# Supplementary material for: Forecasting life expectancy, years of life lost, and all-cause and cause-specific mortality for 250 causes of death: reference and alternative scenarios for 2016–40 for 195 countries and territories
Source: PubMed Central journal article supplement (PMC6227505; doi:10.1016/s0140-6736(18)31694-5), 2018-11-10
Supplement: mmc2.pdf [file mmc2.pdf]

# THE LANCET

## Supplementary appendix 1

This appendix formed part of the original submission and has been peer reviewed. We post it as supplied by the authors.

Supplement to: Foreman KJ, Marquez N, Dolgert A, et al. Forecasting life expectancy, years of life lost, and all-cause and cause-specific mortality for 250 causes of death: reference and alternative scenarios for 2016–40 for 195 countries and territories. *Lancet* 2018; published online October 16. [http://dx.doi.org/10.1016/S0140-6736\(18\)31694-5](http://dx.doi.org/10.1016/S0140-6736(18)31694-5).

## Supplementary Results Appendix

Forecasting life expectancy, years of life lost, all-cause and cause-specific mortality for 250 causes of death: reference and alternative scenarios 2016–2040 for 195 countries and territories

### List of Figures and Tables

**Figure 1.** Swarm plots showing the annualized effect of each covariate on the predicted change in mortality from 2017 to 2040. Where possible, models were fit with a linear spline on SDI with a knot at 0.8 - this is reflected by the two separate SDI columns in many cause-sex pairs. The coefficients for each SDI category only impact mortality for location-years where the SDI falls within that category. Thus, countries with SDI below 0.8 through the entire forecast time series will have non-zero swarm plot values only in the 'SDI < 0.8' column. Likewise, locations with SDI above 0.8 through the time series will only have non-zero swarm plot values in the 'SDI  $\geq$  0.8' column. Locations with forecast SDI values in both categories will have non-zero swarm plot values in both columns. Secular trend effect is shown as the average effect taken over ages. Each data point represents a location and is color coded by GBD 2016 super region. Blue = Southeast Asia, East Asia, Oceania. Orange = Central Europe, Eastern Europe, Central Asia. Green = High Income. Red = Latin America and Caribbean. Purple = North Africa and Middle East. Brown = South Asia. Pink = Sub-Saharan Africa. SDI = Sociodemographic Index. (Page 3)

**Figure 2.** Illustration of the components of the mortality modeling process for all-cause mortality for females in Australia. The panels on the left show cause-specific death rates by age, with small multiples showing the time trend from 1990 to 2040 for each age group. The bottom left panel is the underlying mortality component captured by SDI and global secular trends; above that is risk-attributable mortality, captured by the risk factor scalar; second from the top is the sum of the underlying and risk-attributable mortality; and the top left panel shows the final mortality predictions after the ARIMA process, which accounts for latent trends. The panels on the right show the cause- and risk-specific population attributable fractions (PAFs) that go into the risk attributable estimation; the all-risk PAF at the top is used to create the risk factor scalar, and the specific risks are then sorted in descending order of attributable deaths in 2016. (Page 57)

**Figure 3.** Ten leading risk factors contributing to the difference in YLLs between the forecast and worse health scenario in 2040 by location, representing potential burden with regression to the worse scenario for each risk factor. Values are reported in thousands, with 95% uncertainty intervals in parentheses. YLLs = years of life lost. (Page 58)

**Figure 4.** Global life expectancy from 1990-2040 in the reference scenario (forecast), better health, and worse health scenarios. Dashed lines represent global male life expectancy, solid lines represent global female life expectancy. Black lines = past data from GBD 2016. Blue = reference scenario. Green = better scenario. Red = worse scenario. Shaded areas represent 95% uncertainty intervals. (Page 68)

**Figure 5.** Difference between the better and worse life expectancy scenarios in 2040 for both sexes combined. Legend measured in years. *Summary:* Based on the potential trajectories of many independent drivers (ie, risk factors, SDI, and coverage of interventions like ART and vaccination) and their substantive effects on life expectancy, we forecasted gains in survival that could span from nearly 3

years in Japan to more than 20 years in South Africa. In higher-income countries, this range was generally bounded to a 3–4 year gain, even for the better scenario. Conversely, modifying trajectories of independent drivers could result in life expectancy improvements of at least four years in much of sub-Saharan Africa; among locations with large HIV epidemics, such advances could easily exceed 10 years by 2040. ATG=Antigua and Barbuda. BRB=Barbados. COM=Comoros. DMA=Dominica. E Med=Eastern Mediterranean. FJI=Fiji. FSM=Federated States of Micronesia. GRD=Grenada. KIR=Kiribati. LCA=Saint Lucia. MDV=Maldives. MHL=Marshall Islands. MLT=Malta. MUS=Mauritius. SGP=Singapore. SLB=Solomon Islands. SYC=Seychelles. TLS=Timor-Leste. TON=Tonga. TTO=Trinidad and Tobago. VCT=Saint Vincent and the Grenadines. VUT=Vanuatu. W Africa=West Africa. WSM=Samoa. (Page 69)

**Table 1.** Number of Years of life lost (YLLs) and deaths in GBD 2016, the 2040 forecast (reference scenario), better, and worse scenarios for all causes of death and all locations. Values are reported as counts, or in thousands, as described in the location specific heading, and 95% uncertainty intervals are in parentheses. Due to differences in populations and SDI across the scenarios, forecasts of numbers (and not rates) may result in reference values outside of the better and worse estimates. Highlighted rows indicate level 1 and 2 causes from the GBD cause hierarchy. GBD = Global burden of disease. (Page 70)

**Table 2.** Correlation between  $SEV_{rc}$  and  $SEV_r$  in the period 1990-2016. Values were computed as Pearson correlation coefficients. SEV = summary exposure variable. (Page 3,649)

**Table 3a.** Pearson correlation coefficients among the components of SDI, top 20 risks, and vaccines in GBD 2016 for 1990-2016. Blank cells occur where risk pairs are not estimated on overlapping age groups. (Page 3,659)

**Table 3b.** Pearson correlation coefficients among the components of SDI, top 20 risks, and vaccines in reference scenario forecasts 2017-2040. Blank cells occur where risk pairs are not estimated on overlapping age groups. (Page 3,660)

**Table 3c.** Ratio of correlation coefficients among the components of SDI, top 20 risks, and vaccines in reference scenario forecasts (2017-2040) divided by correlations in the past (1990-2016). (Page 3,661)

**Supplemental Results Appendix Figure 1.** Swarm plots showing the annualized effect of each covariate on the predicted change in mortality from 2017 to 2040. Where possible, models were fit with a linear spline on SDI with a knot at 0.8 - this is reflected by the two separate SDI columns in many cause-sex pairs. The coefficients for each SDI category only impact mortality for location-years where the SDI falls within that category. Thus, countries with SDI below 0.8 through the entire forecast time series will have non-zero swarm plot values only in the 'SDI < 0.8' column. Likewise, locations with SDI above 0.8 through the time series will only have non-zero swarm plot values in the 'SDI >= 0.8' column. A subset of causes also include coefficients for the SDI\*Time interaction term. See the methods appendix (pp 9) for more details. Locations with forecasted SDI values in both categories will have non-zero swarm plot values in both columns. Secular trend effect is shown as the average effect taken over ages. Each data point represents a location and is color coded by GBD 2016 super region. Blue = Southeast Asia, East Asia, Oceania. Orange = Central Europe, Eastern Europe, Central Asia. Green = High Income. Red = Latin America and Caribbean. Purple = North Africa and Middle East. Brown = South Asia. Pink = Sub-Saharan Africa. SDI = Sociodemographic Index.

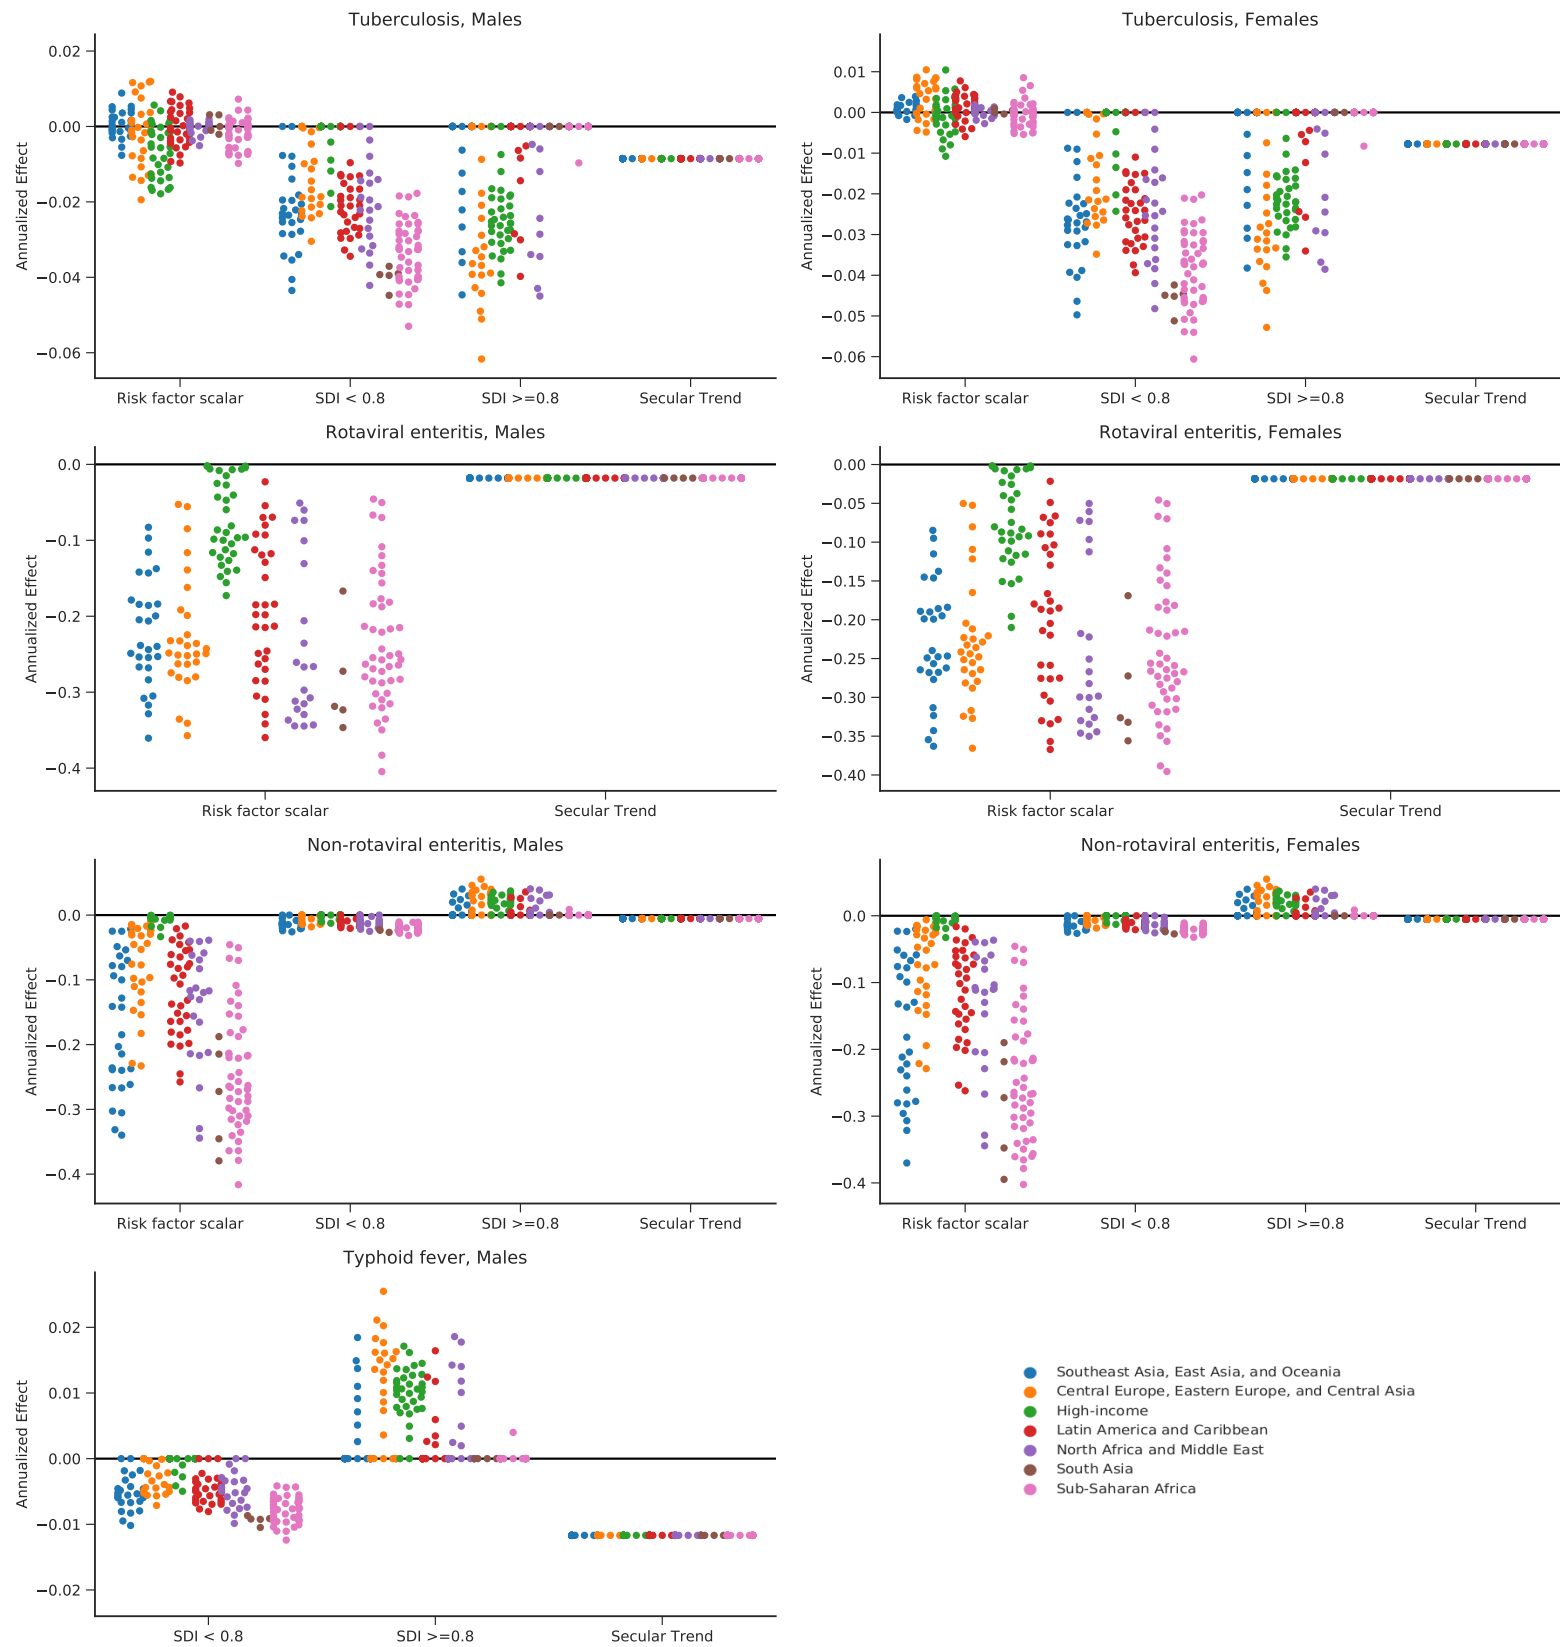

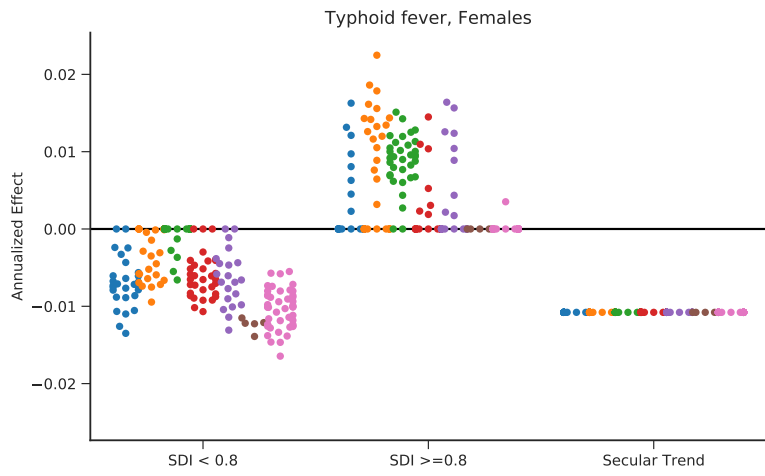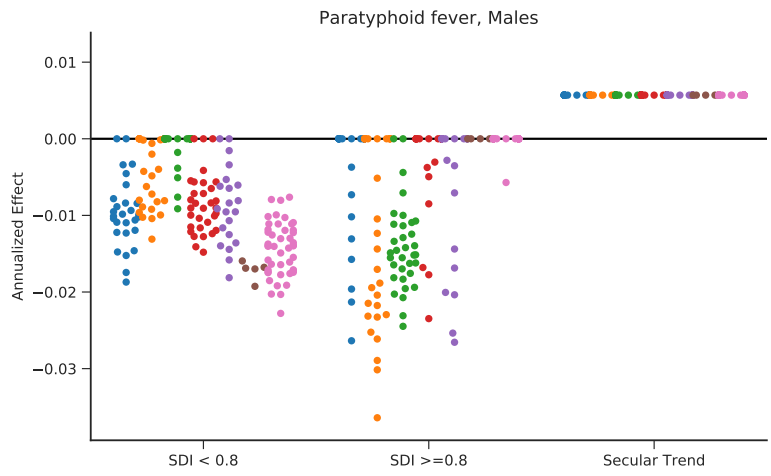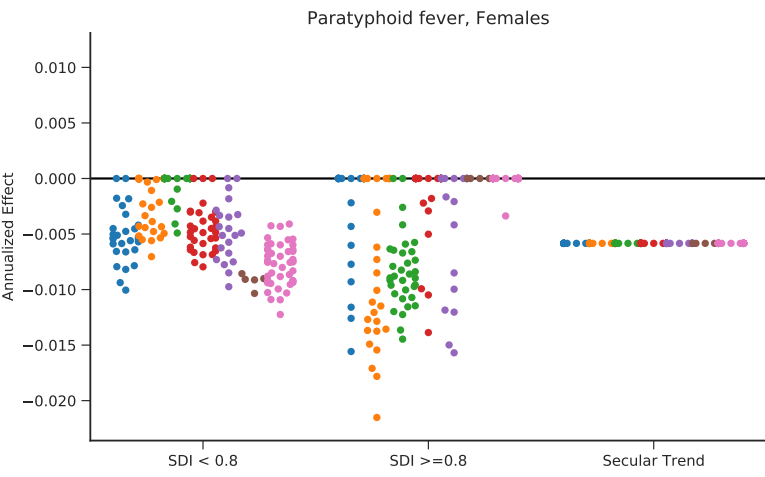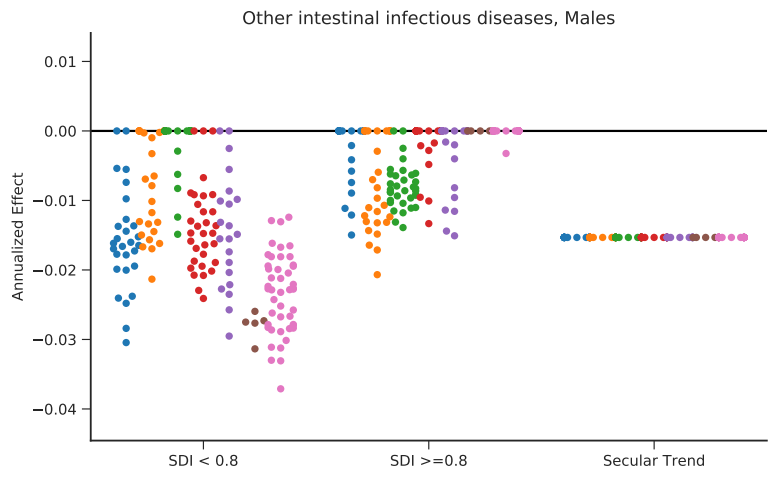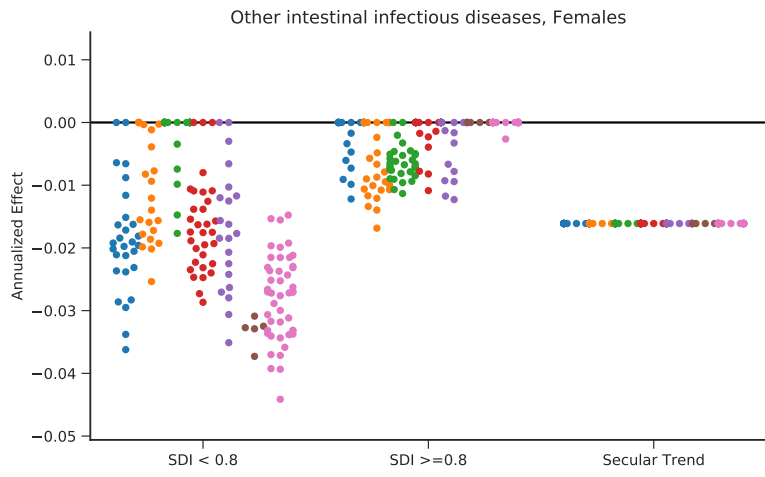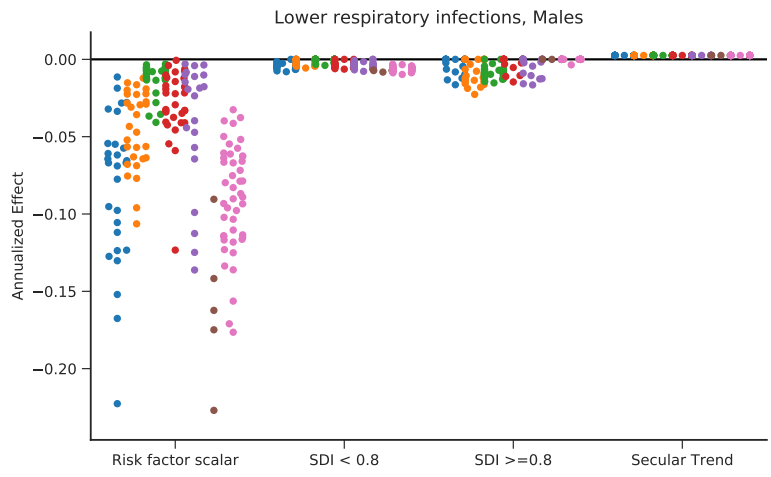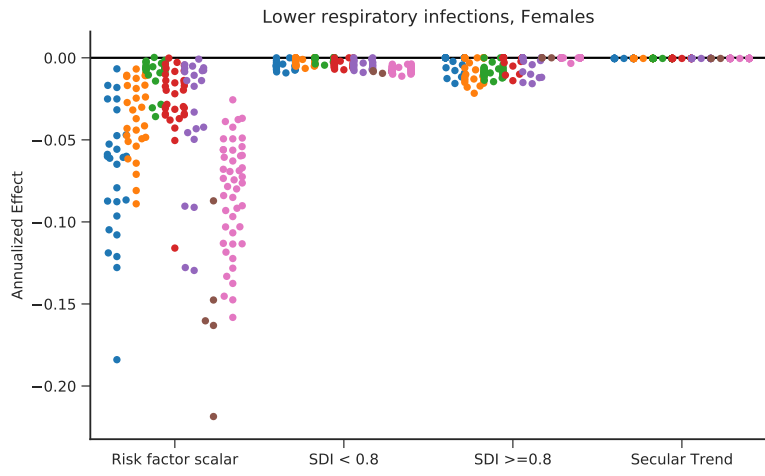

- Southeast Asia, East Asia, and Oceania
- Central Europe, Eastern Europe, and Central Asia
- High-income
- Latin America and Caribbean
- North Africa and Middle East
- South Asia
- Sub-Saharan Africa

Upper respiratory infections, Males

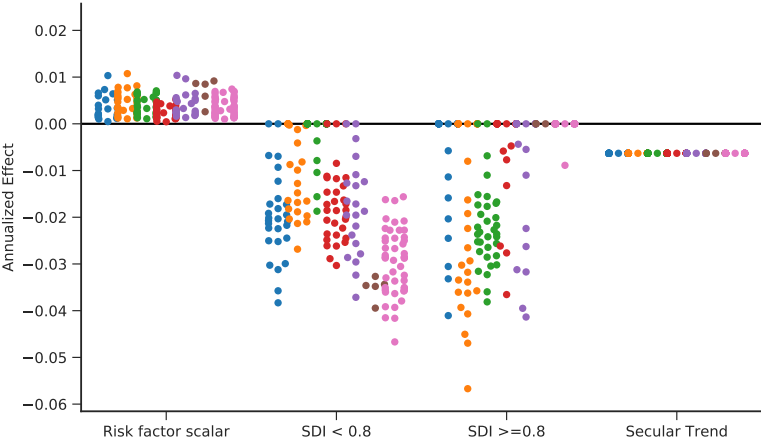

Upper respiratory infections, Females

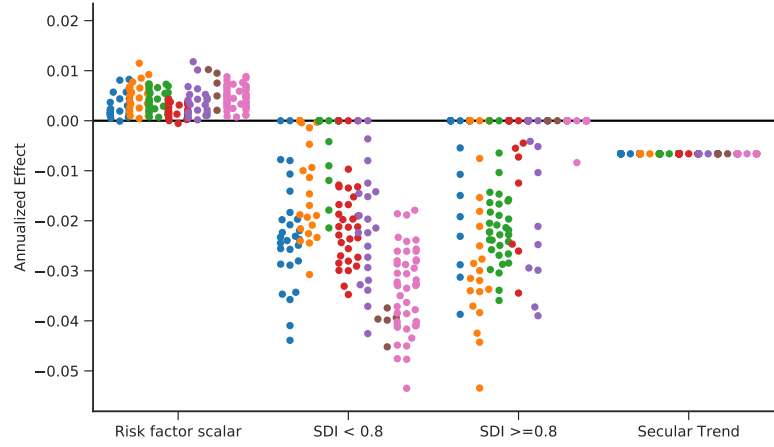

Otitis media, Males

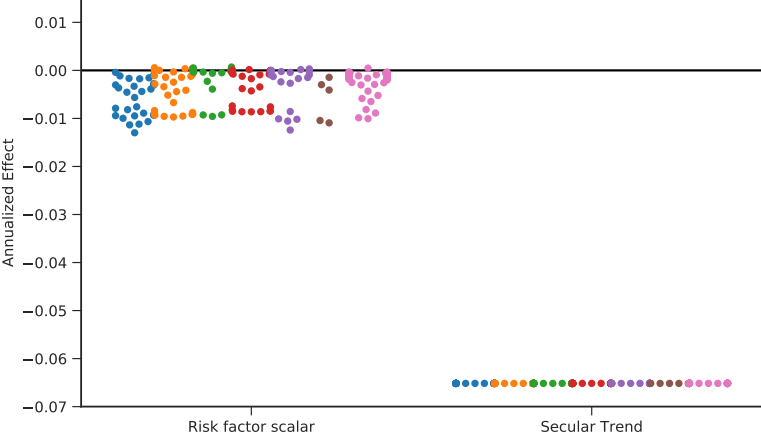

Otitis media, Females

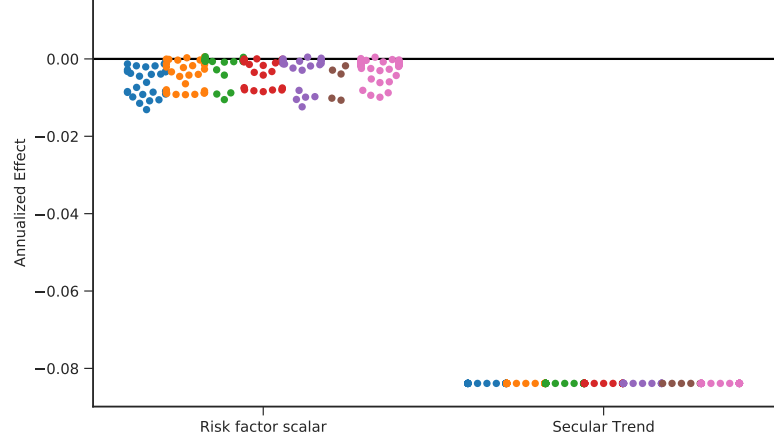

Pneumococcal meningitis, Males

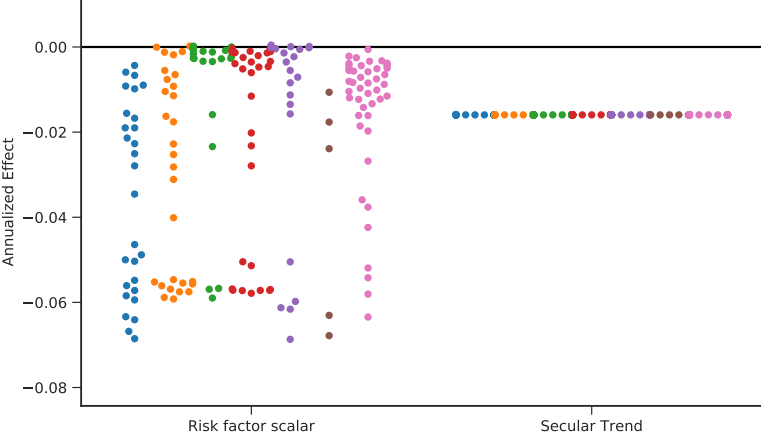

Pneumococcal meningitis, Females

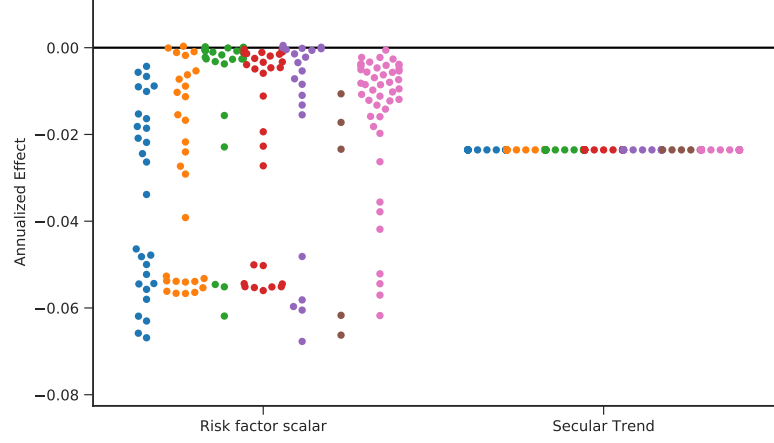

H influenzae type B meningitis, Males

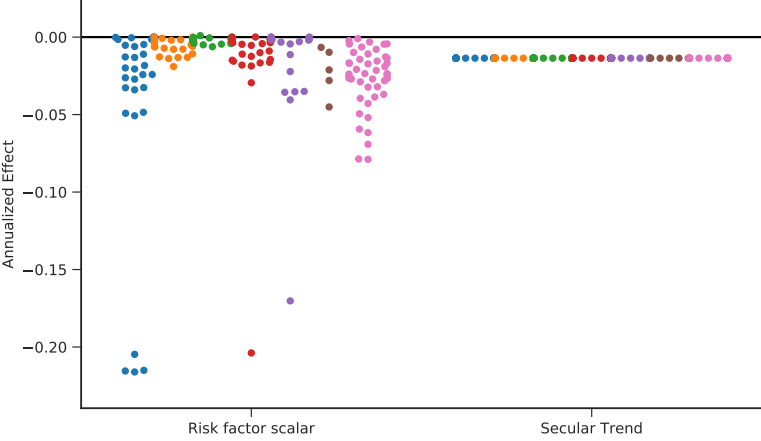

- Southeast Asia, East Asia, and Oceania
- Central Europe, Eastern Europe, and Central Asia
- High-income
- Latin America and Caribbean
- North Africa and Middle East
- South Asia
- Sub-Saharan Africa

H influenzae type B meningitis, Females

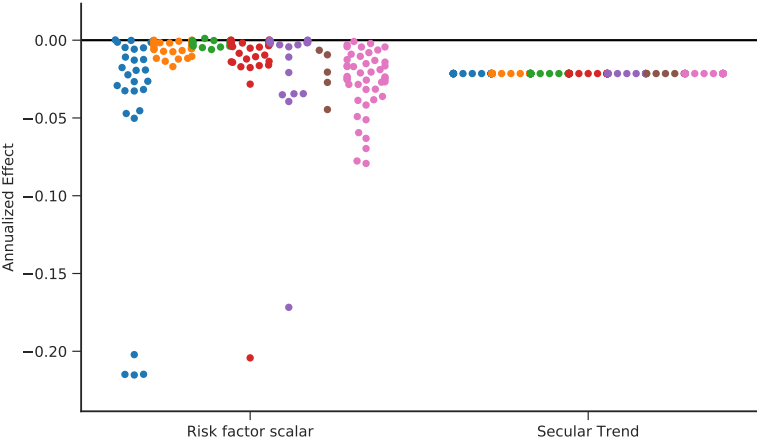

Meningococcal meningitis, Males

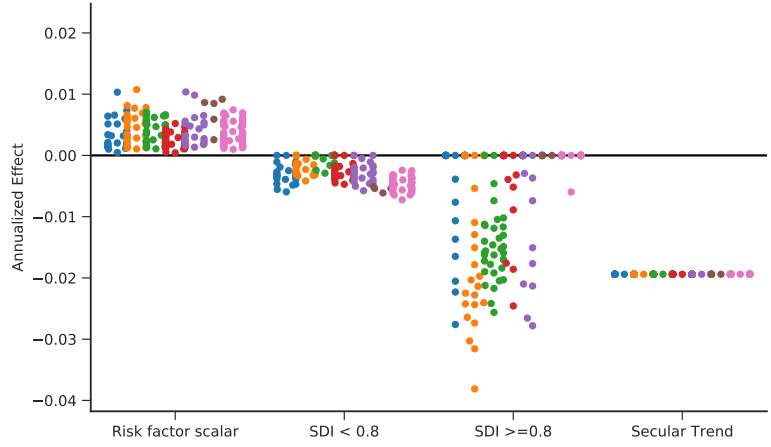

Meningococcal meningitis, Females

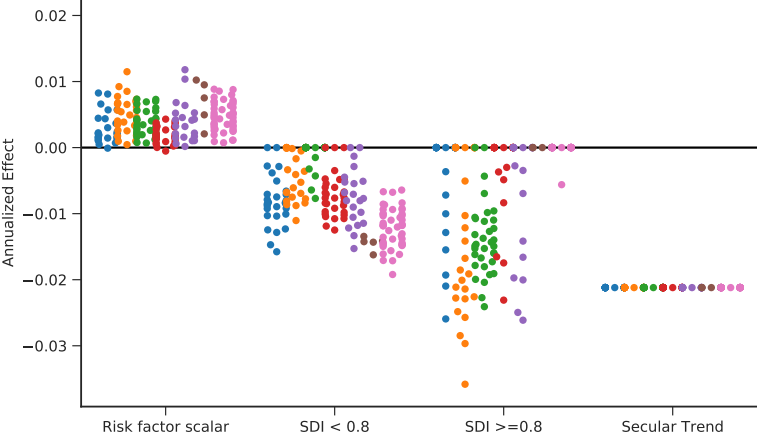

Other meningitis, Males

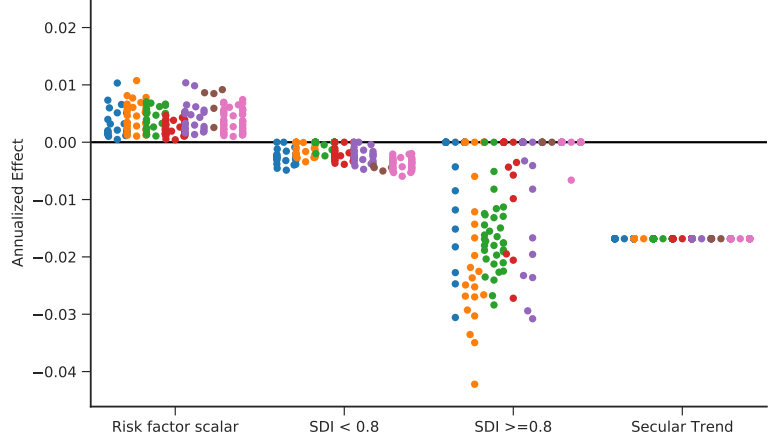

Other meningitis, Females

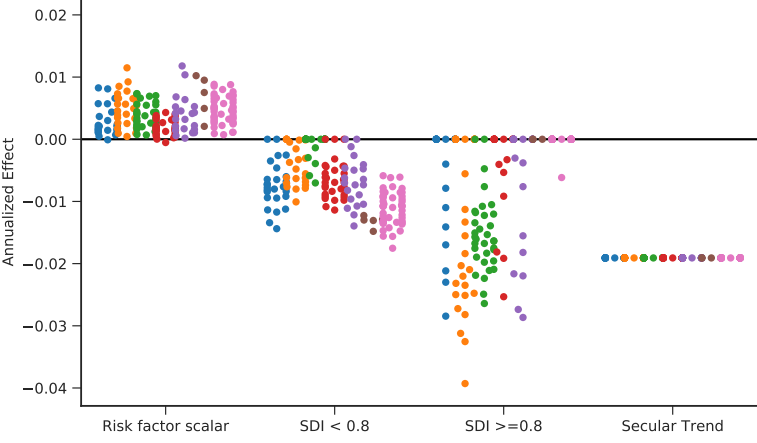

Encephalitis, Males

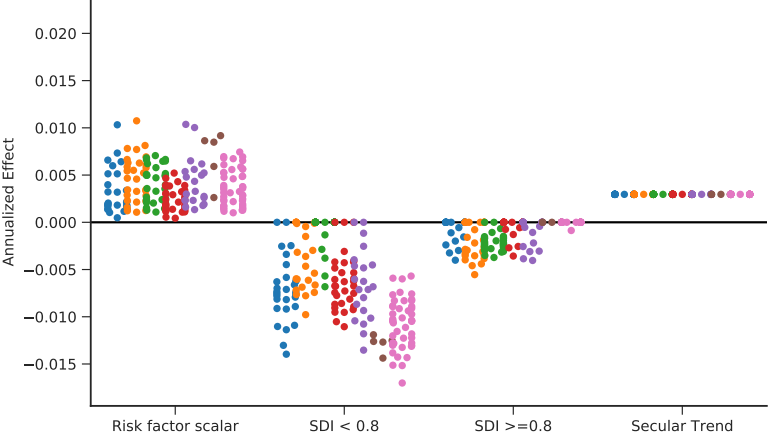

Encephalitis, Females

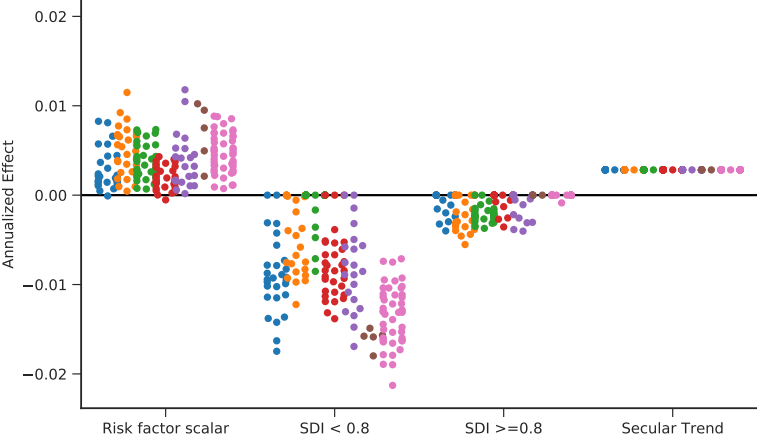

- Southeast Asia, East Asia, and Oceania
- Central Europe, Eastern Europe, and Central Asia
- High-income
- Latin America and Caribbean
- North Africa and Middle East
- South Asia
- Sub-Saharan Africa

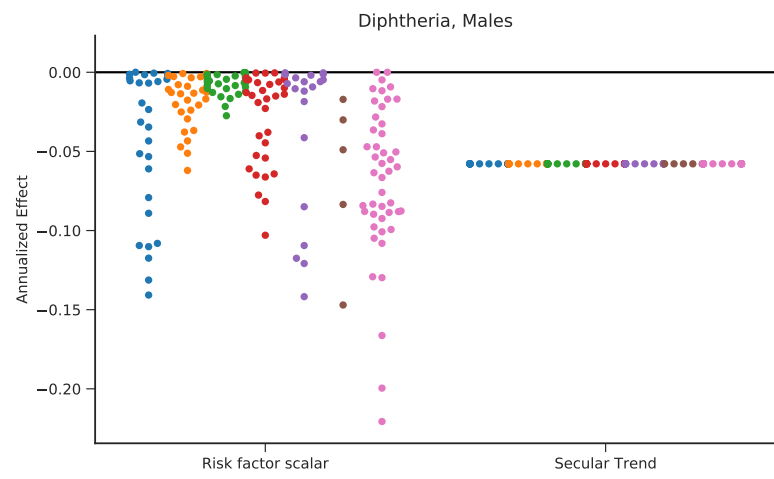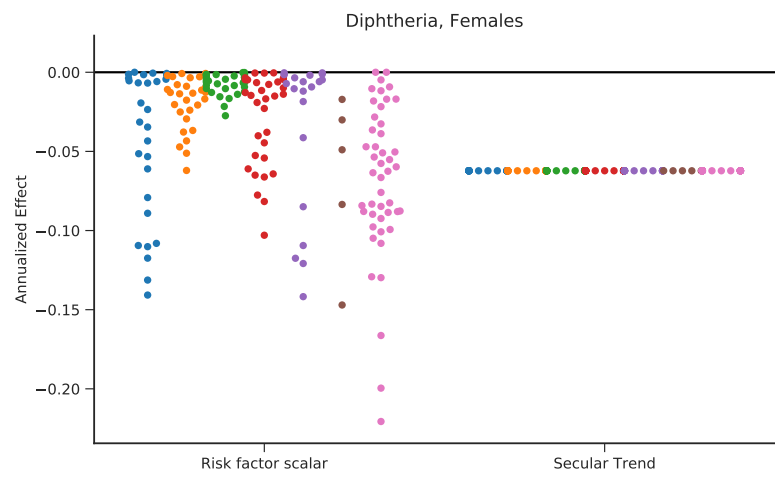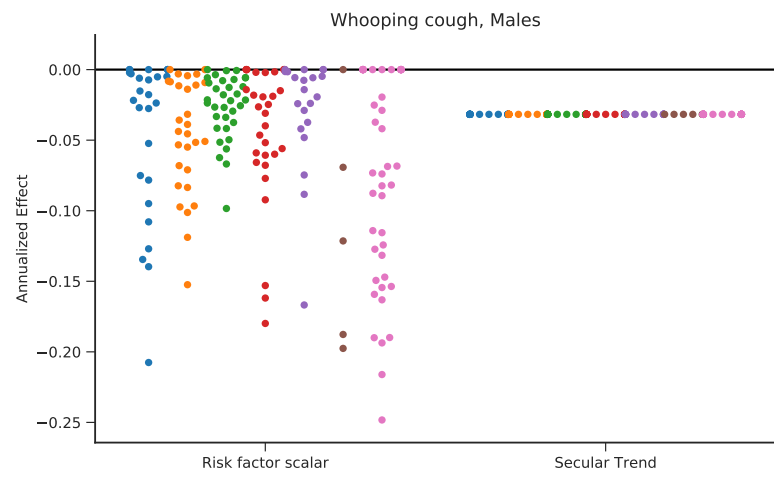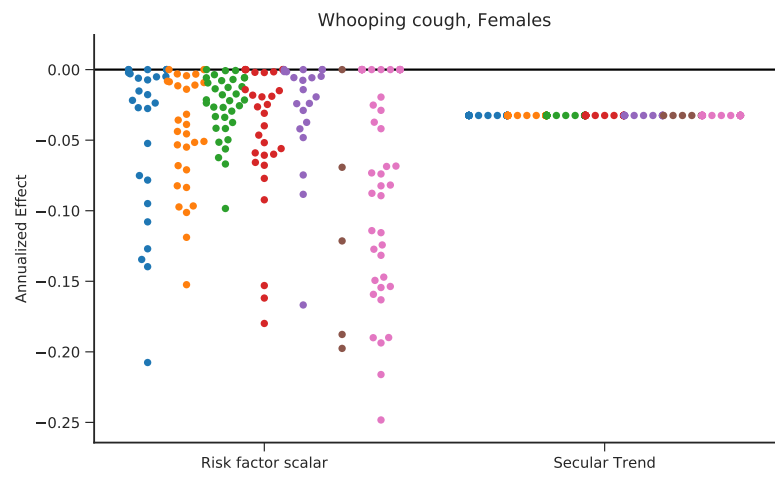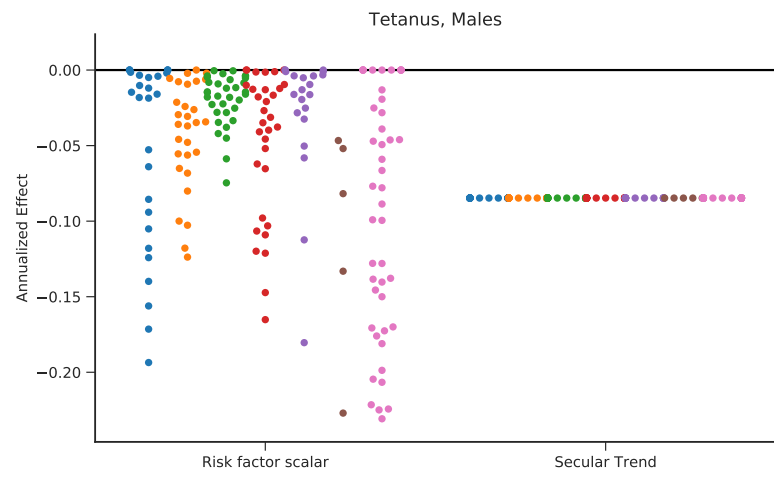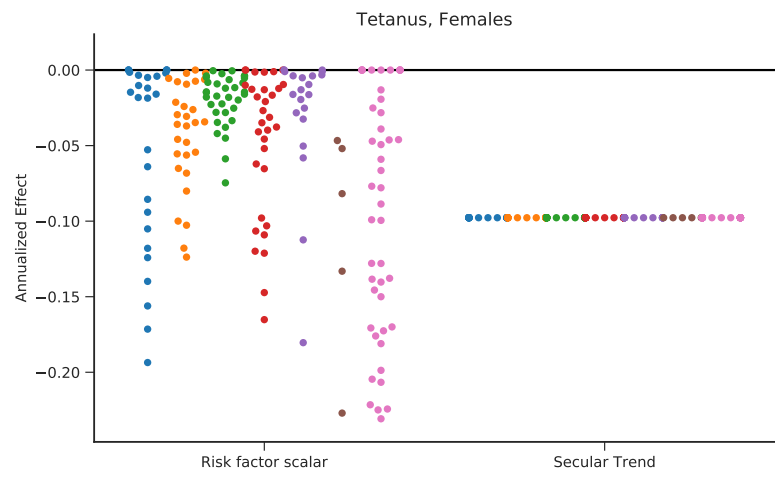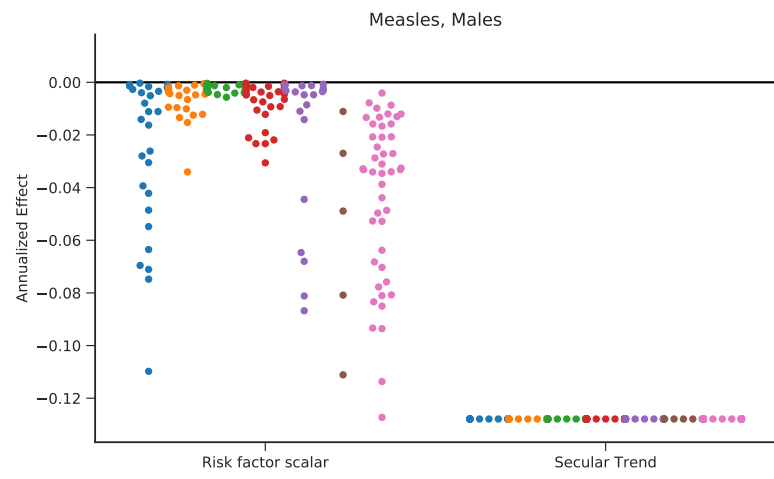

- Southeast Asia, East Asia, and Oceania
- Central Europe, Eastern Europe, and Central Asia
- High-income
- Latin America and Caribbean
- North Africa and Middle East
- South Asia
- Sub-Saharan Africa



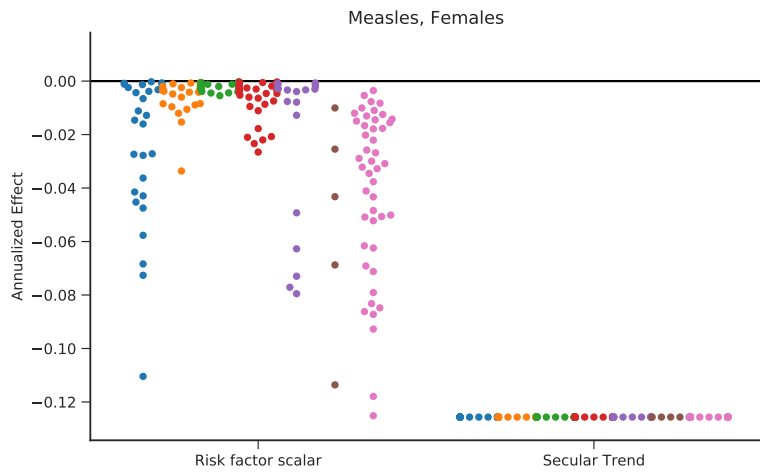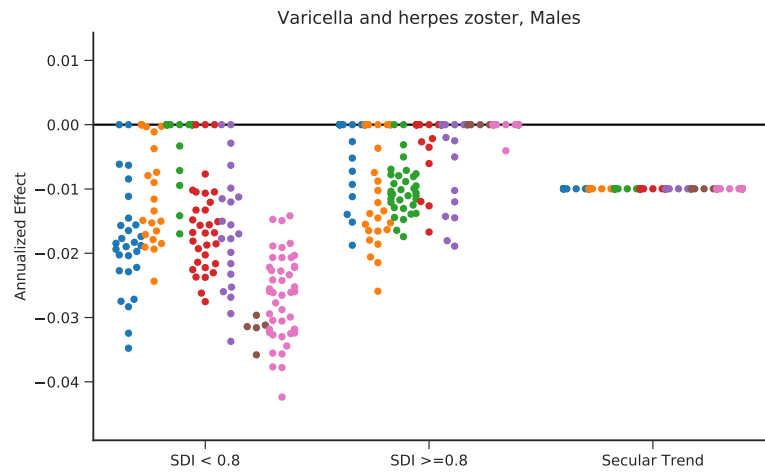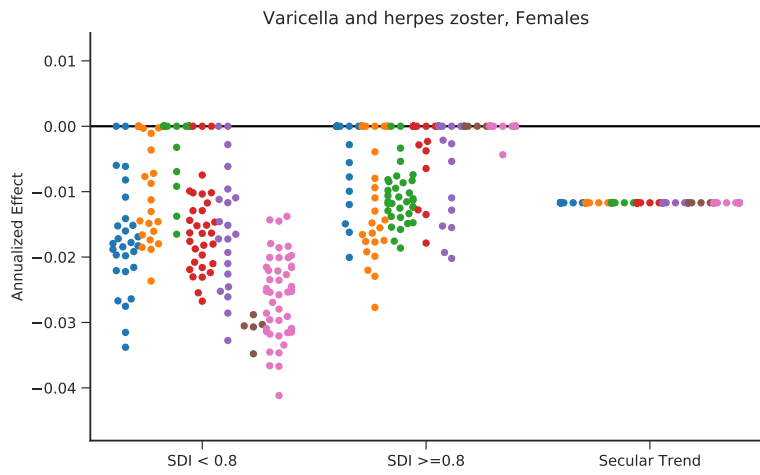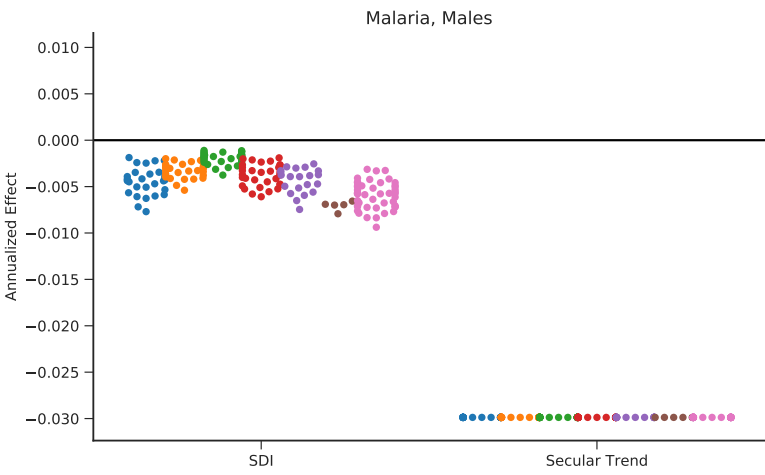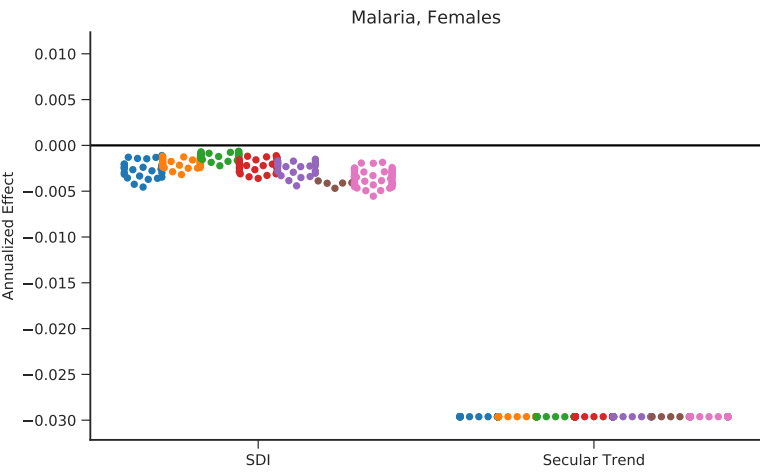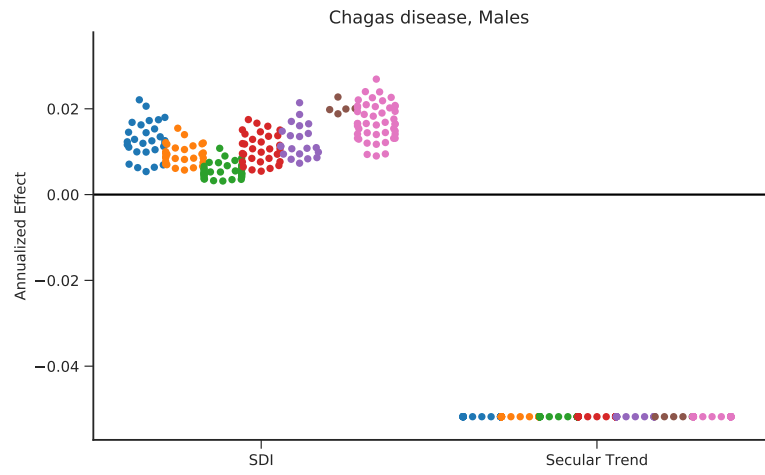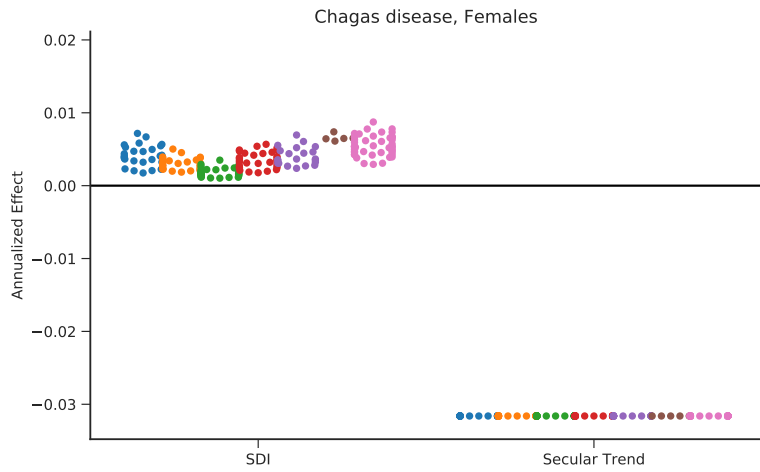

- Southeast Asia, East Asia, and Oceania
- Central Europe, Eastern Europe, and Central Asia
- High-income
- Latin America and Caribbean
- North Africa and Middle East
- South Asia
- Sub-Saharan Africa

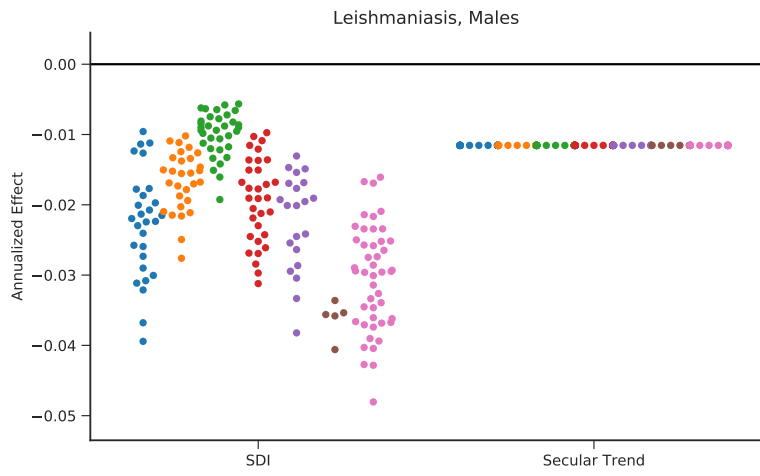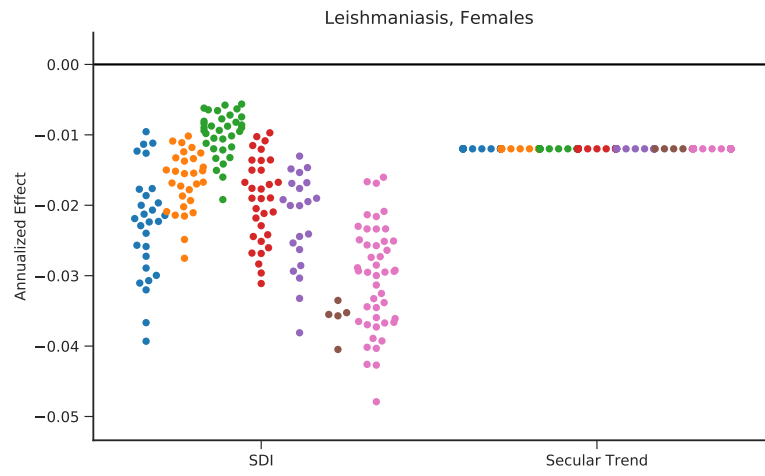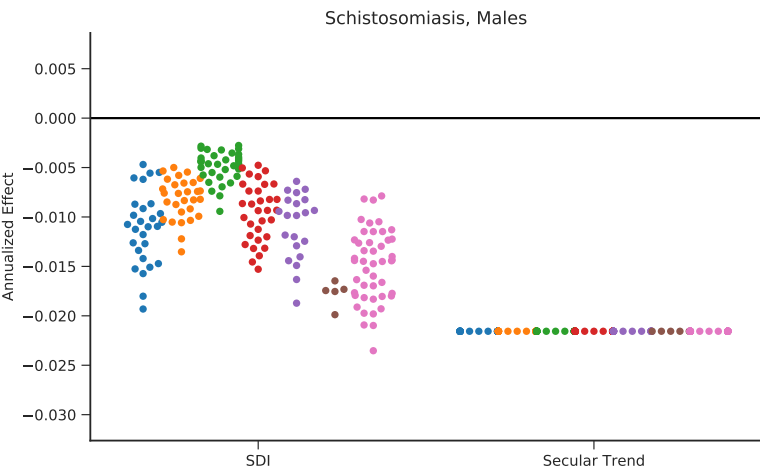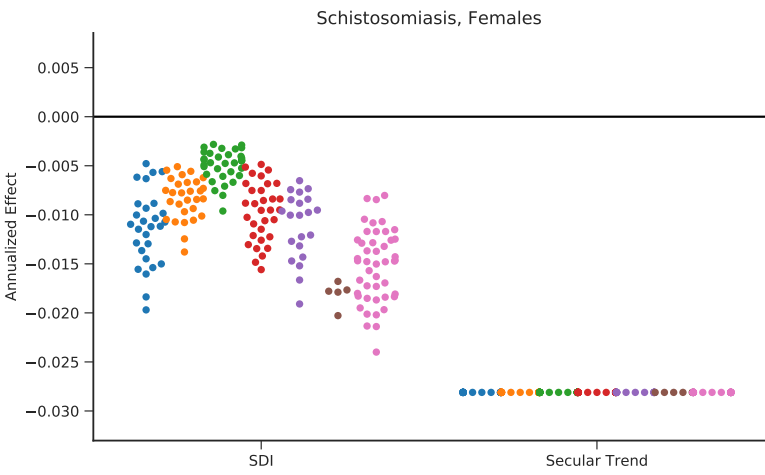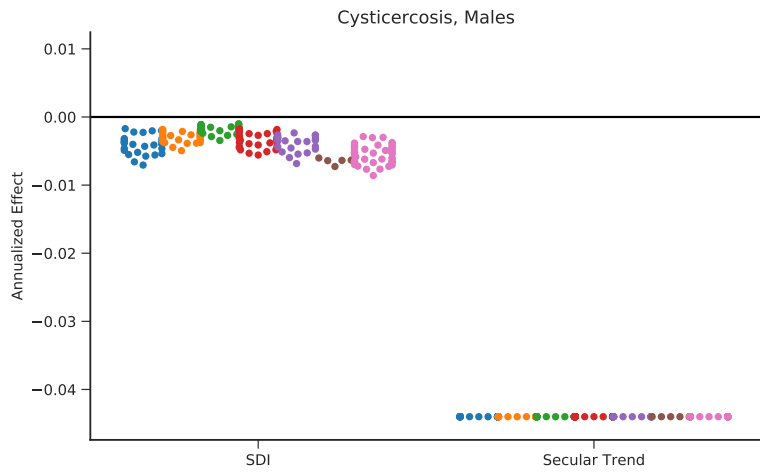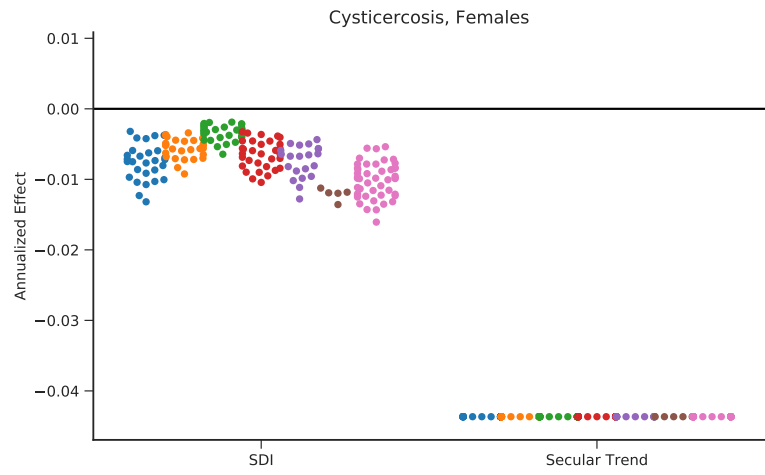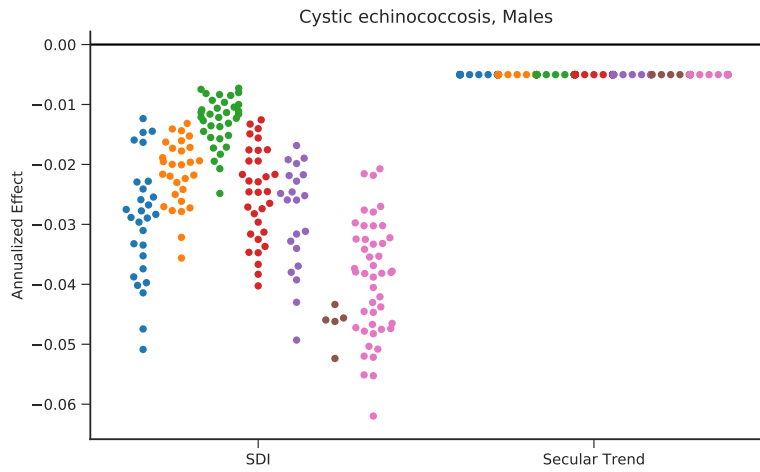

- Southeast Asia, East Asia, and Oceania
- Central Europe, Eastern Europe, and Central Asia
- High-income
- Latin America and Caribbean
- North Africa and Middle East
- South Asia
- Sub-Saharan Africa

Cystic echinococcosis, Females

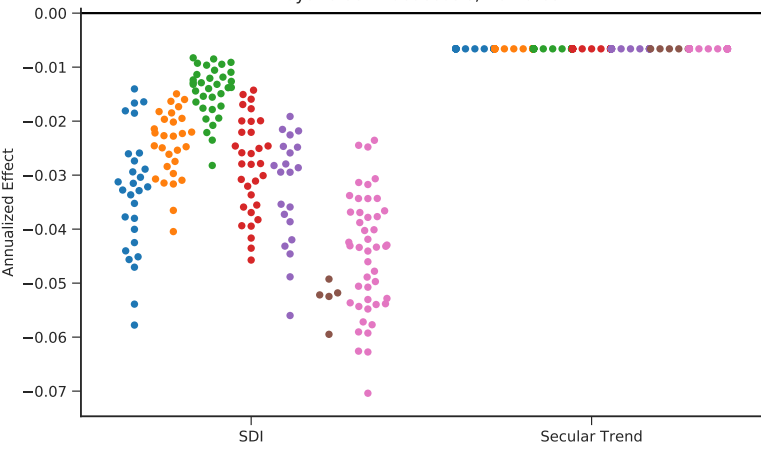

Dengue, Males

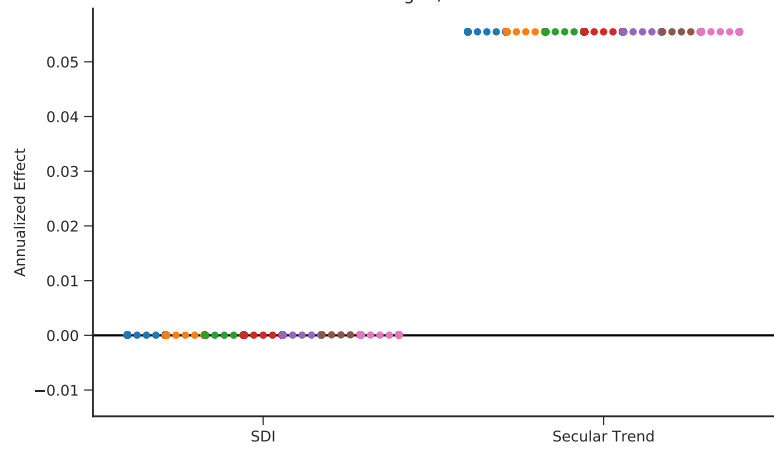

Dengue, Females

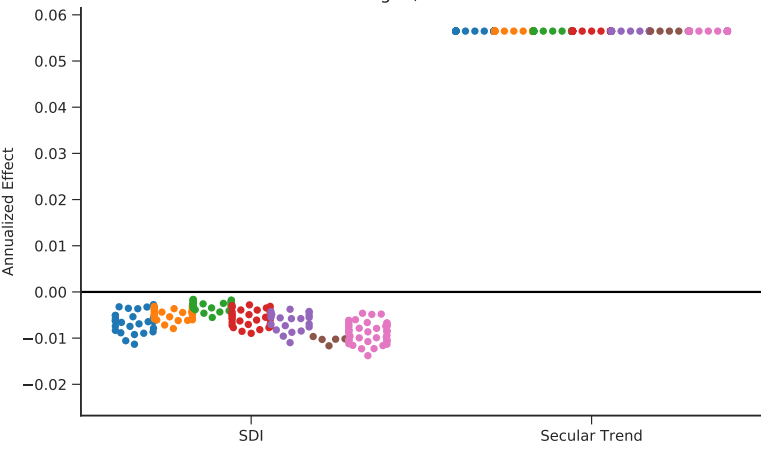

Yellow fever, Males

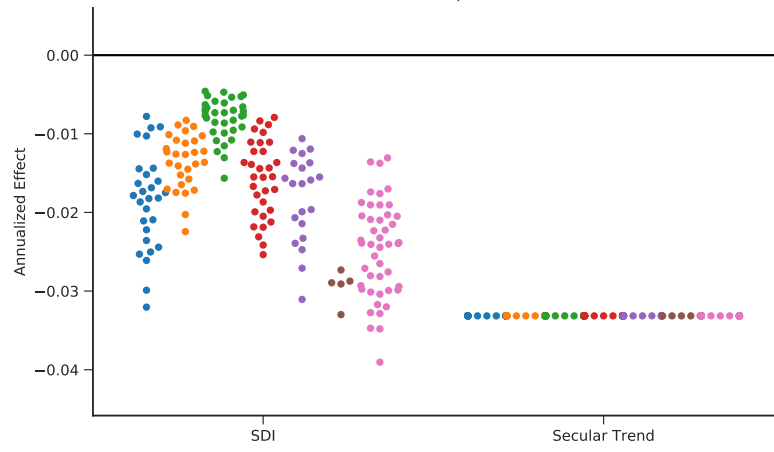

Yellow fever, Females

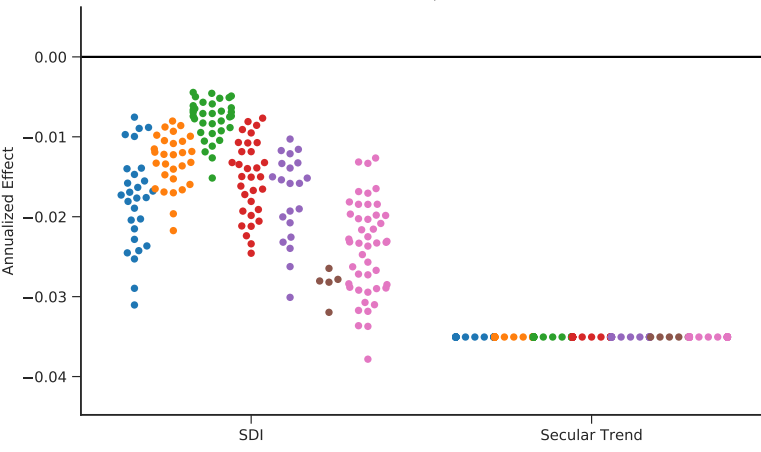

Rabies, Males

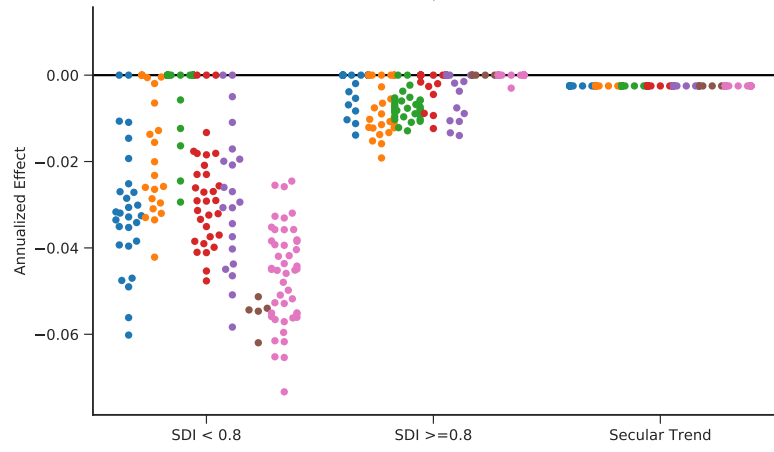

Rabies, Females

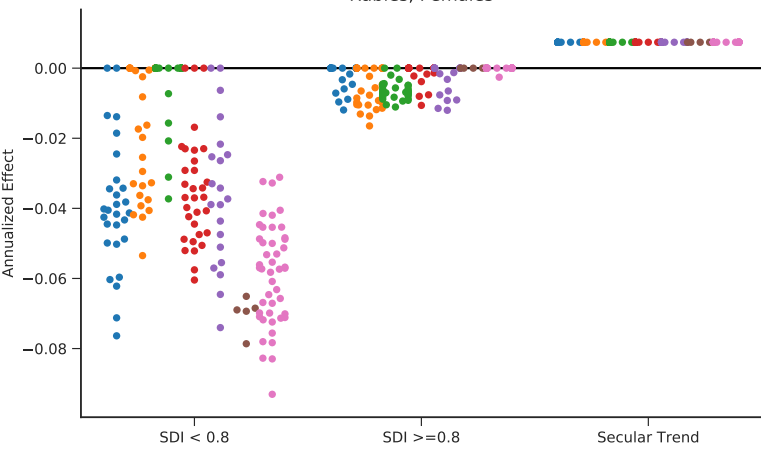

- Southeast Asia, East Asia, and Oceania
- Central Europe, Eastern Europe, and Central Asia
- High-income
- Latin America and Caribbean
- North Africa and Middle East
- South Asia
- Sub-Saharan Africa

Other neglected tropical diseases, Males

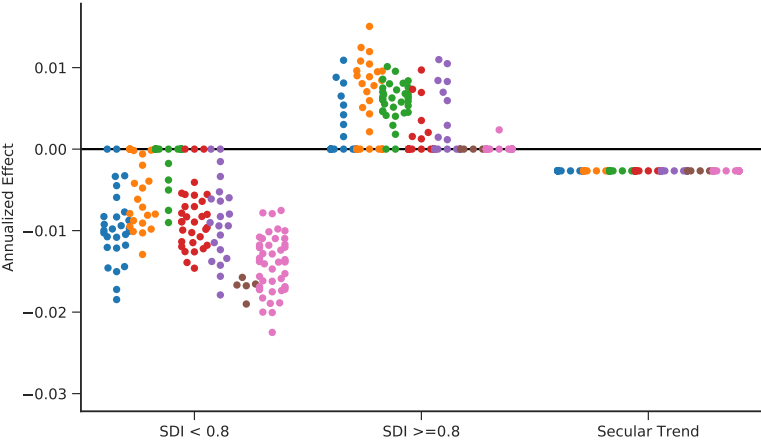

Other neglected tropical diseases, Females

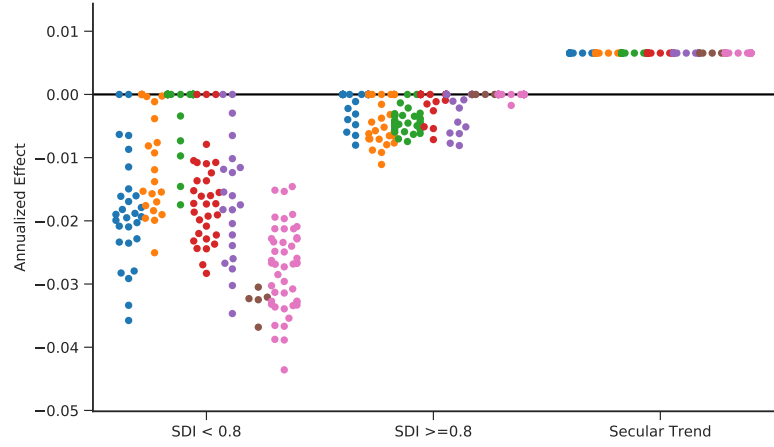

Maternal hemorrhage, Females

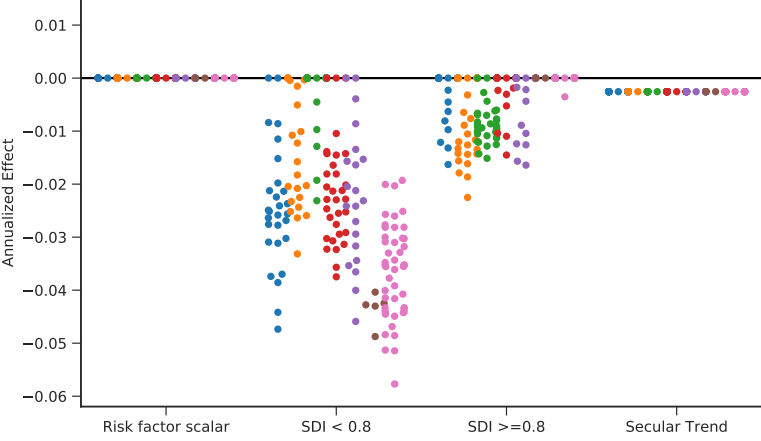

Maternal sepsis and other maternal infections, Females

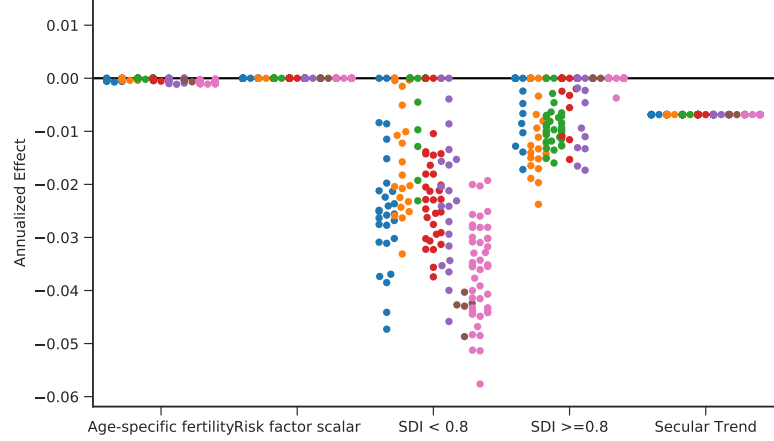

Maternal hypertensive disorders, Females

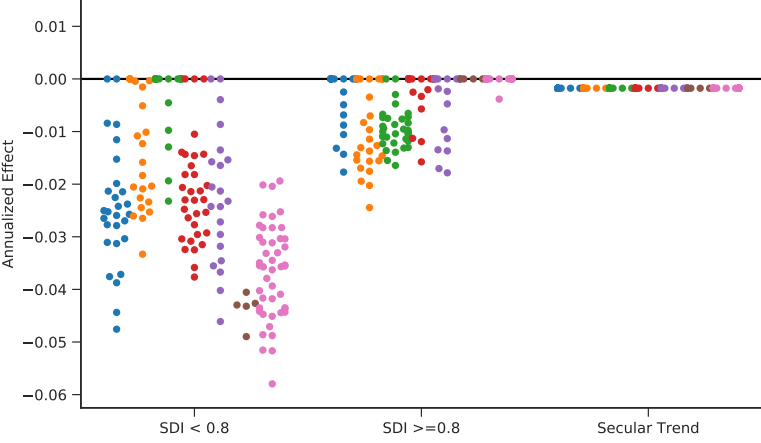

Maternal obstructed labor and uterine rupture, Females

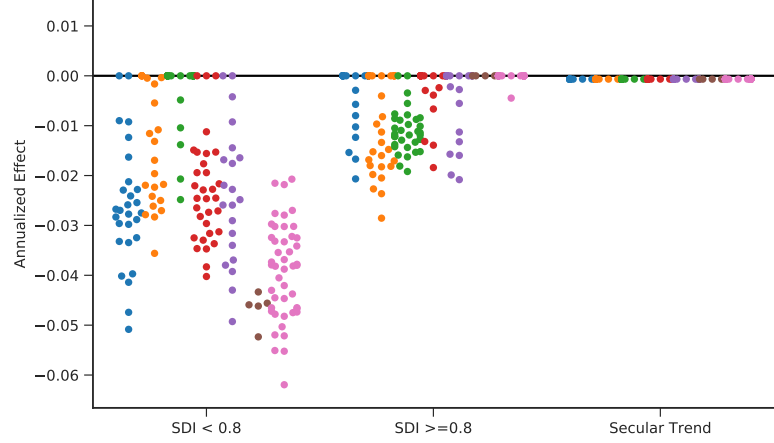

Maternal abortion, miscarriage, and ectopic pregnancy, Females

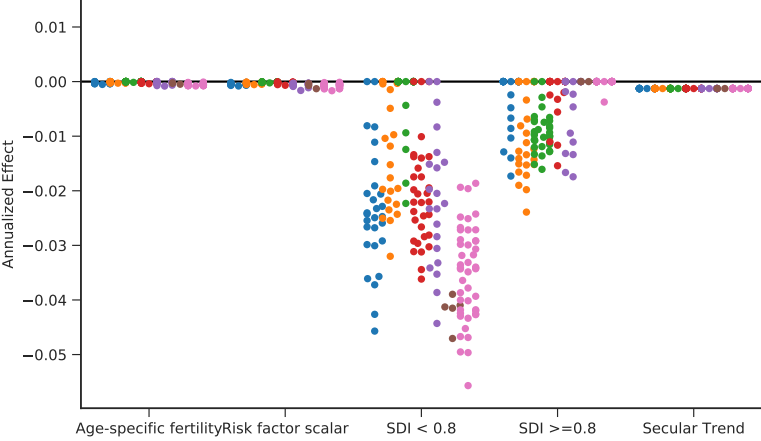

- Southeast Asia, East Asia, and Oceania
- Central Europe, Eastern Europe, and Central Asia
- High-income
- Latin America and Caribbean
- North Africa and Middle East
- South Asia
- Sub-Saharan Africa

Indirect maternal deaths, Females

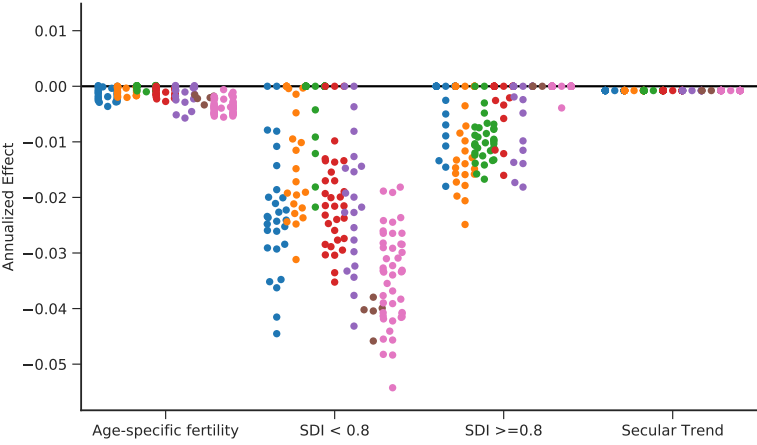

Late maternal deaths, Females

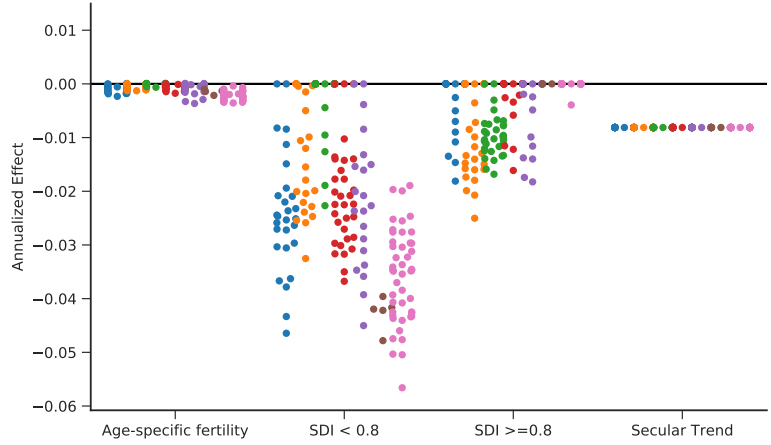

Maternal deaths aggravated by HIV/AIDS, Females

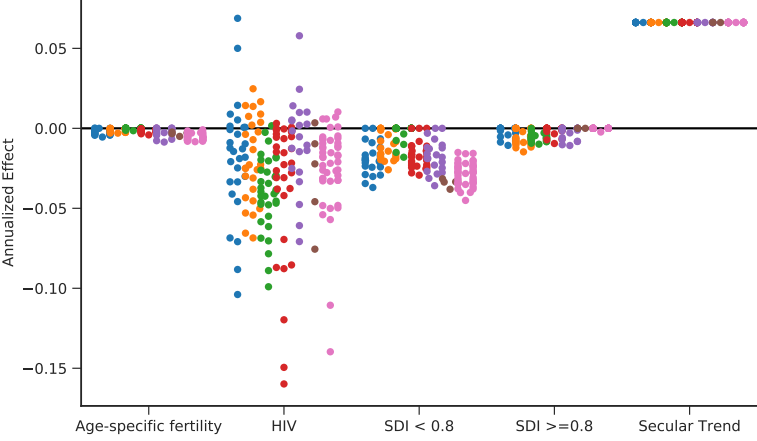

Other maternal disorders, Females

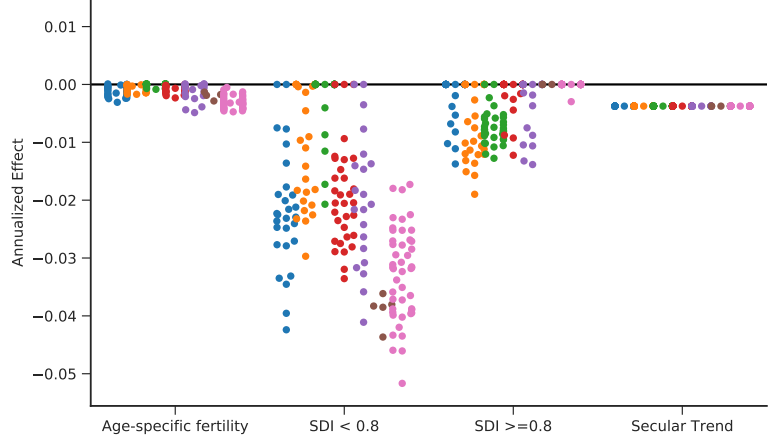

Neonatal preterm birth, Males

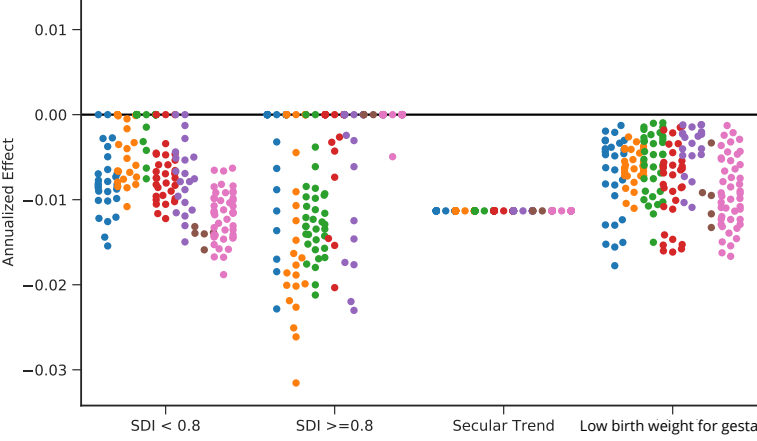

Neonatal preterm birth, Females

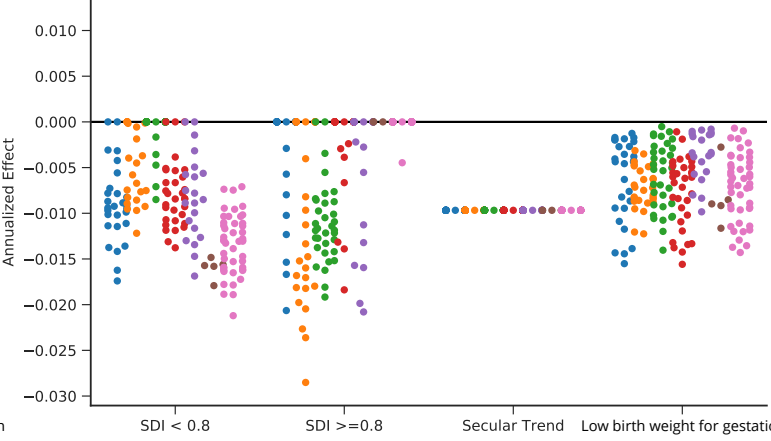

Neonatal encephalopathy due to birth asphyxia and trauma, Males

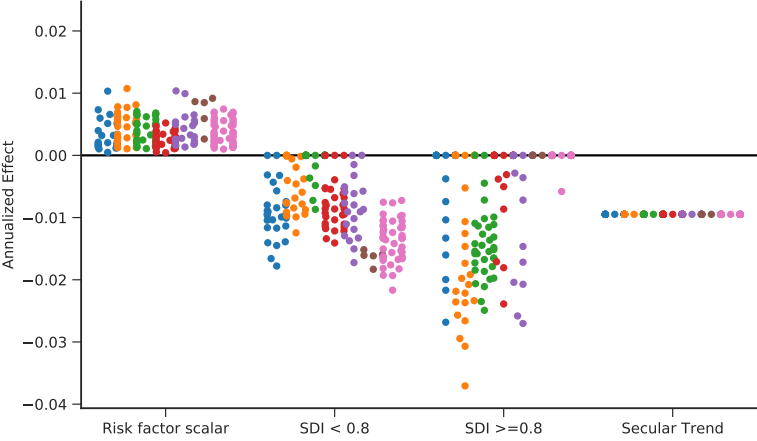

- Southeast Asia, East Asia, and Oceania
- Central Europe, Eastern Europe, and Central Asia
- High-income
- Latin America and Caribbean
- North Africa and Middle East
- South Asia
- Sub-Saharan Africa

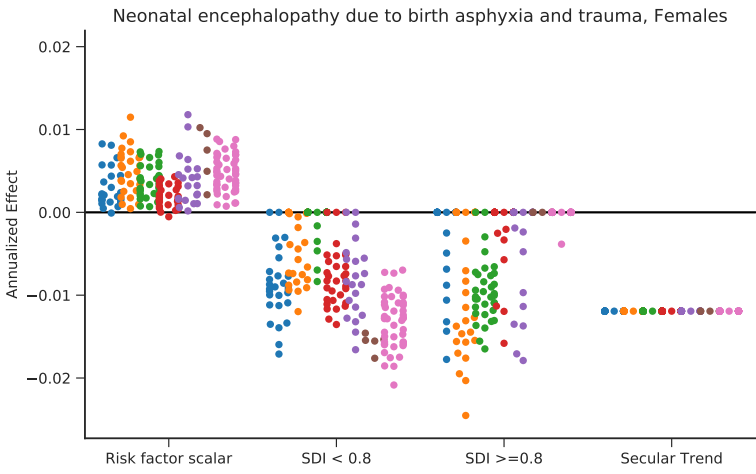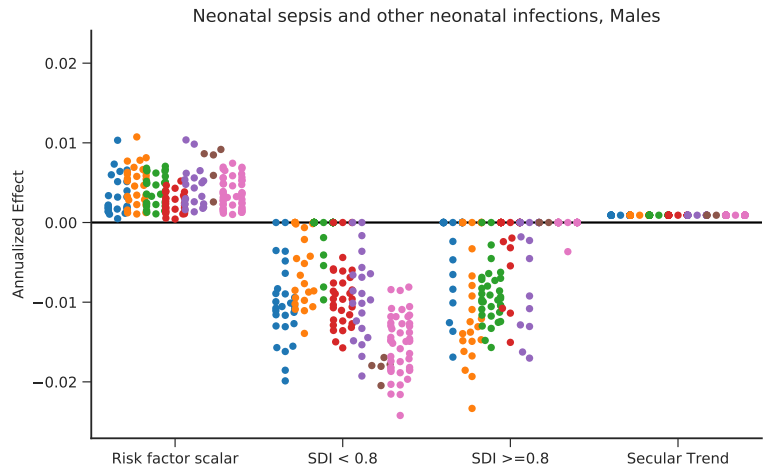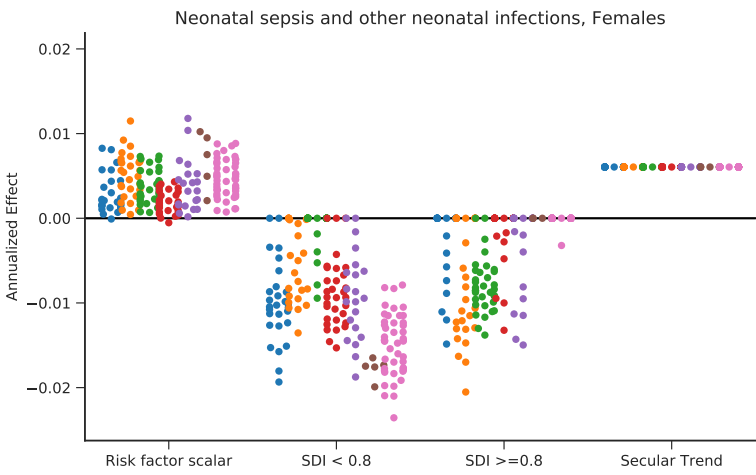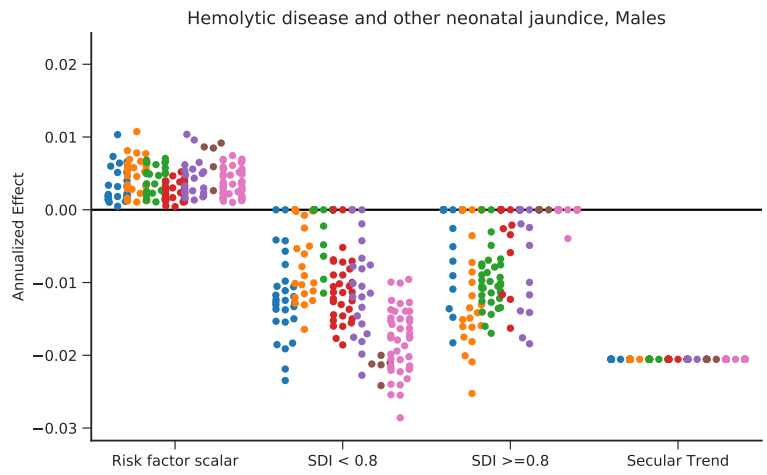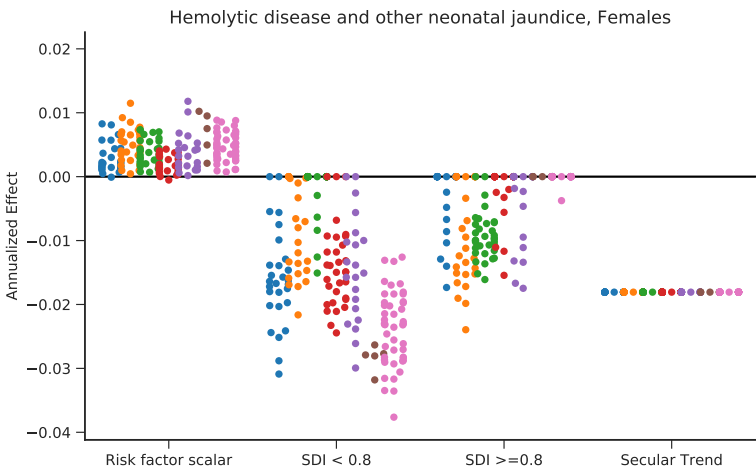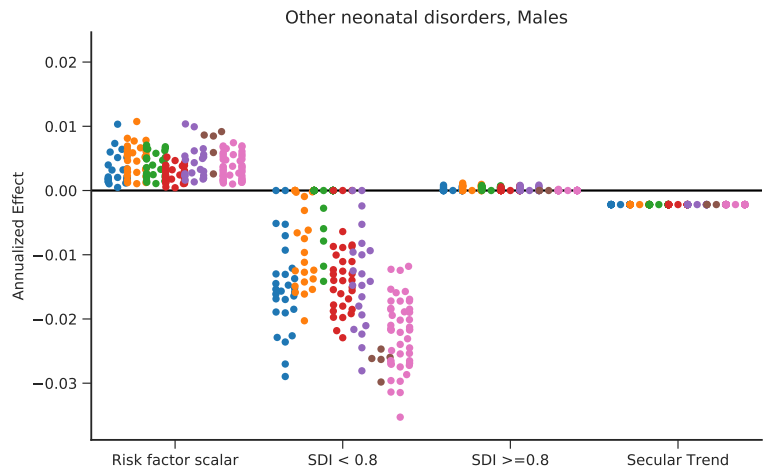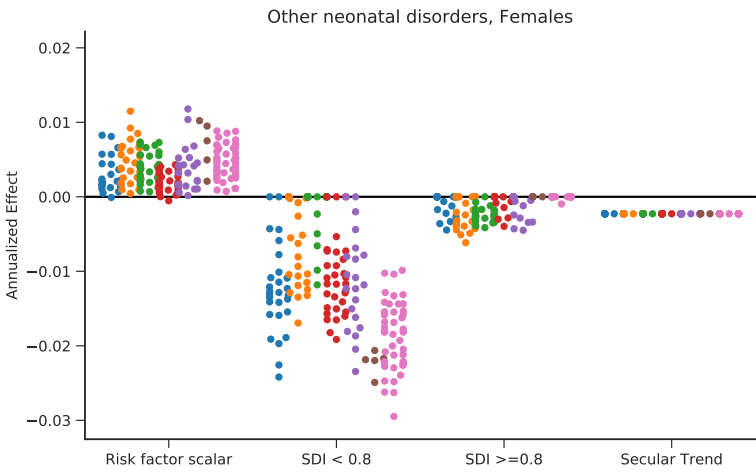

- Southeast Asia, East Asia, and Oceania
- Central Europe, Eastern Europe, and Central Asia
- High-income
- Latin America and Caribbean
- North Africa and Middle East
- South Asia
- Sub-Saharan Africa

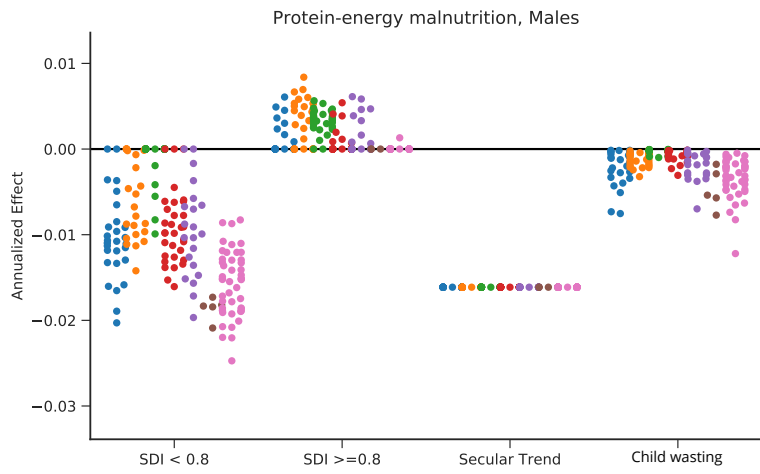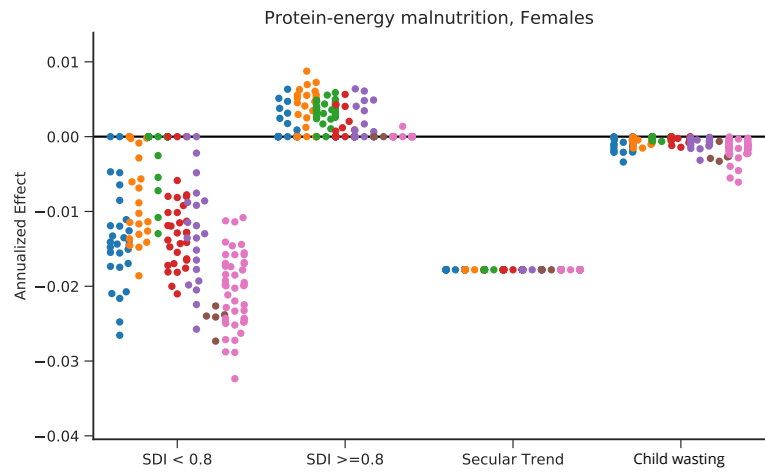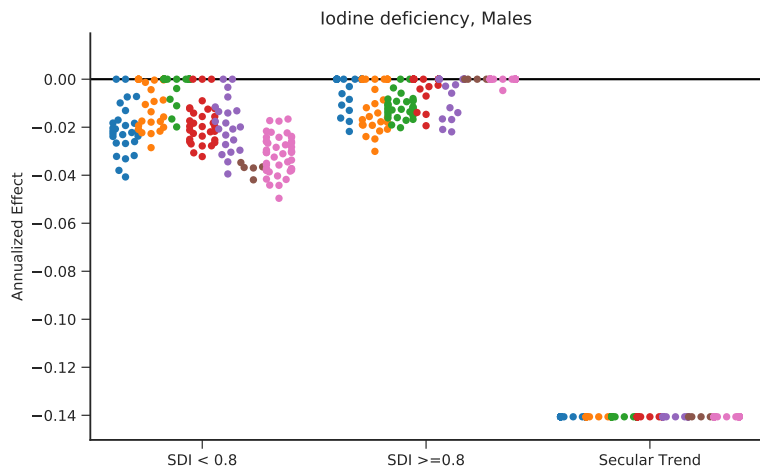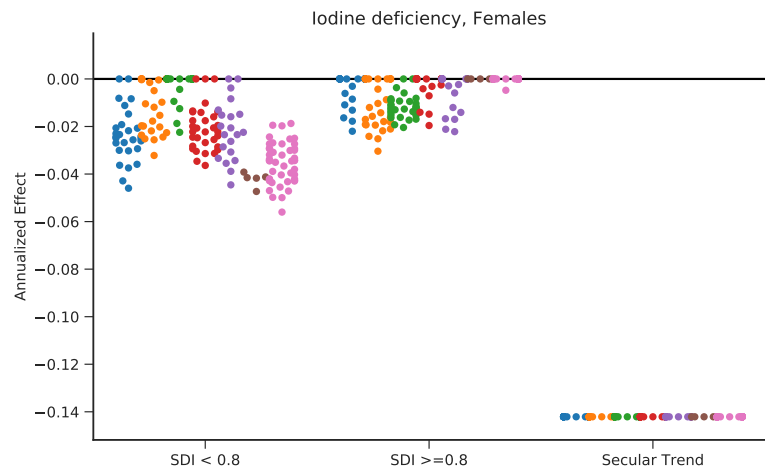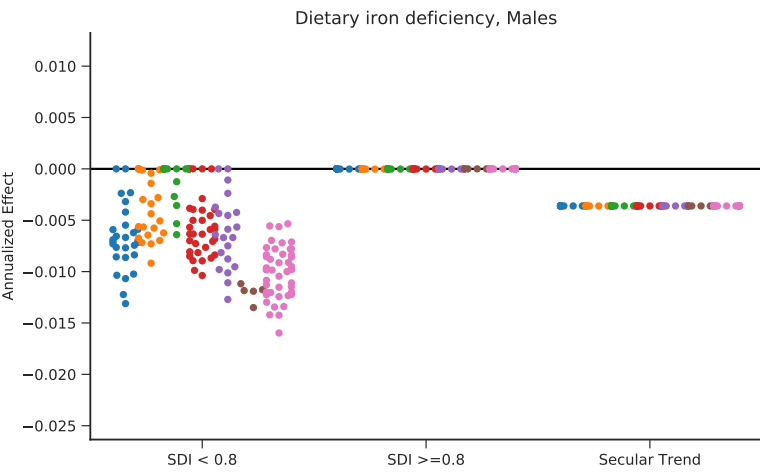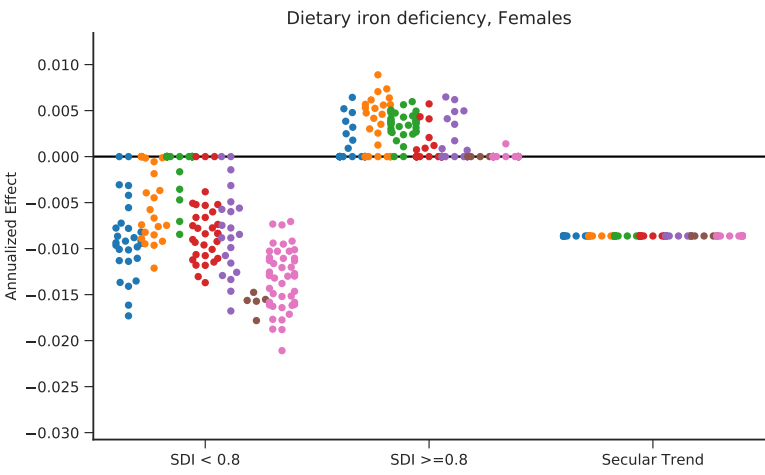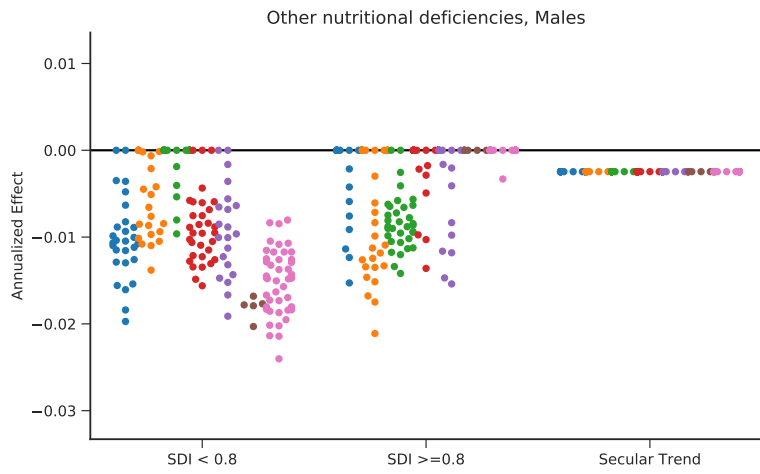

- Southeast Asia, East Asia, and Oceania
- Central Europe, Eastern Europe, and Central Asia
- High-income
- Latin America and Caribbean
- North Africa and Middle East
- South Asia
- Sub-Saharan Africa

Other nutritional deficiencies, Females

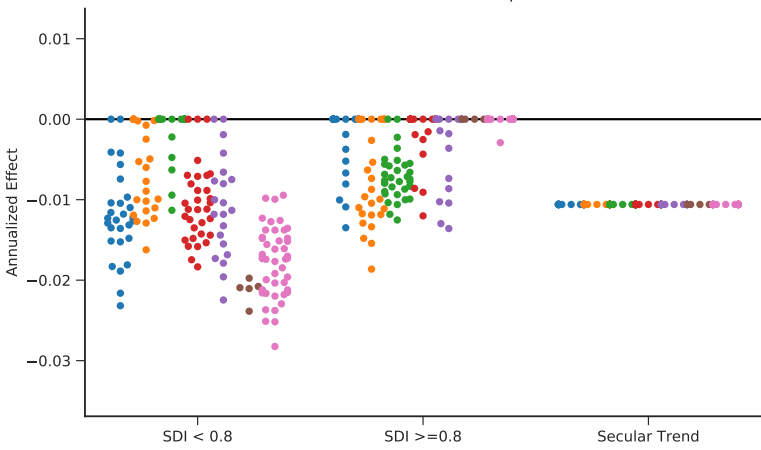

Syphilis, Males

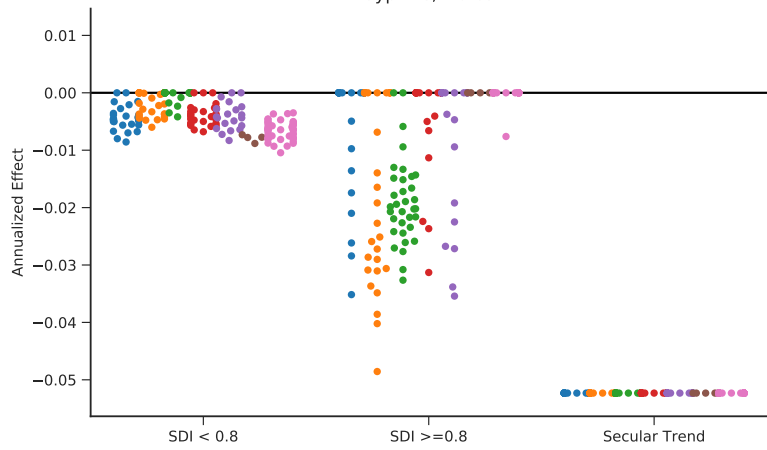

Syphilis, Females

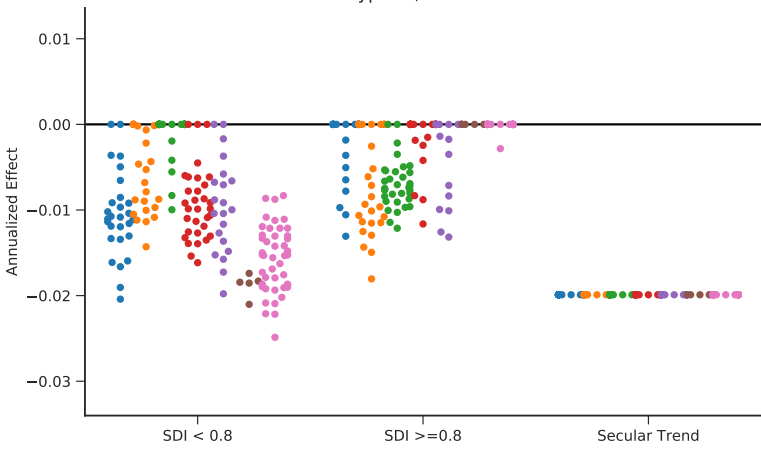

Chlamydial infection, Females

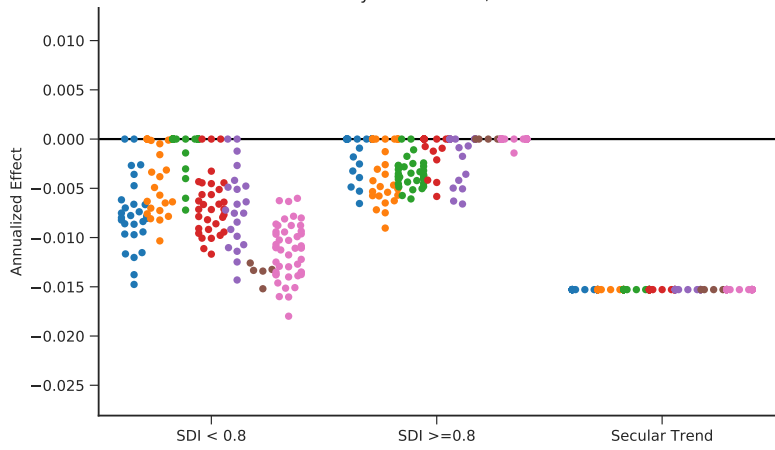

Gonococcal infection, Males

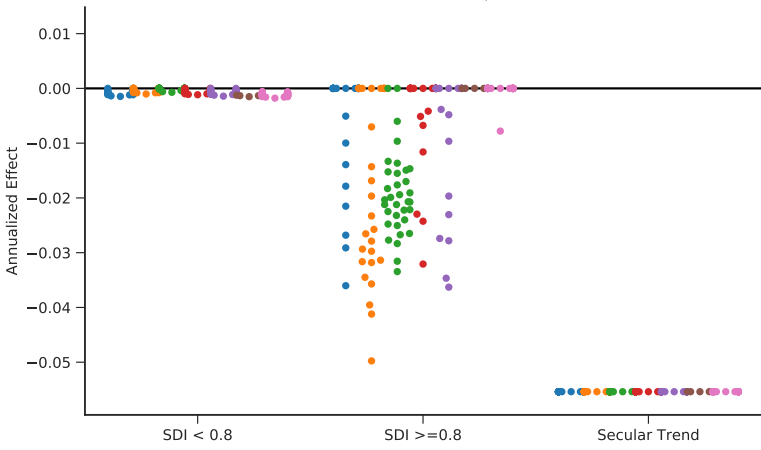

Gonococcal infection, Females

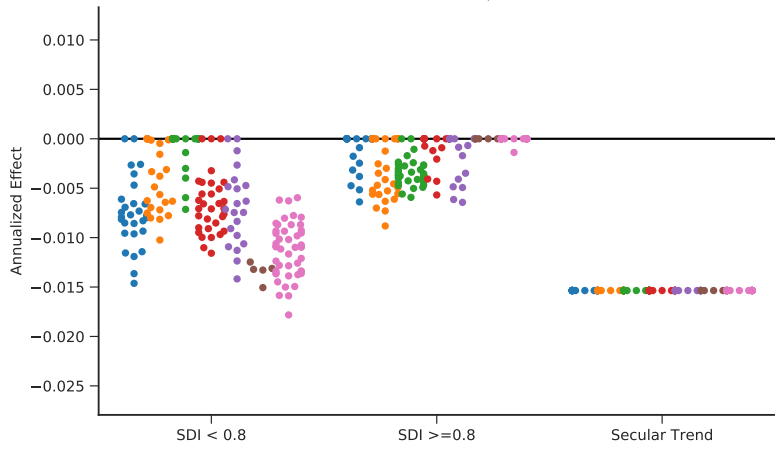

Other sexually transmitted infections, Males

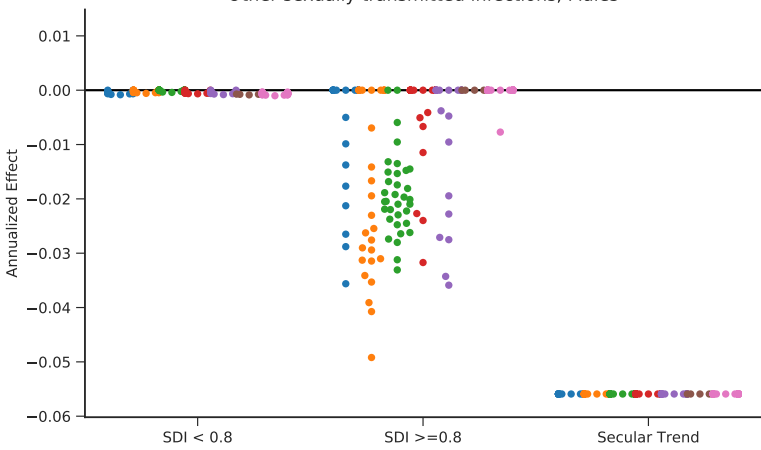

- Southeast Asia, East Asia, and Oceania
- Central Europe, Eastern Europe, and Central Asia
- High-income
- Latin America and Caribbean
- North Africa and Middle East
- South Asia
- Sub-Saharan Africa



Other sexually transmitted infections, Females

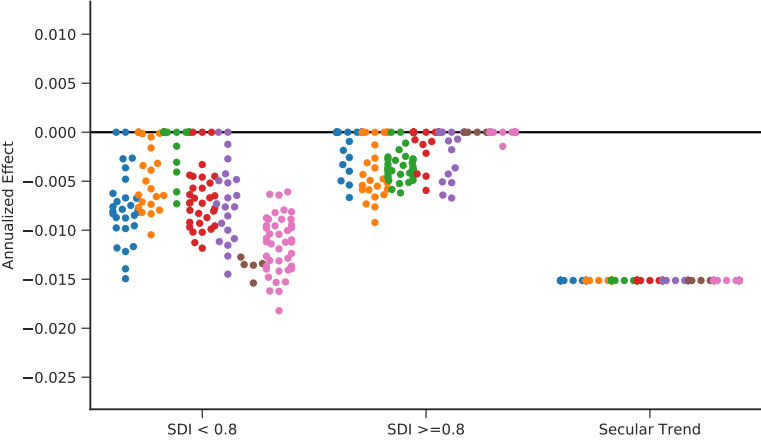

Acute hepatitis A, Males

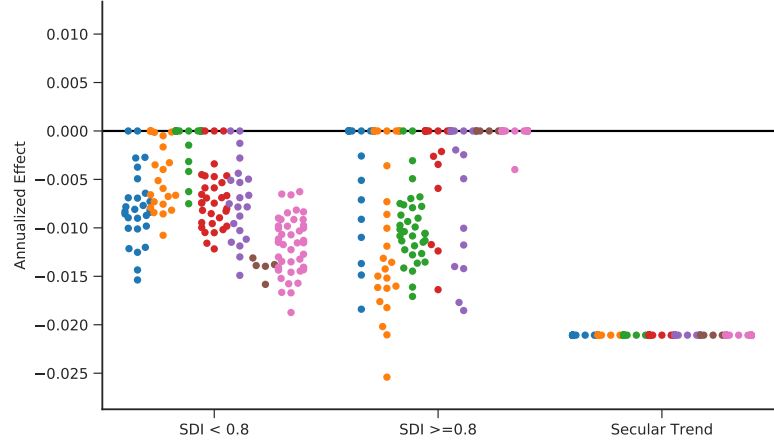

Acute hepatitis A, Females

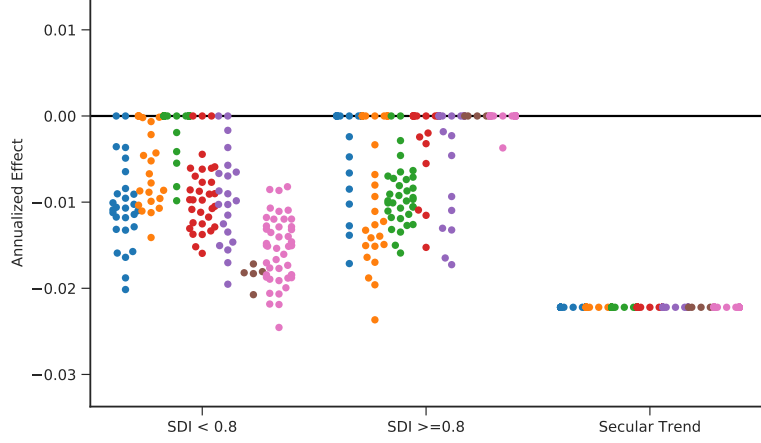

Acute hepatitis B, Males

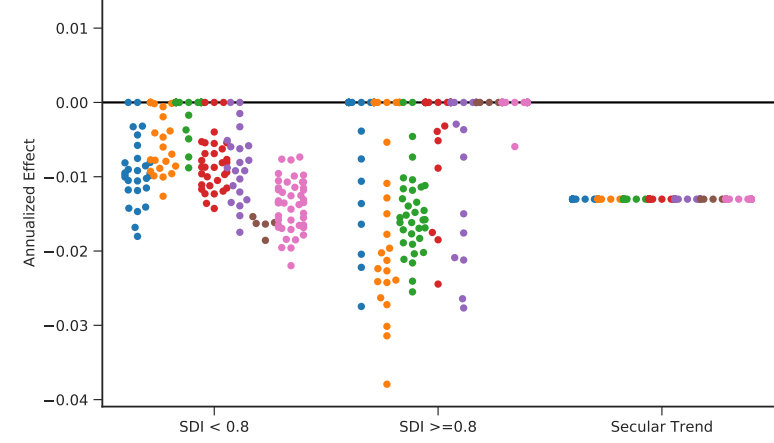

Acute hepatitis B, Females

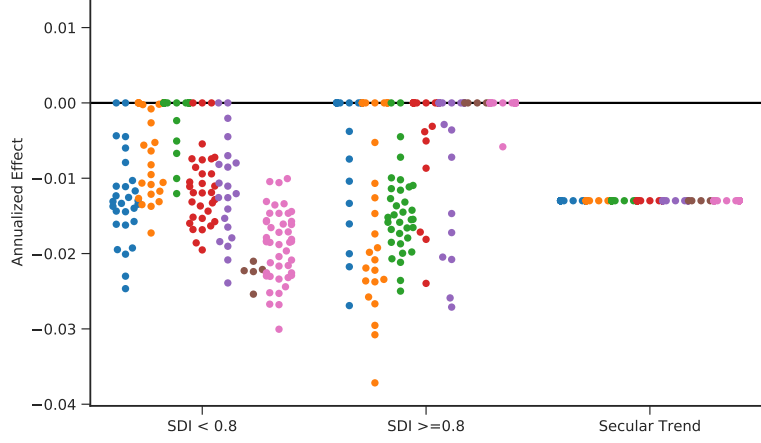

Acute hepatitis C, Males

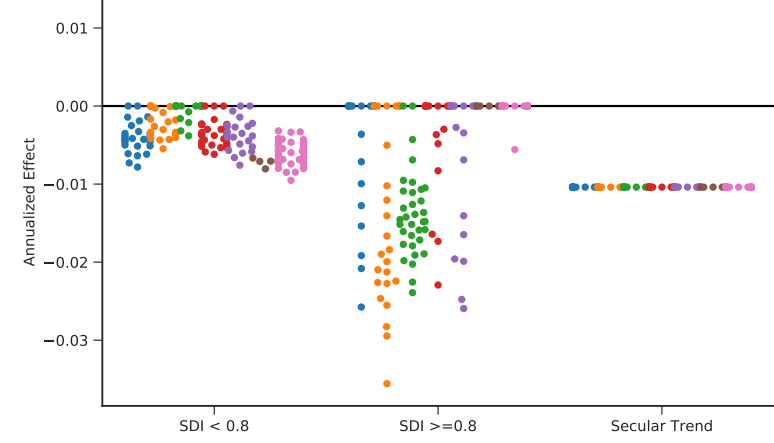

Acute hepatitis C, Females

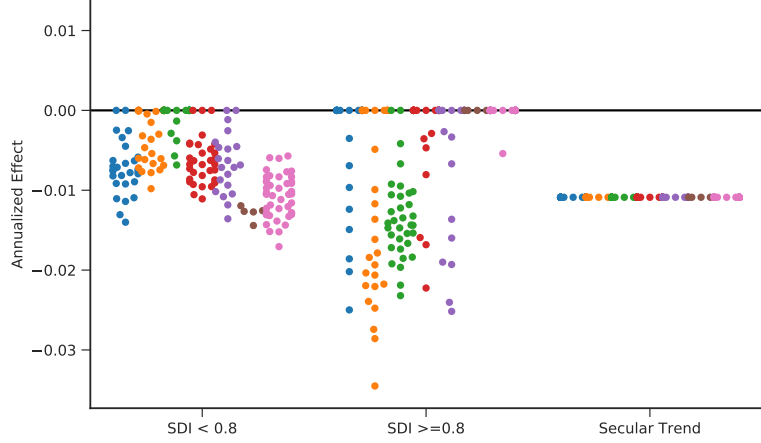

- Southeast Asia, East Asia, and Oceania
- Central Europe, Eastern Europe, and Central Asia
- High-income
- Latin America and Caribbean
- North Africa and Middle East
- South Asia
- Sub-Saharan Africa

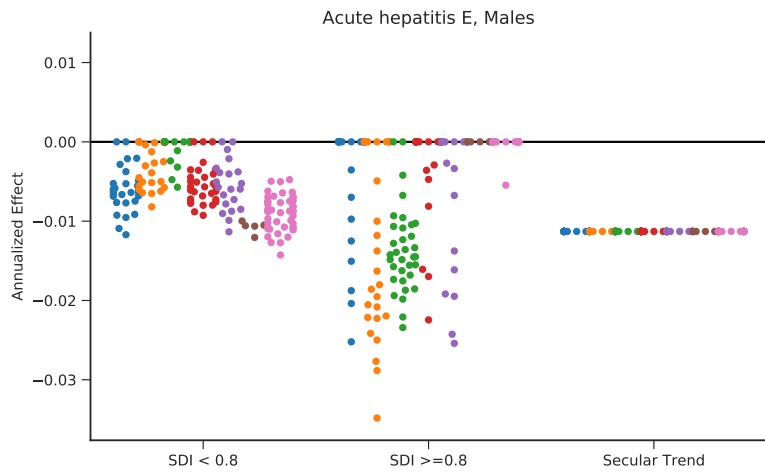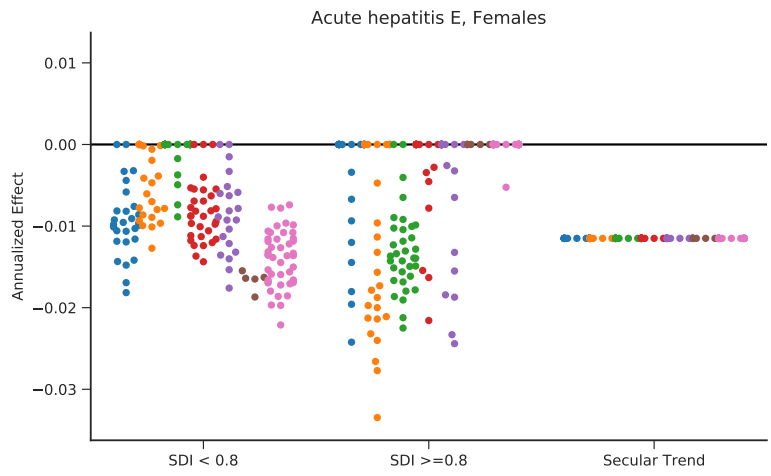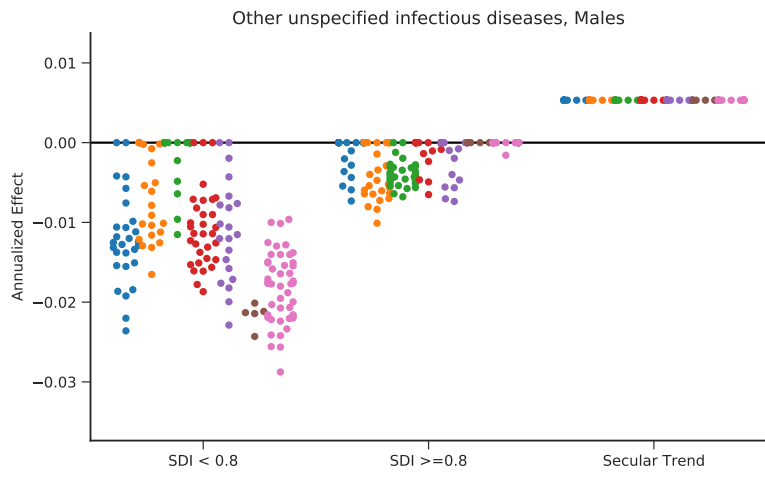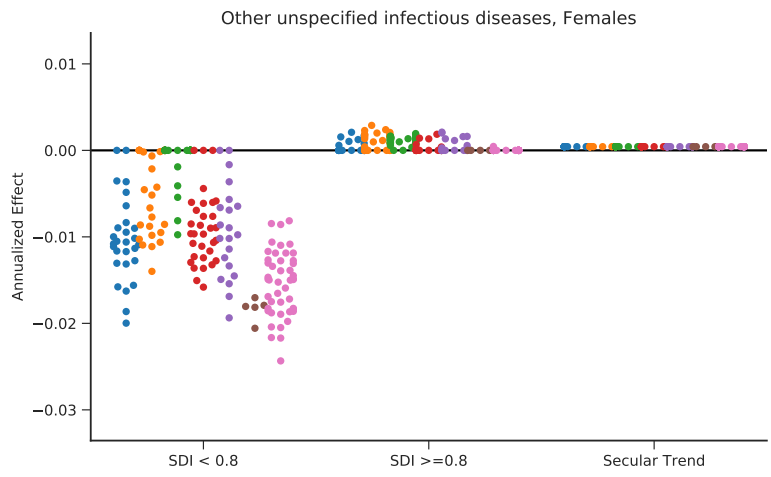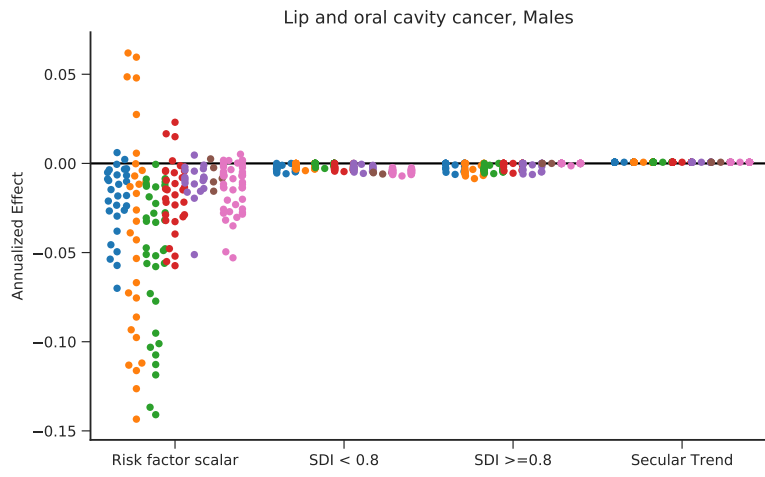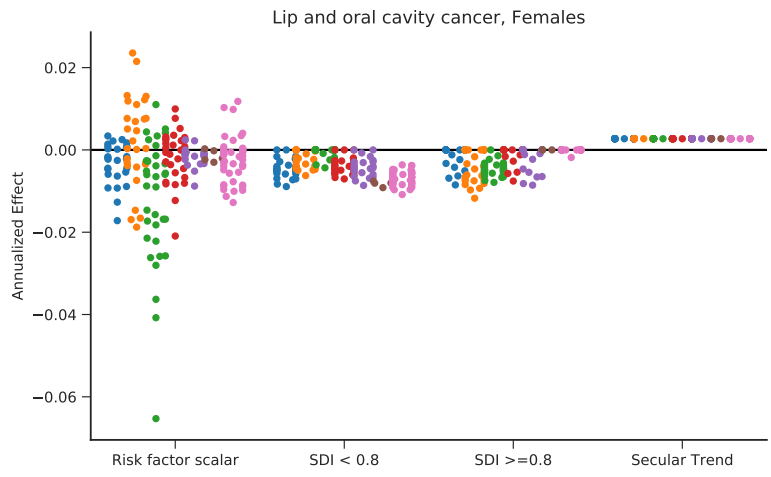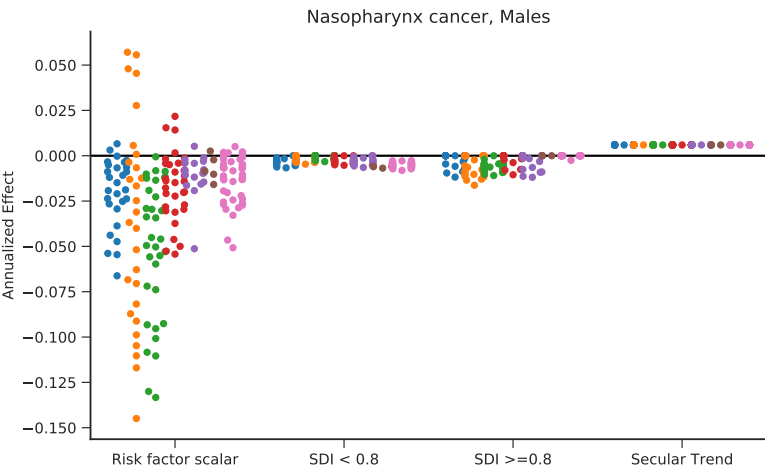

- Southeast Asia, East Asia, and Oceania
- Central Europe, Eastern Europe, and Central Asia
- High-income
- Latin America and Caribbean
- North Africa and Middle East
- South Asia
- Sub-Saharan Africa

Nasopharynx cancer, Females

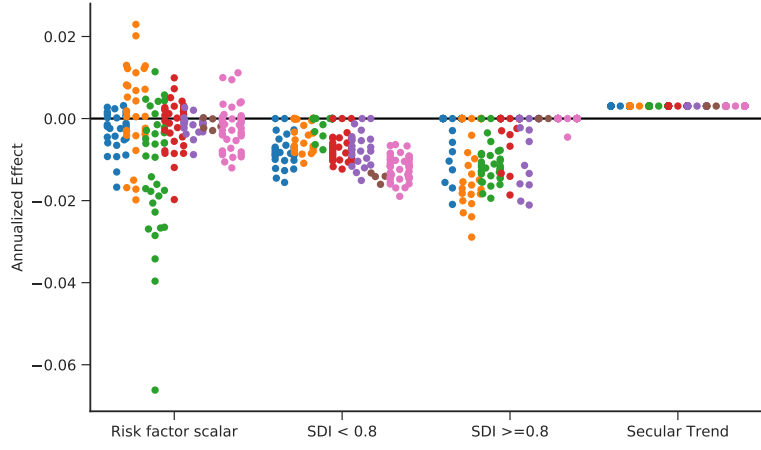

Other pharynx cancer, Males

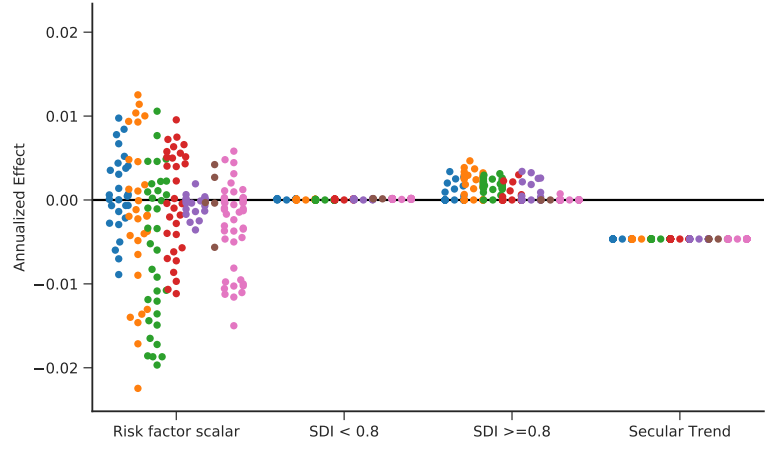

Other pharynx cancer, Females

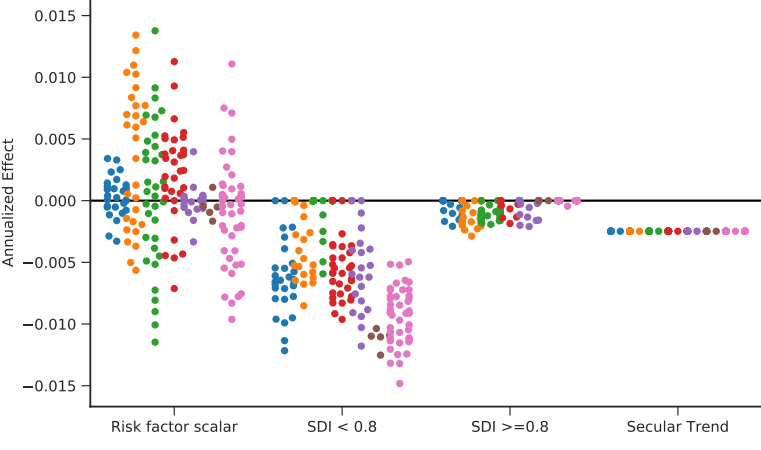

Esophageal cancer, Males

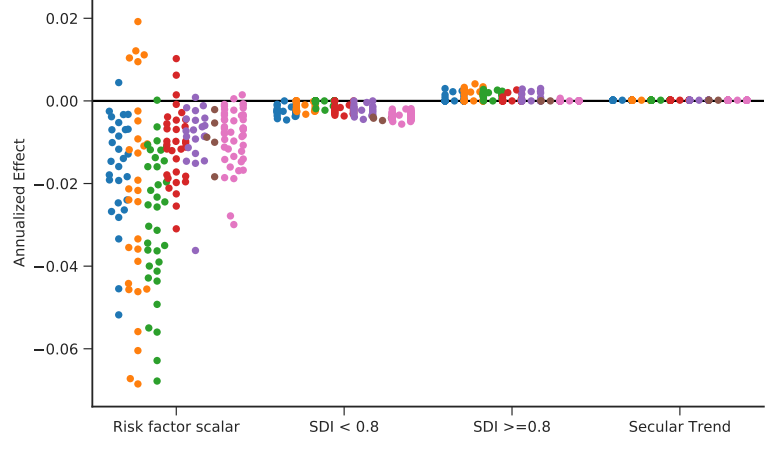

Esophageal cancer, Females

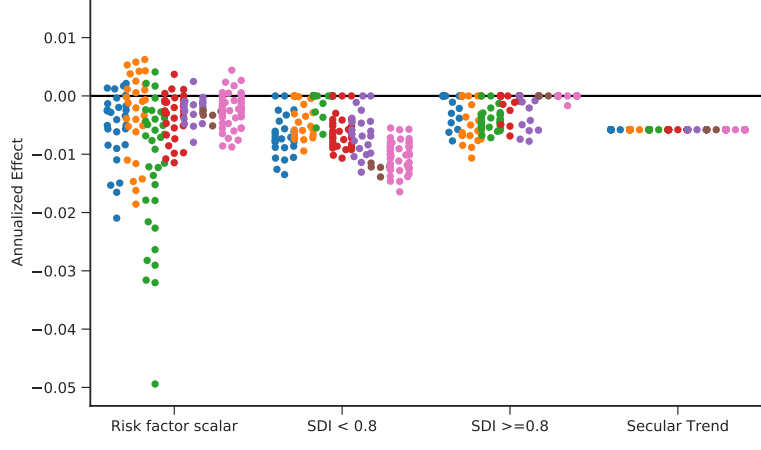

Stomach cancer, Males

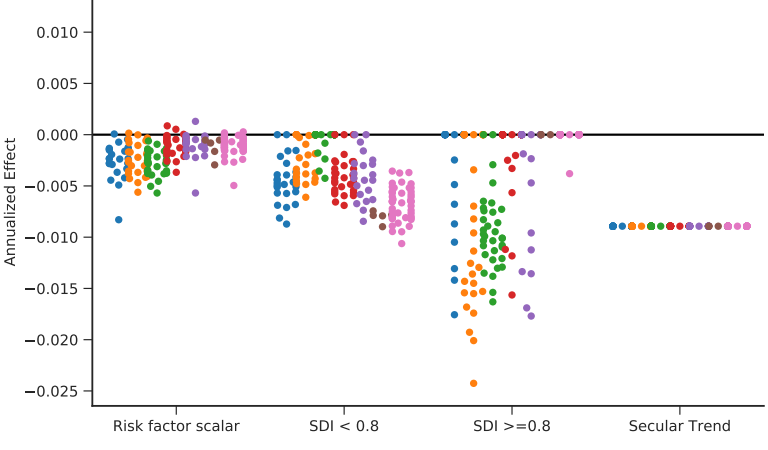

Stomach cancer, Females

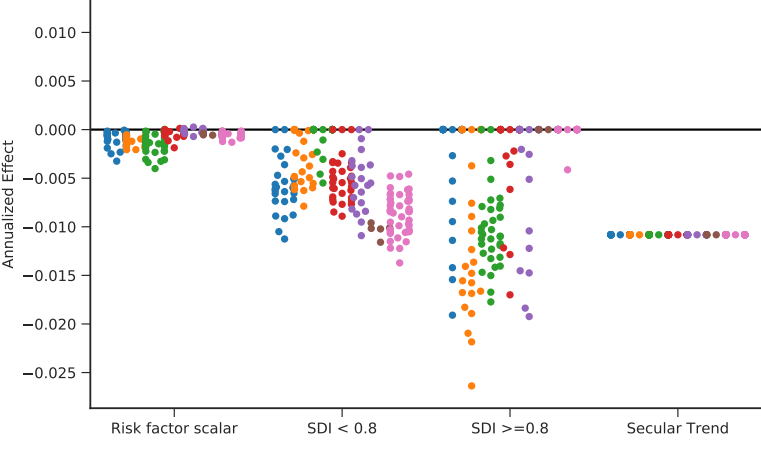

- Southeast Asia, East Asia, and Oceania
- Central Europe, Eastern Europe, and Central Asia
- High-income
- Latin America and Caribbean
- North Africa and Middle East
- South Asia
- Sub-Saharan Africa

Colon and rectum cancer, Males

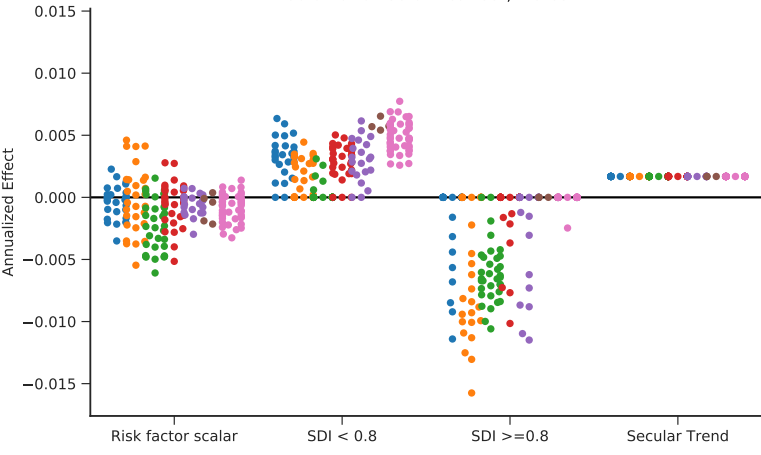

Colon and rectum cancer, Females

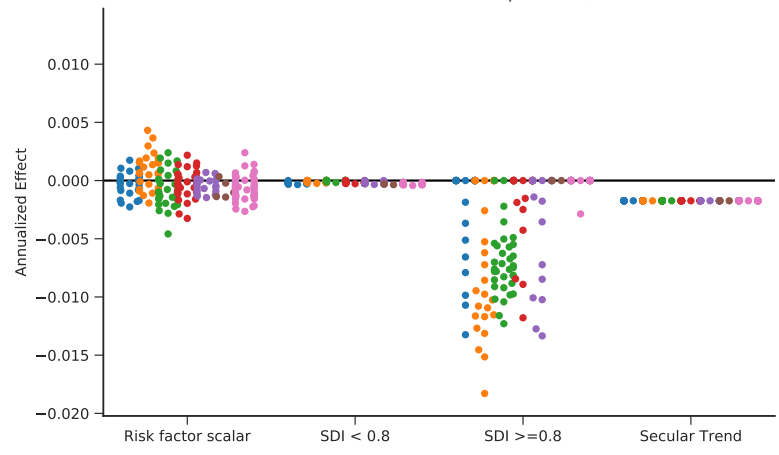

Liver cancer due to hepatitis B, Males

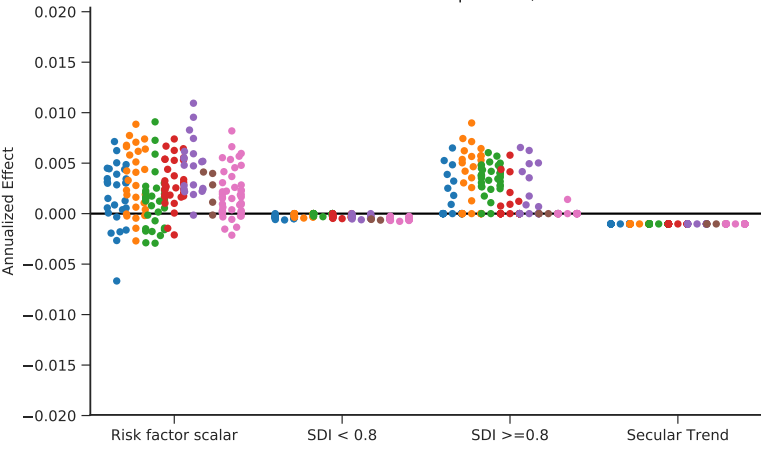

Liver cancer due to hepatitis B, Females

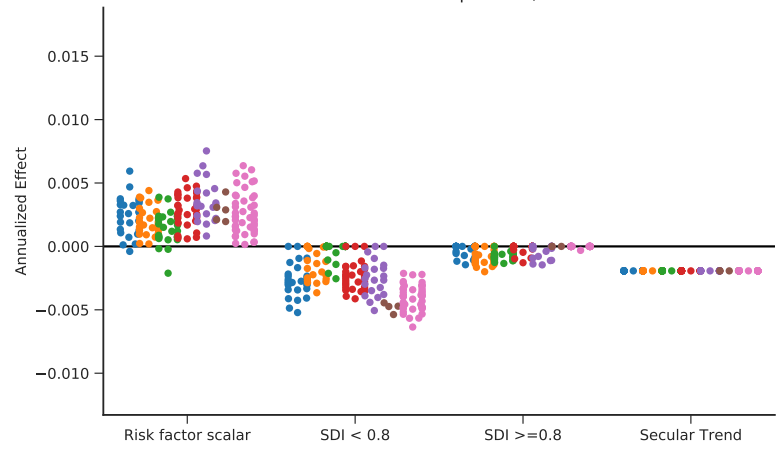

Liver cancer due to hepatitis C, Males

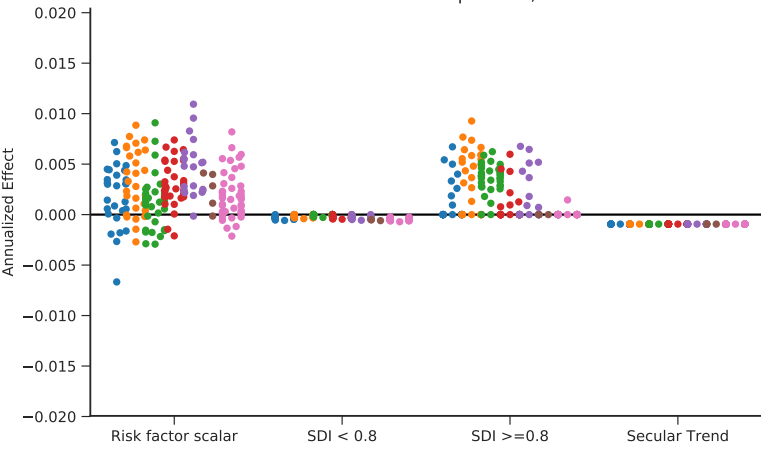

Liver cancer due to hepatitis C, Females

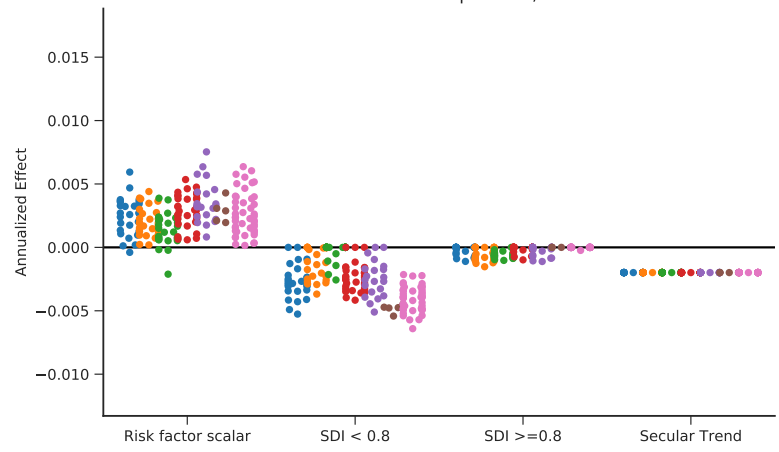

Liver cancer due to alcohol use, Males

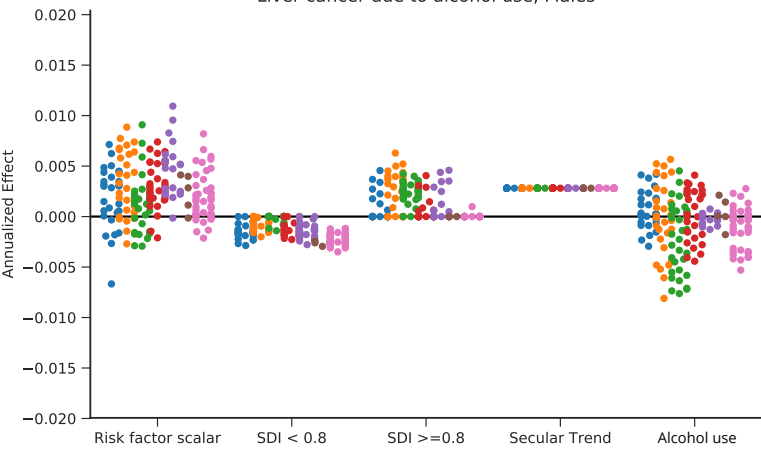

- Southeast Asia, East Asia, and Oceania
- Central Europe, Eastern Europe, and Central Asia
- High-income
- Latin America and Caribbean
- North Africa and Middle East
- South Asia
- Sub-Saharan Africa

Liver cancer due to alcohol use, Females

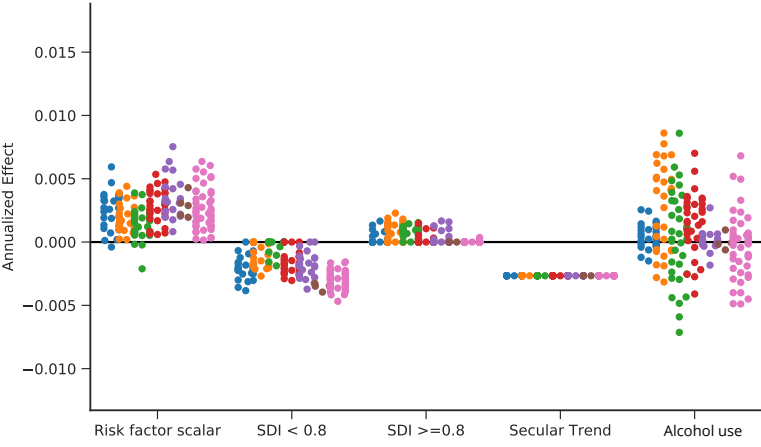

Liver cancer due to other causes, Males

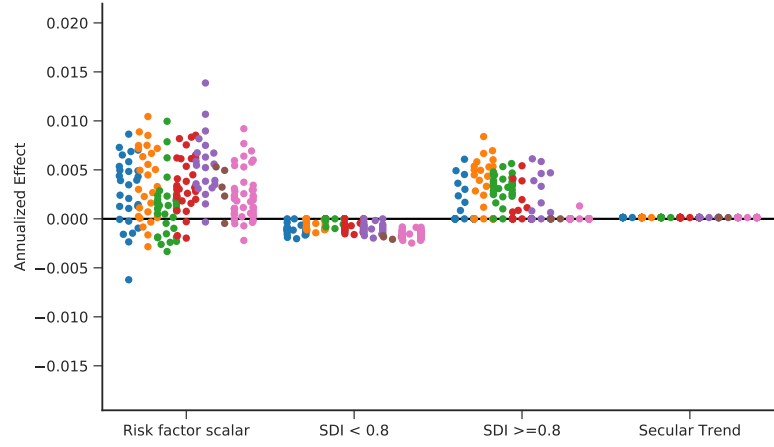

Liver cancer due to other causes, Females

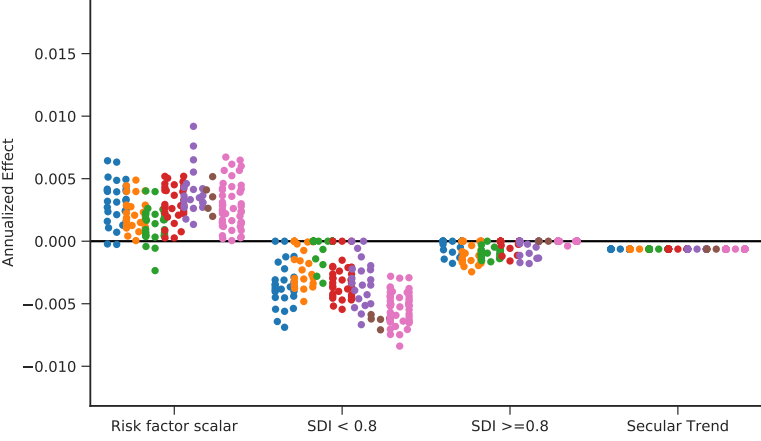

Gallbladder and biliary tract cancer, Males

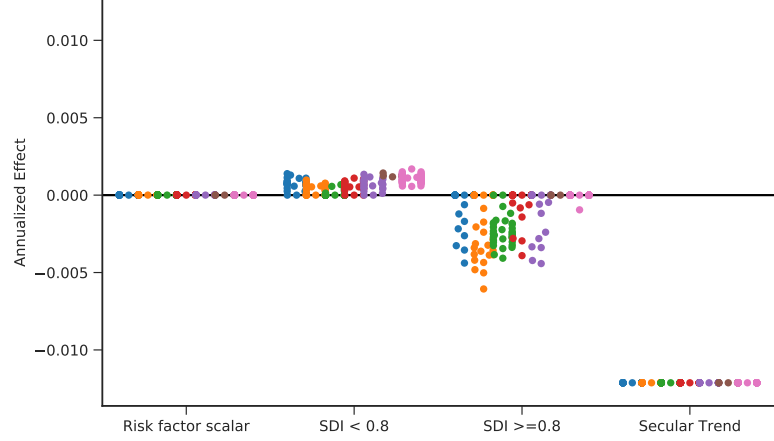

Gallbladder and biliary tract cancer, Females

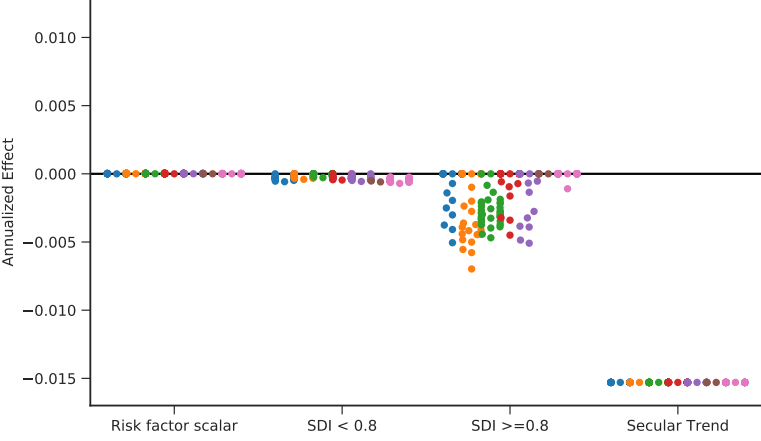

Pancreatic cancer, Males

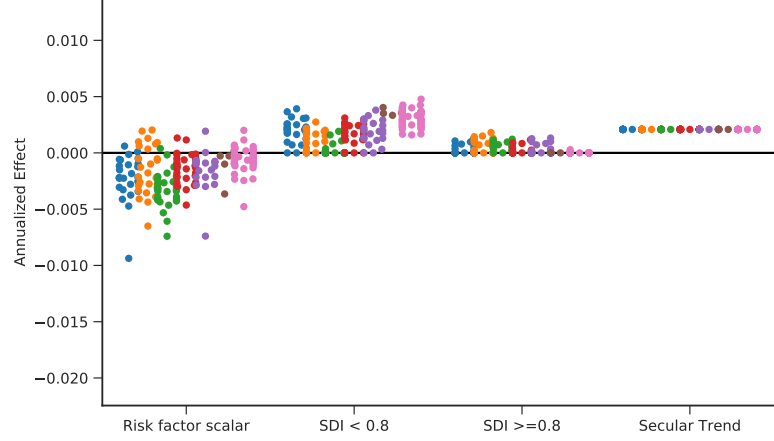

Pancreatic cancer, Females

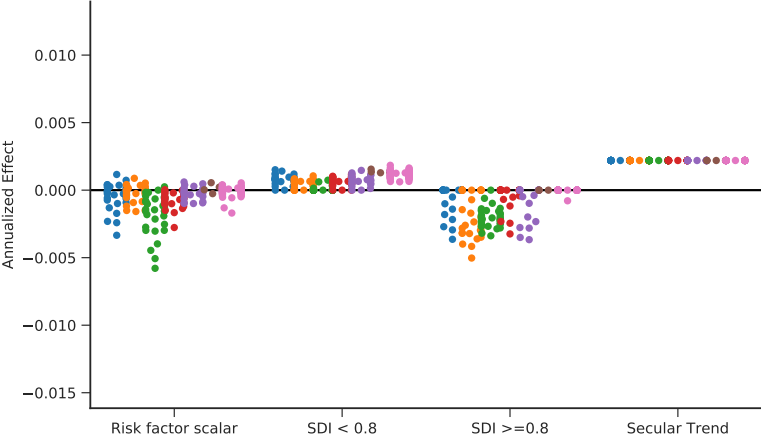

- Southeast Asia, East Asia, and Oceania
- Central Europe, Eastern Europe, and Central Asia
- High-income
- Latin America and Caribbean
- North Africa and Middle East
- South Asia
- Sub-Saharan Africa

Larynx cancer, Males

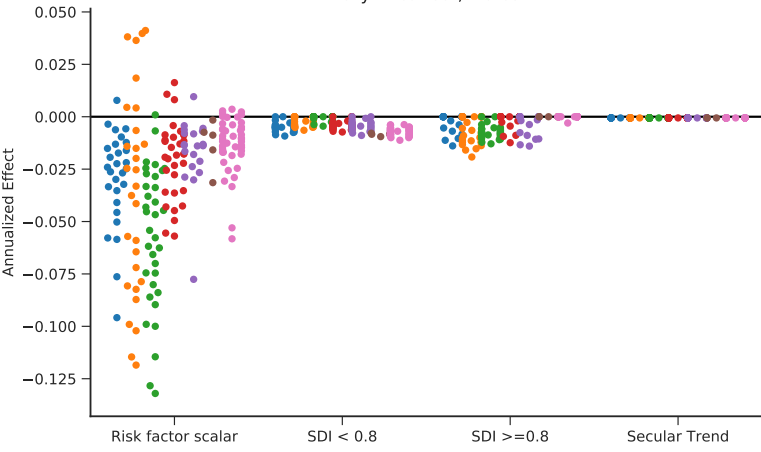

Larynx cancer, Females

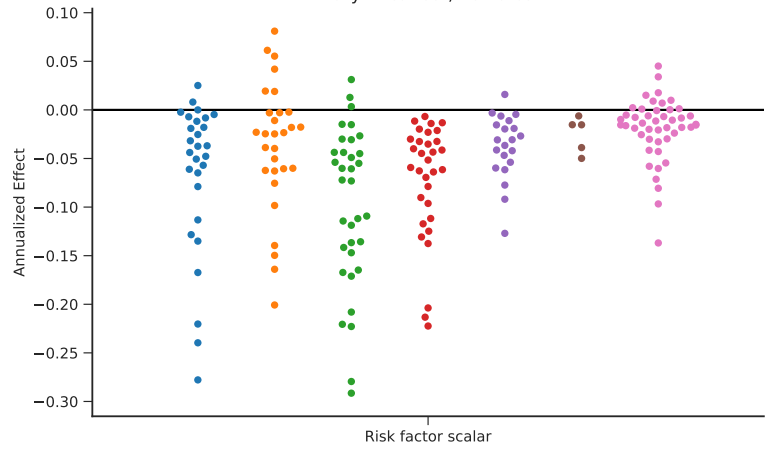

Tracheal, bronchus, and lung cancer, Males

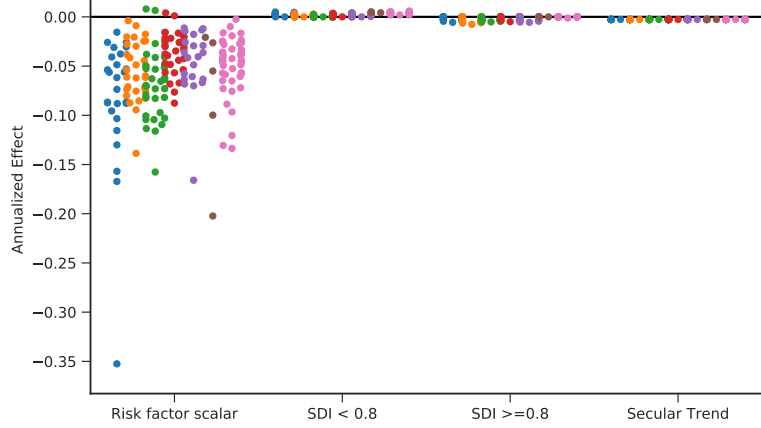

Tracheal, bronchus, and lung cancer, Females

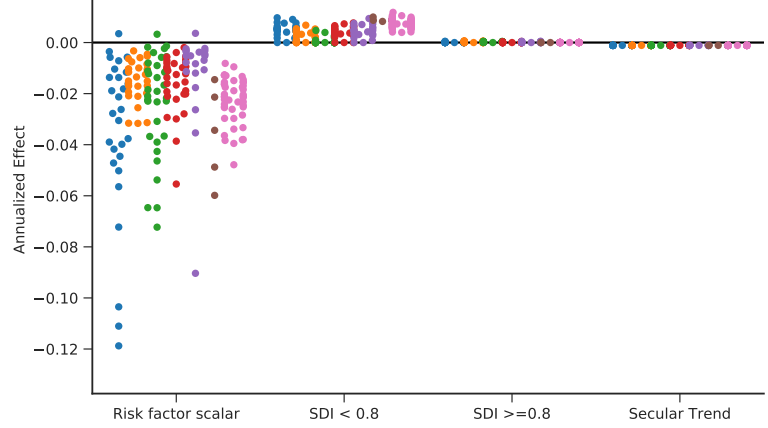

Malignant skin melanoma, Males

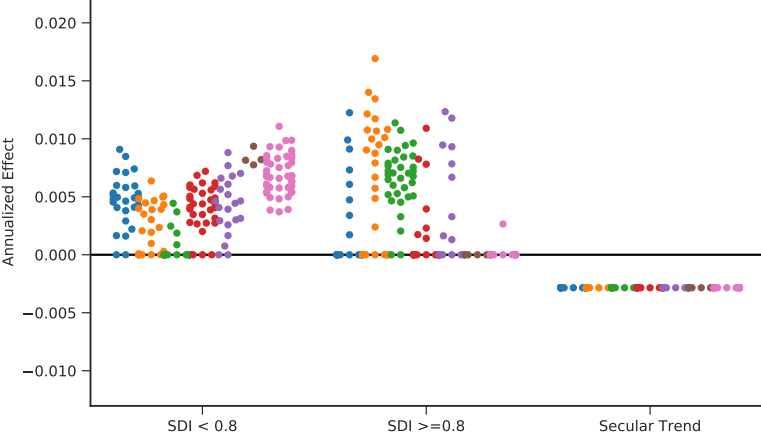

Malignant skin melanoma, Females

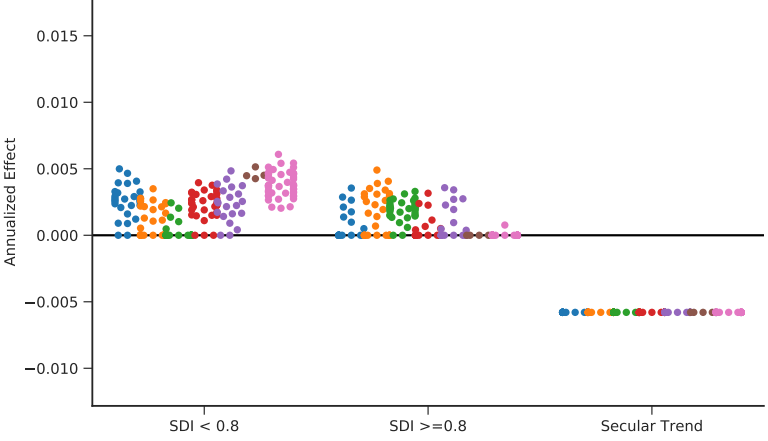

Non-melanoma skin cancer, Males

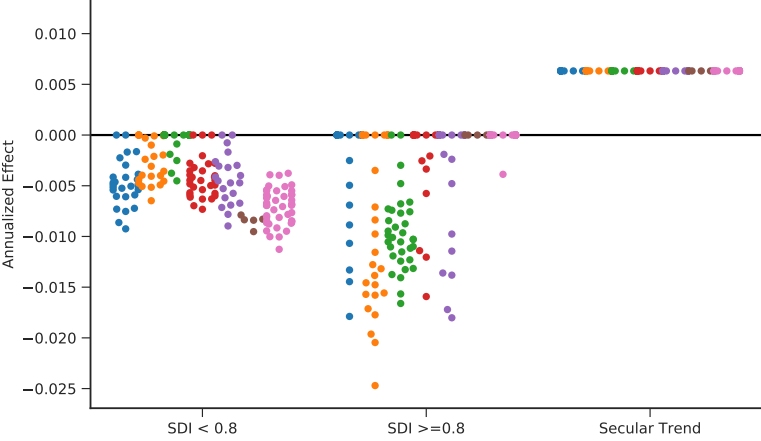

- Southeast Asia, East Asia, and Oceania
- Central Europe, Eastern Europe, and Central Asia
- High-income
- Latin America and Caribbean
- North Africa and Middle East
- South Asia
- Sub-Saharan Africa

Non-melanoma skin cancer, Females

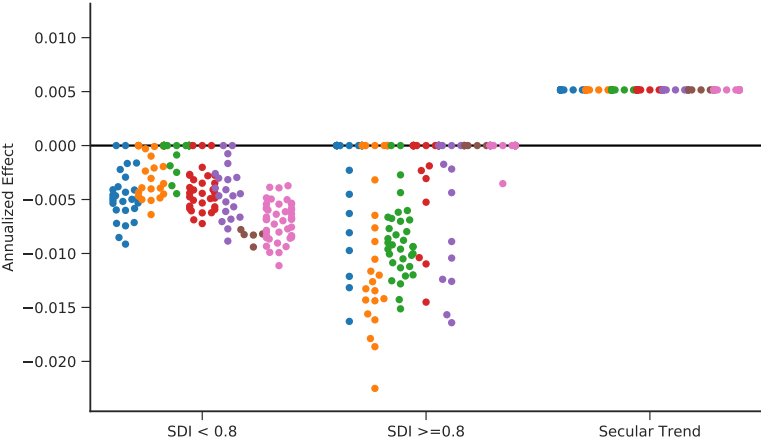

Breast cancer, Males

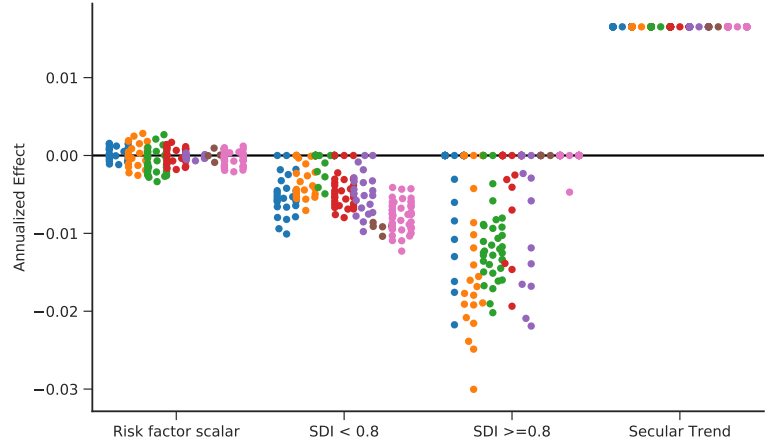

Breast cancer, Females

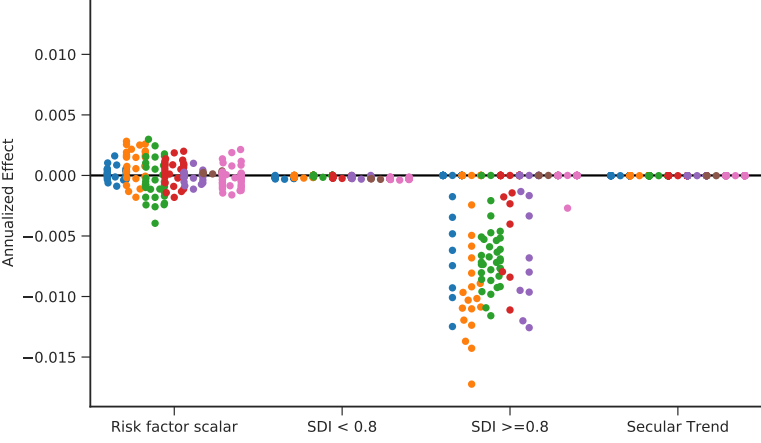

Cervical cancer, Females

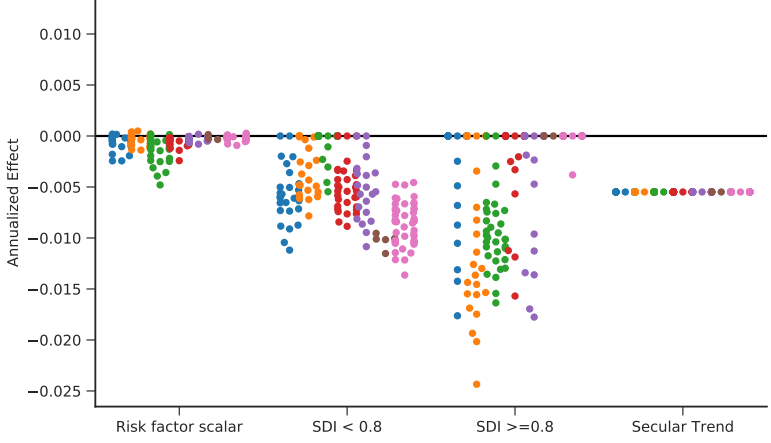

Uterine cancer, Females

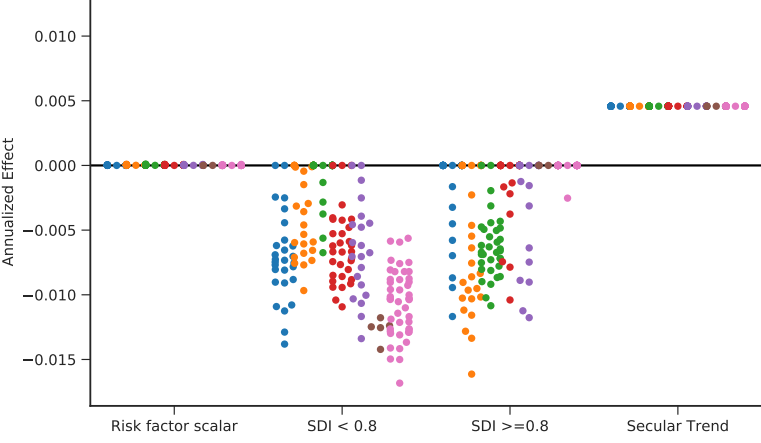

Ovarian cancer, Females

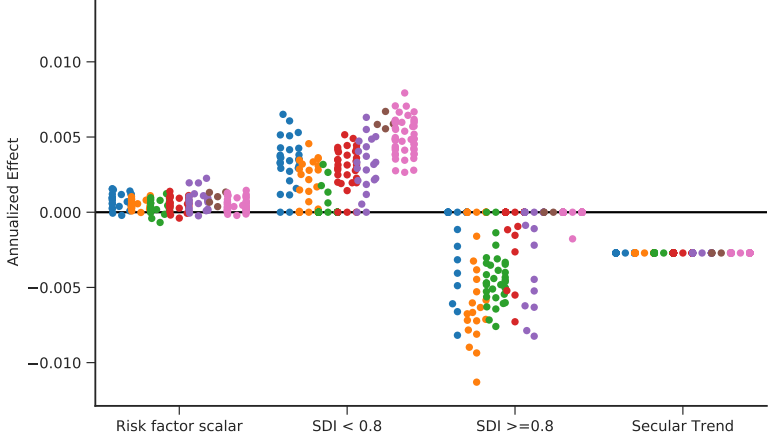

Prostate cancer, Males

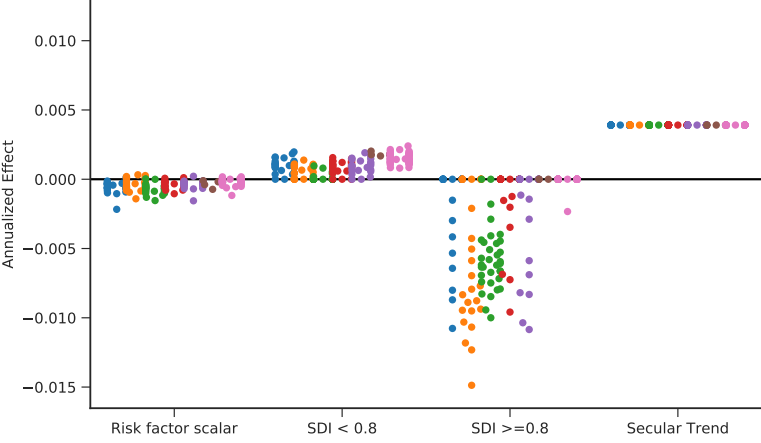

- Southeast Asia, East Asia, and Oceania
- Central Europe, Eastern Europe, and Central Asia
- High-income
- Latin America and Caribbean
- North Africa and Middle East
- South Asia
- Sub-Saharan Africa

Testicular cancer, Males

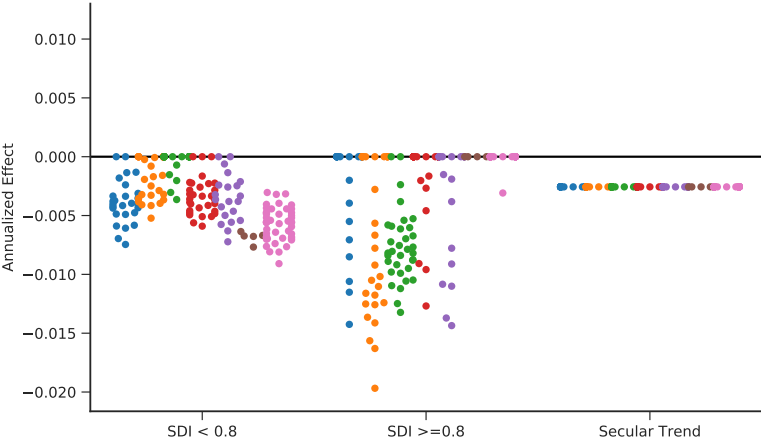

Kidney cancer, Males

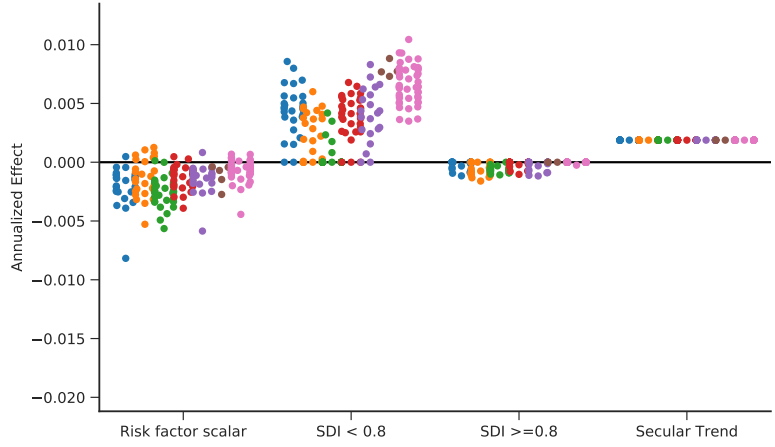

Kidney cancer, Females

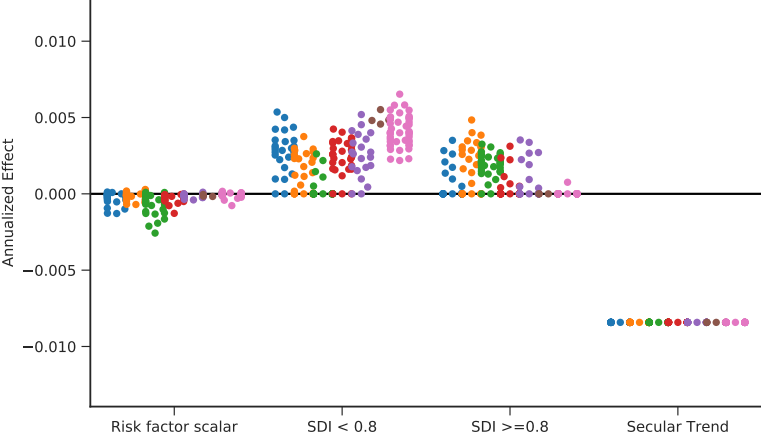

Bladder cancer, Males

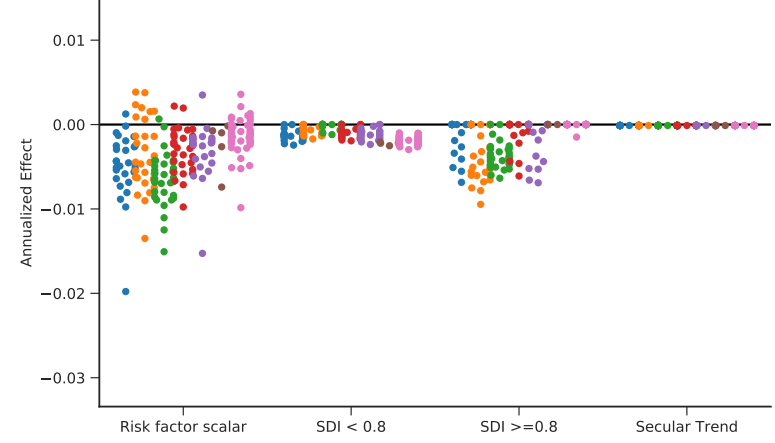

Bladder cancer, Females

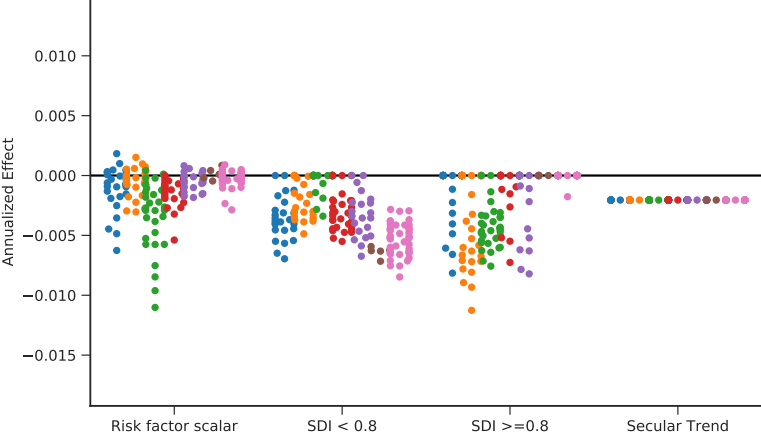

Brain and nervous system cancer, Males

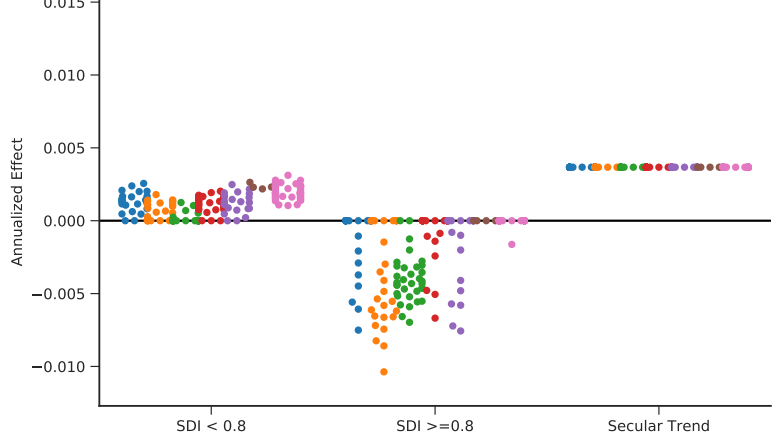

Brain and nervous system cancer, Females

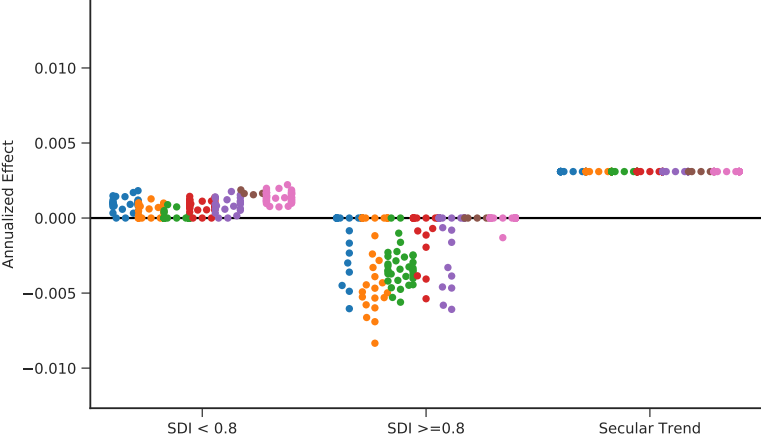

- Southeast Asia, East Asia, and Oceania
- Central Europe, Eastern Europe, and Central Asia
- High-income
- Latin America and Caribbean
- North Africa and Middle East
- South Asia
- Sub-Saharan Africa



Thyroid cancer, Males

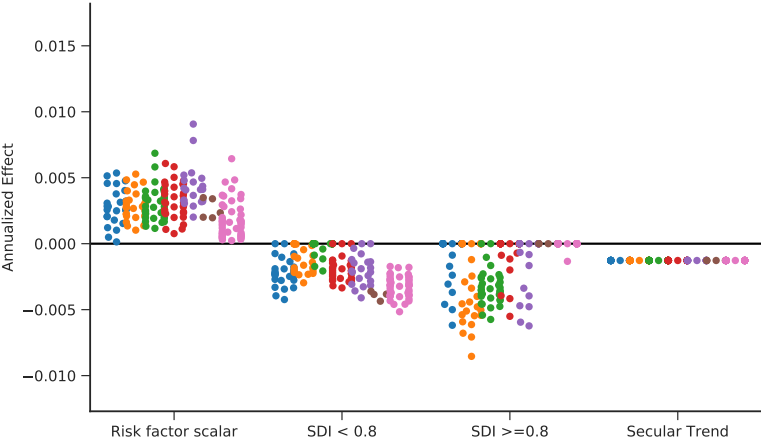

Thyroid cancer, Females

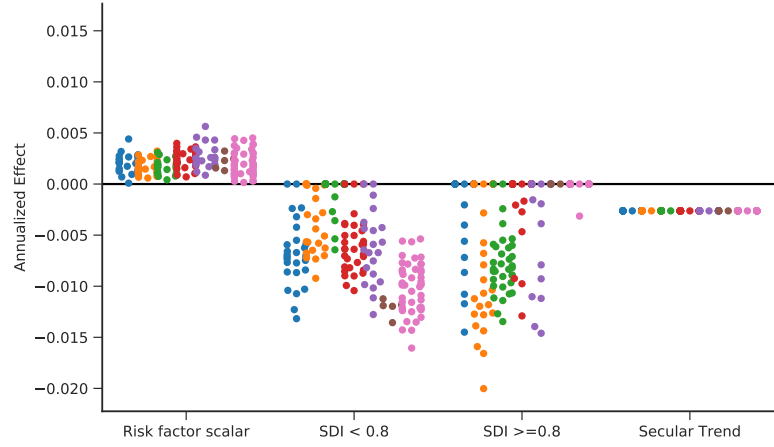

Mesothelioma, Males

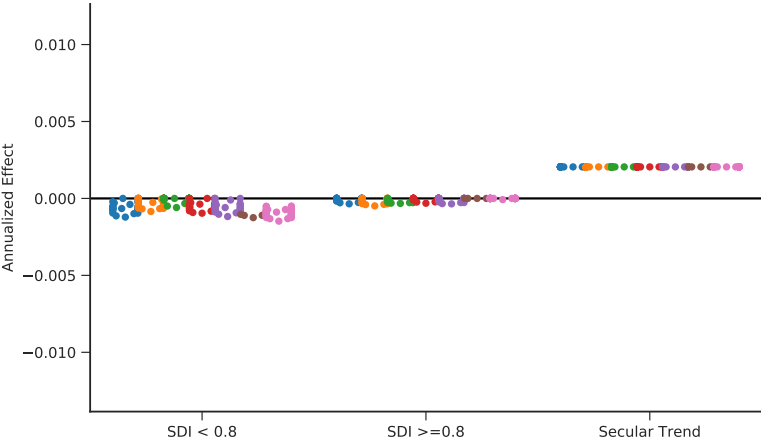

Mesothelioma, Females

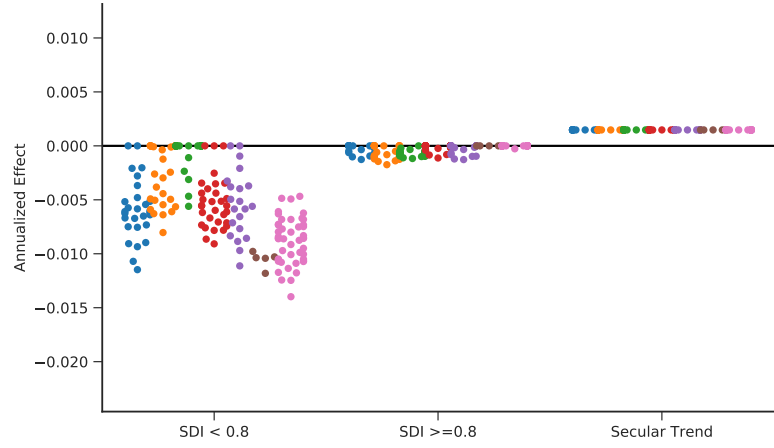

Hodgkin lymphoma, Males

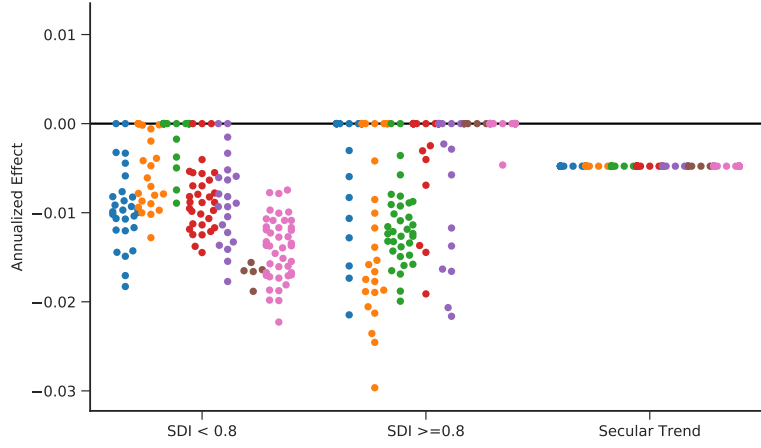

Hodgkin lymphoma, Females

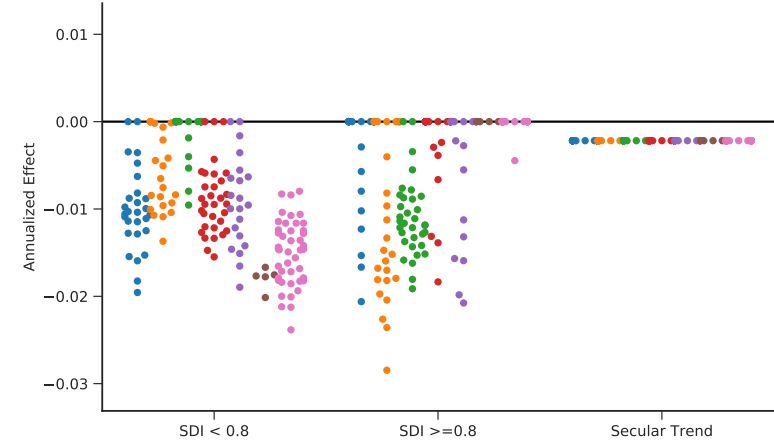

Non-Hodgkin lymphoma, Males

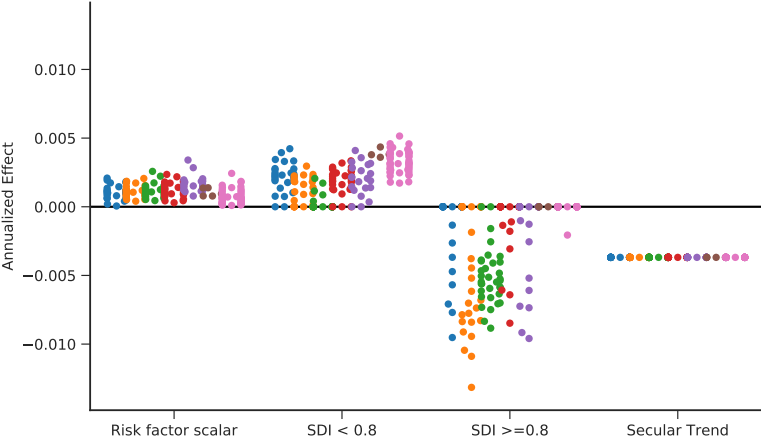

- Southeast Asia, East Asia, and Oceania
- Central Europe, Eastern Europe, and Central Asia
- High-income
- Latin America and Caribbean
- North Africa and Middle East
- South Asia
- Sub-Saharan Africa

Non-Hodgkin lymphoma, Females

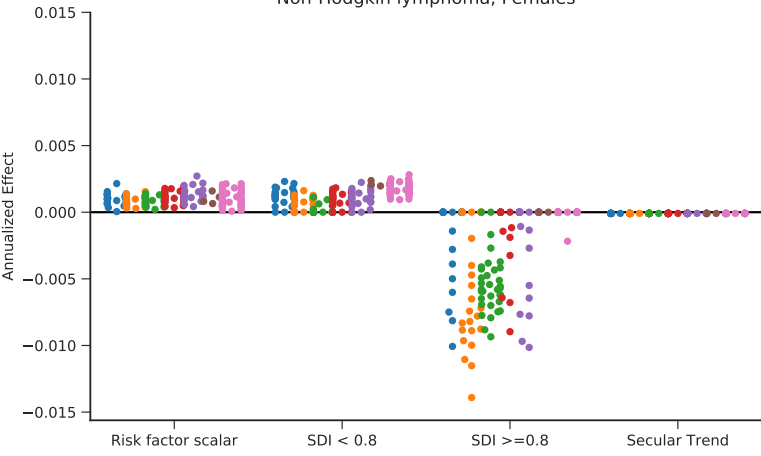

Multiple myeloma, Males

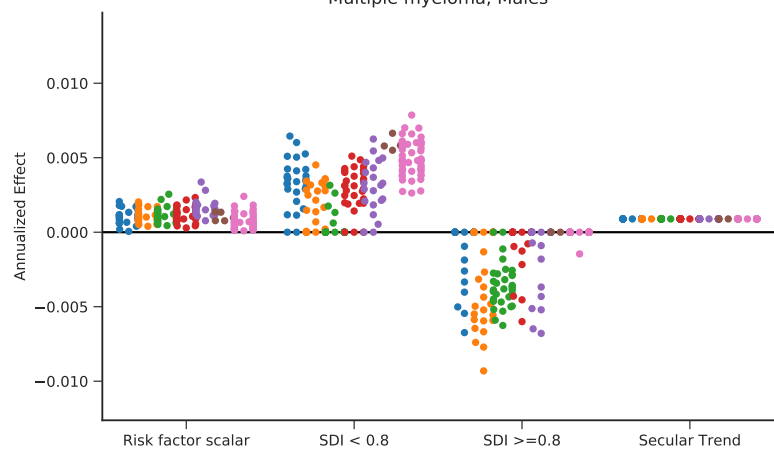

Multiple myeloma, Females

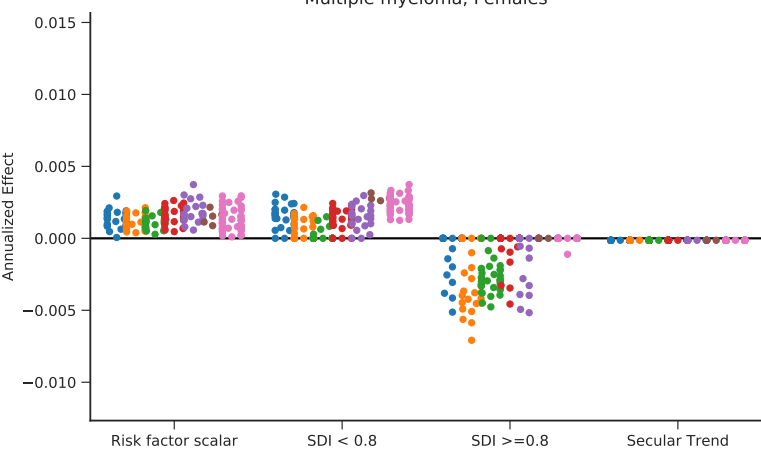

Acute lymphoid leukemia, Males

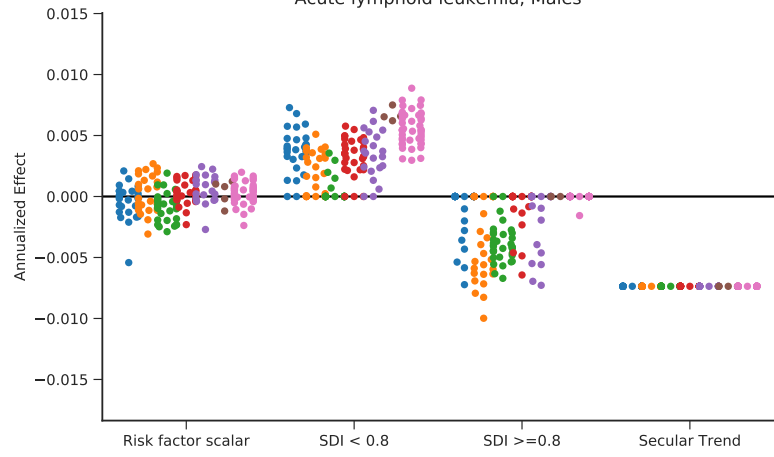

Acute lymphoid leukemia, Females

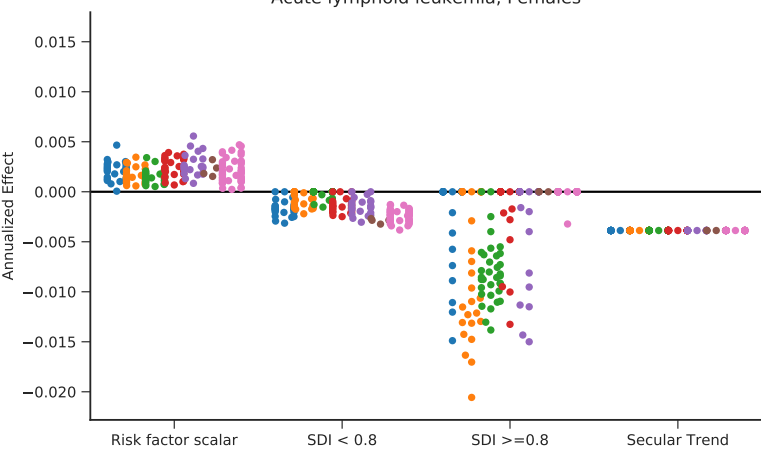

Chronic lymphoid leukemia, Males

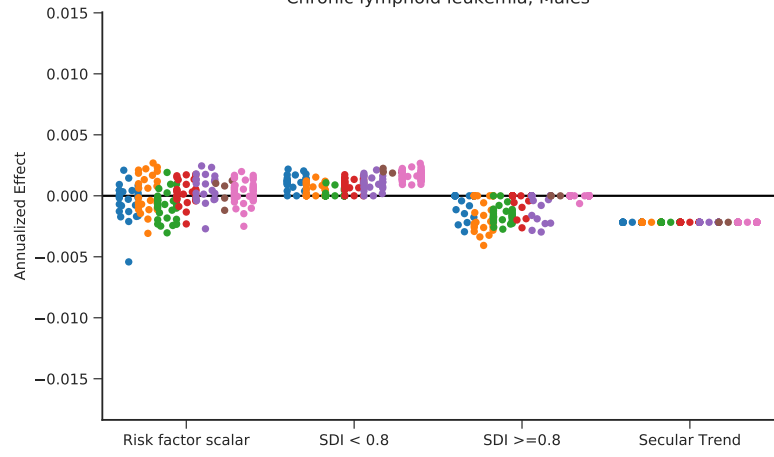

Chronic lymphoid leukemia, Females

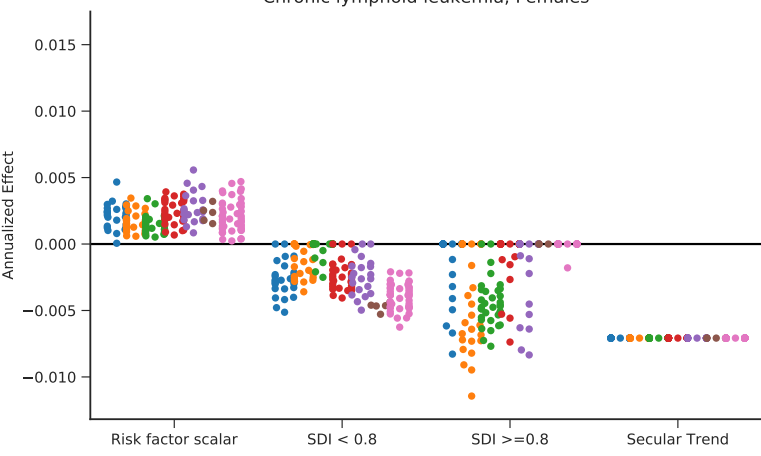

- Southeast Asia, East Asia, and Oceania
- Central Europe, Eastern Europe, and Central Asia
- High-income
- Latin America and Caribbean
- North Africa and Middle East
- South Asia
- Sub-Saharan Africa

Acute myeloid leukemia, Males

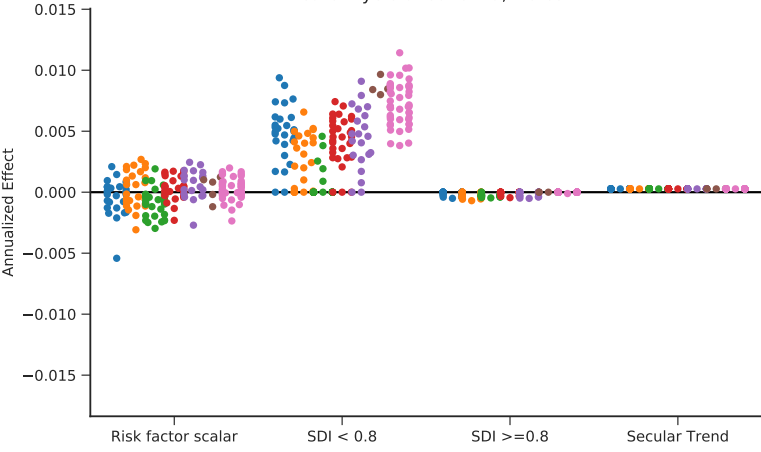

Acute myeloid leukemia, Females

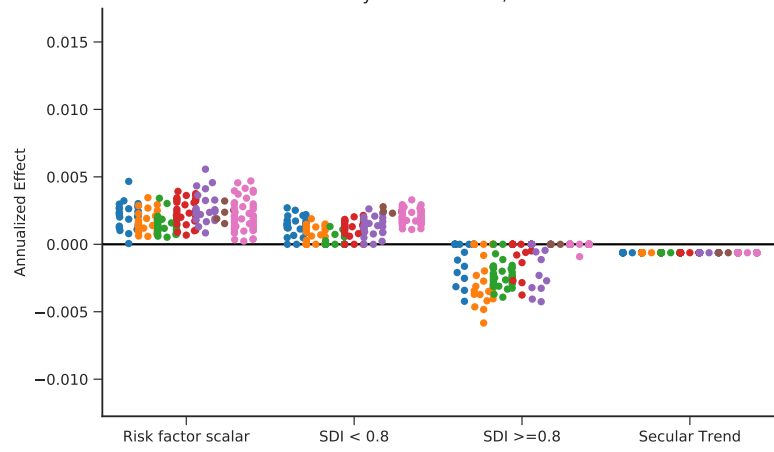

Chronic myeloid leukemia, Males

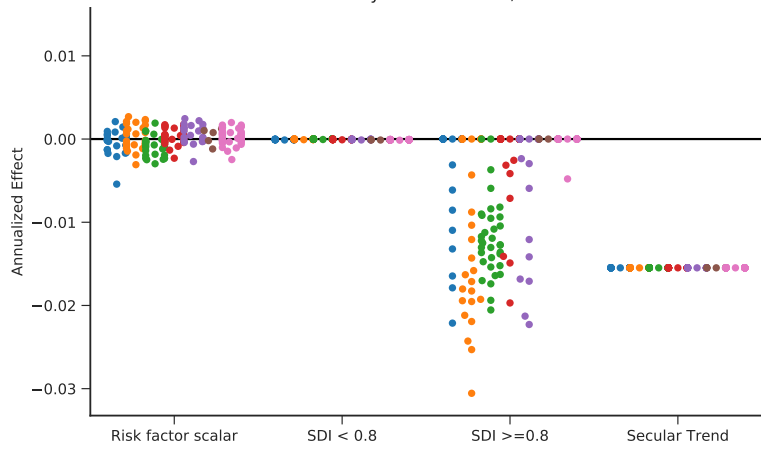

Chronic myeloid leukemia, Females

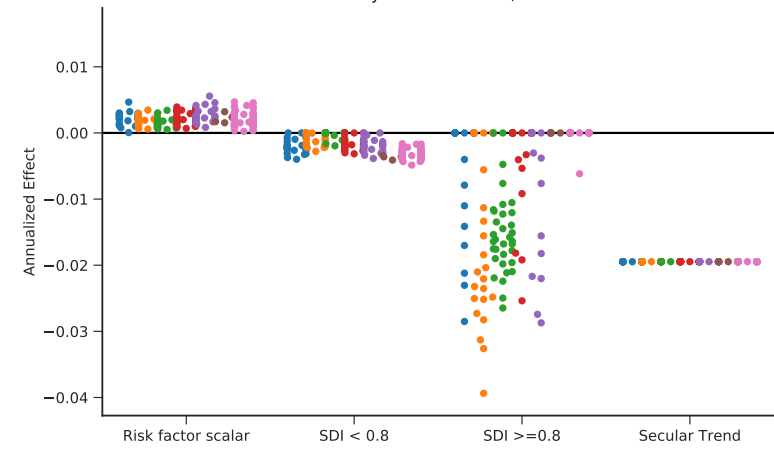

Other leukemia, Males

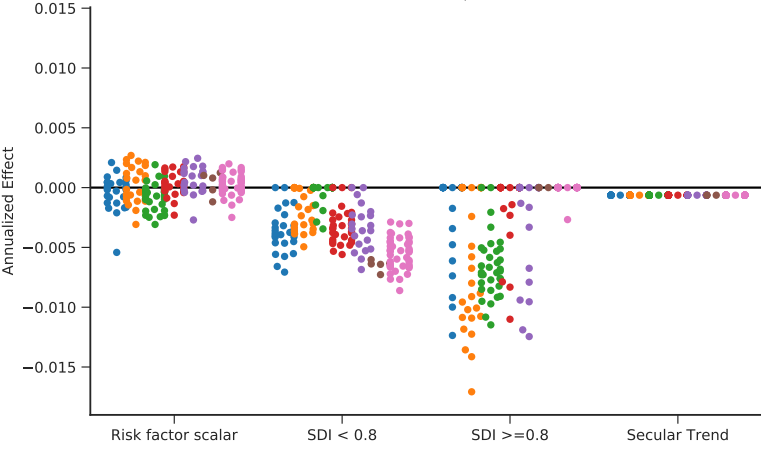

Other leukemia, Females

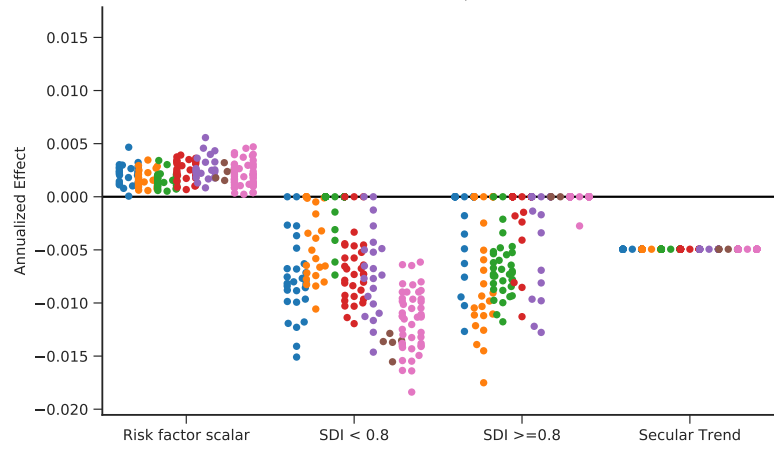

Other neoplasms, Males

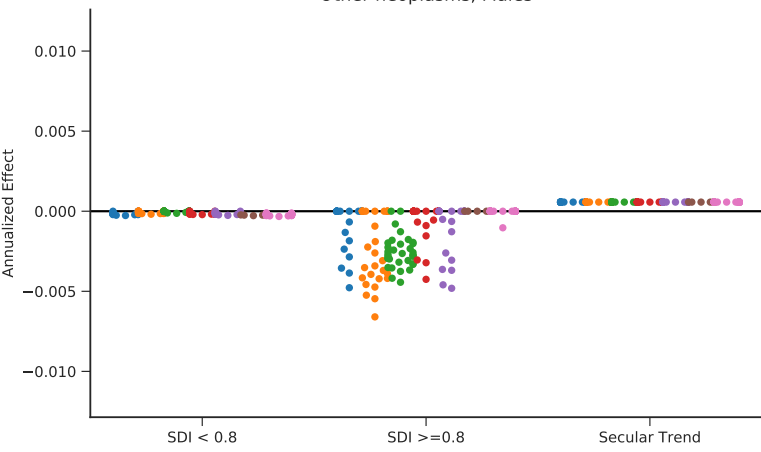

- Southeast Asia, East Asia, and Oceania
- Central Europe, Eastern Europe, and Central Asia
- High-income
- Latin America and Caribbean
- North Africa and Middle East
- South Asia
- Sub-Saharan Africa

Other neoplasms, Females

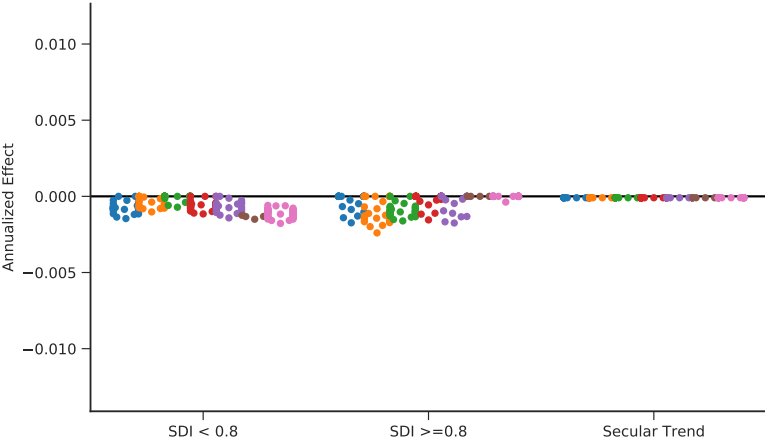

Rheumatic heart disease, Males

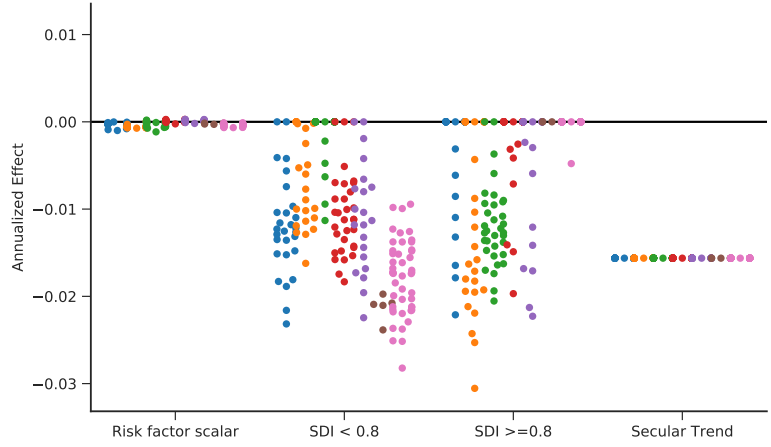

Rheumatic heart disease, Females

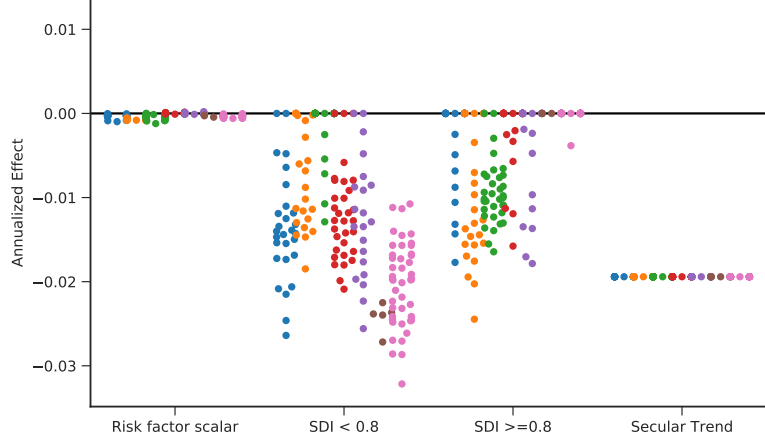

Ischemic heart disease, Males

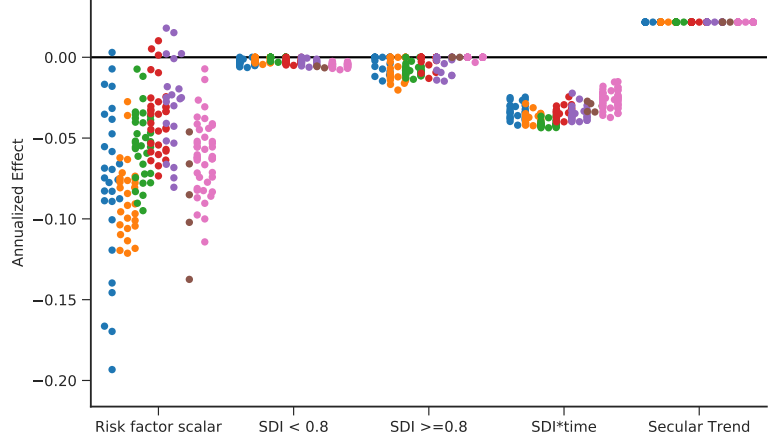

Ischemic heart disease, Females

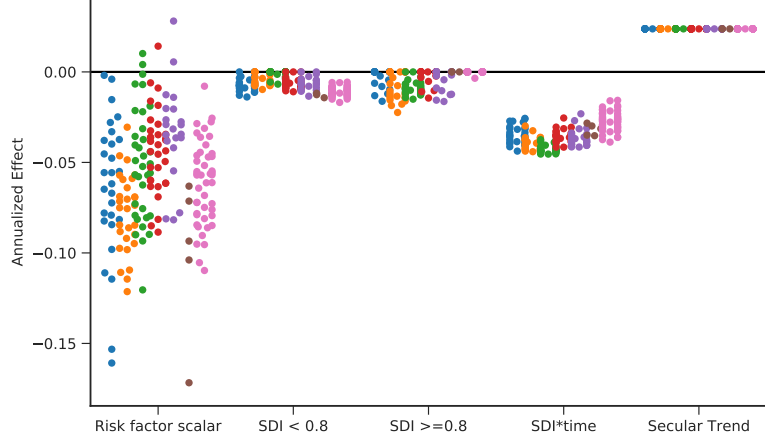

Ischemic stroke, Males

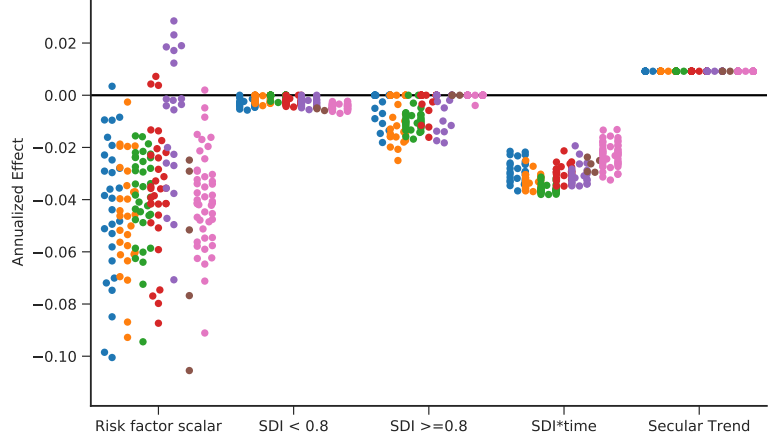

Ischemic stroke, Females

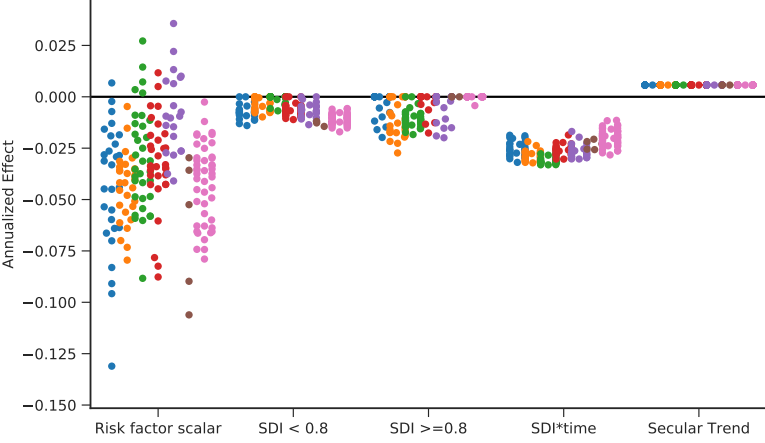

- Southeast Asia, East Asia, and Oceania
- Central Europe, Eastern Europe, and Central Asia
- High-income
- Latin America and Caribbean
- North Africa and Middle East
- South Asia
- Sub-Saharan Africa

Intracerebral hemorrhage, Males

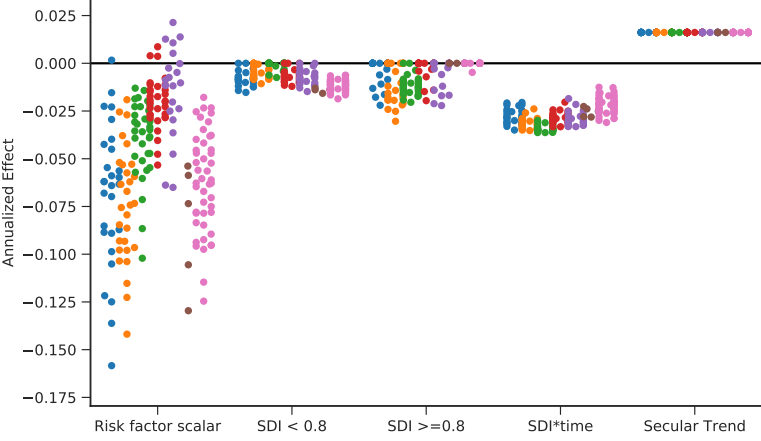

Intracerebral hemorrhage, Females

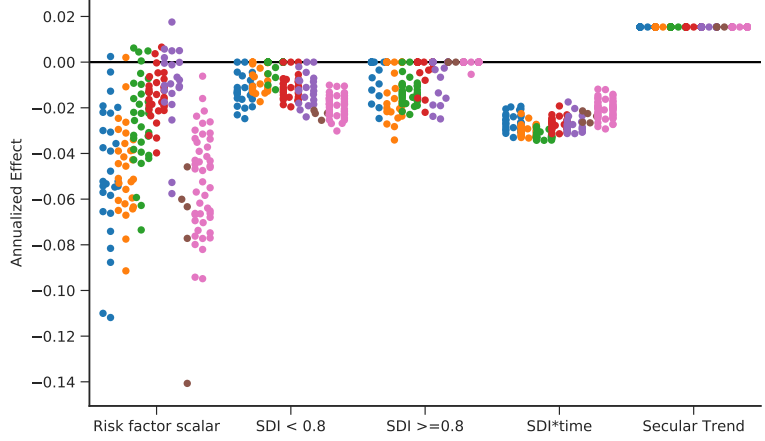

Hypertensive heart disease, Males

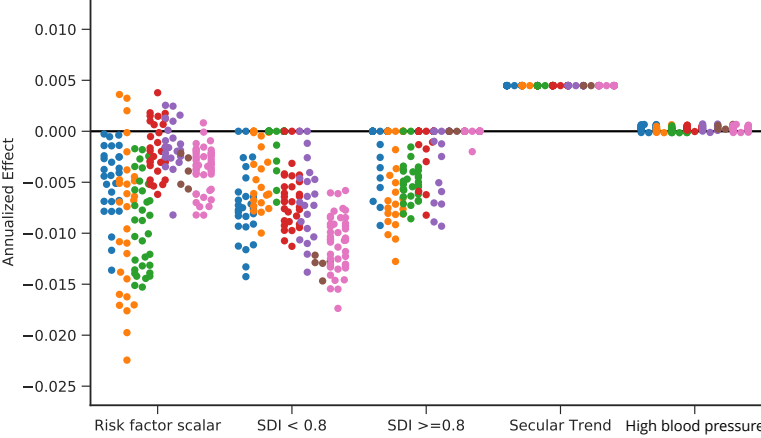

Hypertensive heart disease, Females

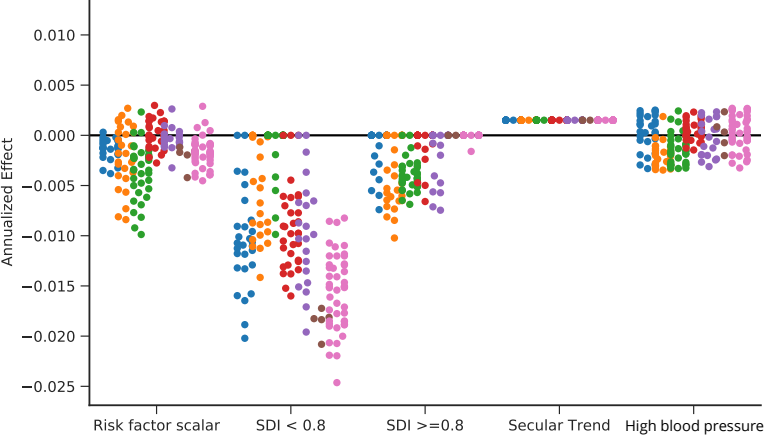

Myocarditis, Males

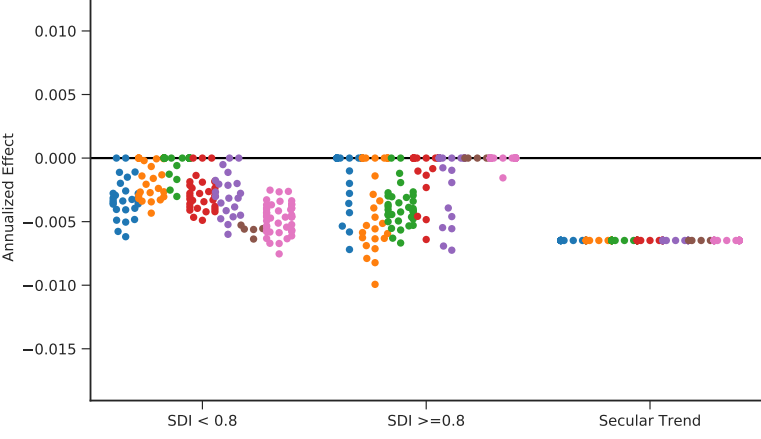

Myocarditis, Females

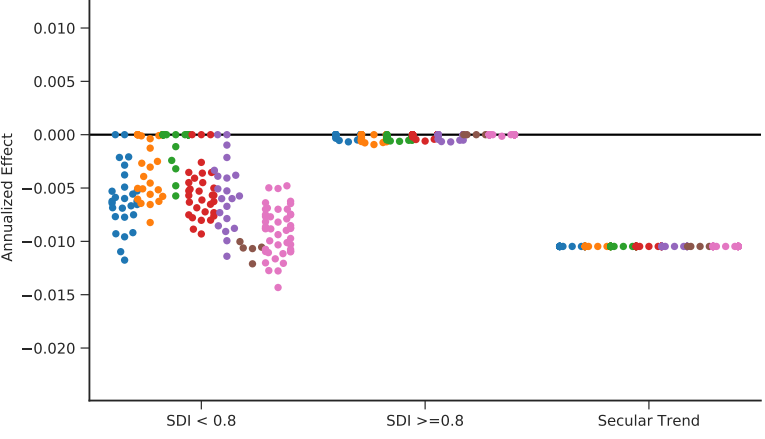

Alcoholic cardiomyopathy, Males

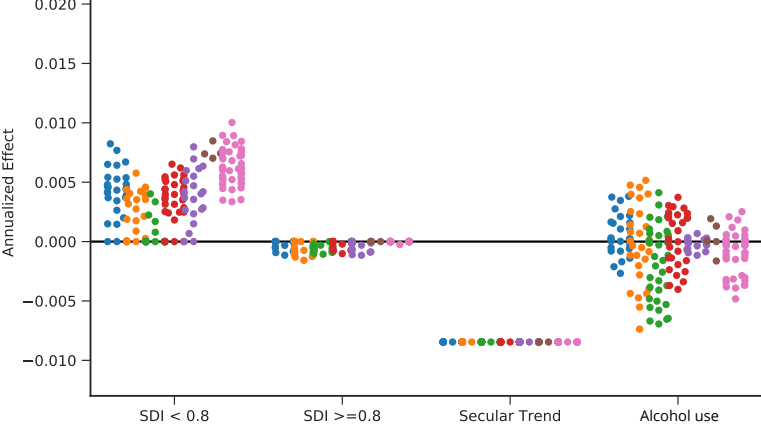

- Southeast Asia, East Asia, and Oceania
- Central Europe, Eastern Europe, and Central Asia
- High-income
- Latin America and Caribbean
- North Africa and Middle East
- South Asia
- Sub-Saharan Africa

Alcoholic cardiomyopathy, Females

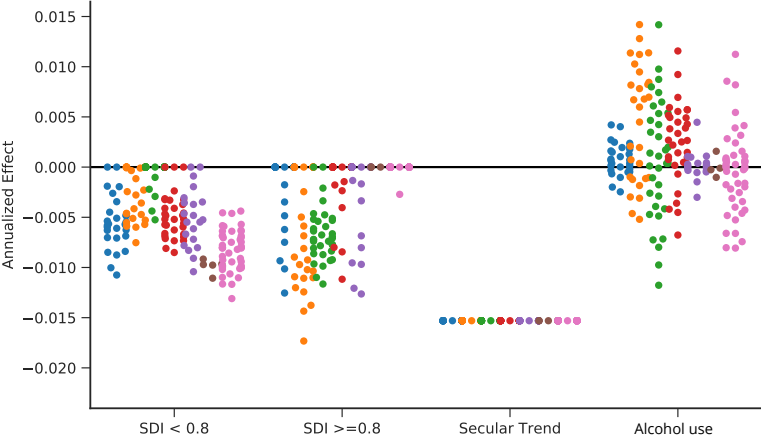

Other cardiomyopathy, Males

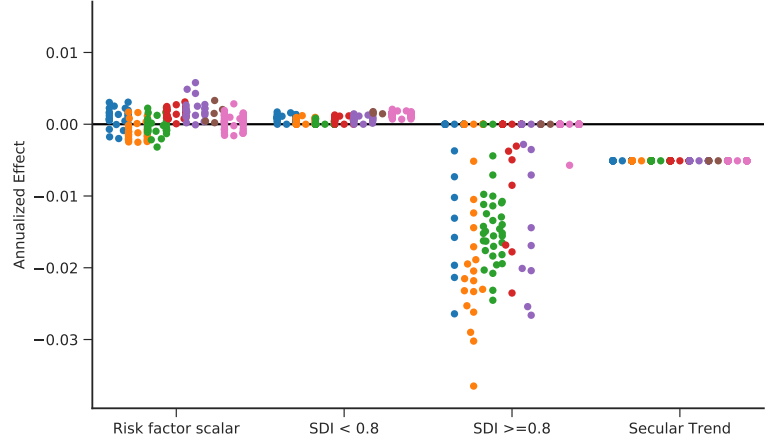

Other cardiomyopathy, Females

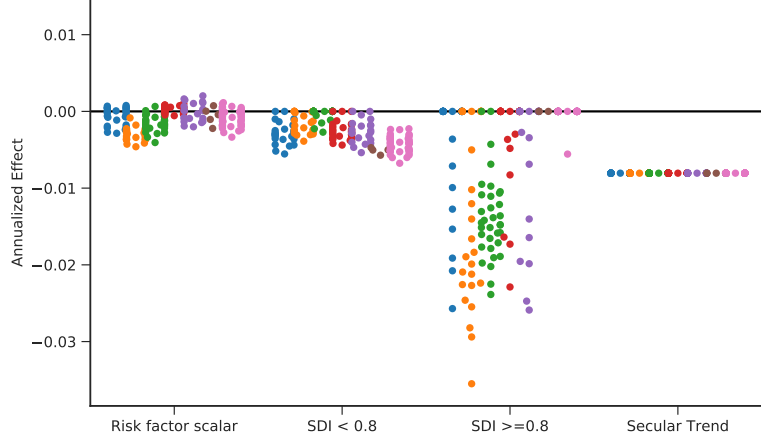

Atrial fibrillation and flutter, Males

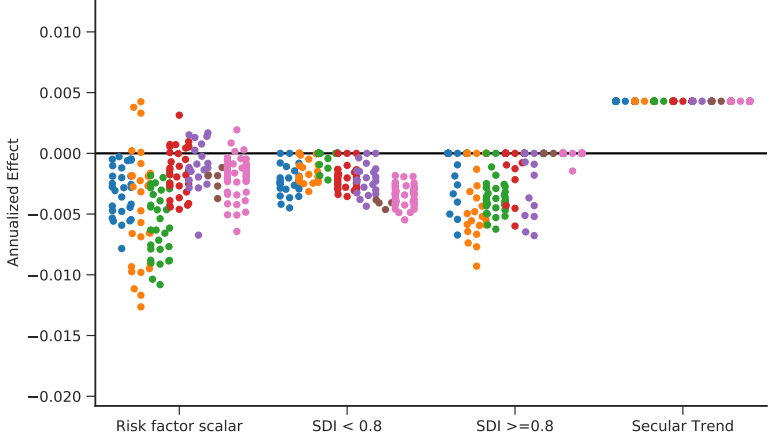

Atrial fibrillation and flutter, Females

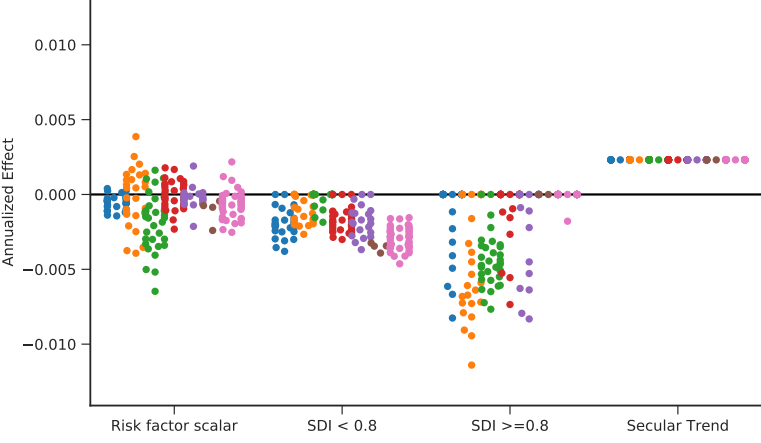

Aortic aneurysm, Males

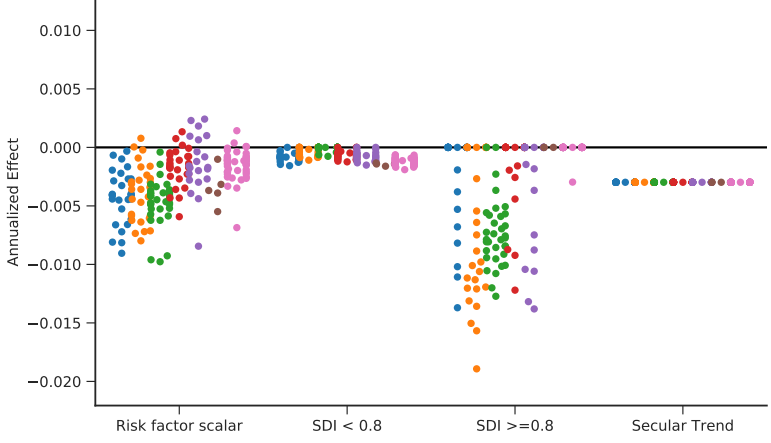

Aortic aneurysm, Females

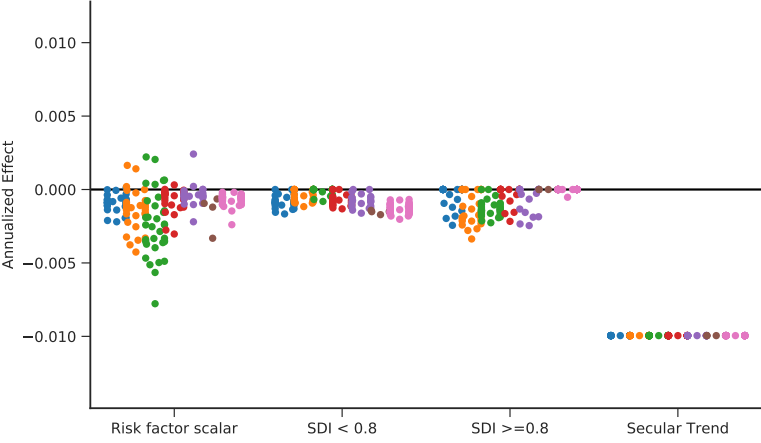

- Southeast Asia, East Asia, and Oceania
- Central Europe, Eastern Europe, and Central Asia
- High-income
- Latin America and Caribbean
- North Africa and Middle East
- South Asia
- Sub-Saharan Africa

Peripheral artery disease, Males

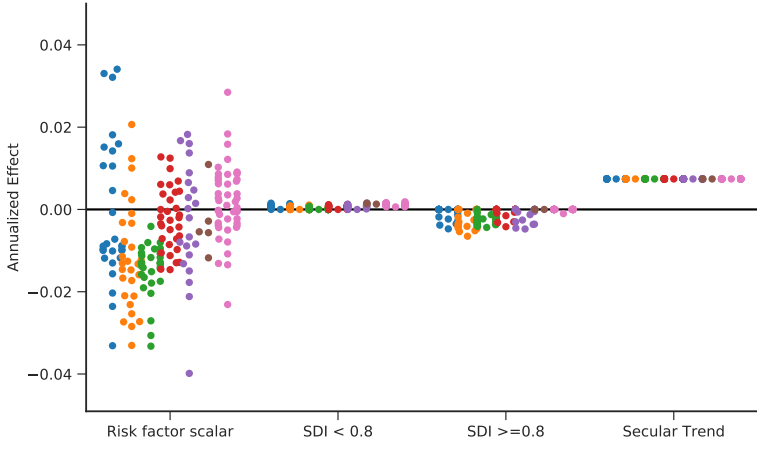

Peripheral artery disease, Females

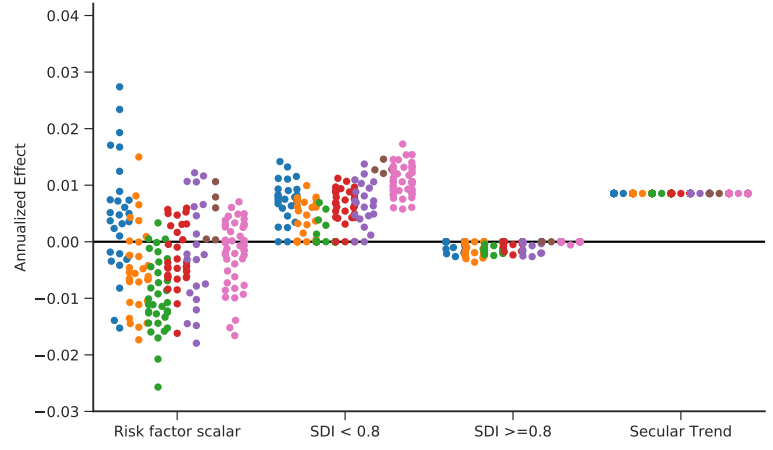

Endocarditis, Males

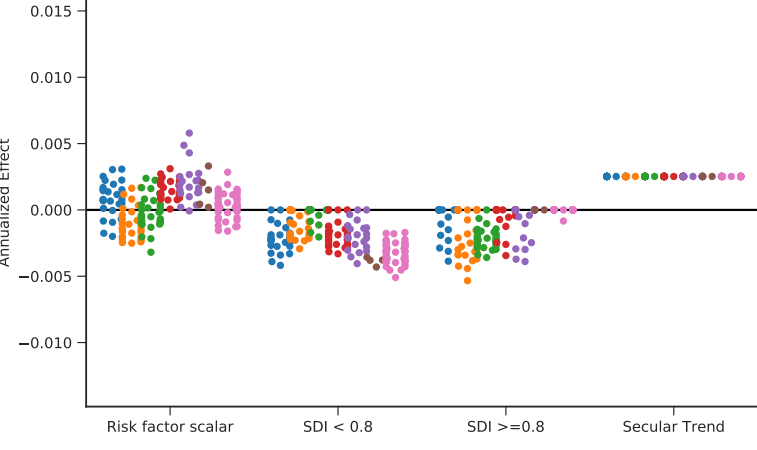

Endocarditis, Females

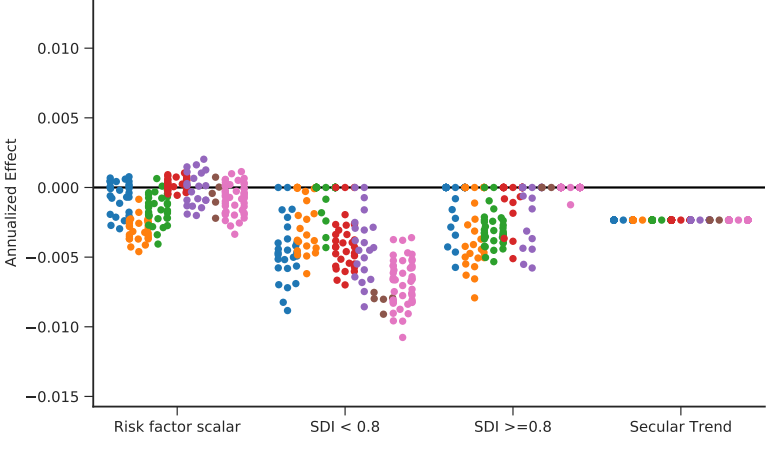

Other cardiovascular and circulatory diseases, Males

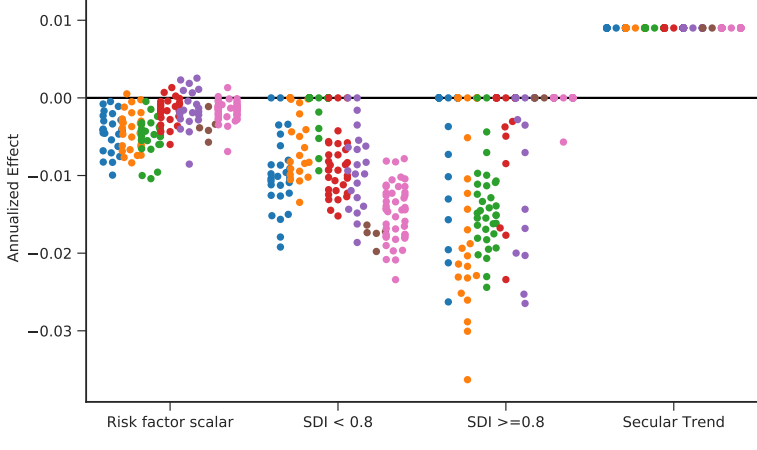

Other cardiovascular and circulatory diseases, Females

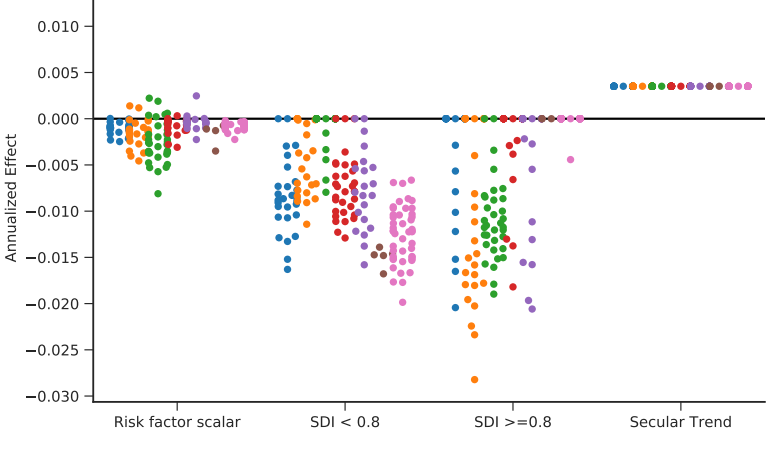

Chronic obstructive pulmonary disease, Males

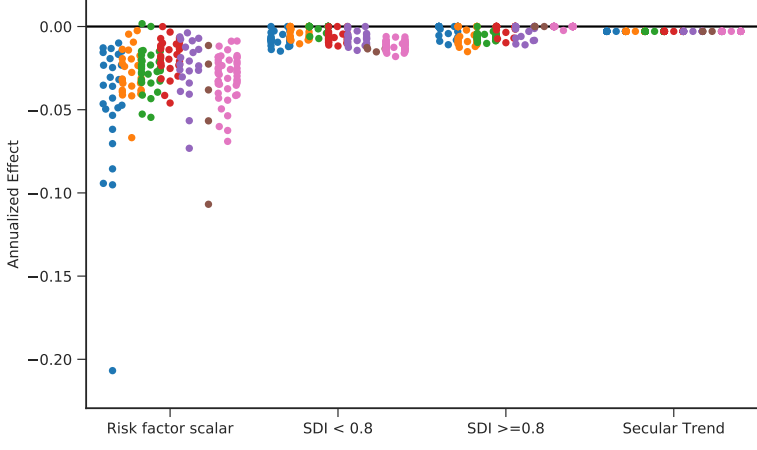

- Southeast Asia, East Asia, and Oceania
- Central Europe, Eastern Europe, and Central Asia
- High-income
- Latin America and Caribbean
- North Africa and Middle East
- South Asia
- Sub-Saharan Africa

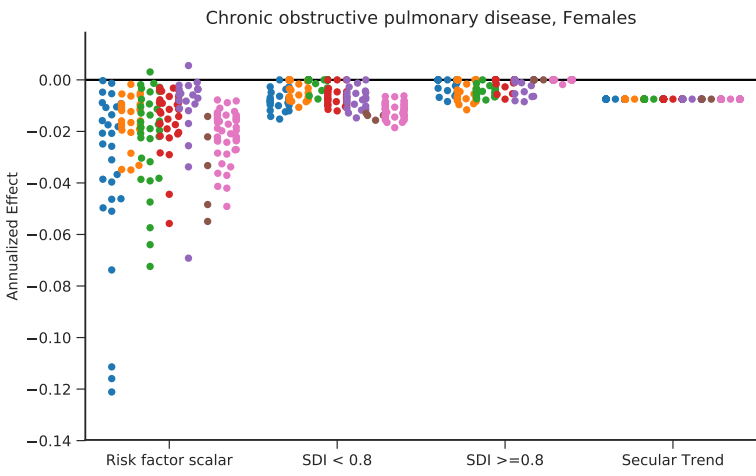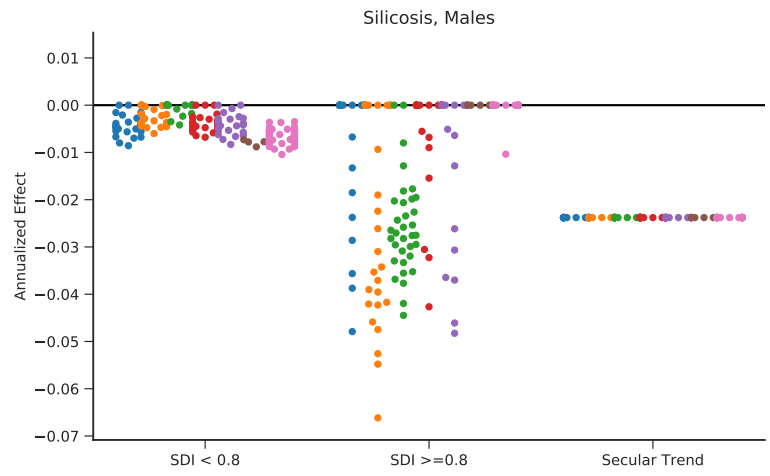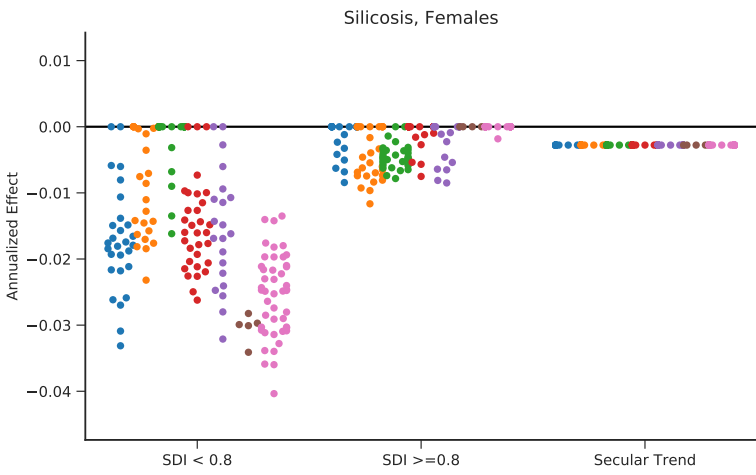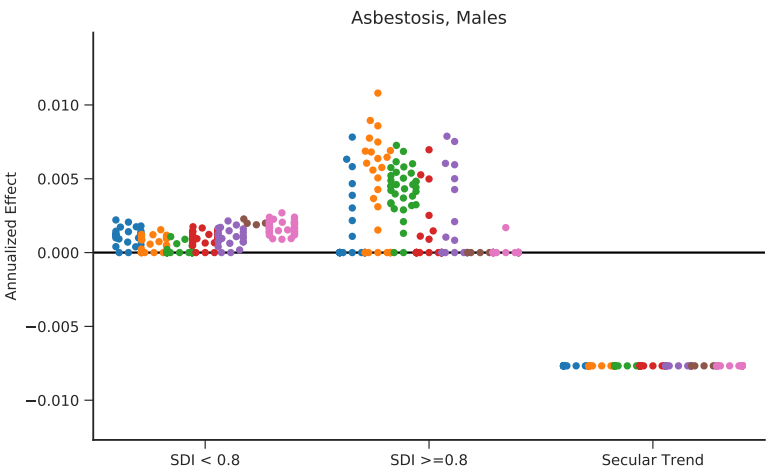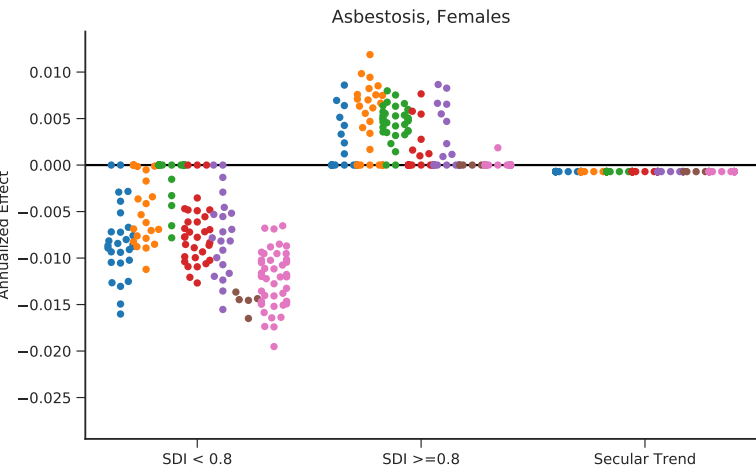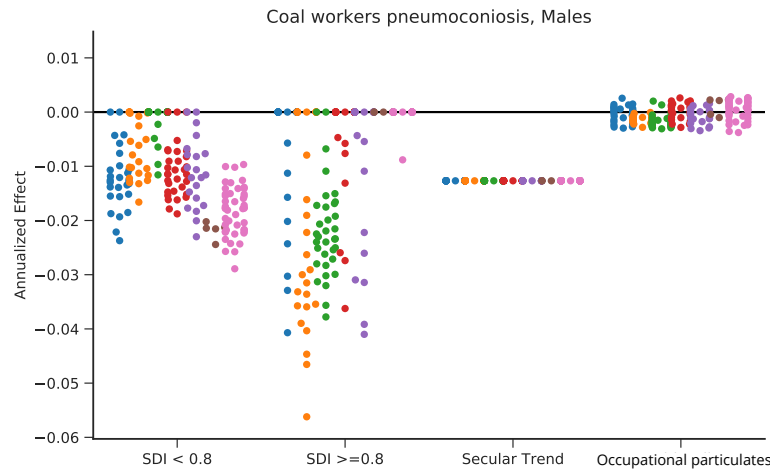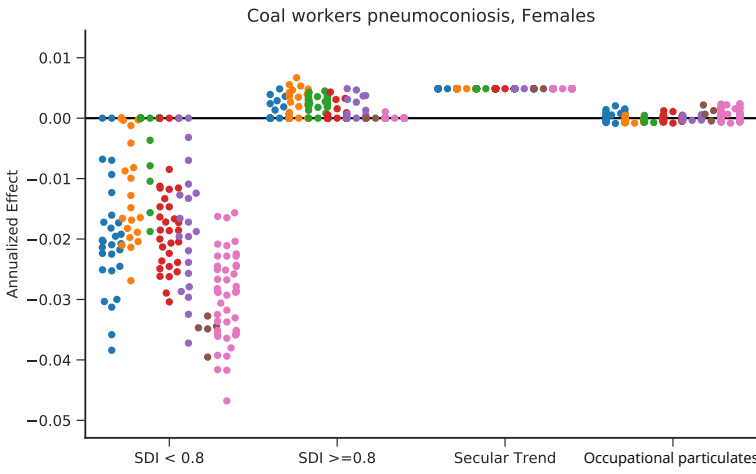

- Southeast Asia, East Asia, and Oceania
- Central Europe, Eastern Europe, and Central Asia
- High-income
- Latin America and Caribbean
- North Africa and Middle East
- South Asia
- Sub-Saharan Africa



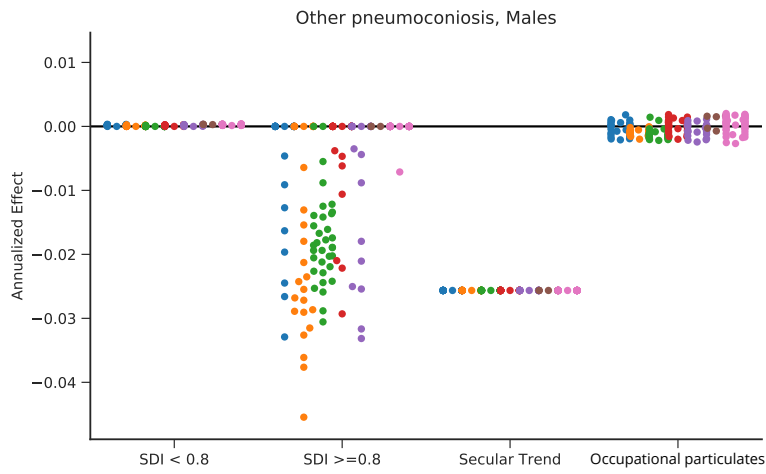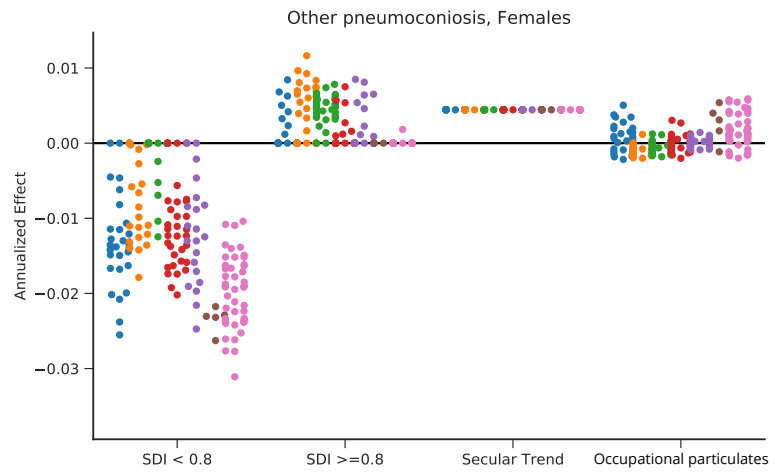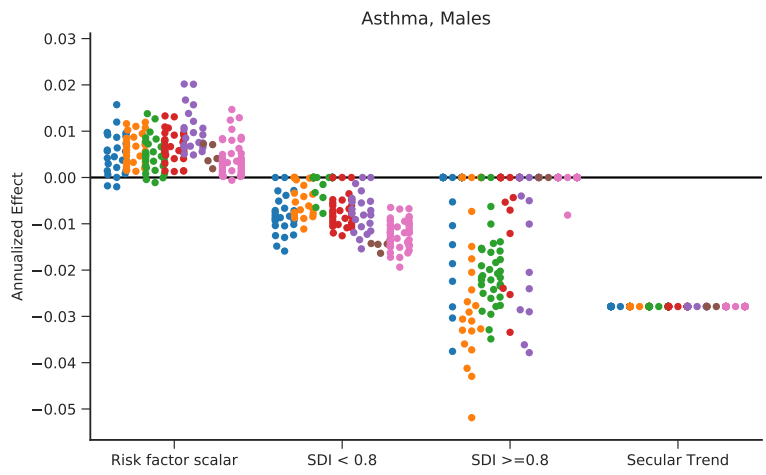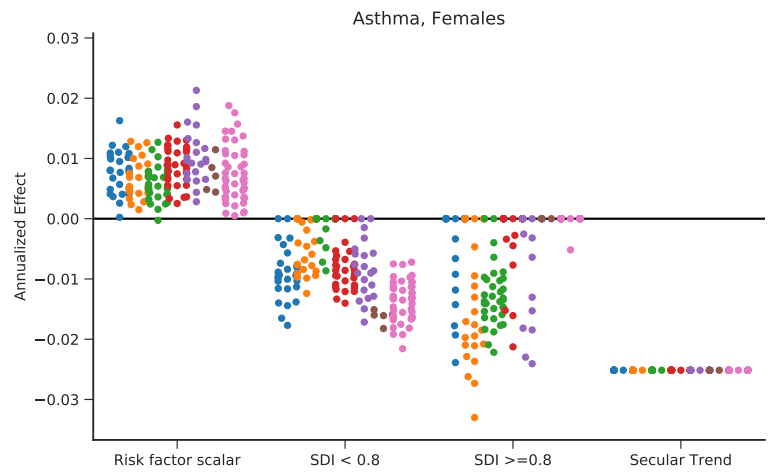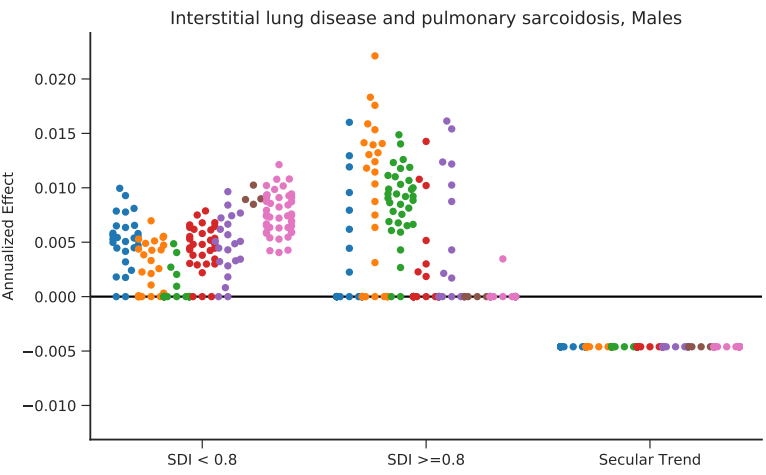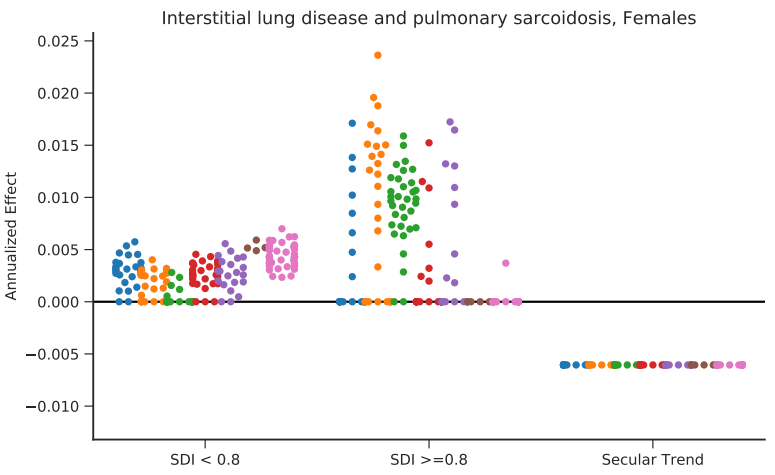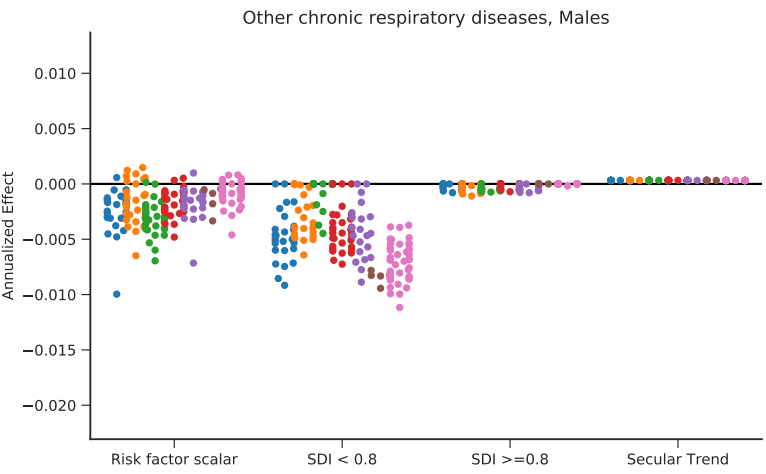

- Southeast Asia, East Asia, and Oceania
- Central Europe, Eastern Europe, and Central Asia
- High-income
- Latin America and Caribbean
- North Africa and Middle East
- South Asia
- Sub-Saharan Africa

Other chronic respiratory diseases, Females

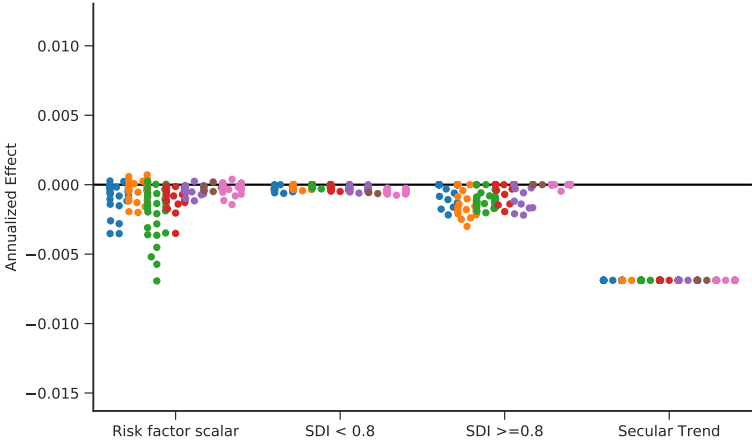

Cirrhosis and other chronic liver diseases due to hepatitis B, Males

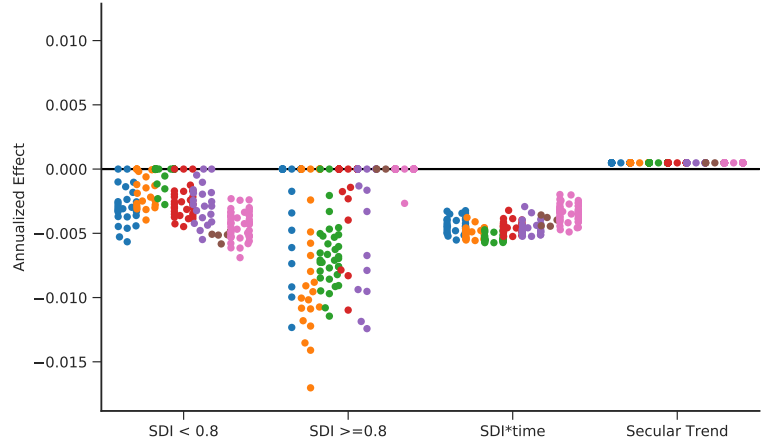

Cirrhosis and other chronic liver diseases due to hepatitis B, Females

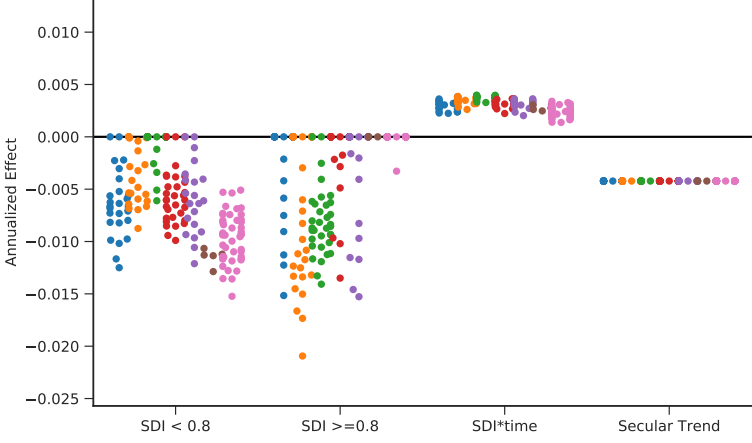

Cirrhosis and other chronic liver diseases due to hepatitis C, Males

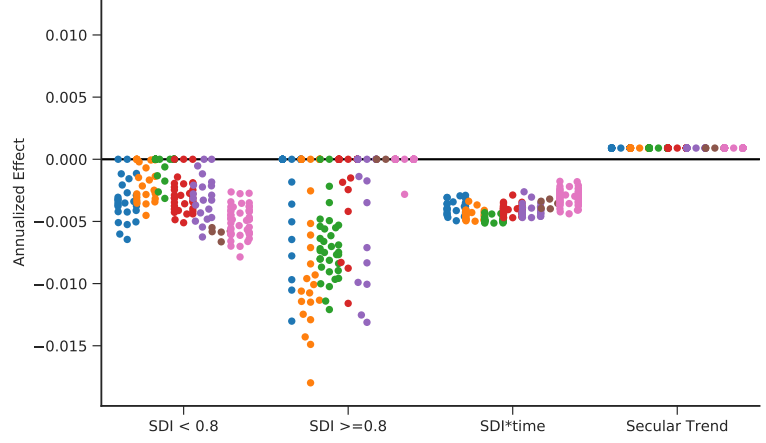

Cirrhosis and other chronic liver diseases due to hepatitis C, Females

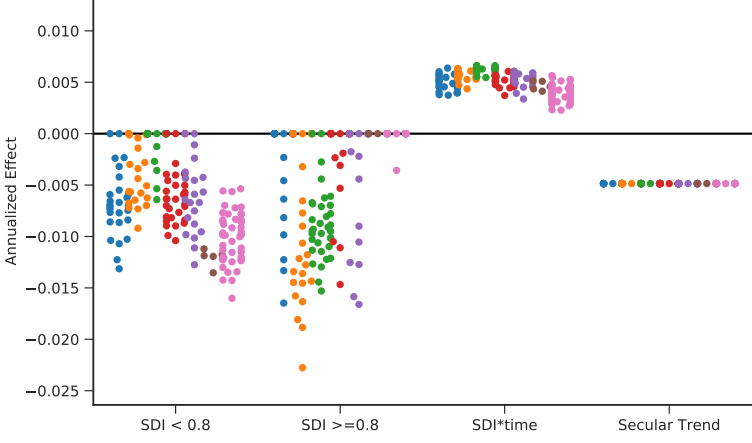

Cirrhosis and other chronic liver diseases due to alcohol use, Males

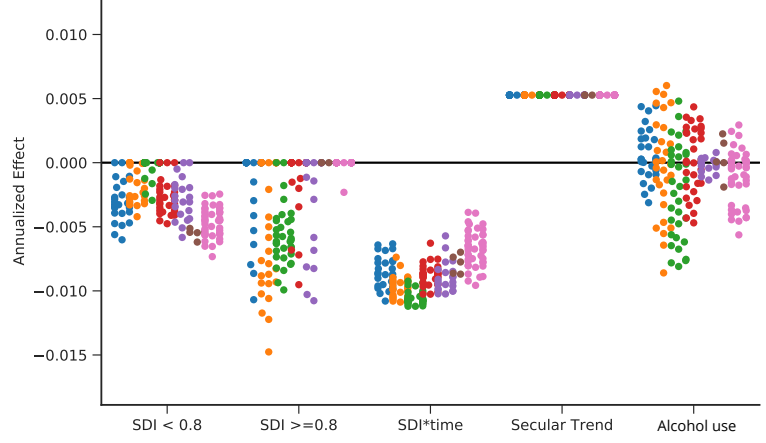

Cirrhosis and other chronic liver diseases due to alcohol use, Females

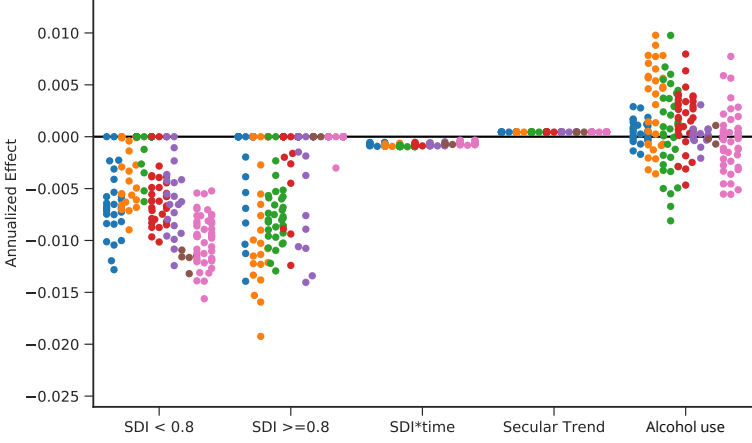

- Southeast Asia, East Asia, and Oceania
- Central Europe, Eastern Europe, and Central Asia
- High-income
- Latin America and Caribbean
- North Africa and Middle East
- South Asia
- Sub-Saharan Africa

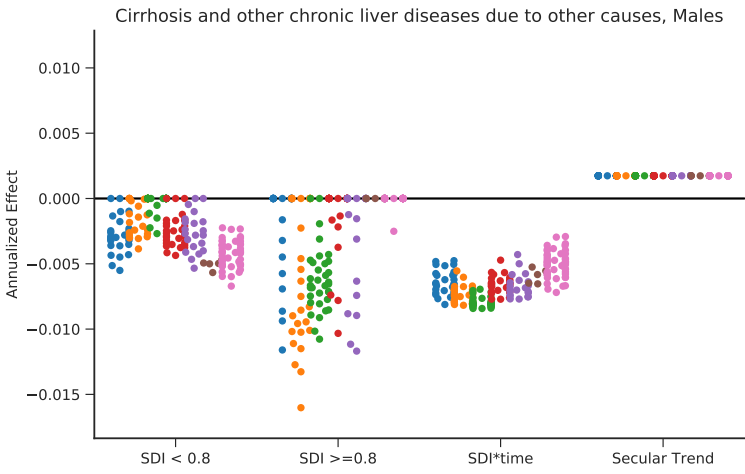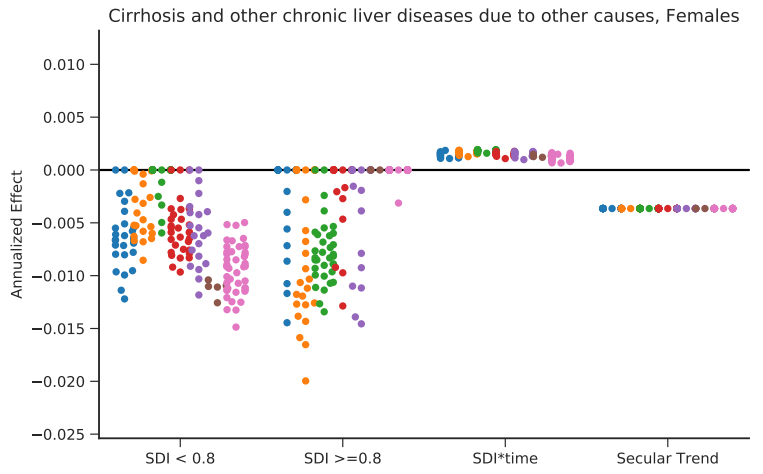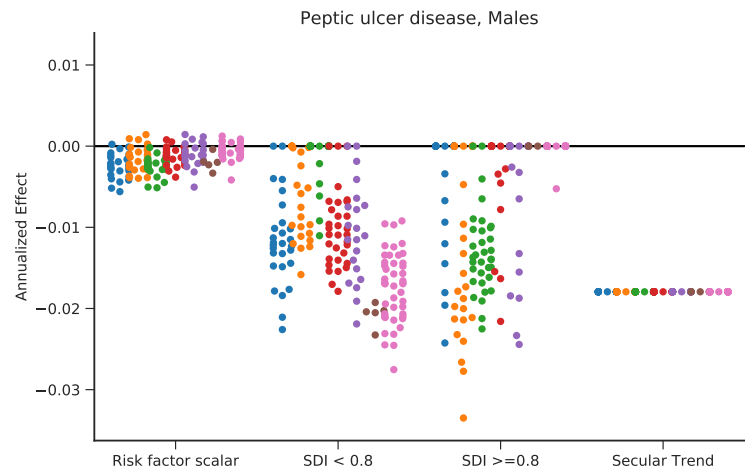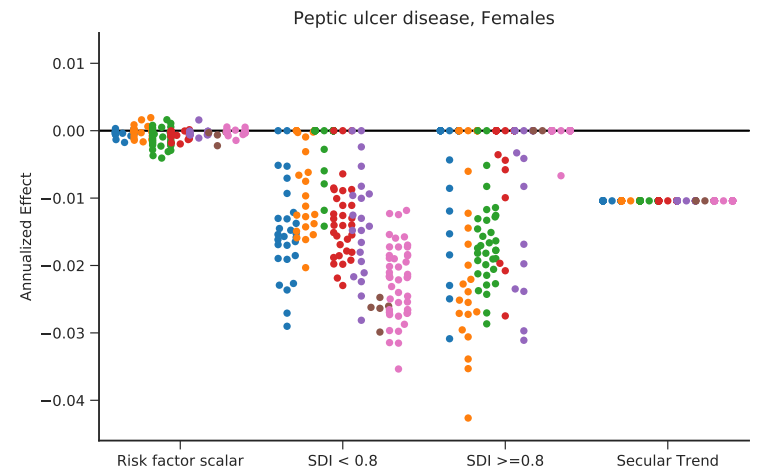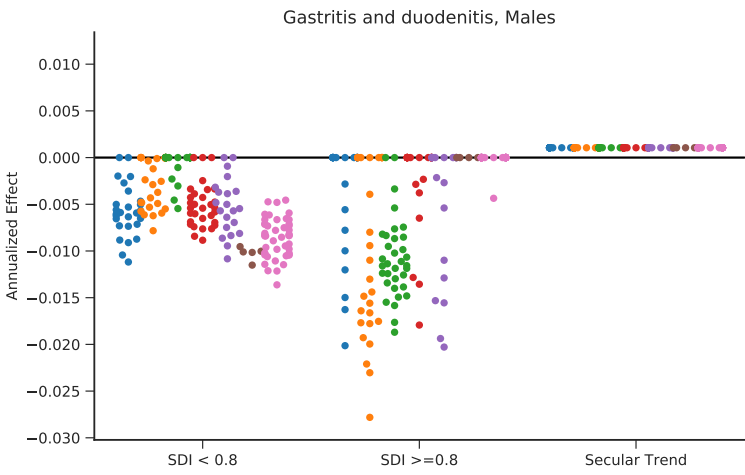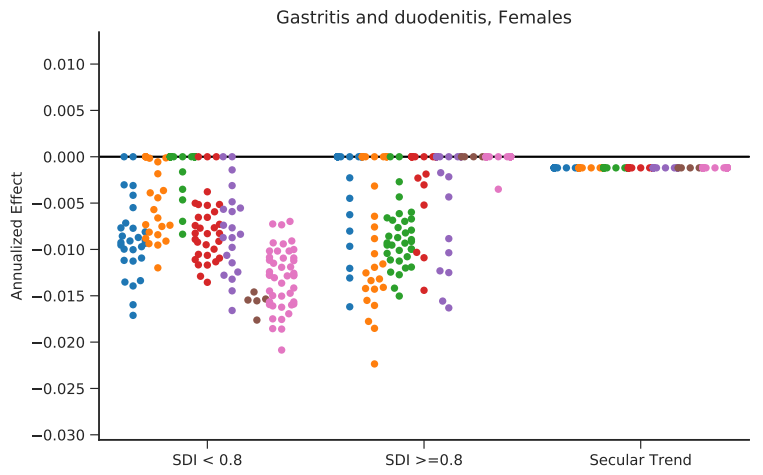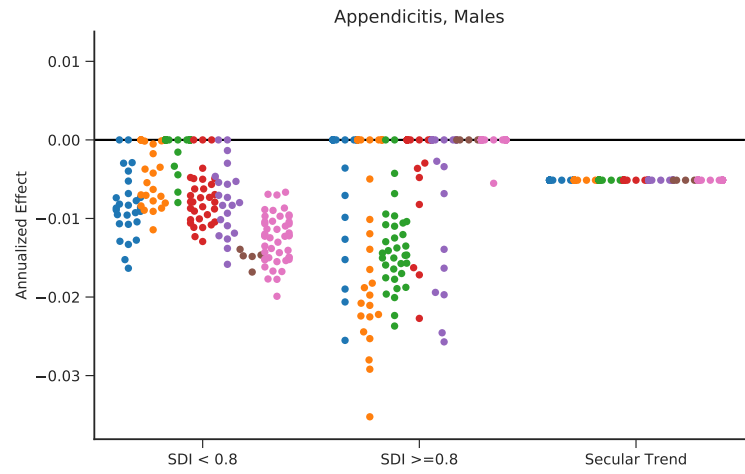

- Southeast Asia, East Asia, and Oceania
- Central Europe, Eastern Europe, and Central Asia
- High-income
- Latin America and Caribbean
- North Africa and Middle East
- South Asia
- Sub-Saharan Africa

Appendicitis, Females

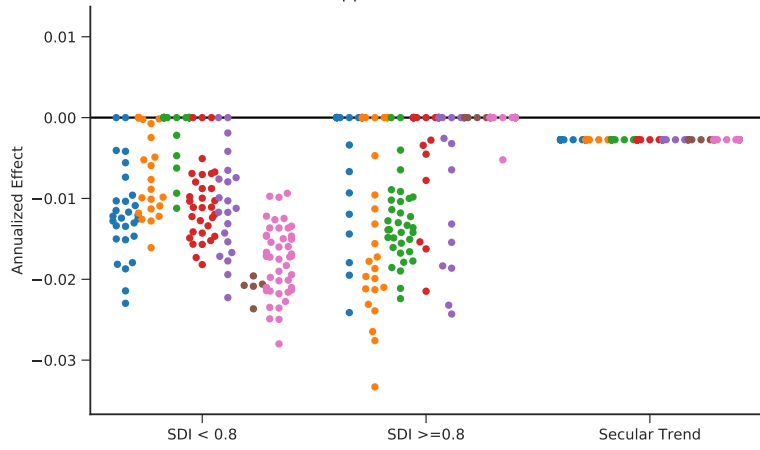

Paralytic ileus and intestinal obstruction, Males

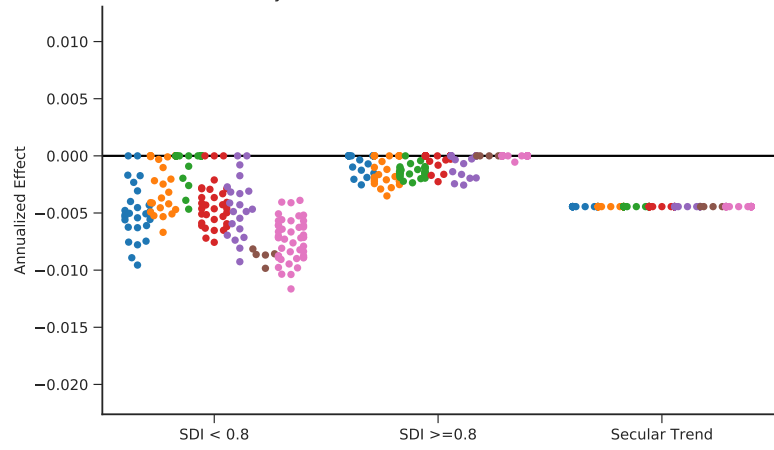

Paralytic ileus and intestinal obstruction, Females

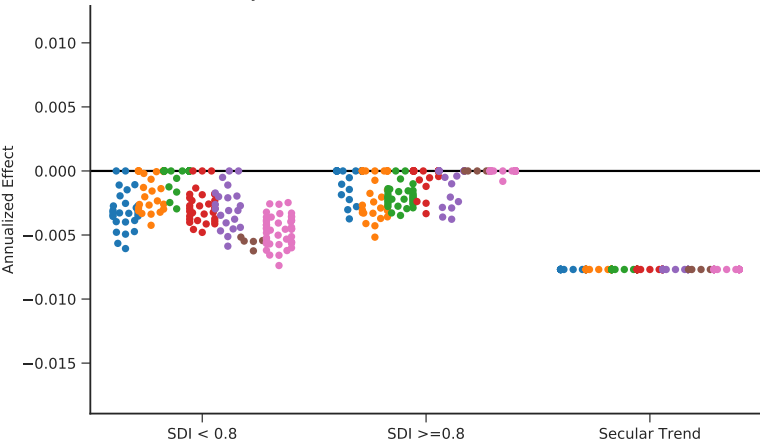

Inguinal, femoral, and abdominal hernia, Males

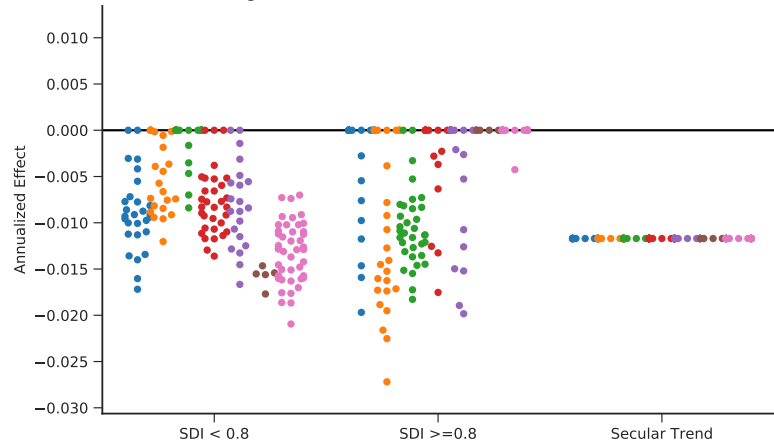

Inguinal, femoral, and abdominal hernia, Females

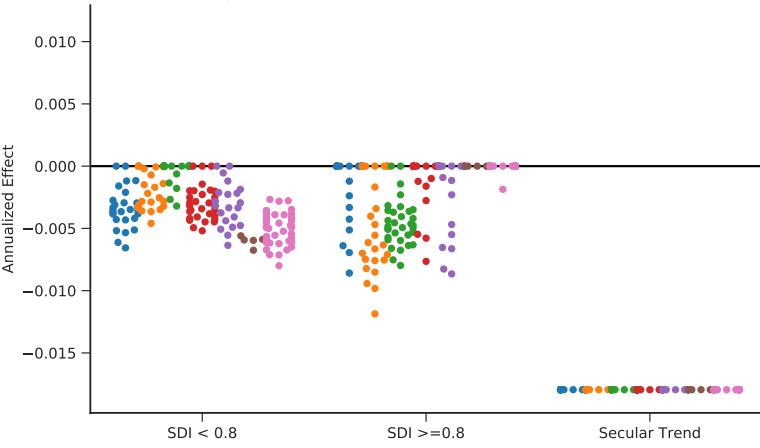

Inflammatory bowel disease, Males

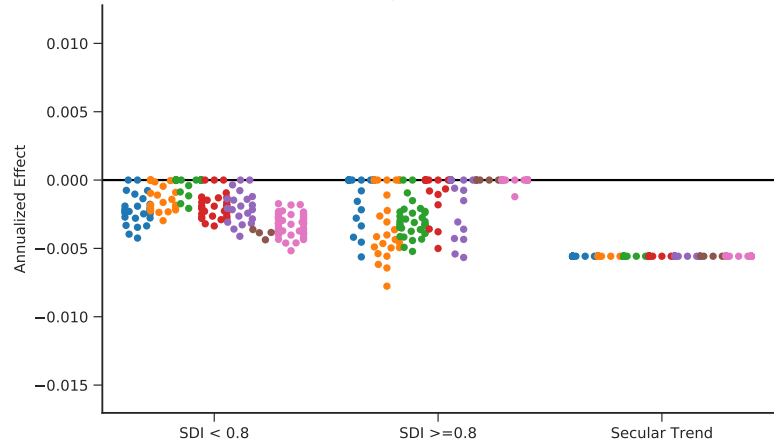

Inflammatory bowel disease, Females

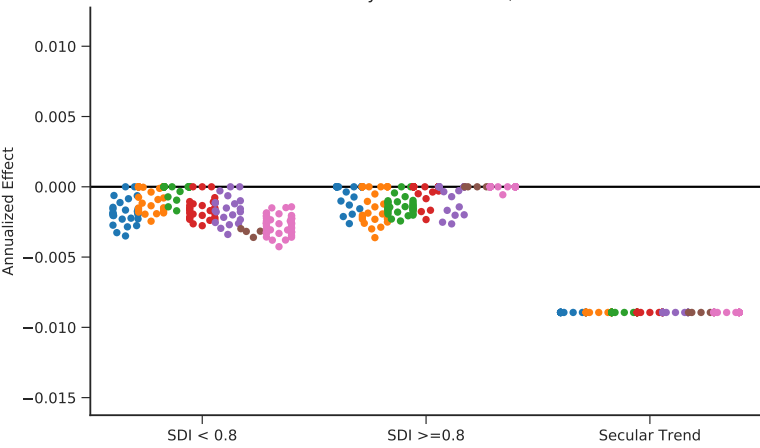

- Southeast Asia, East Asia, and Oceania
- Central Europe, Eastern Europe, and Central Asia
- High-income
- Latin America and Caribbean
- North Africa and Middle East
- South Asia
- Sub-Saharan Africa

Vascular intestinal disorders, Males

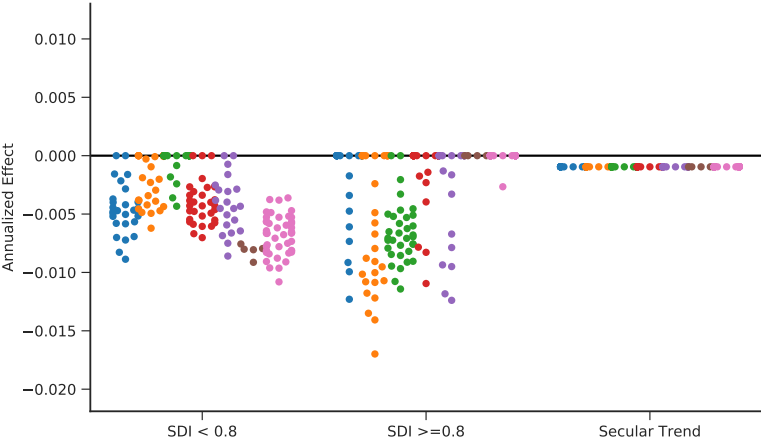

Vascular intestinal disorders, Females

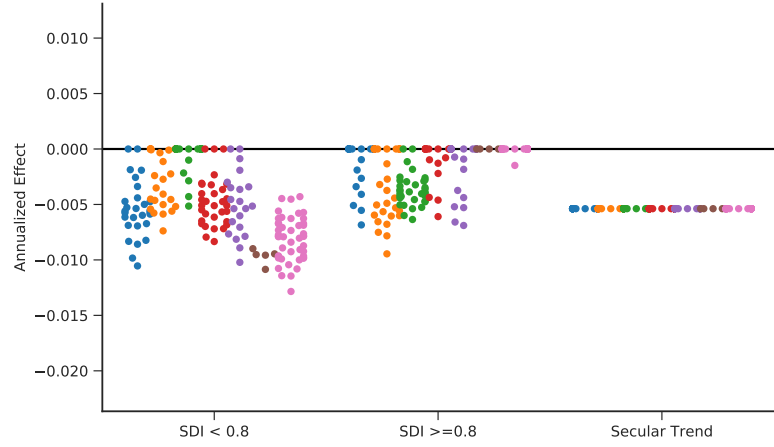

Gallbladder and biliary diseases, Males

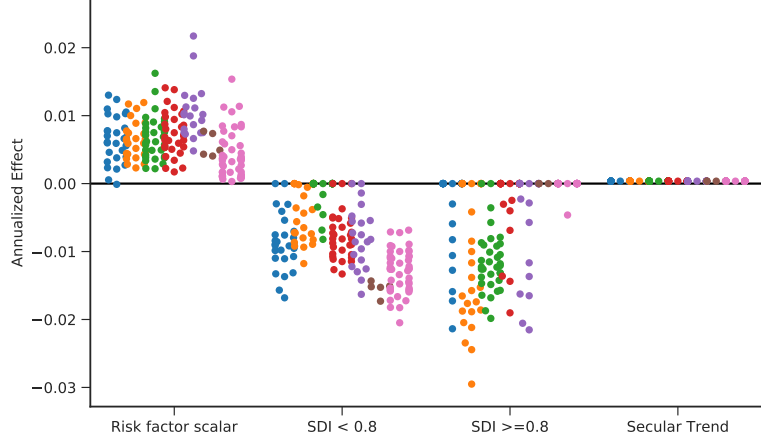

Gallbladder and biliary diseases, Females

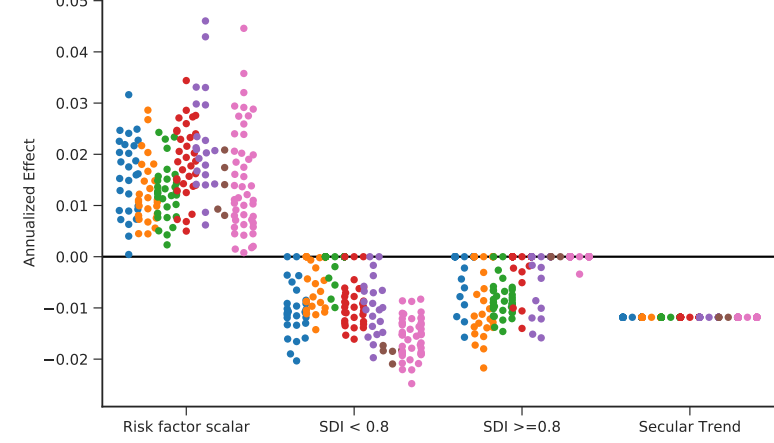

Pancreatitis, Males

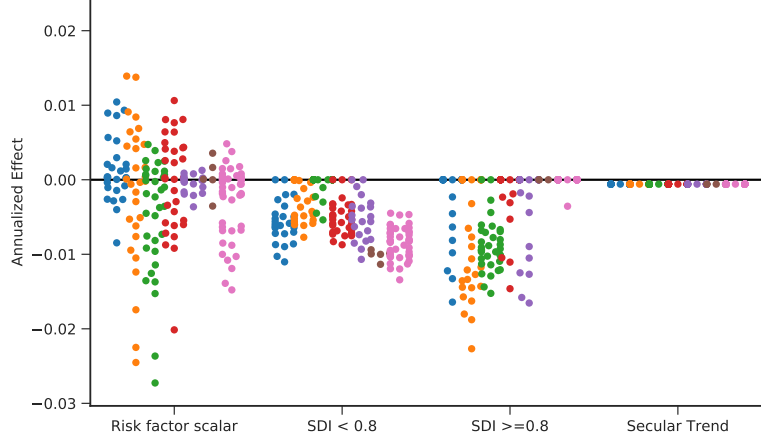

Pancreatitis, Females

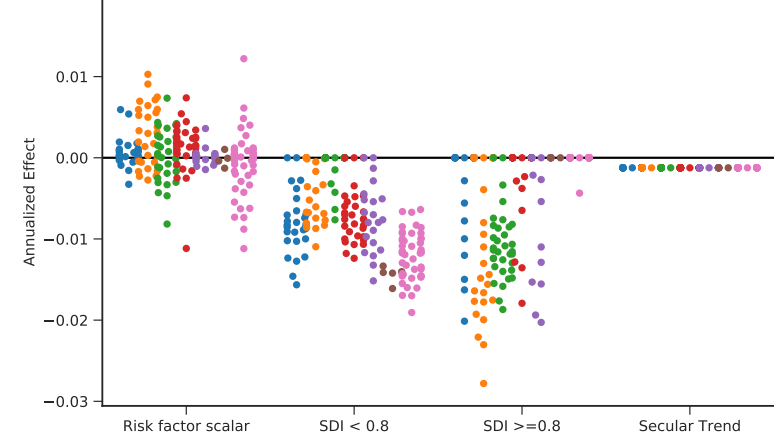

Other digestive diseases, Males

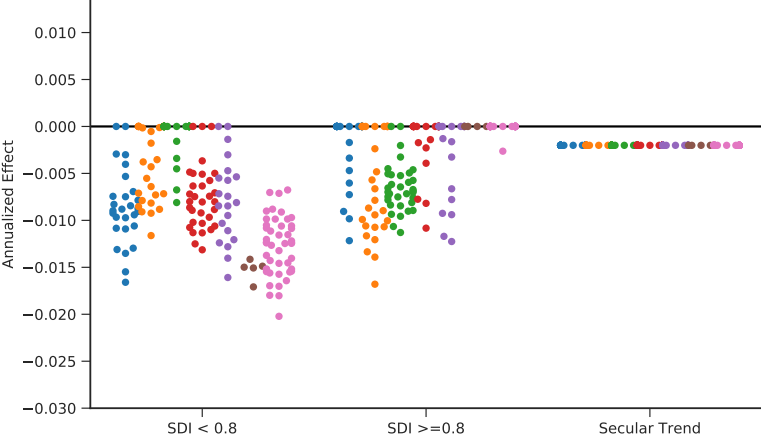

- Southeast Asia, East Asia, and Oceania
- Central Europe, Eastern Europe, and Central Asia
- High-income
- Latin America and Caribbean
- North Africa and Middle East
- South Asia
- Sub-Saharan Africa

Other digestive diseases, Females

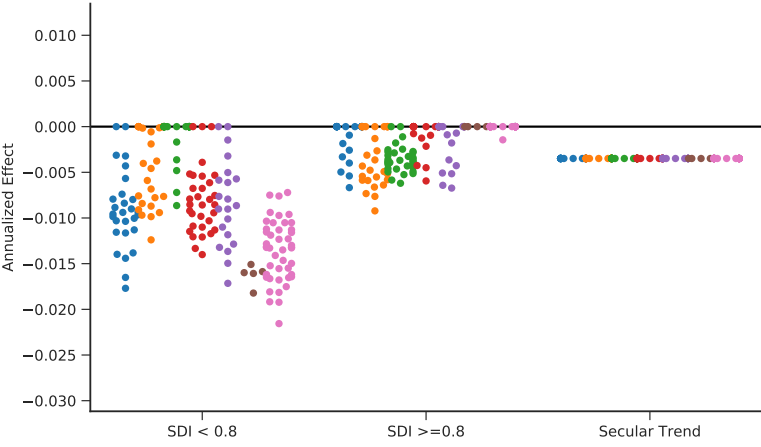

Alzheimer's disease and other dementias, Males

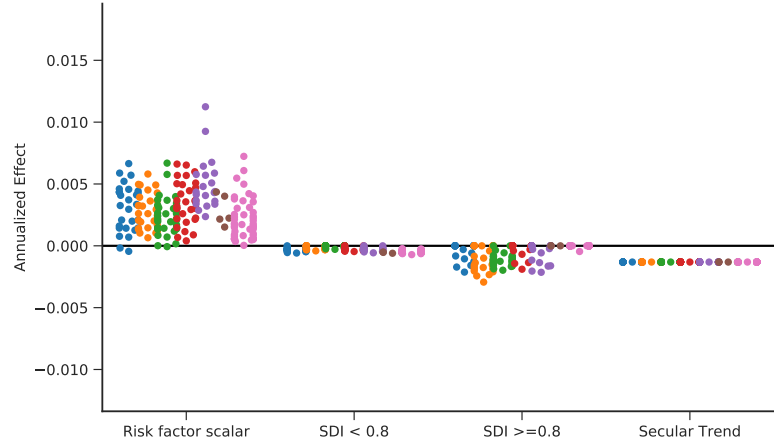

Alzheimer's disease and other dementias, Females

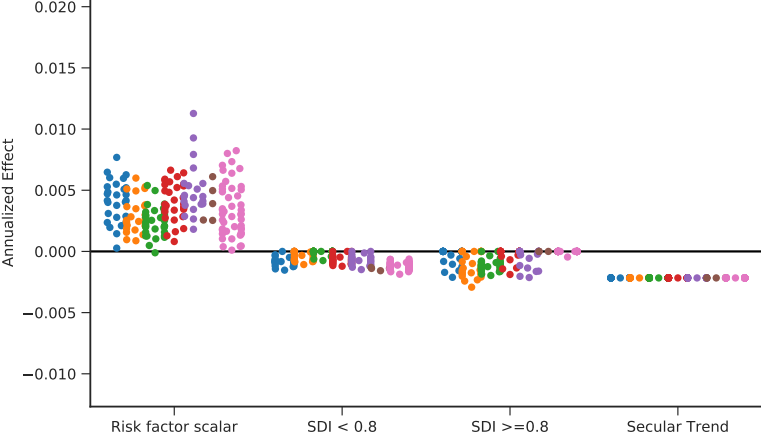

Parkinson's disease, Males

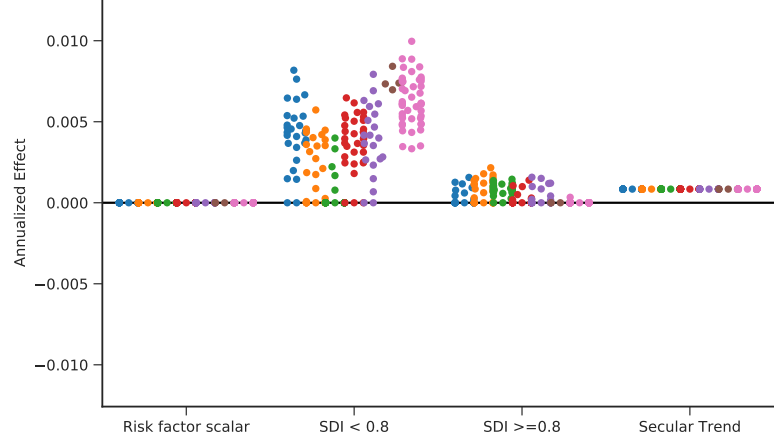

Parkinson's disease, Females

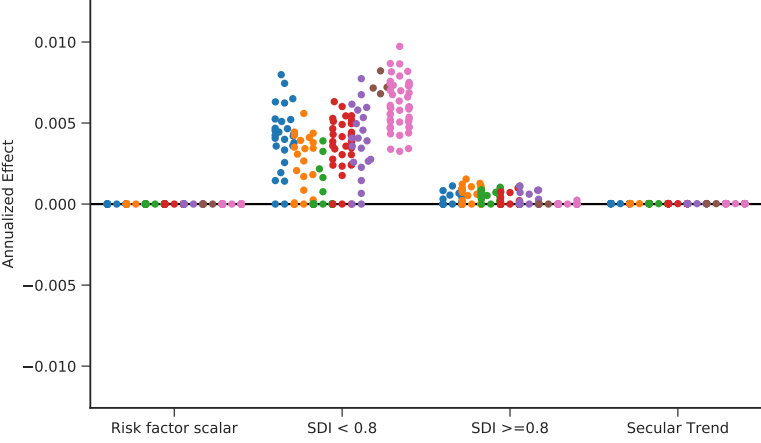

Epilepsy, Males

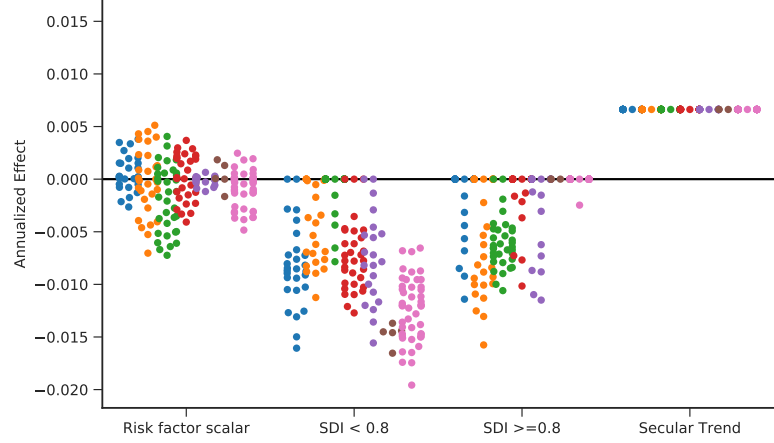

Epilepsy, Females

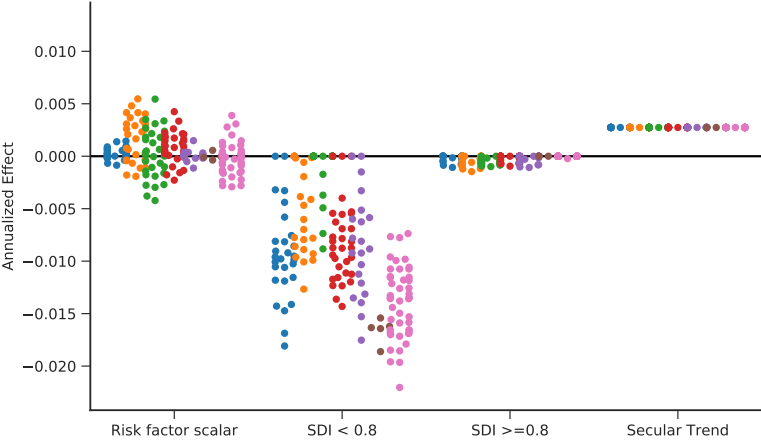

- Southeast Asia, East Asia, and Oceania
- Central Europe, Eastern Europe, and Central Asia
- High-income
- Latin America and Caribbean
- North Africa and Middle East
- South Asia
- Sub-Saharan Africa

Multiple sclerosis, Males

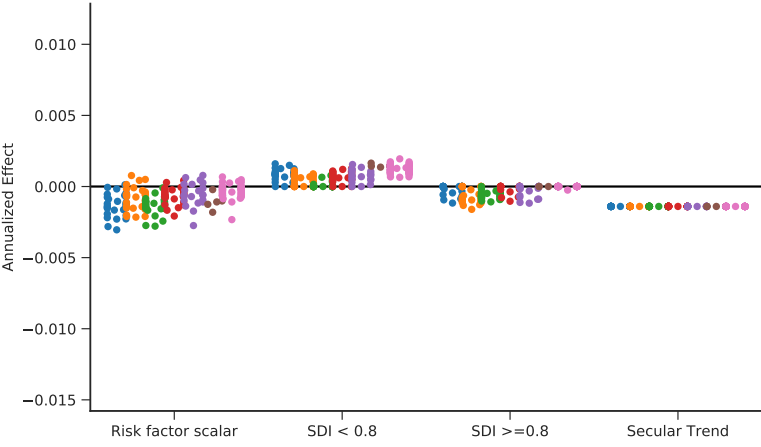

Multiple sclerosis, Females

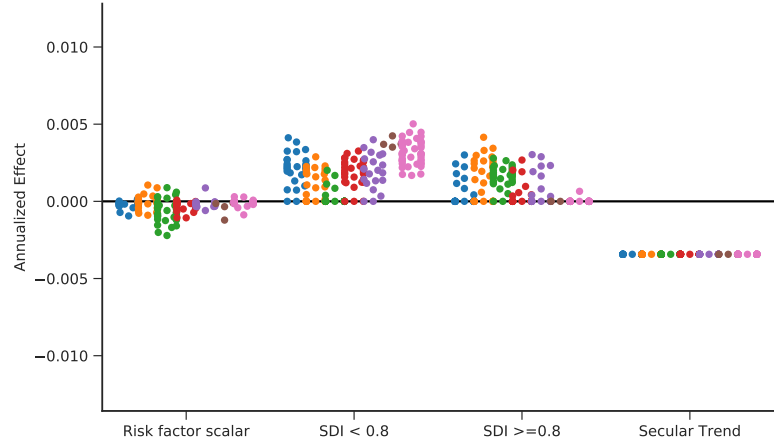

Motor neuron disease, Males

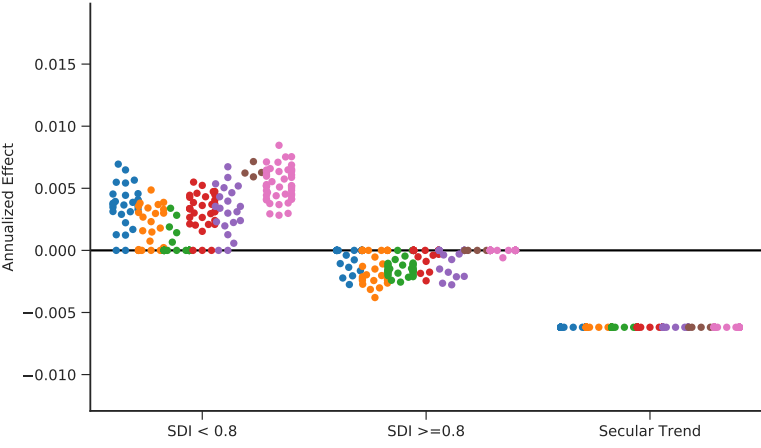

Motor neuron disease, Females

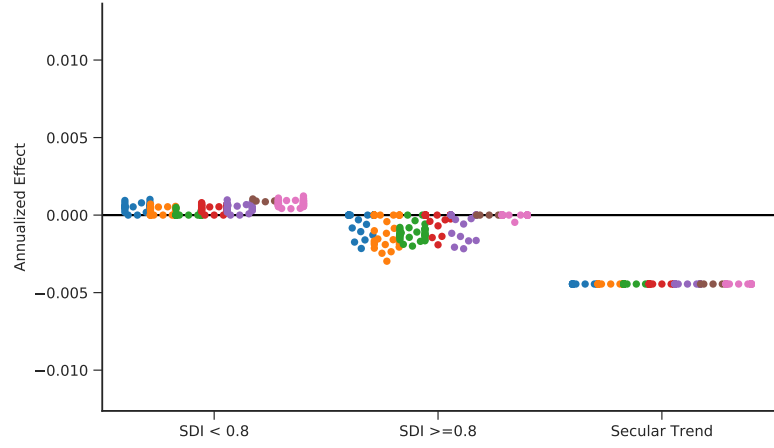

Other neurological disorders, Males

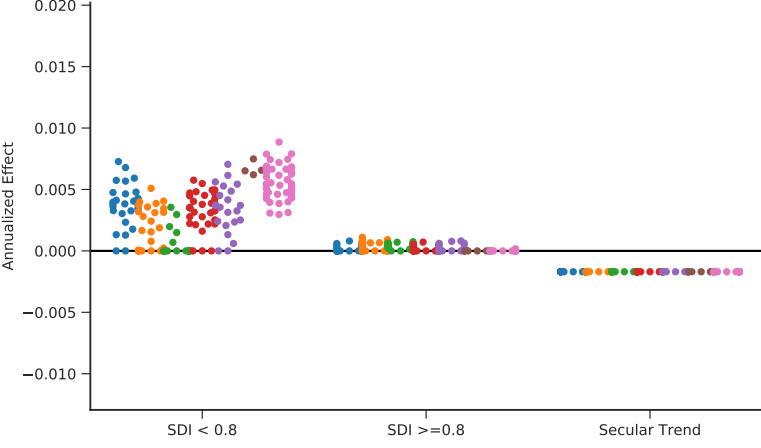

Other neurological disorders, Females

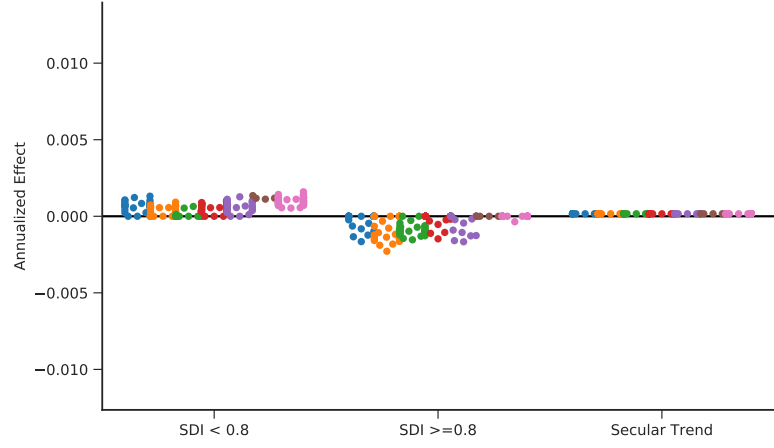

Alcohol use disorders, Males

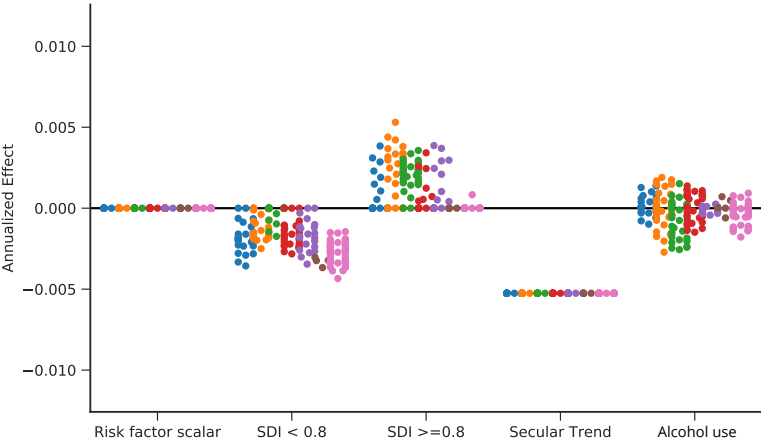

- Southeast Asia, East Asia, and Oceania
- Central Europe, Eastern Europe, and Central Asia
- High-income
- Latin America and Caribbean
- North Africa and Middle East
- South Asia
- Sub-Saharan Africa

Alcohol use disorders, Females

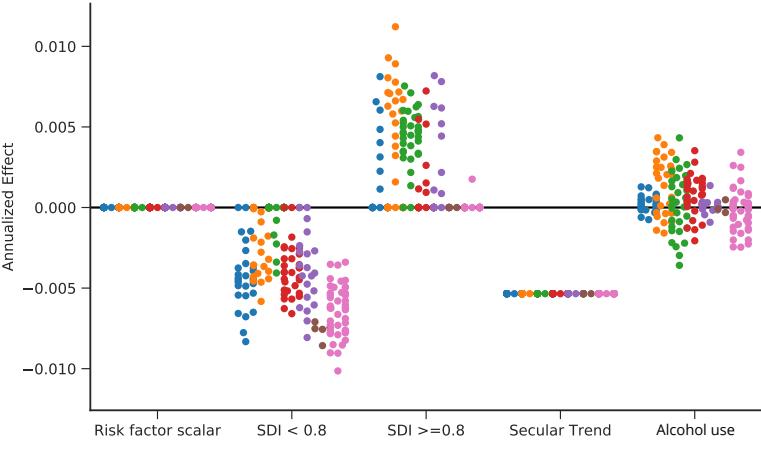

Opioid use disorders, Males

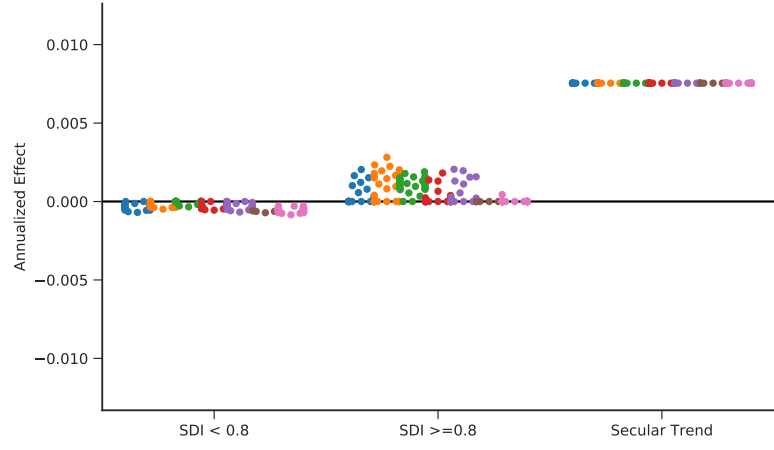

Opioid use disorders, Females

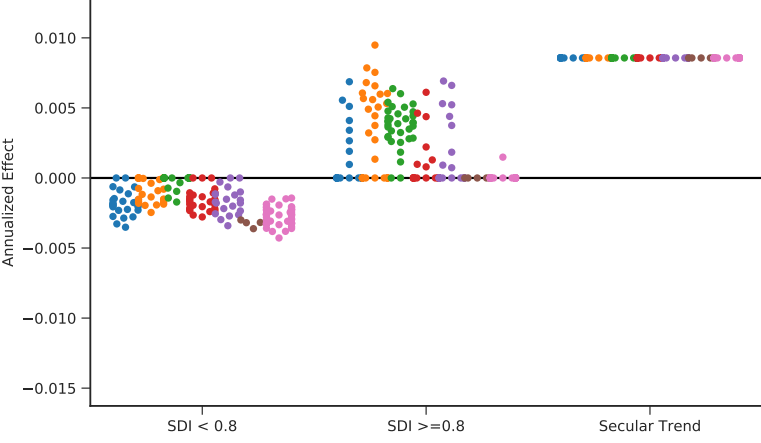

Cocaine use disorders, Males

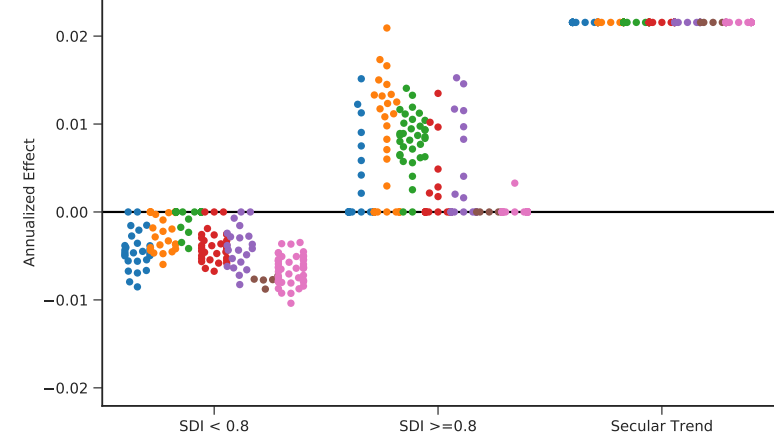

Cocaine use disorders, Females

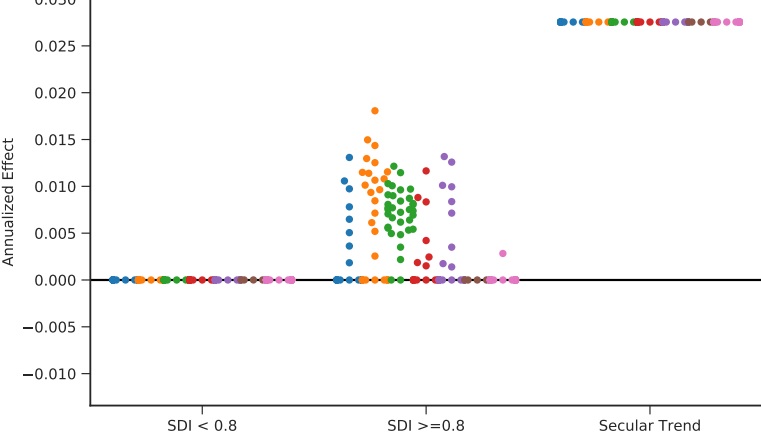

Amphetamine use disorders, Males

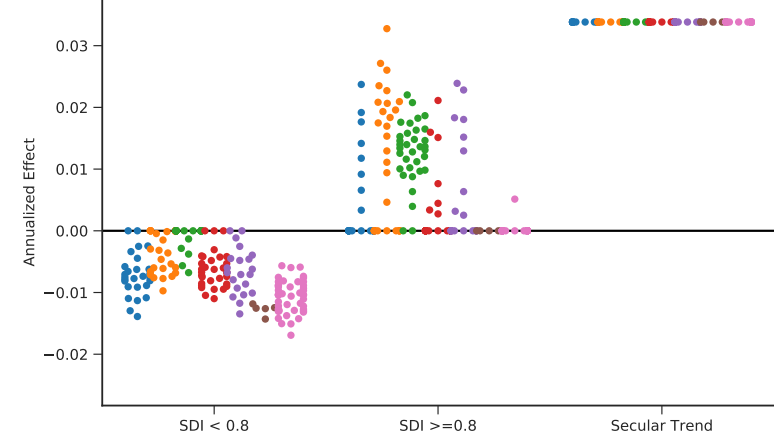

Amphetamine use disorders, Females

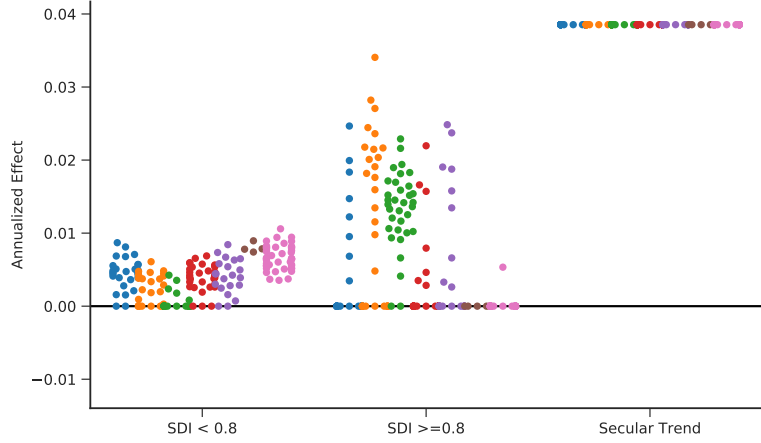

- Southeast Asia, East Asia, and Oceania
- Central Europe, Eastern Europe, and Central Asia
- High-income
- Latin America and Caribbean
- North Africa and Middle East
- South Asia
- Sub-Saharan Africa



Other drug use disorders, Males

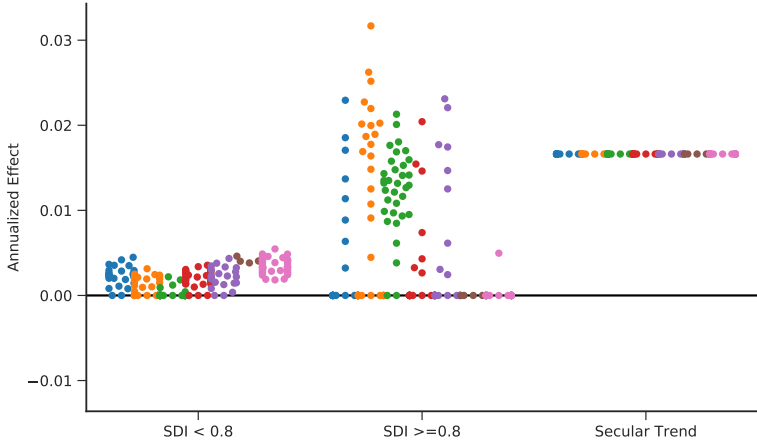

Other drug use disorders, Females

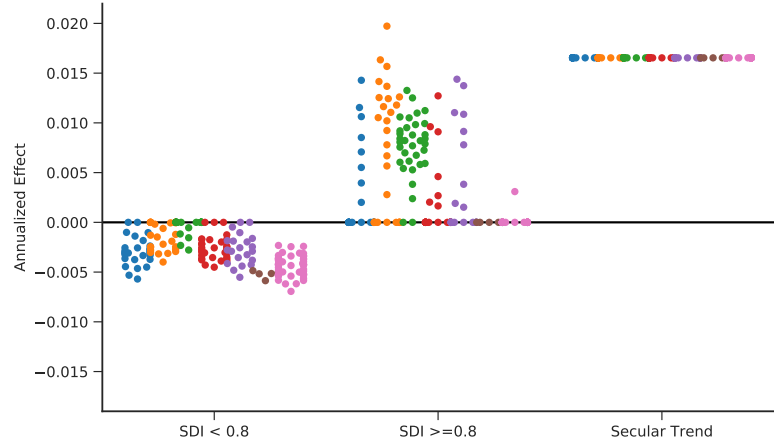

Eating disorders, Males

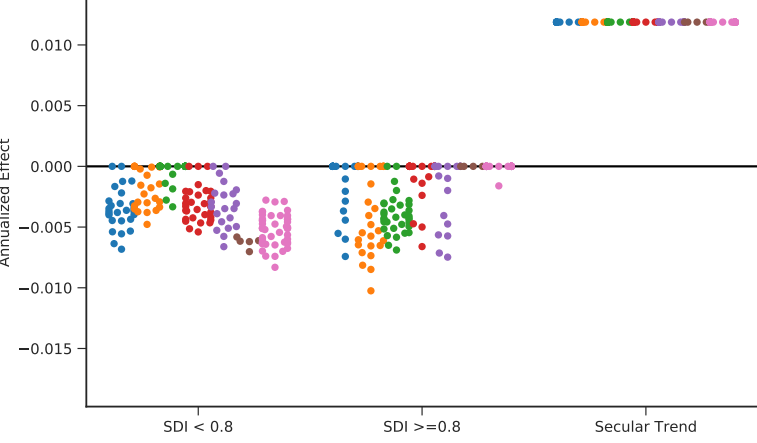

Eating disorders, Females

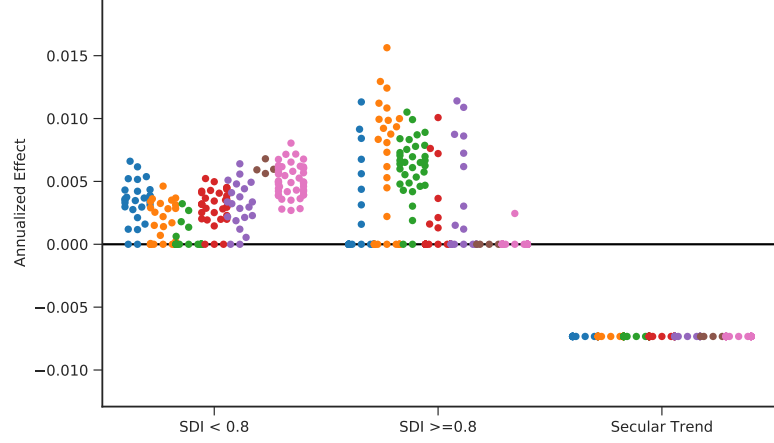

Diabetes mellitus, Males

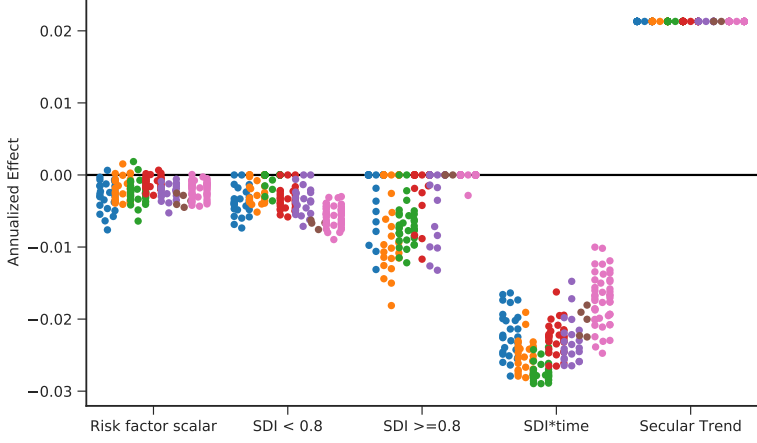

Diabetes mellitus, Females

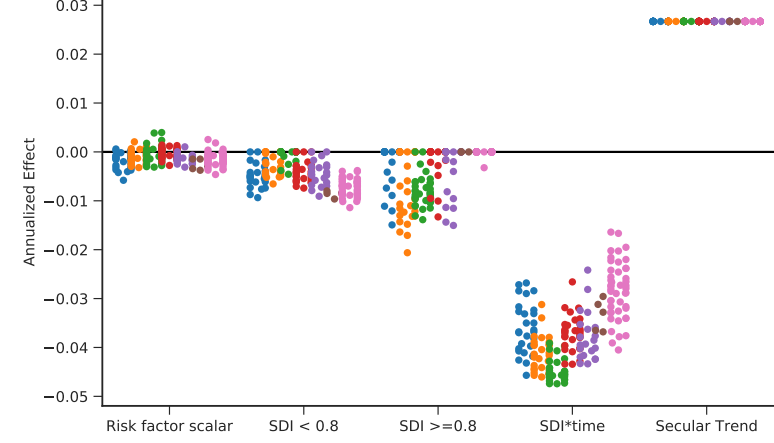

Acute glomerulonephritis, Males

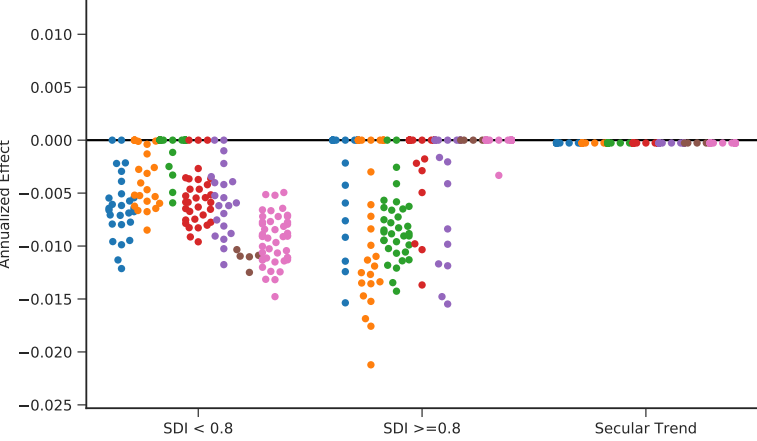

- Southeast Asia, East Asia, and Oceania
- Central Europe, Eastern Europe, and Central Asia
- High-income
- Latin America and Caribbean
- North Africa and Middle East
- South Asia
- Sub-Saharan Africa

Acute glomerulonephritis, Females

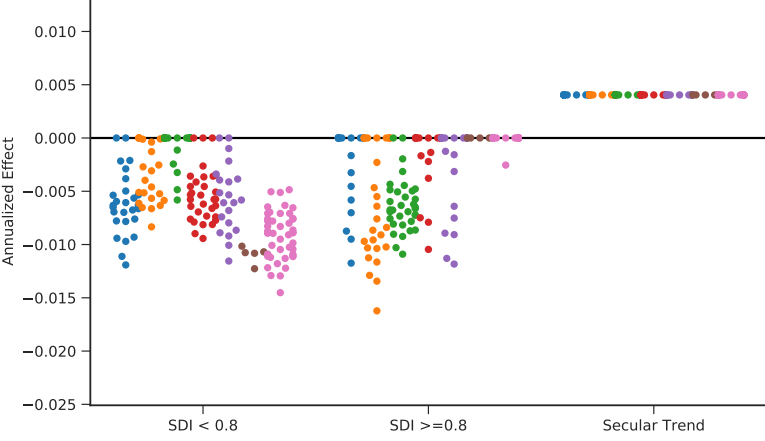

Chronic kidney disease due to diabetes mellitus, Males

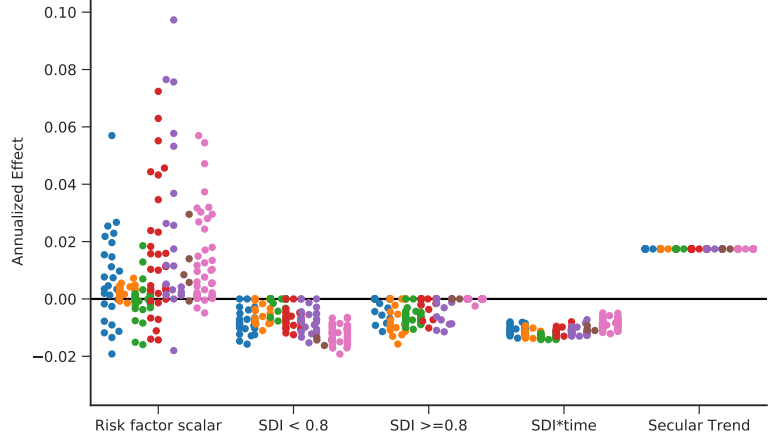

Chronic kidney disease due to diabetes mellitus, Females

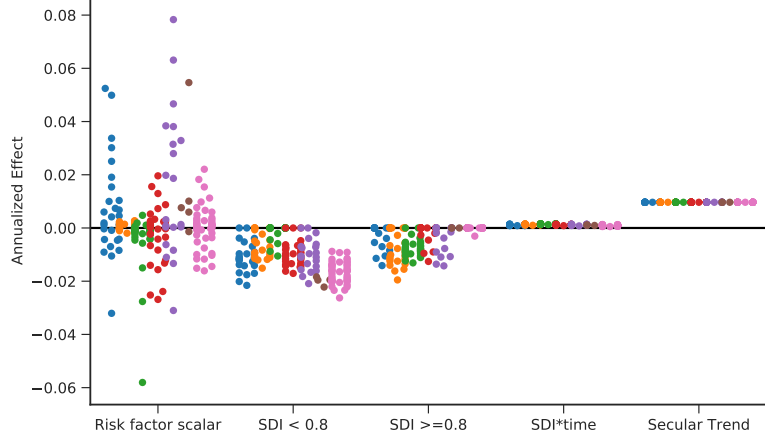

Chronic kidney disease due to hypertension, Males

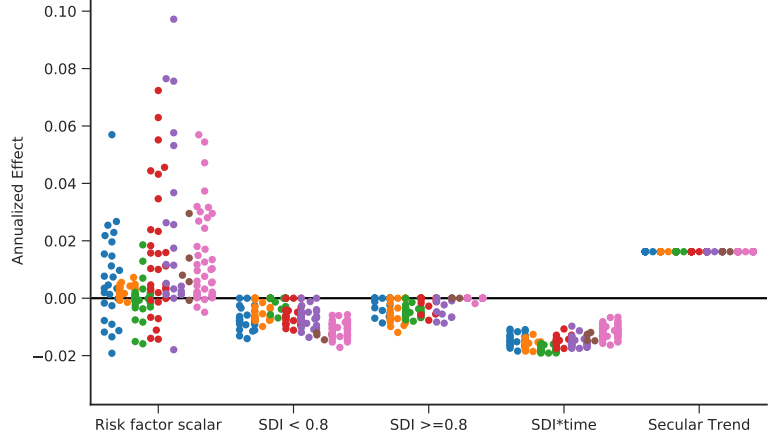

Chronic kidney disease due to hypertension, Females

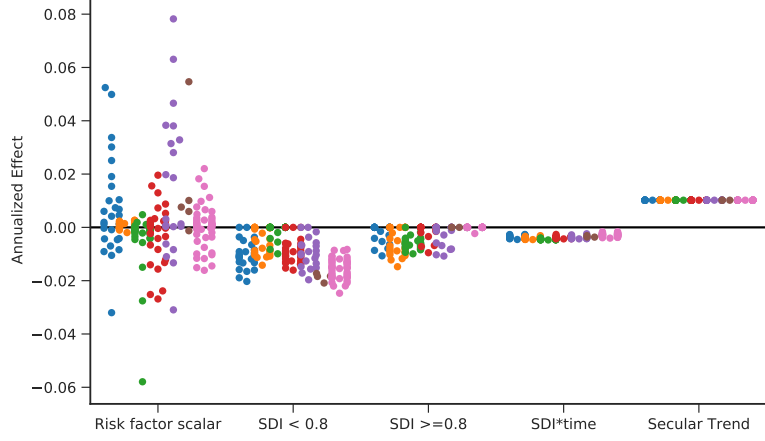

Chronic kidney disease due to glomerulonephritis, Males

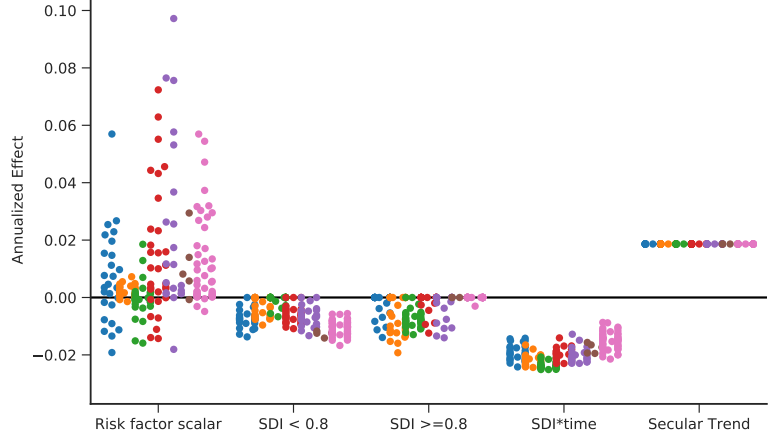

Chronic kidney disease due to glomerulonephritis, Females

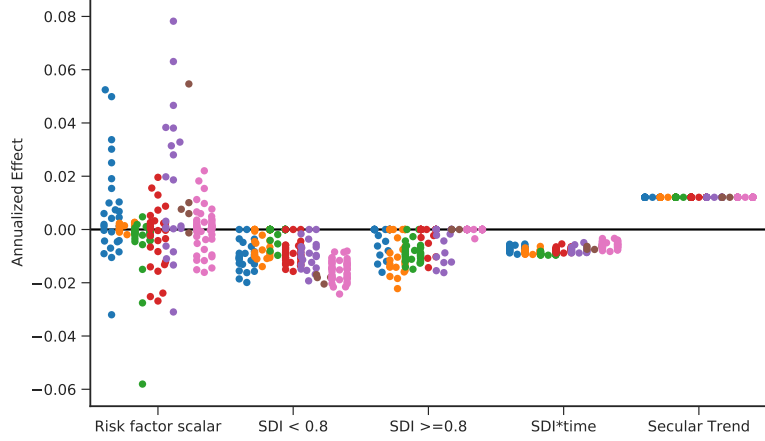

- Southeast Asia, East Asia, and Oceania
- Central Europe, Eastern Europe, and Central Asia
- High-income
- Latin America and Caribbean
- North Africa and Middle East
- South Asia
- Sub-Saharan Africa

Chronic kidney disease due to other and unspecified causes, Males

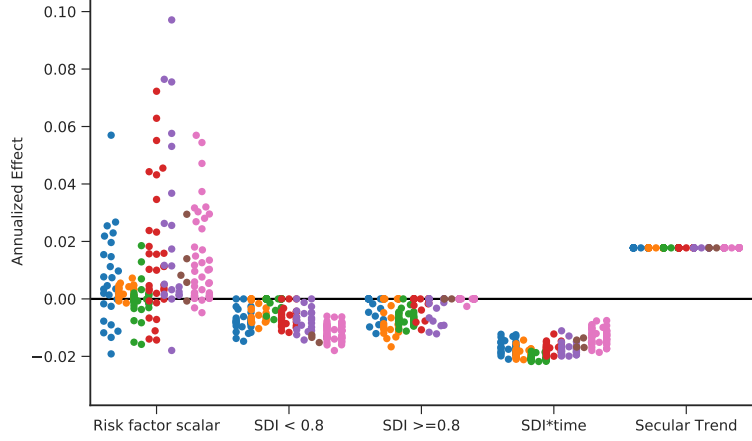

Chronic kidney disease due to other and unspecified causes, Females

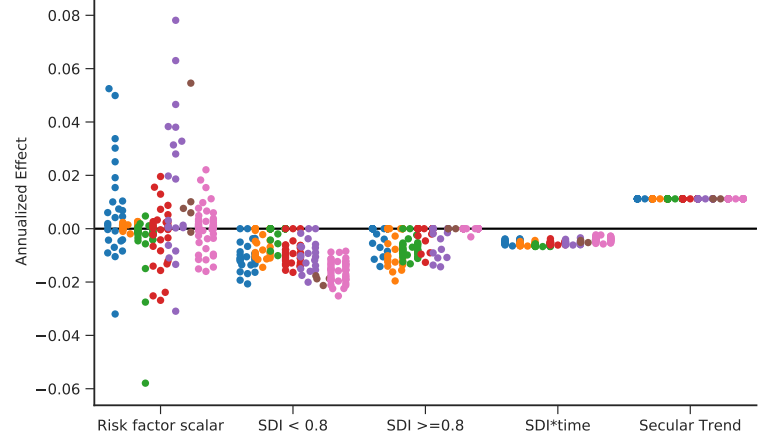

Urinary tract infections, Males

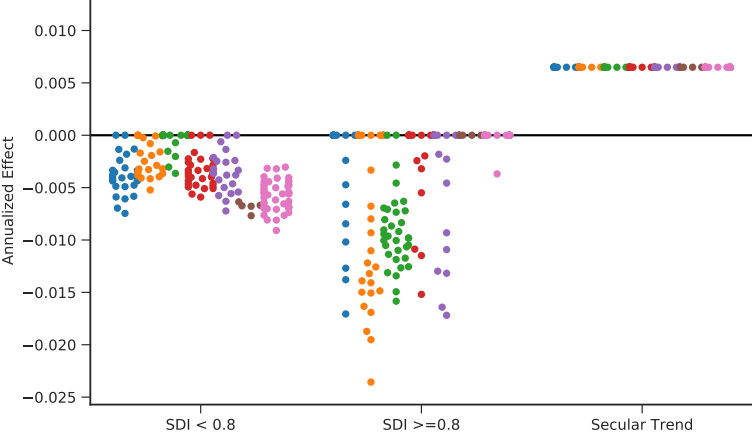

Urinary tract infections, Females

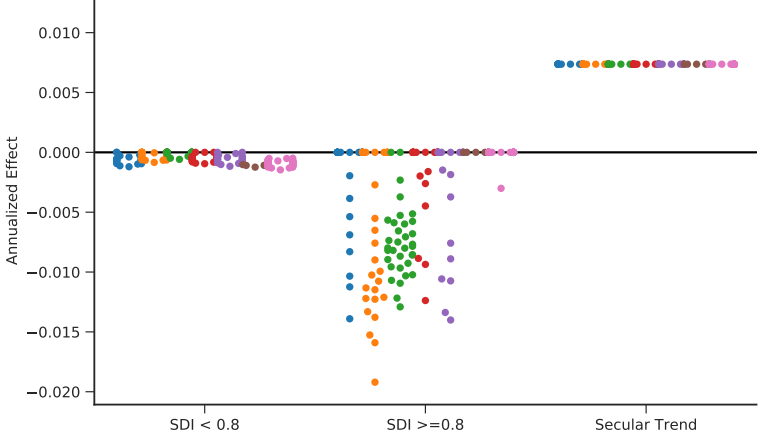

Urolithiasis, Males

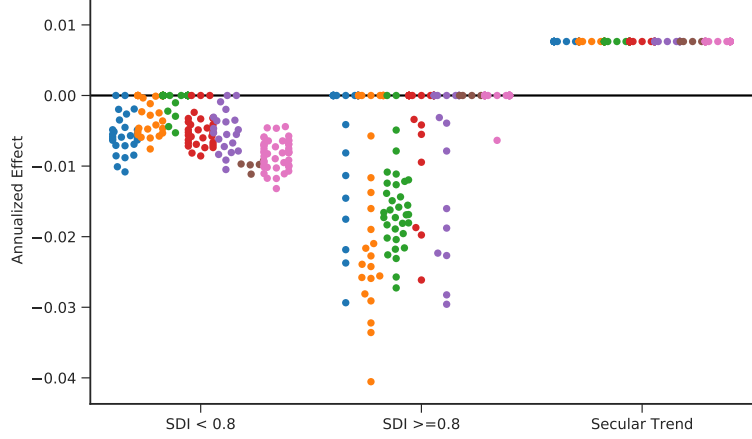

Urolithiasis, Females

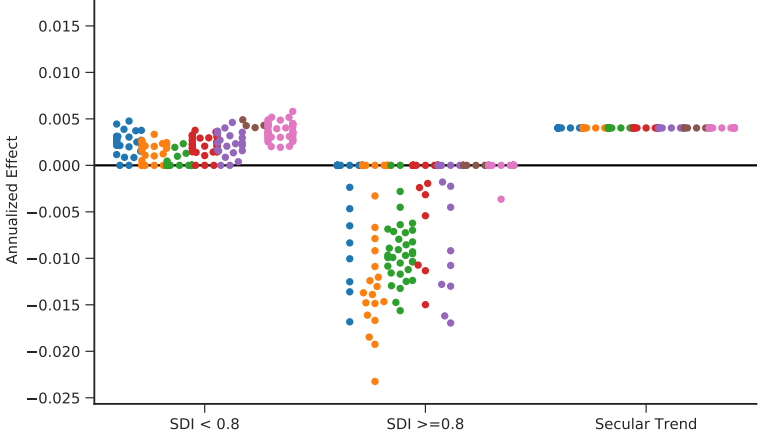

Other urinary diseases, Males

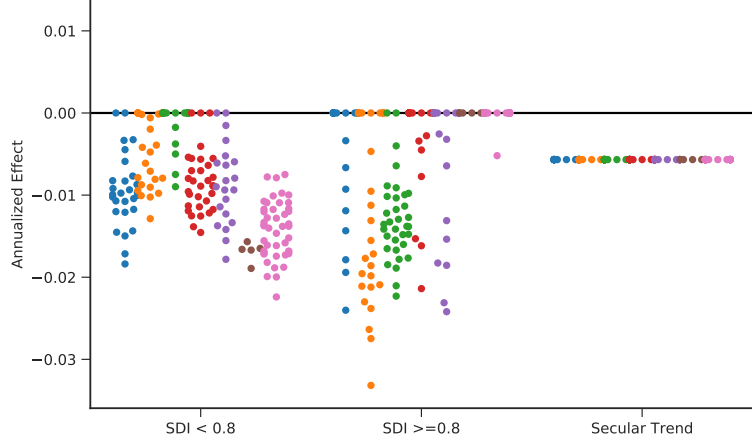

- Southeast Asia, East Asia, and Oceania
- Central Europe, Eastern Europe, and Central Asia
- High-income
- Latin America and Caribbean
- North Africa and Middle East
- South Asia
- Sub-Saharan Africa

Other urinary diseases, Females

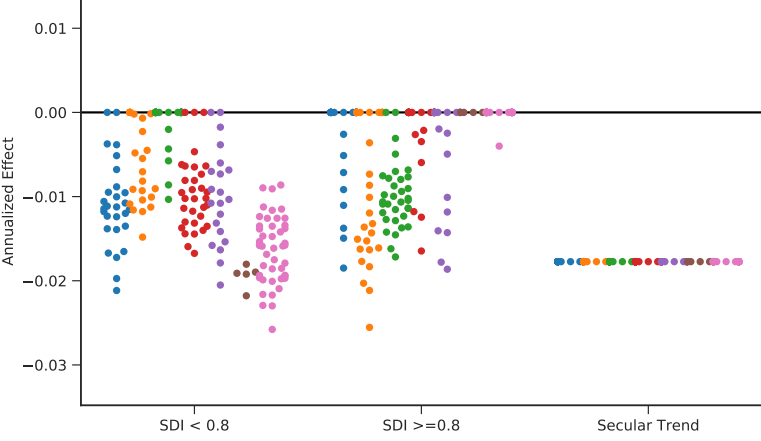

Uterine fibroids, Females

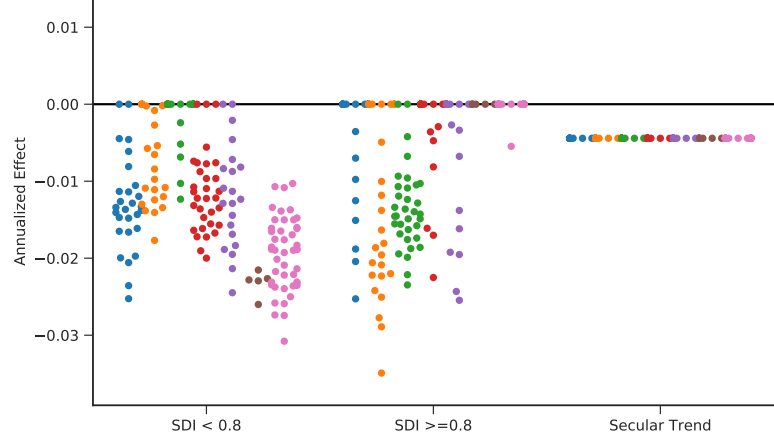

Polycystic ovarian syndrome, Females

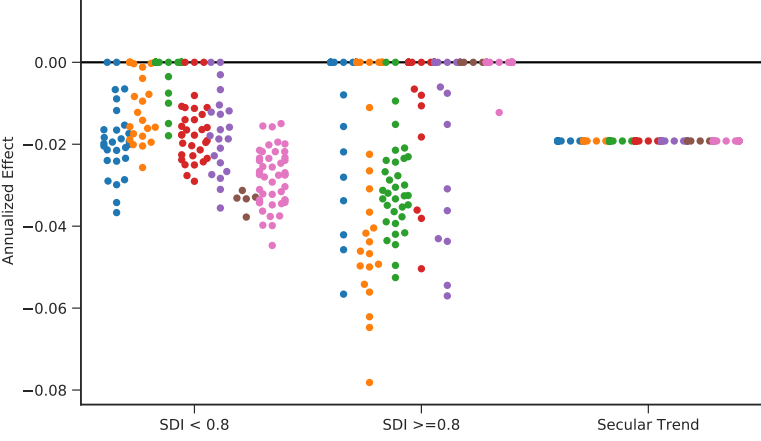

Endometriosis, Females

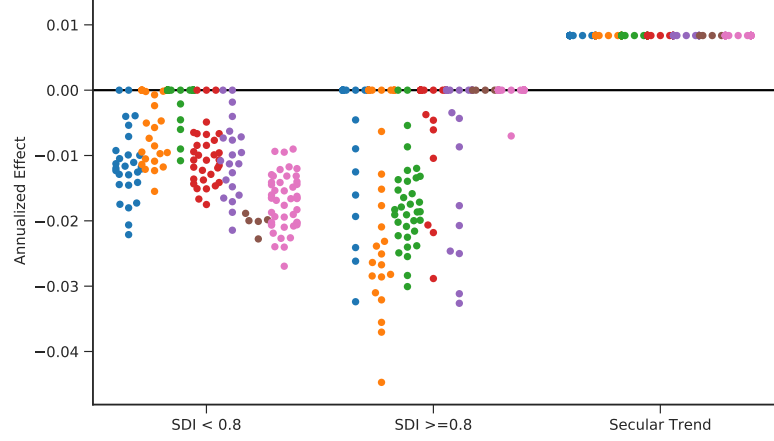

Genital prolapse, Females

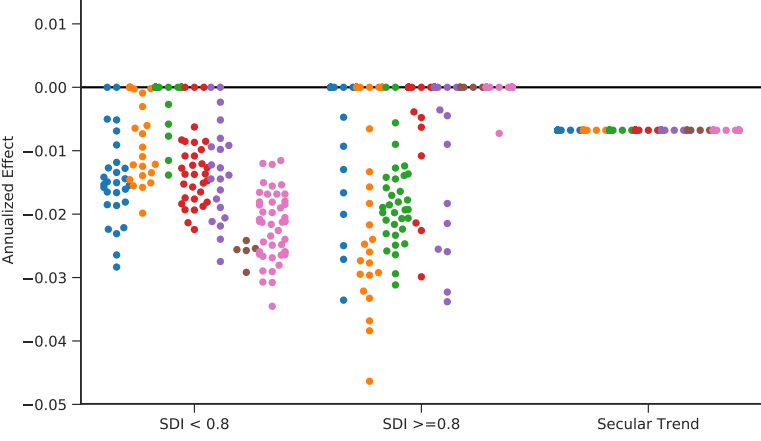

Other gynecological diseases, Females

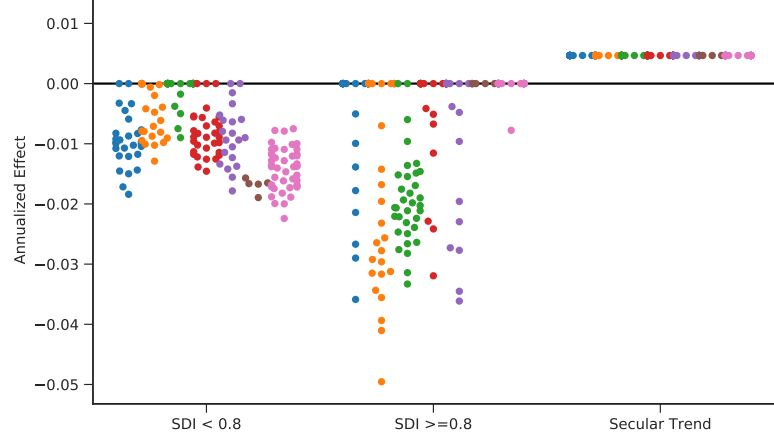

Thalassemiias, Males

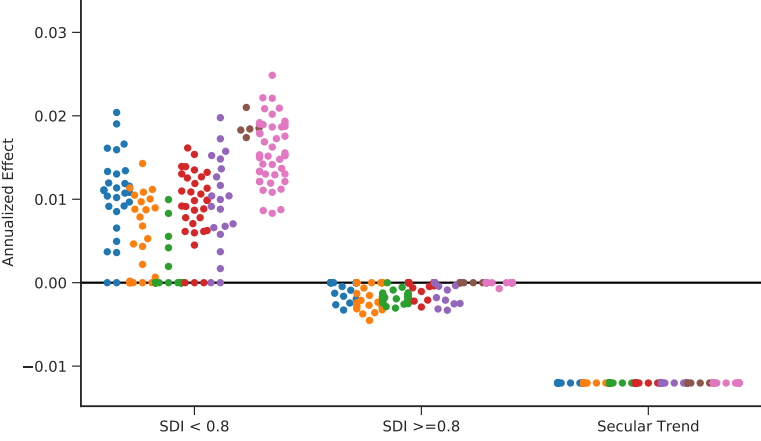

- Southeast Asia, East Asia, and Oceania
- Central Europe, Eastern Europe, and Central Asia
- High-income
- Latin America and Caribbean
- North Africa and Middle East
- South Asia
- Sub-Saharan Africa

Thalassemias, Females

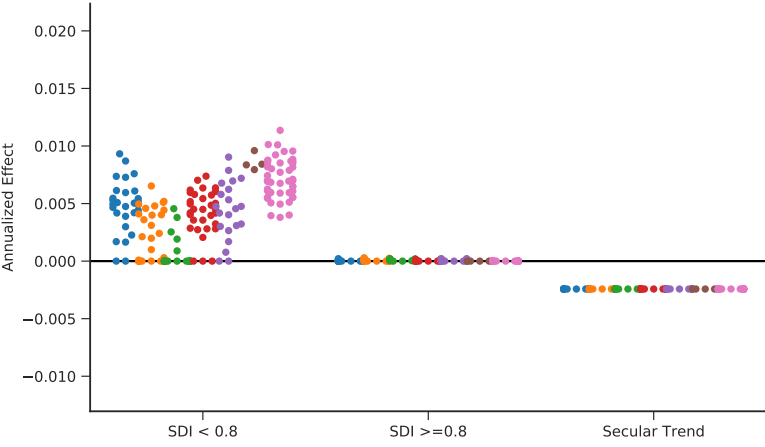

Sickle cell disorders, Males

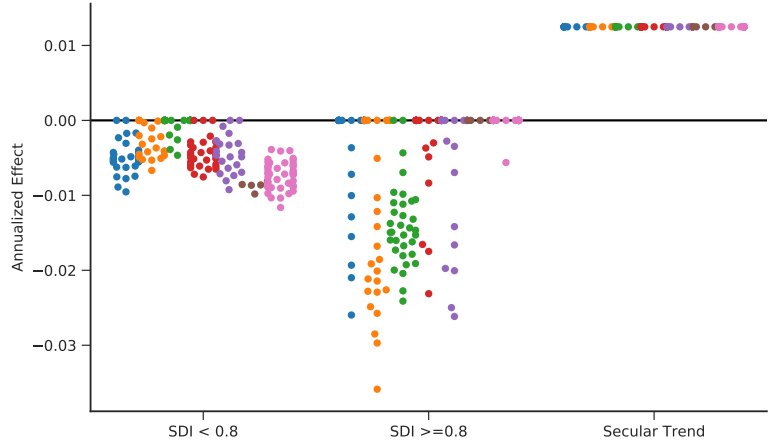

Sickle cell disorders, Females

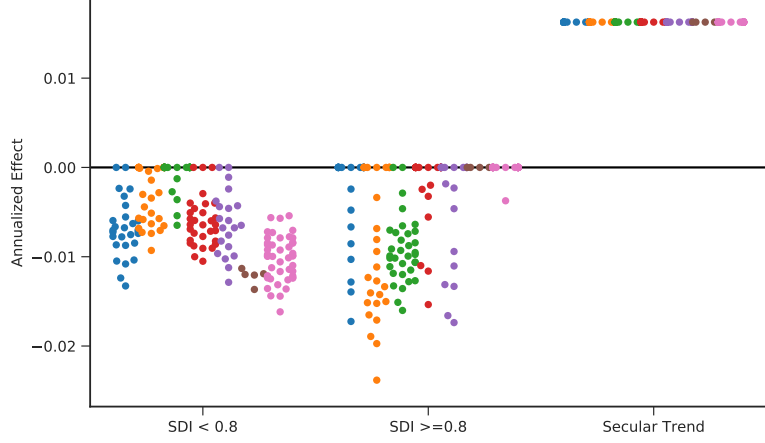

G6PD deficiency, Males

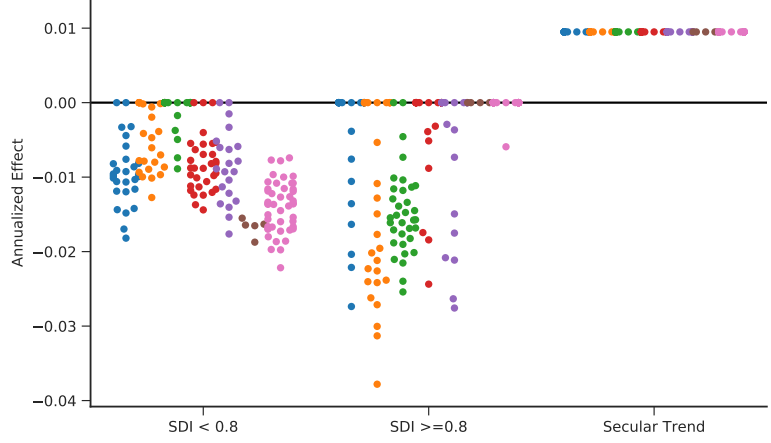

G6PD deficiency, Females

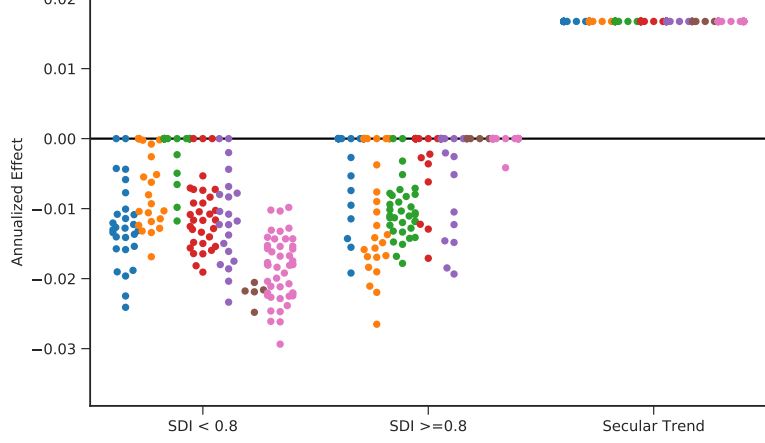

Other hemoglobinopathies and hemolytic anemias, Males

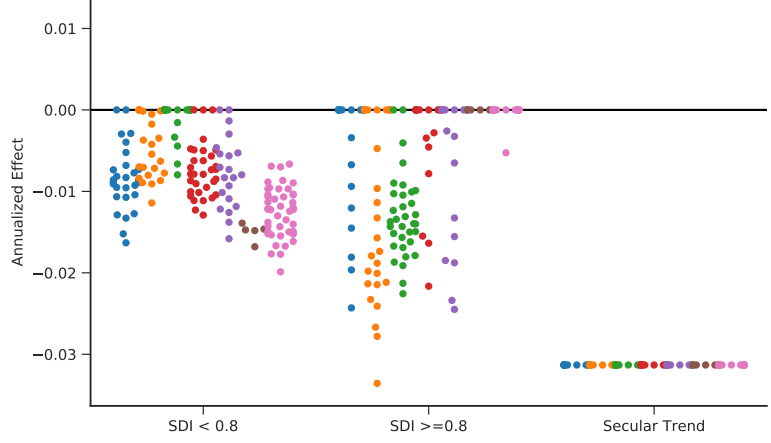

Other hemoglobinopathies and hemolytic anemias, Females

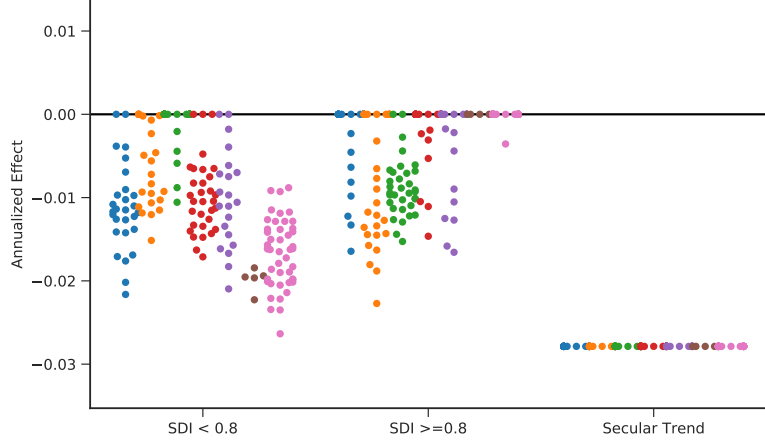

- Southeast Asia, East Asia, and Oceania
- Central Europe, Eastern Europe, and Central Asia
- High-income
- Latin America and Caribbean
- North Africa and Middle East
- South Asia
- Sub-Saharan Africa

Endocrine, metabolic, blood, and immune disorders, Males

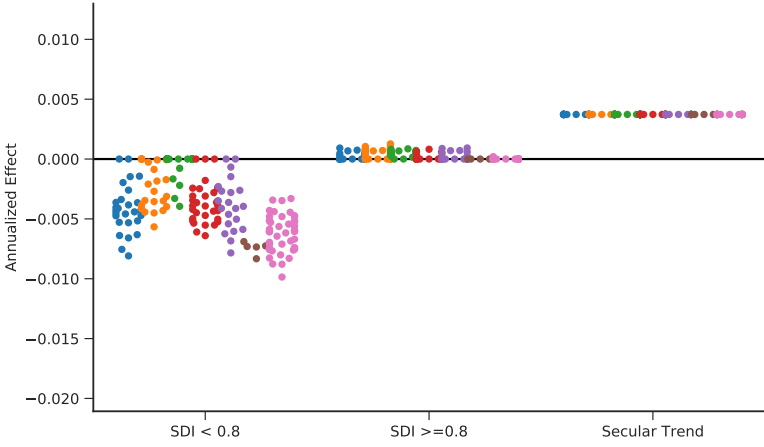

Endocrine, metabolic, blood, and immune disorders, Females

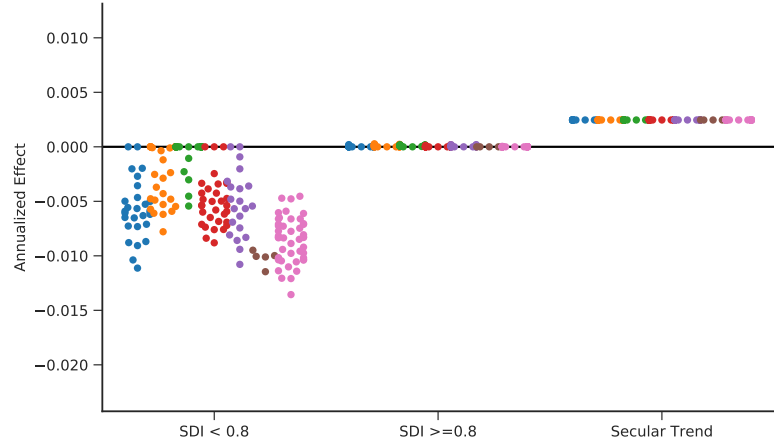

Rheumatoid arthritis, Males

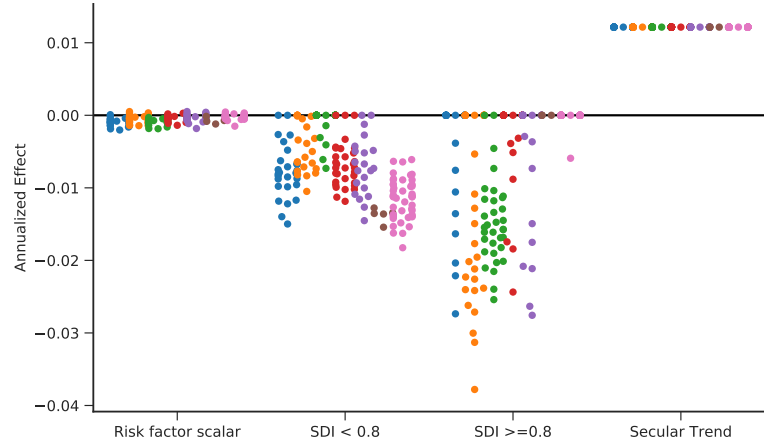

Rheumatoid arthritis, Females

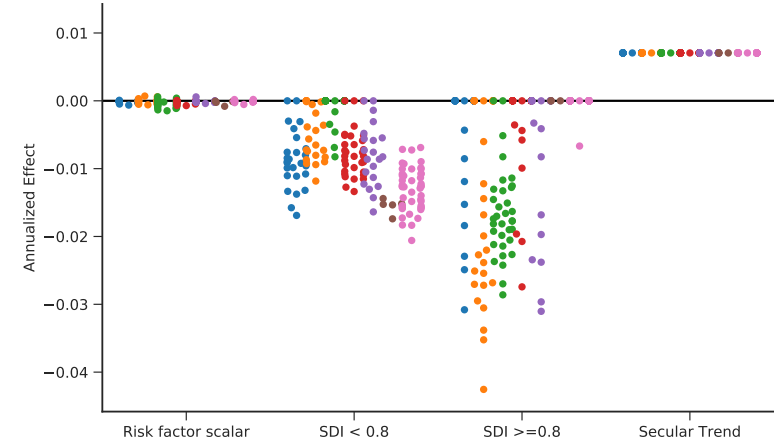

Other musculoskeletal disorders, Males

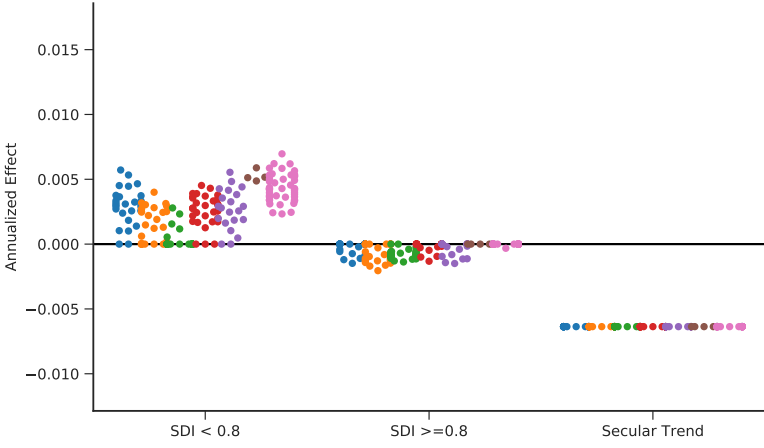

Other musculoskeletal disorders, Females

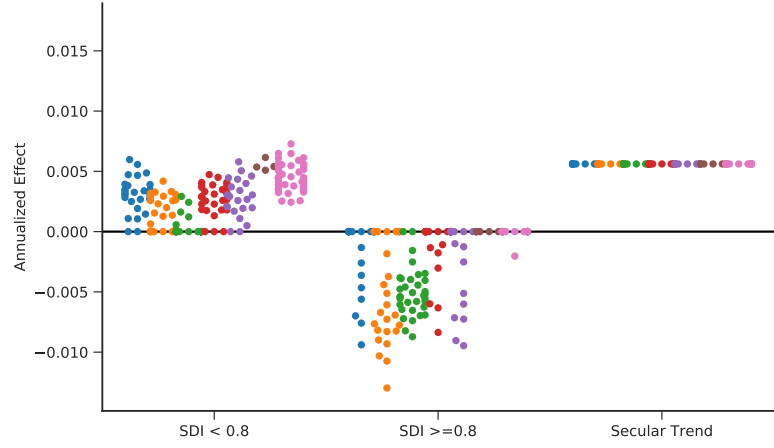

Neural tube defects, Males

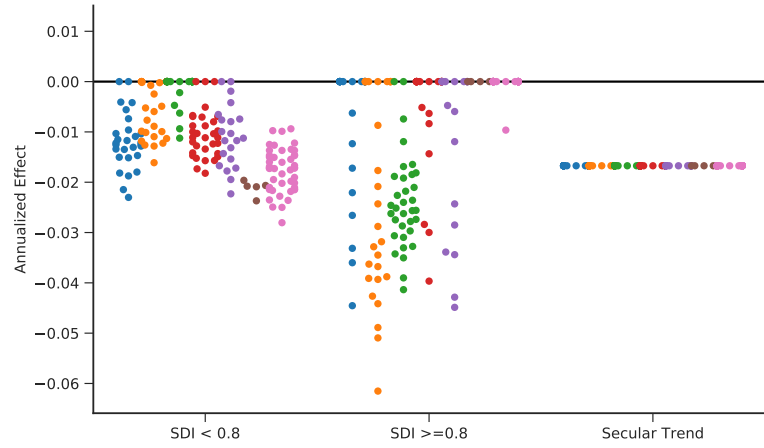

- Southeast Asia, East Asia, and Oceania
- Central Europe, Eastern Europe, and Central Asia
- High-income
- Latin America and Caribbean
- North Africa and Middle East
- South Asia
- Sub-Saharan Africa

Neural tube defects, Females

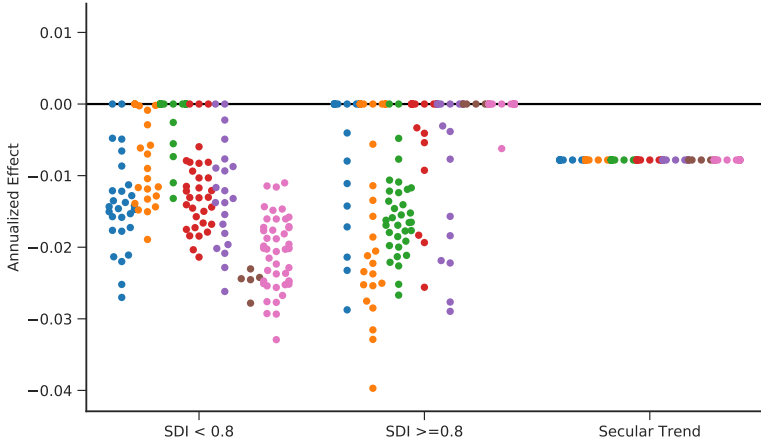

Congenital heart anomalies, Males

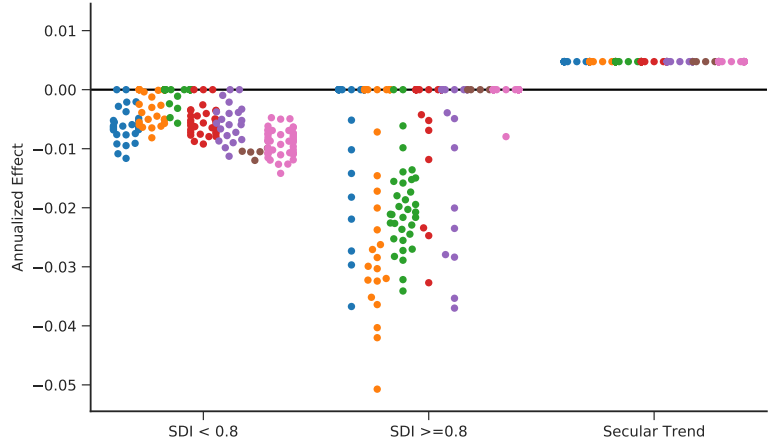

Congenital heart anomalies, Females

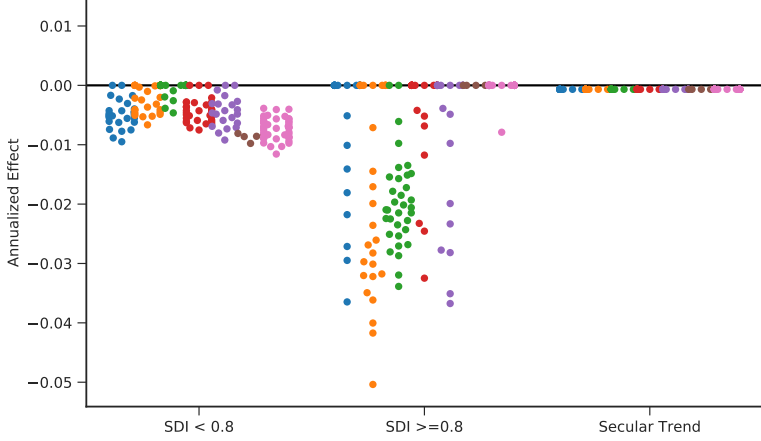

Orofacial clefts, Males

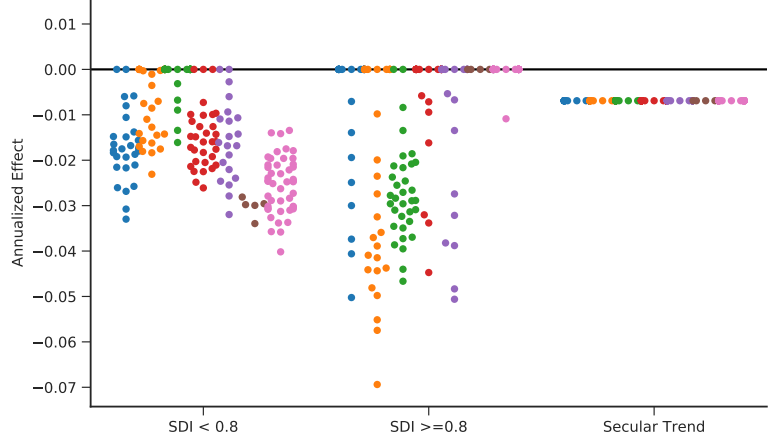

Orofacial clefts, Females

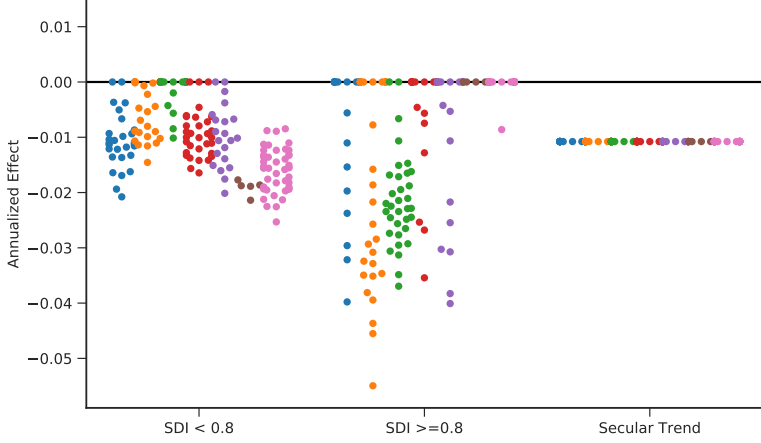

Down syndrome, Males

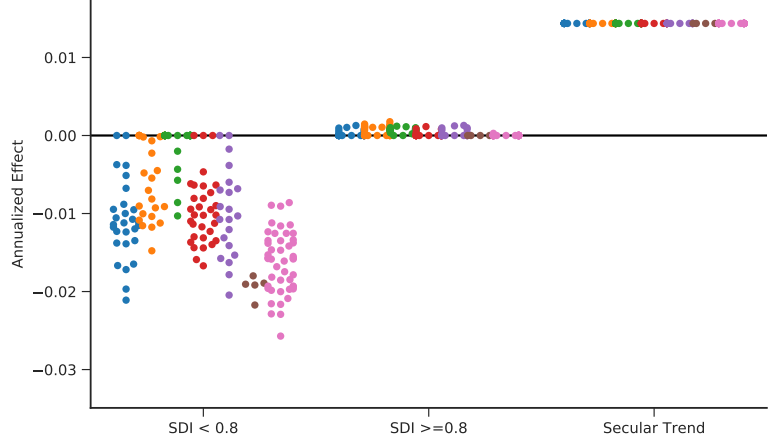

Down syndrome, Females

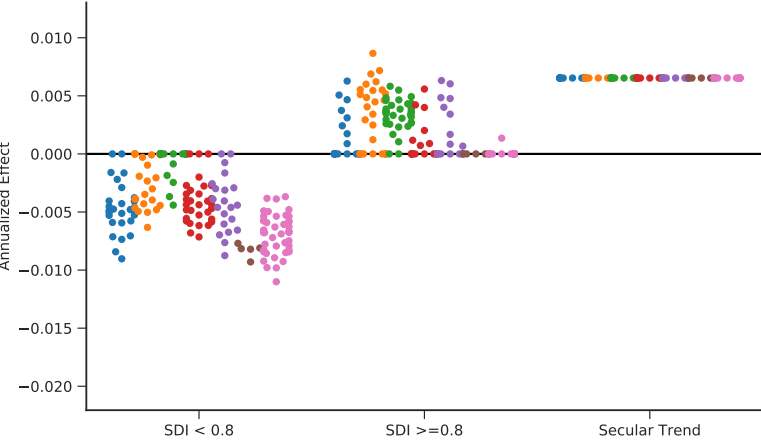

- Southeast Asia, East Asia, and Oceania
- Central Europe, Eastern Europe, and Central Asia
- High-income
- Latin America and Caribbean
- North Africa and Middle East
- South Asia
- Sub-Saharan Africa

Other chromosomal abnormalities, Males

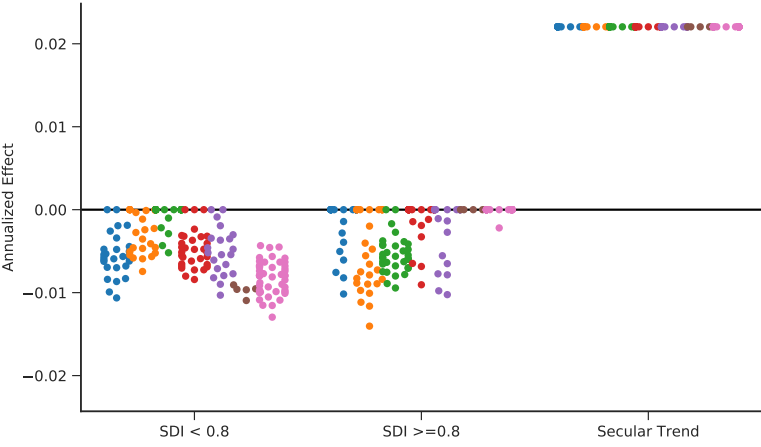

Other chromosomal abnormalities, Females

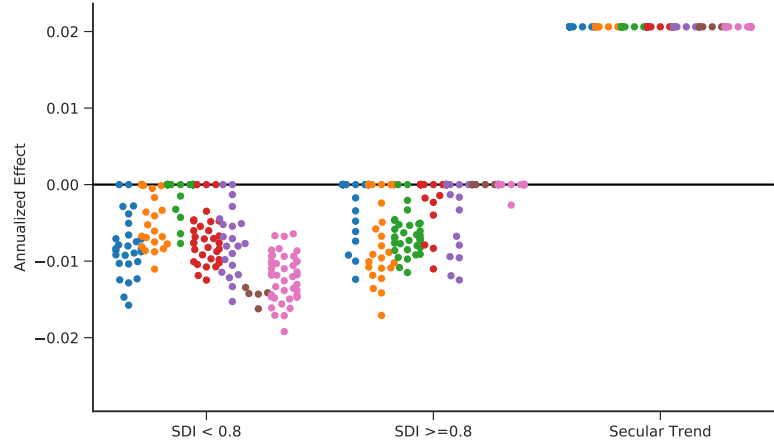

Congenital musculoskeletal and limb anomalies, Males

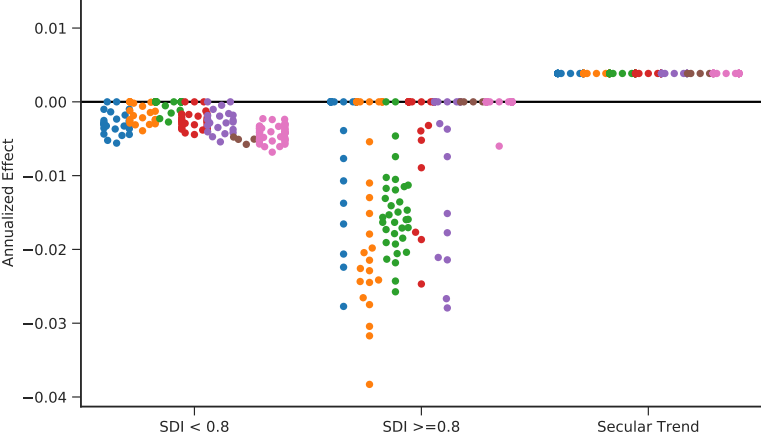

Congenital musculoskeletal and limb anomalies, Females

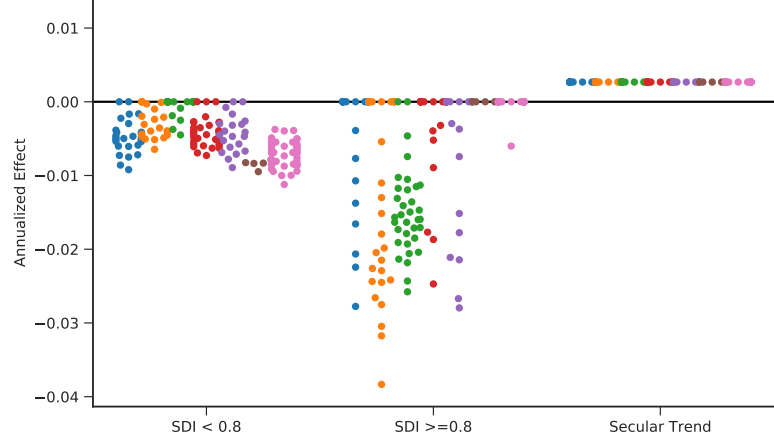

Urogenital congenital anomalies, Males

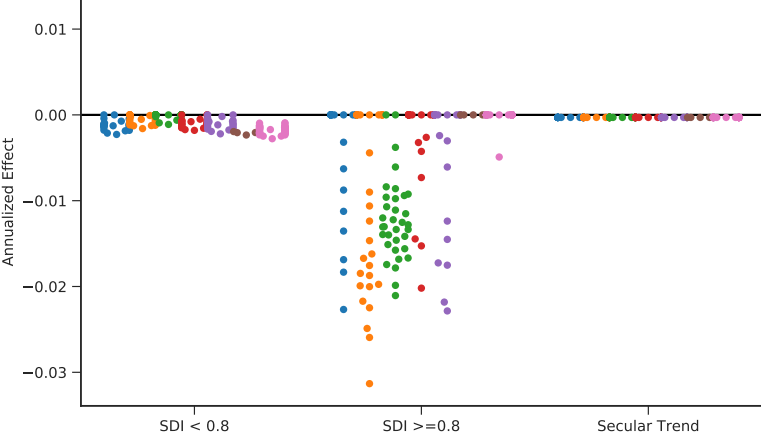

Urogenital congenital anomalies, Females

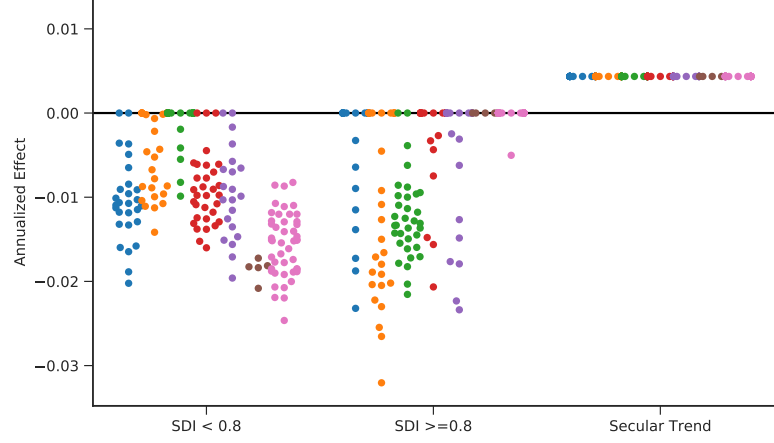

Digestive congenital anomalies, Males

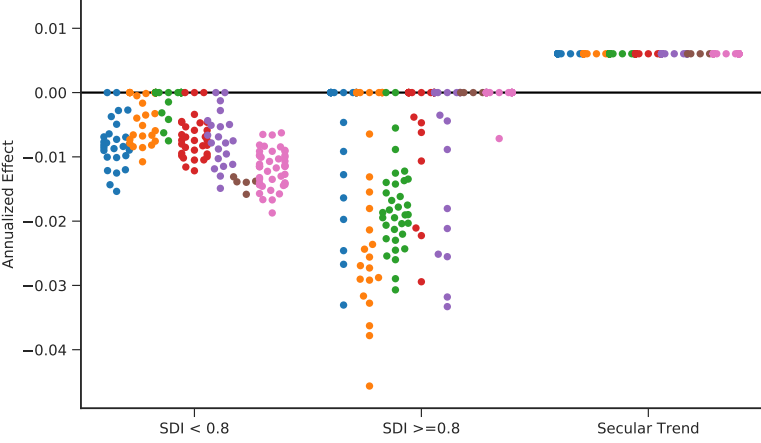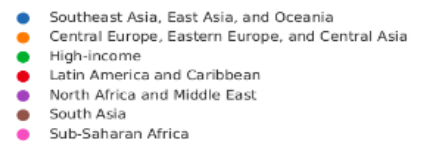



Digestive congenital anomalies, Females

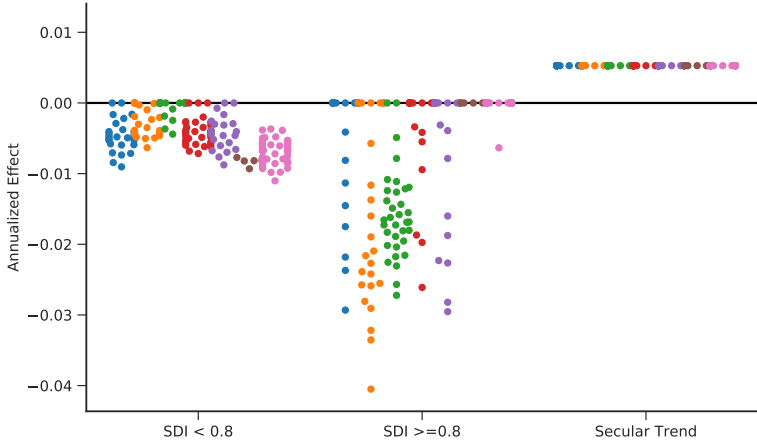

Other congenital birth defects, Males

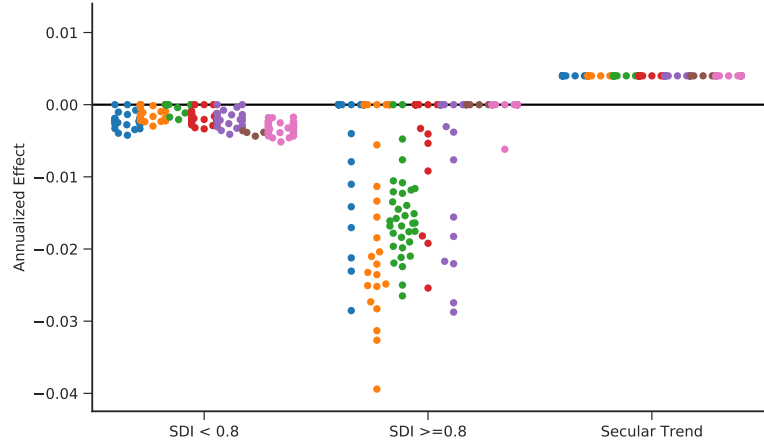

Other congenital birth defects, Females

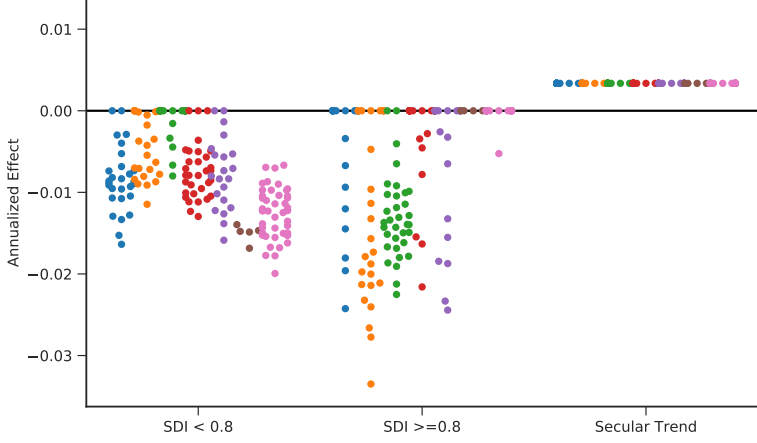

Cellulitis, Males

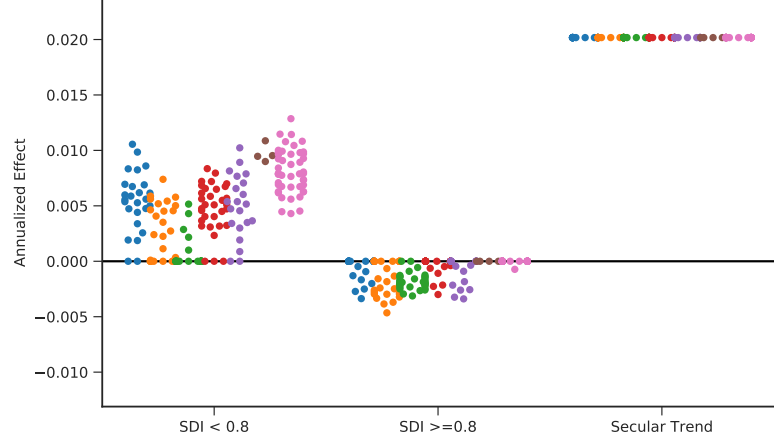

Cellulitis, Females

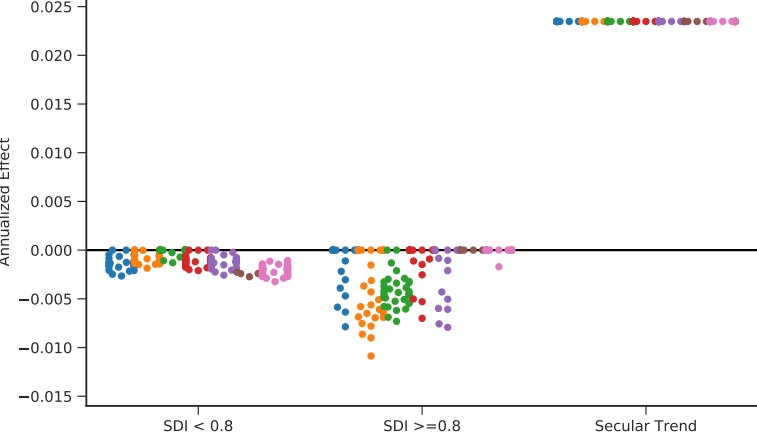

Pyoderma, Males

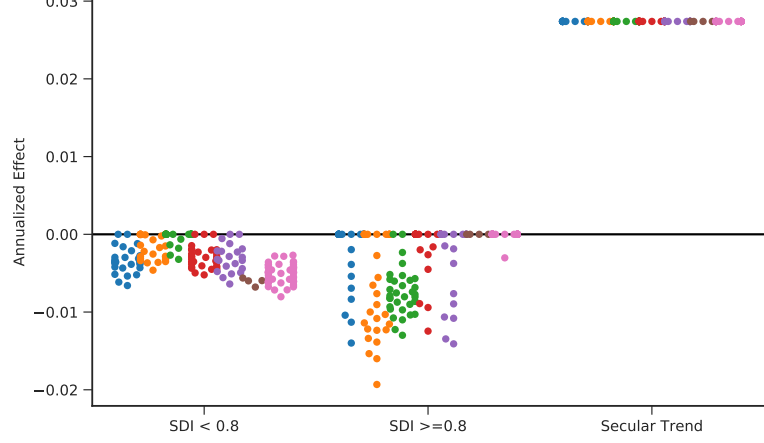

Pyoderma, Females

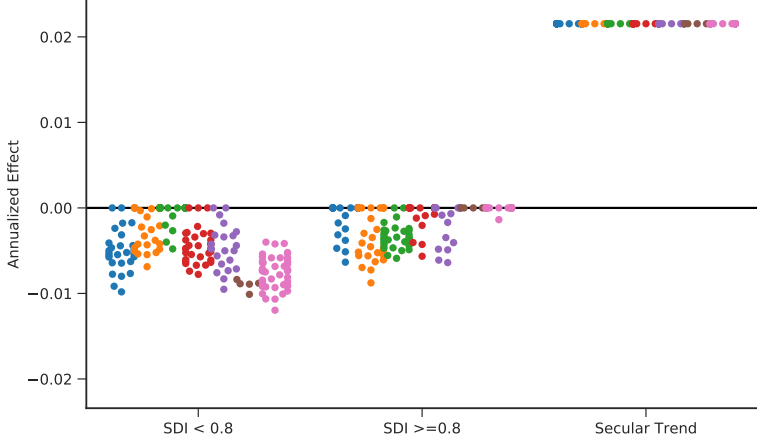

- Southeast Asia, East Asia, and Oceania
- Central Europe, Eastern Europe, and Central Asia
- High-income
- Latin America and Caribbean
- North Africa and Middle East
- South Asia
- Sub-Saharan Africa

Decubitus ulcer, Males

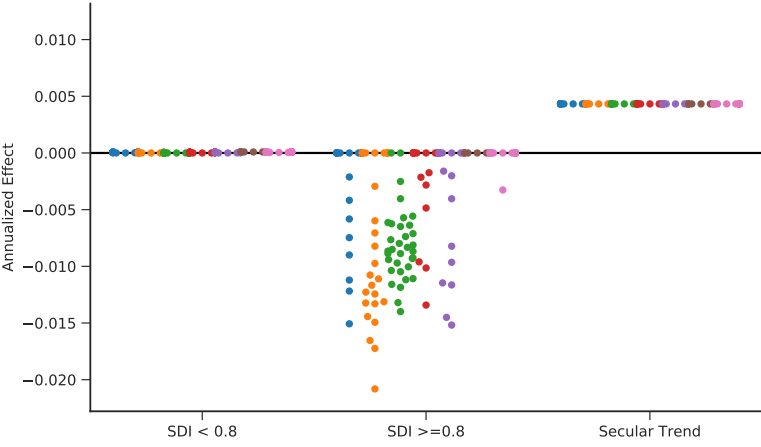

Decubitus ulcer, Females

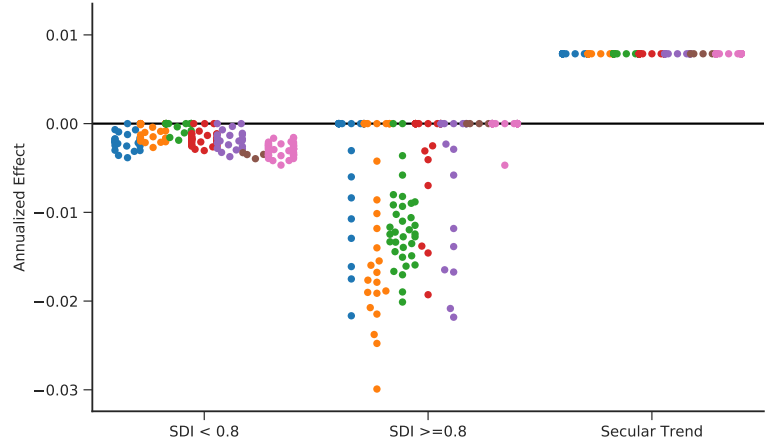

Other skin and subcutaneous diseases, Males

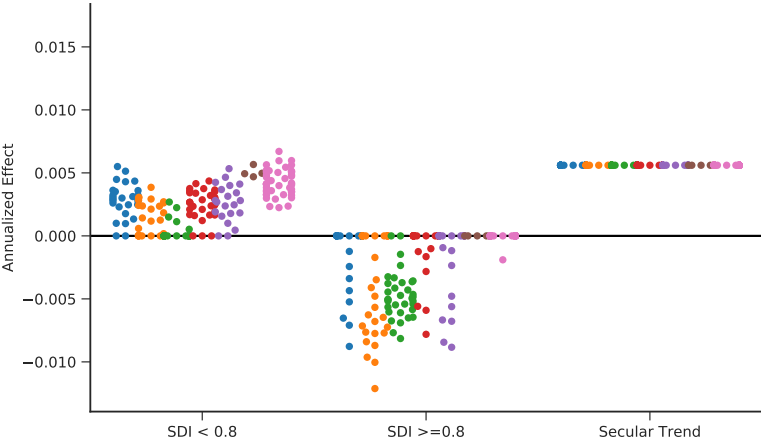

Other skin and subcutaneous diseases, Females

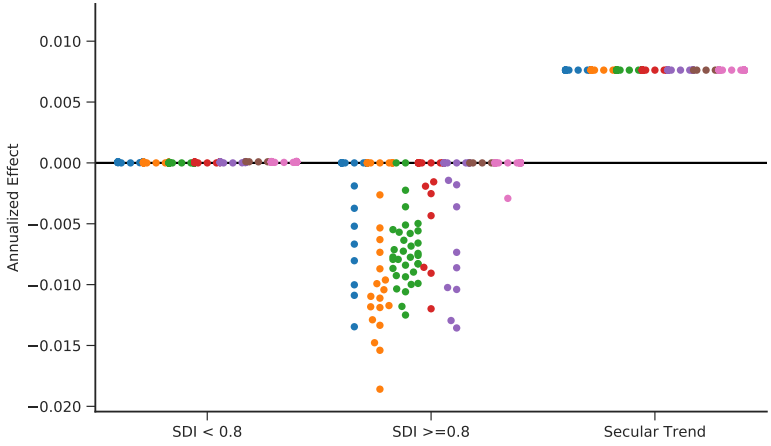

Sudden infant death syndrome, Males

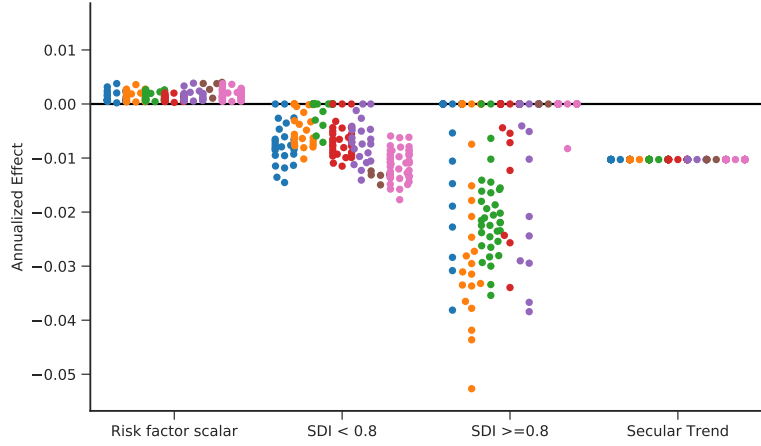

Sudden infant death syndrome, Females

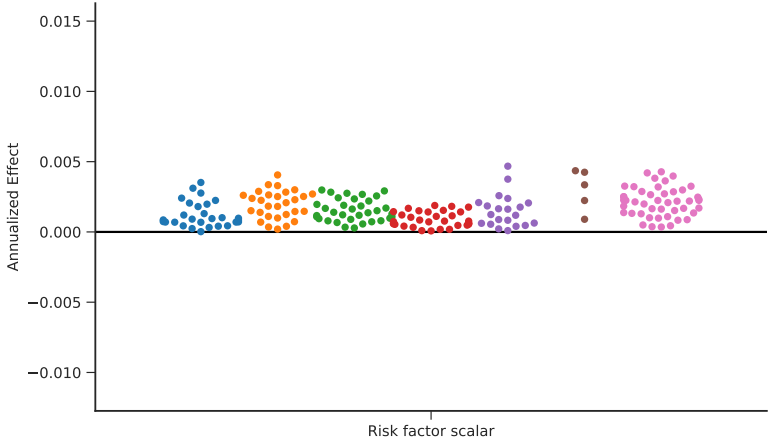

Pedestrian road injuries, Males

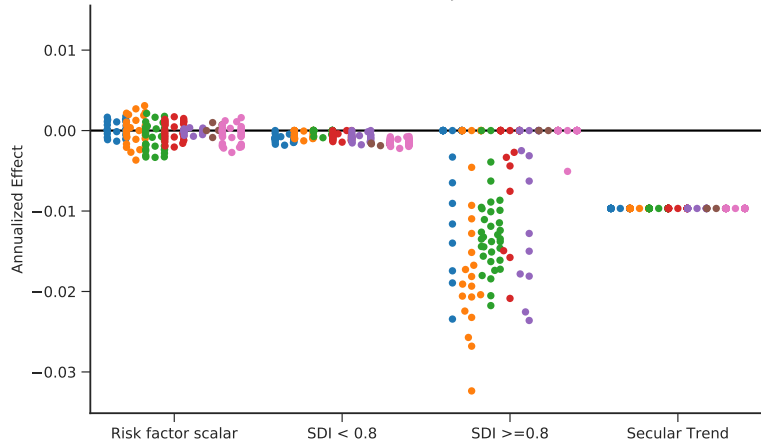

- Southeast Asia, East Asia, and Oceania
- Central Europe, Eastern Europe, and Central Asia
- High-income
- Latin America and Caribbean
- North Africa and Middle East
- South Asia
- Sub-Saharan Africa

Pedestrian road injuries, Females

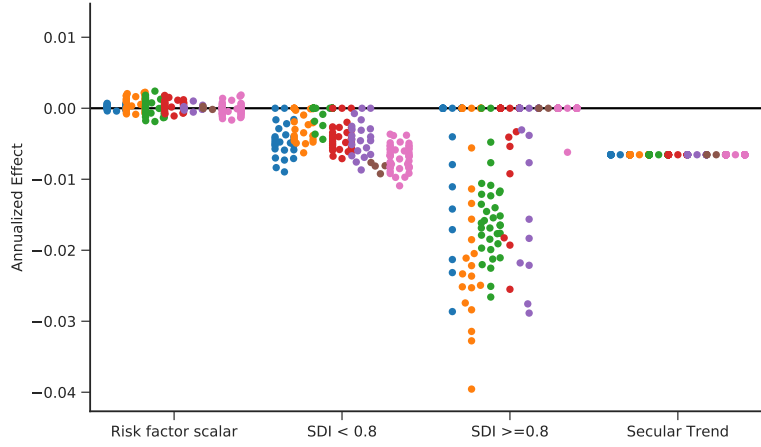

Cyclist road injuries, Males

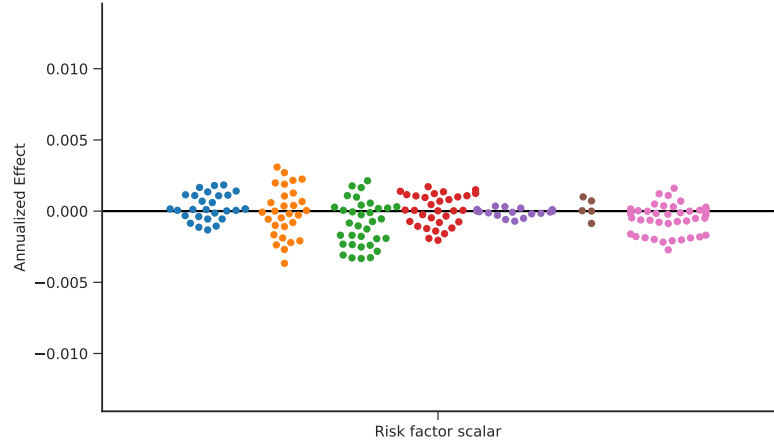

Cyclist road injuries, Females

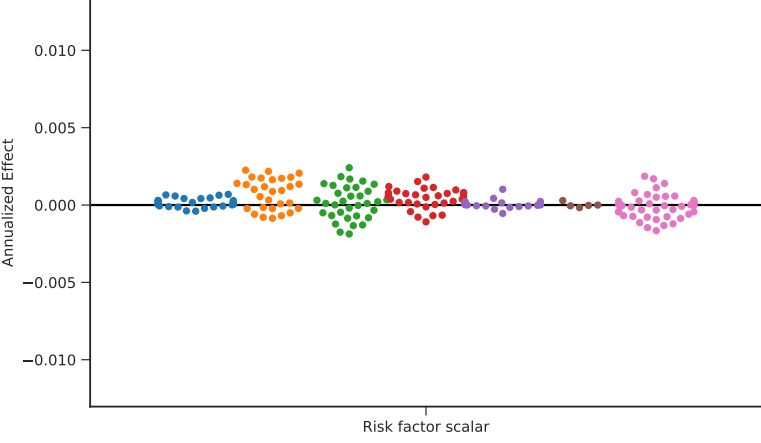

Motorcyclist road injuries, Males

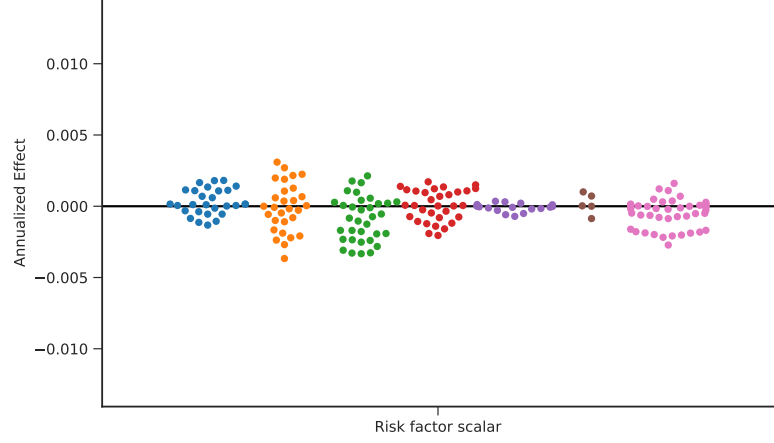

Motorcyclist road injuries, Females

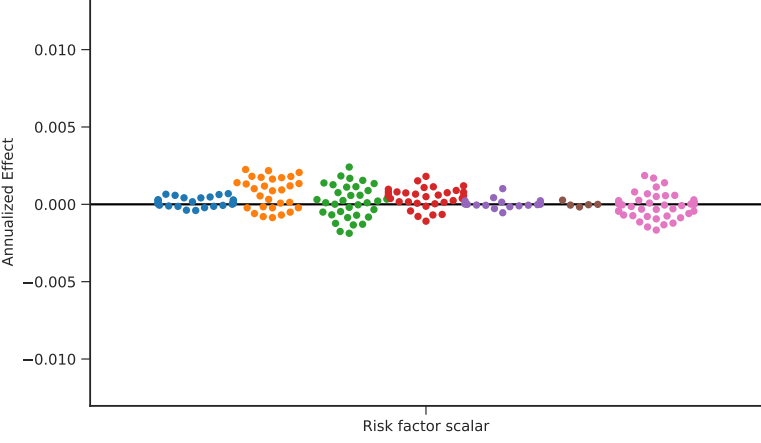

Motor vehicle road injuries, Males

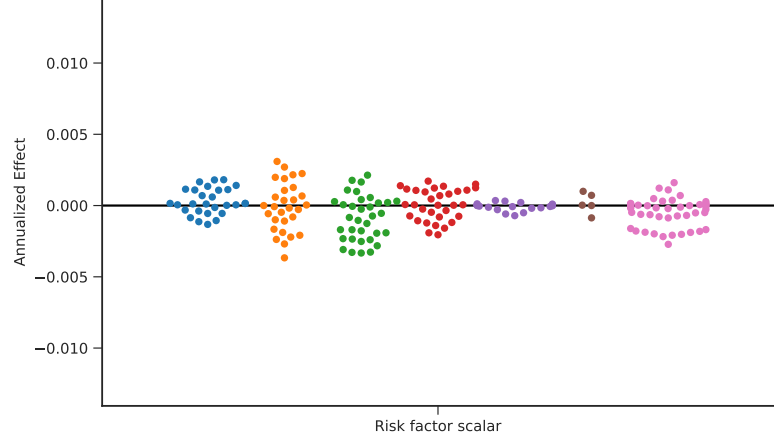

Motor vehicle road injuries, Females

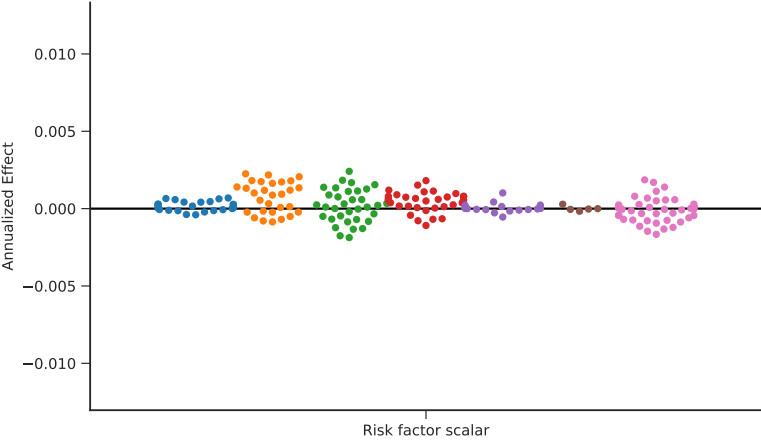

- Southeast Asia, East Asia, and Oceania
- Central Europe, Eastern Europe, and Central Asia
- High-income
- Latin America and Caribbean
- North Africa and Middle East
- South Asia
- Sub-Saharan Africa

Other road injuries, Males

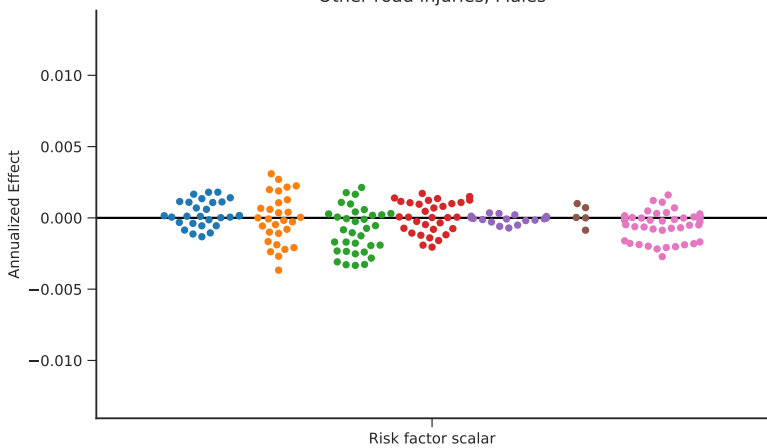

Other road injuries, Females

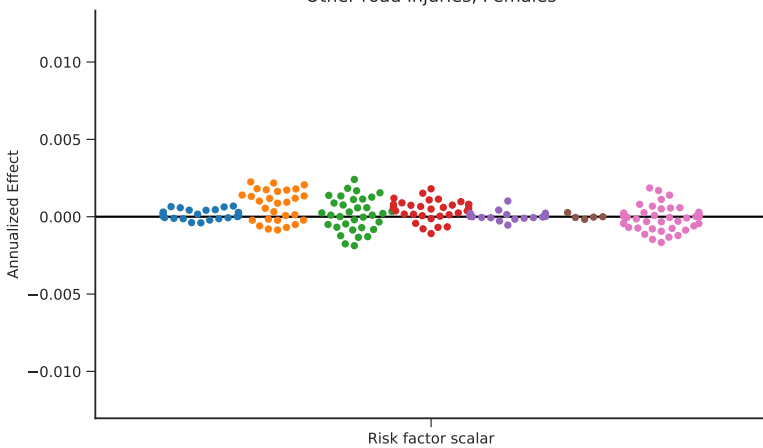

Other transport injuries, Males

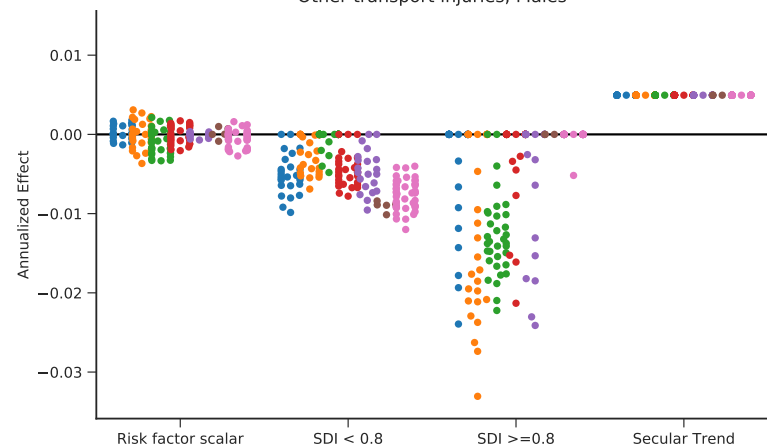

Other transport injuries, Females

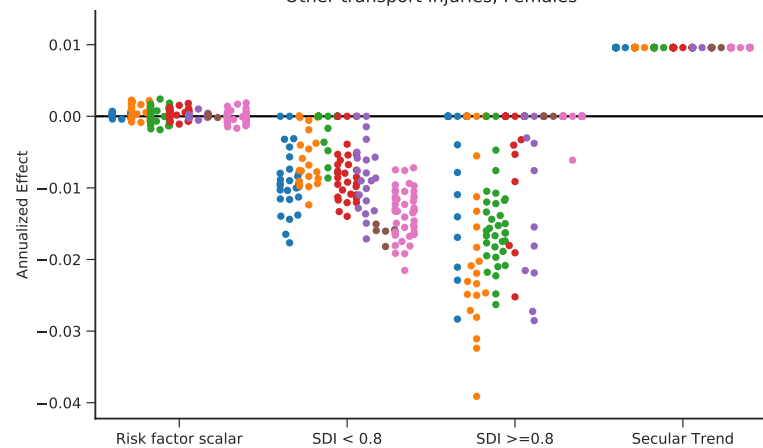

Falls, Males

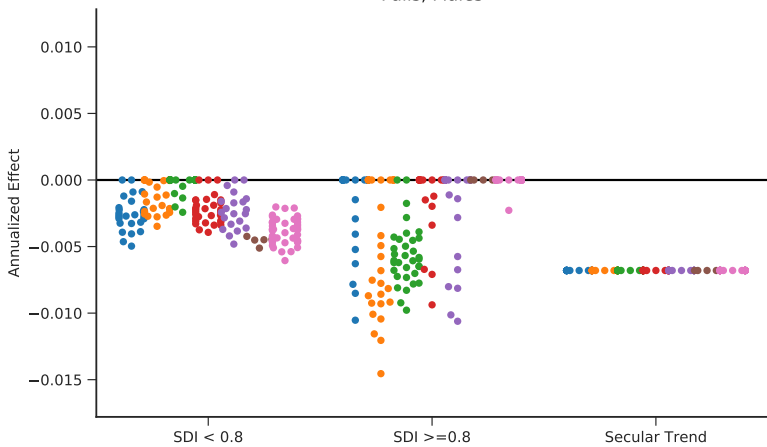

Falls, Females

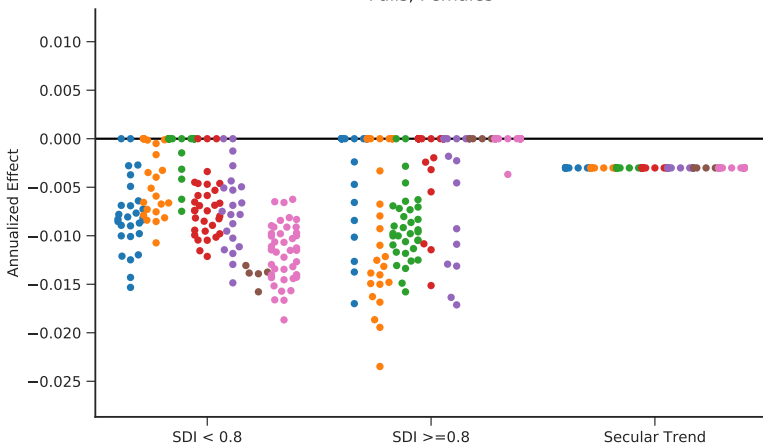

Drowning, Males

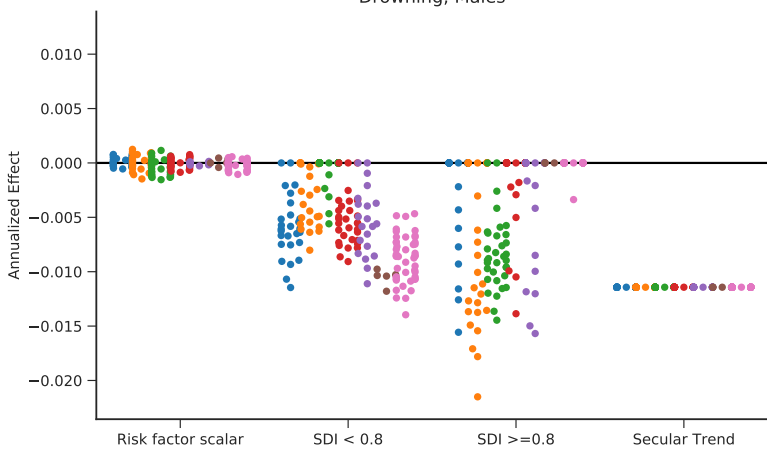

- Southeast Asia, East Asia, and Oceania
- Central Europe, Eastern Europe, and Central Asia
- High-income
- Latin America and Caribbean
- North Africa and Middle East
- South Asia
- Sub-Saharan Africa

Drowning, Females

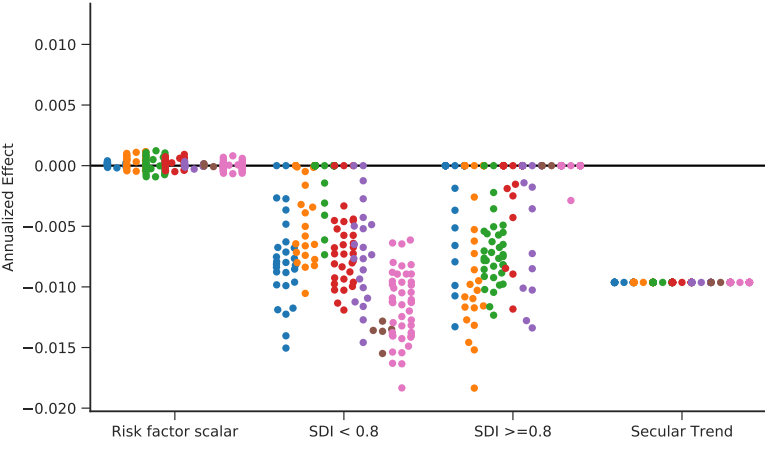

Fire, heat, and hot substances, Males

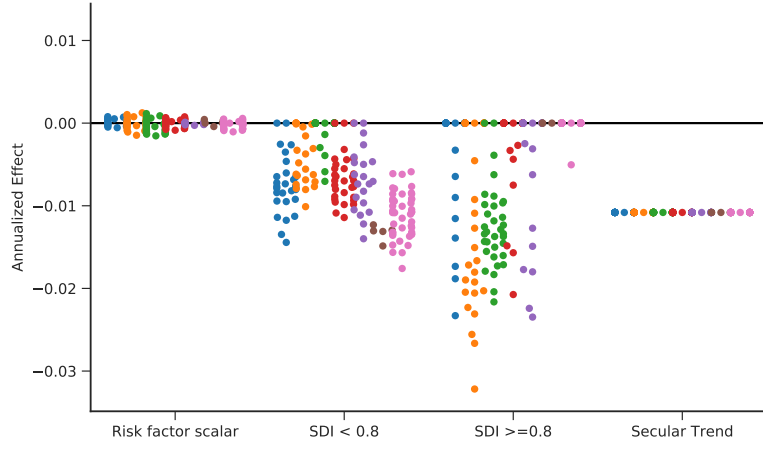

Fire, heat, and hot substances, Females

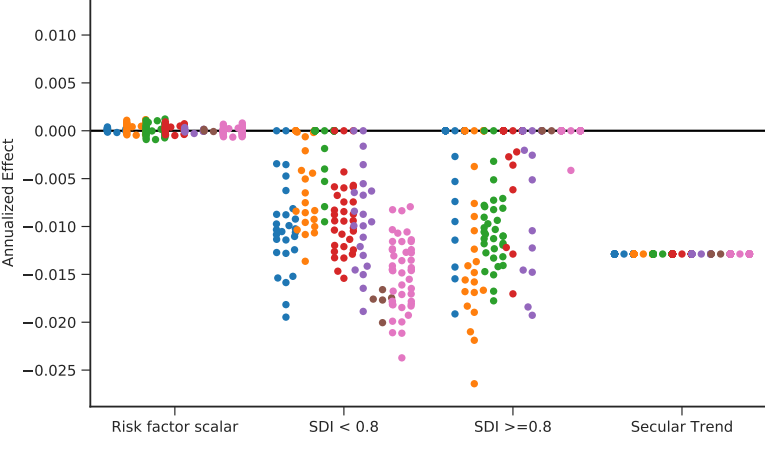

Poisonings, Males

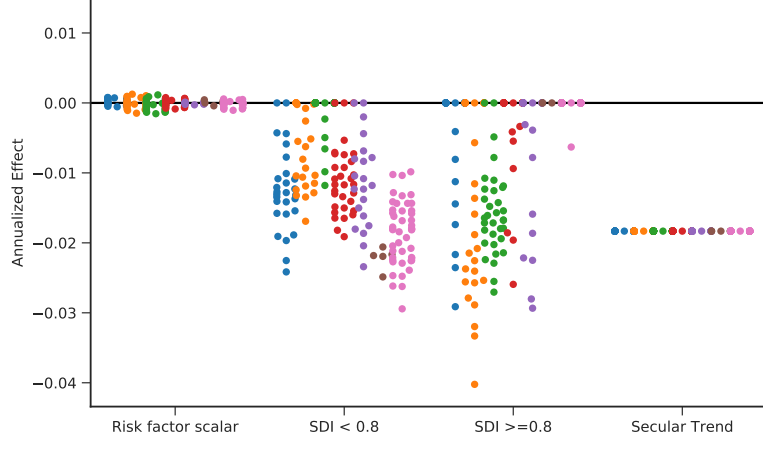

Poisonings, Females

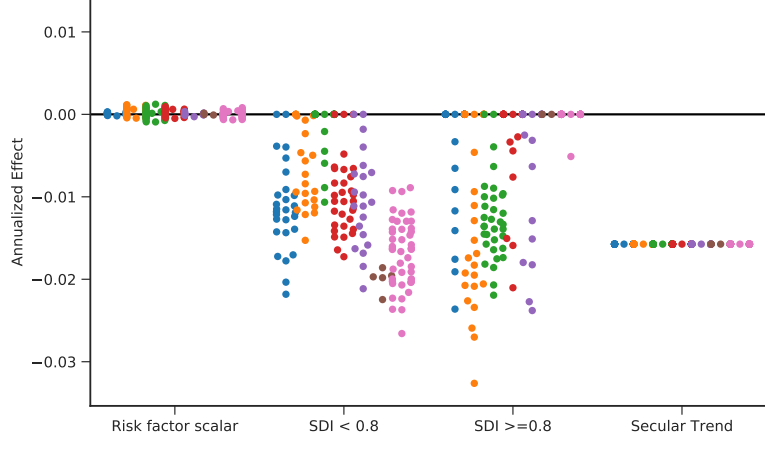

Unintentional firearm injuries, Males

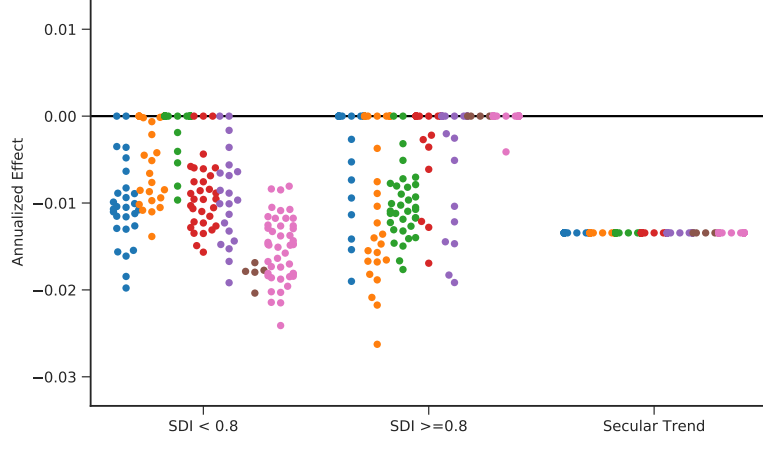

Unintentional firearm injuries, Females

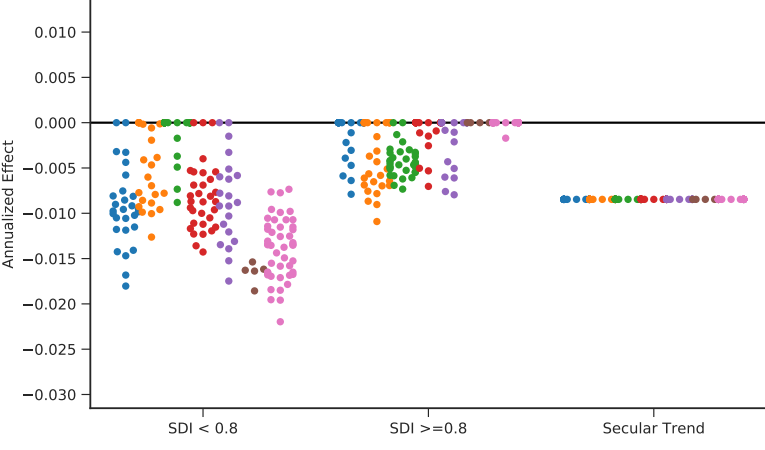

- Southeast Asia, East Asia, and Oceania
- Central Europe, Eastern Europe, and Central Asia
- High-income
- Latin America and Caribbean
- North Africa and Middle East
- South Asia
- Sub-Saharan Africa

Unintentional suffocation, Males

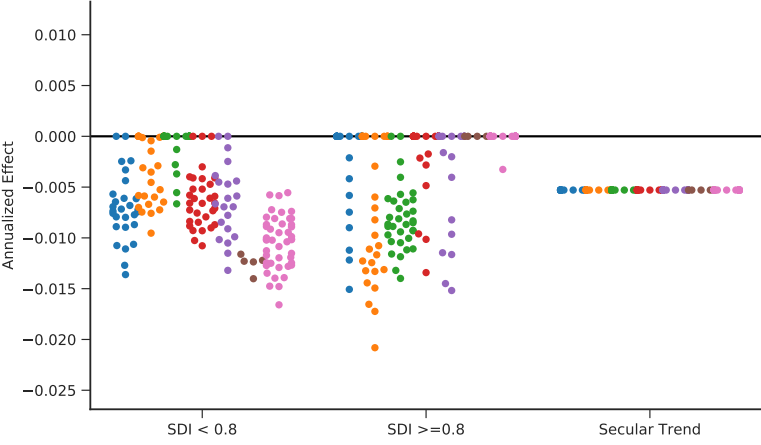

Unintentional suffocation, Females

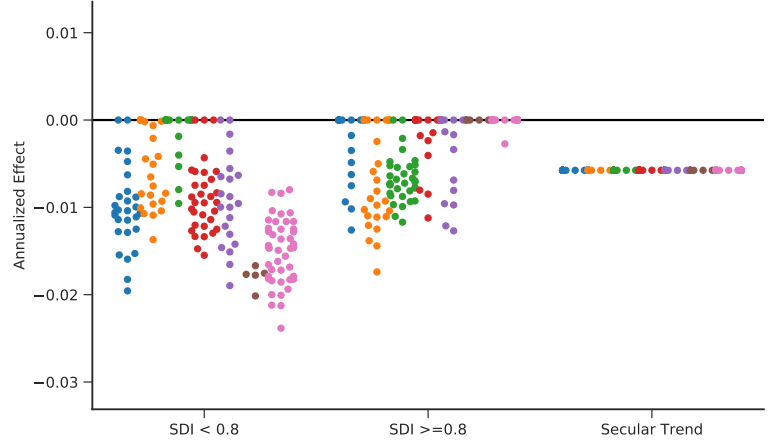

Other exposure to mechanical forces, Males

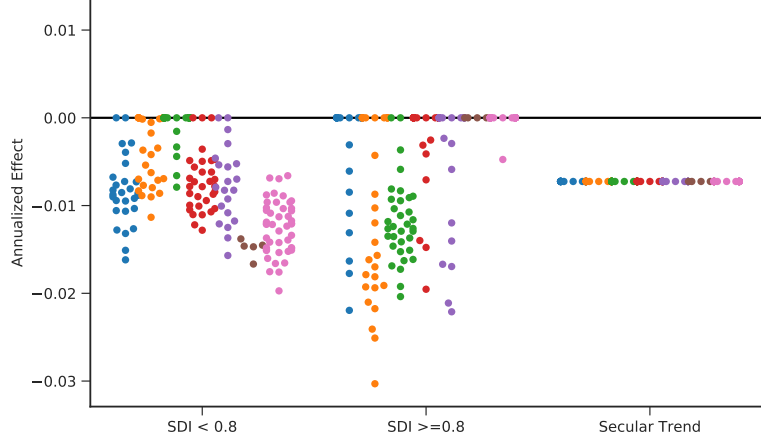

Other exposure to mechanical forces, Females

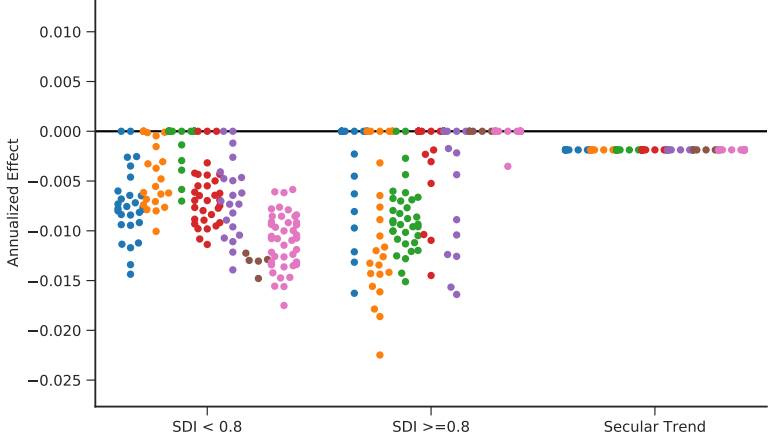

Adverse effects of medical treatment, Males

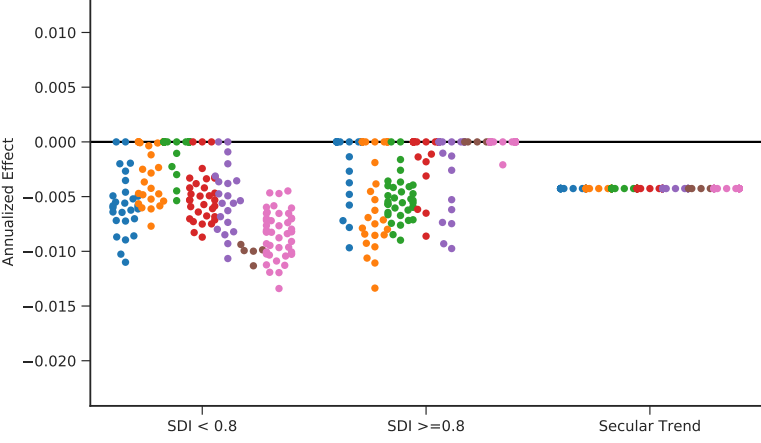

Adverse effects of medical treatment, Females

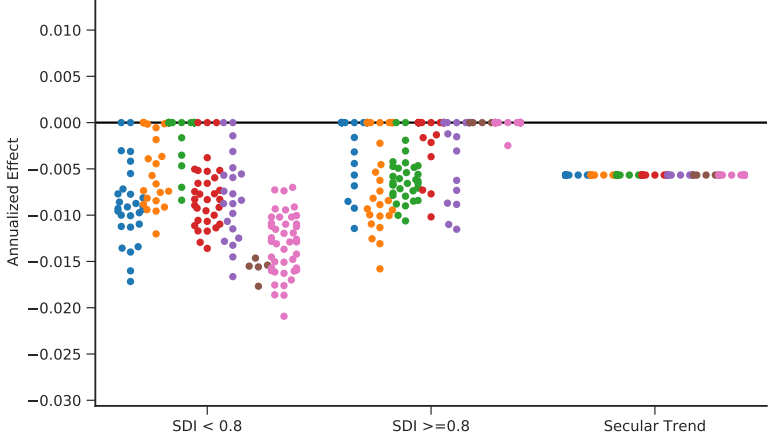

Venomous animal contact, Males

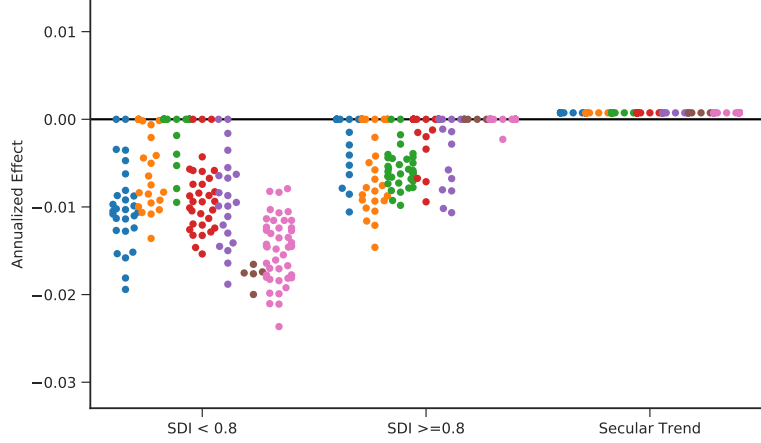

- Southeast Asia, East Asia, and Oceania
- Central Europe, Eastern Europe, and Central Asia
- High-income
- Latin America and Caribbean
- North Africa and Middle East
- South Asia
- Sub-Saharan Africa

Venomous animal contact, Females

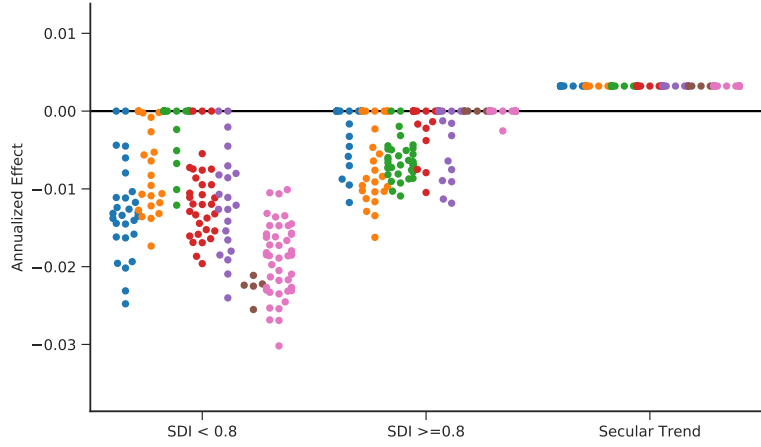

Non-venomous animal contact, Males

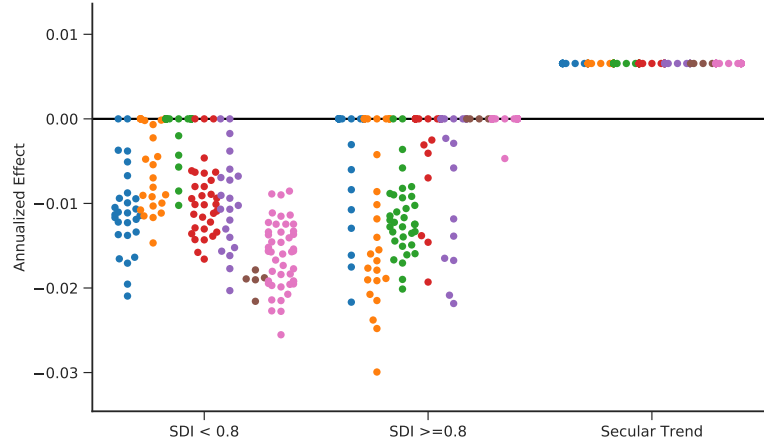

Non-venomous animal contact, Females

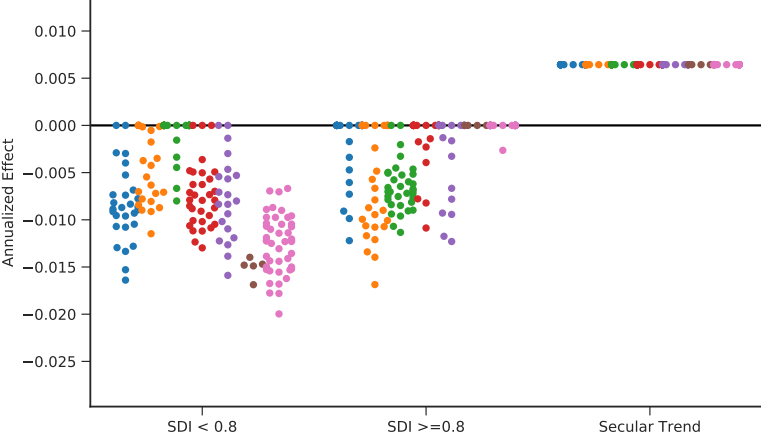

Pulmonary aspiration and foreign body in airway, Males

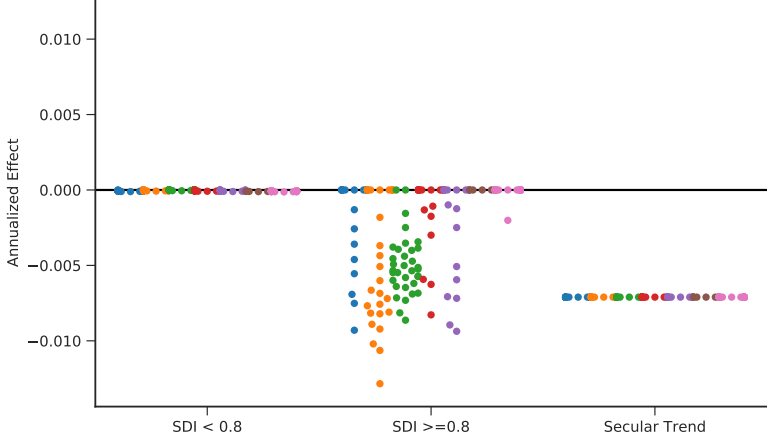

Pulmonary aspiration and foreign body in airway, Females

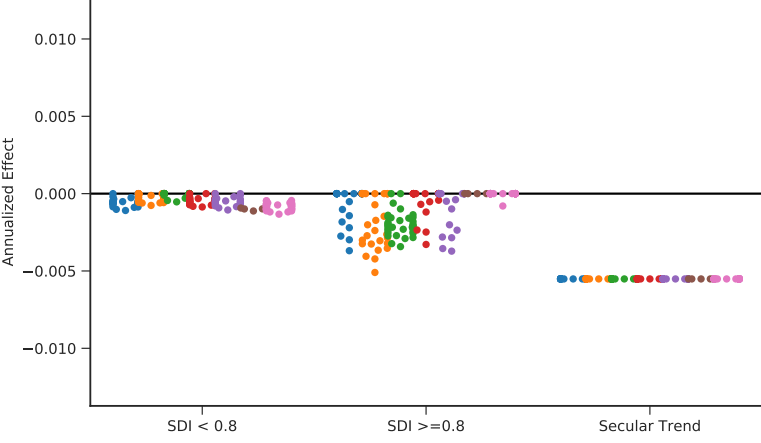

Foreign body in other body part, Males

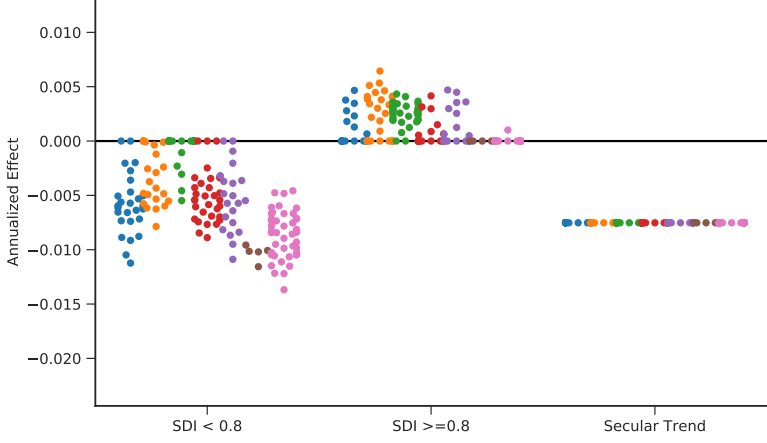

Foreign body in other body part, Females

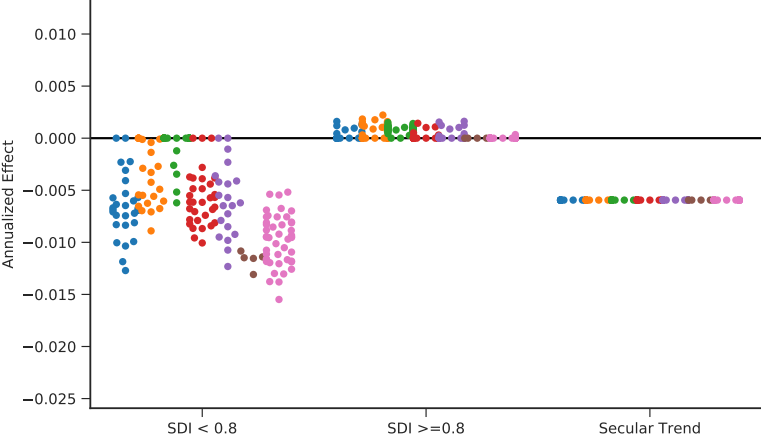

- Southeast Asia, East Asia, and Oceania
- Central Europe, Eastern Europe, and Central Asia
- High-income
- Latin America and Caribbean
- North Africa and Middle East
- South Asia
- Sub-Saharan Africa

Environmental heat and cold exposure, Males

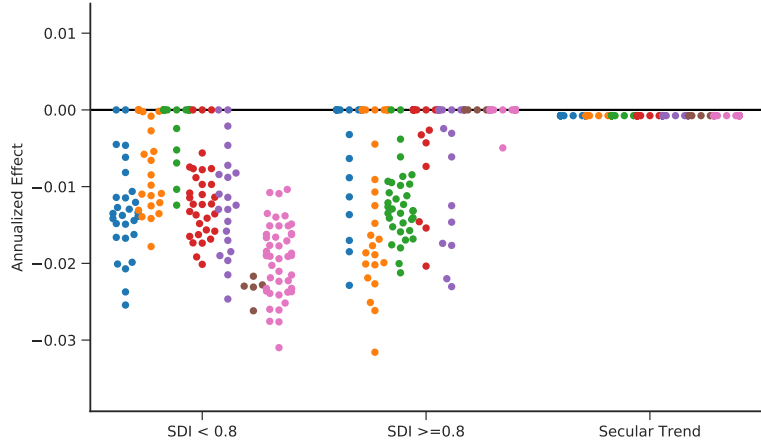

Environmental heat and cold exposure, Females

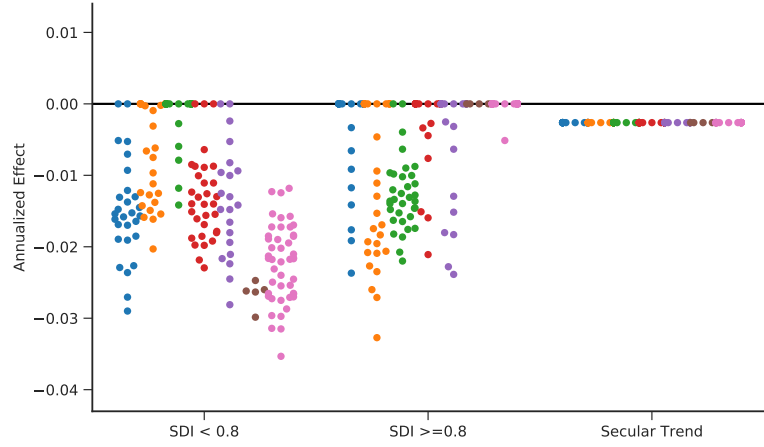

Other unintentional injuries, Males

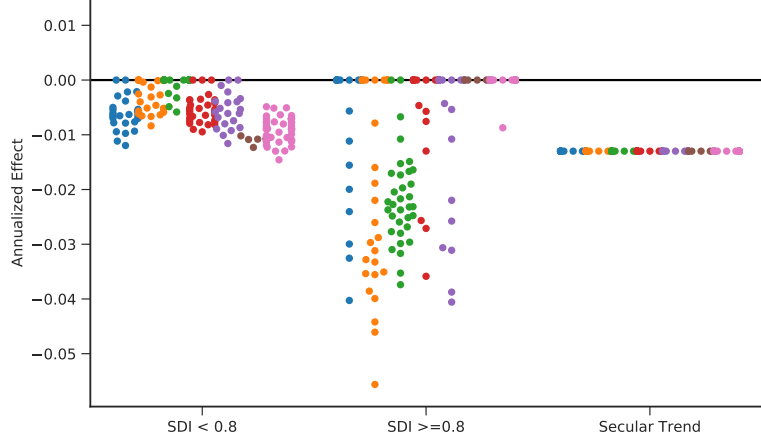

Other unintentional injuries, Females

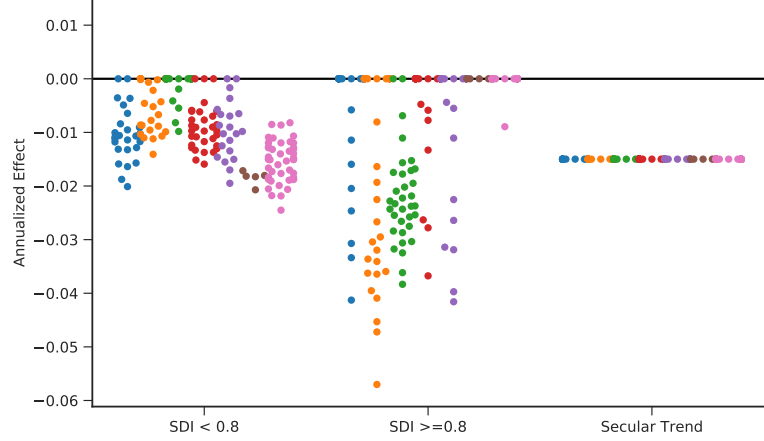

Self-harm by firearm, Males

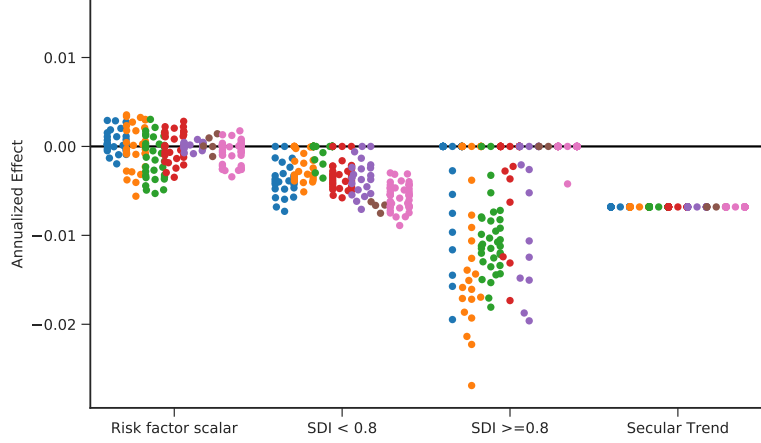

Self-harm by firearm, Females

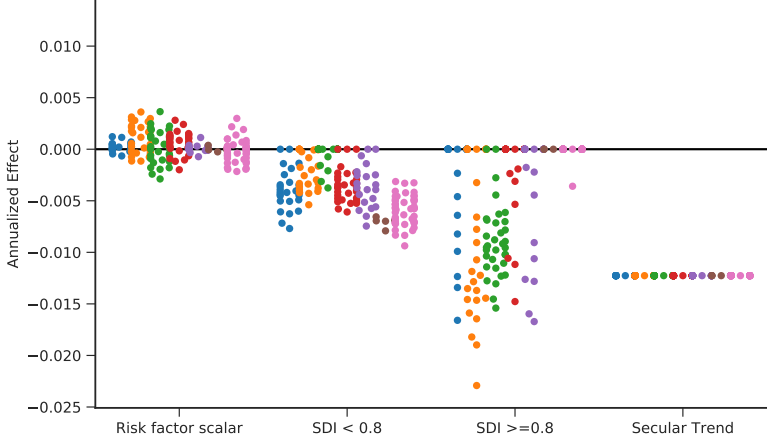

Self-harm by other specified means, Males

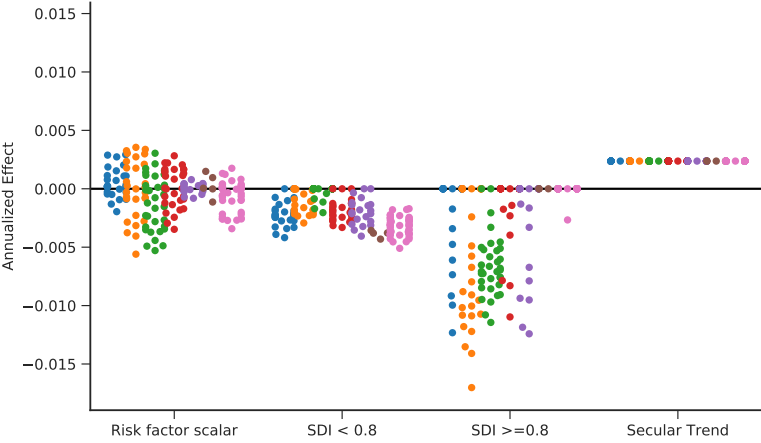

- Southeast Asia, East Asia, and Oceania
- Central Europe, Eastern Europe, and Central Asia
- High-income
- Latin America and Caribbean
- North Africa and Middle East
- South Asia
- Sub-Saharan Africa



Self-harm by other specified means, Females

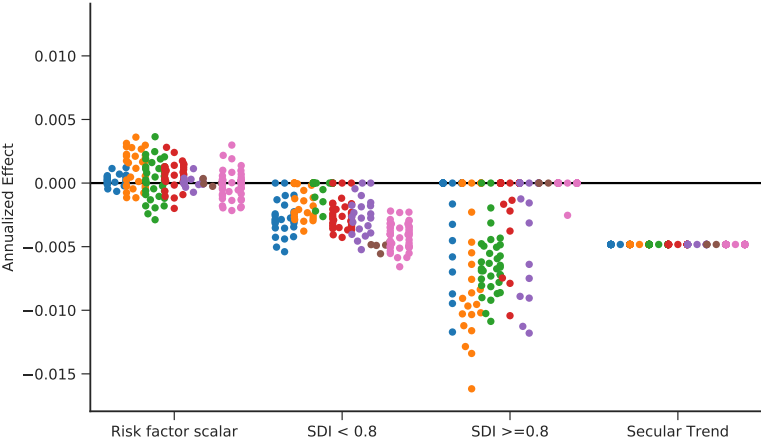

Physical violence by firearm, Males

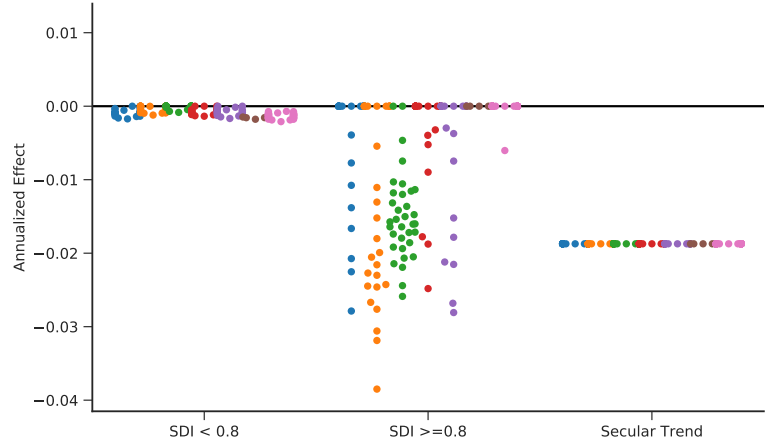

Physical violence by firearm, Females

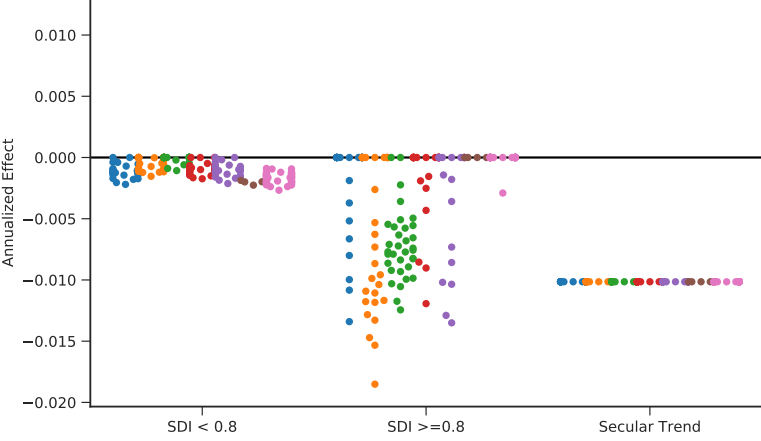

Physical violence by sharp object, Males

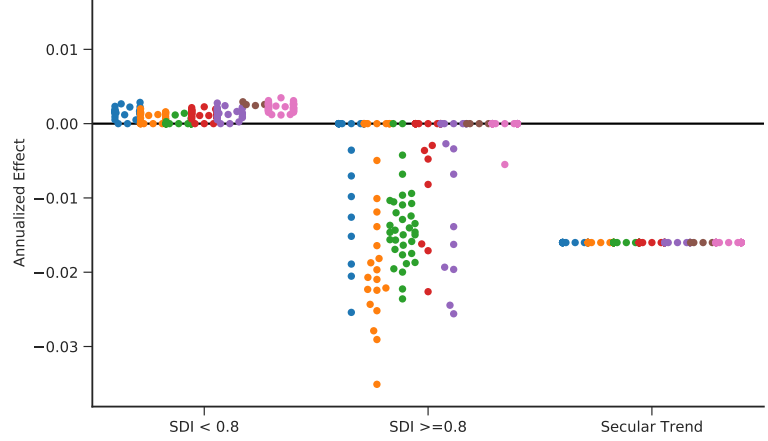

Physical violence by sharp object, Females

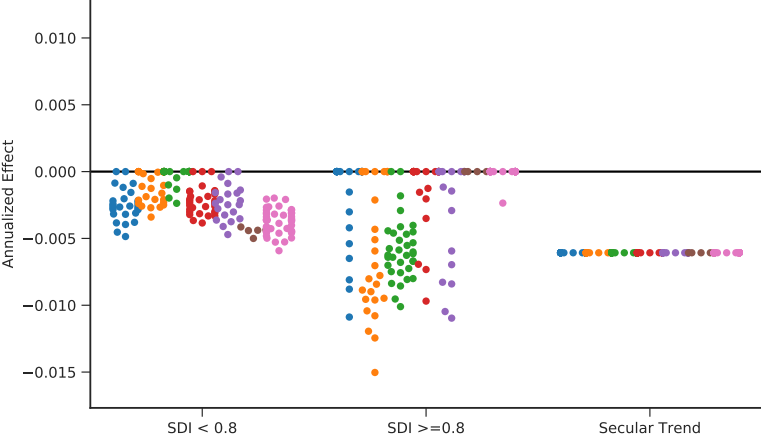

Physical violence by other means, Males

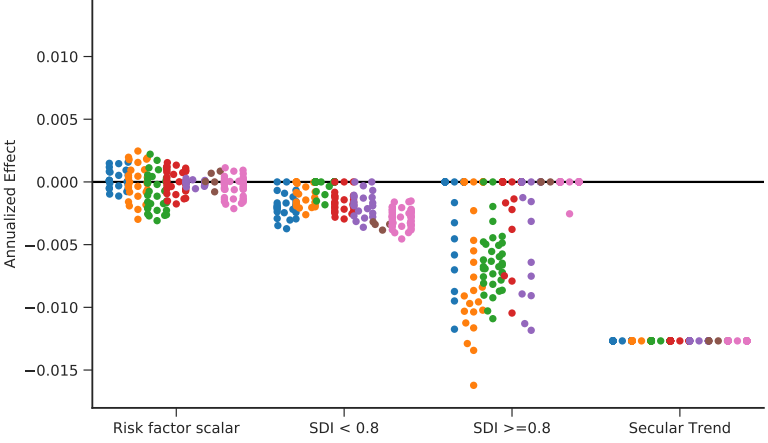

Physical violence by other means, Females

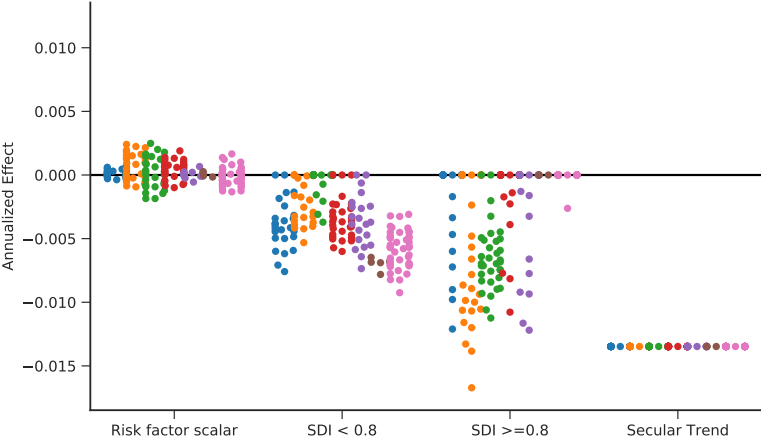

- Southeast Asia, East Asia, and Oceania
- Central Europe, Eastern Europe, and Central Asia
- High-income
- Latin America and Caribbean
- North Africa and Middle East
- South Asia
- Sub-Saharan Africa

**Figure 2. Illustration of the components of the mortality modeling process for all-cause mortality for females in Australia.** The panels on the left show cause-specific death rates by age, with small multiples showing the time trend from 1990 to 2040 for each age group. The bottom left panel is the underlying mortality component captured by SDI and global secular trends; above that is risk-attributable mortality, captured by the risk factor scalar; second from the top is the sum of the underlying and risk-attributable mortality; and the top left panel shows the final mortality predictions after the ARIMA process, which accounts for latent trends. The panels on the right show the cause- and risk-specific population attributable fractions (PAFs) that go into the risk attributable estimation; the all-risk PAF at the top is used to create the risk factor scalar, and the specific risks are then sorted in descending order of attributable deaths in 2016.

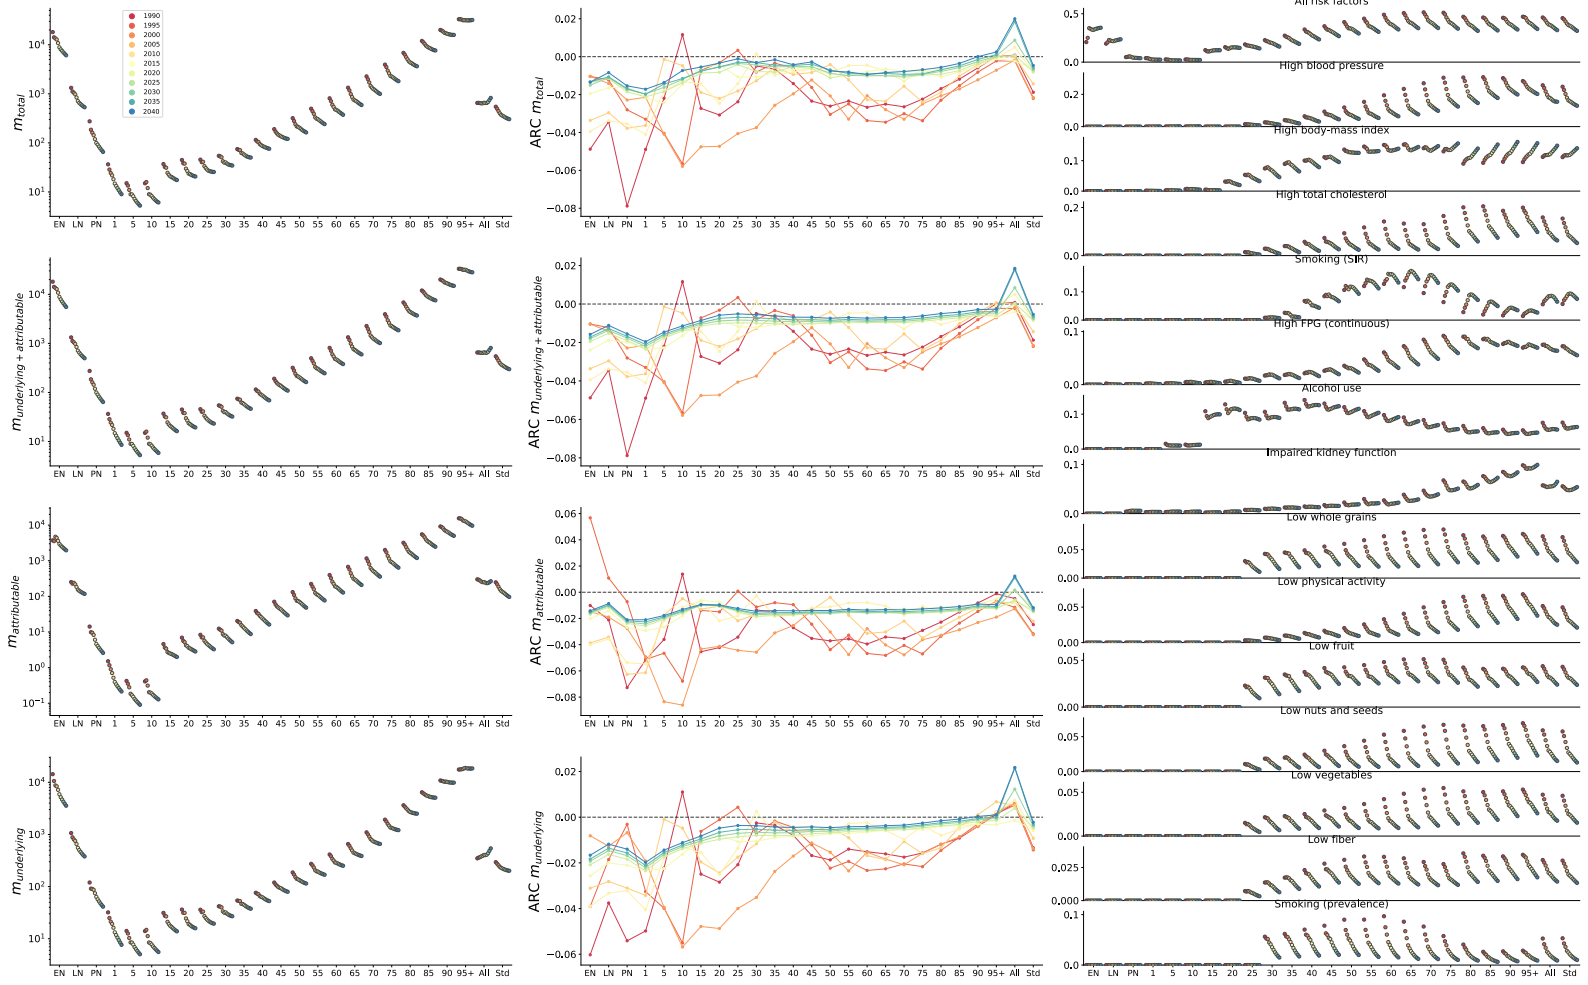

**Supplemental Appendix Figure 3. Ten leading risk factors contributing to the greatest difference in risk-attributable years of life lost (YLLs) between the forecast and better health scenario in 2040 by location. Values are reported in thousands, with 95% uncertainty intervals in parentheses.**

| Location                               | Risk #1                                                | Risk #2                                                     | Risk #3                                                           | Risk #4                                                           | Risk #5                                                            | Risk #6                                                          | Risk #7                                                       | Risk #8                                                   | Risk #9                                                      | Risk #10                                                     |
|----------------------------------------|--------------------------------------------------------|-------------------------------------------------------------|-------------------------------------------------------------------|-------------------------------------------------------------------|--------------------------------------------------------------------|------------------------------------------------------------------|---------------------------------------------------------------|-----------------------------------------------------------|--------------------------------------------------------------|--------------------------------------------------------------|
| Global                                 | Tobacco<br>162,104.0<br>(104,421.9 to 240,944.4)       | High blood pressure<br>142,907.9<br>(91,000.2 to 208,810.7) | High body-mass index<br>115,871.6<br>(75,375.4 to 180,141.6)      | Ambient particulate matter<br>95,201.9<br>(70,345.0 to 124,534.8) | High fasting plasma glucose<br>92,960.5<br>(55,023.4 to 150,881.2) | High total cholesterol<br>71,564.6<br>(43,565.4 to 107,116.1)    | Household air pollution<br>64,509.1<br>(46,583.5 to 84,250.1) | Alcohol use<br>59,698.3<br>(43,368.4 to 82,832.7)         | Low fruit<br>59,033.5<br>(32,536.0 to 99,619.0)              | Short gestation<br>49,918.8<br>(34,782.7 to 73,108.4)        |
| Southeast Asia, East Asia, and Oceania | Tobacco<br>62,345.7<br>(33,274.6 to 104,797.5)         | High blood pressure<br>48,100.6<br>(28,685.0 to 70,259.2)   | High fasting plasma glucose<br>29,661.4<br>(17,247.3 to 45,518.7) | High body-mass index<br>28,965.3<br>(15,988.0 to 44,332.8)        | Ambient particulate matter<br>25,549.0<br>(16,273.3 to 35,360.2)   | Low fruit<br>21,698.1<br>(12,508.3 to 32,678.3)                  | High sodium<br>21,249.5<br>(9,276.6 to 42,180.0)              | Alcohol use<br>18,651.2<br>(12,165.3 to 26,465.6)         | High total cholesterol<br>18,208.9<br>(11,402.3 to 27,175.0) | Low whole grains<br>17,261.5<br>(10,160.9 to 28,544.8)       |
| East Asia                              | Tobacco<br>46,489.6<br>(21,004.7 to 86,109.1)          | High blood pressure<br>34,321.3<br>(19,014.0 to 50,852.2)   | High fasting plasma glucose<br>20,178.9<br>(10,699.5 to 33,450.3) | High body-mass index<br>19,441.0<br>(9,949.2 to 30,960.0)         | High sodium<br>18,726.1<br>(9,102.4 to 35,415.5)                   | Ambient particulate matter<br>18,317.2<br>(10,509.1 to 26,990.5) | Low fruit<br>99.4<br>(8,760.5 to 23,064.5)                    | Alcohol use<br>15,309.1<br>(7,844.0 to 20,154.2)          | High total cholesterol<br>12,416.9<br>(7,038.6 to 19,528.1)  | Household air pollution<br>11,747.3<br>(6,933.9 to 18,846.4) |
| China                                  | Tobacco<br>45,348.8<br>(20,707.0 to 84,904.1)          | High blood pressure<br>33,588.2<br>(18,397.3 to 49,931.8)   | High fasting plasma glucose<br>19,624.9<br>(10,338.3 to 32,694.8) | High body-mass index<br>18,841.6<br>(9,632.8 to 29,953.1)         | High sodium<br>18,305.8<br>(8,996.8 to 34,647.0)                   | Ambient particulate matter<br>17,888.7<br>(10,150.5 to 26,568.6) | Low fruit<br>15,183.8<br>(8,586.7 to 22,710.2)                | Alcohol use<br>12,950.6<br>(7,598.6 to 19,515.3)          | High total cholesterol<br>12,144.3<br>(6,824.6 to 19,177.9)  | Household air pollution<br>11,446.6<br>(6,650.2 to 18,414.0) |
| North Korea                            | Tobacco<br>721.2<br>(460.2 to 1,072.0)                 | High blood pressure<br>499.3<br>(258.2 to 837.8)            | Ambient particulate matter<br>341.1<br>(215.2 to 460.1)           | High body-mass index<br>311.8<br>(85.9 to 689.0)                  | Household air pollution<br>311.0<br>(191.0 to 443.2)               | High sodium<br>294.1<br>(43.9 to 636.9)                          | High fasting plasma glucose<br>269.8<br>(144.9 to 465.5)      | Alcohol use<br>237.2<br>(112.4 to 534.9)                  | Low fruit<br>227.1<br>(118.2 to 401.2)                       | Low whole grains<br>224.6<br>(116.9 to 382.8)                |
| Taiwan (Province of China)             | Tobacco<br>500.3<br>(348.0 to 672.1)                   | High fasting plasma glucose<br>286.5<br>(150.8 to 474.6)    | High body-mass index<br>267.9<br>(144.9 to 422.4)                 | High blood pressure<br>231.6<br>(128.0 to 366.0)                  | Alcohol use<br>123.9<br>(57.9 to 209.9)                            | Impaired kidney function<br>102.4<br>(58.8 to 155.4)             | High sodium<br>99.4<br>(12.8 to 229.1)                        | Ambient particulate matter<br>90.9<br>(61.1 to 128.9)     | High total cholesterol<br>88.6<br>(44.4 to 148.2)            | Low fruit<br>88.7<br>(27.7 to 116.7)                         |
| Southeast Asia                         | Tobacco<br>15,896.8<br>(11,402.8 to 20,829.3)          | High blood pressure<br>13,539.1<br>(8,835.7 to 19,083.9)    | High fasting plasma glucose<br>9,200.5<br>(5,842.5 to 14,318.1)   | High body-mass index<br>9,065.5<br>(5,624.5 to 14,361.2)          | Ambient particulate matter<br>7,009.4<br>(4,996.1 to 9,073.0)      | Low fruit<br>6,054.0<br>(3,435.8 to 9,292.3)                     | Low whole grains<br>5,760.5<br>(3,595.1 to 8,897.6)           | High total cholesterol<br>5,638.1<br>(3,509.3 to 7,779.8) | Alcohol use<br>5,123.1<br>(3,886.0 to 6,623.4)               | Household air pollution<br>4,628.9<br>(3,343.7 to 6,435.7)   |
| Cambodia                               | Tobacco<br>471.1<br>(313.7 to 656.4)                   | Alcohol use<br>310.0<br>(215.1 to 429.8)                    | Household air pollution<br>306.1<br>(218.4 to 449.3)              | High blood pressure<br>264.7<br>(159.3 to 388.5)                  | Ambient particulate matter<br>243.1<br>(174.7 to 354.3)            | High body-mass index<br>215.2<br>(115.2 to 344.0)                | High fasting plasma glucose<br>198.0<br>(113.0 to 296.4)      | Low fruit<br>180.7<br>(114.2 to 292.7)                    | Low whole grains<br>155.8<br>(89.2 to 241.0)                 | High total cholesterol<br>133.4<br>(80.5 to 193.2)           |
| Indonesia                              | High blood pressure<br>6,225.2<br>(3,591.9 to 9,076.5) | Tobacco<br>4,704.9<br>(2,790.6 to 6,831.3)                  | High fasting plasma glucose<br>3,920.3<br>(2,215.9 to 6,028.3)    | High body-mass index<br>3,759.6<br>(2,104.3 to 6,427.2)           | Low fruit<br>2,832.5<br>(1,490.0 to 4,688.4)                       | Low whole grains<br>2,626.8<br>(1,466.4 to 4,278.9)              | Ambient particulate matter<br>2,584.5<br>(1,547.0 to 3,569.1) | High total cholesterol<br>2,415.4<br>(1,364.7 to 3,446.3) | Low vegetables<br>2,280.9<br>(1,182.3 to 3,634.1)            | Low nuts and seeds<br>1,556.8<br>(894.5 to 2,500.8)          |
| Laos                                   | Tobacco<br>237.2<br>(152.7 to 349.7)                   | High blood pressure<br>180.7<br>(118.8 to 258.3)            | Household air pollution<br>169.5<br>(103.5 to 254.7)              | Ambient particulate matter<br>146.4<br>(95.8 to 219.2)            | High body-mass index<br>134.3<br>(76.6 to 207.6)                   | High fasting plasma glucose<br>128.7<br>(73.0 to 203.7)          | Child wasting<br>122.5<br>(32.4 to 292.0)                     | Short gestation<br>118.9<br>(52.5 to 231.2)               | High total cholesterol<br>93.2<br>(57.2 to 125.9)            | Alcohol use<br>93.4<br>(42.7 to 157.5)                       |
| Malaysia                               | Tobacco<br>789.1<br>(531.8 to 1,120.3)                 | High blood pressure<br>751.1<br>(438.8 to 1,123.9)          | High body-mass index<br>591.1<br>(353.7 to 948.6)                 | High fasting plasma glucose<br>511.5<br>(262.9 to 931.7)          | High total cholesterol<br>467.2<br>(258.6 to 699.1)                | Ambient particulate matter<br>332.0<br>(237.8 to 448.3)          | Low whole grains<br>298.6<br>(167.1 to 503.4)                 | Low vegetables<br>248.4<br>(131.3 to 438.1)               | Low fruit<br>216.3<br>(102.1 to 371.6)                       | Low nuts and seeds<br>212.1<br>(108.0 to 363.9)              |
| Maldives                               | High blood pressure<br>6.7<br>(3.3 to 10.2)            | Tobacco<br>5.4<br>(2.3 to 10.9)                             | High body-mass index<br>5.3<br>(2.4 to 10.6)                      | High fasting plasma glucose<br>4.7<br>(2.1 to 9.2)                | High total cholesterol<br>4.2<br>(1.7 to 8.1)                      | Ambient particulate matter<br>3.2<br>(1.5 to 5.8)                | Low whole grains<br>2.6<br>(1.0 to 5.2)                       | Impaired kidney function<br>2.3<br>(1.2 to 4.1)           | Low vegetables<br>2.1<br>(0.8 to 4.0)                        | Low fruit<br>1.9<br>(0.7 to 4.2)                             |
| Mauritius                              | High fasting plasma glucose<br>45.0<br>(26.9 to 63.4)  | High body-mass index<br>38.7<br>(23.0 to 56.3)              | High blood pressure<br>35.3<br>(21.3 to 50.5)                     | Tobacco<br>25.9<br>(15.2 to 38.9)                                 | High total cholesterol<br>17.4<br>(9.1 to 27.6)                    | Impaired kidney function<br>15.1<br>(9.2 to 22.6)                | Low fruit<br>13.2<br>(7.7 to 20.6)                            | Alcohol use<br>13.0<br>(7.8 to 21.2)                      | Low whole grains<br>12.2<br>(6.8 to 19.4)                    | Ambient particulate matter<br>10.9<br>(6.2 to 16.6)          |
| Myanmar                                | Tobacco<br>1,924.1<br>(1,404.3 to 2,569.4)             | High blood pressure<br>967.9<br>(623.7 to 1,487.7)          | Household air pollution<br>786.4<br>(492.3 to 1,127.3)            | Ambient particulate matter<br>703.3<br>(358.5 to 979.4)           | High fasting plasma glucose<br>591.5<br>(338.3 to 951.3)           | High body-mass index<br>556.5<br>(320.6 to 938.3)                | Low fruit<br>537.1<br>(357.4 to 813.0)                        | Low whole grains<br>403.3<br>(256.4 to 643.7)             | High total cholesterol<br>294.1<br>(178.8 to 457.1)          | Low vegetables<br>279.4<br>(138.1 to 540.5)                  |
| Philippines                            | Tobacco<br>3,118.0<br>(2,188.0 to 4,272.3)             | High blood pressure<br>2,327.2<br>(1,519.0 to 3,225.2)      | High body-mass index<br>1,214.1<br>(1,299.4 to 3,423.6)           | High fasting plasma glucose<br>2,013.1<br>(1,270.3 to 3,023.0)    | Alcohol use<br>1,438.0<br>(860.7 to 2,061.7)                       | Ambient particulate matter<br>1,386.4<br>(989.2 to 1,900.3)      | High total cholesterol<br>1,107.4<br>(733.0 to 1,591.7)       | Low whole grains<br>1,061.5<br>(678.3 to 1,565.3)         | Household air pollution<br>952.1<br>(610.5 to 1,485.4)       | Low fruit<br>885.8<br>(403.9 to 1,414.9)                     |
| Sri Lanka                              | High blood pressure<br>316.2<br>(171.5 to 520.9)       | High fasting plasma glucose<br>304.9<br>(157.1 to 509.6)    | Tobacco<br>267.3<br>(135.5 to 448.2)                              | High body-mass index<br>258.0<br>(116.8 to 478.3)                 | High total cholesterol<br>196.4<br>(105.7 to 330.4)                | Ambient particulate matter<br>159.8<br>(81.5 to 243.0)           | Household air pollution<br>133.7<br>(67.1 to 239.5)           | Low fruit<br>130.3<br>(63.0 to 221.4)                     | Low whole grains<br>112.7<br>(57.0 to 193.0)                 | Low nuts and seeds<br>103.8<br>(50.6 to 177.4)               |
| Seychelles                             | High blood pressure<br>2.3<br>(1.2 to 3.6)             | High body-mass index<br>2.3<br>(1.3 to 3.6)                 | Tobacco<br>1.4<br>(1.2 to 3.3)                                    | Alcohol use<br>1.4<br>(0.8 to 2.4)                                | High fasting plasma glucose<br>1.3<br>(0.6 to 2.2)                 | High total cholesterol<br>0.9<br>(0.4 to 1.5)                    | Ambient particulate matter<br>0.8<br>(0.4 to 1.3)             | Low whole grains<br>0.6<br>(0.3 to 1.1)                   | Impaired kidney function<br>0.6<br>(0.3 to 0.9)              | Low fruit<br>0.6<br>(0.3 to 1.0)                             |
| Thailand                               | Tobacco<br>1,699.4<br>(1,194.3 to 2,480.6)             | Alcohol use<br>820.5<br>(495.9 to 1,284.5)                  | High body-mass index<br>608.6<br>(348.7 to 950.2)                 | High blood pressure<br>605.1<br>(366.0 to 964.9)                  | High fasting plasma glucose<br>571.2<br>(311.3 to 961.6)           | Ambient particulate matter<br>484.6<br>(357.5 to 673.3)          | High total cholesterol<br>302.0<br>(177.9 to 457.7)           | Impaired kidney function<br>254.7<br>(138.2 to 414.2)     | Low whole grains<br>244.2<br>(135.0 to 393.3)                | Low fruit<br>234.9<br>(104.6 to 421.8)                       |
| Timor-Leste                            | Tobacco<br>18.0<br>(10.1 to 31.1)                      | Short gestation<br>14.9<br>(6.2 to 30.5)                    | High blood pressure<br>13.9<br>(7.6 to 23.5)                      | Household air pollution<br>13.8<br>(8.2 to 22.9)                  | Child wasting<br>13.1<br>(3.4 to 30.7)                             | Low birth weight<br>10.0<br>(4.7 to 18.3)                        | Ambient particulate matter<br>9.8<br>(5.8 to 16.9)            | High fasting plasma glucose<br>7.0<br>(3.5 to 13.4)       | High body-mass index<br>6.8<br>(2.4 to 12.8)                 | Low whole grains<br>5.8<br>(3.7 to 10.0)                     |
| Vietnam                                | Tobacco<br>2,671.6<br>(1,854.9 to 3,725.6)             | High blood pressure<br>1,230.3<br>(1,137.5 to 2,750.8)      | Alcohol use<br>1,520.5<br>(954.7 to 2,169.3)                      | High fasting plasma glucose<br>1,065.4<br>(634.6 to 1,635.9)      | Ambient particulate matter<br>946.6<br>(693.1 to 1,276.9)          | Low fruit<br>568.7<br>(335.0 to 1,302.9)                         | High body-mass index<br>441.6<br>(241.6 to 1,183.1)           | Household air pollution<br>674.0<br>(413.4 to 1,091.1)    | High total cholesterol<br>584.5<br>(346.7 to 858.9)          |                                                              |
| Oceania                                | Tobacco<br>433.3<br>(295.7 to 600.3)                   | High body-mass index<br>400.6<br>(284.0 to 524.3)           | High fasting plasma glucose<br>295.5<br>(190.1 to 382.3)          | High blood pressure<br>265.6<br>(181.6 to 344.4)                  | Household air pollution<br>252.3<br>(185.7 to 354.8)               | Ambient particulate matter<br>209.8<br>(151.4 to 286.6)          | High total cholesterol<br>177.0<br>(111.1 to 237.5)           | Alcohol use<br>162.0<br>(84.6 to 273.3)                   | Low fruit<br>157.6<br>(106.4 to 226.7)                       | Low whole grains<br>138.3<br>(92.6 to 195.0)                 |
| American Samoa                         | High body-mass index<br>2.4<br>(1.7 to 3.3)            | High fasting plasma glucose<br>2.0<br>(1.2 to 2.9)          | Tobacco<br>1.6<br>(1.0 to 2.4)                                    | High blood pressure<br>1.5<br>(0.9 to 2.2)                        | Impaired kidney function<br>0.7<br>(0.5 to 0.9)                    | High total cholesterol<br>0.6<br>(0.3 to 0.9)                    | Low whole grains<br>0.4<br>(0.4 to 0.9)                       | Low vegetables<br>0.4<br>(0.2 to 0.7)                     | Low nuts and seeds<br>0.4<br>(0.2 to 0.6)                    | Alcohol use<br>0.3<br>(0.1 to 0.7)                           |
| Federated States of Micronesia         | High body-mass index<br>4.4<br>(2.7 to 6.0)            | Tobacco<br>3.5<br>(1.9 to 5.5)                              | High fasting plasma glucose<br>3.3<br>(1.7 to 5.1)                | High blood pressure<br>2.5<br>(1.4 to 3.8)                        | High total cholesterol<br>1.8<br>(1.0 to 2.8)                      | Low whole grains<br>1.2<br>(0.8 to 2.0)                          | Ambient particulate matter<br>1.2<br>(0.5 to 2.1)             | Low vegetables<br>1.1<br>(0.6 to 1.8)                     | Low fruit<br>1.1<br>(0.6 to 1.7)                             | Impaired kidney function<br>1.0<br>(0.5 to 1.7)              |
| Fiji                                   | High body-mass index<br>35.9<br>(23.2 to 52.0)         | High fasting plasma glucose<br>28.0<br>(16.3 to 42.2)       | Tobacco<br>21.0<br>(11.0 to 34.6)                                 | High blood pressure<br>20.4<br>(11.0 to 31.9)                     | High total cholesterol<br>15.1<br>(7.8 to 24.3)                    | Low whole grains<br>10.8<br>(5.8 to 17.5)                        | Low fruit<br>10.0<br>(5.8 to 17.1)                            | Low vegetables<br>8.2<br>(4.4 to 15.2)                    | Low nuts and seeds<br>8.0<br>(3.8 to 14.5)                   | Impaired kidney function<br>7.7<br>(5.0 to 11.1)             |

| Location                                         | Risk #1                                                   | Risk #2                                                 | Risk #3                                                 | Risk #4                                                 | Risk #5                                                     | Risk #6                                                       | Risk #7                                                        | Risk #8                                            | Risk #9                                                | Risk #10                                                   |
|--------------------------------------------------|-----------------------------------------------------------|---------------------------------------------------------|---------------------------------------------------------|---------------------------------------------------------|-------------------------------------------------------------|---------------------------------------------------------------|----------------------------------------------------------------|----------------------------------------------------|--------------------------------------------------------|------------------------------------------------------------|
| Guam                                             | High body-mass index<br>4.4<br>(2.7 to 6.2)               | Tobacco<br>3.6<br>(2.1 to 5.5)                          | High fasting plasma glucose<br>3.5<br>(1.3 to 6.1)      | High blood pressure<br>3.1<br>(1.5 to 5.1)              | High total cholesterol<br>2.1<br>(0.9 to 3.6)               | Low whole grains<br>1.3<br>(0.6 to 2.5)                       | Ambient particulate matter<br>1.2<br>(0.3 to 2.0)              | Low vegetables<br>1.1<br>(0.5 to 1.9)              | Low nuts and seeds<br>1.0<br>(0.4 to 1.8)              | Impaired kidney function<br>0.9<br>(0.2 to 1.4)            |
| Kiribati                                         | High body-mass index<br>4.5<br>(2.0 to 6.7)               | Tobacco<br>3.2<br>(2.0 to 4.8)                          | High fasting plasma glucose<br>3.1<br>(1.3 to 5.1)      | High blood pressure<br>2.1<br>(1.2 to 3.4)              | Household air pollution<br>1.6<br>(1.0 to 2.1)              | Low whole grains<br>1.3<br>(0.6 to 2.2)                       | High total cholesterol<br>1.1<br>(0.6 to 1.9)                  | Low fruit<br>1.1<br>(0.6 to 1.8)                   | Short gestation<br>1.0<br>(0.5 to 2.2)                 | Low vegetables<br>1.0<br>(0.5 to 1.7)                      |
| Marshall Islands                                 | High body-mass index<br>3.2<br>(1.9 to 4.6)               | High fasting plasma glucose<br>2.2<br>(1.0 to 3.8)      | Tobacco<br>1.8<br>(0.9 to 2.7)                          | High blood pressure<br>1.2<br>(0.6 to 1.8)              | Low whole grains<br>0.9<br>(0.4 to 1.5)                     | High total cholesterol<br>0.8<br>(0.4 to 1.2)                 | Low fruit<br>0.7<br>(0.3 to 1.2)                               | Ambient particulate matter<br>0.6<br>(0.0 to 1.2)  | Low nuts and seeds<br>0.5<br>(0.2 to 1.0)              | Low vegetables<br>0.5<br>(0.3 to 0.8)                      |
| Northern Mariana Islands                         | High body-mass index<br>3.8<br>(2.4 to 5.6)               | Tobacco<br>3.5<br>(2.1 to 5.2)                          | High fasting plasma glucose<br>3.1<br>(1.5 to 5.0)      | High blood pressure<br>2.4<br>(1.2 to 3.6)              | High total cholesterol<br>1.2<br>(0.6 to 1.9)               | Ambient particulate matter<br>1.1<br>(0.6 to 1.6)             | Low whole grains<br>1.1<br>(0.5 to 1.7)                        | Impaired kidney function<br>0.8<br>(0.4 to 1.4)    | Low vegetables<br>0.7<br>(0.3 to 1.2)                  | Low fruit<br>0.6<br>(0.3 to 1.1)                           |
| Papua New Guinea                                 | Tobacco<br>331.6<br>(220.3 to 464.2)                      | High body-mass index<br>269.6<br>(185.1 to 380.3)       | Household air pollution<br>210.3<br>(152.9 to 308.1)    | High fasting plasma glucose<br>2.1<br>(1.23 to 2.70.8)  | High blood pressure<br>185.1<br>(126.3 to 240.9)            | Ambient particulate matter<br>172.1<br>(124.3 to 230.1)       | Alcohol use<br>139.7<br>(70.8 to 235.8)                        | High total cholesterol<br>125.4<br>(72.9 to 172.3) | Low fruit<br>118.9<br>(76.9 to 166.8)                  | Child wasting<br>102.2<br>(32.4 to 201.2)                  |
| Samoa                                            | High body-mass index<br>3.9<br>(2.4 to 5.3)               | High fasting plasma glucose<br>2.8<br>(1.4 to 4.4)      | Tobacco<br>2.7<br>(1.7 to 3.8)                          | High blood pressure<br>2.2<br>(1.3 to 3.5)              | Household air pollution<br>1.0<br>(0.6 to 1.5)              | Low whole grains<br>0.8<br>(0.5 to 1.7)                       | High total cholesterol<br>0.9<br>(0.5 to 1.5)                  | Impaired kidney function<br>0.9<br>(0.3 to 1.4)    | Low vegetables<br>0.8<br>(0.5 to 1.3)                  | Alcohol use<br>0.8<br>(0.5 to 1.3)                         |
| Solomon Islands                                  | High body-mass index<br>22.6<br>(16.7 to 29.9)            | Tobacco<br>18.2<br>(12.7 to 25.7)                       | High fasting plasma glucose<br>15.5<br>(9.1 to 22.8)    | High blood pressure<br>12.3<br>(7.6 to 18.8)            | Household air pollution<br>10.2<br>(7.4 to 13.7)            | High total cholesterol<br>7.3<br>(4.0 to 10.5)                | Low fruit<br>7.3<br>(4.7 to 10.6)                              | Low whole grains<br>7.1<br>(4.3 to 10.6)           | Ambient particulate matter<br>6.3<br>(4.4 to 8.8)      | Low vegetables<br>5.3<br>(3.1 to 8.1)                      |
| Tonga                                            | High body-mass index<br>3.0<br>(2.2 to 3.9)               | Tobacco<br>2.2<br>(1.5 to 2.9)                          | High fasting plasma glucose<br>2.1<br>(1.4 to 3.0)      | High blood pressure<br>1.6<br>(1.0 to 2.2)              | High total cholesterol<br>0.9<br>(0.5 to 1.3)               | Low whole grains<br>0.8<br>(0.5 to 1.2)                       | Impaired kidney function<br>0.7<br>(0.4 to 1.0)                | Low fruit<br>0.6<br>(0.4 to 0.9)                   | Household air pollution<br>0.6<br>(0.3 to 0.8)         | Low vegetables<br>0.5<br>(0.3 to 0.8)                      |
| Vanuatu                                          | High body-mass index<br>11.9<br>(7.6 to 16.4)             | High blood pressure<br>9.5<br>(5.7 to 14.1)             | High fasting plasma glucose<br>8.4<br>(4.8 to 13.2)     | Tobacco<br>8.2<br>(4.5 to 12.5)                         | High total cholesterol<br>7.0<br>(3.3 to 8.6)               | Household air pollution<br>5.9<br>(3.1 to 7.9)                | Low whole grains<br>4.4<br>(2.5 to 6.9)                        | Ambient particulate matter<br>3.8<br>(2.0 to 6.3)  | Low vegetables<br>3.7<br>(1.8 to 5.9)                  | Low fruit<br>3.7<br>(2.0 to 5.8)                           |
| Central Europe, Eastern Europe, and Central Asia | High body-mass index<br>10.025.6<br>(6,283.9 to 18,262.6) | Tobacco<br>9,200.9<br>(5,605.6 to 15,532.8)             | High blood pressure<br>9,137.5<br>(5,003.9 to 15,588.5) | Alcohol use<br>6,099.7<br>(4,006.1 to 10,212.1)         | High total cholesterol<br>5,926.5<br>(3,010.3 to 10,369.6)  | Ambient particulate matter<br>4,758.1<br>(2,986.8 to 7,614.4) | High fasting plasma glucose<br>3,422.0<br>(1,860.9 to 8,186.3) | Low fruit<br>4,164.5<br>(1,975.3 to 6,446.4)       | Low whole grains<br>3,401.9<br>(1,686.8 to 6,402.1)    | High sodium<br>3,278.4<br>(743.4 to 8,005.2)               |
| Central Asia                                     | High body-mass index<br>2,410.1<br>(1,457.3 to 3,892.8)   | High blood pressure<br>2,284.9<br>(1,395.6 to 3,420.5)  | Tobacco<br>1,784.2<br>(1,077.9 to 2,706.0)              | High total cholesterol<br>1,328.7<br>(756.8 to 1,942.1) | Ambient particulate matter<br>1,272.3<br>(800.6 to 1,731.8) | Alcohol use<br>1,143.5<br>(753.7 to 1,642.4)                  | High sodium<br>990.7<br>(353.2 to 2,004.9)                     | Low fruit<br>981.1<br>(536.1 to 1,639.6)           | Low whole grains<br>911.0<br>(482.8 to 1,484.0)        | High fasting plasma glucose<br>800.1<br>(382.3 to 1,431.2) |
| Armenia                                          | Tobacco<br>58.6<br>(35.5 to 89.0)                         | High body-mass index<br>51.6<br>(32.1 to 78.3)          | High blood pressure<br>48.5<br>(22.8 to 88.0)           | High total cholesterol<br>27.3<br>(12.6 to 49.6)        | High fasting plasma glucose<br>25.0<br>(10.2 to 44.8)       | High sodium<br>22.9<br>(5.7 to 50.8)                          | Ambient particulate matter<br>22.3<br>(13.0 to 32.9)           | Low nuts and seeds<br>17.8<br>(8.4 to 31.9)        | Low whole grains<br>17.6<br>(8.1 to 34.7)              | Low fruit<br>16.9<br>(9.3 to 27.3)                         |
| Azerbaijan                                       | High blood pressure<br>227.5<br>(122.9 to 381.2)          | High body-mass index<br>217.2<br>(124.0 to 377.8)       | Tobacco<br>203.0<br>(107.4 to 333.3)                    | Ambient particulate matter<br>144.3<br>(89.5 to 210.9)  | High total cholesterol<br>129.9<br>(65.0 to 210.9)          | Alcohol use<br>118.6<br>(64.6 to 178.9)                       | High sodium<br>110.7<br>(38.6 to 204.0)                        | Low fruit<br>100.1<br>(50.5 to 173.4)              | High fasting plasma glucose<br>92.7<br>(41.1 to 172.6) | Low nuts and seeds<br>91.2<br>(46.4 to 143.5)              |
| Georgia                                          | High body-mass index<br>80.2<br>(43.7 to 133.2)           | High blood pressure<br>74.1<br>(24.6 to 137.4)          | Tobacco<br>53.5<br>(25.8 to 97.1)                       | High sodium<br>37.3<br>(12.5 to 78.3)                   | Ambient particulate matter<br>33.6<br>(20.0 to 56.7)        | Low fruit<br>31.6<br>(15.0 to 58.8)                           | High total cholesterol<br>31.6<br>(11.3 to 61.7)               | Alcohol use<br>27.7<br>(12.6 to 53.6)              | Low whole grains<br>26.3<br>(8.3 to 59.1)              | Low nuts and seeds<br>24.6<br>(9.1 to 41.9)                |
| Kazakhstan                                       | High body-mass index<br>561.3<br>(282.5 to 1,029.2)       | High blood pressure<br>559.6<br>(276.6 to 982.4)        | Tobacco<br>556.4<br>(286.0 to 929.3)                    | Alcohol use<br>419.5<br>(230.1 to 693.1)                | High total cholesterol<br>337.5<br>(151.8 to 574.4)         | Ambient particulate matter<br>251.1<br>(138.8 to 408.3)       | High sodium<br>234.7<br>(72.5 to 561.7)                        | Low fruit<br>223.4<br>(99.6 to 423.8)              | Low whole grains<br>221.6<br>(93.8 to 415.1)           | High fasting plasma glucose<br>184.4<br>(78.1 to 396.2)    |
| Kyrgyzstan                                       | High body-mass index<br>118.7<br>(78.5 to 275.1)          | Tobacco<br>118.7<br>(56.0 to 194.3)                     | High blood pressure<br>102.2<br>(49.4 to 201.9)         | Alcohol use<br>102.2<br>(51.1 to 188.0)                 | Ambient particulate matter<br>74.5<br>(41.7 to 114.7)       | High sodium<br>67.2<br>(19.8 to 127.7)                        | High total cholesterol<br>67.1<br>(26.5 to 109.1)              | Low fruit<br>57.2<br>(22.2 to 105.9)               | Low whole grains<br>55.1<br>(21.9 to 108.9)            | High fasting plasma glucose<br>45.2<br>(18.1 to 93.9)      |
| Mongolia                                         | High body-mass index<br>100.3<br>(55.1 to 169.3)          | High blood pressure<br>81.7<br>(38.8 to 143.4)          | Tobacco<br>71.8<br>(37.4 to 122.6)                      | Low fruit<br>43.9<br>(21.5 to 88.1)                     | Alcohol use<br>41.5<br>(21.5 to 72.5)                       | Ambient particulate matter<br>38.3<br>(21.5 to 63.2)          | High sodium<br>36.9<br>(13.2 to 85.6)                          | Low vegetables<br>36.0<br>(15.7 to 66.1)           | Low whole grains<br>33.0<br>(14.9 to 63.2)             | High total cholesterol<br>30.7<br>(14.9 to 49.9)           |
| Tajikistan                                       | High body-mass index<br>169.2<br>(101.4 to 286.9)         | High blood pressure<br>141.5<br>(71.0 to 246.6)         | Ambient particulate matter<br>110.5<br>(68.7 to 177.4)  | Tobacco<br>92.3<br>(45.6 to 175.7)                      | High total cholesterol<br>79.8<br>(38.5 to 140.7)           | High sodium<br>72.4<br>(19.7 to 152.0)                        | Low fruit<br>70.3<br>(35.2 to 137.9)                           | Low whole grains<br>60.5<br>(27.7 to 105.0)        | High fasting plasma glucose<br>57.4<br>(25.4 to 113.9) | Alcohol use<br>52.8<br>(26.0 to 90.5)                      |
| Turkmenistan                                     | High blood pressure<br>203.7<br>(105.9 to 324.4)          | High body-mass index<br>181.2<br>(92.7 to 296.8)        | Tobacco<br>112.6<br>(59.1 to 179.3)                     | High total cholesterol<br>103.8<br>(49.2 to 168.7)      | Ambient particulate matter<br>102.8<br>(57.5 to 151.1)      | Alcohol use<br>102.2<br>(54.1 to 165.0)                       | Low fruit<br>86.8<br>(42.3 to 152.6)                           | High sodium<br>83.9<br>(24.5 to 171.5)             | Low whole grains<br>81.9<br>(36.9 to 147.2)            | High fasting plasma glucose<br>75.3<br>(22.6 to 123.2)     |
| Uzbekistan                                       | High body-mass index<br>889.0<br>(541.1 to 1,433.9)       | High blood pressure<br>826.4<br>(443.6 to 1,308.1)      | Tobacco<br>543.3<br>(294.0 to 895.2)                    | High total cholesterol<br>515.0<br>(254.2 to 784.3)     | Ambient particulate matter<br>494.5<br>(296.5 to 780.8)     | High sodium<br>404.6<br>(123.5 to 861.3)                      | Low fruit<br>343.7<br>(170.6 to 561.7)                         | Low whole grains<br>323.6<br>(164.8 to 553.8)      | Low nuts and seeds<br>301.6<br>(129.2 to 538.6)        | Alcohol use<br>291.4<br>(139.6 to 501.6)                   |
| Central Europe                                   | Tobacco<br>2,427.1<br>(1,820.1 to 3,184.7)                | High body-mass index<br>2,030.2<br>(1,428.9 to 2,842.5) | High blood pressure<br>1,947.8<br>(1,306.7 to 2,867.4)  | Alcohol use<br>1,413.7<br>(957.4 to 1,970.7)            | High total cholesterol<br>1,093.5<br>(683.5 to 1,590.0)     | High fasting plasma glucose<br>923.6<br>(479.2 to 1,609.2)    | Ambient particulate matter<br>907.5<br>(658.3 to 1,182.9)      | High sodium<br>710.2<br>(247.2 to 1,405.8)         | Low fruit<br>697.0<br>(448.3 to 1,009.0)               | Low whole grains<br>618.3<br>(377.9 to 899.8)              |
| Albania                                          | High blood pressure<br>50.7<br>(27.9 to 80.6)             | High body-mass index<br>48.4<br>(29.1 to 76.8)          | Tobacco<br>42.4<br>(24.9 to 65.8)                       | High total cholesterol<br>27.4<br>(15.3 to 45.7)        | High sodium<br>22.0<br>(6.5 to 43.4)                        | Ambient particulate matter<br>21.8<br>(13.9 to 34.2)          | Alcohol use<br>20.8<br>(12.2 to 35.4)                          | Low whole grains<br>16.6<br>(9.4 to 31.6)          | High fasting plasma glucose<br>16.6<br>(7.7 to 32.5)   | Low fruit<br>15.3<br>(7.7 to 27.2)                         |
| Bosnia and Herzegovina                           | High body-mass index<br>84.5<br>(33.1 to 84.0)            | High blood pressure<br>50.6<br>(23.9 to 79.7)           | Tobacco<br>48.7<br>(27.3 to 73.7)                       | Alcohol use<br>34.0<br>(20.3 to 53.7)                   | High total cholesterol<br>29.1<br>(14.7 to 48.8)            | Ambient particulate matter<br>28.5<br>(17.8 to 41.1)          | High fasting plasma glucose<br>24.8<br>(8.6 to 46.5)           | High sodium<br>24.2<br>(7.2 to 51.0)               | Low fruit<br>21.1<br>(11.1 to 34.1)                    | Low whole grains<br>18.5<br>(8.0 to 32.5)                  |
| Bulgaria                                         | High body-mass index<br>168.7<br>(104.4 to 251.4)         | High blood pressure<br>163.0<br>(69.5 to 294.2)         | Tobacco<br>140.5<br>(76.9 to 223.7)                     | High total cholesterol<br>91.8<br>(40.6 to 157.1)       | Alcohol use<br>72.9<br>(32.3 to 137.0)                      | High fasting plasma glucose<br>72.6<br>(30.7 to 123.9)        | Ambient particulate matter<br>70.9<br>(45.5 to 109.4)          | High sodium<br>68.3<br>(17.7 to 159.5)             | Low fruit<br>58.8<br>(29.9 to 100.1)                   | Low whole grains<br>50.9<br>(21.1 to 92.4)                 |

| Location                 | Risk #1                                                  | Risk #2                                                   | Risk #3                                                 | Risk #4                                                      | Risk #5                                                         | Risk #6                                                       | Risk #7                                                       | Risk #8                                                 | Risk #9                                               | Risk #10                                            |
|--------------------------|----------------------------------------------------------|-----------------------------------------------------------|---------------------------------------------------------|--------------------------------------------------------------|-----------------------------------------------------------------|---------------------------------------------------------------|---------------------------------------------------------------|---------------------------------------------------------|-------------------------------------------------------|-----------------------------------------------------|
| Croatia                  | Tobacco<br>83.0<br>(55.2 to 115.8)                       | High body-mass index<br>39.5<br>(38.2 to 90.6)            | Alcohol use<br>55.1<br>(34.7 to 81.2)                   | High blood pressure<br>52.8<br>(25.1 to 86.1)                | High fasting plasma glucose<br>30.8<br>(14.0 to 58.3)           | High total cholesterol<br>27.2<br>(12.9 to 45.2)              | Ambient particulate matter<br>25.4<br>(16.8 to 36.0)          | High sodium<br>23.0<br>(8.2 to 47.4)                    | Low fruit<br>19.9<br>(12.1 to 30.5)                   | Low whole grains<br>17.0<br>(8.7 to 30.5)           |
| Czech Republic           | Tobacco<br>219.9<br>(162.1 to 299.0)                     | High body-mass index<br>180.5<br>(127.0 to 252.4)         | High blood pressure<br>153.4<br>(86.9 to 238.8)         | Alcohol use<br>133.4<br>(92.5 to 187.0)                      | High total cholesterol<br>100.4<br>(57.1 to 158.8)              | High fasting plasma glucose<br>96.7<br>(49.1 to 173.8)        | Ambient particulate matter<br>72.7<br>(50.9 to 103.8)         | High sodium<br>61.8<br>(16.3 to 118.4)                  | Low whole grains<br>50.3<br>(31.3 to 85.2)            | Low fruit<br>48.1<br>(31.2 to 71.6)                 |
| Hungary                  | Tobacco<br>205.9<br>(145.1 to 285.3)                     | High body-mass index<br>192.1<br>(134.2 to 267.2)         | Alcohol use<br>169.4<br>(102.7 to 281.0)                | High blood pressure<br>159.8<br>(90.5 to 266.4)              | High total cholesterol<br>92.2<br>(49.3 to 153.2)               | High fasting plasma glucose<br>86.1<br>(38.3 to 165.4)        | Ambient particulate matter<br>79.2<br>(56.3 to 112.4)         | High sodium<br>62.9<br>(21.6 to 119.0)                  | Low fruit<br>52.5<br>(32.8 to 80.1)                   | Low whole grains<br>46.2<br>(22.6 to 81.6)          |
| Macedonia                | High body-mass index<br>45.2<br>(25.0 to 69.0)           | High blood pressure<br>40.9<br>(12.0 to 71.8)             | Tobacco<br>561.6<br>(22.9 to 63.5)                      | High fasting plasma glucose<br>23.6<br>(9.6 to 38.4)         | Ambient particulate matter<br>21.5<br>(14.4 to 31.7)            | High total cholesterol<br>20.1<br>(8.5 to 33.8)               | High sodium<br>17.3<br>(5.1 to 36.2)                          | Low whole grains<br>14.6<br>(4.8 to 26.2)               | Alcohol use<br>13.2<br>(6.2 to 24.7)                  | Low fruit<br>13.0<br>(6.7 to 22.3)                  |
| Montenegro               | High body-mass index<br>11.5<br>(6.8 to 16.8)            | High blood pressure<br>10.5<br>(4.2 to 19.7)              | Tobacco<br>9.1<br>(4.5 to 15.3)                         | Alcohol use<br>6.0<br>(2.7 to 11.0)                          | High fasting plasma glucose<br>5.8<br>(2.4 to 10.9)             | High total cholesterol<br>4.8<br>(2.3 to 7.9)                 | Ambient particulate matter<br>4.7<br>(2.8 to 6.8)             | High sodium<br>4.5<br>(1.2 to 9.2)                      | Low fruit<br>4.0<br>(1.8 to 7.7)                      | Low whole grains<br>3.7<br>(1.5 to 7.0)             |
| Poland                   | Tobacco<br>975.7<br>(708.5 to 1,296.0)                   | High body-mass index<br>594.1<br>(410.3 to 843.3)         | High blood pressure<br>561.6<br>(303.9 to 876.9)        | Alcohol use<br>396.6<br>(268.7 to 586.4)                     | High total cholesterol<br>344.2<br>(182.9 to 547.1)             | Ambient particulate matter<br>291.7<br>(207.1 to 382.6)       | High fasting plasma glucose<br>285.8<br>(135.1 to 520.6)      | Low fruit<br>240.9<br>(157.2 to 362.3)                  | High sodium<br>199.3<br>(63.7 to 459.1)               | Low whole grains<br>185.3<br>(92.2 to 324.3)        |
| Romania                  | High blood pressure<br>443.7<br>(193.7 to 774.6)         | Tobacco<br>371.1<br>(227.7 to 593.9)                      | High body-mass index<br>366.0<br>(203.7 to 599.9)       | Alcohol use<br>358.6<br>(158.9 to 673.6)                     | High total cholesterol<br>202.0<br>(98.9 to 389.1)              | Ambient particulate matter<br>171.3<br>(109.9 to 281.4)       | High sodium<br>162.3<br>(48.8 to 365.1)                       | High fasting plasma glucose<br>144.5<br>(60.1 to 297.1) | Low fruit<br>129.8<br>(62.1 to 214.1)                 | Low whole grains<br>128.9<br>(48.2 to 260.7)        |
| Serbia                   | High body-mass index<br>170.6<br>(99.2 to 258.9)         | High blood pressure<br>133.2<br>(48.0 to 237.8)           | Tobacco<br>122.2<br>(62.5 to 190.1)                     | High fasting plasma glucose<br>76.9<br>(29.9 to 150.8)       | High total cholesterol<br>74.5<br>(33.3 to 132.9)               | Alcohol use<br>69.5<br>(23.6 to 144.7)                        | Ambient particulate matter<br>63.1<br>(37.7 to 96.4)          | High sodium<br>58.5<br>(18.6 to 112.0)                  | Low fruit<br>53.8<br>(29.2 to 89.9)                   | Low whole grains<br>44.5<br>(17.0 to 82.2)          |
| Slovakia                 | Tobacco<br>138.1<br>(93.1 to 203.9)                      | High body-mass index<br>115.9<br>(73.2 to 177.1)          | High blood pressure<br>106.6<br>(50.7 to 172.9)         | Alcohol use<br>84.2<br>(51.6 to 125.9)                       | High total cholesterol<br>34.2<br>(34.4 to 109.5)               | High fasting plasma glucose<br>49.9<br>(21.1 to 108.7)        | Ambient particulate matter<br>106.6<br>(33.2 to 73.5)         | High sodium<br>99.0<br>(9.7 to 82.5)                    | Low fruit<br>92.0<br>(22.9 to 64.9)                   | Low whole grains<br>82.4<br>(16.7 to 63.7)          |
| Slovenia                 | Tobacco<br>35.4<br>(24.1 to 50.0)                        | Alcohol use<br>22.8<br>(14.2 to 32.5)                     | High body-mass index<br>22.4<br>(15.3 to 31.3)          | High blood pressure<br>20.9<br>(10.8 to 32.2)                | High fasting plasma glucose<br>12.3<br>(5.3 to 21.5)            | High total cholesterol<br>10.4<br>(5.1 to 16.0)               | Ambient particulate matter<br>8.7<br>(5.7 to 11.6)            | High sodium<br>8.6<br>(2.1 to 16.6)                     | Low whole grains<br>5.8<br>(2.7 to 9.6)               | Low fruit<br>5.1<br>(2.6 to 8.6)                    |
| Eastern Europe           | High body-mass index<br>5,585.1<br>(3,061.0 to 11,145.3) | Tobacco<br>4,990.0<br>(2,503.9 to 9,629.8)                | High blood pressure<br>4,896.3<br>(2,039.4 to 9,279.8)  | Alcohol use<br>3,569.1<br>(1,922.3 to 6,381.1)               | High total cholesterol<br>3,511.1<br>(1,436.0 to 7,065.4)       | Ambient particulate matter<br>2,573.3<br>(1,457.3 to 4,688.5) | High fasting plasma glucose<br>2,458.5<br>(861.4 to 5,380.0)  | Low whole grains<br>1,869.6<br>(719.2 to 4,025.7)       | Low fruit<br>1,734.4<br>(760.7 to 3,510.5)            | High sodium<br>1,592.1<br>(128.3 to 4,408.2)        |
| Belarus                  | High body-mass index<br>255.6<br>(132.8 to 433.6)        | High blood pressure<br>209.7<br>(106.4 to 410.9)          | Tobacco<br>187.0<br>(102.5 to 348.9)                    | High total cholesterol<br>187.0<br>(74.6 to 309.2)           | Alcohol use<br>147.6<br>(76.8 to 235.2)                         | Ambient particulate matter<br>123.7<br>(59.8 to 197.7)        | Low whole grains<br>95.0<br>(40.0 to 173.2)                   | High fasting plasma glucose<br>95.0<br>(34.2 to 186.5)  | Low nuts and seeds<br>92.4<br>(37.8 to 161.1)         | Low fruit<br>92.4<br>(41.9 to 162.5)                |
| Estonia                  | High blood pressure<br>21.0<br>(9.3 to 38.9)             | Tobacco<br>20.3<br>(11.5 to 33.8)                         | High body-mass index<br>18.8<br>(10.9 to 32.2)          | Alcohol use<br>13.6<br>(7.2 to 23.0)                         | High total cholesterol<br>11.1<br>(4.2 to 18.7)                 | High fasting plasma glucose<br>9.1<br>(3.4 to 18.5)           | High sodium<br>7.4<br>(0.6 to 19.5)                           | Low fruit<br>5.4<br>(2.9 to 9.5)                        | Low whole grains<br>5.3<br>(2.1 to 9.7)               | Low nuts and seeds<br>5.3<br>(1.4 to 9.8)           |
| Latvia                   | High body-mass index<br>31.2<br>(16.7 to 53.9)           | High blood pressure<br>28.3<br>(9.8 to 55.3)              | Tobacco<br>25.0<br>(11.9 to 48.9)                       | Alcohol use<br>20.1<br>(10.4 to 40.4)                        | High total cholesterol<br>19.3<br>(7.4 to 34.9)                 | Ambient particulate matter<br>13.5<br>(6.9 to 24.6)           | Low fruit<br>11.5<br>(4.4 to 21.8)                            | High fasting plasma glucose<br>11.4<br>(3.1 to 23.7)    | High sodium<br>10.4<br>(0.8 to 28.1)                  | Low whole grains<br>9.7<br>(3.0 to 20.3)            |
| Lithuania                | Tobacco<br>52.3<br>(30.4 to 94.5)                        | High blood pressure<br>46.5<br>(15.4 to 103.9)            | High body-mass index<br>44.5<br>(20.7 to 93.6)          | High total cholesterol<br>32.8<br>(10.2 to 68.4)             | Alcohol use<br>31.9<br>(17.1 to 66.0)                           | Ambient particulate matter<br>22.5<br>(12.1 to 42.8)          | High fasting plasma glucose<br>19.4<br>(7.1 to 47.1)          | Low fruit<br>18.6<br>(8.8 to 39.9)                      | High sodium<br>16.3<br>(1.5 to 52.0)                  | Low whole grains<br>15.6<br>(5.0 to 32.2)           |
| Moldova                  | High body-mass index<br>113.3<br>(59.4 to 225.3)         | High blood pressure<br>106.9<br>(50.1 to 183.6)           | Tobacco<br>104.3<br>(56.3 to 190.7)                     | Alcohol use<br>86.3<br>(44.6 to 163.3)                       | High total cholesterol<br>60.6<br>(29.3 to 116.1)               | Ambient particulate matter<br>60.6<br>(31.1 to 106.9)         | High fasting plasma glucose<br>45.6<br>(17.1 to 93.8)         | Low fruit<br>40.0<br>(17.9 to 85.1)                     | Low whole grains<br>37.5<br>(16.8 to 81.9)            | High sodium<br>37.5<br>(3.2 to 100.5)               |
| Russia                   | High body-mass index<br>3,744.3<br>(1,921.5 to 8,024.5)  | Tobacco<br>3,357.3<br>(1,515.8 to 7,042.0)                | High blood pressure<br>3,144.1<br>(1,035.7 to 6,562.4)  | Alcohol use<br>2,465.3<br>(1,174.1 to 4,662.0)               | High total cholesterol<br>2,254.9<br>(822.6 to 5,084.8)         | High fasting plasma glucose<br>1,744.9<br>(595.8 to 4,082.5)  | Ambient particulate matter<br>1,635.6<br>(840.3 to 3,188.2)   | Low whole grains<br>1,220.6<br>(385.7 to 2,904.2)       | Low fruit<br>1,153.4<br>(465.3 to 2,552.2)            | Low nuts and seeds<br>1,056.4<br>(427.5 to 2,238.5) |
| Ukraine                  | High body-mass index<br>1,373.2<br>(739.6 to 2,419.2)    | High blood pressure<br>1,283.8<br>(549.4 to 2,169.5)      | Tobacco<br>1,231.5<br>(595.9 to 2,098.5)                | High total cholesterol<br>931.9<br>(395.9 to 1,582.4)        | Alcohol use<br>837.1<br>(448.7 to 1,433.2)                      | Ambient particulate matter<br>708.1<br>(360.8 to 1,179.9)     | High fasting plasma glucose<br>554.4<br>(196.8 to 1,026.8)    | Low whole grains<br>477.6<br>(202.8 to 868.6)           | High sodium<br>457.0<br>(36.7 to 1,100.3)             | Low fruit<br>409.7<br>(175.0 to 736.0)              |
| High-income              | Tobacco<br>20,021.3<br>(15,278.0 to 27,635.0)            | High body-mass index<br>12,308.1<br>(8,759.8 to 18,512.6) | High blood pressure<br>8,407.5<br>(5,059.5 to 14,788.0) | Alcohol use<br>8,178.6<br>(5,652.7 to 12,055.9)              | High fasting plasma glucose<br>7,995.8<br>(4,067.5 to 14,850.4) | High total cholesterol<br>5,188.1<br>(2,594.9 to 8,854.4)     | Ambient particulate matter<br>4,307.5<br>(2,969.3 to 6,338.7) | Low whole grains<br>3,145.8<br>(1,755.1 to 5,733.8)     | High sodium<br>2,927.0<br>(587.9 to 6,903.6)          | Low fruit<br>2,898.9<br>(1,663.9 to 4,766.6)        |
| High-income Asia Pacific | Tobacco<br>2,193.7<br>(1,537.3 to 3,203.6)               | High body-mass index<br>1,108.3<br>(527.9 to 1,911.3)     | High blood pressure<br>1,060.5<br>(570.7 to 1,678.8)    | High fasting plasma glucose<br>1,052.7<br>(522.9 to 1,895.7) | Alcohol use<br>811.8<br>(481.3 to 1,279.3)                      | High sodium<br>606.5<br>(282.3 to 1,075.6)                    | Ambient particulate matter<br>478.2<br>(313.8 to 736.2)       | High total cholesterol<br>440.5<br>(215.8 to 789.1)     | Impaired kidney function<br>348.8<br>(203.2 to 527.3) | Low whole grains<br>334.8<br>(168.9 to 597.8)       |
| Brunei                   | Tobacco<br>11.2<br>(6.8 to 19.4)                         | High fasting plasma glucose<br>9.0<br>(3.0 to 17.9)       | High body-mass index<br>6.7<br>(2.9 to 13.6)            | High blood pressure<br>6.4<br>(2.6 to 12.2)                  | High total cholesterol<br>3.7<br>(1.3 to 7.2)                   | High sodium<br>3.2<br>(1.1 to 7.4)                            | Low whole grains<br>2.8<br>(1.0 to 5.9)                       | Impaired kidney function<br>2.8<br>(0.4 to 4.5)         | Ambient particulate matter<br>2.2<br>(1.1 to 4.0)     | Low fruit<br>2.0<br>(0.8 to 4.2)                    |
| Japan                    | Tobacco<br>1,201.0<br>(869.6 to 1,719.0)                 | High blood pressure<br>659.3<br>(287.5 to 1,163.2)        | High body-mass index<br>659.3<br>(286.9 to 1,072.5)     | High fasting plasma glucose<br>587.7<br>(240.5 to 1,120.9)   | High sodium<br>419.7<br>(216.1 to 742.2)                        | Alcohol use<br>416.6<br>(220.6 to 668.6)                      | High total cholesterol<br>270.0<br>(117.3 to 526.4)           | Ambient particulate matter<br>241.2<br>(169.5 to 370.4) | Impaired kidney function<br>229.2<br>(108.4 to 389.1) | Low whole grains<br>182.6<br>(71.6 to 369.3)        |
| South Korea              | Tobacco<br>942.7<br>(477.5 to 1,599.2)                   | High fasting plasma glucose<br>426.8<br>(209.9 to 832.3)  | High body-mass index<br>396.7<br>(205.2 to 753.4)       | Alcohol use<br>396.7<br>(231.3 to 663.9)                     | High blood pressure<br>342.0<br>(192.6 to 544.5)                | Ambient particulate matter<br>213.9<br>(106.7 to 344.5)       | High sodium<br>154.8<br>(34.6 to 318.9)                       | High total cholesterol<br>141.3<br>(72.7 to 249.4)      | Low whole grains<br>138.6<br>(73.4 to 248.6)          | Low fruit<br>137.5<br>(67.4 to 241.4)               |
| Singapore                | Tobacco<br>65.1<br>(36.9 to 105.9)                       | High blood pressure<br>43.7<br>(24.9 to 85.7)             | High body-mass index<br>34.3<br>(19.4 to 63.2)          | High fasting plasma glucose<br>29.0<br>(13.0 to 62.0)        | Ambient particulate matter<br>24.9<br>(14.8 to 41.1)            | High total cholesterol<br>23.4<br>(11.8 to 46.1)              | High sodium<br>20.7<br>(7.6 to 43.6)                          | Occupational SHS<br>12.9<br>(8.0 to 21.3)               | Low whole grains<br>12.3<br>(6.3 to 26.8)             | Low nuts and seeds<br>12.3<br>(6.2 to 25.6)         |

| Location       | Risk #1                                        | Risk #2                                                 | Risk #3                                                | Risk #4                                                 | Risk #5                                                        | Risk #6                                                 | Risk #7                                                       | Risk #8                                             | Risk #9                                              | Risk #10                                             |
|----------------|------------------------------------------------|---------------------------------------------------------|--------------------------------------------------------|---------------------------------------------------------|----------------------------------------------------------------|---------------------------------------------------------|---------------------------------------------------------------|-----------------------------------------------------|------------------------------------------------------|------------------------------------------------------|
| Australasia    | Tobacco<br>393.3<br>(297.9 to 533.2)           | High body-mass index<br>279.8<br>(201.4 to 420.2)       | High blood pressure<br>200.0<br>(120.4 to 343.1)       | Alcohol use<br>193.9<br>(127.8 to 299.3)                | High fasting plasma glucose<br>143.8<br>(68.6 to 270.7)        | High total cholesterol<br>127.3<br>(69.3 to 214.2)      | Low whole grains<br>68.4<br>(39.7 to 133.0)                   | Low fruit<br>62.4<br>(36.5 to 103.8)                | Low nuts and seeds<br>58.0<br>(30.1 to 107.0)        | Ambient particulate matter<br>55.9<br>(34.2 to 89.2) |
| Australia      | Tobacco<br>335.5<br>(252.2 to 464.4)           | High body-mass index<br>232.8<br>(167.2 to 349.2)       | High blood pressure<br>166.3<br>(97.7 to 285.3)        | Alcohol use<br>164.6<br>(104.3 to 255.5)                | High fasting plasma glucose<br>124.7<br>(59.9 to 234.7)        | High total cholesterol<br>108.0<br>(58.7 to 182.0)      | Low whole grains<br>60.5<br>(33.7 to 118.0)                   | Low fruit<br>52.0<br>(30.1 to 87.1)                 | Ambient particulate matter<br>47.5<br>(29.3 to 77.0) | Low nuts and seeds<br>47.2<br>(24.1 to 89.9)         |
| New Zealand    | Tobacco<br>58.5<br>(42.4 to 85.3)              | High body-mass index<br>46.9<br>(34.0 to 68.8)          | High blood pressure<br>33.6<br>(20.6 to 56.2)          | Alcohol use<br>29.8<br>(18.4 to 46.2)                   | High total cholesterol<br>19.4<br>(11.0 to 31.3)               | High fasting plasma glucose<br>19.4<br>(9.9 to 36.9)    | Low nuts and seeds<br>10.8<br>(5.3 to 18.4)                   | Low fruit<br>10.5<br>(6.4 to 17.8)                  | High sodium<br>9.7<br>(0.0 to 29.0)                  | Ambient particulate matter<br>8.5<br>(5.1 to 13.4)   |
| Western Europe | Tobacco<br>6,585.9<br>(5,169.1 to 8,626.2)     | High body-mass index<br>4,349.6<br>(3,220.7 to 5,917.1) | Alcohol use<br>3,842.6<br>(2,881.5 to 5,199.4)         | High blood pressure<br>3,005.1<br>(1,911.3 to 4,749.2)  | High fasting plasma glucose<br>2,334.2<br>(1,214.9 to 4,105.0) | High total cholesterol<br>1,684.5<br>(940.7 to 2,784.0) | Ambient particulate matter<br>1,457.9<br>(1,082.9 to 1,994.3) | Low fruit<br>940.6<br>(576.3 to 1,414.5)            | Low whole grains<br>930.8<br>(550.3 to 1,609.9)      | Occupational asbestos<br>761.3<br>(507.7 to 1,106.2) |
| Andorra        | Tobacco<br>1.2<br>(0.7 to 1.8)                 | Alcohol use<br>0.8<br>(0.5 to 1.2)                      | High body-mass index<br>0.7<br>(0.5 to 1.1)            | High blood pressure<br>0.5<br>(0.2 to 0.9)              | High fasting plasma glucose<br>0.4<br>(0.2 to 0.7)             | High total cholesterol<br>0.3<br>(0.1 to 0.5)           | Ambient particulate matter<br>0.2<br>(0.1 to 0.4)             | Low whole grains<br>0.2<br>(0.1 to 0.3)             | High sodium<br>0.2<br>(0.0 to 0.4)                   | Occupational asbestos<br>0.1<br>(0.1 to 0.2)         |
| Austria        | Tobacco<br>103.8<br>(73.3 to 141.1)            | High body-mass index<br>102.2<br>(74.5 to 141.5)        | Alcohol use<br>86.2<br>(62.0 to 128.8)                 | High blood pressure<br>71.0<br>(41.4 to 116.3)          | High fasting plasma glucose<br>42.5<br>(20.3 to 74.3)          | High total cholesterol<br>42.3<br>(21.7 to 66.6)        | Ambient particulate matter<br>32.9<br>(21.6 to 47.2)          | High sodium<br>23.3<br>(3.0 to 53.9)                | Low whole grains<br>23.2<br>(11.9 to 36.9)           | Low vegetables<br>19.6<br>(9.5 to 33.8)              |
| Belgium        | Tobacco<br>217.8<br>(160.0 to 295.7)           | High body-mass index<br>118.7<br>(82.7 to 166.1)        | Alcohol use<br>91.2<br>(60.5 to 123.7)                 | High blood pressure<br>72.5<br>(33.1 to 129.9)          | High fasting plasma glucose<br>57.5<br>(23.5 to 106.7)         | Ambient particulate matter<br>53.2<br>(36.0 to 71.5)    | High total cholesterol<br>42.3<br>(21.0 to 71.5)              | Low fruit<br>33.4<br>(21.5 to 49.8)                 | Occupational asbestos<br>28.4<br>(17.3 to 41.1)      | Low whole grains<br>24.1<br>(12.1 to 45.8)           |
| Cyprus         | High body-mass index<br>11.9<br>(8.7 to 17.8)  | Tobacco<br>11.9<br>(7.9 to 16.7)                        | High fasting plasma glucose<br>10.6<br>(5.8 to 17.7)   | High blood pressure<br>9.2<br>(4.5 to 14.4)             | Alcohol use<br>6.8<br>(4.2 to 10.3)                            | High total cholesterol<br>5.1<br>(2.3 to 8.3)           | Ambient particulate matter<br>3.8<br>(2.5 to 5.3)             | Low whole grains<br>3.1<br>(1.7 to 5.0)             | Impaired kidney function<br>3.1<br>(1.8 to 4.8)      | Low fruit<br>2.8<br>(1.7 to 4.2)                     |
| Denmark        | Tobacco<br>132.4<br>(97.2 to 177.2)            | Alcohol use<br>51.3<br>(43.9 to 87.2)                   | High body-mass index<br>51.3<br>(36.4 to 68.4)         | High blood pressure<br>41.4<br>(23.8 to 67.3)           | High fasting plasma glucose<br>32.2<br>(16.7 to 56.9)          | Ambient particulate matter<br>21.5<br>(14.1 to 30.7)    | High total cholesterol<br>19.5<br>(10.1 to 35.6)              | Occupational asbestos<br>11.0<br>(8.2 to 18.8)      | Low whole grains<br>11.0<br>(6.5 to 20.9)            | Low vegetables<br>11.0<br>(5.6 to 19.1)              |
| Finland        | High body-mass index<br>57.7<br>(36.3 to 83.3) | Tobacco<br>56.5<br>(39.5 to 78.8)                       | Alcohol use<br>46.0<br>(29.8 to 63.9)                  | High blood pressure<br>45.7<br>(21.9 to 73.0)           | High fasting plasma glucose<br>34.5<br>(14.2 to 65.0)          | High total cholesterol<br>24.8<br>(11.2 to 38.6)        | Low whole grains<br>13.6<br>(6.6 to 24.1)                     | Low vegetables<br>13.5<br>(6.5 to 25.1)             | Low fruit<br>12.4<br>(6.5 to 20.1)                   | Ambient particulate matter<br>11.2<br>(6.9 to 17.9)  |
| France         | Tobacco<br>878.2<br>(660.8 to 1,152.6)         | Alcohol use<br>689.8<br>(475.2 to 940.5)                | High body-mass index<br>521.9<br>(368.1 to 718.1)      | High blood pressure<br>310.1<br>(137.5 to 510.0)        | High fasting plasma glucose<br>237.0<br>(99.5 to 449.4)        | High total cholesterol<br>168.8<br>(75.3 to 295.3)      | Ambient particulate matter<br>158.2<br>(106.1 to 216.9)       | Low fruit<br>128.1<br>(79.1 to 182.1)               | Occupational asbestos<br>122.7<br>(76.8 to 185.0)    | Low whole grains<br>101.3<br>(46.7 to 163.5)         |
| Germany        | Tobacco<br>1,280.5<br>(939.6 to 1,812.5)       | High body-mass index<br>976.6<br>(726.7 to 1,457.9)     | Alcohol use<br>940.9<br>(695.7 to 1,292.4)             | High blood pressure<br>746.6<br>(432.9 to 1,219.1)      | High fasting plasma glucose<br>632.0<br>(324.6 to 1,133.5)     | High total cholesterol<br>416.1<br>(209.7 to 756.0)     | Ambient particulate matter<br>343.5<br>(234.1 to 486.1)       | Low fruit<br>253.8<br>(162.1 to 377.9)              | Low whole grains<br>223.0<br>(121.9 to 398.3)        | Low nuts and seeds<br>209.4<br>(91.5 to 372.3)       |
| Greece         | Tobacco<br>202.6<br>(141.7 to 286.2)           | High body-mass index<br>127.8<br>(84.0 to 199.4)        | Alcohol use<br>105.7<br>(72.8 to 168.5)                | High blood pressure<br>96.3<br>(47.1 to 168.8)          | High fasting plasma glucose<br>78.3<br>(36.3 to 156.4)         | High total cholesterol<br>61.8<br>(33.0 to 102.5)       | Ambient particulate matter<br>50.0<br>(32.3 to 73.3)          | Low whole grains<br>37.5<br>(19.3 to 67.9)          | High sodium<br>34.2<br>(3.4 to 84.7)                 | Low nuts and seeds<br>23.6<br>(10.5 to 45.2)         |
| Iceland        | Tobacco<br>7.7<br>(5.9 to 10.4)                | High body-mass index<br>3.3<br>(2.3 to 4.7)             | High blood pressure<br>2.0<br>(0.8 to 4.0)             | High fasting plasma glucose<br>1.5<br>(0.6 to 3.1)      | High total cholesterol<br>1.5<br>(0.6 to 2.9)                  | Alcohol use<br>1.4<br>(0.8 to 2.4)                      | Ambient particulate matter<br>0.9<br>(0.6 to 1.4)             | Low fruit<br>0.8<br>(0.4 to 1.4)                    | Low vegetables<br>0.8<br>(0.4 to 1.4)                | Low whole grains<br>0.7<br>(0.3 to 1.4)              |
| Ireland        | Tobacco<br>92.5<br>(65.2 to 126.5)             | High body-mass index<br>51.8<br>(32.1 to 76.0)          | Alcohol use<br>50.1<br>(34.5 to 70.9)                  | High blood pressure<br>38.9<br>(20.7 to 64.1)           | High fasting plasma glucose<br>31.5<br>(14.5 to 59.3)          | High total cholesterol<br>31.5<br>(10.8 to 38.2)        | Ambient particulate matter<br>17.2<br>(11.0 to 25.5)          | Low fruit<br>16.9<br>(10.0 to 27.4)                 | Low whole grains<br>17.2<br>(6.3 to 21.6)            | High sodium<br>12.3<br>(1.0 to 28.2)                 |
| Israel         | Tobacco<br>103.2<br>(58.3 to 178.9)            | High body-mass index<br>87.3<br>(45.5 to 147.3)         | High fasting plasma glucose<br>74.2<br>(27.5 to 158.7) | High blood pressure<br>65.7<br>(28.0 to 123.1)          | High total cholesterol<br>32.2<br>(12.3 to 62.1)               | Impaired kidney function<br>30.0<br>(11.9 to 62.6)      | Ambient particulate matter<br>27.7<br>(14.9 to 49.1)          | Low whole grains<br>20.2<br>(8.6 to 40.2)           | High sodium<br>18.6<br>(2.2 to 49.6)                 | Alcohol use<br>15.6<br>(6.9 to 28.9)                 |
| Italy          | Tobacco<br>941.1<br>(672.4 to 1,262.2)         | High body-mass index<br>636.6<br>(457.2 to 892.9)       | Alcohol use<br>525.5<br>(367.4 to 755.8)               | High blood pressure<br>401.3<br>(242.4 to 626.4)        | High fasting plasma glucose<br>257.0<br>(116.6 to 482.9)       | Ambient particulate matter<br>193.1<br>(138.8 to 265.4) | High total cholesterol<br>190.4<br>(105.9 to 303.1)           | Occupational asbestos<br>141.0<br>(83.3 to 218.3)   | High sodium<br>127.3<br>(11.2 to 316.2)              | Low whole grains<br>116.2<br>(64.0 to 203.0)         |
| Luxembourg     | Tobacco<br>9.8<br>(6.4 to 14.0)                | Alcohol use<br>6.2<br>(4.0 to 9.2)                      | High body-mass index<br>5.6<br>(3.4 to 8.2)            | High blood pressure<br>4.9<br>(2.6 to 8.2)              | High fasting plasma glucose<br>3.4<br>(1.5 to 6.8)             | Ambient particulate matter<br>2.5<br>(1.6 to 3.7)       | High total cholesterol<br>2.3<br>(1.2 to 3.7)                 | High sodium<br>1.4<br>(0.1 to 3.5)                  | Low whole grains<br>1.4<br>(0.7 to 2.3)              | Low vegetables<br>1.2<br>(0.6 to 2.2)                |
| Malta          | Tobacco<br>5.6<br>(3.2 to 10.2)                | High body-mass index<br>5.4<br>(3.2 to 9.2)             | High blood pressure<br>5.0<br>(2.5 to 9.1)             | High fasting plasma glucose<br>3.5<br>(1.6 to 6.7)      | High total cholesterol<br>3.0<br>(1.5 to 5.7)                  | Ambient particulate matter<br>1.8<br>(0.8 to 3.2)       | Alcohol use<br>1.7<br>(0.9 to 3.5)                            | Low nuts and seeds<br>1.5<br>(0.7 to 3.0)           | Low fruit<br>1.5<br>(0.8 to 2.9)                     | Low whole grains<br>1.4<br>(0.7 to 3.1)              |
| Netherlands    | Tobacco<br>361.2<br>(278.4 to 470.3)           | High body-mass index<br>154.5<br>(107.1 to 226.6)       | Alcohol use<br>115.6<br>(77.5 to 182.9)                | High fasting plasma glucose<br>111.0<br>(51.3 to 221.1) | High blood pressure<br>107.5<br>(62.2 to 185.5)                | Ambient particulate matter<br>71.6<br>(50.2 to 98.9)    | High total cholesterol<br>54.9<br>(27.3 to 94.5)              | Occupational asbestos<br>43.5<br>(28.1 to 60.7)     | Low fruit<br>38.9<br>(21.6 to 59.7)                  | Low whole grains<br>35.8<br>(18.9 to 67.5)           |
| Norway         | Tobacco<br>96.6<br>(72.3 to 132.3)             | High body-mass index<br>42.3<br>(27.9 to 62.0)          | High blood pressure<br>35.8<br>(19.2 to 62.6)          | High fasting plasma glucose<br>31.8<br>(13.9 to 59.5)   | Alcohol use<br>30.5<br>(19.5 to 45.4)                          | High total cholesterol<br>23.2<br>(11.3 to 41.9)        | Ambient particulate matter<br>15.9<br>(9.8 to 24.1)           | Low fruit<br>11.1<br>(5.7 to 19.7)                  | Low vegetables<br>11.0<br>(5.5 to 19.1)              | Low nuts and seeds<br>10.5<br>(4.6 to 18.2)          |
| Portugal       | Alcohol use<br>121.3<br>(77.7 to 194.1)        | Tobacco<br>106.9<br>(73.0 to 163.3)                     | High body-mass index<br>74.5<br>(66.6 to 164.9)        | High blood pressure<br>74.5<br>(39.8 to 133.4)          | High fasting plasma glucose<br>67.5<br>(32.7 to 126.2)         | High total cholesterol<br>35.4<br>(18.4 to 64.2)        | Ambient particulate matter<br>27.4<br>(15.7 to 53.2)          | Low whole grains<br>22.2<br>(12.4 to 49.6)          | Low fruit<br>22.1<br>(10.7 to 41.0)                  | High sodium<br>19.6<br>(2.1 to 60.7)                 |
| Spain          | Tobacco<br>538.8<br>(396.9 to 765.3)           | High body-mass index<br>427.3<br>(290.9 to 623.3)       | Alcohol use<br>396.8<br>(262.2 to 553.4)               | High blood pressure<br>266.4<br>(133.6 to 441.3)        | High fasting plasma glucose<br>235.5<br>(111.7 to 451.1)       | High total cholesterol<br>140.2<br>(68.1 to 240.6)      | Ambient particulate matter<br>109.2<br>(71.7 to 162.7)        | Impaired kidney function<br>73.2<br>(38.1 to 112.6) | Low whole grains<br>73.2<br>(34.8 to 119.2)          | Low nuts and seeds<br>67.1<br>(28.4 to 108.9)        |

| Location                    | Risk #1                                                  | Risk #2                                                 | Risk #3                                                        | Risk #4                                                        | Risk #5                                                  | Risk #6                                                       | Risk #7                                                       | Risk #8                                           | Risk #9                                                     | Risk #10                                              |
|-----------------------------|----------------------------------------------------------|---------------------------------------------------------|----------------------------------------------------------------|----------------------------------------------------------------|----------------------------------------------------------|---------------------------------------------------------------|---------------------------------------------------------------|---------------------------------------------------|-------------------------------------------------------------|-------------------------------------------------------|
| Sweden                      | Tobacco<br>149.2<br>(112.1 to 199.1)                     | High body-mass index<br>89.1<br>(59.5 to 127.3)         | High blood pressure<br>70.5<br>(35.8 to 124.6)                 | Alcohol use<br>66.1<br>(39.4 to 99.0)                          | High fasting plasma glucose<br>53.4<br>(21.0 to 118.2)   | High total cholesterol<br>42.5<br>(21.2 to 72.0)              | Low fruit<br>23.9<br>(12.5 to 39.7)                           | Low vegetables<br>22.2<br>(11.5 to 38.2)          | Low nuts and seeds<br>21.9<br>(10.2 to 38.0)                | High sodium<br>21.5<br>(3.3 to 50.9)                  |
| Switzerland                 | Tobacco<br>109.0<br>(68.4 to 167.5)                      | High body-mass index<br>74.8<br>(45.1 to 113.8)         | Alcohol use<br>65.6<br>(41.4 to 98.0)                          | High blood pressure<br>49.7<br>(29.3 to 85.1)                  | High fasting plasma glucose<br>42.2<br>(18.5 to 78.1)    | High total cholesterol<br>31.6<br>(14.7 to 55.3)              | Ambient particulate matter<br>23.1<br>(13.8 to 34.7)          | Low fruit<br>17.9<br>(10.4 to 30.0)               | High sodium<br>16.9<br>(1.9 to 43.0)                        | Low whole grains<br>15.7<br>(7.8 to 30.2)             |
| United Kingdom              | Tobacco<br>1,205.6<br>(917.7 to 1,596.7)                 | High body-mass index<br>907.3<br>(491.2 to 977.0)       | High blood pressure<br>486.4<br>(278.7 to 819.3)               | Alcohol use<br>433.6<br>(279.2 to 632.1)                       | High total cholesterol<br>324.7<br>(173.9 to 534.8)      | High fasting plasma glucose<br>313.6<br>(142.2 to 606.1)      | Ambient particulate matter<br>279.5<br>(201.7 to 409.1)       | Low fruit<br>199.0<br>(121.8 to 307.2)            | Low whole grains<br>169.8<br>(92.6 to 311.7)                | Occupational asbestos<br>140.4<br>(94.1 to 192.7)     |
| Southern Latin America      | Tobacco<br>1,249.1<br>(924.1 to 1,753.8)                 | High body-mass index<br>907.3<br>(651.4 to 1,340.0)     | High blood pressure<br>723.9<br>(412.2 to 1,210.4)             | Alcohol use<br>588.1<br>(353.7 to 981.3)                       | High fasting plasma glucose<br>465.8<br>(224.6 to 829.4) | Ambient particulate matter<br>393.2<br>(278.6 to 533.8)       | High total cholesterol<br>371.4<br>(206.3 to 578.0)           | Low whole grains<br>274.6<br>(153.2 to 462.1)     | High sodium<br>250.1<br>(10.5 to 646.8)                     | Low fruit<br>208.8<br>(95.3 to 354.3)                 |
| Argentina                   | Tobacco<br>963.6<br>(715.5 to 1,293.9)                   | High body-mass index<br>686.5<br>(476.3 to 1,000.6)     | High blood pressure<br>542.1<br>(305.8 to 911.6)               | Alcohol use<br>443.8<br>(247.0 to 773.8)                       | High fasting plasma glucose<br>350.9<br>(164.6 to 602.3) | Ambient particulate matter<br>299.7<br>(208.3 to 414.5)       | High total cholesterol<br>284.5<br>(147.7 to 452.2)           | Low whole grains<br>204.6<br>(108.9 to 339.8)     | High sodium<br>176.0<br>(5.7 to 460.9)                      | Low vegetables<br>156.0<br>(81.0 to 296.4)            |
| Chile                       | Tobacco<br>225.5<br>(134.6 to 379.6)                     | High body-mass index<br>181.1<br>(113.6 to 287.0)       | High blood pressure<br>148.9<br>(72.0 to 272.3)                | Alcohol use<br>117.6<br>(65.8 to 203.1)                        | High fasting plasma glucose<br>98.8<br>(44.2 to 190.4)   | Ambient particulate matter<br>76.2<br>(50.8 to 120.7)         | High total cholesterol<br>69.3<br>(33.3 to 118.8)             | High sodium<br>61.0<br>(3.7 to 161.2)             | Low whole grains<br>56.5<br>(27.9 to 106.1)                 | Low fruit<br>51.5<br>(26.7 to 101.3)                  |
| Uruguay                     | Tobacco<br>65.8<br>(50.7 to 87.7)                        | High body-mass index<br>40.9<br>(28.1 to 56.5)          | High blood pressure<br>34.2<br>(20.7 to 50.7)                  | Alcohol use<br>29.5<br>(16.9 to 46.1)                          | Ambient particulate matter<br>18.0<br>(13.4 to 24.1)     | High total cholesterol<br>17.9<br>(10.8 to 25.5)              | High fasting plasma glucose<br>17.9<br>(8.3 to 30.9)          | Low fruit<br>17.2<br>(10.3 to 26.0)               | Low whole grains<br>13.3<br>(8.0 to 22.0)                   | High sodium<br>12.5<br>(0.7 to 28.8)                  |
| High-income North America   | Tobacco<br>9,799.2<br>(6,995.1 to 14,358.5)              | High body-mass index<br>5,684.0<br>(3,603.1 to 9,186.8) | High fasting plasma glucose<br>4,102.5<br>(1,860.3 to 8,331.8) | High blood pressure<br>3,390.1<br>(1,743.9 to 6,284.1)         | Alcohol use<br>2,673.9<br>(1,544.6 to 4,130.0)           | High total cholesterol<br>2,594.3<br>(1,101.7 to 4,925.4)     | Ambient particulate matter<br>1,916.0<br>(1,102.5 to 3,090.5) | Low whole grains<br>1,545.6<br>(743.7 to 3,053.0) | Low fruit<br>1,383.0<br>(763.5 to 2,560.5)                  | High sodium<br>1,289.6<br>(205.5 to 3,181.1)          |
| Canada                      | Tobacco<br>685.7<br>(509.5 to 893.9)                     | High body-mass index<br>411.7<br>(285.4 to 577.7)       | High fasting plasma glucose<br>289.0<br>(127.8 to 546.4)       | High blood pressure<br>259.0<br>(132.2 to 402.6)               | Alcohol use<br>211.6<br>(148.7 to 292.5)                 | High total cholesterol<br>174.9<br>(87.5 to 279.1)            | Ambient particulate matter<br>109.3<br>(75.0 to 154.1)        | Low whole grains<br>103.0<br>(51.1 to 184.4)      | High sodium<br>100.4<br>(15.5 to 223.1)                     | Low nuts and seeds<br>88.9<br>(38.0 to 153.1)         |
| Greenland                   | Tobacco<br>1.1<br>(0.6 to 2.1)                           | High body-mass index<br>1.0<br>(0.6 to 1.8)             | High fasting plasma glucose<br>0.6<br>(0.3 to 1.3)             | High blood pressure<br>0.6<br>(0.3 to 1.2)                     | Alcohol use<br>0.5<br>(0.2 to 1.1)                       | High total cholesterol<br>0.4<br>(0.2 to 0.8)                 | Low whole grains<br>0.3<br>(0.1 to 0.6)                       | High sodium<br>0.3<br>(0.1 to 0.8)                | Low fruit<br>0.3<br>(0.1 to 0.6)                            | Low vegetables<br>0.2<br>(0.1 to 0.4)                 |
| United States               | Tobacco<br>9,133.0<br>(6,371.0 to 13,544.5)              | High body-mass index<br>5,271.1<br>(3,254.0 to 8,623.9) | High fasting plasma glucose<br>3,825.8<br>(1,717.7 to 7,903.3) | High blood pressure<br>3,128.3<br>(1,569.6 to 5,857.7)         | Alcohol use<br>2,463.9<br>(1,355.4 to 3,867.8)           | High total cholesterol<br>2,417.5<br>(1,010.8 to 4,626.6)     | Ambient particulate matter<br>1,810.3<br>(1,014.6 to 2,936.9) | Low whole grains<br>1,441.7<br>(686.2 to 2,855.7) | Low fruit<br>1,307.1<br>(706.5 to 2,446.2)                  | High sodium<br>1,188.1<br>(191.8 to 2,980.3)          |
| Latin America and Caribbean | High body-mass index<br>9,088.1<br>(6,700.5 to 13,729.2) | Tobacco<br>8,829.7<br>(6,571.4 to 12,284.7)             | High blood pressure<br>6,808.3<br>(4,581.6 to 10,660.0)        | High fasting plasma glucose<br>5,580.3<br>(3,584.1 to 9,055.4) | Alcohol use<br>5,264.2<br>(3,721.0 to 7,178.1)           | Ambient particulate matter<br>3,826.8<br>(2,703.5 to 5,385.8) | High total cholesterol<br>3,759.4<br>(2,269.7 to 6,084.2)     | Low vegetables<br>2,388.3<br>(1,345.1 to 4,102.7) | Impaired kidney function<br>2,212.1<br>(1,500.8 to 3,487.8) | Low nuts and seeds<br>1,981.9<br>(1,092.4 to 3,168.0) |
| Caribbean                   | High body-mass index<br>743.2<br>(516.5 to 1,136.3)      | Tobacco<br>737.6<br>(516.5 to 1,048.2)                  | High blood pressure<br>638.7<br>(408.8 to 907.9)               | High fasting plasma glucose<br>520.9<br>(297.2 to 834.4)       | Ambient particulate matter<br>393.3<br>(280.2 to 534.6)  | High total cholesterol<br>344.0<br>(195.1 to 498.9)           | Alcohol use<br>289.6<br>(187.2 to 445.1)                      | Low vegetables<br>235.8<br>(130.6 to 420.1)       | Household air pollution<br>201.1<br>(131.4 to 290.2)        | Low fruit<br>189.1<br>(95.1 to 335.9)                 |
| Antigua and Barbuda         | High body-mass index<br>1.7<br>(1.1 to 2.8)              | High fasting plasma glucose<br>1.4<br>(0.8 to 2.4)      | High blood pressure<br>1.2<br>(0.7 to 2.0)                     | High total cholesterol<br>0.5<br>(0.3 to 0.9)                  | Impaired kidney function<br>0.5<br>(0.3 to 0.8)          | Ambient particulate matter<br>0.5<br>(0.3 to 0.7)             | Tobacco<br>0.4<br>(0.3 to 0.7)                                | Low vegetables<br>0.4<br>(0.2 to 0.6)             | Low fruit<br>0.4<br>(0.2 to 0.6)                            | Low whole grains<br>0.3<br>(0.2 to 0.7)               |
| The Bahamas                 | High body-mass index<br>9.3<br>(5.7 to 16.1)             | High blood pressure<br>5.6<br>(2.7 to 10.9)             | High fasting plasma glucose<br>5.5<br>(2.6 to 10.7)            | Alcohol use<br>5.2<br>(2.4 to 9.7)                             | Tobacco<br>4.9<br>(2.9 to 8.5)                           | High total cholesterol<br>2.5<br>(1.3 to 4.8)                 | Ambient particulate matter<br>2.5<br>(1.5 to 4.1)             | Impaired kidney function<br>1.8<br>(0.7 to 3.6)   | Low whole grains<br>1.6<br>(0.7 to 3.3)                     | Occupational SHS<br>1.2<br>(0.7 to 2.3)               |
| Barbados                    | High body-mass index<br>5.5<br>(3.6 to 7.8)              | High fasting plasma glucose<br>2.7<br>(1.3 to 5.7)      | High blood pressure<br>2.7<br>(1.0 to 4.5)                     | Alcohol use<br>1.6<br>(0.9 to 2.8)                             | Tobacco<br>1.4<br>(0.9 to 2.0)                           | Ambient particulate matter<br>1.3<br>(0.7 to 1.9)             | High total cholesterol<br>1.1<br>(0.5 to 2.0)                 | Impaired kidney function<br>0.9<br>(0.4 to 1.6)   | Low whole grains<br>0.9<br>(0.4 to 1.6)                     | Low vegetables<br>0.9<br>(0.4 to 1.4)                 |
| Belize                      | High body-mass index<br>9.4<br>(5.7 to 16.1)             | High fasting plasma glucose<br>7.5<br>(4.0 to 14.2)     | Tobacco<br>6.4<br>(3.8 to 10.7)                                | High blood pressure<br>6.3<br>(3.3 to 11.4)                    | Alcohol use<br>4.9<br>(2.6 to 9.1)                       | Ambient particulate matter<br>4.0<br>(2.5 to 6.4)             | High total cholesterol<br>3.3<br>(1.6 to 5.6)                 | Impaired kidney function<br>2.4<br>(1.3 to 4.2)   | Low vegetables<br>2.3<br>(1.1 to 4.7)                       | Low fruit<br>2.2<br>(1.0 to 4.2)                      |
| Bermuda                     | High body-mass index<br>0.9<br>(0.5 to 1.6)              | Tobacco<br>0.8<br>(0.5 to 1.3)                          | Alcohol use<br>0.6<br>(0.3 to 1.2)                             | High blood pressure<br>0.6<br>(0.3 to 1.1)                     | High fasting plasma glucose<br>0.6<br>(0.3 to 1.1)       | High total cholesterol<br>0.3<br>(0.2 to 0.7)                 | Ambient particulate matter<br>0.2<br>(0.1 to 0.4)             | Low vegetables<br>0.2<br>(0.1 to 0.3)             | Low nuts and seeds<br>0.2<br>(0.1 to 0.3)                   | Occupational SHS<br>0.2<br>(0.1 to 0.3)               |
| Cuba                        | Tobacco<br>304.3<br>(225.0 to 404.9)                     | High body-mass index<br>150.0<br>(100.1 to 217.8)       | High blood pressure<br>113.3<br>(66.3 to 166.9)                | High fasting plasma glucose<br>85.2<br>(40.6 to 152.9)         | Ambient particulate matter<br>84.8<br>(58.7 to 108.5)    | High total cholesterol<br>59.1<br>(32.0 to 92.5)              | Alcohol use<br>43.9<br>(25.6 to 73.9)                         | Low vegetables<br>40.1<br>(18.0 to 77.8)          | Low omega-3<br>33.7<br>(9.1 to 66.3)                        | Low nuts and seeds<br>32.8<br>(15.0 to 53.6)          |
| Dominica                    | High body-mass index<br>1.3<br>(0.8 to 2.2)              | High fasting plasma glucose<br>1.1<br>(0.6 to 2.0)      | High blood pressure<br>1.0<br>(0.5 to 1.7)                     | Tobacco<br>0.8<br>(0.5 to 1.3)                                 | Alcohol use<br>0.7<br>(0.4 to 1.2)                       | Ambient particulate matter<br>0.4<br>(0.2 to 0.7)             | Impaired kidney function<br>0.4<br>(0.2 to 0.6)               | High total cholesterol<br>0.4<br>(0.2 to 0.6)     | Low fruit<br>0.3<br>(0.1 to 0.5)                            | Low vegetables<br>0.3<br>(0.1 to 0.5)                 |
| Dominican Republic          | High blood pressure<br>140.1<br>(78.7 to 241.4)          | Tobacco<br>131.0<br>(78.3 to 213.8)                     | High body-mass index<br>127.9<br>(70.0 to 249.2)               | High fasting plasma glucose<br>85.9<br>(43.6 to 155.8)         | High total cholesterol<br>75.7<br>(41.4 to 139.9)        | Ambient particulate matter<br>64.9<br>(40.9 to 105.0)         | Alcohol use<br>64.1<br>(35.5 to 110.2)                        | Low vegetables<br>53.3<br>(27.4 to 101.5)         | Short gestation<br>42.2<br>(20.4 to 82.7)                   | Low nuts and seeds<br>41.3<br>(19.8 to 80.8)          |
| Grenada                     | High body-mass index<br>2.5<br>(1.7 to 3.8)              | High fasting plasma glucose<br>2.3<br>(1.4 to 3.6)      | High blood pressure<br>2.0<br>(1.3 to 3.0)                     | Tobacco<br>1.5<br>(1.0 to 2.2)                                 | Alcohol use<br>1.3<br>(0.8 to 2.2)                       | Ambient particulate matter<br>1.0<br>(0.6 to 1.5)             | High total cholesterol<br>0.9<br>(0.5 to 1.5)                 | Low fruit<br>0.9<br>(0.4 to 1.3)                  | Impaired kidney function<br>0.7<br>(0.4 to 1.1)             | Low vegetables<br>0.7<br>(0.4 to 1.1)                 |
| Guyana                      | High body-mass index<br>20.0<br>(11.9 to 29.2)           | High fasting plasma glucose<br>18.1<br>(9.2 to 27.3)    | High blood pressure<br>16.7<br>(8.9 to 24.6)                   | Tobacco<br>11.2<br>(6.0 to 18.2)                               | Alcohol use<br>10.2<br>(5.8 to 17.1)                     | High total cholesterol<br>8.9<br>(4.2 to 14.3)                | Ambient particulate matter<br>8.7<br>(5.1 to 13.8)            | Low fruit<br>7.4<br>(3.5 to 13.5)                 | Low vegetables<br>6.9<br>(3.3 to 11.5)                      | Low nuts and seeds<br>4.7<br>(2.2 to 7.3)             |

| Location                         | Risk #1                                                 | Risk #2                                                        | Risk #3                                                  | Risk #4                                                 | Risk #5                                                  | Risk #6                                                       | Risk #7                                                 | Risk #8                                                   | Risk #9                                              | Risk #10                                             |
|----------------------------------|---------------------------------------------------------|----------------------------------------------------------------|----------------------------------------------------------|---------------------------------------------------------|----------------------------------------------------------|---------------------------------------------------------------|---------------------------------------------------------|-----------------------------------------------------------|------------------------------------------------------|------------------------------------------------------|
| Haiti                            | High body-mass index<br>278.9<br>(168.1 to 425.8)       | High blood pressure<br>253.3<br>(146.2 to 375.3)               | High fasting plasma glucose<br>212.9<br>(109.6 to 354.3) | Tobacco<br>198.5<br>(119.8 to 311.8)                    | Household air pollution<br>177.8<br>(109.4 to 270.9)     | Ambient particulate matter<br>176.4<br>(117.0 to 248.0)       | High total cholesterol<br>141.3<br>(74.2 to 210.4)      | Alcohol use<br>117.2<br>(67.3 to 190.8)                   | Low vegetables<br>95.7<br>(47.6 to 165.0)            | Low fruit<br>94.4<br>(45.8 to 175.0)                 |
| Jamaica                          | High body-mass index<br>44.5<br>(29.7 to 63.3)          | Tobacco<br>30.5<br>(19.2 to 45.2)                              | High fasting plasma glucose<br>28.5<br>(11.5 to 47.9)    | High blood pressure<br>26.2<br>(13.8 to 42.1)           | Ambient particulate matter<br>15.1<br>(9.8 to 22.0)      | Alcohol use<br>12.6<br>(6.4 to 22.6)                          | High total cholesterol<br>10.7<br>(5.8 to 16.4)         | Low vegetables<br>9.6<br>(4.9 to 16.9)                    | Low whole grains<br>8.5<br>(3.1 to 16.8)             | Occupational SHS<br>7.9<br>(5.0 to 12.0)             |
| Puerto Rico                      | High body-mass index<br>42.6<br>(27.5 to 64.4)          | High fasting plasma glucose<br>34.5<br>(15.2 to 65.6)          | Tobacco<br>28.6<br>(19.2 to 42.5)                        | High blood pressure<br>25.3<br>(13.3 to 44.9)           | Alcohol use<br>15.8<br>(8.1 to 27.2)                     | High total cholesterol<br>13.5<br>(6.5 to 24.2)               | Ambient particulate matter<br>12.5<br>(6.8 to 22.1)     | Low fruit<br>11.8<br>(6.1 to 18.9)                        | Impaired kidney function<br>9.9<br>(4.3 to 18.8)     | Low vegetables<br>8.5<br>(4.3 to 14.9)               |
| Saint Lucia                      | High body-mass index<br>4.1<br>(2.7 to 6.2)             | High fasting plasma glucose<br>3.1<br>(1.6 to 5.2)             | High blood pressure<br>1.5<br>(1.5 to 4.4)               | Alcohol use<br>2.1<br>(1.2 to 3.1)                      | Tobacco<br>1.8<br>(1.1 to 2.7)                           | Ambient particulate matter<br>1.1<br>(0.7 to 1.6)             | Impaired kidney function<br>1.0<br>(0.5 to 1.7)         | High total cholesterol<br>0.9<br>(0.5 to 1.4)             | Low fruit<br>0.8<br>(0.4 to 1.4)                     | Low vegetables<br>0.7<br>(0.4 to 1.2)                |
| Saint Vincent and the Grenadines | High body-mass index<br>2.6<br>(1.9 to 3.7)             | High fasting plasma glucose<br>2.3<br>(1.4 to 3.4)             | High blood pressure<br>1.9<br>(1.2 to 2.8)               | Tobacco<br>1.4<br>(0.9 to 2.1)                          | High total cholesterol<br>0.9<br>(0.5 to 1.4)            | Ambient particulate matter<br>0.9<br>(0.6 to 1.3)             | Alcohol use<br>0.8<br>(0.5 to 1.3)                      | Low vegetables<br>0.7<br>(0.4 to 1.2)                     | Low fruit<br>0.6<br>(0.3 to 1.1)                     | Impaired kidney function<br>0.6<br>(0.3 to 0.8)      |
| Suriname                         | High body-mass index<br>10.5<br>(6.4 to 14.2)           | High blood pressure<br>8.0<br>(4.9 to 11.9)                    | Tobacco<br>8.0<br>(5.0 to 10.9)                          | High fasting plasma glucose<br>6.8<br>(2.9 to 11.4)     | Alcohol use<br>5.6<br>(3.5 to 8.6)                       | Ambient particulate matter<br>5.3<br>(3.5 to 7.2)             | Low fruit<br>4.4<br>(2.2 to 7.2)                        | High total cholesterol<br>4.0<br>(2.0 to 6.0)             | Low vegetables<br>3.2<br>(1.6 to 5.0)                | Short gestation<br>3.2<br>(1.2 to 4.9)               |
| Trinidad and Tobago              | High body-mass index<br>32.4<br>(21.9 to 47.7)          | High fasting plasma glucose<br>31.2<br>(16.0 to 53.7)          | High blood pressure<br>25.1<br>(13.2 to 40.2)            | Tobacco<br>19.7<br>(11.7 to 30.5)                       | High total cholesterol<br>14.3<br>(7.4 to 24.4)          | Ambient particulate matter<br>11.3<br>(7.1 to 17.0)           | Low fruit<br>10.2<br>(5.3 to 16.9)                      | Low nuts and seeds<br>8.8<br>(4.1 to 14.8)                | Low vegetables<br>8.8<br>(4.3 to 15.3)               | Impaired kidney function<br>7.3<br>(4.2 to 10.5)     |
| Virgin Islands, U.S.             | High body-mass index<br>1.5<br>(1.0 to 2.1)             | Tobacco<br>1.0<br>(0.7 to 1.4)                                 | High blood pressure<br>0.9<br>(0.5 to 1.5)               | High fasting plasma glucose<br>0.9<br>(0.4 to 1.6)      | Alcohol use<br>0.6<br>(0.3 to 0.9)                       | High total cholesterol<br>0.6<br>(0.3 to 0.9)                 | Ambient particulate matter<br>0.5<br>(0.3 to 0.7)       | Low vegetables<br>0.3<br>(0.2 to 0.5)                     | Low whole grains<br>0.3<br>(0.2 to 0.6)              | Low nuts and seeds<br>0.3<br>(0.1 to 0.5)            |
| Andean Latin America             | High body-mass index<br>692.4<br>(461.7 to 1,066.3)     | Alcohol use<br>420.9<br>(258.0 to 589.7)                       | Tobacco<br>390.4<br>(257.5 to 603.7)                     | High blood pressure<br>355.5<br>(197.8 to 571.4)        | Ambient particulate matter<br>323.9<br>(199.8 to 450.4)  | High fasting plasma glucose<br>298.5<br>(160.1 to 488.2)      | High total cholesterol<br>227.6<br>(127.8 to 391.0)     | Short gestation<br>163.5<br>(110.3 to 235.7)              | Household air pollution<br>155.8<br>(94.6 to 223.5)  | Low vegetables<br>155.4<br>(72.6 to 290.3)           |
| Bolivia                          | High body-mass index<br>185.0<br>(122.3 to 298.6)       | Tobacco<br>122.9<br>(72.7 to 196.1)                            | Ambient particulate matter<br>103.5<br>(65.7 to 152.4)   | High blood pressure<br>98.0<br>(60.7 to 157.2)          | High fasting plasma glucose<br>95.6<br>(51.8 to 209.8)   | Short gestation<br>96.3<br>(51.7 to 124.7)                    | High total cholesterol<br>69.5<br>(37.3 to 115.4)       | Low birth weight<br>60.2<br>(37.4 to 87.5)                | Alcohol use<br>55.9<br>(26.2 to 113.4)               | Low fruit<br>55.5<br>(30.6 to 115.4)                 |
| Ecuador                          | High body-mass index<br>228.6<br>(158.3 to 329.4)       | Alcohol use<br>127.7<br>(87.3 to 191.9)                        | High blood pressure<br>108.0<br>(60.1 to 172.1)          | Tobacco<br>98.4<br>(63.6 to 146.7)                      | High fasting plasma glucose<br>95.6<br>(52.9 to 164.2)   | Ambient particulate matter<br>68.0<br>(45.4 to 109.6)         | High total cholesterol<br>64.9<br>(35.0 to 107.9)       | Impaired kidney function<br>45.2<br>(25.3 to 74.0)        | Low vegetables<br>42.4<br>(21.4 to 77.2)             | Occupational SHS<br>35.0<br>(22.5 to 52.5)           |
| Peru                             | High body-mass index<br>278.2<br>(158.2 to 438.3)       | Alcohol use<br>241.9<br>(122.6 to 363.5)                       | Tobacco<br>183.9<br>(94.0 to 307.5)                      | Ambient particulate matter<br>153.7<br>(77.3 to 214.8)  | High blood pressure<br>149.8<br>(62.2 to 267.9)          | High fasting plasma glucose<br>109.9<br>(45.0 to 200.2)       | High total cholesterol<br>103.2<br>(41.0 to 181.8)      | Household air pollution<br>100.2<br>(52.5 to 162.4)       | Low fruit<br>69.9<br>(30.8 to 130.9)                 | Low vegetables<br>69.1<br>(25.7 to 139.9)            |
| Central Latin America            | High body-mass index<br>4,482.0<br>(3,149.6 to 6,441.7) | High fasting plasma glucose<br>3,017.3<br>(1,764.6 to 5,057.9) | Tobacco<br>2,808.5<br>(1,977.7 to 4,049.2)               | High blood pressure<br>2,761.7<br>(1,780.1 to 4,428.4)  | Alcohol use<br>2,170.1<br>(1,535.9 to 2,862.7)           | Ambient particulate matter<br>1,545.1<br>(1,092.1 to 2,161.2) | High total cholesterol<br>1,537.6<br>(935.0 to 2,485.4) | Impaired kidney function<br>1,365.5<br>(841.4 to 2,152.2) | Low vegetables<br>933.5<br>(522.5 to 1,528.0)        | Low nuts and seeds<br>852.9<br>(479.8 to 1,380.1)    |
| Colombia                         | Tobacco<br>624.4<br>(405.9 to 958.1)                    | High body-mass index<br>553.6<br>(344.4 to 918.0)              | High blood pressure<br>467.3<br>(249.4 to 839.7)         | Alcohol use<br>298.2<br>(163.7 to 551.0)                | Ambient particulate matter<br>252.1<br>(166.2 to 388.8)  | High fasting plasma glucose<br>251.1<br>(115.2 to 513.4)      | High total cholesterol<br>234.2<br>(108.6 to 418.2)     | Low vegetables<br>159.6<br>(84.4 to 268.9)                | Low fruit<br>139.7<br>(64.5 to 265.6)                | Low nuts and seeds<br>136.5<br>(64.9 to 255.2)       |
| Costa Rica                       | High body-mass index<br>51.1<br>(31.0 to 79.7)          | High blood pressure<br>44.1<br>(22.8 to 78.3)                  | High fasting plasma glucose<br>31.2<br>(14.0 to 62.1)    | Alcohol use<br>28.9<br>(18.4 to 45.2)                   | Tobacco<br>28.6<br>(17.2 to 46.8)                        | High total cholesterol<br>23.0<br>(11.6 to 42.0)              | Impaired kidney function<br>17.8<br>(8.5 to 33.4)       | Ambient particulate matter<br>16.8<br>(10.2 to 26.5)      | Low vegetables<br>13.7<br>(7.4 to 23.2)              | Low nuts and seeds<br>10.9<br>(4.6 to 19.8)          |
| El Salvador                      | High body-mass index<br>78.1<br>(50.2 to 119.3)         | High blood pressure<br>54.6<br>(32.4 to 83.6)                  | High fasting plasma glucose<br>52.3<br>(27.3 to 94.7)    | Tobacco<br>37.3<br>(21.3 to 60.8)                       | Alcohol use<br>34.4<br>(21.4 to 55.3)                    | High total cholesterol<br>33.5<br>(17.3 to 54.9)              | Ambient particulate matter<br>31.5<br>(20.6 to 47.4)    | Impaired kidney function<br>31.4<br>(16.9 to 56.6)        | Low vegetables<br>20.8<br>(11.3 to 33.9)             | Low fruit<br>19.4<br>(10.5 to 34.2)                  |
| Guatemala                        | High body-mass index<br>268.2<br>(157.4 to 427.6)       | High fasting plasma glucose<br>220.3<br>(110.6 to 376.1)       | Alcohol use<br>173.8<br>(105.6 to 255.0)                 | Ambient particulate matter<br>166.1<br>(100.1 to 271.0) | High blood pressure<br>156.6<br>(93.3 to 243.5)          | Household air pollution<br>143.0<br>(58.4 to 277.2)           | Tobacco<br>122.6<br>(68.7 to 202.5)                     | High total cholesterol<br>102.8<br>(52.9 to 152.0)        | Impaired kidney function<br>102.8<br>(51.1 to 154.8) | Low fruit<br>92.6<br>(35.4 to 127.9)                 |
| Honduras                         | High body-mass index<br>174.0<br>(118.8 to 286.9)       | High blood pressure<br>147.4<br>(87.7 to 234.3)                | High fasting plasma glucose<br>114.8<br>(59.6 to 224.4)  | Tobacco<br>110.2<br>(58.2 to 183.7)                     | High total cholesterol<br>107.1<br>(59.0 to 166.4)       | Ambient particulate matter<br>82.1<br>(52.5 to 117.9)         | Impaired kidney function<br>65.4<br>(39.6 to 125.5)     | Low vegetables<br>58.6<br>(26.5 to 97.5)                  | Alcohol use<br>53.0<br>(33.1 to 88.5)                | Household air pollution<br>52.6<br>(32.1 to 85.3)    |
| Mexico                           | High body-mass index<br>2,509.1<br>(1,708.6 to 3,541.3) | High fasting plasma glucose<br>1,874.6<br>(1,008.0 to 3,054.3) | High blood pressure<br>1,258.3<br>(717.4 to 2,070.8)     | Tobacco<br>1,209.3<br>(831.6 to 1,770.7)                | Alcohol use<br>1,096.1<br>(739.7 to 1,583.5)             | Impaired kidney function<br>828.1<br>(409.5 to 1,387.4)       | High total cholesterol<br>707.7<br>(385.4 to 1,158.8)   | Ambient particulate matter<br>657.6<br>(486.6 to 925.7)   | Low nuts and seeds<br>388.3<br>(192.4 to 605.2)      | Low vegetables<br>382.0<br>(209.2 to 637.9)          |
| Nicaragua                        | High body-mass index<br>100.3<br>(59.9 to 159.9)        | High blood pressure<br>70.2<br>(38.0 to 113.9)                 | High fasting plasma glucose<br>64.7<br>(31.2 to 116.3)   | Tobacco<br>41.6<br>(22.4 to 73.8)                       | Impaired kidney function<br>39.2<br>(19.3 to 72.7)       | Alcohol use<br>38.0<br>(24.6 to 58.6)                         | Ambient particulate matter<br>30.2<br>(18.1 to 48.3)    | High total cholesterol<br>29.3<br>(14.7 to 48.1)          | Low fruit<br>25.8<br>(14.1 to 46.2)                  | Household air pollution<br>23.6<br>(8.9 to 39.6)     |
| Panama                           | High blood pressure<br>44.6<br>(25.1 to 64.3)           | High body-mass index<br>43.3<br>(25.5 to 67.2)                 | High fasting plasma glucose<br>38.6<br>(20.2 to 68.9)    | Tobacco<br>31.6<br>(20.9 to 48.1)                       | Alcohol use<br>28.9<br>(16.7 to 43.7)                    | High total cholesterol<br>21.2<br>(12.4 to 32.3)              | Ambient particulate matter<br>19.2<br>(12.7 to 26.7)    | Impaired kidney function<br>17.9<br>(9.5 to 30.7)         | Low fruit<br>16.7<br>(8.1 to 28.4)                   | Low vegetables<br>13.7<br>(7.2 to 23.7)              |
| Venezuela                        | High body-mass index<br>693.5<br>(392.8 to 1,216.7)     | Tobacco<br>614.4<br>(379.4 to 1,014.8)                         | High blood pressure<br>521.7<br>(259.5 to 951.0)         | Alcohol use<br>435.8<br>(242.5 to 758.1)                | High fasting plasma glucose<br>389.7<br>(139.2 to 753.2) | Ambient particulate matter<br>296.0<br>(180.2 to 489.5)       | High total cholesterol<br>274.3<br>(129.5 to 497.4)     | Low vegetables<br>201.5<br>(104.0 to 353.4)               | Low nuts and seeds<br>159.5<br>(72.4 to 294.6)       | Impaired kidney function<br>151.5<br>(54.0 to 279.1) |



| Location                     | Risk #1                                                    | Risk #2                                                    | Risk #3                                                       | Risk #4                                                         | Risk #5                                                      | Risk #6                                                        | Risk #7                                                       | Risk #8                                             | Risk #9                                                      | Risk #10                                              |
|------------------------------|------------------------------------------------------------|------------------------------------------------------------|---------------------------------------------------------------|-----------------------------------------------------------------|--------------------------------------------------------------|----------------------------------------------------------------|---------------------------------------------------------------|-----------------------------------------------------|--------------------------------------------------------------|-------------------------------------------------------|
| Tropical Latin America       | Tobacco<br>4,937.2<br>(3,689.4 to 6,690.4)                 | High body-mass index<br>3,160.2<br>(1,929.8 to 5,098.7)    | High blood pressure<br>3,054.3<br>(1,785.3 to 4,955.6)        | Alcohol use<br>2,410.0<br>(1,483.7 to 3,653.0)                  | High fasting plasma glucose<br>1,737.9<br>(887.8 to 3,166.5) | High total cholesterol<br>1,632.9<br>(959.4 to 2,661.7)        | Ambient particulate matter<br>1,558.8<br>(1,101.5 to 2,221.8) | Low vegetables<br>1,063.1<br>(621.2 to 1,948.3)     | Low fruit<br>875.8<br>(370.9 to 1,573.4)                     | Low nuts and seeds<br>816.2<br>(406.3 to 1,380.4)     |
| Brazil                       | Tobacco<br>4,797.7<br>(3,564.2 to 6,474.6)                 | High body-mass index<br>3,028.6<br>(1,804.1 to 4,896.9)    | High blood pressure<br>2,940.4<br>(1,698.0 to 4,824.0)        | Alcohol use<br>2,330.9<br>(1,438.8 to 3,529.7)                  | High fasting plasma glucose<br>1,660.1<br>(831.1 to 3,044.1) | High total cholesterol<br>1,573.6<br>(923.7 to 2,573.5)        | Ambient particulate matter<br>1,499.6<br>(1,057.4 to 2,145.2) | Low vegetables<br>1,025.1<br>(604.5 to 1,873.1)     | Low fruit<br>827.6<br>(347.7 to 1,489.9)                     | Low nuts and seeds<br>780.6<br>(384.6 to 1,329.9)     |
| Paraguay                     | Tobacco<br>148.0<br>(88.3 to 225.2)                        | High body-mass index<br>132.5<br>(75.7 to 203.0)           | High blood pressure<br>113.2<br>(63.5 to 176.0)               | Alcohol use<br>83.8<br>(41.5 to 160.7)                          | High fasting plasma glucose<br>80.7<br>(44.2 to 141.7)       | Ambient particulate matter<br>63.7<br>(38.3 to 90.2)           | High total cholesterol<br>58.6<br>(29.6 to 96.1)              | Low fruit<br>51.3<br>(23.2 to 99.1)                 | Low vegetables<br>37.7<br>(15.5 to 84.0)                     | Household air pollution<br>37.4<br>(20.7 to 59.2)     |
| North Africa and Middle East | High body-mass index<br>15,106.0<br>(10,156.5 to 22,423.8) | High blood pressure<br>12,378.6<br>(7,757.3 to 17,946.5)   | Tobacco<br>10,925.8<br>(6,857.6 to 15,646.4)                  | High fasting plasma glucose<br>9,961.5<br>(5,770.4 to 15,302.7) | High total cholesterol<br>8,291.0<br>(4,715.4 to 11,475.0)   | Ambient particulate matter<br>8,264.7<br>(5,648.5 to 11,053.8) | Short gestation<br>5,312.5<br>(3,318.4 to 8,335.4)            | Low whole grains<br>4,995.3<br>(3,042.2 to 8,041.8) | Low nuts and seeds<br>4,272.3<br>(2,158.3 to 6,720.9)        | Low fruit<br>3,857.4<br>(2,012.6 to 6,283.3)          |
| North Africa and Middle East | High body-mass index<br>15,106.0<br>(10,156.5 to 22,423.8) | High blood pressure<br>12,378.6<br>(7,757.3 to 17,946.5)   | Tobacco<br>10,925.8<br>(6,857.6 to 15,646.4)                  | High fasting plasma glucose<br>9,961.5<br>(5,770.4 to 15,302.7) | High total cholesterol<br>8,291.0<br>(4,715.4 to 11,475.0)   | Ambient particulate matter<br>8,264.7<br>(5,648.5 to 11,053.8) | Short gestation<br>5,312.5<br>(3,318.4 to 8,335.4)            | Low whole grains<br>4,995.3<br>(3,042.2 to 8,041.8) | Low nuts and seeds<br>4,272.3<br>(2,158.3 to 6,720.9)        | Low fruit<br>3,857.4<br>(2,012.6 to 6,283.3)          |
| Afghanistan                  | Short gestation<br>2,176.2<br>(1,272.3 to 3,416.2)         | Household air pollution<br>2,091.0<br>(1,214.0 to 2,981.0) | Ambient particulate matter<br>1,926.2<br>(1,287.1 to 2,647.3) | High body-mass index<br>1,780.1<br>(1,003.9 to 2,620.8)         | Child wasting<br>1,524.3<br>(529.2 to 2,609.5)               | High blood pressure<br>1,391.2<br>(741.9 to 2,220.3)           | Hib vaccination<br>1,221.8<br>(392.2 to 2,882.0)              | Tobacco<br>1,221.8<br>(633.7 to 1,999.7)            | High fasting plasma glucose<br>1,219.1<br>(566.6 to 2,079.4) | Low birth weight<br>1,154.2<br>(676.4 to 1,700.3)     |
| Algeria                      | High body-mass index<br>612.4<br>(339.9 to 975.6)          | High blood pressure<br>527.0<br>(278.5 to 852.6)           | Tobacco<br>497.2<br>(278.0 to 826.5)                          | High fasting plasma glucose<br>450.5<br>(202.7 to 847.0)        | High total cholesterol<br>338.9<br>(173.4 to 522.9)          | Ambient particulate matter<br>329.8<br>(212.6 to 482.2)        | Low whole grains<br>247.4<br>(126.5 to 444.4)                 | Low fruit<br>212.1<br>(98.1 to 360.1)               | Low nuts and seeds<br>208.0<br>(100.3 to 340.0)              | Impaired kidney function<br>163.2<br>(86.3 to 241.4)  |
| Bahrain                      | High body-mass index<br>37.1<br>(19.3 to 70.3)             | High fasting plasma glucose<br>31.3<br>(15.2 to 59.6)      | High blood pressure<br>22.2<br>(10.6 to 44.8)                 | Tobacco<br>20.8<br>(9.9 to 42.5)                                | High total cholesterol<br>17.1<br>(6.5 to 35.5)              | Ambient particulate matter<br>12.6<br>(5.9 to 25.2)            | Low whole grains<br>11.0<br>(4.7 to 25.9)                     | Impaired kidney function<br>7.5<br>(4.1 to 12.3)    | Low nuts and seeds<br>7.3<br>(2.7 to 18.5)                   | Low omega-3<br>5.8<br>(1.0 to 15.5)                   |
| Egypt                        | High body-mass index<br>2,979.7<br>(1,870.2 to 4,598.2)    | High blood pressure<br>2,091.0<br>(1,132.1 to 3,105.9)     | High fasting plasma glucose<br>1,817.9<br>(795.1 to 2,844.5)  | Tobacco<br>1,682.1<br>(876.7 to 2,622.8)                        | High total cholesterol<br>1,384.9<br>(709.9 to 2,086.1)      | Ambient particulate matter<br>1,144.8<br>(649.5 to 1,703.1)    | Low whole grains<br>792.2<br>(433.0 to 1,368.7)               | Low nuts and seeds<br>609.3<br>(373.5 to 1,256.5)   | Low omega-3<br>603.3<br>(153.8 to 1,137.6)                   | Impaired kidney function<br>606.3<br>(362.6 to 911.0) |
| Iran                         | High body-mass index<br>1,608.6<br>(876.4 to 2,880.3)      | High blood pressure<br>1,172.9<br>(497.3 to 2,095.7)       | Tobacco<br>1,142.0<br>(593.6 to 1,835.0)                      | High total cholesterol<br>1,079.7<br>(491.5 to 1,787.3)         | High fasting plasma glucose<br>988.1<br>(333.9 to 1,984.8)   | Ambient particulate matter<br>755.3<br>(403.0 to 1,135.3)      | Low whole grains<br>568.5<br>(259.7 to 1,038.5)               | Low nuts and seeds<br>432.7<br>(175.1 to 851.1)     | Low omega-3<br>390.5<br>(87.4 to 881.4)                      | High sodium<br>325.2<br>(15.7 to 964.1)               |
| Iraq                         | High body-mass index<br>1,635.6<br>(1,097.0 to 2,515.0)    | High blood pressure<br>1,346.5<br>(850.7 to 2,002.3)       | High fasting plasma glucose<br>1,187.4<br>(721.5 to 1,920.9)  | Tobacco<br>1,081.6<br>(635.1 to 1,680.0)                        | High total cholesterol<br>850.5<br>(494.8 to 1,271.7)        | Ambient particulate matter<br>676.4<br>(458.8 to 978.8)        | Low whole grains<br>537.2<br>(283.2 to 965.7)                 | Low fruit<br>528.7<br>(333.7 to 884.3)              | Short gestation<br>439.6<br>(139.5 to 805.5)                 | Low nuts and seeds<br>436.3<br>(205.3 to 710.7)       |
| Jordan                       | High body-mass index<br>145.8<br>(79.9 to 240.0)           | High fasting plasma glucose<br>112.8<br>(56.5 to 211.2)    | High blood pressure<br>101.5<br>(53.1 to 180.3)               | Tobacco<br>85.4<br>(41.9 to 164.5)                              | High total cholesterol<br>85.4<br>(34.4 to 117.6)            | Ambient particulate matter<br>49.2<br>(29.0 to 85.7)           | Impaired kidney function<br>41.6<br>(20.2 to 76.0)            | Low whole grains<br>37.2<br>(18.6 to 68.0)          | Low fruit<br>32.1<br>(14.6 to 60.7)                          | Low nuts and seeds<br>31.4<br>(14.1 to 62.0)          |
| Kuwait                       | High body-mass index<br>93.2<br>(41.7 to 212.5)            | High fasting plasma glucose<br>70.6<br>(24.6 to 165.2)     | High blood pressure<br>69.5<br>(28.2 to 154.7)                | High total cholesterol<br>50.5<br>(18.9 to 123.6)               | Tobacco<br>48.8<br>(19.0 to 118.2)                           | Ambient particulate matter<br>33.5<br>(13.9 to 71.9)           | Low whole grains<br>27.7<br>(10.5 to 70.5)                    | Low nuts and seeds<br>21.9<br>(7.0 to 60.5)         | Impaired kidney function<br>21.5<br>(9.1 to 45.6)            | Low fruit<br>16.7<br>(5.0 to 45.7)                    |
| Lebanon                      | High body-mass index<br>73.8<br>(41.9 to 142.2)            | Tobacco<br>68.9<br>(35.3 to 128.3)                         | High blood pressure<br>55.0<br>(24.2 to 110.7)                | High fasting plasma glucose<br>54.2<br>(23.1 to 112.7)          | High total cholesterol<br>45.4<br>(17.7 to 94.4)             | Ambient particulate matter<br>27.6<br>(14.4 to 54.3)           | Low whole grains<br>23.6<br>(10.3 to 53.2)                    | Low omega-3<br>14.8<br>(2.6 to 45.3)                | Impaired kidney function<br>14.5<br>(7.7 to 24.6)            | High sodium<br>13.3<br>(0.7 to 40.8)                  |
| Libya                        | High body-mass index<br>154.8<br>(94.2 to 221.9)           | High fasting plasma glucose<br>115.9<br>(57.8 to 198.1)    | High blood pressure<br>115.9<br>(64.3 to 170.1)               | Tobacco<br>86.0<br>(47.6 to 127.9)                              | High total cholesterol<br>86.0<br>(32.2 to 95.0)             | Ambient particulate matter<br>60.8<br>(37.3 to 83.7)           | Impaired kidney function<br>45.7<br>(22.7 to 82.8)            | Low whole grains<br>44.2<br>(21.0 to 68.7)          | Low nuts and seeds<br>31.7<br>(15.7 to 52.6)                 | Low omega-3<br>26.3<br>(6.1 to 49.8)                  |
| Morocco                      | High blood pressure<br>779.8<br>(488.8 to 1,142.8)         | High body-mass index<br>691.8<br>(461.6 to 1,055.0)        | High fasting plasma glucose<br>673.4<br>(410.6 to 1,077.7)    | Tobacco<br>532.4<br>(325.4 to 794.6)                            | High total cholesterol<br>458.4<br>(251.7 to 720.0)          | Ambient particulate matter<br>338.1<br>(222.4 to 500.9)        | Low nuts and seeds<br>268.5<br>(135.0 to 443.0)               | Low whole grains<br>256.7<br>(151.0 to 433.3)       | Low omega-3<br>212.8<br>(53.8 to 436.1)                      | Impaired kidney function<br>200.8<br>(138.5 to 297.8) |
| Palestine                    | High body-mass index<br>151.0<br>(74.8 to 266.2)           | Tobacco<br>107.7<br>(53.3 to 186.8)                        | High blood pressure<br>95.0<br>(42.8 to 159.2)                | High fasting plasma glucose<br>90.9<br>(35.8 to 168.6)          | High total cholesterol<br>83.8<br>(33.8 to 144.4)            | Ambient particulate matter<br>64.8<br>(32.4 to 109.4)          | Low whole grains<br>47.8<br>(19.3 to 88.9)                    | Low fruit<br>43.5<br>(18.8 to 77.5)                 | Low vegetables<br>40.8<br>(17.2 to 75.8)                     | Low nuts and seeds<br>39.7<br>(14.3 to 77.5)          |
| Oman                         | High fasting plasma glucose<br>131.2<br>(64.9 to 244.0)    | High blood pressure<br>130.6<br>(62.5 to 229.2)            | High body-mass index<br>129.6<br>(69.7 to 213.7)              | High total cholesterol<br>83.3<br>(37.6 to 150.7)               | Tobacco<br>68.9<br>(32.8 to 114.7)                           | Ambient particulate matter<br>61.8<br>(32.2 to 100.6)          | Low whole grains<br>53.4<br>(26.6 to 102.8)                   | Low nuts and seeds<br>44.6<br>(20.7 to 80.3)        | Low omega-3<br>29.9<br>(5.9 to 68.9)                         | Impaired kidney function<br>29.0<br>(16.5 to 43.8)    |
| Qatar                        | High body-mass index<br>40.1<br>(19.5 to 80.7)             | High fasting plasma glucose<br>31.0<br>(11.8 to 82.1)      | High blood pressure<br>24.5<br>(9.5 to 60.4)                  | Tobacco<br>21.5<br>(7.9 to 48.8)                                | High total cholesterol<br>17.3<br>(5.6 to 45.1)              | Ambient particulate matter<br>14.0<br>(5.1 to 30.8)            | Low whole grains<br>11.5<br>(4.0 to 29.1)                     | Impaired kidney function<br>7.8<br>(3.2 to 18.6)    | Alcohol use<br>6.9<br>(2.8 to 16.3)                          | High sodium<br>5.6<br>(0.2 to 18.4)                   |
| Saudi Arabia                 | High body-mass index<br>545.1<br>(240.5 to 946.3)          | High blood pressure<br>487.4<br>(210.0 to 880.3)           | High fasting plasma glucose<br>458.7<br>(176.9 to 845.7)      | Tobacco<br>263.6<br>(120.6 to 486.1)                            | High total cholesterol<br>262.0<br>(105.2 to 482.1)          | Ambient particulate matter<br>245.9<br>(108.9 to 458.9)        | Impaired kidney function<br>211.0<br>(99.4 to 355.1)          | Low nuts and seeds<br>165.1<br>(65.7 to 309.4)      | Low whole grains<br>159.3<br>(65.6 to 335.5)                 | Low fruit<br>129.8<br>(50.4 to 262.8)                 |
| Sudan                        | Short gestation<br>1,189.4<br>(603.8 to 2,711.9)           | High blood pressure<br>736.4<br>(376.4 to 1,668.5)         | High body-mass index<br>1,125.9<br>(674.5 to 1,643.8)         | Low birth weight<br>953.1<br>(446.6 to 2,031.4)                 | Ambient particulate matter<br>862.5<br>(504.0 to 1,318.6)    | High fasting plasma glucose<br>718.7<br>(359.5 to 1,094.0)     | Household air pollution<br>705.3<br>(411.2 to 1,122.8)        | Child wasting<br>663.9<br>(128.8 to 1,637.5)        | High total cholesterol<br>637.0<br>(347.3 to 993.8)          | Tobacco<br>634.7<br>(337.8 to 1,046.5)                |
| Syria                        | High body-mass index<br>515.2<br>(285.3 to 888.0)          | High blood pressure<br>431.2<br>(222.8 to 745.5)           | Tobacco<br>379.3<br>(184.5 to 676.4)                          | High total cholesterol<br>326.2<br>(150.2 to 573.6)             | High fasting plasma glucose<br>257.6<br>(114.7 to 501.3)     | Ambient particulate matter<br>235.4<br>(124.6 to 393.0)        | Low whole grains<br>198.7<br>(92.9 to 348.6)                  | Low vegetables<br>166.0<br>(73.3 to 291.2)          | Low nuts and seeds<br>160.6<br>(60.9 to 314.8)               | Low fruit<br>139.9<br>(56.7 to 289.8)                 |
| Tunisia                      | Tobacco<br>200.0<br>(119.6 to 312.0)                       | High body-mass index<br>163.6<br>(106.7 to 269.2)          | High blood pressure<br>144.4<br>(84.8 to 214.3)               | High fasting plasma glucose<br>135.4<br>(75.3 to 232.9)         | High total cholesterol<br>98.0<br>(48.8 to 154.9)            | Ambient particulate matter<br>92.2<br>(57.9 to 127.5)          | Low whole grains<br>59.8<br>(31.9 to 101.3)                   | Impaired kidney function<br>51.6<br>(27.6 to 76.8)  | Low fruit<br>49.8<br>(26.3 to 74.7)                          | Low nuts and seeds<br>48.7<br>(22.7 to 82.9)          |

| Location                         | Risk #1                                                   | Risk #2                                                     | Risk #3                                                          | Risk #4                                                           | Risk #5                                                        | Risk #6                                                       | Risk #7                                                       | Risk #8                                                    | Risk #9                                                 | Risk #10                                                |
|----------------------------------|-----------------------------------------------------------|-------------------------------------------------------------|------------------------------------------------------------------|-------------------------------------------------------------------|----------------------------------------------------------------|---------------------------------------------------------------|---------------------------------------------------------------|------------------------------------------------------------|---------------------------------------------------------|---------------------------------------------------------|
| Turkey                           | Tobacco<br>1,973.4<br>(1,216.3 to 3,053.8)                | High body-mass index<br>1,453.3<br>(947.7 to 2,303.9)       | High blood pressure<br>1,250.5<br>(710.3 to 2,057.5)             | High fasting plasma glucose<br>984.5<br>(505.0 to 1,713.1)        | High total cholesterol<br>689.4<br>(337.7 to 1,193.1)          | Ambient particulate matter<br>682.4<br>(449.5 to 1,078.3)     | Low whole grains<br>430.2<br>(225.5 to 739.4)                 | Impaired kidney function<br>418.7<br>(257.0 to 683.8)      | Low nuts and seeds<br>316.5<br>(152.9 to 739.4)         | Low omega-3<br>294.2<br>(76.6 to 731.2)                 |
| United Arab Emirates             | High body-mass index<br>206.5<br>(122.8 to 312.6)         | High fasting plasma glucose<br>165.1<br>(89.2 to 286.6)     | High blood pressure<br>148.7<br>(85.6 to 232.4)                  | Tobacco<br>114.3<br>(62.6 to 185.2)                               | High total cholesterol<br>104.0<br>(52.4 to 162.3)             | Ambient particulate matter<br>85.4<br>(51.9 to 128.4)         | Low whole grains<br>71.3<br>(35.0 to 113.3)                   | Alcohol use<br>70.5<br>(43.2 to 126.2)                     | Impaired kidney function<br>55.0<br>(33.9 to 84.7)      | Low vegetables<br>41.1<br>(19.2 to 84.3)                |
| Yemen                            | High body-mass index<br>926.6<br>(548.0 to 1,426.7)       | Tobacco<br>835.3<br>(458.0 to 1,253.2)                      | High blood pressure<br>815.0<br>(502.6 to 1,248.1)               | Short gestation<br>641.1<br>(198.4 to 1,357.9)                    | High total cholesterol<br>641.1<br>(371.0 to 959.7)            | Ambient particulate matter<br>589.0<br>(363.3 to 831.1)       | Low birth weight<br>511.0<br>(161.7 to 1,072.2)               | High fasting plasma glucose<br>451.4<br>(242.4 to 763.7)   | Low whole grains<br>429.0<br>(234.9 to 723.6)           | Low fruit<br>360.8<br>(189.0 to 612.1)                  |
| South Asia                       | High blood pressure<br>44,674.2<br>(24,369.6 to 68,424.6) | Tobacco<br>39,681.6<br>(22,418.4 to 64,380.3)               | Ambient particulate matter<br>30,776.2<br>(17,965.5 to 45,300.2) | High fasting plasma glucose<br>28,444.0<br>(15,239.6 to 50,946.9) | High body-mass index<br>27,798.4<br>(15,324.6 to 49,985.1)     | Household air pollution<br>25,745.8<br>(15,984.8 to 37,850.9) | High total cholesterol<br>25,488.6<br>(13,489.6 to 41,297.1)  | Low fruit<br>19,684.4<br>(9,769.1 to 34,391.7)             | Low vegetables<br>17,762.8<br>(8,625.6 to 29,536.1)     | Low nuts and seeds<br>15,303.1<br>(7,915.6 to 27,059.9) |
| South Asia                       | High blood pressure<br>44,674.2<br>(24,369.6 to 68,424.6) | Tobacco<br>39,681.6<br>(22,418.4 to 64,380.3)               | Ambient particulate matter<br>30,776.2<br>(17,965.5 to 45,300.2) | High fasting plasma glucose<br>28,444.0<br>(15,239.6 to 50,946.9) | High body-mass index<br>27,798.4<br>(15,324.6 to 49,985.1)     | Household air pollution<br>25,745.8<br>(15,984.8 to 37,850.9) | High total cholesterol<br>25,488.6<br>(13,489.6 to 41,297.1)  | Low fruit<br>19,684.4<br>(9,769.1 to 34,391.7)             | Low vegetables<br>17,762.8<br>(8,625.6 to 29,536.1)     | Low nuts and seeds<br>15,303.1<br>(7,915.6 to 27,059.9) |
| Bangladesh                       | Tobacco<br>3,872.3<br>(2,454.0 to 5,862.1)                | High blood pressure<br>2,738.1<br>(1,694.8 to 4,347.6)      | Household air pollution<br>2,249.0<br>(1,440.1 to 3,328.6)       | Ambient particulate matter<br>2,148.9<br>(1,488.1 to 3,216.4)     | High fasting plasma glucose<br>1,964.8<br>(1,103.9 to 3,187.6) | Low fruit<br>1,573.6<br>(941.1 to 2,529.4)                    | High body-mass index<br>1,557.7<br>(734.3 to 2,585.4)         | Low whole grains<br>1,314.0<br>(783.6 to 2,246.2)          | High total cholesterol<br>1,216.7<br>(769.2 to 1,904.7) | Low vegetables<br>1,216.7<br>(617.2 to 2,060.7)         |
| Bhutan                           | High blood pressure<br>13.4<br>(7.0 to 20.4)              | High body-mass index<br>10.2<br>(5.9 to 17.0)               | High total cholesterol<br>9.0<br>(4.9 to 13.9)                   | High fasting plasma glucose<br>8.4<br>(4.4 to 13.8)               | Ambient particulate matter<br>8.2<br>(5.2 to 12.0)             | Tobacco<br>7.9<br>(4.1 to 13.8)                               | Low whole grains<br>6.1<br>(3.4 to 11.0)                      | Low fruit<br>5.9<br>(3.3 to 9.8)                           | Low vegetables<br>5.4<br>(2.9 to 9.6)                   | Low nuts and seeds<br>5.1<br>(2.5 to 8.2)               |
| India                            | High blood pressure<br>36,549.1<br>(19,086.8 to 57,054.8) | Tobacco<br>29,654.0<br>(15,885.7 to 51,226.0)               | Ambient particulate matter<br>24,923.3<br>(13,375.9 to 37,935.1) | High fasting plasma glucose<br>22,972.6<br>(11,604.5 to 43,124.1) | High total cholesterol<br>21,284.8<br>(10,114.6 to 36,442.4)   | High body-mass index<br>21,203.3<br>(10,886.7 to 40,421.5)    | Household air pollution<br>20,160.8<br>(11,675.8 to 31,355.6) | Low fruit<br>15,605.1<br>(7,340.7 to 27,989.5)             | Low vegetables<br>14,500.8<br>(6,607.1 to 24,563.9)     | Low nuts and seeds<br>12,854.9<br>(6,254.0 to 24,383.2) |
| Nepal                            | Tobacco<br>741.7<br>(434.9 to 1,142.0)                    | High blood pressure<br>611.6<br>(376.5 to 875.1)            | Household air pollution<br>520.8<br>(312.2 to 700.6)             | Ambient particulate matter<br>413.7<br>(283.3 to 584.6)           | High body-mass index<br>356.3<br>(197.1 to 597.2)              | High fasting plasma glucose<br>320.5<br>(173.1 to 512.6)      | High total cholesterol<br>316.7<br>(182.6 to 461.1)           | Low whole grains<br>264.4<br>(159.1 to 442.8)              | Low fruit<br>257.9<br>(146.1 to 404.1)                  | Low nuts and seeds<br>214.3<br>(117.3 to 334.9)         |
| Pakistan                         | Tobacco<br>5,243.6<br>(3,038.1 to 7,865.8)                | High blood pressure<br>4,822.3<br>(3,142.2 to 6,605.2)      | High body-mass index<br>4,651.1<br>(2,840.5 to 6,846.1)          | Short gestation<br>3,634.7<br>(1,595.4 to 6,659.7)                | High fasting plasma glucose<br>3,404.5<br>(2,173.0 to 5,081.6) | Ambient particulate matter<br>3,284.9<br>(2,314.1 to 4,368.3) | High total cholesterol<br>2,779.0<br>(1,617.5 to 3,916.5)     | Household air pollution<br>2,728.7<br>(1,809.6 to 3,872.7) | Low whole grains<br>2,283.4<br>(1,365.7 to 3,263.5)     | Low fruit<br>2,211.1<br>(1,265.3 to 3,589.1)            |
| Sub-Saharan Africa               | Short gestation<br>28,334.8<br>(19,057.1 to 42,880.9)     | Child wasting<br>21,494.9<br>(10,638.5 to 32,598.2)         | Household air pollution<br>18,796.7<br>(12,425.5 to 27,163.8)    | Ambient particulate matter<br>17,663.6<br>(11,995.8 to 23,848.2)  | High blood pressure<br>13,321.1<br>(8,129.3 to 20,918.7)       | Low birth weight<br>13,035.9<br>(9,688.3 to 17,492.8)         | Alcohol use<br>12,794.1<br>(8,893.9 to 18,978.4)              | High body-mass index<br>12,212.6<br>(7,191.5 to 20,520.3)  | Tobacco<br>11,267.7<br>(7,192.5 to 16,197.0)            | Handwashing<br>9,853.9<br>(5,220.8 to 15,170.3)         |
| Central Sub-Saharan Africa       | Short gestation<br>4,114.3<br>(2,378.5 to 6,225.8)        | Child wasting<br>3,353.6<br>(1,409.5 to 6,102.8)            | Household air pollution<br>2,520.4<br>(1,405.8 to 3,803.0)       | Low birth weight<br>2,442.6<br>(1,465.5 to 3,400.4)               | Ambient particulate matter<br>2,385.5<br>(1,568.9 to 3,466.2)  | High body-mass index<br>1,614.8<br>(859.9 to 2,769.1)         | High blood pressure<br>1,607.2<br>(808.6 to 2,692.5)          | Alcohol use<br>1,412.7<br>(679.5 to 2,638.3)               | Tobacco<br>1,266.2<br>(753.4 to 2,194.0)                | Handwashing<br>1,246.0<br>(588.5 to 2,126.9)            |
| Angola                           | Short gestation<br>988.3<br>(606.6 to 1,775.8)            | Child wasting<br>780.5<br>(272.6 to 1,645.8)                | Ambient particulate matter<br>530.5<br>(322.5 to 888.2)          | Low birth weight<br>502.4<br>(300.5 to 806.9)                     | Household air pollution<br>475.0<br>(141.0 to 1,086.1)         | High blood pressure<br>429.3<br>(235.6 to 767.0)              | High body-mass index<br>413.2<br>(222.0 to 720.4)             | Alcohol use<br>389.0<br>(166.8 to 757.3)                   | Handwashing<br>358.6<br>(166.5 to 651.1)                | Unsafe water<br>354.4<br>(135.9 to 732.8)               |
| Central African Republic         | Alcohol use<br>217.3<br>(68.0 to 450.2)                   | Child wasting<br>216.1<br>(62.2 to 410.3)                   | Short gestation<br>177.8<br>(85.1 to 301.7)                      | Household air pollution<br>155.0<br>(77.8 to 245.6)               | Ambient particulate matter<br>146.2<br>(83.8 to 223.2)         | Low birth weight<br>109.0<br>(56.3 to 176.1)                  | High body-mass index<br>105.0<br>(47.1 to 171.1)              | High blood pressure<br>99.3<br>(36.7 to 181.2)             | Tobacco<br>87.2<br>(37.5 to 159.1)                      | High fasting plasma glucose<br>77.1<br>(30.0 to 146.7)  |
| Congo                            | High body-mass index<br>78.2<br>(38.2 to 142.7)           | High blood pressure<br>71.4<br>(32.2 to 133.2)              | Household air pollution<br>64.8<br>(30.1 to 116.7)               | Short gestation<br>63.8<br>(33.3 to 117.8)                        | Ambient particulate matter<br>63.2<br>(36.1 to 109.1)          | Alcohol use<br>58.4<br>(22.2 to 117.9)                        | Tobacco<br>52.3<br>(25.9 to 96.7)                             | High fasting plasma glucose<br>46.9<br>(21.8 to 92.5)      | Child wasting<br>42.7<br>(10.6 to 115.6)                | Low birth weight<br>39.6<br>(22.0 to 69.6)              |
| Democratic Republic of the Congo | Short gestation<br>2,844.6<br>(1,417.5 to 4,767.0)        | Child wasting<br>2,331.5<br>(935.3 to 4,240.1)              | Household air pollution<br>1,869.2<br>(952.8 to 2,954.4)         | Low birth weight<br>1,768.4<br>(933.4 to 2,651.8)                 | Ambient particulate matter<br>1,637.5<br>(963.8 to 2,391.6)    | High blood pressure<br>1,462.2<br>(384.0 to 1,792.3)          | High body-mass index<br>968.2<br>(456.8 to 1,631.9)           | Tobacco<br>813.4<br>(389.0 to 1,507.4)                     | Child underweight<br>807.0<br>(377.0 to 1,540.6)        | Handwashing<br>788.3<br>(380.1 to 1,409.3)              |
| Equatorial Guinea                | Short gestation<br>29.9<br>(12.1 to 69.6)                 | Low birth weight<br>16.9<br>(7.6 to 34.6)                   | Alcohol use<br>13.4<br>(6.1 to 26.8)                             | High body-mass index<br>10.6<br>(6.1 to 17.3)                     | Ambient particulate matter<br>10.3<br>(5.7 to 17.6)            | Household air pollution<br>8.9<br>(1.1 to 19.9)               | High blood pressure<br>8.9<br>(4.4 to 14.1)                   | High fasting plasma glucose<br>8.8<br>(3.9 to 12.8)        | Child wasting<br>6.9<br>(2.0 to 16.9)                   | Tobacco<br>6.1<br>(2.6 to 12.2)                         |
| Gabon                            | High body-mass index<br>25.5<br>(13.5 to 45.1)            | Alcohol use<br>25.5<br>(14.4 to 43.8)                       | High blood pressure<br>20.9<br>(10.3 to 41.3)                    | Ambient particulate matter<br>17.3<br>(11.0 to 26.9)              | Tobacco<br>16.3<br>(8.3 to 30.4)                               | High fasting plasma glucose<br>16.2<br>(7.9 to 29.8)          | Short gestation<br>14.7<br>(6.7 to 26.8)                      | Low birth weight<br>9.2<br>(4.6 to 16.4)                   | Low whole grains<br>8.6<br>(3.9 to 17.8)                | High total cholesterol<br>8.3<br>(4.0 to 15.3)          |
| Eastern Sub-Saharan Africa       | Short gestation<br>11,590.6<br>(8,147.2 to 17,403.7)      | Household air pollution<br>7,999.9<br>(5,173.0 to 11,174.8) | Child wasting<br>7,662.2<br>(4,091.9 to 12,157.8)                | Ambient particulate matter<br>6,577.5<br>(4,383.1 to 9,157.6)     | High blood pressure<br>6,005.3<br>(3,596.2 to 9,182.7)         | Alcohol use<br>5,348.0<br>(3,555.1 to 7,492.8)                | Low birth weight<br>4,670.5<br>(3,577.0 to 6,455.9)           | High body-mass index<br>4,594.5<br>(2,472.7 to 9,920.0)    | Tobacco<br>4,221.5<br>(2,592.4 to 6,519.5)              | Handwashing<br>3,925.5<br>(2,072.0 to 6,256.3)          |
| Burundi                          | Alcohol use<br>428.2<br>(240.0 to 863.8)                  | Household air pollution<br>265.1<br>(139.2 to 392.3)        | Child wasting<br>241.0<br>(117.3 to 424.1)                       | Ambient particulate matter<br>236.2<br>(146.0 to 337.3)           | Short gestation<br>214.6<br>(108.3 to 420.2)                   | High blood pressure<br>189.3<br>(85.9 to 347.4)               | High body-mass index<br>137.8<br>(56.1 to 267.1)              | Tobacco<br>131.2<br>(68.9 to 221.8)                        | Handwashing<br>109.8<br>(51.5 to 197.6)                 | Child stunting<br>101.0<br>(38.5 to 246.0)              |
| Comoros                          | High blood pressure<br>10.8<br>(5.9 to 16.9)              | Short gestation<br>10.6<br>(5.7 to 19.4)                    | Household air pollution<br>8.2<br>(4.3 to 14.8)                  | Tobacco<br>8.2<br>(4.9 to 14.0)                                   | Ambient particulate matter<br>8.1<br>(4.9 to 13.2)             | Unsafe water<br>7.4<br>(1.9 to 18.2)                          | High body-mass index<br>7.3<br>(3.8 to 13.2)                  | Unsafe sanitation<br>6.9<br>(2.8 to 14.3)                  | Child wasting<br>6.7<br>(2.9 to 12.0)                   | Handwashing<br>6.1<br>(2.4 to 11.8)                     |
| Djibouti                         | Tobacco<br>15.5<br>(8.1 to 24.5)                          | Ambient particulate matter<br>13.8<br>(8.6 to 21.4)         | High blood pressure<br>13.3<br>(7.4 to 21.9)                     | Child wasting<br>13.1<br>(5.6 to 23.5)                            | Short gestation<br>11.6<br>(4.4 to 22.7)                       | High body-mass index<br>10.7<br>(5.7 to 17.1)                 | High fasting plasma glucose<br>6.5<br>(3.5 to 10.6)           | High total cholesterol<br>6.1<br>(3.3 to 10.6)             | Household air pollution<br>6.1<br>(0.3 to 20.2)         | Low fruit<br>5.9<br>(3.0 to 11.3)                       |
| Eritrea                          | Child wasting<br>110.1<br>(47.2 to 196.8)                 | Household air pollution<br>104.9<br>(17.0 to 214.1)         | Ambient particulate matter<br>103.3<br>(61.7 to 163.3)           | Short gestation<br>95.1<br>(45.1 to 156.5)                        | High blood pressure<br>91.3<br>(34.6 to 127.4)                 | Tobacco<br>64.3<br>(35.5 to 109.4)                            | Unsafe water<br>62.3<br>(19.5 to 126.1)                       | Handwashing<br>60.8<br>(26.2 to 108.8)                     | Unsafe sanitation<br>58.9<br>(25.1 to 108.4)            | High body-mass index<br>57.8<br>(27.5 to 93.5)          |

| Location                    | Risk #1                                              | Risk #2                                                    | Risk #3                                                       | Risk #4                                                     | Risk #5                                                   | Risk #6                                                    | Risk #7                                                   | Risk #8                                                 | Risk #9                                                 | Risk #10                                                     |
|-----------------------------|------------------------------------------------------|------------------------------------------------------------|---------------------------------------------------------------|-------------------------------------------------------------|-----------------------------------------------------------|------------------------------------------------------------|-----------------------------------------------------------|---------------------------------------------------------|---------------------------------------------------------|--------------------------------------------------------------|
| Ethiopia                    | Short gestation<br>1,411.0<br>(2,396.6 to 4,938.3)   | Household air pollution<br>2,277.8<br>(1,446.0 to 3,703.5) | Ambient particulate matter<br>1,830.6<br>(1,226.5 to 2,639.2) | High blood pressure<br>1,743.7<br>(1,036.1 to 3,035.4)      | Child wasting<br>1,702.1<br>(550.9 to 3,223.9)            | Alcohol use<br>1,195.0<br>(519.6 to 2,194.7)               | Low birth weight<br>1,158.9<br>(830.9 to 1,658.2)         | High body-mass index<br>1,046.0<br>(489.6 to 2,029.4)   | Handwashing<br>1,027.3<br>(482.1 to 1,663.9)            | High fasting plasma glucose<br>1,015.4<br>(597.3 to 1,960.0) |
| Kenya                       | Short gestation<br>777.7<br>(477.1 to 1,389.1)       | Unsafe water<br>752.0<br>(155.7 to 1,809.6)                | Unsafe sanitation<br>722.3<br>(298.0 to 1,649.9)              | Handwashing<br>639.0<br>(271.2 to 1,220.4)                  | Child wasting<br>635.7<br>(242.7 to 1,395.3)              | Household air pollution<br>550.8<br>(297.3 to 935.8)       | Ambient particulate matter<br>444.5<br>(242.9 to 829.4)   | High blood pressure<br>367.0<br>(204.0 to 601.1)        | Tobacco<br>353.6<br>(200.1 to 607.0)                    | High body-mass index<br>304.2<br>(161.7 to 518.1)            |
| Madagascar                  | Short gestation<br>659.4<br>(374.3 to 1,020.5)       | Child wasting<br>652.1<br>(415.2 to 943.1)                 | High blood pressure<br>515.6<br>(272.3 to 846.0)              | Household air pollution<br>504.1<br>(287.7 to 760.8)        | Ambient particulate matter<br>455.4<br>(327.1 to 584.1)   | Tobacco<br>393.3<br>(222.3 to 637.0)                       | High body-mass index<br>360.8<br>(166.1 to 645.7)         | Child underweight<br>323.9<br>(227.3 to 477.9)          | Low birth weight<br>315.0<br>(178.7 to 469.3)           | Low whole grains<br>231.4<br>(120.3 to 377.1)                |
| Malawi                      | Short gestation<br>543.1<br>(355.5 to 810.2)         | Child wasting<br>357.8<br>(150.8 to 718.9)                 | Household air pollution<br>321.8<br>(163.6 to 533.1)          | Ambient particulate matter<br>273.3<br>(151.9 to 452.2)     | Low birth weight<br>272.8<br>(198.5 to 391.1)             | High blood pressure<br>221.6<br>(93.5 to 472.0)            | High body-mass index<br>193.5<br>(89.2 to 420.6)          | Tobacco<br>191.9<br>(97.9 to 405.1)                     | Alcohol use<br>156.2<br>(56.1 to 385.8)                 | Handwashing<br>151.9<br>(73.3 to 296.9)                      |
| Mozambique                  | Short gestation<br>1,079.7<br>(601.7 to 1,648.8)     | Household air pollution<br>672.0<br>(419.5 to 1,112.0)     | High blood pressure<br>565.3<br>(314.7 to 969.9)              | Child wasting<br>514.4<br>(258.5 to 943.2)                  | Low birth weight<br>467.7<br>(304.2 to 665.3)             | Ambient particulate matter<br>429.1<br>(274.9 to 739.1)    | Tobacco<br>386.0<br>(206.4 to 639.1)                      | High body-mass index<br>375.6<br>(199.4 to 623.8)       | Alcohol use<br>320.2<br>(116.9 to 653.9)                | Handwashing<br>251.8<br>(131.7 to 432.6)                     |
| Rwanda                      | Alcohol use<br>294.8<br>(97.3 to 775.4)              | Short gestation<br>253.6<br>(155.5 to 363.4)               | Household air pollution<br>210.5<br>(111.5 to 365.0)          | Ambient particulate matter<br>189.0<br>(101.1 to 311.6)     | Child wasting<br>187.6<br>(84.5 to 382.8)                 | High blood pressure<br>154.2<br>(60.2 to 336.7)            | High body-mass index<br>118.3<br>(40.5 to 262.4)          | Low birth weight<br>113.4<br>(79.1 to 162.2)            | High fasting plasma glucose<br>102.1<br>(44.9 to 217.6) | Tobacco<br>95.0<br>(42.4 to 195.5)                           |
| Somalia                     | Short gestation<br>577.2<br>(360.2 to 910.3)         | Child wasting<br>523.9<br>(281.2 to 799.4)                 | Household air pollution<br>461.3<br>(282.8 to 665.4)          | Ambient particulate matter<br>342.3<br>(202.0 to 475.4)     | High body-mass index<br>270.8<br>(146.9 to 434.4)         | High blood pressure<br>256.2<br>(148.2 to 420.6)           | PCV vaccination<br>238.1<br>(130.3 to 338.4)              | Low birth weight<br>233.4<br>(145.2 to 362.3)           | Child underweight<br>226.4<br>(124.5 to 365.9)          | Tobacco<br>219.0<br>(123.4 to 355.4)                         |
| South Sudan                 | Child wasting<br>921.0<br>(598.1 to 1,375.1)         | Short gestation<br>902.9<br>(567.1 to 1,406.0)             | Household air pollution<br>636.7<br>(440.1 to 888.4)          | Ambient particulate matter<br>495.9<br>(355.0 to 699.6)     | Child underweight<br>373.8<br>(240.0 to 607.3)            | PCV vaccination<br>357.9<br>(230.0 to 546.4)               | Low birth weight<br>341.0<br>(191.6 to 571.0)             | Hib vaccination<br>328.3<br>(108.5 to 665.7)            | High body-mass index<br>293.4<br>(194.3 to 487.6)       | Handwashing<br>249.5<br>(140.9 to 353.6)                     |
| Tanzania                    | Short gestation<br>1,195.5<br>(771.2 to 1,895.7)     | Alcohol use<br>1,014.4<br>(435.7 to 1,893.9)               | Household air pollution<br>970.9<br>(596.6 to 1,546.7)        | High blood pressure<br>838.7<br>(457.3 to 1,363.5)          | Child wasting<br>823.7<br>(334.7 to 1,625.6)              | High body-mass index<br>757.8<br>(445.7 to 1,252.2)        | Ambient particulate matter<br>743.8<br>(493.9 to 1,217.4) | Tobacco<br>713.7<br>(398.0 to 1,185.1)                  | Low birth weight<br>642.8<br>(343.7 to 924.8)           | Unsafe sanitation<br>413.9<br>(225.7 to 923.4)               |
| Uganda                      | Short gestation<br>1,488.6<br>(689.9 to 2,569.6)     | Alcohol use<br>1,278.4<br>(519.1 to 2,529.6)               | Child wasting<br>885.0<br>(387.6 to 1,636.4)                  | Household air pollution<br>826.8<br>(469.9 to 1,245.5)      | Ambient particulate matter<br>786.5<br>(506.1 to 1,106.2) | Low birth weight<br>689.0<br>(332.4 to 1,123.0)            | High blood pressure<br>645.9<br>(386.2 to 1,104.2)        | High body-mass index<br>542.5<br>(275.7 to 938.8)       | Tobacco<br>406.3<br>(291.9 to 892.9)                    | High fasting plasma glucose<br>406.3<br>(240.2 to 715.0)     |
| Zambia                      | Short gestation<br>409.1<br>(235.7 to 744.2)         | Child wasting<br>274.8<br>(135.3 to 547.2)                 | Ambient particulate matter<br>274.4<br>(150.1 to 432.3)       | Alcohol use<br>265.9<br>(79.0 to 696.4)                     | Household air pollution<br>209.7<br>(124.1 to 433.5)      | Tobacco<br>225.9<br>(86.0 to 456.0)                        | High blood pressure<br>210.2<br>(89.4 to 355.3)           | Low birth weight<br>177.5<br>(112.1 to 293.1)           | High body-mass index<br>162.9<br>(53.5 to 350.7)        | Handwashing<br>146.0<br>(66.6 to 264.5)                      |
| Southern Sub-Saharan Africa | Tobacco<br>2,010.5<br>(1,178.6 to 3,628.6)           | Alcohol use<br>1,460.9<br>(746.9 to 2,343.6)               | High body-mass index<br>1,263.3<br>(759.0 to 2,525.3)         | Ambient particulate matter<br>1,048.7<br>(529.3 to 2,349.6) | High blood pressure<br>924.8<br>(394.2 to 1,953.5)        | High fasting plasma glucose<br>713.9<br>(310.1 to 1,524.5) | Child wasting<br>604.8<br>(73.0 to 2,502.6)               | Household air pollution<br>530.8<br>(238.7 to 1,144.4)  | Low fruit<br>428.8<br>(204.2 to 883.7)                  | Low whole grains<br>413.9<br>(179.3 to 883.2)                |
| Botswana                    | Alcohol use<br>69.0<br>(22.3 to 154.0)               | High body-mass index<br>60.2<br>(20.4 to 161.7)            | Tobacco<br>57.2<br>(17.1 to 133.6)                            | High blood pressure<br>52.1<br>(17.4 to 142.2)              | High fasting plasma glucose<br>48.4<br>(18.8 to 102.7)    | Ambient particulate matter<br>30.0<br>(11.5 to 72.6)       | Low fruit<br>23.6<br>(7.4 to 56.4)                        | Low whole grains<br>23.2<br>(7.1 to 61.7)               | High total cholesterol<br>18.3<br>(5.9 to 47.1)         | Household air pollution<br>18.1<br>(5.5 to 47.7)             |
| Lesotho                     | Alcohol use<br>65.9<br>(29.2 to 124.6)               | High body-mass index<br>35.9<br>(18.6 to 67.2)             | Ambient particulate matter<br>26.3<br>(14.4 to 45.6)          | Tobacco<br>25.9<br>(5.2 to 50.5)                            | Household air pollution<br>23.3<br>(11.6 to 43.0)         | High blood pressure<br>21.9<br>(10.1 to 43.0)              | High fasting plasma glucose<br>21.2<br>(9.4 to 43.0)      | Child wasting<br>21.0<br>(4.1 to 55.4)                  | Unsafe water<br>16.1<br>(3.8 to 35.3)                   | Short gestation<br>14.9<br>(7.0 to 27.7)                     |
| Namibia                     | Alcohol use<br>37.3<br>(14.1 to 69.8)                | High blood pressure<br>39.3<br>(13.2 to 57.8)              | Tobacco<br>27.5<br>(14.9 to 54.9)                             | High body-mass index<br>27.5<br>(12.1 to 51.8)              | High fasting plasma glucose<br>23.4<br>(10.3 to 47.8)     | Ambient particulate matter<br>22.8<br>(11.8 to 43.9)       | Child wasting<br>20.5<br>(3.8 to 75.6)                    | Household air pollution<br>18.3<br>(9.2 to 36.5)        | Short gestation<br>16.1<br>(6.3 to 27.5)                | Unsafe water<br>14.0<br>(3.8 to 36.7)                        |
| South Africa                | Tobacco<br>1,494.6<br>(860.1 to 2,629.2)             | Alcohol use<br>932.2<br>(398.7 to 2,491.9)                 | High body-mass index<br>880.2<br>(474.7 to 1,708.1)           | Ambient particulate matter<br>610.1<br>(347.5 to 1,381.9)   | High blood pressure<br>598.7<br>(261.8 to 1,276.7)        | High fasting plasma glucose<br>483.7<br>(203.4 to 1,084.2) | Low fruit<br>271.6<br>(128.1 to 553.1)                    | Low whole grains<br>261.0<br>(116.2 to 586.1)           | High total cholesterol<br>252.8<br>(98.8 to 582.9)      | Household air pollution<br>194.4<br>(98.6 to 407.5)          |
| Swaziland                   | Alcohol use<br>30.0<br>(9.9 to 63.9)                 | High body-mass index<br>26.4<br>(9.5 to 56.9)              | Tobacco<br>23.6<br>(8.9 to 53.9)                              | Ambient particulate matter<br>19.4<br>(8.6 to 39.2)         | Child wasting<br>19.0<br>(2.7 to 60.6)                    | High fasting plasma glucose<br>16.7<br>(5.3 to 36.6)       | Household air pollution<br>16.6<br>(6.2 to 38.4)          | Unsafe water<br>15.0<br>(2.1 to 40.1)                   | High blood pressure<br>14.6<br>(5.5 to 30.2)            | Unsafe sanitation<br>14.1<br>(3.6 to 36.3)                   |
| Zimbabwe                    | Child wasting<br>477.5<br>(35.2 to 2,117.7)          | Tobacco<br>350.9<br>(115.2 to 1,014.1)                     | Alcohol use<br>350.2<br>(67.1 to 1,167.1)                     | Ambient particulate matter<br>328.3<br>(112.2 to 1,068.9)   | High body-mass index<br>316.4<br>(119.9 to 745.5)         | Household air pollution<br>296.3<br>(89.2 to 833.0)        | High blood pressure<br>205.5<br>(56.3 to 580.2)           | Short gestation<br>161.3<br>(69.9 to 287.8)             | Handwashing<br>153.7<br>(24.2 to 637.8)                 | Unsafe sanitation<br>144.8<br>(17.9 to 673.1)                |
| Western Sub-Saharan Africa  | Short gestation<br>12,308.2<br>(7,874.4 to 19,034.4) | Child wasting<br>10,034.4<br>(4,997.2 to 14,598.7)         | Ambient particulate matter<br>7,609.3<br>(5,130.8 to 9,703.6) | Household air pollution<br>7,594.6<br>(4,932.8 to 10,290.4) | Low birth weight<br>5,683.2<br>(3,904.5 to 8,233.9)       | Unsafe sanitation<br>5,036.0<br>(2,523.6 to 7,596.7)       | High blood pressure<br>4,794.0<br>(3,137.7 to 7,371.8)    | High body-mass index<br>4,658.3<br>(3,001.2 to 7,263.9) | Alcohol use<br>4,636.7<br>(3,351.9 to 6,477.1)          | Unsafe water<br>4,598.3<br>(1,873.9 to 7,860.6)              |
| Benin                       | Short gestation<br>384.5<br>(153.5 to 619.3)         | Child wasting<br>340.1<br>(169.9 to 606.6)                 | Ambient particulate matter<br>246.0<br>(175.7 to 363.1)       | Household air pollution<br>243.5<br>(155.3 to 371.3)        | High body-mass index<br>216.4<br>(147.2 to 331.8)         | Low birth weight<br>193.9<br>(81.4 to 308.4)               | High blood pressure<br>191.0<br>(118.0 to 294.4)          | Unsafe water<br>182.3<br>(74.6 to 335.8)                | Unsafe sanitation<br>168.7<br>(81.3 to 279.3)           | Handwashing<br>161.3<br>(81.2 to 271.6)                      |
| Burkina Faso                | Short gestation<br>1,011.8<br>(571.8 to 1,706.9)     | Child wasting<br>790.2<br>(355.0 to 1,722.5)               | Household air pollution<br>790.2<br>(410.6 to 1,109.5)        | Ambient particulate matter<br>705.5<br>(399.3 to 991.3)     | Low birth weight<br>524.5<br>(306.9 to 760.5)             | Alcohol use<br>421.0<br>(215.1 to 656.5)                   | Handwashing<br>347.2<br>(178.6 to 540.7)                  | High blood pressure<br>328.6<br>(226.9 to 488.7)        | Child underweight<br>311.5<br>(137.6 to 614.1)          | Tobacco<br>311.3<br>(182.5 to 494.8)                         |
| Cameroon                    | Short gestation<br>731.0<br>(397.7 to 1,185.9)       | Child wasting<br>562.1<br>(138.0 to 1,564.3)               | Ambient particulate matter<br>560.0<br>(297.2 to 1,113.7)     | Household air pollution<br>463.7<br>(207.1 to 960.1)        | High body-mass index<br>441.4<br>(262.2 to 673.9)         | Alcohol use<br>397.8<br>(242.4 to 606.4)                   | Low birth weight<br>394.8<br>(229.0 to 618.4)             | High blood pressure<br>317.3<br>(182.5 to 493.3)        | Tobacco<br>276.0<br>(144.2 to 520.3)                    | Hib vaccination<br>220.0<br>(65.6 to 607.2)                  |
| Cape Verde                  | High blood pressure<br>9.2<br>(4.9 to 16.0)          | Tobacco<br>7.1<br>(4.3 to 12.8)                            | High body-mass index<br>7.1<br>(4.2 to 10.8)                  | Alcohol use<br>7.0<br>(4.0 to 10.0)                         | Ambient particulate matter<br>5.5<br>(3.1 to 8.5)         | High fasting plasma glucose<br>4.6<br>(2.4 to 7.9)         | Low whole grains<br>3.5<br>(1.8 to 5.9)                   | High total cholesterol<br>3.4<br>(1.8 to 5.7)           | Low fruit<br>3.2<br>(1.7 to 5.5)                        | Low vegetables<br>3.0<br>(1.6 to 5.3)                        |

| Location              | Risk #1                                            | Risk #2                                             | Risk #3                                                       | Risk #4                                                   | Risk #5                                                    | Risk #6                                              | Risk #7                                                  | Risk #8                                        | Risk #9                                                 | Risk #10                                                 |
|-----------------------|----------------------------------------------------|-----------------------------------------------------|---------------------------------------------------------------|-----------------------------------------------------------|------------------------------------------------------------|------------------------------------------------------|----------------------------------------------------------|------------------------------------------------|---------------------------------------------------------|----------------------------------------------------------|
| Chad                  | Child wasting<br>1,437.9<br>(787.4 to 2,122.0)     | Short gestation<br>1,312.8<br>(712.9 to 2,070.9)    | Household air pollution<br>692.1<br>(409.0 to 1,103.3)        | Ambient particulate matter<br>653.8<br>(429.2 to 912.6)   | Low birth weight<br>652.8<br>(355.1 to 1,031.4)            | Unsafe water<br>550.2<br>(199.6 to 929.7)            | Handwashing<br>494.6<br>(297.2 to 760.4)                 | Child underweight<br>488.9<br>(301.7 to 714.8) | Unsafe sanitation<br>482.8<br>(279.6 to 730.1)          | Hib vaccination<br>452.0<br>(155.3 to 842.6)             |
| Cote d'Ivoire         | Short gestation<br>766.2<br>(460.3 to 1,285.3)     | High blood pressure<br>596.6<br>(342.5 to 998.7)    | Ambient particulate matter<br>556.3<br>(357.5 to 816.9)       | Household air pollution<br>541.5<br>(289.3 to 905.5)      | Child wasting<br>518.2<br>(195.6 to 1,108.6)               | High body-mass index<br>515.4<br>(290.5 to 879.7)    | Alcohol use<br>426.1<br>(198.8 to 750.0)                 | Tobacco<br>413.7<br>(232.8 to 683.5)           | Low birth weight<br>410.5<br>(259.1 to 621.4)           | High fasting plasma glucose<br>289.6<br>(147.7 to 508.5) |
| The Gambia            | Short gestation<br>454.4<br>(27.6 to 72.5)         | High body-mass index<br>31.6<br>(21.4 to 45.3)      | High blood pressure<br>26.4<br>(17.7 to 41.7)                 | Tobacco<br>24.2<br>(15.2 to 38.2)                         | Ambient particulate matter<br>24.2<br>(16.8 to 31.3)       | Low birth weight<br>23.9<br>(13.9 to 34.4)           | Household air pollution<br>23.5<br>(16.3 to 31.4)        | Child wasting<br>22.2<br>(11.8 to 35.3)        | Alcohol use<br>17.6<br>(8.5 to 32.2)                    | Unsafe water<br>11.9<br>(4.2 to 22.3)                    |
| Ghana                 | Short gestation<br>464.8<br>(246.8 to 812.2)       | Alcohol use<br>464.2<br>(233.7 to 717.6)            | High blood pressure<br>436.3<br>(274.0 to 648.3)              | High body-mass index<br>404.5<br>(253.4 to 592.9)         | Ambient particulate matter<br>403.4<br>(283.5 to 525.4)    | Household air pollution<br>401.0<br>(257.9 to 547.3) | High fasting plasma glucose<br>204.1<br>(119.5 to 340.7) | Tobacco<br>202.7<br>(128.0 to 319.2)           | Low birth weight<br>180.7<br>(102.2 to 294.2)           | Low whole grains<br>179.0<br>(108.6 to 298.2)            |
| Guinea                | Short gestation<br>654.1<br>(422.7 to 966.5)       | Child wasting<br>420.1<br>(192.5 to 767.5)          | Household air pollution<br>400.4<br>(246.5 to 639.7)          | Ambient particulate matter<br>334.5<br>(222.1 to 495.1)   | Low birth weight<br>315.4<br>(214.2 to 422.9)              | High blood pressure<br>240.3<br>(139.9 to 405.8)     | High body-mass index<br>217.9<br>(126.2 to 351.3)        | Tobacco<br>184.1<br>(96.1 to 317.6)            | Handwashing<br>175.2<br>(92.3 to 266.6)                 | Unsafe water<br>147.9<br>(51.7 to 265.1)                 |
| Guinea-Bissau         | Short gestation<br>69.1<br>(48.2 to 98.9)          | High body-mass index<br>52.6<br>(33.7 to 76.4)      | High blood pressure<br>46.8<br>(30.4 to 66.5)                 | Household air pollution<br>44.6<br>(28.3 to 66.4)         | Ambient particulate matter<br>42.4<br>(31.9 to 59.1)       | Child wasting<br>38.4<br>(17.2 to 73.2)              | Alcohol use<br>37.6<br>(20.2 to 62.5)                    | Low birth weight<br>35.8<br>(24.0 to 48.1)     | Tobacco<br>31.1<br>(18.7 to 48.7)                       | High fasting plasma glucose<br>24.4<br>(14.5 to 40.0)    |
| Liberia               | Short gestation<br>116.6<br>(78.2 to 165.5)        | High body-mass index<br>102.4<br>(50.3 to 162.7)    | High blood pressure<br>86.9<br>(28.3 to 156.0)                | Child wasting<br>84.1<br>(31.0 to 174.8)                  | Household air pollution<br>81.9<br>(51.2 to 131.4)         | Alcohol use<br>75.3<br>(35.7 to 134.0)               | Unsafe water<br>64.8<br>(18.5 to 133.3)                  | Unsafe sanitation<br>62.0<br>(24.1 to 109.5)   | Ambient particulate matter<br>38.5<br>(38.6 to 96.0)    | Low birth weight<br>59.2<br>(41.1 to 80.5)               |
| Mali                  | Short gestation<br>1,629.0<br>(922.7 to 2,528.3)   | Child wasting<br>1,138.4<br>(574.0 to 1,889.7)      | Low birth weight<br>835.8<br>(521.7 to 1,214.0)               | Unsafe water<br>584.0<br>(188.0 to 1,045.8)               | Unsafe sanitation<br>521.1<br>(243.1 to 883.2)             | Household air pollution<br>508.1<br>(320.6 to 757.2) | Ambient particulate matter<br>446.3<br>(296.6 to 686.2)  | Handwashing<br>445.1<br>(213.1 to 769.0)       | Child underweight<br>380.8<br>(200.7 to 600.9)          | Hib vaccination<br>342.0<br>(132.5 to 619.1)             |
| Mauritania            | Short gestation<br>85.5<br>(55.1 to 120.3)         | High body-mass index<br>53.0<br>(32.3 to 80.3)      | Ambient particulate matter<br>52.8<br>(31.5 to 81.9)          | High blood pressure<br>47.2<br>(26.3 to 78.2)             | Household air pollution<br>39.4<br>(14.7 to 66.2)          | Low birth weight<br>38.8<br>(26.6 to 53.2)           | Child wasting<br>38.6<br>(16.4 to 63.8)                  | Tobacco<br>38.5<br>(18.1 to 70.1)              | Unsafe water<br>29.2<br>(8.6 to 61.0)                   | Unsafe sanitation<br>27.2<br>(12.9 to 53.5)              |
| Niger                 | Short gestation<br>1,550.3<br>(1,138.6 to 2,152.0) | Child wasting<br>1,495.0<br>(977.6 to 2,023.2)      | Household air pollution<br>857.6<br>(497.7 to 1,170.8)        | Ambient particulate matter<br>802.4<br>(555.8 to 1,071.1) | Unsafe water<br>789.9<br>(381.4 to 1,320.4)                | Hib vaccination<br>752.0<br>(340.7 to 1,347.1)       | Unsafe sanitation<br>681.0<br>(404.6 to 1,098.2)         | Handwashing<br>651.0<br>(347.2 to 938.2)       | Low birth weight<br>637.7<br>(454.8 to 872.2)           | Child underweight<br>609.4<br>(401.9 to 885.5)           |
| Nigeria               | Short gestation<br>2,565.2<br>(940.9 to 5,243.0)   | Child wasting<br>2,306.6<br>(553.4 to 4,057.1)      | Ambient particulate matter<br>2,255.9<br>(1,386.1 to 3,367.2) | Alcohol use<br>2,103.7<br>(1,201.1 to 3,432.0)            | Household air pollution<br>2,038.9<br>(1,059.1 to 3,397.8) | Unsafe sanitation<br>1,979.0<br>(844.5 to 3,521.0)   | Handwashing<br>1,242.4<br>(563.3 to 2,054.2)             | Unsafe water<br>1,234.7<br>(479.2 to 2,612.4)  | PCV vaccination<br>1,189.8<br>(597.5 to 1,781.0)        | Hib vaccination<br>1,167.4<br>(260.4 to 2,546.3)         |
| Sao Tome and Principe | High blood pressure<br>3.3<br>(1.8 to 6.3)         | Household air pollution<br>2.9<br>(0.7 to 5.4)      | High body-mass index<br>2.9<br>(1.6 to 5.0)                   | Alcohol use<br>2.7<br>(1.6 to 4.5)                        | Tobacco<br>2.4<br>(1.2 to 4.4)                             | Ambient particulate matter<br>2.0<br>(1.0 to 3.5)    | Short gestation<br>1.8<br>(1.1 to 2.8)                   | Low fruit<br>1.3<br>(0.5 to 2.6)               | High fasting plasma glucose<br>1.2<br>(0.6 to 2.4)      | Low whole grains<br>1.2<br>(0.6 to 2.4)                  |
| Senegal               | Short gestation<br>385.4<br>(200.3 to 580.4)       | High blood pressure<br>288.4<br>(172.6 to 443.8)    | High body-mass index<br>284.2<br>(174.9 to 442.6)             | Ambient particulate matter<br>244.6<br>(170.1 to 326.3)   | Tobacco<br>214.6<br>(130.2 to 345.6)                       | Child wasting<br>207.9<br>(87.9 to 410.8)            | Household air pollution<br>193.0<br>(95.4 to 310.0)      | Low birth weight<br>183.7<br>(95.9 to 278.2)   | High fasting plasma glucose<br>159.1<br>(97.6 to 244.2) | Low fruit<br>127.2<br>(71.3 to 212.1)                    |
| Sierra Leone          | Short gestation<br>338.5<br>(220.3 to 499.0)       | Child wasting<br>303.9<br>(139.6 to 557.5)          | Household air pollution<br>257.7<br>(163.4 to 410.8)          | Ambient particulate matter<br>211.7<br>(138.0 to 310.6)   | Alcohol use<br>183.9<br>(103.5 to 295.9)                   | High blood pressure<br>171.3<br>(99.0 to 260.6)      | Tobacco<br>168.3<br>(96.1 to 271.8)                      | Low birth weight<br>159.2<br>(107.5 to 220.2)  | Hib vaccination<br>137.3<br>(47.4 to 308.2)             | High body-mass index<br>132.8<br>(76.3 to 212.3)         |
| Togo                  | Short gestation<br>158.1<br>(95.7 to 239.0)        | Household air pollution<br>154.3<br>(90.7 to 227.7) | Ambient particulate matter<br>149.3<br>(87.5 to 220.8)        | High blood pressure<br>144.2<br>(69.9 to 267.0)           | Tobacco<br>112.1<br>(64.5 to 192.6)                        | High body-mass index<br>103.0<br>(41.0 to 201.6)     | Child wasting<br>95.8<br>(32.1 to 229.9)                 | Alcohol use<br>87.3<br>(42.5 to 164.3)         | Low birth weight<br>83.3<br>(56.3 to 116.6)             | Low fruit<br>67.1<br>(31.9 to 129.5)                     |

**Appendix Figure 4. Global life expectancy from 1990-2040 in the reference scenario (forecast), better health, and worse health scenarios. Dashed lines represent global male life expectancy, solid lines represent global female life expectancy. Black lines = past data from GBD 2016. Blue = reference scenario. Green = better health scenario. Red = worse health scenario. Shaded areas represent 95% uncertainty intervals.**

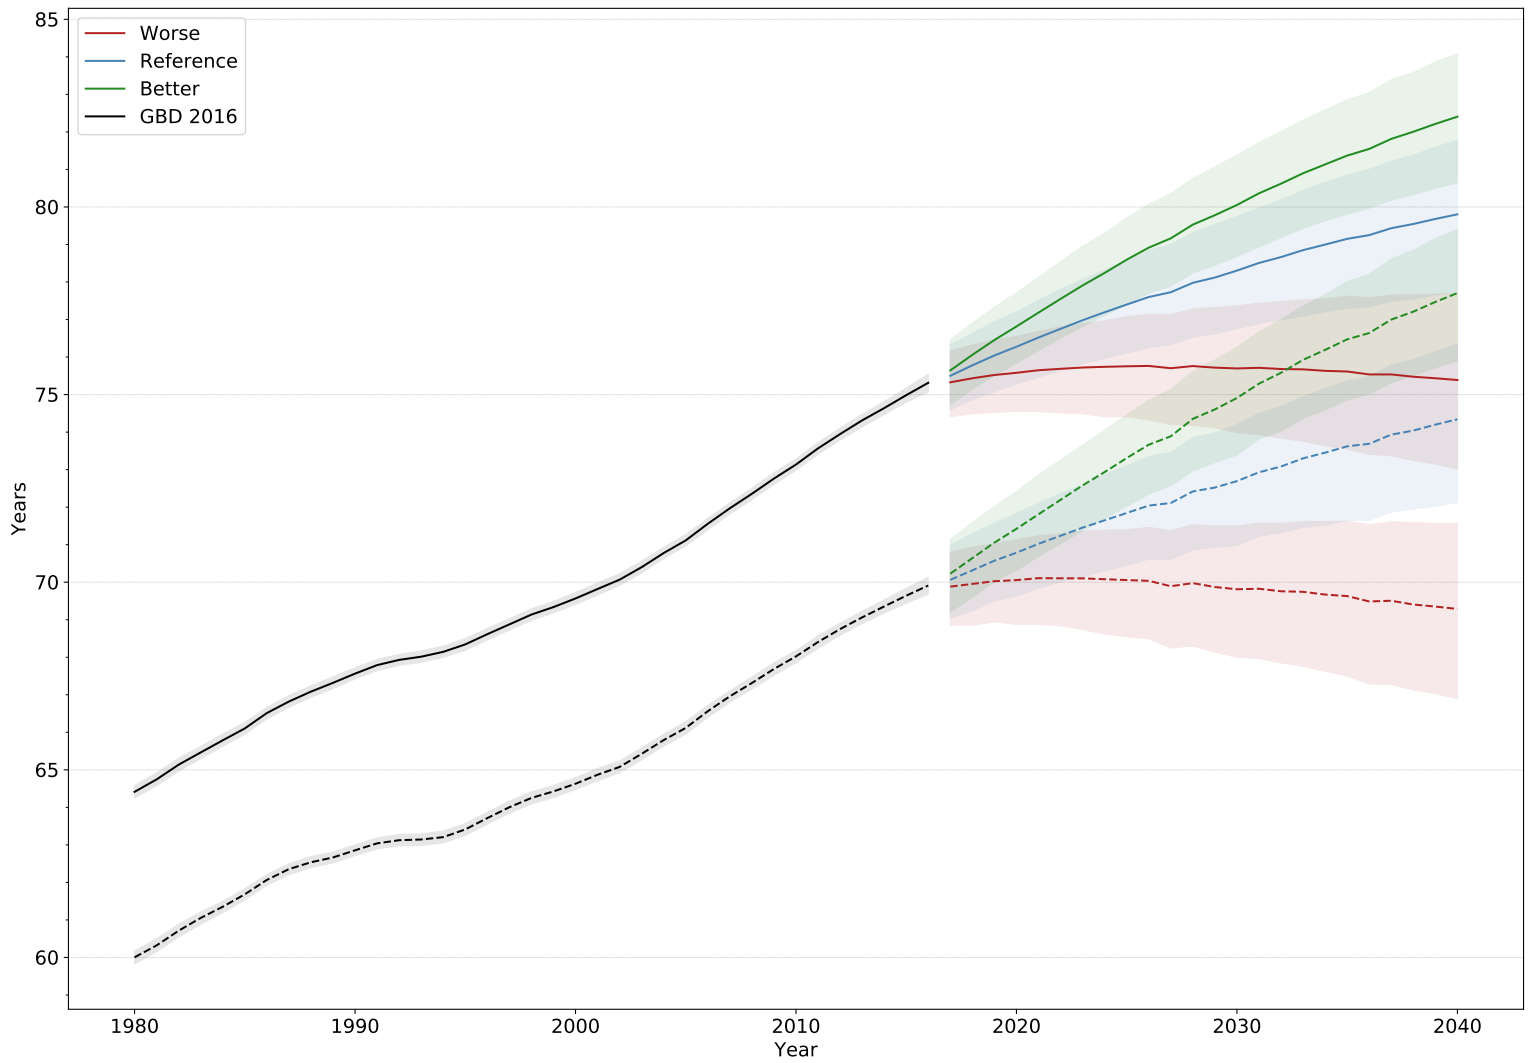

**Appendix Figure 5. Difference between the better and worse life expectancy scenarios in 2040 for both sexes combined.** Legend measured in years. ATG=Antigua and Barbuda. BRB=Barbados. COM=Comoros. DMA=Dominica. E Med=Eastern Mediterranean. FJI=Fiji. FSM=Federated States of Micronesia. GRD=Grenada. KIR=Kiribati. LCA=Saint Lucia. MDV=Maldives. MHL=Marshall Islands. MLT=Malta. MUS=Mauritius. SGP=Singapore. SLB=Solomon Islands. SYC=Seychelles. TLS=Timor-Leste. TON=Tonga. TTO=Trinidad and Tobago. VCT=Saint Vincent and the Grenadines. VUT=Vanuatu. W Africa=West Africa. WSM=Samoa.

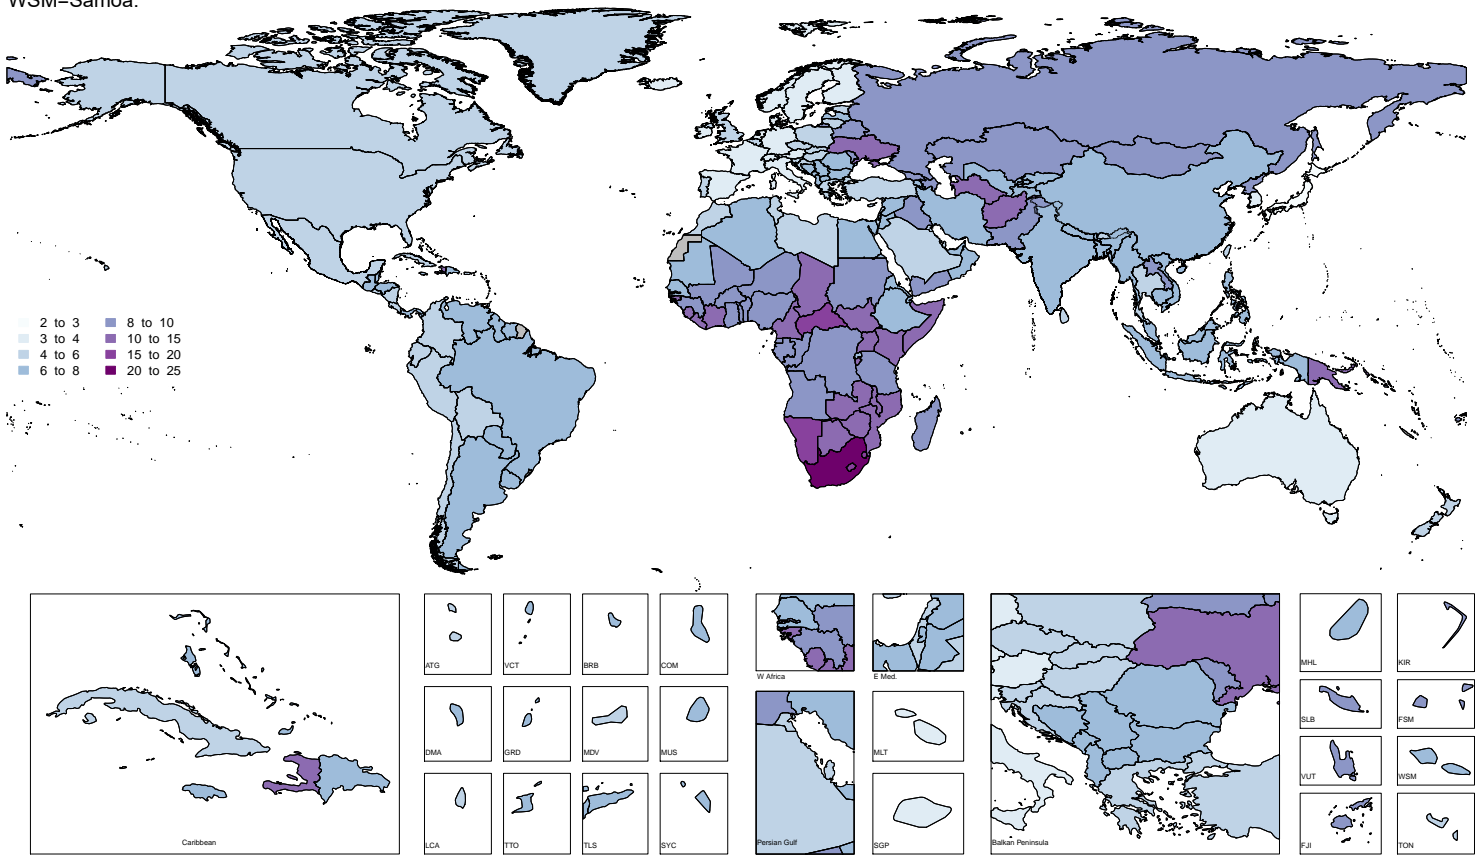

**Table 1. Number of Years of life lost (YLLs) and deaths in GBD 2016, the 2040 forecast (reference scenario), better, and worse scenarios for all causes of death and all locations. Values are reported as counts, or in thousands, as described in the location specific heading, and 95% uncertainty intervals are in parentheses. Due to differences in populations and SDI across the scenarios, forecasts of numbers may result in reference values outside of the better and worse estimates. Highlighted rows indicate level 1 and 2 causes from the GBD cause hierarchy. GBD = Global burden of disease.**

| Cause                                                                    | Global                                                |                                                       |                                                       |                                                       |                                              |                                              |                                              |                                               |
|--------------------------------------------------------------------------|-------------------------------------------------------|-------------------------------------------------------|-------------------------------------------------------|-------------------------------------------------------|----------------------------------------------|----------------------------------------------|----------------------------------------------|-----------------------------------------------|
|                                                                          | YLLs (in 1000s)                                       |                                                       |                                                       |                                                       | Deaths (in 1000s)                            |                                              |                                              |                                               |
|                                                                          | 2016                                                  | 2040 Forecast                                         | 2040 Better Scenario                                  | 2040 Worse Scenario                                   | 2016                                         | 2040 Forecast                                | 2040 Better Scenario                         | 2040 Worse Scenario                           |
| <b>All causes</b>                                                        | <b>1,585,864.98</b><br>(1,559,572.96 to 1,613,799.53) | <b>1,522,929.99</b><br>(1,310,033.32 to 1,775,013.45) | <b>1,193,905.99</b><br>(1,033,011.11 to 1,385,361.63) | <b>2,177,435.98</b><br>(1,858,580.54 to 2,522,615.79) | <b>54,698.58</b><br>(54,028.68 to 55,514.89) | <b>74,983.79</b><br>(66,337.22 to 85,381.93) | <b>62,943.02</b><br>(55,680.24 to 70,996.21) | <b>96,329.12</b><br>(84,258.24 to 107,989.38) |
| <b>Communicable, maternal, neonatal, and nutritional diseases</b>        | <b>566,351.51</b><br>(544,844.20 to 589,177.03)       | <b>326,085.66</b><br>(256,204.27 to 416,351.81)       | <b>223,159.21</b><br>(178,311.61 to 284,636.18)       | <b>596,227.75</b><br>(473,441.15 to 745,019.40)       | <b>10,557.99</b><br>(10,097.72 to 11,143.43) | <b>9,012.74</b><br>(6,969.25 to 12,099.73)   | <b>7,000.50</b><br>(5,462.69 to 9,493.78)    | <b>14,423.84</b><br>(11,187.34 to 19,113.00)  |
| <b>HIV/AIDS and tuberculosis</b>                                         | <b>94,262.23</b><br>(91,806.54 to 97,422.77)          | <b>61,697.37</b><br>(52,307.01 to 73,881.48)          | <b>40,732.09</b><br>(32,189.41 to 49,383.31)          | <b>158,910.20</b><br>(126,153.39 to 197,320.41)       | <b>2,346.81</b><br>(2,172.76 to 2,314.46)    | <b>1,611.50</b><br>(1,371.77 to 1,940.47)    | <b>1,092.93</b><br>(914.99 to 1,309.47)      | <b>3,687.50</b><br>(2,932.53 to 4,490.51)     |
| Tuberculosis                                                             | 40,718.82<br>(38,983.48 to 42,538.24)                 | 24,420.28<br>(18,423.72 to 33,956.86)                 | 15,369.17<br>(11,817.48 to 20,793.65)                 | 41,159.88<br>(30,728.59 to 57,599.09)                 | 1,213.06<br>(1,161.55 to 1,265.42)           | 870.10<br>(668.48 to 1,154.09)               | 588.14<br>(456.75 to 756.09)                 | 1,386.82<br>(1,042.25 to 1,849.57)            |
| HIV/AIDS                                                                 | 53,543.41<br>(50,984.67 to 56,292.03)                 | 37,277.09<br>(30,834.47 to 43,840.23)                 | 25,362.91<br>(18,173.12 to 33,023.26)                 | 117,750.32<br>(88,538.93 to 154,571.28)               | 1,033.75<br>(987.35 to 1,081.57)             | 741.41<br>(624.14 to 863.09)                 | 504.78<br>(389.10 to 619.10)                 | 2,300.68<br>(1,694.61 to 3,024.39)            |
| <b>Diarrhea, lower respiratory, and other common infectious diseases</b> | <b>209,304.89</b><br>(195,330.83 to 228,343.14)       | <b>138,104.82</b><br>(89,879.14 to 210,847.98)        | <b>92,268.80</b><br>(60,763.21 to 143,633.01)         | <b>236,500.14</b><br>(152,036.89 to 359,032.23)       | <b>4,805.16</b><br>(4,381.23 to 5,480.60)    | <b>5,280.21</b><br>(3,533.42 to 8,186.27)    | <b>4,210.74</b><br>(2,884.82 to 6,601.87)    | <b>7,720.03</b><br>(4,938.54 to 12,199.11)    |
| Diarrheal diseases                                                       | 66,908.74<br>(56,202.72 to 85,858.53)                 | 40,222.53<br>(14,747.38 to 95,244.05)                 | 27,516.48<br>(9,284.80 to 70,165.36)                  | 70,657.51<br>(26,572.16 to 165,528.84)                | 1,655.94<br>(1,244.07 to 2,366.55)           | 1,598.66<br>(4,203.65)                       | 1,310.93<br>(386.90 to 3,447.50)             | 2,691.88<br>(677.37 to 6,926.59)              |
| Intestinal infectious diseases                                           | 10,476.49<br>(5,926.65 to 17,188.46)                  | 5,697.97<br>(2,996.07 to 9,529.61)                    | 5,197.83<br>(2,806.16 to 8,632.75)                    | 7,467.83<br>(3,966.52 to 12,584.03)                   | 155.45<br>(87.59 to 255.41)                  | 95.66<br>(51.31 to 159.22)                   | 89.58<br>(48.83 to 147.93)                   | 119.54<br>(63.52 to 202.29)                   |
| Typhoid fever                                                            | 8,729.56<br>(4,775.28 to 14,334.44)                   | 4,566.22<br>(2,403.51 to 7,789.95)                    | 4,199.70<br>(2,266.70 to 6,948.52)                    | 5,964.70<br>(3,085.78 to 10,222.49)                   | 128.17<br>(70.08 to 210.19)                  | 75.29<br>(40.33 to 127.66)                   | 71.04<br>(38.41 to 119.04)                   | 93.78<br>(48.74 to 160.88)                    |
| Paratyphoid fever                                                        | 1,596.58<br>(750.49 to 3,096.66)                      | 1,076.66<br>(504.52 to 2,060.82)                      | 963.33<br>(445.22 to 1,794.98)                        | 1,409.49<br>(654.76 to 2,721.05)                      | 25.19<br>(11.75 to 49.24)                    | 19.37<br>(8.90 to 36.89)                     | 17.80<br>(8.14 to 33.68)                     | 24.25<br>(11.28 to 46.54)                     |
| Other intestinal infectious diseases                                     | 150.35<br>(40.76 to 410.64)                           | 55.09<br>(15.56 to 157.51)                            | 34.81<br>(10.28 to 96.24)                             | 93.64<br>(25.33 to 266.36)                            | 2.09<br>(0.63 to 5.46)                       | 1.00<br>(0.33 to 2.54)                       | 0.73<br>(0.24 to 1.81)                       | 1.50<br>(0.48 to 3.93)                        |
| Lower respiratory infections                                             | 91,363.09<br>(84,223.22 to 97,870.27)                 | 68,309.71<br>(45,673.67 to 99,818.11)                 | 42,962.16<br>(31,363.08 to 60,256.27)                 | 119,611.44<br>(74,820.38 to 178,367.34)               | 2,377.70<br>(2,145.58 to 2,512.81)           | 3,114.69<br>(2,410.77 to 3,963.72)           | 2,423.08<br>(1,916.83 to 2,983.71)           | 4,262.23<br>(3,130.39 to 5,652.28)            |
| Upper respiratory infections                                             | 126.68<br>(105.23 to 154.86)                          | 79.94<br>(61.28 to 104.29)                            | 51.73<br>(40.03 to 64.73)                             | 135.83<br>(103.28 to 172.32)                          | 2.31<br>(2.04 to 2.65)                       | 1.97<br>(1.64 to 2.38)                       | 1.42<br>(1.18 to 1.71)                       | 2.97<br>(2.47 to 3.58)                        |
| Otitis media                                                             | 50.36<br>(37.49 to 72.37)                             | 13.55<br>(8.98 to 20.06)                              | 13.56<br>(9.02 to 20.08)                              | 14.00<br>(9.37 to 20.86)                              | 1.08<br>(0.84 to 1.47)                       | 0.50<br>(0.33 to 0.69)                       | 0.53<br>(0.35 to 0.74)                       | 0.46<br>(0.30 to 0.63)                        |
| Meningitis                                                               | 20,383.03<br>(16,781.47 to 26,724.06)                 | 12,356.42<br>(8,683.57 to 17,687.07)                  | 9,338.58<br>(6,864.48 to 13,293.94)                   | 20,293.47<br>(12,922.01 to 31,384.33)                 | 318.40<br>(265.22 to 408.71)                 | 238.65<br>(177.63 to 337.91)                 | 202.78<br>(153.00 to 291.85)                 | 331.33<br>(232.49 to 484.26)                  |
| Pneumococcal meningitis                                                  | 1,268.37<br>(996.16 to 1,721.54)                      | 739.53<br>(520.77 to 1,088.44)                        | 628.57<br>(452.57 to 912.45)                          | 1,034.23<br>(704.74 to 1,607.46)                      | 23.14<br>(18.70 to 30.93)                    | 18.16<br>(13.38 to 27.09)                    | 17.08<br>(12.71 to 25.41)                    | 21.78<br>(15.68 to 32.19)                     |
| H influenzae type B meningitis                                           | 2,177.50<br>(1,723.91 to 2,955.18)                    | 2,971.42<br>(910.55 to 7,133.43)                      | 1,414.02<br>(624.05 to 3,057.97)                      | 8,177.47<br>(4,971.53)                                | 31.41<br>(25.37 to 41.43)                    | 41.38<br>(16.55 to 90.66)                    | 23.57<br>(13.45 to 42.89)                    | 101.70<br>(29.58 to 236.28)                   |
| Meningococcal meningitis                                                 | 8,159.59<br>(6,630.42 to 10,743.55)                   | 4,037.61<br>(2,903.62 to 5,703.62)                    | 3,426.96<br>(2,469.64 to 4,886.67)                    | 5,129.39<br>(3,626.37 to 7,305.05)                    | 127.42<br>(105.43 to 164.01)                 | 84.65<br>(62.94 to 123.69)                   | 77.07<br>(57.20 to 115.20)                   | 97.62<br>(72.06 to 138.75)                    |
|                                                                          | 8,777.57<br>(7,193.64 to ...)                         | 4,607.86<br>(3,568.47 to ...)                         | 3,869.04<br>(2,851.79 to ...)                         | 5,952.38<br>(4,763.80 to ...)                         | 136.42<br>(119.68 to ...)                    | 94.47<br>(71.15 to ...)                      | 85.06<br>(63.40 to ...)                      | 110.23<br>(83.53 to ...)                      |

|                  | 2014-15                                | 2015-16                               | 2016-17                               | 2017-18                                | 2018-19                        | 2019-20                        | 2020-21                        | 2021-22                         |
|------------------|----------------------------------------|---------------------------------------|---------------------------------------|----------------------------------------|--------------------------------|--------------------------------|--------------------------------|---------------------------------|
| Other meningitis | 11,853.65                              | 6,452.47                              | 5,418.82                              | 8,367.38                               | 178.02                         | 132.32                         |                                | 150.41                          |
| Encephalitis     | 5,053.33<br>(4,020.10 to<br>6,845.05)  | 3,945.66<br>(2,902.24 to<br>5,401.18) | 3,653.69<br>(2,618.86 to<br>5,109.70) | 4,869.64<br>(3,669.82 to<br>6,667.29)  | 102.87<br>(83.93 to<br>138.39) | 129.16<br>(95.02 to<br>178.48) | 128.94<br>(93.05 to<br>180.12) | 138.74<br>(106.26 to<br>190.89) |
| Diphtheria       | 86.90<br>(62.45 to<br>123.42)          | 37.76<br>(19.55 to<br>70.74)          | 14.18<br>(9.40 to<br>21.85)           | 61.13<br>(32.26 to<br>102.91)          | 1.11<br>(0.82 to<br>1.54)      | 0.49<br>(0.27 to<br>0.88)      | 0.21<br>(0.15 to<br>0.31)      | 0.77<br>(0.42 to<br>1.27)       |
| Whooping cough   | 61,70.82<br>(3,287.59 to<br>10,666.24) | 4,811.98<br>(2,229.65 to<br>8,486.00) | 2,103.48<br>(970.90 to<br>3,648.57)   | 8,308.08<br>(4,013.36 to<br>14,473.64) | 73.01<br>(38.90 to<br>126.14)  | 57.12<br>(26.61 to<br>100.78)  | 25.21<br>(11.68 to<br>43.58)   | 98.30<br>(47.56 to<br>171.23)   |
| Tetanus          | 2,362.79<br>(1,440.70 to<br>3,057.88)  | 464.53<br>(262.78 to<br>725.13)       | 318.39<br>(177.14 to<br>504.89)       | 823.26<br>(464.51 to<br>1,258.58)      | 36.69<br>(22.20 to<br>47.21)   | 7.67<br>(4.45 to<br>11.51)     | 6.09<br>(3.37 to<br>9.15)      | 11.67<br>(6.84 to<br>17.47)     |
| Measles          | 5,702.64<br>(2,133.93 to<br>12,239.05) | 1,884.57<br>(503.32 to<br>5,723.56)   | 893.75<br>(334.97 to<br>2,554.95)     | 3,801.20<br>(805.28 to<br>11,309.58)   | 68.12<br>(25.50 to<br>146.06)  | 26.13<br>(8.50 to<br>72.17)    | 13.53<br>(5.69 to<br>33.17)    | 50.07<br>(13.23 to<br>137.33)   |



| Global                                                |                                                     |                                                     |                                                     |                                                     |                                            |                                            |                                            |                                            |
|-------------------------------------------------------|-----------------------------------------------------|-----------------------------------------------------|-----------------------------------------------------|-----------------------------------------------------|--------------------------------------------|--------------------------------------------|--------------------------------------------|--------------------------------------------|
| Cause                                                 | YLLs (in 1000s)                                     |                                                     |                                                     |                                                     | Deaths (in 1000s)                          |                                            |                                            |                                            |
|                                                       | 2016                                                | 2040 Forecast                                       | 2040 Better Scenario                                | 2040 Worse Scenario                                 | 2016                                       | 2040 Forecast                              | 2040 Better Scenario                       | 2040 Worse Scenario                        |
| Varicella and herpes zoster                           | 620.02<br>(557.00 to 693.29)                        | 280.19<br>(219.26 to 343.62)                        | 204.95<br>(160.89 to 250.85)                        | 456.75<br>(357.43 to 556.83)                        | 12.47<br>(11.38 to 13.95)                  | 9.53<br>(7.90 to 11.12)                    | 8.43<br>(7.05 to 9.83)                     | 12.07<br>(10.11 to 14.14)                  |
| <b>Neglected tropical diseases and malaria</b>        | <b>61,330.01</b><br><b>(50,832.05 to 73,173.51)</b> | <b>29,655.40</b><br><b>(22,532.05 to 37,012.64)</b> | <b>24,234.72</b><br><b>(18,735.26 to 29,741.62)</b> | <b>37,890.90</b><br><b>(28,987.41 to 47,666.62)</b> | <b>843.59</b><br><b>(708.02 to 988.97)</b> | <b>575.78</b><br><b>(448.79 to 698.97)</b> | <b>516.57</b><br><b>(401.04 to 623.01)</b> | <b>668.29</b><br><b>(524.86 to 808.09)</b> |
| Malaria                                               | 54,460.50<br>(44,151.02 to 66,240.10)               | 19,935.15<br>(14,728.36 to 26,209.68)               | 15,485.75<br>(11,797.90 to 19,855.20)               | 26,072.79<br>(19,323.25 to 34,516.09)               | 719.55<br>(594.61 to 863.03)               | 332.98<br>(258.49 to 424.73)               | 281.72<br>(223.81 to 356.71)               | 402.98<br>(311.91 to 513.28)               |
| Chagas disease                                        | 156.13<br>(146.16 to 168.66)                        | 97.53<br>(83.94 to 118.72)                          | 119.40<br>(102.76 to 142.79)                        | 86.15<br>(73.77 to 106.02)                          | 7.14<br>(6.74 to 7.77)                     | 5.59<br>(4.86 to 6.74)                     | 7.00<br>(6.09 to 8.29)                     | 4.84<br>(4.18 to 5.89)                     |
| Leishmaniasis                                         | 705.85<br>(398.32 to 1,204.23)                      | 261.41<br>(150.70 to 466.60)                        | 216.61<br>(121.44 to 392.64)                        | 479.18<br>(285.91 to 815.58)                        | 13.67<br>(7.66 to 23.00)                   | 5.28<br>(3.03 to 10.08)                    | 4.52<br>(2.55 to 8.58)                     | 8.80<br>(5.28 to 15.81)                    |
| African trypanosomiasis                               | 126.51<br>(63.55 to 212.07)                         | 15.84<br>(6.73 to 33.30)                            | 15.50<br>(6.69 to 31.59)                            | 16.95<br>(7.32 to 35.11)                            | 2.29<br>(1.16 to 3.83)                     | 0.30<br>(0.13 to 0.62)                     | 0.30<br>(0.13 to 0.61)                     | 0.31<br>(0.13 to 0.66)                     |
| Schistosomiasis                                       | 367.36<br>(333.89 to 401.84)                        | 287.63<br>(237.74 to 353.77)                        | 246.00<br>(202.81 to 302.93)                        | 333.78<br>(279.64 to 408.43)                        | 10.09<br>(9.26 to 10.97)                   | 8.94<br>(7.75 to 10.48)                    | 7.96<br>(6.83 to 9.41)                     | 9.92<br>(8.62 to 11.59)                    |
| Cysticercosis                                         | 47.24<br>(39.82 to 56.34)                           | 21.17<br>(16.13 to 29.05)                           | 19.36<br>(14.78 to 26.63)                           | 22.98<br>(17.60 to 31.19)                           | 1.00<br>(0.86 to 1.17)                     | 0.51<br>(0.40 to 0.68)                     | 0.48<br>(0.38 to 0.64)                     | 0.53<br>(0.42 to 0.70)                     |
| Cystic echinococcosis                                 | 46.04<br>(36.82 to 57.76)                           | 19.61<br>(14.64 to 26.57)                           | 13.61<br>(10.05 to 18.50)                           | 35.11<br>(25.91 to 47.07)                           | 1.01<br>(0.84 to 1.22)                     | 0.57<br>(0.44 to 0.75)                     | 0.43<br>(0.33 to 0.59)                     | 0.92<br>(0.70 to 1.19)                     |
| Dengue                                                | 1,975.12<br>(1,619.25 to 2,751.84)                  | 6,715.71<br>(2,724.90 to 8,798.56)                  | 6,512.22<br>(2,569.42 to 8,534.37)                  | 7,179.34<br>(2,775.20 to 9,552.14)                  | 37.78<br>(10.91 to 52.73)                  | 183.41<br>(71.27 to 240.46)                | 185.34<br>(71.17 to 243.61)                | 182.59<br>(68.22 to 239.58)                |
| Yellow fever                                          | 373.91<br>(80.80 to 1,074.88)                       | 151.77<br>(28.54 to 466.60)                         | 113.00<br>(20.80 to 356.91)                         | 241.11<br>(47.55 to 733.72)                         | 5.80<br>(1.24 to 16.73)                    | 2.48<br>(0.46 to 7.81)                     | 1.88<br>(0.34 to 6.09)                     | 3.83<br>(0.76 to 11.93)                    |
| Rabies                                                | 744.18<br>(383.72 to 1,106.23)                      | 302.22<br>(158.43 to 501.90)                        | 188.19<br>(99.69 to 311.57)                         | 639.35<br>(338.51 to 1,036.62)                      | 13.29<br>(7.16 to 19.06)                   | 6.14<br>(3.47 to 9.98)                     | 4.27<br>(2.36 to 7.11)                     | 12.22<br>(6.93 to 19.75)                   |
| Intestinal nematode infections                        | 385.30<br>(309.19 to 484.21)                        | 440.72<br>(314.83 to 578.85)                        | 352.27<br>(256.28 to 451.04)                        | 567.00<br>(419.56 to 732.24)                        | 4.88<br>(3.98 to 6.06)                     | 5.97<br>(4.43 to 7.72)                     | 4.96<br>(3.76 to 6.30)                     | 7.41<br>(5.63 to 9.41)                     |
| Other neglected tropical diseases                     | 1,940.72<br>(1,328.90 to 2,505.52)                  | 1,406.65<br>(968.43 to 1,889.21)                    | 951.82<br>(671.18 to 1,228.97)                      | 2,217.16<br>(1,520.43 to 2,906.65)                  | 27.06<br>(19.16 to 33.98)                  | 23.61<br>(17.82 to 30.55)                  | 17.72<br>(13.80 to 22.10)                  | 33.94<br>(25.01 to 43.01)                  |
| <b>Maternal disorders</b>                             | <b>12,817.77</b><br><b>(11,808.37 to 14,106.37)</b> | <b>8,181.86</b><br><b>(6,512.04 to 11,242.69)</b>   | <b>5,486.50</b><br><b>(4,357.58 to 7,465.97)</b>    | <b>13,140.04</b><br><b>(10,574.85 to 17,585.16)</b> | <b>230.61</b><br><b>(212.53 to 253.39)</b> | <b>151.90</b><br><b>(120.87 to 206.46)</b> | <b>101.74</b><br><b>(80.88 to 137.01)</b>  | <b>242.65</b><br><b>(195.17 to 323.91)</b> |
| Maternal hemorrhage                                   | 4,018.54<br>(3,248.03 to 4,975.76)                  | 2,193.50<br>(1,592.88 to 3,058.91)                  | 1,540.48<br>(1,115.58 to 2,147.77)                  | 3,486.55<br>(2,522.18 to 4,802.31)                  | 72.40<br>(58.51 to 89.12)                  | 40.81<br>(29.75 to 56.68)                  | 28.56<br>(20.70 to 39.75)                  | 61.56<br>(46.54 to 88.59)                  |
| Maternal sepsis and other maternal infections         | 1,093.59<br>(789.31 to 1,478.23)                    | 542.90<br>(354.74 to 812.87)                        | 372.36<br>(247.53 to 558.14)                        | 853.99<br>(564.47 to 1,258.95)                      | 19.53<br>(14.29 to 26.19)                  | 10.02<br>(6.61 to 14.80)                   | 6.87<br>(4.60 to 10.20)                    | 15.68<br>(10.44 to 22.83)                  |
| Maternal hypertensive disorders                       | 1,780.77<br>(1,360.65 to 2,265.89)                  | 1,224.14<br>(869.31 to 1,732.10)                    | 776.94<br>(551.14 to 1,111.18)                      | 1,864.05<br>(1,332.28 to 2,622.50)                  | 31.60<br>(24.46 to 39.84)                  | 22.21<br>(15.72 to 31.23)                  | 14.10<br>(10.06 to 20.09)                  | 33.67<br>(24.20 to 47.01)                  |
| Maternal obstructed labor and uterine rupture         | 553.65<br>(369.57 to 798.39)                        | 375.56<br>(225.76 to 587.43)                        | 240.72<br>(147.77 to 369.14)                        | 618.69<br>(379.41 to 951.42)                        | 10.25<br>(6.84 to 14.57)                   | 7.11<br>(4.27 to 11.09)                    | 4.56<br>(2.79 to 7.01)                     | 11.67<br>(7.04 to 18.00)                   |
| Maternal abortion, miscarriage, and ectopic pregnancy | 1,081.93<br>(796.17 to 1,466.60)                    | 654.04<br>(395.10 to 1,120.68)                      | 467.84<br>(283.11 to 789.01)                        | 1,063.78<br>(634.35 to 1,858.59)                    | 19.70<br>(14.56 to 26.12)                  | 12.23<br>(7.44 to 20.22)                   | 8.77<br>(5.35 to 14.69)                    | 19.78<br>(11.94 to 33.16)                  |

|                                        |                                       |                                     |                                   |                                       |                              |                              |                              |                              |
|----------------------------------------|---------------------------------------|-------------------------------------|-----------------------------------|---------------------------------------|------------------------------|------------------------------|------------------------------|------------------------------|
|                                        | 1,987.87<br>(1,463.84 to<br>2,619.81) | 1,441.42<br>(961.07 to<br>2,205.51) | 923.25<br>(615.96 to<br>1,407.32) | 2,299.79<br>(1,536.27 to<br>3,392.42) | 35.74<br>(26.39 to<br>46.78) | 26.42<br>(17.73 to<br>40.04) | 16.93<br>(11.37 to<br>25.62) | 41.86<br>(28.60 to<br>61.27) |
| Indirect maternal deaths               |                                       |                                     |                                   |                                       |                              |                              |                              |                              |
|                                        | 228.46<br>(134.55 to<br>370.93)       | 113.28<br>(62.48 to<br>195.51)      | 75.58<br>(42.75 to<br>131.39)     | 177.22<br>(97.54 to<br>312.23)        | 4.11<br>(2.45 to<br>6.55)    | 2.10<br>(1.12 to<br>3.58)    | 1.40<br>(0.77 to<br>2.35)    | 3.26<br>(1.74 to<br>5.63)    |
| Late maternal deaths                   |                                       |                                     |                                   |                                       |                              |                              |                              |                              |
|                                        | 105.42<br>(66.70 to<br>142.91)        | 560.49<br>(331.36 to<br>963.13)     | 308.44<br>(145.36 to<br>566.44)   | 1,104.08<br>(619.68 to<br>1,935.98)   | 2.02<br>(1.28 to<br>2.73)    | 11.03<br>(6.60 to<br>18.18)  | 6.07<br>(3.04 to<br>10.56)   | 21.39<br>(12.43 to<br>36.31) |
| Maternal deaths aggravated by HIV/AIDS |                                       |                                     |                                   |                                       |                              |                              |                              |                              |
|                                        | 1,967.54<br>(1,475.03 to<br>2,540.02) | 1,076.52<br>(738.18 to<br>1,615.13) | 780.88<br>(541.56 to<br>1,147.85) | 1,671.89<br>(1,147.61 to<br>2,421.27) | 35.26<br>(26.84 to<br>45.20) | 19.97<br>(13.77 to<br>29.79) | 14.48<br>(10.10 to<br>21.36) | 30.77<br>(21.11 to<br>44.46) |
| Other maternal disorders               |                                       |                                     |                                   |                                       |                              |                              |                              |                              |

| Global                                                                  |                                                 |                                              |                                              |                                                |                                           |                                       |                                     |                                         |
|-------------------------------------------------------------------------|-------------------------------------------------|----------------------------------------------|----------------------------------------------|------------------------------------------------|-------------------------------------------|---------------------------------------|-------------------------------------|-----------------------------------------|
| Cause                                                                   | YLLs (in 1000s)                                 |                                              |                                              |                                                | Deaths (in 1000s)                         |                                       |                                     |                                         |
|                                                                         | 2016                                            | 2040 Forecast                                | 2040 Better Scenario                         | 2040 Worse Scenario                            | 2016                                      | 2040 Forecast                         | 2040 Better Scenario                | 2040 Worse Scenario                     |
| <b>Neonatal disorders</b>                                               | <b>149,832.24</b><br>(142,306.49 to 157,779.95) | <b>69,930.49</b><br>(47,252.84 to 96,272.91) | <b>45,552.86</b><br>(31,835.16 to 61,843.31) | <b>123,596.22</b><br>(85,104.71 to 167,869.80) | <b>1,731.04</b><br>(1,644.11 to 1,822.86) | <b>808.10</b><br>(546.12 to 1,112.30) | <b>526.42</b><br>(368.00 to 714.67) | <b>1,428.19</b><br>(983.60 to 1,939.63) |
| Neonatal preterm birth                                                  | 53,703.14<br>(49,224.85 to 58,402.33)           | 22,605.27<br>(17,113.81 to 27,929.77)        | 13,550.82<br>(10,485.59 to 16,426.41)        | 41,000.02<br>(31,135.92 to 50,038.09)          | 620.40<br>(568.68 to 674.66)              | 261.19<br>(197.78 to 322.71)          | 156.58<br>(121.20 to 189.80)        | 473.70<br>(359.82 to 578.13)            |
| Neonatal encephalopathy due to birth asphyxia and trauma                | 45,435.32<br>(40,396.97 to 49,877.36)           | 20,129.27<br>(11,122.89 to 32,453.45)        | 13,583.56<br>(7,877.62 to 21,300.38)         | 33,983.44<br>(19,302.40 to 52,988.66)          | 524.89<br>(466.66 to 576.25)              | 232.60<br>(128.60 to 374.92)          | 156.97<br>(91.04 to 246.09)         | 392.68<br>(223.09 to 612.19)            |
| Neonatal sepsis and other neonatal infections                           | 21,029.06<br>(17,940.28 to 27,500.03)           | 15,007.01<br>(10,102.58 to 21,580.83)        | 9,688.07<br>(6,663.61 to 13,633.54)          | 25,487.17<br>(17,462.01 to 36,188.97)          | 242.99<br>(205.03 to 313.71)              | 173.44<br>(116.81 to 249.38)          | 111.97<br>(77.04 to 157.55)         | 294.56<br>(201.88 to 418.16)            |
| Hemolytic disease and other neonatal jaundice                           | 4,258.58<br>(3,689.17 to 4,937.32)              | 1,141.12<br>(722.81 to 1,725.53)             | 774.12<br>(500.71 to 1,152.44)               | 2,215.00<br>(1,430.50 to 3,359.89)             | 49.21<br>(42.63 to 57.04)                 | 13.19<br>(8.36 to 19.94)              | 8.95<br>(5.79 to 13.32)             | 25.60<br>(16.54 to 38.82)               |
| Other neonatal disorders                                                | 25,406.13<br>(22,984.87 to 27,937.49)           | 11,047.81<br>(7,297.14 to 16,152.26)         | 7,956.30<br>(5,335.44 to 11,371.57)          | 20,910.59<br>(13,964.40 to 30,051.45)          | 293.56<br>(265.56 to 322.79)              | 127.69<br>(84.37 to 186.65)           | 91.95<br>(61.68 to 131.40)          | 241.66<br>(161.45 to 347.28)            |
| <b>Nutritional deficiencies</b>                                         | <b>19,504.73</b><br>(17,125.04 to 22,894.16)    | <b>8,993.80</b><br>(7,420.53 to 11,156.35)   | <b>6,916.49</b><br>(5,817.63 to 8,387.63)    | <b>13,012.47</b><br>(10,674.55 to 15,924.56)   | <b>368.11</b><br>(334.00 to 422.69)       | <b>327.19</b><br>(293.14 to 384.19)   | <b>315.46</b><br>(286.79 to 361.39) | <b>366.75</b><br>(323.68 to 434.47)     |
| Protein-energy malnutrition                                             | 17,513.99<br>(15,224.67 to 20,732.25)           | 7,118.59<br>(5,790.22 to 8,788.02)           | 5,290.30<br>(4,413.97 to 6,431.62)           | 10,657.06<br>(8,595.19 to 13,084.27)           | 308.39<br>(276.86 to 355.83)              | 247.19<br>(219.88 to 286.15)          | 239.09<br>(216.83 to 268.95)        | 279.68<br>(244.67 to 327.43)            |
| Iodine deficiency                                                       | 102.59<br>(66.06 to 168.78)                     | 249.20<br>(139.65 to 491.27)                 | 186.00<br>(111.05 to 309.12)                 | 374.16<br>(192.74 to 723.60)                   | 2.23<br>(1.62 to 3.14)                    | 9.69<br>(5.74 to 15.45)               | 8.69<br>(4.93 to 14.42)             | 11.60<br>(7.07 to 18.46)                |
| Dietary iron deficiency                                                 | 114.38<br>(101.14 to 134.79)                    | 114.35<br>(95.58 to 152.63)                  | 106.45<br>(89.01 to 144.00)                  | 128.42<br>(107.59 to 169.05)                   | 2.97<br>(2.52 to 3.75)                    | 4.21<br>(3.44 to 6.32)                | 4.27<br>(3.45 to 6.55)              | 4.24<br>(3.47 to 6.15)                  |
| Other nutritional deficiencies                                          | 1,773.77<br>(1,481.20 to 2,040.79)              | 1,511.66<br>(1,172.55 to 2,062.48)           | 1,333.73<br>(1,041.33 to 1,788.87)           | 1,852.84<br>(1,418.86 to 2,489.70)             | 54.51<br>(46.04 to 88.27)                 | 66.10<br>(52.24 to 88.27)             | 63.41<br>(51.02 to 83.16)           | 71.23<br>(56.97 to 94.79)               |
| <b>Other communicable, maternal, neonatal, and nutritional diseases</b> | <b>19,299.64</b><br>(14,992.73 to 24,689.33)    | <b>9,521.93</b><br>(7,846.48 to 11,505.21)   | <b>7,967.75</b><br>(6,684.42 to 9,545.37)    | <b>13,177.78</b><br>(10,549.48 to 16,324.20)   | <b>332.68</b><br>(281.00 to 395.76)       | <b>258.05</b><br>(229.19 to 292.35)   | <b>236.64</b><br>(210.03 to 267.35) | <b>310.43</b><br>(272.02 to 354.04)     |
| Sexually transmitted infections excluding HIV                           | 9,470.11<br>(5,539.12 to 14,702.01)             | 2,353.20<br>(1,291.78 to 3,857.42)           | 1,818.53<br>(1,038.48 to 2,952.50)           | 3,892.90<br>(2,063.83 to 6,584.46)             | 115.76<br>(69.90 to 176.96)               | 32.34<br>(19.62 to 49.86)             | 25.92<br>(16.34 to 39.39)           | 50.63<br>(29.00 to 81.98)               |
| Syphilis                                                                | 9,228.17<br>(5,288.03 to 14,456.12)             | 2,149.59<br>(1,100.32 to 3,655.36)           | 1,629.77<br>(854.03 to 2,773.29)             | 3,662.18<br>(1,851.97 to 6,298.74)             | 109.57<br>(63.52 to 170.78)               | 26.51<br>(14.19 to 44.15)             | 20.34<br>(11.29 to 33.58)           | 44.31<br>(23.04 to 75.28)               |
| Chlamydial infection                                                    | 46.85<br>(39.26 to 53.45)                       | 39.72<br>(31.19 to 53.21)                    | 36.74<br>(28.61 to 49.04)                    | 45.12<br>(35.39 to 59.66)                      | 1.19<br>(0.98 to 1.33)                    | 1.14<br>(0.92 to 1.44)                | 1.09<br>(0.88 to 1.36)              | 1.23<br>(0.99 to 1.53)                  |
| Gonococcal infection                                                    | 127.41<br>(105.62 to 144.48)                    | 108.02<br>(85.09 to 143.55)                  | 100.51<br>(78.76 to 133.53)                  | 121.77<br>(95.74 to 158.88)                    | 3.37<br>(2.77 to 3.80)                    | 3.23<br>(2.63 to 4.05)                | 3.11<br>(2.50 to 3.87)              | 3.48<br>(2.80 to 4.33)                  |
| Other sexually transmitted infections                                   | 67.69<br>(56.52 to 76.94)                       | 55.87<br>(43.66 to 74.06)                    | 51.51<br>(39.83 to 68.38)                    | 63.82<br>(50.23 to 83.95)                      | 1.63<br>(1.35 to 1.83)                    | 1.46<br>(1.18 to 1.88)                | 1.38<br>(1.10 to 1.78)              | 1.62<br>(1.29 to 2.07)                  |
| Acute hepatitis                                                         | 5,497.93<br>(5,228.66 to 5,778.42)              | 3,644.25<br>(3,170.61 to 4,242.95)           | 3,304.68<br>(2,848.27 to 3,876.01)           | 4,472.44<br>(3,922.50 to 5,124.31)             | 134.04<br>(127.82 to 139.97)              | 120.28<br>(106.41 to 136.72)          | 112.99<br>(97.80 to 130.05)         | 158.57<br>(124.64 to 153.29)            |
| Acute hepatitis A                                                       | 378.87<br>(302.70 to 458.94)                    | 96.18<br>(68.88 to 126.89)                   | 81.37<br>(57.77 to 105.91)                   | 141.26<br>(97.85 to 187.50)                    | 5.25<br>(4.34 to 6.23)                    | 2.23<br>(1.70 to 2.86)                | 2.02<br>(1.54 to 2.64)              | 2.83<br>(2.13 to 3.63)                  |
| Acute hepatitis B                                                       | 3,658.41<br>(3,417.23 to 3,917.82)              | 2,758.88<br>(2,358.95 to 3,253.81)           | 2,492.70<br>(2,107.40 to 2,953.49)           | 3,359.08<br>(2,898.43 to 3,890.38)             | 100.28<br>(94.01 to 106.30)               | 92.58<br>(79.56 to 107.29)            | 85.98<br>(72.90 to 100.93)          | 108.25<br>(94.82 to 122.93)             |

|                                       |                                                                  |                                                                      |                                                                  |                                                                        |                                                               |                                                               |                                                               |                                                               |
|---------------------------------------|------------------------------------------------------------------|----------------------------------------------------------------------|------------------------------------------------------------------|------------------------------------------------------------------------|---------------------------------------------------------------|---------------------------------------------------------------|---------------------------------------------------------------|---------------------------------------------------------------|
|                                       | 77.22<br>(60.92 to<br>97.72)                                     | 86.78<br>(64.71 to<br>115.41)                                        | 81.26<br>(60.15 to<br>108.58)                                    | 94.18<br>(70.47 to<br>124.12)                                          | 2.46<br>(1.87 to<br>3.24)                                     | 3.41<br>(2.51 to<br>4.52)                                     | 3.30<br>(2.41 to<br>4.39)                                     | 3.51<br>(2.57 to<br>4.68)                                     |
| Acute hepatitis C                     |                                                                  |                                                                      |                                                                  |                                                                        |                                                               |                                                               |                                                               |                                                               |
|                                       | 1,383.43<br>(1,195.82 to<br>1,570.28)                            | 702.41<br>(538.26 to<br>877.44)                                      | 649.35<br>(495.18 to<br>809.59)                                  | 877.92<br>(684.86 to<br>1,071.57)                                      | 26.05<br>(22.11 to<br>30.43)                                  | 22.06<br>(16.79 to<br>28.04)                                  | 21.69<br>(16.32 to<br>27.79)                                  | 23.99<br>(18.46 to<br>30.18)                                  |
| Acute hepatitis E                     |                                                                  |                                                                      |                                                                  |                                                                        |                                                               |                                                               |                                                               |                                                               |
|                                       | 4,331.60<br>(2,650.24 to<br>5,920.94)                            | 3,524.48<br>(2,629.91 to<br>4,428.07)                                | 2,844.53<br>(2,152.54 to<br>3,528.95)                            | 4,812.45<br>(3,473.07 to<br>6,247.23)                                  | 82.88<br>(56.22 to<br>103.72)                                 | 105.43<br>(83.79 to<br>122.51)                                | 97.73<br>(78.55 to<br>112.38)                                 | 121.22<br>(93.23 to<br>142.27)                                |
| Other unspecified infectious diseases |                                                                  |                                                                      |                                                                  |                                                                        |                                                               |                                                               |                                                               |                                                               |
| <b>Non-communicable diseases</b>      | <b>819,437.12</b><br><b>(804,360.07 to</b><br><b>836,584.77)</b> | <b>1,025,432.56</b><br><b>(852,319.43 to</b><br><b>1,231,749.50)</b> | <b>825,501.15</b><br><b>(695,151.45 to</b><br><b>972,037.68)</b> | <b>1,368,538.62</b><br><b>(1,114,825.74 to</b><br><b>1,655,765.09)</b> | <b>39,529.59</b><br><b>(38,805.36 to</b><br><b>40,253.20)</b> | <b>60,761.19</b><br><b>(52,144.71 to</b><br><b>70,359.68)</b> | <b>51,258.02</b><br><b>(44,270.10 to</b><br><b>58,471.08)</b> | <b>75,921.84</b><br><b>(64,644.62 to</b><br><b>87,861.03)</b> |

| Global                               |                                                 |                                                 |                                                 |                                                 |                                           |                                              |                                              |                                              |
|--------------------------------------|-------------------------------------------------|-------------------------------------------------|-------------------------------------------------|-------------------------------------------------|-------------------------------------------|----------------------------------------------|----------------------------------------------|----------------------------------------------|
| Cause                                | YLLs (in 1000s)                                 |                                                 |                                                 |                                                 | Deaths (in 1000s)                         |                                              |                                              |                                              |
|                                      | 2016                                            | 2040 Forecast                                   | 2040 Better Scenario                            | 2040 Worse Scenario                             | 2016                                      | 2040 Forecast                                | 2040 Better Scenario                         | 2040 Worse Scenario                          |
| <b>Neoplasms</b>                     | <b>208,041.17</b><br>(203,600.04 to 212,089.56) | <b>294,981.85</b><br>(255,713.08 to 339,042.71) | <b>262,223.01</b><br>(227,227.64 to 300,051.84) | <b>341,487.93</b><br>(291,237.48 to 403,821.99) | <b>8,927.40</b><br>(8,754.97 to 9,089.24) | <b>14,847.21</b><br>(13,125.82 to 16,886.59) | <b>13,495.92</b><br>(12,012.43 to 15,195.22) | <b>16,725.84</b><br>(14,420.60 to 19,635.10) |
| Lip and oral cavity cancer           | 4,492.64<br>(4,287.46 to 4,677.97)              | 7,151.55<br>(5,213.08 to 9,599.93)              | 5,310.62<br>(4,034.69 to 6,935.07)              | 9,354.59<br>(6,601.09 to 12,671.37)             | 176.49<br>(169.18 to 183.02)              | 307.93<br>(227.12 to 406.97)                 | 238.85<br>(184.05 to 307.54)                 | 389.66<br>(280.14 to 530.11)                 |
| Nasopharynx cancer                   | 1,866.39<br>(1,770.55 to 1,967.17)              | 2,654.88<br>(1,974.93 to 3,602.55)              | 1,826.85<br>(1,406.37 to 2,346.40)              | 3,926.98<br>(2,782.06 to 5,832.46)              | 63.75<br>(60.63 to 67.02)                 | 102.81<br>(75.99 to 139.70)                  | 71.91<br>(55.18 to 92.70)                    | 148.94<br>(104.32 to 221.47)                 |
| Other pharynx cancer                 | 3,151.70<br>(2,895.96 to 3,333.59)              | 5,014.49<br>(3,629.42 to 6,781.78)              | 4,327.70<br>(3,214.24 to 5,722.80)              | 5,233.22<br>(3,753.08 to 7,098.64)              | 118.63<br>(109.33 to 125.14)              | 214.18<br>(156.01 to 287.14)                 | 189.94<br>(143.50 to 247.33)                 | 215.19<br>(154.88 to 291.70)                 |
| Esophageal cancer                    | 9,164.59<br>(8,913.46 to 9,444.10)              | 14,449.25<br>(9,456.11 to 21,885.88)            | 11,380.45<br>(7,850.48 to 16,348.30)            | 19,036.49<br>(11,402.03 to 31,446.01)           | 414.89<br>(404.39 to 427.18)              | 740.35<br>(492.94 to 1,112.81)               | 595.60<br>(419.45 to 847.18)                 | 946.51<br>(576.08 to 1,528.55)               |
| Stomach cancer                       | 18,045.32<br>(17,580.05 to 18,535.04)           | 18,091.70<br>(14,605.03 to 22,708.19)           | 15,933.12<br>(13,163.23 to 19,689.92)           | 20,916.43<br>(17,037.78 to 25,731.19)           | 834.17<br>(813.54 to 855.46)              | 989.37<br>(811.62 to 1,239.90)               | 886.40<br>(742.45 to 1,080.84)               | 1,108.81<br>(917.93 to 1,349.69)             |
| Colon and rectum cancer              | 16,597.93<br>(15,919.45 to 17,213.66)           | 26,384.70<br>(19,283.50 to 36,435.60)           | 23,381.81<br>(17,278.16 to 32,103.48)           | 28,885.07<br>(20,776.56 to 39,531.95)           | 829.56<br>(797.30 to 860.44)              | 1,548.94<br>(1,145.23 to 2,130.23)           | 1,399.86<br>(1,052.15 to 1,912.52)           | 1,653.17<br>(1,195.44 to 2,280.94)           |
| Liver cancer                         | 20,915.71<br>(20,029.12 to 21,730.96)           | 35,702.03<br>(26,894.95 to 48,162.19)           | 33,107.01<br>(26,056.47 to 42,080.38)           | 37,658.20<br>(27,410.97 to 52,817.54)           | 828.94<br>(796.16 to 857.96)              | 1,686.11<br>(1,295.49 to 2,215.46)           | 1,604.09<br>(1,284.18 to 1,997.17)           | 1,721.54<br>(1,284.46 to 2,366.28)           |
| Liver cancer due to hepatitis B      | 9,704.02<br>(8,495.14 to 10,846.75)             | 16,111.86<br>(11,816.45 to 22,737.09)           | 15,166.34<br>(11,657.02 to 20,049.62)           | 16,287.69<br>(11,529.61 to 23,736.07)           | 349.53<br>(301.96 to 391.78)              | 705.23<br>(527.29 to 970.49)                 | 680.09<br>(528.90 to 881.00)                 | 687.15<br>(498.04 to 971.15)                 |
| Liver cancer due to hepatitis C      | 3,267.80<br>(2,899.48 to 3,621.48)              | 5,902.95<br>(4,412.47 to 8,065.89)              | 5,623.13<br>(4,315.99 to 7,396.56)              | 6,280.23<br>(4,527.39 to 8,891.89)              | 159.67<br>(143.42 to 176.07)              | 327.99<br>(249.17 to 435.00)                 | 320.98<br>(250.88 to 412.47)                 | 337.93<br>(247.07 to 467.60)                 |
| Liver cancer due to alcohol use      | 2,892.13<br>(2,438.18 to 3,361.38)              | 5,072.51<br>(3,681.31 to 6,917.49)              | 4,235.69<br>(3,157.33 to 5,586.01)              | 6,192.50<br>(4,308.84 to 8,818.66)              | 129.23<br>(109.78 to 150.48)              | 262.81<br>(191.26 to 357.78)                 | 227.38<br>(171.47 to 298.64)                 | 307.39<br>(215.01 to 433.30)                 |
| Liver cancer due to other causes     | 5,051.76<br>(4,479.84 to 5,703.84)              | 8,614.71<br>(6,091.85 to 12,233.58)             | 8,081.84<br>(5,936.45 to 10,960.14)             | 8,897.78<br>(6,001.37 to 13,254.43)             | 190.51<br>(169.75 to 214.63)              | 390.08<br>(276.21 to 548.90)                 | 375.65<br>(281.01 to 501.66)                 | 389.07<br>(263.61 to 572.48)                 |
| Gallbladder and biliary tract cancer | 3,269.80<br>(2,965.89 to 3,487.77)              | 3,611.20<br>(3,145.17 to 4,022.31)              | 3,688.27<br>(3,162.69 to 4,164.63)              | 3,400.82<br>(2,988.92 to 3,714.28)              | 161.56<br>(148.71 to 170.97)              | 203.26<br>(182.19 to 221.04)                 | 211.76<br>(188.43 to 231.61)                 | 186.25<br>(168.98 to 200.20)                 |
| Pancreatic cancer                    | 8,145.03<br>(7,933.68 to 8,359.17)              | 13,336.04<br>(11,162.00 to 16,248.17)           | 13,261.66<br>(11,082.71 to 16,045.54)           | 13,631.93<br>(11,254.79 to 16,819.87)           | 405.50<br>(394.38 to 416.00)              | 743.82<br>(630.99 to 898.57)                 | 753.77<br>(640.84 to 908.45)                 | 743.14<br>(618.84 to 918.82)                 |
| Larynx cancer                        | 2,674.72<br>(2,586.78 to 2,767.61)              | 3,612.62<br>(2,294.72 to 5,452.02)              | 2,470.61<br>(1,702.79 to 3,533.37)              | 5,370.16<br>(3,194.70 to 8,480.95)              | 111.04<br>(107.60 to 114.65)              | 162.23<br>(102.91 to 244.76)                 | 115.04<br>(94.61 to 164.14)                  | 254.92<br>(140.39 to 372.76)                 |
| Tracheal, bronchus, and lung cancer  | 35,966.80<br>(34,937.63 to 36,978.97)           | 44,160.67<br>(33,168.70 to 60,264.97)           | 30,833.78<br>(23,605.89 to 40,601.28)           | 71,120.77<br>(49,953.42 to 104,269.67)          | 1,706.88<br>(1,659.40 to 1,753.40)        | 2,394.91<br>(1,797.79 to 3,274.40)           | 1,719.52<br>(1,344.31 to 2,260.73)           | 3,741.72<br>(2,626.85 to 5,335.29)           |
| Malignant skin melanoma              | 1,460.67<br>(1,301.99 to 1,614.12)              | 2,156.46<br>(1,895.50 to 2,469.02)              | 2,451.85<br>(2,127.00 to 2,861.31)              | 1,929.32<br>(1,712.64 to 2,192.94)              | 61.68<br>(54.39 to 66.60)                 | 109.11<br>(97.36 to 119.44)                  | 127.60<br>(112.13 to 143.42)                 | 94.40<br>(83.34 to 102.99)                   |
| Non-melanoma skin cancer             | 991.73<br>(953.50 to 1,031.27)                  | 1,598.31<br>(1,463.76 to 1,730.79)              | 1,488.79<br>(1,350.60 to 1,625.59)              | 1,647.05<br>(1,539.39 to 1,751.23)              | 53.06<br>(51.14 to 55.18)                 | 104.01<br>(97.36 to 110.91)                  | 100.27<br>(93.46 to 107.10)                  | 102.39<br>(94.59 to 109.45)                  |
| Breast cancer                        | 14,368.87<br>(13,568.90 to 15,369.65)           | 20,651.60<br>(16,232.22 to 26,350.16)           | 18,801.36<br>(14,871.73 to 23,767.86)           | 22,198.76<br>(17,310.73 to 28,544.28)           | 545.59<br>(516.55 to 581.67)              | 896.25<br>(715.69 to 1,139.96)               | 826.49<br>(665.18 to 1,045.86)               | 945.49<br>(745.50 to 1,213.25)               |
| Cervical cancer                      | 7,204.07<br>(5,855.64 to 7,673.39)              | 8,339.31<br>(6,634.14 to 10,021.97)             | 7,579.00<br>(6,039.65 to 9,172.39)              | 9,191.61<br>(7,300.87 to 10,973.25)             | 247.16<br>(204.12 to 263.48)              | 319.33<br>(259.55 to 373.38)                 | 293.83<br>(237.26 to 345.24)                 | 344.63<br>(277.08 to 402.84)                 |

|                   |                                       |                                         |                                         |                                         |                                 |                                   |                                   |                                 |
|-------------------|---------------------------------------|-----------------------------------------|-----------------------------------------|-----------------------------------------|---------------------------------|-----------------------------------|-----------------------------------|---------------------------------|
|                   | 1,973.17<br>(1,875.54 to<br>2,070.08) | 2,853.28<br>(2,530.06 to<br>3,181.37)   | 2,656.32<br>(2,318.38 to<br>2,998.94)   | 3,030.65<br>(2,719.16 to<br>3,326.42)   | 87.53<br>(83.14 to<br>91.97)    | 146.63<br>(134.44 to<br>159.38)   | 139.16<br>(125.43 to<br>153.58)   | 150.71<br>(139.50 to<br>161.75) |
| Uterine cancer    |                                       |                                         |                                         |                                         |                                 |                                   |                                   |                                 |
|                   | 4,141.91<br>(3,927.54 to<br>4,340.62) | 6,223.76<br>(4,887.67 to<br>8,092.70)   | 6,031.34<br>(4,766.68 to<br>7,701.00)   | 6,063.54<br>(4,702.78 to<br>7,963.61)   | 165.04<br>(156.70 to<br>172.73) | 275.93<br>(219.30 to<br>359.91)   | 268.15<br>(214.59 to<br>345.35)   | 266.86<br>(208.37 to<br>355.02) |
| Ovarian cancer    |                                       |                                         |                                         |                                         |                                 |                                   |                                   |                                 |
|                   | 5,540.60<br>(4,536.21 to<br>5,992.09) | 12,249.22<br>(9,695.72 to<br>13,504.91) | 12,551.56<br>(9,860.14 to<br>13,954.96) | 11,345.01<br>(8,945.48 to<br>12,564.25) | 380.92<br>(320.81 to<br>412.87) | 924.26<br>(760.24 to<br>1,018.33) | 971.05<br>(796.59 to<br>1,067.71) | 828.44<br>(675.44 to<br>927.14) |
| Prostate cancer   |                                       |                                         |                                         |                                         |                                 |                                   |                                   |                                 |
|                   | 368.08<br>(350.82 to<br>386.93)       | 374.58<br>(330.64 to<br>422.79)         | 349.16<br>(305.28 to<br>395.72)         | 392.25<br>(349.93 to<br>441.91)         | 8.65<br>(8.29 to<br>9.03)       | 10.69<br>(9.75 to<br>11.64)       | 10.31<br>(9.30 to<br>11.33)       | 10.72<br>(9.89 to<br>11.62)     |
| Testicular cancer |                                       |                                         |                                         |                                         |                                 |                                   |                                   |                                 |

| Global                          |                                          |                                          |                                          |                                          |                                       |                                       |                                       |                                       |
|---------------------------------|------------------------------------------|------------------------------------------|------------------------------------------|------------------------------------------|---------------------------------------|---------------------------------------|---------------------------------------|---------------------------------------|
| Cause                           | YLLs (in 1000s)                          |                                          |                                          |                                          | Deaths (in 1000s)                     |                                       |                                       |                                       |
|                                 | 2016                                     | 2040 Forecast                            | 2040 Better Scenario                     | 2040 Worse Scenario                      | 2016                                  | 2040 Forecast                         | 2040 Better Scenario                  | 2040 Worse Scenario                   |
| Kidney cancer                   | 2,910.03<br>(2,799.88 to 3,016.36)       | 4,442.03<br>(3,791.65 to 5,165.38)       | 4,513.28<br>(3,873.01 to 5,182.87)       | 4,430.44<br>(3,706.09 to 5,330.54)       | 131.80<br>(127.34 to 136.18)          | 233.14<br>(202.88 to 267.82)          | 242.86<br>(212.75 to 276.28)          | 225.72<br>(190.21 to 268.43)          |
| Bladder cancer                  | 3,150.24<br>(3,043.85 to 3,241.97)       | 4,830.92<br>(3,930.58 to 6,026.27)       | 4,514.76<br>(3,758.31 to 5,537.77)       | 5,272.52<br>(4,168.55 to 6,791.95)       | 186.20<br>(180.45 to 191.69)          | 322.25<br>(261.11 to 401.64)          | 309.20<br>(257.40 to 377.62)          | 340.37<br>(263.84 to 440.45)          |
| Brain and nervous system cancer | 7,554.07<br>(6,820.68 to 8,181.18)       | 10,590.67<br>(9,228.00 to 11,866.78)     | 10,460.97<br>(9,058.28 to 11,842.27)     | 10,464.03<br>(9,185.05 to 11,620.88)     | 227.04<br>(204.78 to 241.28)          | 397.08<br>(349.20 to 434.07)          | 401.20<br>(348.64 to 442.11)          | 377.86<br>(333.24 to 408.35)          |
| Thyroid cancer                  | 1,043.17<br>(998.65 to 1,088.04)         | 1,537.40<br>(1,227.77 to 1,955.54)       | 1,414.36<br>(1,151.77 to 1,749.19)       | 1,646.51<br>(1,310.97 to 2,137.13)       | 42.86<br>(41.19 to 44.73)             | 73.45<br>(59.65 to 92.63)             | 69.18<br>(57.76 to 85.40)             | 75.60<br>(60.89 to 97.09)             |
| Mesothelioma                    | 649.65<br>(610.14 to 687.99)             | 933.19<br>(825.68 to 1,050.88)           | 966.17<br>(843.79 to 1,105.82)           | 888.79<br>(800.63 to 981.13)             | 30.21<br>(28.30 to 31.88)             | 50.49<br>(45.97 to 55.10)             | 53.62<br>(48.10 to 59.77)             | 46.53<br>(42.89 to 49.82)             |
| Hodgkin lymphoma                | 1,097.68<br>(916.41 to 1,300.78)         | 1,005.93<br>(819.45 to 1,212.41)         | 869.86<br>(700.20 to 1,049.21)           | 1,182.18<br>(955.62 to 1,411.70)         | 28.74<br>(24.61 to 33.79)             | 31.89<br>(26.58 to 37.86)             | 28.32<br>(23.40 to 33.76)             | 35.73<br>(29.66 to 42.31)             |
| Non-Hodgkin lymphoma            | 6,635.98<br>(6,029.97 to 6,928.74)       | 9,672.61<br>(8,254.59 to 11,357.29)      | 9,387.96<br>(8,023.17 to 10,891.46)      | 9,643.14<br>(8,205.54 to 11,333.58)      | 239.58<br>(221.18 to 247.87)          | 416.38<br>(362.39 to 480.75)          | 412.39<br>(362.11 to 471.54)          | 398.67<br>(346.35 to 465.24)          |
| Multiple myeloma                | 2,044.37<br>(1,839.22 to 2,262.64)       | 3,616.57<br>(3,038.77 to 4,262.64)       | 3,583.36<br>(3,010.79 to 4,293.44)       | 3,477.05<br>(2,902.49 to 4,257.30)       | 98.44<br>(87.38 to 109.81)            | 190.65<br>(162.63 to 226.72)          | 192.24<br>(164.80 to 227.39)          | 179.27<br>(151.68 to 218.80)          |
| Leukemia                        | 9,990.00<br>(9,167.13 to 10,596.07)      | 11,444.15<br>(9,602.38 to 13,611.53)     | 10,598.74<br>(8,943.45 to 12,401.56)     | 12,352.18<br>(10,246.57 to 14,885.93)    | 310.17<br>(286.15 to 324.28)          | 473.68<br>(398.28 to 566.11)          | 450.17<br>(382.11 to 528.44)          | 493.85<br>(405.16 to 604.45)          |
| Acute lymphoid leukemia         | 2,391.03<br>(2,182.08 to 2,644.47)       | 2,197.34<br>(1,850.10 to 2,588.66)       | 2,026.63<br>(1,713.90 to 2,395.85)       | 2,352.91<br>(1,973.13 to 2,802.08)       | 50.94<br>(46.16 to 55.60)             | 61.87<br>(52.46 to 73.45)             | 58.19<br>(49.75 to 68.07)             | 64.02<br>(53.84 to 76.95)             |
| Chronic lymphoid leukemia       | 645.93<br>(602.60 to 738.73)             | 849.38<br>(673.93 to 1,048.19)           | 813.48<br>(656.34 to 993.87)             | 888.69<br>(684.04 to 1,128.29)           | 35.39<br>(33.12 to 40.15)             | 54.07<br>(43.63 to 67.15)             | 53.17<br>(43.69 to 64.71)             | 54.93<br>(42.68 to 70.12)             |
| Acute myeloid leukemia          | 2,622.62<br>(2,419.48 to 2,809.79)       | 3,887.26<br>(3,252.80 to 4,654.11)       | 3,765.31<br>(3,178.64 to 4,422.36)       | 3,977.57<br>(3,305.01 to 4,844.86)       | 85.33<br>(78.40 to 89.70)             | 154.38<br>(129.27 to 184.05)          | 152.76<br>(129.52 to 179.85)          | 154.53<br>(127.01 to 188.59)          |
| Chronic myeloid leukemia        | 597.98<br>(538.80 to 661.31)             | 584.46<br>(459.75 to 724.74)             | 521.02<br>(415.69 to 639.28)             | 626.45<br>(490.94 to 792.18)             | 21.94<br>(20.21 to 23.76)             | 23.75<br>(19.15 to 29.31)             | 21.31<br>(17.32 to 25.78)             | 24.90<br>(19.63 to 31.28)             |
| Other leukemia                  | 3,732.44<br>(3,252.39 to 3,950.12)       | 3,925.71<br>(3,231.90 to 4,701.87)       | 3,472.30<br>(2,875.75 to 4,109.69)       | 4,506.55<br>(3,692.16 to 5,503.89)       | 116.56<br>(103.31 to 123.02)          | 179.61<br>(149.06 to 216.53)          | 164.73<br>(137.50 to 195.72)          | 195.47<br>(160.18 to 242.92)          |
| Other neoplasms                 | 12,626.26<br>(11,487.26 to 13,043.60)    | 18,292.71<br>(16,087.53 to 20,418.76)    | 18,482.30<br>(16,131.17 to 20,877.35)    | 17,798.24<br>(15,795.63 to 19,655.43)    | 431.34<br>(392.75 to 443.83)          | 778.07<br>(699.40 to 833.90)          | 813.15<br>(726.88 to 879.26)          | 718.74<br>(649.04 to 762.34)          |
| Cardiovascular diseases         | 319,638.66<br>(312,436.72 to 327,187.01) | 330,270.82<br>(223,007.85 to 484,160.96) | 214,898.28<br>(150,792.91 to 305,298.44) | 547,359.19<br>(364,191.44 to 782,303.91) | 17,466.59<br>(17,281.71 to 18,071.08) | 21,961.64<br>(15,848.49 to 30,477.22) | 15,771.64<br>(11,679.44 to 21,554.60) | 32,449.52<br>(23,117.49 to 44,488.49) |
| Rheumatic heart disease         | 8,347.62<br>(7,957.19 to 8,806.00)       | 5,527.34<br>(4,513.33 to 6,982.17)       | 4,982.73<br>(4,092.31 to 6,190.92)       | 6,697.09<br>(5,554.20 to 8,331.56)       | 314.58<br>(302.34 to 328.71)          | 295.77<br>(248.53 to 370.28)          | 277.23<br>(235.89 to 340.82)          | 332.71<br>(285.73 to 411.38)          |
| Ischemic heart disease          | 167,695.16<br>(163,400.63 to 172,479.67) | 166,263.04<br>(95,488.90 to 281,374.22)  | 99,265.49<br>(59,905.99 to 165,277.29)   | 292,876.28<br>(167,470.36 to 481,197.21) | 9,480.54<br>(9,230.53 to 9,757.70)    | 10,915.70<br>(6,720.23 to 17,327.79)  | 7,275.74<br>(4,549.47 to 11,115.37)   | 17,099.72<br>(10,510.06 to 26,741.87) |
| Stroke                          | 101,992.79<br>(99,104.55 to 105,018.72)  | 90,246.11<br>(57,622.24 to 141,748.85)   | 54,283.44<br>(36,410.30 to 83,743.37)    | 166,519.06<br>(106,391.86 to 259,930.08) | 5,528.23<br>(5,334.61 to 5,734.68)    | 5,916.98<br>(4,000.37 to 9,122.34)    | 3,993.99<br>(2,798.67 to 6,138.62)    | 9,641.33<br>(6,451.30 to 14,623.44)   |
| Ischemic stroke                 | 40,095.14<br>(38,501.65 to 41,842.07)    | 37,640.13<br>(22,629.86 to 67,060.62)    | 24,810.98<br>(15,483.30 to 43,285.93)    | 60,559.59<br>(35,559.35 to 106,756.57)   | 2,690.17<br>(2,571.77 to 2,817.62)    | 2,958.06<br>(1,816.07 to 5,390.43)    | 2,135.00<br>(1,351.22 to 3,813.85)    | 4,258.82<br>(2,600.59 to 7,687.31)    |

|                                |                                          |                                          |                                          |                                            |                                       |                                       |                                       |                                       |
|--------------------------------|------------------------------------------|------------------------------------------|------------------------------------------|--------------------------------------------|---------------------------------------|---------------------------------------|---------------------------------------|---------------------------------------|
| Intracerebral hemorrhage       | 61,897.65<br>(60,240.15 to<br>63,722.74) | 52,605.98<br>(31,632.02 to<br>87,554.53) | 29,472.46<br>(18,785.86 to<br>46,454.31) | 105,959.47<br>(62,081.29 to<br>175,634.92) | 2,838.06<br>(2,748.57 to<br>2,934.06) | 2,958.92<br>(1,921.13 to<br>4,526.88) | 1,858.99<br>(1,262.85 to<br>2,715.27) | 5,382.50<br>(3,349.48 to<br>8,493.69) |
| Hypertensive heart disease     | 14,955.00<br>(12,105.83 to<br>16,330.59) | 28,661.45<br>(16,859.91 to<br>57,024.80) | 21,881.71<br>(13,887.97 to<br>40,909.26) | 37,324.70<br>(21,247.83 to<br>78,328.22)   | 893.73<br>(698.62 to<br>982.93)       | 2,144.30<br>(1,246.74 to<br>4,660.87) | 1,729.62<br>(1,074.80 to<br>3,495.96) | 2,609.45<br>(1,462.23 to<br>5,716.43) |
| Cardiomyopathy and myocarditis | 8,159.05<br>(7,052.67 to<br>9,049.67)    | 8,654.67<br>(6,462.56 to<br>11,241.49)   | 7,362.49<br>(5,551.26 to<br>9,471.13)    | 9,460.78<br>(7,091.81 to<br>12,178.70)     | 339.55<br>(282.60 to<br>371.08)       | 460.77<br>(341.69 to<br>611.93)       | 410.25<br>(306.88 to<br>536.78)       | 473.18<br>(354.02 to<br>622.39)       |
| Myocarditis                    | 1,234.37<br>(992.16 to<br>1,358.33)      | 1,256.31<br>(998.86 to<br>1,458.17)      | 1,253.20<br>(988.34 to<br>1,456.23)      | 1,263.46<br>(1,015.80 to<br>1,466.97)      | 46.54<br>(35.84 to<br>51.06)          | 74.69<br>(57.91 to<br>84.87)          | 80.05<br>(62.47 to<br>90.66)          | 67.94<br>(51.89 to<br>77.86)          |



| Global                                                        |                                               |                                                |                                               |                                                 |                                            |                                            |                                            |                                             |
|---------------------------------------------------------------|-----------------------------------------------|------------------------------------------------|-----------------------------------------------|-------------------------------------------------|--------------------------------------------|--------------------------------------------|--------------------------------------------|---------------------------------------------|
| Cause                                                         | YLLs (in 1000s)                               |                                                |                                               |                                                 | Deaths (in 1000s)                          |                                            |                                            |                                             |
|                                                               | 2016                                          | 2040 Forecast                                  | 2040 Better Scenario                          | 2040 Worse Scenario                             | 2016                                       | 2040 Forecast                              | 2040 Better Scenario                       | 2040 Worse Scenario                         |
| Alcoholic cardiomyopathy                                      | 2,494.33<br>(1,967.43 to 3,151.60)            | 2,170.98<br>(1,418.52 to 3,213.18)             | 1,779.23<br>(1,158.73 to 2,679.31)            | 2,613.62<br>(1,723.26 to 3,826.12)              | 83.34<br>(67.20 to 102.92)                 | 83.68<br>(61.50 to 112.28)                 | 72.36<br>(51.86 to 96.91)                  | 96.72<br>(71.47 to 128.53)                  |
| Other cardiomyopathy                                          | 4,430.35<br>(3,771.63 to 4,730.05)            | 5,227.37<br>(3,724.93 to 7,274.23)             | 4,330.05<br>(3,106.45 to 6,012.41)            | 5,583.71<br>(3,936.22 to 7,870.80)              | 209.67<br>(170.27 to 224.67)               | 302.40<br>(204.47 to 434.37)               | 257.83<br>(176.20 to 366.20)               | 308.52<br>(207.91 to 447.90)                |
| Atrial fibrillation and flutter                               | 2,336.89<br>(1,890.44 to 2,827.80)            | 4,932.52<br>(3,721.42 to 6,433.66)             | 4,753.94<br>(3,613.08 to 6,200.75)            | 4,880.80<br>(3,698.34 to 6,363.65)              | 239.23<br>(188.69 to 293.59)               | 542.61<br>(410.58 to 697.18)               | 541.65<br>(414.36 to 694.07)               | 511.47<br>(384.67 to 659.21)                |
| Aortic aneurysm                                               | 2,881.76<br>(2,800.85 to 2,975.54)            | 3,801.03<br>(2,993.22 to 4,866.06)             | 3,532.74<br>(2,837.95 to 4,483.12)            | 3,951.56<br>(3,073.59 to 5,110.70)              | 166.57<br>(162.05 to 171.56)               | 257.01<br>(214.27 to 320.20)               | 251.24<br>(210.69 to 309.07)               | 250.82<br>(206.79 to 311.94)                |
| Peripheral artery disease                                     | 715.52<br>(544.36 to 1,007.02)                | 1,627.71<br>(1,130.09 to 2,407.72)             | 1,592.46<br>(1,112.06 to 2,349.64)            | 1,855.46<br>(1,137.68 to 2,447.52)              | 60.70<br>(45.37 to 89.48)                  | 158.36<br>(111.74 to 233.92)               | 163.63<br>(114.91 to 244.82)               | 152.25<br>(106.60 to 224.92)                |
| Endocarditis                                                  | 2,329.06<br>(2,067.07 to 2,756.07)            | 3,662.17<br>(2,730.31 to 4,954.04)             | 3,473.53<br>(2,587.62 to 4,617.13)            | 3,796.47<br>(2,842.21 to 5,134.61)              | 95.97<br>(82.15 to 112.83)                 | 193.07<br>(142.65 to 262.38)               | 192.28<br>(143.32 to 259.97)               | 186.90<br>(138.04 to 255.70)                |
| Other cardiovascular and circulatory diseases                 | 10,225.83<br>(9,436.43 to 12,584.08)          | 16,894.78<br>(13,308.59 to 22,323.43)          | 13,769.74<br>(10,994.84 to 17,999.54)         | 20,196.99<br>(15,641.16 to 26,760.19)           | 527.48<br>(493.07 to 627.50)               | 1,077.07<br>(879.01 to 1,395.65)           | 936.01<br>(769.80 to 1,229.05)             | 1,191.68<br>(957.54 to 1,571.67)            |
| <b>Chronic respiratory diseases</b>                           | <b>61,574.64<br/>(59,099.41 to 65,209.15)</b> | <b>76,985.71<br/>(55,617.08 to 109,526.60)</b> | <b>59,291.19<br/>(44,201.32 to 81,192.42)</b> | <b>112,639.19<br/>(76,361.06 to 168,484.72)</b> | <b>3,542.29<br/>(3,403.60 to 3,739.61)</b> | <b>5,198.60<br/>(3,739.31 to 7,392.03)</b> | <b>4,180.87<br/>(3,127.43 to 5,695.41)</b> | <b>7,239.62<br/>(4,894.90 to 10,776.19)</b> |
| Chronic obstructive pulmonary disease                         | 47,146.20<br>(44,992.80 to 50,032.34)         | 62,113.16<br>(41,814.16 to 94,017.44)          | 45,257.61<br>(31,473.99 to 66,186.93)         | 96,610.46<br>(62,138.89 to 152,974.16)          | 2,934.33<br>(2,817.24 to 3,120.35)         | 4,407.12<br>(3,022.34 to 6,552.79)         | 3,389.85<br>(2,401.30 to 4,851.60)         | 6,445.79<br>(4,158.69 to 10,002.40)         |
| Pneumoconiosis                                                | 414.94<br>(391.48 to 450.21)                  | 330.09<br>(286.39 to 387.59)                   | 316.41<br>(272.95 to 370.75)                  | 361.61<br>(323.19 to 407.45)                    | 21.49<br>(20.45 to 23.05)                  | 22.20<br>(19.63 to 25.44)                  | 22.09<br>(19.51 to 24.97)                  | 22.92<br>(20.32 to 25.76)                   |
| Silicosis                                                     | 210.16<br>(194.31 to 230.82)                  | 92.84<br>(69.58 to 128.33)                     | 80.21<br>(59.94 to 106.19)                    | 121.97<br>(99.04 to 147.08)                     | 10.40<br>(9.57 to 11.68)                   | 6.03<br>(4.55 to 8.16)                     | 5.35<br>(4.04 to 7.03)                     | 7.41<br>(5.99 to 8.90)                      |
| Asbestosis                                                    | 60.96<br>(46.29 to 71.87)                     | 100.90<br>(79.54 to 120.14)                    | 112.34<br>(89.80 to 134.12)                   | 90.09<br>(69.88 to 106.59)                      | 3.50<br>(2.43 to 4.06)                     | 6.98<br>(5.44 to 8.20)                     | 8.04<br>(6.49 to 9.37)                     | 5.99<br>(4.61 to 7.05)                      |
| Coal workers pneumoconiosis                                   | 46.60<br>(30.38 to 54.24)                     | 36.46<br>(24.94 to 47.40)                      | 30.61<br>(20.40 to 39.34)                     | 46.97<br>(31.77 to 58.25)                       | 2.68<br>(1.79 to 3.07)                     | 2.61<br>(1.87 to 3.41)                     | 2.28<br>(1.62 to 2.99)                     | 3.14<br>(2.25 to 3.96)                      |
| Other pneumoconiosis                                          | 97.22<br>(81.95 to 127.89)                    | 99.89<br>(78.34 to 130.02)                     | 93.25<br>(71.06 to 122.60)                    | 102.58<br>(82.72 to 132.94)                     | 4.91<br>(4.17 to 6.57)                     | 6.58<br>(5.30 to 8.48)                     | 6.43<br>(5.10 to 8.23)                     | 6.37<br>(5.18 to 8.34)                      |
| Asthma                                                        | 10,499.32<br>(8,643.21 to 12,621.19)          | 7,910.13<br>(5,598.28 to 11,111.76)            | 6,402.62<br>(4,603.33 to 8,709.47)            | 9,682.32<br>(6,886.61 to 13,820.84)             | 420.02<br>(338.81 to 517.69)               | 390.65<br>(283.68 to 550.09)               | 329.79<br>(242.56 to 445.80)               | 448.77<br>(318.04 to 637.23)                |
| Interstitial lung disease and pulmonary sarcoidosis           | 2,305.43<br>(1,695.61 to 2,717.00)            | 4,948.78<br>(3,555.04 to 6,095.82)             | 5,713.59<br>(4,243.76 to 7,027.83)            | 4,178.20<br>(2,996.88 to 5,109.79)              | 127.47<br>(90.82 to 147.69)                | 309.56<br>(224.83 to 370.18)               | 369.39<br>(274.56 to 441.77)               | 253.20<br>(181.20 to 300.32)                |
| Other chronic respiratory diseases                            | 1,208.75<br>(847.40 to 1,438.67)              | 1,683.54<br>(1,185.90 to 2,049.61)             | 1,806.61<br>(1,130.28 to 1,950.65)            | 1,806.61<br>(1,260.04 to 2,209.97)              | 38.98<br>(27.29 to 45.65)                  | 69.07<br>(48.38 to 82.90)                  | 69.76<br>(49.21 to 83.32)                  | 68.93<br>(47.87 to 83.76)                   |
| <b>Cirrhosis and other chronic liver diseases</b>             | <b>37,283.07<br/>(35,413.31 to 41,442.98)</b> | <b>48,251.38<br/>(43,070.43 to 55,078.20)</b>  | <b>44,180.66<br/>(38,946.40 to 50,876.11)</b> | <b>52,661.56<br/>(47,852.35 to 59,040.38)</b>   | <b>1,256.85<br/>(1,197.09 to 1,376.86)</b> | <b>1,898.70<br/>(1,742.98 to 2,081.23)</b> | <b>1,782.33<br/>(1,616.19 to 1,980.76)</b> | <b>2,002.12<br/>(1,867.95 to 2,167.41)</b>  |
| Cirrhosis and other chronic liver diseases due to hepatitis B | 10,846.50<br>(9,787.89 to 12,777.41)          | 14,891.11<br>(12,958.76 to 17,554.97)          | 14,349.35<br>(12,357.69 to 16,913.95)         | 15,562.53<br>(13,709.65 to 17,859.65)           | 365.57<br>(330.81 to 422.57)               | 582.19<br>(512.95 to 658.05)               | 572.68<br>(501.65 to 659.16)               | 590.11<br>(525.54 to 673.39)                |
| Cirrhosis and other chronic liver diseases due to hepatitis C | 9,455.51<br>(8,516.28 to 10,668.97)           | 12,924.91<br>(11,278.83 to 14,950.89)          | 12,194.33<br>(10,525.96 to 14,302.85)         | 13,391.43<br>(11,700.38 to 15,293.48)           | 326.75<br>(295.07 to 364.97)               | 504.65<br>(447.72 to 569.32)               | 485.93<br>(425.86 to 552.61)               | 508.16<br>(453.32 to 570.77)                |

|                                                                |                                                               |                                                               |                                                               |                                                               |                                                            |                                                            |                                                            |                                                            |
|----------------------------------------------------------------|---------------------------------------------------------------|---------------------------------------------------------------|---------------------------------------------------------------|---------------------------------------------------------------|------------------------------------------------------------|------------------------------------------------------------|------------------------------------------------------------|------------------------------------------------------------|
|                                                                | 9,440.30<br>(8,601.03 to<br>10,523.64)                        | 11,848.21<br>(10,219.38 to<br>13,803.08)                      | 9,622.60<br>(8,177.28 to<br>11,375.40)                        | 14,480.70<br>(12,728.71 to<br>16,496.69)                      | 334.89<br>(306.46 to<br>371.88)                            | 476.27<br>(422.92 to<br>537.12)                            | 399.85<br>(350.41 to<br>455.61)                            | 561.40<br>(507.09 to<br>624.65)                            |
| Cirrhosis and other chronic liver diseases due to alcohol use  |                                                               |                                                               |                                                               |                                                               |                                                            |                                                            |                                                            |                                                            |
|                                                                | 7,540.75<br>(6,769.21 to<br>8,562.42)                         | 8,587.15<br>(7,486.43 to<br>9,927.50)                         | 8,014.38<br>(6,960.50 to<br>9,339.26)                         | 9,226.90<br>(8,114.37 to<br>10,637.26)                        | 229.64<br>(206.21 to<br>258.15)                            | 335.59<br>(298.68 to<br>383.21)                            | 323.87<br>(285.85 to<br>373.96)                            | 342.45<br>(305.48 to<br>391.12)                            |
| Cirrhosis and other chronic liver diseases due to other causes |                                                               |                                                               |                                                               |                                                               |                                                            |                                                            |                                                            |                                                            |
| <b>Digestive diseases</b>                                      | <b>27,082.09</b><br><b>(25,735.97 to</b><br><b>29,026.39)</b> | <b>32,599.21</b><br><b>(28,374.61 to</b><br><b>37,280.38)</b> | <b>29,770.73</b><br><b>(25,823.79 to</b><br><b>34,419.07)</b> | <b>36,196.27</b><br><b>(31,824.71 to</b><br><b>41,428.67)</b> | <b>1,092.33</b><br><b>(1,042.78 to</b><br><b>1,177.81)</b> | <b>1,727.53</b><br><b>(1,540.36 to</b><br><b>1,945.84)</b> | <b>1,653.75</b><br><b>(1,468.53 to</b><br><b>1,860.29)</b> | <b>1,788.09</b><br><b>(1,589.57 to</b><br><b>2,030.92)</b> |
| Peptic ulcer disease                                           | 5,742.34<br>(5,308.86 to<br>6,470.00)                         | 4,812.98<br>(3,969.55 to<br>5,922.66)                         | 4,080.24<br>(3,327.87 to<br>5,005.83)                         | 6,000.96<br>(4,908.67 to<br>7,394.13)                         | 246.72<br>(230.08 to<br>272.70)                            | 264.57<br>(221.04 to<br>315.59)                            | 232.87<br>(195.77 to<br>277.95)                            | 310.76<br>(257.89 to<br>374.28)                            |

| Global                                     |                                       |                                       |                                       |                                       |                                    |                                    |                                    |                                    |
|--------------------------------------------|---------------------------------------|---------------------------------------|---------------------------------------|---------------------------------------|------------------------------------|------------------------------------|------------------------------------|------------------------------------|
| Cause                                      | YLLs (in 1000s)                       |                                       |                                       |                                       | Deaths (in 1000s)                  |                                    |                                    |                                    |
|                                            | 2016                                  | 2040 Forecast                         | 2040 Better Scenario                  | 2040 Worse Scenario                   | 2016                               | 2040 Forecast                      | 2040 Better Scenario               | 2040 Worse Scenario                |
| Gastritis and duodenitis                   | 1,017.42<br>(930.59 to 1,148.36)      | 1,556.96<br>(1,349.77 to 1,823.14)    | 1,469.33<br>(1,251.22 to 1,720.58)    | 1,686.65<br>(1,473.21 to 1,937.54)    | 42.99<br>(39.34 to 47.75)          | 83.57<br>(73.35 to 95.87)          | 82.10<br>(71.87 to 94.11)          | 85.60<br>(74.66 to 97.08)          |
| Appendicitis                               | 1,886.62<br>(1,684.29 to 2,200.23)    | 1,712.92<br>(1,459.48 to 2,073.38)    | 1,522.08<br>(1,266.11 to 1,858.54)    | 2,052.23<br>(1,754.72 to 2,467.49)    | 50.19<br>(44.99 to 57.43)          | 62.87<br>(54.72 to 74.81)          | 58.31<br>(49.63 to 70.60)          | 69.94<br>(61.32 to 83.00)          |
| Paralytic ileus and intestinal obstruction | 7,572.53<br>(6,329.25 to 8,263.90)    | 9,676.75<br>(7,977.25 to 11,342.69)   | 9,555.16<br>(7,857.71 to 11,275.76)   | 10,067.19<br>(8,299.14 to 11,610.77)  | 254.61<br>(213.31 to 280.85)       | 459.69<br>(386.68 to 524.61)       | 479.76<br>(402.38 to 547.14)       | 436.41<br>(365.84 to 496.91)       |
| Inguinal, femoral, and abdominal hernia    | 954.58<br>(739.84 to 1,139.71)        | 1,029.26<br>(772.20 to 1,242.93)      | 984.89<br>(732.02 to 1,198.35)        | 1,088.37<br>(812.53 to 1,294.61)      | 43.73<br>(35.57 to 52.14)          | 58.49<br>(45.47 to 70.50)          | 58.53<br>(44.92 to 70.47)          | 56.96<br>(43.98 to 68.09)          |
| Inflammatory bowel disease                 | 981.64<br>(819.41 to 1,144.74)        | 1,360.14<br>(1,135.08 to 1,589.42)    | 1,376.60<br>(1,141.39 to 1,607.28)    | 1,320.46<br>(1,100.04 to 1,532.17)    | 41.61<br>(34.54 to 45.10)          | 74.40<br>(62.72 to 82.55)          | 78.55<br>(65.48 to 87.92)          | 67.71<br>(57.23 to 74.85)          |
| Vascular intestinal disorders              | 1,671.00<br>(1,536.99 to 1,908.24)    | 2,650.02<br>(2,362.55 to 3,103.86)    | 2,614.25<br>(2,287.54 to 3,060.76)    | 2,595.86<br>(2,352.98 to 3,027.55)    | 100.91<br>(92.87 to 113.67)        | 189.28<br>(172.08 to 217.71)       | 192.80<br>(173.57 to 221.20)       | 177.14<br>(160.13 to 203.59)       |
| Gallbladder and biliary diseases           | 1,866.75<br>(1,758.57 to 2,184.15)    | 2,746.41<br>(1,798.62 to 4,287.99)    | 2,139.49<br>(1,477.76 to 3,243.76)    | 3,365.20<br>(2,146.96 to 5,344.12)    | 101.83<br>(96.11 to 118.08)        | 186.33<br>(121.96 to 294.05)       | 153.05<br>(105.72 to 233.82)       | 214.64<br>(136.93 to 343.92)       |
| Pancreatitis                               | 3,274.24<br>(2,832.81 to 3,650.57)    | 4,187.05<br>(3,108.14 to 5,901.12)    | 3,351.95<br>(2,543.76 to 4,488.36)    | 4,970.58<br>(3,667.46 to 7,117.28)    | 112.05<br>(97.41 to 124.60)        | 173.22<br>(133.07 to 233.49)       | 144.12<br>(113.81 to 187.88)       | 196.84<br>(149.06 to 273.19)       |
| Other digestive diseases                   | 2,114.97<br>(1,937.50 to 2,386.83)    | 2,866.74<br>(2,572.65 to 3,226.40)    | 2,676.73<br>(2,371.21 to 3,041.57)    | 3,048.77<br>(2,743.93 to 3,421.34)    | 97.69<br>(88.88 to 108.10)         | 175.10<br>(157.59 to 195.42)       | 173.67<br>(155.72 to 195.13)       | 172.09<br>(154.78 to 192.16)       |
| Neurological disorders                     | 34,154.45<br>(30,976.21 to 38,350.74) | 68,949.07<br>(56,228.79 to 88,519.59) | 68,906.82<br>(57,075.01 to 85,966.09) | 66,948.50<br>(53,640.20 to 88,556.24) | 2,825.82<br>(2,497.00 to 3,217.57) | 6,742.06<br>(5,392.94 to 8,859.90) | 7,016.38<br>(5,700.98 to 8,866.01) | 6,182.30<br>(4,727.39 to 8,454.55) |
| Alzheimer's disease and other dementias    | 22,348.78<br>(19,381.82 to 26,349.20) | 51,864.33<br>(39,536.97 to 71,088.18) | 52,038.05<br>(40,594.20 to 68,221.11) | 49,508.88<br>(36,333.84 to 70,793.09) | 2,382.13<br>(2,060.41 to 2,777.61) | 5,840.49<br>(4,445.93 to 7,968.13) | 6,051.25<br>(4,739.88 to 7,903.50) | 5,368.20<br>(3,943.69 to 7,588.65) |
| Parkinson's disease                        | 2,528.14<br>(1,992.32 to 3,147.38)    | 6,185.14<br>(4,832.59 to 7,782.07)    | 6,882.42<br>(5,371.70 to 8,676.76)    | 5,175.16<br>(4,040.09 to 6,497.18)    | 211.30<br>(167.77 to 265.16)       | 557.23<br>(439.44 to 696.73)       | 634.04<br>(501.27 to 800.83)       | 452.69<br>(352.53 to 574.38)       |
| Epilepsy                                   | 5,945.43<br>(5,555.08 to 6,409.61)    | 6,505.50<br>(5,279.96 to 8,225.13)    | 5,512.54<br>(4,507.06 to 6,882.85)    | 8,003.17<br>(6,511.97 to 10,093.65)   | 126.05<br>(118.63 to 135.52)       | 174.06<br>(142.59 to 213.64)       | 153.37<br>(127.07 to 185.46)       | 202.48<br>(165.44 to 249.83)       |
| Multiple sclerosis                         | 567.35<br>(517.29 to 646.89)          | 696.15<br>(573.14 to 848.49)          | 708.21<br>(577.50 to 867.00)          | 685.01<br>(564.76 to 837.49)          | 18.93<br>(16.58 to 21.03)          | 25.64<br>(21.15 to 30.29)          | 26.52<br>(21.82 to 31.58)          | 24.75<br>(20.42 to 29.31)          |
| Motor neuron disease                       | 855.92<br>(819.37 to 883.29)          | 1,252.30<br>(1,122.50 to 1,392.23)    | 1,274.70<br>(1,130.42 to 1,441.17)    | 1,193.96<br>(1,085.88 to 1,304.16)    | 34.33<br>(33.05 to 35.36)          | 57.84<br>(52.81 to 63.01)          | 59.64<br>(53.74 to 65.97)          | 54.15<br>(50.09 to 58.07)          |
| Other neurological disorders               | 1,908.83<br>(1,775.71 to 2,020.32)    | 2,445.65<br>(2,186.47 to 2,729.75)    | 2,490.90<br>(2,209.59 to 2,801.26)    | 2,382.32<br>(2,146.23 to 2,656.15)    | 53.08<br>(50.93 to 55.37)          | 86.80<br>(79.30 to 93.79)          | 91.56<br>(82.43 to 100.09)         | 80.02<br>(74.20 to 85.88)          |
| Mental disorders                           | 12,033.73<br>(10,748.31 to 13,076.40) | 18,220.17<br>(15,050.12 to 21,722.47) | 19,666.72<br>(16,000.10 to 24,036.91) | 17,488.79<br>(14,604.30 to 20,671.15) | 318.28<br>(283.23 to 343.69)       | 559.02<br>(476.49 to 641.00)       | 617.27<br>(517.56 to 725.96)       | 515.62<br>(443.27 to 588.90)       |
| Alcohol use disorders                      | 6,213.98<br>(5,164.12 to 6,877.78)    | 6,612.03<br>(5,178.79 to 8,222.62)    | 6,590.80<br>(5,106.05 to 8,369.00)    | 6,792.02<br>(5,405.84 to 8,330.28)    | 173.89<br>(145.53 to 190.90)       | 209.27<br>(167.73 to 252.06)       | 212.70<br>(168.35 to 260.73)       | 209.81<br>(169.75 to 249.82)       |
| Drug use disorders                         | 5,787.35<br>(5,264.51 to 6,426.74)    | 11,572.28<br>(9,526.41 to 13,804.65)  | 13,038.84<br>(10,593.17 to 15,878.42) | 10,661.48<br>(8,827.62 to 12,555.62)  | 143.77<br>(130.28 to 158.78)       | 349.07<br>(294.88 to 401.04)       | 403.85<br>(340.62 to 470.06)       | 305.14<br>(265.48 to 345.68)       |
| Opioid use disorders                       | 3,656.92<br>(3,098.22 to 4,048.42)    | 5,702.43<br>(4,460.17 to 6,925.60)    | 5,963.73<br>(4,599.39 to 7,359.69)    | 5,477.93<br>(4,325.13 to 6,559.71)    | 86.22<br>(72.67 to 94.68)          | 157.57<br>(123.13 to 184.81)       | 168.54<br>(131.93 to 200.94)       | 145.85<br>(116.10 to 168.80)       |

|                           |                                       |                                       |                                       |                                       |                              |                                 |                                 |                                 |
|---------------------------|---------------------------------------|---------------------------------------|---------------------------------------|---------------------------------------|------------------------------|---------------------------------|---------------------------------|---------------------------------|
|                           | 356.97<br>(288.96 to<br>463.85)       | 953.07<br>(685.45 to<br>1,225.97)     | 1,097.38<br>(786.53 to<br>1,430.09)   | 878.96<br>(626.56 to<br>1,141.70)     | 8.80<br>(7.06 to<br>11.27)   | 25.81<br>(18.68 to<br>32.30)    | 29.96<br>(21.43 to<br>38.39)    | 23.23<br>(16.73 to<br>29.43)    |
| Cocaine use disorders     |                                       |                                       |                                       |                                       |                              |                                 |                                 |                                 |
|                           | 224.23<br>(185.18 to<br>300.34)       | 858.48<br>(639.80 to<br>1,123.90)     | 1,062.23<br>(782.54 to<br>1,400.76)   | 768.41<br>(571.03 to<br>993.04)       | 5.22<br>(4.30 to<br>6.85)    | 21.46<br>(16.27 to<br>27.63)    | 26.74<br>(20.03 to<br>34.56)    | 18.78<br>(14.36 to<br>23.79)    |
| Amphetamine use disorders |                                       |                                       |                                       |                                       |                              |                                 |                                 |                                 |
|                           | 1,549.23<br>(1,395.62 to<br>1,961.50) | 4,058.29<br>(3,294.08 to<br>4,860.42) | 4,915.51<br>(3,972.34 to<br>6,020.99) | 3,536.18<br>(2,922.40 to<br>4,258.20) | 43.53<br>(39.37 to<br>52.89) | 144.23<br>(120.76 to<br>167.36) | 178.60<br>(150.94 to<br>207.75) | 117.27<br>(102.06 to<br>133.84) |
| Other drug use disorders  |                                       |                                       |                                       |                                       |                              |                                 |                                 |                                 |
|                           | 32.40<br>(28.77 to<br>36.08)          | 35.87<br>(29.67 to<br>44.08)          | 37.08<br>(30.42 to<br>45.90)          | 35.29<br>(29.41 to<br>43.12)          | 0.61<br>(0.54 to<br>0.68)    | 0.69<br>(0.57 to<br>0.85)       | 0.72<br>(0.59 to<br>0.89)       | 0.68<br>(0.56 to<br>0.82)       |
| Eating disorders          |                                       |                                       |                                       |                                       |                              |                                 |                                 |                                 |

| Global                                                     |                                              |                                                |                                               |                                                 |                                           |                                           |                                           |                                            |
|------------------------------------------------------------|----------------------------------------------|------------------------------------------------|-----------------------------------------------|-------------------------------------------------|-------------------------------------------|-------------------------------------------|-------------------------------------------|--------------------------------------------|
| Cause                                                      | YLLs (in 1000s)                              |                                                |                                               |                                                 | Deaths (in 1000s)                         |                                           |                                           |                                            |
|                                                            | 2016                                         | 2040 Forecast                                  | 2040 Better Scenario                          | 2040 Worse Scenario                             | 2016                                      | 2040 Forecast                             | 2040 Better Scenario                      | 2040 Worse Scenario                        |
| <b>Diabetes, urogenital, blood, and endocrine diseases</b> | <b>71,460.46</b><br>(69,628.99 to 73,288.81) | <b>119,131.34</b><br>(89,406.19 to 164,635.93) | <b>97,067.77</b><br>(73,407.22 to 132,658.46) | <b>146,185.41</b><br>(109,119.47 to 197,727.42) | <b>3,191.13</b><br>(3,112.85 to 3,271.85) | <b>6,914.32</b><br>(5,166.40 to 9,628.62) | <b>5,897.82</b><br>(4,470.86 to 8,170.00) | <b>7,998.80</b><br>(5,939.79 to 11,068.02) |
| Diabetes mellitus                                          | 28,650.00<br>(27,998.10 to 29,279.38)        | 45,425.52<br>(32,589.44 to 63,374.26)          | 36,837.12<br>(26,956.50 to 50,911.65)         | 57,531.52<br>(40,787.06 to 81,635.12)           | 1,437.71<br>(1,402.66 to 1,471.02)        | 2,746.60<br>(2,089.94 to 3,596.09)        | 2,350.27<br>(1,808.28 to 3,055.05)        | 3,253.49<br>(2,426.94 to 4,349.52)         |
| Acute glomerulonephritis                                   | 320.39<br>(305.40 to 337.79)                 | 389.21<br>(333.56 to 454.19)                   | 365.29<br>(308.08 to 431.01)                  | 437.27<br>(379.21 to 502.30)                    | 11.02<br>(10.54 to 11.52)                 | 18.13<br>(15.32 to 21.34)                 | 17.77<br>(14.95 to 20.79)                 | 19.17<br>(16.23 to 22.30)                  |
| Chronic kidney disease                                     | 26,260.54<br>(25,370.98 to 27,674.31)        | 50,779.56<br>(25,297.41 to 96,249.90)          | 38,578.51<br>(20,249.76 to 73,279.94)         | 64,464.09<br>(31,861.45 to 117,883.54)          | 1,186.56<br>(1,150.74 to 1,236.56)        | 3,008.53<br>(1,442.28 to 5,800.88)        | 2,386.76<br>(1,203.99 to 4,639.85)        | 3,536.82<br>(1,709.30 to 6,838.00)         |
| Chronic kidney disease due to diabetes mellitus            | 10,965.18<br>(9,948.04 to 11,927.79)         | 23,916.85<br>(11,260.66 to 46,446.96)          | 18,035.82<br>(9,076.24 to 36,159.73)          | 30,420.37<br>(14,141.80 to 57,177.84)           | 500.76<br>(452.44 to 543.96)              | 1,338.16<br>(610.79 to 2,620.80)          | 1,049.70<br>(508.09 to 2,104.82)          | 1,641.74<br>(740.92 to 3,089.45)           |
| Chronic kidney disease due to hypertension                 | 4,927.08<br>(4,406.71 to 5,548.10)           | 11,243.62<br>(5,263.48 to 21,923.46)           | 8,873.22<br>(4,397.29 to 17,464.59)           | 13,958.58<br>(6,482.44 to 26,381.74)            | 299.69<br>(268.21 to 335.50)              | 861.47<br>(402.13 to 1,658.12)            | 713.56<br>(352.75 to 1,443.07)            | 1,012.06<br>(467.20 to 1,910.97)           |
| Chronic kidney disease due to glomerulonephritis           | 4,453.76<br>(3,958.42 to 5,035.20)           | 6,123.91<br>(3,509.30 to 10,815.67)            | 4,500.87<br>(2,704.90 to 7,992.55)            | 7,878.15<br>(4,515.27 to 13,496.69)             | 150.13<br>(133.20 to 168.89)              | 288.60<br>(144.50 to 547.60)              | 216.36<br>(114.55 to 428.01)              | 353.05<br>(175.65 to 644.11)               |
| Chronic kidney disease due to other and unspecified causes | 5,914.52<br>(5,263.11 to 6,715.11)           | 9,495.17<br>(5,013.85 to 17,402.99)            | 7,168.60<br>(4,011.99 to 13,089.54)           | 12,206.99<br>(6,521.83 to 21,388.73)            | 235.98<br>(206.97 to 266.43)              | 520.30<br>(250.38 to 1,012.77)            | 407.13<br>(206.35 to 812.42)              | 629.97<br>(306.35 to 1,170.65)             |
| Urinary diseases and male infertility                      | 5,825.72<br>(5,620.25 to 6,028.46)           | 10,473.40<br>(9,404.22 to 11,515.63)           | 10,099.31<br>(8,879.84 to 11,289.62)          | 10,442.37<br>(9,608.46 to 11,255.00)            | 275.21<br>(267.02 to 284.13)              | 673.38<br>(620.79 to 723.68)              | 674.80<br>(608.73 to 735.92)              | 623.08<br>(584.82 to 662.33)               |
| Urinary tract infections                                   | 4,040.91<br>(3,794.05 to 4,296.03)           | 8,187.29<br>(7,261.74 to 9,025.34)             | 7,948.73<br>(6,918.39 to 8,954.36)            | 7,956.90<br>(7,193.46 to 8,663.53)              | 203.55<br>(193.71 to 213.94)              | 551.28<br>(504.79 to 596.65)              | 555.11<br>(499.10 to 609.02)              | 501.23<br>(464.85 to 539.76)               |
| Urolithiasis                                               | 415.06<br>(351.37 to 568.25)                 | 813.54<br>(651.49 to 1,121.28)                 | 787.99<br>(619.68 to 1,108.63)                | 816.48<br>(674.69 to 1,119.00)                  | 18.71<br>(15.94 to 25.76)                 | 45.04<br>(37.00 to 61.23)                 | 44.78<br>(36.34 to 62.01)                 | 42.49<br>(35.55 to 57.00)                  |
| Other urinary diseases                                     | 1,369.76<br>(1,187.74 to 1,559.01)           | 1,472.57<br>(1,198.79 to 1,753.96)             | 1,362.59<br>(1,093.81 to 1,654.70)            | 1,668.98<br>(1,378.79 to 1,961.91)              | 52.94<br>(45.28 to 59.29)                 | 77.07<br>(63.86 to 89.42)                 | 79.36<br>(61.52 to 88.70)                 | 79.36<br>(66.28 to 92.17)                  |
| Gynecological diseases                                     | 265.48<br>(239.09 to 289.12)                 | 284.37<br>(230.20 to 349.97)                   | 244.55<br>(194.19 to 301.96)                  | 339.31<br>(279.15 to 410.81)                    | 8.34<br>(7.45 to 9.05)                    | 10.50<br>(8.84 to 12.39)                  | 9.56<br>(7.82 to 11.54)                   | 11.70<br>(10.06 to 13.50)                  |
| Uterine fibroids                                           | 87.93<br>(59.02 to 109.92)                   | 74.99<br>(42.46 to 105.95)                     | 65.36<br>(35.29 to 93.87)                     | 92.23<br>(53.35 to 128.68)                      | 2.91<br>(1.97 to 3.64)                    | 2.83<br>(1.58 to 3.94)                    | 2.57<br>(1.35 to 3.66)                    | 3.33<br>(1.91 to 4.53)                     |
| Polycystic ovarian syndrome                                | 18.70<br>(7.00 to 35.78)                     | 13.66<br>(3.89 to 29.70)                       | 10.59<br>(2.92 to 23.31)                      | 19.32<br>(5.47 to 40.97)                        | 0.42<br>(0.16 to 0.79)                    | 0.31<br>(0.09 to 0.67)                    | 0.24<br>(0.07 to 0.53)                    | 0.44<br>(0.13 to 0.93)                     |
| Endometriosis                                              | 3.05<br>(1.19 to 4.51)                       | 3.34<br>(1.59 to 5.88)                         | 2.62<br>(1.23 to 4.65)                        | 3.92<br>(1.85 to 6.86)                          | 0.07<br>(0.03 to 0.10)                    | 0.07<br>(0.03 to 0.13)                    | 0.06<br>(0.03 to 0.10)                    | 0.09<br>(0.04 to 0.15)                     |
| Genital prolapse                                           | 14.40<br>(7.54 to 20.69)                     | 15.50<br>(7.69 to 24.14)                       | 13.90<br>(6.32 to 22.28)                      | 18.41<br>(9.07 to 28.51)                        | 0.90<br>(0.45 to 1.31)                    | 1.03<br>(0.46 to 1.68)                    | 0.98<br>(0.42 to 1.64)                    | 1.12<br>(0.51 to 1.80)                     |
| Other gynecological diseases                               | 141.39<br>(101.36 to 171.88)                 | 176.88<br>(126.87 to 225.07)                   | 152.08<br>(106.15 to 197.57)                  | 205.42<br>(146.26 to 259.53)                    | 4.04<br>(2.89 to 5.01)                    | 6.26<br>(4.55 to 7.93)                    | 5.72<br>(4.08 to 7.37)                    | 6.71<br>(4.78 to 8.43)                     |
| Hemoglobinopathies and hemolytic anemias                   | 5,749.22<br>(5,096.81 to 6,685.28)           | 5,821.36<br>(4,886.22 to 7,073.23)             | 5,032.04<br>(4,205.76 to 6,187.05)            | 6,911.70<br>(5,814.22 to 8,406.36)              | 127.99<br>(113.11 to 149.07)              | 181.21<br>(159.13 to 216.61)              | 168.10<br>(145.00 to 201.59)              | 195.46<br>(171.85 to 231.18)               |
| Thalassemias                                               | 493.34<br>(422.79 to 608.87)                 | 184.67<br>(142.54 to 241.87)                   | 182.72<br>(140.34 to 237.25)                  | 212.75<br>(159.42 to 288.85)                    | 6.26<br>(5.43 to 7.66)                    | 2.50<br>(1.98 to 3.21)                    | 2.48<br>(1.95 to 3.17)                    | 2.82<br>(2.16 to 3.77)                     |

|                                                   |                                       |                                       |                                       |                                       |                                 |                                 |                                 |                                 |
|---------------------------------------------------|---------------------------------------|---------------------------------------|---------------------------------------|---------------------------------------|---------------------------------|---------------------------------|---------------------------------|---------------------------------|
|                                                   | 3,800.55<br>(3,296.48 to<br>4,494.70) | 3,706.36<br>(2,989.69 to<br>4,597.67) | 3,095.12<br>(2,511.01 to<br>3,853.18) | 4,530.22<br>(3,657.00 to<br>5,615.16) | 55.30<br>(48.14 to<br>65.79)    | 63.04<br>(51.29 to<br>78.98)    | 54.15<br>(43.97 to<br>67.90)    | 74.76<br>(60.61 to<br>93.02)    |
| Sickle cell disorders                             |                                       |                                       |                                       |                                       |                                 |                                 |                                 |                                 |
|                                                   | 711.78<br>(610.56 to<br>850.22)       | 1,028.18<br>(845.98 to<br>1,300.35)   | 896.58<br>(730.08 to<br>1,134.38)     | 1,230.67<br>(1,010.25 to<br>1,531.68) | 17.86<br>(15.35 to<br>21.64)    | 35.39<br>(29.60 to<br>45.06)    | 31.84<br>(26.20 to<br>41.14)    | 40.40<br>(34.04 to<br>51.04)    |
| G6PD deficiency                                   |                                       |                                       |                                       |                                       |                                 |                                 |                                 |                                 |
|                                                   | 743.55<br>(651.51 to<br>875.17)       | 902.14<br>(780.68 to<br>1,084.40)     | 857.62<br>(729.74 to<br>1,027.49)     | 938.05<br>(802.30 to<br>1,122.18)     | 48.58<br>(42.73 to<br>56.86)    | 80.28<br>(68.59 to<br>93.82)    | 79.62<br>(68.41 to<br>93.64)    | 77.48<br>(63.86 to<br>92.19)    |
| Other hemoglobinopathies and hemolytic anemias    |                                       |                                       |                                       |                                       |                                 |                                 |                                 |                                 |
|                                                   | 4,389.11<br>(3,902.73 to<br>4,910.93) | 5,957.92<br>(4,939.59 to<br>7,257.04) | 5,910.95<br>(4,866.98 to<br>7,266.20) | 6,059.16<br>(5,099.05 to<br>7,223.37) | 144.30<br>(122.64 to<br>153.63) | 275.97<br>(225.91 to<br>307.99) | 290.56<br>(235.23 to<br>327.44) | 259.08<br>(217.74 to<br>287.95) |
| Endocrine, metabolic, blood, and immune disorders |                                       |                                       |                                       |                                       |                                 |                                 |                                 |                                 |

| Global                                        |                                              |                                              |                                              |                                              |                                     |                                     |                                     |                                     |
|-----------------------------------------------|----------------------------------------------|----------------------------------------------|----------------------------------------------|----------------------------------------------|-------------------------------------|-------------------------------------|-------------------------------------|-------------------------------------|
| Cause                                         | YLLs (in 1000s)                              |                                              |                                              |                                              | Deaths (in 1000s)                   |                                     |                                     |                                     |
|                                               | 2016                                         | 2040 Forecast                                | 2040 Better Scenario                         | 2040 Worse Scenario                          | 2016                                | 2040 Forecast                       | 2040 Better Scenario                | 2040 Worse Scenario                 |
| <b>Musculoskeletal disorders</b>              | <b>2,198.24</b><br>(1,965.60 to 2,494.14)    | <b>3,544.34</b><br>(3,028.26 to 4,084.00)    | <b>3,412.47</b><br>(2,914.47 to 3,972.27)    | <b>3,616.19</b><br>(3,093.73 to 4,086.64)    | <b>89.23</b><br>(78.89 to 98.13)    | <b>188.29</b><br>(161.74 to 209.22) | <b>184.63</b><br>(158.24 to 204.20) | <b>186.95</b><br>(161.38 to 208.75) |
| Rheumatoid arthritis                          | 574.17<br>(487.59 to 668.99)                 | 1,069.58<br>(874.32 to 1,284.35)             | 931.47<br>(748.40 to 1,122.69)               | 1,243.81<br>(1,021.09 to 1,468.71)           | 31.00<br>(26.47 to 35.76)           | 71.89<br>(58.56 to 85.88)           | 64.46<br>(52.01 to 76.38)           | 80.25<br>(65.63 to 95.56)           |
| Other musculoskeletal disorders               | 1,624.07<br>(1,432.71 to 1,864.54)           | 2,474.76<br>(2,081.88 to 2,870.45)           | 2,481.00<br>(2,079.01 to 2,888.95)           | 2,372.38<br>(2,010.69 to 2,722.34)           | 58.23<br>(51.06 to 64.61)           | 116.40<br>(98.61 to 128.73)         | 120.18<br>(102.11 to 133.71)        | 106.70<br>(91.00 to 117.93)         |
| <b>Other non-communicable diseases</b>        | <b>45,970.60</b><br>(40,880.95 to 50,868.23) | <b>32,498.67</b><br>(26,325.87 to 39,193.51) | <b>26,083.49</b><br>(21,424.77 to 30,943.41) | <b>43,955.59</b><br>(34,887.61 to 53,265.93) | <b>639.68</b><br>(576.40 to 703.63) | <b>723.81</b><br>(584.78 to 862.05) | <b>657.40</b><br>(517.42 to 778.74) | <b>832.98</b><br>(689.93 to 988.29) |
| Congenital birth defects                      | 40,707.17<br>(35,761.86 to 45,627.57)        | 23,891.63<br>(18,373.48 to 29,737.60)        | 17,921.75<br>(14,145.59 to 21,991.54)        | 34,534.25<br>(26,046.99 to 43,354.80)        | 498.92<br>(440.16 to 556.55)        | 312.59<br>(246.52 to 380.94)        | 239.75<br>(193.49 to 289.11)        | 440.16<br>(340.21 to 544.68)        |
| Neural tube defects                           | 3,407.47<br>(2,362.11 to 5,150.35)           | 1,042.20<br>(603.90 to 1,752.97)             | 652.52<br>(384.98 to 1,111.26)               | 1,759.74<br>(1,058.91 to 2,946.79)           | 40.07<br>(27.87 to 60.47)           | 12.61<br>(7.42 to 20.90)            | 7.97<br>(4.78 to 13.43)             | 21.07<br>(12.80 to 35.00)           |
| Congenital heart anomalies                    | 17,809.17<br>(15,807.17 to 20,444.43)        | 9,579.33<br>(7,582.35 to 11,947.30)          | 7,255.60<br>(5,769.92 to 9,128.12)           | 13,693.98<br>(10,668.49 to 17,478.75)        | 221.28<br>(197.71 to 253.82)        | 127.35<br>(102.29 to 156.13)        | 98.12<br>(79.81 to 120.96)          | 177.69<br>(141.58 to 222.47)        |
| Orofacial clefts                              | 192.20<br>(107.02 to 316.42)                 | 90.98<br>(38.00 to 181.19)                   | 55.38<br>(23.34 to 106.52)                   | 159.26<br>(65.14 to 320.07)                  | 2.23<br>(1.24 to 3.67)              | 1.05<br>(0.44 to 2.10)              | 0.64<br>(0.27 to 1.23)              | 1.85<br>(0.75 to 3.71)              |
| Down syndrome                                 | 981.25<br>(850.19 to 1,274.58)               | 906.05<br>(741.43 to 1,239.88)               | 805.56<br>(668.53 to 1,019.28)               | 1,117.77<br>(883.88 to 1,613.47)             | 14.84<br>(12.82 to 18.42)           | 16.49<br>(13.80 to 20.55)           | 15.36<br>(12.89 to 18.48)           | 19.11<br>(15.91 to 23.18)           |
| Other chromosomal abnormalities               | 1,457.92<br>(1,090.95 to 2,066.93)           | 1,552.71<br>(1,073.91 to 2,233.07)           | 1,151.81<br>(825.40 to 1,588.11)             | 2,105.68<br>(1,396.48 to 3,092.50)           | 17.49<br>(13.20 to 24.55)           | 19.15<br>(13.38 to 27.23)           | 14.38<br>(10.46 to 19.67)           | 25.63<br>(17.28 to 37.16)           |
| Congenital musculoskeletal and limb anomalies | 722.00<br>(519.66 to 1,318.57)               | 462.18<br>(296.11 to 900.62)                 | 366.79<br>(232.37 to 738.21)                 | 669.17<br>(409.27 to 1,361.19)               | 8.75<br>(6.35 to 15.70)             | 3.87<br>(3.88 to 11.19)             | 4.69<br>(3.06 to 9.13)              | 8.32<br>(5.26 to 16.54)             |
| Urogenital congenital anomalies               | 896.51<br>(698.38 to 1,105.03)               | 595.82<br>(446.69 to 755.78)                 | 484.30<br>(361.64 to 607.89)                 | 817.88<br>(583.79 to 1,049.63)               | 12.05<br>(9.56 to 14.75)            | 9.76<br>(7.66 to 12.03)             | 8.28<br>(6.37 to 10.20)             | 12.48<br>(9.37 to 15.46)            |
| Digestive congenital anomalies                | 2,915.74<br>(2,252.55 to 4,540.70)           | 1,641.38<br>(1,115.98 to 2,545.94)           | 1,173.89<br>(797.37 to 1,854.03)             | 2,447.01<br>(1,642.12 to 3,919.40)           | 34.29<br>(26.49 to 53.18)           | 19.73<br>(13.47 to 30.26)           | 14.19<br>(9.65 to 22.15)            | 29.15<br>(19.65 to 46.33)           |
| Other congenital birth defects                | 12,324.90<br>(8,589.29 to 17,181.30)         | 8,020.98<br>(4,745.37 to 12,490.21)          | 5,975.90<br>(3,706.90 to 8,896.47)           | 11,763.75<br>(6,779.80 to 18,205.04)         | 147.93<br>(104.12 to 204.96)        | 100.59<br>(61.97 to 153.37)         | 76.12<br>(48.66 to 111.12)          | 144.86<br>(85.12 to 220.79)         |
| Skin and subcutaneous diseases                | 2,759.24<br>(1,738.63 to 3,611.70)           | 7,329.44<br>(4,706.43 to 9,525.26)           | 7,164.78<br>(4,602.76 to 9,252.40)           | 7,517.44<br>(4,847.05 to 9,914.42)           | 111.69<br>(71.83 to 144.41)         | 396.40<br>(257.11 to 511.79)        | 406.09<br>(264.55 to 517.10)        | 370.73<br>(239.34 to 483.60)        |
| Cellulitis                                    | 437.34<br>(235.60 to 565.93)                 | 1,440.79<br>(793.09 to 1,849.23)             | 1,487.57<br>(815.41 to 1,926.52)             | 1,330.59<br>(737.47 to 1,698.73)             | 18.92<br>(10.44 to 25.50)           | 76.44<br>(42.65 to 97.55)           | 81.76<br>(45.22 to 103.09)          | 66.66<br>(37.16 to 86.07)           |
| Pyoderma                                      | 1,827.47<br>(1,139.86 to 2,485.19)           | 4,797.13<br>(3,110.58 to 6,478.61)           | 4,613.05<br>(2,969.57 to 6,185.23)           | 5,116.54<br>(3,291.66 to 6,950.87)           | 62.02<br>(38.96 to 83.22)           | 236.38<br>(154.41 to 317.56)        | 240.01<br>(156.10 to 319.71)        | 226.71<br>(146.56 to 306.05)        |
| Decubitus ulcer                               | 380.63<br>(245.03 to 516.80)                 | 879.61<br>(559.36 to 1,175.21)               | 856.71<br>(543.62 to 1,148.37)               | 856.44<br>(545.46 to 1,149.14)               | 26.44<br>(16.90 to 35.99)           | 73.79<br>(46.58 to 98.43)           | 74.29<br>(47.41 to 98.90)           | 68.33<br>(43.34 to 92.12)           |
| Other skin and subcutaneous diseases          | 113.80<br>(77.82 to 160.51)                  | 211.91<br>(146.21 to 303.33)                 | 207.46<br>(141.39 to 295.20)                 | 213.87<br>(145.69 to 304.19)                 | 4.31<br>(3.04 to 6.30)              | 9.78<br>(6.92 to 14.04)             | 10.03<br>(7.09 to 14.28)            | 9.03<br>(6.28 to 13.05)             |
| Sudden infant death syndrome                  | 2,504.19<br>(2,015.23 to 3,003.09)           | 1,277.60<br>(867.68 to 1,723.21)             | 996.96<br>(674.24 to 1,352.29)               | 1,903.90<br>(1,269.93 to 2,615.15)           | 29.06<br>(23.39 to 34.85)           | 14.82<br>(10.07 to 20.00)           | 11.57<br>(7.82 to 15.69)            | 22.09<br>(14.74 to 30.34)           |

|                          |                                             |                                             |                                             |                                             |                                       |                                       |                                       |                                       |
|--------------------------|---------------------------------------------|---------------------------------------------|---------------------------------------------|---------------------------------------------|---------------------------------------|---------------------------------------|---------------------------------------|---------------------------------------|
| Injuries                 | 200,076.35<br>(191,347.73 to<br>207,066.54) | 171,411.76<br>(147,221.44 to<br>201,646.36) | 145,245.64<br>(125,660.86 to<br>169,190.33) | 212,669.60<br>(182,791.13 to<br>252,362.83) | 4,610.99<br>(4,364.81 to<br>4,768.86) | 5,209.86<br>(4,568.75 to<br>5,950.88) | 4,684.49<br>(4,148.96 to<br>5,287.11) | 5,983.45<br>(5,255.04 to<br>6,852.72) |
| Transport injuries       | 65,706.86<br>(63,870.89 to<br>68,591.16)    | 54,924.92<br>(44,368.75 to<br>69,968.56)    | 41,113.87<br>(34,103.85 to<br>50,773.35)    | 82,310.65<br>(66,220.67 to<br>105,581.13)   | 1,437.29<br>(1,400.00 to<br>1,492.45) | 1,398.53<br>(1,150.12 to<br>1,745.57) | 1,088.56<br>(916.87 to<br>1,326.40)   | 2,017.82<br>(1,639.44 to<br>2,568.95) |
| Road injuries            | 61,412.07<br>(59,638.88 to<br>64,244.07)    | 49,718.06<br>(40,359.63 to<br>63,227.72)    | 36,676.91<br>(30,362.46 to<br>45,130.16)    | 76,184.97<br>(61,435.51 to<br>97,702.33)    | 1,342.28<br>(1,307.57 to<br>1,393.72) | 1,259.64<br>(1,035.55 to<br>1,572.62) | 967.22<br>(814.30 to<br>1,176.58)     | 1,860.39<br>(1,509.07 to<br>2,367.88) |
| Pedestrian road injuries | 21,740.97<br>(20,466.35 to<br>23,243.54)    | 14,191.12<br>(11,492.15 to<br>18,072.23)    | 10,310.14<br>(8,555.22 to<br>12,779.30)     | 22,613.51<br>(18,114.64 to<br>28,802.24)    | 514.33<br>(485.76 to<br>546.68)       | 419.39<br>(346.57 to<br>523.45)       | 315.07<br>(265.02 to<br>383.06)       | 649.54<br>(532.26 to<br>821.22)       |



| Global                                          |                                                     |                                                     |                                                     |                                                     |                                                  |                                                  |                                                  |                                                  |
|-------------------------------------------------|-----------------------------------------------------|-----------------------------------------------------|-----------------------------------------------------|-----------------------------------------------------|--------------------------------------------------|--------------------------------------------------|--------------------------------------------------|--------------------------------------------------|
| Cause                                           | YLLs (in 1000s)                                     |                                                     |                                                     |                                                     | Deaths (in 1000s)                                |                                                  |                                                  |                                                  |
|                                                 | 2016                                                | 2040 Forecast                                       | 2040 Better Scenario                                | 2040 Worse Scenario                                 | 2016                                             | 2040 Forecast                                    | 2040 Better Scenario                             | 2040 Worse Scenario                              |
| Cyclist road injuries                           | 3,095.55<br>(2,811.61 to 3,487.67)                  | 2,619.62<br>(2,052.39 to 3,502.60)                  | 2,079.93<br>(1,649.80 to 2,795.53)                  | 3,985.58<br>(3,103.28 to 5,312.80)                  | 74.75<br>(68.50 to 83.50)                        | 77.70<br>(61.07 to 102.46)                       | 65.04<br>(52.22 to 83.92)                        | 108.46<br>(84.83 to 143.43)                      |
| Motorcyclist road injuries                      | 12,601.43<br>(11,425.94 to 13,642.74)               | 10,841.91<br>(8,362.63 to 14,255.41)                | 9,022.79<br>(7,142.92 to 11,502.85)                 | 15,354.66<br>(11,750.17 to 20,512.54)               | 251.26<br>(227.03 to 269.91)                     | 241.44<br>(187.91 to 316.28)                     | 206.41<br>(164.05 to 261.30)                     | 326.73<br>(252.73 to 434.08)                     |
| Motor vehicle road injuries                     | 23,391.19<br>(21,813.46 to 26,453.91)               | 21,553.36<br>(17,141.92 to 27,808.12)               | 14,885.57<br>(12,034.32 to 18,631.40)               | 33,410.29<br>(26,327.08 to 43,129.29)               | 488.71<br>(454.63 to 549.39)                     | 506.39<br>(409.56 to 636.07)                     | 368.85<br>(303.73 to 456.37)                     | 753.96<br>(603.18 to 964.84)                     |
| Other road injuries                             | 582.93<br>(535.13 to 725.78)                        | 512.05<br>(405.99 to 693.66)                        | 378.48<br>(303.43 to 503.13)                        | 820.92<br>(641.65 to 1,130.29)                      | 13.23<br>(12.19 to 16.38)                        | 14.72<br>(11.73 to 19.94)                        | 11.85<br>(9.66 to 15.84)                         | 21.70<br>(17.11 to 30.07)                        |
| Other transport injuries                        | 4,294.79<br>(3,991.27 to 4,796.07)                  | 5,206.86<br>(4,071.37 to 6,856.82)                  | 4,436.97<br>(3,574.73 to 5,702.85)                  | 6,125.68<br>(4,787.08 to 8,054.59)                  | 95.01<br>(88.78 to 106.62)                       | 138.89<br>(110.24 to 178.04)                     | 121.35<br>(98.92 to 153.17)                      | 157.43<br>(125.36 to 202.14)                     |
| <b>Unintentional injuries</b>                   | <b>69,727.11</b><br><b>(62,737.61 to 73,048.22)</b> | <b>58,035.20</b><br><b>(50,169.88 to 65,332.70)</b> | <b>52,599.50</b><br><b>(44,898.56 to 59,707.40)</b> | <b>66,537.97</b><br><b>(56,941.19 to 74,887.67)</b> | <b>1,803.86</b><br><b>(1,587.98 to 1,889.28)</b> | <b>2,336.80</b><br><b>(1,979.16 to 2,560.75)</b> | <b>2,276.38</b><br><b>(1,917.68 to 2,501.99)</b> | <b>2,392.22</b><br><b>(2,018.78 to 2,612.87)</b> |
| Falls                                           | 16,827.42<br>(14,324.96 to 17,828.35)               | 20,843.05<br>(17,342.11 to 23,095.90)               | 20,391.98<br>(16,791.25 to 22,636.74)               | 21,531.45<br>(17,847.57 to 23,603.46)               | 678.46<br>(559.21 to 719.32)                     | 1,249.81<br>(1,004.57 to 1,378.99)               | 1,277.71<br>(1,032.27 to 1,410.74)               | 1,182.16<br>(942.55 to 1,307.96)                 |
| Drowning                                        | 16,575.72<br>(15,016.39 to 17,803.41)               | 9,515.91<br>(7,898.89 to 11,597.41)                 | 8,174.01<br>(6,844.77 to 9,793.31)                  | 11,576.48<br>(9,551.98 to 14,084.69)                | 302.93<br>(272.75 to 322.39)                     | 236.61<br>(196.01 to 282.91)                     | 212.44<br>(178.23 to 249.07)                     | 269.36<br>(222.52 to 321.97)                     |
| Fire, heat, and hot substances                  | 5,696.05<br>(4,651.71 to 6,188.51)                  | 3,872.99<br>(3,080.63 to 4,784.86)                  | 3,215.98<br>(2,564.56 to 3,918.26)                  | 4,770.36<br>(3,791.51 to 5,853.21)                  | 132.08<br>(110.13 to 141.63)                     | 125.38<br>(102.91 to 150.12)                     | 110.03<br>(91.18 to 129.99)                      | 141.38<br>(115.02 to 169.78)                     |
| Poisonings                                      | 2,851.04<br>(2,118.58 to 3,240.46)                  | 1,295.50<br>(949.41 to 1,616.91)                    | 982.82<br>(709.36 to 1,214.35)                      | 1,787.45<br>(1,267.17 to 2,247.11)                  | 57.08<br>(42.42 to 63.58)                        | 32.71<br>(24.15 to 40.02)                        | 26.22<br>(19.19 to 31.87)                        | 42.27<br>(30.66 to 51.64)                        |
| Exposure to mechanical forces                   | 7,509.63<br>(6,132.22 to 8,051.89)                  | 5,291.63<br>(4,249.96 to 6,156.02)                  | 4,496.95<br>(3,577.64 to 5,227.79)                  | 6,460.05<br>(5,169.79 to 7,446.92)                  | 154.84<br>(123.96 to 165.14)                     | 139.59<br>(110.61 to 158.03)                     | 125.22<br>(98.67 to 141.53)                      | 159.31<br>(125.44 to 178.21)                     |
| Unintentional firearm injuries                  | 1,123.71<br>(881.70 to 1,233.13)                    | 846.76<br>(620.39 to 1,001.00)                      | 696.08<br>(513.53 to 824.74)                        | 1,005.56<br>(738.69 to 1,186.41)                    | 22.95<br>(18.24 to 24.76)                        | 21.20<br>(16.26 to 24.02)                        | 18.50<br>(14.22 to 20.97)                        | 23.65<br>(18.08 to 26.91)                        |
| Unintentional suffocation                       | 1,474.69<br>(1,151.64 to 1,717.10)                  | 816.50<br>(633.32 to 1,028.23)                      | 642.35<br>(497.92 to 795.03)                        | 1,074.29<br>(829.09 to 1,335.94)                    | 22.63<br>(17.38 to 26.00)                        | 16.45<br>(12.31 to 19.92)                        | 14.13<br>(10.52 to 16.91)                        | 19.49<br>(14.84 to 23.50)                        |
| Other exposure to mechanical forces             | 4,911.23<br>(3,856.75 to 5,218.17)                  | 3,628.37<br>(2,795.58 to 4,199.36)                  | 3,158.52<br>(2,427.20 to 3,655.87)                  | 4,380.19<br>(3,354.63 to 5,016.79)                  | 109.26<br>(84.20 to 115.90)                      | 101.94<br>(78.94 to 115.50)                      | 92.59<br>(70.89 to 105.07)                       | 116.16<br>(89.26 to 130.06)                      |
| Adverse effects of medical treatment            | 4,601.97<br>(3,861.10 to 5,157.12)                  | 4,591.94<br>(3,785.40 to 5,318.64)                  | 4,203.13<br>(3,463.06 to 4,861.45)                  | 5,237.89<br>(4,301.18 to 6,056.59)                  | 126.73<br>(109.32 to 140.49)                     | 176.46<br>(151.58 to 199.37)                     | 172.47<br>(146.78 to 194.81)                     | 181.90<br>(156.20 to 203.86)                     |
| Animal contact                                  | 4,268.95<br>(3,176.54 to 4,791.49)                  | 3,863.23<br>(2,882.55 to 4,676.66)                  | 3,476.77<br>(2,555.46 to 4,202.68)                  | 5,038.65<br>(3,643.82 to 6,056.01)                  | 91.59<br>(68.84 to 102.20)                       | 109.59<br>(81.36 to 130.45)                      | 103.12<br>(76.21 to 124.02)                      | 131.89<br>(96.33 to 155.99)                      |
| Venomous animal contact                         | 3,662.04<br>(2,606.92 to 4,190.13)                  | 3,155.89<br>(2,224.65 to 3,863.75)                  | 2,882.39<br>(2,012.86 to 3,545.85)                  | 4,147.59<br>(2,861.95 to 5,075.09)                  | 78.81<br>(56.81 to 89.39)                        | 90.57<br>(64.50 to 109.81)                       | 86.11<br>(61.40 to 104.92)                       | 109.77<br>(76.76 to 132.75)                      |
| Non-venomous animal contact                     | 606.90<br>(479.70 to 841.74)                        | 707.34<br>(531.99 to 976.39)                        | 594.38<br>(445.12 to 810.49)                        | 891.06<br>(656.39 to 1,252.01)                      | 12.78<br>(10.32 to 17.37)                        | 19.03<br>(14.78 to 25.58)                        | 17.01<br>(13.20 to 23.04)                        | 22.11<br>(17.06 to 29.85)                        |
| Foreign body                                    | 4,703.00<br>(4,114.40 to 5,317.87)                  | 4,158.61<br>(3,433.49 to 4,910.99)                  | 3,797.98<br>(3,154.03 to 4,411.37)                  | 4,544.95<br>(3,710.12 to 5,469.50)                  | 106.27<br>(92.49 to 114.91)                      | 134.02<br>(110.12 to 149.25)                     | 133.28<br>(109.52 to 148.90)                     | 130.69<br>(108.11 to 145.76)                     |
| Pulmonary aspiration and foreign body in airway | 4,203.16<br>(3,638.86 to 4,809.69)                  | 3,691.10<br>(3,040.60 to 4,424.71)                  | 3,355.72<br>(2,795.26 to 3,939.14)                  | 4,023.99<br>(3,261.98 to 4,907.38)                  | 95.92<br>(82.50 to 104.51)                       | 120.50<br>(98.40 to 134.58)                      | 119.52<br>(96.54 to 133.61)                      | 117.10<br>(95.28 to 131.07)                      |

|                                             |                                                               |                                                               |                                                               |                                                               |                                                            |                                                            |                                                            |                                                            |
|---------------------------------------------|---------------------------------------------------------------|---------------------------------------------------------------|---------------------------------------------------------------|---------------------------------------------------------------|------------------------------------------------------------|------------------------------------------------------------|------------------------------------------------------------|------------------------------------------------------------|
|                                             | 499.84<br>(372.99 to<br>586.34)                               | 467.51<br>(320.49 to<br>592.65)                               | 442.26<br>(309.15 to<br>559.28)                               | 520.96<br>(349.29 to<br>660.42)                               | 10.34<br>(7.86 to<br>12.04)                                | 13.52<br>(9.89 to<br>16.36)                                | 13.76<br>(10.19 to<br>16.57)                               | 13.59<br>(9.69 to<br>16.57)                                |
| Foreign body in other body part             |                                                               |                                                               |                                                               |                                                               |                                                            |                                                            |                                                            |                                                            |
|                                             | 1,920.96<br>(1,216.20 to<br>2,408.60)                         | 1,720.16<br>(1,065.90 to<br>2,230.22)                         | 1,396.72<br>(836.96 to<br>1,805.61)                           | 2,074.83<br>(1,265.09 to<br>2,598.66)                         | 55.60<br>(36.43 to<br>71.46)                               | 62.65<br>(40.72 to<br>79.14)                               | 54.48<br>(34.26 to<br>68.02)                               | 70.75<br>(44.91 to<br>86.51)                               |
| Environmental heat and cold exposure        |                                                               |                                                               |                                                               |                                                               |                                                            |                                                            |                                                            |                                                            |
|                                             | 4,772.37<br>(4,186.14 to<br>5,000.09)                         | 2,882.20<br>(2,463.58 to<br>3,291.20)                         | 2,463.16<br>(2,101.07 to<br>2,823.15)                         | 3,515.86<br>(3,024.45 to<br>3,970.19)                         | 98.29<br>(84.22 to<br>102.79)                              | 69.98<br>(59.52 to<br>78.56)                               | 61.40<br>(51.44 to<br>69.58)                               | 82.52<br>(69.70 to<br>91.31)                               |
| Other unintentional injuries                |                                                               |                                                               |                                                               |                                                               |                                                            |                                                            |                                                            |                                                            |
| <b>Self-harm and interpersonal violence</b> | <b>54,833.93</b><br><b>(50,105.60 to</b><br><b>58,459.47)</b> | <b>54,442.32</b><br><b>(42,904.37 to</b><br><b>69,895.61)</b> | <b>47,595.98</b><br><b>(38,413.42 to</b><br><b>59,974.15)</b> | <b>59,673.40</b><br><b>(46,283.80 to</b><br><b>77,972.05)</b> | <b>1,207.94</b><br><b>(1,108.85 to</b><br><b>1,290.98)</b> | <b>1,391.68</b><br><b>(1,099.94 to</b><br><b>1,778.88)</b> | <b>1,236.30</b><br><b>(1,003.51 to</b><br><b>1,536.72)</b> | <b>1,490.14</b><br><b>(1,157.08 to</b><br><b>1,944.05)</b> |

| Global                                                                              |                                                             |                                                           |                                                           |                                                           |                                                      |                                                    |                                                    |                                                    |
|-------------------------------------------------------------------------------------|-------------------------------------------------------------|-----------------------------------------------------------|-----------------------------------------------------------|-----------------------------------------------------------|------------------------------------------------------|----------------------------------------------------|----------------------------------------------------|----------------------------------------------------|
| Cause                                                                               | YLLs (in 1000s)                                             |                                                           |                                                           |                                                           | Deaths (in 1000s)                                    |                                                    |                                                    |                                                    |
|                                                                                     | 2016                                                        | 2040 Forecast                                             | 2040 Better Scenario                                      | 2040 Worse Scenario                                       | 2016                                                 | 2040 Forecast                                      | 2040 Better Scenario                               | 2040 Worse Scenario                                |
| Self-harm                                                                           | 34,621.42<br>(32,412.04 to<br>37,408.58)                    | 37,326.03<br>(28,206.16 to<br>49,963.66)                  | 32,614.98<br>(25,598.35 to<br>41,702.33)                  | 41,538.23<br>(30,701.94 to<br>56,783.20)                  | 817.15<br>(762.05 to<br>883.74)                      | 1,031.09<br>(784.85 to<br>1,351.64)                | 917.14<br>(725.86 to<br>1,156.50)                  | 1,113.96<br>(825.22 to<br>1,504.06)                |
| Self-harm by firearm                                                                | 2,840.07<br>(2,373.75 to<br>3,578.95)                       | 2,507.22<br>(1,618.53 to<br>3,726.99)                     | 2,064.63<br>(1,373.43 to<br>2,973.93)                     | 2,869.66<br>(1,804.74 to<br>4,438.30)                     | 67.52<br>(55.39 to<br>84.13)                         | 66.91<br>(44.86 to<br>96.43)                       | 55.99<br>(38.62 to<br>77.74)                       | 74.51<br>(48.10 to<br>111.72)                      |
| Self-harm by other specified means                                                  | 31,781.35<br>(29,699.54 to<br>34,445.40)                    | 34,818.82<br>(26,435.47 to<br>46,321.75)                  | 30,550.35<br>(24,019.59 to<br>38,980.59)                  | 38,668.58<br>(28,670.50 to<br>52,510.59)                  | 749.63<br>(700.93 to<br>812.55)                      | 964.18<br>(736.67 to<br>1,261.75)                  | 861.15<br>(681.38 to<br>1,087.17)                  | 1,039.45<br>(773.92 to<br>1,393.11)                |
| Interpersonal violence                                                              | 20,212.52<br>(16,632.13 to<br>23,093.86)                    | 17,116.29<br>(12,987.52 to<br>21,492.53)                  | 14,981.00<br>(11,524.97 to<br>18,786.98)                  | 18,135.16<br>(13,792.69 to<br>22,733.29)                  | 390.79<br>(320.78 to<br>453.71)                      | 360.59<br>(281.23 to<br>447.02)                    | 319.16<br>(247.11 to<br>397.81)                    | 376.18<br>(293.10 to<br>468.13)                    |
| Physical violence by firearm                                                        | 8,615.86<br>(5,744.46 to<br>9,727.92)                       | 6,933.53<br>(4,597.26 to<br>8,866.50)                     | 5,869.14<br>(3,956.32 to<br>7,536.96)                     | 7,305.21<br>(4,739.26 to<br>9,327.73)                     | 160.98<br>(107.16 to<br>182.48)                      | 137.99<br>(92.61 to<br>173.13)                     | 118.16<br>(80.88 to<br>147.57)                     | 143.86<br>(94.26 to<br>179.51)                     |
| Physical violence by sharp object                                                   | 4,876.53<br>(3,900.91 to<br>6,470.22)                       | 4,396.69<br>(3,169.75 to<br>5,967.74)                     | 3,949.36<br>(2,839.32 to<br>5,346.07)                     | 4,446.66<br>(3,216.35 to<br>6,069.05)                     | 97.39<br>(78.14 to<br>128.54)                        | 95.18<br>(69.37 to<br>127.34)                      | 86.28<br>(62.50 to<br>114.32)                      | 95.14<br>(69.57 to<br>128.43)                      |
| Physical violence by other means                                                    | 6,720.13<br>(5,734.01 to<br>8,489.35)                       | 5,786.07<br>(4,242.44 to<br>7,838.06)                     | 5,162.51<br>(3,805.43 to<br>6,957.57)                     | 6,383.29<br>(4,673.84 to<br>8,650.12)                     | 132.43<br>(111.32 to<br>168.39)                      | 127.41<br>(94.48 to<br>173.55)                     | 114.71<br>(86.32 to<br>155.06)                     | 137.18<br>(101.91 to<br>185.62)                    |
| <b>Forces of nature, conflict and terrorism, and executions and police conflict</b> | <b>9,808.44</b><br><b>(6,797.54 to</b><br><b>13,037.71)</b> | <b>4,009.32</b><br><b>(708.41 to</b><br><b>18,516.93)</b> | <b>3,936.29</b><br><b>(690.83 to</b><br><b>18,617.09)</b> | <b>4,147.59</b><br><b>(748.67 to</b><br><b>18,601.11)</b> | <b>161.89</b><br><b>(112.58 to</b><br><b>215.06)</b> | <b>82.85</b><br><b>(13.20 to</b><br><b>398.28)</b> | <b>83.26</b><br><b>(13.16 to</b><br><b>412.92)</b> | <b>83.27</b><br><b>(13.57 to</b><br><b>391.45)</b> |
| Exposure to forces of nature                                                        | 357.59<br>(217.91 to<br>507.75)                             | 1,385.45<br>(117.06 to<br>9,800.63)                       | 1,357.06<br>(116.38 to<br>9,373.33)                       | 1,438.92<br>(119.16 to<br>10,127.25)                      | 7.06<br>(4.22 to<br>10.13)                           | 31.65<br>(2.86 to<br>196.72)                       | 31.88<br>(2.87 to<br>196.37)                       | 31.63<br>(2.93 to<br>195.78)                       |
| Conflict and terrorism                                                              | 9,226.02<br>(6,241.21 to<br>12,407.43)                      | 1,755.63<br>(207.68 to<br>12,383.02)                      | 1,721.89<br>(204.66 to<br>12,433.62)                      | 1,833.00<br>(210.50 to<br>12,389.01)                      | 150.46<br>(101.46 to<br>202.67)                      | 33.49<br>(4.10 to<br>265.45)                       | 33.68<br>(4.13 to<br>277.92)                       | 33.99<br>(4.08 to<br>260.94)                       |
| Executions and police conflict                                                      | 224.83<br>(119.67 to<br>261.63)                             | 868.25<br>(0.00 to<br>5,258.86)                           | 857.34<br>(0.00 to<br>5,167.22)                           | 875.67<br>(0.00 to<br>5,343.87)                           | 4.38<br>(2.28 to<br>5.04)                            | 17.71<br>(0.00 to<br>104.08)                       | 17.70<br>(0.00 to<br>103.50)                       | 17.65<br>(0.00 to<br>104.10)                       |

| Southeast Asia, East Asia, and Oceania                            |                                             |                                             |                                             |                                             |                                          |                                          |                                          |                                          |
|-------------------------------------------------------------------|---------------------------------------------|---------------------------------------------|---------------------------------------------|---------------------------------------------|------------------------------------------|------------------------------------------|------------------------------------------|------------------------------------------|
| Cause                                                             | YLLS (in 1000s)                             |                                             |                                             |                                             | Deaths (in 1000s)                        |                                          |                                          |                                          |
|                                                                   | 2016                                        | 2040 Forecast                               | 2040 Better Scenario                        | 2040 Worse Scenario                         | 2016                                     | 2040 Forecast                            | 2040 Better Scenario                     | 2040 Worse Scenario                      |
| All causes                                                        | 340,730.94<br>(334,746.11 to<br>346,653.02) | 351,963.37<br>(299,634.52 to<br>417,811.07) | 286,541.66<br>(246,928.57 to<br>332,002.68) | 491,368.42<br>(407,951.53 to<br>588,073.99) | 14,263.65<br>(14,037.66 to<br>14,492.09) | 21,666.09<br>(18,846.39 to<br>25,076.10) | 18,477.07<br>(16,281.33 to<br>20,863.78) | 28,533.07<br>(24,610.42 to<br>32,887.62) |
| Communicable, maternal, neonatal, and nutritional diseases        | 47,609.16<br>(45,330.95 to<br>49,760.23)    | 28,280.71<br>(23,472.04 to<br>34,770.50)    | 21,013.30<br>(17,445.23 to<br>25,882.54)    | 41,153.29<br>(33,611.84 to<br>51,472.87)    | 1,112.78<br>(1,045.93 to<br>1,166.86)    | 1,227.95<br>(992.18 to<br>1,548.17)      | 1,023.35<br>(827.16 to<br>1,281.69)      | 1,641.43<br>(1,292.01 to<br>2,102.28)    |
| HIV/AIDS and tuberculosis                                         | 9,125.43<br>(8,644.28 to<br>9,679.03)       | 5,339.57<br>(4,216.10 to<br>6,841.51)       | 3,418.00<br>(2,678.33 to<br>4,322.47)       | 8,901.26<br>(7,080.14 to<br>11,300.77)      | 277.74<br>(264.00 to<br>292.79)          | 221.35<br>(170.74 to<br>286.17)          | 149.40<br>(117.55 to<br>191.36)          | 341.97<br>(262.27 to<br>447.62)          |
| Tuberculosis                                                      | 5,966.85<br>(5,673.72 to<br>6,282.79)       | 3,835.01<br>(2,781.92 to<br>5,227.11)       | 2,466.86<br>(1,843.62 to<br>3,379.70)       | 6,051.00<br>(4,325.23 to<br>8,441.69)       | 208.16<br>(198.14 to<br>219.94)          | 184.06<br>(135.60 to<br>248.97)          | 123.67<br>(92.63 to<br>166.15)           | 277.43<br>(200.22 to<br>382.79)          |
| HIV/AIDS                                                          | 3,158.58<br>(2,772.28 to<br>3,632.34)       | 1,504.56<br>(1,184.39 to<br>1,965.33)       | 951.14<br>(671.02 to<br>1,353.56)           | 2,850.26<br>(2,320.82 to<br>3,543.39)       | 69.58<br>(60.90 to<br>80.24)             | 37.29<br>(29.44 to<br>48.93)             | 25.73<br>(18.96 to<br>36.15)             | 64.54<br>(52.44 to<br>80.63)             |
| Diarrhea, lower respiratory, and other common infectious diseases | 18,477.07<br>(17,100.57 to<br>20,015.23)    | 13,184.89<br>(9,306.02 to<br>18,906.38)     | 9,953.89<br>(7,145.09 to<br>14,237.71)      | 19,628.10<br>(13,412.79 to<br>29,002.31)    | 534.84<br>(469.21 to<br>584.75)          | 773.69<br>(554.86 to<br>1,082.26)        | 658.08<br>(476.74 to<br>913.70)          | 1,036.11<br>(712.27 to<br>1,468.69)      |
| Diarrheal diseases                                                | 2,888.10<br>(2,270.83 to<br>3,736.04)       | 1,997.50<br>(387.94 to<br>5,629.81)         | 1,753.20<br>(403.44 to<br>5,002.77)         | 3,010.08<br>(561.68 to<br>8,592.92)         | 82.39<br>(52.85 to<br>114.89)            | 122.23<br>(21.72 to<br>360.37)           | 119.72<br>(26.83 to<br>340.28)           | 170.19<br>(29.25 to<br>513.88)           |
| Intestinal infectious diseases                                    | 1,610.67<br>(904.13 to<br>2,645.30)         | 845.60<br>(441.93 to<br>1,424.15)           | 807.93<br>(438.05 to<br>1,339.95)           | 950.11<br>(484.26 to<br>1,622.60)           | 24.47<br>(13.62 to<br>39.99)             | 14.77<br>(7.96 to<br>24.61)              | 14.61<br>(8.05 to<br>23.75)              | 16.14<br>(8.48 to<br>27.23)              |
| Typhoid fever                                                     | 1,393.57<br>(757.95 to<br>2,284.44)         | 719.71<br>(369.74 to<br>1,222.09)           | 706.49<br>(373.15 to<br>1,166.62)           | 797.94<br>(400.71 to<br>1,378.00)           | 21.06<br>(11.53 to<br>34.63)             | 12.49<br>(6.59 to<br>20.82)              | 12.71<br>(6.93 to<br>20.81)              | 13.44<br>(6.85 to<br>22.86)              |
| Paratyphoid fever                                                 | 212.90<br>(100.57 to<br>409.57)             | 124.60<br>(55.42 to<br>238.26)              | 100.36<br>(44.78 to<br>191.36)              | 150.52<br>(66.19 to<br>291.35)              | 3.33<br>(1.55 to<br>6.40)                | 3.22<br>(0.99 to<br>4.31)                | 1.85<br>(0.83 to<br>3.55)                | 2.63<br>(1.18 to<br>5.12)                |
| Other intestinal infectious diseases                              | 4.20<br>(1.66 to<br>9.04)                   | 1.28<br>(0.48 to<br>2.81)                   | 1.08<br>(0.40 to<br>2.31)                   | 1.64<br>(0.62 to<br>3.70)                   | 0.08<br>(0.03 to<br>0.17)                | 0.05<br>(0.02 to<br>0.11)                | 0.05<br>(0.02 to<br>0.10)                | 0.06<br>(0.02 to<br>0.13)                |
| Lower respiratory infections                                      | 11,116.01<br>(10,043.76 to<br>12,011.27)    | 8,570.74<br>(6,279.91 to<br>11,987.39)      | 6,160.23<br>(4,659.79 to<br>8,115.81)       | 13,099.69<br>(9,079.02 to<br>19,521.96)     | 380.06<br>(328.34 to<br>412.92)          | 598.51<br>(454.85 to<br>775.38)          | 492.52<br>(375.95 to<br>621.11)          | 800.97<br>(583.82 to<br>1,077.09)        |
| Upper respiratory infections                                      | 14.14<br>(12.58 to<br>16.08)                | 7.60<br>(5.81 to<br>9.90)                   | 5.76<br>(4.29 to<br>7.64)                   | 11.44<br>(8.60 to<br>15.08)                 | 0.38<br>(0.34 to<br>0.42)                | 0.33<br>(0.25 to<br>0.44)                | 0.27<br>(0.20 to<br>0.36)                | 0.48<br>(0.35 to<br>0.64)                |
| Otitis media                                                      | 8.20<br>(3.79 to<br>13.48)                  | 3.06<br>(1.26 to<br>5.03)                   | 3.13<br>(1.28 to<br>5.16)                   | 2.95<br>(1.21 to<br>4.96)                   | 0.23<br>(0.12 to<br>0.35)                | 0.15<br>(0.06 to<br>0.25)                | 0.16<br>(0.07 to<br>0.26)                | 0.14<br>(0.06 to<br>0.23)                |
| Meningitis                                                        | 1,179.69<br>(888.06 to<br>1,392.26)         | 472.36<br>(316.25 to<br>653.61)             | 379.13<br>(265.30 to<br>502.79)             | 583.85<br>(381.81 to<br>826.66)             | 20.86<br>(15.57 to<br>24.88)             | 12.96<br>(9.44 to<br>17.23)              | 11.42<br>(8.27 to<br>15.56)              | 14.90<br>(10.75 to<br>19.78)             |
| Pneumococcal meningitis                                           | 33.52<br>(24.36 to<br>42.10)                | 11.66<br>(8.41 to<br>17.45)                 | 11.74<br>(8.46 to<br>17.59)                 | 11.80<br>(8.50 to<br>17.02)                 | 0.75<br>(0.56 to<br>1.01)                | 0.58<br>(0.42 to<br>0.91)                | 0.62<br>(0.45 to<br>0.97)                | 0.52<br>(0.39 to<br>0.82)                |
| H influenzae type B meningitis                                    | 94.04<br>(72.00 to<br>115.28)               | 65.90<br>(25.88 to<br>155.52)               | 41.03<br>(22.70 to<br>77.21)                | 106.63<br>(29.93 to<br>282.74)              | 1.57<br>(1.19 to<br>1.88)                | 1.30<br>(0.76 to<br>2.42)                | 1.05<br>(0.71 to<br>1.60)                | 1.72<br>(0.78 to<br>3.84)                |
| Meningococcal meningitis                                          | 432.73<br>(321.51 to<br>520.69)             | 158.01<br>(111.27 to<br>214.04)             | 133.42<br>(94.04 to<br>181.11)              | 191.13<br>(136.44 to<br>255.43)             | 8.28<br>(6.14 to<br>10.40)               | 5.21<br>(3.73 to<br>7.25)                | 4.70<br>(3.37 to<br>6.51)                | 6.08<br>(4.39 to<br>8.37)                |
| Other meningitis                                                  | 619.41<br>(464.72 to<br>739.96)             | 236.78<br>(162.44 to<br>313.27)             | 192.93<br>(135.87 to<br>255.71)             | 274.30<br>(185.40 to<br>359.12)             | 10.26<br>(7.61 to<br>12.24)              | 5.87<br>(4.25 to<br>7.60)                | 5.06<br>(3.64 to<br>6.74)                | 6.58<br>(4.74 to<br>8.57)                |
| Encephalitis                                                      | 644.08<br>(488.68 to<br>739.96)             | 396.58<br>(280.95 to<br>519.67)             | 357.57<br>(260.26 to<br>472.51)             | 448.83<br>(310.67 to<br>589.33)             | 11.43<br>(8.97 to<br>12.92)              | 11.16<br>(8.52 to<br>13.51)              | 10.79<br>(8.32 to<br>12.94)              | 11.83<br>(9.08 to<br>14.36)              |

|                |                                 |                                   |                                   |                                     |                           |                            |                            |                             |
|----------------|---------------------------------|-----------------------------------|-----------------------------------|-------------------------------------|---------------------------|----------------------------|----------------------------|-----------------------------|
| Diphtheria     | 4.24<br>(3.68 to<br>4.87)       | 0.77<br>(0.46 to<br>1.26)         | 0.54<br>(0.40 to<br>0.71)         | 1.23<br>(0.54 to<br>2.34)           | 0.07<br>(0.06 to<br>0.07) | 0.01<br>(0.01 to<br>0.02)  | 0.01<br>(0.01 to<br>0.01)  | 0.02<br>(0.01 to<br>0.03)   |
| Whooping cough | 377.17<br>(145.28 to<br>774.61) | 160.11<br>(16.63 to<br>419.73)    | 39.06<br>(8.72 to<br>97.47)       | 241.21<br>(23.52 to<br>618.51)      | 4.48<br>(1.73 to<br>9.20) | 1.91<br>(0.21 to<br>4.98)  | 0.49<br>(0.11 to<br>1.20)  | 2.87<br>(0.30 to<br>7.32)   |
| Tetanus        | 188.26<br>(82.50 to<br>233.79)  | 29.96<br>(11.74 to<br>42.57)      | 24.16<br>(9.15 to<br>33.99)       | 35.55<br>(14.76 to<br>50.32)        | 4.38<br>(1.78 to<br>5.51) | 0.87<br>(0.32 to<br>1.21)  | 0.83<br>(0.30 to<br>1.16)  | 0.89<br>(0.34 to<br>1.25)   |
| Measles        | 387.07<br>(149.13 to<br>807.94) | 675.38<br>(140.27 to<br>2,462.43) | 402.37<br>(112.79 to<br>1,321.21) | 1,210.46<br>(185.51 to<br>4,604.13) | 4.64<br>(1.79 to<br>9.68) | 9.39<br>(2.30 to<br>30.68) | 5.94<br>(1.88 to<br>16.99) | 16.09<br>(3.02 to<br>56.92) |

| Southeast Asia, East Asia, and Oceania                |                                                  |                                                  |                                                  |                                                  |                                         |                                         |                                         |                                         |
|-------------------------------------------------------|--------------------------------------------------|--------------------------------------------------|--------------------------------------------------|--------------------------------------------------|-----------------------------------------|-----------------------------------------|-----------------------------------------|-----------------------------------------|
| Cause                                                 | YLLs (in 1000s)                                  |                                                  |                                                  |                                                  | Deaths (in 1000s)                       |                                         |                                         |                                         |
|                                                       | 2016                                             | 2040 Forecast                                    | 2040 Better Scenario                             | 2040 Worse Scenario                              | 2016                                    | 2040 Forecast                           | 2040 Better Scenario                    | 2040 Worse Scenario                     |
| Varicella and herpes zoster                           | 59.45<br>(52.94 to 68.10)                        | 25.24<br>(18.02 to 32.80)                        | 20.83<br>(15.64 to 27.22)                        | 32.70<br>(22.33 to 43.28)                        | 1.45<br>(1.34 to 1.58)                  | 1.41<br>(1.14 to 1.73)                  | 1.34<br>(1.09 to 1.64)                  | 1.61<br>(1.27 to 2.01)                  |
| <b>Neglected tropical diseases and malaria</b>        | <b>1,640.34</b><br><b>(1,064.77 to 1,995.00)</b> | <b>2,402.83</b><br><b>(1,655.56 to 2,917.66)</b> | <b>2,165.83</b><br><b>(1,500.10 to 2,601.42)</b> | <b>2,593.47</b><br><b>(1,753.60 to 3,166.40)</b> | <b>30.58</b><br><b>(20.83 to 36.64)</b> | <b>51.92</b><br><b>(37.25 to 61.48)</b> | <b>49.38</b><br><b>(35.67 to 58.17)</b> | <b>54.04</b><br><b>(38.15 to 64.18)</b> |
| Malaria                                               | 804.35<br>(514.13 to 1,079.93)                   | 458.07<br>(316.64 to 813.22)                     | 439.23<br>(308.20 to 782.93)                     | 493.35<br>(336.79 to 887.87)                     | 16.51<br>(11.22 to 23.22)               | 12.74<br>(8.89 to 23.28)                | 12.69<br>(8.90 to 22.68)                | 13.04<br>(8.98 to 24.04)                |
| Chagas disease                                        | 0.00<br>(0.00 to 0.00)                           | 0.00<br>(0.00 to 0.00)                           | 0.00<br>(0.00 to 0.00)                           | 0.00<br>(0.00 to 0.00)                           | 0.00<br>(0.00 to 0.00)                  | 0.00<br>(0.00 to 0.00)                  | 0.00<br>(0.00 to 0.00)                  | 0.00<br>(0.00 to 0.00)                  |
| Leishmaniasis                                         | 2.43<br>(1.55 to 3.79)                           | 0.84<br>(0.51 to 1.43)                           | 0.79<br>(0.49 to 1.32)                           | 1.12<br>(0.69 to 1.92)                           | 0.07<br>(0.05 to 0.12)                  | 0.04<br>(0.02 to 0.06)                  | 0.03<br>(0.02 to 0.06)                  | 0.05<br>(0.03 to 0.08)                  |
| African trypanosomiasis                               | 0.00<br>(0.00 to 0.00)                           | 0.00<br>(0.00 to 0.00)                           | 0.00<br>(0.00 to 0.00)                           | 0.00<br>(0.00 to 0.00)                           | 0.00<br>(0.00 to 0.00)                  | 0.00<br>(0.00 to 0.00)                  | 0.00<br>(0.00 to 0.00)                  | 0.00<br>(0.00 to 0.00)                  |
| Schistosomiasis                                       | 16.19<br>(13.94 to 18.70)                        | 10.01<br>(8.09 to 12.27)                         | 9.67<br>(7.76 to 11.86)                          | 10.87<br>(8.86 to 13.32)                         | 0.61<br>(0.52 to 0.70)                  | 0.50<br>(0.41 to 0.62)                  | 0.50<br>(0.40 to 0.62)                  | 0.52<br>(0.42 to 0.64)                  |
| Cysticercosis                                         | 2.61<br>(2.33 to 2.91)                           | 0.88<br>(0.76 to 1.05)                           | 0.86<br>(0.73 to 1.02)                           | 0.93<br>(0.80 to 1.10)                           | 0.07<br>(0.06 to 0.08)                  | 0.03<br>(0.03 to 0.04)                  | 0.03<br>(0.03 to 0.03)                  | 0.03<br>(0.03 to 0.04)                  |
| Cystic echinococcosis                                 | 1.88<br>(1.60 to 2.19)                           | 0.81<br>(0.62 to 1.06)                           | 0.71<br>(0.56 to 0.90)                           | 1.17<br>(0.89 to 1.55)                           | 0.06<br>(0.05 to 0.07)                  | 0.04<br>(0.03 to 0.05)                  | 0.04<br>(0.03 to 0.05)                  | 0.06<br>(0.04 to 0.07)                  |
| Dengue                                                | 670.36<br>(291.48 to 893.13)                     | 1,852.35<br>(1,055.93 to 2,353.75)               | 1,643.58<br>(931.41 to 2,073.00)                 | 1,989.30<br>(1,122.19 to 2,549.19)               | 10.21<br>(4.48 to 13.58)                | 36.27<br>(21.39 to 45.44)               | 33.88<br>(20.02 to 42.19)               | 37.73<br>(21.83 to 47.57)               |
| Yellow fever                                          | 0.00<br>(0.00 to 0.00)                           | 0.00<br>(0.00 to 0.00)                           | 0.00<br>(0.00 to 0.00)                           | 0.00<br>(0.00 to 0.00)                           | 0.00<br>(0.00 to 0.00)                  | 0.00<br>(0.00 to 0.00)                  | 0.00<br>(0.00 to 0.00)                  | 0.00<br>(0.00 to 0.00)                  |
| Rabies                                                | 72.97<br>(26.79 to 88.35)                        | 24.01<br>(10.32 to 31.31)                        | 19.03<br>(7.41 to 24.36)                         | 36.86<br>(16.62 to 49.14)                        | 1.63<br>(0.61 to 1.93)                  | 0.66<br>(0.29 to 0.83)                  | 0.56<br>(0.22 to 0.69)                  | 0.98<br>(0.44 to 1.26)                  |
| Intestinal nematode infections                        | 27.93<br>(23.48 to 33.28)                        | 25.01<br>(18.92 to 35.69)                        | 21.84<br>(16.50 to 31.93)                        | 27.13<br>(20.47 to 38.44)                        | 0.41<br>(0.36 to 0.48)                  | 0.48<br>(0.39 to 0.66)                  | 0.46<br>(0.37 to 0.63)                  | 0.49<br>(0.39 to 0.66)                  |
| Other neglected tropical diseases                     | 41.63<br>(37.38 to 55.56)                        | 30.86<br>(26.08 to 42.45)                        | 30.11<br>(25.62 to 39.86)                        | 32.75<br>(27.21 to 48.17)                        | 1.01<br>(0.89 to 1.30)                  | 1.16<br>(1.00 to 1.55)                  | 1.19<br>(1.02 to 1.56)                  | 1.15<br>(0.99 to 1.64)                  |
| <b>Maternal disorders</b>                             | <b>1,210.64</b><br><b>(1,122.01 to 1,300.40)</b> | <b>550.75</b><br><b>(452.68 to 667.23)</b>       | <b>433.14</b><br><b>(349.61 to 534.48)</b>       | <b>785.08</b><br><b>(635.69 to 959.69)</b>       | <b>22.27</b><br><b>(20.61 to 23.94)</b> | <b>10.31</b><br><b>(8.46 to 12.55)</b>  | <b>8.15</b><br><b>(6.60 to 10.10)</b>   | <b>14.70</b><br><b>(11.94 to 18.83)</b> |
| Maternal hemorrhage                                   | 398.29<br>(318.61 to 488.83)                     | 174.13<br>(128.01 to 234.29)                     | 137.14<br>(97.86 to 182.54)                      | 247.86<br>(176.70 to 332.65)                     | 7.29<br>(5.85 to 8.92)                  | 3.24<br>(2.37 to 4.37)                  | 2.56<br>(1.83 to 3.44)                  | 4.61<br>(3.28 to 6.22)                  |
| Maternal sepsis and other maternal infections         | 68.50<br>(45.10 to 97.25)                        | 29.81<br>(18.24 to 45.11)                        | 22.39<br>(13.50 to 34.35)                        | 41.62<br>(25.17 to 63.43)                        | 1.30<br>(0.86 to 1.85)                  | 0.57<br>(0.35 to 0.86)                  | 0.43<br>(0.26 to 0.66)                  | 0.80<br>(0.49 to 1.20)                  |
| Maternal hypertensive disorders                       | 139.98<br>(103.71 to 183.32)                     | 66.01<br>(45.02 to 93.30)                        | 50.79<br>(34.27 to 72.06)                        | 93.72<br>(63.89 to 133.05)                       | 2.56<br>(1.88 to 3.36)                  | 1.23<br>(0.84 to 1.74)                  | 0.95<br>(0.64 to 1.36)                  | 1.75<br>(1.19 to 2.50)                  |
| Maternal obstructed labor and uterine rupture         | 39.25<br>(22.53 to 61.23)                        | 18.76<br>(10.04 to 31.76)                        | 13.68<br>(7.16 to 23.43)                         | 26.74<br>(14.27 to 44.97)                        | 0.73<br>(0.42 to 1.15)                  | 0.35<br>(0.19 to 0.62)                  | 0.26<br>(0.14 to 0.45)                  | 0.51<br>(0.27 to 0.86)                  |
| Maternal abortion, miscarriage, and ectopic pregnancy | 129.89<br>(97.19 to 168.27)                      | 59.51<br>(39.36 to 90.52)                        | 46.72<br>(30.93 to 71.44)                        | 88.55<br>(59.99 to 132.47)                       | 2.41<br>(1.82 to 3.09)                  | 1.13<br>(0.76 to 1.70)                  | 0.89<br>(0.60 to 1.34)                  | 1.69<br>(1.16 to 2.50)                  |



| Southeast Asia, East Asia, and Oceania                                  |                                              |                                           |                                           |                                           |                                     |                                  |                                  |                                   |
|-------------------------------------------------------------------------|----------------------------------------------|-------------------------------------------|-------------------------------------------|-------------------------------------------|-------------------------------------|----------------------------------|----------------------------------|-----------------------------------|
| Cause                                                                   | YLLs (in 1000s)                              |                                           |                                           |                                           | Deaths (in 1000s)                   |                                  |                                  |                                   |
|                                                                         | 2016                                         | 2040 Forecast                             | 2040 Better Scenario                      | 2040 Worse Scenario                       | 2016                                | 2040 Forecast                    | 2040 Better Scenario             | 2040 Worse Scenario               |
| <b>Neonatal disorders</b>                                               | <b>14,807.95</b><br>(13,781.10 to 15,854.07) | <b>5,029.74</b><br>(3,619.20 to 6,721.54) | <b>3,359.57</b><br>(2,362.14 to 4,489.64) | <b>7,259.32</b><br>(5,117.14 to 9,740.34) | <b>171.11</b><br>(159.25 to 183.20) | <b>58.13</b><br>(41.82 to 77.69) | <b>38.83</b><br>(27.31 to 51.90) | <b>83.89</b><br>(59.14 to 112.54) |
| Neonatal preterm birth                                                  | 6,918.17<br>(6,360.64 to 7,560.06)           | 2,038.75<br>(1,554.65 to 2,553.05)        | 1,230.79<br>(924.77 to 1,561.77)          | 3,085.58<br>(2,334.26 to 3,858.41)        | 79.93<br>(73.48 to 87.34)           | 23.56<br>(17.96 to 29.50)        | 14.22<br>(10.69 to 18.04)        | 35.65<br>(26.97 to 44.58)         |
| Neonatal encephalopathy due to birth asphyxia and trauma                | 4,596.70<br>(4,138.97 to 5,109.37)           | 1,433.47<br>(846.14 to 2,218.24)          | 1,038.49<br>(597.52 to 1,626.38)          | 2,036.43<br>(1,163.16 to 3,199.80)        | 53.12<br>(47.83 to 59.04)           | 16.57<br>(9.78 to 25.63)         | 12.00<br>(6.91 to 18.79)         | 23.53<br>(13.44 to 36.97)         |
| Neonatal sepsis and other neonatal infections                           | 1,673.42<br>(1,338.87 to 2,187.89)           | 958.06<br>(669.96 to 1,348.86)            | 641.81<br>(446.10 to 905.69)              | 1,302.88<br>(904.25 to 1,861.04)          | 19.34<br>(16.05 to 25.28)           | 11.07<br>(7.74 to 15.59)         | 7.42<br>(5.16 to 10.47)          | 15.06<br>(10.45 to 21.51)         |
| Hemolytic disease and other neonatal jaundice                           | 146.17<br>(128.55 to 167.05)                 | 31.00<br>(19.49 to 49.25)                 | 21.88<br>(13.52 to 34.78)                 | 45.40<br>(28.17 to 73.54)                 | 1.69<br>(1.49 to 1.93)              | 0.36<br>(0.23 to 0.57)           | 0.25<br>(0.16 to 0.40)           | 0.52<br>(0.33 to 0.85)            |
| Other neonatal disorders                                                | 1,473.48<br>(1,313.92 to 1,665.09)           | 568.46<br>(374.49 to 826.76)              | 426.60<br>(276.18 to 627.83)              | 789.03<br>(515.54 to 1,155.01)            | 17.04<br>(15.19 to 19.26)           | 6.57<br>(4.33 to 9.56)           | 4.93<br>(3.19 to 7.26)           | 9.12<br>(5.96 to 13.35)           |
| <b>Nutritional deficiencies</b>                                         | <b>788.54</b><br>(738.24 to 850.19)          | <b>795.88</b><br>(710.69 to 891.89)       | <b>827.64</b><br>(747.62 to 921.62)       | <b>804.61</b><br>(705.65 to 909.03)       | <b>39.38</b><br>(37.63 to 41.25)    | <b>74.17</b><br>(61.78 to 86.55) | <b>83.71</b><br>(72.81 to 95.68) | <b>67.01</b><br>(54.62 to 80.14)  |
| Protein-energy malnutrition                                             | 653.67<br>(606.77 to 716.51)                 | 640.54<br>(556.24 to 734.48)              | 679.63<br>(602.35 to 772.10)              | 636.03<br>(547.16 to 733.21)              | 33.54<br>(31.86 to 35.78)           | 62.41<br>(51.40 to 74.29)        | 71.69<br>(60.72 to 83.15)        | 55.26<br>(43.87 to 66.98)         |
| Iodine deficiency                                                       | 7.99<br>(5.54 to 12.23)                      | 24.98<br>(7.72 to 63.10)                  | 23.98<br>(6.74 to 64.19)                  | 28.22<br>(9.11 to 64.01)                  | 0.26<br>(0.18 to 0.36)              | 2.14<br>(0.44 to 6.74)           | 2.20<br>(0.41 to 7.16)           | 2.24<br>(0.51 to 6.28)            |
| Dietary iron deficiency                                                 | 34.07<br>(21.23 to 40.68)                    | 34.19<br>(24.85 to 43.12)                 | 32.09<br>(24.32 to 40.81)                 | 36.28<br>(25.54 to 45.75)                 | 0.86<br>(0.61 to 1.03)              | 1.40<br>(1.00 to 1.95)           | 1.43<br>(1.01 to 2.06)           | 1.35<br>(0.97 to 1.87)            |
| Other nutritional deficiencies                                          | 92.81<br>(80.16 to 104.98)                   | 96.16<br>(79.19 to 112.42)                | 91.95<br>(74.14 to 108.14)                | 104.09<br>(85.84 to 122.96)               | 4.72<br>(3.83 to 5.27)              | 8.23<br>(6.42 to 9.93)           | 8.40<br>(6.60 to 10.02)          | 8.16<br>(6.20 to 9.90)            |
| <b>Other communicable, maternal, neonatal, and nutritional diseases</b> | <b>1,559.19</b><br>(1,286.28 to 1,849.64)    | <b>977.05</b><br>(862.44 to 1,111.82)     | <b>855.23</b><br>(755.41 to 970.72)       | <b>1,181.45</b><br>(1,040.43 to 1,331.65) | <b>36.86</b><br>(33.45 to 40.45)    | <b>38.37</b><br>(34.92 to 42.53) | <b>35.80</b><br>(32.57 to 39.54) | <b>43.72</b><br>(39.54 to 48.05)  |
| Sexually transmitted infections excluding HIV                           | 405.97<br>(230.08 to 667.13)                 | 93.23<br>(56.58 to 156.42)                | 68.49<br>(44.28 to 111.41)                | 112.89<br>(67.68 to 192.09)               | 5.58<br>(3.53 to 8.65)              | 1.89<br>(1.43 to 2.63)           | 1.59<br>(1.26 to 2.10)           | 2.15<br>(1.60 to 3.10)            |
| Syphilis                                                                | 377.12<br>(201.55 to 638.06)                 | 74.42<br>(38.06 to 135.59)                | 50.71<br>(26.76 to 94.91)                 | 92.07<br>(47.23 to 170.86)                | 4.74<br>(2.68 to 7.79)              | 1.11<br>(0.68 to 1.87)           | 0.82<br>(0.54 to 1.33)           | 1.34<br>(0.81 to 2.28)            |
| Chlamydial infection                                                    | 5.36<br>(4.75 to 6.41)                       | 3.60<br>(3.00 to 4.26)                    | 3.41<br>(2.80 to 4.03)                    | 3.98<br>(3.40 to 4.78)                    | 0.16<br>(0.13 to 0.18)              | 0.15<br>(0.11 to 0.17)           | 0.15<br>(0.11 to 0.17)           | 0.16<br>(0.12 to 0.18)            |
| Gonococcal infection                                                    | 15.50<br>(13.13 to 17.59)                    | 10.34<br>(8.43 to 12.09)                  | 9.81<br>(8.01 to 11.37)                   | 11.39<br>(9.47 to 13.42)                  | 0.47<br>(0.38 to 0.52)              | 0.45<br>(0.33 to 0.51)           | 0.44<br>(0.32 to 0.51)           | 0.47<br>(0.35 to 0.53)            |
| Other sexually transmitted infections                                   | 7.99<br>(6.88 to 9.26)                       | 4.87<br>(4.10 to 5.79)                    | 4.56<br>(3.83 to 5.44)                    | 5.46<br>(4.63 to 6.55)                    | 0.22<br>(0.18 to 0.24)              | 0.17<br>(0.14 to 0.20)           | 0.17<br>(0.13 to 0.20)           | 0.19<br>(0.15 to 0.21)            |
| Acute hepatitis                                                         | 657.92<br>(627.13 to 695.11)                 | 484.64<br>(417.25 to 568.19)              | 417.02<br>(354.15 to 487.55)              | 605.73<br>(530.85 to 689.66)              | 20.19<br>(19.32 to 21.20)           | 19.91<br>(17.24 to 23.21)        | 17.63<br>(15.11 to 20.62)        | 24.22<br>(21.29 to 27.25)         |
| Acute hepatitis A                                                       | 29.14<br>(25.73 to 33.71)                    | 10.37<br>(7.85 to 13.57)                  | 8.85<br>(6.60 to 11.95)                   | 12.83<br>(9.85 to 16.79)                  | 0.51<br>(0.44 to 0.60)              | 0.32<br>(0.25 to 0.41)           | 0.29<br>(0.22 to 0.38)           | 0.37<br>(0.29 to 0.48)            |
| Acute hepatitis B                                                       | 563.28<br>(532.42 to 595.53)                 | 422.18<br>(359.51 to 503.98)              | 362.63<br>(301.65 to 432.17)              | 532.10<br>(456.87 to 612.52)              | 17.80<br>(16.83 to 18.80)           | 16.95<br>(14.41 to 20.06)        | 14.89<br>(12.48 to 17.67)        | 20.95<br>(18.18 to 23.95)         |





| Southeast Asia, East Asia, and Oceania |                                       |                                         |                                        |                                         |                                    |                                    |                                    |                                    |
|----------------------------------------|---------------------------------------|-----------------------------------------|----------------------------------------|-----------------------------------------|------------------------------------|------------------------------------|------------------------------------|------------------------------------|
| Cause                                  | YLLs (in 1000s)                       |                                         |                                        |                                         | Deaths (in 1000s)                  |                                    |                                    |                                    |
|                                        | 2016                                  | 2040 Forecast                           | 2040 Better Scenario                   | 2040 Worse Scenario                     | 2016                               | 2040 Forecast                      | 2040 Better Scenario               | 2040 Worse Scenario                |
| Neoplasms                              | 75,254.30<br>(73,477.23 to 77,033.64) | 101,002.54<br>(82,092.42 to 131,090.52) | 88,381.87<br>(73,636.20 to 108,836.81) | 121,572.00<br>(93,046.67 to 173,364.33) | 3,062.16<br>(2,984.27 to 3,135.91) | 5,309.03<br>(4,362.01 to 6,769.31) | 4,733.73<br>(4,037.00 to 5,789.54) | 6,200.99<br>(4,749.09 to 8,532.46) |
| Lip and oral cavity cancer             | 862.64<br>(822.83 to 898.91)          | 1,075.94<br>(761.46 to 1,576.89)        | 761.30<br>(573.74 to 1,042.58)         | 1,551.37<br>(1,026.86 to 2,438.74)      | 35.97<br>(34.33 to 37.37)          | 56.26<br>(39.42 to 80.63)          | 40.94<br>(31.12 to 55.85)          | 78.02<br>(51.62 to 118.64)         |
| Nasopharynx cancer                     | 1,129.59<br>(1,056.15 to 1,199.72)    | 1,409.28<br>(1,000.53 to 2,171.01)      | 935.24<br>(689.86 to 1,341.04)         | 2,195.93<br>(1,413.65 to 3,877.00)      | 38.47<br>(36.06 to 40.78)          | 58.14<br>(40.73 to 87.87)          | 39.28<br>(28.75 to 55.77)          | 87.98<br>(55.92 to 150.28)         |
| Other pharynx cancer                   | 404.86<br>(348.25 to 454.10)          | 607.66<br>(413.37 to 904.62)            | 506.02<br>(358.11 to 726.73)           | 644.30<br>(424.61 to 971.66)            | 15.07<br>(13.10 to 16.73)          | 27.53<br>(18.95 to 40.25)          | 23.43<br>(16.95 to 33.03)          | 28.19<br>(19.10 to 41.66)          |
| Esophageal cancer                      | 4,808.69<br>(4,611.29 to 5,015.47)    | 7,907.27<br>(4,887.60 to 12,913.10)     | 6,217.72<br>(4,102.92 to 9,481.69)     | 10,203.65<br>(5,439.42 to 18,960.08)    | 224.17<br>(215.49 to 233.15)       | 438.79<br>(276.19 to 714.81)       | 350.30<br>(235.63 to 534.83)       | 550.11<br>(300.89 to 991.30)       |
| Stomach cancer                         | 8,587.82<br>(8,307.91 to 8,866.09)    | 8,181.80<br>(6,273.81 to 10,687.79)     | 7,308.05<br>(5,728.16 to 9,289.23)     | 10,165.87<br>(8,009.81 to 12,711.11)    | 385.52<br>(373.02 to 397.54)       | 467.26<br>(364.03 to 605.06)       | 424.24<br>(336.11 to 527.60)       | 561.50<br>(456.10 to 688.27)       |
| Colon and rectum cancer                | 5,131.45<br>(4,894.17 to 5,357.75)    | 8,596.21<br>(6,344.28 to 11,748.03)     | 7,573.68<br>(5,700.69 to 10,352.94)    | 9,597.28<br>(7,009.59 to 13,061.87)     | 229.72<br>(219.07 to 239.20)       | 513.89<br>(379.57 to 697.92)       | 464.63<br>(351.00 to 629.61)       | 551.10<br>(401.18 to 746.67)       |
| Liver cancer                           | 13,521.84<br>(12,958.96 to 14,226.59) | 21,810.30<br>(16,130.53 to 29,954.56)   | 20,347.43<br>(15,876.86 to 26,289.94)  | 21,612.00<br>(15,284.28 to 31,706.94)   | 507.80<br>(487.43 to 533.00)       | 1,040.02<br>(877.07 to 1,394.90)   | 990.77<br>(787.24 to 1,252.06)     | 996.23<br>(732.33 to 1,410.25)     |
| Liver cancer due to hepatitis B        | 7,175.49<br>(6,310.54 to 7,990.77)    | 11,106.83<br>(8,121.86 to 15,895.16)    | 10,516.95<br>(8,054.38 to 14,049.67)   | 10,814.29<br>(7,513.12 to 16,379.17)    | 257.96<br>(224.51 to 297.41)       | 508.49<br>(375.17 to 700.67)       | 491.29<br>(379.93 to 642.53)       | 478.43<br>(339.90 to 699.04)       |
| Liver cancer due to hepatitis C        | 1,209.80<br>(1,056.37 to 1,379.97)    | 2,220.33<br>(1,646.75 to 3,031.73)      | 2,119.34<br>(1,634.76 to 2,709.56)     | 2,170.82<br>(1,561.16 to 3,065.22)      | 52.28<br>(46.29 to 59.11)          | 122.11<br>(92.39 to 163.11)        | 119.17<br>(93.05 to 150.86)        | 115.64<br>(84.37 to 158.22)        |
| Liver cancer due to alcohol use        | 1,579.44<br>(1,277.42 to 1,924.93)    | 2,821.45<br>(1,993.96 to 3,916.91)      | 2,349.33<br>(1,704.77 to 3,165.79)     | 3,030.05<br>(2,097.09 to 4,306.61)      | 68.01<br>(55.57 to 81.70)          | 151.65<br>(110.05 to 210.64)       | 130.83<br>(95.60 to 174.32)        | 156.47<br>(109.59 to 223.43)       |
| Liver cancer due to other causes       | 3,557.12<br>(3,106.94 to 4,078.63)    | 5,661.68<br>(3,906.05 to 8,204.00)      | 5,361.81<br>(3,897.43 to 7,478.44)     | 5,596.84<br>(3,621.98 to 8,616.19)      | 129.55<br>(114.18 to 148.04)       | 257.76<br>(179.47 to 365.38)       | 249.48<br>(182.09 to 338.32)       | 245.71<br>(162.36 to 374.12)       |
| Gallbladder and biliary tract cancer   | 788.73<br>(641.11 to 866.65)          | 868.35<br>(694.48 to 969.66)            | 886.85<br>(708.19 to 997.36)           | 822.03<br>(669.34 to 920.87)            | 37.02<br>(30.19 to 40.58)          | 52.89<br>(43.10 to 58.97)          | 55.12<br>(44.80 to 61.42)          | 48.20<br>(39.34 to 53.75)          |
| Pancreatic cancer                      | 2,183.40<br>(2,121.72 to 2,248.85)    | 3,741.66<br>(3,096.16 to 4,573.28)      | 3,746.27<br>(3,134.35 to 4,511.54)     | 3,718.61<br>(2,977.58 to 4,771.76)      | 95.96<br>(93.36 to 98.66)          | 206.94<br>(172.79 to 252.47)       | 210.35<br>(177.57 to 251.09)       | 199.38<br>(160.37 to 254.90)       |
| Larynx cancer                          | 579.92<br>(556.22 to 611.01)          | 708.10<br>(384.26 to 1,359.01)          | 470.58<br>(283.76 to 845.28)           | 1,153.54<br>(539.67 to 2,390.10)        | 25.06<br>(24.06 to 26.26)          | 37.49<br>(19.75 to 74.30)          | 25.34<br>(14.95 to 46.89)          | 58.55<br>(27.35 to 118.95)         |
| Tracheal, bronchus, and lung cancer    | 16,017.49<br>(15,357.61 to 16,646.70) | 19,676.08<br>(12,585.75 to 34,208.49)   | 14,076.79<br>(9,648.09 to 22,372.99)   | 22,555.88<br>(18,056.64 to 62,345.17)   | 726.57<br>(697.92 to 753.54)       | 1,099.82<br>(692.90 to 1,846.61)   | 805.55<br>(551.22 to 1,272.80)     | 1,743.70<br>(962.48 to 3,093.38)   |
| Malignant skin melanoma                | 199.51<br>(169.43 to 221.88)          | 279.38<br>(239.62 to 323.81)            | 306.53<br>(262.84 to 357.40)           | 230.04<br>(200.78 to 262.93)            | 7.18<br>(6.19 to 8.08)             | 14.59<br>(12.52 to 17.06)          | 16.40<br>(14.31 to 19.14)          | 11.43<br>(10.02 to 13.23)          |
| Non-melanoma skin cancer               | 397.27<br>(376.10 to 419.12)          | 591.25<br>(521.88 to 675.42)            | 565.75<br>(496.26 to 643.75)           | 648.83<br>(587.97 to 710.60)            | 18.47<br>(17.54 to 19.43)          | 37.63<br>(33.24 to 42.97)          | 37.06<br>(32.82 to 42.30)          | 39.37<br>(34.16 to 43.85)          |
| Breast cancer                          | 3,554.92<br>(3,223.18 to 3,871.44)    | 4,341.05<br>(3,362.94 to 5,543.76)      | 3,952.01<br>(3,116.56 to 4,957.33)     | 4,835.14<br>(3,710.95 to 6,241.51)      | 119.98<br>(108.73 to 130.83)       | 190.58<br>(148.86 to 244.41)       | 176.42<br>(140.36 to 221.01)       | 207.36<br>(159.93 to 264.59)       |
| Cervical cancer                        | 1,958.31<br>(1,357.44 to 2,102.86)    | 1,650.28<br>(1,156.45 to 2,036.95)      | 1,499.35<br>(1,055.41 to 1,828.51)     | 1,952.55<br>(1,351.61 to 2,431.23)      | 66.57<br>(46.65 to 71.37)          | 72.15<br>(51.07 to 88.29)          | 66.50<br>(47.50 to 80.09)          | 83.59<br>(57.90 to 103.04)         |

|                   |                                   |                                       |                                       |                                       |                              |                                 |                                 |                                 |
|-------------------|-----------------------------------|---------------------------------------|---------------------------------------|---------------------------------------|------------------------------|---------------------------------|---------------------------------|---------------------------------|
|                   | 557.04<br>(530.52 to<br>586.53)   | 720.19<br>(626.55 to<br>813.42)       | 684.55<br>(581.52 to<br>777.77)       | 799.86<br>(693.47 to<br>899.17)       | 21.24<br>(20.22 to<br>22.38) | 36.03<br>(31.98 to<br>39.82)    | 34.86<br>(30.55 to<br>38.88)    | 38.88<br>(34.67 to<br>42.86)    |
| Uterine cancer    |                                   |                                       |                                       |                                       |                              |                                 |                                 |                                 |
|                   | 961.69<br>(909.90 to<br>1,018.10) | 1,327.99<br>(1,072.50 to<br>1,666.67) | 1,275.64<br>(1,028.15 to<br>1,580.90) | 1,334.31<br>(1,064.58 to<br>1,705.19) | 33.64<br>(31.86 to<br>35.49) | 59.02<br>(48.23 to<br>73.45)    | 57.28<br>(47.23 to<br>70.25)    | 58.50<br>(47.17 to<br>74.31)    |
| Ovarian cancer    |                                   |                                       |                                       |                                       |                              |                                 |                                 |                                 |
|                   | 869.30<br>(663.27 to<br>1,034.72) | 2,207.49<br>(1,681.36 to<br>2,598.81) | 2,276.50<br>(1,725.67 to<br>2,628.20) | 2,062.74<br>(1,560.66 to<br>2,431.36) | 55.06<br>(41.69 to<br>65.18) | 168.35<br>(126.83 to<br>198.38) | 179.08<br>(135.46 to<br>207.62) | 149.53<br>(109.23 to<br>182.12) |
| Prostate cancer   |                                   |                                       |                                       |                                       |                              |                                 |                                 |                                 |
|                   | 50.73<br>(47.68 to<br>54.71)      | 50.74<br>(45.38 to<br>56.70)          | 48.66<br>(43.60 to<br>54.46)          | 53.68<br>(48.39 to<br>59.57)          | 1.37<br>(1.30 to<br>1.46)    | 1.96<br>(1.75 to<br>2.19)       | 1.95<br>(1.75 to<br>2.20)       | 1.97<br>(1.72 to<br>2.20)       |
| Testicular cancer |                                   |                                       |                                       |                                       |                              |                                 |                                 |                                 |

| Southeast Asia, East Asia, and Oceania |                                                 |                                                |                                               |                                                  |                                            |                                            |                                            |                                              |
|----------------------------------------|-------------------------------------------------|------------------------------------------------|-----------------------------------------------|--------------------------------------------------|--------------------------------------------|--------------------------------------------|--------------------------------------------|----------------------------------------------|
| Cause                                  | YLLs (in 1000s)                                 |                                                |                                               |                                                  | Deaths (in 1000s)                          |                                            |                                            |                                              |
|                                        | 2016                                            | 2040 Forecast                                  | 2040 Better Scenario                          | 2040 Worse Scenario                              | 2016                                       | 2040 Forecast                              | 2040 Better Scenario                       | 2040 Worse Scenario                          |
| Kidney cancer                          | 587.56<br>(556.98 to 613.60)                    | 901.45<br>(767.58 to 1,078.19)                 | 920.70<br>(785.21 to 1,088.79)                | 846.45<br>(705.60 to 1,044.09)                   | 23.02<br>(21.84 to 24.00)                  | 47.79<br>(40.76 to 57.00)                  | 49.93<br>(43.06 to 58.76)                  | 42.93<br>(35.46 to 53.01)                    |
| Bladder cancer                         | 664.10<br>(626.57 to 689.37)                    | 1,130.75<br>(885.16 to 1,427.26)               | 1,084.90<br>(874.86 to 1,364.16)              | 1,231.74<br>(916.92 to 1,643.87)                 | 36.14<br>(34.17 to 37.48)                  | 79.15<br>(62.09 to 100.51)                 | 77.61<br>(62.66 to 95.92)                  | 82.58<br>(61.31 to 109.26)                   |
| Brain and nervous system cancer        | 2,484.81<br>(2,208.10 to 2,763.57)              | 3,040.84<br>(2,606.68 to 3,461.35)             | 3,021.53<br>(2,585.02 to 3,406.99)            | 3,028.89<br>(2,619.48 to 3,381.77)               | 74.97<br>(65.80 to 83.57)                  | 130.11<br>(110.21 to 145.75)               | 132.28<br>(112.16 to 147.47)               | 124.59<br>(105.88 to 137.76)                 |
| Thyroid cancer                         | 275.46<br>(260.89 to 290.07)                    | 389.50<br>(324.06 to 493.55)                   | 361.11<br>(306.35 to 444.82)                  | 409.23<br>(339.00 to 527.22)                     | 11.53<br>(10.96 to 12.09)                  | 21.05<br>(17.69 to 26.34)                  | 20.08<br>(17.53 to 24.38)                  | 21.28<br>(17.66 to 26.69)                    |
| Mesothelioma                           | 118.33<br>(109.67 to 124.45)                    | 141.60<br>(128.56 to 155.23)                   | 145.88<br>(130.93 to 161.50)                  | 135.10<br>(123.87 to 147.67)                     | 4.22<br>(3.91 to 4.46)                     | 6.82<br>(6.25 to 7.44)                     | 7.19<br>(6.58 to 7.92)                     | 6.25<br>(5.69 to 6.83)                       |
| Hodgkin lymphoma                       | 172.81<br>(146.51 to 227.59)                    | 142.38<br>(118.35 to 194.78)                   | 128.31<br>(105.46 to 170.71)                  | 170.72<br>(143.28 to 227.01)                     | 5.28<br>(4.48 to 6.87)                     | 5.79<br>(4.78 to 7.84)                     | 5.35<br>(4.42 to 7.03)                     | 6.76<br>(5.60 to 8.76)                       |
| Non-Hodgkin lymphoma                   | 1,679.90<br>(1,516.03 to 1,769.63)              | 2,073.23<br>(1,813.08 to 2,405.36)             | 2,003.70<br>(1,763.61 to 2,288.46)            | 2,073.81<br>(1,818.23 to 2,394.61)               | 56.67<br>(50.94 to 59.54)                  | 96.61<br>(85.65 to 110.70)                 | 95.68<br>(85.28 to 108.25)                 | 93.24<br>(81.17 to 107.27)                   |
| Multiple myeloma                       | 374.85<br>(333.31 to 428.40)                    | 607.67<br>(518.47 to 735.15)                   | 597.73<br>(511.73 to 706.53)                  | 585.77<br>(502.57 to 711.92)                     | 14.90<br>(13.37 to 17.17)                  | 31.03<br>(27.08 to 37.53)                  | 31.16<br>(27.19 to 37.01)                  | 28.94<br>(25.02 to 35.12)                    |
| Leukemia                               | 3,241.20<br>(2,836.70 to 3,468.92)              | 2,706.60<br>(2,228.33 to 3,246.51)             | 2,489.04<br>(2,077.01 to 2,986.84)            | 3,003.36<br>(2,443.69 to 3,744.87)               | 84.50<br>(72.95 to 89.92)                  | 108.71<br>(88.56 to 133.64)                | 102.70<br>(85.36 to 123.65)                | 115.94<br>(94.42 to 145.19)                  |
| Acute lymphoid leukemia                | 742.44<br>(633.34 to 828.49)                    | 543.50<br>(457.60 to 653.16)                   | 497.78<br>(419.01 to 583.60)                  | 584.17<br>(485.11 to 710.62)                     | 17.20<br>(14.72 to 19.17)                  | 19.03<br>(15.85 to 23.00)                  | 17.85<br>(15.04 to 20.82)                  | 19.77<br>(16.36 to 24.14)                    |
| Chronic lymphoid leukemia              | 126.90<br>(111.50 to 144.62)                    | 112.55<br>(91.44 to 140.18)                    | 108.08<br>(88.02 to 132.06)                   | 116.16<br>(92.88 to 148.45)                      | 4.20<br>(3.70 to 4.79)                     | 5.28<br>(4.37 to 6.51)                     | 5.20<br>(4.33 to 6.27)                     | 5.22<br>(4.21 to 6.63)                       |
| Acute myeloid leukemia                 | 451.26<br>(405.02 to 532.68)                    | 531.21<br>(445.40 to 648.62)                   | 512.09<br>(432.52 to 615.02)                  | 526.88<br>(434.79 to 655.83)                     | 11.47<br>(10.27 to 13.39)                  | 19.64<br>(16.47 to 24.06)                  | 19.46<br>(16.40 to 23.11)                  | 18.72<br>(15.39 to 23.21)                    |
| Chronic myeloid leukemia               | 80.79<br>(73.54 to 95.37)                       | 61.43<br>(49.22 to 78.53)                      | 53.63<br>(44.00 to 67.17)                     | 71.20<br>(56.79 to 92.99)                        | 2.39<br>(2.18 to 2.85)                     | 2.36<br>(1.89 to 3.03)                     | 2.11<br>(1.74 to 2.67)                     | 2.67<br>(2.15 to 3.46)                       |
| Other leukemia                         | 1,839.81<br>(1,507.62 to 1,987.63)              | 1,457.90<br>(1,136.00 to 1,866.91)             | 1,317.46<br>(1,029.43 to 1,630.87)            | 1,704.94<br>(1,344.82 to 2,190.85)               | 49.24<br>(39.66 to 53.13)                  | 62.40<br>(48.95 to 79.71)                  | 58.08<br>(45.56 to 72.10)                  | 69.57<br>(54.48 to 89.05)                    |
| Other neoplasms                        | 3,090.07<br>(2,831.53 to 3,187.93)              | 4,117.50<br>(3,704.70 to 4,387.59)             | 4,190.04<br>(3,753.42 to 4,491.82)            | 3,949.34<br>(3,576.16 to 4,186.68)               | 106.11<br>(95.99 to 109.51)                | 202.63<br>(180.34 to 215.15)               | 212.24<br>(189.06 to 225.26)               | 184.87<br>(163.71 to 197.37)                 |
| <b>Cardiovascular diseases</b>         | <b>100,094.59<br/>(97,879.17 to 102,325.05)</b> | <b>90,753.25<br/>(62,875.01 to 132,385.88)</b> | <b>63,167.81<br/>(45,146.27 to 89,741.03)</b> | <b>163,680.32<br/>(111,665.63 to 231,646.27)</b> | <b>5,445.59<br/>(5,330.22 to 5,559.99)</b> | <b>6,711.14<br/>(4,830.74 to 9,634.18)</b> | <b>5,102.74<br/>(3,750.39 to 7,130.16)</b> | <b>10,916.34<br/>(7,877.86 to 15,039.49)</b> |
| Rheumatic heart disease                | 2,192.35<br>(2,101.89 to 2,290.80)              | 1,723.35<br>(1,374.82 to 2,206.48)             | 1,551.74<br>(1,269.27 to 1,955.22)            | 2,120.04<br>(1,751.73 to 2,663.42)               | 93.41<br>(89.52 to 97.85)                  | 111.37<br>(90.14 to 145.23)                | 104.52<br>(85.43 to 132.49)                | 130.05<br>(107.88 to 167.50)                 |
| Ischemic heart disease                 | 42,694.35<br>(41,522.83 to 43,892.74)           | 35,969.77<br>(21,157.24 to 60,347.52)          | 23,790.15<br>(14,261.78 to 38,349.98)         | 68,299.16<br>(40,049.77 to 109,508.14)           | 2,409.87<br>(2,347.62 to 2,482.02)         | 2,661.78<br>(1,654.97 to 4,263.41)         | 1,957.24<br>(1,232.50 to 2,996.79)         | 4,613.67<br>(2,833.96 to 7,199.54)           |
| Stroke                                 | 44,845.48<br>(43,626.95 to 46,208.81)           | 33,301.42<br>(21,132.12 to 50,669.52)          | 21,404.22<br>(14,404.20 to 32,562.63)         | 68,899.82<br>(43,709.32 to 106,620.14)           | 2,363.25<br>(2,282.94 to 2,444.45)         | 2,367.84<br>(1,554.93 to 3,548.62)         | 1,681.50<br>(1,167.24 to 2,485.83)         | 4,356.74<br>(2,885.06 to 6,608.64)           |
| Ischemic stroke                        | 14,510.05<br>(13,994.63 to 15,060.02)           | 11,717.02<br>(7,004.19 to 20,663.26)           | 8,253.94<br>(5,177.92 to 14,094.76)           | 21,621.60<br>(12,823.76 to 36,225.47)            | 925.31<br>(886.95 to 963.11)               | 960.37<br>(581.17 to 1,710.26)             | 732.79<br>(467.07 to 1,263.01)             | 1,592.03<br>(968.16 to 2,801.49)             |

|                                |                                          |                                          |                                         |                                          |                                       |                                     |                                   |                                       |
|--------------------------------|------------------------------------------|------------------------------------------|-----------------------------------------|------------------------------------------|---------------------------------------|-------------------------------------|-----------------------------------|---------------------------------------|
|                                | 30,335.43<br>(29,434.41 to<br>31,313.55) | 21,584.40<br>(12,932.00 to<br>34,865.34) | 13,150.28<br>(8,224.88 to<br>20,721.36) | 47,278.23<br>(27,875.34 to<br>77,258.73) | 1,437.94<br>(1,389.79 to<br>1,487.91) | 1,407.47<br>(879.37 to<br>2,277.14) | 948.71<br>(624.38 to<br>1,400.06) | 2,764.72<br>(1,718.43 to<br>4,274.81) |
| Intracerebral hemorrhage       |                                          |                                          |                                         |                                          |                                       |                                     |                                   |                                       |
|                                | 5,213.26<br>(3,976.33 to<br>5,791.42)    | 11,200.41<br>(6,104.32 to<br>24,837.25)  | 8,670.97<br>(5,087.63 to<br>18,323.47)  | 14,602.97<br>(7,641.31 to<br>34,521.28)  | 325.55<br>(241.26 to<br>365.35)       | 932.08<br>(485.58 to<br>2,222.80)   | 752.99<br>(423.31 to<br>1,748.22) | 1,138.58<br>(562.10 to<br>2,811.74)   |
| Hypertensive heart disease     |                                          |                                          |                                         |                                          |                                       |                                     |                                   |                                       |
|                                | 1,396.17<br>(1,140.07 to<br>1,495.33)    | 1,575.77<br>(1,153.64 to<br>1,991.25)    | 1,459.05<br>(1,070.03 to<br>1,844.83)   | 1,657.45<br>(1,212.43 to<br>2,100.47)    | 52.16<br>(41.01 to<br>56.11)          | 91.21<br>(63.50 to<br>117.84)       | 89.34<br>(62.76 to<br>115.88)     | 89.33<br>(62.81 to<br>115.96)         |
| Cardiomyopathy and myocarditis |                                          |                                          |                                         |                                          |                                       |                                     |                                   |                                       |
|                                | 477.58<br>(360.72 to<br>532.19)          | 471.02<br>(343.09 to<br>555.09)          | 481.72<br>(349.51 to<br>571.20)         | 455.89<br>(330.20 to<br>537.45)          | 17.59<br>(12.49 to<br>20.18)          | 30.99<br>(21.01 to<br>38.47)        | 33.32<br>(22.61 to<br>40.98)      | 27.12<br>(17.76 to<br>34.37)          |
| Myocarditis                    |                                          |                                          |                                         |                                          |                                       |                                     |                                   |                                       |

| Southeast Asia, East Asia, and Oceania                        |                                                     |                                                     |                                                     |                                                     |                                                  |                                                  |                                                |                                                  |
|---------------------------------------------------------------|-----------------------------------------------------|-----------------------------------------------------|-----------------------------------------------------|-----------------------------------------------------|--------------------------------------------------|--------------------------------------------------|------------------------------------------------|--------------------------------------------------|
| Cause                                                         | YLLs (in 1000s)                                     |                                                     |                                                     |                                                     | Deaths (in 1000s)                                |                                                  |                                                |                                                  |
|                                                               | 2016                                                | 2040 Forecast                                       | 2040 Better Scenario                                | 2040 Worse Scenario                                 | 2016                                             | 2040 Forecast                                    | 2040 Better Scenario                           | 2040 Worse Scenario                              |
| Alcoholic cardiomyopathy                                      | 172.68<br>(113.20 to 198.80)                        | 195.69<br>(124.63 to 237.61)                        | 171.82<br>(109.19 to 210.98)                        | 197.12<br>(129.56 to 233.49)                        | 5.78<br>(3.87 to 6.63)                           | 8.32<br>(5.46 to 9.82)                           | 7.55<br>(4.86 to 8.97)                         | 8.03<br>(5.43 to 9.34)                           |
| Other cardiomyopathy                                          | 745.91<br>(626.69 to 846.30)                        | 909.06<br>(618.50 to 1,248.47)                      | 805.50<br>(567.97 to 1,116.47)                      | 1,004.44<br>(708.46 to 1,388.76)                    | 28.79<br>(23.56 to 33.31)                        | 51.90<br>(33.87 to 75.05)                        | 48.46<br>(32.01 to 69.41)                      | 54.18<br>(36.37 to 77.43)                        |
| Atrial fibrillation and flutter                               | 584.48<br>(465.82 to 712.29)                        | 1,529.41<br>(1,140.74 to 1,988.27)                  | 1,450.68<br>(1,092.18 to 1,882.59)                  | 1,527.61<br>(1,135.09 to 1,999.54)                  | 53.96<br>(42.83 to 66.51)                        | 167.39<br>(124.91 to 217.85)                     | 164.07<br>(123.56 to 211.87)                   | 157.41<br>(114.26 to 209.40)                     |
| Aortic aneurysm                                               | 495.62<br>(465.28 to 530.30)                        | 735.27<br>(591.30 to 921.83)                        | 692.67<br>(563.32 to 858.01)                        | 780.66<br>(617.59 to 978.57)                        | 24.94<br>(23.35 to 26.59)                        | 50.89<br>(42.69 to 61.84)                        | 50.26<br>(42.80 to 60.28)                      | 50.11<br>(41.28 to 60.46)                        |
| Peripheral artery disease                                     | 41.27<br>(34.65 to 50.16)                           | 135.04<br>(100.62 to 179.78)                        | 131.99<br>(99.89 to 174.92)                         | 132.08<br>(97.97 to 174.02)                         | 2.92<br>(2.49 to 3.63)                           | 12.62<br>(9.58 to 16.95)                         | 12.92<br>(9.84 to 17.25)                       | 11.39<br>(8.42 to 15.34)                         |
| Endocarditis                                                  | 567.76<br>(507.57 to 714.58)                        | 846.50<br>(641.23 to 1,137.00)                      | 810.17<br>(616.94 to 1,078.49)                      | 861.14<br>(651.17 to 1,158.72)                      | 20.21<br>(18.00 to 24.98)                        | 45.58<br>(33.70 to 61.84)                        | 45.57<br>(34.17 to 61.22)                      | 43.65<br>(32.15 to 59.04)                        |
| Other cardiovascular and circulatory diseases                 | 2,063.87<br>(1,846.00 to 3,112.32)                  | 3,736.31<br>(2,679.10 to 5,882.62)                  | 3,206.16<br>(2,316.89 to 5,058.76)                  | 4,799.38<br>(3,451.35 to 7,381.20)                  | 99.32<br>(88.55 to 151.65)                       | 270.38<br>(193.79 to 429.36)                     | 244.33<br>(176.30 to 392.71)                   | 325.41<br>(235.88 to 505.80)                     |
| <b>Chronic respiratory diseases</b>                           | <b>18,708.71</b><br><b>(18,080.41 to 19,906.43)</b> | <b>24,495.73</b><br><b>(13,480.41 to 45,232.31)</b> | <b>17,651.59</b><br><b>(10,447.34 to 29,939.55)</b> | <b>38,730.63</b><br><b>(18,805.66 to 76,220.88)</b> | <b>1,204.56</b><br><b>(1,163.56 to 1,295.31)</b> | <b>1,972.66</b><br><b>(1,039.56 to 3,730.98)</b> | <b>1,478.29</b><br><b>(849.30 to 2,660.62)</b> | <b>2,966.21</b><br><b>(1,387.07 to 5,858.69)</b> |
| Chronic obstructive pulmonary disease                         | 15,700.90<br>(15,062.47 to 17,070.50)               | 22,034.96<br>(11,262.26 to 42,431.12)               | 15,576.27<br>(8,622.65 to 27,861.47)                | 35,955.43<br>(16,099.77 to 73,130.27)               | 1,073.46<br>(1,030.97 to 1,172.89)               | 1,828.63<br>(900.24 to 3,578.71)                 | 1,350.45<br>(738.17 to 2,535.96)               | 2,811.37<br>(1,235.17 to 5,717.94)               |
| Pneumoconiosis                                                | 206.64<br>(190.92 to 223.37)                        | 94.01<br>(68.47 to 136.93)                          | 81.51<br>(61.28 to 110.63)                          | 128.20<br>(102.69 to 157.39)                        | 9.07<br>(8.27 to 9.75)                           | 6.05<br>(4.45 to 8.49)                           | 5.45<br>(4.17 to 7.18)                         | 7.66<br>(6.05 to 9.34)                           |
| Silicosis                                                     | 149.34<br>(135.92 to 162.35)                        | 50.54<br>(31.77 to 84.65)                           | 42.71<br>(28.08 to 65.91)                           | 78.29<br>(59.02 to 98.76)                           | 6.49<br>(5.87 to 7.03)                           | 3.11<br>(1.99 to 5.06)                           | 2.72<br>(1.77 to 4.12)                         | 4.53<br>(3.36 to 5.71)                           |
| Asbestosis                                                    | 9.71<br>(7.50 to 12.55)                             | 12.70<br>(8.95 to 17.04)                            | 13.88<br>(9.77 to 18.77)                            | 10.46<br>(7.57 to 14.12)                            | 0.39<br>(0.28 to 0.52)                           | 0.83<br>(0.57 to 1.14)                           | 0.94<br>(0.67 to 1.29)                         | 0.64<br>(0.44 to 0.90)                           |
| Coal workers pneumoconiosis                                   | 18.81<br>(10.35 to 21.78)                           | 11.38<br>(6.84 to 17.58)                            | 8.67<br>(5.09 to 12.94)                             | 17.11<br>(10.02 to 23.76)                           | 0.97<br>(0.53 to 1.13)                           | 0.79<br>(0.46 to 1.22)                           | 0.63<br>(0.37 to 0.93)                         | 1.11<br>(0.65 to 1.55)                           |
| Other pneumoconiosis                                          | 28.78<br>(25.69 to 36.10)                           | 19.38<br>(15.28 to 25.48)                           | 16.25<br>(12.85 to 21.05)                           | 22.34<br>(18.07 to 28.49)                           | 1.22<br>(1.09 to 1.48)                           | 1.31<br>(1.06 to 1.68)                           | 1.15<br>(0.92 to 1.49)                         | 1.38<br>(1.12 to 1.76)                           |
| Asthma                                                        | 2,356.60<br>(1,936.77 to 2,743.64)                  | 1,705.82<br>(1,203.06 to 2,391.59)                  | 1,271.04<br>(922.15 to 1,721.01)                    | 2,086.00<br>(1,443.80 to 2,982.58)                  | 103.43<br>(81.29 to 121.95)                      | 99.38<br>(69.74 to 137.01)                       | 78.39<br>(56.48 to 105.46)                     | 116.78<br>(79.69 to 165.47)                      |
| Interstitial lung disease and pulmonary sarcoidosis           | 247.21<br>(205.94 to 309.00)                        | 452.26<br>(353.75 to 580.45)                        | 521.74<br>(416.33 to 670.90)                        | 347.66<br>(280.69 to 442.91)                        | 11.60<br>(9.50 to 14.55)                         | 27.74<br>(21.05 to 35.25)                        | 32.87<br>(25.76 to 41.94)                      | 20.16<br>(15.82 to 25.80)                        |
| Other chronic respiratory diseases                            | 197.36<br>(119.98 to 239.96)                        | 208.68<br>(128.97 to 272.40)                        | 201.02<br>(124.83 to 263.08)                        | 213.34<br>(132.20 to 277.51)                        | 7.02<br>(3.93 to 8.85)                           | 10.86<br>(6.07 to 15.09)                         | 11.13<br>(6.22 to 15.53)                       | 10.24<br>(5.80 to 14.11)                         |
| <b>Cirrhosis and other chronic liver diseases</b>             | <b>9,138.71</b><br><b>(8,588.76 to 10,197.97)</b>   | <b>10,598.37</b><br><b>(9,543.33 to 11,960.17)</b>  | <b>9,833.77</b><br><b>(8,796.60 to 11,199.85)</b>   | <b>11,589.26</b><br><b>(10,580.42 to 13,085.24)</b> | <b>313.73</b><br><b>(295.49 to 351.05)</b>       | <b>466.63</b><br><b>(425.07 to 527.66)</b>       | <b>444.09</b><br><b>(403.12 to 497.93)</b>     | <b>491.91</b><br><b>(450.05 to 553.18)</b>       |
| Cirrhosis and other chronic liver diseases due to hepatitis B | 3,716.07<br>(3,367.26 to 4,407.82)                  | 4,277.50<br>(3,713.95 to 5,008.27)                  | 4,120.19<br>(3,585.68 to 4,900.45)                  | 4,602.14<br>(4,078.78 to 5,393.19)                  | 131.82<br>(119.99 to 155.44)                     | 193.11<br>(169.39 to 227.71)                     | 190.14<br>(167.06 to 225.03)                   | 201.14<br>(178.60 to 234.69)                     |
| Cirrhosis and other chronic liver diseases due to hepatitis C | 1,519.11<br>(1,313.60 to 1,772.15)                  | 1,799.37<br>(1,534.54 to 2,117.18)                  | 1,715.46<br>(1,477.07 to 2,008.51)                  | 1,913.76<br>(1,649.71 to 2,235.65)                  | 49.98<br>(43.88 to 57.55)                        | 73.01<br>(63.83 to 84.25)                        | 71.04<br>(61.90 to 82.37)                      | 75.39<br>(66.06 to 86.99)                        |

|                                                                |                                                            |                                                            |                                                            |                                                            |                                                      |                                                      |                                                      |                                                      |
|----------------------------------------------------------------|------------------------------------------------------------|------------------------------------------------------------|------------------------------------------------------------|------------------------------------------------------------|------------------------------------------------------|------------------------------------------------------|------------------------------------------------------|------------------------------------------------------|
|                                                                | 1,671.12<br>(1,464.64 to<br>1,941.90)                      | 2,025.71<br>(1,752.75 to<br>2,393.58)                      | 1,626.08<br>(1,397.88 to<br>1,901.19)                      | 2,384.26<br>(2,072.15 to<br>2,807.00)                      | 58.01<br>(51.56 to<br>67.72)                         | 87.81<br>(76.90 to<br>102.28)                        | 73.22<br>(63.48 to<br>84.89)                         | 99.17<br>(86.35 to<br>114.88)                        |
| Cirrhosis and other chronic liver diseases due to alcohol use  |                                                            |                                                            |                                                            |                                                            |                                                      |                                                      |                                                      |                                                      |
|                                                                | 2,232.41<br>(1,982.05 to<br>2,531.79)                      | 2,495.81<br>(2,169.48 to<br>2,894.89)                      | 2,372.04<br>(2,066.39 to<br>2,784.74)                      | 2,689.09<br>(2,350.09 to<br>3,111.06)                      | 73.92<br>(65.44 to<br>83.84)                         | 112.10<br>(97.03 to<br>130.04)                       | 109.68<br>(95.33 to<br>128.72)                       | 116.20<br>(99.61 to<br>136.36)                       |
| Cirrhosis and other chronic liver diseases due to other causes |                                                            |                                                            |                                                            |                                                            |                                                      |                                                      |                                                      |                                                      |
| <b>Digestive diseases</b>                                      | <b>5,795.37</b><br><b>(5,469.33 to</b><br><b>6,221.97)</b> | <b>6,728.40</b><br><b>(5,888.31 to</b><br><b>7,782.68)</b> | <b>6,132.11</b><br><b>(5,386.38 to</b><br><b>6,982.61)</b> | <b>7,579.28</b><br><b>(6,609.75 to</b><br><b>8,740.40)</b> | <b>247.53</b><br><b>(234.02 to</b><br><b>265.15)</b> | <b>427.11</b><br><b>(368.83 to</b><br><b>488.69)</b> | <b>408.09</b><br><b>(359.30 to</b><br><b>462.64)</b> | <b>453.98</b><br><b>(387.49 to</b><br><b>528.10)</b> |
| Peptic ulcer disease                                           | 1,797.50<br>(1,660.36 to<br>1,929.34)                      | 1,507.52<br>(1,205.41 to<br>1,860.95)                      | 1,270.08<br>(1,014.57 to<br>1,575.19)                      | 1,931.12<br>(1,539.85 to<br>2,395.27)                      | 83.46<br>(75.91 to<br>88.92)                         | 95.18<br>(75.66 to<br>117.05)                        | 83.55<br>(66.85 to<br>102.72)                        | 117.23<br>(92.58 to<br>145.32)                       |

| Southeast Asia, East Asia, and Oceania     |                                     |                                       |                                       |                                       |                              |                                    |                                    |                                    |
|--------------------------------------------|-------------------------------------|---------------------------------------|---------------------------------------|---------------------------------------|------------------------------|------------------------------------|------------------------------------|------------------------------------|
| Cause                                      | YLLs (in 1000s)                     |                                       |                                       |                                       | Deaths (in 1000s)            |                                    |                                    |                                    |
|                                            | 2016                                | 2040 Forecast                         | 2040 Better Scenario                  | 2040 Worse Scenario                   | 2016                         | 2040 Forecast                      | 2040 Better Scenario               | 2040 Worse Scenario                |
| Gastritis and duodenitis                   | 353.98<br>(324.70 to 382.91)        | 488.07<br>(410.03 to 581.97)          | 467.76<br>(386.96 to 558.89)          | 552.78<br>(464.29 to 644.52)          | 18.03<br>(16.51 to 19.42)    | 34.69<br>(28.66 to 41.98)          | 34.39<br>(28.23 to 41.81)          | 37.11<br>(29.59 to 44.48)          |
| Appendicitis                               | 257.81<br>(233.45 to 329.88)        | 235.59<br>(205.31 to 295.83)          | 204.87<br>(177.37 to 254.61)          | 275.59<br>(242.57 to 344.15)          | 7.78<br>(7.07 to 9.78)       | 11.09<br>(9.71 to 13.42)           | 10.19<br>(8.82 to 12.28)           | 12.40<br>(10.86 to 15.05)          |
| Paralytic ileus and intestinal obstruction | 1,173.25<br>(953.31 to 1,521.17)    | 1,374.98<br>(1,147.59 to 1,621.01)    | 1,394.00<br>(1,163.89 to 1,639.44)    | 1,355.01<br>(1,123.69 to 1,598.93)    | 40.55<br>(33.85 to 48.48)    | 85.66<br>(70.59 to 102.92)         | 91.31<br>(76.11 to 109.46)         | 77.95<br>(64.02 to 94.95)          |
| Inguinal, femoral, and abdominal hernia    | 136.09<br>(85.37 to 162.08)         | 165.04<br>(94.03 to 206.71)           | 158.18<br>(89.41 to 200.42)           | 170.70<br>(99.64 to 215.07)           | 6.71<br>(4.00 to 8.17)       | 11.76<br>(6.35 to 15.17)           | 11.84<br>(6.34 to 15.35)           | 11.41<br>(6.29 to 14.92)           |
| Inflammatory bowel disease                 | 176.54<br>(160.94 to 200.18)        | 260.14<br>(232.33 to 308.36)          | 268.65<br>(238.67 to 318.86)          | 245.47<br>(218.36 to 292.75)          | 7.73<br>(7.02 to 9.05)       | 18.18<br>(15.73 to 21.81)          | 19.47<br>(17.01 to 23.51)          | 16.02<br>(13.28 to 19.41)          |
| Vascular intestinal disorders              | 226.88<br>(210.75 to 280.03)        | 398.57<br>(357.65 to 487.74)          | 400.40<br>(356.49 to 487.76)          | 399.11<br>(357.82 to 487.50)          | 13.02<br>(12.11 to 15.75)    | 30.64<br>(27.22 to 37.19)          | 31.71<br>(28.24 to 38.05)          | 29.17<br>(24.85 to 35.76)          |
| Gallbladder and biliary diseases           | 440.40<br>(409.07 to 537.28)        | 705.64<br>(481.03 to 1,099.48)        | 566.83<br>(409.67 to 829.99)          | 849.58<br>(562.60 to 1,329.65)        | 24.04<br>(22.32 to 28.58)    | 53.47<br>(36.18 to 82.43)          | 45.39<br>(32.50 to 65.55)          | 60.80<br>(39.64 to 93.88)          |
| Pancreatitis                               | 689.88<br>(591.30 to 797.96)        | 872.27<br>(641.89 to 1,236.12)        | 699.55<br>(529.83 to 939.41)          | 1,037.73<br>(752.98 to 1,527.72)      | 23.13<br>(19.63 to 26.16)    | 39.86<br>(29.50 to 55.75)          | 32.98<br>(25.09 to 43.69)          | 45.56<br>(32.77 to 64.97)          |
| Other digestive diseases                   | 543.05<br>(498.33 to 620.36)        | 720.57<br>(643.27 to 832.79)          | 701.79<br>(622.06 to 818.28)          | 762.20<br>(680.58 to 886.35)          | 23.07<br>(21.40 to 25.74)    | 46.59<br>(41.53 to 53.04)          | 47.26<br>(41.98 to 54.02)          | 46.33<br>(40.46 to 53.53)          |
| Neurological disorders                     | 9,479.77<br>(8,433.07 to 10,794.61) | 23,676.66<br>(19,039.60 to 30,206.14) | 23,653.32<br>(19,656.88 to 29,206.24) | 21,950.44<br>(17,051.72 to 28,998.84) | 756.67<br>(659.26 to 876.33) | 2,410.78<br>(1,886.55 to 3,121.03) | 2,485.24<br>(2,016.42 to 3,081.22) | 2,108.82<br>(1,549.11 to 2,857.72) |
| Alzheimer's disease and other dementias    | 7,143.60<br>(6,117.14 to 8,458.33)  | 20,023.91<br>(15,464.44 to 26,461.03) | 19,915.50<br>(15,904.97 to 25,134.44) | 18,575.89<br>(13,762.69 to 25,721.89) | 665.08<br>(571.57 to 783.78) | 2,172.54<br>(1,660.76 to 2,885.81) | 2,227.33<br>(1,760.94 to 2,831.09) | 1,910.54<br>(1,354.72 to 2,667.70) |
| Parkinson's disease                        | 727.35<br>(564.27 to 915.33)        | 2,137.12<br>(1,634.73 to 2,722.99)    | 2,336.43<br>(1,784.18 to 2,972.23)    | 1,743.22<br>(1,315.18 to 2,250.45)    | 53.58<br>(41.75 to 67.91)    | 186.48<br>(141.99 to 240.80)       | 208.23<br>(159.42 to 267.60)       | 145.67<br>(108.30 to 191.21)       |
| Epilepsy                                   | 1,061.19<br>(1,006.83 to 1,136.64)  | 871.75<br>(708.43 to 1,073.58)        | 746.03<br>(616.25 to 899.47)          | 1,023.20<br>(830.14 to 1,289.37)      | 23.08<br>(21.89 to 24.66)    | 26.80<br>(21.99 to 32.79)          | 23.64<br>(19.82 to 28.22)          | 29.98<br>(24.27 to 36.96)          |
| Multiple sclerosis                         | 62.61<br>(58.39 to 76.57)           | 71.11<br>(60.52 to 88.68)             | 71.87<br>(61.01 to 90.56)             | 68.59<br>(58.27 to 85.99)             | 1.87<br>(1.73 to 2.28)       | 2.73<br>(2.37 to 3.37)             | 2.81<br>(2.44 to 3.44)             | 2.55<br>(2.20 to 3.17)             |
| Motor neuron disease                       | 130.06<br>(122.11 to 135.29)        | 181.33<br>(163.62 to 196.47)          | 184.69<br>(165.36 to 201.57)          | 171.80<br>(155.98 to 185.04)          | 4.01<br>(3.77 to 4.15)       | 7.33<br>(6.66 to 8.17)             | 7.56<br>(6.86 to 8.17)             | 6.77<br>(6.17 to 7.28)             |
| Other neurological disorders               | 354.97<br>(337.96 to 373.50)        | 391.43<br>(361.42 to 424.35)          | 398.80<br>(366.77 to 433.47)          | 367.74<br>(341.63 to 396.94)          | 9.05<br>(8.73 to 9.40)       | 14.90<br>(14.04 to 15.80)          | 15.67<br>(14.72 to 16.64)          | 13.31<br>(12.50 to 14.12)          |
| Mental disorders                           | 2,437.85<br>(2,056.33 to 2,802.44)  | 3,559.40<br>(2,893.71 to 4,218.16)    | 3,794.46<br>(3,105.92 to 4,414.09)    | 2,998.96<br>(2,536.12 to 3,393.12)    | 67.82<br>(55.87 to 75.83)    | 143.18<br>(114.23 to 168.86)       | 157.83<br>(127.90 to 185.44)       | 112.62<br>(93.00 to 125.38)        |
| Alcohol use disorders                      | 1,108.86<br>(706.36 to 1,230.46)    | 915.96<br>(576.09 to 1,093.53)        | 882.10<br>(545.96 to 1,056.74)        | 872.69<br>(560.71 to 1,024.57)        | 30.05<br>(19.34 to 33.30)    | 31.99<br>(21.09 to 37.43)          | 31.63<br>(20.81 to 37.25)          | 29.13<br>(19.13 to 33.55)          |
| Drug use disorders                         | 1,321.52<br>(1,181.29 to 1,759.52)  | 2,637.14<br>(2,097.24 to 3,255.47)    | 2,905.93<br>(2,356.25 to 3,520.54)    | 2,120.12<br>(1,816.27 to 2,526.11)    | 37.63<br>(33.00 to 47.02)    | 111.07<br>(86.86 to 134.98)        | 126.07<br>(100.94 to 151.81)       | 83.37<br>(70.13 to 95.90)          |
| Opioid use disorders                       | 825.55<br>(684.18 to 1,146.98)      | 1,220.67<br>(937.17 to 1,522.70)      | 1,282.48<br>(969.54 to 1,613.83)      | 1,095.80<br>(850.83 to 1,384.09)      | 22.55<br>(18.04 to 29.34)    | 47.10<br>(34.45 to 57.06)          | 50.84<br>(36.20 to 61.01)          | 39.90<br>(29.31 to 48.00)          |



|                           |                                 |                                     |                                     |                                 |                             |                              |                              |                              |
|---------------------------|---------------------------------|-------------------------------------|-------------------------------------|---------------------------------|-----------------------------|------------------------------|------------------------------|------------------------------|
|                           | 86.71<br>(67.37 to<br>132.43)   | 214.08<br>(144.42 to<br>320.18)     | 237.16<br>(163.17 to<br>343.72)     | 169.02<br>(122.80 to<br>241.89) | 2.28<br>(1.77 to<br>3.43)   | 7.27<br>(4.86 to<br>10.72)   | 8.15<br>(5.49 to<br>11.83)   | 5.58<br>(4.01 to<br>7.88)    |
| Cocaine use disorders     |                                 |                                     |                                     |                                 |                             |                              |                              |                              |
|                           | 53.55<br>(40.63 to<br>85.71)    | 181.02<br>(116.73 to<br>271.97)     | 207.91<br>(140.61 to<br>309.98)     | 130.24<br>(97.43 to<br>192.60)  | 1.30<br>(1.00 to<br>2.01)   | 5.48<br>(3.53 to<br>8.04)    | 6.38<br>(4.28 to<br>9.37)    | 3.82<br>(2.88 to<br>5.45)    |
| Amphetamine use disorders |                                 |                                     |                                     |                                 |                             |                              |                              |                              |
|                           | 355.70<br>(286.31 to<br>512.52) | 1,021.37<br>(732.89 to<br>1,350.78) | 1,178.38<br>(878.83 to<br>1,551.68) | 725.06<br>(578.38 to<br>926.89) | 11.49<br>(9.40 to<br>15.43) | 51.22<br>(35.63 to<br>67.33) | 60.70<br>(44.69 to<br>79.55) | 34.07<br>(27.11 to<br>42.09) |
| Other drug use disorders  |                                 |                                     |                                     |                                 |                             |                              |                              |                              |
|                           | 7.47<br>(6.45 to<br>9.33)       | 6.30<br>(5.10 to<br>8.04)           | 6.43<br>(5.13 to<br>8.22)           | 6.14<br>(4.99 to<br>7.85)       | 0.14<br>(0.12 to<br>0.18)   | 0.12<br>(0.10 to<br>0.16)    | 0.13<br>(0.10 to<br>0.16)    | 0.12<br>(0.10 to<br>0.15)    |
| Eating disorders          |                                 |                                     |                                     |                                 |                             |                              |                              |                              |

| Southeast Asia, East Asia, and Oceania                     |                                              |                                              |                                              |                                              |                                     |                                           |                                           |                                           |
|------------------------------------------------------------|----------------------------------------------|----------------------------------------------|----------------------------------------------|----------------------------------------------|-------------------------------------|-------------------------------------------|-------------------------------------------|-------------------------------------------|
| Cause                                                      | YLLS (in 1000s)                              |                                              |                                              |                                              | Deaths (in 1000s)                   |                                           |                                           |                                           |
|                                                            | 2016                                         | 2040 Forecast                                | 2040 Better Scenario                         | 2040 Worse Scenario                          | 2016                                | 2040 Forecast                             | 2040 Better Scenario                      | 2040 Worse Scenario                       |
| <b>Diabetes, urogenital, blood, and endocrine diseases</b> | <b>17,374.11</b><br>(16,885.59 to 17,982.98) | <b>26,634.35</b><br>(19,987.47 to 37,147.97) | <b>21,966.23</b><br>(16,802.94 to 30,122.83) | <b>34,094.90</b><br>(25,276.84 to 46,850.34) | <b>765.48</b><br>(743.21 to 788.90) | <b>1,645.36</b><br>(1,246.53 to 2,290.37) | <b>1,418.47</b><br>(1,087.78 to 1,947.45) | <b>2,009.92</b><br>(1,517.85 to 2,767.18) |
| Diabetes mellitus                                          | 7,697.50<br>(7,470.37 to 7,957.24)           | 10,415.01<br>(7,407.45 to 14,687.07)         | 8,518.00<br>(6,094.65 to 11,749.96)          | 13,930.07<br>(9,707.13 to 19,877.46)         | 358.68<br>(347.88 to 371.33)        | 638.77<br>(471.41 to 858.63)              | 546.17<br>(407.46 to 723.24)              | 809.19<br>(580.66 to 1,114.55)            |
| Acute glomerulonephritis                                   | 215.96<br>(204.71 to 228.00)                 | 260.55<br>(212.83 to 317.56)                 | 249.93<br>(200.91 to 305.82)                 | 296.55<br>(245.64 to 351.28)                 | 7.98<br>(7.58 to 8.41)              | 13.48<br>(10.82 to 16.50)                 | 13.31<br>(10.71 to 16.25)                 | 14.54<br>(11.73 to 17.56)                 |
| Chronic kidney disease                                     | 7,086.08<br>(6,700.21 to 7,394.10)           | 12,602.27<br>(6,617.93 to 23,211.69)         | 9,972.79<br>(5,544.61 to 18,202.40)          | 16,395.54<br>(8,376.01 to 29,503.96)         | 308.48<br>(289.63 to 321.10)        | 781.30<br>(400.26 to 1,447.36)            | 646.49<br>(349.22 to 1,194.62)            | 980.63<br>(489.20 to 1,776.35)            |
| Chronic kidney disease due to diabetes mellitus            | 3,894.16<br>(3,540.70 to 4,207.95)           | 7,204.45<br>(3,671.79 to 13,494.73)          | 5,618.99<br>(3,051.98 to 10,621.91)          | 9,406.67<br>(4,742.36 to 17,253.83)          | 160.01<br>(143.70 to 174.31)        | 400.73<br>(198.03 to 760.42)              | 324.68<br>(168.88 to 613.79)              | 509.46<br>(247.15 to 942.44)              |
| Chronic kidney disease due to hypertension                 | 1,934.04<br>(1,706.89 to 2,181.48)           | 4,027.01<br>(2,058.61 to 7,592.60)           | 3,269.16<br>(1,744.76 to 6,134.93)           | 5,143.14<br>(2,519.15 to 9,498.49)           | 108.01<br>(95.76 to 120.25)         | 306.81<br>(158.49 to 567.01)              | 261.01<br>(140.94 to 489.04)              | 374.35<br>(184.24 to 677.91)              |
| Chronic kidney disease due to glomerulonephritis           | 606.97<br>(517.20 to 709.20)                 | 582.59<br>(362.32 to 969.03)                 | 456.09<br>(292.76 to 763.31)                 | 787.90<br>(475.55 to 1,301.62)               | 17.24<br>(14.54 to 20.35)           | 26.96<br>(14.73 to 50.77)                 | 21.75<br>(12.33 to 40.94)                 | 36.07<br>(19.35 to 66.80)                 |
| Chronic kidney disease due to other and unspecified causes | 650.90<br>(551.33 to 762.67)                 | 788.22<br>(448.94 to 1,387.49)               | 628.55<br>(373.93 to 1,091.94)               | 1,057.83<br>(599.51 to 1,806.30)             | 23.21<br>(19.52 to 27.39)           | 46.79<br>(24.22 to 85.35)                 | 39.05<br>(20.88 to 71.79)                 | 60.75<br>(31.42 to 110.04)                |
| Urinary diseases and male infertility                      | 947.59<br>(908.97 to 1,001.21)               | 1,817.86<br>(1,667.80 to 1,980.59)           | 1,735.93<br>(1,577.84 to 1,898.81)           | 1,864.67<br>(1,742.66 to 1,995.45)           | 45.97<br>(44.07 to 48.55)           | 131.88<br>(120.19 to 145.45)              | 130.99<br>(119.34 to 144.00)              | 127.96<br>(115.42 to 140.30)              |
| Urinary tract infections                                   | 643.14<br>(595.56 to 700.29)                 | 1,243.06<br>(1,219.57 to 1,480.73)           | 1,298.13<br>(1,171.03 to 1,427.07)           | 1,341.75<br>(1,232.60 to 1,467.35)           | 29.64<br>(27.55 to 33.37)           | 96.57<br>(87.04 to 109.90)                | 97.12<br>(87.27 to 110.72)                | 91.40<br>(81.22 to 104.24)                |
| Urolithiasis                                               | 106.21<br>(95.12 to 132.44)                  | 221.86<br>(184.05 to 286.95)                 | 206.51<br>(169.49 to 261.65)                 | 246.02<br>(211.67 to 307.54)                 | 5.48<br>(4.91 to 6.73)              | 15.57<br>(12.52 to 19.96)                 | 14.98<br>(12.13 to 19.29)                 | 16.27<br>(13.49 to 20.80)                 |
| Other urinary diseases                                     | 198.24<br>(169.41 to 234.94)                 | 252.94<br>(206.32 to 308.69)                 | 231.28<br>(184.89 to 282.69)                 | 276.90<br>(228.43 to 337.34)                 | 10.85<br>(8.72 to 12.22)            | 19.75<br>(15.34 to 23.96)                 | 18.90<br>(14.54 to 23.04)                 | 20.29<br>(15.68 to 24.69)                 |
| Gynecological diseases                                     | 89.67<br>(56.46 to 102.22)                   | 66.19<br>(43.05 to 82.60)                    | 52.50<br>(35.38 to 67.70)                    | 80.44<br>(54.01 to 100.39)                   | 2.66<br>(1.72 to 3.00)              | 2.31<br>(1.53 to 2.81)                    | 1.90<br>(1.32 to 2.33)                    | 2.77<br>(1.93 to 3.30)                    |
| Uterine fibroids                                           | 33.68<br>(19.16 to 40.08)                    | 18.16<br>(11.41 to 24.20)                    | 15.45<br>(9.86 to 20.69)                     | 23.26<br>(14.60 to 30.69)                    | 1.15<br>(0.64 to 1.35)              | 0.74<br>(0.48 to 0.97)                    | 0.64<br>(0.40 to 0.85)                    | 0.94<br>(0.56 to 1.21)                    |
| Polycystic ovarian syndrome                                | 2.47<br>(0.99 to 4.35)                       | 1.18<br>(0.42 to 2.24)                       | 0.79<br>(0.27 to 1.53)                       | 1.59<br>(0.57 to 2.98)                       | 0.06<br>(0.02 to 0.10)              | 0.03<br>(0.05 to 0.05)                    | 0.02<br>(0.01 to 0.04)                    | 0.04<br>(0.01 to 0.07)                    |
| Endometriosis                                              | 1.27<br>(0.44 to 2.01)                       | 1.00<br>(0.46 to 1.88)                       | 0.79<br>(0.37 to 1.48)                       | 1.22<br>(0.57 to 2.24)                       | 0.03<br>(0.01 to 0.05)              | 0.02<br>(0.01 to 0.04)                    | 0.02<br>(0.01 to 0.03)                    | 0.03<br>(0.01 to 0.05)                    |
| Genital prolapse                                           | 2.75<br>(1.59 to 4.10)                       | 3.03<br>(1.75 to 4.79)                       | 2.44<br>(1.47 to 3.90)                       | 3.63<br>(2.12 to 5.74)                       | 0.15<br>(0.08 to 0.21)              | 0.17<br>(0.09 to 0.27)                    | 0.14<br>(0.08 to 0.22)                    | 0.20<br>(0.11 to 0.31)                    |
| Other gynecological diseases                               | 49.51<br>(33.09 to 58.25)                    | 42.83<br>(28.88 to 55.66)                    | 33.02<br>(21.97 to 44.38)                    | 50.74<br>(34.79 to 65.79)                    | 1.28<br>(0.89 to 1.49)              | 1.35<br>(0.95 to 1.69)                    | 1.07<br>(0.74 to 1.39)                    | 1.56<br>(1.11 to 1.94)                    |
| Hemoglobinopathies and hemolytic anemias                   | 627.48<br>(515.31 to 696.84)                 | 543.86<br>(430.24 to 632.11)                 | 494.72<br>(387.00 to 578.02)                 | 627.19<br>(496.83 to 717.28)                 | 18.61<br>(14.85 to 20.65)           | 26.33<br>(20.27 to 30.44)                 | 24.72<br>(18.91 to 28.97)                 | 29.25<br>(22.65 to 33.37)                 |
| Thalassemias                                               | 183.85<br>(156.15 to 211.55)                 | 59.97<br>(47.31 to 76.44)                    | 57.10<br>(44.88 to 72.45)                    | 60.00<br>(46.75 to 77.09)                    | 2.39<br>(2.06 to 2.74)              | 0.85<br>(0.67 to 1.06)                    | 0.81<br>(0.65 to 1.01)                    | 0.84<br>(0.66 to 1.06)                    |

|                                                   |                                 |                                   |                                   |                                   |                              |                              |                              |                              |
|---------------------------------------------------|---------------------------------|-----------------------------------|-----------------------------------|-----------------------------------|------------------------------|------------------------------|------------------------------|------------------------------|
|                                                   | 1.15<br>(0.94 to<br>1.35)       | 0.71<br>(0.56 to<br>0.88)         | 0.61<br>(0.47 to<br>0.75)         | 0.83<br>(0.65 to<br>1.01)         | 0.02<br>(0.02 to<br>0.02)    | 0.02<br>(0.01 to<br>0.02)    | 0.01<br>(0.01 to<br>0.02)    | 0.02<br>(0.01 to<br>0.02)    |
| Sickle cell disorders                             | 226.27<br>(180.61 to<br>260.78) | 253.51<br>(199.07 to<br>301.23)   | 222.18<br>(172.01 to<br>264.00)   | 306.87<br>(239.48 to<br>364.30)   | 5.66<br>(4.48 to<br>6.53)    | 8.97<br>(6.96 to<br>10.56)   | 8.01<br>(6.14 to<br>9.49)    | 10.61<br>(8.25 to<br>12.37)  |
| G6PD deficiency                                   | 216.21<br>(165.19 to<br>240.85) | 229.66<br>(173.54 to<br>271.21)   | 214.84<br>(162.10 to<br>256.16)   | 259.49<br>(198.88 to<br>301.85)   | 10.53<br>(8.02 to<br>11.71)  | 16.50<br>(12.33 to<br>19.39) | 15.89<br>(11.97 to<br>18.84) | 17.78<br>(13.24 to<br>20.77) |
| Other hemoglobinopathies and hemolytic anemias    | 709.83<br>(622.88 to<br>834.84) | 928.62<br>(805.67 to<br>1,096.48) | 942.36<br>(818.16 to<br>1,110.98) | 900.43<br>(787.00 to<br>1,067.38) | 23.10<br>(20.32 to<br>27.41) | 51.29<br>(44.68 to<br>60.77) | 54.89<br>(48.02 to<br>65.03) | 45.58<br>(39.28 to<br>53.92) |
| Endocrine, metabolic, blood, and immune disorders |                                 |                                   |                                   |                                   |                              |                              |                              |                              |

| Southeast Asia, East Asia, and Oceania        |                                           |                                           |                                           |                                           |                                    |                                    |                                    |                                    |
|-----------------------------------------------|-------------------------------------------|-------------------------------------------|-------------------------------------------|-------------------------------------------|------------------------------------|------------------------------------|------------------------------------|------------------------------------|
| Cause                                         | YLLs (in 1000s)                           |                                           |                                           |                                           | Deaths (in 1000s)                  |                                    |                                    |                                    |
|                                               | 2016                                      | 2040 Forecast                             | 2040 Better Scenario                      | 2040 Worse Scenario                       | 2016                               | 2040 Forecast                      | 2040 Better Scenario               | 2040 Worse Scenario                |
| <b>Musculoskeletal disorders</b>              | <b>714.60</b><br>(608.99 to 889.51)       | <b>953.05</b><br>(788.07 to 1,207.23)     | <b>909.29</b><br>(757.66 to 1,126.56)     | <b>1,071.27</b><br>(909.16 to 1,320.25)   | <b>24.92</b><br>(21.31 to 30.75)   | <b>52.54</b><br>(43.34 to 68.31)   | <b>51.06</b><br>(42.62 to 64.08)   | <b>58.19</b><br>(47.97 to 71.47)   |
| Rheumatoid arthritis                          | 205.73<br>(155.90 to 242.59)              | 362.70<br>(256.96 to 501.78)              | 321.86<br>(234.61 to 432.38)              | 489.05<br>(369.49 to 607.31)              | 10.55<br>(8.07 to 12.19)           | 25.87<br>(18.21 to 35.71)          | 23.64<br>(17.49 to 31.77)          | 33.30<br>(25.01 to 41.99)          |
| Other musculoskeletal disorders               | 508.87<br>(442.31 to 656.56)              | 590.35<br>(501.48 to 772.79)              | 587.43<br>(498.51 to 764.30)              | 582.21<br>(497.75 to 765.93)              | 14.37<br>(12.75 to 19.15)          | 26.67<br>(22.82 to 37.04)          | 27.42<br>(23.63 to 38.21)          | 24.89<br>(21.02 to 34.48)          |
| <b>Other non-communicable diseases</b>        | <b>7,585.90</b><br>(6,933.98 to 8,306.41) | <b>4,035.47</b><br>(3,369.04 to 4,886.19) | <b>3,318.19</b><br>(2,749.91 to 3,961.80) | <b>4,967.88</b><br>(4,150.31 to 6,086.80) | <b>109.76</b><br>(97.86 to 120.11) | <b>118.05</b><br>(89.26 to 147.60) | <b>111.68</b><br>(81.73 to 142.42) | <b>124.98</b><br>(96.43 to 155.17) |
| Congenital birth defects                      | 6,933.23<br>(6,294.75 to 7,647.88)        | 2,787.79<br>(2,240.02 to 3,564.07)        | 2,107.90<br>(1,696.53 to 2,671.17)        | 3,712.87<br>(2,945.43 to 4,783.81)        | 96.67<br>(78.75 to 95.39)          | 37.90<br>(30.98 to 47.29)          | 29.31<br>(24.02 to 36.49)          | 49.96<br>(40.47 to 62.76)          |
| Neural tube defects                           | 281.48<br>(211.31 to 365.14)              | 63.12<br>(41.79 to 91.11)                 | 42.33<br>(27.94 to 61.34)                 | 90.73<br>(60.44 to 129.79)                | 3.33<br>(2.53 to 4.29)             | 0.78<br>(0.53 to 1.09)             | 0.53<br>(0.36 to 0.75)             | 1.12<br>(0.77 to 1.57)             |
| Congenital heart anomalies                    | 4,405.19<br>(3,934.01 to 4,906.76)        | 1,642.64<br>(1,255.97 to 2,173.83)        | 1,231.70<br>(951.54 to 1,601.10)          | 2,241.12<br>(1,720.60 to 2,934.57)        | 55.39<br>(49.37 to 61.42)          | 22.18<br>(17.31 to 28.76)          | 16.91<br>(13.22 to 21.74)          | 30.12<br>(23.73 to 38.68)          |
| Orofacial clefts                              | 35.63<br>(26.53 to 52.79)                 | 8.53<br>(4.99 to 14.26)                   | 5.49<br>(3.14 to 9.04)                    | 13.83<br>(8.27 to 22.81)                  | 0.41<br>(0.31 to 0.61)             | 0.10<br>(0.06 to 0.17)             | 0.06<br>(0.04 to 0.10)             | 0.16<br>(0.10 to 0.26)             |
| Down syndrome                                 | 121.34<br>(101.68 to 159.87)              | 87.53<br>(69.76 to 125.72)                | 77.55<br>(62.72 to 103.58)                | 98.16<br>(78.01 to 143.97)                | 1.80<br>(1.55 to 2.32)             | 1.80<br>(1.29 to 2.40)             | 1.45<br>(1.20 to 1.93)             | 1.70<br>(1.40 to 2.33)             |
| Other chromosomal abnormalities               | 135.04<br>(102.23 to 258.70)              | 109.99<br>(71.22 to 245.41)               | 86.75<br>(58.17 to 177.40)                | 136.68<br>(87.54 to 303.83)               | 1.63<br>(1.25 to 3.08)             | 1.41<br>(0.97 to 2.97)             | 1.13<br>(0.81 to 2.16)             | 1.73<br>(1.18 to 3.63)             |
| Congenital musculoskeletal and limb anomalies | 106.25<br>(90.85 to 127.84)               | 52.68<br>(37.84 to 71.98)                 | 40.42<br>(29.03 to 54.01)                 | 67.63<br>(48.80 to 90.82)                 | 1.30<br>(1.11 to 1.56)             | 0.67<br>(0.49 to 0.90)             | 0.53<br>(0.39 to 0.69)             | 0.87<br>(0.64 to 1.15)             |
| Urogenital congenital anomalies               | 89.02<br>(75.32 to 115.19)                | 64.49<br>(52.62 to 80.34)                 | 53.70<br>(43.31 to 66.93)                 | 75.54<br>(62.23 to 96.46)                 | 1.52<br>(1.28 to 1.91)             | 1.47<br>(1.15 to 1.77)             | 1.28<br>(0.99 to 1.52)             | 1.67<br>(1.34 to 2.03)             |
| Digestive congenital anomalies                | 522.40<br>(448.61 to 648.78)              | 199.33<br>(143.00 to 286.03)              | 144.20<br>(104.34 to 207.55)              | 271.05<br>(194.35 to 386.76)              | 6.14<br>(5.29 to 7.62)             | 2.40<br>(1.73 to 3.43)             | 1.75<br>(1.28 to 2.49)             | 3.26<br>(2.37 to 4.61)             |
| Other congenital birth defects                | 1,236.89<br>(1,025.77 to 1,384.75)        | 559.49<br>(400.02 to 714.10)              | 425.74<br>(305.39 to 534.76)              | 718.13<br>(519.36 to 913.39)              | 15.14<br>(12.73 to 16.94)          | 7.32<br>(5.37 to 9.19)             | 5.67<br>(4.16 to 7.00)             | 9.34<br>(7.00 to 11.68)            |
| Skin and subcutaneous diseases                | 441.31<br>(385.17 to 611.65)              | 1,169.75<br>(774.36 to 1,584.61)          | 1,150.73<br>(759.86 to 1,548.63)          | 1,156.08<br>(760.13 to 1,588.59)          | 20.64<br>(13.00 to 28.39)          | 79.25<br>(50.57 to 111.25)         | 81.68<br>(52.93 to 112.71)         | 73.87<br>(46.47 to 104.22)         |
| Cellulitis                                    | 58.92<br>(39.66 to 94.59)                 | 201.46<br>(134.86 to 306.60)              | 208.72<br>(141.74 to 315.39)              | 187.17<br>(125.53 to 294.21)              | 2.19<br>(1.42 to 3.41)             | 11.00<br>(6.80 to 16.32)           | 11.94<br>(7.53 to 17.44)           | 9.65<br>(5.91 to 14.62)            |
| Pyoderma                                      | 226.90<br>(145.73 to 324.87)              | 603.19<br>(391.04 to 852.12)              | 579.33<br>(377.28 to 816.56)              | 611.34<br>(394.66 to 863.66)              | 8.72<br>(5.54 to 12.72)            | 36.50<br>(24.04 to 54.30)          | 36.98<br>(24.10 to 54.38)          | 34.59<br>(22.55 to 51.49)          |
| Decubitus ulcer                               | 134.59<br>(79.33 to 182.35)               | 329.82<br>(194.03 to 434.38)              | 327.66<br>(195.24 to 427.35)              | 322.62<br>(188.16 to 426.10)              | 8.95<br>(5.10 to 11.89)            | 29.69<br>(16.71 to 39.64)          | 30.60<br>(17.42 to 40.49)          | 27.72<br>(15.11 to 37.11)          |
| Other skin and subcutaneous diseases          | 20.90<br>(14.13 to 31.37)                 | 35.28<br>(24.33 to 51.34)                 | 35.01<br>(24.11 to 51.08)                 | 34.95<br>(23.98 to 51.13)                 | 0.78<br>(0.53 to 1.15)             | 2.07<br>(1.41 to 3.08)             | 2.16<br>(1.48 to 3.22)             | 1.92<br>(1.28 to 2.93)             |
| Sudden infant death syndrome                  | 211.36<br>(170.36 to 267.32)              | 77.93<br>(53.32 to 113.60)                | 59.57<br>(40.82 to 88.43)                 | 98.94<br>(67.40 to 144.91)                | 2.45<br>(1.98 to 3.10)             | 0.90<br>(0.62 to 1.32)             | 0.69<br>(0.47 to 1.03)             | 1.15<br>(0.78 to 1.68)             |

|                          |                                          |                                          |                                          |                                          |                                       |                                     |                                     |                                       |
|--------------------------|------------------------------------------|------------------------------------------|------------------------------------------|------------------------------------------|---------------------------------------|-------------------------------------|-------------------------------------|---------------------------------------|
| Injuries                 | 46,537.86<br>(44,215.50 to<br>47,866.03) | 31,245.45<br>(25,865.30 to<br>41,065.73) | 26,719.71<br>(22,362.66 to<br>35,889.99) | 41,980.20<br>(34,747.78 to<br>54,320.70) | 1,152.64<br>(1,067.33 to<br>1,188.50) | 1,176.26<br>(992.68 to<br>1,440.28) | 1,062.51<br>(902.71 to<br>1,266.05) | 1,447.68<br>(1,234.93 to<br>1,753.20) |
| Transport injuries       | 20,122.41<br>(19,444.68 to<br>20,926.09) | 10,081.09<br>(7,724.76 to<br>13,620.59)  | 7,541.46<br>(5,977.55 to<br>9,673.86)    | 18,232.84<br>(14,190.18 to<br>23,990.84) | 470.82<br>(455.11 to<br>487.14)       | 319.27<br>(250.19 to<br>422.91)     | 248.48<br>(201.99 to<br>308.98)     | 540.96<br>(428.49 to<br>695.45)       |
| Road injuries            | 19,141.21<br>(18,487.90 to<br>19,875.42) | 9,091.86<br>(6,970.96 to<br>12,303.36)   | 6,730.23<br>(5,335.11 to<br>8,606.09)    | 17,007.27<br>(13,215.99 to<br>22,390.47) | 447.83<br>(432.41 to<br>462.85)       | 288.46<br>(226.31 to<br>381.58)     | 222.44<br>(181.36 to<br>275.47)     | 504.05<br>(399.80 to<br>647.09)       |
| Pedestrian road injuries | 8,676.21<br>(8,198.58 to<br>9,121.23)    | 3,250.42<br>(2,389.21 to<br>4,586.73)    | 2,256.86<br>(1,735.55 to<br>2,992.78)    | 6,763.29<br>(5,210.97 to<br>8,893.65)    | 217.59<br>(206.35 to<br>227.93)       | 123.38<br>(94.10 to<br>169.16)      | 90.11<br>(71.54 to<br>116.71)       | 236.59<br>(188.25 to<br>304.50)       |

| Southeast Asia, East Asia, and Oceania          |                                                               |                                                              |                                                              |                                                               |                                                      |                                                      |                                                      |                                                      |
|-------------------------------------------------|---------------------------------------------------------------|--------------------------------------------------------------|--------------------------------------------------------------|---------------------------------------------------------------|------------------------------------------------------|------------------------------------------------------|------------------------------------------------------|------------------------------------------------------|
| Cause                                           | YLLs (in 1000s)                                               |                                                              |                                                              |                                                               | Deaths (in 1000s)                                    |                                                      |                                                      |                                                      |
|                                                 | 2016                                                          | 2040 Forecast                                                | 2040 Better Scenario                                         | 2040 Worse Scenario                                           | 2016                                                 | 2040 Forecast                                        | 2040 Better Scenario                                 | 2040 Worse Scenario                                  |
| Cyclist road injuries                           | 1,220.20<br>(1,119.13 to<br>1,305.52)                         | 757.17<br>(569.69 to<br>1,045.32)                            | 588.88<br>(459.00 to<br>785.13)                              | 1,238.28<br>(927.69 to<br>1,700.19)                           | 31.63<br>(29.26 to<br>33.86)                         | 27.34<br>(20.50 to<br>37.19)                         | 22.37<br>(17.52 to<br>29.28)                         | 39.90<br>(29.98 to<br>53.93)                         |
| Motorcyclist road injuries                      | 4,166.13<br>(3,806.24 to<br>4,625.50)                         | 2,635.34<br>(1,858.04 to<br>3,737.79)                        | 2,145.30<br>(1,577.65 to<br>2,925.36)                        | 3,953.80<br>(2,841.48 to<br>5,459.83)                         | 86.91<br>(79.20 to<br>95.48)                         | 65.80<br>(46.84 to<br>91.92)                         | 55.09<br>(41.06 to<br>73.14)                         | 92.46<br>(67.03 to<br>127.63)                        |
| Motor vehicle road injuries                     | 4,892.78<br>(4,375.87 to<br>5,745.74)                         | 2,341.15<br>(1,818.88 to<br>3,073.42)                        | 1,659.92<br>(1,333.88 to<br>2,114.30)                        | 4,844.66<br>(3,758.67 to<br>6,328.78)                         | 107.36<br>(95.57 to<br>126.55)                       | 68.29<br>(54.28 to<br>87.21)                         | 51.92<br>(42.76 to<br>65.19)                         | 128.96<br>(101.18 to<br>165.47)                      |
| Other road injuries                             | 185.89<br>(167.94 to<br>232.42)                               | 107.78<br>(82.83 to<br>149.48)                               | 79.28<br>(63.26 to<br>107.30)                                | 207.23<br>(157.70 to<br>285.02)                               | 4.33<br>(3.91 to<br>5.47)                            | 3.65<br>(2.81 to<br>5.15)                            | 2.95<br>(2.34 to<br>4.07)                            | 6.15<br>(4.74 to<br>8.55)                            |
| Other transport injuries                        | 981.20<br>(896.97 to<br>1,178.44)                             | 989.23<br>(748.49 to<br>1,359.37)                            | 811.23<br>(634.28 to<br>1,067.38)                            | 1,225.58<br>(942.83 to<br>1,635.21)                           | 22.99<br>(21.02 to<br>27.75)                         | 30.81<br>(23.46 to<br>41.91)                         | 26.04<br>(20.48 to<br>34.34)                         | 36.91<br>(28.21 to<br>49.32)                         |
| <b>Unintentional injuries</b>                   | <b>17,078.18</b><br><b>(14,399.82 to</b><br><b>17,930.45)</b> | <b>11,325.16</b><br><b>(9,110.64 to</b><br><b>13,143.26)</b> | <b>10,464.71</b><br><b>(8,418.24 to</b><br><b>12,650.69)</b> | <b>12,904.22</b><br><b>(10,468.48 to</b><br><b>14,735.62)</b> | <b>445.15</b><br><b>(356.76 to</b><br><b>470.10)</b> | <b>538.51</b><br><b>(409.23 to</b><br><b>620.22)</b> | <b>528.08</b><br><b>(400.16 to</b><br><b>601.25)</b> | <b>565.06</b><br><b>(426.66 to</b><br><b>642.63)</b> |
| Falls                                           | 4,710.19<br>(3,564.64 to<br>5,099.57)                         | 4,947.88<br>(3,679.62 to<br>5,667.55)                        | 4,820.25<br>(3,541.25 to<br>5,496.21)                        | 5,221.69<br>(3,859.40 to<br>5,865.37)                         | 177.84<br>(126.16 to<br>193.81)                      | 319.91<br>(219.90 to<br>372.50)                      | 324.34<br>(226.98 to<br>374.24)                      | 316.97<br>(218.07 to<br>370.01)                      |
| Drowning                                        | 5,210.58<br>(4,586.05 to<br>5,495.28)                         | 2,434.81<br>(1,989.23 to<br>2,998.18)                        | 2,141.18<br>(1,750.57 to<br>2,626.97)                        | 2,899.96<br>(2,352.41 to<br>3,611.12)                         | 99.82<br>(86.15 to<br>104.90)                        | 74.17<br>(59.52 to<br>89.12)                         | 68.05<br>(54.97 to<br>80.81)                         | 83.72<br>(66.67 to<br>101.94)                        |
| Fire, heat, and hot substances                  | 631.02<br>(513.38 to<br>680.48)                               | 431.75<br>(335.46 to<br>542.40)                              | 373.96<br>(292.38 to<br>458.60)                              | 526.01<br>(410.12 to<br>649.95)                               | 17.62<br>(14.00 to<br>18.99)                         | 20.71<br>(15.85 to<br>26.10)                         | 19.05<br>(14.44 to<br>23.52)                         | 23.66<br>(17.89 to<br>29.49)                         |
| Poisonings                                      | 814.56<br>(465.53 to<br>936.79)                               | 277.30<br>(153.64 to<br>390.61)                              | 231.17<br>(127.02 to<br>317.81)                              | 384.06<br>(211.05 to<br>516.66)                               | 19.94<br>(11.25 to<br>23.04)                         | 10.23<br>(5.80 to<br>14.28)                          | 8.85<br>(4.89 to<br>12.20)                           | 13.65<br>(7.42 to<br>18.24)                          |
| Exposure to mechanical forces                   | 2,301.18<br>(1,521.45 to<br>2,508.96)                         | 1,070.82<br>(697.98 to<br>1,340.73)                          | 952.69<br>(620.23 to<br>1,184.33)                            | 1,343.40<br>(853.86 to<br>1,619.62)                           | 50.60<br>(32.59 to<br>55.14)                         | 34.16<br>(22.12 to<br>42.33)                         | 31.66<br>(20.43 to<br>38.89)                         | 40.78<br>(25.49 to<br>48.07)                         |
| Unintentional firearm injuries                  | 84.89<br>(74.87 to<br>109.00)                                 | 58.36<br>(50.14 to<br>73.42)                                 | 52.13<br>(44.74 to<br>64.80)                                 | 66.13<br>(56.41 to<br>84.47)                                  | 2.18<br>(1.96 to<br>2.68)                            | 2.67<br>(2.28 to<br>3.14)                            | 2.60<br>(3.05)                                       | 2.74<br>(2.30 to<br>3.29)                            |
| Unintentional suffocation                       | 478.34<br>(284.77 to<br>565.36)                               | 162.77<br>(95.55 to<br>226.58)                               | 142.52<br>(81.14 to<br>201.66)                               | 201.74<br>(116.68 to<br>286.30)                               | 7.62<br>(4.32 to<br>8.99)                            | 4.30<br>(2.22 to<br>5.64)                            | 4.04<br>(2.06 to<br>5.33)                            | 4.93<br>(2.54 to<br>6.34)                            |
| Other exposure to mechanical forces             | 1,737.95<br>(1,086.49 to<br>1,889.41)                         | 849.70<br>(524.06 to<br>1,083.28)                            | 758.03<br>(466.44 to<br>944.48)                              | 1,075.52<br>(651.88 to<br>1,294.06)                           | 40.79<br>(24.99 to<br>44.42)                         | 27.19<br>(16.81 to<br>34.24)                         | 25.01<br>(15.43 to<br>31.02)                         | 33.10<br>(19.76 to<br>39.22)                         |
| Adverse effects of medical treatment            | 594.68<br>(519.77 to<br>672.27)                               | 520.45<br>(449.45 to<br>606.98)                              | 486.88<br>(419.15 to<br>570.97)                              | 566.96<br>(490.65 to<br>654.57)                               | 15.22<br>(13.57 to<br>17.50)                         | 20.69<br>(18.44 to<br>24.13)                         | 20.39<br>(18.11 to<br>24.22)                         | 21.24<br>(18.86 to<br>24.75)                         |
| Animal contact                                  | 264.11<br>(239.45 to<br>298.43)                               | 272.87<br>(238.16 to<br>316.03)                              | 244.22<br>(210.83 to<br>280.90)                              | 319.67<br>(274.73 to<br>369.25)                               | 6.94<br>(6.11 to<br>7.61)                            | 10.06<br>(8.67 to<br>11.43)                          | 9.50<br>(8.04 to<br>10.83)                           | 11.23<br>(9.42 to<br>12.77)                          |
| Venomous animal contact                         | 160.61<br>(133.35 to<br>178.14)                               | 163.62<br>(129.96 to<br>188.72)                              | 147.17<br>(117.20 to<br>170.43)                              | 188.08<br>(148.27 to<br>219.04)                               | 4.29<br>(3.51 to<br>4.73)                            | 6.02<br>(4.65 to<br>6.89)                            | 5.73<br>(4.39 to<br>6.58)                            | 6.61<br>(4.91 to<br>7.64)                            |
| Non-venomous animal contact                     | 103.50<br>(89.93 to<br>144.13)                                | 109.25<br>(89.74 to<br>149.79)                               | 97.05<br>(80.03 to<br>134.54)                                | 131.60<br>(108.66 to<br>175.06)                               | 2.64<br>(2.27 to<br>3.65)                            | 4.04<br>(3.29 to<br>5.39)                            | 3.77<br>(3.02 to<br>5.09)                            | 4.63<br>(3.77 to<br>6.02)                            |
| Foreign body                                    | 859.49<br>(736.04 to<br>1,004.02)                             | 630.58<br>(514.51 to<br>735.89)                              | 602.24<br>(490.73 to<br>693.54)                              | 647.47<br>(525.16 to<br>767.60)                               | 18.45<br>(15.37 to<br>20.27)                         | 25.45<br>(19.51 to<br>28.78)                         | 26.19<br>(20.11 to<br>29.41)                         | 23.60<br>(17.93 to<br>27.00)                         |
| Pulmonary aspiration and foreign body in airway | 759.60<br>(628.26 to<br>864.42)                               | 537.24<br>(416.57 to<br>632.36)                              | 508.57<br>(394.17 to<br>594.46)                              | 554.38<br>(427.61 to<br>662.69)                               | 15.97<br>(12.58 to<br>17.59)                         | 21.10<br>(15.12 to<br>24.30)                         | 21.55<br>(15.58 to<br>24.81)                         | 19.72<br>(14.21 to<br>22.94)                         |

|                                             |                                                             |                                                             |                                                            |                                                             |                                                      |                                                      |                                                      |                                                      |
|---------------------------------------------|-------------------------------------------------------------|-------------------------------------------------------------|------------------------------------------------------------|-------------------------------------------------------------|------------------------------------------------------|------------------------------------------------------|------------------------------------------------------|------------------------------------------------------|
|                                             | 99.89<br>(83.86 to<br>164.33)                               | 93.33<br>(77.34 to<br>142.09)                               | 93.66<br>(77.83 to<br>140.48)                              | 93.08<br>(77.18 to<br>142.36)                               | 2.48<br>(2.17 to<br>3.87)                            | 4.34<br>(3.64 to<br>6.15)                            | 4.64<br>(3.94 to<br>6.59)                            | 3.88<br>(3.26 to<br>5.50)                            |
| Foreign body in other body part             |                                                             |                                                             |                                                            |                                                             |                                                      |                                                      |                                                      |                                                      |
|                                             | 153.41<br>(114.42 to<br>194.80)                             | 132.79<br>(95.40 to<br>172.51)                              | 117.52<br>(82.12 to<br>152.10)                             | 172.20<br>(123.45 to<br>223.53)                             | 5.09<br>(3.70 to<br>6.33)                            | 7.01<br>(4.85 to<br>9.18)                            | 6.61<br>(4.45 to<br>8.58)                            | 8.49<br>(5.92 to<br>11.08)                           |
| Environmental heat and cold exposure        |                                                             |                                                             |                                                            |                                                             |                                                      |                                                      |                                                      |                                                      |
|                                             | 1,538.97<br>(1,096.58 to<br>1,629.50)                       | 605.93<br>(442.88 to<br>789.48)                             | 494.61<br>(367.62 to<br>624.61)                            | 822.79<br>(581.23 to<br>960.92)                             | 33.64<br>(23.61 to<br>35.63)                         | 16.12<br>(11.77 to<br>21.06)                         | 13.45<br>(9.76 to<br>16.91)                          | 21.72<br>(15.20 to<br>24.73)                         |
| Other unintentional injuries                |                                                             |                                                             |                                                            |                                                             |                                                      |                                                      |                                                      |                                                      |
| <b>Self-harm and interpersonal violence</b> | <b>9,062.39</b><br><b>(8,582.78 to</b><br><b>10,185.23)</b> | <b>8,407.82</b><br><b>(6,387.06 to</b><br><b>11,133.44)</b> | <b>7,295.54</b><br><b>(5,778.69 to</b><br><b>9,334.04)</b> | <b>9,397.01</b><br><b>(7,067.93 to</b><br><b>12,708.95)</b> | <b>231.34</b><br><b>(218.60 to</b><br><b>255.77)</b> | <b>287.90</b><br><b>(217.86 to</b><br><b>380.80)</b> | <b>254.92</b><br><b>(201.05 to</b><br><b>324.68)</b> | <b>311.45</b><br><b>(233.95 to</b><br><b>425.09)</b> |

| Southeast Asia, East Asia, and Oceania                                              |                                                      |                                                          |                                                          |                                                          |                                                |                                                   |                                                   |                                                   |
|-------------------------------------------------------------------------------------|------------------------------------------------------|----------------------------------------------------------|----------------------------------------------------------|----------------------------------------------------------|------------------------------------------------|---------------------------------------------------|---------------------------------------------------|---------------------------------------------------|
| Cause                                                                               | YLLs (in 1000s)                                      |                                                          |                                                          |                                                          | Deaths (in 1000s)                              |                                                   |                                                   |                                                   |
|                                                                                     | 2016                                                 | 2040 Forecast                                            | 2040 Better Scenario                                     | 2040 Worse Scenario                                      | 2016                                           | 2040 Forecast                                     | 2040 Better Scenario                              | 2040 Worse Scenario                               |
| Self-harm                                                                           | 6,609.26<br>(6,279.10 to<br>7,600.12)                | 6,652.95<br>(4,763.25 to<br>9,199.99)                    | 5,688.83<br>(4,255.98 to<br>7,530.96)                    | 7,548.09<br>(5,348.46 to<br>10,673.41)                   | 181.74<br>(171.93 to<br>203.80)                | 247.28<br>(179.35 to<br>338.45)                   | 217.29<br>(165.78 to<br>284.99)                   | 268.97<br>(192.80 to<br>375.82)                   |
| Self-harm by firearm                                                                | 139.32<br>(98.25 to<br>200.18)                       | 114.80<br>(70.84 to<br>181.04)                           | 94.30<br>(60.31 to<br>146.08)                            | 133.22<br>(79.52 to<br>214.04)                           | 3.31<br>(2.38 to<br>4.70)                      | 3.36<br>(2.18 to<br>5.12)                         | 2.85<br>(1.93 to<br>4.15)                         | 3.77<br>(2.34 to<br>5.86)                         |
| Self-harm by other specified means                                                  | 6,469.94<br>(6,153.96 to<br>7,401.39)                | 6,538.15<br>(4,675.15 to<br>9,052.84)                    | 5,594.53<br>(4,187.68 to<br>7,406.68)                    | 7,414.87<br>(5,256.61 to<br>10,510.65)                   | 178.43<br>(168.62 to<br>200.36)                | 243.92<br>(176.73 to<br>334.52)                   | 214.44<br>(163.79 to<br>282.11)                   | 265.20<br>(189.91 to<br>371.98)                   |
| Interpersonal violence                                                              | 2,453.13<br>(2,068.26 to<br>2,917.71)                | 1,754.87<br>(1,299.16 to<br>2,163.06)                    | 1,606.71<br>(1,192.09 to<br>1,965.41)                    | 1,848.92<br>(1,359.28 to<br>2,287.93)                    | 49.60<br>(41.72 to<br>58.86)                   | 40.62<br>(30.38 to<br>49.21)                      | 57.63<br>(28.33 to<br>45.47)                      | 42.48<br>(31.43 to<br>52.20)                      |
| Physical violence by firearm                                                        | 638.15<br>(392.22 to<br>793.77)                      | 550.00<br>(281.63 to<br>749.74)                          | 504.73<br>(254.28 to<br>685.12)                          | 560.39<br>(287.74 to<br>768.14)                          | 12.91<br>(7.87 to<br>16.00)                    | 11.96<br>(6.23 to<br>15.89)                       | 11.10<br>(5.85 to<br>14.92)                       | 12.11<br>(6.36 to<br>16.28)                       |
| Physical violence by sharp object                                                   | 997.94<br>(826.77 to<br>1,266.84)                    | 748.91<br>(530.97 to<br>947.18)                          | 699.56<br>(506.07 to<br>880.54)                          | 780.85<br>(569.28 to<br>996.13)                          | 19.87<br>(16.35 to<br>25.30)                   | 16.62<br>(11.92 to<br>20.82)                      | 15.73<br>(11.35 to<br>19.71)                      | 17.23<br>(12.56 to<br>21.58)                      |
| Physical violence by other means                                                    | 817.04<br>(706.44 to<br>1,108.10)                    | 455.96<br>(351.76 to<br>635.94)                          | 402.42<br>(311.17 to<br>559.01)                          | 507.68<br>(387.09 to<br>708.11)                          | 16.82<br>(14.48 to<br>22.68)                   | 12.03<br>(9.30 to<br>16.58)                       | 10.81<br>(8.38 to<br>14.50)                       | 13.14<br>(9.96 to<br>18.23)                       |
| <b>Forces of nature, conflict and terrorism, and executions and police conflict</b> | <b>274.88</b><br><b>(183.26 to</b><br><b>373.40)</b> | <b>1,431.37</b><br><b>(34.12 to</b><br><b>12,196.53)</b> | <b>1,418.00</b><br><b>(33.07 to</b><br><b>12,157.18)</b> | <b>1,446.12</b><br><b>(34.43 to</b><br><b>12,218.61)</b> | <b>5.33</b><br><b>(3.51 to</b><br><b>7.31)</b> | <b>30.58</b><br><b>(0.79 to</b><br><b>256.43)</b> | <b>31.02</b><br><b>(0.79 to</b><br><b>268.05)</b> | <b>30.22</b><br><b>(0.77 to</b><br><b>251.24)</b> |
| Exposure to forces of nature                                                        | 93.48<br>(26.71 to<br>165.45)                        | 239.12<br>(1.26 to<br>2,785.01)                          | 234.41<br>(1.21 to<br>2,775.15)                          | 259.72<br>(1.26 to<br>2,780.61)                          | 2.05<br>(0.56 to<br>3.66)                      | 5.96<br>(0.03 to<br>67.84)                        | 6.01<br>(0.03 to<br>68.70)                        | 5.79<br>(0.03 to<br>65.95)                        |
| Conflict and terrorism                                                              | 123.23<br>(60.21 to<br>187.67)                       | 774.32<br>(9.57 to<br>11,252.61)                         | 773.09<br>(9.15 to<br>11,296.45)                         | 787.29<br>(9.68 to<br>11,263.34)                         | 2.10<br>(1.02 to<br>3.19)                      | 15.98<br>(0.19 to<br>237.80)                      | 16.41<br>(0.19 to<br>249.99)                      | 15.86<br>(0.19 to<br>233.15)                      |
| Executions and police conflict                                                      | 58.17<br>(47.55 to<br>65.40)                         | 417.93<br>(0.00 to<br>3,034.58)                          | 410.51<br>(0.00 to<br>2,995.94)                          | 419.11<br>(0.00 to<br>3,047.14)                          | 1.18<br>(0.93 to<br>1.33)                      | 8.64<br>(0.00 to<br>64.56)                        | 8.60<br>(0.00 to<br>64.49)                        | 8.57<br>(0.00 to<br>64.20)                        |



| East Asia                                                                |                                                 |                                                 |                                                 |                                                 |                                             |                                              |                                              |                                              |
|--------------------------------------------------------------------------|-------------------------------------------------|-------------------------------------------------|-------------------------------------------------|-------------------------------------------------|---------------------------------------------|----------------------------------------------|----------------------------------------------|----------------------------------------------|
| Cause                                                                    | YLLs (in 1000s)                                 |                                                 |                                                 |                                                 | Deaths (in 1000s)                           |                                              |                                              |                                              |
|                                                                          | 2016                                            | 2040 Forecast                                   | 2040 Better Scenario                            | 2040 Worse Scenario                             | 2016                                        | 2040 Forecast                                | 2040 Better Scenario                         | 2040 Worse Scenario                          |
| <b>All causes</b>                                                        | <b>217,960.83</b><br>(213,386.33 to 222,754.59) | <b>217,048.81</b><br>(172,074.92 to 272,928.59) | <b>180,317.62</b><br>(148,463.47 to 221,148.47) | <b>313,346.93</b><br>(243,951.32 to 405,311.47) | <b>10,073.64</b><br>(9,874.16 to 10,270.89) | <b>14,972.91</b><br>(12,450.19 to 17,989.92) | <b>12,911.12</b><br>(11,023.75 to 15,111.00) | <b>20,274.69</b><br>(16,817.79 to 24,140.72) |
| <b>Communicable, maternal, neonatal, and nutritional diseases</b>        | <b>13,650.27</b><br>(12,800.25 to 14,587.22)    | <b>6,022.31</b><br>(4,643.77 to 7,992.83)       | <b>4,878.02</b><br>(3,796.12 to 6,251.68)       | <b>9,217.17</b><br>(6,947.54 to 12,398.24)      | <b>364.21</b><br>(340.00 to 396.07)         | <b>423.35</b><br>(326.36 to 545.37)          | <b>376.87</b><br>(302.89 to 466.60)          | <b>568.40</b><br>(417.88 to 746.85)          |
| <b>HIV/AIDS and tuberculosis</b>                                         | <b>2,435.67</b><br>(2,314.58 to 2,609.80)       | <b>848.31</b><br>(587.72 to 1,263.24)           | <b>603.37</b><br>(435.21 to 839.45)             | <b>1,664.23</b><br>(1,156.73 to 2,356.43)       | <b>75.32</b><br>(72.07 to 80.50)            | <b>41.48</b><br>(28.54 to 61.92)             | <b>30.82</b><br>(22.84 to 41.73)             | <b>72.59</b><br>(49.95 to 103.49)            |
| <b>Tuberculosis</b>                                                      | <b>1,123.41</b><br>(1,064.11 to 1,254.67)       | <b>474.75</b><br>(270.81 to 833.40)             | <b>296.43</b><br>(179.70 to 483.38)             | <b>962.87</b><br>(564.96 to 1,583.02)           | <b>43.52</b><br>(41.28 to 48.12)            | <b>27.12</b><br>(15.78 to 47.81)             | <b>17.93</b><br>(11.12 to 28.15)             | <b>51.65</b><br>(30.89 to 83.08)             |
| <b>HIV/AIDS</b>                                                          | <b>1,312.26</b><br>(1,212.17 to 1,460.70)       | <b>373.57</b><br>(245.97 to 601.72)             | <b>306.94</b><br>(202.81 to 494.48)             | <b>701.37</b><br>(473.28 to 1,100.99)           | <b>31.79</b><br>(29.51 to 35.09)            | <b>14.36</b><br>(10.32 to 20.57)             | <b>12.89</b><br>(9.40 to 18.49)              | <b>20.94</b><br>(14.71 to 31.36)             |
| <b>Diarrhea, lower respiratory, and other common infectious diseases</b> | <b>4,964.58</b><br>(4,572.46 to 5,535.92)       | <b>3,684.00</b><br>(2,672.12 to 5,215.03)       | <b>3,000.93</b><br>(2,226.09 to 4,095.88)       | <b>5,582.09</b><br>(3,884.03 to 8,083.13)       | <b>193.34</b><br>(170.07 to 225.13)         | <b>321.70</b><br>(234.50 to 437.91)          | <b>284.32</b><br>(216.29 to 369.77)          | <b>434.81</b><br>(303.41 to 592.56)          |
| <b>Diarrheal diseases</b>                                                | <b>278.37</b><br>(221.06 to 380.50)             | <b>132.55</b><br>(35.03 to 356.87)              | <b>138.89</b><br>(39.65 to 363.68)              | <b>153.61</b><br>(36.46 to 448.51)              | <b>6.44</b><br>(4.67 to 10.22)              | <b>9.08</b><br>(2.54 to 24.52)               | <b>10.45</b><br>(3.07 to 26.74)              | <b>8.97</b><br>(2.25 to 27.41)               |
| <b>Intestinal infectious diseases</b>                                    | <b>176.06</b><br>(89.80 to 303.94)              | <b>63.23</b><br>(29.14 to 118.33)               | <b>65.91</b><br>(30.00 to 123.93)               | <b>59.36</b><br>(26.23 to 113.49)               | <b>2.87</b><br>(1.47 to 4.97)               | <b>1.41</b><br>(0.69 to 2.52)                | <b>1.51</b><br>(0.74 to 2.64)                | <b>1.25</b><br>(0.61 to 2.27)                |
| <b>Typhoid fever</b>                                                     | <b>147.32</b><br>(73.40 to 255.90)              | <b>55.07</b><br>(24.44 to 104.34)               | <b>58.77</b><br>(26.02 to 111.73)               | <b>47.57</b><br>(20.77 to 92.73)                | <b>2.38</b><br>(1.19 to 4.15)               | <b>1.22</b><br>(0.58 to 2.17)                | <b>1.34</b><br>(0.64 to 2.39)                | <b>1.00</b><br>(0.47 to 1.86)                |
| <b>Paratyphoid fever</b>                                                 | <b>28.23</b><br>(12.26 to 55.17)                | <b>7.96</b><br>(3.09 to 16.19)                  | <b>6.95</b><br>(2.77 to 14.38)                  | <b>11.54</b><br>(4.64 to 24.24)                 | <b>0.47</b><br>(0.20 to 0.91)               | <b>0.18</b><br>(0.07 to 0.36)                | <b>0.16</b><br>(0.06 to 0.32)                | <b>0.24</b><br>(0.10 to 0.51)                |
| <b>Other intestinal infectious diseases</b>                              | <b>0.51</b><br>(0.20 to 1.10)                   | <b>0.20</b><br>(0.08 to 0.45)                   | <b>0.19</b><br>(0.07 to 0.44)                   | <b>0.25</b><br>(0.09 to 0.57)                   | <b>0.01</b><br>(0.01 to 0.03)               | <b>0.01</b><br>(0.01 to 0.03)                | <b>0.01</b><br>(0.01 to 0.03)                | <b>0.02</b><br>(0.01 to 0.04)                |
| <b>Lower respiratory infections</b>                                      | <b>3,880.94</b><br>(3,512.14 to 4,528.26)       | <b>3,219.88</b><br>(2,298.20 to 4,655.07)       | <b>2,554.16</b><br>(1,863.35 to 3,533.38)       | <b>4,969.42</b><br>(3,390.75 to 7,368.47)       | <b>171.30</b><br>(148.36 to 203.06)         | <b>301.99</b><br>(217.18 to 415.54)          | <b>263.53</b><br>(197.40 to 350.95)          | <b>413.08</b><br>(283.91 to 566.37)          |
| <b>Upper respiratory infections</b>                                      | <b>7.28</b><br>(6.33 to 8.40)                   | <b>3.23</b><br>(2.09 to 4.99)                   | <b>2.53</b><br>(1.54 to 4.02)                   | <b>5.46</b><br>(3.46 to 8.25)                   | <b>0.23</b><br>(0.20 to 0.26)               | <b>0.17</b><br>(0.11 to 0.27)                | <b>0.14</b><br>(0.09 to 0.23)                | <b>0.28</b><br>(0.18 to 0.42)                |
| <b>Otitis media</b>                                                      | <b>0.69</b><br>(0.59 to 0.80)                   | <b>0.19</b><br>(0.12 to 0.31)                   | <b>0.20</b><br>(0.12 to 0.33)                   | <b>0.18</b><br>(0.11 to 0.29)                   | <b>0.02</b><br>(0.02 to 0.03)               | <b>0.02</b><br>(0.01 to 0.05)                | <b>0.02</b><br>(0.01 to 0.04)                | <b>0.01</b><br>(0.01 to 0.03)                |
| <b>Meningitis</b>                                                        | <b>335.59</b><br>(245.78 to 445.09)             | <b>102.01</b><br>(67.95 to 160.44)              | <b>92.61</b><br>(61.94 to 145.56)               | <b>137.61</b><br>(93.52 to 209.60)              | <b>7.29</b><br>(5.35 to 7.05)               | <b>4.55</b><br>(3.22 to 7.05)                | <b>4.32</b><br>(3.00 to 6.70)                | <b>5.56</b><br>(3.95 to 8.64)                |
| <b>Pneumococcal meningitis</b>                                           | <b>26.72</b><br>(19.42 to 34.78)                | <b>9.66</b><br>(6.83 to 15.10)                  | <b>9.97</b><br>(7.01 to 15.45)                  | <b>9.42</b><br>(6.66 to 14.61)                  | <b>0.63</b><br>(0.47 to 0.89)               | <b>0.52</b><br>(0.38 to 0.84)                | <b>0.56</b><br>(0.41 to 0.90)                | <b>0.46</b><br>(0.33 to 0.73)                |
| <b>H influenzae type B meningitis</b>                                    | <b>24.89</b><br>(18.02 to 31.83)                | <b>11.19</b><br>(6.45 to 21.35)                 | <b>11.20</b><br>(6.55 to 20.87)                 | <b>12.75</b><br>(6.63 to 26.86)                 | <b>0.52</b><br>(0.38 to 0.70)               | <b>0.40</b><br>(0.28 to 0.60)                | <b>0.42</b><br>(0.29 to 0.63)                | <b>0.38</b><br>(0.26 to 0.60)                |
| <b>Meningococcal meningitis</b>                                          | <b>156.53</b><br>(112.50 to 207.96)             | <b>50.29</b><br>(32.68 to 81.21)                | <b>44.74</b><br>(29.28 to 71.95)                | <b>70.25</b><br>(47.96 to 106.51)               | <b>3.74</b><br>(2.72 to 5.19)               | <b>2.47</b><br>(1.70 to 3.92)                | <b>2.30</b><br>(1.58 to 3.66)                | <b>3.17</b><br>(2.25 to 4.87)                |
| <b>Other meningitis</b>                                                  | <b>127.45</b><br>(93.54 to 169.26)              | <b>30.87</b><br>(19.93 to 50.26)                | <b>26.71</b><br>(17.09 to 44.03)                | <b>45.19</b><br>(29.74 to 70.16)                | <b>2.40</b><br>(1.78 to 3.35)               | <b>1.15</b><br>(0.78 to 1.91)                | <b>1.04</b><br>(0.70 to 1.66)                | <b>1.55</b><br>(1.09 to 2.41)                |
| <b>Encephalitis</b>                                                      | <b>217.04</b><br>(177.47 to 287.92)             | <b>96.66</b><br>(63.20 to 142.93)               | <b>93.39</b><br>(61.55 to 139.40)               | <b>109.03</b><br>(68.17 to 165.62)              | <b>3.80</b><br>(3.11 to 4.86)               | <b>3.03</b><br>(2.28 to 3.86)                | <b>3.06</b><br>(2.30 to 3.93)                | <b>3.14</b><br>(2.32 to 4.15)                |

|                |                              |                              |                              |                              |                           |                           |                           |                           |
|----------------|------------------------------|------------------------------|------------------------------|------------------------------|---------------------------|---------------------------|---------------------------|---------------------------|
| Diphtheria     | 0.72<br>(0.63 to<br>0.84)    | 0.08<br>(0.05 to<br>0.12)    | 0.08<br>(0.05 to<br>0.12)    | 0.17<br>(0.07 to<br>0.33)    | 0.01<br>(0.01 to<br>0.01) | 0.00<br>(0.00 to<br>0.00) | 0.00<br>(0.00 to<br>0.00) | 0.00<br>(0.00 to<br>0.00) |
| Whooping cough | 23.42<br>(4.96 to<br>66.50)  | 5.38<br>(0.43 to<br>19.01)   | 4.79<br>(0.39 to<br>16.17)   | 39.74<br>(1.37 to<br>134.53) | 0.28<br>(0.06 to<br>0.79) | 0.06<br>(0.01 to<br>0.23) | 0.06<br>(0.01 to<br>0.19) | 0.47<br>(0.02 to<br>1.59) |
| Tetanus        | 25.18<br>(16.72 to<br>31.62) | 2.38<br>(1.46 to<br>3.49)    | 2.41<br>(1.47 to<br>3.56)    | 4.99<br>(2.52 to<br>9.31)    | 0.57<br>(0.36 to<br>0.78) | 0.09<br>(0.05 to<br>0.14) | 0.09<br>(0.05 to<br>0.14) | 0.11<br>(0.06 to<br>0.17) |
| Measles        | 4.78<br>(1.37 to<br>12.20)   | 51.96<br>(2.58 to<br>250.16) | 40.01<br>(2.10 to<br>171.06) | 94.27<br>(3.31 to<br>534.05) | 0.06<br>(0.02 to<br>0.15) | 0.76<br>(0.04 to<br>3.27) | 0.60<br>(0.03 to<br>2.38) | 1.31<br>(0.05 to<br>6.70) |

| East Asia                                             |                                          |                                       |                                       |                                       |                                    |                                    |                                    |                                    |
|-------------------------------------------------------|------------------------------------------|---------------------------------------|---------------------------------------|---------------------------------------|------------------------------------|------------------------------------|------------------------------------|------------------------------------|
| Cause                                                 | YLLs (in 1000s)                          |                                       |                                       |                                       | Deaths (in 1000s)                  |                                    |                                    |                                    |
|                                                       | 2016                                     | 2040 Forecast                         | 2040 Better Scenario                  | 2040 Worse Scenario                   | 2016                               | 2040 Forecast                      | 2040 Better Scenario               | 2040 Worse Scenario                |
| Varicella and herpes zoster                           | 14.49<br>(12.88 to<br>16.59)             | 6.44<br>(4.74 to<br>8.62)             | 5.94<br>(4.36 to<br>8.18)             | 8.26<br>(5.85 to<br>11.65)            | 0.47<br>(0.43 to<br>0.51)          | 0.55<br>(0.41 to<br>0.72)          | 0.54<br>(0.40 to<br>0.74)          | 0.62<br>(0.43 to<br>0.86)          |
| <b>Neglected tropical diseases and malaria</b>        | <b>94.64<br/>(60.43 to<br/>104.50)</b>   | <b>44.48<br/>(28.65 to<br/>52.82)</b> | <b>44.10<br/>(28.61 to<br/>52.18)</b> | <b>49.97<br/>(30.74 to<br/>63.59)</b> | <b>2.53<br/>(1.69 to<br/>2.77)</b> | <b>1.85<br/>(1.25 to<br/>2.15)</b> | <b>1.89<br/>(1.29 to<br/>2.18)</b> | <b>1.96<br/>(1.28 to<br/>2.40)</b> |
| Malaria                                               | 7.50<br>(5.13 to<br>10.65)               | 3.04<br>(2.00 to<br>4.28)             | 3.06<br>(1.99 to<br>4.21)             | 3.10<br>(2.02 to<br>4.44)             | 0.19<br>(0.13 to<br>0.27)          | 0.11<br>(0.08 to<br>0.16)          | 0.12<br>(0.08 to<br>0.16)          | 0.11<br>(0.07 to<br>0.16)          |
| Chagas disease                                        | 0.00<br>(0.00 to<br>0.00)                | 0.00<br>(0.00 to<br>0.00)             | 0.00<br>(0.00 to<br>0.00)             | 0.00<br>(0.00 to<br>0.00)             | 0.00<br>(0.00 to<br>0.00)          | 0.00<br>(0.00 to<br>0.00)          | 0.00<br>(0.00 to<br>0.00)          | 0.00<br>(0.00 to<br>0.00)          |
| Leishmaniasis                                         | 2.42<br>(1.54 to<br>3.78)                | 0.83<br>(0.50 to<br>1.42)             | 0.78<br>(0.49 to<br>1.31)             | 1.11<br>(0.68 to<br>1.91)             | 0.07<br>(0.05 to<br>0.12)          | 0.04<br>(0.02 to<br>0.06)          | 0.03<br>(0.02 to<br>0.06)          | 0.05<br>(0.03 to<br>0.08)          |
| African trypanosomiasis                               | 0.00<br>(0.00 to<br>0.00)                | 0.00<br>(0.00 to<br>0.00)             | 0.00<br>(0.00 to<br>0.00)             | 0.00<br>(0.00 to<br>0.00)             | 0.00<br>(0.00 to<br>0.00)          | 0.00<br>(0.00 to<br>0.00)          | 0.00<br>(0.00 to<br>0.00)          | 0.00<br>(0.00 to<br>0.00)          |
| Schistosomiasis                                       | 11.97<br>(10.12 to<br>14.13)             | 6.92<br>(5.48 to<br>8.63)             | 6.92<br>(5.47 to<br>8.65)             | 7.50<br>(5.93 to<br>9.43)             | 0.47<br>(0.40 to<br>0.56)          | 0.38<br>(0.30 to<br>0.48)          | 0.39<br>(0.31 to<br>0.48)          | 0.40<br>(0.31 to<br>0.49)          |
| Cysticercosis                                         | 1.52<br>(1.38 to<br>1.69)                | 0.45<br>(0.37 to<br>0.53)             | 0.45<br>(0.37 to<br>0.53)             | 0.46<br>(0.39 to<br>0.54)             | 0.04<br>(0.04 to<br>0.05)          | 0.02<br>(0.02 to<br>0.02)          | 0.02<br>(0.02 to<br>0.02)          | 0.02<br>(0.02 to<br>0.02)          |
| Cystic echinococcosis                                 | 1.55<br>(1.52 to<br>1.82)                | 0.64<br>(0.47 to<br>0.87)             | 0.58<br>(0.44 to<br>0.76)             | 0.93<br>(0.68 to<br>1.24)             | 0.05<br>(0.04 to<br>0.06)          | 0.03<br>(0.03 to<br>0.05)          | 0.03<br>(0.03 to<br>0.04)          | 0.05<br>(0.03 to<br>0.06)          |
| Dengue                                                | 0.60<br>(0.37 to<br>0.93)                | 2.17<br>(0.83 to<br>3.40)             | 2.22<br>(0.84 to<br>3.46)             | 2.10<br>(0.82 to<br>3.28)             | 0.02<br>(0.01 to<br>0.04)          | 0.02<br>(0.04 to<br>0.27)          | 0.17<br>(0.05 to<br>0.28)          | 0.15<br>(0.04 to<br>0.25)          |
| Yellow fever                                          | 0.00<br>(0.00 to<br>0.00)                | 0.00<br>(0.00 to<br>0.00)             | 0.00<br>(0.00 to<br>0.00)             | 0.00<br>(0.00 to<br>0.00)             | 0.00<br>(0.00 to<br>0.00)          | 0.00<br>(0.00 to<br>0.00)          | 0.00<br>(0.00 to<br>0.00)          | 0.00<br>(0.00 to<br>0.00)          |
| Rabies                                                | 41.75<br>(10.88 to<br>50.08)             | 11.49<br>(2.41 to<br>15.68)           | 10.44<br>(2.36 to<br>13.94)           | 16.41<br>(3.55 to<br>24.83)           | 0.97<br>(0.25 to<br>1.15)          | 0.36<br>(0.08 to<br>0.48)          | 0.33<br>(0.08 to<br>0.43)          | 0.49<br>(0.11 to<br>0.74)          |
| Intestinal nematode infections                        | 1.99<br>(1.59 to<br>2.53)                | 1.18<br>(0.95 to<br>1.52)             | 1.18<br>(0.95 to<br>1.52)             | 1.16<br>(0.92 to<br>1.51)             | 0.04<br>(0.03 to<br>0.05)          | 0.05<br>(0.04 to<br>0.05)          | 0.05<br>(0.04 to<br>0.06)          | 0.04<br>(0.03 to<br>0.05)          |
| Other neglected tropical diseases                     | 25.34<br>(17.53 to<br>28.10)             | 17.75<br>(11.52 to<br>21.12)          | 18.47<br>(12.13 to<br>22.04)          | 17.21<br>(11.08 to<br>21.04)          | 0.66<br>(0.45 to<br>0.74)          | 0.70<br>(0.45 to<br>0.82)          | 0.75<br>(0.48 to<br>0.88)          | 0.65<br>(0.42 to<br>0.78)          |
| <b>Maternal disorders</b>                             | <b>159.18<br/>(144.96 to<br/>175.27)</b> | <b>46.16<br/>(31.39 to<br/>68.76)</b> | <b>32.40<br/>(19.83 to<br/>52.98)</b> | <b>60.70<br/>(37.54 to<br/>96.14)</b> | <b>2.86<br/>(2.60 to<br/>3.14)</b> | <b>0.85<br/>(0.58 to<br/>1.25)</b> | <b>0.60<br/>(0.37 to<br/>0.96)</b> | <b>1.12<br/>(0.70 to<br/>1.75)</b> |
| Maternal hemorrhage                                   | 49.22<br>(41.89 to<br>57.86)             | 17.45<br>(10.79 to<br>26.63)          | 11.98<br>(6.91 to<br>19.61)           | 22.59<br>(13.20 to<br>36.55)          | 0.88<br>(0.75 to<br>1.03)          | 0.32<br>(0.20 to<br>0.48)          | 0.22<br>(0.13 to<br>0.35)          | 0.41<br>(0.24 to<br>0.66)          |
| Maternal sepsis and other maternal infections         | 8.53<br>(6.74 to<br>10.69)               | 2.50<br>(1.52 to<br>3.82)             | 1.84<br>(1.06 to<br>3.01)             | 3.37<br>(1.97 to<br>5.62)             | 0.17<br>(0.14 to<br>0.21)          | 0.05<br>(0.03 to<br>0.08)          | 0.04<br>(0.02 to<br>0.06)          | 0.07<br>(0.04 to<br>0.12)          |
| Maternal hypertensive disorders                       | 17.91<br>(14.31 to<br>22.10)             | 4.79<br>(2.81 to<br>7.72)             | 3.32<br>(1.83 to<br>5.74)             | 6.35<br>(3.52 to<br>11.15)            | 0.31<br>(0.25 to<br>0.39)          | 0.09<br>(0.05 to<br>0.14)          | 0.06<br>(0.03 to<br>0.10)          | 0.11<br>(0.06 to<br>0.20)          |
| Maternal obstructed labor and uterine rupture         | 6.90<br>(5.31 to<br>8.88)                | 1.99<br>(1.07 to<br>3.36)             | 1.38<br>(0.71 to<br>2.43)             | 2.75<br>(1.40 to<br>4.87)             | 0.12<br>(0.10 to<br>0.16)          | 0.04<br>(0.02 to<br>0.06)          | 0.03<br>(0.01 to<br>0.04)          | 0.05<br>(0.03 to<br>0.09)          |
| Maternal abortion, miscarriage, and ectopic pregnancy | 18.66<br>(15.12 to<br>22.84)             | 5.27<br>(3.04 to<br>8.75)             | 3.77<br>(2.11 to<br>6.48)             | 7.12<br>(3.86 to<br>12.29)            | 0.34<br>(0.28 to<br>0.42)          | 0.10<br>(0.06 to<br>0.17)          | 0.07<br>(0.04 to<br>0.12)          | 0.14<br>(0.08 to<br>0.23)          |

|                                        |                              |                            |                            |                             |                           |                           |                           |                           |
|----------------------------------------|------------------------------|----------------------------|----------------------------|-----------------------------|---------------------------|---------------------------|---------------------------|---------------------------|
|                                        | 16.17<br>(11.62 to<br>22.79) | 5.58<br>(3.11 to<br>9.28)  | 3.78<br>(1.97 to<br>6.66)  | 7.35<br>(3.78 to<br>12.74)  | 0.28<br>(0.20 to<br>0.39) | 0.10<br>(0.06 to<br>0.16) | 0.07<br>(0.04 to<br>0.12) | 0.13<br>(0.07 to<br>0.23) |
| Indirect maternal deaths               |                              |                            |                            |                             |                           |                           |                           |                           |
|                                        | 1.27<br>(0.75 to<br>1.97)    | 0.39<br>(0.18 to<br>0.74)  | 0.24<br>(0.11 to<br>0.46)  | 0.50<br>(0.22 to<br>0.93)   | 0.02<br>(0.01 to<br>0.03) | 0.01<br>(0.00 to<br>0.01) | 0.00<br>(0.00 to<br>0.01) | 0.01<br>(0.00 to<br>0.02) |
| Late maternal deaths                   |                              |                            |                            |                             |                           |                           |                           |                           |
|                                        | 0.03<br>(0.02 to<br>0.06)    | 0.07<br>(0.00 to<br>0.43)  | 0.04<br>(0.00 to<br>0.27)  | 0.13<br>(0.02 to<br>0.56)   | 0.00<br>(0.00 to<br>0.00) | 0.00<br>(0.00 to<br>0.01) | 0.00<br>(0.00 to<br>0.00) | 0.00<br>(0.00 to<br>0.01) |
| Maternal deaths aggravated by HIV/AIDS |                              |                            |                            |                             |                           |                           |                           |                           |
|                                        | 40.49<br>(34.68 to<br>47.07) | 8.12<br>(4.84 to<br>13.22) | 6.06<br>(3.47 to<br>10.69) | 10.55<br>(5.99 to<br>18.40) | 0.72<br>(0.62 to<br>0.84) | 0.15<br>(0.09 to<br>0.24) | 0.11<br>(0.06 to<br>0.19) | 0.19<br>(0.11 to<br>0.33) |
| Other maternal disorders               |                              |                            |                            |                             |                           |                           |                           |                           |

| East Asia                                                               |                                           |                                       |                                       |                                         |                                  |                                  |                                  |                                  |
|-------------------------------------------------------------------------|-------------------------------------------|---------------------------------------|---------------------------------------|-----------------------------------------|----------------------------------|----------------------------------|----------------------------------|----------------------------------|
| Cause                                                                   | YLLs (in 1000s)                           |                                       |                                       |                                         | Deaths (in 1000s)                |                                  |                                  |                                  |
|                                                                         | 2016                                      | 2040 Forecast                         | 2040 Better Scenario                  | 2040 Worse Scenario                     | 2016                             | 2040 Forecast                    | 2040 Better Scenario             | 2040 Worse Scenario              |
| <b>Neonatal disorders</b>                                               | <b>5,327.54</b><br>(4,806.34 to 5,887.27) | <b>862.79</b><br>(412.01 to 1,500.52) | <b>654.58</b><br>(299.08 to 1,156.89) | <b>1,283.74</b><br>(587.46 to 2,248.84) | <b>61.58</b><br>(55.55 to 68.06) | <b>9.98</b><br>(4.77 to 17.35)   | <b>7.57</b><br>(3.46 to 13.38)   | <b>14.84</b><br>(6.80 to 25.99)  |
| Neonatal preterm birth                                                  | 2,705.87<br>(2,317.75 to 3,065.45)        | 397.83<br>(189.02 to 684.45)          | 269.49<br>(124.42 to 463.96)          | 621.22<br>(280.23 to 1,062.21)          | 31.27<br>(26.78 to 35.42)        | 4.60<br>(2.19 to 7.91)           | 3.12<br>(1.44 to 5.36)           | 7.18<br>(3.24 to 12.28)          |
| Neonatal encephalopathy due to birth asphyxia and trauma                | 1,741.94<br>(1,540.02 to 2,001.37)        | 274.81<br>(106.50 to 540.31)          | 219.96<br>(81.86 to 446.51)           | 418.83<br>(152.48 to 816.16)            | 20.14<br>(17.80 to 25.13)        | 3.18<br>(1.23 to 6.25)           | 2.54<br>(0.95 to 5.16)           | 4.84<br>(1.77 to 9.43)           |
| Neonatal sepsis and other neonatal infections                           | 194.15<br>(144.72 to 262.41)              | 44.87<br>(25.51 to 77.68)             | 37.77<br>(21.46 to 64.00)             | 65.89<br>(36.17 to 106.48)              | 2.24<br>(1.67 to 3.03)           | 0.52<br>(0.30 to 0.90)           | 0.44<br>(0.25 to 0.74)           | 0.74<br>(0.42 to 1.23)           |
| Hemolytic disease and other neonatal jaundice                           | 92.14<br>(79.59 to 108.45)                | 12.15<br>(6.29 to 22.22)              | 9.80<br>(4.98 to 17.59)               | 17.81<br>(9.22 to 32.69)                | 1.07<br>(0.92 to 1.25)           | 0.14<br>(0.07 to 0.26)           | 0.11<br>(0.06 to 0.20)           | 0.21<br>(0.11 to 0.38)           |
| Other neonatal disorders                                                | 593.45<br>(511.60 to 676.94)              | 133.13<br>(67.85 to 229.41)           | 117.56<br>(57.60 to 205.32)           | 162.00<br>(82.07 to 287.29)             | 6.87<br>(5.92 to 7.84)           | 1.54<br>(0.79 to 2.66)           | 1.36<br>(0.67 to 2.38)           | 1.88<br>(0.95 to 3.33)           |
| <b>Nutritional deficiencies</b>                                         | <b>232.76</b><br>(221.20 to 247.27)       | <b>288.08</b><br>(234.77 to 349.61)   | <b>314.79</b><br>(262.97 to 376.76)   | <b>250.29</b><br>(195.71 to 311.05)     | <b>14.80</b><br>(14.18 to 15.46) | <b>34.64</b><br>(25.51 to 44.30) | <b>39.40</b><br>(30.29 to 49.50) | <b>27.44</b><br>(18.87 to 36.62) |
| Protein-energy malnutrition                                             | 167.32<br>(156.65 to 193.78)              | 227.34<br>(174.26 to 287.15)          | 254.12<br>(202.74 to 310.65)          | 184.93<br>(139.46 to 237.32)            | 11.69<br>(11.08 to 12.80)        | 28.91<br>(19.74 to 38.15)        | 33.44<br>(24.66 to 43.12)        | 21.75<br>(14.28 to 30.07)        |
| Iodine deficiency                                                       | 3.45<br>(2.27 to 5.25)                    | 10.68<br>(1.24 to 36.72)              | 10.79<br>(1.14 to 39.16)              | 11.35<br>(1.48 to 35.95)                | 0.13<br>(0.08 to 0.19)           | 1.11<br>(0.08 to 4.72)           | 1.16<br>(0.08 to 5.12)           | 1.10<br>(0.10 to 4.47)           |
| Dietary iron deficiency                                                 | 8.47<br>(7.51 to 9.21)                    | 7.41<br>(4.68 to 10.67)               | 7.74<br>(4.81 to 11.29)               | 6.89<br>(4.52 to 9.73)                  | 0.25<br>(0.18 to 0.27)           | 0.44<br>(0.20 to 0.74)           | 0.48<br>(0.22 to 0.79)           | 0.37<br>(0.18 to 0.61)           |
| Other nutritional deficiencies                                          | 53.52<br>(34.61 to 58.90)                 | 42.65<br>(25.98 to 52.75)             | 42.14<br>(25.64 to 52.88)             | 47.12<br>(29.04 to 59.74)               | 2.74<br>(1.70 to 3.01)           | 4.18<br>(2.38 to 5.38)           | 4.31<br>(2.60 to 5.59)           | 4.21<br>(2.49 to 5.61)           |
| <b>Other communicable, maternal, neonatal, and nutritional diseases</b> | <b>435.88</b><br>(413.71 to 461.44)       | <b>248.49</b><br>(199.46 to 316.49)   | <b>227.85</b><br>(181.02 to 284.53)   | <b>326.14</b><br>(266.44 to 397.21)     | <b>13.79</b><br>(13.18 to 14.36) | <b>12.85</b><br>(10.62 to 15.65) | <b>12.27</b><br>(10.06 to 15.02) | <b>15.64</b><br>(13.02 to 18.93) |
| Sexually transmitted infections excluding HIV                           | 25.47<br>(20.03 to 34.82)                 | 6.91<br>(5.16 to 8.94)                | 6.39<br>(4.77 to 8.43)                | 8.27<br>(6.16 to 10.63)                 | 0.63<br>(0.50 to 0.75)           | 0.32<br>(0.23 to 0.39)           | 0.32<br>(0.26 to 0.38)           | 0.36<br>(0.26 to 0.43)           |
| Syphilis                                                                | 16.29<br>(11.04 to 25.25)                 | 2.72<br>(1.86 to 4.15)                | 2.34<br>(1.64 to 3.55)                | 3.60<br>(2.58 to 5.41)                  | 0.33<br>(0.26 to 0.44)           | 0.10<br>(0.08 to 0.14)           | 0.10<br>(0.07 to 0.12)           | 0.13<br>(0.10 to 0.16)           |
| Chlamydial infection                                                    | 1.67<br>(1.24 to 1.84)                    | 0.78<br>(0.56 to 0.97)                | 0.76<br>(0.55 to 0.95)                | 0.86<br>(0.62 to 1.09)                  | 0.05<br>(0.04 to 0.06)           | 0.04<br>(0.03 to 0.05)           | 0.04<br>(0.03 to 0.05)           | 0.04<br>(0.03 to 0.05)           |
| Gonococcal infection                                                    | 5.02<br>(3.77 to 5.53)                    | 2.39<br>(1.71 to 2.98)                | 2.32<br>(1.65 to 2.90)                | 2.65<br>(1.89 to 3.32)                  | 0.17<br>(0.13 to 0.19)           | 0.13<br>(0.09 to 0.16)           | 0.13<br>(0.09 to 0.16)           | 0.14<br>(0.09 to 0.17)           |
| Other sexually transmitted infections                                   | 2.48<br>(1.87 to 2.73)                    | 1.01<br>(0.73 to 1.27)                | 0.97<br>(0.70 to 1.23)                | 1.15<br>(0.82 to 1.44)                  | 0.08<br>(0.06 to 0.08)           | 0.05<br>(0.03 to 0.06)           | 0.05<br>(0.03 to 0.06)           | 0.05<br>(0.04 to 0.06)           |
| Acute hepatitis                                                         | 306.44<br>(292.54 to 322.86)              | 165.37<br>(123.59 to 225.67)          | 145.72<br>(107.78 to 194.97)          | 236.69<br>(188.43 to 294.31)            | 10.07<br>(9.65 to 10.53)         | 7.95<br>(6.01 to 10.60)          | 7.20<br>(5.40 to 9.55)           | 10.85<br>(8.78 to 13.30)         |
| Acute hepatitis A                                                       | 12.72<br>(10.99 to 14.98)                 | 3.10<br>(1.91 to 5.04)                | 2.75<br>(1.72 to 4.41)                | 4.11<br>(2.59 to 6.65)                  | 0.21<br>(0.18 to 0.25)           | 0.11<br>(0.07 to 0.15)           | 0.10<br>(0.07 to 0.15)           | 0.13<br>(0.09 to 0.18)           |
| Acute hepatitis B                                                       | 269.17<br>(255.77 to 283.11)              | 148.25<br>(109.45 to 205.62)          | 130.27<br>(93.84 to 176.43)           | 213.80<br>(167.13 to 267.91)            | 9.13<br>(8.66 to 9.61)           | 6.95<br>(5.17 to 9.39)           | 6.25<br>(4.61 to 8.37)           | 9.62<br>(7.67 to 12.00)          |



| East Asia                            |                                              |                                               |                                              |                                               |                                           |                                           |                                           |                                           |
|--------------------------------------|----------------------------------------------|-----------------------------------------------|----------------------------------------------|-----------------------------------------------|-------------------------------------------|-------------------------------------------|-------------------------------------------|-------------------------------------------|
| Cause                                | YLLs (in 1000s)                              |                                               |                                              |                                               | Deaths (in 1000s)                         |                                           |                                           |                                           |
|                                      | 2016                                         | 2040 Forecast                                 | 2040 Better Scenario                         | 2040 Worse Scenario                           | 2016                                      | 2040 Forecast                             | 2040 Better Scenario                      | 2040 Worse Scenario                       |
| <b>Neoplasms</b>                     | <b>59,793.44</b><br>(58,089.53 to 61,531.52) | <b>76,328.24</b><br>(59,227.84 to 105,900.20) | <b>66,540.03</b><br>(53,077.85 to 87,157.02) | <b>93,249.58</b><br>(65,877.63 to 145,081.75) | <b>2,477.76</b><br>(2,407.18 to 2,549.64) | <b>4,143.31</b><br>(3,266.05 to 5,567.97) | <b>3,672.49</b><br>(2,999.59 to 4,691.39) | <b>4,905.55</b><br>(3,476.31 to 7,164.58) |
| Lip and oral cavity cancer           | 533.98<br>(506.30 to 559.58)                 | 350.03<br>(330.12 to 933.84)                  | 373.88<br>(246.83 to 596.57)                 | 770.50<br>(417.22 to 1,492.66)                | 21.75<br>(20.65 to 22.72)                 | 19.96<br>(17.46 to 46.95)                 | 19.96<br>(13.11 to 30.91)                 | 38.78<br>(20.59 to 71.41)                 |
| Nasopharynx cancer                   | 856.25<br>(787.68 to 920.70)                 | 990.50<br>(630.83 to 1,712.59)                | 641.25<br>(435.43 to 1,009.55)               | 1,558.60<br>(868.57 to 3,167.61)              | 29.46<br>(27.19 to 31.61)                 | 41.90<br>(26.36 to 70.49)                 | 27.54<br>(18.51 to 42.05)                 | 64.05<br>(35.83 to 123.76)                |
| Other pharynx cancer                 | 139.61<br>(124.43 to 150.23)                 | 174.68<br>(116.44 to 259.75)                  | 137.39<br>(95.21 to 194.90)                  | 169.49<br>(110.43 to 257.52)                  | 5.43<br>(4.85 to 5.81)                    | 8.96<br>(5.96 to 13.14)                   | 7.26<br>(5.07 to 10.11)                   | 8.39<br>(5.50 to 12.41)                   |
| Esophageal cancer                    | 4,516.66<br>(4,325.44 to 4,714.13)           | 7,508.20<br>(4,598.58 to 12,479.35)           | 5,908.82<br>(3,881.01 to 9,082.27)           | 9,614.28<br>(4,997.16 to 18,226.62)           | 212.00<br>(203.37 to 220.67)              | 419.24<br>(260.25 to 689.93)              | 334.68<br>(223.50 to 518.97)              | 522.34<br>(279.10 to 951.68)              |
| Stomach cancer                       | 7,618.46<br>(7,354.73 to 7,884.59)           | 7,010.92<br>(5,224.69 to 9,414.01)            | 6,243.79<br>(4,725.34 to 8,105.08)           | 8,869.38<br>(6,879.22 to 11,245.42)           | 346.23<br>(334.62 to 357.91)              | 408.93<br>(310.36 to 540.70)              | 369.98<br>(286.46 to 467.97)              | 499.18<br>(400.84 to 621.43)              |
| Colon and rectum cancer              | 3,887.93<br>(3,689.91 to 4,070.67)           | 6,075.40<br>(4,367.89 to 8,374.21)            | 5,250.37<br>(3,867.90 to 7,183.35)           | 7,023.32<br>(5,137.59 to 9,590.25)            | 175.94<br>(167.56 to 183.69)              | 377.00<br>(274.73 to 513.25)              | 334.92<br>(250.60 to 448.77)              | 416.95<br>(304.65 to 564.76)              |
| Liver cancer                         | 11,803.58<br>(11,277.51 to 12,399.29)        | 18,977.42<br>(13,936.89 to 26,663.43)         | 17,888.86<br>(13,694.34 to 23,510.61)        | 18,400.39<br>(12,915.21 to 27,755.02)         | 442.80<br>(423.24 to 467.36)              | 910.04<br>(684.05 to 1,244.60)            | 873.85<br>(687.31 to 1,119.49)            | 853.89<br>(617.08 to 1,240.25)            |
| Liver cancer due to hepatitis B      | 6,448.57<br>(5,683.76 to 7,145.92)           | 10,015.38<br>(7,224.63 to 14,356.54)          | 9,549.52<br>(7,200.52 to 12,912.42)          | 9,609.56<br>(6,576.58 to 14,880.19)           | 232.35<br>(202.90 to 257.09)              | 461.64<br>(339.40 to 642.85)              | 448.43<br>(343.55 to 589.50)              | 428.35<br>(300.25 to 636.50)              |
| Liver cancer due to hepatitis C      | 926.58<br>(812.75 to 1,062.18)               | 1,678.55<br>(1,224.88 to 2,383.35)            | 1,614.83<br>(1,230.88 to 2,147.52)           | 1,601.39<br>(1,112.00 to 2,358.07)            | 39.73<br>(35.31 to 44.89)                 | 93.26<br>(69.16 to 128.11)                | 91.40<br>(69.19 to 119.13)                | 86.34<br>(61.19 to 120.95)                |
| Liver cancer due to alcohol use      | 1,251.31<br>(1,008.07 to 1,540.88)           | 2,264.09<br>(1,561.19 to 3,202.34)            | 1,928.95<br>(1,367.45 to 2,650.65)           | 2,294.01<br>(1,542.83 to 3,374.99)            | 54.78<br>(44.64 to 65.89)                 | 125.67<br>(87.65 to 175.93)               | 110.31<br>(78.17 to 149.59)               | 123.38<br>(83.70 to 177.46)               |
| Liver cancer due to other causes     | 3,177.12<br>(2,780.34 to 3,659.15)           | 5,019.41<br>(3,379.20 to 7,387.25)            | 4,795.56<br>(3,432.32 to 6,688.46)           | 4,895.42<br>(3,087.79 to 7,716.22)            | 115.94<br>(101.96 to 132.92)              | 229.47<br>(158.04 to 331.00)              | 223.72<br>(161.68 to 307.83)              | 215.82<br>(138.93 to 331.97)              |
| Gallbladder and biliary tract cancer | 549.02<br>(454.44 to 625.88)                 | 560.34<br>(456.19 to 652.80)                  | 574.02<br>(467.19 to 664.79)                 | 533.76<br>(435.26 to 621.49)                  | 26.10<br>(21.76 to 29.69)                 | 35.61<br>(41.23 to 41.23)                 | 37.21<br>(30.74 to 42.80)                 | 32.50<br>(26.59 to 37.69)                 |
| Pancreatic cancer                    | 1,691.69<br>(1,624.11 to 1,757.19)           | 2,699.53<br>(2,172.49 to 3,439.59)            | 2,727.00<br>(2,194.20 to 3,388.72)           | 2,671.27<br>(2,047.16 to 3,557.71)            | 74.90<br>(72.00 to 77.88)                 | 153.76<br>(125.01 to 190.71)              | 157.14<br>(128.65 to 192.17)              | 147.69<br>(115.04 to 191.75)              |
| Larynx cancer                        | 414.45<br>(396.25 to 438.25)                 | 478.41<br>(219.14 to 1,069.25)                | 309.63<br>(162.72 to 636.32)                 | 803.16<br>(301.02 to 1,940.56)                | 18.20<br>(17.41 to 19.19)                 | 26.24<br>(11.54 to 58.75)                 | 17.24<br>(8.64 to 26.93)                  | 41.97<br>(15.73 to 99.09)                 |
| Tracheal, bronchus, and lung cancer  | 13,537.41<br>(12,974.95 to 14,101.33)        | 15,837.59<br>(9,188.62 to 30,329.46)          | 11,408.14<br>(7,261.70 to 19,698.01)         | 26,447.02<br>(12,695.37 to 55,485.09)         | 616.83<br>(592.16 to 641.48)              | 902.10<br>(512.68 to 1,628.01)            | 662.25<br>(419.93 to 1,112.34)            | 1,442.42<br>(698.94 to 2,809.13)          |
| Malignant skin melanoma              | 146.11<br>(115.44 to 158.65)                 | 189.26<br>(150.32 to 220.81)                  | 206.57<br>(163.54 to 241.28)                 | 150.34<br>(120.32 to 170.55)                  | 5.31<br>(4.25 to 5.74)                    | 10.44<br>(8.38 to 12.18)                  | 11.65<br>(9.48 to 13.48)                  | 7.92<br>(6.27 to 9.08)                    |
| Non-melanoma skin cancer             | 297.41<br>(280.74 to 315.44)                 | 397.37<br>(337.36 to 475.55)                  | 382.73<br>(323.71 to 455.13)                 | 454.14<br>(402.58 to 504.79)                  | 14.22<br>(13.50 to 15.09)                 | 27.07<br>(23.14 to 32.55)                 | 26.79<br>(22.99 to 31.70)                 | 29.23<br>(24.51 to 33.29)                 |
| Breast cancer                        | 2,122.33<br>(1,787.09 to 2,381.83)           | 2,142.21<br>(1,534.68 to 2,877.02)            | 1,954.34<br>(1,430.40 to 2,565.86)           | 2,536.14<br>(1,853.94 to 3,393.86)            | 73.93<br>(62.05 to 82.91)                 | 104.39<br>(76.90 to 137.60)               | 96.67<br>(72.45 to 125.34)                | 119.60<br>(88.07 to 157.19)               |
| Cervical cancer                      | 1,182.42<br>(724.50 to 1,354.12)             | 783.17<br>(463.67 to 1,092.72)                | 716.67<br>(429.83 to 966.40)                 | 988.14<br>(598.51 to 1,361.97)                | 40.30<br>(25.52 to 46.12)                 | 36.99<br>(22.65 to 50.15)                 | 34.22<br>(21.52 to 45.17)                 | 45.46<br>(28.52 to 61.76)                 |

|                   |                                 |                                     |                                       |                                     |                              |                               |                                |                               |
|-------------------|---------------------------------|-------------------------------------|---------------------------------------|-------------------------------------|------------------------------|-------------------------------|--------------------------------|-------------------------------|
|                   | 366.62<br>(341.80 to<br>403.92) | 413.69<br>(333.95 to<br>498.69)     | 395.79<br>(311.33 to<br>483.98)       | 472.95<br>(381.75 to<br>567.82)     | 13.96<br>(13.03 to<br>15.35) | 21.98<br>(18.42 to<br>25.81)  | 21.36<br>(17.49 to<br>25.04)   | 24.28<br>(20.66 to<br>28.47)  |
| Uterine cancer    |                                 |                                     |                                       |                                     |                              |                               |                                |                               |
|                   | 543.60<br>(490.98 to<br>593.22) | 625.24<br>(476.35 to<br>805.12)     | 600.14<br>(451.49 to<br>768.32)       | 673.02<br>(509.21 to<br>873.37)     | 19.47<br>(17.63 to<br>21.06) | 30.36<br>(23.83 to<br>38.33)  | 29.41<br>(23.11 to<br>36.72)   | 31.97<br>(25.05 to<br>40.85)  |
| Ovarian cancer    |                                 |                                     |                                       |                                     |                              |                               |                                |                               |
|                   | 555.92<br>(432.27 to<br>694.39) | 1,247.22<br>(963.48 to<br>1,575.47) | 1,280.63<br>(1,001.05 to<br>1,607.21) | 1,205.48<br>(916.63 to<br>1,529.97) | 35.75<br>(27.22 to<br>44.15) | 99.97<br>(75.42 to<br>127.02) | 105.97<br>(80.79 to<br>130.26) | 90.87<br>(65.51 to<br>116.89) |
| Prostate cancer   |                                 |                                     |                                       |                                     |                              |                               |                                |                               |
|                   | 22.15<br>(20.78 to<br>23.59)    | 19.51<br>(16.61 to<br>23.31)        | 19.11<br>(16.33 to<br>22.82)          | 21.38<br>(18.49 to<br>24.61)        | 0.68<br>(0.64 to<br>0.73)    | 1.00<br>(0.82 to<br>1.20)     | 1.02<br>(0.85 to<br>1.24)      | 1.02<br>(0.82 to<br>1.22)     |
| Testicular cancer |                                 |                                     |                                       |                                     |                              |                               |                                |                               |



| East Asia                       |                                               |                                               |                                               |                                                 |                                            |                                            |                                            |                                             |
|---------------------------------|-----------------------------------------------|-----------------------------------------------|-----------------------------------------------|-------------------------------------------------|--------------------------------------------|--------------------------------------------|--------------------------------------------|---------------------------------------------|
| Cause                           | YLLs (in 1000s)                               |                                               |                                               |                                                 | Deaths (in 1000s)                          |                                            |                                            |                                             |
|                                 | 2016                                          | 2040 Forecast                                 | 2040 Better Scenario                          | 2040 Worse Scenario                             | 2016                                       | 2040 Forecast                              | 2040 Better Scenario                       | 2040 Worse Scenario                         |
| Kidney cancer                   | 419.62<br>(393.21 to 441.85)                  | 582.61<br>(473.71 to 740.46)                  | 596.49<br>(486.83 to 744.01)                  | 540.35<br>(425.26 to 717.68)                    | 16.96<br>(15.94 to 17.77)                  | 32.97<br>(26.71 to 40.55)                  | 34.38<br>(28.55 to 41.69)                  | 29.25<br>(23.38 to 37.54)                   |
| Bladder cancer                  | 493.97<br>(462.19 to 519.63)                  | 802.53<br>(602.07 to 1,064.57)                | 780.72<br>(610.21 to 1,010.19)                | 879.14<br>(621.50 to 1,255.62)                  | 27.60<br>(25.92 to 28.93)                  | 58.95<br>(44.87 to 76.84)                  | 58.33<br>(45.99 to 73.43)                  | 61.74<br>(43.77 to 84.37)                   |
| Brain and nervous system cancer | 1,951.46<br>(1,757.50 to 2,199.63)            | 2,207.04<br>(1,912.20 to 2,546.49)            | 2,203.68<br>(1,880.84 to 2,547.17)            | 2,224.22<br>(1,941.82 to 2,530.36)              | 60.64<br>(54.29 to 68.08)                  | 100.61<br>(86.22 to 113.90)                | 102.41<br>(87.36 to 115.84)                | 97.19<br>(84.17 to 109.05)                  |
| Thyroid cancer                  | 141.99<br>(125.23 to 151.45)                  | 166.94<br>(130.54 to 219.44)                  | 157.87<br>(124.58 to 202.21)                  | 178.13<br>(138.82 to 239.24)                    | 6.21<br>(5.34 to 6.63)                     | 10.21<br>(7.94 to 13.45)                   | 9.94<br>(7.84 to 12.61)                    | 10.37<br>(7.96 to 13.77)                    |
| Mesothelioma                    | 76.78<br>(66.07 to 81.69)                     | 81.43<br>(68.83 to 91.15)                     | 84.34<br>(70.96 to 94.88)                     | 76.26<br>(65.61 to 85.07)                       | 2.85<br>(2.48 to 3.05)                     | 4.30<br>(3.72 to 4.80)                     | 4.54<br>(3.92 to 5.06)                     | 3.86<br>(3.34 to 4.33)                      |
| Hodgkin lymphoma                | 91.77<br>(75.79 to 119.14)                    | 64.12<br>(47.94 to 90.64)                     | 59.02<br>(44.20 to 79.68)                     | 81.89<br>(64.64 to 107.08)                      | 3.04<br>(2.46 to 3.92)                     | 3.03<br>(2.31 to 4.20)                     | 2.85<br>(2.17 to 3.79)                     | 3.72<br>(2.91 to 4.81)                      |
| Non-Hodgkin lymphoma            | 1,119.91<br>(937.11 to 1,195.89)              | 1,162.77<br>(931.36 to 1,407.47)              | 1,123.26<br>(900.61 to 1,330.63)              | 1,209.52<br>(968.47 to 1,438.61)                | 39.41<br>(32.84 to 42.07)                  | 59.21<br>(48.42 to 70.11)                  | 59.09<br>(47.66 to 67.99)                  | 59.09<br>(47.64 to 69.70)                   |
| Multiple myeloma                | 269.12<br>(230.21 to 298.90)                  | 390.30<br>(322.08 to 469.92)                  | 383.20<br>(317.05 to 452.37)                  | 384.44<br>(317.50 to 468.78)                    | 10.83<br>(9.34 to 12.24)                   | 21.02<br>(17.81 to 25.08)                  | 21.06<br>(17.89 to 24.71)                  | 19.92<br>(16.58 to 24.16)                   |
| Leukemia                        | 2,415.31<br>(2,050.84 to 2,605.25)            | 1,704.97<br>(1,342.27 to 2,230.42)            | 1,585.17<br>(1,260.99 to 1,976.27)            | 1,945.59<br>(1,520.98 to 2,545.79)              | 62.65<br>(53.41 to 67.52)                  | 71.71<br>(57.23 to 92.68)                  | 68.13<br>(55.28 to 85.30)                  | 78.29<br>(61.91 to 101.37)                  |
| Acute lymphoid leukemia         | 514.15<br>(408.47 to 560.61)                  | 257.10<br>(198.54 to 324.26)                  | 238.72<br>(183.61 to 294.55)                  | 290.20<br>(221.49 to 369.01)                    | 11.36<br>(9.16 to 12.38)                   | 8.81<br>(6.83 to 11.02)                    | 8.29<br>(6.47 to 10.18)                    | 9.64<br>(7.45 to 12.21)                     |
| Chronic lymphoid leukemia       | 113.48<br>(97.57 to 128.47)                   | 93.64<br>(74.93 to 119.58)                    | 90.23<br>(72.61 to 111.26)                    | 96.76<br>(76.46 to 125.76)                      | 3.77<br>(3.25 to 4.20)                     | 4.49<br>(3.66 to 5.59)                     | 4.43<br>(3.64 to 5.39)                     | 4.44<br>(3.51 to 5.70)                      |
| Acute myeloid leukemia          | 289.51<br>(253.27 to 338.09)                  | 280.55<br>(223.45 to 351.04)                  | 273.18<br>(219.41 to 334.80)                  | 276.82<br>(219.73 to 356.94)                    | 7.62<br>(6.62 to 8.92)                     | 11.79<br>(9.49 to 14.65)                   | 11.71<br>(9.44 to 14.34)                   | 11.15<br>(8.80 to 14.33)                    |
| Chronic myeloid leukemia        | 37.88<br>(34.23 to 46.77)                     | 20.59<br>(14.92 to 30.50)                     | 17.94<br>(13.24 to 24.73)                     | 27.33<br>(20.92 to 38.71)                       | 1.17<br>(1.06 to 1.43)                     | 0.93<br>(0.68 to 1.36)                     | 0.83<br>(1.13)                             | 1.19<br>(0.92 to 1.63)                      |
| Other leukemia                  | 1,460.28<br>(1,186.96 to 1,595.71)            | 1,053.10<br>(796.69 to 1,402.26)              | 965.10<br>(732.87 to 1,238.05)                | 1,254.48<br>(952.07 to 1,669.89)                | 38.74<br>(31.70 to 42.13)                  | 45.69<br>(34.88 to 60.05)                  | 42.88<br>(33.33 to 54.70)                  | 51.87<br>(40.18 to 68.31)                   |
| Other neoplasms                 | 2,027.89<br>(1,798.66 to 2,119.33)            | 2,484.83<br>(2,126.81 to 2,718.63)            | 2,547.15<br>(2,172.04 to 2,807.51)            | 2,367.26<br>(2,042.81 to 2,569.04)              | 74.31<br>(64.32 to 77.63)                  | 136.55<br>(116.02 to 148.23)               | 143.34<br>(122.84 to 155.47)               | 123.60<br>(104.88 to 135.60)                |
| <b>Cardiovascular diseases</b>  | <b>71,276.84<br/>(69,398.04 to 73,078.07)</b> | <b>58,009.35<br/>(37,641.98 to 90,795.71)</b> | <b>41,944.91<br/>(27,924.45 to 62,914.87)</b> | <b>111,473.85<br/>(73,464.15 to 162,995.41)</b> | <b>4,105.07<br/>(4,004.93 to 4,203.12)</b> | <b>4,274.93<br/>(3,266.45 to 7,276.58)</b> | <b>3,734.46<br/>(2,637.80 to 5,465.14)</b> | <b>8,098.96<br/>(5,728.13 to 11,410.00)</b> |
| Rheumatic heart disease         | 1,522.60<br>(1,437.45 to 1,607.40)            | 1,281.89<br>(963.67 to 1,724.58)              | 1,173.67<br>(911.43 to 1,520.80)              | 1,601.79<br>(1,274.54 to 2,092.38)              | 74.48<br>(70.26 to 78.72)                  | 93.82<br>(73.55 to 125.86)                 | 88.58<br>(69.93 to 115.03)                 | 110.37<br>(88.27 to 146.83)                 |
| Ischemic heart disease          | 29,375.42<br>(28,459.34 to 30,346.98)         | 20,930.56<br>(12,348.17 to 34,817.57)         | 14,951.45<br>(8,889.40 to 24,667.55)          | 43,090.65<br>(25,240.97 to 67,890.38)           | 1,774.98<br>(1,722.03 to 1,832.87)         | 1,777.88<br>(1,096.98 to 2,846.12)         | 1,382.09<br>(867.23 to 2,124.94)           | 3,256.01<br>(2,016.14 to 4,988.77)          |
| Stroke                          | 33,843.27<br>(32,785.23 to 34,970.45)         | 22,726.82<br>(13,456.82 to 36,569.36)         | 15,081.94<br>(9,297.16 to 23,861.91)          | 50,190.18<br>(30,689.96 to 77,985.86)           | 1,848.93<br>(1,782.31 to 1,917.49)         | 1,730.96<br>(1,078.33 to 2,642.41)         | 1,258.69<br>(837.72 to 1,915.66)           | 3,353.59<br>(2,158.59 to 5,046.55)          |
| Ischemic stroke                 | 11,715.49<br>(11,302.51 to 12,166.18)         | 8,416.87<br>(4,860.09 to 14,265.60)           | 6,062.49<br>(3,653.62 to 10,586.19)           | 16,627.05<br>(9,700.38 to 28,168.36)            | 749.12<br>(717.14 to 780.96)               | 710.76<br>(425.73 to 1,241.60)             | 552.81<br>(342.17 to 947.78)               | 1,247.73<br>(760.54 to 2,102.13)            |

|                                |                                          |                                         |                                        |                                          |                                       |                                     |                                   |                                       |
|--------------------------------|------------------------------------------|-----------------------------------------|----------------------------------------|------------------------------------------|---------------------------------------|-------------------------------------|-----------------------------------|---------------------------------------|
|                                | 22,127.77<br>(21,406.00 to<br>22,908.60) | 14,309.96<br>(7,952.03 to<br>24,492.59) | 9,019.45<br>(5,278.48 to<br>14,838.59) | 33,563.14<br>(19,051.87 to<br>55,404.46) | 1,099.81<br>(1,060.91 to<br>1,141.08) | 1,020.20<br>(595.13 to<br>1,653.47) | 705.88<br>(445.07 to<br>1,074.31) | 2,105.85<br>(1,286.12 to<br>3,299.54) |
| Intracerebral hemorrhage       |                                          |                                         |                                        |                                          |                                       |                                     |                                   |                                       |
|                                | 3,661.51<br>(2,589.66 to<br>4,209.66)    | 8,274.06<br>(3,794.07 to<br>20,613.89)  | 6,361.46<br>(3,130.14 to<br>14,987.36) | 10,864.08<br>(4,900.74 to<br>28,519.53)  | 248.49<br>(173.39 to<br>285.45)       | 751.97<br>(343.38 to<br>1,963.03)   | 604.74<br>(303.33 to<br>1,542.85) | 920.71<br>(396.15 to<br>2,476.44)     |
| Hypertensive heart disease     |                                          |                                         |                                        |                                          |                                       |                                     |                                   |                                       |
|                                | 807.29<br>(652.43 to<br>874.05)          | 742.78<br>(534.54 to<br>967.31)         | 700.97<br>(502.80 to<br>896.05)        | 822.30<br>(597.02 to<br>1,048.87)        | 31.10<br>(24.29 to<br>33.85)          | 49.97<br>(34.73 to<br>65.82)        | 49.73<br>(35.26 to<br>63.90)      | 50.46<br>(35.02 to<br>66.28)          |
| Cardiomyopathy and myocarditis |                                          |                                         |                                        |                                          |                                       |                                     |                                   |                                       |
|                                | 364.86<br>(258.73 to<br>418.71)          | 357.11<br>(239.66 to<br>438.25)         | 370.93<br>(249.46 to<br>458.07)        | 338.81<br>(225.47 to<br>419.36)          | 14.55<br>(9.76 to<br>17.12)           | 26.54<br>(17.12 to<br>33.88)        | 28.73<br>(18.77 to<br>36.30)      | 22.83<br>(14.15 to<br>30.06)          |
| Myocarditis                    |                                          |                                         |                                        |                                          |                                       |                                     |                                   |                                       |

| East Asia                                                     |                                                     |                                                    |                                                    |                                                     |                                              |                                                |                                                |                                                |
|---------------------------------------------------------------|-----------------------------------------------------|----------------------------------------------------|----------------------------------------------------|-----------------------------------------------------|----------------------------------------------|------------------------------------------------|------------------------------------------------|------------------------------------------------|
| Cause                                                         | YLLs (in 1000s)                                     |                                                    |                                                    |                                                     | Deaths (in 1000s)                            |                                                |                                                |                                                |
|                                                               | 2016                                                | 2040 Forecast                                      | 2040 Better Scenario                               | 2040 Worse Scenario                                 | 2016                                         | 2040 Forecast                                  | 2040 Better Scenario                           | 2040 Worse Scenario                            |
| Alcoholic cardiomyopathy                                      | 84.61<br>(52.09 to 107.26)                          | 75.99<br>(46.41 to 101.63)                         | 59.82<br>(36.51 to 81.38)                          | 75.33<br>(44.97 to 97.58)                           | 2.81<br>(1.79 to 3.61)                       | 3.36<br>(2.20 to 4.53)                         | 2.77<br>(1.81 to 3.83)                         | 3.19<br>(2.05 to 4.20)                         |
| Other cardiomyopathy                                          | 357.81<br>(313.39 to 423.78)                        | 309.68<br>(182.45 to 492.52)                       | 270.23<br>(171.56 to 417.98)                       | 408.16<br>(273.42 to 584.06)                        | 13.74<br>(11.61 to 17.03)                    | 20.06<br>(11.44 to 32.18)                      | 18.23<br>(11.15 to 29.30)                      | 24.44<br>(15.76 to 37.40)                      |
| Atrial fibrillation and flutter                               | 430.96<br>(345.28 to 524.63)                        | 1,108.28<br>(820.23 to 1,451.96)                   | 1,040.74<br>(777.26 to 1,365.66)                   | 1,113.61<br>(830.14 to 1,487.88)                    | 39.99<br>(31.78 to 49.14)                    | 126.20<br>(93.16 to 165.95)                    | 122.59<br>(90.77 to 160.31)                    | 118.76<br>(83.65 to 160.56)                    |
| Aortic aneurysm                                               | 287.10<br>(268.59 to 306.29)                        | 374.43<br>(288.26 to 495.73)                       | 351.23<br>(271.79 to 464.96)                       | 418.41<br>(322.62 to 538.01)                        | 14.26<br>(13.39 to 15.06)                    | 27.76<br>(22.33 to 34.79)                      | 27.34<br>(22.21 to 34.32)                      | 28.12<br>(22.22 to 35.18)                      |
| Peripheral artery disease                                     | 31.73<br>(25.82 to 39.51)                           | 100.41<br>(72.50 to 136.70)                        | 99.18<br>(71.71 to 136.97)                         | 100.55<br>(71.41 to 137.20)                         | 2.26<br>(1.84 to 2.84)                       | 9.78<br>(7.13 to 13.49)                        | 10.06<br>(7.43 to 13.95)                       | 8.97<br>(6.39 to 12.37)                        |
| Endocarditis                                                  | 145.76<br>(124.73 to 184.54)                        | 245.18<br>(176.20 to 342.32)                       | 241.56<br>(173.87 to 332.50)                       | 244.38<br>(175.63 to 336.16)                        | 6.99<br>(5.94 to 8.43)                       | 19.41<br>(13.70 to 28.07)                      | 19.81<br>(14.23 to 27.93)                      | 18.15<br>(12.46 to 26.18)                      |
| Other cardiovascular and circulatory diseases                 | 1,171.21<br>(1,024.50 to 1,797.09)                  | 2,224.94<br>(1,422.73 to 3,775.96)                 | 1,942.71<br>(1,253.33 to 3,250.04)                 | 3,027.90<br>(2,049.83 to 4,919.66)                  | 63.59<br>(55.48 to 98.97)                    | 187.19<br>(124.02 to 311.91)                   | 170.83<br>(114.27 to 283.90)                   | 233.82<br>(160.03 to 379.36)                   |
| <b>Chronic respiratory diseases</b>                           | <b>13,682.27</b><br><b>(13,144.49 to 14,847.99)</b> | <b>19,085.65</b><br><b>(8,552.56 to 39,368.40)</b> | <b>13,695.68</b><br><b>(6,918.56 to 26,311.48)</b> | <b>30,912.17</b><br><b>(12,059.46 to 69,109.42)</b> | <b>955.46</b><br><b>(917.78 to 1,045.94)</b> | <b>1,639.70</b><br><b>(734.13 to 3,398.97)</b> | <b>1,220.71</b><br><b>(610.26 to 2,401.27)</b> | <b>2,506.02</b><br><b>(977.40 to 5,420.85)</b> |
| Chronic obstructive pulmonary disease                         | 12,844.32<br>(12,317.81 to 14,043.12)               | 18,452.52<br>(8,024.28 to 38,623.10)               | 13,082.71<br>(6,419.95 to 25,519.11)               | 30,208.63<br>(11,417.42 to 68,229.50)               | 913.22<br>(876.76 to 1,005.67)               | 1,593.68<br>(695.57 to 3,346.24)               | 1,175.25<br>(575.10 to 2,347.93)               | 2,456.99<br>(935.44 to 5,371.89)               |
| Pneumoconiosis                                                | 201.83<br>(186.03 to 218.29)                        | 87.99<br>(62.65 to 130.71)                         | 75.87<br>(55.54 to 105.11)                         | 122.28<br>(96.70 to 151.71)                         | 8.83<br>(8.04 to 9.51)                       | 5.66<br>(4.08 to 8.08)                         | 5.07<br>(3.79 to 6.81)                         | 7.30<br>(5.71 to 8.95)                         |
| Silicosis                                                     | 148.36<br>(135.18 to 161.51)                        | 49.68<br>(30.83 to 83.70)                          | 41.94<br>(27.25 to 65.06)                          | 77.42<br>(58.14 to 98.04)                           | 6.44<br>(5.82 to 6.98)                       | 3.06<br>(1.92 to 5.02)                         | 2.67<br>(1.72 to 4.09)                         | 4.48<br>(3.31 to 5.67)                         |
| Asbestosis                                                    | 8.59<br>(6.41 to 11.33)                             | 11.00<br>(7.33 to 14.98)                           | 12.04<br>(8.04 to 16.55)                           | 8.87<br>(5.90 to 12.27)                             | 0.34<br>(0.24 to 0.47)                       | 0.74<br>(0.49 to 1.02)                         | 0.84<br>(0.56 to 1.16)                         | 0.56<br>(0.37 to 0.80)                         |
| Coal workers pneumoconiosis                                   | 18.55<br>(10.06 to 21.52)                           | 11.09<br>(6.57 to 17.30)                           | 8.44<br>(4.93 to 12.65)                            | 16.76<br>(9.60 to 23.44)                            | 0.96<br>(0.52 to 1.12)                       | 0.77<br>(0.44 to 1.20)                         | 0.61<br>(0.35 to 0.91)                         | 1.09<br>(0.61 to 1.52)                         |
| Other pneumoconiosis                                          | 26.33<br>(23.12 to 33.41)                           | 16.23<br>(12.18 to 22.17)                          | 13.46<br>(10.06 to 18.38)                          | 19.22<br>(14.96 to 25.35)                           | 1.08<br>(0.95 to 1.34)                       | 1.09<br>(0.84 to 1.46)                         | 0.94<br>(0.71 to 1.28)                         | 1.17<br>(0.91 to 1.55)                         |
| Asthma                                                        | 406.13<br>(342.75 to 453.40)                        | 227.39<br>(139.96 to 376.21)                       | 181.62<br>(116.27 to 275.65)                       | 341.47<br>(222.41 to 517.32)                        | 22.89<br>(18.42 to 25.57)                    | 19.07<br>(11.96 to 30.87)                      | 15.92<br>(10.62 to 24.13)                      | 26.57<br>(17.31 to 39.56)                      |
| Interstitial lung disease and pulmonary sarcoidosis           | 143.57<br>(113.90 to 185.62)                        | 251.83<br>(168.82 to 339.40)                       | 288.60<br>(202.36 to 395.73)                       | 175.55<br>(131.05 to 237.27)                        | 7.05<br>(5.41 to 8.81)                       | 16.80<br>(11.03 to 22.45)                      | 19.75<br>(13.57 to 26.65)                      | 11.13<br>(7.92 to 14.42)                       |
| Other chronic respiratory diseases                            | 86.42<br>(42.25 to 114.20)                          | 65.91<br>(28.78 to 111.89)                         | 66.88<br>(29.00 to 112.81)                         | 64.23<br>(28.11 to 111.58)                          | 3.47<br>(1.60 to 4.67)                       | 4.49<br>(1.88 to 7.72)                         | 4.73<br>(1.97 to 8.20)                         | 4.03<br>(1.71 to 6.92)                         |
| <b>Cirrhosis and other chronic liver diseases</b>             | <b>4,651.90</b><br><b>(4,353.68 to 5,595.28)</b>    | <b>4,605.34</b><br><b>(3,915.37 to 5,638.37)</b>   | <b>4,275.70</b><br><b>(3,617.62 to 5,187.58)</b>   | <b>5,231.79</b><br><b>(4,570.84 to 6,399.70)</b>    | <b>170.38</b><br><b>(159.84 to 202.33)</b>   | <b>227.01</b><br><b>(196.95 to 274.73)</b>     | <b>216.43</b><br><b>(186.85 to 259.37)</b>     | <b>247.31</b><br><b>(217.91 to 296.95)</b>     |
| Cirrhosis and other chronic liver diseases due to hepatitis B | 2,290.01<br>(2,102.30 to 2,822.83)                  | 2,318.77<br>(1,945.83 to 2,906.84)                 | 2,244.78<br>(1,885.04 to 2,827.36)                 | 2,591.32<br>(2,231.07 to 3,188.30)                  | 85.46<br>(78.34 to 103.43)                   | 115.42<br>(98.14 to 144.07)                    | 114.00<br>(97.77 to 140.31)                    | 124.01<br>(106.77 to 149.32)                   |
| Cirrhosis and other chronic liver diseases due to hepatitis C | 640.75<br>(562.35 to 795.84)                        | 571.81<br>(466.52 to 729.30)                       | 551.38<br>(451.77 to 705.97)                       | 642.86<br>(538.98 to 807.02)                        | 22.08<br>(19.50 to 27.39)                    | 25.59<br>(21.39 to 32.59)                      | 25.17<br>(21.13 to 30.99)                      | 27.74<br>(23.49 to 34.62)                      |

|                                                                |                                                            |                                                            |                                                            |                                                            |                                                      |                                                      |                                                      |                                                      |
|----------------------------------------------------------------|------------------------------------------------------------|------------------------------------------------------------|------------------------------------------------------------|------------------------------------------------------------|------------------------------------------------------|------------------------------------------------------|------------------------------------------------------|------------------------------------------------------|
|                                                                | 716.05<br>(639.37 to<br>876.79)                            | 740.97<br>(618.09 to<br>945.61)                            | 539.98<br>(451.71 to<br>673.94)                            | 901.07<br>(759.22 to<br>1,113.50)                          | 26.16<br>(23.59 to<br>31.43)                         | 35.46<br>(30.11 to<br>43.64)                         | 27.40<br>(23.21 to<br>33.49)                         | 41.12<br>(34.88 to<br>50.30)                         |
| Cirrhosis and other chronic liver diseases due to alcohol use  |                                                            |                                                            |                                                            |                                                            |                                                      |                                                      |                                                      |                                                      |
|                                                                | 1,005.09<br>(862.95 to<br>1,198.69)                        | 973.79<br>(796.53 to<br>1,228.39)                          | 939.57<br>(765.98 to<br>1,192.09)                          | 1,096.54<br>(909.37 to<br>1,347.71)                        | 36.67<br>(31.52 to<br>43.59)                         | 50.53<br>(40.78 to<br>62.26)                         | 49.85<br>(41.13 to<br>62.49)                         | 54.44<br>(44.30 to<br>68.40)                         |
| Cirrhosis and other chronic liver diseases due to other causes |                                                            |                                                            |                                                            |                                                            |                                                      |                                                      |                                                      |                                                      |
| <b>Digestive diseases</b>                                      | <b>2,483.74</b><br><b>(2,349.93 to</b><br><b>2,802.40)</b> | <b>2,801.76</b><br><b>(2,327.42 to</b><br><b>3,474.05)</b> | <b>2,620.91</b><br><b>(2,205.42 to</b><br><b>3,215.94)</b> | <b>3,260.44</b><br><b>(2,717.22 to</b><br><b>4,034.57)</b> | <b>121.83</b><br><b>(114.54 to</b><br><b>139.62)</b> | <b>214.49</b><br><b>(176.71 to</b><br><b>265.33)</b> | <b>208.55</b><br><b>(174.90 to</b><br><b>254.76)</b> | <b>232.86</b><br><b>(184.27 to</b><br><b>290.37)</b> |
| Peptic ulcer disease                                           | 797.53<br>(732.10 to<br>882.57)                            | 557.21<br>(409.17 to<br>758.35)                            | 491.74<br>(364.09 to<br>665.35)                            | 796.99<br>(608.36 to<br>1,024.69)                          | 39.78<br>(36.65 to<br>43.87)                         | 40.37<br>(30.03 to<br>54.29)                         | 36.84<br>(27.67 to<br>49.36)                         | 54.59<br>(41.05 to<br>70.12)                         |

| East Asia                                  |                                                  |                                                     |                                                     |                                                     |                                            |                                                  |                                                  |                                                  |
|--------------------------------------------|--------------------------------------------------|-----------------------------------------------------|-----------------------------------------------------|-----------------------------------------------------|--------------------------------------------|--------------------------------------------------|--------------------------------------------------|--------------------------------------------------|
| Cause                                      | YLLs (in 1000s)                                  |                                                     |                                                     |                                                     | Deaths (in 1000s)                          |                                                  |                                                  |                                                  |
|                                            | 2016                                             | 2040 Forecast                                       | 2040 Better Scenario                                | 2040 Worse Scenario                                 | 2016                                       | 2040 Forecast                                    | 2040 Better Scenario                             | 2040 Worse Scenario                              |
| Gastritis and duodenitis                   | 290.63<br>(261.76 to 314.43)                     | 382.62<br>(308.53 to 472.44)                        | 369.47<br>(291.69 to 460.44)                        | 443.03<br>(359.07 to 532.66)                        | 15.34<br>(13.93 to 16.55)                  | 28.67<br>(22.80 to 36.00)                        | 28.54<br>(22.40 to 35.77)                        | 31.13<br>(23.80 to 38.34)                        |
| Appendicitis                               | 49.98<br>(44.75 to 62.22)                        | 52.23<br>(41.31 to 68.52)                           | 48.37<br>(38.43 to 63.53)                           | 66.86<br>(55.66 to 84.81)                           | 2.14<br>(1.92 to 2.68)                     | 3.77<br>(2.96 to 4.98)                           | 3.61<br>(2.90 to 4.67)                           | 4.51<br>(3.64 to 5.68)                           |
| Paralytic ileus and intestinal obstruction | 373.78<br>(319.04 to 461.35)                     | 443.62<br>(373.89 to 601.46)                        | 465.32<br>(391.54 to 628.58)                        | 410.75<br>(335.77 to 569.78)                        | 15.65<br>(13.61 to 20.49)                  | 35.69<br>(28.79 to 47.71)                        | 38.62<br>(31.62 to 51.32)                        | 30.87<br>(23.96 to 42.09)                        |
| Inguinal, femoral, and abdominal hernia    | 27.94<br>(23.05 to 39.54)                        | 29.09<br>(22.36 to 42.70)                           | 28.97<br>(22.25 to 42.50)                           | 31.21<br>(23.48 to 46.17)                           | 1.61<br>(1.29 to 2.35)                     | 2.64<br>(1.98 to 3.97)                           | 2.73<br>(2.04 to 3.99)                           | 2.63<br>(1.84 to 3.88)                           |
| Inflammatory bowel disease                 | 117.36<br>(99.10 to 132.13)                      | 169.70<br>(144.55 to 202.30)                        | 176.98<br>(150.98 to 212.22)                        | 157.91<br>(132.78 to 190.64)                        | 5.56<br>(4.89 to 6.66)                     | 13.53<br>(11.26 to 16.76)                        | 14.55<br>(12.25 to 18.11)                        | 11.74<br>(9.17 to 14.68)                         |
| Vascular intestinal disorders              | 125.96<br>(116.11 to 161.47)                     | 212.89<br>(185.19 to 265.75)                        | 215.94<br>(186.30 to 273.57)                        | 215.14<br>(185.23 to 269.55)                        | 7.58<br>(6.99 to 9.45)                     | 17.82<br>(15.19 to 22.44)                        | 18.55<br>(15.84 to 23.25)                        | 17.01<br>(13.93 to 21.81)                        |
| Gallbladder and biliary diseases           | 242.84<br>(219.37 to 341.12)                     | 404.72<br>(252.75 to 676.97)                        | 341.02<br>(228.48 to 544.83)                        | 506.51<br>(311.02 to 867.40)                        | 14.85<br>(13.50 to 19.96)                  | 35.41<br>(22.46 to 56.52)                        | 31.06<br>(20.97 to 47.87)                        | 41.29<br>(25.09 to 67.18)                        |
| Pancreatitis                               | 271.66<br>(235.75 to 331.83)                     | 294.47<br>(194.39 to 439.86)                        | 226.66<br>(159.49 to 323.51)                        | 364.59<br>(247.42 to 553.42)                        | 10.57<br>(9.16 to 12.96)                   | 17.14<br>(11.77 to 25.01)                        | 13.88<br>(9.94 to 19.65)                         | 20.05<br>(13.87 to 29.61)                        |
| Other digestive diseases                   | 186.06<br>(168.82 to 209.65)                     | 255.20<br>(222.10 to 299.66)                        | 256.44<br>(220.25 to 311.04)                        | 267.45<br>(228.75 to 321.81)                        | 8.75<br>(8.04 to 9.95)                     | 19.45<br>(16.63 to 23.25)                        | 20.17<br>(17.22 to 24.30)                        | 19.03<br>(15.36 to 23.62)                        |
| Neurological disorders                     | <b>6,868.10</b><br><b>(6,078.34 to 7,832.91)</b> | <b>17,187.76</b><br><b>(13,689.96 to 21,893.03)</b> | <b>17,287.62</b><br><b>(14,221.84 to 21,400.98)</b> | <b>15,908.42</b><br><b>(12,122.03 to 21,541.42)</b> | <b>561.18</b><br><b>(488.36 to 648.77)</b> | <b>1,830.60</b><br><b>(1,397.14 to 2,382.34)</b> | <b>1,893.73</b><br><b>(1,499.50 to 2,345.63)</b> | <b>1,597.76</b><br><b>(1,118.33 to 2,190.32)</b> |
| Alzheimer's disease and other dementias    | 5,304.09<br>(4,546.76 to 6,262.52)               | 14,733.60<br>(11,290.10 to 19,462.95)               | 14,750.04<br>(11,774.97 to 18,804.74)               | 13,717.40<br>(9,946.48 to 19,349.40)                | 495.13<br>(423.61 to 582.79)               | 1,654.69<br>(1,243.59 to 2,209.24)               | 1,703.21<br>(1,325.42 to 2,169.80)               | 1,454.70<br>(993.20 to 2,049.42)                 |
| Parkinson's disease                        | 561.22<br>(435.55 to 707.52)                     | 1,602.53<br>(1,216.76 to 2,061.21)                  | 1,740.41<br>(1,332.36 to 2,221.94)                  | 1,297.11<br>(962.95 to 1,708.33)                    | 41.58<br>(32.29 to 53.09)                  | 143.68<br>(107.93 to 186.22)                     | 159.35<br>(120.82 to 205.05)                     | 111.14<br>(79.61 to 148.07)                      |
| Epilepsy                                   | 616.04<br>(578.24 to 692.07)                     | 436.29<br>(332.90 to 560.64)                        | 372.95<br>(289.10 to 475.13)                        | 503.72<br>(379.91 to 672.59)                        | 13.61<br>(12.80 to 15.21)                  | 14.92<br>(11.84 to 18.92)                        | 13.14<br>(10.63 to 16.31)                        | 16.29<br>(12.64 to 21.29)                        |
| Multiple sclerosis                         | 42.10<br>(37.05 to 48.78)                        | 43.15<br>(35.45 to 52.00)                           | 43.69<br>(35.91 to 52.75)                           | 41.34<br>(34.13 to 50.48)                           | 1.29<br>(1.13 to 1.49)                     | 1.79<br>(1.52 to 2.14)                           | 1.84<br>(1.55 to 2.18)                           | 1.65<br>(1.39 to 1.98)                           |
| Motor neuron disease                       | 99.83<br>(95.08 to 104.69)                       | 128.25<br>(114.37 to 141.94)                        | 130.32<br>(115.24 to 145.08)                        | 122.09<br>(109.59 to 134.62)                        | 3.10<br>(2.96 to 3.23)                     | 5.35<br>(4.83 to 5.86)                           | 5.31<br>(4.93 to 6.04)                           | 4.96<br>(4.47 to 5.41)                           |
| Other neurological disorders               | 244.83<br>(234.54 to 255.95)                     | 243.94<br>(221.22 to 268.09)                        | 250.21<br>(225.79 to 275.41)                        | 226.76<br>(206.35 to 247.50)                        | 6.47<br>(6.25 to 6.74)                     | 10.17<br>(9.44 to 10.90)                         | 10.67<br>(9.93 to 11.45)                         | 9.01<br>(8.29 to 9.71)                           |
| Mental disorders                           | <b>1,944.44</b><br><b>(1,616.78 to 2,270.88)</b> | <b>2,897.33</b><br><b>(2,260.81 to 3,530.97)</b>    | <b>3,120.09</b><br><b>(2,479.83 to 3,687.85)</b>    | <b>2,338.55</b><br><b>(1,915.20 to 2,698.66)</b>    | <b>55.93</b><br><b>(45.29 to 63.07)</b>    | <b>124.27</b><br><b>(96.18 to 149.04)</b>        | <b>138.03</b><br><b>(109.96 to 163.88)</b>       | <b>94.35</b><br><b>(75.97 to 106.68)</b>         |
| Alcohol use disorders                      | 816.12<br>(473.99 to 920.83)                     | 608.48<br>(318.24 to 762.61)                        | 581.28<br>(300.28 to 727.71)                        | 553.28<br>(291.53 to 682.78)                        | 22.57<br>(13.20 to 25.45)                  | 22.67<br>(13.24 to 27.55)                        | 22.30<br>(12.81 to 26.94)                        | 19.73<br>(11.36 to 23.57)                        |
| Drug use disorders                         | 1,124.81<br>(996.81 to 1,553.17)                 | 2,286.27<br>(1,769.80 to 2,888.96)                  | 2,536.20<br>(2,018.00 to 3,122.50)                  | 1,782.74<br>(1,502.08 to 2,171.98)                  | 33.30<br>(29.31 to 42.42)                  | 101.55<br>(77.97 to 124.82)                      | 115.68<br>(91.13 to 140.90)                      | 74.57<br>(61.90 to 86.46)                        |
| Opioid use disorders                       | 685.87<br>(563.38 to 999.86)                     | 1,010.56<br>(750.37 to 1,285.21)                    | 1,068.70<br>(788.25 to 1,374.83)                    | 888.42<br>(675.84 to 1,163.60)                      | 19.60<br>(15.45 to 26.15)                  | 41.71<br>(29.47 to 51.29)                        | 45.18<br>(31.05 to 54.87)                        | 34.77<br>(24.68 to 42.39)                        |

|                           |                                 |                                   |                                     |                                 |                             |                              |                              |                              |
|---------------------------|---------------------------------|-----------------------------------|-------------------------------------|---------------------------------|-----------------------------|------------------------------|------------------------------|------------------------------|
|                           | 81.37<br>(63.65 to<br>125.50)   | 200.98<br>(133.04 to<br>301.39)   | 223.37<br>(152.45 to<br>323.67)     | 156.01<br>(112.31 to<br>223.33) | 2.16<br>(1.67 to<br>3.23)   | 6.91<br>(4.55 to<br>10.25)   | 7.76<br>(5.17 to<br>11.31)   | 5.23<br>(3.70 to<br>7.44)    |
| Cocaine use disorders     |                                 |                                   |                                     |                                 |                             |                              |                              |                              |
|                           | 48.33<br>(36.96 to<br>79.34)    | 163.96<br>(100.35 to<br>252.24)   | 189.59<br>(125.61 to<br>287.86)     | 113.01<br>(81.68 to<br>168.71)  | 1.19<br>(0.91 to<br>1.88)   | 5.08<br>(3.19 to<br>7.62)    | 5.93<br>(3.87 to<br>8.78)    | 3.42<br>(2.52 to<br>4.91)    |
| Amphetamine use disorders |                                 |                                   |                                     |                                 |                             |                              |                              |                              |
|                           | 309.24<br>(251.56 to<br>459.60) | 910.77<br>(630.16 to<br>1,238.88) | 1,054.54<br>(772.34 to<br>1,408.05) | 625.30<br>(494.04 to<br>822.64) | 10.34<br>(8.51 to<br>14.19) | 47.85<br>(32.82 to<br>63.70) | 56.81<br>(41.18 to<br>75.31) | 31.15<br>(24.37 to<br>39.26) |
| Other drug use disorders  |                                 |                                   |                                     |                                 |                             |                              |                              |                              |
|                           | 3.52<br>(2.65 to<br>3.91)       | 2.57<br>(1.80 to<br>3.28)         | 2.61<br>(1.81 to<br>3.37)           | 2.53<br>(1.82 to<br>3.22)       | 0.07<br>(0.05 to<br>0.07)   | 0.05<br>(0.04 to<br>0.07)    | 0.05<br>(0.04 to<br>0.07)    | 0.05<br>(0.04 to<br>0.06)    |
| Eating disorders          |                                 |                                   |                                     |                                 |                             |                              |                              |                              |

| East Asia                                                  |                                       |                                         |                                        |                                          |                                 |                                 |                                 |                                   |
|------------------------------------------------------------|---------------------------------------|-----------------------------------------|----------------------------------------|------------------------------------------|---------------------------------|---------------------------------|---------------------------------|-----------------------------------|
| Cause                                                      | YLLs (in 1000s)                       |                                         |                                        |                                          | Deaths (in 1000s)               |                                 |                                 |                                   |
|                                                            | 2016                                  | 2040 Forecast                           | 2040 Better Scenario                   | 2040 Worse Scenario                      | 2016                            | 2040 Forecast                   | 2040 Better Scenario            | 2040 Worse Scenario               |
|                                                            | 8,106.97<br>(7,829.73 to<br>8,487.74) | 10,491.97<br>(7,920.09 to<br>13,802.96) | 9,222.63<br>(7,134.23 to<br>12,002.08) | 14,516.16<br>(11,036.31 to<br>19,016.69) | 383.59<br>(370.85 to<br>398.62) | 747.93<br>(582.19 to<br>974.39) | 681.56<br>(532.63 to<br>869.62) | 974.10<br>(752.19 to<br>1,272.64) |
| Diabetes, urogenital, blood, and endocrine diseases        |                                       |                                         |                                        |                                          |                                 |                                 |                                 |                                   |
| Diabetes mellitus                                          | 3,062.45<br>(2,955.41 to<br>3,167.57) | 3,850.89<br>(2,640.21 to<br>5,658.10)   | 3,217.77<br>(2,275.90 to<br>4,555.65)  | 5,515.58<br>(3,762.05 to<br>7,983.24)    | 155.91<br>(150.48 to<br>161.27) | 270.96<br>(191.99 to<br>375.34) | 236.68<br>(172.63 to<br>324.67) | 362.33<br>(253.15 to<br>503.56)   |
| Acute glomerulonephritis                                   | 204.32<br>(193.36 to<br>216.49)       | 246.42<br>(199.39 to<br>302.20)         | 237.37<br>(188.89 to<br>292.56)        | 281.44<br>(230.44 to<br>337.28)          | 7.68<br>(7.30 to<br>8.10)       | 13.03<br>(10.40 to<br>16.01)    | 12.87<br>(10.20 to<br>15.77)    | 14.08<br>(11.30 to<br>17.11)      |
| Chronic kidney disease                                     | 3,766.13<br>(3,583.29 to<br>4,055.26) | 5,066.92<br>(3,086.99 to<br>8,172.51)   | 4,445.15<br>(2,753.86 to<br>6,988.64)  | 7,317.74<br>(4,276.98 to<br>11,864.99)   | 177.04<br>(167.44 to<br>188.11) | 362.45<br>(216.08 to<br>581.27) | 327.59<br>(202.75 to<br>520.26) | 497.91<br>(388.20 to<br>803.37)   |
| Chronic kidney disease due to diabetes mellitus            | 1,963.02<br>(1,764.64 to<br>2,168.61) | 2,651.81<br>(1,575.12 to<br>4,387.06)   | 2,308.98<br>(1,392.82 to<br>3,759.91)  | 3,878.16<br>(2,184.83 to<br>6,597.64)    | 87.18<br>(77.42 to<br>96.59)    | 173.03<br>(100.07 to<br>291.36) | 154.65<br>(92.66 to<br>253.55)  | 242.46<br>(136.13 to<br>408.49)   |
| Chronic kidney disease due to hypertension                 | 1,123.62<br>(984.97 to<br>1,276.16)   | 1,806.71<br>(1,080.13 to<br>2,930.34)   | 1,611.17<br>(984.62 to<br>2,548.62)    | 2,529.06<br>(1,443.58 to<br>4,140.42)    | 64.69<br>(57.53 to<br>72.78)    | 149.78<br>(88.63 to<br>250.05)  | 137.74<br>(84.09 to<br>225.49)  | 198.61<br>(110.69 to<br>329.15)   |
| Chronic kidney disease due to glomerulonephritis           | 308.57<br>(257.18 to<br>370.12)       | 234.19<br>(140.15 to<br>384.78)         | 199.80<br>(122.19 to<br>321.89)        | 357.86<br>(208.72 to<br>592.18)          | 10.19<br>(8.36 to<br>12.43)     | 15.53<br>(7.67 to<br>23.55)     | 11.82<br>(6.80 to<br>20.29)     | 20.08<br>(11.18 to<br>34.41)      |
| Chronic kidney disease due to other and unspecified causes | 370.91<br>(307.70 to<br>445.27)       | 374.21<br>(218.87 to<br>632.79)         | 325.20<br>(196.75 to<br>542.08)        | 552.65<br>(316.60 to<br>930.06)          | 14.98<br>(12.27 to<br>18.14)    | 26.11<br>(14.61 to<br>45.56)    | 23.38<br>(13.51 to<br>39.25)    | 36.77<br>(20.01 to<br>63.12)      |
| Urinary diseases and male infertility                      | 320.04<br>(306.31 to<br>339.12)       | 610.22<br>(531.17 to<br>714.60)         | 594.54<br>(516.09 to<br>691.64)        | 675.90<br>(607.05 to<br>749.49)          | 18.22<br>(17.41 to<br>19.24)    | 57.03<br>(49.01 to<br>67.05)    | 57.51<br>(49.85 to<br>67.22)    | 58.34<br>(48.54 to<br>68.07)      |
| Urinary tract infections                                   | 196.28<br>(178.59 to<br>215.80)       | 402.38<br>(349.13 to<br>464.67)         | 396.69<br>(343.58 to<br>458.94)        | 428.67<br>(377.02 to<br>484.63)          | 10.80<br>(9.82 to<br>11.94)     | 39.33<br>(33.49 to<br>46.32)    | 40.00<br>(34.05 to<br>46.87)    | 38.94<br>(32.09 to<br>46.35)      |
| Urolithiasis                                               | 68.12<br>(59.51 to<br>82.38)          | 130.56<br>(99.81 to<br>178.22)          | 122.38<br>(95.23 to<br>162.71)         | 157.73<br>(130.93 to<br>197.44)          | 3.69<br>(3.20 to<br>4.47)       | 10.08<br>(7.63 to<br>13.86)     | 9.78<br>(7.51 to<br>13.14)      | 11.24<br>(8.76 to<br>14.60)       |
| Other urinary diseases                                     | 55.64<br>(47.80 to<br>68.28)          | 77.28<br>(56.91 to<br>105.55)           | 75.47<br>(55.73 to<br>101.56)          | 89.49<br>(65.19 to<br>117.76)            | 3.73<br>(3.18 to<br>4.51)       | 7.62<br>(5.41 to<br>10.61)      | 7.33<br>(5.59 to<br>10.58)      | 8.15<br>(5.62 to<br>11.45)        |
| Gynecological diseases                                     | 30.91<br>(18.29 to<br>34.74)          | 10.74<br>(5.97 to<br>15.53)             | 9.32<br>(5.35 to<br>13.10)             | 15.75<br>(9.35 to<br>20.64)              | 1.09<br>(0.64 to<br>1.22)       | 0.53<br>(0.30 to<br>0.75)       | 0.47<br>(0.27 to<br>0.66)       | 0.76<br>(0.44 to<br>0.98)         |
| Uterine fibroids                                           | 22.40<br>(10.80 to<br>26.87)          | 7.51<br>(3.92 to<br>11.04)              | 6.60<br>(3.32 to<br>9.36)              | 10.70<br>(5.81 to<br>14.57)              | 0.79<br>(0.38 to<br>0.95)       | 0.36<br>(0.18 to<br>0.52)       | 0.32<br>(0.18 to<br>0.46)       | 0.50<br>(0.27 to<br>0.69)         |
| Polycystic ovarian syndrome                                | 0.33<br>(0.26 to<br>0.43)             | 0.04<br>(0.02 to<br>0.08)               | 0.03<br>(0.02 to<br>0.05)              | 0.09<br>(0.05 to<br>0.13)                | 0.01<br>(0.01 to<br>0.01)       | 0.00<br>(0.00 to<br>0.00)       | 0.00<br>(0.00 to<br>0.00)       | 0.00<br>(0.00 to<br>0.00)         |
| Endometriosis                                              | 0.48<br>(0.08 to<br>0.67)             | 0.08<br>(0.02 to<br>0.15)               | 0.07<br>(0.01 to<br>0.12)              | 0.12<br>(0.02 to<br>0.22)                | 0.01<br>(0.00 to<br>0.01)       | 0.00<br>(0.00 to<br>0.00)       | 0.00<br>(0.00 to<br>0.00)       | 0.00<br>(0.00 to<br>0.01)         |
| Genital prolapse                                           | 0.48<br>(0.18 to<br>0.59)             | 0.25<br>(0.09 to<br>0.39)               | 0.21<br>(0.07 to<br>0.32)              | 0.37<br>(0.13 to<br>0.54)                | 0.03<br>(0.01 to<br>0.04)       | 0.02<br>(0.01 to<br>0.03)       | 0.02<br>(0.01 to<br>0.03)       | 0.03<br>(0.01 to<br>0.04)         |
| Other gynecological diseases                               | 7.22<br>(4.00 to<br>8.69)             | 2.86<br>(1.43 to<br>4.46)               | 2.40<br>(1.23 to<br>3.69)              | 4.46<br>(2.39 to<br>6.07)                | 0.25<br>(0.14 to<br>0.29)       | 0.15<br>(0.08 to<br>0.23)       | 0.13<br>(0.07 to<br>0.20)       | 0.23<br>(0.13 to<br>0.30)         |
| Hemoglobinopathies and hemolytic anemias                   | 305.20<br>(250.84 to<br>345.36)       | 183.47<br>(135.93 to<br>236.84)         | 170.79<br>(126.18 to<br>215.30)        | 228.00<br>(174.49 to<br>276.77)          | 8.87<br>(7.05 to<br>10.13)      | 9.61<br>(7.09 to<br>12.26)      | 9.17<br>(6.72 to<br>11.74)      | 11.46<br>(8.63 to<br>13.78)       |
| Thalassemias                                               | 96.56<br>(83.62 to<br>115.06)         | 22.58<br>(15.77 to<br>32.13)            | 22.26<br>(15.62 to<br>31.47)           | 22.54<br>(15.60 to<br>31.87)             | 1.28<br>(1.11 to<br>1.52)       | 0.35<br>(0.25 to<br>0.47)       | 0.34<br>(0.25 to<br>0.47)       | 0.34<br>(0.25 to<br>0.46)         |

|                                                   |                                 |                                 |                                 |                                 |                              |                              |                              |                              |
|---------------------------------------------------|---------------------------------|---------------------------------|---------------------------------|---------------------------------|------------------------------|------------------------------|------------------------------|------------------------------|
|                                                   | 0.49<br>(0.38 to<br>0.61)       | 0.17<br>(0.11 to<br>0.24)       | 0.15<br>(0.10 to<br>0.21)       | 0.22<br>(0.15 to<br>0.31)       | 0.01<br>(0.01 to<br>0.01)    | 0.00<br>(0.00 to<br>0.01)    | 0.00<br>(0.00 to<br>0.00)    | 0.00<br>(0.00 to<br>0.01)    |
| Sickle cell disorders                             |                                 |                                 |                                 |                                 |                              |                              |                              |                              |
|                                                   | 94.95<br>(72.97 to<br>111.20)   | 64.59<br>(45.11 to<br>88.49)    | 57.70<br>(39.35 to<br>77.66)    | 88.43<br>(62.70 to<br>113.21)   | 2.36<br>(1.79 to<br>2.77)    | 2.36<br>(1.64 to<br>3.23)    | 2.14<br>(1.49 to<br>2.87)    | 3.17<br>(2.27 to<br>3.98)    |
| G6PD deficiency                                   |                                 |                                 |                                 |                                 |                              |                              |                              |                              |
|                                                   | 113.20<br>(86.58 to<br>129.83)  | 96.13<br>(70.17 to<br>124.06)   | 90.68<br>(65.86 to<br>116.10)   | 116.81<br>(87.62 to<br>140.31)  | 5.23<br>(4.00 to<br>5.94)    | 6.90<br>(4.96 to<br>8.74)    | 6.68<br>(4.86 to<br>8.53)    | 7.95<br>(5.89 to<br>9.61)    |
| Other hemoglobinopathies and hemolytic anemias    |                                 |                                 |                                 |                                 |                              |                              |                              |                              |
|                                                   | 417.92<br>(350.56 to<br>489.67) | 523.31<br>(427.29 to<br>603.80) | 547.70<br>(443.62 to<br>630.78) | 481.74<br>(394.13 to<br>558.72) | 14.79<br>(11.97 to<br>16.84) | 34.32<br>(27.38 to<br>39.30) | 37.26<br>(30.00 to<br>42.00) | 29.22<br>(22.50 to<br>33.93) |
| Endocrine, metabolic, blood, and immune disorders |                                 |                                 |                                 |                                 |                              |                              |                              |                              |



| East Asia                                     |                                           |                                         |                                       |                                           |                                  |                                  |                                  |                                  |
|-----------------------------------------------|-------------------------------------------|-----------------------------------------|---------------------------------------|-------------------------------------------|----------------------------------|----------------------------------|----------------------------------|----------------------------------|
| Cause                                         | YLLs (in 1000s)                           |                                         |                                       |                                           | Deaths (in 1000s)                |                                  |                                  |                                  |
|                                               | 2016                                      | 2040 Forecast                           | 2040 Better Scenario                  | 2040 Worse Scenario                       | 2016                             | 2040 Forecast                    | 2040 Better Scenario             | 2040 Worse Scenario              |
| <b>Musculoskeletal disorders</b>              | <b>507.58</b><br>(422.56 to 634.82)       | <b>622.91</b><br>(483.13 to 811.35)     | <b>585.68</b><br>(451.24 to 734.48)   | <b>753.11</b><br>(588.58 to 932.69)       | <b>19.07</b><br>(15.65 to 23.03) | <b>38.98</b><br>(29.65 to 50.55) | <b>37.34</b><br>(29.06 to 46.72) | <b>45.65</b><br>(35.23 to 54.98) |
| Rheumatoid arthritis                          | 184.91<br>(138.49 to 215.05)              | 307.61<br>(206.55 to 442.94)            | 273.14<br>(191.90 to 375.83)          | 430.78<br>(313.51 to 537.11)              | 9.55<br>(7.14 to 10.94)          | 22.46<br>(15.37 to 31.95)        | 20.49<br>(14.50 to 28.15)        | 29.87<br>(21.61 to 37.36)        |
| Other musculoskeletal disorders               | 322.67<br>(270.90 to 427.23)              | 315.30<br>(252.55 to 423.36)            | 312.53<br>(248.89 to 417.07)          | 322.33<br>(256.57 to 446.81)              | 9.52<br>(8.10 to 12.57)          | 16.52<br>(13.23 to 21.74)        | 16.86<br>(13.47 to 22.13)        | 15.78<br>(12.74 to 21.28)        |
| <b>Other non-communicable diseases</b>        | <b>3,711.04</b><br>(3,209.94 to 4,453.76) | <b>1,121.32</b><br>(806.31 to 1,641.15) | <b>972.76</b><br>(708.80 to 1,389.44) | <b>1,601.58</b><br>(1,179.85 to 2,249.92) | <b>53.07</b><br>(47.42 to 62.60) | <b>40.86</b><br>(28.41 to 55.87) | <b>39.84</b><br>(27.31 to 54.50) | <b>46.27</b><br>(33.78 to 61.21) |
| Congenital birth defects                      | 3,524.81<br>(3,118.23 to 4,259.81)        | 805.64<br>(531.51 to 1,292.95)          | 657.31<br>(430.75 to 1,064.47)        | 1,273.30<br>(881.84 to 1,873.40)          | 44.88<br>(39.96 to 54.02)        | 11.77<br>(8.20 to 17.95)         | 9.75<br>(6.68 to 14.84)          | 18.25<br>(13.45 to 25.48)        |
| Neural tube defects                           | 41.74<br>(33.16 to 55.42)                 | 6.43<br>(4.06 to 10.27)                 | 4.93<br>(3.03 to 8.07)                | 10.74<br>(6.89 to 16.77)                  | 0.53<br>(0.43 to 0.70)           | 0.10<br>(0.07 to 0.15)           | 0.08<br>(0.05 to 0.12)           | 0.17<br>(0.12 to 0.25)           |
| Congenital heart anomalies                    | 2,528.52<br>(2,244.06 to 3,025.96)        | 538.73<br>(340.04 to 888.11)            | 430.38<br>(274.38 to 702.99)          | 889.27<br>(616.79 to 1,326.56)            | 32.21<br>(28.83 to 38.30)        | 7.67<br>(5.02 to 12.09)          | 6.18<br>(4.08 to 9.62)           | 12.55<br>(8.97 to 17.83)         |
| Orofacial clefts                              | 27.47<br>(20.27 to 43.39)                 | 4.15<br>(2.03 to 7.80)                  | 2.89<br>(1.34 to 5.52)                | 7.68<br>(3.80 to 14.01)                   | 0.32<br>(0.23 to 0.50)           | 0.05<br>(0.02 to 0.09)           | 0.03<br>(0.02 to 0.06)           | 0.09<br>(0.04 to 0.16)           |
| Down syndrome                                 | 47.44<br>(38.88 to 60.94)                 | 27.67<br>(21.38 to 38.25)               | 27.88<br>(21.76 to 38.12)             | 27.31<br>(20.99 to 38.40)                 | 0.79<br>(0.66 to 1.03)           | 0.61<br>(0.47 to 0.84)           | 0.62<br>(0.49 to 0.84)           | 0.59<br>(0.46 to 0.81)           |
| Other chromosomal abnormalities               | 37.01<br>(29.96 to 54.80)                 | 15.87<br>(10.43 to 24.15)               | 14.36<br>(9.40 to 22.30)              | 19.48<br>(12.58 to 30.42)                 | 0.47<br>(0.38 to 0.67)           | 0.22<br>(0.15 to 0.33)           | 0.20<br>(0.14 to 0.30)           | 0.27<br>(0.18 to 0.41)           |
| Congenital musculoskeletal and limb anomalies | 43.79<br>(37.02 to 61.69)                 | 12.23<br>(7.88 to 19.11)                | 10.31<br>(6.73 to 15.60)              | 17.93<br>(11.78 to 26.97)                 | 0.56<br>(0.48 to 0.79)           | 0.18<br>(0.13 to 0.28)           | 0.16<br>(0.11 to 0.23)           | 0.27<br>(0.19 to 0.38)           |
| Urogenital congenital anomalies               | 33.15<br>(27.72 to 45.76)                 | 13.27<br>(9.53 to 18.63)                | 11.75<br>(8.20 to 16.04)              | 17.84<br>(12.93 to 24.92)                 | 0.57<br>(0.47 to 0.78)           | 0.33<br>(0.24 to 0.45)           | 0.29<br>(0.20 to 0.39)           | 0.43<br>(0.32 to 0.57)           |
| Digestive congenital anomalies                | 299.01<br>(251.06 to 367.80)              | 61.80<br>(36.32 to 108.57)              | 49.63<br>(28.54 to 84.90)             | 98.28<br>(58.57 to 160.03)                | 3.53<br>(2.96 to 4.33)           | 0.76<br>(0.46 to 1.31)           | 0.62<br>(0.37 to 1.04)           | 1.21<br>(0.74 to 1.93)           |
| Other congenital birth defects                | 466.69<br>(385.11 to 658.77)              | 125.50<br>(80.26 to 197.75)             | 105.17<br>(66.03 to 168.97)           | 184.76<br>(120.76 to 289.21)              | 5.91<br>(4.90 to 8.25)           | 1.85<br>(1.25 to 2.75)           | 1.57<br>(1.05 to 2.38)           | 2.68<br>(1.87 to 4.03)           |
| Skin and subcutaneous diseases                | 127.61<br>(83.25 to 196.19)               | 302.36<br>(191.61 to 455.24)            | 303.94<br>(187.60 to 444.66)          | 309.80<br>(195.65 to 475.20)              | 7.51<br>(4.59 to 11.19)          | 28.93<br>(17.25 to 42.18)        | 29.95<br>(17.60 to 44.14)        | 27.80<br>(16.20 to 41.99)        |
| Cellulitis                                    | 14.53<br>(8.70 to 26.02)                  | 33.65<br>(16.83 to 53.02)               | 34.68<br>(17.17 to 55.05)             | 31.75<br>(15.90 to 51.54)                 | 0.57<br>(0.28 to 0.90)           | 2.64<br>(1.06 to 3.83)           | 2.81<br>(1.12 to 4.08)           | 2.36<br>(0.93 to 3.40)           |
| Pyoderma                                      | 51.24<br>(34.66 to 90.07)                 | 134.96<br>(87.65 to 221.35)             | 136.22<br>(89.14 to 221.48)           | 137.65<br>(89.74 to 229.13)               | 2.48<br>(1.63 to 4.31)           | 11.58<br>(7.35 to 19.17)         | 12.13<br>(7.87 to 19.95)         | 10.89<br>(6.92 to 18.87)         |
| Decubitus ulcer                               | 49.29<br>(27.17 to 69.96)                 | 116.07<br>(58.99 to 164.08)             | 115.22<br>(57.63 to 164.36)           | 122.62<br>(61.97 to 175.19)               | 3.93<br>(2.11 to 5.60)           | 13.35<br>(6.64 to 19.50)         | 13.60<br>(6.54 to 19.73)         | 13.30<br>(6.50 to 19.43)         |
| Other skin and subcutaneous diseases          | 12.55<br>(8.41 to 20.78)                  | 17.69<br>(11.86 to 27.99)               | 17.82<br>(11.50 to 28.44)             | 17.78<br>(11.55 to 29.17)                 | 0.52<br>(0.35 to 0.85)           | 1.35<br>(0.86 to 2.16)           | 1.42<br>(0.91 to 2.22)           | 1.25<br>(0.79 to 2.05)           |
| Sudden infant death syndrome                  | 58.61<br>(49.96 to 71.38)                 | 13.31<br>(6.89 to 25.15)                | 11.51<br>(6.04 to 21.74)              | 18.49<br>(9.88 to 32.56)                  | 0.68<br>(0.58 to 0.83)           | 0.15<br>(0.08 to 0.29)           | 0.13<br>(0.07 to 0.25)           | 0.21<br>(0.11 to 0.38)           |

|                          |                                          |                                          |                                          |                                          |                                 |                                 |                                 |                                   |
|--------------------------|------------------------------------------|------------------------------------------|------------------------------------------|------------------------------------------|---------------------------------|---------------------------------|---------------------------------|-----------------------------------|
| Injuries                 | 31,284.24<br>(29,365.98 to<br>32,339.28) | 17,874.89<br>(13,871.07 to<br>26,827.69) | 15,173.60<br>(11,855.58 to<br>24,055.07) | 24,884.11<br>(19,722.12 to<br>34,514.34) | 806.10<br>(735.68 to<br>836.50) | 767.48<br>(622.74 to<br>998.73) | 691.12<br>(568.88 to<br>876.35) | 957.47<br>(792.01 to<br>1,222.28) |
| Transport injuries       | 14,066.14<br>(13,563.90 to<br>14,621.59) | 6,127.83<br>(4,415.02 to<br>8,747.55)    | 4,518.53<br>(3,365.87 to<br>6,035.45)    | 11,180.63<br>(8,271.29 to<br>15,326.64)  | 336.96<br>(324.64 to<br>349.57) | 203.46<br>(150.99 to<br>281.60) | 155.28<br>(119.76 to<br>204.55) | 348.45<br>(265.94 to<br>465.72)   |
| Road injuries            | 13,496.73<br>(13,028.65 to<br>13,979.53) | 5,692.15<br>(4,108.91 to<br>8,108.72)    | 4,167.01<br>(3,112.29 to<br>5,574.33)    | 10,576.35<br>(7,854.32 to<br>14,506.64)  | 323.21<br>(311.75 to<br>333.88) | 188.89<br>(141.37 to<br>260.01) | 143.24<br>(111.51 to<br>188.20) | 329.02<br>(251.98 to<br>439.20)   |
| Pedestrian road injuries | 7,469.49<br>(7,050.72 to<br>7,879.06)    | 2,466.37<br>(1,727.99 to<br>3,682.68)    | 1,682.75<br>(1,221.51 to<br>2,355.92)    | 5,382.31<br>(4,026.06 to<br>7,309.50)    | 186.17<br>(175.83 to<br>195.51) | 93.38<br>(66.45 to<br>135.40)   | 66.85<br>(49.80 to<br>91.41)    | 187.11<br>(144.93 to<br>246.60)   |

| East Asia                                       |                                                    |                                                  |                                                  |                                                  |                                            |                                            |                                            |                                            |
|-------------------------------------------------|----------------------------------------------------|--------------------------------------------------|--------------------------------------------------|--------------------------------------------------|--------------------------------------------|--------------------------------------------|--------------------------------------------|--------------------------------------------|
| Cause                                           | YLLs (in 1000s)                                    |                                                  |                                                  |                                                  | Deaths (in 1000s)                          |                                            |                                            |                                            |
|                                                 | 2016                                               | 2040 Forecast                                    | 2040 Better Scenario                             | 2040 Worse Scenario                              | 2016                                       | 2040 Forecast                              | 2040 Better Scenario                       | 2040 Worse Scenario                        |
| Cyclist road injuries                           | 989.89<br>(874.21 to 1,056.62)                     | 591.76<br>(421.95 to 815.01)                     | 461.38<br>(345.98 to 614.15)                     | 942.91<br>(674.09 to 1,297.61)                   | 25.87<br>(22.95 to 27.60)                  | 21.69<br>(15.66 to 29.73)                  | 17.68<br>(13.28 to 23.51)                  | 30.81<br>(22.02 to 41.94)                  |
| Motorcyclist road injuries                      | 2,531.59<br>(2,218.63 to 2,736.05)                 | 1,628.06<br>(1,085.96 to 2,438.64)               | 1,311.76<br>(906.82 to 1,881.55)                 | 2,253.37<br>(1,509.63 to 3,373.47)               | 54.94<br>(47.74 to 59.15)                  | 42.41<br>(28.97 to 62.13)                  | 35.00<br>(24.87 to 48.77)                  | 55.42<br>(37.91 to 80.74)                  |
| Motor vehicle road injuries                     | 2,424.57<br>(2,104.44 to 3,007.71)                 | 967.14<br>(697.28 to 1,350.29)                   | 682.68<br>(508.91 to 933.31)                     | 1,926.61<br>(1,375.68 to 2,662.78)               | 54.28<br>(46.92 to 67.40)                  | 30.00<br>(22.57 to 41.05)                  | 22.59<br>(17.71 to 29.94)                  | 53.43<br>(39.66 to 72.17)                  |
| Other road injuries                             | 81.19<br>(66.20 to 90.46)                          | 38.82<br>(27.13 to 54.23)                        | 28.43<br>(20.79 to 38.23)                        | 71.16<br>(48.84 to 100.41)                       | 1.94<br>(1.59 to 2.17)                     | 1.42<br>(1.05 to 1.96)                     | 1.12<br>(0.86 to 1.48)                     | 2.26<br>(1.62 to 3.17)                     |
| Other transport injuries                        | 569.40<br>(515.56 to 762.12)                       | 435.68<br>(280.08 to 686.41)                     | 351.52<br>(235.67 to 530.89)                     | 604.28<br>(417.51 to 894.16)                     | 13.75<br>(12.48 to 18.41)                  | 14.57<br>(9.56 to 22.62)                   | 12.04<br>(8.30 to 17.97)                   | 19.43<br>(13.83 to 28.69)                  |
| <b>Unintentional injuries</b>                   | <b>11,488.71</b><br><b>(9,117.19 to 12,201.88)</b> | <b>6,515.75</b><br><b>(4,674.52 to 8,074.54)</b> | <b>6,108.19</b><br><b>(4,454.72 to 7,440.01)</b> | <b>7,725.99</b><br><b>(5,671.24 to 9,220.71)</b> | <b>308.86</b><br><b>(235.58 to 329.96)</b> | <b>355.54</b><br><b>(251.09 to 428.27)</b> | <b>350.77</b><br><b>(249.73 to 417.60)</b> | <b>381.49</b><br><b>(271.00 to 451.39)</b> |
| Falls                                           | 3,355.02<br>(2,380.39 to 3,677.79)                 | 3,093.87<br>(2,095.29 to 3,732.14)               | 3,027.33<br>(2,041.68 to 3,613.21)               | 3,354.62<br>(2,285.26 to 3,897.58)               | 125.85<br>(86.33 to 138.02)                | 217.54<br>(143.56 to 262.64)               | 220.87<br>(147.44 to 264.17)               | 219.37<br>(143.71 to 265.45)               |
| Drowning                                        | 3,348.89<br>(2,851.41 to 3,543.09)                 | 1,356.76<br>(991.79 to 1,771.10)                 | 1,218.07<br>(891.26 to 1,592.48)                 | 1,668.32<br>(1,215.68 to 2,193.11)               | 66.49<br>(53.43 to 70.21)                  | 48.86<br>(34.26 to 60.85)                  | 45.45<br>(31.68 to 56.37)                  | 55.93<br>(38.88 to 70.07)                  |
| Fire, heat, and hot substances                  | 342.63<br>(271.43 to 371.69)                       | 226.51<br>(164.52 to 310.40)                     | 200.24<br>(144.76 to 265.87)                     | 289.35<br>(208.65 to 373.89)                     | 11.12<br>(8.50 to 12.08)                   | 14.06<br>(10.19 to 18.86)                  | 13.07<br>(9.20 to 16.94)                   | 16.45<br>(11.65 to 21.16)                  |
| Poisonings                                      | 668.96<br>(369.66 to 773.05)                       | 200.58<br>(106.30 to 296.83)                     | 168.99<br>(87.56 to 246.42)                      | 289.82<br>(150.54 to 404.66)                     | 16.78<br>(9.33 to 19.43)                   | 8.15<br>(4.40 to 11.75)                    | 7.09<br>(3.86 to 10.15)                    | 11.19<br>(5.89 to 15.31)                   |
| Exposure to mechanical forces                   | 1,916.83<br>(1,160.40 to 2,124.57)                 | 767.16<br>(436.93 to 1,024.57)                   | 694.19<br>(393.95 to 911.15)                     | 998.84<br>(551.14 to 1,243.52)                   | 42.84<br>(25.35 to 47.32)                  | 26.43<br>(15.45 to 34.29)                  | 24.77<br>(14.38 to 31.85)                  | 32.31<br>(18.49 to 39.12)                  |
| Unintentional firearm injuries                  | 29.07<br>(25.36 to 41.65)                          | 19.93<br>(16.48 to 25.89)                        | 19.28<br>(15.74 to 24.50)                        | 22.35<br>(18.04 to 30.44)                        | 0.96<br>(0.86 to 1.24)                     | 1.61<br>(1.25 to 1.95)                     | 1.65<br>(1.29 to 2.01)                     | 1.58<br>(1.18 to 2.01)                     |
| Unintentional suffocation                       | 404.13<br>(207.84 to 495.78)                       | 116.51<br>(50.74 to 175.57)                      | 106.15<br>(46.81 to 165.64)                      | 146.42<br>(63.78 to 223.51)                      | 6.54<br>(3.28 to 7.91)                     | 3.50<br>(1.54 to 4.75)                     | 3.37<br>(1.50 to 4.60)                     | 4.00<br>(1.74 to 5.49)                     |
| Other exposure to mechanical forces             | 1,483.63<br>(872.32 to 1,626.76)                   | 630.73<br>(350.30 to 844.54)                     | 568.76<br>(316.92 to 751.57)                     | 830.07<br>(450.62 to 1,025.71)                   | 35.34<br>(20.40 to 38.84)                  | 21.32<br>(11.99 to 28.15)                  | 19.75<br>(11.12 to 25.55)                  | 26.72<br>(14.77 to 32.40)                  |
| Adverse effects of medical treatment            | 211.65<br>(90.71 to 275.61)                        | 160.34<br>(135.73 to 209.64)                     | 155.30<br>(129.25 to 207.05)                     | 177.01<br>(149.65 to 229.90)                     | 5.89<br>(5.38 to 7.64)                     | 8.27<br>(7.11 to 10.63)                    | 8.33<br>(7.06 to 10.78)                    | 8.49<br>(7.21 to 10.89)                    |
| Animal contact                                  | 100.24<br>(90.14 to 117.19)                        | 91.85<br>(75.47 to 114.24)                       | 86.11<br>(68.04 to 108.27)                       | 111.91<br>(89.64 to 140.00)                      | 2.93<br>(2.60 to 3.40)                     | 4.14<br>(3.42 to 5.14)                     | 4.01<br>(3.23 to 4.97)                     | 4.74<br>(3.82 to 5.89)                     |
| Venomous animal contact                         | 53.25<br>(43.22 to 61.83)                          | 46.42<br>(34.27 to 57.46)                        | 44.43<br>(33.26 to 56.09)                        | 54.01<br>(40.10 to 67.75)                        | 1.62<br>(1.29 to 1.87)                     | 2.15<br>(1.57 to 2.66)                     | 2.12<br>(1.55 to 2.61)                     | 2.36<br>(1.74 to 2.94)                     |
| Non-venomous animal contact                     | 46.99<br>(41.20 to 63.47)                          | 45.44<br>(35.33 to 62.10)                        | 41.68<br>(31.26 to 57.77)                        | 57.91<br>(44.87 to 79.83)                        | 1.31<br>(1.14 to 1.80)                     | 1.99<br>(1.55 to 2.74)                     | 1.89<br>(1.43 to 2.64)                     | 2.38<br>(1.86 to 3.26)                     |
| Foreign body                                    | 343.29<br>(288.99 to 401.65)                       | 236.61<br>(188.67 to 285.84)                     | 237.00<br>(187.93 to 281.79)                     | 236.91<br>(186.49 to 287.62)                     | 8.48<br>(6.91 to 9.26)                     | 13.80<br>(10.57 to 15.92)                  | 14.55<br>(11.21 to 16.63)                  | 12.39<br>(9.30 to 14.69)                   |
| Pulmonary aspiration and foreign body in airway | 310.03<br>(247.19 to 363.25)                       | 201.56<br>(146.48 to 246.11)                     | 200.26<br>(146.75 to 242.18)                     | 205.17<br>(152.60 to 251.36)                     | 7.54<br>(5.86 to 8.29)                     | 11.38<br>(8.01 to 13.32)                   | 11.89<br>(8.44 to 13.89)                   | 10.41<br>(7.38 to 12.49)                   |

|                                             |                                                            |                                                            |                                                            |                                                            |                                                      |                                                      |                                                      |                                                      |
|---------------------------------------------|------------------------------------------------------------|------------------------------------------------------------|------------------------------------------------------------|------------------------------------------------------------|------------------------------------------------------|------------------------------------------------------|------------------------------------------------------|------------------------------------------------------|
|                                             | 33.25<br>(27.79 to<br>56.87)                               | 35.05<br>(27.41 to<br>54.03)                               | 36.74<br>(29.09 to<br>56.25)                               | 31.74<br>(24.69 to<br>50.01)                               | 0.93<br>(0.80 to<br>1.50)                            | 2.42<br>(1.82 to<br>3.56)                            | 2.66<br>(2.10 to<br>3.89)                            | 1.97<br>(1.46 to<br>2.85)                            |
| Foreign body in other body part             |                                                            |                                                            |                                                            |                                                            |                                                      |                                                      |                                                      |                                                      |
|                                             | 126.03<br>(96.52 to<br>166.64)                             | 105.86<br>(74.53 to<br>142.56)                             | 96.27<br>(66.93 to<br>128.81)                              | 140.85<br>(100.46 to<br>187.24)                            | 4.43<br>(3.22 to<br>5.60)                            | 6.19<br>(4.19 to<br>8.28)                            | 5.91<br>(3.90 to<br>7.85)                            | 7.57<br>(5.19 to<br>10.04)                           |
| Environmental heat and cold exposure        |                                                            |                                                            |                                                            |                                                            |                                                      |                                                      |                                                      |                                                      |
|                                             | 1,075.17<br>(682.63 to<br>1,150.70)                        | 276.21<br>(166.77 to<br>445.95)                            | 224.70<br>(130.48 to<br>340.24)                            | 458.36<br>(281.54 to<br>562.38)                            | 24.05<br>(15.23 to<br>25.71)                         | 8.10<br>(5.06 to<br>12.93)                           | 6.72<br>(3.86 to<br>9.94)                            | 13.05<br>(8.15 to<br>15.51)                          |
| Other unintentional injuries                |                                                            |                                                            |                                                            |                                                            |                                                      |                                                      |                                                      |                                                      |
| <b>Self-harm and interpersonal violence</b> | <b>5,605.68</b><br><b>(5,307.46 to</b><br><b>6,512.43)</b> | <b>4,688.40</b><br><b>(3,278.97 to</b><br><b>6,537.13)</b> | <b>4,001.66</b><br><b>(2,945.94 to</b><br><b>5,413.95)</b> | <b>5,435.08</b><br><b>(3,813.28 to</b><br><b>7,645.45)</b> | <b>157.63</b><br><b>(149.20 to</b><br><b>178.57)</b> | <b>196.23</b><br><b>(140.81 to</b><br><b>271.36)</b> | <b>172.38</b><br><b>(129.14 to</b><br><b>230.61)</b> | <b>215.58</b><br><b>(153.99 to</b><br><b>303.87)</b> |

| East Asia                                                                           |                                           |                                             |                                             |                                             |                                      |                                         |                                         |                                         |
|-------------------------------------------------------------------------------------|-------------------------------------------|---------------------------------------------|---------------------------------------------|---------------------------------------------|--------------------------------------|-----------------------------------------|-----------------------------------------|-----------------------------------------|
| Cause                                                                               | YLLs (in 1000s)                           |                                             |                                             |                                             | Deaths (in 1000s)                    |                                         |                                         |                                         |
|                                                                                     | 2016                                      | 2040 Forecast                               | 2040 Better Scenario                        | 2040 Worse Scenario                         | 2016                                 | 2040 Forecast                           | 2040 Better Scenario                    | 2040 Worse Scenario                     |
| Self-harm                                                                           | 4,664.99<br>(4,418.41 to 5,330.07)        | 4,304.76<br>(2,942.78 to 6,094.56)          | 3,658.05<br>(2,646.00 to 4,993.06)          | 4,973.81<br>(3,397.91 to 7,158.52)          | 137.85<br>(129.29 to 153.80)         | 185.28<br>(131.78 to 260.00)            | 162.46<br>(120.36 to 218.85)            | 202.81<br>(142.03 to 288.53)            |
| Self-harm by firearm                                                                | 50.72<br>(37.86 to 85.95)                 | 27.55<br>(15.48 to 49.54)                   | 21.86<br>(13.33 to 38.47)                   | 35.58<br>(20.23 to 64.20)                   | 1.33<br>(1.02 to 2.19)               | 1.08<br>(0.67 to 1.80)                  | 0.91<br>(0.61 to 1.50)                  | 1.29<br>(0.79 to 2.18)                  |
| Self-harm by other specified means                                                  | 4,614.26<br>(4,371.87 to 5,258.46)        | 4,277.21<br>(2,926.50 to 6,056.75)          | 3,636.19<br>(2,632.82 to 4,958.74)          | 4,938.23<br>(3,366.33 to 7,106.17)          | 136.51<br>(127.81 to 151.73)         | 184.20<br>(131.06 to 258.55)            | 161.54<br>(119.72 to 217.45)            | 201.51<br>(141.10 to 286.80)            |
| Interpersonal violence                                                              | 940.70<br>(826.78 to 1,383.21)            | 383.63<br>(284.82 to 595.73)                | 343.61<br>(256.43 to 519.26)                | 461.27<br>(353.02 to 716.29)                | 19.79<br>(17.45 to 29.02)            | 10.95<br>(8.28 to 16.33)                | 9.92<br>(7.60 to 14.67)                 | 12.77<br>(9.94 to 19.05)                |
| Physical violence by firearm                                                        | 34.94<br>(23.32 to 67.20)                 | 15.09<br>(10.25 to 29.24)                   | 13.81<br>(9.47 to 25.68)                    | 18.86<br>(13.26 to 36.44)                   | 0.83<br>(0.56 to 1.60)               | 0.52<br>(0.36 to 0.96)                  | 0.49<br>(0.34 to 0.88)                  | 0.63<br>(0.45 to 1.15)                  |
| Physical violence by sharp object                                                   | 403.62<br>(349.79 to 641.45)              | 159.15<br>(116.11 to 257.61)                | 145.45<br>(107.11 to 231.94)                | 198.66<br>(154.83 to 325.89)                | 8.29<br>(7.18 to 13.00)              | 4.17<br>(3.12 to 6.47)                  | 3.86<br>(2.92 to 5.88)                  | 5.06<br>(4.05 to 7.88)                  |
| Physical violence by other means                                                    | 502.13<br>(441.25 to 730.51)              | 209.40<br>(151.14 to 328.32)                | 184.35<br>(134.52 to 285.07)                | 243.75<br>(176.44 to 379.43)                | 10.66<br>(9.34 to 15.20)             | 6.26<br>(4.55 to 9.70)                  | 5.58<br>(4.14 to 8.42)                  | 7.08<br>(5.19 to 10.98)                 |
| <b>Forces of nature, conflict and terrorism, and executions and police conflict</b> | <b>123.71</b><br><b>(58.70 to 195.77)</b> | <b>542.92</b><br><b>(0.21 to 10,803.23)</b> | <b>545.22</b><br><b>(0.21 to 10,857.03)</b> | <b>542.42</b><br><b>(0.20 to 10,805.38)</b> | <b>2.65</b><br><b>(1.20 to 4.28)</b> | <b>12.24</b><br><b>(0.01 to 230.10)</b> | <b>12.69</b><br><b>(0.01 to 242.51)</b> | <b>11.95</b><br><b>(0.01 to 225.29)</b> |
| Exposure to forces of nature                                                        | 78.51<br>(12.46 to 150.48)                | 87.76<br>(0.01 to 568.11)                   | 88.30<br>(0.01 to 570.56)                   | 86.53<br>(0.01 to 560.49)                   | 1.76<br>(0.28 to 3.37)               | 2.60<br>(0.00 to 16.85)                 | 2.65<br>(0.00 to 17.20)                 | 2.48<br>(0.00 to 16.09)                 |
| Conflict and terrorism                                                              | 0.00<br>(0.00 to 0.00)                    | 435.05<br>(0.00 to 10,718.77)               | 436.76<br>(0.00 to 10,771.51)               | 435.93<br>(0.00 to 10,722.31)               | 0.00<br>(0.00 to 0.00)               | 9.16<br>(0.00 to 227.39)                | 9.55<br>(0.00 to 239.59)                | 9.00<br>(0.00 to 222.79)                |
| Executions and police conflict                                                      | 45.20<br>(39.00 to 52.16)                 | 20.10<br>(0.00 to 0.00)                     | 20.16<br>(0.00 to 0.00)                     | 19.96<br>(0.00 to 0.00)                     | 0.89<br>(0.77 to 1.02)               | 0.48<br>(0.00 to 0.00)                  | 0.49<br>(0.00 to 0.00)                  | 0.47<br>(0.00 to 0.00)                  |

| China                                                             |                                             |                                             |                                             |                                             |                                       |                                          |                                          |                                          |
|-------------------------------------------------------------------|---------------------------------------------|---------------------------------------------|---------------------------------------------|---------------------------------------------|---------------------------------------|------------------------------------------|------------------------------------------|------------------------------------------|
| Cause                                                             | YLLs (in 1000s)                             |                                             |                                             |                                             | Deaths (in 1000s)                     |                                          |                                          |                                          |
|                                                                   | 2016                                        | 2040 Forecast                               | 2040 Better Scenario                        | 2040 Worse Scenario                         | 2016                                  | 2040 Forecast                            | 2040 Better Scenario                     | 2040 Worse Scenario                      |
| All causes                                                        | 208,211.11<br>(203,732.37 to<br>212,783.98) | 205,805.78<br>(161,956.42 to<br>260,208.98) | 171,770.68<br>(140,312.63 to<br>211,401.78) | 299,978.34<br>(229,103.62 to<br>389,729.07) | 9,666.24<br>(9,471.55 to<br>9,856.85) | 14,170.52<br>(11,663.26 to<br>17,128.11) | 12,239.82<br>(10,419.04 to<br>14,358.81) | 19,349.03<br>(15,960.69 to<br>23,171.62) |
| Communicable, maternal, neonatal, and nutritional diseases        | 12,347.10<br>(11,624.18 to<br>13,202.23)    | 5,294.29<br>(4,017.38 to<br>7,150.27)       | 4,368.95<br>(3,355.55 to<br>5,646.95)       | 8,321.00<br>(6,173.39 to<br>11,280.47)      | 334.18<br>(313.15 to<br>365.07)       | 368.77<br>(285.49 to<br>481.51)          | 330.47<br>(262.53 to<br>413.36)          | 505.83<br>(367.11 to<br>669.97)          |
| HIV/AIDS and tuberculosis                                         | 2,309.34<br>(2,204.74 to<br>2,433.45)       | 741.11<br>(506.99 to<br>1,136.67)           | 543.00<br>(391.35 to<br>759.46)             | 1,531.58<br>(1,062.27 to<br>2,205.42)       | 71.03<br>(68.10 to<br>75.45)          | 36.19<br>(24.77 to<br>55.89)             | 27.56<br>(20.37 to<br>37.84)             | 66.21<br>(44.94 to<br>96.19)             |
| Tuberculosis                                                      | 1,036.57<br>(980.89 to<br>1,154.17)         | 397.49<br>(208.52 to<br>730.65)             | 259.27<br>(148.78 to<br>440.96)             | 868.23<br>(481.68 to<br>1,461.79)           | 40.12<br>(37.99 to<br>44.44)          | 22.56<br>(12.19 to<br>42.08)             | 15.26<br>(8.97 to<br>24.82)              | 46.17<br>(26.70 to<br>75.72)             |
| HIV/AIDS                                                          | 1,272.78<br>(1,189.39 to<br>1,348.35)       | 343.62<br>(227.23 to<br>550.44)             | 283.74<br>(196.06 to<br>413.64)             | 663.35<br>(458.35 to<br>1,025.22)           | 30.91<br>(28.94 to<br>32.71)          | 13.63<br>(9.96 to<br>19.27)              | 12.30<br>(9.27 to<br>16.57)              | 20.08<br>(14.25 to<br>29.72)             |
| Diarrhea, lower respiratory, and other common infectious diseases | 4,474.53<br>(4,111.93 to<br>5,008.77)       | 3,275.10<br>(2,340.14 to<br>4,751.93)       | 2,686.13<br>(1,952.55 to<br>3,682.05)       | 5,055.61<br>(3,453.26 to<br>7,417.89)       | 176.78<br>(157.45 to<br>208.64)       | 277.52<br>(204.44 to<br>385.66)          | 245.30<br>(187.17 to<br>326.86)          | 383.81<br>(262.67 to<br>536.53)          |
| Diarrheal diseases                                                | 216.95<br>(173.61 to<br>306.90)             | 111.10<br>(29.35 to<br>307.47)              | 127.15<br>(34.56 to<br>341.91)              | 130.47<br>(29.82 to<br>403.60)              | 5.54<br>(3.95 to<br>9.21)             | 7.63<br>(2.08 to<br>20.60)               | 9.33<br>(2.58 to<br>24.42)               | 7.68<br>(1.77 to<br>23.34)               |
| Intestinal infectious diseases                                    | 172.07<br>(87.76 to<br>297.17)              | 61.19<br>(27.83 to<br>115.52)               | 64.16<br>(29.05 to<br>121.07)               | 57.31<br>(25.15 to<br>110.46)               | 2.80<br>(1.43 to<br>4.85)             | 1.36<br>(0.66 to<br>2.45)                | 1.47<br>(0.72 to<br>2.58)                | 1.21<br>(0.59 to<br>2.20)                |
| Typhoid fever                                                     | 143.93<br>(71.62 to<br>250.62)              | 53.36<br>(23.42 to<br>101.99)               | 57.27<br>(25.20 to<br>109.58)               | 45.87<br>(19.80 to<br>89.80)                | 2.33<br>(1.16 to<br>4.07)             | 1.18<br>(0.56 to<br>2.12)                | 1.30<br>(0.62 to<br>2.32)                | 0.96<br>(0.45 to<br>1.80)                |
| Paratyphoid fever                                                 | 27.63<br>(11.95 to<br>54.18)                | 7.63<br>(2.94 to<br>15.74)                  | 6.70<br>(2.66 to<br>14.03)                  | 11.20<br>(4.48 to<br>23.59)                 | 0.46<br>(0.20 to<br>0.89)             | 0.17<br>(0.07 to<br>0.35)                | 0.15<br>(0.06 to<br>0.31)                | 0.24<br>(0.10 to<br>0.50)                |
| Other intestinal infectious diseases                              | 0.50<br>(0.20 to<br>1.08)                   | 0.20<br>(0.07 to<br>0.44)                   | 0.19<br>(0.07 to<br>0.43)                   | 0.24<br>(0.09 to<br>0.56)                   | 0.01<br>(0.01 to<br>0.03)             | 0.01<br>(0.01 to<br>0.03)                | 0.01<br>(0.00 to<br>0.03)                | 0.02<br>(0.01 to<br>0.04)                |
| Lower respiratory infections                                      | 3,510.50<br>(3,181.07 to<br>4,125.98)       | 2,861.66<br>(2,004.11 to<br>4,233.72)       | 2,273.35<br>(1,629.05 to<br>3,200.17)       | 4,516.44<br>(3,027.60 to<br>6,772.51)       | 156.62<br>(138.09 to<br>189.57)       | 260.08<br>(187.51 to<br>366.77)          | 226.36<br>(166.46 to<br>305.94)          | 364.42<br>(245.24 to<br>510.65)          |
| Upper respiratory infections                                      | 6.45<br>(5.65 to<br>7.34)                   | 2.60<br>(1.54 to<br>4.26)                   | 2.20<br>(1.22 to<br>3.72)                   | 4.79<br>(2.82 to<br>7.64)                   | 0.21<br>(0.18 to<br>0.23)             | 0.15<br>(0.09 to<br>0.24)                | 0.13<br>(0.07 to<br>0.22)                | 0.25<br>(0.15 to<br>0.40)                |
| Otitis media                                                      | 0.65<br>(0.56 to<br>0.76)                   | 0.14<br>(0.09 to<br>0.21)                   | 0.14<br>(0.09 to<br>0.22)                   | 0.13<br>(0.08 to<br>0.21)                   | 0.02<br>(0.02 to<br>0.02)             | 0.01<br>(0.01 to<br>0.01)                | 0.01<br>(0.01 to<br>0.01)                | 0.01<br>(0.00 to<br>0.01)                |
| Meningitis                                                        | 316.18<br>(226.12 to<br>423.74)             | 95.65<br>(62.29 to<br>152.34)               | 86.89<br>(57.33 to<br>139.80)               | 130.59<br>(87.38 to<br>201.05)              | 6.91<br>(5.00 to<br>9.71)             | 4.29<br>(3.00 to<br>6.74)                | 4.06<br>(2.79 to<br>6.39)                | 5.29<br>(3.73 to<br>8.31)                |
| Pneumococcal meningitis                                           | 25.62<br>(18.33 to<br>33.57)                | 9.33<br>(6.60 to<br>14.70)                  | 9.63<br>(6.78 to<br>15.03)                  | 9.05<br>(6.37 to<br>14.13)                  | 0.61<br>(0.45 to<br>0.86)             | 0.50<br>(0.36 to<br>0.81)                | 0.54<br>(0.39 to<br>0.88)                | 0.44<br>(0.32 to<br>0.71)                |
| H influenzae type B meningitis                                    | 23.69<br>(16.64 to<br>30.63)                | 10.78<br>(6.18 to<br>20.71)                 | 10.79<br>(6.28 to<br>20.15)                 | 11.89<br>(6.19 to<br>25.36)                 | 0.49<br>(0.35 to<br>0.67)             | 0.39<br>(0.27 to<br>0.58)                | 0.41<br>(0.28 to<br>0.61)                | 0.36<br>(0.24 to<br>0.57)                |
| Meningococcal meningitis                                          | 149.65<br>(106.22 to<br>201.22)             | 47.84<br>(30.62 to<br>77.61)                | 42.56<br>(27.37 to<br>69.68)                | 67.76<br>(45.68 to<br>103.69)               | 3.60<br>(2.61 to<br>5.04)             | 2.36<br>(1.59 to<br>3.79)                | 2.19<br>(1.50 to<br>3.50)                | 3.06<br>(2.15 to<br>4.73)                |
| Other meningitis                                                  | 117.22<br>(83.44 to<br>157.53)              | 27.69<br>(17.28 to<br>45.61)                | 23.91<br>(14.83 to<br>40.69)                | 41.89<br>(26.95 to<br>66.54)                | 2.21<br>(1.60 to<br>3.10)             | 1.03<br>(0.69 to<br>1.73)                | 0.93<br>(0.61 to<br>1.52)                | 1.43<br>(1.00 to<br>2.28)                |
| Encephalitis                                                      | 199.38<br>(158.89 to<br>268.35)             | 88.19<br>(57.11 to<br>133.87)               | 86.42<br>(55.25 to<br>130.92)               | 100.26<br>(62.08 to<br>154.32)              | 3.52<br>(2.82 to<br>4.55)             | 2.76<br>(2.05 to<br>3.59)                | 2.81<br>(2.10 to<br>3.67)                | 2.88<br>(2.09 to<br>3.87)                |

|                |                              |                              |                              |                              |                           |                           |                           |                           |
|----------------|------------------------------|------------------------------|------------------------------|------------------------------|---------------------------|---------------------------|---------------------------|---------------------------|
| Diphtheria     | 0.66<br>(0.58 to<br>0.77)    | 0.08<br>(0.05 to<br>0.11)    | 0.08<br>(0.05 to<br>0.11)    | 0.12<br>(0.06 to<br>0.22)    | 0.01<br>(0.01 to<br>0.01) | 0.00<br>(0.00 to<br>0.00) | 0.00<br>(0.00 to<br>0.00) | 0.00<br>(0.00 to<br>0.00) |
| Whooping cough | 11.72<br>(1.06 to<br>39.02)  | 2.48<br>(0.09 to<br>10.34)   | 2.39<br>(0.09 to<br>10.12)   | 2378<br>(0.45 to<br>94.68)   | 0.14<br>(0.01 to<br>0.47) | 0.03<br>(0.00 to<br>0.13) | 0.03<br>(0.00 to<br>0.12) | 0.28<br>(0.01 to<br>1.12) |
| Tetanus        | 22.99<br>(15.66 to<br>29.47) | 2.21<br>(1.33 to<br>3.34)    | 2.25<br>(1.36 to<br>3.40)    | 4.44<br>(2.29 to<br>8.38)    | 0.53<br>(0.34 to<br>0.75) | 0.08<br>(0.05 to<br>0.13) | 0.09<br>(0.05 to<br>0.14) | 0.10<br>(0.06 to<br>0.16) |
| Measles        | 4.05<br>(1.12 to<br>10.21)   | 44.25<br>(0.85 to<br>214.52) | 35.80<br>(0.83 to<br>159.79) | 79.95<br>(1.32 to<br>448.28) | 0.05<br>(0.01 to<br>0.12) | 0.65<br>(0.02 to<br>2.86) | 0.54<br>(0.02 to<br>2.16) | 1.12<br>(0.02 to<br>5.99) |

| China                                                 |                                        |                                     |                                     |                                     |                                  |                                  |                                  |                                  |
|-------------------------------------------------------|----------------------------------------|-------------------------------------|-------------------------------------|-------------------------------------|----------------------------------|----------------------------------|----------------------------------|----------------------------------|
| Cause                                                 | YLLs (in 1000s)                        |                                     |                                     |                                     | Deaths (in 1000s)                |                                  |                                  |                                  |
|                                                       | 2016                                   | 2040 Forecast                       | 2040 Better Scenario                | 2040 Worse Scenario                 | 2016                             | 2040 Forecast                    | 2040 Better Scenario             | 2040 Worse Scenario              |
| Varicella and herpes zoster                           | 12.93<br>(11.53 to<br>14.84)           | 5.56<br>(4.00 to<br>7.63)           | 5.31<br>(3.78 to<br>7.47)           | 7.34<br>(5.11 to<br>10.67)          | 0.43<br>(0.40 to<br>0.47)        | 0.48<br>(0.34 to<br>0.64)        | 0.48<br>(0.34 to<br>0.67)        | 0.55<br>(0.37 to<br>0.79)        |
| <b>Neglected tropical diseases and malaria</b>        | <b>91.88</b><br>(59.45 to<br>101.64)   | <b>41.32</b><br>(27.65 to<br>49.10) | <b>41.58</b><br>(28.02 to<br>49.22) | <b>46.78</b><br>(29.91 to<br>60.39) | <b>2.46</b><br>(1.66 to<br>2.69) | <b>1.67</b><br>(1.21 to<br>1.93) | <b>1.72</b><br>(1.26 to<br>1.98) | <b>1.78</b><br>(1.25 to<br>2.22) |
| Malaria                                               | 7.41<br>(5.03 to<br>10.56)             | 2.98<br>(1.95 to<br>4.23)           | 3.01<br>(1.95 to<br>4.17)           | 3.04<br>(1.96 to<br>4.39)           | 0.19<br>(0.13 to<br>0.27)        | 0.11<br>(0.07 to<br>0.15)        | 0.12<br>(0.07 to<br>0.16)        | 0.11<br>(0.07 to<br>0.16)        |
| Chagas disease                                        | 0.00<br>(0.00 to<br>0.00)              | 0.00<br>(0.00 to<br>0.00)           | 0.00<br>(0.00 to<br>0.00)           | 0.00<br>(0.00 to<br>0.00)           | 0.00<br>(0.00 to<br>0.00)        | 0.00<br>(0.00 to<br>0.00)        | 0.00<br>(0.00 to<br>0.00)        | 0.00<br>(0.00 to<br>0.00)        |
| Leishmaniasis                                         | 2.42<br>(1.54 to<br>3.78)              | 0.83<br>(0.50 to<br>1.42)           | 0.78<br>(0.49 to<br>1.31)           | 1.11<br>(0.68 to<br>1.91)           | 0.07<br>(0.05 to<br>0.12)        | 0.04<br>(0.02 to<br>0.06)        | 0.03<br>(0.02 to<br>0.06)        | 0.05<br>(0.03 to<br>0.08)        |
| African trypanosomiasis                               | 0.00<br>(0.00 to<br>0.00)              | 0.00<br>(0.00 to<br>0.00)           | 0.00<br>(0.00 to<br>0.00)           | 0.00<br>(0.00 to<br>0.00)           | 0.00<br>(0.00 to<br>0.00)        | 0.00<br>(0.00 to<br>0.00)        | 0.00<br>(0.00 to<br>0.00)        | 0.00<br>(0.00 to<br>0.00)        |
| Schistosomiasis                                       | 11.97<br>(10.12 to<br>14.13)           | 6.92<br>(5.48 to<br>8.63)           | 6.92<br>(5.47 to<br>8.65)           | 7.50<br>(5.93 to<br>9.43)           | 0.47<br>(0.40 to<br>0.56)        | 0.38<br>(0.30 to<br>0.48)        | 0.39<br>(0.31 to<br>0.48)        | 0.40<br>(0.31 to<br>0.49)        |
| Cysticercosis                                         | 1.45<br>(1.31 to<br>1.61)              | 0.42<br>(0.35 to<br>0.50)           | 0.42<br>(0.35 to<br>0.50)           | 0.43<br>(0.37 to<br>0.51)           | 0.04<br>(0.04 to<br>0.05)        | 0.02<br>(0.01 to<br>0.02)        | 0.02<br>(0.01 to<br>0.02)        | 0.02<br>(0.01 to<br>0.02)        |
| Cystic echinococcosis                                 | 1.51<br>(1.27 to<br>1.77)              | 0.61<br>(0.44 to<br>0.84)           | 0.57<br>(0.43 to<br>0.74)           | 0.89<br>(0.65 to<br>1.21)           | 0.05<br>(0.04 to<br>0.06)        | 0.03<br>(0.02 to<br>0.04)        | 0.03<br>(0.02 to<br>0.04)        | 0.05<br>(0.03 to<br>0.06)        |
| Dengue                                                | 0.28<br>(0.15 to<br>0.84)              | 0.54<br>(0.30 to<br>1.57)           | 0.55<br>(0.30 to<br>1.61)           | 0.53<br>(0.29 to<br>1.58)           | 0.01<br>(0.00 to<br>0.02)        | 0.02<br>(0.01 to<br>0.08)        | 0.03<br>(0.01 to<br>0.08)        | 0.02<br>(0.01 to<br>0.07)        |
| Yellow fever                                          | 0.00<br>(0.00 to<br>0.00)              | 0.00<br>(0.00 to<br>0.00)           | 0.00<br>(0.00 to<br>0.00)           | 0.00<br>(0.00 to<br>0.00)           | 0.00<br>(0.00 to<br>0.00)        | 0.00<br>(0.00 to<br>0.00)        | 0.00<br>(0.00 to<br>0.00)        | 0.00<br>(0.00 to<br>0.00)        |
| Rabies                                                | 40.66<br>(10.80 to<br>48.96)           | 10.84<br>(2.38 to<br>14.90)         | 10.22<br>(2.35 to<br>13.76)         | 15.68<br>(3.49 to<br>24.12)         | 0.95<br>(0.25 to<br>1.13)        | 0.34<br>(0.08 to<br>0.46)        | 0.33<br>(0.08 to<br>0.43)        | 0.48<br>(0.11 to<br>0.72)        |
| Intestinal nematode infections                        | 1.79<br>(1.44 to<br>2.24)              | 1.07<br>(0.85 to<br>1.39)           | 1.08<br>(0.86 to<br>1.39)           | 1.05<br>(0.82 to<br>1.38)           | 0.04<br>(0.03 to<br>0.04)        | 0.04<br>(0.04 to<br>0.05)        | 0.04<br>(0.04 to<br>0.05)        | 0.04<br>(0.03 to<br>0.04)        |
| Other neglected tropical diseases                     | 24.39<br>(16.96 to<br>27.14)           | 17.10<br>(11.12 to<br>20.45)        | 18.04<br>(11.88 to<br>21.59)        | 16.54<br>(10.68 to<br>20.34)        | 0.64<br>(0.44 to<br>0.72)        | 0.68<br>(0.44 to<br>0.80)        | 0.74<br>(0.47 to<br>0.87)        | 0.63<br>(0.41 to<br>0.76)        |
| <b>Maternal disorders</b>                             | <b>130.45</b><br>(117.26 to<br>145.10) | <b>25.09</b><br>(13.41 to<br>44.16) | <b>23.09</b><br>(11.58 to<br>42.68) | <b>37.83</b><br>(17.70 to<br>71.83) | <b>2.34</b><br>(2.11 to<br>2.60) | <b>0.47</b><br>(0.26 to<br>0.81) | <b>0.43</b><br>(0.22 to<br>0.78) | <b>0.70</b><br>(0.34 to<br>1.32) |
| Maternal hemorrhage                                   | 37.01<br>(31.82 to<br>42.79)           | 8.93<br>(4.49 to<br>16.46)          | 8.27<br>(3.84 to<br>16.04)          | 13.37<br>(5.81 to<br>26.35)         | 0.66<br>(0.57 to<br>0.76)        | 0.16<br>(0.08 to<br>0.30)        | 0.15<br>(0.07 to<br>0.29)        | 0.25<br>(0.11 to<br>0.48)        |
| Maternal sepsis and other maternal infections         | 7.06<br>(5.75 to<br>8.58)              | 1.56<br>(0.87 to<br>2.57)           | 1.43<br>(0.75 to<br>2.46)           | 2.35<br>(1.21 to<br>4.38)           | 0.14<br>(0.12 to<br>0.17)        | 0.03<br>(0.02 to<br>0.05)        | 0.03<br>(0.02 to<br>0.05)        | 0.05<br>(0.03 to<br>0.09)        |
| Maternal hypertensive disorders                       | 14.87<br>(12.21 to<br>18.12)           | 2.56<br>(1.24 to<br>4.89)           | 2.35<br>(1.09 to<br>4.64)           | 3.93<br>(1.70 to<br>8.13)           | 0.26<br>(0.21 to<br>0.32)        | 0.05<br>(0.02 to<br>0.09)        | 0.04<br>(0.02 to<br>0.08)        | 0.07<br>(0.03 to<br>0.15)        |
| Maternal obstructed labor and uterine rupture         | 5.77<br>(4.56 to<br>7.14)              | 1.14<br>(0.56 to<br>2.15)           | 1.03<br>(0.45 to<br>2.04)           | 1.83<br>(0.77 to<br>3.83)           | 0.10<br>(0.08 to<br>0.13)        | 0.02<br>(0.01 to<br>0.04)        | 0.02<br>(0.01 to<br>0.04)        | 0.03<br>(0.02 to<br>0.07)        |
| Maternal abortion, miscarriage, and ectopic pregnancy | 15.88<br>(13.18 to<br>18.89)           | 3.08<br>(1.67 to<br>5.89)           | 2.82<br>(1.43 to<br>5.01)           | 4.73<br>(2.32 to<br>8.90)           | 0.29<br>(0.24 to<br>0.35)        | 0.06<br>(0.03 to<br>0.11)        | 0.05<br>(0.03 to<br>0.10)        | 0.09<br>(0.05 to<br>0.17)        |



|                                        |                              |                           |                           |                            |                           |                           |                           |                           |
|----------------------------------------|------------------------------|---------------------------|---------------------------|----------------------------|---------------------------|---------------------------|---------------------------|---------------------------|
| Indirect maternal deaths               | 12.83<br>(9.31 to<br>18.63)  | 2.76<br>(1.28 to<br>5.67) | 2.50<br>(1.05 to<br>5.27) | 4.27<br>(1.74 to<br>8.96)  | 0.22<br>(0.16 to<br>0.32) | 0.05<br>(0.02 to<br>0.10) | 0.04<br>(0.02 to<br>0.09) | 0.08<br>(0.03 to<br>0.16) |
| Late maternal deaths                   | 0.88<br>(0.53 to<br>1.34)    | 0.15<br>(0.06 to<br>0.32) | 0.14<br>(0.05 to<br>0.29) | 0.23<br>(0.08 to<br>0.54)  | 0.02<br>(0.01 to<br>0.02) | 0.00<br>(0.00 to<br>0.01) | 0.00<br>(0.00 to<br>0.01) | 0.00<br>(0.00 to<br>0.01) |
| Maternal deaths aggravated by HIV/AIDS | 0.03<br>(0.01 to<br>0.05)    | 0.02<br>(0.00 to<br>0.19) | 0.02<br>(0.00 to<br>0.18) | 0.06<br>(0.01 to<br>0.38)  | 0.00<br>(0.00 to<br>0.00) | 0.00<br>(0.00 to<br>0.00) | 0.00<br>(0.00 to<br>0.00) | 0.00<br>(0.00 to<br>0.01) |
| Other maternal disorders               | 36.12<br>(31.14 to<br>41.61) | 4.89<br>(2.53 to<br>8.99) | 4.53<br>(2.26 to<br>8.92) | 7.05<br>(3.29 to<br>13.49) | 0.64<br>(0.55 to<br>0.74) | 0.09<br>(0.05 to<br>0.16) | 0.08<br>(0.04 to<br>0.16) | 0.13<br>(0.06 to<br>0.24) |

| China                                                                   |                                           |                                       |                                       |                                         |                                  |                                  |                                  |                                  |
|-------------------------------------------------------------------------|-------------------------------------------|---------------------------------------|---------------------------------------|-----------------------------------------|----------------------------------|----------------------------------|----------------------------------|----------------------------------|
| Cause                                                                   | YLLs (in 1000s)                           |                                       |                                       |                                         | Deaths (in 1000s)                |                                  |                                  |                                  |
|                                                                         | 2016                                      | 2040 Forecast                         | 2040 Better Scenario                  | 2040 Worse Scenario                     | 2016                             | 2040 Forecast                    | 2040 Better Scenario             | 2040 Worse Scenario              |
| <b>Neonatal disorders</b>                                               | <b>4,722.14</b><br>(4,277.91 to 5,224.10) | <b>713.47</b><br>(289.32 to 1,322.12) | <b>565.81</b><br>(224.11 to 1,035.08) | <b>1,110.54</b><br>(439.38 to 2,035.60) | <b>54.59</b><br>(49.45 to 60.39) | <b>8.25</b><br>(3.35 to 15.28)   | <b>6.54</b><br>(2.59 to 11.97)   | <b>12.84</b><br>(5.09 to 23.53)  |
| Neonatal preterm birth                                                  | 2,411.04<br>(2,069.95 to 2,697.09)        | 326.74<br>(126.64 to 597.34)          | 230.68<br>(90.38 to 423.37)           | 537.29<br>(205.50 to 976.83)            | 27.86<br>(23.92 to 31.17)        | 3.78<br>(1.46 to 6.90)           | 2.67<br>(1.05 to 4.89)           | 6.21<br>(2.38 to 11.29)          |
| Neonatal encephalopathy due to birth asphyxia and trauma                | 1,524.96<br>(1,353.06 to 1,778.55)        | 223.79<br>(70.77 to 469.94)           | 186.53<br>(55.52 to 396.28)           | 360.53<br>(112.93 to 743.60)            | 17.63<br>(15.64 to 20.55)        | 2.59<br>(0.82 to 5.45)           | 2.16<br>(0.64 to 4.58)           | 4.17<br>(1.31 to 8.59)           |
| Neonatal sepsis and other neonatal infections                           | 178.97<br>(138.32 to 251.25)              | 39.69<br>(21.79 to 71.57)             | 34.37<br>(18.62 to 60.19)             | 58.01<br>(31.94 to 98.84)               | 2.07<br>(1.60 to 2.90)           | 0.46<br>(0.25 to 0.83)           | 0.40<br>(0.22 to 0.70)           | 0.67<br>(0.37 to 1.14)           |
| Hemolytic disease and other neonatal jaundice                           | 79.97<br>(68.15 to 93.84)                 | 10.00<br>(4.72 to 18.82)              | 8.59<br>(4.11 to 16.37)               | 15.34<br>(7.52 to 29.45)                | 0.93<br>(0.79 to 1.09)           | 0.12<br>(0.05 to 0.22)           | 0.10<br>(0.05 to 0.19)           | 0.18<br>(0.09 to 0.34)           |
| Other neonatal disorders                                                | 527.21<br>(448.47 to 602.02)              | 113.26<br>(51.58 to 204.20)           | 105.64<br>(48.39 to 189.40)           | 139.38<br>(63.11 to 253.48)             | 6.10<br>(5.19 to 6.97)           | 1.31<br>(0.60 to 2.37)           | 1.22<br>(0.56 to 2.19)           | 1.61<br>(0.73 to 2.93)           |
| <b>Nutritional deficiencies</b>                                         | <b>215.58</b><br>(205.49 to 227.42)       | <b>274.27</b><br>(220.74 to 336.00)   | <b>302.26</b><br>(251.44 to 363.46)   | <b>237.33</b><br>(182.57 to 297.18)     | <b>14.17</b><br>(13.55 to 14.79) | <b>33.18</b><br>(24.05 to 42.88) | <b>14.17</b><br>(29.03 to 48.01) | <b>26.16</b><br>(17.57 to 35.29) |
| Protein-energy malnutrition                                             | 153.92<br>(144.90 to 178.19)              | 217.51<br>(164.11 to 277.61)          | 245.08<br>(194.49 to 301.03)          | 175.84<br>(130.13 to 227.78)            | 11.20<br>(10.61 to 12.27)        | 27.83<br>(18.93 to 36.92)        | 32.32<br>(23.44 to 41.95)        | 20.81<br>(13.36 to 29.16)        |
| Iodine deficiency                                                       | 3.10<br>(2.07 to 4.64)                    | 9.99<br>(0.61 to 36.52)               | 10.23<br>(0.57 to 38.84)              | 10.67<br>(0.82 to 35.55)                | 0.12<br>(0.07 to 0.17)           | 1.05<br>(0.04 to 4.65)           | 1.11<br>(0.04 to 5.10)           | 1.05<br>(0.05 to 4.45)           |
| Dietary iron deficiency                                                 | 8.84<br>(7.09 to 8.78)                    | 7.01<br>(4.31 to 10.24)               | 7.38<br>(4.47 to 10.80)               | 6.49<br>(4.12 to 9.34)                  | 0.24<br>(0.17 to 0.26)           | 0.42<br>(0.18 to 0.72)           | 0.46<br>(0.21 to 0.77)           | 0.36<br>(0.16 to 0.60)           |
| Other nutritional deficiencies                                          | 30.52<br>(32.48 to 55.44)                 | 39.76<br>(24.04 to 50.21)             | 39.57<br>(23.71 to 50.37)             | 44.33<br>(27.20 to 56.84)               | 2.62<br>(1.61 to 2.88)           | 3.88<br>(2.20 to 5.05)           | 4.02<br>(2.40 to 5.25)           | 3.94<br>(2.31 to 5.30)           |
| <b>Other communicable, maternal, neonatal, and nutritional diseases</b> | <b>403.17</b><br>(382.77 to 424.44)       | <b>223.92</b><br>(173.64 to 290.85)   | <b>207.08</b><br>(160.71 to 263.86)   | <b>301.32</b><br>(242.61 to 372.34)     | <b>12.81</b><br>(12.22 to 13.35) | <b>11.49</b><br>(9.30 to 14.29)  | <b>11.00</b><br>(8.85 to 13.63)  | <b>14.32</b><br>(11.74 to 17.51) |
| Sexually transmitted infections excluding HIV                           | 20.47<br>(16.49 to 26.42)                 | 5.83<br>(4.28 to 7.47)                | 5.52<br>(4.00 to 7.12)                | 7.15<br>(5.21 to 9.22)                  | 0.55<br>(0.43 to 0.63)           | 0.28<br>(0.19 to 0.34)           | 0.27<br>(0.19 to 0.33)           | 0.31<br>(0.23 to 0.38)           |
| Syphilis                                                                | 11.88<br>(8.62 to 17.74)                  | 2.08<br>(1.44 to 3.15)                | 1.86<br>(1.29 to 2.79)                | 2.92<br>(2.08 to 4.30)                  | 0.27<br>(0.21 to 0.35)           | 0.09<br>(0.06 to 0.12)           | 0.08<br>(0.06 to 0.11)           | 0.11<br>(0.08 to 0.14)           |
| Chlamydial infection                                                    | 1.56<br>(1.13 to 1.74)                    | 0.70<br>(0.49 to 0.87)                | 0.68<br>(0.48 to 0.87)                | 0.78<br>(0.54 to 1.00)                  | 0.05<br>(0.04 to 0.06)           | 0.04<br>(0.03 to 0.04)           | 0.04<br>(0.03 to 0.05)           | 0.04<br>(0.03 to 0.05)           |
| Gonococcal infection                                                    | 4.70<br>(3.45 to 5.21)                    | 2.14<br>(1.47 to 2.69)                | 2.09<br>(1.45 to 2.67)                | 2.41<br>(1.68 to 3.05)                  | 0.16<br>(0.11 to 0.18)           | 0.11<br>(0.08 to 0.14)           | 0.11<br>(0.08 to 0.14)           | 0.12<br>(0.08 to 0.15)           |
| Other sexually transmitted infections                                   | 2.33<br>(1.69 to 2.58)                    | 0.91<br>(0.63 to 1.16)                | 0.89<br>(0.62 to 1.13)                | 1.05<br>(0.72 to 1.34)                  | 0.07<br>(0.05 to 0.08)           | 0.04<br>(0.03 to 0.05)           | 0.04<br>(0.03 to 0.05)           | 0.04<br>(0.03 to 0.05)           |
| Acute hepatitis                                                         | 287.34<br>(273.57 to 303.69)              | 151.37<br>(108.39 to 212.26)          | 134.39<br>(96.87 to 183.19)           | 222.27<br>(175.01 to 282.16)            | 9.45<br>(9.04 to 9.89)           | 7.31<br>(5.38 to 9.96)           | 6.63<br>(4.85 to 8.98)           | 10.19<br>(8.14 to 12.66)         |
| Acute hepatitis A                                                       | 11.29<br>(9.81 to 13.62)                  | 2.74<br>(1.65 to 4.66)                | 2.47<br>(1.51 to 4.13)                | 3.73<br>(2.27 to 6.25)                  | 0.19<br>(0.16 to 0.22)           | 0.09<br>(0.06 to 0.14)           | 0.09<br>(0.06 to 0.13)           | 0.12<br>(0.08 to 0.17)           |
| Acute hepatitis B                                                       | 252.98<br>(240.11 to 266.98)              | 135.87<br>(96.50 to 192.73)           | 120.36<br>(84.60 to 166.24)           | 201.02<br>(154.38 to 256.67)            | 8.59<br>(8.15 to 9.04)           | 6.41<br>(4.64 to 8.89)           | 5.79<br>(4.16 to 7.87)           | 9.07<br>(7.08 to 11.48)          |

|                                       |                                                                  |                                                                  |                                                                  |                                                                  |                                                            |                                                               |                                                              |                                                               |
|---------------------------------------|------------------------------------------------------------------|------------------------------------------------------------------|------------------------------------------------------------------|------------------------------------------------------------------|------------------------------------------------------------|---------------------------------------------------------------|--------------------------------------------------------------|---------------------------------------------------------------|
| Acute hepatitis C                     | 3.48<br>(2.53 to<br>4.82)                                        | 2.64<br>(1.67 to<br>4.13)                                        | 2.36<br>(1.49 to<br>3.66)                                        | 3.67<br>(2.45 to<br>5.47)                                        | 0.13<br>(0.09 to<br>0.18)                                  | 0.13<br>(0.09 to<br>0.21)                                     | 0.12<br>(0.08 to<br>0.19)                                    | 0.18<br>(0.12 to<br>0.26)                                     |
| Acute hepatitis E                     | 19.60<br>(16.50 to<br>23.24)                                     | 10.13<br>(6.64 to<br>15.02)                                      | 9.20<br>(6.08 to<br>13.49)                                       | 13.85<br>(9.57 to<br>20.03)                                      | 0.55<br>(0.43 to<br>0.70)                                  | 0.67<br>(0.41 to<br>1.02)                                     | 0.64<br>(0.40 to<br>1.00)                                    | 0.83<br>(0.53 to<br>1.26)                                     |
| Other unspecified infectious diseases | 95.36<br>(78.09 to<br>107.59)                                    | 66.71<br>(53.47 to<br>80.80)                                     | 67.17<br>(53.91 to<br>81.49)                                     | 71.89<br>(56.33 to<br>90.19)                                     | 2.80<br>(2.35 to<br>3.05)                                  | 3.90<br>(3.15 to<br>4.64)                                     | 4.10<br>(3.33 to<br>4.88)                                    | 3.82<br>(2.93 to<br>4.74)                                     |
| <b>Non-communicable diseases</b>      | <b>165,968.00</b><br><b>(162,300.56 to</b><br><b>169,991.72)</b> | <b>184,016.09</b><br><b>(141,760.04 to</b><br><b>236,119.62)</b> | <b>153,406.61</b><br><b>(122,629.15 to</b><br><b>191,933.36)</b> | <b>268,229.44</b><br><b>(199,382.44 to</b><br><b>358,037.95)</b> | <b>8,558.79</b><br><b>(8,378.23 to</b><br><b>8,733.13)</b> | <b>13,078.35</b><br><b>(10,619.30 to</b><br><b>16,029.41)</b> | <b>11,258.60</b><br><b>(9,452.91 to</b><br><b>13,364.12)</b> | <b>17,930.65</b><br><b>(14,474.68 to</b><br><b>21,948.70)</b> |

| China                                |                                       |                                        |                                       |                                        |                                    |                                    |                                    |                                    |
|--------------------------------------|---------------------------------------|----------------------------------------|---------------------------------------|----------------------------------------|------------------------------------|------------------------------------|------------------------------------|------------------------------------|
| Cause                                | YLLs (in 1000s)                       |                                        |                                       |                                        | Deaths (in 1000s)                  |                                    |                                    |                                    |
|                                      | 2016                                  | 2040 Forecast                          | 2040 Better Scenario                  | 2040 Worse Scenario                    | 2016                               | 2040 Forecast                      | 2040 Better Scenario               | 2040 Worse Scenario                |
| Neoplasms                            | 57,405.56<br>(55,724.40 to 59,141.06) | 73,481.70<br>(56,482.02 to 102,953.74) | 64,111.55<br>(50,798.86 to 84,844.40) | 89,971.01<br>(62,757.93 to 141,389.79) | 2,378.51<br>(2,310.36 to 2,448.01) | 3,976.62<br>(3,107.04 to 5,391.09) | 3,525.08<br>(2,849.09 to 4,528.93) | 4,714.12<br>(3,306.56 to 6,970.56) |
| Lip and oral cavity cancer           | 471.60<br>(448.17 to 492.97)          | 506.35<br>(296.56 to 882.49)           | 346.95<br>(225.63 to 563.27)          | 707.28<br>(366.69 to 1,420.68)         | 19.59<br>(18.67 to 20.41)          | 26.61<br>(15.54 to 44.76)          | 18.58<br>(12.09 to 29.49)          | 35.70<br>(18.63 to 67.48)          |
| Nasopharynx cancer                   | 814.88<br>(744.84 to 882.42)          | 947.64<br>(592.34 to 1,661.47)         | 614.13<br>(408.73 to 980.36)          | 1,498.17<br>(813.46 to 3,109.35)       | 28.11<br>(25.79 to 30.33)          | 40.20<br>(25.03 to 68.92)          | 26.45<br>(17.69 to 41.09)          | 61.64<br>(33.59 to 121.12)         |
| Other pharynx cancer                 | 116.02<br>(103.19 to 125.15)          | 154.21<br>(101.86 to 228.59)           | 121.56<br>(84.11 to 173.10)           | 148.60<br>(96.48 to 225.77)            | 4.61<br>(4.11 to 4.94)             | 7.88<br>(5.25 to 11.58)            | 6.39<br>(4.45 to 8.96)             | 7.31<br>(4.73 to 11.02)            |
| Esophageal cancer                    | 4,378.09<br>(4,186.88 to 4,575.94)    | 7,339.89<br>(4,490.96 to 12,268.07)    | 5,792.78<br>(3,796.65 to 8,970.11)    | 9,400.67<br>(4,849.41 to 17,930.30)    | 206.21<br>(197.72 to 214.83)       | 410.30<br>(253.16 to 678.56)       | 328.33<br>(218.61 to 509.85)       | 511.00<br>(268.54 to 933.30)       |
| Stomach cancer                       | 7,355.90<br>(7,094.72 to 7,624.13)    | 6,777.56<br>(4,984.37 to 9,196.54)     | 6,036.47<br>(4,535.76 to 7,856.90)    | 8,617.93<br>(6,662.30 to 10,920.55)    | 334.78<br>(323.44 to 346.91)       | 395.57<br>(298.02 to 525.38)       | 357.53<br>(274.56 to 453.74)       | 484.83<br>(390.14 to 605.61)       |
| Colon and rectum cancer              | 3,704.45<br>(3,517.06 to 3,881.33)    | 5,841.82<br>(4,190.94 to 8,054.13)     | 5,025.22<br>(3,698.41 to 6,891.67)    | 6,769.18<br>(4,950.79 to 9,278.51)     | 167.09<br>(159.11 to 174.55)       | 359.34<br>(261.25 to 489.36)       | 317.74<br>(236.61 to 428.40)       | 397.90<br>(290.21 to 536.72)       |
| Liver cancer                         | 11,411.23<br>(10,876.68 to 12,016.77) | 18,416.16<br>(13,474.85 to 25,915.37)  | 17,372.37<br>(13,238.49 to 22,883.95) | 17,778.93<br>(12,411.93 to 26,786.93)  | 426.90<br>(408.02 to 451.24)       | 878.56<br>(658.35 to 1,208.67)     | 844.28<br>(662.62 to 1,088.91)     | 819.65<br>(588.96 to 1,202.70)     |
| Liver cancer due to hepatitis B      | 6,237.32<br>(5,489.41 to 6,916.12)    | 9,738.64<br>(6,988.78 to 13,947.41)    | 9,291.83<br>(6,959.97 to 12,630.70)   | 9,306.05<br>(6,541.89 to 14,455.83)    | 224.53<br>(195.82 to 249.91)       | 447.83<br>(328.56 to 623.25)       | 435.32<br>(331.56 to 575.41)       | 413.47<br>(288.41 to 616.25)       |
| Liver cancer due to hepatitis C      | 849.73<br>(745.21 to 976.08)          | 1,546.95<br>(1,121.29 to 2,203.32)     | 1,492.11<br>(1,128.87 to 1,985.52)    | 1,457.54<br>(996.36 to 2,177.07)       | 35.95<br>(31.78 to 40.76)          | 84.05<br>(61.41 to 116.63)         | 82.64<br>(62.31 to 108.76)         | 76.45<br>(53.51 to 108.92)         |
| Liver cancer due to alcohol use      | 1,220.95<br>(981.87 to 1,499.37)      | 2,218.88<br>(1,524.57 to 3,148.96)     | 1,891.33<br>(1,335.64 to 2,613.02)    | 2,240.09<br>(1,499.79 to 3,312.25)     | 53.37<br>(43.34 to 64.50)          | 123.05<br>(85.37 to 172.11)        | 108.06<br>(76.51 to 147.05)        | 120.33<br>(81.45 to 173.78)        |
| Liver cancer due to other causes     | 3,103.22<br>(2,709.19 to 3,578.61)    | 4,911.69<br>(3,297.48 to 7,237.59)     | 4,697.10<br>(3,351.76 to 6,536.26)    | 4,775.24<br>(2,981.98 to 7,562.33)     | 113.05<br>(99.25 to 129.71)        | 223.62<br>(153.62 to 322.64)       | 218.26<br>(157.41 to 301.32)       | 209.40<br>(134.11 to 323.48)       |
| Gallbladder and biliary tract cancer | 524.55<br>(434.40 to 599.66)          | 536.83<br>(437.65 to 629.24)           | 548.58<br>(447.88 to 639.86)          | 511.57<br>(416.74 to 598.34)           | 24.90<br>(20.73 to 28.46)          | 33.92<br>(28.13 to 39.56)          | 35.35<br>(29.07 to 40.84)          | 30.94<br>(25.31 to 35.96)          |
| Pancreatic cancer                    | 1,623.54<br>(1,556.23 to 1,688.22)    | 2,604.05<br>(2,075.78 to 3,333.03)     | 2,631.86<br>(2,105.61 to 3,289.14)    | 2,569.62<br>(1,961.52 to 3,437.86)     | 71.72<br>(68.87 to 74.56)          | 147.46<br>(119.24 to 183.69)       | 150.80<br>(123.02 to 185.51)       | 141.01<br>(109.15 to 183.46)       |
| Larynx cancer                        | 397.30<br>(378.33 to 422.06)          | 459.22<br>(204.69 to 1,055.11)         | 296.18<br>(151.88 to 621.28)          | 778.41<br>(285.15 to 1,920.46)         | 17.48<br>(16.67 to 18.50)          | 25.21<br>(10.68 to 57.49)          | 16.51<br>(8.15 to 36.06)           | 40.60<br>(14.75 to 97.37)          |
| Tracheal, bronchus, and lung cancer  | 12,940.05<br>(12,373.08 to 13,527.21) | 15,058.26<br>(8,510.82 to 29,607.19)   | 10,876.07<br>(6,826.42 to 19,171.18)  | 25,438.54<br>(11,833.66 to 54,532.04)  | 590.55<br>(565.38 to 615.88)       | 859.07<br>(469.38 to 1,587.68)     | 632.25<br>(390.94 to 1,084.30)     | 1,384.23<br>(643.43 to 2,770.56)   |
| Malignant skin melanoma              | 140.31<br>(111.20 to 152.76)          | 181.71<br>(144.40 to 213.01)           | 198.07<br>(157.04 to 232.19)          | 143.53<br>(114.70 to 163.51)           | 5.07<br>(4.06 to 5.50)             | 9.90<br>(7.89 to 11.66)            | 11.03<br>(8.97 to 12.84)           | 7.45<br>(5.93 to 8.58)             |
| Non-melanoma skin cancer             | 289.35<br>(272.42 to 307.89)          | 383.79<br>(323.89 to 462.12)           | 369.33<br>(309.62 to 442.33)          | 441.06<br>(389.35 to 492.06)           | 13.82<br>(13.09 to 14.72)          | 25.99<br>(22.01 to 31.32)          | 25.66<br>(21.84 to 30.49)          | 28.20<br>(23.52 to 32.20)          |
| Breast cancer                        | 2,021.11<br>(1,708.00 to 2,283.17)    | 2,058.92<br>(1,465.14 to 2,779.57)     | 1,874.99<br>(1,353.14 to 2,488.03)    | 2,444.50<br>(1,776.21 to 3,274.50)     | 70.45<br>(58.97 to 79.29)          | 100.33<br>(73.38 to 132.75)        | 92.71<br>(69.24 to 121.13)         | 115.20<br>(84.26 to 151.83)        |
| Cervical cancer                      | 1,129.49<br>(665.18 to 1,307.05)      | 738.44<br>(423.52 to 1,047.58)         | 678.61<br>(391.72 to 936.74)          | 939.68<br>(549.36 to 1,312.03)         | 38.36<br>(23.44 to 44.28)          | 34.67<br>(20.59 to 47.86)          | 32.15<br>(19.71 to 42.96)          | 42.96<br>(26.55 to 58.31)          |

|                   |                                 |                                     |                                     |                                     |                              |                               |                               |                               |
|-------------------|---------------------------------|-------------------------------------|-------------------------------------|-------------------------------------|------------------------------|-------------------------------|-------------------------------|-------------------------------|
|                   | 347.97<br>(322.65 to<br>385.01) | 392.06<br>(314.34 to<br>477.40)     | 376.70<br>(294.47 to<br>464.60)     | 451.23<br>(360.93 to<br>547.50)     | 13.24<br>(12.32 to<br>14.60) | 20.87<br>(17.42 to<br>24.68)  | 20.32<br>(16.55 to<br>24.03)  | 23.19<br>(19.53 to<br>27.32)  |
| Uterine cancer    |                                 |                                     |                                     |                                     |                              |                               |                               |                               |
|                   | 519.21<br>(466.69 to<br>570.63) | 603.97<br>(456.08 to<br>781.39)     | 577.25<br>(432.64 to<br>737.16)     | 651.21<br>(488.56 to<br>850.10)     | 18.59<br>(16.73 to<br>20.21) | 29.31<br>(22.88 to<br>37.15)  | 28.28<br>(22.20 to<br>35.35)  | 30.91<br>(24.06 to<br>39.57)  |
| Ovarian cancer    |                                 |                                     |                                     |                                     |                              |                               |                               |                               |
|                   | 532.73<br>(419.16 to<br>671.78) | 1,191.62<br>(929.68 to<br>1,523.40) | 1,219.17<br>(960.79 to<br>1,546.31) | 1,152.92<br>(880.44 to<br>1,479.38) | 34.08<br>(26.18 to<br>42.65) | 94.20<br>(71.77 to<br>121.89) | 99.55<br>(76.47 to<br>124.56) | 85.49<br>(61.68 to<br>112.28) |
| Prostate cancer   |                                 |                                     |                                     |                                     |                              |                               |                               |                               |
|                   | 20.67<br>(19.26 to<br>22.09)    | 18.35<br>(15.52 to<br>22.06)        | 18.01<br>(15.30 to<br>21.79)        | 20.24<br>(17.49 to<br>23.40)        | 0.65<br>(0.60 to<br>0.69)    | 0.96<br>(0.78 to<br>1.16)     | 0.97<br>(0.81 to<br>1.20)     | 0.98<br>(0.78 to<br>1.18)     |
| Testicular cancer |                                 |                                     |                                     |                                     |                              |                               |                               |                               |

| China                           |                                                     |                                                     |                                                     |                                                       |                                                  |                                                  |                                                  |                                                   |
|---------------------------------|-----------------------------------------------------|-----------------------------------------------------|-----------------------------------------------------|-------------------------------------------------------|--------------------------------------------------|--------------------------------------------------|--------------------------------------------------|---------------------------------------------------|
| Cause                           | YLLs (in 1000s)                                     |                                                     |                                                     |                                                       | Deaths (in 1000s)                                |                                                  |                                                  |                                                   |
|                                 | 2016                                                | 2040 Forecast                                       | 2040 Better Scenario                                | 2040 Worse Scenario                                   | 2016                                             | 2040 Forecast                                    | 2040 Better Scenario                             | 2040 Worse Scenario                               |
| Kidney cancer                   | 397.99<br>(375.46 to 419.61)                        | 553.09<br>(447.64 to 702.51)                        | 565.61<br>(462.27 to 705.28)                        | 510.40<br>(399.35 to 684.43)                          | 15.95<br>(15.07 to 16.75)                        | 30.77<br>(24.91 to 38.00)                        | 32.09<br>(26.46 to 39.28)                        | 27.05<br>(21.38 to 35.09)                         |
| Bladder cancer                  | 468.04<br>(437.07 to 493.43)                        | 759.66<br>(569.20 to 1,011.44)                      | 740.88<br>(574.42 to 969.07)                        | 831.25<br>(579.39 to 1,205.67)                        | 26.05<br>(24.44 to 27.32)                        | 55.12<br>(41.39 to 72.04)                        | 54.69<br>(42.57 to 69.07)                        | 57.44<br>(40.07 to 78.99)                         |
| Brain and nervous system cancer | 1,898.64<br>(1,720.58 to 2,155.71)                  | 2,149.86<br>(1,866.40 to 2,493.93)                  | 2,141.61<br>(1,832.55 to 2,490.87)                  | 2,168.75<br>(1,900.09 to 2,477.95)                    | 59.12<br>(53.26 to 66.81)                        | 98.24<br>(84.60 to 111.78)                       | 99.75<br>(85.51 to 113.27)                       | 94.96<br>(82.45 to 107.05)                        |
| Thyroid cancer                  | 135.81<br>(119.25 to 145.42)                        | 159.16<br>(123.85 to 209.97)                        | 150.37<br>(117.98 to 192.44)                        | 170.21<br>(131.77 to 229.58)                          | 5.92<br>(5.08 to 6.34)                           | 9.68<br>(7.47 to 12.79)                          | 9.41<br>(7.34 to 12.01)                          | 9.84<br>(7.51 to 13.11)                           |
| Mesothelioma                    | 74.17<br>(63.37 to 79.19)                           | 78.02<br>(65.51 to 87.80)                           | 80.86<br>(68.20 to 91.25)                           | 73.06<br>(62.18 to 81.98)                             | 2.75<br>(2.38 to 2.94)                           | 4.06<br>(3.50 to 4.56)                           | 4.29<br>(3.70 to 4.82)                           | 3.65<br>(3.15 to 4.12)                            |
| Hodgkin lymphoma                | 87.75<br>(73.50 to 115.04)                          | 60.54<br>(45.50 to 86.54)                           | 56.17<br>(42.02 to 76.81)                           | 78.30<br>(62.27 to 103.42)                            | 2.92<br>(2.40 to 3.79)                           | 2.89<br>(2.21 to 4.06)                           | 2.73<br>(2.08 to 3.67)                           | 3.59<br>(2.81 to 4.66)                            |
| Non-Hodgkin lymphoma            | 1,074.94<br>(895.46 to 1,150.27)                    | 1,113.37<br>(892.97 to 1,354.39)                    | 1,070.37<br>(856.07 to 1,276.73)                    | 1,160.68<br>(927.03 to 1,384.84)                      | 37.64<br>(31.36 to 40.23)                        | 56.17<br>(46.00 to 66.60)                        | 56.17<br>(45.17 to 64.44)                        | 56.16<br>(45.39 to 66.39)                         |
| Multiple myeloma                | 258.68<br>(223.45 to 290.60)                        | 376.51<br>(312.35 to 455.35)                        | 368.24<br>(304.83 to 437.46)                        | 370.96<br>(307.93 to 452.20)                          | 10.36<br>(9.08 to 11.90)                         | 20.13<br>(17.09 to 24.19)                        | 20.08<br>(17.19 to 23.76)                        | 19.06<br>(15.95 to 23.26)                         |
| Leukemia                        | 2,320.77<br>(1,979.51 to 2,513.02)                  | 1,627.69<br>(1,274.48 to 2,131.79)                  | 1,513.11<br>(1,201.68 to 1,902.06)                  | 1,864.36<br>(1,446.77 to 2,450.55)                    | 60.20<br>(51.61 to 65.08)                        | 68.44<br>(54.46 to 88.63)                        | 64.97<br>(52.41 to 81.92)                        | 74.90<br>(59.48 to 97.49)                         |
| Acute lymphoid leukemia         | 492.42<br>(387.77 to 536.86)                        | 243.40<br>(186.84 to 309.84)                        | 224.94<br>(171.25 to 279.48)                        | 275.73<br>(210.13 to 352.37)                          | 10.88<br>(8.64 to 11.87)                         | 8.38<br>(6.45 to 10.54)                          | 7.85<br>(6.10 to 9.74)                           | 9.20<br>(7.06 to 11.67)                           |
| Chronic lymphoid leukemia       | 108.47<br>(93.55 to 123.01)                         | 88.53<br>(70.59 to 113.69)                          | 85.17<br>(68.37 to 105.10)                          | 91.43<br>(71.84 to 119.65)                            | 3.59<br>(3.13 to 4.04)                           | 4.24<br>(3.45 to 5.29)                           | 4.17<br>(3.42 to 5.11)                           | 4.19<br>(3.30 to 5.38)                            |
| Acute myeloid leukemia          | 275.29<br>(240.81 to 322.43)                        | 266.41<br>(211.90 to 335.09)                        | 258.50<br>(206.38 to 318.60)                        | 262.12<br>(206.86 to 341.76)                          | 7.23<br>(6.28 to 8.46)                           | 11.18<br>(8.99 to 13.99)                         | 11.07<br>(8.93 to 13.65)                         | 10.52<br>(8.27 to 13.51)                          |
| Chronic myeloid leukemia        | 35.49<br>(31.92 to 44.02)                           | 19.06<br>(13.59 to 28.81)                           | 16.46<br>(11.97 to 23.03)                           | 25.71<br>(19.62 to 36.70)                             | 1.10<br>(0.98 to 1.35)                           | 0.87<br>(0.63 to 1.30)                           | 0.77<br>(0.57 to 1.07)                           | 1.12<br>(0.87 to 1.55)                            |
| Other leukemia                  | 1,409.11<br>(1,162.84 to 1,544.36)                  | 1,010.29<br>(767.85 to 1,360.32)                    | 928.04<br>(703.68 to 1,199.07)                      | 1,209.37<br>(916.17 to 1,615.70)                      | 37.39<br>(30.98 to 40.81)                        | 43.77<br>(33.79 to 58.09)                        | 41.11<br>(31.97 to 53.36)                        | 49.87<br>(38.72 to 66.45)                         |
| Other neoplasms                 | 1,950.32<br>(1,730.28 to 2,037.97)                  | 2,392.97<br>(2,049.84 to 2,628.25)                  | 2,450.01<br>(2,087.19 to 2,707.14)                  | 2,279.78<br>(1,908.84 to 2,482.25)                    | 71.41<br>(61.82 to 74.65)                        | 130.78<br>(111.75 to 142.24)                     | 137.06<br>(117.43 to 149.03)                     | 118.30<br>(100.79 to 130.05)                      |
| <b>Cardiovascular diseases</b>  | <b>68,855.42</b><br><b>(66,991.62 to 70,620.65)</b> | <b>55,000.42</b><br><b>(55,211.47 to 86,756.83)</b> | <b>40,218.38</b><br><b>(26,752.20 to 60,876.57)</b> | <b>107,432.53</b><br><b>(70,306.38 to 158,159.75)</b> | <b>3,974.88</b><br><b>(3,877.57 to 4,075.74)</b> | <b>4,540.44</b><br><b>(3,064.97 to 6,994.40)</b> | <b>3,570.28</b><br><b>(2,505.94 to 5,214.86)</b> | <b>7,804.28</b><br><b>(5,485.19 to 11,041.59)</b> |
| Rheumatic heart disease         | 1,448.11<br>(1,364.94 to 1,533.90)                  | 1,224.75<br>(910.40 to 1,660.76)                    | 1,130.07<br>(867.42 to 1,479.57)                    | 1,544.07<br>(1,221.72 to 2,034.68)                    | 71.29<br>(67.19 to 75.60)                        | 90.10<br>(70.33 to 121.86)                       | 85.41<br>(66.98 to 111.72)                       | 106.75<br>(85.26 to 142.34)                       |
| Ischemic heart disease          | 28,455.70<br>(27,500.49 to 29,360.31)               | 19,799.33<br>(11,611.30 to 33,137.10)               | 14,332.90<br>(8,487.17 to 23,697.43)                | 41,533.52<br>(24,338.01 to 65,326.70)                 | 1,722.57<br>(1,670.39 to 1,777.85)               | 1,686.66<br>(1,033.56 to 2,718.17)               | 1,321.26<br>(824.25 to 2,031.65)                 | 3,137.10<br>(1,937.40 to 4,807.66)                |
| Stroke                          | 32,685.80<br>(31,644.62 to 33,888.79)               | 21,387.24<br>(12,371.34 to 34,892.11)               | 14,450.98<br>(8,839.81 to 23,005.71)                | 48,317.20<br>(29,355.88 to 75,424.69)                 | 1,790.03<br>(1,725.73 to 1,857.80)               | 1,642.21<br>(1,008.34 to 2,521.81)               | 1,207.05<br>(795.76 to 1,852.55)                 | 3,238.20<br>(2,076.92 to 4,884.22)                |
| Ischemic stroke                 | 11,384.99<br>(10,979.20 to 11,823.26)               | 8,021.04<br>(4,606.41 to 13,719.72)                 | 5,829.06<br>(3,500.21 to 10,151.06)                 | 16,103.48<br>(9,395.61 to 27,392.25)                  | 728.57<br>(697.51 to 759.23)                     | 679.31<br>(404.45 to 1,192.04)                   | 530.79<br>(326.79 to 910.88)                     | 1,208.47<br>(734.51 to 2,039.98)                  |

|                                |                                          |                                         |                                        |                                          |                                       |                                   |                                   |                                       |
|--------------------------------|------------------------------------------|-----------------------------------------|----------------------------------------|------------------------------------------|---------------------------------------|-----------------------------------|-----------------------------------|---------------------------------------|
| Intracerebral hemorrhage       | 21,300.81<br>(20,580.48 to<br>22,064.97) | 13,366.20<br>(7,342.41 to<br>23,119.25) | 8,621.93<br>(4,990.70 to<br>14,167.73) | 32,213.71<br>(18,207.79 to<br>53,274.62) | 1,061.47<br>(1,023.17 to<br>1,101.97) | 962.90<br>(554.23 to<br>1,571.49) | 676.27<br>(422.18 to<br>1,038.61) | 2,029.74<br>(1,232.72 to<br>3,176.29) |
| Hypertensive heart disease     | 3,547.91<br>(2,491.71 to<br>4,102.04)    | 8,041.07<br>(3,651.61 to<br>20,197.89)  | 6,167.94<br>(2,996.66 to<br>14,649.34) | 10,567.73<br>(4,720.54 to<br>27,925.77)  | 241.08<br>(167.70 to<br>278.28)       | 726.66<br>(327.11 to<br>1,919.92) | 582.19<br>(287.26 to<br>1,500.76) | 889.39<br>(375.14 to<br>2,406.76)     |
| Cardiomyopathy and myocarditis | 771.13<br>(619.97 to<br>835.66)          | 717.11<br>(510.29 to<br>938.52)         | 675.27<br>(479.12 to<br>867.73)        | 795.93<br>(571.69 to<br>1,015.75)        | 29.98<br>(23.08 to<br>32.74)          | 48.28<br>(32.67 to<br>63.65)      | 47.95<br>(33.14 to<br>61.75)      | 48.80<br>(33.29 to<br>64.30)          |
| Myocarditis                    | 353.49<br>(250.37 to<br>405.63)          | 348.33<br>(232.25 to<br>428.77)         | 362.32<br>(241.55 to<br>447.62)        | 330.37<br>(217.89 to<br>410.33)          | 14.23<br>(9.49 to<br>16.81)           | 25.97<br>(16.52 to<br>33.42)      | 28.11<br>(18.05 to<br>35.79)      | 22.31<br>(13.49 to<br>29.60)          |

| China                                                         |                                                     |                                                    |                                                    |                                                     |                                              |                                                |                                                |                                                |
|---------------------------------------------------------------|-----------------------------------------------------|----------------------------------------------------|----------------------------------------------------|-----------------------------------------------------|----------------------------------------------|------------------------------------------------|------------------------------------------------|------------------------------------------------|
| Cause                                                         | YLLs (in 1000s)                                     |                                                    |                                                    |                                                     | Deaths (in 1000s)                            |                                                |                                                |                                                |
|                                                               | 2016                                                | 2040 Forecast                                      | 2040 Better Scenario                               | 2040 Worse Scenario                                 | 2016                                         | 2040 Forecast                                  | 2040 Better Scenario                           | 2040 Worse Scenario                            |
| Alcoholic cardiomyopathy                                      | 81.97<br>(49.83 to 103.83)                          | 73.64<br>(44.36 to 99.08)                          | 57.60<br>(34.66 to 78.90)                          | 72.90<br>(43.19 to 95.00)                           | 2.72<br>(1.70 to 3.49)                       | 3.22<br>(2.04 to 4.38)                         | 2.63<br>(1.69 to 3.67)                         | 3.05<br>(1.91 to 4.07)                         |
| Other cardiomyopathy                                          | 335.68<br>(291.97 to 398.81)                        | 295.14<br>(170.84 to 472.96)                       | 255.35<br>(159.77 to 401.48)                       | 392.66<br>(260.94 to 563.88)                        | 13.03<br>(10.94 to 16.30)                    | 19.10<br>(10.71 to 31.09)                      | 17.20<br>(10.39 to 28.23)                      | 23.44<br>(15.05 to 36.32)                      |
| Atrial fibrillation and flutter                               | 413.09<br>(332.06 to 502.32)                        | 1,057.60<br>(781.57 to 1,383.95)                   | 988.47<br>(737.16 to 1,298.55)                     | 1,062.89<br>(789.95 to 1,420.39)                    | 38.23<br>(30.51 to 46.98)                    | 119.27<br>(87.87 to 156.74)                    | 115.35<br>(85.09 to 151.13)                    | 112.00<br>(78.85 to 152.09)                    |
| Aortic aneurysm                                               | 264.24<br>(245.87 to 284.58)                        | 347.56<br>(261.83 to 462.26)                       | 323.54<br>(246.42 to 431.56)                       | 390.41<br>(297.81 to 504.25)                        | 13.04<br>(12.19 to 13.89)                    | 25.18<br>(19.99 to 31.75)                      | 24.62<br>(19.84 to 31.00)                      | 25.57<br>(20.05 to 32.11)                      |
| Peripheral artery disease                                     | 31.02<br>(25.18 to 38.85)                           | 97.94<br>(70.37 to 133.65)                         | 96.44<br>(69.89 to 134.29)                         | 98.02<br>(69.87 to 134.36)                          | 2.20<br>(1.79 to 2.79)                       | 9.45<br>(6.87 to 13.09)                        | 9.69<br>(7.10 to 13.57)                        | 8.65<br>(6.10 to 12.00)                        |
| Endocarditis                                                  | 127.30<br>(110.18 to 165.22)                        | 212.43<br>(152.32 to 298.21)                       | 207.69<br>(148.97 to 294.00)                       | 211.74<br>(151.68 to 291.42)                        | 5.92<br>(5.08 to 7.42)                       | 15.67<br>(10.99 to 22.81)                      | 15.86<br>(11.39 to 22.48)                      | 14.53<br>(9.94 to 20.94)                       |
| Other cardiovascular and circulatory diseases                 | 1,111.12<br>(966.67 to 1,712.59)                    | 2,115.39<br>(1,334.34 to 3,629.65)                 | 1,845.07<br>(1,173.93 to 3,123.74)                 | 2,911.02<br>(1,969.15 to 4,740.44)                  | 60.53<br>(52.58 to 95.06)                    | 176.96<br>(115.57 to 300.55)                   | 160.89<br>(106.35 to 273.22)                   | 223.29<br>(152.53 to 363.84)                   |
| <b>Chronic respiratory diseases</b>                           | <b>13,077.50</b><br><b>(12,537.87 to 14,263.13)</b> | <b>18,153.13</b><br><b>(7,871.53 to 38,373.22)</b> | <b>13,193.38</b><br><b>(6,567.12 to 25,826.67)</b> | <b>29,704.73</b><br><b>(11,266.44 to 68,329.65)</b> | <b>916.11</b><br><b>(878.54 to 1,007.50)</b> | <b>1,564.05</b><br><b>(672.27 to 3,312.43)</b> | <b>1,174.37</b><br><b>(565.59 to 2,352.48)</b> | <b>2,407.97</b><br><b>(893.14 to 5,335.49)</b> |
| Chronic obstructive pulmonary disease                         | 12,286.52<br>(11,764.69 to 13,513.27)               | 17,563.71<br>(7,371.23 to 37,672.46)               | 12,623.55<br>(6,069.73 to 25,076.47)               | 29,044.61<br>(10,671.46 to 67,489.12)               | 876.27<br>(839.48 to 969.50)                 | 1,521.64<br>(638.64 to 3,263.44)               | 1,132.61<br>(534.34 to 2,303.20)               | 2,362.45<br>(858.43 to 5,289.62)               |
| Pneumoconiosis                                                | 191.19<br>(174.13 to 207.13)                        | 80.74<br>(55.66 to 121.07)                         | 68.96<br>(49.25 to 97.49)                          | 115.19<br>(89.37 to 143.92)                         | 8.34<br>(7.53 to 9.03)                       | 5.16<br>(3.61 to 7.55)                         | 4.57<br>(3.32 to 6.31)                         | 6.82<br>(5.24 to 8.44)                         |
| Silicosis                                                     | 140.97<br>(127.41 to 153.75)                        | 45.58<br>(26.95 to 78.62)                          | 37.98<br>(23.65 to 61.34)                          | 73.49<br>(54.28 to 94.01)                           | 6.13<br>(5.50 to 6.67)                       | 2.82<br>(1.69 to 4.77)                         | 2.43<br>(1.53 to 3.83)                         | 4.25<br>(3.07 to 5.45)                         |
| Asbestosis                                                    | 8.15<br>(6.10 to 10.73)                             | 10.12<br>(6.72 to 14.06)                           | 11.10<br>(7.42 to 15.59)                           | 8.09<br>(5.42 to 11.39)                             | 0.32<br>(0.23 to 0.44)                       | 0.66<br>(0.44 to 0.94)                         | 0.75<br>(0.50 to 1.07)                         | 0.49<br>(0.33 to 0.72)                         |
| Coal workers pneumoconiosis                                   | 17.59<br>(9.32 to 20.69)                            | 10.20<br>(5.71 to 16.43)                           | 7.73<br>(4.18 to 11.93)                            | 15.84<br>(8.61 to 22.39)                            | 0.90<br>(0.46 to 1.06)                       | 0.70<br>(0.39 to 1.12)                         | 0.55<br>(0.29 to 0.85)                         | 1.02<br>(0.55 to 1.44)                         |
| Other pneumoconiosis                                          | 24.48<br>(21.38 to 30.38)                           | 14.85<br>(10.94 to 20.51)                          | 12.15<br>(8.90 to 16.44)                           | 17.77<br>(13.64 to 23.84)                           | 0.99<br>(0.86 to 1.23)                       | 0.97<br>(0.73 to 1.32)                         | 0.83<br>(0.61 to 1.13)                         | 1.05<br>(0.81 to 1.40)                         |
| Asthma                                                        | 380.66<br>(304.40 to 428.17)                        | 210.39<br>(124.51 to 356.64)                       | 167.06<br>(104.35 to 261.06)                       | 322.30<br>(205.84 to 493.52)                        | 21.51<br>(16.71 to 24.20)                    | 17.58<br>(10.54 to 29.26)                      | 14.55<br>(9.34 to 22.41)                       | 24.91<br>(15.90 to 37.29)                      |
| Interstitial lung disease and pulmonary sarcoidosis           | 135.50<br>(107.34 to 176.78)                        | 234.93<br>(155.96 to 321.98)                       | 269.32<br>(184.50 to 373.62)                       | 161.01<br>(117.06 to 221.26)                        | 6.61<br>(5.05 to 8.31)                       | 15.35<br>(9.98 to 20.86)                       | 18.09<br>(12.17 to 25.07)                      | 9.93<br>(6.96 to 13.21)                        |
| Other chronic respiratory diseases                            | 83.83<br>(40.73 to 111.51)                          | 63.36<br>(26.88 to 109.37)                         | 64.49<br>(27.15 to 110.62)                         | 61.61<br>(26.31 to 108.64)                          | 3.38<br>(1.54 to 4.57)                       | 4.32<br>(1.75 to 7.52)                         | 4.55<br>(1.86 to 7.98)                         | 3.85<br>(1.57 to 6.70)                         |
| <b>Cirrhosis and other chronic liver diseases</b>             | <b>4,369.89</b><br><b>(4,050.48 to 5,268.66)</b>    | <b>4,347.61</b><br><b>(3,649.58 to 5,379.37)</b>   | <b>4,033.74</b><br><b>(3,387.38 to 4,936.54)</b>   | <b>4,972.31</b><br><b>(4,315.17 to 6,107.23)</b>    | <b>160.30</b><br><b>(149.23 to 191.35)</b>   | <b>213.02</b><br><b>(182.93 to 259.58)</b>     | <b>202.71</b><br><b>(173.59 to 243.84)</b>     | <b>233.57</b><br><b>(204.20 to 280.97)</b>     |
| Cirrhosis and other chronic liver diseases due to hepatitis B | 2,172.20<br>(1,976.23 to 2,665.26)                  | 2,207.48<br>(1,839.54 to 2,789.59)                 | 2,137.23<br>(1,775.25 to 2,710.30)                 | 2,481.72<br>(2,118.48 to 3,060.43)                  | 81.23<br>(74.07 to 98.15)                    | 109.50<br>(92.28 to 137.31)                    | 108.04<br>(91.79 to 133.99)                    | 118.31<br>(101.57 to 143.21)                   |
| Cirrhosis and other chronic liver diseases due to hepatitis C | 577.53<br>(505.95 to 736.86)                        | 520.55<br>(421.09 to 673.74)                       | 501.84<br>(406.69 to 651.24)                       | 591.83<br>(492.18 to 752.72)                        | 19.95<br>(17.56 to 24.96)                    | 23.03<br>(19.05 to 29.79)                      | 22.61<br>(18.78 to 28.48)                      | 25.24<br>(21.23 to 32.01)                      |



|                                                                |                                                            |                                                            |                                                            |                                                            |                                                      |                                                      |                                                      |                                                      |
|----------------------------------------------------------------|------------------------------------------------------------|------------------------------------------------------------|------------------------------------------------------------|------------------------------------------------------------|------------------------------------------------------|------------------------------------------------------|------------------------------------------------------|------------------------------------------------------|
|                                                                | 673.95<br>(599.60 to<br>833.66)                            | 702.75<br>(577.16 to<br>895.84)                            | 509.34<br>(424.11 to<br>637.76)                            | 858.82<br>(718.50 to<br>1,067.65)                          | 24.65<br>(22.11 to<br>29.93)                         | 33.38<br>(28.13 to<br>41.38)                         | 25.62<br>(21.47 to<br>31.60)                         | 38.90<br>(32.73 to<br>47.75)                         |
| Cirrhosis and other chronic liver diseases due to alcohol use  |                                                            |                                                            |                                                            |                                                            |                                                      |                                                      |                                                      |                                                      |
|                                                                | 946.21<br>(805.28 to<br>1,131.54)                          | 916.83<br>(739.69 to<br>1,166.47)                          | 885.32<br>(715.54 to<br>1,129.99)                          | 1,039.94<br>(854.40 to<br>1,289.80)                        | 34.48<br>(29.47 to<br>41.30)                         | 47.11<br>(37.60 to<br>58.63)                         | 46.43<br>(37.92 to<br>58.68)                         | 51.12<br>(41.18 to<br>64.80)                         |
| Cirrhosis and other chronic liver diseases due to other causes |                                                            |                                                            |                                                            |                                                            |                                                      |                                                      |                                                      |                                                      |
| <b>Digestive diseases</b>                                      | <b>2,338.77</b><br><b>(2,207.50 to</b><br><b>2,621.27)</b> | <b>2,603.14</b><br><b>(2,143.37 to</b><br><b>3,266.79)</b> | <b>2,438.25</b><br><b>(2,029.67 to</b><br><b>3,016.76)</b> | <b>3,060.87</b><br><b>(2,520.38 to</b><br><b>3,804.35)</b> | <b>114.37</b><br><b>(107.17 to</b><br><b>131.45)</b> | <b>195.59</b><br><b>(159.05 to</b><br><b>246.24)</b> | <b>189.97</b><br><b>(156.93 to</b><br><b>236.58)</b> | <b>214.40</b><br><b>(167.15 to</b><br><b>270.89)</b> |
| Peptic ulcer disease                                           | 753.87<br>(688.40 to<br>832.29)                            | 515.17<br>(371.35 to<br>710.47)                            | 458.41<br>(332.04 to<br>625.51)                            | 753.36<br>(572.38 to<br>976.67)                            | 37.58<br>(34.56 to<br>41.25)                         | 37.04<br>(26.83 to<br>50.98)                         | 33.89<br>(24.95 to<br>46.15)                         | 51.19<br>(38.19 to<br>66.64)                         |

| China                                      |                                    |                                       |                                       |                                       |                              |                                    |                                    |                                    |
|--------------------------------------------|------------------------------------|---------------------------------------|---------------------------------------|---------------------------------------|------------------------------|------------------------------------|------------------------------------|------------------------------------|
| Cause                                      | YLLs (in 1000s)                    |                                       |                                       |                                       | Deaths (in 1000s)            |                                    |                                    |                                    |
|                                            | 2016                               | 2040 Forecast                         | 2040 Better Scenario                  | 2040 Worse Scenario                   | 2016                         | 2040 Forecast                      | 2040 Better Scenario               | 2040 Worse Scenario                |
| Gastritis and duodenitis                   | 284.18<br>(254.48 to 308.45)       | 372.17<br>(297.84 to 462.90)          | 359.90<br>(282.33 to 451.01)          | 433.18<br>(349.21 to 522.82)          | 15.02<br>(13.61 to 16.29)    | 28.01<br>(22.15 to 35.37)          | 27.89<br>(21.85 to 35.07)          | 30.54<br>(23.29 to 37.68)          |
| Appendicitis                               | 45.61<br>(40.46 to 56.60)          | 46.33<br>(35.52 to 62.41)             | 42.93<br>(32.93 to 58.39)             | 60.92<br>(49.97 to 79.28)             | 1.92<br>(1.69 to 2.45)       | 3.20<br>(2.43 to 4.42)             | 3.05<br>(2.34 to 4.16)             | 3.95<br>(3.13 to 5.23)             |
| Paralytic ileus and intestinal obstruction | 351.99<br>(302.18 to 437.74)       | 413.55<br>(346.80 to 573.74)          | 434.30<br>(364.81 to 601.90)          | 382.92<br>(310.99 to 543.93)          | 14.71<br>(12.88 to 19.64)    | 32.48<br>(25.99 to 45.41)          | 35.16<br>(28.91 to 49.08)          | 28.01<br>(21.57 to 40.24)          |
| Inguinal, femoral, and abdominal hernia    | 25.73<br>(21.05 to 35.97)          | 26.25<br>(19.83 to 38.15)             | 26.12<br>(19.47 to 37.70)             | 28.50<br>(20.99 to 42.24)             | 1.47<br>(1.17 to 2.15)       | 2.33<br>(1.71 to 3.55)             | 2.40<br>(1.75 to 3.54)             | 2.34<br>(1.59 to 3.48)             |
| Inflammatory bowel disease                 | 110.76<br>(93.15 to 125.55)        | 161.09<br>(135.45 to 194.03)          | 167.84<br>(141.32 to 203.36)          | 149.92<br>(124.77 to 182.49)          | 5.23<br>(4.59 to 6.33)       | 12.64<br>(10.38 to 15.85)          | 13.58<br>(11.31 to 17.18)          | 10.95<br>(8.53 to 13.95)           |
| Vascular intestinal disorders              | 113.86<br>(104.07 to 142.37)       | 187.75<br>(160.53 to 231.65)          | 190.06<br>(161.76 to 240.32)          | 191.30<br>(162.43 to 238.83)          | 6.77<br>(6.20 to 8.36)       | 15.01<br>(12.56 to 18.91)          | 15.60<br>(13.05 to 19.44)          | 14.41<br>(11.44 to 18.47)          |
| Gallbladder and biliary diseases           | 225.73<br>(201.05 to 322.56)       | 372.46<br>(225.94 to 638.73)          | 312.18<br>(205.83 to 516.21)          | 470.77<br>(285.08 to 825.10)          | 13.69<br>(12.26 to 18.85)    | 31.68<br>(19.52 to 53.04)          | 27.59<br>(18.22 to 43.98)          | 37.24<br>(22.18 to 62.77)          |
| Pancreatitis                               | 255.09<br>(219.28 to 309.09)       | 274.54<br>(179.89 to 409.42)          | 210.71<br>(145.75 to 306.34)          | 343.00<br>(229.60 to 521.95)          | 9.93<br>(8.52 to 12.11)      | 15.82<br>(10.66 to 23.32)          | 12.76<br>(9.06 to 18.21)           | 18.67<br>(12.79 to 27.53)          |
| Other digestive diseases                   | 171.93<br>(155.33 to 194.49)       | 233.81<br>(200.76 to 276.08)          | 235.79<br>(200.92 to 288.32)          | 247.00<br>(209.19 to 300.28)          | 8.05<br>(7.30 to 9.22)       | 17.37<br>(14.55 to 21.10)          | 18.05<br>(15.16 to 22.11)          | 17.11<br>(13.54 to 21.57)          |
| Neurological disorders                     | 6,617.03<br>(5,852.04 to 7,559.00) | 16,539.13<br>(13,135.52 to 21,026.34) | 16,603.72<br>(13,666.84 to 20,597.11) | 15,272.45<br>(11,584.30 to 20,675.38) | 540.03<br>(470.60 to 624.51) | 1,744.79<br>(1,326.00 to 2,278.28) | 1,801.99<br>(1,427.56 to 2,237.08) | 2,151.25<br>(1,042.00 to 2,100.23) |
| Alzheimer's disease and other dementias    | 5,124.79<br>(4,392.46 to 6,066.37) | 14,192.22<br>(10,865.75 to 18,748.84) | 14,176.60<br>(11,282.66 to 18,087.91) | 13,183.86<br>(9,544.89 to 18,646.44)  | 476.90<br>(407.70 to 560.63) | 1,577.40<br>(1,165.98 to 2,111.01) | 1,620.84<br>(1,251.70 to 2,068.24) | 1,379.88<br>(929.93 to 1,945.67)   |
| Parkinson's disease                        | 542.29<br>(421.01 to 683.39)       | 1,544.46<br>(1,172.45 to 1,992.28)    | 1,673.40<br>(1,274.02 to 2,143.69)    | 1,245.52<br>(920.42 to 1,640.76)      | 40.01<br>(31.13 to 51.07)    | 137.29<br>(102.63 to 178.42)       | 151.99<br>(114.91 to 196.23)       | 105.56<br>(74.75 to 141.63)        |
| Epilepsy                                   | 580.81<br>(542.10 to 651.07)       | 403.44<br>(304.49 to 524.60)          | 347.11<br>(267.34 to 449.39)          | 468.67<br>(351.25 to 631.23)          | 12.78<br>(11.97 to 14.36)    | 13.50<br>(10.57 to 17.29)          | 11.91<br>(9.57 to 14.96)           | 14.86<br>(11.42 to 19.66)          |
| Multiple sclerosis                         | 40.24<br>(35.26 to 46.59)          | 41.49<br>(33.86 to 50.16)             | 41.92<br>(34.25 to 50.66)             | 39.70<br>(32.62 to 48.18)             | 1.23<br>(1.08 to 1.42)       | 1.72<br>(1.46 to 2.06)             | 1.76<br>(1.48 to 2.09)             | 1.59<br>(1.32 to 1.91)             |
| Motor neuron disease                       | 96.17<br>(90.97 to 101.13)         | 124.36<br>(109.92 to 137.90)          | 126.05<br>(111.04 to 140.48)          | 118.33<br>(105.49 to 130.78)          | 2.99<br>(2.84 to 3.12)       | 5.19<br>(4.66 to 5.68)             | 5.33<br>(4.75 to 5.86)             | 4.81<br>(4.31 to 5.26)             |
| Other neurological disorders               | 232.73<br>(222.79 to 243.58)       | 233.16<br>(210.35 to 257.07)          | 238.63<br>(214.24 to 263.42)          | 216.37<br>(196.45 to 236.47)          | 6.12<br>(5.90 to 6.37)       | 9.68<br>(8.96 to 10.40)            | 10.14<br>(9.42 to 10.92)           | 8.56<br>(7.87 to 9.26)             |
| Mental disorders                           | 1,879.29<br>(1,568.00 to 2,221.29) | 2,818.42<br>(2,192.57 to 3,448.06)    | 3,039.36<br>(2,419.49 to 3,604.67)    | 2,263.26<br>(1,852.16 to 2,619.20)    | 54.19<br>(44.06 to 61.79)    | 121.19<br>(93.32 to 145.89)        | 134.70<br>(107.32 to 160.21)       | 91.55<br>(73.77 to 104.01)         |
| Alcohol use disorders                      | 790.12<br>(459.94 to 895.55)       | 592.37<br>(311.59 to 748.67)          | 565.97<br>(291.62 to 712.14)          | 537.19<br>(284.76 to 662.14)          | 21.90<br>(12.80 to 24.76)    | 22.12<br>(12.81 to 27.03)          | 21.76<br>(12.46 to 26.28)          | 19.20<br>(11.04 to 23.04)          |
| Drug use disorders                         | 1,085.79<br>(949.07 to 1,525.29)   | 2,223.57<br>(1,708.49 to 2,848.68)    | 2,470.88<br>(1,964.73 to 3,069.66)    | 1,723.65<br>(1,442.38 to 2,122.85)    | 32.24<br>(28.25 to 41.53)    | 99.01<br>(75.68 to 122.35)         | 112.89<br>(88.52 to 137.78)        | 72.30<br>(59.83 to 84.56)          |
| Opioid use disorders                       | 663.65<br>(542.30 to 986.76)       | 983.56<br>(728.88 to 1,259.11)        | 1,040.93<br>(765.19 to 1,344.47)      | 862.37<br>(654.53 to 1,146.65)        | 19.03<br>(14.80 to 25.76)    | 40.76<br>(28.66 to 50.40)          | 44.15<br>(30.29 to 53.84)          | 33.89<br>(24.00 to 41.44)          |

|                           |                                 |                                   |                                     |                                 |                            |                              |                              |                              |
|---------------------------|---------------------------------|-----------------------------------|-------------------------------------|---------------------------------|----------------------------|------------------------------|------------------------------|------------------------------|
|                           | 78.35<br>(61.87 to<br>122.31)   | 195.00<br>(128.63 to<br>294.95)   | 217.51<br>(148.15 to<br>317.13)     | 150.29<br>(107.75 to<br>216.81) | 2.08<br>(1.62 to<br>3.16)  | 6.72<br>(4.41 to<br>10.06)   | 7.58<br>(5.04 to<br>11.08)   | 5.06<br>(3.59 to<br>7.24)    |
| Cocaine use disorders     |                                 |                                   |                                     |                                 |                            |                              |                              |                              |
|                           | 46.29<br>(35.81 to<br>77.10)    | 158.50<br>(95.79 to<br>247.00)    | 184.21<br>(120.90 to<br>282.96)     | 107.88<br>(78.14 to<br>162.40)  | 1.15<br>(0.88 to<br>1.82)  | 4.93<br>(3.03 to<br>7.47)    | 5.78<br>(3.78 to<br>8.61)    | 3.28<br>(2.41 to<br>4.77)    |
| Amphetamine use disorders |                                 |                                   |                                     |                                 |                            |                              |                              |                              |
|                           | 297.49<br>(242.65 to<br>449.44) | 886.51<br>(607.17 to<br>1,217.67) | 1,028.22<br>(749.04 to<br>1,382.21) | 603.12<br>(474.09 to<br>799.50) | 9.98<br>(8.19 to<br>13.90) | 46.60<br>(31.76 to<br>62.45) | 55.39<br>(39.70 to<br>73.82) | 30.07<br>(23.39 to<br>38.25) |
| Other drug use disorders  |                                 |                                   |                                     |                                 |                            |                              |                              |                              |
|                           | 3.38<br>(2.52 to<br>3.76)       | 2.47<br>(1.70 to<br>3.18)         | 2.51<br>(1.71 to<br>3.26)           | 2.43<br>(1.73 to<br>3.08)       | 0.06<br>(0.05 to<br>0.07)  | 0.05<br>(0.03 to<br>0.06)    | 0.05<br>(0.03 to<br>0.07)    | 0.05<br>(0.03 to<br>0.06)    |
| Eating disorders          |                                 |                                   |                                     |                                 |                            |                              |                              |                              |

| China                                                      |                                           |                                            |                                            |                                              |                                     |                                     |                                     |                                       |
|------------------------------------------------------------|-------------------------------------------|--------------------------------------------|--------------------------------------------|----------------------------------------------|-------------------------------------|-------------------------------------|-------------------------------------|---------------------------------------|
| Cause                                                      | YLLs (in 1000s)                           |                                            |                                            |                                              | Deaths (in 1000s)                   |                                     |                                     |                                       |
|                                                            | 2016                                      | 2040 Forecast                              | 2040 Better Scenario                       | 2040 Worse Scenario                          | 2016                                | 2040 Forecast                       | 2040 Better Scenario                | 2040 Worse Scenario                   |
| <b>Diabetes, urogenital, blood, and endocrine diseases</b> | <b>7,569.95</b><br>(7,292.39 to 7,930.97) | <b>9,509.30</b><br>(7,144.42 to 12,520.37) | <b>8,367.09</b><br>(6,416.11 to 10,854.67) | <b>13,384.78</b><br>(10,086.64 to 17,514.12) | <b>354.02</b><br>(341.11 to 367.91) | <b>651.03</b><br>(503.89 to 858.46) | <b>590.53</b><br>(459.20 to 753.05) | <b>865.53</b><br>(667.91 to 1,131.59) |
| Diabetes mellitus                                          | 2,797.16<br>(2,700.24 to 2,893.94)        | 3,460.57<br>(2,347.22 to 5,124.61)         | 2,894.56<br>(2,020.08 to 4,101.62)         | 5,081.22<br>(3,444.95 to 7,396.54)           | 140.84<br>(135.94 to 145.57)        | 235.22<br>(163.83 to 331.89)        | 204.79<br>(147.56 to 282.13)        | 323.81<br>(223.96 to 450.20)          |
| Acute glomerulonephritis                                   | 200.10<br>(189.38 to 212.54)              | 240.53<br>(193.71 to 297.41)               | 232.19<br>(183.65 to 287.60)               | 275.69<br>(225.23 to 331.23)                 | 7.53<br>(7.16 to 7.96)              | 12.78<br>(10.19 to 15.73)           | 12.63<br>(10.02 to 15.52)           | 13.85<br>(11.05 to 16.85)             |
| Chronic kidney disease                                     | 3,585.70<br>(3,408.10 to 3,867.63)        | 4,647.44<br>(2,866.37 to 7,416.70)         | 4,085.50<br>(2,564.73 to 6,363.34)         | 6,789.39<br>(3,996.62 to 11,037.92)          | 167.50<br>(158.36 to 178.80)        | 323.01<br>(196.35 to 521.54)        | 290.81<br>(184.15 to 452.53)        | 448.58<br>(266.47 to 722.60)          |
| Chronic kidney disease due to diabetes mellitus            | 1,868.73<br>(1,681.93 to 2,068.27)        | 2,442.85<br>(1,460.21 to 4,031.01)         | 2,133.03<br>(1,294.36 to 3,412.65)         | 3,613.37<br>(2,071.78 to 6,080.52)           | 82.61<br>(73.57 to 91.63)           | 155.83<br>(92.46 to 261.73)         | 138.89<br>(84.88 to 224.37)         | 220.80<br>(127.07 to 365.85)          |
| Chronic kidney disease due to hypertension                 | 1,070.21<br>(937.57 to 1,222.88)          | 1,647.27<br>(1,004.79 to 2,604.61)         | 1,468.78<br>(915.76 to 2,289.83)           | 2,328.83<br>(1,358.80 to 3,727.80)           | 61.05<br>(54.21 to 68.77)           | 131.75<br>(80.14 to 211.16)         | 120.55<br>(75.33 to 188.06)         | 176.23<br>(101.40 to 283.86)          |
| Chronic kidney disease due to glomerulonephritis           | 293.80<br>(244.54 to 353.96)              | 214.70<br>(128.66 to 356.92)               | 184.69<br>(112.52 to 299.10)               | 333.93<br>(194.48 to 553.18)                 | 9.67<br>(7.93 to 11.82)             | 12.18<br>(6.97 to 20.87)            | 10.63<br>(6.23 to 17.61)            | 18.38<br>(10.48 to 31.65)             |
| Chronic kidney disease due to other and unspecified causes | 352.96<br>(291.57 to 425.44)              | 342.63<br>(202.06 to 575.15)               | 298.99<br>(182.08 to 499.23)               | 513.25<br>(297.62 to 858.59)                 | 14.18<br>(11.57 to 17.24)           | 23.24<br>(13.17 to 39.37)           | 20.74<br>(12.23 to 34.44)           | 33.17<br>(18.47 to 56.35)             |
| Urinary diseases and male infertility                      | 277.21<br>(265.86 to 293.34)              | 487.34<br>(412.33 to 589.20)               | 469.56<br>(397.21 to 562.49)               | 555.30<br>(491.27 to 618.18)                 | 14.76<br>(14.22 to 15.47)           | 38.86<br>(31.76 to 47.89)           | 38.79<br>(32.57 to 47.20)           | 40.88<br>(32.25 to 48.05)             |
| Urinary tract infections                                   | 165.48<br>(148.77 to 181.61)              | 304.63<br>(254.49 to 366.51)               | 297.00<br>(251.77 to 353.08)               | 333.05<br>(283.89 to 380.01)                 | 8.31<br>(7.39 to 9.18)              | 24.52<br>(19.91 to 30.11)           | 24.73<br>(20.37 to 30.03)           | 24.76<br>(19.42 to 29.81)             |
| Urolithiasis                                               | 61.27<br>(53.64 to 77.46)                 | 116.58<br>(85.20 to 165.07)                | 108.31<br>(81.23 to 150.70)                | 143.68<br>(117.16 to 187.95)                 | 3.16<br>(2.75 to 4.00)              | 8.27<br>(6.04 to 11.78)             | 7.94<br>(5.96 to 11.08)             | 9.46<br>(7.33 to 12.65)               |
| Other urinary diseases                                     | 50.46<br>(42.96 to 61.16)                 | 66.12<br>(46.26 to 92.07)                  | 64.25<br>(45.69 to 87.26)                  | 78.58<br>(55.90 to 103.14)                   | 3.30<br>(2.77 to 3.88)              | 6.07<br>(4.16 to 8.72)              | 6.13<br>(4.25 to 8.46)              | 6.66<br>(4.28 to 9.26)                |
| Gynecological diseases                                     | 29.96<br>(17.33 to 33.89)                 | 10.11<br>(5.28 to 14.79)                   | 8.86<br>(4.92 to 12.64)                    | 15.10<br>(8.74 to 19.94)                     | 1.05<br>(0.61 to 1.19)              | 0.51<br>(0.28 to 0.72)              | 0.45<br>(0.24 to 0.64)              | 0.73<br>(0.42 to 0.95)                |
| Uterine fibroids                                           | 21.79<br>(10.37 to 26.17)                 | 7.13<br>(3.67 to 10.63)                    | 6.34<br>(3.11 to 9.16)                     | 10.31<br>(5.45 to 14.17)                     | 0.77<br>(0.37 to 0.92)              | 0.34<br>(0.17 to 0.50)              | 0.31<br>(0.16 to 0.45)              | 0.48<br>(0.25 to 0.68)                |
| Polycystic ovarian syndrome                                | 0.31<br>(0.22 to 0.41)                    | 0.03<br>(0.01 to 0.07)                     | 0.02<br>(0.01 to 0.05)                     | 0.07<br>(0.04 to 0.12)                       | 0.01<br>(0.01 to 0.01)              | 0.00<br>(0.00 to 0.00)              | 0.00<br>(0.00 to 0.00)              | 0.00<br>(0.00 to 0.00)                |
| Endometriosis                                              | 0.48<br>(0.08 to 0.66)                    | 0.07<br>(0.01 to 0.14)                     | 0.06<br>(0.01 to 0.11)                     | 0.12<br>(0.02 to 0.21)                       | 0.01<br>(0.00 to 0.01)              | 0.00<br>(0.00 to 0.00)              | 0.00<br>(0.00 to 0.00)              | 0.00<br>(0.00 to 0.00)                |
| Genital prolapse                                           | 0.46<br>(0.16 to 0.57)                    | 0.23<br>(0.07 to 0.37)                     | 0.20<br>(0.06 to 0.31)                     | 0.35<br>(0.11 to 0.52)                       | 0.03<br>(0.01 to 0.04)              | 0.02<br>(0.00 to 0.03)              | 0.02<br>(0.00 to 0.03)              | 0.03<br>(0.01 to 0.04)                |
| Other gynecological diseases                               | 6.93<br>(3.76 to 8.41)                    | 2.65<br>(1.26 to 4.26)                     | 2.23<br>(1.09 to 3.51)                     | 4.24<br>(2.21 to 5.86)                       | 0.24<br>(0.13 to 0.29)              | 0.14<br>(0.07 to 0.22)              | 0.12<br>(0.06 to 0.19)              | 0.22<br>(0.12 to 0.29)                |
| Hemoglobinopathies and hemolytic anemias                   | 285.49<br>(233.22 to 320.46)              | 170.68<br>(124.77 to 222.89)               | 159.41<br>(116.84 to 203.48)               | 215.16<br>(163.32 to 261.63)                 | 8.34<br>(6.60 to 9.51)              | 8.83<br>(6.50 to 11.39)             | 8.43<br>(6.23 to 10.85)             | 10.70<br>(8.10 to 12.99)              |
| Thalassemias                                               | 88.35<br>(75.93 to 103.67)                | 21.05<br>(14.42 to 30.56)                  | 20.48<br>(14.07 to 29.69)                  | 20.98<br>(14.15 to 30.28)                    | 1.18<br>(1.02 to 1.37)              | 0.33<br>(0.24 to 0.45)              | 0.32<br>(0.23 to 0.44)              | 0.32<br>(0.23 to 0.44)                |

|                                                   |                                 |                                 |                                 |                                 |                              |                              |                              |                              |
|---------------------------------------------------|---------------------------------|---------------------------------|---------------------------------|---------------------------------|------------------------------|------------------------------|------------------------------|------------------------------|
|                                                   | 0.46<br>(0.35 to<br>0.58)       | 0.15<br>(0.10 to<br>0.22)       | 0.14<br>(0.09 to<br>0.20)       | 0.20<br>(0.13 to<br>0.28)       | 0.01<br>(0.01 to<br>0.01)    | 0.00<br>(0.00 to<br>0.00)    | 0.00<br>(0.00 to<br>0.00)    | 0.00<br>(0.00 to<br>0.01)    |
| Sickle cell disorders                             |                                 |                                 |                                 |                                 |                              |                              |                              |                              |
| G6PD deficiency                                   | 90.03<br>(68.60 to<br>104.28)   | 60.17<br>(41.52 to<br>84.37)    | 54.27<br>(36.48 to<br>73.88)    | 83.88<br>(58.97 to<br>107.91)   | 2.24<br>(1.69 to<br>2.63)    | 2.23<br>(1.54 to<br>3.08)    | 2.03<br>(1.40 to<br>2.73)    | 3.03<br>(2.14 to<br>3.82)    |
| Other hemoglobinopathies and hemolytic anemias    | 106.66<br>(80.80 to<br>122.27)  | 89.31<br>(64.71 to<br>116.22)   | 84.51<br>(61.17 to<br>109.17)   | 110.09<br>(82.32 to<br>133.33)  | 4.91<br>(3.76 to<br>5.60)    | 6.28<br>(4.60 to<br>8.07)    | 6.08<br>(4.45 to<br>7.86)    | 7.35<br>(5.51 to<br>8.94)    |
| Endocrine, metabolic, blood, and immune disorders | 394.32<br>(331.04 to<br>462.47) | 492.64<br>(397.00 to<br>564.27) | 517.02<br>(417.14 to<br>594.87) | 452.91<br>(367.30 to<br>521.39) | 13.99<br>(11.25 to<br>15.84) | 31.82<br>(24.94 to<br>36.54) | 34.62<br>(27.41 to<br>39.32) | 26.99<br>(20.27 to<br>31.32) |

| China                                         |                                           |                                       |                                       |                                           |                                  |                                  |                                  |                                  |
|-----------------------------------------------|-------------------------------------------|---------------------------------------|---------------------------------------|-------------------------------------------|----------------------------------|----------------------------------|----------------------------------|----------------------------------|
| Cause                                         | YLLs (in 1000s)                           |                                       |                                       |                                           | Deaths (in 1000s)                |                                  |                                  |                                  |
|                                               | 2016                                      | 2040 Forecast                         | 2040 Better Scenario                  | 2040 Worse Scenario                       | 2016                             | 2040 Forecast                    | 2040 Better Scenario             | 2040 Worse Scenario              |
| <b>Musculoskeletal disorders</b>              | <b>481.95</b><br>(401.01 to 601.61)       | <b>588.92</b><br>(451.70 to 775.31)   | <b>551.83</b><br>(423.38 to 693.99)   | <b>719.53</b><br>(559.38 to 884.09)       | <b>18.10</b><br>(14.82 to 21.86) | <b>36.72</b><br>(27.89 to 48.05) | <b>35.04</b><br>(27.28 to 44.19) | <b>43.47</b><br>(33.33 to 52.75) |
| Rheumatoid arthritis                          | 177.59<br>(130.42 to 205.27)              | 293.71<br>(194.57 to 427.72)          | 260.86<br>(179.04 to 363.30)          | 416.83<br>(303.08 to 521.67)              | 9.19<br>(6.79 to 10.37)          | 21.52<br>(14.37 to 30.98)        | 19.60<br>(13.64 to 27.17)        | 28.94<br>(20.68 to 36.41)        |
| Other musculoskeletal disorders               | 304.36<br>(255.80 to 407.45)              | 295.22<br>(233.63 to 398.18)          | 290.97<br>(230.94 to 392.04)          | 302.70<br>(239.90 to 423.15)              | 8.92<br>(7.63 to 11.86)          | 15.20<br>(12.09 to 20.23)        | 15.44<br>(12.39 to 20.52)        | 14.54<br>(11.27 to 19.92)        |
| <b>Other non-communicable diseases</b>        | <b>3,372.63</b><br>(3,008.59 to 4,093.15) | <b>974.33</b><br>(682.75 to 1,456.52) | <b>849.31</b><br>(608.75 to 1,237.74) | <b>1,447.98</b><br>(1,053.89 to 2,052.03) | <b>48.26</b><br>(43.27 to 57.70) | <b>34.91</b><br>(24.47 to 47.98) | <b>33.94</b><br>(23.22 to 46.43) | <b>40.50</b><br>(29.29 to 54.39) |
| Congenital birth defects                      | 3,207.68<br>(2,848.47 to 3,927.89)        | 697.18<br>(437.76 to 1,148.33)        | 573.46<br>(360.65 to 952.26)          | 1,156.91<br>(871.11 to 1,719.32)          | 41.04<br>(36.54 to 49.99)        | 10.35<br>(7.00 to 16.07)         | 8.64<br>(5.75 to 13.37)          | 16.74<br>(12.12 to 23.63)        |
| Neural tube defects                           | 33.72<br>(26.96 to 45.32)                 | 5.07<br>(3.05 to 8.60)                | 4.12<br>(2.40 to 7.18)                | 9.25<br>(5.66 to 15.05)                   | 0.44<br>(0.36 to 0.59)           | 0.08<br>(0.05 to 0.14)           | 0.07<br>(0.04 to 0.11)           | 0.15<br>(0.10 to 0.22)           |
| Congenital heart anomalies                    | 2,317.45<br>(2,065.57 to 2,838.27)        | 467.50<br>(282.89 to 793.52)          | 375.26<br>(225.18 to 640.60)          | 812.86<br>(551.12 to 1,218.25)            | 29.65<br>(26.53 to 36.19)        | 6.74<br>(4.27 to 11.05)          | 5.45<br>(3.47 to 8.80)           | 11.55<br>(8.19 to 16.54)         |
| Orofacial clefts                              | 24.08<br>(17.95 to 39.99)                 | 3.00<br>(1.30 to 6.29)                | 2.26<br>(0.93 to 4.67)                | 6.41<br>(2.90 to 12.09)                   | 0.28<br>(0.21 to 0.46)           | 0.03<br>(0.01 to 0.07)           | 0.03<br>(0.01 to 0.05)           | 0.07<br>(0.03 to 0.14)           |
| Down syndrome                                 | 44.16<br>(35.69 to 56.31)                 | 25.58<br>(19.52 to 34.91)             | 26.16<br>(20.00 to 35.39)             | 25.18<br>(19.05 to 35.27)                 | 0.74<br>(0.62 to 0.96)           | 0.57<br>(0.44 to 0.76)           | 0.59<br>(0.46 to 0.78)           | 0.55<br>(0.42 to 0.76)           |
| Other chromosomal abnormalities               | 32.06<br>(25.17 to 47.53)                 | 13.13<br>(8.06 to 21.03)              | 12.07<br>(7.37 to 19.29)              | 16.53<br>(10.10 to 26.79)                 | 0.41<br>(0.31 to 0.60)           | 0.19<br>(0.12 to 0.29)           | 0.17<br>(0.11 to 0.26)           | 0.23<br>(0.15 to 0.36)           |
| Congenital musculoskeletal and limb anomalies | 39.23<br>(32.22 to 55.94)                 | 10.50<br>(6.56 to 17.51)              | 8.88<br>(5.33 to 14.02)               | 16.08<br>(10.08 to 24.99)                 | 0.50<br>(0.42 to 0.72)           | 0.16<br>(0.10 to 0.26)           | 0.14<br>(0.09 to 0.21)           | 0.24<br>(0.17 to 0.36)           |
| Urogenital congenital anomalies               | 30.59<br>(25.05 to 42.14)                 | 12.10<br>(8.49 to 17.30)              | 10.78<br>(7.36 to 15.02)              | 16.62<br>(11.98 to 23.52)                 | 0.53<br>(0.43 to 0.72)           | 0.30<br>(0.22 to 0.43)           | 0.27<br>(0.19 to 0.37)           | 0.41<br>(0.30 to 0.54)           |
| Digestive congenital anomalies                | 270.64<br>(218.28 to 335.39)              | 52.17<br>(28.36 to 95.05)             | 42.52<br>(21.91 to 75.33)             | 87.87<br>(48.99 to 147.89)                | 3.19<br>(2.58 to 3.95)           | 0.65<br>(0.37 to 1.16)           | 0.53<br>(0.29 to 0.92)           | 1.08<br>(0.63 to 1.79)           |
| Other congenital birth defects                | 415.75<br>(335.37 to 603.89)              | 108.12<br>(66.38 to 178.21)           | 91.41<br>(54.81 to 153.67)            | 166.12<br>(104.02 to 270.30)              | 5.29<br>(4.31 to 7.56)           | 1.62<br>(1.07 to 2.54)           | 1.38<br>(0.90 to 2.18)           | 2.44<br>(1.65 to 3.76)           |
| Skin and subcutaneous diseases                | 114.45<br>(75.67 to 178.85)               | 265.74<br>(170.35 to 400.38)          | 265.91<br>(165.49 to 388.11)          | 274.64<br>(174.18 to 424.55)              | 6.64<br>(4.13 to 9.83)           | 24.43<br>(14.83 to 35.56)        | 25.19<br>(14.86 to 37.46)        | 23.58<br>(13.42 to 36.29)        |
| Cellulitis                                    | 11.44<br>(7.40 to 22.52)                  | 23.61<br>(14.29 to 44.96)             | 24.14<br>(14.15 to 45.57)             | 22.30<br>(13.33 to 43.10)                 | 0.39<br>(0.23 to 0.76)           | 1.48<br>(0.80 to 2.79)           | 1.57<br>(0.84 to 2.91)           | 1.29<br>(0.70 to 2.46)           |
| Pyoderma                                      | 46.78<br>(31.67 to 83.16)                 | 121.54<br>(78.69 to 200.26)           | 122.51<br>(79.80 to 201.77)           | 124.83<br>(81.86 to 211.96)               | 2.24<br>(1.47 to 3.88)           | 10.03<br>(6.38 to 17.16)         | 10.49<br>(6.69 to 17.69)         | 9.46<br>(5.89 to 16.55)          |
| Decubitus ulcer                               | 45.12<br>(24.64 to 63.25)                 | 105.36<br>(51.84 to 149.04)           | 104.03<br>(50.11 to 149.25)           | 112.13<br>(55.33 to 159.80)               | 3.57<br>(1.87 to 5.03)           | 11.82<br>(5.57 to 17.33)         | 11.98<br>(5.34 to 17.59)         | 11.82<br>(5.52 to 17.60)         |
| Other skin and subcutaneous diseases          | 11.11<br>(7.28 to 18.66)                  | 15.22<br>(9.74 to 23.63)              | 15.23<br>(9.49 to 23.83)              | 15.39<br>(9.71 to 24.04)                  | 0.45<br>(0.29 to 0.72)           | 1.10<br>(0.68 to 1.69)           | 1.15<br>(0.70 to 1.76)           | 1.02<br>(0.62 to 1.64)           |
| Sudden infant death syndrome                  | 50.50<br>(43.11 to 61.62)                 | 11.41<br>(5.71 to 21.35)              | 9.94<br>(4.97 to 19.39)               | 16.43<br>(8.60 to 29.61)                  | 0.59<br>(0.50 to 0.71)           | 0.13<br>(0.07 to 0.25)           | 0.12<br>(0.06 to 0.22)           | 0.19<br>(0.10 to 0.34)           |

|                          |                                          |                                          |                                          |                                          |                                 |                                 |                                 |                                   |
|--------------------------|------------------------------------------|------------------------------------------|------------------------------------------|------------------------------------------|---------------------------------|---------------------------------|---------------------------------|-----------------------------------|
| Injuries                 | 29,896.02<br>(27,939.92 to<br>30,919.87) | 16,495.40<br>(13,009.70 to<br>21,163.23) | 13,995.12<br>(11,161.49 to<br>17,527.39) | 23,427.90<br>(18,810.84 to<br>29,376.37) | 773.27<br>(704.60 to<br>803.71) | 723.40<br>(585.05 to<br>894.66) | 650.75<br>(536.37 to<br>778.43) | 912.56<br>(756.03 to<br>1,093.72) |
| Transport injuries       | 13,528.38<br>(13,023.09 to<br>14,108.88) | 5,739.09<br>(4,078.50 to<br>8,257.98)    | 4,267.77<br>(3,151.56 to<br>5,756.35)    | 10,736.59<br>(7,879.53 to<br>14,845.90)  | 324.63<br>(312.66 to<br>336.75) | 191.90<br>(141.28 to<br>269.48) | 146.84<br>(112.51 to<br>195.44) | 335.74<br>(255.38 to<br>450.10)   |
| Road injuries            | 12,989.94<br>(12,521.59 to<br>13,476.48) | 5,336.76<br>(3,796.52 to<br>7,663.41)    | 3,943.38<br>(2,920.09 to<br>5,321.30)    | 10,167.99<br>(7,494.15 to<br>14,043.59)  | 311.61<br>(299.90 to<br>322.29) | 178.35<br>(132.41 to<br>249.71) | 135.67<br>(104.83 to<br>178.98) | 317.38<br>(241.01 to<br>425.78)   |
| Pedestrian road injuries | 7,225.78<br>(6,797.06 to<br>7,629.11)    | 2,315.06<br>(1,576.73 to<br>3,509.56)    | 1,593.46<br>(1,134.17 to<br>2,269.85)    | 5,206.59<br>(3,873.63 to<br>7,111.00)    | 180.36<br>(169.64 to<br>189.35) | 88.37<br>(62.34 to<br>130.49)   | 63.36<br>(46.39 to<br>87.40)    | 181.48<br>(139.78 to<br>240.04)   |

| China                                           |                                                              |                                                            |                                                            |                                                            |                                                      |                                                      |                                                      |                                                      |
|-------------------------------------------------|--------------------------------------------------------------|------------------------------------------------------------|------------------------------------------------------------|------------------------------------------------------------|------------------------------------------------------|------------------------------------------------------|------------------------------------------------------|------------------------------------------------------|
| Cause                                           | YLLs (in 1000s)                                              |                                                            |                                                            |                                                            | Deaths (in 1000s)                                    |                                                      |                                                      |                                                      |
|                                                 | 2016                                                         | 2040 Forecast                                              | 2040 Better Scenario                                       | 2040 Worse Scenario                                        | 2016                                                 | 2040 Forecast                                        | 2040 Better Scenario                                 | 2040 Worse Scenario                                  |
| Cyclist road injuries                           | 968.37<br>(858.79 to<br>1,031.73)                            | 574.07<br>(409.95 to<br>793.86)                            | 449.30<br>(335.94 to<br>600.17)                            | 923.15<br>(661.08 to<br>1,274.56)                          | 25.27<br>(22.50 to<br>26.99)                         | 21.00<br>(15.07 to<br>28.97)                         | 17.13<br>(12.80 to<br>22.81)                         | 30.10<br>(21.60 to<br>41.09)                         |
| Motorcyclist road injuries                      | 2,399.00<br>(2,093.86 to<br>2,605.97)                        | 1,522.58<br>(993.64 to<br>2,314.37)                        | 1,233.13<br>(836.75 to<br>1,795.07)                        | 2,136.79<br>(1,418.74 to<br>3,229.22)                      | 52.06<br>(44.73 to<br>56.14)                         | 52.06<br>(26.55 to<br>58.55)                         | 32.81<br>(23.03 to<br>46.59)                         | 52.52<br>(35.29 to<br>76.59)                         |
| Motor vehicle road injuries                     | 2,319.09<br>(2,001.57 to<br>2,876.08)                        | 889.24<br>(636.69 to<br>1,263.65)                          | 640.76<br>(475.96 to<br>886.13)                            | 1,833.83<br>(1,301.84 to<br>2,543.51)                      | 52.05<br>(44.72 to<br>64.47)                         | 27.96<br>(20.84 to<br>38.18)                         | 21.30<br>(16.61 to<br>28.33)                         | 51.12<br>(37.68 to<br>69.64)                         |
| Other road injuries                             | 77.70<br>(64.58 to<br>87.57)                                 | 35.82<br>(25.24 to<br>50.45)                               | 26.72<br>(19.64 to<br>36.08)                               | 67.63<br>(46.29 to<br>95.43)                               | 1.87<br>(1.56 to<br>2.11)                            | 1.33<br>(0.98 to<br>1.83)                            | 1.06<br>(0.81 to<br>1.41)                            | 2.16<br>(1.55 to<br>3.04)                            |
| Other transport injuries                        | 538.45<br>(484.02 to<br>725.48)                              | 402.32<br>(251.19 to<br>648.84)                            | 324.40<br>(212.52 to<br>495.50)                            | 568.60<br>(385.10 to<br>855.19)                            | 13.02<br>(11.76 to<br>17.52)                         | 13.55<br>(8.77 to<br>21.32)                          | 11.18<br>(7.58 to<br>16.78)                          | 18.36<br>(12.94 to<br>27.07)                         |
| <b>Unintentional injuries</b>                   | <b>11,007.13</b><br><b>(8,659.05 to</b><br><b>11,715.72)</b> | <b>6,215.34</b><br><b>(4,403.49 to</b><br><b>7,750.09)</b> | <b>5,846.18</b><br><b>(4,229.32 to</b><br><b>7,174.79)</b> | <b>7,420.88</b><br><b>(5,423.05 to</b><br><b>8,880.47)</b> | <b>297.56</b><br><b>(225.52 to</b><br><b>318.39)</b> | <b>341.16</b><br><b>(236.93 to</b><br><b>413.79)</b> | <b>336.75</b><br><b>(236.34 to</b><br><b>404.13)</b> | <b>367.56</b><br><b>(258.26 to</b><br><b>437.33)</b> |
| Falls                                           | 3,243.92<br>(2,281.43 to<br>3,568.97)                        | 2,983.12<br>(1,994.36 to<br>3,624.64)                      | 2,919.55<br>(1,955.24 to<br>3,502.54)                      | 3,245.70<br>(2,189.00 to<br>3,788.35)                      | 121.94<br>(82.94 to<br>134.19)                       | 209.82<br>(135.41 to<br>255.10)                      | 212.88<br>(139.32 to<br>256.06)                      | 212.04<br>(136.53 to<br>257.98)                      |
| Drowning                                        | 3,187.77<br>(2,704.99 to<br>3,376.79)                        | 1,291.41<br>(932.84 to<br>1,700.63)                        | 1,164.98<br>(840.69 to<br>1,530.37)                        | 1,599.49<br>(840.69 to<br>2,109.66)                        | 63.72<br>(51.17 to<br>67.37)                         | 47.14<br>(32.75 to<br>58.85)                         | 43.94<br>(30.34 to<br>54.79)                         | 54.18<br>(37.28 to<br>68.05)                         |
| Fire, heat, and hot substances                  | 320.65<br>(249.04 to<br>348.65)                              | 212.08<br>(147.96 to<br>297.78)                            | 188.23<br>(131.77 to<br>253.32)                            | 274.44<br>(193.75 to<br>356.45)                            | 10.51<br>(7.90 to<br>11.44)                          | 13.22<br>(9.26 to<br>17.94)                          | 12.29<br>(8.48 to<br>16.16)                          | 15.62<br>(10.81 to<br>20.28)                         |
| Poisonings                                      | 641.53<br>(349.36 to<br>746.95)                              | 187.70<br>(94.32 to<br>282.53)                             | 160.14<br>(80.41 to<br>237.14)                             | 276.22<br>(138.61 to<br>391.69)                            | 16.18<br>(8.82 to<br>18.87)                          | 7.76<br>(4.02 to<br>11.30)                           | 6.79<br>(3.60 to<br>9.85)                            | 10.78<br>(5.56 to<br>14.80)                          |
| Exposure to mechanical forces                   | 1,841.29<br>(1,103.64 to<br>2,042.18)                        | 725.20<br>(404.52 to<br>979.07)                            | 661.46<br>(371.00 to<br>876.54)                            | 955.61<br>(519.94 to<br>1,202.98)                          | 41.40<br>(24.27 to<br>45.76)                         | 25.27<br>(14.56 to<br>33.07)                         | 23.79<br>(13.65 to<br>30.81)                         | 31.15<br>(17.60 to<br>37.83)                         |
| Unintentional firearm injuries                  | 27.09<br>(23.79 to<br>38.46)                                 | 18.33<br>(15.02 to<br>23.59)                               | 17.95<br>(14.52 to<br>22.62)                               | 20.73<br>(16.57 to<br>28.20)                               | 0.91<br>(0.81 to<br>1.15)                            | 1.50<br>(1.14 to<br>1.85)                            | 1.55<br>(1.19 to<br>1.90)                            | 1.48<br>(1.08 to<br>1.90)                            |
| Unintentional suffocation                       | 379.75<br>(199.36 to<br>463.60)                              | 109.59<br>(48.05 to<br>167.77)                             | 101.06<br>(45.00 to<br>157.72)                             | 139.04<br>(61.15 to<br>214.49)                             | 6.23<br>(3.18 to<br>7.50)                            | 3.38<br>(1.47 to<br>4.59)                            | 3.27<br>(1.45 to<br>4.48)                            | 3.88<br>(1.67 to<br>5.32)                            |
| Other exposure to mechanical forces             | 1,434.44<br>(834.64 to<br>1,573.97)                          | 597.28<br>(326.07 to<br>810.31)                            | 542.45<br>(295.91 to<br>720.84)                            | 795.84<br>(425.22 to<br>988.66)                            | 34.27<br>(19.55 to<br>37.68)                         | 20.39<br>(11.36 to<br>26.96)                         | 18.96<br>(10.57 to<br>24.71)                         | 25.79<br>(14.12 to<br>31.45)                         |
| Adverse effects of medical treatment            | 194.85<br>(174.79 to<br>254.24)                              | 147.23<br>(122.13 to<br>195.30)                            | 143.38<br>(117.79 to<br>195.75)                            | 163.90<br>(136.28 to<br>216.24)                            | 5.41<br>(4.89 to<br>7.15)                            | 7.39<br>(6.26 to<br>9.93)                            | 7.45<br>(6.23 to<br>10.07)                           | 7.65<br>(6.40 to<br>10.27)                           |
| Animal contact                                  | 96.41<br>(87.23 to<br>113.35)                                | 87.62<br>(71.58 to<br>109.57)                              | 82.94<br>(64.86 to<br>105.17)                              | 107.62<br>(85.61 to<br>135.66)                             | 2.83<br>(2.51 to<br>3.30)                            | 3.98<br>(3.29 to<br>4.98)                            | 3.88<br>(3.13 to<br>4.83)                            | 4.59<br>(3.66 to<br>5.74)                            |
| Venomous animal contact                         | 51.60<br>(40.97 to<br>60.31)                                 | 44.79<br>(32.76 to<br>55.87)                               | 43.22<br>(32.32 to<br>54.75)                               | 52.37<br>(38.78 to<br>66.17)                               | 1.57<br>(1.26 to<br>1.83)                            | 2.09<br>(1.52 to<br>2.60)                            | 2.06<br>(1.52 to<br>2.55)                            | 2.30<br>(1.68 to<br>2.88)                            |
| Non-venomous animal contact                     | 44.80<br>(39.40 to<br>61.23)                                 | 42.82<br>(32.87 to<br>59.17)                               | 39.72<br>(29.31 to<br>55.85)                               | 55.25<br>(42.50 to<br>77.17)                               | 1.25<br>(1.09 to<br>1.74)                            | 1.90<br>(1.45 to<br>2.64)                            | 1.81<br>(1.35 to<br>2.55)                            | 2.28<br>(1.76 to<br>3.17)                            |
| Foreign body                                    | 320.20<br>(268.05 to<br>376.57)                              | 223.94<br>(176.17 to<br>271.49)                            | 224.31<br>(176.63 to<br>267.74)                            | 224.37<br>(175.93 to<br>271.66)                            | 7.97<br>(6.50 to<br>8.71)                            | 13.03<br>(9.91 to<br>15.10)                          | 13.73<br>(10.47 to<br>15.76)                         | 11.67<br>(8.69 to<br>13.89)                          |
| Pulmonary aspiration and foreign body in airway | 289.01<br>(228.06 to<br>335.39)                              | 190.28<br>(136.78 to<br>234.14)                            | 188.84<br>(136.62 to<br>229.50)                            | 193.99<br>(142.05 to<br>238.30)                            | 7.08<br>(5.43 to<br>7.79)                            | 10.69<br>(7.43 to<br>12.64)                          | 11.16<br>(7.80 to<br>13.10)                          | 9.77<br>(6.79 to<br>11.81)                           |



|                                             |                                                            |                                                            |                                                            |                                                            |                                                      |                                                      |                                                      |                                                      |
|---------------------------------------------|------------------------------------------------------------|------------------------------------------------------------|------------------------------------------------------------|------------------------------------------------------------|------------------------------------------------------|------------------------------------------------------|------------------------------------------------------|------------------------------------------------------|
|                                             | 31.18<br>(25.67 to<br>54.48)                               | 33.66<br>(25.95 to<br>52.50)                               | 35.47<br>(27.88 to<br>55.03)                               | 30.38<br>(23.43 to<br>48.33)                               | 0.89<br>(0.76 to<br>1.45)                            | 2.33<br>(1.73 to<br>3.43)                            | 2.57<br>(2.02 to<br>3.77)                            | 1.89<br>(1.38 to<br>2.76)                            |
| Foreign body in other body part             |                                                            |                                                            |                                                            |                                                            |                                                      |                                                      |                                                      |                                                      |
|                                             | 119.51<br>(91.81 to<br>159.29)                             | 99.64<br>(69.45 to<br>135.64)                              | 91.78<br>(63.46 to<br>124.54)                              | 134.50<br>(96.10 to<br>180.46)                             | 4.24<br>(3.09 to<br>5.38)                            | 5.90<br>(4.00 to<br>8.00)                            | 5.67<br>(3.69 to<br>7.56)                            | 7.30<br>(4.94 to<br>9.67)                            |
| Environmental heat and cold exposure        |                                                            |                                                            |                                                            |                                                            |                                                      |                                                      |                                                      |                                                      |
|                                             | 1,041.00<br>(667.30 to<br>1,113.83)                        | 257.40<br>(153.09 to<br>424.64)                            | 209.41<br>(120.08 to<br>322.97)                            | 439.03<br>(270.80 to<br>540.76)                            | 23.35<br>(14.91 to<br>24.98)                         | 7.65<br>(4.72 to<br>12.46)                           | 6.33<br>(3.68 to<br>9.56)                            | 12.58<br>(7.84 to<br>15.01)                          |
| Other unintentional injuries                |                                                            |                                                            |                                                            |                                                            |                                                      |                                                      |                                                      |                                                      |
| <b>Self-harm and interpersonal violence</b> | <b>5,273.75</b><br><b>(4,985.26 to</b><br><b>6,136.79)</b> | <b>4,425.34</b><br><b>(3,068.26 to</b><br><b>6,193.87)</b> | <b>3,764.97</b><br><b>(2,742.76 to</b><br><b>5,109.93)</b> | <b>5,156.16</b><br><b>(3,604.56 to</b><br><b>7,258.98)</b> | <b>149.25</b><br><b>(141.07 to</b><br><b>168.07)</b> | <b>187.12</b><br><b>(133.29 to</b><br><b>258.71)</b> | <b>163.89</b><br><b>(121.89 to</b><br><b>219.93)</b> | <b>206.18</b><br><b>(146.45 to</b><br><b>289.97)</b> |

| China                                                                               |                                          |                                            |                                            |                                            |                                      |                                       |                                       |                                       |
|-------------------------------------------------------------------------------------|------------------------------------------|--------------------------------------------|--------------------------------------------|--------------------------------------------|--------------------------------------|---------------------------------------|---------------------------------------|---------------------------------------|
| Cause                                                                               | YLLs (in 1000s)                          |                                            |                                            |                                            | Deaths (in 1000s)                    |                                       |                                       |                                       |
|                                                                                     | 2016                                     | 2040 Forecast                              | 2040 Better Scenario                       | 2040 Worse Scenario                        | 2016                                 | 2040 Forecast                         | 2040 Better Scenario                  | 2040 Worse Scenario                   |
| Self-harm                                                                           | 4,387.79<br>(4,155.67 to 5,038.28)       | 4,072.96<br>(2,761.88 to 5,809.12)         | 3,451.02<br>(2,478.67 to 4,734.89)         | 4,727.25<br>(3,215.27 to 6,767.64)         | 130.56<br>(121.94 to 145.40)         | 176.93<br>(125.45 to 248.16)          | 154.70<br>(114.41 to 208.12)          | 194.19<br>(135.94 to 276.75)          |
| Self-harm by firearm                                                                | 46.95<br>(34.99 to 78.98)                | 24.72<br>(13.55 to 44.59)                  | 19.49<br>(11.41 to 34.75)                  | 32.48<br>(17.96 to 58.68)                  | 1.24<br>(0.95 to 2.04)               | 0.99<br>(0.60 to 1.67)                | 0.84<br>(0.55 to 1.37)                | 1.20<br>(0.72 to 1.98)                |
| Self-harm by other specified means                                                  | 4,340.84<br>(4,106.33 to 4,955.86)       | 4,048.24<br>(2,749.10 to 5,771.78)         | 3,431.53<br>(2,467.96 to 4,704.88)         | 4,694.77<br>(3,188.56 to 6,714.65)         | 129.31<br>(120.80 to 143.71)         | 175.94<br>(124.79 to 246.86)          | 153.86<br>(113.86 to 206.82)          | 192.99<br>(135.12 to 275.14)          |
| Interpersonal violence                                                              | 885.96<br>(773.87 to 1,313.42)           | 352.38<br>(259.89 to 558.64)               | 313.95<br>(231.45 to 487.43)               | 428.91<br>(324.42 to 674.60)               | 18.69<br>(16.43 to 27.61)            | 10.19<br>(7.58 to 15.52)              | 9.19<br>(6.90 to 13.78)               | 12.00<br>(9.25 to 18.12)              |
| Physical violence by firearm                                                        | 31.64<br>(21.21 to 62.23)                | 13.44<br>(9.01 to 25.13)                   | 12.19<br>(8.12 to 22.63)                   | 17.17<br>(12.08 to 32.85)                  | 0.76<br>(0.51 to 1.44)               | 0.48<br>(0.32 to 0.87)                | 0.44<br>(0.29 to 0.80)                | 0.59<br>(0.41 to 1.07)                |
| Physical violence by sharp object                                                   | 384.29<br>(328.78 to 612.15)             | 146.28<br>(105.20 to 243.75)               | 132.45<br>(93.98 to 218.24)                | 185.66<br>(142.15 to 307.85)               | 7.91<br>(6.79 to 12.54)              | 3.88<br>(2.85 to 6.16)                | 3.56<br>(2.64 to 5.57)                | 4.77<br>(3.77 to 7.50)                |
| Physical violence by other means                                                    | 470.03<br>(406.81 to 691.53)             | 192.66<br>(136.35 to 304.98)               | 169.31<br>(122.45 to 266.71)               | 226.08<br>(161.71 to 351.77)               | 10.02<br>(8.68 to 14.42)             | 5.83<br>(4.15 to 9.06)                | 5.19<br>(3.82 to 7.90)                | 6.64<br>(4.80 to 10.30)               |
| <b>Forces of nature, conflict and terrorism, and executions and police conflict</b> | <b>86.76</b><br><b>(50.77 to 126.14)</b> | <b>115.64</b><br><b>(0.01 to 1,284.71)</b> | <b>116.20</b><br><b>(0.01 to 1,289.09)</b> | <b>114.28</b><br><b>(0.01 to 1,277.85)</b> | <b>1.83</b><br><b>(1.02 to 2.72)</b> | <b>3.21</b><br><b>(0.00 to 31.13)</b> | <b>3.27</b><br><b>(0.00 to 31.45)</b> | <b>3.08</b><br><b>(0.00 to 30.53)</b> |
| Exposure to forces of nature                                                        | 43.00<br>(6.82 to 82.41)                 | 85.93<br>(0.00 to 568.00)                  | 86.44<br>(0.00 to 570.45)                  | 84.71<br>(0.00 to 590.38)                  | 0.97<br>(0.15 to 1.86)               | 2.54<br>(0.00 to 16.85)               | 2.60<br>(0.00 to 17.20)               | 2.43<br>(0.00 to 16.09)               |
| Conflict and terrorism                                                              | 0.00<br>(0.00 to 0.00)                   | 9.61<br>(0.00 to 91.82)                    | 9.60<br>(0.00 to 91.52)                    | 9.61<br>(0.00 to 92.19)                    | 0.00<br>(0.00 to 0.00)               | 0.18<br>(0.00 to 2.28)                | 0.18<br>(0.00 to 2.35)                | 0.18<br>(0.00 to 2.17)                |
| Executions and police conflict                                                      | 43.76<br>(38.03 to 50.70)                | 20.10<br>(0.00 to 0.00)                    | 20.16<br>(0.00 to 0.00)                    | 19.96<br>(0.00 to 0.00)                    | 0.87<br>(0.76 to 0.99)               | 0.48<br>(0.00 to 0.00)                | 0.49<br>(0.00 to 0.00)                | 0.47<br>(0.00 to 0.00)                |

| North Korea                                                              |                                                       |                                                        |                                                        |                                                        |                                                 |                                                 |                                                 |                                                 |
|--------------------------------------------------------------------------|-------------------------------------------------------|--------------------------------------------------------|--------------------------------------------------------|--------------------------------------------------------|-------------------------------------------------|-------------------------------------------------|-------------------------------------------------|-------------------------------------------------|
| Cause                                                                    | YLLs (actual counts)                                  |                                                        |                                                        |                                                        | Deaths (actual counts)                          |                                                 |                                                 |                                                 |
|                                                                          | 2016                                                  | 2040 Forecast                                          | 2040 Better Scenario                                   | 2040 Worse Scenario                                    | 2016                                            | 2040 Forecast                                   | 2040 Better Scenario                            | 2040 Worse Scenario                             |
| <b>All causes</b>                                                        | <b>6,512,459.48</b><br>(5,869,571.43 to 7,359,191.01) | <b>7,120,788.91</b><br>(5,545,284.56 to 17,019,415.11) | <b>4,814,053.40</b><br>(3,674,150.96 to 14,957,174.52) | <b>8,391,252.41</b><br>(6,485,946.08 to 18,195,585.58) | <b>233,049.96</b><br>(217,420.58 to 248,809.64) | <b>350,064.17</b><br>(300,813.52 to 556,985.74) | <b>248,090.84</b><br>(211,018.63 to 467,690.11) | <b>400,414.36</b><br>(340,528.27 to 599,969.08) |
| <b>Communicable, maternal, neonatal, and nutritional diseases</b>        | <b>1,107,254.90</b><br>(798,225.18 to 1,561,650.88)   | <b>426,016.11</b><br>(304,014.06 to 606,258.30)        | <b>242,619.08</b><br>(171,483.07 to 381,562.73)        | <b>535,090.43</b><br>(376,569.12 to 770,731.96)        | <b>18,553.24</b><br>(14,415.41 to 24,566.96)    | <b>13,499.65</b><br>(10,025.27 to 18,393.88)    | <b>8,689.17</b><br>(6,545.97 to 12,291.32)      | <b>15,657.28</b><br>(11,501.63 to 21,504.24)    |
| <b>HIV/AIDS and tuberculosis</b>                                         | <b>103,246.26</b><br>(69,207.40 to 237,446.26)        | <b>92,255.44</b><br>(50,825.35 to 225,077.59)          | <b>48,591.11</b><br>(20,873.39 to 180,199.89)          | <b>112,102.00</b><br>(62,259.06 to 243,179.95)         | <b>3,139.43</b><br>(2,309.45 to 6,074.22)       | <b>3,463.02</b><br>(2,123.77 to 6,766.98)       | <b>1,802.55</b><br>(974.12 to 5,051.96)         | <b>4,030.44</b><br>(2,454.57 to 7,136.51)       |
| <b>Tuberculosis</b>                                                      | <b>73,724.83</b><br>(61,695.58 to 89,495.18)          | <b>63,390.70</b><br>(44,165.97 to 90,455.30)           | <b>26,428.74</b><br>(19,097.04 to 37,418.84)           | <b>76,335.55</b><br>(52,072.13 to 111,703.75)          | <b>2,490.40</b><br>(2,108.64 to 2,969.32)       | <b>2,770.11</b><br>(1,911.85 to 4,008.30)       | <b>1,249.18</b><br>(887.98 to 1,757.41)         | <b>3,200.15</b><br>(2,161.43 to 4,691.69)       |
| <b>HIV/AIDS</b>                                                          | <b>29,521.44</b><br>(1,572.78 to 160,189.23)          | <b>28,864.73</b><br>(406.82 to 157,179.65)             | <b>22,162.36</b><br>(57.00 to 153,358.93)              | <b>35,766.45</b><br>(2,525.55 to 159,826.59)           | <b>649.02</b><br>(31.02 to 3,684.55)            | <b>692.92</b><br>(8.46 to 4,022.76)             | <b>553.37</b><br>(1.58 to 3,834.10)             | <b>830.29</b><br>(52.94 to 4,175.39)            |
| <b>Diarrhea, lower respiratory, and other common infectious diseases</b> | <b>362,828.83</b><br>(251,004.38 to 533,014.81)       | <b>144,454.40</b><br>(87,568.55 to 237,900.20)         | <b>82,753.85</b><br>(54,639.30 to 124,249.64)          | <b>208,656.93</b><br>(120,367.09 to 362,142.55)        | <b>7,279.28</b><br>(5,649.39 to 9,968.01)       | <b>6,865.94</b><br>(4,255.54 to 10,618.78)      | <b>4,792.58</b><br>(3,184.51 to 7,091.41)       | <b>8,234.93</b><br>(5,108.76 to 12,765.35)      |
| <b>Diarrheal diseases</b>                                                | <b>58,715.53</b><br>(32,271.83 to 103,242.24)         | <b>12,288.20</b><br>(1,969.99 to 31,695.17)            | <b>3,849.77</b><br>(738.08 to 11,071.46)               | <b>15,360.42</b><br>(2,731.43 to 38,668.69)            | <b>317.57</b><br>(462.11 to 1,301.35)           | <b>784.20</b><br>(63.18 to 878.83)              | <b>120.30</b><br>(28.70 to 349.91)              | <b>363.01</b><br>(76.44 to 1,000.83)            |
| <b>Intestinal infectious diseases</b>                                    | <b>2,833.72</b><br>(1,459.48 to 5,000.86)             | <b>1,366.53</b><br>(665.15 to 2,431.12)                | <b>1,058.21</b><br>(516.71 to 1,852.79)                | <b>1,443.05</b><br>(689.04 to 2,550.79)                | <b>43.30</b><br>(22.73 to 75.11)                | <b>24.63</b><br>(10.16 to 42.63)                | <b>19.82</b><br>(10.16 to 33.72)                | <b>25.40</b><br>(12.64 to 44.16)                |
| <b>Typhoid fever</b>                                                     | <b>2,412.15</b><br>(1,242.34 to 4,278.26)             | <b>1,106.90</b><br>(527.07 to 2,054.39)                | <b>865.36</b><br>(411.92 to 1,544.99)                  | <b>1,169.77</b><br>(548.02 to 2,155.57)                | <b>36.59</b><br>(19.01 to 64.36)                | <b>19.77</b><br>(10.01 to 34.88)                | <b>16.08</b><br>(8.33 to 27.54)                 | <b>20.38</b><br>(10.20 to 36.12)                |
| <b>Paratyphoid fever</b>                                                 | <b>416.15</b><br>(178.87 to 819.17)                   | <b>258.06</b><br>(108.61 to 512.00)                    | <b>191.95</b><br>(81.88 to 379.81)                     | <b>271.65</b><br>(114.36 to 545.45)                    | <b>6.61</b><br>(2.88 to 13.01)                  | <b>4.81</b><br>(2.09 to 9.39)                   | <b>3.70</b><br>(1.61 to 7.13)                   | <b>4.96</b><br>(2.13 to 9.70)                   |
| <b>Other intestinal infectious diseases</b>                              | <b>5.42</b><br>(1.93 to 12.82)                        | <b>1.57</b><br>(0.59 to 3.66)                          | <b>0.90</b><br>(0.33 to 2.05)                          | <b>1.63</b><br>(0.61 to 3.77)                          | <b>0.10</b><br>(0.04 to 0.21)                   | <b>0.06</b><br>(0.02 to 0.12)                   | <b>0.04</b><br>(0.01 to 0.08)                   | <b>0.06</b><br>(0.02 to 0.12)                   |
| <b>Lower respiratory infections</b>                                      | <b>255,737.53</b><br>(171,771.35 to 380,590.37)       | <b>109,264.74</b><br>(62,797.23 to 182,296.23)         | <b>62,791.28</b><br>(39,985.22 to 95,129.52)           | <b>150,204.78</b><br>(80,537.74 to 268,528.02)         | <b>5,769.27</b><br>(4,484.17 to 7,911.62)       | <b>6,096.94</b><br>(3,669.62 to 9,577.84)       | <b>4,320.20</b><br>(2,796.21 to 6,549.40)       | <b>7,191.16</b><br>(4,246.21 to 11,406.92)      |
| <b>Upper respiratory infections</b>                                      | <b>784.91</b><br>(380.68 to 1,583.96)                 | <b>595.49</b><br>(271.72 to 1,093.17)                  | <b>301.70</b><br>(133.87 to 554.49)                    | <b>626.07</b><br>(287.92 to 1,157.38)                  | <b>17.27</b><br>(9.35 to 29.07)                 | <b>21.39</b><br>(9.65 to 40.41)                 | <b>11.84</b><br>(5.21 to 22.79)                 | <b>21.45</b><br>(9.37 to 39.81)                 |
| <b>Otitis media</b>                                                      | <b>11.37</b><br>(4.90 to 29.45)                       | <b>2.79</b><br>(1.03 to 7.96)                          | <b>2.95</b><br>(1.09 to 8.47)                          | <b>2.72</b><br>(1.01 to 7.75)                          | <b>0.29</b><br>(0.13 to 0.73)                   | <b>0.11</b><br>(0.04 to 0.32)                   | <b>0.13</b><br>(0.05 to 0.37)                   | <b>0.10</b><br>(0.04 to 0.29)                   |
| <b>Meningitis</b>                                                        | <b>15,521.94</b><br>(9,897.91 to 23,473.20)           | <b>4,777.06</b><br>(3,139.50 to 7,455.17)              | <b>4,166.10</b><br>(2,757.86 to 6,539.21)              | <b>5,309.91</b><br>(3,298.25 to 8,450.60)              | <b>259.86</b><br>(184.84 to 381.19)             | <b>133.77</b><br>(98.13 to 209.54)              | <b>128.34</b><br>(94.40 to 199.06)              | <b>135.06</b><br>(97.20 to 209.98)              |
| <b>Pneumococcal meningitis</b>                                           | <b>909.18</b><br>(551.16 to 1,436.89)                 | <b>178.52</b><br>(120.20 to 281.39)                    | <b>184.74</b><br>(125.37 to 291.74)                    | <b>224.30</b><br>(142.94 to 358.98)                    | <b>15.94</b><br>(11.07 to 24.06)                | <b>6.07</b><br>(4.35 to 9.52)                   | <b>7.03</b><br>(5.11 to 10.89)                  | <b>6.85</b><br>(4.82 to 10.62)                  |
| <b>H influenzae type B meningitis</b>                                    | <b>1,016.58</b><br>(615.76 to 1,589.54)               | <b>283.38</b><br>(147.27 to 566.89)                    | <b>277.42</b><br>(149.03 to 544.64)                    | <b>721.76</b><br>(189.25 to 2,066.15)                  | <b>16.51</b><br>(11.16 to 24.59)                | <b>6.95</b><br>(4.58 to 11.39)                  | <b>7.57</b><br>(5.11 to 12.19)                  | <b>11.77</b><br>(5.07 to 27.59)                 |
| <b>Meningococcal meningitis</b>                                          | <b>5,900.16</b><br>(3,604.19 to 8,533.27)             | <b>1,875.80</b><br>(1,253.20 to 2,931.72)              | <b>1,619.54</b><br>(1,094.93 to 2,536.22)              | <b>1,881.17</b><br>(1,254.50 to 2,965.16)              | <b>100.99</b><br>(72.74 to 148.93)              | <b>59.47</b><br>(42.98 to 92.14)                | <b>56.85</b><br>(41.28 to 87.95)                | <b>56.59</b><br>(41.19 to 88.11)                |
| <b>Other meningitis</b>                                                  | <b>8,006.02</b><br>(4,976.60 to 12,534.82)            | <b>2,439.35</b><br>(1,573.45 to 3,849.15)              | <b>2,084.40</b><br>(1,343.48 to 3,276.87)              | <b>2,482.67</b><br>(1,581.69 to 4,045.70)              | <b>126.42</b><br>(87.16 to 187.17)              | <b>61.28</b><br>(43.88 to 97.40)                | <b>56.89</b><br>(41.32 to 91.27)                | <b>59.84</b><br>(42.41 to 94.85)                |
| <b>Encephalitis</b>                                                      | <b>14,020.80</b><br>(8,222.62 to 22,870.55)           | <b>5,835.76</b><br>(3,112.79 to 9,977.59)              | <b>4,277.85</b><br>(2,370.03 to 7,248.64)              | <b>6,188.98</b><br>(3,197.33 to 10,437.31)             | <b>198.21</b><br>(125.50 to 309.82)             | <b>119.67</b><br>(79.98 to 180.57)              | <b>94.09</b><br>(64.08 to 139.40)               | <b>121.91</b><br>(78.54 to 187.05)              |

|                |                                       |                                     |                                     |                                       |                               |                              |                              |                                 |
|----------------|---------------------------------------|-------------------------------------|-------------------------------------|---------------------------------------|-------------------------------|------------------------------|------------------------------|---------------------------------|
| Diphtheria     | 49.34<br>(24.99 to<br>90.78)          | 6.24<br>(3.18 to<br>11.95)          | 6.03<br>(3.08 to<br>11.36)          | 40.24<br>(4.97 to<br>134.61)          | 0.73<br>(0.42 to<br>1.23)     | 0.12<br>(0.06 to<br>0.21)    | 0.11<br>(0.06 to<br>0.20)    | 0.52<br>(0.10 to<br>1.65)       |
| Whooping cough | 11,287.47<br>(615.88 to<br>42,212.35) | 2,800.63<br>(81.97 to<br>11,882.97) | 2,370.44<br>(72.80 to<br>9,292.18)  | 15,470.58<br>(313.68 to<br>51,490.76) | 133.55<br>(7.29 to<br>499.17) | 33.39<br>(1.03 to<br>141.49) | 28.31<br>(0.96 to<br>111.46) | 182.63<br>(3.90 to<br>606.87)   |
| Tetanus        | 2,071.04<br>(809.69 to<br>4,369.54)   | 156.38<br>(53.50 to<br>336.08)      | 155.34<br>(53.46 to<br>323.90)      | 534.47<br>(158.66 to<br>1,439.20)     | 38.56<br>(15.23 to<br>75.89)  | 3.92<br>(1.28 to<br>7.82)    | 4.19<br>(1.35 to<br>8.42)    | 8.16<br>(2.71 to<br>18.76)      |
| Measles        | 440.20<br>(114.64 to<br>1,172.01)     | 6,746.94<br>(99.91 to<br>47,638.18) | 3,419.95<br>(89.21 to<br>20,444.97) | 12,833.01<br>(136.28 to<br>90,692.14) | 5.24<br>(1.37 to<br>13.92)    | 87.55<br>(1.63 to<br>558.43) | 45.92<br>(1.41 to<br>242.38) | 160.52<br>(2.02 to<br>1,065.51) |

| North Korea                                           |                                                               |                                                               |                                                             |                                                               |                                                      |                                                      |                                                      |                                                      |
|-------------------------------------------------------|---------------------------------------------------------------|---------------------------------------------------------------|-------------------------------------------------------------|---------------------------------------------------------------|------------------------------------------------------|------------------------------------------------------|------------------------------------------------------|------------------------------------------------------|
| Cause                                                 | YLLs (actual counts)                                          |                                                               |                                                             |                                                               | Deaths (actual counts)                               |                                                      |                                                      |                                                      |
|                                                       | 2016                                                          | 2040 Forecast                                                 | 2040 Better Scenario                                        | 2040 Worse Scenario                                           | 2016                                                 | 2040 Forecast                                        | 2040 Better Scenario                                 | 2040 Worse Scenario                                  |
| Varicella and herpes zoster                           | 1,354.99<br>(738.65 to<br>2,367.22)                           | 613.65<br>(331.88 to<br>1,020.99)                             | 354.24<br>(202.28 to<br>583.46)                             | 642.70<br>(335.58 to<br>1,130.14)                             | 28.80<br>(19.00 to<br>41.94)                         | 26.89<br>(16.04 to<br>41.12)                         | 19.34<br>(11.23 to<br>30.44)                         | 25.03<br>(14.61 to<br>38.86)                         |
| <b>Neglected tropical diseases and malaria</b>        | <b>2,275.63</b><br><b>(905.58 to</b><br><b>3,930.26)</b>      | <b>1,424.56</b><br><b>(567.55 to</b><br><b>2,357.39)</b>      | <b>743.12</b><br><b>(301.68 to</b><br><b>1,222.29)</b>      | <b>1,529.90</b><br><b>(608.04 to</b><br><b>2,576.37)</b>      | <b>45.53</b><br><b>(18.41 to</b><br><b>74.71)</b>    | <b>38.46</b><br><b>(16.27 to</b><br><b>60.71)</b>    | <b>21.85</b><br><b>(9.27 to</b><br><b>34.44)</b>     | <b>39.83</b><br><b>(16.43 to</b><br><b>63.66)</b>    |
| Malaria                                               | 95.65<br>(79.15 to<br>117.45)                                 | 57.24<br>(47.19 to<br>70.08)                                  | 52.38<br>(39.70 to<br>66.38)                                | 56.66<br>(46.62 to<br>70.09)                                  | 2.39<br>(2.03 to<br>2.85)                            | 1.81<br>(1.53 to<br>2.18)                            | 1.77<br>(1.39 to<br>2.23)                            | 1.74<br>(1.47 to<br>2.10)                            |
| Chagas disease                                        | 0.00<br>(0.00 to<br>0.00)                                     | 0.00<br>(0.00 to<br>0.00)                                     | 0.00<br>(0.00 to<br>0.00)                                   | 0.00<br>(0.00 to<br>0.00)                                     | 0.00<br>(0.00 to<br>0.00)                            | 0.00<br>(0.00 to<br>0.00)                            | 0.00<br>(0.00 to<br>0.00)                            | 0.00<br>(0.00 to<br>0.00)                            |
| Leishmaniasis                                         | 0.00<br>(0.00 to<br>0.00)                                     | 0.00<br>(0.00 to<br>0.00)                                     | 0.00<br>(0.00 to<br>0.00)                                   | 0.00<br>(0.00 to<br>0.00)                                     | 0.00<br>(0.00 to<br>0.00)                            | 0.00<br>(0.00 to<br>0.00)                            | 0.00<br>(0.00 to<br>0.00)                            | 0.00<br>(0.00 to<br>0.00)                            |
| African trypanosomiasis                               | 0.00<br>(0.00 to<br>0.00)                                     | 0.00<br>(0.00 to<br>0.00)                                     | 0.00<br>(0.00 to<br>0.00)                                   | 0.00<br>(0.00 to<br>0.00)                                     | 0.00<br>(0.00 to<br>0.00)                            | 0.00<br>(0.00 to<br>0.00)                            | 0.00<br>(0.00 to<br>0.00)                            | 0.00<br>(0.00 to<br>0.00)                            |
| Schistosomiasis                                       | 0.00<br>(0.00 to<br>0.00)                                     | 0.00<br>(0.00 to<br>0.00)                                     | 0.00<br>(0.00 to<br>0.00)                                   | 0.00<br>(0.00 to<br>0.00)                                     | 0.00<br>(0.00 to<br>0.00)                            | 0.00<br>(0.00 to<br>0.00)                            | 0.00<br>(0.00 to<br>0.00)                            | 0.00<br>(0.00 to<br>0.00)                            |
| Cysticercosis                                         | 72.93<br>(62.49 to<br>84.52)                                  | 27.54<br>(22.82 to<br>32.95)                                  | 23.54<br>(17.80 to<br>30.07)                                | 27.55<br>(22.99 to<br>32.73)                                  | 1.87<br>(1.62 to<br>2.13)                            | 0.85<br>(0.71 to<br>1.01)                            | 0.76<br>(0.59 to<br>0.97)                            | 0.83<br>(0.70 to<br>0.99)                            |
| Cystic echinococcosis                                 | 41.49<br>(32.07 to<br>52.51)                                  | 29.92<br>(22.51 to<br>40.35)                                  | 11.98<br>(8.34 to<br>16.47)                                 | 31.78<br>(23.56 to<br>42.08)                                  | 1.10<br>(0.87 to<br>1.39)                            | 1.08<br>(0.80 to<br>1.45)                            | 0.46<br>(0.34 to<br>0.63)                            | 1.17<br>(0.83 to<br>1.46)                            |
| Dengue                                                | 0.00<br>(0.00 to<br>0.00)                                     | 0.00<br>(0.00 to<br>0.00)                                     | 0.00<br>(0.00 to<br>0.00)                                   | 0.00<br>(0.00 to<br>0.00)                                     | 0.00<br>(0.00 to<br>0.00)                            | 0.00<br>(0.00 to<br>0.00)                            | 0.00<br>(0.00 to<br>0.00)                            | 0.00<br>(0.00 to<br>0.00)                            |
| Yellow fever                                          | 0.00<br>(0.00 to<br>0.00)                                     | 0.00<br>(0.00 to<br>0.00)                                     | 0.00<br>(0.00 to<br>0.00)                                   | 0.00<br>(0.00 to<br>0.00)                                     | 0.00<br>(0.00 to<br>0.00)                            | 0.00<br>(0.00 to<br>0.00)                            | 0.00<br>(0.00 to<br>0.00)                            | 0.00<br>(0.00 to<br>0.00)                            |
| Rabies                                                | 1,084.76<br>(69.03 to<br>2,640.63)                            | 646.97<br>(45.49 to<br>1,477.65)                              | 211.34<br>(9.39 to<br>544.60)                               | 723.29<br>(47.53 to<br>1,661.98)                              | 21.01<br>(1.41 to<br>49.16)                          | 15.50<br>(1.12 to<br>34.45)                          | 5.30<br>(0.25 to<br>13.46)                           | 16.88<br>(1.15 to<br>37.74)                          |
| Intestinal nematode infections                        | 172.85<br>(44.29 to<br>396.86)                                | 92.59<br>(36.87 to<br>189.73)                                 | 86.50<br>(35.24 to<br>184.30)                               | 96.69<br>(36.61 to<br>199.69)                                 | 2.55<br>(0.97 to<br>5.22)                            | 1.95<br>(0.99 to<br>3.29)                            | 2.01<br>(3.39)                                       | 1.93<br>(0.96 to<br>3.25)                            |
| Other neglected tropical diseases                     | 807.94<br>(378.10 to<br>1,317.88)                             | 570.30<br>(280.93 to<br>792.46)                               | 357.38<br>(145.37 to<br>503.02)                             | 593.94<br>(298.88 to<br>830.29)                               | 16.61<br>(7.67 to<br>24.46)                          | 17.27<br>(7.79 to<br>23.68)                          | 11.55<br>(4.35 to<br>16.16)                          | 17.36<br>(7.96 to<br>23.67)                          |
| <b>Maternal disorders</b>                             | <b>27,324.90</b><br><b>(19,772.53 to</b><br><b>35,760.01)</b> | <b>20,767.08</b><br><b>(13,929.39 to</b><br><b>29,530.89)</b> | <b>9,015.59</b><br><b>(5,870.05 to</b><br><b>13,313.74)</b> | <b>22,537.62</b><br><b>(14,839.09 to</b><br><b>32,748.58)</b> | <b>488.06</b><br><b>(355.77 to</b><br><b>637.01)</b> | <b>376.52</b><br><b>(252.41 to</b><br><b>531.46)</b> | <b>163.43</b><br><b>(106.74 to</b><br><b>238.58)</b> | <b>408.41</b><br><b>(272.49 to</b><br><b>588.12)</b> |
| Maternal hemorrhage                                   | 11,670.57<br>(7,549.31 to<br>16,492.22)                       | 8,404.38<br>(4,600.00 to<br>13,737.63)                        | 3,606.09<br>(1,928.94 to<br>5,866.99)                       | 9,104.08<br>(5,026.80 to<br>15,005.64)                        | 207.63<br>(134.63 to<br>292.64)                      | 151.51<br>(84.85 to<br>241.25)                       | 65.00<br>(35.14 to<br>105.32)                        | 164.08<br>(90.96 to<br>265.41)                       |
| Maternal sepsis and other maternal infections         | 1,396.64<br>(690.22 to<br>2,468.50)                           | 924.86<br>(424.91 to<br>1,750.21)                             | 395.49<br>(180.82 to<br>758.12)                             | 1,001.70<br>(459.70 to<br>1,875.47)                           | 27.28<br>(13.61 to<br>47.41)                         | 18.37<br>(8.55 to<br>34.30)                          | 7.86<br>(3.62 to<br>14.66)                           | 19.89<br>(8.98 to<br>37.12)                          |
| Maternal hypertensive disorders                       | 2,883.74<br>(1,640.70 to<br>4,703.66)                         | 2,196.41<br>(1,117.94 to<br>3,967.22)                         | 932.52<br>(465.65 to<br>1,722.97)                           | 2,382.27<br>(1,206.89 to<br>4,315.60)                         | 51.14<br>(28.93 to<br>83.23)                         | 39.56<br>(20.19 to<br>70.60)                         | 16.80<br>(8.50 to<br>30.83)                          | 42.90<br>(21.54 to<br>76.97)                         |
| Maternal obstructed labor and uterine rupture         | 1,088.00<br>(518.30 to<br>1,931.16)                           | 839.20<br>(336.68 to<br>1,713.03)                             | 337.60<br>(133.49 to<br>697.36)                             | 914.49<br>(361.51 to<br>1,911.57)                             | 19.60<br>(9.34 to<br>34.86)                          | 15.35<br>(6.21 to<br>31.48)                          | 6.17<br>(2.46 to<br>12.89)                           | 16.72<br>(6.54 to<br>34.46)                          |
| Maternal abortion, miscarriage, and ectopic pregnancy | 2,690.68<br>(1,322.57 to<br>4,491.85)                         | 2,178.14<br>(966.32 to<br>4,101.82)                           | 931.98<br>(402.93 to<br>1,787.83)                           | 2,363.76<br>(1,042.69 to<br>4,493.28)                         | 48.76<br>(24.37 to<br>81.15)                         | 40.28<br>(18.53 to<br>73.77)                         | 17.23<br>(7.74 to<br>32.29)                          | 43.69<br>(19.98 to<br>81.25)                         |

|                                        |                                       |                                       |                                     |                                       |                               |                              |                              |                               |
|----------------------------------------|---------------------------------------|---------------------------------------|-------------------------------------|---------------------------------------|-------------------------------|------------------------------|------------------------------|-------------------------------|
|                                        | 3,218.23<br>(1,756.74 to<br>5,057.76) | 2,778.10<br>(1,285.44 to<br>4,865.01) | 1,230.79<br>(559.58 to<br>2,177.19) | 3,030.64<br>(1,413.25 to<br>5,329.79) | 55.88<br>(30.80 to<br>87.61)  | 49.14<br>(23.00 to<br>85.78) | 21.77<br>(9.93 to<br>37.61)  | 53.57<br>(24.97 to<br>94.08)  |
| Indirect maternal deaths               |                                       |                                       |                                     |                                       |                               |                              |                              |                               |
|                                        | 363.80<br>(140.53 to<br>690.61)       | 238.61<br>(87.60 to<br>489.56)        | 103.07<br>(36.32 to<br>216.12)      | 259.79<br>(93.11 to<br>547.20)        | 6.47<br>(2.56 to<br>12.23)    | 4.31<br>(1.58 to<br>8.94)    | 1.86<br>(0.66 to<br>3.94)    | 4.69<br>(1.71 to<br>10.01)    |
| Late maternal deaths                   |                                       |                                       |                                     |                                       |                               |                              |                              |                               |
|                                        | 4.58<br>(0.20 to<br>26.60)            | 54.03<br>(0.13 to<br>404.69)          | 24.17<br>(0.00 to<br>193.72)        | 61.38<br>(0.57 to<br>440.81)          | 0.08<br>(0.00 to<br>0.48)     | 0.96<br>(0.00 to<br>6.94)    | 0.43<br>(0.00 to<br>3.31)    | 1.08<br>(0.01 to<br>7.67)     |
| Maternal deaths aggravated by HIV/AIDS |                                       |                                       |                                     |                                       |                               |                              |                              |                               |
|                                        | 4,008.66<br>(2,244.46 to<br>6,084.94) | 3,153.35<br>(1,603.66 to<br>5,545.09) | 1,453.87<br>(733.70 to<br>2,577.84) | 3,419.50<br>(1,701.54 to<br>6,035.04) | 71.22<br>(39.95 to<br>108.33) | 57.04<br>(28.91 to<br>99.73) | 26.30<br>(13.54 to<br>46.47) | 61.80<br>(31.31 to<br>110.30) |
| Other maternal disorders               |                                       |                                       |                                     |                                       |                               |                              |                              |                               |

| North Korea                                                             |                                                 |                                                |                                               |                                                |                                           |                                         |                                       |                                           |
|-------------------------------------------------------------------------|-------------------------------------------------|------------------------------------------------|-----------------------------------------------|------------------------------------------------|-------------------------------------------|-----------------------------------------|---------------------------------------|-------------------------------------------|
| Cause                                                                   | YLLs (actual counts)                            |                                                |                                               |                                                | Deaths (actual counts)                    |                                         |                                       |                                           |
|                                                                         | 2016                                            | 2040 Forecast                                  | 2040 Better Scenario                          | 2040 Worse Scenario                            | 2016                                      | 2040 Forecast                           | 2040 Better Scenario                  | 2040 Worse Scenario                       |
| <b>Neonatal disorders</b>                                               | <b>576,894.27</b><br>(374,929.52 to 863,542.00) | <b>145,160.32</b><br>(81,589.17 to 234,008.19) | <b>85,056.18</b><br>(48,122.59 to 137,786.46) | <b>168,443.74</b><br>(94,941.00 to 271,132.78) | <b>6,667.20</b><br>(4,332.52 to 9,983.92) | <b>1,678.14</b><br>(943.11 to 2,703.75) | <b>983.38</b><br>(556.35 to 1,592.58) | <b>1,947.26</b><br>(1,097.21 to 3,134.39) |
| Neonatal preterm birth                                                  | 283,479.92<br>(161,282.68 to 460,106.34)        | 70,017.13<br>(38,501.44 to 118,584.62)         | 37,926.37<br>(19,960.23 to 64,845.75)         | 82,497.66<br>(44,352.95 to 139,773.68)         | 3,275.60<br>(1,864.52 to 5,318.02)        | 809.18<br>(445.06 to 1,370.20)          | 438.38<br>(230.71 to 749.55)          | 953.38<br>(512.55 to 1,615.27)            |
| Neonatal encephalopathy due to birth asphyxia and trauma                | 212,771.84<br>(116,025.01 to 342,568.89)        | 50,594.40<br>(20,836.87 to 93,705.11)          | 33,048.02<br>(13,957.20 to 60,456.17)         | 57,795.12<br>(23,773.32 to 107,135.88)         | 2,458.69<br>(1,340.64 to 3,957.92)        | 584.87<br>(241.09 to 1,083.00)          | 382.04<br>(161.46 to 698.87)          | 668.11<br>(274.93 to 1,238.35)            |
| Neonatal sepsis and other neonatal infections                           | 12,853.11<br>(4,801.20 to 24,614.53)            | 4,796.69<br>(1,795.49 to 9,297.26)             | 3,047.25<br>(1,133.90 to 6,319.16)            | 5,439.60<br>(2,034.63 to 11,342.77)            | 148.60<br>(55.53 to 284.58)               | 55.47<br>(20.75 to 113.41)              | 35.24<br>(13.11 to 73.04)             | 62.91<br>(23.52 to 131.17)                |
| Hemolytic disease and other neonatal jaundice                           | 12,102.99<br>(5,844.40 to 22,778.62)            | 2,145.22<br>(860.06 to 4,603.95)               | 1,206.35<br>(484.25 to 2,541.30)              | 2,467.79<br>(990.44 to 5,318.00)               | 139.96<br>(67.56 to 263.39)               | 24.81<br>(9.96 to 53.27)                | 13.95<br>(5.60 to 29.38)              | 28.54<br>(11.45 to 61.52)                 |
| Other neonatal disorders                                                | 55,686.40<br>(29,399.13 to 96,947.94)           | 17,606.87<br>(8,105.22 to 33,755.64)           | 9,828.20<br>(4,544.18 to 18,749.56)           | 20,243.57<br>(9,268.38 to 38,697.72)           | 644.36<br>(340.37 to 1,121.05)            | 203.80<br>(93.87 to 390.85)             | 113.76<br>(52.59 to 216.96)           | 234.31<br>(107.31 to 448.00)              |
| <b>Nutritional deficiencies</b>                                         | <b>13,961.46</b><br>(9,400.97 to 21,622.73)     | <b>7,504.55</b><br>(5,796.77 to 9,916.92)      | <b>5,878.26</b><br>(4,599.38 to 7,680.00)     | <b>7,252.98</b><br>(5,488.98 to 9,843.44)      | <b>433.73</b><br>(355.68 to 540.36)       | <b>542.41</b><br>(386.69 to 722.51)     | <b>504.78</b><br>(373.25 to 663.32)   | <b>477.58</b><br>(330.50 to 655.18)       |
| Protein-energy malnutrition                                             | 10,899.61<br>(6,737.90 to 17,566.51)            | 5,116.28<br>(3,569.28 to 7,278.05)             | 4,023.59<br>(2,888.62 to 5,598.70)            | 4,930.15<br>(3,383.91 to 7,138.94)             | 335.79<br>(267.06 to 430.83)              | 397.87<br>(261.98 to 552.12)            | 374.33<br>(249.44 to 515.32)          | 347.86<br>(221.77 to 494.36)              |
| Iodine deficiency                                                       | 299.63<br>(26,70 to 1,163.20)                   | 439.73<br>(33.71 to 1,430.16)                  | 298.05<br>(17.51 to 954.67)                   | 435.47<br>(35.38 to 1,539.20)                  | 8.46<br>(0.83 to 27.64)                   | 27.05<br>(0.93 to 99.87)                | 21.04<br>(0.55 to 87.00)              | 24.85<br>(0.94 to 90.38)                  |
| Dietary iron deficiency                                                 | 299.96<br>(214.79 to 397.94)                    | 267.71<br>(163.11 to 426.88)                   | 220.69<br>(132.27 to 360.14)                  | 264.42<br>(165.31 to 412.50)                   | 7.93<br>(4.94 to 13.17)                   | 11.56<br>(5.21 to 23.13)                | 10.68<br>(4.55 to 22.56)              | 10.76<br>(4.96 to 21.33)                  |
| Other nutritional deficiencies                                          | 2,462.26<br>(1,468.70 to 4,049.88)              | 1,680.83<br>(1,117.57 to 2,374.07)             | 1,335.93<br>(888.65 to 1,886.58)              | 1,622.94<br>(1,057.74 to 2,300.98)             | 81.55<br>(53.01 to 113.48)                | 105.93<br>(68.31 to 145.43)             | 98.73<br>(63.57 to 145.43)            | 94.12<br>(58.88 to 141.18)                |
| <b>Other communicable, maternal, neonatal, and nutritional diseases</b> | <b>20,723.55</b><br>(15,549.54 to 29,824.63)    | <b>14,449.75</b><br>(11,495.90 to 18,324.25)   | <b>10,580.97</b><br>(8,376.95 to 13,371.88)   | <b>14,567.26</b><br>(11,465.99 to 18,623.41)   | <b>500.00</b><br>(407.59 to 620.88)       | <b>535.15</b><br>(431.78 to 654.74)     | <b>420.59</b><br>(336.89 to 517.56)   | <b>518.83</b><br>(412.66 to 640.78)       |
| Sexually transmitted infections excluding HIV                           | 4,486.29<br>(1,740.92 to 9,994.31)              | 779.25<br>(385.82 to 1,589.16)                 | 572.79<br>(304.79 to 1,111.79)                | 819.79<br>(399.95 to 1,659.23)                 | 63.45<br>(30.89 to 129.06)                | 17.48<br>(11.18 to 28.19)               | 14.05<br>(9.26 to 21.88)              | 17.60<br>(11.08 to 29.11)                 |
| Syphilis                                                                | 4,147.53<br>(1,449.66 to 9,590.91)              | 562.78<br>(196.30 to 1,326.28)                 | 398.65<br>(145.08 to 915.59)                  | 603.22<br>(200.08 to 1,437.71)                 | 52.65<br>(20.88 to 116.86)                | 9.49<br>(4.67 to 18.77)                 | 7.21<br>(3.77 to 13.87)               | 9.82<br>(4.73 to 19.40)                   |
| Chlamydial infection                                                    | 62.70<br>(44.05 to 100.01)                      | 40.18<br>(27.48 to 61.96)                      | 32.17<br>(21.86 to 49.26)                     | 40.22<br>(27.13 to 62.01)                      | 1.99<br>(1.41 to 3.12)                    | 1.48<br>(1.04 to 2.25)                  | 1.28<br>(0.90 to 1.97)                | 1.44<br>(1.02 to 2.19)                    |
| Gonococcal infection                                                    | 184.63<br>(130.55 to 287.70)                    | 120.18<br>(80.60 to 186.71)                    | 97.38<br>(65.42 to 147.33)                    | 119.93<br>(79.91 to 184.55)                    | 6.10<br>(4.34 to 9.29)                    | 4.61<br>(3.18 to 6.94)                  | 3.98<br>(2.75 to 5.98)                | 4.48<br>(3.08 to 6.77)                    |
| Other sexually transmitted infections                                   | 91.43<br>(64.83 to 143.46)                      | 56.12<br>(38.08 to 84.86)                      | 44.60<br>(30.54 to 67.05)                     | 56.41<br>(38.18 to 85.15)                      | 2.71<br>(1.93 to 4.14)                    | 1.89<br>(1.31 to 2.83)                  | 1.58<br>(1.09 to 2.32)                | 1.86<br>(1.28 to 2.76)                    |
| Acute hepatitis                                                         | 11,811.25<br>(9,531.20 to 14,600.61)            | 9,803.12<br>(7,370.54 to 12,605.56)            | 7,242.86<br>(5,389.71 to 9,275.34)            | 9,837.14<br>(7,358.94 to 12,844.89)            | 339.32<br>(282.53 to 408.12)              | 367.06<br>(279.22 to 461.95)            | 286.11<br>(216.26 to 363.91)          | 357.80<br>(270.90 to 456.75)              |
| Acute hepatitis A                                                       | 1,285.40<br>(621.06 to 2,292.37)                | 271.50<br>(138.80 to 514.95)                   | 285.33<br>(102.69 to 354.26)                  | 17.46<br>(142.86 to 546.65)                    | 6.21<br>(9.45 to 29.11)                   | 4.83<br>(3.91 to 9.85)                  | 6.21<br>(3.07 to 7.44)                | 6.21<br>(3.87 to 9.85)                    |
| Acute hepatitis B                                                       | 9,579.44<br>(7,625.04 to 11,959.10)             | 8,788.09<br>(6,454.49 to 11,426.35)            | 6,415.66<br>(4,691.79 to 8,377.47)            | 8,824.35<br>(6,397.26 to 11,713.27)            | 294.59<br>(241.49 to 355.43)              | 325.99<br>(244.27 to 417.75)            | 248.33<br>(183.09 to 323.36)          | 319.32<br>(236.44 to 409.72)              |





| North Korea                          |                                                       |                                                       |                                                       |                                                       |                                              |                                              |                                              |                                              |
|--------------------------------------|-------------------------------------------------------|-------------------------------------------------------|-------------------------------------------------------|-------------------------------------------------------|----------------------------------------------|----------------------------------------------|----------------------------------------------|----------------------------------------------|
| Cause                                | YLLs (actual counts)                                  |                                                       |                                                       |                                                       | Deaths (actual counts)                       |                                              |                                              |                                              |
|                                      | 2016                                                  | 2040 Forecast                                         | 2040 Better Scenario                                  | 2040 Worse Scenario                                   | 2016                                         | 2040 Forecast                                | 2040 Better Scenario                         | 2040 Worse Scenario                          |
| <b>Neoplasms</b>                     | <b>1,308,770.61</b><br>(1,188,358.08 to 1,438,673.68) | <b>1,663,721.18</b><br>(1,311,444.57 to 2,036,922.73) | <b>1,409,987.95</b><br>(1,126,445.27 to 1,697,199.04) | <b>1,818,894.04</b><br>(1,440,429.51 to 2,216,083.53) | <b>49,006.04</b><br>(44,700.37 to 53,387.23) | <b>73,992.49</b><br>(59,475.63 to 89,614.32) | <b>64,851.13</b><br>(53,494.56 to 76,854.48) | <b>80,333.93</b><br>(64,414.80 to 97,858.22) |
| Lip and oral cavity cancer           | 7,508.66<br>(5,328.49 to 11,103.06)                   | 10,210.91<br>(5,576.29 to 18,704.75)                  | 7,139.45<br>(3,932.00 to 12,692.97)                   | 12,875.80<br>(6,736.16 to 23,828.68)                  | 279.88<br>(199.46 to 406.13)                 | 432.83<br>(238.81 to 781.38)                 | 311.45<br>(173.86 to 541.36)                 | 542.86<br>(286.17 to 998.78)                 |
| Nasopharynx cancer                   | 16,518.50<br>(11,138.40 to 21,942.97)                 | 23,291.86<br>(11,779.36 to 40,499.32)                 | 15,427.33<br>(7,908.31 to 27,176.78)                  | 29,603.06<br>(14,987.15 to 52,459.87)                 | 514.15<br>(350.80 to 678.23)                 | 800.64<br>(408.10 to 1,369.07)               | 534.00<br>(274.44 to 927.05)                 | 1,016.45<br>(509.23 to 1,765.45)             |
| Other pharynx cancer                 | 1,930.43<br>(1,492.53 to 2,669.10)                    | 2,290.51<br>(1,347.52 to 3,844.93)                    | 2,030.31<br>(1,240.60 to 3,345.35)                    | 2,582.39<br>(1,461.59 to 4,391.56)                    | 69.81<br>(54.55 to 94.91)                    | 100.42<br>(59.63 to 166.70)                  | 93.92<br>(58.17 to 149.80)                   | 109.70<br>(62.64 to 188.69)                  |
| Esophageal cancer                    | 81,938.39<br>(71,919.78 to 93,374.89)                 | 118,075.67<br>(66,008.17 to 196,621.80)               | 81,188.96<br>(46,637.42 to 134,583.06)                | 142,679.72<br>(78,451.61 to 241,998.28)               | 3,545.10<br>(3,127.16 to 4,008.22)           | 5,689.61<br>(3,246.87 to 9,303.25)           | 4,013.04<br>(2,376.87 to 6,422.79)           | 6,832.41<br>(3,818.49 to 11,258.17)          |
| Stomach cancer                       | 194,998.99<br>(170,011.59 to 228,625.99)              | 183,357.30<br>(133,030.25 to 246,614.91)              | 159,787.80<br>(118,383.31 to 211,396.27)              | 193,335.02<br>(134,932.82 to 265,929.07)              | 7,852.16<br>(6,842.80 to 9,162.67)           | 8,696.39<br>(6,436.88 to 11,460.05)          | 7,961.12<br>(6,015.41 to 10,338.48)          | 9,016.04<br>(6,482.29 to 12,194.66)          |
| Colon and rectum cancer              | 65,635.10<br>(54,877.17 to 79,705.91)                 | 98,569.86<br>(69,146.12 to 139,015.82)                | 104,089.29<br>(73,800.17 to 145,029.88)               | 100,304.91<br>(69,424.68 to 142,135.62)               | 2,642.18<br>(2,210.19 to 3,177.61)           | 5,689.61<br>(3,442.85 to 8,336.33)           | 4,013.04<br>(3,877.35 to 7,616.71)           | 4,790.72<br>(3,332.62 to 6,717.85)           |
| Liver cancer                         | 183,217.16<br>(145,482.43 to 237,392.33)              | 243,056.97<br>(156,181.02 to 377,589.16)              | 232,070.76<br>(152,415.54 to 351,880.32)              | 261,224.81<br>(160,678.64 to 419,238.64)              | 6,509.57<br>(5,204.14 to 8,352.59)           | 10,116.93<br>(6,775.16 to 15,319.59)         | 10,022.33<br>(6,959.48 to 14,732.88)         | 10,695.34<br>(6,875.16 to 16,700.42)         |
| Liver cancer due to hepatitis B      | 109,762.16<br>(85,271.58 to 145,057.41)               | 139,675.25<br>(86,697.23 to 220,548.65)               | 134,509.73<br>(86,137.89 to 208,767.46)               | 149,048.27<br>(90,270.69 to 240,796.03)               | 3,676.26<br>(2,887.42 to 4,818.82)           | 5,472.90<br>(3,618.15 to 8,320.88)           | 5,451.06<br>(3,709.21 to 8,084.48)           | 5,751.37<br>(3,618.61 to 9,096.97)           |
| Liver cancer due to hepatitis C      | 24,517.22<br>(17,560.64 to 32,781.59)                 | 36,630.68<br>(23,875.33 to 56,118.45)                 | 35,741.89<br>(22,999.50 to 55,140.10)                 | 38,643.21<br>(23,296.77 to 59,808.92)                 | 1,041.00<br>(768.91 to 1,398.28)             | 1,807.22<br>(1,164.07 to 2,731.34)           | 1,847.82<br>(1,242.27 to 2,709.72)           | 1,868.64<br>(1,147.99 to 2,821.71)           |
| Liver cancer due to alcohol use      | 13,707.03<br>(9,568.44 to 19,004.01)                  | 18,695.90<br>(11,939.05 to 28,752.25)                 | 16,648.63<br>(10,845.55 to 24,899.40)                 | 21,869.46<br>(13,461.16 to 34,003.05)                 | 578.84<br>(398.48 to 814.90)                 | 873.14<br>(560.92 to 1,333.12)               | 813.62<br>(530.65 to 1,213.89)               | 997.07<br>(626.78 to 1,560.11)               |
| Liver cancer due to other causes     | 35,230.75<br>(26,720.91 to 47,851.08)                 | 48,065.14<br>(28,398.70 to 79,706.61)                 | 45,170.51<br>(27,767.82 to 72,621.52)                 | 51,663.86<br>(29,362.67 to 88,579.21)                 | 1,213.46<br>(926.19 to 1,632.05)             | 1,963.66<br>(1,216.30 to 3,149.95)           | 1,909.83<br>(1,240.83 to 2,927.47)           | 2,078.06<br>(1,223.38 to 3,433.85)           |
| Gallbladder and biliary tract cancer | 10,947.52<br>(8,405.02 to 14,055.70)                  | 10,689.70<br>(8,116.73 to 13,712.24)                  | 12,189.80<br>(9,221.69 to 15,798.02)                  | 9,987.23<br>(7,496.68 to 12,939.62)                   | 485.68<br>(377.57 to 617.49)                 | 560.06<br>(428.16 to 720.52)                 | 677.25<br>(525.99 to 878.31)                 | 507.69<br>(383.47 to 658.22)                 |
| Pancreatic cancer                    | 26,407.96<br>(23,263.74 to 29,951.91)                 | 42,383.22<br>(32,392.37 to 54,322.15)                 | 44,259.45<br>(33,911.70 to 55,908.00)                 | 43,053.51<br>(32,620.55 to 55,650.76)                 | 1,091.64<br>(959.93 to 1,238.70)             | 2,006.25<br>(1,574.97 to 2,542.88)           | 2,182.85<br>(1,741.51 to 2,731.61)           | 2,008.55<br>(1,557.36 to 2,578.45)           |
| Larynx cancer                        | 10,975.88<br>(7,478.52 to 13,756.12)                  | 13,736.30<br>(6,868.89 to 24,177.80)                  | 10,060.25<br>(5,232.45 to 16,813.72)                  | 16,166.37<br>(7,953.79 to 28,555.48)                  | 425.08<br>(302.38 to 523.02)                 | 602.11<br>(310.48 to 1,031.41)               | 447.28<br>(236.25 to 740.67)                 | 708.88<br>(354.08 to 1,233.27)               |
| Tracheal, bronchus, and lung cancer  | 405,414.06<br>(334,575.09 to 477,514.94)              | 575,955.99<br>(370,341.65 to 814,280.33)              | 394,302.53<br>(253,236.65 to 560,126.98)              | 665,762.19<br>(439,885.01 to 929,566.28)              | 16,142.94<br>(13,513.79 to 18,904.93)        | 26,051.29<br>(16,791.28 to 37,388.29)        | 17,850.23<br>(11,519.97 to 25,727.62)        | 30,808.58<br>(20,074.43 to 43,260.43)        |
| Malignant skin melanoma              | 2,259.32<br>(1,733.63 to 3,050.82)                    | 2,488.66<br>(1,931.02 to 3,375.28)                    | 3,098.50<br>(2,376.00 to 4,202.45)                    | 2,350.10<br>(1,819.64 to 3,189.61)                    | 78.17<br>(61.82 to 102.52)                   | 106.09<br>(84.05 to 138.96)                  | 96.55<br>(76.03 to 118.65)                   | 96.55<br>(76.03 to 127.50)                   |
| Non-melanoma skin cancer             | 5,174.06<br>(4,187.68 to 6,118.60)                    | 8,630.77<br>(6,963.36 to 10,296.12)                   | 8,343.06<br>(6,713.34 to 9,923.93)                    | 8,163.57<br>(6,541.82 to 9,764.34)                    | 221.25<br>(182.81 to 257.22)                 | 459.11<br>(375.81 to 543.37)                 | 481.10<br>(399.98 to 561.63)                 | 417.19<br>(332.15 to 500.54)                 |
| Breast cancer                        | 43,489.71<br>(31,370.68 to 65,753.03)                 | 48,749.98<br>(29,466.46 to 79,182.13)                 | 47,386.71<br>(29,740.67 to 75,872.16)                 | 51,635.59<br>(30,976.93 to 84,193.10)                 | 1,446.96<br>(1,052.70 to 2,152.81)           | 1,893.31<br>(1,199.72 to 2,993.22)           | 1,929.62<br>(1,261.64 to 2,966.13)           | 1,966.38<br>(1,215.55 to 3,152.55)           |
| Cervical cancer                      | 32,980.96<br>(20,996.15 to 52,433.92)                 | 29,229.73<br>(14,731.21 to 47,980.49)                 | 23,413.48<br>(12,150.22 to 38,512.48)                 | 30,472.17<br>(15,101.69 to 50,898.21)                 | 1,096.29<br>(677.20 to 1,782.58)             | 1,110.38<br>(572.76 to 1,842.26)             | 929.19<br>(492.12 to 1,513.96)               | 1,138.98<br>(575.62 to 1,942.41)             |



| North Korea                     |                                                                        |                                                                        |                                                                      |                                                                        |                                                               |                                                                  |                                                                |                                                                  |
|---------------------------------|------------------------------------------------------------------------|------------------------------------------------------------------------|----------------------------------------------------------------------|------------------------------------------------------------------------|---------------------------------------------------------------|------------------------------------------------------------------|----------------------------------------------------------------|------------------------------------------------------------------|
| Cause                           | YLLs (actual counts)                                                   |                                                                        |                                                                      |                                                                        | Deaths (actual counts)                                        |                                                                  |                                                                |                                                                  |
|                                 | 2016                                                                   | 2040 Forecast                                                          | 2040 Better Scenario                                                 | 2040 Worse Scenario                                                    | 2016                                                          | 2040 Forecast                                                    | 2040 Better Scenario                                           | 2040 Worse Scenario                                              |
| Kidney cancer                   | 7,056.57<br>(4,865.18 to<br>9,550.68)                                  | 9,192.83<br>(5,328.85 to<br>14,855.41)                                 | 10,845.12<br>(6,355.70 to<br>17,403.05)                              | 9,063.24<br>(5,277.64 to<br>14,781.08)                                 | 242.11<br>(166.17 to<br>328.58)                               | 405.68<br>(237.54 to<br>647.96)                                  | 502.77<br>(298.62 to<br>779.49)                                | 391.80<br>(229.92 to<br>635.99)                                  |
| Bladder cancer                  | 11,145.41<br>(8,340.69 to<br>14,068.82)                                | 17,784.54<br>(11,277.57 to<br>27,021.87)                               | 16,615.86<br>(10,749.40 to<br>24,819.60)                             | 18,372.02<br>(11,297.44 to<br>29,015.74)                               | 530.36<br>(404.08 to<br>660.18)                               | 1,009.26<br>(652.60 to<br>1,511.87)                              | 997.36<br>(668.51 to<br>1,433.06)                              | 1,022.81<br>(637.21 to<br>1,565.08)                              |
| Brain and nervous system cancer | 34,815.70<br>(21,246.71 to<br>45,467.67)                               | 42,397.54<br>(25,438.33 to<br>56,390.73)                               | 47,044.46<br>(27,806.75 to<br>62,697.26)                             | 40,929.27<br>(24,775.36 to<br>53,848.24)                               | 937.49<br>(564.69 to<br>1,217.28)                             | 1,506.88<br>(882.51 to<br>1,997.46)                              | 1,771.41<br>(1,028.84 to<br>2,366.45)                          | 1,407.96<br>(844.20 to<br>1,871.08)                              |
| Thyroid cancer                  | 2,958.02<br>(2,494.13 to<br>3,498.19)                                  | 3,700.28<br>(2,983.18 to<br>4,673.76)                                  | 3,510.94<br>(2,838.06 to<br>4,363.05)                                | 3,673.04<br>(2,998.49 to<br>4,850.36)                                  | 117.52<br>(100.03 to<br>138.94)                               | 180.58<br>(147.18 to<br>225.58)                                  | 182.80<br>(150.29 to<br>227.64)                                | 173.05<br>(135.93 to<br>229.79)                                  |
| Mesothelioma                    | 1,320.82<br>(1,070.25 to<br>1,687.09)                                  | 1,510.80<br>(1,214.60 to<br>1,920.20)                                  | 1,479.37<br>(1,183.99 to<br>1,934.68)                                | 1,461.18<br>(1,169.62 to<br>1,850.53)                                  | 44.58<br>(36.35 to<br>56.00)                                  | 61.07<br>(49.76 to<br>76.22)                                     | 62.90<br>(51.81 to<br>78.71)                                   | 57.42<br>(46.29 to<br>71.64)                                     |
| Hodgkin lymphoma                | 3,131.26<br>(1,823.23 to<br>3,943.79)                                  | 3,094.38<br>(1,841.04 to<br>3,989.28)                                  | 2,369.74<br>(1,427.37 to<br>3,045.72)                                | 3,076.59<br>(1,838.53 to<br>3,976.63)                                  | 88.46<br>(51.36 to<br>110.23)                                 | 112.34<br>(66.31 to<br>141.89)                                   | 90.99<br>(54.60 to<br>115.74)                                  | 108.20<br>(63.38 to<br>137.81)                                   |
| Non-Hodgkin lymphoma            | 18,904.84<br>(15,707.82 to<br>22,469.00)                               | 22,253.88<br>(18,317.41 to<br>26,723.42)                               | 25,753.07<br>(20,741.75 to<br>31,132.19)                             | 21,506.47<br>(17,740.04 to<br>26,196.17)                               | 586.39<br>(488.51 to<br>687.76)                               | 907.95<br>(745.36 to<br>1,093.03)                                | 1,116.05<br>(904.51 to<br>1,334.75)                            | 849.09<br>(698.47 to<br>1,033.55)                                |
| Multiple myeloma                | 3,730.37<br>(2,616.80 to<br>4,837.45)                                  | 5,361.44<br>(3,646.81 to<br>7,148.90)                                  | 6,476.88<br>(4,290.60 to<br>8,677.14)                                | 5,132.88<br>(3,543.16 to<br>6,913.45)                                  | 139.67<br>(97.61 to<br>182.86)                                | 242.06<br>(168.00 to<br>324.71)                                  | 307.38<br>(202.98 to<br>413.07)                                | 225.58<br>(156.59 to<br>304.11)                                  |
| Leukemia                        | 67,725.90<br>(42,927.39 to<br>84,835.11)                               | 54,682.60<br>(34,918.73 to<br>75,618.47)                               | 50,462.20<br>(32,226.98 to<br>69,204.44)                             | 56,758.45<br>(36,148.13 to<br>79,481.26)                               | 1,500.37<br>(943.03 to<br>1,863.97)                           | 1,701.99<br>(1,073.43 to<br>2,397.29)                            | 1,639.53<br>(1,020.61 to<br>2,289.17)                          | 1,727.44<br>(1,100.40 to<br>2,469.65)                            |
| Acute lymphoid leukemia         | 13,678.13<br>(9,282.11 to<br>20,211.90)                                | 9,370.67<br>(6,249.02 to<br>13,484.07)                                 | 9,685.35<br>(6,530.18 to<br>13,185.69)                               | 9,681.17<br>(6,458.33 to<br>14,105.70)                                 | 259.86<br>(171.30 to<br>379.55)                               | 240.51<br>(155.33 to<br>337.99)                                  | 257.93<br>(165.46 to<br>352.24)                                | 244.47<br>(157.06 to<br>348.85)                                  |
| Chronic lymphoid leukemia       | 2,647.23<br>(1,873.47 to<br>4,087.89)                                  | 2,830.42<br>(1,918.20 to<br>4,175.58)                                  | 2,860.45<br>(1,968.91 to<br>4,103.40)                                | 2,894.34<br>(1,932.63 to<br>4,337.13)                                  | 78.96<br>(53.20 to<br>118.73)                                 | 102.91<br>(67.48 to<br>155.52)                                   | 109.34<br>(72.80 to<br>157.32)                                 | 102.74<br>(66.32 to<br>158.04)                                   |
| Acute myeloid leukemia          | 6,617.05<br>(4,419.42 to<br>9,387.38)                                  | 6,815.41<br>(4,553.54 to<br>9,778.57)                                  | 7,640.34<br>(5,143.33 to<br>10,710.91)                               | 6,951.54<br>(4,666.33 to<br>10,043.37)                                 | 148.06<br>(96.76 to<br>204.91)                                | 208.16<br>(141.09 to<br>303.47)                                  | 244.07<br>(164.35 to<br>344.47)                                | 208.05<br>(140.60 to<br>306.33)                                  |
| Chronic myeloid leukemia        | 1,602.52<br>(1,028.95 to<br>2,290.32)                                  | 1,193.80<br>(695.51 to<br>1,793.01)                                    | 1,173.98<br>(687.57 to<br>1,732.77)                                  | 1,228.37<br>(712.77 to<br>1,885.05)                                    | 43.98<br>(27.73 to<br>61.06)                                  | 39.80<br>(23.14 to<br>59.97)                                     | 40.76<br>(23.96 to<br>59.97)                                   | 40.17<br>(23.07 to<br>61.87)                                     |
| Other leukemia                  | 43,180.98<br>(22,383.90 to<br>59,581.74)                               | 34,472.30<br>(17,672.56 to<br>52,312.31)                               | 29,102.07<br>(14,347.96 to<br>45,251.16)                             | 36,003.02<br>(18,482.47 to<br>55,088.43)                               | 969.51<br>(485.30 to<br>1,311.88)                             | 1,110.61<br>(560.87 to<br>1,705.96)                              | 987.42<br>(472.47 to<br>1,527.88)                              | 1,132.01<br>(570.94 to<br>1,754.04)                              |
| Other neoplasms                 | 39,338.11<br>(33,331.42 to<br>45,111.27)                               | 46,759.25<br>(39,308.22 to<br>53,922.21)                               | 50,533.60<br>(42,067.97 to<br>58,511.22)                             | 44,657.09<br>(37,509.30 to<br>51,610.33)                               | 1,225.35<br>(1,031.50 to<br>1,395.89)                         | 1,984.41<br>(1,628.55 to<br>2,317.68)                            | 2,306.25<br>(1,899.74 to<br>2,707.65)                          | 1,821.42<br>(1,495.56 to<br>2,150.06)                            |
| <b>Cardiovascular diseases</b>  | <b>1,783,376.02</b><br><b>(1,633,159.19 to</b><br><b>1,922,511.38)</b> | <b>2,274,334.15</b><br><b>(1,601,488.75 to</b><br><b>3,196,351.58)</b> | <b>1,089,062.80</b><br><b>(773,676.08 to</b><br><b>1,517,841.22)</b> | <b>3,007,995.91</b><br><b>(2,009,908.09 to</b><br><b>4,244,202.83)</b> | <b>87,999.81</b><br><b>(81,783.88 to</b><br><b>94,430.05)</b> | <b>139,251.40</b><br><b>(104,923.87 to</b><br><b>181,080.82)</b> | <b>78,361.66</b><br><b>(60,408.92 to</b><br><b>104,160.70)</b> | <b>170,416.37</b><br><b>(124,258.30 to</b><br><b>226,662.22)</b> |
| Rheumatic heart disease         | 67,628.89<br>(51,200.53 to<br>88,066.32)                               | 49,771.04<br>(36,554.33 to<br>66,167.62)                               | 36,180.82<br>(25,996.45 to<br>47,929.64)                             | 50,098.90<br>(36,191.22 to<br>67,969.81)                               | 2,763.29<br>(2,063.40 to<br>3,704.57)                         | 2,759.96<br>(1,978.99 to<br>3,686.62)                            | 2,194.48<br>(1,577.68 to<br>2,909.63)                          | 2,657.40<br>(1,876.82 to<br>3,553.59)                            |
| Ischemic heart disease          | 619,697.11<br>(532,637.51 to<br>701,822.31)                            | 831,165.94<br>(491,870.73 to<br>1,323,816.97)                          | 379,477.28<br>(226,622.54 to<br>614,998.29)                          | 1,094,935.54<br>(623,262.28 to<br>1,721,151.37)                        | 31,791.17<br>(26,973.68 to<br>35,882.89)                      | 52,341.74<br>(33,446.86 to<br>80,439.54)                         | 28,227.98<br>(18,349.65 to<br>43,517.92)                       | 63,695.07<br>(39,990.57 to<br>98,307.73)                         |
| Stroke                          | 949,374.33<br>(837,486.09 to<br>1,055,541.57)                          | 1,170,117.92<br>(754,190.75 to<br>1,810,056.32)                        | 486,894.91<br>(317,571.60 to<br>733,757.41)                          | 1,607,628.82<br>(998,778.50 to<br>2,548,390.48)                        | 46,224.20<br>(40,907.69 to<br>51,735.57)                      | 68,861.38<br>(47,548.26 to<br>97,877.11)                         | 33,825.24<br>(23,786.77 to<br>47,391.59)                       | 87,445.13<br>(58,126.59 to<br>126,897.73)                        |
| Ischemic stroke                 | 258,411.40<br>(221,801.80 to<br>296,427.82)                            | 318,480.51<br>(193,786.42 to<br>513,999.21)                            | 164,230.54<br>(101,631.32 to<br>268,010.12)                          | 411,007.99<br>(239,356.31 to<br>665,286.12)                            | 14,919.66<br>(12,783.44 to<br>17,081.98)                      | 21,380.48<br>(13,546.28 to<br>34,455.49)                         | 12,686.99<br>(8,351.00 to<br>20,509.03)                        | 25,699.99<br>(15,689.91 to<br>41,684.46)                         |

|                                |                                             |                                               |                                             |                                                 |                                          |                                          |                                          |                                          |
|--------------------------------|---------------------------------------------|-----------------------------------------------|---------------------------------------------|-------------------------------------------------|------------------------------------------|------------------------------------------|------------------------------------------|------------------------------------------|
|                                | 690,962.93<br>(601,811.21 to<br>781,395.65) | 851,637.42<br>(519,200.44 to<br>1,378,278.85) | 322,664.37<br>(202,895.64 to<br>510,781.25) | 1,196,620.83<br>(709,102.59 to<br>1,960,384.61) | 31,304.54<br>(27,450.80 to<br>35,611.53) | 47,480.91<br>(31,293.52 to<br>70,520.64) | 21,138.26<br>(14,554.42 to<br>30,268.59) | 61,745.15<br>(38,930.37 to<br>93,380.67) |
| Intracerebral hemorrhage       |                                             |                                               |                                             |                                                 |                                          |                                          |                                          |                                          |
|                                | 67,895.52<br>(51,227.38 to<br>85,456.55)    | 116,727.10<br>(68,845.30 to<br>223,323.92)    | 88,280.80<br>(53,509.33 to<br>159,438.79)   | 146,254.66<br>(78,843.74 to<br>312,512.33)      | 3,984.89<br>(2,936.08 to<br>5,074.70)    | 8,496.88<br>(5,028.16 to<br>16,704.66)   | 7,060.87<br>(4,351.21 to<br>13,332.60)   | 10,082.26<br>(5,382.52 to<br>22,006.20)  |
| Hypertensive heart disease     |                                             |                                               |                                             |                                                 |                                          |                                          |                                          |                                          |
|                                | 20,518.28<br>(15,064.33 to<br>27,177.90)    | 15,248.00<br>(10,740.92 to<br>21,483.18)      | 15,454.25<br>(10,714.36 to<br>21,959.85)    | 15,319.77<br>(10,810.07 to<br>21,921.92)        | 548.16<br>(413.14 to<br>702.25)          | 666.27<br>(461.58 to<br>927.07)          | 755.06<br>(516.95 to<br>1,076.14)        | 631.28<br>(439.18 to<br>886.26)          |
| Cardiomyopathy and myocarditis |                                             |                                               |                                             |                                                 |                                          |                                          |                                          |                                          |
|                                | 9,103.87<br>(4,872.30 to<br>13,220.31)      | 6,143.99<br>(3,213.14 to<br>8,816.97)         | 5,859.17<br>(2,923.55 to<br>8,545.22)       | 5,966.52<br>(3,147.05 to<br>8,579.21)           | 234.15<br>(124.02 to<br>324.53)          | 272.87<br>(138.15 to<br>399.34)          | 298.01<br>(142.76 to<br>436.13)          | 247.09<br>(125.35 to<br>362.29)          |
| Myocarditis                    |                                             |                                               |                                             |                                                 |                                          |                                          |                                          |                                          |

| North Korea                                                   |                                                        |                                                          |                                                        |                                                          |                                                     |                                                     |                                                     |                                                     |
|---------------------------------------------------------------|--------------------------------------------------------|----------------------------------------------------------|--------------------------------------------------------|----------------------------------------------------------|-----------------------------------------------------|-----------------------------------------------------|-----------------------------------------------------|-----------------------------------------------------|
| Cause                                                         | YLLs (actual counts)                                   |                                                          |                                                        |                                                          | Deaths (actual counts)                              |                                                     |                                                     |                                                     |
|                                                               | 2016                                                   | 2040 Forecast                                            | 2040 Better Scenario                                   | 2040 Worse Scenario                                      | 2016                                                | 2040 Forecast                                       | 2040 Better Scenario                                | 2040 Worse Scenario                                 |
| Alcoholic cardiomyopathy                                      | 1,090.18<br>(569.54 to 1,697.24)                       | 940.73<br>(464.41 to 1,514.24)                           | 1,014.46<br>(476.75 to 1,653.69)                       | 1,013.88<br>(500.00 to 1,610.59)                         | 33.85<br>(18.90 to 52.97)                           | 35.28<br>(18.67 to 56.41)                           | 40.12<br>(20.07 to 65.75)                           | 36.65<br>(19.41 to 58.37)                           |
| Other cardiomyopathy                                          | 10,324.23<br>(7,185.53 to 15,658.34)                   | 8,163.28<br>(5,357.34 to 13,249.07)                      | 8,580.62<br>(5,683.94 to 13,806.14)                    | 8,339.38<br>(5,337.30 to 13,585.88)                      | 280.16<br>(203.98 to 429.36)                        | 358.11<br>(225.72 to 591.55)                        | 416.94<br>(266.00 to 672.97)                        | 347.54<br>(215.39 to 574.63)                        |
| Atrial fibrillation and flutter                               | 7,617.86<br>(5,701.86 to 9,971.07)                     | 14,854.45<br>(10,796.30 to 19,876.64)                    | 17,234.83<br>(12,642.95 to 22,822.45)                  | 14,460.15<br>(10,318.07 to 19,672.35)                    | 648.18<br>(478.09 to 855.51)                        | 1,390.94<br>(966.91 to 1,889.53)                    | 1,767.63<br>(1,279.49 to 2,348.65)                  | 1,285.35<br>(876.17 to 1,771.81)                    |
| Aortic aneurysm                                               | 6,009.38<br>(4,854.62 to 7,584.85)                     | 6,708.12<br>(5,002.47 to 9,027.10)                       | 7,097.41<br>(5,301.55 to 9,623.81)                     | 6,962.36<br>(5,051.72 to 9,462.59)                       | 260.36<br>(215.40 to 322.88)                        | 308.22<br>(285.06 to 477.60)                        | 432.64<br>(340.51 to 559.25)                        | 359.84<br>(271.12 to 477.82)                        |
| Peripheral artery disease                                     | 281.51<br>(138.95 to 422.08)                           | 760.71<br>(333.59 to 1,266.87)                           | 967.63<br>(413.27 to 1,598.48)                         | 752.24<br>(322.12 to 1,245.78)                           | 17.27<br>(8.15 to 26.12)                            | 56.95<br>(23.89 to 91.13)                           | 81.70<br>(34.42 to 131.24)                          | 53.03<br>(21.90 to 85.56)                           |
| Endocarditis                                                  | 4,213.94<br>(2,813.60 to 6,757.49)                     | 5,099.49<br>(3,268.86 to 8,150.32)                       | 5,160.89<br>(3,307.39 to 8,374.99)                     | 5,132.41<br>(3,262.37 to 8,331.43)                       | 140.91<br>(101.10 to 222.69)                        | 270.85<br>(169.31 to 448.99)                        | 305.32<br>(193.66 to 506.59)                        | 257.24<br>(158.74 to 433.99)                        |
| Other cardiovascular and circulatory diseases                 | 39,039.18<br>(28,971.48 to 54,146.78)                  | 63,881.39<br>(43,869.14 to 92,858.52)                    | 52,313.97<br>(35,987.17 to 75,166.43)                  | 66,451.06<br>(44,614.27 to 98,417.00)                    | 1,621.38<br>(1,224.16 to 2,290.62)                  | 4,041.20<br>(2,716.15 to 5,837.88)                  | 3,710.74<br>(2,543.25 to 5,278.91)                  | 3,949.77<br>(2,606.09 to 5,719.12)                  |
| <b>Chronic respiratory diseases</b>                           | <b>500,304.74</b><br><b>(413,440.30 to 590,505.34)</b> | <b>729,850.67</b><br><b>(390,658.49 to 1,275,287.13)</b> | <b>348,262.78</b><br><b>(199,655.80 to 566,312.33)</b> | <b>915,379.79</b><br><b>(487,009.15 to 1,540,433.91)</b> | <b>30,367.34</b><br><b>(24,820.92 to 36,543.87)</b> | <b>48,900.90</b><br><b>(25,991.27 to 81,787.58)</b> | <b>25,252.32</b><br><b>(14,199.72 to 40,672.69)</b> | <b>60,001.13</b><br><b>(31,761.43 to 98,613.93)</b> |
| Chronic obstructive pulmonary disease                         | 472,339.55<br>(388,263.06 to 563,800.64)               | 708,593.22<br>(374,506.71 to 1,243,712.24)               | 328,006.63<br>(182,256.92 to 544,943.40)               | 894,021.69<br>(466,792.52 to 1,519,210.16)               | 29,185.01<br>(23,628.67 to 35,372.47)               | 47,710.24<br>(24,879.35 to 80,676.13)               | 24,032.50<br>(12,998.44 to 39,581.11)               | 58,851.79<br>(30,295.56 to 97,377.93)               |
| Pneumoconiosis                                                | 7,941.63<br>(5,572.70 to 11,289.96)                    | 4,940.95<br>(3,274.99 to 7,488.61)                       | 4,593.34<br>(2,989.27 to 6,847.16)                     | 4,733.17<br>(3,170.40 to 7,225.46)                       | 292.33<br>(204.75 to 411.99)                        | 292.33<br>(164.42 to 377.76)                        | 244.56<br>(158.16 to 368.97)                        | 230.18<br>(153.29 to 346.31)                        |
| Silicosis                                                     | 6,361.86<br>(4,277.66 to 9,103.87)                     | 3,523.57<br>(2,173.75 to 5,483.73)                       | 3,378.91<br>(2,084.96 to 5,277.78)                     | 3,303.04<br>(2,076.82 to 5,141.14)                       | 232.41<br>(157.46 to 333.94)                        | 173.77<br>(105.66 to 273.21)                        | 176.52<br>(106.29 to 285.41)                        | 157.07<br>(94.95 to 249.00)                         |
| Asbestosis                                                    | 210.87<br>(124.58 to 381.20)                           | 249.61<br>(136.00 to 465.42)                             | 244.73<br>(131.96 to 469.56)                           | 238.85<br>(131.14 to 432.97)                             | 7.57<br>(3.94 to 14.33)                             | 12.71<br>(6.23 to 23.68)                            | 13.61<br>(6.61 to 26.52)                            | 11.63<br>(5.64 to 21.89)                            |
| Coal workers pneumoconiosis                                   | 426.90<br>(155.96 to 1,122.28)                         | 507.38<br>(189.69 to 1,269.73)                           | 349.77<br>(122.27 to 963.27)                           | 507.92<br>(188.78 to 1,302.22)                           | 19.14<br>(6.86 to 50.87)                            | 29.85<br>(10.72 to 77.25)                           | 22.05<br>(7.60 to 62.39)                            | 28.73<br>(10.30 to 73.02)                           |
| Other pneumoconiosis                                          | 942.01<br>(481.75 to 1,912.59)                         | 660.39<br>(362.82 to 1,178.42)                           | 619.92<br>(331.05 to 1,119.47)                         | 683.36<br>(383.51 to 1,208.77)                           | 33.20<br>(17.76 to 66.16)                           | 32.55<br>(17.96 to 59.32)                           | 32.38<br>(17.50 to 59.11)                           | 32.76<br>(18.05 to 59.02)                           |
| Asthma                                                        | 15,580.39<br>(10,593.27 to 28,244.18)                  | 10,586.67<br>(6,546.37 to 19,566.19)                     | 8,799.28<br>(5,480.15 to 16,119.37)                    | 11,196.39<br>(6,500.91 to 21,365.59)                     | 727.76<br>(479.79 to 1,442.99)                      | 656.22<br>(389.33 to 1,239.35)                      | 601.70<br>(364.93 to 1,107.69)                      | 659.48<br>(380.59 to 1,107.69)                      |
| Interstitial lung disease and pulmonary sarcoidosis           | 2,643.31<br>(1,232.24 to 4,763.72)                     | 4,135.90<br>(1,893.58 to 7,874.82)                       | 5,402.46<br>(2,392.89 to 10,904.23)                    | 3,807.27<br>(1,755.57 to 7,190.95)                       | 110.75<br>(50.99 to 206.29)                         | 216.33<br>(97.10 to 420.09)                         | 301.66<br>(133.00 to 607.16)                        | 192.49<br>(86.76 to 370.98)                         |
| Other chronic respiratory diseases                            | 1,799.87<br>(987.17 to 2,664.22)                       | 1,593.92<br>(828.16 to 2,435.83)                         | 1,461.07<br>(778.59 to 2,215.08)                       | 1,621.27<br>(849.28 to 2,503.50)                         | 51.50<br>(28.78 to 73.63)                           | 69.25<br>(36.16 to 107.44)                          | 71.89<br>(38.71 to 111.10)                          | 67.18<br>(34.40 to 104.11)                          |
| <b>Cirrhosis and other chronic liver diseases</b>             | <b>108,887.17</b><br><b>(87,990.49 to 146,797.86)</b>  | <b>132,009.12</b><br><b>(106,339.56 to 178,481.23)</b>   | <b>120,069.59</b><br><b>(96,753.22 to 162,229.96)</b>  | <b>130,428.15</b><br><b>(104,925.65 to 175,181.40)</b>   | <b>3,676.60</b><br><b>(3,040.69 to 4,833.53)</b>    | <b>5,364.76</b><br><b>(4,412.40 to 7,003.93)</b>    | <b>5,150.17</b><br><b>(4,215.81 to 6,712.47)</b>    | <b>5,143.52</b><br><b>(4,220.44 to 6,771.49)</b>    |
| Cirrhosis and other chronic liver diseases due to hepatitis B | 48,758.81<br>(38,138.72 to 67,372.68)                  | 61,568.57<br>(47,962.14 to 83,888.54)                    | 57,531.44<br>(44,824.76 to 79,372.91)                  | 59,420.07<br>(46,240.15 to 79,993.53)                    | 1,676.72<br>(1,359.34 to 2,223.93)                  | 2,535.34<br>(2,025.40 to 3,426.22)                  | 2,495.44<br>(1,998.85 to 3,321.36)                  | 2,377.52<br>(1,894.55 to 3,216.61)                  |
| Cirrhosis and other chronic liver diseases due to hepatitis C | 19,518.83<br>(14,141.52 to 28,590.47)                  | 23,463.57<br>(17,127.92 to 33,513.08)                    | 21,695.71<br>(15,645.43 to 30,838.05)                  | 22,748.35<br>(16,515.54 to 32,618.90)                    | 630.88<br>(470.96 to 902.43)                        | 896.12<br>(663.52 to 1,287.65)                      | 866.65<br>(640.93 to 1,240.91)                      | 847.35<br>(628.37 to 1,215.59)                      |

|                                                                |                                                                |                                                                |                                                               |                                                                |                                                            |                                                            |                                                            |                                                            |
|----------------------------------------------------------------|----------------------------------------------------------------|----------------------------------------------------------------|---------------------------------------------------------------|----------------------------------------------------------------|------------------------------------------------------------|------------------------------------------------------------|------------------------------------------------------------|------------------------------------------------------------|
|                                                                | 15,395.36<br>(11,819.84 to<br>21,709.22)                       | 17,685.09<br>(13,711.44 to<br>24,830.99)                       | 14,341.44<br>(11,160.92 to<br>20,094.86)                      | 19,690.19<br>(15,102.44 to<br>27,920.42)                       | 526.47<br>(418.16 to<br>721.07)                            | 724.23<br>(573.17 to<br>994.06)                            | 625.31<br>(497.77 to<br>842.42)                            | 775.66<br>(603.88 to<br>1,062.15)                          |
| Cirrhosis and other chronic liver diseases due to alcohol use  |                                                                |                                                                |                                                               |                                                                |                                                            |                                                            |                                                            |                                                            |
|                                                                | 25,214.17<br>(20,492.30 to<br>32,882.62)                       | 29,291.88<br>(23,470.80 to<br>37,599.92)                       | 26,501.01<br>(21,131.67 to<br>34,316.20)                      | 28,569.54<br>(22,784.95 to<br>36,877.51)                       | 842.53<br>(694.10 to<br>1,050.00)                          | 1,209.05<br>(979.47 to<br>1,554.14)                        | 1,162.78<br>(946.27 to<br>1,479.14)                        | 1,142.99<br>(918.62 to<br>1,474.25)                        |
| Cirrhosis and other chronic liver diseases due to other causes |                                                                |                                                                |                                                               |                                                                |                                                            |                                                            |                                                            |                                                            |
| <b>Digestive diseases</b>                                      | <b>81,425.66</b><br><b>(62,324.61 to</b><br><b>108,449.06)</b> | <b>88,383.82</b><br><b>(69,109.84 to</b><br><b>121,212.27)</b> | <b>73,913.52</b><br><b>(57,660.41 to</b><br><b>98,424.06)</b> | <b>87,652.96</b><br><b>(67,845.27 to</b><br><b>120,836.94)</b> | <b>3,271.50</b><br><b>(2,585.31 to</b><br><b>4,285.94)</b> | <b>5,002.76</b><br><b>(3,773.04 to</b><br><b>6,782.58)</b> | <b>4,604.94</b><br><b>(3,587.99 to</b><br><b>6,057.12)</b> | <b>4,716.25</b><br><b>(3,483.57 to</b><br><b>6,489.75)</b> |
| Peptic ulcer disease                                           | 30,980.12<br>(23,599.43 to<br>42,570.71)                       | 28,846.03<br>(20,947.72 to<br>40,393.27)                       | 20,292.38<br>(14,706.64 to<br>28,016.99)                      | 29,033.27<br>(20,878.79 to<br>40,679.83)                       | 1,340.99<br>(1,031.79 to<br>1,809.52)                      | 1,632.51<br>(1,179.37 to<br>2,280.50)                      | 1,247.49<br>(903.78 to<br>1,718.32)                        | 1,571.17<br>(1,116.50 to<br>2,215.80)                      |

| North Korea                                |                                            |                                             |                                             |                                             |                                       |                                          |                                          |                                         |
|--------------------------------------------|--------------------------------------------|---------------------------------------------|---------------------------------------------|---------------------------------------------|---------------------------------------|------------------------------------------|------------------------------------------|-----------------------------------------|
| Cause                                      | YLLs (actual counts)                       |                                             |                                             |                                             | Deaths (actual counts)                |                                          |                                          |                                         |
|                                            | 2016                                       | 2040 Forecast                               | 2040 Better Scenario                        | 2040 Worse Scenario                         | 2016                                  | 2040 Forecast                            | 2040 Better Scenario                     | 2040 Worse Scenario                     |
| Gastritis and duodenitis                   | 6,204.27<br>(4,125.49 to<br>8,204.86)      | 10,079.96<br>(6,657.84 to<br>13,783.12)     | 9,201.53<br>(6,017.85 to<br>12,549.92)      | 9,487.06<br>(6,133.10 to<br>13,060.01)      | 299.95<br>(196.72 to<br>416.94)       | 607.07<br>(389.94 to<br>877.37)          | 605.18<br>(391.68 to<br>860.67)          | 546.27<br>(341.50 to<br>801.71)         |
| Appendicitis                               | 2,164.38<br>(1,521.45 to<br>3,839.02)      | 2,319.21<br>(1,591.98 to<br>4,093.36)       | 1,838.10<br>(1,246.93 to<br>3,278.55)       | 2,256.58<br>(1,537.36 to<br>4,049.65)       | 73.52<br>(50.92 to<br>128.21)         | 114.51<br>(77.43 to<br>205.36)           | 99.52<br>(67.71 to<br>176.72)            | 105.99<br>(71.51 to<br>191.29)          |
| Paralytic ileus and intestinal obstruction | 13,766.37<br>(8,514.88 to<br>25,384.91)    | 10,352.10<br>(7,896.86 to<br>13,863.95)     | 10,208.94<br>(7,790.95 to<br>13,417.30)     | 9,816.07<br>(7,405.17 to<br>13,478.85)      | 364.91<br>(276.45 to<br>520.72)       | 556.29<br>(415.46 to<br>747.10)          | 621.01<br>(472.24 to<br>812.51)          | 493.37<br>(359.57 to<br>673.32)         |
| Inguinal, femoral, and abdominal hernia    | 1,023.85<br>(620.98 to<br>2,149.79)        | 1,091.25<br>(647.31 to<br>2,197.47)         | 1,039.35<br>(627.53 to<br>2,106.15)         | 1,006.13<br>(595.10 to<br>2,063.46)         | 49.02<br>(30.59 to<br>99.22)          | 73.41<br>(42.16 to<br>149.22)            | 78.07<br>(46.02 to<br>155.23)            | 64.06<br>(36.09 to<br>132.92)           |
| Inflammatory bowel disease                 | 3,166.12<br>(2,070.10 to<br>5,120.41)      | 3,261.45<br>(2,325.39 to<br>4,675.30)       | 3,540.35<br>(2,575.92 to<br>4,853.40)       | 3,038.09<br>(2,157.48 to<br>4,392.99)       | 114.66<br>(82.65 to<br>162.09)        | 191.57<br>(136.62 to<br>267.70)          | 233.17<br>(168.94 to<br>316.42)          | 168.36<br>(116.44 to<br>239.57)         |
| Vascular intestinal disorders              | 2,772.54<br>(1,921.48 to<br>5,420.38)      | 4,718.33<br>(3,196.60 to<br>9,378.74)       | 4,711.16<br>(3,195.76 to<br>9,271.20)       | 4,359.16<br>(2,908.60 to<br>8,736.36)       | 145.09<br>(101.66 to<br>268.44)       | 297.71<br>(196.62 to<br>588.86)          | 320.21<br>(219.25 to<br>608.72)          | 264.97<br>(172.60 to<br>524.83)         |
| Gallbladder and biliary diseases           | 7,600.00<br>(5,523.58 to<br>11,570.92)     | 10,321.70<br>(6,462.23 to<br>16,256.50)     | 8,731.22<br>(5,526.20 to<br>13,762.39)      | 10,840.16<br>(6,447.15 to<br>18,108.25)     | 395.00<br>(285.30 to<br>604.08)       | 678.15<br>(414.14 to<br>1,074.01)        | 628.42<br>(389.91 to<br>992.17)          | 678.39<br>(386.28 to<br>1,147.91)       |
| Pancreatitis                               | 7,097.53<br>(4,981.47 to<br>11,721.76)     | 9,530.47<br>(5,687.03 to<br>18,064.04)      | 7,686.39<br>(4,738.98 to<br>13,789.49)      | 10,301.70<br>(5,874.53 to<br>20,008.04)     | 243.08<br>(169.62 to<br>392.88)       | 412.29<br>(252.73 to<br>727.03)          | 361.46<br>(231.77 to<br>616.27)          | 424.37<br>(249.10 to<br>796.06)         |
| Other digestive diseases                   | 6,650.47<br>(4,595.58 to<br>10,315.71)     | 7,863.33<br>(5,642.99 to<br>12,015.90)      | 6,664.12<br>(4,767.92 to<br>10,280.79)      | 7,514.72<br>(5,277.92 to<br>11,465.04)      | 245.27<br>(174.53 to<br>373.96)       | 439.26<br>(296.51 to<br>697.03)          | 410.41<br>(285.55 to<br>542.19)          | 399.29<br>(268.98 to<br>634.00)         |
| Neurological disorders                     | 108,037.18<br>(93,300.35 to<br>125,259.41) | 178,017.22<br>(140,869.26 to<br>223,941.66) | 211,463.33<br>(173,428.53 to<br>257,432.07) | 168,549.95<br>(129,120.37 to<br>216,557.21) | 7,170.01<br>(6,117.78 to<br>8,668.59) | 14,508.17<br>(10,573.57 to<br>24,505.24) | 19,520.52<br>(15,236.33 to<br>24,500.55) | 13,060.72<br>(8,971.16 to<br>18,078.04) |
| Alzheimer's disease and other dementias    | 70,466.52<br>(58,364.96 to<br>85,749.91)   | 135,823.49<br>(98,926.90 to<br>180,435.58)  | 167,977.13<br>(130,506.77 to<br>213,883.09) | 126,409.54<br>(88,042.16 to<br>173,009.35)  | 6,098.29<br>(5,061.53 to<br>7,511.28) | 12,762.99<br>(8,869.46 to<br>17,548.34)  | 17,213.33<br>(13,002.69 to<br>22,145.46) | 11,402.26<br>(7,366.48 to<br>16,351.98) |
| Parkinson's disease                        | 5,849.73<br>(4,366.65 to<br>7,580.43)      | 13,246.34<br>(9,553.31 to<br>17,528.95)     | 19,305.70<br>(14,424.77 to<br>24,922.58)    | 11,472.80<br>(8,061.60 to<br>15,496.85)     | 418.12<br>(310.12 to<br>545.16)       | 1,043.81<br>(718.49 to<br>1,434.17)      | 1,620.10<br>(1,185.93 to<br>2,130.65)    | 875.97<br>(579.86 to<br>1,228.02)       |
| Epilepsy                                   | 23,340.75<br>(18,718.70 to<br>29,235.01)   | 20,755.89<br>(14,765.21 to<br>28,527.00)    | 14,924.17<br>(10,671.25 to<br>20,719.12)    | 22,683.30<br>(15,940.79 to<br>31,719.94)    | 453.23<br>(370.65 to<br>554.66)       | 500.30<br>(369.27 to<br>665.59)          | 376.48<br>(284.94 to<br>497.93)          | 535.33<br>(388.55 to<br>728.15)         |
| Multiple sclerosis                         | 1,020.84<br>(672.11 to<br>1,588.60)        | 1,076.87<br>(693.08 to<br>1,701.62)         | 1,171.82<br>(746.88 to<br>1,843.44)         | 1,066.59<br>(680.66 to<br>1,679.84)         | 29.41<br>(19.26 to<br>45.08)          | 35.58<br>(22.64 to<br>54.15)             | 40.41<br>(25.65 to<br>61.49)             | 34.50<br>(21.71 to<br>53.45)            |
| Motor neuron disease                       | 2,274.26<br>(1,623.98 to<br>3,799.90)      | 2,451.51<br>(1,741.82 to<br>3,871.41)       | 2,798.63<br>(1,967.12 to<br>4,458.29)       | 2,363.26<br>(1,692.98 to<br>3,693.28)       | 59.70<br>(43.09 to<br>96.37)          | 86.38<br>(60.53 to<br>133.05)            | 102.22<br>(70.68 to<br>156.84)           | 81.57<br>(57.32 to<br>126.85)           |
| Other neurological disorders               | 5,085.08<br>(4,232.32 to<br>6,165.36)      | 4,663.13<br>(3,926.74 to<br>5,614.17)       | 5,285.88<br>(4,451.02 to<br>6,347.09)       | 4,554.47<br>(3,829.66 to<br>5,471.28)       | 111.26<br>(95.48 to<br>130.92)        | 139.12<br>(119.10 to<br>165.02)          | 167.98<br>(141.35 to<br>199.46)          | 131.09<br>(112.44 to<br>154.45)         |
| Mental disorders                           | 36,310.92<br>(20,991.98 to<br>49,715.45)   | 53,556.78<br>(31,529.20 to<br>72,678.71)    | 54,526.36<br>(32,537.20 to<br>73,338.75)    | 52,575.64<br>(31,017.29 to<br>71,534.74)    | 978.73<br>(578.14 to<br>1,291.65)     | 1,739.78<br>(1,086.76 to<br>2,234.05)    | 1,895.49<br>(1,181.14 to<br>2,403.16)    | 1,649.59<br>(1,018.98 to<br>2,140.24)   |
| Alcohol use disorders                      | 12,920.82<br>(5,662.75 to<br>20,562.33)    | 10,265.50<br>(4,312.26 to<br>17,330.99)     | 9,803.07<br>(4,055.00 to<br>16,541.15)      | 10,489.54<br>(4,397.38 to<br>17,734.90)     | 327.51<br>(151.02 to<br>510.78)       | 305.31<br>(144.10 to<br>492.07)          | 305.42<br>(145.19 to<br>487.84)          | 304.19<br>(143.23 to<br>492.63)         |
| Drug use disorders                         | 23,312.81<br>(12,282.21 to<br>34,047.17)   | 43,211.76<br>(24,310.48 to<br>60,561.95)    | 44,645.87<br>(25,477.72 to<br>61,399.71)    | 42,006.51<br>(23,691.11 to<br>59,376.44)    | 649.76<br>(350.07 to<br>903.22)       | 1,432.96<br>(838.21 to<br>1,882.87)      | 1,588.59<br>(959.03 to<br>2,049.56)      | 1,343.88<br>(776.10 to<br>1,784.19)     |
| Opioid use disorders                       | 13,208.72<br>(5,552.22 to<br>20,620.30)    | 20,659.26<br>(9,212.70 to<br>31,408.52)     | 21,226.84<br>(9,747.97 to<br>32,090.95)     | 20,131.64<br>(9,015.08 to<br>30,893.24)     | 352.34<br>(158.87 to<br>514.83)       | 652.44<br>(322.61 to<br>913.01)          | 712.56<br>(353.44 to<br>983.73)          | 615.52<br>(298.51 to<br>878.15)         |

|                           |                                        |                                         |                                         |                                         |                                 |                                 |                                 |                                 |
|---------------------------|----------------------------------------|-----------------------------------------|-----------------------------------------|-----------------------------------------|---------------------------------|---------------------------------|---------------------------------|---------------------------------|
|                           | 1,918.81<br>(1,023.73 to<br>3,002.77)  | 4,377.85<br>(2,364.11 to<br>6,866.09)   | 4,163.98<br>(2,222.23 to<br>6,593.99)   | 4,309.56<br>(2,338.88 to<br>6,763.64)   | 48.24<br>(25.89 to<br>75.80)    | 126.12<br>(67.71 to<br>201.01)  | 123.69<br>(66.48 to<br>201.27)  | 121.98<br>(66.05 to<br>195.71)  |
| Cocaine use disorders     |                                        |                                         |                                         |                                         |                                 |                                 |                                 |                                 |
|                           | 1,128.29<br>(604.25 to<br>1,789.64)    | 3,473.58<br>(1,731.05 to<br>5,703.50)   | 3,251.84<br>(1,520.14 to<br>5,450.68)   | 3,443.73<br>(1,717.42 to<br>5,648.10)   | 27.25<br>(13.56 to<br>44.59)    | 92.40<br>(44.23 to<br>157.70)   | 90.30<br>(39.85 to<br>161.61)   | 90.12<br>(42.84 to<br>152.62)   |
| Amphetamine use disorders |                                        |                                         |                                         |                                         |                                 |                                 |                                 |                                 |
|                           | 7,056.99<br>(3,626.95 to<br>11,012.88) | 14,701.06<br>(7,947.25 to<br>22,215.61) | 16,003.20<br>(8,813.26 to<br>23,884.46) | 14,121.58<br>(7,519.09 to<br>21,440.04) | 221.93<br>(121.06 to<br>324.23) | 562.00<br>(333.14 to<br>790.65) | 662.04<br>(395.70 to<br>909.20) | 516.26<br>(303.28 to<br>738.53) |
| Other drug use disorders  |                                        |                                         |                                         |                                         |                                 |                                 |                                 |                                 |
|                           | 77.29<br>(49.06 to<br>109.41)          | 79.53<br>(48.50 to<br>118.05)           | 77.43<br>(47.08 to<br>116.18)           | 79.59<br>(48.95 to<br>117.83)           | 1.46<br>(0.93 to<br>2.07)       | 1.52<br>(0.93 to<br>2.26)       | 1.48<br>(0.89 to<br>2.22)       | 1.51<br>(0.93 to<br>2.24)       |
| Eating disorders          |                                        |                                         |                                         |                                         |                                 |                                 |                                 |                                 |



| North Korea                                                |                                                 |                                                 |                                                 |                                                 |                                           |                                              |                                             |                                              |
|------------------------------------------------------------|-------------------------------------------------|-------------------------------------------------|-------------------------------------------------|-------------------------------------------------|-------------------------------------------|----------------------------------------------|---------------------------------------------|----------------------------------------------|
| Cause                                                      | YLLs (actual counts)                            |                                                 |                                                 |                                                 | Deaths (actual counts)                    |                                              |                                             |                                              |
|                                                            | 2016                                            | 2040 Forecast                                   | 2040 Better Scenario                            | 2040 Worse Scenario                             | 2016                                      | 2040 Forecast                                | 2040 Better Scenario                        | 2040 Worse Scenario                          |
| <b>Diabetes, urogenital, blood, and endocrine diseases</b> | <b>203,496.70</b><br>(179,473.02 to 229,421.72) | <b>333,109.51</b><br>(244,206.47 to 533,356.69) | <b>229,902.29</b><br>(170,304.27 to 364,081.04) | <b>365,766.80</b><br>(263,775.15 to 584,838.76) | <b>7,919.95</b><br>(7,003.24 to 8,942.83) | <b>17,495.67</b><br>(12,803.01 to 30,527.46) | <b>12,913.72</b><br>(9,769.75 to 21,045.73) | <b>18,571.34</b><br>(13,212.22 to 32,907.59) |
| Diabetes mellitus                                          | 75,503.09<br>(64,893.93 to 86,761.72)           | 130,691.85<br>(86,147.93 to 191,818.30)         | 87,001.26<br>(58,733.49 to 127,419.18)          | 141,182.89<br>(90,181.20 to 208,969.33)         | 3,394.22<br>(2,896.62 to 3,946.70)        | 7,204.67<br>(4,928.96 to 10,109.13)          | 5,163.63<br>(3,582.52 to 7,264.26)          | 7,456.33<br>(4,917.87 to 10,792.50)          |
| Acute glomerulonephritis                                   | 4,073.85<br>(3,137.61 to 5,512.70)              | 5,782.31<br>(4,259.79 to 7,994.44)              | 5,074.26<br>(3,680.15 to 6,880.26)              | 5,642.91<br>(4,155.41 to 7,609.35)              | 141.76<br>(109.40 to 186.78)              | 241.62<br>(174.93 to 339.76)                 | 229.90<br>(164.48 to 321.79)                | 226.21<br>(162.08 to 313.70)                 |
| Chronic kidney disease                                     | 92,565.33<br>(79,394.31 to 107,145.72)          | 168,838.07<br>(98,593.82 to 384,124.55)         | 112,434.72<br>(69,206.67 to 241,839.38)         | 191,931.90<br>(108,362.11 to 433,716.89)        | 3,572.89<br>(3,098.06 to 4,166.83)        | 8,300.97<br>(4,823.21 to 22,475.87)          | 6,284.95<br>(3,690.92 to 14,746.30)         | 9,771.64<br>(5,141.79 to 25,598.26)          |
| Chronic kidney disease due to diabetes mellitus            | 48,873.77<br>(40,770.71 to 58,500.27)           | 92,998.09<br>(54,315.11 to 200,529.55)          | 61,950.81<br>(37,162.88 to 128,217.47)          | 106,412.18<br>(59,882.03 to 234,886.47)         | 1,847.55<br>(1,552.76 to 2,225.45)        | 4,558.21<br>(2,480.85 to 11,348.94)          | 3,207.42<br>(1,831.31 to 7,581.76)          | 5,098.86<br>(2,665.15 to 12,790.83)          |
| Chronic kidney disease due to hypertension                 | 23,004.43<br>(18,681.56 to 28,004.92)           | 50,297.02<br>(26,965.07 to 134,115.62)          | 34,144.75<br>(19,502.89 to 82,357.53)           | 56,738.42<br>(29,063.37 to 148,561.58)          | 1,142.37<br>(936.71 to 1,376.44)          | 3,181.58<br>(1,654.23 to 8,260.88)           | 2,332.97<br>(1,319.97 to 5,469.42)          | 3,465.73<br>(1,720.02 to 9,360.01)           |
| Chronic kidney disease due to glomerulonephritis           | 9,929.81<br>(7,782.82 to 12,456.03)             | 11,320.50<br>(7,120.45 to 21,219.81)            | 7,165.51<br>(4,553.69 to 13,223.97)             | 12,723.18<br>(7,710.04 to 24,526.45)            | 255.21<br>(201.64 to 320.96)              | 428.59<br>(246.59 to 1,028.30)               | 285.59<br>(170.63 to 682.98)                | 476.46<br>(264.33 to 1,181.93)               |
| Chronic kidney disease due to other and unspecified causes | 10,757.32<br>(8,511.86 to 13,442.33)            | 14,222.46<br>(8,468.10 to 29,204.92)            | 9,173.65<br>(5,553.18 to 18,532.14)             | 16,058.12<br>(9,159.69 to 33,006.70)            | 327.76<br>(255.96 to 411.10)              | 662.59<br>(362.04 to 1,609.28)               | 458.97<br>(260.87 to 1,060.16)              | 730.59<br>(385.06 to 1,799.74)               |
| Urinary diseases and male infertility                      | 5,906.44<br>(4,958.04 to 7,225.28)              | 9,200.70<br>(7,655.07 to 11,191.13)             | 9,302.45<br>(7,730.69 to 11,570.15)             | 8,622.26<br>(7,194.13 to 10,514.18)             | 227.99<br>(195.72 to 271.82)              | 508.24<br>(406.22 to 619.23)                 | 571.10<br>(472.95 to 691.48)                | 449.42<br>(349.87 to 557.79)                 |
| Urinary tract infections                                   | 3,622.78<br>(2,653.84 to 4,644.34)              | 5,554.26<br>(4,185.09 to 7,049.16)              | 5,840.57<br>(4,428.38 to 7,543.17)              | 5,233.26<br>(3,937.74 to 6,625.63)              | 130.57<br>(100.10 to 165.00)              | 296.15<br>(218.67 to 387.03)                 | 350.36<br>(267.43 to 447.16)                | 263.41<br>(194.12 to 349.39)                 |
| Urolithiasis                                               | 1,003.31<br>(566.63 to 1,373.36)                | 1,856.32<br>(1,024.09 to 2,570.65)              | 1,891.84<br>(1,038.65 to 2,630.01)              | 1,740.36<br>(967.65 to 2,422.41)                | 41.24<br>(23.14 to 56.37)                 | 94.19<br>(52.16 to 134.56)                   | 104.85<br>(57.39 to 146.86)                 | 84.31<br>(46.79 to 121.78)                   |
| Other urinary diseases                                     | 1,280.36<br>(843.59 to 1,972.30)                | 1,790.11<br>(1,039.40 to 3,076.17)              | 1,570.04<br>(871.63 to 2,753.68)                | 1,648.64<br>(963.15 to 2,847.71)                | 117.90<br>(37.58 to 85.00)                | 117.90<br>(65.46 to 209.72)                  | 115.89<br>(63.68 to 209.07)                 | 101.71<br>(56.71 to 181.80)                  |
| Gynecological diseases                                     | 779.37<br>(474.62 to 1,131.34)                  | 564.24<br>(316.40 to 843.97)                    | 393.59<br>(223.08 to 594.96)                    | 571.89<br>(315.04 to 875.96)                    | 25.76<br>(15.87 to 36.71)                 | 21.35<br>(12.35 to 31.83)                    | 15.76<br>(9.04 to 23.10)                    | 21.12<br>(12.07 to 31.77)                    |
| Uterine fibroids                                           | 532.28<br>(273.31 to 812.50)                    | 360.95<br>(165.71 to 604.63)                    | 243.42<br>(113.43 to 411.31)                    | 366.92<br>(164.79 to 624.47)                    | 17.75<br>(9.34 to 26.95)                  | 13.66<br>(6.39 to 22.51)                     | 9.65<br>(4.62 to 16.03)                     | 13.60<br>(6.45 to 22.56)                     |
| Polycystic ovarian syndrome                                | 18.60<br>(6.03 to 43.17)                        | 11.70<br>(3.47 to 28.08)                        | 6.16<br>(1.81 to 15.12)                         | 12.40<br>(3.74 to 29.73)                        | 0.41<br>(0.13 to 0.98)                    | 0.26<br>(0.08 to 0.63)                       | 0.14<br>(0.04 to 0.33)                      | 0.28<br>(0.08 to 0.66)                       |
| Endometriosis                                              | 5.34<br>(1.52 to 15.17)                         | 5.21<br>(1.36 to 16.04)                         | 3.54<br>(0.93 to 10.88)                         | 5.39<br>(1.43 to 16.63)                         | 0.13<br>(0.03 to 0.37)                    | 0.12<br>(0.03 to 0.38)                       | 0.08<br>(0.02 to 0.26)                      | 0.13<br>(0.03 to 0.39)                       |
| Genital prolapse                                           | 11.71<br>(4.46 to 30.52)                        | 10.59<br>(3.78 to 27.04)                        | 7.04<br>(2.48 to 18.42)                         | 10.60<br>(3.74 to 27.83)                        | 0.59<br>(0.21 to 1.58)                    | 0.55<br>(0.19 to 1.48)                       | 0.40<br>(0.14 to 1.08)                      | 0.53<br>(0.18 to 1.47)                       |
| Other gynecological diseases                               | 211.43<br>(105.47 to 346.71)                    | 175.79<br>(83.80 to 289.83)                     | 133.43<br>(64.18 to 220.95)                     | 176.59<br>(84.28 to 296.43)                     | 6.89<br>(3.18 to 11.18)                   | 6.76<br>(3.14 to 11.27)                      | 5.49<br>(2.61 to 9.07)                      | 6.59<br>(3.00 to 11.10)                      |
| Hemoglobinopathies and hemolytic anemias                   | 14,942.35<br>(11,098.93 to 20,664.68)           | 8,504.66<br>(6,612.59 to 11,587.42)             | 7,092.05<br>(5,464.10 to 9,634.74)              | 8,447.23<br>(6,578.02 to 11,504.37)             | 321.35<br>(253.48 to 428.97)              | 308.93<br>(243.73 to 416.48)                 | 262.38<br>(209.41 to 353.51)                | 294.54<br>(228.37 to 398.80)                 |
| Thalassemias                                               | 7,617.85<br>(4,560.92 to 12,322.20)             | 1,394.73<br>(810.59 to 2,304.35)                | 1,644.42<br>(986.30 to 2,679.03)                | 1,428.49<br>(825.18 to 2,379.50)                | 94.21<br>(57.71 to 149.93)                | 18.31<br>(11.13 to 30.31)                    | 21.68<br>(13.53 to 35.25)                   | 18.70<br>(11.29 to 31.12)                    |

|                                                   |                                        |                                        |                                        |                                        |                                 |                                 |                                 |                                 |
|---------------------------------------------------|----------------------------------------|----------------------------------------|----------------------------------------|----------------------------------------|---------------------------------|---------------------------------|---------------------------------|---------------------------------|
|                                                   | 25.40<br>(13.50 to<br>47.37)           | 14.19<br>(7.98 to<br>24.57)            | 11.34<br>(6.38 to<br>19.49)            | 14.62<br>(8.22 to<br>25.15)            | 0.40<br>(0.22 to<br>0.68)       | 0.26<br>(0.15 to<br>0.43)       | 0.21<br>(0.12 to<br>0.35)       | 0.27<br>(0.16 to<br>0.44)       |
| Sickle cell disorders                             | 3,373.16<br>(2,583.35 to<br>4,736.47)  | 3,576.83<br>(2,636.75 to<br>5,188.05)  | 2,600.22<br>(1,861.92 to<br>3,798.98)  | 3,620.39<br>(2,635.84 to<br>5,280.06)  | 74.92<br>(58.32 to<br>103.85)   | 98.68<br>(74.65 to<br>138.25)   | 74.25<br>(54.92 to<br>107.04)   | 97.91<br>(73.41 to<br>138.92)   |
| G6PD deficiency                                   | 3,925.95<br>(3,120.05 to<br>5,328.26)  | 3,518.91<br>(2,678.95 to<br>4,751.60)  | 2,836.07<br>(2,167.09 to<br>3,812.87)  | 3,383.73<br>(2,549.55 to<br>4,596.88)  | 151.82<br>(121.10 to<br>206.61) | 191.67<br>(145.65 to<br>264.65) | 166.24<br>(129.46 to<br>225.89) | 177.66<br>(132.78 to<br>246.02) |
| Other hemoglobinopathies and hemolytic anemias    | 9,726.27<br>(7,093.76 to<br>15,425.15) | 9,527.68<br>(7,247.30 to<br>15,367.75) | 8,603.95<br>(6,540.86 to<br>13,921.92) | 9,367.71<br>(7,069.64 to<br>15,349.60) | 235.99<br>(180.31 to<br>379.74) | 379.90<br>(293.99 to<br>608.76) | 386.00<br>(299.21 to<br>613.05) | 352.06<br>(271.00 to<br>570.23) |
| Endocrine, metabolic, blood, and immune disorders |                                        |                                        |                                        |                                        |                                 |                                 |                                 |                                 |

| North Korea                                   |                                                 |                                                |                                               |                                                |                                           |                                           |                                           |                                           |
|-----------------------------------------------|-------------------------------------------------|------------------------------------------------|-----------------------------------------------|------------------------------------------------|-------------------------------------------|-------------------------------------------|-------------------------------------------|-------------------------------------------|
| Cause                                         | YLLs (actual counts)                            |                                                |                                               |                                                | Deaths (actual counts)                    |                                           |                                           |                                           |
|                                               | 2016                                            | 2040 Forecast                                  | 2040 Better Scenario                          | 2040 Worse Scenario                            | 2016                                      | 2040 Forecast                             | 2040 Better Scenario                      | 2040 Worse Scenario                       |
| <b>Musculoskeletal disorders</b>              | <b>12,751.44</b><br>(9,449.78 to 18,854.20)     | <b>18,853.30</b><br>(13,791.15 to 28,315.66)   | <b>18,617.34</b><br>(13,585.02 to 27,388.37)  | <b>18,296.77</b><br>(13,377.62 to 27,937.10)   | <b>418.94</b><br>(311.20 to 638.84)       | <b>856.90</b><br>(621.05 to 1,297.47)     | <b>870.42</b><br>(638.83 to 1,284.56)     | <b>801.69</b><br>(573.71 to 1,216.82)     |
| Rheumatoid arthritis                          | 5,216.72<br>(3,357.88 to 8,511.06)              | 10,338.32<br>(6,822.67 to 16,410.65)           | 8,807.39<br>(5,622.90 to 14,169.76)           | 10,009.72<br>(6,491.45 to 16,081.30)           | 233.94<br>(156.29 to 380.31)              | 589.31<br>(392.74 to 929.89)              | 541.01<br>(357.91 to 843.81)              | 549.70<br>(363.78 to 885.12)              |
| Other musculoskeletal disorders               | 7,534.72<br>(5,353.21 to 10,962.33)             | 8,514.98<br>(5,766.66 to 13,372.85)            | 9,809.95<br>(6,765.40 to 15,235.90)           | 8,287.05<br>(5,602.41 to 13,031.75)            | 185.00<br>(126.41 to 287.25)              | 267.58<br>(174.08 to 442.52)              | 329.40<br>(222.25 to 531.84)              | 251.99<br>(162.89 to 419.70)              |
| <b>Other non-communicable diseases</b>        | <b>299,264.92</b><br>(193,070.36 to 459,999.16) | <b>110,503.82</b><br>(70,613.77 to 176,034.96) | <b>86,293.47</b><br>(56,489.23 to 134,753.32) | <b>117,272.33</b><br>(73,953.58 to 186,236.84) | <b>3,697.43</b><br>(2,459.88 to 5,567.36) | <b>1,759.05</b><br>(1,218.65 to 2,555.96) | <b>1,546.05</b><br>(1,092.11 to 2,209.81) | <b>1,791.09</b><br>(1,224.84 to 2,636.59) |
| Congenital birth defects                      | 290,836.37<br>(186,189.81 to 450,221.18)        | 102,725.16<br>(64,022.13 to 166,401.20)        | 78,428.87<br>(49,046.14 to 126,546.04)        | 109,803.30<br>(67,043.77 to 176,985.90)        | 3,499.33<br>(2,265.02 to 5,360.90)        | 1,331.77<br>(866.31 to 2,091.53)          | 1,027.71<br>(674.65 to 1,606.53)          | 1,415.49<br>(907.06 to 2,208.79)          |
| Neural tube defects                           | 7,761.93<br>(3,582.34 to 15,660.98)             | 1,322.13<br>(571.27 to 2,949.93)               | 784.50<br>(339.93 to 1,761.55)                | 1,445.94<br>(618.47 to 3,147.78)               | 91.25<br>(42.66 to 183.32)                | 16.60<br>(7.66 to 35.71)                  | 9.93<br>(4.64 to 21.60)                   | 18.07<br>(8.25 to 38.68)                  |
| Congenital heart anomalies                    | 196,885.57<br>(120,350.61 to 307,049.07)        | 68,938.18<br>(41,914.73 to 116,398.53)         | 53,020.96<br>(32,664.59 to 88,855.65)         | 73,607.44<br>(44,309.95 to 126,857.83)         | 2,377.59<br>(1,488.62 to 3,661.43)        | 896.60<br>(562.22 to 1,467.20)            | 696.24<br>(440.24 to 1,125.81)            | 952.23<br>(588.53 to 1,585.43)            |
| Orofacial clefts                              | 3,335.31<br>(1,026.11 to 8,053.08)              | 1,143.20<br>(316.54 to 3,063.56)               | 620.03<br>(180.04 to 1,640.97)                | 1,267.51<br>(346.49 to 3,477.40)               | 38.59<br>(11.88 to 93.09)                 | 13.23<br>(3.66 to 35.50)                  | 7.18<br>(2.08 to 18.99)                   | 14.67<br>(4.01 to 40.24)                  |
| Down syndrome                                 | 2,282.25<br>(1,354.04 to 4,059.98)              | 1,432.21<br>(889.71 to 2,312.71)               | 1,053.50<br>(656.39 to 1,607.02)              | 1,499.12<br>(936.93 to 2,474.61)               | 32.32<br>(20.41 to 54.09)                 | 25.67<br>(16.74 to 40.36)                 | 19.33<br>(12.55 to 30.37)                 | 26.54<br>(17.09 to 41.79)                 |
| Other chromosomal abnormalities               | 2,237.02<br>(743.35 to 5,864.05)                | 1,507.46<br>(496.54 to 3,814.70)               | 1,102.97<br>(363.08 to 2,921.83)              | 1,615.87<br>(539.79 to 4,156.47)               | 26.57<br>(8.86 to 70.31)                  | 18.87<br>(6.34 to 49.00)                  | 13.93<br>(4.67 to 37.63)                  | 20.15<br>(6.78 to 51.92)                  |
| Congenital musculoskeletal and limb anomalies | 3,773.66<br>(1,900.76 to 7,632.24)              | 1,562.97<br>(783.04 to 3,224.96)               | 1,277.67<br>(647.09 to 2,627.53)              | 1,656.26<br>(830.22 to 3,414.34)               | 45.37<br>(23.53 to 91.18)                 | 20.15<br>(10.56 to 41.31)                 | 16.63<br>(8.93 to 33.31)                  | 21.24<br>(11.05 to 43.21)                 |
| Urogenital congenital anomalies               | 2,178.38<br>(1,275.05 to 3,632.72)              | 1,030.69<br>(649.11 to 1,652.91)               | 841.15<br>(527.15 to 1,352.51)                | 1,074.28<br>(672.57 to 1,717.40)               | 30.16<br>(18.80 to 49.09)                 | 19.06<br>(12.79 to 28.40)                 | 16.01<br>(10.70 to 23.80)                 | 19.49<br>(13.11 to 29.01)                 |
| Digestive congenital anomalies                | 27,191.38<br>(13,305.57 to 53,556.52)           | 9,384.73<br>(4,214.20 to 19,270.02)            | 6,886.13<br>(3,080.16 to 14,109.66)           | 10,125.52<br>(4,469.32 to 20,577.67)           | 316.70<br>(155.11 to 623.90)              | 110.84<br>(50.55 to 225.61)               | 81.54<br>(37.14 to 167.00)                | 119.43<br>(53.35 to 242.06)               |
| Other congenital birth defects                | 45,190.87<br>(25,115.08 to 75,602.21)           | 16,403.59<br>(8,784.55 to 27,999.41)           | 12,841.97<br>(7,005.49 to 21,783.01)          | 17,511.34<br>(9,298.83 to 30,032.79)           | 540.78<br>(304.76 to 899.15)              | 210.74<br>(118.92 to 349.49)              | 166.91<br>(94.85 to 274.90)               | 223.66<br>(125.27 to 372.42)              |
| Skin and subcutaneous diseases                | 3,133.86<br>(2,000.68 to 6,195.09)              | 6,269.16<br>(4,103.51 to 12,301.43)            | 6,770.37<br>(4,505.08 to 12,971.99)           | 5,844.62<br>(3,796.63 to 11,505.44)            | 136.66<br>(88.61 to 280.34)               | 409.78<br>(245.89 to 845.49)              | 504.49<br>(316.77 to 1,001.93)            | 357.35<br>(209.28 to 739.19)              |
| Cellulitis                                    | 364.44<br>(170.52 to 942.41)                    | 775.11<br>(348.05 to 2,061.33)                 | 896.10<br>(402.41 to 2,307.19)                | 735.56<br>(332.27 to 1,918.02)                 | 11.83<br>(4.70 to 35.32)                  | 38.53<br>(14.05 to 109.20)                | 49.48<br>(18.11 to 141.02)                | 34.58<br>(12.59 to 99.03)                 |
| Pyoderma                                      | 1,622.92<br>(959.29 to 3,219.89)                | 3,287.34<br>(2,065.74 to 6,261.67)             | 3,265.11<br>(2,038.25 to 6,179.52)            | 3,105.88<br>(1,913.96 to 5,903.82)             | 59.10<br>(32.53 to 126.57)                | 198.52<br>(112.99 to 401.95)              | 225.57<br>(127.67 to 453.78)              | 175.04<br>(98.00 to 351.58)               |
| Decubitus ulcer                               | 836.98<br>(443.23 to 1,859.44)                  | 1,779.08<br>(837.14 to 3,984.41)               | 2,120.27<br>(1,016.14 to 4,625.68)            | 1,596.24<br>(740.48 to 3,599.35)               | 55.87<br>(26.85 to 131.61)                | 151.92<br>(64.59 to 364.05)               | 202.42<br>(93.29 to 466.56)               | 129.22<br>(52.83 to 322.78)               |
| Other skin and subcutaneous diseases          | 309.52<br>(181.85 to 738.34)                    | 427.64<br>(253.18 to 981.70)                   | 488.90<br>(292.87 to 1,099.91)                | 406.94<br>(238.94 to 944.51)                   | 9.87<br>(5.57 to 25.18)                   | 20.81<br>(11.24 to 52.07)                 | 27.02<br>(14.74 to 65.08)                 | 18.52<br>(9.90 to 47.36)                  |
| Sudden infant death syndrome                  | 5,294.68<br>(2,411.83 to 10,365.44)             | 1,509.49<br>(553.59 to 3,655.09)               | 1,194.22<br>(430.84 to 2,904.14)              | 1,624.41<br>(601.13 to 3,856.39)               | 61.44<br>(27.98 to 120.32)                | 17.51<br>(6.42 to 42.41)                  | 13.85<br>(5.00 to 33.70)                  | 18.84<br>(6.97 to 44.74)                  |

|                          |                                               |                                                  |                                                |                                                  |                                          |                                           |                                           |                                           |
|--------------------------|-----------------------------------------------|--------------------------------------------------|------------------------------------------------|--------------------------------------------------|------------------------------------------|-------------------------------------------|-------------------------------------------|-------------------------------------------|
| Injuries                 | 963,679.23<br>(826,284.97 to<br>1,122,201.66) | 1,112,433.25<br>(551,250.71 to<br>11,207,742.85) | 929,234.89<br>(407,817.96 to<br>11,181,627.12) | 1,173,349.65<br>(587,660.33 to<br>11,386,070.09) | 19,990.35<br>(17,476.93 to<br>22,605.76) | 27,629.65<br>(15,889.16 to<br>247,749.50) | 24,435.25<br>(13,000.79 to<br>253,456.49) | 28,270.86<br>(16,353.81 to<br>244,670.56) |
| Transport injuries       | 387,881.88<br>(310,372.30 to<br>467,892.59)   | 293,454.07<br>(204,990.94 to<br>395,329.64)      | 162,417.88<br>(112,769.12 to<br>219,890.37)    | 341,032.97<br>(234,744.29 to<br>468,228.87)      | 7,976.84<br>(6,464.43 to<br>9,541.23)    | 7,052.00<br>(5,118.13 to<br>9,212.03)     | 4,201.34<br>(3,067.53 to<br>5,532.81)     | 7,993.89<br>(5,727.94 to<br>10,576.33)    |
| Road injuries            | 364,076.17<br>(289,699.92 to<br>441,411.50)   | 265,066.39<br>(182,949.09 to<br>361,787.42)      | 139,724.73<br>(95,418.13 to<br>192,337.41)     | 310,979.53<br>(212,081.71 to<br>428,938.81)      | 7,448.95<br>(6,039.18 to<br>8,921.65)    | 6,294.89<br>(4,571.49 to<br>8,337.00)     | 3,571.99<br>(2,558.09 to<br>4,767.78)     | 7,209.66<br>(5,136.99 to<br>9,662.80)     |
| Pedestrian road injuries | 196,237.03<br>(143,196.14 to<br>242,082.68)   | 126,577.14<br>(82,430.37 to<br>173,542.74)       | 66,889.78<br>(43,375.26 to<br>91,671.61)       | 146,932.88<br>(95,582.34 to<br>204,652.77)       | 4,121.59<br>(3,095.47 to<br>5,030.48)    | 3,299.60<br>(2,261.92 to<br>4,356.38)     | 1,889.99<br>(1,275.02 to<br>2,491.50)     | 3,723.04<br>(2,529.49 to<br>4,984.19)     |

| North Korea                                     |                                                        |                                                        |                                                        |                                                        |                                                  |                                                  |                                                  |                                                  |
|-------------------------------------------------|--------------------------------------------------------|--------------------------------------------------------|--------------------------------------------------------|--------------------------------------------------------|--------------------------------------------------|--------------------------------------------------|--------------------------------------------------|--------------------------------------------------|
| Cause                                           | YLLs (actual counts)                                   |                                                        |                                                        |                                                        | Deaths (actual counts)                           |                                                  |                                                  |                                                  |
|                                                 | 2016                                                   | 2040 Forecast                                          | 2040 Better Scenario                                   | 2040 Worse Scenario                                    | 2016                                             | 2040 Forecast                                    | 2040 Better Scenario                             | 2040 Worse Scenario                              |
| Cyclist road injuries                           | 12,686.74<br>(6,627.39 to 20,645.76)                   | 11,101.85<br>(5,130.99 to 18,485.27)                   | 5,843.02<br>(2,641.53 to 9,810.18)                     | 13,060.05<br>(6,023.64 to 22,202.69)                   | 279.18<br>(147.52 to 443.19)                     | 288.62<br>(137.84 to 471.92)                     | 173.51<br>(78.78 to 288.38)                      | 328.37<br>(157.97 to 540.68)                     |
| Motorcyclist road injuries                      | 76,527.87<br>(54,973.96 to 106,965.26)                 | 64,863.93<br>(39,861.06 to 99,007.01)                  | 40,578.14<br>(24,663.67 to 62,690.64)                  | 74,267.50<br>(45,469.80 to 113,577.86)                 | 1,472.86<br>(1,054.92 to 2,065.39)               | 1,318.31<br>(842.39 to 1,956.61)                 | 864.95<br>(545.94 to 1,275.52)                   | 1,492.20<br>(936.26 to 2,229.65)                 |
| Motor vehicle road injuries                     | 75,949.43<br>(51,957.39 to 104,889.08)                 | 60,219.94<br>(38,550.90 to 87,569.30)                  | 25,370.11<br>(16,009.98 to 36,930.25)                  | 73,929.03<br>(46,889.05 to 108,246.92)                 | 1,519.54<br>(1,048.89 to 2,060.83)               | 1,332.32<br>(883.59 to 1,900.56)                 | 614.50<br>(409.41 to 858.87)                     | 1,600.41<br>(1,041.97 to 2,333.59)               |
| Other road injuries                             | 2,675.11<br>(810.14 to 3,909.45)                       | 2,303.54<br>(653.44 to 3,682.03)                       | 1,043.68<br>(282.72 to 1,614.65)                       | 2,790.07<br>(798.78 to 4,541.32)                       | 55.78<br>(17.29 to 79.47)                        | 56.04<br>(16.08 to 84.85)                        | 29.05<br>(8.05 to 43.15)                         | 65.65<br>(18.72 to 103.01)                       |
| Other transport injuries                        | 23,805.71<br>(14,656.28 to 35,916.29)                  | 28,387.68<br>(16,499.12 to 43,271.72)                  | 22,693.15<br>(13,176.07 to 33,956.28)                  | 30,053.44<br>(17,386.09 to 46,325.21)                  | 527.89<br>(331.28 to 774.69)                     | 527.89<br>(456.19 to 1,111.05)                   | 629.35<br>(382.10 to 901.33)                     | 784.23<br>(465.96 to 1,172.70)                   |
| <b>Unintentional injuries</b>                   | <b>378,659.23</b><br><b>(310,430.63 to 471,088.50)</b> | <b>219,199.58</b><br><b>(177,258.91 to 266,616.02)</b> | <b>180,828.56</b><br><b>(142,613.70 to 218,653.85)</b> | <b>222,635.67</b><br><b>(177,820.37 to 274,651.99)</b> | <b>7,491.63</b><br><b>(6,344.52 to 8,829.53)</b> | <b>6,703.52</b><br><b>(5,701.02 to 7,735.28)</b> | <b>6,171.39</b><br><b>(5,184.55 to 7,120.32)</b> | <b>6,448.51</b><br><b>(5,452.27 to 7,468.12)</b> |
| Falls                                           | 67,656.41<br>(51,376.24 to 91,109.97)                  | 63,620.09<br>(48,825.07 to 84,471.98)                  | 60,006.02<br>(45,888.62 to 79,367.01)                  | 61,893.34<br>(47,553.22 to 82,924.27)                  | 1,949.49<br>(1,542.30 to 2,535.95)               | 1,949.49<br>(2,167.97 to 3,488.01)               | 2,735.84<br>(2,266.72 to 3,611.76)               | 2,505.97<br>(1,978.13 to 3,202.71)               |
| Drowning                                        | 140,042.37<br>(107,033.51 to 186,035.92)               | 55,095.43<br>(40,177.84 to 73,987.16)                  | 43,378.94<br>(31,641.20 to 57,965.84)                  | 57,891.21<br>(41,468.00 to 78,472.38)                  | 2,205.65<br>(1,765.36 to 2,807.44)               | 1,232.11<br>(954.94 to 1,548.88)                 | 1,034.23<br>(794.98 to 1,304.90)                 | 1,251.29<br>(960.40 to 1,601.86)                 |
| Fire, heat, and hot substances                  | 16,365.69<br>(11,112.38 to 27,150.44)                  | 10,523.08<br>(7,039.45 to 17,885.44)                   | 8,255.90<br>(5,614.35 to 13,984.80)                    | 10,762.95<br>(7,037.54 to 18,495.81)                   | 375.32<br>(268.89 to 603.78)                     | 395.82<br>(277.35 to 665.15)                     | 349.82<br>(252.32 to 500.29)                     | 380.05<br>(262.80 to 643.68)                     |
| Poisonings                                      | 24,103.30<br>(15,247.10 to 34,159.21)                  | 11,979.95<br>(7,449.64 to 17,320.08)                   | 8,021.45<br>(5,084.14 to 11,376.51)                    | 12,590.72<br>(7,806.48 to 18,519.42)                   | 512.71<br>(331.14 to 703.05)                     | 512.71<br>(214.56 to 486.46)                     | 340.12<br>(155.11 to 342.02)                     | 244.15<br>(121.07 to 495.59)                     |
| Exposure to mechanical forces                   | 66,654.02<br>(42,462.45 to 96,546.87)                  | 37,924.25<br>(25,436.39 to 52,879.43)                  | 28,746.78<br>(19,089.29 to 40,271.41)                  | 38,936.18<br>(25,860.44 to 54,761.19)                  | 1,197.17<br>(802.52 to 1,634.87)                 | 878.25<br>(608.45 to 1,170.38)                   | 701.05<br>(488.13 to 921.77)                     | 878.16<br>(608.56 to 1,180.28)                   |
| Unintentional firearm injuries                  | 1,522.04<br>(967.42 to 2,736.92)                       | 1,095.51<br>(660.88 to 1,975.49)                       | 813.31<br>(498.48 to 1,443.06)                         | 1,109.24<br>(665.27 to 1,993.41)                       | 34.07<br>(23.44 to 57.48)                        | 35.33<br>(24.13 to 58.72)                        | 30.28<br>(21.05 to 48.71)                        | 33.58<br>(22.23 to 55.76)                        |
| Unintentional suffocation                       | 23,023.05<br>(7,796.02 to 47,578.24)                   | 6,563.36<br>(2,241.73 to 13,592.74)                    | 4,746.23<br>(1,624.55 to 9,860.58)                     | 7,003.02<br>(2,359.73 to 14,646.92)                    | 290.04<br>(103.21 to 579.12)                     | 106.76<br>(42.06 to 197.71)                      | 82.56<br>(32.83 to 150.99)                       | 109.98<br>(42.18 to 205.13)                      |
| Other exposure to mechanical forces             | 42,108.93<br>(30,090.95 to 55,115.95)                  | 30,265.39<br>(20,401.74 to 42,403.90)                  | 23,187.24<br>(15,509.01 to 32,006.87)                  | 30,823.91<br>(20,776.13 to 43,418.75)                  | 873.07<br>(637.62 to 1,145.93)                   | 736.17<br>(514.45 to 987.30)                     | 588.21<br>(409.82 to 781.35)                     | 734.59<br>(507.00 to 989.58)                     |
| Adverse effects of medical treatment            | 10,943.23<br>(7,735.23 to 16,230.88)                   | 6,950.89<br>(5,234.44 to 10,176.38)                    | 5,658.72<br>(4,378.37 to 8,247.87)                     | 7,000.84<br>(5,332.55 to 10,332.79)                    | 219.61<br>(168.76 to 315.97)                     | 226.37<br>(186.06 to 322.41)                     | 202.17<br>(165.97 to 283.76)                     | 216.82<br>(175.81 to 309.53)                     |
| Animal contact                                  | 3,419.92<br>(2,296.37 to 4,721.66)                     | 3,858.81<br>(2,556.80 to 5,478.73)                     | 2,798.61<br>(1,853.03 to 4,055.16)                     | 3,909.99<br>(2,549.83 to 5,508.68)                     | 82.59<br>(54.34 to 113.11)                       | 124.93<br>(82.68 to 176.00)                      | 97.54<br>(64.62 to 138.53)                       | 121.71<br>(80.19 to 172.50)                      |
| Venomous animal contact                         | 1,399.21<br>(855.56 to 2,074.80)                       | 1,447.16<br>(866.12 to 2,277.67)                       | 1,039.11<br>(620.96 to 1,677.21)                       | 1,464.76<br>(873.19 to 2,317.05)                       | 35.78<br>(21.23 to 53.41)                        | 49.84<br>(29.09 to 77.45)                        | 38.55<br>(22.39 to 60.09)                        | 48.43<br>(27.81 to 75.96)                        |
| Non-venomous animal contact                     | 2,020.71<br>(1,368.40 to 2,834.37)                     | 2,411.65<br>(1,562.04 to 3,253.66)                     | 1,759.50<br>(1,131.22 to 2,654.91)                     | 2,445.23<br>(1,578.25 to 3,607.93)                     | 46.81<br>(31.86 to 66.01)                        | 75.09<br>(50.05 to 109.15)                       | 58.99<br>(38.51 to 87.47)                        | 73.29<br>(48.93 to 105.80)                       |
| Foreign body                                    | 14,795.00<br>(9,242.48 to 23,386.35)                   | 6,391.04<br>(4,456.26 to 9,848.69)                     | 6,281.06<br>(4,476.56 to 9,315.14)                     | 6,417.46<br>(4,429.83 to 9,950.74)                     | 238.44<br>(165.74 to 347.40)                     | 194.55<br>(151.80 to 263.97)                     | 220.73<br>(172.18 to 295.93)                     | 180.74<br>(139.30 to 244.03)                     |
| Pulmonary aspiration and foreign body in airway | 13,064.32<br>(7,832.24 to 21,321.58)                   | 5,471.14<br>(3,650.24 to 8,741.90)                     | 5,505.67<br>(3,817.73 to 8,413.85)                     | 5,485.74<br>(3,627.47 to 8,855.96)                     | 207.57<br>(139.85 to 307.82)                     | 163.27<br>(121.82 to 236.32)                     | 189.63<br>(143.10 to 272.86)                     | 151.60<br>(111.71 to 219.12)                     |

|                                             |                                                                  |                                                                  |                                                                  |                                                                  |                                                            |                                                            |                                                            |                                                            |
|---------------------------------------------|------------------------------------------------------------------|------------------------------------------------------------------|------------------------------------------------------------------|------------------------------------------------------------------|------------------------------------------------------------|------------------------------------------------------------|------------------------------------------------------------|------------------------------------------------------------|
|                                             | 1,730.69<br>(920.07 to<br>2,899.65)                              | 919.90<br>(519.38 to<br>1,407.64)                                | 775.40<br>(425.77 to<br>1,173.72)                                | 931.72<br>(520.90 to<br>1,442.58)                                | 30.87<br>(17.68 to<br>45.97)                               | 31.29<br>(18.42 to<br>42.18)                               | 31.10<br>(18.12 to<br>42.10)                               | 29.14<br>(17.12 to<br>39.46)                               |
| Foreign body in other body part             |                                                                  |                                                                  |                                                                  |                                                                  |                                                            |                                                            |                                                            |                                                            |
|                                             | 5,159.37<br>(3,843.32 to<br>7,118.06)                            | 5,171.20<br>(3,722.56 to<br>7,505.35)                            | 3,444.57<br>(2,443.35 to<br>4,995.27)                            | 5,236.98<br>(3,704.88 to<br>7,520.80)                            | 132.22<br>(98.34 to<br>177.98)                             | 187.40<br>(136.05 to<br>265.36)                            | 138.89<br>(99.16 to<br>200.95)                             | 179.50<br>(130.91 to<br>258.40)                            |
| Environmental heat and cold exposure        |                                                                  |                                                                  |                                                                  |                                                                  |                                                            |                                                            |                                                            |                                                            |
|                                             | 29,519.91<br>(14,602.80 to<br>38,508.66)                         | 17,684.83<br>(8,540.61 to<br>24,268.48)                          | 14,236.51<br>(6,743.81 to<br>19,721.03)                          | 17,996.02<br>(8,674.89 to<br>24,988.88)                          | 578.44<br>(279.18 to<br>750.04)                            | 388.13<br>(190.40 to<br>526.29)                            | 320.01<br>(153.65 to<br>435.59)                            | 389.30<br>(190.69 to<br>529.04)                            |
| Other unintentional injuries                |                                                                  |                                                                  |                                                                  |                                                                  |                                                            |                                                            |                                                            |                                                            |
| <b>Self-harm and interpersonal violence</b> | <b>170,336.57</b><br><b>(130,620.14 to</b><br><b>220,987.29)</b> | <b>173,258.87</b><br><b>(118,131.27 to</b><br><b>248,666.86)</b> | <b>157,733.86</b><br><b>(112,573.82 to</b><br><b>220,120.46)</b> | <b>182,291.36</b><br><b>(121,578.32 to</b><br><b>267,223.53)</b> | <b>3,951.59</b><br><b>(3,069.60 to</b><br><b>5,248.85)</b> | <b>4,864.52</b><br><b>(3,432.83 to</b><br><b>6,913.86)</b> | <b>4,665.39</b><br><b>(3,386.18 to</b><br><b>6,471.33)</b> | <b>4,981.07</b><br><b>(3,388.17 to</b><br><b>7,298.84)</b> |

| North Korea                                                                         |                                                              |                                                               |                                                               |                                                               |                                                        |                                                          |                                                          |                                                          |
|-------------------------------------------------------------------------------------|--------------------------------------------------------------|---------------------------------------------------------------|---------------------------------------------------------------|---------------------------------------------------------------|--------------------------------------------------------|----------------------------------------------------------|----------------------------------------------------------|----------------------------------------------------------|
| Cause                                                                               | YLLs (actual counts)                                         |                                                               |                                                               |                                                               | Deaths (actual counts)                                 |                                                          |                                                          |                                                          |
|                                                                                     | 2016                                                         | 2040 Forecast                                                 | 2040 Better Scenario                                          | 2040 Worse Scenario                                           | 2016                                                   | 2040 Forecast                                            | 2040 Better Scenario                                     | 2040 Worse Scenario                                      |
| Self-harm                                                                           | 132,155.50<br>(97,590.03 to<br>176,588.82)                   | 147,862.32<br>(97,583.69 to<br>218,722.59)                    | 133,517.58<br>(91,132.06 to<br>193,120.39)                    | 156,265.84<br>(98,800.76 to<br>234,293.23)                    | 3,239.83<br>(2,435.43 to<br>4,356.27)                  | 4,308.07<br>(2,958.17 to<br>6,273.27)                    | 4,123.49<br>(2,929.09 to<br>5,841.27)                    | 4,418.12<br>(2,907.01 to<br>6,609.16)                    |
| Self-harm by firearm                                                                | 2,724.93<br>(1,214.43 to<br>5,814.45)                        | 2,403.84<br>(945.97 to<br>5,519.51)                           | 1,999.17<br>(822.57 to<br>4,422.19)                           | 2,620.73<br>(972.00 to<br>6,144.06)                           | 60.85<br>(28.94 to<br>124.78)                          | 60.17<br>(25.80 to<br>132.47)                            | 52.53<br>(24.11 to<br>110.73)                            | 64.15<br>(26.17 to<br>144.41)                            |
| Self-harm by other specified means                                                  | 129,430.56<br>(96,250.97 to<br>170,848.27)                   | 145,458.48<br>(96,163.46 to<br>214,141.49)                    | 131,518.41<br>(90,202.80 to<br>189,607.31)                    | 153,645.11<br>(97,392.72 to<br>230,452.43)                    | 3,178.97<br>(2,404.18 to<br>4,238.29)                  | 4,247.90<br>(2,919.04 to<br>6,196.50)                    | 4,070.96<br>(2,907.66 to<br>5,758.90)                    | 4,353.97<br>(2,879.22 to<br>6,409.50)                    |
| Interpersonal violence                                                              | 38,181.07<br>(28,474.36 to<br>52,755.63)                     | 25,396.55<br>(17,515.10 to<br>37,239.08)                      | 24,216.28<br>(16,813.39 to<br>35,140.06)                      | 26,025.52<br>(17,777.13 to<br>38,185.06)                      | 711.76<br>(539.08 to<br>979.55)                        | 556.45<br>(398.16 to<br>787.85)                          | 541.90<br>(389.93 to<br>753.05)                          | 562.95<br>(399.44 to<br>803.28)                          |
| Physical violence by firearm                                                        | 1,688.25<br>(832.74 to<br>4,245.54)                          | 1,242.02<br>(608.44 to<br>3,208.17)                           | 1,226.53<br>(601.28 to<br>3,203.88)                           | 1,234.28<br>(600.07 to<br>3,160.48)                           | 35.53<br>(18.06 to<br>86.60)                           | 31.39<br>(16.53 to<br>74.61)                             | 32.07<br>(17.15 to<br>76.70)                             | 30.55<br>(15.95 to<br>72.83)                             |
| Physical violence by sharp object                                                   | 15,292.86<br>(9,560.33 to<br>21,728.50)                      | 11,479.41<br>(7,003.62 to<br>17,571.96)                       | 11,665.11<br>(7,159.41 to<br>17,825.02)                       | 11,476.93<br>(6,969.18 to<br>17,545.03)                       | 286.30<br>(179.70 to<br>396.42)                        | 237.17<br>(146.56 to<br>349.56)                          | 244.63<br>(150.87 to<br>356.69)                          | 234.67<br>(144.55 to<br>345.01)                          |
| Physical violence by other means                                                    | 21,199.95<br>(15,373.23 to<br>30,667.46)                     | 12,675.12<br>(8,281.10 to<br>19,557.88)                       | 11,324.65<br>(7,458.12 to<br>17,421.54)                       | 13,314.30<br>(8,529.94 to<br>20,819.49)                       | 389.94<br>(288.52 to<br>559.90)                        | 287.90<br>(192.98 to<br>427.60)                          | 265.19<br>(180.81 to<br>392.96)                          | 297.72<br>(195.76 to<br>447.61)                          |
| <b>Forces of nature, conflict and terrorism, and executions and police conflict</b> | <b>26,801.55</b><br><b>(5,569.26 to</b><br><b>50,219.92)</b> | <b>426,520.73</b><br><b>(0.00 to</b><br><b>10,627,429.65)</b> | <b>428,254.59</b><br><b>(0.00 to</b><br><b>10,683,556.18)</b> | <b>427,389.64</b><br><b>(0.00 to</b><br><b>10,630,448.42)</b> | <b>570.29</b><br><b>(116.88 to</b><br><b>1,072.73)</b> | <b>9,009.60</b><br><b>(0.00 to</b><br><b>225,887.27)</b> | <b>9,397.13</b><br><b>(0.00 to</b><br><b>238,138.75)</b> | <b>8,847.39</b><br><b>(0.00 to</b><br><b>221,283.83)</b> |
| Exposure to forces of nature                                                        | 25,501.31<br>(4,046.20 to<br>48,876.38)                      | 1,126.78<br>(0.00 to<br>13,963.41)                            | 1,144.75<br>(0.00 to<br>14,157.49)                            | 1,121.88<br>(0.00 to<br>13,917.40)                            | 545.41<br>(86.54 to<br>1,045.34)                       | 28.79<br>(0.00 to<br>361.53)                             | 30.91<br>(0.00 to<br>388.92)                             | 27.82<br>(0.00 to<br>348.80)                             |
| Conflict and terrorism                                                              | 0.00<br>(0.00 to<br>0.00)                                    | 425,393.95<br>(0.00 to<br>10,627,429.65)                      | 427,109.84<br>(0.00 to<br>10,683,556.18)                      | 426,267.76<br>(0.00 to<br>10,630,448.42)                      | 0.00<br>(0.00 to<br>0.00)                              | 8,980.81<br>(0.00 to<br>225,887.27)                      | 9,366.22<br>(0.00 to<br>238,138.75)                      | 8,819.57<br>(0.00 to<br>221,283.83)                      |
| Executions and police conflict                                                      | 1,300.24<br>(365.08 to<br>2,680.91)                          | 0.00<br>(0.00 to<br>0.00)                                     | 0.00<br>(0.00 to<br>0.00)                                     | 0.00<br>(0.00 to<br>0.00)                                     | 24.88<br>(6.66 to<br>51.23)                            | 0.00<br>(0.00 to<br>0.00)                                | 0.00<br>(0.00 to<br>0.00)                                | 0.00<br>(0.00 to<br>0.00)                                |

| Taiwan (Province of China)                                               |                                                |                                                |                                                |                                                |                                          |                                          |                                          |                                          |
|--------------------------------------------------------------------------|------------------------------------------------|------------------------------------------------|------------------------------------------------|------------------------------------------------|------------------------------------------|------------------------------------------|------------------------------------------|------------------------------------------|
| Cause                                                                    | YLLs (actual counts)                           |                                                |                                                |                                                | Deaths (actual counts)                   |                                          |                                          |                                          |
|                                                                          | 2016                                           | 2040 Forecast                                  | 2040 Better Scenario                           | 2040 Worse Scenario                            | 2016                                     | 2040 Forecast                            | 2040 Better Scenario                     | 2040 Worse Scenario                      |
| <b>All causes</b>                                                        | 3,237,260.78<br>(2,828,916.88 to 3,630,385.33) | 4,122,244.18<br>(3,392,744.04 to 4,945,896.39) | 3,732,885.90<br>(3,100,501.91 to 4,468,086.65) | 4,977,342.74<br>(4,057,971.37 to 5,999,796.01) | 174,355.77<br>(154,007.14 to 193,599.71) | 452,320.87<br>(391,962.32 to 523,840.24) | 423,215.84<br>(369,326.65 to 491,616.16) | 525,244.95<br>(449,773.93 to 613,305.13) |
| <b>Communicable, maternal, neonatal, and nutritional diseases</b>        | 195,914.26<br>(135,279.72 to 233,706.66)       | 302,005.64<br>(148,615.11 to 466,024.98)       | 266,443.74<br>(135,508.97 to 396,861.35)       | 361,079.01<br>(181,856.55 to 571,570.28)       | 11,485.87<br>(6,870.28 to 14,205.62)     | 41,076.10<br>(19,689.18 to 64,355.16)    | 37,709.81<br>(18,565.55 to 57,114.24)    | 46,910.36<br>(22,225.99 to 75,932.14)    |
| <b>HIV/AIDS and tuberculosis</b>                                         | 23,081.03<br>(20,397.86 to 25,825.46)          | 14,943.25<br>(8,298.38 to 26,795.69)           | 11,772.65<br>(7,045.67 to 19,991.03)           | 20,550.33<br>(11,477.19 to 38,549.26)          | 1,147.58<br>(1,016.54 to 1,286.68)       | 1,825.19<br>(958.50 to 3,362.30)         | 1,458.18<br>(833.52 to 2,511.36)         | 2,345.02<br>(1,218.26 to 4,548.92)       |
| <b>Tuberculosis</b>                                                      | 13,118.79<br>(11,137.00 to 15,150.09)          | 13,862.63<br>(7,242.51 to 25,602.81)           | 10,732.40<br>(6,174.52 to 18,761.84)           | 18,298.23<br>(9,419.60 to 36,049.49)           | 912.75<br>(87.33 to 1,044.30)            | 1,790.04<br>(930.33 to 3,321.77)         | 1,425.10<br>(804.22 to 2,478.45)         | 2,278.74<br>(1,138.03 to 4,460.53)       |
| <b>HIV/AIDS</b>                                                          | 9,962.24<br>(8,253.42 to 11,446.99)            | 1,080.62<br>(485.48 to 1,972.64)               | 1,040.25<br>(509.37 to 1,862.11)               | 2,252.09<br>(1,154.50 to 3,569.87)             | 234.82<br>(192.21 to 271.04)             | 35.15<br>(14.10 to 67.80)                | 33.08<br>(14.14 to 63.46)                | 66.28<br>(28.88 to 109.56)               |
| <b>Diarrhea, lower respiratory, and other common infectious diseases</b> | 127,222.43<br>(69,769.19 to 162,051.64)        | 264,444.67<br>(116,996.10 to 416,625.47)       | 232,046.72<br>(104,725.17 to 356,889.67)       | 317,816.73<br>(138,787.06 to 510,371.14)       | 9,277.00<br>(4,690.18 to 11,852.54)      | 37,315.43<br>(16,669.03 to 59,317.29)    | 34,227.85<br>(15,775.73 to 53,033.72)    | 42,769.47<br>(18,851.39 to 70,926.47)    |
| <b>Diarrheal diseases</b>                                                | 2,707.34<br>(1,659.65 to 3,769.23)             | 9,165.97<br>(2,301.77 to 28,530.29)            | 7,886.65<br>(2,349.99 to 22,548.13)            | 7,780.48<br>(1,889.81 to 24,812.17)            | 114.44<br>(56.85 to 172.72)              | 1,136.55<br>(285.69 to 3,500.73)         | 999.51<br>(297.50 to 2,782.76)           | 930.18<br>(222.32 to 2,995.28)           |
| <b>Intestinal infectious diseases</b>                                    | 1,158.88<br>(560.17 to 2,048.99)               | 667.79<br>(303.73 to 1,242.74)                 | 694.51<br>(320.42 to 1,280.44)                 | 605.14<br>(270.93 to 1,121.55)                 | 20.13<br>(10.00 to 35.46)                | 17.74<br>(8.80 to 30.27)                 | 18.79<br>(9.35 to 32.89)                 | 15.55<br>(7.58 to 27.01)                 |
| <b>Typhoid fever</b>                                                     | 976.27<br>(461.69 to 1,743.45)                 | 600.42<br>(272.31 to 1,111.25)                 | 629.04<br>(286.49 to 1,158.87)                 | 532.47<br>(234.77 to 992.75)                   | 16.82<br>(8.03 to 29.64)                 | 15.76<br>(7.76 to 27.17)                 | 16.82<br>(8.25 to 29.75)                 | 13.49<br>(6.38 to 23.87)                 |
| <b>Paratyphoid fever</b>                                                 | 180.86<br>(77.49 to 359.16)                    | 65.53<br>(25.15 to 140.20)                     | 63.59<br>(24.25 to 134.66)                     | 70.89<br>(27.55 to 148.87)                     | 3.23<br>(1.38 to 6.47)                   | 3.23<br>(0.70 to 3.57)                   | 1.73<br>(0.69 to 3.52)                   | 1.82<br>(0.74 to 3.73)                   |
| <b>Other intestinal infectious diseases</b>                              | 1.75<br>(0.69 to 3.62)                         | 1.84<br>(0.66 to 4.14)                         | 1.88<br>(0.67 to 4.25)                         | 1.78<br>(0.64 to 3.96)                         | 0.07<br>(0.03 to 0.15)                   | 0.25<br>(0.08 to 0.59)                   | 0.26<br>(0.08 to 0.62)                   | 0.23<br>(0.07 to 0.55)                   |
| <b>Lower respiratory infections</b>                                      | 114,704.30<br>(58,305.42 to 148,274.31)        | 248,960.24<br>(106,866.65 to 397,287.75)       | 218,018.02<br>(95,222.11 to 333,519.02)        | 302,778.91<br>(129,317.84 to 492,779.94)       | 8,907.83<br>(4,345.94 to 11,469.56)      | 35,809.79<br>(15,620.14 to 57,093.59)    | 32,853.16<br>(14,765.69 to 50,734.39)    | 41,469.59<br>(17,949.96 to 69,203.03)    |
| <b>Upper respiratory infections</b>                                      | 44.04<br>(23.24 to 77.32)                      | 37.98<br>(15.23 to 78.06)                      | 36.36<br>(14.28 to 74.69)                      | 43.83<br>(17.36 to 91.23)                      | 1.65<br>(0.85 to 2.89)                   | 3.45<br>(1.09 to 7.80)                   | 3.36<br>(1.07 to 7.75)                   | 3.83<br>(1.23 to 8.81)                   |
| <b>Otitis media</b>                                                      | 32.91<br>(4.91 to 65.72)                       | 52.25<br>(0.97 to 147.58)                      | 56.48<br>(1.02 to 159.21)                      | 45.46<br>(0.89 to 129.34)                      | 3.44<br>(0.31 to 7.53)                   | 8.52<br>(0.12 to 25.10)                  | 9.32<br>(0.13 to 27.33)                  | 7.27<br>(0.11 to 21.56)                  |
| <b>Meningitis</b>                                                        | 3,891.79<br>(2,789.47 to 5,151.56)             | 1,581.63<br>(1,053.01 to 2,238.97)             | 1,560.47<br>(1,031.46 to 2,230.97)             | 1,708.32<br>(1,136.06 to 2,395.03)             | 122.87<br>(83.09 to 158.20)              | 126.91<br>(87.97 to 174.95)              | 127.68<br>(89.94 to 175.51)              | 129.91<br>(89.91 to 178.37)              |
| <b>Pneumococcal meningitis</b>                                           | 191.82<br>(133.65 to 247.06)                   | 145.73<br>(95.98 to 203.13)                    | 151.23<br>(97.46 to 212.43)                    | 140.80<br>(93.04 to 194.65)                    | 7.12<br>(4.82 to 9.18)                   | 13.83<br>(9.39 to 19.69)                 | 14.58<br>(9.83 to 21.05)                 | 12.91<br>(8.73 to 18.38)                 |
| <b>H influenzae type B meningitis</b>                                    | 187.73<br>(136.05 to 242.50)                   | 128.23<br>(80.15 to 200.06)                    | 129.80<br>(81.11 to 197.09)                    | 144.62<br>(82.21 to 261.53)                    | 5.94<br>(3.96 to 7.66)                   | 8.94<br>(6.14 to 12.30)                  | 9.40<br>(6.46 to 13.13)                  | 8.33<br>(5.69 to 11.51)                  |
| <b>Meningococcal meningitis</b>                                          | 1,289.80<br>(908.28 to 1,706.54)               | 567.07<br>(376.87 to 785.98)                   | 558.10<br>(367.24 to 780.21)                   | 607.37<br>(403.34 to 841.45)                   | 45.99<br>(30.85 to 59.01)                | 51.11<br>(35.00 to 70.47)                | 51.09<br>(35.13 to 70.76)                | 52.75<br>(36.12 to 73.21)                |
| <b>Other meningitis</b>                                                  | 2,222.44<br>(1,614.47 to 2,964.85)             | 740.60<br>(483.35 to 1,065.54)                 | 721.34<br>(470.57 to 1,033.82)                 | 815.53<br>(528.77 to 1,178.33)                 | 63.83<br>(43.61 to 83.30)                | 53.02<br>(35.79 to 74.50)                | 52.62<br>(35.97 to 73.41)                | 55.92<br>(37.57 to 78.17)                |
| <b>Encephalitis</b>                                                      | 3,638.95<br>(2,818.76 to 4,520.31)             | 2,630.73<br>(1,642.22 to 3,620.18)             | 2,683.82<br>(1,628.59 to 3,731.36)             | 2,582.74<br>(1,605.32 to 3,581.29)             | 84.90<br>(61.17 to 105.80)               | 149.43<br>(85.43 to 209.22)              | 155.57<br>(88.80 to 218.79)              | 139.54<br>(80.12 to 193.59)              |



|                |                                  |                                  |                                  |                                    |                            |                             |                             |                              |
|----------------|----------------------------------|----------------------------------|----------------------------------|------------------------------------|----------------------------|-----------------------------|-----------------------------|------------------------------|
| Diphtheria     | 8.31<br>(5.23 to<br>12.27)       | 1.31<br>(0.63 to<br>2.61)        | 1.26<br>(0.59 to<br>2.49)        | 1.84<br>(0.71 to<br>4.17)          | 0.17<br>(0.10 to<br>0.27)  | 0.03<br>(0.01 to<br>0.07)   | 0.03<br>(0.01 to<br>0.07)   | 0.04<br>(0.02 to<br>0.08)    |
| Whooping cough | 410.19<br>(38.12 to<br>1,264.06) | 94.43<br>(2.12 to<br>432.64)     | 34.50<br>(1.32 to<br>156.87)     | 497.18<br>(2.82 to<br>1,880.30)    | 4.91<br>(0.46 to<br>15.15) | 1.13<br>(0.03 to<br>5.10)   | 0.43<br>(0.02 to<br>1.88)   | 5.87<br>(0.04 to<br>22.08)   |
| Tetanus        | 119.93<br>(106.77 to<br>133.98)  | 9.08<br>(5.81 to<br>14.01)       | 9.00<br>(5.71 to<br>14.09)       | 10.56<br>(6.56 to<br>17.69)        | 2.52<br>(2.22 to<br>2.84)  | 0.24<br>(0.18 to<br>0.34)   | 0.25<br>(0.18 to<br>0.35)   | 0.25<br>(0.18 to<br>0.35)    |
| Measles        | 296.79<br>(89.94 to<br>728.21)   | 969.17<br>(25.46 to<br>4,182.64) | 787.85<br>(23.76 to<br>3,194.18) | 1,488.07<br>(36.94 to<br>6,202.83) | 3.58<br>(1.08 to<br>8.76)  | 17.40<br>(0.41 to<br>83.91) | 14.34<br>(0.38 to<br>66.56) | 24.65<br>(0.60 to<br>109.86) |

| Taiwan (Province of China)                            |                                                            |                                                          |                                                          |                                                          |                                                   |                                                     |                                                     |                                                     |
|-------------------------------------------------------|------------------------------------------------------------|----------------------------------------------------------|----------------------------------------------------------|----------------------------------------------------------|---------------------------------------------------|-----------------------------------------------------|-----------------------------------------------------|-----------------------------------------------------|
| Cause                                                 | YLLs (actual counts)                                       |                                                          |                                                          |                                                          | Deaths (actual counts)                            |                                                     |                                                     |                                                     |
|                                                       | 2016                                                       | 2040 Forecast                                            | 2040 Better Scenario                                     | 2040 Worse Scenario                                      | 2016                                              | 2040 Forecast                                       | 2040 Better Scenario                                | 2040 Worse Scenario                                 |
| Varicella and herpes zoster                           | 208.99<br>(143.49 to<br>294.55)                            | 274.08<br>(145.03 to<br>463.52)                          | 277.81<br>(147.40 to<br>470.24)                          | 274.20<br>(145.45 to<br>465.16)                          | 10.56<br>(7.01 to<br>15.14)                       | 44.24<br>(20.28 to<br>80.17)                        | 45.42<br>(20.66 to<br>82.97)                        | 42.79<br>(19.86 to<br>78.38)                        |
| <b>Neglected tropical diseases and malaria</b>        | <b>488.94</b><br><b>(183.11 to</b><br><b>754.56)</b>       | <b>1,733.52</b><br><b>(223.61 to</b><br><b>3,088.16)</b> | <b>1,777.54</b><br><b>(228.24 to</b><br><b>3,167.55)</b> | <b>1,659.84</b><br><b>(217.40 to</b><br><b>2,973.92)</b> | <b>22.25</b><br><b>(4.34 to</b><br><b>37.80)</b>  | <b>143.25</b><br><b>(13.73 to</b><br><b>255.13)</b> | <b>149.01</b><br><b>(14.41 to</b><br><b>263.92)</b> | <b>133.79</b><br><b>(12.82 to</b><br><b>240.14)</b> |
| Malaria                                               | 0.00<br>(0.00 to<br>0.00)                                  | 0.00<br>(0.00 to<br>0.00)                                | 0.00<br>(0.00 to<br>0.00)                                | 0.00<br>(0.00 to<br>0.00)                                | 0.00<br>(0.00 to<br>0.00)                         | 0.00<br>(0.00 to<br>0.00)                           | 0.00<br>(0.00 to<br>0.00)                           | 0.00<br>(0.00 to<br>0.00)                           |
| Chagas disease                                        | 0.00<br>(0.00 to<br>0.00)                                  | 0.00<br>(0.00 to<br>0.00)                                | 0.00<br>(0.00 to<br>0.00)                                | 0.00<br>(0.00 to<br>0.00)                                | 0.00<br>(0.00 to<br>0.00)                         | 0.00<br>(0.00 to<br>0.00)                           | 0.00<br>(0.00 to<br>0.00)                           | 0.00<br>(0.00 to<br>0.00)                           |
| Leishmaniasis                                         | 0.00<br>(0.00 to<br>0.00)                                  | 0.00<br>(0.00 to<br>0.00)                                | 0.00<br>(0.00 to<br>0.00)                                | 0.00<br>(0.00 to<br>0.00)                                | 0.00<br>(0.00 to<br>0.00)                         | 0.00<br>(0.00 to<br>0.00)                           | 0.00<br>(0.00 to<br>0.00)                           | 0.00<br>(0.00 to<br>0.00)                           |
| African trypanosomiasis                               | 0.00<br>(0.00 to<br>0.00)                                  | 0.00<br>(0.00 to<br>0.00)                                | 0.00<br>(0.00 to<br>0.00)                                | 0.00<br>(0.00 to<br>0.00)                                | 0.00<br>(0.00 to<br>0.00)                         | 0.00<br>(0.00 to<br>0.00)                           | 0.00<br>(0.00 to<br>0.00)                           | 0.00<br>(0.00 to<br>0.00)                           |
| Schistosomiasis                                       | 0.00<br>(0.00 to<br>0.00)                                  | 0.00<br>(0.00 to<br>0.00)                                | 0.00<br>(0.00 to<br>0.00)                                | 0.00<br>(0.00 to<br>0.00)                                | 0.00<br>(0.00 to<br>0.00)                         | 0.00<br>(0.00 to<br>0.00)                           | 0.00<br>(0.00 to<br>0.00)                           | 0.00<br>(0.00 to<br>0.00)                           |
| Cysticercosis                                         | 0.00<br>(0.00 to<br>0.00)                                  | 0.00<br>(0.00 to<br>0.00)                                | 0.00<br>(0.00 to<br>0.00)                                | 0.00<br>(0.00 to<br>0.00)                                | 0.00<br>(0.00 to<br>0.00)                         | 0.00<br>(0.00 to<br>0.00)                           | 0.00<br>(0.00 to<br>0.00)                           | 0.00<br>(0.00 to<br>0.00)                           |
| Cystic echinococcosis                                 | 1.80<br>(1.38 to<br>2.29)                                  | 1.28<br>(0.85 to<br>2.41)                                | 1.27<br>(0.84 to<br>2.40)                                | 1.35<br>(0.88 to<br>2.55)                                | 0.08<br>(0.06 to<br>0.09)                         | 0.13<br>(0.08 to<br>0.22)                           | 0.13<br>(0.08 to<br>0.23)                           | 0.13<br>(0.08 to<br>0.23)                           |
| Dengue                                                | 312.42<br>(27.58 to<br>560.78)                             | 1,631.44<br>(88.95 to<br>2,990.68)                       | 1,674.22<br>(91.00 to<br>3,068.86)                       | 1,500.21<br>(86.81 to<br>2,884.91)                       | 18.32<br>(0.75 to<br>33.31)                       | 139.02<br>(6.92 to<br>251.44)                       | 144.62<br>(7.23 to<br>260.25)                       | 129.83<br>(6.45 to<br>236.60)                       |
| Yellow fever                                          | 0.00<br>(0.00 to<br>0.00)                                  | 0.00<br>(0.00 to<br>0.00)                                | 0.00<br>(0.00 to<br>0.00)                                | 0.00<br>(0.00 to<br>0.00)                                | 0.00<br>(0.00 to<br>0.00)                         | 0.00<br>(0.00 to<br>0.00)                           | 0.00<br>(0.00 to<br>0.00)                           | 0.00<br>(0.00 to<br>0.00)                           |
| Rabies                                                | 3.17<br>(1.28 to<br>4.84)                                  | 1.22<br>(0.75 to<br>1.98)                                | 1.20<br>(0.73 to<br>1.90)                                | 1.29<br>(0.78 to<br>2.05)                                | 0.06<br>(0.03 to<br>0.08)                         | 0.05<br>(0.03 to<br>0.09)                           | 0.06<br>(0.03 to<br>0.09)                           | 0.05<br>(0.03 to<br>0.09)                           |
| Intestinal nematode infections                        | 30.95<br>(14.37 to<br>54.79)                               | 20.36<br>(8.99 to<br>43.07)                              | 20.76<br>(9.20 to<br>43.57)                              | 19.56<br>(8.74 to<br>40.82)                              | 0.85<br>(0.45 to<br>1.30)                         | 1.51<br>(0.53 to<br>3.46)                           | 1.58<br>(0.55 to<br>3.57)                           | 1.38<br>(0.49 to<br>3.20)                           |
| Other neglected tropical diseases                     | 140.60<br>(117.31 to<br>165.62)                            | 79.21<br>(61.11 to<br>111.64)                            | 80.09<br>(61.50 to<br>113.53)                            | 77.43<br>(59.99 to<br>108.58)                            | 2.94<br>(2.50 to<br>3.38)                         | 2.54<br>(1.90 to<br>4.41)                           | 2.62<br>(1.96 to<br>4.59)                           | 2.39<br>(1.81 to<br>4.11)                           |
| <b>Maternal disorders</b>                             | <b>1,405.12</b><br><b>(1,067.68 to</b><br><b>1,817.35)</b> | <b>305.60</b><br><b>(193.24 to</b><br><b>449.39)</b>     | <b>294.20</b><br><b>(185.33 to</b><br><b>429.41)</b>     | <b>335.49</b><br><b>(211.67 to</b><br><b>491.37)</b>     | <b>27.22</b><br><b>(20.63 to</b><br><b>35.43)</b> | <b>5.66</b><br><b>(3.62 to</b><br><b>8.16)</b>      | <b>5.44</b><br><b>(3.47 to</b><br><b>7.87)</b>      | <b>6.21</b><br><b>(3.95 to</b><br><b>8.92)</b>      |
| Maternal hemorrhage                                   | 541.91<br>(369.98 to<br>746.23)                            | 109.88<br>(61.29 to<br>178.66)                           | 105.96<br>(58.42 to<br>171.32)                           | 120.36<br>(66.77 to<br>196.28)                           | 10.45<br>(7.20 to<br>14.53)                       | 2.04<br>(1.16 to<br>3.22)                           | 1.97<br>(1.09 to<br>3.08)                           | 2.24<br>(1.25 to<br>3.56)                           |
| Maternal sepsis and other maternal infections         | 72.21<br>(42.48 to<br>115.88)                              | 14.50<br>(7.21 to<br>26.06)                              | 13.96<br>(6.97 to<br>25.32)                              | 15.96<br>(7.93 to<br>28.82)                              | 1.54<br>(0.90 to<br>2.51)                         | 0.31<br>(0.15 to<br>0.56)                           | 0.30<br>(0.15 to<br>0.54)                           | 0.34<br>(0.17 to<br>0.61)                           |
| Maternal hypertensive disorders                       | 153.56<br>(94.98 to<br>231.07)                             | 33.10<br>(17.64 to<br>55.41)                             | 31.83<br>(16.95 to<br>53.60)                             | 36.53<br>(19.46 to<br>61.46)                             | 2.91<br>(1.76 to<br>4.36)                         | 0.59<br>(0.32 to<br>0.98)                           | 0.57<br>(0.31 to<br>0.95)                           | 0.66<br>(0.35 to<br>1.09)                           |
| Maternal obstructed labor and uterine rupture         | 37.11<br>(16.87 to<br>67.84)                               | 9.44<br>(3.84 to<br>18.15)                               | 9.03<br>(3.73 to<br>17.33)                               | 10.57<br>(4.36 to<br>20.73)                              | 0.73<br>(0.34 to<br>1.33)                         | 0.18<br>(0.08 to<br>0.34)                           | 0.17<br>(0.07 to<br>0.32)                           | 0.20<br>(0.08 to<br>0.38)                           |
| Maternal abortion, miscarriage, and ectopic pregnancy | 89.22<br>(48.72 to<br>145.20)                              | 19.03<br>(9.71 to<br>35.05)                              | 18.19<br>(9.22 to<br>33.21)                              | 21.10<br>(10.70 to<br>39.89)                             | 1.84<br>(1.01 to<br>3.01)                         | 0.38<br>(0.19 to<br>0.70)                           | 0.36<br>(0.18 to<br>0.68)                           | 0.42<br>(0.22 to<br>0.77)                           |

|                                        |                                 |                               |                               |                               |                            |                           |                           |                           |
|----------------------------------------|---------------------------------|-------------------------------|-------------------------------|-------------------------------|----------------------------|---------------------------|---------------------------|---------------------------|
|                                        | 126.84<br>(77.90 to<br>196.00)  | 41.53<br>(20.72 to<br>75.04)  | 39.78<br>(19.94 to<br>71.65)  | 46.08<br>(22.87 to<br>83.26)  | 2.39<br>(1.47 to<br>3.66)  | 0.73<br>(0.37 to<br>1.30) | 0.69<br>(0.36 to<br>1.25) | 0.80<br>(0.41 to<br>1.43) |
| Indirect maternal deaths               |                                 |                               |                               |                               |                            |                           |                           |                           |
|                                        | 22.57<br>(9.84 to<br>45.39)     | 5.26<br>(2.10 to<br>11.33)    | 5.05<br>(2.02 to<br>10.78)    | 5.84<br>(2.37 to<br>12.78)    | 0.44<br>(0.19 to<br>0.88)  | 0.10<br>(0.04 to<br>0.20) | 0.09<br>(0.04 to<br>0.19) | 0.11<br>(0.04 to<br>0.22) |
| Late maternal deaths                   |                                 |                               |                               |                               |                            |                           |                           |                           |
|                                        | 0.04<br>(0.01 to<br>0.10)       | 0.04<br>(0.00 to<br>0.51)     | 0.05<br>(0.00 to<br>0.50)     | 0.09<br>(0.00 to<br>0.86)     | 0.00<br>(0.00 to<br>0.00)  | 0.00<br>(0.00 to<br>0.01) | 0.00<br>(0.00 to<br>0.01) | 0.00<br>(0.00 to<br>0.01) |
| Maternal deaths aggravated by HIV/AIDS |                                 |                               |                               |                               |                            |                           |                           |                           |
|                                        | 361.64<br>(246.68 to<br>521.51) | 72.81<br>(41.63 to<br>117.32) | 70.34<br>(39.99 to<br>113.64) | 78.96<br>(44.49 to<br>128.51) | 6.93<br>(4.70 to<br>10.01) | 1.33<br>(0.77 to<br>2.15) | 1.29<br>(0.74 to<br>2.05) | 1.44<br>(0.83 to<br>2.36) |
| Other maternal disorders               |                                 |                               |                               |                               |                            |                           |                           |                           |

| Taiwan (Province of China)                                              |                                              |                                             |                                             |                                             |                                     |                                       |                                       |                                       |
|-------------------------------------------------------------------------|----------------------------------------------|---------------------------------------------|---------------------------------------------|---------------------------------------------|-------------------------------------|---------------------------------------|---------------------------------------|---------------------------------------|
| Cause                                                                   | YLLs (actual counts)                         |                                             |                                             |                                             | Deaths (actual counts)              |                                       |                                       |                                       |
|                                                                         | 2016                                         | 2040 Forecast                               | 2040 Better Scenario                        | 2040 Worse Scenario                         | 2016                                | 2040 Forecast                         | 2040 Better Scenario                  | 2040 Worse Scenario                   |
| <b>Neonatal disorders</b>                                               | <b>28,503.32</b><br>(24,433.05 to 32,850.33) | <b>4,155.05</b><br>(2,304.95 to 7,571.03)   | <b>3,717.39</b><br>(2,069.27 to 6,869.25)   | <b>4,756.71</b><br>(2,646.72 to 8,811.23)   | <b>329.39</b><br>(282.35 to 379.68) | <b>48.03</b><br>(26.65 to 87.51)      | <b>42.98</b><br>(23.94 to 79.40)      | <b>54.98</b><br>(30.60 to 101.81)     |
| Neonatal preterm birth                                                  | 11,351.95<br>(8,933.75 to 14,098.63)         | 1,073.98<br>(596.76 to 1,829.81)            | 891.13<br>(501.34 to 1,549.93)              | 1,426.79<br>(815.71 to 2,507.03)            | 131.18<br>(103.26 to 162.90)        | 12.42<br>(6.90 to 21.18)              | 10.30<br>(5.80 to 17.96)              | 16.49<br>(9.43 to 28.97)              |
| Neonatal encephalopathy due to birth asphyxia and trauma                | 4,206.28<br>(2,977.59 to 6,636.23)           | 430.36<br>(210.55 to 914.03)                | 383.11<br>(185.94 to 828.03)                | 504.76<br>(238.44 to 1,074.32)              | 48.64<br>(34.44 to 76.68)           | 4.98<br>(2.44 to 10.56)               | 4.43<br>(2.15 to 9.57)                | 5.84<br>(2.76 to 12.42)               |
| Neonatal sepsis and other neonatal infections                           | 2,327.06<br>(708.34 to 3,212.90)             | 386.65<br>(100.54 to 726.68)                | 349.70<br>(91.54 to 658.09)                 | 438.87<br>(112.02 to 820.82)                | 26.89<br>(8.19 to 37.12)            | 4.47<br>(1.16 to 8.40)                | 4.04<br>(1.06 to 7.60)                | 5.07<br>(1.30 to 9.48)                |
| Hemolytic disease and other neonatal jaundice                           | 63.54<br>(45.85 to 85.32)                    | 5.63<br>(2.78 to 11.10)                     | 5.09<br>(2.50 to 10.12)                     | 6.43<br>(3.16 to 12.82)                     | 0.74<br>(0.53 to 0.99)              | 0.07<br>(0.03 to 0.13)                | 0.06<br>(0.03 to 0.12)                | 0.07<br>(0.04 to 0.15)                |
| Other neonatal disorders                                                | 10,554.50<br>(8,241.15 to 13,017.94)         | 2,258.42<br>(1,102.04 to 4,596.23)          | 2,088.35<br>(1,037.80 to 4,216.62)          | 2,379.86<br>(1,146.38 to 4,883.17)          | 121.94<br>(95.22 to 150.40)         | 26.10<br>(12.74 to 53.11)             | 24.14<br>(12.00 to 48.73)             | 27.50<br>(13.25 to 56.45)             |
| <b>Nutritional deficiencies</b>                                         | <b>3,226.73</b><br>(2,725.27 to 3,741.43)    | <b>6,304.26</b><br>(5,007.57 to 7,947.39)   | <b>6,650.35</b><br>(5,252.42 to 8,374.20)   | <b>5,701.38</b><br>(4,557.47 to 7,105.96)   | <b>202.57</b><br>(173.17 to 234.34) | <b>914.00</b><br>(680.05 to 1,209.85) | <b>978.09</b><br>(727.89 to 1,291.78) | <b>801.69</b><br>(592.07 to 1,075.31) |
| Protein-energy malnutrition                                             | 2,506.68<br>(2,079.57 to 3,042.86)           | 4,707.89<br>(3,547.94 to 6,255.71)          | 5,012.18<br>(3,768.35 to 6,577.95)          | 4,155.56<br>(3,146.33 to 5,579.64)          | 153.55<br>(128.30 to 191.42)        | 683.63<br>(479.07 to 960.91)          | 738.62<br>(516.11 to 1,034.50)        | 584.39<br>(399.27 to 831.18)          |
| Iodine deficiency                                                       | 57.07<br>(5.51 to 163.25)                    | 253.33<br>(5.29 to 1,105.69)                | 261.74<br>(5.06 to 1,174.70)                | 239.52<br>(5.78 to 1,002.79)                | 2.59<br>(0.20 to 8.60)              | 33.65<br>(0.17 to 210.74)             | 35.26<br>(0.17 to 232.97)             | 30.87<br>(0.18 to 188.47)             |
| Dietary iron deficiency                                                 | 127.95<br>(105.37 to 152.61)                 | 135.85<br>(87.67 to 224.84)                 | 138.70<br>(89.56 to 231.69)                 | 130.21<br>(84.51 to 212.63)                 | 3.05<br>(2.48 to 3.79)              | 6.24<br>(3.37 to 13.19)               | 6.49<br>(3.50 to 13.74)               | 5.78<br>(3.18 to 12.02)               |
| Other nutritional deficiencies                                          | 535.03<br>(334.92 to 645.57)                 | 1,207.18<br>(677.13 to 1,653.51)            | 1,237.73<br>(680.94 to 1,702.45)            | 1,176.08<br>(665.41 to 1,609.81)            | 43.37<br>(24.72 to 54.08)           | 190.49<br>(103.27 to 273.29)          | 197.72<br>(105.67 to 283.81)          | 180.65<br>(98.89 to 261.16)           |
| <b>Other communicable, maternal, neonatal, and nutritional diseases</b> | <b>11,986.69</b><br>(10,051.34 to 13,961.86) | <b>10,119.30</b><br>(7,796.24 to 12,658.51) | <b>10,184.89</b><br>(7,765.47 to 12,732.64) | <b>10,258.53</b><br>(7,991.06 to 12,705.78) | <b>479.86</b><br>(392.01 to 555.95) | <b>824.54</b><br>(629.51 to 1,018.63) | <b>848.27</b><br>(638.37 to 1,049.44) | <b>799.19</b><br>(607.51 to 985.14)   |
| Sexually transmitted infections excluding HIV                           | 507.39<br>(359.04 to 712.38)                 | 292.30<br>(219.36 to 383.04)                | 292.87<br>(219.36 to 385.84)                | 292.27<br>(220.79 to 377.55)                | 16.79<br>(12.94 to 20.61)           | 30.18<br>(17.05 to 42.21)             | 30.80<br>(17.10 to 43.22)             | 28.92<br>(16.44 to 40.34)             |
| Syphilis                                                                | 265.05<br>(136.97 to 461.03)                 | 78.69<br>(56.10 to 112.81)                  | 77.47<br>(54.88 to 109.80)                  | 82.34<br>(57.89 to 118.10)                  | 6.41<br>(4.52 to 8.94)              | 6.89<br>(4.00 to 9.61)                | 6.94<br>(4.02 to 9.69)                | 6.85<br>(3.99 to 9.47)                |
| Chlamydial infection                                                    | 45.74<br>(35.19 to 60.80)                    | 44.50<br>(32.52 to 59.58)                   | 44.96<br>(32.46 to 60.67)                   | 43.56<br>(32.36 to 57.30)                   | 2.05<br>(1.53 to 2.55)              | 5.12<br>(2.71 to 7.32)                | 5.25<br>(2.77 to 7.57)                | 4.84<br>(2.59 to 6.92)                |
| Gonococcal infection                                                    | 133.78<br>(104.24 to 178.10)                 | 125.49<br>(91.13 to 167.96)                 | 126.65<br>(91.98 to 169.96)                 | 123.08<br>(90.23 to 162.05)                 | 6.00<br>(4.53 to 7.43)              | 14.01<br>(7.74 to 20.38)              | 14.36<br>(7.79 to 20.97)              | 13.27<br>(7.28 to 19.12)              |
| Other sexually transmitted infections                                   | 62.83<br>(48.21 to 85.18)                    | 43.62<br>(33.15 to 58.75)                   | 43.80<br>(33.21 to 59.15)                   | 43.29<br>(33.18 to 57.50)                   | 2.33<br>(1.83 to 2.93)              | 4.16<br>(2.44 to 6.02)                | 4.25<br>(2.48 to 6.17)                | 3.96<br>(2.37 to 5.64)                |
| Acute hepatitis                                                         | 7,292.38<br>(5,968.01 to 8,749.62)           | 4,192.01<br>(2,836.40 to 5,847.88)          | 4,087.74<br>(2,781.04 to 5,692.40)          | 4,579.89<br>(3,182.32 to 6,320.04)          | 280.94<br>(230.94 to 336.66)        | 280.91<br>(196.88 to 386.12)          | 278.29<br>(194.60 to 383.36)          | 297.55<br>(213.72 to 405.81)          |
| Acute hepatitis A                                                       | 149.21<br>(93.35 to 214.45)                  | 86.97<br>(49.01 to 143.01)                  | 86.43<br>(48.44 to 140.15)                  | 90.52<br>(51.05 to 150.25)                  | 4.48<br>(2.97 to 6.46)              | 6.04<br>(3.31 to 9.90)                | 6.09<br>(3.35 to 9.95)                | 6.09<br>(3.35 to 9.96)                |
| Acute hepatitis B                                                       | 6,612.23<br>(5,382.70 to 8,021.30)           | 3,597.99<br>(2,374.71 to 5,086.53)          | 3,498.00<br>(2,348.16 to 4,932.93)          | 3,955.64<br>(2,681.65 to 5,575.35)          | 248.10<br>(203.54 to 298.06)        | 219.62<br>(149.85 to 310.99)          | 216.56<br>(146.43 to 308.48)          | 235.06<br>(161.17 to 331.52)          |



| Taiwan (Province of China)           |                                                     |                                                     |                                                     |                                                       |                                              |                                               |                                              |                                                |
|--------------------------------------|-----------------------------------------------------|-----------------------------------------------------|-----------------------------------------------------|-------------------------------------------------------|----------------------------------------------|-----------------------------------------------|----------------------------------------------|------------------------------------------------|
| Cause                                | YLLs (actual counts)                                |                                                     |                                                     |                                                       | Deaths (actual counts)                       |                                               |                                              |                                                |
|                                      | 2016                                                | 2040 Forecast                                       | 2040 Better Scenario                                | 2040 Worse Scenario                                   | 2016                                         | 2040 Forecast                                 | 2040 Better Scenario                         | 2040 Worse Scenario                            |
| <b>Neoplasms</b>                     | <b>1,079,109.07</b><br>(930,279.51 to 1,224,088.25) | <b>1,182,814.44</b><br>(916,940.22 to 1,512,406.15) | <b>1,018,493.84</b><br>(804,156.61 to 1,264,973.62) | <b>1,459,676.68</b><br>(1,104,837.80 to 1,892,870.76) | <b>50,243.39</b><br>(43,747.22 to 56,602.37) | <b>92,696.99</b><br>(76,124.18 to 111,972.25) | <b>82,559.34</b><br>(68,259.81 to 98,296.47) | <b>111,097.68</b><br>(89,044.91 to 136,523.41) |
| Lip and oral cavity cancer           | 54,868.26<br>(44,404.32 to 66,045.41)               | 33,462.45<br>(15,600.34 to 61,983.99)               | 19,794.13<br>(10,090.00 to 35,346.85)               | 50,344.41<br>(22,285.01 to 95,276.13)                 | 1,883.95<br>(1,543.58 to 2,236.74)           | 1,725.18<br>(880.28 to 3,038.22)              | 1,072.03<br>(603.66 to 1,821.21)             | 2,540.94<br>(1,243.73 to 4,534.52)             |
| Nasopharynx cancer                   | 24,859.96<br>(20,574.42 to 30,082.92)               | 19,562.23<br>(9,738.62 to 34,789.23)                | 11,693.59<br>(6,288.91 to 20,196.26)                | 30,827.35<br>(14,976.46 to 57,044.14)                 | 832.57<br>(690.23 to 1,004.42)               | 903.83<br>(476.73 to 1,583.29)                | 552.22<br>(314.39 to 918.63)                 | 1,395.10<br>(715.73 to 2,435.86)               |
| Other pharynx cancer                 | 21,658.85<br>(16,840.72 to 26,568.31)               | 18,175.38<br>(8,970.77 to 31,291.99)                | 13,795.84<br>(7,171.79 to 23,241.66)                | 18,309.68<br>(9,109.17 to 30,803.95)                  | 751.56<br>(586.86 to 910.45)                 | 981.76<br>(525.22 to 1,652.34)                | 768.11<br>(434.91 to 1,267.80)               | 963.53<br>(503.28 to 1,651.52)                 |
| Esophageal cancer                    | 56,626.75<br>(46,358.50 to 68,021.13)               | 50,234.64<br>(28,197.36 to 85,209.35)               | 34,844.19<br>(21,153.32 to 55,815.89)               | 70,927.58<br>(37,572.87 to 127,046.90)                | 2,252.83<br>(1,880.42 to 2,670.99)           | 3,248.56<br>(1,976.03 to 5,265.19)            | 2,335.11<br>(1,516.61 to 3,594.86)           | 4,505.86<br>(2,608.34 to 7,664.14)             |
| Stomach cancer                       | 67,563.26<br>(57,732.19 to 78,214.87)               | 50,007.02<br>(38,002.84 to 66,313.77)               | 47,533.86<br>(36,796.84 to 62,115.10)               | 58,120.91<br>(42,821.14 to 78,278.62)                 | 3,599.25<br>(3,114.44 to 4,134.68)           | 4,662.60<br>(3,598.31 to 6,107.64)            | 4,485.66<br>(3,539.17 to 5,833.20)           | 5,337.00<br>(3,938.01 to 7,152.00)             |
| Colon and rectum cancer              | 117,846.26<br>(100,073.40 to 136,199.12)            | 135,010.46<br>(93,334.15 to 191,746.63)             | 121,064.96<br>(85,464.15 to 170,442.84)             | 153,831.78<br>(104,554.22 to 221,883.33)              | 6,207.49<br>(5,340.68 to 7,164.17)           | 12,799.93<br>(9,078.76 to 17,951.20)          | 11,707.83<br>(8,349.23 to 16,439.21)         | 14,258.14<br>(9,943.19 to 20,058.93)           |
| Liver cancer                         | 209,134.84<br>(174,375.03 to 246,309.87)            | 318,204.59<br>(209,977.19 to 467,326.47)            | 284,416.57<br>(196,977.85 to 397,416.27)            | 360,242.65<br>(221,472.08 to 559,984.76)              | 9,387.32<br>(7,889.29 to 10,954.34)          | 21,360.77<br>(14,994.82 to 29,759.34)         | 19,554.68<br>(14,408.50 to 26,151.99)        | 23,549.92<br>(15,440.25 to 34,503.40)          |
| Liver cancer due to hepatitis B      | 101,486.70<br>(81,534.98 to 123,940.74)             | 137,056.40<br>(85,945.58 to 212,108.02)             | 123,176.20<br>(81,646.37 to 180,775.76)             | 154,462.67<br>(90,350.27 to 250,778.27)               | 4,140.02<br>(3,353.76 to 4,982.03)           | 8,331.85<br>(6,575.02 to 12,062.87)           | 7,662.73<br>(5,378.39 to 10,628.19)          | 9,134.20<br>(5,858.12 to 14,021.61)            |
| Liver cancer due to hepatitis C      | 52,328.26<br>(42,392.28 to 62,776.37)               | 94,981.37<br>(64,368.96 to 135,415.44)              | 86,979.64<br>(61,665.00 to 118,704.31)              | 105,213.20<br>(67,194.83 to 156,340.85)               | 2,743.60<br>(2,188.44 to 3,296.53)           | 7,403.59<br>(5,199.11 to 10,214.71)           | 6,912.78<br>(5,047.63 to 9,143.72)           | 8,020.61<br>(5,307.78 to 11,499.43)            |
| Liver cancer due to alcohol use      | 16,645.94<br>(11,981.51 to 22,348.54)               | 26,514.77<br>(16,881.27 to 39,322.29)               | 20,969.96<br>(13,367.32 to 30,704.72)               | 32,050.03<br>(19,482.32 to 49,056.04)                 | 824.91<br>(543.01 to 1,122.02)               | 1,743.16<br>(1,052.97 to 2,586.68)            | 1,433.65<br>(862.09 to 2,094.04)             | 2,050.01<br>(1,202.51 to 3,100.26)             |
| Liver cancer due to other causes     | 38,673.94<br>(30,959.43 to 47,725.76)               | 59,652.64<br>(34,934.32 to 95,287.38)               | 53,290.77<br>(33,231.96 to 82,273.84)               | 68,516.76<br>(37,354.57 to 118,193.87)                | 1,678.79<br>(1,359.33 to 2,053.55)           | 3,882.16<br>(2,450.72 to 5,306.35)            | 3,545.53<br>(2,330.39 to 5,306.83)           | 4,345.09<br>(2,531.64 to 7,270.15)             |
| Gallbladder and biliary tract cancer | 13,527.80<br>(9,355.69 to 16,405.34)                | 12,820.72<br>(8,910.53 to 15,380.66)                | 13,250.15<br>(9,294.15 to 15,941.07)                | 12,202.61<br>(8,439.36 to 14,514.94)                  | 720.07<br>(488.32 to 863.41)                 | 1,133.49<br>(783.85 to 1,329.48)              | 1,186.40<br>(825.88 to 1,389.74)             | 1,051.93<br>(715.06 to 1,234.58)               |
| Pancreatic cancer                    | 41,743.46<br>(35,599.95 to 48,199.94)               | 53,095.71<br>(39,773.80 to 69,639.38)               | 50,887.63<br>(38,346.48 to 66,413.11)               | 58,593.98<br>(43,068.73 to 78,278.28)                 | 2,089.53<br>(1,793.02 to 2,394.65)           | 4,293.38<br>(3,336.88 to 5,480.82)            | 4,158.66<br>(3,257.15 to 5,325.10)           | 4,667.75<br>(3,549.96 to 6,096.96)             |
| Larynx cancer                        | 6,175.25<br>(4,957.14 to 7,402.09)                  | 5,453.99<br>(2,642.01 to 10,063.48)                 | 3,390.27<br>(1,816.43 to 6,002.18)                  | 8,582.77<br>(4,009.95 to 16,314.94)                   | 294.75<br>(241.48 to 349.56)                 | 429.33<br>(217.53 to 780.54)                  | 280.03<br>(150.00 to 493.69)                 | 659.32<br>(316.42 to 1,229.39)                 |
| Tracheal, bronchus, and lung cancer  | 191,950.34<br>(163,550.47 to 220,295.80)            | 203,374.84<br>(135,596.67 to 289,741.27)            | 177,764.88<br>(93,415.25 to 194,234.99)             | 342,723.97<br>(221,928.70 to 496,581.45)              | 10,134.37<br>(8,748.89 to 11,559.04)         | 16,984.82<br>(11,674.00 to 23,789.49)         | 12,145.80<br>(8,431.47 to 17,018.98)         | 27,686.40<br>(18,474.47 to 38,538.09)          |
| Malignant skin melanoma              | 3,545.04<br>(2,496.33 to 4,203.09)                  | 5,063.39<br>(3,201.41 to 6,149.77)                  | 5,403.91<br>(3,454.80 to 6,616.68)                  | 4,460.43<br>(2,819.54 to 5,425.64)                    | 154.60<br>(101.70 to 184.83)                 | 435.88<br>(278.45 to 527.30)                  | 473.00<br>(305.54 to 568.31)                 | 372.39<br>(236.68 to 453.73)                   |
| Non-melanoma skin cancer             | 2,889.56<br>(2,417.01 to 3,362.20)                  | 4,947.97<br>(4,173.42 to 5,774.86)                  | 5,050.15<br>(4,243.43 to 5,985.59)                  | 4,912.69<br>(4,147.85 to 5,742.50)                    | 174.67<br>(149.19 to 201.15)                 | 627.96<br>(505.16 to 747.37)                  | 648.50<br>(525.75 to 779.92)                 | 606.93<br>(484.00 to 737.22)                   |
| Breast cancer                        | 57,727.40<br>(37,480.94 to 71,962.67)               | 34,543.94<br>(22,507.80 to 48,226.23)               | 31,955.35<br>(21,221.58 to 43,730.25)               | 40,009.49<br>(25,317.12 to 57,599.37)                 | 2,038.40<br>(1,373.37 to 2,526.43)           | 2,167.30<br>(1,543.28 to 2,926.52)            | 2,036.29<br>(1,456.03 to 2,747.67)           | 2,438.22<br>(1,673.16 to 3,422.56)             |
| Cervical cancer                      | 19,945.80<br>(15,376.15 to 26,948.44)               | 15,506.17<br>(10,825.59 to 21,429.35)               | 14,639.16<br>(10,373.37 to 19,686.48)               | 17,991.81<br>(11,953.71 to 25,873.01)                 | 843.50<br>(654.05 to 1,050.39)               | 1,200.56<br>(726.16 to 1,641.13)              | 1,143.02<br>(712.87 to 1,548.23)             | 1,361.20<br>(806.41 to 1,935.99)               |

|                   |                                          |                                          |                                          |                                          |                                     |                                       |                                       |                                       |
|-------------------|------------------------------------------|------------------------------------------|------------------------------------------|------------------------------------------|-------------------------------------|---------------------------------------|---------------------------------------|---------------------------------------|
| Uterine cancer    | 7,468.40<br>(5,691.93 to<br>9,334.87)    | 6,797.68<br>(5,217.71 to<br>8,513.04)    | 6,738.58<br>(5,125.59 to<br>8,469.98)    | 6,998.08<br>(5,330.49 to<br>8,774.13)    | 306.17<br>(238.00 to<br>377.84)     | 482.14<br>(380.72 to<br>595.19)       | 483.61<br>(374.31 to<br>600.96)       | 482.65<br>(380.48 to<br>593.62)       |
| Ovarian cancer    | 14,976.59<br>(11,379.90 to<br>18,181.36) | 9,917.44<br>(7,164.47 to<br>13,521.23)   | 9,693.99<br>(7,030.09 to<br>13,199.15)   | 10,650.53<br>(7,553.40 to<br>15,072.69)  | 547.83<br>(422.68 to<br>660.10)     | 589.62<br>(443.34 to<br>789.12)       | 580.27<br>(438.44 to<br>776.07)       | 623.28<br>(458.46 to<br>857.90)       |
| Prostate cancer   | 15,479.14<br>(7,956.42 to<br>20,444.45)  | 36,452.78<br>(19,276.79 to<br>48,110.32) | 37,785.71<br>(20,194.70 to<br>50,200.54) | 35,289.20<br>(18,492.72 to<br>46,374.37) | 1,249.50<br>(620.80 to<br>1,635.18) | 4,493.12<br>(2,409.08 to<br>5,878.91) | 4,718.42<br>(2,569.77 to<br>6,127.80) | 4,270.94<br>(2,234.13 to<br>5,683.67) |
| Testicular cancer | 540.05<br>(417.12 to<br>671.41)          | 222.98<br>(165.49 to<br>300.04)          | 224.36<br>(166.63 to<br>299.56)          | 227.07<br>(170.22 to<br>303.75)          | 13.97<br>(11.23 to<br>17.18)        | 12.57<br>(9.69 to<br>16.01)           | 13.12<br>(10.12 to<br>16.87)          | 12.06<br>(9.38 to<br>15.24)           |

| Taiwan (Province of China)      |                                          |                                            |                                          |                                              |                                       |                                        |                                        |                                         |
|---------------------------------|------------------------------------------|--------------------------------------------|------------------------------------------|----------------------------------------------|---------------------------------------|----------------------------------------|----------------------------------------|-----------------------------------------|
| Cause                           | YLLs (actual counts)                     |                                            |                                          |                                              | Deaths (actual counts)                |                                        |                                        |                                         |
|                                 | 2016                                     | 2040 Forecast                              | 2040 Better Scenario                     | 2040 Worse Scenario                          | 2016                                  | 2040 Forecast                          | 2040 Better Scenario                   | 2040 Worse Scenario                     |
| Kidney cancer                   | 14,573.36<br>(10,969.89 to 17,138.91)    | 20,330.02<br>(14,207.39 to 27,356.68)      | 20,033.52<br>(14,190.74 to 26,349.90)    | 20,879.33<br>(14,010.92 to 28,786.51)        | 762.65<br>(573.36 to 898.17)          | 1,794.43<br>(1,242.14 to 2,387.50)     | 1,791.10<br>(1,264.93 to 2,341.81)     | 1,811.44<br>(1,191.78 to 2,449.86)      |
| Bladder cancer                  | 14,784.72<br>(12,622.66 to 17,196.86)    | 25,088.33<br>(17,575.66 to 35,009.74)      | 23,214.70<br>(16,600.88 to 32,078.38)    | 29,517.65<br>(19,889.58 to 43,265.06)        | 1,017.52<br>(873.81 to 1,176.53)      | 2,815.80<br>(2,027.84 to 3,895.85)     | 2,642.30<br>(1,933.29 to 3,608.38)     | 3,280.35<br>(2,266.43 to 4,691.64)      |
| Brain and nervous system cancer | 18,006.01<br>(12,343.42 to 21,851.62)    | 14,784.28<br>(10,451.80 to 18,508.85)      | 15,029.72<br>(10,600.12 to 18,997.29)    | 14,545.77<br>(10,242.48 to 17,999.05)        | 582.65<br>(411.90 to 709.66)          | 856.66<br>(618.03 to 1,053.19)         | 885.78<br>(636.64 to 1,102.40)         | 817.89<br>(585.50 to 990.43)            |
| Thyroid cancer                  | 3,229.31<br>(2,696.84 to 3,802.96)       | 4,088.85<br>(3,139.18 to 5,443.67)         | 3,983.41<br>(3,123.94 to 5,185.38)       | 4,252.38<br>(3,237.69 to 5,766.68)           | 169.70<br>(140.35 to 198.98)          | 354.64<br>(270.81 to 459.52)           | 351.27<br>(273.65 to 445.29)           | 358.12<br>(274.73 to 469.45)            |
| Mesothelioma                    | 1,291.23<br>(1,070.93 to 1,555.51)       | 1,897.52<br>(1,482.15 to 2,247.62)         | 1,998.39<br>(1,542.84 to 2,393.60)       | 1,742.24<br>(1,392.53 to 2,043.16)           | 62.11<br>(51.12 to 72.94)             | 172.01<br>(112.76 to 207.39)           | 184.12<br>(120.20 to 220.58)           | 153.19<br>(101.22 to 183.19)            |
| Hodgkin lymphoma                | 881.19<br>(479.35 to 1,135.12)           | 490.22<br>(275.93 to 653.41)               | 486.10<br>(276.11 to 646.50)             | 516.89<br>(289.66 to 687.13)                 | 29.87<br>(16.92 to 37.89)             | 29.08<br>(16.92 to 37.10)              | 29.35<br>(17.48 to 37.51)              | 29.73<br>(17.60 to 37.70)               |
| Non-Hodgkin lymphoma            | 26,068.11<br>(20,752.37 to 30,665.92)    | 27,145.54<br>(17,936.75 to 33,971.81)      | 27,131.17<br>(17,930.96 to 33,985.35)    | 27,339.88<br>(17,669.30 to 34,922.13)        | 1,180.76<br>(810.26 to 1,416.03)      | 2,137.00<br>(1,169.13 to 2,698.18)     | 2,172.82<br>(1,188.98 to 2,735.92)     | 2,086.96<br>(1,121.13 to 2,673.39)      |
| Multiple myeloma                | 6,705.12<br>(3,530.81 to 8,534.88)       | 8,433.41<br>(3,829.10 to 11,536.94)        | 8,484.39<br>(3,866.56 to 11,534.25)      | 8,348.29<br>(3,787.23 to 11,464.61)          | 326.97<br>(152.06 to 422.35)          | 655.59<br>(276.32 to 898.06)           | 670.15<br>(283.53 to 908.13)           | 630.86<br>(261.49 to 872.57)            |
| Leukemia                        | 26,806.43<br>(20,304.12 to 31,210.00)    | 22,600.13<br>(13,361.16 to 30,352.01)      | 21,595.35<br>(12,768.36 to 28,447.58)    | 24,468.49<br>(14,430.62 to 33,728.69)        | 955.51<br>(601.34 to 1,143.86)        | 1,567.42<br>(738.16 to 2,148.70)       | 1,519.43<br>(715.16 to 2,041.59)       | 1,665.20<br>(768.85 to 2,362.18)        |
| Acute lymphoid leukemia         | 8,060.50<br>(6,407.57 to 9,828.49)       | 4,327.99<br>(3,036.04 to 5,930.50)         | 4,094.22<br>(2,905.50 to 5,500.39)       | 4,786.59<br>(3,316.63 to 6,636.16)           | 213.29<br>(169.35 to 259.44)          | 213.29<br>(122.23 to 253.34)           | 176.80<br>(118.85 to 237.60)           | 202.19<br>(135.51 to 280.44)            |
| Chronic lymphoid leukemia       | 2,367.27<br>(1,687.77 to 2,994.31)       | 2,285.44<br>(1,254.63 to 3,222.57)         | 2,195.78<br>(1,226.40 to 3,034.64)       | 2,429.42<br>(1,517.22 to 3,499.63)           | 93.16<br>(58.42 to 118.70)            | 148.68<br>(72.60 to 209.52)            | 144.89<br>(71.53 to 198.71)            | 154.88<br>(73.58 to 224.98)             |
| Acute myeloid leukemia          | 7,603.79<br>(5,855.31 to 9,485.30)       | 7,321.52<br>(5,112.44 to 9,868.31)         | 7,046.90<br>(4,955.14 to 9,395.73)       | 7,749.49<br>(5,313.51 to 10,651.77)          | 239.45<br>(180.37 to 298.44)          | 406.03<br>(258.68 to 552.18)           | 396.27<br>(255.37 to 534.15)           | 420.55<br>(263.45 to 590.05)            |
| Chronic myeloid leukemia        | 788.24<br>(561.86 to 1,084.69)           | 327.23<br>(203.84 to 501.17)               | 300.27<br>(188.74 to 457.03)             | 390.97<br>(240.09 to 601.39)                 | 27.73<br>(19.58 to 38.31)             | 20.59<br>(12.61 to 30.44)              | 19.23<br>(11.78 to 28.75)              | 23.96<br>(14.25 to 36.67)               |
| Other leukemia                  | 7,986.62<br>(3,286.30 to 10,093.79)      | 8,337.95<br>(1,788.24 to 12,305.94)        | 7,958.18<br>(1,695.71 to 11,376.24)      | 9,112.03<br>(1,954.24 to 13,758.12)          | 381.87<br>(104.90 to 488.94)          | 806.73<br>(131.84 to 1,187.87)         | 782.25<br>(126.04 to 1,121.46)         | 863.63<br>(140.34 to 1,300.68)          |
| Other neoplasms                 | 38,236.56<br>(30,039.77 to 44,339.64)    | 45,101.77<br>(33,091.96 to 52,252.03)      | 46,609.79<br>(34,519.24 to 54,312.24)    | 42,818.75<br>(31,156.38 to 49,317.92)        | 1,673.32<br>(1,219.07 to 1,938.27)    | 3,781.58<br>(2,481.30 to 4,404.71)     | 3,970.28<br>(2,629.58 to 4,634.53)     | 3,480.35<br>(2,250.30 to 4,048.32)      |
| Cardiovascular diseases         | 639,146.40<br>(550,080.85 to 731,859.68) | 734,603.05<br>(596,529.40 to 1,060,688.93) | 637,467.39<br>(451,693.90 to 906,487.12) | 1,033,331.98<br>(675,872.37 to 1,561,168.28) | 42,186.36<br>(36,670.51 to 48,061.45) | 95,236.20<br>(67,839.48 to 137,151.36) | 85,817.89<br>(62,182.67 to 121,732.34) | 124,271.37<br>(83,447.32 to 185,270.86) |
| Rheumatic heart disease         | 6,861.02<br>(5,804.52 to 8,151.17)       | 7,375.82<br>(5,990.51 to 9,558.07)         | 7,419.47<br>(6,040.28 to 9,538.85)       | 7,621.03<br>(6,124.13 to 9,844.00)           | 421.88<br>(361.73 to 498.98)          | 962.31<br>(762.71 to 1,256.02)         | 977.65<br>(780.06 to 1,256.02)         | 968.21<br>(750.11 to 1,288.46)          |
| Ischemic heart disease          | 300,024.59<br>(253,631.70 to 353,918.28) | 300,065.29<br>(171,909.36 to 486,914.48)   | 239,075.78<br>(142,356.48 to 379,284.95) | 462,197.02<br>(251,399.60 to 797,953.29)     | 20,619.09<br>(17,731.32 to 24,400.29) | 38,879.03<br>(22,615.85 to 61,502.88)  | 32,606.59<br>(19,226.95 to 51,304.50)  | 55,207.07<br>(30,824.74 to 94,380.28)   |
| Stroke                          | 208,091.68<br>(175,683.54 to 242,294.26) | 169,470.70<br>(105,076.40 to 284,220.88)   | 144,062.27<br>(92,531.21 to 232,849.14)  | 265,359.61<br>(154,843.77 to 480,384.33)     | 12,674.91<br>(10,877.58 to 14,526.19) | 19,886.41<br>(12,645.78 to 32,955.18)  | 17,807.74<br>(11,641.88 to 29,567.23)  | 27,937.12<br>(17,081.03 to 48,726.09)   |
| Ischemic stroke                 | 72,093.07<br>(60,984.80 to 84,188.83)    | 77,349.33<br>(44,116.93 to 157,885.63)     | 69,207.07<br>(40,012.31 to 140,722.49)   | 112,558.37<br>(60,058.14 to 250,191.95)      | 5,638.28<br>(4,838.24 to 6,509.96)    | 10,075.95<br>(5,719.39 to 19,007.13)   | 9,333.51<br>(5,344.86 to 17,167.75)    | 13,566.95<br>(7,482.11 to 26,929.76)    |



|                                |                                             |                                            |                                            |                                            |                                       |                                         |                                         |                                          |
|--------------------------------|---------------------------------------------|--------------------------------------------|--------------------------------------------|--------------------------------------------|---------------------------------------|-----------------------------------------|-----------------------------------------|------------------------------------------|
| Intracerebral hemorrhage       | 135,998.61<br>(114,569.37 to<br>159,407.82) | 92,121.37<br>(55,953.54 to<br>142,208.06)  | 74,855.21<br>(47,278.34 to<br>115,364.12)  | 152,801.24<br>(85,521.08 to<br>256,327.83) | 7,036.63<br>(5,970.65 to<br>8,097.78) | 9,810.46<br>(6,199.13 to<br>14,942.36)  | 8,474.23<br>(5,557.39 to<br>12,892.15)  | 14,370.17<br>(8,392.60 to<br>23,294.18)  |
| Hypertensive heart disease     | 45,711.94<br>(31,189.56 to<br>54,771.10)    | 116,280.98<br>(67,179.32 to<br>224,833.00) | 105,236.42<br>(63,992.31 to<br>188,767.09) | 150,089.40<br>(76,055.59 to<br>323,461.17) | 3,417.99<br>(2,463.91 to<br>4,041.54) | 16,810.23<br>(9,562.31 to<br>34,213.69) | 15,485.20<br>(9,101.56 to<br>29,379.49) | 21,245.01<br>(10,532.79 to<br>47,298.22) |
| Cardiomyopathy and myocarditis | 15,636.84<br>(11,065.29 to<br>18,827.86)    | 10,420.70<br>(7,548.41 to<br>16,264.54)    | 10,244.68<br>(7,343.21 to<br>16,184.19)    | 11,049.51<br>(7,983.87 to<br>16,841.61)    | 578.25<br>(466.52 to<br>784.10)       | 1,017.83<br>(622.80 to<br>1,977.74)     | 1,030.38<br>(620.66 to<br>2,031.68)     | 1,030.68<br>(624.21 to<br>2,007.19)      |
| Myocarditis                    | 2,272.44<br>(1,403.93 to<br>2,960.50)       | 2,637.44<br>(1,695.83 to<br>5,018.07)      | 2,747.88<br>(1,740.95 to<br>5,303.06)      | 2,474.04<br>(1,622.44 to<br>4,561.12)      | 82.66<br>(60.79 to<br>137.54)         | 298.23<br>(130.38 to<br>742.54)         | 317.85<br>(138.78 to<br>794.33)         | 267.54<br>(115.81 to<br>661.42)          |

| Taiwan (Province of China)                                    |                                                        |                                                        |                                                       |                                                        |                                                   |                                                     |                                                     |                                                     |
|---------------------------------------------------------------|--------------------------------------------------------|--------------------------------------------------------|-------------------------------------------------------|--------------------------------------------------------|---------------------------------------------------|-----------------------------------------------------|-----------------------------------------------------|-----------------------------------------------------|
| Cause                                                         | YLLs (actual counts)                                   |                                                        |                                                       |                                                        | Deaths (actual counts)                            |                                                     |                                                     |                                                     |
|                                                               | 2016                                                   | 2040 Forecast                                          | 2040 Better Scenario                                  | 2040 Worse Scenario                                    | 2016                                              | 2040 Forecast                                       | 2040 Better Scenario                                | 2040 Worse Scenario                                 |
| Alcoholic cardiomyopathy                                      | 1,553.63<br>(920.65 to 2,734.32)                       | 1,407.82<br>(981.20 to 2,256.32)                       | 1,201.93<br>(836.51 to 1,945.81)                      | 1,417.47<br>(1,001.47 to 2,268.83)                     | 57.94<br>(40.64 to 97.72)                         | 110.48<br>(76.27 to 168.08)                         | 99.05<br>(67.11 to 152.52)                          | 108.04<br>(75.05 to 163.76)                         |
| Other cardiomyopathy                                          | 11,810.77<br>(8,376.92 to 14,568.95)                   | 6,375.44<br>(4,344.77 to 9,757.44)                     | 6,294.87<br>(4,359.04 to 9,771.91)                    | 7,158.00<br>(4,874.06 to 10,853.62)                    | 437.65<br>(345.24 to 571.00)                      | 609.12<br>(346.57 to 1,181.41)                      | 613.48<br>(351.38 to 1,189.78)                      | 655.10<br>(370.72 to 1,241.48)                      |
| Atrial fibrillation and flutter                               | 10,254.63<br>(7,772.96 to 13,486.59)                   | 35,820.12<br>(24,970.39 to 49,467.15)                  | 35,032.72<br>(24,833.06 to 48,103.27)                 | 36,258.77<br>(24,922.20 to 50,469.54)                  | 1,117.20<br>(828.28 to 1,476.27)                  | 5,535.02<br>(3,823.18 to 7,667.08)                  | 5,472.26<br>(3,843.91 to 7,583.90)                  | 5,481.14<br>(3,759.86 to 7,652.05)                  |
| Aortic aneurysm                                               | 16,842.54<br>(13,845.07 to 20,119.28)                  | 20,162.37<br>(15,698.09 to 25,973.41)                  | 20,588.43<br>(16,108.16 to 26,671.67)                 | 21,045.27<br>(16,192.53 to 27,420.95)                  | 953.71<br>(795.64 to 1,140.82)                    | 2,206.71<br>(1,745.79 to 2,835.08)                  | 2,287.04<br>(1,807.43 to 2,958.98)                  | 2,191.22<br>(1,703.26 to 2,821.43)                  |
| Peripheral artery disease                                     | 423.05<br>(325.98 to 509.91)                           | 1,718.26<br>(1,075.87 to 2,374.12)                     | 1,771.79<br>(1,126.76 to 2,440.87)                    | 1,781.61<br>(1,101.31 to 2,470.34)                     | 40.59<br>(28.84 to 48.96)                         | 270.95<br>(159.16 to 383.49)                        | 282.66<br>(167.48 to 399.72)                        | 271.15<br>(159.58 to 390.84)                        |
| Endocarditis                                                  | 14,249.81<br>(8,840.02 to 18,973.82)                   | 27,646.86<br>(14,578.03 to 41,794.82)                  | 28,706.08<br>(15,321.06 to 43,210.42)                 | 27,500.68<br>(14,233.90 to 41,847.97)                  | 922.61<br>(509.62 to 1,200.01)                    | 3,473.01<br>(1,666.70 to 5,486.18)                  | 3,642.22<br>(1,783.97 to 5,794.86)                  | 3,358.26<br>(1,604.30 to 5,498.55)                  |
| Other cardiovascular and circulatory diseases                 | 21,050.31<br>(16,523.42 to 28,597.49)                  | 45,661.93<br>(32,867.88 to 64,687.45)                  | 45,329.75<br>(32,831.09 to 64,263.54)                 | 50,429.08<br>(34,928.58 to 72,203.63)                  | 1,440.13<br>(1,139.61 to 1,917.16)                | 6,194.70<br>(4,362.48 to 8,675.46)                  | 6,226.16<br>(4,390.54 to 8,673.61)                  | 6,581.52<br>(4,515.76 to 9,473.62)                  |
| <b>Chronic respiratory diseases</b>                           | <b>104,465.12</b><br><b>(89,581.58 to 125,378.54)</b>  | <b>202,668.51</b><br><b>(121,682.41 to 329,603.13)</b> | <b>154,031.42</b><br><b>(94,069.55 to 244,522.77)</b> | <b>292,065.78</b><br><b>(174,376.52 to 471,002.94)</b> | <b>8,980.80</b><br><b>(7,742.50 to 10,892.33)</b> | <b>26,747.49</b><br><b>(16,588.18 to 42,888.29)</b> | <b>21,087.17</b><br><b>(13,197.72 to 33,821.95)</b> | <b>38,053.30</b><br><b>(23,413.61 to 61,754.32)</b> |
| Chronic obstructive pulmonary disease                         | 85,457.26<br>(72,596.37 to 105,836.29)                 | 180,217.33<br>(102,176.85 to 303,238.86)               | 131,147.04<br>(75,566.51 to 218,239.67)               | 269,997.95<br>(156,242.11 to 446,290.69)               | 7,765.47<br>(6,644.78 to 9,612.33)                | 24,323.93<br>(14,578.85 to 39,017.88)               | 18,603.65<br>(11,059.98 to 30,814.10)               | 35,689.11<br>(21,357.12 to 58,588.65)               |
| Pneumoconiosis                                                | 2,699.20<br>(2,017.90 to 3,536.18)                     | 2,316.88<br>(1,639.17 to 3,293.08)                     | 2,312.95<br>(1,624.57 to 3,300.77)                    | 2,357.77<br>(1,689.93 to 3,250.71)                     | 194.83<br>(147.79 to 251.66)                      | 252.13<br>(180.93 to 351.41)                        | 255.67<br>(182.30 to 358.05)                        | 250.24<br>(182.83 to 340.76)                        |
| Silicosis                                                     | 1,031.53<br>(677.26 to 1,466.10)                       | 579.01<br>(302.57 to 1,049.99)                         | 574.64<br>(300.31 to 1,059.15)                        | 633.98<br>(340.79 to 1,125.52)                         | 80.89<br>(53.01 to 116.62)                        | 62.91<br>(33.18 to 113.92)                          | 63.05<br>(32.42 to 113.86)                          | 67.43<br>(36.19 to 116.71)                          |
| Asbestosis                                                    | 222.56<br>(89.24 to 369.50)                            | 632.16<br>(271.94 to 1,066.05)                         | 687.95<br>(294.65 to 1,155.54)                        | 541.51<br>(224.20 to 914.07)                           | 14.05<br>(5.10 to 23.67)                          | 68.09<br>(30.63 to 112.97)                          | 75.12<br>(34.04 to 123.12)                          | 56.86<br>(23.33 to 95.51)                           |
| Coal workers pneumoconiosis                                   | 533.17<br>(147.90 to 816.02)                           | 382.88<br>(137.64 to 699.43)                           | 353.02<br>(131.94 to 644.77)                          | 415.18<br>(145.75 to 733.99)                           | 40.53<br>(10.37 to 62.64)                         | 40.48<br>(15.83 to 71.04)                           | 38.11<br>(15.48 to 67.58)                           | 42.71<br>(16.55 to 73.26)                           |
| Other pneumoconiosis                                          | 911.95<br>(645.87 to 1,308.00)                         | 722.82<br>(455.24 to 1,189.72)                         | 697.34<br>(428.86 to 1,184.39)                        | 767.10<br>(490.97 to 1,243.24)                         | 59.37<br>(41.93 to 91.18)                         | 80.64<br>(51.00 to 133.12)                          | 79.39<br>(49.15 to 132.92)                          | 83.24<br>(53.97 to 133.19)                          |
| Asthma                                                        | 9,885.22<br>(7,914.24 to 12,114.29)                    | 6,419.10<br>(4,208.16 to 9,947.83)                     | 5,764.13<br>(3,869.88 to 8,717.30)                    | 7,974.10<br>(5,038.25 to 12,581.01)                    | 654.71<br>(534.08 to 825.01)                      | 837.67<br>(545.34 to 1,331.17)                      | 766.76<br>(509.44 to 1,187.39)                      | 1,000.46<br>(626.72 to 1,627.79)                    |
| Interstitial lung disease and pulmonary sarcoidosis           | 5,628.58<br>(4,282.60 to 7,183.00)                     | 12,765.92<br>(8,972.15 to 16,753.00)                   | 13,878.13<br>(9,808.61 to 18,284.34)                  | 10,738.70<br>(7,487.13 to 14,126.94)                   | 326.11<br>(239.93 to 404.67)                      | 1,231.72<br>(848.83 to 1,630.53)                    | 1,360.17<br>(951.57 to 1,810.49)                    | 1,007.60<br>(686.40 to 1,331.16)                    |
| Other chronic respiratory diseases                            | 794.86<br>(477.11 to 1,031.90)                         | 949.28<br>(594.35 to 1,398.42)                         | 929.17<br>(588.76 to 1,362.89)                        | 997.26<br>(618.48 to 1,473.52)                         | 39.69<br>(25.32 to 52.54)                         | 102.04<br>(63.59 to 169.66)                         | 100.91<br>(63.20 to 167.91)                         | 105.89<br>(65.34 to 175.34)                         |
| <b>Cirrhosis and other chronic liver diseases</b>             | <b>173,120.90</b><br><b>(139,009.13 to 206,765.60)</b> | <b>125,717.37</b><br><b>(101,691.28 to 152,504.59)</b> | <b>121,892.65</b><br><b>(98,819.22 to 149,751.78)</b> | <b>129,051.00</b><br><b>(105,804.39 to 156,624.00)</b> | <b>6,400.24</b><br><b>(5,333.48 to 7,545.01)</b>  | <b>8,624.59</b><br><b>(7,329.76 to 10,139.00)</b>   | <b>8,565.58</b><br><b>(7,251.34 to 10,113.74)</b>   | <b>8,591.19</b><br><b>(7,271.24 to 10,051.73)</b>   |
| Cirrhosis and other chronic liver diseases due to hepatitis B | 69,046.49<br>(53,388.20 to 83,654.65)                  | 49,717.41<br>(39,622.19 to 62,585.48)                  | 50,015.05<br>(39,161.69 to 63,605.79)                 | 50,176.48<br>(39,813.72 to 63,013.28)                  | 2,559.63<br>(2,056.02 to 3,081.83)                | 3,383.17<br>(2,734.56 to 4,187.95)                  | 3,457.94<br>(2,873.60 to 4,301.15)                  | 3,321.49<br>(2,686.77 to 4,083.54)                  |
| Cirrhosis and other chronic liver diseases due to hepatitis C | 43,704.11<br>(32,709.42 to 55,515.27)                  | 27,801.08<br>(20,882.21 to 35,795.19)                  | 27,841.16<br>(20,928.85 to 36,189.36)                 | 28,282.12<br>(21,442.28 to 36,467.39)                  | 1,498.81<br>(1,167.10 to 1,870.75)                | 1,663.45<br>(1,303.54 to 2,094.90)                  | 1,693.95<br>(1,313.36 to 2,150.55)                  | 1,646.29<br>(1,294.04 to 2,077.15)                  |

|                                                                |                                                               |                                                                 |                                                                 |                                                                 |                                                            |                                                              |                                                              |                                                              |
|----------------------------------------------------------------|---------------------------------------------------------------|-----------------------------------------------------------------|-----------------------------------------------------------------|-----------------------------------------------------------------|------------------------------------------------------------|--------------------------------------------------------------|--------------------------------------------------------------|--------------------------------------------------------------|
|                                                                | 26,705.61<br>(20,622.91 to<br>33,319.80)                      | 20,532.58<br>(16,280.56 to<br>25,929.18)                        | 16,297.03<br>(13,066.95 to<br>20,485.50)                        | 22,565.69<br>(17,846.96 to<br>28,296.55)                        | 985.89<br>(798.53 to<br>1,200.55)                          | 1,362.48<br>(1,122.04 to<br>1,658.13)                        | 1,159.09<br>(945.84 to<br>1,413.16)                          | 1,443.88<br>(1,185.65 to<br>1,745.57)                        |
| Cirrhosis and other chronic liver diseases due to alcohol use  |                                                               |                                                                 |                                                                 |                                                                 |                                                            |                                                              |                                                              |                                                              |
|                                                                | 33,664.70<br>(27,100.19 to<br>40,526.99)                      | 27,666.30<br>(22,213.41 to<br>34,360.82)                        | 27,739.40<br>(22,226.30 to<br>34,379.64)                        | 28,026.72<br>(22,603.71 to<br>34,484.97)                        | 1,355.91<br>(1,116.55 to<br>1,604.54)                      | 2,215.50<br>(1,791.96 to<br>2,691.00)                        | 2,254.60<br>(1,819.73 to<br>2,750.87)                        | 2,179.53<br>(1,760.26 to<br>2,657.06)                        |
| Cirrhosis and other chronic liver diseases due to other causes |                                                               |                                                                 |                                                                 |                                                                 |                                                            |                                                              |                                                              |                                                              |
| <b>Digestive diseases</b>                                      | <b>63,546.74</b><br><b>(53,909.72 to</b><br><b>73,637.82)</b> | <b>110,236.76</b><br><b>(81,516.02 to</b><br><b>136,041.06)</b> | <b>108,746.97</b><br><b>(80,244.09 to</b><br><b>132,510.15)</b> | <b>111,919.41</b><br><b>(80,986.20 to</b><br><b>140,361.05)</b> | <b>4,179.43</b><br><b>(3,324.43 to</b><br><b>4,857.27)</b> | <b>13,899.44</b><br><b>(9,437.26 to</b><br><b>17,319.28)</b> | <b>13,976.95</b><br><b>(9,585.28 to</b><br><b>17,259.09)</b> | <b>13,744.05</b><br><b>(9,116.85 to</b><br><b>17,513.86)</b> |
| Peptic ulcer disease                                           | 12,678.60<br>(10,563.86 to<br>15,101.96)                      | 13,192.10<br>(10,480.63 to<br>16,594.63)                        | 13,043.07<br>(10,502.35 to<br>16,221.83)                        | 14,593.04<br>(11,439.49 to<br>18,538.60)                        | 858.56<br>(722.23 to<br>1,015.03)                          | 1,700.52<br>(1,323.21 to<br>2,196.24)                        | 1,699.11<br>(1,343.41 to<br>2,187.43)                        | 1,830.53<br>(1,379.35 to<br>2,420.48)                        |

| Taiwan (Province of China)                 |                                          |                                          |                                          |                                          |                                       |                                       |                                       |                                       |
|--------------------------------------------|------------------------------------------|------------------------------------------|------------------------------------------|------------------------------------------|---------------------------------------|---------------------------------------|---------------------------------------|---------------------------------------|
| Cause                                      | YLLs (actual counts)                     |                                          |                                          |                                          | Deaths (actual counts)                |                                       |                                       |                                       |
|                                            | 2016                                     | 2040 Forecast                            | 2040 Better Scenario                     | 2040 Worse Scenario                      | 2016                                  | 2040 Forecast                         | 2040 Better Scenario                  | 2040 Worse Scenario                   |
| Gastritis and duodenitis                   | 245.14<br>(196.91 to 301.94)             | 363.64<br>(275.07 to 477.73)             | 368.69<br>(277.59 to 484.13)             | 364.23<br>(276.48 to 475.33)             | 14.41<br>(11.75 to 17.47)             | 46.11<br>(33.09 to 63.92)             | 47.32<br>(33.90 to 65.23)             | 44.94<br>(32.22 to 63.01)             |
| Appendicitis                               | 2,195.76<br>(1,634.33 to 2,630.41)       | 3,577.57<br>(1,769.77 to 4,691.70)       | 3,602.65<br>(1,740.76 to 4,810.57)       | 3,689.65<br>(1,812.12 to 4,909.60)       | 149.49<br>(78.71 to 187.38)           | 448.80<br>(190.28 to 611.26)          | 457.50<br>(192.07 to 625.80)          | 451.53<br>(188.15 to 610.81)          |
| Paralytic ileus and intestinal obstruction | 8,018.40<br>(4,470.30 to 10,124.39)      | 19,717.48<br>(8,483.23 to 26,358.05)     | 20,809.03<br>(8,874.41 to 27,877.86)     | 18,019.58<br>(7,756.36 to 23,919.54)     | 576.61<br>(258.16 to 756.75)          | 2,653.55<br>(1,002.48 to 3,718.50)    | 2,831.03<br>(1,072.61 to 3,957.99)    | 2,370.89<br>(887.74 to 3,355.39)      |
| Inguinal, femoral, and abdominal hernia    | 1,187.89<br>(866.88 to 1,492.35)         | 1,755.84<br>(1,245.88 to 2,330.27)       | 1,811.02<br>(1,298.78 to 2,398.59)       | 1,708.58<br>(1,213.99 to 2,244.97)       | 87.48<br>(62.28 to 110.81)            | 242.40<br>(167.88 to 326.65)          | 253.20<br>(176.23 to 342.77)          | 229.66<br>(157.38 to 308.67)          |
| Inflammatory bowel disease                 | 3,429.57<br>(2,387.65 to 4,201.26)       | 5,347.35<br>(3,788.82 to 6,621.66)       | 5,606.97<br>(3,972.83 to 6,962.05)       | 4,948.62<br>(3,480.82 to 6,064.67)       | 209.89<br>(145.71 to 257.80)          | 694.18<br>(474.89 to 906.66)          | 737.92<br>(506.95 to 964.32)          | 624.22<br>(425.14 to 813.98)          |
| Vascular intestinal disorders              | 9,325.52<br>(7,644.02 to 12,670.25)      | 20,422.81<br>(16,933.24 to 26,673.76)    | 21,161.20<br>(17,384.22 to 27,564.80)    | 19,485.02<br>(16,158.49 to 25,484.00)    | 664.40<br>(550.72 to 860.54)          | 2,513.96<br>(2,021.87 to 3,291.96)    | 2,634.96<br>(2,141.16 to 3,458.05)    | 2,340.90<br>(1,871.46 to 3,066.12)    |
| Gallbladder and biliary diseases           | 9,514.13<br>(6,099.20 to 11,720.63)      | 21,938.70<br>(9,248.98 to 35,515.53)     | 20,104.55<br>(8,713.99 to 31,540.38)     | 24,895.01<br>(10,209.76 to 41,565.08)    | 767.45<br>(415.65 to 981.46)          | 3,052.32<br>(1,156.25 to 5,045.52)    | 2,840.15<br>(1,117.05 to 4,530.61)    | 3,372.11<br>(1,249.50 to 5,735.13)    |
| Pancreatitis                               | 9,473.00<br>(7,580.84 to 12,735.26)      | 10,397.23<br>(4,883.53 to 20,644.64)     | 8,256.43<br>(4,511.96 to 15,292.12)      | 11,279.87<br>(5,236.98 to 22,728.15)     | 395.68<br>(315.26 to 508.01)          | 911.31<br>(456.58 to 1,774.75)        | 761.59<br>(421.63 to 1,349.92)        | 956.99<br>(473.41 to 1,958.80)        |
| Other digestive diseases                   | 7,478.74<br>(6,227.51 to 9,106.78)       | 13,524.03<br>(11,021.32 to 16,757.08)    | 13,983.35<br>(11,243.39 to 17,372.27)    | 12,935.81<br>(10,623.04 to 15,845.93)    | 455.46<br>(380.16 to 543.81)          | 1,636.29<br>(1,289.31 to 2,075.24)    | 1,714.18<br>(1,357.24 to 2,179.21)    | 1,522.28<br>(1,202.00 to 1,932.79)    |
| Neurological disorders                     | 143,037.16<br>(119,406.71 to 170,650.59) | 470,619.01<br>(367,547.57 to 611,304.55) | 472,437.19<br>(373,046.48 to 604,896.21) | 467,428.63<br>(353,105.90 to 637,827.28) | 13,982.74<br>(11,592.99 to 16,743.36) | 71,245.05<br>(53,845.50 to 93,399.22) | 73,225.06<br>(55,403.47 to 91,964.29) | 69,447.41<br>(50,818.71 to 95,253.51) |
| Alzheimer's disease and other dementias    | 108,826.97<br>(88,686.63 to 134,302.25)  | 405,555.24<br>(300,084.66 to 543,322.00) | 405,460.75<br>(303,750.79 to 535,975.44) | 407,132.81<br>(292,949.16 to 582,014.21) | 12,131.84<br>(9,877.99 to 14,775.74)  | 64,531.68<br>(47,168.74 to 86,462.23) | 65,161.13<br>(48,462.27 to 84,834.29) | 63,425.99<br>(45,054.19 to 89,478.68) |
| Parkinson's disease                        | 13,076.97<br>(9,840.22 to 17,270.05)     | 44,822.49<br>(33,762.75 to 58,892.01)    | 47,702.37<br>(35,982.89 to 62,181.20)    | 40,121.37<br>(30,222.62 to 52,903.51)    | 1,153.87<br>(868.09 to 1,540.40)      | 5,348.37<br>(3,991.63 to 7,027.09)    | 5,739.21<br>(4,334.99 to 7,504.09)    | 4,707.18<br>(3,515.36 to 6,196.11)    |
| Epilepsy                                   | 11,891.91<br>(10,054.32 to 14,854.01)    | 12,096.79<br>(8,598.36 to 17,288.02)     | 10,915.26<br>(8,016.25 to 14,916.75)     | 12,366.96<br>(8,758.22 to 17,824.93)     | 381.19<br>(328.18 to 439.83)          | 912.00<br>(589.70 to 1,281.47)        | 851.63<br>(553.93 to 1,171.15)        | 893.68<br>(581.42 to 1,259.90)        |
| Multiple sclerosis                         | 838.39<br>(686.76 to 1,073.58)           | 577.47<br>(471.83 to 732.94)             | 589.31<br>(479.42 to 749.79)             | 569.21<br>(464.50 to 725.38)             | 26.73<br>(22.27 to 33.56)             | 31.65<br>(26.78 to 39.31)             | 32.82<br>(27.76 to 41.01)             | 30.21<br>(25.58 to 37.47)             |
| Motor neuron disease                       | 1,383.97<br>(1,154.28 to 1,627.26)       | 1,443.56<br>(1,154.61 to 1,721.23)       | 1,476.41<br>(1,167.82 to 1,774.60)       | 1,392.61<br>(1,120.57 to 1,652.66)       | 48.65<br>(40.17 to 56.83)             | 75.48<br>(62.18 to 88.05)             | 78.15<br>(63.60 to 91.64)             | 71.26<br>(59.01 to 82.74)             |
| Other neurological disorders               | 7,018.97<br>(5,980.42 to 8,080.35)       | 6,123.44<br>(5,058.25 to 7,303.60)       | 6,293.10<br>(5,191.13 to 7,557.68)       | 5,837.66<br>(4,851.89 to 6,928.74)       | 240.46<br>(206.60 to 279.55)          | 345.87<br>(300.70 to 405.45)          | 362.12<br>(312.62 to 429.06)          | 319.09<br>(278.34 to 370.58)          |
| Mental disorders                           | 28,842.45<br>(17,118.78 to 36,955.01)    | 25,358.22<br>(18,945.76 to 32,093.14)    | 26,211.70<br>(19,908.40 to 33,149.02)    | 22,711.44<br>(17,145.70 to 28,627.73)    | 754.78<br>(493.73 to 944.71)          | 1,343.05<br>(1,106.76 to 1,619.68)    | 1,433.44<br>(1,170.19 to 1,734.47)    | 1,147.64<br>(927.59 to 1,380.47)      |
| Alcohol use disorders                      | 13,070.17<br>(6,325.19 to 17,281.08)     | 5,848.81<br>(3,257.60 to 8,314.10)       | 5,509.11<br>(3,088.82 to 7,838.82)       | 5,604.48<br>(3,096.57 to 7,962.40)       | 342.77<br>(179.50 to 447.16)          | 241.21<br>(170.20 to 321.08)          | 234.08<br>(167.48 to 313.81)          | 224.31<br>(157.25 to 299.12)          |
| Drug use disorders                         | 15,705.26<br>(9,550.46 to 20,300.92)     | 19,484.94<br>(14,979.62 to 24,809.70)    | 20,678.01<br>(16,032.61 to 26,445.68)    | 17,082.77<br>(13,009.04 to 21,704.56)    | 410.65<br>(288.62 to 513.67)          | 1,101.36<br>(887.94 to 1,342.58)      | 1,198.87<br>(961.13 to 1,478.64)      | 922.84<br>(735.17 to 1,134.31)        |
| Opioid use disorders                       | 9,008.35<br>(4,847.81 to 12,163.98)      | 6,337.93<br>(4,300.58 to 8,581.37)       | 6,545.86<br>(4,527.89 to 8,890.67)       | 5,926.08<br>(4,004.69 to 7,944.36)       | 221.48<br>(136.11 to 289.81)          | 297.70<br>(220.27 to 407.15)          | 314.93<br>(231.36 to 438.69)          | 266.75<br>(198.24 to 364.54)          |

|                           |                                       |                                        |                                         |                                        |                                 |                                 |                                 |                                 |
|---------------------------|---------------------------------------|----------------------------------------|-----------------------------------------|----------------------------------------|---------------------------------|---------------------------------|---------------------------------|---------------------------------|
|                           | 1,102.52<br>(581.49 to<br>1,565.50)   | 1,603.51<br>(1,058.62 to<br>2,394.50)  | 1,695.08<br>(1,117.14 to<br>2,561.16)   | 1,415.29<br>(931.45 to<br>2,060.94)    | 26.50<br>(15.25 to<br>37.18)    | 56.01<br>(37.46 to<br>85.45)    | 60.18<br>(39.93 to<br>92.81)    | 48.26<br>(32.77 to<br>72.75)    |
| Cocaine use disorders     | 906.88<br>(395.38 to<br>1,349.55)     | 1,984.60<br>(1,077.95 to<br>2,816.25)  | 2,121.55<br>(1,172.72 to<br>3,017.15)   | 1,684.60<br>(907.59 to<br>2,447.62)    | 20.52<br>(9.78 to<br>29.63)     | 58.52<br>(36.90 to<br>80.14)    | 63.33<br>(40.03 to<br>86.43)    | 48.76<br>(30.63 to<br>67.45)    |
| Amphetamine use disorders | 4,687.52<br>(2,953.18 to<br>6,077.67) | 9,558.90<br>(7,263.42 to<br>12,599.23) | 10,315.51<br>(7,823.88 to<br>13,654.17) | 8,056.80<br>(5,926.73 to<br>10,482.96) | 142.15<br>(106.02 to<br>178.52) | 689.12<br>(516.51 to<br>882.08) | 760.44<br>(572.36 to<br>975.74) | 559.07<br>(416.70 to<br>726.19) |
| Other drug use disorders  | 67.03<br>(49.51 to<br>85.03)          | 24.47<br>(16.97 to<br>36.17)           | 24.59<br>(17.03 to<br>36.58)            | 24.19<br>(16.71 to<br>35.63)           | 1.36<br>(0.99 to<br>1.73)       | 0.49<br>(0.33 to<br>0.72)       | 0.49<br>(0.34 to<br>0.73)       | 0.49<br>(0.33 to<br>0.70)       |
| Eating disorders          |                                       |                                        |                                         |                                        |                                 |                                 |                                 |                                 |

| Taiwan (Province of China)                                 |                                                 |                                                   |                                                   |                                                   |                                              |                                               |                                               |                                               |
|------------------------------------------------------------|-------------------------------------------------|---------------------------------------------------|---------------------------------------------------|---------------------------------------------------|----------------------------------------------|-----------------------------------------------|-----------------------------------------------|-----------------------------------------------|
| Cause                                                      | YLLs (actual counts)                            |                                                   |                                                   |                                                   | Deaths (actual counts)                       |                                               |                                               |                                               |
|                                                            | 2016                                            | 2040 Forecast                                     | 2040 Better Scenario                              | 2040 Worse Scenario                               | 2016                                         | 2040 Forecast                                 | 2040 Better Scenario                          | 2040 Worse Scenario                           |
| <b>Diabetes, urogenital, blood, and endocrine diseases</b> | <b>333,519.93</b><br>(289,879.38 to 379,485.85) | <b>649,553.84</b><br>(466,623.76 to 1,090,737.16) | <b>625,638.41</b><br>(446,304.05 to 1,091,704.31) | <b>765,618.45</b><br>(528,641.63 to 1,271,404.88) | <b>21,649.30</b><br>(19,064.99 to 24,276.38) | <b>79,402.89</b><br>(58,754.43 to 131,447.87) | <b>78,114.26</b><br>(57,620.47 to 128,987.76) | <b>89,993.00</b><br>(64,272.81 to 152,083.75) |
| Diabetes mellitus                                          | 189,779.46<br>(162,388.60 to 219,479.80)        | 259,627.94<br>(188,297.64 to 349,217.54)          | 236,218.18<br>(173,499.78 to 314,408.14)          | 293,176.17<br>(208,687.04 to 401,358.39)          | 11,673.81<br>(10,084.68 to 13,371.08)        | 28,530.22<br>(20,641.55 to 38,185.48)         | 26,728.87<br>(19,447.31 to 35,075.33)         | 31,067.13<br>(22,160.63 to 42,034.52)         |
| Acute glomerulonephritis                                   | 144.40<br>(125.45 to 164.06)                    | 104.44<br>(78.86 to 135.77)                       | 104.33<br>(78.48 to 136.11)                       | 106.31<br>(80.87 to 136.94)                       | 4.51<br>(3.76 to 5.35)                       | 8.21<br>(5.15 to 13.45)                       | 8.41<br>(5.26 to 13.73)                       | 7.90<br>(5.04 to 12.65)                       |
| Chronic kidney disease                                     | 87,861.53<br>(73,188.68 to 101,614.91)          | 250,641.04<br>(87,864.08 to 725,696.86)           | 247,207.98<br>(87,452.36 to 716,145.93)           | 336,422.25<br>(114,778.44 to 857,473.00)          | 5,964.12<br>(4,114.54 to 6,869.08)           | 30,615.39<br>(11,593.41 to 85,186.87)         | 30,495.24<br>(11,399.19 to 85,533.75)         | 39,565.31<br>(14,276.37 to 100,407.21)        |
| Chronic kidney disease due to diabetes mellitus            | 45,418.45<br>(37,219.71 to 53,607.98)           | 115,964.92<br>(39,734.10 to 330,073.28)           | 113,995.93<br>(40,027.83 to 327,443.47)           | 158,377.58<br>(52,726.67 to 406,931.61)           | 2,728.75<br>(2,015.54 to 3,275.86)           | 12,640.14<br>(4,568.70 to 33,178.37)          | 12,554.48<br>(4,650.86 to 33,272.87)          | 16,562.06<br>(5,753.19 to 41,963.18)          |
| Chronic kidney disease due to hypertension                 | 30,412.00<br>(22,763.15 to 36,523.52)           | 109,145.77<br>(37,224.67 to 320,815.75)           | 108,240.87<br>(37,644.76 to 319,519.74)           | 143,493.78<br>(47,109.04 to 374,975.62)           | 2,498.59<br>(1,613.21 to 3,010.60)           | 14,848.31<br>(5,440.13 to 42,715.80)          | 14,852.21<br>(5,476.35 to 42,264.79)          | 18,911.97<br>(6,738.09 to 51,211.20)          |
| Chronic kidney disease due to glomerulonephritis           | 4,838.25<br>(3,777.06 to 6,250.46)              | 8,176.31<br>(2,845.86 to 23,591.82)               | 7,943.31<br>(2,822.08 to 23,327.26)               | 11,207.46<br>(3,729.58 to 29,518.60)              | 262.69<br>(189.73 to 342.11)                 | 919.17<br>(301.13 to 2,625.77)                | 901.87<br>(300.89 to 2,578.40)                | 1,219.62<br>(394.21 to 3,391.01)              |
| Chronic kidney disease due to other and unspecified causes | 7,192.84<br>(5,594.56 to 9,278.17)              | 17,354.04<br>(5,816.77 to 50,417.02)              | 17,027.86<br>(5,755.11 to 49,916.09)              | 23,343.43<br>(7,570.83 to 61,158.10)              | 474.09<br>(328.56 to 615.73)                 | 2,207.78<br>(738.86 to 6,328.44)              | 2,186.67<br>(732.37 to 6,258.04)              | 2,871.66<br>(928.79 to 7,480.28)              |
| Urinary diseases and male infertility                      | 36,923.42<br>(31,637.03 to 43,083.83)           | 113,684.94<br>(94,911.89 to 138,478.20)           | 115,675.88<br>(97,139.26 to 140,947.74)           | 111,977.37<br>(93,645.42 to 139,287.22)           | 3,225.78<br>(2,764.40 to 3,760.16)           | 17,658.32<br>(14,188.06 to 22,060.01)         | 18,144.87<br>(14,686.90 to 22,393.14)         | 17,005.31<br>(13,561.91 to 21,459.26)         |
| Urinary tract infections                                   | 27,176.45<br>(21,149.44 to 34,297.16)           | 92,189.57<br>(71,529.05 to 117,107.00)            | 93,850.92<br>(72,554.74 to 119,679.21)            | 90,395.46<br>(69,265.77 to 116,393.54)            | 90.395.46<br>(69,265.77 to 116,393.54)       | 2,359.57<br>(1,768.65 to 2,990.02)            | 14,510.99<br>(10,707.75 to 19,322.24)         | 14,913.26<br>(11,031.42 to 19,322.24)         |
| Urolithiasis                                               | 5,851.17<br>(2,563.59 to 10,306.07)             | 12,120.69<br>(4,662.13 to 25,603.40)              | 12,174.07<br>(4,571.01 to 25,520.98)              | 12,317.77<br>(4,571.01 to 25,956.02)              | 491.17<br>(204.97 to 931.08)                 | 1,716.17<br>(606.66 to 3,845.81)              | 1,742.20<br>(601.65 to 3,872.36)              | 1,700.76<br>(591.60 to 3,805.76)              |
| Other urinary diseases                                     | 3,895.81<br>(2,389.64 to 6,236.21)              | 9,374.68<br>(4,982.80 to 15,787.60)               | 9,650.90<br>(5,041.92 to 16,161.80)               | 9,264.14<br>(4,983.60 to 15,636.66)               | 375.04<br>(226.69 to 595.20)                 | 1,431.15<br>(762.22 to 2,411.06)              | 1,489.40<br>(796.30 to 2,513.24)              | 1,387.16<br>(731.38 to 2,374.45)              |
| Gynecological diseases                                     | 170.13<br>(125.21 to 222.42)                    | 64.15<br>(45.49 to 86.74)                         | 61.18<br>(43.52 to 82.47)                         | 72.96<br>(52.06 to 98.88)                         | 6.96<br>(5.35 to 8.73)                       | 5.72<br>(3.84 to 8.22)                        | 5.52<br>(3.71 to 7.83)                        | 6.33<br>(4.30 to 9.13)                        |
| Uterine fibroids                                           | 69.89<br>(45.28 to 97.33)                       | 17.88<br>(11.11 to 27.94)                         | 17.20<br>(10.59 to 27.11)                         | 19.92<br>(12.24 to 31.52)                         | 2.13<br>(1.43 to 2.98)                       | 1.15<br>(0.65 to 2.14)                        | 1.12<br>(0.64 to 2.07)                        | 1.23<br>(0.71 to 2.38)                        |
| Polycystic ovarian syndrome                                | 7.38<br>(2.27 to 14.30)                         | 0.55<br>(0.14 to 1.26)                            | 0.49<br>(0.13 to 1.12)                            | 0.74<br>(0.18 to 1.69)                            | 0.17<br>(0.05 to 0.33)                       | 0.01<br>(0.00 to 0.05)                        | 0.01<br>(0.00 to 0.05)                        | 0.02<br>(0.00 to 0.04)                        |
| Endometriosis                                              | 3.55<br>(1.01 to 7.77)                          | 1.01<br>(0.25 to 2.42)                            | 0.95<br>(0.23 to 2.27)                            | 1.20<br>(0.29 to 2.91)                            | 0.09<br>(0.02 to 0.20)                       | 0.03<br>(0.01 to 0.06)                        | 0.02<br>(0.00 to 0.06)                        | 0.03<br>(0.01 to 0.07)                        |
| Genital prolapse                                           | 9.16<br>(5.05 to 16.86)                         | 7.36<br>(3.10 to 14.15)                           | 7.08<br>(2.96 to 13.48)                           | 8.22<br>(3.46 to 16.16)                           | 0.74<br>(0.35 to 1.36)                       | 0.90<br>(0.33 to 1.86)                        | 0.88<br>(0.32 to 1.75)                        | 0.99<br>(0.38 to 2.02)                        |
| Other gynecological diseases                               | 80.15<br>(58.04 to 109.26)                      | 37.34<br>(24.63 to 54.67)                         | 35.47<br>(23.61 to 51.49)                         | 42.87<br>(28.30 to 62.59)                         | 3.82<br>(2.70 to 5.06)                       | 3.63<br>(2.15 to 5.63)                        | 3.49<br>(2.09 to 5.32)                        | 4.06<br>(2.39 to 6.18)                        |
| Hemoglobinopathies and hemolytic anemias                   | 4,768.04<br>(3,932.21 to 6,225.80)              | 4,288.28<br>(2,677.32 to 5,529.84)                | 4,293.27<br>(2,641.29 to 5,541.09)                | 4,395.86<br>(2,738.46 to 5,650.07)                | 213.05<br>(150.00 to 258.44)                 | 468.62<br>(213.87 to 677.35)                  | 477.27<br>(213.94 to 689.66)                  | 463.79<br>(215.10 to 676.99)                  |
| Thalassemias                                               | 599.16<br>(440.00 to 925.74)                    | 136.46<br>(68.47 to 279.69)                       | 135.24<br>(67.54 to 278.06)                       | 137.54<br>(69.29 to 282.10)                       | 7.86<br>(5.74 to 12.22)                      | 1.95<br>(0.97 to 4.01)                        | 1.93<br>(0.96 to 3.97)                        | 1.96<br>(0.98 to 4.07)                        |

|                                                   |                                          |                                          |                                          |                                          |                                 |                                       |                                       |                                       |
|---------------------------------------------------|------------------------------------------|------------------------------------------|------------------------------------------|------------------------------------------|---------------------------------|---------------------------------------|---------------------------------------|---------------------------------------|
|                                                   | 6.41<br>(3.89 to<br>10.16)               | 2.61<br>(1.51 to<br>4.24)                | 2.52<br>(1.44 to<br>4.12)                | 2.87<br>(1.64 to<br>4.76)                | 0.14<br>(0.08 to<br>0.21)       | 0.07<br>(0.04 to<br>0.11)             | 0.07<br>(0.04 to<br>0.11)             | 0.08<br>(0.05 to<br>0.12)             |
| Sickle cell disorders                             |                                          |                                          |                                          |                                          |                                 |                                       |                                       |                                       |
|                                                   | 1,546.52<br>(1,141.55 to<br>2,324.69)    | 847.82<br>(609.41 to<br>1,171.44)        | 824.90<br>(596.40 to<br>1,156.94)        | 921.68<br>(665.81 to<br>1,297.79)        | 41.24<br>(31.62 to<br>58.58)    | 37.70<br>(26.04 to<br>49.13)          | 37.25<br>(25.66 to<br>48.20)          | 39.95<br>(27.93 to<br>51.90)          |
| G6PD deficiency                                   |                                          |                                          |                                          |                                          |                                 |                                       |                                       |                                       |
|                                                   | 2,615.95<br>(2,013.53 to<br>3,149.38)    | 3,301.39<br>(1,772.29 to<br>4,539.91)    | 3,330.62<br>(1,761.51 to<br>4,545.16)    | 3,333.77<br>(1,800.95 to<br>4,566.45)    | 163.81<br>(104.36 to<br>208.83) | 428.90<br>(183.14 to<br>635.53)       | 438.02<br>(182.39 to<br>642.40)       | 421.80<br>(182.94 to<br>629.09)       |
| Other hemoglobinopathies and hemolytic anemias    |                                          |                                          |                                          |                                          |                                 |                                       |                                       |                                       |
|                                                   | 13,872.96<br>(11,003.51 to<br>16,354.45) | 21,143.05<br>(17,573.71 to<br>27,921.59) | 22,077.59<br>(18,270.59 to<br>29,549.58) | 19,467.54<br>(16,322.79 to<br>25,966.52) | 561.07<br>(464.10 to<br>692.05) | 2,116.41<br>(1,685.42 to<br>3,179.74) | 2,254.09<br>(1,786.53 to<br>3,388.26) | 1,877.24<br>(1,488.48 to<br>2,835.68) |
| Endocrine, metabolic, blood, and immune disorders |                                          |                                          |                                          |                                          |                                 |                                       |                                       |                                       |

| Taiwan (Province of China)                    |                                              |                                              |                                              |                                              |                                         |                                           |                                           |                                           |
|-----------------------------------------------|----------------------------------------------|----------------------------------------------|----------------------------------------------|----------------------------------------------|-----------------------------------------|-------------------------------------------|-------------------------------------------|-------------------------------------------|
| Cause                                         | YLLs (actual counts)                         |                                              |                                              |                                              | Deaths (actual counts)                  |                                           |                                           |                                           |
|                                               | 2016                                         | 2040 Forecast                                | 2040 Better Scenario                         | 2040 Worse Scenario                          | 2016                                    | 2040 Forecast                             | 2040 Better Scenario                      | 2040 Worse Scenario                       |
| <b>Musculoskeletal disorders</b>              | <b>12,876.68</b><br>(9,809.72 to 15,730.39)  | <b>15,133.88</b><br>(11,844.82 to 18,082.83) | <b>15,229.24</b><br>(12,018.62 to 18,230.11) | <b>15,285.41</b><br>(11,781.91 to 18,323.75) | <b>545.22</b><br>(420.94 to 661.18)     | <b>1,407.96</b><br>(1,102.24 to 1,734.36) | <b>1,439.31</b><br>(1,138.79 to 1,772.36) | <b>1,377.00</b><br>(1,054.83 to 1,705.63) |
| Rheumatoid arthritis                          | 2,104.62<br>(1,598.02 to 3,203.60)           | 3,566.71<br>(2,489.84 to 5,751.92)           | 3,472.68<br>(2,402.69 to 5,759.07)           | 3,941.08<br>(2,750.02 to 6,229.08)           | 129.54<br>(96.97 to 203.02)             | 355.34<br>(235.57 to 607.62)              | 349.38<br>(232.71 to 605.30)              | 383.81<br>(256.35 to 640.93)              |
| Other musculoskeletal disorders               | 10,772.07<br>(7,947.67 to 13,003.23)         | 11,567.17<br>(8,158.54 to 14,043.26)         | 11,756.56<br>(8,364.85 to 14,304.87)         | 11,344.33<br>(7,799.90 to 13,758.84)         | 415.68<br>(297.38 to 499.33)            | 1,052.62<br>(711.26 to 1,301.25)          | 1,089.93<br>(751.05 to 1,338.69)          | 993.20<br>(653.21 to 1,237.96)            |
| <b>Other non-communicable diseases</b>        | <b>39,143.60</b><br>(31,990.35 to 45,221.81) | <b>36,484.48</b><br>(21,076.77 to 47,672.96) | <b>37,048.32</b><br>(21,495.03 to 48,610.48) | <b>36,326.66</b><br>(21,530.04 to 47,214.25) | <b>1,104.51</b><br>(724.47 to 1,367.53) | <b>4,190.19</b><br>(2,347.88 to 5,781.49) | <b>4,351.17</b><br>(2,430.94 to 5,953.66) | <b>3,975.51</b><br>(2,194.16 to 5,492.41) |
| Congenital birth defects                      | 26,292.38<br>(22,190.74 to 30,785.35)        | 5,736.69<br>(3,891.67 to 8,476.19)           | 5,418.53<br>(3,670.12 to 8,059.10)           | 6,578.32<br>(4,418.39 to 9,817.31)           | 346.74<br>(296.30 to 401.98)            | 59.88<br>(64.43 to 125.40)                | 85.61<br>(61.12 to 119.44)                | 101.49<br>(72.35 to 143.21)               |
| Neural tube defects                           | 258.42<br>(195.73 to 346.79)                 | 31.79<br>(20.92 to 46.28)                    | 29.43<br>(19.67 to 42.84)                    | 38.36<br>(25.35 to 57.59)                    | 3.81<br>(3.00 to 4.84)                  | 0.58<br>(0.41 to 0.82)                    | 0.54<br>(0.39 to 0.75)                    | 0.69<br>(0.48 to 0.98)                    |
| Congenital heart anomalies                    | 14,179.74<br>(11,160.79 to 17,245.96)        | 2,290.30<br>(1,412.80 to 3,672.58)           | 2,106.02<br>(1,293.38 to 3,408.17)           | 2,803.06<br>(1,753.88 to 4,555.81)           | 182.50<br>(148.45 to 219.06)            | 32.75<br>(21.32 to 49.69)                 | 30.21<br>(19.44 to 46.31)                 | 39.87<br>(25.98 to 61.86)                 |
| Orofacial clefts                              | 52.24<br>(15.41 to 96.91)                    | 5.61<br>(1.21 to 13.36)                      | 4.97<br>(1.07 to 11.71)                      | 7.46<br>(1.67 to 17.36)                      | 0.61<br>(0.18 to 1.12)                  | 0.06<br>(0.01 to 0.16)                    | 0.06<br>(0.01 to 0.14)                    | 0.09<br>(0.02 to 0.20)                    |
| Down syndrome                                 | 1,000.49<br>(779.66 to 1,239.68)             | 658.31<br>(489.03 to 878.63)                 | 665.68<br>(494.64 to 890.08)                 | 637.36<br>(472.88 to 851.77)                 | 18.08<br>(14.37 to 22.88)               | 14.63<br>(10.89 to 19.32)                 | 14.87<br>(11.10 to 19.64)                 | 14.06<br>(10.53 to 18.44)                 |
| Other chromosomal abnormalities               | 2,714.27<br>(1,918.44 to 3,628.99)           | 1,235.98<br>(733.50 to 2,016.83)             | 1,193.19<br>(712.02 to 1,972.55)             | 1,329.27<br>(779.35 to 2,191.47)             | 34.32<br>(25.25 to 46.07)               | 16.93<br>(10.29 to 26.65)                 | 16.39<br>(9.93 to 25.94)                  | 18.15<br>(10.97 to 29.02)                 |
| Congenital musculoskeletal and limb anomalies | 785.52<br>(527.40 to 1,052.57)               | 165.19<br>(95.34 to 270.08)                  | 153.95<br>(89.49 to 254.42)                  | 194.47<br>(111.09 to 326.83)                 | 9.93<br>(6.95 to 13.08)                 | 2.36<br>(1.45 to 3.73)                    | 2.21<br>(1.36 to 3.50)                    | 2.76<br>(1.69 to 4.40)                    |
| Urogenital congenital anomalies               | 380.32<br>(299.36 to 491.10)                 | 136.31<br>(93.12 to 184.61)                  | 131.02<br>(87.57 to 177.62)                  | 151.14<br>(101.79 to 205.23)                 | 7.59<br>(5.50 to 9.37)                  | 3.66<br>(2.34 to 5.00)                    | 3.54<br>(2.19 to 4.83)                    | 4.01<br>(2.48 to 5.48)                    |
| Digestive congenital anomalies                | 1,175.62<br>(761.34 to 3,098.75)             | 241.08<br>(140.43 to 471.45)                 | 224.00<br>(131.03 to 443.29)                 | 286.47<br>(168.18 to 568.54)                 | 15.56<br>(10.92 to 36.71)               | 3.92<br>(2.62 to 6.32)                    | 3.67<br>(2.41 to 5.82)                    | 4.62<br>(3.02 to 7.51)                    |
| Other congenital birth defects                | 5,745.76<br>(4,389.40 to 7,147.09)           | 972.11<br>(614.52 to 1,473.95)               | 910.28<br>(579.33 to 1,380.13)               | 1,130.74<br>(720.86 to 1,754.43)             | 74.35<br>(58.05 to 90.94)               | 14.99<br>(10.08 to 21.43)                 | 14.12<br>(9.62 to 20.19)                  | 17.27<br>(11.70 to 25.50)                 |
| Skin and subcutaneous diseases                | 10,032.99<br>(5,042.08 to 13,586.32)         | 30,354.87<br>(15,799.73 to 40,387.80)        | 31,257.16<br>(16,157.26 to 41,634.46)        | 29,308.14<br>(15,047.00 to 39,492.36)        | 725.07<br>(367.09 to 984.31)            | 4,095.75<br>(2,253.61 to 5,675.61)        | 4,261.24<br>(2,334.24 to 5,858.94)        | 3,868.91<br>(2,094.76 to 5,357.15)        |
| Cellulitis                                    | 2,726.55<br>(840.26 to 4,153.44)             | 9,265.36<br>(1,867.77 to 15,393.25)          | 9,642.07<br>(1,968.23 to 16,146.07)          | 8,718.31<br>(1,777.46 to 14,494.60)          | 169.38<br>(31.66 to 283.98)             | 1,128.88<br>(186.54 to 2,000.32)          | 1,189.76<br>(201.24 to 2,095.80)          | 1,035.56<br>(168.25 to 1,857.65)          |
| Pyoderma                                      | 2,840.09<br>(1,464.88 to 4,266.60)           | 10,128.92<br>(5,786.69 to 16,076.19)         | 10,453.02<br>(6,008.95 to 16,598.83)         | 9,718.99<br>(5,366.56 to 15,466.47)          | 189.62<br>(93.49 to 284.91)             | 1,350.90<br>(769.93 to 2,280.02)          | 1,411.90<br>(807.83 to 2,392.16)          | 1,261.17<br>(694.04 to 2,152.52)          |
| Decubitus ulcer                               | 3,334.17<br>(1,654.43 to 4,777.51)           | 8,923.54<br>(5,006.88 to 15,763.01)          | 9,067.43<br>(5,106.78 to 16,178.01)          | 8,893.01<br>(5,006.22 to 15,473.28)          | 300.10<br>(166.64 to 459.35)            | 1,384.10<br>(779.12 to 2,687.05)          | 1,416.79<br>(820.47 to 2,749.35)          | 1,354.64<br>(765.06 to 2,615.40)          |
| Other skin and subcutaneous diseases          | 1,132.19<br>(675.84 to 1,893.37)             | 2,037.05<br>(1,278.54 to 3,753.67)           | 2,094.65<br>(1,309.12 to 3,850.47)           | 1,977.83<br>(1,243.56 to 3,607.33)           | 65.97<br>(39.88 to 113.23)              | 231.88<br>(142.40 to 473.73)              | 242.79<br>(149.09 to 492.64)              | 217.54<br>(133.37 to 440.18)              |
| Sudden infant death syndrome                  | 2,818.23<br>(1,939.69 to 3,966.44)           | 392.92<br>(163.23 to 915.50)                 | 372.63<br>(153.20 to 871.94)                 | 440.19<br>(182.50 to 991.53)                 | 32.70<br>(22.50 to 46.03)               | 4.56<br>(1.89 to 10.62)                   | 4.32<br>(1.78 to 10.12)                   | 5.11<br>(2.12 to 11.50)                   |



|                          |                                             |                                             |                                             |                                             |                                          |                                          |                                          |                                          |
|--------------------------|---------------------------------------------|---------------------------------------------|---------------------------------------------|---------------------------------------------|------------------------------------------|------------------------------------------|------------------------------------------|------------------------------------------|
| Injuries                 | 424,538.44<br>(367,058.65 to<br>483,208.04) | 267,048.99<br>(204,244.68 to<br>352,703.02) | 249,245.02<br>(194,606.58 to<br>321,997.35) | 282,856.30<br>(214,232.34 to<br>374,757.30) | 12,843.14<br>(11,146.04 to<br>14,550.22) | 16,450.91<br>(13,664.22 to<br>20,053.61) | 15,935.86<br>(13,357.75 to<br>19,175.98) | 16,636.42<br>(13,663.15 to<br>20,540.15) |
| Transport injuries       | 149,872.88<br>(128,205.11 to<br>174,776.46) | 95,285.54<br>(67,815.48 to<br>139,991.81)   | 88,334.74<br>(64,760.73 to<br>126,413.73)   | 103,009.85<br>(72,607.62 to<br>152,103.72)  | 4,355.18<br>(3,716.18 to<br>5,053.86)    | 4,506.49<br>(3,365.55 to<br>6,212.10)    | 4,238.13<br>(3,267.40 to<br>5,610.26)    | 4,719.84<br>(3,495.73 to<br>6,628.25)    |
| Road injuries            | 142,721.99<br>(122,324.73 to<br>166,154.81) | 90,321.32<br>(64,622.12 to<br>132,935.94)   | 83,905.38<br>(61,860.29 to<br>119,944.43)   | 97,382.24<br>(69,038.81 to<br>143,335.41)   | 4,155.87<br>(3,560.04 to<br>4,813.77)    | 4,247.93<br>(3,204.28 to<br>5,858.42)    | 4,001.49<br>(3,101.95 to<br>5,316.32)    | 4,438.45<br>(3,299.59 to<br>6,145.04)    |
| Pedestrian road injuries | 47,478.76<br>(40,096.12 to<br>58,368.81)    | 24,735.93<br>(17,956.66 to<br>34,814.70)    | 22,400.16<br>(16,901.25 to<br>31,332.69)    | 28,785.08<br>(20,677.81 to<br>41,701.00)    | 1,690.13<br>(1,430.15 to<br>2,061.52)    | 1,718.55<br>(1,288.69 to<br>2,351.35)    | 1,592.02<br>(1,227.90 to<br>2,114.14)    | 1,910.66<br>(1,415.39 to<br>2,639.13)    |

| Taiwan (Province of China)                      |                                                                 |                                                               |                                                               |                                                               |                                                            |                                                            |                                                            |                                                            |
|-------------------------------------------------|-----------------------------------------------------------------|---------------------------------------------------------------|---------------------------------------------------------------|---------------------------------------------------------------|------------------------------------------------------------|------------------------------------------------------------|------------------------------------------------------------|------------------------------------------------------------|
| Cause                                           | YLLs (actual counts)                                            |                                                               |                                                               |                                                               | Deaths (actual counts)                                     |                                                            |                                                            |                                                            |
|                                                 | 2016                                                            | 2040 Forecast                                                 | 2040 Better Scenario                                          | 2040 Worse Scenario                                           | 2016                                                       | 2040 Forecast                                              | 2040 Better Scenario                                       | 2040 Worse Scenario                                        |
| Cyclist road injuries                           | 8,837.12<br>(7,291.35 to<br>10,675.54)                          | 6,590.91<br>(4,608.67 to<br>9,987.27)                         | 6,243.23<br>(4,453.54 to<br>9,136.83)                         | 6,697.77<br>(4,652.29 to<br>10,073.29)                        | 320.87<br>(260.70 to<br>391.05)                            | 393.03<br>(259.17 to<br>610.20)                            | 377.95<br>(257.50 to<br>561.26)                            | 383.28<br>(252.70 to<br>590.35)                            |
| Motorcyclist road injuries                      | 56,056.84<br>(46,235.12 to<br>65,778.25)                        | 40,616.74<br>(25,969.81 to<br>63,662.21)                      | 38,051.27<br>(25,269.84 to<br>57,778.87)                      | 42,314.09<br>(27,010.04 to<br>66,196.71)                      | 1,413.39<br>(1,142.58 to<br>1,664.45)                      | 1,400.40<br>(866.49 to<br>2,080.15)                        | 1,325.31<br>(836.12 to<br>1,882.23)                        | 1,402.90<br>(871.87 to<br>2,122.82)                        |
| Motor vehicle road injuries                     | 29,529.72<br>(23,660.13 to<br>38,442.56)                        | 17,678.13<br>(11,653.37 to<br>26,961.03)                      | 16,550.11<br>(11,237.99 to<br>24,587.94)                      | 18,847.85<br>(12,285.02 to<br>28,540.92)                      | 710.56<br>(570.86 to<br>935.98)                            | 704.21<br>(474.51 to<br>1,061.08)                          | 675.54<br>(469.65 to<br>1,003.25)                          | 710.20<br>(482.63 to<br>1,057.46)                          |
| Other road injuries                             | 819.55<br>(632.99 to<br>1,024.17)                               | 699.61<br>(454.88 to<br>1,094.26)                             | 660.61<br>(441.61 to<br>1,004.89)                             | 737.45<br>(473.73 to<br>1,158.04)                             | 20.92<br>(16.89 to<br>26.27)                               | 31.74<br>(21.79 to<br>51.97)                               | 30.67<br>(21.64 to<br>48.48)                               | 31.41<br>(21.26 to<br>50.47)                               |
| Other transport injuries                        | 7,150.89<br>(5,673.09 to<br>8,705.80)                           | 4,964.23<br>(3,207.57 to<br>8,051.09)                         | 4,429.35<br>(2,967.96 to<br>6,932.07)                         | 5,627.61<br>(3,580.86 to<br>9,145.04)                         | 199.30<br>(160.16 to<br>248.38)                            | 258.56<br>(167.99 to<br>423.06)                            | 236.63<br>(158.53 to<br>389.22)                            | 281.40<br>(182.50 to<br>467.89)                            |
| Unintentional injuries                          | <b>102,919.97</b><br><b>(87,931.05 to</b><br><b>117,680.58)</b> | <b>81,210.79</b><br><b>(67,491.45 to</b><br><b>95,090.07)</b> | <b>81,185.04</b><br><b>(67,387.02 to</b><br><b>95,065.43)</b> | <b>82,469.86</b><br><b>(68,478.26 to</b><br><b>97,025.08)</b> | <b>3,807.58</b><br><b>(3,171.18 to</b><br><b>4,369.18)</b> | <b>7,671.06</b><br><b>(6,484.33 to</b><br><b>8,944.72)</b> | <b>7,841.93</b><br><b>(6,693.06 to</b><br><b>9,083.06)</b> | <b>7,479.88</b><br><b>(6,220.16 to</b><br><b>8,788.56)</b> |
| Falls                                           | 43,443.47<br>(33,341.97 to<br>51,605.78)                        | 47,127.49<br>(38,172.27 to<br>55,198.77)                      | 47,773.83<br>(38,553.43 to<br>56,283.02)                      | 47,025.72<br>(37,843.77 to<br>55,602.30)                      | 1,952.69<br>(1,516.47 to<br>2,303.32)                      | 4,983.23<br>(4,084.76 to<br>5,983.47)                      | 5,130.59<br>(4,227.50 to<br>6,161.93)                      | 4,819.95<br>(3,938.67 to<br>5,877.66)                      |
| Drowning                                        | 21,078.10<br>(17,761.31 to<br>24,765.32)                        | 10,256.45<br>(7,631.47 to<br>13,818.34)                       | 9,711.72<br>(7,326.70 to<br>12,859.49)                        | 10,932.62<br>(8,105.96 to<br>15,008.81)                       | 564.65<br>(469.32 to<br>660.58)                            | 486.56<br>(384.10 to<br>624.71)                            | 471.51<br>(377.21 to<br>598.66)                            | 499.99<br>(394.22 to<br>647.70)                            |
| Fire, heat, and hot substances                  | 5,618.29<br>(4,393.99 to<br>6,549.28)                           | 3,900.77<br>(2,835.04 to<br>4,934.77)                         | 3,751.42<br>(2,706.17 to<br>4,646.89)                         | 4,140.82<br>(3,032.76 to<br>5,322.68)                         | 232.40<br>(177.19 to<br>273.77)                            | 442.82<br>(311.30 to<br>569.79)                            | 435.43<br>(310.11 to<br>557.04)                            | 452.21<br>(321.51 to<br>590.32)                            |
| Poisonings                                      | 3,325.31<br>(2,474.33 to<br>4,027.29)                           | 895.80<br>(654.97 to<br>1,255.80)                             | 833.42<br>(618.77 to<br>1,145.51)                             | 1,013.10<br>(729.65 to<br>1,444.22)                           | 91.41<br>(71.25 to<br>112.55)                              | 53.82<br>(41.19 to<br>72.78)                               | 51.45<br>(40.04 to<br>69.33)                               | 58.15<br>(43.92 to<br>80.22)                               |
| Exposure to mechanical forces                   | 8,884.11<br>(7,293.18 to<br>11,395.09)                          | 4,037.65<br>(3,218.71 to<br>4,980.12)                         | 3,976.80<br>(3,196.15 to<br>4,892.51)                         | 4,288.92<br>(3,434.39 to<br>5,314.98)                         | 244.83<br>(205.60 to<br>299.26)                            | 277.97<br>(219.73 to<br>334.42)                            | 281.30<br>(220.96 to<br>334.42)                            | 279.20<br>(218.61 to<br>336.40)                            |
| Unintentional firearm injuries                  | 449.17<br>(369.18 to<br>615.07)                                 | 507.82<br>(405.48 to<br>622.63)                               | 514.13<br>(409.21 to<br>630.35)                               | 502.41<br>(400.40 to<br>616.09)                               | 21.30<br>(17.84 to<br>25.68)                               | 69.45<br>(50.82 to<br>90.72)                               | 71.48<br>(52.38 to<br>93.02)                               | 66.06<br>(48.28 to<br>87.16)                               |
| Unintentional suffocation                       | 1,356.76<br>(410.33 to<br>2,220.22)                             | 351.67<br>(165.80 to<br>639.82)                               | 342.55<br>(163.40 to<br>634.68)                               | 376.17<br>(171.85 to<br>691.79)                               | 20.46<br>(8.54 to<br>31.45)                                | 9.94<br>(6.88 to<br>14.81)                                 | 9.93<br>(6.84 to<br>15.06)                                 | 10.22<br>(7.29 to<br>14.79)                                |
| Other exposure to mechanical forces             | 7,078.19<br>(5,651.25 to<br>10,272.39)                          | 3,178.16<br>(2,456.59 to<br>4,029.89)                         | 3,120.12<br>(2,435.43 to<br>3,931.15)                         | 3,410.34<br>(2,655.26 to<br>4,414.55)                         | 203.07<br>(164.89 to<br>259.94)                            | 198.57<br>(146.63 to<br>244.71)                            | 199.89<br>(145.14 to<br>244.40)                            | 202.92<br>(149.95 to<br>249.80)                            |
| Adverse effects of medical treatment            | 5,851.26<br>(4,291.14 to<br>7,169.41)                           | 6,165.98<br>(2,977.97 to<br>8,283.59)                         | 6,259.63<br>(2,988.89 to<br>8,444.91)                         | 6,103.44<br>(2,994.54 to<br>8,174.40)                         | 260.37<br>(141.21 to<br>347.19)                            | 631.81<br>(256.82 to<br>933.17)                            | 672.68<br>(264.25 to<br>959.43)                            | 623.57<br>(244.11 to<br>894.88)                            |
| Animal contact                                  | 419.14<br>(341.60 to<br>510.24)                                 | 378.01<br>(293.03 to<br>469.50)                               | 379.83<br>(293.19 to<br>475.26)                               | 385.93<br>(299.06 to<br>484.94)                               | 15.22<br>(12.48 to<br>18.45)                               | 33.20<br>(25.28 to<br>42.05)                               | 34.04<br>(25.48 to<br>43.21)                               | 32.60<br>(24.32 to<br>41.86)                               |
| Venomous animal contact                         | 249.32<br>(192.27 to<br>309.91)                                 | 174.99<br>(130.71 to<br>227.88)                               | 175.87<br>(132.17 to<br>228.51)                               | 177.34<br>(133.29 to<br>229.98)                               | 7.76<br>(6.04 to<br>9.72)                                  | 12.27<br>(8.38 to<br>16.70)                                | 12.58<br>(8.59 to<br>17.10)                                | 11.94<br>(8.09 to<br>16.16)                                |
| Non-venomous animal contact                     | 169.82<br>(139.74 to<br>214.65)                                 | 203.02<br>(151.85 to<br>265.78)                               | 203.96<br>(150.43 to<br>266.52)                               | 208.59<br>(154.75 to<br>275.12)                               | 7.46<br>(5.97 to<br>9.50)                                  | 20.93<br>(15.05 to<br>27.54)                               | 21.46<br>(15.55 to<br>28.47)                               | 20.67<br>(14.50 to<br>27.75)                               |
| Foreign body                                    | 8,295.57<br>(6,813.50 to<br>9,999.41)                           | 6,278.57<br>(4,774.55 to<br>7,492.74)                         | 6,405.35<br>(4,862.37 to<br>7,619.64)                         | 6,124.23<br>(4,608.81 to<br>7,316.31)                         | 268.58<br>(204.01 to<br>316.39)                            | 579.01<br>(440.02 to<br>731.94)                            | 603.48<br>(460.55 to<br>766.61)                            | 540.49<br>(410.61 to<br>681.62)                            |
| Pulmonary aspiration and foreign body in airway | 7,954.55<br>(6,439.97 to<br>9,638.98)                           | 5,806.65<br>(4,372.50 to<br>6,994.78)                         | 5,914.47<br>(4,437.29 to<br>7,133.20)                         | 5,688.71<br>(4,271.06 to<br>6,865.52)                         | 255.04<br>(191.15 to<br>302.24)                            | 520.21<br>(390.89 to<br>645.97)                            | 541.30<br>(409.53 to<br>679.04)                            | 488.19<br>(365.12 to<br>606.27)                            |

|                                             |                                                                  |                                                                |                                                                |                                                                |                                                            |                                                            |                                                            |                                                            |
|---------------------------------------------|------------------------------------------------------------------|----------------------------------------------------------------|----------------------------------------------------------------|----------------------------------------------------------------|------------------------------------------------------------|------------------------------------------------------------|------------------------------------------------------------|------------------------------------------------------------|
|                                             | 341.03<br>(256.19 to<br>426.84)                                  | 471.92<br>(339.33 to<br>665.80)                                | 490.88<br>(351.11 to<br>682.33)                                | 435.53<br>(311.70 to<br>610.49)                                | 13.54<br>(9.66 to<br>17.83)                                | 58.80<br>(40.86 to<br>93.39)                               | 62.18<br>(43.23 to<br>98.61)                               | 52.20<br>(36.24 to<br>84.26)                               |
| Foreign body in other body part             |                                                                  |                                                                |                                                                |                                                                |                                                            |                                                            |                                                            |                                                            |
|                                             | 1,361.72<br>(944.32 to<br>1,729.16)                              | 1,052.90<br>(768.63 to<br>1,426.53)                            | 1,043.49<br>(761.06 to<br>1,410.40)                            | 1,116.55<br>(809.38 to<br>1,501.40)                            | 53.59<br>(37.82 to<br>67.82)                               | 96.49<br>(71.74 to<br>151.67)                              | 97.65<br>(72.20 to<br>153.81)                              | 98.23<br>(73.05 to<br>152.81)                              |
| Environmental heat and cold exposure        |                                                                  |                                                                |                                                                |                                                                |                                                            |                                                            |                                                            |                                                            |
|                                             | 4,642.99<br>(3,746.16 to<br>6,403.36)                            | 1,117.17<br>(829.45 to<br>1,500.04)                            | 1,049.55<br>(787.86 to<br>1,385.43)                            | 1,338.53<br>(996.82 to<br>1,827.54)                            | 123.84<br>(100.67 to<br>157.76)                            | 66.15<br>(49.82 to<br>85.12)                               | 63.80<br>(48.98 to<br>81.86)                               | 75.48<br>(56.64 to<br>99.00)                               |
| Other unintentional injuries                |                                                                  |                                                                |                                                                |                                                                |                                                            |                                                            |                                                            |                                                            |
| <b>Self-harm and interpersonal violence</b> | <b>161,594.85</b><br><b>(132,035.39 to</b><br><b>191,079.06)</b> | <b>89,793.75</b><br><b>(56,402.02 to</b><br><b>136,228.26)</b> | <b>78,960.56</b><br><b>(52,349.28 to</b><br><b>115,967.07)</b> | <b>96,628.99</b><br><b>(59,573.33 to</b><br><b>150,378.68)</b> | <b>4,434.29</b><br><b>(3,733.37 to</b><br><b>5,205.31)</b> | <b>4,246.75</b><br><b>(2,776.03 to</b><br><b>6,437.55)</b> | <b>3,828.55</b><br><b>(2,639.54 to</b><br><b>5,641.10)</b> | <b>4,411.24</b><br><b>(2,826.15 to</b><br><b>6,795.63)</b> |

| Taiwan (Province of China)                                                          |                                                              |                                                      |                                                      |                                                      |                                                     |                                                   |                                                   |                                                  |
|-------------------------------------------------------------------------------------|--------------------------------------------------------------|------------------------------------------------------|------------------------------------------------------|------------------------------------------------------|-----------------------------------------------------|---------------------------------------------------|---------------------------------------------------|--------------------------------------------------|
| Cause                                                                               | YLLs (actual counts)                                         |                                                      |                                                      |                                                      | Deaths (actual counts)                              |                                                   |                                                   |                                                  |
|                                                                                     | 2016                                                         | 2040 Forecast                                        | 2040 Better Scenario                                 | 2040 Worse Scenario                                  | 2016                                                | 2040 Forecast                                     | 2040 Better Scenario                              | 2040 Worse Scenario                              |
| Self-harm                                                                           | 145,039.76<br>(114,243.40 to<br>171,290.54)                  | 83,935.44<br>(51,532.10 to<br>128,731.14)            | 73,510.44<br>(48,090.36 to<br>108,119.06)            | 90,293.46<br>(54,714.99 to<br>141,605.88)            | 4,052.40<br>(3,371.32 to<br>4,761.34)               | 4,044.14<br>(2,614.82 to<br>6,203.93)             | 3,636.97<br>(2,485.72 to<br>5,404.69)             | 4,198.11<br>(2,663.76 to<br>6,521.05)            |
| Self-harm by firearm                                                                | 1,043.42<br>(577.21 to<br>1,414.25)                          | 425.39<br>(231.38 to<br>770.24)                      | 365.74<br>(211.55 to<br>627.46)                      | 472.82<br>(249.06 to<br>850.14)                      | 27.76<br>(18.00 to<br>38.41)                        | 27.50<br>(16.22 to<br>46.85)                      | 25.14<br>(15.39 to<br>42.47)                      | 28.86<br>(16.43 to<br>50.89)                     |
| Self-harm by other specified means                                                  | 143,996.34<br>(113,472.62 to<br>169,997.73)                  | 83,510.05<br>(51,299.62 to<br>128,111.33)            | 73,144.69<br>(47,863.85 to<br>107,604.97)            | 89,820.64<br>(54,428.02 to<br>140,793.91)            | 4,024.64<br>(3,350.91 to<br>4,729.63)               | 4,016.64<br>(2,601.18 to<br>6,127.02)             | 3,611.83<br>(2,465.45 to<br>5,370.12)             | 4,169.24<br>(2,647.27 to<br>6,479.88)            |
| Interpersonal violence                                                              | 16,555.09<br>(13,115.33 to<br>23,727.16)                     | 5,858.31<br>(3,908.88 to<br>8,983.32)                | 5,450.12<br>(3,649.71 to<br>8,258.51)                | 6,335.53<br>(4,188.29 to<br>9,790.99)                | 381.89<br>(302.99 to<br>532.70)                     | 202.62<br>(142.64 to<br>287.61)                   | 191.58<br>(137.02 to<br>265.95)                   | 213.13<br>(151.76 to<br>300.92)                  |
| Physical violence by firearm                                                        | 1,610.97<br>(680.57 to<br>2,404.79)                          | 403.79<br>(195.43 to<br>654.94)                      | 387.57<br>(187.10 to<br>634.02)                      | 454.03<br>(215.28 to<br>757.40)                      | 37.48<br>(16.55 to<br>57.05)                        | 12.92<br>(7.28 to<br>21.14)                       | 12.55<br>(7.08 to<br>20.81)                       | 14.19<br>(7.76 to<br>23.50)                      |
| Physical violence by sharp object                                                   | 4,040.46<br>(2,912.84 to<br>7,779.77)                        | 1,389.08<br>(937.45 to<br>2,327.40)                  | 1,343.51<br>(907.44 to<br>2,246.85)                  | 1,522.53<br>(1,013.72 to<br>2,605.82)                | 93.34<br>(69.13 to<br>165.52)                       | 49.27<br>(33.63 to<br>67.46)                      | 48.58<br>(32.61 to<br>66.69)                      | 52.07<br>(35.57 to<br>71.94)                     |
| Physical violence by other means                                                    | 10,903.66<br>(8,473.23 to<br>14,830.72)                      | 4,065.43<br>(2,580.77 to<br>6,423.70)                | 3,719.04<br>(2,402.80 to<br>5,823.16)                | 4,358.97<br>(2,749.86 to<br>6,824.61)                | 251.07<br>(195.02 to<br>341.03)                     | 140.43<br>(93.88 to<br>214.71)                    | 130.45<br>(89.71 to<br>193.80)                    | 146.88<br>(98.51 to<br>225.25)                   |
| <b>Forces of nature, conflict and terrorism, and executions and police conflict</b> | <b>10,150.74</b><br><b>(1,728.76 to</b><br><b>19,324.36)</b> | <b>758.91</b><br><b>(0.00 to</b><br><b>2,957.88)</b> | <b>764.69</b><br><b>(0.00 to</b><br><b>2,969.46)</b> | <b>747.60</b><br><b>(0.00 to</b><br><b>2,934.19)</b> | <b>246.09</b><br><b>(41.56 to</b><br><b>468.81)</b> | <b>26.61</b><br><b>(0.00 to</b><br><b>102.62)</b> | <b>27.25</b><br><b>(0.00 to</b><br><b>104.25)</b> | <b>25.47</b><br><b>(0.00 to</b><br><b>99.33)</b> |
| Exposure to forces of nature                                                        | 10,012.22<br>(1,588.60 to<br>19,189.64)                      | 706.52<br>(0.00 to<br>2,905.08)                      | 711.95<br>(0.00 to<br>2,918.86)                      | 695.88<br>(0.00 to<br>2,884.02)                      | 243.10<br>(38.57 to<br>465.92)                      | 24.97<br>(0.00 to<br>100.49)                      | 25.57<br>(0.00 to<br>102.50)                      | 23.92<br>(0.00 to<br>97.97)                      |
| Conflict and terrorism                                                              | 0.00<br>(0.00 to<br>0.00)                                    | 52.39<br>(0.00 to<br>126.46)                         | 52.74<br>(0.00 to<br>127.35)                         | 51.72<br>(0.00 to<br>124.61)                         | 0.00<br>(0.00 to<br>4.24)                           | 1.64<br>(0.00 to<br>4.24)                         | 1.69<br>(0.00 to<br>4.38)                         | 1.55<br>(0.00 to<br>3.97)                        |
| Executions and police conflict                                                      | 138.53<br>(113.78 to<br>170.24)                              | 0.00<br>(0.00 to<br>0.00)                            | 0.00<br>(0.00 to<br>0.00)                            | 0.00<br>(0.00 to<br>0.00)                            | 2.99<br>(2.39 to<br>3.74)                           | 0.00<br>(0.00 to<br>0.00)                         | 0.00<br>(0.00 to<br>0.00)                         | 0.00<br>(0.00 to<br>0.00)                        |

| Southeast Asia                                                    |                                          |                                          |                                         |                                          |                                    |                                    |                                    |                                    |
|-------------------------------------------------------------------|------------------------------------------|------------------------------------------|-----------------------------------------|------------------------------------------|------------------------------------|------------------------------------|------------------------------------|------------------------------------|
| Cause                                                             | YLLs (in 1000s)                          |                                          |                                         |                                          | Deaths (in 1000s)                  |                                    |                                    |                                    |
|                                                                   | 2016                                     | 2040 Forecast                            | 2040 Better Scenario                    | 2040 Worse Scenario                      | 2016                               | 2040 Forecast                      | 2040 Better Scenario               | 2040 Worse Scenario                |
| All causes                                                        | 118,944.33<br>(115,176.93 to 122,858.72) | 130,423.53<br>(113,556.24 to 149,783.19) | 103,364.11<br>(90,058.59 to 117,568.46) | 172,423.84<br>(148,612.69 to 200,178.73) | 4,090.64<br>(3,977.62 to 4,209.01) | 6,547.56<br>(5,832.27 to 7,332.34) | 5,467.11<br>(4,874.53 to 6,100.14) | 8,091.63<br>(7,187.62 to 9,068.59) |
| Communicable, maternal, neonatal, and nutritional diseases        | 32,654.45<br>(30,819.13 to 34,643.84)    | 21,188.69<br>(17,583.86 to 26,719.29)    | 15,603.51<br>(12,851.05 to 19,666.05)   | 30,477.45<br>(24,679.55 to 38,695.50)    | 727.10<br>(677.13 to 771.72)       | 783.82<br>(612.91 to 1,050.45)     | 634.39<br>(496.87 to 862.79)       | 1,046.02<br>(813.63 to 1,416.77)   |
| HIV/AIDS and tuberculosis                                         | 6,625.80<br>(6,166.97 to 7,143.24)       | 4,411.22<br>(3,475.13 to 5,662.11)       | 2,764.80<br>(2,109.76 to 3,550.52)      | 7,124.18<br>(5,720.05 to 9,082.23)       | 200.82<br>(188.43 to 214.30)       | 178.07<br>(135.64 to 233.98)       | 117.44<br>(89.79 to 152.32)        | 266.95<br>(206.82 to 349.92)       |
| Tuberculosis                                                      | 4,813.88<br>(4,554.07 to 5,076.82)       | 3,339.33<br>(2,462.96 to 4,548.58)       | 2,160.82<br>(1,819.37 to 2,909.56)      | 5,060.16<br>(3,693.95 to 6,938.98)       | 163.69<br>(154.88 to 173.62)       | 156.26<br>(116.22 to 210.60)       | 105.40<br>(79.39 to 140.79)        | 224.92<br>(164.61 to 304.11)       |
| HIV/AIDS                                                          | 1,811.92<br>(1,439.55 to 2,269.91)       | 1,071.89<br>(801.55 to 1,447.39)         | 603.97<br>(368.20 to 939.42)            | 2,064.02<br>(1,638.30 to 2,669.03)       | 37.13<br>(28.92 to 47.35)          | 21.82<br>(15.66 to 30.84)          | 12.05<br>(6.49 to 20.51)           | 42.03<br>(32.57 to 54.91)          |
| Diarrhea, lower respiratory, and other common infectious diseases | 12,884.88<br>(11,665.77 to 14,195.30)    | 8,985.15<br>(5,954.47 to 13,757.51)      | 6,713.14<br>(4,549.85 to 10,298.30)     | 13,267.74<br>(8,670.72 to 20,655.97)     | 329.92<br>(282.05 to 370.48)       | 439.86<br>(285.76 to 684.04)       | 366.78<br>(238.88 to 582.57)       | 584.65<br>(365.51 to 933.30)       |
| Diarrheal diseases                                                | 2,518.42<br>(1,959.84 to 3,270.59)       | 1,790.02<br>(331.00 to 5,137.68)         | 1,577.89<br>(353.56 to 4,508.45)        | 2,751.05<br>(495.50 to 7,822.49)         | 73.48<br>(46.20 to 101.16)         | 110.39<br>(18.56 to 332.27)        | 107.65<br>(22.74 to 305.70)        | 157.53<br>(26.40 to 476.17)        |
| Intestinal infectious diseases                                    | 1,411.74<br>(786.06 to 2,296.39)         | 761.83<br>(398.97 to 1,275.10)           | 727.87<br>(392.89 to 1,203.15)          | 868.77<br>(443.95 to 1,490.75)           | 21.28<br>(11.92 to 34.77)          | 13.06<br>(6.98 to 21.93)           | 12.89<br>(7.02 to 21.13)           | 14.56<br>(7.62 to 24.69)           |
| Typhoid fever                                                     | 1,226.69<br>(668.68 to 2,001.13)         | 647.57<br>(330.50 to 1,094.25)           | 635.89<br>(338.42 to 1,053.35)          | 732.13<br>(363.24 to 1,257.21)           | 18.40<br>(10.07 to 30.03)          | 11.02<br>(5.84 to 18.54)           | 11.20<br>(6.09 to 18.34)           | 12.18<br>(6.20 to 20.65)           |
| Paratyphoid fever                                                 | 181.49<br>(85.67 to 349.83)              | 113.24<br>(50.07 to 216.78)              | 91.13<br>(40.25 to 173.24)              | 135.31<br>(58.89 to 265.86)              | 2.81<br>(1.33 to 5.47)             | 2.06<br>(0.89 to 3.87)             | 1.65<br>(0.75 to 3.15)             | 2.33<br>(1.04 to 4.51)             |
| Other intestinal infectious diseases                              | 3.56<br>(1.36 to 7.72)                   | 1.01<br>(0.38 to 2.28)                   | 0.85<br>(0.31 to 1.84)                  | 1.32<br>(0.49 to 3.04)                   | 0.07<br>(0.03 to 0.14)             | 0.04<br>(0.01 to 0.08)             | 0.04<br>(0.01 to 0.08)             | 0.05<br>(0.02 to 0.09)             |
| Lower respiratory infections                                      | 6,856.31<br>(6,133.53 to 7,442.28)       | 5,088.58<br>(3,575.32 to 7,229.55)       | 3,482.41<br>(2,594.68 to 4,619.55)      | 7,704.65<br>(5,071.99 to 11,766.35)      | 201.79<br>(170.92 to 218.58)       | 289.66<br>(210.86 to 378.40)       | 224.93<br>(170.36 to 284.91)       | 378.26<br>(267.29 to 514.41)       |
| Upper respiratory infections                                      | 6.45<br>(5.37 to 7.88)                   | 3.98<br>(2.89 to 5.40)                   | 3.04<br>(2.17 to 4.12)                  | 5.53<br>(3.99 to 7.44)                   | 0.15<br>(0.13 to 0.18)             | 0.15<br>(0.11 to 0.19)             | 0.12<br>(0.08 to 0.16)             | 0.19<br>(0.14 to 0.25)             |
| Otitis media                                                      | 7.45<br>(3.09 to 12.79)                  | 2.85<br>(1.12 to 4.89)                   | 2.92<br>(1.14 to 4.95)                  | 2.76<br>(1.08 to 4.78)                   | 0.21<br>(0.10 to 0.32)             | 0.13<br>(0.05 to 0.25)             | 0.14<br>(0.06 to 0.25)             | 0.12<br>(0.05 to 0.22)             |
| Meningitis                                                        | 797.07<br>(594.64 to 945.30)             | 338.23<br>(220.74 to 459.47)             | 266.28<br>(182.35 to 356.97)            | 408.35<br>(247.94 to 586.06)             | 12.89<br>(9.54 to 15.06)           | 7.90<br>(5.57 to 10.17)            | 6.73<br>(4.84 to 8.53)             | 8.76<br>(6.10 to 11.64)            |
| Pneumococcal meningitis                                           | 6.65<br>(4.45 to 8.99)                   | 1.94<br>(1.25 to 2.71)                   | 1.73<br>(1.16 to 2.39)                  | 2.30<br>(1.43 to 3.41)                   | 0.11<br>(0.08 to 0.15)             | 0.06<br>(0.04 to 0.08)             | 0.06<br>(0.04 to 0.08)             | 0.06<br>(0.04 to 0.09)             |
| H influenzae type B meningitis                                    | 63.87<br>(47.96 to 78.16)                | 46.38<br>(16.27 to 114.59)               | 27.17<br>(13.98 to 52.67)               | 80.95<br>(19.81 to 221.47)               | 0.98<br>(0.74 to 1.18)             | 0.79<br>(0.40 to 1.61)             | 0.58<br>(0.37 to 0.91)             | 1.17<br>(0.45 to 2.85)             |
| Meningococcal meningitis                                          | 266.96<br>(196.78 to 323.66)             | 102.72<br>(67.56 to 137.61)              | 84.99<br>(58.07 to 114.07)              | 115.64<br>(75.54 to 155.19)              | 4.40<br>(3.24 to 5.28)             | 2.64<br>(1.87 to 3.39)             | 2.33<br>(1.65 to 2.98)             | 2.82<br>(1.99 to 3.62)             |
| Other meningitis                                                  | 459.58<br>(338.13 to 557.01)             | 187.18<br>(126.83 to 246.87)             | 152.39<br>(105.30 to 202.86)            | 209.45<br>(139.42 to 275.06)             | 7.39<br>(5.42 to 8.76)             | 4.41<br>(3.13 to 5.58)             | 3.76<br>(2.70 to 4.80)             | 4.71<br>(3.39 to 5.94)             |
| Encephalitis                                                      | 411.35<br>(294.56 to 499.21)             | 282.67<br>(198.90 to 367.08)             | 252.60<br>(183.87 to 328.58)            | 321.59<br>(222.67 to 417.80)             | 7.38<br>(5.57 to 8.54)             | 7.83<br>(6.00 to 9.45)             | 7.50<br>(5.78 to 8.98)             | 8.37<br>(6.44 to 10.00)            |

|                |                                 |                                   |                                  |                                   |                           |                            |                            |                             |
|----------------|---------------------------------|-----------------------------------|----------------------------------|-----------------------------------|---------------------------|----------------------------|----------------------------|-----------------------------|
| Diphtheria     | 3.32<br>(2.79 to<br>3.92)       | 0.61<br>(0.37 to<br>1.00)         | 0.42<br>(0.30 to<br>0.57)        | 0.95<br>(0.41 to<br>1.79)         | 0.05<br>(0.04 to<br>0.06) | 0.01<br>(0.01 to<br>0.02)  | 0.01<br>(0.01 to<br>0.01)  | 0.01<br>(0.01 to<br>0.02)   |
| Whooping cough | 322.99<br>(102.03 to<br>720.74) | 120.63<br>(10.56 to<br>363.68)    | 28.71<br>(5.53 to<br>80.46)      | 164.71<br>(12.56 to<br>470.78)    | 3.84<br>(1.22 to<br>8.56) | 1.44<br>(0.14 to<br>4.34)  | 0.36<br>(0.08 to<br>1.00)  | 1.96<br>(0.16 to<br>5.59)   |
| Tetanus        | 162.40<br>(64.49 to<br>206.00)  | 27.46<br>(10.16 to<br>39.68)      | 21.70<br>(7.41 to<br>31.22)      | 30.43<br>(12.00 to<br>43.72)      | 3.79<br>(1.39 to<br>4.82) | 0.78<br>(0.27 to<br>1.11)  | 0.74<br>(0.24 to<br>1.06)  | 0.78<br>(0.28 to<br>1.11)   |
| Measles        | 345.23<br>(131.84 to<br>722.74) | 551.49<br>(104.68 to<br>1,970.63) | 335.36<br>(86.13 to<br>1,054.22) | 986.74<br>(138.65 to<br>3,747.07) | 4.14<br>(1.58 to<br>8.65) | 7.69<br>(1.71 to<br>25.48) | 4.97<br>(1.48 to<br>13.98) | 13.14<br>(2.32 to<br>45.98) |

| Southeast Asia                                        |                                                |                                                  |                                                  |                                                  |                                         |                                         |                                         |                                         |
|-------------------------------------------------------|------------------------------------------------|--------------------------------------------------|--------------------------------------------------|--------------------------------------------------|-----------------------------------------|-----------------------------------------|-----------------------------------------|-----------------------------------------|
| Cause                                                 | YLLs (in 1000s)                                |                                                  |                                                  |                                                  | Deaths (in 1000s)                       |                                         |                                         |                                         |
|                                                       | 2016                                           | 2040 Forecast                                    | 2040 Better Scenario                             | 2040 Worse Scenario                              | 2016                                    | 2040 Forecast                           | 2040 Better Scenario                    | 2040 Worse Scenario                     |
| Varicella and herpes zoster                           | 42.16<br>(36.67 to 50.19)                      | 16.81<br>(11.44 to 22.83)                        | 13.95<br>(9.92 to 18.74)                         | 22.20<br>(14.47 to 30.66)                        | 0.93<br>(0.83 to 1.07)                  | 0.82<br>(0.62 to 1.05)                  | 0.77<br>(0.59 to 0.97)                  | 0.95<br>(0.72 to 1.22)                  |
| <b>Neglected tropical diseases and malaria</b>        | <b>1,487.64</b><br><b>(962.69 to 1,819.38)</b> | <b>2,309.02</b><br><b>(1,592.05 to 2,815.21)</b> | <b>2,080.06</b><br><b>(1,436.19 to 2,507.62)</b> | <b>2,492.57</b><br><b>(1,685.95 to 3,045.34)</b> | <b>27.01</b><br><b>(18.51 to 32.67)</b> | <b>49.07</b><br><b>(35.22 to 58.33)</b> | <b>46.58</b><br><b>(33.72 to 55.22)</b> | <b>51.08</b><br><b>(36.01 to 60.92)</b> |
| Malaria                                               | 744.92<br>(485.27 to 1,005.87)                 | 414.23<br>(289.57 to 768.45)                     | 401.19<br>(283.90 to 749.27)                     | 448.21<br>(308.57 to 834.42)                     | 15.38<br>(10.59 to 22.06)               | 11.82<br>(8.38 to 22.24)                | 11.84<br>(8.39 to 21.63)                | 12.12<br>(8.42 to 22.88)                |
| Chagas disease                                        | 0.00<br>(0.00 to 0.00)                         | 0.00<br>(0.00 to 0.00)                           | 0.00<br>(0.00 to 0.00)                           | 0.00<br>(0.00 to 0.00)                           | 0.00<br>(0.00 to 0.00)                  | 0.00<br>(0.00 to 0.00)                  | 0.00<br>(0.00 to 0.00)                  | 0.00<br>(0.00 to 0.00)                  |
| Leishmaniasis                                         | 0.01<br>(0.01 to 0.02)                         | 0.01<br>(0.00 to 0.01)                           | 0.01<br>(0.00 to 0.01)                           | 0.01<br>(0.00 to 0.01)                           | 0.00<br>(0.00 to 0.00)                  | 0.00<br>(0.00 to 0.00)                  | 0.00<br>(0.00 to 0.00)                  | 0.00<br>(0.00 to 0.00)                  |
| African trypanosomiasis                               | 0.00<br>(0.00 to 0.00)                         | 0.00<br>(0.00 to 0.00)                           | 0.00<br>(0.00 to 0.00)                           | 0.00<br>(0.00 to 0.00)                           | 0.00<br>(0.00 to 0.00)                  | 0.00<br>(0.00 to 0.00)                  | 0.00<br>(0.00 to 0.00)                  | 0.00<br>(0.00 to 0.00)                  |
| Schistosomiasis                                       | 4.21<br>(2.97 to 5.76)                         | 3.09<br>(1.96 to 4.82)                           | 2.75<br>(1.75 to 4.28)                           | 3.37<br>(2.16 to 5.12)                           | 0.13<br>(0.09 to 0.18)                  | 0.12<br>(0.07 to 0.18)                  | 0.11<br>(0.07 to 0.17)                  | 0.12<br>(0.08 to 0.19)                  |
| Cysticercosis                                         | 0.97<br>(0.82 to 1.15)                         | 0.37<br>(0.30 to 0.51)                           | 0.36<br>(0.28 to 0.49)                           | 0.40<br>(0.32 to 0.54)                           | 0.02<br>(0.02 to 0.03)                  | 0.01<br>(0.01 to 0.01)                  | 0.01<br>(0.01 to 0.01)                  | 0.01<br>(0.01 to 0.02)                  |
| Cystic echinococcosis                                 | 0.30<br>(0.25 to 0.37)                         | 0.15<br>(0.11 to 0.23)                           | 0.12<br>(0.09 to 0.19)                           | 0.23<br>(0.17 to 0.34)                           | 0.01<br>(0.01 to 0.01)                  | 0.01<br>(0.00 to 0.01)                  | 0.01<br>(0.00 to 0.01)                  | 0.01<br>(0.01 to 0.01)                  |
| Dengue                                                | 668.67<br>(290.39 to 891.34)                   | 1,848.24<br>(1,053.04 to 2,348.96)               | 1,639.48<br>(927.31 to 2,068.28)                 | 1,985.29<br>(1,119.40 to 2,544.29)               | 10.17<br>(4.44 to 13.53)                | 36.05<br>(21.25 to 45.14)               | 33.64<br>(19.87 to 41.90)               | 37.52<br>(21.75 to 47.32)               |
| Yellow fever                                          | 0.00<br>(0.00 to 0.00)                         | 0.00<br>(0.00 to 0.00)                           | 0.00<br>(0.00 to 0.00)                           | 0.00<br>(0.00 to 0.00)                           | 0.00<br>(0.00 to 0.00)                  | 0.00<br>(0.00 to 0.00)                  | 0.00<br>(0.00 to 0.00)                  | 0.00<br>(0.00 to 0.00)                  |
| Rabies                                                | 31.16<br>(16.59 to 41.87)                      | 12.51<br>(7.56 to 17.48)                         | 8.59<br>(5.04 to 11.95)                          | 20.44<br>(12.51 to 27.88)                        | 0.66<br>(0.37 to 0.87)                  | 0.30<br>(0.21 to 0.41)                  | 0.23<br>(0.15 to 0.31)                  | 0.48<br>(0.32 to 0.65)                  |
| Intestinal nematode infections                        | 22.17<br>(18.48 to 26.41)                      | 18.72<br>(13.82 to 28.21)                        | 16.91<br>(12.41 to 26.19)                        | 20.55<br>(15.34 to 30.39)                        | 0.32<br>(0.28 to 0.38)                  | 0.36<br>(0.28 to 0.53)                  | 0.35<br>(0.27 to 0.51)                  | 0.37<br>(0.29 to 0.53)                  |
| Other neglected tropical diseases                     | 15.22<br>(11.54 to 30.21)                      | 11.70<br>(8.26 to 26.28)                         | 10.65<br>(7.62 to 22.90)                         | 14.07<br>(9.88 to 31.40)                         | 0.32<br>(0.26 to 0.60)                  | 0.40<br>(0.29 to 0.81)                  | 0.40<br>(0.29 to 0.80)                  | 0.45<br>(0.32 to 0.93)                  |
| <b>Maternal disorders</b>                             | <b>994.36</b><br><b>(913.12 to 1,078.44)</b>   | <b>456.08</b><br><b>(369.42 to 561.66)</b>       | <b>376.69</b><br><b>(298.40 to 470.01)</b>       | <b>667.91</b><br><b>(538.01 to 824.99)</b>       | <b>18.39</b><br><b>(16.86 to 19.96)</b> | <b>8.59</b><br><b>(6.94 to 10.63)</b>   | <b>7.12</b><br><b>(5.65 to 8.91)</b>    | <b>12.56</b><br><b>(10.05 to 15.52)</b> |
| Maternal hemorrhage                                   | 333.39<br>(260.72 to 412.24)                   | 143.89<br>(104.30 to 196.27)                     | 118.69<br>(83.57 to 160.26)                      | 210.51<br>(148.81 to 285.52)                     | 6.13<br>(4.79 to 7.57)                  | 2.69<br>(1.93 to 3.70)                  | 2.22<br>(1.56 to 2.99)                  | 3.93<br>(2.77 to 5.40)                  |
| Maternal sepsis and other maternal infections         | 54.29<br>(34.60 to 79.99)                      | 23.04<br>(13.92 to 35.70)                        | 18.42<br>(10.68 to 29.20)                        | 33.31<br>(19.66 to 52.33)                        | 1.02<br>(0.65 to 1.49)                  | 0.44<br>(0.27 to 0.68)                  | 0.35<br>(0.21 to 0.55)                  | 0.64<br>(0.38 to 0.99)                  |
| Maternal hypertensive disorders                       | 114.41<br>(83.41 to 151.45)                    | 54.53<br>(36.44 to 78.64)                        | 44.12<br>(28.98 to 64.02)                        | 79.64<br>(53.09 to 113.68)                       | 2.11<br>(1.52 to 2.81)                  | 1.02<br>(0.69 to 1.48)                  | 0.83<br>(0.55 to 1.20)                  | 1.49<br>(1.00 to 2.16)                  |
| Maternal obstructed labor and uterine rupture         | 27.87<br>(14.34 to 45.59)                      | 12.74<br>(6.30 to 22.66)                         | 10.37<br>(4.92 to 18.39)                         | 19.30<br>(9.47 to 34.48)                         | 0.52<br>(0.27 to 0.87)                  | 0.24<br>(0.12 to 0.44)                  | 0.20<br>(0.09 to 0.35)                  | 0.37<br>(0.18 to 0.67)                  |
| Maternal abortion, miscarriage, and ectopic pregnancy | 107.77<br>(78.87 to 142.09)                    | 51.06<br>(33.69 to 78.44)                        | 41.34<br>(26.99 to 63.76)                        | 77.69<br>(52.75 to 118.07)                       | 2.01<br>(1.47 to 2.62)                  | 0.97<br>(0.65 to 1.46)                  | 0.79<br>(0.53 to 1.22)                  | 1.48<br>(1.02 to 2.21)                  |





| Southeast Asia                                                          |                                            |                                           |                                           |                                           |                                    |                                  |                                  |                                  |
|-------------------------------------------------------------------------|--------------------------------------------|-------------------------------------------|-------------------------------------------|-------------------------------------------|------------------------------------|----------------------------------|----------------------------------|----------------------------------|
| Cause                                                                   | YLLs (in 1000s)                            |                                           |                                           |                                           | Deaths (in 1000s)                  |                                  |                                  |                                  |
|                                                                         | 2016                                       | 2040 Forecast                             | 2040 Better Scenario                      | 2040 Worse Scenario                       | 2016                               | 2040 Forecast                    | 2040 Better Scenario             | 2040 Worse Scenario              |
| <b>Neonatal disorders</b>                                               | <b>9,132.97</b><br>(8,252.45 to 10,168.53) | <b>3,863.61</b><br>(2,840.92 to 4,959.00) | <b>2,573.70</b><br>(1,874.16 to 3,335.01) | <b>5,597.50</b><br>(4,105.70 to 7,285.11) | <b>105.51</b><br>(95.34 to 117.47) | <b>44.64</b><br>(32.83 to 57.29) | <b>29.74</b><br>(21.66 to 38.53) | <b>64.67</b><br>(47.44 to 84.17) |
| Neonatal preterm birth                                                  | 4,058.91<br>(3,610.47 to 4,681.85)         | 1,516.42<br>(1,185.24 to 1,887.25)        | 910.87<br>(712.64 to 1,139.98)            | 2,307.39<br>(1,800.85 to 2,897.31)        | 46.89<br>(41.71 to 54.08)          | 17.52<br>(13.70 to 21.80)        | 10.52<br>(8.23 to 13.17)         | 26.66<br>(20.80 to 33.47)        |
| Neonatal encephalopathy due to birth asphyxia and trauma                | 2,777.67<br>(2,381.75 to 3,186.47)         | 1,096.41<br>(669.04 to 1,631.67)          | 788.58<br>(470.68 to 1,183.04)            | 1,541.41<br>(933.91 to 2,329.32)          | 32.09<br>(27.51 to 36.81)          | 12.67<br>(7.73 to 18.85)         | 9.11<br>(5.44 to 13.67)          | 17.81<br>(10.79 to 26.91)        |
| Neonatal sepsis and other neonatal infections                           | 1,444.87<br>(1,165.62 to 1,905.21)         | 873.96<br>(606.04 to 1,252.45)            | 585.57<br>(408.30 to 834.24)              | 1,191.00<br>(823.55 to 1,720.99)          | 16.69<br>(13.47 to 22.01)          | 10.10<br>(7.00 to 14.47)         | 6.77<br>(4.72 to 9.64)           | 13.76<br>(9.52 to 19.89)         |
| Hemolytic disease and other neonatal jaundice                           | 46.57<br>(36.19 to 57.87)                  | 14.59<br>(8.63 to 23.10)                  | 10.32<br>(6.04 to 16.37)                  | 22.21<br>(13.17 to 35.85)                 | 0.54<br>(0.42 to 0.67)             | 0.17<br>(0.10 to 0.27)           | 0.12<br>(0.07 to 0.19)           | 0.26<br>(0.15 to 0.41)           |
| Other neonatal disorders                                                | 804.93<br>(667.12 to 978.98)               | 362.22<br>(234.50 to 516.99)              | 278.36<br>(179.29 to 400.63)              | 535.49<br>(342.57 to 773.53)              | 9.30<br>(7.71 to 11.31)            | 4.19<br>(2.71 to 5.97)           | 3.22<br>(2.07 to 4.63)           | 6.19<br>(3.96 to 8.94)           |
| <b>Nutritional deficiencies</b>                                         | <b>517.91</b><br>(477.83 to 563.58)        | <b>483.21</b><br>(423.78 to 546.89)       | <b>498.05</b><br>(438.58 to 572.59)       | <b>525.46</b><br>(457.62 to 600.55)       | <b>23.90</b><br>(22.44 to 25.61)   | <b>38.93</b><br>(32.25 to 45.84) | <b>43.82</b><br>(37.12 to 51.08) | <b>38.95</b><br>(30.98 to 46.86) |
| Protein-energy malnutrition                                             | 453.32<br>(416.68 to 498.27)               | 396.05<br>(342.19 to 458.53)              | 415.91<br>(359.60 to 485.85)              | 430.21<br>(366.41 to 502.24)              | 21.30<br>(19.89 to 22.86)          | 33.09<br>(26.76 to 39.62)        | 37.92<br>(31.23 to 45.18)        | 33.09<br>(25.78 to 40.69)        |
| Iodine deficiency                                                       | 4.43<br>(2.47 to 8.34)                     | 13.80<br>(3.36 to 37.95)                  | 12.91<br>(2.90 to 37.56)                  | 16.30<br>(4.06 to 45.03)                  | 0.13<br>(0.07 to 0.21)             | 1.02<br>(0.17 to 3.50)           | 1.02<br>(0.16 to 3.81)           | 1.12<br>(0.21 to 3.73)           |
| Dietary iron deficiency                                                 | 21.17<br>(11.37 to 26.26)                  | 20.14<br>(15.16 to 26.96)                 | 19.63<br>(14.86 to 26.89)                 | 22.30<br>(16.33 to 29.47)                 | 0.51<br>(0.36 to 0.66)             | 0.78<br>(0.52 to 1.30)           | 0.80<br>(0.53 to 1.37)           | 0.81<br>(0.54 to 1.31)           |
| Other nutritional deficiencies                                          | 38.98<br>(33.09 to 55.52)                  | 53.22<br>(43.31 to 71.17)                 | 49.59<br>(40.09 to 66.88)                 | 56.66<br>(46.33 to 76.80)                 | 1.96<br>(1.65 to 2.67)             | 4.04<br>(3.05 to 5.52)           | 4.07<br>(3.13 to 5.53)           | 3.93<br>(2.96 to 5.33)           |
| <b>Other communicable, maternal, neonatal, and nutritional diseases</b> | <b>1,010.90</b><br>(775.22 to 1,247.70)    | <b>680.40</b><br>(591.71 to 779.31)       | <b>597.07</b><br>(520.14 to 681.67)       | <b>802.09</b><br>(690.31 to 927.67)       | <b>21.54</b><br>(18.60 to 24.47)   | <b>24.65</b><br>(22.40 to 27.20) | <b>22.91</b><br>(20.66 to 25.47) | <b>27.15</b><br>(24.59 to 30.03) |
| Sexually transmitted infections excluding HIV                           | 290.65<br>(162.79 to 476.89)               | 62.55<br>(37.76 to 106.57)                | 49.38<br>(31.41 to 81.66)                 | 77.35<br>(45.06 to 134.50)                | 3.88<br>(2.40 to 6.06)             | 1.27<br>(0.95 to 1.78)           | 1.11<br>(0.87 to 1.49)           | 1.45<br>(1.07 to 2.12)           |
| Syphilis                                                                | 272.46<br>(144.07 to 458.59)               | 49.18<br>(24.33 to 93.60)                 | 36.69<br>(18.63 to 69.27)                 | 62.50<br>(30.21 to 120.90)                | 3.37<br>(1.87 to 5.54)             | 0.74<br>(0.45 to 1.25)           | 0.59<br>(0.37 to 0.96)           | 0.90<br>(0.52 to 1.59)           |
| Chlamydial infection                                                    | 3.40<br>(3.03 to 4.32)                     | 2.57<br>(2.17 to 3.10)                    | 2.45<br>(2.04 to 2.95)                    | 2.86<br>(2.42 to 3.54)                    | 0.10<br>(0.08 to 0.11)             | 0.10<br>(0.08 to 0.12)           | 0.10<br>(0.08 to 0.12)           | 0.11<br>(0.08 to 0.12)           |
| Gonococcal infection                                                    | 9.71<br>(8.41 to 11.64)                    | 7.31<br>(6.05 to 8.74)                    | 6.95<br>(5.76 to 8.29)                    | 8.07<br>(6.85 to 9.72)                    | 0.28<br>(0.23 to 0.32)             | 0.30<br>(0.23 to 0.35)           | 0.30<br>(0.22 to 0.35)           | 0.31<br>(0.24 to 0.37)           |
| Other sexually transmitted infections                                   | 5.07<br>(4.48 to 6.24)                     | 3.50<br>(2.94 to 4.27)                    | 3.29<br>(2.74 to 4.01)                    | 3.93<br>(3.33 to 4.89)                    | 0.13<br>(0.11 to 0.15)             | 0.12<br>(0.10 to 0.14)           | 0.12<br>(0.09 to 0.14)           | 0.13<br>(0.10 to 0.15)           |
| Acute hepatitis                                                         | 343.48<br>(321.16 to 369.79)               | 312.13<br>(268.89 to 363.13)              | 265.81<br>(223.49 to 318.39)              | 361.58<br>(314.24 to 418.00)              | 9.94<br>(9.29 to 10.69)            | 11.77<br>(10.25 to 13.41)        | 10.28<br>(8.79 to 12.02)         | 13.19<br>(11.55 to 15.11)        |
| Acute hepatitis A                                                       | 15.95<br>(13.71 to 18.55)                  | 7.05<br>(5.42 to 9.26)                    | 5.96<br>(4.52 to 7.94)                    | 8.47<br>(6.54 to 11.04)                   | 0.29<br>(0.25 to 0.34)             | 0.21<br>(0.16 to 0.28)           | 0.19<br>(0.15 to 0.25)           | 0.24<br>(0.18 to 0.31)           |
| Acute hepatitis B                                                       | 288.05<br>(266.06 to 311.80)               | 268.04<br>(225.82 to 316.58)              | 227.77<br>(187.59 to 276.50)              | 312.18<br>(264.65 to 366.96)              | 8.52<br>(7.89 to 9.24)             | 9.84<br>(8.41 to 11.43)          | 8.52<br>(7.14 to 10.15)          | 11.17<br>(9.57 to 12.94)         |

|                                       |                                                               |                                                                |                                                               |                                                                  |                                                            |                                                            |                                                            |                                                            |
|---------------------------------------|---------------------------------------------------------------|----------------------------------------------------------------|---------------------------------------------------------------|------------------------------------------------------------------|------------------------------------------------------------|------------------------------------------------------------|------------------------------------------------------------|------------------------------------------------------------|
|                                       | 6.42<br>(4.87 to<br>8.59)                                     | 7.96<br>(5.68 to<br>11.00)                                     | 6.99<br>(5.06 to<br>9.62)                                     | 8.57<br>(6.21 to<br>11.78)                                       | 0.21<br>(0.16 to<br>0.29)                                  | 0.33<br>(0.24 to<br>0.45)                                  | 0.30<br>(0.21 to<br>0.41)                                  | 0.35<br>(0.25 to<br>0.48)                                  |
| Acute hepatitis C                     |                                                               |                                                                |                                                               |                                                                  |                                                            |                                                            |                                                            |                                                            |
|                                       | 33.06<br>(26.95 to<br>39.84)                                  | 29.08<br>(21.66 to<br>38.24)                                   | 25.09<br>(18.35 to<br>33.40)                                  | 32.36<br>(24.20 to<br>42.35)                                     | 0.92<br>(0.71 to<br>1.17)                                  | 1.39<br>(0.98 to<br>1.91)                                  | 1.28<br>(0.90 to<br>1.77)                                  | 1.43<br>(1.02 to<br>2.00)                                  |
| Acute hepatitis E                     |                                                               |                                                                |                                                               |                                                                  |                                                            |                                                            |                                                            |                                                            |
|                                       | 376.77<br>(183.40 to<br>516.69)                               | 305.73<br>(226.66 to<br>371.53)                                | 281.88<br>(215.91 to<br>338.85)                               | 363.15<br>(256.31 to<br>452.50)                                  | 7.72<br>(5.15 to<br>9.43)                                  | 11.61<br>(9.88 to<br>13.22)                                | 11.51<br>(9.97 to<br>13.16)                                | 12.51<br>(10.43 to<br>14.41)                               |
| Other unspecified infectious diseases |                                                               |                                                                |                                                               |                                                                  |                                                            |                                                            |                                                            |                                                            |
| <b>Non-communicable diseases</b>      | <b>71,506.74</b><br><b>(68,956.76 to</b><br><b>74,054.47)</b> | <b>96,458.70</b><br><b>(81,594.37 to</b><br><b>113,524.76)</b> | <b>76,698.77</b><br><b>(65,794.75 to</b><br><b>88,804.13)</b> | <b>125,501.69</b><br><b>(104,074.86 to</b><br><b>149,908.46)</b> | <b>3,025.97</b><br><b>(2,926.49 to</b><br><b>3,128.43)</b> | <b>5,367.00</b><br><b>(4,693.61 to</b><br><b>6,128.52)</b> | <b>4,471.61</b><br><b>(3,942.99 to</b><br><b>5,047.71)</b> | <b>6,568.29</b><br><b>(5,674.31 to</b><br><b>7,578.99)</b> |

| Southeast Asia                       |                                          |                                          |                                          |                                          |                                 |                                       |                                     |                                       |
|--------------------------------------|------------------------------------------|------------------------------------------|------------------------------------------|------------------------------------------|---------------------------------|---------------------------------------|-------------------------------------|---------------------------------------|
| Cause                                | YLLs (in 1000s)                          |                                          |                                          |                                          | Deaths (in 1000s)               |                                       |                                     |                                       |
|                                      | 2016                                     | 2040 Forecast                            | 2040 Better Scenario                     | 2040 Worse Scenario                      | 2016                            | 2040 Forecast                         | 2040 Better Scenario                | 2040 Worse Scenario                   |
| Neoplasms                            | 15,219.19<br>(14,532.07 to<br>15,946.79) | 24,331.01<br>(21,586.04 to<br>27,437.32) | 21,534.07<br>(19,268.52 to<br>24,030.28) | 27,946.88<br>(24,602.87 to<br>31,717.64) | 576.50<br>(552.60 to<br>601.41) | 1,153.50<br>(1,031.96 to<br>1,293.42) | 1,049.49<br>(945.82 to<br>1,162.98) | 1,282.56<br>(1,130.20 to<br>1,453.98) |
| Lip and oral cavity cancer           | 324.48<br>(305.35 to<br>344.62)          | 519.92<br>(386.93 to<br>699.00)          | 383.38<br>(297.88 to<br>490.93)          | 772.54<br>(543.94 to<br>1,081.94)        | 14.07<br>(13.30 to<br>14.92)    | 27.27<br>(20.20 to<br>37.34)          | 20.82<br>(16.11 to<br>27.05)        | 38.95<br>(27.42 to<br>55.61)          |
| Nasopharynx cancer                   | 269.81<br>(250.88 to<br>289.76)          | 413.03<br>(307.56 to<br>548.06)          | 290.47<br>(221.26 to<br>377.94)          | 628.89<br>(450.19 to<br>856.92)          | 8.90<br>(8.30 to<br>9.52)       | 16.05<br>(11.92 to<br>21.06)          | 11.63<br>(8.91 to<br>14.92)         | 23.67<br>(16.70 to<br>32.31)          |
| Other pharynx cancer                 | 261.77<br>(216.34 to<br>305.65)          | 429.00<br>(283.56 to<br>648.78)          | 365.25<br>(253.38 to<br>539.61)          | 469.91<br>(304.59 to<br>721.95)          | 9.52<br>(7.97 to<br>10.98)      | 18.42<br>(12.47 to<br>27.54)          | 16.04<br>(11.52 to<br>23.24)        | 19.64<br>(13.07 to<br>29.56)          |
| Esophageal cancer                    | 288.69<br>(269.03 to<br>309.76)          | 394.60<br>(259.44 to<br>594.72)          | 305.72<br>(212.84 to<br>435.43)          | 583.37<br>(356.25 to<br>920.74)          | 12.04<br>(11.27 to<br>12.82)    | 19.38<br>(13.21 to<br>28.26)          | 15.49<br>(11.20 to<br>21.65)        | 27.55<br>(17.49 to<br>42.65)          |
| Stomach cancer                       | 948.87<br>(889.29 to<br>1,017.90)        | 1,147.67<br>(974.30 to<br>1,369.44)      | 1,043.51<br>(892.95 to<br>1,226.35)      | 1,272.76<br>(1,047.96 to<br>1,543.68)    | 38.58<br>(36.40 to<br>41.15)    | 57.44<br>(49.57 to<br>67.32)          | 53.41<br>(46.44 to<br>61.63)        | 61.45<br>(51.24 to<br>73.86)          |
| Colon and rectum cancer              | 1,228.52<br>(1,150.14 to<br>1,307.49)    | 2,496.68<br>(1,844.24 to<br>3,499.11)    | 2,398.36<br>(1,711.59 to<br>3,189.28)    | 2,549.21<br>(1,860.07 to<br>3,529.61)    | 53.20<br>(49.78 to<br>56.47)    | 135.91<br>(99.66 to<br>190.17)        | 128.63<br>(95.69 to<br>179.54)      | 133.19<br>(96.22 to<br>183.95)        |
| Liver cancer                         | 1,701.21<br>(1,542.99 to<br>1,858.61)    | 2,807.52<br>(2,107.29 to<br>3,758.27)    | 2,435.60<br>(1,948.13 to<br>3,091.23)    | 3,182.07<br>(2,256.68 to<br>4,450.77)    | 64.40<br>(59.04 to<br>69.85)    | 129.06<br>(99.71 to<br>168.00)        | 116.03<br>(94.38 to<br>143.05)      | 141.32<br>(103.66 to<br>189.69)       |
| Liver cancer due to hepatitis B      | 717.63<br>(581.25 to<br>869.91)          | 1,077.38<br>(763.96 to<br>1,514.63)      | 954.65<br>(726.11 to<br>1,288.30)        | 1,188.44<br>(800.72 to<br>1,742.79)      | 25.31<br>(20.76 to<br>30.36)    | 46.37<br>(33.34 to<br>63.36)          | 42.39<br>(32.03 to<br>54.95)        | 49.54<br>(34.15 to<br>70.87)          |
| Liver cancer due to hepatitis C      | 280.68<br>(229.14 to<br>338.30)          | 537.88<br>(394.27 to<br>729.23)          | 500.74<br>(383.03 to<br>644.09)          | 565.10<br>(408.24 to<br>778.79)          | 12.44<br>(10.38 to<br>14.90)    | 28.68<br>(21.60 to<br>37.75)          | 27.60<br>(21.51 to<br>34.90)        | 29.12<br>(21.32 to<br>39.08)          |
| Liver cancer due to alcohol use      | 326.56<br>(239.95 to<br>425.43)          | 555.56<br>(358.68 to<br>826.88)          | 418.84<br>(282.56 to<br>594.96)          | 733.65<br>(458.77 to<br>1,111.85)        | 13.17<br>(9.65 to<br>17.07)     | 25.91<br>(16.60 to<br>37.72)          | 20.46<br>(13.47 to<br>28.90)        | 33.00<br>(20.71 to<br>49.48)          |
| Liver cancer due to other causes     | 376.34<br>(294.51 to<br>465.76)          | 636.71<br>(419.40 to<br>936.95)          | 561.37<br>(390.84 to<br>771.35)          | 694.89<br>(437.40 to<br>1,059.23)        | 13.49<br>(10.72 to<br>16.63)    | 28.10<br>(18.69 to<br>40.64)          | 25.58<br>(17.85 to<br>35.06)        | 29.66<br>(19.08 to<br>44.08)          |
| Gallbladder and biliary tract cancer | 237.48<br>(180.21 to<br>267.68)          | 305.87<br>(236.85 to<br>343.22)          | 310.45<br>(240.29 to<br>351.13)          | 286.29<br>(222.01 to<br>319.08)          | 10.83<br>(8.37 to<br>12.13)     | 17.20<br>(13.39 to<br>19.16)          | 17.80<br>(13.78 to<br>20.01)        | 15.62<br>(12.07 to<br>17.38)          |
| Pancreatic cancer                    | 486.10<br>(451.92 to<br>528.47)          | 1,032.24<br>(851.34 to<br>1,272.05)      | 1,009.04<br>(847.72 to<br>1,225.79)      | 1,037.59<br>(849.01 to<br>1,280.21)      | 20.83<br>(19.45 to<br>22.58)    | 52.76<br>(43.76 to<br>64.83)          | 52.75<br>(44.45 to<br>63.77)        | 51.30<br>(42.14 to<br>63.32)          |
| Larynx cancer                        | 162.69<br>(151.08 to<br>175.45)          | 225.85<br>(143.03 to<br>342.26)          | 158.63<br>(106.46 to<br>234.87)          | 345.25<br>(208.56 to<br>535.94)          | 6.76<br>(6.30 to<br>7.25)       | 11.10<br>(7.10 to<br>16.93)           | 8.01<br>(5.46 to<br>11.76)          | 16.39<br>(9.91 to<br>25.74)           |
| Tracheal, bronchus, and lung cancer  | 2,448.49<br>(2,273.57 to<br>2,619.30)    | 3,792.17<br>(2,929.74 to<br>4,791.45)    | 2,641.03<br>(2,105.66 to<br>3,265.92)    | 6,045.64<br>(4,585.49 to<br>7,769.12)    | 108.53<br>(101.29 to<br>115.22) | 195.92<br>(153.86 to<br>247.54)       | 142.19<br>(114.26 to<br>175.90)     | 298.90<br>(226.06 to<br>384.53)       |
| Malignant skin melanoma              | 52.28<br>(47.30 to<br>65.85)             | 88.29<br>(78.14 to<br>114.01)            | 97.71<br>(85.38 to<br>127.06)            | 78.03<br>(69.44 to<br>99.95)             | 1.83<br>(1.65 to<br>2.37)       | 4.08<br>(3.64 to<br>5.38)             | 4.66<br>(4.12 to<br>6.23)           | 3.45<br>(3.08 to<br>4.58)             |
| Non-melanoma skin cancer             | 97.90<br>(89.39 to<br>107.14)            | 190.38<br>(169.64 to<br>212.75)          | 179.59<br>(158.37 to<br>203.53)          | 191.37<br>(172.71 to<br>213.49)          | 4.18<br>(3.84 to<br>4.54)       | 10.40<br>(9.47 to<br>11.45)           | 10.11<br>(9.11 to<br>11.19)         | 10.01<br>(9.05 to<br>11.06)           |
| Breast cancer                        | 1,404.11<br>(1,282.79 to<br>1,545.05)    | 2,156.31<br>(1,677.81 to<br>2,795.99)    | 1,956.78<br>(1,555.59 to<br>2,466.47)    | 2,254.57<br>(1,720.57 to<br>2,928.03)    | 45.17<br>(41.29 to<br>50.09)    | 84.75<br>(66.66 to<br>109.33)         | 78.28<br>(63.05 to<br>98.18)        | 86.31<br>(66.89 to<br>112.03)         |
| Cervical cancer                      | 753.41<br>(594.81 to<br>838.20)          | 839.70<br>(641.39 to<br>1,011.41)        | 759.28<br>(574.47 to<br>910.88)          | 935.83<br>(707.05 to<br>1,143.35)        | 25.61<br>(20.33 to<br>28.36)    | 34.32<br>(26.47 to<br>40.63)          | 31.53<br>(24.25 to<br>37.45)        | 37.26<br>(28.29 to<br>45.04)          |

|                   |                                 |                                   |                                   |                                 |                              |                              |                              |                              |
|-------------------|---------------------------------|-----------------------------------|-----------------------------------|---------------------------------|------------------------------|------------------------------|------------------------------|------------------------------|
|                   | 184.31<br>(162.04 to<br>201.33) | 296.86<br>(255.59 to<br>336.17)   | 280.14<br>(238.93 to<br>319.01)   | 317.38<br>(276.14 to<br>359.07) | 7.08<br>(6.29 to<br>7.67)    | 13.69<br>(12.13 to<br>15.20) | 13.17<br>(11.60 to<br>14.76) | 14.25<br>(12.65 to<br>15.83) |
| Uterine cancer    |                                 |                                   |                                   |                                 |                              |                              |                              |                              |
|                   | 414.51<br>(375.55 to<br>462.32) | 697.60<br>(545.70 to<br>906.54)   | 669.70<br>(536.33 to<br>848.88)   | 656.34<br>(511.94 to<br>857.60) | 14.05<br>(12.79 to<br>15.56) | 28.48<br>(22.61 to<br>36.97) | 27.65<br>(22.44 to<br>34.87) | 26.35<br>(20.92 to<br>34.46) |
| Ovarian cancer    |                                 |                                   |                                   |                                 |                              |                              |                              |                              |
|                   | 307.77<br>(221.91 to<br>347.66) | 947.00<br>(685.42 to<br>1,075.20) | 979.77<br>(714.77 to<br>1,113.27) | 845.73<br>(611.96 to<br>966.63) | 18.99<br>(13.74 to<br>21.34) | 67.57<br>(49.28 to<br>77.07) | 72.06<br>(53.18 to<br>81.89) | 57.99<br>(41.60 to<br>67.13) |
| Prostate cancer   |                                 |                                   |                                   |                                 |                              |                              |                              |                              |
|                   | 27.64<br>(25.06 to<br>32.13)    | 30.07<br>(26.11 to<br>35.41)      | 28.48<br>(24.73 to<br>33.43)      | 31.14<br>(27.20 to<br>36.59)    | 0.67<br>(0.61 to<br>0.76)    | 0.93<br>(0.83 to<br>1.06)    | 0.91<br>(0.81 to<br>1.04)    | 0.92<br>(0.83 to<br>1.06)    |
| Testicular cancer |                                 |                                   |                                   |                                 |                              |                              |                              |                              |

| Southeast Asia                  |                                                     |                                                     |                                                     |                                                     |                                                  |                                                  |                                                  |                                                  |
|---------------------------------|-----------------------------------------------------|-----------------------------------------------------|-----------------------------------------------------|-----------------------------------------------------|--------------------------------------------------|--------------------------------------------------|--------------------------------------------------|--------------------------------------------------|
| Cause                           | YLLs (in 1000s)                                     |                                                     |                                                     |                                                     | Deaths (in 1000s)                                |                                                  |                                                  |                                                  |
|                                 | 2016                                                | 2040 Forecast                                       | 2040 Better Scenario                                | 2040 Worse Scenario                                 | 2016                                             | 2040 Forecast                                    | 2040 Better Scenario                             | 2040 Worse Scenario                              |
| Kidney cancer                   | 166.33<br>(154.62 to 182.11)                        | 316.38<br>(267.58 to 372.39)                        | 321.57<br>(274.10 to 375.16)                        | 303.69<br>(254.10 to 366.57)                        | 6.01<br>(5.58 to 6.58)                           | 14.74<br>(12.67 to 17.32)                        | 15.45<br>(13.30 to 18.07)                        | 13.60<br>(11.38 to 16.29)                        |
| Bladder cancer                  | 167.87<br>(157.61 to 179.25)                        | 324.95<br>(255.95 to 418.79)                        | 301.21<br>(243.39 to 379.37)                        | 349.25<br>(267.55 to 460.61)                        | 8.44<br>(7.94 to 9.01)                           | 20.06<br>(15.80 to 25.98)                        | 19.14<br>(15.49 to 24.11)                        | 20.69<br>(15.70 to 27.48)                        |
| Brain and nervous system cancer | 527.62<br>(407.45 to 627.02)                        | 825.38<br>(632.09 to 992.84)                        | 809.58<br>(619.40 to 974.43)                        | 796.35<br>(609.18 to 958.41)                        | 14.20<br>(10.68 to 16.78)                        | 29.29<br>(21.70 to 34.98)                        | 29.64<br>(21.92 to 35.54)                        | 27.20<br>(20.05 to 32.48)                        |
| Thyroid cancer                  | 131.93<br>(121.22 to 153.52)                        | 220.50<br>(182.63 to 282.65)                        | 201.36<br>(169.13 to 251.00)                        | 228.94<br>(188.71 to 295.43)                        | 5.27<br>(4.86 to 6.29)                           | 10.76<br>(9.07 to 13.60)                         | 10.06<br>(8.61 to 12.31)                         | 10.83<br>(9.05 to 13.80)                         |
| Mesothelioma                    | 41.01<br>(38.14 to 47.42)                           | 59.37<br>(53.65 to 69.60)                           | 60.73<br>(54.33 to 71.52)                           | 58.08<br>(52.86 to 67.32)                           | 1.35<br>(1.25 to 1.57)                           | 2.50<br>(2.28 to 3.01)                           | 2.63<br>(2.38 to 3.17)                           | 2.36<br>(2.16 to 2.82)                           |
| Hodgkin lymphoma                | 79.24<br>(68.51 to 108.88)                          | 76.31<br>(62.58 to 106.70)                          | 67.80<br>(55.19 to 93.99)                           | 86.81<br>(71.63 to 119.75)                          | 2.19<br>(1.90 to 3.01)                           | 2.71<br>(2.25 to 3.76)                           | 2.46<br>(2.02 to 3.44)                           | 2.98<br>(2.48 to 4.09)                           |
| Non-Hodgkin lymphoma            | 552.69<br>(507.87 to 658.96)                        | 900.40<br>(789.48 to 1,115.81)                      | 869.91<br>(762.51 to 1,070.59)                      | 854.27<br>(748.55 to 1,058.47)                      | 17.07<br>(15.66 to 20.54)                        | 37.10<br>(32.68 to 46.04)                        | 36.94<br>(32.62 to 46.38)                        | 33.86<br>(29.77 to 41.61)                        |
| Multiple myeloma                | 103.52<br>(92.08 to 131.47)                         | 213.54<br>(180.33 to 273.09)                        | 210.15<br>(177.81 to 264.81)                        | 197.61<br>(166.56 to 252.30)                        | 3.99<br>(3.56 to 5.07)                           | 9.86<br>(8.45 to 12.58)                          | 9.92<br>(8.50 to 12.56)                          | 8.88<br>(7.55 to 11.44)                          |
| Leukemia                        | 805.27<br>(745.39 to 900.81)                        | 976.88<br>(823.85 to 1,156.48)                      | 881.77<br>(754.20 to 1,019.86)                      | 1,031.61<br>(858.52 to 1,240.71)                    | 21.41<br>(18.96 to 23.03)                        | 36.40<br>(30.52 to 43.27)                        | 33.98<br>(28.78 to 39.53)                        | 37.05<br>(30.48 to 45.56)                        |
| Acute lymphoid leukemia         | 224.25<br>(204.99 to 272.72)                        | 282.01<br>(240.27 to 337.75)                        | 255.24<br>(220.07 to 306.49)                        | 289.35<br>(242.64 to 350.61)                        | 5.77<br>(5.32 to 6.84)                           | 10.14<br>(8.53 to 12.22)                         | 9.49<br>(8.09 to 11.42)                          | 10.04<br>(8.36 to 12.33)                         |
| Chronic lymphoid leukemia       | 13.14<br>(11.81 to 15.76)                           | 18.49<br>(14.92 to 22.72)                           | 17.43<br>(14.40 to 20.98)                           | 18.98<br>(15.03 to 23.77)                           | 0.43<br>(0.38 to 0.51)                           | 0.77<br>(0.63 to 0.95)                           | 0.75<br>(0.63 to 0.92)                           | 0.76<br>(0.60 to 0.95)                           |
| Acute myeloid leukemia          | 155.68<br>(140.73 to 191.23)                        | 241.67<br>(202.98 to 293.96)                        | 230.06<br>(195.89 to 274.48)                        | 240.75<br>(199.84 to 297.21)                        | 3.73<br>(3.40 to 4.47)                           | 7.65<br>(6.43 to 9.29)                           | 7.53<br>(6.40 to 8.99)                           | 7.36<br>(6.11 to 9.11)                           |
| Chronic myeloid leukemia        | 40.47<br>(36.09 to 47.05)                           | 38.28<br>(30.47 to 48.73)                           | 33.24<br>(26.66 to 41.54)                           | 41.15<br>(32.20 to 53.63)                           | 1.15<br>(1.03 to 1.36)                           | 1.35<br>(1.09 to 1.74)                           | 1.21<br>(0.98 to 1.54)                           | 1.41<br>(1.11 to 1.84)                           |
| Other leukemia                  | 371.74<br>(316.94 to 399.72)                        | 396.42<br>(322.42 to 476.49)                        | 345.81<br>(279.74 to 405.60)                        | 441.37<br>(354.17 to 542.93)                        | 10.33<br>(8.06 to 11.20)                         | 16.50<br>(12.36 to 20.10)                        | 15.00<br>(11.37 to 17.95)                        | 17.48<br>(13.20 to 22.03)                        |
| Other neoplasms                 | 1,043.66<br>(977.41 to 1,121.20)                    | 1,606.50<br>(1,472.05 to 1,757.17)                  | 1,617.11<br>(1,469.45 to 1,781.92)                  | 1,556.39<br>(1,436.18 to 1,689.78)                  | 31.34<br>(29.48 to 33.79)                        | 65.36<br>(60.63 to 70.90)                        | 68.11<br>(62.87 to 74.32)                        | 60.58<br>(56.63 to 65.57)                        |
| <b>Cardiovascular diseases</b>  | <b>27,994.40</b><br><b>(26,867.78 to 29,170.75)</b> | <b>31,691.81</b><br><b>(22,580.90 to 44,588.37)</b> | <b>20,697.94</b><br><b>(15,294.19 to 28,612.17)</b> | <b>50,739.34</b><br><b>(35,387.91 to 71,706.72)</b> | <b>1,311.38</b><br><b>(1,261.56 to 1,368.22)</b> | <b>1,895.11</b><br><b>(1,409.28 to 2,598.13)</b> | <b>1,344.98</b><br><b>(1,030.58 to 1,795.85)</b> | <b>2,762.42</b><br><b>(2,038.52 to 3,798.04)</b> |
| Rheumatic heart disease         | 612.50<br>(563.69 to 667.03)                        | 402.87<br>(343.22 to 477.37)                        | 350.75<br>(295.14 to 416.83)                        | 477.31<br>(406.11 to 577.60)                        | 17.57<br>(16.04 to 19.22)                        | 16.43<br>(14.22 to 19.23)                        | 15.06<br>(12.93 to 17.60)                        | 18.54<br>(15.99 to 21.86)                        |
| Ischemic heart disease          | 12,943.39<br>(12,379.66 to 13,523.97)               | 14,525.99<br>(8,149.34 to 25,328.09)                | 8,617.86<br>(4,964.32 to 14,738.56)                 | 24,462.84<br>(13,936.51 to 41,542.55)               | 620.73<br>(594.93 to 650.60)                     | 863.53<br>(518.17 to 1,434.37)                   | 565.10<br>(346.38 to 923.19)                     | 1,329.28<br>(797.68 to 2,189.06)                 |
| Stroke                          | 10,724.23<br>(10,259.73 to 11,216.88)               | 10,247.32<br>(6,706.97 to 16,047.68)                | 6,182.08<br>(4,264.53 to 9,299.66)                  | 18,220.21<br>(11,415.52 to 28,636.71)               | 504.52<br>(481.49 to 529.72)                     | 624.05<br>(438.01 to 959.92)                     | 416.42<br>(299.79 to 616.54)                     | 984.80<br>(665.29 to 1,507.04)                   |
| Ischemic stroke                 | 2,727.40<br>(2,526.94 to 2,961.48)                  | 3,219.48<br>(1,936.09 to 6,314.75)                  | 2,147.13<br>(1,354.80 to 3,978.80)                  | 4,888.32<br>(2,845.80 to 9,457.97)                  | 173.12<br>(160.59 to 187.25)                     | 245.63<br>(149.57 to 526.35)                     | 177.50<br>(111.97 to 351.69)                     | 339.27<br>(201.17 to 702.77)                     |

|                                |                                       |                                        |                                       |                                         |                                 |                                 |                                 |                                 |
|--------------------------------|---------------------------------------|----------------------------------------|---------------------------------------|-----------------------------------------|---------------------------------|---------------------------------|---------------------------------|---------------------------------|
| Intracerebral hemorrhage       | 7,996.83<br>(7,610.39 to<br>8,397.26) | 7,027.85<br>(4,398.81 to<br>11,072.39) | 4,034.95<br>(2,681.68 to<br>6,129.37) | 13,331.90<br>(7,950.87 to<br>21,600.78) | 331.40<br>(314.98 to<br>347.89) | 378.42<br>(252.85 to<br>577.02) | 238.92<br>(169.29 to<br>346.57) | 645.53<br>(410.53 to<br>996.95) |
| Hypertensive heart disease     | 1,515.95<br>(1,244.34 to<br>1,683.39) | 2,867.94<br>(2,050.61 to<br>4,258.87)  | 2,268.74<br>(1,713.78 to<br>3,084.02) | 3,667.46<br>(2,462.29 to<br>6,239.63)   | 75.62<br>(62.80 to<br>83.41)    | 177.54<br>(128.36 to<br>267.93) | 146.27<br>(112.14 to<br>200.48) | 214.91<br>(146.06 to<br>361.13) |
| Cardiomyopathy and myocarditis | 566.12<br>(464.68 to<br>619.03)       | 805.43<br>(589.65 to<br>1,018.29)      | 732.44<br>(536.01 to<br>925.34)       | 807.23<br>(596.43 to<br>1,024.39)       | 20.46<br>(16.35 to<br>22.57)    | 40.38<br>(28.15 to<br>53.30)    | 38.71<br>(26.46 to<br>51.05)    | 38.03<br>(27.13 to<br>50.79)    |
| Myocarditis                    | 106.51<br>(88.92 to<br>131.78)        | 106.25<br>(87.53 to<br>130.39)         | 103.80<br>(84.80 to<br>127.49)        | 109.49<br>(90.19 to<br>133.85)          | 2.88<br>(2.37 to<br>3.43)       | 4.20<br>(3.41 to<br>4.97)       | 4.34<br>(3.51 to<br>5.09)       | 4.05<br>(3.31 to<br>4.80)       |

| Southeast Asia                                                |                                                  |                                                  |                                                  |                                                  |                                            |                                            |                                            |                                            |
|---------------------------------------------------------------|--------------------------------------------------|--------------------------------------------------|--------------------------------------------------|--------------------------------------------------|--------------------------------------------|--------------------------------------------|--------------------------------------------|--------------------------------------------|
| Cause                                                         | YLLs (in 1000s)                                  |                                                  |                                                  |                                                  | Deaths (in 1000s)                          |                                            |                                            |                                            |
|                                                               | 2016                                             | 2040 Forecast                                    | 2040 Better Scenario                             | 2040 Worse Scenario                              | 2016                                       | 2040 Forecast                              | 2040 Better Scenario                       | 2040 Worse Scenario                        |
| Alcoholic cardiomyopathy                                      | 86.77<br>(56.69 to 105.02)                       | 118.38<br>(72.28 to 148.69)                      | 110.75<br>(65.74 to 142.08)                      | 120.17<br>(78.07 to 146.99)                      | 2.93<br>(1.94 to 3.48)                     | 4.91<br>(3.06 to 6.03)                     | 4.73<br>(2.88 to 5.89)                     | 4.78<br>(3.10 to 5.76)                     |
| Other cardiomyopathy                                          | 372.83<br>(296.56 to 412.89)                     | 580.79<br>(397.44 to 779.81)                     | 517.88<br>(353.54 to 692.97)                     | 577.56<br>(392.02 to 786.89)                     | 14.65<br>(11.30 to 16.22)                  | 31.26<br>(20.53 to 43.83)                  | 29.64<br>(19.02 to 41.84)                  | 29.20<br>(19.65 to 41.64)                  |
| Atrial fibrillation and flutter                               | 152.00<br>(121.15 to 184.79)                     | 418.55<br>(318.49 to 533.78)                     | 407.04<br>(312.73 to 513.44)                     | 411.57<br>(309.02 to 534.32)                     | 13.84<br>(10.87 to 17.12)                  | 40.99<br>(30.88 to 52.90)                  | 41.22<br>(31.19 to 52.42)                  | 38.47<br>(28.35 to 49.78)                  |
| Aortic aneurysm                                               | 201.47<br>(182.64 to 227.14)                     | 350.50<br>(283.35 to 428.30)                     | 331.43<br>(272.69 to 400.03)                     | 351.78<br>(280.93 to 440.85)                     | 10.40<br>(9.45 to 11.59)                   | 22.69<br>(19.05 to 27.16)                  | 22.44<br>(18.93 to 26.42)                  | 21.57<br>(17.89 to 26.31)                  |
| Peripheral artery disease                                     | 9.24<br>(7.73 to 11.13)                          | 33.86<br>(25.79 to 44.69)                        | 32.04<br>(24.59 to 42.38)                        | 30.76<br>(23.07 to 40.51)                        | 0.64<br>(0.54 to 0.80)                     | 2.80<br>(2.14 to 3.73)                     | 2.82<br>(2.18 to 3.79)                     | 2.38<br>(1.81 to 3.15)                     |
| Endocarditis                                                  | 410.97<br>(366.46 to 517.33)                     | 584.87<br>(441.48 to 799.19)                     | 553.49<br>(421.93 to 740.35)                     | 600.21<br>(448.28 to 826.05)                     | 12.90<br>(11.50 to 16.16)                  | 25.59<br>(19.42 to 34.72)                  | 25.18<br>(19.35 to 34.06)                  | 24.96<br>(18.77 to 34.15)                  |
| Other cardiovascular and circulatory diseases                 | 858.52<br>(752.56 to 1,255.22)                   | 1,454.48<br>(1,101.17 to 2,109.52)               | 1,222.07<br>(939.08 to 1,749.74)                 | 1,709.96<br>(1,263.81 to 2,508.29)               | 34.70<br>(30.54 to 50.84)                  | 81.12<br>(63.10 to 119.26)                 | 71.77<br>(56.83 to 104.46)                 | 89.49<br>(67.87 to 131.28)                 |
| <b>Chronic respiratory diseases</b>                           | <b>4,716.74</b><br><b>(4,427.58 to 4,973.12)</b> | <b>5,031.06</b><br><b>(4,101.34 to 6,248.34)</b> | <b>3,728.98</b><br><b>(3,145.33 to 4,482.77)</b> | <b>7,324.75</b><br><b>(5,713.31 to 9,573.92)</b> | <b>237.44</b><br><b>(220.86 to 250.68)</b> | <b>317.10</b><br><b>(261.23 to 389.21)</b> | <b>247.43</b><br><b>(210.00 to 294.51)</b> | <b>440.45</b><br><b>(347.43 to 568.08)</b> |
| Chronic obstructive pulmonary disease                         | 2,690.18<br>(2,343.46 to 2,973.09)               | 3,345.79<br>(2,466.79 to 4,444.63)               | 2,381.27<br>(1,828.69 to 3,035.98)               | 5,415.03<br>(3,832.14 to 7,547.81)               | 153.50<br>(135.29 to 166.78)               | 224.51<br>(169.29 to 291.22)               | 169.76<br>(133.97 to 213.99)               | 340.53<br>(247.30 to 461.70)               |
| Pneumoconiosis                                                | 4.10<br>(3.55 to 4.89)                           | 5.09<br>(4.44 to 5.87)                           | 4.77<br>(4.14 to 5.48)                           | 5.01<br>(4.41 to 5.76)                           | 0.21<br>(0.18 to 0.24)                     | 0.34<br>(0.30 to 0.39)                     | 0.33<br>(0.29 to 0.37)                     | 0.32<br>(0.28 to 0.38)                     |
| Silicosis                                                     | 0.84<br>(0.62 to 1.15)                           | 0.71<br>(0.50 to 0.97)                           | 0.63<br>(0.43 to 0.87)                           | 0.71<br>(0.52 to 0.97)                           | 0.04<br>(0.03 to 0.05)                     | 0.04<br>(0.03 to 0.06)                     | 0.04<br>(0.03 to 0.06)                     | 0.04<br>(0.03 to 0.06)                     |
| Asbestosis                                                    | 0.96<br>(0.81 to 1.19)                           | 1.46<br>(1.23 to 1.84)                           | 1.61<br>(1.36 to 2.01)                           | 1.36<br>(1.15 to 1.70)                           | 0.04<br>(0.03 to 0.05)                     | 0.08<br>(0.06 to 0.11)                     | 0.09<br>(0.07 to 0.12)                     | 0.07<br>(0.06 to 0.09)                     |
| Coal workers pneumoconiosis                                   | 0.24<br>(0.19 to 0.40)                           | 0.27<br>(0.21 to 0.46)                           | 0.21<br>(0.16 to 0.35)                           | 0.32<br>(0.24 to 0.51)                           | 0.01<br>(0.01 to 0.02)                     | 0.02<br>(0.01 to 0.03)                     | 0.02<br>(0.01 to 0.03)                     | 0.02<br>(0.01 to 0.03)                     |
| Other pneumoconiosis                                          | 2.06<br>(1.73 to 2.51)                           | 2.65<br>(2.19 to 3.19)                           | 2.31<br>(1.90 to 2.80)                           | 2.62<br>(2.16 to 3.13)                           | 0.12<br>(0.10 to 0.14)                     | 0.20<br>(0.16 to 0.24)                     | 0.18<br>(0.15 to 0.22)                     | 0.19<br>(0.15 to 0.23)                     |
| Asthma                                                        | 1,839.90<br>(1,474.68 to 2,181.75)               | 1,389.78<br>(963.21 to 1,981.24)                 | 1,023.97<br>(725.11 to 1,389.10)                 | 1,637.18<br>(1,101.02 to 2,377.73)               | 76.57<br>(58.27 to 95.08)                  | 76.68<br>(52.96 to 108.13)                 | 59.51<br>(41.35 to 79.99)                  | 86.06<br>(56.99 to 125.00)                 |
| Interstitial lung disease and pulmonary sarcoidosis           | 95.11<br>(77.08 to 122.94)                       | 186.63<br>(155.38 to 241.29)                     | 217.64<br>(180.79 to 284.83)                     | 158.99<br>(133.46 to 205.77)                     | 4.32<br>(3.59 to 5.58)                     | 10.49<br>(8.76 to 13.82)                   | 12.56<br>(10.58 to 16.57)                  | 8.62<br>(7.23 to 11.21)                    |
| Other chronic respiratory diseases                            | 87.46<br>(59.20 to 108.05)                       | 103.77<br>(69.44 to 130.07)                      | 101.33<br>(66.79 to 127.67)                      | 108.54<br>(73.48 to 135.09)                      | 2.85<br>(1.78 to 3.64)                     | 5.08<br>(3.01 to 6.75)                     | 5.27<br>(3.08 to 7.02)                     | 4.92<br>(2.95 to 6.51)                     |
| <b>Cirrhosis and other chronic liver diseases</b>             | <b>4,388.64</b><br><b>(4,019.88 to 4,792.19)</b> | <b>5,851.18</b><br><b>(5,261.48 to 6,528.87)</b> | <b>5,430.82</b><br><b>(4,831.38 to 6,114.36)</b> | <b>6,212.13</b><br><b>(5,638.57 to 6,896.25)</b> | <b>140.72</b><br><b>(129.74 to 152.61)</b> | <b>234.88</b><br><b>(215.69 to 258.02)</b> | <b>223.76</b><br><b>(202.77 to 248.04)</b> | <b>240.49</b><br><b>(221.26 to 262.96)</b> |
| Cirrhosis and other chronic liver diseases due to hepatitis B | 1,388.34<br>(1,196.62 to 1,613.22)               | 1,899.80<br>(1,627.74 to 2,239.96)               | 1,820.47<br>(1,560.91 to 2,154.21)               | 1,952.72<br>(1,671.04 to 2,284.28)               | 45.29<br>(39.11 to 52.53)                  | 75.89<br>(65.40 to 87.81)                  | 74.38<br>(63.69 to 87.03)                  | 75.40<br>(64.61 to 86.92)                  |
| Cirrhosis and other chronic liver diseases due to hepatitis C | 862.48<br>(729.00 to 1,026.40)                   | 1,203.56<br>(1,011.03 to 1,414.66)               | 1,141.92<br>(953.11 to 1,350.65)                 | 1,247.15<br>(1,046.05 to 1,465.15)               | 27.46<br>(23.52 to 32.07)                  | 46.70<br>(39.85 to 54.52)                  | 45.19<br>(38.66 to 53.03)                  | 46.96<br>(39.94 to 54.63)                  |

|                                                                |                                                            |                                                            |                                                            |                                                            |                                                      |                                                      |                                                      |                                                      |
|----------------------------------------------------------------|------------------------------------------------------------|------------------------------------------------------------|------------------------------------------------------------|------------------------------------------------------------|------------------------------------------------------|------------------------------------------------------|------------------------------------------------------|------------------------------------------------------|
|                                                                | 942.17<br>(794.15 to<br>1,115.46)                          | 1,267.53<br>(1,062.27 to<br>1,502.21)                      | 1,072.04<br>(895.51 to<br>1,284.57)                        | 1,461.98<br>(1,226.18 to<br>1,740.03)                      | 31.46<br>(26.93 to<br>36.89)                         | 51.79<br>(43.94 to<br>60.29)                         | 45.35<br>(38.28 to<br>53.68)                         | 57.40<br>(48.67 to<br>66.90)                         |
| Cirrhosis and other chronic liver diseases due to alcohol use  |                                                            |                                                            |                                                            |                                                            |                                                      |                                                      |                                                      |                                                      |
|                                                                | 1,195.64<br>(1,063.97 to<br>1,332.51)                      | 1,480.29<br>(1,289.76 to<br>1,706.06)                      | 1,396.40<br>(1,208.11 to<br>1,613.70)                      | 1,550.28<br>(1,364.07 to<br>1,775.22)                      | 36.51<br>(32.56 to<br>40.83)                         | 60.50<br>(52.89 to<br>68.67)                         | 58.84<br>(51.00 to<br>67.18)                         | 60.72<br>(53.25 to<br>68.96)                         |
| Cirrhosis and other chronic liver diseases due to other causes |                                                            |                                                            |                                                            |                                                            |                                                      |                                                      |                                                      |                                                      |
| <b>Digestive diseases</b>                                      | <b>3,243.54</b><br><b>(2,947.05 to</b><br><b>3,423.90)</b> | <b>3,852.35</b><br><b>(3,329.76 to</b><br><b>4,396.15)</b> | <b>3,453.05</b><br><b>(2,966.45 to</b><br><b>3,966.07)</b> | <b>4,239.87</b><br><b>(3,659.87 to</b><br><b>4,905.98)</b> | <b>123.69</b><br><b>(110.29 to</b><br><b>130.56)</b> | <b>210.08</b><br><b>(174.86 to</b><br><b>238.71)</b> | <b>197.33</b><br><b>(164.72 to</b><br><b>225.11)</b> | <b>218.56</b><br><b>(182.54 to</b><br><b>251.41)</b> |
| Peptic ulcer disease                                           | 976.10<br>(860.09 to<br>1,061.73)                          | 929.09<br>(733.28 to<br>1,157.81)                          | 763.58<br>(596.89 to<br>955.66)                            | 1,111.65<br>(872.02 to<br>1,396.62)                        | 42.91<br>(37.02 to<br>46.56)                         | 54.02<br>(41.65 to<br>66.96)                         | 46.11<br>(35.20 to<br>56.93)                         | 61.84<br>(47.33 to<br>77.32)                         |



| Southeast Asia                             |                                    |                                    |                                    |                                    |                              |                              |                              |                              |
|--------------------------------------------|------------------------------------|------------------------------------|------------------------------------|------------------------------------|------------------------------|------------------------------|------------------------------|------------------------------|
| Cause                                      | YLLs (in 1000s)                    |                                    |                                    |                                    | Deaths (in 1000s)            |                              |                              |                              |
|                                            | 2016                               | 2040 Forecast                      | 2040 Better Scenario               | 2040 Worse Scenario                | 2016                         | 2040 Forecast                | 2040 Better Scenario         | 2040 Worse Scenario          |
| Gastritis and duodenitis                   | 62.76<br>(54.62 to 74.79)          | 104.63<br>(88.84 to 125.56)        | 97.57<br>(82.06 to 118.69)         | 108.94<br>(91.87 to 130.08)        | 2.67<br>(2.33 to 3.06)       | 5.99<br>(5.07 to 7.01)       | 5.82<br>(4.87 to 6.89)       | 5.94<br>(4.99 to 6.95)       |
| Appendicitis                               | 199.63<br>(176.83 to 256.89)       | 174.30<br>(148.58 to 221.63)       | 149.55<br>(126.34 to 190.69)       | 199.35<br>(170.20 to 256.42)       | 5.44<br>(4.78 to 6.89)       | 7.07<br>(6.07 to 8.54)       | 6.36<br>(5.39 to 7.64)       | 7.64<br>(6.50 to 9.36)       |
| Paralytic ileus and intestinal obstruction | 788.94<br>(618.56 to 894.90)       | 920.73<br>(739.28 to 1,066.58)     | 920.04<br>(732.49 to 1,066.77)     | 933.33<br>(746.00 to 1,092.02)     | 24.66<br>(19.66 to 28.21)    | 49.67<br>(39.61 to 58.13)    | 52.40<br>(41.71 to 61.53)    | 46.80<br>(37.51 to 55.28)    |
| Inguinal, femoral, and abdominal hernia    | 106.59<br>(58.53 to 133.40)        | 134.26<br>(67.17 to 176.89)        | 127.65<br>(62.53 to 170.34)        | 137.88<br>(70.69 to 182.67)        | 5.04<br>(2.57 to 6.56)       | 9.03<br>(4.03 to 12.49)      | 9.03<br>(3.97 to 12.46)      | 8.71<br>(3.95 to 12.16)      |
| Inflammatory bowel disease                 | 57.06<br>(50.87 to 71.08)          | 87.50<br>(76.47 to 108.33)         | 88.78<br>(77.09 to 109.71)         | 84.69<br>(74.36 to 105.56)         | 2.11<br>(1.89 to 2.51)       | 4.56<br>(3.91 to 5.38)       | 4.82<br>(4.11 to 5.70)       | 4.19<br>(3.59 to 4.98)       |
| Vascular intestinal disorders              | 99.14<br>(89.18 to 123.01)         | 183.16<br>(161.73 to 220.70)       | 182.02<br>(159.77 to 216.19)       | 181.57<br>(158.90 to 219.04)       | 5.37<br>(4.80 to 6.41)       | 12.71<br>(11.05 to 14.95)    | 13.04<br>(11.35 to 15.24)    | 12.06<br>(10.29 to 14.21)    |
| Gallbladder and biliary diseases           | 191.52<br>(157.43 to 209.22)       | 293.10<br>(191.14 to 432.83)       | 219.91<br>(150.19 to 310.12)       | 333.41<br>(214.86 to 498.16)       | 8.99<br>(6.95 to 9.85)       | 17.75<br>(11.14 to 26.06)    | 14.08<br>(9.17 to 19.50)     | 19.16<br>(11.86 to 28.59)    |
| Pancreatitis                               | 414.33<br>(347.47 to 473.28)       | 572.63<br>(406.87 to 832.11)       | 468.90<br>(344.83 to 646.05)       | 666.80<br>(464.41 to 996.73)       | 12.45<br>(9.97 to 14.17)     | 22.56<br>(15.39 to 33.18)    | 18.97<br>(13.17 to 26.55)    | 25.33<br>(17.06 to 38.04)    |
| Other digestive diseases                   | 347.47<br>(308.95 to 403.66)       | 452.94<br>(397.81 to 532.66)       | 435.05<br>(379.25 to 514.84)       | 482.25<br>(423.80 to 569.63)       | 14.04<br>(12.64 to 15.96)    | 26.71<br>(23.37 to 30.91)    | 26.71<br>(23.18 to 30.99)    | 26.89<br>(23.20 to 31.05)    |
| Neurological disorders                     | 2,579.25<br>(2,291.85 to 2,940.95) | 6,438.11<br>(5,234.36 to 8,294.16) | 6,312.24<br>(5,269.32 to 7,760.43) | 5,991.28<br>(4,819.40 to 7,737.28) | 193.67<br>(168.51 to 226.22) | 577.17<br>(453.05 to 742.25) | 587.77<br>(480.33 to 721.16) | 508.31<br>(389.25 to 675.08) |
| Alzheimer's disease and other dementias    | 1,822.48<br>(1,548.30 to 2,180.90) | 5,260.21<br>(4,078.96 to 7,101.85) | 5,130.11<br>(4,104.79 to 6,502.54) | 4,830.10<br>(3,646.70 to 6,573.44) | 168.50<br>(143.92 to 200.85) | 515.40<br>(393.03 to 680.84) | 520.99<br>(413.48 to 659.52) | 453.65<br>(338.53 to 618.30) |
| Parkinson's disease                        | 164.83<br>(131.10 to 206.32)       | 532.11<br>(412.68 to 673.29)       | 592.55<br>(458.97 to 749.68)       | 444.05<br>(343.91 to 559.05)       | 11.90<br>(9.28 to 14.97)     | 42.62<br>(32.88 to 54.55)    | 48.61<br>(37.89 to 62.26)    | 34.39<br>(26.40 to 44.51)    |
| Epilepsy                                   | 434.69<br>(401.35 to 464.45)       | 422.69<br>(347.09 to 523.60)       | 364.11<br>(301.91 to 444.27)       | 504.50<br>(411.55 to 626.90)       | 9.27<br>(8.36 to 9.98)       | 11.64<br>(9.51 to 14.40)     | 10.33<br>(8.48 to 12.52)     | 13.41<br>(10.81 to 16.75)    |
| Multiple sclerosis                         | 20.22<br>(17.65 to 26.95)          | 27.53<br>(22.71 to 37.77)          | 27.73<br>(22.97 to 38.04)          | 26.82<br>(22.08 to 36.66)          | 0.58<br>(0.51 to 0.77)       | 0.93<br>(0.79 to 1.25)       | 0.96<br>(0.81 to 1.28)       | 0.89<br>(0.75 to 1.19)       |
| Motor neuron disease                       | 29.76<br>(25.15 to 32.98)          | 52.27<br>(43.68 to 59.47)          | 53.46<br>(44.42 to 61.28)          | 48.96<br>(41.02 to 55.55)          | 0.90<br>(0.77 to 1.00)       | 1.94<br>(1.63 to 2.19)       | 2.02<br>(1.50 to 2.29)       | 1.78<br>(1.50 to 2.00)       |
| Other neurological disorders               | 107.28<br>(94.59 to 119.02)        | 143.29<br>(127.92 to 159.18)       | 144.28<br>(128.68 to 160.32)       | 136.84<br>(121.22 to 152.08)       | 2.51<br>(2.29 to 2.71)       | 4.63<br>(4.27 to 5.02)       | 4.87<br>(4.49 to 5.31)       | 4.20<br>(3.85 to 4.56)       |
| Mental disorders                           | 487.35<br>(398.47 to 550.59)       | 651.80<br>(557.02 to 769.20)       | 664.38<br>(564.52 to 784.60)       | 649.91<br>(556.96 to 764.00)       | 11.75<br>(9.87 to 13.35)     | 18.67<br>(16.16 to 21.55)    | 19.55<br>(16.80 to 22.59)    | 18.03<br>(15.64 to 20.87)    |
| Alcohol use disorders                      | 289.19<br>(227.55 to 351.38)       | 302.97<br>(243.53 to 386.11)       | 296.60<br>(237.70 to 380.32)       | 314.63<br>(254.67 to 396.89)       | 7.40<br>(5.97 to 9.11)       | 9.21<br>(7.57 to 11.83)      | 9.23<br>(7.54 to 11.84)      | 9.29<br>(7.62 to 11.73)      |
| Drug use disorders                         | 194.23<br>(154.19 to 226.43)       | 345.13<br>(287.68 to 413.37)       | 364.00<br>(302.11 to 434.84)       | 331.70<br>(275.57 to 395.82)       | 4.28<br>(3.51 to 4.94)       | 9.39<br>(8.03 to 10.85)      | 10.25<br>(8.68 to 11.95)     | 8.67<br>(7.35 to 10.09)      |
| Opioid use disorders                       | 138.22<br>(108.43 to 161.47)       | 207.24<br>(168.04 to 250.58)       | 210.96<br>(169.93 to 256.65)       | 204.51<br>(165.85 to 246.54)       | 2.92<br>(2.35 to 3.39)       | 5.34<br>(4.43 to 6.25)       | 5.60<br>(4.61 to 6.56)       | 5.07<br>(4.21 to 5.98)       |



| Southeast Asia                                             |                                           |                                              |                                             |                                              |                                     |                                       |                                       |                                         |
|------------------------------------------------------------|-------------------------------------------|----------------------------------------------|---------------------------------------------|----------------------------------------------|-------------------------------------|---------------------------------------|---------------------------------------|-----------------------------------------|
| Cause                                                      | YLLs (in 1000s)                           |                                              |                                             |                                              | Deaths (in 1000s)                   |                                       |                                       |                                         |
|                                                            | 2016                                      | 2040 Forecast                                | 2040 Better Scenario                        | 2040 Worse Scenario                          | 2016                                | 2040 Forecast                         | 2040 Better Scenario                  | 2040 Worse Scenario                     |
| <b>Diabetes, urogenital, blood, and endocrine diseases</b> | <b>8,958.39</b><br>(8,594.98 to 9,340.66) | <b>15,550.35</b><br>(11,131.04 to 23,240.73) | <b>12,326.79</b><br>(9,074.00 to 18,328.07) | <b>18,915.43</b><br>(13,476.92 to 27,687.65) | <b>370.51</b><br>(355.93 to 386.70) | <b>872.79</b><br>(620.02 to 1,317.45) | <b>718.18</b><br>(524.20 to 1,081.73) | <b>1,009.40</b><br>(714.15 to 1,489.55) |
| Diabetes mellitus                                          | 4,453.80<br>(4,267.48 to 4,669.88)        | 6,259.99<br>(4,377.36 to 8,822.39)           | 5,086.98<br>(3,576.05 to 7,126.44)          | 8,077.84<br>(5,504.77 to 11,428.23)          | 195.54<br>(187.31 to 205.60)        | 354.20<br>(256.47 to 472.60)          | 299.17<br>(219.49 to 394.56)          | 432.51<br>(308.09 to 583.39)            |
| Acute glomerulonephritis                                   | 11.33<br>(9.42 to 13.93)                  | 13.55<br>(10.77 to 16.99)                    | 12.07<br>(9.65 to 15.05)                    | 14.52<br>(11.66 to 18.20)                    | 0.29<br>(0.24 to 0.35)              | 0.44<br>(0.35 to 0.54)                | 0.42<br>(0.34 to 0.53)                | 0.44<br>(0.36 to 0.55)                  |
| Chronic kidney disease                                     | 3,223.84<br>(2,961.56 to 3,422.18)        | 7,293.82<br>(3,299.09 to 15,564.10)          | 5,365.04<br>(2,612.40 to 11,565.85)         | 8,797.70<br>(3,888.69 to 18,038.29)          | 128.14<br>(117.21 to 135.46)        | 409.24<br>(171.65 to 889.51)          | 311.89<br>(138.18 to 699.31)          | 472.01<br>(191.93 to 1,003.59)          |
| Chronic kidney disease due to diabetes mellitus            | 1,878.82<br>(1,701.21 to 2,040.26)        | 4,410.04<br>(1,991.72 to 9,400.94)           | 3,213.79<br>(1,537.00 to 6,965.17)          | 5,361.95<br>(2,387.02 to 11,211.78)          | 71.02<br>(63.64 to 77.45)           | 222.21<br>(89.78 to 491.01)           | 166.07<br>(72.53 to 385.11)           | 260.80<br>(104.30 to 560.19)            |
| Chronic kidney disease due to hypertension                 | 790.03<br>(689.87 to 896.15)              | 2,162.87<br>(902.14 to 4,682.32)             | 1,617.86<br>(715.39 to 3,548.11)            | 2,548.74<br>(1,046.18 to 5,406.67)           | 42.40<br>(36.85 to 47.56)           | 154.22<br>(65.05 to 336.50)           | 121.11<br>(53.34 to 277.51)           | 172.70<br>(69.39 to 365.37)             |
| Chronic kidney disease due to glomerulonephritis           | 287.09<br>(240.59 to 337.03)              | 329.47<br>(200.15 to 588.16)                 | 244.41<br>(154.39 to 427.09)                | 408.08<br>(246.75 to 714.58)                 | 6.80<br>(5.73 to 7.92)              | 12.89<br>(6.17 to 27.57)              | 9.57<br>(4.90 to 20.75)               | 15.38<br>(7.35 to 32.21)                |
| Chronic kidney disease due to other and unspecified causes | 267.89<br>(223.36 to 312.22)              | 391.43<br>(203.09 to 765.05)                 | 288.98<br>(158.82 to 574.72)                | 478.93<br>(247.13 to 927.09)                 | 7.92<br>(6.61 to 9.25)              | 19.93<br>(8.61 to 43.83)              | 15.14<br>(6.91 to 35.23)              | 23.14<br>(9.86 to 49.52)                |
| Urinary diseases and male infertility                      | 616.78<br>(583.22 to 656.31)              | 1,191.30<br>(1,089.28 to 1,301.92)           | 1,126.52<br>(1,009.86 to 1,245.98)          | 1,172.55<br>(1,084.23 to 1,264.82)           | 27.44<br>(25.98 to 29.22)           | 74.31<br>(67.45 to 81.34)             | 72.91<br>(65.55 to 80.39)             | 69.12<br>(63.08 to 75.07)               |
| Urinary tract infections                                   | 438.77<br>(408.54 to 479.55)              | 927.67<br>(837.27 to 1,021.63)               | 889.41<br>(793.14 to 987.02)                | 900.18<br>(819.52 to 983.33)                 | 18.61<br>(17.21 to 21.38)           | 56.81<br>(50.63 to 64.83)             | 56.66<br>(50.30 to 65.02)             | 52.07<br>(46.52 to 59.31)               |
| Urolithiasis                                               | 37.74<br>(31.59 to 50.77)                 | 90.66<br>(75.23 to 119.11)                   | 83.46<br>(67.93 to 109.46)                  | 87.67<br>(73.22 to 115.31)                   | 1.78<br>(1.50 to 2.38)              | 5.46<br>(4.41 to 6.99)                | 5.17<br>(4.13 to 6.67)                | 5.01<br>(4.08 to 6.44)                  |
| Other urinary diseases                                     | 140.27<br>(118.05 to 166.33)              | 172.96<br>(136.36 to 209.42)                 | 153.65<br>(119.56 to 188.50)                | 184.69<br>(148.46 to 222.97)                 | 7.05<br>(5.38 to 8.09)              | 12.03<br>(8.64 to 15.01)              | 11.08<br>(8.01 to 13.85)              | 12.05<br>(8.64 to 14.81)                |
| Gynecological diseases                                     | 58.43<br>(37.21 to 68.45)                 | 55.16<br>(36.48 to 70.37)                    | 42.96<br>(28.87 to 56.51)                   | 64.39<br>(44.79 to 82.07)                    | 1.57<br>(1.07 to 1.81)              | 1.77<br>(1.26 to 2.20)                | 1.42<br>(1.01 to 1.83)                | 2.00<br>(1.47 to 2.48)                  |
| Uterine fibroids                                           | 11.23<br>(7.19 to 15.08)                  | 10.62<br>(6.15 to 15.56)                     | 8.82<br>(5.11 to 13.02)                     | 12.53<br>(7.34 to 18.43)                     | 0.35<br>(0.23 to 0.47)              | 0.38<br>(0.23 to 0.55)                | 0.32<br>(0.19 to 0.46)                | 0.44<br>(0.26 to 0.63)                  |
| Polycystic ovarian syndrome                                | 2.12<br>(0.69 to 4.03)                    | 1.13<br>(0.37 to 2.20)                       | 0.76<br>(0.24 to 1.49)                      | 1.50<br>(0.49 to 2.90)                       | 0.05<br>(0.02 to 0.10)              | 0.03<br>(0.01 to 0.05)                | 0.02<br>(0.01 to 0.04)                | 0.04<br>(0.01 to 0.07)                  |
| Endometriosis                                              | 0.78<br>(0.34 to 1.45)                    | 0.92<br>(0.43 to 1.80)                       | 0.73<br>(0.34 to 1.40)                      | 1.09<br>(0.50 to 2.08)                       | 0.02<br>(0.01 to 0.03)              | 0.02<br>(0.01 to 0.04)                | 0.02<br>(0.01 to 0.03)                | 0.03<br>(0.01 to 0.05)                  |
| Genital prolapse                                           | 2.26<br>(1.35 to 3.57)                    | 2.77<br>(1.60 to 4.53)                       | 2.22<br>(1.27 to 3.64)                      | 3.25<br>(1.88 to 5.33)                       | 0.11<br>(0.07 to 0.18)              | 0.15<br>(0.08 to 0.24)                | 0.12<br>(0.07 to 0.20)                | 0.17<br>(0.10 to 0.28)                  |
| Other gynecological diseases                               | 42.03<br>(26.60 to 50.31)                 | 39.72<br>(26.30 to 52.39)                    | 30.43<br>(19.16 to 41.70)                   | 46.02<br>(30.23 to 61.05)                    | 1.03<br>(0.70 to 1.23)              | 1.19<br>(0.83 to 1.52)                | 0.94<br>(0.63 to 1.24)                | 1.33<br>(0.93 to 1.71)                  |
| Hemoglobinopathies and hemolytic anemias                   | 317.59<br>(260.94 to 349.93)              | 355.52<br>(282.14 to 407.56)                 | 320.04<br>(251.40 to 371.60)                | 394.21<br>(312.62 to 450.66)                 | 9.62<br>(7.60 to 10.58)             | 16.58<br>(12.73 to 19.21)             | 15.43<br>(11.79 to 18.18)             | 17.65<br>(13.50 to 20.33)               |
| Thalassemias                                               | 86.12<br>(70.86 to 100.25)                | 36.67<br>(28.72 to 46.15)                    | 34.18<br>(27.11 to 43.04)                   | 36.73<br>(28.22 to 47.00)                    | 1.10<br>(0.91 to 1.27)              | 0.49<br>(0.39 to 0.61)                | 0.46<br>(0.37 to 0.57)                | 0.49<br>(0.38 to 0.62)                  |

|                                                   |                                 |                                 |                                 |                                 |                            |                              |                              |                              |
|---------------------------------------------------|---------------------------------|---------------------------------|---------------------------------|---------------------------------|----------------------------|------------------------------|------------------------------|------------------------------|
|                                                   | 0.65<br>(0.54 to<br>0.76)       | 0.54<br>(0.43 to<br>0.66)       | 0.45<br>(0.36 to<br>0.55)       | 0.60<br>(0.48 to<br>0.73)       | 0.01<br>(0.01 to<br>0.01)  | 0.01<br>(0.01 to<br>0.01)    | 0.01<br>(0.01 to<br>0.01)    | 0.01<br>(0.01 to<br>0.02)    |
| Sickle cell disorders                             |                                 |                                 |                                 |                                 |                            |                              |                              |                              |
| G6PD deficiency                                   | 129.03<br>(105.18 to<br>145.45) | 185.87<br>(145.56 to<br>218.81) | 162.19<br>(126.63 to<br>193.44) | 215.27<br>(171.49 to<br>251.49) | 3.25<br>(2.62 to<br>3.66)  | 6.53<br>(5.05 to<br>7.62)    | 5.80<br>(4.48 to<br>6.88)    | 7.37<br>(5.76 to<br>8.56)    |
| Other hemoglobinopathies and hemolytic anemias    | 101.79<br>(78.74 to<br>113.82)  | 132.44<br>(98.15 to<br>157.23)  | 123.22<br>(91.67 to<br>148.77)  | 141.62<br>(104.65 to<br>167.89) | 5.26<br>(4.01 to<br>5.89)  | 9.55<br>(6.98 to<br>11.36)   | 9.16<br>(6.79 to<br>11.09)   | 9.78<br>(7.18 to<br>11.74)   |
| Endocrine, metabolic, blood, and immune disorders | 276.63<br>(249.94 to<br>332.85) | 381.01<br>(337.03 to<br>482.85) | 373.19<br>(329.18 to<br>471.00) | 394.23<br>(350.81 to<br>499.44) | 7.91<br>(7.25 to<br>10.25) | 16.24<br>(14.31 to<br>22.01) | 16.93<br>(14.86 to<br>22.63) | 15.67<br>(13.87 to<br>21.15) |

| Southeast Asia                                |                                           |                                           |                                           |                                           |                                  |                                  |                                  |                                  |
|-----------------------------------------------|-------------------------------------------|-------------------------------------------|-------------------------------------------|-------------------------------------------|----------------------------------|----------------------------------|----------------------------------|----------------------------------|
| Cause                                         | YLLs (in 1000s)                           |                                           |                                           |                                           | Deaths (in 1000s)                |                                  |                                  |                                  |
|                                               | 2016                                      | 2040 Forecast                             | 2040 Better Scenario                      | 2040 Worse Scenario                       | 2016                             | 2040 Forecast                    | 2040 Better Scenario             | 2040 Worse Scenario              |
| <b>Musculoskeletal disorders</b>              | <b>201.74</b><br>(181.34 to 246.81)       | <b>322.20</b><br>(279.71 to 417.98)       | <b>315.36</b><br>(273.03 to 410.81)       | <b>310.37</b><br>(270.72 to 398.57)       | <b>5.74</b><br>(5.20 to 7.58)    | <b>13.37</b><br>(11.35 to 19.38) | <b>13.50</b><br>(11.44 to 19.48) | <b>12.36</b><br>(10.50 to 17.87) |
| Rheumatoid arthritis                          | 20.37<br>(17.47 to 27.60)                 | 54.26<br>(42.10 to 73.98)                 | 48.02<br>(36.63 to 64.99)                 | 57.45<br>(43.90 to 78.52)                 | 0.98<br>(0.85 to 1.39)           | 3.37<br>(2.56 to 4.66)           | 3.12<br>(2.37 to 4.30)           | 3.40<br>(2.55 to 4.74)           |
| Other musculoskeletal disorders               | 181.38<br>(162.27 to 218.32)              | 267.93<br>(233.68 to 348.65)              | 267.35<br>(231.18 to 346.54)              | 252.92<br>(221.04 to 328.14)              | 4.76<br>(4.29 to 6.25)           | 10.00<br>(8.57 to 15.10)         | 10.38<br>(8.86 to 15.62)         | 8.96<br>(7.71 to 13.36)          |
| <b>Other non-communicable diseases</b>        | <b>3,717.49</b><br>(3,158.85 to 4,153.36) | <b>2,738.84</b><br>(2,288.19 to 3,190.61) | <b>2,235.14</b><br>(1,842.19 to 2,594.17) | <b>3,171.72</b><br>(2,649.42 to 3,741.11) | <b>54.57</b><br>(46.30 to 60.95) | <b>74.32</b><br>(55.55 to 90.59) | <b>69.62</b><br>(51.44 to 84.48) | <b>75.70</b><br>(58.19 to 90.49) |
| Congenital birth defects                      | 3,266.24<br>(2,669.19 to 3,693.31)        | 1,837.29<br>(1,498.13 to 2,243.55)        | 1,368.29<br>(1,118.40 to 1,661.44)        | 2,275.21<br>(1,824.29 to 2,795.98)        | 40.06<br>(33.01 to 45.11)        | 24.31<br>(20.06 to 29.36)        | 18.49<br>(15.23 to 22.02)        | 29.67<br>(24.15 to 35.93)        |
| Neural tube defects                           | 222.74<br>(150.33 to 294.59)              | 49.16<br>(29.37 to 73.41)                 | 34.09<br>(20.43 to 52.00)                 | 71.03<br>(42.15 to 105.60)                | 2.60<br>(1.76 to 3.44)           | 0.59<br>(0.36 to 0.87)           | 0.41<br>(0.25 to 0.62)           | 0.84<br>(0.51 to 1.24)           |
| Congenital heart anomalies                    | 1,818.53<br>(1,472.37 to 2,105.74)        | 1,045.43<br>(785.78 to 1,308.87)          | 766.82<br>(586.72 to 950.41)              | 1,286.19<br>(965.65 to 1,613.53)          | 22.46<br>(18.26 to 25.89)        | 13.76<br>(10.55 to 16.94)        | 10.27<br>(7.93 to 12.57)         | 16.74<br>(12.82 to 20.71)        |
| Orofacial clefts                              | 8.01<br>(4.40 to 13.49)                   | 4.26<br>(2.03 to 8.17)                    | 2.55<br>(1.20 to 4.64)                    | 5.99<br>(2.89 to 11.46)                   | 0.09<br>(0.05 to 0.16)           | 0.05<br>(0.02 to 0.09)           | 0.03<br>(0.01 to 0.05)           | 0.07<br>(0.03 to 0.13)           |
| Down syndrome                                 | 66.65<br>(54.82 to 86.76)                 | 51.15<br>(40.66 to 65.76)                 | 44.74<br>(35.81 to 57.95)                 | 60.91<br>(48.25 to 80.23)                 | 0.92<br>(0.77 to 1.18)           | 0.84<br>(0.68 to 1.09)           | 0.76<br>(0.62 to 1.00)           | 0.97<br>(0.79 to 1.26)           |
| Other chromosomal abnormalities               | 92.76<br>(63.73 to 199.81)                | 85.37<br>(53.29 to 213.63)                | 67.69<br>(43.96 to 155.20)                | 107.18<br>(66.60 to 265.85)               | 1.10<br>(0.77 to 2.35)           | 1.08<br>(0.72 to 2.55)           | 0.87<br>(0.60 to 1.86)           | 1.34<br>(0.87 to 3.15)           |
| Congenital musculoskeletal and limb anomalies | 59.07<br>(41.80 to 74.98)                 | 36.34<br>(25.11 to 48.63)                 | 27.68<br>(18.74 to 36.66)                 | 45.08<br>(30.85 to 60.78)                 | 0.70<br>(0.49 to 0.88)           | 0.44<br>(0.31 to 0.58)           | 0.34<br>(0.23 to 0.44)           | 0.54<br>(0.37 to 0.72)           |
| Urogenital congenital anomalies               | 51.99<br>(43.12 to 67.68)                 | 47.06<br>(38.43 to 60.43)                 | 39.49<br>(32.07 to 49.56)                 | 53.02<br>(43.14 to 68.45)                 | 0.90<br>(0.75 to 1.11)           | 0.87<br>(0.87 to 1.31)           | 0.95<br>(0.75 to 1.13)           | 1.18<br>(0.95 to 1.42)           |
| Digestive congenital anomalies                | 216.44<br>(169.44 to 316.04)              | 130.73<br>(94.18 to 194.72)               | 91.02<br>(65.75 to 132.68)                | 164.91<br>(118.14 to 243.83)              | 2.54<br>(1.99 to 3.70)           | 1.56<br>(1.14 to 2.31)           | 1.09<br>(0.80 to 1.59)           | 1.96<br>(1.42 to 2.88)           |
| Other congenital birth defects                | 730.05<br>(494.55 to 867.97)              | 387.79<br>(246.30 to 487.40)              | 294.21<br>(188.67 to 367.06)              | 480.90<br>(302.98 to 610.51)              | 8.75<br>(6.00 to 10.34)          | 4.90<br>(3.22 to 6.11)           | 3.77<br>(2.51 to 4.64)           | 6.01<br>(3.91 to 7.51)           |
| Skin and subcutaneous diseases                | 304.24<br>(194.46 to 404.59)              | 841.72<br>(558.15 to 1,106.76)            | 821.48<br>(548.71 to 1,071.52)            | 821.52<br>(541.60 to 1,086.00)            | 12.80<br>(8.11 to 17.04)         | 49.32<br>(32.00 to 67.02)        | 50.61<br>(33.64 to 66.89)        | 45.17<br>(28.87 to 61.10)        |
| Cellulitis                                    | 43.39<br>(29.02 to 69.87)                 | 164.83<br>(113.73 to 263.13)              | 170.69<br>(118.93 to 271.23)              | 152.65<br>(105.46 to 242.06)              | 1.59<br>(1.06 to 2.51)           | 8.23<br>(5.56 to 12.82)          | 8.98<br>(6.14 to 14.09)          | 7.18<br>(4.85 to 11.40)          |
| Pyoderma                                      | 169.01<br>(105.92 to 231.74)              | 449.33<br>(281.31 to 596.37)              | 425.31<br>(267.38 to 566.39)              | 455.19<br>(285.17 to 609.28)              | 6.03<br>(3.64 to 8.37)           | 24.23<br>(15.34 to 34.27)        | 24.13<br>(15.32 to 33.36)        | 23.07<br>(14.39 to 32.32)        |
| Decubitus ulcer                               | 83.59<br>(47.65 to 107.05)                | 210.15<br>(122.55 to 274.61)              | 208.46<br>(121.55 to 265.61)              | 196.69<br>(114.24 to 261.18)              | 4.93<br>(2.80 to 6.35)           | 16.14<br>(9.33 to 21.14)         | 16.75<br>(9.78 to 21.41)         | 14.25<br>(8.07 to 19.00)         |
| Other skin and subcutaneous diseases          | 8.25<br>(5.20 to 11.21)                   | 17.41<br>(11.14 to 24.16)                 | 17.02<br>(10.96 to 23.76)                 | 16.99<br>(10.81 to 23.67)                 | 0.26<br>(0.16 to 0.35)           | 0.72<br>(0.45 to 1.01)           | 0.74<br>(0.46 to 1.04)           | 0.66<br>(0.41 to 0.94)           |
| Sudden infant death syndrome                  | 147.01<br>(111.26 to 194.25)              | 59.83<br>(40.06 to 88.64)                 | 45.36<br>(30.41 to 68.18)                 | 75.00<br>(49.81 to 112.28)                | 1.71<br>(1.29 to 2.25)           | 0.69<br>(0.46 to 1.03)           | 0.53<br>(0.35 to 0.79)           | 0.87<br>(0.58 to 1.30)           |

|                          |                                          |                                          |                                         |                                          |                                 |                                 |                                 |                                 |
|--------------------------|------------------------------------------|------------------------------------------|-----------------------------------------|------------------------------------------|---------------------------------|---------------------------------|---------------------------------|---------------------------------|
| Injuries                 | 14,783.13<br>(14,044.84 to<br>15,519.49) | 12,776.14<br>(10,738.66 to<br>16,375.55) | 11,061.83<br>(9,274.84 to<br>14,535.02) | 16,444.71<br>(13,854.62 to<br>20,864.26) | 337.56<br>(318.38 to<br>353.81) | 396.75<br>(346.00 to<br>472.55) | 361.10<br>(314.19 to<br>432.80) | 477.32<br>(416.93 to<br>570.03) |
| Transport injuries       | 5,909.51<br>(5,547.70 to<br>6,281.89)    | 3,723.15<br>(3,051.67 to<br>4,811.74)    | 2,836.54<br>(2,375.94 to<br>3,551.10)   | 6,793.80<br>(5,615.45 to<br>8,706.09)    | 130.92<br>(123.00 to<br>138.96) | 111.08<br>(92.67 to<br>138.65)  | 89.23<br>(76.16 to<br>108.01)   | 187.28<br>(156.78 to<br>232.72) |
| Road injuries            | 5,512.41<br>(5,159.57 to<br>5,874.07)    | 3,194.72<br>(2,602.58 to<br>4,146.99)    | 2,396.58<br>(1,993.06 to<br>2,989.13)   | 6,200.44<br>(5,105.24 to<br>7,896.14)    | 121.97<br>(114.27 to<br>129.97) | 95.35<br>(79.26 to<br>119.48)   | 75.65<br>(64.51 to<br>91.36)    | 170.36<br>(142.76 to<br>211.48) |
| Pedestrian road injuries | 1,168.76<br>(1,025.49 to<br>1,375.91)    | 732.87<br>(606.87 to<br>920.63)          | 532.31<br>(445.98 to<br>654.32)         | 1,323.99<br>(1,081.50 to<br>1,666.10)    | 30.63<br>(27.32 to<br>35.41)    | 28.87<br>(24.11 to<br>35.35)    | 22.32<br>(18.98 to<br>27.06)    | 48.25<br>(39.76 to<br>59.24)    |

| Southeast Asia                                  |                                                  |                                                  |                                                  |                                                  |                                            |                                            |                                            |                                            |
|-------------------------------------------------|--------------------------------------------------|--------------------------------------------------|--------------------------------------------------|--------------------------------------------------|--------------------------------------------|--------------------------------------------|--------------------------------------------|--------------------------------------------|
| Cause                                           | YLLs (in 1000s)                                  |                                                  |                                                  |                                                  | Deaths (in 1000s)                          |                                            |                                            |                                            |
|                                                 | 2016                                             | 2040 Forecast                                    | 2040 Better Scenario                             | 2040 Worse Scenario                              | 2016                                       | 2040 Forecast                              | 2040 Better Scenario                       | 2040 Worse Scenario                        |
| Cyclist road injuries                           | 228.78<br>(168.90 to 305.81)                     | 163.51<br>(112.74 to 241.79)                     | 125.99<br>(88.44 to 182.41)                      | 293.20<br>(200.09 to 430.85)                     | 5.73<br>(4.16 to 7.71)                     | 5.61<br>(3.82 to 8.42)                     | 4.66<br>(3.21 to 6.88)                     | 9.05<br>(6.06 to 13.62)                    |
| Motorcyclist road injuries                      | 1,608.81<br>(1,395.36 to 1,915.33)               | 965.13<br>(724.90 to 1,334.16)                   | 797.95<br>(611.77 to 1,065.68)                   | 1,653.45<br>(1,243.78 to 2,269.64)               | 31.49<br>(27.42 to 37.54)                  | 22.59<br>(17.11 to 30.54)                  | 19.39<br>(15.14 to 25.10)                  | 36.16<br>(27.40 to 48.83)                  |
| Motor vehicle road injuries                     | 2,404.20<br>(2,095.69 to 2,726.17)               | 1,269.17<br>(1,000.59 to 1,656.05)               | 893.37<br>(727.95 to 1,117.65)                   | 2,799.30<br>(2,213.22 to 3,611.63)               | 51.80<br>(45.53 to 58.79)                  | 36.14<br>(29.41 to 45.95)                  | 27.53<br>(22.96 to 33.99)                  | 73.12<br>(59.02 to 92.85)                  |
| Other road injuries                             | 101.87<br>(84.81 to 148.63)                      | 64.05<br>(48.00 to 98.53)                        | 46.96<br>(36.03 to 70.04)                        | 130.50<br>(97.61 to 199.48)                      | 2.34<br>(1.93 to 3.45)                     | 2.14<br>(1.57 to 3.39)                     | 1.75<br>(1.32 to 2.75)                     | 3.79<br>(2.84 to 5.87)                     |
| Other transport injuries                        | 397.10<br>(323.95 to 465.37)                     | 528.42<br>(398.15 to 698.94)                     | 439.96<br>(334.03 to 572.83)                     | 593.36<br>(442.89 to 796.50)                     | 8.95<br>(7.28 to 10.41)                    | 15.73<br>(12.05 to 20.59)                  | 13.59<br>(10.33 to 17.62)                  | 16.92<br>(12.60 to 22.55)                  |
| <b>Unintentional injuries</b>                   | <b>5,387.92</b><br><b>(5,041.43 to 5,697.85)</b> | <b>4,622.57</b><br><b>(4,120.58 to 5,114.71)</b> | <b>4,214.18</b><br><b>(3,764.91 to 4,662.07)</b> | <b>4,979.49</b><br><b>(4,447.68 to 5,542.69)</b> | <b>132.52</b><br><b>(117.36 to 140.14)</b> | <b>179.03</b><br><b>(151.30 to 194.42)</b> | <b>174.03</b><br><b>(146.35 to 190.64)</b> | <b>179.54</b><br><b>(150.15 to 196.85)</b> |
| Falls                                           | 1,340.37<br>(1,176.50 to 1,447.81)               | 1,839.01<br>(1,524.72 to 2,031.57)               | 1,779.42<br>(1,457.19 to 1,974.70)               | 1,852.08<br>(1,522.34 to 2,044.57)               | 51.58<br>(39.60 to 56.62)                  | 101.93<br>(77.61 to 114.83)                | 103.02<br>(78.02 to 115.92)                | 97.19<br>(72.32 to 110.46)                 |
| Drowning                                        | 1,785.35<br>(1,626.52 to 1,928.66)               | 1,014.61<br>(864.37 to 1,210.85)                 | 875.06<br>(751.64 to 1,036.93)                   | 1,162.87<br>(980.03 to 1,392.42)                 | 32.05<br>(29.87 to 34.72)                  | 24.16<br>(20.97 to 28.63)                  | 21.69<br>(18.84 to 25.52)                  | 26.55<br>(22.82 to 31.52)                  |
| Fire, heat, and hot substances                  | 271.77<br>(222.65 to 298.52)                     | 192.04<br>(157.51 to 226.37)                     | 164.31<br>(134.79 to 193.24)                     | 222.26<br>(180.42 to 263.86)                     | 6.20<br>(5.11 to 6.74)                     | 6.38<br>(5.33 to 7.38)                     | 5.76<br>(4.84 to 6.63)                     | 6.92<br>(5.76 to 8.13)                     |
| Poisonings                                      | 133.54<br>(83.78 to 159.17)                      | 68.34<br>(40.51 to 90.74)                        | 56.90<br>(33.73 to 76.14)                        | 84.84<br>(50.44 to 114.00)                       | 2.94<br>(1.74 to 3.57)                     | 1.91<br>(1.11 to 2.49)                     | 1.65<br>(0.99 to 2.15)                     | 2.28<br>(1.32 to 3.04)                     |
| Exposure to mechanical forces                   | 359.96<br>(328.90 to 394.36)                     | 279.68<br>(235.64 to 319.21)                     | 240.81<br>(201.86 to 276.33)                     | 319.16<br>(268.06 to 365.92)                     | 7.32<br>(6.45 to 7.83)                     | 7.25<br>(6.14 to 8.07)                     | 6.50<br>(5.54 to 7.29)                     | 7.97<br>(6.69 to 8.88)                     |
| Unintentional firearm injuries                  | 51.05<br>(44.62 to 62.34)                        | 33.94<br>(28.64 to 42.10)                        | 29.68<br>(25.10 to 37.19)                        | 39.02<br>(32.86 to 48.89)                        | 1.13<br>(0.99 to 1.35)                     | 0.97<br>(0.83 to 1.18)                     | 0.88<br>(0.76 to 1.08)                     | 1.06<br>(0.92 to 1.29)                     |
| Unintentional suffocation                       | 68.97<br>(57.84 to 88.08)                        | 40.97<br>(33.58 to 52.72)                        | 32.66<br>(26.98 to 40.53)                        | 49.61<br>(40.12 to 63.54)                        | 1.01<br>(0.88 to 1.20)                     | 0.72<br>(0.59 to 0.87)                     | 0.61<br>(0.49 to 0.73)                     | 0.84<br>(0.70 to 1.01)                     |
| Other exposure to mechanical forces             | 239.94<br>(191.73 to 263.05)                     | 204.77<br>(156.58 to 238.24)                     | 178.47<br>(135.23 to 209.71)                     | 230.53<br>(176.36 to 268.27)                     | 5.18<br>(4.15 to 5.65)                     | 5.56<br>(4.44 to 6.31)                     | 5.01<br>(4.04 to 5.70)                     | 6.07<br>(4.78 to 6.87)                     |
| Adverse effects of medical treatment            | 364.27<br>(293.29 to 402.09)                     | 339.65<br>(275.16 to 395.50)                     | 315.69<br>(258.64 to 367.85)                     | 368.52<br>(299.92 to 428.23)                     | 8.97<br>(7.50 to 9.93)                     | 11.95<br>(10.35 to 13.90)                  | 11.66<br>(10.05 to 13.49)                  | 12.28<br>(10.56 to 14.06)                  |
| Animal contact                                  | 157.66<br>(140.68 to 176.84)                     | 171.77<br>(144.11 to 199.43)                     | 151.44<br>(126.47 to 176.00)                     | 198.10<br>(166.92 to 230.67)                     | 3.86<br>(3.37 to 4.20)                     | 5.66<br>(4.76 to 6.46)                     | 5.28<br>(4.40 to 6.04)                     | 6.23<br>(5.23 to 7.15)                     |
| Venomous animal contact                         | 102.46<br>(83.29 to 114.73)                      | 110.01<br>(84.80 to 129.14)                      | 97.60<br>(74.68 to 115.20)                       | 126.56<br>(96.86 to 149.05)                      | 2.55<br>(2.01 to 2.85)                     | 3.66<br>(2.74 to 4.24)                     | 3.45<br>(2.59 to 4.02)                     | 4.04<br>(3.04 to 4.68)                     |
| Non-venomous animal contact                     | 55.20<br>(45.35 to 78.43)                        | 61.76<br>(49.80 to 87.36)                        | 53.85<br>(42.78 to 75.31)                        | 71.54<br>(57.37 to 100.62)                       | 1.30<br>(1.08 to 1.77)                     | 2.00<br>(1.59 to 2.64)                     | 1.83<br>(1.43 to 2.44)                     | 2.20<br>(1.74 to 2.91)                     |
| Foreign body                                    | 503.80<br>(413.27 to 627.29)                     | 380.94<br>(312.04 to 456.44)                     | 354.28<br>(291.16 to 417.94)                     | 397.10<br>(322.94 to 484.36)                     | 9.76<br>(7.92 to 11.24)                    | 11.39<br>(8.66 to 12.93)                   | 11.39<br>(8.62 to 13.03)                   | 10.96<br>(8.34 to 12.48)                   |
| Pulmonary aspiration and foreign body in airway | 438.21<br>(344.84 to 535.99)                     | 323.64<br>(250.25 to 387.39)                     | 298.10<br>(231.31 to 354.60)                     | 336.81<br>(257.36 to 415.43)                     | 8.23<br>(6.33 to 9.57)                     | 9.48<br>(6.74 to 11.02)                    | 9.42<br>(6.66 to 11.03)                    | 9.07<br>(6.50 to 10.57)                    |

|                                      |                                       |                                       |                                       |                                       |                              |                               |                              |                               |
|--------------------------------------|---------------------------------------|---------------------------------------|---------------------------------------|---------------------------------------|------------------------------|-------------------------------|------------------------------|-------------------------------|
|                                      | 65.60<br>(52.18 to<br>112.44)         | 57.30<br>(45.88 to<br>90.58)          | 56.18<br>(45.05 to<br>87.99)          | 60.29<br>(47.96 to<br>96.23)          | 1.53<br>(1.27 to<br>2.43)    | 1.90<br>(1.60 to<br>2.77)     | 1.97<br>(1.64 to<br>2.84)    | 1.89<br>(1.60 to<br>2.76)     |
| Foreign body in other body part      |                                       |                                       |                                       |                                       |                              |                               |                              |                               |
|                                      | 19.83<br>(13.50 to<br>22.47)          | 17.27<br>(12.26 to<br>20.49)          | 14.72<br>(10.55 to<br>17.58)          | 20.99<br>(14.93 to<br>25.00)          | 0.50<br>(0.37 to<br>0.58)    | 0.60<br>(0.47 to<br>0.73)     | 0.54<br>(0.42 to<br>0.67)    | 0.69<br>(0.53 to<br>0.82)     |
| Environmental heat and cold exposure |                                       |                                       |                                       |                                       |                              |                               |                              |                               |
|                                      | 451.27<br>(397.57 to<br>495.28)       | 319.27<br>(263.24 to<br>369.95)       | 261.54<br>(215.78 to<br>307.89)       | 353.56<br>(292.94 to<br>407.57)       | 9.34<br>(8.18 to<br>10.23)   | 7.80<br>(6.49 to<br>8.87)     | 6.56<br>(5.53 to<br>7.51)    | 8.45<br>(7.02 to<br>9.57)     |
| Other unintentional injuries         |                                       |                                       |                                       |                                       |                              |                               |                              |                               |
|                                      | 3,334.77<br>(2,974.44 to<br>3,658.61) | 3,558.20<br>(2,816.68 to<br>4,544.18) | 3,153.05<br>(2,540.17 to<br>3,951.33) | 3,784.23<br>(2,948.43 to<br>4,905.88) | 71.44<br>(64.06 to<br>78.20) | 88.59<br>(71.08 to<br>110.43) | 79.80<br>(65.72 to<br>98.47) | 92.53<br>(73.09 to<br>118.19) |
| Self-harm and interpersonal violence |                                       |                                       |                                       |                                       |                              |                               |                              |                               |



| Southeast Asia                                                                      |                                                     |                                                       |                                                       |                                                       |                                                |                                                  |                                                  |                                                  |
|-------------------------------------------------------------------------------------|-----------------------------------------------------|-------------------------------------------------------|-------------------------------------------------------|-------------------------------------------------------|------------------------------------------------|--------------------------------------------------|--------------------------------------------------|--------------------------------------------------|
| Cause                                                                               | YLLs (in 1000s)                                     |                                                       |                                                       |                                                       | Deaths (in 1000s)                              |                                                  |                                                  |                                                  |
|                                                                                     | 2016                                                | 2040 Forecast                                         | 2040 Better Scenario                                  | 2040 Worse Scenario                                   | 2016                                           | 2040 Forecast                                    | 2040 Better Scenario                             | 2040 Worse Scenario                              |
| Self-harm                                                                           | 1,863.63<br>(1,690.39 to<br>2,231.06)               | 2,231.14<br>(1,654.59 to<br>3,011.43)                 | 1,930.68<br>(1,467.72 to<br>2,554.71)                 | 2,442.75<br>(1,751.77 to<br>3,386.22)                 | 42.38<br>(38.64 to<br>49.79)                   | 59.76<br>(45.00 to<br>77.88)                     | 52.87<br>(41.03 to<br>67.47)                     | 63.69<br>(46.78 to<br>85.56)                     |
| Self-harm by firearm                                                                | 81.15<br>(56.55 to<br>114.09)                       | 77.83<br>(48.69 to<br>124.15)                         | 64.63<br>(41.39 to<br>100.68)                         | 86.85<br>(52.97 to<br>140.37)                         | 1.83<br>(1.28 to<br>2.49)                      | 2.09<br>(1.36 to<br>3.11)                        | 1.78<br>(1.19 to<br>2.65)                        | 2.27<br>(1.44 to<br>3.48)                        |
| Self-harm by other specified means                                                  | 1,782.48<br>(1,619.55 to<br>2,130.00)               | 2,153.31<br>(1,593.41 to<br>2,897.81)                 | 1,866.05<br>(1,416.41 to<br>2,466.85)                 | 2,355.90<br>(1,688.00 to<br>3,244.34)                 | 40.55<br>(37.00 to<br>47.61)                   | 57.67<br>(43.64 to<br>75.36)                     | 51.09<br>(39.69 to<br>65.17)                     | 61.42<br>(45.19 to<br>82.57)                     |
| Interpersonal violence                                                              | 1,471.14<br>(1,053.64 to<br>1,738.40)               | 1,327.05<br>(884.55 to<br>1,679.44)                   | 1,222.37<br>(807.03 to<br>1,556.03)                   | 1,341.48<br>(873.34 to<br>1,710.75)                   | 29.05<br>(20.83 to<br>34.50)                   | 28.83<br>(19.05 to<br>36.16)                     | 26.93<br>(17.66 to<br>33.90)                     | 28.85<br>(18.74 to<br>36.39)                     |
| Physical violence by firearm                                                        | 594.64<br>(343.55 to<br>749.88)                     | 526.12<br>(254.41 to<br>721.97)                       | 482.54<br>(230.44 to<br>659.18)                       | 532.67<br>(254.99 to<br>736.66)                       | 11.92<br>(6.85 to<br>15.03)                    | 11.28<br>(5.60 to<br>15.19)                      | 10.45<br>(5.11 to<br>14.30)                      | 11.31<br>(5.49 to<br>15.30)                      |
| Physical violence by sharp object                                                   | 583.54<br>(390.16 to<br>718.62)                     | 577.30<br>(356.11 to<br>747.66)                       | 541.58<br>(333.69 to<br>711.97)                       | 569.77<br>(345.71 to<br>740.76)                       | 11.38<br>(7.57 to<br>14.00)                    | 12.22<br>(7.41 to<br>15.72)                      | 11.64<br>(7.08 to<br>15.22)                      | 11.94<br>(7.12 to<br>15.46)                      |
| Physical violence by other means                                                    | 292.96<br>(230.25 to<br>375.08)                     | 223.64<br>(167.97 to<br>304.40)                       | 198.25<br>(149.26 to<br>267.42)                       | 239.04<br>(178.22 to<br>323.62)                       | 5.76<br>(4.54 to<br>7.33)                      | 5.34<br>(4.01 to<br>7.09)                        | 4.84<br>(3.61 to<br>6.31)                        | 5.59<br>(4.15 to<br>7.52)                        |
| <b>Forces of nature, conflict and terrorism, and executions and police conflict</b> | <b>150.93</b><br><b>(84.24 to</b><br><b>219.34)</b> | <b>872.22</b><br><b>(25.07 to</b><br><b>3,603.41)</b> | <b>858.06</b><br><b>(24.37 to</b><br><b>3,467.25)</b> | <b>887.19</b><br><b>(25.22 to</b><br><b>3,711.03)</b> | <b>2.68</b><br><b>(1.52 to</b><br><b>3.85)</b> | <b>18.04</b><br><b>(0.57 to</b><br><b>68.39)</b> | <b>18.03</b><br><b>(0.57 to</b><br><b>67.49)</b> | <b>17.97</b><br><b>(0.56 to</b><br><b>68.73)</b> |
| Exposure to forces of nature                                                        | 14.95<br>(9.50 to<br>20.13)                         | 135.41<br>(0.25 to<br>2,242.74)                       | 131.64<br>(0.24 to<br>2,219.47)                       | 136.97<br>(0.25 to<br>2,269.42)                       | 0.29<br>(0.19 to<br>0.40)                      | 3.07<br>(0.01 to<br>51.25)                       | 3.07<br>(0.01 to<br>51.83)                       | 3.01<br>(0.01 to<br>49.96)                       |
| Conflict and terrorism                                                              | 123.09<br>(60.14 to<br>187.45)                      | 338.98<br>(1,605.89)                                  | 336.06<br>(9.07 to<br>1,599.86)                       | 351.06<br>(9.60 to<br>1,646.92)                       | 2.09<br>(1.02 to<br>3.19)                      | 6.81<br>(0.19 to<br>33.75)                       | 6.85<br>(0.19 to<br>34.06)                       | 6.85<br>(0.19 to<br>33.68)                       |
| Executions and police conflict                                                      | 12.89<br>(7.22 to<br>16.27)                         | 397.83<br>(0.00 to<br>3,034.58)                       | 390.35<br>(0.00 to<br>2,995.94)                       | 399.16<br>(0.00 to<br>3,047.14)                       | 0.29<br>(0.14 to<br>0.36)                      | 8.16<br>(0.00 to<br>64.56)                       | 8.11<br>(0.00 to<br>64.49)                       | 8.10<br>(0.00 to<br>64.20)                       |

| Cambodia                                                                 |                                                       |                                                       |                                                       |                                                       |                                               |                                                 |                                                 |                                                 |
|--------------------------------------------------------------------------|-------------------------------------------------------|-------------------------------------------------------|-------------------------------------------------------|-------------------------------------------------------|-----------------------------------------------|-------------------------------------------------|-------------------------------------------------|-------------------------------------------------|
| Cause                                                                    | YLLs (actual counts)                                  |                                                       |                                                       |                                                       | Deaths (actual counts)                        |                                                 |                                                 |                                                 |
|                                                                          | 2016                                                  | 2040 Forecast                                         | 2040 Better Scenario                                  | 2040 Worse Scenario                                   | 2016                                          | 2040 Forecast                                   | 2040 Better Scenario                            | 2040 Worse Scenario                             |
| <b>All causes</b>                                                        | <b>3,626,938.11</b><br>(3,328,727.61 to 3,951,169.95) | <b>3,363,562.47</b><br>(2,910,710.87 to 4,371,076.73) | <b>2,836,557.46</b><br>(2,472,764.61 to 3,802,809.86) | <b>4,901,332.56</b><br>(4,196,974.27 to 5,991,975.41) | <b>98,454.46</b><br>(92,446.85 to 104,628.73) | <b>140,604.17</b><br>(125,539.11 to 161,215.39) | <b>122,209.63</b><br>(109,565.47 to 142,105.91) | <b>185,134.63</b><br>(165,905.88 to 209,078.53) |
| <b>Communicable, maternal, neonatal, and nutritional diseases</b>        | <b>1,465,248.10</b><br>(1,256,444.09 to 1,690,326.86) | <b>625,675.72</b><br>(477,866.46 to 826,264.25)       | <b>508,311.05</b><br>(394,315.60 to 662,794.31)       | <b>1,199,656.85</b><br>(841,779.85 to 1,732,853.47)   | <b>26,198.76</b><br>(23,471.75 to 29,522.26)  | <b>19,183.27</b><br>(14,723.59 to 24,744.42)    | <b>15,694.95</b><br>(12,460.54 to 19,864.09)    | <b>31,521.82</b><br>(23,590.91 to 42,339.77)    |
| <b>HIV/AIDS and tuberculosis</b>                                         | <b>138,288.73</b><br>(103,439.21 to 175,519.46)       | <b>60,973.90</b><br>(31,647.46 to 121,977.35)         | <b>45,410.56</b><br>(22,861.50 to 93,265.72)          | <b>124,723.07</b><br>(63,174.78 to 240,849.79)        | <b>3,724.45</b><br>(2,921.95 to 4,676.00)     | <b>2,262.74</b><br>(1,240.51 to 4,252.56)       | <b>1,733.50</b><br>(974.55 to 3,140.79)         | <b>4,200.11</b><br>(2,239.35 to 7,703.01)       |
| <b>Tuberculosis</b>                                                      | <b>80,473.09</b><br>(67,296.13 to 98,758.82)          | <b>48,562.27</b><br>(24,831.43 to 95,853.38)          | <b>34,355.31</b><br>(18,732.07 to 63,531.29)          | <b>97,195.85</b><br>(46,995.87 to 195,441.31)         | <b>2,501.41</b><br>(2,102.04 to 3,112.59)     | <b>1,971.34</b><br>(1,081.85 to 3,748.21)       | <b>1,464.06</b><br>(840.10 to 2,540.86)         | <b>3,649.44</b><br>(1,838.03 to 7,129.23)       |
| <b>HIV/AIDS</b>                                                          | <b>57,815.64</b><br>(26,211.48 to 94,285.13)          | <b>12,411.63</b><br>(709.45 to 55,787.44)             | <b>11,085.25</b><br>(516.79 to 52,189.59)             | <b>27,527.22</b><br>(3,311.11 to 84,049.72)           | <b>1,223.04</b><br>(556.12 to 2,057.63)       | <b>291.40</b><br>(26.21 to 1,410.26)            | <b>269.44</b><br>(20.30 to 1,407.60)            | <b>550.66</b><br>(66.74 to 1,890.49)            |
| <b>Diarrhea, lower respiratory, and other common infectious diseases</b> | <b>668,336.35</b><br>(562,010.42 to 788,573.08)       | <b>306,697.74</b><br>(197,983.71 to 461,803.18)       | <b>223,783.99</b><br>(151,013.49 to 333,264.87)       | <b>655,296.25</b><br>(386,961.91 to 1,115,846.93)     | <b>12,924.33</b><br>(11,308.47 to 14,935.77)  | <b>11,650.21</b><br>(8,054.08 to 16,869.93)     | <b>8,916.08</b><br>(6,255.35 to 12,766.59)      | <b>19,972.72</b><br>(13,056.39 to 29,892.06)    |
| <b>Diarrheal diseases</b>                                                | <b>54,115.00</b><br>(37,379.58 to 77,032.09)          | <b>21,581.59</b><br>(3,773.81 to 68,194.97)           | <b>17,091.53</b><br>(3,339.55 to 53,296.35)           | <b>50,515.92</b><br>(9,939.72 to 160,774.68)          | <b>1,349.27</b><br>(834.17 to 2,090.02)       | <b>1,172.82</b><br>(189.69 to 4,038.87)         | <b>988.31</b><br>(178.73 to 3,211.73)           | <b>2,395.79</b><br>(392.06 to 8,209.12)         |
| <b>Intestinal infectious diseases</b>                                    | <b>50,648.56</b><br>(27,558.92 to 85,602.82)          | <b>23,365.31</b><br>(11,728.85 to 40,713.79)          | <b>22,222.41</b><br>(11,430.35 to 38,290.52)          | <b>32,303.19</b><br>(15,644.35 to 57,371.77)          | <b>752.82</b><br>(410.85 to 1,254.40)         | <b>397.72</b><br>(205.59 to 668.87)             | <b>381.48</b><br>(638.70)                       | <b>524.35</b><br>(266.16 to 921.32)             |
| <b>Typhoid fever</b>                                                     | <b>43,946.90</b><br>(22,951.47 to 75,318.99)          | <b>19,687.21</b><br>(9,527.60 to 34,994.12)           | <b>18,760.03</b><br>(9,344.62 to 32,456.19)           | <b>27,118.73</b><br>(12,780.66 to 49,771.41)          | <b>650.05</b><br>(342.56 to 1,100.33)         | <b>332.39</b><br>(162.75 to 572.92)             | <b>319.48</b><br>(161.70 to 545.28)             | <b>436.66</b><br>(208.99 to 770.02)             |
| <b>Paratyphoid fever</b>                                                 | <b>6,467.90</b><br>(2,893.24 to 12,772.91)            | <b>3,623.79</b><br>(1,589.14 to 7,196.66)             | <b>3,413.78</b><br>(1,501.10 to 6,787.75)             | <b>5,098.94</b><br>(2,195.43 to 10,381.56)            | <b>98.90</b><br>(44.33 to 192.55)             | <b>63.64</b><br>(28.39 to 124.22)               | <b>60.40</b><br>(27.19 to 117.51)               | <b>85.38</b><br>(37.73 to 168.99)               |
| <b>Other intestinal infectious diseases</b>                              | <b>233.75</b><br>(85.62 to 545.07)                    | <b>54.31</b><br>(17.78 to 124.70)                     | <b>48.60</b><br>(16.13 to 113.36)                     | <b>85.52</b><br>(26.65 to 204.12)                     | <b>3.87</b><br>(1.50 to 8.41)                 | <b>1.70</b><br>(0.59 to 3.75)                   | <b>1.60</b><br>(0.54 to 3.58)                   | <b>2.31</b><br>(0.79 to 5.10)                   |
| <b>Lower respiratory infections</b>                                      | <b>502,252.00</b><br>(412,937.93 to 596,571.09)       | <b>222,457.90</b><br>(136,920.03 to 359,170.39)       | <b>151,439.81</b><br>(98,694.60 to 233,840.84)        | <b>482,756.00</b><br>(253,811.83 to 877,100.06)       | <b>9,857.73</b><br>(8,479.99 to 11,429.14)    | <b>9,324.50</b><br>(6,508.76 to 13,308.79)      | <b>6,870.19</b><br>(4,965.97 to 9,523.82)       | <b>15,672.03</b><br>(10,051.58 to 23,606.40)    |
| <b>Upper respiratory infections</b>                                      | <b>355.66</b><br>(163.72 to 697.00)                   | <b>183.83</b><br>(79.17 to 360.74)                    | <b>160.04</b><br>(68.56 to 310.25)                    | <b>306.38</b><br>(129.43 to 617.77)                   | <b>7.05</b><br>(3.70 to 11.76)                | <b>5.65</b><br>(2.53 to 10.94)                  | <b>5.08</b><br>(2.20 to 9.84)                   | <b>8.58</b><br>(3.85 to 16.87)                  |
| <b>Otitis media</b>                                                      | <b>52.81</b><br>(28.83 to 97.22)                      | <b>37.08</b><br>(14.18 to 81.45)                      | <b>38.68</b><br>(14.67 to 83.43)                      | <b>35.27</b><br>(13.94 to 78.53)                      | <b>1.70</b><br>(0.83 to 3.07)                 | <b>1.77</b><br>(0.59 to 3.78)                   | <b>1.93</b><br>(0.64 to 4.11)                   | <b>1.55</b><br>(0.54 to 3.32)                   |
| <b>Meningitis</b>                                                        | <b>27,950.07</b><br>(15,791.41 to 43,087.57)          | <b>11,281.97</b><br>(6,485.60 to 18,076.24)           | <b>10,755.87</b><br>(6,280.09 to 17,239.43)           | <b>17,342.06</b><br>(7,985.03 to 29,950.91)           | <b>424.26</b><br>(260.25 to 656.03)           | <b>244.21</b><br>(161.62 to 369.59)             | <b>241.04</b><br>(159.76 to 362.37)             | <b>316.17</b><br>(188.87 to 503.47)             |
| <b>Pneumococcal meningitis</b>                                           | <b>276.84</b><br>(141.89 to 463.88)                   | <b>87.88</b><br>(47.46 to 154.11)                     | <b>86.26</b><br>(46.98 to 149.46)                     | <b>132.33</b><br>(63.11 to 246.61)                    | <b>4.26</b><br>(2.40 to 6.83)                 | <b>2.33</b><br>(1.41 to 3.85)                   | <b>2.39</b><br>(1.45 to 3.98)                   | <b>2.88</b><br>(1.69 to 4.94)                   |
| <b>H influenzae type B meningitis</b>                                    | <b>2,218.26</b><br>(1,208.49 to 3,474.92)             | <b>1,391.02</b><br>(447.79 to 3,477.64)               | <b>1,175.18</b><br>(436.67 to 2,785.08)               | <b>5,032.90</b><br>(774.66 to 14,457.54)              | <b>32.15</b><br>(18.79 to 49.21)              | <b>23.20</b><br>(10.79 to 48.15)                | <b>21.10</b><br>(10.90 to 40.57)                | <b>65.05</b><br>(14.67 to 174.99)               |
| <b>Meningococcal meningitis</b>                                          | <b>9,360.76</b><br>(5,101.68 to 14,954.14)            | <b>3,469.33</b><br>(2,035.83 to 5,679.38)             | <b>3,361.13</b><br>(1,970.47 to 5,482.54)             | <b>4,299.63</b><br>(2,394.62 to 7,262.98)             | <b>145.38</b><br>(87.17 to 222.97)            | <b>81.84</b><br>(53.68 to 129.91)               | <b>81.70</b><br>(53.27 to 129.68)               | <b>92.04</b><br>(58.71 to 148.62)               |
| <b>Other meningitis</b>                                                  | <b>16,094.21</b><br>(9,017.84 to 25,297.10)           | <b>6,333.74</b><br>(3,720.06 to 10,052.35)            | <b>6,133.30</b><br>(3,598.00 to 9,790.00)             | <b>7,877.20</b><br>(4,348.27 to 12,996.14)            | <b>242.47</b><br>(146.58 to 365.14)           | <b>136.84</b><br>(89.19 to 209.40)              | <b>135.84</b><br>(89.18 to 209.22)              | <b>156.20</b><br>(98.86 to 242.78)              |
| <b>Encephalitis</b>                                                      | <b>10,065.62</b><br>(6,000.28 to 17,595.72)           | <b>6,097.30</b><br>(3,625.24 to 10,472.50)            | <b>5,775.86</b><br>(3,386.21 to 10,004.74)            | <b>8,095.26</b><br>(4,680.75 to 14,520.64)            | <b>166.47</b><br>(106.89 to 279.82)           | <b>148.17</b><br>(97.90 to 244.68)              | <b>144.51</b><br>(95.48 to 235.64)              | <b>178.38</b><br>(114.92 to 295.84)             |

|                |                                        |                                       |                                       |                                          |                                 |                                |                                |                                  |
|----------------|----------------------------------------|---------------------------------------|---------------------------------------|------------------------------------------|---------------------------------|--------------------------------|--------------------------------|----------------------------------|
| Diphtheria     | 44.83<br>(26.10 to<br>76.15)           | 13.70<br>(7.20 to<br>22.53)           | 12.23<br>(6.65 to<br>20.04)           | 42.59<br>(9.33 to<br>119.71)             | 0.66<br>(0.42 to<br>1.04)       | 0.26<br>(0.14 to<br>0.43)      | 0.24<br>(0.13 to<br>0.40)      | 0.40<br>(0.18 to<br>1.50)        |
| Whooping cough | 11,744.60<br>(883.11 to<br>42,904.13)  | 2,084.64<br>(68.26 to<br>8,667.11)    | 1,039.93<br>(46.61 to<br>4,345.59)    | 6,808.33<br>(142.39 to<br>28,083.55)     | 139.26<br>(10.47 to<br>507.53)  | 25.25<br>(0.93 to<br>104.55)   | 12.97<br>(0.60 to<br>53.22)    | 80.86<br>(1.74 to<br>332.84)     |
| Tetanus        | 8,471.35<br>(4,965.96 to<br>13,807.48) | 1,601.35<br>(782.76 to<br>2,750.61)   | 1,477.70<br>(728.96 to<br>2,460.97)   | 2,707.13<br>(1,265.86 to<br>5,557.23)    | 182.91<br>(106.37 to<br>287.79) | 49.07<br>(25.38 to<br>84.53)   | 49.44<br>(24.38 to<br>84.52)   | 59.03<br>(30.13 to<br>99.87)     |
| Measles        | 1,100.72<br>(339.52 to<br>2,661.64)    | 17,469.44<br>(817.07 to<br>77,426.09) | 13,296.66<br>(780.21 to<br>53,302.25) | 53,529.63<br>(1,547.81 to<br>270,035.99) | 13.18<br>(4.06 to<br>31.81)     | 259.18<br>(14.03 to<br>974.75) | 199.64<br>(13.10 to<br>671.37) | 707.96<br>(25.73 to<br>3,276.19) |

| Cambodia                                              |                                                 |                                                |                                               |                                                |                                            |                                            |                                            |                                            |
|-------------------------------------------------------|-------------------------------------------------|------------------------------------------------|-----------------------------------------------|------------------------------------------------|--------------------------------------------|--------------------------------------------|--------------------------------------------|--------------------------------------------|
| Cause                                                 | YLLs (actual counts)                            |                                                |                                               |                                                | Deaths (actual counts)                     |                                            |                                            |                                            |
|                                                       | 2016                                            | 2040 Forecast                                  | 2040 Better Scenario                          | 2040 Worse Scenario                            | 2016                                       | 2040 Forecast                              | 2040 Better Scenario                       | 2040 Worse Scenario                        |
| Varicella and herpes zoster                           | 1,535.14<br>(919.78 to 2,393.87)                | 523.63<br>(289.79 to 885.73)                   | 473.28<br>(263.18 to 811.89)                  | 854.50<br>(437.06 to 1,527.50)                 | 29.01<br>(20.24 to 40.29)                  | 21.61<br>(13.09 to 33.07)                  | 21.26<br>(12.59 to 33.20)                  | 27.43<br>(16.61 to 42.57)                  |
| <b>Neglected tropical diseases and malaria</b>        | <b>126,259.17<br/>(71,812.29 to 196,016.32)</b> | <b>69,533.16<br/>(42,666.07 to 100,929.66)</b> | <b>67,351.70<br/>(41,868.14 to 96,536.68)</b> | <b>81,739.47<br/>(47,666.66 to 121,861.13)</b> | <b>2,222.97<br/>(1,344.78 to 3,295.20)</b> | <b>1,562.78<br/>(1,019.52 to 2,364.96)</b> | <b>1,536.84<br/>(1,025.68 to 2,287.04)</b> | <b>1,735.46<br/>(1,093.71 to 2,679.12)</b> |
| Malaria                                               | 121,745.49<br>(66,071.88 to 193,038.17)         | 59,705.11<br>(32,270.69 to 91,775.53)          | 57,672.87<br>(31,883.13 to 87,817.69)         | 70,390.36<br>(36,347.50 to 111,856.76)         | 2,143.72<br>(1,266.13 to 3,223.13)         | 1,317.11<br>(780.53 to 2,093.49)           | 1,290.38<br>(769.97 to 2,056.58)           | 1,471.48<br>(841.42 to 2,368.45)           |
| Chagas disease                                        | 0.00<br>(0.00 to 0.00)                          | 0.00<br>(0.00 to 0.00)                         | 0.00<br>(0.00 to 0.00)                        | 0.00<br>(0.00 to 0.00)                         | 0.00<br>(0.00 to 0.00)                     | 0.00<br>(0.00 to 0.00)                     | 0.00<br>(0.00 to 0.00)                     | 0.00<br>(0.00 to 0.00)                     |
| Leishmaniasis                                         | 0.00<br>(0.00 to 0.00)                          | 0.00<br>(0.00 to 0.00)                         | 0.00<br>(0.00 to 0.00)                        | 0.00<br>(0.00 to 0.00)                         | 0.00<br>(0.00 to 0.00)                     | 0.00<br>(0.00 to 0.00)                     | 0.00<br>(0.00 to 0.00)                     | 0.00<br>(0.00 to 0.00)                     |
| African trypanosomiasis                               | 0.00<br>(0.00 to 0.00)                          | 0.00<br>(0.00 to 0.00)                         | 0.00<br>(0.00 to 0.00)                        | 0.00<br>(0.00 to 0.00)                         | 0.00<br>(0.00 to 0.00)                     | 0.00<br>(0.00 to 0.00)                     | 0.00<br>(0.00 to 0.00)                     | 0.00<br>(0.00 to 0.00)                     |
| Schistosomiasis                                       | 117.00<br>(54.44 to 202.61)                     | 75.54<br>(32.15 to 140.12)                     | 71.61<br>(30.18 to 131.76)                    | 91.57<br>(38.61 to 169.71)                     | 3.48<br>(1.58 to 6.01)                     | 2.83<br>(1.11 to 5.50)                     | 2.75<br>(1.09 to 5.36)                     | 3.24<br>(1.28 to 6.18)                     |
| Cysticercosis                                         | 52.39<br>(45.11 to 60.71)                       | 20.64<br>(15.82 to 25.17)                      | 20.00<br>(15.38 to 24.40)                     | 23.31<br>(18.11 to 28.32)                      | 1.20<br>(0.45 to 1.38)                     | 0.57<br>(0.45 to 0.69)                     | 0.56<br>(0.44 to 0.68)                     | 0.63<br>(0.49 to 0.75)                     |
| Cystic echinococcosis                                 | 22.96<br>(18.15 to 28.86)                       | 8.78<br>(5.94 to 11.92)                        | 7.26<br>(5.04 to 9.75)                        | 16.11<br>(11.11 to 22.55)                      | 0.58<br>(0.45 to 0.72)                     | 0.30<br>(0.21 to 0.40)                     | 0.25<br>(0.18 to 0.34)                     | 0.52<br>(0.35 to 0.71)                     |
| Dengue                                                | 3,624.49<br>(748.10 to 11,754.98)               | 9,358.39<br>(2,795.45 to 19,922.41)            | 9,233.30<br>(2,779.42 to 19,710.84)           | 10,700.35<br>(3,107.82 to 22,829.34)           | 61.73<br>(13.43 to 179.65)                 | 230.97<br>(69.31 to 485.23)                | 222.12<br>(69.85 to 488.94)                | 245.88<br>(72.26 to 508.95)                |
| Yellow fever                                          | 0.00<br>(0.00 to 0.00)                          | 0.00<br>(0.00 to 0.00)                         | 0.00<br>(0.00 to 0.00)                        | 0.00<br>(0.00 to 0.00)                         | 0.00<br>(0.00 to 0.00)                     | 0.00<br>(0.00 to 0.00)                     | 0.00<br>(0.00 to 0.00)                     | 0.00<br>(0.00 to 0.00)                     |
| Rabies                                                | 51.00<br>(20.32 to 111.25)                      | 14.58<br>(5.43 to 32.69)                       | 11.47<br>(4.51 to 24.52)                      | 32.28<br>(12.45 to 68.55)                      | 1.05<br>(0.46 to 2.26)                     | 0.40<br>(0.17 to 0.87)                     | 0.32<br>(0.14 to 0.70)                     | 0.81<br>(0.33 to 1.70)                     |
| Intestinal nematode infections                        | 191.49<br>(71.59 to 365.62)                     | 129.59<br>(55.73 to 250.75)                    | 130.32<br>(56.39 to 254.16)                   | 159.23<br>(62.20 to 309.59)                    | 2.80<br>(1.31 to 4.90)                     | 2.73<br>(1.46 to 4.47)                     | 2.81<br>(1.51 to 4.63)                     | 2.96<br>(1.48 to 5.11)                     |
| Other neglected tropical diseases                     | 454.36<br>(229.04 to 1,085.02)                  | 220.54<br>(133.24 to 453.80)                   | 204.85<br>(122.88 to 412.97)                  | 326.25<br>(190.83 to 658.99)                   | 8.41<br>(4.77 to 19.52)                    | 7.88<br>(4.56 to 17.07)                    | 7.63<br>(4.42 to 16.64)                    | 9.96<br>(5.72 to 22.99)                    |
| <b>Maternal disorders</b>                             | <b>27,228.92<br/>(20,337.61 to 36,662.87)</b>   | <b>12,919.15<br/>(8,164.29 to 20,037.09)</b>   | <b>10,730.21<br/>(6,687.15 to 16,593.48)</b>  | <b>22,623.86<br/>(14,169.34 to 35,820.20)</b>  | <b>526.71<br/>(387.96 to 698.33)</b>       | <b>255.56<br/>(162.72 to 389.88)</b>       | <b>212.25<br/>(131.83 to 330.13)</b>       | <b>446.07<br/>(286.23 to 702.61)</b>       |
| Maternal hemorrhage                                   | 3,125.51<br>(1,992.08 to 4,726.81)              | 1,689.48<br>(961.37 to 2,851.86)               | 1,410.42<br>(781.71 to 2,376.76)              | 2,950.21<br>(1,618.38 to 4,910.97)             | 58.33<br>(37.17 to 88.57)                  | 32.65<br>(18.58 to 54.86)                  | 27.26<br>(15.05 to 45.69)                  | 56.90<br>(30.80 to 94.45)                  |
| Maternal sepsis and other maternal infections         | 544.47<br>(258.67 to 909.41)                    | 314.25<br>(139.16 to 580.17)                   | 262.36<br>(114.00 to 494.98)                  | 550.93<br>(239.81 to 1,000.83)                 | 10.63<br>(5.10 to 17.72)                   | 6.45<br>(2.84 to 11.73)                    | 5.38<br>(2.32 to 10.13)                    | 11.27<br>(4.96 to 20.94)                   |
| Maternal hypertensive disorders                       | 1,001.76<br>(626.98 to 1,518.93)                | 593.23<br>(330.02 to 950.78)                   | 494.63<br>(265.75 to 814.30)                  | 1,044.87<br>(563.50 to 1,696.73)               | 18.84<br>(11.84 to 28.45)                  | 11.56<br>(6.50 to 18.71)                   | 9.64<br>(5.24 to 15.93)                    | 20.31<br>(11.23 to 32.38)                  |
| Maternal obstructed labor and uterine rupture         | 132.45<br>(50.42 to 250.69)                     | 81.85<br>(29.20 to 167.91)                     | 67.40<br>(24.16 to 139.41)                    | 148.79<br>(54.14 to 303.95)                    | 2.54<br>(0.98 to 4.83)                     | 1.63<br>(0.56 to 3.37)                     | 1.34<br>(0.48 to 2.81)                     | 2.95<br>(1.08 to 6.03)                     |
| Maternal abortion, miscarriage, and ectopic pregnancy | 20,907.84<br>(15,155.25 to 27,934.19)           | 8,836.49<br>(5,305.96 to 14,224.58)            | 7,329.99<br>(4,222.16 to 11,630.31)           | 15,331.16<br>(8,921.26 to 24,938.69)           | 398.55<br>(289.92 to 530.05)               | 175.95<br>(105.96 to 280.77)               | 145.95<br>(84.52 to 231.88)                | 304.27<br>(177.36 to 488.89)               |

|                                        |                                   |                                   |                                 |                                     |                              |                             |                             |                              |
|----------------------------------------|-----------------------------------|-----------------------------------|---------------------------------|-------------------------------------|------------------------------|-----------------------------|-----------------------------|------------------------------|
|                                        | 925.97<br>(565.90 to<br>1,453.33) | 577.82<br>(295.12 to<br>993.10)   | 485.71<br>(245.52 to<br>858.96) | 1,020.50<br>(529.98 to<br>1,781.03) | 16.94<br>(10.19 to<br>26.26) | 10.90<br>(5.62 to<br>18.39) | 9.17<br>(4.70 to<br>15.89)  | 19.14<br>(9.92 to<br>32.97)  |
| Indirect maternal deaths               |                                   |                                   |                                 |                                     |                              |                             |                             |                              |
|                                        | 81.67<br>(31.88 to<br>167.95)     | 47.77<br>(16.42 to<br>103.54)     | 39.99<br>(13.45 to<br>88.62)    | 84.40<br>(28.80 to<br>188.84)       | 1.54<br>(0.60 to<br>3.11)    | 0.93<br>(0.31 to<br>1.99)   | 0.78<br>(0.26 to<br>1.69)   | 1.64<br>(0.56 to<br>3.54)    |
| Late maternal deaths                   |                                   |                                   |                                 |                                     |                              |                             |                             |                              |
|                                        | 74.88<br>(36.23 to<br>132.00)     | 122.06<br>(1.12 to<br>510.83)     | 83.17<br>(0.53 to<br>413.31)    | 375.10<br>(14.90 to<br>1,069.41)    | 1.57<br>(0.76 to<br>2.75)    | 2.53<br>(0.02 to<br>11.15)  | 1.74<br>(0.01 to<br>9.01)   | 7.67<br>(0.27 to<br>23.46)   |
| Maternal deaths aggravated by HIV/AIDS |                                   |                                   |                                 |                                     |                              |                             |                             |                              |
|                                        | 934.37<br>(565.02 to<br>1,470.35) | 656.20<br>(342.11 to<br>1,122.85) | 556.54<br>(291.52 to<br>965.78) | 1,117.91<br>(590.50 to<br>1,924.24) | 17.76<br>(10.84 to<br>28.07) | 12.95<br>(6.86 to<br>22.30) | 10.99<br>(5.85 to<br>19.52) | 21.93<br>(11.57 to<br>37.73) |
| Other maternal disorders               |                                   |                                   |                                 |                                     |                              |                             |                             |                              |

| Cambodia                                                                |                                                 |                                                |                                                |                                                 |                                           |                                           |                                           |                                           |
|-------------------------------------------------------------------------|-------------------------------------------------|------------------------------------------------|------------------------------------------------|-------------------------------------------------|-------------------------------------------|-------------------------------------------|-------------------------------------------|-------------------------------------------|
| Cause                                                                   | YLLs (actual counts)                            |                                                |                                                |                                                 | Deaths (actual counts)                    |                                           |                                           |                                           |
|                                                                         | 2016                                            | 2040 Forecast                                  | 2040 Better Scenario                           | 2040 Worse Scenario                             | 2016                                      | 2040 Forecast                             | 2040 Better Scenario                      | 2040 Worse Scenario                       |
| <b>Neonatal disorders</b>                                               | <b>420,170.05</b><br>(327,106.37 to 528,461.34) | <b>120,449.50</b><br>(76,861.14 to 185,838.77) | <b>109,109.65</b><br>(70,380.12 to 171,883.94) | <b>242,101.78</b><br>(157,808.55 to 374,509.07) | <b>4,854.09</b><br>(3,778.78 to 6,105.81) | <b>1,391.69</b><br>(887.95 to 2,147.10)   | <b>1,260.67</b><br>(813.34 to 1,985.70)   | <b>2,797.13</b><br>(1,823.64 to 4,326.67) |
| Neonatal preterm birth                                                  | 194,079.14<br>(135,525.92 to 265,107.24)        | 46,699.56<br>(28,367.87 to 72,347.32)          | 42,702.02<br>(26,217.23 to 66,110.29)          | 107,689.23<br>(64,786.02 to 168,310.68)         | 2,241.90<br>(1,565.89 to 3,062.23)        | 539.53<br>(327.82 to 835.67)              | 493.35<br>(302.93 to 763.67)              | 1,244.06<br>(748.41 to 1,944.13)          |
| Neonatal encephalopathy due to birth asphyxia and trauma                | 132,398.65<br>(85,632.35 to 195,183.42)         | 39,916.42<br>(20,280.68 to 73,062.76)          | 36,253.40<br>(18,272.56 to 67,402.77)          | 70,891.62<br>(35,665.40 to 131,869.31)          | 1,529.52<br>(989.43 to 2,254.68)          | 461.18<br>(234.38 to 844.09)              | 418.86<br>(211.11 to 778.71)              | 819.05<br>(412.09 to 1,523.16)            |
| Neonatal sepsis and other neonatal infections                           | 42,218.20<br>(26,882.83 to 65,177.89)           | 17,342.24<br>(9,156.19 to 31,094.23)           | 15,664.16<br>(8,193.92 to 28,674.36)           | 31,253.39<br>(16,061.36 to 56,222.77)           | 487.76<br>(310.71 to 752.85)              | 200.38<br>(105.79 to 359.17)              | 180.99<br>(94.67 to 331.47)               | 361.11<br>(185.59 to 649.47)              |
| Hemolytic disease and other neonatal jaundice                           | 3,137.96<br>(1,524.65 to 5,493.26)              | 772.22<br>(296.76 to 1,758.74)                 | 678.29<br>(261.50 to 1,532.91)                 | 1,507.47<br>(586.15 to 3,436.55)                | 36.26<br>(17.61 to 63.45)                 | 36.26<br>(3.43 to 20.32)                  | 7.84<br>(3.02 to 17.71)                   | 17.42<br>(6.77 to 39.69)                  |
| Other neonatal disorders                                                | 48,336.10<br>(27,766.36 to 76,055.26)           | 15,719.06<br>(7,398.67 to 29,339.05)           | 13,811.78<br>(6,618.71 to 25,577.49)           | 30,760.08<br>(14,731.10 to 56,456.93)           | 558.65<br>(320.90 to 878.59)              | 181.67<br>(85.57 to 338.97)               | 159.63<br>(76.55 to 295.61)               | 355.50<br>(170.35 to 652.18)              |
| <b>Nutritional deficiencies</b>                                         | <b>13,895.46</b><br>(10,473.85 to 18,308.95)    | <b>9,016.16</b><br>(7,202.41 to 11,028.27)     | <b>8,815.74</b><br>(7,090.29 to 10,873.81)     | <b>11,123.84</b><br>(8,670.61 to 14,130.00)     | <b>463.98</b><br>(387.69 to 548.71)       | <b>573.64</b><br>(432.14 to 732.79)       | <b>593.05</b><br>(450.64 to 753.65)       | <b>599.48</b><br>(439.72 to 781.43)       |
| Protein-energy malnutrition                                             | 11,975.96<br>(8,958.70 to 16,078.28)            | 7,260.75<br>(5,644.68 to 9,000.77)             | 7,111.15<br>(5,554.07 to 8,865.91)             | 8,970.72<br>(6,826.56 to 11,504.84)             | 400.42<br>(331.89 to 473.79)              | 472.51<br>(350.96 to 612.55)              | 489.57<br>(369.06 to 625.11)              | 491.91<br>(356.26 to 646.52)              |
| Iodine deficiency                                                       | 211.40<br>(17.83 to 694.28)                     | 346.43<br>(10.34 to 1,111.02)                  | 326.00<br>(9.81 to 1,086.86)                   | 468.27<br>(17.86 to 1,389.51)                   | 5.09<br>(0.45 to 14.40)                   | 19.24<br>(0.37 to 83.76)                  | 18.96<br>(0.33 to 84.14)                  | 22.64<br>(0.60 to 87.53)                  |
| Dietary iron deficiency                                                 | 308.92<br>(151.94 to 290.47)                    | 130.66<br>(85.99 to 249.87)                    | 125.02<br>(82.33 to 242.98)                    | 163.17<br>(107.78 to 291.56)                    | 3.96<br>(2.86 to 6.41)                    | 3.76<br>(2.23 to 9.33)                    | 3.72<br>(2.18 to 9.16)                    | 4.26<br>(2.59 to 10.46)                   |
| Other nutritional deficiencies                                          | 1,499.18<br>(997.56 to 2,343.05)                | 1,278.32<br>(865.46 to 1,938.00)               | 1,253.57<br>(848.72 to 1,917.62)               | 1,521.68<br>(1,022.19 to 2,307.70)              | 54.51<br>(37.19 to 83.04)                 | 78.13<br>(48.98 to 124.25)                | 80.80<br>(50.94 to 126.91)                | 80.27<br>(50.25 to 128.21)                |
| <b>Other communicable, maternal, neonatal, and nutritional diseases</b> | <b>70,569.41</b><br>(42,385.14 to 159,832.59)   | <b>46,086.10</b><br>(34,440.69 to 69,830.95)   | <b>43,109.21</b><br>(32,219.89 to 64,851.69)   | <b>62,048.56</b><br>(42,759.87 to 107,662.95)   | <b>1,482.24</b><br>(1,109.38 to 2,459.52) | <b>1,486.65</b><br>(1,223.26 to 1,874.41) | <b>1,442.56</b><br>(1,179.34 to 1,794.84) | <b>1,770.85</b><br>(1,401.66 to 2,403.12) |
| Sexually transmitted infections excluding HIV                           | 8,045.78<br>(6,154.66 to 10,391.05)             | 6,259.29<br>(4,761.65 to 8,227.43)             | 6,028.51<br>(4,562.46 to 7,904.35)             | 7,335.04<br>(5,500.42 to 9,668.18)              | 211.79<br>(162.84 to 267.83)              | 236.66<br>(161.12 to 308.32)              | 236.49<br>(160.33 to 304.65)              | 253.46<br>(175.85 to 330.33)              |
| Syphilis                                                                | 3,623.09<br>(2,224.90 to 5,136.44)              | 2,250.40<br>(1,405.89 to 3,366.92)             | 2,157.66<br>(1,337.95 to 3,185.71)             | 2,725.51<br>(1,696.20 to 4,085.89)              | 81.80<br>(53.31 to 111.48)                | 74.20<br>(46.77 to 105.15)                | 73.53<br>(46.25 to 103.86)                | 82.36<br>(51.60 to 115.59)                |
| Chlamydial infection                                                    | 831.37<br>(647.49 to 1,209.65)                  | 762.41<br>(569.35 to 1,059.17)                 | 755.57<br>(550.12 to 1,090.92)                 | 880.20<br>(645.64 to 1,256.22)                  | 24.46<br>(19.37 to 31.65)                 | 31.70<br>(21.69 to 42.42)                 | 31.93<br>(21.67 to 42.49)                 | 33.12<br>(22.85 to 44.67)                 |
| Gonococcal infection                                                    | 2,384.06<br>(1,893.54 to 3,232.72)              | 2,221.72<br>(1,683.66 to 2,971.54)             | 2,152.55<br>(1,631.38 to 2,857.11)             | 2,528.80<br>(1,899.49 to 3,447.69)              | 72.94<br>(55.50 to 92.63)                 | 94.67<br>(61.47 to 126.68)                | 95.29<br>(61.51 to 126.61)                | 98.77<br>(66.97 to 133.46)                |
| Other sexually transmitted infections                                   | 1,207.27<br>(946.33 to 1,702.52)                | 1,024.75<br>(779.02 to 1,446.93)               | 982.73<br>(737.44 to 1,366.44)                 | 1,200.53<br>(902.21 to 1,701.24)                | 32.59<br>(26.11 to 42.86)                 | 36.09<br>(26.85 to 46.51)                 | 35.74<br>(26.26 to 46.01)                 | 39.21<br>(29.32 to 51.13)                 |
| Acute hepatitis                                                         | 26,627.22<br>(22,379.16 to 31,385.81)           | 21,571.83<br>(16,746.57 to 28,051.82)          | 20,293.57<br>(15,771.06 to 26,168.28)          | 26,557.47<br>(20,158.65 to 35,083.59)           | 731.77<br>(616.38 to 859.32)              | 744.56<br>(588.64 to 955.50)              | 718.03<br>(568.54 to 913.96)              | 869.74<br>(676.13 to 1,107.01)            |
| Acute hepatitis A                                                       | 1,313.67<br>(759.70 to 1,976.89)                | 303.01<br>(316.62 to 763.00)                   | 475.33<br>(299.00 to 720.15)                   | 671.60<br>(416.39 to 1,049.69)                  | 22.09<br>(14.71 to 30.81)                 | 14.90<br>(9.33 to 22.38)                  | 14.48<br>(9.11 to 21.74)                  | 17.75<br>(11.02 to 26.80)                 |
| Acute hepatitis B                                                       | 22,104.13<br>(18,210.68 to 26,493.57)           | 18,420.41<br>(13,970.08 to 24,399.46)          | 17,234.00<br>(12,879.45 to 22,624.25)          | 22,818.00<br>(16,870.39 to 30,896.59)           | 621.45<br>(517.83 to 742.05)              | 616.08<br>(472.65 to 801.45)              | 587.85<br>(450.56 to 764.81)              | 734.21<br>(555.77 to 960.67)              |



| Cambodia                             |                                                 |                                                 |                                                 |                                                 |                                              |                                              |                                              |                                              |
|--------------------------------------|-------------------------------------------------|-------------------------------------------------|-------------------------------------------------|-------------------------------------------------|----------------------------------------------|----------------------------------------------|----------------------------------------------|----------------------------------------------|
| Cause                                | YLLs (actual counts)                            |                                                 |                                                 |                                                 | Deaths (actual counts)                       |                                              |                                              |                                              |
|                                      | 2016                                            | 2040 Forecast                                   | 2040 Better Scenario                            | 2040 Worse Scenario                             | 2016                                         | 2040 Forecast                                | 2040 Better Scenario                         | 2040 Worse Scenario                          |
| <b>Neoplasms</b>                     | <b>345,624.40</b><br>(311,060.07 to 380,390.02) | <b>580,650.77</b><br>(479,086.27 to 688,260.52) | <b>515,273.05</b><br>(434,959.86 to 594,626.93) | <b>684,069.53</b><br>(552,098.02 to 827,012.51) | <b>12,077.25</b><br>(10,813.24 to 13,188.68) | <b>24,660.78</b><br>(20,245.85 to 29,442.38) | <b>22,528.32</b><br>(18,938.43 to 26,134.30) | <b>27,685.53</b><br>(22,188.18 to 33,918.06) |
| Lip and oral cavity cancer           | 7,884.93<br>(6,747.79 to 9,264.46)              | 13,644.40<br>(8,097.30 to 22,769.74)            | 9,138.61<br>(5,834.71 to 14,432.30)             | 23,013.46<br>(13,124.57 to 39,042.92)           | 295.40<br>(253.11 to 344.11)                 | 597.63<br>(357.38 to 974.95)                 | 422.92<br>(269.90 to 647.44)                 | 958.47<br>(540.17 to 1,635.55)               |
| Nasopharynx cancer                   | 5,856.73<br>(4,745.59 to 7,228.07)              | 10,436.58<br>(6,435.16 to 16,437.77)            | 6,678.48<br>(4,373.00 to 10,078.61)             | 18,240.01<br>(10,970.01 to 29,236.26)           | 185.72<br>(152.07 to 228.61)                 | 373.05<br>(232.37 to 595.67)                 | 245.22<br>(163.84 to 368.86)                 | 636.07<br>(385.88 to 1,013.50)               |
| Other pharynx cancer                 | 3,950.91<br>(3,229.07 to 5,126.48)              | 6,436.60<br>(3,902.70 to 10,435.86)             | 5,500.65<br>(3,515.27 to 8,909.29)              | 8,021.99<br>(4,711.90 to 13,347.46)             | 141.86<br>(117.13 to 181.75)                 | 259.25<br>(160.28 to 417.19)                 | 226.86<br>(147.50 to 357.29)                 | 311.67<br>(184.05 to 515.89)                 |
| Esophageal cancer                    | 6,185.87<br>(5,420.54 to 7,019.26)              | 9,886.10<br>(5,819.90 to 16,764.68)             | 7,261.89<br>(4,491.71 to 11,734.60)             | 15,803.06<br>(8,615.03 to 27,571.91)            | 238.90<br>(210.78 to 270.47)                 | 435.72<br>(255.43 to 728.74)                 | 335.29<br>(208.83 to 528.70)                 | 663.64<br>(361.71 to 1,143.53)               |
| Stomach cancer                       | 26,978.33<br>(23,744.56 to 30,366.66)           | 33,580.63<br>(27,275.96 to 40,906.15)           | 31,833.98<br>(26,339.67 to 38,085.28)           | 37,967.88<br>(29,757.31 to 47,660.35)           | 1,049.76<br>(922.12 to 1,194.21)             | 1,544.13<br>(1,257.86 to 1,875.86)           | 1,512.52<br>(1,254.96 to 1,814.91)           | 1,652.38<br>(1,296.18 to 2,070.42)           |
| Colon and rectum cancer              | 27,700.44<br>(23,092.09 to 32,659.03)           | 62,483.52<br>(41,221.92 to 90,520.53)           | 60,241.27<br>(40,817.05 to 86,494.20)           | 63,120.15<br>(41,317.74 to 93,100.76)           | 1,057.59<br>(872.46 to 1,247.65)             | 2,938.84<br>(1,936.73 to 4,168.02)           | 2,932.97<br>(1,994.93 to 4,127.45)           | 2,791.43<br>(1,831.31 to 4,064.96)           |
| Liver cancer                         | 18,771.93<br>(15,173.34 to 23,629.52)           | 33,971.62<br>(24,374.58 to 47,161.96)           | 30,084.71<br>(22,594.04 to 40,943.48)           | 39,021.36<br>(26,394.18 to 56,469.69)           | 696.84<br>(569.61 to 872.12)                 | 1,489.56<br>(1,070.27 to 2,043.93)           | 1,369.66<br>(1,022.22 to 1,828.02)           | 1,621.47<br>(1,099.14 to 2,318.03)           |
| Liver cancer due to hepatitis B      | 7,522.47<br>(5,708.11 to 9,902.22)              | 12,556.89<br>(8,523.34 to 18,393.62)            | 11,267.73<br>(7,981.59 to 15,884.69)            | 14,059.56<br>(9,046.52 to 21,465.26)            | 252.44<br>(190.19 to 333.48)                 | 499.37<br>(337.15 to 731.62)                 | 462.77<br>(324.38 to 648.94)                 | 534.17<br>(346.13 to 806.99)                 |
| Liver cancer due to hepatitis C      | 5,500.79<br>(4,090.04 to 7,525.76)              | 10,968.03<br>(7,438.82 to 16,073.80)            | 10,113.14<br>(7,147.79 to 14,342.39)            | 11,841.92<br>(7,665.47 to 17,836.50)            | 234.70<br>(175.73 to 317.58)                 | 548.91<br>(374.68 to 776.99)                 | 525.59<br>(373.73 to 737.09)                 | 560.13<br>(367.39 to 822.86)                 |
| Liver cancer due to alcohol use      | 2,600.47<br>(1,792.79 to 3,722.17)              | 4,606.70<br>(2,812.32 to 7,443.21)              | 3,574.02<br>(2,260.25 to 5,618.03)              | 6,458.79<br>(3,754.31 to 10,605.57)             | 100.25<br>(69.85 to 144.11)                  | 197.23<br>(123.43 to 315.60)                 | 159.72<br>(104.41 to 246.51)                 | 262.07<br>(156.95 to 423.51)                 |
| Liver cancer due to other causes     | 3,148.20<br>(2,134.12 to 4,506.63)              | 5,840.01<br>(3,439.96 to 9,283.87)              | 5,129.82<br>(3,194.86 to 7,753.79)              | 6,661.09<br>(3,741.85 to 10,984.19)             | 109.45<br>(74.60 to 155.98)                  | 244.04<br>(146.24 to 383.15)                 | 221.57<br>(139.18 to 338.47)                 | 265.09<br>(149.16 to 433.09)                 |
| Gallbladder and biliary tract cancer | 4,452.80<br>(3,564.16 to 5,519.53)              | 6,445.11<br>(5,220.82 to 7,937.26)              | 6,760.38<br>(5,448.55 to 8,255.77)              | 5,880.66<br>(4,700.51 to 7,411.84)              | 185.84<br>(151.08 to 228.61)                 | 314.43<br>(256.37 to 382.13)                 | 338.77<br>(276.35 to 408.53)                 | 272.30<br>(219.29 to 340.73)                 |
| Pancreatic cancer                    | 10,062.40<br>(8,985.78 to 11,277.81)            | 22,946.42<br>(18,759.63 to 28,128.42)           | 21,974.09<br>(18,218.93 to 26,570.31)           | 23,137.02<br>(18,436.05 to 28,937.38)           | 408.62<br>(367.66 to 456.12)                 | 1,074.56<br>(881.24 to 1,319.93)             | 1,063.87<br>(887.43 to 1,278.44)             | 1,027.89<br>(817.78 to 1,283.50)             |
| Larynx cancer                        | 5,074.29<br>(4,395.80 to 5,904.49)              | 7,910.80<br>(3,865.32 to 14,170.91)             | 4,940.21<br>(2,598.08 to 8,800.79)              | 13,219.28<br>(6,371.00 to 23,613.95)            | 197.49<br>(171.80 to 229.92)                 | 342.54<br>(166.84 to 611.48)                 | 221.67<br>(391.58 to 1,003.46)               | 558.09<br>(263.02 to 1,003.46)               |
| Tracheal, bronchus, and lung cancer  | 54,263.94<br>(45,701.87 to 63,022.37)           | 95,398.35<br>(58,633.28 to 150,693.76)          | 56,103.17<br>(35,844.46 to 85,284.73)           | 152,316.77<br>(92,294.76 to 236,998.73)         | 2,194.20<br>(1,818.82 to 2,609.33)           | 4,301.59<br>(2,593.46 to 6,853.10)           | 2,642.76<br>(1,654.45 to 4,138.94)           | 6,620.38<br>(3,969.49 to 10,565.37)          |
| Malignant skin melanoma              | 1,136.86<br>(895.82 to 1,447.58)                | 2,048.78<br>(1,626.57 to 2,595.19)              | 2,183.27<br>(1,721.87 to 2,769.95)              | 1,775.14<br>(1,594.89 to 2,241.18)              | 36.96<br>(29.54 to 46.42)                    | 84.58<br>(67.44 to 105.85)                   | 93.05<br>(73.83 to 116.74)                   | 68.77<br>(54.05 to 86.65)                    |
| Non-melanoma skin cancer             | 2,131.12<br>(1,800.72 to 2,453.16)              | 4,220.41<br>(3,529.71 to 4,977.76)              | 4,297.01<br>(3,576.76 to 5,079.92)              | 4,276.91<br>(3,589.79 to 5,025.44)              | 82.96<br>(68.93 to 98.08)                    | 202.09<br>(165.08 to 245.29)                 | 213.29<br>(174.24 to 261.32)                 | 191.15<br>(156.38 to 233.58)                 |
| Breast cancer                        | 38,563.29<br>(24,901.43 to 50,952.19)           | 66,341.71<br>(41,255.43 to 100,796.92)          | 62,892.17<br>(40,310.73 to 90,107.25)           | 70,689.84<br>(42,446.12 to 114,026.79)          | 1,194.39<br>(795.27 to 1,562.20)             | 2,394.02<br>(1,528.60 to 3,521.51)           | 2,311.83<br>(1,517.56 to 3,209.22)           | 2,457.21<br>(1,514.49 to 3,870.74)           |
| Cervical cancer                      | 24,407.30<br>(16,258.18 to 30,735.22)           | 29,213.76<br>(19,278.89 to 39,317.92)           | 27,809.88<br>(18,716.56 to 36,860.46)           | 33,971.97<br>(21,843.01 to 47,569.06)           | 793.66<br>(538.64 to 980.15)                 | 1,084.71<br>(753.25 to 1,413.36)             | 1,053.79<br>(734.03 to 1,345.25)             | 1,210.54<br>(811.07 to 1,629.25)             |





| Cambodia                        |                                             |                                             |                                             |                                                 |                                          |                                          |                                          |                                          |
|---------------------------------|---------------------------------------------|---------------------------------------------|---------------------------------------------|-------------------------------------------------|------------------------------------------|------------------------------------------|------------------------------------------|------------------------------------------|
| Cause                           | YLLs (actual counts)                        |                                             |                                             |                                                 | Deaths (actual counts)                   |                                          |                                          |                                          |
|                                 | 2016                                        | 2040 Forecast                               | 2040 Better Scenario                        | 2040 Worse Scenario                             | 2016                                     | 2040 Forecast                            | 2040 Better Scenario                     | 2040 Worse Scenario                      |
| Kidney cancer                   | 3,139.25<br>(2,684.02 to<br>3,743.03)       | 6,601.34<br>(4,812.74 to<br>9,229.86)       | 6,553.28<br>(4,873.78 to<br>8,978.50)       | 6,273.49<br>(4,484.93 to<br>8,934.80)           | 107.41<br>(89.15 to<br>130.43)           | 281.51<br>(202.16 to<br>396.75)          | 288.70<br>(210.04 to<br>394.89)          | 252.94<br>(176.29 to<br>366.50)          |
| Bladder cancer                  | 4,296.66<br>(3,618.20 to<br>5,012.70)       | 8,334.05<br>(5,988.64 to<br>11,516.73)      | 7,622.93<br>(5,674.88 to<br>10,100.27)      | 9,225.74<br>(6,446.93 to<br>13,157.25)          | 199.34<br>(166.97 to<br>232.20)          | 457.40<br>(324.71 to<br>637.68)          | 437.68<br>(323.64 to<br>586.22)          | 473.69<br>(323.91 to<br>688.10)          |
| Brain and nervous system cancer | 11,326.69<br>(8,976.99 to<br>13,470.25)     | 17,858.05<br>(13,806.29 to<br>21,348.75)    | 18,428.22<br>(14,246.06 to<br>22,126.89)    | 17,377.11<br>(13,626.12 to<br>20,755.03)        | 276.46<br>(216.28 to<br>331.48)          | 572.89<br>(443.11 to<br>697.45)          | 604.68<br>(464.06 to<br>734.72)          | 522.43<br>(404.33 to<br>629.68)          |
| Thyroid cancer                  | 2,767.78<br>(2,235.39 to<br>3,378.30)       | 4,519.78<br>(3,462.91 to<br>5,805.89)       | 4,357.02<br>(3,412.69 to<br>5,502.90)       | 4,824.72<br>(3,611.93 to<br>6,317.23)           | 105.66<br>(86.18 to<br>127.55)           | 205.52<br>(157.45 to<br>258.04)          | 201.07<br>(158.36 to<br>249.65)          | 207.39<br>(156.73 to<br>267.53)          |
| Mesothelioma                    | 756.77<br>(606.63 to<br>1,029.15)           | 1,246.05<br>(984.26 to<br>1,713.44)         | 1,266.83<br>(998.37 to<br>1,751.56)         | 1,242.78<br>(988.74 to<br>1,698.06)             | 22.64<br>(18.27 to<br>30.14)             | 45.44<br>(36.32 to<br>61.00)             | 47.45<br>(37.76 to<br>63.74)             | 42.99<br>(34.15 to<br>57.03)             |
| Hodgkin lymphoma                | 2,911.38<br>(2,391.37 to<br>4,053.02)       | 2,781.61<br>(2,209.81 to<br>3,896.15)       | 2,650.97<br>(2,093.59 to<br>3,724.57)       | 3,385.92<br>(2,665.43 to<br>4,820.70)           | 73.92<br>(61.29 to<br>102.46)            | 86.98<br>(69.39 to<br>120.19)            | 84.43<br>(67.64 to<br>117.51)            | 100.95<br>(80.39 to<br>142.00)           |
| Non-Hodgkin lymphoma            | 12,002.75<br>(10,178.18 to<br>14,176.83)    | 20,040.03<br>(16,759.91 to<br>24,274.28)    | 20,632.21<br>(17,209.74 to<br>24,912.13)    | 18,805.21<br>(15,633.32 to<br>22,838.42)        | 344.77<br>(294.07 to<br>406.56)          | 751.51<br>(626.38 to<br>911.64)          | 794.23<br>(661.48 to<br>954.07)          | 661.86<br>(546.41 to<br>807.53)          |
| Multiple myeloma                | 2,284.66<br>(1,878.19 to<br>2,796.27)       | 5,046.04<br>(4,039.37 to<br>6,385.25)       | 5,225.66<br>(4,167.10 to<br>6,555.02)       | 4,527.13<br>(3,598.54 to<br>5,736.10)           | 82.68<br>(68.06 to<br>100.42)            | 210.64<br>(169.38 to<br>263.49)          | 222.85<br>(179.66 to<br>279.25)          | 181.39<br>(143.04 to<br>227.62)          |
| Leukemia                        | 24,346.83<br>(19,538.00 to<br>32,128.65)    | 28,193.94<br>(22,178.24 to<br>37,443.08)    | 26,877.11<br>(21,440.12 to<br>34,994.83)    | 31,241.94<br>(24,123.39 to<br>41,051.41)        | 572.39<br>(472.01 to<br>754.95)          | 929.24<br>(724.85 to<br>1,212.51)        | 905.12<br>(719.35 to<br>1,157.85)        | 964.70<br>(736.29 to<br>1,291.42)        |
| Acute lymphoid leukemia         | 5,814.39<br>(4,590.58 to<br>9,233.29)       | 6,967.78<br>(5,419.22 to<br>10,180.85)      | 6,813.21<br>(5,378.78 to<br>9,904.90)       | 7,251.55<br>(5,577.45 to<br>10,882.15)          | 133.81<br>(107.10 to<br>207.81)          | 230.70<br>(178.16 to<br>343.71)          | 230.02<br>(180.22 to<br>335.37)          | 223.66<br>(170.39 to<br>337.10)          |
| Chronic lymphoid leukemia       | 393.71<br>(294.95 to<br>597.19)             | 559.12<br>(408.76 to<br>837.16)             | 537.92<br>(400.18 to<br>807.17)             | 579.26<br>(416.29 to<br>888.82)                 | 11.70<br>(8.84 to<br>17.66)              | 20.68<br>(15.24 to<br>30.17)             | 20.52<br>(15.33 to<br>29.43)             | 20.23<br>(14.60 to<br>29.88)             |
| Acute myeloid leukemia          | 3,523.19<br>(2,800.71 to<br>4,899.28)       | 5,370.80<br>(4,118.77 to<br>7,326.33)       | 5,274.15<br>(4,093.09 to<br>7,114.76)       | 5,356.97<br>(4,035.76 to<br>7,318.73)           | 77.98<br>(62.17 to<br>103.30)            | 159.73<br>(121.62 to<br>215.93)          | 159.43<br>(123.42 to<br>211.89)          | 150.83<br>(112.63 to<br>208.00)          |
| Chronic myeloid leukemia        | 1,433.40<br>(1,037.26 to<br>2,120.52)       | 1,580.63<br>(1,121.25 to<br>2,352.16)       | 1,488.30<br>(1,063.70 to<br>2,211.77)       | 1,677.28<br>(1,160.39 to<br>2,538.62)           | 39.29<br>(29.15 to<br>57.95)             | 52.65<br>(37.42 to<br>77.61)             | 50.80<br>(36.46 to<br>74.73)             | 53.59<br>(37.49 to<br>80.62)             |
| Other leukemia                  | 13,182.14<br>(9,595.76 to<br>16,830.67)     | 13,715.60<br>(9,779.42 to<br>18,620.42)     | 12,763.54<br>(9,333.15 to<br>17,035.47)     | 16,376.88<br>(11,502.78 to<br>22,470.86)        | 309.60<br>(235.95 to<br>390.75)          | 465.47<br>(340.85 to<br>627.23)          | 444.35<br>(331.88 to<br>587.18)          | 516.40<br>(370.39 to<br>713.72)          |
| Other neoplasms                 | 22,999.12<br>(20,340.06 to<br>25,948.55)    | 35,099.63<br>(30,235.96 to<br>39,741.20)    | 36,091.42<br>(31,105.89 to<br>40,958.63)    | 34,491.84<br>(29,795.48 to<br>39,361.51)        | 639.60<br>(559.99 to<br>717.01)          | 1,312.17<br>(1,107.99 to<br>1,486.00)    | 1,389.52<br>(1,172.90 to<br>1,576.33)    | 1,197.08<br>(1,015.33 to<br>1,364.34)    |
| Cardiovascular diseases         | 551,605.46<br>(507,301.16 to<br>599,852.94) | 612,666.54<br>(442,463.31 to<br>835,111.22) | 412,876.00<br>(307,875.55 to<br>552,877.42) | 1,124,554.84<br>(792,508.38 to<br>1,538,890.37) | 24,134.51<br>(22,484.96 to<br>25,947.03) | 34,287.29<br>(25,775.25 to<br>45,429.48) | 25,261.57<br>(19,514.55 to<br>32,511.71) | 55,047.66<br>(41,327.51 to<br>73,351.45) |
| Rheumatic heart disease         | 14,410.27<br>(10,818.44 to<br>18,048.06)    | 9,004.37<br>(6,801.16 to<br>11,684.11)      | 8,413.45<br>(6,346.68 to<br>10,708.21)      | 11,541.36<br>(8,497.58 to<br>15,111.47)         | 419.16<br>(315.28 to<br>525.92)          | 362.41<br>(269.30 to<br>459.40)          | 351.41<br>(260.63 to<br>439.30)          | 428.95<br>(313.48 to<br>546.30)          |
| Ischemic heart disease          | 206,423.09<br>(185,272.93 to<br>230,515.45) | 234,855.76<br>(136,447.09 to<br>400,529.53) | 146,342.05<br>(87,228.66 to<br>243,071.49)  | 455,545.64<br>(269,260.94 to<br>714,785.51)     | 9,065.53<br>(8,170.63 to<br>9,985.60)    | 13,046.53<br>(7,855.09 to<br>21,128.54)  | 9,046.49<br>(5,593.53 to<br>14,181.67)   | 22,337.51<br>(13,780.47 to<br>34,472.60) |
| Stroke                          | 259,410.33<br>(234,292.42 to<br>285,523.20) | 259,975.62<br>(162,753.87 to<br>398,385.47) | 161,198.54<br>(106,576.08 to<br>246,625.14) | 519,477.04<br>(322,826.77 to<br>790,180.60)     | 11,791.03<br>(10,749.01 to<br>12,888.66) | 14,853.60<br>(9,983.42 to<br>21,696.48)  | 10,250.99<br>(7,098.81 to<br>14,638.08)  | 26,195.43<br>(17,207.38 to<br>38,446.32) |
| Ischemic stroke                 | 66,322.12<br>(56,459.51 to<br>77,265.10)    | 78,304.20<br>(46,254.45 to<br>132,164.83)   | 54,804.48<br>(33,241.06 to<br>91,567.95)    | 126,131.40<br>(72,123.11 to<br>211,017.92)      | 3,904.12<br>(3,344.71 to<br>4,521.24)    | 5,694.12<br>(3,414.56 to<br>10,340.34)   | 4,324.44<br>(2,706.17 to<br>7,763.16)    | 8,276.64<br>(4,834.87 to<br>15,154.43)   |

|                                |                                             |                                             |                                            |                                             |                                       |                                        |                                       |                                          |
|--------------------------------|---------------------------------------------|---------------------------------------------|--------------------------------------------|---------------------------------------------|---------------------------------------|----------------------------------------|---------------------------------------|------------------------------------------|
| Intracerebral hemorrhage       | 193,088.22<br>(172,650.54 to<br>213,987.71) | 181,671.42<br>(105,706.84 to<br>296,436.44) | 106,394.05<br>(64,376.63 to<br>174,095.12) | 393,345.64<br>(229,505.76 to<br>637,085.12) | 7,886.92<br>(7,067.21 to<br>8,721.34) | 9,159.49<br>(5,788.38 to<br>14,246.86) | 5,926.55<br>(3,868.84 to<br>9,214.45) | 17,918.79<br>(11,072.34 to<br>28,518.22) |
| Hypertensive heart disease     | 28,701.92<br>(21,585.59 to<br>35,401.71)    | 47,717.30<br>(28,320.50 to<br>79,053.89)    | 38,455.01<br>(24,267.76 to<br>58,191.25)   | 69,084.22<br>(38,407.00 to<br>129,829.63)   | 1,335.81<br>(1,007.98 to<br>1,641.35) | 2,821.82<br>(1,702.13 to<br>4,634.12)  | 2,385.21<br>(1,516.12 to<br>3,578.89) | 3,750.40<br>(2,129.24 to<br>7,171.66)    |
| Cardiomyopathy and myocarditis | 11,616.88<br>(8,345.88 to<br>14,577.52)     | 14,402.35<br>(9,952.11 to<br>19,035.66)     | 14,190.29<br>(9,782.40 to<br>18,600.46)    | 14,931.63<br>(10,239.46 to<br>19,689.47)    | 354.83<br>(260.86 to<br>429.95)       | 627.38<br>(428.51 to<br>844.52)        | 646.03<br>(442.66 to<br>865.98)       | 592.38<br>(409.78 to<br>790.40)          |
| Myocarditis                    | 2,634.70<br>(1,853.45 to<br>3,665.16)       | 2,068.91<br>(1,493.45 to<br>2,732.31)       | 2,054.64<br>(1,482.86 to<br>2,704.57)      | 2,298.09<br>(1,674.89 to<br>3,050.71)       | 59.40<br>(43.75 to<br>75.99)          | 70.73<br>(48.96 to<br>94.15)           | 73.32<br>(50.28 to<br>97.96)          | 70.41<br>(49.26 to<br>92.57)             |

| Cambodia                                                      |                                                        |                                                        |                                                        |                                                        |                                                  |                                                     |                                                     |                                                     |
|---------------------------------------------------------------|--------------------------------------------------------|--------------------------------------------------------|--------------------------------------------------------|--------------------------------------------------------|--------------------------------------------------|-----------------------------------------------------|-----------------------------------------------------|-----------------------------------------------------|
| Cause                                                         | YLLs (actual counts)                                   |                                                        |                                                        |                                                        | Deaths (actual counts)                           |                                                     |                                                     |                                                     |
|                                                               | 2016                                                   | 2040 Forecast                                          | 2040 Better Scenario                                   | 2040 Worse Scenario                                    | 2016                                             | 2040 Forecast                                       | 2040 Better Scenario                                | 2040 Worse Scenario                                 |
| Alcoholic cardiomyopathy                                      | 1,699.80<br>(965.15 to 2,400.06)                       | 2,403.34<br>(1,330.33 to 3,503.16)                     | 2,151.42<br>(1,159.70 to 3,146.09)                     | 2,819.18<br>(1,597.26 to 3,983.12)                     | 56.72<br>(32.75 to 81.10)                        | 93.79<br>(52.25 to 135.54)                          | 87.05<br>(47.83 to 126.65)                          | 105.26<br>(61.18 to 148.69)                         |
| Other cardiomyopathy                                          | 7,282.37<br>(4,939.82 to 9,454.44)                     | 9,930.11<br>(6,547.98 to 13,974.52)                    | 9,984.22<br>(6,659.70 to 13,800.73)                    | 9,814.35<br>(6,378.70 to 13,947.31)                    | 238.71<br>(171.05 to 297.55)                     | 462.86<br>(308.96 to 653.16)                        | 485.66<br>(322.35 to 675.61)                        | 416.71<br>(276.02 to 593.81)                        |
| Atrial fibrillation and flutter                               | 2,042.22<br>(1,578.64 to 2,580.55)                     | 5,639.69<br>(4,095.01 to 7,491.90)                     | 5,664.03<br>(4,181.70 to 7,445.57)                     | 5,486.99<br>(3,936.70 to 7,460.45)                     | 163.76<br>(126.24 to 205.72)                     | 546.61<br>(385.34 to 738.70)                        | 572.83<br>(408.45 to 766.61)                        | 487.41<br>(328.52 to 679.42)                        |
| Aortic aneurysm                                               | 2,991.51<br>(2,499.71 to 3,658.03)                     | 4,801.50<br>(3,813.27 to 6,123.00)                     | 4,768.49<br>(3,834.18 to 6,045.97)                     | 4,761.30<br>(3,743.81 to 6,184.94)                     | 140.17<br>(119.11 to 169.85)                     | 279.73<br>(222.25 to 353.89)                        | 292.00<br>(224.66 to 368.72)                        | 253.09<br>(199.51 to 325.39)                        |
| Peripheral artery disease                                     | 105.83<br>(73.58 to 164.52)                            | 402.55<br>(263.04 to 741.25)                           | 403.37<br>(265.02 to 740.52)                           | 346.50<br>(222.84 to 618.26)                           | 6.43<br>(4.50 to 10.33)                          | 31.84<br>(20.21 to 61.95)                           | 34.06<br>(21.67 to 67.57)                           | 24.31<br>(15.51 to 46.61)                           |
| Endocarditis                                                  | 6,258.21<br>(4,970.17 to 8,090.97)                     | 8,059.34<br>(6,126.96 to 10,840.10)                    | 7,869.84<br>(5,952.41 to 10,481.03)                    | 8,585.24<br>(6,471.52 to 11,723.97)                    | 176.01<br>(140.91 to 224.08)                     | 314.40<br>(235.67 to 426.18)                        | 319.57<br>(240.12 to 433.56)                        | 307.44<br>(230.59 to 422.88)                        |
| Other cardiovascular and circulatory diseases                 | 19,645.21<br>(15,009.58 to 31,382.75)                  | 27,808.05<br>(20,086.08 to 42,231.45)                  | 25,570.93<br>(18,840.75 to 38,430.98)                  | 34,794.93<br>(24,242.54 to 53,026.87)                  | 681.78<br>(540.87 to 1,069.08)                   | 1,402.96<br>(1,028.60 to 2,095.73)                  | 1,362.98<br>(999.44 to 2,073.75)                    | 1,570.74<br>(1,132.00 to 2,422.78)                  |
| <b>Chronic respiratory diseases</b>                           | <b>88,227.54</b><br><b>(74,506.17 to 100,306.05)</b>   | <b>79,311.80</b><br><b>(57,093.87 to 108,770.47)</b>   | <b>55,587.81</b><br><b>(42,508.54 to 71,275.08)</b>    | <b>129,459.85</b><br><b>(87,279.86 to 191,662.21)</b>  | <b>4,065.12</b><br><b>(3,386.74 to 4,628.50)</b> | <b>4,495.48</b><br><b>(3,211.33 to 6,184.47)</b>    | <b>3,277.11</b><br><b>(2,442.93 to 4,244.88)</b>    | <b>6,933.49</b><br><b>(4,649.18 to 10,250.01)</b>   |
| Chronic obstructive pulmonary disease                         | 45,337.65<br>(34,273.38 to 55,729.13)                  | 48,419.28<br>(30,066.06 to 75,419.44)                  | 28,160.20<br>(17,881.51 to 42,091.15)                  | 92,076.27<br>(54,406.52 to 149,823.13)                 | 2,327.87<br>(1,686.61 to 2,843.08)               | 2,891.29<br>(1,753.53 to 4,461.96)                  | 1,800.60<br>(1,138.98 to 2,637.53)                  | 5,129.70<br>(3,022.29 to 8,297.08)                  |
| Pneumoconiosis                                                | 62.81<br>(43.20 to 93.38)                              | 70.74<br>(49.36 to 102.36)                             | 69.84<br>(46.98 to 103.17)                             | 71.16<br>(51.06 to 99.76)                              | 2.99<br>(2.03 to 4.60)                           | 4.21<br>(2.85 to 6.21)                              | 4.29<br>(2.82 to 6.43)                              | 3.96<br>(2.71 to 5.79)                              |
| Silicosis                                                     | 15.35<br>(7.87 to 27.91)                               | 14.79<br>(7.00 to 28.59)                               | 15.25<br>(7.05 to 29.67)                               | 14.60<br>(7.21 to 27.44)                               | 0.75<br>(0.37 to 1.43)                           | 0.87<br>(0.41 to 1.74)                              | 0.93<br>(0.43 to 1.88)                              | 0.81<br>(0.40 to 1.56)                              |
| Asbestosis                                                    | 12.05<br>(8.37 to 17.03)                               | 15.24<br>(10.34 to 21.70)                              | 15.75<br>(10.29 to 22.99)                              | 14.71<br>(10.30 to 20.54)                              | 0.41<br>(0.28 to 0.59)                           | 0.68<br>(0.43 to 1.05)                              | 0.73<br>(0.44 to 1.16)                              | 0.61<br>(0.41 to 0.92)                              |
| Coal workers pneumoconiosis                                   | 4.32<br>(2.25 to 8.64)                                 | 4.47<br>(2.32 to 8.47)                                 | 3.89<br>(2.00 to 7.36)                                 | 5.75<br>(3.03 to 10.90)                                | 0.22<br>(0.12 to 0.44)                           | 0.29<br>(0.14 to 0.56)                              | 0.26<br>(0.13 to 0.52)                              | 0.35<br>(0.18 to 0.64)                              |
| Other pneumoconiosis                                          | 31.09<br>(19.68 to 47.07)                              | 36.24<br>(23.15 to 55.89)                              | 34.95<br>(21.78 to 55.47)                              | 36.09<br>(23.20 to 54.20)                              | 1.61<br>(1.02 to 2.45)                           | 2.37<br>(1.47 to 3.77)                              | 2.38<br>(1.42 to 3.86)                              | 2.19<br>(1.36 to 3.46)                              |
| Asthma                                                        | 40,406.38<br>(28,919.60 to 57,374.27)                  | 26,987.97<br>(16,772.51 to 43,544.22)                  | 23,367.71<br>(15,152.29 to 35,583.90)                  | 33,724.03<br>(20,203.59 to 57,457.32)                  | 1,647.68<br>(1,138.91 to 2,555.22)               | 1,411.80<br>(829.30 to 2,302.81)                    | 1,268.36<br>(800.27 to 1,963.56)                    | 1,639.75<br>(918.89 to 2,856.94)                    |
| Interstitial lung disease and pulmonary sarcoidosis           | 1,098.41<br>(643.17 to 1,745.43)                       | 2,364.00<br>(1,403.33 to 3,702.48)                     | 2,554.23<br>(1,514.68 to 3,995.39)                     | 1,974.20<br>(1,124.41 to 3,097.56)                     | 47.83<br>(27.41 to 75.54)                        | 121.69<br>(71.42 to 192.47)                         | 135.14<br>(78.97 to 212.84)                         | 96.29<br>(52.88 to 152.00)                          |
| Other chronic respiratory diseases                            | 1,322.29<br>(692.26 to 2,036.71)                       | 1,469.82<br>(764.80 to 2,283.68)                       | 1,435.82<br>(749.30 to 2,264.79)                       | 1,614.19<br>(816.73 to 2,486.23)                       | 38.75<br>(20.06 to 61.09)                        | 66.49<br>(28.89 to 118.77)                          | 68.72<br>(30.28 to 126.39)                          | 63.79<br>(28.81 to 109.92)                          |
| <b>Cirrhosis and other chronic liver diseases</b>             | <b>237,376.80</b><br><b>(208,457.87 to 270,583.55)</b> | <b>333,986.34</b><br><b>(294,152.94 to 379,952.86)</b> | <b>319,714.57</b><br><b>(279,929.34 to 362,839.00)</b> | <b>377,910.34</b><br><b>(329,227.61 to 432,956.69)</b> | <b>7,217.34</b><br><b>(6,420.57 to 8,108.84)</b> | <b>12,143.76</b><br><b>(10,686.34 to 13,755.18)</b> | <b>11,944.42</b><br><b>(10,504.49 to 13,537.52)</b> | <b>13,070.29</b><br><b>(11,395.21 to 14,889.19)</b> |
| Cirrhosis and other chronic liver diseases due to hepatitis B | 69,475.69<br>(55,975.76 to 85,496.78)                  | 103,196.71<br>(82,991.99 to 127,327.38)                | 102,649.94<br>(82,877.66 to 126,691.69)                | 108,370.03<br>(86,695.07 to 136,800.03)                | 2,144.23<br>(1,760.52 to 2,594.56)               | 3,720.26<br>(3,039.99 to 4,494.37)                  | 3,790.94<br>(3,085.69 to 4,568.89)                  | 3,736.89<br>(3,013.99 to 4,572.77)                  |
| Cirrhosis and other chronic liver diseases due to hepatitis C | 44,690.23<br>(35,326.96 to 55,797.97)                  | 68,657.73<br>(54,765.78 to 85,121.74)                  | 68,012.98<br>(54,292.11 to 83,163.33)                  | 72,722.61<br>(57,026.21 to 91,362.33)                  | 1,364.58<br>(1,093.95 to 1,652.78)               | 2,419.02<br>(1,965.03 to 2,966.24)                  | 2,447.50<br>(1,995.28 to 2,975.16)                  | 2,463.07<br>(1,970.93 to 3,036.49)                  |

|                                                                |                                                                  |                                                                  |                                                                  |                                                                  |                                                            |                                                            |                                                            |                                                             |
|----------------------------------------------------------------|------------------------------------------------------------------|------------------------------------------------------------------|------------------------------------------------------------------|------------------------------------------------------------------|------------------------------------------------------------|------------------------------------------------------------|------------------------------------------------------------|-------------------------------------------------------------|
|                                                                | 51,575.39<br>(40,641.39 to<br>65,128.48)                         | 73,532.17<br>(57,965.20 to<br>92,629.86)                         | 61,490.63<br>(48,370.56 to<br>76,965.13)                         | 101,141.62<br>(80,207.30 to<br>125,623.57)                       | 1,661.10<br>(1,342.15 to<br>2,039.96)                      | 2,737.94<br>(2,203.70 to<br>3,337.20)                      | 2,383.51<br>(1,918.97 to<br>2,916.67)                      | 3,557.30<br>(2,884.11 to<br>4,314.62)                       |
| Cirrhosis and other chronic liver diseases due to alcohol use  |                                                                  |                                                                  |                                                                  |                                                                  |                                                            |                                                            |                                                            |                                                             |
|                                                                | 71,635.48<br>(61,140.20 to<br>83,476.73)                         | 88,599.73<br>(74,961.95 to<br>105,301.87)                        | 87,561.01<br>(74,175.83 to<br>103,718.51)                        | 95,676.08<br>(80,644.34 to<br>113,870.11)                        | 2,047.43<br>(1,762.90 to<br>2,353.94)                      | 3,266.54<br>(2,750.08 to<br>3,833.76)                      | 3,322.47<br>(2,784.50 to<br>3,917.59)                      | 3,313.03<br>(2,761.97 to<br>3,930.13)                       |
| Cirrhosis and other chronic liver diseases due to other causes |                                                                  |                                                                  |                                                                  |                                                                  |                                                            |                                                            |                                                            |                                                             |
| <b>Digestive diseases</b>                                      | <b>145,877.73</b><br><b>(123,894.29 to</b><br><b>172,220.30)</b> | <b>142,845.30</b><br><b>(113,236.07 to</b><br><b>191,578.59)</b> | <b>132,841.64</b><br><b>(106,708.27 to</b><br><b>171,281.56)</b> | <b>174,127.16</b><br><b>(135,062.02 to</b><br><b>238,000.32)</b> | <b>4,865.19</b><br><b>(4,179.84 to</b><br><b>5,480.12)</b> | <b>6,943.65</b><br><b>(5,512.55 to</b><br><b>8,724.16)</b> | <b>6,785.79</b><br><b>(5,429.58 to</b><br><b>8,293.60)</b> | <b>7,659.62</b><br><b>(5,882.55 to</b><br><b>10,037.78)</b> |
| Peptic ulcer disease                                           | 51,778.50<br>(40,221.76 to<br>62,575.27)                         | 42,736.89<br>(30,253.03 to<br>55,590.30)                         | 39,242.87<br>(28,167.33 to<br>50,353.64)                         | 55,066.71<br>(38,687.48 to<br>71,210.53)                         | 2,127.33<br>(1,618.32 to<br>2,533.79)                      | 2,340.34<br>(1,640.43 to<br>3,029.75)                      | 2,232.83<br>(1,583.37 to<br>2,848.55)                      | 2,798.52<br>(1,918.76 to<br>3,601.29)                       |

| Cambodia                                   |                                       |                                         |                                          |                                         |                                    |                                     |                                      |                                     |
|--------------------------------------------|---------------------------------------|-----------------------------------------|------------------------------------------|-----------------------------------------|------------------------------------|-------------------------------------|--------------------------------------|-------------------------------------|
| Cause                                      | YLLs (actual counts)                  |                                         |                                          |                                         | Deaths (actual counts)             |                                     |                                      |                                     |
|                                            | 2016                                  | 2040 Forecast                           | 2040 Better Scenario                     | 2040 Worse Scenario                     | 2016                               | 2040 Forecast                       | 2040 Better Scenario                 | 2040 Worse Scenario                 |
| Gastritis and duodenitis                   | 2,990.40<br>(2,109.44 to 4,046.93)    | 4,812.96<br>(3,235.65 to 6,676.54)      | 4,816.27<br>(3,176.86 to 6,704.49)       | 5,115.39<br>(3,418.56 to 7,121.88)      | 118.31<br>(81.42 to 154.11)        | 262.40<br>(168.93 to 368.82)        | 272.54<br>(175.34 to 389.17)         | 258.05<br>(166.67 to 360.63)        |
| Appendicitis                               | 10,253.43<br>(8,051.15 to 13,418.60)  | 7,662.60<br>(5,846.15 to 10,266.90)     | 7,296.33<br>(5,603.82 to 9,832.92)       | 9,531.43<br>(7,208.64 to 13,140.38)     | 247.05<br>(199.54 to 316.02)       | 267.42<br>(210.25 to 347.24)        | 263.67<br>(207.05 to 339.94)         | 304.56<br>(236.15 to 396.97)        |
| Paralytic ileus and intestinal obstruction | 37,048.08<br>(25,666.79 to 59,831.25) | 30,514.86<br>(23,565.64 to 39,051.20)   | 30,908.70<br>(24,125.24 to 39,582.77)    | 33,323.79<br>(24,944.81 to 45,736.19)   | 901.07<br>(685.68 to 1,189.36)     | 1,478.01<br>(1,121.78 to 1,838.21)  | 1,572.51<br>(1,191.74 to 1,952.80)   | 1,378.81<br>(1,026.94 to 1,737.48)  |
| Inguinal, femoral, and abdominal hernia    | 2,518.97<br>(1,666.11 to 3,190.26)    | 2,795.55<br>(1,792.96 to 3,623.77)      | 2,832.05<br>(1,785.54 to 3,675.41)       | 2,936.34<br>(1,898.94 to 3,863.72)      | 105.95<br>(65.52 to 134.31)        | 162.29<br>(97.87 to 213.14)         | 172.26<br>(102.65 to 225.64)         | 153.12<br>(94.20 to 202.83)         |
| Inflammatory bowel disease                 | 2,267.98<br>(1,760.33 to 2,965.92)    | 2,951.86<br>(2,281.68 to 3,787.53)      | 3,033.13<br>(2,364.79 to 3,873.58)       | 2,885.17<br>(2,210.05 to 3,752.42)      | 73.07<br>(57.21 to 90.90)          | 137.79<br>(104.79 to 170.00)        | 147.13<br>(111.98 to 181.80)         | 123.80<br>(92.97 to 155.67)         |
| Vascular intestinal disorders              | 2,285.31<br>(1,695.98 to 3,430.26)    | 3,958.24<br>(2,898.13 to 6,011.98)      | 4,065.22<br>(2,965.82 to 6,137.38)       | 3,919.17<br>(2,837.99 to 5,937.71)      | 110.04<br>(80.04 to 168.10)        | 251.75<br>(181.30 to 384.98)        | 267.64<br>(192.74 to 406.02)         | 231.72<br>(163.35 to 358.87)        |
| Gallbladder and biliary diseases           | 6,611.56<br>(5,258.35 to 8,184.19)    | 7,753.22<br>(5,044.69 to 11,466.00)     | 6,655.17<br>(4,520.75 to 9,320.83)       | 9,405.88<br>(5,983.51 to 14,418.37)     | 274.78<br>(216.65 to 329.18)       | 440.00<br>(280.86 to 656.49)        | 394.74<br>(265.75 to 553.58)         | 490.77<br>(302.94 to 752.26)        |
| Pancreatitis                               | 16,497.73<br>(12,069.87 to 20,947.95) | 23,897.74<br>(9,986.49 to 60,386.58)    | 18,536.72<br>(8,362.28 to 41,982.47)     | 34,049.34<br>(13,623.98 to 86,260.95)   | 450.22<br>(324.51 to 585.25)       | 811.38<br>(357.47 to 1,923.88)      | 651.73<br>(301.66 to 1,469.83)       | 1,104.45<br>(454.38 to 2,664.24)    |
| Other digestive diseases                   | 13,625.76<br>(10,710.91 to 17,433.81) | 15,766.37<br>(11,975.53 to 20,188.71)   | 15,455.17<br>(11,853.92 to 19,732.82)    | 17,893.93<br>(13,847.63 to 23,123.16)   | 457.38<br>(364.26 to 564.50)       | 792.26<br>(613.23 to 1,099.31)      | 810.75<br>(624.23 to 1,030.55)       | 815.83<br>(630.18 to 1,046.97)      |
| Neurological disorders                     | 50,590.54<br>(44,848.24 to 58,060.15) | 118,465.81<br>(96,939.44 to 147,436.65) | 120,582.59<br>(101,417.32 to 145,211.90) | 108,675.99<br>(86,754.06 to 137,733.11) | 2,851.14<br>(2,578.15 to 3,462.45) | 9,756.26<br>(7,584.52 to 12,613.80) | 10,398.59<br>(8,345.60 to 12,820.37) | 7,953.81<br>(5,913.66 to 10,616.50) |
| Alzheimer's disease and other dementias    | 30,814.06<br>(25,901.42 to 37,157.94) | 91,578.56<br>(70,644.18 to 119,669.46)  | 93,967.09<br>(75,221.41 to 119,128.98)   | 79,160.60<br>(58,768.12 to 106,514.86)  | 2,438.55<br>(2,073.29 to 2,955.39) | 8,609.57<br>(6,404.53 to 11,461.59) | 9,163.24<br>(7,114.38 to 11,580.46)  | 6,919.45<br>(4,948.53 to 9,625.60)  |
| Parkinson's disease                        | 2,620.71<br>(2,007.91 to 3,286.17)    | 9,025.06<br>(6,820.62 to 11,377.91)     | 10,235.99<br>(7,826.50 to 12,956.63)     | 6,844.34<br>(5,091.69 to 8,675.82)      | 171.69<br>(130.37 to 217.28)       | 689.20<br>(508.23 to 896.50)        | 804.69<br>(604.74 to 1,039.51)       | 492.16<br>(349.76 to 652.42)        |
| Epilepsy                                   | 13,579.03<br>(10,802.56 to 16,650.57) | 12,629.77<br>(8,137.11 to 19,468.06)    | 10,976.16<br>(7,366.12 to 16,551.67)     | 17,585.14<br>(11,182.06 to 27,397.05)   | 259.95<br>(211.79 to 314.07)       | 302.37<br>(199.18 to 459.02)        | 266.94<br>(183.90 to 391.42)         | 401.15<br>(259.38 to 630.17)        |
| Multiple sclerosis                         | 477.41<br>(366.27 to 650.58)          | 759.89<br>(561.67 to 1,033.91)          | 763.88<br>(570.53 to 1,038.37)           | 737.17<br>(544.75 to 1,011.15)          | 12.91<br>(9.82 to 17.58)           | 23.38<br>(17.26 to 32.09)           | 23.82<br>(17.60 to 32.26)            | 22.08<br>(16.25 to 30.38)           |
| Motor neuron disease                       | 554.74<br>(393.36 to 719.74)          | 1,028.82<br>(718.75 to 1,309.32)        | 1,070.88<br>(748.10 to 1,366.45)         | 950.34<br>(665.40 to 1,210.51)          | 15.33<br>(10.87 to 19.39)          | 34.70<br>(24.71 to 44.33)           | 36.61<br>(26.00 to 47.33)            | 30.98<br>(21.79 to 39.88)           |
| Other neurological disorders               | 2,544.59<br>(2,131.15 to 3,058.63)    | 3,443.71<br>(2,988.79 to 3,976.90)      | 3,568.59<br>(3,083.54 to 4,096.92)       | 3,398.39<br>(2,893.54 to 3,981.11)      | 52.70<br>(46.17 to 59.41)          | 97.04<br>(83.53 to 111.79)          | 103.28<br>(88.75 to 119.59)          | 87.99<br>(76.37 to 100.75)          |
| Mental disorders                           | 15,371.88<br>(9,282.79 to 24,641.28)  | 21,171.71<br>(13,261.39 to 33,374.46)   | 20,516.26<br>(12,935.16 to 32,287.38)    | 22,667.29<br>(14,173.94 to 35,801.62)   | 344.52<br>(218.06 to 528.40)       | 536.64<br>(357.55 to 793.72)        | 527.47<br>(354.54 to 775.52)         | 559.01<br>(365.81 to 838.73)        |
| Alcohol use disorders                      | 11,208.32<br>(6,322.62 to 19,922.69)  | 12,975.16<br>(7,093.61 to 23,513.18)    | 12,254.68<br>(6,705.44 to 22,232.82)     | 14,389.15<br>(7,947.02 to 26,165.02)    | 260.22<br>(154.77 to 428.95)       | 343.40<br>(200.48 to 574.43)        | 328.95<br>(191.31 to 547.67)         | 371.30<br>(216.48 to 625.06)        |
| Drug use disorders                         | 4,123.00<br>(2,399.03 to 7,407.06)    | 8,145.98<br>(5,119.93 to 13,712.70)     | 8,210.38<br>(5,216.20 to 13,664.27)      | 8,227.77<br>(5,110.09 to 14,088.58)     | 83.53<br>(51.26 to 144.10)         | 192.22<br>(129.42 to 303.70)        | 197.49<br>(134.14 to 308.93)         | 186.71<br>(123.10 to 299.78)        |
| Opioid use disorders                       | 2,647.62<br>(1,418.83 to 5,073.59)    | 4,287.42<br>(2,397.79 to 7,871.18)      | 4,306.62<br>(2,427.87 to 7,904.38)       | 4,391.05<br>(2,403.84 to 8,346.67)      | 52.01<br>(29.13 to 96.79)          | 98.21<br>(59.40 to 167.24)          | 100.66<br>(61.65 to 168.32)          | 96.47<br>(56.37 to 168.72)          |

|                           |                                     |                                       |                                       |                                       |                              |                               |                               |                               |
|---------------------------|-------------------------------------|---------------------------------------|---------------------------------------|---------------------------------------|------------------------------|-------------------------------|-------------------------------|-------------------------------|
|                           | 171.74<br>(86.56 to<br>426.31)      | -421.13<br>(205.90 to<br>1,083.69)    | 414.37<br>(203.97 to<br>1,064.33)     | 455.50<br>(223.59 to<br>1,165.65)     | 3.65<br>(1.94 to<br>8.83)    | 10.04<br>(5.30 to<br>23.75)   | 9.98<br>(5.27 to<br>23.40)    | 10.61<br>(5.56 to<br>25.19)   |
| Cocaine use disorders     |                                     |                                       |                                       |                                       |                              |                               |                               |                               |
|                           | 145.45<br>(71.97 to<br>356.65)      | 428.96<br>(208.49 to<br>986.75)       | 414.21<br>(198.40 to<br>937.93)       | 492.14<br>(232.85 to<br>1,116.04)     | 2.85<br>(1.48 to<br>6.89)    | 9.16<br>(4.78 to<br>19.74)    | 8.92<br>(4.64 to<br>19.13)    | 10.31<br>(5.24 to<br>22.32)   |
| Amphetamine use disorders |                                     |                                       |                                       |                                       |                              |                               |                               |                               |
|                           | 1,158.20<br>(660.94 to<br>2,073.33) | 3,008.48<br>(1,761.15 to<br>5,275.12) | 3,075.17<br>(1,812.46 to<br>5,316.89) | 2,889.08<br>(1,652.79 to<br>5,193.04) | 25.01<br>(14.98 to<br>42.73) | 74.82<br>(47.64 to<br>121.65) | 77.93<br>(50.23 to<br>125.87) | 69.31<br>(43.07 to<br>115.28) |
| Other drug use disorders  |                                     |                                       |                                       |                                       |                              |                               |                               |                               |
|                           | 40.55<br>(27.28 to<br>68.29)        | 50.56<br>(33.28 to<br>83.29)          | 51.21<br>(33.55 to<br>83.95)          | 50.37<br>(33.49 to<br>81.87)          | 0.77<br>(0.52 to<br>1.30)    | 1.01<br>(0.65 to<br>1.70)     | 1.03<br>(0.66 to<br>1.73)     | 1.00<br>(0.66 to<br>1.65)     |
| Eating disorders          |                                     |                                       |                                       |                                       |                              |                               |                               |                               |

| Cambodia                                                   |                                                 |                                                 |                                                 |                                                 |                                           |                                             |                                             |                                              |
|------------------------------------------------------------|-------------------------------------------------|-------------------------------------------------|-------------------------------------------------|-------------------------------------------------|-------------------------------------------|---------------------------------------------|---------------------------------------------|----------------------------------------------|
| Cause                                                      | YLLs (actual counts)                            |                                                 |                                                 |                                                 | Deaths (actual counts)                    |                                             |                                             |                                              |
|                                                            | 2016                                            | 2040 Forecast                                   | 2040 Better Scenario                            | 2040 Worse Scenario                             | 2016                                      | 2040 Forecast                               | 2040 Better Scenario                        | 2040 Worse Scenario                          |
| <b>Diabetes, urogenital, blood, and endocrine diseases</b> | <b>144,019.18</b><br>(130,306.53 to 160,008.16) | <b>266,153.14</b><br>(180,536.17 to 476,825.19) | <b>224,783.37</b><br>(156,136.35 to 379,822.11) | <b>343,928.42</b><br>(236,023.43 to 588,016.38) | <b>5,158.54</b><br>(4,702.64 to 5,700.04) | <b>13,419.76</b><br>(8,702.30 to 27,382.58) | <b>11,598.33</b><br>(7,749.09 to 22,412.66) | <b>16,169.96</b><br>(10,502.08 to 31,641.11) |
| Diabetes mellitus                                          | 59,615.04<br>(51,810.33 to 69,304.22)           | 97,625.57<br>(62,155.21 to 148,011.94)          | 84,018.85<br>(54,584.20 to 126,547.51)          | 137,294.28<br>(84,902.47 to 210,862.17)         | 2,396.45<br>(2,089.64 to 2,774.44)        | 4,839.59<br>(3,138.26 to 6,991.82)          | 4,342.68<br>(2,909.40 to 6,322.70)          | 6,348.79<br>(4,012.84 to 9,328.25)           |
| Acute glomerulonephritis                                   | 143.57<br>(117.17 to 177.10)                    | 178.48<br>(132.27 to 241.93)                    | 175.25<br>(128.72 to 234.65)                    | 206.80<br>(154.04 to 279.84)                    | 3.40<br>(2.65 to 4.28)                    | 6.04<br>(4.15 to 8.54)                      | 6.12<br>(4.21 to 8.68)                      | 6.38<br>(4.42 to 9.07)                       |
| Chronic kidney disease                                     | 55,493.24<br>(48,835.05 to 62,598.59)           | 131,353.96<br>(61,007.78 to 347,295.76)         | 103,765.40<br>(52,183.82 to 271,532.90)         | 165,833.06<br>(77,560.23 to 430,031.46)         | 1,919.14<br>(1,715.66 to 2,143.84)        | 6,998.00<br>(2,702.85 to 21,442.28)         | 5,616.26<br>(2,325.33 to 17,134.89)         | 8,239.93<br>(3,199.12 to 24,634.02)          |
| Chronic kidney disease due to diabetes mellitus            | 30,666.61<br>(26,226.66 to 35,264.39)           | 76,877.42<br>(35,746.82 to 207,411.30)          | 60,289.69<br>(30,442.11 to 160,097.89)          | 97,878.52<br>(46,050.08 to 259,088.00)          | 1,039.33<br>(896.33 to 1,186.70)          | 3,704.49<br>(1,442.78 to 11,188.02)         | 2,931.35<br>(1,223.66 to 8,728.63)          | 4,469.77<br>(1,751.00 to 13,032.27)          |
| Chronic kidney disease due to hypertension                 | 13,460.57<br>(11,206.24 to 16,080.92)           | 39,999.03<br>(15,403.85 to 120,163.18)          | 31,616.76<br>(13,098.00 to 93,981.58)           | 48,680.38<br>(18,435.23 to 142,263.38)          | 611.38<br>(514.13 to 713.19)              | 2,675.64<br>(950.70 to 8,381.04)            | 2,183.81<br>(831.95 to 6,870.01)            | 3,016.78<br>(1,042.76 to 9,341.26)           |
| Chronic kidney disease due to glomerulonephritis           | 6,148.70<br>(4,916.22 to 7,722.35)              | 6,885.38<br>(4,074.46 to 13,904.75)             | 5,706.80<br>(3,495.84 to 10,907.75)             | 9,309.63<br>(5,560.39 to 17,935.87)             | 132.58<br>(108.76 to 161.90)              | 252.12<br>(115.91 to 691.10)                | 204.24<br>(98.50 to 548.97)                 | 315.81<br>(150.14 to 816.71)                 |
| Chronic kidney disease due to other and unspecified causes | 5,217.36<br>(4,213.76 to 6,465.76)              | 7,592.13<br>(3,955.18 to 17,473.75)             | 6,152.15<br>(3,354.96 to 14,040.65)             | 9,964.52<br>(5,188.82 to 22,625.77)             | 135.85<br>(111.21 to 165.16)              | 365.75<br>(148.65 to 1,098.07)              | 296.86<br>(86.34 to 886.34)                 | 437.57<br>(178.13 to 1,251.57)               |
| Urinary diseases and male infertility                      | 10,510.48<br>(9,193.49 to 12,137.87)            | 15,776.66<br>(13,489.77 to 18,648.60)           | 16,070.47<br>(13,712.02 to 19,069.36)           | 16,094.68<br>(13,784.28 to 18,823.43)           | 371.19<br>(327.46 to 428.38)              | 766.16<br>(654.37 to 909.03)                | 817.05<br>(695.57 to 967.11)                | 707.47<br>(605.12 to 842.36)                 |
| Urinary tract infections                                   | 6,866.45<br>(5,116.21 to 8,548.29)              | 11,373.64<br>(8,753.00 to 14,021.37)            | 11,720.53<br>(9,045.02 to 14,399.32)            | 11,153.88<br>(8,434.09 to 13,829.44)            | 243.39<br>(180.56 to 300.79)              | 562.72<br>(433.97 to 696.61)                | 605.99<br>(466.68 to 749.71)                | 500.86<br>(378.79 to 628.89)                 |
| Urolithiasis                                               | 423.02<br>(308.54 to 583.72)                    | 862.18<br>(617.56 to 1,241.43)                  | 882.66<br>(633.17 to 1,269.66)                  | 862.23<br>(614.05 to 1,262.74)                  | 16.97<br>(12.41 to 23.08)                 | 40.57<br>(29.04 to 59.65)                   | 43.08<br>(30.98 to 62.95)                   | 37.56<br>(26.99 to 54.88)                    |
| Other urinary diseases                                     | 3,221.01<br>(2,351.28 to 4,568.06)              | 3,540.84<br>(2,399.13 to 5,280.80)              | 3,467.28<br>(2,335.39 to 5,297.97)              | 4,078.57<br>(2,779.53 to 6,066.23)              | 110.83<br>(79.26 to 158.95)               | 162.87<br>(108.80 to 244.79)                | 167.98<br>(111.55 to 254.06)                | 169.05<br>(112.92 to 252.23)                 |
| Gynecological diseases                                     | 644.57<br>(315.50 to 851.10)                    | 569.05<br>(289.07 to 803.06)                    | 534.87<br>(268.83 to 747.29)                    | 702.67<br>(361.60 to 993.67)                    | 17.34<br>(8.56 to 22.64)                  | 17.65<br>(8.75 to 23.86)                    | 17.00<br>(8.28 to 23.05)                    | 20.72<br>(10.49 to 28.31)                    |
| Uterine fibroids                                           | 132.29<br>(39.30 to 215.07)                     | 107.75<br>(33.07 to 197.96)                     | 99.91<br>(30.78 to 180.68)                      | 138.21<br>(43.41 to 248.84)                     | 4.23<br>(1.28 to 6.74)                    | 3.70<br>(1.22 to 6.45)                      | 3.49<br>(1.12 to 6.10)                      | 4.60<br>(1.52 to 7.98)                       |
| Polycystic ovarian syndrome                                | 18.71<br>(6.59 to 44.35)                        | 10.30<br>(3.26 to 27.76)                        | 9.04<br>(2.81 to 24.46)                         | 15.39<br>(4.85 to 41.86)                        | 0.45<br>(0.15 to 1.08)                    | 0.25<br>(0.08 to 0.65)                      | 0.22<br>(0.07 to 0.58)                      | 0.37<br>(0.11 to 0.95)                       |
| Endometriosis                                              | 7.66<br>(2.10 to 21.86)                         | 10.16<br>(2.16 to 31.70)                        | 9.41<br>(2.02 to 29.75)                         | 12.95<br>(2.93 to 41.74)                        | 0.18<br>(0.05 to 0.55)                    | 0.25<br>(0.05 to 0.80)                      | 0.23<br>(0.05 to 0.74)                      | 0.31<br>(0.07 to 1.02)                       |
| Genital prolapse                                           | 25.24<br>(8.48 to 43.55)                        | 23.72<br>(7.56 to 43.20)                        | 22.22<br>(7.19 to 39.87)                        | 29.93<br>(9.88 to 54.28)                        | 1.24<br>(0.40 to 2.08)                    | 1.30<br>(0.41 to 2.34)                      | 1.25<br>(0.41 to 2.25)                      | 1.55<br>(0.51 to 2.80)                       |
| Other gynecological diseases                               | 460.67<br>(239.32 to 627.47)                    | 417.11<br>(218.10 to 605.57)                    | 394.29<br>(213.75 to 573.43)                    | 506.19<br>(259.83 to 752.65)                    | 11.24<br>(6.11 to 15.08)                  | 12.15<br>(6.77 to 17.02)                    | 11.82<br>(6.46 to 16.62)                    | 13.88<br>(7.60 to 19.99)                     |
| Hemoglobinopathies and hemolytic anemias                   | 11,687.50<br>(9,296.56 to 15,070.41)            | 13,259.55<br>(10,665.14 to 17,069.77)           | 12,885.51<br>(10,352.61 to 16,789.72)           | 15,557.86<br>(12,359.49 to 20,119.19)           | 307.18<br>(251.69 to 386.99)              | 516.67<br>(420.52 to 655.93)                | 515.21<br>(419.65 to 658.75)                | 570.08<br>(458.20 to 738.93)                 |
| Thalassemias                                               | 3,291.13<br>(2,028.34 to 4,896.04)              | 1,519.89<br>(965.87 to 2,246.78)                | 1,599.55<br>(1,010.77 to 2,371.25)              | 1,636.86<br>(978.25 to 2,449.23)                | 42.14<br>(26.75 to 61.71)                 | 20.59<br>(13.40 to 29.88)                   | 21.66<br>(13.99 to 31.53)                   | 21.87<br>(13.53 to 32.63)                    |



|                                                   |                                       |                                        |                                        |                                         |                                 |                                 |                                 |                                 |
|---------------------------------------------------|---------------------------------------|----------------------------------------|----------------------------------------|-----------------------------------------|---------------------------------|---------------------------------|---------------------------------|---------------------------------|
|                                                   | 8.98<br>(6.40 to<br>12.28)            | 9.48<br>(6.47 to<br>13.74)             | 9.20<br>(6.25 to<br>13.43)             | 10.91<br>(7.52 to<br>16.05)             | 0.16<br>(0.12 to<br>0.22)       | 0.21<br>(0.15 to<br>0.31)       | 0.21<br>(0.14 to<br>0.30)       | 0.24<br>(0.17 to<br>0.35)       |
| Sickle cell disorders                             | 6,156.49<br>(4,908.98 to<br>7,841.02) | 8,840.03<br>(6,959.10 to<br>11,747.05) | 8,382.70<br>(6,549.79 to<br>11,026.40) | 10,784.64<br>(8,330.89 to<br>14,592.45) | 153.00<br>(121.79 to<br>195.39) | 294.22<br>(234.75 to<br>387.19) | 284.31<br>(224.60 to<br>372.44) | 345.07<br>(270.10 to<br>456.84) |
| G6PD deficiency                                   | 2,230.89<br>(1,778.15 to<br>2,771.10) | 2,890.15<br>(2,294.72 to<br>3,652.28)  | 2,894.06<br>(2,275.96 to<br>3,660.30)  | 3,125.45<br>(2,432.45 to<br>4,065.36)   | 111.87<br>(90.40 to<br>138.88)  | 201.65<br>(158.35 to<br>261.44) | 209.03<br>(162.84 to<br>266.33) | 202.90<br>(156.14 to<br>268.78) |
| Other hemoglobinopathies and hemolytic anemias    | 5,924.78<br>(4,863.00 to<br>8,779.98) | 7,389.87<br>(5,876.84 to<br>10,674.83) | 7,333.03<br>(5,819.68 to<br>10,675.98) | 8,239.07<br>(6,645.46 to<br>11,999.47)  | 143.84<br>(118.34 to<br>206.87) | 275.65<br>(214.26 to<br>397.14) | 284.01<br>(220.37 to<br>411.71) | 276.59<br>(215.68 to<br>400.78) |
| Endocrine, metabolic, blood, and immune disorders |                                       |                                        |                                        |                                         |                                 |                                 |                                 |                                 |

| Cambodia                                      |                                              |                                              |                                              |                                              |                                       |                                       |                                       |                                       |
|-----------------------------------------------|----------------------------------------------|----------------------------------------------|----------------------------------------------|----------------------------------------------|---------------------------------------|---------------------------------------|---------------------------------------|---------------------------------------|
| Cause                                         | YLLs (actual counts)                         |                                              |                                              |                                              | Deaths (actual counts)                |                                       |                                       |                                       |
|                                               | 2016                                         | 2040 Forecast                                | 2040 Better Scenario                         | 2040 Worse Scenario                          | 2016                                  | 2040 Forecast                         | 2040 Better Scenario                  | 2040 Worse Scenario                   |
| <b>Musculoskeletal disorders</b>              | <b>3,380.80</b><br>(2,851.04 to 4,682.57)    | <b>5,829.76</b><br>(4,814.74 to 8,374.49)    | <b>6,019.26</b><br>(4,966.96 to 8,560.00)    | <b>5,570.21</b><br>(4,587.31 to 7,865.31)    | <b>87.64</b><br>(73.91 to 125.03)     | <b>207.13</b><br>(164.82 to 317.90)   | <b>219.65</b><br>(175.17 to 338.21)   | <b>187.35</b><br>(149.78 to 284.56)   |
| Rheumatoid arthritis                          | 459.63<br>(337.55 to 674.75)                 | 968.55<br>(641.02 to 1,461.07)               | 944.23<br>(632.07 to 1,426.45)               | 1,083.84<br>(727.66 to 1,628.56)             | 18.97<br>(13.42 to 29.14)             | 51.14<br>(33.16 to 82.89)             | 51.32<br>(32.81 to 84.37)             | 53.82<br>(35.06 to 86.34)             |
| Other musculoskeletal disorders               | 2,921.17<br>(2,431.06 to 4,104.30)           | 4,861.21<br>(3,953.86 to 7,050.19)           | 5,075.04<br>(4,129.56 to 7,298.73)           | 4,486.37<br>(3,617.30 to 6,507.28)           | 68.67<br>(57.18 to 98.42)             | 155.99<br>(123.00 to 247.15)          | 168.34<br>(132.44 to 265.68)          | 133.53<br>(105.93 to 207.35)          |
| <b>Other non-communicable diseases</b>        | <b>61,172.03</b><br>(45,020.75 to 84,421.03) | <b>32,266.44</b><br>(23,926.25 to 42,258.06) | <b>31,490.18</b><br>(23,597.12 to 41,678.59) | <b>43,527.96</b><br>(31,370.50 to 58,480.12) | <b>822.97</b><br>(621.00 to 1,097.77) | <b>790.26</b><br>(597.98 to 1,128.67) | <b>817.95</b><br>(613.79 to 1,177.01) | <b>867.01</b><br>(653.95 to 1,178.74) |
| Congenital birth defects                      | 51,601.89<br>(37,072.74 to 72,245.76)        | 19,922.96<br>(13,580.20 to 29,170.95)        | 18,922.66<br>(12,839.05 to 27,377.70)        | 30,273.54<br>(20,345.73 to 44,186.19)        | 619.14<br>(449.43 to 860.82)          | 257.06<br>(180.06 to 365.49)          | 244.70<br>(171.89 to 344.28)          | 380.76<br>(259.81 to 544.90)          |
| Neural tube defects                           | 4,909.94<br>(2,347.66 to 8,701.50)           | 915.69<br>(360.37 to 1,918.72)               | 826.70<br>(326.52 to 1,741.99)               | 1,667.57<br>(631.79 to 3,552.10)             | 57.01<br>(27.43 to 100.84)            | 10.73<br>(4.26 to 22.31)              | 9.69<br>(3.85 to 20.26)               | 19.47<br>(7.48 to 41.31)              |
| Congenital heart anomalies                    | 28,495.28<br>(19,142.94 to 41,958.06)        | 10,968.36<br>(7,021.13 to 16,486.91)         | 10,449.88<br>(6,716.06 to 15,864.54)         | 16,322.50<br>(10,494.84 to 25,011.49)        | 344.58<br>(234.72 to 502.00)          | 142.73<br>(95.63 to 210.43)           | 136.19<br>(91.44 to 202.23)           | 207.29<br>(137.02 to 310.74)          |
| Orofacial clefts                              | 115.80<br>(34.38 to 279.97)                  | 34.28<br>(8.87 to 86.63)                     | 30.44<br>(7.84 to 79.41)                     | 65.58<br>(16.24 to 170.08)                   | 1.34<br>(0.40 to 3.24)                | 0.40<br>(0.10 to 1.00)                | 0.35<br>(0.09 to 0.92)                | 0.76<br>(0.19 to 1.97)                |
| Down syndrome                                 | 492.81<br>(305.99 to 849.64)                 | 378.37<br>(232.24 to 631.62)                 | 355.66<br>(220.34 to 597.06)                 | 553.13<br>(335.05 to 944.56)                 | 6.63<br>(4.26 to 11.16)               | 6.20<br>(4.10 to 10.00)               | 5.85<br>(3.84 to 9.40)                | 8.55<br>(5.52 to 13.95)               |
| Other chromosomal abnormalities               | 696.53<br>(290.75 to 1,391.21)               | 562.60<br>(237.19 to 1,169.54)               | 529.54<br>(220.12 to 1,097.72)               | 900.92<br>(372.40 to 1,854.27)               | 8.14<br>(3.42 to 16.20)               | 6.77<br>(2.98 to 13.73)               | 6.38<br>(2.79 to 12.93)               | 10.72<br>(4.70 to 21.75)              |
| Congenital musculoskeletal and limb anomalies | 1,155.05<br>(518.55 to 2,351.46)             | 580.22<br>(230.57 to 1,274.99)               | 557.72<br>(221.54 to 1,220.76)               | 867.52<br>(348.06 to 1,970.65)               | 13.49<br>(6.11 to 27.44)              | 6.89<br>(2.81 to 14.97)               | 6.63<br>(2.73 to 14.40)               | 10.24<br>(4.16 to 23.00)              |
| Urogenital congenital anomalies               | 742.74<br>(491.49 to 1,162.58)               | 463.24<br>(328.12 to 675.26)                 | 448.29<br>(318.84 to 648.64)                 | 610.87<br>(423.12 to 920.77)                 | 11.36<br>(8.04 to 17.02)              | 9.85<br>(7.41 to 13.35)               | 9.62<br>(7.22 to 13.00)               | 11.91<br>(8.86 to 16.55)              |
| Digestive congenital anomalies                | 3,024.68<br>(1,524.10 to 5,868.56)           | 1,114.87<br>(515.72 to 2,215.71)             | 1,052.70<br>(480.93 to 2,092.77)             | 1,773.39<br>(788.95 to 3,569.95)             | 35.22<br>(17.78 to 68.24)             | 13.12<br>(6.12 to 25.93)              | 12.39<br>(5.71 to 24.43)              | 20.79<br>(9.31 to 41.65)              |
| Other congenital birth defects                | 11,969.06<br>(7,658.45 to 17,881.71)         | 4,905.34<br>(3,033.37 to 7,610.21)           | 4,671.72<br>(2,907.62 to 7,193.07)           | 7,512.07<br>(4,600.97 to 11,633.32)          | 141.37<br>(90.91 to 209.81)           | 60.38<br>(38.21 to 92.20)             | 57.59<br>(36.49 to 87.43)             | 91.04<br>(56.61 to 139.12)            |
| Skin and subcutaneous diseases                | 4,069.68<br>(2,701.68 to 6,824.68)           | 10,279.69<br>(6,975.01 to 16,367.20)         | 10,590.96<br>(7,201.00 to 16,802.15)         | 10,113.57<br>(6,785.15 to 16,399.57)         | 139.99<br>(94.08 to 230.15)           | 509.26<br>(341.41 to 828.55)          | 530.32<br>(366.97 to 890.60)          | 449.81<br>(300.57 to 738.57)          |
| Cellulitis                                    | 263.14<br>(148.05 to 493.50)                 | 1,002.73<br>(547.98 to 1,777.90)             | 1,076.78<br>(593.48 to 1,907.03)             | 872.13<br>(481.59 to 1,591.70)               | 8.96<br>(5.09 to 16.93)               | 48.38<br>(27.81 to 90.76)             | 54.08<br>(30.57 to 98.93)             | 38.72<br>(22.35 to 73.88)             |
| Pyoderma                                      | 2,326.20<br>(1,505.27 to 4,037.38)           | 5,695.63<br>(3,709.17 to 9,573.40)           | 5,730.22<br>(3,719.98 to 9,660.19)           | 5,976.04<br>(3,893.72 to 10,110.12)          | 64.35<br>(41.56 to 110.61)            | 235.41<br>(151.56 to 403.19)          | 247.34<br>(159.38 to 422.80)          | 224.02<br>(144.13 to 392.70)          |
| Decubitus ulcer                               | 1,361.70<br>(858.54 to 2,310.42)             | 3,356.32<br>(2,117.29 to 5,609.29)           | 3,549.68<br>(2,249.47 to 5,923.14)           | 3,050.98<br>(1,922.61 to 5,255.63)           | 63.42<br>(39.64 to 109.35)            | 216.92<br>(130.32 to 384.95)          | 239.67<br>(145.83 to 415.96)          | 179.64<br>(106.57 to 329.53)          |
| Other skin and subcutaneous diseases          | 118.64<br>(71.74 to 194.08)                  | 225.01<br>(134.84 to 352.99)                 | 234.28<br>(139.32 to 363.35)                 | 214.42<br>(129.66 to 335.25)                 | 3.26<br>(1.96 to 5.18)                | 8.55<br>(5.07 to 13.65)               | 9.24<br>(5.37 to 14.76)               | 7.43<br>(4.34 to 12.12)               |
| Sudden infant death syndrome                  | 5,500.47<br>(2,282.43 to 11,420.10)          | 2,063.80<br>(814.07 to 4,453.29)             | 1,976.57<br>(773.76 to 4,215.13)             | 3,140.85<br>(1,232.69 to 6,541.12)           | 63.84<br>(26.48 to 132.55)            | 23.94<br>(9.44 to 51.68)              | 22.93<br>(8.98 to 48.91)              | 36.44<br>(14.30 to 75.91)             |

|                          |                                             |                                               |                                               |                                               |                                         |                                          |                                         |                                          |
|--------------------------|---------------------------------------------|-----------------------------------------------|-----------------------------------------------|-----------------------------------------------|-----------------------------------------|------------------------------------------|-----------------------------------------|------------------------------------------|
| Injuries                 | 518,443.65<br>(460,258.27 to<br>573,815.97) | 544,539.15<br>(376,233.64 to<br>1,489,978.72) | 488,561.68<br>(332,444.52 to<br>1,433,420.65) | 687,184.12<br>(483,659.86 to<br>1,707,898.17) | 10,531.50<br>(9,418.71 to<br>11,557.02) | 14,179.90<br>(10,650.80 to<br>32,531.47) | 13,155.48<br>(9,911.97 to<br>31,474.60) | 16,579.07<br>(12,520.93 to<br>35,703.98) |
| Transport injuries       | 178,976.60<br>(150,252.55 to<br>208,752.75) | 164,662.25<br>(117,239.77 to<br>235,163.03)   | 120,015.20<br>(87,364.21 to<br>169,441.05)    | 252,754.95<br>(175,583.64 to<br>369,634.20)   | 3,710.70<br>(3,159.09 to<br>4,303.34)   | 4,290.04<br>(3,115.16 to<br>6,093.74)    | 3,281.46<br>(2,447.90 to<br>4,566.66)   | 6,073.67<br>(4,311.83 to<br>8,908.96)    |
| Road injuries            | 169,904.20<br>(141,904.79 to<br>198,136.97) | 152,478.92<br>(108,207.20 to<br>217,713.66)   | 108,842.78<br>(78,634.93 to<br>152,771.44)    | 237,740.80<br>(166,092.85 to<br>347,208.59)   | 3,520.10<br>(2,990.77 to<br>4,072.55)   | 3,954.42<br>(2,887.59 to<br>5,526.41)    | 2,964.53<br>(2,232.59 to<br>4,083.66)   | 5,687.71<br>(4,035.25 to<br>8,269.33)    |
| Pedestrian road injuries | 40,457.47<br>(33,293.08 to<br>50,751.17)    | 34,436.94<br>(24,555.54 to<br>49,251.45)      | 25,989.90<br>(19,114.87 to<br>35,638.41)      | 50,733.11<br>(34,867.43 to<br>73,716.48)      | 968.48<br>(798.24 to<br>1,188.29)       | 1,154.63<br>(836.18 to<br>1,636.43)      | 917.18<br>(683.26 to<br>1,242.09)       | 1,548.33<br>(1,077.34 to<br>2,248.81)    |

| Cambodia                                        |                                                                  |                                                                  |                                                                  |                                                                  |                                                            |                                                            |                                                            |                                                            |
|-------------------------------------------------|------------------------------------------------------------------|------------------------------------------------------------------|------------------------------------------------------------------|------------------------------------------------------------------|------------------------------------------------------------|------------------------------------------------------------|------------------------------------------------------------|------------------------------------------------------------|
| Cause                                           | YLLs (actual counts)                                             |                                                                  |                                                                  |                                                                  | Deaths (actual counts)                                     |                                                            |                                                            |                                                            |
|                                                 | 2016                                                             | 2040 Forecast                                                    | 2040 Better Scenario                                             | 2040 Worse Scenario                                              | 2016                                                       | 2040 Forecast                                              | 2040 Better Scenario                                       | 2040 Worse Scenario                                        |
| Cyclist road injuries                           | 6,500.90<br>(4,107.18 to<br>10,769.94)                           | 6,730.30<br>(3,832.38 to<br>11,673.72)                           | 4,895.03<br>(2,821.31 to<br>8,373.07)                            | 10,087.40<br>(5,707.59 to<br>17,649.77)                          | 154.43<br>(98.11 to<br>257.49)                             | 201.14<br>(113.77 to<br>359.39)                            | 154.92<br>(87.72 to<br>270.70)                             | 275.95<br>(153.33 to<br>493.30)                            |
| Motorcyclist road injuries                      | 44,602.61<br>(33,324.95 to<br>59,641.80)                         | 42,092.66<br>(26,033.04 to<br>66,053.21)                         | 31,924.50<br>(20,106.59 to<br>49,422.74)                         | 61,187.57<br>(37,772.87 to<br>96,967.75)                         | 811.94<br>(614.45 to<br>1,081.03)                          | 853.60<br>(534.57 to<br>1,326.99)                          | 661.29<br>(424.95 to<br>1,019.75)                          | 1,193.56<br>(739.47 to<br>1,907.49)                        |
| Motor vehicle road injuries                     | 74,950.65<br>(55,414.63 to<br>91,470.73)                         | 65,779.11<br>(43,788.11 to<br>95,122.17)                         | 43,675.54<br>(29,188.29 to<br>61,217.00)                         | 110,153.46<br>(72,737.48 to<br>160,932.85)                       | 1,513.01<br>(1,115.73 to<br>1,840.72)                      | 1,646.31<br>(1,106.39 to<br>2,328.85)                      | 1,157.06<br>(798.53 to<br>1,603.76)                        | 2,529.29<br>(1,696.78 to<br>3,687.00)                      |
| Other road injuries                             | 3,392.57<br>(2,224.11 to<br>6,517.84)                            | 3,439.91<br>(1,983.16 to<br>6,694.52)                            | 2,357.82<br>(1,403.31 to<br>4,519.17)                            | 5,579.26<br>(3,123.97 to<br>10,910.26)                           | 72.25<br>(48.51 to<br>133.23)                              | 98.75<br>(56.38 to<br>196.21)                              | 74.08<br>(43.03 to<br>147.14)                              | 140.57<br>(79.14 to<br>275.72)                             |
| Other transport injuries                        | 9,072.40<br>(5,027.94 to<br>13,453.95)                           | 12,183.33<br>(6,298.70 to<br>20,121.55)                          | 11,172.43<br>(5,959.81 to<br>17,837.83)                          | 15,014.14<br>(7,566.03 to<br>25,525.88)                          | 190.60<br>(102.18 to<br>279.95)                            | 335.62<br>(166.54 to<br>554.91)                            | 316.93<br>(162.15 to<br>501.26)                            | 385.97<br>(188.01 to<br>650.80)                            |
| <b>Unintentional injuries</b>                   | <b>257,883.01</b><br><b>(229,511.60 to</b><br><b>288,277.84)</b> | <b>186,936.37</b><br><b>(159,937.22 to</b><br><b>216,071.92)</b> | <b>181,816.92</b><br><b>(155,931.49 to</b><br><b>209,241.23)</b> | <b>220,767.47</b><br><b>(186,131.44 to</b><br><b>260,253.62)</b> | <b>5,232.10</b><br><b>(4,692.97 to</b><br><b>5,779.82)</b> | <b>5,940.13</b><br><b>(5,161.94 to</b><br><b>6,708.62)</b> | <b>6,032.79</b><br><b>(5,251.91 to</b><br><b>6,770.55)</b> | <b>6,247.68</b><br><b>(5,387.43 to</b><br><b>7,242.84)</b> |
| Falls                                           | 61,948.86<br>(51,953.18 to<br>73,107.13)                         | 74,259.98<br>(60,742.53 to<br>85,342.16)                         | 74,923.36<br>(61,026.90 to<br>85,503.30)                         | 77,210.80<br>(63,493.04 to<br>89,447.29)                         | 1,830.20<br>(1,474.21 to<br>2,098.97)                      | 3,300.70<br>(2,577.27 to<br>3,853.30)                      | 3,473.22<br>(2,718.65 to<br>4,029.85)                      | 3,130.30<br>(2,447.99 to<br>3,714.86)                      |
| Drowning                                        | 114,949.73<br>(94,057.15 to<br>136,038.84)                       | 55,933.11<br>(43,092.40 to<br>72,484.96)                         | 52,568.81<br>(41,288.64 to<br>67,276.48)                         | 74,027.78<br>(56,176.00 to<br>98,491.29)                         | 1,843.42<br>(1,585.91 to<br>2,143.08)                      | 1,164.75<br>(919.73 to<br>1,496.25)                        | 1,108.83<br>(893.24 to<br>1,407.31)                        | 1,444.16<br>(1,122.18 to<br>1,887.76)                      |
| Fire, heat, and hot substances                  | 18,196.67<br>(13,010.44 to<br>25,569.71)                         | 12,612.07<br>(8,674.40 to<br>19,449.17)                          | 11,766.38<br>(8,183.05 to<br>17,847.65)                          | 15,983.09<br>(10,702.11 to<br>24,461.87)                         | 372.17<br>(279.36 to<br>520.29)                            | 358.92<br>(256.82 to<br>542.73)                            | 346.43<br>(251.51 to<br>509.77)                            | 418.31<br>(291.51 to<br>628.75)                            |
| Poisonings                                      | 5,202.54<br>(3,590.85 to<br>7,212.93)                            | 2,575.06<br>(1,707.28 to<br>3,848.69)                            | 2,319.84<br>(1,554.49 to<br>3,431.56)                            | 3,600.14<br>(2,302.64 to<br>5,528.97)                            | 98.62<br>(69.37 to<br>136.02)                              | 61.08<br>(41.62 to<br>92.29)                               | 56.40<br>(39.34 to<br>82.51)                               | 80.11<br>(53.26 to<br>123.18)                              |
| Exposure to mechanical forces                   | 12,821.76<br>(8,468.27 to<br>18,203.43)                          | 8,439.61<br>(5,797.86 to<br>12,177.87)                           | 8,001.61<br>(5,451.84 to<br>11,702.43)                           | 10,722.78<br>(7,299.61 to<br>15,449.66)                          | 233.26<br>(160.02 to<br>328.11)                            | 192.34<br>(139.80 to<br>273.71)                            | 185.60<br>(136.02 to<br>267.17)                            | 230.42<br>(165.59 to<br>330.67)                            |
| Unintentional firearm injuries                  | 2,116.56<br>(1,164.01 to<br>4,564.60)                            | 1,406.51<br>(777.84 to<br>3,189.92)                              | 1,325.12<br>(724.26 to<br>3,011.37)                              | 1,801.05<br>(989.76 to<br>4,125.56)                              | 41.41<br>(23.94 to<br>88.61)                               | 34.22<br>(20.35 to<br>74.57)                               | 32.99<br>(19.58 to<br>72.50)                               | 41.30<br>(24.20 to<br>90.42)                               |
| Unintentional suffocation                       | 2,780.30<br>(1,506.15 to<br>4,616.59)                            | 1,241.36<br>(758.94 to<br>1,926.62)                              | 1,165.45<br>(717.07 to<br>1,816.56)                              | 1,812.29<br>(1,069.24 to<br>2,880.54)                            | 37.36<br>(21.69 to<br>59.68)                               | 19.70<br>(12.96 to<br>29.65)                               | 18.60<br>(12.17 to<br>28.03)                               | 27.39<br>(17.27 to<br>41.58)                               |
| Other exposure to mechanical forces             | 7,924.90<br>(5,270.79 to<br>10,565.92)                           | 5,791.74<br>(3,938.79 to<br>7,817.51)                            | 5,511.04<br>(3,736.80 to<br>7,532.43)                            | 7,109.44<br>(4,836.97 to<br>9,789.77)                            | 154.49<br>(106.89 to<br>203.60)                            | 138.41<br>(102.67 to<br>181.75)                            | 134.02<br>(99.79 to<br>177.12)                             | 161.73<br>(118.69 to<br>216.72)                            |
| Adverse effects of medical treatment            | 11,949.13<br>(9,224.46 to<br>14,543.77)                          | 10,255.88<br>(8,039.88 to<br>12,191.52)                          | 9,962.60<br>(7,822.90 to<br>11,834.44)                           | 12,026.61<br>(9,308.49 to<br>14,356.67)                          | 259.64<br>(210.30 to<br>300.89)                            | 317.63<br>(262.62 to<br>371.26)                            | 318.84<br>(263.56 to<br>373.98)                            | 341.72<br>(276.17 to<br>373.98)                            |
| Animal contact                                  | 3,379.79<br>(2,379.55 to<br>4,490.27)                            | 3,139.69<br>(2,126.66 to<br>4,242.66)                            | 2,960.52<br>(2,030.24 to<br>4,026.55)                            | 4,062.83<br>(2,732.49 to<br>5,508.97)                            | 72.86<br>(52.17 to<br>94.30)                               | 89.46<br>(62.27 to<br>118.56)                              | 86.62<br>(59.90 to<br>115.17)                              | 107.30<br>(74.22 to<br>141.89)                             |
| Venomous animal contact                         | 1,796.93<br>(1,169.12 to<br>2,582.12)                            | 1,569.38<br>(1,022.97 to<br>2,261.01)                            | 1,479.57<br>(963.54 to<br>2,135.17)                              | 2,043.54<br>(1,320.71 to<br>2,992.50)                            | 39.56<br>(26.62 to<br>55.10)                               | 46.62<br>(31.47 to<br>66.00)                               | 45.16<br>(30.47 to<br>63.56)                               | 56.03<br>(37.37 to<br>79.72)                               |
| Non-venomous animal contact                     | 1,582.86<br>(1,012.29 to<br>2,206.09)                            | 1,570.32<br>(992.46 to<br>2,330.42)                              | 1,480.95<br>(934.43 to<br>2,098.02)                              | 2,019.29<br>(1,272.80 to<br>2,873.44)                            | 33.30<br>(21.15 to<br>46.07)                               | 42.84<br>(27.13 to<br>61.05)                               | 41.46<br>(25.79 to<br>58.88)                               | 51.27<br>(32.34 to<br>73.43)                               |
| Foreign body                                    | 14,758.28<br>(9,877.31 to<br>20,791.89)                          | 9,470.51<br>(6,664.13 to<br>11,927.48)                           | 9,497.52<br>(6,696.04 to<br>11,942.97)                           | 10,798.38<br>(7,444.48 to<br>14,330.72)                          | 244.65<br>(171.73 to<br>314.41)                            | 230.44<br>(168.79 to<br>276.65)                            | 239.10<br>(175.59 to<br>286.84)                            | 233.51<br>(170.60 to<br>283.89)                            |
| Pulmonary aspiration and foreign body in airway | 13,378.45<br>(8,485.81 to<br>19,413.90)                          | 8,491.32<br>(5,539.03 to<br>10,874.48)                           | 8,547.72<br>(5,631.70 to<br>10,889.70)                           | 9,630.49<br>(6,243.59 to<br>13,050.69)                           | 217.90<br>(145.04 to<br>288.36)                            | 204.13<br>(139.11 to<br>251.05)                            | 212.88<br>(144.83 to<br>261.89)                            | 204.69<br>(138.85 to<br>254.56)                            |

|                                             |                                                               |                                                                |                                                                |                                                                 |                                                            |                                                            |                                                            |                                                            |
|---------------------------------------------|---------------------------------------------------------------|----------------------------------------------------------------|----------------------------------------------------------------|-----------------------------------------------------------------|------------------------------------------------------------|------------------------------------------------------------|------------------------------------------------------------|------------------------------------------------------------|
|                                             | 1,379.83<br>(815.28 to<br>2,737.64)                           | 979.19<br>(621.18 to<br>1,905.47)                              | 949.81<br>(591.40 to<br>1,860.27)                              | 1,167.89<br>(732.69 to<br>2,249.08)                             | 26.75<br>(16.86 to<br>51.49)                               | 26.30<br>(17.33 to<br>50.58)                               | 26.23<br>(17.39 to<br>51.16)                               | 28.81<br>(19.06 to<br>54.86)                               |
| Foreign body in other body part             |                                                               |                                                                |                                                                |                                                                 |                                                            |                                                            |                                                            |                                                            |
|                                             | 987.44<br>(678.69 to<br>1,561.20)                             | 899.88<br>(616.85 to<br>1,467.77)                              | 833.20<br>(563.78 to<br>1,352.42)                              | 1,211.42<br>(816.49 to<br>1,924.00)                             | 22.69<br>(16.33 to<br>35.73)                               | 27.31<br>(19.53 to<br>44.27)                               | 26.08<br>(18.66 to<br>42.50)                               | 34.11<br>(23.92 to<br>55.98)                               |
| Environmental heat and cold exposure        |                                                               |                                                                |                                                                |                                                                 |                                                            |                                                            |                                                            |                                                            |
|                                             | 13,688.82<br>(10,285.25 to<br>18,394.63)                      | 9,350.56<br>(6,885.10 to<br>12,666.09)                         | 8,983.07<br>(6,599.54 to<br>12,175.45)                         | 11,123.63<br>(8,122.46 to<br>15,321.34)                         | 254.58<br>(195.04 to<br>339.95)                            | 197.50<br>(149.29 to<br>264.61)                            | 191.67<br>(144.57 to<br>255.40)                            | 227.73<br>(170.33 to<br>309.57)                            |
| Other unintentional injuries                |                                                               |                                                                |                                                                |                                                                 |                                                            |                                                            |                                                            |                                                            |
| <b>Self-harm and interpersonal violence</b> | <b>81,459.67</b><br><b>(63,819.40 to</b><br><b>98,608.99)</b> | <b>89,515.93</b><br><b>(62,544.24 to</b><br><b>124,779.35)</b> | <b>82,782.73</b><br><b>(59,260.91 to</b><br><b>112,336.22)</b> | <b>102,383.39</b><br><b>(68,824.57 to</b><br><b>147,385.48)</b> | <b>1,586.33</b><br><b>(1,248.70 to</b><br><b>1,892.58)</b> | <b>1,962.76</b><br><b>(1,385.75 to</b><br><b>2,716.49)</b> | <b>1,827.88</b><br><b>(1,326.74 to</b><br><b>2,435.03)</b> | <b>2,201.14</b><br><b>(1,501.37 to</b><br><b>3,108.32)</b> |

| Cambodia                                                                            |                                                      |                                                              |                                                              |                                                              |                                                |                                                         |                                                         |                                                         |
|-------------------------------------------------------------------------------------|------------------------------------------------------|--------------------------------------------------------------|--------------------------------------------------------------|--------------------------------------------------------------|------------------------------------------------|---------------------------------------------------------|---------------------------------------------------------|---------------------------------------------------------|
| Cause                                                                               | YLLs (actual counts)                                 |                                                              |                                                              |                                                              | Deaths (actual counts)                         |                                                         |                                                         |                                                         |
|                                                                                     | 2016                                                 | 2040 Forecast                                                | 2040 Better Scenario                                         | 2040 Worse Scenario                                          | 2016                                           | 2040 Forecast                                           | 2040 Better Scenario                                    | 2040 Worse Scenario                                     |
| Self-harm                                                                           | 44,546.23<br>(35,975.59 to<br>53,383.87)             | 57,605.73<br>(35,965.31 to<br>87,779.16)                     | 51,409.43<br>(33,374.11 to<br>76,617.56)                     | 68,475.43<br>(41,208.99 to<br>107,981.57)                    | 922.60<br>(757.90 to<br>1,078.83)              | 1,343.53<br>(875.16 to<br>2,024.22)                     | 1,217.67<br>(819.16 to<br>1,771.20)                     | 1,551.50<br>(954.48 to<br>2,402.87)                     |
| Self-harm by firearm                                                                | 1,683.17<br>(888.06 to<br>2,966.55)                  | 1,736.45<br>(734.59 to<br>3,495.09)                          | 1,521.36<br>(676.73 to<br>3,118.05)                          | 2,133.27<br>(867.93 to<br>4,366.74)                          | 34.80<br>(19.44 to<br>60.36)                   | 41.30<br>(18.68 to<br>81.79)                            | 36.93<br>(17.35 to<br>70.52)                            | 48.98<br>(21.22 to<br>97.11)                            |
| Self-harm by other specified means                                                  | 42,863.06<br>(34,615.31 to<br>51,258.96)             | 55,869.28<br>(34,760.22 to<br>84,767.27)                     | 49,888.07<br>(32,527.68 to<br>73,700.89)                     | 66,342.16<br>(39,767.72 to<br>104,724.93)                    | 887.80<br>(730.18 to<br>1,036.54)              | 1,302.23<br>(834.89 to<br>1,954.08)                     | 1,180.75<br>(796.39 to<br>1,704.76)                     | 1,502.52<br>(926.11 to<br>2,347.72)                     |
| Interpersonal violence                                                              | 36,913.44<br>(22,638.12 to<br>50,395.46)             | 31,910.21<br>(18,850.03 to<br>46,117.82)                     | 31,373.51<br>(18,587.31 to<br>44,541.44)                     | 33,907.96<br>(19,483.01 to<br>50,095.48)                     | 663.73<br>(416.37 to<br>888.40)                | 619.22<br>(377.10 to<br>880.48)                         | 610.21<br>(377.19 to<br>846.13)                         | 649.63<br>(391.82 to<br>943.87)                         |
| Physical violence by firearm                                                        | 8,586.32<br>(4,368.98 to<br>17,412.96)               | 7,247.56<br>(3,697.18 to<br>14,746.36)                       | 7,205.02<br>(3,701.20 to<br>14,602.51)                       | 7,619.38<br>(3,805.38 to<br>15,575.64)                       | 153.57<br>(79.55 to<br>318.21)                 | 137.53<br>(73.17 to<br>282.05)                          | 137.01<br>(72.90 to<br>280.57)                          | 142.92<br>(73.92 to<br>293.15)                          |
| Physical violence by sharp object                                                   | 15,733.52<br>(9,176.02 to<br>23,049.07)              | 14,763.25<br>(8,117.63 to<br>22,147.75)                      | 14,904.94<br>(8,194.16 to<br>22,198.91)                      | 14,776.60<br>(8,021.50 to<br>22,358.63)                      | 282.17<br>(164.16 to<br>409.66)                | 279.48<br>(159.93 to<br>411.58)                         | 282.79<br>(161.77 to<br>413.93)                         | 276.95<br>(155.57 to<br>410.64)                         |
| Physical violence by other means                                                    | 12,593.60<br>(6,589.17 to<br>19,411.64)              | 9,899.40<br>(4,381.31 to<br>17,854.62)                       | 9,263.35<br>(4,254.94 to<br>16,340.96)                       | 11,511.98<br>(4,951.20 to<br>21,353.74)                      | 227.99<br>(123.71 to<br>343.29)                | 202.22<br>(97.10 to<br>352.85)                          | 190.41<br>(95.32 to<br>324.32)                          | 229.77<br>(105.98 to<br>413.25)                         |
| <b>Forces of nature, conflict and terrorism, and executions and police conflict</b> | <b>124.36</b><br><b>(103.83 to</b><br><b>166.78)</b> | <b>103,424.61</b><br><b>(0.00 to</b><br><b>1,030,424.06)</b> | <b>103,946.82</b><br><b>(0.00 to</b><br><b>1,035,989.37)</b> | <b>111,278.31</b><br><b>(0.00 to</b><br><b>1,110,930.26)</b> | <b>2.37</b><br><b>(1.90 to</b><br><b>3.25)</b> | <b>1,986.98</b><br><b>(0.00 to</b><br><b>19,827.88)</b> | <b>2,013.34</b><br><b>(0.00 to</b><br><b>20,072.10)</b> | <b>2,056.59</b><br><b>(0.00 to</b><br><b>20,574.77)</b> |
| Exposure to forces of nature                                                        | 0.00<br>(0.00 to<br>0.00)                            | 715.75<br>(0.00 to<br>8,494.32)                              | 721.36<br>(0.00 to<br>8,556.96)                              | 778.63<br>(0.00 to<br>9,210.69)                              | 0.00<br>(0.00 to<br>0.00)                      | 15.58<br>(0.00 to<br>185.51)                            | 15.91<br>(0.00 to<br>189.33)                            | 15.92<br>(0.00 to<br>189.05)                            |
| Conflict and terrorism                                                              | 0.00<br>(0.00 to<br>0.00)                            | 100,983.58<br>(0.00 to<br>1,030,424.06)                      | 101,491.42<br>(0.00 to<br>1,035,989.37)                      | 108,704.84<br>(0.00 to<br>1,110,930.26)                      | 0.00<br>(0.00 to<br>0.00)                      | 1,927.19<br>(0.00 to<br>19,827.88)                      | 1,962.89<br>(0.00 to<br>20,072.10)                      | 2,005.88<br>(0.00 to<br>20,574.77)                      |
| Executions and police conflict                                                      | 124.36<br>(103.83 to<br>166.78)                      | 1,725.28<br>(0.00 to<br>43,691.20)                           | 1,734.04<br>(0.00 to<br>43,932.19)                           | 1,794.85<br>(0.00 to<br>45,455.95)                           | 2.37<br>(1.90 to<br>3.25)                      | 34.21<br>(0.00 to<br>870.55)                            | 34.54<br>(0.00 to<br>879.28)                            | 34.79<br>(0.00 to<br>883.77)                            |

| Indonesia                                                         |                                          |                                          |                                          |                                          |                                       |                                       |                                       |                                       |
|-------------------------------------------------------------------|------------------------------------------|------------------------------------------|------------------------------------------|------------------------------------------|---------------------------------------|---------------------------------------|---------------------------------------|---------------------------------------|
| Cause                                                             | YLLs (in 1000s)                          |                                          |                                          |                                          | Deaths (in 1000s)                     |                                       |                                       |                                       |
|                                                                   | 2016                                     | 2040 Forecast                            | 2040 Better Scenario                     | 2040 Worse Scenario                      | 2016                                  | 2040 Forecast                         | 2040 Better Scenario                  | 2040 Worse Scenario                   |
| All causes                                                        | 47,754.99<br>(45,948.40 to<br>49,440.60) | 51,505.54<br>(42,422.39 to<br>62,455.79) | 39,996.39<br>(33,102.58 to<br>48,390.08) | 67,113.66<br>(54,655.13 to<br>82,061.42) | 1,537.80<br>(1,479.67 to<br>1,598.43) | 2,533.26<br>(2,161.73 to<br>2,922.99) | 2,066.30<br>(1,775.46 to<br>2,385.16) | 3,106.42<br>(2,656.26 to<br>3,633.29) |
| Communicable, maternal, neonatal, and nutritional diseases        | 14,740.03<br>(13,823.34 to<br>15,721.37) | 9,221.28<br>(7,133.48 to<br>12,559.02)   | 7,014.73<br>(5,395.33 to<br>9,675.24)    | 12,567.97<br>(9,559.55 to<br>17,429.16)  | 311.98<br>(285.96 to<br>337.15)       | 334.70<br>(237.59 to<br>504.52)       | 280.89<br>(197.03 to<br>427.91)       | 436.99<br>(308.12 to<br>666.82)       |
| HIV/AIDS and tuberculosis                                         | 3,177.45<br>(3,010.14 to<br>3,362.69)    | 2,238.38<br>(1,690.87 to<br>2,906.12)    | 1,376.62<br>(996.23 to<br>1,863.55)      | 3,196.05<br>(2,460.71 to<br>4,149.47)    | 97.30<br>(91.82 to<br>103.11)         | 93.26<br>(69.17 to<br>125.10)         | 60.90<br>(44.59 to<br>81.51)          | 129.62<br>(95.90 to<br>169.18)        |
| Tuberculosis                                                      | 2,797.47<br>(2,632.55 to<br>2,972.60)    | 1,853.43<br>(1,317.44 to<br>2,553.75)    | 1,203.40<br>(848.41 to<br>1,699.90)      | 2,673.80<br>(1,946.65 to<br>3,643.13)    | 89.89<br>(84.34 to<br>95.55)          | 85.73<br>(61.93 to<br>116.91)         | 57.69<br>(41.56 to<br>78.47)          | 118.80<br>(85.52 to<br>159.46)        |
| HIV/AIDS                                                          | 379.97<br>(329.04 to<br>454.20)          | 374.95<br>(293.67 to<br>516.82)          | 173.22<br>(85.33 to<br>282.11)           | 522.25<br>(405.76 to<br>741.01)          | 7.41<br>(6.39 to<br>8.87)             | 7.53<br>(5.72 to<br>10.91)            | 3.21<br>(1.39 to<br>5.73)             | 10.82<br>(8.16 to<br>16.27)           |
| Diarrhea, lower respiratory, and other common infectious diseases | 5,190.26<br>(4,519.30 to<br>5,880.68)    | 3,282.77<br>(1,693.59 to<br>6,171.58)    | 2,617.14<br>(1,365.13 to<br>5,053.16)    | 4,697.14<br>(2,416.84 to<br>9,093.94)    | 115.14<br>(91.38 to<br>138.19)        | 152.83<br>(65.29 to<br>318.28)        | 135.87<br>(59.77 to<br>290.45)        | 205.80<br>(86.44 to<br>439.71)        |
| Diarrheal diseases                                                | 1,599.51<br>(1,159.58 to<br>2,162.52)    | 1,267.40<br>(208.25 to<br>3,733.74)      | 1,165.33<br>(241.15 to<br>3,408.19)      | 1,894.09<br>(320.37 to<br>5,594.64)      | 49.68<br>(28.68 to<br>70.67)          | 81.70<br>(12.25 to<br>247.00)         | 81.41<br>(15.90 to<br>227.30)         | 115.43<br>(16.37 to<br>338.94)        |
| Intestinal infectious diseases                                    | 767.96<br>(433.88 to<br>1,226.83)        | 387.12<br>(195.02 to<br>662.05)          | 392.69<br>(206.34 to<br>658.86)          | 444.03<br>(219.35 to<br>777.01)          | 11.47<br>(6.49 to<br>18.39)           | 6.68<br>(3.39 to<br>11.24)            | 6.98<br>(3.75 to<br>11.40)            | 7.50<br>(3.84 to<br>12.81)            |
| Typhoid fever                                                     | 666.81<br>(370.57 to<br>1,059.18)        | 327.60<br>(159.51 to<br>566.77)          | 345.94<br>(178.48 to<br>585.02)          | 372.57<br>(178.53 to<br>649.92)          | 9.92<br>(5.51 to<br>15.71)            | 5.62<br>(2.86 to<br>9.51)             | 6.12<br>(3.26 to<br>10.08)            | 6.26<br>(3.20 to<br>10.78)            |
| Paratyphoid fever                                                 | 99.62<br>(47.27 to<br>185.90)            | 59.12<br>(25.59 to<br>114.61)            | 46.39<br>(19.98 to<br>91.75)             | 70.93<br>(30.24 to<br>139.58)            | 1.52<br>(0.72 to<br>2.86)             | 1.04<br>(0.46 to<br>2.03)             | 0.84<br>(0.36 to<br>1.64)             | 1.23<br>(0.54 to<br>2.41)             |
| Other intestinal infectious diseases                              | 1.53<br>(0.57 to<br>3.34)                | 0.40<br>(0.14 to<br>0.92)                | 0.36<br>(0.13 to<br>0.80)                | 0.53<br>(0.18 to<br>1.16)                | 0.03<br>(0.01 to<br>0.06)             | 0.02<br>(0.01 to<br>0.03)             | 0.01<br>(0.01 to<br>0.03)             | 0.02<br>(0.01 to<br>0.04)             |
| Lower respiratory infections                                      | 1,735.20<br>(1,554.54 to<br>1,944.06)    | 1,077.16<br>(710.48 to<br>1,663.88)      | 714.92<br>(498.44 to<br>1,042.69)        | 1,604.87<br>(969.19 to<br>2,769.71)      | 38.14<br>(33.58 to<br>42.03)          | 54.80<br>(38.69 to<br>75.00)          | 40.43<br>(29.91 to<br>55.59)          | 70.61<br>(48.48 to<br>101.45)         |
| Upper respiratory infections                                      | 2.46<br>(2.03 to<br>3.04)                | 1.20<br>(0.76 to<br>1.91)                | 0.88<br>(0.53 to<br>1.42)                | 1.68<br>(1.04 to<br>2.65)                | 0.05<br>(0.05 to<br>0.06)             | 0.04<br>(0.03 to<br>0.07)             | 0.03<br>(0.02 to<br>0.05)             | 0.06<br>(0.04 to<br>0.09)             |
| Otitis media                                                      | 6.18<br>(1.84 to<br>11.06)               | 2.29<br>(0.61 to<br>4.29)                | 2.36<br>(0.63 to<br>4.32)                | 2.21<br>(0.57 to<br>4.24)                | 0.17<br>(0.07 to<br>0.28)             | 0.11<br>(0.03 to<br>0.21)             | 0.12<br>(0.04 to<br>0.21)             | 0.10<br>(0.03 to<br>0.19)             |
| Meningitis                                                        | 287.73<br>(135.80 to<br>392.24)          | 100.90<br>(46.90 to<br>167.35)           | 73.42<br>(35.60 to<br>116.59)            | 120.87<br>(52.35 to<br>214.75)           | 4.31<br>(2.04 to<br>5.73)             | 2.27<br>(1.12 to<br>3.33)             | 1.80<br>(0.91 to<br>2.57)             | 2.51<br>(1.20 to<br>3.83)             |
| Pneumococcal meningitis                                           | 2.83<br>(1.28 to<br>4.39)                | 0.63<br>(0.29 to<br>1.04)                | 0.53<br>(0.25 to<br>0.83)                | 0.75<br>(0.32 to<br>1.32)                | 0.04<br>(0.02 to<br>0.06)             | 0.02<br>(0.01 to<br>0.03)             | 0.02<br>(0.01 to<br>0.02)             | 0.02<br>(0.01 to<br>0.03)             |
| H influenzae type B meningitis                                    | 22.69<br>(10.82 to<br>32.12)             | 14.77<br>(3.19 to<br>46.89)              | 7.22<br>(2.62 to<br>16.72)               | 24.75<br>(3.95 to<br>83.32)              | 0.33<br>(0.16 to<br>0.45)             | 0.24<br>(0.08 to<br>0.61)             | 0.15<br>(0.07 to<br>0.28)             | 0.35<br>(0.09 to<br>1.04)             |
| Meningococcal meningitis                                          | 98.50<br>(45.79 to<br>138.48)            | 31.29<br>(14.98 to<br>49.82)             | 24.46<br>(11.92 to<br>38.18)             | 34.85<br>(16.20 to<br>54.93)             | 1.51<br>(0.72 to<br>2.05)             | 0.78<br>(0.39 to<br>1.13)             | 0.65<br>(0.33 to<br>0.93)             | 0.83<br>(0.42 to<br>1.19)             |
| Other meningitis                                                  | 163.71<br>(76.04 to<br>225.56)           | 54.20<br>(25.82 to<br>85.42)             | 41.21<br>(20.01 to<br>63.47)             | 60.51<br>(27.62 to<br>95.67)             | 2.43<br>(1.14 to<br>3.25)             | 1.23<br>(0.61 to<br>1.78)             | 0.99<br>(0.49 to<br>1.41)             | 1.32<br>(0.64 to<br>1.89)             |
| Encephalitis                                                      | 118.66<br>(47.49 to<br>178.90)           | 66.66<br>(31.07 to<br>114.58)            | 60.60<br>(29.22 to<br>101.09)            | 78.03<br>(35.00 to<br>134.30)            | 1.81<br>(0.85 to<br>2.59)             | 1.55<br>(0.86 to<br>2.29)             | 1.50<br>(0.87 to<br>2.15)             | 1.72<br>(0.93 to<br>2.57)             |

|                |                                 |                                  |                                |                                  |                           |                            |                           |                            |
|----------------|---------------------------------|----------------------------------|--------------------------------|----------------------------------|---------------------------|----------------------------|---------------------------|----------------------------|
| Diphtheria     | 2.32<br>(1.93 to<br>2.81)       | 0.38<br>(0.21 to<br>0.65)        | 0.26<br>(0.17 to<br>0.38)      | 0.53<br>(0.23 to<br>1.05)        | 0.03<br>(0.03 to<br>0.04) | 0.01<br>(0.00 to<br>0.01)  | 0.01<br>(0.00 to<br>0.01) | 0.01<br>(0.00 to<br>0.01)  |
| Whooping cough | 208.44<br>(20.68 to<br>589.91)  | 82.22<br>(2.56 to<br>315.63)     | 17.22<br>(1.13 to<br>65.66)    | 90.71<br>(2.71 to<br>342.93)     | 2.48<br>(0.25 to<br>7.01) | 0.98<br>(0.04 to<br>3.73)  | 0.22<br>(0.02 to<br>0.80) | 1.08<br>(0.04 to<br>4.08)  |
| Tetanus        | 113.23<br>(23.70 to<br>151.17)  | 18.74<br>(3.49 to<br>29.71)      | 14.13<br>(2.09 to<br>22.50)    | 19.55<br>(3.57 to<br>31.08)      | 2.64<br>(0.48 to<br>3.49) | 0.53<br>(0.09 to<br>0.83)  | 0.50<br>(0.07 to<br>0.79) | 0.52<br>(0.09 to<br>0.82)  |
| Measles        | 327.47<br>(121.99 to<br>690.67) | 271.11<br>(16.43 to<br>1,004.39) | 168.86<br>(13.58 to<br>536.31) | 430.66<br>(26.01 to<br>1,676.54) | 3.93<br>(1.46 to<br>8.27) | 3.76<br>(0.28 to<br>12.99) | 2.50<br>(0.24 to<br>7.16) | 5.79<br>(0.39 to<br>20.83) |



| Indonesia                                             |                                     |                                         |                                         |                                         |                                  |                                  |                                  |                                  |
|-------------------------------------------------------|-------------------------------------|-----------------------------------------|-----------------------------------------|-----------------------------------------|----------------------------------|----------------------------------|----------------------------------|----------------------------------|
| Cause                                                 | YLLs (in 1000s)                     |                                         |                                         |                                         | Deaths (in 1000s)                |                                  |                                  |                                  |
|                                                       | 2016                                | 2040 Forecast                           | 2040 Better Scenario                    | 2040 Worse Scenario                     | 2016                             | 2040 Forecast                    | 2040 Better Scenario             | 2040 Worse Scenario              |
| Varicella and herpes zoster                           | 21.11<br>(17.65 to 25.52)           | 7.59<br>(4.85 to 11.14)                 | 6.47<br>(4.36 to 9.34)                  | 9.92<br>(6.33 to 14.52)                 | 0.44<br>(0.38 to 0.50)           | 0.39<br>(0.27 to 0.55)           | 0.37<br>(0.26 to 0.53)           | 0.46<br>(0.31 to 0.64)           |
| <b>Neglected tropical diseases and malaria</b>        | <b>592.40</b><br>(244.17 to 776.82) | <b>1,133.61</b><br>(547.42 to 1,466.37) | <b>1,074.26</b><br>(540.66 to 1,377.97) | <b>1,202.16</b><br>(562.75 to 1,567.15) | <b>10.86</b><br>(4.83 to 13.77)  | <b>25.74</b><br>(12.93 to 32.23) | <b>25.31</b><br>(13.10 to 31.45) | <b>26.39</b><br>(12.97 to 33.02) |
| Malaria                                               | 209.30<br>(132.89 to 294.26)        | 160.96<br>(105.89 to 381.08)            | 158.54<br>(104.81 to 370.51)            | 166.24<br>(108.81 to 404.42)            | 4.93<br>(3.03 to 6.80)           | 5.43<br>(3.59 to 10.47)          | 5.60<br>(3.60 to 10.29)          | 5.34<br>(3.51 to 10.79)          |
| Chagas disease                                        | 0.00<br>(0.00 to 0.00)              | 0.00<br>(0.00 to 0.00)                  | 0.00<br>(0.00 to 0.00)                  | 0.00<br>(0.00 to 0.00)                  | 0.00<br>(0.00 to 0.00)           | 0.00<br>(0.00 to 0.00)           | 0.00<br>(0.00 to 0.00)           | 0.00<br>(0.00 to 0.00)           |
| Leishmaniasis                                         | 0.00<br>(0.00 to 0.00)              | 0.00<br>(0.00 to 0.00)                  | 0.00<br>(0.00 to 0.00)                  | 0.00<br>(0.00 to 0.00)                  | 0.00<br>(0.00 to 0.00)           | 0.00<br>(0.00 to 0.00)           | 0.00<br>(0.00 to 0.00)           | 0.00<br>(0.00 to 0.00)           |
| African trypanosomiasis                               | 0.00<br>(0.00 to 0.00)              | 0.00<br>(0.00 to 0.00)                  | 0.00<br>(0.00 to 0.00)                  | 0.00<br>(0.00 to 0.00)                  | 0.00<br>(0.00 to 0.00)           | 0.00<br>(0.00 to 0.00)           | 0.00<br>(0.00 to 0.00)           | 0.00<br>(0.00 to 0.00)           |
| Schistosomiasis                                       | 0.05<br>(0.02 to 0.09)              | 0.04<br>(0.01 to 0.09)                  | 0.04<br>(0.01 to 0.09)                  | 0.04<br>(0.02 to 0.10)                  | 0.00<br>(0.00 to 0.00)           | 0.00<br>(0.00 to 0.00)           | 0.00<br>(0.00 to 0.00)           | 0.00<br>(0.00 to 0.00)           |
| Cysticercosis                                         | 0.12<br>(0.05 to 0.23)              | 0.06<br>(0.02 to 0.14)                  | 0.05<br>(0.02 to 0.14)                  | 0.06<br>(0.02 to 0.14)                  | 0.00<br>(0.00 to 0.01)           | 0.00<br>(0.00 to 0.00)           | 0.00<br>(0.00 to 0.00)           | 0.00<br>(0.00 to 0.00)           |
| Cystic echinococcosis                                 | 0.11<br>(0.09 to 0.13)              | 0.06<br>(0.04 to 0.13)                  | 0.05<br>(0.04 to 0.11)                  | 0.10<br>(0.06 to 0.19)                  | 0.00<br>(0.00 to 0.00)           | 0.00<br>(0.00 to 0.00)           | 0.00<br>(0.00 to 0.00)           | 0.00<br>(0.00 to 0.01)           |
| Dengue                                                | 364.62<br>(52.63 to 547.71)         | 958.87<br>(301.99 to 1,318.27)          | 902.65<br>(297.59 to 1,230.49)          | 1,020.22<br>(309.92 to 1,416.39)        | 5.62<br>(0.90 to 8.29)           | 19.98<br>(6.87 to 26.78)         | 19.38<br>(6.95 to 25.86)         | 20.69<br>(6.94 to 27.91)         |
| Yellow fever                                          | 0.00<br>(0.00 to 0.00)              | 0.00<br>(0.00 to 0.00)                  | 0.00<br>(0.00 to 0.00)                  | 0.00<br>(0.00 to 0.00)                  | 0.00<br>(0.00 to 0.00)           | 0.00<br>(0.00 to 0.00)           | 0.00<br>(0.00 to 0.00)           | 0.00<br>(0.00 to 0.00)           |
| Rabies                                                | 1.84<br>(0.15 to 2.73)              | 0.54<br>(0.11 to 0.99)                  | 0.45<br>(0.10 to 0.84)                  | 0.93<br>(0.19 to 1.64)                  | 0.03<br>(0.00 to 0.05)           | 0.02<br>(0.00 to 0.02)           | 0.01<br>(0.00 to 0.02)           | 0.02<br>(0.00 to 0.04)           |
| Intestinal nematode infections                        | 11.53<br>(9.38 to 14.05)            | 9.50<br>(6.39 to 17.36)                 | 8.86<br>(5.86 to 16.76)                 | 10.16<br>(6.86 to 18.05)                | 0.17<br>(0.14 to 0.20)           | 0.19<br>(0.13 to 0.32)           | 0.18<br>(0.13 to 0.32)           | 0.19<br>(0.14 to 0.33)           |
| Other neglected tropical diseases                     | 4.82<br>(3.54 to 9.39)              | 3.59<br>(2.29 to 9.08)                  | 3.62<br>(2.31 to 9.34)                  | 4.41<br>(2.77 to 11.22)                 | 0.09<br>(0.07 to 0.18)           | 0.12<br>(0.08 to 0.28)           | 0.13<br>(0.09 to 0.30)           | 0.14<br>(0.09 to 0.33)           |
| <b>Maternal disorders</b>                             | <b>668.27</b><br>(602.07 to 740.67) | <b>299.63</b><br>(228.93 to 380.98)     | <b>256.57</b><br>(193.82 to 330.66)     | <b>438.77</b><br>(332.31 to 566.72)     | <b>12.49</b><br>(11.21 to 13.84) | <b>5.71</b><br>(4.34 to 7.37)    | <b>4.90</b><br>(3.70 to 6.37)    | <b>8.35</b><br>(6.33 to 10.70)   |
| Maternal hemorrhage                                   | 222.90<br>(171.11 to 282.96)        | 91.98<br>(60.78 to 132.76)              | 79.11<br>(51.23 to 113.61)              | 135.66<br>(89.10 to 195.54)             | 4.14<br>(3.19 to 5.25)           | 1.74<br>(1.15 to 2.53)           | 1.50<br>(0.96 to 2.18)           | 2.57<br>(1.67 to 3.73)           |
| Maternal sepsis and other maternal infections         | 29.50<br>(17.20 to 45.40)           | 10.00<br>(5.90 to 19.93)                | 10.00<br>(4.96 to 17.39)                | 17.27<br>(8.95 to 30.26)                | 0.57<br>(0.33 to 0.88)           | 0.23<br>(0.12 to 0.39)           | 0.20<br>(0.10 to 0.34)           | 0.34<br>(0.17 to 0.58)           |
| Maternal hypertensive disorders                       | 77.09<br>(53.63 to 104.95)          | 34.39<br>(21.05 to 52.81)               | 29.16<br>(17.78 to 45.28)               | 51.01<br>(30.82 to 78.46)               | 1.44<br>(0.98 to 1.97)           | 0.66<br>(0.39 to 1.03)           | 0.56<br>(0.34 to 0.87)           | 0.97<br>(0.59 to 1.52)           |
| Maternal obstructed labor and uterine rupture         | 22.59<br>(11.25 to 37.70)           | 10.22<br>(4.63 to 18.69)                | 8.50<br>(3.73 to 15.34)                 | 15.55<br>(7.03 to 28.77)                | 0.43<br>(0.21 to 0.73)           | 0.20<br>(0.09 to 0.36)           | 0.17<br>(0.07 to 0.30)           | 0.30<br>(0.14 to 0.57)           |
| Maternal abortion, miscarriage, and ectopic pregnancy | 30.24<br>(16.67 to 48.19)           | 15.39<br>(7.83 to 27.31)                | 13.07<br>(6.69 to 22.91)                | 22.92<br>(11.76 to 40.73)               | 0.58<br>(0.32 to 0.91)           | 0.30<br>(0.16 to 0.52)           | 0.26<br>(0.13 to 0.45)           | 0.45<br>(0.23 to 0.78)           |

|                                        |                                 |                               |                               |                                |                           |                           |                           |                           |
|----------------------------------------|---------------------------------|-------------------------------|-------------------------------|--------------------------------|---------------------------|---------------------------|---------------------------|---------------------------|
|                                        | 90.26<br>(62.06 to<br>123.43)   | 45.25<br>(27.40 to<br>67.94)  | 38.04<br>(22.49 to<br>58.33)  | 66.26<br>(39.60 to<br>99.17)   | 1.65<br>(1.13 to<br>2.25) | 0.84<br>(0.49 to<br>1.25) | 0.71<br>(0.41 to<br>1.08) | 1.23<br>(0.74 to<br>1.87) |
| Indirect maternal deaths               |                                 |                               |                               |                                |                           |                           |                           |                           |
|                                        | 19.90<br>(9.62 to<br>34.04)     | 7.55<br>(3.36 to<br>13.97)    | 6.36<br>(2.84 to<br>11.86)    | 11.16<br>(5.04 to<br>21.04)    | 0.37<br>(0.18 to<br>0.63) | 0.14<br>(0.06 to<br>0.26) | 0.12<br>(0.05 to<br>0.23) | 0.21<br>(0.09 to<br>0.40) |
| Late maternal deaths                   |                                 |                               |                               |                                |                           |                           |                           |                           |
|                                        | 0.37<br>(0.20 to<br>0.56)       | 0.54<br>(0.22 to<br>1.06)     | 0.42<br>(0.12 to<br>0.86)     | 0.77<br>(0.32 to<br>1.55)      | 0.01<br>(0.00 to<br>0.01) | 0.01<br>(0.00 to<br>0.02) | 0.01<br>(0.00 to<br>0.02) | 0.01<br>(0.01 to<br>0.03) |
| Maternal deaths aggravated by HIV/AIDS |                                 |                               |                               |                                |                           |                           |                           |                           |
|                                        | 175.41<br>(129.07 to<br>224.54) | 82.61<br>(54.61 to<br>119.55) | 71.90<br>(47.76 to<br>105.78) | 118.18<br>(78.68 to<br>171.87) | 3.30<br>(2.45 to<br>4.23) | 1.59<br>(1.04 to<br>2.31) | 1.39<br>(0.91 to<br>2.02) | 2.27<br>(1.50 to<br>3.30) |
| Other maternal disorders               |                                 |                               |                               |                                |                           |                           |                           |                           |

| Indonesia                                                               |                                           |                                           |                                         |                                           |                                  |                                  |                                  |                                  |
|-------------------------------------------------------------------------|-------------------------------------------|-------------------------------------------|-----------------------------------------|-------------------------------------------|----------------------------------|----------------------------------|----------------------------------|----------------------------------|
| Cause                                                                   | YLLs (in 1000s)                           |                                           |                                         |                                           | Deaths (in 1000s)                |                                  |                                  |                                  |
|                                                                         | 2016                                      | 2040 Forecast                             | 2040 Better Scenario                    | 2040 Worse Scenario                       | 2016                             | 2040 Forecast                    | 2040 Better Scenario             | 2040 Worse Scenario              |
| <b>Neonatal disorders</b>                                               | <b>4,247.26</b><br>(3,809.86 to 4,858.93) | <b>1,630.79</b><br>(1,042.08 to 2,177.49) | <b>1,060.74</b><br>(685.28 to 1,436.58) | <b>2,294.89</b><br>(1,465.61 to 3,117.51) | <b>49.06</b><br>(44.01 to 56.13) | <b>18.84</b><br>(12.04 to 25.15) | <b>12.26</b><br>(7.92 to 16.60)  | <b>26.51</b><br>(16.93 to 36.01) |
| Neonatal preterm birth                                                  | 1,973.28<br>(1,732.68 to 2,329.92)        | 764.68<br>(515.30 to 1,054.31)            | 419.29<br>(278.55 to 573.31)            | 1,059.63<br>(707.20 to 1,477.45)          | 22.79<br>(20.01 to 26.91)        | 8.83<br>(5.95 to 12.18)          | 4.84<br>(3.22 to 6.62)           | 12.24<br>(8.17 to 17.07)         |
| Neonatal encephalopathy due to birth asphyxia and trauma                | 1,483.22<br>(1,274.40 to 1,694.87)        | 530.68<br>(277.73 to 825.36)              | 376.75<br>(202.01 to 576.59)            | 748.92<br>(390.83 to 1,167.85)            | 17.13<br>(14.72 to 19.58)        | 6.13<br>(3.21 to 9.55)           | 4.35<br>(2.33 to 6.66)           | 8.65<br>(4.52 to 13.49)          |
| Neonatal sepsis and other neonatal infections                           | 411.63<br>(304.16 to 623.39)              | 192.63<br>(106.60 to 323.47)              | 144.95<br>(84.31 to 243.81)             | 273.41<br>(150.33 to 469.06)              | 4.76<br>(3.51 to 7.20)           | 2.23<br>(1.23 to 3.74)           | 1.67<br>(0.97 to 2.82)           | 3.16<br>(1.74 to 5.42)           |
| Hemolytic disease and other neonatal jaundice                           | 19.12<br>(14.78 to 24.14)                 | 5.15<br>(2.54 to 8.98)                    | 3.81<br>(1.87 to 6.58)                  | 7.72<br>(3.85 to 13.61)                   | 0.22<br>(0.17 to 0.28)           | 0.06<br>(0.03 to 0.10)           | 0.04<br>(0.02 to 0.08)           | 0.09<br>(0.04 to 0.16)           |
| Other neonatal disorders                                                | 360.00<br>(262.21 to 516.57)              | 137.65<br>(72.16 to 230.64)               | 115.93<br>(61.35 to 191.46)             | 205.21<br>(105.52 to 345.90)              | 4.16<br>(3.03 to 5.97)           | 1.59<br>(0.83 to 2.67)           | 1.34<br>(0.71 to 2.21)           | 2.37<br>(1.22 to 4.00)           |
| <b>Nutritional deficiencies</b>                                         | <b>287.06</b><br>(266.00 to 317.47)       | <b>293.98</b><br>(248.05 to 350.32)       | <b>326.56</b><br>(275.52 to 393.25)     | <b>319.18</b><br>(264.59 to 387.62)       | <b>15.62</b><br>(14.48 to 16.99) | <b>25.92</b><br>(20.34 to 31.76) | <b>30.40</b><br>(24.43 to 37.05) | <b>26.41</b><br>(20.02 to 33.42) |
| Protein-energy malnutrition                                             | 257.76<br>(238.54 to 287.00)              | 258.73<br>(214.91 to 314.39)              | 292.48<br>(242.94 to 355.52)            | 279.19<br>(226.47 to 343.04)              | 14.74<br>(13.64 to 16.04)        | 23.80<br>(18.18 to 29.69)        | 28.26<br>(22.33 to 34.64)        | 24.14<br>(17.90 to 30.87)        |
| Iodine deficiency                                                       | 2.19<br>(1.23 to 3.58)                    | 7.64<br>(0.29 to 31.53)                   | 7.58<br>(0.26 to 33.15)                 | 9.14<br>(0.40 to 35.97)                   | 0.06<br>(0.03 to 0.11)           | 0.63<br>(0.02 to 3.08)           | 0.65<br>(0.01 to 3.53)           | 0.71<br>(0.02 to 3.32)           |
| Dietary iron deficiency                                                 | 13.07<br>(5.86 to 16.34)                  | 11.04<br>(7.48 to 16.22)                  | 10.90<br>(7.33 to 17.00)                | 12.42<br>(8.44 to 17.78)                  | 0.25<br>(0.17 to 0.32)           | 0.31<br>(0.21 to 0.69)           | 0.33<br>(0.21 to 0.75)           | 0.33<br>(0.22 to 0.70)           |
| Other nutritional deficiencies                                          | 14.04<br>(11.18 to 21.39)                 | 16.57<br>(12.43 to 25.22)                 | 15.60<br>(11.58 to 24.10)               | 18.42<br>(13.84 to 28.26)                 | 0.58<br>(0.46 to 0.87)           | 1.18<br>(0.85 to 1.77)           | 1.17<br>(0.85 to 1.79)           | 1.22<br>(0.87 to 1.89)           |
| <b>Other communicable, maternal, neonatal, and nutritional diseases</b> | <b>577.34</b><br>(387.34 to 727.47)       | <b>352.12</b><br>(279.25 to 432.93)       | <b>302.85</b><br>(242.59 to 373.62)     | <b>419.79</b><br>(329.35 to 517.60)       | <b>11.51</b><br>(8.93 to 13.41)  | <b>12.40</b><br>(10.39 to 14.49) | <b>11.26</b><br>(9.40 to 13.39)  | <b>13.91</b><br>(11.58 to 16.19) |
| Sexually transmitted infections excluding HIV                           | 170.23<br>(94.24 to 289.12)               | 29.40<br>(14.69 to 55.74)                 | 22.83<br>(11.77 to 43.86)               | 36.77<br>(17.63 to 71.93)                 | 2.18<br>(1.29 to 3.57)           | 0.55<br>(0.37 to 0.86)           | 0.47<br>(0.30 to 0.70)           | 0.64<br>(0.40 to 1.06)           |
| Syphilis                                                                | 163.99<br>(88.03 to 282.62)               | 24.91<br>(10.23 to 51.66)                 | 18.60<br>(7.56 to 39.42)                | 31.86<br>(12.71 to 66.49)                 | 2.01<br>(1.12 to 3.40)           | 0.36<br>(0.19 to 0.68)           | 0.28<br>(0.15 to 0.52)           | 0.45<br>(0.22 to 0.86)           |
| Chlamydial infection                                                    | 1.09<br>(0.97 to 1.37)                    | 0.85<br>(0.69 to 1.03)                    | 0.81<br>(0.65 to 0.98)                  | 0.93<br>(0.75 to 1.14)                    | 0.03<br>(0.03 to 0.04)           | 0.04<br>(0.04 to 0.04)           | 0.04<br>(0.02 to 0.05)           | 0.04<br>(0.03 to 0.04)           |
| Gonococcal infection                                                    | 3.37<br>(2.68 to 3.88)                    | 2.46<br>(1.96 to 2.96)                    | 2.32<br>(1.84 to 2.85)                  | 2.67<br>(2.15 to 3.25)                    | 0.09<br>(0.07 to 0.11)           | 0.11<br>(0.07 to 0.13)           | 0.11<br>(0.07 to 0.13)           | 0.11<br>(0.08 to 0.13)           |
| Other sexually transmitted infections                                   | 1.77<br>(1.45 to 2.08)                    | 1.19<br>(0.93 to 1.47)                    | 1.10<br>(0.88 to 1.37)                  | 1.31<br>(1.04 to 1.61)                    | 0.04<br>(0.04 to 0.05)           | 0.04<br>(0.03 to 0.05)           | 0.04<br>(0.03 to 0.05)           | 0.04<br>(0.03 to 0.05)           |
| Acute hepatitis                                                         | 205.25<br>(188.33 to 225.55)              | 193.07<br>(155.79 to 237.39)              | 160.05<br>(124.23 to 204.48)            | 222.93<br>(182.66 to 272.33)              | 5.93<br>(5.43 to 6.52)           | 7.52<br>(6.19 to 9.02)           | 6.40<br>(5.05 to 7.99)           | 8.42<br>(7.03 to 10.08)          |
| Acute hepatitis A                                                       | 9.79<br>(8.27 to 11.72)                   | 3.91<br>(2.79 to 5.86)                    | 3.34<br>(2.35 to 5.11)                  | 4.63<br>(3.26 to 6.95)                    | 0.18<br>(0.15 to 0.21)           | 0.13<br>(0.09 to 0.17)           | 0.11<br>(0.08 to 0.16)           | 0.14<br>(0.10 to 0.19)           |
| Acute hepatitis B                                                       | 172.90<br>(156.88 to 191.48)              | 166.68<br>(132.56 to 207.67)              | 137.86<br>(105.17 to 178.92)            | 193.62<br>(155.11 to 241.96)              | 5.13<br>(4.65 to 5.71)           | 6.32<br>(5.05 to 7.75)           | 5.33<br>(4.13 to 6.81)           | 7.17<br>(5.81 to 8.80)           |



| Indonesia                            |                                    |                                    |                                    |                                    |                              |                              |                              |                              |
|--------------------------------------|------------------------------------|------------------------------------|------------------------------------|------------------------------------|------------------------------|------------------------------|------------------------------|------------------------------|
| Cause                                | YLLs (in 1000s)                    |                                    |                                    |                                    | Deaths (in 1000s)            |                              |                              |                              |
|                                      | 2016                               | 2040 Forecast                      | 2040 Better Scenario               | 2040 Worse Scenario                | 2016                         | 2040 Forecast                | 2040 Better Scenario         | 2040 Worse Scenario          |
| Neoplasms                            | 4,231.97<br>(3,995.05 to 4,506.35) | 7,359.81<br>(6,333.22 to 8,558.44) | 6,693.02<br>(5,704.89 to 7,756.96) | 7,543.02<br>(6,510.84 to 8,693.40) | 147.35<br>(139.09 to 156.17) | 334.54<br>(292.17 to 380.92) | 313.75<br>(273.68 to 357.08) | 330.97<br>(289.67 to 376.96) |
| Lip and oral cavity cancer           | 74.15<br>(69.27 to 79.50)          | 117.65<br>(93.47 to 148.20)        | 100.43<br>(80.93 to 125.39)        | 137.12<br>(105.54 to 178.63)       | 2.61<br>(2.44 to 2.79)       | 5.35<br>(4.29 to 6.71)       | 4.74<br>(3.88 to 5.88)       | 5.94<br>(4.63 to 7.69)       |
| Nasopharynx cancer                   | 76.96<br>(57.12 to 98.43)          | 130.78<br>(85.21 to 191.20)        | 105.57<br>(69.83 to 153.19)        | 157.23<br>(101.29 to 233.56)       | 2.52<br>(1.85 to 3.21)       | 5.17<br>(3.40 to 7.45)       | 4.29<br>(2.85 to 6.15)       | 6.02<br>(3.87 to 8.79)       |
| Other pharynx cancer                 | 54.13<br>(48.48 to 59.76)          | 85.48<br>(67.27 to 108.35)         | 86.15<br>(67.67 to 108.70)         | 88.67<br>(67.89 to 114.54)         | 1.99<br>(1.78 to 2.20)       | 3.81<br>(3.03 to 4.79)       | 3.93<br>(3.14 to 4.92)       | 3.85<br>(2.99 to 4.94)       |
| Esophageal cancer                    | 46.32<br>(43.86 to 49.10)          | 67.72<br>(49.43 to 95.84)          | 62.88<br>(46.42 to 89.19)          | 82.48<br>(55.91 to 123.58)         | 1.69<br>(1.60 to 1.80)       | 3.08<br>(2.26 to 4.29)       | 2.96<br>(2.21 to 4.10)       | 3.60<br>(2.46 to 5.31)       |
| Stomach cancer                       | 310.69<br>(282.18 to 342.00)       | 410.42<br>(342.07 to 505.71)       | 363.90<br>(300.11 to 446.82)       | 435.92<br>(362.72 to 542.49)       | 12.44<br>(11.33 to 13.60)    | 20.58<br>(17.39 to 24.78)    | 18.75<br>(15.74 to 22.47)    | 21.16<br>(17.75 to 25.73)    |
| Colon and rectum cancer              | 304.25<br>(285.39 to 323.19)       | 660.08<br>(468.14 to 919.88)       | 594.89<br>(421.97 to 830.21)       | 639.48<br>(452.27 to 898.87)       | 11.20<br>(10.51 to 11.92)    | 32.63<br>(22.97 to 45.88)    | 30.27<br>(21.78 to 42.64)    | 30.48<br>(21.58 to 43.06)    |
| Liver cancer                         | 270.87<br>(208.99 to 325.20)       | 545.24<br>(383.84 to 768.44)       | 515.87<br>(381.48 to 682.83)       | 546.38<br>(385.83 to 781.45)       | 10.27<br>(8.09 to 12.15)     | 25.29<br>(18.47 to 34.67)    | 24.84<br>(18.85 to 32.26)    | 24.55<br>(17.86 to 34.18)    |
| Liver cancer due to hepatitis B      | 58.52<br>(40.80 to 80.55)          | 105.46<br>(67.58 to 156.30)        | 99.37<br>(65.91 to 142.65)         | 106.40<br>(68.41 to 159.01)        | 2.02<br>(1.38 to 2.78)       | 4.44<br>(2.87 to 6.50)       | 4.34<br>(2.84 to 6.15)       | 4.35<br>(2.80 to 6.41)       |
| Liver cancer due to hepatitis C      | 95.09<br>(72.47 to 117.09)         | 204.53<br>(146.20 to 283.60)       | 197.60<br>(144.73 to 264.05)       | 202.13<br>(143.19 to 280.65)       | 4.06<br>(3.14 to 4.92)       | 10.48<br>(7.70 to 14.14)     | 10.49<br>(7.97 to 13.73)     | 10.04<br>(7.37 to 13.59)     |
| Liver cancer due to alcohol use      | 22.31<br>(16.18 to 28.76)          | 45.02<br>(30.13 to 65.02)          | 41.91<br>(28.80 to 58.09)          | 45.82<br>(30.31 to 66.18)          | 0.87<br>(0.65 to 1.10)       | 2.04<br>(1.41 to 2.89)       | 1.95<br>(1.39 to 2.68)       | 2.02<br>(1.37 to 2.88)       |
| Liver cancer due to other causes     | 94.95<br>(71.92 to 119.21)         | 190.23<br>(121.25 to 295.97)       | 176.99<br>(120.30 to 257.00)       | 192.02<br>(122.11 to 302.58)       | 3.33<br>(2.57 to 4.12)       | 8.33<br>(5.51 to 12.75)      | 8.05<br>(5.67 to 11.48)      | 8.14<br>(5.33 to 12.52)      |
| Gallbladder and biliary tract cancer | 66.06<br>(56.99 to 79.66)          | 95.39<br>(79.42 to 114.99)         | 96.64<br>(80.28 to 117.85)         | 89.51<br>(75.56 to 108.32)         | 2.78<br>(2.41 to 3.32)       | 4.92<br>(4.19 to 5.91)       | 5.10<br>(4.29 to 6.17)       | 4.48<br>(3.85 to 5.39)       |
| Pancreatic cancer                    | 177.13<br>(155.00 to 205.25)       | 417.08<br>(320.51 to 550.02)       | 413.22<br>(320.20 to 537.77)       | 393.08<br>(304.34 to 521.26)       | 7.17<br>(6.28 to 8.30)       | 20.50<br>(15.95 to 27.18)    | 20.80<br>(16.35 to 26.92)    | 18.73<br>(14.54 to 24.77)    |
| Larynx cancer                        | 47.96<br>(39.39 to 61.00)          | 72.41<br>(50.55 to 101.24)         | 56.71<br>(41.58 to 77.30)          | 89.12<br>(60.07 to 128.45)         | 1.92<br>(1.60 to 2.42)       | 3.50<br>(2.47 to 4.86)       | 2.83<br>(2.11 to 3.87)       | 4.14<br>(2.81 to 6.01)       |
| Tracheal, bronchus, and lung cancer  | 345.61<br>(320.51 to 371.29)       | 667.12<br>(498.89 to 871.15)       | 467.66<br>(370.09 to 588.73)       | 877.81<br>(627.49 to 1,183.03)     | 13.16<br>(12.18 to 14.25)    | 32.04<br>(24.03 to 41.56)    | 23.27<br>(18.51 to 28.79)    | 40.27<br>(29.18 to 53.52)    |
| Malignant skin melanoma              | 19.24<br>(16.61 to 23.00)          | 33.48<br>(27.90 to 42.06)          | 37.61<br>(30.95 to 48.21)          | 29.72<br>(25.05 to 36.57)          | 0.65<br>(0.56 to 0.78)       | 1.51<br>(1.29 to 1.88)       | 1.75<br>(1.47 to 2.23)       | 1.29<br>(1.11 to 1.58)       |
| Non-melanoma skin cancer             | 34.01<br>(28.52 to 41.37)          | 70.96<br>(57.15 to 89.39)          | 65.20<br>(51.01 to 83.19)          | 72.21<br>(59.01 to 90.74)          | 1.36<br>(1.15 to 1.64)       | 3.68<br>(3.05 to 4.54)       | 3.50<br>(2.87 to 4.36)       | 3.61<br>(3.00 to 4.46)       |
| Breast cancer                        | 549.59<br>(498.43 to 615.99)       | 859.92<br>(637.08 to 1,169.22)     | 755.27<br>(566.93 to 1,002.29)     | 865.20<br>(644.18 to 1,177.11)     | 16.46<br>(14.89 to 19.09)    | 31.81<br>(23.73 to 43.27)    | 28.35<br>(21.41 to 37.87)    | 31.26<br>(23.37 to 42.56)    |
| Cervical cancer                      | 299.66<br>(213.03 to 348.88)       | 344.32<br>(236.85 to 426.10)       | 305.74<br>(211.40 to 385.36)       | 368.74<br>(259.75 to 455.45)       | 9.90<br>(7.14 to 11.48)      | 13.66<br>(9.67 to 16.42)     | 12.35<br>(8.78 to 15.23)     | 14.27<br>(10.17 to 17.04)    |

|                   |                                 |                                 |                                 |                                 |                           |                              |                              |                              |
|-------------------|---------------------------------|---------------------------------|---------------------------------|---------------------------------|---------------------------|------------------------------|------------------------------|------------------------------|
| Uterine cancer    | 72.11<br>(56.73 to<br>81.81)    | 122.47<br>(95.20 to<br>151.08)  | 114.88<br>(88.95 to<br>142.87)  | 131.29<br>(101.95 to<br>160.39) | 2.75<br>(2.18 to<br>3.10) | 5.66<br>(4.54 to<br>6.82)    | 5.40<br>(4.26 to<br>6.61)    | 5.92<br>(4.73 to<br>7.08)    |
| Ovarian cancer    | 154.17<br>(129.04 to<br>194.50) | 278.06<br>(202.23 to<br>398.53) | 254.22<br>(187.93 to<br>353.74) | 257.50<br>(187.65 to<br>369.91) | 5.13<br>(4.30 to<br>6.45) | 11.12<br>(8.22 to<br>15.76)  | 10.29<br>(7.75 to<br>14.22)  | 10.11<br>(7.42 to<br>14.47)  |
| Prostate cancer   | 124.72<br>(79.54 to<br>150.93)  | 434.58<br>(276.86 to<br>526.91) | 435.83<br>(281.39 to<br>530.32) | 390.01<br>(245.59 to<br>469.16) | 7.34<br>(4.64 to<br>8.85) | 30.36<br>(19.42 to<br>36.48) | 31.39<br>(20.32 to<br>37.65) | 26.36<br>(16.47 to<br>31.98) |
| Testicular cancer | 10.69<br>(9.37 to<br>14.78)     | 11.72<br>(9.34 to<br>16.44)     | 10.64<br>(8.49 to<br>15.23)     | 12.19<br>(9.76 to<br>17.39)     | 0.25<br>(0.22 to<br>0.34) | 0.36<br>(0.29 to<br>0.49)    | 0.33<br>(0.27 to<br>0.47)    | 0.36<br>(0.30 to<br>0.50)    |

| Indonesia                       |                                                     |                                                     |                                                   |                                                     |                                            |                                              |                                            |                                                |
|---------------------------------|-----------------------------------------------------|-----------------------------------------------------|---------------------------------------------------|-----------------------------------------------------|--------------------------------------------|----------------------------------------------|--------------------------------------------|------------------------------------------------|
| Cause                           | YLLs (in 1000s)                                     |                                                     |                                                   |                                                     | Deaths (in 1000s)                          |                                              |                                            |                                                |
|                                 | 2016                                                | 2040 Forecast                                       | 2040 Better Scenario                              | 2040 Worse Scenario                                 | 2016                                       | 2040 Forecast                                | 2040 Better Scenario                       | 2040 Worse Scenario                            |
| Kidney cancer                   | 60.47<br>(51.88 to 72.46)                           | 121.82<br>(98.99 to 153.05)                         | 124.70<br>(100.64 to 157.02)                      | 111.31<br>(89.77 to 140.03)                         | 2.11<br>(1.80 to 2.53)                     | 5.59<br>(4.54 to 7.00)                       | 5.90<br>(4.81 to 7.44)                     | 4.93<br>(3.98 to 6.20)                         |
| Bladder cancer                  | 62.07<br>(51.22 to 71.61)                           | 136.53<br>(98.78 to 184.45)                         | 128.90<br>(94.47 to 171.15)                       | 135.04<br>(98.79 to 183.21)                         | 2.93<br>(2.43 to 3.41)                     | 2.93<br>(5.95 to 11.01)                      | 7.92<br>(5.92 to 10.52)                    | 7.71<br>(5.62 to 10.61)                        |
| Brain and nervous system cancer | 212.51<br>(153.28 to 295.91)                        | 339.39<br>(241.66 to 467.46)                        | 325.71<br>(230.90 to 446.89)                      | 327.57<br>(233.06 to 447.26)                        | 5.40<br>(3.82 to 7.43)                     | 11.71<br>(8.20 to 15.77)                     | 11.61<br>(8.13 to 15.72)                   | 10.91<br>(7.63 to 14.73)                       |
| Thyroid cancer                  | 40.56<br>(35.42 to 46.86)                           | 72.16<br>(55.74 to 93.88)                           | 64.10<br>(48.20 to 81.87)                         | 75.08<br>(58.51 to 97.85)                           | 1.58<br>(1.38 to 1.82)                     | 3.42<br>(2.73 to 4.31)                       | 3.13<br>(2.50 to 3.91)                     | 3.46<br>(2.78 to 4.42)                         |
| Mesothelioma                    | 14.09<br>(12.58 to 18.27)                           | 20.98<br>(17.81 to 27.42)                           | 21.62<br>(18.10 to 28.09)                         | 20.67<br>(17.74 to 27.02)                           | 0.44<br>(0.39 to 0.57)                     | 0.85<br>(0.73 to 1.09)                       | 0.90<br>(0.77 to 1.17)                     | 0.81<br>(0.70 to 1.02)                         |
| Hodgkin lymphoma                | 35.66<br>(29.13 to 50.78)                           | 35.81<br>(26.65 to 52.02)                           | 30.74<br>(22.74 to 44.55)                         | 40.83<br>(30.59 to 59.68)                           | 0.96<br>(0.79 to 1.37)                     | 1.26<br>(0.94 to 1.81)                       | 1.11<br>(0.83 to 1.59)                     | 1.40<br>(1.06 to 2.01)                         |
| Non-Hodgkin lymphoma            | 204.99<br>(183.60 to 251.76)                        | 345.16<br>(289.63 to 433.82)                        | 319.20<br>(266.10 to 402.40)                      | 326.06<br>(275.24 to 403.48)                        | 6.10<br>(5.46 to 7.44)                     | 13.96<br>(11.97 to 17.13)                    | 13.35<br>(11.39 to 16.61)                  | 12.74<br>(11.01 to 15.68)                      |
| Multiple myeloma                | 40.71<br>(33.10 to 51.80)                           | 87.75<br>(66.47 to 114.62)                          | 84.02<br>(64.11 to 108.87)                        | 80.84<br>(61.65 to 106.13)                          | 1.50<br>(1.22 to 1.91)                     | 3.93<br>(3.06 to 5.10)                       | 3.86<br>(3.00 to 4.95)                     | 3.53<br>(2.73 to 4.65)                         |
| Leukemia                        | 152.93<br>(139.22 to 198.65)                        | 217.45<br>(181.26 to 262.02)                        | 194.68<br>(162.18 to 234.35)                      | 8.33<br>(8.33 to 8.33)                              | 4.09<br>(3.75 to 4.70)                     | 8.33<br>(6.95 to 9.94)                       | 7.73<br>(6.43 to 9.09)                     | 8.14<br>(6.78 to 9.74)                         |
| Acute lymphoid leukemia         | 45.22<br>(37.76 to 69.51)                           | 63.18<br>(51.05 to 84.19)                           | 56.23<br>(45.51 to 74.01)                         | 61.55<br>(49.34 to 81.69)                           | 1.15<br>(0.98 to 1.50)                     | 2.25<br>(1.83 to 2.90)                       | 2.07<br>(1.70 to 2.66)                     | 2.13<br>(1.73 to 2.75)                         |
| Chronic lymphoid leukemia       | 3.06<br>(2.59 to 3.78)                              | 4.66<br>(3.61 to 6.02)                              | 4.34<br>(3.41 to 5.52)                            | 4.62<br>(3.55 to 5.96)                              | 0.10<br>(0.08 to 0.11)                     | 0.19<br>(0.15 to 0.24)                       | 0.18<br>(0.14 to 0.23)                     | 0.18<br>(0.14 to 0.23)                         |
| Acute myeloid leukemia          | 32.36<br>(27.83 to 45.56)                           | 53.75<br>(43.58 to 70.17)                           | 50.47<br>(41.24 to 65.11)                         | 51.05<br>(41.46 to 67.22)                           | 0.78<br>(0.69 to 0.99)                     | 1.72<br>(1.40 to 2.19)                       | 1.66<br>(1.36 to 2.10)                     | 1.59<br>(1.29 to 2.04)                         |
| Chronic myeloid leukemia        | 11.28<br>(8.70 to 13.98)                            | 11.26<br>(8.25 to 15.19)                            | 8.90<br>(6.40 to 12.05)                           | 11.56<br>(8.38 to 15.50)                            | 0.32<br>(0.24 to 0.39)                     | 0.39<br>(0.29 to 0.52)                       | 0.31<br>(0.23 to 0.42)                     | 0.39<br>(0.29 to 0.52)                         |
| Other leukemia                  | 61.00<br>(51.91 to 74.73)                           | 84.59<br>(66.61 to 106.76)                          | 74.73<br>(58.20 to 93.16)                         | 90.49<br>(70.66 to 113.25)                          | 1.76<br>(1.49 to 2.01)                     | 3.79<br>(2.78 to 4.65)                       | 3.50<br>(2.57 to 4.28)                     | 3.86<br>(2.94 to 4.76)                         |
| Other neoplasms                 | 369.67<br>(336.39 to 414.34)                        | 557.88<br>(488.08 to 632.03)                        | 556.04<br>(482.10 to 636.63)                      | 542.66<br>(480.97 to 611.07)                        | 10.66<br>(9.59 to 11.88)                   | 22.37<br>(20.00 to 24.89)                    | 23.12<br>(20.42 to 26.09)                  | 20.91<br>(18.80 to 23.28)                      |
| <b>Cardiovascular diseases</b>  | <b>12,844.18</b><br><b>(12,258.74 to 13,530.03)</b> | <b>15,387.90</b><br><b>(10,292.50 to 22,740.89)</b> | <b>9,617.47</b><br><b>(6,602.93 to 14,032.17)</b> | <b>23,763.87</b><br><b>(15,818.81 to 35,287.50)</b> | <b>558.74</b><br><b>(531.17 to 589.98)</b> | <b>876.53</b><br><b>(627.90 to 1,236.03)</b> | <b>589.93</b><br><b>(428.64 to 814.77)</b> | <b>1,252.09</b><br><b>(890.73 to 1,766.80)</b> |
| Rheumatic heart disease         | 267.20<br>(232.94 to 304.41)                        | 190.09<br>(151.72 to 240.19)                        | 166.50<br>(131.59 to 211.04)                      | 226.08<br>(180.37 to 287.72)                        | 7.99<br>(6.87 to 9.18)                     | 8.07<br>(6.48 to 9.88)                       | 7.33<br>(5.85 to 9.06)                     | 9.23<br>(7.44 to 11.38)                        |
| Ischemic heart disease          | 6,262.91<br>(5,929.31 to 6,629.48)                  | 7,557.07<br>(4,008.73 to 13,776.85)                 | 4,262.99<br>(2,296.87 to 7,741.63)                | 12,243.91<br>(6,510.12 to 21,626.96)                | 273.57<br>(258.72 to 290.33)               | 420.86<br>(236.35 to 728.97)                 | 258.23<br>(150.20 to 432.98)               | 633.19<br>(354.38 to 1,091.91)                 |
| Stroke                          | 4,770.94<br>(4,516.24 to 5,044.50)                  | 4,669.97<br>(2,980.26 to 7,462.08)                  | 2,721.48<br>(1,780.31 to 4,174.88)                | 7,918.39<br>(4,798.70 to 12,726.16)                 | 212.96<br>(200.34 to 227.12)               | 281.19<br>(190.22 to 446.22)                 | 180.50<br>(126.92 to 275.16)               | 427.92<br>(281.01 to 671.36)                   |
| Ischemic stroke                 | 1,171.81<br>(1,037.73 to 1,322.12)                  | 1,490.34<br>(831.21 to 3,033.60)                    | 935.72<br>(558.25 to 1,785.17)                    | 2,202.49<br>(1,203.78 to 4,363.68)                  | 70.28<br>(62.58 to 79.27)                  | 111.57<br>(64.38 to 246.69)                  | 76.19<br>(45.98 to 157.78)                 | 151.25<br>(86.02 to 322.59)                    |

|                                |                                       |                                       |                                       |                                       |                                 |                                 |                                |                                 |
|--------------------------------|---------------------------------------|---------------------------------------|---------------------------------------|---------------------------------------|---------------------------------|---------------------------------|--------------------------------|---------------------------------|
| Intracerebral hemorrhage       | 3,599.13<br>(3,386.46 to<br>3,836.05) | 3,179.63<br>(1,868.77 to<br>5,097.36) | 1,785.76<br>(1,099.18 to<br>2,847.82) | 5,715.90<br>(3,152.61 to<br>9,651.78) | 142.69<br>(133.37 to<br>152.97) | 169.61<br>(109.05 to<br>265.66) | 104.31<br>(70.11 to<br>156.05) | 276.67<br>(167.91 to<br>442.56) |
| Hypertensive heart disease     | 644.92<br>(481.25 to<br>744.77)       | 1,351.03<br>(905.12 to<br>2,073.38)   | 1,071.84<br>(741.20 to<br>1,492.61)   | 1,658.05<br>(1,033.92 to<br>2,840.94) | 30.18<br>(22.66 to<br>34.51)    | 80.01<br>(54.13 to<br>124.69)   | 65.83<br>(46.29 to<br>92.70)   | 94.61<br>(59.24 to<br>162.34)   |
| Cardiomyopathy and myocarditis | 246.53<br>(180.24 to<br>281.73)       | 370.33<br>(244.30 to<br>493.06)       | 317.75<br>(210.06 to<br>426.59)       | 368.41<br>(245.38 to<br>492.00)       | 8.10<br>(5.98 to<br>9.25)       | 16.98<br>(11.19 to<br>22.98)    | 15.06<br>(9.97 to<br>20.56)    | 16.19<br>(10.81 to<br>22.06)    |
| Myocarditis                    | 44.54<br>(34.24 to<br>56.01)          | 45.18<br>(33.71 to<br>57.66)          | 44.36<br>(33.31 to<br>56.80)          | 46.89<br>(35.23 to<br>59.57)          | 1.11<br>(0.85 to<br>1.37)       | 1.61<br>(1.23 to<br>2.03)       | 1.66<br>(1.27 to<br>2.09)      | 1.59<br>(1.21 to<br>1.97)       |



| Indonesia                                                     |                                                            |                                                            |                                                            |                                                            |                                                   |                                                      |                                                     |                                                      |
|---------------------------------------------------------------|------------------------------------------------------------|------------------------------------------------------------|------------------------------------------------------------|------------------------------------------------------------|---------------------------------------------------|------------------------------------------------------|-----------------------------------------------------|------------------------------------------------------|
| Cause                                                         | YLLs (in 1000s)                                            |                                                            |                                                            |                                                            | Deaths (in 1000s)                                 |                                                      |                                                     |                                                      |
|                                                               | 2016                                                       | 2040 Forecast                                              | 2040 Better Scenario                                       | 2040 Worse Scenario                                        | 2016                                              | 2040 Forecast                                        | 2040 Better Scenario                                | 2040 Worse Scenario                                  |
| Alcoholic cardiomyopathy                                      | 41.47<br>(18.39 to<br>57.80)                               | 55.12<br>(24.88 to<br>80.78)                               | 53.54<br>(23.42 to<br>79.64)                               | 52.78<br>(24.35 to<br>75.81)                               | 1.39<br>(0.67 to<br>1.86)                         | 2.30<br>(1.13 to<br>3.20)                            | 2.28<br>(1.08 to<br>3.24)                           | 2.15<br>(1.08 to<br>2.92)                            |
| Other cardiomyopathy                                          | 160.53<br>(114.48 to<br>190.16)                            | 270.03<br>(166.72 to<br>378.65)                            | 219.86<br>(135.65 to<br>316.71)                            | 268.74<br>(162.71 to<br>380.65)                            | 5.61<br>(4.08 to<br>6.53)                         | 13.07<br>(8.14 to<br>18.76)                          | 11.12<br>(6.92 to<br>16.40)                         | 12.44<br>(7.70 to<br>18.02)                          |
| Atrial fibrillation and flutter                               | 53.68<br>(42.70 to<br>66.71)                               | 171.66<br>(130.29 to<br>222.67)                            | 165.26<br>(126.10 to<br>213.15)                            | 165.23<br>(123.45 to<br>218.24)                            | 4.19<br>(3.33 to<br>5.20)                         | 15.21<br>(11.33 to<br>19.36)                         | 15.19<br>(11.52 to<br>19.34)                        | 14.01<br>(10.31 to<br>18.16)                         |
| Aortic aneurysm                                               | 81.17<br>(68.14 to<br>104.48)                              | 151.58<br>(114.30 to<br>204.00)                            | 136.40<br>(102.79 to<br>180.51)                            | 148.56<br>(110.62 to<br>200.75)                            | 3.75<br>(3.12 to<br>4.81)                         | 8.98<br>(6.94 to<br>11.96)                           | 8.44<br>(6.57 to<br>11.08)                          | 8.44<br>(6.48 to<br>11.28)                           |
| Peripheral artery disease                                     | 3.11<br>(2.48 to<br>4.12)                                  | 13.89<br>(9.85 to<br>19.94)                                | 12.40<br>(9.02 to<br>17.79)                                | 12.19<br>(8.51 to<br>17.34)                                | 0.20<br>(0.16 to<br>0.26)                         | 1.06<br>(0.77 to<br>1.48)                            | 1.00<br>(0.74 to<br>1.40)                           | 0.88<br>(0.64 to<br>1.20)                            |
| Endocarditis                                                  | 153.46<br>(131.97 to<br>201.61)                            | 231.89<br>(165.33 to<br>330.02)                            | 219.35<br>(157.75 to<br>308.24)                            | 240.26<br>(170.45 to<br>347.15)                            | 4.42<br>(3.79 to<br>5.74)                         | 9.02<br>(6.47 to<br>12.85)                           | 8.88<br>(6.38 to<br>12.67)                          | 8.98<br>(6.37 to<br>13.00)                           |
| Other cardiovascular and circulatory diseases                 | 360.26<br>(290.75 to<br>573.91)                            | 680.39<br>(477.24 to<br>1,065.95)                          | 543.49<br>(389.72 to<br>852.15)                            | 782.79<br>(540.89 to<br>1,224.17)                          | 13.38<br>(10.77 to<br>21.34)                      | 35.17<br>(24.96 to<br>54.21)                         | 29.45<br>(21.46 to<br>45.81)                        | 38.63<br>(27.15 to<br>60.50)                         |
| <b>Chronic respiratory diseases</b>                           | <b>1,832.92</b><br><b>(1,721.66 to</b><br><b>1,946.62)</b> | <b>2,151.10</b><br><b>(1,753.23 to</b><br><b>2,669.20)</b> | <b>1,660.62</b><br><b>(1,376.76 to</b><br><b>2,000.11)</b> | <b>2,742.05</b><br><b>(2,138.01 to</b><br><b>3,556.85)</b> | <b>86.16</b><br><b>(80.36 to</b><br><b>91.82)</b> | <b>131.88</b><br><b>(107.33 to</b><br><b>160.23)</b> | <b>108.06</b><br><b>(90.85 to</b><br><b>127.28)</b> | <b>160.07</b><br><b>(125.03 to</b><br><b>203.92)</b> |
| Chronic obstructive pulmonary disease                         | 947.07<br>(774.53 to<br>1,097.92)                          | 1,337.19<br>(941.97 to<br>1,805.97)                        | 1,051.37<br>(797.34 to<br>1,343.88)                        | 1,850.01<br>(1,274.04 to<br>2,587.60)                      | 49.93<br>(41.91 to<br>57.54)                      | 87.41<br>(63.70 to<br>114.04)                        | 73.16<br>(56.26 to<br>91.50)                        | 113.32<br>(79.94 to<br>155.63)                       |
| Pneumoconiosis                                                | 1.61<br>(1.33 to<br>2.01)                                  | 1.97<br>(1.59 to<br>2.44)                                  | 1.78<br>(1.44 to<br>2.21)                                  | 1.98<br>(1.61 to<br>2.44)                                  | 0.08<br>(0.06 to<br>0.09)                         | 0.13<br>(0.10 to<br>0.16)                            | 0.12<br>(0.10 to<br>0.15)                           | 0.13<br>(0.10 to<br>0.15)                            |
| Silicosis                                                     | 0.28<br>(0.16 to<br>0.44)                                  | 0.25<br>(0.13 to<br>0.39)                                  | 0.19<br>(0.10 to<br>0.30)                                  | 0.25<br>(0.14 to<br>0.39)                                  | 0.01<br>(0.01 to<br>0.02)                         | 0.02<br>(0.01 to<br>0.02)                            | 0.01<br>(0.01 to<br>0.02)                           | 0.02<br>(0.01 to<br>0.02)                            |
| Asbestosis                                                    | 0.41<br>(0.31 to<br>0.52)                                  | 0.57<br>(0.42 to<br>0.77)                                  | 0.64<br>(0.48 to<br>0.85)                                  | 0.54<br>(0.40 to<br>0.72)                                  | 0.01<br>(0.01 to<br>0.02)                         | 0.01<br>(0.02 to<br>0.04)                            | 0.03<br>(0.02 to<br>0.05)                           | 0.03<br>(0.02 to<br>0.04)                            |
| Coal workers pneumoconiosis                                   | 0.12<br>(0.07 to<br>0.23)                                  | 0.13<br>(0.08 to<br>0.24)                                  | 0.10<br>(0.06 to<br>0.18)                                  | 0.15<br>(0.10 to<br>0.29)                                  | 0.01<br>(0.00 to<br>0.01)                         | 0.01<br>(0.01 to<br>0.02)                            | 0.01<br>(0.01 to<br>0.01)                           | 0.01<br>(0.01 to<br>0.02)                            |
| Other pneumoconiosis                                          | 0.81<br>(0.65 to<br>1.06)                                  | 1.03<br>(0.78 to<br>1.36)                                  | 0.85<br>(0.62 to<br>1.15)                                  | 1.03<br>(0.79 to<br>1.36)                                  | 0.04<br>(0.03 to<br>0.05)                         | 0.07<br>(0.06 to<br>0.10)                            | 0.06<br>(0.05 to<br>0.08)                           | 0.07<br>(0.05 to<br>0.10)                            |
| Asthma                                                        | 799.25<br>(633.30 to<br>985.54)                            | 673.11<br>(425.34 to<br>1,003.96)                          | 449.23<br>(293.59 to<br>661.37)                            | 764.01<br>(483.80 to<br>1,139.10)                          | 32.92<br>(25.10 to<br>41.27)                      | 36.93<br>(23.73 to<br>54.14)                         | 25.98<br>(17.10 to<br>36.50)                        | 40.24<br>(25.15 to<br>59.50)                         |
| Interstitial lung disease and pulmonary sarcoidosis           | 46.89<br>(35.30 to<br>63.12)                               | 92.43<br>(72.16 to<br>124.34)                              | 111.63<br>(86.65 to<br>150.99)                             | 79.73<br>(62.83 to<br>106.39)                              | 2.01<br>(1.55 to<br>2.70)                         | 5.08<br>(4.02 to<br>6.88)                            | 6.31<br>(4.99 to<br>8.46)                           | 4.24<br>(3.37 to<br>5.61)                            |
| Other chronic respiratory diseases                            | 38.10<br>(22.05 to<br>51.66)                               | 46.40<br>(25.97 to<br>65.44)                               | 46.60<br>(26.08 to<br>66.20)                               | 46.32<br>(26.31 to<br>64.96)                               | 1.23<br>(0.68 to<br>1.75)                         | 2.34<br>(1.16 to<br>3.42)                            | 2.49<br>(1.22 to<br>3.63)                           | 2.14<br>(1.08 to<br>3.15)                            |
| <b>Cirrhosis and other chronic liver diseases</b>             | <b>1,691.11</b><br><b>(1,540.67 to</b><br><b>1,836.59)</b> | <b>2,404.95</b><br><b>(2,073.30 to</b><br><b>2,750.18)</b> | <b>2,220.68</b><br><b>(1,886.70 to</b><br><b>2,563.30)</b> | <b>2,517.67</b><br><b>(2,213.57 to</b><br><b>2,834.78)</b> | <b>53.28</b><br><b>(48.56 to</b><br><b>57.71)</b> | <b>98.54</b><br><b>(86.78 to</b><br><b>110.69)</b>   | <b>93.42</b><br><b>(80.95 to</b><br><b>106.66)</b>  | <b>100.00</b><br><b>(88.82 to</b><br><b>110.88)</b>  |
| Cirrhosis and other chronic liver diseases due to hepatitis B | 430.49<br>(378.68 to<br>492.12)                            | 649.34<br>(534.97 to<br>773.89)                            | 604.17<br>(490.93 to<br>722.26)                            | 671.14<br>(557.73 to<br>789.89)                            | 13.99<br>(12.30 to<br>15.90)                      | 26.81<br>(22.35 to<br>31.09)                         | 25.57<br>(20.99 to<br>29.93)                        | 26.92<br>(22.63 to<br>30.94)                         |
| Cirrhosis and other chronic liver diseases due to hepatitis C | 337.28<br>(296.90 to<br>383.87)                            | 514.81<br>(429.78 to<br>606.00)                            | 474.55<br>(390.17 to<br>567.37)                            | 535.66<br>(451.99 to<br>623.94)                            | 10.80<br>(9.58 to<br>12.24)                       | 20.62<br>(17.62 to<br>23.76)                         | 19.43<br>(16.19 to<br>22.84)                        | 20.90<br>(18.01 to<br>24.28)                         |

|                                                                |                                                            |                                                            |                                                            |                                                            |                                                   |                                                     |                                                     |                                                     |
|----------------------------------------------------------------|------------------------------------------------------------|------------------------------------------------------------|------------------------------------------------------------|------------------------------------------------------------|---------------------------------------------------|-----------------------------------------------------|-----------------------------------------------------|-----------------------------------------------------|
|                                                                | 375.62<br>(322.68 to<br>431.23)                            | 527.90<br>(431.47 to<br>631.01)                            | 485.24<br>(396.61 to<br>594.26)                            | 561.49<br>(467.39 to<br>666.94)                            | 12.50<br>(10.76 to<br>14.34)                      | 22.16<br>(18.42 to<br>25.88)                        | 20.86<br>(17.17 to<br>24.86)                        | 22.90<br>(19.10 to<br>26.51)                        |
| Cirrhosis and other chronic liver diseases due to alcohol use  |                                                            |                                                            |                                                            |                                                            |                                                   |                                                     |                                                     |                                                     |
|                                                                | 547.72<br>(479.92 to<br>615.29)                            | 712.90<br>(600.70 to<br>845.30)                            | 656.71<br>(540.90 to<br>786.21)                            | 749.39<br>(630.21 to<br>884.33)                            | 15.99<br>(14.02 to<br>18.11)                      | 28.95<br>(24.52 to<br>34.14)                        | 27.57<br>(22.79 to<br>32.92)                        | 29.29<br>(24.69 to<br>34.55)                        |
| Cirrhosis and other chronic liver diseases due to other causes |                                                            |                                                            |                                                            |                                                            |                                                   |                                                     |                                                     |                                                     |
| <b>Digestive diseases</b>                                      | <b>1,797.14</b><br><b>(1,496.31 to</b><br><b>1,933.47)</b> | <b>2,163.57</b><br><b>(1,715.38 to</b><br><b>2,532.67)</b> | <b>1,945.26</b><br><b>(1,523.63 to</b><br><b>2,296.41)</b> | <b>2,353.76</b><br><b>(1,862.98 to</b><br><b>2,760.94)</b> | <b>66.39</b><br><b>(54.28 to</b><br><b>71.69)</b> | <b>118.36</b><br><b>(90.41 to</b><br><b>137.75)</b> | <b>111.05</b><br><b>(85.13 to</b><br><b>130.26)</b> | <b>122.69</b><br><b>(94.09 to</b><br><b>143.53)</b> |
| Peptic ulcer disease                                           | 501.05<br>(388.65 to<br>575.98)                            | 498.61<br>(343.82 to<br>655.75)                            | 391.33<br>(261.02 to<br>516.48)                            | 593.06<br>(409.30 to<br>776.59)                            | 21.75<br>(16.34 to<br>25.04)                      | 29.58<br>(19.54 to<br>38.67)                        | 24.02<br>(15.39 to<br>31.67)                        | 33.87<br>(22.41 to<br>44.54)                        |

| Indonesia                                  |                                     |                                           |                                           |                                           |                                  |                                     |                                     |                                     |
|--------------------------------------------|-------------------------------------|-------------------------------------------|-------------------------------------------|-------------------------------------------|----------------------------------|-------------------------------------|-------------------------------------|-------------------------------------|
| Cause                                      | YLLs (in 1000s)                     |                                           |                                           |                                           | Deaths (in 1000s)                |                                     |                                     |                                     |
|                                            | 2016                                | 2040 Forecast                             | 2040 Better Scenario                      | 2040 Worse Scenario                       | 2016                             | 2040 Forecast                       | 2040 Better Scenario                | 2040 Worse Scenario                 |
| Gastritis and duodenitis                   | 31.61<br>(26.19 to 37.23)           | 55.84<br>(43.58 to 69.65)                 | 50.95<br>(39.64 to 65.19)                 | 58.66<br>(46.06 to 73.32)                 | 1.33<br>(1.10 to 1.56)           | 3.26<br>(2.50 to 4.05)              | 3.09<br>(2.35 to 3.90)              | 3.28<br>(2.53 to 4.12)              |
| Appendicitis                               | 110.34<br>(90.74 to 146.65)         | 97.06<br>(75.15 to 127.88)                | 81.04<br>(61.66 to 107.30)                | 111.63<br>(87.22 to 145.52)               | 3.02<br>(2.43 to 3.90)           | 4.03<br>(3.10 to 5.06)              | 3.53<br>(2.68 to 4.50)              | 4.41<br>(3.46 to 5.54)              |
| Paralytic ileus and intestinal obstruction | 504.07<br>(367.75 to 585.63)        | 586.72<br>(438.13 to 706.04)              | 590.49<br>(440.12 to 712.81)              | 595.87<br>(443.52 to 722.17)              | 15.39<br>(11.63 to 17.99)        | 31.59<br>(24.19 to 37.96)           | 33.40<br>(25.47 to 40.28)           | 30.11<br>(22.78 to 36.36)           |
| Inguinal, femoral, and abdominal hernia    | 80.00<br>(35.89 to 105.83)          | 103.78<br>(42.17 to 144.46)               | 98.30<br>(38.86 to 138.66)                | 106.63<br>(44.18 to 148.89)               | 3.80<br>(1.56 to 5.22)           | 7.15<br>(2.56 to 10.45)             | 7.12<br>(2.52 to 10.41)             | 6.92<br>(2.50 to 10.16)             |
| Inflammatory bowel disease                 | 30.71<br>(25.31 to 39.79)           | 47.28<br>(37.10 to 61.14)                 | 47.90<br>(36.91 to 61.92)                 | 46.00<br>(36.34 to 59.35)                 | 1.11<br>(0.89 to 1.38)           | 2.48<br>(1.83 to 3.10)              | 2.61<br>(1.94 to 3.26)              | 2.31<br>(1.72 to 2.89)              |
| Vascular intestinal disorders              | 54.69<br>(46.20 to 68.49)           | 105.04<br>(88.58 to 126.99)               | 104.31<br>(86.06 to 127.22)               | 104.87<br>(87.06 to 127.37)               | 2.88<br>(2.45 to 3.43)           | 7.15<br>(5.85 to 8.60)              | 7.33<br>(5.97 to 8.93)              | 6.85<br>(5.49 to 8.24)              |
| Gallbladder and biliary diseases           | 90.94<br>(69.12 to 103.63)          | 144.10<br>(86.35 to 223.39)               | 105.74<br>(67.01 to 156.52)               | 163.19<br>(96.06 to 255.34)               | 4.16<br>(3.01 to 4.76)           | 8.56<br>(4.91 to 13.32)             | 6.72<br>(4.08 to 9.80)              | 9.25<br>(5.30 to 14.43)             |
| Pancreatitis                               | 227.40<br>(174.05 to 269.31)        | 301.55<br>(205.62 to 423.37)              | 258.39<br>(175.47 to 354.09)              | 331.80<br>(227.38 to 484.58)              | 6.75<br>(4.95 to 8.03)           | 12.07<br>(7.90 to 16.90)            | 10.56<br>(6.81 to 14.51)            | 12.87<br>(8.34 to 18.06)            |
| Other digestive diseases                   | 166.34<br>(137.25 to 207.04)        | 223.60<br>(180.43 to 279.75)              | 216.81<br>(172.64 to 276.06)              | 242.03<br>(193.83 to 302.42)              | 6.21<br>(5.18 to 7.54)           | 12.50<br>(10.12 to 15.75)           | 12.67<br>(10.25 to 15.95)           | 12.83<br>(10.26 to 16.11)           |
| Neurological disorders                     | <b>830.40</b><br>(733.13 to 947.96) | <b>2,288.16</b><br>(1,844.55 to 2,946.60) | <b>2,227.69</b><br>(1,848.66 to 2,745.38) | <b>2,101.76</b><br>(1,662.76 to 2,717.80) | <b>53.90</b><br>(46.32 to 63.57) | <b>193.24</b><br>(149.03 to 252.73) | <b>195.81</b><br>(159.93 to 240.92) | <b>168.48</b><br>(125.63 to 222.25) |
| Alzheimer's disease and other dementias    | 549.10<br>(460.53 to 662.18)        | 1,854.15<br>(1,409.27 to 2,486.21)        | 1,785.87<br>(1,419.31 to 2,275.05)        | 1,681.09<br>(1,248.12 to 2,293.49)        | 45.59<br>(38.31 to 54.90)        | 171.43<br>(128.50 to 231.44)        | 172.02<br>(136.47 to 218.02)        | 149.27<br>(107.31 to 204.28)        |
| Parkinson's disease                        | 52.78<br>(41.05 to 66.91)           | 194.39<br>(148.99 to 249.56)              | 215.77<br>(164.00 to 278.09)              | 162.92<br>(123.51 to 210.02)              | 3.49<br>(2.68 to 4.49)           | 14.99<br>(11.26 to 19.54)           | 17.08<br>(13.02 to 22.34)           | 12.16<br>(8.99 to 15.86)            |
| Epilepsy                                   | 162.61<br>(145.60 to 178.11)        | 149.26<br>(122.16 to 178.38)              | 136.08<br>(110.88 to 163.65)              | 171.92<br>(143.98 to 205.67)              | 3.26<br>(2.88 to 3.62)           | 3.94<br>(3.25 to 4.65)              | 3.72<br>(3.06 to 4.45)              | 4.39<br>(3.66 to 5.18)              |
| Multiple sclerosis                         | 6.74<br>(5.59 to 9.85)              | 9.65<br>(7.46 to 13.85)                   | 9.56<br>(7.38 to 13.47)                   | 9.25<br>(7.16 to 13.30)                   | 0.19<br>(0.16 to 0.27)           | 0.32<br>(0.25 to 0.46)              | 0.32<br>(0.25 to 0.45)              | 0.30<br>(0.24 to 0.43)              |
| Motor neuron disease                       | 11.66<br>(8.02 to 13.90)            | 20.21<br>(14.13 to 24.90)                 | 20.37<br>(14.22 to 25.43)                 | 18.90<br>(13.25 to 23.16)                 | 0.33<br>(0.23 to 0.40)           | 0.73<br>(0.51 to 0.89)              | 0.75<br>(0.53 to 0.93)              | 0.67<br>(0.48 to 0.81)              |
| Other neurological disorders               | 47.51<br>(38.78 to 57.29)           | 60.50<br>(49.29 to 71.56)                 | 60.04<br>(48.94 to 70.99)                 | 57.69<br>(46.80 to 68.92)                 | 1.04<br>(0.88 to 1.18)           | 1.84<br>(1.57 to 2.10)              | 1.91<br>(1.63 to 2.19)              | 1.68<br>(1.44 to 1.91)              |
| Mental disorders                           | <b>86.78</b><br>(62.54 to 97.68)    | <b>115.22</b><br>(83.69 to 139.68)        | <b>125.02</b><br>(90.61 to 152.21)        | <b>113.92</b><br>(82.93 to 136.59)        | <b>2.02</b><br>(1.48 to 2.28)    | <b>3.40</b><br>(2.34 to 4.03)       | <b>3.80</b><br>(2.61 to 4.57)       | <b>3.27</b><br>(2.28 to 3.83)       |
| Alcohol use disorders                      | 42.66<br>(28.51 to 52.02)           | 39.62<br>(28.34 to 54.86)                 | 41.57<br>(30.08 to 58.01)                 | 39.76<br>(28.52 to 54.58)                 | 1.03<br>(0.74 to 1.35)           | 1.21<br>(0.90 to 1.81)              | 1.31<br>(0.97 to 1.96)              | 1.19<br>(0.88 to 1.76)              |
| Drug use disorders                         | 43.24<br>(28.80 to 50.00)           | 74.69<br>(47.05 to 92.51)                 | 82.50<br>(51.71 to 102.02)                | 73.28<br>(45.79 to 90.00)                 | 0.98<br>(0.60 to 1.14)           | 2.17<br>(1.22 to 2.64)              | 2.47<br>(1.40 to 3.02)              | 2.06<br>(1.16 to 2.49)              |
| Opioid use disorders                       | 28.23<br>(18.77 to 32.84)           | 40.32<br>(25.14 to 50.96)                 | 41.85<br>(26.01 to 53.11)                 | 40.10<br>(25.05 to 50.77)                 | 0.61<br>(0.38 to 0.71)           | 1.11<br>(0.64 to 1.38)              | 1.19<br>(0.68 to 1.49)              | 1.07<br>(0.61 to 1.32)              |

|                           |                             |                              |                              |                              |                           |                           |                           |                           |
|---------------------------|-----------------------------|------------------------------|------------------------------|------------------------------|---------------------------|---------------------------|---------------------------|---------------------------|
|                           | 1.30<br>(0.80 to<br>2.11)   | 3.22<br>(1.89 to<br>5.19)    | 3.64<br>(2.14 to<br>5.92)    | 3.25<br>(1.94 to<br>5.25)    | 0.03<br>(0.02 to<br>0.05) | 0.09<br>(0.05 to<br>0.15) | 0.10<br>(0.06 to<br>0.17) | 0.09<br>(0.05 to<br>0.14) |
| Cocaine use disorders     |                             |                              |                              |                              |                           |                           |                           |                           |
|                           | 1.16<br>(0.70 to<br>1.51)   | 3.82<br>(2.14 to<br>5.23)    | 4.62<br>(2.56 to<br>6.37)    | 3.81<br>(2.23 to<br>5.12)    | 0.03<br>(0.01 to<br>0.03) | 0.09<br>(0.05 to<br>0.13) | 0.12<br>(0.06 to<br>0.16) | 0.09<br>(0.05 to<br>0.12) |
| Amphetamine use disorders |                             |                              |                              |                              |                           |                           |                           |                           |
|                           | 12.56<br>(6.87 to<br>14.96) | 27.33<br>(15.88 to<br>35.53) | 32.39<br>(18.89 to<br>41.79) | 26.11<br>(15.15 to<br>33.39) | 0.31<br>(0.16 to<br>0.37) | 0.87<br>(0.44 to<br>1.12) | 1.06<br>(0.54 to<br>1.35) | 0.81<br>(0.40 to<br>1.02) |
| Other drug use disorders  |                             |                              |                              |                              |                           |                           |                           |                           |
|                           | 0.88<br>(0.64 to<br>1.60)   | 0.91<br>(0.61 to<br>1.78)    | 0.95<br>(0.63 to<br>1.90)    | 0.88<br>(0.60 to<br>1.70)    | 0.02<br>(0.01 to<br>0.03) | 0.02<br>(0.01 to<br>0.04) | 0.02<br>(0.01 to<br>0.04) | 0.02<br>(0.01 to<br>0.03) |
| Eating disorders          |                             |                              |                              |                              |                           |                           |                           |                           |

| Indonesia                                                  |                                           |                                           |                                           |                                           |                                     |                                     |                                     |                                     |
|------------------------------------------------------------|-------------------------------------------|-------------------------------------------|-------------------------------------------|-------------------------------------------|-------------------------------------|-------------------------------------|-------------------------------------|-------------------------------------|
| Cause                                                      | YLLs (in 1000s)                           |                                           |                                           |                                           | Deaths (in 1000s)                   |                                     |                                     |                                     |
|                                                            | 2016                                      | 2040 Forecast                             | 2040 Better Scenario                      | 2040 Worse Scenario                       | 2016                                | 2040 Forecast                       | 2040 Better Scenario                | 2040 Worse Scenario                 |
| <b>Diabetes, urogenital, blood, and endocrine diseases</b> | <b>3,830.97</b><br>(3,630.65 to 4,018.13) | <b>5,850.91</b><br>(4,294.95 to 8,065.22) | <b>4,496.00</b><br>(3,341.44 to 6,145.07) | <b>7,151.63</b><br>(5,219.91 to 9,884.45) | <b>139.84</b><br>(132.97 to 147.03) | <b>300.68</b><br>(218.58 to 421.48) | <b>237.47</b><br>(176.37 to 327.29) | <b>351.54</b><br>(255.91 to 487.21) |
| Diabetes mellitus                                          | 2,300.77<br>(2,182.52 to 2,428.22)        | 2,918.61<br>(1,949.26 to 4,255.27)        | 2,346.09<br>(1,570.13 to 3,377.05)        | 3,799.09<br>(2,538.36 to 5,517.04)        | 89.43<br>(84.57 to 94.52)           | 150.70<br>(106.10 to 207.23)        | 125.47<br>(89.95 to 169.95)         | 186.69<br>(130.68 to 255.74)        |
| Acute glomerulonephritis                                   | 1.93<br>(1.75 to 2.16)                    | 2.29<br>(1.87 to 2.79)                    | 2.04<br>(1.64 to 2.51)                    | 2.51<br>(2.06 to 3.05)                    | 0.05<br>(0.04 to 0.05)              | 0.08<br>(0.06 to 0.10)              | 0.07<br>(0.05 to 0.09)              | 0.08<br>(0.06 to 0.10)              |
| Chronic kidney disease                                     | 1,056.17<br>(922.85 to 1,120.97)          | 2,248.26<br>(1,068.51 to 4,265.26)        | 1,527.88<br>(977.21 to 2,790.52)          | 2,636.08<br>(1,250.73 to 4,953.58)        | 35.22<br>(32.32 to 37.60)           | 116.28<br>(49.97 to 233.88)         | 80.08<br>(37.76 to 160.74)          | 131.35<br>(55.86 to 261.20)         |
| Chronic kidney disease due to diabetes mellitus            | 585.38<br>(501.36 to 642.18)              | 1,324.02<br>(627.23 to 2,549.93)          | 890.81<br>(460.52 to 1,654.94)            | 1,555.68<br>(733.05 to 3,012.74)          | 19.41<br>(17.19 to 21.48)           | 62.71<br>(25.97 to 124.76)          | 42.37<br>(19.45 to 84.32)           | 71.60<br>(29.78 to 140.51)          |
| Chronic kidney disease due to hypertension                 | 248.82<br>(213.56 to 291.25)              | 679.00<br>(289.37 to 1,329.78)            | 464.20<br>(216.64 to 900.22)              | 783.25<br>(337.30 to 1,544.22)            | 10.80<br>(9.37 to 12.48)            | 43.52<br>(17.72 to 88.40)           | 30.79<br>(13.51 to 62.80)           | 48.11<br>(18.99 to 97.94)           |
| Chronic kidney disease due to glomerulonephritis           | 116.10<br>(89.88 to 139.04)               | 113.90<br>(69.13 to 184.95)               | 80.95<br>(51.13 to 126.04)                | 139.16<br>(84.60 to 226.26)               | 2.43<br>(1.96 to 2.87)              | 4.07<br>(2.04 to 7.52)              | 2.78<br>(1.50 to 5.08)              | 4.79<br>(2.36 to 8.95)              |
| Chronic kidney disease due to other and unspecified causes | 105.87<br>(85.27 to 125.85)               | 131.33<br>(71.32 to 229.82)               | 91.93<br>(53.74 to 155.60)                | 157.98<br>(85.46 to 276.23)               | 2.57<br>(2.12 to 3.05)              | 5.97<br>(2.72 to 11.84)             | 4.13<br>(2.02 to 8.03)              | 6.84<br>(3.08 to 13.30)             |
| Urinary diseases and male infertility                      | 191.26<br>(179.17 to 205.78)              | 375.90<br>(326.44 to 427.26)              | 344.00<br>(291.66 to 398.79)              | 377.41<br>(334.55 to 424.88)              | 7.48<br>(6.98 to 8.05)              | 20.65<br>(17.78 to 23.54)           | 19.69<br>(16.86 to 22.87)           | 19.75<br>(17.15 to 22.36)           |
| Urinary tract infections                                   | 137.03<br>(113.89 to 152.99)              | 292.82<br>(242.74 to 341.35)              | 271.34<br>(222.81 to 321.75)              | 288.12<br>(237.38 to 334.52)              | 5.29<br>(4.39 to 5.91)              | 16.00<br>(13.25 to 18.80)           | 15.43<br>(12.87 to 18.18)           | 15.00<br>(12.22 to 17.57)           |
| Urolithiasis                                               | 7.83<br>(5.88 to 11.67)                   | 18.41<br>(13.04 to 27.93)                 | 15.68<br>(10.81 to 23.86)                 | 18.66<br>(13.25 to 28.22)                 | 0.32<br>(0.24 to 0.48)              | 0.94<br>(0.67 to 1.43)              | 0.83<br>(0.58 to 1.23)              | 0.92<br>(0.65 to 1.40)              |
| Other urinary diseases                                     | 46.40<br>(32.92 to 71.55)                 | 64.67<br>(43.65 to 102.80)                | 56.98<br>(36.99 to 91.19)                 | 70.64<br>(48.11 to 110.30)                | 1.87<br>(1.35 to 2.83)              | 3.71<br>(2.52 to 5.71)              | 3.43<br>(2.25 to 5.37)              | 3.84<br>(2.59 to 5.87)              |
| Gynecological diseases                                     | 51.83<br>(30.65 to 61.54)                 | 47.34<br>(29.03 to 61.86)                 | 36.43<br>(22.86 to 49.58)                 | 55.37<br>(34.77 to 72.59)                 | 1.36<br>(0.87 to 1.59)              | 1.49<br>(0.98 to 1.88)              | 1.18<br>(0.79 to 1.55)              | 1.69<br>(1.10 to 2.14)              |
| Uterine fibroids                                           | 8.78<br>(4.85 to 12.28)                   | 7.78<br>(3.61 to 12.54)                   | 6.46<br>(3.10 to 10.26)                   | 9.27<br>(4.41 to 14.48)                   | 0.28<br>(0.16 to 0.39)              | 0.28<br>(0.14 to 0.43)              | 0.24<br>(0.12 to 0.36)              | 0.33<br>(0.16 to 0.50)              |
| Polycystic ovarian syndrome                                | 1.74<br>(0.35 to 3.74)                    | 0.80<br>(0.15 to 1.95)                    | 0.52<br>(0.10 to 1.24)                    | 1.09<br>(0.21 to 2.56)                    | 0.04<br>(0.01 to 0.09)              | 0.02<br>(0.00 to 0.05)              | 0.01<br>(0.00 to 0.03)              | 0.03<br>(0.01 to 0.06)              |
| Endometriosis                                              | 0.68<br>(0.23 to 1.35)                    | 0.71<br>(0.22 to 1.52)                    | 0.55<br>(0.17 to 1.20)                    | 0.84<br>(0.28 to 1.77)                    | 0.02<br>(0.01 to 0.03)              | 0.02<br>(0.01 to 0.04)              | 0.01<br>(0.00 to 0.03)              | 0.02<br>(0.01 to 0.04)              |
| Genital prolapse                                           | 1.55<br>(0.66 to 2.83)                    | 1.76<br>(0.75 to 3.26)                    | 1.39<br>(0.58 to 2.64)                    | 2.11<br>(0.90 to 3.99)                    | 0.08<br>(0.03 to 0.14)              | 0.10<br>(0.04 to 0.19)              | 0.08<br>(0.03 to 0.15)              | 0.11<br>(0.05 to 0.21)              |
| Other gynecological diseases                               | 39.08<br>(22.58 to 47.30)                 | 36.29<br>(22.55 to 49.02)                 | 27.52<br>(16.00 to 38.63)                 | 42.06<br>(26.41 to 56.71)                 | 0.95<br>(0.59 to 1.15)              | 1.07<br>(0.71 to 1.40)              | 0.84<br>(0.52 to 1.13)              | 1.20<br>(0.80 to 1.57)              |
| Hemoglobinopathies and hemolytic anemias                   | 139.08<br>(95.89 to 159.61)               | 158.09<br>(100.91 to 204.38)              | 139.10<br>(87.82 to 183.63)               | 174.17<br>(109.17 to 223.74)              | 4.24<br>(2.70 to 5.00)              | 7.76<br>(4.54 to 10.34)             | 7.07<br>(4.11 to 9.66)              | 8.25<br>(4.81 to 10.88)             |
| Thalassemias                                               | 39.63<br>(28.45 to 47.44)                 | 16.75<br>(11.10 to 23.19)                 | 15.02<br>(10.15 to 20.37)                 | 16.65<br>(10.81 to 23.36)                 | 0.51<br>(0.37 to 0.60)              | 0.22<br>(0.15 to 0.30)              | 0.20<br>(0.14 to 0.27)              | 0.22<br>(0.15 to 0.30)              |

|                                                   |                              |                                |                                |                                |                           |                           |                           |                           |
|---------------------------------------------------|------------------------------|--------------------------------|--------------------------------|--------------------------------|---------------------------|---------------------------|---------------------------|---------------------------|
|                                                   | 0.23<br>(0.15 to<br>0.29)    | 0.20<br>(0.12 to<br>0.27)      | 0.16<br>(0.10 to<br>0.23)      | 0.22<br>(0.14 to<br>0.29)      | 0.00<br>(0.00 to<br>0.01) | 0.00<br>(0.00 to<br>0.01) | 0.00<br>(0.00 to<br>0.01) | 0.01<br>(0.00 to<br>0.01) |
| Sickle cell disorders                             |                              |                                |                                |                                |                           |                           |                           |                           |
|                                                   | 49.84<br>(34.29 to<br>58.18) | 73.89<br>(45.95 to<br>98.33)   | 62.54<br>(38.77 to<br>85.36)   | 85.20<br>(54.42 to<br>112.27)  | 1.27<br>(0.84 to<br>1.51) | 2.68<br>(1.58 to<br>3.65) | 2.30<br>(1.35 to<br>3.20) | 3.02<br>(1.80 to<br>4.06) |
| G6PD deficiency                                   |                              |                                |                                |                                |                           |                           |                           |                           |
|                                                   | 49.38<br>(31.06 to<br>58.53) | 67.26<br>(38.86 to<br>91.72)   | 61.38<br>(35.49 to<br>85.23)   | 72.10<br>(41.98 to<br>97.74)   | 2.46<br>(1.46 to<br>2.99) | 4.85<br>(2.69 to<br>6.63) | 4.56<br>(2.53 to<br>6.40) | 5.00<br>(2.78 to<br>6.87) |
| Other hemoglobinopathies and hemolytic anemias    |                              |                                |                                |                                |                           |                           |                           |                           |
|                                                   | 89.92<br>(62.31 to<br>99.83) | 100.41<br>(81.90 to<br>119.84) | 100.46<br>(82.75 to<br>121.36) | 107.00<br>(86.18 to<br>126.08) | 2.07<br>(1.67 to<br>2.34) | 3.72<br>(3.20 to<br>4.81) | 3.92<br>(3.34 to<br>5.11) | 3.73<br>(3.20 to<br>4.73) |
| Endocrine, metabolic, blood, and immune disorders |                              |                                |                                |                                |                           |                           |                           |                           |

| Indonesia                                     |                                           |                                       |                                     |                                         |                                  |                                  |                                  |                                  |
|-----------------------------------------------|-------------------------------------------|---------------------------------------|-------------------------------------|-----------------------------------------|----------------------------------|----------------------------------|----------------------------------|----------------------------------|
| Cause                                         | YLLs (in 1000s)                           |                                       |                                     |                                         | Deaths (in 1000s)                |                                  |                                  |                                  |
|                                               | 2016                                      | 2040 Forecast                         | 2040 Better Scenario                | 2040 Worse Scenario                     | 2016                             | 2040 Forecast                    | 2040 Better Scenario             | 2040 Worse Scenario              |
| <b>Musculoskeletal disorders</b>              | <b>53.88</b><br>(46.57 to 75.88)          | <b>90.82</b><br>(75.23 to 130.46)     | <b>85.71</b><br>(70.57 to 122.33)   | <b>86.76</b><br>(72.76 to 123.42)       | <b>1.48</b><br>(1.27 to 2.16)    | <b>3.62</b><br>(2.99 to 5.45)    | <b>3.52</b><br>(2.88 to 5.34)    | <b>3.35</b><br>(2.77 to 4.97)    |
| Rheumatoid arthritis                          | 5.32<br>(4.11 to 7.24)                    | 13.45<br>(9.01 to 19.83)              | 10.89<br>(7.15 to 16.11)            | 14.71<br>(10.06 to 21.42)               | 0.23<br>(0.18 to 0.33)           | 0.75<br>(0.51 to 1.11)           | 0.62<br>(0.42 to 0.93)           | 0.79<br>(0.55 to 1.15)           |
| Other musculoskeletal disorders               | 48.57<br>(41.57 to 69.60)                 | 77.37<br>(63.61 to 115.13)            | 74.82<br>(61.42 to 110.67)          | 72.05<br>(59.73 to 105.72)              | 1.24<br>(1.06 to 1.84)           | 2.87<br>(2.35 to 4.50)           | 2.90<br>(2.37 to 4.59)           | 2.56<br>(2.08 to 3.98)           |
| <b>Other non-communicable diseases</b>        | <b>1,365.61</b><br>(1,057.51 to 1,540.80) | <b>847.42</b><br>(646.32 to 1,044.38) | <b>644.49</b><br>(481.16 to 788.74) | <b>1,003.37</b><br>(764.15 to 1,248.23) | <b>18.38</b><br>(14.59 to 20.63) | <b>19.44</b><br>(13.81 to 23.60) | <b>16.98</b><br>(11.41 to 20.78) | <b>20.52</b><br>(14.78 to 24.75) |
| Congenital birth defects                      | 1,221.10<br>(906.87 to 1,387.14)          | 609.76<br>(440.46 to 796.42)          | 423.56<br>(308.03 to 544.65)        | 763.57<br>(546.25 to 1,011.94)          | 14.73<br>(11.03 to 16.69)        | 7.86<br>(5.80 to 10.07)          | 5.54<br>(4.11 to 7.01)           | 9.73<br>(7.18 to 12.71)          |
| Neural tube defects                           | 97.73<br>(60.52 to 130.92)                | 20.01<br>(9.98 to 35.41)              | 12.94<br>(6.24 to 22.57)            | 28.54<br>(14.34 to 50.50)               | 1.14<br>(0.71 to 1.52)           | 0.24<br>(0.12 to 0.41)           | 0.15<br>(0.08 to 0.26)           | 0.34<br>(0.17 to 0.59)           |
| Congenital heart anomalies                    | 644.38<br>(470.91 to 753.02)              | 330.22<br>(232.83 to 443.66)          | 220.78<br>(149.85 to 297.21)        | 411.68<br>(292.06 to 561.72)            | 7.85<br>(5.79 to 9.11)           | 4.29<br>(3.10 to 5.63)           | 2.90<br>(2.03 to 3.83)           | 5.28<br>(3.81 to 7.08)           |
| Orofacial clefts                              | 1.58<br>(0.43 to 2.91)                    | 0.63<br>(0.14 to 1.32)                | 0.38<br>(0.09 to 0.80)              | 0.95<br>(0.21 to 2.01)                  | 0.02<br>(0.00 to 0.03)           | 0.01<br>(0.00 to 0.02)           | 0.00<br>(0.00 to 0.01)           | 0.01<br>(0.00 to 0.02)           |
| Down syndrome                                 | 22.97<br>(17.34 to 35.77)                 | 14.60<br>(10.24 to 23.32)             | 13.78<br>(9.77 to 21.63)            | 17.86<br>(12.52 to 28.68)               | 0.31<br>(0.24 to 0.47)           | 0.24<br>(0.18 to 0.37)           | 0.23<br>(0.17 to 0.35)           | 0.29<br>(0.21 to 0.45)           |
| Other chromosomal abnormalities               | 37.22<br>(24.04 to 65.36)                 | 26.88<br>(15.26 to 51.41)             | 21.38<br>(12.20 to 40.71)           | 34.42<br>(19.04 to 66.17)               | 0.44<br>(0.28 to 0.61)           | 0.32<br>(0.19 to 0.76)           | 0.26<br>(0.15 to 0.48)           | 0.41<br>(0.24 to 0.78)           |
| Congenital musculoskeletal and limb anomalies | 24.59<br>(14.89 to 34.12)                 | 14.95<br>(7.88 to 23.52)              | 10.53<br>(5.43 to 16.42)            | 18.35<br>(9.63 to 29.05)                | 0.29<br>(0.18 to 0.40)           | 0.18<br>(0.10 to 0.28)           | 0.13<br>(0.07 to 0.19)           | 0.22<br>(0.12 to 0.34)           |
| Urogenital congenital anomalies               | 16.40<br>(11.48 to 20.33)                 | 12.55<br>(9.31 to 16.31)              | 9.90<br>(7.33 to 12.96)             | 14.46<br>(10.85 to 18.95)               | 0.25<br>(0.19 to 0.31)           | 0.27<br>(0.21 to 0.35)           | 0.22<br>(0.17 to 0.29)           | 0.30<br>(0.23 to 0.39)           |
| Digestive congenital anomalies                | 76.78<br>(55.18 to 107.52)                | 36.49<br>(23.42 to 55.86)             | 24.77<br>(15.53 to 37.88)           | 47.32<br>(29.94 to 74.48)               | 0.90<br>(0.65 to 1.25)           | 0.43<br>(0.28 to 0.66)           | 0.29<br>(0.18 to 0.45)           | 0.56<br>(0.36 to 0.87)           |
| Other congenital birth defects                | 299.45<br>(187.78 to 377.28)              | 153.41<br>(87.77 to 215.22)           | 109.11<br>(62.11 to 151.93)         | 189.98<br>(109.39 to 269.41)            | 3.55<br>(2.25 to 4.46)           | 1.90<br>(1.14 to 2.65)           | 1.36<br>(0.81 to 1.87)           | 2.33<br>(1.39 to 3.26)           |
| Skin and subcutaneous diseases                | 81.24<br>(42.31 to 106.81)                | 214.58<br>(117.09 to 283.95)          | 203.73<br>(110.83 to 267.42)        | 210.90<br>(114.84 to 279.88)            | 2.92<br>(1.53 to 3.74)           | 11.30<br>(6.25 to 14.88)         | 11.23<br>(6.22 to 14.69)         | 10.45<br>(5.76 to 13.75)         |
| Cellulitis                                    | 10.51<br>(4.72 to 16.76)                  | 35.91<br>(16.54 to 57.52)             | 36.22<br>(16.71 to 57.48)           | 32.52<br>(14.72 to 52.78)               | 0.34<br>(0.16 to 0.55)           | 1.73<br>(0.81 to 2.87)           | 1.82<br>(0.87 to 3.00)           | 1.49<br>(0.70 to 2.46)           |
| Pyoderma                                      | 44.53<br>(22.48 to 59.47)                 | 114.21<br>(58.60 to 160.41)           | 107.71<br>(55.28 to 149.02)         | 117.44<br>(59.88 to 164.75)             | 1.30<br>(0.65 to 1.81)           | 5.19<br>(2.70 to 7.45)           | 5.17<br>(2.72 to 7.35)           | 5.04<br>(2.66 to 7.17)           |
| Decubitus ulcer                               | 23.92<br>(11.35 to 32.07)                 | 60.01<br>(28.39 to 82.20)             | 55.63<br>(26.14 to 77.31)           | 56.69<br>(26.93 to 76.98)               | 1.21<br>(0.58 to 1.56)           | 4.21<br>(1.91 to 5.72)           | 4.07<br>(1.80 to 5.59)           | 3.75<br>(1.69 to 5.15)           |
| Other skin and subcutaneous diseases          | 2.27<br>(1.05 to 2.91)                    | 4.45<br>(2.02 to 5.98)                | 4.16<br>(1.85 to 5.62)              | 4.25<br>(1.89 to 5.73)                  | 0.07<br>(0.03 to 0.09)           | 0.18<br>(0.08 to 0.25)           | 0.18<br>(0.08 to 0.24)           | 0.17<br>(0.07 to 0.23)           |
| Sudden infant death syndrome                  | 63.26<br>(42.27 to 94.76)                 | 23.09<br>(12.42 to 43.01)             | 17.21<br>(9.25 to 31.75)            | 28.90<br>(15.08 to 53.45)               | 0.73<br>(0.49 to 1.10)           | 0.27<br>(0.14 to 0.50)           | 0.20<br>(0.11 to 0.37)           | 0.34<br>(0.17 to 0.62)           |

|                          |                                       |                                       |                                       |                                       |                               |                                |                                |                                 |
|--------------------------|---------------------------------------|---------------------------------------|---------------------------------------|---------------------------------------|-------------------------------|--------------------------------|--------------------------------|---------------------------------|
| Injuries                 | 4,449.99<br>(4,216.09 to<br>4,703.04) | 3,624.39<br>(2,903.27 to<br>6,406.24) | 3,265.71<br>(2,554.42 to<br>6,095.08) | 5,167.88<br>(4,255.53 to<br>8,089.80) | 98.28<br>(93.55 to<br>103.23) | 118.33<br>(99.37 to<br>178.58) | 111.63<br>(92.65 to<br>173.10) | 156.46<br>(134.72 to<br>218.60) |
| Transport injuries       | 2,056.21<br>(1,915.59 to<br>2,274.74) | 879.02<br>(748.45 to<br>1,057.21)     | 803.82<br>(676.43 to<br>964.21)       | 2,302.17<br>(1,976.13 to<br>2,720.06) | 44.30<br>(41.45 to<br>48.38)  | 29.56<br>(25.89 to<br>34.53)   | 27.97<br>(24.10 to<br>32.79)   | 67.17<br>(59.65 to<br>77.57)    |
| Road injuries            | 1,911.14<br>(1,772.27 to<br>2,128.95) | 666.55<br>(549.63 to<br>831.13)       | 631.08<br>(520.27 to<br>782.64)       | 2,078.83<br>(1,773.81 to<br>2,480.93) | 41.18<br>(38.29 to<br>46.02)  | 23.19<br>(19.81 to<br>28.28)   | 22.56<br>(19.23 to<br>27.52)   | 60.72<br>(53.60 to<br>70.50)    |
| Pedestrian road injuries | 421.84<br>(343.86 to<br>622.54)       | 178.96<br>(143.92 to<br>259.45)       | 147.69<br>(114.33 to<br>217.23)       | 471.44<br>(370.39 to<br>708.42)       | 10.58<br>(8.74 to<br>15.32)   | 8.04<br>(6.49 to<br>11.01)     | 6.96<br>(5.47 to<br>9.90)      | 18.36<br>(14.79 to<br>25.96)    |



| Indonesia                                       |                                                            |                                                            |                                                            |                                                            |                                                   |                                                   |                                                   |                                                   |
|-------------------------------------------------|------------------------------------------------------------|------------------------------------------------------------|------------------------------------------------------------|------------------------------------------------------------|---------------------------------------------------|---------------------------------------------------|---------------------------------------------------|---------------------------------------------------|
| Cause                                           | YLLs (in 1000s)                                            |                                                            |                                                            |                                                            | Deaths (in 1000s)                                 |                                                   |                                                   |                                                   |
|                                                 | 2016                                                       | 2040 Forecast                                              | 2040 Better Scenario                                       | 2040 Worse Scenario                                        | 2016                                              | 2040 Forecast                                     | 2040 Better Scenario                              | 2040 Worse Scenario                               |
| Cyclist road injuries                           | 82.34<br>(51.39 to<br>132.53)                              | 41.69<br>(24.36 to<br>73.80)                               | 42.27<br>(25.24 to<br>75.55)                               | 107.47<br>(64.69 to<br>186.08)                             | 2.04<br>(1.26 to<br>3.31)                         | 1.71<br>(1.00 to<br>3.07)                         | 1.79<br>(1.06 to<br>3.22)                         | 3.57<br>(2.12 to<br>6.11)                         |
| Motorcyclist road injuries                      | 520.22<br>(412.50 to<br>689.50)                            | 215.52<br>(152.26 to<br>306.40)                            | 211.30<br>(150.69 to<br>297.57)                            | 499.93<br>(364.34 to<br>701.41)                            | 9.69<br>(7.57 to<br>12.90)                        | 5.24<br>(3.73 to<br>7.48)                         | 5.25<br>(3.77 to<br>7.37)                         | 10.71<br>(7.86 to<br>14.89)                       |
| Motor vehicle road injuries                     | 851.17<br>(666.95 to<br>1,003.12)                          | 219.01<br>(156.73 to<br>286.85)                            | 218.32<br>(158.51 to<br>284.15)                            | 957.33<br>(722.97 to<br>1,205.37)                          | 18.07<br>(14.02 to<br>21.27)                      | 7.70<br>(5.55 to<br>9.76)                         | 8.02<br>(5.88 to<br>10.12)                        | 26.73<br>(20.33 to<br>33.00)                      |
| Other road injuries                             | 35.56<br>(26.05 to<br>56.35)                               | 11.37<br>(7.51 to<br>19.83)                                | 11.51<br>(7.74 to<br>19.87)                                | 42.66<br>(29.41 to<br>70.88)                               | 0.80<br>(0.58 to<br>1.29)                         | 0.50<br>(0.32 to<br>0.91)                         | 0.53<br>(0.35 to<br>0.98)                         | 1.36<br>(0.94 to<br>2.30)                         |
| Other transport injuries                        | 145.07<br>(99.69 to<br>188.69)                             | 212.47<br>(150.01 to<br>277.94)                            | 172.74<br>(118.73 to<br>230.51)                            | 223.35<br>(150.72 to<br>305.60)                            | 3.12<br>(2.08 to<br>4.08)                         | 6.37<br>(4.49 to<br>8.29)                         | 5.41<br>(3.67 to<br>7.16)                         | 6.45<br>(4.25 to<br>8.59)                         |
| <b>Unintentional injuries</b>                   | <b>1,735.20</b><br><b>(1,586.25 to</b><br><b>1,855.66)</b> | <b>1,697.06</b><br><b>(1,451.70 to</b><br><b>1,948.64)</b> | <b>1,508.77</b><br><b>(1,271.45 to</b><br><b>1,744.49)</b> | <b>1,807.83</b><br><b>(1,506.42 to</b><br><b>2,099.51)</b> | <b>46.53</b><br><b>(35.14 to</b><br><b>43.03)</b> | <b>64.89</b><br><b>(52.46 to</b><br><b>73.54)</b> | <b>61.53</b><br><b>(49.68 to</b><br><b>70.32)</b> | <b>65.43</b><br><b>(51.28 to</b><br><b>74.89)</b> |
| Falls                                           | 476.05<br>(424.28 to<br>509.07)                            | 742.85<br>(618.65 to<br>843.14)                            | 695.92<br>(576.41 to<br>799.27)                            | 754.78<br>(619.09 to<br>863.33)                            | 16.23<br>(13.03 to<br>17.58)                      | 39.60<br>(30.33 to<br>45.85)                      | 38.83<br>(29.42 to<br>45.26)                      | 38.48<br>(28.14 to<br>45.45)                      |
| Drowning                                        | 466.86<br>(405.39 to<br>518.90)                            | 281.92<br>(228.35 to<br>347.55)                            | 238.40<br>(191.09 to<br>295.43)                            | 313.26<br>(251.43 to<br>390.47)                            | 7.83<br>(7.07 to<br>8.60)                         | 6.20<br>(5.24 to<br>7.36)                         | 5.47<br>(4.58 to<br>6.48)                         | 6.69<br>(5.58 to<br>7.99)                         |
| Fire, heat, and hot substances                  | 75.05<br>(59.14 to<br>82.28)                               | 57.65<br>(42.66 to<br>70.40)                               | 48.11<br>(35.52 to<br>59.86)                               | 64.81<br>(47.32 to<br>79.31)                               | 1.67<br>(1.31 to<br>1.84)                         | 1.85<br>(1.41 to<br>2.18)                         | 1.62<br>(1.22 to<br>1.90)                         | 1.99<br>(1.51 to<br>2.36)                         |
| Poisonings                                      | 37.90<br>(20.42 to<br>45.32)                               | 20.03<br>(9.58 to<br>26.23)                                | 15.94<br>(7.58 to<br>21.63)                                | 23.90<br>(11.37 to<br>31.66)                               | 0.86<br>(0.41 to<br>1.04)                         | 0.58<br>(0.25 to<br>0.74)                         | 0.48<br>(0.20 to<br>0.65)                         | 0.67<br>(0.28 to<br>0.87)                         |
| Exposure to mechanical forces                   | 125.34<br>(90.79 to<br>138.78)                             | 118.95<br>(79.58 to<br>146.63)                             | 99.91<br>(64.33 to<br>126.01)                              | 133.36<br>(87.38 to<br>165.35)                             | 2.57<br>(1.76 to<br>2.83)                         | 3.00<br>(1.95 to<br>3.63)                         | 2.61<br>(1.65 to<br>3.22)                         | 3.29<br>(2.10 to<br>3.99)                         |
| Unintentional firearm injuries                  | 4.97<br>(4.47 to<br>5.93)                                  | 3.84<br>(2.99 to<br>4.94)                                  | 3.36<br>(2.64 to<br>4.29)                                  | 4.37<br>(3.37 to<br>5.65)                                  | 0.11<br>(0.10 to<br>0.12)                         | 0.11<br>(0.09 to<br>0.13)                         | 0.10<br>(0.08 to<br>0.12)                         | 0.12<br>(0.10 to<br>0.15)                         |
| Unintentional suffocation                       | 11.33<br>(8.87 to<br>15.97)                                | 6.73<br>(5.18 to<br>8.95)                                  | 5.65<br>(4.34 to<br>7.30)                                  | 7.96<br>(6.01 to<br>10.98)                                 | 0.18<br>(0.15 to<br>0.22)                         | 0.16<br>(0.10 to<br>0.21)                         | 0.14<br>(0.08 to<br>0.20)                         | 0.18<br>(0.11 to<br>0.24)                         |
| Other exposure to mechanical forces             | 109.04<br>(72.31 to<br>120.85)                             | 108.39<br>(67.76 to<br>134.92)                             | 90.89<br>(55.02 to<br>115.40)                              | 121.02<br>(74.25 to<br>150.73)                             | 2.29<br>(1.46 to<br>2.54)                         | 2.74<br>(1.73 to<br>3.32)                         | 2.36<br>(1.45 to<br>2.94)                         | 3.00<br>(1.85 to<br>3.65)                         |
| Adverse effects of medical treatment            | 146.87<br>(117.85 to<br>170.00)                            | 139.09<br>(106.03 to<br>180.16)                            | 128.22<br>(97.02 to<br>167.05)                             | 150.67<br>(112.80 to<br>193.52)                            | 3.46<br>(2.72 to<br>4.12)                         | 4.71<br>(3.64 to<br>5.97)                         | 4.55<br>(3.52 to<br>5.82)                         | 4.89<br>(3.73 to<br>6.25)                         |
| Animal contact                                  | 70.00<br>(63.39 to<br>77.67)                               | 80.80<br>(64.26 to<br>100.60)                              | 71.95<br>(56.74 to<br>89.48)                               | 92.46<br>(73.37 to<br>114.96)                              | 1.71<br>(1.49 to<br>1.89)                         | 2.75<br>(2.16 to<br>3.33)                         | 2.59<br>(2.01 to<br>3.15)                         | 3.03<br>(2.36 to<br>3.71)                         |
| Venomous animal contact                         | 42.63<br>(25.70 to<br>49.21)                               | 48.51<br>(27.13 to<br>62.05)                               | 44.35<br>(25.07 to<br>57.41)                               | 55.28<br>(30.17 to<br>71.26)                               | 1.08<br>(0.56 to<br>1.24)                         | 1.72<br>(0.89 to<br>2.16)                         | 1.65<br>(0.89 to<br>2.07)                         | 1.89<br>(0.95 to<br>2.38)                         |
| Non-venomous animal contact                     | 27.37<br>(22.68 to<br>40.00)                               | 32.29<br>(24.11 to<br>46.25)                               | 27.61<br>(20.31 to<br>40.11)                               | 37.19<br>(27.59 to<br>53.99)                               | 0.63<br>(0.50 to<br>0.90)                         | 1.03<br>(0.73 to<br>1.41)                         | 0.93<br>(0.64 to<br>1.29)                         | 1.14<br>(0.81 to<br>1.57)                         |
| Foreign body                                    | 193.97<br>(137.19 to<br>268.26)                            | 134.69<br>(98.62 to<br>181.79)                             | 122.45<br>(90.79 to<br>162.72)                             | 141.15<br>(101.10 to<br>198.34)                            | 3.30<br>(2.45 to<br>4.31)                         | 3.36<br>(2.57 to<br>4.19)                         | 3.26<br>(2.49 to<br>4.04)                         | 3.29<br>(2.48 to<br>4.18)                         |
| Pulmonary aspiration and foreign body in airway | 176.77<br>(120.32 to<br>249.64)                            | 121.34<br>(84.64 to<br>166.97)                             | 109.01<br>(75.91 to<br>148.31)                             | 126.65<br>(85.03 to<br>181.75)                             | 2.94<br>(2.07 to<br>3.92)                         | 2.98<br>(2.18 to<br>3.75)                         | 2.86<br>(2.09 to<br>3.57)                         | 2.90<br>(2.06 to<br>3.75)                         |

|                                             |                                                      |                                                      |                                                      |                                                      |                                                   |                                                   |                                                   |                                                   |
|---------------------------------------------|------------------------------------------------------|------------------------------------------------------|------------------------------------------------------|------------------------------------------------------|---------------------------------------------------|---------------------------------------------------|---------------------------------------------------|---------------------------------------------------|
|                                             | 17.20<br>(11.45 to<br>34.46)                         | 13.36<br>(8.62 to<br>26.23)                          | 13.44<br>(8.69 to<br>26.14)                          | 14.50<br>(9.32 to<br>28.04)                          | 0.35<br>(0.24 to<br>0.69)                         | 0.38<br>(0.26 to<br>0.74)                         | 0.40<br>(0.27 to<br>0.77)                         | 0.39<br>(0.27 to<br>0.76)                         |
| Foreign body in other body part             |                                                      |                                                      |                                                      |                                                      |                                                   |                                                   |                                                   |                                                   |
|                                             | 4.89<br>(3.39 to<br>5.57)                            | 4.38<br>(3.17 to<br>5.61)                            | 3.62<br>(2.56 to<br>4.71)                            | 5.35<br>(3.83 to<br>6.88)                            | 0.11<br>(0.08 to<br>0.13)                         | 0.14<br>(0.11 to<br>0.19)                         | 0.13<br>(0.09 to<br>0.16)                         | 0.17<br>(0.13 to<br>0.21)                         |
| Environmental heat and cold exposure        |                                                      |                                                      |                                                      |                                                      |                                                   |                                                   |                                                   |                                                   |
|                                             | 138.25<br>(77.00 to<br>157.52)                       | 116.71<br>(64.04 to<br>150.64)                       | 84.24<br>(45.74 to<br>112.30)                        | 128.10<br>(69.56 to<br>162.88)                       | 2.79<br>(1.52 to<br>3.17)                         | 2.69<br>(1.54 to<br>3.41)                         | 1.98<br>(1.13 to<br>2.60)                         | 2.94<br>(1.63 to<br>3.63)                         |
| Other unintentional injuries                |                                                      |                                                      |                                                      |                                                      |                                                   |                                                   |                                                   |                                                   |
| <b>Self-harm and interpersonal violence</b> | <b>640.85</b><br><b>(558.00 to</b><br><b>705.43)</b> | <b>733.98</b><br><b>(597.86 to</b><br><b>900.47)</b> | <b>642.87</b><br><b>(517.53 to</b><br><b>792.08)</b> | <b>742.08</b><br><b>(600.28 to</b><br><b>910.98)</b> | <b>13.06</b><br><b>(11.62 to</b><br><b>14.46)</b> | <b>17.16</b><br><b>(14.33 to</b><br><b>20.34)</b> | <b>15.39</b><br><b>(12.86 to</b><br><b>18.36)</b> | <b>17.18</b><br><b>(14.26 to</b><br><b>20.48)</b> |

| Indonesia                                                                           |                                                   |                                                      |                                                      |                                                      |                                                |                                                 |                                                 |                                                 |
|-------------------------------------------------------------------------------------|---------------------------------------------------|------------------------------------------------------|------------------------------------------------------|------------------------------------------------------|------------------------------------------------|-------------------------------------------------|-------------------------------------------------|-------------------------------------------------|
| Cause                                                                               | YLLs (in 1000s)                                   |                                                      |                                                      |                                                      | Deaths (in 1000s)                              |                                                 |                                                 |                                                 |
|                                                                                     | 2016                                              | 2040 Forecast                                        | 2040 Better Scenario                                 | 2040 Worse Scenario                                  | 2016                                           | 2040 Forecast                                   | 2040 Better Scenario                            | 2040 Worse Scenario                             |
| Self-harm                                                                           | 401.94<br>(363.20 to<br>491.83)                   | 520.00<br>(414.34 to<br>672.91)                      | 460.70<br>(366.34 to<br>587.60)                      | 528.96<br>(418.77 to<br>679.93)                      | 8.58<br>(7.80 to<br>10.35)                     | 12.57<br>(10.38 to<br>15.49)                    | 11.39<br>(9.43 to<br>13.93)                     | 12.64<br>(10.32 to<br>15.50)                    |
| Self-harm by firearm                                                                | 23.78<br>(13.10 to<br>36.53)                      | 25.40<br>(13.23 to<br>43.53)                         | 21.51<br>(11.18 to<br>36.45)                         | 26.41<br>(13.81 to<br>44.99)                         | 0.52<br>(0.29 to<br>0.79)                      | 0.65<br>(0.35 to<br>1.07)                       | 0.57<br>(0.31 to<br>0.92)                       | 0.66<br>(0.36 to<br>1.09)                       |
| Self-harm by other specified means                                                  | 378.16<br>(336.77 to<br>463.17)                   | 494.60<br>(394.50 to<br>635.42)                      | 439.18<br>(347.75 to<br>559.82)                      | 502.55<br>(396.76 to<br>650.55)                      | 8.06<br>(7.17 to<br>9.70)                      | 11.92<br>(9.87 to<br>14.74)                     | 10.83<br>(8.94 to<br>13.38)                     | 11.97<br>(9.80 to<br>14.71)                     |
| Interpersonal violence                                                              | 238.91<br>(166.49 to<br>269.99)                   | 213.97<br>(147.54 to<br>269.63)                      | 182.18<br>(125.70 to<br>229.40)                      | 213.12<br>(143.98 to<br>267.49)                      | 4.49<br>(3.22 to<br>5.05)                      | 4.59<br>(3.15 to<br>5.60)                       | 4.00<br>(2.76 to<br>4.88)                       | 4.55<br>(3.11 to<br>5.56)                       |
| Physical violence by firearm                                                        | 13.24<br>(9.69 to<br>24.16)                       | 11.90<br>(8.55 to<br>21.47)                          | 9.92<br>(7.01 to<br>17.57)                           | 11.94<br>(8.45 to<br>21.58)                          | 0.26<br>(0.19 to<br>0.46)                      | 0.27<br>(0.19 to<br>0.44)                       | 0.23<br>(0.15 to<br>0.37)                       | 0.27<br>(0.18 to<br>0.44)                       |
| Physical violence by sharp object                                                   | 101.06<br>(45.98 to<br>121.21)                    | 102.37<br>(46.92 to<br>137.95)                       | 84.03<br>(36.97 to<br>113.74)                        | 98.73<br>(43.68 to<br>132.39)                        | 1.88<br>(0.86 to<br>2.24)                      | 2.01<br>(0.93 to<br>2.63)                       | 1.67<br>(0.75 to<br>2.22)                       | 1.94<br>(0.87 to<br>2.54)                       |
| Physical violence by other means                                                    | 124.61<br>(95.07 to<br>174.17)                    | 99.70<br>(76.11 to<br>152.46)                        | 88.22<br>(66.78 to<br>133.89)                        | 102.45<br>(77.14 to<br>153.37)                       | 2.34<br>(1.85 to<br>3.21)                      | 2.31<br>(1.74 to<br>3.27)                       | 2.10<br>(1.57 to<br>2.90)                       | 2.34<br>(1.75 to<br>3.30)                       |
| <b>Forces of nature, conflict and terrorism, and executions and police conflict</b> | <b>17.74</b><br><b>(11.40 to</b><br><b>23.53)</b> | <b>314.34</b><br><b>(0.00 to</b><br><b>3,030.84)</b> | <b>310.24</b><br><b>(0.00 to</b><br><b>2,992.23)</b> | <b>315.80</b><br><b>(0.00 to</b><br><b>3,043.39)</b> | <b>0.38</b><br><b>(0.23 to</b><br><b>0.50)</b> | <b>6.74</b><br><b>(0.00 to</b><br><b>64.48)</b> | <b>6.74</b><br><b>(0.00 to</b><br><b>64.40)</b> | <b>6.68</b><br><b>(0.00 to</b><br><b>64.12)</b> |
| Exposure to forces of nature                                                        | 11.60<br>(7.03 to<br>16.09)                       | 50.00<br>(0.00 to<br>87.53)                          | 48.88<br>(0.00 to<br>85.59)                          | 50.62<br>(0.00 to<br>88.84)                          | 0.22<br>(0.13 to<br>0.31)                      | 1.14<br>(0.00 to<br>2.00)                       | 1.14<br>(0.00 to<br>2.01)                       | 1.12<br>(0.00 to<br>1.98)                       |
| Conflict and terrorism                                                              | 0.00<br>(0.00 to<br>0.00)                         | 7.44<br>(0.00 to<br>40.50)                           | 7.26<br>(0.00 to<br>39.34)                           | 7.56<br>(0.00 to<br>41.27)                           | 0.00<br>(0.00 to<br>0.00)                      | 0.15<br>(0.00 to<br>0.80)                       | 0.15<br>(0.00 to<br>0.79)                       | 0.15<br>(0.00 to<br>0.80)                       |
| Executions and police conflict                                                      | 6.14<br>(1.59 to<br>8.61)                         | 256.90<br>(0.00 to<br>3,030.84)                      | 254.11<br>(0.00 to<br>2,992.23)                      | 257.62<br>(0.00 to<br>3,043.39)                      | 0.16<br>(0.03 to<br>0.21)                      | 5.44<br>(0.00 to<br>64.48)                      | 5.44<br>(0.00 to<br>64.40)                      | 5.40<br>(0.00 to<br>64.12)                      |

| Laos                                                              |                                                |                                                |                                              |                                                |                                       |                                       |                                       |                                       |
|-------------------------------------------------------------------|------------------------------------------------|------------------------------------------------|----------------------------------------------|------------------------------------------------|---------------------------------------|---------------------------------------|---------------------------------------|---------------------------------------|
| Cause                                                             | YLLs (actual counts)                           |                                                |                                              |                                                | Deaths (actual counts)                |                                       |                                       |                                       |
|                                                                   | 2016                                           | 2040 Forecast                                  | 2040 Better Scenario                         | 2040 Worse Scenario                            | 2016                                  | 2040 Forecast                         | 2040 Better Scenario                  | 2040 Worse Scenario                   |
| All causes                                                        | 2,304,695.31<br>(1,662,986.58 to 3,221,033.44) | 1,481,104.20<br>(1,245,362.69 to 1,775,425.39) | 1,151,266.87<br>(983,332.62 to 1,368,970.13) | 2,457,049.02<br>(1,959,329.91 to 3,098,415.34) | 48,468.92<br>(40,805.46 to 59,296.61) | 54,241.95<br>(48,889.09 to 59,993.24) | 44,056.89<br>(39,657.71 to 49,154.63) | 77,419.79<br>(68,008.08 to 87,911.95) |
| Communicable, maternal, neonatal, and nutritional diseases        | 1,167,983.19<br>(674,588.27 to 1,915,523.47)   | 354,220.84<br>(205,599.44 to 612,627.34)       | 258,746.89<br>(146,372.80 to 485,877.65)     | 792,172.62<br>(435,856.78 to 1,346,809.99)     | 16,168.12<br>(10,265.92 to 24,994.52) | 7,625.46<br>(4,989.20 to 12,693.28)   | 5,636.64<br>(3,673.08 to 10,552.24)   | 14,140.55<br>(8,853.70 to 21,822.22)  |
| HIV/AIDS and tuberculosis                                         | 71,968.11<br>(47,657.30 to 182,498.87)         | 57,538.51<br>(19,334.53 to 244,138.42)         | 45,856.58<br>(12,694.25 to 234,277.12)       | 88,746.26<br>(36,626.40 to 280,443.74)         | 1,906.83<br>(1,351.33 to 4,345.87)    | 1,697.77<br>(668.55 to 6,074.37)      | 1,346.80<br>(584.99 to 5,846.99)      | 2,624.87<br>(485.30 to 7,196.41)      |
| Tuberculosis                                                      | 53,159.69<br>(41,953.09 to 66,049.82)          | 29,247.88<br>(15,424.33 to 51,425.17)          | 19,529.81<br>(10,961.71 to 32,582.82)        | 56,590.20<br>(28,811.70 to 98,996.47)          | 1,514.76<br>(1,244.65 to 1,919.95)    | 1,057.83<br>(81.26 to 1,792.81)       | 737.25<br>(431.42 to 1,185.85)        | 1,916.56<br>(998.94 to 3,275.71)      |
| HIV/AIDS                                                          | 18,808.42<br>(258.98 to 135,519.65)            | 28,290.63<br>(470.57 to 224,214.33)            | 26,526.77<br>(188.07 to 223,786.68)          | 32,156.06<br>(1,197.91 to 229,953.49)          | 392.08<br>(4.57 to 2,943.41)          | 639.94<br>(8.33 to 4,950.95)          | 609.55<br>(3.50 to 5,052.46)          | 708.31<br>(21.05 to 5,183.78)         |
| Diarrhea, lower respiratory, and other common infectious diseases | 557,203.53<br>(314,585.94 to 915,113.84)       | 160,593.54<br>(89,384.12 to 268,913.05)        | 102,121.57<br>(59,737.02 to 166,946.83)      | 419,244.84<br>(203,276.89 to 784,636.28)       | 7,696.83<br>(4,815.67 to 11,817.18)   | 4,024.61<br>(2,515.45 to 6,093.91)    | 2,680.80<br>(1,750.55 to 3,992.00)    | 7,833.53<br>(4,473.85 to 12,590.71)   |
| Diarrheal diseases                                                | 81,745.49<br>(39,358.32 to 147,348.67)         | 17,506.21<br>(2,656.90 to 44,117.77)           | 10,510.27<br>(1,690.10 to 29,838.39)         | 33,649.78<br>(5,810.81 to 82,325.16)           | 1,175.52<br>(612.19 to 2,020.20)      | 511.89<br>(80.69 to 1,598.48)         | 336.25<br>(55.21 to 1,082.55)         | 881.17<br>(171.50 to 2,653.92)        |
| Intestinal infectious diseases                                    | 29,812.08<br>(14,951.54 to 53,528.90)          | 12,010.34<br>(5,227.52 to 23,261.64)           | 10,625.66<br>(4,723.08 to 20,063.53)         | 16,628.31<br>(6,793.79 to 33,506.54)           | 416.13<br>(212.01 to 734.67)          | 185.79<br>(84.04 to 350.26)           | 166.98<br>(310.04)                    | 249.16<br>(106.90 to 488.61)          |
| Typhoid fever                                                     | 25,898.86<br>(12,240.98 to 47,302.55)          | 10,187.70<br>(4,221.51 to 19,380.14)           | 9,026.84<br>(3,910.12 to 16,945.96)          | 14,026.16<br>(5,481.14 to 28,094.72)           | 360.56<br>(171.88 to 654.56)          | 156.59<br>(69.43 to 295.67)           | 140.94<br>(63.63 to 263.53)           | 208.91<br>(86.88 to 417.96)           |
| Paratyphoid fever                                                 | 3,614.48<br>(1,534.89 to 7,490.20)             | 1,786.25<br>(731.32 to 3,859.50)               | 1,567.73<br>(664.46 to 3,373.34)             | 2,535.72<br>(984.96 to 5,582.66)               | 51.73<br>(22.21 to 105.82)            | 28.50<br>(12.16 to 60.82)             | 25.42<br>(11.21 to 53.59)             | 30.12<br>(15.96 to 85.62)             |
| Other intestinal infectious diseases                              | 298.74<br>(82.38 to 795.65)                    | 36.38<br>(8.14 to 109.60)                      | 31.09<br>(6.80 to 95.52)                     | 66.44<br>(12.61 to 201.67)                     | 3.84<br>(1.14 to 9.75)                | 0.70<br>(0.20 to 1.82)                | 0.63<br>(0.18 to 1.65)                | 1.13<br>(0.31 to 3.10)                |
| Lower respiratory infections                                      | 369,093.06<br>(197,085.13 to 623,692.56)       | 89,393.43<br>(41,321.42 to 174,589.76)         | 50,050.67<br>(25,833.37 to 94,168.63)        | 253,552.97<br>(77,814.75 to 583,210.00)        | 5,124.87<br>(3,118.39 to 8,040.68)    | 2,730.00<br>(1,680.68 to 4,225.33)    | 1,712.28<br>(1,134.02 to 2,552.59)    | 5,227.53<br>(2,628.79 to 9,381.25)    |
| Upper respiratory infections                                      | 292.12<br>(82.92 to 876.40)                    | 74.42<br>(23.86 to 193.68)                     | 61.72<br>(20.01 to 156.13)                   | 142.51<br>(42.35 to 404.44)                    | 4.18<br>(1.60 to 11.53)               | 1.70<br>(0.68 to 3.59)                | 1.48<br>(0.58 to 3.17)                | 2.90<br>(1.09 to 6.66)                |
| Otitis media                                                      | 97.56<br>(32.75 to 325.26)                     | 29.34<br>(9.94 to 67.26)                       | 29.70<br>(9.96 to 68.73)                     | 30.45<br>(10.25 to 71.94)                      | 1.96<br>(0.82 to 4.59)                | 1.18<br>(0.37 to 2.78)                | 1.27<br>(0.39 to 2.98)                | 1.08<br>(0.35 to 2.55)                |
| Meningitis                                                        | 38,839.98<br>(18,340.09 to 74,511.71)          | 9,406.64<br>(3,396.71 to 18,563.64)            | 8,654.30<br>(3,306.25 to 16,675.70)          | 23,500.90<br>(5,131.66 to 57,269.15)           | 491.75<br>(226.16 to 904.30)          | 148.79<br>(74.54 to 263.91)           | 140.84<br>(74.08 to 241.12)           | 314.29<br>(94.13 to 712.56)           |
| Pneumococcal meningitis                                           | 401.66<br>(132.93 to 890.79)                   | 75.94<br>(26.35 to 174.32)                     | 72.34<br>(26.56 to 160.97)                   | 194.14<br>(47.36 to 530.75)                    | 5.10<br>(1.92 to 10.74)               | 1.33<br>(0.64 to 2.51)                | 1.33<br>(0.67 to 2.39)                | 2.81<br>(1.00 to 6.74)                |
| H influenzae type B meningitis                                    | 3,362.43<br>(1,307.99 to 6,590.63)             | 1,983.83<br>(281.12 to 6,770.05)               | 1,846.18<br>(281.81 to 6,230.23)             | 13,133.62<br>(932.26 to 43,572.64)             | 41.67<br>(17.61 to 79.73)             | 25.57<br>(5.43 to 81.40)              | 24.11<br>(5.73 to 75.09)              | 155.28<br>(13.39 to 509.48)           |
| Meningococcal meningitis                                          | 12,914.09<br>(5,308.90 to 25,512.49)           | 2,548.99<br>(1,055.39 to 5,071.38)             | 2,335.33<br>(1,022.81 to 4,608.16)           | 3,541.85<br>(1,290.64 to 7,932.09)             | 164.66<br>(74.58 to 311.63)           | 43.91<br>(24.20 to 76.59)             | 41.76<br>(23.83 to 71.78)             | 55.93<br>(26.81 to 110.72)            |
| Other meningitis                                                  | 22,161.80<br>(9,272.86 to 43,085.08)           | 4,797.88<br>(1,895.91 to 9,109.92)             | 4,400.45<br>(1,812.23 to 8,396.43)           | 6,631.28<br>(2,315.34 to 14,144.92)            | 280.32<br>(127.89 to 527.69)          | 77.99<br>(40.42 to 136.74)            | 73.65<br>(40.00 to 123.99)            | 100.26<br>(45.77 to 191.29)           |
| Encephalitis                                                      | 8,968.65<br>(3,696.30 to 20,327.01)            | 3,684.26<br>(1,651.06 to 7,943.28)             | 3,310.31<br>(1,525.84 to 7,041.45)           | 5,367.62<br>(2,146.50 to 12,722.47)            | 123.14<br>(56.84 to 261.75)           | 68.22<br>(38.69 to 129.32)            | 63.64<br>(37.07 to 117.05)            | 90.92<br>(45.94 to 185.34)            |

|                |                                        |                                          |                                         |                                          |                                |                                  |                                |                                  |
|----------------|----------------------------------------|------------------------------------------|-----------------------------------------|------------------------------------------|--------------------------------|----------------------------------|--------------------------------|----------------------------------|
| Diphtheria     | 106.75<br>(44.06 to<br>251.47)         | 26.36<br>(9.43 to<br>67.79)              | 25.16<br>(8.99 to<br>66.06)             | 106.34<br>(12.88 to<br>351.35)           | 1.35<br>(0.60 to<br>3.05)      | 0.39<br>(0.16 to<br>0.89)        | 0.38<br>(0.16 to<br>0.86)      | 1.33<br>(0.22 to<br>4.22)        |
| Whooping cough | 16,109.65<br>(942.81 to<br>54,656.85)  | 4,337.65<br>(132.15 to<br>16,451.26)     | 4,040.15<br>(144.82 to<br>14,575.36)    | 8,140.99<br>(189.96 to<br>35,505.98)     | 190.06<br>(11.11 to<br>643.76) | 51.49<br>(1.70 to<br>192.89)     | 47.96<br>(1.82 to<br>173.65)   | 96.22<br>(2.46 to<br>420.66)     |
| Tetanus        | 2,980.20<br>(1,275.13 to<br>6,020.30)  | 439.36<br>(179.52 to<br>846.79)          | 424.70<br>(174.67 to<br>785.11)         | 725.55<br>(295.01 to<br>1,633.81)        | 51.80<br>(23.52 to<br>91.03)   | 11.02<br>(4.08 to<br>19.10)      | 11.20<br>(4.23 to<br>19.50)    | 13.86<br>(6.05 to<br>26.80)      |
| Measles        | 7,170.39<br>(1,935.86 to<br>19,799.74) | 23,221.16<br>(1,316.49 to<br>103,975.90) | 13,991.59<br>(1,005.05 to<br>62,444.33) | 76,563.42<br>(1,881.27 to<br>365,676.97) | 85.40<br>(23.11 to<br>235.50)  | 300.37<br>(22.69 to<br>1,256.84) | 185.26<br>(18.20 to<br>756.57) | 935.54<br>(33.33 to<br>4,341.44) |

| Laos                                                  |                                                     |                                                   |                                                   |                                                     |                                            |                                            |                                           |                                            |
|-------------------------------------------------------|-----------------------------------------------------|---------------------------------------------------|---------------------------------------------------|-----------------------------------------------------|--------------------------------------------|--------------------------------------------|-------------------------------------------|--------------------------------------------|
| Cause                                                 | YLLs (actual counts)                                |                                                   |                                                   |                                                     | Deaths (actual counts)                     |                                            |                                           |                                            |
|                                                       | 2016                                                | 2040 Forecast                                     | 2040 Better Scenario                              | 2040 Worse Scenario                                 | 2016                                       | 2040 Forecast                              | 2040 Better Scenario                      | 2040 Worse Scenario                        |
| Varicella and herpes zoster                           | 1,987.62<br>(936.79 to 4,108.52)                    | 464.37<br>(192.63 to 889.18)                      | 397.35<br>(176.26 to 775.89)                      | 836.02<br>(297.16 to 1,721.34)                      | 30.67<br>(17.84 to 54.60)                  | 13.76<br>(7.63 to 22.65)                   | 13.26<br>(7.31 to 21.89)                  | 19.55<br>(10.07 to 33.54)                  |
| <b>Neglected tropical diseases and malaria</b>        | <b>7,184.70</b><br><b>(3,653.99 to 13,920.16)</b>   | <b>5,777.98</b><br><b>(3,266.16 to 10,974.57)</b> | <b>5,272.44</b><br><b>(3,036.04 to 9,820.14)</b>  | <b>7,576.67</b><br><b>(4,169.60 to 14,920.76)</b>   | <b>103.86</b><br><b>(58.17 to 196.90)</b>  | <b>105.39</b><br><b>(64.67 to 190.31)</b>  | <b>100.16</b><br><b>(62.24 to 176.72)</b> | <b>127.47</b><br><b>(75.65 to 235.51)</b>  |
| Malaria                                               | 1,214.71<br>(522.45 to 3,731.90)                    | 669.45<br>(196.56 to 2,312.99)                    | 641.58<br>(187.04 to 2,186.92)                    | 766.98<br>(224.07 to 2,729.99)                      | 21.58<br>(10.39 to 61.88)                  | 15.48<br>(4.89 to 51.19)                   | 15.28<br>(4.77 to 49.19)                  | 16.74<br>(5.29 to 57.42)                   |
| Chagas disease                                        | 0.00<br>(0.00 to 0.00)                              | 0.00<br>(0.00 to 0.00)                            | 0.00<br>(0.00 to 0.00)                            | 0.00<br>(0.00 to 0.00)                              | 0.00<br>(0.00 to 0.00)                     | 0.00<br>(0.00 to 0.00)                     | 0.00<br>(0.00 to 0.00)                    | 0.00<br>(0.00 to 0.00)                     |
| Leishmaniasis                                         | 0.00<br>(0.00 to 0.00)                              | 0.00<br>(0.00 to 0.00)                            | 0.00<br>(0.00 to 0.00)                            | 0.00<br>(0.00 to 0.00)                              | 0.00<br>(0.00 to 0.00)                     | 0.00<br>(0.00 to 0.00)                     | 0.00<br>(0.00 to 0.00)                    | 0.00<br>(0.00 to 0.00)                     |
| African trypanosomiasis                               | 0.00<br>(0.00 to 0.00)                              | 0.00<br>(0.00 to 0.00)                            | 0.00<br>(0.00 to 0.00)                            | 0.00<br>(0.00 to 0.00)                              | 0.00<br>(0.00 to 0.00)                     | 0.00<br>(0.00 to 0.00)                     | 0.00<br>(0.00 to 0.00)                    | 0.00<br>(0.00 to 0.00)                     |
| Schistosomiasis                                       | 173.88<br>(86.08 to 288.32)                         | 126.24<br>(41.80 to 265.41)                       | 119.20<br>(39.04 to 250.39)                       | 152.62<br>(52.77 to 312.08)                         | 4.74<br>(2.33 to 7.87)                     | 4.27<br>(1.42 to 8.69)                     | 4.17<br>(1.38 to 8.66)                    | 4.89<br>(1.72 to 9.71)                     |
| Cysticercosis                                         | 64.58<br>(49.16 to 81.74)                           | 23.43<br>(11.61 to 37.87)                         | 22.42<br>(10.83 to 36.61)                         | 26.85<br>(13.85 to 42.85)                           | 1.30<br>(0.98 to 1.62)                     | 0.57<br>(0.28 to 0.92)                     | 0.56<br>(0.27 to 0.91)                    | 0.63<br>(0.32 to 1.00)                     |
| Cystic echinococcosis                                 | 7.71<br>(5.77 to 10.23)                             | 2.21<br>(1.10 to 3.57)                            | 1.77<br>(0.88 to 2.85)                            | 4.33<br>(2.22 to 6.78)                              | 0.16<br>(0.12 to 0.20)                     | 0.06<br>(0.05 to 0.10)                     | 0.05<br>(0.03 to 0.09)                    | 0.12<br>(0.06 to 0.18)                     |
| Dengue                                                | 2,073.90<br>(256.21 to 6,856.66)                    | 3,016.30<br>(817.93 to 7,854.14)                  | 2,767.70<br>(782.02 to 7,088.13)                  | 3,899.18<br>(995.61 to 10,487.25)                   | 29.11<br>(3.90 to 92.52)                   | 55.93<br>(16.75 to 136.58)                 | 53.42<br>(16.58 to 127.55)                | 66.52<br>(18.48 to 163.50)                 |
| Yellow fever                                          | 0.00<br>(0.00 to 0.00)                              | 0.00<br>(0.00 to 0.00)                            | 0.00<br>(0.00 to 0.00)                            | 0.00<br>(0.00 to 0.00)                              | 0.00<br>(0.00 to 0.00)                     | 0.00<br>(0.00 to 0.00)                     | 0.00<br>(0.00 to 0.00)                    | 0.00<br>(0.00 to 0.00)                     |
| Rabies                                                | 92.02<br>(39.27 to 173.92)                          | 22.35<br>(7.09 to 53.84)                          | 16.64<br>(5.10 to 42.31)                          | 54.57<br>(18.39 to 123.61)                          | 1.57<br>(0.75 to 2.77)                     | 0.48<br>(0.17 to 1.04)                     | 0.37<br>(0.13 to 0.83)                    | 1.07<br>(0.39 to 2.20)                     |
| Intestinal nematode infections                        | 3,190.74<br>(1,630.59 to 5,979.55)                  | 1,795.10<br>(879.90 to 3,300.30)                  | 1,599.92<br>(796.13 to 2,958.14)                  | 2,459.27<br>(1,193.04 to 4,501.88)                  | 40.15<br>(21.13 to 72.78)                  | 25.82<br>(13.70 to 43.61)                  | 23.75<br>(12.52 to 40.54)                 | 33.42<br>(17.54 to 57.68)                  |
| Other neglected tropical diseases                     | 367.14<br>(143.79 to 893.93)                        | 122.89<br>(55.22 to 264.47)                       | 103.21<br>(47.04 to 211.40)                       | 212.88<br>(87.95 to 478.86)                         | 5.24<br>(2.49 to 12.17)                    | 2.78<br>(1.31 to 5.75)                     | 2.55<br>(1.22 to 5.11)                    | 4.07<br>(1.91 to 8.77)                     |
| <b>Maternal disorders</b>                             | <b>25,785.18</b><br><b>(18,350.38 to 34,952.02)</b> | <b>9,808.06</b><br><b>(5,609.98 to 15,199.87)</b> | <b>7,992.50</b><br><b>(4,497.83 to 12,634.33)</b> | <b>17,829.61</b><br><b>(10,268.70 to 28,149.72)</b> | <b>448.55</b><br><b>(320.09 to 608.09)</b> | <b>175.74</b><br><b>(102.92 to 268.91)</b> | <b>143.32</b><br><b>(82.19 to 223.75)</b> | <b>318.54</b><br><b>(184.97 to 494.66)</b> |
| Maternal hemorrhage                                   | 9,211.81<br>(6,080.35 to 13,000.96)                 | 3,459.39<br>(1,786.49 to 5,550.46)                | 2,820.92<br>(1,453.27 to 4,643.27)                | 6,232.84<br>(3,225.56 to 10,046.50)                 | 160.24<br>(104.62 to 223.90)               | 61.79<br>(32.20 to 98.39)                  | 50.40<br>(26.67 to 82.09)                 | 111.11<br>(58.78 to 176.26)                |
| Maternal sepsis and other maternal infections         | 632.05<br>(333.32 to 1,080.76)                      | 222.43<br>(99.89 to 436.19)                       | 180.91<br>(80.96 to 359.12)                       | 404.88<br>(183.38 to 787.71)                        | 11.18<br>(6.02 to 19.07)                   | 4.09<br>(1.91 to 7.72)                     | 3.33<br>(1.54 to 6.31)                    | 7.42<br>(3.44 to 13.94)                    |
| Maternal hypertensive disorders                       | 1,669.54<br>(1,015.18 to 2,602.36)                  | 646.26<br>(314.31 to 1,168.34)                    | 525.11<br>(262.48 to 986.57)                      | 1,173.65<br>(589.24 to 2,077.97)                    | 28.90<br>(17.72 to 44.82)                  | 11.53<br>(5.71 to 20.77)                   | 9.37<br>(4.76 to 17.24)                   | 20.88<br>(10.52 to 36.61)                  |
| Maternal obstructed labor and uterine rupture         | 428.51<br>(208.77 to 752.69)                        | 166.22<br>(70.04 to 334.20)                       | 133.46<br>(56.14 to 270.12)                       | 312.97<br>(127.95 to 634.56)                        | 7.48<br>(3.76 to 12.90)                    | 3.00<br>(1.27 to 5.92)                     | 2.41<br>(1.04 to 4.80)                    | 5.63<br>(2.40 to 11.27)                    |
| Maternal abortion, miscarriage, and ectopic pregnancy | 8,184.58<br>(5,371.41 to 11,687.53)                 | 2,972.76<br>(1,569.04 to 5,131.09)                | 2,426.37<br>(1,249.70 to 4,218.67)                | 5,426.49<br>(2,777.54 to 9,142.56)                  | 143.72<br>(96.24 to 203.74)                | 54.02<br>(28.89 to 91.99)                  | 44.12<br>(23.60 to 75.02)                 | 98.36<br>(53.05 to 166.78)                 |



| Laos                                                                    |                                                 |                                                |                                               |                                                 |                                           |                                         |                                         |                                           |
|-------------------------------------------------------------------------|-------------------------------------------------|------------------------------------------------|-----------------------------------------------|-------------------------------------------------|-------------------------------------------|-----------------------------------------|-----------------------------------------|-------------------------------------------|
| Cause                                                                   | YLLs (actual counts)                            |                                                |                                               |                                                 | Deaths (actual counts)                    |                                         |                                         |                                           |
|                                                                         | 2016                                            | 2040 Forecast                                  | 2040 Better Scenario                          | 2040 Worse Scenario                             | 2016                                      | 2040 Forecast                           | 2040 Better Scenario                    | 2040 Worse Scenario                       |
| <b>Neonatal disorders</b>                                               | <b>474,128.05</b><br>(234,901.50 to 834,461.80) | <b>109,937.05</b><br>(47,936.91 to 207,379.24) | <b>88,031.07</b><br>(38,777.60 to 166,606.29) | <b>243,139.17</b><br>(107,299.82 to 453,540.46) | <b>5,477.37</b><br>(2,713.31 to 9,639.48) | <b>1,270.30</b><br>(553.94 to 2,396.12) | <b>1,017.18</b><br>(448.08 to 1,924.91) | <b>2,809.24</b><br>(1,239.79 to 5,240.30) |
| Neonatal preterm birth                                                  | 230,135.96<br>(113,111.11 to 419,101.32)        | 42,256.36<br>(18,427.37 to 82,636.13)          | 34,678.02<br>(15,404.54 to 66,292.31)         | 110,360.22<br>(49,265.25 to 211,895.28)         | 2,658.44<br>(1,306.60 to 4,841.11)        | 488.25<br>(212.91 to 954.82)            | 400.69<br>(178.00 to 765.81)            | 1,275.00<br>(569.29 to 2,448.08)          |
| Neonatal encephalopathy due to birth asphyxia and trauma                | 139,076.01<br>(59,267.79 to 258,715.26)         | 35,658.80<br>(13,045.18 to 72,868.29)          | 28,404.82<br>(10,412.57 to 57,012.47)         | 67,895.73<br>(24,151.22 to 140,844.61)          | 1,606.59<br>(684.59 to 2,988.81)          | 411.98<br>(150.72 to 841.74)            | 328.18<br>(65.80 to 658.80)             | 784.42<br>(279.06 to 1,627.00)            |
| Neonatal sepsis and other neonatal infections                           | 45,617.12<br>(19,040.92 to 91,157.70)           | 16,599.76<br>(6,217.28 to 35,750.67)           | 13,092.71<br>(4,885.51 to 28,391.10)          | 32,215.75<br>(12,158.08 to 69,592.10)           | 527.02<br>(219.95 to 1,053.64)            | 191.81<br>(71.84 to 413.11)             | 151.29<br>(56.45 to 327.94)             | 372.25<br>(140.53 to 803.92)              |
| Hemolytic disease and other neonatal jaundice                           | 5,730.65<br>(2,495.84 to 11,258.22)             | 1,082.34<br>(367.36 to 2,485.79)               | 831.42<br>(277.28 to 1,892.80)                | 2,291.68<br>(783.71 to 5,314.81)                | 66.21<br>(28.85 to 130.03)                | 12.51<br>(4.25 to 28.72)                | 9.61<br>(3.20 to 21.87)                 | 26.48<br>(9.06 to 61.39)                  |
| Other neonatal disorders                                                | 53,568.30<br>(22,804.92 to 100,792.52)          | 14,339.79<br>(5,272.34 to 30,844.56)           | 11,024.10<br>(4,038.18 to 23,866.64)          | 30,375.79<br>(10,965.08 to 65,469.53)           | 619.10<br>(263.56 to 1,164.89)            | 165.74<br>(60.95 to 356.41)             | 127.42<br>(46.66 to 275.76)             | 351.08<br>(126.75 to 756.41)              |
| <b>Nutritional deficiencies</b>                                         | <b>12,073.33</b><br>(6,707.12 to 21,317.99)     | <b>3,804.13</b><br>(2,651.70 to 5,704.40)      | <b>3,453.15</b><br>(2,458.06 to 4,970.40)     | <b>5,670.20</b><br>(3,544.76 to 9,329.34)       | <b>242.85</b><br>(173.08 to 358.09)       | <b>175.33</b><br>(127.36 to 238.83)     | <b>180.74</b><br>(132.27 to 244.59)     | <b>200.36</b><br>(142.38 to 281.67)       |
| Protein-energy malnutrition                                             | 10,633.87<br>(5,813.64 to 19,037.59)            | 3,082.59<br>(2,100.04 to 4,652.22)             | 2,794.59<br>(1,942.02 to 4,071.02)            | 4,624.12<br>(2,823.62 to 7,673.77)              | 212.98<br>(149.27 to 317.43)              | 143.92<br>(104.94 to 197.31)            | 148.72<br>(108.76 to 199.39)            | 164.17<br>(115.64 to 226.85)              |
| Iodine deficiency                                                       | 155.30<br>(3.91 to 823.91)                      | 130.11<br>(3.35 to 527.97)                     | 113.44<br>(2.80 to 459.74)                    | 214.74<br>(6.11 to 1,045.32)                    | 2.53<br>(0.13 to 10.39)                   | 5.18<br>(0.12 to 21.23)                 | 5.02<br>(0.11 to 21.76)                 | 6.77<br>(0.20 to 25.08)                   |
| Dietary iron deficiency                                                 | 97.46<br>(64.12 to 148.32)                      | 51.38<br>(31.34 to 92.69)                      | 47.06<br>(28.76 to 85.88)                     | 66.70<br>(40.56 to 116.21)                      | 1.62<br>(1.09 to 2.56)                    | 1.21<br>(0.69 to 2.75)                  | 1.16<br>(0.65 to 2.75)                  | 1.44<br>(0.83 to 3.08)                    |
| Other nutritional deficiencies                                          | 1,186.70<br>(554.51 to 2,351.37)                | 540.04<br>(320.77 to 905.63)                   | 498.06<br>(298.56 to 815.34)                  | 764.64<br>(443.07 to 1,363.83)                  | 25.73<br>(15.40 to 44.04)                 | 25.03<br>(15.67 to 45.17)               | 25.85<br>(13.97 to 47.04)               | 27.98<br>(15.35 to 49.45)                 |
| <b>Other communicable, maternal, neonatal, and nutritional diseases</b> | <b>19,640.30</b><br>(8,854.03 to 42,193.35)     | <b>6,761.57</b><br>(4,499.51 to 11,020.08)     | <b>6,019.58</b><br>(4,068.04 to 9,471.31)     | <b>9,965.87</b><br>(6,088.91 to 17,728.29)      | <b>291.82</b><br>(164.48 to 552.88)       | <b>176.32</b><br>(133.78 to 236.50)     | <b>167.65</b><br>(127.41 to 221.93)     | <b>226.54</b><br>(165.23 to 325.84)       |
| Sexually transmitted infections excluding HIV                           | 10,856.24<br>(3,018.37 to 28,812.00)            | 1,435.38<br>(458.92 to 3,809.13)               | 1,215.65<br>(399.49 to 3,195.74)              | 2,416.11<br>(673.48 to 6,505.97)                | 131.01<br>(39.15 to 340.33)               | 20.75<br>(8.86 to 50.06)                | 18.21<br>(8.08 to 42.30)                | 32.54<br>(11.70 to 81.28)                 |
| Syphilis                                                                | 10,609.35<br>(2,784.36 to 28,549.86)            | 1,250.30<br>(284.02 to 3,605.69)               | 1,040.82<br>(243.46 to 3,016.93)              | 2,195.79<br>(468.72 to 6,221.96)                | 125.41<br>(33.78 to 334.51)               | 15.73<br>(4.30 to 43.47)                | 13.29<br>(3.84 to 36.55)                | 26.88<br>(6.76 to 74.12)                  |
| Chlamydial infection                                                    | 50.81<br>(29.63 to 78.11)                       | 37.54<br>(22.05 to 57.12)                      | 35.43<br>(21.13 to 53.18)                     | 44.82<br>(25.81 to 69.20)                       | 1.12<br>(0.66 to 1.67)                    | 1.01<br>(0.59 to 1.49)                  | 0.99<br>(0.58 to 1.44)                  | 1.13<br>(0.66 to 1.68)                    |
| Gonococcal infection                                                    | 126.00<br>(74.64 to 187.59)                     | 96.61<br>(58.91 to 144.87)                     | 91.54<br>(55.95 to 137.54)                    | 114.33<br>(67.92 to 174.90)                     | 2.96<br>(1.75 to 4.28)                    | 2.74<br>(1.68 to 3.96)                  | 2.70<br>(1.65 to 3.92)                  | 3.06<br>(1.84 to 4.51)                    |
| Other sexually transmitted infections                                   | 70.08<br>(41.26 to 106.61)                      | 50.93<br>(31.40 to 78.99)                      | 47.87<br>(29.94 to 73.95)                     | 61.17<br>(36.65 to 96.08)                       | 1.52<br>(0.89 to 2.24)                    | 1.27<br>(0.79 to 1.91)                  | 1.23<br>(0.76 to 1.80)                  | 1.47<br>(0.90 to 2.20)                    |
| Acute hepatitis                                                         | 2,950.41<br>(2,298.71 to 3,837.86)              | 1,789.10<br>(1,264.15 to 2,387.77)             | 1,647.13<br>(1,152.18 to 2,203.04)            | 2,319.67<br>(1,626.74 to 3,084.47)              | 61.92<br>(49.63 to 75.25)                 | 49.72<br>(36.67 to 64.58)               | 47.13<br>(34.51 to 61.77)               | 60.96<br>(45.17 to 80.32)                 |
| Acute hepatitis A                                                       | 562.08<br>(201.36 to 1,166.32)                  | 111.61<br>(42.44 to 274.55)                    | 94.08<br>(37.58 to 232.56)                    | 194.13<br>(66.99 to 497.68)                     | 6.98<br>(2.76 to 14.06)                   | 1.76<br>(0.89 to 3.76)                  | 1.54<br>(0.82 to 3.24)                  | 2.78<br>(1.24 to 6.42)                    |
| Acute hepatitis B                                                       | 1,887.59<br>(1,454.49 to 2,366.56)              | 1,433.68<br>(980.47 to 1,965.92)               | 1,327.93<br>(897.39 to 1,819.29)              | 1,813.58<br>(1,225.04 to 2,464.46)              | 45.89<br>(35.84 to 55.48)                 | 41.02<br>(29.30 to 54.23)               | 38.71<br>(27.08 to 51.32)               | 50.32<br>(35.57 to 67.62)                 |



|                                       |                                                                    |                                                                    |                                                                  |                                                                        |                                                               |                                                               |                                                               |                                                               |
|---------------------------------------|--------------------------------------------------------------------|--------------------------------------------------------------------|------------------------------------------------------------------|------------------------------------------------------------------------|---------------------------------------------------------------|---------------------------------------------------------------|---------------------------------------------------------------|---------------------------------------------------------------|
|                                       | 49.23<br>(35.19 to<br>67.23)                                       | 44.63<br>(29.03 to<br>67.18)                                       | 43.03<br>(27.94 to<br>64.50)                                     | 50.41<br>(32.90 to<br>75.52)                                           | 1.26<br>(0.91 to<br>1.75)                                     | 1.43<br>(0.94 to<br>2.13)                                     | 1.42<br>(0.94 to<br>2.12)                                     | 1.54<br>(1.01 to<br>2.30)                                     |
| Acute hepatitis C                     |                                                                    |                                                                    |                                                                  |                                                                        |                                                               |                                                               |                                                               |                                                               |
|                                       | 451.50<br>(303.83 to<br>649.59)                                    | 199.19<br>(120.04 to<br>305.26)                                    | 182.09<br>(110.78 to<br>274.06)                                  | 261.55<br>(153.79 to<br>412.77)                                        | 7.79<br>(5.60 to<br>10.64)                                    | 5.52<br>(3.51 to<br>8.11)                                     | 5.46<br>(3.44 to<br>8.06)                                     | 6.34<br>(3.98 to<br>9.39)                                     |
| Acute hepatitis E                     |                                                                    |                                                                    |                                                                  |                                                                        |                                                               |                                                               |                                                               |                                                               |
|                                       | 5,833.65<br>(2,319.97 to<br>21,025.48)                             | 3,537.09<br>(2,288.08 to<br>6,694.60)                              | 3,156.80<br>(2,054.73 to<br>5,728.60)                            | 5,230.09<br>(3,047.99 to<br>11,605.18)                                 | 98.88<br>(54.10 to<br>277.61)                                 | 105.86<br>(75.21 to<br>148.86)                                | 102.30<br>(73.22 to<br>138.45)                                | 133.03<br>(91.74 to<br>210.69)                                |
| Other unspecified infectious diseases |                                                                    |                                                                    |                                                                  |                                                                        |                                                               |                                                               |                                                               |                                                               |
| <b>Non-communicable diseases</b>      | <b>884,263.83</b><br><b>(735,863.60 to</b><br><b>1,107,348.43)</b> | <b>955,846.68</b><br><b>(813,909.21 to</b><br><b>1,116,066.87)</b> | <b>745,052.23</b><br><b>(640,822.19 to</b><br><b>862,894.57)</b> | <b>1,401,018.30</b><br><b>(1,171,311.12 to</b><br><b>1,653,883.68)</b> | <b>27,948.55</b><br><b>(25,473.23 to</b><br><b>30,868.76)</b> | <b>42,744.00</b><br><b>(37,755.51 to</b><br><b>48,440.89)</b> | <b>34,950.72</b><br><b>(31,339.89 to</b><br><b>39,476.81)</b> | <b>57,752.28</b><br><b>(50,494.50 to</b><br><b>65,383.12)</b> |

| Laos                                 |                                                 |                                                 |                                                 |                                                 |                                           |                                            |                                           |                                            |
|--------------------------------------|-------------------------------------------------|-------------------------------------------------|-------------------------------------------------|-------------------------------------------------|-------------------------------------------|--------------------------------------------|-------------------------------------------|--------------------------------------------|
| Cause                                | YLLs (actual counts)                            |                                                 |                                                 |                                                 | Deaths (actual counts)                    |                                            |                                           |                                            |
|                                      | 2016                                            | 2040 Forecast                                   | 2040 Better Scenario                            | 2040 Worse Scenario                             | 2016                                      | 2040 Forecast                              | 2040 Better Scenario                      | 2040 Worse Scenario                        |
| <b>Neoplasms</b>                     | <b>132,640.65</b><br>(117,916.10 to 144,849.62) | <b>226,876.18</b><br>(187,568.37 to 268,682.63) | <b>193,876.96</b><br>(165,568.00 to 223,011.36) | <b>263,008.29</b><br>(210,317.34 to 322,392.22) | <b>4,304.43</b><br>(3,899.92 to 4,692.81) | <b>8,983.16</b><br>(7,464.14 to 10,573.93) | <b>7,958.61</b><br>(6,794.24 to 9,130.39) | <b>9,894.97</b><br>(7,945.52 to 12,042.82) |
| Lip and oral cavity cancer           | 2,540.60<br>(2,124.98 to 2,966.51)              | 4,711.17<br>(2,832.36 to 7,760.12)              | 3,064.22<br>(2,014.31 to 4,719.10)              | 7,335.93<br>(4,115.65 to 12,324.63)             | 94.89<br>(81.92 to 110.31)                | 197.40<br>(122.27 to 313.85)               | 136.64<br>(92.47 to 202.28)               | 290.47<br>(170.90 to 487.08)               |
| Nasopharynx cancer                   | 2,068.88<br>(1,627.01 to 2,549.13)              | 3,842.65<br>(2,314.11 to 6,274.90)              | 2,405.62<br>(1,514.04 to 3,761.93)              | 6,301.76<br>(3,540.55 to 10,772.29)             | 63.19<br>(51.37 to 76.58)                 | 130.07<br>(80.00 to 209.74)                | 83.95<br>(55.08 to 128.70)                | 207.21<br>(119.25 to 348.92)               |
| Other pharynx cancer                 | 1,220.54<br>(904.80 to 1,554.26)                | 2,150.30<br>(1,182.86 to 3,641.52)              | 1,772.30<br>(1,049.51 to 2,837.05)              | 2,563.18<br>(1,397.46 to 4,311.30)              | 43.60<br>(32.84 to 54.84)                 | 84.18<br>(46.80 to 137.63)                 | 71.79<br>(42.98 to 112.57)                | 96.71<br>(52.67 to 159.87)                 |
| Esophageal cancer                    | 2,133.79<br>(1,872.20 to 2,409.17)              | 3,453.70<br>(2,121.03 to 5,597.81)              | 2,413.19<br>(1,583.37 to 3,674.48)              | 5,559.10<br>(3,110.99 to 9,597.30)              | 81.89<br>(72.43 to 92.02)                 | 146.24<br>(92.13 to 228.84)                | 107.72<br>(71.88 to 158.58)               | 223.55<br>(127.43 to 372.03)               |
| Stomach cancer                       | 8,783.23<br>(7,484.46 to 10,523.97)             | 11,383.35<br>(8,932.13 to 14,287.10)            | 10,756.19<br>(8,634.01 to 13,325.66)            | 13,021.51<br>(9,858.44 to 16,670.42)            | 337.83<br>(293.32 to 406.30)              | 501.01<br>(401.83 to 630.61)               | 493.37<br>(400.30 to 614.84)              | 541.49<br>(423.31 to 695.75)               |
| Colon and rectum cancer              | 8,774.01<br>(7,494.23 to 10,452.76)             | 20,515.20<br>(13,897.47 to 29,351.96)           | 19,603.61<br>(13,621.94 to 27,872.74)           | 20,496.35<br>(13,811.02 to 29,302.87)           | 331.74<br>(288.46 to 392.97)              | 922.69<br>(636.26 to 1,326.04)             | 922.58<br>(652.24 to 1,307.89)            | 866.85<br>(590.06 to 1,246.78)             |
| Liver cancer                         | 9,177.50<br>(6,524.29 to 11,283.87)             | 18,809.21<br>(12,170.39 to 27,162.04)           | 15,704.42<br>(10,673.98 to 21,169.85)           | 21,230.28<br>(13,314.56 to 31,946.38)           | 324.26<br>(241.66 to 391.47)              | 751.07<br>(507.11 to 1,040.72)             | 658.55<br>(473.40 to 859.05)              | 804.55<br>(527.98 to 1,170.57)             |
| Liver cancer due to hepatitis B      | 4,403.27<br>(3,047.26 to 5,709.84)              | 8,571.02<br>(5,352.24 to 13,046.47)             | 7,304.01<br>(4,806.94 to 10,655.03)             | 9,509.03<br>(5,661.09 to 15,156.28)             | 144.40<br>(103.00 to 187.38)              | 318.29<br>(206.11 to 469.64)               | 283.12<br>(190.50 to 392.11)              | 337.17<br>(211.87 to 517.74)               |
| Liver cancer due to hepatitis C      | 1,568.52<br>(1,012.05 to 2,219.04)              | 3,543.51<br>(2,160.61 to 5,328.82)              | 3,128.70<br>(1,985.02 to 4,531.99)              | 3,782.84<br>(2,237.89 to 5,909.02)              | 67.57<br>(45.32 to 93.24)                 | 170.41<br>(108.24 to 252.58)               | 159.03<br>(105.38 to 229.05)              | 171.29<br>(104.93 to 259.04)               |
| Liver cancer due to alcohol use      | 1,343.57<br>(892.83 to 1,884.96)                | 3,070.35<br>(1,828.77 to 4,948.72)              | 2,750.99<br>(1,425.40 to 3,419.57)              | 3,854.91<br>(2,205.72 to 6,405.38)              | 51.50<br>(34.82 to 72.02)                 | 123.88<br>(77.58 to 195.84)                | 96.10<br>(63.13 to 144.95)                | 147.76<br>(89.11 to 241.45)                |
| Liver cancer due to other causes     | 1,862.14<br>(1,183.17 to 2,560.70)              | 3,624.34<br>(2,081.94 to 5,755.97)              | 3,020.72<br>(1,825.10 to 4,558.36)              | 4,083.51<br>(2,248.86 to 6,706.03)              | 60.78<br>(40.04 to 84.82)                 | 138.49<br>(80.94 to 214.54)                | 120.30<br>(73.48 to 179.06)               | 148.32<br>(83.34 to 237.94)                |
| Gallbladder and biliary tract cancer | 1,535.63<br>(1,287.66 to 1,819.72)              | 2,265.92<br>(1,876.55 to 2,741.24)              | 2,387.29<br>(1,984.16 to 2,871.25)              | 2,085.74<br>(1,708.56 to 2,531.78)              | 64.33<br>(54.45 to 75.53)                 | 106.95<br>(88.68 to 128.62)                | 116.64<br>(96.73 to 137.67)               | 93.55<br>(76.02 to 113.53)                 |
| Pancreatic cancer                    | 3,601.49<br>(3,135.28 to 4,039.31)              | 8,612.16<br>(6,911.91 to 10,804.99)             | 8,182.08<br>(6,746.20 to 9,943.45)              | 8,635.70<br>(6,730.63 to 10,968.84)             | 144.46<br>(128.31 to 161.01)              | 384.50<br>(312.99 to 481.57)               | 380.22<br>(319.09 to 461.85)              | 365.05<br>(290.20 to 463.95)               |
| Larynx cancer                        | 1,604.49<br>(1,365.22 to 1,879.75)              | 2,682.77<br>(1,345.41 to 4,821.63)              | 1,645.51<br>(895.34 to 2,848.12)                | 4,206.55<br>(2,011.02 to 7,226.06)              | 62.32<br>(53.68 to 72.73)                 | 113.24<br>(57.14 to 199.35)                | 71.75<br>(40.17 to 123.61)                | 171.82<br>(85.01 to 308.65)                |
| Tracheal, bronchus, and lung cancer  | 19,727.30<br>(16,097.19 to 23,717.09)           | 39,976.32<br>(24,231.54 to 60,820.65)           | 20,624.85<br>(13,312.29 to 30,474.65)           | 58,392.85<br>(34,388.93 to 90,674.76)           | 774.49<br>(636.62 to 934.13)              | 1,702.76<br>(1,041.21 to 2,591.27)         | 912.37<br>(586.71 to 1,341.47)            | 2,397.94<br>(1,421.60 to 3,685.45)         |
| Malignant skin melanoma              | 455.21<br>(353.40 to 611.37)                    | 877.16<br>(680.67 to 1,168.88)                  | 937.13<br>(728.13 to 1,252.40)                  | 762.00<br>(592.50 to 1,022.91)                  | 14.33<br>(11.44 to 18.98)                 | 33.95<br>(26.83 to 45.58)                  | 37.85<br>(30.19 to 51.05)                 | 27.72<br>(21.89 to 37.34)                  |
| Non-melanoma skin cancer             | 747.75<br>(595.82 to 904.05)                    | 1,495.30<br>(1,162.95 to 1,857.92)              | 1,516.27<br>(1,173.44 to 1,902.36)              | 1,547.04<br>(1,198.10 to 1,921.52)              | 28.55<br>(22.56 to 34.91)                 | 68.53<br>(52.37 to 86.63)                  | 72.73<br>(55.98 to 91.22)                 | 66.30<br>(49.76 to 84.52)                  |
| Breast cancer                        | 12,175.52<br>(7,850.59 to 16,655.50)            | 22,866.52<br>(14,707.73 to 32,886.09)           | 21,011.24<br>(13,924.86 to 29,617.62)           | 24,610.76<br>(15,662.80 to 36,358.55)           | 367.18<br>(242.09 to 500.81)              | 781.83<br>(511.20 to 1,125.42)             | 735.95<br>(489.55 to 1,036.93)            | 811.05<br>(519.17 to 1,197.69)             |
| Cervical cancer                      | 8,545.72<br>(5,920.08 to 10,477.80)             | 10,987.71<br>(7,339.50 to 14,730.89)            | 10,228.72<br>(6,885.39 to 13,366.69)            | 12,899.78<br>(8,352.62 to 18,048.61)            | 270.98<br>(189.90 to 331.28)              | 385.58<br>(259.79 to 507.01)               | 369.55<br>(251.59 to 475.58)              | 435.17<br>(289.36 to 592.10)               |



| Laos                            |                                                        |                                                        |                                                        |                                                        |                                                     |                                                     |                                                    |                                                     |
|---------------------------------|--------------------------------------------------------|--------------------------------------------------------|--------------------------------------------------------|--------------------------------------------------------|-----------------------------------------------------|-----------------------------------------------------|----------------------------------------------------|-----------------------------------------------------|
| Cause                           | YLLs (actual counts)                                   |                                                        |                                                        |                                                        | Deaths (actual counts)                              |                                                     |                                                    |                                                     |
|                                 | 2016                                                   | 2040 Forecast                                          | 2040 Better Scenario                                   | 2040 Worse Scenario                                    | 2016                                                | 2040 Forecast                                       | 2040 Better Scenario                               | 2040 Worse Scenario                                 |
| Kidney cancer                   | 1,478.43<br>(1,206.84 to 1,864.71)                     | 2,761.46<br>(2,050.77 to 3,668.86)                     | 2,739.80<br>(2,064.80 to 3,521.65)                     | 2,665.46<br>(1,920.29 to 3,662.37)                     | 43.02<br>(36.09 to 49.53)                           | 108.35<br>(77.82 to 146.57)                         | 112.34<br>(83.16 to 147.87)                        | 97.49<br>(67.96 to 138.98)                          |
| Bladder cancer                  | 1,410.06<br>(1,150.96 to 1,658.52)                     | 2,865.70<br>(2,026.12 to 3,968.98)                     | 2,609.66<br>(1,897.49 to 3,472.67)                     | 3,158.60<br>(2,129.38 to 4,557.86)                     | 65.74<br>(53.68 to 77.02)                           | 153.97<br>(109.22 to 214.49)                        | 148.25<br>(109.28 to 197.36)                       | 157.86<br>(107.05 to 228.47)                        |
| Brain and nervous system cancer | 5,445.25<br>(4,220.61 to 6,651.98)                     | 7,773.24<br>(5,932.17 to 9,471.38)                     | 7,814.81<br>(5,904.57 to 9,507.10)                     | 7,845.23<br>(6,012.38 to 9,600.35)                     | 112.58<br>(87.42 to 134.49)                         | 215.28<br>(161.37 to 258.44)                        | 225.01<br>(167.70 to 270.90)                       | 202.21<br>(151.32 to 245.36)                        |
| Thyroid cancer                  | 914.71<br>(707.86 to 1,126.41)                         | 1,604.08<br>(1,181.67 to 2,151.95)                     | 1,499.32<br>(1,141.30 to 1,952.19)                     | 1,720.38<br>(1,239.45 to 2,306.67)                     | 34.43<br>(27.03 to 42.19)                           | 68.67<br>(51.03 to 89.92)                           | 66.58<br>(51.27 to 84.89)                          | 70.42<br>(50.70 to 92.79)                           |
| Mesothelioma                    | 286.35<br>(223.49 to 372.70)                           | 489.75<br>(382.29 to 648.44)                           | 495.27<br>(385.65 to 659.17)                           | 495.81<br>(386.14 to 657.06)                           | 8.31<br>(6.65 to 10.57)                             | 16.88<br>(13.41 to 21.89)                           | 17.69<br>(14.14 to 22.84)                          | 16.23<br>(12.92 to 21.05)                           |
| Hodgkin lymphoma                | 1,404.14<br>(1,069.40 to 1,917.18)                     | 1,253.58<br>(909.76 to 1,866.82)                       | 1,167.73<br>(847.47 to 1,730.60)                       | 1,582.83<br>(1,149.87 to 2,315.19)                     | 31.65<br>(24.34 to 44.24)                           | 35.13<br>(25.74 to 53.78)                           | 33.64<br>(24.68 to 51.01)                          | 42.22<br>(31.01 to 64.30)                           |
| Non-Hodgkin lymphoma            | 5,531.92<br>(4,611.09 to 6,677.17)                     | 8,762.99<br>(7,167.15 to 10,620.30)                    | 8,799.44<br>(7,284.32 to 10,527.24)                    | 8,365.78<br>(6,861.52 to 10,103.12)                    | 139.95<br>(121.49 to 163.70)                        | 294.70<br>(245.33 to 351.79)                        | 308.03<br>(256.80 to 364.29)                       | 262.65<br>(219.06 to 313.24)                        |
| Multiple myeloma                | 793.72<br>(645.79 to 958.60)                           | 1,897.74<br>(1,482.67 to 2,361.20)                     | 1,938.19<br>(1,526.97 to 2,388.62)                     | 1,697.97<br>(1,335.38 to 2,122.79)                     | 28.36<br>(23.34 to 33.75)                           | 76.02<br>(59.63 to 93.88)                           | 79.97<br>(63.40 to 98.29)                          | 65.37<br>(50.84 to 82.40)                           |
| Leukemia                        | 14,201.06<br>(10,515.29 to 19,928.49)                  | 13,582.35<br>(10,565.31 to 17,556.51)                  | 12,485.53<br>(9,938.61 to 15,998.11)                   | 15,596.18<br>(11,960.27 to 20,592.13)                  | 272.58<br>(219.38 to 355.89)                        | 376.85<br>(301.57 to 472.70)                        | 359.48<br>(292.45 to 446.15)                       | 401.47<br>(315.63 to 510.75)                        |
| Acute lymphoid leukemia         | 3,320.56<br>(2,240.00 to 5,654.53)                     | 3,363.49<br>(2,510.43 to 5,021.57)                     | 3,164.52<br>(2,404.22 to 4,651.35)                     | 3,616.97<br>(2,647.75 to 5,542.92)                     | 62.42<br>(47.51 to 97.40)                           | 92.74<br>(72.52 to 133.03)                          | 90.58<br>(72.11 to 127.41)                         | 91.33<br>(70.73 to 134.46)                          |
| Chronic lymphoid leukemia       | 162.99<br>(122.07 to 245.85)                           | 234.80<br>(168.44 to 340.20)                           | 221.49<br>(161.33 to 313.97)                           | 244.07<br>(173.13 to 362.64)                           | 4.52<br>(3.44 to 6.37)                              | 7.98<br>(5.87 to 11.05)                             | 7.85<br>(5.91 to 10.75)                            | 7.84<br>(5.67 to 11.26)                             |
| Acute myeloid leukemia          | 1,914.50<br>(1,405.49 to 2,866.76)                     | 2,636.85<br>(2,014.73 to 3,537.86)                     | 2,510.07<br>(1,944.79 to 3,346.45)                     | 2,675.74<br>(2,005.60 to 3,653.80)                     | 36.36<br>(28.28 to 50.06)                           | 68.16<br>(53.17 to 89.27)                           | 66.67<br>(52.85 to 85.95)                          | 65.27<br>(49.55 to 86.53)                           |
| Chronic myeloid leukemia        | 605.72<br>(442.98 to 938.13)                           | 675.76<br>(456.77 to 1,053.14)                         | 624.87<br>(430.76 to 949.98)                           | 720.97<br>(478.69 to 1,131.83)                         | 15.34<br>(11.66 to 23.86)                           | 20.35<br>(14.21 to 31.34)                           | 19.36<br>(13.86 to 29.43)                          | 20.87<br>(14.22 to 32.94)                           |
| Other leukemia                  | 8,197.28<br>(5,648.26 to 11,800.43)                    | 6,671.46<br>(4,902.16 to 8,961.50)                     | 5,964.58<br>(4,429.67 to 7,910.99)                     | 8,338.42<br>(6,016.37 to 11,364.71)                    | 153.94<br>(116.80 to 203.11)                        | 187.62<br>(143.47 to 245.03)                        | 175.02<br>(134.84 to 225.63)                       | 215.55<br>(160.34 to 284.22)                        |
| Other neoplasms                 | 10,797.35<br>(8,871.39 to 12,962.08)                   | 14,932.67<br>(12,536.52 to 17,056.02)                  | 15,060.22<br>(12,637.50 to 17,239.42)                  | 15,171.53<br>(12,656.60 to 17,386.49)                  | 258.19<br>(222.14 to 355.89)                        | 491.87<br>(411.05 to 566.86)                        | 519.79<br>(433.33 to 595.40)                       | 460.53<br>(388.58 to 535.92)                        |
| <b>Cardiovascular diseases</b>  | <b>311,290.28</b><br><b>(277,591.28 to 337,944.31)</b> | <b>319,811.95</b><br><b>(235,141.21 to 427,267.17)</b> | <b>303,173.50</b><br><b>(152,763.11 to 268,641.52)</b> | <b>596,577.80</b><br><b>(435,792.63 to 895,834.92)</b> | <b>12,574.23</b><br><b>(11,600.86 to 13,476.81)</b> | <b>16,354.11</b><br><b>(12,498.57 to 21,587.56)</b> | <b>11,502.24</b><br><b>(9,009.95 to 15,263.92)</b> | <b>27,341.07</b><br><b>(20,573.50 to 35,683.58)</b> |
| Rheumatic heart disease         | 12,001.96<br>(9,618.35 to 14,482.00)                   | 6,260.05<br>(4,736.57 to 7,857.97)                     | 5,681.09<br>(4,314.46 to 7,097.43)                     | 8,552.17<br>(6,431.64 to 10,942.67)                    | 275.43<br>(218.92 to 333.05)                        | 198.49<br>(153.66 to 246.66)                        | 189.72<br>(148.40 to 234.10)                       | 249.99<br>(190.80 to 315.85)                        |
| Ischemic heart disease          | 139,200.62<br>(122,505.41 to 154,563.36)               | 154,703.98<br>(90,390.05 to 249,815.19)                | 87,148.32<br>(51,349.13 to 142,072.37)                 | 298,305.94<br>(179,435.77 to 453,795.69)               | 6,017.17<br>(5,430.31 to 6,699.27)                  | 7,931.85<br>(4,894.81 to 12,784.14)                 | 5,053.00<br>(3,143.67 to 8,178.59)                 | 13,823.95<br>(8,654.05 to 21,431.38)                |
| Stroke                          | 118,036.53<br>(102,186.57 to 131,435.76)               | 101,436.26<br>(66,910.15 to 154,890.77)                | 60,109.13<br>(40,632.76 to 88,486.02)                  | 215,476.97<br>(139,303.51 to 320,570.14)               | 4,833.98<br>(4,193.80 to 5,378.12)                  | 5,428.04<br>(3,690.18 to 8,533.49)                  | 3,656.77<br>(2,537.51 to 5,786.56)                 | 9,940.70<br>(6,670.54 to 14,868.60)                 |
| Ischemic stroke                 | 29,595.66<br>(24,977.79 to 34,469.50)                  | 31,763.88<br>(18,776.81 to 65,135.78)                  | 21,677.97<br>(12,937.77 to 43,974.44)                  | 53,735.76<br>(30,452.25 to 106,391.63)                 | 1,709.57<br>(1,437.42 to 1,991.26)                  | 2,249.46<br>(1,289.90 to 5,080.63)                  | 1,698.67<br>(1,002.70 to 3,528.10)                 | 3,374.04<br>(1,904.57 to 7,300.90)                  |

|                                |                                           |                                           |                                          |                                            |                                       |                                       |                                       |                                        |
|--------------------------------|-------------------------------------------|-------------------------------------------|------------------------------------------|--------------------------------------------|---------------------------------------|---------------------------------------|---------------------------------------|----------------------------------------|
| Intracerebral hemorrhage       | 88,440.87<br>(75,211.49 to<br>101,371.10) | 69,672.38<br>(44,218.27 to<br>109,316.30) | 38,431.16<br>(25,122.19 to<br>58,442.89) | 161,741.21<br>(98,869.73 to<br>255,839.01) | 3,124.41<br>(2,689.99 to<br>3,491.90) | 3,178.57<br>(2,076.69 to<br>4,945.96) | 1,958.10<br>(1,365.57 to<br>2,893.58) | 6,566.66<br>(4,137.60 to<br>10,375.61) |
| Hypertensive heart disease     | 13,874.48<br>(10,312.92 to<br>16,649.80)  | 22,768.49<br>(14,966.05 to<br>34,303.82)  | 17,902.94<br>(12,484.94 to<br>24,455.63) | 33,740.67<br>(20,830.90 to<br>55,877.67)   | 638.15<br>(478.36 to<br>765.73)       | 1,257.37<br>(831.62 to<br>1,915.68)   | 1,058.28<br>(730.12 to<br>1,462.76)   | 1,728.33<br>(1,086.15 to<br>2,928.25)  |
| Cardiomyopathy and myocarditis | 9,198.86<br>(5,561.68 to<br>14,366.71)    | 8,912.69<br>(5,963.34 to<br>11,935.45)    | 8,586.12<br>(5,712.94 to<br>11,380.27)   | 9,711.66<br>(6,351.78 to<br>13,261.82)     | 211.78<br>(140.73 to<br>282.87)       | 318.27<br>(211.26 to<br>430.65)       | 326.67<br>(220.26 to<br>440.50)       | 311.71<br>(204.87 to<br>420.29)        |
| Myocarditis                    | 2,823.03<br>(1,528.17 to<br>5,648.53)     | 1,534.23<br>(1,051.71 to<br>2,248.85)     | 1,456.62<br>(1,010.03 to<br>2,042.56)    | 1,874.88<br>(1,273.02 to<br>3,050.07)      | 46.83<br>(30.33 to<br>79.18)          | 39.27<br>(26.94 to<br>53.47)          | 39.78<br>(27.09 to<br>54.57)          | 42.49<br>(29.21 to<br>58.48)           |

| Laos                                                          |                                                               |                                                               |                                                               |                                                                |                                                            |                                                            |                                                            |                                                            |
|---------------------------------------------------------------|---------------------------------------------------------------|---------------------------------------------------------------|---------------------------------------------------------------|----------------------------------------------------------------|------------------------------------------------------------|------------------------------------------------------------|------------------------------------------------------------|------------------------------------------------------------|
| Cause                                                         | YLLs (actual counts)                                          |                                                               |                                                               |                                                                | Deaths (actual counts)                                     |                                                            |                                                            |                                                            |
|                                                               | 2016                                                          | 2040 Forecast                                                 | 2040 Better Scenario                                          | 2040 Worse Scenario                                            | 2016                                                       | 2040 Forecast                                              | 2040 Better Scenario                                       | 2040 Worse Scenario                                        |
| Alcoholic cardiomyopathy                                      | 1,022.36<br>(630.69 to<br>1,365.78)                           | 1,565.30<br>(945.70 to<br>2,154.61)                           | 1,377.16<br>(824.30 to<br>1,940.04)                           | 1,707.36<br>(1,042.97 to<br>2,298.71)                          | 32.08<br>(20.03 to<br>42.87)                               | 55.49<br>(33.83 to<br>75.47)                               | 50.76<br>(31.01 to<br>69.98)                               | 58.50<br>(36.08 to<br>78.57)                               |
| Other cardiomyopathy                                          | 5,353.47<br>(2,891.56 to<br>9,083.92)                         | 5,813.15<br>(3,537.77 to<br>8,269.92)                         | 5,752.33<br>(3,505.65 to<br>8,019.28)                         | 6,129.42<br>(3,596.54 to<br>8,960.68)                          | 132.87<br>(84.11 to<br>183.78)                             | 223.51<br>(143.99 to<br>320.42)                            | 236.13<br>(151.78 to<br>337.45)                            | 210.73<br>(131.25 to<br>303.36)                            |
| Atrial fibrillation and flutter                               | 952.66<br>(732.79 to<br>1,220.63)                             | 2,496.85<br>(1,809.21 to<br>3,320.95)                         | 2,541.41<br>(1,911.76 to<br>3,341.21)                         | 2,363.21<br>(1,676.34 to<br>3,178.43)                          | 78.95<br>(60.29 to<br>102.04)                              | 237.16<br>(163.16 to<br>322.72)                            | 256.22<br>(181.80 to<br>341.07)                            | 206.30<br>(136.85 to<br>285.12)                            |
| Aortic aneurysm                                               | 1,583.87<br>(1,321.47 to<br>1,892.82)                         | 2,772.11<br>(2,163.48 to<br>3,484.44)                         | 2,692.62<br>(2,140.47 to<br>3,338.66)                         | 2,784.93<br>(2,136.91 to<br>3,534.16)                          | 70.19<br>(59.42 to<br>83.58)                               | 149.65<br>(117.11 to<br>186.28)                            | 155.55<br>(124.53 to<br>191.36)                            | 137.42<br>(106.40 to<br>172.68)                            |
| Peripheral artery disease                                     | 51.53<br>(36.91 to<br>77.58)                                  | 212.82<br>(139.29 to<br>374.44)                               | 208.92<br>(137.97 to<br>375.78)                               | 183.68<br>(117.33 to<br>308.51)                                | 3.29<br>(2.33 to<br>5.20)                                  | 16.42<br>(10.47 to<br>30.44)                               | 17.58<br>(11.39 to<br>32.78)                               | 12.65<br>(7.97 to<br>22.65)                                |
| Endocarditis                                                  | 4,430.12<br>(3,442.76 to<br>5,785.91)                         | 5,251.40<br>(3,747.98 to<br>7,091.35)                         | 5,054.79<br>(3,659.69 to<br>6,807.82)                         | 5,890.63<br>(4,183.10 to<br>7,940.41)                          | 103.21<br>(83.47 to<br>129.13)                             | 168.72<br>(124.01 to<br>229.58)                            | 171.26<br>(127.89 to<br>231.20)                            | 174.10<br>(126.53 to<br>239.70)                            |
| Other cardiovascular and circulatory diseases                 | 11,959.64<br>(8,127.26 to<br>19,285.04)                       | 14,997.31<br>(10,255.34 to<br>23,407.14)                      | 13,248.17<br>(9,251.68 to<br>20,523.67)                       | 19,567.93<br>(13,203.33 to<br>30,948.33)                       | 342.08<br>(248.18 to<br>520.30)                            | 648.14<br>(443.47 to<br>1,020.20)                          | 617.20<br>(428.96 to<br>960.63)                            | 755.92<br>(510.96 to<br>1,185.96)                          |
| <b>Chronic respiratory diseases</b>                           | <b>59,412.33</b><br><b>(49,062.60 to</b><br><b>70,312.28)</b> | <b>55,784.58</b><br><b>(40,727.74 to</b><br><b>76,053.37)</b> | <b>35,084.57</b><br><b>(27,511.04 to</b><br><b>44,364.89)</b> | <b>83,504.43</b><br><b>(58,397.35 to</b><br><b>118,909.41)</b> | <b>2,382.44</b><br><b>(2,016.36 to</b><br><b>2,738.57)</b> | <b>2,928.55</b><br><b>(2,162.85 to</b><br><b>4,124.06)</b> | <b>1,904.11</b><br><b>(1,483.37 to</b><br><b>2,453.35)</b> | <b>4,098.96</b><br><b>(2,865.35 to</b><br><b>6,019.35)</b> |
| Chronic obstructive pulmonary disease                         | 25,412.40<br>(17,905.95 to<br>31,446.27)                      | 32,508.53<br>(18,883.63 to<br>51,792.75)                      | 16,165.07<br>(9,867.73 to<br>23,778.06)                       | 54,650.08<br>(31,435.84 to<br>89,148.44)                       | 1,260.66<br>(893.15 to<br>1,561.59)                        | 1,884.51<br>(1,141.44 to<br>3,063.14)                      | 1,004.73<br>(641.37 to<br>1,486.68)                        | 2,911.28<br>(1,694.50 to<br>4,806.21)                      |
| Pneumoconiosis                                                | 37.77<br>(23.59 to<br>57.74)                                  | 44.45<br>(29.83 to<br>65.47)                                  | 42.48<br>(27.76 to<br>63.21)                                  | 44.48<br>(30.66 to<br>65.00)                                   | 1.69<br>(1.08 to<br>2.59)                                  | 3.53<br>(1.69 to<br>3.74)                                  | 2.52<br>(1.65 to<br>3.77)                                  | 2.33<br>(1.54 to<br>3.45)                                  |
| Silicosis                                                     | 9.16<br>(3.97 to<br>17.70)                                    | 8.81<br>(3.58 to<br>16.59)                                    | 9.01<br>(3.65 to<br>17.05)                                    | 8.94<br>(3.88 to<br>16.72)                                     | 0.43<br>(0.19 to<br>0.80)                                  | 0.49<br>(0.20 to<br>0.90)                                  | 0.52<br>(0.22 to<br>0.99)                                  | 0.47<br>(0.20 to<br>0.86)                                  |
| Asbestosis                                                    | 8.17<br>(5.00 to<br>11.93)                                    | 10.23<br>(6.30 to<br>14.77)                                   | 10.42<br>(6.20 to<br>15.15)                                   | 10.24<br>(6.48 to<br>14.77)                                    | 0.25<br>(0.15 to<br>0.35)                                  | 0.41<br>(0.23 to<br>0.61)                                  | 0.43<br>(0.23 to<br>0.66)                                  | 0.38<br>(0.23 to<br>0.55)                                  |
| Coal workers pneumoconiosis                                   | 2.49<br>(1.15 to<br>5.31)                                     | 2.73<br>(1.24 to<br>6.08)                                     | 2.24<br>(1.03 to<br>5.23)                                     | 3.35<br>(1.59 to<br>7.08)                                      | 0.13<br>(0.06 to<br>0.28)                                  | 0.17<br>(0.08 to<br>0.39)                                  | 0.15<br>(0.07 to<br>0.33)                                  | 0.20<br>(0.09 to<br>0.42)                                  |
| Other pneumoconiosis                                          | 17.94<br>(10.26 to<br>29.92)                                  | 22.68<br>(13.61 to<br>36.81)                                  | 20.82<br>(12.22 to<br>34.51)                                  | 21.95<br>(13.58 to<br>35.28)                                   | 0.88<br>(0.51 to<br>1.48)                                  | 1.46<br>(0.87 to<br>2.48)                                  | 1.41<br>(0.82 to<br>2.43)                                  | 1.29<br>(0.76 to<br>2.13)                                  |
| Asthma                                                        | 31,972.00<br>(23,221.49 to<br>44,917.92)                      | 20,407.45<br>(12,690.46 to<br>31,472.77)                      | 16,013.71<br>(10,757.51 to<br>23,009.54)                      | 26,006.46<br>(15,915.41 to<br>41,074.60)                       | 1,061.86<br>(758.80 to<br>1,605.68)                        | 921.58<br>(574.43 to<br>1,473.62)                          | 767.06<br>(517.68 to<br>1,158.87)                          | 1,080.18<br>(637.03 to<br>1,824.25)                        |
| Interstitial lung disease and pulmonary sarcoidosis           | 653.66<br>(372.36 to<br>1,051.33)                             | 1,491.96<br>(856.76 to<br>2,319.72)                           | 1,610.83<br>(939.38 to<br>2,512.17)                           | 1,262.11<br>(724.56 to<br>1,967.12)                            | 26.92<br>(15.45 to<br>42.75)                               | 72.04<br>(41.27 to<br>113.52)                              | 80.83<br>(46.95 to<br>127.36)                              | 57.46<br>(32.66 to<br>90.99)                               |
| Other chronic respiratory diseases                            | 1,336.49<br>(616.57 to<br>2,389.53)                           | 1,332.19<br>(687.13 to<br>2,102.33)                           | 1,252.47<br>(651.55 to<br>1,971.30)                           | 1,541.30<br>(764.90 to<br>2,408.20)                            | 31.31<br>(15.56 to<br>52.98)                               | 47.89<br>(23.52 to<br>88.46)                               | 48.96<br>(23.87 to<br>94.31)                               | 47.71<br>(23.52 to<br>84.10)                               |
| <b>Cirrhosis and other chronic liver diseases</b>             | <b>36,048.10</b><br><b>(26,512.63 to</b><br><b>46,539.88)</b> | <b>55,619.81</b><br><b>(41,400.99 to</b><br><b>70,885.75)</b> | <b>53,078.27</b><br><b>(39,709.68 to</b><br><b>67,490.16)</b> | <b>61,922.35</b><br><b>(45,748.52 to</b><br><b>79,587.20)</b>  | <b>1,007.25</b><br><b>(773.01 to</b><br><b>1,274.33)</b>   | <b>1,784.28</b><br><b>(1,384.86 to</b><br><b>2,184.00)</b> | <b>1,749.65</b><br><b>(1,367.75 to</b><br><b>2,159.93)</b> | <b>1,911.19</b><br><b>(1,462.68 to</b><br><b>2,390.35)</b> |
| Cirrhosis and other chronic liver diseases due to hepatitis B | 13,467.48<br>(9,424.61 to<br>17,958.30)                       | 22,701.86<br>(16,110.93 to<br>30,529.08)                      | 22,462.48<br>(16,233.20 to<br>29,938.43)                      | 24,203.17<br>(16,836.07 to<br>32,482.93)                       | 395.66<br>(290.07 to<br>513.18)                            | 735.16<br>(542.78 to<br>954.53)                            | 744.77<br>(554.34 to<br>961.81)                            | 757.59<br>(555.51 to<br>979.49)                            |
| Cirrhosis and other chronic liver diseases due to hepatitis C | 5,822.38<br>(3,959.96 to<br>7,905.97)                         | 9,873.52<br>(6,810.46 to<br>13,557.62)                        | 9,737.16<br>(6,717.83 to<br>13,360.90)                        | 10,613.77<br>(7,256.52 to<br>14,678.94)                        | 169.55<br>(123.01 to<br>221.87)                            | 314.01<br>(228.87 to<br>415.61)                            | 316.11<br>(232.18 to<br>418.84)                            | 327.66<br>(236.69 to<br>439.35)                            |

|                                                                |                                                               |                                                               |                                                               |                                                               |                                                          |                                                            |                                                          |                                                            |
|----------------------------------------------------------------|---------------------------------------------------------------|---------------------------------------------------------------|---------------------------------------------------------------|---------------------------------------------------------------|----------------------------------------------------------|------------------------------------------------------------|----------------------------------------------------------|------------------------------------------------------------|
|                                                                | 5,981.31<br>(4,117.59 to<br>8,025.62)                         | 10,168.05<br>(7,062.80 to<br>13,771.81)                       | 8,350.28<br>(5,841.23 to<br>11,214.63)                        | 12,723.70<br>(8,806.06 to<br>17,331.21)                       | 184.39<br>(135.03 to<br>241.20)                          | 340.97<br>(248.04 to<br>449.54)                            | 291.39<br>(211.36 to<br>383.59)                          | 410.13<br>(293.40 to<br>542.82)                            |
| Cirrhosis and other chronic liver diseases due to alcohol use  |                                                               |                                                               |                                                               |                                                               |                                                          |                                                            |                                                          |                                                            |
|                                                                | 10,776.94<br>(8,242.76 to<br>14,330.71)                       | 12,876.38<br>(9,681.04 to<br>16,893.53)                       | 12,528.34<br>(9,392.28 to<br>16,311.87)                       | 14,381.71<br>(10,742.48 to<br>18,738.84)                      | 257.64<br>(199.77 to<br>320.68)                          | 394.14<br>(305.05 to<br>492.85)                            | 397.39<br>(308.50 to<br>495.50)                          | 415.80<br>(319.27 to<br>520.21)                            |
| Cirrhosis and other chronic liver diseases due to other causes |                                                               |                                                               |                                                               |                                                               |                                                          |                                                            |                                                          |                                                            |
|                                                                | <b>45,646.62</b><br><b>(30,880.61 to</b><br><b>69,815.73)</b> | <b>35,640.38</b><br><b>(25,636.82 to</b><br><b>46,198.69)</b> | <b>32,512.34</b><br><b>(23,266.96 to</b><br><b>41,408.51)</b> | <b>44,657.40</b><br><b>(31,423.49 to</b><br><b>58,837.80)</b> | <b>1,198.74</b><br><b>(854.46 to</b><br><b>1,525.53)</b> | <b>1,427.07</b><br><b>(1,014.04 to</b><br><b>1,935.37)</b> | <b>1,390.08</b><br><b>(979.05 to</b><br><b>1,871.23)</b> | <b>1,611.35</b><br><b>(1,123.39 to</b><br><b>2,187.22)</b> |
| Digestive diseases                                             |                                                               |                                                               |                                                               |                                                               |                                                          |                                                            |                                                          |                                                            |
|                                                                | 12,761.81<br>(8,910.23 to<br>16,489.32)                       | 9,801.09<br>(6,236.73 to<br>13,649.06)                        | 8,704.63<br>(5,549.27 to<br>12,106.98)                        | 13,070.66<br>(8,276.78 to<br>18,674.60)                       | 469.30<br>(325.07 to<br>603.32)                          | 465.36<br>(293.17 to<br>658.80)                            | 434.62<br>(275.06 to<br>608.93)                          | 577.11<br>(358.10 to<br>832.67)                            |
| Peptic ulcer disease                                           |                                                               |                                                               |                                                               |                                                               |                                                          |                                                            |                                                          |                                                            |

| Laos                                       |                                       |                                       |                                       |                                       |                                  |                                    |                                    |                                    |
|--------------------------------------------|---------------------------------------|---------------------------------------|---------------------------------------|---------------------------------------|----------------------------------|------------------------------------|------------------------------------|------------------------------------|
| Cause                                      | YLLs (actual counts)                  |                                       |                                       |                                       | Deaths (actual counts)           |                                    |                                    |                                    |
|                                            | 2016                                  | 2040 Forecast                         | 2040 Better Scenario                  | 2040 Worse Scenario                   | 2016                             | 2040 Forecast                      | 2040 Better Scenario               | 2040 Worse Scenario                |
| Gastritis and duodenitis                   | 710.87<br>(486.19 to 1,021.55)        | 1,028.73<br>(711.83 to 1,425.48)      | 1,020.17<br>(704.66 to 1,411.80)      | 1,137.75<br>(773.40 to 1,580.85)      | 24.16<br>(17.46 to 31.40)        | 46.57<br>(32.08 to 64.51)          | 48.69<br>(33.59 to 68.32)          | 47.52<br>(32.26 to 67.08)          |
| Appendicitis                               | 3,523.24<br>(2,312.26 to 5,421.43)    | 2,126.41<br>(1,467.97 to 3,229.86)    | 1,957.94<br>(1,366.56 to 3,057.95)    | 2,792.01<br>(1,901.61 to 4,245.05)    | 68.01<br>(46.58 to 102.56)       | 60.09<br>(41.85 to 99.00)          | 58.51<br>(40.93 to 100.48)         | 72.03<br>(49.44 to 113.54)         |
| Paralytic ileus and intestinal obstruction | 16,466.67<br>(7,447.69 to 37,744.07)  | 8,464.61<br>(5,371.02 to 13,920.80)   | 8,090.69<br>(5,145.01 to 12,779.80)   | 10,628.33<br>(6,269.40 to 19,300.05)  | 285.23<br>(171.93 to 528.45)     | 297.60<br>(195.28 to 405.88)       | 313.55<br>(206.26 to 423.92)       | 304.41<br>(198.00 to 426.71)       |
| Inguinal, femoral, and abdominal hernia    | 778.89<br>(423.67 to 1,161.73)        | 740.78<br>(393.01 to 1,133.05)        | 739.15<br>(387.67 to 1,146.27)        | 826.00<br>(435.05 to 1,275.44)        | 28.27<br>(15.02 to 43.22)        | 38.83<br>(19.35 to 62.30)          | 41.59<br>(20.45 to 67.64)          | 38.44<br>(19.18 to 62.75)          |
| Inflammatory bowel disease                 | 566.39<br>(374.38 to 945.47)          | 657.31<br>(469.00 to 899.21)          | 668.30<br>(476.15 to 909.65)          | 666.80<br>(466.56 to 932.34)          | 15.59<br>(10.98 to 21.95)        | 26.17<br>(19.17 to 34.69)          | 28.15<br>(20.43 to 37.18)          | 24.24<br>(17.40 to 32.37)          |
| Vascular intestinal disorders              | 613.85<br>(443.53 to 878.13)          | 946.88<br>(672.14 to 1,384.17)        | 974.70<br>(682.58 to 1,433.67)        | 965.40<br>(684.83 to 1,412.48)        | 26.99<br>(19.35 to 40.08)        | 54.22<br>(37.14 to 81.00)          | 58.86<br>(40.61 to 88.76)          | 50.95<br>(34.20 to 76.05)          |
| Gallbladder and biliary diseases           | 1,591.91<br>(1,022.15 to 2,341.72)    | 1,890.84<br>(1,026.91 to 3,167.50)    | 1,487.42<br>(847.21 to 2,385.19)      | 2,322.33<br>(1,245.10 to 3,965.80)    | 58.63<br>(38.64 to 86.85)        | 92.77<br>(49.03 to 164.00)         | 78.61<br>(43.78 to 135.14)         | 104.43<br>(54.96 to 180.39)        |
| Pancreatitis                               | 4,351.15<br>(2,632.44 to 6,548.15)    | 6,124.62<br>(3,014.32 to 11,706.39)   | 5,168.46<br>(2,655.84 to 9,319.75)    | 7,569.14<br>(3,619.30 to 14,859.17)   | 111.24<br>(67.50 to 168.31)      | 184.50<br>(93.55 to 343.28)        | 162.11<br>(85.40 to 286.49)        | 218.35<br>(106.05 to 430.28)       |
| Other digestive diseases                   | 4,281.85<br>(2,634.67 to 7,293.25)    | 3,859.12<br>(2,691.72 to 5,187.26)    | 3,700.88<br>(2,615.08 to 4,922.57)    | 4,679.00<br>(3,232.77 to 6,397.58)    | 111.31<br>(79.12 to 151.91)      | 160.96<br>(115.43 to 227.23)       | 165.39<br>(117.86 to 235.93)       | 173.88<br>(123.60 to 243.63)       |
| Neurological disorders                     | 22,274.67<br>(18,019.24 to 27,290.61) | 43,484.10<br>(34,408.37 to 54,357.89) | 43,238.48<br>(35,431.96 to 52,213.20) | 46,948.92<br>(31,554.29 to 51,789.68) | 1,156.51<br>(975.47 to 1,371.58) | 3,417.58<br>(2,519.43 to 4,490.93) | 3,653.41<br>(2,844.33 to 4,545.89) | 2,792.90<br>(1,941.01 to 3,778.28) |
| Alzheimer's disease and other dementias    | 10,932.59<br>(8,988.96 to 13,298.20)  | 31,350.27<br>(22,944.37 to 42,420.40) | 31,707.91<br>(24,584.74 to 40,731.08) | 26,935.35<br>(18,893.88 to 37,061.80) | 919.05<br>(759.70 to 1,126.40)   | 2,981.36<br>(2,097.46 to 4,035.51) | 3,187.44<br>(2,358.12 to 4,061.89) | 2,382.56<br>(1,579.33 to 3,376.12) |
| Parkinson's disease                        | 916.79<br>(694.32 to 1,154.69)        | 3,049.45<br>(2,305.22 to 3,925.56)    | 3,519.94<br>(2,712.93 to 4,528.23)    | 2,324.22<br>(1,693.72 to 3,061.32)    | 61.99<br>(46.84 to 80.63)        | 234.59<br>(171.27 to 314.67)       | 281.74<br>(208.61 to 370.06)       | 168.14<br>(116.40 to 229.32)       |
| Epilepsy                                   | 8,111.55<br>(5,401.25 to 11,694.64)   | 6,345.32<br>(4,126.16 to 8,872.62)    | 5,272.66<br>(3,441.56 to 7,278.68)    | 8,892.44<br>(5,739.27 to 12,607.33)   | 133.51<br>(95.76 to 178.14)      | 132.87<br>(88.77 to 181.35)        | 112.75<br>(76.57 to 150.18)        | 177.36<br>(116.62 to 241.99)       |
| Multiple sclerosis                         | 195.09<br>(144.15 to 265.77)          | 349.15<br>(245.42 to 477.75)          | 346.04<br>(247.17 to 471.71)          | 338.98<br>(238.59 to 465.58)          | 5.12<br>(3.90 to 6.95)           | 10.12<br>(7.25 to 13.84)           | 10.19<br>(7.41 to 14.02)           | 9.60<br>(6.90 to 13.25)            |
| Motor neuron disease                       | 359.68<br>(212.45 to 614.37)          | 448.46<br>(356.38 to 570.86)          | 460.50<br>(365.65 to 576.16)          | 435.29<br>(342.84 to 576.16)          | 7.24<br>(5.32 to 10.50)          | 13.65<br>(11.14 to 17.36)          | 14.38<br>(11.79 to 18.19)          | 12.48<br>(10.16 to 15.76)          |
| Other neurological disorders               | 1,758.97<br>(1,181.23 to 2,753.18)    | 1,941.46<br>(1,559.44 to 2,448.52)    | 1,931.43<br>(1,575.95 to 2,366.48)    | 2,022.65<br>(1,557.37 to 2,745.59)    | 29.59<br>(22.81 to 40.47)        | 44.98<br>(38.18 to 51.77)          | 46.91<br>(39.91 to 53.51)          | 42.76<br>(36.06 to 51.02)          |
| Mental disorders                           | 5,447.64<br>(3,509.99 to 7,871.68)    | 9,038.21<br>(5,859.36 to 12,940.67)   | 8,730.84<br>(5,654.66 to 12,466.52)   | 9,436.05<br>(6,143.25 to 13,655.83)   | 118.99<br>(79.65 to 171.37)      | 218.00<br>(147.47 to 313.22)       | 214.02<br>(145.25 to 304.67)       | 222.52<br>(150.00 to 319.46)       |
| Alcohol use disorders                      | 3,643.29<br>(2,116.06 to 5,814.86)    | 5,138.73<br>(2,799.63 to 8,741.66)    | 4,827.55<br>(2,626.64 to 8,110.46)    | 5,511.09<br>(3,003.21 to 9,301.91)    | 83.63<br>(49.50 to 133.21)       | 131.77<br>(73.11 to 218.51)        | 125.91<br>(69.87 to 207.98)        | 138.19<br>(78.16 to 231.44)        |
| Drug use disorders                         | 1,782.57<br>(1,076.56 to 2,872.60)    | 3,868.85<br>(2,395.29 to 5,872.61)    | 3,872.51<br>(2,396.90 to 5,865.34)    | 3,894.62<br>(2,408.16 to 5,977.17)    | 34.97<br>(21.70 to 56.11)        | 85.63<br>(56.58 to 128.31)         | 87.51<br>(58.67 to 130.08)         | 83.75<br>(55.34 to 127.01)         |
| Opioid use disorders                       | 1,174.74<br>(673.12 to 1,953.46)      | 2,090.20<br>(1,199.24 to 3,410.88)    | 2,079.54<br>(1,197.53 to 3,345.51)    | 2,132.03<br>(1,223.62 to 3,508.67)    | 22.36<br>(13.28 to 36.78)        | 44.95<br>(27.92 to 70.52)          | 45.69<br>(28.42 to 71.06)          | 44.48<br>(27.13 to 70.70)          |



|                           |                                 |                                     |                                     |                                     |                             |                              |                              |                              |
|---------------------------|---------------------------------|-------------------------------------|-------------------------------------|-------------------------------------|-----------------------------|------------------------------|------------------------------|------------------------------|
|                           | 63.70<br>(31.39 to<br>150.88)   | 175.29<br>(89.67 to<br>386.29)      | 170.93<br>(88.10 to<br>373.95)      | 190.80<br>(97.43 to<br>415.85)      | 1.31<br>(0.69 to<br>3.03)   | 4.01<br>(2.18 to<br>8.54)    | 3.95<br>(2.13 to<br>8.41)    | 4.28<br>(2.29 to<br>9.33)    |
| Cocaine use disorders     |                                 |                                     |                                     |                                     |                             |                              |                              |                              |
|                           | 54.75<br>(27.10 to<br>117.24)   | 180.03<br>(93.48 to<br>396.97)      | 172.26<br>(88.47 to<br>368.33)      | 207.33<br>(107.44 to<br>449.44)     | 1.05<br>(0.55 to<br>2.24)   | 3.75<br>(2.08 to<br>8.04)    | 3.62<br>(1.99 to<br>7.75)    | 4.25<br>(2.32 to<br>9.08)    |
| Amphetamine use disorders |                                 |                                     |                                     |                                     |                             |                              |                              |                              |
|                           | 489.38<br>(296.10 to<br>785.24) | 1,423.33<br>(861.80 to<br>2,289.67) | 1,449.77<br>(882.45 to<br>2,327.86) | 1,364.46<br>(812.69 to<br>2,186.88) | 10.24<br>(6.56 to<br>16.54) | 32.93<br>(21.18 to<br>50.62) | 34.25<br>(22.49 to<br>52.52) | 30.74<br>(19.58 to<br>47.71) |
| Other drug use disorders  |                                 |                                     |                                     |                                     |                             |                              |                              |                              |
|                           | 21.78<br>(13.92 to<br>38.36)    | 30.63<br>(19.25 to<br>50.94)        | 30.78<br>(19.79 to<br>51.39)        | 30.34<br>(19.34 to<br>49.28)        | 0.40<br>(0.25 to<br>0.71)   | 0.59<br>(0.38 to<br>1.00)    | 0.60<br>(0.39 to<br>1.01)    | 0.58<br>(0.38 to<br>0.96)    |
| Eating disorders          |                                 |                                     |                                     |                                     |                             |                              |                              |                              |

| Laos                                                       |                                               |                                                |                                                |                                                 |                                           |                                            |                                            |                                            |
|------------------------------------------------------------|-----------------------------------------------|------------------------------------------------|------------------------------------------------|-------------------------------------------------|-------------------------------------------|--------------------------------------------|--------------------------------------------|--------------------------------------------|
| Cause                                                      | YLLs (actual counts)                          |                                                |                                                |                                                 | Deaths (actual counts)                    |                                            |                                            |                                            |
|                                                            | 2016                                          | 2040 Forecast                                  | 2040 Better Scenario                           | 2040 Worse Scenario                             | 2016                                      | 2040 Forecast                              | 2040 Better Scenario                       | 2040 Worse Scenario                        |
| <b>Diabetes, urogenital, blood, and endocrine diseases</b> | <b>93,164.37</b><br>(82,532.24 to 105,717.48) | <b>145,184.47</b><br>(99,267.05 to 243,083.30) | <b>119,463.24</b><br>(84,407.45 to 194,657.32) | <b>198,023.71</b><br>(134,519.09 to 316,706.29) | <b>3,056.48</b><br>(2,782.55 to 3,380.18) | <b>6,663.62</b><br>(4,305.23 to 12,020.28) | <b>5,690.28</b><br>(3,797.73 to 10,023.64) | <b>8,482.77</b><br>(5,442.61 to 14,628.34) |
| Diabetes mellitus                                          | 40,839.02<br>(36,347.46 to 45,593.23)         | 56,744.94<br>(37,575.11 to 80,174.16)          | 48,431.76<br>(33,236.31 to 69,036.67)          | 83,076.25<br>(53,109.90 to 121,859.40)          | 1,638.31<br>(1,452.21 to 1,843.97)        | 2,762.49<br>(1,883.59 to 3,730.39)         | 2,475.12<br>(1,739.37 to 3,349.01)         | 3,751.73<br>(2,452.36 to 5,253.39)         |
| Acute glomerulonephritis                                   | 76.05<br>(60.18 to 100.88)                    | 87.18<br>(64.91 to 115.94)                     | 81.92<br>(60.84 to 107.76)                     | 107.37<br>(80.12 to 145.18)                     | 1.52<br>(1.21 to 1.94)                    | 2.48<br>(1.77 to 3.38)                     | 2.46<br>(1.74 to 3.41)                     | 2.75<br>(1.99 to 3.68)                     |
| Chronic kidney disease                                     | 34,357.64<br>(29,024.47 to 40,334.31)         | 72,673.96<br>(30,983.25 to 172,163.76)         | 55,742.84<br>(25,191.79 to 131,362.02)         | 96,635.43<br>(41,937.56 to 229,660.11)          | 1,025.69<br>(898.17 to 1,188.55)          | 3,340.31<br>(1,136.52 to 8,571.38)         | 2,634.54<br>(970.18 to 6,997.30)           | 4,149.80<br>(1,454.71 to 10,539.94)        |
| Chronic kidney disease due to diabetes mellitus            | 16,779.79<br>(13,741.79 to 19,932.82)         | 44,269.14<br>(18,055.91 to 109,510.18)         | 33,594.09<br>(14,550.03 to 80,583.46)          | 58,711.40<br>(23,822.68 to 145,205.42)          | 549.23<br>(466.96 to 649.69)              | 1,899.66<br>(638.35 to 4,997.96)           | 1,469.91<br>(530.14 to 3,896.46)           | 2,404.62<br>(817.08 to 6,174.52)           |
| Chronic kidney disease due to hypertension                 | 6,412.56<br>(5,251.77 to 7,681.97)            | 18,773.48<br>(6,601.23 to 50,662.15)           | 14,474.24<br>(5,444.72 to 39,851.64)           | 23,996.48<br>(8,500.52 to 62,278.78)            | 278.99<br>(233.46 to 330.64)              | 1,129.47<br>(344.89 to 3,102.41)           | 916.83<br>(302.02 to 2,767.06)             | 1,335.63<br>(400.61 to 3,587.47)           |
| Chronic kidney disease due to glomerulonephritis           | 5,703.61<br>(4,249.44 to 7,518.24)            | 4,728.24<br>(2,893.36 to 8,478.38)             | 3,806.38<br>(2,365.41 to 6,536.17)             | 6,854.10<br>(4,237.76 to 11,470.70)             | 97.62<br>(76.17 to 123.30)                | 133.82<br>(65.65 to 318.67)                | 106.27<br>(54.33 to 247.58)                | 180.07<br>(93.05 to 396.34)                |
| Chronic kidney disease due to other and unspecified causes | 5,461.69<br>(3,803.36 to 7,888.65)            | 4,903.10<br>(2,622.89 to 9,747.72)             | 3,868.13<br>(2,164.94 to 7,653.61)             | 7,073.45<br>(3,892.68 to 13,378.05)             | 99.84<br>(75.72 to 133.58)                | 177.37<br>(71.62 to 439.38)                | 141.54<br>(60.38 to 374.76)                | 229.48<br>(97.51 to 539.95)                |
| Urinary diseases and male infertility                      | 5,354.88<br>(4,198.54 to 6,846.88)            | 6,170.86<br>(5,079.33 to 7,377.60)             | 6,181.50<br>(5,134.69 to 7,312.90)             | 6,652.43<br>(5,404.51 to 8,043.81)              | 152.70<br>(128.83 to 179.21)              | 271.13<br>(222.16 to 328.52)               | 290.74<br>(238.94 to 350.72)               | 259.26<br>(210.11 to 318.19)               |
| Urinary tract infections                                   | 3,475.11<br>(2,385.15 to 4,767.17)            | 4,450.36<br>(3,465.40 to 5,392.48)             | 4,519.67<br>(3,560.89 to 5,478.05)             | 4,593.46<br>(3,475.05 to 5,608.78)              | 99.29<br>(74.03 to 121.64)                | 196.90<br>(153.39 to 240.91)               | 213.71<br>(166.78 to 259.30)               | 180.56<br>(138.16 to 224.26)               |
| Urolithiasis                                               | 117.81<br>(85.21 to 162.95)                   | 240.27<br>(169.40 to 343.84)                   | 243.82<br>(173.32 to 348.59)                   | 245.86<br>(172.14 to 356.86)                    | 4.36<br>(3.19 to 6.18)                    | 10.54<br>(7.44 to 15.02)                   | 11.22<br>(7.95 to 15.95)                   | 9.97<br>(6.96 to 14.60)                    |
| Other urinary diseases                                     | 1,761.95<br>(980.35 to 2,867.88)              | 1,480.23<br>(871.39 to 2,235.37)               | 1,418.00<br>(819.33 to 2,163.77)               | 1,813.12<br>(1,064.54 to 2,737.63)              | 49.05<br>(30.67 to 71.01)                 | 63.70<br>(38.12 to 97.01)                  | 65.81<br>(40.10 to 99.44)                  | 68.72<br>(41.18 to 104.87)                 |
| Gynecological diseases                                     | 269.83<br>(129.60 to 351.17)                  | 241.14<br>(116.41 to 339.22)                   | 224.09<br>(107.66 to 319.77)                   | 304.73<br>(152.90 to 435.10)                    | 6.77<br>(3.29 to 8.79)                    | 6.65<br>(3.19 to 9.27)                     | 6.36<br>(3.10 to 8.98)                     | 8.09<br>(4.06 to 11.28)                    |
| Uterine fibroids                                           | 41.31<br>(16.16 to 72.91)                     | 37.54<br>(12.92 to 71.29)                      | 34.53<br>(12.04 to 64.67)                      | 49.10<br>(17.15 to 91.21)                       | 1.30<br>(0.52 to 2.38)                    | 1.24<br>(0.43 to 2.32)                     | 1.16<br>(0.40 to 2.23)                     | 1.57<br>(0.56 to 2.93)                     |
| Polycystic ovarian syndrome                                | 13.96<br>(3.67 to 34.82)                      | 7.27<br>(1.64 to 19.94)                        | 6.31<br>(1.42 to 18.06)                        | 11.11<br>(2.54 to 29.31)                        | 0.32<br>(0.09 to 0.75)                    | 0.17<br>(0.04 to 0.44)                     | 0.15<br>(0.03 to 0.38)                     | 0.26<br>(0.06 to 0.65)                     |
| Endometriosis                                              | 3.32<br>(0.88 to 8.57)                        | 5.08<br>(1.22 to 14.10)                        | 4.66<br>(1.10 to 13.19)                        | 6.55<br>(1.54 to 18.15)                         | 0.08<br>(0.02 to 0.21)                    | 0.12<br>(0.03 to 0.34)                     | 0.11<br>(0.02 to 0.32)                     | 0.16<br>(0.03 to 0.44)                     |
| Genital prolapse                                           | 13.17<br>(3.23 to 24.68)                      | 11.42<br>(2.63 to 22.28)                       | 10.65<br>(2.45 to 21.07)                       | 14.89<br>(3.43 to 29.64)                        | 0.65<br>(0.16 to 1.20)                    | 0.58<br>(0.13 to 1.10)                     | 0.56<br>(0.13 to 1.10)                     | 0.71<br>(0.17 to 1.35)                     |
| Other gynecological diseases                               | 198.06<br>(95.31 to 276.32)                   | 179.83<br>(80.81 to 264.57)                    | 167.93<br>(78.74 to 248.53)                    | 223.08<br>(110.48 to 327.90)                    | 4.42<br>(2.20 to 6.08)                    | 4.54<br>(2.10 to 6.59)                     | 4.38<br>(2.03 to 6.42)                     | 5.39<br>(2.67 to 7.87)                     |
| Hemoglobinopathies and hemolytic anemias                   | 7,312.31<br>(4,954.96 to 10,467.08)           | 5,295.63<br>(4,061.43 to 7,104.24)             | 5,042.36<br>(3,855.26 to 6,774.54)             | 6,314.12<br>(4,818.80 to 8,491.29)              | 143.95<br>(110.86 to 191.37)              | 163.58<br>(129.12 to 219.50)               | 162.30<br>(128.20 to 218.11)               | 185.02<br>(143.15 to 248.12)               |
| Thalassemias                                               | 4,197.41<br>(2,011.32 to 7,121.47)            | 1,590.10<br>(873.49 to 2,554.87)               | 1,520.33<br>(863.40 to 2,418.41)               | 1,793.45<br>(923.88 to 2,915.60)                | 51.40<br>(25.68 to 86.44)                 | 20.26<br>(11.57 to 31.86)                  | 19.43<br>(11.38 to 30.36)                  | 22.58<br>(12.08 to 35.96)                  |

|                                                   |                                       |                                       |                                       |                                       |                               |                                |                                |                                 |
|---------------------------------------------------|---------------------------------------|---------------------------------------|---------------------------------------|---------------------------------------|-------------------------------|--------------------------------|--------------------------------|---------------------------------|
|                                                   | 9.64<br>(6.21 to<br>13.94)            | 7.12<br>(4.66 to<br>10.40)            | 6.69<br>(4.38 to<br>9.69)             | 8.65<br>(5.68 to<br>12.66)            | 0.15<br>(0.10 to<br>0.21)     | 0.14<br>(0.09 to<br>0.20)      | 0.13<br>(0.09 to<br>0.19)      | 0.16<br>(0.11 to<br>0.23)       |
| Sickle cell disorders                             |                                       |                                       |                                       |                                       |                               |                                |                                |                                 |
|                                                   | 2,024.26<br>(1,527.05 to<br>2,729.92) | 2,620.84<br>(1,894.93 to<br>3,663.61) | 2,443.08<br>(1,744.07 to<br>3,433.03) | 3,297.73<br>(2,384.71 to<br>4,573.88) | 44.91<br>(34.53 to<br>60.66)  | 74.83<br>(55.95 to<br>104.69)  | 71.18<br>(52.48 to<br>100.35)  | 91.04<br>(66.93 to<br>126.24)   |
| G6PD deficiency                                   |                                       |                                       |                                       |                                       |                               |                                |                                |                                 |
|                                                   | 1,081.00<br>(862.08 to<br>1,427.67)   | 1,077.57<br>(832.19 to<br>1,471.57)   | 1,072.26<br>(826.38 to<br>1,445.46)   | 1,214.29<br>(924.09 to<br>1,643.87)   | 47.50<br>(38.55 to<br>63.24)  | 68.36<br>(51.85 to<br>93.79)   | 71.56<br>(54.33 to<br>97.68)   | 71.24<br>(52.54 to<br>98.23)    |
| Other hemoglobinopathies and hemolytic anemias    |                                       |                                       |                                       |                                       |                               |                                |                                |                                 |
|                                                   | 4,954.64<br>(2,881.33 to<br>8,334.48) | 3,970.75<br>(3,042.78 to<br>5,724.83) | 3,758.78<br>(2,905.22 to<br>5,314.68) | 4,933.38<br>(3,597.02 to<br>7,381.48) | 87.54<br>(62.30 to<br>132.15) | 116.98<br>(92.97 to<br>164.49) | 118.77<br>(93.79 to<br>166.51) | 126.13<br>(100.41 to<br>178.51) |
| Endocrine, metabolic, blood, and immune disorders |                                       |                                       |                                       |                                       |                               |                                |                                |                                 |

| Laos                                          |                                                |                                               |                                              |                                                |                                         |                                       |                                       |                                         |
|-----------------------------------------------|------------------------------------------------|-----------------------------------------------|----------------------------------------------|------------------------------------------------|-----------------------------------------|---------------------------------------|---------------------------------------|-----------------------------------------|
| Cause                                         | YLLs (actual counts)                           |                                               |                                              |                                                | Deaths (actual counts)                  |                                       |                                       |                                         |
|                                               | 2016                                           | 2040 Forecast                                 | 2040 Better Scenario                         | 2040 Worse Scenario                            | 2016                                    | 2040 Forecast                         | 2040 Better Scenario                  | 2040 Worse Scenario                     |
| <b>Musculoskeletal disorders</b>              | <b>1,619.49</b><br>(1,224.60 to 2,464.81)      | <b>2,797.15</b><br>(2,124.03 to 4,531.34)     | <b>2,862.74</b><br>(2,171.60 to 4,614.29)    | <b>2,677.53</b><br>(2,037.86 to 4,264.77)      | <b>37.59</b><br>(29.19 to 59.49)        | <b>85.42</b><br>(64.49 to 149.24)     | <b>90.90</b><br>(68.34 to 160.49)     | <b>77.87</b><br>(58.90 to 133.89)       |
| Rheumatoid arthritis                          | 159.00<br>(114.67 to 252.46)                   | 328.04<br>(207.32 to 528.95)                  | 315.82<br>(197.38 to 508.60)                 | 375.49<br>(236.34 to 611.13)                   | 6.40<br>(4.43 to 10.58)                 | 16.68<br>(10.00 to 28.92)             | 16.75<br>(9.79 to 28.98)              | 17.90<br>(10.90 to 30.63)               |
| Other musculoskeletal disorders               | 1,460.49<br>(1,095.41 to 2,237.69)             | 2,469.11<br>(1,829.27 to 3,965.22)            | 2,546.92<br>(1,907.96 to 4,125.53)           | 2,302.04<br>(1,698.12 to 3,647.81)             | 31.19<br>(23.94 to 48.74)               | 68.74<br>(51.58 to 118.03)            | 74.15<br>(55.32 to 128.37)            | 59.97<br>(44.94 to 101.52)              |
| <b>Other non-communicable diseases</b>        | <b>176,719.68</b><br>(71,452.67 to 353,437.19) | <b>61,609.83</b><br>(29,465.40 to 113,930.16) | <b>53,031.29</b><br>(26,300.01 to 95,787.60) | <b>106,261.83</b><br>(44,721.08 to 191,170.25) | <b>2,111.91</b><br>(889.38 to 4,176.38) | <b>882.21</b><br>(480.47 to 1,506.78) | <b>797.43</b><br>(463.10 to 1,310.05) | <b>1,318.66</b><br>(662.48 to 2,401.70) |
| Congenital birth defects                      | 165,769.75<br>(64,832.31 to 343,041.25)        | 54,862.26<br>(23,954.76 to 107,317.60)        | 46,586.56<br>(20,973.89 to 88,817.53)        | 91,700.65<br>(37,412.04 to 183,358.46)         | 1,951.40<br>(769.81 to 4,015.54)        | 671.98<br>(303.22 to 1,279.94)        | 574.04<br>(267.35 to 1,087.94)        | 1,105.67<br>(473.26 to 2,182.17)        |
| Neural tube defects                           | 25,057.39<br>(7,542.61 to 63,269.04)           | 3,739.28<br>(970.79 to 10,471.42)             | 3,003.97<br>(770.10 to 8,400.29)             | 7,427.16<br>(1,913.96 to 20,278.56)            | 290.34<br>(87.68 to 733.51)             | 43.46<br>(11.40 to 121.27)            | 34.93<br>(9.02 to 97.38)              | 86.21<br>(22.37 to 234.91)              |
| Congenital heart anomalies                    | 83,888.63<br>(32,564.87 to 175,369.56)         | 28,890.88<br>(12,303.99 to 56,532.31)         | 24,739.80<br>(10,900.24 to 46,648.59)        | 46,814.17<br>(19,192.46 to 92,099.69)          | 994.51<br>(393.19 to 2,064.98)          | 359.21<br>(160.23 to 673.72)          | 309.61<br>(140.31 to 574.40)          | 571.74<br>(241.58 to 1,107.04)          |
| Orofacial clefts                              | 450.10<br>(72.99 to 1,297.23)                  | 113.50<br>(17.89 to 348.18)                   | 89.05<br>(14.22 to 268.51)                   | 243.58<br>(36.60 to 778.93)                    | 5.21<br>(0.85 to 15.01)                 | 1.31<br>(0.21 to 4.03)                | 1.03<br>(0.16 to 3.11)                | 2.82<br>(0.42 to 9.01)                  |
| Down syndrome                                 | 1,512.42<br>(432.63 to 5,056.60)               | 880.84<br>(331.00 to 2,723.33)                | 744.08<br>(289.02 to 2,171.82)               | 1,503.13<br>(512.94 to 5,117.83)               | 18.46<br>(5.78 to 59.63)                | 12.00<br>(5.02 to 33.35)              | 10.31<br>(4.47 to 26.81)              | 19.59<br>(7.47 to 61.91)                |
| Other chromosomal abnormalities               | 1,793.71<br>(579.32 to 4,396.86)               | 1,198.44<br>(365.80 to 2,865.87)              | 1,006.28<br>(317.72 to 2,402.78)             | 2,084.27<br>(631.62 to 5,157.93)               | 20.85<br>(6.74 to 50.99)                | 14.11<br>(4.39 to 33.61)              | 11.88<br>(3.83 to 28.02)              | 24.41<br>(7.54 to 60.06)                |
| Congenital musculoskeletal and limb anomalies | 2,968.26<br>(742.32 to 8,088.87)               | 1,339.01<br>(360.27 to 3,606.03)              | 1,152.69<br>(312.40 to 3,031.34)             | 2,160.34<br>(567.64 to 6,023.31)               | 34.55<br>(8.76 to 93.93)                | 15.74<br>(4.28 to 42.01)              | 13.57<br>(3.79 to 35.41)              | 25.29<br>(6.79 to 70.12)                |
| Urogenital congenital anomalies               | 1,742.82<br>(647.90 to 3,913.34)               | 818.95<br>(376.71 to 1,615.34)                | 722.87<br>(342.54 to 1,415.08)               | 1,236.63<br>(534.80 to 2,586.23)               | 22.53<br>(9.19 to 48.13)                | 13.51<br>(6.94 to 24.79)              | 12.33<br>(6.47 to 22.38)              | 18.74<br>(9.12 to 36.31)                |
| Digestive congenital anomalies                | 10,207.40<br>(3,129.99 to 25,657.84)           | 3,309.34<br>(1,049.96 to 8,044.04)            | 2,774.65<br>(908.91 to 6,680.17)             | 5,739.02<br>(1,813.61 to 14,106.62)            | 118.72<br>(36.63 to 297.91)             | 38.72<br>(12.40 to 93.64)             | 32.49<br>(10.90 to 77.77)             | 66.99<br>(21.41 to 164.01)              |
| Other congenital birth defects                | 38,149.03<br>(10,761.67 to 99,913.62)          | 14,572.02<br>(4,639.15 to 36,400.56)          | 12,353.19<br>(4,052.27 to 30,230.24)         | 24,492.36<br>(7,292.84 to 63,423.85)           | 446.22<br>(128.09 to 1,164.09)          | 173.91<br>(57.57 to 429.07)           | 147.90<br>(80.15 to 357.71)           | 289.86<br>(89.03 to 742.43)             |
| Skin and subcutaneous diseases                | 1,732.05<br>(1,121.12 to 2,815.06)             | 3,951.66<br>(2,603.43 to 6,226.05)            | 4,041.60<br>(2,680.34 to 6,398.10)           | 4,021.27<br>(2,643.39 to 6,320.65)             | 53.53<br>(35.64 to 87.80)               | 177.79<br>(119.13 to 290.74)          | 195.51<br>(130.52 to 316.75)          | 160.32<br>(106.17 to 264.16)            |
| Cellulitis                                    | 143.91<br>(78.43 to 268.42)                    | 485.35<br>(272.48 to 886.10)                  | 517.86<br>(292.49 to 928.94)                 | 433.02<br>(249.05 to 801.66)                   | 4.32<br>(2.45 to 8.16)                  | 20.96<br>(12.10 to 37.22)             | 23.69<br>(13.87 to 42.61)             | 17.06<br>(9.79 to 32.16)                |
| Pyoderma                                      | 1,055.50<br>(648.59 to 1,769.33)               | 2,219.14<br>(1,390.79 to 3,495.66)            | 2,198.00<br>(1,358.26 to 3,488.56)           | 2,430.27<br>(1,525.74 to 3,824.95)             | 25.45<br>(15.94 to 42.64)               | 82.72<br>(52.45 to 136.19)            | 87.54<br>(55.24 to 144.90)            | 81.08<br>(51.75 to 136.66)              |
| Decubitus ulcer                               | 476.33<br>(292.11 to 820.63)                   | 1,150.08<br>(708.18 to 1,983.44)              | 1,226.73<br>(766.71 to 2,117.51)             | 1,062.52<br>(651.59 to 1,821.96)               | 22.44<br>(14.03 to 39.15)               | 70.95<br>(41.80 to 127.32)            | 80.86<br>(48.35 to 142.34)            | 59.36<br>(34.32 to 106.36)              |
| Other skin and subcutaneous diseases          | 56.31<br>(31.20 to 91.43)                      | 97.09<br>(56.39 to 151.05)                    | 95.46<br>(58.27 to 152.68)                   | 95.46<br>(55.02 to 151.16)                     | 1.33<br>(0.75 to 2.15)                  | 3.16<br>(1.84 to 4.94)                | 3.42<br>(1.98 to 5.33)                | 2.82<br>(1.61 to 4.43)                  |
| Sudden infant death syndrome                  | 9,217.88<br>(3,026.32 to 22,845.49)            | 2,795.91<br>(860.25 to 6,926.93)              | 2,403.13<br>(739.70 to 5,934.81)             | 4,539.91<br>(1,407.99 to 11,254.18)            | 106.98<br>(35.10 to 265.20)             | 32.44<br>(9.98 to 80.39)              | 27.88<br>(8.58 to 68.86)              | 52.67<br>(16.33 to 130.61)              |

|                          |                                             |                                             |                                             |                                             |                                       |                                       |                                       |                                       |
|--------------------------|---------------------------------------------|---------------------------------------------|---------------------------------------------|---------------------------------------------|---------------------------------------|---------------------------------------|---------------------------------------|---------------------------------------|
| Injuries                 | 352,448.28<br>(203,107.43 to<br>317,694.29) | 171,036.68<br>(133,440.07 to<br>206,630.59) | 147,467.76<br>(115,886.63 to<br>176,909.36) | 263,858.10<br>(206,822.81 to<br>321,634.58) | 4,352.25<br>(3,612.76 to<br>5,171.74) | 3,872.50<br>(3,159.83 to<br>4,599.75) | 3,469.53<br>(2,864.96 to<br>4,077.38) | 5,526.96<br>(4,456.42 to<br>6,603.69) |
| Transport injuries       | 90,247.59<br>(71,290.63 to<br>114,621.80)   | 41,722.73<br>(29,885.53 to<br>58,218.38)    | 29,336.40<br>(21,361.96 to<br>40,915.19)    | 107,859.69<br>(78,486.79 to<br>141,842.63)  | 1,608.12<br>(1,320.57 to<br>1,954.06) | 1,004.56<br>(732.51 to<br>1,392.97)   | 748.49<br>(553.95 to<br>1,016.81)     | 2,278.53<br>(1,675.57 to<br>3,046.01) |
| Road injuries            | 84,763.50<br>(68,059.67 to<br>107,724.74)   | 35,486.81<br>(25,024.98 to<br>49,345.29)    | 23,758.89<br>(16,829.92 to<br>32,833.81)    | 100,152.49<br>(72,769.79 to<br>131,583.29)  | 1,513.26<br>(1,251.82 to<br>1,824.68) | 858.69<br>(625.75 to<br>1,175.35)     | 613.18<br>(452.82 to<br>828.16)       | 2,110.40<br>(1,568.89 to<br>2,782.90) |
| Pedestrian road injuries | 23,940.99<br>(16,660.90 to<br>35,519.74)    | 9,264.43<br>(6,430.87 to<br>13,458.32)      | 6,507.16<br>(4,599.52 to<br>9,507.27)       | 22,274.94<br>(15,275.86 to<br>31,452.78)    | 444.10<br>(334.39 to<br>620.90)       | 267.54<br>(192.99 to<br>374.40)       | 201.66<br>(148.04 to<br>279.07)       | 560.58<br>(402.92 to<br>775.00)       |

| Laos                                            |                                                 |                                               |                                               |                                                |                                            |                                            |                                            |                                            |
|-------------------------------------------------|-------------------------------------------------|-----------------------------------------------|-----------------------------------------------|------------------------------------------------|--------------------------------------------|--------------------------------------------|--------------------------------------------|--------------------------------------------|
| Cause                                           | YLLs (actual counts)                            |                                               |                                               |                                                | Deaths (actual counts)                     |                                            |                                            |                                            |
|                                                 | 2016                                            | 2040 Forecast                                 | 2040 Better Scenario                          | 2040 Worse Scenario                            | 2016                                       | 2040 Forecast                              | 2040 Better Scenario                       | 2040 Worse Scenario                        |
| Cyclist road injuries                           | 2,573.73<br>(1,712.63 to 3,864.38)              | 1,268.94<br>(751.19 to 2,044.77)              | 863.37<br>(512.85 to 1,380.55)                | 3,516.55<br>(2,138.71 to 5,409.56)             | 52.79<br>(35.44 to 76.98)                  | 37.50<br>(22.21 to 60.23)                  | 27.89<br>(16.73 to 44.89)                  | 85.03<br>(51.08 to 133.19)                 |
| Motorcyclist road injuries                      | 22,837.32<br>(17,514.36 to 28,783.02)           | 12,309.47<br>(7,593.21 to 18,163.86)          | 8,806.06<br>(5,489.55 to 13,121.24)           | 28,761.48<br>(18,790.53 to 39,896.64)          | 379.74<br>(291.80 to 481.36)               | 243.04<br>(150.59 to 360.63)               | 180.12<br>(112.76 to 263.77)               | 519.58<br>(343.99 to 731.51)               |
| Motor vehicle road injuries                     | 33,694.68<br>(24,203.95 to 45,171.79)           | 11,938.77<br>(7,919.88 to 17,720.67)          | 7,140.75<br>(4,824.77 to 10,430.48)           | 43,209.83<br>(29,655.31 to 60,953.55)          | 604.97<br>(445.67 to 775.84)               | 290.34<br>(200.29 to 422.30)               | 188.97<br>(133.71 to 268.35)               | 892.07<br>(630.78 to 1,249.14)             |
| Other road injuries                             | 1,716.78<br>(1,075.28 to 3,106.58)              | 705.19<br>(414.73 to 1,265.92)                | 441.54<br>(265.34 to 778.87)                  | 2,389.70<br>(1,386.71 to 4,411.29)             | 31.66<br>(20.40 to 56.62)                  | 20.26<br>(11.85 to 38.29)                  | 14.54<br>(8.64 to 27.88)                   | 53.14<br>(31.48 to 99.67)                  |
| Other transport injuries                        | 5,484.09<br>(2,494.05 to 9,336.69)              | 6,235.92<br>(3,055.04 to 9,994.02)            | 5,577.51<br>(2,830.19 to 8,739.19)            | 7,707.20<br>(3,802.99 to 12,257.08)            | 94.86<br>(45.99 to 146.96)                 | 145.88<br>(70.06 to 227.31)                | 135.31<br>(66.78 to 207.48)                | 168.13<br>(80.31 to 265.83)                |
| <b>Unintentional injuries</b>                   | <b>124,862.33<br/>(92,104.77 to 173,296.47)</b> | <b>73,375.41<br/>(57,981.55 to 90,336.15)</b> | <b>67,755.87<br/>(53,470.34 to 82,995.81)</b> | <b>92,793.57<br/>(71,870.69 to 117,822.88)</b> | <b>2,040.06<br/>(1,629.28 to 2,627.57)</b> | <b>1,705.89<br/>(1,406.71 to 2,014.73)</b> | <b>1,659.33<br/>(1,364.33 to 1,947.63)</b> | <b>1,964.53<br/>(1,665.51 to 2,392.75)</b> |
| Falls                                           | 17,191.42<br>(12,434.55 to 24,858.34)           | 15,743.50<br>(12,236.69 to 19,721.39)         | 15,486.00<br>(12,061.68 to 19,286.54)         | 17,358.27<br>(13,374.43 to 21,992.76)          | 375.47<br>(296.65 to 479.00)               | 523.29<br>(417.66 to 648.20)               | 546.92<br>(441.10 to 680.91)               | 521.78<br>(413.47 to 651.82)               |
| Drowning                                        | 48,630.94<br>(35,247.78 to 67,245.94)           | 23,749.02<br>(17,650.82 to 32,052.74)         | 21,189.22<br>(15,890.84 to 28,290.05)         | 31,149.63<br>(22,643.99 to 42,430.34)          | 720.08<br>(543.39 to 956.13)               | 443.33<br>(334.51 to 584.41)               | 405.21<br>(307.99 to 529.08)               | 552.07<br>(412.90 to 727.69)               |
| Fire, heat, and hot substances                  | 13,036.28<br>(8,454.48 to 20,416.10)            | 7,177.19<br>(4,856.34 to 11,163.43)           | 6,435.50<br>(4,376.28 to 9,890.51)            | 9,554.54<br>(6,374.63 to 14,967.84)            | 217.87<br>(153.83 to 320.70)               | 170.74<br>(119.23 to 266.15)               | 160.67<br>(113.55 to 247.01)               | 208.28<br>(143.83 to 333.95)               |
| Poisonings                                      | 3,516.63<br>(1,919.07 to 6,315.42)              | 1,523.85<br>(878.87 to 2,214.79)              | 1,319.64<br>(763.78 to 1,924.06)              | 2,215.15<br>(1,219.57 to 3,449.45)             | 57.90<br>(33.35 to 94.20)                  | 31.56<br>(18.92 to 44.55)                  | 28.27<br>(17.40 to 39.96)                  | 43.06<br>(24.38 to 62.46)                  |
| Exposure to mechanical forces                   | 9,890.35<br>(6,659.31 to 15,432.71)             | 5,394.54<br>(3,631.58 to 7,864.69)            | 4,901.51<br>(3,314.56 to 7,219.62)            | 7,271.65<br>(4,796.83 to 11,109.27)            | 154.24<br>(107.69 to 228.78)               | 107.14<br>(72.77 to 156.73)                | 100.25<br>(68.77 to 146.11)                | 135.70<br>(93.29 to 196.88)                |
| Unintentional firearm injuries                  | 1,466.83<br>(826.23 to 3,430.31)                | 902.48<br>(480.06 to 2,195.26)                | 823.97<br>(436.82 to 1,990.42)                | 1,187.41<br>(627.13 to 2,912.37)               | 25.71<br>(14.92 to 60.95)                  | 19.69<br>(10.87 to 48.56)                  | 18.54<br>(10.17 to 46.22)                  | 24.59<br>(13.36 to 61.26)                  |
| Unintentional suffocation                       | 3,297.02<br>(1,215.99 to 7,269.11)              | 1,079.96<br>(542.33 to 2,079.63)              | 924.08<br>(470.39 to 1,766.57)                | 1,753.71<br>(775.69 to 3,635.02)               | 40.54<br>(16.23 to 87.05)                  | 14.80<br>(8.08 to 26.81)                   | 12.85<br>(7.28 to 22.71)                   | 23.14<br>(11.34 to 45.21)                  |
| Other exposure to mechanical forces             | 5,126.50<br>(3,338.63 to 7,098.35)              | 3,412.10<br>(2,143.70 to 4,952.27)            | 3,153.46<br>(1,967.58 to 4,571.36)            | 4,330.53<br>(2,713.42 to 6,244.73)             | 87.99<br>(58.15 to 122.80)                 | 72.65<br>(47.26 to 105.78)                 | 68.86<br>(44.62 to 100.54)                 | 87.97<br>(56.98 to 126.50)                 |
| Adverse effects of medical treatment            | 8,261.63<br>(5,359.89 to 12,841.99)             | 5,334.38<br>(3,822.55 to 6,772.23)            | 4,998.86<br>(3,547.70 to 6,372.71)            | 6,719.67<br>(4,840.47 to 8,712.94)             | 142.35<br>(105.06 to 191.70)               | 137.96<br>(99.72 to 178.54)                | 136.21<br>(97.04 to 178.19)                | 157.13<br>(115.39 to 197.33)               |
| Animal contact                                  | 3,245.46<br>(1,409.02 to 5,836.81)              | 2,730.80<br>(1,246.48 to 4,607.05)            | 2,474.54<br>(1,134.56 to 4,197.05)            | 3,700.31<br>(1,608.55 to 6,504.24)             | 59.40<br>(26.94 to 97.92)                  | 66.15<br>(31.21 to 107.21)                 | 62.55<br>(29.23 to 99.54)                  | 83.12<br>(37.88 to 139.29)                 |
| Venomous animal contact                         | 1,524.26<br>(635.60 to 2,983.34)                | 1,212.61<br>(523.98 to 2,310.71)              | 1,096.64<br>(467.97 to 2,118.47)              | 1,655.78<br>(703.58 to 3,247.56)               | 28.58<br>(12.45 to 53.11)                  | 30.31<br>(13.58 to 55.73)                  | 28.70<br>(12.70 to 52.78)                  | 38.15<br>(16.75 to 72.15)                  |
| Non-venomous animal contact                     | 1,721.20<br>(663.80 to 3,111.43)                | 1,518.19<br>(636.57 to 2,575.63)              | 1,377.90<br>(579.71 to 2,359.05)              | 2,044.53<br>(820.45 to 3,622.64)               | 30.81<br>(12.12 to 50.81)                  | 35.84<br>(15.03 to 58.01)                  | 33.85<br>(14.48 to 54.40)                  | 44.96<br>(18.27 to 74.93)                  |
| Foreign body                                    | 13,755.73<br>(6,181.71 to 32,716.07)            | 6,807.92<br>(3,968.57 to 12,241.66)           | 6,359.95<br>(3,798.04 to 10,829.99)           | 8,775.96<br>(4,610.49 to 18,268.22)            | 187.93<br>(95.60 to 405.23)                | 126.33<br>(85.17 to 185.58)                | 124.65<br>(85.54 to 171.08)                | 145.07<br>(89.77 to 252.33)                |
| Pulmonary aspiration and foreign body in airway | 12,727.04<br>(5,268.81 to 31,216.32)            | 6,230.36<br>(3,333.33 to 11,469.73)           | 5,826.76<br>(3,233.51 to 10,214.00)           | 8,021.46<br>(3,841.20 to 17,100.85)            | 171.76<br>(79.60 to 385.06)                | 113.64<br>(71.37 to 172.23)                | 112.37<br>(72.65 to 158.76)                | 130.06<br>(73.67 to 232.66)                |

|                                             |                                                               |                                                               |                                                               |                                                               |                                                      |                                                          |                                                          |                                                          |
|---------------------------------------------|---------------------------------------------------------------|---------------------------------------------------------------|---------------------------------------------------------------|---------------------------------------------------------------|------------------------------------------------------|----------------------------------------------------------|----------------------------------------------------------|----------------------------------------------------------|
|                                             | 1,028.69<br>(489.68 to<br>2,395.64)                           | 577.56<br>(326.18 to<br>1,109.41)                             | 533.19<br>(308.81 to<br>1,006.72)                             | 754.49<br>(400.55 to<br>1,555.29)                             | 16.17<br>(8.63 to<br>34.76)                          | 12.68<br>(7.76 to<br>24.11)                              | 12.28<br>(7.62 to<br>23.32)                              | 15.01<br>(8.77 to<br>28.90)                              |
| Foreign body in other body part             |                                                               |                                                               |                                                               |                                                               |                                                      |                                                          |                                                          |                                                          |
|                                             | 597.24<br>(407.24 to<br>875.51)                               | 420.77<br>(278.27 to<br>594.74)                               | 375.93<br>(245.11 to<br>529.43)                               | 607.11<br>(409.41 to<br>847.81)                               | 11.08<br>(8.12 to<br>15.15)                          | 11.13<br>(7.65 to<br>16.54)                              | 10.43<br>(6.97 to<br>15.58)                              | 14.71<br>(10.13 to<br>21.93)                             |
| Environmental heat and cold exposure        |                                                               |                                                               |                                                               |                                                               |                                                      |                                                          |                                                          |                                                          |
|                                             | 6,736.64<br>(5,021.43 to<br>9,087.43)                         | 4,493.44<br>(3,135.58 to<br>6,481.49)                         | 4,214.73<br>(2,929.95 to<br>6,099.66)                         | 5,441.28<br>(3,864.06 to<br>7,866.64)                         | 113.74<br>(84.05 to<br>154.61)                       | 88.27<br>(63.30 to<br>126.03)                            | 84.17<br>(60.31 to<br>120.32)                            | 103.61<br>(74.20 to<br>150.09)                           |
| Other unintentional injuries                |                                                               |                                                               |                                                               |                                                               |                                                      |                                                          |                                                          |                                                          |
| <b>Self-harm and interpersonal violence</b> | <b>37,269.11</b><br><b>(25,488.04 to</b><br><b>46,994.95)</b> | <b>52,728.31</b><br><b>(30,437.97 to</b><br><b>77,665.39)</b> | <b>47,228.09</b><br><b>(28,633.11 to</b><br><b>66,919.18)</b> | <b>59,798.27</b><br><b>(32,376.28 to</b><br><b>91,099.62)</b> | <b>702.84</b><br><b>(490.48 to</b><br><b>878.74)</b> | <b>1,100.79</b><br><b>(652.90 to</b><br><b>1,619.73)</b> | <b>1,000.51</b><br><b>(620.59 to</b><br><b>1,390.49)</b> | <b>1,221.24</b><br><b>(670.60 to</b><br><b>1,848.01)</b> |

| Laos                                                                                |                                                   |                                                         |                                                         |                                                         |                                                |                                                   |                                                   |                                                   |
|-------------------------------------------------------------------------------------|---------------------------------------------------|---------------------------------------------------------|---------------------------------------------------------|---------------------------------------------------------|------------------------------------------------|---------------------------------------------------|---------------------------------------------------|---------------------------------------------------|
| Cause                                                                               | YLLs (actual counts)                              |                                                         |                                                         |                                                         | Deaths (actual counts)                         |                                                   |                                                   |                                                   |
|                                                                                     | 2016                                              | 2040 Forecast                                           | 2040 Better Scenario                                    | 2040 Worse Scenario                                     | 2016                                           | 2040 Forecast                                     | 2040 Better Scenario                              | 2040 Worse Scenario                               |
| Self-harm                                                                           | 34,729.59<br>(22,751.73 to<br>44,505.73)          | 50,442.19<br>(28,328.60 to<br>75,407.10)                | 45,011.52<br>(26,307.59 to<br>64,781.07)                | 57,402.56<br>(30,159.64 to<br>88,605.39)                | 659.46<br>(438.98 to<br>831.32)                | 1,057.21<br>(608.86 to<br>1,580.67)               | 957.88<br>(575.10 to<br>1,350.21)                 | 1,176.37<br>(627.21 to<br>1,804.13)               |
| Self-harm by firearm                                                                | 1,920.13<br>(450.14 to<br>4,431.35)               | 2,243.01<br>(501.43 to<br>5,405.17)                     | 1,967.88<br>(447.43 to<br>4,631.29)                     | 2,633.92<br>(585.14 to<br>6,398.63)                     | 37.48<br>(9.07 to<br>86.16)                    | 49.59<br>(11.31 to<br>119.58)                     | 44.51<br>(10.38 to<br>105.41)                     | 56.53<br>(12.52 to<br>139.35)                     |
| Self-harm by other specified means                                                  | 32,809.46<br>(21,287.65 to<br>42,052.06)          | 48,199.17<br>(26,964.85 to<br>72,175.56)                | 43,043.64<br>(25,254.04 to<br>62,006.36)                | 54,768.65<br>(29,225.58 to<br>84,679.07)                | 621.98<br>(409.66 to<br>790.67)                | 1,007.62<br>(578.86 to<br>1,488.76)               | 913.37<br>(545.96 to<br>1,294.16)                 | 1,119.84<br>(609.80 to<br>1,716.42)               |
| Interpersonal violence                                                              | 2,539.52<br>(1,759.55 to<br>3,287.83)             | 2,286.12<br>(1,448.81 to<br>3,244.06)                   | 2,216.57<br>(1,394.49 to<br>3,124.69)                   | 2,995.70<br>(1,559.60 to<br>3,327.54)                   | 43.38<br>(29.82 to<br>56.90)                   | 43.58<br>(28.14 to<br>61.00)                      | 42.63<br>(27.39 to<br>59.24)                      | 44.87<br>(29.60 to<br>62.29)                      |
| Physical violence by firearm                                                        | 529.87<br>(293.41 to<br>1,001.32)                 | 494.18<br>(259.03 to<br>975.72)                         | 488.28<br>(253.29 to<br>965.42)                         | 507.98<br>(264.39 to<br>1,011.87)                       | 9.23<br>(5.22 to<br>17.87)                     | 9.26<br>(4.92 to<br>18.46)                        | 9.20<br>(4.94 to<br>18.23)                        | 9.42<br>(5.02 to<br>19.12)                        |
| Physical violence by sharp object                                                   | 952.07<br>(556.44 to<br>1,431.53)                 | 998.80<br>(564.81 to<br>1,576.95)                       | 1,003.62<br>(567.97 to<br>1,582.94)                     | 979.86<br>(555.07 to<br>1,543.99)                       | 16.57<br>(9.82 to<br>24.98)                    | 18.69<br>(10.59 to<br>28.89)                      | 18.91<br>(10.56 to<br>28.88)                      | 18.14<br>(10.46 to<br>28.28)                      |
| Physical violence by other means                                                    | 1,057.58<br>(704.51 to<br>1,515.73)               | 793.15<br>(472.21 to<br>1,235.55)                       | 724.66<br>(430.97 to<br>1,122.00)                       | 907.86<br>(545.88 to<br>1,395.73)                       | 17.58<br>(11.84 to<br>24.72)                   | 15.63<br>(9.49 to<br>23.86)                       | 14.51<br>(8.97 to<br>21.68)                       | 17.31<br>(10.63 to<br>25.99)                      |
| <b>Forces of nature, conflict and terrorism, and executions and police conflict</b> | <b>69.26</b><br><b>(51.37 to</b><br><b>92.57)</b> | <b>3,210.24</b><br><b>(0.00 to</b><br><b>15,284.61)</b> | <b>3,147.40</b><br><b>(0.00 to</b><br><b>14,953.65)</b> | <b>3,406.56</b><br><b>(0.00 to</b><br><b>16,247.95)</b> | <b>1.23</b><br><b>(0.89 to</b><br><b>1.68)</b> | <b>61.26</b><br><b>(0.00 to</b><br><b>287.18)</b> | <b>61.20</b><br><b>(0.00 to</b><br><b>286.51)</b> | <b>62.66</b><br><b>(0.00 to</b><br><b>295.33)</b> |
| Exposure to forces of nature                                                        | 0.00<br>(0.00 to<br>0.00)                         | 291.87<br>(0.00 to<br>938.79)                           | 285.70<br>(0.00 to<br>914.21)                           | 311.32<br>(0.00 to<br>1,010.05)                         | 0.00<br>(0.00 to<br>0.00)                      | 6.17<br>(0.00 to<br>19.45)                        | 6.21<br>(0.00 to<br>19.54)                        | 6.24<br>(0.00 to<br>19.80)                        |
| Conflict and terrorism                                                              | 0.00<br>(0.00 to<br>0.00)                         | 2,916.93<br>(0.00 to<br>15,018.75)                      | 2,860.27<br>(0.00 to<br>14,736.35)                      | 3,093.77<br>(0.00 to<br>15,936.74)                      | 0.00<br>(0.00 to<br>0.00)                      | 53.06<br>(0.00 to<br>283.15)                      | 54.96<br>(0.00 to<br>282.42)                      | 56.38<br>(0.00 to<br>289.95)                      |
| Executions and police conflict                                                      | 69.26<br>(51.37 to<br>92.57)                      | 1.44<br>(0.00 to<br>23.10)                              | 1.42<br>(0.00 to<br>22.89)                              | 1.48<br>(0.00 to<br>23.77)                              | 1.23<br>(0.89 to<br>1.68)                      | 0.03<br>(0.00 to<br>0.44)                         | 0.03<br>(0.00 to<br>0.44)                         | 0.03<br>(0.00 to<br>0.45)                         |



| Malaysia                                                          |                                       |                                       |                                       |                                       |                                 |                                 |                                 |                                 |
|-------------------------------------------------------------------|---------------------------------------|---------------------------------------|---------------------------------------|---------------------------------------|---------------------------------|---------------------------------|---------------------------------|---------------------------------|
| Cause                                                             | YLLs (in 1000s)                       |                                       |                                       |                                       | Deaths (in 1000s)               |                                 |                                 |                                 |
|                                                                   | 2016                                  | 2040 Forecast                         | 2040 Better Scenario                  | 2040 Worse Scenario                   | 2016                            | 2040 Forecast                   | 2040 Better Scenario            | 2040 Worse Scenario             |
| All causes                                                        | 3,793.39<br>(3,615.55 to<br>3,969.12) | 4,875.64<br>(4,031.58 to<br>5,743.91) | 4,008.98<br>(3,312.72 to<br>4,724.29) | 6,910.45<br>(5,641.28 to<br>8,270.76) | 150.99<br>(144.50 to<br>157.75) | 274.47<br>(226.49 to<br>336.25) | 234.95<br>(191.59 to<br>290.26) | 358.83<br>(297.28 to<br>432.45) |
| Communicable, maternal, neonatal, and nutritional diseases        | 634.65<br>(495.61 to<br>719.25)       | 821.51<br>(574.40 to<br>1,044.72)     | 689.22<br>(489.29 to<br>859.78)       | 1,092.69<br>(758.61 to<br>1,425.61)   | 21.40<br>(15.44 to<br>24.72)    | 41.29<br>(27.35 to<br>52.91)    | 36.03<br>(24.07 to<br>45.70)    | 51.24<br>(33.32 to<br>67.48)    |
| HIV/AIDS and tuberculosis                                         | 84.98<br>(58.22 to<br>127.61)         | 41.63<br>(16.28 to<br>108.63)         | 31.02<br>(10.67 to<br>92.71)          | 81.46<br>(42.29 to<br>151.16)         | 2.43<br>(1.80 to<br>3.38)       | 1.48<br>(0.75 to<br>3.05)       | 1.08<br>(0.53 to<br>2.58)       | 2.80<br>(1.63 to<br>4.60)       |
| Tuberculosis                                                      | 33.14<br>(29.16 to<br>37.20)          | 18.40<br>(11.44 to<br>29.32)          | 11.80<br>(7.72 to<br>17.97)           | 38.81<br>(23.53 to<br>65.18)          | 1.29<br>(1.14 to<br>1.46)       | 0.98<br>(0.63 to<br>1.48)       | 0.66<br>(0.44 to<br>0.97)       | 1.91<br>(1.18 to<br>3.14)       |
| HIV/AIDS                                                          | 51.84<br>(24.74 to<br>96.89)          | 23.24<br>(2.95 to<br>87.56)           | 19.22<br>(1.84 to<br>81.58)           | 42.64<br>(12.47 to<br>107.95)         | 1.14<br>(0.52 to<br>2.14)       | 0.50<br>(0.05 to<br>2.04)       | 0.42<br>(0.03 to<br>1.93)       | 0.88<br>(0.22 to<br>2.44)       |
| Diarrhea, lower respiratory, and other common infectious diseases | 398.81<br>(272.45 to<br>465.56)       | 584.68<br>(346.68 to<br>783.01)       | 478.13<br>(288.94 to<br>633.24)       | 785.95<br>(464.52 to<br>1,100.94)     | 16.35<br>(10.47 to<br>19.46)    | 34.70<br>(20.69 to<br>46.07)    | 29.95<br>(17.94 to<br>39.52)    | 43.05<br>(25.36 to<br>59.11)    |
| Diarrheal diseases                                                | 14.68<br>(9.38 to<br>20.51)           | 49.68<br>(15.36 to<br>131.63)         | 55.02<br>(20.40 to<br>127.72)         | 29.08<br>(7.94 to<br>79.67)           | 0.50<br>(0.28 to<br>0.76)       | 3.28<br>(1.00 to<br>8.48)       | 3.85<br>(1.40 to<br>9.05)       | 1.73<br>(0.47 to<br>4.95)       |
| Intestinal infectious diseases                                    | 22.05<br>(11.20 to<br>38.69)          | 28.02<br>(13.30 to<br>52.26)          | 31.34<br>(15.21 to<br>55.78)          | 22.72<br>(9.74 to<br>44.05)           | 0.34<br>(0.17 to<br>0.59)       | 0.46<br>(0.22 to<br>0.84)       | 0.51<br>(0.26 to<br>0.92)       | 0.37<br>(0.16 to<br>0.70)       |
| Typhoid fever                                                     | 19.20<br>(9.37 to<br>34.40)           | 25.98<br>(12.17 to<br>47.92)          | 29.63<br>(14.50 to<br>52.35)          | 19.88<br>(8.41 to<br>38.51)           | 0.29<br>(0.15 to<br>0.52)       | 0.42<br>(0.20 to<br>0.78)       | 0.49<br>(0.25 to<br>0.86)       | 0.32<br>(0.14 to<br>0.61)       |
| Paratyphoid fever                                                 | 2.84<br>(1.18 to<br>5.92)             | 2.04<br>(0.77 to<br>4.59)             | 1.70<br>(0.64 to<br>3.75)             | 2.83<br>(1.04 to<br>6.43)             | 0.04<br>(0.02 to<br>0.09)       | 0.03<br>(0.01 to<br>0.08)       | 0.03<br>(0.01 to<br>0.06)       | 0.05<br>(0.02 to<br>0.10)       |
| Other intestinal infectious diseases                              | 0.01<br>(0.00 to<br>0.01)             | 0.00<br>(0.00 to<br>0.01)             | 0.00<br>(0.00 to<br>0.01)             | 0.00<br>(0.00 to<br>0.01)             | 0.00<br>(0.00 to<br>0.00)       | 0.00<br>(0.00 to<br>0.00)       | 0.00<br>(0.00 to<br>0.00)       | 0.00<br>(0.00 to<br>0.00)       |
| Lower respiratory infections                                      | 313.89<br>(193.10 to<br>373.97)       | 456.30<br>(240.95 to<br>644.63)       | 345.95<br>(181.13 to<br>478.14)       | 668.28<br>(355.67 to<br>986.60)       | 14.52<br>(8.75 to<br>17.54)     | 29.65<br>(16.38 to<br>40.62)    | 24.35<br>(13.26 to<br>33.27)    | 39.38<br>(21.99 to<br>55.22)    |
| Upper respiratory infections                                      | 0.08<br>(0.04 to<br>0.13)             | 0.06<br>(0.02 to<br>0.12)             | 0.04<br>(0.02 to<br>0.09)             | 0.10<br>(0.04 to<br>0.22)             | 0.00<br>(0.00 to<br>0.00)       | 0.00<br>(0.00 to<br>0.01)       | 0.00<br>(0.00 to<br>0.00)       | 0.00<br>(0.00 to<br>0.01)       |
| Otitis media                                                      | 0.00<br>(0.00 to<br>0.01)             | 0.00<br>(0.00 to<br>0.01)             | 0.00<br>(0.00 to<br>0.01)             | 0.00<br>(0.00 to<br>0.01)             | 0.00<br>(0.00 to<br>0.00)       | 0.00<br>(0.00 to<br>0.00)       | 0.00<br>(0.00 to<br>0.00)       | 0.00<br>(0.00 to<br>0.00)       |
| Meningitis                                                        | 24.66<br>(18.35 to<br>35.67)          | 11.62<br>(7.72 to<br>18.41)           | 9.62<br>(6.28 to<br>15.24)            | 17.31<br>(11.39 to<br>27.51)          | 0.52<br>(0.38 to<br>0.75)       | 0.34<br>(0.24 to<br>0.51)       | 0.29<br>(0.20 to<br>0.44)       | 0.48<br>(0.34 to<br>0.73)       |
| Pneumococcal meningitis                                           | 0.22<br>(0.15 to<br>0.33)             | 0.11<br>(0.07 to<br>0.17)             | 0.11<br>(0.07 to<br>0.17)             | 0.11<br>(0.07 to<br>0.17)             | 0.00<br>(0.00 to<br>0.01)       | 0.00<br>(0.00 to<br>0.01)       | 0.00<br>(0.00 to<br>0.01)       | 0.00<br>(0.00 to<br>0.01)       |
| H influenzae type B meningitis                                    | 1.77<br>(1.27 to<br>2.55)             | 1.76<br>(0.85 to<br>3.29)             | 1.68<br>(0.87 to<br>2.98)             | 2.36<br>(0.88 to<br>5.24)             | 0.04<br>(0.03 to<br>0.05)       | 0.04<br>(0.03 to<br>0.06)       | 0.04<br>(0.03 to<br>0.06)       | 0.05<br>(0.03 to<br>0.08)       |
| Meningococcal meningitis                                          | 8.56<br>(6.03 to<br>12.98)            | 3.78<br>(2.47 to<br>6.33)             | 3.08<br>(1.96 to<br>5.11)             | 5.58<br>(3.68 to<br>8.94)             | 0.19<br>(0.13 to<br>0.28)       | 0.12<br>(0.08 to<br>0.19)       | 0.10<br>(0.07 to<br>0.16)       | 0.17<br>(0.12 to<br>0.26)       |
| Other meningitis                                                  | 14.10<br>(10.37 to<br>20.82)          | 5.97<br>(3.91 to<br>9.74)             | 4.75<br>(3.07 to<br>7.71)             | 9.25<br>(6.12 to<br>15.17)            | 0.29<br>(0.21 to<br>0.42)       | 0.17<br>(0.12 to<br>0.27)       | 0.14<br>(0.10 to<br>0.22)       | 0.26<br>(0.18 to<br>0.40)       |
| Encephalitis                                                      | 19.24<br>(14.64 to<br>24.21)          | 24.79<br>(17.28 to<br>33.49)          | 24.33<br>(16.55 to<br>33.15)          | 25.64<br>(17.82 to<br>34.00)          | 0.42<br>(0.32 to<br>0.50)       | 0.74<br>(0.52 to<br>0.95)       | 0.74<br>(0.51 to<br>0.96)       | 0.73<br>(0.52 to<br>0.93)       |

|                |                           |                             |                             |                             |                           |                           |                           |                           |
|----------------|---------------------------|-----------------------------|-----------------------------|-----------------------------|---------------------------|---------------------------|---------------------------|---------------------------|
| Diphtheria     | 0.01<br>(0.01 to<br>0.02) | 0.00<br>(0.00 to<br>0.01)   | 0.00<br>(0.00 to<br>0.01)   | 0.01<br>(0.00 to<br>0.02)   | 0.00<br>(0.00 to<br>0.00) | 0.00<br>(0.00 to<br>0.00) | 0.00<br>(0.00 to<br>0.00) | 0.00<br>(0.00 to<br>0.00) |
| Whooping cough | 1.26<br>(0.11 to<br>4.24) | 0.63<br>(0.01 to<br>2.67)   | 0.27<br>(0.01 to<br>1.12)   | 3.28<br>(0.03 to<br>13.39)  | 0.01<br>(0.00 to<br>0.05) | 0.01<br>(0.00 to<br>0.03) | 0.00<br>(0.00 to<br>0.01) | 0.04<br>(0.00 to<br>0.16) |
| Tetanus        | 0.31<br>(0.23 to<br>0.47) | 0.06<br>(0.04 to<br>0.10)   | 0.06<br>(0.04 to<br>0.10)   | 0.09<br>(0.05 to<br>0.18)   | 0.01<br>(0.01 to<br>0.02) | 0.00<br>(0.00 to<br>0.00) | 0.00<br>(0.00 to<br>0.00) | 0.00<br>(0.00 to<br>0.00) |
| Measles        | 1.98<br>(0.62 to<br>4.67) | 13.12<br>(0.47 to<br>44.19) | 11.15<br>(0.37 to<br>35.24) | 18.94<br>(0.60 to<br>65.62) | 0.02<br>(0.01 to<br>0.06) | 0.21<br>(0.01 to<br>0.79) | 0.18<br>(0.01 to<br>0.66) | 0.29<br>(0.01 to<br>1.08) |

| Malaysia                                              |                                         |                                           |                                          |                                           |                                      |                                      |                                      |                                      |
|-------------------------------------------------------|-----------------------------------------|-------------------------------------------|------------------------------------------|-------------------------------------------|--------------------------------------|--------------------------------------|--------------------------------------|--------------------------------------|
| Cause                                                 | YLLs (in 1000s)                         |                                           |                                          |                                           | Deaths (in 1000s)                    |                                      |                                      |                                      |
|                                                       | 2016                                    | 2040 Forecast                             | 2040 Better Scenario                     | 2040 Worse Scenario                       | 2016                                 | 2040 Forecast                        | 2040 Better Scenario                 | 2040 Worse Scenario                  |
| Varicella and herpes zoster                           | 0.65<br>(0.40 to 1.03)                  | 0.39<br>(0.19 to 0.73)                    | 0.34<br>(0.17 to 0.65)                   | 0.50<br>(0.23 to 0.96)                    | 0.01<br>(0.01 to 0.02)               | 0.02<br>(0.01 to 0.03)               | 0.02<br>(0.01 to 0.03)               | 0.02<br>(0.01 to 0.03)               |
| <b>Neglected tropical diseases and malaria</b>        | <b>23.15</b><br><b>(11.10 to 38.50)</b> | <b>100.06</b><br><b>(54.43 to 147.63)</b> | <b>97.98</b><br><b>(54.12 to 141.64)</b> | <b>103.15</b><br><b>(54.49 to 157.63)</b> | <b>0.47</b><br><b>(0.23 to 0.79)</b> | <b>2.69</b><br><b>(1.55 to 4.14)</b> | <b>2.70</b><br><b>(1.58 to 4.09)</b> | <b>2.67</b><br><b>(1.49 to 4.11)</b> |
| Malaria                                               | 0.76<br>(0.52 to 1.32)                  | 0.62<br>(0.39 to 1.26)                    | 0.61<br>(0.38 to 1.27)                   | 0.62<br>(0.39 to 1.25)                    | 0.02<br>(0.01 to 0.03)               | 0.02<br>(0.01 to 0.04)               | 0.02<br>(0.01 to 0.04)               | 0.02<br>(0.01 to 0.04)               |
| Chagas disease                                        | 0.00<br>(0.00 to 0.00)                  | 0.00<br>(0.00 to 0.00)                    | 0.00<br>(0.00 to 0.00)                   | 0.00<br>(0.00 to 0.00)                    | 0.00<br>(0.00 to 0.00)               | 0.00<br>(0.00 to 0.00)               | 0.00<br>(0.00 to 0.00)               | 0.00<br>(0.00 to 0.00)               |
| Leishmaniasis                                         | 0.00<br>(0.00 to 0.00)                  | 0.00<br>(0.00 to 0.00)                    | 0.00<br>(0.00 to 0.00)                   | 0.00<br>(0.00 to 0.00)                    | 0.00<br>(0.00 to 0.00)               | 0.00<br>(0.00 to 0.00)               | 0.00<br>(0.00 to 0.00)               | 0.00<br>(0.00 to 0.00)               |
| African trypanosomiasis                               | 0.00<br>(0.00 to 0.00)                  | 0.00<br>(0.00 to 0.00)                    | 0.00<br>(0.00 to 0.00)                   | 0.00<br>(0.00 to 0.00)                    | 0.00<br>(0.00 to 0.00)               | 0.00<br>(0.00 to 0.00)               | 0.00<br>(0.00 to 0.00)               | 0.00<br>(0.00 to 0.00)               |
| Schistosomiasis                                       | 0.00<br>(0.00 to 0.00)                  | 0.00<br>(0.00 to 0.00)                    | 0.00<br>(0.00 to 0.00)                   | 0.00<br>(0.00 to 0.00)                    | 0.00<br>(0.00 to 0.00)               | 0.00<br>(0.00 to 0.00)               | 0.00<br>(0.00 to 0.00)               | 0.00<br>(0.00 to 0.00)               |
| Cysticercosis                                         | 0.00<br>(0.00 to 0.00)                  | 0.00<br>(0.00 to 0.00)                    | 0.00<br>(0.00 to 0.00)                   | 0.00<br>(0.00 to 0.00)                    | 0.00<br>(0.00 to 0.00)               | 0.00<br>(0.00 to 0.00)               | 0.00<br>(0.00 to 0.00)               | 0.00<br>(0.00 to 0.00)               |
| Cystic echinococcosis                                 | 0.00<br>(0.00 to 0.01)                  | 0.00<br>(0.00 to 0.01)                    | 0.00<br>(0.00 to 0.00)                   | 0.01<br>(0.00 to 0.01)                    | 0.00<br>(0.00 to 0.00)               | 0.00<br>(0.00 to 0.00)               | 0.00<br>(0.00 to 0.00)               | 0.00<br>(0.00 to 0.00)               |
| Dengue                                                | 21.94<br>(9.76 to 37.41)                | 98.74<br>(52.63 to 146.63)                | 96.65<br>(51.57 to 140.36)               | 101.85<br>(52.90 to 156.48)               | 0.45<br>(0.19 to 0.77)               | 2.66<br>(1.50 to 4.11)               | 2.66<br>(1.54 to 4.07)               | 2.64<br>(1.44 to 4.08)               |
| Yellow fever                                          | 0.00<br>(0.00 to 0.00)                  | 0.00<br>(0.00 to 0.00)                    | 0.00<br>(0.00 to 0.00)                   | 0.00<br>(0.00 to 0.00)                    | 0.00<br>(0.00 to 0.00)               | 0.00<br>(0.00 to 0.00)               | 0.00<br>(0.00 to 0.00)               | 0.00<br>(0.00 to 0.00)               |
| Rabies                                                | 0.00<br>(0.00 to 0.00)                  | 0.00<br>(0.00 to 0.00)                    | 0.00<br>(0.00 to 0.00)                   | 0.00<br>(0.00 to 0.00)                    | 0.00<br>(0.00 to 0.00)               | 0.00<br>(0.00 to 0.00)               | 0.00<br>(0.00 to 0.00)               | 0.00<br>(0.00 to 0.00)               |
| Intestinal nematode infections                        | 0.25<br>(0.12 to 0.45)                  | 0.39<br>(0.20 to 0.67)                    | 0.39<br>(0.19 to 0.65)                   | 0.39<br>(0.19 to 0.67)                    | 0.00<br>(0.00 to 0.01)               | 0.01<br>(0.01 to 0.02)               | 0.01<br>(0.01 to 0.02)               | 0.01<br>(0.00 to 0.01)               |
| Other neglected tropical diseases                     | 0.20<br>(0.17 to 0.24)                  | 0.31<br>(0.24 to 0.39)                    | 0.33<br>(0.25 to 0.42)                   | 0.28<br>(0.23 to 0.35)                    | 0.00<br>(0.00 to 0.00)               | 0.01<br>(0.01 to 0.01)               | 0.01<br>(0.01 to 0.01)               | 0.01<br>(0.01 to 0.01)               |
| <b>Maternal disorders</b>                             | <b>13.24</b><br><b>(10.17 to 16.79)</b> | <b>9.43</b><br><b>(5.47 to 14.80)</b>     | <b>8.28</b><br><b>(4.80 to 13.22)</b>    | <b>12.11</b><br><b>(7.17 to 19.00)</b>    | <b>0.25</b><br><b>(0.20 to 0.32)</b> | <b>0.18</b><br><b>(0.11 to 0.29)</b> | <b>0.16</b><br><b>(0.09 to 0.26)</b> | <b>0.24</b><br><b>(0.14 to 0.37)</b> |
| Maternal hemorrhage                                   | 4.97<br>(3.47 to 6.81)                  | 3.26<br>(1.73 to 5.51)                    | 2.88<br>(1.50 to 4.86)                   | 4.13<br>(2.21 to 6.93)                    | 0.09<br>(0.07 to 0.13)               | 0.06<br>(0.03 to 0.11)               | 0.06<br>(0.03 to 0.09)               | 0.08<br>(0.04 to 0.13)               |
| Maternal sepsis and other maternal infections         | 0.86<br>(0.47 to 1.41)                  | 0.56<br>(0.24 to 1.07)                    | 0.49<br>(0.21 to 0.95)                   | 0.72<br>(0.32 to 1.36)                    | 0.02<br>(0.01 to 0.03)               | 0.01<br>(0.00 to 0.02)               | 0.01<br>(0.00 to 0.02)               | 0.01<br>(0.01 to 0.03)               |
| Maternal hypertensive disorders                       | 1.60<br>(1.06 to 2.26)                  | 1.10<br>(0.56 to 1.93)                    | 0.96<br>(0.48 to 1.68)                   | 1.43<br>(0.74 to 2.48)                    | 0.03<br>(0.02 to 0.04)               | 0.02<br>(0.01 to 0.04)               | 0.02<br>(0.01 to 0.03)               | 0.03<br>(0.01 to 0.05)               |
| Maternal obstructed labor and uterine rupture         | 0.19<br>(0.08 to 0.33)                  | 0.13<br>(0.05 to 0.30)                    | 0.11<br>(0.04 to 0.25)                   | 0.18<br>(0.07 to 0.40)                    | 0.00<br>(0.00 to 0.01)               | 0.00<br>(0.00 to 0.01)               | 0.00<br>(0.00 to 0.00)               | 0.00<br>(0.00 to 0.01)               |
| Maternal abortion, miscarriage, and ectopic pregnancy | 2.55<br>(1.72 to 3.71)                  | 2.00<br>(1.03 to 3.50)                    | 1.75<br>(0.91 to 3.08)                   | 2.63<br>(1.37 to 4.52)                    | 0.05<br>(0.03 to 0.07)               | 0.04<br>(0.02 to 0.07)               | 0.04<br>(0.02 to 0.06)               | 0.05<br>(0.03 to 0.09)               |

|                                        |                           |                           |                           |                           |                           |                           |                           |                           |
|----------------------------------------|---------------------------|---------------------------|---------------------------|---------------------------|---------------------------|---------------------------|---------------------------|---------------------------|
|                                        | 1.47<br>(0.97 to<br>2.12) | 1.99<br>(0.52 to<br>1.88) | 0.94<br>(0.45 to<br>1.66) | 1.43<br>(0.69 to<br>2.54) | 0.03<br>(0.02 to<br>0.04) | 0.02<br>(0.01 to<br>0.04) | 0.02<br>(0.01 to<br>0.03) | 0.03<br>(0.01 to<br>0.05) |
| Indirect maternal deaths               |                           |                           |                           |                           |                           |                           |                           |                           |
|                                        | 0.11<br>(0.04 to<br>0.21) | 0.07<br>(0.02 to<br>0.15) | 0.06<br>(0.02 to<br>0.13) | 0.09<br>(0.03 to<br>0.20) | 0.00<br>(0.00 to<br>0.00) | 0.00<br>(0.00 to<br>0.00) | 0.00<br>(0.00 to<br>0.00) | 0.00<br>(0.00 to<br>0.00) |
| Late maternal deaths                   |                           |                           |                           |                           |                           |                           |                           |                           |
|                                        | 0.01<br>(0.00 to<br>0.01) | 0.03<br>(0.01 to<br>0.07) | 0.02<br>(0.00 to<br>0.06) | 0.04<br>(0.01 to<br>0.09) | 0.00<br>(0.00 to<br>0.00) | 0.00<br>(0.00 to<br>0.00) | 0.00<br>(0.00 to<br>0.00) | 0.00<br>(0.00 to<br>0.00) |
| Maternal deaths aggravated by HIV/AIDS |                           |                           |                           |                           |                           |                           |                           |                           |
|                                        | 1.50<br>(0.95 to<br>2.15) | 1.19<br>(0.60 to<br>2.12) | 1.07<br>(0.52 to<br>1.92) | 1.47<br>(0.75 to<br>2.59) | 0.03<br>(0.02 to<br>0.04) | 0.02<br>(0.01 to<br>0.04) | 0.02<br>(0.01 to<br>0.04) | 0.03<br>(0.01 to<br>0.05) |
| Other maternal disorders               |                           |                           |                           |                           |                           |                           |                           |                           |

| Malaysia                                                                |                                   |                                  |                                  |                                   |                               |                               |                               |                               |
|-------------------------------------------------------------------------|-----------------------------------|----------------------------------|----------------------------------|-----------------------------------|-------------------------------|-------------------------------|-------------------------------|-------------------------------|
| Cause                                                                   | YLLs (in 1000s)                   |                                  |                                  |                                   | Deaths (in 1000s)             |                               |                               |                               |
|                                                                         | 2016                              | 2040 Forecast                    | 2040 Better Scenario             | 2040 Worse Scenario               | 2016                          | 2040 Forecast                 | 2040 Better Scenario          | 2040 Worse Scenario           |
| <b>Neonatal disorders</b>                                               | <b>86.25</b><br>(68.23 to 109.51) | <b>49.28</b><br>(27.55 to 78.38) | <b>38.83</b><br>(21.47 to 61.84) | <b>69.65</b><br>(38.21 to 109.33) | <b>1.00</b><br>(0.79 to 1.27) | <b>0.57</b><br>(0.32 to 0.91) | <b>0.45</b><br>(0.25 to 0.71) | <b>0.80</b><br>(0.44 to 1.26) |
| Neonatal preterm birth                                                  | 34.56<br>(24.40 to 46.36)         | 14.31<br>(7.79 to 23.12)         | 9.72<br>(5.29 to 15.56)          | 24.38<br>(13.50 to 38.30)         | 0.40<br>(0.28 to 0.54)        | 0.17<br>(0.09 to 0.27)        | 0.11<br>(0.06 to 0.18)        | 0.28<br>(0.16 to 0.44)        |
| Neonatal encephalopathy due to birth asphyxia and trauma                | 19.97<br>(13.46 to 28.80)         | 8.52<br>(3.99 to 16.03)          | 6.43<br>(3.09 to 12.06)          | 13.08<br>(5.95 to 25.05)          | 0.23<br>(0.16 to 0.33)        | 0.10<br>(0.05 to 0.19)        | 0.07<br>(0.04 to 0.14)        | 0.15<br>(0.07 to 0.29)        |
| Neonatal sepsis and other neonatal infections                           | 14.22<br>(9.57 to 20.77)          | 10.79<br>(5.71 to 18.35)         | 8.64<br>(4.61 to 14.84)          | 14.85<br>(7.70 to 25.71)          | 0.16<br>(0.11 to 0.24)        | 0.12<br>(0.07 to 0.21)        | 0.10<br>(0.05 to 0.17)        | 0.17<br>(0.09 to 0.30)        |
| Hemolytic disease and other neonatal jaundice                           | 0.23<br>(0.14 to 0.34)            | 0.10<br>(0.04 to 0.20)           | 0.08<br>(0.03 to 0.16)           | 0.14<br>(0.06 to 0.29)            | 0.00<br>(0.00 to 0.00)        | 0.00<br>(0.00 to 0.00)        | 0.00<br>(0.00 to 0.00)        | 0.00<br>(0.00 to 0.00)        |
| Other neonatal disorders                                                | 17.27<br>(11.40 to 24.68)         | 15.56<br>(7.78 to 27.81)         | 13.96<br>(7.06 to 24.58)         | 17.20<br>(8.30 to 31.34)          | 0.20<br>(0.13 to 0.29)        | 0.18<br>(0.09 to 0.32)        | 0.16<br>(0.08 to 0.28)        | 0.20<br>(0.10 to 0.36)        |
| <b>Nutritional deficiencies</b>                                         | <b>2.05</b><br>(1.80 to 2.37)     | <b>3.38</b><br>(2.54 to 4.46)    | <b>3.58</b><br>(2.66 to 4.84)    | <b>3.09</b><br>(2.32 to 4.09)     | <b>0.10</b><br>(0.08 to 0.11) | <b>0.27</b><br>(0.19 to 0.37) | <b>0.30</b><br>(0.21 to 0.42) | <b>0.22</b><br>(0.15 to 0.32) |
| Protein-energy malnutrition                                             | 1.18<br>(0.96 to 1.42)            | 1.98<br>(1.44 to 2.70)           | 2.23<br>(1.61 to 3.07)           | 1.58<br>(1.12 to 2.19)            | 0.06<br>(0.05 to 0.07)        | 0.17<br>(0.11 to 0.25)        | 0.20<br>(0.14 to 0.30)        | 0.12<br>(0.08 to 0.19)        |
| Iodine deficiency                                                       | 0.07<br>(0.01 to 0.19)            | 0.18<br>(0.01 to 0.55)           | 0.18<br>(0.01 to 0.57)           | 0.19<br>(0.01 to 0.51)            | 0.00<br>(0.00 to 0.01)        | 0.01<br>(0.00 to 0.05)        | 0.01<br>(0.00 to 0.06)        | 0.01<br>(0.00 to 0.04)        |
| Dietary iron deficiency                                                 | 0.13<br>(0.11 to 0.16)            | 0.16<br>(0.11 to 0.23)           | 0.16<br>(0.11 to 0.24)           | 0.15<br>(0.10 to 0.22)            | 0.00<br>(0.00 to 0.00)        | 0.00<br>(0.00 to 0.01)        | 0.00<br>(0.00 to 0.01)        | 0.00<br>(0.00 to 0.00)        |
| Other nutritional deficiencies                                          | 0.66<br>(0.55 to 0.90)            | 1.06<br>(0.74 to 1.58)           | 1.01<br>(0.70 to 1.55)           | 1.17<br>(0.83 to 1.72)            | 0.03<br>(0.03 to 0.05)        | 0.08<br>(0.05 to 0.13)        | 0.08<br>(0.05 to 0.13)        | 0.08<br>(0.05 to 0.14)        |
| <b>Other communicable, maternal, neonatal, and nutritional diseases</b> | <b>26.16</b><br>(19.68 to 35.42)  | <b>33.06</b><br>(23.64 to 45.45) | <b>31.41</b><br>(22.17 to 43.17) | <b>37.28</b><br>(26.91 to 52.14)  | <b>0.80</b><br>(0.61 to 0.96) | <b>1.39</b><br>(1.01 to 1.82) | <b>1.37</b><br>(1.00 to 1.81) | <b>1.46</b><br>(1.07 to 1.94) |
| Sexually transmitted infections excluding HIV                           | 0.97<br>(0.38 to 1.28)            | 0.70<br>(0.29 to 1.02)           | 0.66<br>(0.28 to 0.99)           | 0.77<br>(0.32 to 1.09)            | 0.02<br>(0.01 to 0.03)        | 0.02<br>(0.01 to 0.02)        | 0.02<br>(0.01 to 0.02)        | 0.02<br>(0.01 to 0.03)        |
| Syphilis                                                                | 0.26<br>(0.14 to 0.32)            | 0.13<br>(0.07 to 0.20)           | 0.12<br>(0.06 to 0.18)           | 0.17<br>(0.09 to 0.24)            | 0.01<br>(0.00 to 0.01)        | 0.00<br>(0.00 to 0.00)        | 0.00<br>(0.00 to 0.00)        | 0.00<br>(0.00 to 0.01)        |
| Chlamydial infection                                                    | 0.14<br>(0.05 to 0.19)            | 0.11<br>(0.04 to 0.16)           | 0.11<br>(0.04 to 0.16)           | 0.12<br>(0.05 to 0.17)            | 0.00<br>(0.00 to 0.00)        | 0.00<br>(0.00 to 0.00)        | 0.00<br>(0.00 to 0.00)        | 0.00<br>(0.00 to 0.00)        |
| Gonococcal infection                                                    | 0.37<br>(0.12 to 0.50)            | 0.29<br>(0.12 to 0.44)           | 0.28<br>(0.12 to 0.43)           | 0.32<br>(0.12 to 0.45)            | 0.01<br>(0.00 to 0.01)        | 0.01<br>(0.00 to 0.01)        | 0.01<br>(0.00 to 0.01)        | 0.01<br>(0.00 to 0.01)        |
| Other sexually transmitted infections                                   | 0.20<br>(0.06 to 0.28)            | 0.16<br>(0.06 to 0.23)           | 0.15<br>(0.06 to 0.23)           | 0.17<br>(0.06 to 0.25)            | 0.00<br>(0.00 to 0.01)        | 0.00<br>(0.00 to 0.01)        | 0.00<br>(0.00 to 0.01)        | 0.00<br>(0.00 to 0.01)        |
| Acute hepatitis                                                         | 11.71<br>(9.63 to 14.33)          | 9.46<br>(6.11 to 14.28)          | 7.92<br>(5.08 to 12.26)          | 13.37<br>(8.74 to 19.81)          | 0.38<br>(0.32 to 0.46)        | 0.37<br>(0.25 to 0.53)        | 0.31<br>(0.21 to 0.46)        | 0.50<br>(0.34 to 0.71)        |
| Acute hepatitis A                                                       | 0.35<br>(0.24 to 0.50)            | 0.29<br>(0.17 to 0.47)           | 0.25<br>(0.15 to 0.42)           | 0.36<br>(0.21 to 0.58)            | 0.01<br>(0.01 to 0.01)        | 0.01<br>(0.01 to 0.02)        | 0.01<br>(0.01 to 0.02)        | 0.01<br>(0.01 to 0.02)        |
| Acute hepatitis B                                                       | 9.90<br>(7.96 to 12.34)           | 7.84<br>(4.81 to 12.36)          | 6.52<br>(3.99 to 10.49)          | 11.19<br>(7.09 to 17.13)          | 0.32<br>(0.26 to 0.39)        | 0.29<br>(0.19 to 0.43)        | 0.24<br>(0.16 to 0.37)        | 0.40<br>(0.27 to 0.59)        |

|                                       |                                                            |                                                            |                                                            |                                                            |                                                      |                                                      |                                                      |                                                      |
|---------------------------------------|------------------------------------------------------------|------------------------------------------------------------|------------------------------------------------------------|------------------------------------------------------------|------------------------------------------------------|------------------------------------------------------|------------------------------------------------------|------------------------------------------------------|
|                                       | 0.41<br>(0.29 to<br>0.61)                                  | 0.37<br>(0.22 to<br>0.61)                                  | 0.32<br>(0.19 to<br>0.52)                                  | 0.52<br>(0.32 to<br>0.82)                                  | 0.01<br>(0.01 to<br>0.02)                            | 0.01<br>(0.01 to<br>0.02)                            | 0.01<br>(0.01 to<br>0.02)                            | 0.02<br>(0.01 to<br>0.03)                            |
| Acute hepatitis C                     |                                                            |                                                            |                                                            |                                                            |                                                      |                                                      |                                                      |                                                      |
|                                       | 1.05<br>(0.64 to<br>1.55)                                  | 0.97<br>(0.52 to<br>1.60)                                  | 0.83<br>(0.45 to<br>1.39)                                  | 1.30<br>(0.70 to<br>2.14)                                  | 0.04<br>(0.02 to<br>0.06)                            | 0.05<br>(0.03 to<br>0.08)                            | 0.05<br>(0.03 to<br>0.07)                            | 0.06<br>(0.04 to<br>0.10)                            |
| Acute hepatitis E                     |                                                            |                                                            |                                                            |                                                            |                                                      |                                                      |                                                      |                                                      |
|                                       | 13.48<br>(7.98 to<br>22.73)                                | 22.90<br>(14.81 to<br>33.07)                               | 22.83<br>(14.96 to<br>32.71)                               | 23.14<br>(14.27 to<br>34.27)                               | 0.40<br>(0.23 to<br>0.54)                            | 1.00<br>(0.64 to<br>1.37)                            | 1.05<br>(0.67 to<br>1.43)                            | 0.94<br>(0.58 to<br>1.30)                            |
| Other unspecified infectious diseases |                                                            |                                                            |                                                            |                                                            |                                                      |                                                      |                                                      |                                                      |
| <b>Non-communicable diseases</b>      | <b>2,570.87</b><br><b>(2,424.78 to</b><br><b>2,746.59)</b> | <b>3,590.05</b><br><b>(2,863.38 to</b><br><b>4,418.31)</b> | <b>2,901.79</b><br><b>(2,340.05 to</b><br><b>3,586.94)</b> | <b>5,167.49</b><br><b>(4,050.24 to</b><br><b>6,475.97)</b> | <b>115.85</b><br><b>(109.57 to</b><br><b>123.90)</b> | <b>218.55</b><br><b>(174.12 to</b><br><b>283.08)</b> | <b>185.32</b><br><b>(146.85 to</b><br><b>245.89)</b> | <b>288.50</b><br><b>(230.80 to</b><br><b>365.45)</b> |

| Malaysia                             |                                     |                                         |                                       |                                           |                                  |                                  |                                  |                                  |
|--------------------------------------|-------------------------------------|-----------------------------------------|---------------------------------------|-------------------------------------------|----------------------------------|----------------------------------|----------------------------------|----------------------------------|
| Cause                                | YLLs (in 1000s)                     |                                         |                                       |                                           | Deaths (in 1000s)                |                                  |                                  |                                  |
|                                      | 2016                                | 2040 Forecast                           | 2040 Better Scenario                  | 2040 Worse Scenario                       | 2016                             | 2040 Forecast                    | 2040 Better Scenario             | 2040 Worse Scenario              |
| <b>Neoplasms</b>                     | <b>602.75</b><br>(562.17 to 659.59) | <b>1,032.93</b><br>(867.57 to 1,224.32) | <b>863.91</b><br>(732.97 to 1,014.69) | <b>1,308.96</b><br>(1,083.23 to 1,587.84) | <b>24.22</b><br>(22.56 to 26.59) | <b>52.67</b><br>(44.73 to 61.89) | <b>45.19</b><br>(38.56 to 52.84) | <b>63.31</b><br>(52.71 to 75.84) |
| Lip and oral cavity cancer           | 9.62<br>(8.57 to 10.67)             | 15.79<br>(11.00 to 22.59)               | 10.87<br>(8.13 to 14.73)              | 25.23<br>(16.18 to 37.21)                 | 0.40<br>(0.36 to 0.45)           | 0.81<br>(0.57 to 1.16)           | 0.57<br>(0.43 to 0.78)           | 1.21<br>(0.80 to 1.78)           |
| Nasopharynx cancer                   | 25.13<br>(21.81 to 29.11)           | 38.14<br>(24.39 to 56.14)               | 23.84<br>(16.08 to 33.59)             | 71.37<br>(42.79 to 111.97)                | 0.86<br>(0.74 to 1.00)           | 1.50<br>(0.96 to 2.17)           | 0.96<br>(0.65 to 1.36)           | 2.64<br>(1.62 to 4.03)           |
| Other pharynx cancer                 | 4.56<br>(3.87 to 5.38)              | 8.91<br>(6.37 to 12.75)                 | 8.29<br>(6.12 to 11.60)               | 9.22<br>(6.42 to 13.54)                   | 0.20<br>(0.17 to 0.23)           | 0.46<br>(0.33 to 0.66)           | 0.45<br>(0.34 to 0.62)           | 0.45<br>(0.32 to 0.66)           |
| Esophageal cancer                    | 10.28<br>(9.19 to 11.46)            | 18.40<br>(12.45 to 27.30)               | 14.40<br>(10.33 to 20.43)             | 25.07<br>(15.97 to 39.52)                 | 0.48<br>(0.43 to 0.54)           | 1.02<br>(0.70 to 1.51)           | 0.82<br>(0.59 to 1.14)           | 1.32<br>(0.86 to 2.03)           |
| Stomach cancer                       | 26.56<br>(24.26 to 29.18)           | 30.14<br>(24.50 to 36.82)               | 25.82<br>(21.09 to 31.08)             | 39.71<br>(31.73 to 50.04)                 | 1.27<br>(1.16 to 1.40)           | 1.83<br>(1.50 to 2.23)           | 1.61<br>(1.33 to 1.95)           | 2.29<br>(1.81 to 2.86)           |
| Colon and rectum cancer              | 61.89<br>(54.10 to 69.98)           | 114.84<br>(80.23 to 163.56)             | 100.86<br>(70.91 to 141.25)           | 139.64<br>(97.45 to 199.58)               | 2.94<br>(2.56 to 3.31)           | 7.14<br>(4.98 to 10.15)          | 6.48<br>(4.53 to 9.24)           | 8.20<br>(5.70 to 11.64)          |
| Liver cancer                         | 45.15<br>(39.35 to 51.72)           | 125.65<br>(84.90 to 180.44)             | 108.60<br>(79.49 to 145.46)           | 126.93<br>(82.51 to 188.44)               | 1.91<br>(1.68 to 2.19)           | 6.24<br>(4.41 to 8.74)           | 5.57<br>(4.21 to 7.29)           | 6.01<br>(4.08 to 8.59)           |
| Liver cancer due to hepatitis B      | 28.83<br>(24.43 to 34.04)           | 77.42<br>(51.92 to 114.35)              | 67.21<br>(48.59 to 92.17)             | 77.84<br>(49.62 to 116.60)                | 1.18<br>(0.99 to 1.39)           | 3.70<br>(2.56 to 5.30)           | 3.32<br>(2.46 to 4.41)           | 3.55<br>(2.39 to 5.20)           |
| Liver cancer due to hepatitis C      | 4.90<br>(3.71 to 6.46)              | 15.19<br>(9.83 to 22.84)                | 13.50<br>(9.21 to 19.26)              | 14.85<br>(9.31 to 22.30)                  | 0.25<br>(0.19 to 0.32)           | 0.91<br>(0.59 to 1.33)           | 0.83<br>(0.57 to 1.17)           | 0.84<br>(0.54 to 1.25)           |
| Liver cancer due to alcohol use      | 3.01<br>(2.15 to 4.06)              | 8.79<br>(5.31 to 14.23)                 | 7.09<br>(4.59 to 10.70)               | 9.54<br>(5.47 to 15.72)                   | 0.13<br>(0.09 to 0.18)           | 0.43<br>(0.26 to 0.66)           | 0.36<br>(0.23 to 0.53)           | 0.44<br>(0.26 to 0.70)           |
| Liver cancer due to other causes     | 8.41<br>(6.19 to 11.26)             | 24.25<br>(14.20 to 38.36)               | 20.81<br>(13.23 to 30.80)             | 24.71<br>(13.79 to 40.37)                 | 0.36<br>(0.26 to 0.48)           | 1.21<br>(0.71 to 1.88)           | 1.07<br>(0.68 to 1.57)           | 1.17<br>(0.68 to 1.87)           |
| Gallbladder and biliary tract cancer | 4.53<br>(3.95 to 5.91)              | 6.43<br>(5.46 to 8.44)                  | 6.49<br>(5.44 to 8.50)                | 6.32<br>(5.45 to 8.31)                    | 0.21<br>(0.19 to 0.28)           | 0.38<br>(0.32 to 0.48)           | 0.40<br>(0.33 to 0.50)           | 0.36<br>(0.30 to 0.45)           |
| Pancreatic cancer                    | 19.42<br>(17.75 to 21.41)           | 43.46<br>(34.88 to 55.13)               | 41.46<br>(33.48 to 51.86)             | 45.85<br>(36.28 to 59.23)                 | 0.89<br>(0.81 to 0.98)           | 2.39<br>(1.91 to 3.02)           | 2.33<br>(1.87 to 2.90)           | 2.42<br>(1.91 to 3.15)           |
| Larynx cancer                        | 4.78<br>(4.21 to 5.39)              | 6.38<br>(5.56 to 10.87)                 | 3.89<br>(2.33 to 6.38)                | 11.11<br>(6.03 to 18.91)                  | 0.23<br>(0.20 to 0.26)           | 0.35<br>(0.31 to 0.61)           | 0.22<br>(0.13 to 0.37)           | 0.57<br>(0.31 to 0.98)           |
| Tracheal, bronchus, and lung cancer  | 107.61<br>(96.37 to 121.10)         | 194.77<br>(141.02 to 261.64)            | 122.94<br>(92.56 to 161.41)           | 321.26<br>(226.37 to 438.62)              | 4.97<br>(4.44 to 5.60)           | 10.66<br>(7.76 to 14.15)         | 6.92<br>(5.20 to 9.05)           | 16.44<br>(11.69 to 22.16)        |
| Malignant skin melanoma              | 2.48<br>(2.10 to 3.04)              | 5.19<br>(4.23 to 6.56)                  | 5.84<br>(4.72 to 7.40)                | 4.17<br>(3.44 to 5.28)                    | 0.09<br>(0.07 to 0.11)           | 0.25<br>(0.20 to 0.31)           | 0.29<br>(0.24 to 0.36)           | 0.19<br>(0.15 to 0.24)           |
| Non-melanoma skin cancer             | 3.40<br>(3.05 to 3.82)              | 5.75<br>(4.81 to 6.72)                  | 5.25<br>(4.39 to 6.25)                | 6.90<br>(5.86 to 8.04)                    | 0.16<br>(0.14 to 0.17)           | 0.34<br>(0.29 to 0.40)           | 0.32<br>(0.27 to 0.38)           | 0.38<br>(0.32 to 0.45)           |
| Breast cancer                        | 64.06<br>(52.43 to 75.77)           | 85.64<br>(62.20 to 114.83)              | 74.98<br>(55.79 to 99.22)             | 107.55<br>(77.47 to 147.50)               | 2.14<br>(1.75 to 2.52)           | 3.62<br>(2.58 to 4.89)           | 3.23<br>(2.33 to 4.36)           | 4.37<br>(3.08 to 6.07)           |
| Cervical cancer                      | 18.52<br>(15.31 to 23.18)           | 21.14<br>(16.13 to 27.92)               | 18.17<br>(14.05 to 23.71)             | 28.05<br>(20.62 to 37.70)                 | 0.68<br>(0.57 to 0.84)           | 0.98<br>(0.74 to 1.27)           | 0.86<br>(0.65 to 1.10)           | 1.24<br>(0.92 to 1.67)           |

|                   |                              |                              |                              |                              |                           |                           |                           |                           |
|-------------------|------------------------------|------------------------------|------------------------------|------------------------------|---------------------------|---------------------------|---------------------------|---------------------------|
| Uterine cancer    | 4.63<br>(3.83 to<br>5.52)    | 7.72<br>(6.06 to<br>9.74)    | 7.20<br>(5.59 to<br>9.13)    | 8.76<br>(6.85 to<br>11.07)   | 0.19<br>(0.15 to<br>0.22) | 0.40<br>(0.31 to<br>0.50) | 0.38<br>(0.29 to<br>0.48) | 0.43<br>(0.34 to<br>0.54) |
| Ovarian cancer    | 18.19<br>(15.11 to<br>21.94) | 27.56<br>(20.60 to<br>37.61) | 25.29<br>(19.23 to<br>33.60) | 31.00<br>(22.76 to<br>43.38) | 0.63<br>(0.53 to<br>0.75) | 1.18<br>(0.87 to<br>1.60) | 1.10<br>(0.83 to<br>1.47) | 1.28<br>(0.95 to<br>1.78) |
| Prostate cancer   | 10.74<br>(8.48 to<br>13.61)  | 25.56<br>(20.21 to<br>32.30) | 25.05<br>(19.85 to<br>31.72) | 26.67<br>(21.07 to<br>34.08) | 0.72<br>(0.55 to<br>0.89) | 2.01<br>(1.51 to<br>2.49) | 2.03<br>(1.53 to<br>2.50) | 1.99<br>(1.50 to<br>2.50) |
| Testicular cancer | 1.01<br>(0.80 to<br>1.33)    | 0.85<br>(0.60 to<br>1.22)    | 0.77<br>(0.54 to<br>1.11)    | 1.03<br>(0.73 to<br>1.44)    | 0.02<br>(0.02 to<br>0.03) | 0.03<br>(0.02 to<br>0.03) | 0.02<br>(0.02 to<br>0.03) | 0.03<br>(0.02 to<br>0.04) |



| Malaysia                        |                                                  |                                                |                                              |                                                  |                                         |                                          |                                         |                                           |
|---------------------------------|--------------------------------------------------|------------------------------------------------|----------------------------------------------|--------------------------------------------------|-----------------------------------------|------------------------------------------|-----------------------------------------|-------------------------------------------|
| Cause                           | YLLs (in 1000s)                                  |                                                |                                              |                                                  | Deaths (in 1000s)                       |                                          |                                         |                                           |
|                                 | 2016                                             | 2040 Forecast                                  | 2040 Better Scenario                         | 2040 Worse Scenario                              | 2016                                    | 2040 Forecast                            | 2040 Better Scenario                    | 2040 Worse Scenario                       |
| Kidney cancer                   | 7.64<br>(6.54 to 8.92)                           | 15.84<br>(12.28 to 20.75)                      | 15.48<br>(12.29 to 19.97)                    | 16.13<br>(12.22 to 21.74)                        | 0.30<br>(0.26 to 0.36)                  | 0.77<br>(0.60 to 1.02)                   | 0.78<br>(0.62 to 1.00)                  | 0.75<br>(0.57 to 1.01)                    |
| Bladder cancer                  | 7.17<br>(6.21 to 8.15)                           | 13.65<br>(10.14 to 18.87)                      | 12.05<br>(9.18 to 16.22)                     | 16.02<br>(11.38 to 23.05)                        | 0.40<br>(0.35 to 0.46)                  | 0.96<br>(0.71 to 1.31)                   | 0.87<br>(0.66 to 1.16)                  | 1.06<br>(0.76 to 1.52)                    |
| Brain and nervous system cancer | 16.07<br>(13.35 to 21.02)                        | 23.94<br>(19.15 to 33.75)                      | 22.98<br>(18.42 to 32.46)                    | 25.81<br>(20.85 to 36.56)                        | 0.43<br>(0.35 to 0.63)                  | 0.82<br>(0.65 to 1.29)                   | 0.81<br>(0.63 to 1.28)                  | 0.85<br>(0.67 to 1.33)                    |
| Thyroid cancer                  | 4.41<br>(3.82 to 5.23)                           | 8.07<br>(6.08 to 10.79)                        | 7.02<br>(5.47 to 9.14)                       | 9.10<br>(6.82 to 12.18)                          | 0.20<br>(0.18 to 0.23)                  | 0.47<br>(0.36 to 0.63)                   | 0.43<br>(0.33 to 0.56)                  | 0.51<br>(0.38 to 0.68)                    |
| Mesothelioma                    | 1.18<br>(1.00 to 1.39)                           | 2.05<br>(1.66 to 2.51)                         | 2.11<br>(1.69 to 2.60)                       | 1.94<br>(1.59 to 2.36)                           | 0.04<br>(0.03 to 0.05)                  | 0.09<br>(0.07 to 0.11)                   | 0.09<br>(0.08 to 0.11)                  | 0.08<br>(0.07 to 0.10)                    |
| Hodgkin lymphoma                | 2.14<br>(1.66 to 2.68)                           | 1.84<br>(1.36 to 2.54)                         | 1.57<br>(1.16 to 2.18)                       | 2.46<br>(1.82 to 3.41)                           | 0.06<br>(0.05 to 0.08)                  | 0.06<br>(0.05 to 0.09)                   | 0.06<br>(0.04 to 0.08)                  | 0.08<br>(0.06 to 0.12)                    |
| Non-Hodgkin lymphoma            | 28.03<br>(24.86 to 33.68)                        | 43.56<br>(35.73 to 53.95)                      | 39.64<br>(32.93 to 48.57)                    | 48.53<br>(39.94 to 60.42)                        | 0.95<br>(0.84 to 1.13)                  | 1.95<br>(1.59 to 2.38)                   | 1.83<br>(1.51 to 2.22)                  | 2.07<br>(1.70 to 2.53)                    |
| Multiple myeloma                | 5.20<br>(4.40 to 6.45)                           | 10.68<br>(8.41 to 13.91)                       | 9.98<br>(7.94 to 12.76)                      | 11.17<br>(8.82 to 14.54)                         | 0.21<br>(0.18 to 0.26)                  | 0.52<br>(0.41 to 0.65)                   | 0.49<br>(0.39 to 0.62)                  | 0.52<br>(0.41 to 0.66)                    |
| Leukemia                        | 48.12<br>(42.47 to 61.05)                        | 64.17<br>(50.22 to 86.59)                      | 56.22<br>(44.99 to 74.98)                    | 75.24<br>(58.00 to 103.03)                       | 1.35<br>(1.19 to 1.78)                  | 2.50<br>(1.97 to 3.47)                   | 2.24<br>(1.78 to 3.04)                  | 2.81<br>(2.15 to 3.96)                    |
| Acute lymphoid leukemia         | 15.81<br>(13.32 to 19.68)                        | 18.97<br>(14.95 to 26.19)                      | 16.42<br>(13.15 to 22.32)                    | 22.77<br>(17.95 to 31.59)                        | 0.43<br>(0.37 to 0.59)                  | 0.70<br>(0.54 to 1.04)                   | 0.62<br>(0.48 to 0.90)                  | 0.81<br>(0.62 to 1.19)                    |
| Chronic lymphoid leukemia       | 1.10<br>(0.89 to 1.35)                           | 1.62<br>(1.23 to 2.14)                         | 1.46<br>(1.13 to 1.92)                       | 1.78<br>(1.34 to 2.37)                           | 0.04<br>(0.03 to 0.05)                  | 0.07<br>(0.06 to 0.10)                   | 0.07<br>(0.05 to 0.09)                  | 0.08<br>(0.06 to 0.10)                    |
| Acute myeloid leukemia          | 13.02<br>(11.15 to 16.62)                        | 21.36<br>(16.77 to 29.26)                      | 19.54<br>(15.63 to 26.08)                    | 22.89<br>(17.74 to 31.99)                        | 0.33<br>(0.28 to 0.44)                  | 0.72<br>(0.56 to 1.02)                   | 0.67<br>(0.53 to 0.95)                  | 0.74<br>(0.56 to 1.07)                    |
| Chronic myeloid leukemia        | 2.52<br>(1.97 to 3.29)                           | 1.74<br>(1.21 to 2.47)                         | 1.32<br>(0.94 to 1.89)                       | 2.64<br>(1.83 to 3.83)                           | 0.08<br>(0.06 to 0.10)                  | 0.07<br>(0.05 to 0.10)                   | 0.05<br>(0.04 to 0.07)                  | 0.10<br>(0.07 to 0.14)                    |
| Other leukemia                  | 15.66<br>(12.94 to 21.66)                        | 20.48<br>(14.83 to 30.48)                      | 17.48<br>(12.94 to 25.54)                    | 25.16<br>(18.16 to 38.23)                        | 0.47<br>(0.40 to 0.67)                  | 0.95<br>(0.70 to 1.36)                   | 0.83<br>(0.63 to 1.17)                  | 1.09<br>(0.78 to 1.60)                    |
| Other neoplasms                 | 40.22<br>(36.66 to 44.44)                        | 66.83<br>(58.68 to 76.16)                      | 66.86<br>(58.30 to 76.80)                    | 66.72<br>(59.06 to 76.15)                        | 1.27<br>(1.15 to 1.43)                  | 2.94<br>(2.55 to 3.44)                   | 3.05<br>(2.61 to 3.58)                  | 2.76<br>(2.41 to 3.21)                    |
| <b>Cardiovascular diseases</b>  | <b>1,166.69</b><br><b>(1,088.69 to 1,250.39)</b> | <b>1,131.77</b><br><b>(761.73 to 1,665.52)</b> | <b>770.20</b><br><b>(536.49 to 1,098.42)</b> | <b>2,137.56</b><br><b>(1,381.42 to 3,174.92)</b> | <b>56.45</b><br><b>(52.88 to 60.64)</b> | <b>72.29</b><br><b>(48.95 to 107.52)</b> | <b>53.48</b><br><b>(36.61 to 79.86)</b> | <b>121.56</b><br><b>(81.48 to 177.61)</b> |
| Rheumatic heart disease         | 13.71<br>(11.85 to 16.00)                        | 9.04<br>(7.15 to 11.59)                        | 7.98<br>(6.20 to 10.22)                      | 11.54<br>(9.02 to 14.62)                         | 0.45<br>(0.39 to 0.52)                  | 0.47<br>(0.37 to 0.61)                   | 0.43<br>(0.34 to 0.56)                  | 0.56<br>(0.44 to 0.71)                    |
| Ischemic heart disease          | 726.61<br>(670.95 to 795.57)                     | 678.72<br>(389.72 to 1,135.29)                 | 423.32<br>(248.32 to 713.84)                 | 1,363.99<br>(763.88 to 2,286.97)                 | 36.30<br>(33.75 to 39.64)               | 43.80<br>(25.61 to 72.36)                | 30.29<br>(17.78 to 52.52)               | 77.87<br>(44.78 to 127.09)                |
| Stroke                          | 292.97<br>(266.30 to 319.13)                     | 231.61<br>(150.02 to 356.29)                   | 153.27<br>(101.00 to 232.15)                 | 500.64<br>(308.56 to 794.48)                     | 14.30<br>(13.08 to 15.51)               | 15.64<br>(10.21 to 24.08)                | 11.43<br>(7.64 to 17.76)                | 29.07<br>(18.69 to 45.36)                 |
| Ischemic stroke                 | 75.05<br>(66.62 to 84.81)                        | 69.03<br>(40.36 to 134.38)                     | 50.17<br>(29.33 to 98.39)                    | 128.13<br>(73.26 to 256.77)                      | 4.70<br>(4.19 to 5.30)                  | 5.83<br>(3.29 to 11.79)                  | 4.57<br>(2.54 to 9.17)                  | 9.54<br>(5.28 to 19.89)                   |

|                                |                                 |                                 |                                |                                 |                            |                            |                            |                              |
|--------------------------------|---------------------------------|---------------------------------|--------------------------------|---------------------------------|----------------------------|----------------------------|----------------------------|------------------------------|
| Intracerebral hemorrhage       | 217.92<br>(197.93 to<br>239.29) | 162.58<br>(102.39 to<br>257.78) | 103.11<br>(67.79 to<br>155.13) | 372.51<br>(216.57 to<br>615.58) | 9.60<br>(8.71 to<br>10.54) | 9.81<br>(6.37 to<br>15.35) | 6.86<br>(4.65 to<br>10.40) | 19.53<br>(12.09 to<br>31.31) |
| Hypertensive heart disease     | 12.86<br>(10.90 to<br>16.09)    | 29.66<br>(20.10 to<br>47.22)    | 23.66<br>(16.82 to<br>34.88)   | 36.09<br>(22.82 to<br>65.42)    | 0.63<br>(0.52 to<br>0.82)  | 2.05<br>(1.36 to<br>3.46)  | 1.70<br>(1.18 to<br>2.59)  | 2.28<br>(1.42 to<br>4.24)    |
| Cardiomyopathy and myocarditis | 22.43<br>(17.09 to<br>26.28)    | 22.23<br>(15.83 to<br>30.48)    | 18.50<br>(13.34 to<br>24.94)   | 30.21<br>(21.35 to<br>41.77)    | 0.70<br>(0.58 to<br>0.84)  | 0.94<br>(0.67 to<br>1.39)  | 0.81<br>(0.58 to<br>1.22)  | 1.21<br>(0.85 to<br>1.76)    |
| Myocarditis                    | 2.34<br>(1.45 to<br>3.16)       | 2.57<br>(1.69 to<br>3.60)       | 2.52<br>(1.69 to<br>3.53)      | 2.69<br>(1.71 to<br>3.78)       | 0.05<br>(0.04 to<br>0.08)  | 0.09<br>(0.06 to<br>0.15)  | 0.09<br>(0.06 to<br>0.16)  | 0.09<br>(0.06 to<br>0.14)    |

| Malaysia                                                      |                                            |                                            |                                           |                                            |                                      |                                        |                                       |                                         |
|---------------------------------------------------------------|--------------------------------------------|--------------------------------------------|-------------------------------------------|--------------------------------------------|--------------------------------------|----------------------------------------|---------------------------------------|-----------------------------------------|
| Cause                                                         | YLLs (in 1000s)                            |                                            |                                           |                                            | Deaths (in 1000s)                    |                                        |                                       |                                         |
|                                                               | 2016                                       | 2040 Forecast                              | 2040 Better Scenario                      | 2040 Worse Scenario                        | 2016                                 | 2040 Forecast                          | 2040 Better Scenario                  | 2040 Worse Scenario                     |
| Alcoholic cardiomyopathy                                      | 2.00<br>(1.27 to 2.86)                     | 2.55<br>(1.59 to 3.66)                     | 2.41<br>(1.53 to 3.45)                    | 2.73<br>(1.70 to 3.91)                     | 0.07<br>(0.05 to 0.10)               | 0.11<br>(0.08 to 0.16)                 | 0.11<br>(0.08 to 0.16)                | 0.11<br>(0.08 to 0.16)                  |
| Other cardiomyopathy                                          | 18.10<br>(13.75 to 21.12)                  | 17.10<br>(11.55 to 24.60)                  | 13.57<br>(9.31 to 19.17)                  | 24.80<br>(16.52 to 35.53)                  | 0.57<br>(0.48 to 0.69)               | 0.74<br>(0.50 to 1.12)                 | 0.61<br>(0.41 to 0.95)                | 1.01<br>(0.67 to 1.48)                  |
| Atrial fibrillation and flutter                               | 4.86<br>(3.80 to 6.10)                     | 14.21<br>(10.40 to 19.02)                  | 13.87<br>(10.16 to 18.44)                 | 14.48<br>(10.40 to 19.57)                  | 0.41<br>(0.32 to 0.52)               | 1.48<br>(1.05 to 2.02)                 | 1.50<br>(1.06 to 2.04)                | 1.41<br>(0.96 to 1.92)                  |
| Aortic aneurysm                                               | 14.52<br>(12.20 to 17.03)                  | 24.79<br>(19.98 to 31.11)                  | 23.27<br>(18.97 to 29.07)                 | 27.71<br>(21.69 to 35.57)                  | 0.80<br>(0.68 to 0.94)               | 1.74<br>(1.41 to 2.17)                 | 1.71<br>(1.39 to 2.12)                | 1.80<br>(1.44 to 2.26)                  |
| Peripheral artery disease                                     | 0.36<br>(0.27 to 0.47)                     | 1.24<br>(0.85 to 1.74)                     | 1.20<br>(0.83 to 1.69)                    | 1.26<br>(0.87 to 1.77)                     | 0.02<br>(0.02 to 0.03)               | 0.11<br>(0.07 to 0.16)                 | 0.12<br>(0.08 to 0.17)                | 0.11<br>(0.07 to 0.15)                  |
| Endocarditis                                                  | 30.10<br>(23.48 to 35.14)                  | 50.93<br>(34.99 to 76.66)                  | 47.97<br>(33.26 to 70.57)                 | 52.80<br>(35.74 to 79.81)                  | 0.88<br>(0.69 to 1.02)               | 2.00<br>(1.39 to 2.80)                 | 1.96<br>(1.37 to 2.73)                | 1.95<br>(1.33 to 2.75)                  |
| Other cardiovascular and circulatory diseases                 | 48.27<br>(34.96 to 57.89)                  | 69.35<br>(45.54 to 94.78)                  | 57.15<br>(38.83 to 77.61)                 | 98.84<br>(63.80 to 138.43)                 | 1.96<br>(1.37 to 2.34)               | 4.07<br>(2.68 to 5.59)                 | 3.53<br>(2.33 to 4.84)                | 5.31<br>(3.35 to 7.28)                  |
| <b>Chronic respiratory diseases</b>                           | <b>129.81</b><br><b>(117.68 to 143.87)</b> | <b>175.29</b><br><b>(133.94 to 232.48)</b> | <b>119.68</b><br><b>(95.87 to 151.76)</b> | <b>270.63</b><br><b>(199.45 to 367.97)</b> | <b>6.59</b><br><b>(5.92 to 7.41)</b> | <b>11.54</b><br><b>(8.68 to 15.24)</b> | <b>8.13</b><br><b>(6.32 to 10.69)</b> | <b>16.68</b><br><b>(12.12 to 22.86)</b> |
| Chronic obstructive pulmonary disease                         | 86.67<br>(76.92 to 98.38)                  | 138.17<br>(99.58 to 193.55)                | 86.61<br>(64.92 to 118.30)                | 224.85<br>(157.45 to 321.79)               | 5.05<br>(4.48 to 5.73)               | 9.65<br>(7.02 to 13.30)                | 6.34<br>(4.75 to 8.65)                | 14.56<br>(10.09 to 20.48)               |
| Pneumoconiosis                                                | 0.14<br>(0.11 to 0.18)                     | 0.14<br>(0.11 to 0.17)                     | 0.13<br>(0.10 to 0.17)                    | 0.15<br>(0.12 to 0.20)                     | 0.01<br>(0.01 to 0.01)               | 0.01<br>(0.01 to 0.01)                 | 0.01<br>(0.01 to 0.01)                | 0.01<br>(0.01 to 0.01)                  |
| Silicosis                                                     | 0.04<br>(0.02 to 0.05)                     | 0.01<br>(0.01 to 0.02)                     | 0.01<br>(0.01 to 0.02)                    | 0.02<br>(0.01 to 0.04)                     | 0.00<br>(0.00 to 0.00)               | 0.00<br>(0.00 to 0.00)                 | 0.00<br>(0.00 to 0.00)                | 0.00<br>(0.00 to 0.00)                  |
| Asbestosis                                                    | 0.03<br>(0.02 to 0.05)                     | 0.07<br>(0.05 to 0.09)                     | 0.07<br>(0.05 to 0.10)                    | 0.05<br>(0.04 to 0.07)                     | 0.00<br>(0.00 to 0.00)               | 0.00<br>(0.00 to 0.00)                 | 0.00<br>(0.00 to 0.01)                | 0.00<br>(0.00 to 0.00)                  |
| Coal workers pneumoconiosis                                   | 0.01<br>(0.00 to 0.01)                     | 0.01<br>(0.00 to 0.01)                     | 0.01<br>(0.00 to 0.01)                    | 0.01<br>(0.01 to 0.02)                     | 0.00<br>(0.00 to 0.00)               | 0.00<br>(0.00 to 0.00)                 | 0.00<br>(0.00 to 0.00)                | 0.00<br>(0.00 to 0.00)                  |
| Other pneumoconiosis                                          | 0.06<br>(0.05 to 0.09)                     | 0.05<br>(0.04 to 0.07)                     | 0.04<br>(0.03 to 0.06)                    | 0.06<br>(0.05 to 0.09)                     | 0.00<br>(0.00 to 0.00)               | 0.00<br>(0.00 to 0.01)                 | 0.00<br>(0.00 to 0.00)                | 0.00<br>(0.00 to 0.01)                  |
| Asthma                                                        | 33.99<br>(27.92 to 40.49)                  | 17.80<br>(11.27 to 27.24)                  | 11.34<br>(7.56 to 16.90)                  | 30.19<br>(19.04 to 47.51)                  | 1.19<br>(0.97 to 1.48)               | 0.84<br>(0.52 to 1.31)                 | 0.57<br>(0.37 to 0.86)                | 1.33<br>(0.82 to 2.12)                  |
| Interstitial lung disease and pulmonary sarcoidosis           | 5.47<br>(3.93 to 8.10)                     | 14.09<br>(9.94 to 21.60)                   | 16.66<br>(12.10 to 24.97)                 | 10.11<br>(7.09 to 15.80)                   | 0.23<br>(0.16 to 0.38)               | 0.77<br>(0.52 to 1.30)                 | 0.93<br>(0.65 to 1.57)                | 0.52<br>(0.35 to 0.88)                  |
| Other chronic respiratory diseases                            | 3.55<br>(2.37 to 4.81)                     | 5.10<br>(3.08 to 7.39)                     | 4.94<br>(3.00 to 7.02)                    | 5.32<br>(3.21 to 7.71)                     | 0.12<br>(0.07 to 0.17)               | 0.27<br>(0.14 to 0.46)                 | 0.27<br>(0.14 to 0.46)                | 0.27<br>(0.13 to 0.45)                  |
| <b>Cirrhosis and other chronic liver diseases</b>             | <b>77.12</b><br><b>(65.88 to 90.29)</b>    | <b>108.86</b><br><b>(88.33 to 134.13)</b>  | <b>99.59</b><br><b>(79.82 to 123.87)</b>  | <b>128.09</b><br><b>(104.31 to 157.73)</b> | <b>2.82</b><br><b>(2.43 to 3.29)</b> | <b>4.84</b><br><b>(3.95 to 5.90)</b>   | <b>4.53</b><br><b>(3.67 to 5.58)</b>  | <b>5.45</b><br><b>(4.46 to 6.64)</b>    |
| Cirrhosis and other chronic liver diseases due to hepatitis B | 34.52<br>(27.64 to 42.99)                  | 48.94<br>(36.70 to 62.85)                  | 45.33<br>(33.87 to 58.42)                 | 56.83<br>(43.02 to 73.22)                  | 1.27<br>(1.02 to 1.57)               | 2.12<br>(1.62 to 2.69)                 | 2.01<br>(1.52 to 2.58)                | 2.37<br>(1.82 to 2.99)                  |
| Cirrhosis and other chronic liver diseases due to hepatitis C | 11.18<br>(8.71 to 14.23)                   | 15.88<br>(11.81 to 21.09)                  | 14.57<br>(10.82 to 19.47)                 | 18.77<br>(13.88 to 24.59)                  | 0.40<br>(0.31 to 0.51)               | 0.67<br>(0.50 to 0.86)                 | 0.62<br>(0.47 to 0.81)                | 0.76<br>(0.57 to 0.98)                  |

|                                                                |                                                    |                                                      |                                                     |                                                      |                                                |                                                 |                                                 |                                                 |
|----------------------------------------------------------------|----------------------------------------------------|------------------------------------------------------|-----------------------------------------------------|------------------------------------------------------|------------------------------------------------|-------------------------------------------------|-------------------------------------------------|-------------------------------------------------|
| Cirrhosis and other chronic liver diseases due to alcohol use  | 12.61<br>(9.86 to<br>16.20)                        | 17.55<br>(13.42 to<br>23.35)                         | 15.16<br>(11.33 to<br>20.29)                        | 21.79<br>(16.58 to<br>28.70)                         | 0.47<br>(0.37 to<br>0.58)                      | 0.77<br>(0.60 to<br>1.00)                       | 0.69<br>(0.53 to<br>0.89)                       | 0.91<br>(0.71 to<br>1.19)                       |
| Cirrhosis and other chronic liver diseases due to other causes | 18.82<br>(15.55 to<br>23.31)                       | 26.49<br>(20.52 to<br>34.33)                         | 24.53<br>(18.99 to<br>31.91)                        | 30.70<br>(23.91 to<br>39.68)                         | 0.69<br>(0.57 to<br>0.84)                      | 1.28<br>(1.00 to<br>1.65)                       | 1.22<br>(0.95 to<br>1.58)                       | 1.41<br>(1.09 to<br>1.82)                       |
| <b>Digestive diseases</b>                                      | <b>89.56</b><br><b>(79.33 to</b><br><b>100.61)</b> | <b>130.52</b><br><b>(101.05 to</b><br><b>164.79)</b> | <b>117.06</b><br><b>(91.89 to</b><br><b>144.88)</b> | <b>154.44</b><br><b>(118.71 to</b><br><b>199.31)</b> | <b>4.17</b><br><b>(3.47 to</b><br><b>4.72)</b> | <b>8.49</b><br><b>(6.32 to</b><br><b>10.78)</b> | <b>8.01</b><br><b>(5.94 to</b><br><b>10.13)</b> | <b>9.27</b><br><b>(6.85 to</b><br><b>11.98)</b> |
| Peptic ulcer disease                                           | 21.93<br>(18.66 to<br>25.45)                       | 19.55<br>(14.94 to<br>25.47)                         | 16.10<br>(12.12 to<br>21.16)                        | 27.89<br>(21.05 to<br>36.07)                         | 1.18<br>(0.99 to<br>1.41)                      | 1.41<br>(1.06 to<br>1.90)                       | 1.21<br>(0.90 to<br>1.66)                       | 1.90<br>(1.40 to<br>2.53)                       |

| Malaysia                                   |                             |                              |                              |                              |                        |                           |                           |                           |
|--------------------------------------------|-----------------------------|------------------------------|------------------------------|------------------------------|------------------------|---------------------------|---------------------------|---------------------------|
| Cause                                      | YLLs (in 1000s)             |                              |                              |                              | Deaths (in 1000s)      |                           |                           |                           |
|                                            | 2016                        | 2040 Forecast                | 2040 Better Scenario         | 2040 Worse Scenario          | 2016                   | 2040 Forecast             | 2040 Better Scenario      | 2040 Worse Scenario       |
| Gastritis and duodenitis                   | 0.55<br>(0.45 to 0.66)      | 0.78<br>(0.57 to 1.03)       | 0.70<br>(0.51 to 0.94)       | 0.96<br>(0.71 to 1.26)       | 0.02<br>(0.02 to 0.03) | 0.04<br>(0.03 to 0.06)    | 0.04<br>(0.03 to 0.05)    | 0.05<br>(0.04 to 0.06)    |
| Appendicitis                               | 3.74<br>(3.08 to 4.76)      | 3.11<br>(2.37 to 4.09)       | 2.62<br>(1.95 to 3.46)       | 4.34<br>(3.27 to 5.78)       | 0.12<br>(0.09 to 0.15) | 0.14<br>(0.10 to 0.19)    | 0.12<br>(0.09 to 0.17)    | 0.18<br>(0.13 to 0.24)    |
| Paralytic ileus and intestinal obstruction | 17.31<br>(12.34 to 21.65)   | 34.06<br>(20.17 to 43.69)    | 35.26<br>(20.64 to 45.45)    | 32.03<br>(19.13 to 40.57)    | 0.82<br>(0.46 to 1.03) | 2.44<br>(1.17 to 3.31)    | 2.63<br>(1.26 to 3.62)    | 2.13<br>(1.02 to 2.93)    |
| Inguinal, femoral, and abdominal hernia    | 1.92<br>(1.38 to 2.40)      | 2.14<br>(1.43 to 2.81)       | 2.01<br>(1.35 to 2.65)       | 2.45<br>(1.69 to 3.19)       | 0.10<br>(0.07 to 0.12) | 0.15<br>(0.10 to 0.20)    | 0.15<br>(0.09 to 0.20)    | 0.16<br>(0.10 to 0.21)    |
| Inflammatory bowel disease                 | 1.58<br>(1.31 to 1.88)      | 2.64<br>(2.08 to 3.26)       | 2.68<br>(2.09 to 3.33)       | 2.59<br>(2.05 to 3.16)       | 0.07<br>(0.05 to 0.08) | 0.15<br>(0.11 to 0.19)    | 0.16<br>(0.12 to 0.21)    | 0.14<br>(0.10 to 0.17)    |
| Vascular intestinal disorders              | 5.40<br>(4.58 to 7.48)      | 10.16<br>(7.96 to 14.72)     | 10.00<br>(7.66 to 14.45)     | 10.57<br>(8.35 to 15.17)     | 0.27<br>(0.23 to 0.39) | 0.72<br>(0.53 to 1.06)    | 0.73<br>(0.53 to 1.11)    | 0.69<br>(0.52 to 1.02)    |
| Gallbladder and biliary diseases           | 8.51<br>(7.18 to 10.05)     | 15.18<br>(9.24 to 24.24)     | 10.80<br>(6.84 to 16.95)     | 19.67<br>(11.94 to 30.99)    | 0.43<br>(0.35 to 0.53) | 1.06<br>(0.61 to 1.81)    | 0.80<br>(0.48 to 1.32)    | 1.27<br>(0.73 to 2.13)    |
| Pancreatitis                               | 15.21<br>(12.55 to 18.24)   | 21.42<br>(11.69 to 42.35)    | 15.96<br>(9.28 to 28.92)     | 31.21<br>(15.89 to 63.55)    | 0.57<br>(0.41 to 0.68) | 1.05<br>(0.54 to 2.08)    | 0.82<br>(0.44 to 1.49)    | 1.45<br>(0.72 to 2.89)    |
| Other digestive diseases                   | 13.41<br>(10.76 to 16.16)   | 21.47<br>(16.12 to 28.27)    | 20.92<br>(15.69 to 27.89)    | 22.75<br>(17.29 to 29.73)    | 0.60<br>(0.47 to 0.76) | 1.34<br>(0.98 to 1.87)    | 1.36<br>(0.97 to 1.95)    | 1.31<br>(0.97 to 1.80)    |
| Neurological disorders                     | 106.47<br>(93.39 to 122.53) | 327.67<br>(249.81 to 442.51) | 315.90<br>(245.28 to 411.20) | 306.72<br>(228.62 to 427.00) | 7.56<br>(6.49 to 8.88) | 30.61<br>(22.25 to 43.09) | 30.62<br>(22.95 to 41.21) | 26.78<br>(19.01 to 38.56) |
| Alzheimer's disease and other dementias    | 78.65<br>(66.29 to 95.46)   | 277.56<br>(200.87 to 393.32) | 264.80<br>(197.13 to 356.97) | 258.32<br>(181.46 to 379.33) | 6.58<br>(5.52 to 7.89) | 27.89<br>(19.76 to 40.21) | 27.68<br>(20.27 to 38.09) | 24.42<br>(16.86 to 36.13) |
| Parkinson's disease                        | 7.37<br>(5.60 to 9.48)      | 23.60<br>(17.73 to 30.43)    | 25.85<br>(19.52 to 33.88)    | 19.89<br>(14.90 to 25.54)    | 0.51<br>(0.39 to 0.67) | 1.93<br>(1.44 to 2.55)    | 2.17<br>(1.63 to 2.86)    | 1.55<br>(1.13 to 2.03)    |
| Epilepsy                                   | 12.26<br>(10.89 to 13.96)   | 13.91<br>(10.42 to 18.42)    | 12.58<br>(9.56 to 16.27)     | 16.13<br>(11.91 to 21.94)    | 0.25<br>(0.23 to 0.28) | 0.37<br>(0.28 to 0.49)    | 0.35<br>(0.27 to 0.45)    | 0.42<br>(0.31 to 0.56)    |
| Multiple sclerosis                         | 0.80<br>(0.68 to 0.95)      | 1.21<br>(0.98 to 1.53)       | 1.22<br>(0.99 to 1.53)       | 1.19<br>(0.97 to 1.50)       | 0.02<br>(0.02 to 0.03) | 0.04<br>(0.03 to 0.05)    | 0.04<br>(0.03 to 0.05)    | 0.04<br>(0.03 to 0.05)    |
| Motor neuron disease                       | 1.37<br>(1.06 to 1.58)      | 2.54<br>(1.95 to 3.03)       | 2.54<br>(1.95 to 3.07)       | 2.53<br>(1.95 to 2.99)       | 0.04<br>(0.03 to 0.05) | 0.09<br>(0.07 to 0.11)    | 0.09<br>(0.07 to 0.11)    | 0.09<br>(0.07 to 0.10)    |
| Other neurological disorders               | 6.03<br>(5.26 to 6.86)      | 8.86<br>(7.53 to 10.33)      | 8.92<br>(7.57 to 10.46)      | 8.66<br>(7.40 to 10.10)      | 0.14<br>(0.13 to 0.16) | 0.28<br>(0.24 to 0.32)    | 0.29<br>(0.24 to 0.34)    | 0.26<br>(0.22 to 0.30)    |
| Mental disorders                           | 35.44<br>(25.98 to 62.24)   | 77.55<br>(55.90 to 129.33)   | 85.33<br>(61.37 to 137.55)   | 65.04<br>(46.47 to 111.10)   | 0.91<br>(0.68 to 1.49) | 2.47<br>(1.89 to 3.64)    | 2.79<br>(2.15 to 3.99)    | 1.99<br>(1.51 to 3.05)    |
| Alcohol use disorders                      | 17.05<br>(11.89 to 28.22)   | 25.86<br>(16.46 to 46.38)    | 26.83<br>(17.00 to 47.35)    | 23.59<br>(15.04 to 42.67)    | 0.47<br>(0.32 to 0.79) | 0.89<br>(0.59 to 1.53)    | 0.94<br>(0.62 to 1.58)    | 0.77<br>(0.51 to 1.35)    |
| Drug use disorders                         | 18.20<br>(12.34 to 35.90)   | 51.43<br>(35.99 to 90.92)    | 58.22<br>(40.78 to 99.22)    | 41.23<br>(28.29 to 75.13)    | 0.43<br>(0.31 to 0.77) | 1.58<br>(1.21 to 2.35)    | 1.85<br>(1.41 to 2.63)    | 1.21<br>(0.91 to 1.87)    |
| Opioid use disorders                       | 13.18<br>(8.59 to 27.22)    | 26.07<br>(16.89 to 49.19)    | 27.33<br>(17.87 to 50.79)    | 23.85<br>(15.33 to 46.58)    | 0.31<br>(0.22 to 0.57) | 0.80<br>(0.57 to 1.26)    | 0.87<br>(0.62 to 1.34)    | 0.69<br>(0.49 to 1.14)    |

|                           |                           |                              |                              |                             |                           |                           |                           |                           |
|---------------------------|---------------------------|------------------------------|------------------------------|-----------------------------|---------------------------|---------------------------|---------------------------|---------------------------|
| Cocaine use disorders     | 0.26<br>(0.16 to<br>0.51) | 1.41<br>(0.89 to<br>2.44)    | 1.63<br>(1.03 to<br>2.80)    | 1.06<br>(0.66 to<br>1.86)   | 0.01<br>(0.00 to<br>0.01) | 0.05<br>(0.03 to<br>0.07) | 0.06<br>(0.03 to<br>0.09) | 0.03<br>(0.02 to<br>0.05) |
| Amphetamine use disorders | 0.15<br>(0.09 to<br>0.37) | 1.35<br>(0.77 to<br>2.76)    | 1.67<br>(0.98 to<br>3.43)    | 0.89<br>(0.51 to<br>1.84)   | 0.00<br>(0.00 to<br>0.01) | 0.04<br>(0.03 to<br>0.06) | 0.05<br>(0.03 to<br>0.08) | 0.03<br>(0.02 to<br>0.04) |
| Other drug use disorders  | 4.60<br>(3.07 to<br>8.80) | 22.60<br>(14.71 to<br>40.17) | 27.60<br>(18.13 to<br>48.70) | 15.44<br>(9.79 to<br>27.62) | 0.12<br>(0.08 to<br>0.20) | 0.70<br>(0.50 to<br>1.08) | 0.87<br>(0.61 to<br>1.32) | 0.46<br>(0.32 to<br>0.73) |
| Eating disorders          | 0.19<br>(0.13 to<br>0.30) | 0.26<br>(0.16 to<br>0.40)    | 0.28<br>(0.17 to<br>0.43)    | 0.22<br>(0.14 to<br>0.34)   | 0.00<br>(0.00 to<br>0.01) | 0.01<br>(0.00 to<br>0.01) | 0.01<br>(0.00 to<br>0.01) | 0.00<br>(0.00 to<br>0.01) |

| Malaysia                                                   |                              |                              |                              |                                |                          |                           |                           |                           |
|------------------------------------------------------------|------------------------------|------------------------------|------------------------------|--------------------------------|--------------------------|---------------------------|---------------------------|---------------------------|
| Cause                                                      | YLLs (in 1000s)              |                              |                              |                                | Deaths (in 1000s)        |                           |                           |                           |
|                                                            | 2016                         | 2040 Forecast                | 2040 Better Scenario         | 2040 Worse Scenario            | 2016                     | 2040 Forecast             | 2040 Better Scenario      | 2040 Worse Scenario       |
|                                                            | 239.58<br>(222.81 to 260.40) | 460.79<br>(290.28 to 852.84) | 398.88<br>(248.56 to 755.08) | 617.28<br>(388.94 to 1,109.90) | 10.70<br>(9.91 to 11.61) | 29.85<br>(17.43 to 65.30) | 26.90<br>(15.26 to 62.05) | 37.27<br>(22.27 to 75.11) |
| Diabetes, urogenital, blood, and endocrine diseases        |                              |                              |                              |                                |                          |                           |                           |                           |
| Diabetes mellitus                                          | 104.25<br>(94.39 to 114.95)  | 140.06<br>(90.62 to 207.65)  | 115.07<br>(75.11 to 173.23)  | 199.37<br>(127.87 to 302.84)   | 4.85<br>(4.38 to 5.36)   | 8.69<br>(5.82 to 12.45)   | 7.46<br>(4.96 to 10.76)   | 11.47<br>(7.46 to 16.55)  |
| Acute glomerulonephritis                                   | 0.16<br>(0.15 to 0.18)       | 0.16<br>(0.12 to 0.21)       | 0.14<br>(0.11 to 0.18)       | 0.20<br>(0.15 to 0.25)         | 0.00<br>(0.00 to 0.00)   | 0.00<br>(0.00 to 0.00)    | 0.00<br>(0.00 to 0.00)    | 0.00<br>(0.00 to 0.01)    |
| Chronic kidney disease                                     | 83.57<br>(74.90 to 93.05)    | 241.38<br>(99.86 to 651.23)  | 208.87<br>(86.13 to 584.90)  | 328.30<br>(132.17 to 852.36)   | 3.68<br>(3.30 to 4.08)   | 16.39<br>(5.51 to 51.97)  | 14.77<br>(5.04 to 50.20)  | 20.76<br>(6.98 to 60.64)  |
| Chronic kidney disease due to diabetes mellitus            | 52.47<br>(46.17 to 58.92)    | 145.75<br>(63.18 to 388.63)  | 124.05<br>(52.53 to 332.34)  | 203.22<br>(83.07 to 505.88)    | 2.19<br>(1.92 to 2.47)   | 8.75<br>(3.13 to 26.07)   | 7.70<br>(2.77 to 23.84)   | 11.54<br>(4.03 to 32.68)  |
| Chronic kidney disease due to hypertension                 | 21.23<br>(17.66 to 25.09)    | 77.92<br>(27.49 to 249.92)   | 69.79<br>(24.01 to 232.66)   | 100.03<br>(34.96 to 280.96)    | 1.16<br>(0.97 to 1.37)   | 6.53<br>(2.01 to 23.92)   | 6.09<br>(1.87 to 24.52)   | 7.75<br>(2.37 to 25.16)   |
| Chronic kidney disease due to glomerulonephritis           | 4.82<br>(3.90 to 6.19)       | 7.09<br>(3.37 to 17.87)      | 5.92<br>(2.83 to 15.41)      | 10.33<br>(4.78 to 23.89)       | 0.14<br>(0.12 to 0.18)   | 0.39<br>(0.14 to 1.26)    | 0.34<br>(0.11 to 1.17)    | 0.54<br>(0.19 to 1.47)    |
| Chronic kidney disease due to other and unspecified causes | 5.06<br>(4.11 to 6.22)       | 10.63<br>(4.51 to 29.90)     | 9.11<br>(3.87 to 26.91)      | 14.72<br>(6.10 to 38.45)       | 0.19<br>(0.15 to 0.23)   | 0.72<br>(0.23 to 2.43)    | 0.65<br>(0.20 to 2.29)    | 0.93<br>(0.30 to 2.92)    |
| Urinary diseases and male infertility                      | 31.00<br>(27.39 to 34.35)    | 47.45<br>(38.96 to 56.33)    | 43.68<br>(35.69 to 52.32)    | 55.74<br>(46.59 to 65.32)      | 1.48<br>(1.30 to 1.64)   | 3.18<br>(2.45 to 4.02)    | 3.05<br>(2.31 to 3.91)    | 3.47<br>(2.72 to 4.28)    |
| Urinary tract infections                                   | 19.21<br>(15.76 to 25.10)    | 34.91<br>(27.25 to 45.33)    | 32.41<br>(25.17 to 42.60)    | 40.22<br>(31.63 to 52.27)      | 0.83<br>(0.64 to 1.18)   | 2.22<br>(1.60 to 3.15)    | 2.15<br>(1.53 to 3.09)    | 2.37<br>(1.71 to 3.34)    |
| Urolithiasis                                               | 0.56<br>(0.40 to 0.72)       | 0.71<br>(0.43 to 1.00)       | 0.62<br>(0.37 to 0.87)       | 0.93<br>(0.59 to 1.29)         | 0.02<br>(0.02 to 0.03)   | 0.04<br>(0.02 to 0.06)    | 0.04<br>(0.02 to 0.06)    | 0.05<br>(0.03 to 0.08)    |
| Other urinary diseases                                     | 11.23<br>(7.41 to 14.30)     | 11.84<br>(6.00 to 18.04)     | 10.66<br>(5.36 to 16.45)     | 14.58<br>(7.92 to 21.40)       | 0.62<br>(0.38 to 0.81)   | 0.92<br>(0.42 to 1.49)    | 0.87<br>(0.38 to 1.44)    | 1.04<br>(0.50 to 1.66)    |
| Gynecological diseases                                     | 0.26<br>(0.19 to 0.35)       | 0.17<br>(0.11 to 0.25)       | 0.13<br>(0.09 to 0.19)       | 0.29<br>(0.19 to 0.44)         | 0.01<br>(0.00 to 0.01)   | 0.01<br>(0.00 to 0.01)    | 0.00<br>(0.00 to 0.01)    | 0.01<br>(0.00 to 0.01)    |
| Uterine fibroids                                           | 0.01<br>(0.01 to 0.02)       | 0.01<br>(0.01 to 0.02)       | 0.01<br>(0.00 to 0.02)       | 0.02<br>(0.01 to 0.03)         | 0.00<br>(0.00 to 0.00)   | 0.00<br>(0.00 to 0.00)    | 0.00<br>(0.00 to 0.00)    | 0.00<br>(0.00 to 0.00)    |
| Polycystic ovarian syndrome                                | 0.00<br>(0.00 to 0.01)       | 0.00<br>(0.00 to 0.00)       | 0.00<br>(0.00 to 0.00)       | 0.00<br>(0.00 to 0.01)         | 0.00<br>(0.00 to 0.00)   | 0.00<br>(0.00 to 0.00)    | 0.00<br>(0.00 to 0.00)    | 0.00<br>(0.00 to 0.00)    |
| Endometriosis                                              | 0.00<br>(0.00 to 0.00)       | 0.00<br>(0.00 to 0.00)       | 0.00<br>(0.00 to 0.00)       | 0.00<br>(0.00 to 0.00)         | 0.00<br>(0.00 to 0.00)   | 0.00<br>(0.00 to 0.00)    | 0.00<br>(0.00 to 0.00)    | 0.00<br>(0.00 to 0.00)    |
| Genital prolapse                                           | 0.00<br>(0.00 to 0.00)       | 0.00<br>(0.00 to 0.00)       | 0.00<br>(0.00 to 0.00)       | 0.00<br>(0.00 to 0.00)         | 0.00<br>(0.00 to 0.00)   | 0.00<br>(0.00 to 0.00)    | 0.00<br>(0.00 to 0.00)    | 0.00<br>(0.00 to 0.00)    |
| Other gynecological diseases                               | 0.24<br>(0.17 to 0.32)       | 0.16<br>(0.10 to 0.23)       | 0.12<br>(0.08 to 0.17)       | 0.27<br>(0.17 to 0.41)         | 0.01<br>(0.00 to 0.01)   | 0.01<br>(0.00 to 0.01)    | 0.00<br>(0.00 to 0.01)    | 0.01<br>(0.00 to 0.01)    |
| Hemoglobinopathies and hemolytic anemias                   | 9.77<br>(7.94 to 11.90)      | 10.73<br>(8.10 to 13.94)     | 9.40<br>(7.04 to 12.38)      | 13.94<br>(10.44 to 18.29)      | 0.34<br>(0.28 to 0.43)   | 0.55<br>(0.42 to 0.73)    | 0.50<br>(0.37 to 0.68)    | 0.67<br>(0.50 to 0.89)    |
| Thalassemias                                               | 1.44<br>(1.11 to 1.98)       | 0.76<br>(0.52 to 1.11)       | 0.73<br>(0.50 to 1.05)       | 0.81<br>(0.55 to 1.19)         | 0.02<br>(0.01 to 0.03)   | 0.01<br>(0.01 to 0.01)    | 0.01<br>(0.01 to 0.01)    | 0.01<br>(0.01 to 0.02)    |

|                                                   |                             |                              |                              |                              |                           |                           |                           |                           |
|---------------------------------------------------|-----------------------------|------------------------------|------------------------------|------------------------------|---------------------------|---------------------------|---------------------------|---------------------------|
|                                                   | 0.03<br>(0.02 to<br>0.04)   | 0.02<br>(0.01 to<br>0.03)    | 0.02<br>(0.01 to<br>0.02)    | 0.03<br>(0.02 to<br>0.04)    | 0.00<br>(0.00 to<br>0.00) | 0.00<br>(0.00 to<br>0.00) | 0.00<br>(0.00 to<br>0.00) | 0.00<br>(0.00 to<br>0.00) |
| Sickle cell disorders                             |                             |                              |                              |                              |                           |                           |                           |                           |
| G6PD deficiency                                   | 4.29<br>(3.29 to<br>5.22)   | 5.53<br>(3.93 to<br>7.48)    | 4.64<br>(3.31 to<br>6.28)    | 7.77<br>(5.53 to<br>10.60)   | 0.11<br>(0.08 to<br>0.13) | 0.19<br>(0.14 to<br>0.27) | 0.17<br>(0.12 to<br>0.23) | 0.27<br>(0.19 to<br>0.36) |
| Other hemoglobinopathies and hemolytic anemias    | 4.02<br>(3.34 to<br>5.15)   | 4.41<br>(3.34 to<br>5.95)    | 4.01<br>(3.01 to<br>5.48)    | 5.33<br>(4.01 to<br>7.27)    | 0.21<br>(0.17 to<br>0.28) | 0.34<br>(0.26 to<br>0.46) | 0.32<br>(0.24 to<br>0.44) | 0.39<br>(0.29 to<br>0.53) |
| Endocrine, metabolic, blood, and immune disorders | 10.56<br>(9.19 to<br>12.82) | 20.83<br>(16.99 to<br>26.27) | 21.58<br>(17.52 to<br>27.07) | 19.43<br>(15.77 to<br>24.41) | 0.35<br>(0.30 to<br>0.43) | 1.03<br>(0.80 to<br>1.29) | 1.11<br>(0.86 to<br>1.41) | 0.89<br>(0.71 to<br>1.12) |



| Malaysia                                      |                                    |                                    |                                    |                                     |                               |                               |                               |                               |
|-----------------------------------------------|------------------------------------|------------------------------------|------------------------------------|-------------------------------------|-------------------------------|-------------------------------|-------------------------------|-------------------------------|
| Cause                                         | YLLs (in 1000s)                    |                                    |                                    |                                     | Deaths (in 1000s)             |                               |                               |                               |
|                                               | 2016                               | 2040 Forecast                      | 2040 Better Scenario               | 2040 Worse Scenario                 | 2016                          | 2040 Forecast                 | 2040 Better Scenario          | 2040 Worse Scenario           |
| <b>Musculoskeletal disorders</b>              | <b>14.17</b><br>(11.19 to 16.74)   | <b>18.46</b><br>(14.61 to 26.89)   | <b>17.67</b><br>(13.94 to 26.03)   | <b>20.15</b><br>(16.07 to 28.84)    | <b>0.33</b><br>(0.27 to 0.51) | <b>0.61</b><br>(0.43 to 1.34) | <b>0.60</b><br>(0.42 to 1.36) | <b>0.64</b><br>(0.45 to 1.35) |
| Rheumatoid arthritis                          | 0.35<br>(0.26 to 0.61)             | 0.49<br>(0.31 to 1.03)             | 0.40<br>(0.25 to 0.87)             | 0.75<br>(0.49 to 1.56)              | 0.01<br>(0.01 to 0.03)        | 0.03<br>(0.01 to 0.06)        | 0.02<br>(0.01 to 0.06)        | 0.04<br>(0.02 to 0.10)        |
| Other musculoskeletal disorders               | 13.82<br>(10.82 to 16.31)          | 17.97<br>(14.19 to 25.98)          | 17.28<br>(13.62 to 25.45)          | 19.40<br>(15.44 to 27.46)           | 0.32<br>(0.26 to 0.49)        | 0.59<br>(0.41 to 1.29)        | 0.58<br>(0.40 to 1.31)        | 0.60<br>(0.43 to 1.26)        |
| <b>Other non-communicable diseases</b>        | <b>109.28</b><br>(85.40 to 133.79) | <b>126.20</b><br>(86.16 to 159.93) | <b>113.57</b><br>(75.96 to 143.49) | <b>158.61</b><br>(111.38 to 201.30) | <b>2.11</b><br>(1.53 to 2.53) | <b>5.18</b><br>(3.06 to 6.81) | <b>5.06</b><br>(2.92 to 6.65) | <b>5.56</b><br>(3.38 to 7.24) |
| Congenital birth defects                      | 83.01<br>(61.92 to 107.31)         | 47.82<br>(33.02 to 68.76)          | 37.73<br>(26.39 to 52.57)          | 74.49<br>(51.97 to 104.57)          | 1.05<br>(0.80 to 1.34)        | 0.66<br>(0.48 to 0.92)        | 0.53<br>(0.39 to 0.72)        | 1.02<br>(0.74 to 1.38)        |
| Neural tube defects                           | 3.10<br>(1.51 to 5.47)             | 0.64<br>(0.27 to 1.40)             | 0.45<br>(0.20 to 0.98)             | 1.16<br>(0.47 to 2.54)              | 0.04<br>(0.02 to 0.06)        | 0.01<br>(0.00 to 0.02)        | 0.01<br>(0.00 to 0.01)        | 0.01<br>(0.01 to 0.03)        |
| Congenital heart anomalies                    | 44.43<br>(33.17 to 57.32)          | 19.62<br>(12.82 to 28.69)          | 14.07<br>(9.08 to 20.54)           | 35.79<br>(23.89 to 51.01)           | 0.57<br>(0.44 to 0.73)        | 0.28<br>(0.19 to 0.39)        | 0.20<br>(0.14 to 0.28)        | 0.50<br>(0.34 to 0.70)        |
| Orofacial clefts                              | 0.07<br>(0.02 to 0.15)             | 0.02<br>(0.00 to 0.06)             | 0.01<br>(0.00 to 0.04)             | 0.04<br>(0.01 to 0.12)              | 0.00<br>(0.00 to 0.00)        | 0.00<br>(0.00 to 0.00)        | 0.00<br>(0.00 to 0.00)        | 0.00<br>(0.00 to 0.00)        |
| Down syndrome                                 | 2.32<br>(1.49 to 3.28)             | 3.48<br>(2.30 to 5.03)             | 3.51<br>(2.29 to 5.06)             | 3.35<br>(2.16 to 4.87)              | 0.03<br>(0.02 to 0.05)        | 0.06<br>(0.04 to 0.08)        | 0.06<br>(0.04 to 0.08)        | 0.06<br>(0.04 to 0.08)        |
| Other chromosomal abnormalities               | 11.71<br>(7.03 to 17.91)           | 12.64<br>(7.41 to 19.78)           | 10.93<br>(6.38 to 16.79)           | 15.95<br>(8.97 to 25.18)            | 0.14<br>(0.08 to 0.21)        | 0.17<br>(0.10 to 0.25)        | 0.14<br>(0.08 to 0.21)        | 0.21<br>(0.12 to 0.32)        |
| Congenital musculoskeletal and limb anomalies | 3.14<br>(1.07 to 5.17)             | 1.61<br>(0.53 to 2.99)             | 1.22<br>(0.40 to 2.25)             | 2.61<br>(0.88 to 4.84)              | 0.04<br>(0.01 to 0.06)        | 0.02<br>(0.01 to 0.04)        | 0.01<br>(0.01 to 0.03)        | 0.03<br>(0.01 to 0.06)        |
| Urogenital congenital anomalies               | 0.99<br>(0.60 to 1.43)             | 0.80<br>(0.54 to 1.16)             | 0.66<br>(0.45 to 0.94)             | 1.14<br>(0.79 to 1.64)              | 0.02<br>(0.01 to 0.02)        | 0.02<br>(0.01 to 0.03)        | 0.02<br>(0.01 to 0.02)        | 0.03<br>(0.02 to 0.04)        |
| Digestive congenital anomalies                | 2.37<br>(1.08 to 3.61)             | 1.17<br>(0.55 to 2.02)             | 0.86<br>(0.41 to 1.51)             | 1.99<br>(0.93 to 3.44)              | 0.03<br>(0.01 to 0.04)        | 0.01<br>(0.01 to 0.02)        | 0.01<br>(0.01 to 0.02)        | 0.02<br>(0.01 to 0.04)        |
| Other congenital birth defects                | 14.89<br>(7.17 to 23.74)           | 7.84<br>(3.96 to 13.70)            | 6.01<br>(2.97 to 10.47)            | 12.45<br>(6.14 to 20.85)            | 0.18<br>(0.09 to 0.28)        | 0.10<br>(0.05 to 0.17)        | 0.08<br>(0.04 to 0.13)        | 0.16<br>(0.08 to 0.26)        |
| Skin and subcutaneous diseases                | 24.93<br>(14.42 to 34.73)          | 77.77<br>(42.86 to 103.09)         | 75.32<br>(41.80 to 99.94)          | 83.27<br>(45.63 to 112.91)          | 1.05<br>(0.56 to 1.38)        | 4.51<br>(2.40 to 6.10)        | 4.52<br>(2.43 to 6.12)        | 4.53<br>(2.39 to 6.17)        |
| Cellulitis                                    | 7.02<br>(3.54 to 10.96)            | 28.44<br>(13.32 to 40.16)          | 28.59<br>(13.33 to 40.27)          | 28.31<br>(13.33 to 40.76)           | 0.29<br>(0.13 to 0.42)        | 1.56<br>(0.67 to 2.24)        | 1.62<br>(0.69 to 2.34)        | 1.46<br>(0.61 to 2.13)        |
| Pyoderma                                      | 11.74<br>(6.43 to 17.28)           | 35.29<br>(18.10 to 48.36)          | 33.73<br>(17.62 to 46.11)          | 38.63<br>(19.91 to 53.09)           | 0.43<br>(0.22 to 0.59)        | 1.90<br>(0.94 to 2.68)        | 1.90<br>(0.93 to 2.71)        | 1.92<br>(0.95 to 2.73)        |
| Decubitus ulcer                               | 5.05<br>(2.55 to 7.09)             | 11.72<br>(6.07 to 17.07)           | 10.81<br>(5.46 to 15.87)           | 13.71<br>(6.94 to 20.01)            | 0.29<br>(0.15 to 0.41)        | 0.94<br>(0.47 to 1.44)        | 0.90<br>(0.45 to 1.39)        | 1.03<br>(0.52 to 1.58)        |
| Other skin and subcutaneous diseases          | 1.11<br>(0.64 to 1.64)             | 2.33<br>(1.34 to 3.43)             | 2.19<br>(1.26 to 3.25)             | 2.61<br>(1.51 to 3.82)              | 0.04<br>(0.02 to 0.06)        | 0.11<br>(0.06 to 0.17)        | 0.11<br>(0.06 to 0.17)        | 0.12<br>(0.06 to 0.18)        |
| Sudden infant death syndrome                  | 1.35<br>(0.83 to 2.17)             | 0.61<br>(0.32 to 1.06)             | 0.52<br>(0.27 to 0.92)             | 0.85<br>(0.45 to 1.50)              | 0.02<br>(0.01 to 0.03)        | 0.01<br>(0.00 to 0.01)        | 0.01<br>(0.00 to 0.01)        | 0.01<br>(0.00 to 0.02)        |

|                          |                                 |                                 |                                 |                                 |                              |                              |                              |                              |
|--------------------------|---------------------------------|---------------------------------|---------------------------------|---------------------------------|------------------------------|------------------------------|------------------------------|------------------------------|
| Injuries                 | 587.88<br>(539.95 to<br>636.95) | 464.08<br>(366.48 to<br>594.56) | 417.97<br>(334.55 to<br>524.04) | 650.27<br>(512.10 to<br>846.09) | 13.75<br>(12.66 to<br>14.91) | 14.64<br>(12.28 to<br>17.55) | 13.60<br>(11.52 to<br>16.11) | 19.09<br>(15.79 to<br>23.51) |
| Transport injuries       | 310.77<br>(275.85 to<br>344.21) | 201.95<br>(148.04 to<br>281.01) | 185.56<br>(138.35 to<br>253.14) | 328.88<br>(240.18 to<br>464.38) | 7.06<br>(6.24 to<br>7.87)    | 5.79<br>(4.43 to<br>7.75)    | 5.41<br>(4.22 to<br>7.04)    | 8.93<br>(6.74 to<br>12.16)   |
| Road injuries            | 276.03<br>(242.80 to<br>309.51) | 166.03<br>(120.34 to<br>231.60) | 156.92<br>(116.11 to<br>213.71) | 276.09<br>(200.42 to<br>393.50) | 6.23<br>(5.50 to<br>6.98)    | 4.72<br>(3.63 to<br>6.27)    | 4.53<br>(3.54 to<br>5.86)    | 7.42<br>(5.67 to<br>9.93)    |
| Pedestrian road injuries | 52.65<br>(43.83 to<br>62.45)    | 23.72<br>(17.32 to<br>31.04)    | 19.18<br>(14.22 to<br>24.89)    | 49.25<br>(35.86 to<br>66.39)    | 1.53<br>(1.26 to<br>1.82)    | 0.98<br>(0.72 to<br>1.27)    | 0.82<br>(0.61 to<br>1.06)    | 1.85<br>(1.38 to<br>2.40)    |

| Malaysia                                        |                                                      |                                                      |                                                      |                                                      |                                                |                                                |                                                |                                                |
|-------------------------------------------------|------------------------------------------------------|------------------------------------------------------|------------------------------------------------------|------------------------------------------------------|------------------------------------------------|------------------------------------------------|------------------------------------------------|------------------------------------------------|
| Cause                                           | YLLs (in 1000s)                                      |                                                      |                                                      |                                                      | Deaths (in 1000s)                              |                                                |                                                |                                                |
|                                                 | 2016                                                 | 2040 Forecast                                        | 2040 Better Scenario                                 | 2040 Worse Scenario                                  | 2016                                           | 2040 Forecast                                  | 2040 Better Scenario                           | 2040 Worse Scenario                            |
| Cyclist road injuries                           | 11.42<br>(9.08 to<br>14.03)                          | 9.64<br>(6.62 to<br>13.38)                           | 9.41<br>(6.55 to<br>12.89)                           | 13.82<br>(9.47 to<br>19.37)                          | 0.29<br>(0.23 to<br>0.37)                      | 0.32<br>(0.22 to<br>0.45)                      | 0.32<br>(0.22 to<br>0.44)                      | 0.42<br>(0.29 to<br>0.60)                      |
| Motorcyclist road injuries                      | 68.13<br>(45.74 to<br>86.70)                         | 52.06<br>(31.65 to<br>80.12)                         | 49.93<br>(30.79 to<br>75.36)                         | 72.21<br>(42.94 to<br>113.25)                        | 1.25<br>(0.87 to<br>1.59)                      | 1.09<br>(0.68 to<br>1.61)                      | 1.05<br>(0.68 to<br>1.52)                      | 1.45<br>(0.90 to<br>2.18)                      |
| Motor vehicle road injuries                     | 137.72<br>(112.80 to<br>161.20)                      | 76.39<br>(53.22 to<br>108.09)                        | 74.24<br>(52.84 to<br>102.60)                        | 133.84<br>(92.47 to<br>195.50)                       | 3.01<br>(2.45 to<br>3.53)                      | 2.18<br>(1.59 to<br>2.95)                      | 2.18<br>(1.62 to<br>2.86)                      | 3.49<br>(2.50 to<br>4.81)                      |
| Other road injuries                             | 6.11<br>(4.24 to<br>7.84)                            | 4.22<br>(2.69 to<br>6.13)                            | 4.15<br>(2.70 to<br>5.90)                            | 6.98<br>(4.36 to<br>10.23)                           | 0.15<br>(0.10 to<br>0.19)                      | 0.15<br>(0.10 to<br>0.21)                      | 0.15<br>(0.10 to<br>0.21)                      | 0.21<br>(0.14 to<br>0.31)                      |
| Other transport injuries                        | 34.74<br>(27.96 to<br>43.99)                         | 35.91<br>(24.43 to<br>53.27)                         | 28.64<br>(20.13 to<br>43.33)                         | 52.79<br>(35.33 to<br>80.99)                         | 0.82<br>(0.66 to<br>1.05)                      | 1.07<br>(0.76 to<br>1.55)                      | 0.88<br>(0.64 to<br>1.27)                      | 1.51<br>(1.06 to<br>2.26)                      |
| <b>Unintentional injuries</b>                   | <b>152.38</b><br><b>(140.05 to</b><br><b>165.97)</b> | <b>133.79</b><br><b>(110.16 to</b><br><b>164.91)</b> | <b>121.79</b><br><b>(100.36 to</b><br><b>149.49)</b> | <b>159.94</b><br><b>(129.74 to</b><br><b>197.55)</b> | <b>3.78</b><br><b>(3.49 to</b><br><b>4.09)</b> | <b>5.12</b><br><b>(4.21 to</b><br><b>6.15)</b> | <b>4.90</b><br><b>(4.04 to</b><br><b>5.86)</b> | <b>5.66</b><br><b>(4.66 to</b><br><b>6.78)</b> |
| Falls                                           | 20.54<br>(17.51 to<br>23.60)                         | 29.24<br>(23.29 to<br>35.19)                         | 27.65<br>(22.10 to<br>33.32)                         | 32.52<br>(26.34 to<br>38.86)                         | 0.77<br>(0.64 to<br>0.88)                      | 1.62<br>(1.28 to<br>1.95)                      | 1.59<br>(1.25 to<br>1.96)                      | 1.69<br>(1.33 to<br>2.05)                      |
| Drowning                                        | 39.94<br>(33.79 to<br>46.13)                         | 26.87<br>(20.15 to<br>35.79)                         | 23.49<br>(17.80 to<br>31.02)                         | 33.76<br>(25.21 to<br>45.39)                         | 0.81<br>(0.69 to<br>0.91)                      | 0.73<br>(0.57 to<br>0.92)                      | 0.65<br>(0.52 to<br>0.81)                      | 0.87<br>(0.68 to<br>1.12)                      |
| Fire, heat, and hot substances                  | 12.12<br>(10.52 to<br>13.87)                         | 8.86<br>(6.44 to<br>11.56)                           | 7.52<br>(5.41 to<br>9.63)                            | 11.93<br>(8.68 to<br>15.65)                          | 0.34<br>(0.27 to<br>0.38)                      | 0.39<br>(0.25 to<br>0.51)                      | 0.34<br>(0.22 to<br>0.44)                      | 0.48<br>(0.31 to<br>0.63)                      |
| Poisonings                                      | 8.25<br>(6.16 to<br>11.02)                           | 3.75<br>(2.48 to<br>5.42)                            | 2.99<br>(2.03 to<br>4.30)                            | 5.68<br>(3.82 to<br>8.28)                            | 0.19<br>(0.14 to<br>0.24)                      | 0.11<br>(0.08 to<br>0.16)                      | 0.09<br>(0.07 to<br>0.13)                      | 0.16<br>(0.11 to<br>0.23)                      |
| Exposure to mechanical forces                   | 12.27<br>(10.42 to<br>14.32)                         | 9.22<br>(6.92 to<br>12.46)                           | 8.02<br>(6.09 to<br>10.68)                           | 11.86<br>(8.87 to<br>15.77)                          | 0.26<br>(0.23 to<br>0.30)                      | 0.26<br>(0.20 to<br>0.33)                      | 0.23<br>(0.18 to<br>0.29)                      | 0.32<br>(0.24 to<br>0.40)                      |
| Unintentional firearm injuries                  | 3.54<br>(2.71 to<br>4.86)                            | 2.63<br>(1.73 to<br>3.84)                            | 2.31<br>(1.53 to<br>3.36)                            | 3.35<br>(2.21 to<br>4.94)                            | 0.09<br>(0.07 to<br>0.12)                      | 0.09<br>(0.06 to<br>0.13)                      | 0.08<br>(0.06 to<br>0.12)                      | 0.11<br>(0.07 to<br>0.15)                      |
| Unintentional suffocation                       | 4.79<br>(3.67 to<br>6.40)                            | 3.53<br>(2.37 to<br>5.25)                            | 3.09<br>(2.11 to<br>4.48)                            | 4.42<br>(3.00 to<br>6.48)                            | 0.08<br>(0.06 to<br>0.10)                      | 0.07<br>(0.04 to<br>0.10)                      | 0.06<br>(0.04 to<br>0.08)                      | 0.08<br>(0.06 to<br>0.12)                      |
| Other exposure to mechanical forces             | 3.94<br>(3.25 to<br>4.66)                            | 3.06<br>(2.30 to<br>3.96)                            | 2.61<br>(1.99 to<br>3.38)                            | 4.09<br>(3.09 to<br>5.30)                            | 0.09<br>(0.08 to<br>0.11)                      | 0.10<br>(0.08 to<br>0.12)                      | 0.09<br>(0.07 to<br>0.11)                      | 0.13<br>(0.10 to<br>0.16)                      |
| Adverse effects of medical treatment            | 18.36<br>(13.85 to<br>21.65)                         | 20.19<br>(14.80 to<br>26.32)                         | 18.89<br>(13.70 to<br>24.20)                         | 22.71<br>(16.67 to<br>29.01)                         | 0.48<br>(0.38 to<br>0.56)                      | 0.73<br>(0.56 to<br>0.95)                      | 0.71<br>(0.54 to<br>0.93)                      | 0.78<br>(0.59 to<br>0.98)                      |
| Animal contact                                  | 2.47<br>(2.10 to<br>2.98)                            | 2.96<br>(2.12 to<br>4.25)                            | 2.70<br>(1.94 to<br>3.83)                            | 3.50<br>(2.48 to<br>5.01)                            | 0.06<br>(0.06 to<br>0.08)                      | 0.11<br>(0.08 to<br>0.15)                      | 0.10<br>(0.07 to<br>0.14)                      | 0.12<br>(0.09 to<br>0.16)                      |
| Venomous animal contact                         | 1.71<br>(1.42 to<br>2.08)                            | 2.09<br>(1.48 to<br>2.99)                            | 1.94<br>(1.36 to<br>2.78)                            | 2.38<br>(1.68 to<br>3.42)                            | 0.05<br>(0.04 to<br>0.06)                      | 0.08<br>(0.06 to<br>0.11)                      | 0.07<br>(0.05 to<br>0.10)                      | 0.08<br>(0.06 to<br>0.11)                      |
| Non-venomous animal contact                     | 0.77<br>(0.59 to<br>1.01)                            | 0.87<br>(0.57 to<br>1.34)                            | 0.76<br>(0.50 to<br>1.17)                            | 1.12<br>(0.73 to<br>1.72)                            | 0.02<br>(0.01 to<br>0.02)                      | 0.03<br>(0.02 to<br>0.04)                      | 0.03<br>(0.02 to<br>0.04)                      | 0.04<br>(0.02 to<br>0.05)                      |
| Foreign body                                    | 27.07<br>(22.16 to<br>35.52)                         | 27.44<br>(22.70 to<br>33.50)                         | 26.65<br>(22.17 to<br>32.35)                         | 28.68<br>(23.43 to<br>35.47)                         | 0.60<br>(0.51 to<br>0.70)                      | 1.01<br>(0.70 to<br>1.24)                      | 1.03<br>(0.70 to<br>1.30)                      | 0.96<br>(0.68 to<br>1.18)                      |
| Pulmonary aspiration and foreign body in airway | 22.21<br>(17.78 to<br>29.81)                         | 20.91<br>(16.94 to<br>26.45)                         | 19.86<br>(16.12 to<br>24.89)                         | 22.67<br>(18.22 to<br>29.12)                         | 0.48<br>(0.40 to<br>0.58)                      | 0.78<br>(0.51 to<br>0.98)                      | 0.79<br>(0.51 to<br>1.02)                      | 0.77<br>(0.53 to<br>0.96)                      |

|                                             |                                                      |                                                     |                                                     |                                                      |                                                |                                                |                                                |                                                |
|---------------------------------------------|------------------------------------------------------|-----------------------------------------------------|-----------------------------------------------------|------------------------------------------------------|------------------------------------------------|------------------------------------------------|------------------------------------------------|------------------------------------------------|
|                                             | 4.86<br>(3.85 to<br>6.62)                            | 6.53<br>(4.78 to<br>8.83)                           | 6.79<br>(4.98 to<br>9.16)                           | 6.00<br>(4.37 to<br>8.20)                            | 0.12<br>(0.09 to<br>0.15)                      | 0.22<br>(0.15 to<br>0.30)                      | 0.24<br>(0.16 to<br>0.32)                      | 0.19<br>(0.13 to<br>0.26)                      |
| Foreign body in other body part             |                                                      |                                                     |                                                     |                                                      |                                                |                                                |                                                |                                                |
|                                             | 0.75<br>(0.55 to<br>0.94)                            | 0.62<br>(0.42 to<br>0.90)                           | 0.53<br>(0.36 to<br>0.75)                           | 0.86<br>(0.59 to<br>1.22)                            | 0.02<br>(0.02 to<br>0.03)                      | 0.02<br>(0.02 to<br>0.04)                      | 0.02<br>(0.01 to<br>0.03)                      | 0.03<br>(0.02 to<br>0.05)                      |
| Environmental heat and cold exposure        |                                                      |                                                     |                                                     |                                                      |                                                |                                                |                                                |                                                |
|                                             | 10.60<br>(8.63 to<br>14.01)                          | 4.63<br>(3.26 to<br>6.67)                           | 3.37<br>(2.38 to<br>4.75)                           | 8.43<br>(5.91 to<br>12.00)                           | 0.25<br>(0.21 to<br>0.32)                      | 0.15<br>(0.11 to<br>0.20)                      | 0.11<br>(0.08 to<br>0.15)                      | 0.26<br>(0.18 to<br>0.35)                      |
| Other unintentional injuries                |                                                      |                                                     |                                                     |                                                      |                                                |                                                |                                                |                                                |
| <b>Self-harm and interpersonal violence</b> | <b>124.51</b><br><b>(105.08 to</b><br><b>167.02)</b> | <b>125.01</b><br><b>(90.92 to</b><br><b>175.45)</b> | <b>107.30</b><br><b>(78.92 to</b><br><b>149.51)</b> | <b>158.10</b><br><b>(112.38 to</b><br><b>226.98)</b> | <b>2.90</b><br><b>(2.47 to</b><br><b>3.70)</b> | <b>3.66</b><br><b>(2.78 to</b><br><b>4.84)</b> | <b>3.23</b><br><b>(2.48 to</b><br><b>4.21)</b> | <b>4.43</b><br><b>(3.26 to</b><br><b>5.97)</b> |

| Malaysia                                                                            |                                                |                                                 |                                                 |                                                 |                                                |                                                |                                                |                                                |
|-------------------------------------------------------------------------------------|------------------------------------------------|-------------------------------------------------|-------------------------------------------------|-------------------------------------------------|------------------------------------------------|------------------------------------------------|------------------------------------------------|------------------------------------------------|
| Cause                                                                               | YLLs (in 1000s)                                |                                                 |                                                 |                                                 | Deaths (in 1000s)                              |                                                |                                                |                                                |
|                                                                                     | 2016                                           | 2040 Forecast                                   | 2040 Better Scenario                            | 2040 Worse Scenario                             | 2016                                           | 2040 Forecast                                  | 2040 Better Scenario                           | 2040 Worse Scenario                            |
| Self-harm                                                                           | 92.75<br>(78.51 to<br>124.25)                  | 105.25<br>(74.73 to<br>150.78)                  | 90.37<br>(65.59 to<br>126.53)                   | 132.05<br>(90.62 to<br>194.20)                  | 2.28<br>(1.93 to<br>2.88)                      | 3.21<br>(2.39 to<br>4.28)                      | 2.84<br>(2.16 to<br>3.72)                      | 3.85<br>(2.79 to<br>5.25)                      |
| Self-harm by firearm                                                                | 3.72<br>(2.67 to<br>7.03)                      | 2.92<br>(1.73 to<br>5.34)                       | 2.35<br>(1.42 to<br>4.15)                       | 4.11<br>(2.40 to<br>7.78)                       | 0.09<br>(0.06 to<br>0.15)                      | 0.08<br>(0.05 to<br>0.14)                      | 0.07<br>(0.04 to<br>0.11)                      | 0.11<br>(0.07 to<br>0.20)                      |
| Self-harm by other specified means                                                  | 89.03<br>(75.32 to<br>119.73)                  | 102.33<br>(72.62 to<br>145.87)                  | 88.01<br>(63.70 to<br>122.76)                   | 127.95<br>(88.11 to<br>188.10)                  | 2.19<br>(1.86 to<br>2.76)                      | 3.12<br>(2.33 to<br>4.19)                      | 2.77<br>(2.11 to<br>3.62)                      | 3.74<br>(2.70 to<br>5.08)                      |
| Interpersonal violence                                                              | 31.76<br>(23.02 to<br>49.99)                   | 19.76<br>(12.87 to<br>33.88)                    | 16.95<br>(11.13 to<br>29.04)                    | 26.05<br>(16.91 to<br>44.79)                    | 0.62<br>(0.45 to<br>1.02)                      | 0.45<br>(0.29 to<br>0.80)                      | 0.39<br>(0.26 to<br>0.71)                      | 0.58<br>(0.38 to<br>1.05)                      |
| Physical violence by firearm                                                        | 7.51<br>(4.44 to<br>12.99)                     | 3.68<br>(2.09 to<br>6.91)                       | 2.98<br>(1.72 to<br>5.49)                       | 5.47<br>(3.12 to<br>10.11)                      | 0.14<br>(0.08 to<br>0.25)                      | 0.08<br>(0.04 to<br>0.15)                      | 0.06<br>(0.04 to<br>0.12)                      | 0.11<br>(0.07 to<br>0.21)                      |
| Physical violence by sharp object                                                   | 9.21<br>(6.00 to<br>17.93)                     | 5.19<br>(3.14 to<br>10.17)                      | 4.33<br>(2.65 to<br>8.55)                       | 7.32<br>(4.42 to<br>14.53)                      | 0.18<br>(0.12 to<br>0.35)                      | 0.11<br>(0.07 to<br>0.22)                      | 0.10<br>(0.06 to<br>0.19)                      | 0.16<br>(0.10 to<br>0.31)                      |
| Physical violence by other means                                                    | 15.04<br>(10.58 to<br>23.48)                   | 10.89<br>(6.85 to<br>19.30)                     | 9.63<br>(6.13 to<br>17.08)                      | 13.27<br>(8.24 to<br>24.21)                     | 0.30<br>(0.21 to<br>0.49)                      | 0.26<br>(0.16 to<br>0.48)                      | 0.23<br>(0.15 to<br>0.43)                      | 0.31<br>(0.19 to<br>0.57)                      |
| <b>Forces of nature, conflict and terrorism, and executions and police conflict</b> | <b>0.21</b><br><b>(0.16 to</b><br><b>0.28)</b> | <b>3.34</b><br><b>(0.00 to</b><br><b>32.57)</b> | <b>3.32</b><br><b>(0.00 to</b><br><b>32.41)</b> | <b>3.34</b><br><b>(0.00 to</b><br><b>32.57)</b> | <b>0.00</b><br><b>(0.00 to</b><br><b>0.01)</b> | <b>0.07</b><br><b>(0.00 to</b><br><b>0.67)</b> | <b>0.07</b><br><b>(0.00 to</b><br><b>0.67)</b> | <b>0.07</b><br><b>(0.00 to</b><br><b>0.65)</b> |
| Exposure to forces of nature                                                        | 0.00<br>(0.00 to<br>0.00)                      | 0.30<br>(0.00 to<br>2.35)                       | 0.30<br>(0.00 to<br>2.35)                       | 0.30<br>(0.00 to<br>2.35)                       | 0.00<br>(0.00 to<br>0.00)                      | 0.01<br>(0.00 to<br>0.05)                      | 0.01<br>(0.00 to<br>0.05)                      | 0.01<br>(0.00 to<br>0.05)                      |
| Conflict and terrorism                                                              | 0.00<br>(0.00 to<br>0.00)                      | 3.04<br>(0.00 to<br>32.57)                      | 3.02<br>(0.00 to<br>32.41)                      | 3.04<br>(0.00 to<br>32.57)                      | 0.00<br>(0.00 to<br>0.00)                      | 0.06<br>(0.00 to<br>0.67)                      | 0.06<br>(0.00 to<br>0.67)                      | 0.06<br>(0.00 to<br>0.65)                      |
| Executions and police conflict                                                      | 0.21<br>(0.16 to<br>0.28)                      | 0.00<br>(0.00 to<br>0.00)                       | 0.00<br>(0.00 to<br>0.00)                       | 0.00<br>(0.00 to<br>0.00)                       | 0.00<br>(0.00 to<br>0.01)                      | 0.00<br>(0.00 to<br>0.00)                      | 0.00<br>(0.00 to<br>0.00)                      | 0.00<br>(0.00 to<br>0.00)                      |

| Maldives                                                          |                                          |                                          |                                          |                                          |                                     |                                       |                                       |                                       |
|-------------------------------------------------------------------|------------------------------------------|------------------------------------------|------------------------------------------|------------------------------------------|-------------------------------------|---------------------------------------|---------------------------------------|---------------------------------------|
| Cause                                                             | YLLs (actual counts)                     |                                          |                                          |                                          | Deaths (actual counts)              |                                       |                                       |                                       |
|                                                                   | 2016                                     | 2040 Forecast                            | 2040 Better Scenario                     | 2040 Worse Scenario                      | 2016                                | 2040 Forecast                         | 2040 Better Scenario                  | 2040 Worse Scenario                   |
| All causes                                                        | 26,809.07<br>(22,697.02 to<br>31,546.49) | 46,609.36<br>(30,754.88 to<br>68,895.29) | 39,588.52<br>(26,528.99 to<br>57,326.18) | 61,217.53<br>(39,594.66 to<br>90,084.56) | 1,128.66<br>(948.98 to<br>1,335.99) | 2,493.38<br>(1,815.08 to<br>3,332.05) | 2,170.76<br>(1,577.35 to<br>2,895.89) | 3,105.16<br>(2,222.85 to<br>4,164.18) |
| Communicable, maternal, neonatal, and nutritional diseases        | 3,823.24<br>(3,268.81 to<br>4,477.91)    | 3,898.30<br>(2,428.83 to<br>5,803.23)    | 3,433.34<br>(2,130.00 to<br>5,139.80)    | 4,851.44<br>(2,945.30 to<br>7,330.79)    | 78.02<br>(67.15 to<br>90.70)        | 127.88<br>(91.38 to<br>174.44)        | 113.51<br>(80.25 to<br>154.31)        | 150.84<br>(106.82 to<br>212.79)       |
| HIV/AIDS and tuberculosis                                         | 238.75<br>(196.09 to<br>290.17)          | 323.09<br>(172.21 to<br>591.86)          | 254.24<br>(138.37 to<br>458.10)          | 474.02<br>(241.37 to<br>926.08)          | 9.06<br>(7.30 to<br>11.06)          | 14.32<br>(8.39 to<br>24.33)           | 11.48<br>(6.85 to<br>18.95)           | 20.16<br>(11.24 to<br>37.12)          |
| Tuberculosis                                                      | 191.54<br>(149.22 to<br>243.45)          | 305.97<br>(153.37 to<br>574.07)          | 240.11<br>(122.76 to<br>445.83)          | 449.11<br>(214.58 to<br>901.21)          | 8.16<br>(6.43 to<br>10.16)          | 14.02<br>(8.07 to<br>24.01)           | 11.22<br>(6.57 to<br>18.65)           | 19.73<br>(10.92 to<br>36.78)          |
| HIV/AIDS                                                          | 47.21<br>(39.52 to<br>56.39)             | 17.12<br>(11.23 to<br>25.57)             | 14.12<br>(8.63 to<br>22.10)              | 24.91<br>(17.50 to<br>34.90)             | 0.90<br>(0.75 to<br>1.07)           | 0.30<br>(0.19 to<br>0.47)             | 0.26<br>(0.15 to<br>0.42)             | 0.42<br>(0.28 to<br>0.63)             |
| Diarrhea, lower respiratory, and other common infectious diseases | 939.84<br>(783.17 to<br>1,162.52)        | 1,268.88<br>(758.56 to<br>2,032.70)      | 1,019.95<br>(627.56 to<br>1,595.05)      | 1,675.00<br>(971.61 to<br>2,841.75)      | 29.93<br>(24.18 to<br>36.32)        | 59.94<br>(39.84 to<br>86.85)          | 50.07<br>(33.38 to<br>71.86)          | 72.26<br>(47.37 to<br>106.94)         |
| Diarrheal diseases                                                | 99.10<br>(69.48 to<br>142.58)            | 73.00<br>(13.89 to<br>236.35)            | 58.75<br>(12.54 to<br>184.26)            | 134.14<br>(24.34 to<br>426.77)           | 3.13<br>(1.82 to<br>4.78)           | 3.82<br>(0.76 to<br>12.25)            | 3.23<br>(0.72 to<br>10.30)            | 6.70<br>(1.15 to<br>22.22)            |
| Intestinal infectious diseases                                    | 77.84<br>(36.54 to<br>144.02)            | 63.42<br>(20.62 to<br>153.13)            | 60.74<br>(19.99 to<br>144.59)            | 71.51<br>(22.69 to<br>170.02)            | 1.16<br>(0.56 to<br>2.16)           | 1.04<br>(0.37 to<br>2.40)             | 1.01<br>(0.36 to<br>2.32)             | 1.16<br>(0.40 to<br>2.71)             |
| Typhoid fever                                                     | 65.89<br>(30.09 to<br>124.26)            | 51.34<br>(15.32 to<br>126.50)            | 49.28<br>(14.89 to<br>121.34)            | 57.71<br>(17.13 to<br>143.03)            | 0.98<br>(0.46 to<br>1.32)           | 0.83<br>(0.29 to<br>1.93)             | 0.81<br>(0.28 to<br>1.85)             | 0.92<br>(0.31 to<br>2.14)             |
| Paratyphoid fever                                                 | 11.80<br>(4.68 to<br>24.53)              | 11.98<br>(3.36 to<br>30.59)              | 11.36<br>(3.20 to<br>28.70)              | 13.68<br>(3.85 to<br>35.86)              | 0.18<br>(0.07 to<br>0.37)           | 0.21<br>(0.06 to<br>0.50)             | 0.20<br>(0.06 to<br>0.48)             | 0.23<br>(0.07 to<br>0.57)             |
| Other intestinal infectious diseases                              | 0.14<br>(0.05 to<br>0.30)                | 0.10<br>(0.03 to<br>0.25)                | 0.09<br>(0.03 to<br>0.22)                | 0.12<br>(0.04 to<br>0.30)                | 0.00<br>(0.00 to<br>0.01)           | 0.00<br>(0.00 to<br>0.01)             | 0.00<br>(0.00 to<br>0.01)             | 0.00<br>(0.00 to<br>0.01)             |
| Lower respiratory infections                                      | 511.90<br>(421.89 to<br>623.98)          | 842.96<br>(506.52 to<br>1,385.24)        | 646.27<br>(395.55 to<br>1,024.05)        | 1,090.90<br>(622.78 to<br>1,930.99)      | 21.01<br>(16.31 to<br>26.21)        | 47.80<br>(31.05 to<br>69.61)          | 38.99<br>(25.54 to<br>55.38)          | 56.04<br>(35.79 to<br>83.73)          |
| Upper respiratory infections                                      | 0.76<br>(0.39 to<br>1.28)                | 1.17<br>(0.41 to<br>2.66)                | 1.03<br>(0.36 to<br>2.36)                | 1.48<br>(0.52 to<br>3.26)                | 0.02<br>(0.01 to<br>0.04)           | 0.04<br>(0.02 to<br>0.09)             | 0.04<br>(0.01 to<br>0.08)             | 0.05<br>(0.02 to<br>0.12)             |
| Otitis media                                                      | 0.48<br>(0.27 to<br>0.83)                | 0.28<br>(0.13 to<br>0.57)                | 0.29<br>(0.13 to<br>0.60)                | 0.28<br>(0.13 to<br>0.58)                | 0.01<br>(0.01 to<br>0.02)           | 0.01<br>(0.01 to<br>0.02)             | 0.01<br>(0.01 to<br>0.02)             | 0.01<br>(0.00 to<br>0.02)             |
| Meningitis                                                        | 73.32<br>(55.58 to<br>106.02)            | 65.65<br>(34.92 to<br>124.50)            | 64.37<br>(33.95 to<br>120.81)            | 71.04<br>(37.37 to<br>132.09)            | 1.46<br>(1.08 to<br>2.09)           | 1.81<br>(1.13 to<br>2.99)             | 1.83<br>(1.12 to<br>3.02)             | 1.84<br>(1.15 to<br>3.00)             |
| Pneumococcal meningitis                                           | 0.68<br>(0.44 to<br>1.06)                | 0.35<br>(0.19 to<br>0.62)                | 0.35<br>(0.19 to<br>0.62)                | 0.37<br>(0.20 to<br>0.67)                | 0.01<br>(0.01 to<br>0.02)           | 0.01<br>(0.01 to<br>0.02)             | 0.01<br>(0.01 to<br>0.02)             | 0.01<br>(0.01 to<br>0.02)             |
| H influenzae type B meningitis                                    | 5.38<br>(3.83 to<br>7.88)                | 5.73<br>(2.34 to<br>15.06)               | 5.02<br>(2.22 to<br>12.13)               | 8.93<br>(2.73 to<br>27.71)               | 0.10<br>(0.08 to<br>0.14)           | 0.13<br>(0.07 to<br>0.25)             | 0.12<br>(0.07 to<br>0.23)             | 0.16<br>(0.07 to<br>0.39)             |
| Meningococcal meningitis                                          | 25.16<br>(17.90 to<br>38.21)             | 22.12<br>(11.79 to<br>42.99)             | 21.91<br>(11.52 to<br>43.59)             | 22.88<br>(12.21 to<br>44.50)             | 0.53<br>(0.39 to<br>0.78)           | 0.66<br>(0.41 to<br>1.12)             | 0.67<br>(0.40 to<br>1.14)             | 0.66<br>(0.41 to<br>1.11)             |
| Other meningitis                                                  | 42.09<br>(31.14 to<br>62.17)             | 37.45<br>(19.57 to<br>68.31)             | 37.09<br>(19.16 to<br>67.93)             | 38.85<br>(20.40 to<br>70.90)             | 0.81<br>(0.61 to<br>1.17)           | 1.01<br>(0.61 to<br>1.65)             | 1.02<br>(0.60 to<br>1.70)             | 1.01<br>(0.62 to<br>1.67)             |
| Encephalitis                                                      | 110.82<br>(77.41 to<br>168.71)           | 147.40<br>(80.29 to<br>262.63)           | 141.29<br>(76.25 to<br>255.76)           | 161.18<br>(86.87 to<br>289.46)           | 2.30<br>(1.77 to<br>3.06)           | 4.33<br>(2.72 to<br>6.42)             | 4.23<br>(2.62 to<br>6.31)             | 4.53<br>(2.90 to<br>6.64)             |

|                |                              |                              |                              |                              |                           |                           |                           |                           |
|----------------|------------------------------|------------------------------|------------------------------|------------------------------|---------------------------|---------------------------|---------------------------|---------------------------|
| Diphtheria     | 0.16<br>(0.09 to<br>0.25)    | 0.06<br>(0.02 to<br>0.14)    | 0.05<br>(0.02 to<br>0.11)    | 0.12<br>(0.03 to<br>0.41)    | 0.00<br>(0.00 to<br>0.00) | 0.00<br>(0.00 to<br>0.00) | 0.00<br>(0.00 to<br>0.00) | 0.00<br>(0.00 to<br>0.01) |
| Whooping cough | 55.29<br>(5.21 to<br>173.02) | 22.58<br>(0.48 to<br>109.41) | 6.79<br>(0.28 to<br>33.54)   | 54.19<br>(0.68 to<br>249.88) | 0.66<br>(0.06 to<br>2.06) | 0.27<br>(0.01 to<br>1.32) | 0.09<br>(0.00 to<br>0.41) | 0.65<br>(0.01 to<br>2.96) |
| Tetanus        | 2.06<br>(1.72 to<br>2.45)    | 0.36<br>(0.17 to<br>0.64)    | 0.35<br>(0.17 to<br>0.63)    | 0.42<br>(0.20 to<br>0.76)    | 0.04<br>(0.03 to<br>0.04) | 0.01<br>(0.00 to<br>0.01) | 0.01<br>(0.00 to<br>0.01) | 0.01<br>(0.00 to<br>0.01) |
| Measles        | 4.28<br>(1.13 to<br>11.47)   | 49.14<br>(0.75 to<br>250.26) | 37.50<br>(0.71 to<br>182.35) | 86.20<br>(0.83 to<br>473.01) | 0.05<br>(0.01 to<br>0.14) | 0.70<br>(0.01 to<br>3.27) | 0.55<br>(0.01 to<br>2.54) | 1.15<br>(0.02 to<br>6.01) |

| Maldives                                              |                                     |                                         |                                         |                                         |                               |                                  |                                  |                                  |
|-------------------------------------------------------|-------------------------------------|-----------------------------------------|-----------------------------------------|-----------------------------------------|-------------------------------|----------------------------------|----------------------------------|----------------------------------|
| Cause                                                 | YLLs (actual counts)                |                                         |                                         |                                         | Deaths (actual counts)        |                                  |                                  |                                  |
|                                                       | 2016                                | 2040 Forecast                           | 2040 Better Scenario                    | 2040 Worse Scenario                     | 2016                          | 2040 Forecast                    | 2040 Better Scenario             | 2040 Worse Scenario              |
| Varicella and herpes zoster                           | 3.85<br>(2.35 to 6.08)              | 2.85<br>(1.23 to 6.41)                  | 2.53<br>(1.08 to 5.82)                  | 3.55<br>(1.46 to 7.91)                  | 0.09<br>(0.06 to 0.12)        | 0.11<br>(0.06 to 0.18)           | 0.10<br>(0.05 to 0.17)           | 0.12<br>(0.06 to 0.21)           |
| <b>Neglected tropical diseases and malaria</b>        | <b>381.34</b><br>(143.27 to 621.79) | <b>1,271.96</b><br>(637.77 to 2,136.62) | <b>1,265.87</b><br>(657.18 to 2,093.55) | <b>1,336.71</b><br>(649.40 to 2,290.48) | <b>6.18</b><br>(2.59 to 9.83) | <b>28.40</b><br>(15.62 to 46.25) | <b>28.70</b><br>(16.10 to 45.67) | <b>28.76</b><br>(15.37 to 46.62) |
| Malaria                                               | 0.00<br>(0.00 to 0.00)              | 0.00<br>(0.00 to 0.00)                  | 0.00<br>(0.00 to 0.00)                  | 0.00<br>(0.00 to 0.00)                  | 0.00<br>(0.00 to 0.00)        | 0.00<br>(0.00 to 0.00)           | 0.00<br>(0.00 to 0.00)           | 0.00<br>(0.00 to 0.00)           |
| Chagas disease                                        | 0.00<br>(0.00 to 0.00)              | 0.00<br>(0.00 to 0.00)                  | 0.00<br>(0.00 to 0.00)                  | 0.00<br>(0.00 to 0.00)                  | 0.00<br>(0.00 to 0.00)        | 0.00<br>(0.00 to 0.00)           | 0.00<br>(0.00 to 0.00)           | 0.00<br>(0.00 to 0.00)           |
| Leishmaniasis                                         | 0.00<br>(0.00 to 0.00)              | 0.00<br>(0.00 to 0.00)                  | 0.00<br>(0.00 to 0.00)                  | 0.00<br>(0.00 to 0.00)                  | 0.00<br>(0.00 to 0.00)        | 0.00<br>(0.00 to 0.00)           | 0.00<br>(0.00 to 0.00)           | 0.00<br>(0.00 to 0.00)           |
| African trypanosomiasis                               | 0.00<br>(0.00 to 0.00)              | 0.00<br>(0.00 to 0.00)                  | 0.00<br>(0.00 to 0.00)                  | 0.00<br>(0.00 to 0.00)                  | 0.00<br>(0.00 to 0.00)        | 0.00<br>(0.00 to 0.00)           | 0.00<br>(0.00 to 0.00)           | 0.00<br>(0.00 to 0.00)           |
| Schistosomiasis                                       | 0.00<br>(0.00 to 0.00)              | 0.00<br>(0.00 to 0.00)                  | 0.00<br>(0.00 to 0.00)                  | 0.00<br>(0.00 to 0.00)                  | 0.00<br>(0.00 to 0.00)        | 0.00<br>(0.00 to 0.00)           | 0.00<br>(0.00 to 0.00)           | 0.00<br>(0.00 to 0.00)           |
| Cysticercosis                                         | 0.00<br>(0.00 to 0.00)              | 0.00<br>(0.00 to 0.00)                  | 0.00<br>(0.00 to 0.00)                  | 0.00<br>(0.00 to 0.00)                  | 0.00<br>(0.00 to 0.00)        | 0.00<br>(0.00 to 0.00)           | 0.00<br>(0.00 to 0.00)           | 0.00<br>(0.00 to 0.00)           |
| Cystic echinococcosis                                 | 0.00<br>(0.00 to 0.00)              | 0.00<br>(0.00 to 0.00)                  | 0.00<br>(0.00 to 0.00)                  | 0.00<br>(0.00 to 0.00)                  | 0.00<br>(0.00 to 0.00)        | 0.00<br>(0.00 to 0.00)           | 0.00<br>(0.00 to 0.00)           | 0.00<br>(0.00 to 0.00)           |
| Dengue                                                | 372.61<br>(134.37 to 612.85)        | 1,263.12<br>(630.94 to 2,125.94)        | 1,257.61<br>(646.81 to 2,084.29)        | 1,326.40<br>(639.72 to 2,279.66)        | 6.00<br>(2.41 to 9.65)        | 28.12<br>(15.24 to 45.95)        | 28.44<br>(15.82 to 45.39)        | 28.45<br>(15.08 to 46.07)        |
| Yellow fever                                          | 0.00<br>(0.00 to 0.00)              | 0.00<br>(0.00 to 0.00)                  | 0.00<br>(0.00 to 0.00)                  | 0.00<br>(0.00 to 0.00)                  | 0.00<br>(0.00 to 0.00)        | 0.00<br>(0.00 to 0.00)           | 0.00<br>(0.00 to 0.00)           | 0.00<br>(0.00 to 0.00)           |
| Rabies                                                | 0.01<br>(0.01 to 0.02)              | 0.01<br>(0.01 to 0.03)                  | 0.01<br>(0.00 to 0.02)                  | 0.02<br>(0.01 to 0.04)                  | 0.00<br>(0.00 to 0.00)        | 0.00<br>(0.00 to 0.00)           | 0.00<br>(0.00 to 0.00)           | 0.00<br>(0.00 to 0.00)           |
| Intestinal nematode infections                        | 0.07<br>(0.02 to 0.16)              | 0.07<br>(0.02 to 0.21)                  | 0.07<br>(0.02 to 0.23)                  | 0.07<br>(0.02 to 0.22)                  | 0.00<br>(0.00 to 0.00)        | 0.00<br>(0.00 to 0.00)           | 0.00<br>(0.00 to 0.00)           | 0.00<br>(0.00 to 0.00)           |
| Other neglected tropical diseases                     | 8.64<br>(5.70 to 12.97)             | 8.75<br>(4.90 to 15.55)                 | 8.17<br>(4.43 to 14.81)                 | 10.22<br>(5.76 to 17.79)                | 0.18<br>(0.13 to 0.25)        | 0.28<br>(0.18 to 0.41)           | 0.26<br>(0.17 to 0.40)           | 0.31<br>(0.20 to 0.45)           |
| <b>Maternal disorders</b>                             | <b>175.69</b><br>(111.91 to 272.74) | <b>151.72</b><br>(83.53 to 453.87)      | <b>126.98</b><br>(27.89 to 385.87)      | <b>209.15</b><br>(45.65 to 620.75)      | <b>3.08</b><br>(1.96 to 4.76) | <b>2.68</b><br>(0.59 to 8.10)    | <b>2.24</b><br>(0.49 to 6.98)    | <b>3.69</b><br>(0.83 to 10.97)   |
| Maternal hemorrhage                                   | 78.26<br>(45.47 to 128.35)          | 61.78<br>(12.78 to 188.63)              | 51.62<br>(10.78 to 160.76)              | 85.02<br>(18.01 to 252.71)              | 1.38<br>(0.80 to 2.25)        | 1.10<br>(0.22 to 3.40)           | 0.92<br>(0.19 to 2.84)           | 1.51<br>(0.31 to 4.53)           |
| Maternal sepsis and other maternal infections         | 5.50<br>(2.13 to 10.59)             | 4.08<br>(0.70 to 12.61)                 | 3.40<br>(0.58 to 10.74)                 | 5.63<br>(0.98 to 17.49)                 | 0.10<br>(0.04 to 0.19)        | 0.07<br>(0.01 to 0.22)           | 0.06<br>(0.01 to 0.19)           | 0.10<br>(0.02 to 0.32)           |
| Maternal hypertensive disorders                       | 23.91<br>(13.02 to 40.42)           | 20.52<br>(3.77 to 65.61)                | 17.12<br>(3.29 to 55.02)                | 28.46<br>(5.59 to 90.84)                | 0.42<br>(0.23 to 0.70)        | 0.36<br>(0.07 to 1.15)           | 0.30<br>(0.06 to 0.97)           | 0.50<br>(0.10 to 1.60)           |
| Maternal obstructed labor and uterine rupture         | 3.46<br>(1.17 to 7.30)              | 3.13<br>(0.51 to 10.51)                 | 2.58<br>(0.40 to 8.70)                  | 4.42<br>(0.71 to 14.47)                 | 0.06<br>(0.02 to 0.13)        | 0.42<br>(0.01 to 0.19)           | 0.05<br>(0.01 to 0.16)           | 0.08<br>(0.01 to 0.26)           |
| Maternal abortion, miscarriage, and ectopic pregnancy | 18.51<br>(9.44 to 33.15)            | 18.16<br>(3.67 to 56.65)                | 15.24<br>(2.98 to 47.85)                | 25.40<br>(5.29 to 78.68)                | 0.33<br>(0.17 to 0.58)        | 0.32<br>(0.07 to 1.04)           | 0.27<br>(0.05 to 0.87)           | 0.45<br>(0.09 to 1.38)           |



|                                        |                              |                             |                             |                             |                           |                           |                           |                           |
|----------------------------------------|------------------------------|-----------------------------|-----------------------------|-----------------------------|---------------------------|---------------------------|---------------------------|---------------------------|
| Indirect maternal deaths               | 22.87<br>(11.80 to<br>40.35) | 21.84<br>(4.25 to<br>65.86) | 18.28<br>(3.55 to<br>55.80) | 30.06<br>(5.77 to<br>90.96) | 0.40<br>(0.20 to<br>0.70) | 0.38<br>(0.07 to<br>1.17) | 0.32<br>(0.06 to<br>0.95) | 0.52<br>(0.10 to<br>1.57) |
| Late maternal deaths                   | 2.60<br>(0.85 to<br>5.73)    | 2.20<br>(0.35 to<br>7.31)   | 1.83<br>(0.28 to<br>6.24)   | 3.05<br>(0.47 to<br>10.12)  | 0.05<br>(0.02 to<br>0.10) | 0.04<br>(0.01 to<br>0.13) | 0.03<br>(0.00 to<br>0.11) | 0.05<br>(0.01 to<br>0.18) |
| Maternal deaths aggravated by HIV/AIDS | 0.01<br>(0.00 to<br>0.01)    | 0.12<br>(0.00 to<br>1.19)   | 0.10<br>(0.00 to<br>1.03)   | 0.19<br>(0.00 to<br>1.75)   | 0.00<br>(0.00 to<br>0.00) | 0.00<br>(0.00 to<br>0.02) | 0.00<br>(0.00 to<br>0.01) | 0.00<br>(0.00 to<br>0.02) |
| Other maternal disorders               | 20.59<br>(10.29 to<br>35.17) | 19.89<br>(3.82 to<br>65.46) | 16.82<br>(3.24 to<br>56.17) | 26.92<br>(5.21 to<br>87.06) | 0.36<br>(0.18 to<br>0.61) | 0.35<br>(0.07 to<br>1.16) | 0.30<br>(0.06 to<br>0.99) | 0.47<br>(0.09 to<br>1.54) |

| Maldives                                                                |                                           |                                       |                                       |                                       |                                  |                                 |                                 |                                 |
|-------------------------------------------------------------------------|-------------------------------------------|---------------------------------------|---------------------------------------|---------------------------------------|----------------------------------|---------------------------------|---------------------------------|---------------------------------|
| Cause                                                                   | YLLs (actual counts)                      |                                       |                                       |                                       | Deaths (actual counts)           |                                 |                                 |                                 |
|                                                                         | 2016                                      | 2040 Forecast                         | 2040 Better Scenario                  | 2040 Worse Scenario                   | 2016                             | 2040 Forecast                   | 2040 Better Scenario            | 2040 Worse Scenario             |
| <b>Neonatal disorders</b>                                               | <b>1,909.77</b><br>(1,534.46 to 2,359.29) | <b>612.64</b><br>(224.65 to 1,559.87) | <b>508.08</b><br>(184.46 to 1,280.29) | <b>861.36</b><br>(319.53 to 2,184.29) | <b>22.06</b><br>(17.73 to 27.25) | <b>7.08</b><br>(2.60 to 18.04)  | <b>5.87</b><br>(2.13 to 14.79)  | <b>9.95</b><br>(3.69 to 25.24)  |
| Neonatal preterm birth                                                  | 761.40<br>(551.35 to 1,010.78)            | 187.67<br>(68.87 to 469.86)           | 149.48<br>(54.28 to 374.04)           | 283.76<br>(104.18 to 700.90)          | 8.79<br>(6.37 to 11.67)          | 2.17<br>(0.80 to 5.43)          | 1.73<br>(0.63 to 4.32)          | 3.28<br>(1.20 to 8.10)          |
| Neonatal encephalopathy due to birth asphyxia and trauma                | 376.96<br>(244.31 to 544.81)              | 109.55<br>(33.42 to 311.78)           | 94.39<br>(28.95 to 268.01)            | 143.79<br>(43.56 to 410.99)           | 4.36<br>(2.82 to 6.29)           | 1.27<br>(0.39 to 3.60)          | 1.09<br>(0.33 to 3.10)          | 1.66<br>(0.50 to 4.75)          |
| Neonatal sepsis and other neonatal infections                           | 244.23<br>(142.24 to 383.51)              | 112.29<br>(36.17 to 271.16)           | 95.50<br>(31.19 to 235.56)            | 150.31<br>(48.33 to 364.74)           | 2.82<br>(1.64 to 4.43)           | 1.30<br>(0.42 to 3.20)          | 1.10<br>(0.36 to 2.72)          | 1.74<br>(0.56 to 4.22)          |
| Hemolytic disease and other neonatal jaundice                           | 11.87<br>(7.57 to 18.64)                  | 4.09<br>(0.99 to 13.70)               | 3.33<br>(0.82 to 11.07)               | 5.86<br>(1.40 to 19.06)               | 0.14<br>(0.09 to 0.22)           | 0.05<br>(0.01 to 0.16)          | 0.04<br>(0.01 to 0.13)          | 0.07<br>(0.02 to 0.22)          |
| Other neonatal disorders                                                | 515.30<br>(321.72 to 761.47)              | 199.04<br>(55.46 to 560.96)           | 165.38<br>(47.70 to 458.39)           | 277.64<br>(80.85 to 769.44)           | 5.95<br>(3.72 to 8.80)           | 2.30<br>(0.64 to 6.48)          | 1.91<br>(0.55 to 5.30)          | 3.21<br>(0.93 to 8.89)          |
| <b>Nutritional deficiencies</b>                                         | <b>112.72</b><br>(92.75 to 136.95)        | <b>159.97</b><br>(113.30 to 222.11)   | <b>153.13</b><br>(106.75 to 216.77)   | <b>174.12</b><br>(121.33 to 239.85)   | <b>5.62</b><br>(4.60 to 6.86)    | <b>11.05</b><br>(8.06 to 14.35) | <b>10.88</b><br>(7.85 to 14.35) | <b>11.33</b><br>(8.16 to 14.65) |
| Protein-energy malnutrition                                             | 77.63<br>(61.76 to 95.84)                 | 88.31<br>(59.42 to 128.03)            | 83.83<br>(55.01 to 122.73)            | 97.58<br>(64.54 to 141.00)            | 3.54<br>(2.81 to 4.41)           | 5.91<br>(4.10 to 8.06)          | 5.78<br>(3.97 to 7.98)          | 6.12<br>(4.13 to 8.31)          |
| Iodine deficiency                                                       | 1.15<br>(0.07 to 3.88)                    | 5.70<br>(0.10 to 19.76)               | 5.27<br>(0.09 to 18.30)               | 6.56<br>(0.13 to 22.18)               | 0.04<br>(0.00 to 0.14)           | 0.35<br>(0.00 to 1.45)          | 0.33<br>(0.00 to 1.36)          | 0.38<br>(0.01 to 1.58)          |
| Dietary iron deficiency                                                 | 4.81<br>(3.22 to 7.60)                    | 7.87<br>(3.80 to 15.60)               | 7.73<br>(3.75 to 15.14)               | 8.35<br>(4.10 to 16.12)               | 0.13<br>(0.08 to 0.27)           | 0.28<br>(0.13 to 0.63)          | 0.29<br>(0.13 to 0.63)          | 0.29<br>(0.14 to 0.63)          |
| Other nutritional deficiencies                                          | 29.12<br>(22.33 to 37.24)                 | 58.10<br>(38.12 to 79.53)             | 56.30<br>(36.21 to 78.13)             | 61.63<br>(41.05 to 84.84)             | 1.92<br>(1.31 to 2.48)           | 4.51<br>(2.86 to 6.08)          | 4.48<br>(2.82 to 6.12)          | 4.53<br>(2.89 to 6.12)          |
| <b>Other communicable, maternal, neonatal, and nutritional diseases</b> | <b>65.13</b><br>(52.21 to 81.09)          | <b>110.04</b><br>(68.43 to 176.54)    | <b>105.09</b><br>(63.73 to 170.23)    | <b>121.09</b><br>(74.63 to 190.52)    | <b>2.08</b><br>(1.64 to 2.57)    | <b>4.41</b><br>(2.91 to 6.33)   | <b>4.27</b><br>(2.77 to 6.21)   | <b>4.70</b><br>(3.21 to 6.62)   |
| Sexually transmitted infections excluding HIV                           | 8.51<br>(6.24 to 11.39)                   | 7.45<br>(4.30 to 13.16)               | 7.27<br>(4.17 to 12.83)               | 7.92<br>(4.62 to 14.06)               | 0.27<br>(0.19 to 0.36)           | 0.27<br>(0.18 to 0.41)          | 0.27<br>(0.18 to 0.42)          | 0.28<br>(0.18 to 0.42)          |
| Syphilis                                                                | 4.66<br>(3.29 to 6.32)                    | 3.38<br>(1.98 to 5.70)                | 3.35<br>(1.92 to 5.77)                | 3.54<br>(2.10 to 5.90)                | 0.16<br>(0.11 to 0.23)           | 0.13<br>(0.08 to 0.20)          | 0.13<br>(0.08 to 0.21)          | 0.13<br>(0.08 to 0.20)          |
| Chlamydial infection                                                    | 0.70<br>(0.43 to 1.06)                    | 0.75<br>(0.35 to 1.55)                | 0.72<br>(0.34 to 1.50)                | 0.82<br>(0.39 to 1.69)                | 0.02<br>(0.01 to 0.03)           | 0.03<br>(0.01 to 0.04)          | 0.02<br>(0.01 to 0.04)          | 0.03<br>(0.02 to 0.05)          |
| Gonococcal infection                                                    | 2.06<br>(1.41 to 3.05)                    | 2.19<br>(1.10 to 4.33)                | 2.12<br>(1.07 to 4.19)                | 2.35<br>(1.20 to 4.60)                | 0.06<br>(0.04 to 0.08)           | 0.08<br>(0.05 to 0.13)          | 0.08<br>(0.05 to 0.13)          | 0.08<br>(0.05 to 0.13)          |
| Other sexually transmitted infections                                   | 1.10<br>(0.75 to 1.63)                    | 1.12<br>(0.54 to 2.26)                | 1.08<br>(0.52 to 2.17)                | 1.21<br>(0.59 to 2.45)                | 0.03<br>(0.02 to 0.04)           | 0.03<br>(0.02 to 0.06)          | 0.03<br>(0.02 to 0.06)          | 0.04<br>(0.02 to 0.06)          |
| Acute hepatitis                                                         | 37.38<br>(29.91 to 47.08)                 | 59.36<br>(35.47 to 98.76)             | 56.61<br>(32.99 to 95.02)             | 65.52<br>(39.39 to 108.46)            | 1.12<br>(0.89 to 1.40)           | 2.09<br>(1.37 to 3.19)          | 2.01<br>(1.30 to 3.07)          | 2.27<br>(1.48 to 3.46)          |
| Acute hepatitis A                                                       | 2.29<br>(1.56 to 3.26)                    | 1.44<br>(0.73 to 2.56)                | 1.38<br>(0.68 to 2.52)                | 1.61<br>(0.80 to 2.94)                | 0.04<br>(0.03 to 0.06)           | 0.04<br>(0.02 to 0.07)          | 0.04<br>(0.02 to 0.07)          | 0.05<br>(0.03 to 0.07)          |
| Acute hepatitis B                                                       | 29.87<br>(23.06 to 38.20)                 | 50.80<br>(29.29 to 84.62)             | 48.28<br>(27.38 to 81.00)             | 56.28<br>(33.16 to 93.73)             | 0.92<br>(0.71 to 1.18)           | 1.76<br>(1.12 to 2.75)          | 1.68<br>(1.05 to 2.66)          | 1.93<br>(1.22 to 2.99)          |

|                                       |                                                               |                                                               |                                                               |                                                               |                                                        |                                                            |                                                            |                                                            |
|---------------------------------------|---------------------------------------------------------------|---------------------------------------------------------------|---------------------------------------------------------------|---------------------------------------------------------------|--------------------------------------------------------|------------------------------------------------------------|------------------------------------------------------------|------------------------------------------------------------|
|                                       | 0.91<br>(0.63 to<br>1.30)                                     | 1.75<br>(0.95 to<br>3.05)                                     | 1.73<br>(0.93 to<br>3.00)                                     | 1.82<br>(1.00 to<br>3.12)                                     | 0.03<br>(0.02 to<br>0.04)                              | 0.07<br>(0.04 to<br>0.11)                                  | 0.07<br>(0.04 to<br>0.11)                                  | 0.07<br>(0.04 to<br>0.11)                                  |
| Acute hepatitis C                     |                                                               |                                                               |                                                               |                                                               |                                                        |                                                            |                                                            |                                                            |
|                                       | 4.31<br>(3.17 to<br>5.67)                                     | 5.38<br>(2.89 to<br>9.28)                                     | 5.23<br>(2.78 to<br>9.02)                                     | 5.81<br>(3.09 to<br>9.90)                                     | 0.12<br>(0.08 to<br>0.18)                              | 0.23<br>(0.13 to<br>0.38)                                  | 0.23<br>(0.13 to<br>0.38)                                  | 0.23<br>(0.13 to<br>0.38)                                  |
| Acute hepatitis E                     |                                                               |                                                               |                                                               |                                                               |                                                        |                                                            |                                                            |                                                            |
|                                       | 19.23<br>(13.97 to<br>26.59)                                  | 43.23<br>(26.20 to<br>67.10)                                  | 41.21<br>(24.26 to<br>65.06)                                  | 47.66<br>(28.80 to<br>73.21)                                  | 0.70<br>(0.45 to<br>0.92)                              | 2.04<br>(1.17 to<br>2.88)                                  | 1.99<br>(1.10 to<br>2.84)                                  | 2.16<br>(1.26 to<br>3.00)                                  |
| Other unspecified infectious diseases |                                                               |                                                               |                                                               |                                                               |                                                        |                                                            |                                                            |                                                            |
| <b>Non-communicable diseases</b>      | <b>19,646.16</b><br><b>(16,357.74 to</b><br><b>23,567.15)</b> | <b>39,134.71</b><br><b>(25,318.94 to</b><br><b>57,435.96)</b> | <b>32,786.04</b><br><b>(21,600.67 to</b><br><b>47,672.64)</b> | <b>51,893.22</b><br><b>(32,627.31 to</b><br><b>77,850.00)</b> | <b>968.34</b><br><b>(813.30 to</b><br><b>1,157.03)</b> | <b>2,240.86</b><br><b>(1,606.64 to</b><br><b>3,021.12)</b> | <b>1,936.48</b><br><b>(1,385.07 to</b><br><b>2,612.97)</b> | <b>2,808.61</b><br><b>(1,976.83 to</b><br><b>3,816.79)</b> |

| Maldives                             |                                           |                                            |                                            |                                            |                                     |                                     |                                     |                                     |
|--------------------------------------|-------------------------------------------|--------------------------------------------|--------------------------------------------|--------------------------------------------|-------------------------------------|-------------------------------------|-------------------------------------|-------------------------------------|
| Cause                                | YLLs (actual counts)                      |                                            |                                            |                                            | Deaths (actual counts)              |                                     |                                     |                                     |
|                                      | 2016                                      | 2040 Forecast                              | 2040 Better Scenario                       | 2040 Worse Scenario                        | 2016                                | 2040 Forecast                       | 2040 Better Scenario                | 2040 Worse Scenario                 |
| <b>Neoplasms</b>                     | <b>3,628.52</b><br>(2,971.88 to 4,444.01) | <b>8,045.44</b><br>(5,414.99 to 11,877.34) | <b>7,544.19</b><br>(5,075.04 to 11,061.91) | <b>8,722.10</b><br>(5,873.41 to 12,811.44) | <b>149.26</b><br>(123.05 to 181.01) | <b>377.50</b><br>(277.91 to 506.97) | <b>361.03</b><br>(264.27 to 484.04) | <b>398.39</b><br>(292.92 to 537.96) |
| Lip and oral cavity cancer           | 170.99<br>(133.46 to 218.74)              | 385.24<br>(227.16 to 649.88)               | 353.70<br>(212.93 to 582.45)               | 486.38<br>(268.97 to 880.84)               | 8.42<br>(6.72 to 10.67)             | 20.44<br>(13.11 to 32.11)           | 19.22<br>(12.44 to 29.68)           | 24.67<br>(14.76 to 41.59)           |
| Nasopharynx cancer                   | 29.34<br>(21.91 to 38.35)                 | 68.24<br>(36.22 to 124.26)                 | 57.79<br>(31.62 to 98.29)                  | 98.72<br>(47.38 to 191.88)                 | 1.15<br>(0.85 to 1.50)              | 2.81<br>(1.59 to 4.81)              | 2.42<br>(1.43 to 3.90)              | 3.94<br>(2.03 to 7.28)              |
| Other pharynx cancer                 | 17.32<br>(13.57 to 22.25)                 | 34.64<br>(19.63 to 59.33)                  | 33.27<br>(18.98 to 55.72)                  | 41.75<br>(22.18 to 76.23)                  | 0.71<br>(0.56 to 0.90)              | 1.56<br>(0.96 to 2.49)              | 1.51<br>(0.94 to 2.34)              | 1.83<br>(1.07 to 3.12)              |
| Esophageal cancer                    | 87.48<br>(69.83 to 109.24)                | 173.01<br>(103.06 to 277.62)               | 154.65<br>(93.64 to 240.01)                | 226.89<br>(125.50 to 395.06)               | 4.00<br>(3.22 to 4.98)              | 8.35<br>(5.33 to 12.56)             | 7.61<br>(4.93 to 11.21)             | 10.57<br>(6.30 to 17.20)            |
| Stomach cancer                       | 125.81<br>(100.98 to 154.40)              | 233.77<br>(161.89 to 334.65)               | 227.18<br>(156.04 to 321.44)               | 245.77<br>(169.71 to 352.96)               | 6.16<br>(5.02 to 7.52)              | 12.44<br>(9.21 to 16.26)            | 12.34<br>(9.14 to 16.15)            | 12.62<br>(9.39 to 16.58)            |
| Colon and rectum cancer              | 244.89<br>(196.82 to 305.76)              | 635.07<br>(392.67 to 1,030.27)             | 645.19<br>(395.38 to 1,039.74)             | 651.97<br>(404.31 to 1,056.91)             | 10.92<br>(8.84 to 13.40)            | 32.02<br>(21.20 to 48.36)           | 33.16<br>(21.89 to 50.03)           | 31.68<br>(20.94 to 47.37)           |
| Liver cancer                         | 286.97<br>(216.40 to 371.50)              | 791.34<br>(473.34 to 1,235.99)             | 660.31<br>(419.36 to 1,039.79)             | 821.50<br>(488.98 to 1,408.64)             | 12.25<br>(9.40 to 15.67)            | 35.82<br>(22.98 to 56.73)           | 30.77<br>(20.66 to 45.16)           | 36.16<br>(23.07 to 57.79)           |
| Liver cancer due to hepatitis B      | 122.66<br>(86.77 to 165.73)               | 327.20<br>(186.17 to 583.53)               | 273.35<br>(161.76 to 453.01)               | 336.10<br>(191.14 to 600.00)               | 4.82<br>(3.36 to 6.60)              | 13.80<br>(8.09 to 23.01)            | 11.85<br>(7.39 to 18.41)            | 13.81<br>(8.05 to 23.27)            |
| Liver cancer due to hepatitis C      | 55.98<br>(36.44 to 79.55)                 | 168.04<br>(92.75 to 278.66)                | 143.37<br>(82.21 to 227.40)                | 169.07<br>(91.80 to 280.09)                | 2.83<br>(1.85 to 4.08)              | 8.82<br>(5.14 to 14.21)             | 7.76<br>(4.68 to 11.92)             | 8.61<br>(5.03 to 13.91)             |
| Liver cancer due to alcohol use      | 35.24<br>(23.64 to 51.73)                 | 99.41<br>(52.00 to 173.90)                 | 81.77<br>(45.31 to 138.50)                 | 110.56<br>(57.62 to 193.68)                | 1.56<br>(1.03 to 2.21)              | 4.46<br>(2.44 to 7.42)              | 3.76<br>(2.16 to 6.02)              | 4.82<br>(2.59 to 8.03)              |
| Liver cancer due to other causes     | 73.09<br>(48.21 to 105.54)                | 196.69<br>(103.04 to 367.41)               | 161.82<br>(89.05 to 284.57)                | 205.77<br>(108.28 to 381.20)               | 3.04<br>(1.98 to 4.50)              | 8.75<br>(4.81 to 15.30)             | 7.40<br>(4.31 to 12.37)             | 8.91<br>(4.85 to 15.76)             |
| Gallbladder and biliary tract cancer | 43.03<br>(30.31 to 54.95)                 | 75.11<br>(50.76 to 101.97)                 | 78.19<br>(52.44 to 107.75)                 | 70.24<br>(48.80 to 94.34)                  | 2.15<br>(1.47 to 2.77)              | 4.03<br>(2.78 to 5.17)              | 4.26<br>(2.89 to 5.55)              | 3.66<br>(2.57 to 4.58)              |
| Pancreatic cancer                    | 135.79<br>(110.16 to 167.93)              | 351.10<br>(233.84 to 510.59)               | 354.11<br>(235.75 to 510.17)               | 342.56<br>(228.33 to 495.66)               | 6.32<br>(5.15 to 7.80)              | 17.61<br>(12.60 to 23.91)           | 18.04<br>(12.89 to 24.43)           | 16.68<br>(11.88 to 22.64)           |
| Larynx cancer                        | 46.68<br>(34.29 to 61.76)                 | 89.89<br>(46.10 to 162.16)                 | 70.08<br>(39.13 to 118.62)                 | 133.63<br>(61.26 to 249.99)                | 2.22<br>(1.66 to 2.86)              | 4.33<br>(2.33 to 7.52)              | 3.43<br>(2.01 to 5.65)              | 6.28<br>(3.03 to 11.45)             |
| Tracheal, bronchus, and lung cancer  | 438.24<br>(336.55 to 561.91)              | 923.98<br>(516.29 to 1,493.53)             | 676.73<br>(407.32 to 1,046.58)             | 1,369.66<br>(709.82 to 2,341.59)           | 21.07<br>(16.10 to 26.82)           | 45.99<br>(26.99 to 72.66)           | 34.48<br>(21.42 to 51.48)           | 66.75<br>(36.66 to 112.03)          |
| Malignant skin melanoma              | 24.55<br>(18.43 to 32.53)                 | 52.93<br>(35.28 to 76.14)                  | 56.69<br>(37.54 to 81.53)                  | 47.48<br>(32.61 to 67.08)                  | 0.97<br>(0.74 to 1.26)              | 2.40<br>(1.72 to 3.13)              | 2.62<br>(1.87 to 3.49)              | 2.08<br>(1.54 to 2.65)              |
| Non-melanoma skin cancer             | 22.73<br>(17.62 to 29.01)                 | 58.95<br>(43.41 to 76.76)                  | 59.29<br>(42.90 to 78.40)                  | 58.62<br>(44.01 to 74.83)                  | 1.15<br>(0.90 to 1.44)              | 3.23<br>(2.56 to 3.89)              | 3.32<br>(2.56 to 4.07)              | 3.09<br>(2.52 to 3.67)              |
| Breast cancer                        | 361.61<br>(248.97 to 508.06)              | 872.75<br>(429.30 to 1,722.75)             | 852.73<br>(422.51 to 1,670.05)             | 905.94<br>(440.08 to 1,770.58)             | 12.52<br>(8.82 to 17.22)            | 35.48<br>(19.85 to 63.02)           | 35.04<br>(19.76 to 62.27)           | 36.02<br>(20.00 to 63.31)           |
| Cervical cancer                      | 138.62<br>(85.47 to 198.19)               | 271.88<br>(128.80 to 519.19)               | 262.20<br>(124.33 to 507.80)               | 288.40<br>(138.66 to 547.97)               | 4.61<br>(3.00 to 6.58)              | 10.01<br>(5.22 to 17.15)            | 9.72<br>(5.03 to 16.81)             | 10.47<br>(5.51 to 17.98)            |

|                   |                                |                                 |                                 |                                 |                           |                              |                              |                              |
|-------------------|--------------------------------|---------------------------------|---------------------------------|---------------------------------|---------------------------|------------------------------|------------------------------|------------------------------|
|                   | 23.60<br>(16.41 to<br>33.85)   | 57.35<br>(31.54 to<br>100.49)   | 55.16<br>(30.20 to<br>98.24)    | 60.78<br>(33.78 to<br>106.34)   | 0.98<br>(0.68 to<br>1.39) | 2.74<br>(1.71 to<br>4.34)    | 2.67<br>(1.65 to<br>4.28)    | 2.83<br>(1.80 to<br>4.39)    |
| Uterine cancer    |                                |                                 |                                 |                                 |                           |                              |                              |                              |
|                   | 116.06<br>(77.01 to<br>169.20) | 281.52<br>(129.46 to<br>560.11) | 278.94<br>(130.07 to<br>543.42) | 267.92<br>(124.50 to<br>528.29) | 4.07<br>(2.66 to<br>5.86) | 11.14<br>(5.69 to<br>20.08)  | 11.13<br>(5.73 to<br>19.92)  | 10.53<br>(5.45 to<br>18.95)  |
| Ovarian cancer    |                                |                                 |                                 |                                 |                           |                              |                              |                              |
|                   | 81.78<br>(57.14 to<br>109.12)  | 243.28<br>(172.79 to<br>313.58) | 261.00<br>(185.50 to<br>341.27) | 217.76<br>(157.74 to<br>280.09) | 6.09<br>(4.22 to<br>8.06) | 18.19<br>(13.06 to<br>23.29) | 20.02<br>(14.21 to<br>25.66) | 15.65<br>(11.21 to<br>20.08) |
| Prostate cancer   |                                |                                 |                                 |                                 |                           |                              |                              |                              |
|                   | 3.88<br>(2.59 to<br>5.44)      | 4.99<br>(2.50 to<br>9.68)       | 4.92<br>(2.43 to<br>9.65)       | 5.17<br>(2.64 to<br>9.92)       | 0.08<br>(0.05 to<br>0.11) | 0.12<br>(0.07 to<br>0.22)    | 0.12<br>(0.07 to<br>0.22)    | 0.12<br>(0.07 to<br>0.22)    |
| Testicular cancer |                                |                                 |                                 |                                 |                           |                              |                              |                              |

| Maldives                        |                                                            |                                                              |                                                             |                                                               |                                                      |                                                        |                                                      |                                                          |
|---------------------------------|------------------------------------------------------------|--------------------------------------------------------------|-------------------------------------------------------------|---------------------------------------------------------------|------------------------------------------------------|--------------------------------------------------------|------------------------------------------------------|----------------------------------------------------------|
| Cause                           | YLLs (actual counts)                                       |                                                              |                                                             |                                                               | Deaths (actual counts)                               |                                                        |                                                      |                                                          |
|                                 | 2016                                                       | 2040 Forecast                                                | 2040 Better Scenario                                        | 2040 Worse Scenario                                           | 2016                                                 | 2040 Forecast                                          | 2040 Better Scenario                                 | 2040 Worse Scenario                                      |
| Kidney cancer                   | 56.07<br>(44.10 to<br>70.32)                               | 135.46<br>(87.80 to<br>190.29)                               | 140.82<br>(91.25 to<br>198.14)                              | 127.51<br>(83.46 to<br>177.66)                                | 2.26<br>(1.74 to<br>2.86)                            | 6.19<br>(4.24 to<br>8.24)                              | 6.56<br>(4.51 to<br>8.79)                            | 5.65<br>(3.96 to<br>7.54)                                |
| Bladder cancer                  | 97.53<br>(75.94 to<br>125.28)                              | 224.32<br>(150.57 to<br>320.25)                              | 218.69<br>(146.79 to<br>308.86)                             | 231.55<br>(155.83 to<br>334.73)                               | 5.81<br>(4.59 to<br>7.38)                            | 13.90<br>(9.88 to<br>19.16)                            | 13.89<br>(9.90 to<br>18.89)                          | 13.78<br>(9.78 to<br>19.29)                              |
| Brain and nervous system cancer | 141.68<br>(112.09 to<br>180.60)                            | 252.89<br>(162.76 to<br>373.51)                              | 260.92<br>(166.47 to<br>387.67)                             | 242.43<br>(158.21 to<br>356.61)                               | 3.96<br>(3.10 to<br>5.02)                            | 9.36<br>(6.29 to<br>12.85)                             | 9.82<br>(6.52 to<br>13.65)                           | 8.67<br>(5.97 to<br>11.81)                               |
| Thyroid cancer                  | 55.04<br>(43.13 to<br>69.34)                               | 145.78<br>(91.86 to<br>230.63)                               | 129.01<br>(85.21 to<br>196.53)                              | 145.42<br>(93.41 to<br>226.41)                                | 2.54<br>(1.94 to<br>3.23)                            | 7.22<br>(4.77 to<br>10.69)                             | 6.55<br>(4.47 to<br>9.45)                            | 7.01<br>(4.70 to<br>10.26)                               |
| Mesothelioma                    | 33.36<br>(24.48 to<br>44.19)                               | 69.35<br>(45.59 to<br>98.53)                                 | 70.77<br>(46.22 to<br>101.98)                               | 67.51<br>(45.23 to<br>94.96)                                  | 1.19<br>(0.87 to<br>1.56)                            | 2.79<br>(2.01 to<br>3.68)                              | 2.89<br>(2.06 to<br>3.87)                            | 2.63<br>(1.93 to<br>3.41)                                |
| Hodgkin lymphoma                | 11.54<br>(8.72 to<br>16.37)                                | 15.66<br>(9.61 to<br>25.18)                                  | 14.85<br>(9.05 to<br>24.37)                                 | 17.25<br>(10.87 to<br>28.02)                                  | 0.33<br>(0.25 to<br>0.49)                            | 0.57<br>(0.37 to<br>0.87)                              | 0.54<br>(0.36 to<br>0.85)                            | 0.61<br>(0.41 to<br>0.93)                                |
| Non-Hodgkin lymphoma            | 171.06<br>(135.43 to<br>219.18)                            | 356.47<br>(246.00 to<br>510.86)                              | 351.65<br>(240.90 to<br>505.72)                             | 334.11<br>(234.08 to<br>476.06)                               | 5.87<br>(4.63 to<br>7.30)                            | 15.52<br>(11.36 to<br>20.53)                           | 15.64<br>(11.48 to<br>20.54)                         | 14.07<br>(10.51 to<br>18.35)                             |
| Multiple myeloma                | 50.32<br>(38.34 to<br>65.60)                               | 146.00<br>(96.57 to<br>213.07)                               | 143.78<br>(96.26 to<br>206.45)                              | 134.54<br>(90.10 to<br>195.27)                                | 2.11<br>(1.62 to<br>2.80)                            | 6.66<br>(4.68 to<br>9.24)                              | 6.68<br>(4.69 to<br>9.22)                            | 5.99<br>(4.31 to<br>8.18)                                |
| Leukemia                        | 342.41<br>(278.04 to<br>425.21)                            | 531.57<br>(345.04 to<br>829.94)                              | 493.13<br>(326.92 to<br>758.27)                             | 539.48<br>(355.56 to<br>849.54)                               | 9.77<br>(7.93 to<br>12.20)                           | 21.64<br>(14.93 to<br>30.83)                           | 20.48<br>(14.37 to<br>28.83)                         | 21.18<br>(14.73 to<br>30.17)                             |
| Acute lymphoid leukemia         | 125.23<br>(99.52 to<br>155.39)                             | 186.47<br>(126.87 to<br>270.76)                              | 177.87<br>(121.75 to<br>252.81)                             | 182.14<br>(124.62 to<br>267.28)                               | 3.60<br>(2.89 to<br>4.54)                            | 7.67<br>(5.35 to<br>10.79)                             | 7.46<br>(5.32 to<br>10.48)                           | 7.22<br>(5.10 to<br>10.00)                               |
| Chronic lymphoid leukemia       | 6.67<br>(3.22 to<br>10.13)                                 | 10.62<br>(5.02 to<br>19.54)                                  | 9.83<br>(4.71 to<br>17.75)                                  | 10.63<br>(4.99 to<br>19.94)                                   | 0.21<br>(0.12 to<br>0.30)                            | 0.43<br>(0.24 to<br>0.71)                              | 0.41<br>(0.23 to<br>0.65)                            | 0.41<br>(0.23 to<br>0.69)                                |
| Acute myeloid leukemia          | 56.96<br>(44.29 to<br>75.17)                               | 96.82<br>(60.73 to<br>150.98)                                | 93.04<br>(57.62 to<br>142.67)                               | 93.55<br>(58.89 to<br>151.38)                                 | 1.42<br>(1.10 to<br>1.82)                            | 3.31<br>(2.17 to<br>4.76)                              | 3.24<br>(2.12 to<br>4.66)                            | 3.09<br>(2.03 to<br>4.50)                                |
| Chronic myeloid leukemia        | 23.66<br>(16.03 to<br>34.47)                               | 30.53<br>(16.01 to<br>60.47)                                 | 27.39<br>(14.71 to<br>51.89)                                | 30.86<br>(16.28 to<br>61.30)                                  | 0.73<br>(0.50 to<br>1.02)                            | 1.22<br>(0.69 to<br>2.09)                              | 1.12<br>(0.64 to<br>1.82)                            | 1.19<br>(0.69 to<br>1.98)                                |
| Other leukemia                  | 129.87<br>(100.81 to<br>173.56)                            | 207.14<br>(128.13 to<br>344.81)                              | 185.00<br>(116.14 to<br>301.77)                             | 222.30<br>(138.77 to<br>371.11)                               | 3.80<br>(3.01 to<br>4.86)                            | 9.02<br>(6.00 to<br>13.30)                             | 8.26<br>(5.52 to<br>11.97)                           | 9.26<br>(6.17 to<br>13.54)                               |
| Other neoplasms                 | 270.04<br>(220.17 to<br>333.98)                            | 562.91<br>(371.97 to<br>785.78)                              | 578.43<br>(373.70 to<br>817.95)                             | 541.17<br>(364.67 to<br>747.60)                               | 9.59<br>(7.15 to<br>12.02)                           | 24.93<br>(16.74 to<br>32.85)                           | 26.09<br>(17.35 to<br>34.74)                         | 23.16<br>(15.62 to<br>29.81)                             |
| <b>Cardiovascular diseases</b>  | <b>8,132.97</b><br><b>(6,651.64 to</b><br><b>9,985.22)</b> | <b>13,136.62</b><br><b>(7,506.56 to</b><br><b>21,919.73)</b> | <b>9,227.60</b><br><b>(5,523.24 to</b><br><b>14,782.68)</b> | <b>22,079.58</b><br><b>(11,888.84 to</b><br><b>37,627.81)</b> | <b>444.48</b><br><b>(369.68 to</b><br><b>536.22)</b> | <b>794.88</b><br><b>(489.19 to</b><br><b>1,215.17)</b> | <b>603.42</b><br><b>(382.91 to</b><br><b>890.43)</b> | <b>1,217.18</b><br><b>(733.94 to</b><br><b>1,882.81)</b> |
| Rheumatic heart disease         | 193.49<br>(155.77 to<br>240.27)                            | 192.86<br>(124.20 to<br>302.01)                              | 177.73<br>(114.27 to<br>277.74)                             | 223.04<br>(144.87 to<br>347.23)                               | 6.34<br>(5.17 to<br>7.80)                            | 9.10<br>(6.65 to<br>12.62)                             | 8.59<br>(6.31 to<br>11.76)                           | 10.02<br>(7.39 to<br>13.84)                              |
| Ischemic heart disease          | 5,430.29<br>(4,407.21 to<br>6,731.93)                      | 8,385.39<br>(4,090.74 to<br>15,150.22)                       | 5,501.59<br>(2,825.91 to<br>9,613.05)                       | 15,122.72<br>(7,131.13 to<br>27,763.88)                       | 304.28<br>(251.69 to<br>371.48)                      | 504.86<br>(270.03 to<br>843.30)                        | 360.49<br>(198.13 to<br>580.90)                      | 830.13<br>(435.29 to<br>1,416.77)                        |
| Stroke                          | 1,580.84<br>(1,259.83 to<br>1,974.56)                      | 2,394.13<br>(1,377.48 to<br>3,960.41)                        | 1,609.24<br>(977.94 to<br>2,592.51)                         | 4,206.16<br>(2,298.42 to<br>7,405.72)                         | 82.90<br>(66.88 to<br>101.75)                        | 140.67<br>(90.35 to<br>217.29)                         | 103.41<br>(68.07 to<br>156.83)                       | 221.83<br>(134.66 to<br>360.48)                          |
| Ischemic stroke                 | 419.06<br>(332.57 to<br>520.93)                            | 662.43<br>(383.07 to<br>1,169.55)                            | 492.78<br>(290.53 to<br>857.80)                             | 1,007.63<br>(551.35 to<br>1,817.48)                           | 29.13<br>(23.52 to<br>36.18)                         | 50.18<br>(29.78 to<br>88.36)                           | 39.85<br>(23.71 to<br>68.76)                         | 70.12<br>(39.87 to<br>126.40)                            |

|                                |                                     |                                     |                                     |                                       |                              |                               |                              |                                |
|--------------------------------|-------------------------------------|-------------------------------------|-------------------------------------|---------------------------------------|------------------------------|-------------------------------|------------------------------|--------------------------------|
| Intracerebral hemorrhage       | 1,161.78<br>(925.31 to<br>1,450.60) | 1,731.71<br>(918.06 to<br>3,049.31) | 1,116.46<br>(643.82 to<br>1,897.29) | 3,198.53<br>(1,616.39 to<br>5,977.84) | 53.77<br>(43.06 to<br>66.91) | 90.49<br>(55.34 to<br>142.99) | 63.56<br>(40.91 to<br>96.39) | 151.71<br>(87.56 to<br>253.99) |
| Hypertensive heart disease     | 316.22<br>(244.33 to<br>410.45)     | 766.46<br>(471.85 to<br>1,314.86)   | 641.56<br>(411.18 to<br>1,015.79)   | 1,049.54<br>(593.04 to<br>1,996.54)   | 18.47<br>(14.21 to<br>23.99) | 49.80<br>(31.76 to<br>82.02)  | 43.29<br>(28.16 to<br>65.89) | 65.38<br>(38.62 to<br>119.96)  |
| Cardiomyopathy and myocarditis | 92.51<br>(73.84 to<br>116.29)       | 171.82<br>(112.84 to<br>253.30)     | 173.40<br>(113.37 to<br>257.03)     | 174.17<br>(115.43 to<br>256.48)       | 4.29<br>(3.14 to<br>5.41)    | 10.40<br>(6.40 to<br>14.99)   | 10.75<br>(6.64 to<br>15.68)  | 10.01<br>(6.33 to<br>14.56)    |
| Myocarditis                    | 28.01<br>(21.64 to<br>37.27)        | 40.99<br>(25.51 to<br>59.79)        | 41.12<br>(25.27 to<br>60.71)        | 41.19<br>(26.51 to<br>59.17)          | 1.03<br>(0.72 to<br>1.38)    | 1.97<br>(1.17 to<br>2.64)     | 2.03<br>(1.18 to<br>2.77)    | 1.87<br>(1.16 to<br>2.46)      |

| Maldives                                                      |                                                  |                                                  |                                                  |                                                  |                                           |                                            |                                            |                                            |
|---------------------------------------------------------------|--------------------------------------------------|--------------------------------------------------|--------------------------------------------------|--------------------------------------------------|-------------------------------------------|--------------------------------------------|--------------------------------------------|--------------------------------------------|
| Cause                                                         | YLLs (actual counts)                             |                                                  |                                                  |                                                  | Deaths (actual counts)                    |                                            |                                            |                                            |
|                                                               | 2016                                             | 2040 Forecast                                    | 2040 Better Scenario                             | 2040 Worse Scenario                              | 2016                                      | 2040 Forecast                              | 2040 Better Scenario                       | 2040 Worse Scenario                        |
| Alcoholic cardiomyopathy                                      | 6.45<br>(4.40 to 8.71)                           | 11.12<br>(6.75 to 16.44)                         | 11.28<br>(6.75 to 16.90)                         | 11.71<br>(7.22 to 17.15)                         | 0.28<br>(0.19 to 0.38)                    | 0.54<br>(0.35 to 0.74)                     | 0.55<br>(0.36 to 0.77)                     | 0.56<br>(0.37 to 0.77)                     |
| Other cardiomyopathy                                          | 58.05<br>(45.48 to 72.75)                        | 119.71<br>(74.40 to 182.90)                      | 120.99<br>(75.04 to 184.49)                      | 121.27<br>(76.13 to 186.90)                      | 2.98<br>(2.11 to 3.85)                    | 7.89<br>(4.48 to 12.07)                    | 8.17<br>(4.67 to 12.47)                    | 7.59<br>(4.35 to 11.75)                    |
| Atrial fibrillation and flutter                               | 60.19<br>(44.50 to 79.39)                        | 164.08<br>(115.41 to 226.76)                     | 160.17<br>(111.33 to 219.99)                     | 159.99<br>(112.24 to 220.08)                     | 5.79<br>(4.28 to 7.53)                    | 16.08<br>(11.26 to 21.80)                  | 16.23<br>(11.35 to 22.08)                  | 14.93<br>(10.24 to 20.54)                  |
| Aortic aneurysm                                               | 95.75<br>(75.15 to 118.71)                       | 213.85<br>(151.75 to 286.01)                     | 199.92<br>(141.82 to 265.73)                     | 209.89<br>(149.23 to 282.75)                     | 5.95<br>(4.71 to 7.31)                    | 14.19<br>(10.59 to 18.04)                  | 13.82<br>(10.32 to 17.51)                  | 13.31<br>(10.12 to 16.82)                  |
| Peripheral artery disease                                     | 17.91<br>(11.42 to 27.42)                        | 78.26<br>(45.38 to 128.58)                       | 79.21<br>(46.64 to 129.74)                       | 72.69<br>(41.77 to 119.36)                       | 1.38<br>(0.89 to 2.24)                    | 6.69<br>(3.90 to 11.38)                    | 7.02<br>(4.11 to 11.90)                    | 5.83<br>(3.41 to 9.63)                     |
| Endocarditis                                                  | 80.89<br>(59.43 to 112.90)                       | 138.07<br>(84.05 to 232.33)                      | 136.16<br>(82.50 to 225.87)                      | 146.64<br>(89.37 to 246.37)                      | 2.68<br>(2.06 to 3.49)                    | 6.09<br>(3.90 to 8.59)                     | 6.15<br>(3.93 to 8.72)                     | 6.18<br>(4.02 to 8.71)                     |
| Other cardiovascular and circulatory diseases                 | 264.88<br>(196.90 to 349.36)                     | 631.70<br>(377.00 to 955.40)                     | 548.63<br>(330.30 to 818.51)                     | 714.74<br>(420.23 to 1,093.72)                   | 12.41<br>(8.99 to 16.28)                  | 37.00<br>(23.55 to 52.22)                  | 33.65<br>(21.54 to 46.73)                  | 39.56<br>(25.35 to 56.14)                  |
| <b>Chronic respiratory diseases</b>                           | <b>1,880.84</b><br><b>(1,535.08 to 2,312.04)</b> | <b>4,086.25</b><br><b>(2,672.04 to 6,196.31)</b> | <b>3,367.77</b><br><b>(2,273.37 to 4,873.34)</b> | <b>5,004.85</b><br><b>(3,177.41 to 7,775.22)</b> | <b>105.49</b><br><b>(86.46 to 128.56)</b> | <b>243.69</b><br><b>(174.43 to 331.78)</b> | <b>206.99</b><br><b>(149.93 to 276.93)</b> | <b>284.48</b><br><b>(196.00 to 397.35)</b> |
| Chronic obstructive pulmonary disease                         | 1,329.99<br>(1,051.44 to 1,614.26)               | 2,888.35<br>(1,729.47 to 4,596.16)               | 2,171.14<br>(1,341.20 to 3,302.12)               | 3,870.87<br>(2,246.52 to 6,412.78)               | 81.84<br>(66.12 to 100.21)                | 182.86<br>(122.00 to 259.25)               | 144.92<br>(98.25 to 202.35)                | 228.96<br>(148.93 to 335.35)               |
| Pneumoconiosis                                                | 3.35<br>(2.48 to 4.36)                           | 6.05<br>(4.04 to 8.48)                           | 5.77<br>(3.69 to 8.17)                           | 6.38<br>(4.40 to 8.86)                           | 0.18<br>(0.13 to 0.23)                    | 0.36<br>(0.26 to 0.49)                     | 0.35<br>(0.24 to 0.48)                     | 0.37<br>(0.26 to 0.49)                     |
| Silicosis                                                     | 0.65<br>(0.44 to 0.92)                           | 0.95<br>(0.56 to 1.41)                           | 0.92<br>(0.53 to 1.39)                           | 1.01<br>(0.62 to 1.49)                           | 0.03<br>(0.02 to 0.04)                    | 0.05<br>(0.03 to 0.07)                     | 0.05<br>(0.03 to 0.07)                     | 0.05<br>(0.03 to 0.07)                     |
| Asbestosis                                                    | 0.75<br>(0.51 to 1.05)                           | 1.70<br>(1.02 to 2.63)                           | 1.72<br>(1.01 to 2.69)                           | 1.68<br>(1.03 to 2.56)                           | 0.03<br>(0.02 to 0.05)                    | 0.09<br>(0.06 to 0.14)                     | 0.10<br>(0.06 to 0.15)                     | 0.09<br>(0.05 to 0.13)                     |
| Coal workers pneumoconiosis                                   | 0.41<br>(0.25 to 0.61)                           | 0.81<br>(0.45 to 1.35)                           | 0.70<br>(0.38 to 1.17)                           | 0.98<br>(0.55 to 1.59)                           | 0.02<br>(0.01 to 0.03)                    | 0.05<br>(0.03 to 0.08)                     | 0.04<br>(0.03 to 0.07)                     | 0.06<br>(0.03 to 0.09)                     |
| Other pneumoconiosis                                          | 1.54<br>(1.11 to 2.08)                           | 2.59<br>(1.66 to 3.70)                           | 2.43<br>(1.51 to 3.52)                           | 2.71<br>(1.78 to 3.85)                           | 0.09<br>(0.06 to 0.12)                    | 0.17<br>(0.11 to 0.24)                     | 0.16<br>(0.10 to 0.23)                     | 0.17<br>(0.11 to 0.24)                     |
| Asthma                                                        | 140.31<br>(104.80 to 184.90)                     | 202.16<br>(103.38 to 387.86)                     | 143.57<br>(76.78 to 265.89)                      | 227.40<br>(117.56 to 435.62)                     | 5.46<br>(4.04 to 7.37)                    | 10.46<br>(5.79 to 18.45)                   | 7.71<br>(4.46 to 13.03)                    | 11.28<br>(6.35 to 19.71)                   |
| Interstitial lung disease and pulmonary sarcoidosis           | 382.79<br>(291.74 to 511.44)                     | 961.93<br>(672.65 to 1,355.44)                   | 1,020.57<br>(704.61 to 1,441.75)                 | 869.98<br>(610.85 to 1,225.05)                   | 17.48<br>(13.04 to 25.08)                 | 49.07<br>(35.66 to 67.03)                  | 53.06<br>(38.12 to 71.57)                  | 42.91<br>(31.48 to 60.14)                  |
| Other chronic respiratory diseases                            | 24.40<br>(16.15 to 38.73)                        | 27.76<br>(15.45 to 47.33)                        | 26.72<br>(14.85 to 46.02)                        | 30.21<br>(17.02 to 53.57)                        | 0.53<br>(0.37 to 0.75)                    | 0.95<br>(0.55 to 1.44)                     | 0.95<br>(0.54 to 1.42)                     | 0.96<br>(0.57 to 1.48)                     |
| <b>Cirrhosis and other chronic liver diseases</b>             | <b>586.15</b><br><b>(455.18 to 752.00)</b>       | <b>1,258.18</b><br><b>(825.71 to 1,824.77)</b>   | <b>1,233.79</b><br><b>(805.45 to 1,805.64)</b>   | <b>1,317.21</b><br><b>(884.57 to 1,908.86)</b>   | <b>21.53</b><br><b>(16.68 to 27.32)</b>   | <b>51.58</b><br><b>(37.50 to 69.46)</b>    | <b>51.24</b><br><b>(36.47 to 69.56)</b>    | <b>52.67</b><br><b>(38.77 to 69.85)</b>    |
| Cirrhosis and other chronic liver diseases due to hepatitis B | 203.05<br>(147.74 to 269.56)                     | 453.82<br>(293.04 to 682.06)                     | 448.19<br>(285.72 to 678.32)                     | 464.13<br>(305.19 to 693.35)                     | 7.61<br>(5.62 to 9.92)                    | 18.42<br>(12.89 to 25.54)                  | 18.43<br>(12.65 to 25.83)                  | 18.41<br>(13.07 to 25.18)                  |
| Cirrhosis and other chronic liver diseases due to hepatitis C | 121.22<br>(88.70 to 164.64)                      | 273.98<br>(171.66 to 428.98)                     | 269.54<br>(167.88 to 422.73)                     | 281.85<br>(179.12 to 435.01)                     | 4.37<br>(3.21 to 5.83)                    | 10.79<br>(7.28 to 15.72)                   | 10.73<br>(7.17 to 15.72)                   | 10.87<br>(7.43 to 15.67)                   |



|                                                                |                                                      |                                                      |                                                      |                                                      |                                                 |                                                   |                                                   |                                                   |
|----------------------------------------------------------------|------------------------------------------------------|------------------------------------------------------|------------------------------------------------------|------------------------------------------------------|-------------------------------------------------|---------------------------------------------------|---------------------------------------------------|---------------------------------------------------|
| Cirrhosis and other chronic liver diseases due to alcohol use  | 108.86<br>(77.75 to<br>148.31)                       | 227.37<br>(145.07 to<br>348.46)                      | 219.29<br>(139.25 to<br>337.36)                      | 257.21<br>(166.19 to<br>387.56)                      | 4.18<br>(3.07 to<br>5.53)                       | 9.42<br>(6.39 to<br>13.07)                        | 9.22<br>(6.25 to<br>12.85)                        | 10.35<br>(7.23 to<br>14.14)                       |
| Cirrhosis and other chronic liver diseases due to other causes | 153.01<br>(121.04 to<br>196.87)                      | 303.00<br>(197.99 to<br>458.55)                      | 296.76<br>(192.99 to<br>451.55)                      | 314.01<br>(205.90 to<br>471.47)                      | 5.37<br>(4.20 to<br>6.88)                       | 12.95<br>(9.09 to<br>18.17)                       | 12.86<br>(8.94 to<br>18.33)                       | 13.04<br>(9.28 to<br>18.02)                       |
| <b>Digestive diseases</b>                                      | <b>188.84</b><br><b>(150.67 to</b><br><b>235.30)</b> | <b>374.44</b><br><b>(262.84 to</b><br><b>514.85)</b> | <b>357.54</b><br><b>(249.28 to</b><br><b>491.90)</b> | <b>396.32</b><br><b>(279.51 to</b><br><b>546.78)</b> | <b>9.04</b><br><b>(7.16 to</b><br><b>11.14)</b> | <b>21.83</b><br><b>(16.69 to</b><br><b>27.39)</b> | <b>21.34</b><br><b>(15.91 to</b><br><b>26.96)</b> | <b>22.02</b><br><b>(16.95 to</b><br><b>27.98)</b> |
| Peptic ulcer disease                                           | 36.45<br>(27.28 to<br>46.74)                         | 65.59<br>(43.60 to<br>96.10)                         | 56.79<br>(37.33 to<br>82.67)                         | 75.93<br>(50.50 to<br>108.74)                        | 2.00<br>(1.50 to<br>2.53)                       | 4.14<br>(2.89 to<br>5.65)                         | 3.67<br>(2.56 to<br>5.03)                         | 4.61<br>(3.27 to<br>6.25)                         |

| Maldives                                   |                                  |                                    |                                    |                                    |                            |                              |                              |                              |
|--------------------------------------------|----------------------------------|------------------------------------|------------------------------------|------------------------------------|----------------------------|------------------------------|------------------------------|------------------------------|
| Cause                                      | YLLs (actual counts)             |                                    |                                    |                                    | Deaths (actual counts)     |                              |                              |                              |
|                                            | 2016                             | 2040 Forecast                      | 2040 Better Scenario               | 2040 Worse Scenario                | 2016                       | 2040 Forecast                | 2040 Better Scenario         | 2040 Worse Scenario          |
| Gastritis and duodenitis                   | 0.68<br>(0.50 to 0.89)           | 1.48<br>(0.93 to 2.17)             | 1.46<br>(0.91 to 2.18)             | 1.53<br>(0.98 to 2.20)             | 0.03<br>(0.02 to 0.04)     | 0.08<br>(0.06 to 0.11)       | 0.08<br>(0.06 to 0.11)       | 0.08<br>(0.06 to 0.11)       |
| Appendicitis                               | 12.41<br>(9.17 to 16.13)         | 22.18<br>(14.17 to 31.47)          | 21.28<br>(13.29 to 30.44)          | 23.94<br>(15.51 to 33.82)          | 0.51<br>(0.35 to 0.66)     | 1.16<br>(0.75 to 1.55)       | 1.14<br>(0.72 to 1.55)       | 1.19<br>(0.79 to 1.59)       |
| Paralytic ileus and intestinal obstruction | 67.05<br>(48.14 to 88.85)        | 121.59<br>(77.71 to 173.15)        | 121.77<br>(77.28 to 174.34)        | 121.49<br>(77.97 to 170.53)        | 2.97<br>(2.13 to 3.91)     | 7.02<br>(4.81 to 9.25)       | 7.22<br>(4.89 to 9.64)       | 6.67<br>(4.61 to 8.70)       |
| Inguinal, femoral, and abdominal hernia    | 2.33<br>(1.43 to 3.14)           | 3.49<br>(1.65 to 5.15)             | 3.48<br>(1.65 to 5.21)             | 3.52<br>(1.75 to 5.10)             | 0.13<br>(0.08 to 0.18)     | 0.26<br>(0.11 to 0.38)       | 0.27<br>(0.11 to 0.40)       | 0.24<br>(0.10 to 0.36)       |
| Inflammatory bowel disease                 | 12.40<br>(8.83 to 16.87)         | 25.12<br>(16.61 to 35.54)          | 25.80<br>(16.66 to 37.02)          | 24.15<br>(16.40 to 33.93)          | 0.62<br>(0.43 to 0.82)     | 1.43<br>(0.98 to 1.88)       | 1.51<br>(1.01 to 2.05)       | 1.31<br>(0.92 to 1.69)       |
| Vascular intestinal disorders              | 12.75<br>(9.50 to 16.41)         | 36.09<br>(25.04 to 48.55)          | 36.14<br>(24.68 to 48.91)          | 35.89<br>(25.42 to 47.51)          | 0.77<br>(0.58 to 0.99)     | 2.44<br>(1.77 to 3.20)       | 2.50<br>(1.78 to 3.27)       | 2.33<br>(1.71 to 3.00)       |
| Gallbladder and biliary diseases           | 5.31<br>(3.26 to 7.03)           | 17.55<br>(7.87 to 30.99)           | 12.69<br>(5.98 to 21.55)           | 18.73<br>(8.70 to 33.17)           | 0.34<br>(0.18 to 0.46)     | 1.24<br>(0.52 to 2.09)       | 0.94<br>(0.40 to 1.55)       | 1.25<br>(0.53 to 2.13)       |
| Pancreatitis                               | 21.59<br>(15.36 to 30.19)        | 44.08<br>(24.43 to 85.58)          | 42.11<br>(22.98 to 78.47)          | 51.72<br>(26.28 to 117.12)         | 0.80<br>(0.57 to 1.07)     | 1.88<br>(1.13 to 3.30)       | 1.83<br>(1.09 to 3.18)       | 2.11<br>(1.19 to 4.46)       |
| Other digestive diseases                   | 17.87<br>(13.10 to 23.29)        | 37.26<br>(25.23 to 52.62)          | 36.02<br>(23.69 to 51.52)          | 39.43<br>(27.17 to 55.47)          | 0.88<br>(0.65 to 1.15)     | 2.19<br>(1.56 to 2.91)       | 2.17<br>(1.52 to 2.92)       | 2.22<br>(1.62 to 2.93)       |
| Neurological disorders                     | 1,093.75<br>(876.21 to 1,334.50) | 2,923.90<br>(2,059.55 to 4,078.25) | 2,694.73<br>(1,946.69 to 3,630.41) | 2,771.17<br>(1,989.38 to 3,876.47) | 82.02<br>(66.01 to 101.16) | 248.40<br>(174.60 to 346.84) | 234.36<br>(170.64 to 316.86) | 222.21<br>(155.38 to 319.16) |
| Alzheimer's disease and other dementias    | 738.64<br>(574.79 to 925.87)     | 2,297.82<br>(1,511.22 to 3,425.52) | 2,060.69<br>(1,432.26 to 2,899.22) | 2,132.26<br>(1,421.91 to 3,164.99) | 69.61<br>(55.46 to 87.30)  | 217.92<br>(145.54 to 317.88) | 202.00<br>(139.46 to 283.88) | 193.93<br>(129.87 to 289.27) |
| Parkinson's disease                        | 73.78<br>(52.95 to 96.45)        | 218.28<br>(159.01 to 289.05)       | 238.85<br>(173.53 to 317.59)       | 186.89<br>(138.72 to 244.50)       | 5.65<br>(3.99 to 7.55)     | 17.05<br>(12.50 to 22.87)    | 19.01<br>(13.84 to 25.51)    | 14.13<br>(10.38 to 18.72)    |
| Epilepsy                                   | 200.84<br>(159.10 to 253.30)     | 264.01<br>(151.70 to 447.99)       | 246.66<br>(140.44 to 415.44)       | 315.20<br>(178.57 to 550.41)       | 4.47<br>(3.53 to 5.61)     | 7.86<br>(5.04 to 11.97)      | 7.48<br>(4.81 to 11.39)      | 9.05<br>(5.66 to 14.27)      |
| Multiple sclerosis                         | 5.79<br>(2.94 to 9.25)           | 10.54<br>(4.56 to 21.24)           | 10.33<br>(4.50 to 20.75)           | 10.30<br>(4.51 to 20.61)           | 0.16<br>(0.09 to 0.25)     | 0.34<br>(0.17 to 0.62)       | 0.33<br>(0.17 to 0.62)       | 0.32<br>(0.16 to 0.59)       |
| Motor neuron disease                       | 11.57<br>(8.98 to 14.44)         | 31.59<br>(19.40 to 50.16)          | 32.74<br>(19.70 to 52.00)          | 29.88<br>(18.60 to 46.61)          | 0.36<br>(0.28 to 0.44)     | 1.08<br>(0.71 to 1.57)       | 1.12<br>(0.73 to 1.65)       | 1.00<br>(0.67 to 1.46)       |
| Other neurological disorders               | 63.13<br>(52.01 to 76.74)        | 101.66<br>(69.75 to 144.48)        | 105.46<br>(71.71 to 150.39)        | 96.65<br>(67.58 to 137.01)         | 1.78<br>(1.47 to 2.15)     | 4.16<br>(3.13 to 5.41)       | 4.41<br>(3.27 to 5.75)       | 3.77<br>(2.88 to 4.80)       |
| Mental disorders                           | 126.92<br>(86.20 to 214.53)      | 273.29<br>(151.18 to 490.03)       | 275.71<br>(151.93 to 490.55)       | 273.14<br>(153.42 to 494.44)       | 3.05<br>(2.21 to 4.62)     | 8.07<br>(5.28 to 12.60)      | 8.26<br>(5.35 to 12.97)      | 7.83<br>(5.21 to 12.21)      |
| Alcohol use disorders                      | 30.45<br>(19.35 to 44.56)        | 49.26<br>(25.86 to 85.89)          | 49.05<br>(25.55 to 86.24)          | 50.90<br>(27.12 to 87.42)          | 0.84<br>(0.55 to 1.20)     | 1.58<br>(0.91 to 2.54)       | 1.58<br>(0.91 to 2.59)       | 1.60<br>(0.94 to 2.53)       |
| Drug use disorders                         | 93.78<br>(61.04 to 175.34)       | 220.92<br>(120.72 to 408.78)       | 223.46<br>(121.09 to 409.81)       | 219.20<br>(120.52 to 411.65)       | 2.16<br>(1.52 to 3.57)     | 6.43<br>(4.20 to 9.95)       | 6.61<br>(4.32 to 10.40)      | 6.18<br>(4.07 to 9.69)       |
| Opioid use disorders                       | 43.33<br>(22.77 to 78.50)        | 65.57<br>(29.86 to 135.98)         | 65.93<br>(29.86 to 137.17)         | 65.97<br>(29.83 to 133.66)         | 0.87<br>(0.50 to 1.47)     | 1.62<br>(0.89 to 3.09)       | 1.66<br>(0.90 to 3.16)       | 1.59<br>(0.86 to 3.01)       |

|                           |                              |                                |                                |                                |                           |                           |                           |                           |
|---------------------------|------------------------------|--------------------------------|--------------------------------|--------------------------------|---------------------------|---------------------------|---------------------------|---------------------------|
|                           | 7.30<br>(4.18 to<br>14.73)   | 26.15<br>(14.07 to<br>50.56)   | 25.94<br>(13.91 to<br>50.18)   | 26.68<br>(14.67 to<br>50.56)   | 0.19<br>(0.12 to<br>0.32) | 0.83<br>(0.48 to<br>1.34) | 0.84<br>(0.48 to<br>1.34) | 0.83<br>(0.49 to<br>1.34) |
| Cocaine use disorders     |                              |                                |                                |                                |                           |                           |                           |                           |
|                           | 5.82<br>(3.49 to<br>9.17)    | 21.56<br>(10.44 to<br>42.27)   | 21.24<br>(10.27 to<br>42.06)   | 22.43<br>(10.99 to<br>44.08)   | 0.12<br>(0.08 to<br>0.18) | 0.52<br>(0.27 to<br>0.95) | 0.52<br>(0.27 to<br>0.96) | 0.53<br>(0.28 to<br>0.96) |
| Amphetamine use disorders |                              |                                |                                |                                |                           |                           |                           |                           |
|                           | 37.33<br>(21.74 to<br>83.44) | 107.64<br>(55.18 to<br>216.07) | 110.35<br>(56.08 to<br>218.89) | 104.12<br>(53.62 to<br>212.47) | 0.98<br>(0.65 to<br>1.75) | 3.45<br>(2.16 to<br>5.46) | 3.60<br>(2.21 to<br>5.66) | 3.23<br>(2.04 to<br>5.27) |
| Other drug use disorders  |                              |                                |                                |                                |                           |                           |                           |                           |
|                           | 2.70<br>(1.59 to<br>4.47)    | 3.11<br>(1.21 to<br>7.13)      | 3.19<br>(1.23 to<br>7.30)      | 3.04<br>(1.19 to<br>6.90)      | 0.05<br>(0.03 to<br>0.08) | 0.06<br>(0.02 to<br>0.15) | 0.06<br>(0.02 to<br>0.15) | 0.06<br>(0.02 to<br>0.14) |
| Eating disorders          |                              |                                |                                |                                |                           |                           |                           |                           |

| Maldives                                                   |                                           |                                            |                                            |                                            |                                     |                                     |                                     |                                       |
|------------------------------------------------------------|-------------------------------------------|--------------------------------------------|--------------------------------------------|--------------------------------------------|-------------------------------------|-------------------------------------|-------------------------------------|---------------------------------------|
| Cause                                                      | YLLs (actual counts)                      |                                            |                                            |                                            | Deaths (actual counts)              |                                     |                                     |                                       |
|                                                            | 2016                                      | 2040 Forecast                              | 2040 Better Scenario                       | 2040 Worse Scenario                        | 2016                                | 2040 Forecast                       | 2040 Better Scenario                | 2040 Worse Scenario                   |
| <b>Diabetes, urogenital, blood, and endocrine diseases</b> | <b>2,859.67</b><br>(2,360.22 to 3,469.09) | <b>7,739.56</b><br>(4,402.69 to 15,982.09) | <b>6,827.91</b><br>(3,889.03 to 13,982.09) | <b>9,929.02</b><br>(5,448.83 to 20,327.08) | <b>132.66</b><br>(110.09 to 159.97) | <b>448.28</b><br>(260.50 to 982.11) | <b>402.35</b><br>(232.91 to 905.61) | <b>558.23</b><br>(317.24 to 1,240.71) |
| Diabetes mellitus                                          | 785.29<br>(634.93 to 970.56)              | 2,053.70<br>(1,233.29 to 3,306.84)         | 1,725.97<br>(1,046.30 to 2,776.93)         | 2,587.05<br>(1,532.87 to 4,185.87)         | 41.12<br>(33.68 to 50.15)           | 120.61<br>(78.40 to 178.73)         | 104.18<br>(68.29 to 155.37)         | 144.47<br>(91.43 to 219.34)           |
| Acute glomerulonephritis                                   | 2.21<br>(1.82 to 2.67)                    | 2.54<br>(1.48 to 4.30)                     | 2.45<br>(1.41 to 4.16)                     | 2.74<br>(1.62 to 4.55)                     | 0.05<br>(0.04 to 0.06)              | 0.09<br>(0.06 to 0.15)              | 0.09<br>(0.05 to 0.14)              | 0.09<br>(0.06 to 0.15)                |
| Chronic kidney disease                                     | 1,498.95<br>(1,216.24 to 1,854.32)        | 4,618.70<br>(2,013.63 to 12,313.41)        | 4,049.20<br>(1,811.66 to 10,787.13)        | 6,246.33<br>(2,651.94 to 16,947.66)        | 70.75<br>(57.78 to 86.32)           | 273.53<br>(116.66 to 823.54)        | 243.41<br>(106.11 to 755.08)        | 360.80<br>(151.39 to 1,064.30)        |
| Chronic kidney disease due to diabetes mellitus            | 852.87<br>(674.90 to 1,074.49)            | 2,768.67<br>(1,197.53 to 7,162.19)         | 2,418.94<br>(1,058.53 to 6,323.43)         | 3,754.81<br>(1,544.39 to 9,905.42)         | 37.67<br>(29.84 to 46.96)           | 148.59<br>(61.01 to 442.78)         | 131.39<br>(55.59 to 394.77)         | 197.70<br>(79.17 to 581.85)           |
| Chronic kidney disease due to hypertension                 | 414.62<br>(323.89 to 531.69)              | 1,439.05<br>(609.58 to 4,354.63)           | 1,270.12<br>(541.43 to 3,871.07)           | 1,934.92<br>(795.36 to 5,755.41)           | 25.65<br>(20.09 to 32.58)           | 103.44<br>(44.31 to 322.73)         | 92.94<br>(40.41 to 289.54)          | 134.47<br>(55.64 to 411.52)           |
| Chronic kidney disease due to glomerulonephritis           | 117.85<br>(90.32 to 154.21)               | 181.42<br>(83.79 to 440.66)                | 159.09<br>(72.81 to 386.82)                | 245.39<br>(109.04 to 591.26)               | 3.28<br>(2.48 to 4.31)              | 8.42<br>(3.61 to 24.50)             | 7.45<br>(3.22 to 21.36)             | 11.30<br>(4.69 to 32.57)              |
| Chronic kidney disease due to other and unspecified causes | 113.60<br>(87.76 to 145.69)               | 229.56<br>(101.88 to 590.24)               | 201.04<br>(89.61 to 532.14)                | 311.22<br>(133.36 to 790.36)               | 4.14<br>(3.08 to 5.42)              | 13.08<br>(5.64 to 37.00)            | 11.63<br>(4.90 to 34.24)            | 17.33<br>(7.05 to 49.15)              |
| Urinary diseases and male infertility                      | 97.00<br>(78.73 to 119.78)                | 282.92<br>(198.72 to 394.54)               | 287.18<br>(200.55 to 403.56)               | 275.07<br>(197.40 to 375.25)               | 4.91<br>(4.00 to 5.94)              | 16.96<br>(12.71 to 21.43)           | 17.63<br>(12.99 to 22.64)           | 15.77<br>(12.17 to 19.56)             |
| Urinary tract infections                                   | 82.62<br>(65.97 to 102.75)                | 250.44<br>(172.06 to 352.52)               | 255.00<br>(173.00 to 362.78)               | 241.95<br>(169.93 to 333.45)               | 4.06<br>(3.27 to 5.00)              | 14.86<br>(10.95 to 19.10)           | 15.49<br>(11.23 to 20.22)           | 13.72<br>(10.41 to 17.29)             |
| Urolithiasis                                               | 4.32<br>(2.68 to 6.58)                    | 11.55<br>(6.57 to 19.28)                   | 11.73<br>(6.63 to 19.87)                   | 11.28<br>(6.41 to 18.62)                   | 0.21<br>(0.13 to 0.32)              | 0.65<br>(0.39 to 1.00)              | 0.67<br>(0.40 to 1.05)              | 0.60<br>(0.36 to 0.93)                |
| Other urinary diseases                                     | 10.06<br>(6.72 to 14.05)                  | 20.93<br>(12.07 to 32.10)                  | 20.46<br>(11.39 to 31.72)                  | 21.85<br>(12.99 to 32.35)                  | 0.64<br>(0.38 to 0.93)              | 1.46<br>(0.81 to 2.24)              | 1.47<br>(0.80 to 2.30)              | 1.44<br>(0.81 to 2.20)                |
| Gynecological diseases                                     | 0.26<br>(0.15 to 0.40)                    | 0.49<br>(0.19 to 1.05)                     | 0.45<br>(0.18 to 0.98)                     | 0.55<br>(0.21 to 1.20)                     | 0.01<br>(0.00 to 0.01)              | 0.02<br>(0.01 to 0.03)              | 0.02<br>(0.01 to 0.03)              | 0.02<br>(0.01 to 0.04)                |
| Uterine fibroids                                           | 0.03<br>(0.01 to 0.05)                    | 0.05<br>(0.02 to 0.12)                     | 0.05<br>(0.02 to 0.11)                     | 0.06<br>(0.02 to 0.13)                     | 0.00<br>(0.00 to 0.00)              | 0.00<br>(0.00 to 0.00)              | 0.00<br>(0.00 to 0.00)              | 0.00<br>(0.00 to 0.01)                |
| Polycystic ovarian syndrome                                | 0.04<br>(0.01 to 0.09)                    | 0.04<br>(0.01 to 0.12)                     | 0.04<br>(0.01 to 0.11)                     | 0.05<br>(0.01 to 0.15)                     | 0.00<br>(0.00 to 0.00)              | 0.00<br>(0.00 to 0.00)              | 0.00<br>(0.00 to 0.00)              | 0.00<br>(0.00 to 0.00)                |
| Endometriosis                                              | 0.01<br>(0.01 to 0.03)                    | 0.03<br>(0.01 to 0.09)                     | 0.03<br>(0.01 to 0.09)                     | 0.04<br>(0.01 to 0.11)                     | 0.00<br>(0.00 to 0.00)              | 0.00<br>(0.00 to 0.00)              | 0.00<br>(0.00 to 0.00)              | 0.00<br>(0.00 to 0.00)                |
| Genital prolapse                                           | 0.02<br>(0.01 to 0.03)                    | 0.03<br>(0.01 to 0.06)                     | 0.03<br>(0.01 to 0.06)                     | 0.04<br>(0.02 to 0.07)                     | 0.00<br>(0.00 to 0.00)              | 0.00<br>(0.00 to 0.00)              | 0.00<br>(0.00 to 0.00)              | 0.00<br>(0.00 to 0.00)                |
| Other gynecological diseases                               | 0.16<br>(0.09 to 0.26)                    | 0.34<br>(0.12 to 0.75)                     | 0.32<br>(0.11 to 0.71)                     | 0.37<br>(0.13 to 0.83)                     | 0.00<br>(0.00 to 0.01)              | 0.01<br>(0.01 to 0.02)              | 0.01<br>(0.01 to 0.02)              | 0.01<br>(0.01 to 0.02)                |
| Hemoglobinopathies and hemolytic anemias                   | 145.49<br>(109.86 to 185.87)              | 258.02<br>(167.98 to 382.98)               | 248.33<br>(159.43 to 371.65)               | 276.71<br>(183.69 to 410.76)               | 5.41<br>(4.03 to 7.46)              | 12.53<br>(8.72 to 17.83)            | 12.29<br>(8.47 to 17.54)            | 12.99<br>(9.28 to 18.42)              |
| Thalassemias                                               | 33.75<br>(26.52 to 41.93)                 | 15.71<br>(8.46 to 27.00)                   | 16.63<br>(8.83 to 28.65)                   | 14.81<br>(7.88 to 25.23)                   | 0.48<br>(0.37 to 0.60)              | 0.28<br>(0.15 to 0.47)              | 0.29<br>(0.15 to 0.50)              | 0.26<br>(0.14 to 0.44)                |

|                                                   |                                 |                                 |                                 |                                 |                             |                              |                              |                              |
|---------------------------------------------------|---------------------------------|---------------------------------|---------------------------------|---------------------------------|-----------------------------|------------------------------|------------------------------|------------------------------|
|                                                   | 0.14<br>(0.09 to<br>0.20)       | 0.32<br>(0.17 to<br>0.52)       | 0.31<br>(0.17 to<br>0.51)       | 0.33<br>(0.18 to<br>0.54)       | 0.00<br>(0.00 to<br>0.00)   | 0.01<br>(0.01 to<br>0.02)    | 0.01<br>(0.01 to<br>0.02)    | 0.01<br>(0.01 to<br>0.02)    |
| Sickle cell disorders                             |                                 |                                 |                                 |                                 |                             |                              |                              |                              |
|                                                   | 63.99<br>(43.89 to<br>87.21)    | 158.09<br>(94.45 to<br>243.46)  | 149.28<br>(87.67 to<br>233.21)  | 174.68<br>(105.53 to<br>267.89) | 1.85<br>(1.28 to<br>2.58)   | 6.15<br>(3.91 to<br>9.07)    | 5.87<br>(3.69 to<br>8.81)    | 6.64<br>(4.31 to<br>9.68)    |
| G6PD deficiency                                   |                                 |                                 |                                 |                                 |                             |                              |                              |                              |
|                                                   | 47.60<br>(35.05 to<br>66.69)    | 83.90<br>(57.14 to<br>120.44)   | 82.11<br>(55.55 to<br>119.27)   | 86.89<br>(60.24 to<br>124.67)   | 3.07<br>(2.23 to<br>4.49)   | 6.10<br>(4.27 to<br>9.03)    | 6.11<br>(4.23 to<br>9.09)    | 6.08<br>(4.37 to<br>8.82)    |
| Other hemoglobinopathies and hemolytic anemias    |                                 |                                 |                                 |                                 |                             |                              |                              |                              |
|                                                   | 330.48<br>(269.27 to<br>437.67) | 523.18<br>(344.69 to<br>810.77) | 514.32<br>(336.11 to<br>803.77) | 540.57<br>(359.83 to<br>826.90) | 10.41<br>(8.28 to<br>14.82) | 24.53<br>(17.71 to<br>35.73) | 24.74<br>(17.77 to<br>36.49) | 24.09<br>(17.60 to<br>35.00) |
| Endocrine, metabolic, blood, and immune disorders |                                 |                                 |                                 |                                 |                             |                              |                              |                              |

| Maldives                                      |                                         |                                         |                                         |                                         |                                  |                                  |                                  |                                  |
|-----------------------------------------------|-----------------------------------------|-----------------------------------------|-----------------------------------------|-----------------------------------------|----------------------------------|----------------------------------|----------------------------------|----------------------------------|
| Cause                                         | YLLs (actual counts)                    |                                         |                                         |                                         | Deaths (actual counts)           |                                  |                                  |                                  |
|                                               | 2016                                    | 2040 Forecast                           | 2040 Better Scenario                    | 2040 Worse Scenario                     | 2016                             | 2040 Forecast                    | 2040 Better Scenario             | 2040 Worse Scenario              |
| <b>Musculoskeletal disorders</b>              | <b>56.04</b><br>(39.89 to 80.72)        | <b>121.84</b><br>(69.16 to 212.48)      | <b>125.80</b><br>(70.79 to 219.70)      | <b>115.70</b><br>(66.23 to 197.76)      | <b>1.71</b><br>(1.26 to 2.45)    | <b>5.29</b><br>(3.34 to 8.14)    | <b>5.55</b><br>(3.47 to 8.65)    | <b>4.84</b><br>(3.13 to 7.27)    |
| Rheumatoid arthritis                          | 3.89<br>(2.67 to 5.96)                  | 13.04<br>(8.03 to 21.36)                | 12.27<br>(7.48 to 20.65)                | 13.92<br>(8.54 to 22.80)                | 0.18<br>(0.13 to 0.29)           | 0.76<br>(0.48 to 1.24)           | 0.73<br>(0.45 to 1.19)           | 0.79<br>(0.50 to 1.24)           |
| Other musculoskeletal disorders               | 52.15<br>(36.68 to 75.48)               | 108.81<br>(59.00 to 193.17)             | 113.53<br>(62.08 to 201.96)             | 101.78<br>(56.21 to 180.92)             | 1.53<br>(1.11 to 2.16)           | 4.53<br>(2.81 to 7.12)           | 4.82<br>(2.98 to 7.58)           | 4.05<br>(2.54 to 6.26)           |
| <b>Other non-communicable diseases</b>        | <b>1,092.47</b><br>(863.74 to 1,455.34) | <b>1,175.20</b><br>(726.92 to 1,791.00) | <b>1,131.02</b><br>(702.78 to 1,707.00) | <b>1,284.12</b><br>(775.55 to 2,018.84) | <b>19.10</b><br>(14.98 to 24.24) | <b>41.34</b><br>(25.85 to 56.42) | <b>41.93</b><br>(24.96 to 58.09) | <b>40.76</b><br>(25.31 to 55.91) |
| Congenital birth defects                      | 893.58<br>(689.42 to 1,220.51)          | 627.91<br>(322.53 to 1,113.38)          | 577.22<br>(299.53 to 1,021.19)          | 746.33<br>(372.14 to 1,326.54)          | 11.44<br>(8.99 to 15.19)         | 10.14<br>(5.79 to 16.20)         | 9.44<br>(5.51 to 15.12)          | 11.73<br>(6.71 to 19.07)         |
| Neural tube defects                           | 12.65<br>(6.37 to 25.48)                | 3.41<br>(1.40 to 8.58)                  | 2.97<br>(1.21 to 7.36)                  | 4.40<br>(1.72 to 11.11)                 | 0.16<br>(0.09 to 0.31)           | 0.05<br>(0.02 to 0.12)           | 0.05<br>(0.02 to 0.10)           | 0.07<br>(0.03 to 0.15)           |
| Congenital heart anomalies                    | 307.24<br>(222.40 to 446.22)            | 193.85<br>(99.47 to 349.22)             | 180.34<br>(93.18 to 320.05)             | 226.27<br>(113.85 to 412.30)            | 4.00<br>(2.95 to 5.66)           | 3.07<br>(1.73 to 5.16)           | 2.88<br>(1.61 to 4.85)           | 3.51<br>(1.92 to 6.05)           |
| Orofacial clefts                              | 0.20<br>(0.12 to 0.33)                  | 0.06<br>(0.02 to 0.15)                  | 0.05<br>(0.02 to 0.13)                  | 0.08<br>(0.02 to 0.20)                  | 0.00<br>(0.00 to 0.00)           | 0.00<br>(0.00 to 0.00)           | 0.00<br>(0.00 to 0.00)           | 0.00<br>(0.00 to 0.00)           |
| Down syndrome                                 | 72.31<br>(45.40 to 105.78)              | 76.03<br>(38.16 to 133.54)              | 69.55<br>(35.43 to 122.61)              | 90.75<br>(45.84 to 161.38)              | 1.03<br>(0.68 to 1.46)           | 1.43<br>(0.76 to 2.40)           | 1.32<br>(0.70 to 2.24)           | 1.66<br>(0.89 to 2.84)           |
| Other chromosomal abnormalities               | 228.04<br>(142.75 to 384.98)            | 180.58<br>(70.55 to 386.23)             | 163.95<br>(65.20 to 346.95)             | 218.91<br>(85.03 to 477.94)             | 2.73<br>(1.74 to 4.54)           | 2.52<br>(1.13 to 4.89)           | 2.31<br>(1.06 to 4.46)           | 2.99<br>(1.34 to 6.00)           |
| Congenital musculoskeletal and limb anomalies | 18.77<br>(10.47 to 32.68)               | 8.32<br>(3.36 to 19.03)                 | 7.69<br>(3.13 to 17.36)                 | 9.80<br>(3.85 to 22.62)                 | 0.23<br>(0.13 to 0.39)           | 0.12<br>(0.06 to 0.25)           | 0.11<br>(0.05 to 0.23)           | 0.14<br>(0.06 to 0.29)           |
| Urogenital congenital anomalies               | 19.32<br>(14.36 to 27.07)               | 29.20<br>(14.00 to 47.80)               | 27.80<br>(13.16 to 45.52)               | 32.15<br>(15.64 to 52.45)               | 0.40<br>(0.27 to 0.52)           | 0.92<br>(0.40 to 1.50)           | 0.89<br>(0.38 to 1.44)           | 1.00<br>(0.44 to 1.59)           |
| Digestive congenital anomalies                | 40.20<br>(23.17 to 86.39)               | 20.89<br>(8.19 to 45.55)                | 18.96<br>(7.52 to 40.19)                | 25.39<br>(9.85 to 55.71)                | 0.48<br>(0.28 to 1.02)           | 0.29<br>(0.13 to 0.58)           | 0.26<br>(0.12 to 0.52)           | 0.34<br>(0.15 to 0.70)           |
| Other congenital birth defects                | 194.85<br>(130.83 to 280.68)            | 115.57<br>(51.35 to 227.07)             | 105.91<br>(47.60 to 205.46)             | 138.59<br>(59.65 to 276.36)             | 2.41<br>(1.64 to 3.44)           | 1.74<br>(0.92 to 3.05)           | 1.62<br>(0.86 to 2.85)           | 2.03<br>(1.03 to 3.71)           |
| Skin and subcutaneous diseases                | 165.09<br>(103.18 to 261.96)            | 534.47<br>(295.86 to 825.25)            | 542.16<br>(297.40 to 850.13)            | 522.30<br>(293.43 to 818.90)            | 7.26<br>(4.08 to 10.67)          | 31.06<br>(16.95 to 43.02)        | 32.36<br>(17.47 to 45.21)        | 28.85<br>(15.92 to 40.56)        |
| Cellulitis                                    | 25.14<br>(12.70 to 54.79)               | 100.04<br>(47.52 to 208.24)             | 102.19<br>(48.51 to 210.04)             | 96.13<br>(44.92 to 203.25)              | 1.04<br>(0.48 to 2.13)           | 5.81<br>(2.59 to 11.11)          | 6.06<br>(2.73 to 11.54)          | 5.33<br>(2.41 to 10.30)          |
| Pyoderma                                      | 85.23<br>(48.29 to 135.46)              | 286.66<br>(143.75 to 449.37)            | 286.88<br>(141.87 to 450.24)            | 287.19<br>(147.01 to 453.47)            | 3.31<br>(1.73 to 4.89)           | 15.45<br>(7.73 to 22.03)         | 15.88<br>(7.79 to 22.77)         | 14.74<br>(7.41 to 21.15)         |
| Decubitus ulcer                               | 41.75<br>(23.09 to 68.09)               | 128.86<br>(67.17 to 204.89)             | 133.75<br>(69.54 to 215.28)             | 120.50<br>(63.53 to 193.08)             | 2.68<br>(1.38 to 4.05)           | 9.41<br>(4.72 to 14.27)          | 10.00<br>(4.98 to 15.12)         | 8.40<br>(4.23 to 12.81)          |
| Other skin and subcutaneous diseases          | 12.98<br>(6.52 to 29.57)                | 18.92<br>(7.18 to 44.97)                | 19.34<br>(7.31 to 46.33)                | 18.49<br>(6.99 to 44.55)                | 0.24<br>(0.13 to 0.53)           | 0.40<br>(0.18 to 0.91)           | 0.41<br>(0.18 to 0.94)           | 0.38<br>(0.17 to 0.86)           |
| Sudden infant death syndrome                  | 33.80<br>(12.74 to 70.64)               | 12.82<br>(1.79 to 41.33)                | 11.64<br>(1.64 to 37.93)                | 15.50<br>(2.16 to 48.98)                | 0.39<br>(0.15 to 0.82)           | 0.15<br>(0.02 to 0.48)           | 0.14<br>(0.02 to 0.44)           | 0.18<br>(0.02 to 0.57)           |

|                          |                                       |                                       |                                       |                                       |                               |                                |                                |                                 |
|--------------------------|---------------------------------------|---------------------------------------|---------------------------------------|---------------------------------------|-------------------------------|--------------------------------|--------------------------------|---------------------------------|
| Injuries                 | 3,339.67<br>(2,732.23 to<br>4,066.75) | 3,576.35<br>(2,291.78 to<br>5,562.46) | 3,369.14<br>(2,139.01 to<br>5,280.61) | 4,472.87<br>(2,824.77 to<br>6,909.27) | 82.31<br>(67.20 to<br>100.06) | 124.64<br>(89.20 to<br>175.65) | 120.78<br>(86.51 to<br>168.95) | 145.71<br>(102.91 to<br>210.45) |
| Transport injuries       | 928.77<br>(724.21 to<br>1,222.18)     | 808.82<br>(502.97 to<br>1,292.79)     | 678.80<br>(426.12 to<br>1,068.27)     | 1,500.83<br>(911.84 to<br>2,420.49)   | 24.45<br>(19.20 to<br>31.53)  | 31.26<br>(21.74 to<br>45.18)   | 27.83<br>(19.35 to<br>40.03)   | 50.12<br>(34.18 to<br>74.34)    |
| Road injuries            | 868.91<br>(682.78 to<br>1,126.93)     | 728.12<br>(457.75 to<br>1,125.86)     | 602.06<br>(382.81 to<br>924.89)       | 1,408.48<br>(858.88 to<br>2,271.12)   | 23.22<br>(18.36 to<br>29.86)  | 29.14<br>(20.24 to<br>41.53)   | 25.78<br>(17.80 to<br>36.33)   | 47.79<br>(32.54 to<br>70.64)    |
| Pedestrian road injuries | 150.25<br>(91.62 to<br>225.99)        | 126.99<br>(68.77 to<br>222.61)        | 101.97<br>(54.54 to<br>178.37)        | 239.59<br>(129.50 to<br>420.59)       | 4.54<br>(2.83 to<br>6.80)     | 5.78<br>(3.35 to<br>9.65)      | 4.84<br>(2.77 to<br>8.13)      | 9.92<br>(5.83 to<br>16.19)      |

| Maldives                                        |                                                            |                                                            |                                                            |                                                            |                                                   |                                                   |                                                   |                                                   |
|-------------------------------------------------|------------------------------------------------------------|------------------------------------------------------------|------------------------------------------------------------|------------------------------------------------------------|---------------------------------------------------|---------------------------------------------------|---------------------------------------------------|---------------------------------------------------|
| Cause                                           | YLLs (actual counts)                                       |                                                            |                                                            |                                                            | Deaths (actual counts)                            |                                                   |                                                   |                                                   |
|                                                 | 2016                                                       | 2040 Forecast                                              | 2040 Better Scenario                                       | 2040 Worse Scenario                                        | 2016                                              | 2040 Forecast                                     | 2040 Better Scenario                              | 2040 Worse Scenario                               |
| Cyclist road injuries                           | 89.90<br>(55.20 to<br>133.13)                              | 88.48<br>(50.58 to<br>150.12)                              | 75.27<br>(43.06 to<br>132.15)                              | 159.36<br>(89.35 to<br>266.87)                             | 3.02<br>(1.94 to<br>4.51)                         | 4.26<br>(2.61 to<br>7.88)                         | 3.93<br>(2.41 to<br>7.52)                         | 6.29<br>(3.84 to<br>10.52)                        |
| Motorcyclist road injuries                      | 261.86<br>(162.52 to<br>380.36)                            | 318.94<br>(189.54 to<br>514.32)                            | 284.68<br>(168.75 to<br>454.64)                            | 496.85<br>(284.15 to<br>829.32)                            | 7.48<br>(5.23 to<br>10.24)                        | 12.75<br>(7.29 to<br>19.16)                       | 12.11<br>(6.56 to<br>18.12)                       | 17.12<br>(10.53 to<br>26.92)                      |
| Motor vehicle road injuries                     | 351.17<br>(232.64 to<br>538.05)                            | 183.68<br>(94.73 to<br>340.10)                             | 132.49<br>(68.39 to<br>245.94)                             | 489.14<br>(253.28 to<br>922.68)                            | 7.81<br>(5.38 to<br>11.86)                        | 5.96<br>(3.49 to<br>10.21)                        | 4.58<br>(2.69 to<br>7.77)                         | 13.72<br>(7.77 to<br>23.64)                       |
| Other road injuries                             | 15.72<br>(7.37 to<br>31.27)                                | 10.03<br>(4.30 to<br>23.98)                                | 7.65<br>(3.27 to<br>18.48)                                 | 23.54<br>(9.91 to<br>55.17)                                | 0.38<br>(0.19 to<br>0.78)                         | 0.39<br>(0.17 to<br>0.95)                         | 0.32<br>(0.14 to<br>0.79)                         | 0.73<br>(0.35 to<br>1.68)                         |
| Other transport injuries                        | 59.86<br>(32.91 to<br>119.02)                              | 80.70<br>(39.36 to<br>168.73)                              | 76.74<br>(36.98 to<br>160.28)                              | 92.35<br>(42.75 to<br>205.56)                              | 1.22<br>(0.75 to<br>2.36)                         | 2.12<br>(1.14 to<br>4.09)                         | 2.06<br>(1.09 to<br>3.98)                         | 2.33<br>(1.23 to<br>4.73)                         |
| <b>Unintentional injuries</b>                   | <b>1,679.49</b><br><b>(1,380.47 to</b><br><b>2,036.50)</b> | <b>1,808.24</b><br><b>(1,218.99 to</b><br><b>2,604.77)</b> | <b>1,751.29</b><br><b>(1,177.97 to</b><br><b>2,532.49)</b> | <b>1,942.99</b><br><b>(1,304.87 to</b><br><b>2,800.46)</b> | <b>41.84</b><br><b>(34.24 to</b><br><b>50.69)</b> | <b>68.02</b><br><b>(50.70 to</b><br><b>90.09)</b> | <b>67.76</b><br><b>(49.93 to</b><br><b>90.01)</b> | <b>69.08</b><br><b>(51.27 to</b><br><b>90.82)</b> |
| Falls                                           | 345.23<br>(266.60 to<br>439.21)                            | 599.98<br>(423.06 to<br>825.17)                            | 598.45<br>(418.24 to<br>830.67)                            | 603.35<br>(425.57 to<br>829.94)                            | 13.11<br>(10.32 to<br>16.45)                      | 30.03<br>(22.88 to<br>37.94)                      | 30.71<br>(23.18 to<br>39.08)                      | 28.85<br>(21.69 to<br>36.34)                      |
| Drowning                                        | 663.95<br>(534.29 to<br>820.73)                            | 557.22<br>(348.54 to<br>841.09)                            | 530.62<br>(333.33 to<br>800.10)                            | 626.11<br>(388.59 to<br>936.85)                            | 13.53<br>(10.95 to<br>16.72)                      | 16.13<br>(11.11 to<br>22.98)                      | 15.65<br>(10.70 to<br>22.26)                      | 17.43<br>(11.75 to<br>24.90)                      |
| Fire, heat, and hot substances                  | 146.81<br>(115.68 to<br>197.90)                            | 147.02<br>(93.73 to<br>235.40)                             | 139.25<br>(89.26 to<br>220.96)                             | 165.16<br>(103.96 to<br>263.49)                            | 3.88<br>(3.07 to<br>5.12)                         | 5.67<br>(4.07 to<br>8.00)                         | 5.53<br>(3.91 to<br>7.84)                         | 6.02<br>(4.29 to<br>8.59)                         |
| Poisonings                                      | 9.62<br>(7.22 to<br>13.07)                                 | 6.73<br>(3.91 to<br>11.61)                                 | 6.15<br>(3.49 to<br>10.59)                                 | 8.88<br>(4.49 to<br>14.01)                                 | 0.20<br>(0.16 to<br>0.27)                         | 0.20<br>(0.13 to<br>0.31)                         | 0.19<br>(0.12 to<br>0.29)                         | 0.23<br>(0.15 to<br>0.36)                         |
| Exposure to mechanical forces                   | 142.53<br>(112.48 to<br>181.60)                            | 130.49<br>(80.94 to<br>203.37)                             | 122.82<br>(76.08 to<br>192.67)                             | 146.29<br>(91.09 to<br>226.58)                             | 2.87<br>(2.32 to<br>3.56)                         | 3.80<br>(2.58 to<br>5.52)                         | 3.66<br>(2.47 to<br>5.36)                         | 4.07<br>(2.78 to<br>5.92)                         |
| Unintentional firearm injuries                  | 14.74<br>(11.37 to<br>19.47)                               | 12.28<br>(7.19 to<br>20.11)                                | 11.47<br>(6.70 to<br>19.07)                                | 13.86<br>(8.11 to<br>22.74)                                | 0.34<br>(0.26 to<br>0.44)                         | 0.38<br>(0.25 to<br>0.57)                         | 0.36<br>(0.23 to<br>0.54)                         | 0.41<br>(0.27 to<br>0.62)                         |
| Unintentional suffocation                       | 49.79<br>(33.86 to<br>74.95)                               | 29.83<br>(16.53 to<br>52.30)                               | 27.68<br>(15.26 to<br>48.02)                               | 34.96<br>(19.02 to<br>62.92)                               | 0.72<br>(0.51 to<br>1.04)                         | 0.54<br>(0.32 to<br>0.88)                         | 0.50<br>(0.30 to<br>0.83)                         | 0.61<br>(0.36 to<br>1.02)                         |
| Other exposure to mechanical forces             | 78.00<br>(61.43 to<br>100.96)                              | 88.38<br>(55.01 to<br>140.81)                              | 83.67<br>(51.45 to<br>134.06)                              | 97.47<br>(61.09 to<br>156.52)                              | 1.82<br>(1.45 to<br>2.31)                         | 2.89<br>(1.97 to<br>4.20)                         | 2.79<br>(1.91 to<br>4.11)                         | 3.05<br>(2.10 to<br>4.40)                         |
| Adverse effects of medical treatment            | 85.61<br>(67.55 to<br>111.33)                              | 107.06<br>(69.99 to<br>158.57)                             | 103.02<br>(67.59 to<br>154.41)                             | 114.43<br>(75.04 to<br>170.85)                             | 2.44<br>(1.95 to<br>3.01)                         | 4.38<br>(3.11 to<br>5.95)                         | 4.32<br>(3.02 to<br>5.86)                         | 4.46<br>(3.20 to<br>6.05)                         |
| Animal contact                                  | 42.04<br>(32.79 to<br>52.90)                               | 52.08<br>(31.63 to<br>83.16)                               | 48.54<br>(29.73 to<br>77.65)                               | 59.21<br>(35.67 to<br>93.73)                               | 0.98<br>(0.78 to<br>1.24)                         | 1.73<br>(1.18 to<br>2.55)                         | 1.65<br>(1.12 to<br>2.46)                         | 1.88<br>(1.27 to<br>2.76)                         |
| Venomous animal contact                         | 7.39<br>(5.10 to<br>10.32)                                 | 7.09<br>(3.83 to<br>12.78)                                 | 6.52<br>(3.57 to<br>11.94)                                 | 8.26<br>(4.52 to<br>15.02)                                 | 0.15<br>(0.11 to<br>0.22)                         | 0.20<br>(0.12 to<br>0.35)                         | 0.19<br>(0.11 to<br>0.34)                         | 0.23<br>(0.13 to<br>0.40)                         |
| Non-venomous animal contact                     | 34.65<br>(27.03 to<br>43.64)                               | 45.00<br>(27.79 to<br>71.50)                               | 42.02<br>(25.74 to<br>67.44)                               | 50.95<br>(30.79 to<br>81.56)                               | 0.83<br>(0.65 to<br>1.05)                         | 1.53<br>(1.05 to<br>2.26)                         | 1.46<br>(0.99 to<br>2.17)                         | 1.65<br>(1.12 to<br>2.42)                         |
| Foreign body                                    | 165.63<br>(80.27 to<br>252.07)                             | 127.12<br>(52.21 to<br>218.32)                             | 126.11<br>(52.15 to<br>215.45)                             | 131.61<br>(52.04 to<br>229.42)                             | 2.99<br>(1.52 to<br>4.41)                         | 3.53<br>(1.74 to<br>5.59)                         | 3.60<br>(1.78 to<br>5.68)                         | 3.44<br>(1.66 to<br>5.48)                         |
| Pulmonary aspiration and foreign body in airway | 158.03<br>(72.10 to<br>245.06)                             | 119.12<br>(45.94 to<br>206.92)                             | 118.39<br>(45.83 to<br>205.51)                             | 123.11<br>(45.51 to<br>220.16)                             | 2.80<br>(1.33 to<br>4.20)                         | 3.24<br>(1.51 to<br>5.22)                         | 3.31<br>(1.57 to<br>5.30)                         | 3.15<br>(1.40 to<br>5.11)                         |



|                                             |                                                      |                                                        |                                                        |                                                        |                                                   |                                                   |                                                   |                                                   |
|---------------------------------------------|------------------------------------------------------|--------------------------------------------------------|--------------------------------------------------------|--------------------------------------------------------|---------------------------------------------------|---------------------------------------------------|---------------------------------------------------|---------------------------------------------------|
|                                             | 7.60<br>(5.76 to<br>12.10)                           | 7.99<br>(4.75 to<br>13.25)                             | 7.72<br>(4.57 to<br>12.83)                             | 8.50<br>(5.12 to<br>14.30)                             | 0.19<br>(0.14 to<br>0.26)                         | 0.29<br>(0.18 to<br>0.44)                         | 0.29<br>(0.18 to<br>0.43)                         | 0.29<br>(0.18 to<br>0.44)                         |
| Foreign body in other body part             |                                                      |                                                        |                                                        |                                                        |                                                   |                                                   |                                                   |                                                   |
|                                             | 5.49<br>(4.03 to<br>7.20)                            | 7.10<br>(4.14 to<br>11.18)                             | 6.47<br>(3.71 to<br>10.32)                             | 8.33<br>(4.87 to<br>13.33)                             | 0.16<br>(0.12 to<br>0.21)                         | 0.27<br>(0.18 to<br>0.40)                         | 0.25<br>(0.16 to<br>0.38)                         | 0.30<br>(0.20 to<br>0.46)                         |
| Environmental heat and cold exposure        |                                                      |                                                        |                                                        |                                                        |                                                   |                                                   |                                                   |                                                   |
|                                             | 72.58<br>(56.78 to<br>92.90)                         | 73.43<br>(46.17 to<br>119.70)                          | 69.86<br>(43.61 to<br>113.43)                          | 80.43<br>(50.61 to<br>130.28)                          | 1.69<br>(1.33 to<br>2.14)                         | 2.28<br>(1.56 to<br>3.37)                         | 2.21<br>(1.48 to<br>3.26)                         | 2.41<br>(1.65 to<br>3.51)                         |
| Other unintentional injuries                |                                                      |                                                        |                                                        |                                                        |                                                   |                                                   |                                                   |                                                   |
| <b>Self-harm and interpersonal violence</b> | <b>729.08</b><br><b>(502.58 to</b><br><b>982.48)</b> | <b>920.81</b><br><b>(486.89 to</b><br><b>1,648.16)</b> | <b>900.71</b><br><b>(482.57 to</b><br><b>1,613.93)</b> | <b>989.57</b><br><b>(513.41 to</b><br><b>1,823.21)</b> | <b>15.97</b><br><b>(11.19 to</b><br><b>21.47)</b> | <b>24.49</b><br><b>(14.21 to</b><br><b>40.12)</b> | <b>24.31</b><br><b>(14.25 to</b><br><b>39.45)</b> | <b>25.64</b><br><b>(14.58 to</b><br><b>43.87)</b> |

| Maldives                                                                            |                                                |                                                 |                                                 |                                                 |                                                |                                                |                                                |                                                |
|-------------------------------------------------------------------------------------|------------------------------------------------|-------------------------------------------------|-------------------------------------------------|-------------------------------------------------|------------------------------------------------|------------------------------------------------|------------------------------------------------|------------------------------------------------|
| Cause                                                                               | YLLs (actual counts)                           |                                                 |                                                 |                                                 | Deaths (actual counts)                         |                                                |                                                |                                                |
|                                                                                     | 2016                                           | 2040 Forecast                                   | 2040 Better Scenario                            | 2040 Worse Scenario                             | 2016                                           | 2040 Forecast                                  | 2040 Better Scenario                           | 2040 Worse Scenario                            |
| Self-harm                                                                           | 533.45<br>(364.41 to<br>732.75)                | 747.09<br>(396.82 to<br>1,320.14)               | 727.23<br>(389.48 to<br>1,281.64)               | 811.74<br>(419.46 to<br>1,489.03)               | 12.08<br>(8.43 to<br>16.16)                    | 20.41<br>(12.20 to<br>33.35)                   | 20.21<br>(12.09 to<br>32.38)                   | 21.50<br>(12.46 to<br>36.49)                   |
| Self-harm by firearm                                                                | 21.16<br>(10.75 to<br>33.06)                   | 24.01<br>(9.34 to<br>49.69)                     | 23.11<br>(9.09 to<br>47.90)                     | 26.48<br>(9.76 to<br>55.39)                     | 0.47<br>(0.25 to<br>0.73)                      | 0.64<br>(0.28 to<br>1.21)                      | 0.62<br>(0.28 to<br>1.17)                      | 0.69<br>(0.29 to<br>1.32)                      |
| Self-harm by other specified means                                                  | 512.29<br>(350.31 to<br>704.13)                | 723.09<br>(383.97 to<br>1,282.52)               | 704.13<br>(376.10 to<br>1,243.04)               | 785.26<br>(406.83 to<br>1,436.32)               | 11.61<br>(8.14 to<br>15.47)                    | 19.77<br>(11.82 to<br>32.18)                   | 19.58<br>(11.77 to<br>31.32)                   | 20.81<br>(12.12 to<br>35.15)                   |
| Interpersonal violence                                                              | 195.63<br>(87.30 to<br>284.11)                 | 173.72<br>(64.77 to<br>317.59)                  | 173.48<br>(64.90 to<br>317.77)                  | 177.82<br>(65.08 to<br>322.16)                  | 3.89<br>(1.73 to<br>5.55)                      | 4.09<br>(1.58 to<br>7.15)                      | 4.10<br>(1.60 to<br>7.20)                      | 4.14<br>(1.57 to<br>7.21)                      |
| Physical violence by firearm                                                        | 22.39<br>(8.88 to<br>40.95)                    | 19.92<br>(6.67 to<br>41.12)                     | 19.87<br>(6.73 to<br>41.15)                     | 20.08<br>(6.63 to<br>40.89)                     | 0.45<br>(0.17 to<br>0.79)                      | 0.46<br>(0.16 to<br>0.91)                      | 0.46<br>(0.16 to<br>0.91)                      | 0.46<br>(0.16 to<br>0.89)                      |
| Physical violence by sharp object                                                   | 97.96<br>(37.19 to<br>151.90)                  | 90.58<br>(30.28 to<br>170.02)                   | 91.78<br>(30.96 to<br>172.56)                   | 89.36<br>(29.54 to<br>166.48)                   | 1.90<br>(0.73 to<br>2.90)                      | 2.00<br>(0.68 to<br>3.63)                      | 2.03<br>(0.69 to<br>3.69)                      | 1.95<br>(0.66 to<br>3.52)                      |
| Physical violence by other means                                                    | 75.27<br>(31.92 to<br>109.47)                  | 63.22<br>(22.81 to<br>116.45)                   | 61.83<br>(22.50 to<br>114.25)                   | 68.38<br>(24.10 to<br>127.27)                   | 1.54<br>(0.67 to<br>2.19)                      | 1.63<br>(0.64 to<br>2.77)                      | 1.61<br>(0.62 to<br>2.74)                      | 1.73<br>(0.67 to<br>3.06)                      |
| <b>Forces of nature, conflict and terrorism, and executions and police conflict</b> | <b>2.33</b><br><b>(1.88 to</b><br><b>3.00)</b> | <b>38.47</b><br><b>(0.00 to</b><br><b>0.00)</b> | <b>38.34</b><br><b>(0.00 to</b><br><b>0.00)</b> | <b>39.48</b><br><b>(0.00 to</b><br><b>0.00)</b> | <b>0.05</b><br><b>(0.04 to</b><br><b>0.06)</b> | <b>0.87</b><br><b>(0.00 to</b><br><b>0.00)</b> | <b>0.87</b><br><b>(0.00 to</b><br><b>0.00)</b> | <b>0.87</b><br><b>(0.00 to</b><br><b>0.00)</b> |
| Exposure to forces of nature                                                        | 0.00<br>(0.00 to<br>0.00)                      | 38.47<br>(0.00 to<br>0.00)                      | 38.34<br>(0.00 to<br>0.00)                      | 39.48<br>(0.00 to<br>0.00)                      | 0.00<br>(0.00 to<br>0.00)                      | 0.87<br>(0.00 to<br>0.00)                      | 0.87<br>(0.00 to<br>0.00)                      | 0.87<br>(0.00 to<br>0.00)                      |
| Conflict and terrorism                                                              | 0.00<br>(0.00 to<br>0.00)                      | 0.00<br>(0.00 to<br>0.00)                       | 0.00<br>(0.00 to<br>0.00)                       | 0.00<br>(0.00 to<br>0.00)                       | 0.00<br>(0.00 to<br>0.00)                      | 0.00<br>(0.00 to<br>0.00)                      | 0.00<br>(0.00 to<br>0.00)                      | 0.00<br>(0.00 to<br>0.00)                      |
| Executions and police conflict                                                      | 2.33<br>(1.88 to<br>3.00)                      | 0.00<br>(0.00 to<br>0.00)                       | 0.00<br>(0.00 to<br>0.00)                       | 0.00<br>(0.00 to<br>0.00)                       | 0.05<br>(0.04 to<br>0.06)                      | 0.00<br>(0.00 to<br>0.00)                      | 0.00<br>(0.00 to<br>0.00)                      | 0.00<br>(0.00 to<br>0.00)                      |

| Mauritius                                                         |                                          |                                          |                                          |                                          |                                      |                                       |                                      |                                       |
|-------------------------------------------------------------------|------------------------------------------|------------------------------------------|------------------------------------------|------------------------------------------|--------------------------------------|---------------------------------------|--------------------------------------|---------------------------------------|
| Cause                                                             | YLLs (actual counts)                     |                                          |                                          |                                          | Deaths (actual counts)               |                                       |                                      |                                       |
|                                                                   | 2016                                     | 2040 Forecast                            | 2040 Better Scenario                     | 2040 Worse Scenario                      | 2016                                 | 2040 Forecast                         | 2040 Better Scenario                 | 2040 Worse Scenario                   |
| All causes                                                        | 230,124.00<br>(204,094.62 to 258,820.18) | 228,739.88<br>(177,909.23 to 296,602.88) | 179,805.70<br>(139,656.74 to 239,124.51) | 317,711.95<br>(245,877.93 to 403,201.49) | 10,115.32<br>(9,041.98 to 11,293.91) | 14,304.04<br>(11,867.09 to 17,685.94) | 11,873.79<br>(9,781.44 to 14,892.93) | 18,320.34<br>(15,243.71 to 22,001.06) |
| Communicable, maternal, neonatal, and nutritional diseases        | 20,975.02<br>(18,617.57 to 23,673.82)    | 15,701.42<br>(12,632.63 to 20,106.72)    | 12,724.20<br>(10,431.25 to 16,027.92)    | 20,280.84<br>(16,040.11 to 26,464.83)    | 534.84<br>(481.63 to 587.79)         | 754.17<br>(554.68 to 995.34)          | 665.92<br>(492.79 to 876.77)         | 882.53<br>(637.83 to 1,164.58)        |
| HIV/AIDS and tuberculosis                                         | 3,754.86<br>(3,344.79 to 4,219.48)       | 3,156.06<br>(2,554.70 to 3,694.96)       | 2,894.47<br>(2,299.22 to 3,438.23)       | 3,546.46<br>(2,997.32 to 4,081.10)       | 88.71<br>(79.18 to 99.08)            | 77.08<br>(61.12 to 89.84)             | 69.97<br>(54.46 to 82.38)            | 87.76<br>(72.17 to 102.51)            |
| Tuberculosis                                                      | 365.41<br>(301.83 to 443.52)             | 150.58<br>(84.81 to 258.42)              | 74.81<br>(44.93 to 125.08)               | 290.92<br>(154.38 to 513.04)             | 13.24<br>(11.17 to 15.73)            | 7.38<br>(4.35 to 12.25)               | 3.94<br>(2.46 to 6.14)               | 13.20<br>(7.53 to 22.54)              |
| HIV/AIDS                                                          | 3,389.45<br>(2,964.90 to 3,850.12)       | 3,005.48<br>(2,421.29 to 3,549.14)       | 2,819.66<br>(2,230.10 to 3,359.61)       | 3,255.54<br>(2,733.78 to 3,770.06)       | 75.47<br>(65.79 to 85.76)            | 69.70<br>(54.36 to 82.31)             | 66.03<br>(50.76 to 79.01)            | 74.57<br>(60.93 to 86.75)             |
| Diarrhea, lower respiratory, and other common infectious diseases | 7,584.50<br>(6,661.25 to 8,608.52)       | 8,575.27<br>(6,095.75 to 11,992.40)      | 6,842.63<br>(4,979.26 to 9,616.87)       | 11,178.20<br>(7,680.88 to 16,178.20)     | 305.99<br>(266.15 to 346.72)         | 598.28<br>(403.83 to 834.29)          | 523.14<br>(359.62 to 730.49)         | 702.19<br>(472.65 to 980.31)          |
| Diarrheal diseases                                                | 815.01<br>(694.33 to 971.14)             | 1,100.85<br>(299.99 to 3,185.16)         | 1,276.95<br>(460.17 to 3,369.06)         | 812.36<br>(205.46 to 2,409.44)           | 28.61<br>(25.03 to 32.74)            | 76.98<br>(21.45 to 233.72)            | 98.51<br>(35.73 to 259.09)           | 51.21<br>(13.62 to 156.48)            |
| Intestinal infectious diseases                                    | 116.47<br>(54.91 to 218.64)              | 74.40<br>(33.20 to 142.81)               | 85.15<br>(39.50 to 159.15)               | 68.86<br>(30.70 to 134.04)               | 1.86<br>(0.88 to 3.42)               | 1.31<br>(0.61 to 2.45)                | 1.53<br>(0.73 to 2.84)               | 1.19<br>(0.54 to 2.28)                |
| Typhoid fever                                                     | 97.17<br>(44.10 to 181.30)               | 64.36<br>(28.03 to 126.93)               | 77.59<br>(35.38 to 146.38)               | 55.86<br>(22.96 to 112.07)               | 1.54<br>(0.71 to 2.86)               | 1.13<br>(0.52 to 2.15)                | 1.38<br>(0.65 to 2.61)               | 0.95<br>(0.42 to 1.85)                |
| Paratyphoid fever                                                 | 19.07<br>(7.73 to 41.36)                 | 9.93<br>(3.85 to 23.43)                  | 7.45<br>(2.84 to 16.92)                  | 12.86<br>(5.07 to 29.43)                 | 0.31<br>(0.13 to 0.66)               | 0.18<br>(0.07 to 0.41)                | 0.14<br>(0.05 to 0.30)               | 0.23<br>(0.09 to 0.51)                |
| Other intestinal infectious diseases                              | 0.23<br>(0.09 to 0.48)                   | 0.12<br>(0.04 to 0.26)                   | 0.10<br>(0.04 to 0.23)                   | 0.13<br>(0.05 to 0.29)                   | 0.01<br>(0.00 to 0.01)               | 0.01<br>(0.00 to 0.01)                | 0.01<br>(0.00 to 0.01)               | 0.01<br>(0.00 to 0.01)                |
| Lower respiratory infections                                      | 5,739.42<br>(4,983.53 to 6,534.65)       | 6,780.05<br>(4,871.99 to 9,444.11)       | 4,968.89<br>(3,657.57 to 6,636.09)       | 9,495.88<br>(6,507.70 to 13,894.98)      | 256.73<br>(221.45 to 294.19)         | 503.34<br>(344.03 to 676.10)          | 408.71<br>(288.68 to 540.96)         | 650.15<br>(417.01 to 882.35)          |
| Upper respiratory infections                                      | 5.17<br>(2.74 to 8.75)                   | 3.36<br>(1.46 to 6.83)                   | 2.05<br>(0.91 to 4.16)                   | 5.12<br>(2.29 to 10.21)                  | 0.16<br>(0.08 to 0.27)               | 0.15<br>(0.06 to 0.33)                | 0.10<br>(0.02 to 0.21)               | 0.22<br>(0.09 to 0.47)                |
| Otitis media                                                      | 0.09<br>(0.06 to 0.13)                   | 0.03<br>(0.02 to 0.05)                   | 0.03<br>(0.02 to 0.05)                   | 0.03<br>(0.02 to 0.04)                   | 0.00<br>(0.00 to 0.01)               | 0.00<br>(0.00 to 0.00)                | 0.00<br>(0.00 to 0.01)               | 0.00<br>(0.00 to 0.00)                |
| Meningitis                                                        | 495.93<br>(424.46 to 595.38)             | 211.46<br>(157.00 to 287.86)             | 151.71<br>(112.13 to 205.21)             | 298.16<br>(211.68 to 411.02)             | 9.97<br>(8.71 to 11.58)              | 6.14<br>(4.97 to 7.55)                | 4.57<br>(3.75 to 5.64)               | 7.99<br>(6.49 to 9.89)                |
| Pneumococcal meningitis                                           | 7.42<br>(5.71 to 9.61)                   | 2.84<br>(2.01 to 4.09)                   | 2.80<br>(1.99 to 3.99)                   | 3.06<br>(2.05 to 4.54)                   | 0.16<br>(0.13 to 0.20)               | 0.11<br>(0.08 to 0.14)                | 0.11<br>(0.08 to 0.14)               | 0.11<br>(0.08 to 0.14)                |
| H influenzae type B meningitis                                    | 35.53<br>(28.62 to 44.10)                | 29.62<br>(15.04 to 55.96)                | 26.88<br>(14.37 to 46.90)                | 48.67<br>(17.90 to 105.75)               | 0.68<br>(0.57 to 0.80)               | 0.62<br>(0.43 to 0.94)                | 0.60<br>(0.43 to 0.86)               | 0.82<br>(0.44 to 1.50)                |
| Meningococcal meningitis                                          | 129.39<br>(106.92 to 158.39)             | 51.90<br>(38.61 to 69.98)                | 36.36<br>(27.46 to 48.88)                | 69.64<br>(51.73 to 93.26)                | 2.70<br>(2.30 to 3.17)               | 1.69<br>(1.35 to 2.11)                | 1.24<br>(1.00 to 1.58)               | 2.14<br>(1.71 to 2.64)                |
| Other meningitis                                                  | 323.58<br>(275.38 to 385.13)             | 127.10<br>(93.38 to 169.71)              | 85.67<br>(64.00 to 115.35)               | 176.79<br>(129.45 to 237.89)             | 6.42<br>(5.57 to 7.46)               | 3.73<br>(2.97 to 4.57)                | 2.62<br>(2.14 to 3.23)               | 4.93<br>(4.02 to 6.01)                |
| Encephalitis                                                      | 399.46<br>(267.49 to 500.09)             | 295.21<br>(174.85 to 407.15)             | 277.19<br>(164.77 to 382.77)             | 312.18<br>(182.46 to 436.01)             | 8.40<br>(5.29 to 10.81)              | 8.51<br>(4.84 to 11.31)               | 8.31<br>(4.71 to 11.15)              | 8.58<br>(4.84 to 11.39)               |

|                |                            |                               |                              |                                 |                           |                           |                           |                            |
|----------------|----------------------------|-------------------------------|------------------------------|---------------------------------|---------------------------|---------------------------|---------------------------|----------------------------|
| Diphtheria     | 0.72<br>(0.46 to<br>1.07)  | 0.16<br>(0.09 to<br>0.28)     | 0.14<br>(0.08 to<br>0.25)    | 0.35<br>(0.12 to<br>0.91)       | 0.01<br>(0.01 to<br>0.02) | 0.00<br>(0.00 to<br>0.01) | 0.00<br>(0.00 to<br>0.01) | 0.01<br>(0.00 to<br>0.01)  |
| Whooping cough | 3.59<br>(1.39 to<br>11.39) | 1.74<br>(0.45 to<br>5.33)     | 1.05<br>(0.34 to<br>3.15)    | 9.79<br>(0.83 to<br>34.50)      | 0.06<br>(0.02 to<br>0.18) | 0.03<br>(0.01 to<br>0.08) | 0.02<br>(0.01 to<br>0.06) | 0.12<br>(0.01 to<br>0.41)  |
| Tetanus        | 1.24<br>(0.76 to<br>1.60)  | 0.16<br>(0.09 to<br>0.25)     | 0.15<br>(0.08 to<br>0.22)    | 0.35<br>(0.16 to<br>0.83)       | 0.03<br>(0.02 to<br>0.04) | 0.01<br>(0.00 to<br>0.01) | 0.01<br>(0.00 to<br>0.01) | 0.01<br>(0.00 to<br>0.01)  |
| Measles        | 2.12<br>(1.49 to<br>3.15)  | 105.56<br>(0.59 to<br>634.95) | 77.52<br>(0.54 to<br>415.01) | 172.33<br>(0.73 to<br>1,049.65) | 0.03<br>(0.02 to<br>0.05) | 1.70<br>(0.01 to<br>8.76) | 1.29<br>(0.01 to<br>6.22) | 2.60<br>(0.01 to<br>14.08) |

| Mauritius                                             |                                            |                                           |                                           |                                            |                                      |                                      |                                      |                                      |
|-------------------------------------------------------|--------------------------------------------|-------------------------------------------|-------------------------------------------|--------------------------------------------|--------------------------------------|--------------------------------------|--------------------------------------|--------------------------------------|
| Cause                                                 | YLLs (actual counts)                       |                                           |                                           |                                            | Deaths (actual counts)               |                                      |                                      |                                      |
|                                                       | 2016                                       | 2040 Forecast                             | 2040 Better Scenario                      | 2040 Worse Scenario                        | 2016                                 | 2040 Forecast                        | 2040 Better Scenario                 | 2040 Worse Scenario                  |
| Varicella and herpes zoster                           | 5.31<br>(1.91 to 7.61)                     | 2.28<br>(0.81 to 3.85)                    | 1.80<br>(0.67 to 3.08)                    | 2.82<br>(0.99 to 4.93)                     | 0.13<br>(0.05 to 0.17)               | 0.10<br>(0.04 to 0.17)               | 0.09<br>(0.04 to 0.15)               | 0.11<br>(0.05 to 0.19)               |
| <b>Neglected tropical diseases and malaria</b>        | <b>79.33</b><br><b>(40.21 to 135.68)</b>   | <b>49.20</b><br><b>(25.62 to 84.35)</b>   | <b>47.27</b><br><b>(24.28 to 80.12)</b>   | <b>50.41</b><br><b>(25.92 to 85.62)</b>    | <b>2.77</b><br><b>(1.33 to 4.84)</b> | <b>2.35</b><br><b>(1.07 to 4.06)</b> | <b>2.35</b><br><b>(1.06 to 4.16)</b> | <b>2.29</b><br><b>(1.04 to 4.05)</b> |
| Malaria                                               | 6.24<br>(1.95 to 8.82)                     | 2.85<br>(0.83 to 4.15)                    | 2.74<br>(0.80 to 4.01)                    | 2.93<br>(0.85 to 4.24)                     | 0.16<br>(0.05 to 0.23)               | 0.09<br>(0.03 to 0.15)               | 0.09<br>(0.03 to 0.13)               | 0.09<br>(0.03 to 0.13)               |
| Chagas disease                                        | 0.00<br>(0.00 to 0.00)                     | 0.00<br>(0.00 to 0.00)                    | 0.00<br>(0.00 to 0.00)                    | 0.00<br>(0.00 to 0.00)                     | 0.00<br>(0.00 to 0.00)               | 0.00<br>(0.00 to 0.00)               | 0.00<br>(0.00 to 0.00)               | 0.00<br>(0.00 to 0.00)               |
| Leishmaniasis                                         | 0.00<br>(0.00 to 0.00)                     | 0.00<br>(0.00 to 0.00)                    | 0.00<br>(0.00 to 0.00)                    | 0.00<br>(0.00 to 0.00)                     | 0.00<br>(0.00 to 0.00)               | 0.00<br>(0.00 to 0.00)               | 0.00<br>(0.00 to 0.00)               | 0.00<br>(0.00 to 0.00)               |
| African trypanosomiasis                               | 0.00<br>(0.00 to 0.00)                     | 0.00<br>(0.00 to 0.00)                    | 0.00<br>(0.00 to 0.00)                    | 0.00<br>(0.00 to 0.00)                     | 0.00<br>(0.00 to 0.00)               | 0.00<br>(0.00 to 0.00)               | 0.00<br>(0.00 to 0.00)               | 0.00<br>(0.00 to 0.00)               |
| Schistosomiasis                                       | 64.73<br>(25.48 to 121.27)                 | 39.67<br>(16.13 to 74.44)                 | 37.77<br>(15.20 to 70.02)                 | 40.78<br>(16.52 to 77.37)                  | 2.41<br>(0.98 to 4.45)               | 1.98<br>(0.75 to 3.72)               | 1.97<br>(0.74 to 3.77)               | 1.95<br>(0.74 to 3.66)               |
| Cysticercosis                                         | 0.00<br>(0.00 to 0.00)                     | 0.00<br>(0.00 to 0.00)                    | 0.00<br>(0.00 to 0.00)                    | 0.00<br>(0.00 to 0.00)                     | 0.00<br>(0.00 to 0.00)               | 0.00<br>(0.00 to 0.00)               | 0.00<br>(0.00 to 0.00)               | 0.00<br>(0.00 to 0.00)               |
| Cystic echinococcosis                                 | 0.31<br>(0.24 to 0.38)                     | 0.14<br>(0.18)                            | 0.11<br>(0.08 to 0.13)                    | 0.17<br>(0.13 to 0.22)                     | 0.01<br>(0.01 to 0.01)               | 0.01<br>(0.01 to 0.01)               | 0.01<br>(0.00 to 0.01)               | 0.01<br>(0.01 to 0.01)               |
| Dengue                                                | 0.15<br>(0.07 to 0.24)                     | 0.87<br>(0.41 to 1.54)                    | 0.92<br>(0.45 to 1.63)                    | 0.81<br>(0.37 to 1.42)                     | 0.01<br>(0.00 to 0.02)               | 0.08<br>(0.03 to 0.17)               | 0.09<br>(0.04 to 0.18)               | 0.07<br>(0.03 to 0.15)               |
| Yellow fever                                          | 0.00<br>(0.00 to 0.00)                     | 0.00<br>(0.00 to 0.00)                    | 0.00<br>(0.00 to 0.00)                    | 0.00<br>(0.00 to 0.00)                     | 0.00<br>(0.00 to 0.00)               | 0.00<br>(0.00 to 0.00)               | 0.00<br>(0.00 to 0.00)               | 0.00<br>(0.00 to 0.00)               |
| Rabies                                                | 0.04<br>(0.03 to 0.05)                     | 0.02<br>(0.02 to 0.03)                    | 0.02<br>(0.01 to 0.02)                    | 0.02<br>(0.02 to 0.03)                     | 0.00<br>(0.00 to 0.00)               | 0.00<br>(0.00 to 0.00)               | 0.00<br>(0.00 to 0.00)               | 0.00<br>(0.00 to 0.00)               |
| Intestinal nematode infections                        | 0.66<br>(0.24 to 1.30)                     | 0.68<br>(0.23 to 1.48)                    | 0.66<br>(0.23 to 1.42)                    | 0.70<br>(0.23 to 1.56)                     | 0.01<br>(0.01 to 0.02)               | 0.02<br>(0.01 to 0.03)               | 0.02<br>(0.01 to 0.03)               | 0.02<br>(0.01 to 0.03)               |
| Other neglected tropical diseases                     | 7.20<br>(6.20 to 9.45)                     | 4.97<br>(3.90 to 6.87)                    | 5.06<br>(3.94 to 7.16)                    | 5.00<br>(3.90 to 6.92)                     | 0.16<br>(0.13 to 0.23)               | 0.16<br>(0.12 to 0.26)               | 0.18<br>(0.13 to 0.29)               | 0.15<br>(0.11 to 0.23)               |
| <b>Maternal disorders</b>                             | <b>384.92</b><br><b>(296.54 to 497.83)</b> | <b>140.05</b><br><b>(94.90 to 201.93)</b> | <b>112.04</b><br><b>(74.06 to 165.00)</b> | <b>172.96</b><br><b>(114.61 to 255.04)</b> | <b>7.21</b><br><b>(5.55 to 9.35)</b> | <b>2.73</b><br><b>(1.85 to 3.92)</b> | <b>2.19</b><br><b>(1.46 to 3.20)</b> | <b>3.38</b><br><b>(2.20 to 4.91)</b> |
| Maternal hemorrhage                                   | 67.93<br>(45.94 to 94.40)                  | 23.37<br>(13.95 to 36.76)                 | 18.96<br>(11.19 to 30.01)                 | 28.49<br>(16.68 to 45.60)                  | 1.26<br>(0.85 to 1.74)               | 0.45<br>(0.27 to 0.72)               | 0.37<br>(0.22 to 0.58)               | 0.55<br>(0.33 to 0.89)               |
| Maternal sepsis and other maternal infections         | 65.81<br>(45.28 to 93.26)                  | 20.58<br>(11.92 to 32.60)                 | 16.50<br>(9.35 to 26.54)                  | 25.37<br>(14.47 to 41.15)                  | 1.26<br>(0.88 to 1.79)               | 0.41<br>(0.24 to 0.65)               | 0.33<br>(0.19 to 0.54)               | 0.51<br>(0.29 to 0.83)               |
| Maternal hypertensive disorders                       | 67.32<br>(46.87 to 93.09)                  | 22.98<br>(13.05 to 36.63)                 | 18.28<br>(10.34 to 29.85)                 | 28.54<br>(16.06 to 46.60)                  | 1.25<br>(0.87 to 1.73)               | 0.45<br>(0.25 to 0.71)               | 0.35<br>(0.20 to 0.58)               | 0.55<br>(0.31 to 0.89)               |
| Maternal obstructed labor and uterine rupture         | 9.04<br>(4.80 to 14.73)                    | 3.24<br>(1.52 to 6.16)                    | 2.49<br>(1.15 to 4.78)                    | 4.13<br>(1.94 to 7.89)                     | 0.17<br>(0.09 to 0.28)               | 0.06<br>(0.03 to 0.12)               | 0.05<br>(0.02 to 0.09)               | 0.08<br>(0.04 to 0.16)               |
| Maternal abortion, miscarriage, and ectopic pregnancy | 70.96<br>(50.03 to 100.34)                 | 29.93<br>(17.05 to 49.44)                 | 23.71<br>(13.61 to 39.87)                 | 37.29<br>(21.11 to 63.54)                  | 1.35<br>(0.95 to 1.90)               | 0.60<br>(0.34 to 1.00)               | 0.48<br>(0.27 to 0.79)               | 0.75<br>(0.42 to 1.27)               |

|                                        |                              |                              |                              |                              |                           |                           |                           |                           |
|----------------------------------------|------------------------------|------------------------------|------------------------------|------------------------------|---------------------------|---------------------------|---------------------------|---------------------------|
|                                        | 70.78<br>(48.69 to<br>98.76) | 25.68<br>(15.28 to<br>41.96) | 20.25<br>(11.94 to<br>33.22) | 32.11<br>(18.58 to<br>53.23) | 1.29<br>(0.88 to<br>1.80) | 0.48<br>(0.29 to<br>0.78) | 0.38<br>(0.22 to<br>0.62) | 0.60<br>(0.35 to<br>0.98) |
| Indirect maternal deaths               |                              |                              |                              |                              |                           |                           |                           |                           |
|                                        | 2.26<br>(0.97 to<br>4.24)    | 0.75<br>(0.29 to<br>1.52)    | 0.59<br>(0.23 to<br>1.19)    | 0.93<br>(0.38 to<br>1.89)    | 0.04<br>(0.02 to<br>0.08) | 0.01<br>(0.01 to<br>0.03) | 0.01<br>(0.00 to<br>0.02) | 0.02<br>(0.01 to<br>0.04) |
| Late maternal deaths                   |                              |                              |                              |                              |                           |                           |                           |                           |
|                                        | 0.21<br>(0.10 to<br>0.40)    | 0.30<br>(0.12 to<br>0.62)    | 0.25<br>(0.10 to<br>0.55)    | 0.34<br>(0.14 to<br>0.74)    | 0.00<br>(0.00 to<br>0.01) | 0.01<br>(0.00 to<br>0.01) | 0.01<br>(0.00 to<br>0.01) | 0.01<br>(0.00 to<br>0.01) |
| Maternal deaths aggravated by HIV/AIDS |                              |                              |                              |                              |                           |                           |                           |                           |
|                                        | 30.61<br>(19.05 to<br>44.80) | 13.23<br>(7.59 to<br>22.15)  | 11.02<br>(6.15 to<br>18.78)  | 15.77<br>(8.78 to<br>26.23)  | 0.58<br>(0.36 to<br>0.85) | 0.26<br>(0.15 to<br>0.44) | 0.22<br>(0.12 to<br>0.36) | 0.31<br>(0.17 to<br>0.52) |
| Other maternal disorders               |                              |                              |                              |                              |                           |                           |                           |                           |

| Mauritius                                                               |                                            |                                           |                                           |                                           |                                   |                                  |                                  |                                  |
|-------------------------------------------------------------------------|--------------------------------------------|-------------------------------------------|-------------------------------------------|-------------------------------------------|-----------------------------------|----------------------------------|----------------------------------|----------------------------------|
| Cause                                                                   | YLLs (actual counts)                       |                                           |                                           |                                           | Deaths (actual counts)            |                                  |                                  |                                  |
|                                                                         | 2016                                       | 2040 Forecast                             | 2040 Better Scenario                      | 2040 Worse Scenario                       | 2016                              | 2040 Forecast                    | 2040 Better Scenario             | 2040 Worse Scenario              |
| <b>Neonatal disorders</b>                                               | <b>8,195.49</b><br>(6,478.49 to 10,148.94) | <b>3,182.13</b><br>(2,098.05 to 4,916.99) | <b>2,210.89</b><br>(1,450.24 to 3,480.80) | <b>4,741.90</b><br>(3,130.33 to 7,403.35) | <b>94.69</b><br>(74.86 to 117.26) | <b>36.78</b><br>(24.25 to 56.82) | <b>25.56</b><br>(16.76 to 40.23) | <b>54.80</b><br>(36.17 to 85.60) |
| Neonatal preterm birth                                                  | 4,471.74<br>(3,513.20 to 5,645.02)         | 1,518.02<br>(1,023.93 to 2,300.11)        | 937.96<br>(612.31 to 1,413.47)            | 2,522.23<br>(1,674.04 to 3,790.61)        | 51.66<br>(40.58 to 65.21)         | 17.54<br>(11.83 to 26.58)        | 10.84<br>(7.08 to 16.33)         | 29.14<br>(19.34 to 43.80)        |
| Neonatal encephalopathy due to birth asphyxia and trauma                | 1,410.83<br>(1,056.97 to 1,874.16)         | 514.01<br>(302.06 to 816.57)              | 348.11<br>(206.73 to 561.75)              | 754.11<br>(436.27 to 1,239.47)            | 16.30<br>(12.21 to 21.65)         | 5.94<br>(3.49 to 9.44)           | 4.02<br>(2.39 to 6.49)           | 8.72<br>(5.05 to 14.35)          |
| Neonatal sepsis and other neonatal infections                           | 1,022.70<br>(675.99 to 1,490.76)           | 629.85<br>(316.15 to 1,164.37)            | 468.07<br>(239.78 to 852.34)              | 851.50<br>(426.23 to 1,570.12)            | 11.82<br>(7.81 to 17.23)          | 7.28<br>(3.66 to 13.45)          | 5.41<br>(2.77 to 9.85)           | 9.84<br>(4.93 to 18.15)          |
| Hemolytic disease and other neonatal jaundice                           | 119.13<br>(73.39 to 188.64)                | 31.92<br>(14.21 to 71.72)                 | 23.14<br>(10.36 to 52.02)                 | 44.14<br>(19.40 to 101.88)                | 1.38<br>(0.85 to 2.18)            | 0.37<br>(0.16 to 0.83)           | 0.27<br>(0.12 to 0.60)           | 0.51<br>(0.22 to 1.18)           |
| Other neonatal disorders                                                | 1,171.09<br>(845.69 to 1,552.39)           | 488.33<br>(278.20 to 820.69)              | 433.61<br>(252.84 to 735.79)              | 569.92<br>(325.55 to 980.58)              | 13.54<br>(9.78 to 17.94)          | 5.65<br>(3.22 to 9.49)           | 5.01<br>(2.92 to 8.51)           | 6.59<br>(3.77 to 11.34)          |
| <b>Nutritional deficiencies</b>                                         | <b>390.21</b><br>(335.90 to 447.37)        | <b>313.85</b><br>(250.76 to 380.27)       | <b>362.60</b><br>(291.61 to 436.53)       | <b>271.85</b><br>(215.95 to 329.13)       | <b>20.61</b><br>(17.74 to 23.73)  | <b>26.88</b><br>(18.95 to 34.74) | <b>33.03</b><br>(23.84 to 42.17) | <b>21.66</b><br>(14.68 to 28.34) |
| Protein-energy malnutrition                                             | 357.92<br>(303.60 to 412.87)               | 283.60<br>(218.09 to 351.06)              | 333.28<br>(259.09 to 406.74)              | 241.00<br>(183.77 to 298.11)              | 19.60<br>(16.71 to 22.64)         | 25.03<br>(17.07 to 32.93)        | 31.12<br>(22.04 to 40.14)        | 19.91<br>(13.20 to 26.67)        |
| Iodine deficiency                                                       | 6.57<br>(0.37 to 19.27)                    | 13.38<br>(0.40 to 46.14)                  | 13.72<br>(0.32 to 50.67)                  | 12.90<br>(0.45 to 40.60)                  | 0.25<br>(0.01 to 0.87)            | 0.98<br>(0.01 to 4.32)           | 1.07<br>(0.01 to 5.18)           | 0.89<br>(0.02 to 3.63)           |
| Dietary iron deficiency                                                 | 7.12<br>(3.95 to 12.81)                    | 4.77<br>(2.74 to 8.41)                    | 4.95<br>(2.83 to 9.05)                    | 4.66<br>(2.71 to 7.97)                    | 0.15<br>(0.08 to 0.31)            | 0.13<br>(0.07 to 0.27)           | 0.14<br>(0.07 to 0.29)           | 0.12<br>(0.07 to 0.24)           |
| Other nutritional deficiencies                                          | 18.60<br>(11.50 to 34.50)                  | 12.09<br>(6.86 to 24.73)                  | 10.65<br>(5.87 to 22.35)                  | 13.28<br>(7.74 to 25.93)                  | 0.61<br>(0.34 to 1.42)            | 0.75<br>(0.36 to 1.81)           | 0.71<br>(0.34 to 1.72)           | 0.75<br>(0.37 to 1.80)           |
| <b>Other communicable, maternal, neonatal, and nutritional diseases</b> | <b>585.70</b><br>(483.50 to 691.29)        | <b>284.86</b><br>(221.08 to 354.95)       | <b>254.28</b><br>(196.06 to 321.65)       | <b>319.06</b><br>(245.52 to 406.94)       | <b>14.86</b><br>(12.46 to 17.36)  | <b>10.07</b><br>(8.09 to 12.00)  | <b>9.68</b><br>(7.68 to 11.52)   | <b>10.45</b><br>(8.31 to 12.62)  |
| Sexually transmitted infections excluding HIV                           | 54.90<br>(26.26 to 103.29)                 | 17.30<br>(9.36 to 31.50)                  | 14.22<br>(8.15 to 25.60)                  | 21.34<br>(10.54 to 40.12)                 | 0.96<br>(0.61 to 1.54)            | 0.45<br>(0.32 to 0.66)           | 0.41<br>(0.30 to 0.58)           | 0.50<br>(0.34 to 0.74)           |
| Syphilis                                                                | 39.44<br>(10.75 to 85.57)                  | 10.19<br>(2.77 to 24.02)                  | 7.52<br>(2.11 to 18.40)                   | 13.84<br>(3.59 to 31.98)                  | 0.53<br>(0.20 to 1.07)            | 0.17<br>(0.08 to 0.34)           | 0.14<br>(0.07 to 0.26)           | 0.22<br>(0.10 to 0.44)           |
| Chlamydial infection                                                    | 3.10<br>(2.37 to 3.98)                     | 1.42<br>(1.04 to 1.88)                    | 1.34<br>(0.97 to 1.81)                    | 1.49<br>(1.10 to 1.97)                    | 0.09<br>(0.07 to 0.11)            | 0.06<br>(0.04 to 0.07)           | 0.06<br>(0.04 to 0.08)           | 0.06<br>(0.04 to 0.07)           |
| Gonococcal infection                                                    | 8.07<br>(6.17 to 10.28)                    | 3.81<br>(2.76 to 5.05)                    | 3.59<br>(2.59 to 4.83)                    | 4.00<br>(2.89 to 5.29)                    | 0.23<br>(0.18 to 0.29)            | 0.16<br>(0.12 to 0.21)           | 0.16<br>(0.12 to 0.21)           | 0.16<br>(0.12 to 0.21)           |
| Other sexually transmitted infections                                   | 4.30<br>(3.28 to 5.52)                     | 1.89<br>(1.36 to 2.61)                    | 1.76<br>(1.25 to 2.46)                    | 2.01<br>(1.45 to 2.75)                    | 0.11<br>(0.08 to 0.14)            | 0.06<br>(0.05 to 0.08)           | 0.06<br>(0.05 to 0.08)           | 0.06<br>(0.05 to 0.08)           |
| Acute hepatitis                                                         | 248.79<br>(202.23 to 300.60)               | 89.77<br>(63.45 to 119.89)                | 66.60<br>(47.18 to 90.26)                 | 115.26<br>(82.88 to 151.00)               | 6.37<br>(5.24 to 7.60)            | 2.83<br>(2.13 to 3.61)           | 2.15<br>(1.64 to 2.77)           | 3.51<br>(2.72 to 4.47)           |
| Acute hepatitis A                                                       | 8.75<br>(5.75 to 12.36)                    | 2.02<br>(1.20 to 3.26)                    | 1.61<br>(0.96 to 2.55)                    | 2.49<br>(1.45 to 4.03)                    | 0.16<br>(0.11 to 0.22)            | 0.05<br>(0.03 to 0.08)           | 0.04<br>(0.03 to 0.07)           | 0.06<br>(0.04 to 0.09)           |
| Acute hepatitis B                                                       | 205.43<br>(163.99 to 250.14)               | 75.36<br>(51.69 to 103.14)                | 55.62<br>(38.41 to 77.17)                 | 97.07<br>(68.80 to 130.32)                | 5.43<br>(4.44 to 6.56)            | 2.35<br>(1.71 to 3.09)           | 1.77<br>(1.30 to 2.36)           | 2.95<br>(2.22 to 3.86)           |

|                                       |                                                                  |                                                                  |                                                                  |                                                                  |                                                             |                                                               |                                                              |                                                               |
|---------------------------------------|------------------------------------------------------------------|------------------------------------------------------------------|------------------------------------------------------------------|------------------------------------------------------------------|-------------------------------------------------------------|---------------------------------------------------------------|--------------------------------------------------------------|---------------------------------------------------------------|
|                                       | 5.70<br>(4.11 to<br>7.87)                                        | 2.32<br>(1.54 to<br>3.44)                                        | 1.74<br>(1.13 to<br>2.61)                                        | 2.92<br>(1.96 to<br>4.31)                                        | 0.16<br>(0.11 to<br>0.22)                                   | 0.08<br>(0.05 to<br>0.11)                                     | 0.06<br>(0.04 to<br>0.09)                                    | 0.10<br>(0.07 to<br>0.14)                                     |
| Acute hepatitis C                     |                                                                  |                                                                  |                                                                  |                                                                  |                                                             |                                                               |                                                              |                                                               |
|                                       | 28.91<br>(20.92 to<br>38.46)                                     | 10.07<br>(6.08 to<br>16.73)                                      | 7.63<br>(4.60 to<br>12.77)                                       | 12.78<br>(7.66 to<br>21.57)                                      | 0.62<br>(0.44 to<br>0.84)                                   | 0.35<br>(0.21 to<br>0.52)                                     | 0.28<br>(0.17 to<br>0.42)                                    | 0.41<br>(0.25 to<br>0.61)                                     |
| Acute hepatitis E                     |                                                                  |                                                                  |                                                                  |                                                                  |                                                             |                                                               |                                                              |                                                               |
|                                       | 282.01<br>(215.63 to<br>343.25)                                  | 177.79<br>(129.94 to<br>227.40)                                  | 173.47<br>(127.98 to<br>220.48)                                  | 182.46<br>(131.21 to<br>235.79)                                  | 7.53<br>(5.93 to<br>8.97)                                   | 6.79<br>(5.10 to<br>8.28)                                     | 7.12<br>(5.36 to<br>8.67)                                    | 6.44<br>(4.77 to<br>7.92)                                     |
| Other unspecified infectious diseases |                                                                  |                                                                  |                                                                  |                                                                  |                                                             |                                                               |                                                              |                                                               |
| <b>Non-communicable diseases</b>      | <b>188,031.64</b><br><b>(166,514.59 to</b><br><b>212,591.43)</b> | <b>200,619.77</b><br><b>(152,047.42 to</b><br><b>268,049.96)</b> | <b>157,024.33</b><br><b>(119,141.00 to</b><br><b>215,519.25)</b> | <b>279,183.79</b><br><b>(210,543.21 to</b><br><b>364,163.82)</b> | <b>9,069.90</b><br><b>(8,099.10 to</b><br><b>10,148.19)</b> | <b>13,147.46</b><br><b>(10,656.30 to</b><br><b>16,581.71)</b> | <b>10,866.35</b><br><b>(8,780.52 to</b><br><b>13,962.07)</b> | <b>16,890.38</b><br><b>(13,818.07 to</b><br><b>20,692.27)</b> |



| Mauritius                            |                                       |                                       |                                       |                                       |                                    |                                    |                                    |                                    |
|--------------------------------------|---------------------------------------|---------------------------------------|---------------------------------------|---------------------------------------|------------------------------------|------------------------------------|------------------------------------|------------------------------------|
| Cause                                | YLLs (actual counts)                  |                                       |                                       |                                       | Deaths (actual counts)             |                                    |                                    |                                    |
|                                      | 2016                                  | 2040 Forecast                         | 2040 Better Scenario                  | 2040 Worse Scenario                   | 2016                               | 2040 Forecast                      | 2040 Better Scenario               | 2040 Worse Scenario                |
| Neoplasms                            | 29,867.50<br>(26,104.88 to 34,080.20) | 34,813.35<br>(27,393.18 to 43,820.72) | 29,558.83<br>(23,565.27 to 36,544.14) | 41,327.39<br>(32,012.78 to 52,163.14) | 1,248.33<br>(1,101.81 to 1,413.64) | 1,923.32<br>(1,527.78 to 2,382.95) | 1,694.39<br>(1,364.69 to 2,046.95) | 2,173.15<br>(1,694.06 to 2,732.49) |
| Lip and oral cavity cancer           | 940.19<br>(787.70 to 1,107.46)        | 887.30<br>(529.23 to 1,418.29)        | 657.95<br>(421.27 to 1,001.66)        | 1,404.18<br>(767.22 to 2,349.73)      | 38.52<br>(32.85 to 44.85)          | 44.82<br>(28.22 to 67.80)          | 34.70<br>(23.41 to 51.32)          | 66.57<br>(39.05 to 107.08)         |
| Nasopharynx cancer                   | 330.67<br>(276.84 to 392.11)          | 331.39<br>(202.61 to 531.65)          | 219.92<br>(139.60 to 358.22)          | 582.54<br>(330.95 to 980.19)          | 12.38<br>(10.45 to 14.56)          | 15.20<br>(9.59 to 23.81)           | 10.39<br>(6.92 to 15.64)           | 25.44<br>(14.80 to 41.05)          |
| Other pharynx cancer                 | 285.00<br>(240.70 to 337.11)          | 253.53<br>(144.91 to 361.24)          | 220.57<br>(141.66 to 336.69)          | 276.13<br>(162.94 to 445.40)          | 10.89<br>(9.31 to 12.65)           | 11.23<br>(7.16 to 16.69)           | 11.04<br>(7.29 to 16.05)           | 12.68<br>(7.72 to 19.95)           |
| Esophageal cancer                    | 842.03<br>(716.86 to 994.01)          | 844.33<br>(537.49 to 1,304.94)        | 713.35<br>(466.25 to 1,068.66)        | 1,175.21<br>(708.74 to 1,916.64)      | 37.47<br>(32.18 to 43.44)          | 46.30<br>(30.55 to 68.76)          | 40.45<br>(27.73 to 58.90)          | 61.17<br>(37.65 to 96.23)          |
| Stomach cancer                       | 2,191.77<br>(1,910.62 to 2,544.35)    | 1,899.19<br>(1,510.29 to 2,363.74)    | 1,540.35<br>(1,243.06 to 1,888.33)    | 2,268.54<br>(1,788.01 to 2,883.83)    | 101.82<br>(89.28 to 116.55)        | 113.81<br>(90.25 to 139.44)        | 95.45<br>(77.15 to 115.89)         | 130.29<br>(102.67 to 162.93)       |
| Colon and rectum cancer              | 3,167.40<br>(2,695.88 to 3,676.12)    | 4,084.90<br>(2,664.81 to 6,268.49)    | 3,348.63<br>(2,266.65 to 4,990.07)    | 4,859.63<br>(3,166.02 to 7,483.48)    | 147.20<br>(127.22 to 169.54)       | 251.56<br>(167.81 to 376.87)       | 214.38<br>(146.94 to 318.16)       | 284.27<br>(187.25 to 430.89)       |
| Liver cancer                         | 1,232.56<br>(1,053.30 to 1,436.95)    | 2,085.36<br>(1,493.18 to 2,915.23)    | 1,942.21<br>(1,461.03 to 2,581.18)    | 2,134.45<br>(1,483.76 to 3,067.08)    | 56.04<br>(48.14 to 64.51)          | 121.50<br>(87.74 to 166.69)        | 117.97<br>(89.32 to 154.30)        | 118.52<br>(83.00 to 169.12)        |
| Liver cancer due to hepatitis B      | 520.04<br>(403.37 to 652.59)          | 804.92<br>(534.13 to 1,197.49)        | 756.56<br>(525.58 to 1,099.01)        | 813.33<br>(532.23 to 1,232.15)        | 21.84<br>(16.40 to 27.55)          | 43.50<br>(28.63 to 63.45)          | 42.58<br>(29.10 to 60.26)          | 42.00<br>(27.02 to 62.31)          |
| Liver cancer due to hepatitis C      | 278.54<br>(185.27 to 386.09)          | 528.19<br>(332.79 to 795.19)          | 508.65<br>(330.27 to 743.23)          | 520.03<br>(319.46 to 805.57)          | 14.68<br>(10.04 to 20.18)          | 35.22<br>(22.12 to 52.42)          | 35.28<br>(22.64 to 51.15)          | 33.24<br>(20.49 to 49.93)          |
| Liver cancer due to alcohol use      | 190.46<br>(135.24 to 263.23)          | 307.81<br>(193.44 to 487.70)          | 272.42<br>(175.13 to 411.36)          | 361.64<br>(221.45 to 584.69)          | 8.69<br>(6.14 to 12.06)            | 17.14<br>(10.71 to 26.92)          | 15.82<br>(10.15 to 23.50)          | 19.06<br>(11.87 to 30.54)          |
| Liver cancer due to other causes     | 243.52<br>(171.59 to 331.59)          | 444.44<br>(242.90 to 774.73)          | 404.57<br>(230.89 to 657.89)          | 439.45<br>(234.69 to 756.06)          | 10.83<br>(7.59 to 14.69)           | 25.65<br>(13.65 to 43.46)          | 24.30<br>(13.58 to 39.70)          | 24.22<br>(12.69 to 41.21)          |
| Gallbladder and biliary tract cancer | 358.32<br>(306.62 to 419.47)          | 336.59<br>(284.07 to 392.58)          | 332.76<br>(278.61 to 391.99)          | 331.71<br>(282.22 to 386.74)          | 16.93<br>(14.55 to 19.65)          | 20.23<br>(16.86 to 23.33)          | 20.66<br>(17.29 to 23.85)          | 19.16<br>(15.77 to 22.09)          |
| Pancreatic cancer                    | 1,501.30<br>(1,288.18 to 1,734.13)    | 2,251.27<br>(1,595.02 to 3,190.71)    | 2,157.53<br>(1,568.85 to 2,979.00)    | 2,255.48<br>(1,593.79 to 3,208.90)    | 66.69<br>(57.63 to 76.67)          | 124.21<br>(89.06 to 175.83)        | 122.46<br>(90.85 to 168.86)        | 119.62<br>(84.97 to 169.62)        |
| Larynx cancer                        | 360.22<br>(299.87 to 427.05)          | 358.71<br>(192.53 to 625.18)          | 223.10<br>(130.75 to 368.93)          | 644.84<br>(338.89 to 1,178.63)        | 15.77<br>(13.21 to 18.62)          | 19.27<br>(10.78 to 33.27)          | 12.38<br>(7.57 to 20.18)           | 32.79<br>(17.01 to 58.22)          |
| Tracheal, bronchus, and lung cancer  | 3,640.39<br>(3,151.99 to 4,185.53)    | 4,688.46<br>(3,098.17 to 7,058.51)    | 3,210.60<br>(2,221.71 to 4,556.23)    | 7,171.42<br>(4,558.98 to 10,980.70)   | 167.64<br>(145.82 to 191.20)       | 266.73<br>(177.99 to 398.46)       | 189.56<br>(133.64 to 266.36)       | 386.18<br>(249.04 to 584.77)       |
| Malignant skin melanoma              | 84.07<br>(68.45 to 108.71)            | 104.97<br>(85.14 to 139.21)           | 122.89<br>(97.98 to 162.08)           | 90.02<br>(73.15 to 119.31)            | 3.28<br>(2.72 to 4.34)             | 5.71<br>(4.50 to 7.52)             | 6.96<br>(5.51 to 9.21)             | 4.66<br>(3.69 to 6.19)             |
| Non-melanoma skin cancer             | 111.34<br>(94.28 to 131.15)           | 153.81<br>(126.38 to 181.89)          | 131.30<br>(107.83 to 155.94)          | 169.87<br>(141.82 to 200.32)          | 5.37<br>(4.63 to 6.20)             | 9.94<br>(7.81 to 11.82)            | 8.85<br>(7.06 to 10.58)            | 10.44<br>(8.05 to 12.47)           |
| Breast cancer                        | 3,973.64<br>(3,142.48 to 4,917.23)    | 3,906.80<br>(2,573.65 to 5,923.16)    | 3,162.91<br>(2,132.44 to 4,636.52)    | 4,608.32<br>(3,035.40 to 7,133.04)    | 144.69<br>(116.26 to 176.61)       | 185.09<br>(124.10 to 277.71)       | 154.49<br>(107.18 to 222.25)       | 210.40<br>(140.66 to 316.26)       |
| Cervical cancer                      | 1,092.03<br>(853.01 to 1,373.16)      | 1,003.20<br>(783.33 to 1,302.81)      | 815.38<br>(628.49 to 1,059.59)        | 1,206.82<br>(924.78 to 1,604.16)      | 43.11<br>(34.53 to 53.54)          | 48.51<br>(38.05 to 61.18)          | 40.52<br>(31.92 to 51.02)          | 56.31<br>(44.74 to 71.94)          |



| Mauritius                       |                                                     |                                                     |                                                     |                                                      |                                                  |                                                  |                                                  |                                                  |
|---------------------------------|-----------------------------------------------------|-----------------------------------------------------|-----------------------------------------------------|------------------------------------------------------|--------------------------------------------------|--------------------------------------------------|--------------------------------------------------|--------------------------------------------------|
| Cause                           | YLLs (actual counts)                                |                                                     |                                                     |                                                      | Deaths (actual counts)                           |                                                  |                                                  |                                                  |
|                                 | 2016                                                | 2040 Forecast                                       | 2040 Better Scenario                                | 2040 Worse Scenario                                  | 2016                                             | 2040 Forecast                                    | 2040 Better Scenario                             | 2040 Worse Scenario                              |
| Kidney cancer                   | 410.88<br>(351.70 to 476.79)                        | 571.35<br>(453.94 to 708.43)                        | 578.00<br>(459.82 to 711.95)                        | 565.05<br>(442.48 to 713.15)                         | 16.35<br>(14.14 to 18.78)                        | 29.87<br>(23.77 to 36.50)                        | 31.35<br>(25.28 to 37.75)                        | 28.16<br>(21.93 to 35.37)                        |
| Bladder cancer                  | 499.88<br>(426.27 to 581.73)                        | 737.02<br>(499.21 to 1,099.13)                      | 646.54<br>(453.68 to 927.73)                        | 796.34<br>(532.53 to 1,210.06)                       | 25.84<br>(22.39 to 29.71)                        | 48.83<br>(32.90 to 73.93)                        | 44.32<br>(31.27 to 64.90)                        | 50.45<br>(33.16 to 77.72)                        |
| Brain and nervous system cancer | 733.61<br>(597.06 to 977.21)                        | 830.90<br>(656.74 to 1,073.70)                      | 776.93<br>(614.35 to 1,003.64)                      | 868.93<br>(699.02 to 1,127.29)                       | 22.05<br>(18.12 to 28.67)                        | 32.63<br>(26.92 to 40.98)                        | 31.59<br>(26.06 to 39.26)                        | 32.67<br>(27.04 to 40.93)                        |
| Thyroid cancer                  | 106.04<br>(89.43 to 124.89)                         | 128.06<br>(94.92 to 174.33)                         | 106.96<br>(82.28 to 140.93)                         | 142.14<br>(105.00 to 194.34)                         | 4.61<br>(3.93 to 5.40)                           | 6.97<br>(5.24 to 9.28)                           | 6.00<br>(4.60 to 7.69)                           | 7.49<br>(5.57 to 10.09)                          |
| Mesothelioma                    | 49.44<br>(41.39 to 59.05)                           | 56.59<br>(46.44 to 67.49)                           | 58.84<br>(47.84 to 70.64)                           | 53.44<br>(43.99 to 62.92)                            | 1.89<br>(1.58 to 2.21)                           | 2.90<br>(2.31 to 3.40)                           | 3.13<br>(2.50 to 3.69)                           | 2.62<br>(2.07 to 3.08)                           |
| Hodgkin lymphoma                | 129.71<br>(108.43 to 150.74)                        | 76.95<br>(60.84 to 94.36)                           | 59.97<br>(47.36 to 76.14)                           | 94.42<br>(75.17 to 116.74)                           | 3.74<br>(3.20 to 4.36)                           | 2.88<br>(2.36 to 3.48)                           | 2.31<br>(1.87 to 2.87)                           | 3.41<br>(2.80 to 4.09)                           |
| Non-Hodgkin lymphoma            | 721.06<br>(616.78 to 848.44)                        | 763.77<br>(616.49 to 950.68)                        | 670.18<br>(544.92 to 825.23)                        | 824.16<br>(667.34 to 1,023.28)                       | 24.43<br>(21.01 to 28.63)                        | 35.63<br>(28.98 to 44.04)                        | 32.50<br>(26.67 to 39.02)                        | 36.69<br>(29.71 to 45.42)                        |
| Multiple myeloma                | 311.96<br>(215.83 to 380.18)                        | 394.61<br>(262.64 to 508.31)                        | 362.45<br>(245.78 to 457.84)                        | 407.67<br>(272.74 to 527.42)                         | 12.86<br>(8.90 to 15.46)                         | 20.01<br>(13.43 to 25.30)                        | 18.96<br>(12.89 to 23.55)                        | 19.97<br>(13.62 to 25.38)                        |
| Leukemia                        | 1,626.02<br>(1,434.30 to 1,859.37)                  | 1,521.49<br>(1,200.45 to 1,909.12)                  | 1,289.99<br>(1,057.35 to 1,597.81)                  | 1,727.79<br>(1,347.42 to 2,181.39)                   | 48.69<br>(42.67 to 55.97)                        | 67.61<br>(52.95 to 83.67)                        | 59.51<br>(47.40 to 73.64)                        | 73.13<br>(55.85 to 92.09)                        |
| Acute lymphoid leukemia         | 359.44<br>(311.41 to 423.31)                        | 350.10<br>(279.31 to 440.67)                        | 296.69<br>(239.70 to 369.53)                        | 396.69<br>(318.19 to 500.36)                         | 10.81<br>(9.34 to 12.45)                         | 15.33<br>(12.12 to 18.77)                        | 13.45<br>(10.86 to 16.27)                        | 16.55<br>(12.93 to 20.55)                        |
| Chronic lymphoid leukemia       | 27.54<br>(18.34 to 34.73)                           | 27.99<br>(18.03 to 37.61)                           | 25.55<br>(16.54 to 34.22)                           | 29.45<br>(19.66 to 40.16)                            | 1.17<br>(0.73 to 1.50)                           | 1.54<br>(0.97 to 2.09)                           | 1.47<br>(0.91 to 1.99)                           | 1.53<br>(0.97 to 2.13)                           |
| Acute myeloid leukemia          | 284.56<br>(241.10 to 333.40)                        | 321.69<br>(249.39 to 413.41)                        | 296.66<br>(234.28 to 375.66)                        | 339.81<br>(260.85 to 443.31)                         | 7.65<br>(6.48 to 9.02)                           | 12.29<br>(9.53 to 15.69)                         | 11.76<br>(9.27 to 14.85)                         | 12.40<br>(9.54 to 15.96)                         |
| Chronic myeloid leukemia        | 57.66<br>(47.72 to 70.71)                           | 34.62<br>(25.18 to 46.58)                           | 24.16<br>(18.41 to 31.94)                           | 46.10<br>(33.88 to 62.19)                            | 2.04<br>(1.70 to 2.48)                           | 1.66<br>(1.23 to 2.25)                           | 1.20<br>(0.91 to 1.57)                           | 2.11<br>(1.56 to 2.78)                           |
| Other leukemia                  | 896.82<br>(768.60 to 1,043.03)                      | 787.10<br>(610.70 to 993.73)                        | 646.94<br>(513.98 to 813.83)                        | 915.75<br>(699.78 to 1,173.44)                       | 27.03<br>(23.39 to 31.35)                        | 36.80<br>(27.98 to 46.16)                        | 31.63<br>(24.64 to 39.20)                        | 40.54<br>(30.36 to 52.29)                        |
| Other neoplasms                 | 2,475.98<br>(2,116.26 to 2,841.42)                  | 2,525.11<br>(2,144.28 to 2,913.91)                  | 2,494.06<br>(2,107.34 to 2,898.86)                  | 2,512.98<br>(2,144.54 to 2,886.23)                   | 82.25<br>(70.23 to 94.60)                        | 118.89<br>(99.18 to 136.09)                      | 122.64<br>(102.71 to 140.50)                     | 112.16<br>(93.67 to 138.39)                      |
| <b>Cardiovascular diseases</b>  | <b>61,282.79</b><br><b>(53,895.35 to 69,521.81)</b> | <b>55,042.92</b><br><b>(37,219.16 to 82,423.34)</b> | <b>35,473.45</b><br><b>(24,144.61 to 53,882.81)</b> | <b>98,540.07</b><br><b>(63,193.29 to 148,471.06)</b> | <b>3,304.11</b><br><b>(2,951.50 to 3,690.72)</b> | <b>4,021.17</b><br><b>(2,700.82 to 6,361.90)</b> | <b>2,856.73</b><br><b>(1,928.81 to 4,821.19)</b> | <b>6,317.33</b><br><b>(4,250.08 to 9,917.63)</b> |
| Rheumatic heart disease         | 648.80<br>(554.73 to 756.36)                        | 358.22<br>(286.84 to 438.77)                        | 287.48<br>(233.65 to 349.49)                        | 428.86<br>(349.71 to 526.22)                         | 24.66<br>(21.29 to 28.45)                        | 21.54<br>(16.72 to 25.87)                        | 18.23<br>(14.28 to 21.79)                        | 24.25<br>(18.69 to 29.51)                        |
| Ischemic heart disease          | 35,832.81<br>(31,433.20 to 40,803.13)               | 30,249.98<br>(16,969.71 to 57,117.24)               | 18,028.93<br>(9,950.51 to 33,218.19)                | 57,332.63<br>(30,882.69 to 100,545.64)               | 1,971.20<br>(1,757.85 to 2,216.14)               | 2,216.54<br>(1,238.23 to 4,258.87)               | 1,471.84<br>(795.90 to 3,106.08)                 | 3,659.92<br>(2,046.21 to 6,690.09)               |
| Stroke                          | 15,533.05<br>(13,361.76 to 17,864.39)               | 12,814.44<br>(7,844.41 to 22,620.33)                | 7,491.09<br>(4,689.59 to 15,003.19)                 | 25,893.82<br>(15,592.44 to 43,061.55)                | 819.66<br>(714.72 to 930.31)                     | 819.66<br>(565.65 to 1,851.51)                   | 602.83<br>(359.49 to 1,334.69)                   | 1,605.47<br>(1,013.68 to 2,933.58)               |
| Ischemic stroke                 | 3,917.88<br>(3,346.03 to 4,515.53)                  | 3,894.58<br>(2,000.13 to 10,600.31)                 | 2,581.79<br>(1,334.17 to 7,443.35)                  | 6,644.92<br>(3,428.28 to 16,213.19)                  | 270.44<br>(235.83 to 309.69)                     | 351.42<br>(168.87 to 1,016.27)                   | 252.09<br>(119.14 to 764.69)                     | 536.56<br>(259.31 to 1,585.98)                   |

|                                |                                          |                                        |                                       |                                          |                                 |                                 |                                 |                                     |
|--------------------------------|------------------------------------------|----------------------------------------|---------------------------------------|------------------------------------------|---------------------------------|---------------------------------|---------------------------------|-------------------------------------|
| Intracerebral hemorrhage       | 11,615.17<br>(10,030.19 to<br>13,377.94) | 8,919.85<br>(5,234.24 to<br>14,832.11) | 4,909.30<br>(2,998.90 to<br>7,881.82) | 19,248.90<br>(10,683.16 to<br>32,207.49) | 549.22<br>(475.65 to<br>624.73) | 570.24<br>(347.24 to<br>964.44) | 350.74<br>(221.30 to<br>628.44) | 1,068.92<br>(625.13 to<br>1,794.21) |
| Hypertensive heart disease     | 5,046.13<br>(3,472.47 to<br>6,482.85)    | 6,663.29<br>(4,260.91 to<br>10,085.31) | 5,605.14<br>(3,750.67 to<br>7,803.29) | 8,860.08<br>(5,362.55 to<br>14,759.59)   | 295.42<br>(201.14 to<br>372.80) | 523.55<br>(328.08 to<br>813.82) | 466.25<br>(302.74 to<br>667.55) | 651.66<br>(380.50 to<br>1,111.14)   |
| Cardiomyopathy and myocarditis | 1,317.63<br>(872.05 to<br>1,638.60)      | 983.10<br>(646.75 to<br>1,343.17)      | 763.24<br>(516.34 to<br>1,022.59)     | 1,261.07<br>(814.38 to<br>1,754.37)      | 46.75<br>(35.44 to<br>55.55)    | 50.02<br>(35.94 to<br>67.06)    | 40.55<br>(29.36 to<br>53.56)    | 60.28<br>(42.72 to<br>81.74)        |
| Myocarditis                    | 112.59<br>(69.25 to<br>146.37)           | 88.75<br>(58.65 to<br>115.95)          | 85.86<br>(58.42 to<br>113.04)         | 90.58<br>(57.79 to<br>119.23)            | 3.18<br>(2.27 to<br>4.04)       | 4.00<br>(2.98 to<br>5.43)       | 4.10<br>(3.09 to<br>5.64)       | 3.80<br>(2.81 to<br>5.06)           |

| Mauritius                                                     |                                                   |                                                   |                                                  |                                                    |                                            |                                            |                                            |                                              |
|---------------------------------------------------------------|---------------------------------------------------|---------------------------------------------------|--------------------------------------------------|----------------------------------------------------|--------------------------------------------|--------------------------------------------|--------------------------------------------|----------------------------------------------|
| Cause                                                         | YLLs (actual counts)                              |                                                   |                                                  |                                                    | Deaths (actual counts)                     |                                            |                                            |                                              |
|                                                               | 2016                                              | 2040 Forecast                                     | 2040 Better Scenario                             | 2040 Worse Scenario                                | 2016                                       | 2040 Forecast                              | 2040 Better Scenario                       | 2040 Worse Scenario                          |
| Alcoholic cardiomyopathy                                      | 189.87<br>(107.54 to 251.93)                      | 156.66<br>(93.31 to 212.67)                       | 141.19<br>(85.30 to 192.96)                      | 192.65<br>(109.40 to 262.46)                       | 5.83<br>(3.85 to 7.57)                     | 6.19<br>(4.50 to 8.51)                     | 5.85<br>(4.26 to 8.13)                     | 7.11<br>(4.96 to 9.44)                       |
| Other cardiomyopathy                                          | 1,015.17<br>(631.85 to 1,276.65)                  | 737.69<br>(459.01 to 1,038.74)                    | 536.20<br>(335.74 to 753.00)                     | 977.84<br>(597.46 to 1,418.53)                     | 37.74<br>(27.77 to 45.44)                  | 39.83<br>(26.71 to 56.28)                  | 30.60<br>(20.85 to 42.91)                  | 49.37<br>(33.34 to 70.01)                    |
| Atrial fibrillation and flutter                               | 384.57<br>(291.10 to 494.68)                      | 793.95<br>(556.76 to 1,058.36)                    | 764.59<br>(539.66 to 1,007.30)                   | 818.76<br>(566.22 to 1,093.03)                     | 37.19<br>(28.20 to 48.43)                  | 87.03<br>(55.77 to 120.45)                 | 87.12<br>(56.93 to 119.27)                 | 85.45<br>(53.42 to 119.95)                   |
| Aortic aneurysm                                               | 335.72<br>(287.70 to 392.00)                      | 422.36<br>(336.85 to 517.59)                      | 375.13<br>(303.15 to 453.76)                     | 470.21<br>(371.65 to 588.48)                       | 17.42<br>(15.13 to 20.09)                  | 29.82<br>(22.68 to 36.81)                  | 28.13<br>(21.60 to 34.14)                  | 30.80<br>(22.77 to 38.72)                    |
| Peripheral artery disease                                     | 47.51<br>(32.45 to 66.95)                         | 143.99<br>(86.94 to 210.44)                       | 128.26<br>(78.09 to 190.43)                      | 140.57<br>(84.06 to 205.02)                        | 3.71<br>(2.38 to 5.27)                     | 14.09<br>(7.69 to 22.13)                   | 13.47<br>(7.24 to 21.67)                   | 12.91<br>(6.98 to 20.09)                     |
| Endocarditis                                                  | 521.80<br>(358.07 to 653.90)                      | 528.15<br>(344.67 to 747.54)                      | 497.35<br>(327.14 to 699.65)                     | 567.59<br>(370.06 to 811.28)                       | 16.92<br>(11.41 to 21.18)                  | 24.37<br>(15.74 to 34.58)                  | 24.14<br>(15.84 to 34.32)                  | 24.64<br>(15.92 to 35.00)                    |
| Other cardiovascular and circulatory diseases                 | 1,614.77<br>(1,377.08 to 1,894.37)                | 2,085.45<br>(1,565.87 to 2,741.90)                | 1,532.23<br>(1,181.94 to 1,975.53)               | 2,766.49<br>(2,049.22 to 3,638.11)                 | 71.18<br>(61.41 to 81.97)                  | 132.55<br>(99.39 to 169.77)                | 104.18<br>(78.80 to 132.33)                | 161.95<br>(120.21 to 211.65)                 |
| <b>Chronic respiratory diseases</b>                           | <b>8,550.09</b><br><b>(7,475.59 to 9,718.26)</b>  | <b>9,091.73</b><br><b>(6,905.95 to 11,401.39)</b> | <b>7,348.15</b><br><b>(5,757.99 to 8,917.33)</b> | <b>11,920.49</b><br><b>(8,727.76 to 15,679.51)</b> | <b>492.93</b><br><b>(437.72 to 552.08)</b> | <b>697.13</b><br><b>(499.93 to 892.55)</b> | <b>585.99</b><br><b>(437.24 to 713.62)</b> | <b>865.30</b><br><b>(598.78 to 1,147.05)</b> |
| Chronic obstructive pulmonary disease                         | 4,293.61<br>(3,592.89 to 4,979.73)                | 5,285.35<br>(3,671.25 to 7,262.76)                | 3,782.13<br>(2,744.71 to 5,078.19)               | 7,679.70<br>(5,115.70 to 10,876.54)                | 275.71<br>(237.50 to 315.30)               | 434.52<br>(292.88 to 596.50)               | 333.46<br>(231.40 to 447.52)               | 584.62<br>(374.19 to 836.78)                 |
| Pneumoconiosis                                                | 7.65<br>(6.26 to 9.25)                            | 5.71<br>(4.55 to 6.91)                            | 5.30<br>(4.23 to 6.64)                           | 6.30<br>(4.99 to 7.64)                             | 0.36<br>(0.30 to 0.43)                     | 0.41<br>(0.30 to 0.53)                     | 0.39<br>(0.28 to 0.50)                     | 0.45<br>(0.31 to 0.58)                       |
| Silicosis                                                     | 0.70<br>(0.44 to 0.95)                            | 0.36<br>(0.23 to 0.52)                            | 0.24<br>(0.16 to 0.36)                           | 0.50<br>(0.32 to 0.71)                             | 0.04<br>(0.03 to 0.05)                     | 0.03<br>(0.02 to 0.04)                     | 0.02<br>(0.01 to 0.03)                     | 0.04<br>(0.02 to 0.05)                       |
| Asbestosis                                                    | 2.93<br>(2.39 to 3.82)                            | 2.12<br>(1.65 to 2.71)                            | 2.42<br>(1.86 to 3.14)                           | 1.87<br>(1.47 to 2.33)                             | 0.08<br>(0.07 to 0.10)                     | 0.10<br>(0.07 to 0.13)                     | 0.11<br>(0.09 to 0.16)                     | 0.08<br>(0.06 to 0.11)                       |
| Coal workers pneumoconiosis                                   | 0.25<br>(0.11 to 0.36)                            | 0.16<br>(0.08 to 0.27)                            | 0.15<br>(0.08 to 0.27)                           | 0.19<br>(0.09 to 0.30)                             | 0.01<br>(0.01 to 0.02)                     | 0.02<br>(0.01 to 0.03)                     | 0.02<br>(0.01 to 0.03)                     | 0.02<br>(0.01 to 0.03)                       |
| Other pneumoconiosis                                          | 3.77<br>(2.93 to 4.59)                            | 3.07<br>(2.30 to 3.95)                            | 2.48<br>(1.85 to 3.27)                           | 3.74<br>(2.76 to 4.85)                             | 0.23<br>(0.19 to 0.27)                     | 0.27<br>(0.18 to 0.37)                     | 0.24<br>(0.16 to 0.32)                     | 0.31<br>(0.20 to 0.43)                       |
| Asthma                                                        | 2,891.08<br>(2,449.05 to 3,534.63)                | 1,774.61<br>(1,135.21 to 2,694.07)                | 1,073.26<br>(721.34 to 1,559.90)                 | 2,553.81<br>(1,635.13 to 3,907.34)                 | 151.93<br>(130.21 to 183.69)               | 131.65<br>(81.68 to 207.98)                | 84.81<br>(54.64 to 127.44)                 | 177.71<br>(109.90 to 280.81)                 |
| Interstitial lung disease and pulmonary sarcoidosis           | 970.61<br>(550.75 to 1,234.72)                    | 1,599.95<br>(908.38 to 2,054.72)                  | 2,065.09<br>(1,258.42 to 2,585.49)               | 1,245.52<br>(685.05 to 1,590.98)                   | 50.79<br>(27.60 to 64.75)                  | 106.39<br>(57.05 to 138.35)                | 141.96<br>(81.00 to 180.61)                | 79.57<br>(40.70 to 103.63)                   |
| Other chronic respiratory diseases                            | 387.14<br>(265.58 to 671.80)                      | 426.11<br>(289.26 to 810.81)                      | 422.37<br>(287.74 to 816.82)                     | 435.17<br>(291.26 to 822.01)                       | 14.15<br>(9.60 to 28.41)                   | 24.16<br>(14.17 to 52.23)                  | 25.38<br>(14.68 to 55.24)                  | 22.95<br>(13.43 to 49.69)                    |
| <b>Cirrhosis and other chronic liver diseases</b>             | <b>8,717.97</b><br><b>(7,216.12 to 10,578.58)</b> | <b>8,410.79</b><br><b>(6,696.01 to 10,395.34)</b> | <b>7,155.65</b><br><b>(5,643.83 to 8,923.95)</b> | <b>9,833.41</b><br><b>(7,857.60 to 12,074.72)</b>  | <b>286.01</b><br><b>(238.87 to 344.96)</b> | <b>335.98</b><br><b>(275.84 to 400.53)</b> | <b>294.50</b><br><b>(244.78 to 352.64)</b> | <b>377.79</b><br><b>(315.13 to 449.05)</b>   |
| Cirrhosis and other chronic liver diseases due to hepatitis B | 3,202.55<br>(2,544.91 to 4,016.34)                | 3,259.93<br>(2,449.35 to 4,295.14)                | 2,822.05<br>(2,116.25 to 3,733.53)               | 3,632.91<br>(2,747.05 to 4,740.80)                 | 105.55<br>(84.12 to 132.39)                | 128.23<br>(100.40 to 161.95)               | 113.92<br>(89.33 to 144.57)                | 138.29<br>(110.02 to 173.57)                 |
| Cirrhosis and other chronic liver diseases due to hepatitis C | 1,851.69<br>(1,416.44 to 2,386.00)                | 1,816.51<br>(1,323.77 to 2,343.71)                | 1,553.73<br>(1,148.16 to 2,030.21)               | 2,048.72<br>(1,510.76 to 2,647.10)                 | 59.66<br>(46.29 to 75.85)                  | 69.22<br>(52.49 to 87.33)                  | 60.60<br>(46.10 to 77.46)                  | 75.81<br>(58.73 to 94.84)                    |

|                                                                |                                                            |                                                            |                                                            |                                                            |                                                      |                                                      |                                                      |                                                      |
|----------------------------------------------------------------|------------------------------------------------------------|------------------------------------------------------------|------------------------------------------------------------|------------------------------------------------------------|------------------------------------------------------|------------------------------------------------------|------------------------------------------------------|------------------------------------------------------|
|                                                                | 1,741.34<br>(1,272.84 to<br>2,267.62)                      | 1,500.28<br>(1,102.21 to<br>1,988.55)                      | 1,189.74<br>(881.37 to<br>1,580.54)                        | 2,103.72<br>(1,572.96 to<br>2,816.04)                      | 58.59<br>(44.22 to<br>74.78)                         | 61.43<br>(47.02 to<br>77.24)                         | 50.79<br>(39.06 to<br>64.35)                         | 81.06<br>(63.06 to<br>102.49)                        |
| Cirrhosis and other chronic liver diseases due to alcohol use  |                                                            |                                                            |                                                            |                                                            |                                                      |                                                      |                                                      |                                                      |
|                                                                | 1,922.39<br>(1,560.86 to<br>2,353.39)                      | 1,834.06<br>(1,454.49 to<br>2,322.58)                      | 1,590.14<br>(1,258.41 to<br>2,011.74)                      | 2,048.05<br>(1,643.22 to<br>2,570.05)                      | 62.21<br>(51.38 to<br>75.55)                         | 77.10<br>(63.15 to<br>93.90)                         | 69.19<br>(56.32 to<br>84.59)                         | 82.62<br>(67.78 to<br>100.90)                        |
| Cirrhosis and other chronic liver diseases due to other causes |                                                            |                                                            |                                                            |                                                            |                                                      |                                                      |                                                      |                                                      |
| <b>Digestive diseases</b>                                      | <b>3,190.12</b><br><b>(2,646.95 to</b><br><b>3,957.39)</b> | <b>2,730.22</b><br><b>(2,031.85 to</b><br><b>3,969.05)</b> | <b>2,259.14</b><br><b>(1,714.40 to</b><br><b>3,144.92)</b> | <b>3,338.37</b><br><b>(2,411.03 to</b><br><b>5,042.55)</b> | <b>124.83</b><br><b>(105.58 to</b><br><b>154.57)</b> | <b>150.54</b><br><b>(116.34 to</b><br><b>200.47)</b> | <b>132.44</b><br><b>(103.03 to</b><br><b>173.68)</b> | <b>169.23</b><br><b>(127.48 to</b><br><b>232.16)</b> |
| Peptic ulcer disease                                           | 736.90<br>(609.99 to<br>940.12)                            | 445.98<br>(340.25 to<br>583.95)                            | 323.88<br>(252.44 to<br>427.93)                            | 587.11<br>(452.90 to<br>762.70)                            | 33.11<br>(27.88 to<br>42.70)                         | 29.17<br>(21.87 to<br>37.69)                         | 22.13<br>(16.75 to<br>28.75)                         | 36.34<br>(26.40 to<br>46.88)                         |

| Mauritius                                  |                                    |                                      |                                      |                                      |                              |                                  |                                  |                                  |
|--------------------------------------------|------------------------------------|--------------------------------------|--------------------------------------|--------------------------------------|------------------------------|----------------------------------|----------------------------------|----------------------------------|
| Cause                                      | YLLs (actual counts)               |                                      |                                      |                                      | Deaths (actual counts)       |                                  |                                  |                                  |
|                                            | 2016                               | 2040 Forecast                        | 2040 Better Scenario                 | 2040 Worse Scenario                  | 2016                         | 2040 Forecast                    | 2040 Better Scenario             | 2040 Worse Scenario              |
| Gastritis and duodenitis                   | 95.65<br>(74.23 to 126.56)         | 99.07<br>(73.51 to 132.60)           | 82.00<br>(60.84 to 111.29)           | 114.01<br>(84.33 to 149.58)          | 4.28<br>(3.44 to 5.52)       | 6.29<br>(4.45 to 8.52)           | 5.53<br>(3.88 to 7.52)           | 6.77<br>(4.71 to 9.03)           |
| Appendicitis                               | 88.12<br>(64.86 to 109.27)         | 54.52<br>(38.84 to 69.95)            | 40.91<br>(28.83 to 53.22)            | 68.96<br>(48.18 to 87.57)            | 2.92<br>(2.07 to 3.58)       | 2.66<br>(1.83 to 3.34)           | 2.10<br>(1.44 to 2.67)           | 3.17<br>(2.16 to 3.97)           |
| Paralytic ileus and intestinal obstruction | 448.92<br>(354.37 to 580.78)       | 488.19<br>(368.55 to 632.66)         | 491.71<br>(375.69 to 637.88)         | 476.28<br>(360.71 to 621.19)         | 18.73<br>(14.27 to 24.27)    | 30.24<br>(22.21 to 39.18)        | 31.90<br>(23.71 to 41.71)        | 27.86<br>(20.25 to 35.85)        |
| Inguinal, femoral, and abdominal hernia    | 42.71<br>(32.59 to 69.19)          | 54.53<br>(24.95 to 53.03)            | 30.25<br>(21.69 to 46.80)            | 37.77<br>(27.59 to 60.75)            | 2.22<br>(1.66 to 3.41)       | 2.48<br>(1.66 to 3.70)           | 2.29<br>(1.54 to 3.39)           | 2.55<br>(1.71 to 3.95)           |
| Inflammatory bowel disease                 | 78.44<br>(49.07 to 101.10)         | 69.66<br>(50.92 to 88.30)            | 68.54<br>(50.51 to 87.31)            | 69.38<br>(50.32 to 87.27)            | 2.83<br>(2.07 to 3.49)       | 3.63<br>(2.79 to 4.47)           | 3.70<br>(2.85 to 4.62)           | 3.46<br>(2.65 to 4.24)           |
| Vascular intestinal disorders              | 134.27<br>(109.61 to 165.30)       | 181.65<br>(144.41 to 223.42)         | 172.30<br>(136.93 to 212.55)         | 184.77<br>(147.69 to 229.51)         | 7.58<br>(6.27 to 9.32)       | 13.84<br>(10.47 to 17.41)        | 13.69<br>(10.36 to 17.12)        | 13.42<br>(10.04 to 17.20)        |
| Gallbladder and biliary diseases           | 175.18<br>(148.65 to 216.42)       | 182.78<br>(113.74 to 284.73)         | 123.94<br>(80.79 to 184.99)          | 230.19<br>(142.40 to 362.86)         | 9.18<br>(7.87 to 11.10)      | 13.42<br>(7.91 to 21.74)         | 9.74<br>(6.03 to 15.26)          | 15.87<br>(9.09 to 26.48)         |
| Pancreatitis                               | 1,063.39<br>(818.55 to 1,400.93)   | 875.83<br>(433.16 to 1,828.14)       | 650.06<br>(341.99 to 1,303.11)       | 1,255.89<br>(574.29 to 2,757.32)     | 30.46<br>(23.72 to 41.27)    | 30.63<br>(17.09 to 62.84)        | 23.58<br>(13.67 to 45.82)        | 41.85<br>(21.11 to 87.21)        |
| Other digestive diseases                   | 326.55<br>(234.48 to 408.19)       | 298.02<br>(215.28 to 369.79)         | 275.57<br>(200.10 to 345.60)         | 314.01<br>(225.42 to 390.69)         | 13.52<br>(10.01 to 16.82)    | 18.18<br>(13.19 to 22.92)        | 17.79<br>(13.01 to 22.24)        | 17.95<br>(12.86 to 23.09)        |
| Neurological disorders                     | 6,956.52<br>(5,978.45 to 8,116.85) | 14,120.33<br>(9,899.30 to 19,892.13) | 13,512.70<br>(9,840.84 to 18,192.85) | 13,539.56<br>(9,344.94 to 19,390.66) | 537.48<br>(454.07 to 637.42) | 1,396.52<br>(907.36 to 2,015.20) | 1,391.32<br>(946.41 to 1,904.48) | 1,271.38<br>(794.16 to 1,912.87) |
| Alzheimer's disease and other dementias    | 4,878.47<br>(4,015.16 to 5,863.70) | 11,682.89<br>(7,546.05 to 17,634.22) | 11,056.48<br>(7,587.56 to 15,677.21) | 11,074.26<br>(6,905.20 to 16,805.86) | 462.46<br>(382.14 to 559.13) | 1,255.30<br>(781.55 to 1,875.38) | 1,237.80<br>(815.95 to 1,748.26) | 1,142.28<br>(673.66 to 1,768.04) |
| Parkinson's disease                        | 463.20<br>(350.69 to 597.41)       | 1,089.73<br>(797.58 to 1,417.38)     | 1,215.35<br>(898.98 to 1,571.03)     | 945.45<br>(677.79 to 1,225.53)       | 34.29<br>(25.93 to 44.88)    | 93.91<br>(65.23 to 125.11)       | 107.78<br>(76.15 to 141.00)      | 78.77<br>(52.66 to 106.67)       |
| Epilepsy                                   | 1,157.96<br>(985.66 to 1,366.63)   | 859.96<br>(610.50 to 1,175.63)       | 749.39<br>(540.01 to 1,013.41)       | 1,040.05<br>(708.10 to 1,477.24)     | 27.72<br>(23.59 to 32.64)    | 28.08<br>(20.66 to 36.58)        | 25.60<br>(19.33 to 32.85)        | 32.26<br>(23.01 to 43.34)        |
| Multiple sclerosis                         | 44.32<br>(33.24 to 55.04)          | 44.13<br>(32.84 to 56.50)            | 44.61<br>(33.01 to 57.14)            | 43.87<br>(32.39 to 56.11)            | 1.35<br>(1.02 to 1.67)       | 1.57<br>(1.21 to 1.99)           | 1.62<br>(1.24 to 2.07)           | 1.52<br>(1.17 to 1.93)           |
| Motor neuron disease                       | 94.72<br>(80.37 to 111.13)         | 125.01<br>(102.08 to 149.20)         | 123.98<br>(100.67 to 148.77)         | 123.86<br>(102.45 to 146.50)         | 3.24<br>(2.75 to 3.76)       | 5.12<br>(4.23 to 6.06)           | 5.17<br>(4.27 to 6.14)           | 4.95<br>(4.11 to 5.78)           |
| Other neurological disorders               | 317.84<br>(270.02 to 369.71)       | 318.62<br>(267.21 to 382.04)         | 322.89<br>(268.01 to 387.02)         | 312.07<br>(262.06 to 374.76)         | 8.42<br>(7.33 to 9.62)       | 12.55<br>(10.40 to 14.38)        | 13.34<br>(11.12 to 15.32)        | 11.60<br>(9.60 to 13.29)         |
| Mental disorders                           | 2,379.22<br>(1,932.05 to 2,897.66) | 2,091.25<br>(1,577.40 to 2,713.49)   | 2,231.93<br>(1,669.05 to 2,895.71)   | 2,067.55<br>(1,570.86 to 2,649.13)   | 64.45<br>(52.41 to 78.21)    | 64.29<br>(50.12 to 80.28)        | 69.53<br>(54.08 to 86.91)        | 62.34<br>(49.22 to 76.84)        |
| Alcohol use disorders                      | 1,914.68<br>(1,534.18 to 2,363.04) | 1,671.19<br>(1,226.39 to 2,187.95)   | 1,714.00<br>(1,249.39 to 2,233.94)   | 1,713.45<br>(1,270.71 to 2,217.46)   | 53.77<br>(43.21 to 65.86)    | 52.48<br>(40.06 to 65.73)        | 54.68<br>(41.36 to 69.20)        | 52.67<br>(40.99 to 65.58)        |
| Drug use disorders                         | 463.16<br>(366.27 to 577.09)       | 418.72<br>(304.80 to 566.91)         | 516.54<br>(375.60 to 696.56)         | 352.77<br>(259.81 to 470.76)         | 10.65<br>(8.41 to 13.26)     | 11.77<br>(9.03 to 15.18)         | 14.82<br>(11.42 to 18.85)        | 9.64<br>(7.38 to 12.20)          |
| Opioid use disorders                       | 105.85<br>(77.22 to 144.89)        | 99.24<br>(69.18 to 141.44)           | 103.88<br>(72.73 to 148.53)          | 95.30<br>(66.19 to 134.78)           | 2.69<br>(1.99 to 3.54)       | 3.36<br>(2.41 to 4.41)           | 3.74<br>(2.70 to 4.89)           | 3.03<br>(2.19 to 3.96)           |

|                           |                                 |                                 |                                 |                                 |                           |                            |                             |                           |
|---------------------------|---------------------------------|---------------------------------|---------------------------------|---------------------------------|---------------------------|----------------------------|-----------------------------|---------------------------|
|                           | 12.56<br>(4.98 to<br>17.45)     | 16.34<br>(7.47 to<br>24.87)     | 19.35<br>(9.37 to<br>29.70)     | 14.20<br>(6.49 to<br>21.65)     | 0.27<br>(0.11 to<br>0.37) | 0.39<br>(0.19 to<br>0.58)  | 0.47<br>(0.24 to<br>0.69)   | 0.34<br>(0.17 to<br>0.49) |
| Cocaine use disorders     |                                 |                                 |                                 |                                 |                           |                            |                             |                           |
|                           | 8.54<br>(5.77 to<br>11.84)      | 16.13<br>(10.01 to<br>24.73)    | 21.55<br>(13.50 to<br>32.96)    | 12.66<br>(7.93 to<br>19.45)     | 0.19<br>(0.13 to<br>0.26) | 0.41<br>(0.27 to<br>0.60)  | 0.56<br>(0.37 to<br>0.80)   | 0.31<br>(0.20 to<br>0.45) |
| Amphetamine use disorders |                                 |                                 |                                 |                                 |                           |                            |                             |                           |
|                           | 336.22<br>(245.37 to<br>431.59) | 287.00<br>(194.96 to<br>402.99) | 371.76<br>(250.40 to<br>514.72) | 230.61<br>(155.20 to<br>320.52) | 7.50<br>(5.50 to<br>9.53) | 7.61<br>(5.39 to<br>10.10) | 10.05<br>(7.10 to<br>13.19) | 5.96<br>(4.18 to<br>7.93) |
| Other drug use disorders  |                                 |                                 |                                 |                                 |                           |                            |                             |                           |
|                           | 1.38<br>(1.12 to<br>1.73)       | 1.34<br>(0.95 to<br>1.82)       | 1.39<br>(0.98 to<br>1.89)       | 1.33<br>(0.92 to<br>1.81)       | 0.03<br>(0.02 to<br>0.04) | 0.03<br>(0.02 to<br>0.04)  | 0.03<br>(0.02 to<br>0.04)   | 0.03<br>(0.02 to<br>0.04) |
| Eating disorders          |                                 |                                 |                                 |                                 |                           |                            |                             |                           |



| Mauritius                                                  |                                              |                                               |                                               |                                               |                                           |                                           |                                           |                                           |
|------------------------------------------------------------|----------------------------------------------|-----------------------------------------------|-----------------------------------------------|-----------------------------------------------|-------------------------------------------|-------------------------------------------|-------------------------------------------|-------------------------------------------|
| Cause                                                      | YLLs (actual counts)                         |                                               |                                               |                                               | Deaths (actual counts)                    |                                           |                                           |                                           |
|                                                            | 2016                                         | 2040 Forecast                                 | 2040 Better Scenario                          | 2040 Worse Scenario                           | 2016                                      | 2040 Forecast                             | 2040 Better Scenario                      | 2040 Worse Scenario                       |
| <b>Diabetes, urogenital, blood, and endocrine diseases</b> | <b>61,388.22</b><br>(53,656.84 to 69,351.16) | <b>70,944.05</b><br>(39,569.66 to 137,082.82) | <b>56,916.09</b><br>(31,064.55 to 116,109.92) | <b>94,187.76</b><br>(54,209.62 to 166,512.41) | <b>2,910.96</b><br>(2,566.89 to 3,272.50) | <b>4,444.23</b><br>(2,603.31 to 8,051.70) | <b>3,740.60</b><br>(2,081.22 to 7,085.92) | <b>5,526.16</b><br>(3,318.68 to 9,072.92) |
| Diabetes mellitus                                          | 39,610.60<br>(34,313.63 to 44,925.50)        | 28,381.45<br>(19,525.03 to 39,303.83)         | 20,969.06<br>(14,601.81 to 29,015.91)         | 36,908.42<br>(25,201.11 to 51,840.72)         | 1,950.95<br>(1,703.04 to 2,201.45)        | 1,811.15<br>(1,304.81 to 2,395.43)        | 1,409.21<br>(1,031.62 to 1,872.55)        | 2,233.27<br>(1,577.89 to 2,999.94)        |
| Acute glomerulonephritis                                   | 6.94<br>(6.09 to 7.90)                       | 5.39<br>(4.13 to 7.03)                        | 4.54<br>(3.48 to 5.93)                        | 6.31<br>(4.82 to 8.18)                        | 0.14<br>(0.12 to 0.16)                    | 0.13<br>(0.10 to 0.17)                    | 0.11<br>(0.09 to 0.15)                    | 0.15<br>(0.12 to 0.19)                    |
| Chronic kidney disease                                     | 20,008.94<br>(17,245.78 to 22,986.56)        | 40,611.75<br>(11,395.77 to 110,710.09)        | 34,107.97<br>(9,731.38 to 91,896.36)          | 55,223.51<br>(16,346.09 to 130,258.73)        | 889.72<br>(775.73 to 1,013.75)            | 2,515.24<br>(673.54 to 6,445.37)          | 2,214.59<br>(585.26 to 5,734.98)          | 3,176.01<br>(909.59 to 7,129.52)          |
| Chronic kidney disease due to diabetes mellitus            | 12,744.21<br>(10,843.53 to 14,836.95)        | 25,794.90<br>(7,189.19 to 71,555.90)          | 21,307.83<br>(6,088.99 to 60,744.96)          | 35,881.29<br>(10,433.53 to 89,247.93)         | 530.89<br>(452.35 to 619.65)              | 1,417.91<br>(385.69 to 3,682.18)          | 1,217.77<br>(323.60 to 3,184.53)          | 1,852.59<br>(539.21 to 4,195.64)          |
| Chronic kidney disease due to hypertension                 | 5,163.02<br>(4,218.50 to 6,168.96)           | 11,961.67<br>(3,240.91 to 30,989.04)          | 10,498.76<br>(2,746.56 to 28,320.44)          | 15,356.80<br>(4,455.21 to 35,397.94)          | 282.53<br>(232.46 to 331.99)              | 927.57<br>(232.12 to 2,368.91)            | 852.97<br>(210.74 to 2,259.29)            | 1,102.97<br>(312.12 to 2,465.74)          |
| Chronic kidney disease due to glomerulonephritis           | 985.69<br>(786.24 to 1,215.83)               | 1,139.92<br>(396.34 to 2,927.01)              | 894.36<br>(313.24 to 2,351.67)                | 1,628.12<br>(577.07 to 3,669.51)              | 32.15<br>(25.41 to 40.42)                 | 60.51<br>(17.33 to 156.08)                | 49.58<br>(14.23 to 131.38)                | 81.43<br>(24.49 to 186.65)                |
| Chronic kidney disease due to other and unspecified causes | 1,116.02<br>(893.83 to 1,397.43)             | 1,715.26<br>(539.19 to 4,412.24)              | 1,407.01<br>(442.02 to 3,747.43)              | 2,357.31<br>(747.84 to 5,495.15)              | 44.15<br>(35.14 to 55.28)                 | 109.25<br>(28.22 to 278.12)               | 94.28<br>(23.71 to 251.83)                | 139.03<br>(38.94 to 325.51)               |
| Urinary diseases and male infertility                      | 559.81<br>(488.42 to 637.21)                 | 638.39<br>(546.00 to 742.97)                  | 557.25<br>(478.14 to 649.61)                  | 705.96<br>(605.18 to 812.24)                  | 25.29<br>(22.35 to 28.65)                 | 44.72<br>(35.24 to 54.10)                 | 41.34<br>(32.98 to 50.10)                 | 46.26<br>(36.49 to 56.94)                 |
| Urinary tract infections                                   | 462.62<br>(396.09 to 534.30)                 | 565.60<br>(479.27 to 662.33)                  | 498.71<br>(423.17 to 583.42)                  | 619.70<br>(528.57 to 719.06)                  | 21.06<br>(18.20 to 24.12)                 | 39.70<br>(31.44 to 48.41)                 | 37.01<br>(29.49 to 45.05)                 | 40.80<br>(31.90 to 50.18)                 |
| Urolithiasis                                               | 12.96<br>(10.07 to 18.57)                    | 12.85<br>(9.19 to 19.83)                      | 10.04<br>(7.16 to 15.91)                      | 15.71<br>(11.36 to 23.64)                     | 0.48<br>(0.37 to 0.72)                    | 0.66<br>(0.46 to 1.13)                    | 0.54<br>(0.38 to 0.93)                    | 0.76<br>(0.54 to 1.25)                    |
| Other urinary diseases                                     | 84.23<br>(61.96 to 113.10)                   | 59.94<br>(40.32 to 85.61)                     | 48.50<br>(33.05 to 70.42)                     | 70.55<br>(47.45 to 100.36)                    | 3.74<br>(2.67 to 5.07)                    | 4.35<br>(2.59 to 7.11)                    | 3.79<br>(2.26 to 6.24)                    | 4.69<br>(2.67 to 7.66)                    |
| Gynecological diseases                                     | 13.44<br>(5.48 to 18.46)                     | 6.94<br>(2.98 to 10.31)                       | 4.65<br>(1.96 to 7.05)                        | 9.88<br>(4.32 to 14.58)                       | 0.42<br>(0.19 to 0.57)                    | 0.30<br>(0.14 to 0.43)                    | 0.21<br>(0.10 to 0.30)                    | 0.41<br>(0.19 to 0.57)                    |
| Uterine fibroids                                           | 4.28<br>(1.95 to 6.02)                       | 2.00<br>(0.95 to 3.16)                        | 1.48<br>(0.66 to 2.35)                        | 2.62<br>(1.18 to 4.12)                        | 0.13<br>(0.06 to 0.18)                    | 0.07<br>(0.03 to 0.11)                    | 0.05<br>(0.03 to 0.08)                    | 0.09<br>(0.04 to 0.14)                    |
| Polycystic ovarian syndrome                                | 1.81<br>(0.60 to 3.01)                       | 0.50<br>(0.14 to 0.97)                        | 0.25<br>(0.07 to 0.51)                        | 0.92<br>(0.27 to 1.75)                        | 0.04<br>(0.02 to 0.07)                    | 0.01<br>(0.00 to 0.02)                    | 0.01<br>(0.00 to 0.02)                    | 0.02<br>(0.01 to 0.04)                    |
| Endometriosis                                              | 0.04<br>(0.01 to 0.07)                       | 0.03<br>(0.01 to 0.06)                        | 0.02<br>(0.01 to 0.04)                        | 0.04<br>(0.01 to 0.08)                        | 0.00<br>(0.00 to 0.00)                    | 0.00<br>(0.00 to 0.00)                    | 0.00<br>(0.00 to 0.00)                    | 0.00<br>(0.00 to 0.00)                    |
| Genital prolapse                                           | 0.15<br>(0.07 to 0.25)                       | 0.11<br>(0.05 to 0.18)                        | 0.07<br>(0.04 to 0.13)                        | 0.15<br>(0.07 to 0.25)                        | 0.01<br>(0.00 to 0.01)                    | 0.01<br>(0.00 to 0.01)                    | 0.00<br>(0.00 to 0.01)                    | 0.01<br>(0.00 to 0.02)                    |
| Other gynecological diseases                               | 7.15<br>(2.80 to 10.38)                      | 4.31<br>(1.80 to 6.73)                        | 2.84<br>(1.14 to 4.49)                        | 6.16<br>(2.56 to 9.44)                        | 0.24<br>(0.11 to 0.34)                    | 0.21<br>(0.09 to 0.32)                    | 0.15<br>(0.06 to 0.22)                    | 0.29<br>(0.13 to 0.41)                    |
| Hemoglobinopathies and hemolytic anemias                   | 541.67<br>(457.69 to 682.81)                 | 415.56<br>(330.06 to 534.92)                  | 336.52<br>(267.07 to 443.94)                  | 495.89<br>(394.59 to 635.00)                  | 18.96<br>(16.09 to 23.96)                 | 21.46<br>(17.17 to 27.60)                 | 18.05<br>(14.41 to 23.23)                 | 24.38<br>(19.49 to 31.64)                 |
| Thalassemias                                               | 98.56<br>(75.52 to 127.01)                   | 38.28<br>(24.38 to 58.72)                     | 35.91<br>(23.30 to 54.76)                     | 40.71<br>(25.53 to 63.17)                     | 1.34<br>(1.00 to 1.75)                    | 0.53<br>(0.35 to 0.81)                    | 0.50<br>(0.32 to 0.76)                    | 0.56<br>(0.35 to 0.87)                    |

|                                                   |                                   |                                   |                                   |                                   |                              |                              |                              |                              |
|---------------------------------------------------|-----------------------------------|-----------------------------------|-----------------------------------|-----------------------------------|------------------------------|------------------------------|------------------------------|------------------------------|
|                                                   | 1.01<br>(0.76 to<br>1.32)         | 0.74<br>(0.51 to<br>1.03)         | 0.55<br>(0.38 to<br>0.78)         | 0.95<br>(0.66 to<br>1.31)         | 0.02<br>(0.02 to<br>0.03)    | 0.02<br>(0.01 to<br>0.03)    | 0.02<br>(0.01 to<br>0.02)    | 0.03<br>(0.02 to<br>0.04)    |
| Sickle cell disorders                             |                                   |                                   |                                   |                                   |                              |                              |                              |                              |
|                                                   | 226.30<br>(180.64 to<br>287.95)   | 197.90<br>(146.92 to<br>266.39)   | 150.00<br>(111.58 to<br>205.03)   | 251.04<br>(188.62 to<br>333.27)   | 6.11<br>(4.96 to<br>7.78)    | 7.17<br>(5.46 to<br>9.55)    | 5.54<br>(4.24 to<br>7.53)    | 8.86<br>(6.81 to<br>11.52)   |
| G6PD deficiency                                   |                                   |                                   |                                   |                                   |                              |                              |                              |                              |
|                                                   | 215.81<br>(179.04 to<br>280.99)   | 178.64<br>(139.68 to<br>232.19)   | 150.07<br>(116.36 to<br>197.48)   | 203.19<br>(157.92 to<br>266.58)   | 11.49<br>(9.61 to<br>14.77)  | 13.74<br>(10.28 to<br>17.97) | 12.00<br>(9.04 to<br>15.75)  | 14.93<br>(10.88 to<br>19.82) |
| Other hemoglobinopathies and hemolytic anemias    |                                   |                                   |                                   |                                   |                              |                              |                              |                              |
|                                                   | 646.82<br>(529.78 to<br>1,052.97) | 884.57<br>(711.54 to<br>1,443.44) | 936.10<br>(749.20 to<br>1,526.84) | 837.79<br>(678.81 to<br>1,371.77) | 25.47<br>(20.88 to<br>41.82) | 51.23<br>(40.35 to<br>87.20) | 57.08<br>(45.08 to<br>96.99) | 45.69<br>(36.00 to<br>78.65) |
| Endocrine, metabolic, blood, and immune disorders |                                   |                                   |                                   |                                   |                              |                              |                              |                              |

| Mauritius                                     |                                           |                                           |                                           |                                           |                                   |                                   |                                   |                                    |
|-----------------------------------------------|-------------------------------------------|-------------------------------------------|-------------------------------------------|-------------------------------------------|-----------------------------------|-----------------------------------|-----------------------------------|------------------------------------|
| Cause                                         | YLLs (actual counts)                      |                                           |                                           |                                           | Deaths (actual counts)            |                                   |                                   |                                    |
|                                               | 2016                                      | 2040 Forecast                             | 2040 Better Scenario                      | 2040 Worse Scenario                       | 2016                              | 2040 Forecast                     | 2040 Better Scenario              | 2040 Worse Scenario                |
| <b>Musculoskeletal disorders</b>              | <b>552.80</b><br>(283.14 to 678.03)       | <b>504.26</b><br>(295.43 to 615.92)       | <b>452.72</b><br>(265.77 to 557.16)       | <b>550.53</b><br>(311.92 to 669.71)       | <b>16.96</b><br>(10.18 to 20.46)  | <b>25.03</b><br>(16.46 to 30.13)  | <b>23.21</b><br>(15.35 to 28.19)  | <b>26.30</b><br>(17.08 to 32.00)   |
| Rheumatoid arthritis                          | 73.74<br>(48.90 to 108.23)                | 89.19<br>(59.78 to 130.87)                | 64.99<br>(42.03 to 96.05)                 | 114.80<br>(76.48 to 166.14)               | 3.96<br>(2.65 to 5.62)            | 6.45<br>(4.23 to 9.60)            | 4.87<br>(3.10 to 7.39)            | 7.97<br>(5.12 to 11.58)            |
| Other musculoskeletal disorders               | 479.05<br>(234.86 to 594.54)              | 415.07<br>(231.06 to 516.90)              | 387.73<br>(217.16 to 479.28)              | 435.73<br>(233.43 to 542.49)              | 13.00<br>(7.30 to 19.53)          | 18.58<br>(11.71 to 22.57)         | 18.34<br>(11.77 to 22.40)         | 18.33<br>(11.06 to 22.53)          |
| <b>Other non-communicable diseases</b>        | <b>5,146.40</b><br>(3,115.51 to 6,534.52) | <b>2,870.88</b><br>(1,607.47 to 3,851.66) | <b>2,115.67</b><br>(1,141.21 to 2,833.48) | <b>3,878.66</b><br>(2,195.63 to 5,238.64) | <b>83.84</b><br>(48.47 to 105.68) | <b>89.25</b><br>(41.55 to 119.74) | <b>77.65</b><br>(34.78 to 104.52) | <b>101.39</b><br>(50.15 to 135.07) |
| Congenital birth defects                      | 4,270.43<br>(2,489.47 to 5,510.65)        | 1,793.26<br>(1,003.41 to 2,512.05)        | 1,146.29<br>(633.49 to 1,625.82)          | 2,709.64<br>(1,504.63 to 3,748.98)        | 53.05<br>(31.50 to 67.69)         | 23.15<br>(13.57 to 31.73)         | 14.93<br>(8.81 to 20.71)          | 34.69<br>(20.46 to 47.19)          |
| Neural tube defects                           | 88.78<br>(58.57 to 132.12)                | 15.14<br>(8.30 to 25.50)                  | 9.09<br>(4.95 to 15.84)                   | 24.34<br>(13.42 to 41.06)                 | 1.05<br>(0.70 to 1.56)            | 0.19<br>(0.11 to 0.31)            | 0.11<br>(0.06 to 0.20)            | 0.30<br>(0.17 to 0.49)             |
| Congenital heart anomalies                    | 1,999.66<br>(1,300.04 to 2,552.96)        | 895.07<br>(538.81 to 1,265.90)            | 531.69<br>(322.33 to 759.88)              | 1,424.67<br>(857.25 to 2,005.64)          | 25.46<br>(16.52 to 32.13)         | 11.77<br>(7.21 to 16.29)          | 7.03<br>(4.37 to 9.83)            | 18.60<br>(11.31 to 25.85)          |
| Orofacial clefts                              | 0.72<br>(0.35 to 1.30)                    | 0.31<br>(0.14 to 0.64)                    | 0.17<br>(0.07 to 0.35)                    | 0.55<br>(0.24 to 1.10)                    | 0.01<br>(0.00 to 0.02)            | 0.00<br>(0.00 to 0.01)            | 0.00<br>(0.00 to 0.00)            | 0.01<br>(0.00 to 0.01)             |
| Down syndrome                                 | 42.24<br>(30.12 to 65.77)                 | 39.37<br>(26.67 to 59.90)                 | 39.75<br>(26.97 to 60.48)                 | 39.82<br>(26.85 to 60.78)                 | 0.69<br>(0.51 to 0.98)            | 0.70<br>(0.48 to 0.97)            | 0.72<br>(0.50 to 1.00)            | 0.70<br>(0.49 to 0.97)             |
| Other chromosomal abnormalities               | 47.14<br>(10.02 to 76.97)                 | 45.67<br>(10.58 to 78.66)                 | 36.70<br>(8.23 to 63.21)                  | 56.79<br>(13.36 to 98.14)                 | 0.55<br>(0.12 to 0.90)            | 0.53<br>(0.13 to 0.92)            | 0.43<br>(0.10 to 0.74)            | 0.66<br>(0.16 to 1.15)             |
| Congenital musculoskeletal and limb anomalies | 48.65<br>(26.96 to 68.04)                 | 26.06<br>(13.81 to 38.81)                 | 17.14<br>(9.12 to 25.73)                  | 38.21<br>(20.23 to 58.22)                 | 0.58<br>(0.32 to 0.81)            | 0.32<br>(0.17 to 0.47)            | 0.21<br>(0.12 to 0.31)            | 0.46<br>(0.25 to 0.69)             |
| Urogenital congenital anomalies               | 55.57<br>(27.20 to 78.10)                 | 32.60<br>(16.65 to 49.85)                 | 23.38<br>(12.31 to 35.25)                 | 44.04<br>(21.81 to 67.34)                 | 0.84<br>(0.50 to 1.13)            | 0.56<br>(0.34 to 0.81)            | 0.41<br>(0.26 to 0.60)            | 0.73<br>(0.45 to 1.05)             |
| Digestive congenital anomalies                | 344.60<br>(151.01 to 512.26)              | 130.32<br>(54.74 to 208.45)               | 81.90<br>(33.39 to 134.02)                | 199.22<br>(86.16 to 319.22)               | 4.06<br>(1.79 to 6.02)            | 1.55<br>(0.67 to 2.47)            | 0.98<br>(0.41 to 1.58)            | 2.37<br>(1.05 to 3.77)             |
| Other congenital birth defects                | 1,643.08<br>(782.14 to 2,240.35)          | 608.71<br>(282.98 to 890.65)              | 406.48<br>(185.28 to 612.38)              | 882.00<br>(403.54 to 1,307.39)            | 19.80<br>(9.49 to 26.71)          | 7.53<br>(3.70 to 10.84)           | 5.05<br>(2.42 to 7.43)            | 10.86<br>(5.22 to 15.88)           |
| Skin and subcutaneous diseases                | 567.70<br>(181.62 to 797.07)              | 980.13<br>(338.16 to 1,346.36)            | 895.96<br>(306.34 to 1,229.90)            | 1,035.62<br>(347.32 to 1,423.94)          | 27.22<br>(8.81 to 37.83)          | 64.97<br>(21.92 to 92.02)         | 61.87<br>(21.71 to 86.21)         | 65.15<br>(21.63 to 93.18)          |
| Cellulitis                                    | 112.68<br>(18.36 to 179.43)               | 245.32<br>(43.16 to 379.47)               | 242.00<br>(43.56 to 375.41)               | 241.31<br>(41.43 to 373.79)               | 4.21<br>(0.69 to 6.72)            | 12.95<br>(2.35 to 20.08)          | 13.39<br>(2.47 to 20.64)          | 12.02<br>(2.15 to 18.69)           |
| Pyoderma                                      | 210.25<br>(69.09 to 293.35)               | 403.66<br>(137.70 to 559.18)              | 369.40<br>(125.57 to 514.19)              | 428.94<br>(141.20 to 597.73)              | 8.23<br>(2.59 to 11.72)           | 24.29<br>(8.09 to 35.03)          | 23.71<br>(7.84 to 34.03)          | 23.95<br>(7.92 to 34.68)           |
| Decubitus ulcer                               | 223.31<br>(71.85 to 307.87)               | 307.09<br>(106.17 to 441.20)              | 263.01<br>(92.34 to 377.42)               | 339.39<br>(114.31 to 489.02)              | 13.91<br>(4.65 to 19.10)          | 26.40<br>(8.89 to 39.67)          | 23.53<br>(8.06 to 35.12)          | 27.83<br>(9.00 to 42.72)           |
| Other skin and subcutaneous diseases          | 21.46<br>(6.57 to 30.89)                  | 24.07<br>(7.13 to 35.00)                  | 21.55<br>(6.27 to 31.39)                  | 25.98<br>(7.80 to 37.72)                  | 0.86<br>(0.24 to 1.27)            | 1.32<br>(0.35 to 2.00)            | 1.24<br>(0.33 to 1.86)            | 1.35<br>(0.36 to 2.02)             |
| Sudden infant death syndrome                  | 308.26<br>(212.33 to 432.08)              | 97.48<br>(53.56 to 159.92)                | 73.42<br>(39.47 to 124.15)                | 133.41<br>(72.94 to 227.87)               | 3.58<br>(2.46 to 5.01)            | 1.13<br>(0.62 to 1.85)            | 0.85<br>(0.46 to 1.44)            | 1.55<br>(0.85 to 2.64)             |

|                          |                                          |                                         |                                         |                                          |                                 |                                 |                                 |                                 |
|--------------------------|------------------------------------------|-----------------------------------------|-----------------------------------------|------------------------------------------|---------------------------------|---------------------------------|---------------------------------|---------------------------------|
| Injuries                 | 21,117.35<br>(17,982.13 to<br>24,721.38) | 12,418.69<br>(9,421.82 to<br>16,664.26) | 10,057.17<br>(7,709.01 to<br>13,213.06) | 18,247.32<br>(13,496.82 to<br>25,294.25) | 510.58<br>(435.81 to<br>597.05) | 402.40<br>(326.88 to<br>503.24) | 341.52<br>(281.52 to<br>417.63) | 547.42<br>(437.42 to<br>703.50) |
| Transport injuries       | 6,734.16<br>(5,677.68 to<br>7,856.52)    | 2,445.93<br>(1,708.53 to<br>3,481.73)   | 1,740.01<br>(1,229.16 to<br>2,437.30)   | 6,332.02<br>(4,353.99 to<br>9,257.60)    | 161.40<br>(137.55 to<br>187.68) | 81.04<br>(60.80 to<br>110.08)   | 60.53<br>(45.93 to<br>81.12)    | 184.85<br>(134.23 to<br>255.66) |
| Road injuries            | 6,250.93<br>(5,256.49 to<br>7,301.04)    | 2,007.48<br>(1,406.07 to<br>2,863.24)   | 1,422.18<br>(1,017.49 to<br>1,978.26)   | 5,744.21<br>(3,971.92 to<br>8,385.61)    | 148.58<br>(126.61 to<br>173.01) | 65.20<br>(48.62 to<br>88.11)    | 48.46<br>(36.92 to<br>64.42)    | 164.84<br>(119.81 to<br>226.84) |
| Pedestrian road injuries | 1,307.73<br>(1,005.54 to<br>1,559.99)    | 397.87<br>(281.22 to<br>545.42)         | 224.64<br>(161.99 to<br>300.26)         | 1,213.61<br>(824.68 to<br>1,725.20)      | 36.63<br>(28.58 to<br>43.44)    | 16.25<br>(11.99 to<br>21.83)    | 9.79<br>(7.27 to<br>12.71)      | 43.64<br>(31.40 to<br>59.77)    |

| Mauritius                                       |                                                  |                                                  |                                                  |                                                  |                                            |                                            |                                            |                                            |
|-------------------------------------------------|--------------------------------------------------|--------------------------------------------------|--------------------------------------------------|--------------------------------------------------|--------------------------------------------|--------------------------------------------|--------------------------------------------|--------------------------------------------|
| Cause                                           | YLLs (actual counts)                             |                                                  |                                                  |                                                  | Deaths (actual counts)                     |                                            |                                            |                                            |
|                                                 | 2016                                             | 2040 Forecast                                    | 2040 Better Scenario                             | 2040 Worse Scenario                              | 2016                                       | 2040 Forecast                              | 2040 Better Scenario                       | 2040 Worse Scenario                        |
| Cyclist road injuries                           | 252.51<br>(189.32 to 306.58)                     | 106.22<br>(70.06 to 148.42)                      | 83.40<br>(55.97 to 115.44)                       | 249.80<br>(165.01 to 358.64)                     | 6.76<br>(5.08 to 8.21)                     | 3.91<br>(2.66 to 5.46)                     | 3.29<br>(2.25 to 4.53)                     | 7.78<br>(5.20 to 10.96)                    |
| Motorcyclist road injuries                      | 1,605.08<br>(1,209.46 to 1,971.48)               | 650.62<br>(404.48 to 1,006.33)                   | 531.75<br>(337.87 to 809.89)                     | 1,252.50<br>(782.67 to 2,003.57)                 | 32.22<br>(24.26 to 39.33)                  | 15.82<br>(10.12 to 23.49)                  | 13.44<br>(8.79 to 19.70)                   | 27.76<br>(17.71 to 42.65)                  |
| Motor vehicle road injuries                     | 2,998.02<br>(2,454.62 to 3,764.03)               | 824.68<br>(585.26 to 1,181.62)                   | 562.14<br>(406.62 to 792.82)                     | 2,939.17<br>(2,027.36 to 4,303.71)               | 70.69<br>(58.26 to 87.68)                  | 28.04<br>(20.86 to 37.90)                  | 20.97<br>(15.93 to 27.89)                  | 82.81<br>(59.96 to 116.05)                 |
| Other road injuries                             | 87.59<br>(61.58 to 111.74)                       | 28.09<br>(18.04 to 41.12)                        | 20.24<br>(13.04 to 28.83)                        | 89.13<br>(55.46 to 136.63)                       | 2.28<br>(1.55 to 2.89)                     | 1.18<br>(0.74 to 1.67)                     | 0.97<br>(0.61 to 1.36)                     | 2.86<br>(1.78 to 4.19)                     |
| Other transport injuries                        | 483.23<br>(393.57 to 595.60)                     | 438.45<br>(292.98 to 666.61)                     | 317.83<br>(218.05 to 471.78)                     | 587.80<br>(391.86 to 904.11)                     | 12.82<br>(10.61 to 15.64)                  | 15.84<br>(11.08 to 22.95)                  | 12.07<br>(8.60 to 17.17)                   | 20.01<br>(13.86 to 29.27)                  |
| <b>Unintentional injuries</b>                   | <b>7,437.53</b><br><b>(6,261.99 to 8,667.96)</b> | <b>4,877.50</b><br><b>(3,907.23 to 5,935.17)</b> | <b>4,177.86</b><br><b>(3,397.69 to 5,063.03)</b> | <b>5,566.77</b><br><b>(4,462.37 to 6,906.33)</b> | <b>199.39</b><br><b>(168.84 to 230.61)</b> | <b>194.09</b><br><b>(161.09 to 226.45)</b> | <b>175.28</b><br><b>(146.39 to 202.34)</b> | <b>207.79</b><br><b>(169.54 to 245.56)</b> |
| Falls                                           | 1,706.55<br>(1,291.67 to 2,061.48)               | 1,405.75<br>(1,102.31 to 1,701.16)               | 1,264.81<br>(1,011.73 to 1,538.27)               | 1,503.32<br>(1,175.75 to 1,803.10)               | 56.70<br>(45.52 to 67.25)                  | 69.52<br>(56.24 to 82.22)                  | 65.33<br>(53.23 to 77.51)                  | 70.50<br>(56.00 to 83.40)                  |
| Drowning                                        | 1,974.50<br>(1,649.68 to 2,362.65)               | 1,068.46<br>(762.20 to 1,457.48)                 | 873.49<br>(625.30 to 1,186.66)                   | 1,289.02<br>(912.32 to 1,816.88)                 | 44.95<br>(37.83 to 53.46)                  | 31.38<br>(23.97 to 41.56)                  | 26.44<br>(20.38 to 34.19)                  | 36.49<br>(27.59 to 49.96)                  |
| Fire, heat, and hot substances                  | 1,151.93<br>(970.34 to 1,437.15)                 | 677.35<br>(507.14 to 914.63)                     | 523.73<br>(399.46 to 719.40)                     | 849.47<br>(637.45 to 1,146.70)                   | 30.55<br>(25.63 to 40.73)                  | 27.29<br>(20.66 to 40.33)                  | 22.34<br>(17.12 to 33.32)                  | 32.09<br>(23.95 to 46.86)                  |
| Poisonings                                      | 52.84<br>(40.77 to 101.06)                       | 24.56<br>(17.34 to 47.30)                        | 18.00<br>(12.81 to 34.37)                        | 32.30<br>(22.69 to 62.66)                        | 1.48<br>(1.19 to 2.60)                     | 1.33<br>(0.85 to 2.04)                     | 1.07<br>(0.70 to 1.63)                     | 1.56<br>(0.99 to 2.50)                     |
| Exposure to mechanical forces                   | 233.57<br>(189.27 to 280.50)                     | 129.74<br>(103.18 to 161.72)                     | 104.25<br>(82.46 to 130.90)                      | 155.81<br>(122.69 to 197.43)                     | 5.37<br>(4.33 to 6.41)                     | 4.62<br>(3.58 to 5.52)                     | 3.96<br>(3.03 to 4.69)                     | 5.15<br>(3.93 to 6.25)                     |
| Unintentional firearm injuries                  | 21.69<br>(17.38 to 39.51)                        | 13.03<br>(9.93 to 22.41)                         | 11.24<br>(8.57 to 19.22)                         | 14.68<br>(11.20 to 25.31)                        | 0.59<br>(0.48 to 1.03)                     | 0.56<br>(0.43 to 0.88)                     | 0.52<br>(0.39 to 0.79)                     | 0.58<br>(0.44 to 0.92)                     |
| Unintentional suffocation                       | 66.34<br>(36.39 to 90.70)                        | 25.16<br>(13.63 to 36.18)                        | 20.54<br>(11.26 to 29.64)                        | 30.34<br>(15.91 to 44.49)                        | 1.05<br>(0.56 to 1.39)                     | 0.44<br>(0.24 to 0.61)                     | 0.37<br>(0.21 to 0.51)                     | 0.52<br>(0.28 to 0.73)                     |
| Other exposure to mechanical forces             | 145.54<br>(120.07 to 188.83)                     | 91.55<br>(71.85 to 121.15)                       | 72.47<br>(57.18 to 95.33)                        | 110.79<br>(87.30 to 148.40)                      | 3.73<br>(3.00 to 4.59)                     | 3.62<br>(2.71 to 4.38)                     | 3.08<br>(2.28 to 3.70)                     | 4.05<br>(3.01 to 4.97)                     |
| Adverse effects of medical treatment            | 1,192.51<br>(882.07 to 1,567.12)                 | 885.04<br>(509.86 to 1,155.69)                   | 803.86<br>(461.19 to 1,055.63)                   | 945.61<br>(536.97 to 1,251.43)                   | 38.28<br>(22.29 to 49.94)                  | 41.53<br>(24.60 to 52.64)                  | 39.59<br>(23.90 to 50.30)                  | 41.87<br>(24.35 to 53.80)                  |
| Animal contact                                  | 39.46<br>(24.41 to 51.22)                        | 27.96<br>(17.03 to 37.66)                        | 23.28<br>(14.43 to 31.18)                        | 32.59<br>(19.42 to 44.41)                        | 1.04<br>(0.63 to 1.32)                     | 1.07<br>(0.66 to 1.38)                     | 0.96<br>(0.58 to 1.24)                     | 1.15<br>(0.69 to 1.53)                     |
| Venomous animal contact                         | 11.32<br>(7.81 to 14.65)                         | 7.72<br>(4.89 to 10.42)                          | 6.85<br>(4.35 to 9.31)                           | 8.52<br>(5.41 to 11.85)                          | 0.28<br>(0.18 to 0.36)                     | 0.30<br>(0.17 to 0.42)                     | 0.29<br>(0.16 to 0.40)                     | 0.31<br>(0.18 to 0.43)                     |
| Non-venomous animal contact                     | 28.15<br>(16.11 to 36.88)                        | 20.24<br>(11.48 to 27.92)                        | 16.42<br>(9.51 to 22.56)                         | 24.07<br>(13.21 to 33.66)                        | 0.75<br>(0.43 to 0.98)                     | 0.76<br>(0.44 to 1.00)                     | 0.66<br>(0.37 to 0.87)                     | 0.85<br>(0.48 to 1.13)                     |
| Foreign body                                    | 871.86<br>(644.49 to 1,080.47)                   | 554.62<br>(412.86 to 698.65)                     | 499.99<br>(376.73 to 624.21)                     | 607.67<br>(438.54 to 771.83)                     | 16.02<br>(12.44 to 19.04)                  | 13.85<br>(11.46 to 16.74)                  | 13.15<br>(10.99 to 16.07)                  | 14.26<br>(11.50 to 17.02)                  |
| Pulmonary aspiration and foreign body in airway | 847.97<br>(624.58 to 1,052.93)                   | 538.17<br>(397.77 to 680.19)                     | 482.96<br>(361.42 to 604.57)                     | 591.63<br>(425.84 to 752.73)                     | 15.53<br>(11.99 to 18.47)                  | 13.40<br>(11.03 to 16.34)                  | 12.67<br>(10.55 to 15.48)                  | 13.85<br>(11.14 to 16.60)                  |

|                                             |                                                            |                                                            |                                                            |                                                             |                                                      |                                                     |                                                     |                                                      |
|---------------------------------------------|------------------------------------------------------------|------------------------------------------------------------|------------------------------------------------------------|-------------------------------------------------------------|------------------------------------------------------|-----------------------------------------------------|-----------------------------------------------------|------------------------------------------------------|
|                                             | 23.90<br>(13.81 to<br>30.38)                               | 16.45<br>(10.30 to<br>21.93)                               | 17.03<br>(10.89 to<br>22.57)                               | 16.04<br>(9.83 to<br>21.56)                                 | 0.49<br>(0.31 to<br>0.61)                            | 0.44<br>(0.30 to<br>0.57)                           | 0.48<br>(0.32 to<br>0.62)                           | 0.41<br>(0.27 to<br>0.53)                            |
| Foreign body in other body part             |                                                            |                                                            |                                                            |                                                             |                                                      |                                                     |                                                     |                                                      |
|                                             | 22.78<br>(16.44 to<br>39.41)                               | 19.67<br>(13.31 to<br>34.17)                               | 15.46<br>(10.47 to<br>26.28)                               | 23.71<br>(15.93 to<br>41.54)                                | 0.84<br>(0.57 to<br>1.39)                            | 1.12<br>(0.73 to<br>1.86)                           | 0.94<br>(0.61 to<br>1.56)                           | 1.26<br>(0.82 to<br>2.09)                            |
| Environmental heat and cold exposure        |                                                            |                                                            |                                                            |                                                             |                                                      |                                                     |                                                     |                                                      |
|                                             | 191.52<br>(154.08 to<br>233.37)                            | 84.35<br>(61.01 to<br>116.61)                              | 51.00<br>(37.67 to<br>70.56)                               | 127.25<br>(94.99 to<br>170.19)                              | 4.16<br>(3.40 to<br>5.02)                            | 2.38<br>(1.81 to<br>3.10)                           | 1.50<br>(1.19 to<br>1.93)                           | 3.44<br>(2.68 to<br>4.36)                            |
| Other unintentional injuries                |                                                            |                                                            |                                                            |                                                             |                                                      |                                                     |                                                     |                                                      |
| <b>Self-harm and interpersonal violence</b> | <b>6,938.96</b><br><b>(5,492.50 to</b><br><b>8,507.86)</b> | <b>5,074.99</b><br><b>(3,347.88 to</b><br><b>7,863.90)</b> | <b>4,118.95</b><br><b>(2,795.06 to</b><br><b>6,248.97)</b> | <b>6,328.43</b><br><b>(4,001.27 to</b><br><b>10,251.03)</b> | <b>149.66</b><br><b>(120.10 to</b><br><b>183.39)</b> | <b>126.73</b><br><b>(86.54 to</b><br><b>189.89)</b> | <b>105.16</b><br><b>(73.23 to</b><br><b>153.29)</b> | <b>154.26</b><br><b>(100.27 to</b><br><b>241.10)</b> |

| Mauritius                                                                           |                                      |                                         |                                         |                                         |                                      |                                      |                                      |                                      |
|-------------------------------------------------------------------------------------|--------------------------------------|-----------------------------------------|-----------------------------------------|-----------------------------------------|--------------------------------------|--------------------------------------|--------------------------------------|--------------------------------------|
| Cause                                                                               | YLLs (actual counts)                 |                                         |                                         |                                         | Deaths (actual counts)               |                                      |                                      |                                      |
|                                                                                     | 2016                                 | 2040 Forecast                           | 2040 Better Scenario                    | 2040 Worse Scenario                     | 2016                                 | 2040 Forecast                        | 2040 Better Scenario                 | 2040 Worse Scenario                  |
| Self-harm                                                                           | 5,363.37<br>(4,143.99 to 6,610.60)   | 4,222.57<br>(2,662.57 to 6,810.34)      | 3,436.58<br>(2,223.80 to 5,409.43)      | 5,284.77<br>(3,131.66 to 8,890.66)      | 115.38<br>(91.14 to 142.91)          | 105.37<br>(69.10 to 166.04)          | 87.69<br>(59.10 to 132.82)           | 128.66<br>(79.18 to 208.80)          |
| Self-harm by firearm                                                                | 70.29<br>(41.88 to 110.12)           | 41.08<br>(21.05 to 77.52)               | 31.00<br>(16.27 to 55.91)               | 54.99<br>(25.81 to 110.44)              | 1.79<br>(1.12 to 2.68)               | 1.42<br>(0.79 to 2.44)               | 1.14<br>(0.64 to 1.93)               | 1.76<br>(0.92 to 3.28)               |
| Self-harm by other specified means                                                  | 5,293.09<br>(4,089.02 to 6,539.14)   | 4,181.48<br>(2,635.74 to 6,753.55)      | 3,405.57<br>(2,207.18 to 5,358.93)      | 5,229.78<br>(3,104.92 to 8,778.04)      | 113.60<br>(90.01 to 140.53)          | 103.95<br>(68.28 to 163.57)          | 86.55<br>(58.27 to 130.91)           | 126.90<br>(78.01 to 207.07)          |
| Interpersonal violence                                                              | 1,575.58<br>(1,001.74 to 2,280.60)   | 852.43<br>(508.12 to 1,338.32)          | 682.57<br>(416.61 to 1,053.66)          | 1,043.67<br>(610.31 to 1,641.89)        | 34.28<br>(22.03 to 48.64)            | 21.36<br>(12.82 to 32.23)            | 17.47<br>(10.73 to 26.07)            | 25.60<br>(15.12 to 39.17)            |
| Physical violence by firearm                                                        | 146.28<br>(74.88 to 331.76)          | 75.01<br>(38.50 to 161.92)              | 56.16<br>(29.23 to 120.31)              | 95.00<br>(47.77 to 208.58)              | 3.13<br>(1.60 to 7.13)               | 1.76<br>(0.91 to 3.69)               | 1.33<br>(0.70 to 2.68)               | 2.20<br>(1.13 to 4.66)               |
| Physical violence by sharp object                                                   | 646.86<br>(250.58 to 949.23)         | 335.65<br>(131.26 to 530.65)            | 255.09<br>(101.94 to 397.33)            | 420.85<br>(161.69 to 671.81)            | 13.46<br>(5.25 to 19.72)             | 7.64<br>(3.07 to 11.81)              | 5.90<br>(2.41 to 8.96)               | 9.44<br>(3.68 to 14.98)              |
| Physical violence by other means                                                    | 782.44<br>(518.24 to 1,315.67)       | 441.77<br>(260.08 to 783.45)            | 371.12<br>(221.21 to 642.24)            | 527.82<br>(302.54 to 942.73)            | 17.68<br>(11.66 to 29.37)            | 11.97<br>(7.25 to 19.58)             | 10.25<br>(6.27 to 16.50)             | 13.96<br>(8.20 to 23.58)             |
| <b>Forces of nature, conflict and terrorism, and executions and police conflict</b> | <b>6.70</b><br><b>(5.94 to 7.56)</b> | <b>20.27</b><br><b>(0.00 to 192.10)</b> | <b>20.36</b><br><b>(0.00 to 192.46)</b> | <b>20.11</b><br><b>(0.00 to 191.33)</b> | <b>0.13</b><br><b>(0.00 to 0.15)</b> | <b>0.54</b><br><b>(0.00 to 4.41)</b> | <b>0.55</b><br><b>(0.00 to 4.49)</b> | <b>0.52</b><br><b>(0.00 to 4.31)</b> |
| Exposure to forces of nature                                                        | 0.00<br>(0.00 to 0.00)               | 20.27<br>(0.00 to 192.10)               | 20.36<br>(0.00 to 192.46)               | 20.11<br>(0.00 to 191.33)               | 0.00<br>(0.00 to 0.00)               | 0.54<br>(0.00 to 4.41)               | 0.55<br>(0.00 to 4.49)               | 0.52<br>(0.00 to 4.31)               |
| Conflict and terrorism                                                              | 0.00<br>(0.00 to 0.00)               | 0.00<br>(0.00 to 0.00)                  | 0.00<br>(0.00 to 0.00)                  | 0.00<br>(0.00 to 0.00)                  | 0.00<br>(0.00 to 0.00)               | 0.00<br>(0.00 to 0.00)               | 0.00<br>(0.00 to 0.00)               | 0.00<br>(0.00 to 0.00)               |
| Executions and police conflict                                                      | 6.70<br>(5.94 to 7.56)               | 0.00<br>(0.00 to 0.00)                  | 0.00<br>(0.00 to 0.00)                  | 0.00<br>(0.00 to 0.00)                  | 0.13<br>(0.12 to 0.15)               | 0.00<br>(0.00 to 0.00)               | 0.00<br>(0.00 to 0.00)               | 0.00<br>(0.00 to 0.00)               |

| Myanmar                                                           |                                          |                                         |                                        |                                          |                                 |                                 |                                 |                                 |
|-------------------------------------------------------------------|------------------------------------------|-----------------------------------------|----------------------------------------|------------------------------------------|---------------------------------|---------------------------------|---------------------------------|---------------------------------|
| Cause                                                             | YLLs (in 1000s)                          |                                         |                                        |                                          | Deaths (in 1000s)               |                                 |                                 |                                 |
|                                                                   | 2016                                     | 2040 Forecast                           | 2040 Better Scenario                   | 2040 Worse Scenario                      | 2016                            | 2040 Forecast                   | 2040 Better Scenario            | 2040 Worse Scenario             |
| All causes                                                        | 11,665.33<br>(10,455.12 to<br>13,504.74) | 11,460.37<br>(9,703.03 to<br>13,460.27) | 9,983.87<br>(8,507.09 to<br>11,647.24) | 15,592.47<br>(13,045.55 to<br>18,558.25) | 374.00<br>(347.26 to<br>416.07) | 560.83<br>(498.94 to<br>619.78) | 505.84<br>(451.82 to<br>555.81) | 701.30<br>(622.58 to<br>777.52) |
| Communicable, maternal, neonatal, and nutritional diseases        | 3,630.09<br>(2,862.92 to<br>4,915.68)    | 1,650.35<br>(1,155.58 to<br>2,347.34)   | 1,293.81<br>(916.64 to<br>1,843.50)    | 2,956.98<br>(2,029.24 to<br>4,318.45)    | 71.74<br>(61.38 to<br>87.01)    | 50.35<br>(37.36 to<br>69.21)    | 40.93<br>(31.02 to<br>55.34)    | 81.97<br>(58.60 to<br>114.76)   |
| HIV/AIDS and tuberculosis                                         | 734.25<br>(624.20 to<br>887.56)          | 357.29<br>(219.03 to<br>570.64)         | 236.28<br>(150.14 to<br>368.72)        | 860.66<br>(527.42 to<br>1,246.02)        | 20.44<br>(17.78 to<br>23.94)    | 14.01<br>(9.20 to<br>21.15)     | 9.95<br>(6.80 to<br>14.27)      | 26.63<br>(17.56 to<br>37.61)    |
| Tuberculosis                                                      | 458.92<br>(391.24 to<br>575.19)          | 298.10<br>(176.74 to<br>491.40)         | 202.41<br>(132.13 to<br>317.45)        | 463.91<br>(277.34 to<br>785.00)          | 14.40<br>(12.37 to<br>17.58)    | 12.67<br>(8.13 to<br>19.31)     | 9.17<br>(6.31 to<br>13.10)      | 18.40<br>(11.54 to<br>28.07)    |
| HIV/AIDS                                                          | 275.33<br>(201.06 to<br>410.94)          | 59.19<br>(15.95 to<br>164.53)           | 33.87<br>(7.48 to<br>113.77)           | 396.75<br>(174.77 to<br>695.00)          | 6.04<br>(4.37 to<br>8.80)       | 1.34<br>(0.28 to<br>3.90)       | 0.78<br>(0.13 to<br>2.75)       | 8.23<br>(3.28 to<br>14.74)      |
| Diarrhea, lower respiratory, and other common infectious diseases | 1,315.26<br>(1,000.95 to<br>1,807.41)    | 619.43<br>(353.76 to<br>1,068.50)       | 464.83<br>(273.70 to<br>763.51)        | 1,169.95<br>(618.29 to<br>2,170.72)      | 27.35<br>(22.56 to<br>34.13)    | 22.75<br>(12.87 to<br>38.89)    | 18.34<br>(10.79 to<br>30.99)    | 38.71<br>(20.61 to<br>68.82)    |
| Diarrheal diseases                                                | 244.96<br>(160.16 to<br>356.91)          | 119.21<br>(18.33 to<br>352.33)          | 87.72<br>(15.33 to<br>258.87)          | 245.53<br>(39.23 to<br>709.41)           | 7.23<br>(4.26 to<br>10.95)      | 6.91<br>(1.08 to<br>21.85)      | 5.47<br>(0.93 to<br>16.56)      | 13.30<br>(2.02 to<br>41.05)     |
| Intestinal infectious diseases                                    | 128.49<br>(67.69 to<br>215.41)           | 55.05<br>(25.73 to<br>101.53)           | 50.61<br>(23.53 to<br>91.40)           | 66.12<br>(29.59 to<br>123.98)            | 1.96<br>(1.04 to<br>3.23)       | 0.97<br>(0.48 to<br>1.71)       | 0.91<br>(0.45 to<br>1.59)       | 1.13<br>(0.54 to<br>2.04)       |
| Typhoid fever                                                     | 111.59<br>(56.45 to<br>190.32)           | 46.52<br>(21.10 to<br>87.32)            | 42.78<br>(19.62 to<br>78.50)           | 55.72<br>(24.66 to<br>107.50)            | 1.70<br>(0.89 to<br>2.84)       | 0.81<br>(0.39 to<br>1.46)       | 0.76<br>(0.37 to<br>1.35)       | 0.95<br>(0.44 to<br>1.74)       |
| Paratyphoid fever                                                 | 16.66<br>(7.15 to<br>33.02)              | 8.45<br>(3.49 to<br>17.59)              | 7.75<br>(3.19 to<br>16.23)             | 10.30<br>(4.14 to<br>21.88)              | 0.26<br>(0.11 to<br>0.51)       | 0.15<br>(0.07 to<br>0.30)       | 0.14<br>(0.06 to<br>0.29)       | 0.18<br>(0.08 to<br>0.38)       |
| Other intestinal infectious diseases                              | 0.25<br>(0.09 to<br>0.52)                | 0.08<br>(0.03 to<br>0.18)               | 0.07<br>(0.02 to<br>0.16)              | 0.11<br>(0.04 to<br>0.24)                | 0.01<br>(0.00 to<br>0.01)       | 0.00<br>(0.00 to<br>0.01)       | 0.00<br>(0.00 to<br>0.01)       | 0.00<br>(0.00 to<br>0.01)       |
| Lower respiratory infections                                      | 760.14<br>(544.83 to<br>1,106.21)        | 317.14<br>(180.19 to<br>605.78)         | 220.77<br>(134.95 to<br>392.06)        | 619.74<br>(309.24 to<br>1,314.17)        | 15.06<br>(11.97 to<br>19.39)    | 12.18<br>(8.15 to<br>18.71)     | 9.55<br>(6.62 to<br>14.21)      | 20.21<br>(12.71 to<br>32.21)    |
| Upper respiratory infections                                      | 0.98<br>(0.50 to<br>1.70)                | 0.61<br>(0.27 to<br>1.21)               | 0.53<br>(0.22 to<br>1.05)              | 0.91<br>(0.39 to<br>1.78)                | 0.02<br>(0.01 to<br>0.04)       | 0.02<br>(0.01 to<br>0.05)       | 0.02<br>(0.01 to<br>0.04)       | 0.03<br>(0.01 to<br>0.06)       |
| Otitis media                                                      | 0.34<br>(0.14 to<br>0.71)                | 0.18<br>(0.06 to<br>0.42)               | 0.19<br>(0.07 to<br>0.43)              | 0.17<br>(0.06 to<br>0.40)                | 0.01<br>(0.01 to<br>0.03)       | 0.01<br>(0.00 to<br>0.02)       | 0.01<br>(0.00 to<br>0.02)       | 0.01<br>(0.00 to<br>0.02)       |
| Meningitis                                                        | 96.84<br>(63.69 to<br>145.92)            | 39.08<br>(22.60 to<br>63.32)            | 36.41<br>(21.21 to<br>59.18)           | 48.11<br>(23.52 to<br>83.61)             | 1.61<br>(1.10 to<br>2.34)       | 0.92<br>(0.60 to<br>1.34)       | 0.89<br>(0.59 to<br>1.30)       | 1.02<br>(0.65 to<br>1.56)       |
| Pneumococcal meningitis                                           | 0.84<br>(0.51 to<br>1.44)                | 0.25<br>(0.15 to<br>0.41)               | 0.24<br>(0.15 to<br>0.39)              | 0.30<br>(0.17 to<br>0.53)                | 0.01<br>(0.01 to<br>0.02)       | 0.01<br>(0.00 to<br>0.01)       | 0.01<br>(0.00 to<br>0.01)       | 0.01<br>(0.01 to<br>0.01)       |
| H influenzae type B meningitis                                    | 7.31<br>(4.48 to<br>11.81)               | 3.83<br>(1.55 to<br>9.16)               | 3.29<br>(1.43 to<br>7.36)              | 8.83<br>(1.89 to<br>26.08)               | 0.12<br>(0.08 to<br>0.18)       | 0.07<br>(0.04 to<br>0.14)       | 0.07<br>(0.04 to<br>0.12)       | 0.13<br>(0.05 to<br>0.33)       |
| Meningococcal meningitis                                          | 33.04<br>(20.82 to<br>52.26)             | 12.54<br>(7.34 to<br>20.27)             | 11.79<br>(7.02 to<br>19.21)            | 13.97<br>(7.76 to<br>22.82)              | 0.56<br>(0.37 to<br>0.83)       | 0.32<br>(0.21 to<br>0.47)       | 0.31<br>(0.21 to<br>0.46)       | 0.33<br>(0.21 to<br>0.50)       |
| Other meningitis                                                  | 55.64<br>(35.78 to<br>84.77)             | 22.45<br>(13.07 to<br>36.72)            | 21.08<br>(12.11 to<br>33.83)           | 25.00<br>(13.91 to<br>41.12)             | 0.91<br>(0.61 to<br>1.32)       | 0.52<br>(0.33 to<br>0.76)       | 0.50<br>(0.33 to<br>0.75)       | 0.55<br>(0.35 to<br>0.81)       |
| Encephalitis                                                      | 47.72<br>(30.58 to<br>74.15)             | 27.85<br>(16.57 to<br>43.45)            | 25.62<br>(15.32 to<br>40.33)           | 33.13<br>(19.31 to<br>52.24)             | 0.83<br>(0.57 to<br>1.16)       | 0.75<br>(0.50 to<br>1.05)       | 0.72<br>(0.49 to<br>1.00)       | 0.82<br>(0.55 to<br>1.17)       |



|                |                             |                              |                              |                               |                           |                           |                           |                           |
|----------------|-----------------------------|------------------------------|------------------------------|-------------------------------|---------------------------|---------------------------|---------------------------|---------------------------|
| Diphtheria     | 0.11<br>(0.07 to<br>0.17)   | 0.02<br>(0.01 to<br>0.04)    | 0.02<br>(0.01 to<br>0.03)    | 0.06<br>(0.01 to<br>0.18)     | 0.00<br>(0.00 to<br>0.00) | 0.00<br>(0.00 to<br>0.00) | 0.00<br>(0.00 to<br>0.00) | 0.00<br>(0.00 to<br>0.00) |
| Whooping cough | 19.44<br>(1.52 to<br>66.52) | 4.57<br>(0.17 to<br>20.00)   | 2.08<br>(0.10 to<br>8.61)    | 2078<br>(0.27 to<br>85.89)    | 0.23<br>(0.02 to<br>0.79) | 0.06<br>(0.00 to<br>0.24) | 0.03<br>(0.00 to<br>0.11) | 0.25<br>(0.00 to<br>1.02) |
| Tetanus        | 6.48<br>(2.14 to<br>11.82)  | 1.10<br>(0.28 to<br>2.08)    | 1.06<br>(0.25 to<br>2.00)    | 1.56<br>(0.51 to<br>3.20)     | 0.18<br>(0.05 to<br>0.32) | 0.04<br>(0.01 to<br>0.07) | 0.04<br>(0.01 to<br>0.07) | 0.04<br>(0.01 to<br>0.08) |
| Measles        | 2.14<br>(0.66 to<br>5.56)   | 51.48<br>(3.30 to<br>203.98) | 37.07<br>(2.92 to<br>127.95) | 129.56<br>(4.87 to<br>546.95) | 0.03<br>(0.01 to<br>0.07) | 0.73<br>(0.06 to<br>2.66) | 0.54<br>(0.06 to<br>1.78) | 1.70<br>(0.09 to<br>6.84) |

| Myanmar                                               |                                            |                                            |                                            |                                            |                                       |                                      |                                      |                                      |
|-------------------------------------------------------|--------------------------------------------|--------------------------------------------|--------------------------------------------|--------------------------------------------|---------------------------------------|--------------------------------------|--------------------------------------|--------------------------------------|
| Cause                                                 | YLLs (in 1000s)                            |                                            |                                            |                                            | Deaths (in 1000s)                     |                                      |                                      |                                      |
|                                                       | 2016                                       | 2040 Forecast                              | 2040 Better Scenario                       | 2040 Worse Scenario                        | 2016                                  | 2040 Forecast                        | 2040 Better Scenario                 | 2040 Worse Scenario                  |
| Varicella and herpes zoster                           | 7.62<br>(4.59 to 12.51)                    | 3.13<br>(1.73 to 5.41)                     | 2.77<br>(1.54 to 4.81)                     | 4.27<br>(2.24 to 7.84)                     | 0.19<br>(0.13 to 0.27)                | 0.17<br>(0.09 to 0.29)               | 0.16<br>(0.09 to 0.28)               | 0.20<br>(0.11 to 0.33)               |
| <b>Neglected tropical diseases and malaria</b>        | <b>371.20</b><br><b>(241.09 to 518.41)</b> | <b>176.50</b><br><b>(119.40 to 249.24)</b> | <b>167.84</b><br><b>(115.40 to 234.51)</b> | <b>196.80</b><br><b>(131.75 to 282.92)</b> | <b>7.35</b><br><b>(5.19 to 10.43)</b> | <b>4.55</b><br><b>(3.31 to 7.10)</b> | <b>4.42</b><br><b>(3.24 to 6.88)</b> | <b>4.86</b><br><b>(3.47 to 7.69)</b> |
| Malaria                                               | 349.67<br>(219.81 to 495.49)               | 156.51<br>(102.87 to 227.56)               | 149.39<br>(99.45 to 218.23)                | 171.96<br>(110.61 to 257.10)               | 6.90<br>(4.76 to 9.97)                | 3.99<br>(2.71 to 6.61)               | 3.89<br>(2.67 to 6.41)               | 4.21<br>(2.82 to 7.09)               |
| Chagas disease                                        | 0.00<br>(0.00 to 0.00)                     | 0.00<br>(0.00 to 0.00)                     | 0.00<br>(0.00 to 0.00)                     | 0.00<br>(0.00 to 0.00)                     | 0.00<br>(0.00 to 0.00)                | 0.00<br>(0.00 to 0.00)               | 0.00<br>(0.00 to 0.00)               | 0.00<br>(0.00 to 0.00)               |
| Leishmaniasis                                         | 0.00<br>(0.00 to 0.00)                     | 0.00<br>(0.00 to 0.00)                     | 0.00<br>(0.00 to 0.00)                     | 0.00<br>(0.00 to 0.00)                     | 0.00<br>(0.00 to 0.00)                | 0.00<br>(0.00 to 0.00)               | 0.00<br>(0.00 to 0.00)               | 0.00<br>(0.00 to 0.00)               |
| African trypanosomiasis                               | 0.00<br>(0.00 to 0.00)                     | 0.00<br>(0.00 to 0.00)                     | 0.00<br>(0.00 to 0.00)                     | 0.00<br>(0.00 to 0.00)                     | 0.00<br>(0.00 to 0.00)                | 0.00<br>(0.00 to 0.00)               | 0.00<br>(0.00 to 0.00)               | 0.00<br>(0.00 to 0.00)               |
| Schistosomiasis                                       | 0.00<br>(0.00 to 0.00)                     | 0.00<br>(0.00 to 0.00)                     | 0.00<br>(0.00 to 0.00)                     | 0.00<br>(0.00 to 0.00)                     | 0.00<br>(0.00 to 0.00)                | 0.00<br>(0.00 to 0.00)               | 0.00<br>(0.00 to 0.00)               | 0.00<br>(0.00 to 0.00)               |
| Cysticercosis                                         | 0.25<br>(0.21 to 0.31)                     | 0.08<br>(0.06 to 0.10)                     | 0.08<br>(0.06 to 0.10)                     | 0.09<br>(0.07 to 0.11)                     | 0.01<br>(0.01 to 0.01)                | 0.00<br>(0.00 to 0.00)               | 0.00<br>(0.00 to 0.00)               | 0.00<br>(0.00 to 0.00)               |
| Cystic echinococcosis                                 | 0.06<br>(0.05 to 0.07)                     | 0.02<br>(0.02 to 0.03)                     | 0.02<br>(0.01 to 0.03)                     | 0.04<br>(0.03 to 0.05)                     | 0.00<br>(0.00 to 0.00)                | 0.00<br>(0.00 to 0.00)               | 0.00<br>(0.00 to 0.00)               | 0.00<br>(0.00 to 0.00)               |
| Dengue                                                | 5.33<br>(1.02 to 17.26)                    | 13.56<br>(3.31 to 37.09)                   | 13.06<br>(3.25 to 35.02)                   | 14.60<br>(3.54 to 39.96)                   | 0.10<br>(0.02 to 0.33)                | 0.38<br>(0.10 to 1.03)               | 0.38<br>(0.10 to 1.00)               | 0.39<br>(0.10 to 1.07)               |
| Yellow fever                                          | 0.00<br>(0.00 to 0.00)                     | 0.00<br>(0.00 to 0.00)                     | 0.00<br>(0.00 to 0.00)                     | 0.00<br>(0.00 to 0.00)                     | 0.00<br>(0.00 to 0.00)                | 0.00<br>(0.00 to 0.00)               | 0.00<br>(0.00 to 0.00)               | 0.00<br>(0.00 to 0.00)               |
| Rabies                                                | 12.80<br>(4.47 to 21.40)                   | 4.27<br>(1.36 to 7.19)                     | 3.38<br>(0.98 to 5.91)                     | 7.69<br>(2.44 to 13.30)                    | 0.28<br>(0.11 to 0.45)                | 0.11<br>(0.05 to 0.18)               | 0.09<br>(0.04 to 0.15)               | 0.19<br>(0.08 to 0.32)               |
| Intestinal nematode infections                        | 1.95<br>(1.18 to 3.08)                     | 1.46<br>(0.85 to 2.42)                     | 1.39<br>(0.81 to 2.26)                     | 1.60<br>(0.90 to 2.69)                     | 0.03<br>(0.02 to 0.05)                | 0.03<br>(0.02 to 0.05)               | 0.03<br>(0.02 to 0.05)               | 0.03<br>(0.02 to 0.05)               |
| Other neglected tropical diseases                     | 1.12<br>(0.67 to 2.21)                     | 0.59<br>(0.39 to 1.10)                     | 0.52<br>(0.34 to 0.97)                     | 0.82<br>(0.53 to 1.56)                     | 0.02<br>(0.01 to 0.04)                | 0.02<br>(0.01 to 0.05)               | 0.02<br>(0.01 to 0.04)               | 0.03<br>(0.02 to 0.06)               |
| <b>Maternal disorders</b>                             | <b>120.39</b><br><b>(94.48 to 147.67)</b>  | <b>38.06</b><br><b>(23.49 to 55.07)</b>    | <b>32.11</b><br><b>(18.89 to 48.18)</b>    | <b>59.71</b><br><b>(36.62 to 87.39)</b>    | <b>2.18</b><br><b>(1.72 to 2.68)</b>  | <b>0.70</b><br><b>(0.44 to 1.01)</b> | <b>0.59</b><br><b>(0.35 to 0.88)</b> | <b>1.09</b><br><b>(0.67 to 1.59)</b> |
| Maternal hemorrhage                                   | 43.17<br>(30.08 to 58.08)                  | 12.75<br>(7.14 to 21.07)                   | 10.80<br>(5.75 to 18.01)                   | 20.02<br>(11.12 to 32.36)                  | 0.78<br>(0.54 to 1.05)                | 0.23<br>(0.13 to 0.38)               | 0.20<br>(0.11 to 0.33)               | 0.37<br>(0.20 to 0.59)               |
| Maternal sepsis and other maternal infections         | 8.87<br>(4.68 to 14.07)                    | 2.40<br>(1.04 to 4.19)                     | 2.02<br>(0.87 to 3.69)                     | 3.78<br>(1.60 to 6.79)                     | 0.16<br>(0.09 to 0.26)                | 0.04<br>(0.02 to 0.08)               | 0.04<br>(0.02 to 0.07)               | 0.07<br>(0.03 to 0.12)               |
| Maternal hypertensive disorders                       | 13.93<br>(9.19 to 19.73)                   | 4.26<br>(2.33 to 7.20)                     | 3.59<br>(1.89 to 6.26)                     | 6.73<br>(3.61 to 11.56)                    | 0.25<br>(0.17 to 0.35)                | 0.08<br>(0.04 to 0.13)               | 0.07<br>(0.03 to 0.11)               | 0.12<br>(0.07 to 0.21)               |
| Maternal obstructed labor and uterine rupture         | 2.04<br>(0.86 to 3.70)                     | 0.64<br>(0.23 to 1.32)                     | 0.53<br>(0.19 to 1.17)                     | 1.04<br>(0.38 to 2.20)                     | 0.04<br>(0.02 to 0.07)                | 0.01<br>(0.00 to 0.02)               | 0.01<br>(0.00 to 0.02)               | 0.02<br>(0.01 to 0.04)               |
| Maternal abortion, miscarriage, and ectopic pregnancy | 18.30<br>(11.35 to 26.46)                  | 6.21<br>(3.18 to 10.91)                    | 5.26<br>(2.64 to 9.33)                     | 9.82<br>(5.04 to 17.31)                    | 0.34<br>(0.21 to 0.48)                | 0.12<br>(0.06 to 0.20)               | 0.10<br>(0.05 to 0.17)               | 0.18<br>(0.09 to 0.32)               |

|                                        |                              |                           |                           |                            |                           |                           |                           |                           |
|----------------------------------------|------------------------------|---------------------------|---------------------------|----------------------------|---------------------------|---------------------------|---------------------------|---------------------------|
|                                        | 16.53<br>(10.70 to<br>23.50) | 5.85<br>(3.02 to<br>9.77) | 4.93<br>(2.49 to<br>8.67) | 9.12<br>(4.74 to<br>15.70) | 0.29<br>(0.19 to<br>0.41) | 0.10<br>(0.05 to<br>0.18) | 0.09<br>(0.04 to<br>0.15) | 0.16<br>(0.08 to<br>0.28) |
| Indirect maternal deaths               |                              |                           |                           |                            |                           |                           |                           |                           |
|                                        | 1.37<br>(0.52 to<br>2.73)    | 0.38<br>(0.13 to<br>0.79) | 0.32<br>(0.11 to<br>0.66) | 0.59<br>(0.21 to<br>1.27)  | 0.02<br>(0.01 to<br>0.05) | 0.01<br>(0.00 to<br>0.01) | 0.01<br>(0.00 to<br>0.01) | 0.01<br>(0.00 to<br>0.02) |
| Late maternal deaths                   |                              |                           |                           |                            |                           |                           |                           |                           |
|                                        | 0.19<br>(0.09 to<br>0.30)    | 0.26<br>(0.04 to<br>0.67) | 0.15<br>(0.01 to<br>0.51) | 0.50<br>(0.16 to<br>1.06)  | 0.00<br>(0.00 to<br>0.01) | 0.00<br>(0.00 to<br>0.01) | 0.00<br>(0.00 to<br>0.01) | 0.01<br>(0.00 to<br>0.02) |
| Maternal deaths aggravated by HIV/AIDS |                              |                           |                           |                            |                           |                           |                           |                           |
|                                        | 15.99<br>(10.27 to<br>22.98) | 5.31<br>(2.75 to<br>8.95) | 4.52<br>(2.32 to<br>7.83) | 8.10<br>(4.26 to<br>14.02) | 0.29<br>(0.19 to<br>0.42) | 0.10<br>(0.05 to<br>0.16) | 0.08<br>(0.04 to<br>0.14) | 0.15<br>(0.08 to<br>0.26) |
| Other maternal disorders               |                              |                           |                           |                            |                           |                           |                           |                           |

| Myanmar                                                                 |                                       |                                     |                                     |                                       |                                 |                               |                               |                                |
|-------------------------------------------------------------------------|---------------------------------------|-------------------------------------|-------------------------------------|---------------------------------------|---------------------------------|-------------------------------|-------------------------------|--------------------------------|
| Cause                                                                   | YLLs (in 1000s)                       |                                     |                                     |                                       | Deaths (in 1000s)               |                               |                               |                                |
|                                                                         | 2016                                  | 2040 Forecast                       | 2040 Better Scenario                | 2040 Worse Scenario                   | 2016                            | 2040 Forecast                 | 2040 Better Scenario          | 2040 Worse Scenario            |
| <b>Neonatal disorders</b>                                               | <b>999.93</b><br>(582.43 to 1,691.07) | <b>400.19</b><br>(162.82 to 793.42) | <b>336.29</b><br>(136.76 to 669.01) | <b>604.32</b><br>(249.63 to 1,164.36) | <b>11.55</b><br>(6.73 to 19.54) | <b>4.62</b><br>(1.88 to 9.17) | <b>3.89</b><br>(1.58 to 7.73) | <b>6.98</b><br>(2.89 to 13.45) |
| Neonatal preterm birth                                                  | 363.55<br>(186.41 to 655.32)          | 112.33<br>(44.07 to 228.13)         | 96.97<br>(37.96 to 193.91)          | 204.18<br>(82.88 to 404.21)           | 4.20<br>(2.15 to 7.57)          | 1.30<br>(0.51 to 2.64)        | 1.12<br>(0.44 to 2.24)        | 2.36<br>(0.96 to 4.67)         |
| Neonatal encephalopathy due to birth asphyxia and trauma                | 441.67<br>(234.22 to 778.44)          | 189.43<br>(62.00 to 404.67)         | 158.37<br>(52.19 to 342.00)         | 259.06<br>(80.69 to 556.16)           | 5.10<br>(2.71 to 8.99)          | 2.19<br>(0.72 to 4.67)        | 1.83<br>(0.60 to 3.95)        | 2.99<br>(0.93 to 6.43)         |
| Neonatal sepsis and other neonatal infections                           | 90.73<br>(42.94 to 167.80)            | 52.25<br>(19.26 to 111.94)          | 43.50<br>(15.89 to 92.33)           | 72.39<br>(26.85 to 152.85)            | 1.05<br>(0.50 to 1.94)          | 0.60<br>(0.22 to 1.29)        | 0.50<br>(0.18 to 1.07)        | 0.84<br>(0.31 to 1.77)         |
| Hemolytic disease and other neonatal jaundice                           | 5.54<br>(2.27 to 11.58)               | 1.97<br>(0.57 to 5.14)              | 1.60<br>(0.46 to 4.00)              | 2.92<br>(0.84 to 7.70)                | 0.06<br>(0.03 to 0.13)          | 0.02<br>(0.01 to 0.06)        | 0.02<br>(0.01 to 0.05)        | 0.03<br>(0.01 to 0.09)         |
| Other neonatal disorders                                                | 98.43<br>(48.54 to 179.43)            | 44.21<br>(14.93 to 97.59)           | 35.85<br>(12.11 to 77.01)           | 65.76<br>(22.49 to 139.97)            | 1.14<br>(0.56 to 2.07)          | 0.51<br>(0.17 to 1.13)        | 0.41<br>(0.14 to 0.89)        | 0.76<br>(0.26 to 1.62)         |
| <b>Nutritional deficiencies</b>                                         | <b>34.20</b><br>(26.93 to 47.45)      | <b>35.29</b><br>(28.87 to 43.79)    | <b>34.66</b><br>(28.27 to 42.97)    | <b>37.29</b><br>(29.66 to 47.70)      | <b>1.80</b><br>(1.56 to 2.13)   | <b>2.97</b><br>(2.33 to 3.75) | <b>3.05</b><br>(2.40 to 3.83) | <b>2.85</b><br>(2.13 to 3.74)  |
| Protein-energy malnutrition                                             | 25.05<br>(19.05 to 35.98)             | 23.25<br>(17.14 to 30.23)           | 22.94<br>(17.23 to 30.08)           | 24.32<br>(17.70 to 32.67)             | 1.41<br>(1.20 to 1.70)          | 2.15<br>(1.58 to 2.87)        | 2.22<br>(1.61 to 2.92)        | 2.04<br>(1.42 to 2.83)         |
| Iodine deficiency                                                       | 0.31<br>(0.02 to 1.27)                | 1.19<br>(0.02 to 4.77)              | 1.12<br>(0.02 to 4.85)              | 1.38<br>(0.03 to 5.16)                | 0.01<br>(0.00 to 0.05)          | 0.09<br>(0.00 to 0.41)        | 0.09<br>(0.00 to 0.40)        | 0.10<br>(0.00 to 0.41)         |
| Dietary iron deficiency                                                 | 6.12<br>(2.79 to 9.66)                | 7.12<br>(3.92 to 11.32)             | 6.89<br>(3.78 to 11.05)             | 7.71<br>(4.18 to 12.27)               | 0.21<br>(0.12 to 0.31)          | 0.39<br>(0.19 to 0.70)        | 0.40<br>(0.20 to 0.71)        | 0.39<br>(0.19 to 0.69)         |
| Other nutritional deficiencies                                          | 2.72<br>(1.84 to 4.29)                | 3.74<br>(2.49 to 5.91)              | 3.70<br>(2.47 to 5.65)              | 3.88<br>(2.52 to 6.16)                | 0.17<br>(0.12 to 0.26)          | 0.33<br>(0.22 to 0.54)        | 0.34<br>(0.23 to 0.54)        | 0.32<br>(0.20 to 0.52)         |
| <b>Other communicable, maternal, neonatal, and nutritional diseases</b> | <b>54.87</b><br>(35.50 to 90.46)      | <b>23.59</b><br>(18.06 to 30.81)    | <b>21.81</b><br>(16.37 to 28.55)    | <b>28.25</b><br>(21.00 to 38.32)      | <b>1.06</b><br>(0.80 to 1.50)   | <b>0.75</b><br>(0.60 to 0.95) | <b>0.71</b><br>(0.57 to 0.90) | <b>0.84</b><br>(0.67 to 1.09)  |
| Sexually transmitted infections excluding HIV                           | 30.42<br>(12.42 to 64.57)             | 6.01<br>(3.06 to 11.54)             | 5.41<br>(2.80 to 10.37)             | 7.53<br>(3.62 to 15.01)               | 0.41<br>(0.20 to 0.82)          | 0.12<br>(0.08 to 0.20)        | 0.11<br>(0.07 to 0.18)        | 0.14<br>(0.09 to 0.24)         |
| Syphilis                                                                | 27.70<br>(9.79 to 61.70)              | 4.40<br>(1.58 to 9.88)              | 3.87<br>(1.37 to 8.77)              | 5.71<br>(2.03 to 12.87)               | 0.34<br>(0.13 to 0.74)          | 0.07<br>(0.03 to 0.15)        | 0.06<br>(0.03 to 0.12)        | 0.08<br>(0.04 to 0.17)         |
| Chlamydial infection                                                    | 0.54<br>(0.40 to 0.84)                | 0.31<br>(0.22 to 0.47)              | 0.30<br>(0.20 to 0.44)              | 0.36<br>(0.25 to 0.54)                | 0.01<br>(0.01 to 0.02)          | 0.01<br>(0.01 to 0.02)        | 0.01<br>(0.01 to 0.02)        | 0.01<br>(0.01 to 0.02)         |
| Gonococcal infection                                                    | 1.42<br>(1.05 to 2.23)                | 0.87<br>(0.58 to 1.27)              | 0.83<br>(0.54 to 1.22)              | 0.98<br>(0.67 to 1.46)                | 0.04<br>(0.03 to 0.06)          | 0.03<br>(0.02 to 0.05)        | 0.03<br>(0.02 to 0.05)        | 0.03<br>(0.02 to 0.05)         |
| Other sexually transmitted infections                                   | 0.76<br>(0.55 to 1.18)                | 0.43<br>(0.29 to 0.64)              | 0.41<br>(0.27 to 0.62)              | 0.49<br>(0.34 to 0.75)                | 0.02<br>(0.01 to 0.03)          | 0.01<br>(0.01 to 0.02)        | 0.01<br>(0.01 to 0.02)        | 0.01<br>(0.01 to 0.02)         |
| Acute hepatitis                                                         | 22.08<br>(18.13 to 27.51)             | 14.85<br>(11.12 to 19.18)           | 13.85<br>(10.27 to 18.10)           | 17.48<br>(13.06 to 22.86)             | 0.57<br>(0.48 to 0.71)          | 0.49<br>(0.38 to 0.62)        | 0.46<br>(0.36 to 0.59)        | 0.55<br>(0.43 to 0.70)         |
| Acute hepatitis A                                                       | 0.87<br>(0.52 to 1.38)                | 0.36<br>(0.22 to 0.57)              | 0.33<br>(0.20 to 0.51)              | 0.43<br>(0.27 to 0.70)                | 0.02<br>(0.01 to 0.02)          | 0.01<br>(0.01 to 0.01)        | 0.01<br>(0.01 to 0.01)        | 0.01<br>(0.01 to 0.02)         |
| Acute hepatitis B                                                       | 18.27<br>(14.88 to 22.84)             | 12.58<br>(9.19 to 16.67)            | 11.70<br>(8.46 to 15.73)            | 14.91<br>(10.86 to 19.87)             | 0.49<br>(0.40 to 0.59)          | 0.41<br>(0.31 to 0.53)        | 0.38<br>(0.29 to 0.51)        | 0.47<br>(0.35 to 0.60)         |



| Myanmar                              |                                    |                                    |                                    |                                    |                           |                              |                             |                              |
|--------------------------------------|------------------------------------|------------------------------------|------------------------------------|------------------------------------|---------------------------|------------------------------|-----------------------------|------------------------------|
| Cause                                | YLLs (in 1000s)                    |                                    |                                    |                                    | Deaths (in 1000s)         |                              |                             |                              |
|                                      | 2016                               | 2040 Forecast                      | 2040 Better Scenario               | 2040 Worse Scenario                | 2016                      | 2040 Forecast                | 2040 Better Scenario        | 2040 Worse Scenario          |
| Neoplasms                            | 1,812.87<br>(1,648.79 to 2,028.33) | 2,553.12<br>(2,107.40 to 3,046.44) | 2,403.85<br>(2,004.52 to 2,850.26) | 3,077.89<br>(2,477.61 to 3,765.14) | 66.43<br>(60.92 to 73.50) | 120.52<br>(102.70 to 139.50) | 116.34<br>(99.94 to 132.98) | 139.89<br>(116.07 to 165.57) |
| Lip and oral cavity cancer           | 39.18<br>(33.19 to 47.11)          | 57.14<br>(36.54 to 85.17)          | 45.53<br>(31.21 to 63.53)          | 89.36<br>(53.68 to 138.70)         | 1.57<br>(1.35 to 1.87)    | 2.81<br>(1.91 to 4.01)       | 2.34<br>(1.68 to 3.19)      | 4.20<br>(2.68 to 6.23)       |
| Nasopharynx cancer                   | 28.16<br>(23.16 to 34.56)          | 38.75<br>(23.06 to 63.20)          | 28.80<br>(18.47 to 44.45)          | 64.37<br>(36.88 to 107.26)         | 0.93<br>(0.77 to 1.12)    | 1.50<br>(0.93 to 2.40)       | 1.15<br>(0.75 to 1.78)      | 2.44<br>(1.46 to 4.05)       |
| Other pharynx cancer                 | 17.65<br>(14.55 to 21.08)          | 26.84<br>(17.93 to 39.87)          | 22.79<br>(16.30 to 32.15)          | 27.52<br>(18.36 to 40.75)          | 0.66<br>(0.55 to 0.78)    | 1.19<br>(0.82 to 1.75)       | 1.04<br>(0.76 to 1.44)      | 1.18<br>(0.81 to 1.73)       |
| Esophageal cancer                    | 27.22<br>(23.38 to 32.61)          | 35.37<br>(19.48 to 62.98)          | 29.14<br>(16.60 to 50.02)          | 59.25<br>(30.45 to 110.09)         | 1.04<br>(0.91 to 1.22)    | 1.59<br>(0.92 to 2.72)       | 1.36<br>(0.82 to 2.29)      | 2.56<br>(1.37 to 4.57)       |
| Stomach cancer                       | 120.70<br>(104.84 to 142.91)       | 140.63<br>(112.05 to 174.12)       | 137.46<br>(110.13 to 169.14)       | 162.36<br>(125.33 to 207.60)       | 4.91<br>(4.29 to 5.80)    | 7.23<br>(5.89 to 8.88)       | 7.22<br>(5.87 to 8.77)      | 7.95<br>(6.26 to 9.99)       |
| Colon and rectum cancer              | 159.58<br>(136.78 to 186.65)       | 302.43<br>(212.76 to 438.61)       | 295.15<br>(210.71 to 427.92)       | 301.49<br>(209.85 to 436.52)       | 6.46<br>(5.57 to 7.48)    | 15.95<br>(11.40 to 22.77)    | 15.96<br>(11.59 to 22.46)   | 15.15<br>(10.69 to 21.68)    |
| Liver cancer                         | 96.93<br>(78.81 to 116.93)         | 160.35<br>(113.58 to 223.56)       | 146.25<br>(107.67 to 196.34)       | 181.42<br>(124.25 to 260.37)       | 3.78<br>(3.13 to 4.49)    | 7.85<br>(5.81 to 10.50)      | 7.36<br>(5.61 to 9.47)      | 8.48<br>(6.00 to 11.65)      |
| Liver cancer due to hepatitis B      | 45.66<br>(35.22 to 57.48)          | 69.11<br>(46.98 to 100.29)         | 63.38<br>(44.59 to 86.88)          | 78.45<br>(51.79 to 116.29)         | 1.65<br>(1.27 to 2.06)    | 3.16<br>(2.15 to 4.29)       | 2.98<br>(2.07 to 3.99)      | 3.43<br>(2.30 to 4.88)       |
| Liver cancer due to hepatitis C      | 26.82<br>(20.08 to 34.71)          | 50.52<br>(34.99 to 71.09)          | 46.98<br>(33.73 to 65.30)          | 55.51<br>(37.46 to 80.87)          | 1.20<br>(0.92 to 1.52)    | 2.78<br>(1.98 to 3.86)       | 2.66<br>(1.93 to 3.59)      | 2.92<br>(2.00 to 4.15)       |
| Liver cancer due to alcohol use      | 6.89<br>(4.70 to 9.97)             | 12.43<br>(7.68 to 19.68)           | 10.43<br>(6.61 to 16.26)           | 14.40<br>(8.63 to 23.93)           | 0.28<br>(0.19 to 0.39)    | 0.59<br>(0.37 to 0.92)       | 0.51<br>(0.33 to 0.77)      | 0.65<br>(0.40 to 1.04)       |
| Liver cancer due to other causes     | 17.57<br>(12.28 to 24.56)          | 28.28<br>(17.33 to 44.93)          | 25.46<br>(16.05 to 39.73)          | 33.07<br>(19.41 to 55.67)          | 0.65<br>(0.45 to 0.89)    | 1.32<br>(0.81 to 2.04)       | 1.22<br>(0.78 to 1.85)      | 1.47<br>(0.88 to 2.35)       |
| Gallbladder and biliary tract cancer | 24.38<br>(19.28 to 30.55)          | 32.03<br>(25.81 to 39.86)          | 33.21<br>(26.76 to 41.33)          | 29.52<br>(23.77 to 36.61)          | 1.05<br>(0.85 to 1.30)    | 1.72<br>(1.42 to 2.09)       | 1.81<br>(1.51 to 2.20)      | 1.52<br>(1.25 to 1.86)       |
| Pancreatic cancer                    | 64.88<br>(57.11 to 73.86)          | 122.34<br>(95.90 to 154.92)        | 121.49<br>(96.91 to 150.35)        | 129.89<br>(100.44 to 167.17)       | 2.72<br>(2.42 to 3.06)    | 6.34<br>(5.11 to 7.95)       | 6.40<br>(5.24 to 7.84)      | 6.43<br>(5.13 to 8.13)       |
| Larynx cancer                        | 24.79<br>(19.56 to 29.68)          | 30.63<br>(14.83 to 57.32)          | 24.12<br>(12.10 to 44.77)          | 56.78<br>(26.81 to 98.54)          | 0.99<br>(0.80 to 1.17)    | 1.43<br>(0.70 to 2.74)       | 1.15<br>(0.58 to 2.17)      | 2.58<br>(1.23 to 4.40)       |
| Tracheal, bronchus, and lung cancer  | 314.59<br>(271.72 to 371.49)       | 358.13<br>(233.30 to 542.20)       | 279.61<br>(185.20 to 418.41)       | 716.91<br>(462.80 to 1,091.70)     | 12.57<br>(11.00 to 14.62) | 17.10<br>(11.29 to 25.08)    | 13.70<br>(9.21 to 19.58)    | 33.67<br>(21.74 to 50.30)    |
| Malignant skin melanoma              | 6.52<br>(5.39 to 8.60)             | 10.09<br>(8.18 to 13.46)           | 10.67<br>(8.62 to 14.38)           | 8.81<br>(7.22 to 11.75)            | 0.23<br>(0.19 to 0.30)    | 0.49<br>(0.41 to 0.66)       | 0.53<br>(0.44 to 0.72)      | 0.40<br>(0.34 to 0.55)       |
| Non-melanoma skin cancer             | 9.46<br>(7.99 to 10.89)            | 17.89<br>(14.94 to 21.12)          | 18.08<br>(15.00 to 21.36)          | 17.70<br>(14.80 to 20.64)          | 0.39<br>(0.33 to 0.44)    | 0.96<br>(0.81 to 1.10)       | 0.99<br>(0.84 to 1.15)      | 0.89<br>(0.75 to 1.03)       |
| Breast cancer                        | 147.11<br>(119.86 to 189.11)       | 204.98<br>(146.08 to 293.87)       | 198.96<br>(144.30 to 281.77)       | 208.60<br>(147.22 to 302.99)       | 4.74<br>(3.89 to 6.04)    | 8.32<br>(6.08 to 11.75)      | 8.18<br>(6.09 to 11.33)     | 8.20<br>(5.91 to 11.56)      |
| Cervical cancer                      | 150.36<br>(107.16 to 187.86)       | 155.11<br>(103.38 to 212.97)       | 149.25<br>(99.51 to 201.50)        | 178.39<br>(116.22 to 253.41)       | 5.12<br>(3.75 to 6.48)    | 6.50<br>(4.57 to 8.80)       | 6.35<br>(4.43 to 8.56)      | 7.24<br>(5.02 to 10.14)      |

|                   |                              |                                |                                |                               |                           |                           |                           |                           |
|-------------------|------------------------------|--------------------------------|--------------------------------|-------------------------------|---------------------------|---------------------------|---------------------------|---------------------------|
|                   | 34.71<br>(27.16 to<br>42.24) | 49.12<br>(37.50 to<br>61.68)   | 47.92<br>(36.39 to<br>60.61)   | 53.03<br>(40.21 to<br>66.17)  | 1.36<br>(1.08 to<br>1.64) | 2.40<br>(1.91 to<br>2.94) | 2.37<br>(1.86 to<br>2.91) | 2.51<br>(1.96 to<br>3.08) |
| Uterine cancer    |                              |                                |                                |                               |                           |                           |                           |                           |
|                   | 66.47<br>(54.95 to<br>79.10) | 102.86<br>(74.42 to<br>141.56) | 102.10<br>(76.84 to<br>136.47) | 96.00<br>(69.26 to<br>132.39) | 2.31<br>(1.92 to<br>2.73) | 4.38<br>(3.22 to<br>6.00) | 4.39<br>(3.32 to<br>5.80) | 4.07<br>(2.98 to<br>5.63) |
| Ovarian cancer    |                              |                                |                                |                               |                           |                           |                           |                           |
|                   | 29.48<br>(18.09 to<br>36.71) | 91.22<br>(57.71 to<br>114.00)  | 98.75<br>(63.04 to<br>123.34)  | 78.69<br>(49.53 to<br>99.11)  | 1.76<br>(1.08 to<br>2.18) | 6.37<br>(4.11 to<br>7.92) | 7.08<br>(4.65 to<br>8.77) | 5.13<br>(3.19 to<br>6.49) |
| Prostate cancer   |                              |                                |                                |                               |                           |                           |                           |                           |
|                   | 3.18<br>(2.44 to<br>4.29)    | 3.29<br>(2.41 to<br>4.60)      | 3.25<br>(2.36 to<br>4.57)      | 3.40<br>(2.53 to<br>4.72)     | 0.07<br>(0.06 to<br>0.09) | 0.10<br>(0.07 to<br>0.13) | 0.10<br>(0.07 to<br>0.13) | 0.09<br>(0.07 to<br>0.13) |
| Testicular cancer |                              |                                |                                |                               |                           |                           |                           |                           |

| Myanmar                         |                                                  |                                                  |                                                  |                                                  |                                         |                                            |                                           |                                            |
|---------------------------------|--------------------------------------------------|--------------------------------------------------|--------------------------------------------------|--------------------------------------------------|-----------------------------------------|--------------------------------------------|-------------------------------------------|--------------------------------------------|
| Cause                           | YLLs (in 1000s)                                  |                                                  |                                                  |                                                  | Deaths (in 1000s)                       |                                            |                                           |                                            |
|                                 | 2016                                             | 2040 Forecast                                    | 2040 Better Scenario                             | 2040 Worse Scenario                              | 2016                                    | 2040 Forecast                              | 2040 Better Scenario                      | 2040 Worse Scenario                        |
| Kidney cancer                   | 20.90<br>(17.30 to 24.80)                        | 34.12<br>(25.63 to 46.10)                        | 35.57<br>(26.67 to 48.15)                        | 34.57<br>(25.15 to 48.53)                        | 0.76<br>(0.63 to 0.90)                  | 1.59<br>(1.24 to 2.08)                     | 1.70<br>(1.31 to 2.21)                    | 1.54<br>(1.14 to 2.13)                     |
| Bladder cancer                  | 24.08<br>(19.98 to 29.34)                        | 40.47<br>(29.81 to 54.79)                        | 39.51<br>(29.48 to 52.58)                        | 48.44<br>(34.58 to 68.31)                        | 1.14<br>(0.96 to 1.37)                  | 2.42<br>(1.86 to 3.19)                     | 2.42<br>(1.87 to 3.13)                    | 2.73<br>(2.01 to 3.76)                     |
| Brain and nervous system cancer | 59.10<br>(46.47 to 70.07)                        | 82.75<br>(63.47 to 101.70)                       | 84.54<br>(64.77 to 103.89)                       | 78.40<br>(60.46 to 95.25)                        | 1.58<br>(1.22 to 1.86)                  | 3.02<br>(2.30 to 3.61)                     | 3.16<br>(2.40 to 3.78)                    | 2.73<br>(2.08 to 3.25)                     |
| Thyroid cancer                  | 16.10<br>(12.84 to 19.73)                        | 25.42<br>(19.57 to 33.41)                        | 23.60<br>(18.43 to 30.37)                        | 26.56<br>(20.26 to 35.26)                        | 0.65<br>(0.53 to 0.78)                  | 1.28<br>(1.01 to 1.64)                     | 1.21<br>(0.98 to 1.53)                    | 1.29<br>(1.00 to 1.67)                     |
| Mesothelioma                    | 4.97<br>(4.19 to 6.10)                           | 7.77<br>(6.35 to 9.61)                           | 7.85<br>(6.40 to 9.69)                           | 7.70<br>(6.32 to 9.56)                           | 0.19<br>(0.16 to 0.23)                  | 0.42<br>(0.34 to 0.53)                     | 0.43<br>(0.34 to 0.55)                    | 0.40<br>(0.31 to 0.50)                     |
| Hodgkin lymphoma                | 13.04<br>(10.33 to 17.93)                        | 11.39<br>(8.48 to 16.42)                         | 10.84<br>(7.90 to 15.75)                         | 13.07<br>(9.77 to 18.82)                         | 0.36<br>(0.28 to 0.49)                  | 0.41<br>(0.31 to 0.59)                     | 0.40<br>(0.30 to 0.56)                    | 0.45<br>(0.34 to 0.64)                     |
| Non-Hodgkin lymphoma            | 61.23<br>(53.36 to 71.10)                        | 93.67<br>(78.44 to 111.06)                       | 94.30<br>(79.21 to 110.78)                       | 86.21<br>(72.89 to 102.23)                       | 1.92<br>(1.69 to 2.21)                  | 4.04<br>(3.45 to 4.73)                     | 4.16<br>(3.55 to 4.83)                    | 3.55<br>(3.02 to 4.17)                     |
| Multiple myeloma                | 14.25<br>(11.86 to 16.97)                        | 27.15<br>(21.82 to 33.94)                        | 27.33<br>(22.04 to 34.01)                        | 24.46<br>(19.72 to 30.76)                        | 0.54<br>(0.46 to 0.65)                  | 1.27<br>(1.04 to 1.57)                     | 1.30<br>(1.06 to 1.59)                    | 1.10<br>(0.90 to 1.38)                     |
| Leukemia                        | 116.31<br>(97.20 to 149.96)                      | 128.66<br>(99.39 to 171.08)                      | 122.19<br>(95.48 to 158.91)                      | 139.19<br>(105.90 to 185.75)                     | 3.05<br>(2.60 to 3.85)                  | 4.86<br>(3.86 to 6.29)                     | 4.73<br>(3.82 to 6.03)                    | 5.04<br>(3.93 to 6.72)                     |
| Acute lymphoid leukemia         | 28.69<br>(22.65 to 43.81)                        | 33.45<br>(25.51 to 49.47)                        | 32.47<br>(25.05 to 47.00)                        | 34.36<br>(25.48 to 51.44)                        | 0.74<br>(0.61 to 1.10)                  | 1.25<br>(0.97 to 1.88)                     | 1.25<br>(0.96 to 1.83)                    | 1.24<br>(0.93 to 1.83)                     |
| Chronic lymphoid leukemia       | 2.31<br>(1.81 to 3.31)                           | 2.80<br>(2.05 to 4.00)                           | 2.68<br>(1.99 to 3.76)                           | 2.91<br>(2.10 to 4.20)                           | 0.07<br>(0.06 to 0.11)                  | 0.12<br>(0.09 to 0.17)                     | 0.12<br>(0.09 to 0.17)                    | 0.12<br>(0.09 to 0.17)                     |
| Acute myeloid leukemia          | 19.50<br>(15.59 to 26.43)                        | 26.23<br>(19.77 to 35.58)                        | 25.57<br>(19.59 to 33.90)                        | 26.16<br>(19.47 to 35.89)                        | 0.48<br>(0.39 to 0.62)                  | 0.88<br>(0.67 to 1.18)                     | 0.88<br>(0.67 to 1.14)                    | 0.85<br>(0.63 to 1.16)                     |
| Chronic myeloid leukemia        | 6.72<br>(5.25 to 9.52)                           | 6.15<br>(4.33 to 8.88)                           | 5.86<br>(4.20 to 8.27)                           | 6.61<br>(4.56 to 9.67)                           | 0.20<br>(0.16 to 0.28)                  | 0.23<br>(0.16 to 0.34)                     | 0.23<br>(0.17 to 0.33)                    | 0.24<br>(0.17 to 0.36)                     |
| Other leukemia                  | 59.09<br>(46.02 to 73.54)                        | 60.03<br>(43.82 to 80.17)                        | 55.61<br>(41.18 to 73.50)                        | 69.14<br>(50.04 to 94.89)                        | 1.56<br>(1.26 to 1.93)                  | 2.37<br>(1.80 to 3.12)                     | 2.26<br>(1.72 to 2.92)                    | 2.60<br>(1.92 to 3.52)                     |
| Other neoplasms                 | 117.51<br>(100.62 to 135.32)                     | 162.51<br>(136.78 to 189.37)                     | 165.61<br>(139.28 to 193.89)                     | 155.81<br>(131.44 to 180.66)                     | 3.59<br>(3.12 to 4.10)                  | 7.00<br>(6.05 to 7.92)                     | 7.31<br>(6.33 to 8.32)                    | 6.36<br>(5.54 to 7.21)                     |
| <b>Cardiovascular diseases</b>  | <b>1,865.61</b><br><b>(1,697.33 to 2,096.67)</b> | <b>2,025.74</b><br><b>(1,822.25 to 2,213.30)</b> | <b>1,520.88</b><br><b>(1,177.87 to 1,980.57)</b> | <b>3,401.82</b><br><b>(2,423.58 to 4,715.63)</b> | <b>87.47</b><br><b>(80.33 to 96.16)</b> | <b>128.16</b><br><b>(100.57 to 162.81)</b> | <b>101.84</b><br><b>(81.66 to 126.27)</b> | <b>190.96</b><br><b>(146.55 to 250.01)</b> |
| Rheumatic heart disease         | 65.43<br>(53.13 to 78.78)                        | 42.31<br>(33.36 to 53.95)                        | 39.70<br>(31.32 to 49.89)                        | 50.56<br>(39.43 to 63.93)                        | 2.10<br>(1.72 to 2.58)                  | 2.06<br>(1.65 to 2.57)                     | 1.99<br>(1.60 to 2.47)                    | 2.30<br>(1.83 to 2.94)                     |
| Ischemic heart disease          | 535.34<br>(475.02 to 614.77)                     | 510.41<br>(324.12 to 800.86)                     | 356.71<br>(233.09 to 547.38)                     | 998.65<br>(608.40 to 1,592.72)                   | 26.01<br>(23.47 to 29.28)               | 33.19<br>(21.85 to 51.27)                  | 24.79<br>(16.62 to 37.51)                 | 56.61<br>(36.74 to 89.81)                  |
| Stroke                          | 881.11<br>(788.92 to 1,000.42)                   | 847.59<br>(535.51 to 1,321.67)                   | 573.45<br>(376.07 to 873.32)                     | 1,607.37<br>(1,006.13 to 2,517.03)               | 41.37<br>(37.28 to 46.28)               | 51.96<br>(35.24 to 76.37)                  | 37.94<br>(26.85 to 54.86)                 | 86.73<br>(58.12 to 127.83)                 |
| Ischemic stroke                 | 251.71<br>(217.15 to 295.42)                     | 292.19<br>(182.29 to 480.10)                     | 213.59<br>(137.68 to 345.49)                     | 473.53<br>(283.62 to 786.13)                     | 15.12<br>(13.22 to 17.49)               | 21.55<br>(13.55 to 36.42)                  | 16.73<br>(11.06 to 27.83)                 | 31.41<br>(19.39 to 53.30)                  |



|                                |                                 |                                 |                                 |                                     |                              |                              |                              |                              |
|--------------------------------|---------------------------------|---------------------------------|---------------------------------|-------------------------------------|------------------------------|------------------------------|------------------------------|------------------------------|
| Intracerebral hemorrhage       | 629.40<br>(552.38 to<br>726.99) | 555.40<br>(322.42 to<br>942.76) | 359.86<br>(218.65 to<br>587.00) | 1,133.85<br>(640.36 to<br>1,934.93) | 26.26<br>(23.24 to<br>29.81) | 30.41<br>(19.24 to<br>47.33) | 21.21<br>(13.92 to<br>31.83) | 55.32<br>(33.66 to<br>88.02) |
| Hypertensive heart disease     | 173.65<br>(131.28 to<br>207.41) | 305.18<br>(209.29 to<br>471.28) | 240.52<br>(171.69 to<br>335.39) | 397.01<br>(251.42 to<br>666.42)     | 9.02<br>(6.79 to<br>10.70)   | 20.84<br>(14.57 to<br>32.61) | 16.85<br>(12.19 to<br>23.77) | 25.24<br>(16.63 to<br>43.39) |
| Cardiomyopathy and myocarditis | 55.72<br>(39.22 to<br>70.64)    | 74.62<br>(48.85 to<br>105.69)   | 72.92<br>(47.48 to<br>102.15)   | 71.57<br>(47.03 to<br>101.11)       | 2.01<br>(1.48 to<br>2.48)    | 3.90<br>(2.57 to<br>5.62)    | 3.96<br>(2.60 to<br>5.70)    | 3.49<br>(2.33 to<br>5.00)    |
| Myocarditis                    | 10.40<br>(7.16 to<br>14.55)     | 8.93<br>(6.49 to<br>11.76)      | 8.83<br>(6.38 to<br>11.66)      | 9.25<br>(6.74 to<br>12.34)          | 0.28<br>(0.21 to<br>0.35)    | 0.37<br>(0.27 to<br>0.47)    | 0.38<br>(0.28 to<br>0.49)    | 0.35<br>(0.26 to<br>0.45)    |

| Myanmar                                                       |                                              |                                                |                                              |                                                |                                         |                                         |                                         |                                         |
|---------------------------------------------------------------|----------------------------------------------|------------------------------------------------|----------------------------------------------|------------------------------------------------|-----------------------------------------|-----------------------------------------|-----------------------------------------|-----------------------------------------|
| Cause                                                         | YLLs (in 1000s)                              |                                                |                                              |                                                | Deaths (in 1000s)                       |                                         |                                         |                                         |
|                                                               | 2016                                         | 2040 Forecast                                  | 2040 Better Scenario                         | 2040 Worse Scenario                            | 2016                                    | 2040 Forecast                           | 2040 Better Scenario                    | 2040 Worse Scenario                     |
| Alcoholic cardiomyopathy                                      | 8.52<br>(4.21 to 11.85)                      | 11.16<br>(5.47 to 15.88)                       | 10.35<br>(5.06 to 14.85)                     | 10.32<br>(5.11 to 14.53)                       | 0.31<br>(0.17 to 0.43)                  | 0.51<br>(0.26 to 0.72)                  | 0.49<br>(0.26 to 0.70)                  | 0.45<br>(0.24 to 0.64)                  |
| Other cardiomyopathy                                          | 36.81<br>(25.13 to 47.27)                    | 54.53<br>(34.70 to 79.68)                      | 53.75<br>(33.96 to 77.34)                    | 52.01<br>(32.88 to 76.86)                      | 1.43<br>(1.00 to 1.77)                  | 3.02<br>(1.90 to 4.55)                  | 3.09<br>(1.94 to 4.62)                  | 2.69<br>(1.72 to 4.08)                  |
| Atrial fibrillation and flutter                               | 14.50<br>(11.19 to 18.44)                    | 40.33<br>(30.45 to 52.72)                      | 41.04<br>(31.27 to 52.90)                    | 38.60<br>(28.62 to 51.11)                      | 1.27<br>(0.97 to 1.60)                  | 4.06<br>(3.02 to 5.29)                  | 4.26<br>(3.23 to 5.51)                  | 3.63<br>(2.67 to 4.85)                  |
| Aortic aneurysm                                               | 17.06<br>(13.81 to 21.09)                    | 26.33<br>(20.71 to 33.29)                      | 26.87<br>(21.23 to 34.18)                    | 26.95<br>(20.67 to 34.73)                      | 0.86<br>(0.71 to 1.04)                  | 1.73<br>(1.39 to 2.15)                  | 1.82<br>(1.45 to 2.27)                  | 1.63<br>(1.29 to 2.05)                  |
| Peripheral artery disease                                     | 0.77<br>(0.60 to 1.03)                       | 2.85<br>(2.02 to 4.06)                         | 2.79<br>(2.00 to 3.95)                       | 2.50<br>(1.77 to 3.56)                         | 0.05<br>(0.04 to 0.07)                  | 0.25<br>(0.17 to 0.37)                  | 0.26<br>(0.18 to 0.38)                  | 0.20<br>(0.14 to 0.29)                  |
| Endocarditis                                                  | 30.40<br>(25.10 to 38.91)                    | 38.87<br>(28.72 to 53.25)                      | 37.26<br>(27.81 to 50.70)                    | 39.66<br>(29.11 to 54.54)                      | 0.99<br>(0.81 to 1.24)                  | 1.84<br>(1.34 to 2.55)                  | 1.82<br>(1.33 to 2.51)                  | 1.75<br>(1.27 to 2.40)                  |
| Other cardiovascular and circulatory diseases                 | 91.63<br>(68.15 to 150.32)                   | 137.25<br>(96.12 to 215.15)                    | 129.62<br>(92.69 to 203.25)                  | 168.94<br>(114.37 to 271.33)                   | 3.78<br>(2.90 to 6.28)                  | 8.33<br>(5.94 to 13.51)                 | 8.16<br>(5.88 to 13.05)                 | 9.37<br>(6.54 to 15.31)                 |
| <b>Chronic respiratory diseases</b>                           | <b>612.49</b><br><b>(526.98 to 712.27)</b>   | <b>538.77</b><br><b>(384.49 to 745.97)</b>     | <b>431.65</b><br><b>(318.73 to 579.94)</b>   | <b>979.07</b><br><b>(660.35 to 1,437.87)</b>   | <b>30.35</b><br><b>(26.13 to 34.73)</b> | <b>32.81</b><br><b>(24.26 to 43.33)</b> | <b>27.29</b><br><b>(20.55 to 35.50)</b> | <b>57.33</b><br><b>(40.47 to 80.58)</b> |
| Chronic obstructive pulmonary disease                         | 346.68<br>(262.80 to 422.38)                 | 329.41<br>(195.72 to 518.70)                   | 246.80<br>(147.51 to 386.02)                 | 730.44<br>(423.33 to 1,183.13)                 | 18.98<br>(14.58 to 22.78)               | 21.12<br>(12.99 to 32.20)               | 16.59<br>(10.16 to 24.94)               | 44.23<br>(27.11 to 68.31)               |
| Pneumoconiosis                                                | 0.55<br>(0.38 to 0.78)                       | 0.67<br>(0.46 to 0.97)                         | 0.66<br>(0.44 to 0.96)                       | 0.62<br>(0.44 to 0.88)                         | 0.03<br>(0.02 to 0.04)                  | 0.04<br>(0.03 to 0.06)                  | 0.04<br>(0.03 to 0.06)                  | 0.04<br>(0.03 to 0.05)                  |
| Silicosis                                                     | 0.15<br>(0.08 to 0.27)                       | 0.14<br>(0.08 to 0.25)                         | 0.15<br>(0.08 to 0.25)                       | 0.14<br>(0.07 to 0.23)                         | 0.01<br>(0.00 to 0.01)                  | 0.01<br>(0.00 to 0.01)                  | 0.01<br>(0.00 to 0.02)                  | 0.01<br>(0.00 to 0.01)                  |
| Asbestosis                                                    | 0.08<br>(0.05 to 0.11)                       | 0.10<br>(0.06 to 0.15)                         | 0.11<br>(0.07 to 0.16)                       | 0.09<br>(0.06 to 0.14)                         | 0.00<br>(0.00 to 0.00)                  | 0.01<br>(0.00 to 0.01)                  | 0.01<br>(0.00 to 0.01)                  | 0.00<br>(0.00 to 0.01)                  |
| Coal workers pneumoconiosis                                   | 0.03<br>(0.01 to 0.06)                       | 0.03<br>(0.01 to 0.06)                         | 0.03<br>(0.01 to 0.05)                       | 0.04<br>(0.02 to 0.07)                         | 0.00<br>(0.00 to 0.00)                  | 0.00<br>(0.00 to 0.00)                  | 0.00<br>(0.00 to 0.00)                  | 0.00<br>(0.00 to 0.00)                  |
| Other pneumoconiosis                                          | 0.30<br>(0.19 to 0.44)                       | 0.40<br>(0.25 to 0.59)                         | 0.38<br>(0.24 to 0.57)                       | 0.35<br>(0.22 to 0.53)                         | 0.02<br>(0.01 to 0.02)                  | 0.03<br>(0.02 to 0.04)                  | 0.03<br>(0.02 to 0.04)                  | 0.02<br>(0.01 to 0.03)                  |
| Asthma                                                        | 247.39<br>(172.97 to 350.47)                 | 181.17<br>(110.62 to 286.41)                   | 155.41<br>(98.08 to 234.75)                  | 222.39<br>(129.40 to 373.66)                   | 10.67<br>(7.12 to 15.33)                | 10.19<br>(6.14 to 16.15)                | 9.09<br>(5.66 to 13.65)                 | 11.82<br>(6.66 to 19.96)                |
| Interstitial lung disease and pulmonary sarcoidosis           | 9.42<br>(6.40 to 13.12)                      | 18.91<br>(12.85 to 26.07)                      | 20.36<br>(13.66 to 28.21)                    | 15.87<br>(10.75 to 21.83)                      | 0.43<br>(0.29 to 0.59)                  | 1.05<br>(0.72 to 1.46)                  | 1.16<br>(0.79 to 1.59)                  | 0.84<br>(0.57 to 1.17)                  |
| Other chronic respiratory diseases                            | 8.45<br>(4.02 to 13.36)                      | 8.60<br>(4.42 to 14.05)                        | 8.42<br>(4.32 to 13.71)                      | 9.75<br>(4.96 to 15.82)                        | 0.25<br>(0.12 to 0.39)                  | 0.39<br>(0.18 to 0.70)                  | 0.40<br>(0.19 to 0.72)                  | 0.41<br>(0.19 to 0.73)                  |
| <b>Cirrhosis and other chronic liver diseases</b>             | <b>807.97</b><br><b>(678.78 to 1,012.25)</b> | <b>1,006.39</b><br><b>(829.67 to 1,243.87)</b> | <b>964.70</b><br><b>(791.69 to 1,196.86)</b> | <b>1,044.56</b><br><b>(855.72 to 1,299.84)</b> | <b>24.37</b><br><b>(20.72 to 30.14)</b> | <b>38.12</b><br><b>(32.38 to 45.07)</b> | <b>37.49</b><br><b>(31.63 to 44.40)</b> | <b>37.77</b><br><b>(31.87 to 45.24)</b> |
| Cirrhosis and other chronic liver diseases due to hepatitis B | 274.86<br>(217.22 to 358.04)                 | 345.50<br>(274.17 to 446.75)                   | 345.35<br>(269.73 to 441.69)                 | 355.39<br>(277.32 to 463.75)                   | 8.42<br>(6.74 to 10.88)                 | 13.19<br>(10.62 to 16.47)               | 13.38<br>(10.71 to 16.77)               | 12.88<br>(10.32 to 16.15)               |
| Cirrhosis and other chronic liver diseases due to hepatitis C | 189.15<br>(145.67 to 248.29)                 | 240.75<br>(184.17 to 316.02)                   | 238.32<br>(182.26 to 312.74)                 | 248.79<br>(190.63 to 326.61)                   | 5.70<br>(4.48 to 7.32)                  | 8.86<br>(7.01 to 11.22)                 | 8.93<br>(7.05 to 11.43)                 | 8.80<br>(6.93 to 11.24)                 |

|                                                                |                                                      |                                                      |                                                      |                                                      |                                                |                                                  |                                                  |                                                  |
|----------------------------------------------------------------|------------------------------------------------------|------------------------------------------------------|------------------------------------------------------|------------------------------------------------------|------------------------------------------------|--------------------------------------------------|--------------------------------------------------|--------------------------------------------------|
|                                                                | 145.97<br>(111.61 to<br>193.45)                      | 198.22<br>(148.81 to<br>263.96)                      | 164.30<br>(123.32 to<br>220.09)                      | 210.31<br>(157.93 to<br>286.49)                      | 4.63<br>(3.59 to<br>5.98)                      | 7.60<br>(5.95 to<br>9.90)                        | 6.61<br>(5.14 to<br>8.61)                        | 7.70<br>(5.98 to<br>10.04)                       |
| Cirrhosis and other chronic liver diseases due to alcohol use  |                                                      |                                                      |                                                      |                                                      |                                                |                                                  |                                                  |                                                  |
|                                                                | 197.99<br>(161.77 to<br>242.01)                      | 219.92<br>(177.26 to<br>268.90)                      | 216.73<br>(173.57 to<br>267.99)                      | 230.07<br>(185.52 to<br>283.20)                      | 5.62<br>(4.70 to<br>6.74)                      | 8.47<br>(7.03 to<br>10.09)                       | 8.57<br>(7.10 to<br>10.30)                       | 8.39<br>(7.01 to<br>10.05)                       |
| Cirrhosis and other chronic liver diseases due to other causes |                                                      |                                                      |                                                      |                                                      |                                                |                                                  |                                                  |                                                  |
| <b>Digestive diseases</b>                                      | <b>220.01</b><br><b>(186.63 to</b><br><b>269.37)</b> | <b>234.76</b><br><b>(183.45 to</b><br><b>302.66)</b> | <b>216.79</b><br><b>(170.92 to</b><br><b>270.85)</b> | <b>260.54</b><br><b>(202.21 to</b><br><b>337.11)</b> | <b>7.79</b><br><b>(6.69 to</b><br><b>9.13)</b> | <b>11.94</b><br><b>(9.58 to</b><br><b>14.34)</b> | <b>11.58</b><br><b>(9.40 to</b><br><b>13.82)</b> | <b>12.39</b><br><b>(9.96 to</b><br><b>14.97)</b> |
| Peptic ulcer disease                                           | 72.61<br>(56.67 to<br>92.08)                         | 58.74<br>(42.56 to<br>76.86)                         | 55.30<br>(39.70 to<br>72.99)                         | 75.01<br>(53.12 to<br>100.60)                        | 3.03<br>(2.38 to<br>3.73)                      | 3.36<br>(2.42 to<br>4.39)                        | 3.25<br>(2.29 to<br>4.26)                        | 4.04<br>(2.90 to<br>5.35)                        |

| Myanmar                                    |                                     |                                     |                                     |                                     |                                  |                                  |                                  |                                  |
|--------------------------------------------|-------------------------------------|-------------------------------------|-------------------------------------|-------------------------------------|----------------------------------|----------------------------------|----------------------------------|----------------------------------|
| Cause                                      | YLLs (in 1000s)                     |                                     |                                     |                                     | Deaths (in 1000s)                |                                  |                                  |                                  |
|                                            | 2016                                | 2040 Forecast                       | 2040 Better Scenario                | 2040 Worse Scenario                 | 2016                             | 2040 Forecast                    | 2040 Better Scenario             | 2040 Worse Scenario              |
| Gastritis and duodenitis                   | 4.41<br>(2.98 to 7.05)              | 6.98<br>(4.56 to 11.08)             | 6.97<br>(4.50 to 11.12)             | 7.15<br>(4.66 to 11.43)             | 0.18<br>(0.12 to 0.26)           | 0.39<br>(0.25 to 0.57)           | 0.40<br>(0.26 to 0.59)           | 0.37<br>(0.24 to 0.56)           |
| Appendicitis                               | 15.63<br>(12.33 to 21.84)           | 12.03<br>(8.93 to 16.65)            | 11.46<br>(8.42 to 16.05)            | 13.77<br>(10.25 to 19.37)           | 0.40<br>(0.31 to 0.56)           | 0.46<br>(0.34 to 0.64)           | 0.46<br>(0.33 to 0.62)           | 0.49<br>(0.36 to 0.68)           |
| Paralytic ileus and intestinal obstruction | 48.11<br>(33.50 to 74.72)           | 51.24<br>(38.48 to 67.82)           | 51.17<br>(38.41 to 66.64)           | 51.91<br>(39.03 to 70.54)           | 1.44<br>(1.11 to 1.86)           | 2.69<br>(2.05 to 3.35)           | 2.81<br>(2.15 to 3.44)           | 2.46<br>(1.88 to 3.09)           |
| Inguinal, femoral, and abdominal hernia    | 5.11<br>(3.32 to 6.62)              | 5.68<br>(3.40 to 7.27)              | 5.68<br>(3.36 to 7.40)              | 5.79<br>(3.53 to 7.56)              | 0.23<br>(0.14 to 0.29)           | 0.35<br>(0.20 to 0.46)           | 0.36<br>(0.21 to 0.48)           | 0.32<br>(0.19 to 0.43)           |
| Inflammatory bowel disease                 | 3.70<br>(2.87 to 5.07)              | 4.86<br>(3.64 to 6.37)              | 4.98<br>(3.71 to 6.46)              | 4.64<br>(3.50 to 6.05)              | 0.13<br>(0.10 to 0.17)           | 0.25<br>(0.19 to 0.32)           | 0.26<br>(0.20 to 0.34)           | 0.22<br>(0.17 to 0.28)           |
| Vascular intestinal disorders              | 5.46<br>(4.26 to 7.58)              | 9.72<br>(7.55 to 13.06)             | 9.91<br>(7.68 to 13.13)             | 9.45<br>(7.31 to 12.79)             | 0.27<br>(0.21 to 0.37)           | 0.64<br>(0.49 to 0.84)           | 0.67<br>(0.52 to 0.87)           | 0.59<br>(0.44 to 0.77)           |
| Gallbladder and biliary diseases           | 10.34<br>(8.40 to 12.57)            | 14.71<br>(9.62 to 22.02)            | 12.02<br>(8.34 to 16.77)            | 16.51<br>(10.66 to 24.64)           | 0.46<br>(0.37 to 0.55)           | 0.88<br>(0.58 to 1.30)           | 0.75<br>(0.52 to 1.03)           | 0.92<br>(0.59 to 1.39)           |
| Pancreatitis                               | 34.48<br>(25.86 to 44.99)           | 47.86<br>(23.78 to 101.50)          | 36.85<br>(20.84 to 67.36)           | 51.63<br>(25.62 to 112.69)          | 0.96<br>(0.72 to 1.22)           | 1.69<br>(0.93 to 3.25)           | 1.38<br>(0.83 to 2.30)           | 1.74<br>(0.94 to 3.38)           |
| Other digestive diseases                   | 20.16<br>(14.25 to 28.98)           | 22.94<br>(16.87 to 31.56)           | 22.45<br>(16.49 to 30.55)           | 24.69<br>(17.87 to 34.09)           | 0.70<br>(0.52 to 0.94)           | 1.23<br>(0.91 to 1.64)           | 1.25<br>(0.92 to 1.65)           | 1.22<br>(0.89 to 1.63)           |
| Neurological disorders                     | <b>289.90</b><br>(253.27 to 335.19) | <b>744.53</b><br>(602.24 to 955.88) | <b>721.63</b><br>(599.98 to 887.29) | <b>679.19</b><br>(540.59 to 848.76) | <b>20.44</b><br>(17.61 to 23.88) | <b>66.28</b><br>(52.94 to 84.84) | <b>66.52</b><br>(55.10 to 81.56) | <b>56.62</b><br>(43.65 to 73.55) |
| Alzheimer's disease and other dementias    | 208.15<br>(174.18 to 248.04)        | 618.33<br>(473.36 to 823.44)        | 596.73<br>(481.80 to 754.44)        | 558.42<br>(422.97 to 752.24)        | 17.86<br>(15.10 to 21.13)        | 59.82<br>(46.56 to 79.04)        | 59.64<br>(48.08 to 74.78)        | 51.18<br>(38.42 to 67.58)        |
| Parkinson's disease                        | 16.40<br>(12.52 to 20.86)           | 54.88<br>(41.93 to 71.36)           | 60.47<br>(46.06 to 78.08)           | 43.45<br>(32.72 to 56.75)           | 1.13<br>(0.86 to 1.47)           | 4.40<br>(3.28 to 5.83)           | 4.95<br>(3.76 to 6.52)           | 3.32<br>(2.44 to 4.43)           |
| Epilepsy                                   | 45.77<br>(38.16 to 57.11)           | 45.79<br>(31.58 to 64.71)           | 38.37<br>(27.54 to 52.81)           | 53.11<br>(36.98 to 74.87)           | 0.95<br>(0.81 to 1.18)           | 1.18<br>(0.85 to 1.62)           | 1.01<br>(0.75 to 1.33)           | 1.32<br>(0.95 to 1.79)           |
| Multiple sclerosis                         | 3.30<br>(2.69 to 4.47)              | 3.95<br>(3.07 to 5.38)              | 4.02<br>(3.11 to 5.44)              | 3.89<br>(3.01 to 5.36)              | 0.09<br>(0.08 to 0.13)           | 0.13<br>(0.11 to 0.18)           | 0.14<br>(0.11 to 0.18)           | 0.13<br>(0.10 to 0.18)           |
| Motor neuron disease                       | 3.61<br>(3.03 to 4.33)              | 5.94<br>(4.81 to 7.35)              | 6.12<br>(4.94 to 7.53)              | 5.51<br>(4.52 to 6.65)              | 0.11<br>(0.09 to 0.13)           | 0.22<br>(0.18 to 0.27)           | 0.23<br>(0.19 to 0.28)           | 0.20<br>(0.17 to 0.24)           |
| Other neurological disorders               | 12.68<br>(10.26 to 15.70)           | 15.63<br>(12.94 to 18.69)           | 15.92<br>(13.15 to 19.06)           | 14.80<br>(12.21 to 17.82)           | 0.30<br>(0.26 to 0.35)           | 0.52<br>(0.46 to 0.60)           | 0.55<br>(0.48 to 0.63)           | 0.47<br>(0.41 to 0.53)           |
| Mental disorders                           | <b>53.05</b><br>(37.22 to 76.47)    | <b>64.63</b><br>(45.31 to 91.45)    | <b>62.69</b><br>(43.91 to 88.52)    | <b>64.60</b><br>(45.41 to 91.75)    | <b>1.26</b><br>(0.91 to 1.76)    | <b>1.86</b><br>(1.37 to 2.53)    | <b>1.83</b><br>(1.36 to 2.50)    | <b>1.79</b><br>(1.32 to 2.44)    |
| Alcohol use disorders                      | 36.70<br>(22.39 to 55.25)           | 38.04<br>(21.87 to 59.47)           | 35.97<br>(20.48 to 56.06)           | 38.32<br>(22.07 to 59.90)           | 0.90<br>(0.57 to 1.32)           | 1.12<br>(0.68 to 1.66)           | 1.08<br>(0.65 to 1.61)           | 1.10<br>(0.67 to 1.62)           |
| Drug use disorders                         | 16.08<br>(11.10 to 26.93)           | 26.34<br>(18.35 to 41.92)           | 26.47<br>(18.52 to 41.83)           | 26.04<br>(18.08 to 41.96)           | 0.35<br>(0.25 to 0.58)           | 0.73<br>(0.55 to 1.14)           | 0.75<br>(0.56 to 1.15)           | 0.69<br>(0.52 to 1.09)           |
| Opioid use disorders                       | 10.42<br>(6.96 to 17.73)            | 14.10<br>(9.38 to 22.82)            | 14.11<br>(9.43 to 22.75)            | 14.05<br>(9.29 to 22.83)            | 0.22<br>(0.15 to 0.37)           | 0.38<br>(0.27 to 0.59)           | 0.38<br>(0.28 to 0.60)           | 0.36<br>(0.25 to 0.56)           |



| Myanmar                                                    |                              |                                  |                                |                                    |                           |                           |                           |                           |
|------------------------------------------------------------|------------------------------|----------------------------------|--------------------------------|------------------------------------|---------------------------|---------------------------|---------------------------|---------------------------|
| Cause                                                      | YLLs (in 1000s)              |                                  |                                |                                    | Deaths (in 1000s)         |                           |                           |                           |
|                                                            | 2016                         | 2040 Forecast                    | 2040 Better Scenario           | 2040 Worse Scenario                | 2016                      | 2040 Forecast             | 2040 Better Scenario      | 2040 Worse Scenario       |
|                                                            | 700.43<br>(630.70 to 794.29) | 1,141.17<br>(858.57 to 1,514.73) | 987.97<br>(753.67 to 1,285.50) | 1,395.52<br>(1,033.04 to 1,860.68) | 27.83<br>(25.35 to 31.11) | 62.71<br>(48.00 to 83.13) | 55.64<br>(43.13 to 72.88) | 71.84<br>(54.32 to 95.01) |
| Diabetes, urogenital, blood, and endocrine diseases        |                              |                                  |                                |                                    |                           |                           |                           |                           |
| Diabetes mellitus                                          | 316.32<br>(282.14 to 362.26) | 474.21<br>(312.87 to 706.47)     | 433.44<br>(286.78 to 648.80)   | 633.95<br>(409.82 to 943.88)       | 13.76<br>(12.35 to 15.52) | 26.67<br>(18.57 to 37.82) | 25.11<br>(17.31 to 35.86) | 33.32<br>(22.43 to 48.37) |
| Acute glomerulonephritis                                   | 0.59<br>(0.50 to 0.72)       | 0.68<br>(0.51 to 0.90)           | 0.65<br>(0.49 to 0.87)         | 0.73<br>(0.56 to 0.97)             | 0.01<br>(0.01 to 0.02)    | 0.03<br>(0.02 to 0.04)    | 0.03<br>(0.02 to 0.04)    | 0.03<br>(0.02 to 0.04)    |
| Chronic kidney disease                                     | 264.30<br>(230.30 to 312.89) | 498.20<br>(300.49 to 822.69)     | 386.82<br>(245.97 to 609.31)   | 588.06<br>(352.97 to 977.71)       | 9.84<br>(8.69 to 11.36)   | 27.11<br>(15.77 to 46.87) | 21.36<br>(13.18 to 35.75) | 29.98<br>(17.59 to 51.36) |
| Chronic kidney disease due to diabetes mellitus            | 156.32<br>(134.25 to 185.46) | 304.52<br>(183.40 to 517.64)     | 234.79<br>(149.98 to 383.48)   | 362.23<br>(211.40 to 609.07)       | 5.58<br>(4.82 to 6.55)    | 14.91<br>(8.70 to 26.99)  | 11.61<br>(7.14 to 19.92)  | 16.83<br>(9.64 to 29.94)  |
| Chronic kidney disease due to hypertension                 | 62.39<br>(51.54 to 77.55)    | 142.98<br>(83.44 to 244.34)      | 111.34<br>(68.57 to 186.41)    | 163.42<br>(94.03 to 295.43)        | 3.09<br>(2.58 to 3.67)    | 9.99<br>(5.79 to 16.95)   | 7.99<br>(4.90 to 13.26)   | 10.62<br>(6.04 to 18.81)  |
| Chronic kidney disease due to glomerulonephritis           | 23.90<br>(18.66 to 30.51)    | 23.44<br>(15.24 to 35.97)        | 19.04<br>(12.77 to 28.79)      | 29.27<br>(19.22 to 44.82)          | 0.55<br>(0.44 to 0.68)    | 0.87<br>(0.54 to 1.49)    | 0.70<br>(0.44 to 1.12)    | 1.02<br>(0.62 to 1.68)    |
| Chronic kidney disease due to other and unspecified causes | 21.69<br>(17.21 to 27.86)    | 27.26<br>(16.94 to 43.96)        | 21.66<br>(14.30 to 33.46)      | 33.14<br>(20.51 to 52.64)          | 0.62<br>(0.50 to 0.76)    | 1.34<br>(0.77 to 2.31)    | 1.07<br>(0.64 to 1.80)    | 1.50<br>(0.88 to 2.59)    |
| Urinary diseases and male infertility                      | 61.86<br>(53.22 to 72.77)    | 100.60<br>(84.52 to 120.81)      | 102.18<br>(85.38 to 122.87)    | 97.45<br>(82.16 to 117.31)         | 2.48<br>(2.15 to 2.92)    | 5.78<br>(4.89 to 6.94)    | 6.06<br>(5.09 to 7.31)    | 5.21<br>(4.40 to 6.26)    |
| Urinary tract infections                                   | 45.78<br>(35.31 to 55.73)    | 81.42<br>(65.43 to 99.65)        | 83.31<br>(66.98 to 102.13)     | 97.22<br>(61.79 to 94.90)          | 1.83<br>(1.41 to 2.19)    | 4.69<br>(3.79 to 5.72)    | 4.95<br>(3.99 to 6.08)    | 4.15<br>(3.31 to 5.08)    |
| Urolithiasis                                               | 1.84<br>(1.27 to 2.73)       | 3.81<br>(2.53 to 5.96)           | 3.90<br>(2.58 to 6.17)         | 3.62<br>(2.44 to 5.58)             | 0.08<br>(0.05 to 0.12)    | 0.21<br>(0.14 to 0.32)    | 0.22<br>(0.14 to 0.34)    | 0.19<br>(0.12 to 0.29)    |
| Other urinary diseases                                     | 14.25<br>(8.56 to 23.57)     | 15.36<br>(8.83 to 26.14)         | 14.98<br>(8.61 to 25.37)       | 16.62<br>(9.51 to 28.59)           | 0.58<br>(0.35 to 0.97)    | 0.88<br>(0.50 to 1.51)    | 0.89<br>(0.50 to 1.52)    | 0.87<br>(0.49 to 1.53)    |
| Gynecological diseases                                     | 0.37<br>(0.29 to 0.49)       | 0.35<br>(0.24 to 0.50)           | 0.33<br>(0.22 to 0.47)         | 0.41<br>(0.28 to 0.59)             | 0.01<br>(0.01 to 0.01)    | 0.01<br>(0.01 to 0.02)    | 0.01<br>(0.01 to 0.02)    | 0.01<br>(0.01 to 0.02)    |
| Uterine fibroids                                           | 0.08<br>(0.04 to 0.13)       | 0.07<br>(0.03 to 0.13)           | 0.07<br>(0.03 to 0.12)         | 0.09<br>(0.04 to 0.16)             | 0.00<br>(0.00 to 0.00)    | 0.00<br>(0.00 to 0.01)    | 0.00<br>(0.00 to 0.00)    | 0.00<br>(0.00 to 0.01)    |
| Polycystic ovarian syndrome                                | 0.01<br>(0.00 to 0.03)       | 0.01<br>(0.00 to 0.02)           | 0.01<br>(0.00 to 0.01)         | 0.01<br>(0.00 to 0.02)             | 0.00<br>(0.00 to 0.00)    | 0.00<br>(0.00 to 0.00)    | 0.00<br>(0.00 to 0.00)    | 0.00<br>(0.00 to 0.00)    |
| Endometriosis                                              | 0.01<br>(0.00 to 0.01)       | 0.01<br>(0.00 to 0.02)           | 0.01<br>(0.00 to 0.02)         | 0.01<br>(0.00 to 0.02)             | 0.00<br>(0.00 to 0.00)    | 0.00<br>(0.00 to 0.00)    | 0.00<br>(0.00 to 0.00)    | 0.00<br>(0.00 to 0.00)    |
| Genital prolapse                                           | 0.02<br>(0.01 to 0.04)       | 0.02<br>(0.01 to 0.04)           | 0.02<br>(0.01 to 0.04)         | 0.03<br>(0.01 to 0.05)             | 0.00<br>(0.00 to 0.00)    | 0.00<br>(0.00 to 0.00)    | 0.00<br>(0.00 to 0.00)    | 0.00<br>(0.00 to 0.00)    |
| Other gynecological diseases                               | 0.25<br>(0.18 to 0.35)       | 0.24<br>(0.15 to 0.36)           | 0.23<br>(0.15 to 0.35)         | 0.28<br>(0.17 to 0.43)             | 0.01<br>(0.00 to 0.01)    | 0.01<br>(0.01 to 0.01)    | 0.01<br>(0.01 to 0.01)    | 0.01<br>(0.01 to 0.01)    |
| Hemoglobinopathies and hemolytic anemias                   | 47.71<br>(39.59 to 60.80)    | 56.97<br>(44.33 to 74.96)        | 54.59<br>(42.04 to 72.79)      | 64.17<br>(49.45 to 84.93)          | 1.47<br>(1.22 to 1.88)    | 2.68<br>(2.10 to 3.52)    | 2.63<br>(2.03 to 3.48)    | 2.87<br>(2.23 to 3.78)    |
| Thalassemias                                               | 8.36<br>(4.63 to 13.78)      | 3.84<br>(1.94 to 6.75)           | 3.78<br>(1.91 to 6.60)         | 3.76<br>(1.86 to 6.63)             | 0.11<br>(0.06 to 0.17)    | 0.05<br>(0.03 to 0.08)    | 0.05<br>(0.03 to 0.08)    | 0.05<br>(0.03 to 0.08)    |

|                                                   |                              |                              |                              |                              |                           |                           |                           |                           |
|---------------------------------------------------|------------------------------|------------------------------|------------------------------|------------------------------|---------------------------|---------------------------|---------------------------|---------------------------|
|                                                   | 0.06<br>(0.04 to<br>0.09)    | 0.05<br>(0.03 to<br>0.07)    | 0.05<br>(0.03 to<br>0.07)    | 0.05<br>(0.03 to<br>0.08)    | 0.00<br>(0.00 to<br>0.00) | 0.00<br>(0.00 to<br>0.00) | 0.00<br>(0.00 to<br>0.00) | 0.00<br>(0.00 to<br>0.00) |
| Sickle cell disorders                             |                              |                              |                              |                              |                           |                           |                           |                           |
|                                                   | 25.84<br>(20.87 to<br>34.00) | 34.67<br>(25.97 to<br>47.36) | 32.71<br>(24.29 to<br>44.71) | 40.62<br>(30.27 to<br>55.27) | 0.66<br>(0.54 to<br>0.87) | 1.28<br>(0.97 to<br>1.71) | 1.22<br>(0.92 to<br>1.64) | 1.45<br>(1.10 to<br>1.93) |
| G6PD deficiency                                   |                              |                              |                              |                              |                           |                           |                           |                           |
|                                                   | 13.44<br>(10.78 to<br>17.05) | 18.41<br>(13.99 to<br>23.87) | 18.06<br>(13.74 to<br>23.81) | 19.74<br>(15.10 to<br>25.84) | 0.70<br>(0.57 to<br>0.91) | 1.35<br>(1.02 to<br>1.80) | 1.36<br>(1.03 to<br>1.81) | 1.37<br>(1.04 to<br>1.83) |
| Other hemoglobinopathies and hemolytic anemias    |                              |                              |                              |                              |                           |                           |                           |                           |
|                                                   | 9.28<br>(7.49 to<br>11.93)   | 10.17<br>(8.16 to<br>13.29)  | 9.96<br>(7.89 to<br>12.95)   | 10.74<br>(8.60 to<br>14.00)  | 0.26<br>(0.21 to<br>0.34) | 0.43<br>(0.35 to<br>0.60) | 0.44<br>(0.35 to<br>0.61) | 0.42<br>(0.34 to<br>0.58) |
| Endocrine, metabolic, blood, and immune disorders |                              |                              |                              |                              |                           |                           |                           |                           |

| Myanmar                                       |                                     |                                     |                                     |                                     |                               |                               |                               |                               |
|-----------------------------------------------|-------------------------------------|-------------------------------------|-------------------------------------|-------------------------------------|-------------------------------|-------------------------------|-------------------------------|-------------------------------|
| Cause                                         | YLLs (in 1000s)                     |                                     |                                     |                                     | Deaths (in 1000s)             |                               |                               |                               |
|                                               | 2016                                | 2040 Forecast                       | 2040 Better Scenario                | 2040 Worse Scenario                 | 2016                          | 2040 Forecast                 | 2040 Better Scenario          | 2040 Worse Scenario           |
| <b>Musculoskeletal disorders</b>              | <b>19.11</b><br>(15.47 to 29.04)    | <b>30.31</b><br>(23.75 to 47.23)    | <b>31.11</b><br>(24.28 to 48.73)    | <b>28.70</b><br>(22.57 to 44.59)    | <b>0.55</b><br>(0.45 to 0.87) | <b>1.31</b><br>(1.01 to 2.23) | <b>1.37</b><br>(1.06 to 2.34) | <b>1.19</b><br>(0.92 to 2.03) |
| Rheumatoid arthritis                          | 2.50<br>(1.80 to 3.74)              | 5.49<br>(3.44 to 9.02)              | 5.31<br>(3.32 to 8.70)              | 6.15<br>(3.89 to 10.07)             | 0.11<br>(0.08 to 0.18)        | 0.32<br>(0.20 to 0.56)        | 0.31<br>(0.19 to 0.55)        | 0.34<br>(0.21 to 0.60)        |
| Other musculoskeletal disorders               | 16.61<br>(13.27 to 25.30)           | 24.82<br>(19.12 to 40.16)           | 25.80<br>(19.88 to 41.20)           | 22.55<br>(17.52 to 36.51)           | 0.44<br>(0.35 to 0.70)        | 0.99<br>(0.76 to 1.76)        | 1.06<br>(0.80 to 1.89)        | 0.85<br>(0.65 to 1.50)        |
| <b>Other non-communicable diseases</b>        | <b>301.01</b><br>(176.71 to 492.99) | <b>223.87</b><br>(143.80 to 351.08) | <b>207.41</b><br>(134.59 to 320.86) | <b>262.86</b><br>(164.10 to 423.01) | <b>4.32</b><br>(2.83 to 6.62) | <b>5.48</b><br>(3.94 to 7.71) | <b>5.43</b><br>(3.91 to 7.76) | <b>5.59</b><br>(3.99 to 8.01) |
| Congenital birth defects                      | 265.05<br>(147.72 to 449.83)        | 163.34<br>(86.67 to 287.64)         | 146.44<br>(77.60 to 256.97)         | 202.77<br>(108.41 to 362.29)        | 3.28<br>(1.87 to 5.44)        | 2.14<br>(1.18 to 3.76)        | 1.94<br>(1.06 to 3.35)        | 2.62<br>(1.46 to 4.62)        |
| Neural tube defects                           | 24.58<br>(9.12 to 50.92)            | 7.03<br>(1.88 to 17.99)             | 5.97<br>(1.63 to 15.49)             | 9.95<br>(2.73 to 25.06)             | 0.29<br>(0.11 to 0.59)        | 0.08<br>(0.02 to 0.21)        | 0.07<br>(0.02 to 0.18)        | 0.12<br>(0.03 to 0.29)        |
| Congenital heart anomalies                    | 133.01<br>(71.41 to 241.07)         | 82.65<br>(42.17 to 150.69)          | 74.50<br>(38.53 to 137.62)          | 101.47<br>(51.74 to 187.16)         | 1.67<br>(0.92 to 3.02)        | 1.09<br>(0.58 to 2.00)        | 0.99<br>(0.53 to 1.82)        | 1.32<br>(0.70 to 2.42)        |
| Orofacial clefts                              | 0.45<br>(0.12 to 1.27)              | 0.23<br>(0.05 to 0.74)              | 0.19<br>(0.04 to 0.60)              | 0.34<br>(0.08 to 1.14)              | 0.01<br>(0.00 to 0.01)        | 0.00<br>(0.00 to 0.01)        | 0.00<br>(0.00 to 0.01)        | 0.00<br>(0.00 to 0.01)        |
| Down syndrome                                 | 8.59<br>(4.24 to 18.25)             | 6.05<br>(3.00 to 12.79)             | 5.47<br>(2.74 to 11.22)             | 7.54<br>(3.68 to 16.03)             | 0.12<br>(0.06 to 0.25)        | 0.10<br>(0.05 to 0.20)        | 0.09<br>(0.05 to 0.18)        | 0.12<br>(0.06 to 0.25)        |
| Other chromosomal abnormalities               | 11.27<br>(3.49 to 28.72)            | 9.75<br>(2.94 to 24.70)             | 8.57<br>(2.56 to 22.13)             | 12.55<br>(3.76 to 32.13)            | 0.13<br>(0.04 to 0.33)        | 0.12<br>(0.04 to 0.29)        | 0.10<br>(0.03 to 0.26)        | 0.15<br>(0.05 to 0.38)        |
| Congenital musculoskeletal and limb anomalies | 4.63<br>(2.01 to 9.56)              | 3.53<br>(1.30 to 7.59)              | 3.18<br>(1.17 to 6.80)              | 4.23<br>(1.57 to 9.13)              | 0.05<br>(0.02 to 0.11)        | 0.04<br>(0.02 to 0.09)        | 0.04<br>(0.01 to 0.08)        | 0.05<br>(0.02 to 0.11)        |
| Urogenital congenital anomalies               | 3.97<br>(2.16 to 7.10)              | 3.42<br>(1.85 to 6.35)              | 3.20<br>(1.74 to 6.00)              | 3.95<br>(2.12 to 7.26)              | 0.07<br>(0.04 to 0.13)        | 0.08<br>(0.05 to 0.15)        | 0.08<br>(0.04 to 0.15)        | 0.09<br>(0.05 to 0.17)        |
| Digestive congenital anomalies                | 14.58<br>(6.38 to 28.36)            | 9.25<br>(3.75 to 19.37)             | 8.15<br>(3.32 to 16.91)             | 11.84<br>(4.71 to 24.49)            | 0.17<br>(0.07 to 0.33)        | 0.11<br>(0.04 to 0.23)        | 0.10<br>(0.04 to 0.20)        | 0.14<br>(0.06 to 0.29)        |
| Other congenital birth defects                | 63.98<br>(33.96 to 109.69)          | 41.44<br>(20.68 to 76.57)           | 37.20<br>(18.57 to 68.00)           | 50.90<br>(25.25 to 95.15)           | 0.77<br>(0.42 to 1.29)        | 0.52<br>(0.27 to 0.95)        | 0.47<br>(0.24 to 0.84)        | 0.63<br>(0.32 to 1.16)        |
| Skin and subcutaneous diseases                | 21.47<br>(14.09 to 34.98)           | 53.08<br>(35.20 to 84.61)           | 54.34<br>(36.11 to 86.57)           | 50.93<br>(33.64 to 83.11)           | 0.87<br>(0.57 to 1.47)        | 3.22<br>(2.07 to 5.42)        | 3.42<br>(2.21 to 5.64)        | 2.86<br>(1.85 to 4.79)        |
| Cellulitis                                    | 1.99<br>(1.09 to 4.14)              | 7.08<br>(3.84 to 14.11)             | 7.47<br>(4.15 to 14.68)             | 6.26<br>(3.46 to 13.08)             | 0.08<br>(0.05 to 0.19)        | 0.43<br>(0.24 to 0.93)        | 0.47<br>(0.27 to 1.00)        | 0.36<br>(0.20 to 0.82)        |
| Pyoderma                                      | 11.80<br>(7.79 to 20.90)            | 28.10<br>(18.07 to 49.26)           | 28.18<br>(18.03 to 49.28)           | 28.29<br>(18.35 to 49.67)           | 0.40<br>(0.25 to 0.75)        | 1.50<br>(0.94 to 2.70)        | 1.56<br>(0.97 to 2.79)        | 1.39<br>(0.87 to 2.52)        |
| Decubitus ulcer                               | 7.06<br>(3.60 to 12.14)             | 16.80<br>(8.01 to 28.13)            | 17.54<br>(8.30 to 29.30)            | 15.35<br>(7.44 to 25.72)            | 0.37<br>(0.19 to 0.64)        | 1.24<br>(0.58 to 2.15)        | 1.33<br>(0.62 to 2.31)        | 1.06<br>(0.50 to 1.86)        |
| Other skin and subcutaneous diseases          | 0.62<br>(0.34 to 1.04)              | 1.11<br>(0.61 to 1.80)              | 1.15<br>(0.63 to 1.85)              | 1.03<br>(0.56 to 1.70)              | 0.02<br>(0.01 to 0.03)        | 0.05<br>(0.03 to 0.09)        | 0.06<br>(0.03 to 0.09)        | 0.05<br>(0.03 to 0.08)        |
| Sudden infant death syndrome                  | 14.49<br>(6.32 to 27.49)            | 7.45<br>(2.90 to 15.15)             | 6.63<br>(2.56 to 13.82)             | 9.16<br>(3.59 to 18.17)             | 0.17<br>(0.05 to 0.32)        | 0.09<br>(0.03 to 0.18)        | 0.08<br>(0.03 to 0.16)        | 0.11<br>(0.04 to 0.21)        |



|                          |                                       |                                       |                                     |                                       |                              |                              |                              |                              |
|--------------------------|---------------------------------------|---------------------------------------|-------------------------------------|---------------------------------------|------------------------------|------------------------------|------------------------------|------------------------------|
| Injuries                 | 1,352.80<br>(1,191.24 to<br>1,558.65) | 1,246.73<br>(1,012.87 to<br>1,490.10) | 1,141.37<br>(928.84 to<br>1,356.88) | 1,440.73<br>(1,170.96 to<br>1,710.11) | 31.45<br>(28.05 to<br>35.92) | 41.33<br>(35.43 to<br>47.31) | 39.57<br>(33.71 to<br>44.70) | 43.97<br>(37.75 to<br>50.53) |
| Transport injuries       | 587.31<br>(504.92 to<br>701.09)       | 536.42<br>(427.16 to<br>683.61)       | 457.79<br>(369.42 to<br>569.68)     | 693.09<br>(552.03 to<br>881.18)       | 13.50<br>(11.68 to<br>16.04) | 16.70<br>(13.87 to<br>21.02) | 14.86<br>(12.46 to<br>18.35) | 19.92<br>(16.63 to<br>24.86) |
| Road injuries            | 554.56<br>(476.55 to<br>661.33)       | 493.84<br>(392.19 to<br>634.79)       | 418.78<br>(337.28 to<br>529.56)     | 646.64<br>(516.90 to<br>822.70)       | 12.75<br>(11.02 to<br>15.20) | 15.29<br>(12.66 to<br>19.27) | 13.53<br>(11.37 to<br>16.76) | 18.49<br>(15.38 to<br>23.10) |
| Pedestrian road injuries | 145.29<br>(113.48 to<br>194.41)       | 131.59<br>(98.99 to<br>188.60)        | 115.26<br>(87.50 to<br>164.98)      | 164.33<br>(123.42 to<br>233.50)       | 3.97<br>(3.18 to<br>5.38)    | 5.34<br>(4.12 to<br>7.38)    | 4.86<br>(3.78 to<br>6.73)    | 6.17<br>(4.77 to<br>8.44)    |

| Myanmar                                         |                                                      |                                                      |                                                      |                                                      |                                                   |                                                   |                                                   |                                                   |
|-------------------------------------------------|------------------------------------------------------|------------------------------------------------------|------------------------------------------------------|------------------------------------------------------|---------------------------------------------------|---------------------------------------------------|---------------------------------------------------|---------------------------------------------------|
| Cause                                           | YLLs (in 1000s)                                      |                                                      |                                                      |                                                      | Deaths (in 1000s)                                 |                                                   |                                                   |                                                   |
|                                                 | 2016                                                 | 2040 Forecast                                        | 2040 Better Scenario                                 | 2040 Worse Scenario                                  | 2016                                              | 2040 Forecast                                     | 2040 Better Scenario                              | 2040 Worse Scenario                               |
| Cyclist road injuries                           | 23.49<br>(14.68 to<br>38.55)                         | 23.16<br>(13.87 to<br>37.76)                         | 19.90<br>(11.90 to<br>32.95)                         | 29.59<br>(17.71 to<br>48.80)                         | 0.60<br>(0.37 to<br>1.03)                         | 0.78<br>(0.45 to<br>1.37)                         | 0.70<br>(0.41 to<br>1.22)                         | 0.92<br>(0.53 to<br>1.63)                         |
| Motorcyclist road injuries                      | 125.08<br>(93.62 to<br>163.18)                       | 109.09<br>(75.35 to<br>153.42)                       | 93.27<br>(65.19 to<br>129.01)                        | 137.06<br>(96.12 to<br>189.43)                       | 2.38<br>(1.79 to<br>3.12)                         | 2.35<br>(1.66 to<br>3.25)                         | 2.05<br>(1.46 to<br>2.80)                         | 2.84<br>(2.02 to<br>3.90)                         |
| Motor vehicle road injuries                     | 249.09<br>(191.92 to<br>317.39)                      | 218.26<br>(160.26 to<br>295.70)                      | 180.50<br>(134.25 to<br>241.15)                      | 300.14<br>(221.89 to<br>403.12)                      | 5.52<br>(4.34 to<br>6.91)                         | 6.42<br>(4.92 to<br>8.46)                         | 5.56<br>(4.33 to<br>7.21)                         | 8.08<br>(6.26 to<br>10.60)                        |
| Other road injuries                             | 11.61<br>(7.92 to<br>20.98)                          | 11.74<br>(7.52 to<br>21.36)                          | 9.86<br>(6.39 to<br>17.97)                           | 15.52<br>(10.06 to<br>28.34)                         | 0.28<br>(0.19 to<br>0.50)                         | 0.40<br>(0.26 to<br>0.76)                         | 0.36<br>(0.23 to<br>0.67)                         | 0.47<br>(0.30 to<br>0.87)                         |
| Other transport injuries                        | 32.75<br>(18.28 to<br>48.87)                         | 42.58<br>(22.91 to<br>65.60)                         | 39.01<br>(21.45 to<br>59.84)                         | 46.45<br>(24.60 to<br>71.69)                         | 0.75<br>(0.42 to<br>1.10)                         | 1.40<br>(0.74 to<br>2.12)                         | 1.33<br>(0.71 to<br>1.96)                         | 1.43<br>(0.75 to<br>2.16)                         |
| <b>Unintentional injuries</b>                   | <b>563.40</b><br><b>(488.85 to</b><br><b>660.27)</b> | <b>477.44</b><br><b>(401.92 to</b><br><b>564.57)</b> | <b>465.16</b><br><b>(390.03 to</b><br><b>552.62)</b> | <b>598.03</b><br><b>(426.44 to</b><br><b>607.10)</b> | <b>13.75</b><br><b>(12.17 to</b><br><b>15.70)</b> | <b>18.99</b><br><b>(15.71 to</b><br><b>21.92)</b> | <b>19.34</b><br><b>(15.93 to</b><br><b>22.38)</b> | <b>18.40</b><br><b>(15.42 to</b><br><b>21.33)</b> |
| Falls                                           | 189.60<br>(155.98 to<br>232.43)                      | 240.26<br>(196.93 to<br>286.45)                      | 242.12<br>(197.64 to<br>288.14)                      | 237.89<br>(195.84 to<br>281.16)                      | 6.42<br>(5.38 to<br>7.60)                         | 12.41<br>(9.56 to<br>15.02)                       | 12.94<br>(9.96 to<br>15.59)                       | 11.37<br>(8.81 to<br>13.67)                       |
| Drowning                                        | 118.76<br>(93.78 to<br>148.69)                       | 62.08<br>(46.56 to<br>83.44)                         | 56.96<br>(43.00 to<br>75.93)                         | 71.81<br>(53.58 to<br>97.92)                         | 1.97<br>(1.62 to<br>2.41)                         | 1.30<br>(1.03 to<br>1.67)                         | 1.22<br>(0.97 to<br>1.54)                         | 1.44<br>(1.14 to<br>1.86)                         |
| Fire, heat, and hot substances                  | 40.96<br>(24.70 to<br>57.11)                         | 26.68<br>(16.54 to<br>37.46)                         | 24.64<br>(15.34 to<br>34.49)                         | 30.81<br>(18.77 to<br>44.39)                         | 0.84<br>(0.55 to<br>1.08)                         | 0.79<br>(0.54 to<br>1.00)                         | 0.75<br>(0.53 to<br>0.96)                         | 0.84<br>(0.58 to<br>1.09)                         |
| Poisonings                                      | 18.79<br>(12.94 to<br>25.70)                         | 8.75<br>(5.83 to<br>12.40)                           | 7.89<br>(5.26 to<br>11.18)                           | 10.89<br>(7.03 to<br>15.72)                          | 0.39<br>(0.28 to<br>0.51)                         | 0.25<br>(0.18 to<br>0.34)                         | 0.23<br>(0.16 to<br>0.31)                         | 0.29<br>(0.20 to<br>0.40)                         |
| Exposure to mechanical forces                   | 41.73<br>(32.73 to<br>56.66)                         | 26.01<br>(19.46 to<br>36.50)                         | 24.38<br>(18.18 to<br>34.40)                         | 30.63<br>(22.60 to<br>43.32)                         | 0.82<br>(0.66 to<br>1.11)                         | 0.68<br>(0.53 to<br>0.94)                         | 0.66<br>(0.51 to<br>0.91)                         | 0.76<br>(0.59 to<br>1.05)                         |
| Unintentional firearm injuries                  | 6.32<br>(4.10 to<br>13.44)                           | 3.92<br>(2.39 to<br>8.42)                            | 3.67<br>(2.23 to<br>7.93)                            | 4.65<br>(2.80 to<br>9.98)                            | 0.13<br>(0.09 to<br>0.28)                         | 0.11<br>(0.08 to<br>0.23)                         | 0.11<br>(0.07 to<br>0.22)                         | 0.13<br>(0.08 to<br>0.26)                         |
| Unintentional suffocation                       | 8.12<br>(4.95 to<br>13.37)                           | 4.16<br>(2.54 to<br>6.89)                            | 3.74<br>(2.26 to<br>6.14)                            | 5.28<br>(3.16 to<br>8.66)                            | 0.12<br>(0.08 to<br>0.18)                         | 0.07<br>(0.04 to<br>0.10)                         | 0.06<br>(0.04 to<br>0.09)                         | 0.08<br>(0.05 to<br>0.13)                         |
| Other exposure to mechanical forces             | 27.29<br>(21.51 to<br>35.70)                         | 17.93<br>(13.48 to<br>24.22)                         | 16.97<br>(12.71 to<br>22.95)                         | 20.70<br>(15.43 to<br>28.23)                         | 0.57<br>(0.46 to<br>0.74)                         | 0.50<br>(0.39 to<br>0.66)                         | 0.49<br>(0.38 to<br>0.64)                         | 0.55<br>(0.43 to<br>0.72)                         |
| Adverse effects of medical treatment            | 47.09<br>(36.48 to<br>57.05)                         | 40.19<br>(29.82 to<br>51.65)                         | 38.76<br>(28.63 to<br>49.76)                         | 44.44<br>(33.03 to<br>56.75)                         | 1.20<br>(0.92 to<br>1.48)                         | 1.55<br>(1.17 to<br>2.01)                         | 1.54<br>(1.17 to<br>2.01)                         | 1.60<br>(1.21 to<br>2.07)                         |
| Animal contact                                  | 13.89<br>(7.89 to<br>20.43)                          | 12.38<br>(6.95 to<br>18.51)                          | 11.58<br>(6.47 to<br>17.48)                          | 14.80<br>(8.19 to<br>22.65)                          | 0.32<br>(0.19 to<br>0.46)                         | 0.40<br>(0.24 to<br>0.57)                         | 0.39<br>(0.23 to<br>0.57)                         | 0.45<br>(0.27 to<br>0.66)                         |
| Venomous animal contact                         | 6.92<br>(3.89 to<br>11.32)                           | 5.88<br>(3.34 to<br>9.59)                            | 5.48<br>(3.07 to<br>8.93)                            | 7.06<br>(3.98 to<br>11.68)                           | 0.17<br>(0.10 to<br>0.27)                         | 0.20<br>(0.12 to<br>0.32)                         | 0.19<br>(0.11 to<br>0.31)                         | 0.23<br>(0.13 to<br>0.36)                         |
| Non-venomous animal contact                     | 6.97<br>(3.71 to<br>10.66)                           | 6.51<br>(3.42 to<br>10.48)                           | 6.10<br>(3.20 to<br>9.87)                            | 7.74<br>(4.00 to<br>12.49)                           | 0.16<br>(0.09 to<br>0.23)                         | 0.20<br>(0.11 to<br>0.31)                         | 0.19<br>(0.11 to<br>0.29)                         | 0.22<br>(0.12 to<br>0.34)                         |
| Foreign body                                    | 47.38<br>(33.28 to<br>70.55)                         | 32.66<br>(23.03 to<br>46.15)                         | 31.80<br>(22.67 to<br>44.52)                         | 34.32<br>(24.01 to<br>49.91)                         | 0.88<br>(0.67 to<br>1.16)                         | 0.91<br>(0.70 to<br>1.10)                         | 0.92<br>(0.71 to<br>1.11)                         | 0.87<br>(0.66 to<br>1.08)                         |
| Pulmonary aspiration and foreign body in airway | 42.19<br>(28.27 to<br>64.52)                         | 28.99<br>(19.77 to<br>41.92)                         | 28.29<br>(19.42 to<br>40.45)                         | 30.23<br>(20.01 to<br>45.31)                         | 0.76<br>(0.55 to<br>1.04)                         | 0.79<br>(0.57 to<br>0.99)                         | 0.81<br>(0.59 to<br>1.00)                         | 0.75<br>(0.54 to<br>0.96)                         |

|                                             |                                                      |                                                      |                                                      |                                                      |                                                |                                                |                                                |                                                |
|---------------------------------------------|------------------------------------------------------|------------------------------------------------------|------------------------------------------------------|------------------------------------------------------|------------------------------------------------|------------------------------------------------|------------------------------------------------|------------------------------------------------|
| Foreign body in other body part             | 5.19<br>(3.27 to<br>9.90)                            | 3.67<br>(2.30 to<br>6.83)                            | 3.51<br>(2.19 to<br>6.50)                            | 4.09<br>(2.52 to<br>7.54)                            | 0.11<br>(0.08 to<br>0.21)                      | 0.11<br>(0.08 to<br>0.20)                      | 0.11<br>(0.08 to<br>0.20)                      | 0.12<br>(0.08 to<br>0.21)                      |
| Environmental heat and cold exposure        | 2.91<br>(2.25 to<br>4.03)                            | 2.54<br>(1.85 to<br>3.66)                            | 2.35<br>(1.65 to<br>3.46)                            | 3.17<br>(2.26 to<br>4.64)                            | 0.08<br>(0.06 to<br>0.11)                      | 0.10<br>(0.07 to<br>0.14)                      | 0.09<br>(0.07 to<br>0.14)                      | 0.11<br>(0.08 to<br>0.16)                      |
| Other unintentional injuries                | 42.29<br>(32.37 to<br>56.41)                         | 25.89<br>(18.84 to<br>35.78)                         | 24.69<br>(17.86 to<br>34.42)                         | 29.27<br>(21.06 to<br>40.88)                         | 0.84<br>(0.65 to<br>1.12)                      | 0.61<br>(0.46 to<br>0.82)                      | 0.59<br>(0.44 to<br>0.80)                      | 0.67<br>(0.50 to<br>0.90)                      |
| <b>Self-harm and interpersonal violence</b> | <b>201.52</b><br><b>(165.26 to</b><br><b>244.70)</b> | <b>183.89</b><br><b>(132.43 to</b><br><b>249.11)</b> | <b>169.91</b><br><b>(126.17 to</b><br><b>223.39)</b> | <b>190.08</b><br><b>(136.99 to</b><br><b>259.01)</b> | <b>4.19</b><br><b>(3.47 to</b><br><b>5.07)</b> | <b>4.58</b><br><b>(3.43 to</b><br><b>6.04)</b> | <b>4.30</b><br><b>(3.31 to</b><br><b>5.45)</b> | <b>4.61</b><br><b>(3.45 to</b><br><b>6.11)</b> |

| Myanmar                                                                             |                                                |                                                   |                                                   |                                                   |                                                |                                                |                                                |                                                |
|-------------------------------------------------------------------------------------|------------------------------------------------|---------------------------------------------------|---------------------------------------------------|---------------------------------------------------|------------------------------------------------|------------------------------------------------|------------------------------------------------|------------------------------------------------|
| Cause                                                                               | YLLs (in 1000s)                                |                                                   |                                                   |                                                   | Deaths (in 1000s)                              |                                                |                                                |                                                |
|                                                                                     | 2016                                           | 2040 Forecast                                     | 2040 Better Scenario                              | 2040 Worse Scenario                               | 2016                                           | 2040 Forecast                                  | 2040 Better Scenario                           | 2040 Worse Scenario                            |
| Self-harm                                                                           | 138.39<br>(111.51 to<br>171.91)                | 139.08<br>(97.45 to<br>192.62)                    | 126.32<br>(91.38 to<br>168.32)                    | 144.49<br>(101.20 to<br>199.28)                   | 3.01<br>(2.48 to<br>3.73)                      | 3.66<br>(2.67 to<br>4.94)                      | 3.39<br>(2.57 to<br>4.36)                      | 3.68<br>(2.67 to<br>5.04)                      |
| Self-harm by firearm                                                                | 6.86<br>(2.94 to<br>11.40)                     | 6.49<br>(2.47 to<br>12.60)                        | 5.70<br>(2.29 to<br>10.92)                        | 6.87<br>(2.65 to<br>13.53)                        | 0.15<br>(0.07 to<br>0.24)                      | 0.18<br>(0.07 to<br>0.33)                      | 0.16<br>(0.07 to<br>0.29)                      | 0.18<br>(0.07 to<br>0.34)                      |
| Self-harm by other specified means                                                  | 131.53<br>(106.55 to<br>163.17)                | 132.59<br>(93.97 to<br>181.01)                    | 120.62<br>(88.13 to<br>160.34)                    | 137.62<br>(96.81 to<br>190.05)                    | 2.86<br>(2.35 to<br>3.53)                      | 3.48<br>(2.57 to<br>4.67)                      | 3.23<br>(2.47 to<br>4.14)                      | 3.50<br>(2.57 to<br>4.74)                      |
| Interpersonal violence                                                              | 63.14<br>(41.73 to<br>84.92)                   | 44.80<br>(27.91 to<br>63.84)                      | 43.59<br>(27.34 to<br>61.50)                      | 45.59<br>(28.28 to<br>65.72)                      | 1.18<br>(0.80 to<br>1.57)                      | 0.93<br>(0.61 to<br>1.29)                      | 0.91<br>(0.60 to<br>1.25)                      | 0.93<br>(0.61 to<br>1.30)                      |
| Physical violence by firearm                                                        | 16.50<br>(8.83 to<br>31.37)                    | 11.49<br>(5.76 to<br>22.33)                       | 11.35<br>(5.71 to<br>21.97)                       | 11.75<br>(5.84 to<br>22.93)                       | 0.31<br>(0.17 to<br>0.59)                      | 0.23<br>(0.12 to<br>0.45)                      | 0.23<br>(0.12 to<br>0.43)                      | 0.23<br>(0.12 to<br>0.45)                      |
| Physical violence by sharp object                                                   | 23.85<br>(14.41 to<br>34.69)                   | 18.00<br>(10.23 to<br>26.47)                      | 18.03<br>(10.23 to<br>26.55)                      | 17.76<br>(10.05 to<br>26.34)                      | 0.44<br>(0.27 to<br>0.63)                      | 0.36<br>(0.22 to<br>0.52)                      | 0.36<br>(0.22 to<br>0.52)                      | 0.35<br>(0.21 to<br>0.51)                      |
| Physical violence by other means                                                    | 22.79<br>(13.04 to<br>33.31)                   | 15.31<br>(8.10 to<br>24.57)                       | 14.20<br>(7.48 to<br>22.41)                       | 16.07<br>(8.49 to<br>25.68)                       | 0.43<br>(0.25 to<br>0.63)                      | 0.34<br>(0.20 to<br>0.53)                      | 0.32<br>(0.19 to<br>0.49)                      | 0.35<br>(0.21 to<br>0.55)                      |
| <b>Forces of nature, conflict and terrorism, and executions and police conflict</b> | <b>0.57</b><br><b>(0.45 to</b><br><b>0.74)</b> | <b>48.98</b><br><b>(0.58 to</b><br><b>101.50)</b> | <b>48.52</b><br><b>(0.57 to</b><br><b>100.76)</b> | <b>49.54</b><br><b>(0.59 to</b><br><b>102.85)</b> | <b>0.01</b><br><b>(0.01 to</b><br><b>0.02)</b> | <b>1.07</b><br><b>(0.01 to</b><br><b>2.11)</b> | <b>1.08</b><br><b>(0.01 to</b><br><b>2.13)</b> | <b>1.05</b><br><b>(0.01 to</b><br><b>2.07)</b> |
| Exposure to forces of nature                                                        | 0.00<br>(0.00 to<br>0.00)                      | 32.15<br>(0.00 to<br>32.37)                       | 31.86<br>(0.00 to<br>32.24)                       | 32.46<br>(0.00 to<br>32.69)                       | 0.00<br>(0.00 to<br>0.00)                      | 0.73<br>(0.00 to<br>0.74)                      | 0.74<br>(0.00 to<br>0.75)                      | 0.72<br>(0.00 to<br>0.72)                      |
| Conflict and terrorism                                                              | 0.00<br>(0.00 to<br>0.00)                      | 16.78<br>(0.28 to<br>68.56)                       | 16.60<br>(0.27 to<br>67.80)                       | 17.02<br>(0.28 to<br>69.61)                       | 0.00<br>(0.00 to<br>0.00)                      | 0.33<br>(0.01 to<br>1.37)                      | 0.33<br>(0.01 to<br>1.37)                      | 0.33<br>(0.01 to<br>1.35)                      |
| Executions and police conflict                                                      | 0.57<br>(0.45 to<br>0.74)                      | 0.05<br>(0.00 to<br>0.61)                         | 0.05<br>(0.00 to<br>0.61)                         | 0.05<br>(0.00 to<br>0.62)                         | 0.01<br>(0.01 to<br>0.02)                      | 0.00<br>(0.00 to<br>0.01)                      | 0.00<br>(0.00 to<br>0.01)                      | 0.00<br>(0.00 to<br>0.01)                      |

| Philippines                                                       |                                          |                                          |                                          |                                          |                                 |                                     |                                 |                                       |
|-------------------------------------------------------------------|------------------------------------------|------------------------------------------|------------------------------------------|------------------------------------------|---------------------------------|-------------------------------------|---------------------------------|---------------------------------------|
| Cause                                                             | YLLs (in 1000s)                          |                                          |                                          |                                          | Deaths (in 1000s)               |                                     |                                 |                                       |
|                                                                   | 2016                                     | 2040 Forecast                            | 2040 Better Scenario                     | 2040 Worse Scenario                      | 2016                            | 2040 Forecast                       | 2040 Better Scenario            | 2040 Worse Scenario                   |
| All causes                                                        | 20,663.31<br>(18,600.34 to<br>22,926.65) | 24,958.40<br>(21,054.78 to<br>30,158.97) | 18,596.58<br>(15,563.75 to<br>22,368.43) | 32,644.24<br>(27,513.69 to<br>38,727.98) | 626.89<br>(560.15 to<br>696.38) | 1,043.23<br>(914.25 to<br>1,218.20) | 845.19<br>(733.20 to<br>994.06) | 1,286.69<br>(1,128.36 to<br>1,462.20) |
| Communicable, maternal, neonatal, and nutritional diseases        | 6,620.14<br>(5,867.17 to<br>7,424.92)    | 5,672.84<br>(4,689.67 to<br>6,858.83)    | 3,582.91<br>(3,011.77 to<br>4,230.00)    | 7,807.05<br>(6,385.47 to<br>9,616.83)    | 144.32<br>(130.43 to<br>158.73) | 182.44<br>(148.81 to<br>222.28)     | 133.56<br>(109.14 to<br>158.94) | 232.96<br>(187.15 to<br>287.22)       |
| HIV/AIDS and tuberculosis                                         | 1,067.29<br>(941.93 to<br>1,206.49)      | 922.00<br>(659.51 to<br>1,282.30)        | 475.98<br>(317.44 to<br>695.59)          | 1,614.61<br>(1,112.13 to<br>2,339.82)    | 31.76<br>(27.71 to<br>36.12)    | 31.10<br>(21.60 to<br>43.52)        | 18.08<br>(11.96 to<br>26.86)    | 50.57<br>(33.75 to<br>73.49)          |
| Tuberculosis                                                      | 857.72<br>(732.25 to<br>997.52)          | 659.35<br>(412.17 to<br>995.83)          | 408.18<br>(252.55 to<br>624.88)          | 1,060.75<br>(615.90 to<br>1,679.65)      | 28.10<br>(24.13 to<br>32.49)    | 26.14<br>(16.93 to<br>38.56)        | 17.10<br>(10.79 to<br>25.68)    | 39.78<br>(24.14 to<br>62.01)          |
| HIV/AIDS                                                          | 209.57<br>(190.94 to<br>229.87)          | 262.65<br>(162.48 to<br>364.25)          | 67.80<br>(49.96 to<br>90.53)             | 553.86<br>(370.34 to<br>955.07)          | 3.67<br>(3.34 to<br>4.00)       | 4.96<br>(2.85 to<br>7.12)           | 0.98<br>(0.69 to<br>1.37)       | 10.79<br>(6.91 to<br>18.79)           |
| Diarrhea, lower respiratory, and other common infectious diseases | 2,790.87<br>(2,478.43 to<br>3,124.49)    | 2,461.76<br>(1,797.96 to<br>3,380.88)    | 1,593.89<br>(1,230.13 to<br>2,062.52)    | 3,328.26<br>(2,344.83 to<br>4,725.11)    | 75.51<br>(67.54 to<br>83.61)    | 114.94<br>(83.87 to<br>152.72)      | 88.17<br>(66.87 to<br>111.75)   | 139.53<br>(98.61 to<br>190.90)        |
| Diarrheal diseases                                                | 378.63<br>(277.98 to<br>515.14)          | 174.81<br>(38.59 to<br>487.33)           | 109.16<br>(27.39 to<br>307.29)           | 300.69<br>(62.58 to<br>799.97)           | 6.85<br>(5.18 to<br>8.88)       | 5.50<br>(1.34 to<br>15.64)          | 4.23<br>(1.11 to<br>11.87)      | 8.80<br>(1.99 to<br>25.86)            |
| Intestinal infectious diseases                                    | 203.02<br>(109.81 to<br>343.40)          | 158.15<br>(81.49 to<br>286.96)           | 124.65<br>(63.68 to<br>221.93)           | 176.01<br>(89.16 to<br>318.75)           | 2.93<br>(1.59 to<br>5.02)       | 2.43<br>(1.28 to<br>4.40)           | 1.99<br>(1.05 to<br>3.55)       | 2.67<br>(1.39 to<br>4.85)             |
| Typhoid fever                                                     | 177.60<br>(94.30 to<br>306.29)           | 134.88<br>(67.06 to<br>244.05)           | 107.20<br>(53.96 to<br>189.07)           | 149.76<br>(74.56 to<br>288.05)           | 2.55<br>(1.36 to<br>4.38)       | 2.06<br>(1.05 to<br>3.67)           | 1.70<br>(0.88 to<br>2.95)       | 2.26<br>(1.15 to<br>4.01)             |
| Paratyphoid fever                                                 | 21.57<br>(11.15 to<br>47.66)             | 22.99<br>(9.64 to<br>47.00)              | 17.25<br>(7.23 to<br>34.91)              | 25.91<br>(10.76 to<br>53.37)             | 0.36<br>(0.17 to<br>0.71)       | 0.37<br>(0.16 to<br>0.74)           | 0.28<br>(0.12 to<br>0.57)       | 0.41<br>(0.17 to<br>0.84)             |
| Other intestinal infectious diseases                              | 0.85<br>(0.31 to<br>1.89)                | 0.28<br>(0.10 to<br>0.66)                | 0.20<br>(0.07 to<br>0.46)                | 0.34<br>(0.12 to<br>0.80)                | 0.01<br>(0.01 to<br>0.03)       | 0.01<br>(0.00 to<br>0.02)           | 0.01<br>(0.00 to<br>0.02)       | 0.01<br>(0.00 to<br>0.02)             |
| Lower respiratory infections                                      | 1,873.68<br>(1,649.88 to<br>2,102.83)    | 1,815.00<br>(1,259.96 to<br>2,569.61)    | 1,164.57<br>(874.68 to<br>1,528.61)      | 2,444.11<br>(1,596.77 to<br>3,655.57)    | 60.75<br>(54.00 to<br>67.85)    | 101.96<br>(72.26 to<br>138.84)      | 78.39<br>(57.87 to<br>102.14)   | 121.87<br>(82.42 to<br>171.86)        |
| Upper respiratory infections                                      | 1.16<br>(0.52 to<br>2.20)                | 0.98<br>(0.45 to<br>1.85)                | 0.66<br>(0.29 to<br>1.25)                | 1.24<br>(0.55 to<br>2.39)                | 0.02<br>(0.01 to<br>0.04)       | 0.03<br>(0.01 to<br>0.05)           | 0.02<br>(0.01 to<br>0.04)       | 0.04<br>(0.02 to<br>0.06)             |
| Otitis media                                                      | 0.64<br>(0.45 to<br>0.89)                | 0.21<br>(0.13 to<br>0.34)                | 0.20<br>(0.12 to<br>0.32)                | 0.21<br>(0.13 to<br>0.35)                | 0.01<br>(0.01 to<br>0.01)       | 0.01<br>(0.00 to<br>0.01)           | 0.01<br>(0.00 to<br>0.01)       | 0.00<br>(0.00 to<br>0.01)             |
| Meningitis                                                        | 211.96<br>(176.28 to<br>251.32)          | 109.50<br>(67.54 to<br>151.29)           | 80.37<br>(55.19 to<br>107.44)            | 120.18<br>(71.80 to<br>170.37)           | 3.02<br>(2.55 to<br>3.52)       | 1.94<br>(1.40 to<br>2.51)           | 1.57<br>(1.20 to<br>1.99)       | 2.04<br>(1.44 to<br>2.67)             |
| Pneumococcal meningitis                                           | 1.04<br>(0.80 to<br>1.33)                | 0.39<br>(0.24 to<br>0.56)                | 0.31<br>(0.21 to<br>0.43)                | 0.41<br>(0.25 to<br>0.60)                | 0.01<br>(0.01 to<br>0.02)       | 0.01<br>(0.01 to<br>0.01)           | 0.01<br>(0.01 to<br>0.01)       | 0.01<br>(0.01 to<br>0.01)             |
| H influenzae type B meningitis                                    | 18.56<br>(14.86 to<br>22.90)             | 17.57<br>(5.14 to<br>46.45)              | 8.12<br>(4.16 to<br>15.95)               | 20.21<br>(5.20 to<br>55.91)              | 0.26<br>(0.21 to<br>0.31)       | 0.25<br>(0.10 to<br>0.58)           | 0.14<br>(0.09 to<br>0.23)       | 0.28<br>(0.10 to<br>0.69)             |
| Meningococcal meningitis                                          | 72.46<br>(60.08 to<br>86.23)             | 32.98<br>(21.90 to<br>44.06)             | 25.88<br>(17.71 to<br>34.29)             | 36.00<br>(23.13 to<br>48.26)             | 1.04<br>(0.89 to<br>1.23)       | 0.63<br>(0.48 to<br>0.79)           | 0.54<br>(0.41 to<br>0.68)       | 0.66<br>(0.49 to<br>0.84)             |
| Other meningitis                                                  | 119.91<br>(99.11 to<br>142.29)           | 58.56<br>(39.07 to<br>78.34)             | 46.05<br>(31.98 to<br>61.61)             | 63.56<br>(41.52 to<br>85.79)             | 1.70<br>(1.43 to<br>1.99)       | 1.05<br>(0.79 to<br>1.34)           | 0.89<br>(0.67 to<br>1.14)       | 1.10<br>(0.81 to<br>1.41)             |
| Encephalitis                                                      | 86.46<br>(44.25 to<br>124.96)            | 59.14<br>(32.17 to<br>87.58)             | 45.23<br>(26.17 to<br>65.50)             | 67.12<br>(34.79 to<br>100.95)            | 1.25<br>(0.69 to<br>1.72)       | 1.05<br>(0.66 to<br>1.45)           | 0.87<br>(0.56 to<br>1.17)       | 1.16<br>(0.72 to<br>1.61)             |

|                |                              |                               |                              |                               |                           |                           |                           |                            |
|----------------|------------------------------|-------------------------------|------------------------------|-------------------------------|---------------------------|---------------------------|---------------------------|----------------------------|
| Diphtheria     | 0.47<br>(0.26 to<br>0.78)    | 0.11<br>(0.04 to<br>0.23)     | 0.06<br>(0.03 to<br>0.09)    | 0.12<br>(0.05 to<br>0.26)     | 0.01<br>(0.00 to<br>0.01) | 0.00<br>(0.00 to<br>0.00) | 0.00<br>(0.00 to<br>0.00) | 0.00<br>(0.00 to<br>0.00)  |
| Whooping cough | 2.69<br>(1.21 to<br>7.00)    | 1.91<br>(0.37 to<br>6.12)     | 0.41<br>(0.16 to<br>0.88)    | 2.12<br>(0.36 to<br>6.95)     | 0.04<br>(0.02 to<br>0.09) | 0.02<br>(0.01 to<br>0.08) | 0.01<br>(0.00 to<br>0.01) | 0.03<br>(0.01 to<br>0.08)  |
| Tetanus        | 22.82<br>(14.75 to<br>32.38) | 4.26<br>(2.45 to<br>6.65)     | 3.45<br>(1.82 to<br>5.46)    | 4.39<br>(2.53 to<br>6.83)     | 0.49<br>(0.32 to<br>0.70) | 0.09<br>(0.06 to<br>0.14) | 0.09<br>(0.05 to<br>0.13) | 0.09<br>(0.06 to<br>0.14)  |
| Measles        | 3.57<br>(2.03 to<br>7.18)    | 134.81<br>(2.13 to<br>577.90) | 63.16<br>(1.51 to<br>226.52) | 208.45<br>(2.40 to<br>891.69) | 0.04<br>(0.02 to<br>0.09) | 1.83<br>(0.03 to<br>7.08) | 0.93<br>(0.02 to<br>3.01) | 2.75<br>(0.04 to<br>10.97) |

| Philippines                                           |                                            |                                            |                                            |                                              |                                      |                                        |                                       |                                        |
|-------------------------------------------------------|--------------------------------------------|--------------------------------------------|--------------------------------------------|----------------------------------------------|--------------------------------------|----------------------------------------|---------------------------------------|----------------------------------------|
| Cause                                                 | YLLs (in 1000s)                            |                                            |                                            |                                              | Deaths (in 1000s)                    |                                        |                                       |                                        |
|                                                       | 2016                                       | 2040 Forecast                              | 2040 Better Scenario                       | 2040 Worse Scenario                          | 2016                                 | 2040 Forecast                          | 2040 Better Scenario                  | 2040 Worse Scenario                    |
| Varicella and herpes zoster                           | 5.77<br>(2.33 to 9.16)                     | 2.89<br>(1.02 to 5.02)                     | 1.97<br>(0.67 to 3.31)                     | 3.61<br>(1.27 to 6.26)                       | 0.11<br>(0.04 to 0.15)               | 0.08<br>(0.02 to 0.12)                 | 0.07<br>(0.02 to 0.10)                | 0.09<br>(0.03 to 0.14)                 |
| <b>Neglected tropical diseases and malaria</b>        | <b>267.55</b><br><b>(172.90 to 381.26)</b> | <b>693.88</b><br><b>(488.84 to 912.70)</b> | <b>541.67</b><br><b>(397.05 to 694.45)</b> | <b>763.81</b><br><b>(528.22 to 1,024.12)</b> | <b>3.83</b><br><b>(2.56 to 5.34)</b> | <b>10.53</b><br><b>(7.63 to 13.70)</b> | <b>8.64</b><br><b>(6.50 to 11.10)</b> | <b>11.37</b><br><b>(8.10 to 14.88)</b> |
| Malaria                                               | 8.62<br>(3.76 to 30.83)                    | 6.57<br>(2.27 to 30.68)                    | 6.12<br>(2.11 to 28.75)                    | 6.81<br>(2.37 to 31.48)                      | 0.19<br>(0.08 to 0.71)               | 0.17<br>(0.06 to 0.79)                 | 0.16<br>(0.06 to 0.77)                | 0.17<br>(0.06 to 0.80)                 |
| Chagas disease                                        | 0.00<br>(0.00 to 0.00)                     | 0.00<br>(0.00 to 0.00)                     | 0.00<br>(0.00 to 0.00)                     | 0.00<br>(0.00 to 0.00)                       | 0.00<br>(0.00 to 0.00)               | 0.00<br>(0.00 to 0.00)                 | 0.00<br>(0.00 to 0.00)                | 0.00<br>(0.00 to 0.00)                 |
| Leishmaniasis                                         | 0.00<br>(0.00 to 0.00)                     | 0.00<br>(0.00 to 0.00)                     | 0.00<br>(0.00 to 0.00)                     | 0.00<br>(0.00 to 0.00)                       | 0.00<br>(0.00 to 0.00)               | 0.00<br>(0.00 to 0.00)                 | 0.00<br>(0.00 to 0.00)                | 0.00<br>(0.00 to 0.00)                 |
| African trypanosomiasis                               | 0.00<br>(0.00 to 0.00)                     | 0.00<br>(0.00 to 0.00)                     | 0.00<br>(0.00 to 0.00)                     | 0.00<br>(0.00 to 0.00)                       | 0.00<br>(0.00 to 0.00)               | 0.00<br>(0.00 to 0.00)                 | 0.00<br>(0.00 to 0.00)                | 0.00<br>(0.00 to 0.00)                 |
| Schistosomiasis                                       | 3.81<br>(2.55 to 5.41)                     | 2.80<br>(1.65 to 4.52)                     | 2.48<br>(1.46 to 4.01)                     | 3.04<br>(1.84 to 4.76)                       | 0.12<br>(0.08 to 0.17)               | 0.11<br>(0.06 to 0.17)                 | 0.10<br>(0.06 to 0.16)                | 0.11<br>(0.07 to 0.18)                 |
| Cysticercosis                                         | 0.24<br>(0.21 to 0.29)                     | 0.10<br>(0.08 to 0.14)                     | 0.09<br>(0.07 to 0.13)                     | 0.11<br>(0.08 to 0.15)                       | 0.01<br>(0.00 to 0.01)               | 0.00<br>(0.00 to 0.00)                 | 0.00<br>(0.00 to 0.00)                | 0.00<br>(0.00 to 0.00)                 |
| Cystic echinococcosis                                 | 0.05<br>(0.04 to 0.06)                     | 0.03<br>(0.02 to 0.04)                     | 0.02<br>(0.01 to 0.02)                     | 0.04<br>(0.03 to 0.05)                       | 0.00<br>(0.00 to 0.00)               | 0.00<br>(0.00 to 0.00)                 | 0.00<br>(0.00 to 0.00)                | 0.00<br>(0.00 to 0.00)                 |
| Dengue                                                | 234.23<br>(133.31 to 349.73)               | 670.62<br>(460.70 to 891.38)               | 523.77<br>(375.73 to 675.56)               | 735.79<br>(492.14 to 993.71)                 | 3.16<br>(1.87 to 4.58)               | 9.98<br>(7.10 to 12.92)                | 8.18<br>(6.08 to 10.39)               | 10.75<br>(7.49 to 14.05)               |
| Yellow fever                                          | 0.00<br>(0.00 to 0.00)                     | 0.00<br>(0.00 to 0.00)                     | 0.00<br>(0.00 to 0.00)                     | 0.00<br>(0.00 to 0.00)                       | 0.00<br>(0.00 to 0.00)               | 0.00<br>(0.00 to 0.00)                 | 0.00<br>(0.00 to 0.00)                | 0.00<br>(0.00 to 0.00)                 |
| Rabies                                                | 12.74<br>(8.00 to 19.54)                   | 6.28<br>(3.48 to 10.53)                    | 3.54<br>(2.11 to 5.78)                     | 9.53<br>(5.46 to 15.82)                      | 0.24<br>(0.16 to 0.34)               | 0.13<br>(0.07 to 0.20)                 | 0.08<br>(0.05 to 0.11)                | 0.19<br>(0.11 to 0.29)                 |
| Intestinal nematode infections                        | 3.43<br>(2.25 to 4.88)                     | 3.96<br>(2.44 to 6.27)                     | 3.10<br>(1.93 to 5.09)                     | 4.22<br>(2.65 to 6.68)                       | 0.05<br>(0.03 to 0.06)               | 0.06<br>(0.04 to 0.09)                 | 0.05<br>(0.03 to 0.08)                | 0.06<br>(0.04 to 0.09)                 |
| Other neglected tropical diseases                     | 4.42<br>(2.33 to 13.90)                    | 3.52<br>(1.80 to 12.28)                    | 2.55<br>(1.35 to 8.86)                     | 4.27<br>(2.18 to 14.92)                      | 0.08<br>(0.04 to 0.24)               | 0.08<br>(0.04 to 0.30)                 | 0.07<br>(0.03 to 0.26)                | 0.09<br>(0.05 to 0.32)                 |
| <b>Maternal disorders</b>                             | <b>104.26</b><br><b>(77.78 to 133.99)</b>  | <b>70.15</b><br><b>(42.52 to 105.73)</b>   | <b>48.28</b><br><b>(28.55 to 74.28)</b>    | <b>94.43</b><br><b>(55.80 to 143.26)</b>     | <b>1.86</b><br><b>(1.39 to 2.39)</b> | <b>1.26</b><br><b>(0.76 to 1.89)</b>   | <b>0.87</b><br><b>(0.51 to 1.32)</b>  | <b>1.69</b><br><b>(1.00 to 2.56)</b>   |
| Maternal hemorrhage                                   | 40.37<br>(27.73 to 56.14)                  | 26.54<br>(14.88 to 42.47)                  | 18.37<br>(10.15 to 29.60)                  | 35.63<br>(19.28 to 57.21)                    | 0.72<br>(0.49 to 0.99)               | 0.48<br>(0.27 to 0.76)                 | 0.33<br>(0.18 to 0.54)                | 0.64<br>(0.34 to 1.02)                 |
| Maternal sepsis and other maternal infections         | 11.85<br>(7.84 to 17.16)                   | 6.90<br>(3.61 to 11.80)                    | 4.74<br>(2.44 to 8.32)                     | 9.33<br>(4.74 to 16.26)                      | 0.21<br>(0.14 to 0.30)               | 0.12<br>(0.07 to 0.21)                 | 0.09<br>(0.04 to 0.15)                | 0.17<br>(0.09 to 0.29)                 |
| Maternal hypertensive disorders                       | 16.62<br>(10.76 to 23.66)                  | 12.23<br>(6.37 to 19.85)                   | 8.39<br>(4.22 to 13.94)                    | 16.47<br>(8.63 to 27.12)                     | 0.29<br>(0.19 to 0.42)               | 0.22<br>(0.11 to 0.35)                 | 0.15<br>(0.08 to 0.25)                | 0.29<br>(0.15 to 0.48)                 |
| Maternal obstructed labor and uterine rupture         | 2.18<br>(1.08 to 3.56)                     | 1.32<br>(0.54 to 2.50)                     | 0.88<br>(0.36 to 1.69)                     | 1.81<br>(0.74 to 3.61)                       | 0.04<br>(0.02 to 0.06)               | 0.05<br>(0.01 to 0.05)                 | 0.02<br>(0.01 to 0.03)                | 0.03<br>(0.01 to 0.06)                 |
| Maternal abortion, miscarriage, and ectopic pregnancy | 13.97<br>(9.11 to 20.50)                   | 9.76<br>(4.92 to 16.61)                    | 6.71<br>(3.37 to 11.84)                    | 13.18<br>(6.54 to 23.51)                     | 0.25<br>(0.16 to 0.36)               | 0.18<br>(0.09 to 0.30)                 | 0.12<br>(0.06 to 0.21)                | 0.24<br>(0.12 to 0.42)                 |





| Philippines                                                             |                                           |                                         |                                     |                                           |                                  |                                  |                                |                                  |
|-------------------------------------------------------------------------|-------------------------------------------|-----------------------------------------|-------------------------------------|-------------------------------------------|----------------------------------|----------------------------------|--------------------------------|----------------------------------|
| Cause                                                                   | YLLs (in 1000s)                           |                                         |                                     |                                           | Deaths (in 1000s)                |                                  |                                |                                  |
|                                                                         | 2016                                      | 2040 Forecast                           | 2040 Better Scenario                | 2040 Worse Scenario                       | 2016                             | 2040 Forecast                    | 2040 Better Scenario           | 2040 Worse Scenario              |
| <b>Neonatal disorders</b>                                               | <b>2,105.47</b><br>(1,717.19 to 2,540.38) | <b>1,301.72</b><br>(940.20 to 1,746.00) | <b>737.32</b><br>(551.14 to 969.18) | <b>1,758.26</b><br>(1,286.63 to 2,350.88) | <b>24.33</b><br>(19.84 to 29.35) | <b>15.04</b><br>(10.87 to 20.18) | <b>8.52</b><br>(6.37 to 11.20) | <b>20.32</b><br>(14.87 to 27.17) |
| Neonatal preterm birth                                                  | 830.99<br>(617.66 to 1,059.19)            | 429.39<br>(290.95 to 595.34)            | 220.85<br>(147.76 to 307.79)        | 615.05<br>(416.85 to 851.80)              | 9.60<br>(7.13 to 12.24)          | 4.96<br>(3.36 to 6.88)           | 2.55<br>(1.71 to 3.56)         | 7.11<br>(4.82 to 9.84)           |
| Neonatal encephalopathy due to birth asphyxia and trauma                | 443.93<br>(328.46 to 569.75)              | 248.53<br>(151.56 to 373.41)            | 148.21<br>(90.46 to 219.59)         | 321.46<br>(197.11 to 486.55)              | 5.13<br>(3.80 to 6.58)           | 2.87<br>(1.75 to 4.32)           | 1.71<br>(1.05 to 2.54)         | 3.72<br>(2.28 to 5.62)           |
| Neonatal sepsis and other neonatal infections                           | 698.56<br>(517.61 to 983.78)              | 524.69<br>(334.19 to 772.63)            | 311.33<br>(200.71 to 456.35)        | 686.33<br>(438.77 to 1,018.95)            | 8.07<br>(5.98 to 11.37)          | 6.06<br>(3.86 to 8.92)           | 3.60<br>(2.32 to 5.27)         | 7.93<br>(5.07 to 11.78)          |
| Hemolytic disease and other neonatal jaundice                           | 9.60<br>(5.90 to 14.64)                   | 4.64<br>(2.33 to 8.19)                  | 2.63<br>(1.34 to 4.63)              | 6.32<br>(3.13 to 11.22)                   | 0.11<br>(0.07 to 0.17)           | 0.05<br>(0.03 to 0.09)           | 0.03<br>(0.02 to 0.05)         | 0.07<br>(0.04 to 0.13)           |
| Other neonatal disorders                                                | 122.38<br>(88.70 to 164.48)               | 94.47<br>(56.33 to 146.83)              | 54.31<br>(32.99 to 84.06)           | 129.09<br>(75.55 to 198.04)               | 1.41<br>(1.03 to 1.90)           | 1.09<br>(0.65 to 1.70)           | 0.63<br>(0.38 to 0.97)         | 1.49<br>(0.87 to 2.29)           |
| <b>Nutritional deficiencies</b>                                         | <b>151.49</b><br>(124.27 to 186.57)       | <b>113.32</b><br>(90.86 to 143.94)      | <b>95.55</b><br>(78.35 to 117.93)   | <b>123.94</b><br>(98.72 to 159.20)        | <b>4.46</b><br>(3.84 to 5.29)    | <b>6.44</b><br>(4.59 to 8.41)    | <b>6.51</b><br>(4.79 to 8.36)  | <b>6.13</b><br>(4.25 to 8.29)    |
| Protein-energy malnutrition                                             | 135.07<br>(108.44 to 170.07)              | 85.07<br>(64.10 to 113.20)              | 70.27<br>(53.77 to 91.08)           | 94.50<br>(69.82 to 126.10)                | 3.69<br>(3.07 to 4.52)           | 4.51<br>(3.04 to 6.31)           | 4.54<br>(3.08 to 6.22)         | 4.33<br>(2.85 to 6.04)           |
| Iodine deficiency                                                       | 1.09<br>(0.05 to 4.71)                    | 3.19<br>(0.08 to 12.01)                 | 2.49<br>(0.06 to 9.33)              | 3.69<br>(0.10 to 13.47)                   | 0.02<br>(0.00 to 0.08)           | 0.16<br>(0.00 to 0.88)           | 0.15<br>(0.00 to 0.88)         | 0.16<br>(0.00 to 0.86)           |
| Dietary iron deficiency                                                 | 0.77<br>(0.50 to 1.55)                    | 0.81<br>(0.51 to 1.53)                  | 0.67<br>(0.42 to 1.22)              | 0.90<br>(0.56 to 1.74)                    | 0.01<br>(0.01 to 0.03)           | 0.01<br>(0.01 to 0.03)           | 0.02<br>(0.01 to 0.03)         | 0.02<br>(0.01 to 0.04)           |
| Other nutritional deficiencies                                          | 14.57<br>(9.07 to 23.21)                  | 24.25<br>(14.47 to 36.14)               | 22.11<br>(12.46 to 33.04)           | 24.84<br>(14.99 to 36.96)                 | 0.73<br>(0.39 to 1.24)           | 1.75<br>(0.89 to 2.80)           | 1.80<br>(0.91 to 2.85)         | 1.61<br>(0.81 to 2.61)           |
| <b>Other communicable, maternal, neonatal, and nutritional diseases</b> | <b>133.21</b><br>(95.80 to 185.19)        | <b>110.01</b><br>(83.70 to 141.70)      | <b>90.21</b><br>(69.96 to 115.74)   | <b>123.74</b><br>(93.95 to 160.64)        | <b>2.87</b><br>(2.04 to 3.34)    | <b>3.13</b><br>(2.52 to 3.87)    | <b>2.78</b><br>(2.24 to 3.51)  | <b>3.34</b><br>(2.66 to 4.22)    |
| Sexually transmitted infections excluding HIV                           | 54.84<br>(22.64 to 106.04)                | 14.89<br>(5.25 to 32.46)                | 9.75<br>(3.73 to 20.21)             | 17.87<br>(6.19 to 38.78)                  | 0.67<br>(0.30 to 1.27)           | 0.20<br>(0.09 to 0.41)           | 0.14<br>(0.07 to 0.27)         | 0.24<br>(0.10 to 0.49)           |
| Syphilis                                                                | 53.45<br>(21.13 to 104.69)                | 13.80<br>(4.30 to 31.38)                | 8.77<br>(2.78 to 19.23)             | 16.70<br>(5.17 to 37.72)                  | 0.64<br>(0.26 to 1.24)           | 0.17<br>(0.06 to 0.38)           | 0.11<br>(0.04 to 0.23)         | 0.20<br>(0.07 to 0.46)           |
| Chlamydial infection                                                    | 0.27<br>(0.21 to 0.35)                    | 0.22<br>(0.15 to 0.29)                  | 0.20<br>(0.14 to 0.26)              | 0.23<br>(0.17 to 0.31)                    | 0.01<br>(0.01 to 0.01)           | 0.01<br>(0.01 to 0.01)           | 0.01<br>(0.01 to 0.01)         | 0.01<br>(0.01 to 0.01)           |
| Gonococcal infection                                                    | 0.72<br>(0.55 to 0.91)                    | 0.57<br>(0.41 to 0.76)                  | 0.52<br>(0.37 to 0.70)              | 0.61<br>(0.44 to 0.82)                    | 0.02<br>(0.01 to 0.02)           | 0.02<br>(0.01 to 0.02)           | 0.02<br>(0.01 to 0.02)         | 0.02<br>(0.01 to 0.02)           |
| Other sexually transmitted infections                                   | 0.39<br>(0.29 to 0.49)                    | 0.29<br>(0.21 to 0.40)                  | 0.26<br>(0.18 to 0.36)              | 0.32<br>(0.22 to 0.43)                    | 0.01<br>(0.01 to 0.01)           | 0.01<br>(0.01 to 0.01)           | 0.01<br>(0.01 to 0.01)         | 0.01<br>(0.01 to 0.01)           |
| Acute hepatitis                                                         | 37.79<br>(31.23 to 46.07)                 | 40.56<br>(29.92 to 52.98)               | 34.45<br>(25.01 to 46.62)           | 44.56<br>(32.85 to 59.14)                 | 0.94<br>(0.78 to 1.15)           | 1.21<br>(0.92 to 1.56)           | 1.07<br>(0.81 to 1.41)         | 1.29<br>(0.98 to 1.68)           |
| Acute hepatitis A                                                       | 2.19<br>(1.33 to 3.12)                    | 1.37<br>(0.83 to 2.25)                  | 1.00<br>(0.62 to 1.54)              | 1.61<br>(0.95 to 2.65)                    | 0.03<br>(0.02 to 0.04)           | 0.03<br>(0.02 to 0.04)           | 0.02<br>(0.01 to 0.03)         | 0.03<br>(0.02 to 0.05)           |
| Acute hepatitis B                                                       | 30.65<br>(24.75 to 37.85)                 | 34.64<br>(24.97 to 46.26)               | 29.60<br>(20.80 to 40.86)           | 38.09<br>(27.24 to 51.57)                 | 0.80<br>(0.65 to 0.99)           | 1.04<br>(0.78 to 1.37)           | 0.91<br>(0.66 to 1.23)         | 1.12<br>(0.83 to 1.49)           |

|                                       |                                                               |                                                               |                                                               |                                                               |                                                      |                                                      |                                                      |                                                        |
|---------------------------------------|---------------------------------------------------------------|---------------------------------------------------------------|---------------------------------------------------------------|---------------------------------------------------------------|------------------------------------------------------|------------------------------------------------------|------------------------------------------------------|--------------------------------------------------------|
|                                       | 0.58<br>(0.42 to<br>0.81)                                     | 0.78<br>(0.51 to<br>1.15)                                     | 0.71<br>(0.47 to<br>1.08)                                     | 0.79<br>(0.52 to<br>1.17)                                     | 0.02<br>(0.01 to<br>0.02)                            | 0.03<br>(0.02 to<br>0.04)                            | 0.03<br>(0.02 to<br>0.04)                            | 0.03<br>(0.02 to<br>0.04)                              |
| Acute hepatitis C                     |                                                               |                                                               |                                                               |                                                               |                                                      |                                                      |                                                      |                                                        |
|                                       | 4.37<br>(3.23 to<br>5.74)                                     | 3.77<br>(2.39 to<br>5.60)                                     | 3.13<br>(2.01 to<br>4.69)                                     | 4.06<br>(2.57 to<br>6.07)                                     | 0.09<br>(0.06 to<br>0.12)                            | 0.11<br>(0.07 to<br>0.17)                            | 0.11<br>(0.07 to<br>0.16)                            | 0.11<br>(0.07 to<br>0.17)                              |
| Acute hepatitis E                     |                                                               |                                                               |                                                               |                                                               |                                                      |                                                      |                                                      |                                                        |
|                                       | 40.58<br>(32.27 to<br>57.61)                                  | 54.56<br>(41.93 to<br>75.15)                                  | 46.01<br>(35.38 to<br>63.11)                                  | 61.31<br>(46.64 to<br>85.51)                                  | 0.96<br>(0.77 to<br>1.35)                            | 1.72<br>(1.36 to<br>2.35)                            | 1.57<br>(1.24 to<br>2.15)                            | 1.81<br>(1.42 to<br>2.54)                              |
| Other unspecified infectious diseases |                                                               |                                                               |                                                               |                                                               |                                                      |                                                      |                                                      |                                                        |
| <b>Non-communicable diseases</b>      | <b>11,585.78</b><br><b>(10,231.04 to</b><br><b>13,053.12)</b> | <b>16,565.83</b><br><b>(13,221.06 to</b><br><b>21,329.52)</b> | <b>12,665.65</b><br><b>(10,187.77 to</b><br><b>16,128.67)</b> | <b>21,770.45</b><br><b>(17,233.36 to</b><br><b>27,435.77)</b> | <b>434.21</b><br><b>(383.98 to</b><br><b>486.49)</b> | <b>797.21</b><br><b>(667.57 to</b><br><b>979.39)</b> | <b>653.87</b><br><b>(549.24 to</b><br><b>812.58)</b> | <b>984.77</b><br><b>(824.31 to</b><br><b>1,173.81)</b> |

| Philippines                          |                                           |                                           |                                           |                                           |                                  |                                     |                                     |                                     |
|--------------------------------------|-------------------------------------------|-------------------------------------------|-------------------------------------------|-------------------------------------------|----------------------------------|-------------------------------------|-------------------------------------|-------------------------------------|
| Cause                                | YLLs (in 1000s)                           |                                           |                                           |                                           | Deaths (in 1000s)                |                                     |                                     |                                     |
|                                      | 2016                                      | 2040 Forecast                             | 2040 Better Scenario                      | 2040 Worse Scenario                       | 2016                             | 2040 Forecast                       | 2040 Better Scenario                | 2040 Worse Scenario                 |
| <b>Neoplasms</b>                     | <b>2,145.24</b><br>(1,867.85 to 2,441.96) | <b>3,737.67</b><br>(3,067.09 to 4,475.30) | <b>3,385.54</b><br>(2,790.96 to 3,990.92) | <b>4,283.92</b><br>(3,441.08 to 5,220.56) | <b>72.69</b><br>(63.11 to 82.38) | <b>152.47</b><br>(128.22 to 178.48) | <b>145.10</b><br>(123.91 to 168.04) | <b>168.30</b><br>(138.58 to 201.91) |
| Lip and oral cavity cancer           | 39.37<br>(34.06 to 45.67)                 | 71.53<br>(45.10 to 109.77)                | 53.55<br>(35.72 to 78.32)                 | 115.74<br>(68.27 to 188.56)               | 1.58<br>(1.37 to 1.81)           | 3.30<br>(2.19 to 4.87)              | 2.63<br>(1.82 to 3.76)              | 5.02<br>(3.04 to 7.81)              |
| Nasopharynx cancer                   | 45.22<br>(38.22 to 52.80)                 | 71.19<br>(43.48 to 111.78)                | 49.07<br>(31.83 to 73.39)                 | 122.69<br>(70.55 to 201.50)               | 1.48<br>(1.26 to 1.71)           | 2.60<br>(1.64 to 3.95)              | 1.89<br>(1.26 to 2.72)              | 4.31<br>(2.53 to 6.70)              |
| Other pharynx cancer                 | 10.36<br>(8.81 to 12.14)                  | 17.87<br>(11.81 to 26.03)                 | 16.75<br>(11.30 to 23.92)                 | 22.06<br>(13.55 to 33.76)                 | 0.39<br>(0.34 to 0.45)           | 0.78<br>(0.53 to 1.13)              | 0.75<br>(0.53 to 1.05)              | 0.91<br>(0.57 to 1.38)              |
| Esophageal cancer                    | 21.58<br>(18.36 to 25.04)                 | 32.92<br>(21.57 to 50.32)                 | 25.00<br>(17.35 to 36.27)                 | 52.53<br>(31.56 to 86.84)                 | 0.85<br>(0.73 to 0.98)           | 1.48<br>(0.99 to 2.18)              | 1.19<br>(0.85 to 1.69)              | 2.24<br>(1.38 to 3.53)              |
| Stomach cancer                       | 66.93<br>(57.98 to 77.47)                 | 96.19<br>(78.04 to 118.78)                | 88.62<br>(72.40 to 108.83)                | 102.98<br>(81.56 to 130.12)               | 2.66<br>(2.32 to 3.04)           | 4.52<br>(3.70 to 5.44)              | 4.37<br>(3.66 to 5.25)              | 4.61<br>(3.67 to 5.73)              |
| Colon and rectum cancer              | 190.63<br>(161.79 to 223.58)              | 381.78<br>(270.49 to 536.46)              | 379.69<br>(268.09 to 530.21)              | 394.52<br>(276.24 to 553.88)              | 7.43<br>(6.38 to 8.58)           | 17.94<br>(12.78 to 25.05)           | 18.71<br>(13.42 to 26.16)           | 17.57<br>(12.45 to 24.90)           |
| Liver cancer                         | 218.51<br>(183.38 to 259.39)              | 348.47<br>(254.53 to 487.06)              | 311.75<br>(238.93 to 406.76)              | 404.34<br>(277.30 to 589.06)              | 7.64<br>(6.47 to 8.92)           | 14.28<br>(10.69 to 18.89)           | 13.41<br>(10.57 to 16.92)           | 15.77<br>(11.18 to 21.99)           |
| Liver cancer due to hepatitis B      | 106.06<br>(84.00 to 133.32)               | 161.25<br>(112.61 to 231.05)              | 145.35<br>(105.96 to 199.47)              | 181.49<br>(120.35 to 269.61)              | 3.46<br>(2.72 to 4.28)           | 6.13<br>(4.42 to 8.62)              | 5.78<br>(4.28 to 7.74)              | 6.62<br>(4.52 to 9.62)              |
| Liver cancer due to hepatitis C      | 31.14<br>(23.04 to 46.87)                 | 62.36<br>(39.90 to 92.78)                 | 58.37<br>(38.01 to 84.15)                 | 67.64<br>(41.85 to 103.39)                | 1.45<br>(0.99 to 1.98)           | 3.11<br>(2.00 to 4.51)              | 3.07<br>(2.01 to 4.32)              | 3.21<br>(1.98 to 4.77)              |
| Liver cancer due to alcohol use      | 32.21<br>(22.51 to 44.14)                 | 52.11<br>(33.04 to 79.53)                 | 44.12<br>(29.13 to 64.83)                 | 72.41<br>(43.63 to 114.67)                | 1.20<br>(0.85 to 1.64)           | 2.18<br>(1.42 to 3.38)              | 1.95<br>(1.29 to 2.94)              | 2.84<br>(1.75 to 4.52)              |
| Liver cancer due to other causes     | 46.09<br>(31.63 to 63.85)                 | 72.75<br>(44.29 to 114.06)                | 63.91<br>(40.35 to 96.39)                 | 82.80<br>(47.68 to 134.22)                | 1.53<br>(1.06 to 2.12)           | 2.85<br>(1.72 to 4.50)              | 2.62<br>(1.65 to 3.98)              | 3.10<br>(1.80 to 5.00)              |
| Gallbladder and biliary tract cancer | 9.55<br>(7.87 to 14.60)                   | 15.73<br>(13.22 to 24.50)                 | 16.80<br>(13.99 to 26.31)                 | 14.49<br>(12.34 to 22.10)                 | 0.40<br>(0.33 to 0.62)           | 0.77<br>(0.65 to 1.20)              | 0.85<br>(0.72 to 1.36)              | 0.68<br>(0.57 to 1.05)              |
| Pancreatic cancer                    | 54.81<br>(47.02 to 63.08)                 | 127.88<br>(99.47 to 163.19)               | 127.11<br>(101.00 to 158.65)              | 130.62<br>(100.34 to 169.30)              | 2.21<br>(1.90 to 2.52)           | 5.94<br>(4.72 to 7.55)              | 6.16<br>(5.00 to 7.60)              | 5.81<br>(4.51 to 7.47)              |
| Larynx cancer                        | 17.68<br>(14.76 to 20.83)                 | 26.16<br>(13.48 to 48.72)                 | 17.11<br>(9.38 to 31.50)                  | 44.01<br>(21.64 to 79.74)                 | 0.70<br>(0.59 to 0.82)           | 1.16<br>(0.60 to 2.18)              | 0.79<br>(0.45 to 1.52)              | 1.88<br>(0.93 to 3.38)              |
| Tracheal, bronchus, and lung cancer  | 315.75<br>(267.36 to 367.95)              | 555.32<br>(376.57 to 784.50)              | 351.70<br>(252.42 to 482.56)              | 881.43<br>(574.68 to 1,287.86)            | 12.63<br>(10.78 to 14.63)        | 24.44<br>(17.07 to 33.88)           | 16.28<br>(11.87 to 21.83)           | 37.67<br>(25.13 to 53.29)           |
| Malignant skin melanoma              | 6.76<br>(5.32 to 10.25)                   | 13.44<br>(10.57 to 20.36)                 | 15.15<br>(11.79 to 23.29)                 | 12.05<br>(9.57 to 18.67)                  | 0.24<br>(0.19 to 0.36)           | 0.57<br>(0.46 to 0.86)              | 0.68<br>(0.54 to 1.01)              | 0.49<br>(0.39 to 0.75)              |
| Non-melanoma skin cancer             | 11.12<br>(9.47 to 12.93)                  | 23.33<br>(20.12 to 26.95)                 | 22.76<br>(19.19 to 26.95)                 | 22.86<br>(19.79 to 26.39)                 | 0.42<br>(0.37 to 0.49)           | 1.07<br>(0.93 to 1.21)              | 1.10<br>(0.95 to 1.27)              | 1.00<br>(0.85 to 1.14)              |
| Breast cancer                        | 256.16<br>(201.52 to 319.17)              | 460.46<br>(326.98 to 635.64)              | 436.32<br>(314.47 to 591.35)              | 488.66<br>(343.45 to 689.10)              | 8.23<br>(6.56 to 10.19)          | 17.28<br>(12.80 to 23.35)           | 16.87<br>(12.64 to 22.27)           | 17.75<br>(12.98 to 24.29)           |
| Cervical cancer                      | 81.54<br>(63.45 to 102.22)                | 100.87<br>(69.22 to 139.40)               | 90.57<br>(62.32 to 125.45)                | 111.25<br>(74.30 to 162.90)               | 2.48<br>(1.95 to 3.07)           | 3.46<br>(2.52 to 4.64)              | 3.19<br>(2.32 to 4.24)              | 3.71<br>(2.65 to 5.19)              |

|                   |                              |                                 |                                 |                                 |                           |                             |                             |                            |
|-------------------|------------------------------|---------------------------------|---------------------------------|---------------------------------|---------------------------|-----------------------------|-----------------------------|----------------------------|
|                   | 30.47<br>(24.30 to<br>37.77) | 56.47<br>(43.16 to<br>72.50)    | 51.98<br>(39.51 to<br>67.79)    | 59.26<br>(45.25 to<br>75.49)    | 1.05<br>(0.85 to<br>1.29) | 2.23<br>(1.76 to<br>2.73)   | 2.11<br>(1.67 to<br>2.62)   | 2.28<br>(1.82 to<br>2.79)  |
| Uterine cancer    |                              |                                 |                                 |                                 |                           |                             |                             |                            |
|                   | 63.14<br>(49.98 to<br>78.86) | 120.10<br>(83.77 to<br>166.27)  | 124.24<br>(89.07 to<br>167.88)  | 113.58<br>(79.90 to<br>157.47)  | 1.99<br>(1.58 to<br>2.46) | 4.40<br>(3.21 to<br>5.93)   | 4.66<br>(3.44 to<br>6.12)   | 4.06<br>(3.02 to<br>5.57)  |
| Ovarian cancer    |                              |                                 |                                 |                                 |                           |                             |                             |                            |
|                   | 58.66<br>(46.25 to<br>71.51) | 160.29<br>(127.51 to<br>192.55) | 181.11<br>(147.90 to<br>216.65) | 138.09<br>(105.29 to<br>169.60) | 3.53<br>(2.80 to<br>4.26) | 10.83<br>(8.14 to<br>13.21) | 12.87<br>(9.84 to<br>15.25) | 8.86<br>(6.38 to<br>11.22) |
| Prostate cancer   |                              |                                 |                                 |                                 |                           |                             |                             |                            |
|                   | 3.13<br>(2.41 to<br>4.05)    | 4.70<br>(3.56 to<br>6.08)       | 4.53<br>(3.39 to<br>5.94)       | 4.71<br>(3.58 to<br>6.11)       | 0.08<br>(0.06 to<br>0.10) | 0.15<br>(0.11 to<br>0.19)   | 0.15<br>(0.12 to<br>0.19)   | 0.14<br>(0.11 to<br>0.18)  |
| Testicular cancer |                              |                                 |                                 |                                 |                           |                             |                             |                            |

| Philippines                     |                                                 |                                                  |                                                  |                                                   |                                            |                                            |                                            |                                            |
|---------------------------------|-------------------------------------------------|--------------------------------------------------|--------------------------------------------------|---------------------------------------------------|--------------------------------------------|--------------------------------------------|--------------------------------------------|--------------------------------------------|
| Cause                           | YLLs (in 1000s)                                 |                                                  |                                                  |                                                   | Deaths (in 1000s)                          |                                            |                                            |                                            |
|                                 | 2016                                            | 2040 Forecast                                    | 2040 Better Scenario                             | 2040 Worse Scenario                               | 2016                                       | 2040 Forecast                              | 2040 Better Scenario                       | 2040 Worse Scenario                        |
| Kidney cancer                   | 27.80<br>(24.36 to 31.75)                       | 51.21<br>(40.29 to 64.38)                        | 52.40<br>(41.89 to 64.52)                        | 50.25<br>(38.76 to 64.90)                         | 0.84<br>(0.73 to 0.96)                     | 1.99<br>(1.60 to 2.51)                     | 2.17<br>(1.77 to 2.67)                     | 1.87<br>(1.45 to 2.40)                     |
| Bladder cancer                  | 13.22<br>(11.21 to 15.31)                       | 26.35<br>(19.53 to 35.04)                        | 24.44<br>(18.79 to 31.43)                        | 28.65<br>(20.49 to 39.44)                         | 0.60<br>(0.51 to 0.68)                     | 1.41<br>(1.04 to 1.87)                     | 1.39<br>(1.07 to 1.78)                     | 1.44<br>(1.03 to 1.97)                     |
| Brain and nervous system cancer | 81.29<br>(68.03 to 99.03)                       | 157.01<br>(129.06 to 190.54)                     | 155.21<br>(127.34 to 188.64)                     | 151.98<br>(125.91 to 184.88)                      | 1.97<br>(1.63 to 2.38)                     | 4.57<br>(3.84 to 5.40)                     | 4.79<br>(4.00 to 5.65)                     | 4.24<br>(3.57 to 5.05)                     |
| Thyroid cancer                  | 23.51<br>(19.41 to 28.82)                       | 43.25<br>(33.54 to 56.90)                        | 40.16<br>(31.33 to 51.91)                        | 44.82<br>(34.08 to 60.12)                         | 0.92<br>(0.77 to 1.12)                     | 1.96<br>(1.57 to 2.53)                     | 1.89<br>(1.52 to 2.36)                     | 1.96<br>(1.55 to 2.57)                     |
| Mesothelioma                    | 4.82<br>(4.00 to 5.79)                          | 8.47<br>(7.11 to 10.10)                          | 8.57<br>(7.14 to 10.29)                          | 8.28<br>(6.95 to 9.85)                            | 0.14<br>(0.12 to 0.17)                     | 0.29<br>(0.25 to 0.34)                     | 0.31<br>(0.26 to 0.36)                     | 0.27<br>(0.23 to 0.32)                     |
| Hodgkin lymphoma                | 5.23<br>(4.20 to 10.04)                         | 6.49<br>(5.10 to 12.64)                          | 5.55<br>(4.19 to 10.75)                          | 7.07<br>(5.50 to 13.87)                           | 0.14<br>(0.11 to 0.25)                     | 0.20<br>(0.16 to 0.37)                     | 0.18<br>(0.14 to 0.33)                     | 0.21<br>(0.17 to 0.39)                     |
| Non-Hodgkin lymphoma            | 71.52<br>(61.35 to 87.48)                       | 126.69<br>(105.15 to 156.77)                     | 127.68<br>(105.89 to 158.01)                     | 121.06<br>(100.48 to 148.95)                      | 2.01<br>(1.72 to 2.47)                     | 4.51<br>(3.80 to 5.63)                     | 4.82<br>(4.07 to 5.94)                     | 4.11<br>(3.47 to 5.02)                     |
| Multiple myeloma                | 10.65<br>(8.17 to 17.63)                        | 24.95<br>(18.68 to 41.86)                        | 26.44<br>(19.93 to 44.65)                        | 23.17<br>(17.36 to 39.08)                         | 0.40<br>(0.30 to 0.66)                     | 1.06<br>(0.81 to 1.79)                     | 1.17<br>(0.89 to 1.98)                     | 0.96<br>(0.72 to 1.61)                     |
| Leukemia                        | 218.63<br>(192.11 to 248.10)                    | 262.57<br>(217.11 to 312.51)                     | 233.47<br>(193.45 to 277.54)                     | 278.21<br>(228.15 to 336.66)                      | 4.41<br>(3.88 to 5.00)                     | 7.08<br>(5.93 to 8.52)                     | 6.75<br>(5.71 to 8.02)                     | 7.23<br>(5.97 to 8.90)                     |
| Acute lymphoid leukemia         | 58.43<br>(48.26 to 69.63)                       | 63.71<br>(51.78 to 77.58)                        | 56.12<br>(46.19 to 67.57)                        | 65.83<br>(53.37 to 80.93)                         | 1.02<br>(0.88 to 1.18)                     | 1.52<br>(1.27 to 1.79)                     | 1.45<br>(1.23 to 1.72)                     | 1.51<br>(1.25 to 1.82)                     |
| Chronic lymphoid leukemia       | 2.29<br>(1.81 to 2.86)                          | 3.89<br>(2.95 to 5.14)                           | 3.78<br>(2.87 to 4.88)                           | 4.00<br>(2.99 to 5.33)                            | 0.07<br>(0.06 to 0.09)                     | 0.15<br>(0.12 to 0.20)                     | 0.15<br>(0.12 to 0.20)                     | 0.15<br>(0.11 to 0.20)                     |
| Acute myeloid leukemia          | 49.24<br>(41.34 to 58.59)                       | 79.05<br>(64.41 to 97.58)                        | 75.64<br>(61.82 to 92.55)                        | 79.68<br>(64.10 to 99.77)                         | 1.02<br>(0.87 to 1.18)                     | 2.11<br>(1.73 to 2.55)                     | 2.14<br>(1.78 to 2.57)                     | 2.05<br>(1.66 to 2.54)                     |
| Chronic myeloid leukemia        | 7.88<br>(6.59 to 9.34)                          | 8.34<br>(6.33 to 10.76)                          | 7.68<br>(5.86 to 9.82)                           | 8.81<br>(6.58 to 11.66)                           | 0.21<br>(0.18 to 0.25)                     | 0.27<br>(0.21 to 0.34)                     | 0.26<br>(0.20 to 0.32)                     | 0.27<br>(0.21 to 0.36)                     |
| Other leukemia                  | 100.78<br>(86.70 to 116.82)                     | 107.58<br>(85.70 to 132.47)                      | 90.25<br>(71.79 to 111.70)                       | 119.90<br>(95.10 to 149.75)                       | 2.08<br>(1.80 to 2.40)                     | 3.04<br>(2.45 to 3.76)                     | 2.74<br>(2.19 to 3.35)                     | 3.25<br>(2.57 to 4.10)                     |
| Other neoplasms                 | 187.21<br>(162.26 to 214.93)                    | 345.98<br>(294.42 to 397.32)                     | 347.84<br>(294.27 to 403.00)                     | 334.56<br>(288.03 to 382.92)                      | 5.28<br>(4.57 to 6.09)                     | 12.20<br>(10.50 to 13.87)                  | 12.98<br>(11.20 to 14.74)                  | 11.26<br>(9.75 to 12.79)                   |
| <b>Cardiovascular diseases</b>  | <b>4870.46</b><br><b>(4,230.51 to 5,552.89)</b> | <b>5,725.70</b><br><b>(4,002.48 to 8,306.07)</b> | <b>3,533.32</b><br><b>(2,522.42 to 5,164.35)</b> | <b>9,178.20</b><br><b>(6,183.37 to 12,871.52)</b> | <b>206.19</b><br><b>(181.86 to 232.44)</b> | <b>308.92</b><br><b>(225.11 to 451.54)</b> | <b>213.94</b><br><b>(157.17 to 324.65)</b> | <b>446.92</b><br><b>(323.05 to 621.72)</b> |
| Rheumatic heart disease         | 167.49<br>(142.77 to 194.90)                    | 97.13<br>(76.01 to 122.33)                       | 76.97<br>(59.68 to 98.15)                        | 113.04<br>(87.32 to 145.90)                       | 3.44<br>(2.93 to 4.04)                     | 2.53<br>(2.07 to 3.09)                     | 2.15<br>(1.73 to 2.62)                     | 2.79<br>(2.26 to 3.49)                     |
| Ischemic heart disease          | 2,419.12<br>(2,085.79 to 2,759.77)              | 2,932.78<br>(1,622.79 to 5,315.49)               | 1,666.56<br>(927.34 to 3,007.64)                 | 4,776.90<br>(2,699.78 to 8,048.37)                | 107.02<br>(93.87 to 120.47)                | 161.53<br>(92.48 to 296.43)                | 103.99<br>(59.68 to 185.06)                | 239.44<br>(141.31 to 413.41)               |
| Stroke                          | 1,615.75<br>(1,399.99 to 1,847.18)              | 1,601.95<br>(973.21 to 2,676.32)                 | 860.83<br>(546.77 to 1,423.54)                   | 2,952.16<br>(1,736.79 to 4,737.36)                | 67.16<br>(58.68 to 76.41)                  | 83.90<br>(53.73 to 157.52)                 | 51.90<br>(33.43 to 95.62)                  | 135.60<br>(83.82 to 231.79)                |
| Ischemic stroke                 | 312.96<br>(269.77 to 358.61)                    | 399.44<br>(209.50 to 1,146.07)                   | 254.27<br>(135.76 to 661.32)                     | 593.07<br>(306.73 to 1,580.54)                    | 18.14<br>(15.75 to 20.64)                  | 28.47<br>(14.76 to 82.02)                  | 20.37<br>(10.77 to 54.32)                  | 37.87<br>(19.23 to 106.71)                 |

|                                |                                       |                                     |                                   |                                       |                              |                              |                              |                               |
|--------------------------------|---------------------------------------|-------------------------------------|-----------------------------------|---------------------------------------|------------------------------|------------------------------|------------------------------|-------------------------------|
| Intracerebral hemorrhage       | 1,302.79<br>(1,129.20 to<br>1,493.20) | 1,202.52<br>(697.54 to<br>1,984.76) | 606.55<br>(370.81 to<br>1,018.50) | 2,359.09<br>(1,252.14 to<br>4,016.16) | 49.03<br>(42.64 to<br>56.04) | 55.43<br>(34.57 to<br>91.87) | 31.53<br>(20.52 to<br>50.63) | 97.73<br>(56.96 to<br>167.73) |
| Hypertensive heart disease     | 392.18<br>(283.46 to<br>525.74)       | 654.48<br>(434.53 to<br>971.51)     | 519.39<br>(364.50 to<br>713.96)   | 873.91<br>(543.22 to<br>1,439.16)     | 18.51<br>(13.48 to<br>24.83) | 38.23<br>(26.08 to<br>58.30) | 32.40<br>(23.13 to<br>45.15) | 47.37<br>(30.51 to<br>78.51)  |
| Cardiomyopathy and myocarditis | 92.77<br>(78.46 to<br>111.00)         | 127.74<br>(94.62 to<br>163.19)      | 128.21<br>(91.04 to<br>166.44)    | 126.32<br>(96.78 to<br>160.06)        | 3.50<br>(2.34 to<br>4.29)    | 7.02<br>(3.63 to<br>10.60)   | 7.78<br>(3.80 to<br>11.85)   | 6.21<br>(3.46 to<br>9.21)     |
| Myocarditis                    | 18.86<br>(14.37 to<br>27.28)          | 20.36<br>(15.52 to<br>28.70)        | 19.03<br>(14.54 to<br>26.39)      | 20.89<br>(15.70 to<br>29.98)          | 0.45<br>(0.36 to<br>0.57)    | 0.68<br>(0.49 to<br>0.87)    | 0.71<br>(0.48 to<br>0.92)    | 0.64<br>(0.47 to<br>0.80)     |

| Philippines                                                   |                                            |                                              |                                            |                                                |                                         |                                         |                                         |                                         |
|---------------------------------------------------------------|--------------------------------------------|----------------------------------------------|--------------------------------------------|------------------------------------------------|-----------------------------------------|-----------------------------------------|-----------------------------------------|-----------------------------------------|
| Cause                                                         | YLLs (in 1000s)                            |                                              |                                            |                                                | Deaths (in 1000s)                       |                                         |                                         |                                         |
|                                                               | 2016                                       | 2040 Forecast                                | 2040 Better Scenario                       | 2040 Worse Scenario                            | 2016                                    | 2040 Forecast                           | 2040 Better Scenario                    | 2040 Worse Scenario                     |
| Alcoholic cardiomyopathy                                      | 15.61<br>(11.06 to 23.26)                  | 19.61<br>(13.61 to 28.20)                    | 20.01<br>(13.77 to 28.44)                  | 22.71<br>(16.20 to 33.27)                      | 0.43<br>(0.31 to 0.60)                  | 0.65<br>(0.43 to 0.85)                  | 0.71<br>(0.46 to 0.93)                  | 0.69<br>(0.48 to 0.92)                  |
| Other cardiomyopathy                                          | 58.30<br>(46.20 to 68.65)                  | 87.77<br>(56.09 to 121.07)                   | 89.17<br>(55.11 to 124.06)                 | 82.72<br>(54.91 to 113.82)                     | 2.62<br>(1.53 to 3.31)                  | 5.69<br>(2.57 to 9.16)                  | 6.37<br>(2.71 to 10.37)                 | 4.88<br>(2.28 to 7.83)                  |
| Atrial fibrillation and flutter                               | 13.73<br>(10.53 to 17.13)                  | 37.49<br>(27.53 to 48.54)                    | 39.32<br>(29.05 to 50.56)                  | 36.63<br>(26.48 to 48.43)                      | 1.13<br>(0.86 to 1.43)                  | 3.48<br>(2.30 to 4.75)                  | 3.88<br>(2.70 to 5.22)                  | 3.18<br>(2.07 to 4.42)                  |
| Aortic aneurysm                                               | 27.51<br>(23.34 to 31.83)                  | 49.42<br>(39.58 to 60.52)                    | 48.52<br>(39.74 to 58.81)                  | 49.66<br>(39.23 to 62.17)                      | 1.23<br>(1.06 to 1.40)                  | 2.69<br>(2.17 to 3.21)                  | 2.83<br>(2.34 to 3.37)                  | 2.52<br>(1.98 to 3.05)                  |
| Peripheral artery disease                                     | 1.96<br>(1.35 to 2.73)                     | 6.03<br>(4.01 to 9.22)                       | 6.08<br>(4.12 to 9.70)                     | 5.78<br>(3.78 to 8.65)                         | 0.11<br>(0.08 to 0.17)                  | 0.43<br>(0.27 to 0.77)                  | 0.48<br>(0.30 to 0.92)                  | 0.37<br>(0.23 to 0.67)                  |
| Endocarditis                                                  | 52.07<br>(37.74 to 71.13)                  | 65.43<br>(47.01 to 95.62)                    | 60.37<br>(43.31 to 88.86)                  | 68.60<br>(48.89 to 100.47)                     | 1.23<br>(0.92 to 1.78)                  | 1.99<br>(1.44 to 2.92)                  | 1.98<br>(1.44 to 2.96)                  | 1.96<br>(1.42 to 2.91)                  |
| Other cardiovascular and circulatory diseases                 | 87.88<br>(76.35 to 100.64)                 | 153.25<br>(117.85 to 197.88)                 | 127.05<br>(97.91 to 164.10)                | 175.21<br>(132.85 to 232.45)                   | 2.86<br>(2.50 to 3.27)                  | 7.12<br>(5.49 to 9.04)                  | 6.54<br>(4.98 to 8.25)                  | 7.47<br>(5.52 to 9.74)                  |
| <b>Chronic respiratory diseases</b>                           | <b>803.21</b><br><b>(704.59 to 911.70)</b> | <b>757.91</b><br><b>(563.63 to 1,009.66)</b> | <b>498.71</b><br><b>(392.88 to 628.03)</b> | <b>1,129.20</b><br><b>(805.55 to 1,570.18)</b> | <b>33.72</b><br><b>(29.73 to 38.13)</b> | <b>40.47</b><br><b>(30.03 to 53.50)</b> | <b>28.37</b><br><b>(22.33 to 35.73)</b> | <b>57.70</b><br><b>(40.95 to 80.71)</b> |
| Chronic obstructive pulmonary disease                         | 422.32<br>(360.98 to 493.65)               | 501.44<br>(338.74 to 740.82)                 | 296.44<br>(212.56 to 410.56)               | 828.06<br>(522.58 to 1,282.65)                 | 21.21<br>(18.32 to 24.34)               | 29.11<br>(19.65 to 42.38)               | 18.70<br>(13.47 to 25.63)               | 45.15<br>(29.65 to 68.54)               |
| Pneumoconiosis                                                | 0.51<br>(0.43 to 0.61)                     | 0.79<br>(0.66 to 0.93)                       | 0.80<br>(0.67 to 0.95)                     | 0.78<br>(0.65 to 0.92)                         | 0.02<br>(0.02 to 0.03)                  | 0.05<br>(0.04 to 0.06)                  | 0.05<br>(0.04 to 0.06)                  | 0.04<br>(0.03 to 0.06)                  |
| Silicosis                                                     | 0.07<br>(0.05 to 0.10)                     | 0.07<br>(0.04 to 0.10)                       | 0.07<br>(0.04 to 0.09)                     | 0.07<br>(0.04 to 0.10)                         | 0.00<br>(0.00 to 0.00)                  | 0.00<br>(0.00 to 0.01)                  | 0.00<br>(0.00 to 0.01)                  | 0.00<br>(0.00 to 0.01)                  |
| Asbestosis                                                    | 0.19<br>(0.15 to 0.26)                     | 0.38<br>(0.29 to 0.51)                       | 0.42<br>(0.32 to 0.56)                     | 0.35<br>(0.27 to 0.46)                         | 0.01<br>(0.01 to 0.01)                  | 0.02<br>(0.01 to 0.03)                  | 0.02<br>(0.02 to 0.03)                  | 0.02<br>(0.01 to 0.02)                  |
| Coal workers pneumoconiosis                                   | 0.04<br>(0.02 to 0.06)                     | 0.04<br>(0.02 to 0.06)                       | 0.03<br>(0.01 to 0.05)                     | 0.05<br>(0.02 to 0.07)                         | 0.00<br>(0.00 to 0.00)                  | 0.00<br>(0.00 to 0.00)                  | 0.00<br>(0.00 to 0.00)                  | 0.00<br>(0.00 to 0.01)                  |
| Other pneumoconiosis                                          | 0.21<br>(0.17 to 0.26)                     | 0.30<br>(0.23 to 0.38)                       | 0.29<br>(0.21 to 0.36)                     | 0.31<br>(0.24 to 0.39)                         | 0.01<br>(0.01 to 0.01)                  | 0.02<br>(0.01 to 0.05)                  | 0.02<br>(0.01 to 0.03)                  | 0.02<br>(0.01 to 0.03)                  |
| Asthma                                                        | 363.44<br>(308.36 to 421.18)               | 230.19<br>(171.57 to 311.99)                 | 176.04<br>(129.49 to 236.24)               | 274.74<br>(197.94 to 386.97)                   | 11.98<br>(10.09 to 13.95)               | 10.29<br>(7.61 to 14.39)                | 8.50<br>(6.31 to 11.48)                 | 11.56<br>(8.21 to 16.62)                |
| Interstitial lung disease and pulmonary sarcoidosis           | 4.16<br>(3.17 to 6.31)                     | 7.79<br>(5.99 to 12.09)                      | 9.03<br>(6.81 to 14.21)                    | 6.86<br>(5.37 to 10.57)                        | 0.16<br>(0.13 to 0.27)                  | 0.37<br>(0.28 to 0.63)                  | 0.46<br>(0.34 to 0.78)                  | 0.31<br>(0.24 to 0.52)                  |
| Other chronic respiratory diseases                            | 12.77<br>(9.01 to 23.04)                   | 17.69<br>(12.57 to 29.63)                    | 16.39<br>(11.65 to 26.41)                  | 18.77<br>(13.21 to 31.63)                      | 0.34<br>(0.24 to 0.58)                  | 0.65<br>(0.40 to 1.02)                  | 0.67<br>(0.41 to 1.05)                  | 0.64<br>(0.40 to 1.02)                  |
| <b>Cirrhosis and other chronic liver diseases</b>             | <b>390.42</b><br><b>(322.38 to 465.68)</b> | <b>582.69</b><br><b>(488.05 to 690.33)</b>   | <b>551.40</b><br><b>(453.39 to 662.97)</b> | <b>614.77</b><br><b>(514.61 to 731.08)</b>     | <b>12.62</b><br><b>(10.63 to 14.88)</b> | <b>21.33</b><br><b>(18.52 to 24.71)</b> | <b>20.90</b><br><b>(17.98 to 24.45)</b> | <b>21.64</b><br><b>(18.56 to 25.15)</b> |
| Cirrhosis and other chronic liver diseases due to hepatitis B | 155.42<br>(123.27 to 192.41)               | 243.39<br>(195.13 to 303.25)                 | 235.51<br>(185.86 to 294.12)               | 243.06<br>(194.46 to 303.45)                   | 5.10<br>(4.10 to 6.29)                  | 8.88<br>(7.33 to 10.76)                 | 8.86<br>(7.23 to 10.77)                 | 8.58<br>(7.04 to 10.47)                 |
| Cirrhosis and other chronic liver diseases due to hepatitis C | 66.38<br>(50.49 to 84.73)                  | 105.25<br>(79.74 to 136.33)                  | 101.01<br>(75.84 to 132.09)                | 105.81<br>(79.96 to 137.67)                    | 2.14<br>(1.64 to 2.72)                  | 3.75<br>(2.95 to 4.67)                  | 3.70<br>(2.91 to 4.67)                  | 3.66<br>(2.87 to 4.60)                  |

|                                                                |                                                      |                                                      |                                                      |                                                      |                                                   |                                                   |                                                   |                                                   |
|----------------------------------------------------------------|------------------------------------------------------|------------------------------------------------------|------------------------------------------------------|------------------------------------------------------|---------------------------------------------------|---------------------------------------------------|---------------------------------------------------|---------------------------------------------------|
|                                                                | 74.49<br>(56.83 to<br>96.59)                         | 101.56<br>(77.13 to<br>131.42)                       | 89.94<br>(67.75 to<br>115.57)                        | 131.13<br>(100.33 to<br>167.73)                      | 2.51<br>(1.95 to<br>3.23)                         | 3.86<br>(3.02 to<br>4.88)                         | 3.57<br>(2.75 to<br>4.50)                         | 4.69<br>(3.66 to<br>5.82)                         |
| Cirrhosis and other chronic liver diseases due to alcohol use  |                                                      |                                                      |                                                      |                                                      |                                                   |                                                   |                                                   |                                                   |
|                                                                | 94.12<br>(77.74 to<br>113.69)                        | 132.49<br>(109.05 to<br>161.64)                      | 124.93<br>(100.66 to<br>155.39)                      | 134.77<br>(110.56 to<br>164.24)                      | 2.86<br>(2.36 to<br>3.44)                         | 4.84<br>(4.03 to<br>5.77)                         | 4.78<br>(3.92 to<br>5.80)                         | 4.72<br>(3.91 to<br>5.63)                         |
| Cirrhosis and other chronic liver diseases due to other causes |                                                      |                                                      |                                                      |                                                      |                                                   |                                                   |                                                   |                                                   |
| <b>Digestive diseases</b>                                      | <b>439.07</b><br><b>(366.60 to</b><br><b>589.02)</b> | <b>504.86</b><br><b>(414.37 to</b><br><b>683.09)</b> | <b>435.90</b><br><b>(353.05 to</b><br><b>585.41)</b> | <b>562.02</b><br><b>(451.72 to</b><br><b>769.56)</b> | <b>14.93</b><br><b>(12.72 to</b><br><b>18.77)</b> | <b>22.11</b><br><b>(18.27 to</b><br><b>27.22)</b> | <b>20.42</b><br><b>(16.89 to</b><br><b>25.12)</b> | <b>23.12</b><br><b>(18.68 to</b><br><b>29.08)</b> |
| Peptic ulcer disease                                           | 207.80<br>(168.82 to<br>262.67)                      | 201.58<br>(156.07 to<br>264.14)                      | 164.54<br>(123.99 to<br>215.54)                      | 230.93<br>(173.27 to<br>306.03)                      | 8.28<br>(6.89 to<br>10.04)                        | 10.09<br>(7.73 to<br>13.04)                       | 8.70<br>(6.50 to<br>11.17)                        | 10.99<br>(8.16 to<br>14.46)                       |



| Philippines                                |                              |                              |                              |                              |                           |                           |                           |                           |
|--------------------------------------------|------------------------------|------------------------------|------------------------------|------------------------------|---------------------------|---------------------------|---------------------------|---------------------------|
| Cause                                      | YLLs (in 1000s)              |                              |                              |                              | Deaths (in 1000s)         |                           |                           |                           |
|                                            | 2016                         | 2040 Forecast                | 2040 Better Scenario         | 2040 Worse Scenario          | 2016                      | 2040 Forecast             | 2040 Better Scenario      | 2040 Worse Scenario       |
| Gastritis and duodenitis                   | 9.21<br>(7.11 to 14.37)      | 15.20<br>(11.10 to 24.36)    | 14.10<br>(10.18 to 23.41)    | 15.45<br>(11.23 to 25.02)    | 0.31<br>(0.24 to 0.54)    | 0.70<br>(0.51 to 1.31)    | 0.71<br>(0.51 to 1.29)    | 0.67<br>(0.47 to 1.25)    |
| Appendicitis                               | 28.85<br>(22.80 to 38.23)    | 26.99<br>(20.53 to 36.92)    | 22.50<br>(16.72 to 31.14)    | 29.74<br>(22.39 to 40.82)    | 0.64<br>(0.51 to 0.87)    | 0.79<br>(0.62 to 1.07)    | 0.72<br>(0.54 to 0.96)    | 0.82<br>(0.63 to 1.12)    |
| Paralytic ileus and intestinal obstruction | 83.45<br>(65.24 to 106.74)   | 99.34<br>(78.88 to 132.43)   | 92.30<br>(73.72 to 124.35)   | 101.04<br>(79.26 to 135.08)  | 2.13<br>(1.72 to 2.87)    | 3.92<br>(3.03 to 5.46)    | 4.08<br>(3.16 to 5.62)    | 3.66<br>(2.84 to 5.13)    |
| Inguinal, femoral, and abdominal hernia    | 8.84<br>(6.81 to 13.81)      | 10.19<br>(7.79 to 15.28)     | 9.52<br>(7.10 to 14.14)      | 10.32<br>(7.88 to 15.86)     | 0.33<br>(0.26 to 0.51)    | 0.49<br>(0.36 to 0.73)    | 0.49<br>(0.37 to 0.72)    | 0.46<br>(0.34 to 0.69)    |
| Inflammatory bowel disease                 | 7.54<br>(5.20 to 14.48)      | 14.39<br>(10.10 to 26.85)    | 14.56<br>(10.24 to 27.15)    | 13.82<br>(9.72 to 26.50)     | 0.25<br>(0.18 to 0.44)    | 0.64<br>(0.47 to 1.03)    | 0.70<br>(0.52 to 1.11)    | 0.58<br>(0.42 to 0.96)    |
| Vascular intestinal disorders              | 5.27<br>(4.26 to 6.57)       | 10.79<br>(8.54 to 13.10)     | 10.95<br>(8.61 to 13.36)     | 10.26<br>(8.06 to 12.49)     | 0.27<br>(0.22 to 0.33)    | 0.68<br>(0.52 to 0.83)    | 0.73<br>(0.56 to 0.88)    | 0.61<br>(0.46 to 0.76)    |
| Gallbladder and biliary diseases           | 26.89<br>(21.87 to 33.18)    | 37.43<br>(24.81 to 55.73)    | 29.41<br>(20.08 to 42.14)    | 44.27<br>(28.12 to 68.24)    | 0.95<br>(0.78 to 1.15)    | 1.64<br>(1.12 to 2.51)    | 1.37<br>(0.95 to 1.95)    | 1.82<br>(1.19 to 2.82)    |
| Pancreatitis                               | 44.09<br>(31.06 to 90.63)    | 67.59<br>(37.49 to 144.12)   | 58.66<br>(33.21 to 121.07)   | 83.84<br>(41.83 to 189.78)   | 1.23<br>(0.91 to 2.30)    | 2.21<br>(1.40 to 4.11)    | 2.01<br>(1.28 to 3.56)    | 2.59<br>(1.48 to 5.15)    |
| Other digestive diseases                   | 17.13<br>(12.60 to 22.90)    | 21.35<br>(15.51 to 28.22)    | 19.36<br>(13.87 to 24.75)    | 22.35<br>(15.98 to 29.69)    | 0.53<br>(0.40 to 0.68)    | 0.94<br>(0.69 to 1.46)    | 0.92<br>(0.69 to 1.14)    | 0.91<br>(0.66 to 1.14)    |
| Neurological disorders                     | 259.38<br>(218.08 to 304.78) | 670.28<br>(533.85 to 857.68) | 699.35<br>(565.25 to 863.07) | 632.66<br>(481.37 to 827.33) | 17.24<br>(14.41 to 20.79) | 54.86<br>(38.53 to 72.78) | 61.33<br>(45.92 to 77.50) | 48.18<br>(31.98 to 67.31) |
| Alzheimer's disease and other dementias    | 180.40<br>(145.64 to 222.57) | 528.78<br>(391.25 to 710.54) | 556.07<br>(429.27 to 716.88) | 489.85<br>(341.98 to 687.79) | 14.94<br>(12.21 to 18.28) | 48.57<br>(32.72 to 66.54) | 54.07<br>(39.26 to 70.57) | 42.63<br>(27.14 to 61.35) |
| Parkinson's disease                        | 16.97<br>(12.78 to 21.55)    | 54.69<br>(41.84 to 70.46)    | 66.08<br>(50.46 to 83.19)    | 44.84<br>(33.14 to 57.98)    | 1.13<br>(0.85 to 1.46)    | 4.07<br>(2.93 to 5.39)    | 5.13<br>(3.80 to 6.58)    | 3.19<br>(2.20 to 4.27)    |
| Epilepsy                                   | 43.58<br>(37.39 to 50.82)    | 52.26<br>(38.03 to 69.96)    | 41.96<br>(30.42 to 55.71)    | 64.97<br>(45.29 to 89.05)    | 0.82<br>(0.70 to 0.95)    | 1.16<br>(0.85 to 1.54)    | 0.98<br>(0.72 to 1.29)    | 1.40<br>(0.99 to 1.92)    |
| Multiple sclerosis                         | 2.68<br>(1.95 to 4.26)       | 4.56<br>(3.27 to 7.37)       | 4.66<br>(3.33 to 7.47)       | 4.47<br>(3.22 to 7.26)       | 0.08<br>(0.06 to 0.12)    | 0.14<br>(0.11 to 0.22)    | 0.15<br>(0.11 to 0.23)    | 0.14<br>(0.10 to 0.22)    |
| Motor neuron disease                       | 3.41<br>(2.63 to 4.17)       | 7.60<br>(5.88 to 9.44)       | 8.07<br>(6.19 to 10.00)      | 7.09<br>(5.50 to 8.68)       | 0.10<br>(0.08 to 0.12)    | 0.26<br>(0.20 to 0.32)    | 0.28<br>(0.22 to 0.34)    | 0.24<br>(0.19 to 0.28)    |
| Other neurological disorders               | 12.34<br>(10.67 to 14.27)    | 22.38<br>(19.08 to 26.24)    | 22.50<br>(19.21 to 26.24)    | 21.42<br>(18.38 to 25.23)    | 0.27<br>(0.24 to 0.31)    | 0.65<br>(0.57 to 0.74)    | 0.72<br>(0.63 to 0.81)    | 0.59<br>(0.51 to 0.66)    |
| Mental disorders                           | 75.50<br>(60.57 to 92.59)    | 147.50<br>(116.55 to 186.96) | 146.33<br>(115.06 to 184.59) | 152.93<br>(121.31 to 193.58) | 1.81<br>(1.46 to 2.20)    | 3.83<br>(3.13 to 4.65)    | 3.93<br>(3.21 to 4.79)    | 3.85<br>(3.15 to 4.66)    |
| Alcohol use disorders                      | 50.12<br>(39.79 to 62.10)    | 77.37<br>(60.24 to 100.29)   | 75.57<br>(58.36 to 97.76)    | 83.41<br>(64.96 to 107.19)   | 1.27<br>(1.02 to 1.56)    | 2.17<br>(1.75 to 2.70)    | 2.19<br>(1.75 to 2.73)    | 2.26<br>(1.83 to 2.82)    |
| Drug use disorders                         | 23.53<br>(17.49 to 31.46)    | 68.56<br>(50.51 to 92.62)    | 69.16<br>(51.00 to 92.53)    | 67.99<br>(49.69 to 91.97)    | 0.50<br>(0.37 to 0.67)    | 1.63<br>(1.23 to 2.11)    | 1.71<br>(1.29 to 2.21)    | 1.56<br>(1.17 to 2.03)    |
| Opioid use disorders                       | 19.60<br>(14.19 to 26.28)    | 51.44<br>(36.08 to 70.40)    | 51.40<br>(36.31 to 70.06)    | 51.10<br>(35.89 to 69.95)    | 0.40<br>(0.30 to 0.54)    | 1.16<br>(0.84 to 1.54)    | 1.20<br>(0.88 to 1.58)    | 1.11<br>(0.81 to 1.49)    |

|                           |                           |                             |                             |                            |                           |                           |                           |                           |
|---------------------------|---------------------------|-----------------------------|-----------------------------|----------------------------|---------------------------|---------------------------|---------------------------|---------------------------|
|                           | 0.51<br>(0.34 to<br>0.80) | 2.12<br>(1.39 to<br>3.34)   | 2.11<br>(1.38 to<br>3.30)   | 2.14<br>(1.38 to<br>3.41)  | 0.01<br>(0.01 to<br>0.02) | 0.06<br>(0.04 to<br>0.09) | 0.06<br>(0.04 to<br>0.09) | 0.06<br>(0.04 to<br>0.09) |
| Cocaine use disorders     |                           |                             |                             |                            |                           |                           |                           |                           |
|                           | 1.00<br>(0.52 to<br>1.70) | 4.80<br>(2.58 to<br>8.53)   | 4.70<br>(2.56 to<br>8.20)   | 5.01<br>(2.65 to<br>8.82)  | 0.02<br>(0.01 to<br>0.03) | 0.10<br>(0.06 to<br>0.17) | 0.10<br>(0.06 to<br>0.17) | 0.10<br>(0.06 to<br>0.18) |
| Amphetamine use disorders |                           |                             |                             |                            |                           |                           |                           |                           |
|                           | 2.42<br>(1.63 to<br>3.43) | 10.20<br>(6.57 to<br>14.95) | 10.95<br>(6.88 to<br>15.96) | 9.75<br>(6.27 to<br>14.28) | 0.07<br>(0.05 to<br>0.09) | 0.31<br>(0.20 to<br>0.43) | 0.35<br>(0.23 to<br>0.48) | 0.28<br>(0.18 to<br>0.39) |
| Other drug use disorders  |                           |                             |                             |                            |                           |                           |                           |                           |
|                           | 1.85<br>(1.35 to<br>2.47) | 1.57<br>(1.01 to<br>2.27)   | 1.60<br>(1.02 to<br>2.34)   | 1.52<br>(0.99 to<br>2.22)  | 0.03<br>(0.02 to<br>0.04) | 0.03<br>(0.02 to<br>0.04) | 0.03<br>(0.02 to<br>0.04) | 0.03<br>(0.02 to<br>0.04) |
| Eating disorders          |                           |                             |                             |                            |                           |                           |                           |                           |

| Philippines                                                |                                           |                                           |                                           |                                           |                                  |                                    |                                    |                                     |
|------------------------------------------------------------|-------------------------------------------|-------------------------------------------|-------------------------------------------|-------------------------------------------|----------------------------------|------------------------------------|------------------------------------|-------------------------------------|
| Cause                                                      | YLLs (in 1000s)                           |                                           |                                           |                                           | Deaths (in 1000s)                |                                    |                                    |                                     |
|                                                            | 2016                                      | 2040 Forecast                             | 2040 Better Scenario                      | 2040 Worse Scenario                       | 2016                             | 2040 Forecast                      | 2040 Better Scenario               | 2040 Worse Scenario                 |
| <b>Diabetes, urogenital, blood, and endocrine diseases</b> | <b>1,631.82</b><br>(1,423.14 to 1,856.55) | <b>3,479.50</b><br>(1,968.78 to 7,435.06) | <b>2,666.63</b><br>(1,530.84 to 5,975.69) | <b>4,161.55</b><br>(2,304.75 to 8,702.42) | <b>60.61</b><br>(53.33 to 68.54) | <b>170.31</b><br>(90.79 to 382.98) | <b>138.05</b><br>(76.49 to 321.31) | <b>192.58</b><br>(101.76 to 406.92) |
| Diabetes mellitus                                          | 573.55<br>(493.68 to 657.41)              | 891.82<br>(618.79 to 1,268.33)            | 694.40<br>(485.08 to 969.47)              | 1,095.23<br>(750.25 to 1,555.65)          | 24.18<br>(21.05 to 27.74)        | 46.02<br>(32.56 to 62.95)          | 38.09<br>(27.37 to 51.06)          | 53.07<br>(36.80 to 72.50)           |
| Acute glomerulonephritis                                   | 7.30<br>(5.49 to 9.79)                    | 9.10<br>(6.55 to 12.31)                   | 7.98<br>(5.75 to 10.84)                   | 9.63<br>(6.87 to 13.14)                   | 0.20<br>(0.15 to 0.25)           | 0.29<br>(0.20 to 0.39)             | 0.28<br>(0.20 to 0.38)             | 0.28<br>(0.20 to 0.39)              |
| Chronic kidney disease                                     | 804.67<br>(701.32 to 922.55)              | 2,157.08<br>(673.16 to 6,153.26)          | 1,560.49<br>(514.68 to 4,840.57)          | 2,636.65<br>(803.08 to 7,250.26)          | 28.37<br>(24.78 to 32.32)        | 105.26<br>(24.74 to 323.14)        | 79.98<br>(19.70 to 269.70)         | 122.01<br>(28.49 to 344.63)         |
| Chronic kidney disease due to diabetes mellitus            | 468.02<br>(398.14 to 549.68)              | 1,351.48<br>(402.31 to 3,981.10)          | 968.59<br>(309.98 to 3,034.45)            | 1,670.20<br>(485.03 to 4,757.30)          | 16.27<br>(13.89 to 19.03)        | 60.16<br>(14.08 to 186.18)         | 44.62<br>(10.86 to 146.91)         | 71.37<br>(16.54 to 204.27)          |
| Chronic kidney disease due to hypertension                 | 184.47<br>(151.84 to 222.92)              | 573.10<br>(140.65 to 1,762.65)            | 424.21<br>(107.78 to 1,455.89)            | 681.63<br>(163.69 to 1,941.00)            | 8.49<br>(7.11 to 10.06)          | 36.23<br>(7.69 to 119.22)          | 28.69<br>(6.32 to 99.53)           | 40.25<br>(8.50 to 119.33)           |
| Chronic kidney disease due to glomerulonephritis           | 80.14<br>(64.97 to 98.10)                 | 110.37<br>(59.23 to 242.04)               | 79.87<br>(43.03 to 175.18)                | 135.33<br>(71.81 to 287.96)               | 1.73<br>(1.42 to 2.13)           | 3.63<br>(1.38 to 9.77)             | 2.69<br>(1.04 to 8.06)             | 4.32<br>(1.63 to 11.10)             |
| Chronic kidney disease due to other and unspecified causes | 72.04<br>(58.64 to 87.88)                 | 122.13<br>(52.62 to 297.18)               | 87.82<br>(38.21 to 234.55)                | 149.48<br>(63.77 to 357.69)               | 1.87<br>(1.53 to 2.28)           | 5.24<br>(1.52 to 15.51)            | 3.98<br>(1.17 to 12.82)            | 6.07<br>(1.77 to 16.93)             |
| Urinary diseases and male infertility                      | 130.16<br>(113.58 to 148.82)              | 245.37<br>(213.01 to 280.44)              | 244.62<br>(209.09 to 283.78)              | 235.67<br>(204.49 to 270.02)              | 4.65<br>(4.05 to 5.32)           | 11.99<br>(10.10 to 13.76)          | 12.94<br>(10.82 to 14.97)          | 10.67<br>(8.97 to 12.37)            |
| Urinary tract infections                                   | 107.38<br>(90.14 to 124.63)               | 200.60<br>(168.87 to 231.98)              | 201.20<br>(166.05 to 234.73)              | 191.78<br>(160.97 to 221.52)              | 3.79<br>(3.19 to 4.40)           | 9.97<br>(8.17 to 11.66)            | 10.86<br>(8.95 to 12.74)           | 8.81<br>(7.11 to 10.34)             |
| Urolithiasis                                               | 16.14<br>(11.88 to 24.55)                 | 34.88<br>(25.13 to 53.33)                 | 34.58<br>(23.93 to 54.15)                 | 33.53<br>(24.12 to 51.54)                 | 0.63<br>(0.48 to 0.97)           | 1.57<br>(1.11 to 2.44)             | 1.65<br>(1.15 to 2.58)             | 1.43<br>(1.01 to 2.20)              |
| Other urinary diseases                                     | 6.64<br>(4.33 to 12.09)                   | 9.89<br>(6.52 to 16.80)                   | 8.84<br>(5.71 to 15.08)                   | 10.36<br>(6.81 to 17.67)                  | 0.22<br>(0.15 to 0.38)           | 0.45<br>(0.29 to 0.76)             | 0.44<br>(0.28 to 0.76)             | 0.43<br>(0.28 to 0.74)              |
| Gynecological diseases                                     | 4.01<br>(2.88 to 6.54)                    | 5.46<br>(3.53 to 8.87)                    | 4.50<br>(2.90 to 7.43)                    | 6.16<br>(3.99 to 10.13)                   | 0.13<br>(0.10 to 0.19)           | 0.19<br>(0.13 to 0.27)             | 0.17<br>(0.11 to 0.24)             | 0.21<br>(0.15 to 0.30)              |
| Uterine fibroids                                           | 2.09<br>(1.44 to 3.39)                    | 2.50<br>(1.53 to 4.03)                    | 2.07<br>(1.24 to 3.43)                    | 2.84<br>(1.75 to 4.61)                    | 0.06<br>(0.04 to 0.09)           | 0.08<br>(0.05 to 0.13)             | 0.07<br>(0.05 to 0.11)             | 0.09<br>(0.06 to 0.14)              |
| Polycystic ovarian syndrome                                | 0.32<br>(0.08 to 0.68)                    | 0.29<br>(0.06 to 0.69)                    | 0.21<br>(0.04 to 0.52)                    | 0.36<br>(0.08 to 0.84)                    | 0.01<br>(0.00 to 0.02)           | 0.01<br>(0.00 to 0.02)             | 0.00<br>(0.00 to 0.02)             | 0.01<br>(0.00 to 0.02)              |
| Endometriosis                                              | 0.07<br>(0.03 to 0.16)                    | 0.18<br>(0.07 to 0.41)                    | 0.15<br>(0.05 to 0.33)                    | 0.21<br>(0.08 to 0.47)                    | 0.00<br>(0.00 to 0.00)           | 0.00<br>(0.00 to 0.01)             | 0.00<br>(0.00 to 0.01)             | 0.00<br>(0.00 to 0.01)              |
| Genital prolapse                                           | 0.63<br>(0.39 to 1.04)                    | 0.92<br>(0.52 to 1.55)                    | 0.75<br>(0.42 to 1.28)                    | 1.03<br>(0.57 to 1.72)                    | 0.03<br>(0.02 to 0.05)           | 0.05<br>(0.03 to 0.08)             | 0.04<br>(0.02 to 0.07)             | 0.05<br>(0.03 to 0.08)              |
| Other gynecological diseases                               | 0.90<br>(0.57 to 1.95)                    | 1.56<br>(0.92 to 3.33)                    | 1.32<br>(0.77 to 2.83)                    | 1.71<br>(1.00 to 3.68)                    | 0.03<br>(0.02 to 0.05)           | 0.05<br>(0.03 to 0.08)             | 0.04<br>(0.03 to 0.07)             | 0.05<br>(0.03 to 0.09)              |
| Hemoglobinopathies and hemolytic anemias                   | 41.64<br>(34.63 to 49.33)                 | 49.91<br>(39.71 to 62.15)                 | 42.91<br>(33.16 to 53.98)                 | 53.80<br>(42.86 to 67.56)                 | 1.06<br>(0.88 to 1.32)           | 1.72<br>(1.42 to 2.21)             | 1.58<br>(1.26 to 2.04)             | 1.76<br>(1.45 to 2.26)              |
| Thalassemias                                               | 8.26<br>(6.91 to 9.80)                    | 4.79<br>(3.32 to 6.77)                    | 4.16<br>(2.96 to 5.76)                    | 4.69<br>(3.24 to 6.53)                    | 0.10<br>(0.09 to 0.12)           | 0.06<br>(0.04 to 0.09)             | 0.05<br>(0.04 to 0.08)             | 0.06<br>(0.04 to 0.08)              |

|                                                   |                              |                                |                                |                                 |                           |                           |                           |                           |
|---------------------------------------------------|------------------------------|--------------------------------|--------------------------------|---------------------------------|---------------------------|---------------------------|---------------------------|---------------------------|
|                                                   | 0.24<br>(0.18 to<br>0.30)    | 0.18<br>(0.13 to<br>0.25)      | 0.14<br>(0.10 to<br>0.19)      | 0.20<br>(0.14 to<br>0.27)       | 0.00<br>(0.00 to<br>0.00) | 0.00<br>(0.00 to<br>0.00) | 0.00<br>(0.00 to<br>0.00) | 0.00<br>(0.00 to<br>0.00) |
| Sickle cell disorders                             |                              |                                |                                |                                 |                           |                           |                           |                           |
|                                                   | 21.66<br>(17.17 to<br>26.09) | 31.78<br>(23.88 to<br>40.69)   | 26.45<br>(19.51 to<br>34.50)   | 35.50<br>(26.82 to<br>45.50)    | 0.47<br>(0.38 to<br>0.57) | 0.86<br>(0.67 to<br>1.09) | 0.74<br>(0.56 to<br>0.95) | 0.93<br>(0.72 to<br>1.18) |
| G6PD deficiency                                   |                              |                                |                                |                                 |                           |                           |                           |                           |
|                                                   | 11.48<br>(9.25 to<br>14.78)  | 13.16<br>(10.37 to<br>17.61)   | 12.17<br>(9.41 to<br>16.02)    | 13.41<br>(10.61 to<br>18.03)    | 0.49<br>(0.40 to<br>0.65) | 0.80<br>(0.62 to<br>1.09) | 0.78<br>(0.61 to<br>1.07) | 0.77<br>(0.59 to<br>1.07) |
| Other hemoglobinopathies and hemolytic anemias    |                              |                                |                                |                                 |                           |                           |                           |                           |
|                                                   | 70.49<br>(59.00 to<br>99.84) | 120.76<br>(99.63 to<br>164.73) | 111.73<br>(91.42 to<br>152.75) | 124.41<br>(102.59 to<br>171.74) | 2.02<br>(1.69 to<br>2.69) | 4.85<br>(3.92 to<br>6.28) | 5.01<br>(4.09 to<br>6.43) | 4.58<br>(3.69 to<br>6.08) |
| Endocrine, metabolic, blood, and immune disorders |                              |                                |                                |                                 |                           |                           |                           |                           |

| Philippines                                   |                                       |                                       |                                     |                                       |                                  |                                  |                                  |                                  |
|-----------------------------------------------|---------------------------------------|---------------------------------------|-------------------------------------|---------------------------------------|----------------------------------|----------------------------------|----------------------------------|----------------------------------|
| Cause                                         | YLLs (in 1000s)                       |                                       |                                     |                                       | Deaths (in 1000s)                |                                  |                                  |                                  |
|                                               | 2016                                  | 2040 Forecast                         | 2040 Better Scenario                | 2040 Worse Scenario                   | 2016                             | 2040 Forecast                    | 2040 Better Scenario             | 2040 Worse Scenario              |
| <b>Musculoskeletal disorders</b>              | <b>46.25</b><br>(36.89 to 55.99)      | <b>86.99</b><br>(68.75 to 105.86)     | <b>87.82</b><br>(69.09 to 106.79)   | <b>83.20</b><br>(65.80 to 100.85)     | <b>1.25</b><br>(1.02 to 1.46)    | <b>3.46</b><br>(2.67 to 4.26)    | <b>3.68</b><br>(2.82 to 4.46)    | <b>3.15</b><br>(2.44 to 3.92)    |
| Rheumatoid arthritis                          | 4.87<br>(3.82 to 6.20)                | 19.64<br>(14.11 to 26.23)             | 18.44<br>(12.90 to 24.98)           | 19.57<br>(13.50 to 26.80)             | 0.29<br>(0.23 to 0.36)           | 1.39<br>(0.94 to 1.93)           | 1.39<br>(0.94 to 1.92)           | 1.31<br>(0.84 to 1.85)           |
| Other musculoskeletal disorders               | 41.37<br>(32.72 to 50.43)             | 67.35<br>(51.85 to 84.06)             | 69.38<br>(53.70 to 86.82)           | 63.63<br>(49.06 to 79.71)             | 0.96<br>(0.77 to 1.16)           | 2.07<br>(1.60 to 2.52)           | 2.30<br>(1.78 to 2.77)           | 1.84<br>(1.43 to 2.23)           |
| <b>Other non-communicable diseases</b>        | <b>924.44</b><br>(751.19 to 1,132.15) | <b>872.74</b><br>(693.39 to 1,092.53) | <b>660.65</b><br>(522.10 to 835.97) | <b>972.00</b><br>(770.90 to 1,224.22) | <b>13.06</b><br>(10.81 to 15.74) | <b>19.45</b><br>(14.87 to 26.39) | <b>18.14</b><br>(13.15 to 25.39) | <b>19.33</b><br>(15.33 to 26.21) |
| Congenital birth defects                      | 815.02<br>(640.98 to 1,016.27)        | 635.70<br>(473.07 to 839.79)          | 428.43<br>(308.38 to 558.43)        | 742.12<br>(554.24 to 969.84)          | 9.95<br>(7.89 to 12.27)          | 8.20<br>(6.17 to 10.69)          | 5.69<br>(4.10 to 7.36)           | 9.49<br>(7.15 to 12.20)          |
| Neural tube defects                           | 42.11<br>(26.92 to 63.88)             | 11.77<br>(5.98 to 21.11)              | 6.75<br>(3.39 to 12.31)             | 15.25<br>(7.67 to 27.08)              | 0.49<br>(0.31 to 0.74)           | 0.14<br>(0.07 to 0.25)           | 0.08<br>(0.04 to 0.15)           | 0.18<br>(0.09 to 0.32)           |
| Congenital heart anomalies                    | 498.01<br>(368.90 to 618.03)          | 399.89<br>(267.42 to 535.09)          | 271.83<br>(176.42 to 364.31)        | 463.74<br>(312.02 to 617.09)          | 6.13<br>(4.55 to 7.53)           | 5.17<br>(3.53 to 6.80)           | 3.61<br>(2.34 to 4.77)           | 5.95<br>(4.03 to 7.78)           |
| Orofacial clefts                              | 4.41<br>(2.10 to 10.38)               | 2.93<br>(1.24 to 7.17)                | 1.60<br>(0.66 to 4.02)              | 3.90<br>(1.67 to 9.79)                | 0.05<br>(0.02 to 0.12)           | 0.03<br>(0.01 to 0.08)           | 0.02<br>(0.01 to 0.05)           | 0.05<br>(0.02 to 0.11)           |
| Down syndrome                                 | 19.33<br>(10.93 to 26.77)             | 17.12<br>(9.09 to 24.90)              | 12.66<br>(6.84 to 17.47)            | 20.05<br>(10.52 to 28.15)             | 0.25<br>(0.15 to 0.34)           | 0.25<br>(0.14 to 0.35)           | 0.20<br>(0.11 to 0.27)           | 0.29<br>(0.16 to 0.40)           |
| Other chromosomal abnormalities               | 14.48<br>(4.14 to 93.94)              | 24.51<br>(8.36 to 137.92)             | 16.70<br>(6.17 to 85.87)            | 28.92<br>(9.57 to 164.87)             | 0.18<br>(0.06 to 1.10)           | 0.33<br>(0.14 to 1.63)           | 0.24<br>(0.11 to 1.02)           | 0.39<br>(0.16 to 1.95)           |
| Congenital musculoskeletal and limb anomalies | 7.93<br>(5.37 to 14.20)               | 7.67<br>(4.77 to 13.43)               | 5.20<br>(3.30 to 9.07)              | 8.80<br>(5.49 to 15.73)               | 0.10<br>(0.06 to 0.17)           | 0.10<br>(0.06 to 0.16)           | 0.07<br>(0.04 to 0.11)           | 0.11<br>(0.07 to 0.19)           |
| Urogenital congenital anomalies               | 11.66<br>(7.43 to 23.25)              | 13.53<br>(9.03 to 24.36)              | 10.52<br>(6.86 to 18.55)            | 14.92<br>(9.95 to 27.59)              | 0.18<br>(0.12 to 0.32)           | 0.25<br>(0.16 to 0.40)           | 0.21<br>(0.13 to 0.32)           | 0.27<br>(0.17 to 0.43)           |
| Digestive congenital anomalies                | 75.20<br>(44.92 to 145.52)            | 64.37<br>(37.93 to 112.81)            | 40.65<br>(24.47 to 69.73)           | 77.23<br>(45.24 to 135.18)            | 0.88<br>(0.53 to 1.71)           | 0.77<br>(0.46 to 1.34)           | 0.49<br>(0.30 to 0.83)           | 0.92<br>(0.55 to 1.60)           |
| Other congenital birth defects                | 141.89<br>(72.50 to 196.00)           | 93.92<br>(41.35 to 138.45)            | 62.53<br>(28.53 to 91.58)           | 109.30<br>(48.17 to 160.20)           | 1.69<br>(0.86 to 2.32)           | 1.16<br>(0.52 to 1.68)           | 0.79<br>(0.37 to 1.14)           | 1.34<br>(0.61 to 1.94)           |
| Skin and subcutaneous diseases                | 72.89<br>(47.21 to 129.66)            | 218.55<br>(146.74 to 387.98)          | 220.24<br>(150.49 to 372.58)        | 208.00<br>(139.59 to 371.28)          | 2.68<br>(1.66 to 4.77)           | 11.03<br>(6.74 to 17.98)         | 12.31<br>(7.65 to 19.60)         | 9.59<br>(5.87 to 15.80)          |
| Cellulitis                                    | 17.02<br>(10.66 to 37.29)             | 68.14<br>(44.23 to 147.30)            | 72.07<br>(47.29 to 157.57)          | 62.73<br>(40.91 to 135.19)            | 0.54<br>(0.34 to 1.27)           | 2.96<br>(1.84 to 6.32)           | 3.40<br>(2.17 to 7.34)           | 2.53<br>(1.56 to 5.60)           |
| Pyoderma                                      | 31.20<br>(20.14 to 59.23)             | 79.25<br>(49.88 to 145.41)            | 72.51<br>(45.18 to 133.17)          | 80.92<br>(51.56 to 149.00)            | 0.78<br>(0.50 to 1.49)           | 3.08<br>(1.85 to 5.63)           | 3.18<br>(1.84 to 5.71)           | 2.87<br>(1.71 to 5.27)           |
| Decubitus ulcer                               | 22.04<br>(11.87 to 37.15)             | 64.48<br>(33.41 to 101.53)            | 68.99<br>(34.64 to 107.74)          | 57.94<br>(29.82 to 92.54)             | 1.29<br>(0.66 to 2.10)           | 4.77<br>(2.24 to 7.36)           | 5.48<br>(2.57 to 8.23)           | 3.98<br>(1.87 to 6.41)           |
| Other skin and subcutaneous diseases          | 2.63<br>(1.56 to 5.33)                | 6.68<br>(3.83 to 13.68)               | 6.66<br>(3.76 to 14.06)             | 6.41<br>(3.72 to 12.99)               | 0.07<br>(0.04 to 0.15)           | 0.22<br>(0.12 to 0.49)           | 0.24<br>(0.13 to 0.54)           | 0.20<br>(0.11 to 0.43)           |
| Sudden infant death syndrome                  | 36.53<br>(25.81 to 51.21)             | 18.48<br>(10.67 to 29.38)             | 11.97<br>(6.99 to 18.60)            | 21.88<br>(12.70 to 34.85)             | 0.42<br>(0.30 to 0.59)           | 0.21<br>(0.12 to 0.34)           | 0.14<br>(0.08 to 0.22)           | 0.25<br>(0.15 to 0.40)           |

|                          |                                       |                                       |                                       |                                       |                              |                              |                              |                              |
|--------------------------|---------------------------------------|---------------------------------------|---------------------------------------|---------------------------------------|------------------------------|------------------------------|------------------------------|------------------------------|
| Injuries                 | 2,457.39<br>(2,105.97 to<br>2,867.68) | 2,719.73<br>(2,089.52 to<br>3,954.43) | 2,348.01<br>(1,755.77 to<br>3,495.84) | 3,066.75<br>(2,343.02 to<br>4,378.09) | 48.36<br>(41.10 to<br>56.33) | 63.57<br>(50.18 to<br>87.62) | 57.76<br>(44.82 to<br>81.33) | 68.97<br>(54.11 to<br>95.38) |
| Transport injuries       | 556.94<br>(470.29 to<br>650.27)       | 632.34<br>(474.88 to<br>845.59)       | 449.25<br>(337.26 to<br>614.52)       | 856.46<br>(631.85 to<br>1,165.62)     | 11.14<br>(9.42 to<br>12.93)  | 14.82<br>(11.31 to<br>19.50) | 11.26<br>(8.58 to<br>14.91)  | 19.12<br>(14.31 to<br>25.73) |
| Road injuries            | 503.42<br>(424.74 to<br>585.28)       | 549.90<br>(412.65 to<br>738.35)       | 379.18<br>(282.82 to<br>515.08)       | 761.61<br>(563.83 to<br>1,036.93)     | 10.05<br>(8.49 to<br>11.67)  | 12.84<br>(9.87 to<br>16.67)  | 9.50<br>(7.28 to<br>12.40)   | 16.91<br>(12.71 to<br>22.66) |
| Pedestrian road injuries | 114.21<br>(95.29 to<br>144.40)        | 121.96<br>(92.87 to<br>162.65)        | 86.54<br>(64.95 to<br>117.57)         | 158.12<br>(117.69 to<br>218.02)       | 2.56<br>(2.15 to<br>3.24)    | 3.73<br>(2.88 to<br>4.80)    | 2.90<br>(2.21 to<br>3.78)    | 4.54<br>(3.43 to<br>6.09)    |

| Philippines                                     |                                            |                                            |                                            |                                            |                                         |                                         |                                         |                                         |
|-------------------------------------------------|--------------------------------------------|--------------------------------------------|--------------------------------------------|--------------------------------------------|-----------------------------------------|-----------------------------------------|-----------------------------------------|-----------------------------------------|
| Cause                                           | YLLs (in 1000s)                            |                                            |                                            |                                            | Deaths (in 1000s)                       |                                         |                                         |                                         |
|                                                 | 2016                                       | 2040 Forecast                              | 2040 Better Scenario                       | 2040 Worse Scenario                        | 2016                                    | 2040 Forecast                           | 2040 Better Scenario                    | 2040 Worse Scenario                     |
| Cyclist road injuries                           | 20.88<br>(16.63 to 25.40)                  | 21.82<br>(15.88 to 30.01)                  | 15.37<br>(11.19 to 21.22)                  | 29.92<br>(21.36 to 41.78)                  | 0.46<br>(0.36 to 0.56)                  | 0.55<br>(0.41 to 0.76)                  | 0.43<br>(0.32 to 0.58)                  | 0.71<br>(0.51 to 0.98)                  |
| Motorcyclist road injuries                      | 110.32<br>(81.86 to 135.72)                | 112.26<br>(74.20 to 163.65)                | 85.08<br>(56.31 to 124.83)                 | 146.65<br>(95.09 to 218.22)                | 1.97<br>(1.45 to 2.42)                  | 1.97<br>(1.39 to 3.01)                  | 1.64<br>(1.10 to 2.34)                  | 2.69<br>(1.75 to 3.96)                  |
| Motor vehicle road injuries                     | 246.00<br>(198.03 to 300.15)               | 280.28<br>(202.92 to 393.59)               | 183.15<br>(132.12 to 259.37)               | 407.52<br>(292.10 to 575.12)               | 4.81<br>(3.86 to 5.88)                  | 6.14<br>(4.54 to 8.48)                  | 4.29<br>(3.18 to 5.92)                  | 8.55<br>(6.19 to 11.94)                 |
| Other road injuries                             | 12.00<br>(9.15 to 16.16)                   | 13.57<br>(9.35 to 19.89)                   | 9.04<br>(6.19 to 13.37)                    | 19.39<br>(13.05 to 29.18)                  | 0.24<br>(0.18 to 0.32)                  | 0.32<br>(0.23 to 0.47)                  | 0.24<br>(0.17 to 0.35)                  | 0.43<br>(0.29 to 0.64)                  |
| Other transport injuries                        | 53.52<br>(43.63 to 65.66)                  | 82.45<br>(58.89 to 116.05)                 | 70.07<br>(50.37 to 99.24)                  | 94.84<br>(66.85 to 134.77)                 | 1.09<br>(0.90 to 1.33)                  | 1.98<br>(1.45 to 2.77)                  | 1.76<br>(1.29 to 2.44)                  | 2.21<br>(1.59 to 3.13)                  |
| <b>Unintentional injuries</b>                   | <b>778.54</b><br><b>(689.93 to 874.91)</b> | <b>681.31</b><br><b>(577.35 to 802.57)</b> | <b>576.95</b><br><b>(482.07 to 694.50)</b> | <b>741.57</b><br><b>(625.18 to 882.59)</b> | <b>15.01</b><br><b>(13.27 to 16.88)</b> | <b>18.39</b><br><b>(15.51 to 21.34)</b> | <b>17.33</b><br><b>(14.41 to 20.45)</b> | <b>18.61</b><br><b>(15.67 to 21.77)</b> |
| Falls                                           | 120.69<br>(95.21 to 141.26)                | 156.77<br>(121.62 to 185.66)               | 149.20<br>(115.55 to 179.73)               | 156.54<br>(122.52 to 183.92)               | 3.48<br>(2.59 to 4.10)                  | 6.55<br>(4.51 to 7.77)                  | 6.80<br>(4.72 to 8.16)                  | 6.07<br>(4.24 to 7.27)                  |
| Drowning                                        | 304.34<br>(266.45 to 348.31)               | 218.26<br>(174.08 to 272.82)               | 175.01<br>(137.74 to 222.58)               | 248.12<br>(195.03 to 315.06)               | 5.02<br>(4.41 to 5.70)                  | 4.49<br>(3.68 to 5.51)                  | 3.87<br>(3.13 to 4.89)                  | 4.92<br>(3.97 to 6.22)                  |
| Fire, heat, and hot substances                  | 50.32<br>(42.66 to 60.28)                  | 39.00<br>(30.94 to 50.12)                  | 31.62<br>(24.58 to 41.72)                  | 44.35<br>(34.76 to 58.54)                  | 1.04<br>(0.88 to 1.20)                  | 1.17<br>(0.91 to 1.44)                  | 1.06<br>(0.81 to 1.35)                  | 1.23<br>(0.95 to 1.56)                  |
| Poisonings                                      | 11.42<br>(8.72 to 14.02)                   | 7.14<br>(5.14 to 9.45)                     | 5.39<br>(3.82 to 7.27)                     | 8.61<br>(6.16 to 11.78)                    | 0.21<br>(0.16 to 0.25)                  | 0.16<br>(0.12 to 0.21)                  | 0.13<br>(0.10 to 0.17)                  | 0.19<br>(0.14 to 0.25)                  |
| Exposure to mechanical forces                   | 55.99<br>(46.57 to 70.51)                  | 44.17<br>(35.55 to 55.62)                  | 33.98<br>(27.21 to 42.98)                  | 50.58<br>(40.81 to 64.51)                  | 0.91<br>(0.77 to 1.10)                  | 0.85<br>(0.71 to 1.03)                  | 0.71<br>(0.58 to 0.87)                  | 0.94<br>(0.78 to 1.14)                  |
| Unintentional firearm injuries                  | 11.53<br>(9.38 to 14.78)                   | 9.95<br>(7.50 to 13.31)                    | 8.22<br>(6.07 to 11.09)                    | 11.14<br>(8.37 to 14.71)                   | 0.24<br>(0.19 to 0.30)                  | 0.24<br>(0.19 to 0.31)                  | 0.21<br>(0.16 to 0.28)                  | 0.26<br>(0.20 to 0.34)                  |
| Unintentional suffocation                       | 28.31<br>(21.30 to 41.43)                  | 18.83<br>(13.58 to 27.77)                  | 13.18<br>(9.62 to 19.16)                   | 22.30<br>(16.05 to 32.77)                  | 0.37<br>(0.28 to 0.53)                  | 0.27<br>(0.20 to 0.38)                  | 0.19<br>(0.14 to 0.27)                  | 0.31<br>(0.23 to 0.45)                  |
| Other exposure to mechanical forces             | 16.15<br>(12.51 to 19.35)                  | 15.39<br>(11.62 to 19.27)                  | 12.58<br>(9.24 to 16.03)                   | 17.14<br>(12.79 to 21.47)                  | 0.30<br>(0.23 to 0.36)                  | 0.34<br>(0.26 to 0.42)                  | 0.30<br>(0.23 to 0.37)                  | 0.37<br>(0.27 to 0.45)                  |
| Adverse effects of medical treatment            | 43.56<br>(30.97 to 54.92)                  | 46.86<br>(35.47 to 62.28)                  | 41.00<br>(31.40 to 55.83)                  | 50.05<br>(37.35 to 65.22)                  | 0.91<br>(0.69 to 1.22)                  | 1.38<br>(1.09 to 1.92)                  | 1.32<br>(1.04 to 1.89)                  | 1.37<br>(1.09 to 1.88)                  |
| Animal contact                                  | 29.45<br>(21.62 to 39.36)                  | 34.62<br>(25.00 to 49.17)                  | 27.18<br>(19.58 to 39.92)                  | 39.85<br>(28.41 to 56.84)                  | 0.56<br>(0.43 to 0.79)                  | 0.79<br>(0.59 to 1.15)                  | 0.67<br>(0.50 to 1.01)                  | 0.87<br>(0.64 to 1.27)                  |
| Venomous animal contact                         | 24.24<br>(16.54 to 32.21)                  | 27.63<br>(18.87 to 38.73)                  | 21.64<br>(14.79 to 31.03)                  | 31.91<br>(21.71 to 44.79)                  | 0.46<br>(0.32 to 0.63)                  | 0.62<br>(0.45 to 0.89)                  | 0.52<br>(0.38 to 0.78)                  | 0.68<br>(0.49 to 0.98)                  |
| Non-venomous animal contact                     | 5.21<br>(3.42 to 9.55)                     | 6.98<br>(4.43 to 12.97)                    | 5.54<br>(3.54 to 10.46)                    | 7.94<br>(4.99 to 15.24)                    | 0.10<br>(0.07 to 0.19)                  | 0.17<br>(0.11 to 0.31)                  | 0.14<br>(0.09 to 0.26)                  | 0.18<br>(0.12 to 0.34)                  |
| Foreign body                                    | 87.82<br>(70.91 to 115.18)                 | 73.80<br>(59.82 to 93.95)                  | 62.88<br>(52.41 to 77.73)                  | 77.53<br>(62.15 to 99.78)                  | 1.47<br>(1.23 to 1.75)                  | 1.65<br>(1.26 to 1.94)                  | 1.60<br>(1.18 to 1.90)                  | 1.61<br>(1.26 to 1.88)                  |
| Pulmonary aspiration and foreign body in airway | 75.36<br>(59.92 to 96.57)                  | 61.57<br>(49.39 to 78.29)                  | 52.28<br>(42.04 to 64.57)                  | 64.27<br>(50.95 to 82.74)                  | 1.22<br>(0.98 to 1.46)                  | 1.35<br>(0.98 to 1.60)                  | 1.31<br>(0.92 to 1.59)                  | 1.30<br>(0.98 to 1.54)                  |

|                                             |                                                        |                                                          |                                                          |                                                          |                                                   |                                                   |                                                   |                                                   |
|---------------------------------------------|--------------------------------------------------------|----------------------------------------------------------|----------------------------------------------------------|----------------------------------------------------------|---------------------------------------------------|---------------------------------------------------|---------------------------------------------------|---------------------------------------------------|
|                                             | 12.46<br>(9.18 to<br>23.21)                            | 12.23<br>(9.11 to<br>20.96)                              | 10.60<br>(7.93 to<br>17.46)                              | 13.25<br>(9.81 to<br>23.01)                              | 0.24<br>(0.19 to<br>0.41)                         | 0.30<br>(0.23 to<br>0.44)                         | 0.28<br>(0.22 to<br>0.41)                         | 0.31<br>(0.24 to<br>0.46)                         |
| Foreign body in other body part             |                                                        |                                                          |                                                          |                                                          |                                                   |                                                   |                                                   |                                                   |
|                                             | 4.84<br>(1.96 to<br>6.53)                              | 4.48<br>(1.83 to<br>6.43)                                | 3.59<br>(1.45 to<br>5.25)                                | 5.15<br>(2.04 to<br>7.45)                                | 0.12<br>(0.05 to<br>0.15)                         | 0.14<br>(0.07 to<br>0.20)                         | 0.12<br>(0.06 to<br>0.17)                         | 0.15<br>(0.07 to<br>0.21)                         |
| Environmental heat and cold exposure        |                                                        |                                                          |                                                          |                                                          |                                                   |                                                   |                                                   |                                                   |
|                                             | 70.12<br>(57.57 to<br>84.04)                           | 56.21<br>(44.46 to<br>71.12)                             | 47.10<br>(33.84 to<br>62.33)                             | 60.79<br>(47.99 to<br>77.70)                             | 1.31<br>(1.07 to<br>1.57)                         | 1.21<br>(0.99 to<br>1.49)                         | 1.06<br>(0.78 to<br>1.36)                         | 1.27<br>(1.03 to<br>1.57)                         |
| Other unintentional injuries                |                                                        |                                                          |                                                          |                                                          |                                                   |                                                   |                                                   |                                                   |
| <b>Self-harm and interpersonal violence</b> | <b>994.08</b><br><b>(711.51 to</b><br><b>1,265.84)</b> | <b>1,195.53</b><br><b>(809.87 to</b><br><b>1,666.98)</b> | <b>1,120.54</b><br><b>(766.03 to</b><br><b>1,511.07)</b> | <b>1,256.70</b><br><b>(831.01 to</b><br><b>1,788.46)</b> | <b>20.03</b><br><b>(14.09 to</b><br><b>25.45)</b> | <b>26.30</b><br><b>(17.77 to</b><br><b>35.97)</b> | <b>25.19</b><br><b>(17.20 to</b><br><b>33.97)</b> | <b>27.21</b><br><b>(17.87 to</b><br><b>38.10)</b> |



| Philippines                                                                         |                                           |                                            |                                            |                                            |                                      |                                       |                                       |                                       |
|-------------------------------------------------------------------------------------|-------------------------------------------|--------------------------------------------|--------------------------------------------|--------------------------------------------|--------------------------------------|---------------------------------------|---------------------------------------|---------------------------------------|
| Cause                                                                               | YLLs (in 1000s)                           |                                            |                                            |                                            | Deaths (in 1000s)                    |                                       |                                       |                                       |
|                                                                                     | 2016                                      | 2040 Forecast                              | 2040 Better Scenario                       | 2040 Worse Scenario                        | 2016                                 | 2040 Forecast                         | 2040 Better Scenario                  | 2040 Worse Scenario                   |
| Self-harm                                                                           | 268.81<br>(199.62 to 441.20)              | 408.24<br>(239.81 to 705.31)               | 370.01<br>(225.54 to 635.95)               | 467.46<br>(258.66 to 836.34)               | 5.60<br>(4.22 to 9.06)               | 9.46<br>(5.83 to 15.84)               | 8.87<br>(5.64 to 14.59)               | 10.51<br>(6.06 to 18.16)              |
| Self-harm by firearm                                                                | 8.33<br>(4.92 to 17.75)                   | 10.81<br>(5.27 to 24.14)                   | 9.58<br>(4.72 to 21.22)                    | 12.66<br>(5.77 to 28.21)                   | 0.18<br>(0.11 to 0.38)               | 0.27<br>(0.14 to 0.59)                | 0.24<br>(0.13 to 0.53)                | 0.30<br>(0.15 to 0.67)                |
| Self-harm by other specified means                                                  | 260.48<br>(193.90 to 425.52)              | 397.43<br>(234.11 to 679.67)               | 360.44<br>(219.63 to 616.08)               | 454.80<br>(250.62 to 803.41)               | 5.42<br>(4.08 to 8.73)               | 9.19<br>(5.68 to 15.21)               | 8.62<br>(5.51 to 14.17)               | 10.21<br>(5.91 to 17.61)              |
| Interpersonal violence                                                              | 725.27<br>(394.97 to 954.45)              | 787.29<br>(396.12 to 1,096.14)             | 750.53<br>(380.13 to 1,042.47)             | 789.23<br>(380.08 to 1,113.06)             | 14.42<br>(7.51 to 19.32)             | 16.85<br>(8.17 to 23.27)              | 16.52<br>(8.05 to 22.69)              | 16.69<br>(7.75 to 23.37)              |
| Physical violence by firearm                                                        | 379.19<br>(144.16 to 528.54)              | 396.19<br>(137.49 to 572.71)               | 374.02<br>(125.48 to 542.31)               | 399.50<br>(133.41 to 585.38)               | 7.60<br>(2.79 to 10.57)              | 8.44<br>(2.85 to 12.11)               | 8.07<br>(2.72 to 11.71)               | 8.42<br>(2.75 to 12.21)               |
| Physical violence by sharp object                                                   | 305.06<br>(157.51 to 439.87)              | 353.44<br>(175.76 to 516.06)               | 343.33<br>(172.17 to 494.06)               | 347.85<br>(165.22 to 513.87)               | 6.05<br>(3.04 to 8.70)               | 7.58<br>(3.65 to 10.98)               | 7.49<br>(3.62 to 10.72)               | 7.37<br>(3.36 to 10.68)               |
| Physical violence by other means                                                    | 41.02<br>(18.51 to 67.85)                 | 37.66<br>(16.06 to 61.97)                  | 33.18<br>(14.15 to 54.62)                  | 41.89<br>(17.23 to 70.18)                  | 0.77<br>(0.33 to 1.24)               | 0.83<br>(0.34 to 1.35)                | 0.76<br>(0.32 to 1.23)                | 0.90<br>(0.35 to 1.49)                |
| <b>Forces of nature, conflict and terrorism, and executions and police conflict</b> | <b>127.83</b><br><b>(65.67 to 192.10)</b> | <b>210.55</b><br><b>(0.00 to 1,218.84)</b> | <b>201.28</b><br><b>(0.00 to 1,166.97)</b> | <b>212.02</b><br><b>(0.00 to 1,224.88)</b> | <b>2.19</b><br><b>(1.13 to 3.28)</b> | <b>4.06</b><br><b>(0.00 to 23.53)</b> | <b>3.98</b><br><b>(0.00 to 23.16)</b> | <b>4.03</b><br><b>(0.00 to 23.37)</b> |
| Exposure to forces of nature                                                        | 0.00<br>(0.00 to 0.00)                    | 33.89<br>(0.00 to 250.05)                  | 31.57<br>(0.00 to 232.21)                  | 34.31<br>(0.00 to 253.25)                  | 0.00<br>(0.00 to 0.00)               | 0.70<br>(0.00 to 5.07)                | 0.68<br>(0.00 to 4.95)                | 0.69<br>(0.00 to 5.02)                |
| Conflict and terrorism                                                              | 123.09<br>(60.14 to 187.45)               | 38.11<br>(0.00 to 76.37)                   | 35.84<br>(0.00 to 74.42)                   | 38.61<br>(0.00 to 76.72)                   | 2.09<br>(1.02 to 3.19)               | 0.70<br>(0.00 to 1.25)                | 0.67<br>(0.00 to 1.20)                | 0.69<br>(0.00 to 1.23)                |
| Executions and police conflict                                                      | 4.74<br>(3.19 to 6.88)                    | 138.55<br>(0.00 to 932.85)                 | 133.87<br>(0.00 to 898.97)                 | 139.09<br>(0.00 to 938.56)                 | 0.09<br>(0.06 to 0.13)               | 2.66<br>(0.00 to 17.91)               | 2.62<br>(0.00 to 17.67)               | 2.65<br>(0.00 to 17.80)               |

| Sri Lanka                                                                |                                                   |                                                   |                                                   |                                                   |                                             |                                             |                                             |                                             |
|--------------------------------------------------------------------------|---------------------------------------------------|---------------------------------------------------|---------------------------------------------------|---------------------------------------------------|---------------------------------------------|---------------------------------------------|---------------------------------------------|---------------------------------------------|
| Cause                                                                    | YLLs (actual counts)                              |                                                   |                                                   |                                                   | Deaths (actual counts)                      |                                             |                                             |                                             |
|                                                                          | 2016                                              | 2040 Forecast                                     | 2040 Better Scenario                              | 2040 Worse Scenario                               | 2016                                        | 2040 Forecast                               | 2040 Better Scenario                        | 2040 Worse Scenario                         |
| <b>All causes</b>                                                        | 2,829,454.76<br>(2,313,557.10 to<br>3,443,950.82) | 3,178,854.71<br>(2,278,734.18 to<br>4,462,870.88) | 2,599,621.67<br>(1,870,535.77 to<br>3,624,344.47) | 4,070,778.31<br>(2,903,773.00 to<br>5,659,029.06) | 122,696.52<br>(100,743.32 to<br>146,912.22) | 195,808.06<br>(153,250.44 to<br>251,553.80) | 166,208.97<br>(131,444.22 to<br>216,624.75) | 237,470.05<br>(186,699.77 to<br>300,778.71) |
| <b>Communicable, maternal, neonatal, and nutritional diseases</b>        | 301,161.18<br>(244,383.32 to<br>370,766.01)       | 243,191.58<br>(171,711.15 to<br>337,739.32)       | 210,238.91<br>(148,511.88 to<br>291,924.28)       | 335,715.94<br>(229,997.92 to<br>475,883.99)       | 8,604.33<br>(7,036.70 to<br>10,385.10)      | 10,678.89<br>(7,804.33 to<br>14,592.18)     | 9,661.09<br>(7,104.48 to<br>13,585.11)      | 14,436.49<br>(10,178.81 to<br>20,299.14)    |
| <b>HIV/AIDS and tuberculosis</b>                                         | 19,943.28<br>(15,407.69 to<br>25,299.18)          | 13,508.91<br>(7,663.19 to<br>24,222.23)           | 7,717.61<br>(4,532.01 to<br>12,983.89)            | 23,514.82<br>(14,839.92 to<br>39,778.54)          | 731.63<br>(569.32 to<br>920.00)             | 646.31<br>(394.75 to<br>1,112.69)           | 384.36<br>(239.32 to<br>614.79)             | 1,020.07<br>(655.38 to<br>1,706.76)         |
| <b>Tuberculosis</b>                                                      | 17,228.27<br>(13,050.39 to<br>22,260.16)          | 11,738.92<br>(6,088.10 to<br>22,206.49)           | 6,642.40<br>(3,726.06 to<br>12,112.63)            | 18,021.62<br>(9,598.27 to<br>34,098.67)           | 672.50<br>(517.53 to<br>862.76)             | 606.05<br>(354.64 to<br>1,074.28)           | 559.37<br>(221.15 to<br>993.09)             | 898.59<br>(522.33 to<br>1,571.97)           |
| <b>HIV/AIDS</b>                                                          | 2,715.01<br>(1,244.52 to<br>4,792.92)             | 1,769.99<br>(435.55 to<br>3,956.55)               | 1,075.21<br>(239.33 to<br>3,257.57)               | 5,493.20<br>(2,832.85 to<br>9,030.65)             | 59.13<br>(25.08 to<br>108.26)               | 40.26<br>(7.01 to<br>98.03)                 | 24.99<br>(3.70 to<br>81.64)                 | 121.48<br>(58.03 to<br>208.91)              |
| <b>Diarrhea, lower respiratory, and other common infectious diseases</b> | 161,808.26<br>(129,462.82 to<br>202,299.99)       | 133,297.92<br>(87,615.53 to<br>193,741.82)        | 115,769.05<br>(76,374.65 to<br>172,553.70)        | 192,655.75<br>(120,659.15 to<br>288,595.05)       | 5,930.53<br>(4,682.51 to<br>7,462.54)       | 7,639.42<br>(5,182.43 to<br>11,281.47)      | 6,925.40<br>(4,664.56 to<br>10,617.98)      | 10,752.61<br>(6,884.84 to<br>16,761.44)     |
| <b>Diarrheal diseases</b>                                                | 10,879.03<br>(6,192.90 to<br>20,849.48)           | 8,039.19<br>(1,711.88 to<br>24,625.93)            | 10,281.44<br>(2,394.71 to<br>31,124.17)           | 15,513.26<br>(2,770.27 to<br>53,572.18)           | 540.98<br>(266.63 to<br>1,024.62)           | 670.09<br>(137.60 to<br>2,030.34)           | 896.03<br>(201.66 to<br>2,637.00)           | 1,241.72<br>(200.18 to<br>4,184.78)         |
| <b>Intestinal infectious diseases</b>                                    | 25,185.63<br>(13,520.10 to<br>42,630.93)          | 13,882.65<br>(6,026.59 to<br>28,805.66)           | 14,810.53<br>(6,527.75 to<br>30,035.48)           | 14,759.82<br>(6,248.69 to<br>31,368.25)           | 396.02<br>(217.59 to<br>666.57)             | 247.17<br>(118.95 to<br>477.22)             | 268.71<br>(130.36 to<br>506.43)             | 256.54<br>(119.71 to<br>496.09)             |
| <b>Typhoid fever</b>                                                     | 21,919.57<br>(11,812.66 to<br>37,549.06)          | 11,999.75<br>(4,988.54 to<br>25,433.66)           | 13,188.29<br>(5,706.30 to<br>27,108.45)           | 12,515.73<br>(4,999.37 to<br>26,579.69)           | 343.01<br>(186.51 to<br>578.48)             | 212.39<br>(99.17 to<br>416.57)              | 238.18<br>(115.70 to<br>450.69)             | 216.03<br>(98.28 to<br>421.40)              |
| <b>Paratyphoid fever</b>                                                 | 3,253.18<br>(1,460.48 to<br>6,639.86)             | 1,876.39<br>(663.08 to<br>4,402.45)               | 1,616.07<br>(568.72 to<br>3,801.78)               | 2,236.10<br>(806.25 to<br>5,294.52)               | 52.63<br>(23.33 to<br>107.37)               | 34.42<br>(13.11 to<br>71.71)                | 30.16<br>(11.44 to<br>64.95)                | 40.08<br>(15.46 to<br>87.48)                |
| <b>Other intestinal infectious diseases</b>                              | 12.89<br>(5.00 to<br>26.67)                       | 6.51<br>(2.28 to<br>14.55)                        | 6.17<br>(2.15 to<br>13.72)                        | 7.98<br>(2.83 to<br>17.37)                        | 0.38<br>(0.15 to<br>0.80)                   | 0.37<br>(0.13 to<br>0.85)                   | 0.37<br>(0.13 to<br>0.84)                   | 0.42<br>(0.15 to<br>0.96)                   |
| <b>Lower respiratory infections</b>                                      | 96,982.54<br>(75,698.30 to<br>121,313.41)         | 84,412.74<br>(53,524.74 to<br>125,548.00)         | 65,650.45<br>(41,924.80 to<br>98,152.00)          | 131,616.70<br>(77,446.58 to<br>203,996.92)        | 4,155.20<br>(3,236.47 to<br>5,570.31)       | 5,583.20<br>(3,606.51 to<br>8,840.84)       | 4,662.51<br>(2,998.97 to<br>7,576.38)       | 8,049.24<br>(4,928.17 to<br>12,736.80)      |
| <b>Upper respiratory infections</b>                                      | 89.51<br>(47.65 to<br>152.41)                     | 66.85<br>(25.78 to<br>142.62)                     | 52.95<br>(19.17 to<br>113.29)                     | 93.38<br>(34.56 to<br>196.46)                     | 2.81<br>(1.40 to<br>4.79)                   | 3.25<br>(1.17 to<br>7.00)                   | 2.66<br>(0.91 to<br>5.78)                   | 4.35<br>(1.53 to<br>9.37)                   |
| <b>Otitis media</b>                                                      | 9.17<br>(4.31 to<br>18.96)                        | 4.71<br>(1.66 to<br>10.81)                        | 5.00<br>(1.76 to<br>11.64)                        | 4.32<br>(1.56 to<br>10.14)                        | 0.48<br>(0.22 to<br>0.98)                   | 0.34<br>(0.12 to<br>0.76)                   | 0.38<br>(0.13 to<br>0.84)                   | 0.30<br>(0.10 to<br>0.67)                   |
| <b>Meningitis</b>                                                        | 15,717.01<br>(10,730.46 to<br>27,077.21)          | 10,104.15<br>(6,412.52 to<br>16,994.52)           | 8,762.69<br>(5,512.91 to<br>14,789.08)            | 11,122.35<br>(7,189.38 to<br>18,723.38)           | 484.67<br>(316.42 to<br>719.51)             | 508.94<br>(254.50 to<br>731.14)             | 488.45<br>(231.10 to<br>648.49)             | 532.66<br>(267.00 to<br>757.80)             |
| <b>Pneumococcal meningitis</b>                                           | 128.31<br>(84.43 to<br>220.40)                    | 68.23<br>(39.48 to<br>110.20)                     | 70.91<br>(40.22 to<br>115.11)                     | 65.52<br>(38.43 to<br>103.66)                     | 4.59<br>(2.62 to<br>7.08)                   | 4.38<br>(1.69 to<br>7.61)                   | 4.71<br>(1.83 to<br>8.22)                   | 4.01<br>(1.59 to<br>7.00)                   |
| <b>H influenzae type B meningitis</b>                                    | 959.46<br>(637.52 to<br>1,683.35)                 | 723.47<br>(430.77 to<br>1,274.99)                 | 728.83<br>(439.53 to<br>1,288.08)                 | 734.14<br>(419.86 to<br>1,354.43)                 | 27.76<br>(18.46 to<br>41.20)                | 29.45<br>(15.82 to<br>42.45)                | 31.22<br>(16.10 to<br>45.20)                | 27.39<br>(15.28 to<br>40.42)                |
| <b>Meningococcal meningitis</b>                                          | 9,299.06<br>(6,378.61 to<br>16,026.92)            | 5,932.43<br>(3,722.02 to<br>9,653.63)             | 5,118.48<br>(3,180.94 to<br>8,527.92)             | 6,548.82<br>(4,195.82 to<br>11,010.18)            | 299.21<br>(188.72 to<br>432.18)             | 317.22<br>(155.24 to<br>463.94)             | 284.58<br>(137.04 to<br>406.29)             | 333.15<br>(162.18 to<br>480.31)             |
| <b>Other meningitis</b>                                                  | 5,330.18<br>(3,545.23 to<br>9,144.53)             | 3,380.02<br>(2,123.28 to<br>5,763.33)             | 2,844.47<br>(1,768.91 to<br>4,884.40)             | 3,773.87<br>(2,433.99 to<br>6,593.32)             | 153.11<br>(103.33 to<br>227.65)             | 157.90<br>(81.97 to<br>229.20)              | 137.94<br>(71.28 to<br>198.20)              | 168.11<br>(85.84 to<br>241.59)              |
| <b>Encephalitis</b>                                                      | 12,003.76<br>(6,272.34 to<br>24,330.72)           | 12,473.67<br>(7,620.03 to<br>22,999.23)           | 12,387.74<br>(7,666.72 to<br>22,129.84)           | 13,531.61<br>(8,093.67 to<br>25,713.49)           | 328.15<br>(228.52 to<br>504.13)             | 555.02<br>(375.07 to<br>726.82)             | 572.21<br>(387.36 to<br>748.75)             | 572.68<br>(389.95 to<br>757.28)             |

|                |                                 |                                     |                                     |                                     |                            |                              |                              |                              |
|----------------|---------------------------------|-------------------------------------|-------------------------------------|-------------------------------------|----------------------------|------------------------------|------------------------------|------------------------------|
| Diphtheria     | 9.58<br>(6.02 to<br>14.13)      | 2.02<br>(0.85 to<br>4.01)           | 2.01<br>(0.84 to<br>4.04)           | 2.43<br>(0.96 to<br>5.33)           | 0.17<br>(0.10 to<br>0.25)  | 0.04<br>(0.02 to<br>0.07)    | 0.04<br>(0.02 to<br>0.07)    | 0.04<br>(0.02 to<br>0.08)    |
| Whooping cough | 178.92<br>(11.90 to<br>658.47)  | 92.69<br>(1.89 to<br>474.90)        | 89.24<br>(1.94 to<br>454.95)        | 305.39<br>(3.68 to<br>1,481.38)     | 2.13<br>(0.14 to<br>7.82)  | 1.10<br>(0.02 to<br>5.65)    | 1.06<br>(0.03 to<br>5.40)    | 3.61<br>(0.05 to<br>17.52)   |
| Tetanus        | 306.96<br>(204.42 to<br>566.50) | 45.47<br>(26.10 to<br>96.99)        | 46.32<br>(26.37 to<br>99.98)        | 49.86<br>(28.09 to<br>100.19)       | 8.82<br>(5.69 to<br>20.03) | 1.73<br>(1.02 to<br>4.36)    | 1.83<br>(1.07 to<br>4.51)    | 1.67<br>(1.00 to<br>4.00)    |
| Measles        | 164.10<br>(35.22 to<br>474.40)  | 4,011.31<br>(79.60 to<br>16,517.59) | 3,533.23<br>(74.01 to<br>13,868.67) | 5,451.54<br>(96.05 to<br>23,888.29) | 1.97<br>(0.43 to<br>5.70)  | 57.80<br>(1.32 to<br>225.46) | 51.10<br>(1.25 to<br>187.41) | 77.50<br>(1.51 to<br>330.14) |

| Sri Lanka                                             |                                                    |                                                     |                                                     |                                                     |                                            |                                              |                                              |                                              |
|-------------------------------------------------------|----------------------------------------------------|-----------------------------------------------------|-----------------------------------------------------|-----------------------------------------------------|--------------------------------------------|----------------------------------------------|----------------------------------------------|----------------------------------------------|
| Cause                                                 | YLLs (actual counts)                               |                                                     |                                                     |                                                     | Deaths (actual counts)                     |                                              |                                              |                                              |
|                                                       | 2016                                               | 2040 Forecast                                       | 2040 Better Scenario                                | 2040 Worse Scenario                                 | 2016                                       | 2040 Forecast                                | 2040 Better Scenario                         | 2040 Worse Scenario                          |
| Varicella and herpes zoster                           | 282.03<br>(176.40 to 445.19)                       | 162.47<br>(77.44 to 295.17)                         | 147.46<br>(71.14 to 265.64)                         | 205.11<br>(92.17 to 380.02)                         | 9.12<br>(6.18 to 12.66)                    | 10.72<br>(5.43 to 18.36)                     | 10.42<br>(5.19 to 18.10)                     | 12.31<br>(6.22 to 21.36)                     |
| <b>Neglected tropical diseases and malaria</b>        | <b>15,964.72</b><br><b>(5,139.33 to 27,422.69)</b> | <b>33,227.05</b><br><b>(13,756.52 to 54,856.53)</b> | <b>32,525.62</b><br><b>(13,808.13 to 52,822.69)</b> | <b>35,042.14</b><br><b>(13,705.31 to 59,015.46)</b> | <b>335.67</b><br><b>(124.09 to 551.77)</b> | <b>969.07</b><br><b>(484.09 to 1,436.90)</b> | <b>980.27</b><br><b>(505.09 to 1,449.57)</b> | <b>975.81</b><br><b>(462.76 to 1,465.91)</b> |
| Malaria                                               | 0.00<br>(0.00 to 0.00)                             | 0.00<br>(0.00 to 0.00)                              | 0.00<br>(0.00 to 0.00)                              | 0.00<br>(0.00 to 0.00)                              | 0.00<br>(0.00 to 0.00)                     | 0.00<br>(0.00 to 0.00)                       | 0.00<br>(0.00 to 0.00)                       | 0.00<br>(0.00 to 0.00)                       |
| Chagas disease                                        | 0.00<br>(0.00 to 0.00)                             | 0.00<br>(0.00 to 0.00)                              | 0.00<br>(0.00 to 0.00)                              | 0.00<br>(0.00 to 0.00)                              | 0.00<br>(0.00 to 0.00)                     | 0.00<br>(0.00 to 0.00)                       | 0.00<br>(0.00 to 0.00)                       | 0.00<br>(0.00 to 0.00)                       |
| Leishmaniasis                                         | 2.09<br>(1.10 to 3.27)                             | 0.86<br>(0.39 to 1.62)                              | 0.79<br>(0.36 to 1.51)                              | 1.09<br>(0.50 to 1.95)                              | 0.07<br>(0.04 to 0.11)                     | 0.04<br>(0.01 to 0.07)                       | 0.03<br>(0.01 to 0.07)                       | 0.04<br>(0.02 to 0.09)                       |
| African trypanosomiasis                               | 0.00<br>(0.00 to 0.00)                             | 0.00<br>(0.00 to 0.00)                              | 0.00<br>(0.00 to 0.00)                              | 0.00<br>(0.00 to 0.00)                              | 0.00<br>(0.00 to 0.00)                     | 0.00<br>(0.00 to 0.00)                       | 0.00<br>(0.00 to 0.00)                       | 0.00<br>(0.00 to 0.00)                       |
| Schistosomiasis                                       | 0.00<br>(0.00 to 0.00)                             | 0.00<br>(0.00 to 0.00)                              | 0.00<br>(0.00 to 0.00)                              | 0.00<br>(0.00 to 0.00)                              | 0.00<br>(0.00 to 0.00)                     | 0.00<br>(0.00 to 0.00)                       | 0.00<br>(0.00 to 0.00)                       | 0.00<br>(0.00 to 0.00)                       |
| Cysticercosis                                         | 0.00<br>(0.00 to 0.00)                             | 0.00<br>(0.00 to 0.00)                              | 0.00<br>(0.00 to 0.00)                              | 0.00<br>(0.00 to 0.00)                              | 0.00<br>(0.00 to 0.00)                     | 0.00<br>(0.00 to 0.00)                       | 0.00<br>(0.00 to 0.00)                       | 0.00<br>(0.00 to 0.00)                       |
| Cystic echinococcosis                                 | 0.00<br>(0.00 to 0.00)                             | 0.00<br>(0.00 to 0.00)                              | 0.00<br>(0.00 to 0.00)                              | 0.00<br>(0.00 to 0.00)                              | 0.00<br>(0.00 to 0.00)                     | 0.00<br>(0.00 to 0.00)                       | 0.00<br>(0.00 to 0.00)                       | 0.00<br>(0.00 to 0.00)                       |
| Dengue                                                | 13,444.80<br>(3,111.04 to 24,496.83)               | 31,794.38<br>(11,816.38 to 53,060.86)               | 31,105.76<br>(11,730.04 to 51,153.54)               | 33,263.24<br>(11,586.69 to 57,021.01)               | 273.13<br>(64.81 to 480.91)                | 913.93<br>(406.70 to 1,388.29)               | 922.87<br>(425.36 to 1,389.66)               | 912.35<br>(380.70 to 1,398.79)               |
| Yellow fever                                          | 0.00<br>(0.00 to 0.00)                             | 0.00<br>(0.00 to 0.00)                              | 0.00<br>(0.00 to 0.00)                              | 0.00<br>(0.00 to 0.00)                              | 0.00<br>(0.00 to 0.00)                     | 0.00<br>(0.00 to 0.00)                       | 0.00<br>(0.00 to 0.00)                       | 0.00<br>(0.00 to 0.00)                       |
| Rabies                                                | 1,428.77<br>(742.84 to 2,534.97)                   | 574.57<br>(250.57 to 1,486.90)                      | 531.70<br>(232.22 to 1,410.66)                      | 847.44<br>(379.14 to 2,135.66)                      | 36.78<br>(20.79 to 72.31)                  | 20.07<br>(8.27 to 71.14)                     | 19.20<br>(7.76 to 71.14)                     | 28.04<br>(12.10 to 92.61)                    |
| Intestinal nematode infections                        | 98.24<br>(37.02 to 185.24)                         | 96.44<br>(34.71 to 208.16)                          | 94.60<br>(34.42 to 200.89)                          | 96.29<br>(34.42 to 206.72)                          | 1.96<br>(0.98 to 3.16)                     | 2.80<br>(1.20 to 5.60)                       | 2.88<br>(1.23 to 5.88)                       | 2.62<br>(1.12 to 5.07)                       |
| Other neglected tropical diseases                     | 990.82<br>(633.14 to 1,637.06)                     | 760.79<br>(439.00 to 1,594.83)                      | 792.77<br>(456.20 to 1,632.09)                      | 834.08<br>(500.43 to 1,690.22)                      | 23.74<br>(17.09 to 36.71)                  | 32.23<br>(18.88 to 77.80)                    | 35.29<br>(20.31 to 85.19)                    | 32.76<br>(19.92 to 76.20)                    |
| <b>Maternal disorders</b>                             | <b>5,476.19</b><br><b>(3,516.24 to 7,819.14)</b>   | <b>2,042.16</b><br><b>(908.97 to 3,915.36)</b>      | <b>1,819.11</b><br><b>(770.89 to 3,535.45)</b>      | <b>2,848.67</b><br><b>(1,278.47 to 5,453.25)</b>    | <b>95.84</b><br><b>(61.41 to 136.84)</b>   | <b>36.07</b><br><b>(16.03 to 68.74)</b>      | <b>32.15</b><br><b>(13.85 to 61.78)</b>      | <b>50.27</b><br><b>(22.51 to 94.94)</b>      |
| Maternal hemorrhage                                   | 1,695.48<br>(1,013.91 to 2,631.73)                 | 558.32<br>(229.81 to 1,106.13)                      | 500.66<br>(200.38 to 1,002.11)                      | 775.66<br>(318.34 to 1,490.63)                      | 29.77<br>(17.80 to 46.54)                  | 9.86<br>(4.05 to 19.15)                      | 8.85<br>(3.49 to 17.91)                      | 13.69<br>(5.63 to 26.15)                     |
| Maternal sepsis and other maternal infections         | 350.33<br>(193.00 to 562.67)                       | 108.89<br>(41.78 to 217.45)                         | 96.90<br>(36.33 to 195.88)                          | 152.10<br>(60.14 to 298.09)                         | 6.21<br>(3.46 to 9.95)                     | 1.96<br>(0.76 to 3.81)                       | 1.74<br>(0.67 to 3.50)                       | 2.73<br>(1.10 to 5.27)                       |
| Maternal hypertensive disorders                       | 610.56<br>(357.99 to 969.53)                       | 200.56<br>(81.94 to 410.71)                         | 177.77<br>(71.71 to 365.41)                         | 281.64<br>(114.25 to 560.27)                        | 10.64<br>(6.23 to 16.74)                   | 3.52<br>(1.45 to 7.15)                       | 3.13<br>(1.25 to 6.35)                       | 4.94<br>(2.01 to 9.80)                       |
| Maternal obstructed labor and uterine rupture         | 37.72<br>(14.24 to 74.14)                          | 13.79<br>(3.81 to 35.75)                            | 12.00<br>(3.33 to 31.66)                            | 19.90<br>(5.67 to 51.25)                            | 0.66<br>(0.25 to 1.30)                     | 0.25<br>(0.07 to 0.64)                       | 0.21<br>(0.06 to 0.56)                       | 0.35<br>(0.10 to 0.92)                       |
| Maternal abortion, miscarriage, and ectopic pregnancy | 1,172.88<br>(693.38 to 1,833.37)                   | 530.62<br>(211.95 to 1,078.76)                      | 471.57<br>(183.46 to 970.10)                        | 751.57<br>(301.17 to 1,501.15)                      | 20.72<br>(12.19 to 31.87)                  | 9.49<br>(3.87 to 19.48)                      | 8.44<br>(3.32 to 17.53)                      | 13.44<br>(5.55 to 27.48)                     |

|                                        |                                   |                                 |                                 |                                 |                             |                            |                            |                            |
|----------------------------------------|-----------------------------------|---------------------------------|---------------------------------|---------------------------------|-----------------------------|----------------------------|----------------------------|----------------------------|
|                                        | 838.42<br>(476.66 to<br>1,408.55) | 321.47<br>(128.95 to<br>661.98) | 282.01<br>(109.00 to<br>598.94) | 448.83<br>(181.13 to<br>916.86) | 14.36<br>(8.20 to<br>23.88) | 5.54<br>(2.23 to<br>11.29) | 4.86<br>(1.90 to<br>10.15) | 7.72<br>(3.15 to<br>15.69) |
| Indirect maternal deaths               |                                   |                                 |                                 |                                 |                             |                            |                            |                            |
|                                        | 29.45<br>(11.15 to<br>60.91)      | 11.25<br>(3.34 to<br>28.16)     | 9.88<br>(2.81 to<br>24.63)      | 15.80<br>(4.70 to<br>38.63)     | 0.51<br>(0.20 to<br>1.06)   | 0.20<br>(0.06 to<br>0.49)  | 0.17<br>(0.05 to<br>0.43)  | 0.28<br>(0.09 to<br>0.67)  |
| Late maternal deaths                   |                                   |                                 |                                 |                                 |                             |                            |                            |                            |
|                                        | 0.31<br>(0.11 to<br>0.69)         | 0.97<br>(0.08 to<br>5.26)       | 0.76<br>(0.03 to<br>4.66)       | 1.48<br>(0.23 to<br>7.76)       | 0.01<br>(0.00 to<br>0.01)   | 0.02<br>(0.00 to<br>0.08)  | 0.01<br>(0.00 to<br>0.07)  | 0.03<br>(0.00 to<br>0.12)  |
| Maternal deaths aggravated by HIV/AIDS |                                   |                                 |                                 |                                 |                             |                            |                            |                            |
|                                        | 741.03<br>(431.93 to<br>1,143.92) | 296.31<br>(121.82 to<br>594.11) | 267.54<br>(107.27 to<br>539.10) | 401.68<br>(164.53 to<br>785.33) | 12.94<br>(7.54 to<br>20.05) | 5.24<br>(2.14 to<br>10.59) | 4.74<br>(1.93 to<br>9.43)  | 7.09<br>(2.94 to<br>13.79) |
| Other maternal disorders               |                                   |                                 |                                 |                                 |                             |                            |                            |                            |

| Sri Lanka                                                               |                                               |                                              |                                              |                                               |                                       |                                       |                                     |                                       |
|-------------------------------------------------------------------------|-----------------------------------------------|----------------------------------------------|----------------------------------------------|-----------------------------------------------|---------------------------------------|---------------------------------------|-------------------------------------|---------------------------------------|
| Cause                                                                   | YLLs (actual counts)                          |                                              |                                              |                                               | Deaths (actual counts)                |                                       |                                     |                                       |
|                                                                         | 2016                                          | 2040 Forecast                                | 2040 Better Scenario                         | 2040 Worse Scenario                           | 2016                                  | 2040 Forecast                         | 2040 Better Scenario                | 2040 Worse Scenario                   |
| <b>Neonatal disorders</b>                                               | <b>82,489.65</b><br>(52,833.77 to 122,367.84) | <b>46,375.60</b><br>(17,739.82 to 97,239.82) | <b>37,462.25</b><br>(14,174.24 to 77,707.18) | <b>65,540.55</b><br>(24,087.54 to 135,707.18) | <b>953.16</b><br>(610.50 to 1,413.91) | <b>535.95</b><br>(205.03 to 1,123.50) | <b>432.96</b><br>(163.91 to 898.18) | <b>757.38</b><br>(278.53 to 1,567.50) |
| Neonatal preterm birth                                                  | 40,643.71<br>(24,576.41 to 62,672.24)         | 16,966.48<br>(6,115.28 to 34,202.62)         | 13,324.13<br>(4,719.51 to 28,079.95)         | 27,817.19<br>(9,975.94 to 57,453.54)          | 469.55<br>(283.87 to 723.99)          | 196.04<br>(70.69 to 395.09)           | 153.96<br>(54.52 to 324.42)         | 321.38<br>(115.31 to 663.83)          |
| Neonatal encephalopathy due to birth asphyxia and trauma                | 18,943.04<br>(10,953.34 to 30,348.09)         | 11,339.47<br>(3,613.33 to 28,002.80)         | 8,759.33<br>(2,726.72 to 21,696.02)          | 14,679.92<br>(4,550.08 to 37,071.68)          | 218.91<br>(126.60 to 350.67)          | 131.06<br>(41.79 to 323.55)           | 101.24<br>(31.54 to 250.70)         | 169.66<br>(52.63 to 428.27)           |
| Neonatal sepsis and other neonatal infections                           | 13,420.83<br>(7,391.91 to 23,610.19)          | 9,331.78<br>(3,379.64 to 20,318.05)          | 7,581.83<br>(2,709.34 to 16,938.16)          | 11,926.42<br>(4,209.02 to 25,840.30)          | 155.08<br>(85.42 to 272.84)           | 107.84<br>(39.06 to 234.75)           | 87.62<br>(31.32 to 195.68)          | 137.82<br>(48.68 to 298.54)           |
| Hemolytic disease and other neonatal jaundice                           | 127.68<br>(72.89 to 217.49)                   | 48.01<br>(14.47 to 117.24)                   | 38.48<br>(11.78 to 93.48)                    | 64.03<br>(19.41 to 157.66)                    | 1.48<br>(0.84 to 2.51)                | 0.56<br>(0.17 to 1.36)                | 0.45<br>(0.14 to 1.08)              | 0.74<br>(0.23 to 1.83)                |
| Other neonatal disorders                                                | 9,354.40<br>(5,338.29 to 15,673.91)           | 8,689.86<br>(3,032.24 to 18,874.44)          | 7,758.49<br>(2,742.66 to 16,839.96)          | 11,053.00<br>(3,864.05 to 24,062.81)          | 108.13<br>(61.70 to 181.12)           | 100.46<br>(35.11 to 218.06)           | 89.69<br>(31.78 to 194.66)          | 127.77<br>(44.73 to 278.06)           |
| <b>Nutritional deficiencies</b>                                         | <b>3,389.02</b><br>(2,749.43 to 4,149.96)     | <b>3,919.75</b><br>(3,021.34 to 5,005.45)    | <b>4,227.73</b><br>(3,252.56 to 5,455.26)    | <b>4,081.16</b><br>(3,169.32 to 5,201.82)     | <b>172.24</b><br>(140.13 to 210.05)   | <b>323.09</b><br>(246.54 to 408.31)   | <b>361.87</b><br>(279.88 to 455.48) | <b>320.71</b><br>(232.94 to 410.91)   |
| Protein-energy malnutrition                                             | 2,843.81<br>(2,275.29 to 3,474.61)            | 3,146.25<br>(2,375.45 to 4,086.52)           | 3,460.88<br>(2,467.54 to 4,480.58)           | 3,234.24<br>(2,467.54 to 4,170.76)            | 150.43<br>(121.64 to 183.93)          | 272.95<br>(201.42 to 359.39)          | 310.98<br>(227.75 to 402.24)        | 267.86<br>(186.41 to 357.54)          |
| Iodine deficiency                                                       | 71.40<br>(7.40 to 205.13)                     | 175.15<br>(6.69 to 628.36)                   | 179.19<br>(5.86 to 669.68)                   | 194.85<br>(8.78 to 665.74)                    | 2.89<br>(0.21 to 9.89)                | 13.42<br>(0.25 to 57.17)              | 14.16<br>(0.22 to 61.79)            | 14.35<br>(0.35 to 58.23)              |
| Dietary iron deficiency                                                 | 130.85<br>(96.71 to 183.58)                   | 218.85<br>(130.20 to 374.27)                 | 224.82<br>(133.20 to 393.34)                 | 233.58<br>(141.74 to 387.20)                  | 2.88<br>(2.08 to 5.09)                | 6.53<br>(3.72 to 13.95)               | 6.86<br>(3.84 to 15.31)             | 6.78<br>(3.95 to 14.14)               |
| Other nutritional deficiencies                                          | 342.95<br>(259.00 to 448.83)                  | 379.50<br>(264.34 to 519.85)                 | 362.84<br>(248.67 to 510.62)                 | 418.50<br>(287.00 to 575.08)                  | 16.05<br>(11.88 to 21.86)             | 30.18<br>(20.65 to 44.53)             | 29.88<br>(20.11 to 44.78)           | 31.72<br>(21.52 to 46.53)             |
| <b>Other communicable, maternal, neonatal, and nutritional diseases</b> | <b>12,090.07</b><br>(9,324.71 to 15,518.63)   | <b>10,820.20</b><br>(7,734.66 to 15,353.76)  | <b>10,717.54</b><br>(7,516.99 to 15,173.81)  | <b>12,032.85</b><br>(8,517.09 to 17,002.89)   | <b>385.26</b><br>(299.64 to 494.86)   | <b>528.99</b><br>(396.42 to 735.12)   | <b>544.07</b><br>(404.13 to 773.52) | <b>559.63</b><br>(419.76 to 776.51)   |
| Sexually transmitted infections excluding HIV                           | 554.93<br>(369.39 to 768.14)                  | 255.18<br>(161.98 to 370.94)                 | 243.89<br>(152.79 to 359.34)                 | 280.06<br>(175.01 to 401.50)                  | 16.57<br>(10.99 to 23.16)             | 12.44<br>(8.17 to 16.82)              | 12.34<br>(8.06 to 16.73)            | 12.98<br>(8.52 to 17.64)              |
| Syphilis                                                                | 187.78<br>(125.43 to 255.32)                  | 68.88<br>(45.47 to 96.55)                    | 62.00<br>(40.00 to 89.47)                    | 79.10<br>(51.52 to 111.73)                    | 5.51<br>(3.35 to 7.66)                | 3.25<br>(2.15 to 4.39)                | 3.06<br>(1.97 to 4.19)              | 3.54<br>(2.30 to 4.76)                |
| Chlamydial infection                                                    | 71.18<br>(45.34 to 103.79)                    | 37.01<br>(22.00 to 55.61)                    | 36.23<br>(21.76 to 54.78)                    | 39.82<br>(24.10 to 59.08)                     | 2.15<br>(1.43 to 3.10)                | 1.91<br>(1.20 to 2.71)                | 1.94<br>(1.23 to 2.76)              | 1.95<br>(1.23 to 2.77)                |
| Gonococcal infection                                                    | 194.96<br>(125.73 to 281.05)                  | 102.59<br>(62.03 to 151.32)                  | 100.39<br>(60.25 to 151.31)                  | 110.25<br>(66.41 to 161.61)                   | 6.15<br>(4.06 to 8.82)                | 5.36<br>(3.46 to 7.39)                | 5.43<br>(3.45 to 7.55)              | 5.49<br>(3.53 to 7.52)                |
| Other sexually transmitted infections                                   | 101.01<br>(65.84 to 146.09)                   | 46.71<br>(26.83 to 71.99)                    | 45.27<br>(25.87 to 69.94)                    | 50.89<br>(29.63 to 78.36)                     | 2.76<br>(1.81 to 3.98)                | 1.91<br>(1.24 to 2.63)                | 1.91<br>(1.24 to 2.66)              | 2.00<br>(1.29 to 2.77)                |
| Acute hepatitis                                                         | 491.75<br>(379.11 to 629.34)                  | 357.39<br>(240.70 to 506.02)                 | 306.16<br>(204.26 to 446.86)                 | 419.25<br>(293.51 to 594.70)                  | 15.61<br>(12.03 to 19.94)             | 16.34<br>(11.76 to 22.04)             | 14.32<br>(10.27 to 20.03)           | 18.58<br>(13.66 to 24.96)             |
| Acute hepatitis A                                                       | 12.43<br>(8.34 to 18.92)                      | 5.65<br>(3.27 to 9.42)                       | 5.01<br>(2.89 to 8.33)                       | 6.56<br>(3.68 to 10.92)                       | 0.26<br>(0.18 to 0.38)                | 0.20<br>(0.11 to 0.32)                | 0.19<br>(0.10 to 0.30)              | 0.22<br>(0.13 to 0.36)                |
| Acute hepatitis B                                                       | 398.32<br>(297.84 to 518.03)                  | 293.81<br>(190.82 to 428.91)                 | 250.83<br>(158.42 to 372.68)                 | 347.25<br>(233.43 to 494.37)                  | 13.00<br>(9.77 to 16.74)              | 12.84<br>(9.02 to 17.88)              | 11.15<br>(7.67 to 15.98)            | 14.83<br>(10.61 to 20.55)             |



| Sri Lanka                            |                                          |                                          |                                          |                                          |                                       |                                       |                                       |                                       |
|--------------------------------------|------------------------------------------|------------------------------------------|------------------------------------------|------------------------------------------|---------------------------------------|---------------------------------------|---------------------------------------|---------------------------------------|
| Cause                                | YLLs (actual counts)                     |                                          |                                          |                                          | Deaths (actual counts)                |                                       |                                       |                                       |
|                                      | 2016                                     | 2040 Forecast                            | 2040 Better Scenario                     | 2040 Worse Scenario                      | 2016                                  | 2040 Forecast                         | 2040 Better Scenario                  | 2040 Worse Scenario                   |
| Neoplasms                            | 371,476.69<br>(298,801.99 to 452,698.06) | 516,547.21<br>(382,323.32 to 688,495.88) | 469,084.38<br>(350,349.25 to 618,678.21) | 564,113.52<br>(412,409.76 to 750,617.86) | 15,358.64<br>(12,529.41 to 18,552.16) | 28,179.04<br>(22,489.87 to 34,563.21) | 26,275.71<br>(21,070.30 to 32,416.15) | 29,308.72<br>(23,103.52 to 36,913.80) |
| Lip and oral cavity cancer           | 21,447.47<br>(16,633.23 to 26,976.83)    | 36,362.32<br>(20,288.95 to 60,919.24)    | 26,192.70<br>(15,921.23 to 40,962.58)    | 45,484.81<br>(23,722.27 to 78,414.65)    | 988.18<br>(783.56 to 1,221.78)        | 2,058.74<br>(1,229.90 to 3,240.85)    | 1,550.02<br>(1,003.82 to 2,322.88)    | 2,397.21<br>(1,354.90 to 3,899.75)    |
| Nasopharynx cancer                   | 6,987.06<br>(5,108.78 to 9,148.33)       | 11,294.19<br>(6,033.02 to 19,161.00)     | 7,594.81<br>(4,289.52 to 12,457.77)      | 15,213.47<br>(7,693.81 to 26,789.44)     | 279.20<br>(207.08 to 362.78)          | 546.62<br>(313.25 to 892.21)          | 382.43<br>(230.59 to 598.31)          | 689.41<br>(376.37 to 1,168.66)        |
| Other pharynx cancer                 | 8,809.25<br>(6,473.88 to 11,582.52)      | 14,804.35<br>(7,844.86 to 24,327.66)     | 11,889.18<br>(6,600.28 to 18,463.79)     | 14,926.26<br>(7,596.70 to 24,731.43)     | 364.75<br>(272.33 to 473.96)          | 735.07<br>(411.00 to 1,182.66)        | 587.74<br>(358.96 to 901.25)          | 722.75<br>(413.92 to 1,148.20)        |
| Esophageal cancer                    | 22,917.83<br>(18,208.25 to 28,581.65)    | 28,558.12<br>(16,833.52 to 46,847.02)    | 24,315.29<br>(14,628.72 to 39,303.22)    | 35,611.29<br>(19,876.33 to 59,658.93)    | 997.32<br>(801.74 to 1,225.80)        | 1,495.13<br>(935.73 to 2,326.25)      | 1,314.60<br>(845.46 to 2,024.52)      | 1,768.43<br>(1,051.95 to 2,807.30)    |
| Stomach cancer                       | 21,244.73<br>(16,834.24 to 26,031.98)    | 21,244.69<br>(15,892.54 to 27,772.22)    | 19,389.71<br>(14,343.73 to 25,564.04)    | 23,212.55<br>(17,441.71 to 30,637.59)    | 996.02<br>(803.29 to 1,209.72)        | 1,302.68<br>(1,044.93 to 1,622.09)    | 1,214.00<br>(968.24 to 1,529.80)      | 1,371.91<br>(1,104.12 to 1,738.30)    |
| Colon and rectum cancer              | 21,121.17<br>(16,573.02 to 26,216.04)    | 38,001.81<br>(24,233.01 to 58,232.08)    | 32,604.34<br>(21,102.84 to 48,340.91)    | 38,774.96<br>(25,032.14 to 58,600.24)    | 1,002.56<br>(792.20 to 1,224.57)      | 2,382.03<br>(1,606.78 to 3,520.62)    | 2,102.77<br>(1,437.99 to 3,028.13)    | 2,348.48<br>(1,578.00 to 3,473.74)    |
| Liver cancer                         | 15,941.40<br>(12,412.53 to 20,069.89)    | 20,339.75<br>(13,726.10 to 29,271.62)    | 19,776.04<br>(13,646.62 to 28,157.01)    | 21,166.17<br>(14,190.84 to 30,808.82)    | 694.39<br>(550.22 to 869.45)          | 1,127.39<br>(805.13 to 1,518.45)      | 1,122.95<br>(821.52 to 1,494.72)      | 1,127.31<br>(800.25 to 1,554.80)      |
| Liver cancer due to hepatitis B      | 6,801.21<br>(4,859.83 to 9,070.48)       | 7,835.71<br>(4,950.24 to 11,636.17)      | 7,842.77<br>(5,030.03 to 11,505.15)      | 8,155.21<br>(5,189.81 to 12,225.53)      | 277.43<br>(197.51 to 370.04)          | 410.06<br>(263.44 to 586.63)          | 419.01<br>(273.83 to 589.74)          | 410.33<br>(264.70 to 598.89)          |
| Liver cancer due to hepatitis C      | 3,251.66<br>(2,034.11 to 4,742.39)       | 4,698.29<br>(2,795.91 to 7,200.78)       | 4,742.55<br>(2,841.40 to 7,261.94)       | 4,765.27<br>(2,787.70 to 7,291.22)       | 162.56<br>(103.25 to 237.84)          | 298.40<br>(184.99 to 450.11)          | 307.29<br>(191.32 to 458.32)          | 291.69<br>(179.37 to 444.74)          |
| Liver cancer due to alcohol use      | 2,249.23<br>(1,501.12 to 3,318.41)       | 2,928.87<br>(1,706.66 to 4,787.62)       | 2,404.21<br>(1,405.07 to 3,950.67)       | 3,175.15<br>(1,828.93 to 5,190.34)       | 99.86<br>(67.08 to 150.36)            | 152.82<br>(92.80 to 239.26)           | 130.27<br>(79.41 to 207.18)           | 159.97<br>(96.64 to 253.24)           |
| Liver cancer due to other causes     | 3,639.30<br>(2,437.23 to 5,356.30)       | 4,876.88<br>(2,778.22 to 8,172.24)       | 4,786.50<br>(2,797.15 to 7,823.46)       | 5,070.54<br>(2,853.86 to 8,487.76)       | 154.54<br>(103.06 to 228.03)          | 266.11<br>(155.30 to 428.69)          | 266.38<br>(158.38 to 420.85)          | 265.34<br>(152.06 to 427.39)          |
| Gallbladder and biliary tract cancer | 7,870.97<br>(5,897.92 to 10,588.69)      | 11,016.10<br>(8,249.58 to 14,915.57)     | 11,137.83<br>(8,256.23 to 15,240.36)     | 10,428.35<br>(7,957.60 to 13,752.43)     | 380.83<br>(292.78 to 507.88)          | 677.40<br>(537.63 to 884.87)          | 697.84<br>(542.74 to 919.79)          | 623.54<br>(503.58 to 798.00)          |
| Pancreatic cancer                    | 13,516.69<br>(10,815.42 to 16,634.06)    | 25,404.55<br>(17,732.59 to 35,902.73)    | 25,235.78<br>(17,716.37 to 34,849.53)    | 24,289.02<br>(17,066.40 to 33,802.69)    | 637.21<br>(517.17 to 778.35)          | 1,492.56<br>(1,109.75 to 2,035.20)    | 1,510.04<br>(1,131.56 to 1,999.16)    | 1,376.22<br>(1,026.52 to 1,876.88)    |
| Larynx cancer                        | 3,621.84<br>(2,767.62 to 4,754.31)       | 4,156.44<br>(2,298.66 to 7,040.40)       | 3,060.78<br>(1,833.47 to 4,901.66)       | 6,355.39<br>(3,087.36 to 12,078.60)      | 155.49<br>(119.78 to 201.44)          | 216.72<br>(132.77 to 340.44)          | 167.52<br>(110.57 to 245.83)          | 301.90<br>(165.71 to 536.32)          |
| Tracheal, bronchus, and lung cancer  | 34,183.15<br>(26,739.42 to 43,393.44)    | 36,827.86<br>(23,573.35 to 56,284.35)    | 30,739.52<br>(20,476.86 to 45,832.44)    | 61,646.51<br>(35,203.72 to 103,559.45)   | 1,457.97<br>(1,155.94 to 1,823.66)    | 1,981.68<br>(1,355.55 to 2,930.17)    | 1,712.08<br>(1,214.13 to 2,429.96)    | 3,022.86<br>(1,855.09 to 4,797.45)    |
| Malignant skin melanoma              | 1,586.07<br>(1,154.39 to 2,063.05)       | 1,997.91<br>(1,450.41 to 2,673.25)       | 2,201.52<br>(1,567.78 to 2,973.01)       | 1,749.40<br>(1,275.89 to 2,316.42)       | 59.95<br>(45.20 to 77.27)             | 108.04<br>(84.54 to 135.45)           | 121.95<br>(93.52 to 153.79)           | 97.18<br>(72.16 to 112.38)            |
| Non-melanoma skin cancer             | 5,386.71<br>(4,212.63 to 6,834.41)       | 8,673.11<br>(6,730.94 to 11,095.10)      | 8,091.93<br>(6,084.81 to 10,629.78)      | 8,975.40<br>(7,130.24 to 11,083.60)      | 249.76<br>(198.13 to 312.93)          | 521.93<br>(435.05 to 613.79)          | 498.38<br>(407.23 to 603.20)          | 521.63<br>(440.23 to 602.69)          |
| Breast cancer                        | 30,115.15<br>(20,386.70 to 42,405.68)    | 38,884.65<br>(22,574.77 to 63,742.00)    | 33,963.62<br>(20,090.98 to 53,266.11)    | 40,602.82<br>(23,297.43 to 66,189.23)    | 1,133.54<br>(780.83 to 1,564.19)      | 1,962.70<br>(1,227.25 to 3,074.49)    | 1,743.37<br>(1,100.65 to 2,640.61)    | 1,988.92<br>(1,207.44 to 3,114.66)    |
| Cervical cancer                      | 9,584.59<br>(6,381.07 to 13,589.73)      | 8,570.96<br>(5,200.19 to 12,667.68)      | 7,655.74<br>(4,698.45 to 11,757.80)      | 9,500.22<br>(5,851.30 to 14,078.27)      | 370.91<br>(250.11 to 523.81)          | 426.34<br>(283.22 to 597.61)          | 393.32<br>(254.76 to 560.71)          | 459.39<br>(307.46 to 642.74)          |



|                   |                                        |                                          |                                          |                                          |                                 |                                       |                                       |                                       |
|-------------------|----------------------------------------|------------------------------------------|------------------------------------------|------------------------------------------|---------------------------------|---------------------------------------|---------------------------------------|---------------------------------------|
|                   | 3,963.23<br>(2,735.02 to<br>5,421.84)  | 5,131.09<br>(3,329.86 to<br>7,263.71)    | 4,870.28<br>(3,118.69 to<br>7,063.16)    | 5,579.10<br>(3,616.73 to<br>7,791.29)    | 180.04<br>(123.18 to<br>241.99) | 302.80<br>(215.01 to<br>399.67)       | 292.57<br>(204.38 to<br>393.13)       | 320.69<br>(227.43 to<br>423.21)       |
| Uterine cancer    |                                        |                                          |                                          |                                          |                                 |                                       |                                       |                                       |
| Ovarian cancer    | 9,642.28<br>(6,908.10 to<br>12,900.38) | 12,490.38<br>(7,624.10 to<br>19,964.10)  | 11,398.81<br>(7,070.49 to<br>17,828.15)  | 12,272.88<br>(7,541.26 to<br>19,287.70)  | 356.85<br>(258.27 to<br>474.67) | 585.70<br>(374.22 to<br>914.29)       | 538.06<br>(352.73 to<br>819.12)       | 567.10<br>(368.84 to<br>865.87)       |
| Prostate cancer   | 8,368.58<br>(5,897.00 to<br>12,078.60) | 20,723.66<br>(15,558.72 to<br>29,830.08) | 20,746.12<br>(15,498.97 to<br>29,489.41) | 18,877.40<br>(14,655.98 to<br>26,792.48) | 546.70<br>(392.20 to<br>798.48) | 1,631.25<br>(1,251.42 to<br>2,310.16) | 1,670.59<br>(1,310.46 to<br>2,370.13) | 1,432.90<br>(1,079.08 to<br>2,096.76) |
| Testicular cancer | 829.96<br>(589.92 to<br>1,156.89)      | 701.50<br>(445.72 to<br>1,098.62)        | 653.27<br>(407.74 to<br>1,021.84)        | 736.73<br>(471.63 to<br>1,132.59)        | 22.21<br>(16.07 to<br>30.69)    | 25.56<br>(18.42 to<br>34.50)          | 24.54<br>(17.66 to<br>33.36)          | 25.61<br>(18.66 to<br>34.17)          |

| Sri Lanka                       |                                                      |                                                        |                                                        |                                                          |                                                   |                                                    |                                                   |                                                    |
|---------------------------------|------------------------------------------------------|--------------------------------------------------------|--------------------------------------------------------|----------------------------------------------------------|---------------------------------------------------|----------------------------------------------------|---------------------------------------------------|----------------------------------------------------|
| Cause                           | YLLs (actual counts)                                 |                                                        |                                                        |                                                          | Deaths (actual counts)                            |                                                    |                                                   |                                                    |
|                                 | 2016                                                 | 2040 Forecast                                          | 2040 Better Scenario                                   | 2040 Worse Scenario                                      | 2016                                              | 2040 Forecast                                      | 2040 Better Scenario                              | 2040 Worse Scenario                                |
| Kidney cancer                   | 11,260.46<br>(8,845.50 to<br>14,397.18)              | 25,411.14<br>(18,620.86 to<br>33,915.45)               | 26,323.24<br>(19,124.50 to<br>35,879.84)               | 23,540.85<br>(17,098.58 to<br>31,732.35)                 | 480.63<br>(379.69 to<br>608.89)                   | 1,365.93<br>(1,059.96 to<br>1,716.09)              | 1,444.69<br>(1,114.43 to<br>1,829.27)             | 1,218.90<br>(945.90 to<br>1,532.00)                |
| Bladder cancer                  | 4,759.80<br>(3,682.82 to<br>6,046.24)                | 7,300.62<br>(5,014.89 to<br>10,503.68)                 | 7,045.74<br>(4,878.65 to<br>9,987.93)                  | 7,361.91<br>(5,111.69 to<br>10,543.65)                   | 254.38<br>(199.89 to<br>319.54)                   | 500.54<br>(363.10 to<br>689.54)                    | 494.71<br>(363.58 to<br>671.78)                   | 480.73<br>(347.04 to<br>669.39)                    |
| Brain and nervous system cancer | 15,606.35<br>(11,808.43 to<br>20,534.15)             | 19,841.22<br>(13,355.39 to<br>27,397.09)               | 19,432.76<br>(12,891.50 to<br>27,337.80)               | 19,216.55<br>(13,194.67 to<br>26,278.58)                 | 500.52<br>(352.24 to<br>680.54)                   | 906.33<br>(574.60 to<br>1,248.40)                  | 910.51<br>(570.01 to<br>1,257.16)                 | 845.43<br>(545.37 to<br>1,158.54)                  |
| Thyroid cancer                  | 2,783.53<br>(2,149.70 to<br>3,550.83)                | 3,854.58<br>(2,660.14 to<br>5,288.71)                  | 3,553.83<br>(2,458.15 to<br>4,895.95)                  | 4,167.03<br>(2,890.31 to<br>5,786.83)                    | 120.15<br>(93.81 to<br>150.60)                    | 209.64<br>(154.69 to<br>279.23)                    | 196.63<br>(145.42 to<br>258.36)                   | 220.98<br>(164.18 to<br>296.40)                    |
| Mesothelioma                    | 2,180.86<br>(1,587.17 to<br>2,840.06)                | 2,527.44<br>(1,797.94 to<br>3,348.32)                  | 2,603.60<br>(1,829.43 to<br>3,478.62)                  | 2,450.01<br>(1,772.26 to<br>3,190.60)                    | 79.54<br>(59.22 to<br>101.36)                     | 119.58<br>(93.04 to<br>146.59)                     | 125.70<br>(96.40 to<br>156.87)                    | 112.93<br>(89.18 to<br>136.07)                     |
| Hodgkin lymphoma                | 2,634.49<br>(1,904.60 to<br>3,770.25)                | 2,156.03<br>(1,454.60 to<br>3,157.26)                  | 1,923.62<br>(1,266.63 to<br>2,867.43)                  | 2,466.62<br>(1,687.78 to<br>3,660.19)                    | 88.29<br>(63.30 to<br>122.61)                     | 93.42<br>(63.44 to<br>128.69)                      | 84.94<br>(56.27 to<br>121.80)                     | 103.88<br>(72.17 to<br>143.93)                     |
| Non-Hodgkin lymphoma            | 14,297.50<br>(11,186.53 to<br>17,879.41)             | 17,887.35<br>(13,076.36 to<br>23,383.60)               | 16,958.98<br>(12,279.97 to<br>22,610.11)               | 17,535.89<br>(13,099.35 to<br>22,625.53)                 | 527.17<br>(415.05 to<br>656.13)                   | 901.12<br>(702.13 to<br>1,117.33)                  | 873.53<br>(671.58 to<br>1,101.18)                 | 854.66<br>(668.03 to<br>1,060.03)                  |
| Multiple myeloma                | 4,378.87<br>(3,334.28 to<br>5,713.54)                | 6,957.23<br>(4,789.97 to<br>9,297.48)                  | 6,772.41<br>(4,659.34 to<br>9,215.86)                  | 6,631.83<br>(4,660.72 to<br>8,707.61)                    | 184.57<br>(140.32 to<br>237.92)                   | 368.42<br>(268.17 to<br>468.43)                    | 365.33<br>(264.60 to<br>471.61)                   | 341.91<br>(251.36 to<br>429.73)                    |
| Leukemia                        | 36,274.74<br>(28,406.25 to<br>45,221.59)             | 41,406.76<br>(29,752.41 to<br>55,137.75)               | 38,839.00<br>(28,110.57 to<br>52,623.25)               | 42,792.33<br>(31,132.09 to<br>57,385.81)                 | 1,151.42<br>(915.80 to<br>1,431.26)               | 1,892.98<br>(1,444.06 to<br>2,404.46)              | 1,818.60<br>(1,391.11 to<br>2,319.06)             | 1,883.49<br>(1,445.61 to<br>2,404.60)              |
| Acute lymphoid leukemia         | 11,794.55<br>(9,246.86 to<br>15,310.93)              | 14,979.65<br>(10,645.07 to<br>20,049.60)               | 13,972.45<br>(9,853.84 to<br>18,870.54)                | 15,167.56<br>(10,859.91 to<br>20,374.67)                 | 405.99<br>(320.99 to<br>524.61)                   | 714.08<br>(534.87 to<br>921.60)                    | 681.95<br>(507.65 to<br>884.48)                   | 696.03<br>(525.13 to<br>890.31)                    |
| Chronic lymphoid leukemia       | 456.53<br>(329.37 to<br>622.47)                      | 501.59<br>(336.32 to<br>738.51)                        | 479.20<br>(322.82 to<br>701.86)                        | 512.88<br>(343.53 to<br>775.41)                          | 15.26<br>(11.44 to<br>21.36)                      | 24.42<br>(17.78 to<br>35.42)                       | 24.24<br>(17.70 to<br>34.67)                      | 23.65<br>(17.14 to<br>35.05)                       |
| Acute myeloid leukemia          | 9,584.89<br>(7,421.06 to<br>12,540.56)               | 12,395.49<br>(8,763.99 to<br>17,187.05)                | 12,018.16<br>(8,442.54 to<br>16,749.99)                | 12,216.26<br>(8,599.42 to<br>16,890.39)                  | 267.19<br>(207.29 to<br>356.36)                   | 478.65<br>(345.35 to<br>659.42)                    | 475.31<br>(341.87 to<br>653.12)                   | 454.76<br>(331.40 to<br>631.94)                    |
| Chronic myeloid leukemia        | 1,554.80<br>(1,163.14 to<br>2,174.88)                | 1,134.88<br>(724.31 to<br>1,712.11)                    | 957.94<br>(606.63 to<br>1,445.48)                      | 1,262.51<br>(808.50 to<br>1,884.96)                      | 46.67<br>(34.64 to<br>64.78)                      | 45.15<br>(30.50 to<br>68.18)                       | 38.90<br>(26.38 to<br>59.86)                      | 48.34<br>(32.89 to<br>71.31)                       |
| Other leukemia                  | 12,883.96<br>(8,212.24 to<br>16,805.24)              | 12,395.16<br>(7,678.86 to<br>17,443.68)                | 11,411.25<br>(6,902.34 to<br>16,179.64)                | 13,633.12<br>(8,383.80 to<br>19,239.84)                  | 416.30<br>(267.55 to<br>536.27)                   | 630.68<br>(390.01 to<br>844.21)                    | 598.20<br>(370.08 to<br>809.32)                   | 660.71<br>(405.25 to<br>892.57)                    |
| Other neoplasms                 | 30,161.98<br>(24,401.04 to<br>36,999.27)             | 44,021.40<br>(33,367.63 to<br>55,908.53)               | 44,403.92<br>(33,133.73 to<br>56,950.34)               | 42,547.76<br>(32,802.27 to<br>53,058.82)                 | 1,098.10<br>(878.82 to<br>1,343.02)               | 2,240.74<br>(1,814.70 to<br>2,680.31)              | 2,316.30<br>(1,839.39 to<br>2,852.13)             | 2,088.36<br>(1,725.61 to<br>2,440.46)              |
| <b>Cardiovascular diseases</b>  | <b>784,987.03<br/>(633,937.58 to<br/>959,677.67)</b> | <b>789,710.93<br/>(473,592.36 to<br/>1,450,390.82)</b> | <b>548,911.49<br/>(333,160.86 to<br/>1,039,665.32)</b> | <b>1,268,524.76<br/>(740,320.38 to<br/>2,220,067.51)</b> | <b>42,376.13<br/>(34,717.17 to<br/>50,916.41)</b> | <b>56,891.89<br/>(36,329.46 to<br/>108,734.67)</b> | <b>41,962.23<br/>(27,400.60 to<br/>77,661.54)</b> | <b>83,317.42<br/>(53,605.15 to<br/>143,011.31)</b> |
| Rheumatic heart disease         | 8,549.27<br>(6,626.28 to<br>10,955.38)               | 5,273.56<br>(3,859.19 to<br>7,036.06)                  | 4,799.21<br>(3,417.08 to<br>6,506.97)                  | 6,165.10<br>(4,523.16 to<br>8,225.76)                    | 363.24<br>(286.38 to<br>461.10)                   | 331.36<br>(250.93 to<br>423.31)                    | 310.05<br>(232.29 to<br>406.02)                   | 372.00<br>(282.05 to<br>482.48)                    |
| Ischemic heart disease          | 470,690.81<br>(377,055.56 to<br>579,944.92)          | 418,799.87<br>(196,277.81 to<br>979,153.25)            | 269,110.32<br>(129,043.63 to<br>590,337.73)            | 752,310.67<br>(354,636.93 to<br>1,589,373.21)            | 25,175.45<br>(20,553.29 to<br>30,186.18)          | 29,469.38<br>(14,521.25 to<br>65,757.15)           | 20,280.94<br>(10,241.03 to<br>44,041.09)          | 47,688.29<br>(24,441.50 to<br>99,664.83)           |
| Stroke                          | 184,637.21<br>(148,977.66 to<br>228,182.42)          | 183,770.57<br>(94,578.29 to<br>478,123.94)             | 117,767.53<br>(63,163.16 to<br>296,566.95)             | 304,600.71<br>(160,126.71 to<br>707,982.51)              | 11,009.58<br>(8,982.17 to<br>13,338.98)           | 14,843.34<br>(7,709.81 to<br>40,032.50)            | 10,377.38<br>(5,487.22 to<br>26,675.93)           | 22,062.59<br>(11,928.69 to<br>56,467.04)           |
| Ischemic stroke                 | 85,292.72<br>(69,135.63 to<br>104,304.49)            | 101,599.11<br>(45,126.07 to<br>346,027.94)             | 70,451.23<br>(31,841.61 to<br>231,308.06)              | 151,601.62<br>(68,451.38 to<br>501,796.14)               | 6,202.21<br>(5,086.02 to<br>7,454.65)             | 9,419.17<br>(4,260.95 to<br>31,420.28)             | 6,954.38<br>(3,202.32 to<br>20,702.40)            | 12,978.98<br>(5,884.23 to<br>42,415.56)            |

|                                |                                           |                                           |                                          |                                            |                                       |                                        |                                       |                                        |
|--------------------------------|-------------------------------------------|-------------------------------------------|------------------------------------------|--------------------------------------------|---------------------------------------|----------------------------------------|---------------------------------------|----------------------------------------|
| Intracerebral hemorrhage       | 99,344.49<br>(78,779.53 to<br>124,294.48) | 82,171.46<br>(41,360.00 to<br>161,082.27) | 47,316.30<br>(25,112.79 to<br>87,822.48) | 152,999.09<br>(72,386.57 to<br>297,284.42) | 4,807.37<br>(3,874.11 to<br>5,935.30) | 5,424.17<br>(2,966.10 to<br>10,074.07) | 3,423.00<br>(1,957.03 to<br>6,158.32) | 9,083.61<br>(4,816.63 to<br>16,891.43) |
| Hypertensive heart disease     | 31,809.50<br>(17,425.38 to<br>44,069.21)  | 44,191.63<br>(21,905.61 to<br>74,152.00)  | 35,281.37<br>(17,958.34 to<br>54,893.17) | 56,048.58<br>(26,601.44 to<br>106,815.07)  | 1,691.24<br>(977.35 to<br>2,295.62)   | 3,119.88<br>(1,641.61 to<br>5,230.67)  | 2,587.18<br>(1,387.43 to<br>3,972.19) | 3,791.68<br>(1,873.59 to<br>7,408.98)  |
| Cardiomyopathy and myocarditis | 36,047.85<br>(26,371.12 to<br>50,518.64)  | 54,272.65<br>(35,053.83 to<br>82,133.87)  | 46,425.07<br>(30,598.06 to<br>69,640.13) | 56,229.66<br>(36,922.39 to<br>83,502.01)   | 1,453.80<br>(1,052.22 to<br>2,127.42) | 3,061.34<br>(2,009.12 to<br>4,747.16)  | 2,703.15<br>(1,822.97 to<br>4,171.70) | 3,060.26<br>(2,037.03 to<br>4,683.31)  |
| Myocarditis                    | 6,956.34<br>(5,122.41 to<br>9,400.30)     | 6,792.52<br>(4,731.48 to<br>9,363.31)     | 6,784.43<br>(4,693.89 to<br>9,359.88)    | 6,876.40<br>(4,860.07 to<br>9,462.40)      | 232.13<br>(169.34 to<br>315.72)       | 349.86<br>(249.76 to<br>489.18)        | 362.12<br>(256.58 to<br>509.09)       | 336.50<br>(241.05 to<br>472.03)        |

| Sri Lanka                                                     |                                                  |                                                  |                                                 |                                                  |                                              |                                              |                                             |                                               |
|---------------------------------------------------------------|--------------------------------------------------|--------------------------------------------------|-------------------------------------------------|--------------------------------------------------|----------------------------------------------|----------------------------------------------|---------------------------------------------|-----------------------------------------------|
| Cause                                                         | YLLs (actual counts)                             |                                                  |                                                 |                                                  | Deaths (actual counts)                       |                                              |                                             |                                               |
|                                                               | 2016                                             | 2040 Forecast                                    | 2040 Better Scenario                            | 2040 Worse Scenario                              | 2016                                         | 2040 Forecast                                | 2040 Better Scenario                        | 2040 Worse Scenario                           |
| Alcoholic cardiomyopathy                                      | 3,862.43<br>(2,596.57 to 5,607.66)               | 6,792.49<br>(4,306.99 to 9,700.92)               | 5,545.90<br>(3,465.54 to 7,974.05)              | 6,443.59<br>(4,189.44 to 9,064.77)               | 156.42<br>(107.94 to 221.02)                 | 340.97<br>(224.08 to 465.12)                 | 292.48<br>(189.20 to 410.50)                | 315.26<br>(210.35 to 426.00)                  |
| Other cardiomyopathy                                          | 25,229.09<br>(17,835.10 to 37,848.28)            | 40,687.65<br>(24,782.12 to 66,294.46)            | 34,094.74<br>(20,569.26 to 55,444.45)           | 42,909.67<br>(26,373.81 to 68,523.61)            | 1,065.25<br>(743.17 to 1,675.48)             | 2,370.51<br>(1,446.91 to 3,910.60)           | 2,048.56<br>(1,250.64 to 3,412.62)          | 2,408.50<br>(1,469.14 to 3,931.02)            |
| Atrial fibrillation and flutter                               | 6,305.99<br>(4,586.72 to 8,161.08)               | 16,374.86<br>(11,825.94 to 21,875.52)            | 15,484.25<br>(11,353.64 to 20,774.84)           | 16,228.42<br>(11,596.59 to 22,017.65)            | 615.24<br>(454.36 to 812.37)                 | 1,829.44<br>(1,260.38 to 2,463.91)           | 1,773.55<br>(1,222.77 to 2,379.72)          | 1,747.11<br>(1,165.53 to 2,380.53)            |
| Aortic aneurysm                                               | 6,408.93<br>(4,977.98 to 7,965.15)               | 9,449.91<br>(7,077.51 to 12,115.92)              | 9,095.49<br>(6,703.89 to 11,733.95)             | 9,674.68<br>(7,252.76 to 12,517.82)              | 572.89<br>(294.68 to 456.82)                 | 713.81<br>(550.21 to 881.51)                 | 708.96<br>(545.10 to 875.94)                | 695.41<br>(528.07 to 867.28)                  |
| Peripheral artery disease                                     | 458.98<br>(297.32 to 643.46)                     | 1,446.61<br>(898.67 to 2,067.73)                 | 1,325.95<br>(836.21 to 1,887.14)                | 1,369.39<br>(850.38 to 1,962.69)                 | 32.50<br>(21.95 to 43.93)                    | 132.07<br>(83.76 to 185.50)                  | 126.56<br>(80.73 to 178.86)                 | 171.13<br>(73.59 to 165.33)                   |
| Endocarditis                                                  | 12,016.45<br>(9,056.18 to 15,700.40)             | 14,141.48<br>(9,354.59 to 20,741.64)             | 13,639.50<br>(8,982.36 to 19,758.65)            | 14,432.84<br>(9,506.53 to 21,264.35)             | 418.16<br>(319.48 to 535.46)                 | 718.74<br>(487.16 to 997.53)                 | 718.45<br>(483.08 to 994.03)                | 699.99<br>(477.74 to 990.72)                  |
| Other cardiovascular and circulatory diseases                 | 28,062.03<br>(19,110.11 to 53,861.31)            | 41,989.78<br>(25,941.07 to 80,419.11)            | 35,982.80<br>(21,852.44 to 68,526.28)           | 51,464.71<br>(31,284.99 to 98,942.42)            | 2,672.54<br>(838.79 to 2,489.53)             | 2,672.54<br>(1,709.60 to 5,345.18)           | 2,376.01<br>(1,514.07 to 4,798.86)          | 3,082.97<br>(1,979.93 to 6,261.32)            |
| <b>Chronic respiratory diseases</b>                           | <b>181,506.94<br/>(147,707.55 to 224,511.00)</b> | <b>149,586.75<br/>(109,265.15 to 200,906.03)</b> | <b>123,101.41<br/>(90,965.62 to 163,454.94)</b> | <b>211,724.07<br/>(147,380.26 to 292,196.90)</b> | <b>10,417.60<br/>(8,542.81 to 12,775.50)</b> | <b>11,155.95<br/>(8,567.66 to 14,153.20)</b> | <b>9,519.79<br/>(7,390.98 to 12,024.82)</b> | <b>14,544.40<br/>(10,858.77 to 19,243.30)</b> |
| Chronic obstructive pulmonary disease                         | 81,527.61<br>(64,051.69 to 106,029.05)           | 74,971.85<br>(49,422.07 to 109,274.06)           | 62,899.57<br>(43,051.64 to 89,860.23)           | 119,577.96<br>(72,291.85 to 192,956.97)          | 4,694.39<br>(3,725.00 to 6,176.75)           | 5,478.03<br>(3,955.88 to 7,580.27)           | 4,842.74<br>(3,560.09 to 6,539.26)          | 7,799.14<br>(5,168.72 to 11,654.09)           |
| Pneumoconiosis                                                | 114.86<br>(84.84 to 153.60)                      | 134.47<br>(102.09 to 177.09)                     | 127.37<br>(94.35 to 169.04)                     | 136.78<br>(104.91 to 180.14)                     | 6.49<br>(4.85 to 8.47)                       | 10.73<br>(8.14 to 14.24)                     | 10.39<br>(7.76 to 13.84)                    | 10.50<br>(7.59 to 14.02)                      |
| Silicosis                                                     | 13.39<br>(8.51 to 21.17)                         | 11.92<br>(7.25 to 18.93)                         | 10.13<br>(5.99 to 16.79)                        | 13.39<br>(8.42 to 21.12)                         | 0.74<br>(0.48 to 1.17)                       | 0.92<br>(0.56 to 1.50)                       | 0.81<br>(0.48 to 1.39)                      | 0.99<br>(0.61 to 1.58)                        |
| Asbestosis                                                    | 31.90<br>(21.95 to 48.92)                        | 43.61<br>(29.27 to 66.80)                        | 47.88<br>(32.45 to 71.01)                       | 40.23<br>(27.15 to 61.42)                        | 1.43<br>(0.92 to 2.37)                       | 2.75<br>(1.76 to 4.35)                       | 3.10<br>(2.02 to 4.74)                      | 2.42<br>(1.56 to 3.82)                        |
| Coal workers pneumoconiosis                                   | 12.94<br>(7.14 to 21.25)                         | 10.51<br>(5.62 to 17.97)                         | 8.74<br>(4.59 to 15.42)                         | 12.89<br>(7.19 to 21.57)                         | 0.65<br>(0.39 to 1.03)                       | 0.78<br>(0.42 to 1.40)                       | 0.70<br>(0.35 to 1.35)                      | 0.91<br>(0.50 to 1.60)                        |
| Other pneumoconiosis                                          | 56.63<br>(41.07 to 78.45)                        | 68.42<br>(46.08 to 95.72)                        | 60.62<br>(39.47 to 87.56)                       | 70.27<br>(49.07 to 95.39)                        | 3.66<br>(2.62 to 4.96)                       | 6.28<br>(4.01 to 9.08)                       | 5.78<br>(3.54 to 8.68)                      | 6.18<br>(3.95 to 9.02)                        |
| Asthma                                                        | 93,727.39<br>(70,629.48 to 117,168.97)           | 66,362.71<br>(41,367.94 to 95,359.45)            | 51,080.18<br>(31,642.43 to 73,771.60)           | 84,663.74<br>(51,210.58 to 124,938.61)           | 5,458.49<br>(3,954.93 to 6,848.18)           | 5,190.14<br>(3,079.82 to 7,403.02)           | 4,122.38<br>(2,437.86 to 5,908.31)          | 6,324.63<br>(3,608.03 to 9,286.98)            |
| Interstitial lung disease and pulmonary sarcoidosis           | 3,456.81<br>(2,352.41 to 5,213.47)               | 5,210.98<br>(3,451.98 to 8,002.60)               | 6,065.34<br>(4,026.98 to 9,181.25)              | 4,397.49<br>(2,939.44 to 6,748.01)               | 157.80<br>(105.83 to 253.62)                 | 308.52<br>(204.73 to 492.79)                 | 367.52<br>(245.04 to 573.29)                | 251.48<br>(168.39 to 401.21)                  |
| Other chronic respiratory diseases                            | 2,680.27<br>(1,851.61 to 3,846.86)               | 2,906.74<br>(1,903.23 to 4,253.85)               | 2,928.95<br>(1,880.52 to 4,278.04)              | 2,948.10<br>(1,939.95 to 4,361.79)               | 100.43<br>(66.07 to 144.90)                  | 168.53<br>(105.55 to 254.22)                 | 176.76<br>(110.43 to 265.34)                | 158.64<br>(99.58 to 237.59)                   |
| <b>Cirrhosis and other chronic liver diseases</b>             | <b>142,310.13<br/>(102,961.93 to 193,374.13)</b> | <b>148,643.33<br/>(103,465.94 to 207,697.89)</b> | <b>130,594.89<br/>(90,712.60 to 185,236.24)</b> | <b>159,093.34<br/>(112,788.36 to 221,866.56)</b> | <b>4,708.29<br/>(3,479.77 to 6,362.37)</b>   | <b>6,078.42<br/>(4,581.93 to 8,080.67)</b>   | <b>5,488.81<br/>(4,087.96 to 7,296.54)</b>  | <b>6,336.46<br/>(4,822.98 to 8,222.37)</b>    |
| Cirrhosis and other chronic liver diseases due to hepatitis B | 51,043.44<br>(34,875.81 to 71,636.06)            | 52,244.64<br>(35,145.30 to 76,024.75)            | 48,909.44<br>(32,355.56 to 72,239.95)           | 54,906.66<br>(36,796.33 to 78,429.12)            | 1,693.76<br>(1,190.08 to 2,341.10)           | 2,119.38<br>(1,538.39 to 2,963.32)           | 2,019.81<br>(1,442.75 to 2,831.72)          | 2,172.37<br>(1,588.07 to 2,958.94)            |
| Cirrhosis and other chronic liver diseases due to hepatitis C | 27,735.08<br>(18,558.62 to 39,625.45)            | 28,933.02<br>(18,538.65 to 42,960.50)            | 26,909.01<br>(17,203.02 to 39,242.41)           | 30,681.45<br>(19,885.94 to 44,780.66)            | 900.52<br>(620.39 to 1,266.14)               | 1,137.07<br>(778.94 to 1,590.17)             | 1,074.43<br>(736.06 to 1,517.81)            | 1,179.25<br>(822.96 to 1,623.52)              |

|                                                                |                                                               |                                                               |                                                               |                                                               |                                                          |                                                            |                                                            |                                                            |
|----------------------------------------------------------------|---------------------------------------------------------------|---------------------------------------------------------------|---------------------------------------------------------------|---------------------------------------------------------------|----------------------------------------------------------|------------------------------------------------------------|------------------------------------------------------------|------------------------------------------------------------|
| Cirrhosis and other chronic liver diseases due to alcohol use  | 31,711.74<br>(21,175.24 to<br>44,537.48)                      | 36,730.03<br>(23,815.27 to<br>52,635.69)                      | 25,995.76<br>(16,973.31 to<br>37,384.80)                      | 40,812.54<br>(26,846.90 to<br>58,194.68)                      | 1,070.21<br>(751.35 to<br>1,481.85)                      | 1,476.42<br>(1,033.35 to<br>1,982.12)                      | 1,105.89<br>(777.97 to<br>1,499.59)                        | 1,598.25<br>(1,133.43 to<br>2,119.25)                      |
| Cirrhosis and other chronic liver diseases due to other causes | 31,819.87<br>(23,430.29 to<br>42,986.01)                      | 30,735.64<br>(21,697.09 to<br>42,562.31)                      | 28,780.68<br>(20,091.86 to<br>40,357.54)                      | 32,692.68<br>(23,433.30 to<br>44,501.42)                      | 1,043.81<br>(776.75 to<br>1,383.79)                      | 1,345.54<br>(1,014.83 to<br>1,728.21)                      | 1,288.68<br>(952.83 to<br>1,702.83)                        | 1,386.60<br>(1,045.83 to<br>1,765.96)                      |
| <b>Digestive diseases</b>                                      | <b>25,413.46</b><br><b>(19,023.93 to</b><br><b>35,381.94)</b> | <b>35,187.84</b><br><b>(24,706.37 to</b><br><b>50,945.71)</b> | <b>32,701.95</b><br><b>(23,019.15 to</b><br><b>46,772.20)</b> | <b>37,422.28</b><br><b>(26,428.42 to</b><br><b>53,685.61)</b> | <b>1,171.71</b><br><b>(867.71 to</b><br><b>1,624.40)</b> | <b>2,329.00</b><br><b>(1,722.30 to</b><br><b>3,167.93)</b> | <b>2,259.09</b><br><b>(1,693.76 to</b><br><b>3,030.89)</b> | <b>2,372.06</b><br><b>(1,735.28 to</b><br><b>3,208.98)</b> |
| Peptic ulcer disease                                           | 1,990.03<br>(1,403.21 to<br>2,750.45)                         | 1,815.50<br>(1,265.86 to<br>2,653.36)                         | 1,559.42<br>(1,054.66 to<br>2,252.74)                         | 2,242.90<br>(1,568.52 to<br>3,273.98)                         | 103.90<br>(73.28 to<br>145.10)                           | 136.29<br>(94.67 to<br>197.30)                             | 120.01<br>(83.39 to<br>171.98)                             | 161.81<br>(111.86 to<br>230.71)                            |

| Sri Lanka                                  |                                           |                                             |                                             |                                             |                                       |                                          |                                          |                                          |
|--------------------------------------------|-------------------------------------------|---------------------------------------------|---------------------------------------------|---------------------------------------------|---------------------------------------|------------------------------------------|------------------------------------------|------------------------------------------|
| Cause                                      | YLLs (actual counts)                      |                                             |                                             |                                             | Deaths (actual counts)                |                                          |                                          |                                          |
|                                            | 2016                                      | 2040 Forecast                               | 2040 Better Scenario                        | 2040 Worse Scenario                         | 2016                                  | 2040 Forecast                            | 2040 Better Scenario                     | 2040 Worse Scenario                      |
| Gastritis and duodenitis                   | 2,729.10<br>(1,962.90 to<br>3,654.07)     | 3,812.60<br>(2,596.07 to<br>5,390.87)       | 3,529.22<br>(2,364.90 to<br>5,061.93)       | 4,083.81<br>(2,840.81 to<br>5,734.39)       | 130.46<br>(94.91 to<br>175.50)        | 247.19<br>(175.92 to<br>338.83)          | 234.99<br>(164.52 to<br>325.51)          | 256.12<br>(182.50 to<br>348.03)          |
| Appendicitis                               | 1,763.14<br>(1,273.74 to<br>2,354.25)     | 1,709.53<br>(1,163.90 to<br>2,408.64)       | 1,497.48<br>(995.16 to<br>2,127.62)         | 1,973.51<br>(1,364.21 to<br>2,765.07)       | 61.18<br>(43.32 to<br>81.53)          | 91.89<br>(61.83 to<br>122.21)            | 83.06<br>(55.97 to<br>113.38)            | 101.47<br>(68.41 to<br>136.30)           |
| Paralytic ileus and intestinal obstruction | 6,179.04<br>(4,463.27 to<br>9,423.49)     | 9,216.95<br>(6,335.78 to<br>14,661.82)      | 9,445.90<br>(6,424.70 to<br>15,039.26)      | 9,102.78<br>(6,340.68 to<br>14,181.20)      | 279.60<br>(197.28 to<br>435.25)       | 629.96<br>(443.59 to<br>959.84)          | 664.73<br>(470.28 to<br>1,011.61)        | 594.41<br>(413.77 to<br>910.49)          |
| Inguinal, femoral, and abdominal hernia    | 1,118.08<br>(658.69 to<br>2,118.29)       | 1,295.37<br>(756.68 to<br>2,512.72)         | 1,231.78<br>(709.49 to<br>2,431.94)         | 1,356.50<br>(795.50 to<br>2,640.91)         | 59.65<br>(34.94 to<br>113.61)         | 95.60<br>(55.59 to<br>185.18)            | 93.67<br>(54.33 to<br>182.23)            | 95.61<br>(54.79 to<br>183.20)            |
| Inflammatory bowel disease                 | 586.84<br>(409.36 to<br>831.80)           | 777.99<br>(536.60 to<br>1,181.82)           | 787.95<br>(535.47 to<br>1,191.51)           | 758.95<br>(532.12 to<br>1,133.08)           | 23.87<br>(16.99 to<br>35.25)          | 46.95<br>(33.95 to<br>70.11)             | 48.93<br>(34.79 to<br>73.22)             | 43.92<br>(31.75 to<br>65.54)             |
| Vascular intestinal disorders              | 1,919.68<br>(1,428.33 to<br>2,625.40)     | 3,498.51<br>(2,565.68 to<br>4,950.19)       | 3,468.02<br>(2,482.91 to<br>4,957.19)       | 3,519.09<br>(2,623.67 to<br>4,885.11)       | 109.88<br>(81.90 to<br>151.51)        | 269.17<br>(204.50 to<br>364.09)          | 273.80<br>(206.13 to<br>369.77)          | 261.21<br>(195.58 to<br>353.00)          |
| Gallbladder and biliary diseases           | 999.95<br>(723.92 to<br>1,473.21)         | 1,686.98<br>(1,021.25 to<br>2,693.29)       | 1,377.03<br>(859.02 to<br>2,159.63)         | 2,052.60<br>(1,216.64 to<br>3,353.05)       | 56.26<br>(41.54 to<br>75.55)          | 131.75<br>(81.40 to<br>209.27)           | 110.66<br>(70.48 to<br>172.82)           | 153.20<br>(91.78 to<br>251.30)           |
| Pancreatitis                               | 2,820.82<br>(1,968.69 to<br>4,172.00)     | 4,349.45<br>(1,693.67 to<br>9,979.55)       | 2,895.62<br>(1,271.05 to<br>6,220.90)       | 4,931.63<br>(1,872.48 to<br>11,173.81)      | 95.11<br>(68.15 to<br>132.53)         | 191.60<br>(88.33 to<br>406.63)           | 134.05<br>(69.07 to<br>255.85)           | 211.34<br>(94.61 to<br>454.98)           |
| Other digestive diseases                   | 5,306.79<br>(3,835.34 to<br>7,474.52)     | 7,024.96<br>(5,023.20 to<br>10,003.64)      | 6,909.55<br>(4,826.43 to<br>9,870.02)       | 7,400.51<br>(5,327.04 to<br>10,599.54)      | 251.79<br>(181.22 to<br>356.39)       | 488.59<br>(354.21 to<br>678.60)          | 495.18<br>(356.84 to<br>680.95)          | 492.97<br>(353.68 to<br>686.61)          |
| Neurological disorders                     | 83,236.86<br>(74,489.66 to<br>115,784.05) | 226,819.95<br>(173,907.88 to<br>305,668.63) | 220,087.20<br>(171,595.01 to<br>286,308.10) | 246,791.02<br>(162,690.11 to<br>299,709.37) | 7,690.21<br>(6,186.36 to<br>9,473.88) | 23,313.77<br>(17,002.60 to<br>31,343.59) | 23,249.43<br>(17,750.18 to<br>29,814.88) | 21,424.15<br>(14,925.79 to<br>29,916.25) |
| Alzheimer's disease and other dementias    | 68,621.40<br>(53,346.16 to<br>87,009.90)  | 187,594.15<br>(136,978.33 to<br>264,611.57) | 181,245.09<br>(136,814.32 to<br>247,230.36) | 179,392.67<br>(126,827.01 to<br>260,159.30) | 6,679.87<br>(5,276.57 to<br>8,345.53) | 20,783.19<br>(14,672.50 to<br>28,668.86) | 20,583.52<br>(15,124.78 to<br>27,265.89) | 19,197.84<br>(12,913.47 to<br>27,577.55) |
| Parkinson's disease                        | 7,375.87<br>(5,308.92 to<br>9,934.17)     | 21,071.70<br>(15,571.97 to<br>27,541.43)    | 22,787.74<br>(16,778.56 to<br>29,894.58)    | 17,914.67<br>(13,371.11 to<br>23,511.68)    | 557.55<br>(401.61 to<br>757.91)       | 1,850.29<br>(1,364.01 to<br>2,443.12)    | 2,035.93<br>(1,510.05 to<br>2,687.70)    | 1,532.24<br>(1,086.52 to<br>2,051.38)    |
| Epilepsy                                   | 12,759.25<br>(10,071.61 to<br>16,158.18)  | 12,287.80<br>(7,605.63 to<br>19,268.07)     | 10,101.74<br>(6,458.78 to<br>15,336.88)     | 13,938.11<br>(8,556.16 to<br>21,724.89)     | 318.31<br>(253.67 to<br>401.23)       | 424.91<br>(290.57 to<br>619.74)          | 362.46<br>(255.40 to<br>507.85)          | 463.41<br>(317.73 to<br>677.34)          |
| Multiple sclerosis                         | 620.62<br>(452.41 to<br>897.09)           | 671.12<br>(459.83 to<br>975.80)             | 680.47<br>(462.39 to<br>996.22)             | 655.40<br>(455.14 to<br>940.01)             | 19.17<br>(14.16 to<br>28.00)          | 25.72<br>(18.66 to<br>37.09)             | 26.48<br>(19.03 to<br>38.36)             | 24.56<br>(18.08 to<br>35.14)             |
| Motor neuron disease                       | 1,234.02<br>(964.96 to<br>1,574.09)       | 1,674.94<br>(1,222.59 to<br>2,220.51)       | 1,683.04<br>(1,208.68 to<br>2,257.50)       | 1,583.66<br>(1,175.36 to<br>2,062.67)       | 40.17<br>(31.72 to<br>50.77)          | 69.60<br>(52.97 to<br>89.36)             | 71.06<br>(53.42 to<br>93.79)             | 64.36<br>(49.73 to<br>81.06)             |
| Other neurological disorders               | 2,625.70<br>(2,115.05 to<br>3,257.48)     | 3,520.24<br>(2,717.48 to<br>4,489.34)       | 3,589.11<br>(2,763.89 to<br>4,598.39)       | 3,306.51<br>(2,581.90 to<br>4,214.70)       | 75.14<br>(60.79 to<br>92.13)          | 160.06<br>(131.02 to<br>188.85)          | 169.98<br>(138.80 to<br>203.49)          | 141.74<br>(117.18 to<br>166.93)          |
| Mental disorders                           | 15,428.16<br>(10,889.35 to<br>22,587.51)  | 17,102.10<br>(10,978.10 to<br>25,130.12)    | 17,206.38<br>(10,995.35 to<br>25,232.13)    | 16,579.95<br>(10,796.18 to<br>24,107.32)    | 435.27<br>(310.30 to<br>619.89)       | 589.54<br>(407.16 to<br>817.19)          | 605.66<br>(415.42 to<br>844.25)          | 557.51<br>(390.79 to<br>764.02)          |
| Alcohol use disorders                      | 10,782.71<br>(6,979.27 to<br>15,506.33)   | 11,164.37<br>(6,414.12 to<br>16,740.45)     | 10,671.31<br>(6,065.08 to<br>16,217.88)     | 10,974.11<br>(6,420.97 to<br>16,390.92)     | 318.68<br>(207.29 to<br>446.02)       | 397.64<br>(237.32 to<br>571.45)          | 389.16<br>(228.81 to<br>569.38)          | 382.33<br>(230.16 to<br>538.23)          |
| Drug use disorders                         | 4,586.79<br>(3,011.82 to<br>8,591.26)     | 5,884.16<br>(3,652.48 to<br>10,422.58)      | 6,481.75<br>(4,096.45 to<br>11,364.35)      | 5,551.29<br>(3,527.78 to<br>9,987.37)       | 115.47<br>(79.22 to<br>201.60)        | 190.88<br>(130.91 to<br>310.15)          | 215.48<br>(149.97 to<br>345.39)          | 174.15<br>(121.91 to<br>284.01)          |
| Opioid use disorders                       | 2,757.39<br>(1,769.67 to<br>5,037.26)     | 2,708.81<br>(1,565.50 to<br>4,657.94)       | 2,796.50<br>(1,627.53 to<br>4,710.75)       | 2,645.14<br>(1,541.22 to<br>4,597.26)       | 65.53<br>(43.40 to<br>111.30)         | 81.82<br>(51.79 to<br>138.50)            | 86.27<br>(54.70 to<br>146.03)            | 77.54<br>(49.35 to<br>131.17)            |

|                           |                                     |                                       |                                       |                                       |                              |                               |                               |                               |
|---------------------------|-------------------------------------|---------------------------------------|---------------------------------------|---------------------------------------|------------------------------|-------------------------------|-------------------------------|-------------------------------|
|                           | 337.39<br>(212.78 to<br>579.70)     | 546.50<br>(310.28 to<br>907.86)       | 610.21<br>(347.72 to<br>1,024.67)     | 529.22<br>(305.25 to<br>886.10)       | 8.91<br>(5.68 to<br>14.43)   | 16.67<br>(9.62 to<br>26.66)   | 18.84<br>(10.93 to<br>30.36)  | 15.85<br>(9.29 to<br>25.06)   |
| Cocaine use disorders     |                                     |                                       |                                       |                                       |                              |                               |                               |                               |
|                           | 201.60<br>(126.50 to<br>388.37)     | 457.71<br>(254.90 to<br>851.63)       | 540.16<br>(309.20 to<br>976.15)       | 436.22<br>(249.92 to<br>815.58)       | 4.92<br>(3.16 to<br>8.67)    | 12.52<br>(7.38 to<br>21.25)   | 14.94<br>(8.88 to<br>25.27)   | 11.75<br>(7.15 to<br>20.09)   |
| Amphetamine use disorders |                                     |                                       |                                       |                                       |                              |                               |                               |                               |
|                           | 1,290.40<br>(789.85 to<br>3,013.37) | 2,171.14<br>(1,267.31 to<br>4,376.71) | 2,534.88<br>(1,492.14 to<br>4,995.98) | 1,940.70<br>(1,137.59 to<br>4,098.12) | 36.11<br>(23.97 to<br>75.23) | 79.87<br>(54.47 to<br>137.22) | 95.43<br>(65.55 to<br>164.40) | 69.00<br>(46.79 to<br>122.29) |
| Other drug use disorders  |                                     |                                       |                                       |                                       |                              |                               |                               |                               |
|                           | 58.66<br>(43.77 to<br>82.11)        | 53.57<br>(32.58 to<br>85.69)          | 53.32<br>(32.14 to<br>84.77)          | 54.56<br>(33.01 to<br>87.43)          | 1.12<br>(0.82 to<br>1.61)    | 1.02<br>(0.61 to<br>1.63)     | 1.02<br>(0.62 to<br>1.63)     | 1.03<br>(0.62 to<br>1.64)     |
| Eating disorders          |                                     |                                       |                                       |                                       |                              |                               |                               |                               |

| Sri Lanka                                                  |                                                 |                                                   |                                                 |                                                   |                                              |                                              |                                              |                                              |
|------------------------------------------------------------|-------------------------------------------------|---------------------------------------------------|-------------------------------------------------|---------------------------------------------------|----------------------------------------------|----------------------------------------------|----------------------------------------------|----------------------------------------------|
| Cause                                                      | YLLs (actual counts)                            |                                                   |                                                 |                                                   | Deaths (actual counts)                       |                                              |                                              |                                              |
|                                                            | 2016                                            | 2040 Forecast                                     | 2040 Better Scenario                            | 2040 Worse Scenario                               | 2016                                         | 2040 Forecast                                | 2040 Better Scenario                         | 2040 Worse Scenario                          |
| <b>Diabetes, urogenital, blood, and endocrine diseases</b> | <b>327,195.45</b><br>(265,263.04 to 399,622.81) | <b>551,766.23</b><br>(286,026.78 to 1,168,629.42) | <b>436,677.45</b><br>(232,159.33 to 994,939.46) | <b>668,024.68</b><br>(350,306.97 to 1,352,812.98) | <b>16,948.54</b><br>(13,859.81 to 20,329.04) | <b>38,522.61</b><br>(20,877.45 to 79,084.69) | <b>31,618.89</b><br>(17,537.91 to 70,526.11) | <b>44,756.97</b><br>(24,009.92 to 87,128.06) |
| Diabetes mellitus                                          | 191,943.70<br>(154,569.27 to 233,494.87)        | 231,172.06<br>(159,445.68 to 325,970.26)          | 194,370.86<br>(133,031.90 to 278,892.81)        | 294,215.77<br>(203,144.50 to 410,847.78)          | 10,663.83<br>(8,680.99 to 12,743.42)         | 17,131.56<br>(12,602.51 to 22,999.68)        | 14,857.26<br>(10,806.13 to 19,885.81)        | 20,895.71<br>(15,092.97 to 28,190.71)        |
| Acute glomerulonephritis                                   | 134.53<br>(103.65 to 183.78)                    | 110.25<br>(73.41 to 173.83)                       | 100.15<br>(65.09 to 157.62)                     | 124.00<br>(82.14 to 198.87)                       | 2.88<br>(2.26 to 3.71)                       | 3.28<br>(2.37 to 4.51)                       | 3.09<br>(2.17 to 4.30)                       | 3.50<br>(2.52 to 4.86)                       |
| Chronic kidney disease                                     | 94,034.89<br>(75,239.15 to 115,856.35)          | 268,699.51<br>(48,075.92 to 861,048.73)           | 193,588.71<br>(35,594.73 to 741,385.71)         | 319,713.61<br>(56,047.60 to 975,045.96)           | 4,476.42<br>(3,611.48 to 5,477.27)           | 18,122.94<br>(2,795.02 to 58,872.88)         | 13,608.72<br>(2,157.38 to 52,144.26)         | 20,603.40<br>(3,177.14 to 62,897.21)         |
| Chronic kidney disease due to diabetes mellitus            | 57,404.03<br>(45,294.70 to 71,033.81)           | 163,530.10<br>(28,874.66 to 540,254.75)           | 115,889.81<br>(21,498.06 to 456,192.18)         | 196,771.35<br>(34,423.54 to 612,126.68)           | 2,538.92<br>(2,004.81 to 3,128.61)           | 9,649.62<br>(1,453.73 to 31,742.74)          | 7,082.91<br>(1,108.71 to 28,096.95)          | 11,168.84<br>(1,705.09 to 34,270.37)         |
| Chronic kidney disease due to hypertension                 | 25,109.04<br>(19,194.75 to 31,923.74)           | 84,864.20<br>(13,419.65 to 278,023.26)            | 63,027.68<br>(9,977.65 to 245,947.53)           | 98,223.90<br>(15,661.05 to 304,892.70)            | 1,537.73<br>(1,200.71 to 1,913.12)           | 7,176.77<br>(1,119.03 to 23,046.62)          | 5,565.02<br>(883.39 to 21,535.30)            | 7,933.20<br>(1,259.97 to 24,381.01)          |
| Chronic kidney disease due to glomerulonephritis           | 5,581.17<br>(4,305.76 to 7,193.60)              | 8,176.51<br>(2,340.62 to 24,206.96)               | 5,880.31<br>(1,778.74 to 19,283.62)             | 10,091.01<br>(2,905.32 to 28,859.77)              | 173.01<br>(130.21 to 225.34)                 | 460.76<br>(90.86 to 1,487.29)                | 335.08<br>(67.99 to 1,243.15)                | 543.67<br>(110.72 to 1,620.40)               |
| Chronic kidney disease due to other and unspecified causes | 5,940.65<br>(4,479.53 to 7,855.00)              | 12,128.70<br>(2,667.40 to 36,682.65)              | 8,790.91<br>(2,086.83 to 31,790.00)             | 14,627.35<br>(3,209.31 to 42,496.83)              | 236.76<br>(176.61 to 308.97)                 | 835.79<br>(147.49 to 2,773.60)               | 625.70<br>(111.55 to 2,424.57)               | 957.69<br>(169.78 to 3,022.06)               |
| Urinary diseases and male infertility                      | 27,191.81<br>(21,754.33 to 33,880.33)           | 33,814.26<br>(25,481.85 to 42,839.00)             | 31,436.56<br>(23,188.82 to 41,487.51)           | 34,640.75<br>(26,479.84 to 43,556.84)             | 1,265.40<br>(1,029.27 to 1,552.98)           | 2,263.15<br>(1,768.46 to 2,772.32)           | 2,164.58<br>(1,679.79 to 2,695.67)           | 2,218.17<br>(1,724.09 to 2,699.47)           |
| Urinary tract infections                                   | 21,279.65<br>(16,510.37 to 26,723.05)           | 27,858.06<br>(20,833.83 to 36,859.13)             | 26,071.88<br>(18,917.82 to 34,698.94)           | 28,103.92<br>(21,113.16 to 35,923.97)             | 969.26<br>(748.34 to 1,219.50)               | 1,851.21<br>(1,407.78 to 2,324.83)           | 1,782.23<br>(1,331.62 to 2,273.28)           | 1,786.56<br>(1,343.04 to 2,217.26)           |
| Urolithiasis                                               | 258.27<br>(167.18 to 450.78)                    | 341.36<br>(206.48 to 653.25)                      | 300.55<br>(179.28 to 567.52)                    | 356.70<br>(219.60 to 681.84)                      | 10.32<br>(6.87 to 18.76)                     | 19.35<br>(12.31 to 33.92)                    | 17.58<br>(11.15 to 30.85)                    | 19.22<br>(12.54 to 35.15)                    |
| Other urinary diseases                                     | 5,653.88<br>(3,503.87 to 8,788.42)              | 5,614.84<br>(3,296.29 to 9,131.32)                | 5,064.12<br>(2,959.24 to 8,394.59)              | 6,180.13<br>(3,714.18 to 9,939.20)                | 285.82<br>(182.03 to 425.32)                 | 392.59<br>(237.95 to 613.42)                 | 364.77<br>(217.73 to 584.79)                 | 412.39<br>(251.79 to 639.89)                 |
| Gynecological diseases                                     | 186.23<br>(126.78 to 262.40)                    | 185.90<br>(114.48 to 283.41)                      | 148.47<br>(88.67 to 231.67)                     | 228.48<br>(142.97 to 346.58)                      | 5.89<br>(4.12 to 8.29)                       | 7.99<br>(5.15 to 11.89)                      | 6.50<br>(4.07 to 10.07)                      | 9.51<br>(6.24 to 14.14)                      |
| Uterine fibroids                                           | 4.03<br>(1.67 to 10.48)                         | 4.42<br>(1.71 to 10.86)                           | 3.78<br>(1.51 to 9.20)                          | 5.41<br>(2.13 to 13.53)                           | 0.14<br>(0.07 to 0.32)                       | 0.20<br>(0.09 to 0.45)                       | 0.18<br>(0.08 to 0.37)                       | 0.24<br>(0.11 to 0.51)                       |
| Polycystic ovarian syndrome                                | 2.56<br>(0.60 to 8.10)                          | 1.21<br>(0.23 to 4.19)                            | 0.83<br>(0.16 to 2.86)                          | 1.77<br>(0.25 to 6.04)                            | 0.06<br>(0.01 to 0.21)                       | 0.03<br>(0.01 to 0.10)                       | 0.02<br>(0.00 to 0.15)                       | 0.04<br>(0.01 to 0.15)                       |
| Endometriosis                                              | 1.32<br>(0.51 to 3.54)                          | 1.24<br>(0.38 to 3.56)                            | 1.01<br>(0.30 to 2.87)                          | 1.57<br>(0.49 to 4.43)                            | 0.03<br>(0.01 to 0.08)                       | 0.03<br>(0.01 to 0.08)                       | 0.02<br>(0.01 to 0.07)                       | 0.03<br>(0.01 to 0.10)                       |
| Genital prolapse                                           | 4.95<br>(2.14 to 9.19)                          | 4.96<br>(1.53 to 10.62)                           | 4.06<br>(1.21 to 9.03)                          | 6.28<br>(1.97 to 13.71)                           | 0.27<br>(0.09 to 0.52)                       | 0.31<br>(0.08 to 0.68)                       | 0.26<br>(0.07 to 0.56)                       | 0.39<br>(0.10 to 0.86)                       |
| Other gynecological diseases                               | 173.36<br>(116.72 to 246.52)                    | 174.07<br>(107.00 to 264.89)                      | 138.81<br>(83.33 to 215.96)                     | 213.45<br>(132.72 to 326.01)                      | 5.39<br>(3.73 to 7.57)                       | 7.41<br>(4.77 to 10.96)                      | 6.03<br>(3.75 to 9.47)                       | 8.80<br>(5.73 to 13.12)                      |
| Hemoglobinopathies and hemolytic anemias                   | 7,095.27<br>(5,105.70 to 11,648.98)             | 9,305.55<br>(6,258.97 to 14,702.70)               | 8,293.05<br>(5,418.12 to 13,292.46)             | 10,578.30<br>(7,132.30 to 16,951.99)              | 279.48<br>(205.07 to 438.79)                 | 507.82<br>(359.74 to 769.29)                 | 462.72<br>(314.45 to 714.39)                 | 559.33<br>(397.07 to 855.54)                 |
| Thalassemias                                               | 699.35<br>(393.09 to 1,457.99)                  | 350.06<br>(159.90 to 794.86)                      | 332.55<br>(154.49 to 744.53)                    | 344.41<br>(151.90 to 801.73)                      | 9.33<br>(5.14 to 19.98)                      | 4.75<br>(2.16 to 11.02)                      | 4.53<br>(2.08 to 10.41)                      | 4.67<br>(2.02 to 11.08)                      |



|                                                |                                       |                                        |                                        |                                        |                                 |                                 |                                 |                                 |
|------------------------------------------------|---------------------------------------|----------------------------------------|----------------------------------------|----------------------------------------|---------------------------------|---------------------------------|---------------------------------|---------------------------------|
|                                                | 7.18<br>(4.43 to<br>12.43)            | 8.06<br>(4.82 to<br>13.57)             | 6.97<br>(4.05 to<br>11.78)             | 9.09<br>(5.51 to<br>15.24)             | 0.16<br>(0.10 to<br>0.26)       | 0.24<br>(0.15 to<br>0.40)       | 0.21<br>(0.12 to<br>0.35)       | 0.27<br>(0.17 to<br>0.44)       |
| Sickle cell disorders                          | 3,666.54<br>(2,577.18 to<br>5,673.34) | 5,632.57<br>(3,611.58 to<br>8,959.63)  | 4,906.00<br>(3,081.88 to<br>7,839.89)  | 6,573.28<br>(4,205.94 to<br>10,262.41) | 114.53<br>(82.04 to<br>170.02)  | 246.18<br>(159.92 to<br>377.79) | 216.99<br>(137.38 to<br>334.64) | 280.78<br>(186.90 to<br>429.74) |
| G6PD deficiency                                | 2,722.20<br>(1,957.48 to<br>4,547.82) | 3,314.85<br>(2,241.53 to<br>5,484.43)  | 3,047.53<br>(1,997.69 to<br>5,030.60)  | 3,652.52<br>(2,477.51 to<br>5,938.87)  | 155.46<br>(113.80 to<br>256.79) | 256.64<br>(181.43 to<br>404.88) | 240.99<br>(167.53 to<br>387.22) | 273.60<br>(188.76 to<br>438.62) |
| Other hemoglobinopathies and hemolytic anemias | 6,609.02<br>(5,087.63 to<br>8,447.24) | 8,478.70<br>(6,116.02 to<br>11,247.82) | 8,739.66<br>(6,268.12 to<br>11,729.59) | 8,523.76<br>(6,228.38 to<br>11,197.84) | 254.64<br>(196.24 to<br>323.49) | 485.87<br>(359.00 to<br>617.96) | 516.01<br>(377.11 to<br>665.91) | 467.35<br>(347.02 to<br>588.78) |

| Sri Lanka                                     |                                              |                                              |                                              |                                              |                                       |                                       |                                     |                                       |
|-----------------------------------------------|----------------------------------------------|----------------------------------------------|----------------------------------------------|----------------------------------------------|---------------------------------------|---------------------------------------|-------------------------------------|---------------------------------------|
| Cause                                         | YLLs (actual counts)                         |                                              |                                              |                                              | Deaths (actual counts)                |                                       |                                     |                                       |
|                                               | 2016                                         | 2040 Forecast                                | 2040 Better Scenario                         | 2040 Worse Scenario                          | 2016                                  | 2040 Forecast                         | 2040 Better Scenario                | 2040 Worse Scenario                   |
| <b>Musculoskeletal disorders</b>              | <b>1,547.43</b><br>(1,074.33 to 1,974.49)    | <b>2,272.32</b><br>(1,380.24 to 3,018.87)    | <b>2,194.75</b><br>(1,337.14 to 2,934.54)    | <b>2,218.81</b><br>(1,347.82 to 2,947.47)    | <b>60.50</b><br>(38.95 to 78.31)      | <b>133.49</b><br>(78.80 to 170.30)    | <b>131.77</b><br>(78.56 to 169.73)  | <b>126.05</b><br>(73.13 to 160.15)    |
| Rheumatoid arthritis                          | 273.02<br>(151.72 to 374.25)                 | 404.88<br>(228.61 to 583.18)                 | 346.33<br>(197.18 to 509.18)                 | 464.68<br>(265.99 to 661.70)                 | 13.96<br>(8.23 to 19.25)              | 27.79<br>(16.29 to 40.67)             | 24.32<br>(14.59 to 35.74)           | 30.79<br>(18.30 to 44.11)             |
| Other musculoskeletal disorders               | 1,274.41<br>(892.85 to 1,630.74)             | 1,867.45<br>(1,096.88 to 2,517.25)           | 1,848.42<br>(1,096.08 to 2,484.97)           | 1,754.13<br>(1,016.82 to 2,369.39)           | 46.53<br>(28.69 to 60.46)             | 105.70<br>(57.38 to 138.16)           | 107.45<br>(60.13 to 139.93)         | 95.26<br>(49.90 to 124.55)            |
| <b>Other non-communicable diseases</b>        | <b>53,714.78</b><br>(36,734.84 to 77,186.07) | <b>35,402.96</b><br>(21,658.97 to 55,586.25) | <b>28,840.40</b><br>(17,540.22 to 45,057.06) | <b>42,316.73</b><br>(25,130.19 to 67,025.25) | <b>779.79</b><br>(565.28 to 1,065.52) | <b>794.02</b><br>(573.48 to 1,081.94) | <b>711.96</b><br>(512.75 to 962.83) | <b>861.95</b><br>(609.64 to 1,187.27) |
| Congenital birth defects                      | 50,534.14<br>(34,601.38 to 74,238.00)        | 29,310.43<br>(16,552.27 to 49,125.63)        | 22,898.03<br>(12,450.31 to 38,382.97)        | 36,311.29<br>(20,019.05 to 61,434.54)        | 678.94<br>(469.73 to 963.13)          | 427.75<br>(253.31 to 670.19)          | 339.68<br>(200.63 to 545.36)        | 521.94<br>(308.47 to 835.32)          |
| Neural tube defects                           | 735.71<br>(365.49 to 1,356.32)               | 184.00<br>(84.20 to 373.47)                  | 137.82<br>(60.98 to 268.90)                  | 253.40<br>(111.75 to 507.12)                 | 9.56<br>(5.08 to 16.85)               | 2.71<br>(1.40 to 5.02)                | 2.06<br>(1.06 to 3.73)              | 3.68<br>(1.88 to 6.85)                |
| Congenital heart anomalies                    | 33,130.60<br>(18,602.56 to 49,096.29)        | 17,724.44<br>(8,702.50 to 30,233.25)         | 13,343.53<br>(6,401.79 to 23,352.82)         | 22,372.82<br>(10,748.02 to 38,717.78)        | 437.37<br>(243.58 to 628.36)          | 247.06<br>(124.10 to 406.21)          | 187.52<br>(91.56 to 313.86)         | 309.03<br>(153.96 to 509.78)          |
| Orofacial clefts                              | 36.01<br>(8.13 to 102.26)                    | 14.03<br>(2.49 to 42.29)                     | 9.59<br>(1.70 to 30.43)                      | 21.22<br>(3.50 to 69.68)                     | 0.42<br>(0.09 to 1.19)                | 0.16<br>(0.03 to 0.49)                | 0.11<br>(0.02 to 0.35)              | 0.25<br>(0.04 to 0.81)                |
| Down syndrome                                 | 1,442.89<br>(950.75 to 2,126.00)             | 1,240.09<br>(718.15 to 2,049.25)             | 1,244.52<br>(730.71 to 2,061.53)             | 1,364.68<br>(788.99 to 2,285.23)             | 22.80<br>(15.85 to 32.44)             | 22.10<br>(13.49 to 34.27)             | 22.44<br>(13.66 to 34.43)           | 24.03<br>(14.67 to 37.48)             |
| Other chromosomal abnormalities               | 574.53<br>(298.43 to 1,014.51)               | 548.63<br>(209.23 to 1,160.40)               | 471.17<br>(175.70 to 1,001.06)               | 660.54<br>(250.54 to 1,384.15)               | 6.78<br>(3.54 to 11.91)               | 6.55<br>(2.56 to 13.70)               | 5.31<br>(2.17 to 11.84)             | 7.87<br>(3.02 to 16.29)               |
| Congenital musculoskeletal and limb anomalies | 573.32<br>(300.24 to 1,089.35)               | 409.98<br>(182.61 to 856.29)                 | 321.89<br>(139.14 to 677.84)                 | 498.49<br>(223.74 to 1,089.42)               | 6.98<br>(3.75 to 12.99)               | 5.08<br>(2.37 to 10.37)               | 4.00<br>(1.84 to 8.17)              | 6.16<br>(2.87 to 13.01)               |
| Urogenital congenital anomalies               | 1,934.76<br>(1,353.94 to 2,881.95)           | 1,676.59<br>(1,054.32 to 2,553.41)           | 1,423.49<br>(883.72 to 2,194.88)             | 1,929.82<br>(1,222.33 to 3,011.57)           | 38.41<br>(28.11 to 53.85)             | 40.12<br>(26.17 to 58.04)             | 34.71<br>(22.27 to 51.90)           | 44.99<br>(29.73 to 64.93)             |
| Digestive congenital anomalies                | 3,041.77<br>(1,219.26 to 5,450.80)           | 1,722.15<br>(602.68 to 3,622.35)             | 1,319.18<br>(438.07 to 2,822.66)             | 2,184.76<br>(740.39 to 4,577.68)             | 35.90<br>(14.46 to 63.98)             | 20.53<br>(7.35 to 42.88)              | 15.75<br>(5.41 to 33.30)            | 26.01<br>(8.90 to 53.78)              |
| Other congenital birth defects                | 9,054.56<br>(5,224.30 to 15,672.03)          | 5,790.50<br>(2,961.34 to 10,635.29)          | 4,620.85<br>(2,312.50 to 8,280.61)           | 7,025.56<br>(3,523.87 to 12,907.62)          | 120.73<br>(74.35 to 195.69)           | 83.43<br>(47.10 to 141.99)            | 67.37<br>(37.94 to 112.53)          | 99.91<br>(55.89 to 168.73)            |
| Skin and subcutaneous diseases                | 2,005.16<br>(1,129.84 to 2,923.94)           | 5,433.45<br>(3,398.64 to 8,316.47)           | 5,372.35<br>(3,344.24 to 8,132.56)           | 5,250.35<br>(3,342.63 to 8,070.32)           | 87.10<br>(54.86 to 137.99)            | 358.63<br>(249.99 to 596.87)          | 365.66<br>(254.22 to 602.14)        | 331.25<br>(230.22 to 556.61)          |
| Cellulitis                                    | 738.83<br>(360.64 to 1,179.18)               | 2,551.92<br>(1,274.45 to 3,831.90)           | 2,597.63<br>(1,295.46 to 3,939.32)           | 2,319.61<br>(1,176.98 to 3,569.36)           | 35.13<br>(17.75 to 56.35)             | 171.80<br>(93.80 to 275.62)           | 179.36<br>(99.21 to 289.06)         | 150.57<br>(81.58 to 248.88)           |
| Pyoderma                                      | 1,058.95<br>(587.16 to 1,587.26)             | 2,493.75<br>(1,524.29 to 4,067.20)           | 2,410.04<br>(1,473.22 to 3,939.93)           | 2,547.89<br>(1,569.80 to 4,081.46)           | 41.81<br>(26.18 to 70.91)             | 156.09<br>(98.67 to 288.61)           | 156.56<br>(99.34 to 293.40)         | 151.66<br>(99.30 to 275.85)           |
| Decubitus ulcer                               | 141.05<br>(74.39 to 223.03)                  | 286.81<br>(153.26 to 518.37)                 | 268.80<br>(143.41 to 487.51)                 | 283.00<br>(151.11 to 513.43)                 | 8.07<br>(4.39 to 14.98)               | 25.48<br>(13.62 to 53.27)             | 24.53<br>(12.96 to 51.58)           | 24.12<br>(12.27 to 51.54)             |
| Other skin and subcutaneous diseases          | 66.33<br>(37.74 to 97.68)                    | 100.96<br>(60.28 to 171.96)                  | 95.88<br>(57.74 to 160.05)                   | 99.86<br>(58.81 to 166.57)                   | 2.09<br>(1.33 to 3.65)                | 5.26<br>(3.31 to 10.21)               | 5.20<br>(3.25 to 10.30)             | 4.90<br>(3.06 to 9.60)                |
| Sudden infant death syndrome                  | 1,185.48<br>(491.74 to 2,491.92)             | 659.09<br>(171.64 to 1,864.05)               | 570.02<br>(146.61 to 1,633.40)               | 755.09<br>(198.06 to 2,064.92)               | 13.76<br>(5.71 to 28.92)              | 7.65<br>(1.99 to 21.64)               | 6.61<br>(1.70 to 18.96)             | 8.76<br>(2.29 to 23.96)               |

|                          |                                             |                                             |                                             |                                             |                                          |                                          |                                          |                                          |
|--------------------------|---------------------------------------------|---------------------------------------------|---------------------------------------------|---------------------------------------------|------------------------------------------|------------------------------------------|------------------------------------------|------------------------------------------|
| Injuries                 | 531,476.64<br>(420,892.04 to<br>672,785.81) | 462,623.50<br>(266,309.76 to<br>807,538.40) | 379,982.45<br>(227,325.20 to<br>676,379.07) | 548,253.20<br>(325,754.50 to<br>958,058.80) | 14,145.51<br>(11,286.68 to<br>17,684.89) | 17,141.43<br>(11,961.19 to<br>25,176.48) | 14,724.54<br>(10,523.85 to<br>22,011.10) | 19,427.86<br>(13,558.44 to<br>28,763.89) |
| Transport injuries       | 119,982.58<br>(94,067.35 to<br>152,124.85)  | 66,593.05<br>(40,847.81 to<br>112,146.48)   | 44,394.01<br>(27,429.62 to<br>70,025.76)    | 127,015.28<br>(76,001.83 to<br>213,698.69)  | 3,458.51<br>(2,722.35 to<br>4,358.02)    | 2,807.00<br>(1,944.93 to<br>4,163.55)    | 1,977.17<br>(1,409.28 to<br>2,767.33)    | 4,792.00<br>(3,300.13 to<br>7,162.73)    |
| Road injuries            | 102,461.37<br>(80,491.00 to<br>130,274.09)  | 47,710.41<br>(29,447.12 to<br>79,273.51)    | 29,573.42<br>(18,596.87 to<br>46,730.49)    | 105,673.01<br>(63,894.81 to<br>177,014.30)  | 2,954.03<br>(2,322.76 to<br>3,733.62)    | 2,042.31<br>(1,427.95 to<br>2,989.75)    | 1,354.25<br>(966.25 to<br>1,910.13)      | 3,964.00<br>(2,752.16 to<br>5,896.42)    |
| Pedestrian road injuries | 28,712.15<br>(21,656.19 to<br>37,084.75)    | 15,392.68<br>(10,310.58 to<br>22,752.47)    | 8,868.32<br>(6,149.07 to<br>12,510.17)      | 32,873.29<br>(22,366.75 to<br>48,917.30)    | 1,105.90<br>(839.98 to<br>1,406.21)      | 885.54<br>(612.70 to<br>1,199.85)        | 545.55<br>(387.45 to<br>719.85)          | 1,698.06<br>(1,216.73 to<br>2,309.89)    |

| Sri Lanka                                       |                                                                  |                                                                 |                                                                 |                                                                 |                                                            |                                                            |                                                            |                                                            |
|-------------------------------------------------|------------------------------------------------------------------|-----------------------------------------------------------------|-----------------------------------------------------------------|-----------------------------------------------------------------|------------------------------------------------------------|------------------------------------------------------------|------------------------------------------------------------|------------------------------------------------------------|
| Cause                                           | YLLs (actual counts)                                             |                                                                 |                                                                 |                                                                 | Deaths (actual counts)                                     |                                                            |                                                            |                                                            |
|                                                 | 2016                                                             | 2040 Forecast                                                   | 2040 Better Scenario                                            | 2040 Worse Scenario                                             | 2016                                                       | 2040 Forecast                                              | 2040 Better Scenario                                       | 2040 Worse Scenario                                        |
| Cyclist road injuries                           | 4,982.27<br>(3,593.10 to<br>6,689.96)                            | 2,670.29<br>(1,560.33 to<br>4,365.26)                           | 1,814.62<br>(1,092.26 to<br>2,894.73)                           | 5,254.83<br>(3,065.21 to<br>8,827.17)                           | 148.52<br>(108.26 to<br>195.43)                            | 111.64<br>(72.12 to<br>172.14)                             | 82.59<br>(54.40 to<br>122.61)                              | 188.48<br>(117.35 to<br>294.38)                            |
| Motorcyclist road injuries                      | 25,431.22<br>(17,640.84 to<br>34,945.24)                         | 15,069.97<br>(7,501.37 to<br>28,195.96)                         | 10,778.85<br>(5,606.14 to<br>19,231.35)                         | 25,332.22<br>(12,563.06 to<br>48,243.42)                        | 575.17<br>(412.85 to<br>769.21)                            | 445.94<br>(260.62 to<br>743.45)                            | 343.59<br>(209.12 to<br>555.61)                            | 673.90<br>(385.85 to<br>1,176.67)                          |
| Motor vehicle road injuries                     | 41,473.46<br>(31,330.91 to<br>54,721.93)                         | 13,737.32<br>(8,231.36 to<br>23,168.19)                         | 7,600.15<br>(4,841.50 to<br>12,162.74)                          | 40,100.43<br>(22,850.18 to<br>71,864.48)                        | 1,068.79<br>(809.94 to<br>1,389.72)                        | 554.14<br>(362.85 to<br>817.44)                            | 350.47<br>(229.04 to<br>488.67)                            | 1,316.87<br>(872.47 to<br>2,032.88)                        |
| Other road injuries                             | 1,862.27<br>(1,310.70 to<br>2,520.78)                            | 840.15<br>(502.14 to<br>1,417.43)                               | 511.48<br>(318.66 to<br>805.63)                                 | 2,112.24<br>(1,191.47 to<br>3,732.42)                           | 55.64<br>(38.54 to<br>74.48)                               | 45.05<br>(27.20 to<br>66.90)                               | 32.05<br>(18.50 to<br>46.23)                               | 86.69<br>(51.33 to<br>135.13)                              |
| Other transport injuries                        | 17,521.21<br>(12,126.45 to<br>23,285.95)                         | 18,882.63<br>(10,560.47 to<br>33,002.65)                        | 14,820.59<br>(8,415.49 to<br>24,122.76)                         | 21,342.27<br>(11,627.23 to<br>36,556.02)                        | 504.48<br>(380.56 to<br>661.07)                            | 764.69<br>(484.07 to<br>1,174.14)                          | 622.93<br>(401.73 to<br>946.02)                            | 827.99<br>(529.40 to<br>1,283.50)                          |
| <b>Unintentional injuries</b>                   | <b>158,202.71</b><br><b>(126,502.24 to</b><br><b>199,132.52)</b> | <b>124,288.14</b><br><b>(88,959.57 to</b><br><b>173,126.37)</b> | <b>113,693.56</b><br><b>(80,935.84 to</b><br><b>160,121.08)</b> | <b>134,035.97</b><br><b>(94,742.43 to</b><br><b>187,840.03)</b> | <b>4,636.69</b><br><b>(3,762.92 to</b><br><b>5,721.71)</b> | <b>6,009.50</b><br><b>(4,886.16 to</b><br><b>7,300.86)</b> | <b>5,742.55</b><br><b>(4,676.88 to</b><br><b>7,093.13)</b> | <b>6,132.67</b><br><b>(4,947.12 to</b><br><b>7,529.88)</b> |
| Falls                                           | 51,596.11<br>(39,043.90 to<br>66,696.13)                         | 56,132.53<br>(41,845.26 to<br>73,052.24)                        | 53,779.34<br>(39,233.17 to<br>71,446.74)                        | 57,169.76<br>(42,666.12 to<br>74,669.71)                        | 2,024.64<br>(1,595.81 to<br>2,537.48)                      | 3,508.73<br>(2,817.55 to<br>4,178.60)                      | 3,455.59<br>(2,789.76 to<br>4,146.48)                      | 3,443.82<br>(2,731.69 to<br>4,155.80)                      |
| Drowning                                        | 48,883.82<br>(38,755.20 to<br>62,989.05)                         | 28,844.89<br>(17,862.85 to<br>46,460.18)                        | 25,183.53<br>(15,809.90 to<br>40,422.80)                        | 32,079.85<br>(19,463.95 to<br>51,634.32)                        | 1,101.52<br>(877.03 to<br>1,410.95)                        | 918.60<br>(643.07 to<br>1,330.29)                          | 827.66<br>(585.39 to<br>1,182.25)                          | 982.02<br>(684.83 to<br>1,423.97)                          |
| Fire, heat, and hot substances                  | 15,220.36<br>(11,656.93 to<br>19,313.12)                         | 9,684.68<br>(6,608.61 to<br>13,843.75)                          | 8,326.16<br>(5,668.47 to<br>11,977.49)                          | 11,122.24<br>(7,537.98 to<br>15,980.68)                         | 415.02<br>(325.31 to<br>516.38)                            | 434.67<br>(308.91 to<br>587.77)                            | 388.89<br>(278.14 to<br>525.02)                            | 472.59<br>(340.00 to<br>631.26)                            |
| Poisonings                                      | 2,747.46<br>(2,010.93 to<br>4,220.07)                            | 1,254.19<br>(738.37 to<br>2,067.84)                             | 1,019.05<br>(595.40 to<br>1,773.63)                             | 1,548.94<br>(905.41 to<br>2,634.56)                             | 63.28<br>(45.45 to<br>101.46)                              | 41.77<br>(26.29 to<br>70.35)                               | 35.19<br>(22.30 to<br>58.76)                               | 49.14<br>(31.30 to<br>83.71)                               |
| Exposure to mechanical forces                   | 11,234.78<br>(6,384.55 to<br>15,177.24)                          | 6,403.47<br>(3,465.99 to<br>10,502.78)                          | 5,677.28<br>(3,072.65 to<br>9,346.81)                           | 7,393.98<br>(3,955.78 to<br>12,180.50)                          | 253.93<br>(158.37 to<br>342.96)                            | 197.28<br>(128.70 to<br>285.36)                            | 180.52<br>(118.73 to<br>260.48)                            | 218.22<br>(139.51 to<br>321.75)                            |
| Unintentional firearm injuries                  | 3,249.78<br>(1,581.87 to<br>4,887.11)                            | 1,736.52<br>(872.37 to<br>3,129.31)                             | 1,575.00<br>(793.75 to<br>2,817.67)                             | 2,005.27<br>(969.68 to<br>3,515.74)                             | 75.34<br>(42.01 to<br>108.61)                              | 55.18<br>(35.57 to<br>83.61)                               | 51.72<br>(33.60 to<br>78.03)                               | 61.11<br>(37.78 to<br>93.55)                               |
| Unintentional suffocation                       | 629.01<br>(317.17 to<br>956.83)                                  | 345.42<br>(156.26 to<br>616.05)                                 | 305.98<br>(139.47 to<br>548.95)                                 | 413.21<br>(185.02 to<br>757.24)                                 | 10.14<br>(5.31 to<br>14.94)                                | 6.28<br>(3.05 to<br>10.60)                                 | 5.66<br>(2.80 to<br>9.50)                                  | 7.35<br>(3.55 to<br>12.19)                                 |
| Other exposure to mechanical forces             | 7,355.99<br>(3,853.02 to<br>10,156.95)                           | 4,321.53<br>(2,176.47 to<br>7,143.46)                           | 3,796.30<br>(1,946.53 to<br>6,314.78)                           | 4,975.50<br>(2,536.56 to<br>8,251.09)                           | 168.45<br>(93.85 to<br>231.44)                             | 135.81<br>(82.15 to<br>196.39)                             | 123.14<br>(74.77 to<br>182.03)                             | 149.75<br>(89.02 to<br>219.19)                             |
| Adverse effects of medical treatment            | 8,008.49<br>(5,995.20 to<br>10,091.46)                           | 7,041.35<br>(4,727.74 to<br>9,650.78)                           | 6,753.68<br>(4,503.29 to<br>9,584.03)                           | 7,507.22<br>(5,039.38 to<br>10,391.35)                          | 259.14<br>(190.26 to<br>333.55)                            | 352.34<br>(256.99 to<br>454.94)                            | 348.59<br>(250.29 to<br>457.04)                            | 359.46<br>(263.04 to<br>462.52)                            |
| Animal contact                                  | 5,993.80<br>(4,481.86 to<br>7,658.98)                            | 4,684.28<br>(3,033.40 to<br>6,858.82)                           | 4,307.84<br>(2,732.41 to<br>6,427.41)                           | 5,407.33<br>(3,492.28 to<br>8,132.48)                           | 156.77<br>(120.34 to<br>200.90)                            | 176.25<br>(127.70 to<br>236.25)                            | 166.67<br>(119.06 to<br>231.04)                            | 194.10<br>(139.60 to<br>263.80)                            |
| Venomous animal contact                         | 3,811.47<br>(2,626.59 to<br>4,959.87)                            | 2,588.27<br>(1,593.76 to<br>3,924.50)                           | 2,407.50<br>(1,487.15 to<br>3,713.08)                           | 3,016.45<br>(1,845.04 to<br>4,649.45)                           | 88.53<br>(64.87 to<br>114.62)                              | 78.84<br>(52.38 to<br>115.05)                              | 75.06<br>(49.04 to<br>111.61)                              | 88.73<br>(58.26 to<br>128.97)                              |
| Non-venomous animal contact                     | 2,182.33<br>(1,577.90 to<br>3,119.53)                            | 2,096.01<br>(1,369.58 to<br>3,118.25)                           | 1,900.34<br>(1,234.68 to<br>2,939.18)                           | 2,390.88<br>(1,546.09 to<br>3,582.95)                           | 68.24<br>(50.78 to<br>95.90)                               | 97.41<br>(70.16 to<br>134.60)                              | 91.60<br>(64.42 to<br>127.92)                              | 105.37<br>(75.88 to<br>143.40)                             |
| Foreign body                                    | 3,153.75<br>(2,369.37 to<br>4,195.64)                            | 2,680.22<br>(1,947.91 to<br>3,592.18)                           | 2,657.08<br>(1,910.19 to<br>3,548.15)                           | 2,702.31<br>(1,950.08 to<br>3,654.73)                           | 84.93<br>(63.18 to<br>107.02)                              | 127.03<br>(77.13 to<br>161.69)                             | 132.59<br>(79.40 to<br>169.55)                             | 119.95<br>(75.09 to<br>152.86)                             |
| Pulmonary aspiration and foreign body in airway | 2,033.46<br>(1,476.28 to<br>2,800.26)                            | 1,740.70<br>(1,151.31 to<br>2,385.99)                           | 1,680.06<br>(1,086.71 to<br>2,324.67)                           | 1,742.49<br>(1,166.53 to<br>2,411.99)                           | 52.78<br>(36.82 to<br>67.92)                               | 75.12<br>(44.75 to<br>98.80)                               | 76.05<br>(45.35 to<br>100.80)                              | 70.34<br>(42.25 to<br>92.18)                               |

|                                             |                                                                  |                                                                  |                                                                  |                                                                  |                                                            |                                                             |                                                             |                                                             |
|---------------------------------------------|------------------------------------------------------------------|------------------------------------------------------------------|------------------------------------------------------------------|------------------------------------------------------------------|------------------------------------------------------------|-------------------------------------------------------------|-------------------------------------------------------------|-------------------------------------------------------------|
|                                             | 1,120.29<br>(817.43 to<br>1,737.20)                              | 939.52<br>(646.64 to<br>1,389.61)                                | 977.02<br>(677.92 to<br>1,443.06)                                | 959.82<br>(658.30 to<br>1,441.70)                                | 32.14<br>(23.47 to<br>44.97)                               | 51.92<br>(28.69 to<br>72.36)                                | 56.54<br>(30.70 to<br>78.11)                                | 49.61<br>(28.13 to<br>68.99)                                |
| Foreign body in other body part             |                                                                  |                                                                  |                                                                  |                                                                  |                                                            |                                                             |                                                             |                                                             |
| Environmental heat and cold exposure        | 1,771.19<br>(1,050.84 to<br>2,413.73)                            | 1,485.55<br>(873.64 to<br>2,246.69)                              | 1,300.92<br>(746.18 to<br>2,033.10)                              | 1,800.48<br>(1,053.11 to<br>2,755.93)                            | 53.55<br>(35.47 to<br>72.81)                               | 60.44<br>(40.56 to<br>88.51)                                | 54.33<br>(35.37 to<br>80.41)                                | 70.54<br>(46.59 to<br>101.69)                               |
| Other unintentional injuries                | 9,592.94<br>(7,117.65 to<br>13,510.55)                           | 6,076.97<br>(3,581.90 to<br>10,575.77)                           | 4,688.70<br>(2,707.08 to<br>8,239.26)                            | 7,303.85<br>(4,401.23 to<br>12,423.04)                           | 223.93<br>(165.75 to<br>315.70)                            | 192.38<br>(129.02 to<br>291.16)                             | 152.52<br>(99.98 to<br>236.62)                              | 222.84<br>(154.84 to<br>345.61)                             |
| <b>Self-harm and interpersonal violence</b> | <b>249,808.75</b><br><b>(189,087.45 to</b><br><b>330,844.30)</b> | <b>258,767.06</b><br><b>(127,146.56 to</b><br><b>510,093.95)</b> | <b>208,978.24</b><br><b>(109,562.13 to</b><br><b>399,158.98)</b> | <b>274,164.31</b><br><b>(133,171.43 to</b><br><b>560,289.09)</b> | <b>5,976.25</b><br><b>(4,536.09 to</b><br><b>7,903.80)</b> | <b>8,006.80</b><br><b>(4,560.21 to</b><br><b>13,878.90)</b> | <b>6,682.27</b><br><b>(4,055.56 to</b><br><b>10,948.64)</b> | <b>8,191.94</b><br><b>(4,630.28 to</b><br><b>14,536.56)</b> |

| Sri Lanka                                                                           |                                                  |                                                |                                                |                                                |                                          |                                          |                                          |                                          |
|-------------------------------------------------------------------------------------|--------------------------------------------------|------------------------------------------------|------------------------------------------------|------------------------------------------------|------------------------------------------|------------------------------------------|------------------------------------------|------------------------------------------|
| Cause                                                                               | YLLs (actual counts)                             |                                                |                                                |                                                | Deaths (actual counts)                   |                                          |                                          |                                          |
|                                                                                     | 2016                                             | 2040 Forecast                                  | 2040 Better Scenario                           | 2040 Worse Scenario                            | 2016                                     | 2040 Forecast                            | 2040 Better Scenario                     | 2040 Worse Scenario                      |
| Self-harm                                                                           | 202,343.24<br>(153,230.43 to 274,363.63)         | 231,358.04<br>(110,437.43 to 466,503.25)       | 185,511.73<br>(95,730.57 to 357,799.61)        | 245,108.12<br>(115,527.60 to 511,090.28)       | 4,976.61<br>(3,766.57 to 6,707.80)       | 7,317.12<br>(4,124.14 to 12,794.50)      | 6,082.52<br>(3,666.76 to 10,059.20)      | 7,474.57<br>(4,129.72 to 13,538.66)      |
| Self-harm by firearm                                                                | 1,144.57<br>(715.45 to 1,847.08)                 | 960.52<br>(381.44 to 2,107.32)                 | 731.27<br>(310.59 to 1,585.68)                 | 1,062.03<br>(410.13 to 2,371.10)               | 27.76<br>(17.94 to 43.85)                | 31.44<br>(15.46 to 61.04)                | 25.21<br>(13.38 to 47.48)                | 33.23<br>(16.05 to 67.66)                |
| Self-harm by other specified means                                                  | 201,198.67<br>(152,456.12 to 272,802.62)         | 230,397.53<br>(109,962.23 to 464,397.55)       | 184,780.46<br>(95,441.62 to 356,213.74)        | 244,046.09<br>(115,061.86 to 509,019.02)       | 4,948.85<br>(3,748.37 to 6,671.87)       | 7,285.67<br>(4,107.29 to 12,741.74)      | 6,057.31<br>(3,651.37 to 9,999.93)       | 7,441.34<br>(4,112.31 to 13,480.46)      |
| Interpersonal violence                                                              | 47,465.51<br>(33,058.54 to 65,800.95)            | 27,409.01<br>(14,286.92 to 48,134.75)          | 23,466.50<br>(12,559.54 to 41,041.28)          | 29,056.19<br>(15,172.81 to 50,787.41)          | 999.64<br>(703.32 to 1,359.20)           | 689.68<br>(393.65 to 1,119.17)           | 599.76<br>(351.87 to 967.09)             | 717.37<br>(408.87 to 1,173.03)           |
| Physical violence by firearm                                                        | 14,581.43<br>(8,548.09 to 23,534.06)             | 7,267.37<br>(3,562.40 to 14,272.87)            | 6,135.93<br>(3,048.08 to 12,399.47)            | 7,879.72<br>(3,883.34 to 16,030.73)            | 284.76<br>(170.00 to 471.48)             | 158.07<br>(82.79 to 296.64)              | 134.80<br>(71.63 to 255.81)              | 169.32<br>(89.40 to 324.42)              |
| Physical violence by sharp object                                                   | 17,565.53<br>(10,861.63 to 25,948.10)            | 10,569.36<br>(5,265.72 to 18,940.60)           | 9,174.76<br>(4,607.48 to 16,223.86)            | 11,073.79<br>(5,491.58 to 19,828.77)           | 371.02<br>(223.77 to 538.74)             | 261.99<br>(136.57 to 427.46)             | 230.75<br>(120.64 to 372.68)             | 270.17<br>(140.36 to 443.35)             |
| Physical violence by other means                                                    | 15,318.54<br>(9,974.17 to 22,325.23)             | 9,572.28<br>(4,746.10 to 17,623.80)            | 8,155.82<br>(4,163.74 to 14,725.59)            | 10,102.68<br>(4,996.36 to 18,644.93)           | 343.86<br>(226.40 to 496.00)             | 269.62<br>(145.49 to 465.56)             | 234.20<br>(130.29 to 394.99)             | 277.88<br>(150.21 to 483.67)             |
| <b>Forces of nature, conflict and terrorism, and executions and police conflict</b> | <b>3,482.60</b><br><b>(1,838.23 to 5,154.66)</b> | <b>12,975.26</b><br><b>(0.00 to 35,699.29)</b> | <b>12,916.64</b><br><b>(0.00 to 35,438.05)</b> | <b>13,037.65</b><br><b>(0.00 to 35,991.14)</b> | <b>74.06</b><br><b>(38.91 to 109.62)</b> | <b>318.13</b><br><b>(0.00 to 790.97)</b> | <b>322.55</b><br><b>(0.00 to 798.90)</b> | <b>311.26</b><br><b>(0.00 to 774.88)</b> |
| Exposure to forces of nature                                                        | 3,351.13<br>(1,698.44 to 5,040.81)               | 7,917.38<br>(0.00 to 10,028.00)                | 7,884.71<br>(0.00 to 9,994.58)                 | 7,949.12<br>(0.00 to 10,047.51)                | 71.27<br>(36.12 to 107.20)               | 203.95<br>(0.00 to 250.66)               | 206.92<br>(0.00 to 254.28)               | 199.28<br>(0.00 to 245.15)               |
| Conflict and terrorism                                                              | 0.00<br>(0.00 to 0.00)                           | 5,039.13<br>(0.00 to 28,673.58)                | 5,013.22<br>(0.00 to 28,613.51)                | 5,069.72<br>(0.00 to 28,863.48)                | 0.00<br>(0.00 to 0.00)                   | 113.77<br>(0.00 to 675.75)               | 115.22<br>(0.00 to 682.89)               | 111.58<br>(0.00 to 666.22)               |
| Executions and police conflict                                                      | 131.47<br>(101.97 to 168.43)                     | 18.75<br>(0.00 to 534.47)                      | 18.71<br>(0.00 to 533.22)                      | 18.81<br>(0.00 to 536.47)                      | 2.79<br>(0.00 to 3.84)                   | 0.41<br>(0.00 to 11.63)                  | 0.41<br>(0.00 to 11.71)                  | 0.40<br>(0.00 to 11.50)                  |

| Seychelles                                                        |                                       |                                       |                                       |                                       |                              |                                  |                              |                                    |
|-------------------------------------------------------------------|---------------------------------------|---------------------------------------|---------------------------------------|---------------------------------------|------------------------------|----------------------------------|------------------------------|------------------------------------|
| Cause                                                             | YLLs (actual counts)                  |                                       |                                       |                                       | Deaths (actual counts)       |                                  |                              |                                    |
|                                                                   | 2016                                  | 2040 Forecast                         | 2040 Better Scenario                  | 2040 Worse Scenario                   | 2016                         | 2040 Forecast                    | 2040 Better Scenario         | 2040 Worse Scenario                |
| All causes                                                        | 17,462.30<br>(15,695.05 to 19,717.60) | 18,016.32<br>(14,672.90 to 22,659.86) | 14,661.12<br>(12,133.67 to 18,258.45) | 24,521.27<br>(19,683.03 to 30,836.85) | 729.06<br>(666.17 to 811.88) | 1,013.07<br>(881.46 to 1,180.99) | 865.67<br>(759.08 to 994.19) | 1,287.18<br>(1,118.71 to 1,491.17) |
| Communicable, maternal, neonatal, and nutritional diseases        | 2,930.19<br>(2,614.88 to 3,295.11)    | 2,240.28<br>(1,747.70 to 2,849.46)    | 1,764.74<br>(1,419.69 to 2,194.21)    | 3,358.25<br>(2,635.43 to 4,348.47)    | 93.30<br>(82.32 to 104.67)   | 114.98<br>(91.18 to 140.13)      | 97.10<br>(78.46 to 117.32)   | 152.29<br>(119.28 to 192.59)       |
| HIV/AIDS and tuberculosis                                         | 444.08<br>(404.34 to 499.87)          | 150.69<br>(111.89 to 208.99)          | 112.68<br>(83.27 to 149.28)           | 536.72<br>(436.79 to 650.24)          | 10.17<br>(9.41 to 11.32)     | 3.71<br>(2.83 to 4.95)           | 2.67<br>(2.04 to 3.44)       | 13.67<br>(10.87 to 17.01)          |
| Tuberculosis                                                      | 39.76<br>(32.75 to 49.34)             | 18.62<br>(10.10 to 33.03)             | 10.75<br>(6.40 to 18.07)              | 38.80<br>(20.47 to 70.79)             | 1.49<br>(1.27 to 1.80)       | 0.90<br>(0.52 to 1.48)           | 0.54<br>(0.34 to 0.86)       | 1.78<br>(0.99 to 3.15)             |
| HIV/AIDS                                                          | 404.32<br>(367.36 to 460.18)          | 132.08<br>(94.63 to 188.85)           | 101.93<br>(73.37 to 137.86)           | 497.93<br>(401.28 to 610.19)          | 8.67<br>(7.98 to 9.75)       | 2.81<br>(2.04 to 3.98)           | 2.13<br>(1.55 to 2.83)       | 11.89<br>(9.37 to 15.07)           |
| Diarrhea, lower respiratory, and other common infectious diseases | 1,517.41<br>(1,302.48 to 1,760.12)    | 1,522.58<br>(1,110.47 to 2,081.84)    | 1,178.72<br>(886.54 to 1,563.10)      | 2,116.07<br>(1,473.67 to 3,002.91)    | 66.91<br>(56.01 to 77.56)    | 95.12<br>(72.18 to 120.75)       | 78.94<br>(60.98 to 98.94)    | 121.16<br>(89.52 to 161.06)        |
| Diarrheal diseases                                                | 43.38<br>(27.82 to 63.94)             | 49.27<br>(11.87 to 145.46)            | 57.69<br>(18.12 to 153.00)            | 45.78<br>(10.86 to 136.57)            | 1.82<br>(1.07 to 2.97)       | 3.29<br>(0.78 to 9.45)           | 4.10<br>(1.28 to 10.91)      | 2.85<br>(0.66 to 8.64)             |
| Intestinal infectious diseases                                    | 10.64<br>(5.05 to 19.34)              | 6.78<br>(2.80 to 12.98)               | 7.37<br>(3.06 to 13.99)               | 6.72<br>(2.76 to 13.04)               | 0.17<br>(0.08 to 0.30)       | 0.12<br>(0.05 to 0.22)           | 0.13<br>(0.06 to 0.25)       | 0.11<br>(0.05 to 0.21)             |
| Typhoid fever                                                     | 8.85<br>(4.00 to 16.55)               | 5.78<br>(2.27 to 11.10)               | 6.60<br>(2.72 to 12.56)               | 5.42<br>(2.17 to 10.65)               | 0.14<br>(0.06 to 0.25)       | 0.10<br>(0.04 to 0.19)           | 0.12<br>(0.05 to 0.22)       | 0.09<br>(0.04 to 0.17)             |
| Paratyphoid fever                                                 | 1.72<br>(0.69 to 3.54)                | 0.97<br>(0.36 to 2.15)                | 0.74<br>(0.27 to 1.67)                | 1.26<br>(0.46 to 2.77)                | 0.03<br>(0.01 to 0.06)       | 0.02<br>(0.01 to 0.04)           | 0.01<br>(0.01 to 0.03)       | 0.02<br>(0.01 to 0.05)             |
| Other intestinal infectious diseases                              | 0.07<br>(0.03 to 0.14)                | 0.03<br>(0.01 to 0.07)                | 0.03<br>(0.01 to 0.06)                | 0.04<br>(0.01 to 0.08)                | 0.00<br>(0.00 to 0.00)       | 0.00<br>(0.00 to 0.00)           | 0.00<br>(0.00 to 0.00)       | 0.00<br>(0.00 to 0.00)             |
| Lower respiratory infections                                      | 1,233.00<br>(1,041.64 to 1,451.39)    | 1,333.61<br>(937.22 to 1,873.34)      | 1,009.05<br>(733.46 to 1,360.66)      | 1,896.14<br>(1,289.72 to 2,744.86)    | 59.56<br>(48.78 to 69.38)    | 87.42<br>(64.76 to 113.45)       | 71.13<br>(53.96 to 90.02)    | 113.18<br>(82.32 to 153.99)        |
| Upper respiratory infections                                      | 0.34<br>(0.18 to 0.60)                | 0.22<br>(0.09 to 0.46)                | 0.14<br>(0.06 to 0.30)                | 0.33<br>(0.15 to 0.69)                | 0.01<br>(0.01 to 0.02)       | 0.01<br>(0.00 to 0.02)           | 0.01<br>(0.01 to 0.01)       | 0.01<br>(0.01 to 0.03)             |
| Otitis media                                                      | 0.07<br>(0.05 to 0.10)                | 0.02<br>(0.01 to 0.04)                | 0.03<br>(0.01 to 0.04)                | 0.02<br>(0.01 to 0.04)                | 0.00<br>(0.00 to 0.00)       | 0.00<br>(0.00 to 0.00)           | 0.00<br>(0.00 to 0.00)       | 0.00<br>(0.00 to 0.00)             |
| Meningitis                                                        | 191.29<br>(148.27 to 290.43)          | 86.67<br>(56.43 to 142.75)            | 65.32<br>(42.91 to 106.89)            | 110.07<br>(74.97 to 177.75)           | 4.41<br>(3.42 to 6.70)       | 2.98<br>(2.07 to 4.77)           | 2.34<br>(1.63 to 3.66)       | 3.56<br>(2.62 to 5.59)             |
| Pneumococcal meningitis                                           | 1.78<br>(1.26 to 2.62)                | 0.68<br>(0.46 to 1.05)                | 0.69<br>(0.46 to 1.07)                | 0.68<br>(0.46 to 1.05)                | 0.05<br>(0.03 to 0.07)       | 0.03<br>(0.02 to 0.05)           | 0.03<br>(0.02 to 0.05)       | 0.03<br>(0.02 to 0.04)             |
| H influenzae type B meningitis                                    | 13.77<br>(10.57 to 21.14)             | 7.38<br>(4.84 to 12.13)               | 7.26<br>(4.73 to 11.96)               | 7.71<br>(4.92 to 12.65)               | 0.31<br>(0.24 to 0.47)       | 0.23<br>(0.16 to 0.36)           | 0.24<br>(0.17 to 0.38)       | 0.22<br>(0.16 to 0.35)             |
| Meningococcal meningitis                                          | 63.60<br>(48.03 to 98.99)             | 28.65<br>(18.00 to 49.91)             | 21.42<br>(13.25 to 36.64)             | 36.33<br>(24.21 to 60.48)             | 1.54<br>(1.16 to 2.41)       | 1.06<br>(0.71 to 1.75)           | 0.83<br>(0.56 to 1.35)       | 1.26<br>(0.87 to 2.06)             |
| Other meningitis                                                  | 112.14<br>(87.46 to 166.10)           | 49.96<br>(31.88 to 83.59)             | 35.95<br>(23.56 to 58.51)             | 65.36<br>(44.96 to 103.67)            | 2.52<br>(1.96 to 3.80)       | 1.66<br>(1.12 to 2.73)           | 1.25<br>(0.87 to 1.93)       | 2.05<br>(1.51 to 3.15)             |
| Encephalitis                                                      | 30.41<br>(23.98 to 42.67)             | 26.28<br>(19.51 to 35.37)             | 25.30<br>(18.49 to 33.94)             | 27.96<br>(20.62 to 38.02)             | 0.73<br>(0.57 to 0.89)       | 0.95<br>(0.67 to 1.20)           | 0.96<br>(0.67 to 1.22)       | 0.96<br>(0.68 to 1.20)             |

|                |                           |                             |                             |                              |                           |                           |                           |                           |
|----------------|---------------------------|-----------------------------|-----------------------------|------------------------------|---------------------------|---------------------------|---------------------------|---------------------------|
| Diphtheria     | 0.06<br>(0.04 to<br>0.08) | 0.01<br>(0.01 to<br>0.02)   | 0.01<br>(0.01 to<br>0.02)   | 0.01<br>(0.01 to<br>0.03)    | 0.00<br>(0.00 to<br>0.00) | 0.00<br>(0.00 to<br>0.00) | 0.00<br>(0.00 to<br>0.00) | 0.00<br>(0.00 to<br>0.00) |
| Whooping cough | 0.60<br>(0.04 to<br>2.00) | 0.29<br>(0.01 to<br>1.23)   | 0.23<br>(0.01 to<br>0.99)   | 0.79<br>(0.01 to<br>3.40)    | 0.01<br>(0.00 to<br>0.02) | 0.00<br>(0.00 to<br>0.01) | 0.00<br>(0.00 to<br>0.01) | 0.01<br>(0.00 to<br>0.04) |
| Tetanus        | 4.49<br>(2.37 to<br>6.21) | 0.59<br>(0.30 to<br>0.94)   | 0.58<br>(0.29 to<br>0.92)   | 0.66<br>(0.33 to<br>1.04)    | 0.12<br>(0.07 to<br>0.17) | 0.02<br>(0.01 to<br>0.03) | 0.02<br>(0.01 to<br>0.03) | 0.02<br>(0.01 to<br>0.03) |
| Measles        | 0.78<br>(0.23 to<br>1.95) | 17.75<br>(0.17 to<br>83.72) | 12.12<br>(0.15 to<br>49.49) | 26.15<br>(0.21 to<br>129.60) | 0.01<br>(0.00 to<br>0.02) | 0.27<br>(0.00 to<br>1.30) | 0.19<br>(0.00 to<br>0.87) | 0.38<br>(0.00 to<br>2.03) |



| Seychelles                                            |                                      |                                       |                                       |                                       |                                  |                                  |                                  |                                  |
|-------------------------------------------------------|--------------------------------------|---------------------------------------|---------------------------------------|---------------------------------------|----------------------------------|----------------------------------|----------------------------------|----------------------------------|
| Cause                                                 | YLLs (actual counts)                 |                                       |                                       |                                       | Deaths (actual counts)           |                                  |                                  |                                  |
|                                                       | 2016                                 | 2040 Forecast                         | 2040 Better Scenario                  | 2040 Worse Scenario                   | 2016                             | 2040 Forecast                    | 2040 Better Scenario             | 2040 Worse Scenario              |
| Varicella and herpes zoster                           | 2.35<br>(1.49 to<br>3.65)            | 1.08<br>(0.59 to<br>1.87)             | 0.88<br>(0.50 to<br>1.50)             | 1.41<br>(0.74 to<br>2.44)             | 0.08<br>(0.05 to<br>0.11)        | 0.06<br>(0.03 to<br>0.09)        | 0.05<br>(0.03 to<br>0.08)        | 0.06<br>(0.04 to<br>0.10)        |
| <b>Neglected tropical diseases and malaria</b>        | <b>61.59</b><br>(19.23 to<br>132.94) | <b>138.94</b><br>(52.64 to<br>265.60) | <b>134.49</b><br>(53.28 to<br>248.81) | <b>144.83</b><br>(51.77 to<br>286.64) | <b>1.20</b><br>(0.44 to<br>2.41) | <b>3.45</b><br>(1.47 to<br>6.39) | <b>3.50</b><br>(1.54 to<br>6.41) | <b>3.40</b><br>(1.37 to<br>6.44) |
| Malaria                                               | 0.00<br>(0.00 to<br>0.00)            | 0.00<br>(0.00 to<br>0.00)             | 0.00<br>(0.00 to<br>0.00)             | 0.00<br>(0.00 to<br>0.00)             | 0.00<br>(0.00 to<br>0.00)        | 0.00<br>(0.00 to<br>0.00)        | 0.00<br>(0.00 to<br>0.00)        | 0.00<br>(0.00 to<br>0.00)        |
| Chagas disease                                        | 0.00<br>(0.00 to<br>0.00)            | 0.00<br>(0.00 to<br>0.00)             | 0.00<br>(0.00 to<br>0.00)             | 0.00<br>(0.00 to<br>0.00)             | 0.00<br>(0.00 to<br>0.00)        | 0.00<br>(0.00 to<br>0.00)        | 0.00<br>(0.00 to<br>0.00)        | 0.00<br>(0.00 to<br>0.00)        |
| Leishmaniasis                                         | 0.00<br>(0.00 to<br>0.00)            | 0.00<br>(0.00 to<br>0.00)             | 0.00<br>(0.00 to<br>0.00)             | 0.00<br>(0.00 to<br>0.00)             | 0.00<br>(0.00 to<br>0.00)        | 0.00<br>(0.00 to<br>0.00)        | 0.00<br>(0.00 to<br>0.00)        | 0.00<br>(0.00 to<br>0.00)        |
| African trypanosomiasis                               | 0.00<br>(0.00 to<br>0.00)            | 0.00<br>(0.00 to<br>0.00)             | 0.00<br>(0.00 to<br>0.00)             | 0.00<br>(0.00 to<br>0.00)             | 0.00<br>(0.00 to<br>0.00)        | 0.00<br>(0.00 to<br>0.00)        | 0.00<br>(0.00 to<br>0.00)        | 0.00<br>(0.00 to<br>0.00)        |
| Schistosomiasis                                       | 0.00<br>(0.00 to<br>0.00)            | 0.00<br>(0.00 to<br>0.00)             | 0.00<br>(0.00 to<br>0.00)             | 0.00<br>(0.00 to<br>0.00)             | 0.00<br>(0.00 to<br>0.00)        | 0.00<br>(0.00 to<br>0.00)        | 0.00<br>(0.00 to<br>0.00)        | 0.00<br>(0.00 to<br>0.00)        |
| Cysticercosis                                         | 0.00<br>(0.00 to<br>0.00)            | 0.00<br>(0.00 to<br>0.00)             | 0.00<br>(0.00 to<br>0.00)             | 0.00<br>(0.00 to<br>0.00)             | 0.00<br>(0.00 to<br>0.00)        | 0.00<br>(0.00 to<br>0.00)        | 0.00<br>(0.00 to<br>0.00)        | 0.00<br>(0.00 to<br>0.00)        |
| Cystic echinococcosis                                 | 0.00<br>(0.00 to<br>0.00)            | 0.00<br>(0.00 to<br>0.00)             | 0.00<br>(0.00 to<br>0.00)             | 0.00<br>(0.00 to<br>0.00)             | 0.00<br>(0.00 to<br>0.00)        | 0.00<br>(0.00 to<br>0.00)        | 0.00<br>(0.00 to<br>0.00)        | 0.00<br>(0.00 to<br>0.00)        |
| Dengue                                                | 47.02<br>(6.53 to<br>117.84)         | 125.18<br>(36.72 to<br>254.79)        | 119.87<br>(36.23 to<br>237.68)        | 131.01<br>(36.06 to<br>274.82)        | 0.85<br>(0.13 to<br>2.07)        | 2.97<br>(0.88 to<br>6.04)        | 2.97<br>(0.88 to<br>5.93)        | 2.96<br>(0.86 to<br>6.09)        |
| Yellow fever                                          | 0.00<br>(0.00 to<br>0.00)            | 0.00<br>(0.00 to<br>0.00)             | 0.00<br>(0.00 to<br>0.00)             | 0.00<br>(0.00 to<br>0.00)             | 0.00<br>(0.00 to<br>0.00)        | 0.00<br>(0.00 to<br>0.00)        | 0.00<br>(0.00 to<br>0.00)        | 0.00<br>(0.00 to<br>0.00)        |
| Rabies                                                | 0.02<br>(0.01 to<br>0.02)            | 0.01<br>(0.00 to<br>0.01)             | 0.01<br>(0.00 to<br>0.01)             | 0.01<br>(0.00 to<br>0.02)             | 0.00<br>(0.00 to<br>0.00)        | 0.00<br>(0.00 to<br>0.00)        | 0.00<br>(0.00 to<br>0.00)        | 0.00<br>(0.00 to<br>0.00)        |
| Intestinal nematode infections                        | 0.29<br>(0.09 to<br>0.61)            | 0.30<br>(0.11 to<br>0.66)             | 0.29<br>(0.11 to<br>0.63)             | 0.32<br>(0.11 to<br>0.73)             | 0.01<br>(0.00 to<br>0.01)        | 0.01<br>(0.00 to<br>0.02)        | 0.01<br>(0.00 to<br>0.02)        | 0.01<br>(0.00 to<br>0.02)        |
| Other neglected tropical diseases                     | 14.26<br>(9.47 to<br>21.05)          | 13.44<br>(7.16 to<br>24.72)           | 14.32<br>(7.52 to<br>26.69)           | 13.49<br>(7.38 to<br>24.90)           | 0.34<br>(0.25 to<br>0.48)        | 0.46<br>(0.26 to<br>0.89)        | 0.51<br>(0.28 to<br>0.99)        | 0.44<br>(0.25 to<br>0.83)        |
| <b>Maternal disorders</b>                             | <b>25.30</b><br>(17.65 to<br>36.27)  | <b>11.23</b><br>(6.44 to<br>18.51)    | <b>9.13</b><br>(5.32 to<br>14.82)     | <b>14.77</b><br>(8.30 to<br>24.11)    | <b>0.47</b><br>(0.33 to<br>0.68) | <b>0.21</b><br>(0.12 to<br>0.34) | <b>0.17</b><br>(0.10 to<br>0.27) | <b>0.27</b><br>(0.16 to<br>0.45) |
| Maternal hemorrhage                                   | 6.19<br>(3.98 to<br>9.47)            | 2.52<br>(1.33 to<br>4.49)             | 2.08<br>(1.11 to<br>3.77)             | 3.28<br>(1.69 to<br>5.90)             | 0.11<br>(0.07 to<br>0.17)        | 0.05<br>(0.02 to<br>0.08)        | 0.04<br>(0.02 to<br>0.07)        | 0.06<br>(0.03 to<br>0.11)        |
| Maternal sepsis and other maternal infections         | 1.23<br>(0.62 to<br>2.09)            | 0.46<br>(0.21 to<br>0.90)             | 0.38<br>(0.17 to<br>0.74)             | 0.60<br>(0.26 to<br>1.18)             | 0.02<br>(0.01 to<br>0.04)        | 0.01<br>(0.00 to<br>0.02)        | 0.01<br>(0.00 to<br>0.01)        | 0.01<br>(0.00 to<br>0.02)        |
| Maternal hypertensive disorders                       | 2.04<br>(1.24 to<br>3.22)            | 0.86<br>(0.44 to<br>1.54)             | 0.69<br>(0.36 to<br>1.26)             | 1.13<br>(0.55 to<br>2.05)             | 0.04<br>(0.02 to<br>0.06)        | 0.02<br>(0.01 to<br>0.03)        | 0.01<br>(0.01 to<br>0.02)        | 0.02<br>(0.01 to<br>0.04)        |
| Maternal obstructed labor and uterine rupture         | 0.26<br>(0.11 to<br>0.49)            | 0.11<br>(0.04 to<br>0.24)             | 0.09<br>(0.03 to<br>0.19)             | 0.15<br>(0.06 to<br>0.33)             | 0.00<br>(0.00 to<br>0.01)        | 0.00<br>(0.00 to<br>0.00)        | 0.00<br>(0.00 to<br>0.00)        | 0.00<br>(0.00 to<br>0.01)        |
| Maternal abortion, miscarriage, and ectopic pregnancy | 11.91<br>(8.02 to<br>17.48)          | 5.54<br>(3.00 to<br>9.59)             | 4.45<br>(2.44 to<br>7.71)             | 7.30<br>(3.91 to<br>12.99)            | 0.22<br>(0.15 to<br>0.33)        | 0.10<br>(0.06 to<br>0.18)        | 0.08<br>(0.05 to<br>0.14)        | 0.14<br>(0.07 to<br>0.24)        |

|                                        |                           |                           |                           |                           |                           |                           |                           |                           |
|----------------------------------------|---------------------------|---------------------------|---------------------------|---------------------------|---------------------------|---------------------------|---------------------------|---------------------------|
|                                        | 1.33<br>(0.73 to<br>2.18) | 0.66<br>(0.29 to<br>1.30) | 0.53<br>(0.24 to<br>1.01) | 0.88<br>(0.40 to<br>1.72) | 0.02<br>(0.01 to<br>0.04) | 0.01<br>(0.01 to<br>0.02) | 0.01<br>(0.00 to<br>0.02) | 0.02<br>(0.01 to<br>0.03) |
| Indirect maternal deaths               |                           |                           |                           |                           |                           |                           |                           |                           |
|                                        | 0.15<br>(0.04 to<br>0.31) | 0.06<br>(0.02 to<br>0.14) | 0.05<br>(0.01 to<br>0.11) | 0.08<br>(0.02 to<br>0.18) | 0.00<br>(0.00 to<br>0.01) | 0.00<br>(0.00 to<br>0.00) | 0.00<br>(0.00 to<br>0.00) | 0.00<br>(0.00 to<br>0.00) |
| Late maternal deaths                   |                           |                           |                           |                           |                           |                           |                           |                           |
|                                        | 0.02<br>(0.01 to<br>0.04) | 0.03<br>(0.01 to<br>0.08) | 0.02<br>(0.00 to<br>0.06) | 0.06<br>(0.02 to<br>0.14) | 0.00<br>(0.00 to<br>0.00) | 0.00<br>(0.00 to<br>0.00) | 0.00<br>(0.00 to<br>0.00) | 0.00<br>(0.00 to<br>0.00) |
| Maternal deaths aggravated by HIV/AIDS |                           |                           |                           |                           |                           |                           |                           |                           |
|                                        | 2.18<br>(1.31 to<br>3.40) | 1.00<br>(0.53 to<br>1.77) | 0.85<br>(0.45 to<br>1.48) | 1.28<br>(0.65 to<br>2.29) | 0.04<br>(0.02 to<br>0.06) | 0.02<br>(0.01 to<br>0.03) | 0.02<br>(0.01 to<br>0.03) | 0.02<br>(0.01 to<br>0.04) |
| Other maternal disorders               |                           |                           |                           |                           |                           |                           |                           |                           |

| Seychelles                                                              |                                     |                                     |                                     |                                     |                                |                               |                               |                               |
|-------------------------------------------------------------------------|-------------------------------------|-------------------------------------|-------------------------------------|-------------------------------------|--------------------------------|-------------------------------|-------------------------------|-------------------------------|
| Cause                                                                   | YLLs (actual counts)                |                                     |                                     |                                     | Deaths (actual counts)         |                               |                               |                               |
|                                                                         | 2016                                | 2040 Forecast                       | 2040 Better Scenario                | 2040 Worse Scenario                 | 2016                           | 2040 Forecast                 | 2040 Better Scenario          | 2040 Worse Scenario           |
| <b>Neonatal disorders</b>                                               | <b>725.23</b><br>(588.93 to 893.72) | <b>236.66</b><br>(139.91 to 359.99) | <b>154.13</b><br>(90.88 to 230.27)  | <b>355.79</b><br>(206.42 to 535.05) | <b>8.38</b><br>(6.80 to 10.32) | <b>2.73</b><br>(1.62 to 4.16) | <b>1.78</b><br>(1.05 to 2.66) | <b>4.11</b><br>(2.38 to 6.18) |
| Neonatal preterm birth                                                  | 357.67<br>(261.18 to 459.99)        | 108.65<br>(61.66 to 163.08)         | 58.82<br>(32.96 to 90.16)           | 167.10<br>(93.62 to 257.69)         | 4.13<br>(3.02 to 5.31)         | 1.26<br>(0.71 to 1.88)        | 0.68<br>(0.38 to 1.04)        | 1.93<br>(1.08 to 2.98)        |
| Neonatal encephalopathy due to birth asphyxia and trauma                | 187.53<br>(121.05 to 269.61)        | 50.87<br>(22.34 to 95.48)           | 34.73<br>(15.26 to 63.89)           | 79.26<br>(34.49 to 147.81)          | 2.17<br>(1.40 to 3.11)         | 0.59<br>(0.26 to 1.10)        | 0.40<br>(0.18 to 0.74)        | 0.92<br>(0.40 to 1.71)        |
| Neonatal sepsis and other neonatal infections                           | 110.14<br>(71.70 to 166.54)         | 49.04<br>(24.95 to 81.29)           | 36.31<br>(19.35 to 60.58)           | 72.11<br>(37.00 to 123.53)          | 1.27<br>(0.83 to 1.92)         | 0.57<br>(0.29 to 0.94)        | 0.42<br>(0.22 to 0.70)        | 0.83<br>(0.43 to 1.43)        |
| Hemolytic disease and other neonatal jaundice                           | 2.61<br>(1.47 to 4.18)              | 0.58<br>(0.24 to 1.26)              | 0.42<br>(0.18 to 0.88)              | 0.88<br>(0.35 to 1.87)              | 0.03<br>(0.02 to 0.05)         | 0.01<br>(0.00 to 0.01)        | 0.00<br>(0.00 to 0.01)        | 0.01<br>(0.00 to 0.02)        |
| Other neonatal disorders                                                | 67.27<br>(42.61 to 103.41)          | 27.53<br>(13.87 to 50.17)           | 23.84<br>(12.38 to 42.75)           | 36.43<br>(17.51 to 67.14)           | 0.78<br>(0.49 to 1.19)         | 0.32<br>(0.16 to 0.58)        | 0.28<br>(0.14 to 0.49)        | 0.42<br>(0.20 to 0.78)        |
| <b>Nutritional deficiencies</b>                                         | <b>30.65</b><br>(26.96 to 35.00)    | <b>32.54</b><br>(27.11 to 38.96)    | <b>34.50</b><br>(28.61 to 41.34)    | <b>31.79</b><br>(26.53 to 38.24)    | <b>1.80</b><br>(1.60 to 2.06)  | <b>2.45</b><br>(1.95 to 3.03) | <b>2.70</b><br>(2.17 to 3.32) | <b>2.27</b><br>(1.77 to 2.86) |
| Protein-energy malnutrition                                             | 18.12<br>(14.99 to 21.38)           | 18.93<br>(14.22 to 23.81)           | 21.74<br>(16.46 to 26.70)           | 17.11<br>(12.81 to 21.47)           | 0.98<br>(0.82 to 1.15)         | 1.39<br>(1.01 to 1.83)        | 1.68<br>(1.26 to 2.14)        | 1.19<br>(0.85 to 1.56)        |
| Iodine deficiency                                                       | 0.86<br>(0.12 to 2.24)              | 1.68<br>(0.08 to 5.64)              | 1.63<br>(0.06 to 5.69)              | 1.79<br>(0.09 to 5.71)              | 0.04<br>(0.00 to 0.13)         | 0.12<br>(0.00 to 0.45)        | 0.12<br>(0.00 to 0.48)        | 0.12<br>(0.00 to 0.43)        |
| Dietary iron deficiency                                                 | 1.75<br>(1.36 to 2.24)              | 1.44<br>(0.99 to 2.16)              | 1.50<br>(1.03 to 2.25)              | 1.47<br>(1.01 to 2.20)              | 0.04<br>(0.03 to 0.06)         | 0.04<br>(0.03 to 0.07)        | 0.05<br>(0.03 to 0.08)        | 0.04<br>(0.03 to 0.07)        |
| Other nutritional deficiencies                                          | 9.92<br>(8.22 to 12.48)             | 10.49<br>(7.60 to 14.03)            | 9.64<br>(6.99 to 13.00)             | 11.43<br>(8.33 to 14.95)            | 0.74<br>(0.60 to 0.93)         | 0.89<br>(0.61 to 1.26)        | 0.86<br>(0.59 to 1.21)        | 0.92<br>(0.62 to 1.29)        |
| <b>Other communicable, maternal, neonatal, and nutritional diseases</b> | <b>125.93</b><br>(103.31 to 163.09) | <b>147.63</b><br>(117.45 to 189.12) | <b>141.09</b><br>(111.95 to 180.78) | <b>158.29</b><br>(125.48 to 203.62) | <b>4.37</b><br>(3.75 to 5.23)  | <b>7.31</b><br>(5.89 to 8.85) | <b>7.33</b><br>(5.94 to 8.82) | <b>7.40</b><br>(5.94 to 9.04) |
| Sexually transmitted infections excluding HIV                           | 8.21<br>(4.53 to 10.91)             | 3.30<br>(1.70 to 4.76)              | 3.02<br>(1.54 to 4.32)              | 3.67<br>(1.87 to 5.23)              | 0.24<br>(0.14 to 0.31)         | 0.13<br>(0.07 to 0.16)        | 0.12<br>(0.07 to 0.16)        | 0.13<br>(0.08 to 0.17)        |
| Syphilis                                                                | 3.08<br>(1.58 to 4.16)              | 0.93<br>(0.48 to 1.33)              | 0.76<br>(0.39 to 1.08)              | 1.13<br>(0.57 to 1.62)              | 0.09<br>(0.05 to 0.12)         | 0.04<br>(0.02 to 0.05)        | 0.03<br>(0.02 to 0.04)        | 0.04<br>(0.02 to 0.05)        |
| Chlamydial infection                                                    | 0.99<br>(0.58 to 1.37)              | 0.47<br>(0.24 to 0.67)              | 0.44<br>(0.23 to 0.64)              | 0.50<br>(0.25 to 0.72)              | 0.03<br>(0.02 to 0.04)         | 0.02<br>(0.02 to 0.02)        | 0.02<br>(0.01 to 0.02)        | 0.02<br>(0.01 to 0.02)        |
| Gonococcal infection                                                    | 2.71<br>(1.53 to 3.74)              | 1.29<br>(0.66 to 1.86)              | 1.22<br>(0.63 to 1.78)              | 1.37<br>(0.70 to 2.00)              | 0.08<br>(0.05 to 0.11)         | 0.05<br>(0.03 to 0.07)        | 0.05<br>(0.03 to 0.07)        | 0.05<br>(0.03 to 0.07)        |
| Other sexually transmitted infections                                   | 1.43<br>(0.80 to 1.98)              | 0.63<br>(0.31 to 0.95)              | 0.59<br>(0.29 to 0.90)              | 0.68<br>(0.33 to 1.03)              | 0.04<br>(0.02 to 0.05)         | 0.02<br>(0.01 to 0.03)        | 0.02<br>(0.01 to 0.03)        | 0.02<br>(0.01 to 0.03)        |
| Acute hepatitis                                                         | 33.07<br>(26.60 to 42.23)           | 19.80<br>(13.84 to 28.59)           | 15.18<br>(10.90 to 21.14)           | 25.00<br>(18.05 to 33.49)           | 0.97<br>(0.80 to 1.21)         | 0.75<br>(0.55 to 1.04)        | 0.59<br>(0.44 to 0.78)        | 0.93<br>(0.70 to 1.18)        |
| Acute hepatitis A                                                       | 1.29<br>(0.95 to 1.71)              | 0.50<br>(0.31 to 0.78)              | 0.41<br>(0.26 to 0.66)              | 0.61<br>(0.39 to 0.99)              | 0.03<br>(0.02 to 0.04)         | 0.02<br>(0.01 to 0.02)        | 0.01<br>(0.01 to 0.02)        | 0.02<br>(0.01 to 0.03)        |
| Acute hepatitis B                                                       | 28.25<br>(22.31 to 36.56)           | 16.90<br>(11.76 to 24.84)           | 12.89<br>(9.16 to 18.45)            | 21.45<br>(15.34 to 29.46)           | 0.83<br>(0.67 to 1.05)         | 0.63<br>(0.44 to 0.88)        | 0.49<br>(0.35 to 0.65)        | 0.78<br>(0.58 to 1.01)        |



| Seychelles                           |                                           |                                           |                                           |                                           |                                     |                                     |                                     |                                     |
|--------------------------------------|-------------------------------------------|-------------------------------------------|-------------------------------------------|-------------------------------------------|-------------------------------------|-------------------------------------|-------------------------------------|-------------------------------------|
| Cause                                | YLLs (actual counts)                      |                                           |                                           |                                           | Deaths (actual counts)              |                                     |                                     |                                     |
|                                      | 2016                                      | 2040 Forecast                             | 2040 Better Scenario                      | 2040 Worse Scenario                       | 2016                                | 2040 Forecast                       | 2040 Better Scenario                | 2040 Worse Scenario                 |
| <b>Neoplasms</b>                     | <b>3,341.52</b><br>(2,936.98 to 3,862.16) | <b>4,429.59</b><br>(3,535.25 to 5,476.59) | <b>3,911.23</b><br>(3,193.69 to 4,734.81) | <b>5,411.45</b><br>(4,293.08 to 6,703.74) | <b>139.77</b><br>(124.77 to 158.55) | <b>233.72</b><br>(199.05 to 273.00) | <b>212.68</b><br>(182.80 to 245.27) | <b>271.94</b><br>(227.74 to 320.03) |
| Lip and oral cavity cancer           | 161.98<br>(133.35 to 196.57)              | 160.31<br>(87.20 to 276.61)               | 124.63<br>(71.35 to 201.77)               | 298.71<br>(148.59 to 536.33)              | 6.84<br>(5.79 to 8.13)              | 8.31<br>(4.92 to 13.18)             | 6.68<br>(4.18 to 10.31)             | 14.53<br>(7.58 to 24.44)            |
| Nasopharynx cancer                   | 52.24<br>(42.54 to 63.96)                 | 51.43<br>(28.15 to 88.36)                 | 36.54<br>(20.71 to 59.71)                 | 105.44<br>(52.98 to 188.88)               | 1.81<br>(1.51 to 2.20)              | 2.20<br>(1.25 to 3.56)              | 1.60<br>(0.95 to 2.49)              | 4.27<br>(2.23 to 7.34)              |
| Other pharynx cancer                 | 110.79<br>(89.03 to 137.75)               | 120.36<br>(68.60 to 201.95)               | 120.07<br>(68.65 to 195.15)               | 151.60<br>(80.57 to 261.31)               | 4.23<br>(3.46 to 5.16)              | 5.62<br>(3.35 to 9.14)              | 5.74<br>(3.49 to 9.01)              | 6.83<br>(3.84 to 11.37)             |
| Esophageal cancer                    | 117.80<br>(97.75 to 143.57)               | 128.03<br>(77.64 to 207.35)               | 111.96<br>(70.88 to 170.13)               | 201.48<br>(110.14 to 353.28)              | 4.76<br>(4.02 to 5.67)              | 6.22<br>(3.95 to 9.35)              | 5.58<br>(3.70 to 8.10)              | 9.29<br>(5.29 to 15.23)             |
| Stomach cancer                       | 123.32<br>(106.30 to 145.94)              | 117.09<br>(89.83 to 150.52)               | 96.88<br>(76.36 to 121.48)                | 139.47<br>(108.75 to 177.78)              | 5.31<br>(4.63 to 6.12)              | 6.21<br>(4.97 to 7.68)              | 5.27<br>(4.34 to 6.29)              | 7.14<br>(5.80 to 8.73)              |
| Colon and rectum cancer              | 430.77<br>(375.06 to 494.46)              | 596.21<br>(409.61 to 850.79)              | 516.65<br>(359.76 to 723.52)              | 719.80<br>(483.16 to 1,027.00)            | 19.54<br>(17.29 to 22.03)           | 33.34<br>(23.46 to 46.11)           | 29.69<br>(21.18 to 41.06)           | 38.70<br>(26.82 to 54.29)           |
| Liver cancer                         | 136.84<br>(113.13 to 165.97)              | 181.50<br>(120.35 to 266.08)              | 166.82<br>(116.59 to 232.18)              | 203.10<br>(130.11 to 310.13)              | 5.33<br>(4.47 to 6.29)              | 8.83<br>(6.15 to 12.30)             | 8.38<br>(6.18 to 11.16)             | 9.47<br>(6.38 to 13.59)             |
| Liver cancer due to hepatitis B      | 60.74<br>(45.54 to 79.01)                 | 74.53<br>(45.57 to 115.96)                | 68.70<br>(44.47 to 102.56)                | 80.59<br>(48.09 to 129.96)                | 2.19<br>(1.63 to 2.81)              | 3.39<br>(2.15 to 5.02)              | 3.22<br>(2.11 to 4.58)              | 3.53<br>(2.19 to 5.48)              |
| Liver cancer due to hepatitis C      | 26.17<br>(17.71 to 36.47)                 | 42.31<br>(25.59 to 65.20)                 | 39.91<br>(25.04 to 59.45)                 | 44.46<br>(26.22 to 70.36)                 | 1.23<br>(0.86 to 1.67)              | 2.38<br>(1.46 to 3.57)              | 2.31<br>(1.49 to 3.40)              | 2.40<br>(1.45 to 3.72)              |
| Liver cancer due to alcohol use      | 21.70<br>(14.93 to 30.80)                 | 28.05<br>(16.15 to 46.36)                 | 24.79<br>(15.03 to 39.35)                 | 38.09<br>(20.76 to 63.81)                 | 0.86<br>(0.60 to 1.18)              | 1.34<br>(0.78 to 2.16)              | 1.22<br>(0.74 to 1.92)              | 1.72<br>(0.98 to 2.84)              |
| Liver cancer due to other causes     | 28.22<br>(19.17 to 40.05)                 | 36.61<br>(21.02 to 62.59)                 | 33.42<br>(20.20 to 53.88)                 | 39.97<br>(22.26 to 70.10)                 | 1.05<br>(0.73 to 1.47)              | 1.63<br>(0.99 to 2.86)              | 1.63<br>(0.98 to 2.56)              | 1.81<br>(1.03 to 3.10)              |
| Gallbladder and biliary tract cancer | 27.20<br>(21.65 to 32.44)                 | 30.76<br>(24.45 to 36.64)                 | 30.61<br>(24.23 to 36.88)                 | 29.84<br>(23.82 to 35.16)                 | 1.30<br>(1.06 to 1.52)              | 1.73<br>(1.41 to 2.01)              | 1.76<br>(1.44 to 2.07)              | 1.64<br>(1.33 to 1.89)              |
| Pancreatic cancer                    | 124.13<br>(107.43 to 144.63)              | 211.01<br>(160.59 to 269.34)              | 208.01<br>(159.55 to 263.51)              | 217.99<br>(163.58 to 281.59)              | 5.42<br>(4.80 to 6.17)              | 11.07<br>(8.79 to 13.86)            | 11.15<br>(8.96 to 13.86)            | 11.04<br>(8.65 to 13.96)            |
| Larynx cancer                        | 89.86<br>(73.91 to 112.13)                | 80.66<br>(42.16 to 143.44)                | 53.96<br>(30.21 to 90.74)                 | 161.71<br>(77.37 to 305.33)               | 3.67<br>(3.07 to 4.41)              | 4.02<br>(2.27 to 6.96)              | 2.75<br>(1.67 to 4.50)              | 7.63<br>(3.93 to 13.87)             |
| Tracheal, bronchus, and lung cancer  | 295.18<br>(250.99 to 347.90)              | 397.48<br>(273.86 to 568.06)              | 289.16<br>(207.10 to 399.73)              | 672.34<br>(436.06 to 1,012.87)            | 12.70<br>(10.98 to 14.65)           | 20.74<br>(14.70 to 28.57)           | 15.50<br>(11.49 to 20.82)           | 33.26<br>(22.10 to 48.02)           |
| Malignant skin melanoma              | 17.39<br>(14.09 to 24.40)                 | 29.04<br>(22.73 to 41.69)                 | 33.33<br>(25.93 to 47.81)                 | 24.91<br>(19.94 to 35.72)                 | 0.68<br>(0.56 to 0.96)              | 1.45<br>(1.18 to 2.07)              | 1.70<br>(1.38 to 2.41)              | 1.20<br>(0.99 to 1.72)              |
| Non-melanoma skin cancer             | 12.84<br>(10.86 to 15.35)                 | 19.06<br>(15.34 to 23.50)                 | 16.50<br>(13.48 to 20.15)                 | 20.94<br>(17.69 to 24.66)                 | 0.57<br>(0.50 to 0.66)              | 1.05<br>(0.88 to 1.24)              | 0.94<br>(0.81 to 1.09)              | 1.11<br>(0.97 to 1.26)              |
| Breast cancer                        | 323.85<br>(251.87 to 414.54)              | 364.25<br>(246.33 to 527.88)              | 311.23<br>(219.11 to 437.66)              | 428.95<br>(286.84 to 636.11)              | 11.62<br>(9.27 to 14.30)            | 16.29<br>(11.56 to 22.78)           | 14.19<br>(10.32 to 19.46)           | 18.68<br>(13.13 to 26.94)           |
| Cervical cancer                      | 197.53<br>(147.06 to 298.11)              | 178.40<br>(126.15 to 274.52)              | 148.89<br>(108.74 to 216.63)              | 209.83<br>(154.77 to 318.30)              | 7.64<br>(5.95 to 11.14)             | 8.40<br>(6.34 to 12.32)             | 7.17<br>(5.56 to 10.08)             | 9.59<br>(7.48 to 13.81)             |

|                   |                                 |                                 |                                 |                                 |                              |                              |                              |                              |
|-------------------|---------------------------------|---------------------------------|---------------------------------|---------------------------------|------------------------------|------------------------------|------------------------------|------------------------------|
|                   | 16.36<br>(13.09 to<br>20.12)    | 26.51<br>(20.94 to<br>33.44)    | 24.14<br>(19.09 to<br>30.55)    | 28.93<br>(22.74 to<br>36.33)    | 0.84<br>(0.70 to<br>1.01)    | 1.54<br>(1.24 to<br>1.91)    | 1.44<br>(1.16 to<br>1.77)    | 1.64<br>(1.30 to<br>2.03)    |
| Uterine cancer    |                                 |                                 |                                 |                                 |                              |                              |                              |                              |
| Ovarian cancer    | 83.53<br>(64.70 to<br>102.98)   | 128.57<br>(90.96 to<br>178.17)  | 116.00<br>(83.18 to<br>157.85)  | 136.51<br>(95.56 to<br>192.29)  | 3.36<br>(2.66 to<br>4.04)    | 6.22<br>(4.44 to<br>8.42)    | 5.71<br>(4.17 to<br>7.65)    | 6.47<br>(4.57 to<br>8.98)    |
| Prostate cancer   | 274.54<br>(212.54 to<br>358.77) | 616.05<br>(486.60 to<br>786.96) | 588.39<br>(472.51 to<br>746.80) | 607.35<br>(477.14 to<br>779.44) | 17.86<br>(14.17 to<br>22.97) | 44.44<br>(34.81 to<br>56.54) | 43.64<br>(35.08 to<br>54.87) | 42.32<br>(32.41 to<br>54.10) |
| Testicular cancer | 4.19<br>(3.23 to<br>5.33)       | 3.22<br>(2.33 to<br>4.37)       | 2.84<br>(2.11 to<br>3.90)       | 3.52<br>(2.63 to<br>4.72)       | 0.12<br>(0.09 to<br>0.14)    | 0.12<br>(0.10 to<br>0.16)    | 0.11<br>(0.09 to<br>0.15)    | 0.13<br>(0.10 to<br>0.16)    |

| Seychelles                      |                                                            |                                                            |                                                            |                                                             |                                                      |                                                      |                                                      |                                                      |
|---------------------------------|------------------------------------------------------------|------------------------------------------------------------|------------------------------------------------------------|-------------------------------------------------------------|------------------------------------------------------|------------------------------------------------------|------------------------------------------------------|------------------------------------------------------|
| Cause                           | YLLs (actual counts)                                       |                                                            |                                                            |                                                             | Deaths (actual counts)                               |                                                      |                                                      |                                                      |
|                                 | 2016                                                       | 2040 Forecast                                              | 2040 Better Scenario                                       | 2040 Worse Scenario                                         | 2016                                                 | 2040 Forecast                                        | 2040 Better Scenario                                 | 2040 Worse Scenario                                  |
| Kidney cancer                   | 44.52<br>(37.46 to<br>53.02)                               | 70.00<br>(53.70 to<br>90.61)                               | 70.37<br>(54.08 to<br>90.79)                               | 70.22<br>(52.44 to<br>94.70)                                | 1.74<br>(1.48 to<br>2.03)                            | 3.41<br>(2.72 to<br>4.25)                            | 3.52<br>(2.84 to<br>4.30)                            | 3.29<br>(2.54 to<br>4.24)                            |
| Bladder cancer                  | 68.05<br>(58.59 to<br>79.10)                               | 105.22<br>(79.77 to<br>139.73)                             | 96.17<br>(74.67 to<br>125.14)                              | 118.80<br>(87.73 to<br>162.50)                              | 3.68<br>(3.21 to<br>4.19)                            | 6.74<br>(5.22 to<br>8.84)                            | 6.36<br>(5.01 to<br>8.16)                            | 7.26<br>(5.39 to<br>9.83)                            |
| Brain and nervous system cancer | 130.51<br>(106.76 to<br>173.66)                            | 173.29<br>(135.81 to<br>227.89)                            | 164.05<br>(128.49 to<br>214.80)                            | 176.81<br>(140.19 to<br>232.44)                             | 4.02<br>(3.31 to<br>5.26)                            | 7.05<br>(5.52 to<br>9.02)                            | 6.87<br>(5.35 to<br>8.79)                            | 6.93<br>(5.53 to<br>8.90)                            |
| Thyroid cancer                  | 6.17<br>(5.21 to<br>7.28)                                  | 9.81<br>(7.06 to<br>13.78)                                 | 8.37<br>(6.26 to<br>11.19)                                 | 10.92<br>(7.88 to<br>15.26)                                 | 0.27<br>(0.23 to<br>0.31)                            | 0.51<br>(0.38 to<br>0.69)                            | 0.45<br>(0.34 to<br>0.59)                            | 0.55<br>(0.41 to<br>0.75)                            |
| Mesothelioma                    | 5.72<br>(4.17 to<br>7.83)                                  | 6.83<br>(4.90 to<br>9.43)                                  | 7.04<br>(5.01 to<br>9.85)                                  | 6.53<br>(4.71 to<br>8.97)                                   | 0.19<br>(0.14 to<br>0.27)                            | 0.30<br>(0.23 to<br>0.40)                            | 0.32<br>(0.24 to<br>0.43)                            | 0.27<br>(0.21 to<br>0.37)                            |
| Hodgkin lymphoma                | 15.56<br>(11.76 to<br>23.46)                               | 11.91<br>(8.46 to<br>18.21)                                | 9.63<br>(6.99 to<br>14.75)                                 | 14.40<br>(10.39 to<br>22.31)                                | 0.49<br>(0.38 to<br>0.72)                            | 0.48<br>(0.36 to<br>0.73)                            | 0.40<br>(0.30 to<br>0.60)                            | 0.57<br>(0.43 to<br>0.86)                            |
| Non-Hodgkin lymphoma            | 132.91<br>(107.84 to<br>155.86)                            | 171.84<br>(130.10 to<br>219.90)                            | 152.83<br>(116.64 to<br>194.14)                            | 181.73<br>(139.06 to<br>231.48)                             | 4.66<br>(3.81 to<br>5.41)                            | 7.91<br>(6.16 to<br>9.83)                            | 7.23<br>(5.69 to<br>8.95)                            | 8.09<br>(6.24 to<br>10.16)                           |
| Multiple myeloma                | 38.49<br>(28.74 to<br>46.56)                               | 58.49<br>(42.00 to<br>75.53)                               | 54.11<br>(38.76 to<br>69.19)                               | 59.53<br>(42.85 to<br>76.26)                                | 1.50<br>(1.15 to<br>1.77)                            | 2.77<br>(2.07 to<br>3.49)                            | 2.62<br>(1.96 to<br>3.27)                            | 2.75<br>(2.04 to<br>3.52)                            |
| Leukemia                        | 195.10<br>(163.90 to<br>229.97)                            | 214.53<br>(159.66 to<br>281.76)                            | 185.23<br>(141.57 to<br>240.68)                            | 245.25<br>(182.52 to<br>325.65)                             | 5.91<br>(4.98 to<br>6.92)                            | 8.98<br>(6.90 to<br>11.72)                           | 7.97<br>(6.26 to<br>10.00)                           | 9.89<br>(7.58 to<br>12.98)                           |
| Acute lymphoid leukemia         | 52.03<br>(43.07 to<br>64.64)                               | 54.88<br>(40.95 to<br>73.09)                               | 46.80<br>(35.75 to<br>62.55)                               | 62.49<br>(47.14 to<br>84.25)                                | 1.52<br>(1.28 to<br>1.95)                            | 2.25<br>(1.74 to<br>3.10)                            | 1.98<br>(1.54 to<br>2.65)                            | 2.47<br>(1.89 to<br>3.39)                            |
| Chronic lymphoid leukemia       | 4.13<br>(3.20 to<br>5.17)                                  | 5.04<br>(3.61 to<br>6.91)                                  | 4.60<br>(3.34 to<br>6.16)                                  | 5.46<br>(3.90 to<br>7.54)                                   | 0.15<br>(0.12 to<br>0.18)                            | 0.24<br>(0.18 to<br>0.32)                            | 0.22<br>(0.17 to<br>0.29)                            | 0.25<br>(0.18 to<br>0.33)                            |
| Acute myeloid leukemia          | 45.51<br>(36.48 to<br>56.69)                               | 60.62<br>(44.29 to<br>82.19)                               | 55.99<br>(41.40 to<br>74.87)                               | 64.72<br>(46.67 to<br>88.88)                                | 1.24<br>(1.01 to<br>1.53)                            | 2.22<br>(1.64 to<br>2.97)                            | 2.11<br>(1.58 to<br>2.76)                            | 2.29<br>(1.67 to<br>3.15)                            |
| Chronic myeloid leukemia        | 10.61<br>(8.19 to<br>13.73)                                | 6.85<br>(4.46 to<br>10.09)                                 | 4.96<br>(3.44 to<br>7.22)                                  | 8.97<br>(6.09 to<br>13.18)                                  | 0.33<br>(0.26 to<br>0.42)                            | 0.28<br>(0.19 to<br>0.40)                            | 0.21<br>(0.15 to<br>0.29)                            | 0.35<br>(0.25 to<br>0.50)                            |
| Other leukemia                  | 82.82<br>(64.37 to<br>99.71)                               | 87.14<br>(60.80 to<br>118.33)                              | 72.89<br>(51.53 to<br>98.47)                               | 103.60<br>(73.00 to<br>144.28)                              | 2.68<br>(2.08 to<br>3.19)                            | 3.99<br>(2.86 to<br>5.31)                            | 3.45<br>(2.53 to<br>4.47)                            | 4.54<br>(3.27 to<br>6.14)                            |
| Other neoplasms                 | 104.16<br>(88.87 to<br>123.39)                             | 167.73<br>(139.62 to<br>202.02)                            | 166.83<br>(137.90 to<br>202.18)                            | 164.84<br>(138.78 to<br>195.91)                             | 3.69<br>(3.18 to<br>4.28)                            | 7.76<br>(6.74 to<br>8.98)                            | 7.94<br>(6.86 to<br>9.13)                            | 7.37<br>(6.48 to<br>8.48)                            |
| <b>Cardiovascular diseases</b>  | <b>4,489.24</b><br><b>(3,973.38 to</b><br><b>5,126.46)</b> | <b>4,243.85</b><br><b>(3,026.92 to</b><br><b>6,127.54)</b> | <b>3,135.41</b><br><b>(2,356.10 to</b><br><b>4,207.99)</b> | <b>7,063.26</b><br><b>(4,795.94 to</b><br><b>10,456.43)</b> | <b>238.05</b><br><b>(216.28 to</b><br><b>264.15)</b> | <b>275.20</b><br><b>(211.50 to</b><br><b>367.29)</b> | <b>215.69</b><br><b>(172.92 to</b><br><b>272.33)</b> | <b>416.47</b><br><b>(309.55 to</b><br><b>571.63)</b> |
| Rheumatic heart disease         | 55.94<br>(46.20 to<br>66.55)                               | 27.90<br>(21.15 to<br>37.46)                               | 22.73<br>(17.30 to<br>29.43)                               | 33.97<br>(26.23 to<br>43.02)                                | 1.74<br>(1.50 to<br>2.01)                            | 1.28<br>(1.03 to<br>1.61)                            | 1.09<br>(0.89 to<br>1.31)                            | 1.48<br>(1.22 to<br>1.79)                            |
| Ischemic heart disease          | 1,909.46<br>(1,648.51 to<br>2,219.39)                      | 1,445.75<br>(798.17 to<br>2,506.97)                        | 883.35<br>(513.36 to<br>1,515.37)                          | 2,847.48<br>(1,547.35 to<br>4,970.77)                       | 104.05<br>(91.56 to<br>116.69)                       | 94.55<br>(57.07 to<br>152.00)                        | 62.56<br>(38.36 to<br>98.09)                         | 164.90<br>(97.13 to<br>267.11)                       |
| Stroke                          | 949.90<br>(814.19 to<br>1,115.54)                          | 651.34<br>(393.17 to<br>1,075.36)                          | 385.86<br>(246.71 to<br>587.99)                            | 1,330.68<br>(783.93 to<br>2,115.62)                         | 47.19<br>(41.14 to<br>53.85)                         | 40.33<br>(26.22 to<br>62.73)                         | 26.12<br>(17.47 to<br>38.11)                         | 72.20<br>(46.11 to<br>108.88)                        |
| Ischemic stroke                 | 252.66<br>(216.54 to<br>296.50)                            | 210.46<br>(124.80 to<br>374.18)                            | 136.57<br>(82.77 to<br>237.16)                             | 362.31<br>(206.89 to<br>622.31)                             | 17.27<br>(14.96 to<br>19.93)                         | 16.16<br>(9.67 to<br>29.22)                          | 11.26<br>(6.85 to<br>19.22)                          | 25.08<br>(14.88 to<br>44.79)                         |

|                                |                                     |                                       |                                     |                                       |                              |                                |                               |                                |
|--------------------------------|-------------------------------------|---------------------------------------|-------------------------------------|---------------------------------------|------------------------------|--------------------------------|-------------------------------|--------------------------------|
|                                | 697.24<br>(589.74 to<br>825.78)     | 440.88<br>(252.90 to<br>752.06)       | 249.29<br>(155.39 to<br>413.79)     | 968.38<br>(534.26 to<br>1,646.59)     | 29.92<br>(25.82 to<br>34.59) | 24.18<br>(15.45 to<br>38.48)   | 14.86<br>(10.04 to<br>22.26)  | 47.13<br>(28.85 to<br>74.62)   |
| Intracerebral hemorrhage       |                                     |                                       |                                     |                                       |                              |                                |                               |                                |
|                                | 1,109.72<br>(897.08 to<br>1,383.35) | 1,531.87<br>(1,074.71 to<br>2,295.16) | 1,330.71<br>(990.64 to<br>1,811.73) | 2,148.69<br>(1,409.79 to<br>3,454.72) | 63.10<br>(52.67 to<br>77.93) | 102.80<br>(75.56 to<br>150.43) | 93.42<br>(73.22 to<br>122.57) | 137.21<br>(95.17 to<br>215.11) |
| Hypertensive heart disease     |                                     |                                       |                                     |                                       |                              |                                |                               |                                |
|                                | 205.42<br>(170.36 to<br>249.78)     | 219.73<br>(160.68 to<br>292.85)       | 193.48<br>(142.53 to<br>254.09)     | 262.82<br>(195.92 to<br>341.65)       | 8.97<br>(7.15 to<br>10.58)   | 12.49<br>(8.76 to<br>17.11)    | 11.29<br>(8.04 to<br>15.03)   | 14.18<br>(10.10 to<br>18.71)   |
| Cardiomyopathy and myocarditis |                                     |                                       |                                     |                                       |                              |                                |                               |                                |
|                                | 23.92<br>(18.58 to<br>32.55)        | 23.29<br>(17.29 to<br>31.23)          | 22.81<br>(16.78 to<br>30.59)        | 23.74<br>(17.82 to<br>31.54)          | 0.79<br>(0.62 to<br>1.01)    | 1.13<br>(0.81 to<br>1.42)      | 1.16<br>(0.83 to<br>1.49)     | 1.07<br>(0.78 to<br>1.34)      |
| Myocarditis                    |                                     |                                       |                                     |                                       |                              |                                |                               |                                |



| Seychelles                                                    |                                                      |                                                      |                                                      |                                                        |                                                   |                                                   |                                                   |                                                   |
|---------------------------------------------------------------|------------------------------------------------------|------------------------------------------------------|------------------------------------------------------|--------------------------------------------------------|---------------------------------------------------|---------------------------------------------------|---------------------------------------------------|---------------------------------------------------|
| Cause                                                         | YLLs (actual counts)                                 |                                                      |                                                      |                                                        | Deaths (actual counts)                            |                                                   |                                                   |                                                   |
|                                                               | 2016                                                 | 2040 Forecast                                        | 2040 Better Scenario                                 | 2040 Worse Scenario                                    | 2016                                              | 2040 Forecast                                     | 2040 Better Scenario                              | 2040 Worse Scenario                               |
| Alcoholic cardiomyopathy                                      | 85.63<br>(67.15 to<br>112.29)                        | 90.66<br>(66.72 to<br>119.06)                        | 87.51<br>(63.85 to<br>115.56)                        | 110.24<br>(82.64 to<br>142.95)                         | 3.40<br>(2.70 to<br>4.27)                         | 4.49<br>(3.33 to<br>5.59)                         | 4.46<br>(3.29 to<br>5.58)                         | 5.20<br>(3.93 to<br>6.43)                         |
| Other cardiomyopathy                                          | 95.86<br>(74.18 to<br>116.76)                        | 105.78<br>(67.20 to<br>161.27)                       | 83.16<br>(52.10 to<br>122.56)                        | 128.85<br>(83.72 to<br>183.63)                         | 4.78<br>(3.36 to<br>5.83)                         | 6.88<br>(4.04 to<br>11.06)                        | 5.66<br>(3.26 to<br>8.87)                         | 7.91<br>(4.69 to<br>12.13)                        |
| Atrial fibrillation and flutter                               | 24.58<br>(19.00 to<br>30.64)                         | 49.99<br>(35.63 to<br>65.80)                         | 48.39<br>(34.63 to<br>64.02)                         | 53.30<br>(37.64 to<br>71.34)                           | 2.61<br>(1.99 to<br>3.37)                         | 5.10<br>(3.53 to<br>6.76)                         | 5.10<br>(3.62 to<br>6.78)                         | 5.20<br>(3.53 to<br>7.06)                         |
| Aortic aneurysm                                               | 32.54<br>(27.22 to<br>39.04)                         | 48.33<br>(38.27 to<br>60.41)                         | 43.81<br>(34.74 to<br>53.86)                         | 52.23<br>(41.02 to<br>64.96)                           | 1.82<br>(1.53 to<br>2.15)                         | 3.23<br>(2.61 to<br>3.95)                         | 3.07<br>(2.49 to<br>3.72)                         | 3.29<br>(2.65 to<br>4.02)                         |
| Peripheral artery disease                                     | 3.29<br>(2.07 to<br>4.90)                            | 9.86<br>(5.86 to<br>15.32)                           | 9.37<br>(5.69 to<br>14.59)                           | 9.87<br>(5.80 to<br>15.53)                             | 0.28<br>(0.18 to<br>0.42)                         | 0.89<br>(0.52 to<br>1.40)                         | 0.89<br>(0.53 to<br>1.40)                         | 0.83<br>(0.48 to<br>1.33)                         |
| Endocarditis                                                  | 45.57<br>(35.66 to<br>60.01)                         | 51.14<br>(35.48 to<br>72.49)                         | 49.57<br>(34.30 to<br>69.78)                         | 54.54<br>(38.08 to<br>77.75)                           | 1.52<br>(1.21 to<br>1.98)                         | 2.32<br>(1.65 to<br>3.20)                         | 2.34<br>(1.65 to<br>3.27)                         | 2.35<br>(1.67 to<br>3.28)                         |
| Other cardiovascular and circulatory diseases                 | 152.83<br>(107.97 to<br>265.64)                      | 207.95<br>(130.88 to<br>366.36)                      | 158.15<br>(103.42 to<br>272.41)                      | 269.68<br>(175.32 to<br>478.94)                        | 6.77<br>(4.69 to<br>11.67)                        | 12.22<br>(7.99 to<br>21.56)                       | 9.81<br>(6.49 to<br>16.68)                        | 14.82<br>(9.92 to<br>25.84)                       |
| <b>Chronic respiratory diseases</b>                           | <b>483.97</b><br><b>(422.64 to</b><br><b>564.17)</b> | <b>496.76</b><br><b>(369.98 to</b><br><b>654.16)</b> | <b>376.05</b><br><b>(293.64 to</b><br><b>475.12)</b> | <b>745.63</b><br><b>(527.29 to</b><br><b>1,040.74)</b> | <b>26.77</b><br><b>(23.61 to</b><br><b>30.98)</b> | <b>32.60</b><br><b>(25.36 to</b><br><b>41.46)</b> | <b>25.72</b><br><b>(20.98 to</b><br><b>31.76)</b> | <b>45.92</b><br><b>(34.01 to</b><br><b>61.00)</b> |
| Chronic obstructive pulmonary disease                         | 306.89<br>(262.60 to<br>370.49)                      | 357.65<br>(248.00 to<br>500.74)                      | 261.62<br>(193.07 to<br>345.71)                      | 571.45<br>(374.61 to<br>841.31)                        | 18.61<br>(16.11 to<br>22.41)                      | 24.54<br>(18.08 to<br>32.45)                      | 18.86<br>(14.63 to<br>24.25)                      | 36.27<br>(24.86 to<br>50.48)                      |
| Pneumoconiosis                                                | 0.48<br>(0.37 to<br>0.63)                            | 0.49<br>(0.36 to<br>0.63)                            | 0.45<br>(0.34 to<br>0.59)                            | 0.52<br>(0.39 to<br>0.67)                              | 0.03<br>(0.02 to<br>0.03)                         | 0.03<br>(0.02 to<br>0.04)                         | 0.03<br>(0.02 to<br>0.04)                         | 0.03<br>(0.02 to<br>0.04)                         |
| Silicosis                                                     | 0.05<br>(0.03 to<br>0.09)                            | 0.04<br>(0.02 to<br>0.06)                            | 0.02<br>(0.02 to<br>0.04)                            | 0.05<br>(0.03 to<br>0.07)                              | 0.00<br>(0.00 to<br>0.00)                         | 0.00<br>(0.00 to<br>0.00)                         | 0.00<br>(0.00 to<br>0.00)                         | 0.00<br>(0.00 to<br>0.00)                         |
| Asbestosis                                                    | 0.14<br>(0.10 to<br>0.18)                            | 0.19<br>(0.13 to<br>0.26)                            | 0.21<br>(0.15 to<br>0.29)                            | 0.16<br>(0.11 to<br>0.23)                              | 0.01<br>(0.00 to<br>0.01)                         | 0.01<br>(0.01 to<br>0.01)                         | 0.01<br>(0.01 to<br>0.02)                         | 0.01<br>(0.01 to<br>0.01)                         |
| Coal workers pneumoconiosis                                   | 0.02<br>(0.01 to<br>0.04)                            | 0.02<br>(0.01 to<br>0.03)                            | 0.02<br>(0.01 to<br>0.03)                            | 0.02<br>(0.01 to<br>0.04)                              | 0.00<br>(0.00 to<br>0.00)                         | 0.00<br>(0.00 to<br>0.00)                         | 0.00<br>(0.00 to<br>0.00)                         | 0.00<br>(0.00 to<br>0.00)                         |
| Other pneumoconiosis                                          | 0.27<br>(0.19 to<br>0.36)                            | 0.24<br>(0.17 to<br>0.34)                            | 0.20<br>(0.14 to<br>0.28)                            | 0.29<br>(0.20 to<br>0.39)                              | 0.02<br>(0.01 to<br>0.02)                         | 0.02<br>(0.01 to<br>0.05)                         | 0.02<br>(0.01 to<br>0.02)                         | 0.02<br>(0.01 to<br>0.03)                         |
| Asthma                                                        | 144.12<br>(107.51 to<br>174.99)                      | 88.02<br>(49.96 to<br>144.43)                        | 54.56<br>(33.75 to<br>84.42)                         | 129.94<br>(78.90 to<br>206.43)                         | 6.72<br>(5.09 to<br>8.13)                         | 5.20<br>(3.08 to<br>8.29)                         | 3.40<br>(2.17 to<br>5.24)                         | 7.28<br>(4.55 to<br>11.39)                        |
| Interstitial lung disease and pulmonary sarcoidosis           | 19.04<br>(12.90 to<br>32.35)                         | 36.69<br>(24.29 to<br>60.15)                         | 45.73<br>(31.81 to<br>70.54)                         | 29.29<br>(19.95 to<br>48.72)                           | 0.89<br>(0.61 to<br>1.51)                         | 2.08<br>(1.39 to<br>3.40)                         | 2.66<br>(1.86 to<br>4.23)                         | 1.61<br>(1.08 to<br>2.63)                         |
| Other chronic respiratory diseases                            | 13.43<br>(8.04 to<br>18.93)                          | 13.91<br>(7.75 to<br>20.70)                          | 13.68<br>(7.50 to<br>20.55)                          | 14.43<br>(8.01 to<br>21.59)                            | 0.53<br>(0.28 to<br>0.84)                         | 0.75<br>(0.36 to<br>1.25)                         | 0.77<br>(0.38 to<br>1.30)                         | 0.72<br>(0.36 to<br>1.20)                         |
| <b>Cirrhosis and other chronic liver diseases</b>             | <b>643.75</b><br><b>(515.75 to</b><br><b>811.43)</b> | <b>592.50</b><br><b>(436.17 to</b><br><b>775.88)</b> | <b>520.06</b><br><b>(387.72 to</b><br><b>677.03)</b> | <b>693.16</b><br><b>(521.37 to</b><br><b>876.15)</b>   | <b>21.41</b><br><b>(17.70 to</b><br><b>26.11)</b> | <b>24.44</b><br><b>(19.46 to</b><br><b>30.06)</b> | <b>21.89</b><br><b>(17.54 to</b><br><b>26.95)</b> | <b>27.76</b><br><b>(22.59 to</b><br><b>33.03)</b> |
| Cirrhosis and other chronic liver diseases due to hepatitis B | 224.87<br>(169.90 to<br>295.95)                      | 190.80<br>(147.80 to<br>294.75)                      | 235.69<br>(132.71 to<br>259.25)                      | 7.41<br>(167.80 to<br>319.00)                          | 8.73<br>(5.70 to<br>9.47)                         | 7.89<br>(6.34 to<br>11.28)                        | 7.89<br>(5.81 to<br>10.15)                        | 9.35<br>(7.02 to<br>11.92)                        |
| Cirrhosis and other chronic liver diseases due to hepatitis C | 114.58<br>(82.64 to<br>152.23)                       | 108.13<br>(74.36 to<br>149.53)                       | 94.88<br>(66.14 to<br>134.61)                        | 119.86<br>(83.88 to<br>165.75)                         | 3.71<br>(2.78 to<br>4.82)                         | 4.28<br>(3.09 to<br>5.68)                         | 3.82<br>(2.78 to<br>5.13)                         | 4.64<br>(3.46 to<br>6.02)                         |

|                                                                |                                                      |                                                      |                                                      |                                                      |                                                   |                                                   |                                                   |                                                   |
|----------------------------------------------------------------|------------------------------------------------------|------------------------------------------------------|------------------------------------------------------|------------------------------------------------------|---------------------------------------------------|---------------------------------------------------|---------------------------------------------------|---------------------------------------------------|
|                                                                | 152.06<br>(111.53 to<br>202.31)                      | 124.39<br>(85.95 to<br>176.58)                       | 106.05<br>(73.81 to<br>149.74)                       | 177.57<br>(123.53 to<br>244.14)                      | 5.13<br>(3.85 to<br>6.63)                         | 5.21<br>(3.84 to<br>6.92)                         | 4.55<br>(3.41 to<br>6.03)                         | 7.10<br>(5.25 to<br>9.31)                         |
| Cirrhosis and other chronic liver diseases due to alcohol use  |                                                      |                                                      |                                                      |                                                      |                                                   |                                                   |                                                   |                                                   |
|                                                                | 152.25<br>(120.08 to<br>187.34)                      | 144.90<br>(108.94 to<br>191.51)                      | 128.34<br>(98.48 to<br>171.84)                       | 160.04<br>(124.77 to<br>206.78)                      | 5.17<br>(4.21 to<br>6.17)                         | 6.22<br>(4.96 to<br>7.78)                         | 5.63<br>(4.53 to<br>7.01)                         | 6.67<br>(5.40 to<br>8.08)                         |
| Cirrhosis and other chronic liver diseases due to other causes |                                                      |                                                      |                                                      |                                                      |                                                   |                                                   |                                                   |                                                   |
| <b>Digestive diseases</b>                                      | <b>557.16</b><br><b>(475.85 to</b><br><b>657.03)</b> | <b>569.88</b><br><b>(448.14 to</b><br><b>731.53)</b> | <b>513.64</b><br><b>(410.84 to</b><br><b>652.48)</b> | <b>656.22</b><br><b>(511.85 to</b><br><b>876.23)</b> | <b>24.00</b><br><b>(20.83 to</b><br><b>28.07)</b> | <b>32.42</b><br><b>(26.67 to</b><br><b>39.40)</b> | <b>30.48</b><br><b>(25.48 to</b><br><b>36.19)</b> | <b>35.14</b><br><b>(28.53 to</b><br><b>43.35)</b> |
| Peptic ulcer disease                                           | 153.62<br>(125.42 to<br>190.58)                      | 103.17<br>(75.53 to<br>144.03)                       | 78.26<br>(57.49 to<br>107.02)                        | 134.70<br>(101.60 to<br>179.81)                      | 6.76<br>(5.67 to<br>8.18)                         | 5.87<br>(4.43 to<br>7.92)                         | 4.59<br>(3.51 to<br>5.98)                         | 7.37<br>(5.73 to<br>9.54)                         |

| Seychelles                                 |                              |                                |                                |                                |                           |                            |                            |                            |
|--------------------------------------------|------------------------------|--------------------------------|--------------------------------|--------------------------------|---------------------------|----------------------------|----------------------------|----------------------------|
| Cause                                      | YLLs (actual counts)         |                                |                                |                                | Deaths (actual counts)    |                            |                            |                            |
|                                            | 2016                         | 2040 Forecast                  | 2040 Better Scenario           | 2040 Worse Scenario            | 2016                      | 2040 Forecast              | 2040 Better Scenario       | 2040 Worse Scenario        |
| Gastritis and duodenitis                   | 6.24<br>(4.65 to 8.16)       | 7.24<br>(5.00 to 10.17)        | 6.18<br>(4.27 to 8.55)         | 8.17<br>(5.78 to 11.37)        | 0.29<br>(0.22 to 0.37)    | 0.43<br>(0.30 to 0.59)     | 0.38<br>(0.26 to 0.52)     | 0.46<br>(0.33 to 0.62)     |
| Appendicitis                               | 61.06<br>(48.94 to 75.52)    | 48.93<br>(36.16 to 66.55)      | 38.50<br>(27.50 to 50.83)      | 60.22<br>(44.99 to 76.42)      | 2.30<br>(1.84 to 2.75)    | 2.49<br>(1.82 to 3.18)     | 2.03<br>(1.45 to 2.58)     | 2.93<br>(2.19 to 3.61)     |
| Paralytic ileus and intestinal obstruction | 192.80<br>(162.25 to 237.61) | 251.49<br>(210.38 to 307.38)   | 255.32<br>(211.89 to 310.34)   | 246.07<br>(206.15 to 301.49)   | 8.81<br>(7.48 to 11.05)   | 15.08<br>(12.71 to 18.96)  | 15.83<br>(13.36 to 19.56)  | 14.13<br>(11.82 to 17.89)  |
| Inguinal, femoral, and abdominal hernia    | 2.70<br>(1.86 to 4.32)       | 2.57<br>(1.69 to 4.19)         | 2.31<br>(1.51 to 3.82)         | 2.79<br>(1.86 to 4.57)         | 0.15<br>(0.10 to 0.24)    | 0.18<br>(0.11 to 0.28)     | 0.16<br>(0.11 to 0.27)     | 0.18<br>(0.11 to 0.30)     |
| Inflammatory bowel disease                 | 6.70<br>(5.42 to 8.38)       | 8.71<br>(6.70 to 11.04)        | 8.70<br>(6.59 to 11.06)        | 8.55<br>(6.73 to 10.75)        | 0.28<br>(0.23 to 0.34)    | 0.48<br>(0.38 to 0.59)     | 0.49<br>(0.38 to 0.61)     | 0.45<br>(0.36 to 0.55)     |
| Vascular intestinal disorders              | 15.66<br>(12.02 to 20.94)    | 25.25<br>(19.34 to 34.99)      | 24.11<br>(18.27 to 33.29)      | 25.80<br>(20.02 to 35.40)      | 0.93<br>(0.72 to 1.26)    | 1.75<br>(1.33 to 2.41)     | 1.72<br>(1.29 to 2.34)     | 1.72<br>(1.30 to 2.36)     |
| Gallbladder and biliary diseases           | 14.60<br>(10.26 to 19.74)    | 21.14<br>(10.76 to 36.94)      | 14.96<br>(7.75 to 25.86)       | 27.82<br>(14.31 to 48.57)      | 0.79<br>(0.54 to 1.15)    | 1.36<br>(0.72 to 2.41)     | 1.01<br>(0.53 to 1.77)     | 1.71<br>(0.88 to 2.96)     |
| Pancreatitis                               | 72.78<br>(44.27 to 100.61)   | 66.17<br>(25.07 to 150.63)     | 52.06<br>(20.72 to 114.41)     | 104.88<br>(37.31 to 253.29)    | 2.27<br>(1.40 to 3.11)    | 2.66<br>(1.14 to 5.67)     | 2.15<br>(0.94 to 4.31)     | 4.04<br>(1.58 to 9.16)     |
| Other digestive diseases                   | 31.00<br>(25.54 to 40.49)    | 35.20<br>(26.53 to 46.06)      | 33.24<br>(24.98 to 43.76)      | 37.21<br>(28.21 to 47.82)      | 1.43<br>(1.10 to 1.81)    | 2.13<br>(1.64 to 2.74)     | 2.09<br>(1.59 to 2.69)     | 2.15<br>(1.63 to 2.73)     |
| Neurological disorders                     | 457.45<br>(391.89 to 534.24) | 932.10<br>(708.85 to 1,278.66) | 903.62<br>(703.69 to 1,189.81) | 930.38<br>(687.69 to 1,307.28) | 40.52<br>(34.29 to 48.08) | 85.01<br>(62.12 to 116.93) | 85.20<br>(64.71 to 111.98) | 81.06<br>(56.78 to 115.03) |
| Alzheimer's disease and other dementias    | 344.03<br>(285.17 to 417.23) | 773.45<br>(552.90 to 1,113.34) | 742.10<br>(551.20 to 1,022.94) | 770.66<br>(525.15 to 1,150.91) | 36.01<br>(29.91 to 43.40) | 75.89<br>(53.58 to 108.05) | 75.35<br>(55.25 to 102.41) | 72.74<br>(48.56 to 106.57) |
| Parkinson's disease                        | 30.06<br>(22.81 to 38.24)    | 79.60<br>(58.93 to 102.66)     | 87.47<br>(65.73 to 112.55)     | 69.08<br>(50.85 to 89.39)      | 2.39<br>(1.82 to 3.12)    | 6.48<br>(4.70 to 8.64)     | 7.28<br>(5.40 to 9.67)     | 5.47<br>(3.94 to 7.30)     |
| Epilepsy                                   | 49.89<br>(39.21 to 64.75)    | 38.51<br>(24.61 to 60.76)      | 33.23<br>(21.67 to 52.35)      | 51.06<br>(31.65 to 83.99)      | 1.14<br>(0.90 to 1.48)    | 1.12<br>(0.75 to 1.68)     | 1.00<br>(0.68 to 1.49)     | 1.43<br>(0.94 to 2.21)     |
| Multiple sclerosis                         | 8.79<br>(4.98 to 12.83)      | 9.42<br>(5.12 to 14.01)        | 9.66<br>(5.19 to 14.38)        | 9.13<br>(4.98 to 13.55)        | 0.26<br>(0.15 to 0.38)    | 0.35<br>(0.19 to 0.50)     | 0.37<br>(0.20 to 0.52)     | 0.33<br>(0.18 to 0.47)     |
| Motor neuron disease                       | 6.04<br>(4.81 to 7.30)       | 8.74<br>(6.68 to 10.91)        | 8.70<br>(6.63 to 10.94)        | 8.53<br>(6.52 to 10.58)        | 0.19<br>(0.15 to 0.23)    | 0.35<br>(0.21 to 0.41)     | 0.35<br>(0.28 to 0.42)     | 0.33<br>(0.26 to 0.39)     |
| Other neurological disorders               | 18.64<br>(15.27 to 23.45)    | 22.38<br>(17.62 to 28.65)      | 22.46<br>(17.63 to 28.78)      | 21.92<br>(17.40 to 28.03)      | 0.51<br>(0.42 to 0.64)    | 0.82<br>(0.68 to 1.01)     | 0.86<br>(0.71 to 1.05)     | 0.77<br>(0.64 to 0.94)     |
| Mental disorders                           | 122.80<br>(87.27 to 196.80)  | 150.41<br>(103.13 to 228.80)   | 169.36<br>(115.60 to 258.59)   | 139.87<br>(96.27 to 218.91)    | 3.17<br>(2.32 to 4.93)    | 4.88<br>(3.52 to 7.07)     | 5.63<br>(4.13 to 8.11)     | 4.39<br>(3.23 to 6.31)     |
| Alcohol use disorders                      | 56.92<br>(37.41 to 82.27)    | 45.06<br>(25.51 to 69.25)      | 47.50<br>(26.14 to 73.42)      | 46.12<br>(26.97 to 70.05)      | 1.48<br>(0.99 to 2.13)    | 1.44<br>(0.86 to 2.13)     | 1.55<br>(0.90 to 2.26)     | 1.44<br>(0.88 to 2.07)     |
| Drug use disorders                         | 65.56<br>(38.11 to 130.10)   | 105.05<br>(63.67 to 176.13)    | 121.54<br>(74.48 to 201.12)    | 93.46<br>(56.91 to 162.28)     | 1.68<br>(1.02 to 3.10)    | 3.43<br>(2.24 to 5.30)     | 4.08<br>(2.72 to 6.20)     | 2.95<br>(1.91 to 4.57)     |
| Opioid use disorders                       | 41.58<br>(23.81 to 85.93)    | 53.33<br>(32.55 to 90.30)      | 56.54<br>(34.71 to 94.66)      | 50.74<br>(30.64 to 87.76)      | 1.01<br>(0.61 to 1.93)    | 1.66<br>(1.08 to 2.65)     | 1.82<br>(1.19 to 2.83)     | 1.53<br>(0.98 to 2.45)     |

|                           |                              |                              |                              |                              |                           |                           |                           |                           |
|---------------------------|------------------------------|------------------------------|------------------------------|------------------------------|---------------------------|---------------------------|---------------------------|---------------------------|
|                           | 2.31<br>(1.11 to<br>5.57)    | 5.79<br>(2.86 to<br>12.55)   | 6.86<br>(3.45 to<br>14.38)   | 5.07<br>(2.48 to<br>11.23)   | 0.06<br>(0.03 to<br>0.14) | 0.18<br>(0.09 to<br>0.37) | 0.22<br>(0.11 to<br>0.44) | 0.16<br>(0.08 to<br>0.33) |
| Cocaine use disorders     | 1.83<br>(0.92 to<br>4.31)    | 6.49<br>(3.16 to<br>13.62)   | 8.50<br>(4.21 to<br>17.91)   | 5.22<br>(2.54 to<br>11.54)   | 0.04<br>(0.02 to<br>0.10) | 0.18<br>(0.09 to<br>0.38) | 0.24<br>(0.12 to<br>0.51) | 0.14<br>(0.07 to<br>0.32) |
| Amphetamine use disorders | 19.84<br>(11.12 to<br>39.91) | 39.44<br>(22.55 to<br>68.09) | 49.64<br>(28.85 to<br>83.40) | 32.42<br>(18.62 to<br>55.02) | 0.56<br>(0.34 to<br>1.02) | 1.40<br>(0.88 to<br>2.19) | 1.80<br>(1.15 to<br>2.75) | 1.12<br>(0.69 to<br>1.73) |
| Other drug use disorders  | 0.33<br>(0.21 to<br>0.66)    | 0.30<br>(0.17 to<br>0.64)    | 0.33<br>(0.18 to<br>0.70)    | 0.29<br>(0.16 to<br>0.59)    | 0.01<br>(0.00 to<br>0.01) | 0.01<br>(0.00 to<br>0.01) | 0.01<br>(0.00 to<br>0.01) | 0.01<br>(0.00 to<br>0.01) |
| Eating disorders          |                              |                              |                              |                              |                           |                           |                           |                           |

| Seychelles                                                 |                                    |                                    |                                    |                                    |                           |                             |                             |                              |
|------------------------------------------------------------|------------------------------------|------------------------------------|------------------------------------|------------------------------------|---------------------------|-----------------------------|-----------------------------|------------------------------|
| Cause                                                      | YLLs (actual counts)               |                                    |                                    |                                    | Deaths (actual counts)    |                             |                             |                              |
|                                                            | 2016                               | 2040 Forecast                      | 2040 Better Scenario               | 2040 Worse Scenario                | 2016                      | 2040 Forecast               | 2040 Better Scenario        | 2040 Worse Scenario          |
|                                                            | 1,688.38<br>(1,470.68 to 1,925.81) | 2,507.13<br>(1,609.44 to 4,813.55) | 2,023.84<br>(1,339.71 to 3,980.26) | 3,123.52<br>(2,027.86 to 5,796.60) | 78.59<br>(70.40 to 87.36) | 151.09<br>(98.35 to 279.21) | 125.59<br>(84.20 to 243.30) | 181.00<br>(118.93 to 332.98) |
| Diabetes, urogenital, blood, and endocrine diseases        |                                    |                                    |                                    |                                    |                           |                             |                             |                              |
| Diabetes mellitus                                          | 368.13<br>(316.90 to 421.16)       | 397.24<br>(263.07 to 590.90)       | 303.68<br>(204.57 to 446.46)       | 548.11<br>(357.81 to 841.84)       | 18.70<br>(16.48 to 21.09) | 24.55<br>(16.94 to 34.91)   | 19.44<br>(13.56 to 26.70)   | 32.08<br>(22.01 to 46.60)    |
| Acute glomerulonephritis                                   | 1.16<br>(0.96 to 1.39)             | 2.03<br>(1.53 to 2.70)             | 1.79<br>(1.35 to 2.37)             | 2.27<br>(1.75 to 2.93)             | 0.04<br>(0.04 to 0.05)    | 0.09<br>(0.07 to 0.15)      | 0.09<br>(0.06 to 0.11)      | 0.10<br>(0.07 to 0.13)       |
| Chronic kidney disease                                     | 899.48<br>(746.21 to 1,047.76)     | 1,546.25<br>(740.18 to 3,862.10)   | 1,220.54<br>(604.27 to 3,149.67)   | 1,958.37<br>(913.72 to 4,567.70)   | 41.17<br>(35.17 to 46.82) | 93.21<br>(43.46 to 226.00)  | 75.45<br>(36.63 to 194.20)  | 114.17<br>(51.97 to 273.96)  |
| Chronic kidney disease due to diabetes mellitus            | 560.03<br>(456.45 to 659.17)       | 971.07<br>(457.91 to 2,521.36)     | 758.63<br>(372.07 to 2,066.81)     | 1,242.14<br>(573.37 to 3,100.09)   | 23.39<br>(19.41 to 27.16) | 53.38<br>(24.37 to 135.74)  | 42.49<br>(20.36 to 116.22)  | 66.45<br>(29.87 to 163.99)   |
| Chronic kidney disease due to hypertension                 | 227.18<br>(184.50 to 272.05)       | 453.29<br>(211.61 to 1,137.19)     | 368.32<br>(177.35 to 1,000.05)     | 557.42<br>(254.13 to 1,305.75)     | 13.92<br>(11.58 to 16.21) | 33.31<br>(15.70 to 84.31)   | 27.85<br>(13.66 to 72.27)   | 39.49<br>(18.15 to 95.65)    |
| Chronic kidney disease due to glomerulonephritis           | 55.77<br>(43.46 to 69.27)          | 52.43<br>(28.61 to 113.09)         | 39.68<br>(22.19 to 89.41)          | 69.25<br>(37.47 to 148.56)         | 1.66<br>(1.29 to 2.05)    | 2.45<br>(1.18 to 6.01)      | 1.88<br>(0.92 to 4.80)      | 3.16<br>(1.53 to 7.68)       |
| Chronic kidney disease due to other and unspecified causes | 56.50<br>(43.79 to 70.27)          | 69.46<br>(34.37 to 156.33)         | 53.92<br>(27.35 to 125.92)         | 89.56<br>(43.36 to 193.94)         | 2.20<br>(1.71 to 2.73)    | 4.06<br>(1.87 to 10.15)     | 3.23<br>(1.50 to 8.40)      | 5.06<br>(2.27 to 12.46)      |
| Urinary diseases and male infertility                      | 238.82<br>(208.40 to 274.53)       | 358.61<br>(296.25 to 429.05)       | 316.39<br>(266.95 to 374.70)       | 387.81<br>(335.27 to 450.84)       | 11.99<br>(10.66 to 13.43) | 23.00<br>(19.27 to 26.95)   | 21.10<br>(18.00 to 24.39)   | 23.72<br>(20.12 to 27.34)    |
| Urinary tract infections                                   | 220.16<br>(190.27 to 255.57)       | 337.09<br>(279.96 to 403.49)       | 299.39<br>(248.83 to 355.05)       | 362.15<br>(307.44 to 421.78)       | 11.09<br>(9.77 to 12.53)  | 21.74<br>(18.26 to 25.47)   | 20.06<br>(16.94 to 23.26)   | 22.29<br>(18.65 to 25.88)    |
| Urolithiasis                                               | 8.99<br>(5.32 to 15.86)            | 12.17<br>(6.36 to 23.13)           | 9.31<br>(5.06 to 17.50)            | 14.73<br>(8.16 to 28.27)           | 0.41<br>(0.24 to 0.75)    | 0.65<br>(0.34 to 1.24)      | 0.51<br>(0.28 to 1.00)      | 0.76<br>(0.41 to 1.49)       |
| Other urinary diseases                                     | 9.67<br>(6.26 to 16.28)            | 9.36<br>(5.73 to 16.54)            | 7.70<br>(4.71 to 13.48)            | 10.94<br>(6.84 to 18.84)           | 0.50<br>(0.32 to 0.85)    | 0.61<br>(0.37 to 1.07)      | 0.52<br>(0.33 to 0.91)      | 0.67<br>(0.42 to 1.15)       |
| Gynecological diseases                                     | 1.52<br>(0.74 to 2.02)             | 0.73<br>(0.35 to 1.12)             | 0.51<br>(0.22 to 0.74)             | 0.99<br>(0.44 to 1.41)             | 0.06<br>(0.03 to 0.07)    | 0.03<br>(0.02 to 0.05)      | 0.02<br>(0.01 to 0.03)      | 0.04<br>(0.02 to 0.06)       |
| Uterine fibroids                                           | 0.30<br>(0.09 to 0.48)             | 0.16<br>(0.05 to 0.27)             | 0.12<br>(0.04 to 0.21)             | 0.20<br>(0.06 to 0.36)             | 0.01<br>(0.00 to 0.02)    | 0.01<br>(0.00 to 0.01)      | 0.01<br>(0.00 to 0.01)      | 0.01<br>(0.00 to 0.01)       |
| Polycystic ovarian syndrome                                | 0.04<br>(0.01 to 0.09)             | 0.01<br>(0.00 to 0.02)             | 0.00<br>(0.00 to 0.01)             | 0.01<br>(0.00 to 0.04)             | 0.00<br>(0.00 to 0.00)    | 0.00<br>(0.00 to 0.00)      | 0.00<br>(0.00 to 0.00)      | 0.00<br>(0.00 to 0.00)       |
| Endometriosis                                              | 0.02<br>(0.01 to 0.05)             | 0.01<br>(0.00 to 0.03)             | 0.01<br>(0.00 to 0.02)             | 0.01<br>(0.00 to 0.04)             | 0.00<br>(0.00 to 0.00)    | 0.00<br>(0.00 to 0.00)      | 0.00<br>(0.00 to 0.00)      | 0.00<br>(0.00 to 0.00)       |
| Genital prolapse                                           | 0.07<br>(0.02 to 0.12)             | 0.04<br>(0.01 to 0.07)             | 0.03<br>(0.01 to 0.05)             | 0.05<br>(0.01 to 0.09)             | 0.00<br>(0.00 to 0.01)    | 0.00<br>(0.00 to 0.00)      | 0.00<br>(0.00 to 0.00)      | 0.00<br>(0.00 to 0.01)       |
| Other gynecological diseases                               | 1.09<br>(0.58 to 1.47)             | 0.51<br>(0.27 to 0.81)             | 0.35<br>(0.18 to 0.53)             | 0.70<br>(0.37 to 1.05)             | 0.04<br>(0.02 to 0.05)    | 0.02<br>(0.01 to 0.04)      | 0.02<br>(0.01 to 0.02)      | 0.03<br>(0.01 to 0.04)       |
| Hemoglobinopathies and hemolytic anemias                   | 132.53<br>(104.64 to 161.47)       | 133.35<br>(100.98 to 173.90)       | 108.99<br>(83.18 to 139.57)        | 159.24<br>(123.53 to 199.38)       | 4.87<br>(4.00 to 6.17)    | 6.60<br>(5.16 to 8.83)      | 5.56<br>(4.39 to 7.27)      | 7.59<br>(6.12 to 9.82)       |
| Thalassemias                                               | 16.96<br>(12.39 to 23.05)          | 8.12<br>(4.92 to 12.46)            | 7.40<br>(4.55 to 11.17)            | 8.64<br>(5.20 to 13.58)            | 0.23<br>(0.17 to 0.33)    | 0.12<br>(0.07 to 0.18)      | 0.11<br>(0.06 to 0.16)      | 0.12<br>(0.07 to 0.19)       |

|                                                   |                              |                               |                               |                               |                           |                           |                           |                           |
|---------------------------------------------------|------------------------------|-------------------------------|-------------------------------|-------------------------------|---------------------------|---------------------------|---------------------------|---------------------------|
|                                                   | 0.20<br>(0.13 to<br>0.28)    | 0.17<br>(0.10 to<br>0.27)     | 0.13<br>(0.08 to<br>0.20)     | 0.21<br>(0.13 to<br>0.32)     | 0.00<br>(0.00 to<br>0.01) | 0.00<br>(0.00 to<br>0.01) | 0.00<br>(0.00 to<br>0.01) | 0.01<br>(0.00 to<br>0.01) |
| Sickle cell disorders                             |                              |                               |                               |                               |                           |                           |                           |                           |
|                                                   | 67.59<br>(49.51 to<br>85.94) | 75.64<br>(51.72 to<br>104.94) | 59.28<br>(40.54 to<br>81.12)  | 94.08<br>(65.41 to<br>124.47) | 1.85<br>(1.36 to<br>2.37) | 2.91<br>(2.03 to<br>3.97) | 2.31<br>(1.59 to<br>3.15) | 3.53<br>(2.54 to<br>4.67) |
| G6PD deficiency                                   |                              |                               |                               |                               |                           |                           |                           |                           |
|                                                   | 47.78<br>(37.79 to<br>59.81) | 49.41<br>(37.56 to<br>67.35)  | 42.17<br>(32.28 to<br>56.40)  | 56.31<br>(43.54 to<br>76.36)  | 2.79<br>(2.28 to<br>3.65) | 3.57<br>(2.72 to<br>5.04) | 3.14<br>(2.43 to<br>4.34) | 3.93<br>(3.00 to<br>5.45) |
| Other hemoglobinopathies and hemolytic anemias    |                              |                               |                               |                               |                           |                           |                           |                           |
|                                                   | 46.74<br>(37.69 to<br>73.19) | 68.93<br>(53.62 to<br>106.25) | 71.93<br>(55.81 to<br>110.06) | 66.74<br>(53.03 to<br>103.25) | 1.76<br>(1.45 to<br>2.63) | 3.60<br>(2.96 to<br>5.16) | 3.93<br>(3.20 to<br>5.58) | 3.30<br>(2.70 to<br>4.82) |
| Endocrine, metabolic, blood, and immune disorders |                              |                               |                               |                               |                           |                           |                           |                           |

| Seychelles                                    |                                     |                                     |                                     |                                     |                               |                               |                               |                               |
|-----------------------------------------------|-------------------------------------|-------------------------------------|-------------------------------------|-------------------------------------|-------------------------------|-------------------------------|-------------------------------|-------------------------------|
| Cause                                         | YLLs (actual counts)                |                                     |                                     |                                     | Deaths (actual counts)        |                               |                               |                               |
|                                               | 2016                                | 2040 Forecast                       | 2040 Better Scenario                | 2040 Worse Scenario                 | 2016                          | 2040 Forecast                 | 2040 Better Scenario          | 2040 Worse Scenario           |
| <b>Musculoskeletal disorders</b>              | <b>8.81</b><br>(6.72 to 10.69)      | <b>13.70</b><br>(8.88 to 16.87)     | <b>13.23</b><br>(8.64 to 16.34)     | <b>13.62</b><br>(8.74 to 16.62)     | <b>0.35</b><br>(0.24 to 0.41) | <b>0.72</b><br>(0.45 to 0.87) | <b>0.72</b><br>(0.46 to 0.87) | <b>0.68</b><br>(0.43 to 0.84) |
| Rheumatoid arthritis                          | 0.09<br>(0.05 to 0.12)              | 0.11<br>(0.06 to 0.18)              | 0.08<br>(0.04 to 0.13)              | 0.15<br>(0.07 to 0.24)              | 0.00<br>(0.00 to 0.00)        | 0.01<br>(0.00 to 0.01)        | 0.00<br>(0.00 to 0.01)        | 0.01<br>(0.00 to 0.01)        |
| Other musculoskeletal disorders               | 8.72<br>(6.63 to 10.58)             | 13.58<br>(8.82 to 16.74)            | 13.15<br>(8.59 to 16.26)            | 13.47<br>(8.68 to 16.46)            | 0.34<br>(0.24 to 0.40)        | 0.71<br>(0.45 to 0.87)        | 0.72<br>(0.45 to 0.86)        | 0.68<br>(0.42 to 0.83)        |
| <b>Other non-communicable diseases</b>        | <b>459.09</b><br>(382.79 to 556.64) | <b>237.96</b><br>(175.12 to 316.13) | <b>171.98</b><br>(128.29 to 221.33) | <b>331.25</b><br>(249.30 to 426.00) | <b>6.79</b><br>(5.72 to 7.98) | <b>5.93</b><br>(4.22 to 7.69) | <b>4.89</b><br>(3.37 to 6.63) | <b>7.19</b><br>(5.25 to 8.82) |
| Congenital birth defects                      | 429.39<br>(354.84 to 525.36)        | 186.15<br>(130.20 to 258.10)        | 124.77<br>(91.88 to 164.78)         | 275.83<br>(201.77 to 363.67)        | 5.75<br>(4.76 to 6.91)        | 2.97<br>(2.04 to 4.05)        | 2.06<br>(1.45 to 2.71)        | 4.23<br>(3.12 to 5.43)        |
| Neural tube defects                           | 11.57<br>(6.55 to 19.50)            | 1.88<br>(0.88 to 3.52)              | 1.16<br>(0.56 to 2.18)              | 3.12<br>(1.46 to 6.07)              | 0.14<br>(0.08 to 0.23)        | 0.03<br>(0.01 to 0.05)        | 0.02<br>(0.01 to 0.03)        | 0.04<br>(0.02 to 0.08)        |
| Congenital heart anomalies                    | 240.36<br>(182.93 to 313.56)        | 100.93<br>(66.10 to 146.77)         | 62.89<br>(44.27 to 87.97)           | 155.86<br>(111.39 to 212.33)        | 3.24<br>(2.52 to 4.11)        | 1.55<br>(1.03 to 2.26)        | 0.99<br>(0.67 to 1.36)        | 2.33<br>(1.68 to 3.09)        |
| Orofacial clefts                              | 0.08<br>(0.04 to 0.14)              | 0.02<br>(0.01 to 0.05)              | 0.01<br>(0.00 to 0.03)              | 0.04<br>(0.01 to 0.09)              | 0.00<br>(0.00 to 0.00)        | 0.00<br>(0.00 to 0.00)        | 0.00<br>(0.00 to 0.00)        | 0.00<br>(0.00 to 0.00)        |
| Down syndrome                                 | 9.46<br>(6.73 to 13.47)             | 7.92<br>(5.18 to 11.61)             | 8.00<br>(5.26 to 11.54)             | 8.31<br>(5.34 to 12.32)             | 0.16<br>(0.11 to 0.23)        | 0.17<br>(0.10 to 0.25)        | 0.17<br>(0.11 to 0.25)        | 0.17<br>(0.11 to 0.26)        |
| Other chromosomal abnormalities               | 12.65<br>(7.67 to 20.76)            | 9.12<br>(4.92 to 15.98)             | 7.32<br>(3.97 to 12.37)             | 12.01<br>(6.41 to 20.80)            | 0.16<br>(0.10 to 0.25)        | 0.13<br>(0.07 to 0.21)        | 0.10<br>(0.06 to 0.18)        | 0.16<br>(0.09 to 0.28)        |
| Congenital musculoskeletal and limb anomalies | 8.42<br>(5.33 to 12.44)             | 3.74<br>(2.05 to 6.11)              | 2.50<br>(1.40 to 4.02)              | 5.60<br>(3.06 to 8.99)              | 0.10<br>(0.06 to 0.15)        | 0.05<br>(0.03 to 0.08)        | 0.03<br>(0.02 to 0.05)        | 0.07<br>(0.04 to 0.11)        |
| Urogenital congenital anomalies               | 10.10<br>(6.73 to 13.02)            | 8.61<br>(4.58 to 12.30)             | 6.68<br>(3.50 to 9.32)              | 10.72<br>(5.92 to 14.52)            | 0.23<br>(0.14 to 0.30)        | 0.27<br>(0.13 to 0.39)        | 0.21<br>(0.10 to 0.30)        | 0.32<br>(0.16 to 0.44)        |
| Digestive congenital anomalies                | 37.48<br>(22.28 to 64.00)           | 15.13<br>(8.23 to 26.57)            | 9.73<br>(5.48 to 15.85)             | 23.42<br>(12.94 to 39.78)           | 0.46<br>(0.28 to 0.76)        | 0.21<br>(0.12 to 0.34)        | 0.14<br>(0.08 to 0.21)        | 0.32<br>(0.19 to 0.50)        |
| Other congenital birth defects                | 99.27<br>(70.48 to 142.95)          | 38.80<br>(24.22 to 61.02)           | 26.47<br>(17.05 to 39.50)           | 56.75<br>(36.19 to 86.14)           | 1.25<br>(0.90 to 1.79)        | 0.57<br>(0.36 to 0.86)        | 0.39<br>(0.25 to 0.57)        | 0.80<br>(0.52 to 1.17)        |
| Skin and subcutaneous diseases                | 20.58<br>(11.53 to 30.70)           | 48.34<br>(26.09 to 68.01)           | 44.65<br>(24.59 to 60.68)           | 50.38<br>(27.25 to 70.77)           | 0.94<br>(0.53 to 1.33)        | 2.92<br>(1.56 to 4.02)        | 2.80<br>(1.53 to 3.83)        | 2.90<br>(1.55 to 4.03)        |
| Cellulitis                                    | 2.04<br>(1.10 to 4.29)              | 6.47<br>(3.18 to 11.20)             | 6.51<br>(3.15 to 10.98)             | 6.12<br>(3.10 to 11.09)             | 0.09<br>(0.05 to 0.17)        | 0.38<br>(0.19 to 0.64)        | 0.40<br>(0.19 to 0.67)        | 0.35<br>(0.17 to 0.59)        |
| Pyoderma                                      | 14.80<br>(7.97 to 22.60)            | 34.27<br>(17.66 to 48.49)           | 31.36<br>(16.26 to 43.82)           | 36.27<br>(18.76 to 50.84)           | 0.58<br>(0.32 to 0.85)        | 1.93<br>(0.98 to 2.69)        | 1.85<br>(0.94 to 2.53)        | 1.94<br>(0.99 to 2.69)        |
| Decubitus ulcer                               | 3.49<br>(1.84 to 4.94)              | 7.15<br>(3.61 to 10.37)             | 6.37<br>(3.09 to 9.26)              | 7.52<br>(3.75 to 10.88)             | 0.25<br>(0.13 to 0.35)        | 0.58<br>(0.29 to 0.86)        | 0.53<br>(0.26 to 0.79)        | 0.59<br>(0.29 to 0.86)        |
| Other skin and subcutaneous diseases          | 0.25<br>(0.15 to 0.37)              | 0.45<br>(0.26 to 0.66)              | 0.42<br>(0.24 to 0.61)              | 0.46<br>(0.27 to 0.69)              | 0.01<br>(0.01 to 0.02)        | 0.02<br>(0.01 to 0.04)        | 0.02<br>(0.01 to 0.03)        | 0.02<br>(0.01 to 0.04)        |
| Sudden infant death syndrome                  | 9.12<br>(5.29 to 15.09)             | 3.47<br>(1.72 to 6.60)              | 2.56<br>(1.30 to 4.76)              | 5.04<br>(2.44 to 9.40)              | 0.11<br>(0.06 to 0.18)        | 0.04<br>(0.02 to 0.08)        | 0.03<br>(0.02 to 0.06)        | 0.06<br>(0.03 to 0.11)        |

|                          |                                       |                                       |                                     |                                       |                              |                              |                              |                              |
|--------------------------|---------------------------------------|---------------------------------------|-------------------------------------|---------------------------------------|------------------------------|------------------------------|------------------------------|------------------------------|
| Injuries                 | 2,279.93<br>(1,924.48 to<br>2,682.66) | 1,602.16<br>(1,205.75 to<br>2,126.76) | 1,167.96<br>(889.80 to<br>1,533.85) | 2,054.66<br>(1,554.67 to<br>2,775.55) | 56.34<br>(48.16 to<br>65.96) | 52.08<br>(41.86 to<br>64.83) | 40.09<br>(32.87 to<br>49.08) | 63.33<br>(51.12 to<br>79.73) |
| Transport injuries       | 643.85<br>(539.53 to<br>766.83)       | 477.72<br>(345.81 to<br>679.61)       | 213.12<br>(156.00 to<br>297.31)     | 696.56<br>(497.75 to<br>1,018.75)     | 16.31<br>(13.93 to<br>19.12) | 15.44<br>(11.85 to<br>20.43) | 7.66<br>(5.95 to<br>9.97)    | 21.37<br>(16.24 to<br>29.24) |
| Road injuries            | 538.15<br>(443.16 to<br>642.32)       | 383.74<br>(278.74 to<br>554.62)       | 142.48<br>(102.90 to<br>201.03)     | 569.31<br>(406.58 to<br>844.39)       | 13.43<br>(11.31 to<br>15.84) | 12.06<br>(9.34 to<br>16.06)  | 5.02<br>(3.84 to<br>6.53)    | 17.00<br>(12.81 to<br>23.15) |
| Pedestrian road injuries | 111.80<br>(79.48 to<br>140.03)        | 74.47<br>(49.03 to<br>106.69)         | 26.10<br>(16.95 to<br>36.64)        | 121.81<br>(81.67 to<br>175.74)        | 3.52<br>(2.57 to<br>4.30)    | 3.21<br>(2.16 to<br>4.41)    | 1.26<br>(0.85 to<br>1.69)    | 4.94<br>(3.43 to<br>6.76)    |



| Seychelles                                      |                                                          |                                                      |                                                      |                                                      |                                                   |                                                   |                                                   |                                                   |
|-------------------------------------------------|----------------------------------------------------------|------------------------------------------------------|------------------------------------------------------|------------------------------------------------------|---------------------------------------------------|---------------------------------------------------|---------------------------------------------------|---------------------------------------------------|
| Cause                                           | YLLs (actual counts)                                     |                                                      |                                                      |                                                      | Deaths (actual counts)                            |                                                   |                                                   |                                                   |
|                                                 | 2016                                                     | 2040 Forecast                                        | 2040 Better Scenario                                 | 2040 Worse Scenario                                  | 2016                                              | 2040 Forecast                                     | 2040 Better Scenario                              | 2040 Worse Scenario                               |
| Cyclist road injuries                           | 18.21<br>(8.50 to<br>30.24)                              | 16.08<br>(7.25 to<br>29.00)                          | 7.51<br>(3.20 to<br>13.16)                           | 21.69<br>(9.59 to<br>40.26)                          | 0.50<br>(0.25 to<br>0.82)                         | 0.55<br>(0.26 to<br>0.97)                         | 0.30<br>(0.13 to<br>0.51)                         | 0.70<br>(0.32 to<br>1.26)                         |
| Motorcyclist road injuries                      | 118.35<br>(77.75 to<br>168.97)                           | 88.72<br>(52.17 to<br>149.36)                        | 46.33<br>(27.37 to<br>76.04)                         | 117.98<br>(67.68 to<br>202.45)                       | 2.40<br>(1.60 to<br>3.44)                         | 1.98<br>(1.19 to<br>3.25)                         | 1.13<br>(0.69 to<br>1.80)                         | 2.55<br>(1.51 to<br>4.26)                         |
| Motor vehicle road injuries                     | 280.48<br>(220.87 to<br>350.30)                          | 197.02<br>(139.01 to<br>284.96)                      | 59.98<br>(42.09 to<br>84.70)                         | 296.92<br>(204.36 to<br>448.59)                      | 6.76<br>(5.38 to<br>8.35)                         | 6.04<br>(4.47 to<br>8.21)                         | 2.21<br>(1.65 to<br>2.89)                         | 8.46<br>(6.07 to<br>11.94)                        |
| Other road injuries                             | 9.31<br>(2.39 to<br>13.20)                               | 7.44<br>(1.69 to<br>12.25)                           | 2.56<br>(0.60 to<br>3.98)                            | 10.90<br>(2.39 to<br>18.46)                          | 0.25<br>(0.07 to<br>0.35)                         | 0.26<br>(0.07 to<br>0.40)                         | 0.12<br>(0.03 to<br>0.18)                         | 0.35<br>(0.09 to<br>0.56)                         |
| Other transport injuries                        | 105.70<br>(76.98 to<br>135.60)                           | 93.98<br>(60.88 to<br>141.87)                        | 70.64<br>(48.02 to<br>104.69)                        | 127.26<br>(82.80 to<br>189.66)                       | 2.88<br>(2.19 to<br>3.63)                         | 3.38<br>(2.32 to<br>4.88)                         | 2.64<br>(1.88 to<br>3.74)                         | 4.37<br>(3.02 to<br>6.37)                         |
| <b>Unintentional injuries</b>                   | <b>1,002.81</b><br><b>(859.93 to</b><br><b>1,174.47)</b> | <b>649.22</b><br><b>(502.84 to</b><br><b>830.08)</b> | <b>555.74</b><br><b>(438.88 to</b><br><b>702.91)</b> | <b>763.00</b><br><b>(603.38 to</b><br><b>976.10)</b> | <b>25.53</b><br><b>(22.13 to</b><br><b>29.73)</b> | <b>23.52</b><br><b>(19.36 to</b><br><b>28.10)</b> | <b>21.07</b><br><b>(17.74 to</b><br><b>24.99)</b> | <b>26.04</b><br><b>(21.88 to</b><br><b>31.25)</b> |
| Falls                                           | 166.65<br>(138.22 to<br>200.00)                          | 167.93<br>(135.66 to<br>204.17)                      | 154.44<br>(125.56 to<br>190.42)                      | 177.49<br>(145.91 to<br>212.87)                      | 5.92<br>(5.09 to<br>6.96)                         | 8.18<br>(6.94 to<br>9.50)                         | 7.78<br>(6.65 to<br>8.99)                         | 8.28<br>(7.09 to<br>9.53)                         |
| Drowning                                        | 490.59<br>(414.62 to<br>587.17)                          | 273.87<br>(200.20 to<br>371.22)                      | 229.80<br>(171.57 to<br>311.89)                      | 333.33<br>(244.54 to<br>460.89)                      | 10.73<br>(9.09 to<br>12.82)                       | 7.90<br>(6.05 to<br>10.23)                        | 6.85<br>(5.32 to<br>8.79)                         | 9.23<br>(7.08 to<br>12.30)                        |
| Fire, heat, and hot substances                  | 134.46<br>(111.91 to<br>168.04)                          | 79.48<br>(57.38 to<br>109.39)                        | 63.18<br>(47.12 to<br>85.93)                         | 100.77<br>(73.76 to<br>137.71)                       | 3.83<br>(3.21 to<br>4.67)                         | 3.22<br>(2.43 to<br>4.21)                         | 2.69<br>(2.08 to<br>3.44)                         | 3.85<br>(2.98 to<br>5.03)                         |
| Poisonings                                      | 21.98<br>(16.62 to<br>27.92)                             | 8.93<br>(5.94 to<br>12.96)                           | 6.62<br>(4.72 to<br>9.35)                            | 12.22<br>(8.41 to<br>17.72)                          | 0.51<br>(0.40 to<br>0.66)                         | 0.27<br>(0.20 to<br>0.38)                         | 0.21<br>(0.16 to<br>0.28)                         | 0.36<br>(0.26 to<br>0.50)                         |
| Exposure to mechanical forces                   | 60.58<br>(41.54 to<br>80.49)                             | 33.31<br>(20.74 to<br>48.65)                         | 26.97<br>(17.03 to<br>38.54)                         | 40.71<br>(25.99 to<br>57.26)                         | 1.40<br>(0.95 to<br>1.86)                         | 0.97<br>(0.62 to<br>1.35)                         | 0.81<br>(0.53 to<br>1.12)                         | 1.14<br>(0.74 to<br>1.56)                         |
| Unintentional firearm injuries                  | 23.61<br>(11.94 to<br>35.33)                             | 11.74<br>(5.28 to<br>18.75)                          | 9.70<br>(4.46 to<br>15.26)                           | 14.11<br>(6.32 to<br>22.80)                          | 0.57<br>(0.29 to<br>0.85)                         | 0.37<br>(0.18 to<br>0.55)                         | 0.31<br>(0.16 to<br>0.47)                         | 0.42<br>(0.20 to<br>0.65)                         |
| Unintentional suffocation                       | 5.12<br>(3.55 to<br>7.55)                                | 2.49<br>(1.67 to<br>3.69)                            | 2.03<br>(1.35 to<br>3.05)                            | 3.14<br>(2.07 to<br>4.89)                            | 0.08<br>(0.06 to<br>0.11)                         | 0.04<br>(0.03 to<br>0.06)                         | 0.04<br>(0.05)                                    | 0.05<br>(0.04 to<br>0.08)                         |
| Other exposure to mechanical forces             | 31.85<br>(20.33 to<br>43.74)                             | 19.09<br>(11.24 to<br>28.41)                         | 15.24<br>(8.78 to<br>21.96)                          | 23.45<br>(13.95 to<br>33.58)                         | 0.75<br>(0.48 to<br>1.02)                         | 0.56<br>(0.34 to<br>0.80)                         | 0.46<br>(0.28 to<br>0.64)                         | 0.66<br>(0.40 to<br>0.91)                         |
| Adverse effects of medical treatment            | 26.08<br>(20.47 to<br>31.99)                             | 22.53<br>(17.12 to<br>28.56)                         | 20.67<br>(15.81 to<br>26.36)                         | 24.52<br>(18.88 to<br>31.04)                         | 0.79<br>(0.60 to<br>0.96)                         | 0.94<br>(0.72 to<br>1.14)                         | 0.90<br>(0.70 to<br>1.10)                         | 0.97<br>(0.76 to<br>1.18)                         |
| Animal contact                                  | 8.74<br>(7.25 to<br>10.76)                               | 7.20<br>(5.47 to<br>9.58)                            | 6.17<br>(4.74 to<br>8.14)                            | 8.48<br>(6.45 to<br>11.28)                           | 0.22<br>(0.19 to<br>0.28)                         | 0.51<br>(0.19 to<br>0.31)                         | 0.27<br>(0.17 to<br>0.28)                         | 0.21<br>(0.21 to<br>0.34)                         |
| Venomous animal contact                         | 4.83<br>(3.68 to<br>6.43)                                | 3.82<br>(2.71 to<br>5.27)                            | 3.42<br>(2.43 to<br>4.72)                            | 4.36<br>(3.07 to<br>6.08)                            | 0.12<br>(0.10 to<br>0.17)                         | 0.13<br>(0.09 to<br>0.18)                         | 0.12<br>(0.09 to<br>0.17)                         | 0.14<br>(0.10 to<br>0.20)                         |
| Non-venomous animal contact                     | 3.91<br>(2.76 to<br>5.19)                                | 3.38<br>(2.24 to<br>4.96)                            | 2.76<br>(1.84 to<br>4.01)                            | 4.12<br>(2.75 to<br>6.04)                            | 0.10<br>(0.07 to<br>0.13)                         | 0.11<br>(0.07 to<br>0.16)                         | 0.09<br>(0.06 to<br>0.13)                         | 0.13<br>(0.09 to<br>0.18)                         |
| Foreign body                                    | 60.10<br>(42.48 to<br>77.38)                             | 40.03<br>(27.96 to<br>52.09)                         | 36.89<br>(26.12 to<br>47.32)                         | 43.56<br>(29.93 to<br>57.46)                         | 1.30<br>(0.94 to<br>1.58)                         | 1.27<br>(0.92 to<br>1.55)                         | 1.24<br>(0.91 to<br>1.51)                         | 1.27<br>(0.91 to<br>1.55)                         |
| Pulmonary aspiration and foreign body in airway | 55.12<br>(34.41 to<br>73.06)                             | 36.33<br>(23.07 to<br>48.40)                         | 33.05<br>(20.94 to<br>43.54)                         | 39.85<br>(25.05 to<br>53.95)                         | 1.18<br>(0.77 to<br>1.47)                         | 1.14<br>(0.74 to<br>1.44)                         | 1.10<br>(0.71 to<br>1.39)                         | 1.15<br>(0.75 to<br>1.44)                         |

|                                             |                                                      |                                                      |                                                      |                                                      |                                                   |                                                  |                                                  |                                                   |
|---------------------------------------------|------------------------------------------------------|------------------------------------------------------|------------------------------------------------------|------------------------------------------------------|---------------------------------------------------|--------------------------------------------------|--------------------------------------------------|---------------------------------------------------|
|                                             | 4.98<br>(3.46 to<br>9.56)                            | 3.70<br>(2.46 to<br>7.28)                            | 3.84<br>(2.56 to<br>7.49)                            | 3.70<br>(2.44 to<br>7.42)                            | 0.12<br>(0.09 to<br>0.25)                         | 0.13<br>(0.09 to<br>0.25)                        | 0.14<br>(0.10 to<br>0.27)                        | 0.12<br>(0.08 to<br>0.24)                         |
| Foreign body in other body part             |                                                      |                                                      |                                                      |                                                      |                                                   |                                                  |                                                  |                                                   |
|                                             | 7.70<br>(3.50 to<br>10.35)                           | 4.78<br>(2.17 to<br>6.98)                            | 3.80<br>(1.75 to<br>5.52)                            | 6.00<br>(2.75 to<br>8.68)                            | 0.22<br>(0.11 to<br>0.28)                         | 0.17<br>(0.09 to<br>0.24)                        | 0.14<br>(0.08 to<br>0.19)                        | 0.21<br>(0.11 to<br>0.28)                         |
| Environmental heat and cold exposure        |                                                      |                                                      |                                                      |                                                      |                                                   |                                                  |                                                  |                                                   |
|                                             | 25.92<br>(20.65 to<br>32.23)                         | 11.16<br>(7.49 to<br>16.43)                          | 7.18<br>(5.08 to<br>9.77)                            | 15.93<br>(11.57 to<br>21.14)                         | 0.60<br>(0.49 to<br>0.74)                         | 0.34<br>(0.23 to<br>0.48)                        | 0.23<br>(0.17 to<br>0.29)                        | 0.47<br>(0.35 to<br>0.57)                         |
| Other unintentional injuries                |                                                      |                                                      |                                                      |                                                      |                                                   |                                                  |                                                  |                                                   |
| <b>Self-harm and interpersonal violence</b> | <b>631.02</b><br><b>(511.71 to</b><br><b>778.73)</b> | <b>473.63</b><br><b>(313.50 to</b><br><b>711.05)</b> | <b>397.55</b><br><b>(268.21 to</b><br><b>581.15)</b> | <b>593.50</b><br><b>(379.76 to</b><br><b>912.45)</b> | <b>14.45</b><br><b>(11.76 to</b><br><b>17.71)</b> | <b>13.09</b><br><b>(9.02 to</b><br><b>18.70)</b> | <b>11.32</b><br><b>(7.97 to</b><br><b>15.72)</b> | <b>15.88</b><br><b>(10.60 to</b><br><b>23.34)</b> |

| Seychelles                                                                          |                                                |                                                 |                                                 |                                                 |                                                |                                                |                                                |                                                |
|-------------------------------------------------------------------------------------|------------------------------------------------|-------------------------------------------------|-------------------------------------------------|-------------------------------------------------|------------------------------------------------|------------------------------------------------|------------------------------------------------|------------------------------------------------|
| Cause                                                                               | YLLs (actual counts)                           |                                                 |                                                 |                                                 | Deaths (actual counts)                         |                                                |                                                |                                                |
|                                                                                     | 2016                                           | 2040 Forecast                                   | 2040 Better Scenario                            | 2040 Worse Scenario                             | 2016                                           | 2040 Forecast                                  | 2040 Better Scenario                           | 2040 Worse Scenario                            |
| Self-harm                                                                           | 345.02<br>(273.94 to<br>467.81)                | 315.82<br>(195.74 to<br>519.89)                 | 268.59<br>(171.85 to<br>425.33)                 | 403.19<br>(238.02 to<br>684.39)                 | 8.23<br>(6.71 to<br>10.95)                     | 9.10<br>(5.98 to<br>14.02)                     | 7.98<br>(5.46 to<br>11.73)                     | 11.17<br>(7.01 to<br>17.62)                    |
| Self-harm by firearm                                                                | 11.72<br>(5.89 to<br>21.75)                    | 7.50<br>(2.95 to<br>15.43)                      | 5.93<br>(2.47 to<br>11.50)                      | 10.21<br>(3.89 to<br>20.82)                     | 0.29<br>(0.15 to<br>0.52)                      | 0.24<br>(0.10 to<br>0.47)                      | 0.20<br>(0.09 to<br>0.38)                      | 0.31<br>(0.13 to<br>0.61)                      |
| Self-harm by other specified means                                                  | 333.30<br>(265.37 to<br>452.30)                | 308.32<br>(191.18 to<br>507.70)                 | 262.66<br>(168.09 to<br>414.14)                 | 392.98<br>(232.53 to<br>664.30)                 | 7.93<br>(6.48 to<br>10.53)                     | 8.86<br>(5.86 to<br>13.68)                     | 7.78<br>(5.38 to<br>11.50)                     | 10.86<br>(6.84 to<br>17.14)                    |
| Interpersonal violence                                                              | 285.99<br>(193.17 to<br>358.56)                | 157.81<br>(96.29 to<br>227.33)                  | 128.96<br>(77.96 to<br>183.31)                  | 190.31<br>(114.13 to<br>275.28)                 | 6.22<br>(4.09 to<br>7.80)                      | 3.99<br>(2.34 to<br>5.54)                      | 3.33<br>(1.93 to<br>4.67)                      | 4.71<br>(2.70 to<br>6.66)                      |
| Physical violence by firearm                                                        | 61.45<br>(33.08 to<br>106.85)                  | 31.39<br>(16.63 to<br>56.21)                    | 24.40<br>(12.86 to<br>42.94)                    | 38.41<br>(20.37 to<br>68.18)                    | 1.30<br>(0.71 to<br>2.26)                      | 0.73<br>(0.38 to<br>1.27)                      | 0.58<br>(0.30 to<br>1.00)                      | 0.88<br>(0.47 to<br>1.54)                      |
| Physical violence by sharp object                                                   | 117.55<br>(72.62 to<br>159.83)                 | 63.49<br>(36.30 to<br>95.11)                    | 49.99<br>(28.98 to<br>74.89)                    | 76.28<br>(42.74 to<br>114.28)                   | 2.47<br>(1.50 to<br>3.37)                      | 1.47<br>(0.82 to<br>2.16)                      | 1.18<br>(0.67 to<br>1.71)                      | 1.74<br>(0.95 to<br>2.58)                      |
| Physical violence by other means                                                    | 106.99<br>(62.02 to<br>145.00)                 | 62.93<br>(32.72 to<br>101.02)                   | 54.57<br>(28.95 to<br>85.55)                    | 75.63<br>(38.37 to<br>124.26)                   | 2.45<br>(1.37 to<br>3.32)                      | 1.78<br>(0.93 to<br>2.69)                      | 1.57<br>(0.83 to<br>2.34)                      | 2.09<br>(1.03 to<br>3.30)                      |
| <b>Forces of nature, conflict and terrorism, and executions and police conflict</b> | <b>2.25</b><br><b>(1.39 to</b><br><b>3.58)</b> | <b>1.58</b><br><b>(0.00 to</b><br><b>30.78)</b> | <b>1.56</b><br><b>(0.00 to</b><br><b>30.32)</b> | <b>1.60</b><br><b>(0.00 to</b><br><b>31.11)</b> | <b>0.05</b><br><b>(0.03 to</b><br><b>0.07)</b> | <b>0.04</b><br><b>(0.00 to</b><br><b>0.76)</b> | <b>0.04</b><br><b>(0.00 to</b><br><b>0.77)</b> | <b>0.04</b><br><b>(0.00 to</b><br><b>0.75)</b> |
| Exposure to forces of nature                                                        | 0.00<br>(0.00 to<br>0.00)                      | 1.56<br>(0.00 to<br>30.73)                      | 1.54<br>(0.00 to<br>30.27)                      | 1.58<br>(0.00 to<br>31.06)                      | 0.00<br>(0.00 to<br>0.00)                      | 0.04<br>(0.00 to<br>0.76)                      | 0.04<br>(0.00 to<br>0.77)                      | 0.04<br>(0.00 to<br>0.75)                      |
| Conflict and terrorism                                                              | 0.00<br>(0.00 to<br>0.00)                      | 0.02<br>(0.00 to<br>0.18)                       | 0.02<br>(0.00 to<br>0.18)                       | 0.02<br>(0.00 to<br>0.18)                       | 0.00<br>(0.00 to<br>0.00)                      | 0.00<br>(0.00 to<br>0.00)                      | 0.00<br>(0.00 to<br>0.00)                      | 0.00<br>(0.00 to<br>0.00)                      |
| Executions and police conflict                                                      | 2.25<br>(1.39 to<br>3.58)                      | 0.00<br>(0.00 to<br>0.00)                       | 0.00<br>(0.00 to<br>0.00)                       | 0.00<br>(0.00 to<br>0.00)                       | 0.05<br>(0.03 to<br>0.07)                      | 0.00<br>(0.00 to<br>0.00)                      | 0.00<br>(0.00 to<br>0.00)                      | 0.00<br>(0.00 to<br>0.00)                      |

| Thailand                                                          |                                      |                                      |                                     |                                       |                              |                              |                              |                                |
|-------------------------------------------------------------------|--------------------------------------|--------------------------------------|-------------------------------------|---------------------------------------|------------------------------|------------------------------|------------------------------|--------------------------------|
| Cause                                                             | YLLs (in 1000s)                      |                                      |                                     |                                       | Deaths (in 1000s)            |                              |                              |                                |
|                                                                   | 2016                                 | 2040 Forecast                        | 2040 Better Scenario                | 2040 Worse Scenario                   | 2016                         | 2040 Forecast                | 2040 Better Scenario         | 2040 Worse Scenario            |
| All causes                                                        | 10,680.28<br>(9,671.60 to 11,603.28) | 11,904.62<br>(9,969.55 to 14,104.93) | 9,609.29<br>(8,127.56 to 11,364.69) | 15,102.23<br>(12,582.24 to 18,054.27) | 452.45<br>(413.60 to 491.80) | 767.56<br>(637.20 to 910.50) | 639.09<br>(528.96 to 758.73) | 918.27<br>(766.55 to 1,074.63) |
| Communicable, maternal, neonatal, and nutritional diseases        | 1,659.28<br>(1,254.20 to 2,035.20)   | 1,286.03<br>(759.88 to 1,895.70)     | 1,019.99<br>(606.49 to 1,525.79)    | 1,737.57<br>(1,047.28 to 2,567.61)    | 63.00<br>(44.24 to 75.54)    | 82.91<br>(45.31 to 128.75)   | 67.54<br>(36.50 to 105.57)   | 105.13<br>(57.11 to 164.38)    |
| HIV/AIDS and tuberculosis                                         | 589.61<br>(325.23 to 939.81)         | 282.02<br>(133.14 to 554.89)         | 212.05<br>(80.35 to 464.88)         | 437.25<br>(232.94 to 740.78)          | 16.91<br>(10.75 to 25.36)    | 13.00<br>(7.28 to 22.35)     | 8.68<br>(4.48 to 16.02)      | 18.64<br>(10.69 to 31.65)      |
| Tuberculosis                                                      | 117.96<br>(101.43 to 137.97)         | 122.69<br>(70.68 to 210.73)          | 68.32<br>(39.93 to 119.62)          | 175.24<br>(97.42 to 323.26)           | 6.48<br>(5.60 to 7.62)       | 9.49<br>(5.44 to 16.49)      | 5.48<br>(3.15 to 9.60)       | 13.08<br>(7.16 to 23.55)       |
| HIV/AIDS                                                          | 471.65<br>(202.44 to 819.24)         | 159.33<br>(30.84 to 412.77)          | 143.72<br>(23.74 to 390.82)         | 262.00<br>(91.66 to 531.79)           | 10.44<br>(4.23 to 18.87)     | 3.51<br>(0.53 to 9.79)       | 3.19<br>(0.42 to 9.26)       | 5.56<br>(1.70 to 11.99)        |
| Diarrhea, lower respiratory, and other common infectious diseases | 862.09<br>(578.45 to 1,026.78)       | 862.88<br>(416.84 to 1,296.44)       | 681.39<br>(334.47 to 1,119.93)      | 1,142.20<br>(537.92 to 1,933.57)      | 41.79<br>(24.45 to 51.23)    | 63.81<br>(28.23 to 106.44)   | 52.87<br>(23.00 to 90.43)    | 80.22<br>(35.71 to 133.82)     |
| Diarrheal diseases                                                | 76.18<br>(45.16 to 125.50)           | 97.15<br>(16.39 to 328.76)           | 97.62<br>(19.96 to 313.77)          | 121.66<br>(19.18 to 414.74)           | 3.90<br>(2.17 to 6.84)       | 8.31<br>(1.35 to 28.97)      | 8.62<br>(1.68 to 28.83)      | 10.04<br>(1.54 to 34.67)       |
| Intestinal infectious diseases                                    | 70.11<br>(35.24 to 119.55)           | 32.86<br>(13.25 to 71.08)            | 34.90<br>(14.39 to 75.20)           | 35.42<br>(14.04 to 78.78)             | 1.20<br>(0.60 to 2.04)       | 0.71<br>(0.32 to 1.42)       | 0.78<br>(0.35 to 1.56)       | 0.75<br>(0.33 to 1.51)         |
| Typhoid fever                                                     | 60.58<br>(30.49 to 104.75)           | 27.52<br>(10.90 to 59.92)            | 30.67<br>(12.57 to 66.18)           | 29.63<br>(11.42 to 65.25)             | 1.03<br>(0.51 to 1.80)       | 0.59<br>(0.26 to 1.18)       | 0.68<br>(0.30 to 1.36)       | 0.62<br>(0.27 to 1.25)         |
| Paratyphoid fever                                                 | 9.37<br>(4.07 to 19.01)              | 5.26<br>(1.97 to 12.17)              | 4.16<br>(1.51 to 9.34)              | 5.70<br>(2.07 to 13.33)               | 0.16<br>(0.07 to 0.33)       | 0.16<br>(0.05 to 0.25)       | 0.09<br>(0.04 to 0.20)       | 0.12<br>(0.05 to 0.27)         |
| Other intestinal infectious diseases                              | 0.17<br>(0.07 to 0.35)               | 0.08<br>(0.03 to 0.17)               | 0.07<br>(0.03 to 0.15)              | 0.09<br>(0.03 to 0.19)                | 0.01<br>(0.00 to 0.01)       | 0.01<br>(0.00 to 0.01)       | 0.00<br>(0.00 to 0.01)       | 0.01<br>(0.00 to 0.01)         |
| Lower respiratory infections                                      | 637.95<br>(365.30 to 777.27)         | 673.88<br>(287.70 to 1,057.06)       | 499.07<br>(212.10 to 778.43)        | 921.05<br>(392.35 to 1,496.78)        | 34.76<br>(17.86 to 42.97)    | 52.67<br>(21.12 to 83.62)    | 41.60<br>(16.36 to 66.01)    | 67.28<br>(27.17 to 108.75)     |
| Upper respiratory infections                                      | 0.26<br>(0.14 to 0.45)               | 0.24<br>(0.10 to 0.49)               | 0.16<br>(0.06 to 0.33)              | 0.27<br>(0.11 to 0.56)                | 0.01<br>(0.00 to 0.01)       | 0.01<br>(0.00 to 0.02)       | 0.01<br>(0.00 to 0.02)       | 0.01<br>(0.01 to 0.03)         |
| Otitis media                                                      | 0.08<br>(0.03 to 0.15)               | 0.06<br>(0.02 to 0.14)               | 0.07<br>(0.02 to 0.14)              | 0.06<br>(0.02 to 0.13)                | 0.00<br>(0.00 to 0.01)       | 0.01<br>(0.00 to 0.01)       | 0.01<br>(0.00 to 0.01)       | 0.00<br>(0.00 to 0.01)         |
| Meningitis                                                        | 41.72<br>(27.41 to 53.41)            | 23.34<br>(14.02 to 34.67)            | 18.29<br>(10.58 to 29.57)           | 23.59<br>(14.24 to 35.50)             | 1.07<br>(0.70 to 1.38)       | 0.90<br>(0.57 to 1.30)       | 0.73<br>(0.45 to 1.08)       | 0.88<br>(0.57 to 1.27)         |
| Pneumococcal meningitis                                           | 0.41<br>(0.28 to 0.59)               | 0.18<br>(0.11 to 0.27)               | 0.17<br>(0.10 to 0.27)              | 0.17<br>(0.11 to 0.27)                | 0.01<br>(0.01 to 0.02)       | 0.01<br>(0.01 to 0.01)       | 0.01<br>(0.01 to 0.01)       | 0.01<br>(0.01 to 0.01)         |
| H influenzae type B meningitis                                    | 3.09<br>(1.99 to 4.09)               | 1.46<br>(0.86 to 2.25)               | 1.43<br>(0.83 to 2.17)              | 1.47<br>(0.87 to 2.33)                | 0.08<br>(0.05 to 0.10)       | 0.06<br>(0.04 to 0.08)       | 0.06<br>(0.04 to 0.08)       | 0.05<br>(0.03 to 0.08)         |
| Meningococcal meningitis                                          | 5.17<br>(3.34 to 7.00)               | 2.86<br>(1.68 to 4.53)               | 2.25<br>(1.28 to 3.73)              | 2.89<br>(1.70 to 4.55)                | 0.14<br>(0.09 to 0.19)       | 0.12<br>(0.08 to 0.18)       | 0.10<br>(0.06 to 0.15)       | 0.12<br>(0.08 to 0.17)         |
| Other meningitis                                                  | 33.05<br>(21.55 to 42.52)            | 18.84<br>(11.25 to 28.17)            | 14.43<br>(8.35 to 23.20)            | 19.06<br>(11.48 to 28.52)             | 0.84<br>(0.55 to 1.08)       | 0.71<br>(0.45 to 1.04)       | 0.56<br>(0.35 to 0.85)       | 0.70<br>(0.45 to 1.00)         |
| Encephalitis                                                      | 26.61<br>(21.79 to 33.63)            | 23.76<br>(17.41 to 33.24)            | 22.69<br>(16.54 to 31.42)           | 24.81<br>(18.21 to 35.28)             | 0.68<br>(0.57 to 0.83)       | 0.96<br>(0.72 to 1.26)       | 0.94<br>(0.71 to 1.25)       | 0.97<br>(0.73 to 1.27)         |

|                |                            |                            |                            |                             |                           |                           |                           |                           |
|----------------|----------------------------|----------------------------|----------------------------|-----------------------------|---------------------------|---------------------------|---------------------------|---------------------------|
| Diphtheria     | 0.05<br>(0.03 to<br>0.07)  | 0.01<br>(0.01 to<br>0.02)  | 0.01<br>(0.00 to<br>0.02)  | 0.01<br>(0.01 to<br>0.02)   | 0.00<br>(0.00 to<br>0.00) | 0.00<br>(0.00 to<br>0.00) | 0.00<br>(0.00 to<br>0.00) | 0.00<br>(0.00 to<br>0.00) |
| Whooping cough | 6.49<br>(0.62 to<br>20.28) | 1.22<br>(0.04 to<br>5.55)  | 0.27<br>(0.02 to<br>1.24)  | 2.14<br>(0.06 to<br>9.00)   | 0.08<br>(0.01 to<br>0.24) | 0.02<br>(0.00 to<br>0.07) | 0.00<br>(0.00 to<br>0.02) | 0.03<br>(0.00 to<br>0.11) |
| Tetanus        | 1.27<br>(0.88 to<br>1.80)  | 0.20<br>(0.12 to<br>0.31)  | 0.20<br>(0.11 to<br>0.31)  | 0.20<br>(0.12 to<br>0.30)   | 0.05<br>(0.03 to<br>0.07) | 0.01<br>(0.00 to<br>0.02) | 0.01<br>(0.00 to<br>0.02) | 0.01<br>(0.00 to<br>0.01) |
| Measles        | 0.52<br>(0.15 to<br>1.30)  | 9.55<br>(0.24 to<br>34.82) | 7.61<br>(0.21 to<br>27.70) | 12.32<br>(0.26 to<br>47.27) | 0.01<br>(0.00 to<br>0.02) | 0.16<br>(0.00 to<br>0.69) | 0.13<br>(0.00 to<br>0.54) | 0.20<br>(0.00 to<br>0.90) |

| Thailand                                              |                                        |                                         |                                         |                                         |                                      |                                      |                                      |                                      |
|-------------------------------------------------------|----------------------------------------|-----------------------------------------|-----------------------------------------|-----------------------------------------|--------------------------------------|--------------------------------------|--------------------------------------|--------------------------------------|
| Cause                                                 | YLLs (in 1000s)                        |                                         |                                         |                                         | Deaths (in 1000s)                    |                                      |                                      |                                      |
|                                                       | 2016                                   | 2040 Forecast                           | 2040 Better Scenario                    | 2040 Worse Scenario                     | 2016                                 | 2040 Forecast                        | 2040 Better Scenario                 | 2040 Worse Scenario                  |
| Varicella and herpes zoster                           | 0.84<br>(0.59 to 1.18)                 | 0.61<br>(0.35 to 0.98)                  | 0.50<br>(0.29 to 0.83)                  | 0.67<br>(0.38 to 1.08)                  | 0.04<br>(0.02 to 0.05)               | 0.06<br>(0.03 to 0.10)               | 0.05<br>(0.02 to 0.09)               | 0.06<br>(0.03 to 0.10)               |
| <b>Neglected tropical diseases and malaria</b>        | <b>16.11</b><br><b>(9.35 to 23.62)</b> | <b>32.34</b><br><b>(20.32 to 52.53)</b> | <b>31.24</b><br><b>(20.02 to 50.42)</b> | <b>33.28</b><br><b>(20.62 to 54.59)</b> | <b>0.34</b><br><b>(0.23 to 0.49)</b> | <b>0.95</b><br><b>(0.65 to 1.59)</b> | <b>0.94</b><br><b>(0.64 to 1.58)</b> | <b>0.95</b><br><b>(0.65 to 1.55)</b> |
| Malaria                                               | 1.76<br>(1.06 to 4.55)                 | 0.96<br>(0.48 to 3.17)                  | 0.94<br>(0.46 to 3.09)                  | 0.96<br>(0.48 to 3.22)                  | 0.04<br>(0.03 to 0.12)               | 0.03<br>(0.02 to 0.11)               | 0.03<br>(0.02 to 0.11)               | 0.03<br>(0.02 to 0.11)               |
| Chagas disease                                        | 0.00<br>(0.00 to 0.00)                 | 0.00<br>(0.00 to 0.00)                  | 0.00<br>(0.00 to 0.00)                  | 0.00<br>(0.00 to 0.00)                  | 0.00<br>(0.00 to 0.00)               | 0.00<br>(0.00 to 0.00)               | 0.00<br>(0.00 to 0.00)               | 0.00<br>(0.00 to 0.00)               |
| Leishmaniasis                                         | 0.01<br>(0.01 to 0.02)                 | 0.01<br>(0.00 to 0.01)                  | 0.01<br>(0.00 to 0.01)                  | 0.01<br>(0.00 to 0.01)                  | 0.00<br>(0.00 to 0.00)               | 0.00<br>(0.00 to 0.00)               | 0.00<br>(0.00 to 0.00)               | 0.00<br>(0.00 to 0.00)               |
| African trypanosomiasis                               | 0.00<br>(0.00 to 0.00)                 | 0.00<br>(0.00 to 0.00)                  | 0.00<br>(0.00 to 0.00)                  | 0.00<br>(0.00 to 0.00)                  | 0.00<br>(0.00 to 0.00)               | 0.00<br>(0.00 to 0.00)               | 0.00<br>(0.00 to 0.00)               | 0.00<br>(0.00 to 0.00)               |
| Schistosomiasis                                       | 0.00<br>(0.00 to 0.00)                 | 0.00<br>(0.00 to 0.00)                  | 0.00<br>(0.00 to 0.00)                  | 0.00<br>(0.00 to 0.00)                  | 0.00<br>(0.00 to 0.00)               | 0.00<br>(0.00 to 0.00)               | 0.00<br>(0.00 to 0.00)               | 0.00<br>(0.00 to 0.00)               |
| Cysticercosis                                         | 0.09<br>(0.07 to 0.11)                 | 0.03<br>(0.02 to 0.04)                  | 0.03<br>(0.02 to 0.04)                  | 0.03<br>(0.02 to 0.04)                  | 0.00<br>(0.00 to 0.00)               | 0.00<br>(0.00 to 0.00)               | 0.00<br>(0.00 to 0.00)               | 0.00<br>(0.00 to 0.00)               |
| Cystic echinococcosis                                 | 0.01<br>(0.01 to 0.02)                 | 0.01<br>(0.01 to 0.01)                  | 0.01<br>(0.00 to 0.01)                  | 0.01<br>(0.01 to 0.01)                  | 0.00<br>(0.00 to 0.00)               | 0.00<br>(0.00 to 0.00)               | 0.00<br>(0.00 to 0.00)               | 0.00<br>(0.00 to 0.00)               |
| Dengue                                                | 12.24<br>(4.65 to 19.71)               | 29.32<br>(17.13 to 49.53)               | 28.23<br>(16.83 to 47.45)               | 30.14<br>(17.53 to 51.43)               | 0.23<br>(0.11 to 0.36)               | 0.82<br>(0.52 to 1.44)               | 0.81<br>(0.52 to 1.44)               | 0.81<br>(0.52 to 1.43)               |
| Yellow fever                                          | 0.00<br>(0.00 to 0.00)                 | 0.00<br>(0.00 to 0.00)                  | 0.00<br>(0.00 to 0.00)                  | 0.00<br>(0.00 to 0.00)                  | 0.00<br>(0.00 to 0.00)               | 0.00<br>(0.00 to 0.00)               | 0.00<br>(0.00 to 0.00)               | 0.00<br>(0.00 to 0.00)               |
| Rabies                                                | 0.09<br>(0.02 to 0.14)                 | 0.04<br>(0.01 to 0.08)                  | 0.04<br>(0.01 to 0.06)                  | 0.06<br>(0.01 to 0.10)                  | 0.00<br>(0.00 to 0.00)               | 0.00<br>(0.00 to 0.00)               | 0.00<br>(0.00 to 0.00)               | 0.00<br>(0.00 to 0.00)               |
| Intestinal nematode infections                        | 0.36<br>(0.20 to 0.55)                 | 0.33<br>(0.18 to 0.55)                  | 0.33<br>(0.18 to 0.55)                  | 0.32<br>(0.18 to 0.54)                  | 0.01<br>(0.01 to 0.01)               | 0.01<br>(0.01 to 0.02)               | 0.01<br>(0.01 to 0.02)               | 0.01<br>(0.01 to 0.02)               |
| Other neglected tropical diseases                     | 1.55<br>(0.93 to 1.95)                 | 1.64<br>(0.91 to 2.40)                  | 1.66<br>(0.92 to 2.41)                  | 1.75<br>(0.99 to 2.53)                  | 0.05<br>(0.03 to 0.06)               | 0.08<br>(0.05 to 0.12)               | 0.08<br>(0.05 to 0.12)               | 0.09<br>(0.05 to 0.12)               |
| <b>Maternal disorders</b>                             | <b>8.51</b><br><b>(5.79 to 11.94)</b>  | <b>4.65</b><br><b>(2.16 to 9.40)</b>    | <b>3.73</b><br><b>(1.74 to 7.65)</b>    | <b>5.77</b><br><b>(2.74 to 11.94)</b>   | <b>0.16</b><br><b>(0.11 to 0.23)</b> | <b>0.09</b><br><b>(0.04 to 0.14)</b> | <b>0.07</b><br><b>(0.03 to 0.14)</b> | <b>0.11</b><br><b>(0.05 to 0.22)</b> |
| Maternal hemorrhage                                   | 1.72<br>(1.08 to 2.56)                 | 0.91<br>(0.40 to 1.90)                  | 0.74<br>(0.32 to 1.58)                  | 1.13<br>(0.50 to 2.38)                  | 0.03<br>(0.02 to 0.05)               | 0.02<br>(0.01 to 0.03)               | 0.01<br>(0.01 to 0.03)               | 0.02<br>(0.01 to 0.04)               |
| Maternal sepsis and other maternal infections         | 1.08<br>(0.68 to 1.59)                 | 0.49<br>(0.22 to 0.94)                  | 0.39<br>(0.17 to 0.77)                  | 0.60<br>(0.26 to 1.19)                  | 0.02<br>(0.01 to 0.03)               | 0.01<br>(0.00 to 0.02)               | 0.01<br>(0.00 to 0.01)               | 0.01<br>(0.01 to 0.02)               |
| Maternal hypertensive disorders                       | 0.83<br>(0.52 to 1.23)                 | 0.49<br>(0.21 to 1.01)                  | 0.39<br>(0.17 to 0.81)                  | 0.61<br>(0.26 to 1.31)                  | 0.02<br>(0.01 to 0.02)               | 0.01<br>(0.00 to 0.02)               | 0.01<br>(0.00 to 0.02)               | 0.01<br>(0.00 to 0.02)               |
| Maternal obstructed labor and uterine rupture         | 0.11<br>(0.06 to 0.20)                 | 0.06<br>(0.02 to 0.13)                  | 0.04<br>(0.01 to 0.10)                  | 0.07<br>(0.02 to 0.17)                  | 0.00<br>(0.00 to 0.00)               | 0.00<br>(0.00 to 0.00)               | 0.00<br>(0.00 to 0.00)               | 0.00<br>(0.00 to 0.00)               |
| Maternal abortion, miscarriage, and ectopic pregnancy | 3.16<br>(2.08 to 4.60)                 | 1.78<br>(0.85 to 3.91)                  | 1.42<br>(0.66 to 3.14)                  | 2.23<br>(1.05 to 4.83)                  | 0.06<br>(0.04 to 0.09)               | 0.03<br>(0.02 to 0.07)               | 0.03<br>(0.01 to 0.06)               | 0.04<br>(0.02 to 0.09)               |

|                                        |                           |                           |                           |                           |                           |                           |                           |                           |
|----------------------------------------|---------------------------|---------------------------|---------------------------|---------------------------|---------------------------|---------------------------|---------------------------|---------------------------|
|                                        | 0.95<br>(0.58 to<br>1.47) | 0.47<br>(0.18 to<br>1.00) | 0.37<br>(0.14 to<br>0.82) | 0.58<br>(0.22 to<br>1.27) | 0.02<br>(0.01 to<br>0.03) | 0.01<br>(0.00 to<br>0.02) | 0.01<br>(0.00 to<br>0.01) | 0.01<br>(0.00 to<br>0.02) |
| Indirect maternal deaths               |                           |                           |                           |                           |                           |                           |                           |                           |
|                                        | 0.03<br>(0.01 to<br>0.06) | 0.02<br>(0.00 to<br>0.04) | 0.01<br>(0.00 to<br>0.03) | 0.02<br>(0.01 to<br>0.05) | 0.00<br>(0.00 to<br>0.00) | 0.00<br>(0.00 to<br>0.00) | 0.00<br>(0.00 to<br>0.00) | 0.00<br>(0.00 to<br>0.00) |
| Late maternal deaths                   |                           |                           |                           |                           |                           |                           |                           |                           |
|                                        | 0.05<br>(0.02 to<br>0.08) | 0.15<br>(0.03 to<br>0.39) | 0.13<br>(0.02 to<br>0.33) | 0.19<br>(0.05 to<br>0.48) | 0.00<br>(0.00 to<br>0.00) | 0.00<br>(0.00 to<br>0.01) | 0.00<br>(0.00 to<br>0.01) | 0.00<br>(0.00 to<br>0.01) |
| Maternal deaths aggravated by HIV/AIDS |                           |                           |                           |                           |                           |                           |                           |                           |
|                                        | 0.59<br>(0.33 to<br>0.91) | 0.28<br>(0.12 to<br>0.60) | 0.24<br>(0.10 to<br>0.50) | 0.35<br>(0.14 to<br>0.74) | 0.01<br>(0.01 to<br>0.02) | 0.01<br>(0.00 to<br>0.01) | 0.00<br>(0.00 to<br>0.01) | 0.01<br>(0.00 to<br>0.01) |
| Other maternal disorders               |                           |                           |                           |                           |                           |                           |                           |                           |

| Thailand                                                                |                                    |                                  |                                  |                                  |                               |                               |                               |                               |
|-------------------------------------------------------------------------|------------------------------------|----------------------------------|----------------------------------|----------------------------------|-------------------------------|-------------------------------|-------------------------------|-------------------------------|
| Cause                                                                   | YLLs (in 1000s)                    |                                  |                                  |                                  | Deaths (in 1000s)             |                               |                               |                               |
|                                                                         | 2016                               | 2040 Forecast                    | 2040 Better Scenario             | 2040 Worse Scenario              | 2016                          | 2040 Forecast                 | 2040 Better Scenario          | 2040 Worse Scenario           |
| <b>Neonatal disorders</b>                                               | <b>121.76</b><br>(84.10 to 166.52) | <b>35.14</b><br>(16.37 to 70.76) | <b>25.75</b><br>(11.86 to 51.54) | <b>46.82</b><br>(21.59 to 94.62) | <b>1.41</b><br>(0.97 to 1.92) | <b>0.41</b><br>(0.19 to 0.82) | <b>0.30</b><br>(0.14 to 0.60) | <b>0.54</b><br>(0.25 to 1.09) |
| Neonatal preterm birth                                                  | 51.33<br>(34.44 to 71.73)          | 13.21<br>(5.97 to 26.75)         | 9.44<br>(4.37 to 19.18)          | 20.15<br>(9.28 to 40.76)         | 0.59<br>(0.40 to 0.83)        | 0.15<br>(0.07 to 0.31)        | 0.11<br>(0.05 to 0.22)        | 0.23<br>(0.11 to 0.47)        |
| Neonatal encephalopathy due to birth asphyxia and trauma                | 21.94<br>(13.90 to 32.45)          | 6.62<br>(2.47 to 16.05)          | 4.59<br>(1.67 to 11.06)          | 7.95<br>(2.95 to 18.95)          | 0.25<br>(0.16 to 0.37)        | 0.08<br>(0.05 to 0.19)        | 0.05<br>(0.02 to 0.13)        | 0.09<br>(0.03 to 0.22)        |
| Neonatal sepsis and other neonatal infections                           | 31.62<br>(20.12 to 48.02)          | 10.78<br>(4.28 to 21.54)         | 7.96<br>(3.22 to 16.41)          | 13.06<br>(5.15 to 26.31)         | 0.57<br>(0.23 to 0.55)        | 0.12<br>(0.05 to 0.25)        | 0.09<br>(0.04 to 0.19)        | 0.15<br>(0.06 to 0.30)        |
| Hemolytic disease and other neonatal jaundice                           | 0.14<br>(0.08 to 0.21)             | 0.03<br>(0.01 to 0.06)           | 0.02<br>(0.01 to 0.04)           | 0.03<br>(0.01 to 0.07)           | 0.00<br>(0.00 to 0.00)        | 0.00<br>(0.00 to 0.00)        | 0.00<br>(0.00 to 0.00)        | 0.00<br>(0.00 to 0.00)        |
| Other neonatal disorders                                                | 16.74<br>(10.36 to 24.51)          | 4.50<br>(1.76 to 9.97)           | 3.74<br>(1.47 to 8.23)           | 5.63<br>(2.17 to 12.54)          | 0.19<br>(0.12 to 0.28)        | 0.05<br>(0.02 to 0.12)        | 0.04<br>(0.02 to 0.10)        | 0.07<br>(0.03 to 0.14)        |
| <b>Nutritional deficiencies</b>                                         | <b>9.03</b><br>(7.92 to 10.31)     | <b>15.46</b><br>(12.19 to 19.27) | <b>16.20</b><br>(12.67 to 20.58) | <b>15.58</b><br>(12.29 to 19.45) | <b>0.69</b><br>(0.60 to 0.80) | <b>1.79</b><br>(1.35 to 2.33) | <b>1.93</b><br>(1.44 to 2.55) | <b>1.74</b><br>(1.30 to 2.29) |
| Protein-energy malnutrition                                             | 6.85<br>(5.96 to 7.95)             | 11.49<br>(8.55 to 14.85)         | 12.54<br>(9.29 to 16.46)         | 11.54<br>(8.47 to 14.99)         | 0.55<br>(0.47 to 0.65)        | 1.38<br>(0.97 to 1.86)        | 1.55<br>(1.10 to 2.10)        | 1.34<br>(0.96 to 1.82)        |
| Iodine deficiency                                                       | 0.20<br>(0.02 to 0.54)             | 0.67<br>(0.01 to 2.46)           | 0.65<br>(0.01 to 2.43)           | 0.70<br>(0.02 to 2.48)           | 0.01<br>(0.00 to 0.03)        | 0.07<br>(0.00 to 0.33)        | 0.07<br>(0.00 to 0.34)        | 0.07<br>(0.00 to 0.33)        |
| Dietary iron deficiency                                                 | 0.29<br>(0.24 to 0.36)             | 0.25<br>(0.15 to 0.47)           | 0.25<br>(0.16 to 0.48)           | 0.25<br>(0.16 to 0.46)           | 0.01<br>(0.01 to 0.01)        | 0.01<br>(0.01 to 0.04)        | 0.02<br>(0.01 to 0.04)        | 0.01<br>(0.01 to 0.04)        |
| Other nutritional deficiencies                                          | 1.70<br>(1.36 to 2.04)             | 3.06<br>(2.16 to 4.02)           | 2.76<br>(1.94 to 3.75)           | 3.09<br>(2.17 to 4.11)           | 0.12<br>(0.09 to 0.14)        | 0.33<br>(0.21 to 0.45)        | 0.30<br>(0.20 to 0.43)        | 0.32<br>(0.21 to 0.44)        |
| <b>Other communicable, maternal, neonatal, and nutritional diseases</b> | <b>52.15</b><br>(44.53 to 62.57)   | <b>53.54</b><br>(42.00 to 68.62) | <b>49.64</b><br>(38.71 to 63.80) | <b>56.67</b><br>(44.13 to 73.21) | <b>1.70</b><br>(1.46 to 2.13) | <b>2.87</b><br>(2.22 to 3.99) | <b>2.76</b><br>(2.11 to 3.91) | <b>2.92</b><br>(2.27 to 4.05) |
| Sexually transmitted infections excluding HIV                           | 2.14<br>(1.46 to 2.80)             | 0.91<br>(0.65 to 1.29)           | 0.83<br>(0.58 to 1.18)           | 0.96<br>(0.69 to 1.37)           | 0.05<br>(0.04 to 0.06)        | 0.04<br>(0.03 to 0.07)        | 0.04<br>(0.03 to 0.07)        | 0.04<br>(0.03 to 0.07)        |
| Syphilis                                                                | 0.79<br>(0.51 to 1.25)             | 0.26<br>(0.18 to 0.39)           | 0.22<br>(0.14 to 0.32)           | 0.28<br>(0.19 to 0.43)           | 0.01<br>(0.01 to 0.02)        | 0.01<br>(0.01 to 0.02)        | 0.01<br>(0.01 to 0.02)        | 0.01<br>(0.01 to 0.02)        |
| Chlamydial infection                                                    | 0.26<br>(0.16 to 0.35)             | 0.13<br>(0.09 to 0.19)           | 0.12<br>(0.08 to 0.18)           | 0.13<br>(0.09 to 0.19)           | 0.01<br>(0.01 to 0.01)        | 0.01<br>(0.01 to 0.01)        | 0.01<br>(0.01 to 0.01)        | 0.01<br>(0.01 to 0.01)        |
| Gonococcal infection                                                    | 0.70<br>(0.44 to 0.92)             | 0.36<br>(0.25 to 0.51)           | 0.33<br>(0.24 to 0.48)           | 0.37<br>(0.26 to 0.54)           | 0.02<br>(0.01 to 0.02)        | 0.02<br>(0.01 to 0.03)        | 0.02<br>(0.01 to 0.03)        | 0.02<br>(0.01 to 0.03)        |
| Other sexually transmitted infections                                   | 0.38<br>(0.23 to 0.51)             | 0.17<br>(0.11 to 0.24)           | 0.16<br>(0.10 to 0.23)           | 0.18<br>(0.12 to 0.26)           | 0.01<br>(0.01 to 0.01)        | 0.01<br>(0.00 to 0.01)        | 0.01<br>(0.00 to 0.01)        | 0.01<br>(0.00 to 0.01)        |
| Acute hepatitis                                                         | 11.91<br>(9.77 to 14.45)           | 9.14<br>(6.84 to 12.02)          | 7.17<br>(5.16 to 9.85)           | 9.60<br>(7.13 to 12.78)          | 0.41<br>(0.34 to 0.49)        | 0.43<br>(0.34 to 0.56)        | 0.35<br>(0.26 to 0.46)        | 0.45<br>(0.35 to 0.57)        |
| Acute hepatitis A                                                       | 0.18<br>(0.13 to 0.25)             | 0.10<br>(0.06 to 0.15)           | 0.08<br>(0.05 to 0.13)           | 0.10<br>(0.06 to 0.16)           | 0.01<br>(0.00 to 0.01)        | 0.01<br>(0.00 to 0.01)        | 0.00<br>(0.00 to 0.01)        | 0.01<br>(0.00 to 0.01)        |
| Acute hepatitis B                                                       | 10.73<br>(8.70 to 13.17)           | 7.96<br>(5.76 to 10.63)          | 6.20<br>(4.36 to 8.63)           | 8.40<br>(6.07 to 11.29)          | 0.36<br>(0.30 to 0.44)        | 0.35<br>(0.27 to 0.46)        | 0.28<br>(0.20 to 0.37)        | 0.37<br>(0.27 to 0.48)        |





| Thailand                             |                                           |                                           |                                           |                                           |                                    |                                     |                                     |                                     |
|--------------------------------------|-------------------------------------------|-------------------------------------------|-------------------------------------------|-------------------------------------------|------------------------------------|-------------------------------------|-------------------------------------|-------------------------------------|
| Cause                                | YLLs (in 1000s)                           |                                           |                                           |                                           | Deaths (in 1000s)                  |                                     |                                     |                                     |
|                                      | 2016                                      | 2040 Forecast                             | 2040 Better Scenario                      | 2040 Worse Scenario                       | 2016                               | 2040 Forecast                       | 2040 Better Scenario                | 2040 Worse Scenario                 |
| <b>Neoplasms</b>                     | <b>2,435.39</b><br>(2,177.84 to 2,714.69) | <b>3,236.31</b><br>(2,652.34 to 3,996.39) | <b>2,702.64</b><br>(2,262.95 to 3,290.44) | <b>4,004.55</b><br>(3,212.57 to 5,106.98) | <b>103.73</b><br>(93.56 to 114.61) | <b>182.45</b><br>(151.07 to 221.08) | <b>156.53</b><br>(132.20 to 186.52) | <b>220.07</b><br>(178.65 to 272.14) |
| Lip and oral cavity cancer           | 62.50<br>(54.77 to 71.59)                 | 81.07<br>(50.43 to 128.55)                | 54.44<br>(35.72 to 83.70)                 | 140.21<br>(83.78 to 230.38)               | 2.95<br>(2.61 to 3.32)             | 5.12<br>(3.24 to 8.11)              | 3.58<br>(2.32 to 5.45)              | 8.71<br>(5.20 to 14.61)             |
| Nasopharynx cancer                   | 36.72<br>(30.84 to 43.81)                 | 38.59<br>(23.08 to 63.46)                 | 22.94<br>(14.34 to 36.05)                 | 66.46<br>(38.06 to 109.78)                | 1.31<br>(1.11 to 1.55)             | 1.73<br>(1.03 to 2.72)              | 1.06<br>(0.65 to 1.61)              | 2.93<br>(1.68 to 4.72)              |
| Other pharynx cancer                 | 16.79<br>(14.01 to 19.60)                 | 18.72<br>(11.93 to 28.99)                 | 16.11<br>(10.63 to 24.31)                 | 22.71<br>(14.09 to 36.53)                 | 0.61<br>(0.52 to 0.71)             | 0.86<br>(0.55 to 1.31)              | 0.75<br>(0.50 to 1.12)              | 1.02<br>(0.63 to 1.62)              |
| Esophageal cancer                    | 66.58<br>(57.21 to 78.31)                 | 61.73<br>(38.52 to 96.42)                 | 46.53<br>(30.80 to 69.71)                 | 99.69<br>(57.42 to 162.96)                | 2.77<br>(2.41 to 3.22)             | 3.35<br>(2.14 to 5.06)              | 2.59<br>(1.77 to 3.78)              | 5.30<br>(3.16 to 8.41)              |
| Stomach cancer                       | 95.59<br>(84.08 to 110.43)                | 95.46<br>(76.74 to 121.48)                | 78.84<br>(62.80 to 100.07)                | 104.88<br>(81.83 to 135.51)               | 4.19<br>(3.72 to 4.80)             | 5.68<br>(4.58 to 7.24)              | 4.78<br>(3.81 to 6.08)              | 6.09<br>(4.76 to 7.85)              |
| Colon and rectum cancer              | 176.16<br>(152.71 to 202.03)              | 314.21<br>(224.09 to 446.82)              | 266.58<br>(191.41 to 380.72)              | 333.66<br>(235.99 to 483.55)              | 8.37<br>(7.29 to 9.55)             | 20.57<br>(14.46 to 29.62)           | 17.89<br>(12.68 to 25.39)           | 21.21<br>(14.74 to 30.30)           |
| Liver cancer                         | 557.20<br>(477.50 to 642.39)              | 817.35<br>(567.92 to 1,158.24)            | 685.52<br>(518.77 to 909.41)              | 974.68<br>(658.48 to 1,436.65)            | 22.93<br>(19.89 to 26.49)          | 41.72<br>(30.47 to 57.36)           | 36.34<br>(28.04 to 46.76)           | 48.37<br>(33.51 to 68.13)           |
| Liver cancer due to hepatitis B      | 231.72<br>(180.94 to 291.59)              | 315.35<br>(209.93 to 474.46)              | 275.45<br>(193.68 to 390.54)              | 353.40<br>(225.47 to 557.05)              | 8.87<br>(6.99 to 11.07)            | 15.16<br>(10.34 to 22.18)           | 13.70<br>(9.73 to 18.78)            | 16.58<br>(10.80 to 25.37)           |
| Liver cancer due to hepatitis C      | 63.63<br>(47.95 to 82.77)                 | 105.04<br>(68.32 to 155.12)               | 94.33<br>(64.84 to 131.57)                | 115.37<br>(72.48 to 176.78)               | 3.10<br>(2.34 to 4.06)             | 6.41<br>(4.21 to 9.39)              | 5.94<br>(4.06 to 8.41)              | 6.87<br>(4.34 to 10.27)             |
| Liver cancer due to alcohol use      | 173.34<br>(113.11 to 239.63)              | 269.52<br>(155.34 to 414.92)              | 206.47<br>(119.44 to 306.24)              | 361.99<br>(205.20 to 561.39)              | 7.43<br>(4.73 to 10.07)            | 13.76<br>(7.56 to 20.92)            | 11.04<br>(6.12 to 16.30)            | 17.88<br>(10.09 to 27.77)           |
| Liver cancer due to other causes     | 88.51<br>(62.99 to 119.69)                | 127.44<br>(75.34 to 199.88)               | 109.27<br>(69.62 to 162.10)               | 143.93<br>(81.58 to 234.00)               | 3.53<br>(2.52 to 4.66)             | 6.39<br>(3.86 to 9.73)              | 5.66<br>(3.65 to 8.44)              | 7.04<br>(4.05 to 11.19)             |
| Gallbladder and biliary tract cancer | 100.71<br>(46.04 to 130.87)               | 110.98<br>(50.34 to 143.59)               | 110.31<br>(50.11 to 144.01)               | 104.51<br>(45.01 to 135.53)               | 4.86<br>(2.16 to 6.24)             | 6.91<br>(3.06 to 8.91)              | 6.98<br>(3.15 to 9.10)              | 6.35<br>(2.64 to 8.12)              |
| Pancreatic cancer                    | 70.03<br>(61.53 to 79.98)                 | 113.14<br>(88.40 to 143.14)               | 108.13<br>(85.68 to 136.09)               | 122.26<br>(94.37 to 156.36)               | 3.23<br>(2.85 to 3.66)             | 6.70<br>(5.26 to 8.51)              | 6.50<br>(5.19 to 8.21)              | 7.09<br>(5.56 to 9.01)              |
| Larynx cancer                        | 30.06<br>(25.41 to 35.60)                 | 32.16<br>(16.83 to 57.95)                 | 19.41<br>(10.92 to 33.22)                 | 55.32<br>(27.08 to 101.85)                | 1.30<br>(1.11 to 1.52)             | 1.81<br>(0.95 to 3.16)              | 1.13<br>(0.63 to 1.94)              | 3.04<br>(1.49 to 5.50)              |
| Tracheal, bronchus, and lung cancer  | 446.20<br>(389.03 to 550.09)              | 546.04<br>(376.93 to 851.87)              | 378.63<br>(269.45 to 619.45)              | 959.08<br>(639.13 to 1,517.99)            | 21.12<br>(18.55 to 25.86)          | 32.40<br>(22.59 to 50.95)           | 23.25<br>(16.64 to 37.10)           | 55.18<br>(37.90 to 87.23)           |
| Malignant skin melanoma              | 6.22<br>(4.88 to 11.04)                   | 8.44<br>(6.25 to 16.44)                   | 9.59<br>(6.96 to 18.83)                   | 7.74<br>(5.78 to 14.92)                   | 0.23<br>(0.18 to 0.45)             | 0.45<br>(0.34 to 0.94)              | 0.52<br>(0.38 to 1.10)              | 0.40<br>(0.30 to 0.82)              |
| Non-melanoma skin cancer             | 19.44<br>(16.86 to 22.47)                 | 34.03<br>(29.41 to 39.52)                 | 29.88<br>(25.32 to 35.55)                 | 33.24<br>(28.93 to 37.97)                 | 0.90<br>(0.80 to 1.04)             | 2.21<br>(1.91 to 2.58)              | 1.99<br>(1.66 to 2.35)              | 2.08<br>(1.82 to 2.38)              |
| Breast cancer                        | 153.04<br>(122.31 to 185.40)              | 165.42<br>(114.71 to 240.87)              | 142.17<br>(101.20 to 198.59)              | 180.82<br>(121.32 to 277.83)              | 5.38<br>(4.30 to 6.42)             | 7.89<br>(5.59 to 11.10)             | 6.88<br>(4.95 to 9.31)              | 8.42<br>(5.76 to 12.51)             |
| Cervical cancer                      | 92.80<br>(73.94 to 114.24)                | 90.84<br>(66.32 to 126.63)                | 75.89<br>(55.47 to 105.50)                | 100.67<br>(69.79 to 144.80)               | 3.47<br>(2.81 to 4.21)             | 4.51<br>(3.32 to 6.03)              | 3.82<br>(2.80 to 5.17)              | 4.89<br>(3.44 to 6.81)              |

|                   |                              |                               |                               |                               |                           |                            |                            |                           |
|-------------------|------------------------------|-------------------------------|-------------------------------|-------------------------------|---------------------------|----------------------------|----------------------------|---------------------------|
| Uterine cancer    | 12.25<br>(10.04 to<br>15.08) | 16.80<br>(13.37 to<br>21.18)  | 15.13<br>(12.03 to<br>19.45)  | 17.14<br>(13.75 to<br>21.38)  | 0.53<br>(0.44 to<br>0.64) | 0.94<br>(0.76 to<br>1.17)  | 0.86<br>(0.70 to<br>1.08)  | 0.94<br>(0.77 to<br>1.15) |
| Ovarian cancer    | 46.32<br>(37.46 to<br>57.83) | 60.26<br>(45.01 to<br>80.80)  | 55.63<br>(41.75 to<br>74.09)  | 57.84<br>(43.39 to<br>78.45)  | 1.71<br>(1.42 to<br>2.09) | 2.94<br>(2.23 to<br>3.88)  | 2.75<br>(2.11 to<br>3.58)  | 2.78<br>(2.10 to<br>3.71) |
| Prostate cancer   | 38.22<br>(25.05 to<br>48.05) | 97.11<br>(66.15 to<br>123.42) | 92.85<br>(63.69 to<br>119.39) | 90.22<br>(60.42 to<br>114.06) | 2.60<br>(1.70 to<br>3.24) | 8.18<br>(5.28 to<br>10.78) | 7.99<br>(5.22 to<br>10.63) | 7.38<br>(4.71 to<br>9.63) |
| Testicular cancer | 1.51<br>(1.18 to<br>1.89)    | 1.25<br>(0.88 to<br>1.80)     | 1.11<br>(0.78 to<br>1.62)     | 1.24<br>(0.89 to<br>1.79)     | 0.04<br>(0.03 to<br>0.05) | 0.05<br>(0.04 to<br>0.06)  | 0.04<br>(0.03 to<br>0.06)  | 0.05<br>(0.03 to<br>0.06) |

| Thailand                        |                                                  |                                                  |                                                |                                                  |                                          |                                            |                                           |                                            |
|---------------------------------|--------------------------------------------------|--------------------------------------------------|------------------------------------------------|--------------------------------------------------|------------------------------------------|--------------------------------------------|-------------------------------------------|--------------------------------------------|
| Cause                           | YLLs (in 1000s)                                  |                                                  |                                                |                                                  | Deaths (in 1000s)                        |                                            |                                           |                                            |
|                                 | 2016                                             | 2040 Forecast                                    | 2040 Better Scenario                           | 2040 Worse Scenario                              | 2016                                     | 2040 Forecast                              | 2040 Better Scenario                      | 2040 Worse Scenario                        |
| Kidney cancer                   | 18.31<br>(15.84 to 20.89)                        | 27.85<br>(21.47 to 36.30)                        | 27.53<br>(21.73 to 35.13)                      | 28.59<br>(21.33 to 38.45)                        | 0.75<br>(0.65 to 0.86)                   | 1.53<br>(1.20 to 1.98)                     | 1.55<br>(1.23 to 1.99)                    | 1.53<br>(1.15 to 2.01)                     |
| Bladder cancer                  | 26.77<br>(23.06 to 30.94)                        | 44.59<br>(32.64 to 61.28)                        | 39.05<br>(29.33 to 52.40)                      | 51.17<br>(36.12 to 72.40)                        | 1.54<br>(1.33 to 1.78)                   | 3.36<br>(2.42 to 4.68)                     | 3.01<br>(2.22 to 4.12)                    | 3.77<br>(2.64 to 5.39)                     |
| Brain and nervous system cancer | 75.05<br>(47.18 to 92.37)                        | 99.52<br>(58.03 to 128.20)                       | 96.04<br>(56.20 to 124.76)                     | 94.76<br>(55.07 to 122.43)                       | 2.49<br>(1.49 to 3.11)                   | 4.65<br>(2.56 to 6.05)                     | 4.57<br>(2.53 to 5.99)                    | 4.31<br>(2.40 to 5.61)                     |
| Thyroid cancer                  | 9.99<br>(8.13 to 18.81)                          | 18.86<br>(13.87 to 32.35)                        | 16.08<br>(12.15 to 27.33)                      | 18.78<br>(13.88 to 30.73)                        | 0.52<br>(0.43 to 0.81)                   | 1.24<br>(0.94 to 1.82)                     | 1.09<br>(0.83 to 1.60)                    | 1.21<br>(0.91 to 1.73)                     |
| Mesothelioma                    | 7.94<br>(6.44 to 9.69)                           | 8.94<br>(7.18 to 11.43)                          | 9.13<br>(7.30 to 11.77)                        | 8.65<br>(6.97 to 10.91)                          | 0.26<br>(0.21 to 0.31)                   | 0.38<br>(0.31 to 0.50)                     | 0.39<br>(0.32 to 0.54)                    | 0.36<br>(0.30 to 0.45)                     |
| Hodgkin lymphoma                | 5.69<br>(4.23 to 9.84)                           | 5.01<br>(3.61 to 8.60)                           | 4.12<br>(2.89 to 7.17)                         | 5.23<br>(3.78 to 8.83)                           | 0.18<br>(0.14 to 0.31)                   | 0.20<br>(0.15 to 0.33)                     | 0.17<br>(0.12 to 0.28)                    | 0.21<br>(0.15 to 0.34)                     |
| Non-Hodgkin lymphoma            | 39.94<br>(29.33 to 86.65)                        | 65.09<br>(45.59 to 139.37)                       | 59.09<br>(41.59 to 126.39)                     | 61.43<br>(43.28 to 127.54)                       | 1.48<br>(1.09 to 3.15)                   | 3.27<br>(2.34 to 6.88)                     | 3.04<br>(2.17 to 6.43)                    | 3.04<br>(2.17 to 6.18)                     |
| Multiple myeloma                | 12.70<br>(9.77 to 20.99)                         | 22.00<br>(15.72 to 37.98)                        | 20.59<br>(15.04 to 35.98)                      | 20.62<br>(14.87 to 34.86)                        | 0.51<br>(0.39 to 0.86)                   | 1.12<br>(0.81 to 1.96)                     | 1.07<br>(0.78 to 1.89)                    | 1.03<br>(0.75 to 1.75)                     |
| Leukemia                        | 128.34<br>(73.05 to 153.61)                      | 127.86<br>(64.23 to 175.77)                      | 108.55<br>(55.03 to 146.30)                    | 134.90<br>(66.18 to 193.12)                      | 4.47<br>(2.30 to 5.40)                   | 6.52<br>(3.04 to 9.00)                     | 5.65<br>(2.62 to 7.69)                    | 6.72<br>(3.08 to 9.54)                     |
| Acute lymphoid leukemia         | 28.15<br>(15.59 to 34.16)                        | 41.13<br>(20.61 to 55.24)                        | 35.31<br>(17.94 to 46.76)                      | 42.22<br>(20.71 to 58.66)                        | 1.03<br>(0.53 to 1.25)                   | 1.90<br>(0.94 to 2.57)                     | 1.66<br>(0.83 to 2.19)                    | 1.91<br>(0.94 to 2.64)                     |
| Chronic lymphoid leukemia       | 1.32<br>(0.83 to 1.71)                           | 1.36<br>(0.83 to 2.00)                           | 1.20<br>(0.75 to 1.72)                         | 1.42<br>(0.85 to 2.13)                           | 0.04<br>(0.02 to 0.05)                   | 0.05<br>(0.03 to 0.07)                     | 0.05<br>(0.03 to 0.06)                    | 0.05<br>(0.03 to 0.07)                     |
| Acute myeloid leukemia          | 7.57<br>(4.95 to 9.42)                           | 10.95<br>(6.39 to 15.23)                         | 10.13<br>(5.94 to 13.87)                       | 11.16<br>(6.43 to 15.88)                         | 0.22<br>(0.13 to 0.28)                   | 0.42<br>(0.23 to 0.57)                     | 0.39<br>(0.22 to 0.52)                    | 0.42<br>(0.23 to 0.59)                     |
| Chronic myeloid leukemia        | 3.32<br>(1.84 to 4.36)                           | 2.50<br>(1.40 to 3.94)                           | 1.85<br>(1.02 to 2.84)                         | 2.70<br>(1.44 to 4.47)                           | 0.09<br>(0.05 to 0.12)                   | 0.08<br>(0.05 to 0.12)                     | 0.06<br>(0.04 to 0.09)                    | 0.09<br>(0.05 to 0.14)                     |
| Other leukemia                  | 87.99<br>(47.58 to 105.92)                       | 71.91<br>(32.49 to 102.55)                       | 60.06<br>(27.45 to 83.79)                      | 77.41<br>(35.18 to 114.05)                       | 3.10<br>(1.50 to 3.76)                   | 4.06<br>(1.72 to 5.70)                     | 3.49<br>(1.48 to 4.86)                    | 4.24<br>(1.76 to 6.18)                     |
| Other neoplasms                 | 82.29<br>(70.73 to 92.94)                        | 112.99<br>(95.86 to 131.42)                      | 112.77<br>(95.30 to 131.78)                    | 108.03<br>(90.71 to 125.54)                      | 3.04<br>(2.61 to 3.43)                   | 6.15<br>(5.20 to 7.19)                     | 6.27<br>(5.34 to 7.37)                    | 5.70<br>(4.68 to 6.60)                     |
| <b>Cardiovascular diseases</b>  | <b>1,886.49</b><br><b>(1,679.26 to 2,162.32)</b> | <b>1,870.33</b><br><b>(1,336.95 to 2,556.43)</b> | <b>1,254.09</b><br><b>(916.85 to 1,709.81)</b> | <b>2,769.97</b><br><b>(1,912.28 to 3,915.04)</b> | <b>98.89</b><br><b>(88.82 to 111.98)</b> | <b>142.95</b><br><b>(100.50 to 198.96)</b> | <b>102.49</b><br><b>(73.24 to 142.42)</b> | <b>192.55</b><br><b>(132.79 to 272.57)</b> |
| Rheumatic heart disease         | 11.35<br>(9.88 to 12.87)                         | 7.25<br>(5.93 to 8.86)                           | 6.04<br>(4.85 to 7.48)                         | 7.75<br>(6.29 to 9.68)                           | 0.43<br>(0.38 to 0.50)                   | 0.44<br>(0.36 to 0.55)                     | 0.38<br>(0.30 to 0.47)                    | 0.46<br>(0.37 to 0.58)                     |
| Ischemic heart disease          | 850.13<br>(751.83 to 988.04)                     | 792.31<br>(450.96 to 1,288.84)                   | 500.20<br>(293.37 to 824.80)                   | 1,254.19<br>(700.42 to 2,082.26)                 | 47.59<br>(42.21 to 55.33)                | 63.06<br>(36.50 to 102.43)                 | 42.74<br>(24.17 to 70.08)                 | 90.53<br>(51.71 to 151.40)                 |
| Stroke                          | 755.66<br>(667.16 to 855.26)                     | 629.16<br>(412.11 to 937.98)                     | 365.94<br>(250.87 to 537.59)                   | 1,034.73<br>(649.92 to 1,606.28)                 | 36.82<br>(33.06 to 41.33)                | 45.46<br>(30.27 to 66.44)                  | 29.09<br>(19.89 to 42.09)                 | 66.61<br>(44.07 to 100.08)                 |
| Ischemic stroke                 | 185.73<br>(165.08 to 210.10)                     | 187.09<br>(117.31 to 312.51)                     | 121.49<br>(76.98 to 197.40)                    | 270.31<br>(160.75 to 464.02)                     | 12.24<br>(10.82 to 13.76)                | 16.49<br>(10.16 to 28.73)                  | 11.45<br>(7.02 to 19.14)                  | 21.85<br>(13.00 to 39.85)                  |

|                                |                                 |                                 |                                 |                                   |                              |                              |                              |                              |
|--------------------------------|---------------------------------|---------------------------------|---------------------------------|-----------------------------------|------------------------------|------------------------------|------------------------------|------------------------------|
| Intracerebral hemorrhage       | 569.93<br>(497.95 to<br>647.24) | 442.07<br>(277.55 to<br>686.61) | 244.45<br>(162.84 to<br>367.80) | 764.43<br>(453.96 to<br>1,258.43) | 24.58<br>(21.91 to<br>27.60) | 28.98<br>(19.13 to<br>43.06) | 17.65<br>(11.95 to<br>25.61) | 44.76<br>(27.92 to<br>69.79) |
| Hypertensive heart disease     | 30.76<br>(26.01 to<br>39.10)    | 52.98<br>(35.64 to<br>81.69)    | 40.76<br>(28.69 to<br>58.24)    | 66.18<br>(41.61 to<br>113.44)     | 1.78<br>(1.51 to<br>2.20)    | 4.43<br>(2.88 to<br>7.11)    | 3.49<br>(2.37 to<br>5.13)    | 5.26<br>(3.21 to<br>9.42)    |
| Cardiomyopathy and myocarditis | 14.53<br>(11.68 to<br>20.79)    | 20.02<br>(14.95 to<br>29.38)    | 17.43<br>(13.02 to<br>25.30)    | 19.51<br>(14.66 to<br>28.42)      | 0.61<br>(0.50 to<br>0.84)    | 1.27<br>(0.92 to<br>1.81)    | 1.13<br>(0.82 to<br>1.62)    | 1.19<br>(0.87 to<br>1.67)    |
| Myocarditis                    | 6.21<br>(4.83 to<br>9.47)       | 7.81<br>(5.96 to<br>11.18)      | 7.68<br>(5.84 to<br>10.88)      | 7.65<br>(5.83 to<br>10.88)        | 0.23<br>(0.19 to<br>0.32)    | 0.45<br>(0.35 to<br>0.60)    | 0.45<br>(0.35 to<br>0.61)    | 0.43<br>(0.33 to<br>0.56)    |

| Thailand                                                      |                                            |                                            |                                            |                                              |                                         |                                         |                                         |                                         |
|---------------------------------------------------------------|--------------------------------------------|--------------------------------------------|--------------------------------------------|----------------------------------------------|-----------------------------------------|-----------------------------------------|-----------------------------------------|-----------------------------------------|
| Cause                                                         | YLLs (in 1000s)                            |                                            |                                            |                                              | Deaths (in 1000s)                       |                                         |                                         |                                         |
|                                                               | 2016                                       | 2040 Forecast                              | 2040 Better Scenario                       | 2040 Worse Scenario                          | 2016                                    | 2040 Forecast                           | 2040 Better Scenario                    | 2040 Worse Scenario                     |
| Alcoholic cardiomyopathy                                      | 1.01<br>(0.76 to 1.44)                     | 0.86<br>(0.59 to 1.23)                     | 0.76<br>(0.50 to 1.10)                     | 0.97<br>(0.69 to 1.37)                       | 0.04<br>(0.03 to 0.05)                  | 0.04<br>(0.03 to 0.06)                  | 0.04<br>(0.03 to 0.05)                  | 0.04<br>(0.03 to 0.06)                  |
| Other cardiomyopathy                                          | 7.31<br>(5.83 to 10.62)                    | 11.34<br>(7.63 to 17.28)                   | 9.00<br>(5.93 to 14.06)                    | 10.89<br>(7.27 to 16.50)                     | 0.34<br>(0.27 to 0.49)                  | 0.78<br>(0.50 to 1.21)                  | 0.64<br>(0.40 to 1.03)                  | 0.72<br>(0.47 to 1.12)                  |
| Atrial fibrillation and flutter                               | 23.49<br>(18.16 to 30.32)                  | 61.38<br>(44.03 to 85.30)                  | 56.97<br>(40.55 to 78.54)                  | 64.07<br>(44.61 to 89.46)                    | 2.32<br>(1.76 to 3.03)                  | 6.97<br>(4.91 to 9.92)                  | 6.62<br>(4.63 to 9.51)                  | 7.03<br>(4.85 to 9.97)                  |
| Aortic aneurysm                                               | 25.26<br>(21.92 to 29.11)                  | 41.91<br>(34.07 to 52.78)                  | 39.30<br>(32.04 to 49.18)                  | 42.08<br>(33.84 to 53.41)                    | 1.62<br>(1.41 to 1.88)                  | 3.69<br>(2.93 to 4.73)                  | 3.57<br>(2.82 to 4.55)                  | 3.54<br>(2.80 to 4.53)                  |
| Peripheral artery disease                                     | 0.99<br>(0.75 to 1.19)                     | 3.24<br>(2.08 to 4.43)                     | 3.12<br>(1.98 to 4.28)                     | 3.11<br>(1.97 to 4.32)                       | 0.08<br>(0.06 to 0.10)                  | 0.35<br>(0.22 to 0.49)                  | 0.35<br>(0.22 to 0.50)                  | 0.32<br>(0.19 to 0.46)                  |
| Endocarditis                                                  | 78.42<br>(64.49 to 104.74)                 | 109.78<br>(81.42 to 150.92)                | 103.65<br>(78.07 to 138.72)                | 108.90<br>(80.32 to 150.93)                  | 3.08<br>(2.55 to 3.98)                  | 6.68<br>(4.86 to 9.32)                  | 6.45<br>(4.70 to 9.01)                  | 6.41<br>(4.66 to 9.09)                  |
| Other cardiovascular and circulatory diseases                 | 95.90<br>(79.45 to 129.98)                 | 152.30<br>(113.15 to 212.09)               | 120.69<br>(89.29 to 163.84)                | 169.44<br>(122.52 to 238.32)                 | 4.57<br>(3.81 to 6.05)                  | 10.59<br>(7.83 to 14.49)                | 8.67<br>(6.30 to 11.90)                 | 11.19<br>(8.20 to 15.53)                |
| <b>Chronic respiratory diseases</b>                           | <b>412.03</b><br><b>(361.17 to 479.97)</b> | <b>502.05</b><br><b>(362.73 to 727.76)</b> | <b>332.36</b><br><b>(246.89 to 465.85)</b> | <b>831.87</b><br><b>(573.36 to 1,240.17)</b> | <b>23.89</b><br><b>(21.02 to 28.12)</b> | <b>37.35</b><br><b>(26.83 to 54.24)</b> | <b>25.69</b><br><b>(18.80 to 36.90)</b> | <b>60.07</b><br><b>(41.89 to 89.39)</b> |
| Chronic obstructive pulmonary disease                         | 339.74<br>(296.11 to 399.22)               | 435.05<br>(299.25 to 651.67)               | 280.39<br>(198.42 to 406.84)               | 759.22<br>(505.06 to 1,168.24)               | 20.76<br>(18.18 to 24.37)               | 33.30<br>(23.35 to 49.34)               | 22.45<br>(15.86 to 32.13)               | 55.81<br>(38.18 to 84.39)               |
| Pneumoconiosis                                                | 0.49<br>(0.38 to 0.61)                     | 0.59<br>(0.46 to 0.73)                     | 0.48<br>(0.38 to 0.61)                     | 0.58<br>(0.46 to 0.72)                       | 0.03<br>(0.02 to 0.03)                  | 0.04<br>(0.03 to 0.06)                  | 0.04<br>(0.03 to 0.05)                  | 0.04<br>(0.03 to 0.06)                  |
| Silicosis                                                     | 0.12<br>(0.08 to 0.18)                     | 0.07<br>(0.05 to 0.10)                     | 0.05<br>(0.03 to 0.07)                     | 0.07<br>(0.05 to 0.10)                       | 0.00<br>(0.00 to 0.01)                  | 0.00<br>(0.00 to 0.01)                  | 0.00<br>(0.00 to 0.00)                  | 0.00<br>(0.00 to 0.01)                  |
| Asbestosis                                                    | 0.11<br>(0.08 to 0.16)                     | 0.14<br>(0.10 to 0.19)                     | 0.15<br>(0.11 to 0.21)                     | 0.13<br>(0.10 to 0.19)                       | 0.00<br>(0.00 to 0.01)                  | 0.01<br>(0.01 to 0.01)                  | 0.01<br>(0.01 to 0.01)                  | 0.01<br>(0.01 to 0.01)                  |
| Coal workers pneumoconiosis                                   | 0.01<br>(0.01 to 0.02)                     | 0.02<br>(0.01 to 0.04)                     | 0.01<br>(0.01 to 0.03)                     | 0.02<br>(0.01 to 0.04)                       | 0.00<br>(0.00 to 0.00)                  | 0.00<br>(0.00 to 0.00)                  | 0.00<br>(0.00 to 0.00)                  | 0.00<br>(0.00 to 0.00)                  |
| Other pneumoconiosis                                          | 0.25<br>(0.19 to 0.31)                     | 0.35<br>(0.27 to 0.46)                     | 0.27<br>(0.19 to 0.35)                     | 0.35<br>(0.27 to 0.45)                       | 0.02<br>(0.01 to 0.02)                  | 0.03<br>(0.02 to 0.04)                  | 0.02<br>(0.02 to 0.03)                  | 0.03<br>(0.02 to 0.04)                  |
| Asthma                                                        | 55.06<br>(45.94 to 65.01)                  | 44.93<br>(30.20 to 66.30)                  | 27.80<br>(19.32 to 39.91)                  | 50.70<br>(33.27 to 75.93)                    | 2.49<br>(2.07 to 2.97)                  | 2.79<br>(1.86 to 4.09)                  | 1.80<br>(1.26 to 2.56)                  | 3.05<br>(2.00 to 4.48)                  |
| Interstitial lung disease and pulmonary sarcoidosis           | 7.64<br>(6.00 to 11.25)                    | 12.32<br>(8.87 to 20.86)                   | 14.96<br>(10.66 to 25.33)                  | 11.26<br>(8.15 to 18.91)                     | 0.33<br>(0.24 to 0.55)                  | 0.75<br>(0.51 to 1.36)                  | 0.92<br>(0.62 to 1.66)                  | 0.66<br>(0.46 to 1.22)                  |
| Other chronic respiratory diseases                            | 9.10<br>(6.71 to 13.18)                    | 9.17<br>(5.98 to 15.24)                    | 8.72<br>(5.73 to 14.33)                    | 10.12<br>(6.49 to 16.98)                     | 0.29<br>(0.21 to 0.45)                  | 0.48<br>(0.29 to 0.84)                  | 0.47<br>(0.29 to 0.82)                  | 0.51<br>(0.31 to 0.89)                  |
| <b>Cirrhosis and other chronic liver diseases</b>             | <b>419.70</b><br><b>(350.37 to 498.16)</b> | <b>419.95</b><br><b>(344.64 to 509.32)</b> | <b>359.04</b><br><b>(290.47 to 440.57)</b> | <b>450.69</b><br><b>(368.56 to 546.11)</b>   | <b>13.43</b><br><b>(11.50 to 15.88)</b> | <b>17.74</b><br><b>(15.07 to 21.00)</b> | <b>15.44</b><br><b>(12.97 to 18.61)</b> | <b>18.60</b><br><b>(15.79 to 22.00)</b> |
| Cirrhosis and other chronic liver diseases due to hepatitis B | 136.59<br>(104.40 to 175.50)               | 137.08<br>(104.23 to 180.12)               | 122.46<br>(92.90 to 161.84)                | 137.55<br>(103.46 to 180.83)                 | 4.33<br>(3.36 to 5.52)                  | 5.67<br>(4.49 to 7.37)                  | 5.13<br>(4.01 to 6.68)                  | 5.59<br>(4.40 to 7.23)                  |
| Cirrhosis and other chronic liver diseases due to hepatitis C | 78.42<br>(59.77 to 101.05)                 | 78.75<br>(60.00 to 100.99)                 | 69.68<br>(52.90 to 90.92)                  | 79.36<br>(60.48 to 101.72)                   | 2.45<br>(1.90 to 3.09)                  | 3.14<br>(2.47 to 3.97)                  | 2.81<br>(2.20 to 3.61)                  | 3.12<br>(2.46 to 3.91)                  |

|                                                                |                                                      |                                                      |                                                      |                                                      |                                                  |                                                   |                                                   |                                                   |
|----------------------------------------------------------------|------------------------------------------------------|------------------------------------------------------|------------------------------------------------------|------------------------------------------------------|--------------------------------------------------|---------------------------------------------------|---------------------------------------------------|---------------------------------------------------|
|                                                                | 117.53<br>(91.57 to<br>146.15)                       | 110.92<br>(86.78 to<br>139.00)                       | 83.88<br>(65.36 to<br>104.85)                        | 139.57<br>(110.47 to<br>173.39)                      | 3.78<br>(3.02 to<br>4.61)                        | 4.66<br>(3.74 to<br>5.71)                         | 3.65<br>(2.89 to<br>4.49)                         | 5.68<br>(4.59 to<br>6.87)                         |
| Cirrhosis and other chronic liver diseases due to alcohol use  |                                                      |                                                      |                                                      |                                                      |                                                  |                                                   |                                                   |                                                   |
|                                                                | 87.16<br>(71.14 to<br>105.85)                        | 93.20<br>(74.02 to<br>115.34)                        | 83.02<br>(65.86 to<br>103.08)                        | 94.22<br>(75.24 to<br>115.70)                        | 2.88<br>(2.40 to<br>3.47)                        | 4.26<br>(3.45 to<br>5.10)                         | 3.85<br>(3.10 to<br>4.70)                         | 4.21<br>(3.44 to<br>5.04)                         |
| Cirrhosis and other chronic liver diseases due to other causes |                                                      |                                                      |                                                      |                                                      |                                                  |                                                   |                                                   |                                                   |
| <b>Digestive diseases</b>                                      | <b>232.61</b><br><b>(191.37 to</b><br><b>270.16)</b> | <b>283.43</b><br><b>(217.53 to</b><br><b>360.58)</b> | <b>242.14</b><br><b>(188.51 to</b><br><b>302.93)</b> | <b>298.54</b><br><b>(225.81 to</b><br><b>387.17)</b> | <b>10.38</b><br><b>(8.53 to</b><br><b>11.90)</b> | <b>18.72</b><br><b>(14.61 to</b><br><b>23.27)</b> | <b>16.62</b><br><b>(13.11 to</b><br><b>20.48)</b> | <b>18.90</b><br><b>(14.63 to</b><br><b>23.53)</b> |
| Peptic ulcer disease                                           | 28.03<br>(22.71 to<br>33.55)                         | 22.92<br>(18.02 to<br>28.59)                         | 17.57<br>(13.55 to<br>22.65)                         | 25.85<br>(20.08 to<br>32.63)                         | 1.31<br>(1.10 to<br>1.54)                        | 1.64<br>(1.28 to<br>2.04)                         | 1.28<br>(0.97 to<br>1.64)                         | 1.78<br>(1.38 to<br>2.22)                         |

| Thailand                                   |                              |                                |                                |                                |                           |                            |                            |                            |
|--------------------------------------------|------------------------------|--------------------------------|--------------------------------|--------------------------------|---------------------------|----------------------------|----------------------------|----------------------------|
| Cause                                      | YLLs (in 1000s)              |                                |                                |                                | Deaths (in 1000s)         |                            |                            |                            |
|                                            | 2016                         | 2040 Forecast                  | 2040 Better Scenario           | 2040 Worse Scenario            | 2016                      | 2040 Forecast              | 2040 Better Scenario       | 2040 Worse Scenario        |
| Gastritis and duodenitis                   | 3.86<br>(3.08 to 4.68)       | 5.10<br>(3.85 to 6.53)         | 4.40<br>(3.25 to 5.74)         | 5.10<br>(3.87 to 6.48)         | 0.17<br>(0.14 to 0.20)    | 0.32<br>(0.25 to 0.41)     | 0.29<br>(0.21 to 0.37)     | 0.31<br>(0.24 to 0.39)     |
| Appendicitis                               | 10.92<br>(8.14 to 14.08)     | 9.41<br>(7.01 to 12.68)        | 7.54<br>(5.58 to 10.44)        | 9.79<br>(7.32 to 13.30)        | 0.36<br>(0.28 to 0.46)    | 0.50<br>(0.37 to 0.69)     | 0.41<br>(0.30 to 0.58)     | 0.50<br>(0.38 to 0.69)     |
| Paralytic ileus and intestinal obstruction | 26.33<br>(21.06 to 36.01)    | 36.49<br>(27.98 to 50.90)      | 36.69<br>(27.93 to 50.93)      | 35.50<br>(27.63 to 49.54)      | 1.26<br>(0.98 to 1.67)    | 2.59<br>(1.94 to 3.42)     | 2.67<br>(1.98 to 3.53)     | 2.43<br>(1.87 to 3.25)     |
| Inguinal, femoral, and abdominal hernia    | 2.86<br>(2.04 to 3.68)       | 3.37<br>(2.30 to 4.41)         | 2.98<br>(1.98 to 3.92)         | 3.33<br>(2.28 to 4.39)         | 0.15<br>(0.10 to 0.18)    | 0.26<br>(0.16 to 0.35)     | 0.24<br>(0.14 to 0.32)     | 0.25<br>(0.15 to 0.33)     |
| Inflammatory bowel disease                 | 4.02<br>(3.01 to 4.91)       | 4.51<br>(3.51 to 5.65)         | 4.47<br>(3.45 to 5.64)         | 4.35<br>(3.41 to 5.44)         | 0.16<br>(0.13 to 0.19)    | 0.26<br>(0.21 to 0.33)     | 0.27<br>(0.21 to 0.34)     | 0.24<br>(0.20 to 0.30)     |
| Vascular intestinal disorders              | 13.84<br>(10.28 to 16.40)    | 20.72<br>(16.54 to 24.79)      | 19.60<br>(15.41 to 23.71)      | 20.16<br>(15.96 to 24.14)      | 0.73<br>(0.57 to 0.85)    | 1.58<br>(1.27 to 1.92)     | 1.53<br>(1.21 to 1.89)     | 1.49<br>(1.21 to 1.82)     |
| Gallbladder and biliary diseases           | 28.93<br>(19.12 to 35.05)    | 45.97<br>(23.49 to 72.08)      | 31.43<br>(16.75 to 47.19)      | 49.14<br>(25.07 to 77.24)      | 1.52<br>(0.96 to 1.82)    | 3.25<br>(1.60 to 5.38)     | 2.33<br>(1.20 to 3.67)     | 3.36<br>(1.65 to 5.50)     |
| Pancreatitis                               | 32.95<br>(23.33 to 41.26)    | 33.89<br>(14.54 to 73.08)      | 23.43<br>(10.40 to 49.43)      | 42.71<br>(17.46 to 92.97)      | 1.01<br>(0.70 to 1.24)    | 1.45<br>(0.66 to 3.11)     | 1.04<br>(0.49 to 2.13)     | 1.79<br>(0.79 to 3.97)     |
| Other digestive diseases                   | 80.87<br>(63.11 to 96.00)    | 101.06<br>(78.63 to 122.12)    | 94.03<br>(72.26 to 114.14)     | 102.61<br>(78.32 to 122.88)    | 3.73<br>(2.92 to 4.36)    | 6.88<br>(5.42 to 8.21)     | 6.58<br>(5.16 to 7.93)     | 6.75<br>(5.29 to 8.10)     |
| Neurological disorders                     | 381.74<br>(321.08 to 455.58) | 944.36<br>(704.87 to 1,279.36) | 897.82<br>(690.25 to 1,168.08) | 903.87<br>(675.95 to 1,242.15) | 33.78<br>(28.27 to 40.80) | 98.98<br>(71.90 to 137.19) | 96.51<br>(71.80 to 128.68) | 91.71<br>(66.24 to 128.01) |
| Alzheimer's disease and other dementias    | 309.13<br>(253.34 to 378.90) | 824.49<br>(593.84 to 1,145.54) | 774.02<br>(579.89 to 1,032.34) | 791.01<br>(567.05 to 1,123.47) | 30.29<br>(24.88 to 37.13) | 90.30<br>(64.12 to 127.85) | 87.17<br>(63.09 to 119.40) | 83.96<br>(59.26 to 119.31) |
| Parkinson's disease                        | 31.41<br>(25.21 to 38.48)    | 84.51<br>(66.80 to 104.29)     | 91.56<br>(72.12 to 113.69)     | 74.86<br>(58.25 to 92.12)      | 2.40<br>(1.92 to 2.98)    | 7.38<br>(5.79 to 9.23)     | 8.12<br>(6.28 to 10.22)    | 6.39<br>(5.03 to 7.96)     |
| Epilepsy                                   | 28.26<br>(24.16 to 32.62)    | 20.06<br>(13.33 to 30.31)      | 16.64<br>(11.39 to 24.74)      | 23.42<br>(15.36 to 36.58)      | 0.69<br>(0.60 to 0.79)    | 0.67<br>(0.47 to 0.96)     | 0.57<br>(0.41 to 0.80)     | 0.76<br>(0.53 to 1.12)     |
| Multiple sclerosis                         | 2.16<br>(1.81 to 2.82)       | 2.14<br>(1.69 to 2.79)         | 2.18<br>(1.73 to 2.85)         | 2.12<br>(1.68 to 2.78)         | 0.07<br>(0.06 to 0.08)    | 0.08<br>(0.07 to 0.10)     | 0.09<br>(0.07 to 0.11)     | 0.08<br>(0.07 to 0.10)     |
| Motor neuron disease                       | 3.63<br>(3.12 to 4.21)       | 5.42<br>(4.58 to 6.39)         | 5.47<br>(4.62 to 6.42)         | 5.11<br>(4.33 to 5.96)         | 0.12<br>(0.11 to 0.14)    | 0.23<br>(0.20 to 0.27)     | 0.23<br>(0.20 to 0.25)     | 0.21<br>(0.18 to 0.25)     |
| Other neurological disorders               | 7.13<br>(6.21 to 8.19)       | 7.75<br>(6.53 to 9.34)         | 7.95<br>(6.66 to 9.64)         | 7.35<br>(6.20 to 8.83)         | 0.21<br>(0.18 to 0.24)    | 0.32<br>(0.28 to 0.37)     | 0.33<br>(0.29 to 0.39)     | 0.29<br>(0.26 to 0.34)     |
| Mental disorders                           | 107.47<br>(78.99 to 130.00)  | 87.76<br>(62.31 to 121.36)     | 89.72<br>(63.68 to 124.80)     | 90.91<br>(64.67 to 125.40)     | 2.70<br>(2.09 to 3.28)    | 2.74<br>(2.13 to 3.56)     | 2.86<br>(2.22 to 3.73)     | 2.78<br>(2.16 to 3.57)     |
| Alcohol use disorders                      | 79.45<br>(55.51 to 98.86)    | 55.23<br>(37.65 to 76.40)      | 54.73<br>(37.24 to 75.81)      | 58.82<br>(40.34 to 80.47)      | 2.08<br>(1.54 to 2.59)    | 1.77<br>(1.30 to 2.34)     | 1.79<br>(1.30 to 2.35)     | 1.86<br>(1.36 to 2.44)     |
| Drug use disorders                         | 27.64<br>(19.02 to 35.42)    | 32.19<br>(20.33 to 49.47)      | 34.66<br>(22.48 to 52.55)      | 31.75<br>(20.05 to 48.76)      | 0.61<br>(0.46 to 0.77)    | 0.96<br>(0.72 to 1.30)     | 1.06<br>(0.79 to 1.43)     | 0.92<br>(0.68 to 1.25)     |
| Opioid use disorders                       | 24.17<br>(15.41 to 31.74)    | 25.32<br>(14.97 to 40.03)      | 26.22<br>(15.53 to 41.21)      | 25.05<br>(14.81 to 39.77)      | 0.51<br>(0.37 to 0.65)    | 0.69<br>(0.49 to 0.99)     | 0.73<br>(0.52 to 1.05)     | 0.67<br>(0.47 to 0.95)     |



|                           |                           |                           |                            |                           |                           |                           |                           |                           |
|---------------------------|---------------------------|---------------------------|----------------------------|---------------------------|---------------------------|---------------------------|---------------------------|---------------------------|
|                           | 0.35<br>(0.24 to<br>0.61) | 0.61<br>(0.41 to<br>1.03) | 0.71<br>(0.47 to<br>1.18)  | 0.62<br>(0.41 to<br>1.04) | 0.01<br>(0.01 to<br>0.02) | 0.02<br>(0.01 to<br>0.03) | 0.02<br>(0.02 to<br>0.04) | 0.02<br>(0.01 to<br>0.03) |
| Cocaine use disorders     |                           |                           |                            |                           |                           |                           |                           |                           |
|                           | 0.51<br>(0.34 to<br>0.77) | 1.26<br>(0.73 to<br>2.15) | 1.56<br>(0.89 to<br>2.72)  | 1.28<br>(0.74 to<br>2.17) | 0.01<br>(0.01 to<br>0.02) | 0.03<br>(0.02 to<br>0.05) | 0.04<br>(0.02 to<br>0.06) | 0.03<br>(0.02 to<br>0.05) |
| Amphetamine use disorders |                           |                           |                            |                           |                           |                           |                           |                           |
|                           | 2.62<br>(1.85 to<br>4.61) | 5.00<br>(3.33 to<br>8.28) | 6.17<br>(4.13 to<br>10.11) | 4.81<br>(3.21 to<br>7.97) | 0.08<br>(0.06 to<br>0.12) | 0.21<br>(0.15 to<br>0.29) | 0.27<br>(0.19 to<br>0.36) | 0.20<br>(0.14 to<br>0.27) |
| Other drug use disorders  |                           |                           |                            |                           |                           |                           |                           |                           |
|                           | 0.38<br>(0.30 to<br>0.50) | 0.34<br>(0.22 to<br>0.51) | 0.33<br>(0.22 to<br>0.50)  | 0.34<br>(0.22 to<br>0.51) | 0.01<br>(0.01 to<br>0.01) | 0.01<br>(0.00 to<br>0.01) | 0.01<br>(0.00 to<br>0.01) | 0.01<br>(0.00 to<br>0.01) |
| Eating disorders          |                           |                           |                            |                           |                           |                           |                           |                           |

| Thailand                                                   |                                       |                                           |                                           |                                           |                                  |                                    |                                    |                                     |
|------------------------------------------------------------|---------------------------------------|-------------------------------------------|-------------------------------------------|-------------------------------------------|----------------------------------|------------------------------------|------------------------------------|-------------------------------------|
| Cause                                                      | YLLs (in 1000s)                       |                                           |                                           |                                           | Deaths (in 1000s)                |                                    |                                    |                                     |
|                                                            | 2016                                  | 2040 Forecast                             | 2040 Better Scenario                      | 2040 Worse Scenario                       | 2016                             | 2040 Forecast                      | 2040 Better Scenario               | 2040 Worse Scenario                 |
| <b>Diabetes, urogenital, blood, and endocrine diseases</b> | <b>959.60</b><br>(858.54 to 1,080.86) | <b>1,752.91</b><br>(1,317.58 to 2,510.08) | <b>1,402.78</b><br>(1,036.98 to 1,909.53) | <b>2,026.50</b><br>(1,484.07 to 2,983.84) | <b>49.12</b><br>(44.29 to 54.98) | <b>126.43</b><br>(93.97 to 176.67) | <b>104.05</b><br>(76.88 to 143.49) | <b>140.88</b><br>(103.28 to 205.87) |
| Diabetes mellitus                                          | 363.34<br>(319.79 to 419.40)          | 676.79<br>(456.20 to 1,007.84)            | 508.53<br>(344.26 to 760.06)              | 809.16<br>(515.07 to 1,226.70)            | 18.92<br>(16.63 to 21.92)        | 46.53<br>(31.51 to 66.35)          | 36.11<br>(24.45 to 52.57)          | 53.51<br>(35.29 to 79.19)           |
| Acute glomerulonephritis                                   | 0.35<br>(0.30 to 0.39)                | 0.29<br>(0.21 to 0.39)                    | 0.25<br>(0.18 to 0.35)                    | 0.30<br>(0.22 to 0.41)                    | 0.01<br>(0.01 to 0.01)           | 0.01<br>(0.01 to 0.02)             | 0.01<br>(0.01 to 0.01)             | 0.01<br>(0.01 to 0.01)              |
| Chronic kidney disease                                     | 424.82<br>(371.98 to 481.13)          | 724.81<br>(429.88 to 1,502.02)            | 576.14<br>(355.70 to 1,146.15)            | 878.28<br>(495.32 to 1,892.24)            | 21.31<br>(18.25 to 23.98)        | 52.89<br>(29.27 to 106.12)         | 42.94<br>(25.09 to 81.50)          | 62.36<br>(33.44 to 131.59)          |
| Chronic kidney disease due to diabetes mellitus            | 278.66<br>(240.23 to 317.55)          | 439.78<br>(260.16 to 910.27)              | 346.00<br>(214.88 to 690.93)              | 536.21<br>(305.45 to 1,148.52)            | 12.45<br>(10.58 to 14.17)        | 27.61<br>(15.30 to 59.71)          | 22.03<br>(12.87 to 44.08)          | 32.97<br>(17.45 to 72.26)           |
| Chronic kidney disease due to hypertension                 | 110.16<br>(91.76 to 128.12)           | 234.73<br>(132.43 to 506.58)              | 191.08<br>(111.39 to 388.44)              | 281.07<br>(150.57 to 625.66)              | 7.34<br>(5.97 to 8.62)           | 21.79<br>(11.84 to 42.66)          | 18.16<br>(10.22 to 33.36)          | 25.26<br>(13.34 to 52.26)           |
| Chronic kidney disease due to glomerulonephritis           | 17.15<br>(14.17 to 22.05)             | 20.72<br>(12.66 to 39.86)                 | 15.89<br>(9.70 to 30.02)                  | 25.16<br>(14.55 to 50.12)                 | 0.63<br>(0.53 to 0.75)           | 1.25<br>(0.69 to 2.73)             | 0.97<br>(0.55 to 2.05)             | 1.49<br>(0.79 to 3.26)              |
| Chronic kidney disease due to other and unspecified causes | 18.84<br>(15.00 to 23.16)             | 29.59<br>(16.45 to 60.41)                 | 23.16<br>(13.54 to 45.59)                 | 35.84<br>(19.78 to 75.85)                 | 0.89<br>(0.70 to 1.10)           | 2.24<br>(1.17 to 4.53)             | 1.78<br>(0.97 to 3.51)             | 2.64<br>(1.33 to 5.64)              |
| Urinary diseases and male infertility                      | 122.59<br>(107.55 to 141.17)          | 280.79<br>(236.15 to 332.15)              | 249.95<br>(206.81 to 298.88)              | 268.06<br>(226.62 to 313.51)              | 7.12<br>(6.25 to 8.17)           | 23.19<br>(18.55 to 28.10)          | 21.22<br>(16.64 to 26.02)          | 21.29<br>(17.53 to 25.49)           |
| Urinary tract infections                                   | 66.13<br>(48.33 to 101.76)            | 198.26<br>(152.11 to 270.98)              | 179.99<br>(137.45 to 244.12)              | 187.65<br>(145.09 to 255.72)              | 3.47<br>(2.36 to 5.85)           | 15.76<br>(11.48 to 22.50)          | 14.71<br>(10.53 to 21.14)          | 14.34<br>(10.53 to 20.50)           |
| Urolithiasis                                               | 9.28<br>(7.27 to 12.59)               | 27.77<br>(17.84 to 36.14)                 | 23.48<br>(14.37 to 31.75)                 | 26.07<br>(17.37 to 33.38)                 | 0.60<br>(0.46 to 0.86)           | 2.38<br>(1.33 to 3.31)             | 2.09<br>(1.10 to 2.99)             | 2.14<br>(1.24 to 2.90)              |
| Other urinary diseases                                     | 47.18<br>(23.81 to 62.45)             | 54.75<br>(22.14 to 79.91)                 | 46.48<br>(18.17 to 69.62)                 | 54.35<br>(22.24 to 78.91)                 | 3.05<br>(1.43 to 4.18)           | 5.04<br>(1.91 to 7.81)             | 4.42<br>(1.62 to 7.03)             | 4.81<br>(1.84 to 7.42)              |
| Gynecological diseases                                     | 0.64<br>(0.48 to 0.83)                | 0.55<br>(0.37 to 0.83)                    | 0.40<br>(0.26 to 0.60)                    | 0.59<br>(0.37 to 0.87)                    | 0.02<br>(0.01 to 0.02)           | 0.03<br>(0.02 to 0.04)             | 0.02<br>(0.01 to 0.03)             | 0.03<br>(0.02 to 0.04)              |
| Uterine fibroids                                           | 0.05<br>(0.03 to 0.08)                | 0.05<br>(0.03 to 0.08)                    | 0.04<br>(0.02 to 0.07)                    | 0.05<br>(0.03 to 0.09)                    | 0.00<br>(0.00 to 0.00)           | 0.00<br>(0.00 to 0.01)             | 0.00<br>(0.00 to 0.01)             | 0.00<br>(0.00 to 0.01)              |
| Polycystic ovarian syndrome                                | 0.01<br>(0.00 to 0.02)                | 0.00<br>(0.00 to 0.01)                    | 0.00<br>(0.00 to 0.01)                    | 0.01<br>(0.00 to 0.01)                    | 0.00<br>(0.00 to 0.00)           | 0.00<br>(0.00 to 0.00)             | 0.00<br>(0.00 to 0.00)             | 0.00<br>(0.00 to 0.00)              |
| Endometriosis                                              | 0.00<br>(0.00 to 0.01)                | 0.00<br>(0.00 to 0.01)                    | 0.00<br>(0.00 to 0.01)                    | 0.00<br>(0.00 to 0.01)                    | 0.00<br>(0.00 to 0.00)           | 0.00<br>(0.00 to 0.00)             | 0.00<br>(0.00 to 0.00)             | 0.00<br>(0.00 to 0.00)              |
| Genital prolapse                                           | 0.01<br>(0.00 to 0.01)                | 0.01<br>(0.00 to 0.01)                    | 0.00<br>(0.00 to 0.01)                    | 0.01<br>(0.00 to 0.01)                    | 0.00<br>(0.00 to 0.00)           | 0.00<br>(0.00 to 0.00)             | 0.00<br>(0.00 to 0.00)             | 0.00<br>(0.00 to 0.00)              |
| Other gynecological diseases                               | 0.57<br>(0.42 to 0.75)                | 0.49<br>(0.32 to 0.75)                    | 0.35<br>(0.22 to 0.54)                    | 0.52<br>(0.34 to 0.79)                    | 0.02<br>(0.01 to 0.02)           | 0.02<br>(0.01 to 0.03)             | 0.02<br>(0.01 to 0.02)             | 0.02<br>(0.01 to 0.03)              |
| Hemoglobinopathies and hemolytic anemias                   | 14.64<br>(11.55 to 21.00)             | 18.79<br>(13.14 to 29.85)                 | 15.68<br>(10.66 to 25.02)                 | 19.31<br>(13.61 to 30.46)                 | 0.52<br>(0.40 to 0.81)           | 1.03<br>(0.69 to 1.75)             | 0.87<br>(0.57 to 1.46)             | 1.03<br>(0.70 to 1.72)              |
| Thalassemias                                               | 3.30<br>(2.55 to 4.69)                | 1.71<br>(0.98 to 2.89)                    | 1.70<br>(0.96 to 2.89)                    | 1.63<br>(0.95 to 2.71)                    | 0.05<br>(0.04 to 0.07)           | 0.03<br>(0.02 to 0.05)             | 0.03<br>(0.02 to 0.05)             | 0.03<br>(0.02 to 0.04)              |

|                                                   |                              |                              |                              |                              |                           |                           |                           |                           |
|---------------------------------------------------|------------------------------|------------------------------|------------------------------|------------------------------|---------------------------|---------------------------|---------------------------|---------------------------|
|                                                   | 0.02<br>(0.01 to<br>0.02)    | 0.02<br>(0.01 to<br>0.03)    | 0.02<br>(0.01 to<br>0.03)    | 0.02<br>(0.01 to<br>0.03)    | 0.00<br>(0.00 to<br>0.00) | 0.00<br>(0.00 to<br>0.00) | 0.00<br>(0.00 to<br>0.00) | 0.00<br>(0.00 to<br>0.00) |
| Sickle cell disorders                             |                              |                              |                              |                              |                           |                           |                           |                           |
|                                                   | 5.99<br>(4.68 to<br>8.49)    | 9.60<br>(6.69 to<br>14.76)   | 7.62<br>(5.05 to<br>12.14)   | 10.08<br>(7.00 to<br>15.40)  | 0.17<br>(0.13 to<br>0.25) | 0.40<br>(0.27 to<br>0.65) | 0.32<br>(0.21 to<br>0.55) | 0.41<br>(0.28 to<br>0.68) |
| G6PD deficiency                                   |                              |                              |                              |                              |                           |                           |                           |                           |
|                                                   | 5.33<br>(4.02 to<br>8.21)    | 7.46<br>(5.06 to<br>12.62)   | 6.34<br>(4.12 to<br>10.78)   | 7.57<br>(5.15 to<br>12.71)   | 0.30<br>(0.22 to<br>0.50) | 0.60<br>(0.39 to<br>1.05) | 0.52<br>(0.33 to<br>0.92) | 0.59<br>(0.38 to<br>1.02) |
| Other hemoglobinopathies and hemolytic anemias    |                              |                              |                              |                              |                           |                           |                           |                           |
|                                                   | 33.23<br>(27.81 to<br>46.28) | 50.89<br>(39.56 to<br>73.33) | 51.83<br>(39.97 to<br>75.04) | 50.80<br>(39.86 to<br>72.88) | 1.22<br>(1.02 to<br>1.77) | 2.76<br>(2.14 to<br>4.25) | 2.88<br>(2.21 to<br>4.51) | 2.66<br>(2.08 to<br>4.04) |
| Endocrine, metabolic, blood, and immune disorders |                              |                              |                              |                              |                           |                           |                           |                           |

| Thailand                                      |                                     |                                     |                                     |                                     |                               |                                 |                                 |                                 |
|-----------------------------------------------|-------------------------------------|-------------------------------------|-------------------------------------|-------------------------------------|-------------------------------|---------------------------------|---------------------------------|---------------------------------|
| Cause                                         | YLLs (in 1000s)                     |                                     |                                     |                                     | Deaths (in 1000s)             |                                 |                                 |                                 |
|                                               | 2016                                | 2040 Forecast                       | 2040 Better Scenario                | 2040 Worse Scenario                 | 2016                          | 2040 Forecast                   | 2040 Better Scenario            | 2040 Worse Scenario             |
| <b>Musculoskeletal disorders</b>              | <b>45.32</b><br>(33.37 to 53.83)    | <b>56.71</b><br>(44.78 to 74.76)    | <b>53.09</b><br>(41.91 to 69.64)    | <b>54.58</b><br>(43.41 to 71.19)    | <b>1.37</b><br>(1.15 to 1.73) | <b>2.61</b><br>(2.05 to 4.24)   | <b>2.48</b><br>(1.92 to 4.03)   | <b>2.44</b><br>(1.94 to 3.82)   |
| Rheumatoid arthritis                          | 4.34<br>(3.42 to 6.62)              | 8.64<br>(6.21 to 14.32)             | 6.63<br>(4.53 to 11.10)             | 9.07<br>(6.54 to 14.72)             | 0.19<br>(0.14 to 0.31)        | 0.50<br>(0.35 to 0.92)          | 0.39<br>(0.26 to 0.74)          | 0.51<br>(0.36 to 0.92)          |
| Other musculoskeletal disorders               | 40.99<br>(29.09 to 49.06)           | 48.08<br>(37.34 to 62.95)           | 46.46<br>(36.26 to 61.01)           | 45.51<br>(34.65 to 59.55)           | 1.18<br>(0.98 to 1.43)        | 2.11<br>(1.67 to 3.35)          | 2.08<br>(1.63 to 3.33)          | 1.93<br>(1.54 to 2.93)          |
| <b>Other non-communicable diseases</b>        | <b>150.12</b><br>(109.78 to 186.29) | <b>223.38</b><br>(138.40 to 292.55) | <b>198.34</b><br>(119.88 to 261.80) | <b>222.45</b><br>(139.52 to 286.48) | <b>4.31</b><br>(2.85 to 5.53) | <b>13.60</b><br>(8.28 to 18.87) | <b>12.80</b><br>(7.73 to 18.07) | <b>12.81</b><br>(7.89 to 17.62) |
| Congenital birth defects                      | 82.18<br>(61.62 to 111.19)          | 44.17<br>(29.77 to 64.78)           | 32.15<br>(21.69 to 47.22)           | 48.61<br>(32.38 to 71.86)           | 1.14<br>(0.89 to 1.48)        | 0.76<br>(0.56 to 1.04)          | 0.57<br>(0.41 to 0.79)          | 0.82<br>(0.59 to 1.13)          |
| Neural tube defects                           | 2.51<br>(1.51 to 4.13)              | 0.61<br>(0.33 to 1.15)              | 0.40<br>(0.21 to 0.76)              | 0.73<br>(0.39 to 1.42)              | 0.03<br>(0.02 to 0.05)        | 0.01<br>(0.01 to 0.01)          | 0.01<br>(0.00 to 0.01)          | 0.01<br>(0.01 to 0.02)          |
| Congenital heart anomalies                    | 38.76<br>(27.58 to 53.30)           | 19.99<br>(12.42 to 30.91)           | 13.54<br>(8.41 to 20.99)            | 22.15<br>(13.81 to 34.31)           | 0.51<br>(0.38 to 0.68)        | 0.30<br>(0.20 to 0.45)          | 0.21<br>(0.13 to 0.33)          | 0.33<br>(0.21 to 0.50)          |
| Orofacial clefts                              | 0.04<br>(0.02 to 0.07)              | 0.01<br>(0.00 to 0.03)              | 0.01<br>(0.00 to 0.02)              | 0.01<br>(0.01 to 0.03)              | 0.00<br>(0.00 to 0.00)        | 0.00<br>(0.00 to 0.00)          | 0.00<br>(0.00 to 0.00)          | 0.00<br>(0.00 to 0.00)          |
| Down syndrome                                 | 2.03<br>(1.56 to 2.82)              | 1.65<br>(1.14 to 2.45)              | 1.66<br>(1.13 to 2.49)              | 1.79<br>(1.22 to 2.65)              | 0.04<br>(0.03 to 0.05)        | 0.03<br>(0.02 to 0.05)          | 0.04<br>(0.02 to 0.05)          | 0.04<br>(0.03 to 0.05)          |
| Other chromosomal abnormalities               | 4.11<br>(1.12 to 6.82)              | 1.90<br>(0.49 to 3.84)              | 1.54<br>(0.41 to 3.12)              | 2.21<br>(0.57 to 4.47)              | 0.05<br>(0.01 to 0.08)        | 0.05<br>(0.01 to 0.04)          | 0.02<br>(0.01 to 0.04)          | 0.03<br>(0.01 to 0.05)          |
| Congenital musculoskeletal and limb anomalies | 2.66<br>(1.33 to 4.33)              | 0.89<br>(0.45 to 1.66)              | 0.64<br>(0.32 to 1.19)              | 0.99<br>(0.50 to 1.88)              | 0.03<br>(0.02 to 0.05)        | 0.01<br>(0.01 to 0.02)          | 0.01<br>(0.00 to 0.01)          | 0.01<br>(0.01 to 0.02)          |
| Urogenital congenital anomalies               | 3.93<br>(2.92 to 4.80)              | 4.71<br>(2.76 to 5.86)              | 3.82<br>(2.25 to 4.89)              | 4.83<br>(2.84 to 6.00)              | 0.11<br>(0.07 to 0.13)        | 0.16<br>(0.08 to 0.20)          | 0.13<br>(0.07 to 0.16)          | 0.16<br>(0.08 to 0.20)          |
| Digestive congenital anomalies                | 2.64<br>(1.49 to 4.95)              | 1.73<br>(0.97 to 3.09)              | 1.20<br>(0.67 to 2.11)              | 1.97<br>(1.07 to 3.51)              | 0.03<br>(0.02 to 0.06)        | 0.03<br>(0.02 to 0.04)          | 0.02<br>(0.03 to 0.03)          | 0.03<br>(0.02 to 0.05)          |
| Other congenital birth defects                | 25.50<br>(18.28 to 36.21)           | 12.68<br>(8.10 to 19.48)            | 9.36<br>(5.86 to 14.97)             | 13.91<br>(8.79 to 21.78)            | 0.34<br>(0.25 to 0.46)        | 0.20<br>(0.14 to 0.29)          | 0.15<br>(0.10 to 0.22)          | 0.21<br>(0.14 to 0.32)          |
| Skin and subcutaneous diseases                | 64.38<br>(33.16 to 87.58)           | 178.47<br>(96.48 to 243.53)         | 165.64<br>(89.42 to 226.30)         | 172.98<br>(92.89 to 233.81)         | 3.13<br>(1.72 to 4.35)        | 12.83<br>(7.45 to 18.15)        | 12.23<br>(7.07 to 17.51)        | 11.98<br>(7.02 to 16.88)        |
| Cellulitis                                    | 1.64<br>(0.79 to 2.82)              | 6.04<br>(2.76 to 10.56)             | 6.03<br>(2.81 to 10.41)             | 5.61<br>(2.56 to 9.77)              | 0.07<br>(0.03 to 0.14)        | 0.41<br>(0.20 to 0.80)          | 0.42<br>(0.21 to 0.81)          | 0.37<br>(0.18 to 0.72)          |
| Pyoderma                                      | 49.01<br>(24.68 to 66.39)           | 143.09<br>(75.42 to 194.94)         | 133.51<br>(71.14 to 182.75)         | 139.86<br>(72.92 to 190.52)         | 2.24<br>(1.19 to 3.02)        | 9.81<br>(5.53 to 14.12)         | 9.43<br>(5.36 to 13.47)         | 9.24<br>(5.15 to 12.88)         |
| Decubitus ulcer                               | 13.25<br>(6.83 to 20.20)            | 28.57<br>(15.46 to 47.03)           | 25.38<br>(13.37 to 41.77)           | 26.80<br>(14.37 to 44.35)           | 0.80<br>(0.44 to 1.31)        | 2.57<br>(1.37 to 4.53)          | 2.33<br>(1.27 to 4.21)          | 2.32<br>(1.24 to 4.17)          |
| Other skin and subcutaneous diseases          | 0.49<br>(0.30 to 0.78)              | 0.76<br>(0.42 to 1.17)              | 0.71<br>(0.40 to 1.09)              | 0.72<br>(0.41 to 1.11)              | 0.02<br>(0.01 to 0.03)        | 0.04<br>(0.03 to 0.07)          | 0.04<br>(0.02 to 0.07)          | 0.04<br>(0.02 to 0.06)          |
| Sudden infant death syndrome                  | 3.56<br>(2.11 to 5.82)              | 0.75<br>(0.31 to 1.59)              | 0.56<br>(0.23 to 1.17)              | 0.86<br>(0.36 to 1.80)              | 0.04<br>(0.02 to 0.07)        | 0.01<br>(0.00 to 0.02)          | 0.01<br>(0.00 to 0.01)          | 0.01<br>(0.00 to 0.02)          |

|                          |                                       |                                     |                                     |                                       |                              |                              |                              |                              |
|--------------------------|---------------------------------------|-------------------------------------|-------------------------------------|---------------------------------------|------------------------------|------------------------------|------------------------------|------------------------------|
| Injuries                 | 1,990.52<br>(1,749.54 to<br>2,256.47) | 1,241.39<br>(861.76 to<br>1,851.02) | 1,057.27<br>(744.47 to<br>1,567.15) | 1,710.73<br>(1,159.14 to<br>2,653.95) | 47.84<br>(42.32 to<br>53.86) | 41.10<br>(31.24 to<br>55.04) | 36.09<br>(27.86 to<br>47.81) | 52.33<br>(38.65 to<br>72.43) |
| Transport injuries       | 868.34<br>(749.31 to<br>994.78)       | 369.31<br>(230.42 to<br>610.92)     | 329.36<br>(211.52 to<br>531.09)     | 786.52<br>(482.39 to<br>1,303.99)     | 20.12<br>(17.48 to<br>23.08) | 11.59<br>(7.88 to<br>18.01)  | 10.45<br>(7.31 to<br>15.66)  | 22.19<br>(14.67 to<br>35.37) |
| Road injuries            | 828.27<br>(715.54 to<br>948.82)       | 326.61<br>(205.06 to<br>534.71)     | 297.69<br>(193.24 to<br>475.87)     | 739.48<br>(454.28 to<br>1,222.55)     | 19.18<br>(16.69 to<br>22.00) | 10.32<br>(7.00 to<br>15.88)  | 9.49<br>(6.67 to<br>14.36)   | 20.81<br>(13.84 to<br>33.08) |
| Pedestrian road injuries | 117.22<br>(98.98 to<br>138.24)        | 49.50<br>(33.68 to<br>74.25)        | 37.54<br>(25.73 to<br>56.07)        | 115.06<br>(76.01 to<br>176.04)        | 3.27<br>(2.80 to<br>3.92)    | 2.15<br>(1.51 to<br>3.36)    | 1.67<br>(1.17 to<br>2.55)    | 4.37<br>(3.08 to<br>6.70)    |

| Thailand                                        |                                                      |                                                      |                                                      |                                                      |                                                   |                                                   |                                                   |                                                   |
|-------------------------------------------------|------------------------------------------------------|------------------------------------------------------|------------------------------------------------------|------------------------------------------------------|---------------------------------------------------|---------------------------------------------------|---------------------------------------------------|---------------------------------------------------|
| Cause                                           | YLLs (in 1000s)                                      |                                                      |                                                      |                                                      | Deaths (in 1000s)                                 |                                                   |                                                   |                                                   |
|                                                 | 2016                                                 | 2040 Forecast                                        | 2040 Better Scenario                                 | 2040 Worse Scenario                                  | 2016                                              | 2040 Forecast                                     | 2040 Better Scenario                              | 2040 Worse Scenario                               |
| Cyclist road injuries                           | 19.58<br>(16.18 to<br>23.90)                         | 7.13<br>(4.61 to<br>11.08)                           | 6.77<br>(4.51 to<br>10.25)                           | 16.68<br>(10.59 to<br>26.42)                         | 0.52<br>(0.43 to<br>0.64)                         | 0.27<br>(0.18 to<br>0.44)                         | 0.26<br>(0.18 to<br>0.42)                         | 0.52<br>(0.35 to<br>0.81)                         |
| Motorcyclist road injuries                      | 414.15<br>(343.39 to<br>498.91)                      | 206.54<br>(121.30 to<br>360.15)                      | 193.25<br>(118.09 to<br>325.01)                      | 389.05<br>(222.06 to<br>690.03)                      | 9.04<br>(7.59 to<br>10.75)                        | 5.81<br>(3.78 to<br>9.23)                         | 5.52<br>(3.71 to<br>8.47)                         | 9.83<br>(6.21 to<br>16.48)                        |
| Motor vehicle road injuries                     | 267.80<br>(206.29 to<br>326.56)                      | 60.58<br>(37.96 to<br>97.82)                         | 57.42<br>(37.12 to<br>90.83)                         | 209.48<br>(124.09 to<br>345.91)                      | 6.12<br>(4.91 to<br>7.44)                         | 1.99<br>(1.34 to<br>3.08)                         | 1.94<br>(1.34 to<br>2.92)                         | 5.82<br>(3.83 to<br>9.09)                         |
| Other road injuries                             | 9.52<br>(6.98 to<br>11.97)                           | 2.86<br>(1.78 to<br>4.78)                            | 2.71<br>(1.73 to<br>4.48)                            | 9.21<br>(5.41 to<br>16.13)                           | 0.22<br>(0.18 to<br>0.28)                         | 0.10<br>(0.06 to<br>0.18)                         | 0.10<br>(0.06 to<br>0.17)                         | 0.26<br>(0.16 to<br>0.44)                         |
| Other transport injuries                        | 40.07<br>(31.93 to<br>49.87)                         | 42.69<br>(24.62 to<br>73.05)                         | 31.66<br>(18.87 to<br>54.25)                         | 47.04<br>(27.08 to<br>81.34)                         | 0.95<br>(0.77 to<br>1.16)                         | 1.28<br>(0.79 to<br>2.09)                         | 0.97<br>(0.61 to<br>1.55)                         | 1.38<br>(0.84 to<br>2.26)                         |
| <b>Unintentional injuries</b>                   | <b>545.65</b><br><b>(475.91 to</b><br><b>615.75)</b> | <b>404.39</b><br><b>(317.41 to</b><br><b>527.78)</b> | <b>351.85</b><br><b>(275.31 to</b><br><b>456.65)</b> | <b>415.26</b><br><b>(322.62 to</b><br><b>543.90)</b> | <b>14.62</b><br><b>(12.84 to</b><br><b>16.31)</b> | <b>16.80</b><br><b>(13.87 to</b><br><b>20.38)</b> | <b>15.21</b><br><b>(12.50 to</b><br><b>18.62)</b> | <b>16.54</b><br><b>(13.82 to</b><br><b>20.08)</b> |
| Falls                                           | 109.43<br>(90.18 to<br>129.09)                       | 127.03<br>(104.69 to<br>157.17)                      | 115.75<br>(94.61 to<br>144.82)                       | 125.37<br>(103.72 to<br>155.01)                      | 3.88<br>(3.33 to<br>4.50)                         | 7.05<br>(5.70 to<br>9.09)                         | 6.54<br>(5.22 to<br>8.50)                         | 6.73<br>(5.52 to<br>8.56)                         |
| Drowning                                        | 210.30<br>(179.94 to<br>241.29)                      | 110.48<br>(76.45 to<br>162.42)                       | 92.27<br>(65.14 to<br>134.26)                        | 118.65<br>(81.64 to<br>174.47)                       | 4.78<br>(4.10 to<br>5.46)                         | 3.26<br>(2.43 to<br>4.52)                         | 2.78<br>(2.11 to<br>3.82)                         | 3.42<br>(2.52 to<br>4.71)                         |
| Fire, heat, and hot substances                  | 26.19<br>(15.58 to<br>33.01)                         | 15.52<br>(9.02 to<br>23.12)                          | 12.32<br>(7.19 to<br>18.33)                          | 16.63<br>(9.60 to<br>24.95)                          | 0.76<br>(0.49 to<br>0.93)                         | 0.66<br>(0.43 to<br>0.91)                         | 0.55<br>(0.35 to<br>0.75)                         | 0.69<br>(0.43 to<br>0.95)                         |
| Poisonings                                      | 8.38<br>(4.90 to<br>10.55)                           | 3.64<br>(2.05 to<br>5.86)                            | 2.70<br>(1.54 to<br>4.31)                            | 4.07<br>(2.24 to<br>6.52)                            | 0.19<br>(0.12 to<br>0.24)                         | 0.11<br>(0.08 to<br>0.16)                         | 0.09<br>(0.06 to<br>0.13)                         | 0.12<br>(0.08 to<br>0.18)                         |
| Exposure to mechanical forces                   | 31.47<br>(25.33 to<br>37.36)                         | 20.32<br>(14.65 to<br>27.92)                         | 16.82<br>(12.13 to<br>23.64)                         | 21.41<br>(15.66 to<br>29.94)                         | 0.75<br>(0.62 to<br>0.89)                         | 0.65<br>(0.52 to<br>0.84)                         | 0.55<br>(0.43 to<br>0.72)                         | 0.67<br>(0.54 to<br>0.86)                         |
| Unintentional firearm injuries                  | 11.65<br>(7.35 to<br>14.88)                          | 6.22<br>(3.55 to<br>9.48)                            | 5.23<br>(2.98 to<br>7.85)                            | 6.61<br>(3.73 to<br>9.94)                            | 0.29<br>(0.19 to<br>0.36)                         | 0.20<br>(0.13 to<br>0.28)                         | 0.17<br>(0.11 to<br>0.24)                         | 0.21<br>(0.13 to<br>0.29)                         |
| Unintentional suffocation                       | 4.61<br>(2.49 to<br>6.31)                            | 1.85<br>(0.80 to<br>3.12)                            | 1.57<br>(0.68 to<br>2.63)                            | 1.97<br>(0.87 to<br>3.34)                            | 0.08<br>(0.04 to<br>0.11)                         | 0.04<br>(0.02 to<br>0.06)                         | 0.03<br>(0.02 to<br>0.05)                         | 0.04<br>(0.02 to<br>0.06)                         |
| Other exposure to mechanical forces             | 15.21<br>(12.45 to<br>20.29)                         | 12.25<br>(9.02 to<br>17.38)                          | 10.03<br>(7.33 to<br>14.33)                          | 12.83<br>(9.55 to<br>18.17)                          | 0.38<br>(0.32 to<br>0.50)                         | 0.41<br>(0.32 to<br>0.56)                         | 0.35<br>(0.27 to<br>0.47)                         | 0.42<br>(0.33 to<br>0.56)                         |
| Adverse effects of medical treatment            | 36.47<br>(21.39 to<br>47.64)                         | 31.53<br>(20.57 to<br>44.17)                         | 28.63<br>(19.00 to<br>40.04)                         | 32.43<br>(20.98 to<br>45.29)                         | 0.95<br>(0.71 to<br>1.15)                         | 1.11<br>(0.84 to<br>1.52)                         | 1.03<br>(0.77 to<br>1.42)                         | 1.10<br>(0.86 to<br>1.48)                         |
| Animal contact                                  | 9.53<br>(7.90 to<br>11.70)                           | 8.79<br>(6.57 to<br>11.81)                           | 7.64<br>(5.65 to<br>10.45)                           | 9.34<br>(6.96 to<br>12.50)                           | 0.27<br>(0.22 to<br>0.33)                         | 0.35<br>(0.27 to<br>0.46)                         | 0.31<br>(0.24 to<br>0.41)                         | 0.36<br>(0.27 to<br>0.47)                         |
| Venomous animal contact                         | 6.58<br>(5.39 to<br>8.13)                            | 5.60<br>(4.08 to<br>7.62)                            | 4.98<br>(3.62 to<br>6.90)                            | 5.97<br>(4.37 to<br>8.25)                            | 0.18<br>(0.15 to<br>0.23)                         | 0.21<br>(0.16 to<br>0.29)                         | 0.19<br>(0.15 to<br>0.26)                         | 0.22<br>(0.17 to<br>0.30)                         |
| Non-venomous animal contact                     | 2.95<br>(2.28 to<br>3.98)                            | 3.19<br>(2.21 to<br>4.62)                            | 2.66<br>(1.81 to<br>3.85)                            | 3.37<br>(2.32 to<br>4.79)                            | 0.08<br>(0.07 to<br>0.11)                         | 0.13<br>(0.10 to<br>0.18)                         | 0.12<br>(0.08 to<br>0.16)                         | 0.14<br>(0.10 to<br>0.19)                         |
| Foreign body                                    | 56.96<br>(47.24 to<br>79.35)                         | 54.75<br>(42.94 to<br>69.87)                         | 53.36<br>(41.93 to<br>67.45)                         | 53.66<br>(42.24 to<br>68.58)                         | 1.76<br>(1.46 to<br>2.05)                         | 2.70<br>(1.79 to<br>3.59)                         | 2.73<br>(1.78 to<br>3.65)                         | 2.52<br>(1.69 to<br>3.28)                         |
| Pulmonary aspiration and foreign body in airway | 39.38<br>(32.39 to<br>55.50)                         | 39.09<br>(29.37 to<br>49.28)                         | 37.26<br>(27.54 to<br>46.79)                         | 37.73<br>(28.33 to<br>47.32)                         | 1.25<br>(0.94 to<br>1.46)                         | 2.03<br>(1.12 to<br>2.80)                         | 2.02<br>(1.09 to<br>2.85)                         | 1.86<br>(1.05 to<br>2.50)                         |

|                                             |                                                      |                                                      |                                                      |                                                      |                                                   |                                                  |                                                  |                                                  |
|---------------------------------------------|------------------------------------------------------|------------------------------------------------------|------------------------------------------------------|------------------------------------------------------|---------------------------------------------------|--------------------------------------------------|--------------------------------------------------|--------------------------------------------------|
|                                             | 17.58<br>(13.54 to<br>28.60)                         | 15.66<br>(11.29 to<br>25.16)                         | 16.10<br>(11.68 to<br>25.59)                         | 15.93<br>(11.59 to<br>25.10)                         | 0.51<br>(0.41 to<br>0.79)                         | 0.67<br>(0.52 to<br>0.99)                        | 0.71<br>(0.54 to<br>1.03)                        | 0.66<br>(0.51 to<br>0.96)                        |
| Foreign body in other body part             |                                                      |                                                      |                                                      |                                                      |                                                   |                                                  |                                                  |                                                  |
|                                             | 1.31<br>(0.91 to<br>1.71)                            | 1.00<br>(0.70 to<br>1.41)                            | 0.80<br>(0.55 to<br>1.12)                            | 1.09<br>(0.74 to<br>1.50)                            | 0.04<br>(0.03 to<br>0.05)                         | 0.04<br>(0.03 to<br>0.06)                        | 0.04<br>(0.03 to<br>0.05)                        | 0.05<br>(0.03 to<br>0.06)                        |
| Environmental heat and cold exposure        |                                                      |                                                      |                                                      |                                                      |                                                   |                                                  |                                                  |                                                  |
|                                             | 55.60<br>(44.63 to<br>67.43)                         | 31.34<br>(21.74 to<br>46.55)                         | 21.55<br>(14.22 to<br>33.24)                         | 32.60<br>(22.91 to<br>47.96)                         | 1.24<br>(1.01 to<br>1.50)                         | 0.85<br>(0.63 to<br>1.17)                        | 0.59<br>(0.43 to<br>0.85)                        | 0.87<br>(0.65 to<br>1.19)                        |
| Other unintentional injuries                |                                                      |                                                      |                                                      |                                                      |                                                   |                                                  |                                                  |                                                  |
| <b>Self-harm and interpersonal violence</b> | <b>576.16</b><br><b>(473.10 to</b><br><b>671.30)</b> | <b>463.65</b><br><b>(280.66 to</b><br><b>807.11)</b> | <b>372.02</b><br><b>(233.13 to</b><br><b>630.47)</b> | <b>504.92</b><br><b>(294.09 to</b><br><b>914.81)</b> | <b>13.10</b><br><b>(10.93 to</b><br><b>15.15)</b> | <b>12.59</b><br><b>(8.31 to</b><br><b>20.17)</b> | <b>10.31</b><br><b>(7.08 to</b><br><b>16.09)</b> | <b>13.49</b><br><b>(8.69 to</b><br><b>22.18)</b> |

| Thailand                                                                            |                                      |                                       |                                       |                                       |                                      |                                      |                                      |                                      |
|-------------------------------------------------------------------------------------|--------------------------------------|---------------------------------------|---------------------------------------|---------------------------------------|--------------------------------------|--------------------------------------|--------------------------------------|--------------------------------------|
| Cause                                                                               | YLLs (in 1000s)                      |                                       |                                       |                                       | Deaths (in 1000s)                    |                                      |                                      |                                      |
|                                                                                     | 2016                                 | 2040 Forecast                         | 2040 Better Scenario                  | 2040 Worse Scenario                   | 2016                                 | 2040 Forecast                        | 2040 Better Scenario                 | 2040 Worse Scenario                  |
| Self-harm                                                                           | 350.93<br>(289.22 to 409.03)         | 331.90<br>(186.70 to 604.73)          | 266.09<br>(158.45 to 471.56)          | 372.13<br>(202.40 to 705.08)          | 8.41<br>(6.99 to 9.75)               | 9.48<br>(6.00 to 15.66)              | 7.78<br>(5.12 to 12.75)              | 10.38<br>(6.35 to 17.74)             |
| Self-harm by firearm                                                                | 23.48<br>(12.16 to 31.05)            | 17.71<br>(7.60 to 35.53)              | 13.18<br>(5.96 to 26.54)              | 20.22<br>(8.33 to 41.96)              | 0.54<br>(0.29 to 0.71)               | 0.49<br>(0.24 to 0.92)               | 0.37<br>(0.19 to 0.69)               | 0.54<br>(0.26 to 1.04)               |
| Self-harm by other specified means                                                  | 327.45<br>(271.01 to 384.11)         | 314.19<br>(176.87 to 574.66)          | 252.91<br>(150.79 to 444.82)          | 351.91<br>(191.56 to 665.20)          | 7.87<br>(6.58 to 9.09)               | 8.99<br>(5.72 to 14.88)              | 7.41<br>(4.89 to 11.99)              | 9.83<br>(6.04 to 16.72)              |
| Interpersonal violence                                                              | 225.23<br>(157.17 to 280.94)         | 131.75<br>(81.57 to 207.73)           | 105.93<br>(66.18 to 168.60)           | 132.79<br>(80.59 to 210.66)           | 4.69<br>(3.34 to 5.83)               | 3.11<br>(2.10 to 4.57)               | 2.53<br>(1.74 to 3.77)               | 3.11<br>(2.11 to 4.51)               |
| Physical violence by firearm                                                        | 146.69<br>(90.51 to 187.65)          | 82.08<br>(45.79 to 130.79)            | 64.77<br>(36.14 to 107.11)            | 82.11<br>(45.53 to 131.60)            | 3.00<br>(1.92 to 3.83)               | 1.84<br>(1.10 to 2.82)               | 1.46<br>(0.87 to 2.25)               | 1.82<br>(1.09 to 2.81)               |
| Physical violence by sharp object                                                   | 44.36<br>(22.84 to 74.06)            | 28.18<br>(13.99 to 50.15)             | 22.96<br>(11.57 to 40.75)             | 27.72<br>(13.50 to 48.91)             | 0.92<br>(0.50 to 1.49)               | 0.67<br>(0.37 to 1.11)               | 0.55<br>(0.31 to 0.90)               | 0.65<br>(0.36 to 1.04)               |
| Physical violence by other means                                                    | 34.18<br>(22.40 to 57.82)            | 21.50<br>(11.73 to 39.41)             | 18.19<br>(10.22 to 33.07)             | 22.96<br>(12.07 to 41.81)             | 0.77<br>(0.52 to 1.25)               | 0.60<br>(0.37 to 1.04)               | 0.52<br>(0.32 to 0.88)               | 0.63<br>(0.38 to 1.10)               |
| <b>Forces of nature, conflict and terrorism, and executions and police conflict</b> | <b>0.37</b><br><b>(0.31 to 0.47)</b> | <b>4.04</b><br><b>(0.00 to 17.89)</b> | <b>4.04</b><br><b>(0.00 to 17.91)</b> | <b>4.02</b><br><b>(0.00 to 17.80)</b> | <b>0.01</b><br><b>(0.01 to 0.01)</b> | <b>0.11</b><br><b>(0.00 to 0.53)</b> | <b>0.12</b><br><b>(0.00 to 0.54)</b> | <b>0.11</b><br><b>(0.00 to 0.51)</b> |
| Exposure to forces of nature                                                        | 0.00<br>(0.00 to 0.00)               | 2.98<br>(0.00 to 17.89)               | 2.98<br>(0.00 to 17.91)               | 2.96<br>(0.00 to 17.80)               | 0.00<br>(0.00 to 0.00)               | 0.09<br>(0.00 to 0.53)               | 0.09<br>(0.00 to 0.54)               | 0.09<br>(0.00 to 0.51)               |
| Conflict and terrorism                                                              | 0.00<br>(0.00 to 0.00)               | 0.97<br>(0.00 to 4.88)                | 0.97<br>(0.00 to 4.88)                | 0.97<br>(0.00 to 4.88)                | 0.00<br>(0.00 to 0.00)               | 0.02<br>(0.00 to 0.12)               | 0.02<br>(0.00 to 0.13)               | 0.02<br>(0.00 to 0.12)               |
| Executions and police conflict                                                      | 0.37<br>(0.31 to 0.47)               | 0.09<br>(0.00 to 2.50)                | 0.09<br>(0.00 to 2.50)                | 0.09<br>(0.00 to 2.48)                | 0.01<br>(0.01 to 0.01)               | 0.00<br>(0.00 to 0.06)               | 0.00<br>(0.00 to 0.06)               | 0.00<br>(0.00 to 0.06)               |



| Timor-Leste                                                       |                                             |                                             |                                             |                                             |                                       |                                       |                                       |                                        |
|-------------------------------------------------------------------|---------------------------------------------|---------------------------------------------|---------------------------------------------|---------------------------------------------|---------------------------------------|---------------------------------------|---------------------------------------|----------------------------------------|
| Cause                                                             | YLLs (actual counts)                        |                                             |                                             |                                             | Deaths (actual counts)                |                                       |                                       |                                        |
|                                                                   | 2016                                        | 2040 Forecast                               | 2040 Better Scenario                        | 2040 Worse Scenario                         | 2016                                  | 2040 Forecast                         | 2040 Better Scenario                  | 2040 Worse Scenario                    |
| All causes                                                        | 220,092.57<br>(167,674.95 to<br>287,912.39) | 189,086.62<br>(142,261.37 to<br>244,442.33) | 143,747.34<br>(108,200.86 to<br>185,478.35) | 282,357.80<br>(204,377.22 to<br>377,409.37) | 5,535.35<br>(4,571.74 to<br>6,575.53) | 7,482.79<br>(6,391.21 to<br>8,656.58) | 6,093.47<br>(5,236.44 to<br>7,017.41) | 9,585.04<br>(8,009.45 to<br>11,350.00) |
| Communicable, maternal, neonatal, and nutritional diseases        | 108,961.04<br>(70,427.13 to<br>168,410.74)  | 58,968.41<br>(33,218.21 to<br>110,056.62)   | 40,205.31<br>(21,490.78 to<br>84,254.55)    | 114,043.15<br>(62,398.92 to<br>190,111.68)  | 1,697.51<br>(1,191.90 to<br>2,485.57) | 1,254.31<br>(783.44 to<br>2,250.96)   | 918.64<br>(549.30 to<br>1,901.66)     | 2,156.30<br>(1,331.11 to<br>3,462.12)  |
| HIV/AIDS and tuberculosis                                         | 10,753.15<br>(4,587.97 to<br>37,566.43)     | 11,163.41<br>(2,407.30 to<br>52,634.72)     | 8,731.68<br>(1,422.41 to<br>49,447.76)      | 20,500.79<br>(6,163.17 to<br>69,165.54)     | 292.11<br>(148.21 to<br>856.55)       | 311.53<br>(99.24 to<br>1,245.55)      | 239.86<br>(63.01 to<br>1,207.77)      | 521.87<br>(199.30 to<br>1,597.52)      |
| Tuberculosis                                                      | 4,287.10<br>(2,305.11 to<br>5,929.16)       | 2,931.84<br>(1,748.07 to<br>4,380.37)       | 1,783.28<br>(1,031.25 to<br>2,744.04)       | 4,157.00<br>(2,396.51 to<br>6,626.38)       | 150.70<br>(106.61 to<br>210.99)       | 127.55<br>(84.66 to<br>187.75)        | 81.85<br>(53.49 to<br>121.54)         | 170.40<br>(109.22 to<br>263.11)        |
| HIV/AIDS                                                          | 6,466.05<br>(434.98 to<br>34,439.33)        | 8,231.56<br>(3.13 to<br>50,146.13)          | 6,948.40<br>(0.00 to<br>48,371.03)          | 16,343.79<br>(2,001.66 to<br>66,170.47)     | 141.40<br>(8.36 to<br>747.58)         | 183.98<br>(0.11 to<br>1,133.40)       | 158.01<br>(0.00 to<br>1,131.77)       | 351.47<br>(42.90 to<br>1,445.41)       |
| Diarrhea, lower respiratory, and other common infectious diseases | 52,294.28<br>(33,927.19 to<br>77,790.29)    | 21,426.79<br>(10,360.84 to<br>41,682.23)    | 13,501.56<br>(6,671.74 to<br>25,330.84)     | 47,724.25<br>(20,839.44 to<br>92,475.12)    | 803.80<br>(562.09 to<br>1,134.55)     | 552.98<br>(301.04 to<br>952.25)       | 399.44<br>(221.31 to<br>668.40)       | 1,009.39<br>(525.09 to<br>1,744.44)    |
| Diarrheal diseases                                                | 19,257.97<br>(10,408.12 to<br>32,372.77)    | 4,389.88<br>(739.98 to<br>11,909.07)        | 2,802.20<br>(437.10 to<br>8,043.08)         | 9,443.93<br>(2,309.84 to<br>23,426.45)      | 271.48<br>(140.82 to<br>443.86)       | 108.77<br>(16.17 to<br>315.00)        | 80.13<br>(10.73 to<br>250.31)         | 223.60<br>(44.03 to<br>633.51)         |
| Intestinal infectious diseases                                    | 3,352.10<br>(1,636.65 to<br>5,764.63)       | 1,996.19<br>(809.82 to<br>4,052.34)         | 1,680.30<br>(689.95 to<br>3,328.94)         | 2,609.56<br>(1,014.20 to<br>5,442.38)       | 47.16<br>(23.39 to<br>81.78)          | 30.07<br>(12.81 to<br>59.87)          | 25.62<br>(11.00 to<br>50.46)          | 38.34<br>(15.37 to<br>80.41)           |
| Typhoid fever                                                     | 2,928.06<br>(1,380.47 to<br>5,145.18)       | 1,693.89<br>(671.45 to<br>3,455.08)         | 1,433.06<br>(579.11 to<br>2,878.30)         | 2,209.45<br>(850.93 to<br>4,548.83)         | 41.09<br>(19.50 to<br>72.42)          | 25.38<br>(10.67 to<br>51.55)          | 21.75<br>(9.52 to<br>42.63)           | 32.30<br>(12.90 to<br>66.84)           |
| Paratyphoid fever                                                 | 413.90<br>(173.47 to<br>879.58)             | 299.69<br>(106.45 to<br>698.58)             | 245.48<br>(86.65 to<br>568.96)              | 395.97<br>(134.62 to<br>922.17)             | 5.93<br>(2.51 to<br>12.46)            | 4.62<br>(1.72 to<br>10.72)            | 3.83<br>(1.43 to<br>8.73)             | 5.95<br>(2.15 to<br>13.67)             |
| Other intestinal infectious diseases                              | 10.14<br>(3.32 to<br>26.32)                 | 2.60<br>(0.67 to<br>7.33)                   | 1.76<br>(0.46 to<br>4.92)                   | 4.14<br>(0.99 to<br>11.66)                  | 0.14<br>(0.05 to<br>0.34)             | 0.06<br>(0.02 to<br>0.15)             | 0.05<br>(0.01 to<br>0.11)             | 0.08<br>(0.02 to<br>0.20)              |
| Lower respiratory infections                                      | 22,983.04<br>(14,626.24 to<br>36,159.96)    | 8,705.95<br>(3,792.09 to<br>18,381.66)      | 5,335.25<br>(2,552.76 to<br>10,035.89)      | 22,948.70<br>(7,741.41 to<br>51,876.23)     | 395.49<br>(283.43 to<br>555.59)       | 324.64<br>(183.92 to<br>519.17)       | 236.42<br>(141.00 to<br>355.44)       | 581.38<br>(301.58 to<br>994.50)        |
| Upper respiratory infections                                      | 17.15<br>(5.91 to<br>42.19)                 | 8.91<br>(3.23 to<br>21.34)                  | 5.70<br>(2.06 to<br>12.94)                  | 13.94<br>(4.59 to<br>36.62)                 | 0.29<br>(0.13 to<br>0.58)             | 0.23<br>(0.09 to<br>0.47)             | 0.16<br>(0.06 to<br>0.33)             | 0.32<br>(0.12 to<br>0.67)              |
| Otitis media                                                      | 2.92<br>(1.25 to<br>7.69)                   | 1.05<br>(0.41 to<br>2.55)                   | 1.07<br>(0.42 to<br>2.55)                   | 1.09<br>(0.43 to<br>2.72)                   | 0.07<br>(0.03 to<br>0.15)             | 0.04<br>(0.02 to<br>0.10)             | 0.05<br>(0.02 to<br>0.11)             | 0.04<br>(0.02 to<br>0.09)              |
| Meningitis                                                        | 2,593.68<br>(1,415.60 to<br>4,409.52)       | 1,057.40<br>(458.89 to<br>2,053.58)         | 808.39<br>(391.57 to<br>1,452.64)           | 1,874.22<br>(671.81 to<br>4,233.32)         | 35.26<br>(20.92 to<br>56.57)          | 17.95<br>(9.43 to<br>31.32)           | 15.01<br>(8.46 to<br>25.49)           | 27.59<br>(12.58 to<br>55.66)           |
| Pneumococcal meningitis                                           | 25.79<br>(11.63 to<br>49.95)                | 6.06<br>(2.72 to<br>12.01)                  | 4.80<br>(2.33 to<br>8.99)                   | 11.13<br>(4.30 to<br>26.05)                 | 0.36<br>(0.19 to<br>0.64)             | 0.12<br>(0.07 to<br>0.21)             | 0.11<br>(0.06 to<br>0.18)             | 0.19<br>(0.09 to<br>0.37)              |
| H influenzae type B meningitis                                    | 217.99<br>(106.01 to<br>401.70)             | 259.44<br>(41.97 to<br>904.19)              | 111.59<br>(29.01 to<br>355.01)              | 808.16<br>(95.26 to<br>2,757.92)            | 2.86<br>(1.54 to<br>4.95)             | 3.36<br>(0.77 to<br>10.84)            | 1.66<br>(0.61 to<br>4.50)             | 9.74<br>(1.41 to<br>32.55)             |
| Meningococcal meningitis                                          | 866.30<br>(465.56 to<br>1,533.35)           | 276.38<br>(136.42 to<br>498.76)             | 240.68<br>(118.80 to<br>433.83)             | 368.37<br>(172.02 to<br>701.55)             | 11.96<br>(6.72 to<br>19.86)           | 5.31<br>(3.06 to<br>9.06)             | 4.88<br>(2.84 to<br>8.25)             | 6.42<br>(3.49 to<br>11.31)             |
| Other meningitis                                                  | 1,483.59<br>(794.51 to<br>2,521.83)         | 515.52<br>(250.45 to<br>935.89)             | 451.32<br>(221.73 to<br>800.61)             | 686.55<br>(322.12 to<br>1,280.74)           | 20.08<br>(11.60 to<br>32.29)          | 9.15<br>(5.14 to<br>15.55)            | 8.36<br>(4.70 to<br>14.27)            | 11.24<br>(6.02 to<br>19.51)            |
| Encephalitis                                                      | 839.85<br>(466.07 to<br>1,432.02)           | 533.68<br>(262.28 to<br>970.70)             | 436.32<br>(220.85 to<br>803.43)             | 713.51<br>(343.06 to<br>1,334.44)           | 12.61<br>(7.49 to<br>20.74)           | 10.62<br>(5.85 to<br>18.68)           | 9.13<br>(5.11 to<br>15.89)            | 13.05<br>(7.12 to<br>23.10)            |

|                |                                     |                                      |                                     |                                      |                             |                              |                             |                               |
|----------------|-------------------------------------|--------------------------------------|-------------------------------------|--------------------------------------|-----------------------------|------------------------------|-----------------------------|-------------------------------|
| Diphtheria     | 17.13<br>(8.35 to<br>32.47)         | 7.46<br>(2.48 to<br>18.20)           | 3.95<br>(1.73 to<br>8.08)           | 15.16<br>(4.04 to<br>39.12)          | 0.22<br>(0.11 to<br>0.41)   | 0.10<br>(0.04 to<br>0.23)    | 0.06<br>(0.03 to<br>0.12)   | 0.20<br>(0.06 to<br>0.48)     |
| Whooping cough | 2,410.94<br>(175.55 to<br>7,363.77) | 1,116.77<br>(57.06 to<br>4,074.84)   | 456.25<br>(25.00 to<br>1,771.96)    | 1,609.21<br>(80.69 to<br>5,794.22)   | 28.56<br>(2.09 to<br>87.08) | 13.29<br>(0.68 to<br>48.40)  | 5.51<br>(0.31 to<br>21.37)  | 19.09<br>(0.99 to<br>68.45)   |
| Tetanus        | 244.81<br>(121.38 to<br>484.57)     | 62.69<br>(25.08 to<br>137.34)        | 36.62<br>(15.13 to<br>75.71)        | 81.53<br>(31.01 to<br>184.94)        | 5.05<br>(2.74 to<br>9.35)   | 1.36<br>(0.62 to<br>2.68)    | 1.11<br>(0.51 to<br>2.26)   | 1.54<br>(0.71 to<br>3.30)     |
| Measles        | 438.65<br>(121.80 to<br>1,081.08)   | 3,493.55<br>(167.39 to<br>14,638.54) | 1,898.75<br>(128.96 to<br>7,363.20) | 8,332.74<br>(249.07 to<br>36,211.59) | 5.26<br>(1.47 to<br>12.94)  | 43.95<br>(2.72 to<br>179.71) | 24.65<br>(2.06 to<br>88.40) | 101.88<br>(3.79 to<br>433.13) |

| Timor-Leste                                           |                                                |                                                |                                              |                                                |                                        |                                        |                                       |                                        |
|-------------------------------------------------------|------------------------------------------------|------------------------------------------------|----------------------------------------------|------------------------------------------------|----------------------------------------|----------------------------------------|---------------------------------------|----------------------------------------|
| Cause                                                 | YLLs (actual counts)                           |                                                |                                              |                                                | Deaths (actual counts)                 |                                        |                                       |                                        |
|                                                       | 2016                                           | 2040 Forecast                                  | 2040 Better Scenario                         | 2040 Worse Scenario                            | 2016                                   | 2040 Forecast                          | 2040 Better Scenario                  | 2040 Worse Scenario                    |
| Varicella and herpes zoster                           | 136.03<br>(72.12 to<br>234.90)                 | 53.27<br>(24.83 to<br>100.35)                  | 36.76<br>(18.35 to<br>70.68)                 | 80.63<br>(36.11 to<br>162.77)                  | 2.34<br>(1.51 to<br>3.57)              | 1.95<br>(1.05 to<br>3.30)              | 1.58<br>(0.85 to<br>2.72)             | 2.36<br>(1.24 to<br>4.06)              |
| <b>Neglected tropical diseases and malaria</b>        | <b>375.91<br/>(172.02 to<br/>834.57)</b>       | <b>377.51<br/>(176.67 to<br/>828.86)</b>       | <b>343.34<br/>(161.58 to<br/>755.24)</b>     | <b>465.54<br/>(212.53 to<br/>1,042.36)</b>     | <b>6.13<br/>(3.03 to<br/>13.40)</b>    | <b>7.84<br/>(4.12 to<br/>16.85)</b>    | <b>7.44<br/>(3.95 to<br/>16.01)</b>   | <b>8.88<br/>(4.56 to<br/>19.03)</b>    |
| Malaria                                               | 110.38<br>(47.58 to<br>298.49)                 | 80.95<br>(21.81 to<br>254.66)                  | 76.70<br>(20.38 to<br>240.97)                | 88.20<br>(24.21 to<br>284.49)                  | 2.21<br>(1.04 to<br>6.05)              | 2.02<br>(0.60 to<br>6.15)              | 1.97<br>(0.57 to<br>6.22)             | 2.09<br>(0.62 to<br>6.55)              |
| Chagas disease                                        | 0.00<br>(0.00 to<br>0.00)                      | 0.00<br>(0.00 to<br>0.00)                      | 0.00<br>(0.00 to<br>0.00)                    | 0.00<br>(0.00 to<br>0.00)                      | 0.00<br>(0.00 to<br>0.00)              | 0.00<br>(0.00 to<br>0.00)              | 0.00<br>(0.00 to<br>0.00)             | 0.00<br>(0.00 to<br>0.00)              |
| Leishmaniasis                                         | 0.00<br>(0.00 to<br>0.00)                      | 0.00<br>(0.00 to<br>0.00)                      | 0.00<br>(0.00 to<br>0.00)                    | 0.00<br>(0.00 to<br>0.00)                      | 0.00<br>(0.00 to<br>0.00)              | 0.00<br>(0.00 to<br>0.00)              | 0.00<br>(0.00 to<br>0.00)             | 0.00<br>(0.00 to<br>0.00)              |
| African trypanosomiasis                               | 0.00<br>(0.00 to<br>0.00)                      | 0.00<br>(0.00 to<br>0.00)                      | 0.00<br>(0.00 to<br>0.00)                    | 0.00<br>(0.00 to<br>0.00)                      | 0.00<br>(0.00 to<br>0.00)              | 0.00<br>(0.00 to<br>0.00)              | 0.00<br>(0.00 to<br>0.00)             | 0.00<br>(0.00 to<br>0.00)              |
| Schistosomiasis                                       | 0.00<br>(0.00 to<br>0.00)                      | 0.00<br>(0.00 to<br>0.00)                      | 0.00<br>(0.00 to<br>0.00)                    | 0.00<br>(0.00 to<br>0.00)                      | 0.00<br>(0.00 to<br>0.00)              | 0.00<br>(0.00 to<br>0.00)              | 0.00<br>(0.00 to<br>0.00)             | 0.00<br>(0.00 to<br>0.00)              |
| Cysticercosis                                         | 0.00<br>(0.00 to<br>0.00)                      | 0.00<br>(0.00 to<br>0.00)                      | 0.00<br>(0.00 to<br>0.00)                    | 0.00<br>(0.00 to<br>0.00)                      | 0.00<br>(0.00 to<br>0.00)              | 0.00<br>(0.00 to<br>0.00)              | 0.00<br>(0.00 to<br>0.00)             | 0.00<br>(0.00 to<br>0.00)              |
| Cystic echinococcosis                                 | 0.70<br>(0.48 to<br>0.94)                      | 0.39<br>(0.15 to<br>0.66)                      | 0.23<br>(0.08 to<br>0.40)                    | 0.56<br>(0.25 to<br>0.95)                      | 0.02<br>(0.01 to<br>0.02)              | 0.01<br>(0.01 to<br>0.02)              | 0.01<br>(0.00 to<br>0.01)             | 0.02<br>(0.01 to<br>0.03)              |
| Dengue                                                | 109.55<br>(11.58 to<br>506.12)                 | 190.87<br>(43.74 to<br>650.43)                 | 175.22<br>(41.30 to<br>589.56)               | 232.80<br>(51.45 to<br>803.45)                 | 1.68<br>(0.19 to<br>7.48)              | 3.90<br>(0.97 to<br>12.64)             | 3.74<br>(0.96 to<br>12.03)            | 4.37<br>(1.05 to<br>14.12)             |
| Yellow fever                                          | 0.00<br>(0.00 to<br>0.00)                      | 0.00<br>(0.00 to<br>0.00)                      | 0.00<br>(0.00 to<br>0.00)                    | 0.00<br>(0.00 to<br>0.00)                      | 0.00<br>(0.00 to<br>0.00)              | 0.00<br>(0.00 to<br>0.00)              | 0.00<br>(0.00 to<br>0.00)             | 0.00<br>(0.00 to<br>0.00)              |
| Rabies                                                | 10.63<br>(4.05 to<br>23.81)                    | 6.07<br>(1.44 to<br>19.36)                     | 3.24<br>(0.71 to<br>11.69)                   | 9.93<br>(2.66 to<br>29.94)                     | 0.21<br>(0.09 to<br>0.43)              | 0.14<br>(0.04 to<br>0.40)              | 0.08<br>(0.02 to<br>0.24)             | 0.22<br>(0.07 to<br>0.58)              |
| Intestinal nematode infections                        | 109.51<br>(26.77 to<br>239.35)                 | 77.81<br>(19.62 to<br>176.96)                  | 71.58<br>(19.54 to<br>160.11)                | 103.90<br>(25.49 to<br>242.42)                 | 1.44<br>(0.44 to<br>2.95)              | 1.21<br>(0.44 to<br>2.40)              | 1.16<br>(0.45 to<br>2.27)             | 1.50<br>(0.51 to<br>3.16)              |
| Other neglected tropical diseases                     | 35.15<br>(16.33 to<br>78.66)                   | 21.42<br>(7.51 to<br>47.73)                    | 16.38<br>(5.52 to<br>35.24)                  | 30.15<br>(10.91 to<br>69.92)                   | 0.57<br>(0.31 to<br>1.25)              | 0.56<br>(0.21 to<br>1.21)              | 0.47<br>(0.17 to<br>0.98)             | 0.68<br>(0.26 to<br>1.50)              |
| <b>Maternal disorders</b>                             | <b>4,832.34<br/>(2,127.94 to<br/>7,080.86)</b> | <b>3,318.44<br/>(1,342.30 to<br/>5,476.50)</b> | <b>2,074.06<br/>(825.94 to<br/>3,470.22)</b> | <b>4,678.43<br/>(1,958.37 to<br/>8,063.37)</b> | <b>93.01<br/>(40.77 to<br/>137.83)</b> | <b>65.19<br/>(26.60 to<br/>108.37)</b> | <b>40.77<br/>(16.19 to<br/>67.67)</b> | <b>91.59<br/>(36.98 to<br/>156.99)</b> |
| Maternal hemorrhage                                   | 1,568.34<br>(654.42 to<br>2,406.11)            | 1,082.90<br>(365.11 to<br>1,903.86)            | 674.57<br>(228.60 to<br>1,224.63)            | 1,501.43<br>(537.85 to<br>2,714.20)            | 29.75<br>(12.55 to<br>45.55)           | 20.95<br>(7.49 to<br>36.80)            | 13.05<br>(4.54 to<br>23.60)           | 29.00<br>(10.81 to<br>53.37)           |
| Maternal sepsis and other maternal infections         | 416.35<br>(164.13 to<br>718.09)                | 267.68<br>(92.49 to<br>513.69)                 | 166.45<br>(58.23 to<br>320.19)               | 374.66<br>(132.01 to<br>771.18)                | 8.43<br>(3.31 to<br>14.80)             | 5.54<br>(1.95 to<br>10.84)             | 3.45<br>(1.21 to<br>6.91)             | 7.73<br>(2.77 to<br>16.17)             |
| Maternal hypertensive disorders                       | 535.39<br>(223.54 to<br>878.19)                | 386.11<br>(147.77 to<br>692.59)                | 239.16<br>(86.75 to<br>437.60)               | 538.59<br>(201.90 to<br>1,002.65)              | 10.24<br>(4.33 to<br>16.70)            | 7.54<br>(2.80 to<br>13.60)             | 4.67<br>(1.65 to<br>8.54)             | 10.50<br>(3.89 to<br>19.35)            |
| Maternal obstructed labor and uterine rupture         | 83.48<br>(30.45 to<br>166.79)                  | 64.48<br>(18.28 to<br>144.74)                  | 38.74<br>(11.18 to<br>87.89)                 | 91.64<br>(26.25 to<br>211.13)                  | 1.64<br>(0.59 to<br>3.33)              | 1.30<br>(0.37 to<br>2.99)              | 0.78<br>(0.22 to<br>1.80)             | 1.84<br>(0.52 to<br>4.25)              |
| Maternal abortion, miscarriage, and ectopic pregnancy | 806.41<br>(312.74 to<br>1,337.66)              | 489.64<br>(169.07 to<br>919.54)                | 304.17<br>(104.22 to<br>583.21)              | 696.27<br>(243.26 to<br>1,384.47)              | 15.95<br>(6.39 to<br>26.39)            | 9.89<br>(3.49 to<br>18.28)             | 6.14<br>(2.02 to<br>11.92)            | 14.02<br>(5.15 to<br>27.51)            |

|                                        |                                   |                                 |                                 |                                   |                             |                             |                            |                             |
|----------------------------------------|-----------------------------------|---------------------------------|---------------------------------|-----------------------------------|-----------------------------|-----------------------------|----------------------------|-----------------------------|
|                                        | 651.30<br>(252.29 to<br>1,047.54) | 459.45<br>(174.79 to<br>851.60) | 287.74<br>(102.05 to<br>529.41) | 668.09<br>(246.85 to<br>1,227.82) | 12.01<br>(4.62 to<br>19.58) | 8.64<br>(3.27 to<br>16.02)  | 5.42<br>(1.93 to<br>9.94)  | 12.49<br>(4.60 to<br>22.99) |
| Indirect maternal deaths               |                                   |                                 |                                 |                                   |                             |                             |                            |                             |
|                                        | 55.36<br>(14.17 to<br>113.57)     | 35.48<br>(8.62 to<br>78.10)     | 22.02<br>(5.00 to<br>47.89)     | 30.81<br>(11.87 to<br>115.05)     | 1.07<br>(0.27 to<br>2.15)   | 0.70<br>(0.16 to<br>1.55)   | 0.44<br>(0.10 to<br>0.98)  | 1.00<br>(0.23 to<br>2.27)   |
| Late maternal deaths                   |                                   |                                 |                                 |                                   |                             |                             |                            |                             |
|                                        | 2.46<br>(0.19 to<br>8.94)         | 30.43<br>(0.00 to<br>171.59)    | 17.89<br>(0.00 to<br>117.33)    | 49.05<br>(1.27 to<br>259.87)      | 0.05<br>(0.00 to<br>0.17)   | 0.61<br>(0.00 to<br>3.53)   | 0.36<br>(0.00 to<br>2.47)  | 0.99<br>(0.03 to<br>5.42)   |
| Maternal deaths aggravated by HIV/AIDS |                                   |                                 |                                 |                                   |                             |                             |                            |                             |
|                                        | 713.25<br>(314.81 to<br>1,152.89) | 502.25<br>(184.16 to<br>904.47) | 323.33<br>(119.76 to<br>587.12) | 707.89<br>(264.26 to<br>1,285.07) | 13.89<br>(6.08 to<br>22.76) | 10.01<br>(3.71 to<br>17.99) | 6.46<br>(2.41 to<br>11.66) | 14.03<br>(5.53 to<br>26.37) |
| Other maternal disorders               |                                   |                                 |                                 |                                   |                             |                             |                            |                             |

| Timor-Leste                                                             |                                              |                                             |                                             |                                              |                                     |                                     |                                    |                                     |
|-------------------------------------------------------------------------|----------------------------------------------|---------------------------------------------|---------------------------------------------|----------------------------------------------|-------------------------------------|-------------------------------------|------------------------------------|-------------------------------------|
| Cause                                                                   | YLLs (actual counts)                         |                                             |                                             |                                              | Deaths (actual counts)              |                                     |                                    |                                     |
|                                                                         | 2016                                         | 2040 Forecast                               | 2040 Better Scenario                        | 2040 Worse Scenario                          | 2016                                | 2040 Forecast                       | 2040 Better Scenario               | 2040 Worse Scenario                 |
| <b>Neonatal disorders</b>                                               | <b>36,426.16</b><br>(17,759.54 to 62,388.18) | <b>20,564.41</b><br>(8,843.66 to 40,234.44) | <b>13,863.40</b><br>(6,148.49 to 27,101.46) | <b>37,814.00</b><br>(16,733.99 to 71,588.84) | <b>420.83</b><br>(205.16 to 720.67) | <b>237.58</b><br>(102.19 to 464.83) | <b>160.16</b><br>(71.03 to 313.07) | <b>436.85</b><br>(193.35 to 827.01) |
| Neonatal preterm birth                                                  | 16,891.83<br>(7,704.17 to 31,352.69)         | 8,846.67<br>(3,691.69 to 17,685.43)         | 5,456.02<br>(2,265.89 to 10,783.44)         | 16,843.75<br>(7,164.46 to 32,889.45)         | 195.13<br>(89.00 to 362.25)         | 102.20<br>(42.65 to 204.28)         | 63.03<br>(26.18 to 124.57)         | 194.58<br>(82.78 to 379.87)         |
| Neonatal encephalopathy due to birth asphyxia and trauma                | 11,554.67<br>(4,969.17 to 22,274.33)         | 6,286.26<br>(2,150.79 to 14,288.69)         | 4,616.84<br>(1,614.02 to 10,496.48)         | 11,080.40<br>(3,835.96 to 24,697.16)         | 133.48<br>(57.40 to 257.28)         | 72.62<br>(24.85 to 165.06)          | 53.34<br>(18.65 to 121.25)         | 128.00<br>(44.32 to 285.28)         |
| Neonatal sepsis and other neonatal infections                           | 3,675.44<br>(1,509.11 to 7,309.78)           | 2,885.73<br>(1,026.44 to 6,369.06)          | 2,082.35<br>(750.08 to 4,556.98)            | 5,134.82<br>(1,866.57 to 11,292.34)          | 42.46<br>(17.43 to 84.48)           | 33.34<br>(11.86 to 73.57)           | 24.06<br>(8.67 to 52.64)           | 59.32<br>(21.57 to 130.45)          |
| Hemolytic disease and other neonatal jaundice                           | 295.29<br>(120.69 to 591.91)                 | 123.64<br>(38.64 to 299.77)                 | 83.02<br>(27.45 to 200.04)                  | 231.24<br>(73.52 to 561.11)                  | 3.41<br>(1.39 to 6.84)              | 1.43<br>(0.45 to 3.46)              | 0.96<br>(0.32 to 2.31)             | 2.67<br>(0.85 to 6.48)              |
| Other neonatal disorders                                                | 4,008.93<br>(1,725.26 to 8,157.34)           | 2,422.11<br>(862.87 to 5,509.14)            | 1,625.17<br>(590.88 to 3,679.95)            | 4,523.79<br>(1,625.21 to 10,297.90)          | 46.34<br>(19.95 to 94.23)           | 27.99<br>(9.98 to 63.65)            | 18.78<br>(6.83 to 42.51)           | 52.28<br>(18.79 to 118.97)          |
| <b>Nutritional deficiencies</b>                                         | <b>1,254.42</b><br>(801.51 to 1,938.61)      | <b>603.84</b><br>(409.94 to 866.49)         | <b>501.17</b><br>(341.03 to 710.54)         | <b>785.72</b><br>(498.06 to 1,195.45)        | <b>34.16</b><br>(24.57 to 44.73)    | <b>38.63</b><br>(25.64 to 53.16)    | <b>36.37</b><br>(24.69 to 49.12)   | <b>39.61</b><br>(26.03 to 56.74)    |
| Protein-energy malnutrition                                             | 1,140.23<br>(708.68 to 1,799.20)             | 499.46<br>(332.51 to 716.68)                | 414.59<br>(280.58 to 588.31)                | 656.56<br>(413.51 to 1,028.09)               | 30.64<br>(22.28 to 40.68)           | 32.78<br>(21.74 to 46.32)           | 30.97<br>(20.97 to 42.75)          | 33.55<br>(21.90 to 48.58)           |
| Iodine deficiency                                                       | 14.53<br>(0.62 to 65.55)                     | 22.47<br>(0.78 to 82.44)                    | 17.13<br>(0.56 to 60.83)                    | 30.73<br>(1.05 to 123.45)                    | 0.32<br>(0.02 to 1.35)              | 1.02<br>(0.02 to 5.36)              | 1.02<br>(0.01 to 4.78)             | 1.34<br>(0.03 to 5.54)              |
| Dietary iron deficiency                                                 | 16.07<br>(9.42 to 26.84)                     | 12.29<br>(6.28 to 24.98)                    | 10.53<br>(5.32 to 21.76)                    | 14.67<br>(7.66 to 29.90)                     | 0.30<br>(0.18 to 0.61)              | 0.34<br>(0.16 to 0.92)              | 0.31<br>(0.15 to 0.88)             | 0.37<br>(0.18 to 0.97)              |
| Other nutritional deficiencies                                          | 83.59<br>(47.42 to 146.90)                   | 69.62<br>(37.75 to 116.47)                  | 58.91<br>(31.86 to 99.20)                   | 83.77<br>(45.00 to 146.97)                   | 2.90<br>(1.60 to 4.99)              | 4.31<br>(2.19 to 7.90)              | 4.07<br>(2.06 to 7.62)             | 4.36<br>(2.19 to 7.92)              |
| <b>Other communicable, maternal, neonatal, and nutritional diseases</b> | <b>3,024.78</b><br>(1,379.84 to 6,168.61)    | <b>1,514.02</b><br>(783.66 to 2,629.36)     | <b>1,190.11</b><br>(614.32 to 1,996.17)     | <b>2,074.43</b><br>(1,016.52 to 3,887.75)    | <b>47.47</b><br>(25.15 to 88.58)    | <b>40.57</b><br>(23.30 to 61.36)    | <b>34.60</b><br>(19.99 to 51.50)   | <b>48.09</b><br>(27.20 to 74.71)    |
| Sexually transmitted infections excluding HIV                           | 1,276.57<br>(453.98 to 2,574.62)             | 263.16<br>(79.26 to 635.86)                 | 204.98<br>(63.41 to 482.98)                 | 419.28<br>(119.13 to 996.92)                 | 15.40<br>(5.72 to 30.57)            | 3.52<br>(1.34 to 7.84)              | 2.82<br>(1.16 to 6.08)             | 5.35<br>(1.77 to 12.22)             |
| Syphilis                                                                | 1,256.57<br>(431.81 to 2,551.78)             | 244.51<br>(61.96 to 615.97)                 | 188.61<br>(49.52 to 462.51)                 | 398.73<br>(97.81 to 972.33)                  | 14.89<br>(5.24 to 30.10)            | 2.99<br>(0.86 to 7.35)              | 2.33<br>(0.71 to 5.54)             | 4.80<br>(1.31 to 11.56)             |
| Chlamydial infection                                                    | 3.98<br>(2.03 to 6.63)                       | 3.77<br>(1.85 to 6.46)                      | 3.31<br>(1.63 to 5.82)                      | 4.16<br>(2.05 to 7.23)                       | 0.10<br>(0.06 to 0.16)              | 0.11<br>(0.06 to 0.17)              | 0.10<br>(0.06 to 0.16)             | 0.11<br>(0.06 to 0.18)              |
| Gonococcal infection                                                    | 10.41<br>(5.39 to 17.14)                     | 9.69<br>(4.71 to 16.18)                     | 8.55<br>(4.15 to 14.47)                     | 10.63<br>(5.24 to 17.79)                     | 0.28<br>(0.16 to 0.45)              | 0.29<br>(0.18 to 0.45)              | 0.27<br>(0.17 to 0.42)             | 0.30<br>(0.18 to 0.48)              |
| Other sexually transmitted infections                                   | 5.60<br>(2.85 to 9.33)                       | 5.18<br>(2.58 to 8.99)                      | 4.52<br>(2.19 to 7.72)                      | 5.76<br>(2.85 to 9.96)                       | 0.13<br>(0.08 to 0.22)              | 0.13<br>(0.07 to 0.21)              | 0.12<br>(0.07 to 0.19)             | 0.14<br>(0.08 to 0.23)              |
| Acute hepatitis                                                         | 254.97<br>(167.30 to 333.82)                 | 196.62<br>(112.01 to 292.71)                | 162.85<br>(92.83 to 243.94)                 | 232.27<br>(136.32 to 342.86)                 | 6.18<br>(4.28 to 8.05)              | 5.84<br>(3.77 to 8.21)              | 5.01<br>(3.25 to 7.08)             | 6.52<br>(4.15 to 9.24)              |
| Acute hepatitis A                                                       | 36.59<br>(19.05 to 65.49)                    | 10.54<br>(4.48 to 23.33)                    | 8.06<br>(3.57 to 17.05)                     | 16.36<br>(6.21 to 37.40)                     | 0.49<br>(0.28 to 0.83)              | 0.18<br>(0.10 to 0.34)              | 0.15<br>(0.08 to 0.25)             | 0.25<br>(0.13 to 0.49)              |
| Acute hepatitis B                                                       | 164.64<br>(90.03 to 226.08)                  | 150.44<br>(79.13 to 231.40)                 | 124.12<br>(64.73 to 192.87)                 | 172.34<br>(92.35 to 267.02)                  | 4.64<br>(2.98 to 6.29)              | 4.63<br>(2.86 to 6.73)              | 3.91<br>(2.44 to 5.70)             | 5.15<br>(3.20 to 7.52)              |

|                                       |                                                                |                                                                 |                                                                |                                                                  |                                                            |                                                            |                                                            |                                                            |
|---------------------------------------|----------------------------------------------------------------|-----------------------------------------------------------------|----------------------------------------------------------------|------------------------------------------------------------------|------------------------------------------------------------|------------------------------------------------------------|------------------------------------------------------------|------------------------------------------------------------|
| Acute hepatitis C                     | 5.21<br>(3.38 to<br>7.41)                                      | 4.98<br>(2.86 to<br>7.88)                                       | 4.54<br>(2.64 to<br>7.24)                                      | 5.47<br>(3.14 to<br>8.75)                                        | 0.15<br>(0.10 to<br>0.21)                                  | 0.17<br>(0.10 to<br>0.26)                                  | 0.16<br>(0.10 to<br>0.25)                                  | 0.17<br>(0.11 to<br>0.27)                                  |
| Acute hepatitis E                     | 48.52<br>(32.46 to<br>70.81)                                   | 30.66<br>(16.86 to<br>50.44)                                    | 26.13<br>(14.19 to<br>43.42)                                   | 38.11<br>(20.49 to<br>65.56)                                     | 0.90<br>(0.61 to<br>1.26)                                  | 0.86<br>(0.51 to<br>1.31)                                  | 0.80<br>(0.47 to<br>1.21)                                  | 0.94<br>(0.55 to<br>1.44)                                  |
| Other unspecified infectious diseases | 1,493.24<br>(404.72 to<br>4,849.08)                            | 1,054.23<br>(415.80 to<br>2,125.79)                             | 822.28<br>(330.51 to<br>1,589.72)                              | 1,422.88<br>(543.62 to<br>3,174.35)                              | 25.89<br>(8.54 to<br>67.47)                                | 31.21<br>(14.72 to<br>49.65)                               | 26.77<br>(12.78 to<br>41.46)                               | 36.22<br>(16.37 to<br>61.50)                               |
| <b>Non-communicable diseases</b>      | <b>89,562.85</b><br><b>(68,844.78 to</b><br><b>109,286.67)</b> | <b>107,422.03</b><br><b>(78,326.97 to</b><br><b>142,834.50)</b> | <b>83,167.34</b><br><b>(61,582.38 to</b><br><b>107,891.02)</b> | <b>141,100.79</b><br><b>(100,277.42 to</b><br><b>190,226.94)</b> | <b>3,431.86</b><br><b>(2,765.51 to</b><br><b>4,091.95)</b> | <b>5,705.19</b><br><b>(4,718.03 to</b><br><b>6,795.33)</b> | <b>4,683.09</b><br><b>(3,950.77 to</b><br><b>5,477.03)</b> | <b>6,846.68</b><br><b>(5,579.67 to</b><br><b>8,263.75)</b> |

| Timor-Leste                          |                                              |                                              |                                              |                                              |                                     |                                         |                                         |                                         |
|--------------------------------------|----------------------------------------------|----------------------------------------------|----------------------------------------------|----------------------------------------------|-------------------------------------|-----------------------------------------|-----------------------------------------|-----------------------------------------|
| Cause                                | YLLs (actual counts)                         |                                              |                                              |                                              | Deaths (actual counts)              |                                         |                                         |                                         |
|                                      | 2016                                         | 2040 Forecast                                | 2040 Better Scenario                         | 2040 Worse Scenario                          | 2016                                | 2040 Forecast                           | 2040 Better Scenario                    | 2040 Worse Scenario                     |
| <b>Neoplasms</b>                     | <b>16,167.81</b><br>(11,558.38 to 20,292.05) | <b>23,700.97</b><br>(16,039.63 to 32,415.70) | <b>22,698.16</b><br>(15,683.83 to 30,278.92) | <b>26,951.80</b><br>(17,624.68 to 38,067.42) | <b>587.78</b><br>(452.47 to 732.19) | <b>1,027.01</b><br>(783.05 to 1,295.24) | <b>1,031.24</b><br>(799.32 to 1,273.27) | <b>1,105.18</b><br>(801.93 to 1,465.47) |
| Lip and oral cavity cancer           | 360.27<br>(236.28 to 512.48)                 | 538.86<br>(287.85 to 943.01)                 | 459.51<br>(255.06 to 784.25)                 | 736.95<br>(356.06 to 1,403.34)               | 15.19<br>(10.73 to 20.47)           | 25.55<br>(15.40 to 39.22)               | 23.12<br>(14.65 to 34.61)               | 32.51<br>(17.87 to 54.58)               |
| Nasopharynx cancer                   | 278.13<br>(168.16 to 422.14)                 | 452.81<br>(213.24 to 887.76)                 | 369.53<br>(183.16 to 695.02)                 | 656.03<br>(275.89 to 1,410.04)               | 9.69<br>(6.35 to 14.77)             | 16.68<br>(8.73 to 30.57)                | 14.14<br>(7.57 to 25.14)                | 23.13<br>(10.83 to 46.10)               |
| Other pharynx cancer                 | 163.55<br>(111.61 to 231.52)                 | 218.31<br>(136.77 to 336.88)                 | 209.29<br>(131.43 to 316.78)                 | 222.17<br>(137.92 to 337.99)                 | 6.53<br>(4.69 to 9.07)              | 9.67<br>(6.46 to 14.05)                 | 9.61<br>(6.47 to 13.94)                 | 9.50<br>(6.33 to 13.92)                 |
| Esophageal cancer                    | 252.27<br>(173.73 to 345.12)                 | 368.90<br>(180.94 to 702.59)                 | 310.64<br>(161.37 to 561.79)                 | 497.14<br>(224.81 to 1,042.45)               | 10.82<br>(7.92 to 14.47)            | 17.32<br>(9.56 to 28.88)                | 15.28<br>(8.71 to 25.81)                | 21.95<br>(11.23 to 39.46)               |
| Stomach cancer                       | 950.78<br>(678.02 to 1,222.54)               | 1,085.55<br>(750.47 to 1,454.39)             | 1,011.59<br>(711.79 to 1,360.95)             | 1,173.55<br>(807.92 to 1,608.46)             | 41.88<br>(31.16 to 53.16)           | 55.53<br>(42.46 to 69.96)               | 54.21<br>(41.25 to 68.07)               | 57.12<br>(42.86 to 73.71)               |
| Colon and rectum cancer              | 1,148.77<br>(816.16 to 1,561.95)             | 2,198.14<br>(1,379.78 to 3,367.51)           | 2,239.51<br>(1,423.79 to 3,385.62)           | 2,136.98<br>(1,305.45 to 3,293.85)           | 49.34<br>(36.31 to 65.10)           | 113.89<br>(76.74 to 166.65)             | 121.69<br>(82.74 to 177.49)             | 105.20<br>(69.74 to 155.60)             |
| Liver cancer                         | 947.04<br>(568.41 to 1,284.14)               | 1,475.83<br>(835.54 to 2,263.03)             | 1,432.60<br>(815.08 to 2,151.92)             | 1,634.19<br>(899.41 to 2,625.98)             | 38.52<br>(24.48 to 51.14)           | 67.09<br>(43.37 to 94.25)               | 67.73<br>(44.26 to 93.48)               | 70.52<br>(43.45 to 103.25)              |
| Liver cancer due to hepatitis B      | 414.25<br>(239.92 to 574.89)                 | 633.89<br>(338.86 to 990.10)                 | 616.22<br>(331.54 to 958.77)                 | 704.83<br>(360.56 to 1,149.49)               | 15.77<br>(9.33 to 21.84)            | 26.55<br>(15.96 to 39.21)               | 26.79<br>(16.32 to 38.79)               | 28.14<br>(16.24 to 44.27)               |
| Liver cancer due to hepatitis C      | 302.98<br>(119.04 to 308.43)                 | 328.10<br>(184.63 to 523.32)                 | 325.68<br>(185.45 to 514.95)                 | 350.82<br>(190.75 to 581.80)                 | 9.61<br>(5.80 to 14.66)             | 17.85<br>(10.84 to 26.95)               | 18.51<br>(11.41 to 27.82)               | 18.09<br>(10.63 to 28.42)               |
| Liver cancer due to alcohol use      | 91.83<br>(51.49 to 140.08)                   | 138.51<br>(73.97 to 231.08)                  | 132.71<br>(70.71 to 216.64)                  | 155.84<br>(79.13 to 276.82)                  | 3.97<br>(2.32 to 6.17)              | 6.32<br>(3.60 to 10.33)                 | 6.25<br>(3.62 to 10.09)                 | 6.80<br>(3.73 to 11.23)                 |
| Liver cancer due to other causes     | 237.98<br>(129.47 to 365.07)                 | 375.34<br>(183.21 to 648.58)                 | 357.98<br>(176.71 to 615.83)                 | 422.70<br>(196.98 to 788.52)                 | 9.17<br>(5.16 to 14.00)             | 16.36<br>(8.88 to 25.96)                | 16.18<br>(9.01 to 25.59)                | 17.50<br>(9.18 to 29.31)                |
| Gallbladder and biliary tract cancer | 234.97<br>(164.98 to 303.37)                 | 266.73<br>(184.04 to 349.07)                 | 283.60<br>(195.08 to 378.20)                 | 250.26<br>(175.21 to 322.82)                 | 10.67<br>(7.84 to 13.48)            | 13.91<br>(10.52 to 17.48)               | 15.39<br>(11.63 to 19.42)               | 12.54<br>(9.62 to 15.79)                |
| Pancreatic cancer                    | 563.60<br>(415.71 to 712.57)                 | 1,025.31<br>(726.57 to 1,391.05)             | 1,061.01<br>(749.25 to 1,435.17)             | 1,043.74<br>(711.53 to 1,447.49)             | 24.51<br>(18.99 to 30.53)           | 49.82<br>(38.10 to 63.63)               | 53.60<br>(41.47 to 67.53)               | 48.33<br>(36.21 to 62.69)               |
| Larynx cancer                        | 165.72<br>(115.84 to 235.07)                 | 215.71<br>(99.24 to 432.38)                  | 163.61<br>(81.41 to 432.38)                  | 339.87<br>(143.63 to 691.96)                 | 7.30<br>(5.26 to 10.17)             | 10.26<br>(5.30 to 19.88)                | 8.10<br>(4.48 to 14.85)                 | 15.51<br>(7.23 to 29.72)                |
| Tracheal, bronchus, and lung cancer  | 1,887.70<br>(1,327.51 to 2,507.26)           | 2,584.68<br>(1,340.06 to 4,450.54)           | 1,853.31<br>(1,054.49 to 3,154.87)           | 4,578.90<br>(2,149.63 to 8,387.02)           | 80.15<br>(59.78 to 103.92)          | 119.08<br>(69.04 to 184.95)             | 89.69<br>(56.06 to 134.44)              | 200.28<br>(106.10 to 341.55)            |
| Malignant skin melanoma              | 56.07<br>(35.48 to 77.91)                    | 91.29<br>(57.23 to 130.49)                   | 102.89<br>(65.98 to 148.27)                  | 83.33<br>(52.30 to 118.16)                   | 2.01<br>(1.40 to 2.74)              | 3.97<br>(2.94 to 5.31)                  | 4.71<br>(3.52 to 6.27)                  | 3.43<br>(2.52 to 4.51)                  |
| Non-melanoma skin cancer             | 109.56<br>(68.72 to 167.75)                  | 198.11<br>(127.56 to 296.90)                 | 190.71<br>(123.88 to 286.88)                 | 198.30<br>(127.21 to 295.57)                 | 4.67<br>(3.14 to 6.75)              | 10.48<br>(7.48 to 14.39)                | 10.67<br>(7.72 to 14.54)                | 9.92<br>(7.05 to 13.69)                 |
| Breast cancer                        | 1,322.57<br>(760.64 to 1,947.28)             | 2,141.28<br>(1,197.75 to 3,391.48)           | 2,095.73<br>(1,195.37 to 3,278.62)           | 2,192.10<br>(1,212.50 to 3,518.38)           | 45.08<br>(27.47 to 64.70)           | 80.01<br>(47.93 to 120.77)              | 80.95<br>(49.74 to 118.84)              | 79.31<br>(46.87 to 123.21)              |
| Cervical cancer                      | 1,001.01<br>(600.11 to 1,486.62)             | 1,171.37<br>(630.15 to 1,926.17)             | 1,047.27<br>(590.49 to 1,684.32)             | 1,294.89<br>(684.62 to 2,186.14)             | 36.26<br>(22.56 to 53.14)           | 44.69<br>(27.13 to 67.18)               | 41.44<br>(25.53 to 60.69)               | 47.68<br>(28.23 to 74.54)               |

|                   |                                 |                                     |                                     |                                     |                              |                               |                                |                               |
|-------------------|---------------------------------|-------------------------------------|-------------------------------------|-------------------------------------|------------------------------|-------------------------------|--------------------------------|-------------------------------|
| Uterine cancer    | 222.79<br>(147.03 to<br>330.45) | 315.34<br>(206.50 to<br>469.83)     | 286.26<br>(186.71 to<br>417.01)     | 331.42<br>(220.33 to<br>490.23)     | 9.29<br>(6.29 to<br>13.77)   | 14.58<br>(10.41 to<br>20.68)  | 13.75<br>(9.75 to<br>19.26)    | 14.82<br>(10.53 to<br>21.04)  |
| Ovarian cancer    | 452.27<br>(291.55 to<br>641.89) | 673.30<br>(407.95 to<br>1,008.88)   | 725.41<br>(434.30 to<br>1,083.01)   | 633.91<br>(383.32 to<br>955.18)     | 16.14<br>(10.82 to<br>22.45) | 25.79<br>(17.16 to<br>37.29)  | 28.48<br>(18.97 to<br>40.71)   | 23.79<br>(15.53 to<br>34.20)  |
| Prostate cancer   | 504.45<br>(311.50 to<br>713.36) | 1,213.00<br>(769.13 to<br>1,595.05) | 1,356.75<br>(870.59 to<br>1,778.05) | 1,087.53<br>(673.07 to<br>1,438.20) | 30.13<br>(18.66 to<br>41.86) | 93.33<br>(59.89 to<br>120.97) | 109.29<br>(70.69 to<br>139.71) | 79.66<br>(49.86 to<br>104.65) |
| Testicular cancer | 33.47<br>(14.10 to<br>63.47)    | 47.13<br>(20.55 to<br>95.98)        | 44.28<br>(19.40 to<br>89.91)        | 49.25<br>(20.98 to<br>102.07)       | 0.78<br>(0.37 to<br>1.45)    | 1.26<br>(0.70 to<br>2.42)     | 1.23<br>(0.69 to<br>2.37)      | 1.26<br>(0.69 to<br>2.42)     |



| Timor-Leste                     |                                                     |                                                     |                                                     |                                                     |                                                  |                                                  |                                                  |                                                  |
|---------------------------------|-----------------------------------------------------|-----------------------------------------------------|-----------------------------------------------------|-----------------------------------------------------|--------------------------------------------------|--------------------------------------------------|--------------------------------------------------|--------------------------------------------------|
| Cause                           | YLLs (actual counts)                                |                                                     |                                                     |                                                     | Deaths (actual counts)                           |                                                  |                                                  |                                                  |
|                                 | 2016                                                | 2040 Forecast                                       | 2040 Better Scenario                                | 2040 Worse Scenario                                 | 2016                                             | 2040 Forecast                                    | 2040 Better Scenario                             | 2040 Worse Scenario                              |
| Kidney cancer                   | 194.39<br>(130.36 to 274.50)                        | 325.26<br>(186.40 to 523.60)                        | 358.31<br>(206.19 to 569.89)                        | 326.51<br>(186.14 to 533.38)                        | 6.69<br>(4.43 to 9.66)                           | 14.03<br>(8.47 to 21.05)                         | 16.20<br>(9.89 to 24.33)                         | 13.18<br>(7.87 to 20.66)                         |
| Bladder cancer                  | 213.49<br>(152.19 to 291.15)                        | 344.83<br>(227.63 to 498.34)                        | 337.75<br>(227.73 to 476.49)                        | 371.27<br>(235.28 to 563.19)                        | 10.74<br>(8.01 to 14.27)                         | 21.42<br>(15.13 to 29.34)                        | 22.13<br>(16.21 to 29.41)                        | 21.66<br>(14.75 to 31.11)                        |
| Brain and nervous system cancer | 765.56<br>(507.41 to 1,005.17)                      | 1,124.49<br>(697.84 to 1,590.56)                    | 1,152.17<br>(710.54 to 1,637.26)                    | 1,171.56<br>(739.18 to 1,626.80)                    | 17.61<br>(11.52 to 25.38)                        | 31.45<br>(20.22 to 43.24)                        | 33.58<br>(21.59 to 45.97)                        | 30.51<br>(19.79 to 40.91)                        |
| Thyroid cancer                  | 135.93<br>(94.34 to 185.61)                         | 191.12<br>(128.27 to 270.42)                        | 178.93<br>(120.88 to 254.09)                        | 199.27<br>(133.91 to 281.49)                        | 5.71<br>(4.02 to 7.64)                           | 9.00<br>(6.53 to 12.09)                          | 8.75<br>(6.39 to 11.71)                          | 9.03<br>(6.53 to 12.15)                          |
| Mesothelioma                    | 37.28<br>(20.53 to 56.78)                           | 57.31<br>(31.15 to 88.96)                           | 57.06<br>(31.55 to 89.47)                           | 56.99<br>(30.83 to 87.75)                           | 1.23<br>(0.75 to 1.83)                           | 2.18<br>(1.40 to 3.14)                           | 2.26<br>(1.46 to 3.29)                           | 2.07<br>(1.32 to 2.99)                           |
| Hodgkin lymphoma                | 136.51<br>(84.42 to 218.78)                         | 137.66<br>(80.26 to 241.84)                         | 115.03<br>(65.97 to 204.12)                         | 159.23<br>(93.10 to 272.42)                         | 3.56<br>(2.28 to 5.94)                           | 4.11<br>(2.53 to 6.99)                           | 3.54<br>(2.18 to 6.04)                           | 4.52<br>(2.81 to 7.62)                           |
| Non-Hodgkin lymphoma            | 782.85<br>(517.82 to 1,035.80)                      | 1,138.96<br>(695.88 to 1,570.64)                    | 1,198.82<br>(735.35 to 1,654.15)                    | 1,133.77<br>(712.19 to 1,544.92)                    | 22.60<br>(15.28 to 29.56)                        | 40.01<br>(27.00 to 51.87)                        | 44.03<br>(29.94 to 57.17)                        | 37.36<br>(25.32 to 48.61)                        |
| Multiple myeloma                | 112.17<br>(75.00 to 159.62)                         | 200.51<br>(130.45 to 297.67)                        | 218.31<br>(142.25 to 324.10)                        | 187.85<br>(121.82 to 278.09)                        | 4.50<br>(3.14 to 6.24)                           | 8.88<br>(6.30 to 12.42)                          | 10.00<br>(7.07 to 13.98)                         | 8.04<br>(5.64 to 11.22)                          |
| Leukemia                        | 1,638.35<br>(1,157.09 to 2,147.48)                  | 1,776.36<br>(1,152.20 to 2,457.67)                  | 1,696.21<br>(1,107.08 to 2,346.08)                  | 2,017.87<br>(1,305.49 to 2,905.56)                  | 35.35<br>(25.65 to 44.72)                        | 50.28<br>(34.95 to 65.75)                        | 50.27<br>(34.75 to 65.95)                        | 52.95<br>(36.55 to 70.51)                        |
| Acute lymphoid leukemia         | 442.42<br>(302.33 to 640.14)                        | 483.09<br>(313.10 to 705.88)                        | 490.52<br>(312.87 to 724.98)                        | 530.65<br>(342.16 to 782.34)                        | 9.38<br>(6.51 to 13.13)                          | 13.33<br>(8.80 to 19.13)                         | 14.16<br>(9.36 to 20.43)                         | 13.56<br>(9.01 to 19.17)                         |
| Chronic lymphoid leukemia       | 20.43<br>(11.98 to 29.45)                           | 28.94<br>(16.95 to 45.17)                           | 28.88<br>(17.01 to 45.10)                           | 29.79<br>(16.86 to 46.59)                           | 0.66<br>(0.43 to 0.93)                           | 1.07<br>(0.70 to 1.54)                           | 1.12<br>(0.74 to 1.61)                           | 1.05<br>(0.68 to 1.53)                           |
| Acute myeloid leukemia          | 232.90<br>(155.28 to 328.12)                        | 323.66<br>(201.12 to 475.30)                        | 338.44<br>(210.60 to 499.80)                        | 343.37<br>(213.43 to 502.67)                        | 4.77<br>(3.22 to 6.62)                           | 8.22<br>(5.35 to 11.91)                          | 8.92<br>(5.81 to 12.95)                          | 8.22<br>(5.29 to 11.96)                          |
| Chronic myeloid leukemia        | 53.56<br>(27.84 to 83.13)                           | 56.78<br>(28.30 to 93.46)                           | 55.56<br>(27.86 to 91.93)                           | 60.08<br>(29.16 to 101.95)                          | 1.53<br>(0.88 to 2.35)                           | 1.82<br>(1.04 to 2.88)                           | 1.84<br>(1.06 to 2.89)                           | 1.85<br>(1.02 to 3.02)                           |
| Other leukemia                  | 889.05<br>(615.42 to 1,181.57)                      | 883.89<br>(563.47 to 1,234.25)                      | 782.80<br>(494.23 to 1,122.05)                      | 1,053.98<br>(674.37 to 1,486.30)                    | 19.02<br>(13.36 to 24.44)                        | 25.84<br>(16.95 to 35.12)                        | 24.22<br>(15.83 to 32.86)                        | 28.27<br>(18.51 to 38.80)                        |
| Other neoplasms                 | 1,496.30<br>(1,002.56 to 1,983.81)                  | 2,122.82<br>(1,343.70 to 2,903.97)                  | 2,142.05<br>(1,351.02 to 2,943.63)                  | 2,186.99<br>(1,389.08 to 2,963.12)                  | 40.83<br>(27.38 to 54.39)                        | 72.77<br>(48.17 to 95.15)                        | 77.37<br>(51.35 to 101.84)                       | 69.41<br>(46.13 to 89.65)                        |
| <b>Cardiovascular diseases</b>  | <b>34,519.28</b><br><b>(25,787.26 to 42,816.19)</b> | <b>39,882.31</b><br><b>(26,022.83 to 59,979.52)</b> | <b>23,527.00</b><br><b>(15,744.41 to 34,740.75)</b> | <b>60,063.84</b><br><b>(36,877.56 to 89,550.62)</b> | <b>1,615.07</b><br><b>(1,283.72 to 1,961.04)</b> | <b>2,477.55</b><br><b>(1,765.64 to 3,372.98)</b> | <b>1,633.28</b><br><b>(1,209.17 to 2,204.79)</b> | <b>3,344.48</b><br><b>(2,337.04 to 4,560.63)</b> |
| Rheumatic heart disease         | 1,136.89<br>(724.56 to 1,581.59)                    | 756.68<br>(452.11 to 1,128.17)                      | 597.88<br>(353.10 to 873.72)                        | 912.74<br>(548.15 to 1,362.42)                      | 32.15<br>(20.50 to 45.27)                        | 28.78<br>(18.42 to 40.15)                        | 24.37<br>(15.35 to 33.73)                        | 31.88<br>(20.38 to 45.62)                        |
| Ischemic heart disease          | 16,504.39<br>(11,877.92 to 20,848.52)               | 19,528.79<br>(10,524.79 to 34,587.08)               | 10,064.02<br>(5,400.65 to 17,569.80)                | 31,288.64<br>(15,997.02 to 54,865.58)               | 805.52<br>(615.22 to 998.23)                     | 1,241.87<br>(722.50 to 2,055.01)                 | 732.59<br>(428.90 to 1,196.37)                   | 1,766.77<br>(1,029.39 to 2,897.60)               |
| Stroke                          | 11,952.81<br>(9,006.00 to 15,398.27)                | 12,427.57<br>(7,061.15 to 21,481.76)                | 6,752.53<br>(3,959.08 to 12,312.96)                 | 19,520.65<br>(10,864.71 to 33,527.53)               | 570.17<br>(447.16 to 717.97)                     | 785.60<br>(492.40 to 1,358.11)                   | 489.42<br>(314.82 to 853.82)                     | 1,093.80<br>(674.77 to 1,840.80)                 |
| Ischemic stroke                 | 2,858.03<br>(2,188.88 to 3,624.90)                  | 3,408.49<br>(1,837.67 to 8,091.94)                  | 2,142.90<br>(1,207.96 to 4,893.86)                  | 4,638.90<br>(2,505.19 to 10,584.12)                 | 178.51<br>(139.71 to 224.70)                     | 288.39<br>(162.72 to 700.02)                     | 202.25<br>(117.79 to 450.30)                     | 356.46<br>(199.10 to 844.72)                     |

|                                |                                        |                                        |                                       |                                         |                                 |                                 |                                 |                                   |
|--------------------------------|----------------------------------------|----------------------------------------|---------------------------------------|-----------------------------------------|---------------------------------|---------------------------------|---------------------------------|-----------------------------------|
| Intracerebral hemorrhage       | 9,094.79<br>(6,585.48 to<br>12,011.16) | 9,019.08<br>(4,674.58 to<br>17,317.11) | 4,609.63<br>(2,489.92 to<br>8,458.56) | 14,881.75<br>(7,421.65 to<br>27,579.93) | 391.66<br>(298.90 to<br>509.14) | 497.21<br>(288.23 to<br>844.37) | 287.17<br>(172.67 to<br>460.93) | 737.34<br>(419.15 to<br>1,268.18) |
| Hypertensive heart disease     | 1,802.78<br>(1,210.52 to<br>2,491.42)  | 2,727.71<br>(1,722.95 to<br>4,356.62)  | 2,076.54<br>(1,386.75 to<br>3,120.31) | 3,424.37<br>(2,021.96 to<br>6,007.31)   | 92.07<br>(64.77 to<br>122.15)   | 182.94<br>(119.74 to<br>292.06) | 149.12<br>(102.22 to<br>218.84) | 213.95<br>(130.64 to<br>386.11)   |
| Cardiomyopathy and myocarditis | 825.10<br>(519.60 to<br>1,116.99)      | 986.29<br>(536.23 to<br>1,529.60)      | 962.40<br>(534.77 to<br>1,478.99)     | 1,035.59<br>(574.30 to<br>1,594.04)     | 25.09<br>(15.95 to<br>34.30)    | 42.87<br>(24.48 to<br>63.37)    | 45.31<br>(26.54 to<br>65.87)    | 40.50<br>(23.20 to<br>60.34)      |
| Myocarditis                    | 202.80<br>(128.98 to<br>289.81)        | 169.82<br>(91.48 to<br>293.62)         | 155.34<br>(82.56 to<br>273.97)        | 196.87<br>(108.80 to<br>325.46)         | 4.22<br>(2.55 to<br>6.32)       | 5.24<br>(2.89 to<br>9.10)       | 5.21<br>(2.88 to<br>9.06)       | 5.35<br>(3.07 to<br>9.02)         |

| Timor-Leste                                                   |                                                            |                                                            |                                                            |                                                             |                                                      |                                                      |                                                      |                                                      |
|---------------------------------------------------------------|------------------------------------------------------------|------------------------------------------------------------|------------------------------------------------------------|-------------------------------------------------------------|------------------------------------------------------|------------------------------------------------------|------------------------------------------------------|------------------------------------------------------|
| Cause                                                         | YLLs (actual counts)                                       |                                                            |                                                            |                                                             | Deaths (actual counts)                               |                                                      |                                                      |                                                      |
|                                                               | 2016                                                       | 2040 Forecast                                              | 2040 Better Scenario                                       | 2040 Worse Scenario                                         | 2016                                                 | 2040 Forecast                                        | 2040 Better Scenario                                 | 2040 Worse Scenario                                  |
| Alcoholic cardiomyopathy                                      | 77.72<br>(35.06 to<br>135.38)                              | 103.73<br>(43.01 to<br>196.66)                             | 109.19<br>(44.44 to<br>200.02)                             | 99.90<br>(40.89 to<br>190.78)                               | 2.89<br>(1.53 to<br>4.89)                            | 4.36<br>(2.15 to<br>7.44)                            | 4.80<br>(2.35 to<br>8.14)                            | 4.00<br>(2.00 to<br>6.83)                            |
| Other cardiomyopathy                                          | 544.59<br>(329.99 to<br>739.10)                            | 712.75<br>(389.31 to<br>1,123.82)                          | 697.88<br>(387.78 to<br>1,085.09)                          | 738.82<br>(399.20 to<br>1,160.41)                           | 17.99<br>(11.40 to<br>24.10)                         | 33.27<br>(18.88 to<br>50.45)                         | 35.29<br>(20.24 to<br>52.93)                         | 31.15<br>(17.56 to<br>47.90)                         |
| Atrial fibrillation and flutter                               | 192.94<br>(134.83 to<br>261.82)                            | 432.47<br>(308.87 to<br>565.50)                            | 457.91<br>(331.80 to<br>594.04)                            | 411.63<br>(291.25 to<br>547.14)                             | 15.02<br>(10.66 to<br>20.29)                         | 46.43<br>(30.70 to<br>63.94)                         | 52.42<br>(36.02 to<br>70.61)                         | 41.46<br>(26.32 to<br>58.40)                         |
| Aortic aneurysm                                               | 191.54<br>(128.89 to<br>292.37)                            | 269.99<br>(181.82 to<br>410.78)                            | 269.00<br>(184.36 to<br>394.42)                            | 276.84<br>(181.39 to<br>430.71)                             | 9.64<br>(6.86 to<br>13.91)                           | 17.39<br>(12.27 to<br>24.94)                         | 18.62<br>(13.53 to<br>26.35)                         | 16.55<br>(11.57 to<br>24.39)                         |
| Peripheral artery disease                                     | 6.71<br>(3.89 to<br>10.69)                                 | 21.90<br>(12.81 to<br>35.37)                               | 23.81<br>(14.28 to<br>37.24)                               | 20.14<br>(11.67 to<br>32.05)                                | 0.43<br>(0.25 to<br>0.69)                            | 2.05<br>(1.18 to<br>3.32)                            | 2.46<br>(1.44 to<br>4.03)                            | 1.73<br>(0.94 to<br>2.77)                            |
| Endocarditis                                                  | 539.80<br>(337.61 to<br>767.67)                            | 783.04<br>(427.07 to<br>1,270.36)                          | 719.65<br>(394.59 to<br>1,160.40)                          | 839.31<br>(465.75 to<br>1,354.78)                           | 15.08<br>(10.16 to<br>20.96)                         | 27.61<br>(18.00 to<br>41.01)                         | 27.10<br>(17.82 to<br>40.65)                         | 27.44<br>(17.60 to<br>40.93)                         |
| Other cardiovascular and circulatory diseases                 | 1,366.31<br>(918.99 to<br>2,274.62)                        | 1,947.87<br>(1,230.20 to<br>3,146.65)                      | 1,603.25<br>(1,018.29 to<br>2,605.61)                      | 2,333.93<br>(1,424.17 to<br>3,811.87)                       | 49.89<br>(34.15 to<br>83.78)                         | 102.01<br>(67.81 to<br>170.38)                       | 91.86<br>(61.26 to<br>154.18)                        | 110.40<br>(71.88 to<br>184.01)                       |
| <b>Chronic respiratory diseases</b>                           | <b>6,858.53</b><br><b>(5,129.67 to</b><br><b>8,640.53)</b> | <b>5,113.05</b><br><b>(3,414.28 to</b><br><b>7,093.99)</b> | <b>3,798.13</b><br><b>(2,670.27 to</b><br><b>5,074.42)</b> | <b>7,863.86</b><br><b>(4,914.26 to</b><br><b>11,763.76)</b> | <b>322.95</b><br><b>(249.77 to</b><br><b>402.81)</b> | <b>317.82</b><br><b>(231.45 to</b><br><b>425.47)</b> | <b>250.83</b><br><b>(191.22 to</b><br><b>317.81)</b> | <b>458.77</b><br><b>(309.92 to</b><br><b>660.76)</b> |
| Chronic obstructive pulmonary disease                         | 3,403.98<br>(2,239.82 to<br>4,456.76)                      | 2,953.64<br>(1,729.22 to<br>4,605.06)                      | 1,949.46<br>(1,188.76 to<br>2,866.97)                      | 5,307.06<br>(2,875.52 to<br>8,784.76)                       | 186.26<br>(129.53 to<br>239.28)                      | 205.21<br>(129.94 to<br>309.21)                      | 147.23<br>(99.73 to<br>205.23)                       | 336.29<br>(209.53 to<br>530.81)                      |
| Pneumoconiosis                                                | 4.29<br>(2.67 to<br>6.53)                                  | 4.46<br>(2.97 to<br>6.33)                                  | 4.39<br>(2.88 to<br>6.28)                                  | 4.46<br>(3.04 to<br>6.38)                                   | 0.22<br>(0.14 to<br>0.32)                            | 0.32<br>(0.21 to<br>0.45)                            | 0.33<br>(0.22 to<br>0.47)                            | 0.30<br>(0.20 to<br>0.43)                            |
| Silicosis                                                     | 0.83<br>(0.39 to<br>1.51)                                  | 0.65<br>(0.33 to<br>1.12)                                  | 0.63<br>(0.31 to<br>1.12)                                  | 0.64<br>(0.33 to<br>1.09)                                   | 0.04<br>(0.02 to<br>0.08)                            | 0.05<br>(0.02 to<br>0.08)                            | 0.05<br>(0.02 to<br>0.08)                            | 0.04<br>(0.02 to<br>0.07)                            |
| Asbestosis                                                    | 1.03<br>(0.58 to<br>1.62)                                  | 1.28<br>(0.75 to<br>1.95)                                  | 1.32<br>(0.74 to<br>2.04)                                  | 1.25<br>(0.75 to<br>1.89)                                   | 0.04<br>(0.02 to<br>0.06)                            | 0.07<br>(0.04 to<br>0.11)                            | 0.07<br>(0.04 to<br>0.12)                            | 0.06<br>(0.04 to<br>0.10)                            |
| Coal workers pneumoconiosis                                   | 0.28<br>(0.13 to<br>0.65)                                  | 0.27<br>(0.14 to<br>0.53)                                  | 0.21<br>(0.11 to<br>0.43)                                  | 0.31<br>(0.16 to<br>0.61)                                   | 0.02<br>(0.01 to<br>0.04)                            | 0.02<br>(0.01 to<br>0.04)                            | 0.02<br>(0.01 to<br>0.04)                            | 0.02<br>(0.01 to<br>0.05)                            |
| Other pneumoconiosis                                          | 2.15<br>(1.28 to<br>3.45)                                  | 2.25<br>(1.43 to<br>3.45)                                  | 2.23<br>(1.40 to<br>3.37)                                  | 2.26<br>(1.43 to<br>3.53)                                   | 0.12<br>(0.07 to<br>0.18)                            | 0.18<br>(0.11 to<br>0.29)                            | 0.20<br>(0.12 to<br>0.31)                            | 0.17<br>(0.10 to<br>0.27)                            |
| Asthma                                                        | 3,157.96<br>(2,138.30 to<br>4,514.92)                      | 1,789.27<br>(1,107.52 to<br>2,740.66)                      | 1,461.39<br>(934.27 to<br>2,162.12)                        | 2,179.62<br>(1,321.79 to<br>3,492.35)                       | 126.31<br>(86.19 to<br>193.49)                       | 95.04<br>(61.27 to<br>143.26)                        | 83.47<br>(56.14 to<br>123.15)                        | 106.41<br>(66.86 to<br>171.14)                       |
| Interstitial lung disease and pulmonary sarcoidosis           | 115.47<br>(62.55 to<br>193.92)                             | 176.63<br>(98.98 to<br>288.92)                             | 202.68<br>(115.94 to<br>325.51)                            | 158.92<br>(87.19 to<br>258.77)                              | 5.29<br>(2.92 to<br>9.07)                            | 9.69<br>(5.68 to<br>15.90)                           | 11.66<br>(6.99 to<br>18.78)                          | 8.30<br>(4.63 to<br>13.64)                           |
| Other chronic respiratory diseases                            | 176.82<br>(96.25 to<br>294.29)                             | 189.05<br>(100.70 to<br>319.45)                            | 180.21<br>(95.74 to<br>302.52)                             | 213.80<br>(111.60 to<br>365.80)                             | 4.87<br>(2.47 to<br>8.56)                            | 7.57<br>(3.61 to<br>14.09)                           | 8.14<br>(3.83 to<br>15.02)                           | 7.47<br>(3.67 to<br>13.55)                           |
| <b>Cirrhosis and other chronic liver diseases</b>             | <b>3,132.34</b><br><b>(1,931.51 to</b><br><b>4,592.30)</b> | <b>4,428.28</b><br><b>(2,631.37 to</b><br><b>6,872.10)</b> | <b>4,127.08</b><br><b>(2,417.76 to</b><br><b>6,356.77)</b> | <b>4,625.11</b><br><b>(2,747.19 to</b><br><b>7,311.55)</b>  | <b>102.06</b><br><b>(69.99 to</b><br><b>145.62)</b>  | <b>163.07</b><br><b>(114.67 to</b><br><b>234.34)</b> | <b>157.80</b><br><b>(110.83 to</b><br><b>223.25)</b> | <b>163.20</b><br><b>(113.51 to</b><br><b>236.53)</b> |
| Cirrhosis and other chronic liver diseases due to hepatitis B | 1,004.54<br>(560.90 to<br>1,590.96)                        | 1,538.52<br>(860.14 to<br>2,494.83)                        | 1,454.64<br>(798.72 to<br>2,335.11)                        | 1,575.24<br>(867.67 to<br>2,617.34)                         | 34.73<br>(22.64 to<br>52.91)                         | 57.79<br>(37.92 to<br>86.22)                         | 56.47<br>(37.48 to<br>83.73)                         | 57.16<br>(37.30 to<br>87.17)                         |
| Cirrhosis and other chronic liver diseases due to hepatitis C | 619.94<br>(346.69 to<br>970.15)                            | 954.92<br>(532.47 to<br>1,576.21)                          | 896.51<br>(498.66 to<br>1,471.71)                          | 983.32<br>(543.35 to<br>1,615.02)                           | 21.03<br>(13.43 to<br>31.97)                         | 34.70<br>(22.30 to<br>53.36)                         | 33.57<br>(21.34 to<br>51.09)                         | 34.66<br>(21.96 to<br>53.47)                         |

|                                                                |                                                            |                                                            |                                                            |                                                            |                                                      |                                                      |                                                      |                                                      |
|----------------------------------------------------------------|------------------------------------------------------------|------------------------------------------------------------|------------------------------------------------------------|------------------------------------------------------------|------------------------------------------------------|------------------------------------------------------|------------------------------------------------------|------------------------------------------------------|
|                                                                | 516.48<br>(297.09 to<br>807.01)                            | 740.23<br>(404.66 to<br>1,180.76)                          | 674.19<br>(378.66 to<br>1,078.72)                          | 780.03<br>(430.64 to<br>1,265.44)                          | 18.50<br>(11.72 to<br>27.88)                         | 29.10<br>(19.34 to<br>42.43)                         | 27.49<br>(18.33 to<br>39.99)                         | 29.56<br>(19.44 to<br>44.25)                         |
| Cirrhosis and other chronic liver diseases due to alcohol use  |                                                            |                                                            |                                                            |                                                            |                                                      |                                                      |                                                      |                                                      |
|                                                                | 991.38<br>(671.95 to<br>1,336.12)                          | 1,194.62<br>(778.58 to<br>1,731.67)                        | 1,101.74<br>(720.43 to<br>1,580.25)                        | 1,286.53<br>(839.45 to<br>1,852.22)                        | 27.80<br>(19.92 to<br>37.58)                         | 41.48<br>(29.69 to<br>56.74)                         | 40.27<br>(29.01 to<br>54.05)                         | 41.82<br>(29.90 to<br>56.89)                         |
| Cirrhosis and other chronic liver diseases due to other causes |                                                            |                                                            |                                                            |                                                            |                                                      |                                                      |                                                      |                                                      |
|                                                                | <b>4,567.33</b><br><b>(2,946.18 to</b><br><b>6,371.27)</b> | <b>4,502.76</b><br><b>(2,719.98 to</b><br><b>6,751.92)</b> | <b>3,941.46</b><br><b>(2,423.40 to</b><br><b>5,922.17)</b> | <b>5,106.69</b><br><b>(3,109.03 to</b><br><b>7,670.76)</b> | <b>152.56</b><br><b>(101.29 to</b><br><b>217.06)</b> | <b>214.10</b><br><b>(143.46 to</b><br><b>312.18)</b> | <b>201.40</b><br><b>(136.75 to</b><br><b>287.69)</b> | <b>220.32</b><br><b>(146.43 to</b><br><b>321.75)</b> |
| Digestive diseases                                             |                                                            |                                                            |                                                            |                                                            |                                                      |                                                      |                                                      |                                                      |
|                                                                | 1,168.77<br>(748.41 to<br>1,687.53)                        | 952.18<br>(600.92 to<br>1,398.03)                          | 748.04<br>(484.02 to<br>1,070.80)                          | 1,129.63<br>(708.90 to<br>1,685.32)                        | 50.96<br>(34.69 to<br>72.59)                         | 54.64<br>(36.76 to<br>77.58)                         | 45.75<br>(30.46 to<br>64.95)                         | 60.71<br>(40.17 to<br>85.67)                         |
| Peptic ulcer disease                                           |                                                            |                                                            |                                                            |                                                            |                                                      |                                                      |                                                      |                                                      |

| Timor-Leste                                |                                       |                                       |                                       |                                       |                                 |                                 |                                 |                                 |
|--------------------------------------------|---------------------------------------|---------------------------------------|---------------------------------------|---------------------------------------|---------------------------------|---------------------------------|---------------------------------|---------------------------------|
| Cause                                      | YLLs (actual counts)                  |                                       |                                       |                                       | Deaths (actual counts)          |                                 |                                 |                                 |
|                                            | 2016                                  | 2040 Forecast                         | 2040 Better Scenario                  | 2040 Worse Scenario                   | 2016                            | 2040 Forecast                   | 2040 Better Scenario            | 2040 Worse Scenario             |
| Gastritis and duodenitis                   | 76.41<br>(38.60 to<br>139.34)         | 118.85<br>(54.93 to<br>227.83)        | 109.84<br>(50.74 to<br>210.95)        | 123.29<br>(57.21 to<br>234.21)        | 3.10<br>(1.61 to<br>5.62)       | 6.30<br>(3.25 to<br>11.04)      | 6.17<br>(3.17 to<br>10.77)      | 6.13<br>(3.13 to<br>10.89)      |
| Appendicitis                               | 342.51<br>(219.71 to<br>477.81)       | 269.87<br>(166.26 to<br>415.80)       | 223.89<br>(132.00 to<br>345.52)       | 321.86<br>(190.78 to<br>492.11)       | 7.89<br>(5.32 to<br>11.33)      | 8.70<br>(5.87 to<br>13.01)      | 7.74<br>(5.21 to<br>11.60)      | 9.41<br>(6.30 to<br>14.14)      |
| Paralytic ileus and intestinal obstruction | 1,546.76<br>(931.57 to<br>2,714.84)   | 1,316.42<br>(836.28 to<br>1,952.88)   | 1,230.86<br>(797.08 to<br>1,785.43)   | 1,509.97<br>(927.07 to<br>2,448.87)   | 39.56<br>(25.88 to<br>55.69)    | 58.62<br>(37.87 to<br>77.47)    | 60.39<br>(39.84 to<br>78.90)    | 57.14<br>(37.16 to<br>76.31)    |
| Inguinal, femoral, and abdominal hernia    | 95.00<br>(45.90 to<br>147.07)         | 96.76<br>(44.68 to<br>151.35)         | 89.56<br>(41.56 to<br>138.70)         | 101.09<br>(46.46 to<br>158.95)        | 4.20<br>(1.96 to<br>6.54)       | 6.13<br>(2.79 to<br>9.28)       | 6.16<br>(2.79 to<br>9.27)       | 5.83<br>(2.63 to<br>9.02)       |
| Inflammatory bowel disease                 | 85.67<br>(50.42 to<br>122.73)         | 107.59<br>(63.39 to<br>156.55)        | 107.90<br>(63.45 to<br>156.28)        | 107.17<br>(63.69 to<br>154.90)        | 2.94<br>(1.86 to<br>4.30)       | 2.94<br>(3.19 to<br>7.14)       | 5.02<br>(3.46 to<br>7.58)       | 5.36<br>(3.00 to<br>6.55)       |
| Vascular intestinal disorders              | 88.40<br>(51.04 to<br>147.35)         | 128.84<br>(77.25 to<br>212.38)        | 126.45<br>(76.66 to<br>206.55)        | 126.85<br>(76.34 to<br>212.01)        | 4.53<br>(2.64 to<br>7.62)       | 8.86<br>(5.43 to<br>14.16)      | 9.26<br>(5.78 to<br>14.70)      | 8.19<br>(4.93 to<br>13.37)      |
| Gallbladder and biliary diseases           | 195.49<br>(106.50 to<br>314.20)       | 208.02<br>(103.93 to<br>378.09)       | 172.56<br>(87.53 to<br>302.42)        | 240.45<br>(115.30 to<br>440.04)       | 8.72<br>(4.78 to<br>13.96)      | 12.45<br>(6.27 to<br>21.77)     | 11.18<br>(5.89 to<br>18.91)     | 13.25<br>(6.59 to<br>24.01)     |
| Pancreatitis                               | 485.04<br>(180.14 to<br>1,012.94)     | 745.03<br>(244.03 to<br>1,750.75)     | 641.99<br>(220.55 to<br>1,431.23)     | 829.57<br>(261.42 to<br>2,030.64)     | 14.65<br>(6.09 to<br>29.60)     | 25.19<br>(9.76 to<br>55.50)     | 22.67<br>(9.01 to<br>47.89)     | 26.82<br>(9.97 to<br>59.75)     |
| Other digestive diseases                   | 482.70<br>(281.75 to<br>781.10)       | 559.20<br>(322.18 to<br>998.54)       | 490.39<br>(285.61 to<br>871.66)       | 616.81<br>(353.16 to<br>1,084.92)     | 16.00<br>(9.50 to<br>28.12)     | 28.20<br>(17.30 to<br>49.31)    | 26.74<br>(16.62 to<br>46.52)    | 28.20<br>(16.98 to<br>49.31)    |
| Neurological disorders                     | 3,412.39<br>(2,670.07 to<br>4,222.60) | 6,629.47<br>(5,263.64 to<br>8,164.86) | 7,059.10<br>(5,732.57 to<br>8,532.58) | 6,331.63<br>(4,967.80 to<br>7,960.53) | 203.19<br>(160.94 to<br>251.99) | 614.46<br>(434.60 to<br>797.26) | 706.87<br>(529.84 to<br>876.60) | 533.22<br>(365.30 to<br>723.99) |
| Alzheimer's disease and other dementias    | 2,214.65<br>(1,681.41 to<br>2,851.75) | 5,056.31<br>(3,772.34 to<br>6,556.17) | 5,483.16<br>(4,246.55 to<br>6,809.20) | 4,616.55<br>(3,357.81 to<br>6,160.53) | 171.88<br>(133.78 to<br>218.90) | 548.85<br>(373.20 to<br>730.02) | 632.11<br>(454.52 to<br>800.68) | 473.10<br>(309.15 to<br>659.73) |
| Parkinson's disease                        | 196.78<br>(137.56 to<br>270.63)       | 495.83<br>(365.93 to<br>659.62)       | 600.53<br>(444.99 to<br>794.28)       | 416.92<br>(304.87 to<br>558.91)       | 12.98<br>(9.19 to<br>17.90)     | 40.96<br>(29.01 to<br>56.11)    | 51.83<br>(38.30 to<br>69.36)    | 32.98<br>(22.65 to<br>45.50)    |
| Epilepsy                                   | 763.56<br>(510.77 to<br>1,021.27)     | 778.24<br>(454.13 to<br>1,197.93)     | 641.76<br>(370.71 to<br>1,004.56)     | 960.89<br>(565.47 to<br>1,464.00)     | 13.43<br>(8.74 to<br>18.07)     | 16.47<br>(9.91 to<br>25.40)     | 14.03<br>(8.40 to<br>21.74)     | 19.17<br>(11.68 to<br>29.24)    |
| Multiple sclerosis                         | 18.21<br>(9.71 to<br>28.21)           | 28.72<br>(14.88 to<br>45.23)          | 29.48<br>(15.44 to<br>46.89)          | 28.49<br>(14.92 to<br>45.05)          | 0.53<br>(0.31 to<br>0.82)       | 0.88<br>(0.52 to<br>1.36)       | 0.92<br>(0.54 to<br>1.42)       | 0.86<br>(0.50 to<br>1.33)       |
| Motor neuron disease                       | 34.05<br>(21.60 to<br>49.92)          | 42.85<br>(25.80 to<br>63.57)          | 45.44<br>(27.53 to<br>68.08)          | 43.12<br>(26.33 to<br>62.70)          | 0.86<br>(0.57 to<br>1.19)       | 1.38<br>(0.87 to<br>2.09)       | 1.31<br>(0.94 to<br>2.29)       | 1.31<br>(0.84 to<br>1.95)       |
| Other neurological disorders               | 185.14<br>(127.68 to<br>262.07)       | 248.50<br>(157.27 to<br>376.43)       | 258.73<br>(159.54 to<br>391.92)       | 265.66<br>(169.87 to<br>395.90)       | 3.52<br>(2.46 to<br>4.94)       | 5.91<br>(3.82 to<br>8.59)       | 6.47<br>(4.19 to<br>9.39)       | 5.80<br>(3.88 to<br>8.40)       |
| Mental disorders                           | 564.61<br>(234.63 to<br>1,051.70)     | 993.12<br>(401.63 to<br>1,803.01)     | 981.85<br>(397.34 to<br>1,801.29)     | 1,006.47<br>(409.59 to<br>1,818.30)   | 13.24<br>(5.88 to<br>23.70)     | 24.32<br>(11.90 to<br>42.87)    | 24.52<br>(12.19 to<br>42.95)    | 24.06<br>(11.65 to<br>42.18)    |
| Alcohol use disorders                      | 343.74<br>(132.97 to<br>717.53)       | 478.24<br>(187.45 to<br>1,058.52)     | 465.10<br>(183.09 to<br>1,038.29)     | 486.79<br>(188.13 to<br>1,065.22)     | 8.81<br>(3.86 to<br>17.60)      | 13.07<br>(6.12 to<br>26.67)     | 12.96<br>(6.05 to<br>26.98)     | 13.00<br>(6.08 to<br>26.27)     |
| Drug use disorders                         | 218.61<br>(86.87 to<br>405.30)        | 511.72<br>(193.77 to<br>956.60)       | 513.54<br>(193.36 to<br>942.53)       | 516.44<br>(199.01 to<br>951.41)       | 4.38<br>(1.87 to<br>7.93)       | 11.19<br>(5.35 to<br>19.52)     | 11.50<br>(5.63 to<br>20.11)     | 11.00<br>(5.23 to<br>19.28)     |
| Opioid use disorders                       | 147.97<br>(62.33 to<br>281.75)        | 291.40<br>(116.12 to<br>566.05)       | 289.22<br>(114.53 to<br>555.36)       | 297.12<br>(120.24 to<br>570.33)       | 2.86<br>(1.26 to<br>5.34)       | 6.16<br>(2.95 to<br>11.30)      | 6.27<br>(3.05 to<br>11.51)      | 6.11<br>(2.92 to<br>11.22)      |

|                           |                               |                                |                                |                                |                           |                           |                           |                           |
|---------------------------|-------------------------------|--------------------------------|--------------------------------|--------------------------------|---------------------------|---------------------------|---------------------------|---------------------------|
| Cocaine use disorders     | 6.41<br>(2.38 to<br>13.86)    | 19.84<br>(7.45 to<br>44.31)    | 18.52<br>(6.96 to<br>41.86)    | 20.89<br>(7.80 to<br>47.04)    | 0.14<br>(0.06 to<br>0.30) | 0.46<br>(0.20 to<br>1.01) | 0.44<br>(0.19 to<br>0.97) | 0.48<br>(0.20 to<br>1.03) |
| Amphetamine use disorders | 5.59<br>(2.03 to<br>11.90)    | 23.00<br>(7.38 to<br>51.81)    | 20.57<br>(6.67 to<br>45.79)    | 25.03<br>(7.99 to<br>56.27)    | 0.11<br>(0.04 to<br>0.24) | 0.48<br>(0.17 to<br>1.05) | 0.43<br>(0.16 to<br>0.94) | 0.51<br>(0.18 to<br>1.13) |
| Other drug use disorders  | 58.63<br>(20.52 to<br>110.21) | 177.48<br>(58.93 to<br>328.80) | 185.23<br>(61.73 to<br>344.71) | 173.39<br>(57.40 to<br>324.01) | 1.27<br>(0.52 to<br>2.34) | 4.08<br>(1.73 to<br>7.20) | 4.36<br>(1.90 to<br>7.64) | 3.89<br>(1.62 to<br>6.90) |
| Eating disorders          | 2.26<br>(1.12 to<br>3.96)     | 3.15<br>(1.47 to<br>5.69)      | 3.21<br>(1.49 to<br>5.86)      | 3.23<br>(1.56 to<br>5.82)      | 0.04<br>(0.02 to<br>0.07) | 0.06<br>(0.03 to<br>0.11) | 0.06<br>(0.03 to<br>0.11) | 0.06<br>(0.03 to<br>0.11) |

| Timor-Leste                                                |                                           |                                             |                                            |                                             |                                     |                                       |                                       |                                       |
|------------------------------------------------------------|-------------------------------------------|---------------------------------------------|--------------------------------------------|---------------------------------------------|-------------------------------------|---------------------------------------|---------------------------------------|---------------------------------------|
| Cause                                                      | YLLs (actual counts)                      |                                             |                                            |                                             | Deaths (actual counts)              |                                       |                                       |                                       |
|                                                            | 2016                                      | 2040 Forecast                               | 2040 Better Scenario                       | 2040 Worse Scenario                         | 2016                                | 2040 Forecast                         | 2040 Better Scenario                  | 2040 Worse Scenario                   |
| <b>Diabetes, urogenital, blood, and endocrine diseases</b> | <b>7,088.44</b><br>(5,244.12 to 8,957.34) | <b>13,140.78</b><br>(7,404.32 to 26,532.17) | <b>9,582.91</b><br>(5,577.46 to 18,376.15) | <b>15,546.67</b><br>(8,957.05 to 31,264.87) | <b>269.02</b><br>(205.43 to 336.73) | <b>725.83</b><br>(397.85 to 1,612.24) | <b>550.91</b><br>(315.41 to 1,261.01) | <b>806.02</b><br>(448.16 to 1,752.18) |
| Diabetes mellitus                                          | 2,902.32<br>(2,085.31 to 3,835.94)        | 4,179.75<br>(2,502.12 to 6,401.12)          | 3,163.07<br>(1,900.06 to 4,866.41)         | 5,109.18<br>(3,022.70 to 8,037.76)          | 129.81<br>(96.38 to 170.45)         | 233.69<br>(151.91 to 339.50)          | 187.32<br>(122.95 to 268.35)          | 268.96<br>(173.27 to 390.13)          |
| Acute glomerulonephritis                                   | 9.72<br>(6.83 to 13.08)                   | 11.56<br>(7.41 to 16.46)                    | 10.15<br>(6.43 to 14.30)                   | 13.73<br>(8.78 to 19.53)                    | 0.20<br>(0.14 to 0.26)              | 0.30<br>(0.21 to 0.42)                | 0.28<br>(0.19 to 0.39)                | 0.32<br>(0.22 to 0.45)                |
| Chronic kidney disease                                     | 2,899.49<br>(1,856.21 to 3,633.94)        | 7,266.71<br>(2,525.80 to 20,774.06)         | 4,834.98<br>(1,790.59 to 13,849.39)        | 8,566.96<br>(2,949.69 to 24,604.67)         | 97.97<br>(71.17 to 130.50)          | 418.89<br>(114.11 to 1,331.95)        | 290.23<br>(83.51 to 1,013.15)         | 465.02<br>(124.11 to 1,420.07)        |
| Chronic kidney disease due to diabetes mellitus            | 1,377.80<br>(905.63 to 1,914.76)          | 4,185.44<br>(1,371.15 to 12,796.10)         | 2,747.40<br>(969.17 to 8,232.10)           | 4,928.94<br>(1,577.46 to 14,354.21)         | 52.99<br>(36.88 to 71.51)           | 217.86<br>(57.97 to 700.44)           | 147.11<br>(42.36 to 501.74)           | 246.49<br>(65.38 to 750.91)           |
| Chronic kidney disease due to hypertension                 | 698.29<br>(420.69 to 842.96)              | 2,137.71<br>(613.68 to 6,857.17)            | 1,431.09<br>(433.78 to 4,738.54)           | 2,437.48<br>(681.17 to 7,575.32)            | 30.32<br>(22.12 to 41.68)           | 163.69<br>(38.33 to 564.76)           | 117.16<br>(30.26 to 425.30)           | 175.43<br>(41.62 to 585.65)           |
| Chronic kidney disease due to glomerulonephritis           | 362.84<br>(240.08 to 517.36)              | 449.68<br>(235.30 to 861.13)                | 316.56<br>(166.07 to 588.09)               | 574.81<br>(307.55 to 1,055.30)              | 6.99<br>(4.68 to 9.84)              | 14.80<br>(5.75 to 40.03)              | 10.22<br>(4.11 to 29.63)              | 17.49<br>(7.02 to 44.11)              |
| Chronic kidney disease due to other and unspecified causes | 350.56<br>(236.24 to 487.96)              | 493.88<br>(224.49 to 1,129.10)              | 339.94<br>(164.78 to 744.96)               | 625.73<br>(299.21 to 1,333.66)              | 7.67<br>(5.54 to 10.67)             | 22.53<br>(7.32 to 66.81)              | 15.75<br>(4.94 to 49.04)              | 25.61<br>(8.64 to 75.09)              |
| Urinary diseases and male infertility                      | 467.18<br>(346.15 to 587.17)              | 669.23<br>(488.23 to 845.69)                | 652.02<br>(476.46 to 837.48)               | 692.25<br>(505.89 to 879.87)                | 17.11<br>(13.23 to 21.44)           | 37.02<br>(28.80 to 44.94)             | 39.14<br>(30.95 to 47.78)             | 34.32<br>(26.79 to 41.69)             |
| Urinary tract infections                                   | 321.38<br>(217.37 to 424.54)              | 492.46<br>(348.03 to 643.88)                | 493.06<br>(346.83 to 650.56)               | 501.82<br>(352.00 to 656.56)                | 11.46<br>(7.93 to 14.88)            | 26.44<br>(19.32 to 33.34)             | 28.80<br>(21.47 to 36.21)             | 24.11<br>(17.57 to 30.44)             |
| Urolithiasis                                               | 16.98<br>(11.07 to 25.67)                 | 30.54<br>(19.32 to 47.42)                   | 30.25<br>(18.91 to 47.29)                  | 30.63<br>(19.21 to 47.20)                   | 0.71<br>(0.46 to 1.08)              | 1.58<br>(1.04 to 2.40)                | 1.67<br>(1.11 to 2.52)                | 1.47<br>(0.97 to 2.20)                |
| Other urinary diseases                                     | 128.82<br>(82.64 to 213.71)               | 146.22<br>(87.15 to 249.65)                 | 128.71<br>(76.37 to 223.28)                | 159.80<br>(97.87 to 274.85)                 | 4.94<br>(3.30 to 8.07)              | 9.01<br>(5.49 to 14.78)               | 8.67<br>(5.27 to 14.39)               | 8.74<br>(5.33 to 14.49)               |
| Gynecological diseases                                     | 23.16<br>(8.35 to 38.17)                  | 23.57<br>(8.47 to 41.23)                    | 19.59<br>(6.88 to 34.36)                   | 26.70<br>(9.56 to 47.34)                    | 0.69<br>(0.29 to 1.09)              | 0.73<br>(0.31 to 1.18)                | 0.64<br>(0.10 to 1.01)                | 0.79<br>(0.34 to 1.31)                |
| Uterine fibroids                                           | 3.98<br>(1.23 to 8.54)                    | 3.50<br>(1.02 to 8.35)                      | 2.80<br>(0.75 to 6.65)                     | 4.04<br>(1.17 to 9.55)                      | 0.14<br>(0.05 to 0.30)              | 0.13<br>(0.04 to 0.31)                | 0.11<br>(0.03 to 0.25)                | 0.14<br>(0.04 to 0.34)                |
| Polycystic ovarian syndrome                                | 1.28<br>(0.26 to 3.97)                    | 0.69<br>(0.10 to 2.35)                      | 0.48<br>(0.07 to 1.63)                     | 0.86<br>(0.14 to 2.89)                      | 0.03<br>(0.01 to 0.09)              | 0.02<br>(0.00 to 0.05)                | 0.01<br>(0.00 to 0.04)                | 0.02<br>(0.00 to 0.07)                |
| Endometriosis                                              | 0.34<br>(0.07 to 1.15)                    | 0.47<br>(0.08 to 1.59)                      | 0.38<br>(0.06 to 1.20)                     | 0.54<br>(0.09 to 1.79)                      | 0.01<br>(0.00 to 0.03)              | 0.01<br>(0.00 to 0.04)                | 0.01<br>(0.00 to 0.03)                | 0.01<br>(0.00 to 0.04)                |
| Genital prolapse                                           | 2.18<br>(0.48 to 4.86)                    | 1.48<br>(0.32 to 3.58)                      | 1.18<br>(0.25 to 2.84)                     | 1.68<br>(0.37 to 4.01)                      | 0.11<br>(0.03 to 0.24)              | 0.08<br>(0.02 to 0.19)                | 0.07<br>(0.01 to 0.16)                | 0.09<br>(0.02 to 0.20)                |
| Other gynecological diseases                               | 15.38<br>(5.61 to 24.68)                  | 17.43<br>(6.02 to 31.14)                    | 14.75<br>(5.00 to 26.30)                   | 19.57<br>(6.80 to 35.49)                    | 0.39<br>(0.16 to 0.64)              | 0.49<br>(0.20 to 0.80)                | 0.44<br>(0.18 to 0.70)                | 0.53<br>(0.21 to 0.86)                |
| Hemoglobinopathies and hemolytic anemias                   | 646.04<br>(463.80 to 872.07)              | 603.04<br>(416.98 to 839.84)                | 552.65<br>(381.98 to 769.21)               | 678.23<br>(466.47 to 940.35)                | 15.77<br>(11.55 to 21.50)           | 22.30<br>(16.86 to 30.95)             | 20.60<br>(15.24 to 28.22)             | 23.32<br>(17.33 to 31.74)             |
| Thalassemias                                               | 329.25<br>(214.33 to 484.80)              | 174.80<br>(99.96 to 296.24)                 | 187.62<br>(106.93 to 315.84)               | 206.96<br>(116.82 to 355.56)                | 4.13<br>(2.71 to 6.00)              | 2.29<br>(1.31 to 3.88)                | 2.46<br>(1.41 to 4.09)                | 2.67<br>(1.51 to 4.57)                |

|                                                   |                                 |                                 |                                 |                                 |                            |                             |                             |                             |
|---------------------------------------------------|---------------------------------|---------------------------------|---------------------------------|---------------------------------|----------------------------|-----------------------------|-----------------------------|-----------------------------|
|                                                   | 1.02<br>(0.47 to<br>2.11)       | 0.77<br>(0.37 to<br>1.43)       | 0.67<br>(0.33 to<br>1.24)       | 0.95<br>(0.46 to<br>1.83)       | 0.01<br>(0.01 to<br>0.03)  | 0.01<br>(0.01 to<br>0.02)   | 0.01<br>(0.01 to<br>0.02)   | 0.02<br>(0.01 to<br>0.03)   |
| Sickle cell disorders                             |                                 |                                 |                                 |                                 |                            |                             |                             |                             |
| G6PD deficiency                                   | 177.99<br>(101.18 to<br>267.47) | 279.24<br>(162.24 to<br>433.89) | 231.24<br>(131.83 to<br>360.88) | 316.57<br>(183.17 to<br>487.37) | 4.54<br>(2.81 to<br>6.74)  | 8.75<br>(5.70 to<br>13.10)  | 7.39<br>(4.70 to<br>11.14)  | 9.63<br>(6.28 to<br>14.54)  |
| Other hemoglobinopathies and hemolytic anemias    | 137.77<br>(95.51 to<br>196.01)  | 148.24<br>(104.25 to<br>211.62) | 133.11<br>(92.06 to<br>189.86)  | 153.74<br>(108.60 to<br>216.34) | 7.08<br>(5.21 to<br>9.98)  | 11.25<br>(8.07 to<br>15.90) | 10.73<br>(7.62 to<br>14.97) | 11.00<br>(7.76 to<br>15.35) |
| Endocrine, metabolic, blood, and immune disorders | 340.53<br>(231.13 to<br>506.88) | 386.93<br>(250.85 to<br>581.41) | 350.45<br>(225.85 to<br>533.18) | 459.62<br>(297.32 to<br>691.45) | 7.48<br>(5.15 to<br>11.02) | 12.89<br>(8.78 to<br>19.20) | 12.69<br>(8.64 to<br>19.10) | 13.27<br>(9.09 to<br>19.74) |



| Timor-Leste                                   |                                             |                                            |                                            |                                             |                                    |                                    |                                    |                                     |
|-----------------------------------------------|---------------------------------------------|--------------------------------------------|--------------------------------------------|---------------------------------------------|------------------------------------|------------------------------------|------------------------------------|-------------------------------------|
| Cause                                         | YLLs (actual counts)                        |                                            |                                            |                                             | Deaths (actual counts)             |                                    |                                    |                                     |
|                                               | 2016                                        | 2040 Forecast                              | 2040 Better Scenario                       | 2040 Worse Scenario                         | 2016                               | 2040 Forecast                      | 2040 Better Scenario               | 2040 Worse Scenario                 |
| <b>Musculoskeletal disorders</b>              | <b>170.85</b><br>(103.69 to 252.71)         | <b>285.15</b><br>(166.77 to 446.32)        | <b>299.05</b><br>(174.24 to 470.86)        | <b>283.60</b><br>(167.73 to 441.99)         | <b>4.44</b><br>(2.84 to 6.78)      | <b>9.66</b><br>(6.24 to 15.49)     | <b>10.58</b><br>(6.88 to 17.28)    | <b>9.05</b><br>(5.87 to 14.23)      |
| Rheumatoid arthritis                          | 24.54<br>(14.19 to 37.72)                   | 44.58<br>(23.59 to 73.88)                  | 39.63<br>(20.37 to 65.49)                  | 48.14<br>(25.99 to 79.23)                   | 1.05<br>(0.59 to 1.68)             | 2.43<br>(1.28 to 3.92)             | 2.28<br>(1.16 to 3.78)             | 2.48<br>(1.33 to 4.02)              |
| Other musculoskeletal disorders               | 146.31<br>(84.82 to 221.86)                 | 240.58<br>(137.37 to 391.00)               | 259.42<br>(148.41 to 421.81)               | 235.46<br>(136.12 to 375.03)                | 3.38<br>(2.10 to 5.39)             | 7.23<br>(4.54 to 12.09)            | 8.30<br>(5.25 to 13.93)            | 6.57<br>(4.13 to 10.91)             |
| <b>Other non-communicable diseases</b>        | <b>13,081.28</b><br>(7,433.58 to 22,203.12) | <b>8,725.14</b><br>(5,015.20 to 15,045.38) | <b>7,152.60</b><br>(4,202.76 to 12,117.57) | <b>13,321.12</b><br>(7,257.17 to 23,478.31) | <b>161.55</b><br>(91.66 to 268.41) | <b>131.37</b><br>(86.43 to 206.31) | <b>115.66</b><br>(78.84 to 176.11) | <b>182.38</b><br>(110.84 to 302.47) |
| Congenital birth defects                      | 12,103.27<br>(6,510.86 to 20,855.46)        | 7,758.54<br>(4,163.23 to 13,803.96)        | 6,241.61<br>(3,428.16 to 10,985.38)        | 12,150.12<br>(6,329.31 to 21,985.15)        | 143.92<br>(78.28 to 245.66)        | 94.73<br>(52.95 to 164.60)         | 76.60<br>(43.57 to 131.41)         | 146.33<br>(78.10 to 259.75)         |
| Neural tube defects                           | 1,166.30<br>(487.35 to 2,293.24)            | 359.14<br>(124.01 to 843.62)               | 252.37<br>(88.51 to 578.29)                | 630.13<br>(222.08 to 1,453.05)              | 13.54<br>(5.67 to 26.54)           | 4.18<br>(1.46 to 9.78)             | 2.94<br>(1.04 to 6.71)             | 7.32<br>(2.59 to 16.84)             |
| Congenital heart anomalies                    | 6,686.54<br>(3,670.85 to 11,114.06)         | 4,075.16<br>(2,227.40 to 7,138.91)         | 3,314.51<br>(1,797.33 to 5,703.93)         | 6,253.79<br>(3,304.85 to 11,231.70)         | 80.02<br>(44.86 to 131.25)         | 50.36<br>(27.84 to 85.97)          | 41.18<br>(22.93 to 69.43)          | 76.10<br>(40.88 to 133.47)          |
| Orofacial clefts                              | 18.31<br>(4.79 to 48.73)                    | 10.82<br>(2.53 to 32.52)                   | 7.18<br>(1.70 to 21.19)                    | 19.75<br>(4.49 to 56.83)                    | 0.21<br>(0.06 to 0.56)             | 0.13<br>(0.03 to 0.38)             | 0.08<br>(0.02 to 0.24)             | 0.23<br>(0.05 to 0.66)              |
| Down syndrome                                 | 235.32<br>(88.16 to 710.60)                 | 223.99<br>(89.04 to 628.92)                | 172.16<br>(70.79 to 483.74)                | 297<br>(131.29 to 1,021.76)                 | 2.92<br>(1.18 to 8.50)             | 2.97<br>(1.31 to 7.70)             | 2.32<br>(1.05 to 6.13)             | 4.50<br>(1.86 to 12.60)             |
| Other chromosomal abnormalities               | 279.09<br>(92.10 to 777.98)                 | 358.07<br>(114.14 to 983.51)               | 280.06<br>(89.74 to 752.27)                | 586.22<br>(188.36 to 1,581.02)              | 3.25<br>(1.08 to 9.04)             | 4.20<br>(1.56 to 11.43)            | 3.29<br>(1.07 to 8.75)             | 6.84<br>(2.22 to 18.39)             |
| Congenital musculoskeletal and limb anomalies | 211.42<br>(81.37 to 447.48)                 | 182.28<br>(64.57 to 387.18)                | 152.83<br>(54.84 to 322.40)                | 282.96<br>(99.61 to 604.78)                 | 2.47<br>(0.96 to 5.21)             | 2.14<br>(0.78 to 4.52)             | 1.80<br>(0.66 to 3.75)             | 3.31<br>(1.18 to 7.03)              |
| Urogenital congenital anomalies               | 144.15<br>(74.82 to 251.28)                 | 115.67<br>(62.76 to 202.06)                | 97.43<br>(54.25 to 170.80)                 | 165.86<br>(84.74 to 304.75)                 | 2.02<br>(1.17 to 3.35)             | 1.84<br>(1.13 to 2.95)             | 1.59<br>(0.96 to 2.53)             | 2.45<br>(1.43 to 4.19)              |
| Digestive congenital anomalies                | 666.25<br>(291.26 to 1,392.33)              | 436.15<br>(180.06 to 896.61)               | 342.98<br>(145.45 to 701.10)               | 709.83<br>(287.07 to 1,473.84)              | 7.77<br>(3.42 to 16.22)            | 5.10<br>(2.14 to 10.43)            | 4.02<br>(1.72 to 8.18)             | 8.29<br>(3.38 to 17.15)             |
| Other congenital birth defects                | 2,695.89<br>(1,093.63 to 5,595.57)          | 1,997.27<br>(836.64 to 4,088.94)           | 1,622.09<br>(703.98 to 3,339.60)           | 3,150.55<br>(1,299.53 to 6,688.18)          | 31.73<br>(13.17 to 65.43)          | 23.81<br>(10.41 to 48.09)          | 19.39<br>(8.73 to 39.26)           | 37.29<br>(15.70 to 78.35)           |
| Skin and subcutaneous diseases                | 262.27<br>(159.50 to 416.49)                | 640.25<br>(392.28 to 1,048.90)             | 641.82<br>(399.47 to 1,035.64)             | 647.65<br>(392.06 to 1,040.31)              | 9.31<br>(5.88 to 15.83)            | 32.85<br>(21.46 to 54.12)          | 35.93<br>(23.84 to 58.39)          | 29.98<br>(19.27 to 50.67)           |
| Cellulitis                                    | 23.01<br>(10.92 to 45.53)                   | 68.15<br>(31.48 to 132.25)                 | 75.78<br>(34.16 to 148.20)                 | 64.23<br>(29.48 to 125.34)                  | 0.71<br>(0.35 to 1.41)             | 3.09<br>(1.51 to 6.02)             | 3.67<br>(1.82 to 7.06)             | 2.68<br>(1.29 to 5.33)              |
| Pyoderma                                      | 161.46<br>(91.02 to 279.17)                 | 401.68<br>(223.63 to 670.88)               | 383.47<br>(213.51 to 643.41)               | 423.75<br>(236.67 to 703.38)                | 4.72<br>(2.78 to 8.14)             | 17.39<br>(10.44 to 29.30)          | 17.94<br>(10.85 to 30.50)          | 16.61<br>(10.09 to 28.15)           |
| Decubitus ulcer                               | 69.50<br>(38.92 to 126.66)                  | 155.36<br>(94.86 to 279.67)                | 166.83<br>(100.55 to 299.23)               | 144.45<br>(88.54 to 258.01)                 | 3.65<br>(2.19 to 6.59)             | 11.86<br>(6.84 to 21.27)           | 13.75<br>(7.96 to 24.64)           | 10.22<br>(5.82 to 18.69)            |
| Other skin and subcutaneous diseases          | 8.31<br>(4.45 to 13.89)                     | 15.05<br>(7.70 to 24.60)                   | 15.75<br>(8.22 to 25.43)                   | 15.21<br>(7.87 to 24.95)                    | 0.22<br>(0.12 to 0.37)             | 0.51<br>(0.30 to 0.85)             | 0.57<br>(0.33 to 0.93)             | 0.47<br>(0.27 to 0.77)              |
| Sudden infant death syndrome                  | 715.74<br>(295.49 to 1,511.36)              | 326.36<br>(111.29 to 747.19)               | 269.17<br>(91.46 to 613.02)                | 523.35<br>(179.47 to 1,176.94)              | 8.31<br>(3.43 to 17.54)            | 3.79<br>(1.29 to 8.67)             | 3.12<br>(1.06 to 7.11)             | 6.07<br>(2.08 to 13.66)             |

|                          |                                          |                                          |                                          |                                          |                                 |                                 |                                 |                                 |
|--------------------------|------------------------------------------|------------------------------------------|------------------------------------------|------------------------------------------|---------------------------------|---------------------------------|---------------------------------|---------------------------------|
| Injuries                 | 21,568.68<br>(15,083.56 to<br>27,765.94) | 22,696.18<br>(13,447.71 to<br>33,683.46) | 20,374.69<br>(11,823.89 to<br>30,982.80) | 27,213.85<br>(16,583.78 to<br>39,331.83) | 405.98<br>(285.53 to<br>512.86) | 533.28<br>(348.71 to<br>725.05) | 491.74<br>(328.50 to<br>690.64) | 582.07<br>(392.19 to<br>798.76) |
| Transport injuries       | 6,072.81<br>(3,930.77 to<br>8,170.44)    | 6,714.55<br>(4,265.13 to<br>9,531.34)    | 5,745.80<br>(3,603.25 to<br>8,181.57)    | 9,033.35<br>(5,728.58 to<br>12,714.14)   | 120.28<br>(82.07 to<br>158.37)  | 159.32<br>(107.29 to<br>215.13) | 144.37<br>(97.70 to<br>193.78)  | 195.09<br>(131.78 to<br>263.05) |
| Road injuries            | 5,393.66<br>(3,490.93 to<br>7,218.02)    | 5,800.41<br>(3,588.65 to<br>8,142.60)    | 4,944.02<br>(3,022.51 to<br>6,931.73)    | 7,954.78<br>(4,987.47 to<br>11,136.82)   | 107.29<br>(73.80 to<br>142.28)  | 136.57<br>(92.30 to<br>182.41)  | 123.27<br>(84.33 to<br>164.35)  | 170.53<br>(115.07 to<br>229.24) |
| Pedestrian road injuries | 1,427.95<br>(888.69 to<br>2,055.48)      | 1,194.30<br>(743.83 to<br>1,770.78)      | 1,023.43<br>(643.16 to<br>1,509.58)      | 1,581.11<br>(997.60 to<br>2,314.77)      | 31.16<br>(20.61 to<br>43.83)    | 36.56<br>(25.58 to<br>52.68)    | 33.79<br>(23.28 to<br>48.36)    | 42.81<br>(29.85 to<br>60.53)    |

| Timor-Leste                                     |                                                    |                                                   |                                                  |                                                   |                                            |                                            |                                            |                                            |
|-------------------------------------------------|----------------------------------------------------|---------------------------------------------------|--------------------------------------------------|---------------------------------------------------|--------------------------------------------|--------------------------------------------|--------------------------------------------|--------------------------------------------|
| Cause                                           | YLLs (actual counts)                               |                                                   |                                                  |                                                   | Deaths (actual counts)                     |                                            |                                            |                                            |
|                                                 | 2016                                               | 2040 Forecast                                     | 2040 Better Scenario                             | 2040 Worse Scenario                               | 2016                                       | 2040 Forecast                              | 2040 Better Scenario                       | 2040 Worse Scenario                        |
| Cyclist road injuries                           | 111.24<br>(42.65 to 188.59)                        | 125.28<br>(47.45 to 216.12)                       | 108.32<br>(41.43 to 186.70)                      | 170.42<br>(63.78 to 303.73)                       | 2.53<br>(1.02 to 4.19)                     | 3.28<br>(1.31 to 5.53)                     | 3.04<br>(1.21 to 5.17)                     | 3.99<br>(1.58 to 6.74)                     |
| Motorcyclist road injuries                      | 1,132.84<br>(673.45 to 1,747.98)                   | 1,411.54<br>(739.71 to 2,302.09)                  | 1,234.67<br>(639.85 to 2,034.19)                 | 1,860.79<br>(1,017.13 to 2,972.38)                | 19.55<br>(11.31 to 29.89)                  | 25.90<br>(13.49 to 42.65)                  | 23.21<br>(11.96 to 37.82)                  | 32.57<br>(17.71 to 52.97)                  |
| Motor vehicle road injuries                     | 2,598.17<br>(1,610.85 to 3,541.75)                 | 2,913.87<br>(1,685.90 to 4,391.72)                | 2,445.77<br>(1,405.69 to 3,676.23)               | 4,123.61<br>(2,436.29 to 6,139.16)                | 51.50<br>(32.66 to 70.60)                  | 66.72<br>(41.83 to 94.80)                  | 59.40<br>(37.56 to 84.15)                  | 86.12<br>(53.98 to 122.02)                 |
| Other road injuries                             | 123.46<br>(39.47 to 209.16)                        | 155.42<br>(50.21 to 284.90)                       | 131.83<br>(42.25 to 245.38)                      | 218.85<br>(72.58 to 384.54)                       | 2.55<br>(0.86 to 4.48)                     | 4.12<br>(1.40 to 7.35)                     | 3.84<br>(1.34 to 6.74)                     | 5.05<br>(1.72 to 9.00)                     |
| Other transport injuries                        | 679.15<br>(390.02 to 1,053.51)                     | 914.14<br>(494.42 to 1,455.72)                    | 801.78<br>(444.02 to 1,265.62)                   | 1,078.57<br>(600.83 to 1,727.02)                  | 13.00<br>(7.75 to 19.37)                   | 22.75<br>(13.19 to 33.28)                  | 21.10<br>(12.37 to 30.90)                  | 24.57<br>(14.28 to 36.17)                  |
| <b>Unintentional injuries</b>                   | <b>10,367.56</b><br><b>(7,593.24 to 13,583.72)</b> | <b>7,714.45</b><br><b>(5,027.43 to 10,690.27)</b> | <b>6,753.10</b><br><b>(4,356.55 to 9,384.29)</b> | <b>9,372.55</b><br><b>(6,174.33 to 13,045.32)</b> | <b>186.85</b><br><b>(138.55 to 235.54)</b> | <b>196.55</b><br><b>(144.03 to 253.21)</b> | <b>185.21</b><br><b>(135.15 to 239.11)</b> | <b>213.13</b><br><b>(153.78 to 277.66)</b> |
| Falls                                           | 1,588.52<br>(1,093.97 to 2,265.54)                 | 1,670.66<br>(1,082.69 to 2,488.27)                | 1,588.25<br>(1,029.38 to 2,378.56)               | 1,807.36<br>(1,192.00 to 2,661.31)                | 42.47<br>(30.67 to 58.21)                  | 68.70<br>(51.72 to 93.50)                  | 70.65<br>(54.05 to 95.04)                  | 66.25<br>(49.26 to 90.61)                  |
| Drowning                                        | 4,083.06<br>(2,865.58 to 5,585.75)                 | 2,475.83<br>(1,533.97 to 3,670.05)                | 2,101.87<br>(1,281.51 to 3,132.26)               | 3,128.67<br>(1,941.53 to 4,681.44)                | 61.92<br>(44.28 to 83.84)                  | 44.92<br>(29.58 to 64.79)                  | 39.28<br>(25.38 to 56.67)                  | 53.52<br>(34.74 to 76.88)                  |
| Fire, heat, and hot substances                  | 990.66<br>(654.52 to 1,488.48)                     | 698.69<br>(413.25 to 1,145.81)                    | 583.22<br>(344.39 to 958.21)                     | 862.54<br>(512.16 to 1,419.09)                    | 18.67<br>(12.79 to 28.02)                  | 18.41<br>(12.26 to 30.45)                  | 16.49<br>(10.90 to 26.81)                  | 20.42<br>(13.53 to 33.10)                  |
| Poisonings                                      | 364.93<br>(155.33 to 429.00)                       | 156.55<br>(84.25 to 270.17)                       | 121.04<br>(64.33 to 211.93)                      | 201.17<br>(108.34 to 351.28)                      | 4.74<br>(2.84 to 7.47)                     | 3.42<br>(2.02 to 5.60)                     | 2.78<br>(1.63 to 4.63)                     | 4.09<br>(2.35 to 6.82)                     |
| Exposure to mechanical forces                   | 738.30<br>(471.97 to 1,116.71)                     | 547.88<br>(307.44 to 897.26)                      | 450.12<br>(253.48 to 758.29)                     | 699.55<br>(408.27 to 1,147.71)                    | 12.12<br>(7.79 to 18.66)                   | 11.04<br>(6.37 to 18.44)                   | 9.45<br>(5.51 to 15.75)                    | 13.08<br>(7.83 to 21.53)                   |
| Unintentional firearm injuries                  | 101.45<br>(50.47 to 247.76)                        | 81.67<br>(35.64 to 206.44)                        | 66.39<br>(27.48 to 169.49)                       | 99.85<br>(42.37 to 251.60)                        | 1.91<br>(0.94 to 4.80)                     | 1.62<br>(0.89 to 4.70)                     | 1.62<br>(0.77 to 4.13)                     | 2.16<br>(1.00 to 5.41)                     |
| Unintentional suffocation                       | 247.01<br>(117.71 to 469.40)                       | 130.75<br>(65.64 to 241.42)                       | 102.52<br>(51.19 to 182.13)                      | 197.20<br>(92.09 to 386.96)                       | 3.11<br>(1.58 to 5.70)                     | 1.78<br>(0.95 to 3.07)                     | 1.42<br>(0.75 to 2.38)                     | 2.60<br>(1.30 to 4.78)                     |
| Other exposure to mechanical forces             | 389.85<br>(238.21 to 648.21)                       | 335.46<br>(177.69 to 633.37)                      | 281.21<br>(141.93 to 537.14)                     | 402.50<br>(216.67 to 735.98)                      | 7.10<br>(4.31 to 12.11)                    | 7.36<br>(4.07 to 13.41)                    | 6.41<br>(3.55 to 11.69)                    | 8.32<br>(4.62 to 14.99)                    |
| Adverse effects of medical treatment            | 724.96<br>(505.25 to 970.25)                       | 630.37<br>(385.45 to 938.13)                      | 549.14<br>(333.66 to 838.43)                     | 754.14<br>(480.46 to 1,103.16)                    | 14.65<br>(10.34 to 19.58)                  | 17.89<br>(11.81 to 26.16)                  | 16.67<br>(11.05 to 24.56)                  | 19.17<br>(12.86 to 27.55)                  |
| Animal contact                                  | 268.25<br>(163.99 to 388.87)                       | 285.32<br>(160.90 to 436.20)                      | 229.11<br>(125.45 to 356.40)                     | 356.61<br>(197.70 to 567.14)                      | 5.35<br>(3.36 to 7.48)                     | 7.15<br>(4.40 to 10.31)                    | 6.03<br>(3.59 to 8.87)                     | 8.20<br>(4.94 to 12.20)                    |
| Venomous animal contact                         | 133.79<br>(77.85 to 207.73)                        | 132.65<br>(69.28 to 215.68)                       | 105.98<br>(53.51 to 168.64)                      | 167.30<br>(87.36 to 277.91)                       | 2.73<br>(1.62 to 4.08)                     | 3.41<br>(1.97 to 5.24)                     | 2.88<br>(1.62 to 4.44)                     | 3.94<br>(2.25 to 6.26)                     |
| Non-venomous animal contact                     | 134.45<br>(74.70 to 215.48)                        | 152.68<br>(75.47 to 258.27)                       | 123.13<br>(60.19 to 209.74)                      | 189.32<br>(92.52 to 325.86)                       | 2.61<br>(1.50 to 4.22)                     | 3.71<br>(2.05 to 6.15)                     | 3.15<br>(1.74 to 5.21)                     | 4.26<br>(2.30 to 7.12)                     |
| Foreign body                                    | 1,214.17<br>(685.93 to 2,236.84)                   | 822.54<br>(495.84 to 1,318.78)                    | 765.39<br>(473.42 to 1,180.79)                   | 1,060.51<br>(599.54 to 1,868.40)                  | 17.89<br>(11.33 to 29.53)                  | 15.98<br>(11.03 to 22.62)                  | 15.91<br>(11.09 to 22.22)                  | 18.23<br>(12.03 to 26.92)                  |
| Pulmonary aspiration and foreign body in airway | 1,119.41<br>(588.38 to 2,123.34)                   | 751.38<br>(437.91 to 1,244.01)                    | 703.74<br>(415.31 to 1,121.69)                   | 971.86<br>(520.30 to 1,773.44)                    | 16.25<br>(9.70 to 27.72)                   | 14.33<br>(9.47 to 20.57)                   | 14.39<br>(9.58 to 20.55)                   | 16.39<br>(10.37 to 25.41)                  |

|                                             |                                                            |                                                             |                                                            |                                                             |                                                    |                                                     |                                                     |                                                     |
|---------------------------------------------|------------------------------------------------------------|-------------------------------------------------------------|------------------------------------------------------------|-------------------------------------------------------------|----------------------------------------------------|-----------------------------------------------------|-----------------------------------------------------|-----------------------------------------------------|
|                                             | 94.76<br>(54.44 to<br>179.34)                              | 71.15<br>(38.84 to<br>133.06)                               | 61.65<br>(32.74 to<br>114.47)                              | 88.65<br>(46.73 to<br>167.52)                               | 1.64<br>(1.00 to<br>2.93)                          | 1.65<br>(0.96 to<br>3.01)                           | 1.52<br>(0.88 to<br>2.79)                           | 1.85<br>(1.07 to<br>3.37)                           |
| Foreign body in other body part             |                                                            |                                                             |                                                            |                                                             |                                                    |                                                     |                                                     |                                                     |
|                                             | 50.16<br>(31.70 to<br>74.79)                               | 48.31<br>(27.40 to<br>78.10)                                | 36.92<br>(20.69 to<br>59.43)                               | 62.06<br>(35.24 to<br>98.60)                                | 1.09<br>(0.72 to<br>1.64)                          | 1.43<br>(0.95 to<br>2.23)                           | 1.17<br>(0.76 to<br>1.87)                           | 1.66<br>(1.06 to<br>2.59)                           |
| Environmental heat and cold exposure        |                                                            |                                                             |                                                            |                                                             |                                                    |                                                     |                                                     |                                                     |
|                                             | 444.55<br>(267.93 to<br>679.39)                            | 378.30<br>(197.55 to<br>628.04)                             | 328.04<br>(170.04 to<br>573.03)                            | 439.92<br>(235.75 to<br>745.54)                             | 7.94<br>(4.70 to<br>12.43)                         | 7.63<br>(4.19 to<br>12.84)                          | 6.78<br>(3.76 to<br>11.73)                          | 8.51<br>(4.80 to<br>14.44)                          |
| Other unintentional injuries                |                                                            |                                                             |                                                            |                                                             |                                                    |                                                     |                                                     |                                                     |
| <b>Self-harm and interpersonal violence</b> | <b>5,119.72</b><br><b>(2,743.92 to</b><br><b>7,021.58)</b> | <b>7,000.95</b><br><b>(3,498.86 to</b><br><b>10,399.06)</b> | <b>6,631.84</b><br><b>(3,385.23 to</b><br><b>9,911.98)</b> | <b>7,426.38</b><br><b>(3,690.14 to</b><br><b>11,099.41)</b> | <b>98.70</b><br><b>(54.73 to</b><br><b>134.80)</b> | <b>144.35</b><br><b>(79.60 to</b><br><b>209.34)</b> | <b>139.10</b><br><b>(76.98 to</b><br><b>201.31)</b> | <b>149.59</b><br><b>(81.70 to</b><br><b>218.69)</b> |

| Timor-Leste                                                                         |                                                 |                                                         |                                                        |                                                         |                                                |                                                   |                                                   |                                                   |
|-------------------------------------------------------------------------------------|-------------------------------------------------|---------------------------------------------------------|--------------------------------------------------------|---------------------------------------------------------|------------------------------------------------|---------------------------------------------------|---------------------------------------------------|---------------------------------------------------|
| Cause                                                                               | YLLs (actual counts)                            |                                                         |                                                        |                                                         | Deaths (actual counts)                         |                                                   |                                                   |                                                   |
|                                                                                     | 2016                                            | 2040 Forecast                                           | 2040 Better Scenario                                   | 2040 Worse Scenario                                     | 2016                                           | 2040 Forecast                                     | 2040 Better Scenario                              | 2040 Worse Scenario                               |
| Self-harm                                                                           | 3,307.20<br>(1,713.45 to<br>4,726.79)           | 5,180.29<br>(2,576.12 to<br>8,149.78)                   | 4,855.99<br>(2,373.94 to<br>7,521.55)                  | 5,502.76<br>(2,714.80 to<br>8,684.77)                   | 67.25<br>(36.77 to<br>95.19)                   | 110.91<br>(59.03 to<br>164.58)                    | 106.26<br>(57.93 to<br>157.02)                    | 114.85<br>(61.05 to<br>172.29)                    |
| Self-harm by firearm                                                                | 105.33<br>(39.90 to<br>236.38)                  | 134.81<br>(46.54 to<br>318.40)                          | 122.96<br>(42.97 to<br>290.49)                         | 144.76<br>(49.50 to<br>339.87)                          | 2.21<br>(0.83 to<br>4.90)                      | 3.15<br>(1.16 to<br>7.10)                         | 2.96<br>(1.09 to<br>6.74)                         | 3.26<br>(1.18 to<br>7.44)                         |
| Self-harm by other specified means                                                  | 3,201.87<br>(1,664.87 to<br>4,585.97)           | 5,045.48<br>(2,519.52 to<br>7,800.50)                   | 4,733.03<br>(2,320.62 to<br>7,336.20)                  | 5,358.01<br>(2,640.32 to<br>8,410.37)                   | 65.05<br>(35.33 to<br>91.90)                   | 107.77<br>(57.99 to<br>160.80)                    | 103.30<br>(56.94 to<br>154.28)                    | 111.59<br>(60.10 to<br>167.85)                    |
| Interpersonal violence                                                              | 1,812.52<br>(927.62 to<br>2,564.47)             | 1,820.66<br>(809.94 to<br>2,787.47)                     | 1,775.85<br>(795.80 to<br>2,707.07)                    | 1,923.62<br>(872.42 to<br>2,944.46)                     | 31.45<br>(16.61 to<br>44.43)                   | 33.43<br>(16.05 to<br>50.67)                      | 32.84<br>(15.70 to<br>49.88)                      | 34.74<br>(16.73 to<br>52.18)                      |
| Physical violence by firearm                                                        | 419.36<br>(157.67 to<br>889.62)                 | 442.76<br>(144.17 to<br>971.53)                         | 432.04<br>(140.18 to<br>953.20)                        | 461.25<br>(152.44 to<br>1,012.37)                       | 7.38<br>(2.64 to<br>15.73)                     | 8.04<br>(2.69 to<br>17.77)                        | 7.87<br>(2.63 to<br>17.49)                        | 8.29<br>(2.81 to<br>18.19)                        |
| Physical violence by sharp object                                                   | 631.23<br>(279.19 to<br>1,009.22)               | 712.15<br>(278.48 to<br>1,207.68)                       | 721.08<br>(279.91 to<br>1,219.21)                      | 724.07<br>(292.91 to<br>1,217.05)                       | 11.03<br>(4.88 to<br>17.88)                    | 12.93<br>(5.23 to<br>22.26)                       | 13.16<br>(5.28 to<br>22.56)                       | 13.01<br>(5.35 to<br>22.34)                       |
| Physical violence by other means                                                    | 761.93<br>(385.78 to<br>1,120.99)               | 665.75<br>(289.56 to<br>1,099.04)                       | 622.73<br>(269.76 to<br>1,033.58)                      | 738.30<br>(327.15 to<br>1,204.01)                       | 13.04<br>(6.69 to<br>19.10)                    | 12.47<br>(5.94 to<br>20.33)                       | 11.80<br>(5.58 to<br>19.18)                       | 13.45<br>(6.43 to<br>21.68)                       |
| <b>Forces of nature, conflict and terrorism, and executions and police conflict</b> | <b>8.58</b><br><b>(5.88 to</b><br><b>11.18)</b> | <b>1,266.23</b><br><b>(0.00 to</b><br><b>10,013.82)</b> | <b>1,243.95</b><br><b>(0.00 to</b><br><b>9,835.61)</b> | <b>1,381.57</b><br><b>(0.00 to</b><br><b>10,831.78)</b> | <b>0.15</b><br><b>(0.10 to</b><br><b>0.20)</b> | <b>23.06</b><br><b>(0.00 to</b><br><b>182.67)</b> | <b>23.06</b><br><b>(0.00 to</b><br><b>182.97)</b> | <b>24.25</b><br><b>(0.00 to</b><br><b>191.50)</b> |
| Exposure to forces of nature                                                        | 0.00<br>(0.00 to<br>0.00)                       | 1.52<br>(0.00 to<br>28.21)                              | 1.49<br>(0.00 to<br>27.59)                             | 1.70<br>(0.00 to<br>31.43)                              | 0.00<br>(0.00 to<br>0.00)                      | 0.03<br>(0.00 to<br>0.53)                         | 0.03<br>(0.00 to<br>0.54)                         | 0.03<br>(0.00 to<br>0.56)                         |
| Conflict and terrorism                                                              | 0.00<br>(0.00 to<br>0.00)                       | 1,264.70<br>(0.00 to<br>10,013.82)                      | 1,242.45<br>(0.00 to<br>9,835.61)                      | 1,379.88<br>(0.00 to<br>10,831.78)                      | 0.00<br>(0.00 to<br>0.00)                      | 23.03<br>(0.00 to<br>182.67)                      | 23.03<br>(0.00 to<br>182.97)                      | 24.22<br>(0.00 to<br>191.50)                      |
| Executions and police conflict                                                      | 8.58<br>(5.88 to<br>11.18)                      | 0.00<br>(0.00 to<br>0.00)                               | 0.00<br>(0.00 to<br>0.00)                              | 0.00<br>(0.00 to<br>0.00)                               | 0.15<br>(0.10 to<br>0.20)                      | 0.00<br>(0.00 to<br>0.00)                         | 0.00<br>(0.00 to<br>0.00)                         | 0.00<br>(0.00 to<br>0.00)                         |

| Vietnam                                                           |                                       |                                       |                                       |                                       |                              |                                |                              |                                    |
|-------------------------------------------------------------------|---------------------------------------|---------------------------------------|---------------------------------------|---------------------------------------|------------------------------|--------------------------------|------------------------------|------------------------------------|
| Cause                                                             | YLLs (in 1000s)                       |                                       |                                       |                                       | Deaths (in 1000s)            |                                |                              |                                    |
|                                                                   | 2016                                  | 2040 Forecast                         | 2040 Better Scenario                  | 2040 Worse Scenario                   | 2016                         | 2040 Forecast                  | 2040 Better Scenario         | 2040 Worse Scenario                |
| All causes                                                        | 15,131.45<br>(13,458.78 to 16,798.15) | 16,967.59<br>(14,493.98 to 20,288.41) | 14,006.10<br>(12,115.96 to 16,293.18) | 22,628.12<br>(19,042.89 to 27,057.72) | 661.38<br>(613.80 to 715.77) | 937.00<br>(848.66 to 1,037.43) | 809.19<br>(742.93 to 883.37) | 1,169.52<br>(1,053.25 to 1,302.09) |
| Communicable, maternal, neonatal, and nutritional diseases        | 2,299.19<br>(1,924.98 to 2,714.61)    | 1,198.96<br>(919.05 to 1,598.23)      | 941.70<br>(739.73 to 1,217.75)        | 1,797.67<br>(1,346.17 to 2,463.60)    | 61.30<br>(53.72 to 71.06)    | 50.65<br>(37.84 to 70.62)      | 41.18<br>(31.46 to 55.11)    | 72.06<br>(52.83 to 102.04)         |
| HIV/AIDS and tuberculosis                                         | 726.82<br>(545.88 to 949.37)          | 425.69<br>(257.66 to 758.12)          | 317.15<br>(197.44 to 522.92)          | 660.59<br>(397.58 to 1,183.97)        | 25.21<br>(20.56 to 31.07)    | 19.84<br>(11.74 to 36.12)      | 14.72<br>(9.25 to 24.84)     | 29.67<br>(17.57 to 54.25)          |
| Tuberculosis                                                      | 392.92<br>(325.53 to 480.30)          | 288.33<br>(147.31 to 592.06)          | 200.29<br>(107.54 to 384.95)          | 461.85<br>(234.35 to 961.01)          | 18.67<br>(15.88 to 22.21)    | 17.12<br>(9.58 to 33.12)       | 12.39<br>(7.29 to 22.36)     | 25.80<br>(14.04 to 49.99)          |
| HIV/AIDS                                                          | 333.91<br>(158.37 to 555.93)          | 137.36<br>(58.00 to 260.28)           | 116.86<br>(45.66 to 212.31)           | 198.74<br>(98.09 to 361.61)           | 6.54<br>(2.98 to 11.30)      | 2.72<br>(1.10 to 5.39)         | 2.32<br>(0.83 to 4.59)       | 3.87<br>(1.83 to 7.42)             |
| Diarrhea, lower respiratory, and other common infectious diseases | 877.92<br>(730.95 to 1,058.16)        | 524.04<br>(384.16 to 732.26)          | 400.91<br>(303.03 to 546.52)          | 791.31<br>(562.34 to 1,158.77)        | 26.02<br>(22.40 to 31.15)    | 25.14<br>(18.05 to 35.03)      | 21.09<br>(15.70 to 28.62)    | 35.50<br>(24.64 to 51.02)          |
| Diarrheal diseases                                                | 37.51<br>(21.66 to 59.64)             | 25.43<br>(4.61 to 83.43)              | 17.64<br>(4.01 to 54.95)              | 44.52<br>(8.04 to 143.13)             | 1.96<br>(0.87 to 3.71)       | 1.87<br>(0.31 to 6.80)         | 1.37<br>(0.40 to 4.40)       | 3.03<br>(0.47 to 10.54)            |
| Intestinal infectious diseases                                    | 110.90<br>(59.89 to 187.86)           | 48.29<br>(25.26 to 83.07)             | 43.29<br>(22.91 to 73.23)             | 56.95<br>(29.12 to 101.16)            | 1.76<br>(0.94 to 3.00)       | 0.92<br>(0.49 to 1.55)         | 0.85<br>(0.46 to 1.44)       | 1.05<br>(0.55 to 1.82)             |
| Typhoid fever                                                     | 96.05<br>(49.79 to 162.13)            | 40.59<br>(20.47 to 68.55)             | 36.34<br>(18.95 to 61.71)             | 47.68<br>(23.64 to 82.49)             | 1.51<br>(0.79 to 2.57)       | 0.77<br>(0.40 to 1.30)         | 0.71<br>(0.38 to 1.19)       | 0.87<br>(0.45 to 1.51)             |
| Paratyphoid fever                                                 | 14.65<br>(6.64 to 28.62)              | 7.64<br>(3.29 to 14.89)               | 6.89<br>(3.06 to 13.28)               | 9.19<br>(3.94 to 18.07)               | 0.24<br>(0.11 to 0.47)       | 0.15<br>(0.07 to 0.30)         | 0.14<br>(0.06 to 0.27)       | 0.18<br>(0.08 to 0.35)             |
| Other intestinal infectious diseases                              | 0.19<br>(0.08 to 0.41)                | 0.07<br>(0.02 to 0.15)                | 0.06<br>(0.02 to 0.13)                | 0.08<br>(0.03 to 0.19)                | 0.01<br>(0.00 to 0.01)       | 0.00<br>(0.00 to 0.01)         | 0.00<br>(0.00 to 0.01)       | 0.00<br>(0.00 to 0.01)             |
| Lower respiratory infections                                      | 536.65<br>(443.98 to 650.78)          | 325.22<br>(223.43 to 479.21)          | 250.85<br>(180.63 to 354.45)          | 529.06<br>(346.27 to 827.87)          | 18.69<br>(15.93 to 23.27)    | 19.08<br>(13.44 to 27.66)      | 16.03<br>(11.52 to 22.43)    | 27.67<br>(18.64 to 40.78)          |
| Upper respiratory infections                                      | 0.75<br>(0.39 to 1.22)                | 0.55<br>(0.23 to 1.05)                | 0.48<br>(0.20 to 0.92)                | 0.75<br>(0.32 to 1.38)                | 0.02<br>(0.01 to 0.04)       | 0.02<br>(0.01 to 0.05)         | 0.02<br>(0.01 to 0.04)       | 0.03<br>(0.01 to 0.06)             |
| Otitis media                                                      | 0.05<br>(0.02 to 0.10)                | 0.03<br>(0.01 to 0.06)                | 0.03<br>(0.01 to 0.06)                | 0.03<br>(0.01 to 0.06)                | 0.00<br>(0.00 to 0.00)       | 0.00<br>(0.00 to 0.00)         | 0.00<br>(0.00 to 0.00)       | 0.00<br>(0.00 to 0.00)             |
| Meningitis                                                        | 48.29<br>(34.68 to 72.60)             | 21.13<br>(13.88 to 32.69)             | 18.55<br>(12.71 to 27.96)             | 23.44<br>(14.88 to 37.29)             | 0.91<br>(0.70 to 1.29)       | 0.60<br>(0.43 to 0.88)         | 0.57<br>(0.42 to 0.86)       | 0.62<br>(0.45 to 0.91)             |
| Pneumococcal meningitis                                           | 0.46<br>(0.28 to 0.89)                | 0.14<br>(0.09 to 0.22)                | 0.12<br>(0.08 to 0.18)                | 0.14<br>(0.09 to 0.25)                | 0.01<br>(0.01 to 0.02)       | 0.00<br>(0.00 to 0.01)         | 0.00<br>(0.00 to 0.01)       | 0.00<br>(0.00 to 0.01)             |
| H influenzae type B meningitis                                    | 3.64<br>(2.45 to 5.81)                | 2.53<br>(0.93 to 6.58)                | 1.49<br>(0.82 to 2.96)                | 3.45<br>(0.98 to 9.66)                | 0.06<br>(0.05 to 0.10)       | 0.04<br>(0.03 to 0.10)         | 0.04<br>(0.03 to 0.06)       | 0.06<br>(0.03 to 0.13)             |
| Meningococcal meningitis                                          | 16.56<br>(11.21 to 24.84)             | 6.79<br>(4.49 to 10.51)               | 6.26<br>(4.12 to 9.82)                | 7.30<br>(4.81 to 11.35)               | 0.33<br>(0.24 to 0.46)       | 0.21<br>(0.15 to 0.33)         | 0.21<br>(0.14 to 0.33)       | 0.22<br>(0.15 to 0.34)             |
| Other meningitis                                                  | 27.63<br>(19.58 to 42.25)             | 11.67<br>(7.85 to 17.41)              | 10.68<br>(7.21 to 16.02)              | 12.55<br>(8.34 to 19.28)              | 0.51<br>(0.38 to 0.73)       | 0.33<br>(0.23 to 0.49)         | 0.32<br>(0.22 to 0.48)       | 0.34<br>(0.24 to 0.50)             |
| Encephalitis                                                      | 80.24<br>(57.11 to 113.19)            | 56.81<br>(39.67 to 81.45)             | 51.41<br>(37.21 to 72.53)             | 64.20<br>(43.46 to 94.51)             | 1.75<br>(1.34 to 2.34)       | 1.97<br>(1.53 to 2.54)         | 1.91<br>(1.49 to 2.43)       | 2.09<br>(1.61 to 2.80)             |

|                |                              |                             |                             |                              |                           |                           |                           |                           |
|----------------|------------------------------|-----------------------------|-----------------------------|------------------------------|---------------------------|---------------------------|---------------------------|---------------------------|
| Diphtheria     | 0.18<br>(0.11 to<br>0.28)    | 0.04<br>(0.02 to<br>0.07)   | 0.03<br>(0.02 to<br>0.05)   | 0.05<br>(0.02 to<br>0.10)    | 0.00<br>(0.00 to<br>0.00) | 0.00<br>(0.00 to<br>0.00) | 0.00<br>(0.00 to<br>0.00) | 0.00<br>(0.00 to<br>0.00) |
| Whooping cough | 54.17<br>(4.61 to<br>168.25) | 22.29<br>(0.54 to<br>69.88) | 2.79<br>(0.15 to<br>10.15)  | 28.56<br>(0.51 to<br>89.67)  | 0.64<br>(0.05 to<br>2.01) | 0.27<br>(0.01 to<br>0.83) | 0.04<br>(0.00 to<br>0.13) | 0.34<br>(0.01 to<br>1.06) |
| Tetanus        | 6.28<br>(4.40 to<br>9.60)    | 0.91<br>(0.53 to<br>1.50)   | 0.78<br>(0.42 to<br>1.36)   | 1.04<br>(0.62 to<br>1.68)    | 0.19<br>(0.12 to<br>0.34) | 0.04<br>(0.02 to<br>0.06) | 0.03<br>(0.02 to<br>0.06) | 0.03<br>(0.02 to<br>0.06) |
| Measles        | 0.67<br>(0.19 to<br>1.68)    | 22.40<br>(0.46 to<br>97.23) | 14.27<br>(0.43 to<br>49.40) | 41.50<br>(0.66 to<br>183.62) | 0.01<br>(0.00 to<br>0.02) | 0.32<br>(0.01 to<br>1.21) | 0.22<br>(0.01 to<br>0.71) | 0.57<br>(0.01 to<br>2.33) |

| Vietnam                                               |                                         |                                         |                                         |                                         |                                      |                                      |                                      |                                      |
|-------------------------------------------------------|-----------------------------------------|-----------------------------------------|-----------------------------------------|-----------------------------------------|--------------------------------------|--------------------------------------|--------------------------------------|--------------------------------------|
| Cause                                                 | YLLs (in 1000s)                         |                                         |                                         |                                         | Deaths (in 1000s)                    |                                      |                                      |                                      |
|                                                       | 2016                                    | 2040 Forecast                           | 2040 Better Scenario                    | 2040 Worse Scenario                     | 2016                                 | 2040 Forecast                        | 2040 Better Scenario                 | 2040 Worse Scenario                  |
| Varicella and herpes zoster                           | 2.22<br>(1.45 to 3.31)                  | 0.95<br>(0.55 to 1.54)                  | 0.80<br>(0.49 to 1.24)                  | 1.21<br>(0.67 to 2.03)                  | 0.08<br>(0.05 to 0.12)               | 0.05<br>(0.03 to 0.09)               | 0.05<br>(0.03 to 0.09)               | 0.06<br>(0.04 to 0.10)               |
| <b>Neglected tropical diseases and malaria</b>        | <b>66.93</b><br><b>(48.26 to 97.59)</b> | <b>59.21</b><br><b>(43.83 to 87.64)</b> | <b>57.34</b><br><b>(42.50 to 84.51)</b> | <b>63.77</b><br><b>(46.61 to 95.35)</b> | <b>1.49</b><br><b>(1.10 to 2.17)</b> | <b>1.84</b><br><b>(1.37 to 2.92)</b> | <b>1.84</b><br><b>(1.36 to 2.92)</b> | <b>1.89</b><br><b>(1.41 to 3.02)</b> |
| Malaria                                               | 51.73<br>(35.08 to 77.19)               | 27.56<br>(16.46 to 48.48)               | 26.60<br>(15.97 to 46.80)               | 29.72<br>(17.61 to 53.11)               | 1.13<br>(0.80 to 1.81)               | 0.82<br>(0.49 to 1.64)               | 0.81<br>(0.49 to 1.59)               | 0.84<br>(0.51 to 1.72)               |
| Chagas disease                                        | 0.00<br>(0.00 to 0.00)                  | 0.00<br>(0.00 to 0.00)                  | 0.00<br>(0.00 to 0.00)                  | 0.00<br>(0.00 to 0.00)                  | 0.00<br>(0.00 to 0.00)               | 0.00<br>(0.00 to 0.00)               | 0.00<br>(0.00 to 0.00)               | 0.00<br>(0.00 to 0.00)               |
| Leishmaniasis                                         | 0.00<br>(0.00 to 0.00)                  | 0.00<br>(0.00 to 0.00)                  | 0.00<br>(0.00 to 0.00)                  | 0.00<br>(0.00 to 0.00)                  | 0.00<br>(0.00 to 0.00)               | 0.00<br>(0.00 to 0.00)               | 0.00<br>(0.00 to 0.00)               | 0.00<br>(0.00 to 0.00)               |
| African trypanosomiasis                               | 0.00<br>(0.00 to 0.00)                  | 0.00<br>(0.00 to 0.00)                  | 0.00<br>(0.00 to 0.00)                  | 0.00<br>(0.00 to 0.00)                  | 0.00<br>(0.00 to 0.00)               | 0.00<br>(0.00 to 0.00)               | 0.00<br>(0.00 to 0.00)               | 0.00<br>(0.00 to 0.00)               |
| Schistosomiasis                                       | 0.00<br>(0.00 to 0.00)                  | 0.00<br>(0.00 to 0.00)                  | 0.00<br>(0.00 to 0.00)                  | 0.00<br>(0.00 to 0.00)                  | 0.00<br>(0.00 to 0.00)               | 0.00<br>(0.00 to 0.00)               | 0.00<br>(0.00 to 0.00)               | 0.00<br>(0.00 to 0.00)               |
| Cysticercosis                                         | 0.15<br>(0.12 to 0.18)                  | 0.06<br>(0.04 to 0.09)                  | 0.06<br>(0.04 to 0.08)                  | 0.06<br>(0.04 to 0.09)                  | 0.00<br>(0.00 to 0.00)               | 0.00<br>(0.00 to 0.00)               | 0.00<br>(0.00 to 0.00)               | 0.00<br>(0.00 to 0.00)               |
| Cystic echinococcosis                                 | 0.03<br>(0.03 to 0.04)                  | 0.02<br>(0.01 to 0.03)                  | 0.01<br>(0.01 to 0.02)                  | 0.02<br>(0.02 to 0.04)                  | 0.00<br>(0.00 to 0.00)               | 0.00<br>(0.00 to 0.00)               | 0.00<br>(0.00 to 0.00)               | 0.00<br>(0.00 to 0.00)               |
| Dengue                                                | 10.63<br>(3.62 to 28.15)                | 28.99<br>(14.88 to 49.71)               | 28.32<br>(14.87 to 47.96)               | 30.60<br>(15.59 to 52.94)               | 0.23<br>(0.08 to 0.53)               | 0.92<br>(0.50 to 1.66)               | 0.94<br>(0.51 to 1.67)               | 0.93<br>(0.49 to 1.63)               |
| Yellow fever                                          | 0.00<br>(0.00 to 0.00)                  | 0.00<br>(0.00 to 0.00)                  | 0.00<br>(0.00 to 0.00)                  | 0.00<br>(0.00 to 0.00)                  | 0.00<br>(0.00 to 0.00)               | 0.00<br>(0.00 to 0.00)               | 0.00<br>(0.00 to 0.00)               | 0.00<br>(0.00 to 0.00)               |
| Rabies                                                | 2.09<br>(0.77 to 3.41)                  | 0.75<br>(0.25 to 1.50)                  | 0.61<br>(0.20 to 1.20)                  | 1.26<br>(0.43 to 2.35)                  | 0.07<br>(0.03 to 0.11)               | 0.03<br>(0.01 to 0.05)               | 0.02<br>(0.01 to 0.04)               | 0.04<br>(0.02 to 0.08)               |
| Intestinal nematode infections                        | 1.06<br>(0.67 to 1.55)                  | 0.95<br>(0.52 to 1.58)                  | 0.92<br>(0.51 to 1.49)                  | 1.01<br>(0.55 to 1.69)                  | 0.02<br>(0.01 to 0.03)               | 0.03<br>(0.01 to 0.04)               | 0.03<br>(0.01 to 0.04)               | 0.03<br>(0.01 to 0.04)               |
| Other neglected tropical diseases                     | 1.24<br>(0.81 to 2.41)                  | 0.89<br>(0.53 to 1.51)                  | 0.82<br>(0.48 to 1.39)                  | 1.09<br>(0.66 to 1.95)                  | 0.03<br>(0.02 to 0.06)               | 0.04<br>(0.02 to 0.07)               | 0.04<br>(0.02 to 0.07)               | 0.04<br>(0.02 to 0.09)               |
| <b>Maternal disorders</b>                             | <b>15.28</b><br><b>(10.18 to 23.04)</b> | <b>5.23</b><br><b>(3.21 to 8.45)</b>    | <b>4.41</b><br><b>(2.58 to 7.46)</b>    | <b>7.94</b><br><b>(4.84 to 13.24)</b>   | <b>0.28</b><br><b>(0.19 to 0.42)</b> | <b>0.10</b><br><b>(0.06 to 0.16)</b> | <b>0.08</b><br><b>(0.05 to 0.14)</b> | <b>0.15</b><br><b>(0.09 to 0.25)</b> |
| Maternal hemorrhage                                   | 4.52<br>(2.72 to 7.13)                  | 1.39<br>(0.77 to 2.39)                  | 1.18<br>(0.64 to 2.12)                  | 2.11<br>(1.18 to 3.64)                  | 0.08<br>(0.05 to 0.13)               | 0.02<br>(0.01 to 0.04)               | 0.02<br>(0.01 to 0.04)               | 0.04<br>(0.02 to 0.07)               |
| Maternal sepsis and other maternal infections         | 0.11<br>(0.05 to 0.21)                  | 0.03<br>(0.01 to 0.07)                  | 0.03<br>(0.01 to 0.06)                  | 0.05<br>(0.02 to 0.10)                  | 0.00<br>(0.00 to 0.00)               | 0.00<br>(0.00 to 0.00)               | 0.00<br>(0.00 to 0.00)               | 0.00<br>(0.00 to 0.00)               |
| Maternal hypertensive disorders                       | 0.43<br>(0.23 to 0.71)                  | 0.14<br>(0.07 to 0.23)                  | 0.11<br>(0.06 to 0.20)                  | 0.21<br>(0.10 to 0.36)                  | 0.01<br>(0.00 to 0.01)               | 0.00<br>(0.00 to 0.00)               | 0.00<br>(0.00 to 0.00)               | 0.00<br>(0.00 to 0.01)               |
| Maternal obstructed labor and uterine rupture         | 0.07<br>(0.03 to 0.14)                  | 0.02<br>(0.01 to 0.05)                  | 0.02<br>(0.01 to 0.04)                  | 0.04<br>(0.01 to 0.08)                  | 0.00<br>(0.00 to 0.00)               | 0.00<br>(0.00 to 0.00)               | 0.00<br>(0.00 to 0.00)               | 0.00<br>(0.00 to 0.00)               |
| Maternal abortion, miscarriage, and ectopic pregnancy | 8.38<br>(5.48 to 12.75)                 | 2.97<br>(1.70 to 5.16)                  | 2.51<br>(1.40 to 4.39)                  | 4.54<br>(2.59 to 7.98)                  | 0.15<br>(0.10 to 0.25)               | 0.06<br>(0.03 to 0.10)               | 0.05<br>(0.03 to 0.08)               | 0.09<br>(0.05 to 0.15)               |



|                                        |                           |                           |                           |                           |                           |                           |                           |                           |
|----------------------------------------|---------------------------|---------------------------|---------------------------|---------------------------|---------------------------|---------------------------|---------------------------|---------------------------|
|                                        | 0.96<br>(0.54 to<br>1.62) | 0.36<br>(0.18 to<br>0.66) | 0.30<br>(0.15 to<br>0.55) | 0.54<br>(0.28 to<br>0.95) | 0.02<br>(0.01 to<br>0.03) | 0.01<br>(0.00 to<br>0.01) | 0.01<br>(0.00 to<br>0.01) | 0.01<br>(0.01 to<br>0.02) |
| Indirect maternal deaths               |                           |                           |                           |                           |                           |                           |                           |                           |
|                                        | 0.06<br>(0.02 to<br>0.12) | 0.02<br>(0.01 to<br>0.04) | 0.02<br>(0.00 to<br>0.03) | 0.03<br>(0.01 to<br>0.06) | 0.00<br>(0.00 to<br>0.00) | 0.00<br>(0.00 to<br>0.00) | 0.00<br>(0.00 to<br>0.00) | 0.00<br>(0.00 to<br>0.00) |
| Late maternal deaths                   |                           |                           |                           |                           |                           |                           |                           |                           |
|                                        | 0.03<br>(0.01 to<br>0.05) | 0.03<br>(0.01 to<br>0.08) | 0.03<br>(0.01 to<br>0.06) | 0.05<br>(0.01 to<br>0.11) | 0.00<br>(0.00 to<br>0.00) | 0.00<br>(0.00 to<br>0.00) | 0.00<br>(0.00 to<br>0.00) | 0.00<br>(0.00 to<br>0.00) |
| Maternal deaths aggravated by HIV/AIDS |                           |                           |                           |                           |                           |                           |                           |                           |
|                                        | 0.73<br>(0.40 to<br>1.22) | 0.26<br>(0.13 to<br>0.46) | 0.22<br>(0.11 to<br>0.39) | 0.38<br>(0.20 to<br>0.66) | 0.01<br>(0.01 to<br>0.02) | 0.00<br>(0.00 to<br>0.01) | 0.00<br>(0.00 to<br>0.01) | 0.01<br>(0.00 to<br>0.01) |
| Other maternal disorders               |                           |                           |                           |                           |                           |                           |                           |                           |

| Vietnam                                                                 |                                     |                                    |                                    |                                     |                               |                               |                               |                               |
|-------------------------------------------------------------------------|-------------------------------------|------------------------------------|------------------------------------|-------------------------------------|-------------------------------|-------------------------------|-------------------------------|-------------------------------|
| Cause                                                                   | YLLs (in 1000s)                     |                                    |                                    |                                     | Deaths (in 1000s)             |                               |                               |                               |
|                                                                         | 2016                                | 2040 Forecast                      | 2040 Better Scenario               | 2040 Worse Scenario                 | 2016                          | 2040 Forecast                 | 2040 Better Scenario          | 2040 Worse Scenario           |
| <b>Neonatal disorders</b>                                               | <b>548.25</b><br>(402.91 to 741.29) | <b>140.70</b><br>(87.66 to 211.08) | <b>120.49</b><br>(74.06 to 182.03) | <b>222.59</b><br>(139.12 to 330.77) | <b>6.33</b><br>(4.65 to 8.56) | <b>1.63</b><br>(1.01 to 2.44) | <b>1.39</b><br>(0.86 to 2.10) | <b>2.57</b><br>(1.61 to 3.82) |
| Neonatal preterm birth                                                  | 317.85<br>(223.33 to 437.74)        | 64.19<br>(37.59 to 100.83)         | 56.25<br>(32.64 to 88.12)          | 115.67<br>(68.67 to 177.27)         | 3.67<br>(2.58 to 5.06)        | 0.74<br>(0.43 to 1.17)        | 0.65<br>(0.38 to 1.02)        | 1.34<br>(0.79 to 2.05)        |
| Neonatal encephalopathy due to birth asphyxia and trauma                | 62.99<br>(35.59 to 115.04)          | 17.49<br>(8.40 to 35.53)           | 14.82<br>(6.98 to 30.41)           | 23.65<br>(11.22 to 48.15)           | 0.73<br>(0.41 to 1.33)        | 0.20<br>(0.10 to 0.41)        | 0.17<br>(0.08 to 0.35)        | 0.27<br>(0.13 to 0.56)        |
| Neonatal sepsis and other neonatal infections                           | 91.80<br>(54.60 to 151.84)          | 34.89<br>(18.24 to 62.35)          | 29.50<br>(15.48 to 53.52)          | 47.99<br>(24.42 to 88.82)           | 1.06<br>(0.63 to 1.75)        | 0.40<br>(0.21 to 0.72)        | 0.34<br>(0.18 to 0.62)        | 0.55<br>(0.28 to 1.03)        |
| Hemolytic disease and other neonatal jaundice                           | 2.52<br>(1.46 to 4.10)              | 0.62<br>(0.29 to 1.25)             | 0.51<br>(0.24 to 1.03)             | 0.90<br>(0.41 to 1.78)              | 0.03<br>(0.02 to 0.05)        | 0.01<br>(0.00 to 0.01)        | 0.01<br>(0.00 to 0.01)        | 0.01<br>(0.00 to 0.02)        |
| Other neonatal disorders                                                | 73.09<br>(43.05 to 117.70)          | 23.52<br>(12.16 to 41.43)          | 19.41<br>(9.87 to 34.00)           | 34.38<br>(17.19 to 60.94)           | 0.84<br>(0.50 to 1.36)        | 0.27<br>(0.14 to 0.48)        | 0.22<br>(0.11 to 0.39)        | 0.40<br>(0.20 to 0.70)        |
| <b>Nutritional deficiencies</b>                                         | <b>2.92</b><br>(2.47 to 3.43)       | <b>2.84</b><br>(2.16 to 3.65)      | <b>2.77</b><br>(2.09 to 3.60)      | <b>3.10</b><br>(2.32 to 4.03)       | <b>0.29</b><br>(0.24 to 0.36) | <b>0.29</b><br>(0.20 to 0.38) | <b>0.29</b><br>(0.20 to 0.39) | <b>0.30</b><br>(0.20 to 0.40) |
| Protein-energy malnutrition                                             | 0.36<br>(0.27 to 0.47)              | 0.25<br>(0.15 to 0.38)             | 0.24<br>(0.15 to 0.38)             | 0.28<br>(0.17 to 0.43)              | 0.03<br>(0.02 to 0.04)        | 0.03<br>(0.01 to 0.04)        | 0.03<br>(0.01 to 0.04)        | 0.03<br>(0.01 to 0.05)        |
| Iodine deficiency                                                       | 0.11<br>(0.01 to 0.40)              | 0.20<br>(0.01 to 0.91)             | 0.19<br>(0.01 to 0.87)             | 0.23<br>(0.01 to 1.04)              | 0.01<br>(0.00 to 0.04)        | 0.02<br>(0.00 to 0.09)        | 0.02<br>(0.00 to 0.09)        | 0.02<br>(0.00 to 0.10)        |
| Dietary iron deficiency                                                 | 0.33<br>(0.20 to 0.51)              | 0.31<br>(0.13 to 0.63)             | 0.30<br>(0.13 to 0.63)             | 0.33<br>(0.15 to 0.68)              | 0.03<br>(0.01 to 0.06)        | 0.03<br>(0.01 to 0.07)        | 0.03<br>(0.01 to 0.07)        | 0.03<br>(0.01 to 0.07)        |
| Other nutritional deficiencies                                          | 2.13<br>(1.70 to 2.59)              | 2.08<br>(1.32 to 2.86)             | 2.04<br>(1.29 to 2.81)             | 2.26<br>(1.41 to 3.20)              | 0.23<br>(0.18 to 0.29)        | 0.21<br>(0.13 to 0.31)        | 0.21<br>(0.13 to 0.31)        | 0.22<br>(0.13 to 0.32)        |
| <b>Other communicable, maternal, neonatal, and nutritional diseases</b> | <b>61.06</b><br>(41.42 to 113.30)   | <b>41.26</b><br>(32.32 to 54.84)   | <b>38.63</b><br>(29.87 to 51.12)   | <b>48.37</b><br>(37.14 to 66.20)    | <b>1.68</b><br>(1.34 to 2.32) | <b>1.81</b><br>(1.51 to 2.21) | <b>1.77</b><br>(1.46 to 2.13) | <b>1.99</b><br>(1.62 to 2.43) |
| Sexually transmitted infections excluding HIV                           | 11.25<br>(3.91 to 26.95)            | 2.32<br>(1.10 to 5.26)             | 2.12<br>(1.03 to 4.82)             | 2.86<br>(1.27 to 6.78)              | 0.17<br>(0.08 to 0.35)        | 0.06<br>(0.04 to 0.10)        | 0.06<br>(0.04 to 0.09)        | 0.07<br>(0.04 to 0.12)        |
| Syphilis                                                                | 10.55<br>(3.20 to 26.24)            | 1.79<br>(0.58 to 4.72)             | 1.60<br>(0.53 to 4.28)             | 2.28<br>(0.70 to 6.22)              | 0.14<br>(0.05 to 0.32)        | 0.03<br>(0.02 to 0.07)        | 0.03<br>(0.02 to 0.06)        | 0.04<br>(0.02 to 0.08)        |
| Chlamydial infection                                                    | 0.13<br>(0.10 to 0.19)              | 0.10<br>(0.07 to 0.13)             | 0.10<br>(0.07 to 0.13)             | 0.11<br>(0.08 to 0.14)              | 0.01<br>(0.01 to 0.01)        | 0.01<br>(0.00 to 0.01)        | 0.01<br>(0.00 to 0.01)        | 0.01<br>(0.00 to 0.01)        |
| Gonococcal infection                                                    | 0.39<br>(0.31 to 0.53)              | 0.31<br>(0.22 to 0.41)             | 0.30<br>(0.21 to 0.40)             | 0.33<br>(0.24 to 0.45)              | 0.03<br>(0.01 to 0.02)        | 0.03<br>(0.01 to 0.03)        | 0.03<br>(0.01 to 0.02)        | 0.03<br>(0.01 to 0.03)        |
| Other sexually transmitted infections                                   | 0.18<br>(0.14 to 0.27)              | 0.13<br>(0.09 to 0.17)             | 0.12<br>(0.09 to 0.16)             | 0.14<br>(0.10 to 0.18)              | 0.01<br>(0.01 to 0.01)        | 0.01<br>(0.00 to 0.01)        | 0.01<br>(0.00 to 0.01)        | 0.01<br>(0.00 to 0.01)        |
| Acute hepatitis                                                         | 24.09<br>(19.63 to 29.58)           | 20.43<br>(15.49 to 26.44)          | 19.37<br>(14.72 to 25.34)          | 23.31<br>(17.71 to 30.22)           | 0.88<br>(0.73 to 1.06)        | 0.91<br>(0.71 to 1.14)        | 0.88<br>(0.69 to 1.11)        | 0.99<br>(0.78 to 1.25)        |
| Acute hepatitis A                                                       | 0.63<br>(0.44 to 0.87)              | 0.38<br>(0.23 to 0.59)             | 0.36<br>(0.22 to 0.57)             | 0.44<br>(0.27 to 0.67)              | 0.02<br>(0.01 to 0.02)        | 0.02<br>(0.01 to 0.03)        | 0.02<br>(0.01 to 0.03)        | 0.02<br>(0.01 to 0.03)        |
| Acute hepatitis B                                                       | 20.78<br>(16.78 to 25.89)           | 17.45<br>(12.91 to 23.41)          | 16.46<br>(11.96 to 22.12)          | 20.12<br>(14.70 to 26.86)           | 0.73<br>(0.59 to 0.88)        | 0.73<br>(0.55 to 0.93)        | 0.70<br>(0.53 to 0.91)        | 0.82<br>(0.61 to 1.04)        |



| Vietnam                              |                                           |                                           |                                           |                                           |                                     |                                     |                                     |                                     |
|--------------------------------------|-------------------------------------------|-------------------------------------------|-------------------------------------------|-------------------------------------------|-------------------------------------|-------------------------------------|-------------------------------------|-------------------------------------|
| Cause                                | YLLs (in 1000s)                           |                                           |                                           |                                           | Deaths (in 1000s)                   |                                     |                                     |                                     |
|                                      | 2016                                      | 2040 Forecast                             | 2040 Better Scenario                      | 2040 Worse Scenario                       | 2016                                | 2040 Forecast                       | 2040 Better Scenario                | 2040 Worse Scenario                 |
| <b>Neoplasms</b>                     | <b>3,088.23</b><br>(2,703.93 to 3,543.14) | <b>4,969.71</b><br>(4,014.71 to 6,139.40) | <b>4,201.78</b><br>(3,447.53 to 5,097.21) | <b>6,082.08</b><br>(4,782.53 to 7,626.88) | <b>128.23</b><br>(115.72 to 143.10) | <b>242.95</b><br>(202.79 to 289.22) | <b>210.18</b><br>(178.19 to 244.90) | <b>286.43</b><br>(230.59 to 345.44) |
| Lip and oral cavity cancer           | 66.15<br>(56.00 to 77.53)                 | 119.02<br>(67.58 to 195.95)               | 77.81<br>(46.16 to 123.30)                | 184.60<br>(103.88 to 302.45)              | 3.51<br>(3.07 to 3.98)              | 6.87<br>(3.79 to 11.22)             | 4.71<br>(2.70 to 7.47)              | 9.99<br>(5.40 to 16.37)             |
| Nasopharynx cancer                   | 42.02<br>(29.22 to 55.90)                 | 68.39<br>(34.33 to 119.78)                | 42.38<br>(21.79 to 75.56)                 | 104.48<br>(52.81 to 173.92)               | 1.25<br>(0.90 to 1.63)              | 2.43<br>(1.27 to 4.15)              | 1.52<br>(0.81 to 2.61)              | 3.70<br>(1.92 to 6.05)              |
| Other pharynx cancer                 | 143.73<br>(99.41 to 184.73)               | 246.37<br>(130.10 to 434.63)              | 195.14<br>(108.24 to 331.95)              | 272.65<br>(145.60 to 476.20)              | 5.11<br>(3.63 to 6.40)              | 10.18<br>(5.44 to 17.59)            | 8.17<br>(4.55 to 14.09)             | 11.01<br>(5.95 to 19.01)            |
| Esophageal cancer                    | 84.18<br>(71.38 to 98.58)                 | 134.27<br>(70.33 to 246.48)               | 91.88<br>(51.27 to 159.66)                | 204.14<br>(101.37 to 388.14)              | 3.83<br>(3.37 to 4.33)              | 6.67<br>(3.73 to 11.48)             | 4.72<br>(2.80 to 7.69)              | 9.71<br>(5.12 to 17.41)             |
| Stomach cancer                       | 268.00<br>(226.53 to 316.12)              | 303.03<br>(226.69 to 390.77)              | 281.95<br>(217.38 to 357.24)              | 346.40<br>(249.08 to 461.85)              | 10.58<br>(9.14 to 12.20)            | 13.93<br>(10.67 to 17.62)           | 13.18<br>(10.45 to 16.33)           | 15.44<br>(11.31 to 20.21)           |
| Colon and rectum cancer              | 273.41<br>(232.77 to 316.82)              | 589.81<br>(405.68 to 849.45)              | 537.36<br>(381.66 to 755.75)              | 604.62<br>(416.32 to 875.81)              | 14.18<br>(12.27 to 16.08)           | 34.69<br>(24.11 to 48.84)           | 32.65<br>(23.54 to 45.43)           | 33.80<br>(23.30 to 47.26)           |
| Liver cancer                         | 466.05<br>(351.16 to 620.48)              | 727.46<br>(451.24 to 1,153.62)            | 593.15<br>(387.24 to 892.51)              | 856.12<br>(501.61 to 1,420.58)            | 16.04<br>(12.50 to 20.54)           | 29.81<br>(19.47 to 44.77)           | 24.88<br>(17.11 to 35.18)           | 34.06<br>(20.97 to 53.16)           |
| Liver cancer due to hepatitis B      | 227.00<br>(162.06 to 322.04)              | 316.01<br>(189.04 to 507.93)              | 273.98<br>(174.48 to 425.62)              | 355.05<br>(201.76 to 600.28)              | 7.41<br>(5.46 to 10.13)             | 12.36<br>(7.71 to 19.40)            | 10.95<br>(7.24 to 16.26)            | 13.54<br>(8.03 to 21.80)            |
| Liver cancer due to hepatitis C      | 45.22<br>(30.88 to 63.01)                 | 78.86<br>(46.75 to 123.42)                | 69.93<br>(44.06 to 106.25)                | 86.99<br>(48.78 to 139.29)                | 1.90<br>(1.32 to 2.63)              | 3.84<br>(2.30 to 5.92)              | 3.49<br>(2.19 to 5.22)              | 4.08<br>(2.35 to 6.33)              |
| Liver cancer due to alcohol use      | 82.25<br>(55.21 to 118.02)                | 155.44<br>(89.65 to 258.24)               | 99.25<br>(60.22 to 157.24)                | 213.93<br>(117.44 to 366.94)              | 2.99<br>(2.08 to 4.26)              | 6.36<br>(3.80 to 10.25)             | 4.20<br>(2.62 to 6.59)              | 8.50<br>(4.84 to 14.21)             |
| Liver cancer due to other causes     | 111.58<br>(70.24 to 161.61)               | 177.16<br>(97.28 to 293.11)               | 149.98<br>(87.46 to 241.18)               | 200.16<br>(104.65 to 340.90)              | 3.75<br>(2.50 to 5.25)              | 7.24<br>(4.10 to 11.64)             | 6.25<br>(3.73 to 9.63)              | 7.94<br>(4.31 to 13.26)             |
| Gallbladder and biliary tract cancer | 17.73<br>(13.98 to 21.95)                 | 24.24<br>(18.98 to 29.28)                 | 25.35<br>(19.86 to 30.72)                 | 22.27<br>(17.12 to 27.12)                 | 0.87<br>(0.72 to 1.05)              | 1.32<br>(1.06 to 1.57)              | 1.41<br>(1.13 to 1.68)              | 1.18<br>(0.95 to 1.40)              |
| Pancreatic cancer                    | 70.32<br>(60.73 to 81.12)                 | 145.49<br>(112.63 to 186.98)              | 136.45<br>(108.20 to 170.37)              | 153.93<br>(116.85 to 202.29)              | 3.32<br>(2.94 to 3.76)              | 7.62<br>(6.03 to 9.61)              | 7.29<br>(5.92 to 8.99)              | 7.75<br>(6.02 to 9.97)              |
| Larynx cancer                        | 26.46<br>(20.56 to 34.40)                 | 42.18<br>(19.03 to 82.11)                 | 26.92<br>(13.22 to 52.20)                 | 63.17<br>(27.95 to 121.83)                | 1.17<br>(0.94 to 1.48)              | 2.12<br>(1.00 to 4.08)              | 1.37<br>(0.69 to 2.54)              | 3.04<br>(1.38 to 5.74)              |
| Tracheal, bronchus, and lung cancer  | 804.28<br>(678.53 to 923.50)              | 1,282.39<br>(862.24 to 1,759.30)          | 921.64<br>(626.71 to 1,233.05)            | 1,991.00<br>(1,310.02 to 2,748.83)        | 39.37<br>(32.78 to 44.40)           | 70.42<br>(49.04 to 93.55)           | 52.86<br>(36.37 to 69.81)           | 102.30<br>(69.32 to 137.99)         |
| Malignant skin melanoma              | 7.69<br>(5.66 to 9.91)                    | 12.28<br>(9.32 to 15.50)                  | 13.04<br>(9.84 to 16.50)                  | 10.85<br>(8.24 to 13.71)                  | 0.29<br>(0.22 to 0.36)              | 0.56<br>(0.43 to 0.72)              | 0.61<br>(0.47 to 0.78)              | 0.47<br>(0.37 to 0.61)              |
| Non-melanoma skin cancer             | 11.95<br>(9.93 to 14.18)                  | 23.22<br>(19.65 to 27.16)                 | 23.75<br>(20.03 to 27.88)                 | 22.83<br>(19.53 to 26.77)                 | 0.58<br>(0.50 to 0.67)              | 1.29<br>(1.13 to 1.49)              | 1.36<br>(1.18 to 1.56)              | 1.21<br>(1.04 to 1.41)              |
| Breast cancer                        | 147.31<br>(112.49 to 192.19)              | 240.66<br>(164.69 to 358.57)              | 221.29<br>(156.50 to 313.07)              | 255.71<br>(167.69 to 401.66)              | 5.31<br>(4.22 to 6.68)              | 10.21<br>(7.11 to 14.93)            | 9.53<br>(6.94 to 13.27)             | 10.53<br>(7.01 to 16.20)            |
| Cervical cancer                      | 65.57<br>(35.47 to 89.38)                 | 74.49<br>(35.74 to 114.59)                | 70.21<br>(33.72 to 103.75)                | 87.68<br>(39.17 to 140.73)                | 2.43<br>(1.36 to 3.21)              | 3.13<br>(1.52 to 4.68)              | 2.98<br>(1.51 to 4.34)              | 3.60<br>(1.68 to 5.69)              |

|                   |                              |                               |                               |                              |                           |                           |                           |                           |
|-------------------|------------------------------|-------------------------------|-------------------------------|------------------------------|---------------------------|---------------------------|---------------------------|---------------------------|
|                   | 18.57<br>(13.82 to<br>25.30) | 26.60<br>(19.94 to<br>36.12)  | 25.98<br>(19.38 to<br>35.27)  | 28.48<br>(21.41 to<br>38.51) | 0.74<br>(0.57 to<br>0.98) | 1.20<br>(0.93 to<br>1.57) | 1.19<br>(0.92 to<br>1.55) | 1.26<br>(0.97 to<br>1.66) |
| Uterine cancer    | 43.76<br>(33.97 to<br>56.60) | 71.28<br>(52.75 to<br>97.46)  | 71.64<br>(54.01 to<br>95.34)  | 65.51<br>(48.41 to<br>89.28) | 1.50<br>(1.21 to<br>1.90) | 2.91<br>(2.24 to<br>3.91) | 2.94<br>(2.30 to<br>3.90) | 2.62<br>(2.01 to<br>3.55) |
| Ovarian cancer    | 26.40<br>(17.22 to<br>32.75) | 82.84<br>(53.92 to<br>102.90) | 88.13<br>(57.60 to<br>108.95) | 73.13<br>(47.45 to<br>92.52) | 1.82<br>(1.22 to<br>2.20) | 5.80<br>(3.93 to<br>7.20) | 6.35<br>(4.32 to<br>7.77) | 4.89<br>(3.25 to<br>6.18) |
| Prostate cancer   | 5.72<br>(4.07 to<br>7.58)    | 5.80<br>(4.08 to<br>7.89)     | 5.80<br>(4.07 to<br>7.91)     | 5.93<br>(4.21 to<br>8.05)    | 0.15<br>(0.11 to<br>0.19) | 0.19<br>(0.14 to<br>0.24) | 0.19<br>(0.14 to<br>0.25) | 0.19<br>(0.14 to<br>0.24) |
| Testicular cancer |                              |                               |                               |                              |                           |                           |                           |                           |

| Vietnam                         |                                                  |                                                  |                                                  |                                                  |                                            |                                            |                                            |                                            |
|---------------------------------|--------------------------------------------------|--------------------------------------------------|--------------------------------------------------|--------------------------------------------------|--------------------------------------------|--------------------------------------------|--------------------------------------------|--------------------------------------------|
| Cause                           | YLLs (in 1000s)                                  |                                                  |                                                  |                                                  | Deaths (in 1000s)                          |                                            |                                            |                                            |
|                                 | 2016                                             | 2040 Forecast                                    | 2040 Better Scenario                             | 2040 Worse Scenario                              | 2016                                       | 2040 Forecast                              | 2040 Better Scenario                       | 2040 Worse Scenario                        |
| Kidney cancer                   | 14.61<br>(11.78 to 17.56)                        | 29.07<br>(20.71 to 39.07)                        | 28.52<br>(20.83 to 37.90)                        | 28.70<br>(19.68 to 40.00)                        | 0.60<br>(0.49 to 0.71)                     | 1.41<br>(1.02 to 1.88)                     | 1.41<br>(1.05 to 1.84)                     | 1.34<br>(0.93 to 1.84)                     |
| Bladder cancer                  | 23.23<br>(18.18 to 27.50)                        | 42.75<br>(28.72 to 62.08)                        | 38.03<br>(26.46 to 53.07)                        | 47.93<br>(31.07 to 71.27)                        | 1.26<br>(1.00 to 1.46)                     | 2.55<br>(1.70 to 3.65)                     | 2.32<br>(1.61 to 3.21)                     | 2.72<br>(1.76 to 4.00)                     |
| Brain and nervous system cancer | 49.45<br>(37.17 to 60.40)                        | 73.57<br>(55.05 to 91.87)                        | 75.72<br>(56.56 to 94.85)                        | 69.65<br>(51.99 to 86.25)                        | 1.38<br>(1.07 to 1.68)                     | 2.69<br>(2.15 to 3.30)                     | 2.82<br>(2.26 to 3.46)                     | 2.46<br>(1.95 to 3.00)                     |
| Thyroid cancer                  | 30.59<br>(24.58 to 37.91)                        | 41.87<br>(32.63 to 56.04)                        | 40.17<br>(31.96 to 52.59)                        | 42.95<br>(33.04 to 57.59)                        | 1.12<br>(0.91 to 1.47)                     | 1.85<br>(1.46 to 2.54)                     | 1.81<br>(1.45 to 2.45)                     | 1.84<br>(1.43 to 2.58)                     |
| Mesothelioma                    | 4.66<br>(3.66 to 6.27)                           | 6.61<br>(5.16 to 8.84)                           | 6.78<br>(5.30 to 9.12)                           | 6.37<br>(5.06 to 8.44)                           | 0.16<br>(0.13 to 0.22)                     | 0.29<br>(0.23 to 0.36)                     | 0.30<br>(0.25 to 0.39)                     | 0.27<br>(0.21 to 0.34)                     |
| Hodgkin lymphoma                | 10.24<br>(7.45 to 13.19)                         | 9.22<br>(6.56 to 12.53)                          | 8.91<br>(6.30 to 12.09)                          | 10.29<br>(7.40 to 13.84)                         | 0.29<br>(0.22 to 0.39)                     | 0.34<br>(0.24 to 0.47)                     | 0.34<br>(0.24 to 0.47)                     | 0.37<br>(0.26 to 0.51)                     |
| Non-Hodgkin lymphoma            | 113.33<br>(93.63 to 137.32)                      | 175.51<br>(143.10 to 217.25)                     | 179.67<br>(146.66 to 222.69)                     | 162.31<br>(132.73 to 201.67)                     | 3.54<br>(2.95 to 4.45)                     | 7.24<br>(5.95 to 9.22)                     | 7.59<br>(6.26 to 9.65)                     | 6.44<br>(5.28 to 8.26)                     |
| Multiple myeloma                | 12.04<br>(8.81 to 14.97)                         | 25.91<br>(18.23 to 33.03)                        | 26.68<br>(18.83 to 33.66)                        | 23.33<br>(16.53 to 29.44)                        | 0.51<br>(0.37 to 0.64)                     | 1.25<br>(0.88 to 1.58)                     | 1.31<br>(0.92 to 1.64)                     | 1.09<br>(0.78 to 1.38)                     |
| Leukemia                        | 62.32<br>(50.22 to 91.06)                        | 87.32<br>(62.80 to 125.22)                       | 83.30<br>(61.81 to 118.19)                       | 88.94<br>(62.55 to 130.30)                       | 1.95<br>(1.63 to 2.72)                     | 3.69<br>(2.69 to 4.95)                     | 3.59<br>(2.69 to 4.95)                     | 3.62<br>(2.54 to 5.19)                     |
| Acute lymphoid leukemia         | 26.03<br>(20.61 to 40.04)                        | 34.71<br>(25.02 to 51.10)                        | 33.29<br>(24.58 to 48.62)                        | 34.94<br>(24.99 to 51.21)                        | 0.78<br>(0.63 to 1.15)                     | 1.42<br>(1.03 to 2.11)                     | 1.39<br>(1.04 to 2.05)                     | 1.38<br>(0.97 to 2.06)                     |
| Chronic lymphoid leukemia       | 1.98<br>(1.56 to 2.61)                           | 2.76<br>(1.99 to 3.77)                           | 2.63<br>(1.92 to 3.50)                           | 2.82<br>(1.98 to 3.91)                           | 0.07<br>(0.06 to 0.10)                     | 0.13<br>(0.09 to 0.17)                     | 0.12<br>(0.09 to 0.16)                     | 0.12<br>(0.09 to 0.17)                     |
| Acute myeloid leukemia          | 18.34<br>(14.16 to 27.00)                        | 28.75<br>(20.19 to 41.75)                        | 27.74<br>(19.94 to 39.69)                        | 28.35<br>(19.45 to 41.70)                        | 0.50<br>(0.40 to 0.71)                     | 1.06<br>(0.75 to 1.53)                     | 1.04<br>(0.75 to 1.48)                     | 1.01<br>(0.70 to 1.50)                     |
| Chronic myeloid leukemia        | 5.00<br>(3.77 to 7.41)                           | 4.71<br>(3.05 to 7.35)                           | 4.40<br>(2.93 to 6.81)                           | 4.95<br>(3.12 to 7.77)                           | 0.16<br>(0.12 to 0.23)                     | 0.19<br>(0.12 to 0.29)                     | 0.18<br>(0.12 to 0.28)                     | 0.19<br>(0.12 to 0.30)                     |
| Other leukemia                  | 10.96<br>(8.53 to 18.26)                         | 16.39<br>(10.99 to 24.89)                        | 15.24<br>(10.42 to 22.98)                        | 17.88<br>(11.64 to 28.14)                        | 0.44<br>(0.36 to 0.60)                     | 0.89<br>(0.60 to 1.35)                     | 0.86<br>(0.59 to 1.24)                     | 0.92<br>(0.60 to 1.42)                     |
| Other neoplasms                 | 178.44<br>(151.30 to 208.34)                     | 258.07<br>(217.12 to 306.96)                     | 264.17<br>(221.28 to 315.95)                     | 248.30<br>(209.26 to 294.34)                     | 5.37<br>(4.55 to 6.37)                     | 10.30<br>(8.70 to 12.59)                   | 10.78<br>(9.08 to 13.16)                   | 9.52<br>(8.03 to 11.71)                    |
| <b>Cardiovascular diseases</b>  | <b>3,604.67</b><br><b>(3,243.25 to 4,032.74)</b> | <b>3,650.27</b><br><b>(2,712.66 to 4,907.76)</b> | <b>2,721.63</b><br><b>(2,113.53 to 3,582.60)</b> | <b>6,208.48</b><br><b>(4,404.19 to 8,515.04)</b> | <b>218.95</b><br><b>(203.91 to 237.69)</b> | <b>246.58</b><br><b>(191.69 to 319.49)</b> | <b>195.90</b><br><b>(157.72 to 247.39)</b> | <b>374.02</b><br><b>(283.56 to 498.10)</b> |
| Rheumatic heart disease         | 50.33<br>(39.45 to 64.62)                        | 34.48<br>(26.86 to 46.02)                        | 32.96<br>(25.60 to 43.87)                        | 39.68<br>(30.54 to 53.45)                        | 2.03<br>(1.65 to 2.56)                     | 1.87<br>(1.49 to 2.45)                     | 1.85<br>(1.48 to 2.39)                     | 2.04<br>(1.58 to 2.67)                     |
| Ischemic heart disease          | 1,273.29<br>(1,133.94 to 1,435.32)               | 1,156.67<br>(729.27 to 1,868.30)                 | 852.56<br>(558.40 to 1,320.66)                   | 2,163.17<br>(1,299.63 to 3,523.54)               | 86.80<br>(79.28 to 95.08)                  | 84.50<br>(55.39 to 126.30)                 | 66.62<br>(45.26 to 97.50)                  | 138.28<br>(88.86 to 215.17)                |
| Stroke                          | 1,815.70<br>(1,608.02 to 2,055.90)               | 1,672.04<br>(1,069.62 to 2,560.15)               | 1,138.34<br>(763.58 to 1,713.51)                 | 3,079.68<br>(1,884.45 to 4,884.53)               | 102.75<br>(92.85 to 113.54)                | 107.38<br>(73.22 to 156.88)                | 79.00<br>(56.85 to 112.53)                 | 175.39<br>(117.56 to 259.80)               |
| Ischemic stroke                 | 541.48<br>(473.65 to 615.78)                     | 554.08<br>(344.71 to 950.15)                     | 414.48<br>(266.18 to 681.44)                     | 865.67<br>(517.19 to 1,432.47)                   | 40.33<br>(35.79 to 45.09)                  | 43.02<br>(26.98 to 76.05)                  | 34.23<br>(22.53 to 58.09)                  | 60.88<br>(37.63 to 107.47)                 |

|                                |                                       |                                     |                                   |                                       |                              |                              |                              |                                |
|--------------------------------|---------------------------------------|-------------------------------------|-----------------------------------|---------------------------------------|------------------------------|------------------------------|------------------------------|--------------------------------|
| Intracerebral hemorrhage       | 1,274.22<br>(1,107.04 to<br>1,475.38) | 1,117.96<br>(656.90 to<br>1,819.67) | 723.85<br>(463.14 to<br>1,130.01) | 2,214.01<br>(1,247.11 to<br>3,698.41) | 62.41<br>(55.23 to<br>70.14) | 64.36<br>(41.24 to<br>99.10) | 44.76<br>(30.96 to<br>65.30) | 114.51<br>(70.06 to<br>185.19) |
| Hypertensive heart disease     | 178.93<br>(126.82 to<br>250.76)       | 342.18<br>(192.45 to<br>627.67)     | 266.41<br>(162.26 to<br>433.06)   | 454.26<br>(241.62 to<br>926.63)       | 11.37<br>(8.03 to<br>16.01)  | 23.49<br>(13.30 to<br>42.96) | 18.85<br>(11.40 to<br>30.90) | 29.30<br>(15.48 to<br>61.29)   |
| Cardiomyopathy and myocarditis | 74.84<br>(53.60 to<br>98.65)          | 109.05<br>(72.42 to<br>152.75)      | 104.94<br>(69.57 to<br>146.77)    | 106.13<br>(71.16 to<br>150.65)        | 3.44<br>(2.54 to<br>4.36)    | 6.05<br>(4.00 to<br>8.37)    | 6.09<br>(4.01 to<br>8.43)    | 5.56<br>(3.70 to<br>7.76)      |
| Myocarditis                    | 11.39<br>(8.15 to<br>15.24)           | 10.51<br>(7.39 to<br>14.25)         | 10.62<br>(7.37 to<br>14.40)       | 10.55<br>(7.39 to<br>14.22)           | 0.41<br>(0.29 to<br>0.54)    | 0.51<br>(0.36 to<br>0.69)    | 0.54<br>(0.38 to<br>0.73)    | 0.48<br>(0.34 to<br>0.65)      |

| Vietnam                                                       |                                                      |                                                      |                                                      |                                                        |                                                   |                                                   |                                                   |                                                   |
|---------------------------------------------------------------|------------------------------------------------------|------------------------------------------------------|------------------------------------------------------|--------------------------------------------------------|---------------------------------------------------|---------------------------------------------------|---------------------------------------------------|---------------------------------------------------|
| Cause                                                         | YLLs (in 1000s)                                      |                                                      |                                                      |                                                        | Deaths (in 1000s)                                 |                                                   |                                                   |                                                   |
|                                                               | 2016                                                 | 2040 Forecast                                        | 2040 Better Scenario                                 | 2040 Worse Scenario                                    | 2016                                              | 2040 Forecast                                     | 2040 Better Scenario                              | 2040 Worse Scenario                               |
| Alcoholic cardiomyopathy                                      | 11.23<br>(6.12 to<br>17.55)                          | 17.74<br>(9.54 to<br>27.78)                          | 14.06<br>(7.46 to<br>21.91)                          | 19.08<br>(10.68 to<br>29.81)                           | 0.44<br>(0.26 to<br>0.65)                         | 0.80<br>(0.46 to<br>1.20)                         | 0.66<br>(0.37 to<br>1.00)                         | 0.83<br>(0.49 to<br>1.23)                         |
| Other cardiomyopathy                                          | 52.22<br>(37.45 to<br>67.30)                         | 80.79<br>(52.09 to<br>114.85)                        | 80.26<br>(51.82 to<br>113.17)                        | 76.50<br>(49.06 to<br>110.25)                          | 2.59<br>(1.92 to<br>3.28)                         | 4.74<br>(3.02 to<br>6.88)                         | 4.90<br>(3.12 to<br>7.04)                         | 4.25<br>(2.71 to<br>6.23)                         |
| Atrial fibrillation and flutter                               | 31.78<br>(24.71 to<br>39.87)                         | 66.47<br>(47.41 to<br>90.35)                         | 64.40<br>(46.81 to<br>84.29)                         | 66.00<br>(46.84 to<br>90.59)                           | 3.60<br>(2.75 to<br>4.66)                         | 6.91<br>(4.89 to<br>9.35)                         | 6.89<br>(4.95 to<br>9.11)                         | 6.52<br>(4.49 to<br>9.00)                         |
| Aortic aneurysm                                               | 24.30<br>(20.15 to<br>29.67)                         | 37.73<br>(29.60 to<br>47.34)                         | 38.91<br>(30.93 to<br>48.36)                         | 37.85<br>(28.98 to<br>48.43)                           | 1.53<br>(1.30 to<br>1.82)                         | 2.61<br>(2.08 to<br>3.22)                         | 2.79<br>(2.25 to<br>3.43)                         | 2.44<br>(1.91 to<br>3.05)                         |
| Peripheral artery disease                                     | 1.36<br>(0.73 to<br>2.04)                            | 4.23<br>(2.15 to<br>6.72)                            | 4.20<br>(2.11 to<br>6.59)                            | 3.71<br>(1.90 to<br>5.96)                              | 0.13<br>(0.06 to<br>0.19)                         | 0.39<br>(0.18 to<br>0.56)                         | 0.40<br>(0.19 to<br>0.65)                         | 0.32<br>(0.15 to<br>0.52)                         |
| Endocarditis                                                  | 42.61<br>(33.25 to<br>57.77)                         | 58.00<br>(41.20 to<br>83.18)                         | 55.96<br>(40.08 to<br>79.99)                         | 58.46<br>(40.79 to<br>84.28)                           | 1.58<br>(1.27 to<br>2.09)                         | 2.74<br>(1.94 to<br>3.90)                         | 2.75<br>(1.98 to<br>3.88)                         | 2.61<br>(1.85 to<br>3.72)                         |
| Other cardiovascular and circulatory diseases                 | 111.53<br>(83.00 to<br>175.63)                       | 169.42<br>(119.17 to<br>266.48)                      | 162.96<br>(115.25 to<br>253.05)                      | 199.53<br>(134.58 to<br>318.72)                        | 5.74<br>(4.34 to<br>8.82)                         | 10.64<br>(7.58 to<br>16.81)                       | 10.65<br>(7.67 to<br>16.70)                       | 11.57<br>(8.05 to<br>18.84)                       |
| <b>Chronic respiratory diseases</b>                           | <b>579.36</b><br><b>(448.50 to</b><br><b>668.10)</b> | <b>591.76</b><br><b>(415.66 to</b><br><b>779.75)</b> | <b>449.23</b><br><b>(317.30 to</b><br><b>573.35)</b> | <b>906.30</b><br><b>(602.28 to</b><br><b>1,250.33)</b> | <b>38.91</b><br><b>(29.60 to</b><br><b>44.79)</b> | <b>42.41</b><br><b>(29.45 to</b><br><b>56.25)</b> | <b>33.51</b><br><b>(23.29 to</b><br><b>43.47)</b> | <b>60.31</b><br><b>(40.08 to</b><br><b>81.83)</b> |
| Chronic obstructive pulmonary disease                         | 386.10<br>(301.56 to<br>466.72)                      | 429.81<br>(283.05 to<br>612.37)                      | 298.94<br>(197.24 to<br>418.15)                      | 727.07<br>(464.15 to<br>1,072.50)                      | 28.73<br>(22.28 to<br>34.52)                      | 32.26<br>(21.52 to<br>45.26)                      | 23.78<br>(16.04 to<br>33.21)                      | 49.63<br>(32.09 to<br>71.74)                      |
| Pneumoconiosis                                                | 0.56<br>(0.42 to<br>0.77)                            | 0.65<br>(0.48 to<br>0.89)                            | 0.65<br>(0.47 to<br>0.89)                            | 0.63<br>(0.46 to<br>0.86)                              | 0.04<br>(0.03 to<br>0.05)                         | 0.05<br>(0.03 to<br>0.05)                         | 0.05<br>(0.03 to<br>0.07)                         | 0.04<br>(0.03 to<br>0.06)                         |
| Silicosis                                                     | 0.14<br>(0.07 to<br>0.24)                            | 0.12<br>(0.06 to<br>0.22)                            | 0.13<br>(0.06 to<br>0.22)                            | 0.12<br>(0.06 to<br>0.21)                              | 0.01<br>(0.00 to<br>0.01)                         | 0.01<br>(0.00 to<br>0.01)                         | 0.01<br>(0.00 to<br>0.02)                         | 0.01<br>(0.00 to<br>0.01)                         |
| Asbestosis                                                    | 0.09<br>(0.07 to<br>0.13)                            | 0.13<br>(0.08 to<br>0.20)                            | 0.13<br>(0.09 to<br>0.21)                            | 0.12<br>(0.08 to<br>0.18)                              | 0.00<br>(0.00 to<br>0.01)                         | 0.01<br>(0.00 to<br>0.01)                         | 0.01<br>(0.01 to<br>0.01)                         | 0.01<br>(0.00 to<br>0.01)                         |
| Coal workers pneumoconiosis                                   | 0.02<br>(0.01 to<br>0.04)                            | 0.02<br>(0.01 to<br>0.04)                            | 0.02<br>(0.01 to<br>0.03)                            | 0.02<br>(0.01 to<br>0.05)                              | 0.00<br>(0.00 to<br>0.00)                         | 0.00<br>(0.00 to<br>0.00)                         | 0.00<br>(0.00 to<br>0.00)                         | 0.00<br>(0.00 to<br>0.00)                         |
| Other pneumoconiosis                                          | 0.32<br>(0.23 to<br>0.43)                            | 0.38<br>(0.26 to<br>0.54)                            | 0.37<br>(0.25 to<br>0.52)                            | 0.36<br>(0.25 to<br>0.51)                              | 0.02<br>(0.02 to<br>0.03)                         | 0.03<br>(0.02 to<br>0.04)                         | 0.03<br>(0.02 to<br>0.04)                         | 0.03<br>(0.02 to<br>0.04)                         |
| Asthma                                                        | 168.32<br>(105.56 to<br>243.01)                      | 122.20<br>(63.78 to<br>197.54)                       | 108.85<br>(59.38 to<br>167.85)                       | 142.43<br>(73.36 to<br>244.86)                         | 8.86<br>(5.20 to<br>13.27)                        | 7.70<br>(3.93 to<br>10.74)                        | 7.10<br>(3.83 to<br>10.74)                        | 8.52<br>(4.31 to<br>14.23)                        |
| Interstitial lung disease and pulmonary sarcoidosis           | 14.82<br>(9.92 to<br>21.18)                          | 28.85<br>(19.59 to<br>40.04)                         | 30.98<br>(21.19 to<br>42.63)                         | 24.90<br>(16.54 to<br>35.91)                           | 0.85<br>(0.53 to<br>1.29)                         | 1.78<br>(1.17 to<br>2.59)                         | 1.96<br>(1.32 to<br>2.78)                         | 1.48<br>(0.94 to<br>2.22)                         |
| Other chronic respiratory diseases                            | 9.55<br>(4.97 to<br>15.02)                           | 10.25<br>(4.38 to<br>17.84)                          | 9.81<br>(4.20 to<br>16.83)                           | 11.27<br>(4.75 to<br>19.55)                            | 0.44<br>(0.18 to<br>0.83)                         | 0.63<br>(0.20 to<br>1.25)                         | 0.62<br>(0.21 to<br>1.23)                         | 0.64<br>(0.21 to<br>1.30)                         |
| <b>Cirrhosis and other chronic liver diseases</b>             | <b>573.50</b><br><b>(461.29 to</b><br><b>759.38)</b> | <b>765.16</b><br><b>(629.29 to</b><br><b>982.35)</b> | <b>709.40</b><br><b>(584.45 to</b><br><b>911.07)</b> | <b>830.22</b><br><b>(678.20 to</b><br><b>1,053.82)</b> | <b>20.84</b><br><b>(17.43 to</b><br><b>26.48)</b> | <b>33.27</b><br><b>(28.34 to</b><br><b>40.26)</b> | <b>31.80</b><br><b>(27.17 to</b><br><b>38.28)</b> | <b>34.60</b><br><b>(29.23 to</b><br><b>42.39)</b> |
| Cirrhosis and other chronic liver diseases due to hepatitis B | 217.84<br>(164.75 to<br>298.11)                      | 286.63<br>(219.33 to<br>385.88)                      | 285.50<br>(218.96 to<br>382.73)                      | 292.01<br>(221.47 to<br>392.47)                        | 7.79<br>(6.14 to<br>10.21)                        | 12.27<br>(9.77 to<br>15.85)                       | 12.53<br>(10.02 to<br>16.10)                      | 12.03<br>(9.45 to<br>15.59)                       |
| Cirrhosis and other chronic liver diseases due to hepatitis C | 99.12<br>(71.12 to<br>139.34)                        | 135.40<br>(100.44 to<br>183.75)                      | 134.31<br>(100.07 to<br>179.74)                      | 139.17<br>(102.58 to<br>189.68)                        | 3.45<br>(2.63 to<br>4.48)                         | 5.59<br>(4.36 to<br>7.20)                         | 5.66<br>(4.44 to<br>7.23)                         | 5.55<br>(4.30 to<br>7.22)                         |



|                                                                |                                                      |                                                      |                                                      |                                                      |                                                   |                                                   |                                                   |                                                   |
|----------------------------------------------------------------|------------------------------------------------------|------------------------------------------------------|------------------------------------------------------|------------------------------------------------------|---------------------------------------------------|---------------------------------------------------|---------------------------------------------------|---------------------------------------------------|
| Cirrhosis and other chronic liver diseases due to alcohol use  | 124.16<br>(92.95 to<br>175.78)                       | 186.09<br>(141.99 to<br>253.86)                      | 133.56<br>(99.73 to<br>182.85)                       | 237.12<br>(180.96 to<br>323.20)                      | 4.58<br>(3.58 to<br>6.12)                         | 7.98<br>(6.31 to<br>10.16)                        | 6.01<br>(4.69 to<br>7.66)                         | 9.71<br>(7.71 to<br>12.47)                        |
| Cirrhosis and other chronic liver diseases due to other causes | 132.38<br>(104.55 to<br>174.65)                      | 157.05<br>(124.95 to<br>204.11)                      | 156.03<br>(124.56 to<br>202.81)                      | 161.92<br>(128.33 to<br>209.21)                      | 5.02<br>(4.13 to<br>6.24)                         | 7.43<br>(6.06 to<br>9.13)                         | 7.60<br>(6.23 to<br>9.25)                         | 7.32<br>(5.92 to<br>9.05)                         |
| <b>Digestive diseases</b>                                      | <b>239.72</b><br><b>(201.46 to</b><br><b>310.01)</b> | <b>305.83</b><br><b>(229.08 to</b><br><b>447.67)</b> | <b>283.91</b><br><b>(218.22 to</b><br><b>396.34)</b> | <b>336.75</b><br><b>(249.49 to</b><br><b>499.73)</b> | <b>12.49</b><br><b>(10.79 to</b><br><b>15.02)</b> | <b>18.85</b><br><b>(15.00 to</b><br><b>25.02)</b> | <b>18.35</b><br><b>(14.85 to</b><br><b>23.66)</b> | <b>19.59</b><br><b>(15.08 to</b><br><b>26.89)</b> |
| Peptic ulcer disease                                           | 76.07<br>(53.47 to<br>108.32)                        | 69.86<br>(47.91 to<br>98.88)                         | 66.44<br>(45.42 to<br>91.84)                         | 84.37<br>(56.86 to<br>120.54)                        | 4.56<br>(3.39 to<br>5.97)                         | 4.77<br>(3.36 to<br>6.35)                         | 4.68<br>(3.31 to<br>6.17)                         | 5.46<br>(3.75 to<br>7.38)                         |

| Vietnam                                    |                              |                                  |                                  |                                |                           |                            |                            |                            |
|--------------------------------------------|------------------------------|----------------------------------|----------------------------------|--------------------------------|---------------------------|----------------------------|----------------------------|----------------------------|
| Cause                                      | YLLs (in 1000s)              |                                  |                                  |                                | Deaths (in 1000s)         |                            |                            |                            |
|                                            | 2016                         | 2040 Forecast                    | 2040 Better Scenario             | 2040 Worse Scenario            | 2016                      | 2040 Forecast              | 2040 Better Scenario       | 2040 Worse Scenario        |
| Gastritis and duodenitis                   | 6.51<br>(4.52 to 9.18)       | 10.63<br>(7.12 to 15.15)         | 10.67<br>(7.12 to 15.23)         | 10.81<br>(7.25 to 15.55)       | 0.38<br>(0.27 to 0.54)    | 0.69<br>(0.47 to 1.01)     | 0.71<br>(0.48 to 1.03)     | 0.67<br>(0.45 to 0.99)     |
| Appendicitis                               | 14.12<br>(9.89 to 21.08)     | 13.51<br>(9.25 to 20.17)         | 13.05<br>(8.98 to 19.39)         | 14.97<br>(10.30 to 22.74)      | 0.53<br>(0.38 to 0.75)    | 0.70<br>(0.48 to 0.98)     | 0.70<br>(0.49 to 0.97)     | 0.73<br>(0.50 to 1.04)     |
| Paralytic ileus and intestinal obstruction | 47.73<br>(36.88 to 63.32)    | 60.72<br>(47.49 to 81.60)        | 61.77<br>(48.38 to 82.09)        | 59.83<br>(46.39 to 82.11)      | 2.10<br>(1.70 to 2.69)    | 3.81<br>(2.95 to 4.97)     | 4.03<br>(3.15 to 5.24)     | 3.51<br>(2.65 to 4.66)     |
| Inguinal, femoral, and abdominal hernia    | 3.30<br>(2.04 to 4.26)       | 3.86<br>(2.13 to 5.17)           | 3.94<br>(2.14 to 5.27)           | 3.81<br>(2.12 to 5.11)         | 0.24<br>(0.12 to 0.33)    | 0.31<br>(0.15 to 0.44)     | 0.32<br>(0.16 to 0.47)     | 0.28<br>(0.14 to 0.41)     |
| Inflammatory bowel disease                 | 5.89<br>(4.64 to 7.71)       | 9.05<br>(7.08 to 11.60)          | 9.32<br>(7.31 to 11.85)          | 8.62<br>(6.77 to 11.06)        | 0.28<br>(0.23 to 0.35)    | 0.54<br>(0.43 to 0.67)     | 0.57<br>(0.46 to 0.71)     | 0.49<br>(0.39 to 0.62)     |
| Vascular intestinal disorders              | 9.41<br>(7.51 to 13.18)      | 17.55<br>(13.68 to 24.40)        | 17.98<br>(14.05 to 24.89)        | 17.09<br>(13.13 to 24.34)      | 0.68<br>(0.56 to 0.91)    | 1.32<br>(1.03 to 1.78)     | 1.39<br>(1.08 to 1.86)     | 1.23<br>(0.94 to 1.69)     |
| Gallbladder and biliary diseases           | 16.31<br>(13.25 to 20.40)    | 23.34<br>(15.39 to 34.00)        | 20.21<br>(13.95 to 27.41)        | 25.66<br>(16.65 to 38.01)      | 1.06<br>(0.85 to 1.29)    | 1.64<br>(1.04 to 2.42)     | 1.47<br>(1.00 to 2.03)     | 1.72<br>(1.08 to 2.54)     |
| Pancreatitis                               | 34.90<br>(24.16 to 48.02)    | 63.27<br>(21.91 to 168.87)       | 46.83<br>(17.13 to 121.46)       | 75.72<br>(25.95 to 201.40)     | 1.23<br>(0.88 to 1.65)    | 2.81<br>(1.01 to 7.09)     | 2.13<br>(0.84 to 5.12)     | 3.24<br>(1.15 to 8.30)     |
| Other digestive diseases                   | 25.48<br>(18.29 to 37.06)    | 34.03<br>(23.95 to 50.12)        | 33.69<br>(23.78 to 45.76)        | 35.88<br>(24.87 to 52.58)      | 1.42<br>(1.04 to 1.89)    | 2.28<br>(1.60 to 3.08)     | 2.34<br>(1.67 to 3.14)     | 2.27<br>(1.56 to 3.13)     |
| Neurological disorders                     | 533.25<br>(463.72 to 613.85) | 1,034.04<br>(842.42 to 1,294.62) | 1,026.19<br>(857.85 to 1,231.39) | 962.86<br>(764.57 to 1,219.84) | 47.98<br>(41.00 to 56.30) | 92.74<br>(72.13 to 119.78) | 95.59<br>(76.73 to 118.51) | 80.88<br>(60.52 to 106.97) |
| Alzheimer's disease and other dementias    | 378.50<br>(318.34 to 452.38) | 813.14<br>(622.61 to 1,063.39)   | 813.08<br>(645.76 to 1,027.11)   | 735.18<br>(546.34 to 972.21)   | 42.46<br>(35.60 to 50.80) | 81.43<br>(61.09 to 108.10) | 83.81<br>(65.34 to 106.68) | 70.53<br>(51.11 to 96.74)  |
| Parkinson's disease                        | 28.23<br>(21.92 to 35.80)    | 83.75<br>(63.23 to 106.82)       | 92.72<br>(70.35 to 118.45)       | 68.36<br>(51.28 to 88.05)      | 2.39<br>(1.82 to 3.08)    | 6.81<br>(5.04 to 8.82)     | 7.72<br>(5.81 to 9.97)     | 5.36<br>(3.87 to 7.06)     |
| Epilepsy                                   | 105.58<br>(86.08 to 126.38)  | 107.60<br>(70.25 to 168.47)      | 89.94<br>(61.04 to 136.79)       | 131.44<br>(85.69 to 207.20)    | 2.54<br>(2.04 to 3.03)    | 3.39<br>(2.23 to 5.10)     | 2.90<br>(1.97 to 4.21)     | 3.99<br>(2.62 to 6.13)     |
| Multiple sclerosis                         | 3.18<br>(2.30 to 4.43)       | 4.10<br>(2.97 to 5.62)           | 4.17<br>(3.03 to 5.74)           | 4.03<br>(2.89 to 5.56)         | 0.09<br>(0.07 to 0.13)    | 0.15<br>(0.11 to 0.20)     | 0.15<br>(0.11 to 0.20)     | 0.14<br>(0.10 to 0.19)     |
| Motor neuron disease                       | 3.79<br>(3.04 to 4.75)       | 7.11<br>(5.65 to 8.84)           | 7.37<br>(5.85 to 9.18)           | 6.57<br>(5.26 to 8.20)         | 0.12<br>(0.10 to 0.15)    | 0.28<br>(0.23 to 0.34)     | 0.29<br>(0.24 to 0.35)     | 0.25<br>(0.20 to 0.30)     |
| Other neurological disorders               | 14.07<br>(10.82 to 17.62)    | 18.35<br>(14.03 to 22.88)        | 18.92<br>(14.40 to 23.57)        | 17.28<br>(13.18 to 21.48)      | 0.38<br>(0.29 to 0.47)    | 0.68<br>(0.52 to 0.84)     | 0.73<br>(0.55 to 0.89)     | 0.61<br>(0.47 to 0.75)     |
| Mental disorders                           | 89.66<br>(49.74 to 124.56)   | 107.40<br>(63.70 to 158.00)      | 104.24<br>(61.70 to 153.08)      | 109.44<br>(64.37 to 161.38)    | 2.07<br>(1.27 to 2.77)    | 2.90<br>(2.02 to 3.88)     | 2.86<br>(2.00 to 3.83)     | 2.89<br>(1.97 to 3.86)     |
| Alcohol use disorders                      | 35.23<br>(21.57 to 49.26)    | 34.86<br>(20.73 to 49.96)        | 31.45<br>(18.58 to 45.27)        | 37.10<br>(22.06 to 52.61)      | 0.92<br>(0.57 to 1.26)    | 1.09<br>(0.65 to 1.50)     | 1.00<br>(0.59 to 1.38)     | 1.13<br>(0.68 to 1.56)     |
| Drug use disorders                         | 54.21<br>(24.28 to 81.93)    | 72.32<br>(39.29 to 113.68)       | 72.56<br>(40.14 to 113.63)       | 72.13<br>(38.40 to 113.82)     | 1.15<br>(0.63 to 1.64)    | 1.81<br>(1.24 to 2.57)     | 1.85<br>(1.28 to 2.61)     | 1.75<br>(1.18 to 2.51)     |
| Opioid use disorders                       | 35.70<br>(15.44 to 54.37)    | 40.12<br>(20.82 to 63.61)        | 40.08<br>(21.21 to 63.28)        | 40.43<br>(20.45 to 64.34)      | 0.72<br>(0.36 to 1.04)    | 0.95<br>(0.62 to 1.40)     | 0.97<br>(0.63 to 1.41)     | 0.93<br>(0.59 to 1.38)     |



| Vietnam                                                    |                                       |                                           |                                           |                                           |                                  |                                    |                                    |                                    |
|------------------------------------------------------------|---------------------------------------|-------------------------------------------|-------------------------------------------|-------------------------------------------|----------------------------------|------------------------------------|------------------------------------|------------------------------------|
| Cause                                                      | YLLs (in 1000s)                       |                                           |                                           |                                           | Deaths (in 1000s)                |                                    |                                    |                                    |
|                                                            | 2016                                  | 2040 Forecast                             | 2040 Better Scenario                      | 2040 Worse Scenario                       | 2016                             | 2040 Forecast                      | 2040 Better Scenario               | 2040 Worse Scenario                |
| <b>Diabetes, urogenital, blood, and endocrine diseases</b> | <b>958.59</b><br>(849.33 to 1,080.61) | <b>1,776.26</b><br>(1,216.68 to 3,073.33) | <b>1,493.12</b><br>(1,061.63 to 2,445.27) | <b>2,192.62</b><br>(1,504.06 to 3,720.41) | <b>53.84</b><br>(47.93 to 59.61) | <b>116.36</b><br>(81.37 to 203.22) | <b>100.60</b><br>(72.54 to 170.17) | <b>136.47</b><br>(94.58 to 234.02) |
| Diabetes mellitus                                          | 459.52<br>(401.85 to 525.48)          | 725.10<br>(473.99 to 1,070.85)            | 625.89<br>(423.06 to 906.82)              | 965.02<br>(621.79 to 1,460.04)            | 27.56<br>(24.23 to 31.42)        | 47.83<br>(32.55 to 67.11)          | 42.81<br>(29.60 to 59.28)          | 59.78<br>(38.45 to 85.65)          |
| Acute glomerulonephritis                                   | 0.62<br>(0.51 to 0.75)                | 0.62<br>(0.46 to 0.82)                    | 0.60<br>(0.44 to 0.80)                    | 0.67<br>(0.51 to 0.88)                    | 0.02<br>(0.01 to 0.02)           | 0.02<br>(0.01 to 0.05)             | 0.02<br>(0.02 to 0.03)             | 0.02<br>(0.02 to 0.03)             |
| Chronic kidney disease                                     | 381.32<br>(255.86 to 443.66)          | 882.66<br>(411.95 to 2,294.95)            | 696.67<br>(350.12 to 1,743.39)            | 1,058.72<br>(478.82 to 2,681.05)          | 21.20<br>(12.42 to 24.13)        | 58.58<br>(25.90 to 154.64)         | 47.33<br>(21.96 to 124.64)         | 67.35<br>(28.88 to 177.81)         |
| Chronic kidney disease due to diabetes mellitus            | 217.59<br>(155.00 to 258.74)          | 517.52<br>(244.20 to 1,295.33)            | 406.28<br>(203.60 to 992.09)              | 624.92<br>(287.22 to 1,533.53)            | 10.36<br>(6.62 to 12.21)         | 30.48<br>(13.11 to 82.70)          | 24.34<br>(11.07 to 66.28)          | 35.51<br>(14.97 to 94.83)          |
| Chronic kidney disease due to hypertension                 | 111.57<br>(69.63 to 133.62)           | 290.72<br>(129.07 to 795.36)              | 230.91<br>(109.83 to 620.99)              | 342.58<br>(145.83 to 910.51)              | 8.73<br>(4.57 to 10.38)          | 23.55<br>(10.16 to 63.46)          | 19.32<br>(8.67 to 54.44)           | 26.53<br>(11.26 to 70.67)          |
| Chronic kidney disease due to glomerulonephritis           | 26.03<br>(19.09 to 32.71)             | 31.80<br>(16.21 to 73.20)                 | 25.54<br>(13.80 to 57.90)                 | 39.39<br>(20.24 to 88.20)                 | 0.86<br>(0.56 to 1.08)           | 1.71<br>(0.73 to 4.85)             | 1.37<br>(0.62 to 3.89)             | 2.03<br>(0.87 to 5.67)             |
| Chronic kidney disease due to other and unspecified causes | 26.13<br>(19.20 to 31.73)             | 42.63<br>(20.40 to 104.82)                | 33.95<br>(17.40 to 83.57)                 | 51.83<br>(24.73 to 122.91)                | 1.24<br>(0.75 to 1.57)           | 2.84<br>(1.25 to 7.53)             | 2.30<br>(1.05 to 6.16)             | 3.28<br>(1.38 to 8.58)             |
| Urinary diseases and male infertility                      | 35.48<br>(30.76 to 40.68)             | 81.02<br>(69.05 to 94.58)                 | 84.22<br>(72.06 to 96.04)                 | 76.39<br>(64.85 to 89.08)                 | 2.38<br>(2.07 to 2.71)           | 5.91<br>(4.79 to 7.07)             | 6.36<br>(5.23 to 7.54)             | 5.26<br>(4.20 to 6.33)             |
| Urinary tract infections                                   | 30.53<br>(26.33 to 35.17)             | 72.42<br>(61.17 to 84.45)                 | 75.45<br>(63.83 to 87.64)                 | 67.81<br>(57.01 to 79.11)                 | 2.04<br>(1.76 to 2.37)           | 5.31<br>(4.23 to 6.44)             | 5.72<br>(4.64 to 6.88)             | 4.69<br>(3.71 to 5.75)             |
| Urolithiasis                                               | 1.25<br>(0.87 to 1.73)                | 3.39<br>(2.18 to 4.79)                    | 3.54<br>(2.28 to 5.00)                    | 3.15<br>(2.01 to 4.44)                    | 0.09<br>(0.06 to 0.12)           | 0.23<br>(0.15 to 0.34)             | 0.25<br>(0.16 to 0.37)             | 0.20<br>(0.13 to 0.30)             |
| Other urinary diseases                                     | 3.69<br>(2.03 to 6.27)                | 5.20<br>(2.70 to 8.99)                    | 5.23<br>(2.72 to 9.00)                    | 5.42<br>(2.81 to 9.28)                    | 0.25<br>(0.14 to 0.42)           | 0.37<br>(0.20 to 0.66)             | 0.39<br>(0.20 to 0.70)             | 0.36<br>(0.19 to 0.64)             |
| Gynecological diseases                                     | 0.17<br>(0.13 to 0.24)                | 0.17<br>(0.13 to 0.24)                    | 0.17<br>(0.12 to 0.23)                    | 0.20<br>(0.14 to 0.28)                    | 0.01<br>(0.01 to 0.01)           | 0.01<br>(0.01 to 0.01)             | 0.01<br>(0.01 to 0.01)             | 0.01<br>(0.01 to 0.01)             |
| Uterine fibroids                                           | 0.03<br>(0.01 to 0.04)                | 0.03<br>(0.01 to 0.05)                    | 0.03<br>(0.01 to 0.04)                    | 0.03<br>(0.02 to 0.06)                    | 0.00<br>(0.00 to 0.00)           | 0.00<br>(0.00 to 0.00)             | 0.00<br>(0.00 to 0.00)             | 0.00<br>(0.00 to 0.00)             |
| Polycystic ovarian syndrome                                | 0.00<br>(0.00 to 0.01)                | 0.00<br>(0.00 to 0.01)                    | 0.00<br>(0.00 to 0.00)                    | 0.00<br>(0.00 to 0.01)                    | 0.00<br>(0.00 to 0.00)           | 0.00<br>(0.00 to 0.00)             | 0.00<br>(0.00 to 0.00)             | 0.00<br>(0.00 to 0.00)             |
| Endometriosis                                              | 0.00<br>(0.00 to 0.01)                | 0.00<br>(0.00 to 0.01)                    | 0.00<br>(0.00 to 0.01)                    | 0.00<br>(0.00 to 0.01)                    | 0.00<br>(0.00 to 0.00)           | 0.00<br>(0.00 to 0.00)             | 0.00<br>(0.00 to 0.00)             | 0.00<br>(0.00 to 0.00)             |
| Genital prolapse                                           | 0.01<br>(0.00 to 0.01)                | 0.01<br>(0.00 to 0.01)                    | 0.01<br>(0.00 to 0.01)                    | 0.01<br>(0.00 to 0.02)                    | 0.00<br>(0.00 to 0.00)           | 0.00<br>(0.00 to 0.00)             | 0.00<br>(0.00 to 0.00)             | 0.00<br>(0.00 to 0.00)             |
| Other gynecological diseases                               | 0.13<br>(0.10 to 0.19)                | 0.13<br>(0.09 to 0.19)                    | 0.13<br>(0.09 to 0.19)                    | 0.15<br>(0.11 to 0.22)                    | 0.00<br>(0.00 to 0.01)           | 0.01<br>(0.00 to 0.01)             | 0.01<br>(0.00 to 0.01)             | 0.01<br>(0.00 to 0.01)             |
| Hemoglobinopathies and hemolytic anemias                   | 37.18<br>(29.32 to 45.26)             | 31.11<br>(24.48 to 39.30)                 | 30.30<br>(23.93 to 37.96)                 | 34.05<br>(26.92 to 43.03)                 | 1.21<br>(0.97 to 1.49)           | 1.56<br>(1.23 to 2.04)             | 1.56<br>(1.22 to 2.04)             | 1.65<br>(1.30 to 2.16)             |
| Thalassemias                                               | 16.46<br>(11.28 to 22.88)             | 5.08<br>(3.40 to 7.51)                    | 5.05<br>(3.44 to 7.42)                    | 5.09<br>(3.27 to 7.74)                    | 0.21<br>(0.15 to 0.28)           | 0.07<br>(0.05 to 0.10)             | 0.07<br>(0.05 to 0.10)             | 0.07<br>(0.04 to 0.10)             |

|                                                   |                              |                              |                              |                              |                           |                           |                           |                           |
|---------------------------------------------------|------------------------------|------------------------------|------------------------------|------------------------------|---------------------------|---------------------------|---------------------------|---------------------------|
|                                                   | 0.05<br>(0.04 to<br>0.07)    | 0.05<br>(0.03 to<br>0.06)    | 0.04<br>(0.03 to<br>0.06)    | 0.05<br>(0.04 to<br>0.07)    | 0.00<br>(0.00 to<br>0.00) | 0.00<br>(0.00 to<br>0.00) | 0.00<br>(0.00 to<br>0.00) | 0.00<br>(0.00 to<br>0.00) |
| Sickle cell disorders                             |                              |                              |                              |                              |                           |                           |                           |                           |
|                                                   | 9.01<br>(6.98 to<br>11.75)   | 12.28<br>(9.37 to<br>16.40)  | 11.64<br>(8.79 to<br>15.63)  | 14.25<br>(10.78 to<br>19.03) | 0.24<br>(0.19 to<br>0.31) | 0.46<br>(0.36 to<br>0.62) | 0.45<br>(0.34 to<br>0.59) | 0.53<br>(0.41 to<br>0.71) |
| G6PD deficiency                                   |                              |                              |                              |                              |                           |                           |                           |                           |
|                                                   | 11.65<br>(9.26 to<br>14.69)  | 13.70<br>(10.56 to<br>18.20) | 13.56<br>(10.54 to<br>17.84) | 14.66<br>(11.41 to<br>19.55) | 0.76<br>(0.61 to<br>0.97) | 1.03<br>(0.79 to<br>1.37) | 1.04<br>(0.80 to<br>1.38) | 1.05<br>(0.79 to<br>1.44) |
| Other hemoglobinopathies and hemolytic anemias    |                              |                              |                              |                              |                           |                           |                           |                           |
|                                                   | 44.30<br>(36.40 to<br>58.31) | 55.58<br>(44.64 to<br>79.72) | 55.26<br>(44.20 to<br>79.19) | 57.58<br>(46.43 to<br>81.86) | 1.47<br>(1.20 to<br>2.28) | 2.45<br>(1.94 to<br>4.05) | 2.51<br>(2.00 to<br>4.21) | 2.40<br>(1.91 to<br>3.91) |
| Endocrine, metabolic, blood, and immune disorders |                              |                              |                              |                              |                           |                           |                           |                           |

| Vietnam                                       |                                     |                                     |                                     |                                     |                                |                                |                                |                                |
|-----------------------------------------------|-------------------------------------|-------------------------------------|-------------------------------------|-------------------------------------|--------------------------------|--------------------------------|--------------------------------|--------------------------------|
| Cause                                         | YLLs (in 1000s)                     |                                     |                                     |                                     | Deaths (in 1000s)              |                                |                                |                                |
|                                               | 2016                                | 2040 Forecast                       | 2040 Better Scenario                | 2040 Worse Scenario                 | 2016                           | 2040 Forecast                  | 2040 Better Scenario           | 2040 Worse Scenario            |
| <b>Musculoskeletal disorders</b>              | <b>15.67</b><br>(10.84 to 26.68)    | <b>26.54</b><br>(18.03 to 45.28)    | <b>27.45</b><br>(18.75 to 47.08)    | <b>25.03</b><br>(17.10 to 42.39)    | <b>0.55</b><br>(0.38 to 0.99)  | <b>1.26</b><br>(0.85 to 2.35)  | <b>1.34</b><br>(0.91 to 2.51)  | <b>1.14</b><br>(0.77 to 2.10)  |
| Rheumatoid arthritis                          | 1.99<br>(1.28 to 3.21)              | 4.59<br>(2.88 to 7.59)              | 4.52<br>(2.86 to 7.40)              | 4.98<br>(3.14 to 8.30)              | 0.10<br>(0.07 to 0.18)         | 0.27<br>(0.17 to 0.48)         | 0.28<br>(0.17 to 0.49)         | 0.29<br>(0.18 to 0.52)         |
| Other musculoskeletal disorders               | 13.68<br>(9.27 to 23.74)            | 21.94<br>(14.56 to 39.38)           | 22.93<br>(15.22 to 40.70)           | 20.05<br>(13.31 to 35.91)           | 0.45<br>(0.30 to 0.84)         | 0.98<br>(0.64 to 1.89)         | 1.06<br>(0.70 to 2.01)         | 0.85<br>(0.55 to 1.66)         |
| <b>Other non-communicable diseases</b>        | <b>555.64</b><br>(398.06 to 745.22) | <b>299.04</b><br>(223.34 to 382.70) | <b>283.42</b><br>(209.84 to 359.02) | <b>343.19</b><br>(250.80 to 447.19) | <b>8.40</b><br>(6.04 to 10.87) | <b>8.33</b><br>(5.43 to 10.80) | <b>8.49</b><br>(5.39 to 11.03) | <b>8.38</b><br>(5.65 to 10.83) |
| Congenital birth defects                      | 514.29<br>(366.22 to 694.61)        | 219.89<br>(158.28 to 293.46)        | 201.88<br>(147.35 to 267.02)        | 266.83<br>(190.21 to 362.96)        | 6.45<br>(4.66 to 8.53)         | 3.16<br>(2.36 to 4.07)         | 2.94<br>(2.21 to 3.79)         | 3.75<br>(2.77 to 4.92)         |
| Neural tube defects                           | 20.73<br>(8.49 to 41.22)            | 3.83<br>(1.55 to 8.48)              | 3.31<br>(1.35 to 7.23)              | 5.31<br>(2.09 to 11.53)             | 0.25<br>(0.10 to 0.48)         | 0.05<br>(0.02 to 0.10)         | 0.04<br>(0.02 to 0.09)         | 0.07<br>(0.03 to 0.14)         |
| Congenital heart anomalies                    | 305.20<br>(215.07 to 404.86)        | 129.00<br>(90.90 to 174.42)         | 118.59<br>(84.61 to 159.85)         | 156.29<br>(107.74 to 211.63)        | 3.85<br>(2.74 to 5.01)         | 1.81<br>(1.31 to 2.38)         | 1.68<br>(1.23 to 2.19)         | 2.15<br>(1.54 to 2.83)         |
| Orofacial clefts                              | 0.84<br>(0.23 to 1.97)              | 0.26<br>(0.07 to 0.66)              | 0.22<br>(0.06 to 0.57)              | 0.38<br>(0.10 to 0.99)              | 0.01<br>(0.00 to 0.02)         | 0.00<br>(0.00 to 0.01)         | 0.00<br>(0.00 to 0.01)         | 0.00<br>(0.00 to 0.01)         |
| Down syndrome                                 | 7.61<br>(5.01 to 11.54)             | 5.34<br>(3.62 to 8.38)              | 4.98<br>(3.38 to 7.79)              | 6.34<br>(4.32 to 9.90)              | 0.12<br>(0.08 to 0.17)         | 0.11<br>(0.07 to 0.16)         | 0.10<br>(0.07 to 0.16)         | 0.12<br>(0.08 to 0.19)         |
| Other chromosomal abnormalities               | 10.25<br>(5.71 to 17.95)            | 6.68<br>(3.53 to 11.61)             | 6.00<br>(3.22 to 10.21)             | 8.47<br>(4.48 to 14.48)             | 0.12<br>(0.07 to 0.21)         | 0.09<br>(0.05 to 0.15)         | 0.08<br>(0.04 to 0.13)         | 0.11<br>(0.06 to 0.18)         |
| Congenital musculoskeletal and limb anomalies | 11.13<br>(6.18 to 17.43)            | 5.10<br>(2.68 to 8.45)              | 4.66<br>(2.47 to 7.73)              | 6.16<br>(3.18 to 10.26)             | 0.13<br>(0.07 to 0.20)         | 0.06<br>(0.03 to 0.10)         | 0.06<br>(0.03 to 0.09)         | 0.08<br>(0.04 to 0.12)         |
| Urogenital congenital anomalies               | 10.40<br>(7.54 to 13.85)            | 8.84<br>(6.54 to 11.78)             | 8.57<br>(6.29 to 11.44)             | 9.62<br>(7.10 to 12.69)             | 0.19<br>(0.15 to 0.24)         | 0.24<br>(0.18 to 0.32)         | 0.24<br>(0.18 to 0.32)         | 0.26<br>(0.19 to 0.34)         |
| Digestive congenital anomalies                | 27.50<br>(14.17 to 47.06)           | 10.81<br>(5.30 to 18.99)            | 9.69<br>(4.72 to 16.98)             | 13.71<br>(6.60 to 24.69)            | 0.32<br>(0.17 to 0.55)         | 0.13<br>(0.07 to 0.23)         | 0.12<br>(0.06 to 0.20)         | 0.17<br>(0.08 to 0.29)         |
| Other congenital birth defects                | 120.53<br>(77.13 to 190.70)         | 50.03<br>(31.46 to 80.73)           | 45.86<br>(28.92 to 72.47)           | 60.55<br>(37.15 to 99.67)           | 1.46<br>(0.95 to 2.29)         | 0.67<br>(0.44 to 1.04)         | 0.62<br>(0.41 to 0.95)         | 0.80<br>(0.51 to 1.26)         |
| Skin and subcutaneous diseases                | 30.51<br>(14.66 to 41.29)           | 75.73<br>(39.33 to 101.71)          | 78.43<br>(40.70 to 104.79)          | 72.20<br>(37.43 to 96.74)           | 1.83<br>(0.80 to 2.61)         | 5.13<br>(2.48 to 7.28)         | 5.52<br>(2.64 to 7.80)         | 4.58<br>(2.21 to 6.58)         |
| Cellulitis                                    | 3.90<br>(1.96 to 6.62)              | 14.45<br>(7.75 to 23.85)            | 15.35<br>(8.15 to 25.12)            | 12.90<br>(6.87 to 21.92)            | 0.21<br>(0.10 to 0.37)         | 0.85<br>(0.46 to 1.45)         | 0.94<br>(0.50 to 1.55)         | 0.72<br>(0.39 to 1.30)         |
| Pyoderma                                      | 15.81<br>(7.32 to 22.50)            | 36.99<br>(18.14 to 52.31)           | 37.43<br>(18.14 to 52.94)           | 37.06<br>(18.33 to 52.67)           | 0.73<br>(0.31 to 1.09)         | 2.17<br>(0.98 to 3.17)         | 2.29<br>(1.04 to 3.34)         | 2.04<br>(0.95 to 3.00)         |
| Decubitus ulcer                               | 9.95<br>(3.66 to 14.71)             | 22.71<br>(8.86 to 34.74)            | 24.01<br>(9.39 to 37.01)            | 20.76<br>(8.08 to 32.31)            | 0.86<br>(0.28 to 1.37)         | 2.02<br>(0.70 to 3.38)         | 2.21<br>(0.77 to 3.65)         | 1.75<br>(0.59 to 2.96)         |
| Other skin and subcutaneous diseases          | 0.84<br>(0.36 to 1.25)              | 1.58<br>(0.69 to 2.31)              | 1.64<br>(0.72 to 2.39)              | 1.47<br>(0.65 to 2.16)              | 0.04<br>(0.01 to 0.05)         | 0.08<br>(0.03 to 0.15)         | 0.09<br>(0.04 to 0.14)         | 0.07<br>(0.03 to 0.11)         |
| Sudden infant death syndrome                  | 10.85<br>(5.99 to 19.10)            | 3.42<br>(1.58 to 6.88)              | 3.12<br>(1.42 to 6.27)              | 4.16<br>(1.90 to 8.24)              | 0.13<br>(0.07 to 0.22)         | 0.04<br>(0.02 to 0.08)         | 0.04<br>(0.02 to 0.07)         | 0.05<br>(0.02 to 0.10)         |

|                          |                                       |                                       |                                       |                                       |                              |                               |                              |                               |
|--------------------------|---------------------------------------|---------------------------------------|---------------------------------------|---------------------------------------|------------------------------|-------------------------------|------------------------------|-------------------------------|
| Injuries                 | 2,593.87<br>(2,143.76 to<br>3,004.68) | 2,242.60<br>(1,587.96 to<br>3,387.55) | 1,764.02<br>(1,250.15 to<br>2,793.23) | 2,833.49<br>(1,998.17 to<br>4,194.43) | 67.80<br>(56.33 to<br>77.60) | 80.71<br>(60.74 to<br>107.12) | 69.39<br>(51.89 to<br>92.04) | 92.76<br>(69.78 to<br>123.66) |
| Transport injuries       | 1,126.35<br>(899.70 to<br>1,354.35)   | 815.23<br>(498.31 to<br>1,438.66)     | 404.39<br>(254.52 to<br>660.79)       | 1,311.82<br>(805.95 to<br>2,284.29)   | 25.70<br>(21.08 to<br>30.44) | 24.03<br>(15.60 to<br>39.77)  | 12.86<br>(8.64 to<br>20.04)  | 36.03<br>(23.07 to<br>59.74)  |
| Road injuries            | 1,068.82<br>(855.07 to<br>1,282.24)   | 742.51<br>(457.64 to<br>1,292.58)     | 340.04<br>(217.00 to<br>551.63)       | 1,229.74<br>(760.67 to<br>2,137.45)   | 24.31<br>(19.91 to<br>28.82) | 21.72<br>(14.11 to<br>35.36)  | 10.77<br>(7.30 to<br>16.54)  | 33.54<br>(21.53 to<br>54.69)  |
| Pedestrian road injuries | 221.43<br>(159.03 to<br>281.58)       | 165.02<br>(100.64 to<br>277.79)       | 82.43<br>(53.79 to<br>128.17)         | 254.60<br>(153.57 to<br>435.60)       | 6.12<br>(4.56 to<br>7.58)    | 6.21<br>(4.06 to<br>9.80)     | 3.34<br>(2.27 to<br>4.89)    | 8.96<br>(5.73 to<br>14.40)    |

| Vietnam                                         |                                                          |                                                      |                                                      |                                                        |                                                   |                                                   |                                                   |                                                   |
|-------------------------------------------------|----------------------------------------------------------|------------------------------------------------------|------------------------------------------------------|--------------------------------------------------------|---------------------------------------------------|---------------------------------------------------|---------------------------------------------------|---------------------------------------------------|
| Cause                                           | YLLs (in 1000s)                                          |                                                      |                                                      |                                                        | Deaths (in 1000s)                                 |                                                   |                                                   |                                                   |
|                                                 | 2016                                                     | 2040 Forecast                                        | 2040 Better Scenario                                 | 2040 Worse Scenario                                    | 2016                                              | 2040 Forecast                                     | 2040 Better Scenario                              | 2040 Worse Scenario                               |
| Cyclist road injuries                           | 56.54<br>(35.19 to<br>93.67)                             | 48.78<br>(25.32 to<br>90.39)                         | 24.20<br>(12.95 to<br>43.18)                         | 75.80<br>(39.17 to<br>143.98)                          | 1.45<br>(0.90 to<br>2.42)                         | 1.60<br>(0.84 to<br>2.93)                         | 0.87<br>(0.48 to<br>1.52)                         | 2.31<br>(1.20 to<br>4.32)                         |
| Motorcyclist road injuries                      | 274.91<br>(198.75 to<br>356.78)                          | 196.45<br>(103.45 to<br>380.14)                      | 110.46<br>(58.25 to<br>210.70)                       | 287.41<br>(152.64 to<br>536.93)                        | 5.32<br>(3.91 to<br>6.93)                         | 4.37<br>(2.34 to<br>8.35)                         | 2.61<br>(1.40 to<br>4.82)                         | 6.11<br>(3.38 to<br>11.39)                        |
| Motor vehicle road injuries                     | 496.08<br>(359.17 to<br>629.93)                          | 317.26<br>(191.54 to<br>534.55)                      | 116.80<br>(73.37 to<br>185.39)                       | 585.80<br>(350.95 to<br>996.23)                        | 10.94<br>(8.09 to<br>13.74)                       | 9.04<br>(5.84 to<br>14.33)                        | 3.71<br>(2.50 to<br>5.49)                         | 15.40<br>(9.72 to<br>24.64)                       |
| Other road injuries                             | 19.87<br>(12.20 to<br>35.20)                             | 14.99<br>(7.82 to<br>28.73)                          | 6.15<br>(3.30 to<br>11.64)                           | 26.13<br>(13.51 to<br>51.73)                           | 0.48<br>(0.30 to<br>0.85)                         | 0.49<br>(0.26 to<br>0.94)                         | 0.24<br>(0.13 to<br>0.45)                         | 0.76<br>(0.40 to<br>1.49)                         |
| Other transport injuries                        | 57.53<br>(40.65 to<br>80.00)                             | 72.72<br>(40.04 to<br>143.56)                        | 64.35<br>(37.09 to<br>122.19)                        | 82.08<br>(45.20 to<br>161.87)                          | 1.40<br>(1.05 to<br>1.87)                         | 2.31<br>(1.31 to<br>4.29)                         | 2.10<br>(1.25 to<br>3.71)                         | 2.49<br>(1.39 to<br>4.56)                         |
| <b>Unintentional injuries</b>                   | <b>1,051.32</b><br><b>(853.16 to</b><br><b>1,220.52)</b> | <b>821.45</b><br><b>(637.98 to</b><br><b>988.69)</b> | <b>806.17</b><br><b>(627.74 to</b><br><b>965.19)</b> | <b>873.76</b><br><b>(675.28 to</b><br><b>1,053.30)</b> | <b>32.47</b><br><b>(24.38 to</b><br><b>37.44)</b> | <b>40.32</b><br><b>(28.25 to</b><br><b>47.28)</b> | <b>41.46</b><br><b>(29.41 to</b><br><b>48.44)</b> | <b>39.65</b><br><b>(27.96 to</b><br><b>46.95)</b> |
| Falls                                           | 289.51<br>(211.07 to<br>344.80)                          | 389.35<br>(256.16 to<br>459.46)                      | 397.52<br>(264.16 to<br>470.22)                      | 385.66<br>(254.94 to<br>460.01)                        | 16.46<br>(9.45 to<br>19.78)                       | 26.94<br>(15.47 to<br>32.89)                      | 28.40<br>(16.68 to<br>34.36)                      | 25.35<br>(14.36 to<br>31.53)                      |
| Drowning                                        | 425.47<br>(350.78 to<br>503.81)                          | 200.73<br>(150.38 to<br>276.95)                      | 185.05<br>(139.20 to<br>250.21)                      | 233.09<br>(173.44 to<br>323.18)                        | 7.85<br>(6.69 to<br>9.34)                         | 5.52<br>(4.23 to<br>7.55)                         | 5.22<br>(4.06 to<br>7.06)                         | 6.07<br>(4.58 to<br>8.41)                         |
| Fire, heat, and hot substances                  | 18.27<br>(14.07 to<br>22.36)                             | 12.95<br>(9.21 to<br>18.46)                          | 12.02<br>(8.70 to<br>16.74)                          | 14.75<br>(10.22 to<br>21.38)                           | 0.49<br>(0.39 to<br>0.58)                         | 0.50<br>(0.37 to<br>0.68)                         | 0.48<br>(0.36 to<br>0.64)                         | 0.53<br>(0.39 to<br>0.74)                         |
| Poisonings                                      | 36.98<br>(13.18 to<br>57.76)                             | 19.39<br>(5.26 to<br>36.01)                          | 17.11<br>(4.74 to<br>31.32)                          | 23.95<br>(6.45 to<br>45.26)                            | 0.89<br>(0.30 to<br>1.37)                         | 0.56<br>(0.17 to<br>0.99)                         | 0.50<br>(0.15 to<br>0.86)                         | 0.67<br>(0.19 to<br>1.22)                         |
| Exposure to mechanical forces                   | 58.03<br>(44.61 to<br>72.13)                             | 39.56<br>(29.36 to<br>50.68)                         | 38.08<br>(28.32 to<br>49.28)                         | 44.46<br>(32.99 to<br>56.48)                           | 1.34<br>(1.05 to<br>1.63)                         | 1.27<br>(1.02 to<br>1.54)                         | 1.25<br>(1.01 to<br>1.53)                         | 1.37<br>(1.09 to<br>1.65)                         |
| Unintentional firearm injuries                  | 6.04<br>(3.40 to<br>8.66)                                | 3.18<br>(1.78 to<br>4.70)                            | 3.02<br>(1.71 to<br>4.39)                            | 3.71<br>(2.04 to<br>5.44)                              | 0.13<br>(0.08 to<br>0.18)                         | 0.09<br>(0.06 to<br>0.13)                         | 0.09<br>(0.06 to<br>0.12)                         | 0.10<br>(0.07 to<br>0.14)                         |
| Unintentional suffocation                       | 4.74<br>(2.96 to<br>8.01)                                | 2.97<br>(2.09 to<br>4.16)                            | 2.84<br>(1.98 to<br>3.98)                            | 3.37<br>(2.38 to<br>4.78)                              | 0.09<br>(0.06 to<br>0.12)                         | 0.08<br>(0.05 to<br>0.13)                         | 0.08<br>(0.04 to<br>0.13)                         | 0.09<br>(0.05 to<br>0.14)                         |
| Other exposure to mechanical forces             | 47.25<br>(34.45 to<br>59.17)                             | 33.41<br>(24.36 to<br>43.48)                         | 32.22<br>(23.61 to<br>42.21)                         | 37.39<br>(26.99 to<br>47.92)                           | 1.12<br>(0.87 to<br>1.37)                         | 1.10<br>(0.88 to<br>1.35)                         | 1.08<br>(0.87 to<br>1.32)                         | 1.18<br>(0.93 to<br>1.42)                         |
| Adverse effects of medical treatment            | 41.77<br>(31.60 to<br>52.22)                             | 36.98<br>(28.13 to<br>46.97)                         | 36.49<br>(27.63 to<br>46.68)                         | 39.56<br>(29.72 to<br>49.80)                           | 1.25<br>(0.97 to<br>1.53)                         | 1.58<br>(1.22 to<br>1.94)                         | 1.61<br>(1.24 to<br>2.01)                         | 1.59<br>(1.23 to<br>1.95)                         |
| Animal contact                                  | 19.34<br>(14.31 to<br>23.75)                             | 21.02<br>(14.24 to<br>26.88)                         | 20.10<br>(13.74 to<br>25.58)                         | 24.22<br>(16.47 to<br>31.29)                           | 0.63<br>(0.42 to<br>0.78)                         | 0.91<br>(0.57 to<br>1.17)                         | 0.89<br>(0.57 to<br>1.14)                         | 1.00<br>(0.62 to<br>1.31)                         |
| Venomous animal contact                         | 13.09<br>(8.22 to<br>16.92)                              | 14.61<br>(7.84 to<br>20.06)                          | 13.94<br>(7.52 to<br>19.08)                          | 16.86<br>(8.89 to<br>22.99)                            | 0.46<br>(0.26 to<br>0.60)                         | 0.66<br>(0.34 to<br>0.91)                         | 0.65<br>(0.34 to<br>0.89)                         | 0.74<br>(0.37 to<br>1.02)                         |
| Non-venomous animal contact                     | 6.25<br>(4.37 to<br>8.87)                                | 6.41<br>(4.49 to<br>9.08)                            | 6.15<br>(4.26 to<br>8.75)                            | 7.36<br>(5.15 to<br>10.47)                             | 0.17<br>(0.13 to<br>0.25)                         | 0.24<br>(0.18 to<br>0.35)                         | 0.24<br>(0.17 to<br>0.35)                         | 0.26<br>(0.19 to<br>0.39)                         |
| Foreign body                                    | 56.62<br>(40.20 to<br>75.27)                             | 36.54<br>(25.63 to<br>48.99)                         | 36.67<br>(25.86 to<br>49.38)                         | 37.09<br>(25.73 to<br>49.95)                           | 1.21<br>(0.87 to<br>1.57)                         | 1.22<br>(0.89 to<br>1.56)                         | 1.28<br>(0.94 to<br>1.62)                         | 1.15<br>(0.83 to<br>1.46)                         |
| Pulmonary aspiration and foreign body in airway | 51.98<br>(34.16 to<br>70.50)                             | 33.37<br>(21.60 to<br>45.57)                         | 33.57<br>(22.23 to<br>45.87)                         | 33.66<br>(21.74 to<br>46.48)                           | 1.09<br>(0.73 to<br>1.45)                         | 1.11<br>(0.75 to<br>1.45)                         | 1.17<br>(0.80 to<br>1.52)                         | 1.03<br>(0.68 to<br>1.36)                         |



|                                             |                                                      |                                                      |                                                      |                                                      |                                                 |                                                  |                                                  |                                                  |
|---------------------------------------------|------------------------------------------------------|------------------------------------------------------|------------------------------------------------------|------------------------------------------------------|-------------------------------------------------|--------------------------------------------------|--------------------------------------------------|--------------------------------------------------|
|                                             | 4.64<br>(3.17 to<br>8.49)                            | 3.17<br>(2.15 to<br>5.79)                            | 3.11<br>(2.06 to<br>5.79)                            | 3.43<br>(2.33 to<br>6.19)                            | 0.12<br>(0.08 to<br>0.21)                       | 0.11<br>(0.08 to<br>0.21)                        | 0.11<br>(0.08 to<br>0.21)                        | 0.12<br>(0.08 to<br>0.21)                        |
| Foreign body in other body part             |                                                      |                                                      |                                                      |                                                      |                                                 |                                                  |                                                  |                                                  |
|                                             | 1.67<br>(0.91 to<br>2.26)                            | 1.32<br>(0.73 to<br>1.83)                            | 1.23<br>(0.69 to<br>1.74)                            | 1.61<br>(0.88 to<br>2.24)                            | 0.05<br>(0.03 to<br>0.06)                       | 0.05<br>(0.03 to<br>0.06)                        | 0.05<br>(0.03 to<br>0.06)                        | 0.06<br>(0.04 to<br>0.07)                        |
| Environmental heat and cold exposure        |                                                      |                                                      |                                                      |                                                      |                                                 |                                                  |                                                  |                                                  |
|                                             | 103.66<br>(74.81 to<br>134.74)                       | 63.61<br>(44.11 to<br>86.11)                         | 61.90<br>(42.53 to<br>85.26)                         | 69.37<br>(49.65 to<br>93.90)                         | 2.30<br>(1.71 to<br>2.95)                       | 1.78<br>(1.29 to<br>2.28)                        | 1.77<br>(1.29 to<br>2.28)                        | 1.86<br>(1.37 to<br>2.39)                        |
| Other unintentional injuries                |                                                      |                                                      |                                                      |                                                      |                                                 |                                                  |                                                  |                                                  |
| <b>Self-harm and interpersonal violence</b> | <b>415.68</b><br><b>(332.08 to</b><br><b>508.53)</b> | <b>436.95</b><br><b>(273.79 to</b><br><b>680.25)</b> | <b>385.17</b><br><b>(252.51 to</b><br><b>585.35)</b> | <b>475.68</b><br><b>(288.89 to</b><br><b>754.93)</b> | <b>9.62</b><br><b>(7.89 to</b><br><b>11.51)</b> | <b>12.79</b><br><b>(8.34 to</b><br><b>19.34)</b> | <b>11.46</b><br><b>(7.84 to</b><br><b>16.50)</b> | <b>13.52</b><br><b>(8.61 to</b><br><b>20.59)</b> |

| Vietnam                                                                             |                                      |                                            |                                            |                                            |                                      |                                       |                                       |                                       |
|-------------------------------------------------------------------------------------|--------------------------------------|--------------------------------------------|--------------------------------------------|--------------------------------------------|--------------------------------------|---------------------------------------|---------------------------------------|---------------------------------------|
| Cause                                                                               | YLLs (in 1000s)                      |                                            |                                            |                                            | Deaths (in 1000s)                    |                                       |                                       |                                       |
|                                                                                     | 2016                                 | 2040 Forecast                              | 2040 Better Scenario                       | 2040 Worse Scenario                        | 2016                                 | 2040 Forecast                         | 2040 Better Scenario                  | 2040 Worse Scenario                   |
| Self-harm                                                                           | 319.64<br>(256.78 to 389.00)         | 373.73<br>(220.89 to 610.51)               | 323.30<br>(201.03 to 506.87)               | 411.34<br>(234.94 to 683.98)               | 7.74<br>(6.40 to 9.20)               | 11.33<br>(7.13 to 17.88)              | 10.03<br>(6.67 to 14.78)              | 12.05<br>(7.37 to 19.16)              |
| Self-harm by firearm                                                                | 10.03<br>(6.25 to 16.60)             | 9.24<br>(4.17 to 18.04)                    | 7.82<br>(3.78 to 15.26)                    | 10.39<br>(4.65 to 20.59)                   | 0.25<br>(0.15 to 0.40)               | 0.30<br>(0.14 to 0.55)                | 0.26<br>(0.13 to 0.46)                | 0.32<br>(0.15 to 0.59)                |
| Self-harm by other specified means                                                  | 309.61<br>(249.55 to 378.11)         | 364.49<br>(216.06 to 589.14)               | 315.48<br>(196.68 to 492.30)               | 400.95<br>(229.99 to 663.49)               | 7.50<br>(6.21 to 8.94)               | 11.03<br>(6.98 to 17.28)              | 9.77<br>(6.53 to 14.37)               | 11.74<br>(7.22 to 18.64)              |
| Interpersonal violence                                                              | 96.04<br>(64.55 to 130.27)           | 63.22<br>(40.42 to 96.48)                  | 61.87<br>(39.82 to 92.70)                  | 64.35<br>(41.05 to 97.98)                  | 1.87<br>(1.29 to 2.51)               | 1.46<br>(0.98 to 2.13)                | 1.43<br>(0.97 to 2.06)                | 1.46<br>(0.97 to 2.15)                |
| Physical violence by firearm                                                        | 7.16<br>(3.90 to 13.35)              | 4.55<br>(2.49 to 8.36)                     | 4.54<br>(2.47 to 8.46)                     | 4.64<br>(2.53 to 8.42)                     | 0.14<br>(0.08 to 0.26)               | 0.10<br>(0.06 to 0.19)                | 0.10<br>(0.06 to 0.19)                | 0.10<br>(0.06 to 0.18)                |
| Physical violence by sharp object                                                   | 64.26<br>(36.56 to 91.39)            | 41.89<br>(23.12 to 63.70)                  | 42.03<br>(23.23 to 64.12)                  | 41.56<br>(22.53 to 62.94)                  | 1.21<br>(0.71 to 1.70)               | 0.89<br>(0.52 to 1.31)                | 0.90<br>(0.53 to 1.32)                | 0.87<br>(0.49 to 1.28)                |
| Physical violence by other means                                                    | 24.62<br>(17.56 to 40.10)            | 16.78<br>(9.84 to 30.80)                   | 15.31<br>(9.22 to 27.77)                   | 18.15<br>(10.48 to 33.62)                  | 0.52<br>(0.38 to 0.82)               | 0.47<br>(0.29 to 0.82)                | 0.43<br>(0.27 to 0.74)                | 0.49<br>(0.29 to 0.87)                |
| <b>Forces of nature, conflict and terrorism, and executions and police conflict</b> | <b>0.52</b><br><b>(0.44 to 0.60)</b> | <b>168.96</b><br><b>(0.00 to 1,048.82)</b> | <b>168.29</b><br><b>(0.00 to 1,044.77)</b> | <b>172.22</b><br><b>(0.00 to 1,070.79)</b> | <b>0.01</b><br><b>(0.01 to 0.01)</b> | <b>3.58</b><br><b>(0.00 to 22.25)</b> | <b>3.61</b><br><b>(0.00 to 22.46)</b> | <b>3.56</b><br><b>(0.00 to 22.17)</b> |
| Exposure to forces of nature                                                        | 0.00<br>(0.00 to 0.00)               | 6.93<br>(0.00 to 48.97)                    | 6.92<br>(0.00 to 48.96)                    | 7.03<br>(0.00 to 49.42)                    | 0.00<br>(0.00 to 0.00)               | 0.17<br>(0.00 to 1.24)                | 0.17<br>(0.00 to 1.26)                | 0.17<br>(0.00 to 1.21)                |
| Conflict and terrorism                                                              | 0.00<br>(0.00 to 0.00)               | 162.03<br>(0.00 to 1,048.82)               | 161.36<br>(0.00 to 1,044.77)               | 165.19<br>(0.00 to 1,070.79)               | 0.00<br>(0.00 to 0.00)               | 3.41<br>(0.00 to 22.25)               | 3.44<br>(0.00 to 22.46)               | 3.39<br>(0.00 to 22.17)               |
| Executions and police conflict                                                      | 0.52<br>(0.44 to 0.60)               | 0.00<br>(0.00 to 0.00)                     | 0.00<br>(0.00 to 0.00)                     | 0.00<br>(0.00 to 0.00)                     | 0.01<br>(0.01 to 0.01)               | 0.00<br>(0.00 to 0.00)                | 0.00<br>(0.00 to 0.00)                | 0.00<br>(0.00 to 0.00)                |

| Oceania                                                                  |                                                       |                                                       |                                                       |                                                       |                                               |                                                 |                                               |                                                 |
|--------------------------------------------------------------------------|-------------------------------------------------------|-------------------------------------------------------|-------------------------------------------------------|-------------------------------------------------------|-----------------------------------------------|-------------------------------------------------|-----------------------------------------------|-------------------------------------------------|
| Cause                                                                    | YLLs (actual counts)                                  |                                                       |                                                       |                                                       | Deaths (actual counts)                        |                                                 |                                               |                                                 |
|                                                                          | 2016                                                  | 2040 Forecast                                         | 2040 Better Scenario                                  | 2040 Worse Scenario                                   | 2016                                          | 2040 Forecast                                   | 2040 Better Scenario                          | 2040 Worse Scenario                             |
| <b>All causes</b>                                                        | <b>3,635,869.45</b><br>(3,060,471.99 to 4,327,879.66) | <b>4,491,033.47</b><br>(3,748,718.20 to 5,405,571.88) | <b>2,859,928.15</b><br>(2,425,397.99 to 3,397,381.75) | <b>5,597,639.05</b><br>(4,690,790.36 to 6,657,416.52) | <b>90,985.00</b><br>(79,517.12 to 103,386.10) | <b>139,616.52</b><br>(124,665.33 to 155,478.07) | <b>98,838.15</b><br>(88,657.26 to 110,656.52) | <b>166,747.42</b><br>(149,290.98 to 184,519.48) |
| <b>Communicable, maternal, neonatal, and nutritional diseases</b>        | <b>1,260,905.05</b><br>(910,793.54 to 1,783,706.06)   | <b>1,069,707.62</b><br>(728,389.33 to 1,577,356.89)   | <b>531,773.87</b><br>(386,700.51 to 740,906.64)       | <b>1,458,668.93</b><br>(968,191.54 to 2,191,962.39)   | <b>20,180.61</b><br>(15,677.97 to 26,599.88)  | <b>20,779.97</b><br>(14,824.80 to 28,712.35)    | <b>12,088.96</b><br>(9,028.70 to 16,361.21)   | <b>27,017.99</b><br>(18,733.33 to 37,894.46)    |
| <b>HIV/AIDS and tuberculosis</b>                                         | <b>54,211.17</b><br>(42,978.40 to 69,632.91)          | <b>80,033.83</b><br>(53,288.60 to 116,467.88)         | <b>49,835.50</b><br>(30,417.28 to 78,643.28)          | <b>112,844.98</b><br>(78,132.10 to 165,355.30)        | <b>1,237.80</b><br>(1,031.85 to 1,519.02)     | <b>1,796.48</b><br>(1,222.09 to 2,505.44)       | <b>1,132.56</b><br>(733.84 to 1,716.46)       | <b>2,437.15</b><br>(1,749.17 to 3,499.08)       |
| <b>Tuberculosis</b>                                                      | <b>21,966.16</b><br>(18,945.41 to 25,460.45)          | <b>20,927.59</b><br>(14,886.52 to 30,183.93)          | <b>9,610.03</b><br>(6,868.92 to 13,601.40)            | <b>27,970.92</b><br>(19,262.87 to 42,302.08)          | <b>627.98</b><br>(546.68 to 720.87)           | <b>678.18</b><br>(483.90 to 963.10)             | <b>538.65</b><br>(248.32 to 468.42)           | <b>860.83</b><br>(596.06 to 1,271.60)           |
| <b>HIV/AIDS</b>                                                          | <b>32,245.01</b><br>(21,532.22 to 47,352.77)          | <b>59,106.24</b><br>(34,095.62 to 94,203.82)          | <b>40,225.47</b><br>(21,301.83 to 68,008.65)          | <b>84,874.06</b><br>(52,255.59 to 137,989.25)         | <b>609.82</b><br>(430.25 to 868.98)           | <b>1,118.30</b><br>(643.74 to 1,795.23)         | <b>793.91</b><br>(402.60 to 1,359.59)         | <b>1,576.31</b><br>(987.09 to 2,554.62)         |
| <b>Diarrhea, lower respiratory, and other common infectious diseases</b> | <b>609,555.39</b><br>(433,947.64 to 863,713.80)       | <b>515,743.44</b><br>(298,027.07 to 811,971.36)       | <b>239,815.36</b><br>(153,768.99 to 365,111.13)       | <b>778,273.41</b><br>(431,170.08 to 1,286,244.69)     | <b>10,930.21</b><br>(8,573.39 to 14,243.23)   | <b>12,126.91</b><br>(7,564.85 to 18,851.87)     | <b>6,978.97</b><br>(4,493.21 to 10,786.39)    | <b>16,650.22</b><br>(10,002.62 to 26,138.74)    |
| <b>Diarrheal diseases</b>                                                | <b>87,605.68</b><br>(55,612.69 to 130,231.52)         | <b>74,931.07</b><br>(13,737.02 to 215,634.89)         | <b>36,425.72</b><br>(7,437.29 to 107,129.83)          | <b>105,419.36</b><br>(21,426.42 to 298,357.88)        | <b>2,311.55</b><br>(1,377.90 to 3,590.62)     | <b>2,756.73</b><br>(496.58 to 7,866.80)         | <b>1,625.13</b><br>(310.43 to 4,707.45)       | <b>3,691.62</b><br>(645.85 to 10,430.45)        |
| <b>Intestinal infectious diseases</b>                                    | <b>21,184.08</b><br>(10,539.84 to 36,171.89)          | <b>20,540.73</b><br>(9,263.41 to 37,337.93)           | <b>14,144.56</b><br>(6,496.30 to 25,260.70)           | <b>21,985.18</b><br>(9,937.34 to 39,687.62)           | <b>304.72</b><br>(152.55 to 520.47)           | <b>302.88</b><br>(144.03 to 533.37)             | <b>216.91</b><br>(104.03 to 378.03)           | <b>321.54</b><br>(149.56 to 575.75)             |
| <b>Typhoid fever</b>                                                     | <b>18,088.65</b><br>(8,546.01 to 32,011.86)           | <b>17,073.10</b><br>(7,555.71 to 31,524.75)           | <b>11,833.05</b><br>(5,371.42 to 21,508.52)           | <b>18,242.94</b><br>(7,950.98 to 34,208.43)           | <b>258.95</b><br>(124.56 to 457.05)           | <b>249.92</b><br>(114.51 to 458.21)             | <b>180.09</b><br>(84.52 to 319.68)            | <b>264.92</b><br>(118.72 to 491.04)             |
| <b>Paratyphoid fever</b>                                                 | <b>2,962.98</b><br>(1,294.35 to 6,021.24)             | <b>3,401.96</b><br>(1,407.18 to 7,113.08)             | <b>2,279.20</b><br>(966.77 to 4,551.76)               | <b>3,669.82</b><br>(1,484.62 to 7,680.76)             | <b>43.80</b><br>(19.22 to 88.84)              | <b>51.78</b><br>(22.17 to 106.49)               | <b>36.14</b><br>(15.70 to 72.42)              | <b>55.36</b><br>(23.26 to 114.36)               |
| <b>Other intestinal infectious diseases</b>                              | <b>132.45</b><br>(44.25 to 318.03)                    | <b>65.67</b><br>(15.70 to 186.39)                     | <b>32.31</b><br>(8.88 to 84.68)                       | <b>72.43</b><br>(16.40 to 202.13)                     | <b>1.97</b><br>(0.68 to 4.51)                 | <b>1.18</b><br>(0.36 to 2.97)                   | <b>0.68</b><br>(0.22 to 1.61)                 | <b>1.26</b><br>(0.38 to 3.26)                   |
| <b>Lower respiratory infections</b>                                      | <b>368,629.87</b><br>(253,352.93 to 541,652.30)       | <b>262,281.35</b><br>(136,484.53 to 479,637.67)       | <b>123,662.72</b><br>(76,599.67 to 200,664.81)        | <b>425,626.56</b><br>(192,299.54 to 808,759.51)       | <b>6,550.66</b><br>(4,940.57 to 8,958.73)     | <b>6,854.79</b><br>(4,385.00 to 10,853.40)      | <b>4,060.24</b><br>(2,885.56 to 5,874.51)     | <b>9,620.35</b><br>(5,528.29 to 15,729.17)      |
| <b>Upper respiratory infections</b>                                      | <b>401.81</b><br>(202.65 to 804.09)                   | <b>389.96</b><br>(165.00 to 905.59)                   | <b>191.65</b><br>(90.94 to 398.03)                    | <b>441.71</b><br>(182.84 to 1,021.87)                 | <b>7.25</b><br>(4.23 to 12.32)                | <b>8.62</b><br>(4.12 to 17.40)                  | <b>4.80</b><br>(2.38 to 9.46)                 | <b>9.43</b><br>(4.40 to 19.48)                  |
| <b>Otitis media</b>                                                      | <b>42.06</b><br>(19.24 to 89.03)                      | <b>13.36</b><br>(5.52 to 31.92)                       | <b>12.72</b><br>(5.34 to 31.59)                       | <b>13.39</b><br>(5.56 to 32.48)                       | <b>0.80</b><br>(0.42 to 1.50)                 | <b>0.34</b><br>(0.15 to 0.85)                   | <b>0.35</b><br>(0.17 to 0.79)                 | <b>0.32</b><br>(0.14 to 0.81)                   |
| <b>Meningitis</b>                                                        | <b>46,070.55</b><br>(30,542.77 to 73,971.52)          | <b>32,125.33</b><br>(15,516.10 to 60,727.81)          | <b>20,252.20</b><br>(12,114.12 to 32,950.93)          | <b>37,896.05</b><br>(16,461.52 to 77,581.99)          | <b>667.43</b><br>(468.31 to 1,010.44)         | <b>514.17</b><br>(292.49 to 885.30)             | <b>370.25</b><br>(239.92 to 559.16)           | <b>578.01</b><br>(304.83 to 1,067.94)           |
| <b>Pneumococcal meningitis</b>                                           | <b>138.76</b><br>(85.21 to 236.48)                    | <b>65.71</b><br>(34.48 to 116.58)                     | <b>45.79</b><br>(27.65 to 72.67)                      | <b>78.18</b><br>(38.54 to 148.37)                     | <b>2.02</b><br>(1.33 to 3.19)                 | <b>1.17</b><br>(0.72 to 1.90)                   | <b>0.95</b><br>(0.64 to 1.41)                 | <b>1.32</b><br>(0.78 to 2.24)                   |
| <b>H influenzae type B meningitis</b>                                    | <b>5,198.81</b><br>(3,201.30 to 9,052.54)             | <b>8,328.77</b><br>(1,668.17 to 26,138.47)            | <b>2,668.46</b><br>(1,136.76 to 6,395.56)             | <b>12,925.21</b><br>(1,908.50 to 41,463.36)           | <b>73.04</b><br>(48.23 to 118.79)             | <b>108.86</b><br>(29.02 to 317.85)              | <b>43.67</b><br>(23.28 to 89.72)              | <b>161.96</b><br>(32.63 to 500.94)              |
| <b>Meningococcal meningitis</b>                                          | <b>8,910.56</b><br>(5,621.61 to 14,812.14)            | <b>5,003.43</b><br>(2,859.88 to 8,401.17)             | <b>3,695.04</b><br>(2,279.40 to 5,831.70)             | <b>5,232.21</b><br>(2,961.38 to 8,761.11)             | <b>134.50</b><br>(90.94 to 209.52)            | <b>90.71</b><br>(58.04 to 139.00)               | <b>74.16</b><br>(49.44 to 110.29)             | <b>92.25</b><br>(58.10 to 139.62)               |
| <b>Other meningitis</b>                                                  | <b>31,822.42</b><br>(20,990.79 to 51,789.94)          | <b>18,727.42</b><br>(10,143.48 to 30,770.30)          | <b>13,822.92</b><br>(8,301.10 to 21,774.93)           | <b>19,660.44</b><br>(10,431.75 to 32,767.59)          | <b>457.87</b><br>(315.98 to 691.79)           | <b>313.42</b><br>(192.80 to 495.73)             | <b>251.47</b><br>(163.54 to 374.90)           | <b>322.48</b><br>(192.38 to 504.50)             |
| <b>Encephalitis</b>                                                      | <b>15,178.39</b><br>(10,116.74 to 24,891.03)          | <b>17,248.55</b><br>(9,571.07 to 28,671.90)           | <b>11,582.72</b><br>(6,945.80 to 17,409.58)           | <b>18,208.87</b><br>(9,856.08 to 30,355.97)           | <b>235.93</b><br>(170.20 to 347.92)           | <b>306.64</b><br>(195.17 to 445.04)             | <b>229.07</b><br>(156.57 to 310.33)           | <b>315.53</b><br>(196.46 to 464.96)             |

|                |                                          |                                          |                                         |                                           |                                  |                                  |                                  |                                     |
|----------------|------------------------------------------|------------------------------------------|-----------------------------------------|-------------------------------------------|----------------------------------|----------------------------------|----------------------------------|-------------------------------------|
|                | 203.94<br>(108.69 to<br>367.65)          | 78.51<br>(24.50 to<br>198.90)            | 31.31<br>(18.84 to<br>49.14)            | 112.85<br>(25.34 to<br>318.91)            | 2.90<br>(1.73 to<br>4.82)        | 1.15<br>(0.46 to<br>2.59)        | 0.60<br>(0.37 to<br>0.92)        | 1.55<br>(0.48 to<br>3.95)           |
| Diphtheria     |                                          |                                          |                                         |                                           |                                  |                                  |                                  |                                     |
|                | 30,387.31<br>(4,982.41 to<br>85,827.59)  | 34,100.70<br>(1,399.18 to<br>109,255.64) | 5,552.21<br>(558.52 to<br>18,118.65)    | 36,755.20<br>(1,596.39 to<br>125,549.97)  | 359.54<br>(59.04 to<br>1,015.29) | 403.82<br>(18.15 to<br>1,296.66) | 67.43<br>(7.21 to<br>218.19)     | 435.02<br>(19.59 to<br>1,479.88)    |
| Whooping cough |                                          |                                          |                                         |                                           |                                  |                                  |                                  |                                     |
|                | 446.51<br>(207.59 to<br>937.81)          | 118.95<br>(46.61 to<br>268.77)           | 46.33<br>(18.25 to<br>128.18)           | 125.75<br>(48.44 to<br>289.96)            | 8.14<br>(3.71 to<br>20.43)       | 2.00<br>(0.86 to<br>4.64)        | 1.24<br>(0.39 to<br>3.80)        | 2.04<br>(0.88 to<br>4.53)           |
| Tetanus        |                                          |                                          |                                         |                                           |                                  |                                  |                                  |                                     |
|                | 36,661.97<br>(11,387.41 to<br>82,423.56) | 71,921.73<br>(5,509.07 to<br>308,727.97) | 26,991.06<br>(3,912.69 to<br>99,437.00) | 129,451.48<br>(7,958.25 to<br>528,254.22) | 438.05<br>(137.48 to<br>987.29)  | 937.77<br>(93.95 to<br>3,773.66) | 379.60<br>(64.65 to<br>1,228.33) | 1,635.00<br>(124.22 to<br>6,349.02) |
| Measles        |                                          |                                          |                                         |                                           |                                  |                                  |                                  |                                     |

| Oceania                                               |                                                                |                                                               |                                                               |                                                               |                                                          |                                                        |                                                        |                                                          |
|-------------------------------------------------------|----------------------------------------------------------------|---------------------------------------------------------------|---------------------------------------------------------------|---------------------------------------------------------------|----------------------------------------------------------|--------------------------------------------------------|--------------------------------------------------------|----------------------------------------------------------|
| Cause                                                 | YLLs (actual counts)                                           |                                                               |                                                               |                                                               | Deaths (actual counts)                                   |                                                        |                                                        |                                                          |
|                                                       | 2016                                                           | 2040 Forecast                                                 | 2040 Better Scenario                                          | 2040 Worse Scenario                                           | 2016                                                     | 2040 Forecast                                          | 2040 Better Scenario                                   | 2040 Worse Scenario                                      |
| Varicella and herpes zoster                           | 2,743.21<br>(1,578.94 to<br>4,865.94)                          | 1,993.21<br>(735.44 to<br>4,136.98)                           | 942.15<br>(413.26 to<br>1,760.99)                             | 2,237.02<br>(812.78 to<br>4,771.07)                           | 43.25<br>(28.70 to<br>68.15)                             | 38.00<br>(20.02 to<br>66.37)                           | 23.37<br>(13.98 to<br>35.45)                           | 39.80<br>(19.93 to<br>71.05)                             |
| <b>Neglected tropical diseases and malaria</b>        | <b>56,202.08</b><br><b>(30,726.63 to</b><br><b>102,318.73)</b> | <b>49,335.14</b><br><b>(25,941.91 to</b><br><b>87,735.81)</b> | <b>41,668.65</b><br><b>(22,902.24 to</b><br><b>66,333.93)</b> | <b>50,921.29</b><br><b>(26,056.55 to</b><br><b>91,310.11)</b> | <b>999.15</b><br><b>(549.52 to</b><br><b>1,680.75)</b>   | <b>996.96</b><br><b>(575.50 to</b><br><b>1,579.07)</b> | <b>902.63</b><br><b>(548.83 to</b><br><b>1,317.70)</b> | <b>999.26</b><br><b>(554.51 to</b><br><b>1,632.45)</b>   |
| Malaria                                               | 50,965.67<br>(25,902.84 to<br>95,619.82)                       | 40,800.85<br>(18,614.80 to<br>75,865.33)                      | 34,985.62<br>(17,271.62 to<br>59,910.85)                      | 42,035.79<br>(18,650.21 to<br>80,497.12)                      | 912.19<br>(468.86 to<br>1,590.31)                        | 805.66<br>(410.22 to<br>1,388.11)                      | 727.16<br>(393.22 to<br>1,150.10)                      | 813.27<br>(396.78 to<br>1,406.59)                        |
| Chagas disease                                        | 0.00<br>(0.00 to<br>0.00)                                      | 0.00<br>(0.00 to<br>0.00)                                     | 0.00<br>(0.00 to<br>0.00)                                     | 0.00<br>(0.00 to<br>0.00)                                     | 0.00<br>(0.00 to<br>0.00)                                | 0.00<br>(0.00 to<br>0.00)                              | 0.00<br>(0.00 to<br>0.00)                              | 0.00<br>(0.00 to<br>0.00)                                |
| Leishmaniasis                                         | 0.00<br>(0.00 to<br>0.00)                                      | 0.00<br>(0.00 to<br>0.00)                                     | 0.00<br>(0.00 to<br>0.00)                                     | 0.00<br>(0.00 to<br>0.00)                                     | 0.00<br>(0.00 to<br>0.00)                                | 0.00<br>(0.00 to<br>0.00)                              | 0.00<br>(0.00 to<br>0.00)                              | 0.00<br>(0.00 to<br>0.00)                                |
| African trypanosomiasis                               | 0.00<br>(0.00 to<br>0.00)                                      | 0.00<br>(0.00 to<br>0.00)                                     | 0.00<br>(0.00 to<br>0.00)                                     | 0.00<br>(0.00 to<br>0.00)                                     | 0.00<br>(0.00 to<br>0.00)                                | 0.00<br>(0.00 to<br>0.00)                              | 0.00<br>(0.00 to<br>0.00)                              | 0.00<br>(0.00 to<br>0.00)                                |
| Schistosomiasis                                       | 0.00<br>(0.00 to<br>0.00)                                      | 0.00<br>(0.00 to<br>0.00)                                     | 0.00<br>(0.00 to<br>0.00)                                     | 0.00<br>(0.00 to<br>0.00)                                     | 0.00<br>(0.00 to<br>0.00)                                | 0.00<br>(0.00 to<br>0.00)                              | 0.00<br>(0.00 to<br>0.00)                              | 0.00<br>(0.00 to<br>0.00)                                |
| Cysticercosis                                         | 118.62<br>(88.24 to<br>153.87)                                 | 61.60<br>(45.90 to<br>79.19)                                  | 53.79<br>(39.68 to<br>69.48)                                  | 62.41<br>(46.46 to<br>80.34)                                  | 2.60<br>(1.94 to<br>3.38)                                | 1.51<br>(1.14 to<br>1.93)                              | 1.38<br>(1.03 to<br>1.76)                              | 1.50<br>(1.14 to<br>1.92)                                |
| Cystic echinococcosis                                 | 21.80<br>(15.89 to<br>29.52)                                   | 15.42<br>(10.82 to<br>21.73)                                  | 7.15<br>(4.90 to<br>10.00)                                    | 17.69<br>(12.16 to<br>24.57)                                  | 0.50<br>(0.36 to<br>0.67)                                | 0.43<br>(0.31 to<br>0.60)                              | 0.22<br>(0.15 to<br>0.30)                              | 0.48<br>(0.34 to<br>0.65)                                |
| Dengue                                                | 289.66<br>(130.50 to<br>485.53)                                | 1,938.51<br>(1,023.61 to<br>3,135.77)                         | 1,874.18<br>(1,013.06 to<br>2,978.65)                         | 1,909.43<br>(981.77 to<br>3,123.75)                           | 7.25<br>(3.19 to<br>13.04)                               | 63.05<br>(34.78 to<br>106.42)                          | 67.37<br>(38.37 to<br>109.69)                          | 58.25<br>(31.39 to<br>99.60)                             |
| Yellow fever                                          | 0.00<br>(0.00 to<br>0.00)                                      | 0.00<br>(0.00 to<br>0.00)                                     | 0.00<br>(0.00 to<br>0.00)                                     | 0.00<br>(0.00 to<br>0.00)                                     | 0.00<br>(0.00 to<br>0.00)                                | 0.00<br>(0.00 to<br>0.00)                              | 0.00<br>(0.00 to<br>0.00)                              | 0.00<br>(0.00 to<br>0.00)                                |
| Rabies                                                | 13.62<br>(4.90 to<br>26.90)                                    | 12.02<br>(3.85 to<br>23.44)                                   | 5.11<br>(1.68 to<br>9.42)                                     | 14.11<br>(4.59 to<br>27.25)                                   | 0.40<br>(0.15 to<br>0.79)                                | 0.45<br>(0.15 to<br>0.84)                              | 0.23<br>(0.07 to<br>0.42)                              | 0.48<br>(0.15 to<br>0.92)                                |
| Intestinal nematode infections                        | 3,732.88<br>(2,093.87 to<br>6,401.18)                          | 5,109.05<br>(2,641.16 to<br>10,105.85)                        | 3,756.34<br>(2,038.00 to<br>7,180.13)                         | 5,416.07<br>(2,808.81 to<br>10,660.21)                        | 49.67<br>(29.30 to<br>81.81)                             | 73.21<br>(41.90 to<br>134.52)                          | 58.86<br>(35.68 to<br>99.27)                           | 75.85<br>(42.74 to<br>140.31)                            |
| Other neglected tropical diseases                     | 1,059.83<br>(490.56 to<br>2,097.01)                            | 1,397.69<br>(743.18 to<br>2,676.68)                           | 986.46<br>(562.82 to<br>1,941.99)                             | 1,465.77<br>(761.74 to<br>2,765.93)                           | 26.55<br>(13.84 to<br>50.04)                             | 52.65<br>(28.11 to<br>103.07)                          | 47.41<br>(24.84 to<br>95.95)                           | 49.42<br>(26.42 to<br>92.95)                             |
| <b>Maternal disorders</b>                             | <b>55,931.66</b><br><b>(41,675.43 to</b><br><b>74,711.99)</b>  | <b>48,512.72</b><br><b>(32,255.73 to</b><br><b>69,550.29)</b> | <b>34,056.29</b><br><b>(15,810.86 to</b><br><b>34,604.33)</b> | <b>56,468.61</b><br><b>(37,562.58 to</b><br><b>80,848.47)</b> | <b>1,003.90</b><br><b>(746.13 to</b><br><b>1,336.99)</b> | <b>875.92</b><br><b>(583.77 to</b><br><b>1,248.21)</b> | <b>436.16</b><br><b>(286.19 to</b><br><b>624.00)</b>   | <b>1,018.82</b><br><b>(679.46 to</b><br><b>1,445.80)</b> |
| Maternal hemorrhage                                   | 15,292.81<br>(9,312.90 to<br>23,112.26)                        | 12,786.16<br>(7,255.91 to<br>20,097.22)                       | 6,471.21<br>(3,640.43 to<br>10,389.64)                        | 14,755.31<br>(8,355.36 to<br>23,373.71)                       | 274.18<br>(164.45 to<br>410.37)                          | 230.56<br>(129.64 to<br>364.07)                        | 117.04<br>(66.51 to<br>187.22)                         | 265.92<br>(150.22 to<br>419.53)                          |
| Maternal sepsis and other maternal infections         | 5,621.30<br>(2,947.12 to<br>9,318.43)                          | 4,268.46<br>(1,932.31 to<br>7,705.27)                         | 2,128.39<br>(977.84 to<br>3,867.57)                           | 4,946.49<br>(2,270.19 to<br>8,816.38)                         | 102.78<br>(53.48 to<br>170.11)                           | 78.56<br>(35.78 to<br>139.24)                          | 39.32<br>(18.23 to<br>70.02)                           | 90.97<br>(41.40 to<br>161.07)                            |
| Maternal hypertensive disorders                       | 7,524.63<br>(4,369.29 to<br>11,851.36)                         | 6,691.41<br>(3,722.89 to<br>11,260.47)                        | 3,350.40<br>(1,842.09 to<br>5,589.19)                         | 7,731.63<br>(4,241.99 to<br>13,217.28)                        | 134.63<br>(78.41 to<br>212.86)                           | 120.61<br>(66.25 to<br>204.20)                         | 60.61<br>(32.66 to<br>101.89)                          | 139.27<br>(76.14 to<br>238.76)                           |
| Maternal obstructed labor and uterine rupture         | 4,452.13<br>(2,074.17 to<br>8,164.66)                          | 4,032.29<br>(1,687.66 to<br>8,016.17)                         | 1,936.23<br>(820.89 to<br>3,929.06)                           | 4,691.64<br>(2,003.24 to<br>9,187.92)                         | 80.64<br>(37.12 to<br>144.96)                            | 73.46<br>(31.04 to<br>144.96)                          | 35.39<br>(15.05 to<br>71.86)                           | 85.41<br>(36.12 to<br>164.03)                            |
| Maternal abortion, miscarriage, and ectopic pregnancy | 3,328.26<br>(1,502.10 to<br>6,247.02)                          | 3,173.13<br>(1,257.80 to<br>6,721.35)                         | 1,615.65<br>(619.18 to<br>3,356.27)                           | 3,743.65<br>(1,468.12 to<br>7,802.08)                         | 61.04<br>(27.92 to<br>113.55)                            | 58.45<br>(23.50 to<br>123.03)                          | 29.89<br>(11.98 to<br>60.77)                           | 68.92<br>(27.53 to<br>142.93)                            |

|                                        |                                        |                                        |                                       |                                        |                                |                                |                               |                                |
|----------------------------------------|----------------------------------------|----------------------------------------|---------------------------------------|----------------------------------------|--------------------------------|--------------------------------|-------------------------------|--------------------------------|
|                                        | 6,934.17<br>(3,576.98 to<br>11,437.92) | 6,630.74<br>(3,212.67 to<br>12,209.54) | 3,165.87<br>(1,528.69 to<br>5,853.79) | 7,794.56<br>(3,777.76 to<br>14,489.07) | 122.53<br>(63.27 to<br>204.62) | 117.62<br>(57.32 to<br>216.38) | 56.46<br>(27.17 to<br>105.96) | 138.12<br>(67.01 to<br>256.52) |
| Indirect maternal deaths               |                                        |                                        |                                       |                                        |                                |                                |                               |                                |
|                                        | 3,143.58<br>(1,313.48 to<br>5,958.81)  | 2,202.79<br>(888.35 to<br>4,522.90)    | 1,059.70<br>(423.94 to<br>2,139.82)   | 2,583.08<br>(1,049.11 to<br>5,175.46)  | 56.07<br>(24.16 to<br>103.63)  | 39.37<br>(15.48 to<br>79.87)   | 19.03<br>(7.60 to<br>38.36)   | 46.12<br>(18.82 to<br>91.35)   |
| Late maternal deaths                   |                                        |                                        |                                       |                                        |                                |                                |                               |                                |
|                                        | 198.90<br>(97.00 to<br>349.94)         | 607.48<br>(169.08 to<br>1,557.37)      | 257.26<br>(27.35 to<br>704.88)        | 762.58<br>(272.47 to<br>1,868.13)      | 3.78<br>(1.86 to<br>6.64)      | 11.43<br>(3.15 to<br>28.01)    | 4.88<br>(0.48 to<br>13.10)    | 14.35<br>(5.23 to<br>33.11)    |
| Maternal deaths aggravated by HIV/AIDS |                                        |                                        |                                       |                                        |                                |                                |                               |                                |
|                                        | 9,435.89<br>(5,244.94 to<br>15,056.94) | 8,120.27<br>(4,229.46 to<br>13,996.87) | 4,071.56<br>(2,057.69 to<br>6,956.93) | 9,459.68<br>(4,857.29 to<br>16,464.41) | 168.25<br>(94.45 to<br>272.45) | 145.85<br>(75.23 to<br>250.54) | 73.54<br>(36.99 to<br>124.96) | 169.73<br>(87.50 to<br>294.08) |
| Other maternal disorders               |                                        |                                        |                                       |                                        |                                |                                |                               |                                |

| Oceania                                                                 |                                                 |                                                 |                                                |                                                 |                                           |                                           |                                         |                                           |
|-------------------------------------------------------------------------|-------------------------------------------------|-------------------------------------------------|------------------------------------------------|-------------------------------------------------|-------------------------------------------|-------------------------------------------|-----------------------------------------|-------------------------------------------|
| Cause                                                                   | YLLs (actual counts)                            |                                                 |                                                |                                                 | Deaths (actual counts)                    |                                           |                                         |                                           |
|                                                                         | 2016                                            | 2040 Forecast                                   | 2040 Better Scenario                           | 2040 Worse Scenario                             | 2016                                      | 2040 Forecast                             | 2040 Better Scenario                    | 2040 Worse Scenario                       |
| <b>Neonatal disorders</b>                                               | <b>336,964.43</b><br>(201,838.98 to 543,278.66) | <b>303,341.19</b><br>(172,158.16 to 511,630.57) | <b>131,282.11</b><br>(74,770.72 to 219,031.63) | <b>378,074.22</b><br>(212,069.33 to 624,531.59) | <b>3,894.96</b><br>(2,333.69 to 6,279.18) | <b>3,507.62</b><br>(1,990.86 to 5,917.26) | <b>1,518.30</b><br>(865.03 to 2,531.49) | <b>4,371.48</b><br>(2,453.46 to 7,220.00) |
| Neonatal preterm birth                                                  | 148,732.45<br>(85,157.36 to 251,643.75)         | 124,501.73<br>(214,410.98)                      | 50,430.72<br>(27,567.59 to 87,093.19)          | 156,968.99<br>(85,648.86 to 272,396.87)         | 1,718.66<br>(984.12 to 2,908.44)          | 1,439.01<br>(781.00 to 2,477.03)          | 583.00<br>(318.84 to 1,006.70)          | 1,814.16<br>(990.17 to 3,147.79)          |
| Neonatal encephalopathy due to birth asphyxia and trauma                | 73,907.65<br>(40,668.60 to 126,773.94)          | 62,241.24<br>(31,232.80 to 115,811.85)          | 29,945.51<br>(15,296.76 to 55,271.06)          | 76,183.11<br>(38,505.33 to 141,670.93)          | 854.47<br>(470.10 to 1,465.25)            | 720.09<br>(361.42 to 1,339.60)            | 346.50<br>(177.02 to 639.09)            | 881.30<br>(445.94 to 1,637.74)            |
| Neonatal sepsis and other neonatal infections                           | 32,740.05<br>(15,086.04 to 58,961.18)           | 39,226.00<br>(17,670.21 to 75,805.92)           | 18,467.76<br>(8,452.09 to 35,041.90)           | 47,997.07<br>(21,809.25 to 92,555.97)           | 378.42<br>(174.34 to 681.31)              | 453.60<br>(204.44 to 876.79)              | 213.58<br>(97.72 to 405.22)             | 555.00<br>(252.31 to 1,069.46)            |
| Hemolytic disease and other neonatal jaundice                           | 7,409.22<br>(3,520.17 to 15,303.63)             | 4,261.01<br>(1,731.23 to 9,381.56)              | 1,759.22<br>(712.86 to 3,968.11)               | 5,378.75<br>(2,182.55 to 11,818.07)             | 85.60<br>(40.67 to 176.81)                | 49.24<br>(20.01 to 108.29)                | 20.33<br>(8.24 to 45.85)                | 62.15<br>(25.23 to 136.56)                |
| Other neonatal disorders                                                | 74,175.06<br>(39,558.53 to 132,666.37)          | 73,111.22<br>(36,305.36 to 136,385.89)          | 30,678.90<br>(15,369.61 to 56,763.70)          | 91,546.30<br>(45,297.37 to 168,066.92)          | 857.80<br>(457.33 to 1,533.34)            | 845.69<br>(420.00 to 1,576.92)            | 354.90<br>(177.88 to 656.38)            | 1,058.86<br>(524.00 to 1,942.79)          |
| <b>Nutritional deficiencies</b>                                         | <b>36,978.72</b><br>(20,692.32 to 63,397.93)    | <b>24,587.76</b><br>(14,833.55 to 41,009.87)    | <b>14,808.61</b><br>(9,898.19 to 22,958.47)    | <b>28,868.88</b><br>(16,401.38 to 50,398.70)    | <b>616.91</b><br>(411.39 to 933.06)       | <b>599.60</b><br>(425.08 to 835.39)       | <b>493.95</b><br>(369.33 to 643.72)     | <b>612.38</b><br>(413.64 to 893.78)       |
| Protein-energy malnutrition                                             | 32,232.63<br>(16,676.74 to 58,147.38)           | 17,156.95<br>(9,151.50 to 30,945.94)            | 9,592.27<br>(5,716.37 to 16,328.83)            | 20,896.84<br>(10,479.73 to 39,061.25)           | 507.60<br>(319.54 to 810.23)              | 406.00<br>(265.85 to 598.87)              | 328.18<br>(231.91 to 442.97)            | 421.36<br>(259.02 to 666.05)              |
| Iodine deficiency                                                       | 94.16<br>(19.28 to 353.13)                      | 497.24<br>(52.38 to 2,714.27)                   | 283.02<br>(35.83 to 1,238.42)                  | 573.22<br>(54.33 to 3,550.92)                   | 1.84<br>(0.51 to 5.29)                    | 13.46<br>(1.81 to 47.27)                  | 10.08<br>(1.38 to 37.96)                | 13.73<br>(1.87 to 50.95)                  |
| Dietary iron deficiency                                                 | 4,409.25<br>(2,411.43 to 8,253.63)              | 6,639.57<br>(3,818.61 to 11,958.53)             | 4,716.65<br>(2,953.72 to 7,005.56)             | 7,092.00<br>(3,829.29 to 13,217.63)             | 100.91<br>(64.46 to 155.58)               | 169.76<br>(106.58 to 254.46)              | 146.28<br>(92.38 to 221.18)             | 167.49<br>(105.73 to 260.99)              |
| Other nutritional deficiencies                                          | 242.68<br>(156.85 to 461.80)                    | 294.00<br>(179.49 to 528.06)                    | 216.67<br>(137.44 to 383.22)                   | 306.83<br>(187.21 to 558.42)                    | 6.56<br>(4.57 to 10.86)                   | 10.38<br>(6.45 to 17.46)                  | 9.40<br>(5.73 to 16.20)                 | 9.79<br>(6.09 to 16.51)                   |
| <b>Other communicable, maternal, neonatal, and nutritional diseases</b> | <b>111,061.60</b><br>(54,193.06 to 210,856.22)  | <b>48,153.54</b><br>(29,874.53 to 77,248.48)    | <b>30,307.35</b><br>(20,531.25 to 45,399.38)   | <b>53,217.53</b><br>(32,558.07 to 86,929.48)    | <b>1,497.69</b><br>(824.57 to 2,680.24)   | <b>876.48</b><br>(626.47 to 1,235.91)     | <b>626.39</b><br>(474.46 to 820.55)     | <b>928.69</b><br>(659.87 to 1,349.96)     |
| Sexually transmitted infections excluding HIV                           | 89,513.57<br>(34,557.49 to 185,574.23)          | 23,773.68<br>(8,742.41 to 48,621.88)            | 12,713.14<br>(5,068.73 to 25,634.72)           | 27,269.85<br>(10,041.15 to 56,605.30)           | 1,064.40<br>(422.04 to 2,177.77)          | 294.72<br>(117.86 to 584.14)              | 162.94<br>(73.03 to 313.31)             | 335.86<br>(133.68 to 676.96)              |
| Syphilis                                                                | 88,052.95<br>(32,954.90 to 183,627.62)          | 22,514.97<br>(7,638.42 to 47,207.68)            | 11,676.16<br>(4,063.22 to 24,630.09)           | 25,966.66<br>(8,845.33 to 55,408.46)            | 1,032.71<br>(388.24 to 2,151.35)          | 266.90<br>(91.90 to 555.66)               | 139.67<br>(49.71 to 291.15)             | 307.25<br>(106.22 to 650.95)              |
| Chlamydial infection                                                    | 285.12<br>(146.87 to 411.01)                    | 247.13<br>(127.76 to 357.94)                    | 202.80<br>(106.71 to 301.18)                   | 256.18<br>(131.87 to 371.25)                    | 6.13<br>(3.12 to 8.86)                    | 5.41<br>(2.79 to 7.87)                    | 4.31<br>(2.36 to 6.63)                  | 5.57<br>(2.87 to 8.06)                    |
| Gonococcal infection                                                    | 752.08<br>(383.49 to 1,091.83)                  | 646.78<br>(329.33 to 946.06)                    | 534.87<br>(275.19 to 803.04)                   | 668.91<br>(345.79 to 979.90)                    | 16.43<br>(8.25 to 23.71)                  | 14.42<br>(7.45 to 20.98)                  | 12.12<br>(6.33 to 17.85)                | 11.80<br>(7.77 to 21.46)                  |
| Other sexually transmitted infections                                   | 423.43<br>(220.22 to 615.49)                    | 364.80<br>(185.29 to 547.58)                    | 299.31<br>(155.19 to 448.03)                   | 378.10<br>(193.23 to 565.02)                    | 9.13<br>(4.66 to 13.19)                   | 7.99<br>(3.97 to 11.97)                   | 6.64<br>(3.42 to 9.88)                  | 8.23<br>(4.19 to 12.23)                   |
| Acute hepatitis                                                         | 7,484.09<br>(5,838.23 to 9,336.86)              | 7,148.86<br>(5,223.37 to 9,703.34)              | 5,496.04<br>(3,984.39 to 7,383.92)             | 7,456.17<br>(5,406.24 to 10,044.77)             | 164.52<br>(129.33 to 204.43)              | 178.28<br>(131.12 to 235.94)              | 142.58<br>(104.41 to 189.12)            | 182.22<br>(134.08 to 240.70)              |
| Acute hepatitis A                                                       | 450.86<br>(270.98 to 749.60)                    | 224.61<br>(125.68 to 389.29)                    | 139.15<br>(83.64 to 223.40)                    | 248.88<br>(136.38 to 432.15)                    | 6.43<br>(4.17 to 9.95)                    | 3.86<br>(2.44 to 5.94)                    | 2.70<br>(1.78 to 3.95)                  | 4.12<br>(2.56 to 6.44)                    |
| Acute hepatitis B                                                       | 5,624.73<br>(4,334.02 to 7,172.27)              | 5,888.29<br>(4,212.76 to 8,125.02)              | 4,583.53<br>(3,252.88 to 6,263.28)             | 6,113.97<br>(4,306.16 to 8,366.27)              | 134.49<br>(105.30 to 170.44)              | 152.88<br>(111.39 to 203.98)              | 122.09<br>(88.18 to 164.68)             | 156.23<br>(112.86 to 211.11)              |

|                                       |                                                                        |                                                                        |                                                                        |                                                                        |                                                               |                                                                 |                                                               |                                                                  |
|---------------------------------------|------------------------------------------------------------------------|------------------------------------------------------------------------|------------------------------------------------------------------------|------------------------------------------------------------------------|---------------------------------------------------------------|-----------------------------------------------------------------|---------------------------------------------------------------|------------------------------------------------------------------|
|                                       | 129.49<br>(87.03 to<br>187.43)                                         | 141.34<br>(89.45 to<br>212.38)                                         | 124.09<br>(78.56 to<br>188.83)                                         | 142.15<br>(88.61 to<br>215.63)                                         | 3.05<br>(2.03 to<br>4.33)                                     | 3.90<br>(2.49 to<br>5.96)                                       | 3.59<br>(2.28 to<br>5.51)                                     | 3.83<br>(2.44 to<br>5.91)                                        |
| Acute hepatitis C                     |                                                                        |                                                                        |                                                                        |                                                                        |                                                               |                                                                 |                                                               |                                                                  |
|                                       | 1,279.01<br>(839.16 to<br>1,882.17)                                    | 894.61<br>(529.35 to<br>1,425.75)                                      | 649.26<br>(394.89 to<br>987.27)                                        | 951.18<br>(564.37 to<br>1,531.85)                                      | 20.55<br>(13.90 to<br>29.54)                                  | 17.64<br>(10.80 to<br>26.19)                                    | 14.20<br>(8.77 to<br>20.93)                                   | 18.04<br>(10.97 to<br>26.81)                                     |
| Acute hepatitis E                     |                                                                        |                                                                        |                                                                        |                                                                        |                                                               |                                                                 |                                                               |                                                                  |
|                                       | 14,063.94<br>(9,250.65 to<br>27,084.64)                                | 17,231.00<br>(12,035.59 to<br>25,770.00)                               | 12,098.18<br>(8,744.14 to<br>16,935.60)                                | 18,491.51<br>(12,803.28 to<br>28,623.10)                               | 268.77<br>(196.91 to<br>428.40)                               | 403.48<br>(306.98 to<br>544.60)                                 | 320.87<br>(247.99 to<br>413.85)                               | 410.61<br>(311.68 to<br>558.92)                                  |
| Other unspecified infectious diseases |                                                                        |                                                                        |                                                                        |                                                                        |                                                               |                                                                 |                                                               |                                                                  |
| <b>Non-communicable diseases</b>      | <b>1,923,696.60</b><br><b>(1,658,075.45 to</b><br><b>2,218,282.77)</b> | <b>2,826,905.34</b><br><b>(2,356,994.82 to</b><br><b>3,340,874.56)</b> | <b>1,843,873.71</b><br><b>(1,554,195.02 to</b><br><b>2,180,307.62)</b> | <b>3,487,585.48</b><br><b>(2,911,324.13 to</b><br><b>4,098,275.80)</b> | <b>62,360.57</b><br><b>(55,208.82 to</b><br><b>70,612.91)</b> | <b>106,806.06</b><br><b>(94,550.13 to</b><br><b>120,595.27)</b> | <b>76,459.78</b><br><b>(67,847.88 to</b><br><b>86,024.76)</b> | <b>126,834.76</b><br><b>(111,815.09 to</b><br><b>141,057.43)</b> |



| Oceania                              |                                          |                                          |                                          |                                          |                                    |                                      |                                      |                                       |
|--------------------------------------|------------------------------------------|------------------------------------------|------------------------------------------|------------------------------------------|------------------------------------|--------------------------------------|--------------------------------------|---------------------------------------|
| Cause                                | YLLs (actual counts)                     |                                          |                                          |                                          | Deaths (actual counts)             |                                      |                                      |                                       |
|                                      | 2016                                     | 2040 Forecast                            | 2040 Better Scenario                     | 2040 Worse Scenario                      | 2016                               | 2040 Forecast                        | 2040 Better Scenario                 | 2040 Worse Scenario                   |
| Neoplasms                            | 215,239.78<br>(178,864.53 to 256,652.69) | 343,290.38<br>(273,260.97 to 431,746.64) | 307,768.17<br>(252,873.76 to 373,956.27) | 375,535.17<br>(293,510.75 to 478,232.39) | 6,744.95<br>(5,731.64 to 7,927.60) | 12,222.44<br>(9,957.95 to 15,092.88) | 11,757.00<br>(9,920.94 to 13,970.23) | 12,872.85<br>(10,277.53 to 16,196.10) |
| Lip and oral cavity cancer           | 3,587.86<br>(2,993.38 to 4,384.81)       | 5,985.65<br>(3,767.56 to 9,819.49)       | 4,036.98<br>(2,719.41 to 6,229.89)       | 8,334.39<br>(4,883.43 to 14,463.71)      | 122.43<br>(104.83 to 146.59)       | 220.39<br>(144.28 to 348.53)         | 162.35<br>(114.18 to 243.47)         | 290.03<br>(174.29 to 479.65)          |
| Nasopharynx cancer                   | 3,080.92<br>(2,246.88 to 4,086.87)       | 5,754.66<br>(2,941.02 to 10,859.42)      | 3,512.12<br>(1,943.74 to 6,336.82)       | 8,436.65<br>(4,083.23 to 16,264.54)      | 92.86<br>(68.67 to 121.38)         | 184.67<br>(98.15 to 339.52)          | 117.87<br>(66.47 to 205.85)          | 263.27<br>(127.58 to 502.10)          |
| Other pharynx cancer                 | 3,013.09<br>(2,142.66 to 4,197.60)       | 3,982.95<br>(2,418.86 to 6,425.84)       | 3,390.27<br>(2,170.55 to 5,299.25)       | 4,898.88<br>(2,715.65 to 8,317.15)       | 98.22<br>(71.80 to 134.30)         | 142.53<br>(89.22 to 221.87)          | 128.61<br>(84.92 to 197.17)          | 168.37<br>(96.99 to 275.74)           |
| Esophageal cancer                    | 2,806.05<br>(2,391.92 to 3,313.60)       | 4,475.10<br>(2,726.17 to 7,156.18)       | 3,185.00<br>(2,063.13 to 4,865.07)       | 6,000.76<br>(3,315.99 to 10,302.43)      | 101.62<br>(87.77 to 117.93)        | 175.15<br>(108.16 to 272.15)         | 134.13<br>(89.82 to 198.44)          | 223.76<br>(127.73 to 368.40)          |
| Stomach cancer                       | 18,779.83<br>(15,553.03 to 22,297.58)    | 23,213.81<br>(18,316.27 to 29,419.48)    | 20,751.69<br>(16,619.00 to 25,627.90)    | 23,728.23<br>(18,346.32 to 30,696.05)    | 636.57<br>(537.01 to 743.22)       | 884.60<br>(719.10 to 1,079.08)       | 849.97<br>(701.78 to 1,011.53)       | 866.10<br>(688.00 to 1,077.87)        |
| Colon and rectum cancer              | 12,766.97<br>(9,844.40 to 17,143.29)     | 24,134.83<br>(15,401.55 to 37,735.82)    | 24,952.84<br>(16,574.95 to 38,120.18)    | 24,754.34<br>(15,463.26 to 39,423.52)    | 460.76<br>(369.62 to 602.73)       | 979.80<br>(636.66 to 1,528.39)       | 1,086.12<br>(734.19 to 1,653.08)     | 956.68<br>(609.86 to 1,515.47)        |
| Liver cancer                         | 14,084.94<br>(11,400.71 to 18,454.82)    | 25,356.17<br>(17,184.15 to 37,199.06)    | 22,970.73<br>(16,298.92 to 32,370.49)    | 29,532.86<br>(18,812.77 to 44,836.08)    | 466.04<br>(382.79 to 602.67)       | 920.64<br>(641.18 to 1,327.97)       | 890.77<br>(645.61 to 1,235.12)       | 1,024.71<br>(671.61 to 1,518.95)      |
| Liver cancer due to hepatitis B      | 8,084.34<br>(6,411.20 to 10,707.63)      | 14,068.39<br>(9,541.68 to 21,016.98)     | 12,783.83<br>(9,090.97 to 18,550.53)     | 16,283.62<br>(10,289.51 to 24,922.88)    | 252.99<br>(203.67 to 331.57)       | 481.00<br>(333.91 to 691.45)         | 463.90<br>(331.86 to 653.40)         | 534.81<br>(344.33 to 799.95)          |
| Liver cancer due to hepatitis C      | 2,007.68<br>(1,531.84 to 2,829.02)       | 3,910.59<br>(2,729.62 to 5,910.59)       | 3,764.00<br>(2,718.83 to 5,509.08)       | 4,230.62<br>(2,837.59 to 6,683.79)       | 80.59<br>(62.68 to 112.48)         | 171.83<br>(123.42 to 254.91)         | 178.12<br>(130.19 to 256.77)         | 180.56<br>(121.71 to 269.28)          |
| Liver cancer due to alcohol use      | 971.27<br>(730.46 to 1,349.09)           | 1,806.86<br>(1,177.14 to 2,754.08)       | 1,538.22<br>(1,050.37 to 2,323.53)       | 2,393.85<br>(1,465.19 to 3,786.98)       | 35.15<br>(27.08 to 47.85)          | 69.29<br>(46.11 to 105.04)           | 63.16<br>(44.55 to 92.76)            | 86.79<br>(55.07 to 137.10)            |
| Liver cancer due to other causes     | 3,021.65<br>(2,379.97 to 3,868.87)       | 5,570.32<br>(3,520.36 to 8,717.95)       | 4,884.67<br>(3,207.20 to 7,334.60)       | 6,524.77<br>(3,842.37 to 10,719.83)      | 97.31<br>(77.78 to 124.54)         | 198.52<br>(121.49 to 315.55)         | 185.59<br>(120.76 to 280.72)         | 222.54<br>(128.41 to 364.27)          |
| Gallbladder and biliary tract cancer | 1,777.09<br>(1,306.98 to 2,472.84)       | 2,129.60<br>(1,597.44 to 2,866.20)       | 2,376.11<br>(1,802.08 to 3,215.07)       | 1,975.35<br>(1,467.44 to 2,688.09)       | 67.04<br>(51.02 to 90.39)          | 88.84<br>(67.37 to 116.84)           | 105.11<br>(80.85 to 137.45)          | 79.46<br>(58.99 to 105.77)            |
| Pancreatic cancer                    | 4,713.38<br>(4,039.51 to 5,537.72)       | 9,891.60<br>(7,104.09 to 13,575.93)      | 10,222.11<br>(7,630.43 to 13,645.68)     | 9,752.98<br>(6,988.09 to 13,582.69)      | 184.18<br>(160.56 to 212.56)       | 416.20<br>(304.61 to 574.53)         | 456.36<br>(345.61 to 604.85)         | 394.69<br>(284.03 to 550.97)          |
| Larynx cancer                        | 2,483.95<br>(2,052.47 to 2,961.78)       | 3,839.62<br>(2,058.40 to 6,536.62)       | 2,327.60<br>(1,358.84 to 3,974.15)       | 5,135.68<br>(2,636.55 to 8,674.09)       | 85.06<br>(71.82 to 99.76)          | 145.33<br>(78.69 to 243.68)          | 92.11<br>(54.81 to 154.07)           | 187.90<br>(98.24 to 317.43)           |
| Tracheal, bronchus, and lung cancer  | 26,994.64<br>(21,870.65 to 34,952.79)    | 46,318.63<br>(26,683.77 to 79,695.00)    | 27,627.89<br>(17,465.04 to 46,005.71)    | 63,215.98<br>(35,880.55 to 105,732.83)   | 970.35<br>(801.39 to 1,227.15)     | 1,794.87<br>(1,064.45 to 3,063.73)   | 1,114.95<br>(724.98 to 1,822.16)     | 2,381.40<br>(1,396.43 to 4,038.55)    |
| Malignant skin melanoma              | 1,027.07<br>(749.38 to 1,566.70)         | 1,826.22<br>(1,274.26 to 2,899.12)       | 2,255.64<br>(1,565.67 to 3,734.65)       | 1,665.57<br>(1,171.09 to 2,614.25)       | 35.22<br>(26.35 to 52.69)          | 70.69<br>(51.00 to 109.48)           | 93.60<br>(66.90 to 148.61)           | 61.77<br>(44.36 to 94.30)             |
| Non-melanoma skin cancer             | 1,780.86<br>(1,339.82 to 2,320.80)       | 3,498.88<br>(2,680.24 to 4,439.56)       | 3,433.64<br>(2,620.89 to 4,387.14)       | 3,330.24<br>(2,545.45 to 4,220.11)       | 66.55<br>(52.51 to 82.73)          | 151.80<br>(120.20 to 186.89)         | 164.95<br>(131.36 to 202.50)         | 136.25<br>(106.73 to 169.47)          |
| Breast cancer                        | 26,153.35<br>(16,143.86 to 38,364.86)    | 42,526.28<br>(23,212.16 to 68,839.89)    | 40,889.32<br>(23,322.80 to 65,020.63)    | 44,422.13<br>(23,750.67 to 74,421.49)    | 795.94<br>(512.41 to 1,138.14)     | 1,441.62<br>(825.78 to 2,307.47)     | 1,459.38<br>(873.51 to 2,261.21)     | 1,457.00<br>(812.55 to 2,375.99)      |
| Cervical cancer                      | 21,200.48<br>(12,859.85 to 29,032.93)    | 27,409.19<br>(16,495.24 to 39,490.30)    | 23,400.87<br>(14,461.11 to 33,291.52)    | 28,579.74<br>(16,518.79 to 42,200.89)    | 613.44<br>(381.16 to 825.73)       | 848.09<br>(529.43 to 1,196.49)       | 750.96<br>(482.77 to 1,039.50)       | 864.48<br>(524.92 to 1,242.43)        |



| Oceania                         |                                          |                                              |                                          |                                                |                                       |                                       |                                       |                                       |
|---------------------------------|------------------------------------------|----------------------------------------------|------------------------------------------|------------------------------------------------|---------------------------------------|---------------------------------------|---------------------------------------|---------------------------------------|
| Cause                           | YLLs (actual counts)                     |                                              |                                          |                                                | Deaths (actual counts)                |                                       |                                       |                                       |
|                                 | 2016                                     | 2040 Forecast                                | 2040 Better Scenario                     | 2040 Worse Scenario                            | 2016                                  | 2040 Forecast                         | 2040 Better Scenario                  | 2040 Worse Scenario                   |
| Kidney cancer                   | 1,321.98<br>(1,111.05 to 1,628.66)       | 2,453.87<br>(1,874.97 to 3,279.09)           | 2,639.18<br>(2,034.15 to 3,542.64)       | 2,413.35<br>(1,823.87 to 3,307.03)             | 39.57<br>(33.75 to 48.49)             | 85.67<br>(65.38 to 113.50)            | 100.71<br>(76.81 to 129.72)           | 80.35<br>(60.68 to 108.27)            |
| Bladder cancer                  | 1,924.08<br>(1,547.83 to 2,573.64)       | 3,270.39<br>(2,090.10 to 5,252.66)           | 2,976.63<br>(2,000.43 to 4,672.94)       | 3,351.92<br>(2,091.24 to 5,413.87)             | 78.24<br>(64.40 to 102.67)            | 145.63<br>(96.75 to 233.52)           | 143.11<br>(99.20 to 219.71)           | 142.23<br>(91.90 to 226.81)           |
| Brain and nervous system cancer | 4,952.84<br>(3,860.14 to 6,022.50)       | 8,412.67<br>(6,250.75 to 10,352.98)          | 8,266.52<br>(6,111.60 to 10,204.87)      | 8,311.34<br>(6,195.02 to 10,233.11)            | 108.35<br>(83.33 to 130.61)           | 209.73<br>(153.65 to 255.52)          | 225.95<br>(164.14 to 276.66)          | 198.79<br>(146.29 to 240.91)          |
| Thyroid cancer                  | 1,304.40<br>(1,010.29 to 1,675.23)       | 2,052.82<br>(1,503.94 to 2,794.96)           | 1,884.97<br>(1,404.34 to 2,537.61)       | 2,151.91<br>(1,527.79 to 3,030.30)             | 47.85<br>(37.55 to 60.53)             | 83.31<br>(62.40 to 112.19)            | 81.00<br>(61.50 to 106.84)            | 84.17<br>(60.87 to 116.39)            |
| Mesothelioma                    | 485.35<br>(354.76 to 715.73)             | 796.59<br>(582.61 to 1,210.36)               | 807.89<br>(585.57 to 1,256.22)           | 762.75<br>(554.20 to 1,156.88)                 | 15.45<br>(11.54 to 22.32)             | 27.53<br>(20.50 to 40.60)             | 29.25<br>(21.56 to 44.30)             | 25.58<br>(18.82 to 37.41)             |
| Hodgkin lymphoma                | 1,679.49<br>(1,224.22 to 2,137.22)       | 1,942.72<br>(1,409.28 to 2,567.56)           | 1,488.49<br>(1,069.08 to 1,969.46)       | 2,021.52<br>(1,441.83 to 2,653.98)             | 37.72<br>(27.90 to 47.77)             | 48.57<br>(36.37 to 62.97)             | 39.76<br>(29.57 to 51.38)             | 48.87<br>(36.28 to 63.53)             |
| Non-Hodgkin lymphoma            | 6,438.39<br>(5,294.38 to 8,081.37)       | 10,058.39<br>(8,108.13 to 12,965.81)         | 10,534.85<br>(8,593.01 to 13,605.67)     | 10,014.89<br>(7,989.45 to 13,060.31)           | 166.10<br>(140.01 to 206.83)          | 302.61<br>(248.03 to 381.70)          | 348.15<br>(286.39 to 441.45)          | 287.36<br>(232.51 to 371.12)          |
| Multiple myeloma                | 2,027.50<br>(1,444.10 to 2,543.89)       | 3,826.75<br>(2,717.13 to 5,063.62)           | 4,377.43<br>(3,144.75 to 5,732.00)       | 3,717.45<br>(2,618.11 to 4,990.76)             | 72.14<br>(52.75 to 88.93)             | 150.12<br>(108.55 to 197.14)          | 181.01<br>(133.69 to 236.89)          | 140.85<br>(101.85 to 185.00)          |
| Leukemia                        | 19,455.58<br>(13,965.31 to 26,048.90)    | 24,745.80<br>(17,272.93 to 33,896.59)        | 22,104.11<br>(15,839.44 to 29,429.87)    | 26,155.57<br>(18,119.22 to 36,590.59)          | 394.12<br>(288.24 to 508.57)          | 595.31<br>(432.42 to 803.46)          | 585.00<br>(434.51 to 764.33)          | 607.50<br>(429.75 to 835.62)          |
| Acute lymphoid leukemia         | 3,713.51<br>(2,448.28 to 6,113.96)       | 4,391.76<br>(2,830.87 to 7,300.25)           | 3,822.43<br>(2,490.43 to 5,984.48)       | 4,628.08<br>(2,942.27 to 7,751.28)             | 60.30<br>(41.64 to 95.34)             | 79.97<br>(53.49 to 124.45)            | 75.10<br>(51.12 to 111.86)            | 83.03<br>(55.04 to 130.74)            |
| Chronic lymphoid leukemia       | 258.68<br>(183.93 to 354.50)             | 415.72<br>(275.47 to 603.52)                 | 428.01<br>(284.37 to 619.59)             | 420.40<br>(272.76 to 620.92)                   | 9.55<br>(6.80 to 13.06)               | 17.25<br>(11.40 to 24.82)             | 19.13<br>(12.78 to 27.68)             | 16.65<br>(10.77 to 24.54)             |
| Acute myeloid leukemia          | 5,854.77<br>(4,130.61 to 7,765.15)       | 8,987.84<br>(6,213.64 to 12,148.63)          | 8,851.29<br>(6,253.87 to 11,586.07)      | 9,306.94<br>(6,439.40 to 12,699.13)            | 115.36<br>(81.47 to 147.42)           | 208.42<br>(149.29 to 267.97)          | 224.77<br>(164.13 to 281.25)          | 208.79<br>(147.48 to 273.81)          |
| Chronic myeloid leukemia        | 2,383.23<br>(1,517.90 to 3,552.34)       | 2,566.18<br>(1,531.94 to 4,187.21)           | 2,458.23<br>(1,486.29 to 3,934.93)       | 2,715.44<br>(1,592.47 to 4,448.50)             | 64.30<br>(42.54 to 95.55)             | 76.67<br>(47.78 to 122.22)            | 76.90<br>(48.59 to 121.67)            | 78.78<br>(47.93 to 129.29)            |
| Other leukemia                  | 7,245.39<br>(4,295.01 to 11,100.52)      | 8,384.30<br>(4,743.77 to 13,491.93)          | 6,544.15<br>(3,778.04 to 10,286.05)      | 9,084.70<br>(5,035.85 to 14,787.08)            | 144.61<br>(91.41 to 212.45)           | 213.00<br>(128.70 to 323.82)          | 189.09<br>(116.84 to 284.29)          | 220.25<br>(129.59 to 339.43)          |
| Other neoplasms                 | 16,912.92<br>(13,532.87 to 19,803.24)    | 26,170.99<br>(21,202.04 to 30,616.68)        | 25,778.80<br>(20,618.23 to 30,111.71)    | 25,702.97<br>(20,732.40 to 30,163.89)          | 403.61<br>(322.42 to 466.38)          | 726.89<br>(590.74 to 836.59)          | 789.30<br>(634.98 to 913.00)          | 679.65<br>(548.93 to 785.86)          |
| Cardiovascular diseases         | 771,046.03<br>(668,412.66 to 897,990.75) | 1,052,081.26<br>(752,825.71 to 1,416,253.62) | 524,965.11<br>(389,829.48 to 726,950.72) | 1,467,119.10<br>(1,078,164.76 to 1,900,838.04) | 26,207.28<br>(22,979.80 to 29,963.13) | 41,094.06<br>(30,968.33 to 54,396.30) | 23,299.91<br>(18,058.05 to 32,705.21) | 54,951.90<br>(41,990.41 to 70,219.40) |
| Rheumatic heart disease         | 56,346.95<br>(42,754.75 to 71,771.54)    | 38,586.19<br>(27,688.41 to 51,424.85)        | 27,326.40<br>(19,859.33 to 35,807.81)    | 40,944.55<br>(29,214.02 to 53,767.51)          | 1,331.70<br>(986.46 to 1,703.21)      | 1,124.37<br>(821.76 to 1,446.88)      | 880.20<br>(659.60 to 1,117.05)        | 1,135.31<br>(810.38 to 1,472.68)      |
| Ischemic heart disease          | 351,076.73<br>(300,417.26 to 417,582.51) | 513,215.89<br>(278,546.88 to 849,699.67)     | 220,831.18<br>(119,905.67 to 399,752.50) | 745,666.56<br>(435,078.23 to 1,130,446.09)     | 12,764.30<br>(11,099.77 to 14,850.75) | 20,361.40<br>(11,785.81 to 33,814.18) | 10,051.46<br>(5,825.64 to 17,866.05)  | 28,384.81<br>(17,237.55 to 44,885.87) |
| Stroke                          | 257,759.27<br>(216,803.67 to 303,915.22) | 327,274.45<br>(199,003.59 to 496,628.41)     | 140,202.43<br>(86,930.60 to 231,030.12)  | 489,427.08<br>(302,936.22 to 704,516.95)       | 8,675.12<br>(7,362.17 to 10,037.92)   | 12,831.13<br>(8,151.77 to 20,922.16)  | 6,392.84<br>(4,151.26 to 11,430.22)   | 18,357.02<br>(11,684.44 to 27,342.50) |
| Ischemic stroke                 | 61,272.08<br>(51,687.15 to 71,135.32)    | 80,679.27<br>(45,831.50 to 178,662.03)       | 44,317.25<br>(24,154.78 to 101,652.96)   | 106,231.89<br>(60,287.78 to 216,814.83)        | 2,636.10<br>(2,243.95 to 3,035.51)    | 3,977.10<br>(2,119.33 to 10,251.60)   | 2,483.19<br>(1,311.31 to 6,527.52)    | 5,020.87<br>(2,649.92 to 11,568.66)   |

|                                |                                             |                                             |                                           |                                             |                                       |                                        |                                       |                                         |
|--------------------------------|---------------------------------------------|---------------------------------------------|-------------------------------------------|---------------------------------------------|---------------------------------------|----------------------------------------|---------------------------------------|-----------------------------------------|
|                                | 196,487.19<br>(163,800.23 to<br>234,660.84) | 246,595.18<br>(136,317.79 to<br>411,290.32) | 95,885.18<br>(54,830.87 to<br>169,734.82) | 383,195.19<br>(222,681.62 to<br>584,727.64) | 6,039.02<br>(5,070.89 to<br>7,075.54) | 8,854.03<br>(5,133.82 to<br>15,307.64) | 3,909.65<br>(2,431.66 to<br>6,813.00) | 13,336.15<br>(7,712.40 to<br>21,686.84) |
| Intracerebral hemorrhage       | 32,851.46<br>(21,476.29 to<br>42,301.77)    | 58,411.18<br>(36,860.22 to<br>86,056.67)    | 40,780.06<br>(26,905.76 to<br>56,032.34)  | 71,429.93<br>(41,795.63 to<br>116,075.83)   | 1,269.14<br>(860.35 to<br>1,603.31)   | 2,571.47<br>(1,660.04 to<br>3,710.42)  | 1,983.39<br>(1,348.10 to<br>2,681.44) | 2,953.64<br>(1,792.62 to<br>4,770.35)   |
| Hypertensive heart disease     | 21,853.33<br>(13,339.30 to<br>30,545.46)    | 27,563.01<br>(16,666.00 to<br>38,411.62)    | 25,637.24<br>(15,943.09 to<br>35,018.89)  | 27,923.06<br>(16,727.13 to<br>39,437.12)    | 558.97<br>(362.58 to<br>739.60)       | 871.24<br>(557.07 to<br>1,191.38)      | 898.09<br>(583.10 to<br>1,226.74)     | 836.47<br>(527.48 to<br>1,161.35)       |
| Cardiomyopathy and myocarditis | 6,059.09<br>(4,048.63 to<br>8,807.76)       | 7,659.18<br>(5,245.65 to<br>10,879.67)      | 6,993.80<br>(4,806.40 to<br>9,867.61)     | 7,584.61<br>(5,148.47 to<br>10,782.97)      | 164.55<br>(112.65 to<br>238.23)       | 257.36<br>(175.46 to<br>373.61)        | 259.19<br>(176.07 to<br>377.73)       | 241.55<br>(164.01 to<br>353.26)         |
| Myocarditis                    |                                             |                                             |                                           |                                             |                                       |                                        |                                       |                                         |

| Oceania                                                       |                                                        |                                                        |                                                        |                                                        |                                                    |                                                     |                                                    |                                                     |
|---------------------------------------------------------------|--------------------------------------------------------|--------------------------------------------------------|--------------------------------------------------------|--------------------------------------------------------|----------------------------------------------------|-----------------------------------------------------|----------------------------------------------------|-----------------------------------------------------|
| Cause                                                         | YLLs (actual counts)                                   |                                                        |                                                        |                                                        | Deaths (actual counts)                             |                                                     |                                                    |                                                     |
|                                                               | 2016                                                   | 2040 Forecast                                          | 2040 Better Scenario                                   | 2040 Worse Scenario                                    | 2016                                               | 2040 Forecast                                       | 2040 Better Scenario                               | 2040 Worse Scenario                                 |
| Alcoholic cardiomyopathy                                      | 1,155.87<br>(581.84 to 2,023.75)                       | 1,318.18<br>(663.18 to 2,192.47)                       | 1,251.66<br>(626.93 to 2,001.96)                       | 1,624.44<br>(803.84 to 2,790.26)                       | 35.39<br>(18.71 to 58.94)                          | 45.26<br>(23.50 to 71.39)                           | 46.35<br>(23.72 to 71.29)                          | 52.22<br>(26.75 to 86.35)                           |
| Other cardiomyopathy                                          | 14,638.37<br>(8,255.36 to 20,660.41)                   | 18,585.65<br>(10,297.93 to 27,528.81)                  | 17,391.78<br>(9,921.97 to 25,605.71)                   | 18,714.01<br>(10,144.55 to 28,163.39)                  | 359.03<br>(219.95 to 486.75)                       | 568.62<br>(332.02 to 861.14)                        | 592.54<br>(355.03 to 891.14)                       | 542.71<br>(310.75 to 826.48)                        |
| Atrial fibrillation and flutter                               | 1,132.33<br>(875.96 to 1,440.83)                       | 2,579.14<br>(1,866.97 to 3,399.84)                     | 2,902.46<br>(2,138.02 to 3,765.66)                     | 2,435.30<br>(1,715.29 to 3,276.10)                     | 85.14<br>(65.74 to 109.00)                         | 205.88<br>(138.60 to 278.87)                        | 257.67<br>(182.35 to 341.12)                       | 181.63<br>(120.23 to 252.64)                        |
| Aortic aneurysm                                               | 6,663.96<br>(4,652.10 to 9,652.95)                     | 10,343.35<br>(6,955.12 to 15,283.85)                   | 10,016.08<br>(6,882.78 to 14,700.11)                   | 10,461.93<br>(6,801.64 to 15,733.24)                   | 254.19<br>(187.37 to 357.57)                       | 442.15<br>(321.13 to 624.84)                        | 477.65<br>(355.01 to 666.78)                       | 420.67<br>(295.12 to 603.87)                        |
| Peripheral artery disease                                     | 280.32<br>(148.46 to 520.79)                           | 765.31<br>(365.25 to 1,701.97)                         | 765.17<br>(387.97 to 1,638.61)                         | 761.01<br>(350.95 to 1,742.26)                         | 13.73<br>(7.64 to 23.05)                           | 40.37<br>(20.57 to 84.43)                           | 46.63<br>(25.35 to 96.20)                          | 37.35<br>(18.61 to 78.38)                           |
| Endocarditis                                                  | 10,415.75<br>(8,218.39 to 13,243.97)                   | 16,451.58<br>(12,185.26 to 21,454.37)                  | 15,123.99<br>(11,272.24 to 19,949.14)                  | 16,554.32<br>(12,260.18 to 22,019.08)                  | 301.94<br>(243.08 to 381.77)                       | 572.10<br>(424.06 to 779.59)                        | 587.70<br>(438.40 to 799.72)                       | 542.67<br>(403.43 to 734.87)                        |
| Other cardiovascular and circulatory diseases                 | 32,665.94<br>(21,609.95 to 42,239.78)                  | 56,891.17<br>(37,525.63 to 76,074.89)                  | 41,380.10<br>(27,319.22 to 54,457.23)                  | 61,515.36<br>(39,566.52 to 83,638.73)                  | 953.05<br>(639.85 to 1,208.68)                     | 2,073.96<br>(1,369.81 to 2,710.52)                  | 1,724.29<br>(1,173.72 to 2,219.18)                 | 2,102.34<br>(1,366.49 to 2,795.83)                  |
| <b>Chronic respiratory diseases</b>                           | <b>300,590.44</b><br><b>(249,064.55 to 353,244.89)</b> | <b>379,023.00</b><br><b>(280,928.78 to 524,652.53)</b> | <b>226,931.54</b><br><b>(181,397.26 to 287,699.64)</b> | <b>493,710.12</b><br><b>(349,268.34 to 722,492.73)</b> | <b>11,114.96</b><br><b>(9,133.00 to 13,077.65)</b> | <b>15,862.04</b><br><b>(11,700.13 to 21,663.61)</b> | <b>10,144.40</b><br><b>(8,095.80 to 12,451.74)</b> | <b>19,742.79</b><br><b>(13,917.91 to 27,978.48)</b> |
| Chronic obstructive pulmonary disease                         | 160,889.66<br>(122,179.09 to 198,235.81)               | 236,641.86<br>(148,565.55 to 375,623.29)               | 112,286.72<br>(78,176.15 to 162,889.93)                | 331,767.90<br>(201,730.77 to 549,394.79)               | 6,375.96<br>(4,781.12 to 7,838.13)                 | 10,447.32<br>(6,858.01 to 16,168.11)                | 5,436.29<br>(3,853.11 to 7,621.77)                 | 13,846.15<br>(8,706.73 to 21,616.76)                |
| Pneumoconiosis                                                | 701.40<br>(466.30 to 993.35)                           | 923.75<br>(604.35 to 1,340.82)                         | 874.21<br>(560.30 to 1,259.40)                         | 907.03<br>(596.61 to 1,322.39)                         | 30.02<br>(20.29 to 41.96)                          | 47.68<br>(29.98 to 70.93)                           | 51.72<br>(32.00 to 76.80)                          | 43.80<br>(27.50 to 65.25)                           |
| Silicosis                                                     | 138.88<br>(68.94 to 226.53)                            | 157.64<br>(75.84 to 268.20)                            | 143.74<br>(67.14 to 245.99)                            | 149.92<br>(71.19 to 258.80)                            | 6.59<br>(3.34 to 10.61)                            | 8.98<br>(4.04 to 15.93)                             | 9.36<br>(4.00 to 16.88)                            | 7.99<br>(3.56 to 13.97)                             |
| Asbestosis                                                    | 155.76<br>(98.44 to 269.33)                            | 239.70<br>(148.00 to 402.99)                           | 237.24<br>(144.74 to 380.18)                           | 230.25<br>(141.90 to 392.99)                           | 5.32<br>(3.25 to 8.95)                             | 10.06<br>(5.84 to 17.19)                            | 11.20<br>(6.46 to 19.05)                           | 9.10<br>(5.24 to 15.78)                             |
| Coal workers pneumoconiosis                                   | 18.34<br>(7.27 to 34.98)                               | 28.27<br>(10.02 to 56.53)                              | 20.76<br>(7.16 to 41.23)                               | 29.74<br>(10.42 to 60.76)                              | 0.89<br>(0.35 to 1.67)                             | 1.63<br>(0.54 to 3.28)                              | 1.38<br>(0.44 to 2.76)                             | 1.61<br>(0.53 to 3.22)                              |
| Other pneumoconiosis                                          | 388.42<br>(243.62 to 584.09)                           | 498.14<br>(299.79 to 758.86)                           | 472.47<br>(271.09 to 728.74)                           | 497.12<br>(301.17 to 757.82)                           | 17.21<br>(10.81 to 25.55)                          | 27.01<br>(15.64 to 43.34)                           | 29.78<br>(16.45 to 48.58)                          | 25.11<br>(14.48 to 40.93)                           |
| Asthma                                                        | 107,307.31<br>(78,572.11 to 144,369.93)                | 88,647.02<br>(57,655.78 to 137,262.22)                 | 65,456.13<br>(43,140.24 to 98,823.39)                  | 107,347.40<br>(66,965.87 to 174,372.05)                | 3,801.30<br>(2,765.06 to 5,172.41)                 | 3,627.56<br>(2,309.14 to 5,820.11)                  | 2,955.80<br>(1,934.85 to 4,574.79)                 | 4,144.00<br>(2,518.62 to 6,776.44)                  |
| Interstitial lung disease and pulmonary sarcoidosis           | 8,352.48<br>(3,519.79 to 17,903.42)                    | 13,804.42<br>(5,892.54 to 28,311.60)                   | 15,502.33<br>(6,911.58 to 30,814.66)                   | 13,117.96<br>(5,553.83 to 27,143.19)                   | 219.83<br>(96.11 to 467.84)                        | 450.65<br>(179.68 to 930.92)                        | 561.58<br>(227.15 to 1,114.24)                     | 406.13<br>(163.66 to 846.82)                        |
| Other chronic respiratory diseases                            | 23,339.60<br>(13,258.05 to 34,370.64)                  | 39,005.95<br>(22,642.91 to 59,085.22)                  | 32,812.16<br>(20,207.07 to 47,341.15)                  | 40,569.83<br>(22,602.48 to 63,094.82)                  | 687.85<br>(395.93 to 1,006.34)                     | 1,288.82<br>(763.94 to 1,956.08)                    | 1,139.01<br>(711.14 to 1,649.45)                   | 1,302.72<br>(748.17 to 2,020.50)                    |
| <b>Cirrhosis and other chronic liver diseases</b>             | <b>91,267.10</b><br><b>(74,017.17 to 113,428.49)</b>   | <b>141,857.87</b><br><b>(115,620.23 to 174,729.94)</b> | <b>127,253.74</b><br><b>(103,492.20 to 156,241.08)</b> | <b>145,341.14</b><br><b>(118,811.62 to 180,307.39)</b> | <b>2,389.46</b><br><b>(1,954.03 to 2,945.91)</b>   | <b>4,333.10</b><br><b>(3,460.41 to 4,960.30)</b>    | <b>3,906.30</b><br><b>(3,254.19 to 4,688.49)</b>   | <b>4,111.10</b><br><b>(3,435.13 to 4,992.99)</b>    |
| Cirrhosis and other chronic liver diseases due to hepatitis B | 35,519.07<br>(28,175.86 to 44,939.85)                  | 58,929.34<br>(46,576.65 to 73,153.72)                  | 54,951.05<br>(43,428.47 to 68,437.76)                  | 58,101.13<br>(45,975.92 to 73,136.09)                  | 992.70<br>(797.68 to 1,234.99)                     | 1,803.86<br>(1,472.00 to 2,207.45)                  | 1,758.07<br>(1,436.59 to 2,136.13)                 | 1,729.41<br>(1,412.30 to 2,117.03)                  |
| Cirrhosis and other chronic liver diseases due to hepatitis C | 14,520.00<br>(11,485.05 to 18,665.40)                  | 23,997.64<br>(19,140.66 to 30,585.91)                  | 22,164.16<br>(17,721.62 to 28,346.41)                  | 23,755.72<br>(18,861.22 to 30,408.65)                  | 398.45<br>(320.07 to 503.33)                       | 713.79<br>(583.42 to 881.97)                        | 684.20<br>(559.11 to 846.55)                       | 690.15<br>(563.03 to 857.26)                        |

|                                                                |                                                               |                                                                |                                                               |                                                                |                                                            |                                                            |                                                            |                                                            |
|----------------------------------------------------------------|---------------------------------------------------------------|----------------------------------------------------------------|---------------------------------------------------------------|----------------------------------------------------------------|------------------------------------------------------------|------------------------------------------------------------|------------------------------------------------------------|------------------------------------------------------------|
|                                                                | 11,366.00<br>(8,830.16 to<br>14,698.03)                       | 17,204.28<br>(13,589.34 to<br>22,024.95)                       | 14,061.88<br>(11,175.20 to<br>17,961.83)                      | 21,208.70<br>(16,553.38 to<br>27,395.53)                       | 330.95<br>(262.44 to<br>418.89)                            | 548.98<br>(447.65 to<br>687.88)                            | 473.78<br>(384.54 to<br>588.85)                            | 647.82<br>(524.02 to<br>816.83)                            |
| Cirrhosis and other chronic liver diseases due to alcohol use  |                                                               |                                                                |                                                               |                                                                |                                                            |                                                            |                                                            |                                                            |
|                                                                | 29,862.03<br>(24,331.09 to<br>37,152.35)                      | 41,726.60<br>(33,468.95 to<br>51,774.78)                       | 36,076.64<br>(29,112.73 to<br>44,812.76)                      | 42,275.58<br>(33,793.90 to<br>53,076.57)                       | 667.35<br>(549.84 to<br>819.30)                            | 1,066.46<br>(886.80 to<br>1,294.14)                        | 990.25<br>(824.36 to<br>1,191.31)                          | 1,043.72<br>(866.99 to<br>1,277.40)                        |
| Cirrhosis and other chronic liver diseases due to other causes |                                                               |                                                                |                                                               |                                                                |                                                            |                                                            |                                                            |                                                            |
|                                                                | <b>62,683.55</b><br><b>(49,401.20 to</b><br><b>87,969.70)</b> | <b>74,290.93</b><br><b>(59,234.79 to</b><br><b>104,455.10)</b> | <b>58,147.26</b><br><b>(46,375.71 to</b><br><b>81,216.19)</b> | <b>78,960.95</b><br><b>(62,396.04 to</b><br><b>111,307.11)</b> | <b>1,761.11</b><br><b>(1,446.93 to</b><br><b>2,441.80)</b> | <b>2,540.22</b><br><b>(2,000.62 to</b><br><b>3,487.02)</b> | <b>2,207.96</b><br><b>(1,736.12 to</b><br><b>3,007.52)</b> | <b>2,555.54</b><br><b>(1,995.37 to</b><br><b>3,543.87)</b> |
| Digestive diseases                                             |                                                               |                                                                |                                                               |                                                                |                                                            |                                                            |                                                            |                                                            |
|                                                                | 22,110.76<br>(16,630.75 to<br>32,407.69)                      | 21,218.16<br>(15,252.37 to<br>31,256.85)                       | 14,758.32<br>(10,498.98 to<br>21,500.55)                      | 22,484.77<br>(15,908.38 to<br>33,639.91)                       | 683.17<br>(521.51 to<br>985.02)                            | 790.90<br>(561.06 to<br>1,158.51)                          | 601.18<br>(428.25 to<br>858.84)                            | 799.53<br>(550.29 to<br>1,179.79)                          |
| Peptic ulcer disease                                           |                                                               |                                                                |                                                               |                                                                |                                                            |                                                            |                                                            |                                                            |

| Oceania                                    |                                       |                                       |                                       |                                       |                                    |                                    |                                    |                                    |
|--------------------------------------------|---------------------------------------|---------------------------------------|---------------------------------------|---------------------------------------|------------------------------------|------------------------------------|------------------------------------|------------------------------------|
| Cause                                      | YLLs (actual counts)                  |                                       |                                       |                                       | Deaths (actual counts)             |                                    |                                    |                                    |
|                                            | 2016                                  | 2040 Forecast                         | 2040 Better Scenario                  | 2040 Worse Scenario                   | 2016                               | 2040 Forecast                      | 2040 Better Scenario               | 2040 Worse Scenario                |
| Gastritis and duodenitis                   | 482.67<br>(313.94 to 860.98)          | 821.32<br>(531.57 to 1,497.87)        | 724.14<br>(470.61 to 1,303.22)        | 812.23<br>(518.86 to 1,506.05)        | 16.07<br>(10.57 to 27.74)          | 31.54<br>(20.11 to 54.61)          | 30.44<br>(19.54 to 51.84)          | 29.63<br>(18.67 to 52.74)          |
| Appendicitis                               | 7,916.85<br>(5,555.50 to 11,668.62)   | 9,059.93<br>(6,478.91 to 13,614.51)   | 6,945.70<br>(5,027.38 to 10,445.67)   | 9,377.34<br>(6,613.84 to 14,251.29)   | 185.58<br>(137.32 to 272.60)       | 256.08<br>(195.93 to 384.72)       | 215.81<br>(165.30 to 322.40)       | 252.50<br>(191.63 to 380.19)       |
| Paralytic ileus and intestinal obstruction | 9,314.01<br>(5,622.73 to 16,107.04)   | 10,627.66<br>(7,084.30 to 17,116.88)  | 8,643.43<br>(6,085.62 to 13,609.51)   | 10,924.53<br>(7,117.39 to 17,987.25)  | 189.27<br>(133.01 to 294.89)       | 299.51<br>(217.27 to 458.68)       | 297.18<br>(218.16 to 446.73)       | 281.84<br>(201.02 to 456.49)       |
| Inguinal, femoral, and abdominal hernia    | 1,356.38<br>(1,015.06 to 2,173.39)    | 1,678.71<br>(1,235.18 to 2,664.70)    | 1,555.40<br>(1,147.01 to 2,435.69)    | 1,601.90<br>(1,174.31 to 2,561.34)    | 52.74<br>(39.09 to 79.81)          | 78.20<br>(54.66 to 116.61)         | 80.57<br>(56.42 to 119.30)         | 70.11<br>(48.33 to 105.90)         |
| Inflammatory bowel disease                 | 2,026.28<br>(1,330.73 to 3,603.70)    | 2,939.32<br>(1,999.84 to 4,994.52)    | 2,884.95<br>(2,014.01 to 4,683.67)    | 2,868.16<br>(1,927.96 to 4,929.07)    | 52.80<br>(37.56 to 84.51)          | 91.31<br>(66.27 to 136.88)         | 98.56<br>(73.12 to 142.80)         | 84.49<br>(60.28 to 131.51)         |
| Vascular intestinal disorders              | 1,578.12<br>(1,026.35 to 2,133.44)    | 2,519.61<br>(1,712.24 to 3,254.73)    | 2,440.16<br>(1,721.88 to 3,144.23)    | 2,402.42<br>(1,585.20 to 3,106.81)    | 57.52<br>(41.38 to 74.25)          | 111.05<br>(79.81 to 144.75)        | 118.17<br>(88.12 to 153.88)        | 100.33<br>(70.01 to 131.42)        |
| Gallbladder and biliary diseases           | 5,683.97<br>(4,329.27 to 8,162.47)    | 7,817.54<br>(4,760.47 to 13,302.69)   | 5,906.74<br>(3,613.52 to 9,856.83)    | 9,662.95<br>(5,549.56 to 16,833.95)   | 186.25<br>(140.72 to 262.76)       | 302.67<br>(177.54 to 519.64)       | 251.34<br>(149.91 to 417.02)       | 352.94<br>(196.45 to 625.86)       |
| Pancreatitis                               | 3,277.70<br>(2,301.60 to 4,806.71)    | 5,169.05<br>(2,607.63 to 10,555.89)   | 3,988.57<br>(2,098.09 to 7,916.59)    | 6,334.32<br>(2,905.92 to 13,544.17)   | 86.22<br>(60.15 to 124.92)         | 153.91<br>(80.84 to 293.74)        | 128.97<br>(70.37 to 239.10)        | 178.65<br>(85.37 to 370.13)        |
| Other digestive diseases                   | 8,936.82<br>(6,537.75 to 13,215.66)   | 12,439.63<br>(9,125.46 to 18,326.13)  | 10,299.84<br>(7,492.96 to 15,257.06)  | 12,492.34<br>(9,138.63 to 18,881.69)  | 251.48<br>(190.85 to 363.22)       | 425.05<br>(312.01 to 605.51)       | 385.94<br>(279.00 to 545.58)       | 405.53<br>(297.37 to 581.62)       |
| Neurological disorders                     | 26,692.77<br>(22,581.20 to 32,195.04) | 58,789.65<br>(39,355.11 to 66,931.64) | 53,467.16<br>(42,325.72 to 69,134.37) | 59,748.43<br>(38,418.92 to 67,914.37) | 1,286.79<br>(1,092.34 to 1,521.81) | 1,286.79<br>(2,068.48 to 4,256.50) | 3,740.63<br>(2,707.59 to 5,076.26) | 2,750.52<br>(1,842.12 to 4,092.21) |
| Alzheimer's disease and other dementias    | 12,471.69<br>(10,179.84 to 15,289.01) | 30,098.65<br>(19,772.39 to 45,461.14) | 35,350.40<br>(24,909.04 to 51,015.10) | 28,387.79<br>(17,488.62 to 44,986.43) | 968.49<br>(793.76 to 1,187.03)     | 2,447.18<br>(1,529.31 to 3,713.31) | 3,132.82<br>(2,133.83 to 4,462.15) | 2,189.55<br>(1,298.45 to 3,449.43) |
| Parkinson's disease                        | 928.14<br>(709.64 to 1,177.50)        | 2,477.10<br>(1,806.03 to 3,264.32)    | 3,476.48<br>(2,603.02 to 4,494.94)    | 2,057.80<br>(1,472.28 to 2,733.52)    | 62.37<br>(47.54 to 80.28)          | 176.73<br>(123.86 to 239.27)       | 264.11<br>(193.67 to 351.71)       | 141.21<br>(96.11 to 194.58)        |
| Epilepsy                                   | 9,898.27<br>(7,088.06 to 13,919.71)   | 12,762.28<br>(8,410.98 to 19,322.55)  | 8,966.21<br>(5,852.12 to 13,632.90)   | 14,982.01<br>(9,697.62 to 23,089.75)  | 177.25<br>(128.54 to 246.53)       | 244.33<br>(164.52 to 360.88)       | 178.55<br>(120.24 to 265.68)       | 283.43<br>(184.95 to 435.60)       |
| Multiple sclerosis                         | 265.65<br>(144.43 to 517.36)          | 436.85<br>(233.56 to 851.82)          | 451.44<br>(243.98 to 886.02)          | 432.40<br>(230.94 to 844.24)          | 7.13<br>(3.96 to 13.73)            | 12.44<br>(6.94 to 23.90)           | 13.22<br>(7.53 to 25.65)           | 12.10<br>(6.67 to 23.28)           |
| Motor neuron disease                       | 422.15<br>(338.10 to 572.38)          | 809.77<br>(624.18 to 1,174.27)        | 914.95<br>(701.15 to 1,333.91)        | 760.58<br>(590.97 to 1,102.66)        | 12.89<br>(10.49 to 17.82)          | 27.97<br>(21.56 to 40.82)          | 33.08<br>(25.06 to 48.53)          | 25.57<br>(19.74 to 37.72)          |
| Other neurological disorders               | 2,706.88<br>(2,260.16 to 3,227.93)    | 4,205.00<br>(3,388.15 to 5,086.03)    | 4,307.68<br>(3,469.56 to 5,268.76)    | 4,127.84<br>(3,344.82 to 4,964.61)    | 58.66<br>(49.48 to 70.08)          | 105.12<br>(84.91 to 127.64)        | 118.85<br>(94.59 to 144.93)        | 98.67<br>(80.05 to 119.63)         |
| Mental disorders                           | 5,431.57<br>(3,075.79 to 12,057.82)   | 10,271.32<br>(5,596.70 to 24,044.46)  | 9,983.49<br>(5,467.25 to 23,105.33)   | 10,496.60<br>(5,662.76 to 24,603.77)  | 120.52<br>(70.12 to 264.82)        | 239.40<br>(135.98 to 338.24)       | 243.73<br>(140.24 to 533.53)       | 238.63<br>(133.79 to 541.08)       |
| Alcohol use disorders                      | 3,161.15<br>(1,575.62 to 9,881.70)    | 4,505.65<br>(1,842.00 to 16,540.90)   | 4,224.40<br>(1,701.32 to 15,559.86)   | 4,776.63<br>(1,961.98 to 17,431.08)   | 72.70<br>(37.73 to 218.25)         | 107.57<br>(47.12 to 374.13)        | 103.84<br>(46.08 to 358.45)        | 111.90<br>(48.89 to 389.48)        |
| Drug use disorders                         | 2,249.03<br>(1,277.88 to 4,077.90)    | 5,730.27<br>(3,166.85 to 10,191.63)   | 5,724.48<br>(3,195.42 to 10,140.26)   | 5,684.58<br>(3,111.57 to 10,206.06)   | 47.40<br>(27.44 to 82.89)          | 131.14<br>(73.91 to 224.85)        | 139.21<br>(79.62 to 235.01)        | 126.04<br>(70.03 to 218.34)        |
| Opioid use disorders                       | 1,304.60<br>(668.66 to 2,629.48)      | 2,866.02<br>(1,287.52 to 5,822.86)    | 2,811.78<br>(1,285.45 to 5,709.03)    | 2,865.08<br>(1,276.75 to 5,876.14)    | 25.49<br>(13.16 to 50.82)          | 59.44<br>(26.71 to 118.96)         | 60.43<br>(27.82 to 118.62)         | 58.28<br>(25.84 to 118.55)         |

|                           |                                   |                                       |                                       |                                       |                             |                              |                               |                              |
|---------------------------|-----------------------------------|---------------------------------------|---------------------------------------|---------------------------------------|-----------------------------|------------------------------|-------------------------------|------------------------------|
|                           | 170.16<br>(81.01 to<br>272.68)    | 498.56<br>(229.28 to<br>848.58)       | 467.09<br>(211.17 to<br>807.74)       | 499.61<br>(232.03 to<br>843.62)       | 3.53<br>(1.70 to<br>5.51)   | 11.04<br>(5.28 to<br>18.41)  | 10.76<br>(5.07 to<br>18.31)   | 10.82<br>(5.23 to<br>17.90)  |
| Cocaine use disorders     |                                   |                                       |                                       |                                       |                             |                              |                               |                              |
|                           | 67.54<br>(36.12 to<br>105.69)     | 268.90<br>(139.05 to<br>437.04)       | 245.70<br>(124.81 to<br>402.30)       | 271.61<br>(141.14 to<br>435.71)       | 1.47<br>(0.81 to<br>2.24)   | 6.07<br>(3.20 to<br>9.51)    | 5.69<br>(2.97 to<br>8.81)     | 6.03<br>(3.20 to<br>9.42)    |
| Amphetamine use disorders |                                   |                                       |                                       |                                       |                             |                              |                               |                              |
|                           | 706.73<br>(367.74 to<br>1,256.10) | 2,096.79<br>(1,038.26 to<br>3,813.64) | 2,199.92<br>(1,111.91 to<br>3,998.91) | 2,048.27<br>(1,001.03 to<br>3,767.63) | 16.90<br>(9.26 to<br>28.71) | 54.60<br>(28.09 to<br>96.71) | 62.34<br>(32.85 to<br>107.08) | 50.92<br>(25.77 to<br>91.64) |
| Other drug use disorders  |                                   |                                       |                                       |                                       |                             |                              |                               |                              |
|                           | 21.38<br>(14.98 to<br>32.58)      | 35.40<br>(23.01 to<br>54.86)          | 34.61<br>(22.80 to<br>55.10)          | 35.39<br>(23.06 to<br>53.80)          | 0.42<br>(0.29 to<br>0.65)   | 0.69<br>(0.45 to<br>1.07)    | 0.68<br>(0.45 to<br>1.10)     | 0.69<br>(0.45 to<br>1.07)    |
| Eating disorders          |                                   |                                       |                                       |                                       |                             |                              |                               |                              |



| Oceania                                                    |                                                 |                                                 |                                                 |                                                 |                                             |                                              |                                              |                                              |
|------------------------------------------------------------|-------------------------------------------------|-------------------------------------------------|-------------------------------------------------|-------------------------------------------------|---------------------------------------------|----------------------------------------------|----------------------------------------------|----------------------------------------------|
| Cause                                                      | YLLs (actual counts)                            |                                                 |                                                 |                                                 | Deaths (actual counts)                      |                                              |                                              |                                              |
|                                                            | 2016                                            | 2040 Forecast                                   | 2040 Better Scenario                            | 2040 Worse Scenario                             | 2016                                        | 2040 Forecast                                | 2040 Better Scenario                         | 2040 Worse Scenario                          |
| <b>Diabetes, urogenital, blood, and endocrine diseases</b> | <b>292,849.16</b><br>(255,490.77 to 336,784.95) | <b>592,034.57</b><br>(421,378.06 to 897,325.50) | <b>416,803.32</b><br>(294,574.94 to 674,081.22) | <b>663,305.94</b><br>(461,454.95 to 981,566.70) | <b>10,590.97</b><br>(9,313.34 to 11,978.18) | <b>24,640.07</b><br>(17,582.71 to 37,219.78) | <b>18,735.69</b><br>(13,454.38 to 29,866.91) | <b>26,420.41</b><br>(18,482.97 to 38,348.17) |
| Diabetes mellitus                                          | 172,970.23<br>(150,915.76 to 198,399.83)        | 304,130.97<br>(205,715.52 to 426,753.36)        | 213,253.56<br>(144,566.30 to 300,370.51)        | 336,650.43<br>(219,421.91 to 477,574.65)        | 6,813.79<br>(6,011.54 to 7,734.49)          | 13,609.57<br>(9,513.64 to 18,153.55)         | 10,313.91<br>(7,280.16 to 13,838.35)         | 14,357.39<br>(9,775.86 to 19,593.29)         |
| Acute glomerulonephritis                                   | 296.36<br>(177.45 to 467.20)                    | 578.22<br>(303.48 to 1,045.22)                  | 495.48<br>(252.47 to 902.80)                    | 580.90<br>(304.49 to 1,046.88)                  | 8.27<br>(4.77 to 13.26)                     | 17.13<br>(8.49 to 31.52)                     | 15.33<br>(7.49 to 28.30)                     | 16.85<br>(8.32 to 30.94)                     |
| Chronic kidney disease                                     | 90,590.27<br>(71,370.62 to 115,998.65)          | 241,530.47<br>(173,901.16 to 609,556.36)        | 162,608.82<br>(50,219.87 to 449,597.45)         | 280,106.96<br>(86,317.13 to 649,942.81)         | 3,027.50<br>(2,421.88 to 3,813.12)          | 9,599.48<br>(2,563.65 to 24,619.81)          | 7,009.74<br>(1,799.20 to 20,060.94)          | 10,703.69<br>(2,922.85 to 24,776.37)         |
| Chronic kidney disease due to diabetes mellitus            | 49,120.84<br>(38,308.59 to 64,052.91)           | 142,593.20<br>(39,876.88 to 373,447.41)         | 96,220.84<br>(27,514.60 to 273,006.32)          | 166,559.35<br>(47,129.84 to 405,296.48)         | 1,668.00<br>(1,311.63 to 2,136.12)          | 5,493.04<br>(1,402.73 to 14,312.42)          | 3,959.14<br>(1,001.24 to 11,402.85)          | 6,198.94<br>(1,602.43 to 14,741.84)          |
| Chronic kidney disease due to hypertension                 | 18,844.62<br>(14,443.11 to 25,021.30)           | 57,426.78<br>(14,677.40 to 152,198.80)          | 40,131.77<br>(10,464.83 to 116,258.47)          | 65,346.06<br>(16,736.05 to 153,520.14)          | 818.33<br>(646.71 to 1,061.02)              | 2,808.60<br>(681.76 to 7,400.15)             | 2,158.20<br>(526.51 to 6,277.56)             | 3,041.47<br>(771.65 to 7,203.49)             |
| Chronic kidney disease due to glomerulonephritis           | 10,920.21<br>(8,131.27 to 14,614.39)            | 18,926.62<br>(8,642.80 to 41,451.41)            | 11,882.04<br>(5,439.24 to 27,472.77)            | 21,951.16<br>(9,784.75 to 45,643.99)            | 244.12<br>(183.26 to 324.22)                | 542.76<br>(195.06 to 1,322.92)               | 364.42<br>(130.47 to 959.06)                 | 615.55<br>(224.08 to 1,414.33)               |
| Chronic kidney disease due to other and unspecified causes | 11,704.60<br>(8,631.60 to 15,727.14)            | 22,583.87<br>(8,959.38 to 50,974.70)            | 14,374.16<br>(5,618.20 to 34,527.44)            | 26,250.39<br>(10,223.31 to 53,810.63)           | 297.05<br>(219.79 to 389.38)                | 755.08<br>(233.70 to 1,830.05)               | 527.98<br>(158.48 to 1,415.69)               | 847.72<br>(268.20 to 1,864.60)               |
| Urinary diseases and male infertility                      | 9,661.07<br>(7,686.26 to 12,795.78)             | 16,335.48<br>(13,018.29 to 22,147.51)           | 14,872.18<br>(11,947.11 to 20,135.22)           | 16,220.50<br>(12,933.98 to 21,971.64)           | 257.17<br>(217.39 to 328.86)                | 544.59<br>(452.47 to 705.77)                 | 572.89<br>(472.67 to 748.90)                 | 503.07<br>(414.45 to 660.45)                 |
| Urinary tract infections                                   | 7,315.28<br>(5,600.81 to 9,944.31)              | 13,005.03<br>(10,078.62 to 17,948.56)           | 12,035.90<br>(9,420.75 to 16,594.96)            | 12,897.19<br>(9,985.82 to 18,009.21)            | 188.07<br>(152.37 to 241.36)                | 426.21<br>(348.32 to 561.11)                 | 462.04<br>(376.22 to 604.94)                 | 391.34<br>(316.24 to 519.11)                 |
| Urolithiasis                                               | 278.96<br>(199.03 to 447.54)                    | 637.95<br>(434.56 to 1,021.18)                  | 677.05<br>(459.52 to 1,100.02)                  | 610.00<br>(417.65 to 972.51)                    | 8.68<br>(6.16 to 13.85)                     | 21.85<br>(14.76 to 35.71)                    | 24.78<br>(16.60 to 40.12)                    | 20.06<br>(13.45 to 32.58)                    |
| Other urinary diseases                                     | 2,066.82<br>(1,291.51 to 2,863.47)              | 2,692.50<br>(1,481.66 to 3,761.26)              | 2,159.22<br>(1,165.21 to 3,015.75)              | 2,713.31<br>(1,463.05 to 3,782.79)              | 60.42<br>(38.70 to 81.15)                   | 96.53<br>(52.54 to 135.03)                   | 86.08<br>(46.12 to 122.32)                   | 91.68<br>(49.74 to 129.39)                   |
| Gynecological diseases                                     | 250.22<br>(143.73 to 351.00)                    | 295.27<br>(162.84 to 444.52)                    | 222.73<br>(122.56 to 335.65)                    | 308.24<br>(173.12 to 459.39)                    | 6.01<br>(3.54 to 8.36)                      | 7.33<br>(4.28 to 10.79)                      | 5.65<br>(3.26 to 8.29)                       | 7.56<br>(4.39 to 11.09)                      |
| Uterine fibroids                                           | 29.65<br>(5.89 to 59.28)                        | 32.20<br>(5.76 to 70.72)                        | 23.52<br>(4.31 to 53.67)                        | 33.76<br>(6.20 to 74.92)                        | 0.82<br>(0.18 to 1.62)                      | 0.92<br>(0.18 to 1.97)                       | 0.69<br>(0.14 to 1.51)                       | 0.95<br>(0.19 to 2.04)                       |
| Polycystic ovarian syndrome                                | 6.02<br>(2.22 to 14.03)                         | 4.75<br>(1.59 to 12.24)                         | 2.87<br>(0.96 to 7.26)                          | 5.22<br>(1.82 to 12.69)                         | 0.15<br>(0.05 to 0.34)                      | 0.11<br>(0.04 to 0.29)                       | 0.07<br>(0.02 to 0.17)                       | 0.13<br>(0.04 to 0.31)                       |
| Endometriosis                                              | 1.70<br>(0.75 to 3.69)                          | 2.35<br>(0.77 to 6.41)                          | 1.73<br>(0.56 to 4.96)                          | 2.48<br>(0.82 to 6.80)                          | 0.04<br>(0.02 to 0.08)                      | 0.05<br>(0.02 to 0.16)                       | 0.04<br>(0.01 to 0.12)                       | 0.06<br>(0.02 to 0.17)                       |
| Genital prolapse                                           | 10.46<br>(2.36 to 24.16)                        | 12.69<br>(2.48 to 30.39)                        | 9.06<br>(1.76 to 21.65)                         | 13.28<br>(2.64 to 32.22)                        | 0.33<br>(0.08 to 0.66)                      | 0.39<br>(0.08 to 0.81)                       | 0.30<br>(0.06 to 0.63)                       | 0.39<br>(0.08 to 0.82)                       |
| Other gynecological diseases                               | 202.39<br>(110.17 to 289.70)                    | 243.28<br>(135.19 to 369.90)                    | 185.55<br>(101.24 to 283.18)                    | 253.51<br>(138.60 to 387.21)                    | 4.67<br>(2.61 to 6.61)                      | 5.85<br>(3.27 to 8.76)                       | 4.55<br>(2.56 to 6.79)                       | 6.03<br>(3.37 to 9.15)                       |
| Hemoglobinopathies and hemolytic anemias                   | 4,209.95<br>(3,163.04 to 5,341.08)              | 4,863.15<br>(3,672.86 to 6,297.00)              | 3,889.64<br>(2,931.00 to 5,051.84)              | 4,979.23<br>(3,757.95 to 6,547.20)              | 97.89<br>(75.78 to 125.09)                  | 139.26<br>(107.51 to 184.98)                 | 117.64<br>(90.40 to 154.53)                  | 137.14<br>(106.64 to 183.36)                 |
| Thalassemias                                               | 1,070.40<br>(627.52 to 1,558.82)                | 720.83<br>(427.83 to 1,080.42)                  | 663.15<br>(419.11 to 976.52)                    | 732.95<br>(429.37 to 1,087.93)                  | 13.58<br>(8.14 to 19.39)                    | 9.36<br>(5.71 to 13.98)                      | 8.72<br>(5.58 to 12.56)                      | 9.49<br>(5.70 to 13.97)                      |

|                                                   |                                          |                                          |                                          |                                          |                                 |                                 |                                 |                                 |
|---------------------------------------------------|------------------------------------------|------------------------------------------|------------------------------------------|------------------------------------------|---------------------------------|---------------------------------|---------------------------------|---------------------------------|
|                                                   | 4.45<br>(2.96 to<br>6.11)                | 4.90<br>(3.13 to<br>7.20)                | 3.83<br>(2.40 to<br>5.65)                | 5.14<br>(3.26 to<br>7.55)                | 0.07<br>(0.05 to<br>0.10)       | 0.08<br>(0.05 to<br>0.12)       | 0.06<br>(0.04 to<br>0.09)       | 0.09<br>(0.05 to<br>0.12)       |
| Sickle cell disorders                             | 2,108.53<br>(1,602.36 to<br>2,756.77)    | 3,045.37<br>(2,245.54 to<br>4,068.13)    | 2,288.20<br>(1,675.72 to<br>3,071.57)    | 3,181.09<br>(2,551.69 to<br>4,291.33)    | 46.15<br>(35.05 to<br>60.26)    | 77.27<br>(58.19 to<br>104.39)   | 60.22<br>(44.90 to<br>80.65)    | 78.99<br>(59.74 to<br>106.11)   |
| G6PD deficiency                                   | 1,026.57<br>(769.98 to<br>1,362.65)      | 1,092.05<br>(819.81 to<br>1,507.59)      | 934.46<br>(703.10 to<br>1,273.37)        | 1,060.05<br>(796.47 to<br>1,464.21)      | 38.09<br>(29.77 to<br>50.76)    | 52.56<br>(40.25 to<br>72.13)    | 48.63<br>(37.47 to<br>67.21)    | 48.58<br>(36.58 to<br>67.49)    |
| Other hemoglobinopathies and hemolytic anemias    | 14,871.06<br>(11,656.79 to<br>19,388.62) | 24,301.01<br>(18,554.22 to<br>32,603.57) | 21,460.92<br>(16,276.74 to<br>28,717.13) | 24,459.68<br>(18,698.87 to<br>32,561.46) | 380.34<br>(302.05 to<br>490.35) | 722.72<br>(554.28 to<br>963.83) | 700.53<br>(534.37 to<br>941.41) | 694.72<br>(537.31 to<br>919.95) |
| Endocrine, metabolic, blood, and immune disorders |                                          |                                          |                                          |                                          |                                 |                                 |                                 |                                 |

| Oceania                                       |                                                |                                                |                                                |                                                 |                                           |                                           |                                           |                                           |
|-----------------------------------------------|------------------------------------------------|------------------------------------------------|------------------------------------------------|-------------------------------------------------|-------------------------------------------|-------------------------------------------|-------------------------------------------|-------------------------------------------|
| Cause                                         | YLLs (actual counts)                           |                                                |                                                |                                                 | Deaths (actual counts)                    |                                           |                                           |                                           |
|                                               | 2016                                           | 2040 Forecast                                  | 2040 Better Scenario                           | 2040 Worse Scenario                             | 2016                                      | 2040 Forecast                             | 2040 Better Scenario                      | 2040 Worse Scenario                       |
| <b>Musculoskeletal disorders</b>              | <b>4,986.63</b><br>(3,077.89 to 6,871.83)      | <b>7,948.01</b><br>(4,693.74 to 11,317.57)     | <b>8,253.05</b><br>(4,938.87 to 11,799.33)     | <b>7,790.68</b><br>(4,629.97 to 11,133.93)      | <b>103.13</b><br>(66.23 to 140.14)        | <b>188.67</b><br>(118.21 to 260.83)       | <b>208.76</b><br>(131.27 to 285.70)       | <b>178.58</b><br>(111.82 to 247.87)       |
| Rheumatoid arthritis                          | 412.93<br>(253.85 to 573.84)                   | 829.31<br>(494.08 to 1,201.78)                 | 700.40<br>(408.44 to 1,022.41)                 | 828.24<br>(494.59 to 1,200.37)                  | 13.38<br>(8.06 to 18.54)                  | 33.30<br>(18.80 to 49.25)                 | 30.80<br>(16.88 to 45.27)                 | 31.69<br>(18.33 to 46.72)                 |
| Other musculoskeletal disorders               | 4,573.70<br>(2,800.63 to 6,371.36)             | 7,118.70<br>(4,136.26 to 10,192.56)            | 7,552.65<br>(4,425.21 to 10,842.28)            | 6,962.45<br>(4,046.34 to 9,961.20)              | 89.76<br>(56.66 to 122.42)                | 155.37<br>(94.33 to 216.56)               | 177.97<br>(111.24 to 244.09)              | 146.89<br>(88.16 to 205.14)               |
| <b>Other non-communicable diseases</b>        | <b>152,909.56</b><br>(73,485.14 to 268,591.79) | <b>175,318.35</b><br>(95,206.92 to 298,995.33) | <b>110,300.88</b><br>(68,821.79 to 174,862.55) | <b>194,577.34</b><br>(102,810.42 to 338,137.37) | <b>2,041.39</b><br>(1,106.79 to 3,399.51) | <b>2,872.28</b><br>(1,910.15 to 4,395.09) | <b>2,215.41</b><br>(1,600.51 to 3,159.60) | <b>3,012.43</b><br>(1,911.41 to 4,762.20) |
| Congenital birth defects                      | 138,406.76<br>(59,043.90 to 251,002.95)        | 144,865.84<br>(65,374.36 to 261,628.77)        | 82,300.40<br>(39,874.30 to 144,203.92)         | 164,359.01<br>(71,084.55 to 301,309.50)         | 1,677.74<br>(736.39 to 2,993.73)          | 1,815.41<br>(853.96 to 3,224.16)          | 1,067.79<br>(544.43 to 1,811.03)          | 2,045.02<br>(930.40 to 3,667.21)          |
| Neural tube defects                           | 16,745.97<br>(5,733.24 to 38,881.78)           | 7,537.44<br>(2,284.28 to 19,349.46)            | 3,315.69<br>(1,000.37 to 8,698.14)             | 8,966.98<br>(2,665.89 to 23,307.30)             | 194.38<br>(66.82 to 450.20)               | 87.82<br>(26.89 to 224.51)                | 38.78<br>(11.86 to 101.10)                | 104.40<br>(31.42 to 270.11)               |
| Congenital heart anomalies                    | 56,042.56<br>(30,318.88 to 97,674.91)          | 58,483.58<br>(31,744.07 to 98,316.22)          | 34,504.55<br>(19,720.15 to 55,981.60)          | 65,655.84<br>(35,116.37 to 112,220.62)          | 689.54<br>(379.34 to 1,183.12)            | 746.21<br>(420.36 to 1,240.10)            | 456.67<br>(267.57 to 723.61)              | 831.39<br>(460.60 to 1,385.57)            |
| Orofacial clefts                              | 149.04<br>(58.66 to 315.62)                    | 128.57<br>(45.28 to 303.26)                    | 54.48<br>(20.78 to 122.84)                     | 158.67<br>(55.77 to 385.83)                     | 1.73<br>(0.68 to 3.66)                    | 1.49<br>(0.52 to 3.52)                    | 0.63<br>(0.24 to 1.42)                    | 1.84<br>(0.65 to 4.47)                    |
| Down syndrome                                 | 7,166.04<br>(1,783.34 to 27,788.78)            | 8,712.54<br>(2,308.01 to 32,468.30)            | 4,926.77<br>(1,476.65 to 17,354.00)            | 9,930.72<br>(2,580.47 to 37,010.98)             | 90.73<br>(24.61 to 340.97)                | 117.81<br>(34.44 to 413.20)               | 70.93<br>(23.35 to 227.35)                | 132.41<br>(37.08 to 467.13)               |
| Other chromosomal abnormalities               | 5,149.43<br>(1,519.99 to 13,424.71)            | 8,747.86<br>(2,375.24 to 21,752.85)            | 4,699.99<br>(1,366.98 to 11,333.20)            | 10,026.38<br>(2,755.75 to 25,093.49)            | 60.68<br>(18.04 to 157.35)                | 104.25<br>(28.56 to 256.68)               | 56.84<br>(16.65 to 136.02)                | 119.14<br>(33.10 to 296.89)               |
| Congenital musculoskeletal and limb anomalies | 3,319.90<br>(1,029.83 to 8,532.21)             | 4,104.83<br>(1,345.75 to 10,622.29)            | 2,424.78<br>(841.06 to 6,156.69)               | 4,617.57<br>(1,479.61 to 12,006.86)             | 39.62<br>(12.43 to 102.07)                | 49.67<br>(16.48 to 128.68)                | 29.92<br>(10.62 to 75.37)                 | 55.67<br>(18.09 to 143.64)                |
| Urogenital congenital anomalies               | 3,820.36<br>(1,434.59 to 7,224.40)             | 4,151.75<br>(1,684.30 to 7,644.38)             | 2,463.50<br>(1,076.73 to 4,298.08)             | 4,673.40<br>(1,878.42 to 8,669.04)              | 49.69<br>(19.63 to 90.98)                 | 58.25<br>(25.80 to 103.06)                | 37.54<br>(17.82 to 61.41)                 | 64.26<br>(27.91 to 113.99)                |
| Digestive congenital anomalies                | 6,702.30<br>(2,412.61 to 14,420.23)            | 6,798.86<br>(2,452.90 to 15,031.07)            | 3,549.82<br>(1,346.39 to 7,624.64)             | 7,856.43<br>(2,787.63 to 17,445.08)             | 78.44<br>(28.38 to 168.26)                | 80.28<br>(29.22 to 176.43)                | 42.35<br>(16.36 to 90.67)                 | 92.60<br>(33.22 to 203.84)                |
| Other congenital birth defects                | 39,311.16<br>(10,118.15 to 93,542.29)          | 46,200.42<br>(13,080.32 to 110,368.38)         | 26,360.82<br>(8,286.96 to 59,074.47)           | 52,473.03<br>(14,708.32 to 125,168.89)          | 472.93<br>(125.19 to 1,115.95)            | 569.63<br>(167.98 to 1,335.32)            | 334.12<br>(111.03 to 734.07)              | 643.30<br>(187.38 to 1,496.73)            |
| Skin and subcutaneous diseases                | 8,934.89<br>(5,480.18 to 13,772.16)            | 25,666.59<br>(16,463.08 to 39,137.81)          | 25,300.59<br>(16,350.88 to 38,210.75)          | 24,769.19<br>(15,824.88 to 37,534.26)           | 299.08<br>(183.98 to 467.46)              | 1,001.38<br>(643.37 to 1,515.89)          | 1,116.31<br>(721.67 to 1,703.82)          | 904.23<br>(580.38 to 1,395.17)            |
| Cellulitis                                    | 929.07<br>(361.75 to 1,428.58)                 | 2,980.66<br>(1,094.43 to 4,704.13)             | 3,353.36<br>(1,223.76 to 5,359.06)             | 2,776.28<br>(1,015.72 to 4,395.51)              | 32.24<br>(12.38 to 48.75)                 | 124.19<br>(47.61 to 196.28)               | 153.68<br>(57.85 to 243.71)               | 109.01<br>(41.35 to 171.65)               |
| Pyoderma                                      | 6,374.28<br>(3,874.90 to 9,906.17)             | 18,907.41<br>(11,925.38 to 29,613.40)          | 17,792.98<br>(11,195.63 to 27,764.41)          | 18,499.85<br>(11,673.98 to 29,083.66)           | 192.54<br>(117.80 to 303.04)              | 680.93<br>(448.76 to 1,076.43)            | 716.44<br>(466.08 to 1,134.84)            | 626.48<br>(411.66 to 980.01)              |
| Decubitus ulcer                               | 1,547.01<br>(838.57 to 3,027.23)               | 3,600.98<br>(1,804.48 to 7,450.31)             | 3,979.90<br>(2,069.14 to 8,051.14)             | 3,316.90<br>(1,611.26 to 7,009.19)              | 72.54<br>(41.21 to 141.48)                | 192.11<br>(97.59 to 392.00)               | 241.55<br>(127.15 to 478.56)              | 164.86<br>(81.49 to 334.77)               |
| Other skin and subcutaneous diseases          | 84.54<br>(49.35 to 134.02)                     | 177.53<br>(104.34 to 277.14)                   | 174.35<br>(102.61 to 275.89)                   | 176.16<br>(103.96 to 280.22)                    | 1.75<br>(1.05 to 2.81)                    | 4.15<br>(2.52 to 6.55)                    | 4.64<br>(2.78 to 7.28)                    | 3.87<br>(2.36 to 6.17)                    |
| Sudden infant death syndrome                  | 5,567.90<br>(2,744.07 to 10,765.85)            | 4,785.92<br>(2,147.98 to 9,631.39)             | 2,699.90<br>(1,227.42 to 5,231.54)             | 5,449.14<br>(2,468.31 to 10,841.74)             | 64.58<br>(31.83 to 124.88)                | 55.49<br>(24.90 to 111.74)                | 31.31<br>(14.24 to 60.69)                 | 63.18<br>(28.62 to 125.73)                |

|                          |                                             |                                             |                                             |                                             |                                       |                                         |                                         |                                          |
|--------------------------|---------------------------------------------|---------------------------------------------|---------------------------------------------|---------------------------------------------|---------------------------------------|-----------------------------------------|-----------------------------------------|------------------------------------------|
| Injuries                 | 451,267.80<br>(381,662.95 to<br>530,079.84) | 594,420.50<br>(471,510.60 to<br>751,670.48) | 484,280.57<br>(385,861.96 to<br>611,457.32) | 651,384.64<br>(510,345.88 to<br>830,810.22) | 8,443.83<br>(7,106.27 to<br>9,943.33) | 12,030.49<br>(9,745.06 to<br>15,076.63) | 10,289.41<br>(8,393.05 to<br>12,753.09) | 12,894.67<br>(10,332.53 to<br>16,189.25) |
| Transport injuries       | 139,103.92<br>(115,509.14 to<br>166,276.15) | 230,119.96<br>(175,707.07 to<br>302,472.49) | 186,385.62<br>(142,918.77 to<br>241,818.77) | 258,412.47<br>(192,598.58 to<br>352,395.48) | 2,738.66<br>(2,290.47 to<br>3,278.39) | 4,726.82<br>(3,647.52 to<br>6,181.36)   | 3,971.62<br>(3,096.58 to<br>5,149.62)   | 5,225.11<br>(3,910.30 to<br>7,078.78)    |
| Road injuries            | 124,921.27<br>(103,500.80 to<br>149,892.53) | 204,982.39<br>(156,444.24 to<br>273,501.54) | 166,639.49<br>(127,442.63 to<br>219,282.17) | 230,472.51<br>(170,408.29 to<br>314,266.80) | 2,466.27<br>(2,053.57 to<br>2,963.39) | 4,215.51<br>(3,209.35 to<br>5,541.90)   | 3,554.63<br>(2,732.73 to<br>4,619.64)   | 4,665.32<br>(3,486.24 to<br>6,286.53)    |
| Pedestrian road injuries | 36,298.85<br>(28,800.38 to<br>44,634.25)    | 51,173.55<br>(37,157.23 to<br>69,482.80)    | 41,793.57<br>(30,865.10 to<br>56,356.70)    | 56,990.56<br>(40,375.75 to<br>80,011.79)    | 740.75<br>(596.53 to<br>919.39)       | 1,122.15<br>(826.18 to<br>1,523.97)     | 949.61<br>(705.72 to<br>1,267.97)       | 1,228.86<br>(888.42 to<br>1,711.71)      |

| Oceania                                         |                                                  |                                                  |                                                  |                                                  |                                            |                                            |                                            |                                            |
|-------------------------------------------------|--------------------------------------------------|--------------------------------------------------|--------------------------------------------------|--------------------------------------------------|--------------------------------------------|--------------------------------------------|--------------------------------------------|--------------------------------------------|
| Cause                                           | YLLs (actual counts)                             |                                                  |                                                  |                                                  | Deaths (actual counts)                     |                                            |                                            |                                            |
|                                                 | 2016                                             | 2040 Forecast                                    | 2040 Better Scenario                             | 2040 Worse Scenario                              | 2016                                       | 2040 Forecast                              | 2040 Better Scenario                       | 2040 Worse Scenario                        |
| Cyclist road injuries                           | 1,206.21<br>(996.49 to 1,455.68)                 | 1,904.96<br>(1,423.69 to 2,484.96)               | 1,500.90<br>(1,114.50 to 1,972.08)               | 2,170.54<br>(1,594.70 to 2,894.31)               | 24.54<br>(20.44 to 29.70)                  | 40.51<br>(30.77 to 52.79)                  | 33.72<br>(25.67 to 44.13)                  | 45.03<br>(33.30 to 59.94)                  |
| Motorcyclist road injuries                      | 23,770.09<br>(17,017.76 to 31,255.95)            | 42,154.26<br>(27,161.38 to 62,303.13)            | 35,591.00<br>(22,888.04 to 52,311.90)            | 46,982.26<br>(29,342.23 to 71,717.72)            | 443.95<br>(315.15 to 582.74)               | 798.21<br>(511.00 to 1,173.59)             | 690.10<br>(442.42 to 1,012.90)             | 882.16<br>(554.69 to 1,357.50)             |
| Motor vehicle road injuries                     | 60,950.88<br>(49,135.56 to 75,345.76)            | 104,836.32<br>(77,691.16 to 137,962.63)          | 83,863.49<br>(62,697.55 to 109,822.03)           | 118,761.79<br>(86,005.45 to 159,248.94)          | 1,207.34<br>(968.23 to 1,486.72)           | 2,160.97<br>(1,618.47 to 2,819.95)         | 1,803.56<br>(1,363.27 to 2,335.26)         | 2,404.80<br>(1,765.84 to 3,198.80)         |
| Other road injuries                             | 2,695.23<br>(1,324.83 to 3,668.28)               | 4,913.31<br>(2,247.07 to 7,180.87)               | 3,890.52<br>(1,747.75 to 5,686.12)               | 5,567.38<br>(2,571.52 to 8,369.64)               | 49.69<br>(24.52 to 67.07)                  | 93.67<br>(42.36 to 135.54)                 | 77.65<br>(34.97 to 112.05)                 | 104.46<br>(47.32 to 154.86)                |
| Other transport injuries                        | 14,182.65<br>(8,168.72 to 22,199.61)             | 25,137.57<br>(13,972.36 to 39,855.65)            | 19,746.13<br>(10,982.66 to 31,442.91)            | 27,939.95<br>(14,850.62 to 44,916.21)            | 272.39<br>(161.62 to 424.20)               | 511.31<br>(291.61 to 816.99)               | 416.99<br>(238.76 to 670.11)               | 559.78<br>(311.47 to 912.78)               |
| <b>Unintentional injuries</b>                   | <b>194,281.27<br/>(160,913.52 to 233,716.08)</b> | <b>186,835.93<br/>(151,158.14 to 230,341.11)</b> | <b>142,340.17<br/>(115,000.93 to 171,864.90)</b> | <b>198,751.90<br/>(159,499.30 to 247,971.18)</b> | <b>3,533.13<br/>(2,977.60 to 4,137.10)</b> | <b>3,936.29<br/>(3,290.56 to 4,633.42)</b> | <b>3,281.34<br/>(2,754.81 to 3,831.89)</b> | <b>4,031.12<br/>(3,349.92 to 4,797.17)</b> |
| Falls                                           | 12,639.32<br>(8,910.59 to 18,444.54)             | 14,997.49<br>(10,989.07 to 21,200.17)            | 13,501.44<br>(10,087.97 to 18,750.43)            | 14,996.78<br>(10,902.51 to 21,549.43)            | 296.37<br>(223.27 to 406.49)               | 439.28<br>(333.28 to 593.94)               | 447.24<br>(345.87 to 597.27)               | 411.72<br>(309.13 to 560.06)               |
| Drowning                                        | 74,138.12<br>(58,766.87 to 93,177.55)            | 63,439.04<br>(46,448.77 to 83,668.33)            | 48,055.10<br>(35,828.01 to 62,201.03)            | 68,776.03<br>(49,636.49 to 92,214.19)            | 1,233.80<br>(980.16 to 1,518.60)           | 1,153.15<br>(876.26 to 1,486.08)           | 913.17<br>(702.02 to 1,156.33)             | 1,232.00<br>(916.85 to 1,621.36)           |
| Fire, heat, and hot substances                  | 16,258.41<br>(12,170.50 to 21,641.61)            | 13,206.97<br>(9,507.87 to 18,124.42)             | 9,406.32<br>(6,944.06 to 12,877.92)              | 14,408.99<br>(10,222.21 to 19,781.30)            | 288.51<br>(223.73 to 374.58)               | 272.21<br>(211.80 to 365.31)               | 214.05<br>(167.55 to 284.64)               | 285.87<br>(181.91 to 385.62)               |
| Poisonings                                      | 11,887.43<br>(5,713.74 to 19,491.32)             | 8,375.57<br>(4,062.54 to 13,886.12)              | 5,271.25<br>(2,576.52 to 8,500.68)               | 9,398.03<br>(4,500.26 to 15,625.49)              | 207.17<br>(102.35 to 309.63)               | 164.87<br>(82.00 to 259.49)                | 115.35<br>(58.63 to 172.09)                | 178.23<br>(87.68 to 282.58)                |
| Exposure to mechanical forces                   | 23,943.53<br>(19,040.91 to 29,580.44)            | 23,976.93<br>(18,306.65 to 30,822.82)            | 17,685.54<br>(13,473.56 to 22,734.40)            | 25,401.08<br>(19,370.62 to 32,770.03)            | 429.31<br>(345.19 to 539.27)               | 483.56<br>(377.14 to 621.29)               | 383.67<br>(298.87 to 508.32)               | 496.62<br>(385.41 to 641.53)               |
| Unintentional firearm injuries                  | 4,716.78<br>(3,137.45 to 6,742.91)               | 4,484.72<br>(2,777.68 to 6,762.73)               | 3,172.41<br>(1,974.28 to 4,701.18)               | 4,769.77<br>(2,983.23 to 7,200.01)               | 86.97<br>(59.06 to 120.01)                 | 95.51<br>(61.29 to 137.57)                 | 73.68<br>(47.59 to 106.20)                 | 97.78<br>(62.59 to 141.71)                 |
| Unintentional suffocation                       | 5,149.65<br>(3,245.84 to 7,478.82)               | 5,293.28<br>(3,308.20 to 7,855.42)               | 3,705.49<br>(2,349.35 to 5,518.75)               | 5,719.00<br>(3,553.56 to 8,664.54)               | 77.42<br>(50.18 to 109.34)                 | 83.60<br>(53.68 to 123.96)                 | 60.84<br>(39.23 to 90.31)                  | 89.30<br>(56.87 to 132.14)                 |
| Other exposure to mechanical forces             | 14,077.10<br>(10,826.42 to 18,784.11)            | 14,198.93<br>(10,480.90 to 19,527.42)            | 10,807.64<br>(7,989.91 to 15,251.21)             | 14,912.30<br>(11,146.32 to 20,381.29)            | 264.91<br>(202.51 to 363.17)               | 304.45<br>(225.73 to 434.76)               | 249.15<br>(184.57 to 361.86)               | 309.54<br>(230.37 to 449.98)               |
| Adverse effects of medical treatment            | 18,163.96<br>(13,475.87 to 23,779.47)            | 20,454.15<br>(15,636.40 to 26,460.91)            | 15,892.19<br>(12,410.47 to 20,630.12)            | 21,427.71<br>(16,072.44 to 28,255.34)            | 354.14<br>(278.22 to 439.79)               | 465.71<br>(379.58 to 561.15)               | 402.54<br>(330.02 to 478.32)               | 465.90<br>(377.56 to 566.81)               |
| Animal contact                                  | 5,992.63<br>(3,986.70 to 8,473.22)               | 9,244.10<br>(6,477.10 to 13,187.24)              | 6,666.90<br>(4,902.20 to 9,310.15)               | 9,637.75<br>(6,676.90 to 14,020.11)              | 144.40<br>(104.28 to 188.22)               | 263.64<br>(198.27 to 354.02)               | 215.01<br>(163.66 to 288.41)               | 260.37<br>(196.06 to 356.68)               |
| Venomous animal contact                         | 4,759.24<br>(3,033.15 to 7,233.69)               | 7,192.98<br>(4,786.32 to 10,759.62)              | 5,145.18<br>(3,608.65 to 7,452.61)               | 7,509.78<br>(4,942.78 to 11,480.39)              | 115.92<br>(79.96 to 156.67)                | 208.52<br>(148.23 to 292.44)               | 169.03<br>(121.84 to 235.16)               | 205.66<br>(145.93 to 295.30)               |
| Non-venomous animal contact                     | 1,233.39<br>(740.55 to 2,255.30)                 | 2,051.12<br>(1,191.08 to 3,609.28)               | 1,521.72<br>(929.75 to 2,553.26)                 | 2,147.96<br>(1,243.65 to 3,742.84)               | 28.47<br>(17.91 to 49.66)                  | 55.12<br>(34.00 to 91.02)                  | 45.98<br>(29.29 to 74.09)                  | 54.70<br>(33.00 to 91.93)                  |
| Foreign body                                    | 11,761.58<br>(7,351.23 to 18,698.48)             | 13,027.46<br>(8,369.27 to 19,383.49)             | 10,958.84<br>(7,344.62 to 15,210.99)             | 13,454.52<br>(8,493.58 to 20,640.65)             | 199.68<br>(135.71 to 282.37)               | 260.94<br>(184.29 to 339.24)               | 253.16<br>(181.26 to 314.87)               | 255.15<br>(178.58 to 338.76)               |
| Pulmonary aspiration and foreign body in airway | 10,807.35<br>(6,496.20 to 17,530.75)             | 12,046.61<br>(7,474.27 to 18,209.85)             | 10,216.69<br>(6,745.42 to 14,220.39)             | 12,410.78<br>(7,578.16 to 19,079.84)             | 183.52<br>(120.04 to 263.40)               | 243.08<br>(166.21 to 314.81)               | 238.70<br>(167.02 to 297.62)               | 236.56<br>(160.60 to 314.42)               |

|                                      |                                                                 |                                                                  |                                                                 |                                                                  |                                                            |                                                            |                                                            |                                                            |
|--------------------------------------|-----------------------------------------------------------------|------------------------------------------------------------------|-----------------------------------------------------------------|------------------------------------------------------------------|------------------------------------------------------------|------------------------------------------------------------|------------------------------------------------------------|------------------------------------------------------------|
|                                      | 954.23<br>(532.00 to<br>1,609.49)                               | 980.85<br>(535.26 to<br>1,686.45)                                | 742.15<br>(422.08 to<br>1,230.60)                               | 1,043.74<br>(575.54 to<br>1,802.16)                              | 16.16<br>(9.47 to<br>26.51)                                | 17.86<br>(10.37 to<br>29.25)                               | 14.46<br>(8.62 to<br>23.19)                                | 18.59<br>(10.70 to<br>30.65)                               |
| Foreign body in other body part      | 7,523.04<br>(4,266.35 to<br>10,825.41)                          | 9,656.17<br>(5,227.32 to<br>15,112.16)                           | 6,527.71<br>(3,551.92 to<br>9,921.36)                           | 10,364.39<br>(5,672.61 to<br>15,982.85)                          | 150.83<br>(87.42 to<br>208.18)                             | 217.10<br>(122.65 to<br>317.92)                            | 157.36<br>(87.15 to<br>231.34)                             | 225.23<br>(126.01 to<br>332.35)                            |
| Environmental heat and cold exposure | 11,973.24<br>(8,448.81 to<br>15,457.63)                         | 10,458.05<br>(7,246.67 to<br>14,035.76)                          | 8,374.86<br>(5,684.96 to<br>11,261.38)                          | 10,866.63<br>(7,500.99 to<br>14,592.68)                          | 228.93<br>(160.44 to<br>296.38)                            | 215.83<br>(149.59 to<br>286.94)                            | 179.78<br>(123.93 to<br>242.59)                            | 220.03<br>(151.82 to<br>290.78)                            |
| Other unintentional injuries         | <b>117,817.57</b><br><b>(87,745.22 to</b><br><b>144,359.76)</b> | <b>161,227.23</b><br><b>(111,352.59 to</b><br><b>215,844.79)</b> | <b>140,830.05</b><br><b>(99,442.97 to</b><br><b>186,304.12)</b> | <b>177,705.82</b><br><b>(118,163.06 to</b><br><b>251,618.74)</b> | <b>2,170.94</b><br><b>(1,617.94 to</b><br><b>2,643.91)</b> | <b>3,067.07</b><br><b>(2,147.78 to</b><br><b>4,102.61)</b> | <b>2,745.72</b><br><b>(1,973.81 to</b><br><b>3,608.98)</b> | <b>3,340.10</b><br><b>(2,241.33 to</b><br><b>4,672.82)</b> |
| Self-harm and interpersonal violence |                                                                 |                                                                  |                                                                 |                                                                  |                                                            |                                                            |                                                            |                                                            |

| Oceania                                                                             |                                         |                                                 |                                                 |                                                 |                                      |                                            |                                            |                                            |
|-------------------------------------------------------------------------------------|-----------------------------------------|-------------------------------------------------|-------------------------------------------------|-------------------------------------------------|--------------------------------------|--------------------------------------------|--------------------------------------------|--------------------------------------------|
| Cause                                                                               | YLLs (actual counts)                    |                                                 |                                                 |                                                 | Deaths (actual counts)               |                                            |                                            |                                            |
|                                                                                     | 2016                                    | 2040 Forecast                                   | 2040 Better Scenario                            | 2040 Worse Scenario                             | 2016                                 | 2040 Forecast                              | 2040 Better Scenario                       | 2040 Worse Scenario                        |
| Self-harm                                                                           | 78,267.01<br>(53,610.58 to 98,559.99)   | 117,045.22<br>(70,020.11 to 170,168.87)         | 100,098.37<br>(61,175.39 to 143,000.97)         | 131,537.90<br>(77,079.24 to 201,233.14)         | 1,447.61<br>(1,005.93 to 1,810.57)   | 2,233.21<br>(1,380.67 to 3,229.41)         | 1,963.39<br>(1,240.20 to 2,774.29)         | 2,475.08<br>(1,491.22 to 3,742.95)         |
| Self-harm by firearm                                                                | 7,339.04<br>(1,807.47 to 15,410.47)     | 9,418.08<br>(2,227.89 to 21,043.02)             | 7,814.90<br>(1,852.15 to 17,179.45)             | 10,799.34<br>(2,487.00 to 24,620.30)            | 139.63<br>(35.98 to 291.67)          | 183.97<br>(43.72 to 400.84)                | 155.34<br>(37.09 to 333.19)                | 208.93<br>(47.86 to 465.23)                |
| Self-harm by other specified means                                                  | 70,927.96<br>(46,945.01 to 89,189.17)   | 107,627.15<br>(63,001.24 to 154,923.48)         | 92,283.47<br>(55,468.97 to 131,135.38)          | 120,738.55<br>(69,015.23 to 182,564.44)         | 1,307.99<br>(871.88 to 1,647.52)     | 2,049.25<br>(1,227.21 to 2,921.50)         | 1,808.05<br>(1,121.82 to 2,534.08)         | 2,266.15<br>(1,328.47 to 3,391.54)         |
| Interpersonal violence                                                              | 39,550.56<br>(24,754.71 to 50,693.09)   | 44,182.01<br>(25,838.88 to 60,232.23)           | 40,731.68<br>(23,873.21 to 55,257.36)           | 46,167.92<br>(26,766.15 to 64,205.92)           | 723.33<br>(450.09 to 923.19)         | 833.86<br>(492.71 to 1,123.90)             | 782.33<br>(468.02 to 1,048.00)             | 865.02<br>(500.65 to 1,192.60)             |
| Physical violence by firearm                                                        | 7,869.91<br>(3,797.24 to 13,209.87)     | 8,791.09<br>(4,157.08 to 15,007.15)             | 8,384.04<br>(3,962.72 to 14,316.92)             | 8,862.87<br>(4,198.87 to 15,103.83)             | 143.35<br>(69.78 to 240.63)          | 162.08<br>(78.25 to 278.57)                | 156.33<br>(75.45 to 266.95)                | 162.62<br>(77.84 to 281.80)                |
| Physical violence by sharp object                                                   | 10,092.78<br>(6,147.60 to 13,863.09)    | 12,467.09<br>(7,474.27 to 17,665.22)            | 12,533.67<br>(7,506.51 to 17,700.33)            | 12,418.44<br>(7,418.19 to 17,785.07)            | 186.53<br>(113.33 to 255.88)         | 235.26<br>(141.41 to 333.25)               | 238.97<br>(144.06 to 336.54)               | 233.20<br>(139.34 to 332.79)               |
| Physical violence by other means                                                    | 21,587.87<br>(12,830.85 to 28,891.80)   | 22,923.82<br>(11,896.55 to 34,893.02)           | 19,813.97<br>(10,206.79 to 30,146.29)           | 24,886.62<br>(12,823.92 to 38,696.06)           | 393.45<br>(230.01 to 522.07)         | 436.53<br>(228.06 to 654.64)               | 387.02<br>(204.10 to 579.50)               | 469.20<br>(241.45 to 727.91)               |
| <b>Forces of nature, conflict and terrorism, and executions and police conflict</b> | <b>65.03</b><br><b>(55.80 to 75.17)</b> | <b>16,237.38</b><br><b>(0.00 to 170,272.96)</b> | <b>14,724.73</b><br><b>(0.00 to 154,718.56)</b> | <b>16,514.46</b><br><b>(0.00 to 172,944.69)</b> | <b>1.09</b><br><b>(0.95 to 1.25)</b> | <b>300.30</b><br><b>(0.00 to 3,137.51)</b> | <b>290.74</b><br><b>(0.00 to 3,061.58)</b> | <b>298.35</b><br><b>(0.00 to 3,096.88)</b> |
| Exposure to forces of nature                                                        | 0.00<br>(0.00 to 0.00)                  | 15,950.31<br>(0.00 to 170,256.85)               | 14,461.63<br>(0.00 to 154,703.41)               | 16,222.88<br>(0.00 to 172,927.99)               | 0.00<br>(0.00 to 0.00)               | 295.39<br>(0.00 to 3,137.23)               | 286.04<br>(0.00 to 3,061.31)               | 293.43<br>(0.00 to 3,096.59)               |
| Conflict and terrorism                                                              | 0.00<br>(0.00 to 0.00)                  | 287.08<br>(0.00 to 3,068.10)                    | 263.10<br>(0.00 to 2,793.43)                    | 291.57<br>(0.00 to 3,109.13)                    | 0.00<br>(0.00 to 0.00)               | 4.91<br>(0.00 to 52.30)                    | 4.70<br>(0.00 to 50.00)                    | 4.92<br>(0.00 to 52.25)                    |
| Executions and police conflict                                                      | 65.03<br>(55.80 to 75.17)               | 0.00<br>(0.00 to 0.00)                          | 0.00<br>(0.00 to 0.00)                          | 0.00<br>(0.00 to 0.00)                          | 1.09<br>(0.95 to 1.25)               | 0.00<br>(0.00 to 0.00)                     | 0.00<br>(0.00 to 0.00)                     | 0.00<br>(0.00 to 0.00)                     |

| American Samoa                                                    |                                         |                                          |                                          |                                          |                                 |                                 |                                 |                                   |
|-------------------------------------------------------------------|-----------------------------------------|------------------------------------------|------------------------------------------|------------------------------------------|---------------------------------|---------------------------------|---------------------------------|-----------------------------------|
| Cause                                                             | YLLs (actual counts)                    |                                          |                                          |                                          | Deaths (actual counts)          |                                 |                                 |                                   |
|                                                                   | 2016                                    | 2040 Forecast                            | 2040 Better Scenario                     | 2040 Worse Scenario                      | 2016                            | 2040 Forecast                   | 2040 Better Scenario            | 2040 Worse Scenario               |
| All causes                                                        | 11,198.21<br>(9,569.29 to<br>12,985.06) | 19,509.42<br>(15,556.70 to<br>24,492.43) | 12,686.54<br>(10,141.66 to<br>15,880.83) | 23,073.78<br>(18,329.94 to<br>29,462.02) | 345.83<br>(295.12 to<br>401.89) | 839.26<br>(710.38 to<br>978.09) | 583.07<br>(492.31 to<br>691.39) | 963.72<br>(815.21 to<br>1,139.26) |
| Communicable, maternal, neonatal, and nutritional diseases        | 1,479.15<br>(1,199.59 to<br>2,057.79)   | 1,641.47<br>(1,223.76 to<br>2,448.66)    | 1,067.47<br>(783.59 to<br>1,836.91)      | 1,912.79<br>(1,432.00 to<br>2,777.69)    | 29.82<br>(24.27 to<br>42.09)    | 53.20<br>(41.43 to<br>74.02)    | 39.67<br>(30.62 to<br>60.16)    | 58.97<br>(45.41 to<br>80.92)      |
| HIV/AIDS and tuberculosis                                         | 144.33<br>(24.68 to<br>737.96)          | 208.41<br>(27.78 to<br>1,060.48)         | 113.99<br>(5.93 to<br>892.73)            | 285.58<br>(56.31 to<br>1,139.60)         | 3.30<br>(0.68 to<br>16.03)      | 5.32<br>(0.99 to<br>26.71)      | 2.97<br>(0.25 to<br>23.60)      | 6.98<br>(1.79 to<br>27.55)        |
| Tuberculosis                                                      | 18.10<br>(14.37 to<br>21.84)            | 25.73<br>(16.52 to<br>40.56)             | 7.53<br>(4.94 to<br>11.34)               | 31.01<br>(19.39 to<br>50.21)             | 0.55<br>(0.45 to<br>0.66)       | 1.03<br>(0.67 to<br>1.61)       | 0.32<br>(0.21 to<br>0.48)       | 1.19<br>(0.77 to<br>1.91)         |
| HIV/AIDS                                                          | 126.22<br>(6.17 to<br>719.66)           | 182.68<br>(4.01 to<br>1,034.63)          | 106.47<br>(0.00 to<br>886.83)            | 254.57<br>(26.53 to<br>1,110.05)         | 2.75<br>(0.12 to<br>15.51)      | 4.29<br>(0.08 to<br>25.65)      | 2.65<br>(0.00 to<br>23.36)      | 5.79<br>(0.60 to<br>26.50)        |
| Diarrhea, lower respiratory, and other common infectious diseases | 625.49<br>(514.70 to<br>756.76)         | 870.02<br>(662.96 to<br>1,182.02)        | 585.37<br>(445.96 to<br>783.25)          | 999.78<br>(747.03 to<br>1,376.44)        | 16.18<br>(13.32 to<br>19.71)    | 35.18<br>(26.87 to<br>47.22)    | 25.98<br>(19.82 to<br>35.86)    | 38.79<br>(28.98 to<br>53.09)      |
| Diarrheal diseases                                                | 41.74<br>(27.16 to<br>62.12)            | 55.09<br>(14.30 to<br>154.61)            | 82.19<br>(27.11 to<br>205.19)            | 66.94<br>(16.03 to<br>190.15)            | 1.31<br>(0.75 to<br>2.04)       | 2.98<br>(0.75 to<br>8.30)       | 4.90<br>(1.55 to<br>12.06)      | 3.43<br>(0.77 to<br>9.93)         |
| Intestinal infectious diseases                                    | 54.00<br>(26.52 to<br>94.98)            | 42.93<br>(20.53 to<br>72.60)             | 49.11<br>(25.29 to<br>78.20)             | 46.09<br>(21.73 to<br>79.34)             | 0.78<br>(0.39 to<br>1.37)       | 0.69<br>(0.33 to<br>1.17)       | 0.81<br>(0.41 to<br>1.30)       | 0.73<br>(0.35 to<br>1.25)         |
| Typhoid fever                                                     | 46.27<br>(21.96 to<br>81.99)            | 35.44<br>(16.69 to<br>60.62)             | 45.02<br>(22.84 to<br>72.44)             | 38.04<br>(17.85 to<br>65.97)             | 0.67<br>(0.32 to<br>1.17)       | 0.56<br>(0.27 to<br>0.98)       | 0.74<br>(0.37 to<br>1.21)       | 0.59<br>(0.28 to<br>1.03)         |
| Paratyphoid fever                                                 | 7.71<br>(3.18 to<br>15.81)              | 7.48<br>(3.08 to<br>14.73)               | 4.08<br>(1.64 to<br>7.83)                | 8.03<br>(3.30 to<br>15.78)               | 0.12<br>(0.05 to<br>0.23)       | 0.12<br>(0.05 to<br>0.24)       | 0.07<br>(0.03 to<br>0.13)       | 0.13<br>(0.05 to<br>0.26)         |
| Other intestinal infectious diseases                              | 0.02<br>(0.01 to<br>0.04)               | 0.02<br>(0.01 to<br>0.04)                | 0.01<br>(0.00 to<br>0.02)                | 0.02<br>(0.01 to<br>0.04)                | 0.00<br>(0.00 to<br>0.00)       | 0.00<br>(0.00 to<br>0.00)       | 0.00<br>(0.00 to<br>0.00)       | 0.00<br>(0.00 to<br>0.00)         |
| Lower respiratory infections                                      | 449.23<br>(367.77 to<br>545.95)         | 704.47<br>(523.80 to<br>988.99)          | 412.54<br>(297.07 to<br>575.91)          | 810.45<br>(586.85 to<br>1,171.41)        | 12.76<br>(10.40 to<br>15.83)    | 30.03<br>(22.67 to<br>41.09)    | 19.28<br>(14.19 to<br>26.51)    | 33.06<br>(24.47 to<br>46.83)      |
| Upper respiratory infections                                      | 0.33<br>(0.17 to<br>0.57)               | 0.52<br>(0.19 to<br>1.12)                | 0.18<br>(0.07 to<br>0.41)                | 0.56<br>(0.21 to<br>1.22)                | 0.01<br>(0.00 to<br>0.01)       | 0.02<br>(0.01 to<br>0.04)       | 0.01<br>(0.00 to<br>0.01)       | 0.02<br>(0.01 to<br>0.04)         |
| Otitis media                                                      | 0.01<br>(0.00 to<br>0.02)               | 0.00<br>(0.00 to<br>0.01)                | 0.00<br>(0.00 to<br>0.01)                | 0.00<br>(0.00 to<br>0.01)                | 0.00<br>(0.00 to<br>0.00)       | 0.00<br>(0.00 to<br>0.00)       | 0.00<br>(0.00 to<br>0.00)       | 0.00<br>(0.00 to<br>0.00)         |
| Meningitis                                                        | 46.13<br>(35.56 to<br>64.75)            | 32.90<br>(23.28 to<br>50.01)             | 17.50<br>(12.19 to<br>27.08)             | 34.21<br>(23.90 to<br>51.75)             | 0.79<br>(0.61 to<br>1.11)       | 0.75<br>(0.56 to<br>1.13)       | 0.42<br>(0.31 to<br>0.66)       | 0.75<br>(0.56 to<br>1.12)         |
| Pneumococcal meningitis                                           | 0.13<br>(0.09 to<br>0.19)               | 0.06<br>(0.04 to<br>0.09)                | 0.06<br>(0.04 to<br>0.09)                | 0.06<br>(0.04 to<br>0.09)                | 0.00<br>(0.00 to<br>0.00)       | 0.00<br>(0.00 to<br>0.00)       | 0.00<br>(0.00 to<br>0.00)       | 0.00<br>(0.00 to<br>0.00)         |
| H influenzae type B meningitis                                    | 4.75<br>(3.50 to<br>6.78)               | 2.82<br>(1.73 to<br>4.98)                | 2.57<br>(1.65 to<br>4.21)                | 3.11<br>(1.77 to<br>6.01)                | 0.08<br>(0.06 to<br>0.11)       | 0.06<br>(0.04 to<br>0.10)       | 0.06<br>(0.05 to<br>0.10)       | 0.06<br>(0.04 to<br>0.11)         |
| Meningococcal meningitis                                          | 9.35<br>(6.60 to<br>13.82)              | 6.88<br>(4.72 to<br>10.87)               | 3.59<br>(2.36 to<br>5.68)                | 7.08<br>(4.85 to<br>11.17)               | 0.17<br>(0.12 to<br>0.25)       | 0.18<br>(0.13 to<br>0.27)       | 0.10<br>(0.07 to<br>0.16)       | 0.17<br>(0.12 to<br>0.26)         |
| Other meningitis                                                  | 31.90<br>(24.33 to<br>45.58)            | 23.14<br>(16.19 to<br>35.13)             | 11.28<br>(7.61 to<br>17.79)              | 23.96<br>(16.62 to<br>36.30)             | 0.54<br>(0.41 to<br>0.77)       | 0.51<br>(0.37 to<br>0.77)       | 0.26<br>(0.18 to<br>0.41)       | 0.51<br>(0.37 to<br>0.77)         |
| Encephalitis                                                      | 11.91<br>(9.16 to<br>15.86)             | 17.59<br>(12.53 to<br>24.10)             | 14.94<br>(10.50 to<br>20.83)             | 18.30<br>(13.03 to<br>25.34)             | 0.24<br>(0.18 to<br>0.31)       | 0.46<br>(0.34 to<br>0.61)       | 0.41<br>(0.31 to<br>0.56)       | 0.46<br>(0.35 to<br>0.62)         |



|                |                             |                             |                            |                             |                           |                           |                           |                           |
|----------------|-----------------------------|-----------------------------|----------------------------|-----------------------------|---------------------------|---------------------------|---------------------------|---------------------------|
| Diphtheria     | 0.06<br>(0.04 to<br>0.09)   | 0.02<br>(0.01 to<br>0.03)   | 0.01<br>(0.01 to<br>0.02)  | 0.02<br>(0.01 to<br>0.05)   | 0.00<br>(0.00 to<br>0.00) | 0.00<br>(0.00 to<br>0.00) | 0.00<br>(0.00 to<br>0.00) | 0.00<br>(0.00 to<br>0.00) |
| Whooping cough | 4.31<br>(0.31 to<br>13.61)  | 2.81<br>(0.11 to<br>11.14)  | 0.58<br>(0.04 to<br>2.27)  | 5.98<br>(0.19 to<br>22.98)  | 0.05<br>(0.00 to<br>0.16) | 0.03<br>(0.00 to<br>0.13) | 0.01<br>(0.00 to<br>0.03) | 0.07<br>(0.00 to<br>0.27) |
| Tetanus        | 0.46<br>(0.40 to<br>0.54)   | 0.07<br>(0.05 to<br>0.10)   | 0.06<br>(0.04 to<br>0.09)  | 0.08<br>(0.05 to<br>0.13)   | 0.01<br>(0.01 to<br>0.01) | 0.00<br>(0.00 to<br>0.00) | 0.00<br>(0.00 to<br>0.00) | 0.00<br>(0.00 to<br>0.00) |
| Measles        | 14.92<br>(4.74 to<br>36.08) | 11.76<br>(0.03 to<br>66.49) | 7.25<br>(0.02 to<br>34.43) | 15.05<br>(0.04 to<br>88.00) | 0.18<br>(0.06 to<br>0.44) | 0.17<br>(0.00 to<br>0.90) | 0.11<br>(0.00 to<br>0.48) | 0.21<br>(0.00 to<br>1.18) |

| American Samoa                                        |                                  |                                   |                                   |                                   |                               |                               |                               |                               |
|-------------------------------------------------------|----------------------------------|-----------------------------------|-----------------------------------|-----------------------------------|-------------------------------|-------------------------------|-------------------------------|-------------------------------|
| Cause                                                 | YLLs (actual counts)             |                                   |                                   |                                   | Deaths (actual counts)        |                               |                               |                               |
|                                                       | 2016                             | 2040 Forecast                     | 2040 Better Scenario              | 2040 Worse Scenario               | 2016                          | 2040 Forecast                 | 2040 Better Scenario          | 2040 Worse Scenario           |
| Varicella and herpes zoster                           | 2.38<br>(1.44 to 3.76)           | 1.87<br>(0.90 to 3.39)            | 1.00<br>(0.50 to 1.78)            | 2.09<br>(0.97 to 3.81)            | 0.04<br>(0.03 to 0.06)        | 0.06<br>(0.03 to 0.09)        | 0.04<br>(0.02 to 0.06)        | 0.06<br>(0.03 to 0.09)        |
| <b>Neglected tropical diseases and malaria</b>        | <b>15.38</b><br>(5.10 to 24.18)  | <b>94.21</b><br>(34.93 to 146.49) | <b>93.78</b><br>(36.45 to 141.59) | <b>92.59</b><br>(33.71 to 143.68) | <b>0.42</b><br>(0.14 to 0.66) | <b>3.85</b><br>(1.50 to 6.07) | <b>4.00</b><br>(1.70 to 6.17) | <b>3.66</b><br>(1.39 to 5.81) |
| Malaria                                               | 5.32<br>(0.34 to 10.54)          | 9.44<br>(0.27 to 22.78)           | 9.05<br>(0.26 to 21.56)           | 9.39<br>(0.27 to 22.67)           | 0.13<br>(0.01 to 0.25)        | 0.26<br>(0.01 to 0.59)        | 0.25<br>(0.01 to 0.58)        | 0.25<br>(0.01 to 0.58)        |
| Chagas disease                                        | 0.00<br>(0.00 to 0.00)           | 0.00<br>(0.00 to 0.00)            | 0.00<br>(0.00 to 0.00)            | 0.00<br>(0.00 to 0.00)            | 0.00<br>(0.00 to 0.00)        | 0.00<br>(0.00 to 0.00)        | 0.00<br>(0.00 to 0.00)        | 0.00<br>(0.00 to 0.00)        |
| Leishmaniasis                                         | 0.00<br>(0.00 to 0.00)           | 0.00<br>(0.00 to 0.00)            | 0.00<br>(0.00 to 0.00)            | 0.00<br>(0.00 to 0.00)            | 0.00<br>(0.00 to 0.00)        | 0.00<br>(0.00 to 0.00)        | 0.00<br>(0.00 to 0.00)        | 0.00<br>(0.00 to 0.00)        |
| African trypanosomiasis                               | 0.00<br>(0.00 to 0.00)           | 0.00<br>(0.00 to 0.00)            | 0.00<br>(0.00 to 0.00)            | 0.00<br>(0.00 to 0.00)            | 0.00<br>(0.00 to 0.00)        | 0.00<br>(0.00 to 0.00)        | 0.00<br>(0.00 to 0.00)        | 0.00<br>(0.00 to 0.00)        |
| Schistosomiasis                                       | 0.00<br>(0.00 to 0.00)           | 0.00<br>(0.00 to 0.00)            | 0.00<br>(0.00 to 0.00)            | 0.00<br>(0.00 to 0.00)            | 0.00<br>(0.00 to 0.00)        | 0.00<br>(0.00 to 0.00)        | 0.00<br>(0.00 to 0.00)        | 0.00<br>(0.00 to 0.00)        |
| Cysticercosis                                         | 0.12<br>(0.09 to 0.15)           | 0.10<br>(0.06 to 0.14)            | 0.09<br>(0.05 to 0.13)            | 0.10<br>(0.06 to 0.14)            | 0.00<br>(0.00 to 0.00)        | 0.00<br>(0.00 to 0.00)        | 0.00<br>(0.00 to 0.00)        | 0.00<br>(0.00 to 0.00)        |
| Cystic echinococcosis                                 | 0.07<br>(0.06 to 0.10)           | 0.12<br>(0.07 to 0.17)            | 0.06<br>(0.04 to 0.09)            | 0.13<br>(0.07 to 0.19)            | 0.00<br>(0.00 to 0.00)        | 0.00<br>(0.00 to 0.01)        | 0.00<br>(0.00 to 0.01)        | 0.00<br>(0.00 to 0.01)        |
| Dengue                                                | 8.29<br>(2.85 to 14.36)          | 80.24<br>(30.57 to 129.04)        | 79.91<br>(32.39 to 123.99)        | 78.65<br>(29.35 to 127.39)        | 0.24<br>(0.08 to 0.43)        | 3.36<br>(1.29 to 5.53)        | 3.48<br>(1.43 to 5.55)        | 3.19<br>(1.20 to 5.32)        |
| Yellow fever                                          | 0.00<br>(0.00 to 0.00)           | 0.00<br>(0.00 to 0.00)            | 0.00<br>(0.00 to 0.00)            | 0.00<br>(0.00 to 0.00)            | 0.00<br>(0.00 to 0.00)        | 0.00<br>(0.00 to 0.00)        | 0.00<br>(0.00 to 0.00)        | 0.00<br>(0.00 to 0.00)        |
| Rabies                                                | 0.02<br>(0.01 to 0.03)           | 0.03<br>(0.01 to 0.06)            | 0.02<br>(0.01 to 0.04)            | 0.04<br>(0.01 to 0.06)            | 0.00<br>(0.00 to 0.00)        | 0.00<br>(0.00 to 0.00)        | 0.00<br>(0.00 to 0.00)        | 0.00<br>(0.00 to 0.00)        |
| Intestinal nematode infections                        | 0.00<br>(0.00 to 0.00)           | 0.00<br>(0.00 to 0.00)            | 0.00<br>(0.00 to 0.00)            | 0.00<br>(0.00 to 0.00)            | 0.00<br>(0.00 to 0.00)        | 0.00<br>(0.00 to 0.00)        | 0.00<br>(0.00 to 0.00)        | 0.00<br>(0.00 to 0.00)        |
| Other neglected tropical diseases                     | 1.56<br>(1.02 to 2.14)           | 4.27<br>(1.94 to 6.08)            | 4.65<br>(2.14 to 6.66)            | 4.29<br>(1.94 to 6.02)            | 0.05<br>(0.03 to 0.07)        | 0.22<br>(0.09 to 0.35)        | 0.26<br>(0.11 to 0.39)        | 0.21<br>(0.09 to 0.32)        |
| <b>Maternal disorders</b>                             | <b>71.62</b><br>(56.15 to 95.54) | <b>69.88</b><br>(48.86 to 114.26) | <b>39.12</b><br>(23.07 to 62.84)  | <b>78.56</b><br>(46.40 to 124.80) | <b>1.38</b><br>(0.96 to 1.85) | <b>1.30</b><br>(0.76 to 2.13) | <b>0.73</b><br>(0.42 to 1.17) | <b>1.46</b><br>(0.87 to 2.32) |
| Maternal hemorrhage                                   | 23.01<br>(14.08 to 34.29)        | 22.44<br>(12.05 to 39.86)         | 12.76<br>(6.63 to 21.85)          | 24.98<br>(13.35 to 43.58)         | 0.44<br>(0.28 to 0.66)        | 0.42<br>(0.22 to 0.74)        | 0.24<br>(0.12 to 0.41)        | 0.46<br>(0.25 to 0.81)        |
| Maternal sepsis and other maternal infections         | 7.53<br>(3.59 to 13.40)          | 6.22<br>(2.45 to 13.21)           | 3.46<br>(1.35 to 7.26)            | 6.95<br>(2.83 to 14.73)           | 0.15<br>(0.07 to 0.26)        | 0.12<br>(0.05 to 0.25)        | 0.07<br>(0.03 to 0.14)        | 0.13<br>(0.05 to 0.28)        |
| Maternal hypertensive disorders                       | 10.01<br>(5.63 to 16.08)         | 10.03<br>(4.85 to 18.34)          | 5.49<br>(2.61 to 10.21)           | 11.19<br>(5.38 to 20.57)          | 0.19<br>(0.11 to 0.31)        | 0.19<br>(0.09 to 0.35)        | 0.10<br>(0.05 to 0.19)        | 0.21<br>(0.10 to 0.38)        |
| Maternal obstructed labor and uterine rupture         | 4.95<br>(2.21 to 9.50)           | 5.11<br>(1.79 to 11.09)           | 2.61<br>(0.91 to 5.58)            | 5.73<br>(2.03 to 12.26)           | 0.10<br>(0.04 to 0.18)        | 0.10<br>(0.03 to 0.21)        | 0.05<br>(0.02 to 0.11)        | 0.11<br>(0.04 to 0.23)        |
| Maternal abortion, miscarriage, and ectopic pregnancy | 5.11<br>(2.43 to 9.01)           | 5.17<br>(2.07 to 10.30)           | 2.85<br>(1.15 to 5.79)            | 5.82<br>(2.35 to 11.45)           | 0.10<br>(0.05 to 0.17)        | 0.10<br>(0.04 to 0.20)        | 0.05<br>(0.02 to 0.11)        | 0.11<br>(0.04 to 0.22)        |



| American Samoa                                                          |                                     |                                     |                                    |                                     |                               |                               |                               |                               |
|-------------------------------------------------------------------------|-------------------------------------|-------------------------------------|------------------------------------|-------------------------------------|-------------------------------|-------------------------------|-------------------------------|-------------------------------|
| Cause                                                                   | YLLs (actual counts)                |                                     |                                    |                                     | Deaths (actual counts)        |                               |                               |                               |
|                                                                         | 2016                                | 2040 Forecast                       | 2040 Better Scenario               | 2040 Worse Scenario                 | 2016                          | 2040 Forecast                 | 2040 Better Scenario          | 2040 Worse Scenario           |
|                                                                         | <b>356.06</b><br>(260.61 to 471.24) | <b>254.03</b><br>(140.25 to 422.31) | <b>120.35</b><br>(66.27 to 196.44) | <b>302.51</b><br>(170.08 to 502.39) | <b>4.12</b><br>(3.01 to 5.45) | <b>2.94</b><br>(1.62 to 4.88) | <b>1.39</b><br>(0.77 to 2.27) | <b>3.50</b><br>(1.97 to 5.81) |
| Neonatal disorders                                                      |                                     |                                     |                                    |                                     |                               |                               |                               |                               |
| Neonatal preterm birth                                                  | 157.09<br>(112.77 to 209.72)        | 103.13<br>(56.97 to 164.62)         | 37.84<br>(21.05 to 60.76)          | 123.06<br>(68.28 to 197.95)         | 1.82<br>(1.30 to 2.42)        | 1.19<br>(0.66 to 1.90)        | 0.44<br>(0.24 to 0.70)        | 1.42<br>(0.79 to 2.29)        |
| Neonatal encephalopathy due to birth asphyxia and trauma                | 94.41<br>(64.65 to 132.98)          | 64.22<br>(31.16 to 118.98)          | 27.87<br>(13.72 to 50.55)          | 75.74<br>(36.83 to 139.10)          | 1.09<br>(0.75 to 1.54)        | 0.74<br>(0.36 to 1.38)        | 0.32<br>(0.16 to 0.58)        | 0.88<br>(0.43 to 1.61)        |
| Neonatal sepsis and other neonatal infections                           | 26.34<br>(16.03 to 42.13)           | 25.48<br>(12.01 to 47.94)           | 12.74<br>(6.17 to 23.85)           | 30.17<br>(14.21 to 57.03)           | 0.30<br>(0.19 to 0.49)        | 0.29<br>(0.14 to 0.55)        | 0.15<br>(0.07 to 0.28)        | 0.35<br>(0.16 to 0.66)        |
| Hemolytic disease and other neonatal jaundice                           | 1.30<br>(0.74 to 2.16)              | 0.73<br>(0.30 to 1.51)              | 0.35<br>(0.14 to 0.74)             | 0.87<br>(0.35 to 1.85)              | 0.02<br>(0.01 to 0.03)        | 0.01<br>(0.00 to 0.02)        | 0.00<br>(0.00 to 0.01)        | 0.01<br>(0.00 to 0.02)        |
| Other neonatal disorders                                                | 76.92<br>(50.07 to 108.00)          | 60.46<br>(27.60 to 110.27)          | 41.54<br>(19.91 to 74.69)          | 72.68<br>(33.38 to 133.57)          | 0.89<br>(0.58 to 1.25)        | 0.70<br>(0.32 to 1.28)        | 0.48<br>(0.23 to 0.86)        | 0.84<br>(0.39 to 1.54)        |
| <b>Nutritional deficiencies</b>                                         | <b>32.06</b><br>(24.03 to 43.19)    | <b>33.29</b><br>(26.12 to 41.77)    | <b>35.43</b><br>(28.74 to 42.72)   | <b>33.95</b><br>(26.22 to 43.27)    | <b>0.98</b><br>(0.82 to 1.16) | <b>1.95</b><br>(1.58 to 2.34) | <b>2.41</b><br>(1.97 to 2.91) | <b>1.84</b><br>(1.46 to 2.22) |
| Protein-energy malnutrition                                             | 28.28<br>(20.50 to 39.41)           | 27.07<br>(20.85 to 35.18)           | 30.58<br>(24.45 to 37.95)          | 27.64<br>(20.83 to 37.11)           | 0.86<br>(0.72 to 1.04)        | 1.64<br>(1.29 to 2.01)        | 2.15<br>(1.70 to 2.65)        | 1.54<br>(1.19 to 1.92)        |
| Iodine deficiency                                                       | 0.31<br>(0.02 to 1.04)              | 1.28<br>(0.04 to 4.27)              | 1.08<br>(0.02 to 3.89)             | 1.33<br>(0.04 to 4.49)              | 0.01<br>(0.00 to 0.02)        | 0.07<br>(0.00 to 0.26)        | 0.06<br>(0.00 to 0.29)        | 0.06<br>(0.00 to 0.24)        |
| Dietary iron deficiency                                                 | 0.50<br>(0.36 to 0.80)              | 0.54<br>(0.37 to 0.83)              | 0.53<br>(0.37 to 0.81)             | 0.57<br>(0.39 to 0.89)              | 0.01<br>(0.01 to 0.01)        | 0.01<br>(0.01 to 0.02)        | 0.01<br>(0.01 to 0.02)        | 0.01<br>(0.01 to 0.02)        |
| Other nutritional deficiencies                                          | 2.97<br>(2.22 to 3.82)              | 4.41<br>(3.28 to 5.65)              | 3.24<br>(2.39 to 4.22)             | 4.42<br>(3.31 to 5.67)              | 0.10<br>(0.07 to 0.12)        | 0.23<br>(0.16 to 0.30)        | 0.18<br>(0.13 to 0.25)        | 0.21<br>(0.15 to 0.29)        |
| <b>Other communicable, maternal, neonatal, and nutritional diseases</b> | <b>234.21</b><br>(86.14 to 444.55)  | <b>111.63</b><br>(62.79 to 185.32)  | <b>79.43</b><br>(47.41 to 118.50)  | <b>120.02</b><br>(66.41 to 203.14)  | <b>3.45</b><br>(1.66 to 5.91) | <b>2.67</b><br>(1.62 to 3.76) | <b>2.18</b><br>(1.36 to 2.97) | <b>2.74</b><br>(1.65 to 3.89) |
| Sexually transmitted infections excluding HIV                           | 170.09<br>(20.29 to 385.96)         | 38.46<br>(4.83 to 109.74)           | 18.85<br>(2.81 to 51.77)           | 44.17<br>(5.24 to 126.28)           | 2.03<br>(0.27 to 4.55)        | 0.48<br>(0.08 to 1.32)        | 0.25<br>(0.06 to 0.64)        | 0.55<br>(0.09 to 1.51)        |
| Syphilis                                                                | 167.41<br>(17.61 to 383.73)         | 36.55<br>(2.68 to 107.91)           | 17.28<br>(1.31 to 50.26)           | 42.21<br>(3.02 to 124.43)           | 1.97<br>(0.21 to 4.50)        | 0.44<br>(0.04 to 1.27)        | 0.21<br>(0.02 to 0.60)        | 0.50<br>(0.04 to 1.47)        |
| Chlamydial infection                                                    | 0.51<br>(0.34 to 0.72)              | 0.36<br>(0.23 to 0.55)              | 0.30<br>(0.18 to 0.46)             | 0.37<br>(0.23 to 0.56)              | 0.01<br>(0.01 to 0.02)        | 0.01<br>(0.01 to 0.01)        | 0.01<br>(0.00 to 0.01)        | 0.01<br>(0.01 to 0.01)        |
| Gonococcal infection                                                    | 1.39<br>(0.93 to 1.96)              | 0.99<br>(0.65 to 1.49)              | 0.82<br>(0.53 to 1.23)             | 1.02<br>(0.66 to 1.55)              | 0.03<br>(0.02 to 0.04)        | 0.02<br>(0.02 to 0.03)        | 0.02<br>(0.01 to 0.03)        | 0.02<br>(0.02 to 0.03)        |
| Other sexually transmitted infections                                   | 0.78<br>(0.52 to 1.11)              | 0.56<br>(0.36 to 0.86)              | 0.46<br>(0.29 to 0.70)             | 0.58<br>(0.37 to 0.89)              | 0.02<br>(0.01 to 0.02)        | 0.01<br>(0.01 to 0.02)        | 0.01<br>(0.01 to 0.02)        | 0.01<br>(0.01 to 0.02)        |
| Acute hepatitis                                                         | 5.21<br>(3.92 to 6.83)              | 5.17<br>(3.43 to 7.44)              | 2.75<br>(1.79 to 4.07)             | 5.33<br>(3.50 to 7.65)              | 0.13<br>(0.10 to 0.17)        | 0.17<br>(0.11 to 0.24)        | 0.09<br>(0.06 to 0.14)        | 0.17<br>(0.11 to 0.24)        |
| Acute hepatitis A                                                       | 0.19<br>(0.13 to 0.27)              | 0.10<br>(0.06 to 0.16)              | 0.06<br>(0.03 to 0.10)             | 0.10<br>(0.06 to 0.17)              | 0.00<br>(0.00 to 0.00)        | 0.00<br>(0.00 to 0.00)        | 0.00<br>(0.00 to 0.00)        | 0.00<br>(0.00 to 0.00)        |
| Acute hepatitis B                                                       | 4.30<br>(3.16 to 5.74)              | 4.47<br>(2.89 to 6.54)              | 2.35<br>(1.47 to 3.53)             | 4.61<br>(3.00 to 6.70)              | 0.11<br>(0.08 to 0.15)        | 0.15<br>(0.09 to 0.21)        | 0.08<br>(0.05 to 0.12)        | 0.15<br>(0.10 to 0.21)        |

|                                       |                                                            |                                                               |                                                              |                                                               |                                                      |                                                      |                                                      |                                                        |
|---------------------------------------|------------------------------------------------------------|---------------------------------------------------------------|--------------------------------------------------------------|---------------------------------------------------------------|------------------------------------------------------|------------------------------------------------------|------------------------------------------------------|--------------------------------------------------------|
|                                       | 0.09<br>(0.06 to<br>0.13)                                  | 0.12<br>(0.07 to<br>0.19)                                     | 0.07<br>(0.04 to<br>0.11)                                    | 0.12<br>(0.07 to<br>0.19)                                     | 0.00<br>(0.00 to<br>0.00)                            | 0.00<br>(0.00 to<br>0.01)                            | 0.00<br>(0.00 to<br>0.00)                            | 0.00<br>(0.00 to<br>0.01)                              |
| Acute hepatitis C                     |                                                            |                                                               |                                                              |                                                               |                                                      |                                                      |                                                      |                                                        |
|                                       | 0.63<br>(0.44 to<br>0.87)                                  | 0.48<br>(0.28 to<br>0.79)                                     | 0.26<br>(0.15 to<br>0.44)                                    | 0.50<br>(0.29 to<br>0.82)                                     | 0.01<br>(0.01 to<br>0.02)                            | 0.02<br>(0.01 to<br>0.03)                            | 0.01<br>(0.01 to<br>0.02)                            | 0.02<br>(0.01 to<br>0.02)                              |
| Acute hepatitis E                     |                                                            |                                                               |                                                              |                                                               |                                                      |                                                      |                                                      |                                                        |
|                                       | 58.91<br>(33.95 to<br>76.11)                               | 68.00<br>(36.62 to<br>95.34)                                  | 57.83<br>(32.34 to<br>79.54)                                 | 70.51<br>(38.43 to<br>98.05)                                  | 1.29<br>(0.71 to<br>1.67)                            | 2.02<br>(1.12 to<br>2.70)                            | 1.84<br>(1.06 to<br>2.46)                            | 2.02<br>(1.13 to<br>2.70)                              |
| Other unspecified infectious diseases |                                                            |                                                               |                                                              |                                                               |                                                      |                                                      |                                                      |                                                        |
| <b>Non-communicable diseases</b>      | <b>8,132.49</b><br><b>(6,812.04 to</b><br><b>9,569.66)</b> | <b>15,864.36</b><br><b>(12,435.40 to</b><br><b>19,709.72)</b> | <b>10,299.57</b><br><b>(8,067.72 to</b><br><b>12,804.70)</b> | <b>19,029.11</b><br><b>(14,595.71 to</b><br><b>23,996.58)</b> | <b>283.71</b><br><b>(240.75 to</b><br><b>330.61)</b> | <b>736.67</b><br><b>(617.43 to</b><br><b>857.42)</b> | <b>508.96</b><br><b>(425.70 to</b><br><b>602.90)</b> | <b>853.75</b><br><b>(708.06 to</b><br><b>1,001.32)</b> |

| American Samoa                       |                                           |                                           |                                           |                                           |                                  |                                     |                                     |                                     |
|--------------------------------------|-------------------------------------------|-------------------------------------------|-------------------------------------------|-------------------------------------------|----------------------------------|-------------------------------------|-------------------------------------|-------------------------------------|
| Cause                                | YLLs (actual counts)                      |                                           |                                           |                                           | Deaths (actual counts)           |                                     |                                     |                                     |
|                                      | 2016                                      | 2040 Forecast                             | 2040 Better Scenario                      | 2040 Worse Scenario                       | 2016                             | 2040 Forecast                       | 2040 Better Scenario                | 2040 Worse Scenario                 |
| <b>Neoplasms</b>                     | <b>1,738.97</b><br>(1,435.48 to 2,063.42) | <b>3,584.23</b><br>(2,715.82 to 4,683.64) | <b>2,780.16</b><br>(2,110.28 to 3,606.71) | <b>3,987.30</b><br>(2,970.00 to 5,283.60) | <b>57.81</b><br>(48.51 to 67.80) | <b>159.45</b><br>(126.18 to 202.22) | <b>128.36</b><br>(102.68 to 161.60) | <b>172.58</b><br>(133.66 to 223.53) |
| Lip and oral cavity cancer           | 20.53<br>(15.98 to 25.77)                 | 47.98<br>(27.54 to 84.21)                 | 27.92<br>(17.44 to 44.15)                 | 61.71<br>(33.76 to 113.00)                | 0.73<br>(0.58 to 0.90)           | 2.07<br>(1.25 to 3.40)              | 1.25<br>(0.83 to 1.88)              | 2.58<br>(1.46 to 4.49)              |
| Nasopharynx cancer                   | 24.69<br>(19.94 to 30.21)                 | 47.20<br>(27.50 to 81.92)                 | 21.39<br>(13.39 to 34.68)                 | 63.14<br>(35.17 to 114.28)                | 0.75<br>(0.61 to 0.91)           | 1.74<br>(1.05 to 2.92)              | 0.82<br>(0.54 to 1.26)              | 2.27<br>(1.31 to 4.01)              |
| Other pharynx cancer                 | 30.99<br>(23.71 to 39.97)                 | 51.15<br>(33.36 to 78.45)                 | 44.39<br>(30.19 to 64.92)                 | 55.30<br>(34.95 to 87.70)                 | 1.02<br>(0.79 to 1.29)           | 2.12<br>(1.43 to 3.17)              | 1.91<br>(1.35 to 2.71)              | 2.25<br>(1.47 to 3.46)              |
| Esophageal cancer                    | 13.06<br>(10.44 to 15.89)                 | 27.60<br>(16.27 to 45.02)                 | 18.39<br>(12.06 to 27.81)                 | 34.48<br>(19.57 to 59.49)                 | 0.49<br>(0.40 to 0.58)           | 1.26<br>(0.78 to 2.01)              | 0.87<br>(0.59 to 1.28)              | 1.53<br>(0.90 to 2.49)              |
| Stomach cancer                       | 133.44<br>(108.76 to 161.23)              | 202.16<br>(157.16 to 261.86)              | 128.63<br>(98.52 to 164.34)               | 210.44<br>(160.69 to 277.39)              | 4.64<br>(3.84 to 5.52)           | 9.14<br>(7.37 to 11.41)             | 6.07<br>(4.87 to 7.52)              | 9.27<br>(7.31 to 11.74)             |
| Colon and rectum cancer              | 133.92<br>(109.21 to 162.06)              | 328.66<br>(210.51 to 512.59)              | 243.93<br>(160.26 to 374.83)              | 344.24<br>(217.48 to 539.97)              | 4.84<br>(4.00 to 5.80)           | 15.44<br>(10.07 to 23.88)           | 12.02<br>(7.99 to 18.48)            | 15.72<br>(10.17 to 24.86)           |
| Liver cancer                         | 149.19<br>(117.88 to 182.81)              | 300.84<br>(183.84 to 479.83)              | 285.85<br>(180.94 to 437.82)              | 377.69<br>(214.38 to 625.87)              | 4.84<br>(3.90 to 5.84)           | 12.44<br>(7.92 to 19.39)            | 12.25<br>(8.11 to 18.19)            | 15.09<br>(8.94 to 24.26)            |
| Liver cancer due to hepatitis B      | 86.64<br>(67.40 to 107.95)                | 161.58<br>(96.94 to 254.66)               | 153.85<br>(95.35 to 235.52)               | 201.66<br>(112.48 to 330.41)              | 2.66<br>(2.10 to 3.27)           | 6.31<br>(3.89 to 9.79)              | 6.20<br>(3.96 to 9.26)              | 7.63<br>(4.36 to 12.16)             |
| Liver cancer due to hepatitis C      | 20.00<br>(15.40 to 25.28)                 | 50.04<br>(30.52 to 77.79)                 | 48.57<br>(30.69 to 73.51)                 | 60.44<br>(34.92 to 97.60)                 | 0.79<br>(0.61 to 0.98)           | 2.44<br>(1.56 to 3.68)              | 2.47<br>(1.62 to 3.57)              | 2.84<br>(1.73 to 4.42)              |
| Liver cancer due to alcohol use      | 12.23<br>(9.03 to 16.01)                  | 27.15<br>(15.86 to 44.56)                 | 24.43<br>(14.85 to 38.86)                 | 35.16<br>(19.37 to 59.50)                 | 0.43<br>(0.32 to 0.54)           | 1.16<br>(0.70 to 1.84)              | 1.08<br>(0.68 to 1.70)              | 1.45<br>(0.83 to 2.36)              |
| Liver cancer due to other causes     | 30.32<br>(23.00 to 38.95)                 | 62.08<br>(32.59 to 112.54)                | 59.00<br>(32.63 to 103.87)                | 80.43<br>(39.51 to 154.69)                | 0.96<br>(0.74 to 1.21)           | 2.53<br>(1.38 to 4.53)              | 2.50<br>(1.40 to 4.40)              | 3.17<br>(1.60 to 6.02)              |
| Gallbladder and biliary tract cancer | 13.81<br>(10.42 to 17.80)                 | 18.07<br>(14.24 to 22.46)                 | 17.34<br>(13.56 to 21.91)                 | 17.33<br>(13.78 to 21.39)                 | 0.49<br>(0.38 to 0.63)           | 0.83<br>(0.68 to 1.01)              | 0.83<br>(0.67 to 1.02)              | 0.78<br>(0.65 to 0.95)              |
| Pancreatic cancer                    | 47.69<br>(39.08 to 57.24)                 | 128.81<br>(87.03 to 190.12)               | 121.42<br>(83.60 to 177.58)               | 136.00<br>(90.33 to 204.94)               | 1.80<br>(1.49 to 2.13)           | 5.96<br>(4.06 to 8.77)              | 5.79<br>(4.02 to 8.43)              | 6.17<br>(4.13 to 9.31)              |
| Larynx cancer                        | 12.51<br>(10.00 to 15.53)                 | 25.20<br>(13.00 to 45.19)                 | 11.96<br>(6.56 to 21.75)                  | 33.09<br>(16.44 to 60.55)                 | 0.44<br>(0.36 to 0.54)           | 1.17<br>(0.82 to 2.14)              | 0.57<br>(0.32 to 1.01)              | 1.49<br>(0.78 to 2.69)              |
| Tracheal, bronchus, and lung cancer  | 247.20<br>(199.87 to 300.87)              | 604.72<br>(371.18 to 950.75)              | 352.75<br>(223.16 to 550.07)              | 837.30<br>(503.03 to 1,343.26)            | 9.32<br>(7.67 to 11.22)          | 28.45<br>(17.82 to 44.39)           | 16.95<br>(10.93 to 26.03)           | 38.38<br>(23.76 to 60.42)           |
| Malignant skin melanoma              | 12.28<br>(8.79 to 16.08)                  | 23.14<br>(16.81 to 29.10)                 | 32.54<br>(23.29 to 41.54)                 | 21.67<br>(15.79 to 27.15)                 | 0.43<br>(0.31 to 0.55)           | 1.05<br>(0.76 to 1.28)              | 1.56<br>(1.11 to 1.94)              | 0.96<br>(0.69 to 1.17)              |
| Non-melanoma skin cancer             | 14.22<br>(11.38 to 17.58)                 | 31.32<br>(25.93 to 37.12)                 | 22.25<br>(18.10 to 27.02)                 | 30.27<br>(25.20 to 35.81)                 | 0.55<br>(0.45 to 0.65)           | 1.64<br>(1.39 to 1.85)              | 1.25<br>(1.06 to 1.45)              | 1.52<br>(1.28 to 1.73)              |
| Breast cancer                        | 212.75<br>(152.81 to 277.38)              | 373.00<br>(227.97 to 597.04)              | 271.17<br>(168.68 to 431.40)              | 391.97<br>(237.53 to 636.05)              | 6.46<br>(4.71 to 8.28)           | 14.88<br>(9.33 to 23.50)            | 11.20<br>(7.17 to 17.32)            | 15.32<br>(9.44 to 24.60)            |
| Cervical cancer                      | 42.83<br>(27.03 to 58.89)                 | 63.70<br>(35.13 to 99.29)                 | 40.54<br>(22.66 to 62.26)                 | 66.79<br>(36.64 to 105.81)                | 1.28<br>(0.78 to 1.75)           | 2.36<br>(1.30 to 3.57)              | 1.52<br>(0.85 to 2.29)              | 2.45<br>(1.34 to 3.75)              |

|                   |                               |                                 |                                 |                                 |                           |                              |                              |                              |
|-------------------|-------------------------------|---------------------------------|---------------------------------|---------------------------------|---------------------------|------------------------------|------------------------------|------------------------------|
| Uterine cancer    | 60.16<br>(43.65 to<br>80.15)  | 129.46<br>(92.20 to<br>171.34)  | 99.63<br>(70.42 to<br>133.89)   | 129.24<br>(93.11 to<br>170.16)  | 2.05<br>(1.49 to<br>2.71) | 5.50<br>(4.04 to<br>7.18)    | 4.32<br>(3.15 to<br>5.74)    | 5.43<br>(4.06 to<br>7.02)    |
| Ovarian cancer    | 54.04<br>(39.25 to<br>70.35)  | 151.41<br>(90.03 to<br>242.69)  | 129.75<br>(78.31 to<br>204.68)  | 152.67<br>(90.63 to<br>246.95)  | 2.04<br>(1.51 to<br>2.63) | 7.11<br>(4.24 to<br>11.39)   | 6.20<br>(3.72 to<br>9.82)    | 7.09<br>(4.20 to<br>11.53)   |
| Prostate cancer   | 77.85<br>(58.70 to<br>103.47) | 307.82<br>(243.49 to<br>388.34) | 270.63<br>(213.68 to<br>339.76) | 287.14<br>(219.75 to<br>368.20) | 4.08<br>(3.15 to<br>5.28) | 20.19<br>(15.84 to<br>25.16) | 18.68<br>(14.85 to<br>22.93) | 18.31<br>(13.87 to<br>23.22) |
| Testicular cancer | 1.35<br>(0.99 to<br>1.76)     | 1.65<br>(1.19 to<br>2.21)       | 1.19<br>(0.85 to<br>1.60)       | 1.65<br>(1.20 to<br>2.21)       | 0.03<br>(0.02 to<br>0.04) | 0.04<br>(0.03 to<br>0.06)    | 0.03<br>(0.02 to<br>0.04)    | 0.04<br>(0.03 to<br>0.05)    |

| American Samoa                  |                                                 |                                                  |                                                  |                                                  |                                          |                                            |                                           |                                            |
|---------------------------------|-------------------------------------------------|--------------------------------------------------|--------------------------------------------------|--------------------------------------------------|------------------------------------------|--------------------------------------------|-------------------------------------------|--------------------------------------------|
| Cause                           | YLLs (actual counts)                            |                                                  |                                                  |                                                  | Deaths (actual counts)                   |                                            |                                           |                                            |
|                                 | 2016                                            | 2040 Forecast                                    | 2040 Better Scenario                             | 2040 Worse Scenario                              | 2016                                     | 2040 Forecast                              | 2040 Better Scenario                      | 2040 Worse Scenario                        |
| Kidney cancer                   | 12.23<br>(9.83 to 15.07)                        | 26.34<br>(19.66 to 35.83)                        | 26.31<br>(19.66 to 34.95)                        | 26.92<br>(19.26 to 37.60)                        | 0.38<br>(0.31 to 0.46)                   | 1.11<br>(0.85 to 1.47)                     | 1.16<br>(0.91 to 1.48)                    | 1.10<br>(0.82 to 1.51)                     |
| Bladder cancer                  | 18.20<br>(14.87 to 22.01)                       | 37.36<br>(23.45 to 57.97)                        | 28.56<br>(18.48 to 43.55)                        | 41.27<br>(25.10 to 65.70)                        | 0.72<br>(0.60 to 0.86)                   | 1.86<br>(1.20 to 2.90)                     | 1.48<br>(0.99 to 2.25)                    | 2.00<br>(1.24 to 3.21)                     |
| Brain and nervous system cancer | 46.07<br>(36.97 to 57.95)                       | 75.14<br>(59.82 to 98.29)                        | 65.62<br>(51.77 to 86.74)                        | 74.11<br>(59.29 to 96.08)                        | 1.07<br>(0.85 to 1.40)                   | 2.32<br>(1.87 to 3.07)                     | 2.13<br>(1.69 to 2.85)                    | 2.23<br>(1.69 to 2.96)                     |
| Thyroid cancer                  | 8.44<br>(6.66 to 10.47)                         | 19.70<br>(13.94 to 27.48)                        | 14.75<br>(10.37 to 20.57)                        | 21.76<br>(15.16 to 30.29)                        | 0.33<br>(0.27 to 0.41)                   | 0.93<br>(0.67 to 1.25)                     | 0.72<br>(0.52 to 0.97)                    | 1.00<br>(0.71 to 1.34)                     |
| Mesothelioma                    | 5.25<br>(4.11 to 6.57)                          | 9.45<br>(7.31 to 11.66)                          | 9.57<br>(7.36 to 11.98)                          | 9.23<br>(7.21 to 11.33)                          | 0.17<br>(0.14 to 0.21)                   | 0.38<br>(0.30 to 0.46)                     | 0.39<br>(0.31 to 0.49)                    | 0.36<br>(0.29 to 0.44)                     |
| Hodgkin lymphoma                | 4.95<br>(3.69 to 6.58)                          | 7.04<br>(4.76 to 10.29)                          | 4.19<br>(2.81 to 6.07)                           | 7.21<br>(4.85 to 10.52)                          | 0.13<br>(0.09 to 0.17)                   | 0.23<br>(0.16 to 0.32)                     | 0.14<br>(0.10 to 0.20)                    | 0.23<br>(0.16 to 0.32)                     |
| Non-Hodgkin lymphoma            | 49.90<br>(38.52 to 60.74)                       | 87.50<br>(66.28 to 115.50)                       | 72.14<br>(54.17 to 94.68)                        | 90.32<br>(67.63 to 120.58)                       | 1.35<br>(1.06 to 1.64)                   | 3.26<br>(2.53 to 4.22)                     | 2.84<br>(2.16 to 3.65)                    | 3.26<br>(2.51 to 4.26)                     |
| Multiple myeloma                | 22.50<br>(15.31 to 30.29)                       | 52.64<br>(34.28 to 74.71)                        | 48.87<br>(31.61 to 69.66)                        | 54.52<br>(34.93 to 77.88)                        | 0.78<br>(0.54 to 1.03)                   | 2.24<br>(1.54 to 3.07)                     | 2.15<br>(1.46 to 2.97)                    | 2.28<br>(1.54 to 3.16)                     |
| Leukemia                        | 65.22<br>(53.10 to 78.63)                       | 87.32<br>(65.50 to 117.43)                       | 65.16<br>(49.02 to 87.13)                        | 96.82<br>(71.11 to 132.75)                       | 1.52<br>(1.24 to 1.85)                   | 2.87<br>(2.15 to 3.84)                     | 2.25<br>(1.71 to 2.98)                    | 3.10<br>(2.27 to 4.24)                     |
| Acute lymphoid leukemia         | 17.07<br>(13.30 to 22.43)                       | 18.92<br>(13.76 to 26.14)                        | 13.19<br>(9.58 to 18.36)                         | 20.93<br>(15.04 to 29.60)                        | 0.32<br>(0.25 to 0.42)                   | 0.48<br>(0.35 to 0.67)                     | 0.36<br>(0.26 to 0.50)                    | 0.52<br>(0.37 to 0.74)                     |
| Chronic lymphoid leukemia       | 2.01<br>(1.46 to 2.55)                          | 4.33<br>(3.29 to 6.68)                           | 4.23<br>(2.89 to 5.76)                           | 5.26<br>(3.53 to 7.46)                           | 0.07<br>(0.05 to 0.09)                   | 0.23<br>(0.15 to 0.31)                     | 0.21<br>(0.15 to 0.28)                    | 0.24<br>(0.16 to 0.34)                     |
| Acute myeloid leukemia          | 16.55<br>(12.95 to 20.72)                       | 26.35<br>(19.48 to 35.02)                        | 24.22<br>(18.09 to 32.09)                        | 28.92<br>(20.95 to 39.29)                        | 0.36<br>(0.28 to 0.45)                   | 0.78<br>(0.58 to 1.04)                     | 0.76<br>(0.58 to 0.99)                    | 0.84<br>(0.61 to 1.14)                     |
| Chronic myeloid leukemia        | 13.30<br>(10.34 to 17.31)                       | 17.27<br>(11.95 to 25.03)                        | 9.61<br>(6.48 to 14.14)                          | 19.27<br>(13.10 to 28.62)                        | 0.39<br>(0.31 to 0.50)                   | 0.64<br>(0.45 to 0.91)                     | 0.36<br>(0.26 to 0.52)                    | 0.70<br>(0.48 to 1.01)                     |
| Other leukemia                  | 16.29<br>(12.37 to 20.38)                       | 19.96<br>(14.01 to 27.67)                        | 13.91<br>(9.77 to 19.29)                         | 22.43<br>(15.53 to 31.91)                        | 0.38<br>(0.29 to 0.48)                   | 0.75<br>(0.53 to 1.04)                     | 0.56<br>(0.40 to 0.77)                    | 0.81<br>(0.57 to 1.14)                     |
| Other neoplasms                 | 203.67<br>(165.33 to 242.63)                    | 317.85<br>(257.87 to 385.00)                     | 303.32<br>(244.10 to 372.10)                     | 313.02<br>(256.35 to 377.66)                     | 5.10<br>(4.22 to 6.12)                   | 10.87<br>(9.12 to 12.82)                   | 11.00<br>(9.14 to 13.08)                  | 10.39<br>(8.82 to 12.19)                   |
| <b>Cardiovascular diseases</b>  | <b>2715.85</b><br><b>(2,249.12 to 3,242.12)</b> | <b>4,449.25</b><br><b>(3,067.28 to 6,140.78)</b> | <b>2,028.43</b><br><b>(1,462.01 to 2,779.30)</b> | <b>6,084.32</b><br><b>(4,117.94 to 8,561.64)</b> | <b>99.59</b><br><b>(84.02 to 116.74)</b> | <b>209.76</b><br><b>(157.28 to 281.10)</b> | <b>106.27</b><br><b>(81.81 to 140.88)</b> | <b>272.89</b><br><b>(197.61 to 369.15)</b> |
| Rheumatic heart disease         | 113.67<br>(93.17 to 136.99)                     | 93.59<br>(72.59 to 118.66)                       | 56.75<br>(43.32 to 73.97)                        | 96.36<br>(74.48 to 124.28)                       | 3.08<br>(2.53 to 3.67)                   | 3.68<br>(3.04 to 4.40)                     | 2.40<br>(1.97 to 2.91)                    | 3.64<br>(3.01 to 4.42)                     |
| Ischemic heart disease          | 1,333.43<br>(1,092.32 to 1,608.92)              | 1,999.41<br>(1,104.20 to 3,423.18)               | 782.98<br>(442.33 to 1,382.55)                   | 3,019.32<br>(1,670.02 to 5,109.24)               | 50.49<br>(42.60 to 59.66)                | 94.43<br>(56.79 to 153.44)                 | 41.39<br>(24.80 to 71.20)                 | 135.17<br>(79.31 to 217.88)                |
| Stroke                          | 727.59<br>(603.39 to 866.89)                    | 1,168.67<br>(718.82 to 1,836.93)                 | 410.89<br>(262.54 to 652.67)                     | 1,717.07<br>(1,041.37 to 2,700.65)               | 27.22<br>(22.72 to 32.18)                | 55.30<br>(37.20 to 83.01)                  | 22.19<br>(15.28 to 33.44)                 | 76.93<br>(50.27 to 116.22)                 |
| Ischemic stroke                 | 176.47<br>(144.72 to 211.10)                    | 299.01<br>(171.37 to 554.03)                     | 125.42<br>(75.71 to 233.21)                      | 412.60<br>(228.51 to 761.56)                     | 8.18<br>(6.84 to 9.67)                   | 17.08<br>(10.17 to 33.08)                  | 8.05<br>(4.95 to 15.76)                   | 22.36<br>(12.52 to 46.00)                  |



|                                |                                 |                                   |                                 |                                     |                              |                              |                              |                              |
|--------------------------------|---------------------------------|-----------------------------------|---------------------------------|-------------------------------------|------------------------------|------------------------------|------------------------------|------------------------------|
| Intracerebral hemorrhage       | 551.12<br>(453.90 to<br>658.39) | 869.67<br>(499.35 to<br>1,463.08) | 285.47<br>(171.61 to<br>469.05) | 1,304.47<br>(722.67 to<br>2,191.55) | 19.03<br>(15.86 to<br>22.69) | 38.21<br>(23.92 to<br>59.68) | 14.14<br>(9.23 to<br>21.75)  | 54.56<br>(32.50 to<br>88.36) |
| Hypertensive heart disease     | 128.55<br>(99.43 to<br>170.94)  | 349.81<br>(251.79 to<br>501.91)   | 236.76<br>(179.37 to<br>318.99) | 393.38<br>(273.18 to<br>577.24)     | 5.07<br>(4.03 to<br>6.58)    | 17.85<br>(13.39 to<br>24.83) | 13.04<br>(10.30 to<br>17.02) | 19.30<br>(14.00 to<br>28.14) |
| Cardiomyopathy and myocarditis | 162.46<br>(124.69 to<br>199.09) | 273.64<br>(192.99 to<br>373.66)   | 165.75<br>(114.89 to<br>224.66) | 272.95<br>(190.73 to<br>376.79)     | 4.88<br>(3.80 to<br>5.95)    | 11.24<br>(8.06 to<br>15.05)  | 7.24<br>(5.12 to<br>9.65)    | 10.84<br>(7.58 to<br>14.42)  |
| Myocarditis                    | 10.70<br>(7.44 to<br>14.81)     | 18.69<br>(12.80 to<br>25.72)      | 17.57<br>(12.18 to<br>23.87)    | 18.34<br>(12.71 to<br>25.22)        | 0.34<br>(0.23 to<br>0.47)    | 0.80<br>(0.55 to<br>1.08)    | 0.79<br>(0.56 to<br>1.06)    | 0.76<br>(0.52 to<br>1.04)    |

| American Samoa                                                |                                            |                                              |                                            |                                                |                                         |                                         |                                         |                                         |
|---------------------------------------------------------------|--------------------------------------------|----------------------------------------------|--------------------------------------------|------------------------------------------------|-----------------------------------------|-----------------------------------------|-----------------------------------------|-----------------------------------------|
| Cause                                                         | YLLs (actual counts)                       |                                              |                                            |                                                | Deaths (actual counts)                  |                                         |                                         |                                         |
|                                                               | 2016                                       | 2040 Forecast                                | 2040 Better Scenario                       | 2040 Worse Scenario                            | 2016                                    | 2040 Forecast                           | 2040 Better Scenario                    | 2040 Worse Scenario                     |
| Alcoholic cardiomyopathy                                      | 7.14<br>(4.69 to 9.84)                     | 11.07<br>(7.03 to 15.25)                     | 9.76<br>(5.92 to 13.61)                    | 11.27<br>(7.28 to 15.49)                       | 0.23<br>(0.16 to 0.32)                  | 0.45<br>(0.29 to 0.62)                  | 0.42<br>(0.27 to 0.58)                  | 0.45<br>(0.29 to 0.61)                  |
| Other cardiomyopathy                                          | 144.61<br>(110.44 to 177.75)               | 243.88<br>(166.39 to 341.05)                 | 138.41<br>(91.04 to 195.87)                | 243.35<br>(164.73 to 343.78)                   | 4.31<br>(3.34 to 5.28)                  | 9.99<br>(6.94 to 13.68)                 | 6.02<br>(4.09 to 8.30)                  | 9.63<br>(6.65 to 13.10)                 |
| Atrial fibrillation and flutter                               | 8.72<br>(6.78 to 11.09)                    | 32.43<br>(24.61 to 42.30)                    | 29.56<br>(22.58 to 37.93)                  | 31.31<br>(23.51 to 41.55)                      | 0.69<br>(0.54 to 0.91)                  | 2.65<br>(1.95 to 3.49)                  | 2.61<br>(1.97 to 3.37)                  | 2.46<br>(1.78 to 3.30)                  |
| Aortic aneurysm                                               | 27.93<br>(22.70 to 33.89)                  | 56.55<br>(45.93 to 68.50)                    | 46.21<br>(37.34 to 55.79)                  | 57.00<br>(45.54 to 70.08)                      | 1.12<br>(0.93 to 1.34)                  | 2.88<br>(2.44 to 3.41)                  | 2.60<br>(2.18 to 3.02)                  | 2.78<br>(2.33 to 3.26)                  |
| Peripheral artery disease                                     | 7.31<br>(3.31 to 10.47)                    | 17.82<br>(7.92 to 27.57)                     | 15.62<br>(7.17 to 23.50)                   | 18.98<br>(8.31 to 29.85)                       | 0.32<br>(0.16 to 0.43)                  | 1.00<br>(0.49 to 1.48)                  | 0.97<br>(0.50 to 1.39)                  | 1.01<br>(0.49 to 1.53)                  |
| Endocarditis                                                  | 63.05<br>(48.33 to 79.19)                  | 111.87<br>(77.55 to 152.99)                  | 100.10<br>(69.78 to 134.22)                | 112.67<br>(77.63 to 154.21)                    | 1.94<br>(1.52 to 2.39)                  | 4.72<br>(3.36 to 6.18)                  | 4.53<br>(3.27 to 5.84)                  | 4.57<br>(3.24 to 6.08)                  |
| Other cardiovascular and circulatory diseases                 | 143.15<br>(106.75 to 184.66)               | 345.45<br>(241.49 to 467.35)                 | 183.81<br>(130.79 to 246.16)               | 365.28<br>(247.94 to 499.56)                   | 4.78<br>(3.60 to 6.10)                  | 16.01<br>(11.38 to 21.00)               | 9.31<br>(6.95 to 12.10)                 | 16.19<br>(11.22 to 21.49)               |
| <b>Chronic respiratory diseases</b>                           | <b>479.68</b><br><b>(393.76 to 572.56)</b> | <b>841.39</b><br><b>(608.82 to 1,145.03)</b> | <b>504.43</b><br><b>(375.69 to 669.83)</b> | <b>1,111.45</b><br><b>(778.64 to 1,538.97)</b> | <b>17.10</b><br><b>(14.25 to 20.23)</b> | <b>39.26</b><br><b>(29.48 to 51.56)</b> | <b>23.74</b><br><b>(18.36 to 30.17)</b> | <b>50.53</b><br><b>(37.08 to 67.18)</b> |
| Chronic obstructive pulmonary disease                         | 294.56<br>(242.85 to 356.24)               | 601.53<br>(409.79 to 858.08)                 | 313.89<br>(220.15 to 435.11)               | 834.67<br>(552.35 to 1,229.26)                 | 11.35<br>(9.50 to 13.52)                | 29.78<br>(21.42 to 40.44)               | 16.18<br>(12.08 to 21.55)               | 39.85<br>(27.38 to 55.08)               |
| Pneumoconiosis                                                | 1.69<br>(1.24 to 2.30)                     | 1.90<br>(1.40 to 2.52)                       | 1.96<br>(1.39 to 2.67)                     | 2.11<br>(1.54 to 2.83)                         | 0.07<br>(0.05 to 0.08)                  | 0.11<br>(0.08 to 0.14)                  | 0.12<br>(0.09 to 0.15)                  | 0.12<br>(0.09 to 0.15)                  |
| Silicosis                                                     | 0.13<br>(0.07 to 0.21)                     | 0.15<br>(0.08 to 0.24)                       | 0.10<br>(0.05 to 0.17)                     | 0.15<br>(0.08 to 0.24)                         | 0.01<br>(0.00 to 0.01)                  | 0.01<br>(0.00 to 0.02)                  | 0.01<br>(0.00 to 0.01)                  | 0.01<br>(0.00 to 0.01)                  |
| Asbestosis                                                    | 0.46<br>(0.31 to 0.70)                     | 0.51<br>(0.35 to 0.77)                       | 0.63<br>(0.43 to 0.93)                     | 0.51<br>(0.34 to 0.78)                         | 0.01<br>(0.01 to 0.02)                  | 0.02<br>(0.01 to 0.04)                  | 0.03<br>(0.02 to 0.05)                  | 0.02<br>(0.01 to 0.03)                  |
| Coal workers pneumoconiosis                                   | 0.01<br>(0.01 to 0.02)                     | 0.02<br>(0.01 to 0.04)                       | 0.02<br>(0.01 to 0.03)                     | 0.02<br>(0.01 to 0.04)                         | 0.00<br>(0.00 to 0.00)                  | 0.00<br>(0.00 to 0.00)                  | 0.00<br>(0.00 to 0.00)                  | 0.00<br>(0.00 to 0.00)                  |
| Other pneumoconiosis                                          | 1.09<br>(0.79 to 1.50)                     | 1.21<br>(0.85 to 1.68)                       | 1.21<br>(0.80 to 1.74)                     | 1.42<br>(1.00 to 1.97)                         | 0.04<br>(0.03 to 0.06)                  | 0.07<br>(0.05 to 0.10)                  | 0.08<br>(0.05 to 0.11)                  | 0.08<br>(0.06 to 0.11)                  |
| Asthma                                                        | 103.53<br>(81.85 to 131.52)                | 107.78<br>(61.05 to 178.65)                  | 48.84<br>(27.64 to 83.29)                  | 139.05<br>(79.03 to 226.95)                    | 3.47<br>(2.72 to 4.39)                  | 4.81<br>(2.86 to 7.68)                  | 2.35<br>(1.36 to 3.84)                  | 5.90<br>(3.47 to 9.31)                  |
| Interstitial lung disease and pulmonary sarcoidosis           | 23.94<br>(17.37 to 31.32)                  | 36.77<br>(26.99 to 47.31)                    | 56.51<br>(41.13 to 73.13)                  | 35.49<br>(25.41 to 45.51)                      | 0.64<br>(0.46 to 0.83)                  | 1.33<br>(0.98 to 1.73)                  | 2.16<br>(1.58 to 2.77)                  | 1.25<br>(0.91 to 1.61)                  |
| Other chronic respiratory diseases                            | 55.96<br>(37.69 to 76.31)                  | 93.40<br>(59.01 to 137.75)                   | 83.23<br>(54.21 to 119.06)                 | 100.14<br>(61.83 to 152.29)                    | 1.58<br>(1.04 to 2.19)                  | 3.22<br>(2.03 to 4.67)                  | 2.94<br>(1.92 to 4.12)                  | 3.41<br>(2.08 to 5.09)                  |
| <b>Cirrhosis and other chronic liver diseases</b>             | <b>207.96</b><br><b>(164.22 to 258.36)</b> | <b>310.62</b><br><b>(249.51 to 383.57)</b>   | <b>226.25</b><br><b>(178.94 to 283.60)</b> | <b>311.91</b><br><b>(252.35 to 382.82)</b>     | <b>5.69</b><br><b>(4.52 to 6.98)</b>    | <b>10.84</b><br><b>(9.05 to 12.91)</b>  | <b>8.20</b><br><b>(6.72 to 9.90)</b>    | <b>10.65</b><br><b>(8.90 to 12.66)</b>  |
| Cirrhosis and other chronic liver diseases due to hepatitis B | 83.10<br>(64.12 to 106.18)                 | 129.97<br>(101.67 to 161.58)                 | 96.76<br>(73.50 to 123.11)                 | 128.79<br>(101.23 to 160.41)                   | 2.36<br>(1.84 to 2.98)                  | 4.64<br>(3.78 to 5.59)                  | 3.58<br>(2.86 to 4.35)                  | 4.51<br>(3.69 to 5.43)                  |
| Cirrhosis and other chronic liver diseases due to hepatitis C | 33.10<br>(25.21 to 43.60)                  | 51.07<br>(39.37 to 64.78)                    | 37.21<br>(28.24 to 48.11)                  | 50.75<br>(38.98 to 64.23)                      | 0.92<br>(0.71 to 1.18)                  | 1.75<br>(1.43 to 2.13)                  | 1.31<br>(1.03 to 1.62)                  | 1.71<br>(1.40 to 2.08)                  |

|                                                                |                                                      |                                                      |                                                      |                                                      |                                                |                                                   |                                                  |                                                   |
|----------------------------------------------------------------|------------------------------------------------------|------------------------------------------------------|------------------------------------------------------|------------------------------------------------------|------------------------------------------------|---------------------------------------------------|--------------------------------------------------|---------------------------------------------------|
|                                                                | 29.94<br>(22.50 to<br>38.52)                         | 44.82<br>(34.91 to<br>57.56)                         | 30.72<br>(23.37 to<br>39.56)                         | 47.12<br>(37.07 to<br>60.31)                         | 0.88<br>(0.68 to<br>1.12)                      | 1.65<br>(1.33 to<br>2.02)                         | 1.18<br>(0.95 to<br>1.46)                        | 1.69<br>(1.37 to<br>2.08)                         |
| Cirrhosis and other chronic liver diseases due to alcohol use  |                                                      |                                                      |                                                      |                                                      |                                                |                                                   |                                                  |                                                   |
|                                                                | 61.82<br>(50.46 to<br>74.05)                         | 84.76<br>(67.50 to<br>105.59)                        | 61.55<br>(48.36 to<br>78.04)                         | 85.26<br>(67.86 to<br>106.09)                        | 1.52<br>(1.25 to<br>1.83)                      | 2.79<br>(2.30 to<br>3.35)                         | 2.13<br>(1.74 to<br>2.58)                        | 2.74<br>(2.26 to<br>3.28)                         |
| Cirrhosis and other chronic liver diseases due to other causes |                                                      |                                                      |                                                      |                                                      |                                                |                                                   |                                                  |                                                   |
| <b>Digestive diseases</b>                                      | <b>202.99</b><br><b>(165.71 to</b><br><b>242.52)</b> | <b>341.91</b><br><b>(270.11 to</b><br><b>429.44)</b> | <b>233.86</b><br><b>(183.57 to</b><br><b>291.55)</b> | <b>365.96</b><br><b>(286.90 to</b><br><b>463.22)</b> | <b>6.41</b><br><b>(5.26 to</b><br><b>7.57)</b> | <b>14.91</b><br><b>(12.16 to</b><br><b>18.05)</b> | <b>10.81</b><br><b>(8.79 to</b><br><b>13.10)</b> | <b>15.45</b><br><b>(12.45 to</b><br><b>18.93)</b> |
| Peptic ulcer disease                                           | 40.40<br>(32.56 to<br>49.48)                         | 54.17<br>(42.28 to<br>69.05)                         | 27.01<br>(20.36 to<br>35.13)                         | 56.86<br>(43.79 to<br>73.48)                         | 1.40<br>(1.14 to<br>1.70)                      | 2.54<br>(2.06 to<br>3.18)                         | 1.34<br>(1.06 to<br>1.69)                        | 2.59<br>(2.08 to<br>3.25)                         |

| American Samoa                             |                              |                              |                              |                              |                          |                           |                           |                           |
|--------------------------------------------|------------------------------|------------------------------|------------------------------|------------------------------|--------------------------|---------------------------|---------------------------|---------------------------|
| Cause                                      | YLLs (actual counts)         |                              |                              |                              | Deaths (actual counts)   |                           |                           |                           |
|                                            | 2016                         | 2040 Forecast                | 2040 Better Scenario         | 2040 Worse Scenario          | 2016                     | 2040 Forecast             | 2040 Better Scenario      | 2040 Worse Scenario       |
| Gastritis and duodenitis                   | 0.97<br>(0.74 to 1.27)       | 2.19<br>(1.56 to 3.12)       | 1.50<br>(1.05 to 2.17)       | 2.16<br>(1.52 to 3.10)       | 0.04<br>(0.03 to 0.05)   | 0.11<br>(0.08 to 0.15)    | 0.08<br>(0.06 to 0.11)    | 0.10<br>(0.07 to 0.14)    |
| Appendicitis                               | 23.70<br>(18.12 to 29.31)    | 28.65<br>(21.42 to 35.70)    | 16.00<br>(11.59 to 20.33)    | 28.94<br>(21.99 to 36.10)    | 0.62<br>(0.48 to 0.76)   | 1.10<br>(0.84 to 1.32)    | 0.65<br>(0.48 to 0.80)    | 1.07<br>(0.83 to 1.28)    |
| Paralytic ileus and intestinal obstruction | 13.77<br>(10.90 to 17.83)    | 22.63<br>(17.53 to 28.98)    | 21.63<br>(16.69 to 28.02)    | 22.31<br>(17.40 to 28.70)    | 0.38<br>(0.30 to 0.48)   | 1.00<br>(0.76 to 1.27)    | 1.04<br>(0.79 to 1.30)    | 0.95<br>(0.73 to 1.19)    |
| Inguinal, femoral, and abdominal hernia    | 5.63<br>(4.13 to 7.45)       | 9.83<br>(7.18 to 13.33)      | 7.51<br>(5.44 to 10.31)      | 9.52<br>(6.97 to 12.94)      | 0.23<br>(0.17 to 0.31)   | 0.54<br>(0.40 to 0.75)    | 0.43<br>(0.32 to 0.60)    | 0.50<br>(0.38 to 0.69)    |
| Inflammatory bowel disease                 | 16.69<br>(12.67 to 22.18)    | 32.57<br>(24.94 to 43.28)    | 30.36<br>(23.10 to 39.78)    | 31.74<br>(24.19 to 42.31)    | 0.47<br>(0.37 to 0.62)   | 1.25<br>(1.01 to 1.60)    | 1.24<br>(1.00 to 1.58)    | 1.18<br>(0.94 to 1.52)    |
| Vascular intestinal disorders              | 6.15<br>(4.71 to 7.75)       | 14.68<br>(11.86 to 17.54)    | 12.44<br>(9.79 to 15.00)     | 14.15<br>(11.43 to 16.84)    | 0.24<br>(0.20 to 0.30)   | 0.78<br>(0.65 to 0.92)    | 0.70<br>(0.58 to 0.83)    | 0.73<br>(0.61 to 0.87)    |
| Gallbladder and biliary diseases           | 38.43<br>(27.98 to 47.87)    | 74.05<br>(58.31 to 87.30)    | 43.84<br>(32.90 to 55.96)    | 94.52<br>(74.50 to 114.54)   | 1.32<br>(0.97 to 1.63)   | 3.48<br>(2.83 to 4.13)    | 2.18<br>(1.63 to 2.73)    | 4.24<br>(3.26 to 5.22)    |
| Pancreatitis                               | 25.98<br>(19.76 to 32.96)    | 45.95<br>(35.95 to 55.95)    | 27.67<br>(21.47 to 33.87)    | 48.69<br>(38.69 to 58.69)    | 0.71<br>(0.55 to 0.91)   | 1.66<br>(1.16 to 2.66)    | 1.06<br>(0.77 to 1.61)    | 1.71<br>(1.16 to 2.87)    |
| Other digestive diseases                   | 31.27<br>(25.38 to 38.79)    | 57.21<br>(45.60 to 72.64)    | 45.89<br>(36.16 to 58.33)    | 57.07<br>(45.61 to 71.98)    | 0.98<br>(0.81 to 1.20)   | 2.45<br>(2.05 to 3.02)    | 2.07<br>(1.70 to 2.53)    | 2.38<br>(1.96 to 2.92)    |
| Neurological disorders                     | 214.36<br>(179.59 to 250.08) | 556.36<br>(401.17 to 813.26) | 548.33<br>(397.57 to 791.75) | 585.27<br>(408.02 to 870.05) | 10.46<br>(8.77 to 12.40) | 36.78<br>(25.14 to 56.37) | 39.88<br>(27.71 to 59.50) | 37.26<br>(24.43 to 57.89) |
| Alzheimer's disease and other dementias    | 89.86<br>(71.91 to 110.46)   | 372.46<br>(226.34 to 624.33) | 379.21<br>(233.01 to 623.81) | 398.10<br>(225.26 to 678.24) | 7.53<br>(6.12 to 9.23)   | 30.38<br>(18.83 to 49.57) | 33.10<br>(21.05 to 52.59) | 31.10<br>(18.27 to 51.39) |
| Parkinson's disease                        | 7.77<br>(5.86 to 9.92)       | 33.19<br>(25.00 to 42.60)    | 40.69<br>(30.97 to 52.39)    | 29.97<br>(22.67 to 38.44)    | 0.51<br>(0.39 to 0.67)   | 2.40<br>(1.78 to 3.13)    | 3.07<br>(2.34 to 4.00)    | 2.11<br>(1.56 to 2.75)    |
| Epilepsy                                   | 80.44<br>(62.66 to 96.64)    | 88.29<br>(56.19 to 132.75)   | 63.86<br>(41.11 to 93.12)    | 96.34<br>(60.60 to 147.61)   | 1.52<br>(1.17 to 1.84)   | 1.90<br>(1.27 to 2.80)    | 1.42<br>(0.96 to 2.01)    | 2.04<br>(1.34 to 3.04)    |
| Multiple sclerosis                         | 2.30<br>(1.35 to 4.18)       | 3.40<br>(2.03 to 6.10)       | 3.52<br>(2.09 to 6.33)       | 3.39<br>(2.01 to 6.13)       | 0.06<br>(0.04 to 0.11)   | 0.11<br>(0.07 to 0.19)    | 0.12<br>(0.07 to 0.20)    | 0.11<br>(0.07 to 0.19)    |
| Motor neuron disease                       | 4.36<br>(3.46 to 5.35)       | 11.49<br>(9.05 to 14.35)     | 11.71<br>(9.08 to 14.70)     | 11.00<br>(8.70 to 13.53)     | 0.14<br>(0.11 to 0.17)   | 0.45<br>(0.36 to 0.55)    | 0.47<br>(0.37 to 0.57)    | 0.43<br>(0.35 to 0.52)    |
| Other neurological disorders               | 29.64<br>(24.72 to 35.13)    | 47.53<br>(39.32 to 56.74)    | 49.34<br>(40.71 to 59.21)    | 46.47<br>(38.65 to 55.53)    | 0.71<br>(0.59 to 0.85)   | 1.55<br>(1.30 to 1.81)    | 1.69<br>(1.42 to 1.98)    | 1.47<br>(1.24 to 1.72)    |
| Mental disorders                           | 39.56<br>(30.10 to 52.42)    | 77.17<br>(58.49 to 99.78)    | 104.01<br>(78.14 to 135.55)  | 76.64<br>(58.12 to 98.98)    | 0.89<br>(0.69 to 1.18)   | 2.10<br>(1.66 to 2.64)    | 3.02<br>(2.40 to 3.87)    | 2.03<br>(1.61 to 2.57)    |
| Alcohol use disorders                      | 14.70<br>(10.17 to 21.03)    | 17.45<br>(11.41 to 25.49)    | 18.67<br>(12.10 to 27.43)    | 17.70<br>(11.52 to 26.00)    | 0.35<br>(0.24 to 0.50)   | 0.47<br>(0.32 to 0.68)    | 0.52<br>(0.36 to 0.77)    | 0.47<br>(0.32 to 0.68)    |
| Drug use disorders                         | 24.24<br>(17.76 to 32.73)    | 59.03<br>(43.96 to 77.21)    | 84.49<br>(63.10 to 111.05)   | 58.26<br>(43.24 to 76.20)    | 0.53<br>(0.40 to 0.71)   | 1.61<br>(1.26 to 2.05)    | 2.49<br>(1.93 to 3.21)    | 1.55<br>(1.20 to 1.98)    |
| Opioid use disorders                       | 12.25<br>(8.49 to 17.37)     | 23.20<br>(16.09 to 33.17)    | 25.43<br>(17.33 to 37.02)    | 23.10<br>(16.02 to 33.04)    | 0.25<br>(0.18 to 0.35)   | 0.54<br>(0.39 to 0.75)    | 0.61<br>(0.44 to 0.85)    | 0.53<br>(0.38 to 0.74)    |

|                           |                            |                              |                              |                              |                           |                           |                           |                           |
|---------------------------|----------------------------|------------------------------|------------------------------|------------------------------|---------------------------|---------------------------|---------------------------|---------------------------|
|                           | 1.45<br>(0.93 to<br>2.18)  | 4.39<br>(2.68 to<br>7.04)    | 6.10<br>(3.75 to<br>9.61)    | 4.42<br>(2.70 to<br>7.13)    | 0.03<br>(0.02 to<br>0.05) | 0.11<br>(0.07 to<br>0.17) | 0.16<br>(0.10 to<br>0.24) | 0.11<br>(0.07 to<br>0.17) |
| Cocaine use disorders     | 0.55<br>(0.34 to<br>0.82)  | 2.40<br>(1.41 to<br>3.62)    | 4.10<br>(2.38 to<br>6.24)    | 2.40<br>(1.43 to<br>3.66)    | 0.01<br>(0.01 to<br>0.02) | 0.06<br>(0.04 to<br>0.09) | 0.11<br>(0.06 to<br>0.16) | 0.06<br>(0.04 to<br>0.09) |
| Amphetamine use disorders | 9.98<br>(7.09 to<br>14.25) | 29.04<br>(20.18 to<br>40.86) | 48.85<br>(34.59 to<br>69.03) | 28.34<br>(19.74 to<br>40.34) | 0.24<br>(0.18 to<br>0.33) | 0.90<br>(0.67 to<br>1.23) | 1.62<br>(1.20 to<br>2.16) | 0.85<br>(0.63 to<br>1.16) |
| Other drug use disorders  | 0.63<br>(0.42 to<br>0.95)  | 0.69<br>(0.42 to<br>1.10)    | 0.85<br>(0.50 to<br>1.39)    | 0.68<br>(0.42 to<br>1.09)    | 0.01<br>(0.01 to<br>0.02) | 0.01<br>(0.01 to<br>0.02) | 0.02<br>(0.01 to<br>0.03) | 0.01<br>(0.01 to<br>0.02) |
| Eating disorders          |                            |                              |                              |                              |                           |                           |                           |                           |

| American Samoa                                             |                                    |                                    |                                    |                                    |                           |                              |                              |                              |
|------------------------------------------------------------|------------------------------------|------------------------------------|------------------------------------|------------------------------------|---------------------------|------------------------------|------------------------------|------------------------------|
| Cause                                                      | YLLs (actual counts)               |                                    |                                    |                                    | Deaths (actual counts)    |                              |                              |                              |
|                                                            | 2016                               | 2040 Forecast                      | 2040 Better Scenario               | 2040 Worse Scenario                | 2016                      | 2040 Forecast                | 2040 Better Scenario         | 2040 Worse Scenario          |
|                                                            | 2,016.53<br>(1,674.09 to 2,400.17) | 4,696.54<br>(3,412.32 to 6,928.19) | 3,119.06<br>(2,215.21 to 4,653.72) | 5,497.49<br>(3,968.00 to 7,906.34) | 74.03<br>(62.19 to 87.21) | 225.80<br>(174.21 to 320.98) | 156.92<br>(118.08 to 234.44) | 256.40<br>(195.38 to 351.23) |
| Diabetes, urogenital, blood, and endocrine diseases        |                                    |                                    |                                    |                                    |                           |                              |                              |                              |
| Diabetes mellitus                                          | 1,075.03<br>(881.37 to 1,290.65)   | 2,291.92<br>(1,544.31 to 3,259.54) | 1,284.49<br>(860.28 to 1,892.24)   | 2,565.95<br>(1,703.96 to 3,763.34) | 42.38<br>(35.07 to 50.04) | 115.65<br>(80.83 to 158.95)  | 68.77<br>(48.75 to 94.72)    | 124.69<br>(86.33 to 174.81)  |
| Acute glomerulonephritis                                   | 2.72<br>(1.80 to 3.95)             | 7.03<br>(3.98 to 12.65)            | 5.04<br>(2.87 to 8.86)             | 6.98<br>(3.97 to 12.54)            | 0.09<br>(0.06 to 0.13)    | 0.26<br>(0.15 to 0.48)       | 0.19<br>(0.11 to 0.34)       | 0.26<br>(0.14 to 0.47)       |
| Chronic kidney disease                                     | 592.57<br>(488.23 to 711.35)       | 1,682.68<br>(694.48 to 3,975.22)   | 1,170.90<br>(476.04 to 2,798.55)   | 2,221.02<br>(903.77 to 4,763.09)   | 21.13<br>(17.66 to 25.00) | 80.20<br>(33.53 to 180.85)   | 59.42<br>(24.24 to 134.52)   | 103.16<br>(42.89 to 218.37)  |
| Chronic kidney disease due to diabetes mellitus            | 346.42<br>(277.30 to 422.91)       | 1,032.07<br>(412.30 to 2,481.47)   | 711.34<br>(285.10 to 1,739.76)     | 1,369.54<br>(544.77 to 3,089.62)   | 12.00<br>(9.85 to 14.48)  | 46.21<br>(18.42 to 105.73)   | 33.44<br>(13.32 to 78.78)    | 60.09<br>(24.24 to 128.13)   |
| Chronic kidney disease due to hypertension                 | 128.71<br>(101.67 to 161.44)       | 424.52<br>(174.78 to 1,002.90)     | 315.84<br>(128.44 to 759.89)       | 559.05<br>(223.40 to 1,232.47)     | 5.85<br>(4.73 to 7.20)    | 24.82<br>(10.45 to 59.28)    | 19.75<br>(8.09 to 48.00)     | 31.33<br>(13.06 to 69.32)    |
| Chronic kidney disease due to glomerulonephritis           | 55.73<br>(42.58 to 70.62)          | 98.13<br>(45.73 to 226.43)         | 59.87<br>(27.11 to 136.40)         | 125.83<br>(57.03 to 272.62)        | 1.44<br>(1.09 to 1.83)    | 5.83<br>(1.53 to 8.36)       | 2.31<br>(0.97 to 5.50)       | 4.60<br>(1.95 to 10.09)      |
| Chronic kidney disease due to other and unspecified causes | 61.70<br>(48.52 to 77.09)          | 127.96<br>(55.15 to 273.72)        | 83.85<br>(34.72 to 183.97)         | 166.60<br>(70.11 to 354.94)        | 1.85<br>(1.44 to 2.34)    | 5.59<br>(2.34 to 12.50)      | 3.92<br>(1.56 to 9.15)       | 7.14<br>(2.93 to 14.93)      |
| Urinary diseases and male infertility                      | 83.62<br>(69.14 to 101.04)         | 239.13<br>(197.01 to 287.81)       | 179.00<br>(145.06 to 220.42)       | 231.27<br>(191.25 to 276.92)       | 2.77<br>(2.32 to 3.32)    | 11.37<br>(9.74 to 13.15)     | 9.13<br>(7.72 to 10.78)      | 10.60<br>(9.03 to 12.26)     |
| Urinary tract infections                                   | 76.12<br>(62.12 to 91.64)          | 220.35<br>(181.29 to 266.14)       | 167.13<br>(135.66 to 206.60)       | 212.93<br>(175.74 to 254.47)       | 2.53<br>(2.09 to 3.03)    | 10.51<br>(8.99 to 12.20)     | 8.57<br>(7.23 to 10.14)      | 9.79<br>(8.35 to 11.37)      |
| Urolithiasis                                               | 2.79<br>(1.98 to 3.96)             | 8.93<br>(6.18 to 12.76)            | 6.02<br>(4.04 to 8.87)             | 8.58<br>(6.03 to 12.35)            | 0.09<br>(0.07 to 0.13)    | 0.40<br>(0.28 to 0.57)       | 0.28<br>(0.19 to 0.40)       | 0.37<br>(0.27 to 0.53)       |
| Other urinary diseases                                     | 4.71<br>(3.30 to 6.50)             | 9.85<br>(6.46 to 13.97)            | 5.84<br>(3.79 to 8.27)             | 9.76<br>(6.41 to 13.75)            | 0.15<br>(0.11 to 0.21)    | 0.46<br>(0.31 to 0.64)       | 0.29<br>(0.19 to 0.41)       | 0.44<br>(0.30 to 0.60)       |
| Gynecological diseases                                     | 2.34<br>(1.46 to 3.42)             | 2.21<br>(1.33 to 3.35)             | 0.97<br>(0.58 to 1.52)             | 2.27<br>(1.37 to 3.41)             | 0.06<br>(0.04 to 0.09)    | 0.07<br>(0.05 to 0.09)       | 0.03<br>(0.02 to 0.05)       | 0.07<br>(0.05 to 0.09)       |
| Uterine fibroids                                           | 0.14<br>(0.06 to 0.27)             | 0.13<br>(0.06 to 0.24)             | 0.07<br>(0.03 to 0.13)             | 0.13<br>(0.06 to 0.25)             | 0.00<br>(0.00 to 0.01)    | 0.01<br>(0.00 to 0.01)       | 0.00<br>(0.00 to 0.01)       | 0.01<br>(0.00 to 0.01)       |
| Polycystic ovarian syndrome                                | 0.01<br>(0.00 to 0.04)             | 0.01<br>(0.00 to 0.03)             | 0.00<br>(0.00 to 0.01)             | 0.01<br>(0.00 to 0.03)             | 0.00<br>(0.00 to 0.00)    | 0.00<br>(0.00 to 0.00)       | 0.00<br>(0.00 to 0.00)       | 0.00<br>(0.00 to 0.00)       |
| Endometriosis                                              | 0.30<br>(0.09 to 0.61)             | 0.24<br>(0.09 to 0.69)             | 0.15<br>(0.04 to 0.31)             | 0.36<br>(0.09 to 0.72)             | 0.01<br>(0.00 to 0.01)    | 0.01<br>(0.00 to 0.02)       | 0.00<br>(0.00 to 0.01)       | 0.01<br>(0.00 to 0.02)       |
| Genital prolapse                                           | 0.07<br>(0.04 to 0.12)             | 0.09<br>(0.05 to 0.20)             | 0.04<br>(0.02 to 0.09)             | 0.10<br>(0.05 to 0.20)             | 0.00<br>(0.00 to 0.01)    | 0.00<br>(0.00 to 0.01)       | 0.00<br>(0.00 to 0.00)       | 0.00<br>(0.00 to 0.01)       |
| Other gynecological diseases                               | 1.82<br>(1.11 to 2.74)             | 1.64<br>(0.95 to 2.59)             | 0.71<br>(0.41 to 1.15)             | 1.68<br>(0.97 to 2.64)             | 0.05<br>(0.03 to 0.07)    | 0.05<br>(0.03 to 0.07)       | 0.02<br>(0.01 to 0.03)       | 0.05<br>(0.03 to 0.07)       |
| Hemoglobinopathies and hemolytic anemias                   | 6.12<br>(4.33 to 7.71)             | 8.53<br>(5.71 to 11.28)            | 5.03<br>(3.30 to 6.75)             | 8.59<br>(5.79 to 11.29)            | 0.16<br>(0.11 to 0.20)    | 0.33<br>(0.22 to 0.42)       | 0.20<br>(0.14 to 0.26)       | 0.32<br>(0.22 to 0.40)       |
| Thalassemias                                               | 0.87<br>(0.66 to 1.11)             | 0.40<br>(0.26 to 0.58)             | 0.36<br>(0.24 to 0.51)             | 0.41<br>(0.26 to 0.60)             | 0.01<br>(0.01 to 0.01)    | 0.01<br>(0.00 to 0.01)       | 0.01<br>(0.01 to 0.01)       | 0.01<br>(0.00 to 0.01)       |

|                                                   |                                 |                                 |                                 |                                 |                           |                              |                              |                              |
|---------------------------------------------------|---------------------------------|---------------------------------|---------------------------------|---------------------------------|---------------------------|------------------------------|------------------------------|------------------------------|
|                                                   | 0.01<br>(0.00 to<br>0.01)       | 0.01<br>(0.00 to<br>0.01)       | 0.00<br>(0.00 to<br>0.01)       | 0.01<br>(0.00 to<br>0.01)       | 0.00<br>(0.00 to<br>0.00) | 0.00<br>(0.00 to<br>0.00)    | 0.00<br>(0.00 to<br>0.00)    | 0.00<br>(0.00 to<br>0.00)    |
| Sickle cell disorders                             |                                 |                                 |                                 |                                 |                           |                              |                              |                              |
| G6PD deficiency                                   | 3.64<br>(2.47 to<br>4.78)       | 5.38<br>(3.47 to<br>7.53)       | 2.92<br>(1.79 to<br>4.18)       | 5.51<br>(3.53 to<br>7.62)       | 0.08<br>(0.06 to<br>0.11) | 0.16<br>(0.10 to<br>0.22)    | 0.09<br>(0.06 to<br>0.13)    | 0.16<br>(0.11 to<br>0.22)    |
| Other hemoglobinopathies and hemolytic anemias    | 1.60<br>(1.13 to<br>2.07)       | 2.74<br>(1.88 to<br>3.60)       | 1.76<br>(1.20 to<br>2.34)       | 2.67<br>(1.84 to<br>3.52)       | 0.06<br>(0.04 to<br>0.08) | 0.16<br>(0.11 to<br>0.20)    | 0.11<br>(0.07 to<br>0.14)    | 0.15<br>(0.11 to<br>0.19)    |
| Endocrine, metabolic, blood, and immune disorders | 254.14<br>(189.77 to<br>313.41) | 465.04<br>(349.15 to<br>576.43) | 473.63<br>(355.77 to<br>594.32) | 461.42<br>(347.37 to<br>572.03) | 7.44<br>(5.52 to<br>9.15) | 17.93<br>(13.66 to<br>21.68) | 19.17<br>(14.79 to<br>23.24) | 17.32<br>(13.32 to<br>20.83) |

| American Samoa                                |                                     |                                       |                                     |                                       |                                 |                                  |                                  |                                  |
|-----------------------------------------------|-------------------------------------|---------------------------------------|-------------------------------------|---------------------------------------|---------------------------------|----------------------------------|----------------------------------|----------------------------------|
| Cause                                         | YLLs (actual counts)                |                                       |                                     |                                       | Deaths (actual counts)          |                                  |                                  |                                  |
|                                               | 2016                                | 2040 Forecast                         | 2040 Better Scenario                | 2040 Worse Scenario                   | 2016                            | 2040 Forecast                    | 2040 Better Scenario             | 2040 Worse Scenario              |
| <b>Musculoskeletal disorders</b>              | <b>49.81</b><br>(37.67 to 62.57)    | <b>74.20</b><br>(54.55 to 97.12)      | <b>64.96</b><br>(48.14 to 84.90)    | <b>72.60</b><br>(53.42 to 93.77)      | <b>1.12</b><br>(0.85 to 1.40)   | <b>2.27</b><br>(1.71 to 2.82)    | <b>2.11</b><br>(1.59 to 2.62)    | <b>2.15</b><br>(1.61 to 2.67)    |
| Rheumatoid arthritis                          | 1.49<br>(0.97 to 2.07)              | 3.98<br>(2.45 to 5.75)                | 2.01<br>(1.21 to 3.05)              | 4.02<br>(2.48 to 5.73)                | 0.05<br>(0.03 to 0.07)          | 0.19<br>(0.12 to 0.27)           | 0.10<br>(0.06 to 0.15)           | 0.19<br>(0.12 to 0.26)           |
| Other musculoskeletal disorders               | 48.32<br>(36.43 to 60.75)           | 70.23<br>(51.37 to 91.74)             | 62.95<br>(46.32 to 82.28)           | 68.58<br>(50.31 to 89.25)             | 1.07<br>(0.81 to 1.33)          | 2.08<br>(1.56 to 2.60)           | 2.01<br>(1.52 to 2.50)           | 1.97<br>(1.48 to 2.46)           |
| <b>Other non-communicable diseases</b>        | <b>466.78</b><br>(354.49 to 577.20) | <b>932.69</b><br>(641.79 to 1,225.71) | <b>690.09</b><br>(452.77 to 937.09) | <b>936.15</b><br>(643.31 to 1,233.55) | <b>10.60</b><br>(7.55 to 13.66) | <b>35.52</b><br>(22.97 to 49.73) | <b>29.64</b><br>(18.45 to 41.62) | <b>33.80</b><br>(21.93 to 47.37) |
| Congenital birth defects                      | 219.90<br>(167.73 to 277.62)        | 188.89<br>(122.72 to 269.12)          | 85.80<br>(54.84 to 121.71)          | 208.23<br>(134.33 to 297.69)          | 2.92<br>(2.26 to 3.62)          | 2.83<br>(1.94 to 3.85)           | 1.35<br>(0.91 to 1.86)           | 3.06<br>(2.10 to 4.18)           |
| Neural tube defects                           | 4.48<br>(2.59 to 7.52)              | 1.53<br>(0.72 to 2.99)                | 0.58<br>(0.27 to 1.14)              | 1.77<br>(0.83 to 3.49)                | 0.05<br>(0.03 to 0.09)          | 0.02<br>(0.01 to 0.04)           | 0.01<br>(0.00 to 0.02)           | 0.02<br>(0.01 to 0.04)           |
| Congenital heart anomalies                    | 109.46<br>(81.34 to 141.08)         | 92.83<br>(59.68 to 134.61)            | 34.91<br>(21.32 to 50.44)           | 101.97<br>(64.77 to 149.10)           | 1.45<br>(1.10 to 1.83)          | 1.97<br>(0.91 to 1.87)           | 0.52<br>(0.34 to 0.73)           | 1.47<br>(0.98 to 2.05)           |
| Orofacial clefts                              | 0.06<br>(0.03 to 0.10)              | 0.05<br>(0.02 to 0.10)                | 0.01<br>(0.01 to 0.03)              | 0.06<br>(0.02 to 0.12)                | 0.00<br>(0.00 to 0.00)          | 0.00<br>(0.00 to 0.00)           | 0.00<br>(0.00 to 0.00)           | 0.00<br>(0.00 to 0.00)           |
| Down syndrome                                 | 10.35<br>(7.08 to 14.33)            | 10.82<br>(6.43 to 16.37)              | 10.50<br>(6.49 to 15.53)            | 11.67<br>(6.96 to 17.68)              | 0.16<br>(0.12 to 0.21)          | 0.20<br>(0.13 to 0.30)           | 0.21<br>(0.13 to 0.29)           | 0.21<br>(0.14 to 0.31)           |
| Other chromosomal abnormalities               | 7.17<br>(4.08 to 11.31)             | 6.73<br>(3.14 to 12.07)               | 4.15<br>(1.93 to 7.36)              | 7.65<br>(3.50 to 13.53)               | 0.09<br>(0.05 to 0.14)          | 0.09<br>(0.04 to 0.15)           | 0.06<br>(0.03 to 0.10)           | 0.10<br>(0.05 to 0.17)           |
| Congenital musculoskeletal and limb anomalies | 6.43<br>(4.37 to 9.26)              | 6.29<br>(3.60 to 10.23)               | 2.89<br>(1.64 to 4.55)              | 6.92<br>(3.93 to 11.30)               | 0.08<br>(0.06 to 0.12)          | 0.09<br>(0.05 to 0.14)           | 0.04<br>(0.02 to 0.07)           | 0.09<br>(0.06 to 0.15)           |
| Urogenital congenital anomalies               | 11.12<br>(8.02 to 16.17)            | 10.84<br>(7.25 to 16.00)              | 5.76<br>(3.82 to 8.47)              | 11.60<br>(7.62 to 17.31)              | 0.17<br>(0.13 to 0.24)          | 0.21<br>(0.14 to 0.29)           | 0.11<br>(0.08 to 0.16)           | 0.21<br>(0.15 to 0.30)           |
| Digestive congenital anomalies                | 10.85<br>(6.42 to 16.39)            | 7.75<br>(3.69 to 14.08)               | 2.96<br>(1.44 to 5.46)              | 8.86<br>(4.22 to 16.44)               | 0.13<br>(0.08 to 0.20)          | 0.10<br>(0.05 to 0.17)           | 0.04<br>(0.02 to 0.07)           | 0.11<br>(0.05 to 0.20)           |
| Other congenital birth defects                | 59.99<br>(43.11 to 80.24)           | 52.03<br>(32.60 to 80.28)             | 24.05<br>(14.96 to 36.74)           | 57.73<br>(35.74 to 89.03)             | 0.78<br>(0.58 to 1.02)          | 0.77<br>(0.52 to 1.11)           | 0.37<br>(0.24 to 0.54)           | 0.84<br>(0.56 to 1.22)           |
| Skin and subcutaneous diseases                | 214.34<br>(123.55 to 307.35)        | 720.66<br>(440.14 to 1,012.18)        | 594.04<br>(364.99 to 827.00)        | 701.21<br>(425.98 to 987.31)          | 7.31<br>(4.36 to 10.65)         | 32.43<br>(19.83 to 46.45)        | 28.17<br>(16.96 to 40.06)        | 30.44<br>(18.47 to 43.87)        |
| Cellulitis                                    | 35.75<br>(14.47 to 53.59)           | 155.71<br>(64.74 to 221.15)           | 150.83<br>(64.91 to 211.97)         | 148.56<br>(61.70 to 213.31)           | 1.14<br>(0.45 to 1.67)          | 6.65<br>(2.72 to 9.52)           | 6.79<br>(2.86 to 9.58)           | 6.17<br>(2.49 to 8.89)           |
| Pyoderma                                      | 130.53<br>(75.56 to 190.95)         | 432.80<br>(261.63 to 657.14)          | 347.98<br>(217.57 to 527.00)        | 427.15<br>(258.60 to 650.94)          | 3.72<br>(2.16 to 5.61)          | 17.14<br>(10.42 to 26.14)        | 14.65<br>(8.92 to 22.19)         | 16.38<br>(9.95 to 25.08)         |
| Decubitus ulcer                               | 46.66<br>(23.97 to 78.93)           | 129.48<br>(69.49 to 224.17)           | 93.16<br>(51.21 to 160.03)          | 122.82<br>(65.97 to 213.53)           | 2.42<br>(1.25 to 4.05)          | 8.57<br>(4.50 to 14.87)          | 6.66<br>(3.60 to 11.70)          | 7.82<br>(4.05 to 13.71)          |
| Other skin and subcutaneous diseases          | 1.40<br>(0.84 to 2.25)              | 2.66<br>(1.69 to 4.28)                | 2.07<br>(1.32 to 3.18)              | 2.67<br>(1.70 to 4.30)                | 0.03<br>(0.02 to 0.04)          | 0.07<br>(0.04 to 0.11)           | 0.06<br>(0.04 to 0.09)           | 0.06<br>(0.04 to 0.11)           |
| Sudden infant death syndrome                  | 32.54<br>(19.66 to 50.98)           | 23.15<br>(7.64 to 45.47)              | 10.25<br>(3.15 to 19.35)            | 26.72<br>(8.82 to 52.59)              | 0.38<br>(0.23 to 0.59)          | 0.27<br>(0.09 to 0.53)           | 0.12<br>(0.04 to 0.22)           | 0.31<br>(0.10 to 0.61)           |



|                          |                                       |                                       |                                     |                                       |                              |                              |                              |                              |
|--------------------------|---------------------------------------|---------------------------------------|-------------------------------------|---------------------------------------|------------------------------|------------------------------|------------------------------|------------------------------|
| Injuries                 | 1,586.58<br>(1,299.87 to<br>1,878.88) | 2,003.60<br>(1,473.06 to<br>2,584.17) | 1,319.50<br>(931.65 to<br>1,640.03) | 2,131.88<br>(1,563.22 to<br>2,812.48) | 32.30<br>(26.55 to<br>38.49) | 49.38<br>(38.41 to<br>61.05) | 34.44<br>(25.93 to<br>41.18) | 51.01<br>(39.37 to<br>64.52) |
| Transport injuries       | 327.38<br>(265.44 to<br>394.96)       | 472.02<br>(356.07 to<br>632.29)       | 248.27<br>(190.67 to<br>326.36)     | 548.85<br>(409.24 to<br>743.84)       | 6.68<br>(5.45 to<br>8.03)    | 11.29<br>(8.78 to<br>14.69)  | 6.36<br>(5.04 to<br>8.09)    | 12.71<br>(9.87 to<br>16.68)  |
| Road injuries            | 271.03<br>(221.33 to<br>324.92)       | 367.34<br>(277.36 to<br>492.99)       | 193.68<br>(149.33 to<br>255.12)     | 438.94<br>(327.72 to<br>597.23)       | 5.48<br>(4.46 to<br>6.57)    | 8.62<br>(6.71 to<br>11.24)   | 4.90<br>(3.89 to<br>6.24)    | 9.98<br>(7.74 to<br>13.16)   |
| Pedestrian road injuries | 89.74<br>(69.91 to<br>111.19)         | 100.51<br>(71.59 to<br>138.42)        | 37.81<br>(27.02 to<br>50.74)        | 116.68<br>(81.64 to<br>162.54)        | 1.84<br>(1.42 to<br>2.28)    | 2.50<br>(1.84 to<br>3.31)    | 1.00<br>(0.73 to<br>1.30)    | 2.82<br>(2.08 to<br>3.78)    |

| American Samoa                                  |                                            |                                              |                                            |                                              |                                         |                                         |                                         |                                         |
|-------------------------------------------------|--------------------------------------------|----------------------------------------------|--------------------------------------------|----------------------------------------------|-----------------------------------------|-----------------------------------------|-----------------------------------------|-----------------------------------------|
| Cause                                           | YLLs (actual counts)                       |                                              |                                            |                                              | Deaths (actual counts)                  |                                         |                                         |                                         |
|                                                 | 2016                                       | 2040 Forecast                                | 2040 Better Scenario                       | 2040 Worse Scenario                          | 2016                                    | 2040 Forecast                           | 2040 Better Scenario                    | 2040 Worse Scenario                     |
| Cyclist road injuries                           | 12.02<br>(8.98 to 15.26)                   | 13.72<br>(9.65 to 18.68)                     | 8.40<br>(5.97 to 11.22)                    | 16.34<br>(11.39 to 22.67)                    | 0.25<br>(0.19 to 0.32)                  | 0.35<br>(0.25 to 0.46)                  | 0.24<br>(0.18 to 0.32)                  | 0.40<br>(0.28 to 0.54)                  |
| Motorcyclist road injuries                      | 34.58<br>(22.52 to 44.63)                  | 45.30<br>(27.10 to 66.78)                    | 31.16<br>(18.99 to 45.49)                  | 51.88<br>(30.99 to 77.68)                    | 0.66<br>(0.43 to 0.85)                  | 0.91<br>(0.56 to 1.33)                  | 0.65<br>(0.40 to 0.93)                  | 1.03<br>(0.62 to 1.51)                  |
| Motor vehicle road injuries                     | 128.83<br>(104.21 to 158.42)               | 199.66<br>(148.88 to 270.54)                 | 111.60<br>(85.83 to 147.91)                | 244.16<br>(181.11 to 333.47)                 | 2.61<br>(2.12 to 3.21)                  | 4.68<br>(3.66 to 6.14)                  | 2.89<br>(2.30 to 3.69)                  | 5.52<br>(4.27 to 7.36)                  |
| Other road injuries                             | 5.85<br>(4.16 to 7.50)                     | 8.14<br>(5.41 to 11.47)                      | 4.71<br>(3.17 to 6.58)                     | 9.88<br>(6.55 to 14.02)                      | 0.12<br>(0.08 to 0.15)                  | 0.19<br>(0.13 to 0.26)                  | 0.12<br>(0.08 to 0.16)                  | 0.22<br>(0.15 to 0.30)                  |
| Other transport injuries                        | 56.35<br>(43.72 to 70.86)                  | 104.68<br>(75.48 to 143.74)                  | 54.59<br>(38.98 to 74.40)                  | 109.91<br>(78.46 to 154.37)                  | 1.20<br>(0.94 to 1.50)                  | 2.67<br>(2.02 to 3.59)                  | 1.45<br>(1.09 to 1.94)                  | 2.73<br>(2.05 to 3.74)                  |
| <b>Unintentional injuries</b>                   | <b>812.71</b><br><b>(661.84 to 975.18)</b> | <b>855.02</b><br><b>(660.67 to 1,063.16)</b> | <b>577.51</b><br><b>(446.39 to 720.39)</b> | <b>880.86</b><br><b>(681.37 to 1,096.78)</b> | <b>16.90</b><br><b>(13.72 to 20.25)</b> | <b>23.54</b><br><b>(19.44 to 27.82)</b> | <b>17.10</b><br><b>(14.15 to 20.24)</b> | <b>23.43</b><br><b>(19.54 to 27.80)</b> |
| Falls                                           | 73.72<br>(56.97 to 92.20)                  | 101.43<br>(79.38 to 122.46)                  | 79.93<br>(62.20 to 98.38)                  | 100.11<br>(78.59 to 119.83)                  | 1.99<br>(1.57 to 2.46)                  | 3.32<br>(3.24 to 4.55)                  | 3.32<br>(2.70 to 3.87)                  | 3.75<br>(3.06 to 4.34)                  |
| Drowning                                        | 284.04<br>(222.68 to 345.04)               | 246.60<br>(176.41 to 328.29)                 | 159.13<br>(113.93 to 212.61)               | 258.30<br>(186.59 to 347.35)                 | 5.29<br>(4.13 to 6.48)                  | 5.24<br>(3.84 to 6.84)                  | 3.48<br>(2.55 to 4.53)                  | 5.42<br>(4.00 to 7.15)                  |
| Fire, heat, and hot substances                  | 30.82<br>(24.01 to 37.79)                  | 31.19<br>(22.54 to 41.72)                    | 17.59<br>(12.52 to 23.31)                  | 32.75<br>(23.04 to 44.11)                    | 0.64<br>(0.50 to 0.78)                  | 0.85<br>(0.65 to 1.08)                  | 0.51<br>(0.39 to 0.65)                  | 0.86<br>(0.65 to 1.09)                  |
| Poisonings                                      | 30.85<br>(20.46 to 39.65)                  | 20.01<br>(12.96 to 28.53)                    | 9.34<br>(5.92 to 13.36)                    | 21.39<br>(13.72 to 30.57)                    | 0.62<br>(0.41 to 0.79)                  | 0.54<br>(0.37 to 0.73)                  | 0.27<br>(0.18 to 0.37)                  | 0.55<br>(0.37 to 0.75)                  |
| Exposure to mechanical forces                   | 88.20<br>(68.50 to 108.14)                 | 93.38<br>(67.96 to 119.67)                   | 56.62<br>(41.05 to 74.21)                  | 96.68<br>(70.36 to 123.36)                   | 1.78<br>(1.39 to 2.19)                  | 2.35<br>(1.83 to 2.87)                  | 1.50<br>(1.16 to 1.89)                  | 2.37<br>(1.82 to 2.90)                  |
| Unintentional firearm injuries                  | 9.70<br>(7.26 to 15.30)                    | 9.50<br>(6.44 to 15.47)                      | 5.97<br>(4.01 to 9.52)                     | 9.88<br>(6.76 to 15.93)                      | 0.20<br>(0.15 to 0.31)                  | 0.26<br>(0.19 to 0.42)                  | 0.18<br>(0.12 to 0.28)                  | 0.27<br>(0.19 to 0.43)                  |
| Unintentional suffocation                       | 16.24<br>(10.96 to 20.55)                  | 16.54<br>(10.18 to 22.73)                    | 10.79<br>(6.62 to 15.01)                   | 17.40<br>(10.58 to 23.87)                    | 0.27<br>(0.18 to 0.34)                  | 0.30<br>(0.19 to 0.40)                  | 0.20<br>(0.13 to 0.27)                  | 0.31<br>(0.20 to 0.42)                  |
| Other exposure to mechanical forces             | 62.26<br>(47.40 to 78.36)                  | 67.34<br>(49.34 to 87.55)                    | 39.86<br>(28.50 to 52.44)                  | 69.40<br>(50.08 to 89.55)                    | 1.31<br>(1.00 to 1.64)                  | 1.79<br>(1.39 to 2.20)                  | 1.12<br>(0.85 to 1.41)                  | 1.79<br>(1.38 to 2.21)                  |
| Adverse effects of medical treatment            | 105.45<br>(81.32 to 129.45)                | 123.92<br>(91.59 to 158.57)                  | 94.90<br>(69.57 to 121.66)                 | 126.53<br>(94.00 to 160.84)                  | 2.38<br>(1.84 to 2.91)                  | 3.74<br>(2.91 to 4.57)                  | 3.07<br>(2.37 to 3.74)                  | 3.68<br>(2.88 to 4.48)                  |
| Animal contact                                  | 8.58<br>(6.00 to 11.02)                    | 11.45<br>(7.02 to 16.53)                     | 7.65<br>(4.73 to 11.08)                    | 11.85<br>(7.33 to 17.07)                     | 0.20<br>(0.14 to 0.25)                  | 0.36<br>(0.23 to 0.48)                  | 0.26<br>(0.16 to 0.35)                  | 0.36<br>(0.23 to 0.48)                  |
| Venomous animal contact                         | 2.50<br>(1.59 to 3.54)                     | 3.37<br>(1.91 to 5.42)                       | 2.42<br>(1.38 to 3.89)                     | 3.51<br>(1.94 to 5.70)                       | 0.06<br>(0.04 to 0.08)                  | 0.10<br>(0.06 to 0.14)                  | 0.08<br>(0.05 to 0.11)                  | 0.10<br>(0.06 to 0.14)                  |
| Non-venomous animal contact                     | 6.08<br>(4.22 to 7.73)                     | 8.08<br>(4.94 to 11.64)                      | 5.24<br>(3.03 to 7.58)                     | 8.34<br>(5.07 to 11.99)                      | 0.14<br>(0.10 to 0.18)                  | 0.26<br>(0.17 to 0.35)                  | 0.18<br>(0.11 to 0.25)                  | 0.26<br>(0.17 to 0.35)                  |
| Foreign body                                    | 101.57<br>(78.28 to 133.31)                | 114.48<br>(86.86 to 151.05)                  | 94.34<br>(72.76 to 122.10)                 | 115.97<br>(87.10 to 154.01)                  | 1.97<br>(1.55 to 2.55)                  | 3.22<br>(2.64 to 4.14)                  | 2.89<br>(2.39 to 3.66)                  | 3.11<br>(2.54 to 3.99)                  |
| Pulmonary aspiration and foreign body in airway | 96.61<br>(74.18 to 128.96)                 | 109.93<br>(83.04 to 144.71)                  | 89.91<br>(68.65 to 117.74)                 | 111.24<br>(83.49 to 147.80)                  | 1.88<br>(1.46 to 2.47)                  | 3.12<br>(2.55 to 4.04)                  | 2.79<br>(2.29 to 3.56)                  | 3.01<br>(2.45 to 3.89)                  |

|                                             |                                                      |                                                      |                                                      |                                                      |                                                 |                                                  |                                                 |                                                  |
|---------------------------------------------|------------------------------------------------------|------------------------------------------------------|------------------------------------------------------|------------------------------------------------------|-------------------------------------------------|--------------------------------------------------|-------------------------------------------------|--------------------------------------------------|
|                                             | 4.96<br>(2.83 to<br>6.83)                            | 4.55<br>(2.42 to<br>7.18)                            | 4.43<br>(2.41 to<br>6.80)                            | 4.73<br>(2.49 to<br>7.37)                            | 0.09<br>(0.05 to<br>0.13)                       | 0.10<br>(0.05 to<br>0.15)                        | 0.10<br>(0.06 to<br>0.15)                       | 0.10<br>(0.05 to<br>0.15)                        |
| Foreign body in other body part             |                                                      |                                                      |                                                      |                                                      |                                                 |                                                  |                                                 |                                                  |
|                                             | 66.37<br>(46.55 to<br>84.45)                         | 89.73<br>(59.88 to<br>126.60)                        | 49.16<br>(32.32 to<br>68.91)                         | 93.87<br>(62.91 to<br>130.15)                        | 1.57<br>(1.12 to<br>2.00)                       | 2.76<br>(1.97 to<br>3.75)                        | 1.60<br>(1.11 to<br>2.21)                       | 2.81<br>(2.01 to<br>3.79)                        |
| Environmental heat and cold exposure        |                                                      |                                                      |                                                      |                                                      |                                                 |                                                  |                                                 |                                                  |
|                                             | 23.10<br>(17.36 to<br>29.10)                         | 22.84<br>(16.09 to<br>29.89)                         | 8.84<br>(5.89 to<br>12.33)                           | 23.42<br>(16.67 to<br>30.85)                         | 0.47<br>(0.35 to<br>0.59)                       | 0.53<br>(0.39 to<br>0.68)                        | 0.21<br>(0.15 to<br>0.28)                       | 0.53<br>(0.39 to<br>0.69)                        |
| Other unintentional injuries                |                                                      |                                                      |                                                      |                                                      |                                                 |                                                  |                                                 |                                                  |
| <b>Self-harm and interpersonal violence</b> | <b>446.05</b><br><b>(355.92 to</b><br><b>557.93)</b> | <b>541.85</b><br><b>(392.64 to</b><br><b>744.13)</b> | <b>364.88</b><br><b>(270.48 to</b><br><b>496.24)</b> | <b>564.88</b><br><b>(404.50 to</b><br><b>790.26)</b> | <b>8.72</b><br><b>(6.89 to</b><br><b>11.00)</b> | <b>11.72</b><br><b>(8.75 to</b><br><b>15.70)</b> | <b>8.15</b><br><b>(6.20 to</b><br><b>10.80)</b> | <b>12.04</b><br><b>(8.92 to</b><br><b>16.38)</b> |

| American Samoa                                                                      |                                                |                                                    |                                                    |                                                    |                                                |                                                |                                                |                                                |
|-------------------------------------------------------------------------------------|------------------------------------------------|----------------------------------------------------|----------------------------------------------------|----------------------------------------------------|------------------------------------------------|------------------------------------------------|------------------------------------------------|------------------------------------------------|
| Cause                                                                               | YLLs (actual counts)                           |                                                    |                                                    |                                                    | Deaths (actual counts)                         |                                                |                                                |                                                |
|                                                                                     | 2016                                           | 2040 Forecast                                      | 2040 Better Scenario                               | 2040 Worse Scenario                                | 2016                                           | 2040 Forecast                                  | 2040 Better Scenario                           | 2040 Worse Scenario                            |
| Self-harm                                                                           | 232.95<br>(178.62 to<br>284.05)                | 328.06<br>(219.13 to<br>474.73)                    | 222.41<br>(154.26 to<br>306.22)                    | 345.86<br>(228.61 to<br>508.44)                    | 4.57<br>(3.51 to<br>5.58)                      | 7.14<br>(4.98 to<br>10.01)                     | 5.02<br>(3.61 to<br>6.70)                      | 7.41<br>(5.05 to<br>10.53)                     |
| Self-harm by firearm                                                                | 22.55<br>(13.01 to<br>32.74)                   | 26.78<br>(14.59 to<br>47.65)                       | 15.37<br>(8.63 to<br>25.60)                        | 28.39<br>(15.12 to<br>50.39)                       | 0.46<br>(0.27 to<br>0.66)                      | 0.58<br>(0.32 to<br>0.99)                      | 0.34<br>(0.19 to<br>0.55)                      | 0.61<br>(0.33 to<br>1.04)                      |
| Self-harm by other specified means                                                  | 210.40<br>(162.36 to<br>256.51)                | 301.28<br>(202.54 to<br>431.88)                    | 207.04<br>(142.60 to<br>281.33)                    | 317.47<br>(211.03 to<br>465.64)                    | 4.12<br>(3.16 to<br>4.99)                      | 6.57<br>(4.61 to<br>9.12)                      | 4.68<br>(3.40 to<br>6.21)                      | 6.80<br>(4.68 to<br>9.65)                      |
| Interpersonal violence                                                              | 215.10<br>(164.27 to<br>299.95)                | 213.78<br>(152.28 to<br>314.35)                    | 142.46<br>(101.63 to<br>206.12)                    | 219.02<br>(156.87 to<br>325.63)                    | 4.14<br>(3.18 to<br>5.84)                      | 4.58<br>(3.33 to<br>6.64)                      | 3.13<br>(2.27 to<br>4.41)                      | 4.64<br>(3.36 to<br>6.76)                      |
| Physical violence by firearm                                                        | 34.16<br>(20.38 to<br>71.76)                   | 31.95<br>(17.89 to<br>69.18)                       | 17.53<br>(9.73 to<br>37.73)                        | 32.15<br>(17.97 to<br>69.84)                       | 0.66<br>(0.39 to<br>1.37)                      | 0.65<br>(0.38 to<br>1.36)                      | 0.36<br>(0.20 to<br>0.76)                      | 0.64<br>(0.38 to<br>1.37)                      |
| Physical violence by sharp object                                                   | 45.62<br>(32.49 to<br>67.51)                   | 49.22<br>(34.90 to<br>73.78)                       | 30.74<br>(21.33 to<br>46.68)                       | 49.15<br>(34.61 to<br>74.33)                       | 0.89<br>(0.63 to<br>1.31)                      | 1.00<br>(0.71 to<br>1.48)                      | 0.63<br>(0.44 to<br>0.94)                      | 0.99<br>(0.71 to<br>1.47)                      |
| Physical violence by other means                                                    | 133.32<br>(97.66 to<br>178.37)                 | 132.62<br>(88.94 to<br>198.07)                     | 94.20<br>(64.67 to<br>139.17)                      | 137.72<br>(91.02 to<br>208.73)                     | 2.60<br>(1.89 to<br>3.49)                      | 2.94<br>(2.00 to<br>4.26)                      | 2.14<br>(1.52 to<br>3.07)                      | 3.00<br>(2.03 to<br>4.41)                      |
| <b>Forces of nature, conflict and terrorism, and executions and police conflict</b> | <b>0.44</b><br><b>(0.37 to</b><br><b>0.51)</b> | <b>134.71</b><br><b>(0.00 to</b><br><b>290.06)</b> | <b>128.84</b><br><b>(0.00 to</b><br><b>276.12)</b> | <b>137.29</b><br><b>(0.00 to</b><br><b>296.11)</b> | <b>0.01</b><br><b>(0.01 to</b><br><b>0.01)</b> | <b>2.83</b><br><b>(0.00 to</b><br><b>6.00)</b> | <b>2.84</b><br><b>(0.00 to</b><br><b>5.96)</b> | <b>2.82</b><br><b>(0.00 to</b><br><b>5.98)</b> |
| Exposure to forces of nature                                                        | 0.00<br>(0.00 to<br>0.00)                      | 128.98<br>(0.00 to<br>257.65)                      | 123.56<br>(0.00 to<br>245.25)                      | 131.44<br>(0.00 to<br>263.02)                      | 0.00<br>(0.00 to<br>0.00)                      | 2.73<br>(0.00 to<br>5.40)                      | 2.73<br>(0.00 to<br>5.37)                      | 2.71<br>(0.00 to<br>5.37)                      |
| Conflict and terrorism                                                              | 0.00<br>(0.00 to<br>0.00)                      | 5.73<br>(0.00 to<br>66.00)                         | 5.48<br>(0.00 to<br>62.87)                         | 5.85<br>(0.00 to<br>67.34)                         | 0.00<br>(0.00 to<br>0.00)                      | 0.11<br>(0.00 to<br>1.24)                      | 0.11<br>(0.00 to<br>1.22)                      | 0.11<br>(0.00 to<br>1.25)                      |
| Executions and police conflict                                                      | 0.44<br>(0.37 to<br>0.51)                      | 0.00<br>(0.00 to<br>0.00)                          | 0.00<br>(0.00 to<br>0.00)                          | 0.00<br>(0.00 to<br>0.00)                          | 0.01<br>(0.01 to<br>0.01)                      | 0.00<br>(0.00 to<br>0.00)                      | 0.00<br>(0.00 to<br>0.00)                      | 0.00<br>(0.00 to<br>0.00)                      |

| Federated States of Micronesia                                    |                                          |                                          |                                          |                                          |                                   |                                       |                                   |                                       |
|-------------------------------------------------------------------|------------------------------------------|------------------------------------------|------------------------------------------|------------------------------------------|-----------------------------------|---------------------------------------|-----------------------------------|---------------------------------------|
| Cause                                                             | YLLs (actual counts)                     |                                          |                                          |                                          | Deaths (actual counts)            |                                       |                                   |                                       |
|                                                                   | 2016                                     | 2040 Forecast                            | 2040 Better Scenario                     | 2040 Worse Scenario                      | 2016                              | 2040 Forecast                         | 2040 Better Scenario              | 2040 Worse Scenario                   |
| All causes                                                        | 25,655.19<br>(21,136.79 to<br>31,233.88) | 38,372.22<br>(26,954.38 to<br>54,579.52) | 25,991.80<br>(19,234.55 to<br>35,223.34) | 48,835.08<br>(33,195.11 to<br>74,205.69) | 833.21<br>(693.26 to<br>1,003.22) | 1,269.58<br>(1,033.11 to<br>1,580.24) | 960.07<br>(803.22 to<br>1,170.38) | 1,513.59<br>(1,203.27 to<br>1,955.20) |
| Communicable, maternal, neonatal, and nutritional diseases        | 4,564.32<br>(3,225.53 to<br>6,938.19)    | 7,806.03<br>(3,221.78 to<br>21,591.85)   | 3,406.14<br>(1,902.79 to<br>6,762.14)    | 12,126.75<br>(4,345.12 to<br>33,893.38)  | 96.30<br>(69.45 to<br>147.17)     | 170.57<br>(84.86 to<br>394.28)        | 91.99<br>(57.71 to<br>162.43)     | 247.10<br>(104.65 to<br>627.26)       |
| HIV/AIDS and tuberculosis                                         | 918.04<br>(241.02 to<br>3,259.51)        | 4,714.95<br>(541.83 to<br>18,143.34)     | 1,373.24<br>(213.54 to<br>4,901.18)      | 8,358.12<br>(922.98 to<br>30,384.24)     | 22.08<br>(7.11 to<br>73.28)       | 90.08<br>(13.59 to<br>317.72)         | 30.16<br>(6.21 to<br>102.53)      | 153.91<br>(20.85 to<br>550.17)        |
| Tuberculosis                                                      | 205.80<br>(153.38 to<br>268.31)          | 209.08<br>(132.86 to<br>323.02)          | 102.76<br>(66.18 to<br>154.81)           | 255.77<br>(156.79 to<br>400.75)          | 6.49<br>(4.56 to<br>8.36)         | 6.82<br>(4.56 to<br>9.95)             | 3.57<br>(2.42 to<br>5.07)         | 7.91<br>(5.21 to<br>11.64)            |
| HIV/AIDS                                                          | 712.24<br>(34.12 to<br>3,065.98)         | 4,505.88<br>(330.93 to<br>17,973.20)     | 1,270.48<br>(102.81 to<br>4,823.07)      | 8,102.36<br>(637.46 to<br>30,140.11)     | 15.59<br>(0.69 to<br>67.34)       | 83.26<br>(6.66 to<br>311.58)          | 26.60<br>(2.45 to<br>99.34)       | 146.00<br>(12.06 to<br>541.05)        |
| Diarrhea, lower respiratory, and other common infectious diseases | 1,841.99<br>(1,360.50 to<br>2,464.34)    | 1,871.49<br>(1,201.39 to<br>2,835.88)    | 1,272.74<br>(838.48 to<br>1,869.08)      | 2,343.31<br>(1,465.07 to<br>3,659.22)    | 47.95<br>(35.16 to<br>64.01)      | 58.84<br>(38.36 to<br>83.99)          | 46.46<br>(31.40 to<br>65.16)      | 69.57<br>(44.37 to<br>104.47)         |
| Diarrheal diseases                                                | 106.48<br>(67.21 to<br>180.09)           | 86.86<br>(18.82 to<br>272.75)            | 48.26<br>(11.77 to<br>144.36)            | 118.63<br>(23.03 to<br>370.52)           | 3.93<br>(2.32 to<br>7.45)         | 4.24<br>(0.88 to<br>13.16)            | 2.74<br>(0.63 to<br>8.41)         | 5.35<br>(0.99 to<br>17.35)            |
| Intestinal infectious diseases                                    | 132.11<br>(68.21 to<br>237.40)           | 97.13<br>(46.15 to<br>176.16)            | 72.68<br>(35.66 to<br>131.07)            | 103.80<br>(48.82 to<br>191.08)           | 1.94<br>(1.01 to<br>3.44)         | 1.53<br>(0.75 to<br>2.77)             | 1.18<br>(0.58 to<br>2.13)         | 1.61<br>(0.78 to<br>2.95)             |
| Typhoid fever                                                     | 113.24<br>(57.87 to<br>205.49)           | 79.95<br>(37.34 to<br>149.85)            | 60.08<br>(29.42 to<br>111.42)            | 85.42<br>(39.44 to<br>161.25)            | 1.66<br>(0.85 to<br>3.01)         | 1.25<br>(0.60 to<br>2.34)             | 0.97<br>(0.48 to<br>1.78)         | 1.31<br>(0.63 to<br>2.50)             |
| Paratyphoid fever                                                 | 18.80<br>(8.07 to<br>38.03)              | 17.12<br>(6.83 to<br>35.69)              | 12.57<br>(5.01 to<br>26.19)              | 18.33<br>(7.18 to<br>38.31)              | 0.28<br>(0.12 to<br>0.57)         | 0.28<br>(0.11 to<br>0.58)             | 0.21<br>(0.09 to<br>0.45)         | 0.30<br>(0.12 to<br>0.63)             |
| Other intestinal infectious diseases                              | 0.07<br>(0.03 to<br>0.15)                | 0.05<br>(0.02 to<br>0.12)                | 0.03<br>(0.01 to<br>0.07)                | 0.05<br>(0.02 to<br>0.13)                | 0.00<br>(0.00 to<br>0.00)         | 0.00<br>(0.00 to<br>0.00)             | 0.00<br>(0.00 to<br>0.00)         | 0.00<br>(0.00 to<br>0.00)             |
| Lower respiratory infections                                      | 1,302.21<br>(950.30 to<br>1,756.90)      | 1,339.08<br>(810.10 to<br>2,158.18)      | 962.65<br>(608.43 to<br>1,451.40)        | 1,704.84<br>(1,001.83 to<br>2,845.28)    | 37.50<br>(26.41 to<br>51.40)      | 47.32<br>(30.49 to<br>69.82)          | 38.84<br>(26.08 to<br>54.65)      | 56.06<br>(34.88 to<br>85.09)          |
| Upper respiratory infections                                      | 2.34<br>(1.18 to<br>3.92)                | 2.87<br>(0.90 to<br>6.91)                | 1.66<br>(0.51 to<br>4.01)                | 3.10<br>(0.94 to<br>7.48)                | 0.06<br>(0.03 to<br>0.10)         | 0.08<br>(0.03 to<br>0.18)             | 0.05<br>(0.02 to<br>0.11)         | 0.08<br>(0.03 to<br>0.20)             |
| Otitis media                                                      | 0.05<br>(0.02 to<br>0.11)                | 0.02<br>(0.01 to<br>0.06)                | 0.02<br>(0.01 to<br>0.06)                | 0.02<br>(0.01 to<br>0.05)                | 0.00<br>(0.00 to<br>0.00)         | 0.00<br>(0.00 to<br>0.00)             | 0.00<br>(0.00 to<br>0.00)         | 0.00<br>(0.00 to<br>0.00)             |
| Meningitis                                                        | 149.40<br>(95.13 to<br>244.77)           | 99.73<br>(53.94 to<br>179.41)            | 80.93<br>(45.39 to<br>146.12)            | 107.28<br>(56.61 to<br>197.50)           | 2.48<br>(1.58 to<br>4.04)         | 1.97<br>(1.12 to<br>3.56)             | 1.74<br>(1.01 to<br>3.15)         | 2.03<br>(1.15 to<br>3.68)             |
| Pneumococcal meningitis                                           | 0.42<br>(0.25 to<br>0.70)                | 0.23<br>(0.13 to<br>0.44)                | 0.21<br>(0.11 to<br>0.39)                | 0.25<br>(0.14 to<br>0.47)                | 0.01<br>(0.00 to<br>0.01)         | 0.01<br>(0.00 to<br>0.01)             | 0.01<br>(0.00 to<br>0.01)         | 0.01<br>(0.00 to<br>0.01)             |
| H influenzae type B meningitis                                    | 15.36<br>(9.35 to<br>25.45)              | 15.53<br>(4.90 to<br>40.39)              | 9.14<br>(4.28 to<br>18.91)               | 20.71<br>(5.38 to<br>58.05)              | 0.25<br>(0.16 to<br>0.41)         | 0.25<br>(0.10 to<br>0.56)             | 0.18<br>(0.09 to<br>0.35)         | 0.30<br>(0.11 to<br>0.75)             |
| Meningococcal meningitis                                          | 30.05<br>(18.02 to<br>50.89)             | 18.50<br>(9.94 to<br>34.40)              | 15.67<br>(8.45 to<br>28.88)              | 18.97<br>(10.22 to<br>34.39)             | 0.53<br>(0.32 to<br>0.89)         | 0.41<br>(0.23 to<br>0.75)             | 0.37<br>(0.21 to<br>0.67)         | 0.40<br>(0.22 to<br>0.73)             |
| Other meningitis                                                  | 103.56<br>(65.74 to<br>168.58)           | 65.47<br>(36.42 to<br>118.06)            | 55.90<br>(31.52 to<br>102.64)            | 67.35<br>(37.65 to<br>122.11)            | 1.69<br>(1.07 to<br>2.77)         | 1.31<br>(0.74 to<br>2.38)             | 1.18<br>(0.68 to<br>2.18)         | 1.31<br>(0.75 to<br>2.40)             |
| Encephalitis                                                      | 24.69<br>(17.16 to<br>34.36)             | 27.42<br>(16.37 to<br>44.57)             | 21.56<br>(12.83 to<br>34.84)             | 28.36<br>(16.81 to<br>46.20)             | 0.48<br>(0.33 to<br>0.66)         | 0.62<br>(0.39 to<br>0.96)             | 0.52<br>(0.33 to<br>0.80)         | 0.62<br>(0.39 to<br>0.96)             |

|                |                               |                               |                              |                               |                           |                           |                           |                           |
|----------------|-------------------------------|-------------------------------|------------------------------|-------------------------------|---------------------------|---------------------------|---------------------------|---------------------------|
| Diphtheria     | 0.39<br>(0.24 to<br>0.61)     | 0.12<br>(0.06 to<br>0.21)     | 0.10<br>(0.05 to<br>0.17)    | 0.14<br>(0.07 to<br>0.29)     | 0.01<br>(0.00 to<br>0.01) | 0.00<br>(0.00 to<br>0.00) | 0.00<br>(0.00 to<br>0.00) | 0.00<br>(0.00 to<br>0.00) |
| Whooping cough | 107.58<br>(8.59 to<br>346.37) | 70.77<br>(1.62 to<br>239.27)  | 9.86<br>(0.58 to<br>36.93)   | 78.00<br>(1.45 to<br>268.40)  | 1.28<br>(0.10 to<br>4.12) | 0.85<br>(0.02 to<br>2.85) | 0.13<br>(0.01 to<br>0.48) | 0.93<br>(0.02 to<br>3.20) |
| Tetanus        | 0.88<br>(0.68 to<br>1.15)     | 0.14<br>(0.09 to<br>0.21)     | 0.12<br>(0.07 to<br>0.17)    | 0.15<br>(0.10 to<br>0.23)     | 0.02<br>(0.01 to<br>0.02) | 0.00<br>(0.00 to<br>0.00) | 0.00<br>(0.00 to<br>0.00) | 0.00<br>(0.00 to<br>0.00) |
| Measles        | 7.46<br>(2.21 to<br>18.11)    | 142.02<br>(6.86 to<br>509.71) | 71.88<br>(3.89 to<br>211.80) | 193.14<br>(8.28 to<br>692.11) | 0.09<br>(0.03 to<br>0.22) | 2.08<br>(0.11 to<br>6.83) | 1.17<br>(0.07 to<br>3.50) | 2.74<br>(0.13 to<br>8.99) |

| Federated States of Micronesia                        |                                                     |                                                     |                                                    |                                                     |                                                |                                                |                                                |                                                |
|-------------------------------------------------------|-----------------------------------------------------|-----------------------------------------------------|----------------------------------------------------|-----------------------------------------------------|------------------------------------------------|------------------------------------------------|------------------------------------------------|------------------------------------------------|
| Cause                                                 | YLLs (actual counts)                                |                                                     |                                                    |                                                     | Deaths (actual counts)                         |                                                |                                                |                                                |
|                                                       | 2016                                                | 2040 Forecast                                       | 2040 Better Scenario                               | 2040 Worse Scenario                                 | 2016                                           | 2040 Forecast                                  | 2040 Better Scenario                           | 2040 Worse Scenario                            |
| Varicella and herpes zoster                           | 8.39<br>(4.73 to<br>14.03)                          | 5.32<br>(2.29 to<br>10.08)                          | 3.03<br>(1.44 to<br>5.38)                          | 5.85<br>(2.39 to<br>11.63)                          | 0.17<br>(0.11 to<br>0.25)                      | 0.14<br>(0.08 to<br>0.24)                      | 0.10<br>(0.05 to<br>0.16)                      | 0.14<br>(0.07 to<br>0.23)                      |
| <b>Neglected tropical diseases and malaria</b>        | <b>11.64</b><br><b>(7.60 to</b><br><b>17.51)</b>    | <b>35.75</b><br><b>(25.21 to</b><br><b>50.06)</b>   | <b>34.35</b><br><b>(23.87 to</b><br><b>48.12)</b>  | <b>35.15</b><br><b>(24.39 to</b><br><b>49.42)</b>   | <b>0.34</b><br><b>(0.24 to</b><br><b>0.47)</b> | <b>1.31</b><br><b>(0.91 to</b><br><b>1.84)</b> | <b>1.39</b><br><b>(0.97 to</b><br><b>1.95)</b> | <b>1.20</b><br><b>(0.82 to</b><br><b>1.68)</b> |
| Malaria                                               | 0.00<br>(0.00 to<br>0.00)                           | 0.00<br>(0.00 to<br>0.00)                           | 0.00<br>(0.00 to<br>0.00)                          | 0.00<br>(0.00 to<br>0.00)                           | 0.00<br>(0.00 to<br>0.00)                      | 0.00<br>(0.00 to<br>0.00)                      | 0.00<br>(0.00 to<br>0.00)                      | 0.00<br>(0.00 to<br>0.00)                      |
| Chagas disease                                        | 0.00<br>(0.00 to<br>0.00)                           | 0.00<br>(0.00 to<br>0.00)                           | 0.00<br>(0.00 to<br>0.00)                          | 0.00<br>(0.00 to<br>0.00)                           | 0.00<br>(0.00 to<br>0.00)                      | 0.00<br>(0.00 to<br>0.00)                      | 0.00<br>(0.00 to<br>0.00)                      | 0.00<br>(0.00 to<br>0.00)                      |
| Leishmaniasis                                         | 0.00<br>(0.00 to<br>0.00)                           | 0.00<br>(0.00 to<br>0.00)                           | 0.00<br>(0.00 to<br>0.00)                          | 0.00<br>(0.00 to<br>0.00)                           | 0.00<br>(0.00 to<br>0.00)                      | 0.00<br>(0.00 to<br>0.00)                      | 0.00<br>(0.00 to<br>0.00)                      | 0.00<br>(0.00 to<br>0.00)                      |
| African trypanosomiasis                               | 0.00<br>(0.00 to<br>0.00)                           | 0.00<br>(0.00 to<br>0.00)                           | 0.00<br>(0.00 to<br>0.00)                          | 0.00<br>(0.00 to<br>0.00)                           | 0.00<br>(0.00 to<br>0.00)                      | 0.00<br>(0.00 to<br>0.00)                      | 0.00<br>(0.00 to<br>0.00)                      | 0.00<br>(0.00 to<br>0.00)                      |
| Schistosomiasis                                       | 0.00<br>(0.00 to<br>0.00)                           | 0.00<br>(0.00 to<br>0.00)                           | 0.00<br>(0.00 to<br>0.00)                          | 0.00<br>(0.00 to<br>0.00)                           | 0.00<br>(0.00 to<br>0.00)                      | 0.00<br>(0.00 to<br>0.00)                      | 0.00<br>(0.00 to<br>0.00)                      | 0.00<br>(0.00 to<br>0.00)                      |
| Cysticercosis                                         | 0.00<br>(0.00 to<br>0.00)                           | 0.00<br>(0.00 to<br>0.00)                           | 0.00<br>(0.00 to<br>0.00)                          | 0.00<br>(0.00 to<br>0.00)                           | 0.00<br>(0.00 to<br>0.00)                      | 0.00<br>(0.00 to<br>0.00)                      | 0.00<br>(0.00 to<br>0.00)                      | 0.00<br>(0.00 to<br>0.00)                      |
| Cystic echinococcosis                                 | 0.12<br>(0.09 to<br>0.17)                           | 0.16<br>(0.10 to<br>0.25)                           | 0.08<br>(0.05 to<br>0.13)                          | 0.18<br>(0.11 to<br>0.28)                           | 0.00<br>(0.00 to<br>0.00)                      | 0.00<br>(0.00 to<br>0.01)                      | 0.00<br>(0.00 to<br>0.00)                      | 0.01<br>(0.00 to<br>0.01)                      |
| Dengue                                                | 2.11<br>(1.38 to<br>6.09)                           | 20.16<br>(11.29 to<br>34.10)                        | 20.76<br>(12.08 to<br>34.78)                       | 19.45<br>(10.77 to<br>32.91)                        | 0.09<br>(0.04 to<br>0.17)                      | 0.73<br>(0.42 to<br>1.25)                      | 0.83<br>(0.49 to<br>1.35)                      | 0.66<br>(0.37 to<br>1.14)                      |
| Yellow fever                                          | 0.00<br>(0.00 to<br>0.00)                           | 0.00<br>(0.00 to<br>0.00)                           | 0.00<br>(0.00 to<br>0.00)                          | 0.00<br>(0.00 to<br>0.00)                           | 0.00<br>(0.00 to<br>0.00)                      | 0.00<br>(0.00 to<br>0.00)                      | 0.00<br>(0.00 to<br>0.00)                      | 0.00<br>(0.00 to<br>0.00)                      |
| Rabies                                                | 0.05<br>(0.02 to<br>0.09)                           | 0.05<br>(0.02 to<br>0.10)                           | 0.02<br>(0.01 to<br>0.05)                          | 0.06<br>(0.03 to<br>0.12)                           | 0.00<br>(0.00 to<br>0.00)                      | 0.00<br>(0.00 to<br>0.00)                      | 0.00<br>(0.00 to<br>0.00)                      | 0.00<br>(0.00 to<br>0.00)                      |
| Intestinal nematode infections                        | 3.38<br>(1.03 to<br>7.37)                           | 5.68<br>(2.26 to<br>11.04)                          | 5.34<br>(2.26 to<br>9.91)                          | 5.90<br>(2.22 to<br>11.74)                          | 0.06<br>(0.02 to<br>0.11)                      | 0.11<br>(0.05 to<br>0.19)                      | 0.12<br>(0.06 to<br>0.19)                      | 0.11<br>(0.05 to<br>0.19)                      |
| Other neglected tropical diseases                     | 4.98<br>(3.16 to<br>7.65)                           | 9.70<br>(5.58 to<br>14.57)                          | 8.14<br>(4.29 to<br>12.52)                         | 9.57<br>(5.48 to<br>14.42)                          | 0.19<br>(0.12 to<br>0.29)                      | 0.46<br>(0.23 to<br>0.76)                      | 0.44<br>(0.21 to<br>0.74)                      | 0.42<br>(0.21 to<br>0.71)                      |
| <b>Maternal disorders</b>                             | <b>140.98</b><br><b>(78.77 to</b><br><b>219.39)</b> | <b>158.86</b><br><b>(63.16 to</b><br><b>354.17)</b> | <b>83.62</b><br><b>(32.43 to</b><br><b>192.38)</b> | <b>178.79</b><br><b>(70.79 to</b><br><b>398.12)</b> | <b>2.53</b><br><b>(1.43 to</b><br><b>3.91)</b> | <b>3.05</b><br><b>(1.17 to</b><br><b>6.63)</b> | <b>1.61</b><br><b>(0.60 to</b><br><b>3.70)</b> | <b>3.43</b><br><b>(1.32 to</b><br><b>7.66)</b> |
| Maternal hemorrhage                                   | 43.91<br>(21.99 to<br>71.04)                        | 46.85<br>(16.52 to<br>107.79)                       | 24.49<br>(8.24 to<br>56.38)                        | 52.34<br>(18.14 to<br>120.15)                       | 0.79<br>(0.38 to<br>1.27)                      | 0.89<br>(0.31 to<br>2.08)                      | 0.47<br>(0.15 to<br>1.10)                      | 1.00<br>(0.34 to<br>2.27)                      |
| Maternal sepsis and other maternal infections         | 14.76<br>(5.52 to<br>29.53)                         | 16.13<br>(4.37 to<br>41.59)                         | 8.43<br>(2.21 to<br>22.27)                         | 18.09<br>(4.87 to<br>47.41)                         | 0.27<br>(0.11 to<br>0.54)                      | 0.32<br>(0.08 to<br>0.83)                      | 0.17<br>(0.04 to<br>0.44)                      | 0.36<br>(0.09 to<br>0.93)                      |
| Maternal hypertensive disorders                       | 19.04<br>(9.39 to<br>32.72)                         | 22.04<br>(7.35 to<br>53.67)                         | 11.42<br>(3.79 to<br>28.77)                        | 24.66<br>(8.38 to<br>60.56)                         | 0.34<br>(0.17 to<br>0.59)                      | 0.42<br>(0.14 to<br>1.03)                      | 0.22<br>(0.07 to<br>0.55)                      | 0.47<br>(0.16 to<br>1.14)                      |
| Maternal obstructed labor and uterine rupture         | 9.97<br>(3.79 to<br>19.03)                          | 11.95<br>(3.38 to<br>31.50)                         | 5.94<br>(1.63 to<br>16.15)                         | 13.48<br>(3.87 to<br>35.10)                         | 0.18<br>(0.07 to<br>0.34)                      | 0.23<br>(0.07 to<br>0.61)                      | 0.12<br>(0.03 to<br>0.31)                      | 0.26<br>(0.07 to<br>0.68)                      |
| Maternal abortion, miscarriage, and ectopic pregnancy | 6.42<br>(2.25 to<br>13.24)                          | 8.49<br>(2.46 to<br>21.62)                          | 4.49<br>(1.30 to<br>11.49)                         | 9.66<br>(2.84 to<br>24.63)                          | 0.12<br>(0.04 to<br>0.24)                      | 0.17<br>(0.05 to<br>0.42)                      | 0.09<br>(0.03 to<br>0.23)                      | 0.19<br>(0.06 to<br>0.48)                      |

|                                        |                              |                             |                             |                              |                           |                           |                           |                           |
|----------------------------------------|------------------------------|-----------------------------|-----------------------------|------------------------------|---------------------------|---------------------------|---------------------------|---------------------------|
| Indirect maternal deaths               | 16.03<br>(7.02 to<br>28.42)  | 18.70<br>(6.28 to<br>44.12) | 10.01<br>(3.38 to<br>24.00) | 21.28<br>(7.38 to<br>51.88)  | 0.28<br>(0.12 to<br>0.51) | 0.35<br>(0.12 to<br>0.84) | 0.19<br>(0.06 to<br>0.47) | 0.40<br>(0.14 to<br>1.01) |
| Late maternal deaths                   | 6.47<br>(2.57 to<br>12.75)   | 5.98<br>(1.73 to<br>16.28)  | 3.14<br>(0.92 to<br>8.51)   | 6.77<br>(2.00 to<br>18.25)   | 0.12<br>(0.05 to<br>0.23) | 0.11<br>(0.03 to<br>0.31) | 0.06<br>(0.02 to<br>0.17) | 0.13<br>(0.04 to<br>0.35) |
| Maternal deaths aggravated by HIV/AIDS | 0.20<br>(0.02 to<br>0.73)    | 1.21<br>(0.02 to<br>8.08)   | 0.52<br>(0.00 to<br>3.83)   | 1.55<br>(0.03 to<br>9.34)    | 0.00<br>(0.00 to<br>0.01) | 0.02<br>(0.00 to<br>0.15) | 0.01<br>(0.00 to<br>0.07) | 0.03<br>(0.00 to<br>0.17) |
| Other maternal disorders               | 24.20<br>(11.37 to<br>41.86) | 27.49<br>(9.48 to<br>64.77) | 15.19<br>(5.20 to<br>36.99) | 30.96<br>(10.65 to<br>72.81) | 0.43<br>(0.21 to<br>0.75) | 0.53<br>(0.18 to<br>1.26) | 0.29<br>(0.10 to<br>0.72) | 0.59<br>(0.21 to<br>1.43) |



| Federated States of Micronesia                                          |                                                 |                                               |                                             |                                               |                                         |                                        |                                       |                                         |
|-------------------------------------------------------------------------|-------------------------------------------------|-----------------------------------------------|---------------------------------------------|-----------------------------------------------|-----------------------------------------|----------------------------------------|---------------------------------------|-----------------------------------------|
| Cause                                                                   | YLLs (actual counts)                            |                                               |                                             |                                               | Deaths (actual counts)                  |                                        |                                       |                                         |
|                                                                         | 2016                                            | 2040 Forecast                                 | 2040 Better Scenario                        | 2040 Worse Scenario                           | 2016                                    | 2040 Forecast                          | 2040 Better Scenario                  | 2040 Worse Scenario                     |
| <b>Neonatal disorders</b>                                               | <b>1,202.17</b><br>(756.07 to <b>1,833.89</b> ) | <b>727.14</b><br>(392.22 to <b>1,272.10</b> ) | <b>420.26</b><br>(225.18 to <b>709.65</b> ) | <b>896.92</b><br>(485.30 to <b>1,561.49</b> ) | <b>13.89</b><br>(8.74 to <b>21.19</b> ) | <b>8.41</b><br>(4.54 to <b>14.70</b> ) | <b>4.86</b><br>(2.60 to <b>8.20</b> ) | <b>10.37</b><br>(5.61 to <b>18.06</b> ) |
| Neonatal preterm birth                                                  | 527.65<br>(302.11 to 832.88)                    | 304.26<br>(150.89 to 527.27)                  | 160.10<br>(81.62 to 282.43)                 | 372.05<br>(187.67 to 649.99)                  | 6.10<br>(3.49 to 9.62)                  | 3.52<br>(1.74 to 6.09)                 | 1.85<br>(0.94 to 3.26)                | 4.30<br>(2.17 to 7.51)                  |
| Neonatal encephalopathy due to birth asphyxia and trauma                | 291.87<br>(160.42 to 489.27)                    | 155.12<br>(70.25 to 297.99)                   | 100.82<br>(46.67 to 185.67)                 | 190.88<br>(84.87 to 368.66)                   | 3.37<br>(1.85 to 5.66)                  | 1.79<br>(0.81 to 3.44)                 | 1.17<br>(0.54 to 2.15)                | 2.21<br>(0.98 to 4.26)                  |
| Neonatal sepsis and other neonatal infections                           | 135.01<br>(68.35 to 239.89)                     | 105.70<br>(47.46 to 194.07)                   | 66.80<br>(31.71 to 122.63)                  | 130.57<br>(59.07 to 239.75)                   | 1.56<br>(0.79 to 2.77)                  | 1.22<br>(0.55 to 2.25)                 | 0.77<br>(0.37 to 1.42)                | 1.51<br>(0.68 to 2.77)                  |
| Hemolytic disease and other neonatal jaundice                           | 11.64<br>(5.57 to 22.83)                        | 4.83<br>(1.78 to 11.31)                       | 2.80<br>(1.06 to 6.30)                      | 6.08<br>(2.20 to 14.07)                       | 0.13<br>(0.06 to 0.26)                  | 0.13<br>(0.02 to 0.13)                 | 0.03<br>(0.01 to 0.07)                | 0.07<br>(0.03 to 0.16)                  |
| Other neonatal disorders                                                | 235.99<br>(125.59 to 400.83)                    | 157.23<br>(71.22 to 307.26)                   | 89.73<br>(41.73 to 171.88)                  | 197.35<br>(90.17 to 389.15)                   | 2.73<br>(1.45 to 4.64)                  | 1.82<br>(0.82 to 3.55)                 | 1.04<br>(0.48 to 1.99)                | 2.28<br>(1.04 to 4.50)                  |
| <b>Nutritional deficiencies</b>                                         | <b>121.61</b><br>(82.95 to <b>181.33</b> )      | <b>78.29</b><br>(57.94 to <b>105.73</b> )     | <b>59.37</b><br>(45.88 to <b>76.38</b> )    | <b>80.58</b><br>(58.31 to <b>112.81</b> )     | <b>4.03</b><br>(3.21 to <b>5.00</b> )   | <b>3.76</b><br>(2.49 to <b>5.02</b> )  | <b>3.44</b><br>(2.31 to <b>4.59</b> ) | <b>3.43</b><br>(2.27 to <b>4.69</b> )   |
| Protein-energy malnutrition                                             | 116.57<br>(78.56 to 176.44)                     | 71.32<br>(52.61 to 97.23)                     | 54.11<br>(41.17 to 70.51)                   | 73.43<br>(52.38 to 104.00)                    | 3.87<br>(3.07 to 4.80)                  | 3.49<br>(2.25 to 4.72)                 | 3.21<br>(2.13 to 4.31)                | 3.17<br>(2.05 to 4.44)                  |
| Iodine deficiency                                                       | 1.12<br>(0.07 to 3.40)                          | 2.85<br>(0.07 to 9.68)                        | 1.98<br>(0.04 to 7.05)                      | 2.97<br>(0.08 to 10.52)                       | 0.03<br>(0.00 to 0.11)                  | 0.12<br>(0.00 to 0.55)                 | 0.10<br>(0.00 to 0.51)                | 0.12<br>(0.00 to 0.49)                  |
| Dietary iron deficiency                                                 | 1.01<br>(0.70 to 1.47)                          | 1.01<br>(0.63 to 1.71)                        | 0.81<br>(0.49 to 1.41)                      | 1.06<br>(0.66 to 1.76)                        | 0.02<br>(0.01 to 0.04)                  | 0.02<br>(0.01 to 0.05)                 | 0.02<br>(0.01 to 0.04)                | 0.02<br>(0.01 to 0.05)                  |
| Other nutritional deficiencies                                          | 2.92<br>(1.91 to 4.24)                          | 3.11<br>(1.89 to 4.85)                        | 2.47<br>(1.50 to 3.86)                      | 3.12<br>(1.91 to 4.94)                        | 0.11<br>(0.07 to 0.16)                  | 0.12<br>(0.08 to 0.20)                 | 0.11<br>(0.07 to 0.17)                | 0.12<br>(0.07 to 0.18)                  |
| <b>Other communicable, maternal, neonatal, and nutritional diseases</b> | <b>327.89</b><br>(142.03 to <b>619.02</b> )     | <b>219.55</b><br>(131.36 to <b>345.33</b> )   | <b>162.55</b><br>(98.69 to <b>251.55</b> )  | <b>233.87</b><br>(135.84 to <b>373.63</b> )   | <b>5.47</b><br>(3.17 to <b>9.03</b> )   | <b>5.12</b><br>(3.48 to <b>7.38</b> )  | <b>4.07</b><br>(2.79 to <b>5.80</b> ) | <b>5.20</b><br>(3.46 to <b>7.47</b> )   |
| Sexually transmitted infections excluding HIV                           | 193.48<br>(18.78 to 485.53)                     | 57.86<br>(12.77 to 149.88)                    | 41.08<br>(10.08 to 98.82)                   | 65.59<br>(13.06 to 174.88)                    | 2.39<br>(0.34 to 5.83)                  | 0.83<br>(0.25 to 1.95)                 | 0.61<br>(0.21 to 1.35)                | 0.92<br>(0.26 to 2.24)                  |
| Syphilis                                                                | 184.22<br>(9.76 to 477.44)                      | 46.22<br>(3.53 to 137.36)                     | 31.52<br>(2.65 to 88.93)                    | 53.69<br>(3.84 to 161.77)                     | 2.19<br>(0.15 to 5.61)                  | 0.57<br>(0.06 to 1.64)                 | 0.39<br>(0.05 to 1.06)                | 0.66<br>(0.07 to 1.94)                  |
| Chlamydial infection                                                    | 1.82<br>(0.98 to 2.87)                          | 2.24<br>(1.00 to 4.46)                        | 1.84<br>(0.82 to 3.69)                      | 2.30<br>(1.04 to 4.58)                        | 0.04<br>(0.02 to 0.06)                  | 0.05<br>(0.02 to 0.10)                 | 0.04<br>(0.02 to 0.08)                | 0.05<br>(0.02 to 0.10)                  |
| Gonococcal infection                                                    | 4.76<br>(2.61 to 7.50)                          | 6.01<br>(2.55 to 12.05)                       | 4.95<br>(2.12 to 9.99)                      | 6.15<br>(2.63 to 12.05)                       | 0.11<br>(0.06 to 0.17)                  | 0.14<br>(0.06 to 0.26)                 | 0.11<br>(0.05 to 0.22)                | 0.14<br>(0.06 to 0.27)                  |
| Other sexually transmitted infections                                   | 2.68<br>(1.46 to 4.22)                          | 3.38<br>(1.43 to 6.73)                        | 2.77<br>(1.19 to 5.51)                      | 3.46<br>(1.50 to 6.85)                        | 0.06<br>(0.03 to 0.09)                  | 0.07<br>(0.03 to 0.15)                 | 0.06<br>(0.03 to 0.12)                | 0.08<br>(0.03 to 0.15)                  |
| Acute hepatitis                                                         | 32.12<br>(23.08 to 43.20)                       | 41.16<br>(25.30 to 65.66)                     | 32.27<br>(19.88 to 51.61)                   | 41.95<br>(25.61 to 67.01)                     | 0.90<br>(0.66 to 1.19)                  | 1.17<br>(0.75 to 1.79)                 | 0.94<br>(0.61 to 1.44)                | 1.17<br>(0.76 to 1.80)                  |
| Acute hepatitis A                                                       | 1.00<br>(0.57 to 1.68)                          | 0.77<br>(0.41 to 1.34)                        | 0.60<br>(0.32 to 1.04)                      | 0.81<br>(0.43 to 1.40)                        | 0.02<br>(0.01 to 0.03)                  | 0.02<br>(0.01 to 0.03)                 | 0.02<br>(0.01 to 0.03)                | 0.02<br>(0.01 to 0.03)                  |
| Acute hepatitis B                                                       | 27.22<br>(19.09 to 37.49)                       | 36.74<br>(21.95 to 59.45)                     | 28.61<br>(17.10 to 46.44)                   | 37.45<br>(22.50 to 61.36)                     | 0.78<br>(0.57 to 1.05)                  | 1.04<br>(0.67 to 1.61)                 | 0.83<br>(0.53 to 1.29)                | 1.04<br>(0.67 to 1.63)                  |



| Federated States of Micronesia       |                                       |                                       |                                       |                                       |                               |                                 |                                 |                                 |
|--------------------------------------|---------------------------------------|---------------------------------------|---------------------------------------|---------------------------------------|-------------------------------|---------------------------------|---------------------------------|---------------------------------|
| Cause                                | YLLs (actual counts)                  |                                       |                                       |                                       | Deaths (actual counts)        |                                 |                                 |                                 |
|                                      | 2016                                  | 2040 Forecast                         | 2040 Better Scenario                  | 2040 Worse Scenario                   | 2016                          | 2040 Forecast                   | 2040 Better Scenario            | 2040 Worse Scenario             |
| Neoplasms                            | 2,449.12<br>(1,802.82 to<br>3,228.60) | 4,111.53<br>(2,631.01 to<br>6,410.34) | 3,763.76<br>(2,502.64 to<br>5,633.87) | 4,563.65<br>(2,844.05 to<br>7,321.26) | 86.94<br>(65.63 to<br>112.24) | 144.54<br>(102.21 to<br>200.91) | 140.18<br>(104.06 to<br>188.81) | 154.32<br>(106.10 to<br>220.46) |
| Lip and oral cavity cancer           | 40.82<br>(29.25 to<br>56.62)          | 71.84<br>(36.04 to<br>143.74)         | 51.34<br>(27.81 to<br>95.49)          | 97.68<br>(44.97 to<br>212.64)         | 1.54<br>(1.16 to<br>2.07)     | 2.50<br>(1.44 to<br>4.47)       | 1.91<br>(1.20 to<br>3.12)       | 3.20<br>(1.71 to<br>6.30)       |
| Nasopharynx cancer                   | 30.96<br>(18.79 to<br>47.82)          | 65.80<br>(24.39 to<br>144.94)         | 43.94<br>(17.67 to<br>91.96)          | 94.21<br>(32.01 to<br>219.00)         | 1.03<br>(0.64 to<br>1.56)     | 2.00<br>(0.81 to<br>4.21)       | 1.38<br>(0.61 to<br>2.74)       | 2.78<br>(1.04 to<br>6.04)       |
| Other pharynx cancer                 | 31.05<br>(19.74 to<br>46.21)          | 44.99<br>(25.82 to<br>78.49)          | 40.11<br>(23.34 to<br>68.99)          | 48.31<br>(25.54 to<br>86.16)          | 1.13<br>(0.76 to<br>1.64)     | 1.58<br>(1.02 to<br>2.52)       | 1.48<br>(0.97 to<br>2.31)       | 1.63<br>(1.00 to<br>2.65)       |
| Esophageal cancer                    | 33.08<br>(24.94 to<br>43.23)          | 52.44<br>(25.92 to<br>99.48)          | 36.13<br>(19.74 to<br>64.52)          | 68.42<br>(31.27 to<br>137.43)         | 1.31<br>(1.02 to<br>1.68)     | 1.92<br>(1.06 to<br>3.42)       | 1.40<br>(0.84 to<br>2.31)       | 2.39<br>(1.20 to<br>4.59)       |
| Stomach cancer                       | 183.22<br>(138.98 to<br>236.72)       | 214.74<br>(145.20 to<br>314.13)       | 190.05<br>(131.00 to<br>274.13)       | 223.51<br>(148.88 to<br>335.11)       | 7.17<br>(5.65 to<br>9.05)     | 8.06<br>(6.11 to<br>10.69)      | 7.61<br>(5.89 to<br>9.93)       | 8.04<br>(5.92 to<br>10.95)      |
| Colon and rectum cancer              | 180.94<br>(125.12 to<br>251.13)       | 327.56<br>(188.58 to<br>563.17)       | 338.24<br>(200.09 to<br>560.50)       | 330.61<br>(185.88 to<br>563.93)       | 7.18<br>(5.24 to<br>9.71)     | 12.92<br>(7.74 to<br>20.62)     | 14.20<br>(8.86 to<br>21.95)     | 12.42<br>(7.38 to<br>20.03)     |
| Liver cancer                         | 159.56<br>(115.17 to<br>216.84)       | 329.27<br>(185.44 to<br>558.07)       | 282.10<br>(167.94 to<br>451.32)       | 401.79<br>(209.90 to<br>710.14)       | 5.82<br>(4.32 to<br>7.79)     | 11.32<br>(6.89 to<br>17.51)     | 10.29<br>(6.65 to<br>14.97)     | 13.20<br>(7.47 to<br>21.63)     |
| Liver cancer due to hepatitis B      | 89.58<br>(63.41 to<br>125.93)         | 186.15<br>(101.16 to<br>324.06)       | 160.14<br>(93.38 to<br>267.92)        | 226.77<br>(115.82 to<br>412.96)       | 3.09<br>(2.25 to<br>4.23)     | 6.04<br>(3.56 to<br>9.55)       | 5.47<br>(3.46 to<br>8.36)       | 7.07<br>(3.87 to<br>11.78)      |
| Liver cancer due to hepatitis C      | 23.47<br>(16.99 to<br>32.55)          | 44.90<br>(27.02 to<br>70.28)          | 40.50<br>(25.10 to<br>62.70)          | 52.45<br>(29.32 to<br>86.93)          | 1.04<br>(0.77 to<br>1.41)     | 1.91<br>(1.21 to<br>2.87)       | 1.86<br>(1.24 to<br>2.69)       | 2.10<br>(1.27 to<br>3.28)       |
| Liver cancer due to alcohol use      | 10.63<br>(7.27 to<br>15.30)           | 23.15<br>(12.66 to<br>39.16)          | 19.74<br>(11.60 to<br>32.25)          | 29.78<br>(15.06 to<br>53.72)          | 0.42<br>(0.30 to<br>0.60)     | 0.83<br>(0.49 to<br>1.31)       | 0.75<br>(0.47 to<br>1.14)       | 1.02<br>(0.55 to<br>1.68)       |
| Liver cancer due to other causes     | 35.88<br>(25.52 to<br>49.86)          | 75.07<br>(38.10 to<br>135.11)         | 61.73<br>(33.39 to<br>105.76)         | 92.80<br>(43.01 to<br>179.35)         | 1.27<br>(0.93 to<br>1.73)     | 2.54<br>(1.35 to<br>4.45)       | 2.21<br>(1.25 to<br>3.62)       | 3.01<br>(1.48 to<br>5.46)       |
| Gallbladder and biliary tract cancer | 18.93<br>(12.37 to<br>28.34)          | 21.52<br>(14.04 to<br>33.46)          | 23.68<br>(15.36 to<br>36.65)          | 20.09<br>(13.18 to<br>31.32)          | 0.80<br>(0.54 to<br>1.17)     | 0.88<br>(0.62 to<br>1.25)       | 1.02<br>(0.72 to<br>1.46)       | 0.79<br>(0.55 to<br>1.13)       |
| Pancreatic cancer                    | 68.45<br>(49.55 to<br>94.21)          | 133.47<br>(80.69 to<br>217.63)        | 133.99<br>(84.57 to<br>211.85)        | 136.54<br>(81.04 to<br>224.84)        | 2.91<br>(2.18 to<br>3.89)     | 5.39<br>(3.41 to<br>8.18)       | 5.72<br>(3.79 to<br>8.44)       | 5.30<br>(3.25 to<br>8.22)       |
| Larynx cancer                        | 29.61<br>(22.28 to<br>38.36)          | 41.59<br>(18.56 to<br>80.54)          | 26.63<br>(12.53 to<br>51.20)          | 35.58<br>(24.62 to<br>109.76)         | 1.14<br>(0.88 to<br>1.45)     | 1.53<br>(0.74 to<br>2.87)       | 1.01<br>(0.51 to<br>1.89)       | 1.98<br>(0.94 to<br>3.73)       |
| Tracheal, bronchus, and lung cancer  | 346.23<br>(237.93 to<br>487.58)       | 615.10<br>(250.69 to<br>1,244.36)     | 422.69<br>(188.70 to<br>821.08)       | 864.75<br>(350.57 to<br>1,735.93)     | 13.87<br>(9.97 to<br>19.19)   | 22.84<br>(10.76 to<br>42.49)    | 16.17<br>(8.25 to<br>29.14)     | 31.25<br>(14.13 to<br>58.33)    |
| Malignant skin melanoma              | 13.87<br>(9.15 to<br>21.69)           | 23.49<br>(15.74 to<br>37.44)          | 28.61<br>(18.97 to<br>46.25)          | 21.55<br>(14.57 to<br>33.72)          | 0.53<br>(0.36 to<br>0.80)     | 0.87<br>(0.62 to<br>1.30)       | 1.12<br>(0.79 to<br>1.68)       | 0.76<br>(0.54 to<br>1.12)       |
| Non-melanoma skin cancer             | 21.12<br>(13.65 to<br>30.29)          | 40.59<br>(26.15 to<br>60.53)          | 39.59<br>(25.56 to<br>58.89)          | 38.40<br>(24.61 to<br>56.88)          | 0.95<br>(0.68 to<br>1.28)     | 1.77<br>(1.19 to<br>2.34)       | 1.88<br>(1.30 to<br>2.46)       | 1.58<br>(1.05 to<br>2.11)       |
| Breast cancer                        | 312.22<br>(150.89 to<br>510.36)       | 592.55<br>(242.16 to<br>1,144.02)     | 581.72<br>(248.39 to<br>1,116.37)     | 614.67<br>(241.43 to<br>1,219.77)     | 10.53<br>(5.24 to<br>16.89)   | 19.38<br>(8.77 to<br>35.70)     | 19.93<br>(9.46 to<br>35.35)     | 19.49<br>(8.55 to<br>35.57)     |
| Cervical cancer                      | 147.67<br>(76.30 to<br>224.89)        | 246.37<br>(109.57 to<br>495.71)       | 209.89<br>(97.80 to<br>407.29)        | 261.22<br>(112.76 to<br>567.24)       | 4.76<br>(2.57 to<br>7.01)     | 7.34<br>(3.76 to<br>13.06)      | 6.46<br>(3.41 to<br>11.18)      | 7.62<br>(3.69 to<br>14.62)      |

|                   |                               |                                |                                 |                                |                           |                            |                             |                            |
|-------------------|-------------------------------|--------------------------------|---------------------------------|--------------------------------|---------------------------|----------------------------|-----------------------------|----------------------------|
|                   | 69.99<br>(45.41 to<br>99.08)  | 123.92<br>(73.97 to<br>190.16) | 109.39<br>(66.05 to<br>170.33)  | 122.37<br>(72.42 to<br>185.91) | 2.59<br>(1.70 to<br>3.59) | 4.40<br>(2.83 to<br>6.27)  | 4.03<br>(2.63 to<br>5.84)   | 4.25<br>(2.67 to<br>6.09)  |
| Uterine cancer    |                               |                                |                                 |                                |                           |                            |                             |                            |
|                   | 36.35<br>(22.97 to<br>61.28)  | 69.10<br>(35.82 to<br>134.69)  | 76.35<br>(39.99 to<br>147.46)   | 67.21<br>(34.84 to<br>127.74)  | 1.33<br>(0.86 to<br>2.17) | 2.45<br>(1.35 to<br>4.52)  | 2.80<br>(1.57 to<br>5.02)   | 2.33<br>(1.27 to<br>4.27)  |
| Ovarian cancer    |                               |                                |                                 |                                |                           |                            |                             |                            |
|                   | 79.39<br>(57.72 to<br>107.32) | 133.87<br>(97.60 to<br>180.22) | 160.65<br>(121.22 to<br>213.08) | 117.05<br>(83.06 to<br>162.48) | 4.77<br>(3.59 to<br>6.33) | 8.82<br>(5.77 to<br>11.94) | 11.25<br>(7.71 to<br>14.74) | 7.34<br>(4.67 to<br>10.33) |
| Prostate cancer   |                               |                                |                                 |                                |                           |                            |                             |                            |
|                   | 8.21<br>(5.54 to<br>11.51)    | 9.61<br>(5.99 to<br>13.99)     | 8.97<br>(5.58 to<br>13.25)      | 9.51<br>(6.02 to<br>13.80)     | 0.18<br>(0.12 to<br>0.25) | 0.23<br>(0.15 to<br>0.32)  | 0.22<br>(0.15 to<br>0.31)   | 0.22<br>(0.14 to<br>0.31)  |
| Testicular cancer |                               |                                |                                 |                                |                           |                            |                             |                            |

| Federated States of Micronesia  |                                                  |                                                   |                                                  |                                                    |                                            |                                            |                                            |                                            |
|---------------------------------|--------------------------------------------------|---------------------------------------------------|--------------------------------------------------|----------------------------------------------------|--------------------------------------------|--------------------------------------------|--------------------------------------------|--------------------------------------------|
| Cause                           | YLLs (actual counts)                             |                                                   |                                                  |                                                    | Deaths (actual counts)                     |                                            |                                            |                                            |
|                                 | 2016                                             | 2040 Forecast                                     | 2040 Better Scenario                             | 2040 Worse Scenario                                | 2016                                       | 2040 Forecast                              | 2040 Better Scenario                       | 2040 Worse Scenario                        |
| Kidney cancer                   | 17.68<br>(13.18 to 23.03)                        | 37.63<br>(22.93 to 63.18)                         | 40.75<br>(25.79 to 66.19)                        | 38.27<br>(22.84 to 66.09)                          | 0.61<br>(0.47 to 0.80)                     | 1.28<br>(0.84 to 1.97)                     | 1.47<br>(1.01 to 2.19)                     | 1.25<br>(0.79 to 1.97)                     |
| Bladder cancer                  | 24.23<br>(16.86 to 34.07)                        | 37.20<br>(19.65 to 64.68)                         | 32.85<br>(18.40 to 54.83)                        | 39.87<br>(20.31 to 71.65)                          | 1.10<br>(0.81 to 1.51)                     | 1.63<br>(0.96 to 2.61)                     | 1.54<br>(0.96 to 2.40)                     | 1.66<br>(0.95 to 2.74)                     |
| Brain and nervous system cancer | 62.78<br>(45.79 to 91.15)                        | 108.58<br>(74.22 to 168.00)                       | 114.57<br>(77.07 to 180.40)                      | 105.81<br>(72.55 to 163.11)                        | 1.55<br>(1.13 to 2.27)                     | 2.89<br>(2.06 to 4.40)                     | 3.20<br>(2.29 to 4.92)                     | 2.72<br>(1.97 to 4.14)                     |
| Thyroid cancer                  | 13.69<br>(9.54 to 19.19)                         | 20.53<br>(13.24 to 31.86)                         | 18.23<br>(11.96 to 27.69)                        | 21.86<br>(13.71 to 34.98)                          | 0.55<br>(0.39 to 0.75)                     | 0.81<br>(0.54 to 1.14)                     | 0.76<br>(0.52 to 1.06)                     | 0.83<br>(0.54 to 1.20)                     |
| Mesothelioma                    | 5.57<br>(3.79 to 7.94)                           | 8.52<br>(5.57 to 12.70)                           | 8.56<br>(5.51 to 13.07)                          | 8.17<br>(5.35 to 12.11)                            | 0.19<br>(0.14 to 0.28)                     | 0.28<br>(0.19 to 0.39)                     | 0.29<br>(0.20 to 0.42)                     | 0.26<br>(0.18 to 0.36)                     |
| Hodgkin lymphoma                | 13.31<br>(8.56 to 18.44)                         | 16.02<br>(9.09 to 26.29)                          | 12.71<br>(7.17 to 20.79)                         | 16.34<br>(9.34 to 26.51)                           | 0.32<br>(0.21 to 0.44)                     | 0.41<br>(0.25 to 0.63)                     | 0.34<br>(0.21 to 0.52)                     | 0.41<br>(0.25 to 0.61)                     |
| Non-Hodgkin lymphoma            | 75.77<br>(54.14 to 103.29)                       | 120.74<br>(82.26 to 181.06)                       | 128.95<br>(87.35 to 193.12)                      | 121.19<br>(82.18 to 181.87)                        | 2.16<br>(1.58 to 2.92)                     | 3.73<br>(2.71 to 5.15)                     | 4.25<br>(3.13 to 5.86)                     | 3.58<br>(2.56 to 4.97)                     |
| Multiple myeloma                | 30.26<br>(19.58 to 42.37)                        | 56.37<br>(33.79 to 84.56)                         | 62.60<br>(38.10 to 93.70)                        | 55.96<br>(33.80 to 85.14)                          | 1.17<br>(0.78 to 1.60)                     | 2.10<br>(1.35 to 2.97)                     | 2.45<br>(1.59 to 3.40)                     | 2.01<br>(1.30 to 2.89)                     |
| Leukemia                        | 197.67<br>(145.58 to 263.41)                     | 257.14<br>(165.72 to 397.04)                      | 243.13<br>(159.19 to 372.76)                     | 279.44<br>(177.09 to 444.29)                       | 4.57<br>(3.30 to 6.15)                     | 6.81<br>(4.47 to 10.13)                    | 6.81<br>(4.60 to 9.83)                     | 7.17<br>(4.54 to 11.05)                    |
| Acute lymphoid leukemia         | 37.65<br>(27.52 to 52.24)                        | 40.39<br>(26.76 to 63.32)                         | 38.66<br>(25.84 to 59.14)                        | 43.70<br>(28.89 to 69.59)                          | 0.69<br>(0.50 to 0.96)                     | 0.85<br>(0.56 to 1.33)                     | 0.84<br>(0.56 to 1.28)                     | 0.91<br>(0.59 to 1.45)                     |
| Chronic lymphoid leukemia       | 4.02<br>(2.64 to 5.97)                           | 5.57<br>(3.36 to 8.92)                            | 5.55<br>(3.45 to 8.74)                           | 5.83<br>(3.39 to 9.49)                             | 0.16<br>(0.11 to 0.23)                     | 0.23<br>(0.14 to 0.35)                     | 0.25<br>(0.16 to 0.37)                     | 0.23<br>(0.14 to 0.36)                     |
| Acute myeloid leukemia          | 71.57<br>(50.00 to 94.69)                        | 113.14<br>(72.33 to 168.75)                       | 115.76<br>(74.64 to 170.61)                      | 121.43<br>(76.35 to 186.46)                        | 1.55<br>(1.07 to 2.03)                     | 2.84<br>(1.88 to 4.16)                     | 3.07<br>(2.09 to 4.33)                     | 2.96<br>(1.90 to 4.46)                     |
| Chronic myeloid leukemia        | 22.76<br>(12.08 to 34.91)                        | 24.91<br>(11.22 to 46.36)                         | 23.33<br>(10.86 to 41.48)                        | 27.33<br>(12.06 to 52.56)                          | 0.68<br>(0.38 to 1.03)                     | 0.75<br>(0.38 to 1.33)                     | 0.74<br>(0.38 to 1.25)                     | 0.80<br>(0.39 to 1.45)                     |
| Other leukemia                  | 61.67<br>(40.07 to 89.61)                        | 73.13<br>(39.62 to 130.14)                        | 59.83<br>(32.49 to 103.57)                       | 81.15<br>(42.75 to 148.01)                         | 1.50<br>(0.99 to 2.16)                     | 2.14<br>(1.21 to 3.49)                     | 1.91<br>(1.11 to 3.05)                     | 2.26<br>(1.24 to 3.78)                     |
| Other neoplasms                 | 196.49<br>(146.87 to 260.30)                     | 290.98<br>(205.21 to 425.31)                      | 297.55<br>(207.95 to 411.12)                     | 283.24<br>(200.36 to 411.12)                       | 5.21<br>(3.92 to 6.75)                     | 8.43<br>(6.36 to 11.31)                    | 9.21<br>(6.88 to 12.23)                    | 7.86<br>(5.90 to 10.46)                    |
| <b>Cardiovascular diseases</b>  | <b>7,465.57</b><br><b>(5,813.17 to 9,446.40)</b> | <b>9,573.65</b><br><b>(5,940.19 to 14,742.94)</b> | <b>5,404.89</b><br><b>(3,551.98 to 8,234.98)</b> | <b>13,356.47</b><br><b>(8,176.75 to 19,593.16)</b> | <b>302.76</b><br><b>(244.41 to 373.33)</b> | <b>378.78</b><br><b>(276.28 to 523.33)</b> | <b>241.43</b><br><b>(182.41 to 328.97)</b> | <b>495.19</b><br><b>(355.22 to 669.80)</b> |
| Rheumatic heart disease         | 375.09<br>(282.73 to 495.77)                     | 254.34<br>(169.64 to 383.11)                      | 189.19<br>(126.88 to 287.07)                     | 262.44<br>(176.05 to 401.57)                       | 10.49<br>(8.09 to 13.69)                   | 8.04<br>(5.98 to 10.82)                    | 6.48<br>(4.90 to 8.58)                     | 7.89<br>(5.83 to 10.79)                    |
| Ischemic heart disease          | 3,513.52<br>(2,675.24 to 4,572.63)               | 4,690.37<br>(2,162.24 to 8,777.98)                | 2,337.29<br>(1,121.17 to 4,771.72)               | 7,054.66<br>(3,582.38 to 11,483.56)                | 147.19<br>(117.08 to 185.42)               | 182.05<br>(99.33 to 304.87)                | 102.88<br>(57.30 to 187.40)                | 257.73<br>(146.07 to 399.35)               |
| Stroke                          | 2,426.13<br>(1,878.74 to 3,103.44)               | 2,741.00<br>(1,517.51 to 4,749.05)                | 1,320.97<br>(762.40 to 2,332.78)                 | 4,029.61<br>(2,179.09 to 6,810.57)                 | 99.72<br>(78.67 to 125.04)                 | 111.62<br>(71.80 to 176.88)                | 62.58<br>(40.81 to 100.38)                 | 152.34<br>(92.64 to 238.62)                |
| Ischemic stroke                 | 681.64<br>(522.77 to 869.85)                     | 672.12<br>(371.61 to 1,198.67)                    | 401.26<br>(221.86 to 780.98)                     | 872.04<br>(483.60 to 1,448.74)                     | 34.34<br>(27.44 to 42.50)                  | 34.86<br>(19.62 to 70.09)                  | 23.72<br>(13.19 to 50.17)                  | 42.64<br>(24.02 to 81.95)                  |

|                                |                                       |                                       |                                   |                                       |                              |                               |                              |                                |
|--------------------------------|---------------------------------------|---------------------------------------|-----------------------------------|---------------------------------------|------------------------------|-------------------------------|------------------------------|--------------------------------|
| Intracerebral hemorrhage       | 1,744.48<br>(1,334.78 to<br>2,254.40) | 2,068.88<br>(1,024.68 to<br>4,017.98) | 919.71<br>(473.37 to<br>1,863.38) | 3,157.57<br>(1,510.87 to<br>5,780.60) | 65.38<br>(50.75 to<br>83.66) | 76.76<br>(44.13 to<br>133.13) | 38.86<br>(23.57 to<br>69.25) | 109.69<br>(58.76 to<br>190.03) |
| Hypertensive heart disease     | 390.75<br>(253.50 to<br>534.70)       | 660.45<br>(415.78 to<br>1,003.32)     | 471.72<br>(310.39 to<br>682.95)   | 756.04<br>(450.07 to<br>1,255.27)     | 17.18<br>(11.49 to<br>22.79) | 29.35<br>(19.61 to<br>42.41)  | 22.81<br>(15.90 to<br>31.70) | 31.44<br>(19.74 to<br>51.38)   |
| Cardiomyopathy and myocarditis | 230.58<br>(140.06 to<br>315.61)       | 327.10<br>(186.93 to<br>500.76)       | 325.36<br>(188.55 to<br>497.11)   | 319.45<br>(179.08 to<br>497.31)       | 7.47<br>(4.54 to<br>10.26)   | 11.07<br>(6.54 to<br>15.68)   | 11.77<br>(7.02 to<br>17.06)  | 10.32<br>(5.98 to<br>15.03)    |
| Myocarditis                    | 58.34<br>(37.72 to<br>88.25)          | 76.73<br>(47.46 to<br>118.85)         | 72.84<br>(44.51 to<br>111.36)     | 74.49<br>(45.81 to<br>115.20)         | 1.91<br>(1.27 to<br>2.79)    | 2.64<br>(1.75 to<br>3.68)     | 2.68<br>(1.77 to<br>3.69)    | 2.46<br>(1.60 to<br>3.44)      |

| Federated States of Micronesia                                |                                                  |                                                  |                                                |                                                  |                                         |                                         |                                         |                                          |
|---------------------------------------------------------------|--------------------------------------------------|--------------------------------------------------|------------------------------------------------|--------------------------------------------------|-----------------------------------------|-----------------------------------------|-----------------------------------------|------------------------------------------|
| Cause                                                         | YLLs (actual counts)                             |                                                  |                                                |                                                  | Deaths (actual counts)                  |                                         |                                         |                                          |
|                                                               | 2016                                             | 2040 Forecast                                    | 2040 Better Scenario                           | 2040 Worse Scenario                              | 2016                                    | 2040 Forecast                           | 2040 Better Scenario                    | 2040 Worse Scenario                      |
| Alcoholic cardiomyopathy                                      | 12.95<br>(5.84 to 20.55)                         | 15.48<br>(6.24 to 25.19)                         | 16.77<br>(6.70 to 27.40)                       | 15.66<br>(6.27 to 25.66)                         | 0.46<br>(0.21 to 0.70)                  | 0.54<br>(0.25 to 0.83)                  | 0.61<br>(0.27 to 0.94)                  | 0.52<br>(0.23 to 0.81)                   |
| Other cardiomyopathy                                          | 159.29<br>(91.64 to 220.83)                      | 234.89<br>(121.41 to 380.60)                     | 235.75<br>(125.62 to 378.01)                   | 229.31<br>(117.88 to 378.74)                     | 5.10<br>(2.91 to 7.02)                  | 7.88<br>(4.34 to 11.84)                 | 8.47<br>(4.77 to 12.79)                 | 7.35<br>(3.98 to 11.32)                  |
| Atrial fibrillation and flutter                               | 21.07<br>(15.53 to 27.62)                        | 35.55<br>(24.16 to 48.30)                        | 40.55<br>(27.90 to 54.05)                      | 32.46<br>(22.05 to 44.61)                        | 1.80<br>(1.35 to 2.34)                  | 3.03<br>(1.72 to 4.41)                  | 3.76<br>(2.25 to 5.30)                  | 2.61<br>(1.47 to 3.94)                   |
| Aortic aneurysm                                               | 85.88<br>(55.18 to 123.55)                       | 120.32<br>(74.73 to 178.92)                      | 117.63<br>(76.83 to 172.19)                    | 121.61<br>(73.48 to 183.21)                      | 3.78<br>(2.63 to 5.27)                  | 5.18<br>(3.49 to 7.23)                  | 5.65<br>(3.96 to 7.31)                  | 4.90<br>(3.18 to 6.92)                   |
| Peripheral artery disease                                     | 4.59<br>(2.75 to 7.92)                           | 11.64<br>(6.12 to 22.24)                         | 12.01<br>(6.54 to 20.81)                       | 11.48<br>(5.79 to 22.55)                         | 0.26<br>(0.16 to 0.42)                  | 0.64<br>(0.36 to 1.12)                  | 0.77<br>(0.43 to 1.30)                  | 0.58<br>(0.32 to 1.04)                   |
| Endocarditis                                                  | 104.54<br>(73.02 to 144.06)                      | 173.66<br>(110.64 to 266.64)                     | 163.00<br>(105.06 to 250.64)                   | 170.89<br>(107.84 to 264.31)                     | 3.54<br>(2.54 to 4.74)                  | 6.21<br>(4.27 to 8.84)                  | 6.35<br>(4.40 to 9.00)                  | 5.79<br>(3.97 to 8.30)                   |
| Other cardiovascular and circulatory diseases                 | 313.42<br>(192.96 to 419.30)                     | 559.21<br>(328.24 to 860.60)                     | 427.16<br>(253.56 to 631.67)                   | 597.83<br>(342.14 to 958.48)                     | 11.32<br>(6.90 to 14.84)                | 21.58<br>(13.11 to 30.23)               | 18.39<br>(11.42 to 25.06)               | 21.59<br>(12.91 to 31.30)                |
| <b>Chronic respiratory diseases</b>                           | <b>1,444.82</b><br><b>(1,107.26 to 1,837.41)</b> | <b>1,804.61</b><br><b>(1,105.61 to 2,993.76)</b> | <b>1,217.97</b><br><b>(790.30 to 1,898.37)</b> | <b>2,436.84</b><br><b>(1,405.82 to 4,227.25)</b> | <b>55.50</b><br><b>(44.12 to 69.42)</b> | <b>65.60</b><br><b>(43.72 to 98.05)</b> | <b>46.30</b><br><b>(33.00 to 64.75)</b> | <b>85.55</b><br><b>(53.67 to 134.52)</b> |
| Chronic obstructive pulmonary disease                         | 848.40<br>(647.14 to 1,082.73)                   | 1,108.02<br>(588.95 to 1,958.48)                 | 645.21<br>(369.92 to 1,090.15)                 | 1,641.52<br>(813.53 to 3,103.65)                 | 35.19<br>(27.92 to 43.89)               | 42.94<br>(25.63 to 68.36)               | 26.78<br>(17.27 to 39.69)               | 60.56<br>(33.91 to 101.67)               |
| Pneumoconiosis                                                | 3.73<br>(2.53 to 5.45)                           | 4.20<br>(2.72 to 6.63)                           | 3.89<br>(2.57 to 5.93)                         | 4.16<br>(2.65 to 6.59)                           | 0.21<br>(0.13 to 0.26)                  | 0.18<br>(0.14 to 0.32)                  | 0.22<br>(0.14 to 0.33)                  | 0.19<br>(0.13 to 0.30)                   |
| Silicosis                                                     | 0.48<br>(0.25 to 0.85)                           | 0.43<br>(0.21 to 0.79)                           | 0.38<br>(0.19 to 0.69)                         | 0.41<br>(0.19 to 0.78)                           | 0.03<br>(0.01 to 0.05)                  | 0.03<br>(0.01 to 0.05)                  | 0.03<br>(0.01 to 0.05)                  | 0.02<br>(0.01 to 0.04)                   |
| Asbestosis                                                    | 0.96<br>(0.60 to 1.75)                           | 1.42<br>(0.84 to 2.69)                           | 1.38<br>(0.83 to 2.49)                         | 1.37<br>(0.79 to 2.56)                           | 0.04<br>(0.02 to 0.07)                  | 0.06<br>(0.03 to 0.11)                  | 0.06<br>(0.04 to 0.11)                  | 0.05<br>(0.03 to 0.10)                   |
| Coal workers pneumoconiosis                                   | 0.07<br>(0.03 to 0.14)                           | 0.08<br>(0.03 to 0.19)                           | 0.06<br>(0.02 to 0.13)                         | 0.08<br>(0.03 to 0.19)                           | 0.00<br>(0.00 to 0.01)                  | 0.00<br>(0.00 to 0.01)                  | 0.00<br>(0.00 to 0.01)                  | 0.00<br>(0.00 to 0.01)                   |
| Other pneumoconiosis                                          | 2.21<br>(1.47 to 3.30)                           | 2.26<br>(1.43 to 3.66)                           | 2.07<br>(1.31 to 3.13)                         | 2.30<br>(1.44 to 3.79)                           | 0.11<br>(0.08 to 0.16)                  | 0.12<br>(0.07 to 0.19)                  | 0.13<br>(0.08 to 0.20)                  | 0.12<br>(0.07 to 0.18)                   |
| Asthma                                                        | 370.43<br>(236.14 to 523.77)                     | 331.28<br>(177.50 to 586.06)                     | 231.83<br>(129.98 to 402.76)                   | 414.80<br>(214.52 to 740.41)                     | 13.63<br>(9.26 to 19.16)                | 12.11<br>(6.89 to 20.57)                | 9.26<br>(5.50 to 15.33)                 | 14.29<br>(7.93 to 24.66)                 |
| Interstitial lung disease and pulmonary sarcoidosis           | 68.37<br>(42.86 to 107.58)                       | 113.11<br>(65.70 to 186.58)                      | 131.22<br>(77.07 to 211.43)                    | 107.93<br>(63.01 to 179.82)                      | 1.88<br>(1.19 to 3.02)                  | 3.28<br>(2.04 to 5.18)                  | 4.02<br>(2.57 to 6.26)                  | 3.01<br>(1.86 to 4.83)                   |
| Other chronic respiratory diseases                            | 153.89<br>(92.89 to 232.03)                      | 247.99<br>(127.53 to 431.50)                     | 205.82<br>(110.88 to 345.71)                   | 268.43<br>(134.38 to 490.60)                     | 4.63<br>(2.73 to 6.98)                  | 7.05<br>(3.82 to 12.19)                 | 6.02<br>(3.39 to 9.79)                  | 7.49<br>(3.95 to 13.40)                  |
| <b>Cirrhosis and other chronic liver diseases</b>             | <b>588.50</b><br><b>(415.61 to 830.82)</b>       | <b>1,002.94</b><br><b>(654.86 to 1,471.87)</b>   | <b>918.27</b><br><b>(596.79 to 1,361.70)</b>   | <b>1,000.74</b><br><b>(651.59 to 1,463.66)</b>   | <b>17.01</b><br><b>(12.28 to 23.57)</b> | <b>28.99</b><br><b>(20.66 to 40.00)</b> | <b>27.53</b><br><b>(19.62 to 37.67)</b> | <b>28.20</b><br><b>(19.84 to 38.99)</b>  |
| Cirrhosis and other chronic liver diseases due to hepatitis B | 223.56<br>(152.12 to 325.42)                     | 420.87<br>(270.00 to 623.15)                     | 393.17<br>(251.83 to 583.48)                   | 412.30<br>(263.77 to 609.52)                     | 6.92<br>(4.96 to 9.80)                  | 12.47<br>(8.70 to 17.59)                | 12.03<br>(8.48 to 16.91)                | 11.93<br>(8.32 to 16.86)                 |
| Cirrhosis and other chronic liver diseases due to hepatitis C | 89.69<br>(60.26 to 129.47)                       | 176.37<br>(109.89 to 271.09)                     | 163.59<br>(102.85 to 250.87)                   | 173.33<br>(108.63 to 266.56)                     | 2.70<br>(1.87 to 3.85)                  | 5.07<br>(3.46 to 7.42)                  | 4.83<br>(3.28 to 7.06)                  | 4.89<br>(3.31 to 7.18)                   |

|                                                                |                                                      |                                                        |                                                      |                                                        |                                                   |                                                   |                                                   |                                                   |
|----------------------------------------------------------------|------------------------------------------------------|--------------------------------------------------------|------------------------------------------------------|--------------------------------------------------------|---------------------------------------------------|---------------------------------------------------|---------------------------------------------------|---------------------------------------------------|
|                                                                | 73.52<br>(49.85 to<br>107.12)                        | 134.04<br>(86.28 to<br>202.02)                         | 119.07<br>(76.90 to<br>178.62)                       | 143.33<br>(90.66 to<br>218.57)                         | 2.39<br>(1.68 to<br>3.37)                         | 4.10<br>(2.87 to<br>5.88)                         | 3.77<br>(2.64 to<br>5.34)                         | 4.25<br>(2.95 to<br>6.12)                         |
| Cirrhosis and other chronic liver diseases due to alcohol use  |                                                      |                                                        |                                                      |                                                        |                                                   |                                                   |                                                   |                                                   |
|                                                                | 201.73<br>(146.31 to<br>269.97)                      | 271.66<br>(181.11 to<br>386.25)                        | 242.44<br>(161.25 to<br>345.76)                      | 271.78<br>(182.22 to<br>386.18)                        | 5.00<br>(3.71 to<br>6.53)                         | 7.34<br>(5.42 to<br>9.86)                         | 6.89<br>(5.11 to<br>9.27)                         | 7.13<br>(5.20 to<br>9.56)                         |
| Cirrhosis and other chronic liver diseases due to other causes |                                                      |                                                        |                                                      |                                                        |                                                   |                                                   |                                                   |                                                   |
| <b>Digestive diseases</b>                                      | <b>478.17</b><br><b>(316.82 to</b><br><b>755.46)</b> | <b>612.77</b><br><b>(389.66 to</b><br><b>1,005.84)</b> | <b>502.25</b><br><b>(323.47 to</b><br><b>818.52)</b> | <b>641.49</b><br><b>(406.20 to</b><br><b>1,068.30)</b> | <b>16.28</b><br><b>(11.34 to</b><br><b>25.21)</b> | <b>22.05</b><br><b>(15.41 to</b><br><b>33.96)</b> | <b>19.44</b><br><b>(14.03 to</b><br><b>29.62)</b> | <b>21.97</b><br><b>(15.20 to</b><br><b>34.16)</b> |
| Peptic ulcer disease                                           | 130.39<br>(85.58 to<br>209.84)                       | 120.20<br>(77.42 to<br>198.28)                         | 85.36<br>(55.31 to<br>143.10)                        | 125.63<br>(78.98 to<br>212.02)                         | 4.81<br>(3.31 to<br>7.54)                         | 4.66<br>(3.20 to<br>7.20)                         | 3.57<br>(2.49 to<br>5.54)                         | 4.65<br>(3.15 to<br>7.16)                         |



| Federated States of Micronesia             |                                 |                                 |                                 |                                 |                              |                              |                              |                              |
|--------------------------------------------|---------------------------------|---------------------------------|---------------------------------|---------------------------------|------------------------------|------------------------------|------------------------------|------------------------------|
| Cause                                      | YLLs (actual counts)            |                                 |                                 |                                 | Deaths (actual counts)       |                              |                              |                              |
|                                            | 2016                            | 2040 Forecast                   | 2040 Better Scenario            | 2040 Worse Scenario             | 2016                         | 2040 Forecast                | 2040 Better Scenario         | 2040 Worse Scenario          |
| Gastritis and duodenitis                   | 3.10<br>(1.56 to<br>5.70)       | 5.21<br>(2.44 to<br>9.82)       | 4.62<br>(2.22 to<br>8.63)       | 5.08<br>(2.38 to<br>9.65)       | 0.12<br>(0.06 to<br>0.22)    | 0.21<br>(0.11 to<br>0.36)    | 0.20<br>(0.10 to<br>0.34)    | 0.19<br>(0.10 to<br>0.35)    |
| Appendicitis                               | 60.40<br>(37.42 to<br>98.51)    | 79.36<br>(45.75 to<br>137.51)   | 63.23<br>(36.89 to<br>109.15)   | 80.44<br>(46.07 to<br>138.74)   | 1.66<br>(1.07 to<br>2.68)    | 2.38<br>(1.54 to<br>3.86)    | 2.02<br>(1.34 to<br>3.27)    | 2.31<br>(1.47 to<br>3.79)    |
| Paralytic ileus and intestinal obstruction | 57.25<br>(38.26 to<br>90.81)    | 69.47<br>(47.31 to<br>116.79)   | 65.30<br>(44.66 to<br>109.04)   | 68.01<br>(45.66 to<br>112.43)   | 1.71<br>(1.22 to<br>2.79)    | 2.51<br>(1.79 to<br>4.10)    | 2.61<br>(1.89 to<br>4.28)    | 2.28<br>(1.61 to<br>3.78)    |
| Inguinal, femoral, and abdominal hernia    | 10.73<br>(6.85 to<br>19.17)     | 12.26<br>(7.92 to<br>22.52)     | 11.38<br>(7.39 to<br>20.48)     | 11.61<br>(7.43 to<br>21.00)     | 0.49<br>(0.34 to<br>0.84)    | 0.58<br>(0.39 to<br>1.00)    | 0.59<br>(0.40 to<br>0.98)    | 0.52<br>(0.34 to<br>0.90)    |
| Inflammatory bowel disease                 | 20.76<br>(12.70 to<br>35.60)    | 34.13<br>(19.56 to<br>59.09)    | 34.34<br>(20.16 to<br>59.25)    | 32.83<br>(18.83 to<br>57.76)    | 0.63<br>(0.42 to<br>1.03)    | 1.10<br>(0.74 to<br>1.77)    | 1.18<br>(0.80 to<br>1.86)    | 1.01<br>(0.66 to<br>1.62)    |
| Vascular intestinal disorders              | 18.08<br>(10.97 to<br>26.88)    | 28.59<br>(17.87 to<br>42.83)    | 27.91<br>(17.82 to<br>41.87)    | 27.00<br>(16.55 to<br>40.97)    | 0.81<br>(0.53 to<br>1.18)    | 1.30<br>(0.88 to<br>1.87)    | 1.36<br>(0.94 to<br>1.96)    | 1.17<br>(0.77 to<br>1.69)    |
| Gallbladder and biliary diseases           | 63.74<br>(39.40 to<br>101.04)   | 99.79<br>(46.49 to<br>204.04)   | 70.80<br>(33.95 to<br>139.32)   | 123.43<br>(56.32 to<br>253.80)  | 2.42<br>(1.61 to<br>3.71)    | 3.85<br>(1.93 to<br>7.26)    | 2.96<br>(1.55 to<br>5.49)    | 4.49<br>(2.22 to<br>8.47)    |
| Pancreatitis                               | 35.61<br>(21.77 to<br>60.32)    | 58.69<br>(33.26 to<br>109.46)   | 50.86<br>(29.27 to<br>93.67)    | 63.55<br>(34.69 to<br>124.96)   | 1.05<br>(0.66 to<br>1.78)    | 1.79<br>(1.09 to<br>3.15)    | 1.63<br>(1.02 to<br>2.84)    | 1.86<br>(1.10 to<br>3.39)    |
| Other digestive diseases                   | 78.11<br>(44.31 to<br>126.73)   | 105.06<br>(58.38 to<br>177.21)  | 88.46<br>(50.42 to<br>148.35)   | 103.91<br>(56.86 to<br>174.40)  | 2.57<br>(1.59 to<br>4.09)    | 3.69<br>(2.34 to<br>5.79)    | 3.32<br>(2.19 to<br>5.20)    | 3.49<br>(2.18 to<br>5.51)    |
| Neurological disorders                     | 360.86<br>(290.04 to<br>445.40) | 600.56<br>(433.52 to<br>848.52) | 636.26<br>(464.76 to<br>878.67) | 589.34<br>(417.93 to<br>849.84) | 22.11<br>(17.77 to<br>27.02) | 39.63<br>(25.40 to<br>61.38) | 46.86<br>(30.55 to<br>68.61) | 36.26<br>(22.36 to<br>57.96) |
| Alzheimer's disease and other dementias    | 207.54<br>(161.15 to<br>261.47) | 378.39<br>(224.93 to<br>623.50) | 419.75<br>(270.30 to<br>646.07) | 361.88<br>(206.35 to<br>614.89) | 17.99<br>(14.21 to<br>22.28) | 32.72<br>(18.43 to<br>54.41) | 39.01<br>(23.60 to<br>60.37) | 29.72<br>(16.26 to<br>50.95) |
| Parkinson's disease                        | 16.34<br>(11.97 to<br>21.76)    | 31.76<br>(22.49 to<br>42.86)    | 43.61<br>(31.68 to<br>57.50)    | 26.67<br>(18.74 to<br>36.28)    | 1.20<br>(0.87 to<br>1.61)    | 2.37<br>(1.53 to<br>3.38)    | 3.45<br>(2.35 to<br>4.75)    | 1.92<br>(1.20 to<br>2.79)    |
| Epilepsy                                   | 91.17<br>(63.97 to<br>126.62)   | 113.62<br>(65.37 to<br>183.99)  | 88.61<br>(50.47 to<br>144.82)   | 126.71<br>(70.95 to<br>209.60)  | 1.70<br>(1.18 to<br>2.36)    | 2.35<br>(1.39 to<br>3.76)    | 1.88<br>(1.10 to<br>3.03)    | 2.58<br>(1.47 to<br>4.22)    |
| Multiple sclerosis                         | 3.00<br>(1.47 to<br>5.82)       | 6.05<br>(2.69 to<br>13.15)      | 6.28<br>(2.80 to<br>13.53)      | 5.99<br>(2.63 to<br>13.29)      | 0.09<br>(0.04 to<br>0.16)    | 0.17<br>(0.08 to<br>0.35)    | 0.18<br>(0.09 to<br>0.37)    | 0.16<br>(0.08 to<br>0.34)    |
| Motor neuron disease                       | 7.88<br>(5.83 to<br>10.84)      | 16.39<br>(11.96 to<br>23.36)    | 18.73<br>(13.50 to<br>27.07)    | 15.38<br>(11.24 to<br>21.92)    | 0.27<br>(0.21 to<br>0.37)    | 0.54<br>(0.42 to<br>0.76)    | 0.64<br>(0.49 to<br>0.89)    | 0.50<br>(0.38 to<br>0.69)    |
| Other neurological disorders               | 34.93<br>(27.40 to<br>44.07)    | 54.36<br>(39.56 to<br>73.47)    | 59.29<br>(42.98 to<br>80.81)    | 52.71<br>(38.56 to<br>71.16)    | 0.87<br>(0.68 to<br>1.09)    | 1.47<br>(1.13 to<br>1.87)    | 1.70<br>(1.30 to<br>2.16)    | 1.38<br>(1.06 to<br>1.75)    |
| Mental disorders                           | 68.92<br>(42.71 to<br>109.60)   | 137.01<br>(76.19 to<br>239.15)  | 136.34<br>(76.44 to<br>237.34)  | 136.37<br>(75.83 to<br>237.63)  | 1.56<br>(0.99 to<br>2.49)    | 3.27<br>(1.94 to<br>5.39)    | 3.36<br>(2.02 to<br>5.50)    | 3.18<br>(1.87 to<br>5.29)    |
| Alcohol use disorders                      | 34.24<br>(18.38 to<br>64.58)    | 55.21<br>(24.90 to<br>118.25)   | 54.04<br>(24.07 to<br>117.12)   | 55.89<br>(25.37 to<br>119.70)   | 0.82<br>(0.46 to<br>1.51)    | 1.36<br>(0.65 to<br>2.78)    | 1.36<br>(0.65 to<br>2.78)    | 1.36<br>(0.65 to<br>2.79)    |
| Drug use disorders                         | 34.36<br>(22.31 to<br>52.91)    | 81.07<br>(48.49 to<br>133.25)   | 81.57<br>(48.42 to<br>134.58)   | 79.75<br>(47.89 to<br>130.96)   | 0.73<br>(0.49 to<br>1.11)    | 1.89<br>(1.21 to<br>2.96)    | 1.99<br>(1.27 to<br>3.11)    | 1.81<br>(1.16 to<br>2.85)    |
| Opioid use disorders                       | 20.54<br>(12.45 to<br>33.73)    | 38.70<br>(21.00 to<br>68.72)    | 38.53<br>(20.85 to<br>68.15)    | 38.25<br>(20.89 to<br>67.70)    | 0.40<br>(0.24 to<br>0.66)    | 0.82<br>(0.46 to<br>1.44)    | 0.84<br>(0.48 to<br>1.45)    | 0.80<br>(0.45 to<br>1.40)    |

|                           |                             |                              |                              |                              |                           |                           |                           |                           |
|---------------------------|-----------------------------|------------------------------|------------------------------|------------------------------|---------------------------|---------------------------|---------------------------|---------------------------|
| Cocaine use disorders     | 2.14<br>(1.12 to<br>3.36)   | 6.74<br>(3.26 to<br>11.90)   | 6.33<br>(3.03 to<br>11.13)   | 6.71<br>(3.22 to<br>11.86)   | 0.04<br>(0.02 to<br>0.07) | 0.15<br>(0.08 to<br>0.25) | 0.14<br>(0.07 to<br>0.25) | 0.15<br>(0.08 to<br>0.25) |
| Amphetamine use disorders | 0.95<br>(0.49 to<br>1.49)   | 4.03<br>(1.93 to<br>6.98)    | 3.81<br>(1.78 to<br>6.71)    | 4.00<br>(1.92 to<br>6.87)    | 0.02<br>(0.01 to<br>0.03) | 0.09<br>(0.05 to<br>0.16) | 0.09<br>(0.04 to<br>0.15) | 0.09<br>(0.05 to<br>0.15) |
| Other drug use disorders  | 10.73<br>(6.69 to<br>16.51) | 31.60<br>(18.17 to<br>54.20) | 32.91<br>(18.99 to<br>56.39) | 30.79<br>(17.73 to<br>53.30) | 0.27<br>(0.18 to<br>0.40) | 0.82<br>(0.51 to<br>1.32) | 0.91<br>(0.57 to<br>1.44) | 0.77<br>(0.47 to<br>1.25) |
| Eating disorders          | 0.33<br>(0.19 to<br>0.52)   | 0.74<br>(0.36 to<br>1.30)    | 0.73<br>(0.35 to<br>1.34)    | 0.73<br>(0.36 to<br>1.28)    | 0.01<br>(0.00 to<br>0.01) | 0.02<br>(0.01 to<br>0.03) | 0.02<br>(0.01 to<br>0.03) | 0.02<br>(0.01 to<br>0.03) |

| Federated States of Micronesia                             |                                           |                                            |                                           |                                            |                                     |                                     |                                     |                                     |
|------------------------------------------------------------|-------------------------------------------|--------------------------------------------|-------------------------------------------|--------------------------------------------|-------------------------------------|-------------------------------------|-------------------------------------|-------------------------------------|
| Cause                                                      | YLLs (actual counts)                      |                                            |                                           |                                            | Deaths (actual counts)              |                                     |                                     |                                     |
|                                                            | 2016                                      | 2040 Forecast                              | 2040 Better Scenario                      | 2040 Worse Scenario                        | 2016                                | 2040 Forecast                       | 2040 Better Scenario                | 2040 Worse Scenario                 |
| <b>Diabetes, urogenital, blood, and endocrine diseases</b> | <b>3,613.85</b><br>(2,768.11 to 4,589.63) | <b>7,183.72</b><br>(4,388.05 to 12,433.92) | <b>5,322.97</b><br>(3,190.50 to 9,618.19) | <b>8,123.22</b><br>(4,906.30 to 13,501.54) | <b>146.24</b><br>(115.38 to 182.28) | <b>293.96</b><br>(194.91 to 482.11) | <b>233.27</b><br>(152.15 to 407.10) | <b>316.82</b><br>(206.45 to 500.91) |
| Diabetes mellitus                                          | 2,082.94<br>(1,590.38 to 2,644.32)        | 3,133.78<br>(1,944.88 to 4,777.37)         | 2,191.01<br>(1,388.14 to 3,307.32)        | 3,377.44<br>(2,073.39 to 5,306.39)         | 89.23<br>(69.67 to 110.71)          | 133.30<br>(88.68 to 189.85)         | 100.54<br>(67.38 to 140.43)         | 136.74<br>(87.69 to 200.39)         |
| Acute glomerulonephritis                                   | 2.17<br>(1.44 to 3.18)                    | 3.55<br>(2.03 to 6.44)                     | 3.11<br>(1.72 to 5.65)                    | 3.52<br>(2.04 to 6.41)                     | 0.06<br>(0.04 to 0.09)              | 0.10<br>(0.05 to 0.18)              | 0.09<br>(0.05 to 0.17)              | 0.10<br>(0.05 to 0.17)              |
| Chronic kidney disease                                     | 1,195.86<br>(875.78 to 1,611.32)          | 3,428.35<br>(932.91 to 9,034.24)           | 2,541.04<br>(676.84 to 7,032.70)          | 4,137.99<br>(1,142.31 to 9,849.60)         | 46.23<br>(34.41 to 61.02)           | 139.91<br>(37.74 to 350.15)         | 111.46<br>(28.43 to 294.77)         | 160.69<br>(44.08 to 364.42)         |
| Chronic kidney disease due to diabetes mellitus            | 665.96<br>(474.67 to 915.59)              | 2,121.19<br>(535.76 to 5,698.27)           | 1,571.19<br>(394.00 to 4,565.61)          | 2,582.92<br>(669.80 to 6,285.98)           | 25.22<br>(18.53 to 33.67)           | 81.64<br>(21.18 to 210.58)          | 64.29<br>(15.93 to 175.69)          | 95.22<br>(25.17 to 221.65)          |
| Chronic kidney disease due to hypertension                 | 281.24<br>(204.71 to 385.75)              | 802.83<br>(204.64 to 2,175.76)             | 613.46<br>(151.07 to 1,718.56)            | 946.48<br>(244.43 to 2,262.34)             | 13.85<br>(10.24 to 18.42)           | 40.73<br>(10.48 to 102.21)          | 33.86<br>(8.19 to 89.36)            | 45.13<br>(12.33 to 101.45)          |
| Chronic kidney disease due to glomerulonephritis           | 121.03<br>(83.35 to 170.56)               | 224.80<br>(81.34 to 543.52)                | 156.77<br>(54.95 to 396.29)               | 270.96<br>(96.85 to 634.27)                | 3.15<br>(2.20 to 4.36)              | 7.16<br>(2.22 to 18.10)             | 5.31<br>(1.58 to 13.74)             | 8.38<br>(2.65 to 19.59)             |
| Chronic kidney disease due to other and unspecified causes | 127.64<br>(88.61 to 178.51)               | 279.53<br>(87.88 to 714.40)                | 199.63<br>(60.82 to 536.26)               | 337.64<br>(107.24 to 794.17)               | 4.02<br>(2.82 to 5.57)              | 10.37<br>(2.94 to 26.90)            | 8.01<br>(2.16 to 22.12)             | 11.97<br>(3.51 to 28.30)            |
| Urinary diseases and male infertility                      | 118.50<br>(88.43 to 158.56)               | 232.95<br>(163.14 to 348.32)               | 237.36<br>(164.16 to 360.87)              | 8.69<br>(156.78 to 335.03)                 | 4.17<br>(3.18 to 5.51)              | 8.69<br>(6.64 to 11.48)             | 9.69<br>(7.40 to 12.90)             | 7.89<br>(6.00 to 10.41)             |
| Urinary tract infections                                   | 103.82<br>(74.86 to 140.02)               | 208.31<br>(141.99 to 317.41)               | 214.68<br>(145.58 to 332.22)              | 199.92<br>(136.66 to 305.05)               | 3.63<br>(2.72 to 4.83)              | 7.77<br>(5.85 to 10.44)             | 8.39<br>(6.64 to 11.83)             | 7.04<br>(5.26 to 9.44)              |
| Urolithiasis                                               | 3.71<br>(2.10 to 6.10)                    | 8.65<br>(4.39 to 16.10)                    | 9.32<br>(4.71 to 17.70)                   | 8.21<br>(4.21 to 15.25)                    | 0.13<br>(0.08 to 0.22)              | 0.31<br>(0.17 to 0.52)              | 0.35<br>(0.19 to 0.60)              | 0.28<br>(0.16 to 0.48)              |
| Other urinary diseases                                     | 10.98<br>(6.53 to 16.72)                  | 15.99<br>(8.84 to 26.28)                   | 13.37<br>(7.35 to 22.18)                  | 15.65<br>(8.58 to 25.38)                   | 0.41<br>(0.25 to 0.61)              | 0.62<br>(0.36 to 1.00)              | 0.55<br>(0.32 to 0.91)              | 0.57<br>(0.33 to 0.93)              |
| Gynecological diseases                                     | 1.34<br>(0.61 to 2.11)                    | 2.33<br>(0.93 to 4.90)                     | 1.84<br>(0.73 to 3.84)                    | 2.39<br>(0.95 to 5.07)                     | 0.03<br>(0.02 to 0.05)              | 0.06<br>(0.03 to 0.12)              | 0.05<br>(0.02 to 0.09)              | 0.06<br>(0.03 to 0.12)              |
| Uterine fibroids                                           | 0.14<br>(0.04 to 0.28)                    | 0.21<br>(0.05 to 0.49)                     | 0.15<br>(0.03 to 0.37)                    | 0.21<br>(0.05 to 0.50)                     | 0.00<br>(0.00 to 0.01)              | 0.01<br>(0.00 to 0.01)              | 0.00<br>(0.00 to 0.01)              | 0.01<br>(0.00 to 0.01)              |
| Polycystic ovarian syndrome                                | 0.02<br>(0.01 to 0.06)                    | 0.03<br>(0.01 to 0.06)                     | 0.02<br>(0.00 to 0.05)                    | 0.03<br>(0.01 to 0.09)                     | 0.00<br>(0.00 to 0.00)              | 0.00<br>(0.00 to 0.00)              | 0.00<br>(0.00 to 0.00)              | 0.00<br>(0.00 to 0.00)              |
| Endometriosis                                              | 0.01<br>(0.00 to 0.03)                    | 0.02<br>(0.01 to 0.06)                     | 0.01<br>(0.00 to 0.04)                    | 0.02<br>(0.01 to 0.06)                     | 0.00<br>(0.00 to 0.00)              | 0.00<br>(0.00 to 0.00)              | 0.00<br>(0.00 to 0.00)              | 0.00<br>(0.00 to 0.00)              |
| Genital prolapse                                           | 0.04<br>(0.01 to 0.08)                    | 0.05<br>(0.01 to 0.12)                     | 0.03<br>(0.01 to 0.09)                    | 0.05<br>(0.01 to 0.12)                     | 0.00<br>(0.00 to 0.00)              | 0.00<br>(0.00 to 0.00)              | 0.00<br>(0.00 to 0.00)              | 0.00<br>(0.00 to 0.00)              |
| Other gynecological diseases                               | 1.12<br>(0.49 to 1.81)                    | 2.03<br>(0.77 to 4.40)                     | 1.62<br>(0.61 to 3.50)                    | 2.08<br>(0.77 to 4.49)                     | 0.03<br>(0.01 to 0.04)              | 0.05<br>(0.02 to 0.10)              | 0.04<br>(0.02 to 0.08)              | 0.05<br>(0.02 to 0.10)              |
| Hemoglobinopathies and hemolytic anemias                   | 34.00<br>(24.15 to 46.53)                 | 40.15<br>(25.48 to 63.98)                  | 32.53<br>(20.72 to 50.80)                 | 40.57<br>(25.69 to 64.28)                  | 0.92<br>(0.66 to 1.22)              | 1.21<br>(0.83 to 1.78)              | 1.02<br>(0.71 to 1.49)              | 1.18<br>(0.81 to 1.74)              |
| Thalassemias                                               | 5.19<br>(3.60 to 7.12)                    | 2.77<br>(1.74 to 4.10)                     | 2.99<br>(1.96 to 4.34)                    | 2.83<br>(1.79 to 4.18)                     | 0.07<br>(0.05 to 0.10)              | 0.04<br>(0.02 to 0.06)              | 0.04<br>(0.03 to 0.06)              | 0.04<br>(0.02 to 0.06)              |

|                                                   |                                 |                                 |                                 |                                 |                           |                             |                             |                             |
|---------------------------------------------------|---------------------------------|---------------------------------|---------------------------------|---------------------------------|---------------------------|-----------------------------|-----------------------------|-----------------------------|
|                                                   | 0.03<br>(0.02 to<br>0.05)       | 0.04<br>(0.02 to<br>0.07)       | 0.03<br>(0.02 to<br>0.06)       | 0.04<br>(0.02 to<br>0.08)       | 0.00<br>(0.00 to<br>0.00) | 0.00<br>(0.00 to<br>0.00)   | 0.00<br>(0.00 to<br>0.00)   | 0.00<br>(0.00 to<br>0.00)   |
| Sickle cell disorders                             |                                 |                                 |                                 |                                 |                           |                             |                             |                             |
| G6PD deficiency                                   | 18.77<br>(12.63 to<br>26.38)    | 27.19<br>(15.55 to<br>46.05)    | 20.83<br>(11.86 to<br>35.08)    | 27.92<br>(16.16 to<br>46.49)    | 0.42<br>(0.29 to<br>0.59) | 0.68<br>(0.42 to<br>1.09)   | 0.53<br>(0.33 to<br>0.85)   | 0.69<br>(0.42 to<br>1.11)   |
| Other hemoglobinopathies and hemolytic anemias    | 10.00<br>(6.99 to<br>13.83)     | 10.15<br>(7.05 to<br>14.48)     | 8.67<br>(6.05 to<br>12.38)      | 9.79<br>(6.80 to<br>14.00)      | 0.42<br>(0.31 to<br>0.57) | 0.49<br>(0.35 to<br>0.67)   | 0.45<br>(0.33 to<br>0.61)   | 0.45<br>(0.32 to<br>0.62)   |
| Endocrine, metabolic, blood, and immune disorders | 179.04<br>(129.60 to<br>242.90) | 342.61<br>(229.33 to<br>496.13) | 316.08<br>(214.42 to<br>456.71) | 337.52<br>(223.72 to<br>490.55) | 5.59<br>(4.15 to<br>7.46) | 10.70<br>(7.83 to<br>14.62) | 10.42<br>(7.66 to<br>14.12) | 10.17<br>(7.45 to<br>13.96) |

| Federated States of Micronesia                |                                       |                                       |                                       |                                       |                                 |                                  |                                  |                                  |
|-----------------------------------------------|---------------------------------------|---------------------------------------|---------------------------------------|---------------------------------------|---------------------------------|----------------------------------|----------------------------------|----------------------------------|
| Cause                                         | YLLs (actual counts)                  |                                       |                                       |                                       | Deaths (actual counts)          |                                  |                                  |                                  |
|                                               | 2016                                  | 2040 Forecast                         | 2040 Better Scenario                  | 2040 Worse Scenario                   | 2016                            | 2040 Forecast                    | 2040 Better Scenario             | 2040 Worse Scenario              |
| <b>Musculoskeletal disorders</b>              | <b>71.75</b><br>(39.85 to 105.40)     | <b>113.61</b><br>(58.17 to 187.27)    | <b>122.39</b><br>(61.93 to 205.53)    | <b>110.76</b><br>(56.69 to 183.31)    | <b>1.58</b><br>(0.89 to 2.27)   | <b>2.83</b><br>(1.56 to 4.30)    | <b>3.22</b><br>(1.77 to 4.90)    | <b>2.67</b><br>(1.47 to 4.13)    |
| Rheumatoid arthritis                          | 4.19<br>(2.21 to 6.36)                | 7.74<br>(3.97 to 12.40)               | 6.65<br>(3.35 to 10.68)               | 7.64<br>(3.91 to 12.30)               | 0.16<br>(0.08 to 0.24)          | 0.34<br>(0.17 to 0.51)           | 0.31<br>(0.16 to 0.48)           | 0.32<br>(0.16 to 0.48)           |
| Other musculoskeletal disorders               | 67.56<br>(37.07 to 99.10)             | 105.87<br>(53.02 to 177.84)           | 115.75<br>(57.59 to 196.25)           | 103.12<br>(51.05 to 174.21)           | 1.42<br>(0.79 to 2.04)          | 2.50<br>(1.34 to 3.90)           | 2.91<br>(1.58 to 4.48)           | 2.35<br>(1.25 to 3.72)           |
| <b>Other non-communicable diseases</b>        | <b>725.09</b><br>(493.08 to 1,050.85) | <b>878.74</b><br>(605.88 to 1,233.57) | <b>769.13</b><br>(533.90 to 1,061.05) | <b>918.68</b><br>(625.11 to 1,296.24) | <b>12.63</b><br>(9.15 to 17.01) | <b>21.71</b><br>(15.23 to 29.11) | <b>21.81</b><br>(15.31 to 29.15) | <b>20.99</b><br>(14.71 to 28.30) |
| Congenital birth defects                      | 582.21<br>(368.92 to 883.28)          | 504.05<br>(311.62 to 776.75)          | 389.95<br>(243.61 to 589.04)          | 558.30<br>(341.81 to 866.90)          | 7.55<br>(4.96 to 11.10)         | 7.34<br>(4.63 to 11.13)          | 5.84<br>(3.69 to 8.77)           | 7.98<br>(5.01 to 12.09)          |
| Neural tube defects                           | 27.69<br>(13.22 to 51.59)             | 9.36<br>(3.57 to 20.31)               | 5.77<br>(2.20 to 12.50)               | 11.07<br>(4.16 to 23.96)              | 0.33<br>(0.16 to 0.60)          | 0.12<br>(0.05 to 0.25)           | 0.07<br>(0.03 to 0.15)           | 0.14<br>(0.05 to 0.29)           |
| Congenital heart anomalies                    | 283.19<br>(183.64 to 422.76)          | 237.48<br>(148.39 to 367.61)          | 185.50<br>(116.19 to 289.11)          | 260.67<br>(161.94 to 405.71)          | 3.73<br>(2.48 to 5.41)          | 3.51<br>(2.20 to 5.42)           | 2.81<br>(1.76 to 4.31)           | 3.78<br>(2.35 to 5.85)           |
| Orofacial clefts                              | 0.34<br>(0.13 to 0.90)                | 0.22<br>(0.07 to 0.62)                | 0.13<br>(0.04 to 0.35)                | 0.26<br>(0.09 to 0.75)                | 0.00<br>(0.00 to 0.01)          | 0.00<br>(0.00 to 0.01)           | 0.00<br>(0.00 to 0.00)           | 0.00<br>(0.00 to 0.01)           |
| Down syndrome                                 | 16.21<br>(9.42 to 27.01)              | 22.64<br>(12.06 to 38.25)             | 17.59<br>(9.11 to 29.70)              | 24.58<br>(12.98 to 41.77)             | 0.23<br>(0.14 to 0.36)          | 0.40<br>(0.21 to 0.68)           | 0.31<br>(0.17 to 0.55)           | 0.42<br>(0.22 to 0.72)           |
| Other chromosomal abnormalities               | 17.20<br>(8.20 to 33.94)              | 23.70<br>(10.27 to 45.29)             | 16.91<br>(7.64 to 32.22)              | 27.24<br>(11.57 to 52.57)             | 0.21<br>(0.10 to 0.40)          | 0.30<br>(0.14 to 0.55)           | 0.22<br>(0.10 to 0.40)           | 0.34<br>(0.15 to 0.64)           |
| Congenital musculoskeletal and limb anomalies | 17.34<br>(9.35 to 31.10)              | 15.16<br>(7.46 to 28.97)              | 12.20<br>(5.99 to 23.79)              | 16.80<br>(8.09 to 32.13)              | 0.22<br>(0.12 to 0.39)          | 0.20<br>(0.10 to 0.40)           | 0.17<br>(0.08 to 0.33)           | 0.22<br>(0.11 to 0.43)           |
| Urogenital congenital anomalies               | 21.24<br>(10.97 to 35.23)             | 20.48<br>(10.94 to 33.69)             | 16.55<br>(8.95 to 26.97)              | 22.18<br>(11.57 to 36.82)             | 0.32<br>(0.17 to 0.49)          | 0.37<br>(0.20 to 0.59)           | 0.31<br>(0.17 to 0.49)           | 0.39<br>(0.21 to 0.62)           |
| Digestive congenital anomalies                | 33.71<br>(16.54 to 62.95)             | 23.82<br>(10.49 to 46.94)             | 17.01<br>(7.64 to 33.22)              | 27.43<br>(11.81 to 54.27)             | 0.40<br>(0.20 to 0.74)          | 0.30<br>(0.13 to 0.57)           | 0.21<br>(0.10 to 0.41)           | 0.34<br>(0.15 to 0.66)           |
| Other congenital birth defects                | 165.39<br>(96.26 to 270.00)           | 151.19<br>(87.34 to 247.80)           | 118.51<br>(69.83 to 191.80)           | 168.05<br>(95.20 to 277.53)           | 2.11<br>(1.26 to 3.37)          | 2.15<br>(1.26 to 3.46)           | 1.73<br>(1.03 to 2.67)           | 2.34<br>(1.36 to 3.81)           |
| Skin and subcutaneous diseases                | 123.78<br>(73.41 to 191.23)           | 363.42<br>(211.12 to 546.65)          | 370.59<br>(219.54 to 552.75)          | 347.24<br>(200.97 to 526.66)          | 4.85<br>(2.84 to 7.43)          | 14.24<br>(8.75 to 20.40)         | 15.87<br>(9.84 to 22.70)         | 12.86<br>(7.88 to 18.46)         |
| Cellulitis                                    | 23.71<br>(8.50 to 38.90)              | 87.53<br>(33.53 to 139.82)            | 100.48<br>(39.20 to 159.67)           | 81.88<br>(31.29 to 131.37)            | 0.88<br>(0.31 to 1.43)          | 3.23<br>(1.23 to 5.07)           | 3.97<br>(1.56 to 6.19)           | 2.88<br>(1.09 to 4.52)           |
| Pyoderma                                      | 79.12<br>(47.99 to 126.59)            | 230.36<br>(137.47 to 373.04)          | 219.98<br>(128.75 to 355.99)          | 223.42<br>(133.51 to 356.05)          | 2.73<br>(1.69 to 4.36)          | 8.36<br>(5.20 to 13.01)          | 8.64<br>(5.38 to 13.36)          | 7.68<br>(4.79 to 11.97)          |
| Decubitus ulcer                               | 19.51<br>(10.21 to 37.22)             | 42.85<br>(22.29 to 89.00)             | 47.37<br>(24.84 to 93.50)             | 39.31<br>(19.54 to 80.68)             | 1.21<br>(0.65 to 2.27)          | 2.59<br>(1.20 to 5.46)           | 3.19<br>(1.54 to 6.46)           | 2.23<br>(1.03 to 4.72)           |
| Other skin and subcutaneous diseases          | 1.44<br>(0.81 to 2.31)                | 2.67<br>(1.52 to 4.35)                | 2.75<br>(1.57 to 4.40)                | 2.64<br>(1.53 to 4.28)                | 0.03<br>(0.02 to 0.05)          | 0.07<br>(0.04 to 0.11)           | 0.08<br>(0.05 to 0.12)           | 0.06<br>(0.04 to 0.10)           |
| Sudden infant death syndrome                  | 19.01<br>(7.78 to 38.91)              | 11.26<br>(4.14 to 25.15)              | 8.60<br>(3.31 to 18.25)               | 13.14<br>(4.81 to 29.28)              | 0.22<br>(0.09 to 0.45)          | 0.13<br>(0.05 to 0.29)           | 0.10<br>(0.04 to 0.21)           | 0.15<br>(0.06 to 0.34)           |

|                          |                                       |                                       |                                       |                                       |                              |                               |                               |                                |
|--------------------------|---------------------------------------|---------------------------------------|---------------------------------------|---------------------------------------|------------------------------|-------------------------------|-------------------------------|--------------------------------|
| Injuries                 | 3,824.22<br>(2,978.11 to<br>4,841.08) | 4,547.06<br>(3,088.96 to<br>6,338.63) | 3,791.42<br>(2,590.35 to<br>5,310.73) | 4,830.77<br>(3,254.19 to<br>6,819.80) | 74.30<br>(57.94 to<br>94.42) | 97.65<br>(69.22 to<br>134.20) | 84.68<br>(60.44 to<br>115.78) | 101.34<br>(70.93 to<br>141.14) |
| Transport injuries       | 1,037.33<br>(761.96 to<br>1,358.88)   | 1,467.25<br>(993.37 to<br>2,082.17)   | 1,055.38<br>(708.02 to<br>1,510.84)   | 1,592.32<br>(1,074.47 to<br>2,277.47) | 20.18<br>(14.82 to<br>26.37) | 30.95<br>(21.54 to<br>42.93)  | 23.44<br>(16.38 to<br>32.51)  | 32.89<br>(22.71 to<br>46.18)   |
| Road injuries            | 924.83<br>(676.66 to<br>1,210.07)     | 1,283.92<br>(880.90 to<br>1,819.43)   | 900.64<br>(608.28 to<br>1,299.02)     | 1,395.52<br>(947.36 to<br>2,000.62)   | 17.97<br>(13.20 to<br>23.55) | 26.98<br>(18.87 to<br>37.49)  | 20.00<br>(14.03 to<br>27.75)  | 28.71<br>(19.91 to<br>40.47)   |
| Pedestrian road injuries | 80.76<br>(55.11 to<br>110.65)         | 94.80<br>(60.02 to<br>141.69)         | 69.83<br>(44.34 to<br>105.76)         | 102.27<br>(63.83 to<br>154.85)        | 1.63<br>(1.13 to<br>2.22)    | 2.12<br>(1.41 to<br>3.06)     | 1.64<br>(1.10 to<br>2.36)     | 2.24<br>(1.45 to<br>3.28)      |

| Federated States of Micronesia                  |                                                            |                                                          |                                                          |                                                          |                                                   |                                                   |                                                   |                                                   |
|-------------------------------------------------|------------------------------------------------------------|----------------------------------------------------------|----------------------------------------------------------|----------------------------------------------------------|---------------------------------------------------|---------------------------------------------------|---------------------------------------------------|---------------------------------------------------|
| Cause                                           | YLLs (actual counts)                                       |                                                          |                                                          |                                                          | Deaths (actual counts)                            |                                                   |                                                   |                                                   |
|                                                 | 2016                                                       | 2040 Forecast                                            | 2040 Better Scenario                                     | 2040 Worse Scenario                                      | 2016                                              | 2040 Forecast                                     | 2040 Better Scenario                              | 2040 Worse Scenario                               |
| Cyclist road injuries                           | 15.56<br>(9.53 to<br>22.08)                                | 24.19<br>(13.73 to<br>37.28)                             | 17.26<br>(9.74 to<br>26.69)                              | 26.12<br>(14.66 to<br>40.12)                             | 0.32<br>(0.19 to<br>0.45)                         | 0.53<br>(0.31 to<br>0.80)                         | 0.41<br>(0.24 to<br>0.61)                         | 0.56<br>(0.32 to<br>0.86)                         |
| Motorcyclist road injuries                      | 111.64<br>(68.98 to<br>160.44)                             | 154.64<br>(87.30 to<br>236.24)                           | 123.95<br>(70.95 to<br>189.55)                           | 166.70<br>(93.08 to<br>259.16)                           | 2.02<br>(1.24 to<br>2.87)                         | 2.99<br>(1.72 to<br>4.54)                         | 2.46<br>(1.42 to<br>3.74)                         | 3.20<br>(1.80 to<br>4.95)                         |
| Motor vehicle road injuries                     | 703.82<br>(519.36 to<br>940.67)                            | 991.67<br>(677.00 to<br>1,438.58)                        | 676.97<br>(459.57 to<br>999.01)                          | 1,080.02<br>(728.78 to<br>1,577.22)                      | 13.77<br>(10.24 to<br>18.22)                      | 20.97<br>(14.68 to<br>29.56)                      | 15.22<br>(10.73 to<br>21.58)                      | 22.32<br>(15.51 to<br>31.74)                      |
| Other road injuries                             | 11.05<br>(7.19 to<br>19.45)                                | 18.63<br>(9.62 to<br>29.92)                              | 12.64<br>(6.58 to<br>20.25)                              | 20.41<br>(10.46 to<br>33.55)                             | 0.24<br>(0.13 to<br>0.35)                         | 0.37<br>(0.20 to<br>0.57)                         | 0.26<br>(0.15 to<br>0.41)                         | 0.39<br>(0.21 to<br>0.62)                         |
| Other transport injuries                        | 112.50<br>(65.36 to<br>166.94)                             | 183.32<br>(95.46 to<br>291.21)                           | 154.74<br>(82.02 to<br>246.51)                           | 196.79<br>(101.59 to<br>316.50)                          | 2.21<br>(1.28 to<br>3.25)                         | 3.96<br>(2.17 to<br>6.21)                         | 3.44<br>(1.90 to<br>5.37)                         | 4.18<br>(2.25 to<br>6.68)                         |
| <b>Unintentional injuries</b>                   | <b>1,369.58</b><br><b>(1,065.88 to</b><br><b>1,716.30)</b> | <b>1,325.88</b><br><b>(896.18 to</b><br><b>1,836.32)</b> | <b>1,112.73</b><br><b>(757.40 to</b><br><b>1,531.76)</b> | <b>1,374.31</b><br><b>(939.38 to</b><br><b>1,892.36)</b> | <b>27.81</b><br><b>(21.47 to</b><br><b>35.08)</b> | <b>31.31</b><br><b>(22.74 to</b><br><b>41.09)</b> | <b>27.81</b><br><b>(20.32 to</b><br><b>36.49)</b> | <b>31.34</b><br><b>(22.62 to</b><br><b>41.40)</b> |
| Falls                                           | 115.28<br>(79.57 to<br>169.00)                             | 143.84<br>(94.04 to<br>215.74)                           | 136.22<br>(90.20 to<br>204.55)                           | 141.22<br>(92.00 to<br>212.85)                           | 3.39<br>(2.39 to<br>4.87)                         | 4.76<br>(3.41 to<br>6.86)                         | 4.88<br>(3.49 to<br>6.96)                         | 4.42<br>(3.12 to<br>6.40)                         |
| Drowning                                        | 593.12<br>(442.54 to<br>767.09)                            | 491.64<br>(317.42 to<br>704.22)                          | 407.34<br>(259.36 to<br>581.02)                          | 521.14<br>(335.64 to<br>754.57)                          | 10.62<br>(7.91 to<br>13.78)                       | 10.03<br>(6.59 to<br>14.27)                       | 8.50<br>(5.55 to<br>12.03)                        | 10.49<br>(6.81 to<br>15.07)                       |
| Fire, heat, and hot substances                  | 85.70<br>(56.46 to<br>120.19)                              | 72.06<br>(41.99 to<br>113.81)                            | 56.67<br>(32.88 to<br>88.83)                             | 76.44<br>(43.42 to<br>121.38)                            | 1.74<br>(1.15 to<br>2.54)                         | 1.69<br>(1.04 to<br>2.54)                         | 1.41<br>(0.87 to<br>2.12)                         | 1.72<br>(1.05 to<br>2.62)                         |
| Poisonings                                      | 60.41<br>(36.88 to<br>85.90)                               | 38.58<br>(21.54 to<br>60.75)                             | 27.21<br>(15.41 to<br>43.02)                             | 41.89<br>(23.46 to<br>66.70)                             | 1.21<br>(0.77 to<br>1.68)                         | 0.90<br>(0.55 to<br>1.34)                         | 0.68<br>(0.42 to<br>1.01)                         | 0.93<br>(0.56 to<br>1.42)                         |
| Exposure to mechanical forces                   | 160.15<br>(115.81 to<br>210.61)                            | 164.38<br>(104.59 to<br>245.66)                          | 130.65<br>(83.05 to<br>192.30)                           | 169.97<br>(107.13 to<br>247.84)                          | 3.17<br>(2.30 to<br>4.18)                         | 3.68<br>(2.42 to<br>5.30)                         | 3.06<br>(2.03 to<br>4.38)                         | 3.70<br>(2.44 to<br>5.25)                         |
| Unintentional firearm injuries                  | 24.45<br>(17.74 to<br>34.42)                               | 19.98<br>(12.12 to<br>29.95)                             | 15.18<br>(9.23 to<br>22.90)                              | 20.76<br>(12.76 to<br>31.03)                             | 0.51<br>(0.38 to<br>0.71)                         | 0.48<br>(0.31 to<br>0.69)                         | 0.38<br>(0.25 to<br>0.56)                         | 0.48<br>(0.30 to<br>0.69)                         |
| Unintentional suffocation                       | 35.13<br>(22.72 to<br>49.73)                               | 33.42<br>(18.63 to<br>52.75)                             | 25.79<br>(14.40 to<br>40.75)                             | 35.27<br>(19.70 to<br>55.36)                             | 0.56<br>(0.36 to<br>0.80)                         | 0.59<br>(0.33 to<br>0.93)                         | 0.46<br>(0.26 to<br>0.74)                         | 0.61<br>(0.34 to<br>0.97)                         |
| Other exposure to mechanical forces             | 100.57<br>(67.74 to<br>139.22)                             | 110.98<br>(65.57 to<br>167.20)                           | 89.68<br>(53.69 to<br>135.68)                            | 113.94<br>(67.17 to<br>168.71)                           | 2.10<br>(1.43 to<br>2.88)                         | 2.62<br>(1.69 to<br>3.77)                         | 2.21<br>(1.43 to<br>3.16)                         | 2.61<br>(1.65 to<br>3.77)                         |
| Adverse effects of medical treatment            | 140.25<br>(97.04 to<br>189.92)                             | 182.92<br>(105.88 to<br>275.70)                          | 153.73<br>(89.47 to<br>234.55)                           | 186.43<br>(108.62 to<br>281.76)                          | 3.23<br>(2.24 to<br>4.41)                         | 4.70<br>(3.05 to<br>6.63)                         | 4.20<br>(2.74 to<br>5.93)                         | 4.62<br>(2.94 to<br>6.63)                         |
| Animal contact                                  | 8.99<br>(5.95 to<br>13.57)                                 | 15.46<br>(8.48 to<br>28.70)                              | 11.86<br>(6.41 to<br>21.78)                              | 15.95<br>(8.77 to<br>28.99)                              | 0.72<br>(0.15 to<br>0.33)                         | 0.42<br>(0.25 to<br>0.70)                         | 0.34<br>(0.21 to<br>0.58)                         | 0.41<br>(0.25 to<br>0.70)                         |
| Venomous animal contact                         | 2.68<br>(1.57 to<br>4.78)                                  | 3.90<br>(1.74 to<br>8.33)                                | 2.89<br>(1.32 to<br>6.15)                                | 4.06<br>(1.83 to<br>8.77)                                | 0.07<br>(0.04 to<br>0.11)                         | 0.10<br>(0.05 to<br>0.20)                         | 0.08<br>(0.04 to<br>0.16)                         | 0.10<br>(0.05 to<br>0.20)                         |
| Non-venomous animal contact                     | 6.31<br>(4.23 to<br>9.54)                                  | 11.55<br>(6.36 to<br>20.45)                              | 8.97<br>(4.97 to<br>15.59)                               | 11.90<br>(6.70 to<br>20.67)                              | 0.16<br>(0.11 to<br>0.23)                         | 0.32<br>(0.19 to<br>0.52)                         | 0.26<br>(0.16 to<br>0.43)                         | 0.31<br>(0.19 to<br>0.52)                         |
| Foreign body                                    | 88.25<br>(55.03 to<br>123.28)                              | 96.11<br>(58.34 to<br>133.95)                            | 93.69<br>(56.76 to<br>129.30)                            | 96.76<br>(58.55 to<br>134.53)                            | 1.77<br>(1.17 to<br>2.33)                         | 2.34<br>(1.49 to<br>3.07)                         | 2.47<br>(1.59 to<br>3.23)                         | 2.24<br>(1.39 to<br>2.94)                         |
| Pulmonary aspiration and foreign body in airway | 82.22<br>(49.78 to<br>116.26)                              | 89.34<br>(53.06 to<br>123.80)                            | 88.03<br>(52.63 to<br>121.14)                            | 89.77<br>(53.08 to<br>125.15)                            | 1.66<br>(1.06 to<br>2.22)                         | 2.20<br>(1.38 to<br>2.88)                         | 2.35<br>(1.49 to<br>3.06)                         | 2.09<br>(1.29 to<br>2.76)                         |

|                                             |                                                            |                                                            |                                                            |                                                            |                                                   |                                                   |                                                   |                                                   |
|---------------------------------------------|------------------------------------------------------------|------------------------------------------------------------|------------------------------------------------------------|------------------------------------------------------------|---------------------------------------------------|---------------------------------------------------|---------------------------------------------------|---------------------------------------------------|
|                                             | 6.03<br>(3.40 to<br>9.84)                                  | 6.77<br>(3.11 to<br>13.13)                                 | 5.66<br>(2.58 to<br>11.01)                                 | 6.99<br>(3.23 to<br>13.41)                                 | 0.11<br>(0.06 to<br>0.18)                         | 0.14<br>(0.07 to<br>0.27)                         | 0.12<br>(0.06 to<br>0.23)                         | 0.14<br>(0.07 to<br>0.27)                         |
| Foreign body in other body part             |                                                            |                                                            |                                                            |                                                            |                                                   |                                                   |                                                   |                                                   |
| Environmental heat and cold exposure        | 37.29<br>(23.49 to<br>51.66)                               | 48.42<br>(27.08 to<br>73.98)                               | 34.46<br>(19.33 to<br>53.90)                               | 50.55<br>(28.43 to<br>78.42)                               | 0.85<br>(0.55 to<br>1.15)                         | 1.20<br>(0.70 to<br>1.77)                         | 0.89<br>(0.53 to<br>1.31)                         | 1.22<br>(0.71 to<br>1.80)                         |
| Other unintentional injuries                | 80.14<br>(52.11 to<br>110.92)                              | 72.48<br>(40.11 to<br>112.70)                              | 60.90<br>(33.58 to<br>94.37)                               | 73.96<br>(40.71 to<br>114.75)                              | 1.60<br>(1.02 to<br>2.19)                         | 1.59<br>(0.92 to<br>2.42)                         | 1.37<br>(0.79 to<br>2.09)                         | 1.59<br>(0.91 to<br>2.41)                         |
| <b>Self-harm and interpersonal violence</b> | <b>1,416.55</b><br><b>(1,012.05 to</b><br><b>1,855.21)</b> | <b>1,725.35</b><br><b>(1,093.30 to</b><br><b>2,557.95)</b> | <b>1,595.85</b><br><b>(1,032.88 to</b><br><b>2,364.71)</b> | <b>1,835.09</b><br><b>(1,148.33 to</b><br><b>2,809.84)</b> | <b>26.30</b><br><b>(18.59 to</b><br><b>34.54)</b> | <b>34.83</b><br><b>(22.53 to</b><br><b>51.08)</b> | <b>32.87</b><br><b>(21.53 to</b><br><b>48.16)</b> | <b>36.55</b><br><b>(22.93 to</b><br><b>55.51)</b> |



| Federated States of Micronesia                                                      |                                                |                                                   |                                                   |                                                   |                                                |                                                |                                                |                                                |
|-------------------------------------------------------------------------------------|------------------------------------------------|---------------------------------------------------|---------------------------------------------------|---------------------------------------------------|------------------------------------------------|------------------------------------------------|------------------------------------------------|------------------------------------------------|
| Cause                                                                               | YLLs (actual counts)                           |                                                   |                                                   |                                                   | Deaths (actual counts)                         |                                                |                                                |                                                |
|                                                                                     | 2016                                           | 2040 Forecast                                     | 2040 Better Scenario                              | 2040 Worse Scenario                               | 2016                                           | 2040 Forecast                                  | 2040 Better Scenario                           | 2040 Worse Scenario                            |
| Self-harm                                                                           | 1,040.08<br>(715.99 to<br>1,381.80)            | 1,336.16<br>(809.50 to<br>2,057.86)               | 1,221.97<br>(747.39 to<br>1,857.02)               | 1,436.47<br>(841.63 to<br>2,310.17)               | 19.33<br>(13.25 to<br>25.78)                   | 26.92<br>(16.86 to<br>40.79)                   | 25.17<br>(15.92 to<br>37.64)                   | 28.52<br>(17.26 to<br>45.31)                   |
| Self-harm by firearm                                                                | 66.96<br>(23.71 to<br>128.25)                  | 78.19<br>(23.62 to<br>178.82)                     | 69.46<br>(21.50 to<br>157.85)                     | 85.02<br>(25.30 to<br>197.05)                     | 1.28<br>(0.44 to<br>2.47)                      | 1.64<br>(0.50 to<br>3.72)                      | 1.48<br>(0.46 to<br>3.32)                      | 1.77<br>(0.52 to<br>4.04)                      |
| Self-harm by other specified means                                                  | 973.12<br>(681.50 to<br>1,288.46)              | 1,257.97<br>(772.43 to<br>1,899.29)               | 1,152.50<br>(709.67 to<br>1,729.81)               | 1,351.44<br>(807.40 to<br>2,142.11)               | 18.05<br>(12.41 to<br>25.77)                   | 25.27<br>(15.82 to<br>37.39)                   | 23.69<br>(15.09 to<br>34.76)                   | 26.76<br>(16.34 to<br>41.62)                   |
| Interpersonal violence                                                              | 376.46<br>(240.22 to<br>522.00)                | 389.19<br>(217.69 to<br>587.21)                   | 373.89<br>(209.64 to<br>567.19)                   | 398.63<br>(220.76 to<br>599.26)                   | 6.97<br>(4.46 to<br>9.80)                      | 7.91<br>(4.48 to<br>11.99)                     | 7.71<br>(4.36 to<br>11.57)                     | 8.03<br>(4.49 to<br>12.04)                     |
| Physical violence by firearm                                                        | 84.65<br>(39.26 to<br>140.39)                  | 88.27<br>(38.86 to<br>151.67)                     | 86.04<br>(37.57 to<br>147.46)                     | 88.11<br>(38.88 to<br>151.12)                     | 1.54<br>(0.71 to<br>2.49)                      | 1.76<br>(0.77 to<br>3.00)                      | 1.73<br>(0.77 to<br>2.96)                      | 1.75<br>(0.76 to<br>2.97)                      |
| Physical violence by sharp object                                                   | 100.88<br>(58.56 to<br>152.85)                 | 116.24<br>(60.29 to<br>188.98)                    | 118.09<br>(61.16 to<br>193.90)                    | 115.03<br>(59.92 to<br>187.41)                    | 1.87<br>(1.08 to<br>2.82)                      | 2.34<br>(1.20 to<br>3.78)                      | 2.39<br>(1.24 to<br>3.84)                      | 2.30<br>(1.18 to<br>3.71)                      |
| Physical violence by other means                                                    | 190.93<br>(110.77 to<br>268.25)                | 184.68<br>(88.51 to<br>295.43)                    | 169.77<br>(81.23 to<br>270.73)                    | 195.48<br>(93.74 to<br>313.71)                    | 3.57<br>(2.06 to<br>5.06)                      | 3.81<br>(1.90 to<br>6.02)                      | 3.58<br>(1.78 to<br>5.65)                      | 3.98<br>(1.94 to<br>6.40)                      |
| <b>Forces of nature, conflict and terrorism, and executions and police conflict</b> | <b>0.77</b><br><b>(0.60 to</b><br><b>0.96)</b> | <b>28.59</b><br><b>(0.00 to</b><br><b>143.99)</b> | <b>27.46</b><br><b>(0.00 to</b><br><b>136.13)</b> | <b>29.05</b><br><b>(0.00 to</b><br><b>145.95)</b> | <b>0.01</b><br><b>(0.01 to</b><br><b>0.02)</b> | <b>0.56</b><br><b>(0.00 to</b><br><b>2.78)</b> | <b>0.56</b><br><b>(0.00 to</b><br><b>2.74)</b> | <b>0.56</b><br><b>(0.00 to</b><br><b>2.77)</b> |
| Exposure to forces of nature                                                        | 0.00<br>(0.00 to<br>0.00)                      | 28.59<br>(0.00 to<br>143.99)                      | 27.46<br>(0.00 to<br>136.13)                      | 29.05<br>(0.00 to<br>145.95)                      | 0.00<br>(0.00 to<br>0.00)                      | 0.56<br>(0.00 to<br>2.78)                      | 0.56<br>(0.00 to<br>2.74)                      | 0.56<br>(0.00 to<br>2.77)                      |
| Conflict and terrorism                                                              | 0.00<br>(0.00 to<br>0.00)                      | 0.00<br>(0.00 to<br>0.00)                         | 0.00<br>(0.00 to<br>0.00)                         | 0.00<br>(0.00 to<br>0.00)                         | 0.00<br>(0.00 to<br>0.00)                      | 0.00<br>(0.00 to<br>0.00)                      | 0.00<br>(0.00 to<br>0.00)                      | 0.00<br>(0.00 to<br>0.00)                      |
| Executions and police conflict                                                      | 0.77<br>(0.60 to<br>0.96)                      | 0.00<br>(0.00 to<br>0.00)                         | 0.00<br>(0.00 to<br>0.00)                         | 0.00<br>(0.00 to<br>0.00)                         | 0.01<br>(0.01 to<br>0.02)                      | 0.00<br>(0.00 to<br>0.00)                      | 0.00<br>(0.00 to<br>0.00)                      | 0.00<br>(0.00 to<br>0.00)                      |

| Fiji                                                                     |                                                 |                                                 |                                                 |                                                 |                                            |                                             |                                            |                                              |
|--------------------------------------------------------------------------|-------------------------------------------------|-------------------------------------------------|-------------------------------------------------|-------------------------------------------------|--------------------------------------------|---------------------------------------------|--------------------------------------------|----------------------------------------------|
| Cause                                                                    | YLLs (actual counts)                            |                                                 |                                                 |                                                 | Deaths (actual counts)                     |                                             |                                            |                                              |
|                                                                          | 2016                                            | 2040 Forecast                                   | 2040 Better Scenario                            | 2040 Worse Scenario                             | 2016                                       | 2040 Forecast                               | 2040 Better Scenario                       | 2040 Worse Scenario                          |
| <b>All causes</b>                                                        | <b>250,826.89</b><br>(197,552.17 to 305,128.31) | <b>283,134.24</b><br>(214,937.71 to 365,353.38) | <b>204,615.87</b><br>(154,243.95 to 270,105.19) | <b>342,300.83</b><br>(254,553.98 to 446,915.19) | <b>8,320.37</b><br>(6,589.74 to 10,086.31) | <b>11,030.82</b><br>(9,656.70 to 12,624.57) | <b>8,788.68</b><br>(7,537.59 to 10,317.42) | <b>12,639.36</b><br>(10,923.36 to 14,580.80) |
| <b>Communicable, maternal, neonatal, and nutritional diseases</b>        | <b>37,565.59</b><br>(27,692.07 to 50,196.36)    | <b>45,200.14</b><br>(25,142.23 to 86,490.36)    | <b>26,909.15</b><br>(16,146.65 to 47,678.30)    | <b>56,683.12</b><br>(30,397.28 to 111,539.12)   | <b>734.57</b><br>(578.28 to 925.49)        | <b>991.81</b><br>(679.01 to 1,582.93)       | <b>718.02</b><br>(526.10 to 1,044.53)      | <b>1,175.29</b><br>(771.61 to 1,942.65)      |
| <b>HIV/AIDS and tuberculosis</b>                                         | <b>1,732.24</b><br>(1,332.98 to 2,195.42)       | <b>1,714.07</b><br>(1,167.11 to 2,457.23)       | <b>795.46</b><br>(489.52 to 1,248.33)           | <b>2,279.73</b><br>(1,564.04 to 3,154.62)       | <b>49.09</b><br>(38.16 to 62.19)           | <b>48.76</b><br>(33.94 to 68.51)            | <b>24.10</b><br>(15.42 to 36.55)           | <b>61.79</b><br>(43.73 to 85.24)             |
| <b>Tuberculosis</b>                                                      | <b>1,210.80</b><br>(916.90 to 1,516.83)         | <b>869.61</b><br>(529.45 to 1,335.57)           | <b>424.65</b><br>(252.20 to 680.41)             | <b>1,041.62</b><br>(623.92 to 1,623.09)         | <b>38.39</b><br>(29.07 to 48.41)           | <b>31.57</b><br>(20.28 to 47.23)            | <b>16.52</b><br>(10.31 to 26.17)           | <b>36.14</b><br>(22.68 to 55.09)             |
| <b>HIV/AIDS</b>                                                          | <b>521.44</b><br>(264.79 to 890.58)             | <b>844.46</b><br>(451.38 to 1,552.55)           | <b>370.80</b><br>(146.47 to 789.24)             | <b>1,238.11</b><br>(725.24 to 2,029.97)         | <b>10.70</b><br>(5.23 to 19.12)            | <b>17.19</b><br>(8.72 to 32.68)             | <b>7.59</b><br>(2.68 to 17.70)             | <b>25.64</b><br>(14.39 to 43.05)             |
| <b>Diarrhea, lower respiratory, and other common infectious diseases</b> | <b>19,662.11</b><br>(14,700.89 to 25,794.11)    | <b>23,289.88</b><br>(11,122.79 to 51,458.68)    | <b>14,274.52</b><br>(8,204.06 to 26,955.83)     | <b>31,414.39</b><br>(13,915.11 to 72,113.05)    | <b>455.46</b><br>(355.15 to 579.32)        | <b>641.96</b><br>(416.77 to 1,101.08)       | <b>490.65</b><br>(344.38 to 745.16)        | <b>783.92</b><br>(480.34 to 1,403.67)        |
| <b>Diarrheal diseases</b>                                                | <b>2,615.58</b><br>(1,606.75 to 3,843.04)       | <b>2,414.79</b><br>(462.99 to 9,389.45)         | <b>1,613.41</b><br>(393.69 to 5,314.07)         | <b>3,158.30</b><br>(508.78 to 12,825.86)        | <b>73.03</b><br>(43.18 to 107.19)          | <b>95.66</b><br>(22.23 to 286.23)           | <b>80.77</b><br>(21.76 to 229.32)          | <b>112.68</b><br>(22.95 to 355.62)           |
| <b>Intestinal infectious diseases</b>                                    | <b>648.83</b><br>(293.93 to 1,206.69)           | <b>607.99</b><br>(196.63 to 1,525.43)           | <b>527.93</b><br>(184.11 to 1,302.17)           | <b>634.95</b><br>(200.11 to 1,554.74)           | <b>9.64</b><br>(4.48 to 17.87)             | <b>8.98</b><br>(3.18 to 21.03)              | <b>8.03</b><br>(3.07 to 18.50)             | <b>9.30</b><br>(3.26 to 21.99)               |
| <b>Typhoid fever</b>                                                     | <b>555.29</b><br>(246.56 to 1,069.89)           | <b>509.06</b><br>(161.87 to 1,264.94)           | <b>458.93</b><br>(154.00 to 1,135.97)           | <b>531.01</b><br>(164.65 to 1,337.25)           | <b>8.21</b><br>(3.70 to 15.56)             | <b>7.47</b><br>(2.61 to 17.71)              | <b>6.94</b><br>(2.55 to 16.00)             | <b>7.73</b><br>(2.61 to 18.48)               |
| <b>Paratyphoid fever</b>                                                 | <b>92.97</b><br>(36.89 to 192.77)               | <b>98.56</b><br>(29.58 to 264.97)               | <b>68.75</b><br>(20.78 to 179.54)               | <b>103.54</b><br>(30.26 to 264.31)              | <b>1.42</b><br>(0.57 to 2.91)              | <b>1.51</b><br>(0.50 to 3.69)               | <b>1.08</b><br>(0.35 to 2.65)              | <b>1.57</b><br>(0.51 to 3.77)                |
| <b>Other intestinal infectious diseases</b>                              | <b>0.57</b><br>(0.20 to 1.26)                   | <b>0.37</b><br>(0.08 to 1.14)                   | <b>0.24</b><br>(0.06 to 0.71)                   | <b>0.40</b><br>(0.08 to 1.23)                   | <b>0.01</b><br>(0.00 to 0.02)              | <b>0.01</b><br>(0.00 to 0.02)               | <b>0.01</b><br>(0.00 to 0.01)              | <b>0.01</b><br>(0.00 to 0.02)                |
| <b>Lower respiratory infections</b>                                      | <b>12,739.10</b><br>(9,436.48 to 16,979.20)     | <b>14,295.88</b><br>(7,446.21 to 33,547.45)     | <b>9,242.87</b><br>(5,613.28 to 16,731.21)      | <b>18,754.07</b><br>(9,205.42 to 48,126.01)     | <b>319.72</b><br>(240.79 to 426.11)        | <b>453.10</b><br>(318.91 to 703.72)         | <b>355.48</b><br>(259.04 to 502.69)        | <b>543.78</b><br>(361.33 to 926.89)          |
| <b>Upper respiratory infections</b>                                      | <b>12.13</b><br>(5.95 to 22.27)                 | <b>12.89</b><br>(4.71 to 30.21)                 | <b>7.14</b><br>(2.60 to 16.14)                  | <b>14.19</b><br>(4.97 to 34.16)                 | <b>0.28</b><br>(0.15 to 0.46)              | <b>0.33</b><br>(0.14 to 0.69)               | <b>0.20</b><br>(0.08 to 0.41)              | <b>0.35</b><br>(0.14 to 0.73)                |
| <b>Otitis media</b>                                                      | <b>0.41</b><br>(0.21 to 0.72)                   | <b>0.09</b><br>(0.04 to 0.22)                   | <b>0.09</b><br>(0.05 to 0.21)                   | <b>0.09</b><br>(0.04 to 0.22)                   | <b>0.01</b><br>(0.00 to 0.01)              | <b>0.00</b><br>(0.00 to 0.01)               | <b>0.00</b><br>(0.00 to 0.01)              | <b>0.00</b><br>(0.00 to 0.00)                |
| <b>Meningitis</b>                                                        | <b>1,587.99</b><br>(1,084.39 to 2,270.48)       | <b>1,231.13</b><br>(480.52 to 2,898.05)         | <b>803.14</b><br>(347.55 to 1,773.15)           | <b>1,542.25</b><br>(508.09 to 4,001.95)         | <b>24.80</b><br>(17.77 to 35.57)           | <b>20.35</b><br>(10.32 to 40.26)            | <b>14.65</b><br>(8.11 to 26.89)            | <b>23.63</b><br>(10.59 to 53.76)             |
| <b>Pneumococcal meningitis</b>                                           | <b>4.23</b><br>(2.68 to 6.34)                   | <b>2.78</b><br>(1.08 to 6.78)                   | <b>2.31</b><br>(1.03 to 5.03)                   | <b>3.29</b><br>(1.17 to 8.51)                   | <b>0.07</b><br>(0.05 to 0.10)              | <b>0.05</b><br>(0.03 to 0.10)               | <b>0.05</b><br>(0.03 to 0.09)              | <b>0.06</b><br>(0.03 to 0.12)                |
| <b>H influenzae type B meningitis</b>                                    | <b>157.62</b><br>(100.74 to 237.52)             | <b>311.64</b><br>(44.93 to 1,131.87)            | <b>157.98</b><br>(38.29 to 498.75)              | <b>593.76</b><br>(59.30 to 2,313.25)            | <b>2.39</b><br>(1.61 to 3.48)              | <b>4.10</b><br>(0.93 to 13.76)              | <b>2.36</b><br>(0.88 to 6.38)              | <b>7.36</b><br>(1.06 to 27.41)               |
| <b>Meningococcal meningitis</b>                                          | <b>475.37</b><br>(328.76 to 703.28)             | <b>284.10</b><br>(131.32 to 589.91)             | <b>201.14</b><br>(97.27 to 403.48)              | <b>293.08</b><br>(131.41 to 624.43)             | <b>7.73</b><br>(5.50 to 11.12)             | <b>5.43</b><br>(3.27 to 9.46)               | <b>4.21</b><br>(2.57 to 7.02)              | <b>5.40</b><br>(3.17 to 9.67)                |
| <b>Other meningitis</b>                                                  | <b>950.77</b><br>(645.44 to 1,350.29)           | <b>632.61</b><br>(278.12 to 1,341.96)           | <b>441.72</b><br>(199.65 to 905.63)             | <b>652.11</b><br>(280.05 to 1,422.42)           | <b>14.61</b><br>(10.26 to 20.95)           | <b>10.77</b><br>(5.83 to 19.97)             | <b>8.04</b><br>(4.48 to 14.41)             | <b>10.82</b><br>(5.67 to 20.26)              |
| <b>Encephalitis</b>                                                      | <b>320.25</b><br>(238.60 to 424.56)             | <b>392.05</b><br>(216.38 to 685.34)             | <b>323.09</b><br>(184.93 to 544.48)             | <b>403.33</b><br>(222.15 to 717.30)             | <b>6.07</b><br>(4.56 to 7.81)              | <b>8.21</b><br>(5.47 to 12.17)              | <b>7.30</b><br>(5.02 to 10.47)             | <b>8.18</b><br>(5.47 to 12.19)               |

|                |                                     |                                      |                                    |                                      |                             |                              |                              |                              |
|----------------|-------------------------------------|--------------------------------------|------------------------------------|--------------------------------------|-----------------------------|------------------------------|------------------------------|------------------------------|
|                | 3.09<br>(1.74 to<br>5.27)           | 1.12<br>(0.32 to<br>3.44)            | 0.59<br>(0.28 to<br>1.21)          | 2.26<br>(0.34 to<br>9.13)            | 0.05<br>(0.03 to<br>0.08)   | 0.02<br>(0.01 to<br>0.04)    | 0.01<br>(0.01 to<br>0.02)    | 0.03<br>(0.01 to<br>0.11)    |
| Diphtheria     |                                     |                                      |                                    |                                      |                             |                              |                              |                              |
| Whooping cough | 272.62<br>(19.38 to<br>974.03)      | 432.53<br>(5.93 to<br>2,206.33)      | 65.45<br>(2.53 to<br>318.97)       | 643.43<br>(6.03 to<br>3,335.29)      | 3.25<br>(0.23 to<br>11.59)  | 5.13<br>(0.08 to<br>26.14)   | 0.80<br>(0.03 to<br>3.84)    | 7.61<br>(0.08 to<br>39.62)   |
| Tetanus        | 5.80<br>(4.53 to<br>7.16)           | 0.96<br>(0.48 to<br>1.89)            | 0.77<br>(0.39 to<br>1.52)          | 1.14<br>(0.54 to<br>2.27)            | 0.10<br>(0.08 to<br>0.12)   | 0.02<br>(0.01 to<br>0.03)    | 0.01<br>(0.01 to<br>0.02)    | 0.02<br>(0.01 to<br>0.03)    |
| Measles        | 1,349.25<br>(426.64 to<br>3,122.35) | 3,799.60<br>(118.43 to<br>22,754.68) | 1,628.84<br>(82.61 to<br>9,086.89) | 6,151.10<br>(129.48 to<br>34,639.72) | 16.29<br>(5.17 to<br>37.36) | 47.79<br>(1.84 to<br>275.74) | 21.66<br>(1.33 to<br>109.72) | 75.96<br>(2.38 to<br>409.02) |

| Fiji                                                  |                                                        |                                                        |                                                        |                                                        |                                                  |                                                   |                                                   |                                                   |
|-------------------------------------------------------|--------------------------------------------------------|--------------------------------------------------------|--------------------------------------------------------|--------------------------------------------------------|--------------------------------------------------|---------------------------------------------------|---------------------------------------------------|---------------------------------------------------|
| Cause                                                 | YLLs (actual counts)                                   |                                                        |                                                        |                                                        | Deaths (actual counts)                           |                                                   |                                                   |                                                   |
|                                                       | 2016                                                   | 2040 Forecast                                          | 2040 Better Scenario                                   | 2040 Worse Scenario                                    | 2016                                             | 2040 Forecast                                     | 2040 Better Scenario                              | 2040 Worse Scenario                               |
| Varicella and herpes zoster                           | 107.05<br>(62.98 to<br>183.44)                         | 100.86<br>(30.31 to<br>305.48)                         | 61.20<br>(20.77 to<br>173.27)                          | 109.28<br>(30.29 to<br>342.64)                         | 2.22<br>(1.51 to<br>3.21)                        | 2.36<br>(1.18 to<br>4.99)                         | 1.73<br>(0.89 to<br>3.26)                         | 2.37<br>(1.11 to<br>5.27)                         |
| <b>Neglected tropical diseases and malaria</b>        | <b>173.28</b><br><b>(102.65 to</b><br><b>259.54)</b>   | <b>873.07</b><br><b>(436.42 to</b><br><b>1,706.55)</b> | <b>786.88</b><br><b>(413.67 to</b><br><b>1,488.66)</b> | <b>875.04</b><br><b>(424.31 to</b><br><b>1,734.14)</b> | <b>4.58</b><br><b>(2.98 to</b><br><b>6.40)</b>   | <b>25.72</b><br><b>(16.27 to</b><br><b>39.75)</b> | <b>26.09</b><br><b>(17.06 to</b><br><b>39.18)</b> | <b>24.13</b><br><b>(15.01 to</b><br><b>38.10)</b> |
| Malaria                                               | 0.00<br>(0.00 to<br>0.00)                              | 0.00<br>(0.00 to<br>0.00)                              | 0.00<br>(0.00 to<br>0.00)                              | 0.00<br>(0.00 to<br>0.00)                              | 0.00<br>(0.00 to<br>0.00)                        | 0.00<br>(0.00 to<br>0.00)                         | 0.00<br>(0.00 to<br>0.00)                         | 0.00<br>(0.00 to<br>0.00)                         |
| Chagas disease                                        | 0.00<br>(0.00 to<br>0.00)                              | 0.00<br>(0.00 to<br>0.00)                              | 0.00<br>(0.00 to<br>0.00)                              | 0.00<br>(0.00 to<br>0.00)                              | 0.00<br>(0.00 to<br>0.00)                        | 0.00<br>(0.00 to<br>0.00)                         | 0.00<br>(0.00 to<br>0.00)                         | 0.00<br>(0.00 to<br>0.00)                         |
| Leishmaniasis                                         | 0.00<br>(0.00 to<br>0.00)                              | 0.00<br>(0.00 to<br>0.00)                              | 0.00<br>(0.00 to<br>0.00)                              | 0.00<br>(0.00 to<br>0.00)                              | 0.00<br>(0.00 to<br>0.00)                        | 0.00<br>(0.00 to<br>0.00)                         | 0.00<br>(0.00 to<br>0.00)                         | 0.00<br>(0.00 to<br>0.00)                         |
| African trypanosomiasis                               | 0.00<br>(0.00 to<br>0.00)                              | 0.00<br>(0.00 to<br>0.00)                              | 0.00<br>(0.00 to<br>0.00)                              | 0.00<br>(0.00 to<br>0.00)                              | 0.00<br>(0.00 to<br>0.00)                        | 0.00<br>(0.00 to<br>0.00)                         | 0.00<br>(0.00 to<br>0.00)                         | 0.00<br>(0.00 to<br>0.00)                         |
| Schistosomiasis                                       | 0.00<br>(0.00 to<br>0.00)                              | 0.00<br>(0.00 to<br>0.00)                              | 0.00<br>(0.00 to<br>0.00)                              | 0.00<br>(0.00 to<br>0.00)                              | 0.00<br>(0.00 to<br>0.00)                        | 0.00<br>(0.00 to<br>0.00)                         | 0.00<br>(0.00 to<br>0.00)                         | 0.00<br>(0.00 to<br>0.00)                         |
| Cysticercosis                                         | 0.00<br>(0.00 to<br>0.00)                              | 0.00<br>(0.00 to<br>0.00)                              | 0.00<br>(0.00 to<br>0.00)                              | 0.00<br>(0.00 to<br>0.00)                              | 0.00<br>(0.00 to<br>0.00)                        | 0.00<br>(0.00 to<br>0.00)                         | 0.00<br>(0.00 to<br>0.00)                         | 0.00<br>(0.00 to<br>0.00)                         |
| Cystic echinococcosis                                 | 0.45<br>(0.33 to<br>0.60)                              | 0.43<br>(0.27 to<br>0.63)                              | 0.26<br>(0.17 to<br>0.39)                              | 0.47<br>(0.30 to<br>0.68)                              | 0.01<br>(0.01 to<br>0.02)                        | 0.01<br>(0.01 to<br>0.02)                         | 0.01<br>(0.01 to<br>0.02)                         | 0.02<br>(0.01 to<br>0.02)                         |
| Dengue                                                | 64.22<br>(25.52 to<br>127.37)                          | 523.72<br>(240.13 to<br>1,021.73)                      | 497.61<br>(237.55 to<br>939.07)                        | 514.40<br>(234.19 to<br>994.28)                        | 1.64<br>(0.68 to<br>3.45)                        | 16.19<br>(8.93 to<br>28.39)                       | 17.10<br>(9.54 to<br>29.11)                       | 14.94<br>(8.01 to<br>25.95)                       |
| Yellow fever                                          | 0.00<br>(0.00 to<br>0.00)                              | 0.00<br>(0.00 to<br>0.00)                              | 0.00<br>(0.00 to<br>0.00)                              | 0.00<br>(0.00 to<br>0.00)                              | 0.00<br>(0.00 to<br>0.00)                        | 0.00<br>(0.00 to<br>0.00)                         | 0.00<br>(0.00 to<br>0.00)                         | 0.00<br>(0.00 to<br>0.00)                         |
| Rabies                                                | 1.05<br>(0.35 to<br>1.78)                              | 1.45<br>(0.33 to<br>3.16)                              | 0.85<br>(0.19 to<br>1.75)                              | 1.66<br>(0.36 to<br>3.67)                              | 0.05<br>(0.01 to<br>0.10)                        | 0.08<br>(0.01 to<br>0.16)                         | 0.05<br>(0.01 to<br>0.11)                         | 0.08<br>(0.01 to<br>0.17)                         |
| Intestinal nematode infections                        | 38.66<br>(10.07 to<br>91.16)                           | 173.02<br>(21.90 to<br>627.89)                         | 144.73<br>(21.37 to<br>524.59)                         | 178.10<br>(21.63 to<br>639.95)                         | 0.58<br>(0.22 to<br>1.21)                        | 2.41<br>(0.56 to<br>7.89)                         | 2.12<br>(0.56 to<br>6.70)                         | 2.44<br>(0.53 to<br>7.91)                         |
| Other neglected tropical diseases                     | 68.90<br>(40.54 to<br>108.73)                          | 174.45<br>(76.14 to<br>338.09)                         | 143.43<br>(66.02 to<br>257.35)                         | 180.42<br>(79.64 to<br>359.68)                         | 2.29<br>(1.39 to<br>3.25)                        | 7.04<br>(3.14 to<br>11.36)                        | 6.82<br>(3.04 to<br>11.14)                        | 6.66<br>(3.03 to<br>10.66)                        |
| <b>Maternal disorders</b>                             | <b>734.56</b><br><b>(435.11 to</b><br><b>1,181.07)</b> | <b>453.03</b><br><b>(228.02 to</b><br><b>853.41)</b>   | <b>287.40</b><br><b>(138.55 to</b><br><b>552.62)</b>   | <b>519.58</b><br><b>(251.96 to</b><br><b>1,004.11)</b> | <b>13.74</b><br><b>(8.14 to</b><br><b>22.13)</b> | <b>8.57</b><br><b>(4.29 to</b><br><b>15.67)</b>   | <b>5.45</b><br><b>(2.65 to</b><br><b>10.15)</b>   | <b>9.81</b><br><b>(4.85 to</b><br><b>18.62)</b>   |
| Maternal hemorrhage                                   | 116.09<br>(57.99 to<br>212.55)                         | 83.71<br>(35.00 to<br>175.75)                          | 53.69<br>(22.88 to<br>112.46)                          | 95.66<br>(40.04 to<br>203.11)                          | 2.14<br>(1.08 to<br>3.93)                        | 1.56<br>(0.66 to<br>3.27)                         | 1.00<br>(0.43 to<br>2.08)                         | 1.78<br>(0.76 to<br>3.70)                         |
| Maternal sepsis and other maternal infections         | 64.40<br>(34.05 to<br>114.41)                          | 41.99<br>(18.32 to<br>85.80)                           | 26.71<br>(11.55 to<br>55.32)                           | 48.11<br>(20.75 to<br>100.23)                          | 1.22<br>(0.65 to<br>2.18)                        | 0.81<br>(0.35 to<br>1.64)                         | 0.51<br>(0.22 to<br>1.05)                         | 0.92<br>(0.41 to<br>1.90)                         |
| Maternal hypertensive disorders                       | 54.45<br>(28.01 to<br>95.84)                           | 43.52<br>(19.28 to<br>85.64)                           | 27.52<br>(11.62 to<br>56.15)                           | 49.85<br>(21.05 to<br>102.33)                          | 1.00<br>(0.52 to<br>1.75)                        | 0.81<br>(0.36 to<br>1.64)                         | 0.51<br>(0.22 to<br>1.06)                         | 0.93<br>(0.40 to<br>1.90)                         |
| Maternal obstructed labor and uterine rupture         | 31.71<br>(15.47 to<br>59.78)                           | 24.35<br>(9.46 to<br>51.26)                            | 14.86<br>(5.54 to<br>32.40)                            | 28.15<br>(10.75 to<br>61.31)                           | 0.59<br>(0.29 to<br>1.10)                        | 0.46<br>(0.18 to<br>0.97)                         | 0.28<br>(0.10 to<br>0.60)                         | 0.53<br>(0.21 to<br>1.15)                         |
| Maternal abortion, miscarriage, and ectopic pregnancy | 358.95<br>(210.84 to<br>594.73)                        | 173.13<br>(83.20 to<br>336.08)                         | 109.28<br>(51.64 to<br>216.51)                         | 198.63<br>(95.75 to<br>397.73)                         | 6.79<br>(3.97 to<br>11.29)                       | 3.33<br>(1.64 to<br>6.43)                         | 2.11<br>(0.98 to<br>4.12)                         | 3.82<br>(1.86 to<br>7.49)                         |

|                                        |                               |                              |                              |                               |                           |                           |                           |                           |
|----------------------------------------|-------------------------------|------------------------------|------------------------------|-------------------------------|---------------------------|---------------------------|---------------------------|---------------------------|
|                                        | 38.60<br>(20.20 to<br>70.55)  | 30.87<br>(13.81 to<br>66.45) | 19.29<br>(8.54 to<br>42.18)  | 35.63<br>(15.81 to<br>77.23)  | 0.70<br>(0.37 to<br>1.31) | 0.56<br>(0.25 to<br>1.17) | 0.35<br>(0.16 to<br>0.74) | 0.65<br>(0.30 to<br>1.37) |
| Indirect maternal deaths               |                               |                              |                              |                               |                           |                           |                           |                           |
|                                        | 7.64<br>(2.78 to<br>16.66)    | 5.03<br>(1.66 to<br>11.95)   | 3.13<br>(0.98 to<br>8.02)    | 5.80<br>(1.79 to<br>14.22)    | 0.14<br>(0.05 to<br>0.30) | 0.09<br>(0.03 to<br>0.22) | 0.06<br>(0.02 to<br>0.15) | 0.11<br>(0.03 to<br>0.26) |
| Late maternal deaths                   |                               |                              |                              |                               |                           |                           |                           |                           |
|                                        | 0.38<br>(0.14 to<br>0.82)     | 1.42<br>(0.28 to<br>4.54)    | 0.71<br>(0.04 to<br>2.78)    | 1.70<br>(0.37 to<br>5.37)     | 0.01<br>(0.00 to<br>0.02) | 0.03<br>(0.01 to<br>0.08) | 0.01<br>(0.00 to<br>0.05) | 0.03<br>(0.01 to<br>0.09) |
| Maternal deaths aggravated by HIV/AIDS |                               |                              |                              |                               |                           |                           |                           |                           |
|                                        | 62.34<br>(32.79 to<br>112.95) | 49.01<br>(22.02 to<br>99.69) | 32.20<br>(13.57 to<br>66.69) | 56.05<br>(23.95 to<br>114.55) | 1.15<br>(0.60 to<br>2.09) | 0.91<br>(0.42 to<br>1.80) | 0.60<br>(0.26 to<br>1.26) | 1.04<br>(0.45 to<br>2.12) |
| Other maternal disorders               |                               |                              |                              |                               |                           |                           |                           |                           |

| Fiji                                                                    |                                             |                                             |                                            |                                             |                                    |                                    |                                   |                                    |
|-------------------------------------------------------------------------|---------------------------------------------|---------------------------------------------|--------------------------------------------|---------------------------------------------|------------------------------------|------------------------------------|-----------------------------------|------------------------------------|
| Cause                                                                   | YLLs (actual counts)                        |                                             |                                            |                                             | Deaths (actual counts)             |                                    |                                   |                                    |
|                                                                         | 2016                                        | 2040 Forecast                               | 2040 Better Scenario                       | 2040 Worse Scenario                         | 2016                               | 2040 Forecast                      | 2040 Better Scenario              | 2040 Worse Scenario                |
| <b>Neonatal disorders</b>                                               | <b>11,994.64</b><br>(7,394.67 to 18,286.63) | <b>15,633.28</b><br>(6,909.97 to 30,448.27) | <b>8,175.19</b><br>(3,535.51 to 16,328.85) | <b>18,196.04</b><br>(8,079.83 to 35,553.15) | <b>138.63</b><br>(85.45 to 211.45) | <b>180.89</b><br>(79.95 to 352.59) | <b>94.62</b><br>(40.92 to 188.70) | <b>210.52</b><br>(93.62 to 411.62) |
| Neonatal preterm birth                                                  | 6,087.05<br>(3,557.55 to 9,524.77)          | 6,789.23<br>(3,178.00 to 13,388.99)         | 3,021.68<br>(1,355.77 to 6,057.42)         | 7,747.23<br>(3,597.67 to 15,104.94)         | 70.33<br>(41.10 to 110.08)         | 78.48<br>(36.75 to 154.86)         | 34.94<br>(15.67 to 70.09)         | 89.55<br>(41.61 to 174.54)         |
| Neonatal encephalopathy due to birth asphyxia and trauma                | 3,160.06<br>(1,897.96 to 5,025.99)          | 4,004.69<br>(1,641.23 to 8,736.56)          | 2,270.44<br>(906.93 to 4,912.91)           | 4,707.61<br>(1,905.86 to 10,263.07)         | 36.53<br>(21.94 to 58.10)          | 46.37<br>(19.02 to 100.96)         | 26.29<br>(10.49 to 56.85)         | 54.50<br>(22.12 to 119.22)         |
| Neonatal sepsis and other neonatal infections                           | 1,518.80<br>(817.36 to 2,626.19)            | 2,842.32<br>(1,091.90 to 6,021.06)          | 1,663.26<br>(662.97 to 3,511.67)           | 3,353.95<br>(1,333.10 to 7,808.25)          | 17.56<br>(9.45 to 30.36)           | 32.91<br>(12.65 to 69.67)          | 19.26<br>(7.68 to 40.65)          | 38.83<br>(15.45 to 81.03)          |
| Hemolytic disease and other neonatal jaundice                           | 87.58<br>(44.38 to 159.95)                  | 58.35<br>(18.04 to 150.00)                  | 31.76<br>(9.84 to 82.96)                   | 71.16<br>(21.73 to 189.39)                  | 1.01<br>(0.51 to 1.85)             | 0.67<br>(0.21 to 1.73)             | 0.37<br>(0.11 to 0.96)            | 0.82<br>(0.25 to 2.19)             |
| Other neonatal disorders                                                | 1,141.16<br>(634.81 to 1,895.41)            | 1,938.69<br>(710.66 to 4,243.76)            | 1,188.06<br>(429.10 to 2,628.42)           | 2,316.09<br>(838.88 to 5,150.83)            | 13.20<br>(7.34 to 21.91)           | 22.45<br>(8.25 to 49.13)           | 13.76<br>(4.96 to 30.46)          | 26.82<br>(9.75 to 59.67)           |
| <b>Nutritional deficiencies</b>                                         | <b>662.86</b><br>(413.32 to 1,099.95)       | <b>559.43</b><br>(247.16 to 1,304.49)       | <b>437.40</b><br>(219.97 to 971.46)        | <b>599.75</b><br>(244.92 to 1,440.91)       | <b>15.35</b><br>(11.76 to 20.62)   | <b>17.81</b><br>(12.86 to 27.37)   | <b>17.53</b><br>(13.24 to 24.33)  | <b>17.07</b><br>(11.65 to 27.72)   |
| Protein-energy malnutrition                                             | 628.38<br>(382.64 to 1,058.68)              | 509.08<br>(212.75 to 1,229.72)              | 399.34<br>(192.20 to 902.43)               | 546.47<br>(213.89 to 1,378.03)              | 14.42<br>(11.01 to 19.58)          | 16.20<br>(11.31 to 25.53)          | 16.11<br>(11.97 to 22.72)         | 15.50<br>(10.34 to 25.63)          |
| Iodine deficiency                                                       | 9.40<br>(0.61 to 37.64)                     | 24.37<br>(0.83 to 134.78)                   | 17.54<br>(0.54 to 87.47)                   | 26.55<br>(0.84 to 153.30)                   | 0.23<br>(0.02 to 0.71)             | 0.74<br>(0.02 to 2.87)             | 0.64<br>(0.01 to 2.58)            | 0.73<br>(0.02 to 2.73)             |
| Dietary iron deficiency                                                 | 5.03<br>(3.66 to 6.56)                      | 5.69<br>(2.94 to 11.31)                     | 4.76<br>(2.54 to 9.15)                     | 5.99<br>(3.02 to 11.98)                     | 0.09<br>(0.07 to 0.12)             | 0.10<br>(0.06 to 0.17)             | 0.09<br>(0.06 to 0.15)            | 0.10<br>(0.06 to 0.18)             |
| Other nutritional deficiencies                                          | 20.06<br>(13.79 to 28.67)                   | 20.29<br>(12.74 to 33.25)                   | 15.97<br>(10.40 to 24.76)                  | 20.72<br>(12.88 to 34.12)                   | 0.61<br>(0.44 to 0.84)             | 0.77<br>(0.54 to 1.08)             | 0.69<br>(0.48 to 0.96)            | 0.73<br>(0.51 to 1.03)             |
| <b>Other communicable, maternal, neonatal, and nutritional diseases</b> | <b>2,605.90</b><br>(1,964.51 to 3,387.78)   | <b>2,677.37</b><br>(1,762.02 to 4,045.40)   | <b>2,152.31</b><br>(1,400.16 to 3,183.14)  | <b>2,798.59</b><br>(1,793.23 to 4,216.38)   | <b>57.74</b><br>(43.97 to 72.92)   | <b>68.11</b><br>(51.78 to 89.21)   | <b>59.58</b><br>(46.00 to 77.26)  | <b>68.05</b><br>(51.37 to 89.58)   |
| Sexually transmitted infections excluding HIV                           | 351.44<br>(137.68 to 737.29)                | 233.69<br>(75.69 to 644.88)                 | 164.77<br>(59.72 to 426.91)                | 251.80<br>(79.28 to 710.53)                 | 5.58<br>(2.78 to 10.33)            | 3.77<br>(1.67 to 8.67)             | 2.84<br>(1.37 to 6.07)            | 3.99<br>(1.68 to 9.39)             |
| Syphilis                                                                | 242.90<br>(38.54 to 631.91)                 | 162.72<br>(22.22 to 571.69)                 | 103.19<br>(15.94 to 361.35)                | 178.46<br>(23.63 to 632.74)                 | 3.15<br>(0.74 to 7.67)             | 2.12<br>(0.44 to 6.90)             | 1.39<br>(0.34 to 4.39)            | 2.31<br>(0.45 to 7.63)             |
| Chlamydial infection                                                    | 21.31<br>(12.82 to 33.58)                   | 14.00<br>(7.90 to 24.00)                    | 12.10<br>(6.68 to 20.61)                   | 14.48<br>(8.01 to 24.21)                    | 0.47<br>(0.29 to 0.75)             | 0.32<br>(0.19 to 0.53)             | 0.28<br>(0.17 to 0.46)            | 0.33<br>(0.19 to 0.54)             |
| Gonococcal infection                                                    | 55.87<br>(33.52 to 89.60)                   | 36.47<br>(20.30 to 60.65)                   | 31.76<br>(17.43 to 52.96)                  | 37.64<br>(20.68 to 62.91)                   | 1.26<br>(0.77 to 2.01)             | 0.86<br>(0.51 to 1.39)             | 0.76<br>(0.45 to 1.22)            | 0.88<br>(0.52 to 1.42)             |
| Other sexually transmitted infections                                   | 31.37<br>(18.81 to 50.11)                   | 20.51<br>(11.55 to 34.73)                   | 17.72<br>(9.82 to 30.30)                   | 21.22<br>(11.86 to 36.13)                   | 0.70<br>(0.42 to 1.11)             | 0.47<br>(0.27 to 0.78)             | 0.41<br>(0.24 to 0.68)            | 0.48<br>(0.28 to 0.79)             |
| Acute hepatitis                                                         | 340.83<br>(245.38 to 460.45)                | 258.55<br>(167.46 to 382.31)                | 196.43<br>(119.75 to 292.83)               | 263.47<br>(167.44 to 383.29)                | 8.43<br>(6.03 to 11.40)            | 7.14<br>(4.83 to 10.05)            | 5.59<br>(3.57 to 8.08)            | 7.11<br>(4.74 to 9.91)             |
| Acute hepatitis A                                                       | 15.38<br>(9.60 to 23.01)                    | 9.14<br>(3.94 to 19.92)                     | 6.44<br>(2.85 to 13.64)                    | 9.73<br>(4.10 to 21.63)                     | 0.26<br>(0.17 to 0.36)             | 0.17<br>(0.09 to 0.31)             | 0.13<br>(0.07 to 0.23)            | 0.18<br>(0.09 to 0.33)             |
| Acute hepatitis B                                                       | 271.40<br>(187.97 to 376.56)                | 211.80<br>(135.55 to 313.49)                | 162.24<br>(96.27 to 249.57)                | 215.02<br>(135.80 to 314.99)                | 7.13<br>(4.97 to 9.88)             | 6.08<br>(4.00 to 8.66)             | 4.75<br>(3.00 to 7.07)            | 6.06<br>(3.95 to 8.60)             |

|                                       |                                                                  |                                                                  |                                                                  |                                                                  |                                                            |                                                             |                                                            |                                                              |
|---------------------------------------|------------------------------------------------------------------|------------------------------------------------------------------|------------------------------------------------------------------|------------------------------------------------------------------|------------------------------------------------------------|-------------------------------------------------------------|------------------------------------------------------------|--------------------------------------------------------------|
| Acute hepatitis C                     | 6.77<br>(4.42 to<br>10.06)                                       | 5.88<br>(3.43 to<br>9.36)                                        | 4.80<br>(2.68 to<br>7.79)                                        | 5.80<br>(3.39 to<br>9.25)                                        | 0.18<br>(0.12 to<br>0.28)                                  | 0.18<br>(0.11 to<br>0.28)                                   | 0.15<br>(0.09 to<br>0.24)                                  | 0.17<br>(0.10 to<br>0.26)                                    |
| Acute hepatitis E                     | 47.27<br>(31.26 to<br>71.84)                                     | 31.73<br>(15.28 to<br>62.96)                                     | 22.96<br>(11.35 to<br>44.42)                                     | 32.92<br>(15.55 to<br>65.90)                                     | 0.87<br>(0.57 to<br>1.29)                                  | 0.71<br>(0.40 to<br>1.23)                                   | 0.56<br>(0.31 to<br>0.97)                                  | 0.71<br>(0.39 to<br>1.23)                                    |
| Other unspecified infectious diseases | 1,913.62<br>(1,407.44 to<br>2,471.48)                            | 2,185.13<br>(1,437.10 to<br>3,332.86)                            | 1,791.10<br>(1,186.54 to<br>2,640.39)                            | 2,283.31<br>(1,493.20 to<br>3,436.73)                            | 43.73<br>(32.98 to<br>55.87)                               | 57.20<br>(44.00 to<br>74.85)                                | 51.15<br>(39.59 to<br>66.50)                               | 56.95<br>(43.52 to<br>74.25)                                 |
| <b>Non-communicable diseases</b>      | <b>187,511.23</b><br><b>(145,269.43 to</b><br><b>230,853.97)</b> | <b>214,547.39</b><br><b>(166,933.48 to</b><br><b>271,570.14)</b> | <b>161,421.01</b><br><b>(122,538.66 to</b><br><b>210,212.76)</b> | <b>258,517.01</b><br><b>(199,865.39 to</b><br><b>329,958.37)</b> | <b>7,081.82</b><br><b>(5,601.16 to</b><br><b>8,602.85)</b> | <b>9,538.47</b><br><b>(8,319.53 to</b><br><b>10,949.94)</b> | <b>7,697.77</b><br><b>(6,590.09 to</b><br><b>9,121.79)</b> | <b>10,907.79</b><br><b>(9,434.55 to</b><br><b>12,624.31)</b> |

| Fiji                                 |                                       |                                       |                                       |                                       |                                |                                  |                                  |                                  |
|--------------------------------------|---------------------------------------|---------------------------------------|---------------------------------------|---------------------------------------|--------------------------------|----------------------------------|----------------------------------|----------------------------------|
| Cause                                | YLLs (actual counts)                  |                                       |                                       |                                       | Deaths (actual counts)         |                                  |                                  |                                  |
|                                      | 2016                                  | 2040 Forecast                         | 2040 Better Scenario                  | 2040 Worse Scenario                   | 2016                           | 2040 Forecast                    | 2040 Better Scenario             | 2040 Worse Scenario              |
| Neoplasms                            | 23,541.26<br>(17,649.08 to 30,175.03) | 29,863.46<br>(22,015.15 to 40,043.55) | 27,637.91<br>(20,489.51 to 37,276.29) | 31,180.99<br>(22,812.84 to 41,852.04) | 791.38<br>(604.84 to 1,003.39) | 1,163.57<br>(915.56 to 1,487.90) | 1,141.10<br>(899.73 to 1,446.28) | 1,164.88<br>(908.66 to 1,496.37) |
| Lip and oral cavity cancer           | 490.37<br>(370.84 to 627.08)          | 676.94<br>(407.06 to 1,042.95)        | 509.38<br>(331.33 to 738.08)          | 819.49<br>(460.40 to 1,313.01)        | 18.11<br>(13.94 to 22.73)      | 27.95<br>(18.64 to 41.30)        | 22.73<br>(16.11 to 31.64)        | 31.68<br>(19.90 to 48.43)        |
| Nasopharynx cancer                   | 123.61<br>(90.45 to 162.55)           | 185.85<br>(107.12 to 295.89)          | 123.73<br>(75.13 to 190.97)           | 237.26<br>(128.68 to 404.27)          | 4.00<br>(2.96 to 5.19)         | 6.43<br>(3.90 to 10.04)          | 4.50<br>(2.91 to 6.65)           | 7.84<br>(4.51 to 13.04)          |
| Other pharynx cancer                 | 248.22<br>(181.38 to 329.16)          | 260.53<br>(172.14 to 385.89)          | 226.27<br>(154.65 to 322.43)          | 269.14<br>(175.19 to 405.33)          | 8.76<br>(6.55 to 11.38)        | 10.58<br>(7.41 to 14.99)         | 9.64<br>(7.02 to 13.12)          | 10.60<br>(7.24 to 15.55)         |
| Esophageal cancer                    | 427.18<br>(313.06 to 554.17)          | 502.82<br>(300.69 to 804.58)          | 420.02<br>(258.45 to 661.88)          | 602.43<br>(339.16 to 996.38)          | 16.73<br>(12.51 to 21.31)      | 21.75<br>(13.80 to 33.41)        | 19.26<br>(12.58 to 29.04)        | 24.63<br>(14.64 to 38.48)        |
| Stomach cancer                       | 1,044.96<br>(791.04 to 1,337.16)      | 921.76<br>(717.14 to 1,142.91)        | 810.65<br>(613.86 to 1,027.65)        | 917.59<br>(711.19 to 1,155.27)        | 40.06<br>(31.18 to 50.01)      | 42.03<br>(36.12 to 49.33)        | 38.82<br>(32.12 to 46.45)        | 40.11<br>(34.02 to 47.62)        |
| Colon and rectum cancer              | 1,593.07<br>(1,212.15 to 2,045.77)    | 2,290.96<br>(1,421.10 to 3,645.17)    | 2,141.17<br>(1,334.41 to 3,471.74)    | 2,263.84<br>(1,375.72 to 3,660.33)    | 62.42<br>(48.84 to 77.90)      | 106.15<br>(67.91 to 167.86)      | 104.63<br>(67.82 to 163.66)      | 100.49<br>(64.15 to 159.18)      |
| Liver cancer                         | 1,779.59<br>(1,262.37 to 2,348.29)    | 2,277.30<br>(1,454.88 to 3,461.60)    | 2,195.57<br>(1,454.91 to 3,214.82)    | 2,608.10<br>(1,589.73 to 4,196.87)    | 63.82<br>(45.30 to 82.25)      | 92.51<br>(62.23 to 134.48)       | 93.26<br>(63.69 to 132.41)       | 100.86<br>(63.50 to 154.16)      |
| Liver cancer due to hepatitis B      | 937.88<br>(647.00 to 1,256.22)        | 1,147.37<br>(729.06 to 1,777.89)      | 1,111.53<br>(717.21 to 1,662.91)      | 1,314.31<br>(785.99 to 2,173.42)      | 31.81<br>(22.39 to 42.52)      | 43.78<br>(28.95 to 64.30)        | 44.16<br>(29.88 to 64.20)        | 47.92<br>(29.96 to 74.18)        |
| Liver cancer due to hepatitis C      | 273.92<br>(183.00 to 366.27)          | 375.82<br>(239.48 to 556.37)          | 375.87<br>(248.06 to 539.28)          | 411.73<br>(252.09 to 637.91)          | 11.56<br>(7.88 to 15.31)       | 18.34<br>(12.00 to 26.30)        | 19.19<br>(12.76 to 27.10)        | 19.14<br>(11.96 to 28.72)        |
| Liver cancer due to alcohol use      | 143.44<br>(94.14 to 199.34)           | 193.56<br>(115.34 to 307.41)          | 168.47<br>(102.93 to 257.66)          | 229.93<br>(129.79 to 379.02)          | 5.49<br>(3.62 to 7.49)         | 8.03<br>(4.91 to 12.43)          | 7.40<br>(4.76 to 10.94)          | 9.07<br>(5.37 to 14.50)          |
| Liver cancer due to other causes     | 424.34<br>(280.63 to 590.80)          | 560.55<br>(309.93 to 987.91)          | 539.70<br>(301.66 to 926.09)          | 652.13<br>(337.19 to 1,207.07)        | 14.95<br>(10.22 to 20.48)      | 22.36<br>(12.79 to 38.83)        | 22.52<br>(13.17 to 38.28)        | 24.72<br>(13.42 to 44.47)        |
| Gallbladder and biliary tract cancer | 212.88<br>(152.38 to 279.30)          | 189.34<br>(143.92 to 234.07)          | 198.84<br>(149.07 to 249.58)          | 175.44<br>(135.78 to 215.08)          | 8.65<br>(6.26 to 11.09)        | 8.93<br>(7.15 to 10.47)          | 9.77<br>(7.80 to 11.50)          | 8.01<br>(6.37 to 9.33)           |
| Pancreatic cancer                    | 611.08<br>(463.76 to 780.85)          | 1,000.59<br>(661.37 to 1,514.54)      | 1,073.04<br>(711.62 to 1,652.65)      | 970.88<br>(641.48 to 1,469.90)        | 25.18<br>(19.41 to 31.66)      | 46.27<br>(31.64 to 68.87)        | 51.55<br>(35.71 to 76.38)        | 43.22<br>(29.35 to 65.10)        |
| Larynx cancer                        | 216.15<br>(155.69 to 281.36)          | 235.38<br>(130.93 to 427.57)          | 162.57<br>(99.50 to 271.77)           | 323.36<br>(156.46 to 635.01)          | 8.46<br>(6.25 to 10.87)        | 10.27<br>(6.22 to 17.77)         | 7.61<br>(5.08 to 11.77)          | 13.22<br>(6.94 to 25.17)         |
| Tracheal, bronchus, and lung cancer  | 1,297.11<br>(974.63 to 1,645.49)      | 1,697.56<br>(1,023.27 to 2,784.61)    | 1,463.20<br>(907.13 to 2,312.55)      | 2,402.23<br>(1,316.92 to 4,047.33)    | 51.95<br>(39.65 to 65.08)      | 76.90<br>(48.03 to 123.53)       | 69.61<br>(44.72 to 106.49)       | 102.44<br>(60.25 to 167.10)      |
| Malignant skin melanoma              | 121.72<br>(80.43 to 230.98)           | 165.68<br>(117.26 to 300.95)          | 200.87<br>(140.41 to 366.42)          | 150.23<br>(107.91 to 271.91)          | 4.50<br>(3.04 to 8.48)         | 7.30<br>(5.55 to 13.18)          | 9.33<br>(7.04 to 17.06)          | 6.35<br>(4.82 to 11.39)          |
| Non-melanoma skin cancer             | 99.20<br>(70.87 to 134.10)            | 152.32<br>(123.55 to 183.86)          | 139.61<br>(109.71 to 171.66)          | 142.59<br>(116.42 to 171.66)          | 4.09<br>(3.06 to 5.33)         | 7.89<br>(6.70 to 9.25)           | 7.75<br>(6.43 to 9.24)           | 7.01<br>(5.88 to 8.33)           |
| Breast cancer                        | 3,946.18<br>(2,131.15 to 5,844.02)    | 4,854.14<br>(2,383.99 to 8,508.74)    | 4,487.10<br>(2,187.77 to 7,862.62)    | 4,923.85<br>(2,354.14 to 8,762.61)    | 130.29<br>(70.97 to 188.39)    | 191.42<br>(94.97 to 325.50)      | 184.43<br>(90.97 to 313.75)      | 188.14<br>(90.19 to 323.46)      |
| Cervical cancer                      | 2,821.01<br>(1,595.51 to 4,229.77)    | 2,599.82<br>(1,399.20 to 3,971.72)    | 2,198.41<br>(1,185.01 to 3,456.50)    | 2,659.31<br>(1,405.81 to 4,141.45)    | 88.28<br>(50.35 to 129.18)     | 90.91<br>(50.73 to 129.33)       | 79.24<br>(44.90 to 114.33)       | 90.81<br>(51.13 to 131.11)       |



|                   |                                   |                                     |                                     |                                     |                              |                               |                                |                               |
|-------------------|-----------------------------------|-------------------------------------|-------------------------------------|-------------------------------------|------------------------------|-------------------------------|--------------------------------|-------------------------------|
|                   | 592.82<br>(393.20 to<br>840.13)   | 734.80<br>(505.46 to<br>993.84)     | 651.76<br>(437.30 to<br>895.69)     | 729.51<br>(504.71 to<br>983.19)     | 22.06<br>(14.75 to<br>31.56) | 31.25<br>(23.07 to<br>39.67)  | 28.52<br>(20.81 to<br>37.16)   | 30.41<br>(22.74 to<br>38.10)  |
| Uterine cancer    |                                   |                                     |                                     |                                     |                              |                               |                                |                               |
|                   | 318.30<br>(210.05 to<br>457.55)   | 451.44<br>(251.04 to<br>775.91)     | 455.29<br>(255.05 to<br>782.68)     | 449.74<br>(248.40 to<br>781.83)     | 10.37<br>(6.94 to<br>15.04)  | 16.68<br>(9.90 to<br>28.16)   | 17.27<br>(10.19 to<br>29.42)   | 16.29<br>(9.47 to<br>27.38)   |
| Ovarian cancer    |                                   |                                     |                                     |                                     |                              |                               |                                |                               |
|                   | 737.65<br>(279.43 to<br>1,127.78) | 1,424.00<br>(608.43 to<br>1,910.94) | 1,538.19<br>(669.67 to<br>2,063.69) | 1,228.85<br>(510.23 to<br>1,685.35) | 41.46<br>(16.40 to<br>62.32) | 90.97<br>(39.38 to<br>124.22) | 102.34<br>(45.59 to<br>137.07) | 75.77<br>(31.69 to<br>107.07) |
| Prostate cancer   |                                   |                                     |                                     |                                     |                              |                               |                                |                               |
|                   | 146.52<br>(92.41 to<br>216.43)    | 121.27<br>(77.43 to<br>187.37)      | 108.42<br>(68.24 to<br>164.28)      | 119.25<br>(76.47 to<br>185.54)      | 3.54<br>(2.29 to<br>5.07)    | 3.42<br>(2.48 to<br>4.67)     | 3.20<br>(2.27 to<br>4.36)      | 3.22<br>(2.35 to<br>4.40)     |
| Testicular cancer |                                   |                                     |                                     |                                     |                              |                               |                                |                               |

| Fiji                            |                                                     |                                                     |                                                     |                                                      |                                                  |                                                  |                                                  |                                                  |
|---------------------------------|-----------------------------------------------------|-----------------------------------------------------|-----------------------------------------------------|------------------------------------------------------|--------------------------------------------------|--------------------------------------------------|--------------------------------------------------|--------------------------------------------------|
| Cause                           | YLLs (actual counts)                                |                                                     |                                                     |                                                      | Deaths (actual counts)                           |                                                  |                                                  |                                                  |
|                                 | 2016                                                | 2040 Forecast                                       | 2040 Better Scenario                                | 2040 Worse Scenario                                  | 2016                                             | 2040 Forecast                                    | 2040 Better Scenario                             | 2040 Worse Scenario                              |
| Kidney cancer                   | 144.61<br>(109.91 to 183.39)                        | 238.91<br>(176.16 to 315.40)                        | 257.10<br>(191.03 to 338.77)                        | 229.58<br>(169.37 to 305.01)                         | 4.79<br>(3.66 to 6.03)                           | 9.03<br>(7.33 to 11.17)                          | 10.43<br>(8.48 to 12.83)                         | 8.25<br>(6.70 to 10.39)                          |
| Bladder cancer                  | 268.36<br>(201.57 to 337.89)                        | 326.60<br>(204.33 to 524.27)                        | 320.08<br>(202.64 to 504.31)                        | 325.68<br>(199.72 to 517.49)                         | 11.64<br>(8.99 to 14.45)                         | 16.33<br>(10.70 to 25.41)                        | 16.77<br>(11.11 to 25.80)                        | 15.55<br>(10.03 to 24.44)                        |
| Brain and nervous system cancer | 529.71<br>(364.34 to 708.69)                        | 858.25<br>(534.92 to 1,353.15)                      | 786.04<br>(502.43 to 1,205.24)                      | 849.03<br>(524.80 to 1,359.62)                       | 12.72<br>(9.17 to 16.83)                         | 21.76<br>(15.42 to 29.55)                        | 21.74<br>(15.80 to 28.71)                        | 20.58<br>(14.53 to 28.28)                        |
| Thyroid cancer                  | 231.00<br>(137.37 to 306.78)                        | 302.23<br>(193.09 to 412.90)                        | 263.90<br>(169.99 to 364.71)                        | 321.68<br>(201.86 to 447.97)                         | 8.96<br>(5.39 to 11.85)                          | 13.37<br>(8.62 to 17.84)                         | 12.16<br>(8.10 to 16.14)                         | 13.76<br>(8.75 to 18.76)                         |
| Mesothelioma                    | 65.06<br>(44.82 to 88.24)                           | 76.28<br>(54.93 to 97.55)                           | 79.00<br>(56.49 to 102.93)                          | 71.85<br>(52.44 to 90.27)                            | 2.27<br>(1.57 to 3.06)                           | 2.89<br>(2.20 to 3.51)                           | 3.10<br>(2.34 to 3.81)                           | 2.65<br>(2.03 to 3.18)                           |
| Hodgkin lymphoma                | 146.73<br>(86.72 to 206.08)                         | 119.25<br>(69.62 to 174.35)                         | 90.38<br>(52.03 to 135.39)                          | 123.23<br>(71.94 to 182.82)                          | 3.42<br>(2.14 to 4.62)                           | 3.19<br>(2.12 to 4.22)                           | 2.57<br>(1.72 to 3.52)                           | 3.16<br>(2.11 to 4.25)                           |
| Non-Hodgkin lymphoma            | 672.65<br>(474.29 to 861.77)                        | 871.38<br>(588.99 to 1,208.95)                      | 871.38<br>(588.96 to 1,133.67)                      | 870.09<br>(583.65 to 1,220.56)                       | 18.87<br>(13.79 to 23.93)                        | 28.12<br>(21.44 to 35.00)                        | 28.12<br>(22.07 to 35.31)                        | 26.86<br>(20.63 to 33.69)                        |
| Multiple myeloma                | 255.48<br>(169.59 to 344.12)                        | 365.54<br>(245.17 to 493.16)                        | 377.78<br>(252.37 to 504.99)                        | 358.30<br>(234.96 to 493.77)                         | 9.67<br>(6.48 to 12.75)                          | 15.83<br>(11.34 to 20.42)                        | 17.03<br>(12.37 to 21.73)                        | 14.99<br>(10.43 to 19.54)                        |
| Leukemia                        | 2,148.42<br>(1,629.35 to 2,735.48)                  | 2,966.48<br>(1,905.50 to 4,491.69)                  | 2,689.28<br>(1,771.38 to 3,958.20)                  | 3,094.04<br>(1,984.30 to 4,683.14)                   | 48.39<br>(37.15 to 61.07)                        | 75.78<br>(57.07 to 99.93)                        | 74.57<br>(56.81 to 97.49)                        | 76.00<br>(56.11 to 101.32)                       |
| Acute lymphoid leukemia         | 329.72<br>(234.04 to 453.07)                        | 473.63<br>(240.40 to 915.44)                        | 398.72<br>(212.82 to 757.74)                        | 492.58<br>(250.57 to 946.62)                         | 5.93<br>(4.32 to 7.97)                           | 8.65<br>(5.38 to 14.77)                          | 7.79<br>(5.00 to 12.78)                          | 8.86<br>(5.50 to 15.00)                          |
| Chronic lymphoid leukemia       | 26.41<br>(18.44 to 37.49)                           | 35.07<br>(25.17 to 49.71)                           | 35.60<br>(25.37 to 49.38)                           | 34.94<br>(24.68 to 49.96)                            | 1.02<br>(0.73 to 1.44)                           | 1.61<br>(1.17 to 2.17)                           | 1.74<br>(1.27 to 2.36)                           | 1.51<br>(1.10 to 2.08)                           |
| Acute myeloid leukemia          | 1,177.88<br>(886.04 to 1,494.79)                    | 1,782.32<br>(1,142.96 to 2,674.03)                  | 1,706.75<br>(1,104.53 to 2,488.27)                  | 1,845.55<br>(1,197.92 to 2,775.74)                   | 26.07<br>(19.75 to 32.91)                        | 44.54<br>(33.49 to 58.15)                        | 46.32<br>(35.34 to 59.90)                        | 44.39<br>(32.73 to 59.30)                        |
| Chronic myeloid leukemia        | 121.18<br>(86.64 to 161.29)                         | 105.45<br>(70.49 to 152.89)                         | 88.72<br>(58.14 to 130.47)                          | 111.37<br>(73.36 to 161.10)                          | 3.85<br>(2.80 to 5.06)                           | 3.86<br>(2.72 to 5.34)                           | 3.36<br>(2.32 to 4.75)                           | 3.93<br>(2.75 to 5.57)                           |
| Other leukemia                  | 493.23<br>(357.55 to 646.03)                        | 570.00<br>(360.47 to 853.87)                        | 459.49<br>(291.14 to 680.94)                        | 609.59<br>(379.66 to 921.96)                         | 11.53<br>(8.68 to 14.76)                         | 17.12<br>(12.77 to 22.92)                        | 15.36<br>(11.34 to 20.60)                        | 17.30<br>(12.49 to 23.20)                        |
| Other neoplasms                 | 2,251.62<br>(1,586.84 to 2,823.62)                  | 2,996.04<br>(1,969.07 to 4,318.54)                  | 2,850.19<br>(1,938.78 to 3,976.15)                  | 2,944.43<br>(1,895.29 to 4,276.69)                   | 57.92<br>(42.07 to 73.55)                        | 87.64<br>(66.77 to 108.07)                       | 90.72<br>(70.31 to 111.08)                       | 81.96<br>(62.08 to 101.60)                       |
| <b>Cardiovascular diseases</b>  | <b>71,651.27</b><br><b>(54,394.03 to 89,689.67)</b> | <b>67,146.86</b><br><b>(48,227.97 to 94,053.55)</b> | <b>43,569.96</b><br><b>(30,897.79 to 60,725.73)</b> | <b>95,250.14</b><br><b>(63,685.61 to 137,731.85)</b> | <b>2,754.23</b><br><b>(2,150.61 to 3,381.47)</b> | <b>3,655.27</b><br><b>(2,447.05 to 3,926.87)</b> | <b>2,152.40</b><br><b>(1,700.08 to 2,720.34)</b> | <b>4,032.64</b><br><b>(3,042.09 to 5,397.19)</b> |
| Rheumatic heart disease         | 3,558.60<br>(2,736.46 to 4,464.29)                  | 2,047.62<br>(1,501.01 to 2,786.65)                  | 1,553.10<br>(1,099.70 to 2,193.42)                  | 2,110.48<br>(1,538.16 to 2,947.64)                   | 98.81<br>(76.67 to 123.55)                       | 74.49<br>(63.08 to 88.63)                        | 61.32<br>(50.24 to 74.24)                        | 72.54<br>(60.91 to 87.83)                        |
| Ischemic heart disease          | 38,797.20<br>(28,295.04 to 49,982.37)               | 32,117.96<br>(17,847.21 to 55,390.56)               | 18,163.50<br>(10,284.78 to 31,593.89)               | 53,194.62<br>(28,929.80 to 88,795.29)                | 1,515.00<br>(1,153.19 to 1,895.93)               | 1,445.70<br>(907.14 to 2,275.72)                 | 892.45<br>(565.14 to 1,428.00)                   | 2,202.36<br>(1,344.23 to 3,488.81)               |
| Stroke                          | 14,003.41<br>(10,862.45 to 17,578.47)               | 11,181.98<br>(6,718.17 to 17,612.80)                | 6,202.11<br>(3,821.12 to 9,895.19)                  | 17,061.07<br>(10,109.05 to 27,782.76)                | 568.83<br>(449.33 to 709.67)                     | 543.55<br>(366.59 to 813.31)                     | 332.35<br>(224.05 to 535.85)                     | 773.07<br>(507.48 to 1,196.88)                   |
| Ischemic stroke                 | 4,278.18<br>(3,307.61 to 5,386.90)                  | 3,372.43<br>(1,969.15 to 5,955.16)                  | 2,136.87<br>(1,250.60 to 3,835.25)                  | 4,816.34<br>(2,717.68 to 8,388.09)                   | 206.86<br>(163.13 to 258.65)                     | 196.57<br>(118.72 to 360.65)                     | 134.82<br>(82.17 to 246.53)                      | 262.22<br>(151.15 to 499.06)                     |

|                                |                                        |                                        |                                       |                                         |                                 |                                 |                                 |                                 |
|--------------------------------|----------------------------------------|----------------------------------------|---------------------------------------|-----------------------------------------|---------------------------------|---------------------------------|---------------------------------|---------------------------------|
| Intracerebral hemorrhage       | 9,725.23<br>(7,522.73 to<br>12,335.14) | 7,809.56<br>(4,282.39 to<br>13,545.06) | 4,065.24<br>(2,204.07 to<br>6,921.24) | 12,244.73<br>(6,679.81 to<br>21,274.52) | 361.96<br>(283.30 to<br>455.68) | 346.97<br>(213.31 to<br>542.39) | 197.53<br>(122.88 to<br>312.67) | 510.86<br>(301.67 to<br>831.73) |
| Hypertensive heart disease     | 4,790.80<br>(3,269.84 to<br>6,315.48)  | 6,968.82<br>(4,663.90 to<br>9,874.19)  | 5,248.81<br>(3,575.45 to<br>7,182.44) | 7,735.13<br>(4,890.27 to<br>12,318.76)  | 206.45<br>(142.16 to<br>265.71) | 362.46<br>(255.12 to<br>504.19) | 289.77<br>(209.50 to<br>380.82) | 380.48<br>(253.96 to<br>599.16) |
| Cardiomyopathy and myocarditis | 2,482.81<br>(1,859.81 to<br>3,240.15)  | 3,039.46<br>(2,144.45 to<br>4,181.56)  | 2,674.67<br>(1,875.17 to<br>3,746.12) | 2,953.00<br>(2,105.35 to<br>4,132.12)   | 76.44<br>(57.98 to<br>99.28)    | 111.93<br>(87.65 to<br>145.89)  | 106.84<br>(82.96 to<br>138.74)  | 103.05<br>(80.80 to<br>134.33)  |
| Myocarditis                    | 1,066.26<br>(756.64 to<br>1,517.69)    | 1,277.24<br>(937.15 to<br>1,828.26)    | 1,223.48<br>(890.93 to<br>1,726.46)   | 1,231.58<br>(902.20 to<br>1,733.02)     | 34.65<br>(25.03 to<br>48.28)    | 50.28<br>(39.84 to<br>67.73)    | 51.54<br>(40.75 to<br>68.85)    | 46.13<br>(36.43 to<br>62.07)    |

| Fiji                                                          |                                                              |                                                             |                                                             |                                                              |                                                      |                                                      |                                                      |                                                      |
|---------------------------------------------------------------|--------------------------------------------------------------|-------------------------------------------------------------|-------------------------------------------------------------|--------------------------------------------------------------|------------------------------------------------------|------------------------------------------------------|------------------------------------------------------|------------------------------------------------------|
| Cause                                                         | YLLs (actual counts)                                         |                                                             |                                                             |                                                              | Deaths (actual counts)                               |                                                      |                                                      |                                                      |
|                                                               | 2016                                                         | 2040 Forecast                                               | 2040 Better Scenario                                        | 2040 Worse Scenario                                          | 2016                                                 | 2040 Forecast                                        | 2040 Better Scenario                                 | 2040 Worse Scenario                                  |
| Alcoholic cardiomyopathy                                      | 83.26<br>(53.98 to<br>121.95)                                | 84.93<br>(54.20 to<br>123.61)                               | 80.09<br>(50.19 to<br>117.75)                               | 82.41<br>(53.36 to<br>119.33)                                | 2.85<br>(1.90 to<br>4.12)                            | 3.33<br>(2.27 to<br>4.63)                            | 3.35<br>(2.24 to<br>4.70)                            | 3.09<br>(2.15 to<br>4.24)                            |
| Other cardiomyopathy                                          | 1,333.29<br>(977.54 to<br>1,713.57)                          | 1,677.30<br>(1,089.21 to<br>2,499.32)                       | 1,371.10<br>(862.24 to<br>2,068.44)                         | 1,639.02<br>(1,061.46 to<br>2,486.03)                        | 38.94<br>(29.12 to<br>50.55)                         | 58.32<br>(40.72 to<br>80.40)                         | 51.94<br>(35.28 to<br>72.78)                         | 53.83<br>(37.33 to<br>74.80)                         |
| Atrial fibrillation and flutter                               | 140.96<br>(101.82 to<br>187.82)                              | 293.77<br>(221.64 to<br>379.10)                             | 311.67<br>(237.17 to<br>399.72)                             | 269.01<br>(196.56 to<br>350.88)                              | 10.96<br>(8.11 to<br>14.56)                          | 26.32<br>(18.37 to<br>36.16)                         | 29.59<br>(21.44 to<br>39.44)                         | 23.02<br>(15.30 to<br>31.93)                         |
| Aortic aneurysm                                               | 920.39<br>(694.02 to<br>1,174.85)                            | 1,095.56<br>(889.70 to<br>1,339.16)                         | 1,071.65<br>(870.24 to<br>1,315.22)                         | 1,095.31<br>(879.19 to<br>1,366.39)                          | 39.03<br>(30.32 to<br>48.83)                         | 55.69<br>(47.81 to<br>64.45)                         | 58.65<br>(50.59 to<br>67.94)                         | 52.29<br>(43.72 to<br>62.38)                         |
| Peripheral artery disease                                     | 21.05<br>(14.16 to<br>29.18)                                 | 47.19<br>(30.68 to<br>69.24)                                | 52.72<br>(33.90 to<br>77.11)                                | 45.10<br>(29.29 to<br>67.10)                                 | 1.18<br>(0.82 to<br>1.65)                            | 3.34<br>(2.05 to<br>4.83)                            | 4.05<br>(2.45 to<br>5.84)                            | 2.99<br>(1.80 to<br>4.37)                            |
| Endocarditis                                                  | 1,908.63<br>(1,405.27 to<br>2,524.85)                        | 2,738.92<br>(1,938.22 to<br>3,824.27)                       | 2,510.76<br>(1,791.90 to<br>3,491.95)                       | 2,696.04<br>(1,892.61 to<br>3,837.77)                        | 61.60<br>(46.09 to<br>83.39)                         | 106.62<br>(80.17 to<br>145.29)                       | 106.25<br>(79.57 to<br>146.84)                       | 99.30<br>(74.28 to<br>135.00)                        |
| Other cardiovascular and circulatory diseases                 | 5,027.43<br>(3,690.97 to<br>6,828.74)                        | 7,615.59<br>(5,446.80 to<br>10,454.75)                      | 5,780.98<br>(4,056.73 to<br>8,067.76)                       | 8,090.37<br>(5,610.52 to<br>11,418.34)                       | 175.91<br>(130.53 to<br>240.19)                      | 325.17<br>(255.38 to<br>432.03)                      | 271.13<br>(206.75 to<br>358.69)                      | 323.53<br>(246.53 to<br>432.27)                      |
| <b>Chronic respiratory diseases</b>                           | <b>10,907.93</b><br><b>(8,198.80 to</b><br><b>13,669.03)</b> | <b>9,845.34</b><br><b>(7,148.95 to</b><br><b>13,144.05)</b> | <b>7,887.87</b><br><b>(5,770.83 to</b><br><b>10,479.68)</b> | <b>11,803.16</b><br><b>(8,236.46 to</b><br><b>16,113.20)</b> | <b>411.82</b><br><b>(313.76 to</b><br><b>512.12)</b> | <b>423.61</b><br><b>(335.47 to</b><br><b>538.92)</b> | <b>353.30</b><br><b>(277.95 to</b><br><b>447.62)</b> | <b>486.18</b><br><b>(370.76 to</b><br><b>632.84)</b> |
| Chronic obstructive pulmonary disease                         | 3,026.27<br>(2,236.09 to<br>3,863.01)                        | 3,097.87<br>(2,107.43 to<br>4,417.86)                       | 2,387.37<br>(1,669.53 to<br>3,295.12)                       | 4,217.92<br>(2,614.28 to<br>6,514.04)                        | 128.51<br>(96.51 to<br>161.94)                       | 152.66<br>(112.04 to<br>203.71)                      | 126.55<br>(96.37 to<br>162.49)                       | 192.18<br>(131.95 to<br>276.29)                      |
| Pneumoconiosis                                                | 6.54<br>(4.75 to<br>8.83)                                    | 6.35<br>(4.98 to<br>8.16)                                   | 6.18<br>(4.75 to<br>8.03)                                   | 6.25<br>(4.89 to<br>8.07)                                    | 0.31<br>(0.23 to<br>0.41)                            | 0.38<br>(0.29 to<br>0.49)                            | 0.38<br>(0.30 to<br>0.50)                            | 0.35<br>(0.27 to<br>0.47)                            |
| Silicosis                                                     | 1.02<br>(0.64 to<br>1.52)                                    | 0.81<br>(0.52 to<br>1.22)                                   | 0.67<br>(0.41 to<br>1.04)                                   | 0.77<br>(0.50 to<br>1.21)                                    | 0.05<br>(0.03 to<br>0.08)                            | 0.05<br>(0.03 to<br>0.08)                            | 0.05<br>(0.03 to<br>0.07)                            | 0.05<br>(0.03 to<br>0.08)                            |
| Asbestosis                                                    | 1.72<br>(1.14 to<br>2.46)                                    | 2.01<br>(1.39 to<br>2.87)                                   | 2.23<br>(1.57 to<br>3.15)                                   | 1.88<br>(1.32 to<br>2.66)                                    | 0.06<br>(0.04 to<br>0.10)                            | 0.09<br>(0.06 to<br>0.14)                            | 0.11<br>(0.07 to<br>0.17)                            | 0.08<br>(0.06 to<br>0.13)                            |
| Coal workers pneumoconiosis                                   | 0.28<br>(0.16 to<br>0.48)                                    | 0.28<br>(0.15 to<br>0.51)                                   | 0.23<br>(0.13 to<br>0.43)                                   | 0.31<br>(0.16 to<br>0.53)                                    | 0.01<br>(0.01 to<br>0.02)                            | 0.02<br>(0.01 to<br>0.03)                            | 0.01<br>(0.01 to<br>0.03)                            | 0.02<br>(0.01 to<br>0.03)                            |
| Other pneumoconiosis                                          | 3.53<br>(2.44 to<br>4.91)                                    | 3.24<br>(2.25 to<br>4.39)                                   | 3.05<br>(2.05 to<br>4.17)                                   | 3.29<br>(2.32 to<br>4.43)                                    | 0.18<br>(0.13 to<br>0.25)                            | 0.21<br>(0.14 to<br>0.30)                            | 0.21<br>(0.14 to<br>0.30)                            | 0.20<br>(0.14 to<br>0.29)                            |
| Asthma                                                        | 5,739.12<br>(4,286.52 to<br>7,327.05)                        | 3,813.69<br>(2,427.22 to<br>5,955.42)                       | 2,595.46<br>(1,595.98 to<br>4,151.21)                       | 4,688.80<br>(2,910.62 to<br>7,376.25)                        | 216.15<br>(161.87 to<br>272.12)                      | 172.76<br>(115.22 to<br>258.98)                      | 125.94<br>(81.44 to<br>196.77)                       | 199.26<br>(128.58 to<br>302.52)                      |
| Interstitial lung disease and pulmonary sarcoidosis           | 325.70<br>(219.24 to<br>456.92)                              | 405.03<br>(259.98 to<br>613.86)                             | 484.97<br>(308.88 to<br>708.92)                             | 380.33<br>(241.19 to<br>582.52)                              | 8.93<br>(6.06 to<br>12.32)                           | 12.75<br>(9.29 to<br>16.64)                          | 16.50<br>(11.64 to<br>21.60)                         | 11.34<br>(8.11 to<br>14.79)                          |
| Other chronic respiratory diseases                            | 1,810.30<br>(1,123.32 to<br>2,898.09)                        | 2,522.40<br>(1,658.03 to<br>3,851.49)                       | 2,413.89<br>(1,585.60 to<br>3,598.24)                       | 2,539.87<br>(1,652.45 to<br>3,985.63)                        | 57.92<br>(35.90 to<br>92.50)                         | 85.06<br>(57.69 to<br>127.56)                        | 83.92<br>(56.97 to<br>123.03)                        | 83.05<br>(56.21 to<br>128.17)                        |
| <b>Cirrhosis and other chronic liver diseases</b>             | <b>2,627.80</b><br><b>(1,917.75 to</b><br><b>3,409.55)</b>   | <b>2,774.51</b><br><b>(2,063.25 to</b><br><b>3,706.56)</b>  | <b>2,398.29</b><br><b>(1,743.59 to</b><br><b>3,213.89)</b>  | <b>2,759.35</b><br><b>(2,056.47 to</b><br><b>3,635.09)</b>   | <b>76.30</b><br><b>(57.29 to</b><br><b>98.63)</b>    | <b>93.61</b><br><b>(77.11 to</b><br><b>114.40)</b>   | <b>84.77</b><br><b>(68.40 to</b><br><b>105.66)</b>   | <b>90.05</b><br><b>(74.40 to</b><br><b>109.92)</b>   |
| Cirrhosis and other chronic liver diseases due to hepatitis B | 878.20<br>(629.08 to<br>1,191.15)                            | 970.02<br>(724.04 to<br>1,295.64)                           | 875.53<br>(636.42 to<br>1,201.21)                           | 944.47<br>(704.64 to<br>1,240.65)                            | 27.50<br>(20.36 to<br>36.71)                         | 34.68<br>(28.14 to<br>43.28)                         | 32.42<br>(26.11 to<br>41.11)                         | 32.76<br>(26.75 to<br>40.14)                         |
| Cirrhosis and other chronic liver diseases due to hepatitis C | 421.34<br>(295.64 to<br>588.17)                              | 470.96<br>(340.25 to<br>643.45)                             | 420.48<br>(300.60 to<br>585.33)                             | 460.84<br>(336.36 to<br>626.15)                              | 12.79<br>(9.22 to<br>17.29)                          | 16.05<br>(12.65 to<br>20.55)                         | 14.77<br>(11.48 to<br>19.23)                         | 15.31<br>(12.25 to<br>19.39)                         |

|                                                                |                                                            |                                                            |                                                            |                                                            |                                                     |                                                      |                                                      |                                                      |
|----------------------------------------------------------------|------------------------------------------------------------|------------------------------------------------------------|------------------------------------------------------------|------------------------------------------------------------|-----------------------------------------------------|------------------------------------------------------|------------------------------------------------------|------------------------------------------------------|
|                                                                | 377.76<br>(268.92 to<br>510.62)                            | 424.68<br>(313.59 to<br>568.82)                            | 327.94<br>(236.79 to<br>441.00)                            | 441.10<br>(329.57 to<br>587.26)                            | 12.22<br>(8.98 to<br>16.15)                         | 15.35<br>(12.43 to<br>18.95)                         | 12.60<br>(9.98 to<br>15.74)                          | 15.36<br>(12.34 to<br>19.00)                         |
| Cirrhosis and other chronic liver diseases due to alcohol use  |                                                            |                                                            |                                                            |                                                            |                                                     |                                                      |                                                      |                                                      |
|                                                                | 950.50<br>(723.95 to<br>1,211.94)                          | 908.84<br>(650.86 to<br>1,255.12)                          | 774.34<br>(543.76 to<br>1,084.86)                          | 912.94<br>(650.62 to<br>1,272.04)                          | 23.80<br>(18.30 to<br>30.22)                        | 27.54<br>(22.13 to<br>34.37)                         | 24.99<br>(19.72 to<br>31.73)                         | 26.62<br>(21.24 to<br>33.18)                         |
| Cirrhosis and other chronic liver diseases due to other causes |                                                            |                                                            |                                                            |                                                            |                                                     |                                                      |                                                      |                                                      |
| <b>Digestive diseases</b>                                      | <b>3,462.53</b><br><b>(2,583.17 to</b><br><b>4,378.67)</b> | <b>3,438.29</b><br><b>(2,573.34 to</b><br><b>4,418.86)</b> | <b>2,824.64</b><br><b>(2,118.47 to</b><br><b>3,662.90)</b> | <b>3,534.30</b><br><b>(2,657.15 to</b><br><b>4,663.47)</b> | <b>114.78</b><br><b>(87.08 to</b><br><b>143.00)</b> | <b>136.96</b><br><b>(114.22 to</b><br><b>160.57)</b> | <b>121.54</b><br><b>(101.23 to</b><br><b>145.00)</b> | <b>133.74</b><br><b>(110.43 to</b><br><b>158.32)</b> |
| Peptic ulcer disease                                           | 914.59<br>(663.50 to<br>1,169.87)                          | 608.46<br>(463.39 to<br>775.18)                            | 445.34<br>(322.11 to<br>604.79)                            | 636.94<br>(489.15 to<br>829.75)                            | 33.07<br>(24.47 to<br>42.03)                        | 27.11<br>(21.89 to<br>32.94)                         | 20.99<br>(16.02 to<br>27.06)                         | 27.13<br>(21.76 to<br>33.75)                         |

| Fiji                                       |                                    |                                    |                                    |                                    |                              |                              |                              |                              |
|--------------------------------------------|------------------------------------|------------------------------------|------------------------------------|------------------------------------|------------------------------|------------------------------|------------------------------|------------------------------|
| Cause                                      | YLLs (actual counts)               |                                    |                                    |                                    | Deaths (actual counts)       |                              |                              |                              |
|                                            | 2016                               | 2040 Forecast                      | 2040 Better Scenario               | 2040 Worse Scenario                | 2016                         | 2040 Forecast                | 2040 Better Scenario         | 2040 Worse Scenario          |
| Gastritis and duodenitis                   | 22.42<br>(15.75 to 30.69)          | 32.44<br>(22.46 to 44.94)          | 28.00<br>(19.03 to 40.30)          | 31.02<br>(21.86 to 43.19)          | 0.82<br>(0.58 to 1.12)       | 1.44<br>(1.03 to 2.06)       | 1.32<br>(0.93 to 1.91)       | 1.31<br>(0.94 to 1.84)       |
| Appendicitis                               | 439.92<br>(328.76 to 564.07)       | 399.85<br>(284.98 to 543.25)       | 304.83<br>(209.01 to 427.01)       | 404.99<br>(285.31 to 556.12)       | 12.04<br>(9.06 to 15.36)     | 13.88<br>(10.85 to 17.12)    | 11.36<br>(8.62 to 14.66)     | 13.35<br>(10.43 to 16.59)    |
| Paralytic ileus and intestinal obstruction | 692.07<br>(497.39 to 938.75)       | 870.80<br>(588.24 to 1,361.13)     | 793.17<br>(558.79 to 1,183.35)     | 862.53<br>(573.74 to 1,399.62)     | 20.99<br>(15.64 to 28.66)    | 31.11<br>(24.91 to 41.51)    | 31.83<br>(25.81 to 42.07)    | 28.63<br>(22.69 to 39.36)    |
| Inguinal, femoral, and abdominal hernia    | 97.91<br>(57.83 to 136.11)         | 75.89<br>(45.94 to 98.88)          | 67.11<br>(40.65 to 89.69)          | 71.58<br>(43.88 to 94.43)          | 4.16<br>(2.49 to 5.63)       | 3.97<br>(2.47 to 5.04)       | 3.75<br>(2.32 to 4.81)       | 3.56<br>(2.19 to 4.54)       |
| Inflammatory bowel disease                 | 69.01<br>(46.78 to 96.05)          | 82.06<br>(56.84 to 119.02)         | 80.54<br>(56.43 to 117.36)         | 78.75<br>(54.62 to 115.24)         | 2.12<br>(1.50 to 2.82)       | 3.07<br>(2.41 to 3.90)       | 3.23<br>(2.48 to 4.09)       | 2.81<br>(2.20 to 3.57)       |
| Vascular intestinal disorders              | 109.94<br>(79.51 to 144.76)        | 147.65<br>(114.69 to 188.96)       | 139.13<br>(106.56 to 179.97)       | 139.93<br>(109.83 to 180.27)       | 4.36<br>(3.27 to 5.62)       | 7.36<br>(6.05 to 8.89)       | 7.43<br>(5.97 to 8.93)       | 6.67<br>(5.40 to 8.08)       |
| Gallbladder and biliary diseases           | 356.10<br>(244.88 to 472.80)       | 366.60<br>(199.09 to 623.10)       | 266.95<br>(145.47 to 456.87)       | 444.61<br>(235.21 to 756.38)       | 13.08<br>(9.05 to 17.24)     | 16.45<br>(9.13 to 26.81)     | 12.76<br>(7.04 to 21.41)     | 18.91<br>(10.31 to 31.53)    |
| Pancreatitis                               | 159.99<br>(107.68 to 228.79)       | 232.59<br>(119.30 to 479.32)       | 159.51<br>(88.92 to 298.45)        | 246.91<br>(122.13 to 516.80)       | 4.66<br>(3.30 to 6.57)       | 7.67<br>(4.73 to 14.08)      | 5.81<br>(3.91 to 9.42)       | 7.74<br>(4.56 to 14.56)      |
| Other digestive diseases                   | 600.58<br>(449.44 to 775.48)       | 621.95<br>(463.14 to 816.98)       | 540.06<br>(389.79 to 716.77)       | 617.07<br>(456.88 to 812.85)       | 19.48<br>(14.77 to 25.05)    | 24.91<br>(20.21 to 30.18)    | 23.05<br>(18.53 to 28.18)    | 23.63<br>(19.31 to 28.69)    |
| Neurological disorders                     | 3,207.37<br>(2,538.82 to 3,947.59) | 5,579.56<br>(4,002.07 to 8,046.08) | 5,582.11<br>(4,001.24 to 7,987.99) | 5,586.61<br>(3,941.77 to 8,184.58) | 165.92<br>(131.39 to 206.76) | 375.84<br>(251.71 to 584.00) | 421.85<br>(283.75 to 635.96) | 355.62<br>(229.96 to 563.82) |
| Alzheimer's disease and other dementias    | 1,615.35<br>(1,232.78 to 2,084.21) | 3,520.97<br>(2,186.37 to 5,924.97) | 3,804.76<br>(2,390.14 to 6,163.92) | 3,471.74<br>(2,037.30 to 5,997.03) | 126.73<br>(98.54 to 163.48)  | 313.03<br>(189.38 to 520.72) | 356.75<br>(222.02 to 574.41) | 296.33<br>(172.19 to 506.52) |
| Parkinson's disease                        | 150.58<br>(108.79 to 200.37)       | 338.57<br>(258.13 to 434.18)       | 422.19<br>(326.03 to 536.77)       | 286.90<br>(215.83 to 373.43)       | 10.22<br>(7.48 to 13.61)     | 25.84<br>(18.91 to 34.56)    | 33.53<br>(24.83 to 43.93)    | 21.27<br>(14.93 to 28.96)    |
| Epilepsy                                   | 1,124.78<br>(839.60 to 1,430.35)   | 1,271.67<br>(715.08 to 2,074.51)   | 908.36<br>(530.60 to 1,489.23)     | 1,389.74<br>(780.20 to 2,297.08)   | 20.64<br>(15.22 to 26.36)    | 24.24<br>(14.79 to 37.64)    | 17.94<br>(11.17 to 27.51)    | 26.07<br>(15.78 to 40.84)    |
| Multiple sclerosis                         | 39.13<br>(17.36 to 83.24)          | 46.57<br>(21.13 to 102.20)         | 48.61<br>(22.02 to 107.75)         | 45.96<br>(20.69 to 100.24)         | 1.12<br>(0.51 to 2.42)       | 1.45<br>(0.70 to 3.08)       | 1.55<br>(0.74 to 3.37)       | 1.41<br>(0.67 to 3.00)       |
| Motor neuron disease                       | 47.31<br>(35.44 to 60.64)          | 73.65<br>(55.90 to 93.09)          | 77.45<br>(58.19 to 99.47)          | 69.61<br>(53.66 to 86.68)          | 1.54<br>(1.16 to 1.96)       | 2.61<br>(2.07 to 3.17)       | 2.83<br>(2.22 to 3.50)       | 2.41<br>(1.93 to 2.91)       |
| Other neurological disorders               | 230.21<br>(178.95 to 287.21)       | 328.12<br>(220.20 to 475.02)       | 320.74<br>(221.50 to 448.50)       | 322.66<br>(214.87 to 472.88)       | 5.68<br>(4.45 to 7.07)       | 8.67<br>(6.89 to 10.84)      | 9.26<br>(7.42 to 11.42)      | 8.14<br>(6.42 to 10.24)      |
| Mental disorders                           | 268.28<br>(176.82 to 417.40)       | 435.79<br>(285.12 to 686.03)       | 464.61<br>(303.82 to 725.68)       | 428.86<br>(280.62 to 681.52)       | 6.39<br>(4.37 to 9.30)       | 11.63<br>(8.52 to 16.34)     | 13.09<br>(9.61 to 18.07)     | 11.04<br>(8.13 to 15.72)     |
| Alcohol use disorders                      | 78.54<br>(47.74 to 124.72)         | 75.08<br>(47.16 to 118.87)         | 73.00<br>(45.44 to 115.60)         | 74.96<br>(47.24 to 118.01)         | 2.02<br>(1.28 to 3.05)       | 2.16<br>(1.46 to 3.08)       | 2.18<br>(1.46 to 3.12)       | 2.09<br>(1.43 to 3.01)       |
| Drug use disorders                         | 186.16<br>(122.72 to 295.83)       | 355.33<br>(229.54 to 590.25)       | 386.15<br>(251.40 to 629.92)       | 348.52<br>(225.89 to 585.22)       | 4.30<br>(2.93 to 6.36)       | 9.37<br>(6.75 to 13.49)      | 10.80<br>(7.79 to 15.27)     | 8.85<br>(6.43 to 12.90)      |
| Opioid use disorders                       | 113.08<br>(71.48 to 194.01)        | 177.91<br>(105.49 to 316.19)       | 181.51<br>(107.03 to 318.43)       | 175.90<br>(104.13 to 314.28)       | 2.39<br>(1.58 to 3.86)       | 4.14<br>(2.75 to 6.59)       | 4.39<br>(2.96 to 6.86)       | 3.98<br>(2.64 to 6.38)       |

|                           |                              |                                |                                |                                |                           |                           |                           |                           |
|---------------------------|------------------------------|--------------------------------|--------------------------------|--------------------------------|---------------------------|---------------------------|---------------------------|---------------------------|
|                           | 13.54<br>(7.60 to<br>28.13)  | 35.03<br>(18.22 to<br>77.52)   | 37.36<br>(19.43 to<br>82.83)   | 34.87<br>(17.88 to<br>77.41)   | 0.30<br>(0.18 to<br>0.57) | 0.84<br>(0.49 to<br>1.65) | 0.92<br>(0.54 to<br>1.79) | 0.81<br>(0.46 to<br>1.65) |
| Cocaine use disorders     |                              |                                |                                |                                |                           |                           |                           |                           |
|                           | 7.32<br>(4.18 to<br>15.30)   | 27.59<br>(14.09 to<br>60.08)   | 31.74<br>(15.84 to<br>70.88)   | 27.30<br>(14.21 to<br>59.35)   | 0.17<br>(0.10 to<br>0.31) | 0.64<br>(0.38 to<br>1.24) | 0.75<br>(0.42 to<br>1.47) | 0.63<br>(0.37 to<br>1.22) |
| Amphetamine use disorders |                              |                                |                                |                                |                           |                           |                           |                           |
|                           | 52.21<br>(34.56 to<br>77.63) | 114.79<br>(73.17 to<br>172.59) | 135.53<br>(85.63 to<br>202.10) | 110.46<br>(70.26 to<br>165.66) | 1.44<br>(0.98 to<br>2.05) | 3.75<br>(2.67 to<br>5.10) | 4.74<br>(3.37 to<br>6.53) | 3.43<br>(2.44 to<br>4.66) |
| Other drug use disorders  |                              |                                |                                |                                |                           |                           |                           |                           |
|                           | 3.58<br>(2.29 to<br>6.20)    | 5.39<br>(3.10 to<br>9.31)      | 5.46<br>(3.12 to<br>9.76)      | 5.37<br>(3.11 to<br>9.25)      | 0.07<br>(0.04 to<br>0.12) | 0.10<br>(0.06 to<br>0.18) | 0.11<br>(0.06 to<br>0.20) | 0.10<br>(0.06 to<br>0.18) |
| Eating disorders          |                              |                                |                                |                                |                           |                           |                           |                           |

| Fiji                                                       |                                              |                                               |                                              |                                               |                                           |                                           |                                           |                                           |
|------------------------------------------------------------|----------------------------------------------|-----------------------------------------------|----------------------------------------------|-----------------------------------------------|-------------------------------------------|-------------------------------------------|-------------------------------------------|-------------------------------------------|
| Cause                                                      | YLLs (actual counts)                         |                                               |                                              |                                               | Deaths (actual counts)                    |                                           |                                           |                                           |
|                                                            | 2016                                         | 2040 Forecast                                 | 2040 Better Scenario                         | 2040 Worse Scenario                           | 2016                                      | 2040 Forecast                             | 2040 Better Scenario                      | 2040 Worse Scenario                       |
| <b>Diabetes, urogenital, blood, and endocrine diseases</b> | <b>64,206.56</b><br>(49,571.56 to 80,073.09) | <b>82,596.63</b><br>(61,954.60 to 109,361.11) | <b>62,433.25</b><br>(44,894.62 to 86,737.69) | <b>94,168.37</b><br>(70,392.27 to 125,259.55) | <b>2,640.18</b><br>(2,078.96 to 3,234.63) | <b>4,038.09</b><br>(3,356.66 to 4,974.00) | <b>3,214.53</b><br>(2,555.73 to 4,059.40) | <b>4,392.47</b><br>(3,610.82 to 5,434.84) |
| Diabetes mellitus                                          | 49,446.78<br>(38,078.14 to 61,724.75)        | 59,494.84<br>(39,029.40 to 85,149.97)         | 44,498.45<br>(28,556.66 to 66,580.75)        | 66,079.95<br>(42,866.78 to 98,646.36)         | 2,093.87<br>(1,643.91 to 2,580.91)        | 3,033.33<br>(2,197.87 to 4,017.61)        | 2,390.51<br>(1,696.96 to 3,225.60)        | 3,200.57<br>(2,225.58 to 4,385.98)        |
| Acute glomerulonephritis                                   | 6.83<br>(5.14 to 9.23)                       | 10.28<br>(5.68 to 19.11)                      | 7.65<br>(4.24 to 13.77)                      | 10.87<br>(5.88 to 20.18)                      | 0.13<br>(0.10 to 0.16)                    | 0.18<br>(0.12 to 0.29)                    | 0.14<br>(0.09 to 0.23)                    | 0.19<br>(0.12 to 0.31)                    |
| Chronic kidney disease                                     | 12,306.82<br>(9,370.21 to 15,573.75)         | 19,681.28<br>(9,601.65 to 43,927.01)          | 14,882.82<br>(7,398.38 to 33,206.72)         | 24,713.99<br>(11,846.55 to 51,731.10)         | 471.96<br>(365.11 to 595.33)              | 877.69<br>(459.29 to 1,715.22)            | 699.80<br>(371.16 to 1,386.21)            | 1,073.73<br>(544.83 to 1,981.77)          |
| Chronic kidney disease due to diabetes mellitus            | 6,815.47<br>(5,119.88 to 8,848.25)           | 11,636.07<br>(5,352.82 to 27,154.23)          | 8,821.20<br>(4,060.40 to 20,472.64)          | 14,733.32<br>(6,527.38 to 31,852.80)          | 259.69<br>(198.10 to 333.06)              | 494.02<br>(246.02 to 1,006.41)            | 390.02<br>(196.24 to 805.88)              | 610.93<br>(293.47 to 1,174.67)            |
| Chronic kidney disease due to hypertension                 | 2,901.86<br>(2,161.89 to 3,817.30)           | 4,804.37<br>(2,471.82 to 10,162.93)           | 3,769.87<br>(1,930.31 to 7,785.41)           | 6,004.34<br>(2,949.38 to 12,321.55)           | 139.38<br>(106.03 to 179.18)              | 272.81<br>(143.01 to 525.99)              | 226.13<br>(120.86 to 431.32)              | 327.58<br>(165.00 to 605.93)              |
| Chronic kidney disease due to glomerulonephritis           | 1,216.25<br>(891.09 to 1,583.51)             | 1,422.01<br>(740.94 to 2,978.88)              | 990.12<br>(502.52 to 2,180.40)               | 1,736.26<br>(892.65 to 3,633.85)              | 31.32<br>(22.85 to 40.95)                 | 43.97<br>(22.92 to 89.44)                 | 32.33<br>(17.04 to 66.75)                 | 53.77<br>(27.46 to 106.11)                |
| Chronic kidney disease due to other and unspecified causes | 1,373.24<br>(1,003.76 to 1,819.05)           | 1,818.83<br>(898.91 to 3,842.41)              | 1,301.62<br>(656.35 to 2,757.14)             | 2,240.08<br>(1,098.73 to 4,534.42)            | 41.57<br>(30.42 to 55.61)                 | 66.90<br>(34.72 to 136.09)                | 51.32<br>(26.73 to 106.07)                | 81.45<br>(40.62 to 158.31)                |
| Urinary diseases and male infertility                      | 1,012.96<br>(785.81 to 1,266.24)             | 1,682.18<br>(1,270.08 to 2,240.43)            | 1,494.91<br>(1,137.98 to 1,949.65)           | 1,637.98<br>(1,231.26 to 2,240.61)            | 33.33<br>(26.26 to 41.20)                 | 68.69<br>(58.73 to 80.13)                 | 68.32<br>(57.03 to 80.72)                 | 62.46<br>(52.92 to 73.90)                 |
| Urinary tract infections                                   | 888.12<br>(681.80 to 1,122.87)               | 1,561.73<br>(1,171.18 to 2,094.99)            | 1,397.05<br>(1,053.82 to 1,825.01)           | 1,520.67<br>(1,130.28 to 2,095.38)            | 28.82<br>(22.47 to 36.23)                 | 63.62<br>(53.99 to 74.53)                 | 63.89<br>(53.59 to 75.81)                 | 57.81<br>(48.80 to 68.79)                 |
| Urolithiasis                                               | 16.89<br>(12.16 to 22.29)                    | 23.16<br>(16.41 to 31.40)                     | 20.44<br>(13.86 to 28.21)                    | 22.19<br>(15.83 to 30.18)                     | 0.58<br>(0.41 to 0.77)                    | 0.89<br>(0.64 to 1.17)                    | 0.84<br>(0.58 to 1.13)                    | 0.81<br>(0.59 to 1.07)                    |
| Other urinary diseases                                     | 107.95<br>(71.11 to 153.97)                  | 97.29<br>(65.81 to 141.42)                    | 77.42<br>(51.36 to 113.93)                   | 95.12<br>(62.75 to 138.63)                    | 3.93<br>(2.64 to 5.48)                    | 4.18<br>(2.91 to 5.91)                    | 3.59<br>(2.39 to 5.30)                    | 3.83<br>(2.65 to 5.37)                    |
| Gynecological diseases                                     | 66.92<br>(35.40 to 100.26)                   | 58.37<br>(29.34 to 94.60)                     | 41.23<br>(19.74 to 70.49)                    | 60.61<br>(30.12 to 98.91)                     | 1.67<br>(0.89 to 2.49)                    | 1.55<br>(0.84 to 2.45)                    | 1.11<br>(0.57 to 1.85)                    | 1.60<br>(0.85 to 2.52)                    |
| Uterine fibroids                                           | 1.38<br>(0.59 to 2.50)                       | 1.02<br>(0.41 to 1.93)                        | 0.74<br>(0.29 to 1.45)                       | 1.06<br>(0.43 to 2.05)                        | 0.04<br>(0.02 to 0.08)                    | 0.03<br>(0.01 to 0.07)                    | 0.03<br>(0.01 to 0.05)                    | 0.04<br>(0.01 to 0.07)                    |
| Polycystic ovarian syndrome                                | 0.29<br>(0.03 to 0.80)                       | 0.17<br>(0.01 to 0.50)                        | 0.09<br>(0.01 to 0.28)                       | 0.18<br>(0.02 to 0.53)                        | 0.01<br>(0.00 to 0.02)                    | 0.00<br>(0.00 to 0.01)                    | 0.00<br>(0.00 to 0.01)                    | 0.00<br>(0.00 to 0.01)                    |
| Endometriosis                                              | 0.10<br>(0.04 to 0.27)                       | 0.10<br>(0.03 to 0.25)                        | 0.07<br>(0.02 to 0.17)                       | 0.10<br>(0.03 to 0.26)                        | 0.00<br>(0.00 to 0.01)                    | 0.00<br>(0.00 to 0.01)                    | 0.00<br>(0.00 to 0.00)                    | 0.00<br>(0.00 to 0.01)                    |
| Genital prolapse                                           | 0.29<br>(0.09 to 0.59)                       | 0.18<br>(0.06 to 0.39)                        | 0.13<br>(0.04 to 0.26)                       | 0.19<br>(0.06 to 0.41)                        | 0.01<br>(0.00 to 0.02)                    | 0.01<br>(0.00 to 0.01)                    | 0.00<br>(0.00 to 0.01)                    | 0.01<br>(0.00 to 0.01)                    |
| Other gynecological diseases                               | 64.85<br>(34.30 to 97.79)                    | 56.90<br>(28.78 to 92.28)                     | 40.20<br>(19.09 to 69.10)                    | 59.06<br>(29.38 to 97.03)                     | 1.61<br>(0.87 to 2.41)                    | 1.51<br>(0.81 to 2.38)                    | 1.08<br>(0.55 to 1.80)                    | 1.55<br>(0.81 to 2.47)                    |
| Hemoglobinopathies and hemolytic anemias                   | 543.58<br>(392.32 to 715.55)                 | 495.47<br>(345.24 to 659.84)                  | 399.81<br>(271.31 to 551.04)                 | 497.59<br>(346.89 to 663.01)                  | 14.90<br>(10.74 to 19.64)                 | 16.89<br>(13.04 to 21.23)                 | 14.18<br>(10.59 to 18.23)                 | 16.27<br>(12.55 to 20.35)                 |
| Thalassemias                                               | 97.34<br>(67.15 to 132.18)                   | 78.48<br>(35.02 to 146.26)                    | 71.94<br>(32.84 to 134.14)                   | 78.36<br>(35.00 to 144.58)                    | 1.29<br>(0.90 to 1.73)                    | 1.03<br>(0.47 to 1.90)                    | 0.95<br>(0.45 to 1.77)                    | 1.02<br>(0.47 to 1.89)                    |



|                                                   |                                   |                                     |                                     |                                     |                              |                              |                              |                              |
|---------------------------------------------------|-----------------------------------|-------------------------------------|-------------------------------------|-------------------------------------|------------------------------|------------------------------|------------------------------|------------------------------|
|                                                   | 0.61<br>(0.37 to<br>0.91)         | 0.55<br>(0.29 to<br>0.90)           | 0.42<br>(0.22 to<br>0.70)           | 0.57<br>(0.30 to<br>0.93)           | 0.01<br>(0.01 to<br>0.02)    | 0.01<br>(0.01 to<br>0.02)    | 0.01<br>(0.00 to<br>0.01)    | 0.01<br>(0.01 to<br>0.02)    |
| Sickle cell disorders                             |                                   |                                     |                                     |                                     |                              |                              |                              |                              |
|                                                   | 240.49<br>(164.32 to<br>325.01)   | 246.79<br>(160.45 to<br>353.94)     | 184.99<br>(112.75 to<br>270.86)     | 255.74<br>(164.51 to<br>359.77)     | 5.52<br>(3.79 to<br>7.46)    | 6.70<br>(4.57 to<br>9.07)    | 5.15<br>(3.33 to<br>7.25)    | 6.80<br>(4.64 to<br>9.19)    |
| G6PD deficiency                                   |                                   |                                     |                                     |                                     |                              |                              |                              |                              |
|                                                   | 205.14<br>(144.70 to<br>273.81)   | 169.64<br>(131.08 to<br>216.97)     | 142.46<br>(105.85 to<br>187.87)     | 162.92<br>(126.59 to<br>207.42)     | 8.08<br>(5.85 to<br>10.74)   | 9.15<br>(7.19 to<br>11.80)   | 8.07<br>(6.20 to<br>10.57)   | 8.44<br>(6.61 to<br>10.81)   |
| Other hemoglobinopathies and hemolytic anemias    |                                   |                                     |                                     |                                     |                              |                              |                              |                              |
|                                                   | 822.68<br>(607.39 to<br>1,050.66) | 1,174.23<br>(845.44 to<br>1,556.68) | 1,108.37<br>(802.92 to<br>1,447.33) | 1,167.39<br>(834.33 to<br>1,542.42) | 24.32<br>(18.10 to<br>31.12) | 39.74<br>(31.63 to<br>48.27) | 40.47<br>(32.39 to<br>49.46) | 37.65<br>(29.62 to<br>45.59) |
| Endocrine, metabolic, blood, and immune disorders |                                   |                                     |                                     |                                     |                              |                              |                              |                              |

| Fiji                                          |                                            |                                             |                                            |                                             |                                    |                                     |                                     |                                     |
|-----------------------------------------------|--------------------------------------------|---------------------------------------------|--------------------------------------------|---------------------------------------------|------------------------------------|-------------------------------------|-------------------------------------|-------------------------------------|
| Cause                                         | YLLs (actual counts)                       |                                             |                                            |                                             | Deaths (actual counts)             |                                     |                                     |                                     |
|                                               | 2016                                       | 2040 Forecast                               | 2040 Better Scenario                       | 2040 Worse Scenario                         | 2016                               | 2040 Forecast                       | 2040 Better Scenario                | 2040 Worse Scenario                 |
| <b>Musculoskeletal disorders</b>              | <b>316.25</b><br>(226.37 to 433.00)        | <b>394.95</b><br>(263.88 to 591.17)         | <b>383.93</b><br>(260.57 to 575.31)        | <b>383.28</b><br>(255.07 to 578.07)         | <b>7.24</b><br>(5.26 to 9.68)      | <b>11.12</b><br>(8.53 to 14.58)     | <b>11.58</b><br>(8.95 to 15.03)     | <b>10.31</b><br>(7.91 to 13.82)     |
| Rheumatoid arthritis                          | 16.67<br>(11.59 to 26.10)                  | 29.90<br>(20.79 to 42.40)                   | 23.20<br>(15.29 to 34.05)                  | 29.70<br>(20.68 to 41.98)                   | 0.59<br>(0.41 to 0.87)             | 1.33<br>(0.96 to 1.80)              | 1.10<br>(0.75 to 1.59)              | 1.27<br>(0.91 to 1.71)              |
| Other musculoskeletal disorders               | 299.59<br>(211.22 to 410.43)               | 365.05<br>(239.06 to 548.35)                | 360.73<br>(241.45 to 538.53)               | 353.58<br>(230.78 to 537.13)                | 6.66<br>(4.81 to 8.96)             | 9.79<br>(7.37 to 12.99)             | 10.48<br>(8.00 to 13.73)            | 9.04<br>(6.79 to 12.25)             |
| <b>Other non-communicable diseases</b>        | <b>7,321.99</b><br>(4,691.37 to 10,880.04) | <b>12,472.00</b><br>(6,836.78 to 23,207.71) | <b>8,238.44</b><br>(4,293.77 to 14,788.50) | <b>13,421.95</b><br>(6,348.62 to 25,439.03) | <b>113.57</b><br>(78.07 to 156.86) | <b>228.75</b><br>(145.79 to 361.64) | <b>183.61</b><br>(120.27 to 271.97) | <b>230.86</b><br>(146.80 to 379.65) |
| Congenital birth defects                      | 6,320.42<br>(3,815.29 to 9,757.74)         | 9,871.01<br>(3,907.04 to 19,995.22)         | 5,817.36<br>(2,293.64 to 11,793.90)        | 10,901.81<br>(4,336.36 to 22,061.18)        | 79.18<br>(49.34 to 119.13)         | 121.87<br>(51.44 to 240.60)         | 73.10<br>(31.15 to 143.12)          | 133.96<br>(56.41 to 264.40)         |
| Neural tube defects                           | 204.76<br>(97.36 to 389.58)                | 126.05<br>(43.61 to 298.58)                 | 62.42<br>(20.57 to 155.79)                 | 145.84<br>(48.90 to 358.79)                 | 2.41<br>(1.16 to 4.56)             | 1.49<br>(0.53 to 3.48)              | 0.74<br>(0.25 to 1.83)              | 1.72<br>(0.59 to 4.19)              |
| Congenital heart anomalies                    | 3,868.00<br>(2,295.92 to 6,140.12)         | 5,895.81<br>(2,292.66 to 12,329.17)         | 3,359.53<br>(1,233.52 to 6,893.70)         | 6,495.11<br>(2,499.36 to 13,818.83)         | 48.49<br>(29.66 to 74.83)          | 72.73<br>(29.99 to 147.43)          | 42.08<br>(16.70 to 83.43)           | 79.79<br>(32.59 to 163.73)          |
| Orofacial clefts                              | 10.97<br>(1.64 to 38.20)                   | 10.60<br>(1.52 to 44.24)                    | 5.37<br>(0.69 to 22.16)                    | 12.07<br>(1.77 to 50.71)                    | 0.13<br>(0.02 to 0.45)             | 0.12<br>(0.02 to 0.52)              | 0.06<br>(0.01 to 0.26)              | 0.14<br>(0.02 to 0.59)              |
| Down syndrome                                 | 353.63<br>(154.42 to 641.26)               | 511.35<br>(159.02 to 1,265.06)              | 374.15<br>(124.26 to 916.32)               | 565.01<br>(169.57 to 1,390.95)              | 4.65<br>(2.27 to 8.06)             | 6.67<br>(2.45 to 15.56)             | 5.03<br>(1.97 to 11.49)             | 7.31<br>(2.62 to 17.03)             |
| Other chromosomal abnormalities               | 323.46<br>(164.98 to 601.72)               | 736.78<br>(262.91 to 1,796.81)              | 468.30<br>(165.62 to 1,133.70)             | 823.72<br>(294.42 to 1,988.45)              | 3.87<br>(2.04 to 7.17)             | 8.73<br>(3.14 to 21.07)             | 5.58<br>(2.02 to 13.40)             | 9.74<br>(3.52 to 23.25)             |
| Congenital musculoskeletal and limb anomalies | 70.63<br>(37.70 to 125.02)                 | 144.54<br>(51.18 to 311.91)                 | 87.35<br>(30.70 to 187.48)                 | 158.45<br>(55.96 to 342.11)                 | 0.86<br>(0.47 to 1.49)             | 1.72<br>(0.62 to 3.67)              | 1.05<br>(0.39 to 2.21)              | 1.88<br>(0.69 to 4.02)              |
| Urogenital congenital anomalies               | 259.31<br>(144.90 to 402.44)               | 404.38<br>(186.53 to 784.51)                | 254.08<br>(119.46 to 491.87)               | 444.03<br>(199.16 to 879.69)                | 3.69<br>(2.20 to 5.43)             | 5.57<br>(2.91 to 10.07)             | 3.68<br>(1.92 to 6.49)              | 6.02<br>(3.06 to 11.21)             |
| Digestive congenital anomalies                | 351.18<br>(126.69 to 634.78)               | 574.32<br>(170.07 to 1,348.29)              | 318.29<br>(93.91 to 765.48)                | 644.29<br>(193.65 to 1,546.35)              | 4.13<br>(1.50 to 7.42)             | 6.73<br>(2.01 to 15.70)             | 3.74<br>(1.12 to 8.93)              | 7.54<br>(2.29 to 18.02)             |
| Other congenital birth defects                | 878.48<br>(505.24 to 1,421.27)             | 1,467.17<br>(571.26 to 3,190.14)            | 887.88<br>(352.40 to 1,921.46)             | 1,613.29<br>(625.25 to 3,542.22)            | 10.96<br>(6.52 to 17.43)           | 18.10<br>(7.41 to 38.34)            | 11.13<br>(4.79 to 23.35)            | 19.81<br>(8.07 to 42.14)            |
| Skin and subcutaneous diseases                | 927.23<br>(512.64 to 1,375.43)             | 2,443.41<br>(1,405.08 to 3,500.73)          | 2,325.01<br>(1,362.86 to 3,287.82)         | 2,544.22<br>(1,335.29 to 3,398.73)          | 33.53<br>(19.68 to 50.99)          | 105.05<br>(64.90 to 157.35)         | 109.39<br>(68.95 to 163.51)         | 94.86<br>(58.21 to 142.67)          |
| Cellulitis                                    | 280.90<br>(136.81 to 465.17)               | 799.40<br>(407.85 to 1,244.10)              | 841.23<br>(433.26 to 1,281.44)             | 743.23<br>(385.03 to 1,170.75)              | 10.06<br>(5.00 to 16.58)           | 35.46<br>(19.13 to 55.40)           | 40.20<br>(21.64 to 61.51)           | 31.20<br>(16.93 to 49.20)           |
| Pyoderma                                      | 567.98<br>(304.34 to 826.14)               | 1,492.68<br>(822.56 to 2,254.22)            | 1,339.25<br>(752.47 to 1,981.42)           | 1,460.94<br>(785.53 to 2,221.90)            | 19.41<br>(11.15 to 29.56)          | 59.86<br>(36.61 to 90.75)           | 59.11<br>(36.72 to 91.24)           | 55.13<br>(33.41 to 85.22)           |
| Decubitus ulcer                               | 71.83<br>(36.07 to 114.48)                 | 138.00<br>(69.40 to 228.85)                 | 132.67<br>(66.78 to 221.03)                | 126.81<br>(61.82 to 210.24)                 | 3.91<br>(1.99 to 6.54)             | 9.41<br>(4.64 to 17.92)             | 9.76<br>(5.02 to 18.23)             | 8.23<br>(4.03 to 15.89)             |
| Other skin and subcutaneous diseases          | 6.52<br>(3.24 to 9.54)                     | 13.34<br>(6.15 to 23.86)                    | 11.85<br>(5.66 to 20.47)                   | 13.24<br>(6.08 to 24.13)                    | 0.15<br>(0.08 to 0.22)             | 0.33<br>(0.17 to 0.51)              | 0.32<br>(0.17 to 0.50)              | 0.30<br>(0.16 to 0.49)              |
| Sudden infant death syndrome                  | 74.34<br>(35.99 to 135.57)                 | 157.58<br>(33.69 to 429.68)                 | 96.07<br>(20.60 to 259.58)                 | 175.93<br>(39.03 to 477.31)                 | 0.86<br>(0.42 to 1.57)             | 1.83<br>(0.39 to 4.99)              | 1.11<br>(0.24 to 3.01)              | 2.04<br>(0.45 to 5.54)              |

|                          |                                          |                                          |                                          |                                          |                                 |                                 |                                 |                                 |
|--------------------------|------------------------------------------|------------------------------------------|------------------------------------------|------------------------------------------|---------------------------------|---------------------------------|---------------------------------|---------------------------------|
| Injuries                 | 25,750.07<br>(19,272.17 to<br>32,329.10) | 23,386.70<br>(15,007.94 to<br>35,649.51) | 16,285.72<br>(10,523.72 to<br>24,195.83) | 27,100.69<br>(17,099.24 to<br>42,443.96) | 503.98<br>(373.60 to<br>634.75) | 500.54<br>(359.54 to<br>692.46) | 372.88<br>(273.38 to<br>506.39) | 556.28<br>(392.06 to<br>785.49) |
| Transport injuries       | 6,011.21<br>(4,460.15 to<br>7,706.37)    | 4,719.01<br>(2,954.10 to<br>7,211.28)    | 1,724.75<br>(1,127.48 to<br>2,602.32)    | 7,586.31<br>(4,661.93 to<br>11,734.12)   | 118.96<br>(88.11 to<br>151.24)  | 104.30<br>(73.00 to<br>148.02)  | 44.17<br>(32.19 to<br>59.75)    | 155.39<br>(105.79 to<br>223.46) |
| Road injuries            | 5,418.86<br>(3,999.04 to<br>6,947.91)    | 3,956.84<br>(2,459.51 to<br>6,116.93)    | 1,190.56<br>(773.86 to<br>1,807.41)      | 6,781.79<br>(4,170.61 to<br>10,503.50)   | 106.57<br>(78.19 to<br>136.10)  | 86.43<br>(59.45 to<br>124.25)   | 30.78<br>(22.60 to<br>42.09)    | 137.22<br>(92.59 to<br>199.21)  |
| Pedestrian road injuries | 1,114.66<br>(817.52 to<br>1,456.05)      | 683.36<br>(418.19 to<br>1,054.79)        | 229.35<br>(140.17 to<br>358.94)          | 1,005.99<br>(600.43 to<br>1,578.57)      | 22.11<br>(15.98 to<br>28.86)    | 15.64<br>(10.53 to<br>22.49)    | 5.80<br>(3.97 to<br>8.17)       | 21.98<br>(14.44 to<br>32.62)    |

| Fiji                                            |                                                              |                                                              |                                                             |                                                              |                                                      |                                                      |                                                      |                                                      |
|-------------------------------------------------|--------------------------------------------------------------|--------------------------------------------------------------|-------------------------------------------------------------|--------------------------------------------------------------|------------------------------------------------------|------------------------------------------------------|------------------------------------------------------|------------------------------------------------------|
| Cause                                           | YLLs (actual counts)                                         |                                                              |                                                             |                                                              | Deaths (actual counts)                               |                                                      |                                                      |                                                      |
|                                                 | 2016                                                         | 2040 Forecast                                                | 2040 Better Scenario                                        | 2040 Worse Scenario                                          | 2016                                                 | 2040 Forecast                                        | 2040 Better Scenario                                 | 2040 Worse Scenario                                  |
| Cyclist road injuries                           | 148.38<br>(104.45 to<br>196.88)                              | 102.80<br>(64.65 to<br>155.43)                               | 33.41<br>(22.51 to<br>47.33)                                | 175.65<br>(105.98 to<br>276.90)                              | 3.09<br>(2.24 to<br>4.04)                            | 2.51<br>(1.75 to<br>3.48)                            | 1.09<br>(0.81 to<br>1.46)                            | 3.79<br>(2.55 to<br>5.40)                            |
| Motorcyclist road injuries                      | 709.99<br>(434.74 to<br>1,017.90)                            | 566.69<br>(284.80 to<br>1,029.57)                            | 263.84<br>(134.82 to<br>471.12)                             | 809.29<br>(409.90 to<br>1,441.98)                            | 13.22<br>(8.18 to<br>18.95)                          | 11.08<br>(5.81 to<br>19.61)                          | 5.66<br>(3.13 to<br>9.50)                            | 15.12<br>(7.89 to<br>26.83)                          |
| Motor vehicle road injuries                     | 3,322.51<br>(2,427.08 to<br>4,350.10)                        | 2,518.02<br>(1,593.85 to<br>3,862.28)                        | 641.07<br>(432.24 to<br>942.13)                             | 4,634.23<br>(2,878.47 to<br>7,207.33)                        | 65.81<br>(48.34 to<br>85.44)                         | 55.38<br>(39.38 to<br>78.98)                         | 17.59<br>(13.33 to<br>23.57)                         | 93.31<br>(63.81 to<br>136.19)                        |
| Other road injuries                             | 123.31<br>(82.20 to<br>169.75)                               | 85.97<br>(48.97 to<br>133.78)                                | 22.89<br>(14.56 to<br>34.22)                                | 156.62<br>(86.56 to<br>249.55)                               | 2.34<br>(1.57 to<br>3.19)                            | 1.83<br>(1.18 to<br>2.66)                            | 0.64<br>(0.44 to<br>0.86)                            | 3.02<br>(1.86 to<br>4.59)                            |
| Other transport injuries                        | 592.36<br>(437.39 to<br>775.12)                              | 762.16<br>(467.83 to<br>1,198.46)                            | 534.19<br>(329.28 to<br>822.02)                             | 804.52<br>(488.45 to<br>1,263.44)                            | 12.39<br>(9.19 to<br>15.96)                          | 17.87<br>(12.43 to<br>25.27)                         | 13.40<br>(9.38 to<br>19.00)                          | 18.18<br>(12.52 to<br>25.95)                         |
| <b>Unintentional injuries</b>                   | <b>11,775.01</b><br><b>(8,964.63 to</b><br><b>14,671.56)</b> | <b>10,150.41</b><br><b>(6,464.90 to</b><br><b>16,064.98)</b> | <b>7,802.41</b><br><b>(5,019.41 to</b><br><b>11,999.63)</b> | <b>10,610.56</b><br><b>(6,644.82 to</b><br><b>16,839.37)</b> | <b>229.33</b><br><b>(173.80 to</b><br><b>285.02)</b> | <b>220.98</b><br><b>(165.25 to</b><br><b>300.25)</b> | <b>184.61</b><br><b>(139.98 to</b><br><b>245.30)</b> | <b>221.22</b><br><b>(163.87 to</b><br><b>305.54)</b> |
| Falls                                           | 881.05<br>(630.11 to<br>1,171.24)                            | 871.71<br>(626.98 to<br>1,202.62)                            | 772.71<br>(548.44 to<br>1,040.43)                           | 859.33<br>(605.35 to<br>1,187.85)                            | 24.02<br>(17.92 to<br>30.91)                         | 31.22<br>(25.38 to<br>37.31)                         | 30.25<br>(24.29 to<br>36.41)                         | 28.90<br>(23.25 to<br>35.05)                         |
| Drowning                                        | 4,517.60<br>(3,337.45 to<br>5,881.79)                        | 3,340.47<br>(1,961.31 to<br>5,612.02)                        | 2,498.88<br>(1,482.89 to<br>4,123.66)                       | 3,537.66<br>(2,073.33 to<br>5,992.36)                        | 79.39<br>(57.97 to<br>101.67)                        | 61.86<br>(40.02 to<br>94.76)                         | 48.20<br>(30.83 to<br>72.63)                         | 64.26<br>(41.33 to<br>98.63)                         |
| Fire, heat, and hot substances                  | 1,848.57<br>(1,325.97 to<br>2,409.63)                        | 1,314.69<br>(754.88 to<br>2,217.28)                          | 933.31<br>(548.27 to<br>1,538.84)                           | 1,399.86<br>(787.27 to<br>2,450.31)                          | 36.40<br>(26.90 to<br>47.33)                         | 29.55<br>(21.06 to<br>42.07)                         | 22.93<br>(16.59 to<br>32.35)                         | 30.08<br>(21.09 to<br>44.47)                         |
| Poisonings                                      | 254.27<br>(170.07 to<br>352.49)                              | 158.21<br>(91.59 to<br>269.15)                               | 101.28<br>(57.73 to<br>172.49)                              | 171.75<br>(97.64 to<br>305.45)                               | 4.99<br>(3.47 to<br>6.76)                            | 3.50<br>(2.45 to<br>5.25)                            | 2.47<br>(1.71 to<br>3.62)                            | 3.62<br>(2.44 to<br>5.56)                            |
| Exposure to mechanical forces                   | 1,292.05<br>(933.25 to<br>1,692.60)                          | 1,134.29<br>(671.65 to<br>1,802.73)                          | 845.07<br>(494.87 to<br>1,324.76)                           | 1,198.57<br>(703.58 to<br>1,908.18)                          | 23.46<br>(17.22 to<br>30.20)                         | 22.03<br>(14.79 to<br>31.79)                         | 17.40<br>(11.61 to<br>24.57)                         | 22.56<br>(14.85 to<br>32.37)                         |
| Unintentional firearm injuries                  | 43.82<br>(31.60 to<br>57.81)                                 | 36.29<br>(20.86 to<br>62.97)                                 | 27.01<br>(15.79 to<br>45.97)                                | 38.59<br>(21.55 to<br>69.37)                                 | 0.88<br>(0.65 to<br>1.12)                            | 0.81<br>(0.57 to<br>1.19)                            | 0.66<br>(0.47 to<br>0.96)                            | 0.82<br>(0.56 to<br>1.25)                            |
| Unintentional suffocation                       | 657.31<br>(419.22 to<br>896.01)                              | 593.18<br>(316.35 to<br>1,017.51)                            | 438.03<br>(229.98 to<br>750.03)                             | 633.80<br>(322.02 to<br>1,092.97)                            | 10.36<br>(6.79 to<br>13.99)                          | 9.40<br>(5.31 to<br>15.31)                           | 7.15<br>(4.13 to<br>11.55)                           | 9.92<br>(5.50 to<br>16.44)                           |
| Other exposure to mechanical forces             | 590.92<br>(430.72 to<br>768.38)                              | 504.81<br>(324.10 to<br>748.11)                              | 380.04<br>(239.91 to<br>574.55)                             | 526.18<br>(327.75 to<br>798.66)                              | 12.23<br>(8.95 to<br>15.90)                          | 11.83<br>(8.63 to<br>15.84)                          | 9.59<br>(6.81 to<br>12.98)                           | 11.81<br>(8.36 to<br>16.06)                          |
| Adverse effects of medical treatment            | 787.31<br>(573.93 to<br>1,015.53)                            | 815.21<br>(535.83 to<br>1,255.10)                            | 663.21<br>(441.14 to<br>1,094.74)                           | 843.12<br>(551.30 to<br>1,327.19)                            | 17.60<br>(13.10 to<br>22.42)                         | 20.62<br>(15.75 to<br>26.71)                         | 18.35<br>(13.98 to<br>23.50)                         | 20.26<br>(15.36 to<br>26.74)                         |
| Animal contact                                  | 92.08<br>(65.69 to<br>123.03)                                | 120.81<br>(75.03 to<br>189.32)                               | 90.43<br>(56.56 to<br>144.72)                               | 126.89<br>(77.09 to<br>201.32)                               | 2.19<br>(1.59 to<br>2.92)                            | 3.24<br>(2.35 to<br>4.49)                            | 2.67<br>(1.94 to<br>3.70)                            | 3.21<br>(2.28 to<br>4.53)                            |
| Venomous animal contact                         | 21.71<br>(13.47 to<br>34.23)                                 | 26.31<br>(14.04 to<br>48.36)                                 | 19.63<br>(10.74 to<br>35.75)                                | 28.17<br>(14.60 to<br>52.89)                                 | 0.48<br>(0.31 to<br>0.73)                            | 0.63<br>(0.40 to<br>1.00)                            | 0.52<br>(0.34 to<br>0.81)                            | 0.64<br>(0.39 to<br>1.05)                            |
| Non-venomous animal contact                     | 70.37<br>(49.80 to<br>94.48)                                 | 94.50<br>(58.82 to<br>148.02)                                | 70.80<br>(44.51 to<br>110.99)                               | 98.73<br>(60.37 to<br>156.41)                                | 1.71<br>(1.23 to<br>2.25)                            | 2.61<br>(1.91 to<br>3.59)                            | 2.15<br>(1.56 to<br>2.97)                            | 2.57<br>(1.85 to<br>3.63)                            |
| Foreign body                                    | 1,354.86<br>(921.65 to<br>1,884.78)                          | 1,763.04<br>(920.80 to<br>3,386.50)                          | 1,460.69<br>(817.12 to<br>2,646.67)                         | 1,815.58<br>(920.97 to<br>3,487.61)                          | 25.76<br>(18.94 to<br>34.55)                         | 34.45<br>(23.56 to<br>53.87)                         | 31.81<br>(22.94 to<br>46.02)                         | 33.71<br>(22.38 to<br>54.62)                         |
| Pulmonary aspiration and foreign body in airway | 1,218.36<br>(816.79 to<br>1,734.94)                          | 1,629.87<br>(849.40 to<br>3,174.36)                          | 1,350.99<br>(751.71 to<br>2,499.68)                         | 1,673.86<br>(834.52 to<br>3,303.32)                          | 23.36<br>(17.01 to<br>31.56)                         | 32.14<br>(21.96 to<br>50.22)                         | 29.80<br>(21.27 to<br>43.09)                         | 31.30<br>(20.77 to<br>51.22)                         |

|                                             |                                                             |                                                             |                                                             |                                                             |                                                      |                                                      |                                                     |                                                      |
|---------------------------------------------|-------------------------------------------------------------|-------------------------------------------------------------|-------------------------------------------------------------|-------------------------------------------------------------|------------------------------------------------------|------------------------------------------------------|-----------------------------------------------------|------------------------------------------------------|
|                                             | 136.50<br>(77.88 to<br>201.77)                              | 133.17<br>(61.12 to<br>268.34)                              | 109.70<br>(51.60 to<br>213.50)                              | 141.72<br>(62.83 to<br>291.74)                              | 2.40<br>(1.46 to<br>3.60)                            | 2.31<br>(1.21 to<br>4.12)                            | 2.01<br>(1.09 to<br>3.47)                           | 2.41<br>(1.23 to<br>4.35)                            |
| Foreign body in other body part             |                                                             |                                                             |                                                             |                                                             |                                                      |                                                      |                                                     |                                                      |
|                                             | 176.92<br>(104.86 to<br>258.79)                             | 174.16<br>(99.19 to<br>276.86)                              | 123.07<br>(69.19 to<br>199.28)                              | 184.45<br>(105.36 to<br>296.97)                             | 4.00<br>(2.46 to<br>5.71)                            | 4.38<br>(2.81 to<br>6.27)                            | 3.30<br>(2.15 to<br>4.82)                           | 4.43<br>(2.75 to<br>6.49)                            |
| Environmental heat and cold exposure        |                                                             |                                                             |                                                             |                                                             |                                                      |                                                      |                                                     |                                                      |
|                                             | 570.31<br>(420.33 to<br>747.54)                             | 457.82<br>(298.28 to<br>671.88)                             | 313.76<br>(187.80 to<br>495.49)                             | 473.35<br>(302.00 to<br>688.81)                             | 11.51<br>(8.40 to<br>14.98)                          | 10.13<br>(7.13 to<br>14.00)                          | 7.24<br>(4.75 to<br>10.84)                          | 10.20<br>(7.13 to<br>14.09)                          |
| Other unintentional injuries                |                                                             |                                                             |                                                             |                                                             |                                                      |                                                      |                                                     |                                                      |
| <b>Self-harm and interpersonal violence</b> | <b>7,957.91</b><br><b>(5,583.52 to</b><br><b>10,413.25)</b> | <b>8,397.01</b><br><b>(4,952.06 to</b><br><b>14,164.67)</b> | <b>6,643.50</b><br><b>(3,980.32 to</b><br><b>10,715.29)</b> | <b>8,783.69</b><br><b>(5,054.70 to</b><br><b>15,083.31)</b> | <b>155.57</b><br><b>(109.23 to</b><br><b>204.70)</b> | <b>172.65</b><br><b>(108.30 to</b><br><b>275.86)</b> | <b>141.48</b><br><b>(91.18 to</b><br><b>214.21)</b> | <b>177.12</b><br><b>(109.06 to</b><br><b>286.67)</b> |

| Fiji                                                                                |                                                |                                                      |                                                      |                                                      |                                                |                                                 |                                                 |                                                 |
|-------------------------------------------------------------------------------------|------------------------------------------------|------------------------------------------------------|------------------------------------------------------|------------------------------------------------------|------------------------------------------------|-------------------------------------------------|-------------------------------------------------|-------------------------------------------------|
| Cause                                                                               | YLLs (actual counts)                           |                                                      |                                                      |                                                      | Deaths (actual counts)                         |                                                 |                                                 |                                                 |
|                                                                                     | 2016                                           | 2040 Forecast                                        | 2040 Better Scenario                                 | 2040 Worse Scenario                                  | 2016                                           | 2040 Forecast                                   | 2040 Better Scenario                            | 2040 Worse Scenario                             |
| Self-harm                                                                           | 5,479.65<br>(3,855.79 to<br>7,365.91)          | 6,294.36<br>(3,490.15 to<br>11,184.40)               | 4,938.11<br>(2,870.93 to<br>8,373.80)                | 6,614.69<br>(3,630.62 to<br>11,938.61)               | 108.42<br>(75.52 to<br>145.06)                 | 131.31<br>(79.25 to<br>218.26)                  | 106.90<br>(67.68 to<br>167.97)                  | 135.16<br>(80.35 to<br>228.85)                  |
| Self-harm by firearm                                                                | 54.60<br>(35.77 to<br>95.78)                   | 46.84<br>(24.38 to<br>89.45)                         | 34.75<br>(18.66 to<br>63.51)                         | 49.44<br>(25.28 to<br>95.70)                         | 1.11<br>(0.73 to<br>1.90)                      | 1.01<br>(0.55 to<br>1.75)                       | 0.77<br>(0.43 to<br>1.34)                       | 1.04<br>(0.56 to<br>1.88)                       |
| Self-harm by other specified means                                                  | 5,425.05<br>(3,821.97 to<br>7,311.83)          | 6,247.53<br>(3,464.99 to<br>11,105.80)               | 4,903.36<br>(2,852.31 to<br>8,309.05)                | 6,565.25<br>(3,597.43 to<br>11,862.36)               | 107.31<br>(74.80 to<br>143.67)                 | 130.30<br>(78.55 to<br>216.46)                  | 106.13<br>(67.24 to<br>166.71)                  | 134.12<br>(79.81 to<br>227.12)                  |
| Interpersonal violence                                                              | 2,478.26<br>(1,433.53 to<br>3,353.79)          | 2,102.65<br>(1,020.79 to<br>3,420.20)                | 1,705.38<br>(829.16 to<br>2,726.43)                  | 2,169.00<br>(1,049.35 to<br>3,560.25)                | 47.15<br>(27.12 to<br>64.25)                   | 41.34<br>(20.59 to<br>63.84)                    | 34.58<br>(17.49 to<br>52.68)                    | 41.96<br>(20.92 to<br>65.51)                    |
| Physical violence by firearm                                                        | 161.07<br>(84.13 to<br>264.96)                 | 133.53<br>(63.99 to<br>227.91)                       | 109.47<br>(53.45 to<br>185.79)                       | 134.87<br>(63.54 to<br>228.20)                       | 3.04<br>(1.60 to<br>5.05)                      | 2.56<br>(1.30 to<br>4.18)                       | 2.15<br>(1.07 to<br>3.58)                       | 2.55<br>(1.28 to<br>4.16)                       |
| Physical violence by sharp object                                                   | 303.60<br>(167.54 to<br>429.50)                | 259.15<br>(136.94 to<br>402.81)                      | 221.91<br>(113.83 to<br>352.51)                      | 258.91<br>(135.54 to<br>401.05)                      | 5.76<br>(3.22 to<br>8.13)                      | 5.05<br>(2.69 to<br>7.59)                       | 4.41<br>(2.32 to<br>6.91)                       | 5.00<br>(2.64 to<br>7.55)                       |
| Physical violence by other means                                                    | 2,013.59<br>(1,135.25 to<br>2,749.38)          | 1,709.96<br>(795.13 to<br>2,874.56)                  | 1,374.00<br>(659.06 to<br>2,226.59)                  | 1,775.22<br>(820.97 to<br>2,993.24)                  | 38.35<br>(21.59 to<br>52.53)                   | 33.73<br>(16.25 to<br>53.16)                    | 28.02<br>(13.81 to<br>43.25)                    | 34.42<br>(16.57 to<br>54.27)                    |
| <b>Forces of nature, conflict and terrorism, and executions and police conflict</b> | <b>5.94</b><br><b>(4.57 to</b><br><b>7.55)</b> | <b>120.28</b><br><b>(0.00 to</b><br><b>1,282.10)</b> | <b>115.06</b><br><b>(0.00 to</b><br><b>1,231.01)</b> | <b>120.13</b><br><b>(0.00 to</b><br><b>1,276.66)</b> | <b>0.12</b><br><b>(0.08 to</b><br><b>0.16)</b> | <b>2.62</b><br><b>(0.00 to</b><br><b>28.38)</b> | <b>2.62</b><br><b>(0.00 to</b><br><b>28.49)</b> | <b>2.55</b><br><b>(0.00 to</b><br><b>27.51)</b> |
| Exposure to forces of nature                                                        | 0.00<br>(0.00 to<br>0.00)                      | 119.17<br>(0.00 to<br>1,282.10)                      | 114.00<br>(0.00 to<br>1,231.01)                      | 119.02<br>(0.00 to<br>1,276.66)                      | 0.00<br>(0.00 to<br>0.00)                      | 2.59<br>(0.00 to<br>28.38)                      | 2.60<br>(0.00 to<br>28.49)                      | 2.53<br>(0.00 to<br>27.51)                      |
| Conflict and terrorism                                                              | 0.00<br>(0.00 to<br>0.00)                      | 1.11<br>(0.00 to<br>10.11)                           | 1.06<br>(0.00 to<br>9.69)                            | 1.11<br>(0.00 to<br>10.13)                           | 0.00<br>(0.00 to<br>0.00)                      | 0.02<br>(0.00 to<br>0.19)                       | 0.02<br>(0.00 to<br>0.19)                       | 0.02<br>(0.00 to<br>0.19)                       |
| Executions and police conflict                                                      | 5.94<br>(4.57 to<br>7.55)                      | 0.00<br>(0.00 to<br>0.00)                            | 0.00<br>(0.00 to<br>0.00)                            | 0.00<br>(0.00 to<br>0.00)                            | 0.12<br>(0.08 to<br>0.16)                      | 0.00<br>(0.00 to<br>0.00)                       | 0.00<br>(0.00 to<br>0.00)                       | 0.00<br>(0.00 to<br>0.00)                       |

| Guam                                                              |                                       |                                       |                                       |                                       |                                    |                                    |                                    |                                    |
|-------------------------------------------------------------------|---------------------------------------|---------------------------------------|---------------------------------------|---------------------------------------|------------------------------------|------------------------------------|------------------------------------|------------------------------------|
| Cause                                                             | YLLs (actual counts)                  |                                       |                                       |                                       | Deaths (actual counts)             |                                    |                                    |                                    |
|                                                                   | 2016                                  | 2040 Forecast                         | 2040 Better Scenario                  | 2040 Worse Scenario                   | 2016                               | 2040 Forecast                      | 2040 Better Scenario               | 2040 Worse Scenario                |
| All causes                                                        | 36,001.58<br>(31,401.26 to 40,685.71) | 38,504.17<br>(30,199.84 to 48,047.88) | 28,473.13<br>(22,614.27 to 35,371.34) | 45,799.13<br>(35,913.40 to 57,248.41) | 1,459.79<br>(1,308.88 to 1,631.59) | 1,980.26<br>(1,708.35 to 2,265.58) | 1,624.93<br>(1,398.11 to 1,889.94) | 2,235.32<br>(1,904.18 to 2,555.25) |
| Communicable, maternal, neonatal, and nutritional diseases        | 4,500.79<br>(3,542.18 to 5,881.02)    | 3,596.54<br>(2,142.55 to 5,661.06)    | 2,402.92<br>(1,547.59 to 3,969.69)    | 4,096.90<br>(2,494.60 to 6,423.34)    | 105.54<br>(87.12 to 136.92)        | 120.68<br>(87.72 to 164.28)        | 100.12<br>(75.01 to 138.24)        | 128.41<br>(92.27 to 173.93)        |
| HIV/AIDS and tuberculosis                                         | 417.64<br>(141.91 to 1,700.88)        | 404.63<br>(72.52 to 1,924.88)         | 219.04<br>(25.71 to 1,561.53)         | 540.34<br>(124.20 to 2,053.54)        | 11.97<br>(5.21 to 45.18)           | 11.59<br>(3.03 to 49.74)           | 6.63<br>(1.30 to 42.49)            | 14.75<br>(4.65 to 52.19)           |
| Tuberculosis                                                      | 131.14<br>(103.88 to 157.58)          | 68.99<br>(42.51 to 114.97)            | 33.71<br>(22.11 to 51.38)             | 85.64<br>(50.76 to 146.26)            | 5.11<br>(4.02 to 6.05)             | 3.18<br>(2.02 to 5.11)             | 1.68<br>(1.16 to 2.52)             | 3.75<br>(2.31 to 6.10)             |
| HIV/AIDS                                                          | 286.49<br>(13.36 to 1,559.77)         | 335.64<br>(10.24 to 1,854.90)         | 185.33<br>(0.00 to 1,526.39)          | 454.70<br>(47.53 to 1,992.80)         | 6.86<br>(0.28 to 40.14)            | 8.41<br>(0.22 to 46.48)            | 4.95<br>(0.00 to 40.80)            | 10.99<br>(1.14 to 48.55)           |
| Diarrhea, lower respiratory, and other common infectious diseases | 1,792.96<br>(1,469.16 to 2,158.76)    | 1,662.91<br>(1,156.09 to 2,485.95)    | 1,208.36<br>(894.31 to 1,677.57)      | 1,848.70<br>(1,259.85 to 2,866.10)    | 60.05<br>(50.90 to 72.02)          | 79.26<br>(59.02 to 106.19)         | 67.11<br>(50.81 to 89.15)          | 83.06<br>(59.99 to 113.46)         |
| Diarrheal diseases                                                | 39.28<br>(26.14 to 56.64)             | 118.11<br>(31.64 to 351.72)           | 131.39<br>(47.17 to 347.32)           | 101.05<br>(26.56 to 313.56)           | 1.76<br>(1.01 to 2.75)             | 7.89<br>(2.02 to 23.25)            | 10.05<br>(3.36 to 26.08)           | 6.41<br>(1.47 to 19.94)            |
| Intestinal infectious diseases                                    | 85.11<br>(28.54 to 191.20)            | 140.77<br>(47.00 to 301.75)           | 145.65<br>(57.36 to 294.77)           | 133.52<br>(44.69 to 289.25)           | 1.34<br>(0.45 to 3.01)             | 2.18<br>(0.76 to 4.56)             | 2.37<br>(0.95 to 4.72)             | 2.05<br>(0.72 to 4.42)             |
| Typhoid fever                                                     | 72.86<br>(24.57 to 166.05)            | 127.46<br>(41.19 to 273.66)           | 137.33<br>(53.45 to 278.05)           | 119.17<br>(39.78 to 258.14)           | 1.14<br>(0.38 to 2.60)             | 1.97<br>(0.69 to 4.05)             | 2.23<br>(0.88 to 4.39)             | 1.82<br>(0.64 to 3.86)             |
| Paratyphoid fever                                                 | 12.30<br>(3.70 to 29.79)              | 13.28<br>(3.67 to 35.85)              | 8.29<br>(2.52 to 21.55)               | 14.32<br>(4.06 to 37.90)              | 0.20<br>(0.06 to 0.47)             | 0.21<br>(0.06 to 0.55)             | 0.14<br>(0.04 to 0.35)             | 0.23<br>(0.07 to 0.59)             |
| Other intestinal infectious diseases                              | 0.05<br>(0.02 to 0.12)                | 0.03<br>(0.01 to 0.08)                | 0.03<br>(0.01 to 0.06)                | 0.04<br>(0.01 to 0.08)                | 0.00<br>(0.00 to 0.00)             | 0.00<br>(0.00 to 0.00)             | 0.00<br>(0.00 to 0.00)             | 0.00<br>(0.00 to 0.00)             |
| Lower respiratory infections                                      | 1,504.75<br>(1,228.59 to 1,809.78)    | 1,300.29<br>(877.88 to 2,038.93)      | 866.97<br>(623.91 to 1,217.07)        | 1,502.93<br>(994.19 to 2,364.62)      | 54.15<br>(45.26 to 65.68)          | 67.04<br>(46.89 to 92.43)          | 53.08<br>(38.28 to 70.88)          | 72.37<br>(51.19 to 102.36)         |
| Upper respiratory infections                                      | 0.68<br>(0.35 to 1.22)                | 0.54<br>(0.21 to 1.12)                | 0.29<br>(0.12 to 0.61)                | 0.61<br>(0.23 to 1.24)                | 0.02<br>(0.01 to 0.03)             | 0.02<br>(0.01 to 0.04)             | 0.01<br>(0.01 to 0.02)             | 0.02<br>(0.01 to 0.04)             |
| Otitis media                                                      | 0.02<br>(0.01 to 0.05)                | 0.01<br>(0.00 to 0.03)                | 0.01<br>(0.00 to 0.03)                | 0.01<br>(0.00 to 0.03)                | 0.00<br>(0.00 to 0.00)             | 0.00<br>(0.00 to 0.00)             | 0.00<br>(0.00 to 0.00)             | 0.00<br>(0.00 to 0.00)             |
| Meningitis                                                        | 94.09<br>(68.27 to 135.21)            | 38.97<br>(22.49 to 66.06)             | 24.29<br>(14.74 to 39.82)             | 42.20<br>(24.27 to 69.45)             | 1.69<br>(1.29 to 2.37)             | 0.90<br>(0.59 to 1.36)             | 0.64<br>(0.43 to 0.99)             | 0.94<br>(0.62 to 1.43)             |
| Pneumococcal meningitis                                           | 0.30<br>(0.20 to 0.47)                | 0.11<br>(0.07 to 0.19)                | 0.10<br>(0.06 to 0.17)                | 0.11<br>(0.07 to 0.18)                | 0.01<br>(0.00 to 0.01)             | 0.00<br>(0.00 to 0.01)             | 0.00<br>(0.00 to 0.01)             | 0.00<br>(0.00 to 0.00)             |
| H influenzae type B meningitis                                    | 10.79<br>(7.15 to 16.42)              | 5.64<br>(2.79 to 12.00)               | 4.58<br>(2.50 to 8.44)                | 5.65<br>(2.72 to 12.30)               | 0.19<br>(0.13 to 0.28)             | 0.12<br>(0.08 to 0.20)             | 0.12<br>(0.08 to 0.19)             | 0.12<br>(0.07 to 0.20)             |
| Meningococcal meningitis                                          | 18.51<br>(12.48 to 27.86)             | 7.63<br>(4.32 to 12.81)               | 4.75<br>(2.85 to 8.07)                | 8.28<br>(4.82 to 14.10)               | 0.37<br>(0.27 to 0.53)             | 0.21<br>(0.13 to 0.33)             | 0.15<br>(0.10 to 0.22)             | 0.22<br>(0.14 to 0.34)             |
| Other meningitis                                                  | 64.49<br>(46.36 to 92.46)             | 25.58<br>(14.47 to 43.01)             | 14.85<br>(8.74 to 24.60)              | 28.15<br>(15.68 to 46.96)             | 1.12<br>(0.85 to 1.61)             | 0.56<br>(0.36 to 0.88)             | 0.37<br>(0.24 to 0.56)             | 0.60<br>(0.39 to 0.95)             |
| Encephalitis                                                      | 15.93<br>(12.57 to 21.16)             | 22.81<br>(15.54 to 33.87)             | 20.38<br>(13.82 to 29.82)             | 22.74<br>(15.57 to 33.63)             | 0.36<br>(0.29 to 0.48)             | 0.61<br>(0.47 to 0.85)             | 0.61<br>(0.46 to 0.84)             | 0.59<br>(0.45 to 0.81)             |

|                |                              |                              |                              |                              |                           |                           |                           |                           |
|----------------|------------------------------|------------------------------|------------------------------|------------------------------|---------------------------|---------------------------|---------------------------|---------------------------|
| Diphtheria     | 0.16<br>(0.10 to<br>0.26)    | 0.05<br>(0.02 to<br>0.12)    | 0.03<br>(0.02 to<br>0.06)    | 0.05<br>(0.02 to<br>0.12)    | 0.00<br>(0.00 to<br>0.00) | 0.00<br>(0.00 to<br>0.00) | 0.00<br>(0.00 to<br>0.00) | 0.00<br>(0.00 to<br>0.00) |
| Whooping cough | 7.84<br>(0.72 to<br>27.08)   | 8.58<br>(0.30 to<br>35.63)   | 1.27<br>(0.05 to<br>4.89)    | 9.60<br>(0.32 to<br>39.22)   | 0.09<br>(0.01 to<br>0.32) | 0.10<br>(0.00 to<br>0.42) | 0.02<br>(0.00 to<br>0.06) | 0.11<br>(0.00 to<br>0.47) |
| Tetanus        | 1.00<br>(0.84 to<br>1.16)    | 0.19<br>(0.11 to<br>0.33)    | 0.14<br>(0.08 to<br>0.24)    | 0.19<br>(0.11 to<br>0.35)    | 0.02<br>(0.02 to<br>0.02) | 0.00<br>(0.00 to<br>0.01) | 0.00<br>(0.00 to<br>0.00) | 0.00<br>(0.00 to<br>0.01) |
| Measles        | 37.94<br>(11.21 to<br>95.12) | 27.45<br>(0.03 to<br>216.96) | 14.52<br>(0.02 to<br>103.57) | 30.45<br>(0.03 to<br>241.91) | 0.45<br>(0.13 to<br>1.14) | 0.35<br>(0.00 to<br>2.68) | 0.19<br>(0.00 to<br>1.27) | 0.38<br>(0.00 to<br>2.92) |



| Guam                                                  |                                         |                                         |                                         |                                         |                                      |                                      |                                      |                                      |
|-------------------------------------------------------|-----------------------------------------|-----------------------------------------|-----------------------------------------|-----------------------------------------|--------------------------------------|--------------------------------------|--------------------------------------|--------------------------------------|
| Cause                                                 | YLLs (actual counts)                    |                                         |                                         |                                         | Deaths (actual counts)               |                                      |                                      |                                      |
|                                                       | 2016                                    | 2040 Forecast                           | 2040 Better Scenario                    | 2040 Worse Scenario                     | 2016                                 | 2040 Forecast                        | 2040 Better Scenario                 | 2040 Worse Scenario                  |
| Varicella and herpes zoster                           | 6.18<br>(3.81 to 10.10)                 | 5.14<br>(2.12 to 10.66)                 | 3.42<br>(1.54 to 6.64)                  | 5.35<br>(2.15 to 10.89)                 | 0.17<br>(0.11 to 0.24)               | 0.18<br>(0.10 to 0.30)               | 0.15<br>(0.08 to 0.27)               | 0.18<br>(0.09 to 0.30)               |
| <b>Neglected tropical diseases and malaria</b>        | <b>41.53</b><br><b>(10.26 to 77.62)</b> | <b>47.81</b><br><b>(13.29 to 83.04)</b> | <b>47.78</b><br><b>(13.60 to 81.11)</b> | <b>46.42</b><br><b>(12.43 to 81.68)</b> | <b>1.45</b><br><b>(0.40 to 2.52)</b> | <b>2.30</b><br><b>(0.72 to 3.59)</b> | <b>2.55</b><br><b>(0.86 to 3.87)</b> | <b>2.14</b><br><b>(0.64 to 3.41)</b> |
| Malaria                                               | 28.54<br>(2.63 to 62.90)                | 23.11<br>(1.41 to 52.69)                | 22.34<br>(1.31 to 51.19)                | 23.02<br>(1.42 to 53.08)                | 0.75<br>(0.06 to 1.66)               | 0.65<br>(0.03 to 1.47)               | 0.65<br>(0.03 to 1.46)               | 0.63<br>(0.03 to 1.43)               |
| Chagas disease                                        | 0.00<br>(0.00 to 0.00)                  | 0.00<br>(0.00 to 0.00)                  | 0.00<br>(0.00 to 0.00)                  | 0.00<br>(0.00 to 0.00)                  | 0.00<br>(0.00 to 0.00)               | 0.00<br>(0.00 to 0.00)               | 0.00<br>(0.00 to 0.00)               | 0.00<br>(0.00 to 0.00)               |
| Leishmaniasis                                         | 0.00<br>(0.00 to 0.00)                  | 0.00<br>(0.00 to 0.00)                  | 0.00<br>(0.00 to 0.00)                  | 0.00<br>(0.00 to 0.00)                  | 0.00<br>(0.00 to 0.00)               | 0.00<br>(0.00 to 0.00)               | 0.00<br>(0.00 to 0.00)               | 0.00<br>(0.00 to 0.00)               |
| African trypanosomiasis                               | 0.00<br>(0.00 to 0.00)                  | 0.00<br>(0.00 to 0.00)                  | 0.00<br>(0.00 to 0.00)                  | 0.00<br>(0.00 to 0.00)                  | 0.00<br>(0.00 to 0.00)               | 0.00<br>(0.00 to 0.00)               | 0.00<br>(0.00 to 0.00)               | 0.00<br>(0.00 to 0.00)               |
| Schistosomiasis                                       | 0.00<br>(0.00 to 0.00)                  | 0.00<br>(0.00 to 0.00)                  | 0.00<br>(0.00 to 0.00)                  | 0.00<br>(0.00 to 0.00)                  | 0.00<br>(0.00 to 0.00)               | 0.00<br>(0.00 to 0.00)               | 0.00<br>(0.00 to 0.00)               | 0.00<br>(0.00 to 0.00)               |
| Cysticercosis                                         | 0.00<br>(0.00 to 0.00)                  | 0.00<br>(0.00 to 0.00)                  | 0.00<br>(0.00 to 0.00)                  | 0.00<br>(0.00 to 0.00)                  | 0.00<br>(0.00 to 0.00)               | 0.00<br>(0.00 to 0.00)               | 0.00<br>(0.00 to 0.00)               | 0.00<br>(0.00 to 0.00)               |
| Cystic echinococcosis                                 | 0.00<br>(0.00 to 0.00)                  | 0.00<br>(0.00 to 0.00)                  | 0.00<br>(0.00 to 0.00)                  | 0.00<br>(0.00 to 0.00)                  | 0.00<br>(0.00 to 0.00)               | 0.00<br>(0.00 to 0.00)               | 0.00<br>(0.00 to 0.00)               | 0.00<br>(0.00 to 0.00)               |
| Dengue                                                | 0.14<br>(0.04 to 0.24)                  | 0.88<br>(0.20 to 1.46)                  | 0.88<br>(0.20 to 1.49)                  | 0.85<br>(0.19 to 1.42)                  | 0.01<br>(0.00 to 0.01)               | 0.05<br>(0.01 to 0.08)               | 0.05<br>(0.01 to 0.09)               | 0.04<br>(0.01 to 0.08)               |
| Yellow fever                                          | 0.00<br>(0.00 to 0.00)                  | 0.00<br>(0.00 to 0.00)                  | 0.00<br>(0.00 to 0.00)                  | 0.00<br>(0.00 to 0.00)                  | 0.00<br>(0.00 to 0.00)               | 0.00<br>(0.00 to 0.00)               | 0.00<br>(0.00 to 0.00)               | 0.00<br>(0.00 to 0.00)               |
| Rabies                                                | 0.03<br>(0.02 to 0.04)                  | 0.03<br>(0.02 to 0.05)                  | 0.03<br>(0.01 to 0.04)                  | 0.03<br>(0.02 to 0.05)                  | 0.00<br>(0.00 to 0.00)               | 0.00<br>(0.00 to 0.00)               | 0.00<br>(0.00 to 0.00)               | 0.00<br>(0.00 to 0.00)               |
| Intestinal nematode infections                        | 1.17<br>(0.40 to 2.66)                  | 2.06<br>(0.57 to 5.60)                  | 1.67<br>(0.55 to 4.25)                  | 2.04<br>(0.55 to 5.59)                  | 0.02<br>(0.01 to 0.04)               | 0.04<br>(0.02 to 0.08)               | 0.04<br>(0.02 to 0.07)               | 0.04<br>(0.02 to 0.08)               |
| Other neglected tropical diseases                     | 11.65<br>(6.00 to 16.45)                | 21.73<br>(9.52 to 31.03)                | 22.87<br>(10.18 to 31.95)               | 20.48<br>(8.69 to 29.69)                | 0.67<br>(0.30 to 1.00)               | 1.57<br>(0.61 to 2.45)               | 1.82<br>(0.76 to 2.74)               | 1.43<br>(0.54 to 2.26)               |
| <b>Maternal disorders</b>                             | <b>64.95</b><br><b>(42.36 to 94.17)</b> | <b>49.05</b><br><b>(26.85 to 80.15)</b> | <b>36.88</b><br><b>(20.07 to 61.11)</b> | <b>52.51</b><br><b>(28.76 to 86.98)</b> | <b>1.27</b><br><b>(0.52 to 1.87)</b> | <b>0.97</b><br><b>(0.52 to 1.42)</b> | <b>0.73</b><br><b>(0.39 to 1.23)</b> | <b>1.04</b><br><b>(0.56 to 1.75)</b> |
| Maternal hemorrhage                                   | 9.00<br>(4.98 to 14.36)                 | 6.78<br>(3.27 to 12.61)                 | 5.25<br>(2.48 to 10.05)                 | 7.22<br>(3.47 to 13.61)                 | 0.17<br>(0.10 to 0.28)               | 0.13<br>(0.06 to 0.25)               | 0.10<br>(0.05 to 0.20)               | 0.14<br>(0.06 to 0.27)               |
| Maternal sepsis and other maternal infections         | 4.00<br>(1.76 to 7.67)                  | 2.75<br>(1.09 to 5.83)                  | 2.09<br>(0.80 to 4.45)                  | 2.94<br>(1.15 to 6.18)                  | 0.08<br>(0.03 to 0.16)               | 0.06<br>(0.02 to 0.12)               | 0.04<br>(0.02 to 0.09)               | 0.06<br>(0.02 to 0.12)               |
| Maternal hypertensive disorders                       | 4.06<br>(2.19 to 6.89)                  | 3.09<br>(1.40 to 5.75)                  | 2.33<br>(1.05 to 4.41)                  | 3.31<br>(1.50 to 6.16)                  | 0.08<br>(0.04 to 0.14)               | 0.06<br>(0.03 to 0.12)               | 0.05<br>(0.02 to 0.09)               | 0.06<br>(0.03 to 0.12)               |
| Maternal obstructed labor and uterine rupture         | 2.17<br>(0.89 to 4.16)                  | 1.72<br>(0.59 to 3.75)                  | 1.26<br>(0.44 to 2.79)                  | 1.86<br>(0.67 to 4.00)                  | 0.04<br>(0.02 to 0.08)               | 0.03<br>(0.01 to 0.07)               | 0.02<br>(0.01 to 0.06)               | 0.04<br>(0.01 to 0.08)               |
| Maternal abortion, miscarriage, and ectopic pregnancy | 34.04<br>(21.68 to 50.12)               | 25.73<br>(13.41 to 44.25)               | 19.18<br>(9.83 to 33.46)                | 27.54<br>(14.10 to 48.62)               | 0.68<br>(0.42 to 1.02)               | 0.52<br>(0.26 to 0.91)               | 0.39<br>(0.19 to 0.69)               | 0.55<br>(0.27 to 0.99)               |

|                                        |                            |                           |                           |                           |                           |                           |                           |                           |
|----------------------------------------|----------------------------|---------------------------|---------------------------|---------------------------|---------------------------|---------------------------|---------------------------|---------------------------|
|                                        | 3.99<br>(2.15 to<br>6.70)  | 3.25<br>(1.48 to<br>6.14) | 2.36<br>(1.06 to<br>4.48) | 3.51<br>(1.55 to<br>6.65) | 0.08<br>(0.04 to<br>0.13) | 0.06<br>(0.03 to<br>0.12) | 0.05<br>(0.02 to<br>0.09) | 0.07<br>(0.03 to<br>0.13) |
| Indirect maternal deaths               |                            |                           |                           |                           |                           |                           |                           |                           |
|                                        | 1.33<br>(0.52 to<br>2.57)  | 0.81<br>(0.29 to<br>1.73) | 0.60<br>(0.21 to<br>1.27) | 0.87<br>(0.31 to<br>1.86) | 0.03<br>(0.01 to<br>0.05) | 0.02<br>(0.01 to<br>0.03) | 0.01<br>(0.00 to<br>0.02) | 0.02<br>(0.01 to<br>0.04) |
| Late maternal deaths                   |                            |                           |                           |                           |                           |                           |                           |                           |
|                                        | 0.01<br>(0.00 to<br>0.06)  | 0.15<br>(0.00 to<br>1.02) | 0.09<br>(0.00 to<br>0.77) | 0.16<br>(0.00 to<br>1.09) | 0.00<br>(0.00 to<br>0.00) | 0.00<br>(0.00 to<br>0.02) | 0.00<br>(0.00 to<br>0.01) | 0.00<br>(0.00 to<br>0.02) |
| Maternal deaths aggravated by HIV/AIDS |                            |                           |                           |                           |                           |                           |                           |                           |
|                                        | 6.32<br>(3.44 to<br>10.19) | 4.78<br>(2.18 to<br>8.61) | 3.73<br>(1.70 to<br>6.74) | 5.08<br>(2.34 to<br>9.15) | 0.12<br>(0.07 to<br>0.20) | 0.09<br>(0.04 to<br>0.17) | 0.07<br>(0.03 to<br>0.13) | 0.10<br>(0.04 to<br>0.18) |
| Other maternal disorders               |                            |                           |                           |                           |                           |                           |                           |                           |

| Guam                                                                    |                                           |                                         |                                       |                                         |                                  |                                 |                                 |                                 |
|-------------------------------------------------------------------------|-------------------------------------------|-----------------------------------------|---------------------------------------|-----------------------------------------|----------------------------------|---------------------------------|---------------------------------|---------------------------------|
| Cause                                                                   | YLLs (actual counts)                      |                                         |                                       |                                         | Deaths (actual counts)           |                                 |                                 |                                 |
|                                                                         | 2016                                      | 2040 Forecast                           | 2040 Better Scenario                  | 2040 Worse Scenario                     | 2016                             | 2040 Forecast                   | 2040 Better Scenario            | 2040 Worse Scenario             |
| <b>Neonatal disorders</b>                                               | <b>1,680.65</b><br>(1,200.12 to 2,250.74) | <b>1,162.75</b><br>(345.94 to 2,368.44) | <b>648.10</b><br>(195.61 to 1,286.77) | <b>1,342.12</b><br>(406.21 to 2,699.56) | <b>19.42</b><br>(13.87 to 26.02) | <b>13.44</b><br>(4.00 to 27.37) | <b>7.49</b><br>(2.26 to 14.87)  | <b>15.52</b><br>(4.69 to 31.22) |
| Neonatal preterm birth                                                  | 718.71<br>(481.04 to 1,005.74)            | 329.11<br>(99.10 to 694.62)             | 158.35<br>(48.94 to 326.59)           | 454.23<br>(141.00 to 932.06)            | 8.30<br>(5.56 to 11.62)          | 3.80<br>(1.15 to 8.03)          | 1.83<br>(0.57 to 3.77)          | 5.25<br>(1.63 to 10.77)         |
| Neonatal encephalopathy due to birth asphyxia and trauma                | 326.48<br>(205.31 to 475.66)              | 206.07<br>(53.36 to 443.98)             | 100.19<br>(26.53 to 214.60)           | 229.67<br>(58.50 to 504.98)             | 3.77<br>(2.37 to 5.50)           | 2.38<br>(0.62 to 5.15)          | 1.16<br>(0.31 to 2.48)          | 2.66<br>(0.68 to 5.84)          |
| Neonatal sepsis and other neonatal infections                           | 192.60<br>(113.01 to 305.90)              | 181.33<br>(45.59 to 416.26)             | 96.00<br>(24.41 to 218.65)            | 197.57<br>(50.06 to 450.48)             | 2.23<br>(1.31 to 3.53)           | 2.10<br>(0.53 to 4.81)          | 1.11<br>(0.28 to 2.53)          | 2.28<br>(0.58 to 5.21)          |
| Hemolytic disease and other neonatal jaundice                           | 12.39<br>(6.30 to 21.02)                  | 5.38<br>(1.21 to 13.23)                 | 2.76<br>(0.64 to 6.61)                | 5.90<br>(1.35 to 14.32)                 | 0.14<br>(0.07 to 0.24)           | 0.06<br>(0.01 to 0.15)          | 0.03<br>(0.01 to 0.08)          | 0.07<br>(0.02 to 0.17)          |
| Other neonatal disorders                                                | 430.48<br>(278.28 to 627.76)              | 440.85<br>(130.68 to 933.35)            | 290.80<br>(87.75 to 617.50)           | 454.75<br>(134.49 to 972.62)            | 4.98<br>(3.22 to 7.26)           | 5.10<br>(1.51 to 10.80)         | 3.36<br>(1.02 to 7.13)          | 5.26<br>(1.56 to 11.23)         |
| <b>Nutritional deficiencies</b>                                         | <b>94.77</b><br>(71.84 to 126.57)         | <b>111.88</b><br>(79.89 to 161.46)      | <b>126.16</b><br>(97.01 to 165.33)    | <b>102.03</b><br>(69.79 to 148.58)      | <b>4.09</b><br>(3.50 to 4.73)    | <b>8.71</b><br>(5.75 to 11.78)  | <b>11.75</b><br>(8.18 to 15.34) | <b>7.50</b><br>(4.73 to 10.37)  |
| Protein-energy malnutrition                                             | 91.72<br>(69.43 to 123.11)                | 106.11<br>(73.89 to 154.54)             | 120.85<br>(91.59 to 160.02)           | 96.41<br>(65.82 to 141.72)              | 3.99<br>(3.42 to 4.63)           | 8.42<br>(5.37 to 11.47)         | 11.43<br>(7.65 to 14.97)        | 7.23<br>(4.43 to 10.18)         |
| Iodine deficiency                                                       | 0.82<br>(0.04 to 2.92)                    | 3.28<br>(0.09 to 12.76)                 | 3.14<br>(0.07 to 12.84)               | 3.14<br>(0.09 to 12.57)                 | 0.03<br>(0.00 to 0.10)           | 0.21<br>(0.00 to 1.06)          | 0.23<br>(0.00 to 1.30)          | 0.19<br>(0.00 to 0.97)          |
| Dietary iron deficiency                                                 | 0.86<br>(0.68 to 1.08)                    | 1.19<br>(0.75 to 1.82)                  | 1.11<br>(0.73 to 1.65)                | 1.17<br>(0.74 to 1.78)                  | 0.02<br>(0.01 to 0.02)           | 0.02<br>(0.02 to 0.05)          | 0.02<br>(0.02 to 0.03)          | 0.02<br>(0.02 to 0.03)          |
| Other nutritional deficiencies                                          | 1.37<br>(1.08 to 1.73)                    | 1.30<br>(0.90 to 1.80)                  | 1.06<br>(0.76 to 1.44)                | 1.31<br>(0.92 to 1.81)                  | 0.05<br>(0.04 to 0.07)           | 0.06<br>(0.04 to 0.09)          | 0.06<br>(0.04 to 0.09)          | 0.06<br>(0.04 to 0.09)          |
| <b>Other communicable, maternal, neonatal, and nutritional diseases</b> | <b>408.29</b><br>(154.88 to 829.00)       | <b>157.51</b><br>(91.24 to 280.27)      | <b>116.61</b><br>(74.01 to 189.14)    | <b>164.78</b><br>(93.31 to 292.77)      | <b>7.28</b><br>(4.16 to 12.24)   | <b>4.39</b><br>(3.01 to 6.15)   | <b>3.84</b><br>(2.72 to 5.12)   | <b>4.40</b><br>(2.98 to 6.26)   |
| Sexually transmitted infections excluding HIV                           | 264.97<br>(5.60 to 693.20)                | 54.32<br>(4.24 to 168.39)               | 30.28<br>(3.55 to 94.44)              | 58.60<br>(4.20 to 185.23)               | 3.17<br>(0.14 to 8.16)           | 0.69<br>(0.10 to 2.02)          | 0.41<br>(0.09 to 1.17)          | 0.74<br>(0.11 to 2.24)          |
| Syphilis                                                                | 261.08<br>(1.44 to 689.20)                | 51.16<br>(0.85 to 164.55)               | 27.39<br>(0.66 to 91.32)              | 55.38<br>(0.87 to 181.49)               | 3.07<br>(0.04 to 8.07)           | 0.61<br>(0.02 to 1.95)          | 0.33<br>(0.02 to 1.09)          | 0.66<br>(0.02 to 2.16)          |
| Chlamydial infection                                                    | 0.75<br>(0.51 to 1.06)                    | 0.62<br>(0.36 to 1.00)                  | 0.56<br>(0.33 to 0.92)                | 0.63<br>(0.37 to 1.02)                  | 0.02<br>(0.01 to 0.03)           | 0.02<br>(0.01 to 0.02)          | 0.02<br>(0.01 to 0.02)          | 0.02<br>(0.01 to 0.02)          |
| Gonococcal infection                                                    | 2.02<br>(1.26 to 2.82)                    | 1.64<br>(0.94 to 2.67)                  | 1.50<br>(0.85 to 2.49)                | 1.67<br>(0.96 to 2.72)                  | 0.05<br>(0.04 to 0.07)           | 0.04<br>(0.03 to 0.07)          | 0.04<br>(0.03 to 0.06)          | 0.04<br>(0.03 to 0.07)          |
| Other sexually transmitted infections                                   | 1.12<br>(0.75 to 1.57)                    | 0.91<br>(0.52 to 1.47)                  | 0.83<br>(0.47 to 1.37)                | 0.93<br>(0.53 to 1.50)                  | 0.03<br>(0.02 to 0.04)           | 0.02<br>(0.01 to 0.04)          | 0.02<br>(0.01 to 0.03)          | 0.02<br>(0.01 to 0.04)          |
| Acute hepatitis                                                         | 89.38<br>(68.69 to 114.50)                | 50.09<br>(31.90 to 74.46)               | 34.64<br>(21.90 to 51.96)             | 54.00<br>(34.01 to 80.28)               | 2.54<br>(2.00 to 3.19)           | 1.60<br>(1.05 to 2.26)          | 1.16<br>(0.76 to 1.66)          | 1.69<br>(1.12 to 2.39)          |
| Acute hepatitis A                                                       | 3.97<br>(2.60 to 5.77)                    | 1.10<br>(0.62 to 1.88)                  | 0.79<br>(0.47 to 1.29)                | 1.15<br>(0.65 to 2.00)                  | 0.07<br>(0.05 to 0.10)           | 0.02<br>(0.02 to 0.05)          | 0.02<br>(0.01 to 0.04)          | 0.03<br>(0.02 to 0.05)          |
| Acute hepatitis B                                                       | 75.00<br>(56.43 to 96.72)                 | 43.52<br>(27.44 to 65.88)               | 30.11<br>(18.88 to 45.76)             | 47.02<br>(29.66 to 71.55)               | 2.20<br>(1.70 to 2.81)           | 1.38<br>(0.90 to 1.99)          | 0.99<br>(0.64 to 1.43)          | 1.47<br>(0.96 to 2.12)          |



| Guam                                 |                                           |                                            |                                           |                                            |                                     |                                     |                                     |                                     |
|--------------------------------------|-------------------------------------------|--------------------------------------------|-------------------------------------------|--------------------------------------------|-------------------------------------|-------------------------------------|-------------------------------------|-------------------------------------|
| Cause                                | YLLs (actual counts)                      |                                            |                                           |                                            | Deaths (actual counts)              |                                     |                                     |                                     |
|                                      | 2016                                      | 2040 Forecast                              | 2040 Better Scenario                      | 2040 Worse Scenario                        | 2016                                | 2040 Forecast                       | 2040 Better Scenario                | 2040 Worse Scenario                 |
| <b>Neoplasms</b>                     | <b>5,777.64</b><br>(5,006.67 to 6,713.27) | <b>7,831.74</b><br>(5,973.41 to 10,166.62) | <b>6,015.40</b><br>(4,680.10 to 7,631.16) | <b>8,941.26</b><br>(6,759.41 to 11,810.47) | <b>248.02</b><br>(218.95 to 282.27) | <b>394.47</b><br>(312.08 to 491.90) | <b>319.11</b><br>(263.44 to 384.84) | <b>434.66</b><br>(340.76 to 549.43) |
| Lip and oral cavity cancer           | 123.62<br>(102.50 to 146.70)              | 162.32<br>(94.83 to 277.77)                | 102.61<br>(64.50 to 164.33)               | 203.70<br>(114.25 to 359.79)               | 5.50<br>(4.70 to 6.38)              | 8.16<br>(5.08 to 12.71)             | 5.48<br>(3.68 to 8.20)              | 9.79<br>(5.93 to 16.00)             |
| Nasopharynx cancer                   | 180.88<br>(142.13 to 230.56)              | 241.47<br>(123.11 to 449.71)               | 134.61<br>(73.68 to 238.70)               | 320.23<br>(152.70 to 610.79)               | 6.61<br>(5.29 to 8.35)              | 9.35<br>(5.08 to 16.18)             | 5.43<br>(3.08 to 9.07)              | 12.06<br>(6.26 to 21.77)            |
| Other pharynx cancer                 | 51.20<br>(42.03 to 61.47)                 | 67.50<br>(46.30 to 102.46)                 | 65.87<br>(46.50 to 93.99)                 | 69.72<br>(45.50 to 112.27)                 | 2.15<br>(1.81 to 2.55)              | 3.32<br>(2.42 to 4.77)              | 3.41<br>(2.56 to 4.70)              | 3.33<br>(2.32 to 4.98)              |
| Esophageal cancer                    | 113.70<br>(91.91 to 138.38)               | 162.13<br>(88.65 to 293.23)                | 119.28<br>(71.32 to 203.47)               | 192.69<br>(102.47 to 357.69)               | 5.05<br>(4.17 to 6.03)              | 8.01<br>(4.69 to 13.71)             | 6.17<br>(3.90 to 10.15)             | 9.21<br>(5.20 to 16.14)             |
| Stomach cancer                       | 201.04<br>(171.40 to 236.79)              | 159.51<br>(119.73 to 207.08)               | 120.12<br>(93.11 to 152.60)               | 172.41<br>(126.67 to 228.43)               | 9.29<br>(8.13 to 10.65)             | 8.97<br>(6.93 to 11.34)             | 7.15<br>(5.76 to 8.70)              | 9.39<br>(6.99 to 12.12)             |
| Colon and rectum cancer              | 570.96<br>(481.46 to 671.34)              | 734.23<br>(499.09 to 1,077.32)             | 592.08<br>(415.68 to 853.59)              | 794.32<br>(533.93 to 1,186.09)             | 26.73<br>(23.05 to 30.60)           | 41.86<br>(28.67 to 61.17)           | 35.74<br>(25.29 to 50.46)           | 43.60<br>(29.88 to 64.07)           |
| Liver cancer                         | 525.02<br>(424.02 to 640.93)              | 803.16<br>(482.89 to 1,366.45)             | 731.73<br>(464.65 to 1,166.54)            | 958.76<br>(522.65 to 1,693.87)             | 20.83<br>(17.23 to 24.80)           | 36.39<br>(23.05 to 57.20)           | 34.86<br>(23.81 to 51.83)           | 41.55<br>(24.56 to 67.67)           |
| Liver cancer due to hepatitis B      | 281.77<br>(222.49 to 349.56)              | 415.31<br>(246.37 to 702.54)               | 379.76<br>(236.88 to 624.60)              | 495.38<br>(267.50 to 890.29)               | 10.55<br>(8.51 to 12.82)            | 17.55<br>(11.02 to 28.45)           | 16.82<br>(11.27 to 25.99)           | 20.09<br>(11.67 to 33.49)           |
| Liver cancer due to hepatitis C      | 77.19<br>(61.33 to 95.36)                 | 124.54<br>(78.15 to 195.59)                | 117.50<br>(77.61 to 174.44)               | 143.35<br>(84.14 to 233.50)                | 3.68<br>(3.02 to 4.39)              | 7.01<br>(4.57 to 10.29)             | 6.96<br>(4.83 to 9.84)              | 7.70<br>(4.66 to 11.66)             |
| Liver cancer due to alcohol use      | 47.89<br>(35.77 to 63.03)                 | 73.93<br>(43.52 to 125.72)                 | 64.20<br>(40.86 to 103.01)                | 92.23<br>(49.71 to 166.94)                 | 1.97<br>(1.53 to 2.51)              | 3.36<br>(2.07 to 5.39)              | 3.08<br>(2.03 to 4.64)              | 4.00<br>(2.31 to 6.74)              |
| Liver cancer due to other causes     | 118.16<br>(89.62 to 152.94)               | 189.38<br>(99.61 to 341.33)                | 170.26<br>(95.83 to 289.31)               | 227.81<br>(107.32 to 433.93)               | 4.62<br>(3.60 to 5.79)              | 8.47<br>(4.71 to 14.23)             | 8.00<br>(4.79 to 12.95)             | 9.76<br>(5.03 to 17.85)             |
| Gallbladder and biliary tract cancer | 34.46<br>(28.55 to 42.85)                 | 31.59<br>(25.97 to 38.84)                  | 32.18<br>(26.24 to 39.94)                 | 30.13<br>(25.08 to 37.28)                  | 1.65<br>(1.38 to 2.01)              | 1.78<br>(1.47 to 2.14)              | 1.89<br>(1.57 to 2.26)              | 1.65<br>(1.36 to 2.00)              |
| Pancreatic cancer                    | 224.05<br>(192.66 to 259.38)              | 366.61<br>(257.40 to 535.02)               | 326.77<br>(233.66 to 460.07)              | 380.65<br>(265.56 to 557.60)               | 10.50<br>(9.20 to 11.95)            | 19.41<br>(14.09 to 27.71)           | 17.94<br>(13.49 to 24.81)           | 19.68<br>(14.01 to 28.22)           |
| Larynx cancer                        | 60.73<br>(50.06 to 73.25)                 | 67.51<br>(35.02 to 118.80)                 | 39.36<br>(21.44 to 67.62)                 | 84.66<br>(42.56 to 153.76)                 | 2.81<br>(2.36 to 3.30)              | 3.58<br>(1.92 to 6.28)              | 2.17<br>(1.21 to 3.64)              | 4.35<br>(2.25 to 7.83)              |
| Tracheal, bronchus, and lung cancer  | 1,558.84<br>(1,341.29 to 1,847.32)        | 2,309.83<br>(1,478.92 to 3,410.67)         | 1,340.58<br>(889.68 to 1,927.84)          | 2,937.40<br>(1,859.71 to 4,344.66)         | 72.01<br>(62.63 to 84.16)           | 120.73<br>(79.65 to 171.05)         | 73.03<br>(50.49 to 102.78)          | 148.97<br>(97.86 to 213.39)         |
| Malignant skin melanoma              | 34.15<br>(26.29 to 43.60)                 | 51.86<br>(39.45 to 66.30)                  | 67.25<br>(50.62 to 85.53)                 | 46.02<br>(35.35 to 57.44)                  | 1.50<br>(1.16 to 1.87)              | 2.77<br>(2.04 to 3.44)              | 3.81<br>(2.84 to 4.71)              | 2.37<br>(1.74 to 2.93)              |
| Non-melanoma skin cancer             | 37.92<br>(31.10 to 46.19)                 | 45.33<br>(37.05 to 54.57)                  | 39.38<br>(32.49 to 46.90)                 | 44.19<br>(35.88 to 52.75)                  | 1.96<br>(1.68 to 2.28)              | 3.03<br>(2.31 to 3.72)              | 2.86<br>(2.30 to 3.47)              | 2.81<br>(2.11 to 3.46)              |
| Breast cancer                        | 411.74<br>(315.63 to 517.59)              | 485.59<br>(294.57 to 736.82)               | 380.07<br>(242.78 to 555.16)              | 525.84<br>(314.73 to 807.89)               | 16.32<br>(13.06 to 19.96)           | 23.59<br>(15.38 to 34.73)           | 19.42<br>(13.29 to 27.32)           | 24.77<br>(16.08 to 36.61)           |
| Cervical cancer                      | 103.50<br>(75.85 to 145.44)               | 101.96<br>(58.86 to 163.30)                | 73.49<br>(45.49 to 112.11)                | 112.77<br>(64.74 to 184.88)                | 3.63<br>(2.70 to 5.01)              | 3.99<br>(2.55 to 6.06)              | 2.98<br>(2.04 to 4.24)              | 4.32<br>(2.72 to 6.74)              |

|                   |                                 |                                 |                                 |                                 |                              |                              |                              |                              |
|-------------------|---------------------------------|---------------------------------|---------------------------------|---------------------------------|------------------------------|------------------------------|------------------------------|------------------------------|
|                   | 68.37<br>(52.69 to<br>83.66)    | 92.56<br>(68.35 to<br>120.52)   | 82.20<br>(60.26 to<br>107.35)   | 93.77<br>(69.33 to<br>122.04)   | 2.79<br>(2.21 to<br>3.36)    | 4.41<br>(3.50 to<br>5.40)    | 4.06<br>(3.21 to<br>4.98)    | 4.38<br>(3.48 to<br>5.37)    |
| Uterine cancer    |                                 |                                 |                                 |                                 |                              |                              |                              |                              |
|                   | 90.87<br>(71.06 to<br>113.53)   | 112.62<br>(73.21 to<br>175.09)  | 98.98<br>(65.05 to<br>149.50)   | 115.72<br>(74.45 to<br>179.62)  | 3.69<br>(2.90 to<br>4.52)    | 5.14<br>(3.39 to<br>7.96)    | 4.63<br>(3.12 to<br>6.90)    | 5.20<br>(3.45 to<br>8.07)    |
| Ovarian cancer    |                                 |                                 |                                 |                                 |                              |                              |                              |                              |
|                   | 215.72<br>(161.37 to<br>267.26) | 354.12<br>(264.58 to<br>440.65) | 341.51<br>(257.17 to<br>423.00) | 332.72<br>(239.59 to<br>413.35) | 14.28<br>(10.71 to<br>17.58) | 27.24<br>(19.49 to<br>34.74) | 27.59<br>(20.46 to<br>34.60) | 24.84<br>(16.81 to<br>32.09) |
| Prostate cancer   |                                 |                                 |                                 |                                 |                              |                              |                              |                              |
|                   | 7.32<br>(5.38 to<br>9.41)       | 6.19<br>(4.15 to<br>8.74)       | 5.22<br>(3.51 to<br>7.26)       | 6.27<br>(4.21 to<br>8.85)       | 0.20<br>(0.15 to<br>0.25)    | 0.20<br>(0.14 to<br>0.26)    | 0.18<br>(0.13 to<br>0.23)    | 0.19<br>(0.14 to<br>0.25)    |
| Testicular cancer |                                 |                                 |                                 |                                 |                              |                              |                              |                              |

| Guam                            |                                                     |                                                    |                                                   |                                                    |                                            |                                            |                                            |                                              |
|---------------------------------|-----------------------------------------------------|----------------------------------------------------|---------------------------------------------------|----------------------------------------------------|--------------------------------------------|--------------------------------------------|--------------------------------------------|----------------------------------------------|
| Cause                           | YLLs (actual counts)                                |                                                    |                                                   |                                                    | Deaths (actual counts)                     |                                            |                                            |                                              |
|                                 | 2016                                                | 2040 Forecast                                      | 2040 Better Scenario                              | 2040 Worse Scenario                                | 2016                                       | 2040 Forecast                              | 2040 Better Scenario                       | 2040 Worse Scenario                          |
| Kidney cancer                   | 71.48<br>(59.07 to 87.87)                           | 119.63<br>(81.36 to 174.17)                        | 111.83<br>(78.61 to 157.14)                       | 121.65<br>(80.06 to 181.32)                        | 2.90<br>(2.46 to 3.48)                     | 5.75<br>(4.10 to 8.00)                     | 5.72<br>(4.28 to 7.59)                     | 5.65<br>(3.89 to 8.10)                       |
| Bladder cancer                  | 95.30<br>(79.61 to 113.33)                          | 111.32<br>(70.42 to 174.58)                        | 87.60<br>(58.43 to 131.35)                        | 120.54<br>(74.57 to 195.35)                        | 4.79<br>(4.08 to 5.62)                     | 6.56<br>(4.28 to 10.00)                    | 5.43<br>(3.71 to 7.86)                     | 6.87<br>(4.39 to 10.76)                      |
| Brain and nervous system cancer | 99.85<br>(80.37 to 122.52)                          | 133.25<br>(99.07 to 172.09)                        | 118.62<br>(89.16 to 153.05)                       | 132.37<br>(98.17 to 171.34)                        | 2.85<br>(2.30 to 3.50)                     | 4.37<br>(3.49 to 5.41)                     | 4.23<br>(3.38 to 5.25)                     | 4.22<br>(3.37 to 5.25)                       |
| Thyroid cancer                  | 26.47<br>(21.62 to 31.13)                           | 30.95<br>(22.43 to 42.51)                          | 27.15<br>(19.90 to 37.32)                         | 33.44<br>(23.61 to 47.00)                          | 1.23<br>(1.00 to 1.43)                     | 1.69<br>(1.24 to 2.27)                     | 1.55<br>(1.16 to 2.07)                     | 1.76<br>(1.28 to 2.43)                       |
| Mesothelioma                    | 15.33<br>(10.77 to 19.77)                           | 18.56<br>(13.11 to 23.85)                          | 19.83<br>(13.73 to 25.97)                         | 17.40<br>(12.30 to 22.01)                          | 0.60<br>(0.43 to 0.76)                     | 0.80<br>(0.58 to 0.99)                     | 0.90<br>(0.66 to 1.11)                     | 0.73<br>(0.54 to 0.90)                       |
| Hodgkin lymphoma                | 14.86<br>(11.35 to 21.58)                           | 12.31<br>(8.06 to 17.76)                           | 9.18<br>(6.05 to 13.66)                           | 12.83<br>(8.36 to 18.76)                           | 0.42<br>(0.33 to 0.61)                     | 0.40<br>(0.29 to 0.56)                     | 0.32<br>(0.24 to 0.46)                     | 0.41<br>(0.29 to 0.58)                       |
| Non-Hodgkin lymphoma            | 190.94<br>(156.56 to 237.76)                        | 238.36<br>(182.25 to 308.38)                       | 209.18<br>(160.28 to 273.09)                      | 247.33<br>(186.74 to 326.30)                       | 6.69<br>(5.62 to 8.21)                     | 10.19<br>(8.11 to 12.77)                   | 9.65<br>(7.84 to 12.01)                    | 10.18<br>(8.02 to 12.86)                     |
| Multiple myeloma                | 82.47<br>(66.49 to 100.40)                          | 108.62<br>(83.82 to 138.22)                        | 104.95<br>(80.95 to 132.50)                       | 110.18<br>(83.84 to 142.02)                        | 3.65<br>(2.94 to 4.39)                     | 5.74<br>(4.32 to 7.19)                     | 5.88<br>(4.48 to 7.20)                     | 5.60<br>(4.14 to 7.19)                       |
| Leukemia                        | 288.49<br>(240.12 to 348.62)                        | 344.86<br>(244.52 to 477.42)                       | 287.19<br>(207.99 to 386.41)                      | 375.25<br>(261.43 to 532.53)                       | 8.50<br>(7.15 to 10.42)                    | 12.91<br>(9.34 to 17.76)                   | 11.67<br>(8.76 to 15.53)                   | 13.55<br>(9.56 to 19.15)                     |
| Acute lymphoid leukemia         | 48.56<br>(37.07 to 62.43)                           | 46.57<br>(29.97 to 70.02)                          | 35.72<br>(23.27 to 53.43)                         | 50.92<br>(32.92 to 75.71)                          | 1.04<br>(0.82 to 1.34)                     | 1.13<br>(0.77 to 1.63)                     | 0.92<br>(0.64 to 1.31)                     | 1.23<br>(0.82 to 1.80)                       |
| Chronic lymphoid leukemia       | 10.63<br>(8.36 to 13.75)                            | 12.51<br>(8.68 to 17.83)                           | 11.46<br>(8.12 to 15.92)                          | 13.25<br>(8.96 to 19.18)                           | 0.51<br>(0.41 to 0.66)                     | 0.73<br>(0.49 to 1.08)                     | 0.70<br>(0.49 to 1.00)                     | 0.74<br>(0.48 to 1.09)                       |
| Acute myeloid leukemia          | 119.40<br>(96.82 to 147.37)                         | 176.76<br>(126.00 to 243.70)                       | 157.09<br>(112.57 to 213.19)                      | 189.77<br>(133.09 to 266.54)                       | 3.25<br>(2.67 to 4.05)                     | 6.03<br>(4.42 to 8.12)                     | 5.83<br>(4.39 to 7.63)                     | 6.25<br>(4.47 to 8.76)                       |
| Chronic myeloid leukemia        | 28.40<br>(22.64 to 36.08)                           | 17.77<br>(11.15 to 27.20)                          | 11.71<br>(7.92 to 17.10)                          | 21.05<br>(13.45 to 33.10)                          | 1.03<br>(0.83 to 1.29)                     | 0.74<br>(0.49 to 1.10)                     | 0.51<br>(0.36 to 0.73)                     | 0.85<br>(0.56 to 1.26)                       |
| Other leukemia                  | 81.50<br>(66.31 to 100.61)                          | 91.25<br>(60.88 to 135.12)                         | 71.21<br>(49.07 to 103.67)                        | 100.26<br>(65.83 to 151.01)                        | 2.67<br>(2.20 to 3.26)                     | 4.28<br>(2.89 to 6.27)                     | 3.71<br>(2.64 to 5.16)                     | 4.48<br>(2.99 to 6.70)                       |
| Other neoplasms                 | 278.37<br>(235.49 to 329.10)                        | 357.77<br>(286.57 to 432.48)                       | 346.57<br>(276.95 to 418.78)                      | 348.30<br>(280.31 to 422.21)                       | 8.93<br>(7.65 to 10.34)                    | 14.12<br>(12.03 to 16.20)                  | 14.97<br>(12.79 to 17.23)                  | 13.25<br>(11.16 to 15.26)                    |
| <b>Cardiovascular diseases</b>  | <b>12,475.72</b><br><b>(10,871.57 to 14,352.14)</b> | <b>10,857.31</b><br><b>(7,612.43 to 15,867.25)</b> | <b>6,934.46</b><br><b>(5,034.01 to 10,005.30)</b> | <b>15,023.17</b><br><b>(9,991.10 to 22,430.89)</b> | <b>617.08</b><br><b>(550.92 to 689.38)</b> | <b>657.38</b><br><b>(495.37 to 923.51)</b> | <b>475.04</b><br><b>(363.55 to 696.23)</b> | <b>825.44</b><br><b>(605.72 to 1,164.09)</b> |
| Rheumatic heart disease         | 197.64<br>(166.82 to 233.10)                        | 108.05<br>(82.01 to 138.81)                        | 86.21<br>(66.42 to 109.46)                        | 110.57<br>(83.94 to 141.65)                        | 6.94<br>(5.99 to 8.02)                     | 5.41<br>(4.18 to 6.72)                     | 4.80<br>(3.76 to 5.85)                     | 5.27<br>(3.97 to 6.62)                       |
| Ischemic heart disease          | 7,764.84<br>(6,679.55 to 9,006.75)                  | 6,177.90<br>(3,559.53 to 10,879.25)                | 3,487.93<br>(2,001.48 to 6,308.68)                | 9,323.83<br>(5,241.70 to 16,072.21)                | 391.59<br>(346.94 to 439.19)               | 370.00<br>(221.78 to 647.97)               | 238.59<br>(140.39 to 453.61)               | 502.22<br>(303.30 to 849.87)                 |
| Stroke                          | 2,475.15<br>(2,140.20 to 2,863.33)                  | 1,773.39<br>(1,033.05 to 3,100.19)                 | 1,002.08<br>(618.07 to 1,963.29)                  | 2,587.56<br>(1,459.70 to 4,455.60)                 | 121.17<br>(106.56 to 138.11)               | 107.07<br>(64.97 to 221.22)                | 69.98<br>(43.26 to 158.37)                 | 140.56<br>(83.34 to 272.22)                  |
| Ischemic stroke                 | 943.81<br>(818.39 to 1,099.38)                      | 693.66<br>(369.82 to 1,781.89)                     | 438.02<br>(232.40 to 1,272.75)                    | 935.11<br>(476.12 to 2,199.93)                     | 55.83<br>(48.59 to 64.04)                  | 50.30<br>(25.51 to 142.14)                 | 35.70<br>(17.89 to 107.28)                 | 62.19<br>(31.51 to 186.38)                   |

|                                |                                       |                                       |                                     |                                       |                              |                               |                               |                               |
|--------------------------------|---------------------------------------|---------------------------------------|-------------------------------------|---------------------------------------|------------------------------|-------------------------------|-------------------------------|-------------------------------|
| Intracerebral hemorrhage       | 1,531.34<br>(1,306.54 to<br>1,780.05) | 1,079.73<br>(599.01 to<br>1,920.95)   | 564.06<br>(337.41 to<br>940.94)     | 1,652.45<br>(848.93 to<br>2,996.71)   | 65.34<br>(56.58 to<br>74.73) | 56.78<br>(34.73 to<br>99.23)  | 34.28<br>(21.71 to<br>60.16)  | 78.37<br>(43.67 to<br>141.34) |
| Hypertensive heart disease     | 826.89<br>(661.16 to<br>1,117.76)     | 1,419.13<br>(1,055.41 to<br>2,005.85) | 1,192.78<br>(921.51 to<br>1,620.56) | 1,571.24<br>(1,076.84 to<br>2,497.17) | 42.58<br>(34.86 to<br>57.28) | 92.62<br>(67.29 to<br>128.63) | 84.10<br>(63.21 to<br>112.75) | 96.91<br>(65.74 to<br>152.82) |
| Cardiomyopathy and myocarditis | 360.69<br>(274.09 to<br>434.27)       | 305.45<br>(216.13 to<br>402.56)       | 249.88<br>(175.75 to<br>322.87)     | 313.61<br>(221.74 to<br>421.64)       | 13.66<br>(10.46 to<br>16.25) | 14.95<br>(10.55 to<br>20.51)  | 13.33<br>(9.49 to<br>17.96)   | 14.68<br>(10.19 to<br>20.20)  |
| Myocarditis                    | 71.90<br>(46.66 to<br>93.57)          | 82.03<br>(55.04 to<br>107.12)         | 83.70<br>(57.01 to<br>108.70)       | 77.99<br>(51.87 to<br>102.36)         | 2.86<br>(1.89 to<br>3.73)    | 4.17<br>(2.82 to<br>5.42)     | 4.60<br>(3.18 to<br>5.94)     | 3.81<br>(2.56 to<br>4.98)     |



| Guam                                                          |                                                            |                                                            |                                                            |                                                            |                                                   |                                                     |                                                    |                                                     |
|---------------------------------------------------------------|------------------------------------------------------------|------------------------------------------------------------|------------------------------------------------------------|------------------------------------------------------------|---------------------------------------------------|-----------------------------------------------------|----------------------------------------------------|-----------------------------------------------------|
| Cause                                                         | YLLs (actual counts)                                       |                                                            |                                                            |                                                            | Deaths (actual counts)                            |                                                     |                                                    |                                                     |
|                                                               | 2016                                                       | 2040 Forecast                                              | 2040 Better Scenario                                       | 2040 Worse Scenario                                        | 2016                                              | 2040 Forecast                                       | 2040 Better Scenario                               | 2040 Worse Scenario                                 |
| Alcoholic cardiomyopathy                                      | 30.50<br>(19.88 to<br>41.66)                               | 27.56<br>(17.12 to<br>37.23)                               | 27.25<br>(16.92 to<br>36.92)                               | 27.41<br>(17.22 to<br>36.89)                               | 1.25<br>(0.83 to<br>1.67)                         | 1.33<br>(0.85 to<br>1.80)                           | 1.40<br>(0.89 to<br>1.90)                          | 1.27<br>(0.80 to<br>1.70)                           |
| Other cardiomyopathy                                          | 258.29<br>(196.81 to<br>313.68)                            | 195.86<br>(125.84 to<br>277.89)                            | 138.93<br>(88.84 to<br>198.11)                             | 208.21<br>(135.21 to<br>297.03)                            | 9.55<br>(7.31 to<br>11.52)                        | 9.45<br>(6.15 to<br>14.11)                          | 7.33<br>(4.65 to<br>10.86)                         | 9.60<br>(6.26 to<br>14.41)                          |
| Atrial fibrillation and flutter                               | 46.46<br>(35.99 to<br>58.27)                               | 89.64<br>(63.62 to<br>119.12)                              | 93.62<br>(68.33 to<br>121.30)                              | 85.78<br>(60.31 to<br>115.91)                              | 4.34<br>(3.36 to<br>5.58)                         | 9.35<br>(6.04 to<br>12.86)                          | 10.35<br>(7.12 to<br>13.96)                        | 8.64<br>(5.33 to<br>12.12)                          |
| Aortic aneurysm                                               | 211.51<br>(177.72 to<br>252.50)                            | 223.44<br>(180.97 to<br>275.15)                            | 205.19<br>(168.42 to<br>247.85)                            | 229.74<br>(181.69 to<br>291.97)                            | 10.66<br>(9.22 to<br>12.40)                       | 14.26<br>(10.88 to<br>17.28)                        | 14.50<br>(11.49 to<br>17.21)                       | 13.73<br>(10.40 to<br>17.16)                        |
| Peripheral artery disease                                     | 31.06<br>(13.10 to<br>42.23)                               | 44.23<br>(17.25 to<br>66.05)                               | 41.50<br>(16.22 to<br>61.50)                               | 44.12<br>(16.98 to<br>67.03)                               | 1.92<br>(0.84 to<br>2.53)                         | 3.53<br>(1.35 to<br>5.34)                           | 3.70<br>(1.43 to<br>5.53)                          | 3.29<br>(1.24 to<br>5.05)                           |
| Endocarditis                                                  | 154.72<br>(121.83 to<br>184.93)                            | 221.37<br>(157.68 to<br>294.88)                            | 216.81<br>(154.25 to<br>290.41)                            | 216.86<br>(154.23 to<br>287.93)                            | 6.37<br>(5.13 to<br>7.61)                         | 11.65<br>(8.15 to<br>16.43)                         | 12.51<br>(8.79 to<br>17.54)                        | 10.90<br>(7.59 to<br>15.43)                         |
| Other cardiovascular and circulatory diseases                 | 406.77<br>(307.64 to<br>508.61)                            | 494.71<br>(345.46 to<br>654.46)                            | 358.46<br>(255.70 to<br>460.42)                            | 538.86<br>(364.76 to<br>743.98)                            | 17.85<br>(13.41 to<br>22.12)                      | 28.53<br>(19.09 to<br>37.15)                        | 23.18<br>(15.90 to<br>29.90)                       | 29.25<br>(19.33 to<br>39.13)                        |
| <b>Chronic respiratory diseases</b>                           | <b>1,526.29</b><br><b>(1,295.12 to</b><br><b>1,794.95)</b> | <b>1,998.40</b><br><b>(1,493.82 to</b><br><b>2,697.11)</b> | <b>1,613.03</b><br><b>(1,243.00 to</b><br><b>2,078.23)</b> | <b>2,307.11</b><br><b>(1,671.95 to</b><br><b>3,174.80)</b> | <b>75.65</b><br><b>(65.60 to</b><br><b>87.03)</b> | <b>112.35</b><br><b>(86.33 to</b><br><b>144.13)</b> | <b>90.99</b><br><b>(72.70 to</b><br><b>112.42)</b> | <b>126.70</b><br><b>(93.84 to</b><br><b>165.56)</b> |
| Chronic obstructive pulmonary disease                         | 914.63<br>(771.55 to<br>1,076.66)                          | 1,229.39<br>(815.57 to<br>1,818.70)                        | 731.69<br>(499.37 to<br>1,047.89)                          | 1,555.38<br>(1,008.30 to<br>2,310.75)                      | 50.78<br>(43.98 to<br>58.88)                      | 77.70<br>(54.22 to<br>106.75)                       | 49.19<br>(35.00 to<br>66.10)                       | 93.69<br>(64.22 to<br>130.05)                       |
| Pneumoconiosis                                                | 4.77<br>(3.80 to<br>5.95)                                  | 4.79<br>(3.69 to<br>6.29)                                  | 5.43<br>(4.17 to<br>7.15)                                  | 4.67<br>(3.56 to<br>6.13)                                  | 0.33<br>(0.26 to<br>0.41)                         | 0.39<br>(0.27 to<br>0.55)                           | 0.47<br>(0.33 to<br>0.64)                          | 0.37<br>(0.24 to<br>0.53)                           |
| Silicosis                                                     | 0.55<br>(0.38 to<br>0.76)                                  | 0.30<br>(0.17 to<br>0.49)                                  | 0.24<br>(0.13 to<br>0.38)                                  | 0.30<br>(0.17 to<br>0.47)                                  | 0.04<br>(0.03 to<br>0.06)                         | 0.03<br>(0.01 to<br>0.05)                           | 0.02<br>(0.01 to<br>0.04)                          | 0.03<br>(0.01 to<br>0.05)                           |
| Asbestosis                                                    | 1.19<br>(0.82 to<br>1.64)                                  | 1.92<br>(1.35 to<br>2.64)                                  | 2.47<br>(1.77 to<br>3.33)                                  | 1.70<br>(1.16 to<br>2.34)                                  | 0.06<br>(0.04 to<br>0.09)                         | 0.13<br>(0.09 to<br>0.20)                           | 0.18<br>(0.12 to<br>0.27)                          | 0.11<br>(0.07 to<br>0.18)                           |
| Coal workers pneumoconiosis                                   | 0.09<br>(0.04 to<br>0.15)                                  | 0.07<br>(0.03 to<br>0.13)                                  | 0.07<br>(0.03 to<br>0.13)                                  | 0.08<br>(0.04 to<br>0.14)                                  | 0.01<br>(0.00 to<br>0.01)                         | 0.01<br>(0.00 to<br>0.01)                           | 0.01<br>(0.00 to<br>0.01)                          | 0.01<br>(0.00 to<br>0.01)                           |
| Other pneumoconiosis                                          | 2.94<br>(2.29 to<br>3.68)                                  | 2.50<br>(1.73 to<br>3.53)                                  | 2.66<br>(1.79 to<br>3.88)                                  | 2.60<br>(1.79 to<br>3.67)                                  | 0.22<br>(0.17 to<br>0.28)                         | 0.23<br>(0.14 to<br>0.34)                           | 0.25<br>(0.16 to<br>0.39)                          | 0.23<br>(0.14 to<br>0.35)                           |
| Asthma                                                        | 171.49<br>(132.83 to<br>212.65)                            | 84.87<br>(50.78 to<br>136.15)                              | 50.99<br>(31.32 to<br>79.41)                               | 109.82<br>(63.79 to<br>178.36)                             | 8.28<br>(6.47 to<br>10.34)                        | 5.08<br>(3.06 to<br>8.19)                           | 3.37<br>(2.07 to<br>5.52)                          | 6.17<br>(3.67 to<br>10.18)                          |
| Interstitial lung disease and pulmonary sarcoidosis           | 264.59<br>(207.73 to<br>335.96)                            | 478.68<br>(365.00 to<br>626.73)                            | 640.85<br>(504.12 to<br>807.40)                            | 430.35<br>(326.31 to<br>560.25)                            | 10.13<br>(8.12 to<br>13.02)                       | 21.58<br>(16.88 to<br>27.53)                        | 30.77<br>(24.67 to<br>37.88)                       | 18.77<br>(14.46 to<br>24.19)                        |
| Other chronic respiratory diseases                            | 170.82<br>(91.38 to<br>243.16)                             | 200.67<br>(101.54 to<br>310.64)                            | 184.08<br>(94.42 to<br>283.26)                             | 206.88<br>(104.54 to<br>323.38)                            | 6.12<br>(3.25 to<br>8.86)                         | 7.60<br>(3.89 to<br>11.73)                          | 7.20<br>(3.73 to<br>11.04)                         | 7.71<br>(3.92 to<br>12.00)                          |
| <b>Cirrhosis and other chronic liver diseases</b>             | <b>1,207.99</b><br><b>(963.42 to</b><br><b>1,493.26)</b>   | <b>1,181.83</b><br><b>(888.61 to</b><br><b>1,524.74)</b>   | <b>1,010.30</b><br><b>(759.77 to</b><br><b>1,308.76)</b>   | <b>1,197.60</b><br><b>(905.93 to</b><br><b>1,541.11)</b>   | <b>40.03</b><br><b>(33.04 to</b><br><b>48.67)</b> | <b>45.44</b><br><b>(37.43 to</b><br><b>54.96)</b>   | <b>41.08</b><br><b>(33.94 to</b><br><b>50.03)</b>  | <b>44.64</b><br><b>(36.47 to</b><br><b>53.57)</b>   |
| Cirrhosis and other chronic liver diseases due to hepatitis B | 500.20<br>(394.37 to<br>629.89)                            | 500.04<br>(373.15 to<br>651.55)                            | 435.90<br>(323.85 to<br>572.66)                            | 499.47<br>(373.17 to<br>654.10)                            | 17.26<br>(14.17 to<br>21.67)                      | 19.80<br>(16.10 to<br>24.34)                        | 18.11<br>(14.70 to<br>22.43)                       | 19.21<br>(15.67 to<br>23.48)                        |
| Cirrhosis and other chronic liver diseases due to hepatitis C | 196.95<br>(150.29 to<br>251.85)                            | 198.31<br>(139.30 to<br>265.32)                            | 169.99<br>(120.62 to<br>229.30)                            | 199.46<br>(143.66 to<br>262.50)                            | 6.47<br>(5.17 to<br>8.06)                         | 7.30<br>(5.75 to<br>9.16)                           | 6.52<br>(5.15 to<br>8.22)                          | 7.17<br>(5.63 to<br>8.96)                           |

|                                                                |                                                      |                                                      |                                                      |                                                      |                                                   |                                                   |                                                   |                                                   |
|----------------------------------------------------------------|------------------------------------------------------|------------------------------------------------------|------------------------------------------------------|------------------------------------------------------|---------------------------------------------------|---------------------------------------------------|---------------------------------------------------|---------------------------------------------------|
|                                                                | 182.00<br>(141.09 to<br>235.32)                      | 174.42<br>(130.89 to<br>233.21)                      | 145.25<br>(109.20 to<br>191.93)                      | 185.03<br>(136.92 to<br>245.71)                      | 6.38<br>(5.12 to<br>7.99)                         | 7.02<br>(5.69 to<br>8.71)                         | 6.20<br>(5.01 to<br>7.63)                         | 7.17<br>(5.69 to<br>8.82)                         |
| Cirrhosis and other chronic liver diseases due to alcohol use  |                                                      |                                                      |                                                      |                                                      |                                                   |                                                   |                                                   |                                                   |
|                                                                | 328.84<br>(271.33 to<br>394.28)                      | 309.07<br>(232.98 to<br>396.97)                      | 259.16<br>(194.27 to<br>334.77)                      | 313.64<br>(235.73 to<br>400.50)                      | 9.92<br>(8.34 to<br>11.74)                        | 11.32<br>(9.29 to<br>13.59)                       | 10.26<br>(8.49 to<br>12.27)                       | 11.09<br>(9.03 to<br>13.17)                       |
| Cirrhosis and other chronic liver diseases due to other causes |                                                      |                                                      |                                                      |                                                      |                                                   |                                                   |                                                   |                                                   |
| <b>Digestive diseases</b>                                      | <b>368.98</b><br><b>(310.13 to</b><br><b>431.09)</b> | <b>388.38</b><br><b>(312.85 to</b><br><b>473.79)</b> | <b>335.56</b><br><b>(269.68 to</b><br><b>407.96)</b> | <b>401.82</b><br><b>(319.16 to</b><br><b>496.73)</b> | <b>16.00</b><br><b>(13.72 to</b><br><b>18.38)</b> | <b>21.58</b><br><b>(17.31 to</b><br><b>26.06)</b> | <b>20.18</b><br><b>(16.55 to</b><br><b>24.14)</b> | <b>21.43</b><br><b>(16.87 to</b><br><b>26.45)</b> |
| Peptic ulcer disease                                           | 68.47<br>(55.77 to<br>83.43)                         | 40.92<br>(30.47 to<br>54.80)                         | 28.87<br>(21.79 to<br>37.90)                         | 44.09<br>(32.64 to<br>59.35)                         | 3.16<br>(2.63 to<br>3.76)                         | 2.43<br>(1.84 to<br>3.19)                         | 1.85<br>(1.44 to<br>2.36)                         | 2.51<br>(1.86 to<br>3.30)                         |

| Guam                                       |                              |                                    |                                    |                                    |                           |                             |                              |                             |
|--------------------------------------------|------------------------------|------------------------------------|------------------------------------|------------------------------------|---------------------------|-----------------------------|------------------------------|-----------------------------|
| Cause                                      | YLLs (actual counts)         |                                    |                                    |                                    | Deaths (actual counts)    |                             |                              |                             |
|                                            | 2016                         | 2040 Forecast                      | 2040 Better Scenario               | 2040 Worse Scenario                | 2016                      | 2040 Forecast               | 2040 Better Scenario         | 2040 Worse Scenario         |
| Gastritis and duodenitis                   | 1.71<br>(1.33 to 2.17)       | 2.14<br>(1.50 to 2.93)             | 1.81<br>(1.28 to 2.47)             | 2.14<br>(1.52 to 2.96)             | 0.09<br>(0.07 to 0.10)    | 0.13<br>(0.09 to 0.19)      | 0.12<br>(0.09 to 0.17)       | 0.13<br>(0.09 to 0.18)      |
| Appendicitis                               | 51.86<br>(41.78 to 64.15)    | 43.66<br>(31.12 to 58.14)          | 32.23<br>(23.44 to 42.67)          | 45.51<br>(32.28 to 59.93)          | 1.92<br>(1.59 to 2.34)    | 2.14<br>(1.58 to 2.76)      | 1.72<br>(1.28 to 2.20)       | 2.14<br>(1.61 to 2.73)      |
| Paralytic ileus and intestinal obstruction | 48.76<br>(37.45 to 65.50)    | 63.97<br>(49.91 to 84.61)          | 64.83<br>(50.54 to 84.42)          | 60.58<br>(47.08 to 80.69)          | 1.89<br>(1.52 to 2.47)    | 3.48<br>(2.72 to 4.46)      | 3.92<br>(3.09 to 4.99)       | 3.15<br>(2.41 to 4.09)      |
| Inguinal, femoral, and abdominal hernia    | 9.74<br>(7.34 to 14.77)      | 8.82<br>(6.52 to 13.78)            | 7.97<br>(5.83 to 12.24)            | 8.52<br>(6.28 to 13.21)            | 0.54<br>(0.40 to 0.83)    | 0.60<br>(0.42 to 0.98)      | 0.58<br>(0.41 to 0.90)       | 0.56<br>(0.39 to 0.88)      |
| Inflammatory bowel disease                 | 17.64<br>(13.09 to 22.11)    | 21.48<br>(15.89 to 27.45)          | 21.83<br>(16.03 to 28.01)          | 20.53<br>(15.17 to 26.23)          | 0.72<br>(0.54 to 0.88)    | 1.09<br>(0.83 to 1.38)      | 1.18<br>(0.89 to 1.49)       | 1.01<br>(0.76 to 1.27)      |
| Vascular intestinal disorders              | 32.40<br>(25.40 to 38.39)    | 44.08<br>(34.78 to 52.52)          | 43.37<br>(33.88 to 52.34)          | 42.25<br>(33.00 to 49.98)          | 1.75<br>(1.40 to 2.06)    | 3.02<br>(2.32 to 3.65)      | 3.15<br>(2.45 to 3.82)       | 2.82<br>(2.10 to 3.43)      |
| Gallbladder and biliary diseases           | 50.03<br>(39.45 to 60.73)    | 59.24<br>(34.33 to 96.96)          | 42.76<br>(25.33 to 70.61)          | 73.16<br>(40.76 to 121.71)         | 2.38<br>(1.89 to 2.86)    | 3.52<br>(2.02 to 5.90)      | 2.73<br>(1.60 to 4.63)       | 4.13<br>(2.27 to 6.90)      |
| Pancreatitis                               | 28.92<br>(22.08 to 36.83)    | 33.24<br>(20.19 to 62.01)          | 25.35<br>(16.14 to 42.88)          | 36.45<br>(20.64 to 74.89)          | 1.03<br>(0.80 to 1.27)    | 1.43<br>(0.95 to 2.36)      | 1.17<br>(0.81 to 1.79)       | 1.50<br>(0.94 to 2.70)      |
| Other digestive diseases                   | 59.45<br>(47.75 to 72.27)    | 70.83<br>(56.04 to 86.92)          | 66.54<br>(52.17 to 81.78)          | 68.59<br>(54.23 to 83.77)          | 2.51<br>(2.05 to 3.03)    | 3.74<br>(2.98 to 4.56)      | 3.76<br>(2.98 to 4.58)       | 3.50<br>(2.76 to 4.26)      |
| Neurological disorders                     | 797.10<br>(676.34 to 933.27) | 1,591.29<br>(1,141.17 to 2,295.71) | 1,652.53<br>(1,225.82 to 2,262.66) | 1,579.39<br>(1,099.23 to 2,351.68) | 62.85<br>(52.78 to 75.33) | 146.49<br>(94.96 to 217.61) | 161.92<br>(112.23 to 225.63) | 148.86<br>(87.50 to 215.09) |
| Alzheimer's disease and other dementias    | 570.25<br>(464.27 to 695.20) | 1,243.78<br>(809.41 to 1,943.64)   | 1,293.21<br>(885.09 to 1,929.88)   | 1,246.27<br>(779.88 to 2,014.47)   | 53.75<br>(44.10 to 65.87) | 128.91<br>(78.34 to 199.62) | 141.67<br>(93.83 to 206.52)  | 124.90<br>(72.21 to 197.43) |
| Parkinson's disease                        | 50.82<br>(38.05 to 66.50)    | 109.42<br>(81.04 to 142.75)        | 130.95<br>(98.29 to 168.05)        | 97.13<br>(71.55 to 126.49)         | 3.98<br>(2.94 to 5.23)    | 9.33<br>(6.66 to 12.60)     | 8.11<br>(5.58 to 15.33)      | 8.11<br>(5.57 to 11.20)     |
| Epilepsy                                   | 57.06<br>(46.68 to 68.32)    | 66.08<br>(39.54 to 109.58)         | 54.66<br>(34.26 to 88.87)          | 70.73<br>(41.08 to 121.10)         | 1.21<br>(1.01 to 1.45)    | 1.60<br>(1.06 to 2.51)      | 1.41<br>(0.97 to 2.11)       | 1.66<br>(1.06 to 2.69)      |
| Multiple sclerosis                         | 6.11<br>(3.57 to 11.78)      | 7.71<br>(4.21 to 14.89)            | 7.82<br>(4.32 to 15.06)            | 7.70<br>(4.18 to 14.89)            | 0.19<br>(0.11 to 0.37)    | 0.26<br>(0.15 to 0.49)      | 0.27<br>(0.16 to 0.52)       | 0.26<br>(0.15 to 0.48)      |
| Motor neuron disease                       | 28.45<br>(23.25 to 34.00)    | 49.90<br>(40.08 to 60.11)          | 51.96<br>(41.45 to 63.24)          | 47.18<br>(38.13 to 56.22)          | 1.14<br>(0.93 to 1.35)    | 2.29<br>(1.89 to 2.68)      | 2.47<br>(2.01 to 2.92)       | 2.11<br>(1.73 to 2.48)      |
| Other neurological disorders               | 84.41<br>(70.15 to 99.57)    | 114.41<br>(89.39 to 146.32)        | 113.93<br>(89.08 to 141.57)        | 110.39<br>(86.48 to 139.93)        | 2.57<br>(2.19 to 2.99)    | 4.11<br>(3.49 to 4.80)      | 4.50<br>(3.80 to 5.28)       | 3.82<br>(3.24 to 4.51)      |
| Mental disorders                           | 127.20<br>(97.17 to 163.72)  | 248.06<br>(180.76 to 330.71)       | 305.23<br>(225.64 to 404.11)       | 231.30<br>(168.96 to 309.91)       | 3.48<br>(2.73 to 4.43)    | 8.06<br>(6.23 to 10.45)     | 10.81<br>(8.55 to 13.93)     | 7.20<br>(5.61 to 9.22)      |
| Alcohol use disorders                      | 68.38<br>(47.00 to 98.24)    | 77.39<br>(48.02 to 118.80)         | 83.90<br>(51.36 to 130.34)         | 75.32<br>(46.26 to 114.75)         | 1.80<br>(1.26 to 2.58)    | 2.21<br>(1.48 to 3.29)      | 2.50<br>(1.66 to 3.71)       | 2.10<br>(1.40 to 3.11)      |
| Drug use disorders                         | 58.55<br>(45.49 to 74.50)    | 170.20<br>(124.34 to 227.24)       | 220.89<br>(164.74 to 292.45)       | 155.50<br>(114.65 to 209.73)       | 1.68<br>(1.34 to 2.13)    | 5.84<br>(4.44 to 7.54)      | 8.31<br>(6.44 to 10.66)      | 5.10<br>(3.85 to 6.65)      |
| Opioid use disorders                       | 29.64<br>(21.81 to 39.83)    | 58.39<br>(39.78 to 85.18)          | 62.82<br>(43.07 to 91.96)          | 56.19<br>(38.30 to 81.58)          | 0.71<br>(0.54 to 0.95)    | 1.58<br>(1.15 to 2.25)      | 1.81<br>(1.32 to 2.67)       | 1.47<br>(1.08 to 2.09)      |

|                           |                              |                               |                                |                               |                           |                           |                           |                           |
|---------------------------|------------------------------|-------------------------------|--------------------------------|-------------------------------|---------------------------|---------------------------|---------------------------|---------------------------|
|                           | 3.42<br>(1.61 to<br>5.01)    | 11.34<br>(5.69 to<br>18.05)   | 14.37<br>(7.25 to<br>22.28)    | 10.43<br>(5.21 to<br>16.16)   | 0.09<br>(0.04 to<br>0.12) | 0.31<br>(0.16 to<br>0.46) | 0.41<br>(0.22 to<br>0.61) | 0.27<br>(0.15 to<br>0.41) |
| Cocaine use disorders     |                              |                               |                                |                               |                           |                           |                           |                           |
|                           | 2.69<br>(1.09 to<br>4.07)    | 12.52<br>(5.35 to<br>20.33)   | 18.01<br>(7.94 to<br>28.68)    | 11.15<br>(4.78 to<br>17.95)   | 0.07<br>(0.03 to<br>0.10) | 0.32<br>(0.15 to<br>0.51) | 0.48<br>(0.23 to<br>0.72) | 0.28<br>(0.13 to<br>0.44) |
| Amphetamine use disorders |                              |                               |                                |                               |                           |                           |                           |                           |
|                           | 22.80<br>(17.15 to<br>29.32) | 87.95<br>(60.56 to<br>121.44) | 125.69<br>(88.90 to<br>170.85) | 77.73<br>(54.09 to<br>108.23) | 0.82<br>(0.63 to<br>1.07) | 3.63<br>(2.55 to<br>4.87) | 5.61<br>(4.04 to<br>7.42) | 3.07<br>(2.16 to<br>4.22) |
| Other drug use disorders  |                              |                               |                                |                               |                           |                           |                           |                           |
|                           | 0.27<br>(0.20 to<br>0.36)    | 0.48<br>(0.28 to<br>0.75)     | 0.45<br>(0.27 to<br>0.68)      | 0.48<br>(0.29 to<br>0.74)     | 0.01<br>(0.00 to<br>0.01) | 0.01<br>(0.01 to<br>0.01) | 0.01<br>(0.01 to<br>0.01) | 0.01<br>(0.01 to<br>0.01) |
| Eating disorders          |                              |                               |                                |                               |                           |                           |                           |                           |

| Guam                                                       |                                           |                                            |                                           |                                            |                                     |                                     |                                     |                                     |
|------------------------------------------------------------|-------------------------------------------|--------------------------------------------|-------------------------------------------|--------------------------------------------|-------------------------------------|-------------------------------------|-------------------------------------|-------------------------------------|
| Cause                                                      | YLLs (actual counts)                      |                                            |                                           |                                            | Deaths (actual counts)              |                                     |                                     |                                     |
|                                                            | 2016                                      | 2040 Forecast                              | 2040 Better Scenario                      | 2040 Worse Scenario                        | 2016                                | 2040 Forecast                       | 2040 Better Scenario                | 2040 Worse Scenario                 |
| <b>Diabetes, urogenital, blood, and endocrine diseases</b> | <b>3,468.25</b><br>(2,973.50 to 3,983.77) | <b>5,415.09</b><br>(3,142.46 to 10,286.26) | <b>4,507.97</b><br>(2,526.42 to 8,960.09) | <b>6,109.53</b><br>(3,534.80 to 10,754.96) | <b>165.03</b><br>(144.92 to 186.24) | <b>326.67</b><br>(191.33 to 606.36) | <b>289.16</b><br>(166.25 to 509.95) | <b>352.79</b><br>(204.50 to 612.84) |
| Diabetes mellitus                                          | 1,658.93<br>(1,423.81 to 1,912.01)        | 1,546.96<br>(1,059.92 to 2,138.63)         | 1,157.93<br>(791.04 to 1,613.41)          | 1,718.33<br>(1,153.96 to 2,461.67)         | 83.52<br>(73.08 to 94.61)           | 97.49<br>(64.74 to 134.15)          | 78.41<br>(53.50 to 105.77)          | 103.23<br>(68.49 to 144.32)         |
| Acute glomerulonephritis                                   | 4.44<br>(2.95 to 6.57)                    | 4.21<br>(2.53 to 7.02)                     | 3.45<br>(2.02 to 5.78)                    | 4.25<br>(2.56 to 7.14)                     | 0.14<br>(0.09 to 0.20)              | 0.13<br>(0.08 to 0.22)              | 0.11<br>(0.07 to 0.19)              | 0.13<br>(0.08 to 0.22)              |
| Chronic kidney disease                                     | 1,269.14<br>(1,071.25 to 1,486.91)        | 3,082.38<br>(818.12 to 8,252.17)           | 2,592.64<br>(664.88 to 7,237.07)          | 3,627.42<br>(994.93 to 8,582.65)           | 60.17<br>(51.99 to 69.16)           | 189.02<br>(43.08 to 495.19)         | 169.22<br>(38.17 to 469.71)         | 211.92<br>(51.71 to 491.98)         |
| Chronic kidney disease due to diabetes mellitus            | 716.21<br>(590.47 to 856.10)              | 1,806.39<br>(463.18 to 4,903.02)           | 1,497.97<br>(368.81 to 4,191.40)          | 2,153.72<br>(564.07 to 5,164.31)           | 32.23<br>(27.06 to 37.54)           | 101.97<br>(23.61 to 271.27)         | 89.21<br>(19.98 to 248.20)          | 116.13<br>(28.19 to 273.93)         |
| Chronic kidney disease due to hypertension                 | 334.39<br>(272.89 to 407.84)              | 921.90<br>(218.85 to 2,444.78)             | 816.22<br>(191.27 to 2,263.19)            | 1,054.37<br>(266.67 to 2,503.28)           | 19.89<br>(16.57 to 23.78)           | 67.76<br>(15.31 to 177.35)          | 63.65<br>(13.68 to 174.38)          | 73.87<br>(17.85 to 176.99)          |
| Chronic kidney disease due to glomerulonephritis           | 98.19<br>(75.22 to 123.49)                | 139.66<br>(50.99 to 335.26)                | 105.90<br>(37.93 to 265.95)               | 166.60<br>(60.53 to 373.78)                | 3.24<br>(2.49 to 4.12)              | 6.81<br>(1.89 to 17.63)             | 5.54<br>(1.49 to 15.19)             | 7.85<br>(2.24 to 18.59)             |
| Chronic kidney disease due to other and unspecified causes | 120.25<br>(94.59 to 151.34)               | 214.43<br>(65.79 to 540.51)                | 172.55<br>(51.73 to 457.25)               | 252.73<br>(57.71 to 572.71)                | 4.82<br>(3.82 to 5.96)              | 12.49<br>(3.01 to 33.11)            | 10.83<br>(2.51 to 30.38)            | 14.06<br>(3.64 to 32.82)            |
| Urinary diseases and male infertility                      | 203.15<br>(173.17 to 235.94)              | 326.07<br>(265.90 to 401.24)               | 281.03<br>(233.86 to 339.40)              | 324.64<br>(265.91 to 397.19)               | 9.30<br>(8.01 to 10.73)             | 20.16<br>(15.65 to 24.31)           | 19.14<br>(15.12 to 23.50)           | 19.25<br>(14.56 to 23.50)           |
| Urinary tract infections                                   | 187.36<br>(159.38 to 218.13)              | 309.25<br>(250.61 to 379.59)               | 267.76<br>(221.24 to 324.66)              | 307.57<br>(252.26 to 379.39)               | 8.63<br>(7.38 to 9.95)              | 19.27<br>(14.81 to 23.26)           | 18.38<br>(14.39 to 21.94)           | 18.38<br>(13.87 to 22.43)           |
| Urolithiasis                                               | 3.75<br>(2.62 to 5.86)                    | 5.96<br>(3.72 to 9.57)                     | 4.73<br>(2.92 to 7.60)                    | 6.12<br>(3.83 to 9.80)                     | 0.16<br>(0.11 to 0.24)              | 0.29<br>(0.19 to 0.47)              | 0.24<br>(0.16 to 0.39)              | 0.29<br>(0.19 to 0.46)              |
| Other urinary diseases                                     | 12.05<br>(8.30 to 17.93)                  | 10.87<br>(7.15 to 17.09)                   | 8.54<br>(5.64 to 13.34)                   | 10.95<br>(7.32 to 16.97)                   | 0.52<br>(0.36 to 0.76)              | 0.61<br>(0.39 to 0.92)              | 0.52<br>(0.34 to 0.78)              | 0.58<br>(0.39 to 0.88)              |
| Gynecological diseases                                     | 0.56<br>(0.35 to 0.81)                    | 0.38<br>(0.19 to 0.68)                     | 0.23<br>(0.12 to 0.39)                    | 0.43<br>(0.22 to 0.73)                     | 0.01<br>(0.01 to 0.02)              | 0.01<br>(0.01 to 0.02)              | 0.01<br>(0.01 to 0.01)              | 0.01<br>(0.01 to 0.02)              |
| Uterine fibroids                                           | 0.03<br>(0.02 to 0.05)                    | 0.02<br>(0.01 to 0.04)                     | 0.02<br>(0.01 to 0.03)                    | 0.02<br>(0.01 to 0.04)                     | 0.00<br>(0.00 to 0.00)              | 0.00<br>(0.00 to 0.00)              | 0.00<br>(0.00 to 0.00)              | 0.00<br>(0.00 to 0.00)              |
| Polycystic ovarian syndrome                                | 0.01<br>(0.00 to 0.04)                    | 0.01<br>(0.00 to 0.02)                     | 0.00<br>(0.00 to 0.01)                    | 0.01<br>(0.00 to 0.02)                     | 0.00<br>(0.00 to 0.00)              | 0.00<br>(0.00 to 0.00)              | 0.00<br>(0.00 to 0.00)              | 0.00<br>(0.00 to 0.00)              |
| Endometriosis                                              | 0.01<br>(0.00 to 0.02)                    | 0.01<br>(0.00 to 0.02)                     | 0.00<br>(0.00 to 0.01)                    | 0.01<br>(0.00 to 0.02)                     | 0.00<br>(0.00 to 0.00)              | 0.00<br>(0.00 to 0.00)              | 0.00<br>(0.00 to 0.00)              | 0.00<br>(0.00 to 0.00)              |
| Genital prolapse                                           | 0.02<br>(0.01 to 0.03)                    | 0.01<br>(0.01 to 0.02)                     | 0.01<br>(0.00 to 0.01)                    | 0.01<br>(0.01 to 0.02)                     | 0.00<br>(0.00 to 0.00)              | 0.00<br>(0.00 to 0.00)              | 0.00<br>(0.00 to 0.00)              | 0.00<br>(0.00 to 0.00)              |
| Other gynecological diseases                               | 0.49<br>(0.29 to 0.72)                    | 0.33<br>(0.16 to 0.60)                     | 0.20<br>(0.10 to 0.35)                    | 0.37<br>(0.19 to 0.67)                     | 0.01<br>(0.01 to 0.02)              | 0.01<br>(0.01 to 0.02)              | 0.01<br>(0.01 to 0.01)              | 0.01<br>(0.01 to 0.02)              |
| Hemoglobinopathies and hemolytic anemias                   | 43.47<br>(31.70 to 54.32)                 | 36.32<br>(24.36 to 48.65)                  | 27.86<br>(19.08 to 36.65)                 | 37.28<br>(25.46 to 48.64)                  | 1.51<br>(1.10 to 1.86)              | 1.61<br>(1.14 to 2.03)              | 1.32<br>(0.93 to 1.66)              | 1.59<br>(1.13 to 2.01)              |
| Thalassemias                                               | 5.41<br>(3.99 to 7.09)                    | 2.62<br>(1.47 to 4.33)                     | 2.08<br>(1.15 to 3.43)                    | 2.64<br>(1.49 to 4.36)                     | 0.07<br>(0.05 to 0.09)              | 0.04<br>(0.02 to 0.06)              | 0.03<br>(0.02 to 0.05)              | 0.04<br>(0.02 to 0.06)              |

|                                                   |                                 |                                 |                                 |                                 |                             |                              |                              |                              |
|---------------------------------------------------|---------------------------------|---------------------------------|---------------------------------|---------------------------------|-----------------------------|------------------------------|------------------------------|------------------------------|
|                                                   | 0.03<br>(0.02 to<br>0.05)       | 0.03<br>(0.02 to<br>0.05)       | 0.02<br>(0.01 to<br>0.03)       | 0.03<br>(0.02 to<br>0.05)       | 0.00<br>(0.00 to<br>0.00)   | 0.00<br>(0.00 to<br>0.00)    | 0.00<br>(0.00 to<br>0.00)    | 0.00<br>(0.00 to<br>0.00)    |
| Sickle cell disorders                             |                                 |                                 |                                 |                                 |                             |                              |                              |                              |
| G6PD deficiency                                   | 21.97<br>(14.98 to<br>29.00)    | 19.97<br>(12.26 to<br>29.18)    | 14.33<br>(9.11 to<br>20.45)     | 21.11<br>(13.30 to<br>29.41)    | 0.57<br>(0.39 to<br>0.74)   | 0.62<br>(0.40 to<br>0.86)    | 0.46<br>(0.30 to<br>0.63)    | 0.64<br>(0.42 to<br>0.87)    |
| Other hemoglobinopathies and hemolytic anemias    | 16.06<br>(11.69 to<br>20.28)    | 13.70<br>(9.76 to<br>17.57)     | 11.43<br>(8.25 to<br>14.77)     | 13.49<br>(9.61 to<br>17.41)     | 0.86<br>(0.64 to<br>1.08)   | 0.95<br>(0.68 to<br>1.25)    | 0.83<br>(0.60 to<br>1.08)    | 0.91<br>(0.63 to<br>1.20)    |
| Endocrine, metabolic, blood, and immune disorders | 288.57<br>(223.13 to<br>358.79) | 418.77<br>(315.78 to<br>521.07) | 444.82<br>(337.60 to<br>557.60) | 397.17<br>(300.33 to<br>493.61) | 10.38<br>(8.05 to<br>12.64) | 18.23<br>(13.85 to<br>21.44) | 20.94<br>(16.30 to<br>24.64) | 16.65<br>(12.61 to<br>19.76) |

| Guam                                          |                                       |                                       |                                      |                                       |                                  |                                  |                                  |                                  |
|-----------------------------------------------|---------------------------------------|---------------------------------------|--------------------------------------|---------------------------------------|----------------------------------|----------------------------------|----------------------------------|----------------------------------|
| Cause                                         | YLLs (actual counts)                  |                                       |                                      |                                       | Deaths (actual counts)           |                                  |                                  |                                  |
|                                               | 2016                                  | 2040 Forecast                         | 2040 Better Scenario                 | 2040 Worse Scenario                   | 2016                             | 2040 Forecast                    | 2040 Better Scenario             | 2040 Worse Scenario              |
| <b>Musculoskeletal disorders</b>              | <b>96.26</b><br>(75.75 to 123.66)     | <b>120.87</b><br>(85.67 to 164.51)    | <b>108.11</b><br>(78.31 to 147.69)   | <b>121.62</b><br>(85.98 to 167.13)    | <b>2.85</b><br>(2.27 to 3.81)    | <b>4.64</b><br>(3.47 to 6.35)    | <b>4.58</b><br>(3.49 to 6.18)    | <b>4.47</b><br>(3.33 to 6.14)    |
| Rheumatoid arthritis                          | 6.02<br>(4.00 to 8.44)                | 6.68<br>(4.11 to 10.30)               | 4.52<br>(2.76 to 6.95)               | 7.19<br>(4.35 to 11.09)               | 0.28<br>(0.18 to 0.39)           | 0.38<br>(0.23 to 0.58)           | 0.27<br>(0.16 to 0.42)           | 0.40<br>(0.24 to 0.61)           |
| Other musculoskeletal disorders               | 90.24<br>(71.03 to 116.81)            | 114.19<br>(80.54 to 156.42)           | 103.59<br>(74.88 to 142.27)          | 114.42<br>(80.81 to 158.38)           | 2.57<br>(2.05 to 3.41)           | 4.25<br>(3.21 to 5.85)           | 4.30<br>(3.29 to 5.89)           | 4.07<br>(3.08 to 5.60)           |
| <b>Other non-communicable diseases</b>        | <b>1150.75</b><br>(858.72 to 1502.46) | <b>1027.43</b><br>(590.46 to 1621.34) | <b>715.19</b><br>(447.49 to 1010.88) | <b>1076.51</b><br>(611.48 to 1705.94) | <b>20.21</b><br>(15.34 to 25.54) | <b>31.89</b><br>(20.31 to 44.25) | <b>29.15</b><br>(18.01 to 39.63) | <b>30.97</b><br>(19.74 to 43.19) |
| Congenital birth defects                      | 903.71<br>(653.59 to 1215.86)         | 571.79<br>(229.58 to 1073.51)         | 293.65<br>(123.34 to 518.02)         | 632.26<br>(252.36 to 1157.36)         | 11.29<br>(8.34 to 14.96)         | 7.51<br>(3.32 to 13.49)          | 4.04<br>(1.96 to 6.77)           | 8.27<br>(3.70 to 14.47)          |
| Neural tube defects                           | 57.02<br>(31.70 to 95.81)             | 12.49<br>(3.35 to 30.64)              | 5.20<br>(1.38 to 12.70)              | 14.42<br>(3.94 to 36.82)              | 0.67<br>(0.37 to 1.12)           | 0.15<br>(0.04 to 0.36)           | 0.06<br>(0.02 to 0.15)           | 0.17<br>(0.05 to 0.43)           |
| Congenital heart anomalies                    | 394.65<br>(281.31 to 547.08)          | 208.22<br>(82.09 to 394.97)           | 93.39<br>(40.25 to 166.79)           | 238.06<br>(96.04 to 440.33)           | 5.01<br>(3.67 to 6.73)           | 2.79<br>(1.24 to 5.07)           | 1.31<br>(0.63 to 2.21)           | 3.19<br>(1.42 to 5.68)           |
| Orofacial clefts                              | 4.48<br>(1.03 to 11.39)               | 2.11<br>(0.26 to 7.48)                | 0.70<br>(0.09 to 2.36)               | 2.55<br>(0.33 to 9.07)                | 0.05<br>(0.01 to 0.13)           | 0.02<br>(0.00 to 0.09)           | 0.01<br>(0.00 to 0.03)           | 0.03<br>(0.00 to 0.11)           |
| Down syndrome                                 | 23.37<br>(15.56 to 33.87)             | 33.72<br>(17.65 to 58.57)             | 29.20<br>(16.58 to 48.35)            | 33.08<br>(17.27 to 57.37)             | 0.33<br>(0.24 to 0.46)           | 0.54<br>(0.35 to 0.84)           | 0.50<br>(0.32 to 0.75)           | 0.53<br>(0.32 to 0.83)           |
| Other chromosomal abnormalities               | 71.82<br>(35.35 to 109.26)            | 91.53<br>(25.11 to 194.19)            | 54.47<br>(15.03 to 113.16)           | 96.11<br>(26.51 to 199.42)            | 0.85<br>(0.42 to 1.29)           | 1.10<br>(0.31 to 2.28)           | 0.66<br>(0.19 to 1.34)           | 1.15<br>(0.33 to 2.34)           |
| Congenital musculoskeletal and limb anomalies | 31.93<br>(20.36 to 47.30)             | 21.62<br>(7.52 to 43.53)              | 10.57<br>(3.74 to 20.82)             | 24.04<br>(8.32 to 48.69)              | 0.39<br>(0.25 to 0.57)           | 0.27<br>(0.10 to 0.53)           | 0.13<br>(0.05 to 0.25)           | 0.30<br>(0.11 to 0.58)           |
| Urogenital congenital anomalies               | 23.10<br>(10.51 to 35.35)             | 14.97<br>(5.15 to 30.60)              | 8.25<br>(3.12 to 15.74)              | 16.29<br>(5.67 to 33.41)              | 0.33<br>(0.16 to 0.47)           | 0.23<br>(0.10 to 0.42)           | 0.14<br>(0.06 to 0.23)           | 0.25<br>(0.10 to 0.46)           |
| Digestive congenital anomalies                | 54.94<br>(33.05 to 85.29)             | 30.75<br>(9.34 to 66.26)              | 13.71<br>(4.33 to 28.75)             | 34.69<br>(10.99 to 73.48)             | 0.65<br>(0.39 to 1.00)           | 0.37<br>(0.12 to 0.78)           | 0.17<br>(0.05 to 0.34)           | 0.42<br>(0.14 to 0.87)           |
| Other congenital birth defects                | 242.39<br>(165.22 to 343.21)          | 156.38<br>(62.12 to 298.82)           | 78.15<br>(31.50 to 141.40)           | 173.01<br>(68.92 to 329.69)           | 3.02<br>(2.13 to 4.18)           | 2.04<br>(0.90 to 3.74)           | 1.06<br>(0.49 to 1.82)           | 2.25<br>(1.00 to 4.07)           |
| Skin and subcutaneous diseases                | 170.24<br>(96.33 to 249.66)           | 419.68<br>(243.13 to 592.17)          | 402.65<br>(236.87 to 563.29)         | 405.16<br>(235.60 to 565.55)          | 8.02<br>(4.53 to 11.55)          | 23.97<br>(13.60 to 33.94)        | 24.89<br>(14.31 to 35.01)        | 22.25<br>(12.57 to 32.05)        |
| Cellulitis                                    | 47.09<br>(19.99 to 78.66)             | 133.37<br>(62.84 to 216.70)           | 138.97<br>(66.72 to 219.79)          | 124.42<br>(57.56 to 201.47)           | 2.17<br>(1.01 to 3.59)           | 7.27<br>(3.60 to 11.27)          | 8.08<br>(4.15 to 12.63)          | 6.51<br>(3.20 to 10.25)          |
| Pyoderma                                      | 105.18<br>(57.02 to 158.84)           | 255.48<br>(139.02 to 373.10)          | 237.39<br>(127.61 to 350.36)         | 250.13<br>(135.39 to 361.25)          | 4.59<br>(2.35 to 6.75)           | 14.06<br>(7.09 to 20.86)         | 14.39<br>(7.21 to 21.35)         | 13.21<br>(6.72 to 19.77)         |
| Decubitus ulcer                               | 16.38<br>(7.29 to 26.24)              | 28.10<br>(11.84 to 47.60)             | 24.05<br>(10.09 to 39.72)            | 27.84<br>(11.75 to 46.73)             | 1.22<br>(0.53 to 1.93)           | 2.55<br>(0.96 to 4.38)           | 2.34<br>(0.87 to 4.01)           | 2.44<br>(0.89 to 4.27)           |
| Other skin and subcutaneous diseases          | 1.60<br>(0.91 to 2.51)                | 2.73<br>(1.52 to 4.36)                | 2.24<br>(1.28 to 3.48)               | 2.78<br>(1.57 to 4.40)                | 0.05<br>(0.03 to 0.07)           | 0.09<br>(0.05 to 0.14)           | 0.08<br>(0.05 to 0.13)           | 0.09<br>(0.05 to 0.14)           |
| Sudden infant death syndrome                  | 76.80<br>(44.22 to 124.96)            | 35.96<br>(6.28 to 85.76)              | 18.89<br>(3.32 to 43.72)             | 39.09<br>(7.12 to 94.83)              | 0.89<br>(0.51 to 1.45)           | 0.42<br>(0.07 to 1.00)           | 0.22<br>(0.04 to 0.51)           | 0.45<br>(0.08 to 1.10)           |

|                          |                                       |                                       |                                       |                                       |                                |                                |                               |                                |
|--------------------------|---------------------------------------|---------------------------------------|---------------------------------------|---------------------------------------|--------------------------------|--------------------------------|-------------------------------|--------------------------------|
| Injuries                 | 4,504.60<br>(3,735.31 to<br>5,210.67) | 4,247.22<br>(2,890.29 to<br>6,274.89) | 2,872.43<br>(2,005.01 to<br>4,126.02) | 4,713.94<br>(3,159.64 to<br>7,068.54) | 103.04<br>(86.96 to<br>121.58) | 110.62<br>(83.36 to<br>148.59) | 82.78<br>(63.67 to<br>109.55) | 117.74<br>(86.02 to<br>162.36) |
| Transport injuries       | 1,343.07<br>(1,102.61 to<br>1,577.10) | 1,401.47<br>(959.71 to<br>2,092.02)   | 667.44<br>(470.08 to<br>977.02)       | 1,656.03<br>(1,115.54 to<br>2,531.79) | 31.23<br>(26.14 to<br>36.37)   | 36.40<br>(26.98 to<br>50.57)   | 20.32<br>(15.71 to<br>27.04)  | 41.08<br>(29.63 to<br>58.68)   |
| Road injuries            | 1,216.10<br>(992.13 to<br>1,430.27)   | 1,271.14<br>(877.83 to<br>1,901.84)   | 580.81<br>(411.42 to<br>850.20)       | 1,511.03<br>(1,014.05 to<br>2,302.63) | 28.01<br>(23.29 to<br>32.67)   | 32.43<br>(24.00 to<br>45.00)   | 17.45<br>(13.41 to<br>23.28)  | 36.85<br>(26.61 to<br>52.89)   |
| Pedestrian road injuries | 388.11<br>(303.23 to<br>478.08)       | 233.68<br>(145.94 to<br>351.97)       | 91.86<br>(59.85 to<br>134.98)         | 288.08<br>(176.68 to<br>449.41)       | 9.33<br>(7.33 to<br>11.28)     | 6.60<br>(4.43 to<br>9.40)      | 2.97<br>(2.11 to<br>4.09)     | 7.79<br>(5.18 to<br>11.27)     |



| Guam                                            |                                                            |                                                        |                                                      |                                                        |                                                   |                                                   |                                                   |                                                   |
|-------------------------------------------------|------------------------------------------------------------|--------------------------------------------------------|------------------------------------------------------|--------------------------------------------------------|---------------------------------------------------|---------------------------------------------------|---------------------------------------------------|---------------------------------------------------|
| Cause                                           | YLLs (actual counts)                                       |                                                        |                                                      |                                                        | Deaths (actual counts)                            |                                                   |                                                   |                                                   |
|                                                 | 2016                                                       | 2040 Forecast                                          | 2040 Better Scenario                                 | 2040 Worse Scenario                                    | 2016                                              | 2040 Forecast                                     | 2040 Better Scenario                              | 2040 Worse Scenario                               |
| Cyclist road injuries                           | 29.08<br>(22.24 to<br>36.17)                               | 33.38<br>(22.32 to<br>49.51)                           | 17.28<br>(11.85 to<br>24.84)                         | 38.48<br>(25.24 to<br>58.64)                           | 0.74<br>(0.57 to<br>0.90)                         | 0.95<br>(0.68 to<br>1.36)                         | 0.63<br>(0.45 to<br>0.86)                         | 1.03<br>(0.71 to<br>1.50)                         |
| Motorcyclist road injuries                      | 176.00<br>(111.37 to<br>230.44)                            | 182.22<br>(95.19 to<br>316.15)                         | 112.09<br>(60.51 to<br>190.64)                       | 205.86<br>(105.37 to<br>368.25)                        | 3.46<br>(2.19 to<br>4.52)                         | 3.69<br>(2.01 to<br>6.11)                         | 2.46<br>(1.39 to<br>3.90)                         | 4.08<br>(2.15 to<br>7.02)                         |
| Motor vehicle road injuries                     | 610.43<br>(490.09 to<br>754.77)                            | 805.33<br>(550.86 to<br>1,186.84)                      | 352.22<br>(244.98 to<br>505.54)                      | 959.02<br>(643.41 to<br>1,450.40)                      | 14.19<br>(11.57 to<br>17.57)                      | 20.77<br>(15.30 to<br>28.82)                      | 11.16<br>(8.65 to<br>14.69)                       | 23.49<br>(16.93 to<br>33.68)                      |
| Other road injuries                             | 12.48<br>(9.14 to<br>16.31)                                | 16.53<br>(10.33 to<br>26.01)                           | 7.34<br>(4.81 to<br>11.23)                           | 19.61<br>(11.96 to<br>31.60)                           | 0.28<br>(0.21 to<br>0.35)                         | 0.42<br>(0.28 to<br>0.61)                         | 0.23<br>(0.17 to<br>0.33)                         | 0.46<br>(0.31 to<br>0.70)                         |
| Other transport injuries                        | 126.97<br>(95.15 to<br>160.92)                             | 130.33<br>(81.15 to<br>197.43)                         | 86.63<br>(56.30 to<br>129.84)                        | 145.00<br>(90.04 to<br>235.66)                         | 3.23<br>(2.50 to<br>4.00)                         | 3.96<br>(2.67 to<br>5.80)                         | 2.87<br>(2.00 to<br>4.00)                         | 4.23<br>(2.81 to<br>6.31)                         |
| <b>Unintentional injuries</b>                   | <b>1,220.66</b><br><b>(1,016.86 to</b><br><b>1,427.41)</b> | <b>928.71</b><br><b>(673.85 to</b><br><b>1,229.04)</b> | <b>732.71</b><br><b>(544.52 to</b><br><b>955.68)</b> | <b>964.07</b><br><b>(700.74 to</b><br><b>1,286.94)</b> | <b>30.97</b><br><b>(26.27 to</b><br><b>35.88)</b> | <b>31.03</b><br><b>(24.51 to</b><br><b>37.95)</b> | <b>27.48</b><br><b>(22.39 to</b><br><b>32.83)</b> | <b>30.66</b><br><b>(24.06 to</b><br><b>37.53)</b> |
| Falls                                           | 200.86<br>(164.61 to<br>241.49)                            | 199.07<br>(153.53 to<br>251.90)                        | 176.18<br>(136.44 to<br>217.61)                      | 197.41<br>(152.13 to<br>247.62)                        | 7.88<br>(6.59 to<br>9.26)                         | 10.80<br>(8.20 to<br>13.43)                       | 10.41<br>(8.17 to<br>12.77)                       | 10.24<br>(7.56 to<br>12.86)                       |
| Drowning                                        | 446.25<br>(362.49 to<br>537.89)                            | 298.76<br>(196.55 to<br>435.33)                        | 223.08<br>(149.83 to<br>313.06)                      | 319.66<br>(210.63 to<br>458.24)                        | 8.85<br>(7.20 to<br>10.68)                        | 6.53<br>(4.54 to<br>9.02)                         | 5.11<br>(3.57 to<br>6.86)                         | 6.88<br>(4.71 to<br>9.53)                         |
| Fire, heat, and hot substances                  | 54.67<br>(43.97 to<br>68.99)                               | 35.71<br>(23.40 to<br>52.56)                           | 24.93<br>(16.80 to<br>35.30)                         | 38.47<br>(24.51 to<br>56.94)                           | 1.38<br>(1.14 to<br>1.71)                         | 1.16<br>(0.85 to<br>1.59)                         | 0.91<br>(0.69 to<br>1.19)                         | 1.19<br>(0.85 to<br>1.62)                         |
| Poisonings                                      | 42.93<br>(28.38 to<br>56.25)                               | 17.29<br>(10.42 to<br>26.29)                           | 10.80<br>(6.71 to<br>15.92)                          | 19.08<br>(11.02 to<br>29.05)                           | 1.04<br>(0.69 to<br>1.32)                         | 0.54<br>(0.36 to<br>0.76)                         | 0.39<br>(0.27 to<br>0.51)                         | 0.57<br>(0.37 to<br>0.78)                         |
| Exposure to mechanical forces                   | 131.99<br>(108.01 to<br>159.53)                            | 100.89<br>(68.79 to<br>138.11)                         | 74.40<br>(51.79 to<br>98.86)                         | 105.96<br>(72.75 to<br>143.07)                         | 3.08<br>(2.55 to<br>3.69)                         | 2.87<br>(2.14 to<br>3.68)                         | 2.32<br>(1.80 to<br>2.87)                         | 2.90<br>(2.18 to<br>3.69)                         |
| Unintentional firearm injuries                  | 21.31<br>(15.52 to<br>35.52)                               | 16.23<br>(10.02 to<br>27.41)                           | 12.28<br>(7.63 to<br>20.42)                          | 16.84<br>(10.23 to<br>29.03)                           | 0.54<br>(0.39 to<br>0.86)                         | 0.49<br>(0.32 to<br>0.78)                         | 0.41<br>(0.28 to<br>0.64)                         | 0.49<br>(0.32 to<br>0.78)                         |
| Unintentional suffocation                       | 25.40<br>(17.35 to<br>33.63)                               | 18.83<br>(11.11 to<br>29.06)                           | 13.83<br>(8.25 to<br>21.14)                          | 19.79<br>(11.62 to<br>30.92)                           | 0.41<br>(0.29 to<br>0.53)                         | 0.33<br>(0.20 to<br>0.49)                         | 0.25<br>(0.16 to<br>0.37)                         | 0.34<br>(0.21 to<br>0.50)                         |
| Other exposure to mechanical forces             | 85.27<br>(68.06 to<br>104.98)                              | 65.83<br>(44.21 to<br>90.97)                           | 48.29<br>(33.43 to<br>65.84)                         | 69.34<br>(47.54 to<br>96.02)                           | 2.13<br>(1.74 to<br>2.63)                         | 2.06<br>(1.54 to<br>2.68)                         | 1.66<br>(1.30 to<br>2.08)                         | 2.07<br>(1.56 to<br>2.68)                         |
| Adverse effects of medical treatment            | 130.12<br>(95.19 to<br>159.09)                             | 122.03<br>(86.82 to<br>163.73)                         | 104.92<br>(74.66 to<br>140.11)                       | 123.13<br>(86.41 to<br>166.32)                         | 3.68<br>(2.72 to<br>4.43)                         | 4.48<br>(3.27 to<br>5.59)                         | 4.29<br>(3.16 to<br>5.32)                         | 4.31<br>(3.15 to<br>5.45)                         |
| Animal contact                                  | 3.29<br>(2.43 to<br>4.01)                                  | 3.95<br>(2.51 to<br>5.44)                              | 3.16<br>(1.97 to<br>4.32)                            | 4.06<br>(2.61 to<br>5.59)                              | 0.10<br>(0.07 to<br>0.12)                         | 0.15<br>(0.10 to<br>0.20)                         | 0.14<br>(0.09 to<br>0.18)                         | 0.15<br>(0.10 to<br>0.20)                         |
| Venomous animal contact                         | 0.95<br>(0.67 to<br>1.24)                                  | 1.11<br>(0.68 to<br>1.64)                              | 0.92<br>(0.56 to<br>1.34)                            | 1.14<br>(0.68 to<br>1.68)                              | 0.02<br>(0.02 to<br>0.03)                         | 0.03<br>(0.02 to<br>0.05)                         | 0.03<br>(0.02 to<br>0.04)                         | 0.03<br>(0.02 to<br>0.05)                         |
| Non-venomous animal contact                     | 2.34<br>(1.71 to<br>2.86)                                  | 2.83<br>(1.82 to<br>3.87)                              | 2.24<br>(1.41 to<br>3.08)                            | 2.92<br>(1.86 to<br>4.03)                              | 0.08<br>(0.06 to<br>0.10)                         | 0.12<br>(0.08 to<br>0.16)                         | 0.11<br>(0.07 to<br>0.14)                         | 0.12<br>(0.08 to<br>0.16)                         |
| Foreign body                                    | 116.68<br>(84.09 to<br>157.19)                             | 103.90<br>(67.34 to<br>156.00)                         | 85.90<br>(58.20 to<br>123.01)                        | 104.32<br>(66.53 to<br>160.98)                         | 2.72<br>(2.03 to<br>3.47)                         | 3.12<br>(2.28 to<br>4.05)                         | 2.96<br>(2.21 to<br>3.78)                         | 2.97<br>(2.15 to<br>3.90)                         |
| Pulmonary aspiration and foreign body in airway | 113.80<br>(81.72 to<br>154.14)                             | 101.39<br>(65.11 to<br>152.97)                         | 83.49<br>(56.44 to<br>119.85)                        | 101.85<br>(65.04 to<br>157.39)                         | 2.66<br>(1.99 to<br>3.41)                         | 3.06<br>(2.23 to<br>4.00)                         | 2.90<br>(2.17 to<br>3.72)                         | 2.92<br>(2.10 to<br>3.83)                         |

|                                             |                                                            |                                                            |                                                          |                                                            |                                                   |                                                   |                                                   |                                                   |
|---------------------------------------------|------------------------------------------------------------|------------------------------------------------------------|----------------------------------------------------------|------------------------------------------------------------|---------------------------------------------------|---------------------------------------------------|---------------------------------------------------|---------------------------------------------------|
|                                             | 2.89<br>(1.78 to<br>3.89)                                  | 2.51<br>(1.57 to<br>3.67)                                  | 2.41<br>(1.54 to<br>3.49)                                | 2.47<br>(1.54 to<br>3.60)                                  | 0.06<br>(0.03 to<br>0.07)                         | 0.06<br>(0.04 to<br>0.08)                         | 0.06<br>(0.04 to<br>0.08)                         | 0.06<br>(0.03 to<br>0.08)                         |
| Foreign body in other body part             |                                                            |                                                            |                                                          |                                                            |                                                   |                                                   |                                                   |                                                   |
| Environmental heat and cold exposure        | 24.46<br>(13.85 to<br>31.97)                               | 20.06<br>(10.62 to<br>28.87)                               | 14.59<br>(7.96 to<br>20.72)                              | 21.14<br>(11.53 to<br>30.27)                               | 0.68<br>(0.39 to<br>0.87)                         | 0.67<br>(0.37 to<br>0.92)                         | 0.53<br>(0.29 to<br>0.72)                         | 0.67<br>(0.38 to<br>0.92)                         |
| Other unintentional injuries                | 69.42<br>(50.53 to<br>89.65)                               | 27.05<br>(15.78 to<br>41.62)                               | 14.75<br>(8.94 to<br>21.91)                              | 30.85<br>(18.54 to<br>47.15)                               | 1.56<br>(1.17 to<br>1.97)                         | 0.71<br>(0.44 to<br>1.04)                         | 0.42<br>(0.27 to<br>0.59)                         | 0.78<br>(0.50 to<br>1.12)                         |
| <b>Self-harm and interpersonal violence</b> | <b>1,939.94</b><br><b>(1,568.57 to</b><br><b>2,343.35)</b> | <b>1,872.93</b><br><b>(1,173.36 to</b><br><b>3,049.66)</b> | <b>1,430.90</b><br><b>(932.47 to</b><br><b>2,214.74)</b> | <b>2,050.08</b><br><b>(1,244.07 to</b><br><b>3,477.62)</b> | <b>40.82</b><br><b>(33.16 to</b><br><b>49.57)</b> | <b>42.29</b><br><b>(28.14 to</b><br><b>65.05)</b> | <b>34.07</b><br><b>(23.69 to</b><br><b>49.46)</b> | <b>45.11</b><br><b>(29.18 to</b><br><b>72.04)</b> |

| Guam                                                                                |                                                |                                                   |                                                   |                                                   |                                                |                                                |                                                |                                                |
|-------------------------------------------------------------------------------------|------------------------------------------------|---------------------------------------------------|---------------------------------------------------|---------------------------------------------------|------------------------------------------------|------------------------------------------------|------------------------------------------------|------------------------------------------------|
| Cause                                                                               | YLLs (actual counts)                           |                                                   |                                                   |                                                   | Deaths (actual counts)                         |                                                |                                                |                                                |
|                                                                                     | 2016                                           | 2040 Forecast                                     | 2040 Better Scenario                              | 2040 Worse Scenario                               | 2016                                           | 2040 Forecast                                  | 2040 Better Scenario                           | 2040 Worse Scenario                            |
| Self-harm                                                                           | 1,575.83<br>(1,240.69 to<br>1,915.00)          | 1,623.20<br>(986.31 to<br>2,724.30)               | 1,246.35<br>(792.85 to<br>1,972.19)               | 1,781.36<br>(1,057.80 to<br>3,097.07)             | 33.40<br>(26.64 to<br>40.49)                   | 36.83<br>(23.98 to<br>57.94)                   | 29.87<br>(20.33 to<br>44.21)                   | 39.33<br>(24.76 to<br>63.91)                   |
| Self-harm by firearm                                                                | 124.87<br>(80.29 to<br>182.58)                 | 98.96<br>(49.08 to<br>201.21)                     | 69.35<br>(35.52 to<br>134.01)                     | 111.68<br>(53.29 to<br>225.70)                    | 2.72<br>(1.76 to<br>4.05)                      | 2.22<br>(1.15 to<br>4.36)                      | 1.60<br>(0.85 to<br>2.93)                      | 2.47<br>(1.24 to<br>4.84)                      |
| Self-harm by other specified means                                                  | 1,450.96<br>(1,140.32 to<br>1,767.58)          | 1,524.24<br>(938.71 to<br>2,531.24)               | 1,177.00<br>(752.08 to<br>1,867.01)               | 1,669.68<br>(994.79 to<br>2,888.37)               | 30.68<br>(24.48 to<br>37.31)                   | 34.61<br>(22.59 to<br>54.09)                   | 28.27<br>(19.43 to<br>41.77)                   | 36.86<br>(23.53 to<br>59.82)                   |
| Interpersonal violence                                                              | 364.10<br>(272.54 to<br>473.92)                | 249.72<br>(164.03 to<br>368.25)                   | 184.55<br>(121.42 to<br>272.34)                   | 268.72<br>(174.66 to<br>402.82)                   | 7.42<br>(5.63 to<br>9.60)                      | 5.45<br>(3.71 to<br>7.89)                      | 4.20<br>(2.92 to<br>6.03)                      | 5.78<br>(3.91 to<br>8.46)                      |
| Physical violence by firearm                                                        | 112.85<br>(73.77 to<br>177.01)                 | 66.82<br>(39.74 to<br>114.20)                     | 45.56<br>(27.56 to<br>76.68)                      | 72.69<br>(42.99 to<br>122.19)                     | 2.21<br>(1.47 to<br>3.45)                      | 1.35<br>(0.83 to<br>2.25)                      | 0.94<br>(0.58 to<br>1.57)                      | 1.46<br>(0.88 to<br>2.41)                      |
| Physical violence by sharp object                                                   | 107.68<br>(71.43 to<br>156.80)                 | 72.36<br>(43.92 to<br>112.24)                     | 52.42<br>(32.16 to<br>79.65)                      | 77.75<br>(47.16 to<br>120.99)                     | 2.16<br>(1.45 to<br>3.10)                      | 1.50<br>(0.94 to<br>2.31)                      | 1.11<br>(0.70 to<br>1.67)                      | 1.60<br>(1.00 to<br>2.48)                      |
| Physical violence by other means                                                    | 143.57<br>(102.01 to<br>190.60)                | 110.54<br>(67.46 to<br>172.67)                    | 86.58<br>(54.17 to<br>133.05)                     | 118.28<br>(70.32 to<br>190.39)                    | 3.04<br>(2.20 to<br>3.98)                      | 2.60<br>(1.68 to<br>3.93)                      | 2.15<br>(1.42 to<br>3.20)                      | 2.73<br>(1.72 to<br>4.20)                      |
| <b>Forces of nature, conflict and terrorism, and executions and police conflict</b> | <b>0.95</b><br><b>(0.79 to</b><br><b>1.13)</b> | <b>44.11</b><br><b>(0.00 to</b><br><b>411.76)</b> | <b>41.37</b><br><b>(0.00 to</b><br><b>387.72)</b> | <b>43.76</b><br><b>(0.00 to</b><br><b>410.11)</b> | <b>0.02</b><br><b>(0.01 to</b><br><b>0.02)</b> | <b>0.91</b><br><b>(0.00 to</b><br><b>8.86)</b> | <b>0.90</b><br><b>(0.00 to</b><br><b>8.82)</b> | <b>0.88</b><br><b>(0.00 to</b><br><b>8.62)</b> |
| Exposure to forces of nature                                                        | 0.00<br>(0.00 to<br>0.00)                      | 13.69<br>(0.00 to<br>379.52)                      | 12.87<br>(0.00 to<br>356.91)                      | 13.56<br>(0.00 to<br>376.52)                      | 0.00<br>(0.00 to<br>0.00)                      | 0.30<br>(0.00 to<br>8.56)                      | 0.30<br>(0.00 to<br>8.57)                      | 0.29<br>(0.00 to<br>8.29)                      |
| Conflict and terrorism                                                              | 0.00<br>(0.00 to<br>0.00)                      | 30.42<br>(0.00 to<br>401.49)                      | 28.50<br>(0.00 to<br>376.98)                      | 30.20<br>(0.00 to<br>398.82)                      | 0.00<br>(0.00 to<br>0.00)                      | 0.61<br>(0.00 to<br>8.11)                      | 0.60<br>(0.00 to<br>8.03)                      | 0.59<br>(0.00 to<br>7.87)                      |
| Executions and police conflict                                                      | 0.95<br>(0.79 to<br>1.13)                      | 0.00<br>(0.00 to<br>0.00)                         | 0.00<br>(0.00 to<br>0.00)                         | 0.00<br>(0.00 to<br>0.00)                         | 0.02<br>(0.01 to<br>0.02)                      | 0.00<br>(0.00 to<br>0.00)                      | 0.00<br>(0.00 to<br>0.00)                      | 0.00<br>(0.00 to<br>0.00)                      |

| Kiribati                                                          |                                       |                                       |                                       |                                       |                                  |                                    |                                  |                                    |
|-------------------------------------------------------------------|---------------------------------------|---------------------------------------|---------------------------------------|---------------------------------------|----------------------------------|------------------------------------|----------------------------------|------------------------------------|
| Cause                                                             | YLLs (actual counts)                  |                                       |                                       |                                       | Deaths (actual counts)           |                                    |                                  |                                    |
|                                                                   | 2016                                  | 2040 Forecast                         | 2040 Better Scenario                  | 2040 Worse Scenario                   | 2016                             | 2040 Forecast                      | 2040 Better Scenario             | 2040 Worse Scenario                |
| All causes                                                        | 40,544.58<br>(33,927.65 to 50,795.86) | 46,406.26<br>(38,675.42 to 56,192.07) | 30,239.97<br>(25,728.61 to 35,677.70) | 57,067.03<br>(47,364.78 to 69,375.90) | 1,046.51<br>(927.26 to 1,205.07) | 1,455.83<br>(1,295.38 to 1,636.52) | 1,035.74<br>(933.45 to 1,146.34) | 1,698.45<br>(1,512.85 to 1,909.63) |
| Communicable, maternal, neonatal, and nutritional diseases        | 13,312.63<br>(9,106.40 to 20,435.63)  | 9,230.16<br>(6,166.01 to 14,161.69)   | 4,996.40<br>(3,387.85 to 7,367.15)    | 13,118.97<br>(8,569.90 to 20,176.89)  | 233.65<br>(180.53 to 319.80)     | 197.21<br>(138.51 to 274.97)       | 117.85<br>(84.77 to 166.62)      | 262.57<br>(179.75 to 379.78)       |
| HIV/AIDS and tuberculosis                                         | 1,586.22<br>(1,335.09 to 1,874.97)    | 1,265.88<br>(839.94 to 1,821.20)      | 560.71<br>(393.00 to 770.66)          | 1,693.37<br>(1,102.34 to 2,396.51)    | 44.06<br>(36.80 to 51.89)        | 38.85<br>(26.08 to 57.73)          | 18.46<br>(12.85 to 25.78)        | 49.35<br>(31.53 to 70.95)          |
| Tuberculosis                                                      | 1,566.41<br>(1,316.02 to 1,857.07)    | 1,247.66<br>(825.41 to 1,803.24)      | 549.85<br>(380.72 to 763.24)          | 1,657.27<br>(1,079.03 to 2,364.63)    | 43.66<br>(36.47 to 51.56)        | 38.51<br>(25.80 to 57.32)          | 18.26<br>(12.67 to 25.62)        | 48.69<br>(31.01 to 70.37)          |
| HIV/AIDS                                                          | 19.82<br>(14.42 to 32.72)             | 18.22<br>(7.53 to 41.99)              | 10.86<br>(4.45 to 29.25)              | 36.10<br>(17.23 to 65.40)             | 0.39<br>(0.28 to 0.67)           | 0.33<br>(0.13 to 0.83)             | 0.20<br>(0.07 to 0.60)           | 0.66<br>(0.29 to 1.26)             |
| Diarrhea, lower respiratory, and other common infectious diseases | 5,296.80<br>(3,715.51 to 7,691.01)    | 3,593.00<br>(2,085.56 to 6,137.32)    | 1,982.87<br>(1,240.09 to 3,173.57)    | 5,358.46<br>(2,996.63 to 9,422.83)    | 103.99<br>(80.05 to 137.40)      | 94.11<br>(52.83 to 153.95)         | 59.06<br>(34.79 to 96.19)        | 129.64<br>(70.39 to 223.87)        |
| Diarrheal diseases                                                | 1,167.12<br>(697.20 to 1,802.84)      | 704.32<br>(107.46 to 1,930.18)        | 363.00<br>(61.27 to 1,085.76)         | 1,172.89<br>(199.15 to 3,090.07)      | 31.68<br>(17.10 to 50.59)        | 28.46<br>(4.15 to 80.16)           | 17.96<br>(2.64 to 53.23)         | 44.14<br>(6.97 to 126.03)          |
| Intestinal infectious diseases                                    | 197.91<br>(94.16 to 355.65)           | 159.24<br>(69.40 to 299.02)           | 118.00<br>(52.56 to 218.78)           | 185.37<br>(79.62 to 351.36)           | 2.86<br>(1.39 to 5.07)           | 2.38<br>(1.10 to 4.43)             | 1.82<br>(0.87 to 3.35)           | 2.72<br>(1.25 to 5.06)             |
| Typhoid fever                                                     | 169.57<br>(80.01 to 300.01)           | 132.27<br>(55.52 to 250.84)           | 98.67<br>(43.26 to 183.27)            | 153.83<br>(64.43 to 298.52)           | 2.44<br>(1.17 to 4.25)           | 1.97<br>(0.90 to 3.70)             | 1.51<br>(0.71 to 2.76)           | 2.25<br>(1.00 to 4.33)             |
| Paratyphoid fever                                                 | 27.85<br>(11.91 to 57.26)             | 26.74<br>(10.69 to 55.05)             | 19.20<br>(7.60 to 40.27)              | 31.25<br>(12.49 to 65.51)             | 0.41<br>(0.18 to 0.84)           | 0.41<br>(0.17 to 0.83)             | 0.31<br>(0.13 to 0.62)           | 0.47<br>(0.19 to 0.98)             |
| Other intestinal infectious diseases                              | 0.49<br>(0.16 to 1.26)                | 0.23<br>(0.06 to 0.67)                | 0.12<br>(0.04 to 0.35)                | 0.29<br>(0.07 to 0.84)                | 0.01<br>(0.00 to 0.02)           | 0.00<br>(0.00 to 0.01)             | 0.00<br>(0.00 to 0.01)           | 0.01<br>(0.00 to 0.01)             |
| Lower respiratory infections                                      | 2,161.77<br>(1,480.81 to 3,146.20)    | 1,534.52<br>(875.52 to 2,850.00)      | 820.29<br>(531.43 to 1,316.14)        | 2,136.65<br>(1,088.92 to 4,531.44)    | 45.34<br>(34.15 to 59.36)        | 45.51<br>(29.74 to 68.81)          | 27.92<br>(19.63 to 38.78)        | 57.02<br>(34.91 to 92.19)          |
| Upper respiratory infections                                      | 7.42<br>(3.16 to 16.37)               | 6.03<br>(2.57 to 13.31)               | 3.11<br>(1.33 to 6.79)                | 7.52<br>(2.96 to 17.13)               | 0.14<br>(0.07 to 0.26)           | 0.14<br>(0.07 to 0.28)             | 0.08<br>(0.04 to 0.15)           | 0.17<br>(0.08 to 0.34)             |
| Otitis media                                                      | 2.76<br>(0.72 to 5.60)                | 0.51<br>(0.10 to 1.13)                | 0.53<br>(0.10 to 1.19)                | 0.50<br>(0.10 to 1.11)                | 0.07<br>(0.02 to 0.14)           | 0.01<br>(0.00 to 0.05)             | 0.02<br>(0.00 to 0.04)           | 0.01<br>(0.00 to 0.03)             |
| Meningitis                                                        | 1,036.62<br>(638.08 to 1,689.63)      | 508.78<br>(252.51 to 918.83)          | 385.58<br>(212.42 to 627.74)          | 628.75<br>(276.75 to 1,222.29)        | 14.92<br>(9.53 to 22.96)         | 8.38<br>(4.77 to 13.33)            | 6.88<br>(4.25 to 10.11)          | 9.76<br>(5.13 to 17.07)            |
| Pneumococcal meningitis                                           | 3.16<br>(1.86 to 5.39)                | 1.24<br>(0.63 to 2.20)                | 1.09<br>(0.60 to 1.81)                | 1.48<br>(0.70 to 2.81)                | 0.05<br>(0.03 to 0.07)           | 0.02<br>(0.01 to 0.04)             | 0.02<br>(0.01 to 0.03)           | 0.03<br>(0.01 to 0.04)             |
| H influenzae type B meningitis                                    | 118.72<br>(70.10 to 205.05)           | 88.72<br>(23.80 to 270.19)            | 54.11<br>(21.17 to 130.40)            | 146.65<br>(28.36 to 492.86)           | 1.68<br>(1.06 to 2.72)           | 1.25<br>(0.45 to 3.39)             | 0.88<br>(0.43 to 1.80)           | 1.92<br>(0.51 to 5.98)             |
| Meningococcal meningitis                                          | 86.36<br>(52.16 to 144.21)            | 37.60<br>(20.54 to 61.81)             | 29.94<br>(17.22 to 46.67)             | 42.72<br>(22.58 to 73.66)             | 1.30<br>(0.83 to 2.03)           | 0.69<br>(0.42 to 1.04)             | 0.60<br>(0.37 to 0.86)           | 0.74<br>(0.44 to 1.16)             |
| Other meningitis                                                  | 828.38<br>(507.17 to 1,337.07)        | 381.22<br>(203.49 to 642.99)          | 300.45<br>(171.61 to 482.24)          | 437.90<br>(222.79 to 776.34)          | 11.89<br>(7.64 to 18.21)         | 6.42<br>(3.81 to 9.85)             | 5.38<br>(3.30 to 7.81)           | 7.07<br>(4.02 to 11.32)            |
| Encephalitis                                                      | 38.78<br>(17.67 to 69.95)             | 35.46<br>(15.14 to 65.44)             | 26.11<br>(11.47 to 45.57)             | 40.42<br>(16.37 to 78.00)             | 0.66<br>(0.31 to 1.09)           | 0.71<br>(0.32 to 1.17)             | 0.57<br>(0.25 to 0.90)           | 0.77<br>(0.34 to 1.32)             |

|                |                                   |                                  |                                |                                  |                            |                            |                            |                             |
|----------------|-----------------------------------|----------------------------------|--------------------------------|----------------------------------|----------------------------|----------------------------|----------------------------|-----------------------------|
| Diphtheria     | 0.80<br>(0.40 to<br>1.56)         | 0.20<br>(0.07 to<br>0.49)        | 0.11<br>(0.06 to<br>0.19)      | 0.36<br>(0.07 to<br>1.12)        | 0.01<br>(0.01 to<br>0.02)  | 0.00<br>(0.00 to<br>0.01)  | 0.00<br>(0.00 to<br>0.00)  | 0.00<br>(0.00 to<br>0.01)   |
| Whooping cough | 187.88<br>(13.64 to<br>640.07)    | 102.16<br>(1.84 to<br>419.43)    | 16.02<br>(0.82 to<br>63.61)    | 214.30<br>(2.46 to<br>893.27)    | 2.23<br>(0.16 to<br>7.62)  | 1.22<br>(0.02 to<br>4.95)  | 0.20<br>(0.01 to<br>0.80)  | 2.54<br>(0.03 to<br>10.53)  |
| Tetanus        | 1.06<br>(0.85 to<br>1.35)         | 0.17<br>(0.10 to<br>0.27)        | 0.14<br>(0.08 to<br>0.22)      | 0.21<br>(0.12 to<br>0.38)        | 0.02<br>(0.01 to<br>0.02)  | 0.00<br>(0.00 to<br>0.00)  | 0.00<br>(0.00 to<br>0.00)  | 0.00<br>(0.00 to<br>0.01)   |
| Measles        | 466.43<br>(155.28 to<br>1,041.91) | 524.92<br>(30.41 to<br>2,451.62) | 241.08<br>(22.65 to<br>957.98) | 949.76<br>(43.77 to<br>4,211.25) | 5.58<br>(1.86 to<br>12.41) | 6.92<br>(0.52 to<br>29.44) | 3.37<br>(0.40 to<br>11.97) | 12.08<br>(0.67 to<br>49.36) |

| Kiribati                                              |                                     |                                     |                                    |                                     |                               |                               |                               |                               |
|-------------------------------------------------------|-------------------------------------|-------------------------------------|------------------------------------|-------------------------------------|-------------------------------|-------------------------------|-------------------------------|-------------------------------|
| Cause                                                 | YLLs (actual counts)                |                                     |                                    |                                     | Deaths (actual counts)        |                               |                               |                               |
|                                                       | 2016                                | 2040 Forecast                       | 2040 Better Scenario               | 2040 Worse Scenario                 | 2016                          | 2040 Forecast                 | 2040 Better Scenario          | 2040 Worse Scenario           |
| Varicella and herpes zoster                           | 28.25<br>(14.68 to 52.36)           | 16.71<br>(6.21 to 36.35)            | 8.90<br>(3.68 to 18.12)            | 21.73<br>(7.13 to 51.08)            | 0.49<br>(0.31 to 0.77)        | 0.36<br>(0.19 to 0.61)        | 0.24<br>(0.13 to 0.38)        | 0.41<br>(0.20 to 0.77)        |
| <b>Neglected tropical diseases and malaria</b>        | <b>23.60</b><br>(12.55 to 41.69)    | <b>59.33</b><br>(32.33 to 123.81)   | <b>52.94</b><br>(28.99 to 107.74)  | <b>63.66</b><br>(34.79 to 131.48)   | <b>0.61</b><br>(0.32 to 1.03) | <b>1.96</b><br>(1.05 to 4.11) | <b>2.02</b><br>(1.09 to 4.08) | <b>1.88</b><br>(0.99 to 3.93) |
| Malaria                                               | 0.00<br>(0.00 to 0.00)              | 0.00<br>(0.00 to 0.00)              | 0.00<br>(0.00 to 0.00)             | 0.00<br>(0.00 to 0.00)              | 0.00<br>(0.00 to 0.00)        | 0.00<br>(0.00 to 0.00)        | 0.00<br>(0.00 to 0.00)        | 0.00<br>(0.00 to 0.00)        |
| Chagas disease                                        | 0.00<br>(0.00 to 0.00)              | 0.00<br>(0.00 to 0.00)              | 0.00<br>(0.00 to 0.00)             | 0.00<br>(0.00 to 0.00)              | 0.00<br>(0.00 to 0.00)        | 0.00<br>(0.00 to 0.00)        | 0.00<br>(0.00 to 0.00)        | 0.00<br>(0.00 to 0.00)        |
| Leishmaniasis                                         | 0.00<br>(0.00 to 0.00)              | 0.00<br>(0.00 to 0.00)              | 0.00<br>(0.00 to 0.00)             | 0.00<br>(0.00 to 0.00)              | 0.00<br>(0.00 to 0.00)        | 0.00<br>(0.00 to 0.00)        | 0.00<br>(0.00 to 0.00)        | 0.00<br>(0.00 to 0.00)        |
| African trypanosomiasis                               | 0.00<br>(0.00 to 0.00)              | 0.00<br>(0.00 to 0.00)              | 0.00<br>(0.00 to 0.00)             | 0.00<br>(0.00 to 0.00)              | 0.00<br>(0.00 to 0.00)        | 0.00<br>(0.00 to 0.00)        | 0.00<br>(0.00 to 0.00)        | 0.00<br>(0.00 to 0.00)        |
| Schistosomiasis                                       | 0.00<br>(0.00 to 0.00)              | 0.00<br>(0.00 to 0.00)              | 0.00<br>(0.00 to 0.00)             | 0.00<br>(0.00 to 0.00)              | 0.00<br>(0.00 to 0.00)        | 0.00<br>(0.00 to 0.00)        | 0.00<br>(0.00 to 0.00)        | 0.00<br>(0.00 to 0.00)        |
| Cysticercosis                                         | 0.00<br>(0.00 to 0.00)              | 0.00<br>(0.00 to 0.00)              | 0.00<br>(0.00 to 0.00)             | 0.00<br>(0.00 to 0.00)              | 0.00<br>(0.00 to 0.00)        | 0.00<br>(0.00 to 0.00)        | 0.00<br>(0.00 to 0.00)        | 0.00<br>(0.00 to 0.00)        |
| Cystic echinococcosis                                 | 0.00<br>(0.00 to 0.00)              | 0.00<br>(0.00 to 0.00)              | 0.00<br>(0.00 to 0.00)             | 0.00<br>(0.00 to 0.00)              | 0.00<br>(0.00 to 0.00)        | 0.00<br>(0.00 to 0.00)        | 0.00<br>(0.00 to 0.00)        | 0.00<br>(0.00 to 0.00)        |
| Dengue                                                | 2.31<br>(0.27 to 21.99)             | 20.37<br>(4.10 to 105.50)           | 20.03<br>(4.88 to 93.16)           | 21.03<br>(3.97 to 112.74)           | 0.09<br>(0.01 to 0.60)        | 0.71<br>(0.13 to 3.47)        | 0.79<br>(0.17 to 3.45)        | 0.66<br>(0.12 to 3.32)        |
| Yellow fever                                          | 0.00<br>(0.00 to 0.00)              | 0.00<br>(0.00 to 0.00)              | 0.00<br>(0.00 to 0.00)             | 0.00<br>(0.00 to 0.00)              | 0.00<br>(0.00 to 0.00)        | 0.00<br>(0.00 to 0.00)        | 0.00<br>(0.00 to 0.00)        | 0.00<br>(0.00 to 0.00)        |
| Rabies                                                | 0.27<br>(0.01 to 0.47)              | 0.52<br>(0.01 to 1.16)              | 0.27<br>(0.00 to 0.65)             | 0.60<br>(0.01 to 1.37)              | 0.01<br>(0.00 to 0.02)        | 0.03<br>(0.00 to 0.06)        | 0.02<br>(0.00 to 0.04)        | 0.03<br>(0.00 to 0.07)        |
| Intestinal nematode infections                        | 0.75<br>(0.13 to 2.13)              | 1.49<br>(0.34 to 3.76)              | 1.41<br>(0.33 to 3.50)             | 1.72<br>(0.35 to 4.44)              | 0.01<br>(0.00 to 0.03)        | 0.02<br>(0.01 to 0.05)        | 0.02<br>(0.01 to 0.05)        | 0.02<br>(0.01 to 0.06)        |
| Other neglected tropical diseases                     | 19.27<br>(7.40 to 32.42)            | 36.94<br>(8.86 to 60.59)            | 31.23<br>(6.73 to 50.99)           | 40.31<br>(9.50 to 69.18)            | 0.50<br>(0.19 to 0.73)        | 1.20<br>(0.26 to 1.95)        | 1.20<br>(0.24 to 1.95)        | 1.17<br>(0.27 to 1.87)        |
| <b>Maternal disorders</b>                             | <b>263.40</b><br>(179.72 to 369.08) | <b>236.94</b><br>(150.04 to 359.46) | <b>113.12</b><br>(70.21 to 172.51) | <b>292.18</b><br>(178.05 to 488.99) | <b>4.96</b><br>(3.57 to 6.95) | <b>4.50</b><br>(2.87 to 6.90) | <b>2.15</b><br>(1.34 to 3.25) | <b>5.53</b><br>(3.38 to 8.52) |
| Maternal hemorrhage                                   | 87.93<br>(53.65 to 134.26)          | 76.37<br>(42.74 to 128.03)          | 36.61<br>(20.48 to 60.95)          | 93.80<br>(50.99 to 157.36)          | 1.65<br>(1.01 to 2.52)        | 1.45<br>(0.80 to 2.41)        | 0.69<br>(0.39 to 1.14)        | 1.77<br>(0.95 to 2.97)        |
| Maternal sepsis and other maternal infections         | 16.54<br>(6.59 to 31.66)            | 13.28<br>(5.11 to 26.98)            | 6.30<br>(2.43 to 13.27)            | 16.50<br>(6.22 to 32.96)            | 0.32<br>(0.13 to 0.60)        | 0.26<br>(0.10 to 0.53)        | 0.12<br>(0.05 to 0.26)        | 0.32<br>(0.12 to 0.64)        |
| Maternal hypertensive disorders                       | 35.39<br>(16.70 to 61.80)           | 33.40<br>(14.68 to 62.83)           | 15.76<br>(6.98 to 28.19)           | 40.79<br>(18.37 to 75.80)           | 0.67<br>(0.32 to 1.16)        | 0.63<br>(0.28 to 1.19)        | 0.30<br>(0.13 to 0.54)        | 0.77<br>(0.34 to 1.45)        |
| Maternal obstructed labor and uterine rupture         | 16.69<br>(6.72 to 31.17)            | 15.86<br>(5.94 to 32.77)            | 7.17<br>(2.50 to 15.25)            | 19.62<br>(7.13 to 41.04)            | 0.32<br>(0.13 to 0.60)        | 0.31<br>(0.11 to 0.64)        | 0.14<br>(0.05 to 0.29)        | 0.38<br>(0.13 to 0.78)        |
| Maternal abortion, miscarriage, and ectopic pregnancy | 12.61<br>(4.74 to 26.98)            | 13.36<br>(4.69 to 30.60)            | 6.32<br>(2.07 to 14.56)            | 16.48<br>(5.42 to 38.21)            | 0.24<br>(0.09 to 0.55)        | 0.26<br>(0.09 to 0.60)        | 0.12<br>(0.04 to 0.28)        | 0.32<br>(0.11 to 0.74)        |

|                                        |                              |                              |                              |                              |                           |                           |                           |                           |
|----------------------------------------|------------------------------|------------------------------|------------------------------|------------------------------|---------------------------|---------------------------|---------------------------|---------------------------|
|                                        | 29.05<br>(13.92 to<br>52.82) | 27.41<br>(12.63 to<br>50.25) | 13.13<br>(5.96 to<br>24.17)  | 34.67<br>(15.27 to<br>65.05) | 0.54<br>(0.26 to<br>0.95) | 0.52<br>(0.24 to<br>0.94) | 0.25<br>(0.11 to<br>0.46) | 0.65<br>(0.29 to<br>1.23) |
| Indirect maternal deaths               | 17.63<br>(6.90 to<br>34.35)  | 13.36<br>(4.88 to<br>27.32)  | 6.30<br>(2.34 to<br>12.81)   | 16.74<br>(6.07 to<br>33.69)  | 0.33<br>(0.13 to<br>0.64) | 0.25<br>(0.09 to<br>0.52) | 0.12<br>(0.04 to<br>0.24) | 0.31<br>(0.11 to<br>0.62) |
| Late maternal deaths                   | 0.01<br>(0.00 to<br>0.03)    | 0.13<br>(0.02 to<br>0.63)    | 0.06<br>(0.01 to<br>0.27)    | 0.17<br>(0.03 to<br>0.84)    | 0.00<br>(0.00 to<br>0.00) | 0.00<br>(0.00 to<br>0.01) | 0.00<br>(0.00 to<br>0.00) | 0.00<br>(0.00 to<br>0.01) |
| Maternal deaths aggravated by HIV/AIDS | 47.56<br>(23.51 to<br>77.95) | 43.27<br>(20.63 to<br>76.75) | 21.49<br>(10.16 to<br>36.76) | 53.61<br>(26.42 to<br>94.05) | 0.90<br>(0.44 to<br>1.47) | 0.82<br>(0.39 to<br>1.44) | 0.41<br>(0.19 to<br>0.70) | 1.01<br>(0.49 to<br>1.77) |
| Other maternal disorders               |                              |                              |                              |                              |                           |                           |                           |                           |

| Kiribati                                                                |                                           |                                           |                                         |                                           |                                  |                                  |                                 |                                   |
|-------------------------------------------------------------------------|-------------------------------------------|-------------------------------------------|-----------------------------------------|-------------------------------------------|----------------------------------|----------------------------------|---------------------------------|-----------------------------------|
| Cause                                                                   | YLLs (actual counts)                      |                                           |                                         |                                           | Deaths (actual counts)           |                                  |                                 |                                   |
|                                                                         | 2016                                      | 2040 Forecast                             | 2040 Better Scenario                    | 2040 Worse Scenario                       | 2016                             | 2040 Forecast                    | 2040 Better Scenario            | 2040 Worse Scenario               |
| <b>Neonatal disorders</b>                                               | <b>4,646.47</b><br>(2,347.66 to 8,283.25) | <b>3,236.06</b><br>(1,518.27 to 5,936.57) | <b>1,734.42</b><br>(822.06 to 3,305.19) | <b>4,681.04</b><br>(2,246.87 to 8,643.23) | <b>53.74</b><br>(27.17 to 95.78) | <b>37.45</b><br>(17.57 to 68.70) | <b>20.08</b><br>(9.52 to 38.25) | <b>54.17</b><br>(26.01 to 100.00) |
| Neonatal preterm birth                                                  | 1,723.29<br>(829.03 to 3,305.33)          | 1,140.25<br>(515.69 to 2,291.31)          | 561.99<br>(248.43 to 1,097.50)          | 1,658.34<br>(740.77 to 3,247.32)          | 19.92<br>(9.58 to 38.20)         | 13.19<br>(5.96 to 26.49)         | 6.50<br>(2.88 to 12.70)         | 19.18<br>(8.56 to 37.56)          |
| Neonatal encephalopathy due to birth asphyxia and trauma                | 1,578.09<br>(707.26 to 3,126.62)          | 1,028.06<br>(430.08 to 2,105.82)          | 608.19<br>(252.16 to 1,266.29)          | 1,460.16<br>(613.92 to 3,027.40)          | 18.26<br>(8.19 to 36.17)         | 11.91<br>(4.99 to 24.39)         | 7.04<br>(2.92 to 14.68)         | 16.91<br>(7.10 to 35.07)          |
| Neonatal sepsis and other neonatal infections                           | 279.17<br>(108.47 to 706.81)              | 276.94<br>(102.11 to 680.54)              | 158.80<br>(57.97 to 384.38)             | 396.56<br>(149.41 to 978.29)              | 3.23<br>(1.25 to 8.17)           | 3.21<br>(1.18 to 7.90)           | 1.84<br>(0.67 to 4.45)          | 4.59<br>(1.73 to 11.32)           |
| Hemolytic disease and other neonatal jaundice                           | 134.79<br>(56.20 to 291.87)               | 59.44<br>(20.20 to 142.67)                | 30.78<br>(10.62 to 73.69)               | 87.87<br>(30.42 to 210.08)                | 1.56<br>(0.65 to 3.37)           | 0.69<br>(0.23 to 1.65)           | 0.36<br>(0.12 to 0.85)          | 1.02<br>(0.35 to 2.43)            |
| Other neonatal disorders                                                | 931.13<br>(404.59 to 1,873.78)            | 731.37<br>(292.24 to 1,453.46)            | 374.65<br>(151.00 to 777.14)            | 1,078.12<br>(424.17 to 2,262.11)          | 10.77<br>(4.68 to 21.68)         | 8.47<br>(3.39 to 16.81)          | 4.34<br>(1.75 to 9.00)          | 12.48<br>(4.91 to 26.18)          |
| <b>Nutritional deficiencies</b>                                         | <b>1,013.23</b><br>(575.50 to 1,765.02)   | <b>445.90</b><br>(265.88 to 787.82)       | <b>278.07</b><br>(178.57 to 455.47)     | <b>572.21</b><br>(325.16 to 1,042.43)     | <b>17.79</b><br>(12.37 to 26.53) | <b>12.06</b><br>(8.90 to 16.67)  | <b>9.82</b><br>(7.47 to 12.54)  | <b>12.89</b><br>(9.08 to 19.11)   |
| Protein-energy malnutrition                                             | 987.65<br>(559.30 to 1,737.17)            | 413.11<br>(241.07 to 743.30)              | 255.91<br>(160.54 to 421.53)            | 533.27<br>(286.38 to 993.06)              | 17.19<br>(11.92 to 25.89)        | 11.11<br>(8.02 to 15.48)         | 9.05<br>(6.86 to 11.72)         | 11.89<br>(8.25 to 17.83)          |
| Iodine deficiency                                                       | 3.28<br>(0.11 to 15.78)                   | 11.90<br>(0.20 to 79.72)                  | 6.93<br>(0.11 to 39.29)                 | 15.21<br>(0.20 to 110.91)                 | 0.07<br>(0.00 to 0.24)           | 0.34<br>(0.01 to 1.41)           | 0.25<br>(0.00 to 1.23)          | 0.33<br>(0.01 to 1.65)            |
| Dietary iron deficiency                                                 | 1.19<br>(0.80 to 2.10)                    | 1.17<br>(0.73 to 2.28)                    | 0.91<br>(0.57 to 1.66)                  | 1.31<br>(0.83 to 2.51)                    | 0.02<br>(0.01 to 0.04)           | 0.03<br>(0.02 to 0.05)           | 0.02<br>(0.01 to 0.05)          | 0.03<br>(0.02 to 0.05)            |
| Other nutritional deficiencies                                          | 21.11<br>(11.30 to 34.90)                 | 19.72<br>(11.03 to 31.49)                 | 14.32<br>(8.12 to 21.25)                | 22.41<br>(11.91 to 37.52)                 | 0.51<br>(0.31 to 0.74)           | 0.59<br>(0.35 to 0.85)           | 0.50<br>(0.29 to 0.70)          | 0.60<br>(0.35 to 0.88)            |
| <b>Other communicable, maternal, neonatal, and nutritional diseases</b> | <b>482.91</b><br>(289.17 to 884.84)       | <b>393.05</b><br>(268.24 to 623.06)       | <b>274.27</b><br>(193.63 to 408.80)     | <b>458.05</b><br>(300.95 to 785.15)       | <b>8.50</b><br>(5.98 to 13.37)   | <b>8.28</b><br>(6.30 to 11.43)   | <b>6.26</b><br>(4.86 to 8.24)   | <b>9.10</b><br>(6.71 to 13.34)    |
| Sexually transmitted infections excluding HIV                           | 135.82<br>(38.76 to 362.95)               | 51.86<br>(19.27 to 126.58)                | 34.70<br>(14.13 to 81.75)               | 65.28<br>(22.18 to 169.26)                | 1.78<br>(0.63 to 4.42)           | 0.76<br>(0.35 to 1.63)           | 0.53<br>(0.29 to 1.08)          | 0.93<br>(0.39 to 2.15)            |
| Syphilis                                                                | 120.13<br>(23.23 to 349.34)               | 39.31<br>(7.81 to 114.91)                 | 24.71<br>(5.48 to 72.07)                | 51.95<br>(9.71 to 156.53)                 | 1.44<br>(0.31 to 4.12)           | 0.49<br>(0.12 to 1.38)           | 0.31<br>(0.08 to 0.87)          | 0.64<br>(0.15 to 1.87)            |
| Chlamydial infection                                                    | 3.08<br>(2.04 to 5.14)                    | 2.48<br>(1.55 to 4.19)                    | 1.97<br>(1.26 to 3.30)                  | 2.64<br>(1.66 to 4.47)                    | 0.07<br>(0.04 to 0.11)           | 0.05<br>(0.03 to 0.09)           | 0.04<br>(0.03 to 0.07)          | 0.06<br>(0.04 to 0.10)            |
| Gonococcal infection                                                    | 8.06<br>(5.35 to 13.28)                   | 6.44<br>(4.06 to 11.15)                   | 5.15<br>(3.23 to 8.80)                  | 6.83<br>(4.24 to 11.73)                   | 0.18<br>(0.12 to 0.29)           | 0.14<br>(0.09 to 0.24)           | 0.11<br>(0.07 to 0.20)          | 0.15<br>(0.09 to 0.26)            |
| Other sexually transmitted infections                                   | 4.54<br>(3.01 to 7.46)                    | 3.62<br>(2.22 to 6.26)                    | 2.87<br>(1.80 to 4.80)                  | 3.86<br>(2.41 to 6.44)                    | 0.10<br>(0.06 to 0.16)           | 0.08<br>(0.05 to 0.13)           | 0.06<br>(0.04 to 0.10)          | 0.08<br>(0.05 to 0.14)            |
| Acute hepatitis                                                         | 109.36<br>(80.13 to 152.00)               | 100.40<br>(68.65 to 144.80)               | 77.67<br>(53.05 to 110.79)              | 107.49<br>(72.50 to 158.24)               | 2.58<br>(1.88 to 3.56)           | 2.55<br>(1.78 to 3.60)           | 2.03<br>(1.43 to 2.83)          | 2.67<br>(1.83 to 3.88)            |
| Acute hepatitis A                                                       | 4.81<br>(2.68 to 8.69)                    | 2.49<br>(1.28 to 5.13)                    | 1.73<br>(0.91 to 3.36)                  | 3.02<br>(1.46 to 6.37)                    | 0.07<br>(0.05 to 0.13)           | 0.05<br>(0.03 to 0.08)           | 0.03<br>(0.02 to 0.06)          | 0.05<br>(0.03 to 0.10)            |
| Acute hepatitis B                                                       | 90.18<br>(64.28 to 125.74)                | 87.15<br>(58.00 to 128.37)                | 67.30<br>(44.61 to 96.38)               | 92.54<br>(61.22 to 139.21)                | 2.24<br>(1.61 to 3.14)           | 2.26<br>(1.53 to 3.24)           | 1.79<br>(1.24 to 2.51)          | 2.36<br>(1.59 to 3.45)            |





| Kiribati                             |                                       |                                       |                                       |                                       |                               |                                 |                                 |                                 |
|--------------------------------------|---------------------------------------|---------------------------------------|---------------------------------------|---------------------------------------|-------------------------------|---------------------------------|---------------------------------|---------------------------------|
| Cause                                | YLLs (actual counts)                  |                                       |                                       |                                       | Deaths (actual counts)        |                                 |                                 |                                 |
|                                      | 2016                                  | 2040 Forecast                         | 2040 Better Scenario                  | 2040 Worse Scenario                   | 2016                          | 2040 Forecast                   | 2040 Better Scenario            | 2040 Worse Scenario             |
| Neoplasms                            | 2,849.18<br>(2,468.26 to<br>3,276.19) | 4,161.49<br>(3,418.95 to<br>5,087.43) | 3,590.39<br>(2,991.63 to<br>4,273.10) | 4,474.59<br>(3,629.03 to<br>5,569.77) | 88.79<br>(77.97 to<br>100.78) | 142.50<br>(118.79 to<br>172.59) | 131.84<br>(112.59 to<br>154.98) | 147.70<br>(120.40 to<br>182.12) |
| Lip and oral cavity cancer           | 255.44<br>(199.27 to<br>316.67)       | 420.09<br>(258.64 to<br>639.77)       | 253.98<br>(174.73 to<br>357.49)       | 489.63<br>(297.23 to<br>778.64)       | 8.64<br>(6.97 to<br>10.38)    | 14.64<br>(9.73 to<br>21.72)     | 9.78<br>(7.12 to<br>13.35)      | 16.45<br>(10.55 to<br>25.08)    |
| Nasopharynx cancer                   | 26.83<br>(21.31 to<br>32.94)          | 52.62<br>(29.31 to<br>91.14)          | 28.10<br>(17.39 to<br>43.87)          | 62.99<br>(34.76 to<br>110.96)         | 0.81<br>(0.63 to<br>1.01)     | 1.61<br>(0.92 to<br>2.74)       | 0.91<br>(0.57 to<br>1.39)       | 1.89<br>(1.04 to<br>3.25)       |
| Other pharynx cancer                 | 32.48<br>(26.62 to<br>38.87)          | 41.27<br>(29.33 to<br>58.52)          | 36.00<br>(26.42 to<br>49.88)          | 43.59<br>(30.41 to<br>62.58)          | 1.07<br>(0.89 to<br>1.27)     | 1.47<br>(1.08 to<br>2.02)       | 1.37<br>(1.03 to<br>1.83)       | 1.50<br>(1.07 to<br>2.10)       |
| Esophageal cancer                    | 69.30<br>(58.49 to<br>81.90)          | 102.33<br>(58.82 to<br>170.81)        | 63.11<br>(40.93 to<br>97.42)          | 116.24<br>(64.59 to<br>195.19)        | 2.60<br>(2.21 to<br>3.03)     | 3.99<br>(2.38 to<br>6.35)       | 2.71<br>(1.79 to<br>4.09)       | 4.37<br>(2.51 to<br>7.02)       |
| Stomach cancer                       | 215.53<br>(182.77 to<br>253.03)       | 221.42<br>(172.14 to<br>288.48)       | 190.33<br>(155.40 to<br>234.58)       | 225.44<br>(172.27 to<br>296.51)       | 7.34<br>(6.32 to<br>8.48)     | 8.12<br>(6.57 to<br>10.13)      | 7.57<br>(6.36 to<br>9.02)       | 7.98<br>(6.33 to<br>10.13)      |
| Colon and rectum cancer              | 149.62<br>(122.40 to<br>178.07)       | 248.10<br>(164.30 to<br>376.83)       | 266.15<br>(175.16 to<br>400.58)       | 247.48<br>(160.90 to<br>380.11)       | 5.39<br>(4.43 to<br>6.39)     | 9.82<br>(6.44 to<br>15.07)      | 11.39<br>(7.51 to<br>17.27)     | 9.38<br>(6.01 to<br>14.49)      |
| Liver cancer                         | 282.25<br>(223.73 to<br>338.36)       | 481.44<br>(312.10 to<br>725.54)       | 404.03<br>(282.05 to<br>572.60)       | 563.23<br>(347.26 to<br>893.53)       | 9.23<br>(7.42 to<br>11.00)    | 16.65<br>(11.26 to<br>24.27)    | 15.11<br>(10.85 to<br>21.02)    | 18.71<br>(11.96 to<br>28.46)    |
| Liver cancer due to hepatitis B      | 164.45<br>(127.45 to<br>200.61)       | 272.82<br>(178.04 to<br>418.20)       | 228.68<br>(157.28 to<br>332.88)       | 317.93<br>(194.44 to<br>511.12)       | 5.08<br>(3.98 to<br>6.16)     | 8.89<br>(6.01 to<br>13.27)      | 7.98<br>(5.77 to<br>11.35)      | 10.01<br>(6.33 to<br>15.66)     |
| Liver cancer due to hepatitis C      | 38.54<br>(29.78 to<br>47.94)          | 67.29<br>(44.04 to<br>99.51)          | 60.56<br>(41.56 to<br>86.24)          | 75.61<br>(47.63 to<br>116.82)         | 1.56<br>(1.23 to<br>1.93)     | 2.92<br>(2.00 to<br>4.24)       | 2.86<br>(2.03 to<br>3.99)       | 3.12<br>(2.01 to<br>4.74)       |
| Liver cancer due to alcohol use      | 19.75<br>(14.64 to<br>25.85)          | 35.81<br>(22.08 to<br>57.42)          | 29.18<br>(19.14 to<br>43.89)          | 43.29<br>(24.87 to<br>71.44)          | 0.71<br>(0.53 to<br>0.92)     | 1.33<br>(0.87 to<br>2.02)       | 1.18<br>(0.81 to<br>1.71)       | 1.53<br>(0.94 to<br>2.41)       |
| Liver cancer due to other causes     | 59.51<br>(46.78 to<br>74.46)          | 105.51<br>(60.18 to<br>176.78)        | 85.61<br>(52.99 to<br>136.93)         | 126.40<br>(68.23 to<br>224.28)        | 1.87<br>(1.51 to<br>2.32)     | 3.52<br>(2.03 to<br>5.84)       | 3.08<br>(1.91 to<br>4.92)       | 4.06<br>(2.20 to<br>7.08)       |
| Gallbladder and biliary tract cancer | 17.35<br>(13.83 to<br>21.19)          | 18.03<br>(14.67 to<br>21.63)          | 20.41<br>(16.51 to<br>24.65)          | 16.79<br>(13.73 to<br>20.20)          | 0.70<br>(0.56 to<br>0.85)     | 0.79<br>(0.63 to<br>0.96)       | 0.95<br>(0.77 to<br>1.15)       | 0.71<br>(0.57 to<br>0.87)       |
| Pancreatic cancer                    | 70.95<br>(60.39 to<br>83.02)          | 130.29<br>(91.32 to<br>187.95)        | 134.80<br>(96.32 to<br>192.65)        | 127.49<br>(86.97 to<br>189.33)        | 2.93<br>(2.49 to<br>3.43)     | 5.65<br>(3.91 to<br>8.28)       | 6.26<br>(4.45 to<br>8.91)       | 5.36<br>(3.66 to<br>8.07)       |
| Larynx cancer                        | 26.28<br>(22.03 to<br>31.42)          | 39.88<br>(21.57 to<br>69.01)          | 21.31<br>(12.61 to<br>37.67)          | 45.87<br>(23.96 to<br>78.82)          | 0.94<br>(0.79 to<br>1.11)     | 1.49<br>(0.80 to<br>2.64)       | 0.85<br>(0.50 to<br>1.50)       | 1.68<br>(0.87 to<br>2.95)       |
| Tracheal, bronchus, and lung cancer  | 313.70<br>(263.18 to<br>377.51)       | 498.02<br>(306.55 to<br>755.44)       | 269.92<br>(176.61 to<br>401.46)       | 586.87<br>(352.55 to<br>893.23)       | 11.50<br>(9.76 to<br>13.56)   | 19.10<br>(11.98 to<br>29.30)    | 10.90<br>(7.26 to<br>16.31)     | 22.24<br>(13.40 to<br>34.21)    |
| Malignant skin melanoma              | 12.75<br>(9.20 to<br>17.42)           | 18.33<br>(13.70 to<br>24.78)          | 23.14<br>(16.95 to<br>31.44)          | 16.77<br>(12.48 to<br>22.58)          | 0.44<br>(0.32 to<br>0.59)     | 0.68<br>(0.52 to<br>0.90)       | 0.92<br>(0.70 to<br>1.24)       | 0.60<br>(0.44 to<br>0.81)       |
| Non-melanoma skin cancer             | 16.42<br>(13.46 to<br>19.98)          | 27.10<br>(22.49 to<br>32.63)          | 26.63<br>(21.97 to<br>32.00)          | 26.27<br>(21.75 to<br>31.44)          | 0.64<br>(0.53 to<br>0.77)     | 1.18<br>(0.95 to<br>1.43)       | 1.30<br>(1.04 to<br>1.59)       | 1.08<br>(0.85 to<br>1.30)       |
| Breast cancer                        | 300.30<br>(213.05 to<br>412.20)       | 425.92<br>(267.00 to<br>641.57)       | 419.77<br>(269.00 to<br>624.40)       | 431.07<br>(265.91 to<br>660.55)       | 9.41<br>(6.72 to<br>12.88)    | 14.85<br>(9.43 to<br>22.78)     | 15.47<br>(10.12 to<br>23.54)    | 14.56<br>(8.98 to<br>22.71)     |
| Cervical cancer                      | 100.72<br>(60.83 to<br>270.16)        | 129.09<br>(72.56 to<br>365.07)        | 107.48<br>(61.33 to<br>301.97)        | 135.19<br>(74.82 to<br>379.24)        | 2.87<br>(1.69 to<br>8.28)     | 3.89<br>(2.17 to<br>11.65)      | 3.35<br>(1.91 to<br>10.04)      | 4.00<br>(2.22 to<br>12.21)      |

|                   |                              |                              |                               |                              |                           |                           |                           |                           |
|-------------------|------------------------------|------------------------------|-------------------------------|------------------------------|---------------------------|---------------------------|---------------------------|---------------------------|
| Uterine cancer    | 24.27<br>(17.97 to<br>31.89) | 38.26<br>(29.43 to<br>49.06) | 33.52<br>(25.14 to<br>43.63)  | 38.35<br>(29.28 to<br>48.86) | 0.92<br>(0.68 to<br>1.21) | 1.58<br>(1.20 to<br>2.01) | 1.44<br>(1.08 to<br>1.86) | 1.54<br>(1.17 to<br>1.95) |
| Ovarian cancer    | 39.73<br>(30.56 to<br>50.16) | 62.58<br>(42.15 to<br>94.31) | 70.83<br>(47.81 to<br>103.83) | 61.66<br>(40.65 to<br>94.94) | 1.33<br>(1.02 to<br>1.69) | 2.26<br>(1.53 to<br>3.46) | 2.65<br>(1.81 to<br>3.96) | 2.17<br>(1.43 to<br>3.36) |
| Prostate cancer   | 38.45<br>(25.77 to<br>48.01) | 75.24<br>(49.91 to<br>94.22) | 96.03<br>(67.27 to<br>119.35) | 65.68<br>(43.84 to<br>84.33) | 2.07<br>(1.44 to<br>2.61) | 4.42<br>(2.95 to<br>5.73) | 6.12<br>(4.29 to<br>7.77) | 3.70<br>(2.42 to<br>4.94) |
| Testicular cancer | 42.42<br>(30.96 to<br>56.89) | 45.91<br>(33.02 to<br>61.54) | 42.22<br>(30.40 to<br>56.59)  | 46.65<br>(33.33 to<br>62.67) | 0.92<br>(0.68 to<br>1.19) | 1.05<br>(0.77 to<br>1.36) | 1.01<br>(0.75 to<br>1.32) | 1.04<br>(0.77 to<br>1.35) |

| Kiribati                        |                                                  |                                                    |                                                  |                                                     |                                            |                                            |                                            |                                            |
|---------------------------------|--------------------------------------------------|----------------------------------------------------|--------------------------------------------------|-----------------------------------------------------|--------------------------------------------|--------------------------------------------|--------------------------------------------|--------------------------------------------|
| Cause                           | YLLs (actual counts)                             |                                                    |                                                  |                                                     | Deaths (actual counts)                     |                                            |                                            |                                            |
|                                 | 2016                                             | 2040 Forecast                                      | 2040 Better Scenario                             | 2040 Worse Scenario                                 | 2016                                       | 2040 Forecast                              | 2040 Better Scenario                       | 2040 Worse Scenario                        |
| Kidney cancer                   | 47.05<br>(27.96 to 61.23)                        | 82.12<br>(40.74 to 122.80)                         | 87.05<br>(44.73 to 124.91)                       | 79.34<br>(40.19 to 119.25)                          | 1.42<br>(0.83 to 1.81)                     | 2.76<br>(1.43 to 4.02)                     | 3.22<br>(1.73 to 4.45)                     | 2.55<br>(1.34 to 3.76)                     |
| Bladder cancer                  | 16.10<br>(13.76 to 18.87)                        | 24.13<br>(16.30 to 36.22)                          | 21.73<br>(15.21 to 31.91)                        | 24.47<br>(16.23 to 37.61)                           | 0.70<br>(0.60 to 0.81)                     | 1.12<br>(0.76 to 1.70)                     | 1.11<br>(0.77 to 1.65)                     | 1.09<br>(0.71 to 1.70)                     |
| Brain and nervous system cancer | 76.90<br>(56.62 to 107.96)                       | 112.91<br>(84.00 to 154.04)                        | 116.69<br>(88.17 to 156.70)                      | 115.43<br>(84.99 to 158.33)                         | 1.72<br>(1.30 to 2.33)                     | 2.85<br>(2.17 to 3.76)                     | 3.17<br>(2.45 to 4.22)                     | 2.76<br>(2.07 to 3.65)                     |
| Thyroid cancer                  | 5.27<br>(4.30 to 6.36)                           | 7.64<br>(5.67 to 10.37)                            | 6.93<br>(5.28 to 9.29)                           | 8.33<br>(5.97 to 11.54)                             | 0.20<br>(0.16 to 0.24)                     | 0.32<br>(0.24 to 0.43)                     | 0.30<br>(0.23 to 0.40)                     | 0.33<br>(0.24 to 0.46)                     |
| Mesothelioma                    | 3.62<br>(2.99 to 4.38)                           | 4.82<br>(4.02 to 5.78)                             | 4.71<br>(3.89 to 5.69)                           | 4.75<br>(3.98 to 5.72)                              | 0.12<br>(0.10 to 0.14)                     | 0.16<br>(0.14 to 0.19)                     | 0.17<br>(0.14 to 0.20)                     | 0.16<br>(0.13 to 0.18)                     |
| Hodgkin lymphoma                | 19.44<br>(9.16 to 27.69)                         | 20.04<br>(9.37 to 29.29)                           | 14.98<br>(7.15 to 21.41)                         | 21.93<br>(10.08 to 32.10)                           | 0.42<br>(0.21 to 0.58)                     | 0.48<br>(0.24 to 0.67)                     | 0.38<br>(0.19 to 0.53)                     | 0.50<br>(0.25 to 0.70)                     |
| Non-Hodgkin lymphoma            | 142.30<br>(54.93 to 192.92)                      | 200.28<br>(78.90 to 277.78)                        | 213.55<br>(85.63 to 295.17)                      | 207.49<br>(80.06 to 290.24)                         | 3.51<br>(1.43 to 4.64)                     | 5.69<br>(2.39 to 7.76)                     | 6.63<br>(2.80 to 9.00)                     | 5.57<br>(2.31 to 7.73)                     |
| Multiple myeloma                | 17.59<br>(14.12 to 22.79)                        | 29.90<br>(22.71 to 39.98)                          | 34.18<br>(26.18 to 45.52)                        | 29.74<br>(22.13 to 40.39)                           | 0.63<br>(0.51 to 0.81)                     | 1.16<br>(0.89 to 1.55)                     | 1.40<br>(1.09 to 1.87)                     | 1.11<br>(0.84 to 1.50)                     |
| Leukemia                        | 190.59<br>(141.35 to 244.97)                     | 211.31<br>(152.78 to 280.88)                       | 194.25<br>(142.91 to 253.84)                     | 232.12<br>(167.57 to 311.96)                        | 3.77<br>(2.90 to 4.71)                     | 4.90<br>(3.63 to 6.49)                     | 4.81<br>(3.63 to 6.20)                     | 5.16<br>(3.78 to 6.84)                     |
| Acute lymphoid leukemia         | 38.58<br>(25.73 to 59.28)                        | 37.99<br>(25.79 to 57.92)                          | 35.95<br>(24.75 to 53.33)                        | 42.22<br>(28.15 to 64.81)                           | 0.61<br>(0.43 to 0.91)                     | 0.69<br>(0.49 to 1.02)                     | 0.67<br>(0.48 to 0.98)                     | 0.74<br>(0.52 to 1.10)                     |
| Chronic lymphoid leukemia       | 2.64<br>(1.83 to 3.61)                           | 3.67<br>(2.42 to 5.34)                             | 3.70<br>(2.45 to 5.32)                           | 3.77<br>(2.45 to 5.56)                              | 0.10<br>(0.07 to 0.13)                     | 0.15<br>(0.10 to 0.22)                     | 0.16<br>(0.11 to 0.24)                     | 0.15<br>(0.09 to 0.22)                     |
| Acute myeloid leukemia          | 55.06<br>(34.03 to 79.37)                        | 77.12<br>(47.98 to 112.09)                         | 78.61<br>(49.95 to 111.72)                       | 82.14<br>(51.08 to 120.80)                          | 1.06<br>(0.66 to 1.49)                     | 1.72<br>(1.07 to 2.47)                     | 1.87<br>(1.19 to 2.60)                     | 1.77<br>(1.10 to 2.57)                     |
| Chronic myeloid leukemia        | 25.88<br>(18.30 to 33.92)                        | 24.72<br>(16.39 to 36.29)                          | 22.83<br>(15.43 to 32.98)                        | 26.44<br>(17.24 to 39.23)                           | 0.70<br>(0.52 to 0.92)                     | 0.73<br>(0.50 to 1.05)                     | 0.70<br>(0.49 to 1.00)                     | 0.76<br>(0.51 to 1.12)                     |
| Other leukemia                  | 68.43<br>(44.75 to 90.43)                        | 67.81<br>(44.22 to 93.44)                          | 53.16<br>(34.84 to 73.14)                        | 77.54<br>(50.44 to 106.58)                          | 1.30<br>(0.89 to 1.68)                     | 1.61<br>(1.10 to 2.29)                     | 1.39<br>(0.96 to 1.96)                     | 1.75<br>(1.18 to 2.48)                     |
| Other neoplasms                 | 295.52<br>(197.84 to 381.84)                     | 392.42<br>(274.51 to 494.92)                       | 388.57<br>(272.76 to 487.79)                     | 403.74<br>(272.25 to 516.00)                        | 6.54<br>(4.84 to 8.07)                     | 9.82<br>(7.62 to 11.81)                    | 10.59<br>(8.51 to 12.70)                   | 9.53<br>(7.22 to 11.54)                    |
| <b>Cardiovascular diseases</b>  | <b>8,619.48</b><br><b>(7,510.63 to 9,884.77)</b> | <b>10,640.17</b><br><b>(7,595.37 to 14,189.88)</b> | <b>5,172.32</b><br><b>(3,719.07 to 6,915.89)</b> | <b>14,235.85</b><br><b>(10,256.13 to 18,554.20)</b> | <b>288.53</b><br><b>(253.56 to 327.51)</b> | <b>386.34</b><br><b>(293.25 to 504.36)</b> | <b>206.40</b><br><b>(159.72 to 270.80)</b> | <b>505.17</b><br><b>(381.64 to 648.93)</b> |
| Rheumatic heart disease         | 561.64<br>(464.05 to 689.76)                     | 341.03<br>(270.89 to 428.15)                       | 239.42<br>(191.08 to 301.52)                     | 376.36<br>(295.53 to 483.13)                        | 14.45<br>(12.03 to 17.56)                  | 10.11<br>(8.26 to 12.31)                   | 7.72<br>(6.37 to 9.41)                     | 10.61<br>(8.56 to 13.15)                   |
| Ischemic heart disease          | 3,395.83<br>(2,939.24 to 3,946.72)               | 4,450.44<br>(2,484.43 to 6,727.79)                 | 1,787.00<br>(942.59 to 3,032.69)                 | 6,235.58<br>(3,695.60 to 9,055.07)                  | 116.24<br>(101.81 to 133.14)               | 158.94<br>(93.60 to 244.68)                | 70.11<br>(39.56 to 116.87)                 | 220.48<br>(134.27 to 326.43)               |
| Stroke                          | 3,284.19<br>(2,831.08 to 3,781.45)               | 3,859.87<br>(2,360.35 to 5,812.86)                 | 1,602.81<br>(954.70 to 2,528.86)                 | 5,425.81<br>(3,428.11 to 7,927.60)                  | 113.43<br>(98.89 to 128.27)                | 144.04<br>(94.34 to 209.66)                | 66.49<br>(42.63 to 103.85)                 | 197.38<br>(127.93 to 284.28)               |
| Ischemic stroke                 | 1,022.20<br>(890.11 to 1,188.69)                 | 1,118.12<br>(690.68 to 1,787.02)                   | 565.01<br>(336.47 to 946.42)                     | 1,445.67<br>(906.07 to 2,232.36)                    | 42.62<br>(37.36 to 48.88)                  | 51.12<br>(31.92 to 88.33)                  | 28.35<br>(17.47 to 50.54)                  | 64.57<br>(38.68 to 107.25)                 |

|                                |                                       |                                       |                                     |                                       |                              |                               |                              |                                |
|--------------------------------|---------------------------------------|---------------------------------------|-------------------------------------|---------------------------------------|------------------------------|-------------------------------|------------------------------|--------------------------------|
|                                | 2,261.99<br>(1,931.82 to<br>2,638.21) | 2,741.75<br>(1,525.69 to<br>4,493.72) | 1,037.80<br>(568.68 to<br>1,775.00) | 3,980.14<br>(2,213.30 to<br>6,093.78) | 70.81<br>(60.58 to<br>82.10) | 92.91<br>(55.68 to<br>148.57) | 38.14<br>(22.50 to<br>61.95) | 132.82<br>(77.55 to<br>203.71) |
| Intracerebral hemorrhage       |                                       |                                       |                                     |                                       |                              |                               |                              |                                |
|                                | 383.23<br>(251.30 to<br>486.28)       | 582.11<br>(353.88 to<br>846.67)       | 382.31<br>(250.39 to<br>526.59)     | 688.22<br>(398.21 to<br>1,101.45)     | 14.74<br>(9.66 to<br>18.55)  | 24.58<br>(15.12 to<br>35.50)  | 17.69<br>(11.40 to<br>24.00) | 27.60<br>(16.39 to<br>43.64)   |
| Hypertensive heart disease     |                                       |                                       |                                     |                                       |                              |                               |                              |                                |
|                                | 296.40<br>(163.81 to<br>412.08)       | 351.28<br>(187.57 to<br>498.39)       | 337.51<br>(182.72 to<br>474.84)     | 358.60<br>(190.91 to<br>515.26)       | 7.97<br>(4.42 to<br>10.96)   | 10.75<br>(5.82 to<br>14.93)   | 11.17<br>(6.08 to<br>15.35)  | 10.42<br>(5.57 to<br>14.58)    |
| Cardiomyopathy and myocarditis |                                       |                                       |                                     |                                       |                              |                               |                              |                                |
|                                | 148.26<br>(93.42 to<br>208.15)        | 171.28<br>(106.53 to<br>238.55)       | 160.33<br>(100.73 to<br>221.38)     | 172.96<br>(108.60 to<br>239.94)       | 4.20<br>(2.72 to<br>5.87)    | 5.50<br>(3.55 to<br>7.64)     | 5.56<br>(3.60 to<br>7.65)    | 5.28<br>(3.43 to<br>7.30)      |
| Myocarditis                    |                                       |                                       |                                     |                                       |                              |                               |                              |                                |

| Kiribati                                                      |                                                  |                                                  |                                                  |                                                  |                                         |                                          |                                         |                                          |
|---------------------------------------------------------------|--------------------------------------------------|--------------------------------------------------|--------------------------------------------------|--------------------------------------------------|-----------------------------------------|------------------------------------------|-----------------------------------------|------------------------------------------|
| Cause                                                         | YLLs (actual counts)                             |                                                  |                                                  |                                                  | Deaths (actual counts)                  |                                          |                                         |                                          |
|                                                               | 2016                                             | 2040 Forecast                                    | 2040 Better Scenario                             | 2040 Worse Scenario                              | 2016                                    | 2040 Forecast                            | 2040 Better Scenario                    | 2040 Worse Scenario                      |
| Alcoholic cardiomyopathy                                      | 5.36<br>(3.26 to 7.78)                           | 4.92<br>(3.01 to 6.97)                           | 4.68<br>(2.85 to 6.56)                           | 5.05<br>(3.06 to 7.09)                           | 0.16<br>(0.10 to 0.23)                  | 0.16<br>(0.10 to 0.23)                   | 0.16<br>(0.10 to 0.23)                  | 0.16<br>(0.10 to 0.23)                   |
| Other cardiomyopathy                                          | 142.78<br>(49.94 to 212.19)                      | 175.08<br>(58.10 to 285.88)                      | 172.51<br>(58.41 to 274.87)                      | 180.60<br>(59.97 to 296.84)                      | 3.61<br>(1.29 to 5.24)                  | 5.09<br>(1.72 to 7.89)                   | 5.44<br>(1.91 to 8.27)                  | 4.98<br>(1.65 to 7.83)                   |
| Atrial fibrillation and flutter                               | 21.70<br>(16.71 to 28.30)                        | 41.00<br>(30.02 to 53.93)                        | 44.43<br>(33.55 to 57.53)                        | 38.45<br>(27.79 to 51.50)                        | 1.62<br>(1.24 to 2.13)                  | 3.17<br>(2.21 to 4.34)                   | 3.82<br>(2.79 to 5.11)                  | 2.79<br>(1.87 to 3.89)                   |
| Aortic aneurysm                                               | 27.46<br>(22.71 to 33.29)                        | 35.89<br>(27.39 to 47.49)                        | 33.43<br>(26.18 to 43.33)                        | 36.21<br>(27.09 to 48.76)                        | 1.02<br>(0.85 to 1.22)                  | 1.42<br>(1.11 to 1.78)                   | 1.48<br>(1.21 to 1.80)                  | 1.36<br>(1.06 to 1.74)                   |
| Peripheral artery disease                                     | 4.45<br>(2.73 to 8.36)                           | 11.66<br>(6.46 to 24.95)                         | 12.93<br>(7.30 to 26.11)                         | 11.61<br>(6.27 to 24.60)                         | 0.22<br>(0.13 to 0.44)                  | 0.64<br>(0.34 to 1.33)                   | 0.83<br>(0.44 to 1.65)                  | 0.60<br>(0.32 to 1.25)                   |
| Endocarditis                                                  | 189.13<br>(138.04 to 236.45)                     | 273.07<br>(192.32 to 361.50)                     | 247.58<br>(176.72 to 322.34)                     | 284.44<br>(199.01 to 380.32)                     | 5.34<br>(4.10 to 6.56)                  | 8.70<br>(6.33 to 11.11)                  | 8.63<br>(6.38 to 10.90)                 | 8.55<br>(6.25 to 10.94)                  |
| Other cardiovascular and circulatory diseases                 | 455.47<br>(308.90 to 580.89)                     | 693.80<br>(474.23 to 952.10)                     | 484.90<br>(344.35 to 639.26)                     | 780.55<br>(523.42 to 1,066.81)                   | 13.50<br>(9.67 to 16.60)                | 23.98<br>(16.82 to 32.54)                | 18.67<br>(13.45 to 24.86)               | 25.38<br>(17.15 to 34.72)                |
| <b>Chronic respiratory diseases</b>                           | <b>2,171.14</b><br><b>(1,769.06 to 2,680.95)</b> | <b>2,424.14</b><br><b>(1,788.49 to 3,328.22)</b> | <b>1,579.83</b><br><b>(1,220.95 to 2,055.62)</b> | <b>2,839.39</b><br><b>(2,070.56 to 4,014.05)</b> | <b>72.57</b><br><b>(59.90 to 88.37)</b> | <b>86.16</b><br><b>(64.63 to 116.60)</b> | <b>58.24</b><br><b>(46.31 to 73.92)</b> | <b>98.30</b><br><b>(72.23 to 135.16)</b> |
| Chronic obstructive pulmonary disease                         | 727.41<br>(559.55 to 930.21)                     | 948.07<br>(583.48 to 1,565.27)                   | 432.48<br>(287.04 to 667.50)                     | 1,161.20<br>(707.86 to 1,952.82)                 | 28.17<br>(22.12 to 35.48)               | 38.44<br>(24.22 to 61.76)                | 19.00<br>(13.01 to 28.12)               | 45.71<br>(28.43 to 75.98)                |
| Pneumoconiosis                                                | 9.27<br>(6.90 to 12.96)                          | 9.78<br>(7.30 to 13.35)                          | 10.93<br>(7.96 to 15.00)                         | 9.05<br>(6.75 to 12.49)                          | 0.40<br>(0.20 to 0.55)                  | 0.50<br>(0.25 to 0.70)                   | 0.62<br>(0.43 to 0.87)                  | 0.43<br>(0.20 to 0.62)                   |
| Silicosis                                                     | 0.48<br>(0.25 to 0.83)                           | 0.39<br>(0.18 to 0.77)                           | 0.45<br>(0.21 to 0.88)                           | 0.35<br>(0.16 to 0.68)                           | 0.03<br>(0.01 to 0.05)                  | 0.03<br>(0.01 to 0.03)                   | 0.03<br>(0.01 to 0.07)                  | 0.02<br>(0.01 to 0.05)                   |
| Asbestosis                                                    | 3.33<br>(2.36 to 4.58)                           | 4.80<br>(3.39 to 6.64)                           | 5.23<br>(3.50 to 7.50)                           | 4.50<br>(3.24 to 6.10)                           | 0.14<br>(0.09 to 0.20)                  | 0.25<br>(0.15 to 0.34)                   | 0.28<br>(0.17 to 0.42)                  | 0.21<br>(0.14 to 0.30)                   |
| Coal workers pneumoconiosis                                   | 0.01<br>(0.01 to 0.02)                           | 0.01<br>(0.01 to 0.02)                           | 0.01<br>(0.00 to 0.01)                           | 0.01<br>(0.01 to 0.02)                           | 0.00<br>(0.00 to 0.00)                  | 0.00<br>(0.00 to 0.00)                   | 0.00<br>(0.00 to 0.00)                  | 0.00<br>(0.00 to 0.00)                   |
| Other pneumoconiosis                                          | 5.44<br>(3.72 to 8.42)                           | 4.57<br>(2.84 to 7.49)                           | 5.25<br>(3.19 to 8.80)                           | 4.19<br>(2.64 to 6.86)                           | 0.24<br>(0.16 to 0.37)                  | 0.24<br>(0.13 to 0.41)                   | 0.31<br>(0.17 to 0.53)                  | 0.20<br>(0.11 to 0.35)                   |
| Asthma                                                        | 836.60<br>(624.43 to 1,137.76)                   | 595.72<br>(356.89 to 970.83)                     | 407.50<br>(254.40 to 642.31)                     | 768.07<br>(453.80 to 1,256.43)                   | 28.00<br>(21.46 to 37.65)               | 22.49<br>(13.66 to 35.98)                | 16.86<br>(10.80 to 26.03)               | 27.31<br>(16.26 to 43.47)                |
| Interstitial lung disease and pulmonary sarcoidosis           | 74.94<br>(46.08 to 125.84)                       | 93.52<br>(60.95 to 150.70)                       | 108.95<br>(71.70 to 169.99)                      | 91.64<br>(58.46 to 148.79)                       | 1.69<br>(1.11 to 2.62)                  | 2.46<br>(1.63 to 3.81)                   | 3.12<br>(2.10 to 4.77)                  | 2.28<br>(1.50 to 3.58)                   |
| Other chronic respiratory diseases                            | 522.91<br>(366.43 to 758.57)                     | 777.05<br>(511.91 to 1,154.96)                   | 619.96<br>(429.36 to 888.07)                     | 809.42<br>(522.86 to 1,226.28)                   | 14.31<br>(9.89 to 20.82)                | 22.27<br>(14.72 to 33.39)                | 18.64<br>(12.88 to 26.71)               | 22.58<br>(14.66 to 34.78)                |
| <b>Cirrhosis and other chronic liver diseases</b>             | <b>929.96</b><br><b>(597.87 to 1,309.56)</b>     | <b>1,275.69</b><br><b>(824.29 to 1,784.00)</b>   | <b>1,139.83</b><br><b>(742.38 to 1,585.51)</b>   | <b>1,311.90</b><br><b>(845.51 to 1,826.51)</b>   | <b>24.53</b><br><b>(16.66 to 34.04)</b> | <b>36.00</b><br><b>(24.93 to 48.82)</b>  | <b>33.84</b><br><b>(23.92 to 45.56)</b> | <b>35.89</b><br><b>(24.54 to 48.90)</b>  |
| Cirrhosis and other chronic liver diseases due to hepatitis B | 350.71<br>(216.05 to 506.89)                     | 510.36<br>(318.86 to 737.12)                     | 472.39<br>(300.15 to 673.29)                     | 511.99<br>(318.94 to 737.05)                     | 9.94<br>(6.55 to 14.13)                 | 15.11<br>(10.11 to 21.20)                | 14.63<br>(9.91 to 20.25)                | 14.78<br>(9.75 to 20.64)                 |
| Cirrhosis and other chronic liver diseases due to hepatitis C | 139.93<br>(86.92 to 208.46)                      | 204.99<br>(128.89 to 305.61)                     | 187.82<br>(119.86 to 274.42)                     | 206.47<br>(129.20 to 304.56)                     | 3.89<br>(2.53 to 5.69)                  | 5.90<br>(3.88 to 8.51)                   | 5.62<br>(3.81 to 7.95)                  | 5.82<br>(3.77 to 8.39)                   |

|                                                                |                                                          |                                                          |                                                          |                                                          |                                                   |                                                    |                                                   |                                                    |
|----------------------------------------------------------------|----------------------------------------------------------|----------------------------------------------------------|----------------------------------------------------------|----------------------------------------------------------|---------------------------------------------------|----------------------------------------------------|---------------------------------------------------|----------------------------------------------------|
|                                                                | 120.41<br>(74.33 to<br>176.78)                           | 170.59<br>(107.08 to<br>249.12)                          | 142.40<br>(90.84 to<br>204.89)                           | 184.26<br>(114.68 to<br>267.00)                          | 3.57<br>(2.35 to<br>5.08)                         | 5.26<br>(3.51 to<br>7.41)                          | 4.63<br>(3.18 to<br>6.42)                         | 5.49<br>(3.64 to<br>7.76)                          |
| Cirrhosis and other chronic liver diseases due to alcohol use  |                                                          |                                                          |                                                          |                                                          |                                                   |                                                    |                                                   |                                                    |
|                                                                | 318.92<br>(214.83 to<br>433.72)                          | 389.74<br>(267.35 to<br>528.47)                          | 337.23<br>(231.24 to<br>452.27)                          | 409.18<br>(277.50 to<br>549.75)                          | 7.13<br>(5.08 to<br>9.38)                         | 9.73<br>(7.08 to<br>12.70)                         | 8.96<br>(6.60 to<br>11.60)                        | 9.80<br>(7.06 to<br>12.77)                         |
| Cirrhosis and other chronic liver diseases due to other causes |                                                          |                                                          |                                                          |                                                          |                                                   |                                                    |                                                   |                                                    |
|                                                                | <b>1,306.56</b><br><b>(759.30 to</b><br><b>2,706.30)</b> | <b>1,520.17</b><br><b>(853.70 to</b><br><b>3,098.44)</b> | <b>1,204.44</b><br><b>(680.37 to</b><br><b>2,475.50)</b> | <b>1,661.02</b><br><b>(939.25 to</b><br><b>3,413.90)</b> | <b>38.81</b><br><b>(21.93 to</b><br><b>77.51)</b> | <b>53.08</b><br><b>(28.77 to</b><br><b>103.67)</b> | <b>46.00</b><br><b>(25.15 to</b><br><b>89.04)</b> | <b>54.65</b><br><b>(29.74 to</b><br><b>109.26)</b> |
| Digestive diseases                                             |                                                          |                                                          |                                                          |                                                          |                                                   |                                                    |                                                   |                                                    |
|                                                                | 371.83<br>(206.20 to<br>787.66)                          | 329.28<br>(164.76 to<br>693.57)                          | 218.47<br>(110.78 to<br>447.18)                          | 361.68<br>(183.80 to<br>748.82)                          | 12.41<br>(6.82 to<br>25.16)                       | 12.89<br>(6.29 to<br>26.20)                        | 9.23<br>(4.55 to<br>17.81)                        | 13.50<br>(6.66 to<br>27.44)                        |
| Peptic ulcer disease                                           |                                                          |                                                          |                                                          |                                                          |                                                   |                                                    |                                                   |                                                    |

| Kiribati                                   |                              |                                |                                |                                |                           |                           |                           |                           |
|--------------------------------------------|------------------------------|--------------------------------|--------------------------------|--------------------------------|---------------------------|---------------------------|---------------------------|---------------------------|
| Cause                                      | YLLs (actual counts)         |                                |                                |                                | Deaths (actual counts)    |                           |                           |                           |
|                                            | 2016                         | 2040 Forecast                  | 2040 Better Scenario           | 2040 Worse Scenario            | 2016                      | 2040 Forecast             | 2040 Better Scenario      | 2040 Worse Scenario       |
| Gastritis and duodenitis                   | 121.31<br>(62.82 to 229.08)  | 176.91<br>(89.77 to 337.71)    | 154.45<br>(79.81 to 288.73)    | 179.28<br>(92.17 to 342.40)    | 4.06<br>(2.05 to 7.46)    | 6.61<br>(3.27 to 12.46)   | 6.24<br>(3.16 to 11.76)   | 6.39<br>(3.16 to 12.19)   |
| Appendicitis                               | 136.08<br>(77.17 to 300.70)  | 148.87<br>(82.05 to 330.30)    | 112.44<br>(61.89 to 247.19)    | 160.87<br>(88.75 to 353.30)    | 3.31<br>(1.85 to 7.11)    | 4.32<br>(2.34 to 9.28)    | 3.57<br>(1.94 to 7.46)    | 4.40<br>(2.41 to 9.54)    |
| Paralytic ileus and intestinal obstruction | 245.08<br>(112.75 to 543.80) | 275.25<br>(128.55 to 629.09)   | 241.88<br>(113.80 to 557.76)   | 298.83<br>(137.08 to 675.33)   | 5.51<br>(2.67 to 12.94)   | 7.94<br>(3.75 to 18.82)   | 8.11<br>(3.89 to 19.22)   | 7.74<br>(3.63 to 18.19)   |
| Inguinal, femoral, and abdominal hernia    | 23.79<br>(12.04 to 57.46)    | 26.35<br>(12.94 to 62.58)      | 24.82<br>(12.20 to 56.89)      | 25.81<br>(12.80 to 62.02)      | 1.00<br>(0.48 to 2.21)    | 1.25<br>(0.57 to 2.68)    | 1.31<br>(0.62 to 2.66)    | 1.14<br>(0.53 to 2.57)    |
| Inflammatory bowel disease                 | 34.90<br>(15.64 to 108.56)   | 49.12<br>(22.25 to 142.25)     | 48.99<br>(22.69 to 137.47)     | 48.81<br>(21.80 to 145.03)     | 0.99<br>(0.47 to 2.73)    | 1.60<br>(0.76 to 4.08)    | 1.75<br>(0.86 to 4.31)    | 1.49<br>(0.70 to 3.89)    |
| Vascular intestinal disorders              | 14.71<br>(8.07 to 25.56)     | 23.85<br>(12.83 to 41.09)      | 23.58<br>(12.57 to 40.25)      | 22.85<br>(12.38 to 39.32)      | 0.64<br>(0.33 to 1.13)    | 1.21<br>(0.61 to 2.16)    | 1.31<br>(0.66 to 2.32)    | 1.10<br>(0.55 to 1.97)    |
| Gallbladder and biliary diseases           | 117.07<br>(62.11 to 249.53)  | 168.87<br>(62.51 to 401.82)    | 118.70<br>(45.91 to 280.57)    | 220.84<br>(82.14 to 530.83)    | 4.14<br>(2.10 to 8.32)    | 6.93<br>(2.56 to 16.06)   | 5.35<br>(1.99 to 12.18)   | 8.51<br>(3.10 to 19.85)   |
| Pancreatitis                               | 102.80<br>(55.01 to 234.18)  | 147.44<br>(71.25 to 353.08)    | 118.81<br>(59.03 to 280.58)    | 160.69<br>(75.46 to 392.10)    | 2.64<br>(1.36 to 6.19)    | 4.21<br>(1.94 to 10.26)   | 3.63<br>(1.74 to 8.65)    | 4.38<br>(2.00 to 10.85)   |
| Other digestive diseases                   | 138.99<br>(75.36 to 283.38)  | 174.25<br>(90.63 to 346.73)    | 142.31<br>(74.43 to 279.27)    | 181.35<br>(96.49 to 364.40)    | 4.12<br>(2.14 to 7.80)    | 6.13<br>(3.05 to 11.49)   | 5.49<br>(2.65 to 10.13)   | 6.00<br>(3.04 to 11.37)   |
| Neurological disorders                     | 541.35<br>(450.86 to 642.18) | 849.80<br>(652.21 to 1,129.36) | 850.22<br>(655.64 to 1,131.94) | 888.38<br>(669.92 to 1,214.13) | 24.61<br>(20.47 to 29.66) | 46.51<br>(31.72 to 68.60) | 55.72<br>(38.46 to 79.36) | 44.35<br>(29.34 to 66.20) |
| Alzheimer's disease and other dementias    | 227.96<br>(182.29 to 285.54) | 454.33<br>(280.98 to 724.91)   | 521.17<br>(335.07 to 796.55)   | 449.50<br>(253.28 to 751.46)   | 18.16<br>(14.61 to 22.83) | 37.01<br>(22.40 to 58.81) | 46.15<br>(29.27 to 70.00) | 34.63<br>(20.09 to 56.51) |
| Parkinson's disease                        | 14.85<br>(11.01 to 19.62)    | 31.77<br>(22.61 to 41.69)      | 46.48<br>(34.41 to 60.55)      | 26.41<br>(18.82 to 35.33)      | 1.03<br>(0.76 to 1.38)    | 2.28<br>(1.58 to 3.08)    | 3.56<br>(2.59 to 4.76)    | 1.83<br>(1.24 to 2.56)    |
| Epilepsy                                   | 243.04<br>(189.90 to 307.98) | 290.00<br>(215.93 to 381.50)   | 204.42<br>(154.56 to 265.63)   | 337.62<br>(242.83 to 439.96)   | 4.19<br>(3.37 to 5.11)    | 5.32<br>(4.00 to 6.84)    | 3.85<br>(2.92 to 4.89)    | 6.08<br>(4.47 to 7.98)    |
| Multiple sclerosis                         | 3.24<br>(1.79 to 5.97)       | 4.88<br>(2.64 to 8.90)         | 4.97<br>(2.73 to 8.92)         | 4.84<br>(2.60 to 8.88)         | 0.09<br>(0.05 to 0.16)    | 0.14<br>(0.08 to 0.24)    | 0.14<br>(0.08 to 0.25)    | 0.13<br>(0.07 to 0.24)    |
| Motor neuron disease                       | 8.81<br>(6.81 to 11.60)      | 12.72<br>(9.96 to 16.16)       | 14.41<br>(11.35 to 18.32)      | 12.24<br>(9.59 to 15.59)       | 0.24<br>(0.19 to 0.30)    | 0.40<br>(0.32 to 0.51)    | 0.48<br>(0.38 to 0.61)    | 0.38<br>(0.30 to 0.47)    |
| Other neurological disorders               | 43.45<br>(34.08 to 56.86)    | 56.10<br>(45.03 to 70.50)      | 58.76<br>(47.91 to 72.16)      | 57.76<br>(45.74 to 73.48)      | 0.90<br>(0.73 to 1.11)    | 1.35<br>(1.12 to 1.63)    | 1.54<br>(1.27 to 1.83)    | 1.31<br>(1.07 to 1.58)    |
| Mental disorders                           | 130.38<br>(66.23 to 185.11)  | 176.44<br>(93.95 to 243.20)    | 174.29<br>(92.46 to 239.11)    | 177.44<br>(94.12 to 245.35)    | 2.71<br>(1.43 to 3.75)    | 3.95<br>(2.23 to 5.29)    | 4.09<br>(2.32 to 5.43)    | 3.86<br>(2.16 to 5.20)    |
| Alcohol use disorders                      | 22.90<br>(15.20 to 48.98)    | 25.72<br>(16.05 to 57.95)      | 24.37<br>(14.91 to 55.71)      | 26.28<br>(16.33 to 58.86)      | 0.55<br>(0.37 to 1.13)    | 0.66<br>(0.43 to 1.41)    | 0.65<br>(0.42 to 1.41)    | 0.65<br>(0.42 to 1.42)    |
| Drug use disorders                         | 107.17<br>(38.71 to 161.17)  | 150.25<br>(60.50 to 219.95)    | 149.45<br>(60.81 to 217.93)    | 150.67<br>(60.58 to 222.50)    | 2.15<br>(0.79 to 3.18)    | 3.28<br>(1.39 to 4.70)    | 3.43<br>(1.48 to 4.83)    | 3.20<br>(1.35 to 4.57)    |
| Opioid use disorders                       | 99.33<br>(31.15 to 152.98)   | 130.88<br>(42.79 to 199.42)    | 129.45<br>(42.78 to 195.33)    | 131.52<br>(42.74 to 200.99)    | 1.96<br>(0.62 to 2.95)    | 2.77<br>(0.95 to 4.11)    | 2.86<br>(0.98 to 4.19)    | 2.72<br>(0.92 to 4.04)    |



|                           |                           |                             |                             |                             |                           |                           |                           |                           |
|---------------------------|---------------------------|-----------------------------|-----------------------------|-----------------------------|---------------------------|---------------------------|---------------------------|---------------------------|
|                           | 1.31<br>(0.53 to<br>3.92) | 3.40<br>(1.45 to<br>9.67)   | 3.20<br>(1.37 to<br>9.32)   | 3.47<br>(1.48 to<br>9.85)   | 0.03<br>(0.01 to<br>0.08) | 0.07<br>(0.03 to<br>0.20) | 0.07<br>(0.03 to<br>0.20) | 0.07<br>(0.03 to<br>0.20) |
| Cocaine use disorders     | 0.67<br>(0.28 to<br>2.00) | 2.55<br>(1.19 to<br>6.31)   | 2.57<br>(1.18 to<br>6.34)   | 2.55<br>(1.16 to<br>6.32)   | 0.02<br>(0.01 to<br>0.04) | 0.06<br>(0.03 to<br>0.13) | 0.07<br>(0.03 to<br>0.13) | 0.06<br>(0.02 to<br>0.13) |
| Amphetamine use disorders | 5.87<br>(3.60 to<br>9.64) | 13.42<br>(8.22 to<br>21.63) | 14.23<br>(8.55 to<br>22.96) | 13.12<br>(8.03 to<br>21.21) | 0.15<br>(0.10 to<br>0.25) | 0.38<br>(0.25 to<br>0.60) | 0.43<br>(0.29 to<br>0.67) | 0.35<br>(0.23 to<br>0.56) |
| Other drug use disorders  | 0.31<br>(0.15 to<br>0.57) | 0.48<br>(0.24 to<br>0.90)   | 0.47<br>(0.24 to<br>0.93)   | 0.48<br>(0.24 to<br>0.90)   | 0.01<br>(0.00 to<br>0.01) | 0.01<br>(0.00 to<br>0.02) | 0.01<br>(0.00 to<br>0.02) | 0.01<br>(0.00 to<br>0.02) |
| Eating disorders          |                           |                             |                             |                             |                           |                           |                           |                           |

| Kiribati                                                   |                                           |                                            |                                           |                                             |                                     |                                     |                                     |                                     |
|------------------------------------------------------------|-------------------------------------------|--------------------------------------------|-------------------------------------------|---------------------------------------------|-------------------------------------|-------------------------------------|-------------------------------------|-------------------------------------|
| Cause                                                      | YLLs (actual counts)                      |                                            |                                           |                                             | Deaths (actual counts)              |                                     |                                     |                                     |
|                                                            | 2016                                      | 2040 Forecast                              | 2040 Better Scenario                      | 2040 Worse Scenario                         | 2016                                | 2040 Forecast                       | 2040 Better Scenario                | 2040 Worse Scenario                 |
| <b>Diabetes, urogenital, blood, and endocrine diseases</b> | <b>4,759.64</b><br>(4,147.46 to 5,502.01) | <b>9,175.16</b><br>(6,959.42 to 12,253.44) | <b>6,310.90</b><br>(4,823.08 to 8,428.47) | <b>10,295.80</b><br>(7,779.38 to 13,606.48) | <b>171.55</b><br>(149.90 to 196.31) | <b>371.47</b><br>(289.77 to 478.25) | <b>273.52</b><br>(217.81 to 355.33) | <b>399.88</b><br>(314.20 to 506.69) |
| Diabetes mellitus                                          | 3,350.62<br>(2,855.95 to 3,921.32)        | 6,247.28<br>(4,074.19 to 9,011.79)         | 4,102.51<br>(2,732.80 to 5,981.42)        | 6,830.38<br>(4,510.49 to 9,900.37)          | 128.60<br>(110.05 to 149.58)        | 262.09<br>(176.09 to 359.21)        | 184.68<br>(129.13 to 257.93)        | 275.62<br>(186.59 to 384.42)        |
| Acute glomerulonephritis                                   | 1.45<br>(1.17 to 1.81)                    | 2.08<br>(1.57 to 2.83)                     | 1.76<br>(1.31 to 2.40)                    | 2.23<br>(1.70 to 3.00)                      | 0.05<br>(0.04 to 0.06)              | 0.06<br>(0.05 to 0.09)              | 0.07<br>(0.05 to 0.10)              | 0.06<br>(0.05 to 0.09)              |
| Chronic kidney disease                                     | 821.93<br>(693.15 to 964.38)              | 2,073.71<br>(768.21 to 5,061.37)           | 1,441.19<br>(547.27 to 3,618.68)          | 2,576.62<br>(956.41 to 5,963.92)            | 27.69<br>(23.53 to 32.51)           | 83.17<br>(29.46 to 206.66)          | 62.94<br>(22.55 to 169.71)          | 98.73<br>(36.37 to 226.83)          |
| Chronic kidney disease due to diabetes mellitus            | 455.27<br>(380.09 to 544.20)              | 1,256.41<br>(427.90 to 3,186.28)           | 874.05<br>(309.00 to 2,327.76)            | 1,567.06<br>(532.17 to 3,805.13)            | 15.62<br>(13.14 to 18.61)           | 48.54<br>(16.55 to 123.60)          | 36.32<br>(12.78 to 97.68)           | 58.25<br>(20.16 to 138.09)          |
| Chronic kidney disease due to hypertension                 | 164.27<br>(128.76 to 204.03)              | 468.24<br>(163.78 to 1,198.50)             | 339.08<br>(120.31 to 898.23)              | 570.67<br>(203.59 to 1,345.50)              | 7.25<br>(5.76 to 8.86)              | 23.65<br>(7.97 to 62.39)            | 18.80<br>(6.31 to 52.32)            | 27.19<br>(9.43 to 66.39)            |
| Chronic kidney disease due to glomerulonephritis           | 98.27<br>(75.67 to 124.44)                | 160.98<br>(79.12 to 346.24)                | 104.11<br>(51.04 to 235.83)               | 202.24<br>(99.88 to 411.80)                 | 2.18<br>(1.70 to 2.68)              | 4.63<br>(1.90 to 10.91)             | 3.22<br>(1.35 to 8.20)              | 5.66<br>(2.41 to 12.45)             |
| Chronic kidney disease due to other and unspecified causes | 103.93<br>(80.40 to 131.18)               | 188.09<br>(83.95 to 429.79)                | 123.95<br>(54.21 to 295.51)               | 236.65<br>(104.74 to 515.95)                | 2.63<br>(2.07 to 3.24)              | 6.34<br>(2.46 to 15.76)             | 4.60<br>(1.71 to 12.26)             | 7.63<br>(2.96 to 17.50)             |
| Urinary diseases and male infertility                      | 152.43<br>(124.12 to 190.52)              | 237.01<br>(201.82 to 280.27)               | 230.72<br>(196.89 to 268.33)              | 242.41<br>(201.50 to 295.81)                | 4.22<br>(3.61 to 4.91)              | 8.05<br>(6.85 to 9.37)              | 8.89<br>(7.63 to 10.33)             | 7.52<br>(6.34 to 8.82)              |
| Urinary tract infections                                   | 110.48<br>(85.96 to 143.95)               | 168.26<br>(135.61 to 210.35)               | 162.91<br>(132.76 to 197.74)              | 174.49<br>(137.72 to 227.54)                | 2.85<br>(2.34 to 3.40)              | 5.57<br>(4.55 to 6.71)              | 6.26<br>(5.13 to 7.52)              | 5.20<br>(4.20 to 6.26)              |
| Urolithiasis                                               | 22.85<br>(15.33 to 31.40)                 | 46.79<br>(31.18 to 62.84)                  | 50.15<br>(33.47 to 67.06)                 | 44.84<br>(30.22 to 60.31)                   | 0.81<br>(0.54 to 1.10)              | 1.73<br>(1.15 to 2.30)              | 1.96<br>(1.33 to 2.62)              | 1.59<br>(1.08 to 2.13)              |
| Other urinary diseases                                     | 19.10<br>(13.89 to 27.01)                 | 21.96<br>(14.82 to 33.24)                  | 17.66<br>(11.75 to 28.11)                 | 23.09<br>(15.78 to 35.23)                   | 0.56<br>(0.42 to 0.82)              | 0.75<br>(0.50 to 1.26)              | 0.67<br>(0.44 to 1.16)              | 0.74<br>(0.49 to 1.22)              |
| Gynecological diseases                                     | 2.14<br>(1.16 to 3.07)                    | 2.48<br>(1.41 to 3.69)                     | 1.84<br>(1.00 to 2.75)                    | 2.64<br>(1.46 to 3.91)                      | 0.07<br>(0.03 to 0.09)              | 0.08<br>(0.04 to 0.11)              | 0.06<br>(0.03 to 0.09)              | 0.08<br>(0.04 to 0.12)              |
| Uterine fibroids                                           | 0.39<br>(0.13 to 0.69)                    | 0.41<br>(0.12 to 0.81)                     | 0.30<br>(0.09 to 0.59)                    | 0.43<br>(0.13 to 0.82)                      | 0.02<br>(0.00 to 0.03)              | 0.02<br>(0.00 to 0.04)              | 0.01<br>(0.00 to 0.03)              | 0.02<br>(0.00 to 0.04)              |
| Polycystic ovarian syndrome                                | 0.28<br>(0.09 to 0.57)                    | 0.21<br>(0.06 to 0.50)                     | 0.12<br>(0.03 to 0.29)                    | 0.24<br>(0.07 to 0.57)                      | 0.01<br>(0.00 to 0.01)              | 0.01<br>(0.00 to 0.01)              | 0.00<br>(0.00 to 0.01)              | 0.01<br>(0.00 to 0.01)              |
| Endometriosis                                              | 0.04<br>(0.01 to 0.08)                    | 0.05<br>(0.01 to 0.12)                     | 0.04<br>(0.01 to 0.08)                    | 0.06<br>(0.01 to 0.13)                      | 0.00<br>(0.00 to 0.00)              | 0.00<br>(0.00 to 0.00)              | 0.00<br>(0.00 to 0.00)              | 0.00<br>(0.00 to 0.00)              |
| Genital prolapse                                           | 0.19<br>(0.03 to 0.35)                    | 0.19<br>(0.03 to 0.36)                     | 0.13<br>(0.02 to 0.26)                    | 0.21<br>(0.03 to 0.39)                      | 0.01<br>(0.00 to 0.01)              | 0.01<br>(0.00 to 0.02)              | 0.01<br>(0.00 to 0.01)              | 0.01<br>(0.00 to 0.02)              |
| Other gynecological diseases                               | 1.24<br>(0.70 to 1.86)                    | 1.62<br>(0.89 to 2.52)                     | 1.25<br>(0.69 to 1.96)                    | 1.71<br>(0.95 to 2.64)                      | 0.03<br>(0.02 to 0.05)              | 0.05<br>(0.02 to 0.08)              | 0.04<br>(0.02 to 0.06)              | 0.05<br>(0.02 to 0.08)              |
| Hemoglobinopathies and hemolytic anemias                   | 79.85<br>(58.29 to 102.14)                | 87.42<br>(62.90 to 111.06)                 | 69.09<br>(48.99 to 89.00)                 | 93.42<br>(66.78 to 118.94)                  | 1.88<br>(1.39 to 2.35)              | 2.49<br>(1.77 to 3.19)              | 2.05<br>(1.45 to 2.63)              | 2.55<br>(1.81 to 3.29)              |
| Thalassemias                                               | 18.69<br>(11.95 to 28.15)                 | 10.56<br>(6.40 to 16.57)                   | 11.12<br>(7.03 to 17.15)                  | 11.66<br>(6.98 to 18.34)                    | 0.24<br>(0.15 to 0.35)              | 0.14<br>(0.08 to 0.21)              | 0.15<br>(0.09 to 0.22)              | 0.15<br>(0.09 to 0.23)              |

|                                                   |                                 |                                   |                                 |                                   |                            |                              |                              |                              |
|---------------------------------------------------|---------------------------------|-----------------------------------|---------------------------------|-----------------------------------|----------------------------|------------------------------|------------------------------|------------------------------|
|                                                   | 0.06<br>(0.04 to<br>0.09)       | 0.07<br>(0.04 to<br>0.11)         | 0.05<br>(0.03 to<br>0.08)       | 0.07<br>(0.04 to<br>0.12)         | 0.00<br>(0.00 to<br>0.00)  | 0.00<br>(0.00 to<br>0.00)    | 0.00<br>(0.00 to<br>0.00)    | 0.00<br>(0.00 to<br>0.00)    |
| Sickle cell disorders                             |                                 |                                   |                                 |                                   |                            |                              |                              |                              |
| G6PD deficiency                                   | 42.45<br>(28.96 to<br>55.65)    | 58.09<br>(38.82 to<br>76.98)      | 42.43<br>(28.02 to<br>56.89)    | 62.89<br>(42.20 to<br>83.79)      | 0.93<br>(0.63 to<br>1.21)  | 1.45<br>(0.99 to<br>1.88)    | 1.10<br>(0.73 to<br>1.44)    | 1.54<br>(1.05 to<br>2.02)    |
| Other hemoglobinopathies and hemolytic anemias    | 18.65<br>(13.74 to<br>24.54)    | 18.71<br>(13.22 to<br>25.67)      | 15.49<br>(10.87 to<br>20.92)    | 18.80<br>(13.15 to<br>25.62)      | 0.72<br>(0.53 to<br>0.95)  | 0.90<br>(0.62 to<br>1.29)    | 0.81<br>(0.56 to<br>1.12)    | 0.86<br>(0.58 to<br>1.24)    |
| Endocrine, metabolic, blood, and immune disorders | 351.21<br>(233.21 to<br>683.73) | 525.18<br>(350.58 to<br>1,018.93) | 463.78<br>(313.34 to<br>869.36) | 548.09<br>(363.60 to<br>1,073.40) | 9.05<br>(6.10 to<br>17.12) | 15.53<br>(10.48 to<br>29.63) | 14.83<br>(10.14 to<br>28.04) | 15.32<br>(10.22 to<br>29.34) |

| Kiribati                                      |                                         |                                           |                                         |                                           |                                  |                                  |                                  |                                  |
|-----------------------------------------------|-----------------------------------------|-------------------------------------------|-----------------------------------------|-------------------------------------------|----------------------------------|----------------------------------|----------------------------------|----------------------------------|
| Cause                                         | YLLs (actual counts)                    |                                           |                                         |                                           | Deaths (actual counts)           |                                  |                                  |                                  |
|                                               | 2016                                    | 2040 Forecast                             | 2040 Better Scenario                    | 2040 Worse Scenario                       | 2016                             | 2040 Forecast                    | 2040 Better Scenario             | 2040 Worse Scenario              |
| <b>Musculoskeletal disorders</b>              | <b>36.84</b><br>(17.21 to 48.93)        | <b>53.24</b><br>(25.17 to 71.08)          | <b>57.33</b><br>(26.60 to 76.05)        | <b>52.94</b><br>(24.97 to 70.77)          | <b>0.76</b><br>(0.35 to 0.99)    | <b>1.26</b><br>(0.59 to 1.61)    | <b>1.46</b><br>(0.66 to 1.84)    | <b>1.20</b><br>(0.56 to 1.55)    |
| Rheumatoid arthritis                          | 2.62<br>(1.31 to 5.84)                  | 4.11<br>(2.03 to 8.57)                    | 3.36<br>(1.68 to 7.36)                  | 4.32<br>(2.11 to 8.94)                    | 0.07<br>(0.04 to 0.14)           | 0.15<br>(0.07 to 0.27)           | 0.13<br>(0.06 to 0.26)           | 0.15<br>(0.07 to 0.27)           |
| Other musculoskeletal disorders               | 34.22<br>(15.41 to 45.68)               | 49.12<br>(22.50 to 65.98)                 | 53.97<br>(24.92 to 71.73)               | 48.62<br>(22.17 to 65.72)                 | 0.69<br>(0.31 to 0.90)           | 1.12<br>(0.51 to 1.44)           | 1.32<br>(0.59 to 1.68)           | 1.06<br>(0.47 to 1.37)           |
| <b>Other non-communicable diseases</b>        | <b>1,923.16</b><br>(772.81 to 3,355.55) | <b>2,199.34</b><br>(1,096.68 to 3,675.88) | <b>1,696.21</b><br>(899.85 to 2,740.80) | <b>2,667.39</b><br>(1,254.36 to 4,632.93) | <b>27.28</b><br>(13.14 to 44.57) | <b>39.19</b><br>(23.75 to 58.10) | <b>34.89</b><br>(22.89 to 50.82) | <b>43.45</b><br>(24.65 to 67.90) |
| Congenital birth defects                      | 1,701.20<br>(589.29 to 3,079.59)        | 1,711.32<br>(652.86 to 3,140.08)          | 1,226.95<br>(480.22 to 2,191.65)        | 2,170.76<br>(821.06 to 4,004.47)          | 20.82<br>(7.44 to 37.16)         | 21.83<br>(8.65 to 38.36)         | 15.94<br>(6.57 to 27.26)         | 27.26<br>(10.64 to 48.99)        |
| Neural tube defects                           | 29.60<br>(9.83 to 62.32)                | 12.48<br>(4.59 to 27.26)                  | 7.07<br>(2.80 to 14.91)                 | 16.75<br>(5.84 to 38.05)                  | 0.36<br>(0.13 to 0.75)           | 0.16<br>(0.07 to 0.34)           | 0.10<br>(0.04 to 0.19)           | 0.21<br>(0.08 to 0.46)           |
| Congenital heart anomalies                    | 597.14<br>(210.41 to 1,098.98)          | 583.90<br>(231.16 to 1,048.59)            | 410.90<br>(167.75 to 714.10)            | 736.87<br>(275.53 to 1,327.65)            | 7.40<br>(2.67 to 13.33)          | 7.60<br>(3.12 to 13.14)          | 5.46<br>(2.26 to 9.14)           | 9.43<br>(3.73 to 16.31)          |
| Orofacial clefts                              | 25.04<br>(0.62 to 88.99)                | 15.97<br>(0.44 to 59.23)                  | 7.58<br>(0.22 to 30.41)                 | 23.12<br>(0.61 to 90.18)                  | 0.29<br>(0.01 to 1.03)           | 0.19<br>(0.01 to 0.69)           | 0.09<br>(0.00 to 0.35)           | 0.27<br>(0.01 to 1.05)           |
| Down syndrome                                 | 62.91<br>(20.19 to 213.26)              | 83.03<br>(30.51 to 265.24)                | 56.81<br>(21.83 to 179.60)              | 105.65<br>(36.87 to 344.87)               | 0.80<br>(0.28 to 2.60)           | 1.13<br>(0.47 to 3.40)           | 0.79<br>(0.35 to 2.37)           | 1.40<br>(0.55 to 4.32)           |
| Other chromosomal abnormalities               | 24.06<br>(7.43 to 56.29)                | 41.22<br>(12.91 to 98.01)                 | 27.77<br>(9.09 to 63.40)                | 53.57<br>(16.12 to 128.68)                | 0.31<br>(0.10 to 0.68)           | 0.55<br>(0.19 to 1.22)           | 0.39<br>(0.14 to 0.83)           | 0.70<br>(0.23 to 1.58)           |
| Congenital musculoskeletal and limb anomalies | 30.78<br>(10.75 to 60.17)               | 31.18<br>(11.53 to 63.60)                 | 22.68<br>(8.59 to 45.12)                | 39.97<br>(14.51 to 81.46)                 | 0.37<br>(0.13 to 0.71)           | 0.38<br>(0.14 to 0.75)           | 0.28<br>(0.11 to 0.53)           | 0.48<br>(0.18 to 0.96)           |
| Urogenital congenital anomalies               | 39.95<br>(14.85 to 78.41)               | 36.63<br>(14.85 to 71.10)                 | 26.77<br>(10.98 to 50.27)               | 46.04<br>(18.18 to 91.86)                 | 0.51<br>(0.20 to 0.96)           | 0.51<br>(0.22 to 0.91)           | 0.39<br>(0.17 to 0.66)           | 0.62<br>(0.26 to 1.14)           |
| Digestive congenital anomalies                | 107.72<br>(33.25 to 220.03)             | 101.33<br>(34.91 to 210.34)               | 65.67<br>(23.40 to 133.08)              | 133.51<br>(44.93 to 281.98)               | 1.29<br>(0.41 to 2.61)           | 1.24<br>(0.44 to 2.52)           | 0.82<br>(0.30 to 1.60)           | 1.62<br>(0.55 to 3.36)           |
| Other congenital birth defects                | 783.99<br>(262.89 to 1,451.61)          | 805.58<br>(292.91 to 1,532.45)            | 601.69<br>(223.01 to 1,108.75)          | 1,015.28<br>(365.33 to 1,947.01)          | 9.49<br>(3.29 to 17.28)          | 10.07<br>(3.78 to 18.54)         | 7.64<br>(2.94 to 13.74)          | 12.54<br>(4.61 to 23.62)         |
| Skin and subcutaneous diseases                | 177.88<br>(108.96 to 263.60)            | 453.48<br>(286.28 to 670.33)              | 442.35<br>(282.50 to 661.55)            | 452.37<br>(284.96 to 669.30)              | 5.96<br>(3.72 to 9.34)           | 16.96<br>(11.14 to 27.13)        | 18.63<br>(12.48 to 29.62)        | 15.68<br>(10.16 to 25.01)        |
| Cellulitis                                    | 7.84<br>(2.13 to 13.18)                 | 26.06<br>(6.89 to 44.61)                  | 29.85<br>(7.99 to 49.01)                | 24.65<br>(6.42 to 42.34)                  | 0.28<br>(0.06 to 0.49)           | 1.08<br>(0.25 to 1.88)           | 1.38<br>(0.33 to 2.36)           | 0.95<br>(0.22 to 1.68)           |
| Pyoderma                                      | 137.15<br>(77.24 to 204.43)             | 359.92<br>(216.34 to 527.37)              | 337.29<br>(202.30 to 505.31)            | 364.85<br>(216.46 to 533.97)              | 4.08<br>(2.33 to 6.28)           | 12.27<br>(7.61 to 19.04)         | 12.75<br>(7.95 to 20.05)         | 11.60<br>(7.25 to 17.94)         |
| Decubitus ulcer                               | 31.75<br>(19.55 to 61.35)               | 65.23<br>(40.13 to 134.57)                | 72.85<br>(45.82 to 147.97)              | 60.56<br>(37.38 to 128.85)                | 1.56<br>(0.98 to 3.02)           | 3.56<br>(2.02 to 7.43)           | 4.43<br>(2.59 to 8.94)           | 3.08<br>(1.72 to 6.54)           |
| Other skin and subcutaneous diseases          | 1.15<br>(0.71 to 2.15)                  | 2.27<br>(1.41 to 4.13)                    | 2.35<br>(1.49 to 4.14)                  | 2.32<br>(1.45 to 4.25)                    | 0.03<br>(0.02 to 0.05)           | 0.06<br>(0.04 to 0.10)           | 0.07<br>(0.04 to 0.12)           | 0.05<br>(0.03 to 0.10)           |
| Sudden infant death syndrome                  | 44.08<br>(17.11 to 97.89)               | 34.53<br>(10.86 to 85.59)                 | 26.91<br>(8.59 to 68.04)                | 44.26<br>(13.99 to 109.43)                | 0.51<br>(0.20 to 1.14)           | 0.40<br>(0.13 to 0.99)           | 0.31<br>(0.10 to 0.79)           | 0.51<br>(0.16 to 1.27)           |

|                          |                                       |                                       |                                       |                                       |                              |                               |                              |                                |
|--------------------------|---------------------------------------|---------------------------------------|---------------------------------------|---------------------------------------|------------------------------|-------------------------------|------------------------------|--------------------------------|
| Injuries                 | 3,964.26<br>(3,246.57 to<br>4,841.99) | 4,700.47<br>(3,732.83 to<br>5,832.08) | 3,467.82<br>(2,766.57 to<br>4,262.13) | 5,343.36<br>(4,183.83 to<br>6,671.95) | 72.71<br>(59.60 to<br>87.88) | 92.16<br>(74.18 to<br>112.51) | 71.71<br>(57.78 to<br>87.22) | 101.40<br>(80.64 to<br>125.73) |
| Transport injuries       | 860.47<br>(694.30 to<br>1,073.76)     | 1,075.01<br>(822.07 to<br>1,423.36)   | 387.07<br>(292.72 to<br>508.75)       | 1,377.25<br>(1,050.60 to<br>1,813.06) | 15.61<br>(12.83 to<br>18.97) | 20.57<br>(16.13 to<br>26.42)  | 8.35<br>(6.51 to<br>10.61)   | 25.31<br>(19.77 to<br>32.87)   |
| Road injuries            | 804.87<br>(645.70 to<br>1,006.70)     | 987.82<br>(763.35 to<br>1,299.02)     | 319.17<br>(239.96 to<br>420.96)       | 1,279.24<br>(981.08 to<br>1,691.24)   | 14.65<br>(12.08 to<br>17.77) | 18.95<br>(14.97 to<br>24.35)  | 7.05<br>(5.49 to<br>8.97)    | 23.54<br>(18.38 to<br>30.59)   |
| Pedestrian road injuries | 57.96<br>(39.68 to<br>79.84)          | 65.66<br>(43.87 to<br>90.11)          | 23.44<br>(16.06 to<br>32.53)          | 81.90<br>(53.87 to<br>114.83)         | 1.05<br>(0.75 to<br>1.39)    | 1.28<br>(0.91 to<br>1.72)     | 0.49<br>(0.37 to<br>0.64)    | 1.55<br>(1.08 to<br>2.11)      |

| Kiribati                                        |                                                |                                                |                                              |                                                |                                         |                                         |                                         |                                         |
|-------------------------------------------------|------------------------------------------------|------------------------------------------------|----------------------------------------------|------------------------------------------------|-----------------------------------------|-----------------------------------------|-----------------------------------------|-----------------------------------------|
| Cause                                           | YLLs (actual counts)                           |                                                |                                              |                                                | Deaths (actual counts)                  |                                         |                                         |                                         |
|                                                 | 2016                                           | 2040 Forecast                                  | 2040 Better Scenario                         | 2040 Worse Scenario                            | 2016                                    | 2040 Forecast                           | 2040 Better Scenario                    | 2040 Worse Scenario                     |
| Cyclist road injuries                           | 15.13<br>(10.60 to 21.48)                      | 17.85<br>(12.00 to 25.03)                      | 4.92<br>(3.44 to 6.87)                       | 23.86<br>(15.80 to 34.06)                      | 0.27<br>(0.20 to 0.37)                  | 0.33<br>(0.24 to 0.46)                  | 0.11<br>(0.08 to 0.16)                  | 0.43<br>(0.30 to 0.59)                  |
| Motorcyclist road injuries                      | 320.00<br>(235.37 to 413.26)                   | 423.97<br>(309.70 to 565.61)                   | 181.64<br>(131.79 to 243.83)                 | 523.33<br>(379.29 to 707.46)                   | 5.90<br>(4.50 to 7.43)                  | 8.19<br>(6.14 to 10.80)                 | 4.00<br>(3.00 to 5.24)                  | 9.70<br>(7.23 to 12.96)                 |
| Motor vehicle road injuries                     | 398.29<br>(293.88 to 528.67)                   | 463.65<br>(325.60 to 627.23)                   | 105.40<br>(70.78 to 146.65)                  | 627.32<br>(444.56 to 855.43)                   | 7.21<br>(5.36 to 9.27)                  | 8.86<br>(6.30 to 11.49)                 | 2.37<br>(1.67 to 3.07)                  | 11.47<br>(8.18 to 15.08)                |
| Other road injuries                             | 13.50<br>(7.90 to 20.49)                       | 16.69<br>(9.04 to 26.06)                       | 3.77<br>(2.01 to 6.02)                       | 22.83<br>(12.36 to 35.48)                      | 0.22<br>(0.14 to 0.34)                  | 0.29<br>(0.16 to 0.44)                  | 0.07<br>(0.04 to 0.11)                  | 0.38<br>(0.21 to 0.59)                  |
| Other transport injuries                        | 55.59<br>(34.45 to 78.11)                      | 87.19<br>(54.45 to 125.28)                     | 67.90<br>(43.02 to 96.14)                    | 98.00<br>(60.46 to 143.32)                     | 0.97<br>(0.64 to 1.31)                  | 1.62<br>(1.06 to 2.25)                  | 1.30<br>(0.88 to 1.79)                  | 1.77<br>(1.15 to 2.53)                  |
| <b>Unintentional injuries</b>                   | <b>1,431.51</b><br><b>(992.35 to 1,909.07)</b> | <b>1,273.25</b><br><b>(853.46 to 1,649.63)</b> | <b>995.77</b><br><b>(666.09 to 1,268.67)</b> | <b>1,418.12</b><br><b>(947.53 to 1,870.28)</b> | <b>26.56</b><br><b>(18.43 to 34.19)</b> | <b>27.51</b><br><b>(18.67 to 34.05)</b> | <b>23.37</b><br><b>(15.57 to 28.82)</b> | <b>28.99</b><br><b>(19.44 to 36.17)</b> |
| Falls                                           | 101.55<br>(48.34 to 145.87)                    | 105.21<br>(50.90 to 142.31)                    | 95.86<br>(46.01 to 127.17)                   | 109.51<br>(52.16 to 151.90)                    | 2.42<br>(1.19 to 3.29)                  | 3.22<br>(1.55 to 4.24)                  | 3.27<br>(1.57 to 4.25)                  | 3.08<br>(1.47 to 4.10)                  |
| Drowning                                        | 304.72<br>(213.89 to 427.16)                   | 227.55<br>(151.86 to 311.35)                   | 175.20<br>(114.16 to 236.43)                 | 257.94<br>(171.07 to 364.69)                   | 4.97<br>(3.53 to 6.57)                  | 4.11<br>(2.76 to 5.38)                  | 3.28<br>(2.18 to 4.28)                  | 4.53<br>(3.04 to 6.11)                  |
| Fire, heat, and hot substances                  | 82.77<br>(36.60 to 125.42)                     | 60.60<br>(26.51 to 90.76)                      | 44.16<br>(18.83 to 66.39)                    | 69.43<br>(30.06 to 106.71)                     | 1.44<br>(0.69 to 2.11)                  | 1.21<br>(0.55 to 1.75)                  | 0.95<br>(0.42 to 1.36)                  | 1.32<br>(0.59 to 1.93)                  |
| Poisonings                                      | 169.86<br>(50.79 to 304.37)                    | 99.44<br>(28.98 to 174.16)                     | 64.52<br>(19.30 to 109.39)                   | 118.84<br>(35.01 to 215.77)                    | 2.96<br>(0.94 to 4.87)                  | 2.96<br>(3.19 to 4.87)                  | 1.97<br>(0.46 to 2.22)                  | 2.22<br>(0.70 to 3.74)                  |
| Exposure to mechanical forces                   | 128.60<br>(76.98 to 169.53)                    | 120.11<br>(67.43 to 160.87)                    | 90.30<br>(48.81 to 120.41)                   | 134.83<br>(76.11 to 184.65)                    | 2.29<br>(1.36 to 2.91)                  | 2.38<br>(1.35 to 3.09)                  | 1.91<br>(1.04 to 2.48)                  | 2.56<br>(1.45 to 3.36)                  |
| Unintentional firearm injuries                  | 15.45<br>(10.31 to 24.52)                      | 11.83<br>(7.98 to 17.99)                       | 8.39<br>(5.70 to 12.81)                      | 13.66<br>(9.05 to 20.58)                       | 0.27<br>(0.18 to 0.43)                  | 0.24<br>(0.16 to 0.36)                  | 0.18<br>(0.13 to 0.28)                  | 0.26<br>(0.18 to 0.39)                  |
| Unintentional suffocation                       | 17.19<br>(10.35 to 28.60)                      | 17.68<br>(10.11 to 29.57)                      | 12.30<br>(7.01 to 20.63)                     | 20.87<br>(11.87 to 34.72)                      | 0.25<br>(0.15 to 0.40)                  | 0.27<br>(0.16 to 0.45)                  | 0.19<br>(0.11 to 0.34)                  | 0.31<br>(0.18 to 0.51)                  |
| Other exposure to mechanical forces             | 95.96<br>(39.41 to 131.77)                     | 90.60<br>(33.18 to 127.46)                     | 69.61<br>(25.15 to 96.97)                    | 100.31<br>(36.75 to 142.69)                    | 1.77<br>(0.73 to 2.36)                  | 1.87<br>(0.72 to 2.55)                  | 1.53<br>(0.58 to 2.07)                  | 1.99<br>(0.76 to 2.73)                  |
| Adverse effects of medical treatment            | 485.03<br>(317.84 to 666.88)                   | 502.13<br>(340.16 to 678.41)                   | 404.63<br>(272.20 to 539.74)                 | 550.56<br>(365.87 to 740.99)                   | 9.46<br>(6.65 to 12.51)                 | 11.24<br>(8.06 to 14.59)                | 9.79<br>(6.95 to 12.51)                 | 11.68<br>(8.30 to 15.21)                |
| Animal contact                                  | 9.37<br>(5.35 to 13.36)                        | 12.30<br>(7.20 to 17.67)                       | 8.71<br>(5.20 to 12.36)                      | 14.02<br>(8.06 to 20.56)                       | 0.19<br>(0.12 to 0.25)                  | 0.28<br>(0.18 to 0.37)                  | 0.22<br>(0.14 to 0.29)                  | 0.30<br>(0.19 to 0.41)                  |
| Venomous animal contact                         | 4.80<br>(2.74 to 7.19)                         | 5.74<br>(3.13 to 8.80)                         | 3.89<br>(2.13 to 5.95)                       | 6.62<br>(3.59 to 10.25)                        | 0.09<br>(0.06 to 0.14)                  | 0.12<br>(0.07 to 0.19)                  | 0.09<br>(0.06 to 0.14)                  | 0.14<br>(0.08 to 0.21)                  |
| Non-venomous animal contact                     | 4.56<br>(2.29 to 6.99)                         | 6.56<br>(3.49 to 9.95)                         | 4.81<br>(2.56 to 7.22)                       | 7.40<br>(3.86 to 11.54)                        | 0.09<br>(0.05 to 0.13)                  | 0.15<br>(0.09 to 0.22)                  | 0.12<br>(0.07 to 0.17)                  | 0.16<br>(0.09 to 0.23)                  |
| Foreign body                                    | 42.06<br>(23.23 to 92.56)                      | 42.62<br>(24.16 to 84.69)                      | 37.39<br>(22.13 to 69.34)                    | 48.32<br>(26.38 to 100.86)                     | 0.70<br>(0.41 to 1.43)                  | 0.84<br>(0.52 to 1.55)                  | 0.82<br>(0.52 to 1.44)                  | 0.88<br>(0.53 to 1.69)                  |
| Pulmonary aspiration and foreign body in airway | 34.66<br>(19.69 to 72.59)                      | 34.92<br>(20.60 to 66.41)                      | 31.40<br>(19.40 to 55.00)                    | 39.53<br>(22.39 to 78.90)                      | 0.58<br>(0.36 to 1.10)                  | 0.70<br>(0.45 to 1.21)                  | 0.71<br>(0.47 to 1.20)                  | 0.73<br>(0.45 to 1.30)                  |

|                                             |                                                            |                                                            |                                                            |                                                            |                                                   |                                                   |                                                   |                                                   |
|---------------------------------------------|------------------------------------------------------------|------------------------------------------------------------|------------------------------------------------------------|------------------------------------------------------------|---------------------------------------------------|---------------------------------------------------|---------------------------------------------------|---------------------------------------------------|
|                                             | 7.40<br>(3.01 to<br>22.49)                                 | 7.71<br>(3.16 to<br>23.22)                                 | 5.99<br>(2.48 to<br>18.35)                                 | 8.79<br>(3.57 to<br>26.17)                                 | 0.12<br>(0.05 to<br>0.37)                         | 0.14<br>(0.06 to<br>0.42)                         | 0.11<br>(0.05 to<br>0.35)                         | 0.15<br>(0.06 to<br>0.45)                         |
| Foreign body in other body part             |                                                            |                                                            |                                                            |                                                            |                                                   |                                                   |                                                   |                                                   |
| Environmental heat and cold exposure        | 48.89<br>(18.65 to<br>71.10)                               | 55.33<br>(20.87 to<br>81.58)                               | 36.65<br>(13.62 to<br>53.62)                               | 62.86<br>(23.42 to<br>92.32)                               | 1.03<br>(0.38 to<br>1.44)                         | 1.28<br>(0.47 to<br>1.88)                         | 0.91<br>(0.33 to<br>1.31)                         | 1.40<br>(0.52 to<br>2.02)                         |
| Other unintentional injuries                | 58.66<br>(24.78 to<br>74.83)                               | 47.95<br>(19.31 to<br>63.12)                               | 38.37<br>(15.02 to<br>51.43)                               | 51.79<br>(20.67 to<br>68.47)                               | 1.11<br>(0.49 to<br>1.41)                         | 0.98<br>(0.40 to<br>1.27)                         | 0.81<br>(0.33 to<br>1.07)                         | 1.03<br>(0.43 to<br>1.35)                         |
| <b>Self-harm and interpersonal violence</b> | <b>1,671.26</b><br><b>(1,304.37 to</b><br><b>2,102.04)</b> | <b>2,342.24</b><br><b>(1,736.29 to</b><br><b>3,145.74)</b> | <b>2,075.31</b><br><b>(1,593.12 to</b><br><b>2,671.86)</b> | <b>2,537.59</b><br><b>(1,829.56 to</b><br><b>3,471.54)</b> | <b>30.52</b><br><b>(24.14 to</b><br><b>38.34)</b> | <b>43.90</b><br><b>(32.72 to</b><br><b>58.23)</b> | <b>39.80</b><br><b>(30.73 to</b><br><b>50.91)</b> | <b>46.91</b><br><b>(34.00 to</b><br><b>64.38)</b> |

| Kiribati                                                                            |                                                |                                                  |                                                  |                                                   |                                                |                                                |                                                |                                                |
|-------------------------------------------------------------------------------------|------------------------------------------------|--------------------------------------------------|--------------------------------------------------|---------------------------------------------------|------------------------------------------------|------------------------------------------------|------------------------------------------------|------------------------------------------------|
| Cause                                                                               | YLLs (actual counts)                           |                                                  |                                                  |                                                   | Deaths (actual counts)                         |                                                |                                                |                                                |
|                                                                                     | 2016                                           | 2040 Forecast                                    | 2040 Better Scenario                             | 2040 Worse Scenario                               | 2016                                           | 2040 Forecast                                  | 2040 Better Scenario                           | 2040 Worse Scenario                            |
| Self-harm                                                                           | 1,458.92<br>(1,113.94 to<br>1,858.08)          | 2,121.31<br>(1,493.93 to<br>2,908.60)            | 1,862.15<br>(1,368.49 to<br>2,455.75)            | 2,308.21<br>(1,594.58 to<br>3,243.98)             | 26.71<br>(20.49 to<br>34.09)                   | 39.75<br>(28.53 to<br>54.00)                   | 35.71<br>(26.51 to<br>46.71)                   | 42.67<br>(29.79 to<br>60.24)                   |
| Self-harm by firearm                                                                | 12.08<br>(7.15 to<br>19.22)                    | 13.86<br>(7.72 to<br>22.86)                      | 11.70<br>(6.52 to<br>18.89)                      | 15.17<br>(8.26 to<br>25.47)                       | 0.23<br>(0.14 to<br>0.37)                      | 0.27<br>(0.15 to<br>0.46)                      | 0.24<br>(0.13 to<br>0.38)                      | 0.29<br>(0.16 to<br>0.50)                      |
| Self-harm by other specified means                                                  | 1,446.84<br>(1,107.15 to<br>1,844.73)          | 2,107.45<br>(1,484.47 to<br>2,897.35)            | 1,850.45<br>(1,362.71 to<br>2,439.53)            | 2,293.03<br>(1,584.42 to<br>3,218.86)             | 26.48<br>(20.33 to<br>33.79)                   | 39.48<br>(28.33 to<br>53.55)                   | 35.47<br>(26.34 to<br>46.32)                   | 42.37<br>(29.59 to<br>59.74)                   |
| Interpersonal violence                                                              | 212.34<br>(153.58 to<br>320.53)                | 220.93<br>(154.78 to<br>341.73)                  | 213.16<br>(151.05 to<br>331.32)                  | 229.38<br>(160.24 to<br>355.57)                   | 3.81<br>(2.77 to<br>5.77)                      | 4.15<br>(2.93 to<br>6.45)                      | 4.09<br>(2.93 to<br>6.33)                      | 4.24<br>(2.98 to<br>6.59)                      |
| Physical violence by firearm                                                        | 42.43<br>(18.42 to<br>65.27)                   | 42.83<br>(18.16 to<br>68.43)                     | 41.08<br>(17.27 to<br>66.16)                     | 44.21<br>(19.22 to<br>70.64)                      | 0.75<br>(0.33 to<br>1.17)                      | 0.79<br>(0.34 to<br>1.27)                      | 0.77<br>(0.33 to<br>1.24)                      | 0.80<br>(0.35 to<br>1.28)                      |
| Physical violence by sharp object                                                   | 99.43<br>(59.88 to<br>208.93)                  | 109.91<br>(64.32 to<br>233.00)                   | 111.93<br>(66.69 to<br>231.43)                   | 111.00<br>(65.50 to<br>238.23)                    | 1.80<br>(1.07 to<br>3.80)                      | 2.07<br>(1.21 to<br>4.34)                      | 2.13<br>(1.28 to<br>4.46)                      | 2.06<br>(1.21 to<br>4.40)                      |
| Physical violence by other means                                                    | 70.48<br>(47.26 to<br>97.60)                   | 68.19<br>(43.17 to<br>98.85)                     | 60.16<br>(37.61 to<br>86.87)                     | 74.17<br>(47.51 to<br>107.92)                     | 1.25<br>(0.84 to<br>1.71)                      | 1.30<br>(0.83 to<br>1.87)                      | 1.19<br>(0.75 to<br>1.70)                      | 1.38<br>(0.88 to<br>2.00)                      |
| <b>Forces of nature, conflict and terrorism, and executions and police conflict</b> | <b>1.02</b><br><b>(0.81 to</b><br><b>1.30)</b> | <b>9.97</b><br><b>(0.00 to</b><br><b>259.47)</b> | <b>9.66</b><br><b>(0.00 to</b><br><b>253.95)</b> | <b>10.41</b><br><b>(0.00 to</b><br><b>266.82)</b> | <b>0.02</b><br><b>(0.01 to</b><br><b>0.02)</b> | <b>0.18</b><br><b>(0.00 to</b><br><b>4.41)</b> | <b>0.18</b><br><b>(0.00 to</b><br><b>4.35)</b> | <b>0.18</b><br><b>(0.00 to</b><br><b>4.51)</b> |
| Exposure to forces of nature                                                        | 0.00<br>(0.00 to<br>0.00)                      | 5.31<br>(0.00 to<br>0.00)                        | 5.10<br>(0.00 to<br>0.00)                        | 5.62<br>(0.00 to<br>0.00)                         | 0.00<br>(0.00 to<br>0.00)                      | 0.10<br>(0.00 to<br>0.00)                      | 0.10<br>(0.00 to<br>0.00)                      | 0.10<br>(0.00 to<br>0.00)                      |
| Conflict and terrorism                                                              | 0.00<br>(0.00 to<br>0.00)                      | 4.66<br>(0.00 to<br>0.00)                        | 4.56<br>(0.00 to<br>0.00)                        | 4.79<br>(0.00 to<br>0.00)                         | 0.00<br>(0.00 to<br>0.00)                      | 0.08<br>(0.00 to<br>0.00)                      | 0.08<br>(0.00 to<br>0.00)                      | 0.08<br>(0.00 to<br>0.00)                      |
| Executions and police conflict                                                      | 1.02<br>(0.81 to<br>1.30)                      | 0.00<br>(0.00 to<br>0.00)                        | 0.00<br>(0.00 to<br>0.00)                        | 0.00<br>(0.00 to<br>0.00)                         | 0.02<br>(0.01 to<br>0.02)                      | 0.00<br>(0.00 to<br>0.00)                      | 0.00<br>(0.00 to<br>0.00)                      | 0.00<br>(0.00 to<br>0.00)                      |



| Marshall Islands                                                  |                                          |                                          |                                          |                                          |                                 |                                 |                                 |                                   |
|-------------------------------------------------------------------|------------------------------------------|------------------------------------------|------------------------------------------|------------------------------------------|---------------------------------|---------------------------------|---------------------------------|-----------------------------------|
| Cause                                                             | YLLs (actual counts)                     |                                          |                                          |                                          | Deaths (actual counts)          |                                 |                                 |                                   |
|                                                                   | 2016                                     | 2040 Forecast                            | 2040 Better Scenario                     | 2040 Worse Scenario                      | 2016                            | 2040 Forecast                   | 2040 Better Scenario            | 2040 Worse Scenario               |
| All causes                                                        | 19,596.28<br>(16,391.82 to<br>23,274.90) | 24,794.41<br>(19,745.57 to<br>30,325.05) | 17,292.71<br>(13,766.30 to<br>21,376.53) | 29,345.06<br>(23,222.05 to<br>36,220.52) | 541.48<br>(468.10 to<br>617.93) | 854.55<br>(732.31 to<br>992.62) | 641.50<br>(548.77 to<br>748.05) | 976.55<br>(829.55 to<br>1,135.19) |
| Communicable, maternal, neonatal, and nutritional diseases        | 4,127.56<br>(2,684.49 to<br>6,401.42)    | 2,721.96<br>(1,706.81 to<br>4,432.39)    | 1,566.78<br>(1,050.28 to<br>2,556.76)    | 3,555.17<br>(2,170.65 to<br>5,712.29)    | 65.23<br>(47.64 to<br>93.59)    | 57.05<br>(40.58 to<br>82.73)    | 39.16<br>(28.82 to<br>55.22)    | 70.95<br>(48.94 to<br>102.08)     |
| HIV/AIDS and tuberculosis                                         | 261.06<br>(148.37 to<br>694.95)          | 307.45<br>(121.23 to<br>984.20)          | 199.44<br>(59.59 to<br>843.47)           | 399.99<br>(165.66 to<br>1,191.59)        | 6.46<br>(3.92 to<br>16.08)      | 7.80<br>(3.55 to<br>22.50)      | 5.08<br>(1.83 to<br>19.56)      | 9.72<br>(4.44 to<br>25.28)        |
| Tuberculosis                                                      | 157.60<br>(117.72 to<br>195.20)          | 143.65<br>(83.31 to<br>218.99)           | 66.76<br>(41.13 to<br>99.17)             | 174.25<br>(101.19 to<br>274.19)          | 4.33<br>(3.18 to<br>5.31)       | 4.45<br>(2.67 to<br>6.77)       | 2.24<br>(1.40 to<br>3.33)       | 5.19<br>(3.10 to<br>8.24)         |
| HIV/AIDS                                                          | 103.46<br>(5.95 to<br>535.34)            | 163.80<br>(9.99 to<br>854.52)            | 132.68<br>(4.41 to<br>776.36)            | 225.74<br>(23.51 to<br>999.92)           | 2.13<br>(0.11 to<br>11.41)      | 3.35<br>(0.15 to<br>18.43)      | 2.84<br>(0.07 to<br>17.41)      | 4.52<br>(0.43 to<br>19.98)        |
| Diarrhea, lower respiratory, and other common infectious diseases | 1,709.49<br>(1,157.13 to<br>2,652.97)    | 1,350.28<br>(825.18 to<br>2,326.76)      | 774.12<br>(523.43 to<br>1,173.91)        | 1,802.53<br>(1,037.49 to<br>3,289.38)    | 30.99<br>(22.93 to<br>43.50)    | 33.30<br>(22.69 to<br>49.90)    | 24.05<br>(17.35 to<br>33.08)    | 41.98<br>(27.36 to<br>67.38)      |
| Diarrheal diseases                                                | 86.25<br>(52.78 to<br>147.51)            | 42.15<br>(9.68 to<br>115.65)             | 25.32<br>(6.12 to<br>75.07)              | 73.70<br>(15.02 to<br>213.37)            | 2.11<br>(1.31 to<br>3.67)       | 1.69<br>(0.37 to<br>5.10)       | 1.23<br>(0.28 to<br>3.75)       | 2.77<br>(0.51 to<br>8.24)         |
| Intestinal infectious diseases                                    | 68.53<br>(32.46 to<br>127.00)            | 45.44<br>(18.04 to<br>88.02)             | 33.28<br>(13.34 to<br>62.27)             | 50.33<br>(19.70 to<br>97.62)             | 0.97<br>(0.46 to<br>1.78)       | 0.68<br>(0.29 to<br>1.32)       | 0.51<br>(0.22 to<br>0.95)       | 0.74<br>(0.30 to<br>1.43)         |
| Typhoid fever                                                     | 58.95<br>(27.17 to<br>110.81)            | 37.78<br>(14.08 to<br>76.38)             | 27.82<br>(10.76 to<br>52.87)             | 41.80<br>(15.61 to<br>85.07)             | 0.83<br>(0.39 to<br>1.56)       | 0.56<br>(0.22 to<br>1.09)       | 0.43<br>(0.17 to<br>0.79)       | 0.61<br>(0.24 to<br>1.21)         |
| Paratyphoid fever                                                 | 9.50<br>(3.79 to<br>20.09)               | 7.63<br>(2.71 to<br>16.76)               | 5.43<br>(1.92 to<br>12.03)               | 8.49<br>(2.99 to<br>18.92)               | 0.14<br>(0.06 to<br>0.29)       | 0.14<br>(0.04 to<br>0.26)       | 0.09<br>(0.03 to<br>0.19)       | 0.13<br>(0.05 to<br>0.28)         |
| Other intestinal infectious diseases                              | 0.08<br>(0.03 to<br>0.18)                | 0.03<br>(0.01 to<br>0.08)                | 0.02<br>(0.01 to<br>0.05)                | 0.04<br>(0.01 to<br>0.10)                | 0.00<br>(0.00 to<br>0.00)       | 0.00<br>(0.00 to<br>0.00)       | 0.00<br>(0.00 to<br>0.00)       | 0.00<br>(0.00 to<br>0.00)         |
| Lower respiratory infections                                      | 1,046.87<br>(722.40 to<br>1,572.32)      | 859.02<br>(502.88 to<br>1,470.49)        | 556.14<br>(366.79 to<br>856.28)          | 1,172.12<br>(631.11 to<br>2,176.96)      | 21.35<br>(15.69 to<br>28.98)    | 25.34<br>(17.03 to<br>38.72)    | 19.68<br>(14.04 to<br>27.75)    | 31.63<br>(20.13 to<br>52.70)      |
| Upper respiratory infections                                      | 1.61<br>(0.78 to<br>3.10)                | 1.38<br>(0.49 to<br>2.92)                | 0.78<br>(0.28 to<br>1.70)                | 1.58<br>(0.58 to<br>3.40)                | 0.03<br>(0.02 to<br>0.05)       | 0.03<br>(0.01 to<br>0.07)       | 0.02<br>(0.01 to<br>0.04)       | 0.04<br>(0.01 to<br>0.08)         |
| Otitis media                                                      | 0.05<br>(0.02 to<br>0.13)                | 0.01<br>(0.01 to<br>0.04)                | 0.01<br>(0.01 to<br>0.04)                | 0.02<br>(0.01 to<br>0.04)                | 0.00<br>(0.00 to<br>0.00)       | 0.00<br>(0.00 to<br>0.00)       | 0.00<br>(0.00 to<br>0.00)       | 0.00<br>(0.00 to<br>0.00)         |
| Meningitis                                                        | 142.97<br>(86.96 to<br>229.60)           | 79.43<br>(37.53 to<br>152.38)            | 54.69<br>(30.17 to<br>95.63)             | 95.22<br>(42.92 to<br>195.01)            | 2.08<br>(1.32 to<br>3.33)       | 1.33<br>(0.71 to<br>2.46)       | 1.03<br>(0.61 to<br>1.82)       | 1.51<br>(0.79 to<br>2.89)         |
| Pneumococcal meningitis                                           | 0.42<br>(0.23 to<br>0.74)                | 0.17<br>(0.09 to<br>0.31)                | 0.12<br>(0.07 to<br>0.23)                | 0.20<br>(0.10 to<br>0.39)                | 0.01<br>(0.00 to<br>0.01)       | 0.00<br>(0.00 to<br>0.01)       | 0.00<br>(0.00 to<br>0.00)       | 0.00<br>(0.00 to<br>0.01)         |
| H influenzae type B meningitis                                    | 15.83<br>(8.89 to<br>26.91)              | 21.26<br>(4.31 to<br>70.87)              | 7.10<br>(3.00 to<br>17.30)               | 32.65<br>(5.51 to<br>114.73)             | 0.22<br>(0.13 to<br>0.37)       | 0.28<br>(0.08 to<br>0.89)       | 0.12<br>(0.06 to<br>0.25)       | 0.41<br>(0.09 to<br>1.38)         |
| Meningococcal meningitis                                          | 27.68<br>(15.68 to<br>47.01)             | 12.32<br>(6.41 to<br>23.03)              | 10.05<br>(5.43 to<br>18.90)              | 13.20<br>(6.88 to<br>24.12)              | 0.42<br>(0.25 to<br>0.69)       | 0.24<br>(0.13 to<br>0.45)       | 0.21<br>(0.12 to<br>0.39)       | 0.25<br>(0.14 to<br>0.45)         |
| Other meningitis                                                  | 99.04<br>(60.15 to<br>160.85)            | 45.68<br>(23.48 to<br>79.65)             | 37.41<br>(20.67 to<br>64.97)             | 49.16<br>(25.51 to<br>86.87)             | 1.43<br>(0.89 to<br>2.30)       | 0.81<br>(0.45 to<br>1.44)       | 0.70<br>(0.41 to<br>1.26)       | 0.85<br>(0.47 to<br>1.49)         |
| Encephalitis                                                      | 17.24<br>(11.26 to<br>25.65)             | 16.18<br>(9.40 to<br>25.05)              | 12.39<br>(7.43 to<br>18.81)              | 17.41<br>(10.09 to<br>26.97)             | 0.29<br>(0.20 to<br>0.42)       | 0.32<br>(0.20 to<br>0.48)       | 0.27<br>(0.17 to<br>0.39)       | 0.34<br>(0.21 to<br>0.50)         |

|                |                                |                               |                              |                               |                           |                           |                           |                            |
|----------------|--------------------------------|-------------------------------|------------------------------|-------------------------------|---------------------------|---------------------------|---------------------------|----------------------------|
| Diphtheria     | 1.55<br>(0.85 to<br>2.83)      | 0.47<br>(0.20 to<br>1.09)     | 0.27<br>(0.15 to<br>0.46)    | 0.59<br>(0.23 to<br>1.43)     | 0.02<br>(0.01 to<br>0.04) | 0.01<br>(0.00 to<br>0.02) | 0.01<br>(0.00 to<br>0.01) | 0.01<br>(0.00 to<br>0.02)  |
| Whooping cough | 237.24<br>(21.94 to<br>731.33) | 140.43<br>(8.05 to<br>453.17) | 32.84<br>(2.25 to<br>113.44) | 160.80<br>(9.88 to<br>542.87) | 2.81<br>(0.26 to<br>8.65) | 1.67<br>(0.10 to<br>5.40) | 0.40<br>(0.03 to<br>1.37) | 1.91<br>(0.12 to<br>6.45)  |
| Tetanus        | 0.90<br>(0.57 to<br>1.60)      | 0.14<br>(0.08 to<br>0.28)     | 0.09<br>(0.05 to<br>0.15)    | 0.16<br>(0.09 to<br>0.31)     | 0.02<br>(0.01 to<br>0.03) | 0.00<br>(0.00 to<br>0.00) | 0.00<br>(0.00 to<br>0.00) | 0.00<br>(0.00 to<br>0.01)  |
| Measles        | 96.63<br>(25.79 to<br>238.96)  | 160.88<br>(3.93 to<br>638.28) | 55.80<br>(3.58 to<br>173.81) | 224.96<br>(4.77 to<br>895.72) | 1.16<br>(0.31 to<br>2.87) | 2.13<br>(0.07 to<br>7.66) | 0.84<br>(0.06 to<br>2.54) | 2.93<br>(0.07 to<br>10.70) |

| Marshall Islands                                      |                                                     |                                                    |                                                   |                                                    |                                                |                                                |                                                |                                                |
|-------------------------------------------------------|-----------------------------------------------------|----------------------------------------------------|---------------------------------------------------|----------------------------------------------------|------------------------------------------------|------------------------------------------------|------------------------------------------------|------------------------------------------------|
| Cause                                                 | YLLs (actual counts)                                |                                                    |                                                   |                                                    | Deaths (actual counts)                         |                                                |                                                |                                                |
|                                                       | 2016                                                | 2040 Forecast                                      | 2040 Better Scenario                              | 2040 Worse Scenario                                | 2016                                           | 2040 Forecast                                  | 2040 Better Scenario                           | 2040 Worse Scenario                            |
| Varicella and herpes zoster                           | 9.66<br>(4.60 to<br>18.45)                          | 4.75<br>(1.93 to<br>10.31)                         | 2.50<br>(1.21 to<br>4.87)                         | 5.65<br>(2.22 to<br>12.13)                         | 0.15<br>(0.09 to<br>0.25)                      | 0.10<br>(0.05 to<br>0.16)                      | 0.06<br>(0.04 to<br>0.10)                      | 0.10<br>(0.06 to<br>0.19)                      |
| <b>Neglected tropical diseases and malaria</b>        | <b>7.78</b><br><b>(4.65 to</b><br><b>12.14)</b>     | <b>25.70</b><br><b>(15.55 to</b><br><b>38.74)</b>  | <b>24.57</b><br><b>(14.86 to</b><br><b>36.67)</b> | <b>26.02</b><br><b>(15.69 to</b><br><b>39.34)</b>  | <b>0.18</b><br><b>(0.12 to</b><br><b>0.26)</b> | <b>0.82</b><br><b>(0.54 to</b><br><b>1.17)</b> | <b>0.87</b><br><b>(0.58 to</b><br><b>1.22)</b> | <b>0.78</b><br><b>(0.51 to</b><br><b>1.12)</b> |
| Malaria                                               | 0.00<br>(0.00 to<br>0.00)                           | 0.00<br>(0.00 to<br>0.00)                          | 0.00<br>(0.00 to<br>0.00)                         | 0.00<br>(0.00 to<br>0.00)                          | 0.00<br>(0.00 to<br>0.00)                      | 0.00<br>(0.00 to<br>0.00)                      | 0.00<br>(0.00 to<br>0.00)                      | 0.00<br>(0.00 to<br>0.00)                      |
| Chagas disease                                        | 0.00<br>(0.00 to<br>0.00)                           | 0.00<br>(0.00 to<br>0.00)                          | 0.00<br>(0.00 to<br>0.00)                         | 0.00<br>(0.00 to<br>0.00)                          | 0.00<br>(0.00 to<br>0.00)                      | 0.00<br>(0.00 to<br>0.00)                      | 0.00<br>(0.00 to<br>0.00)                      | 0.00<br>(0.00 to<br>0.00)                      |
| Leishmaniasis                                         | 0.00<br>(0.00 to<br>0.00)                           | 0.00<br>(0.00 to<br>0.00)                          | 0.00<br>(0.00 to<br>0.00)                         | 0.00<br>(0.00 to<br>0.00)                          | 0.00<br>(0.00 to<br>0.00)                      | 0.00<br>(0.00 to<br>0.00)                      | 0.00<br>(0.00 to<br>0.00)                      | 0.00<br>(0.00 to<br>0.00)                      |
| African trypanosomiasis                               | 0.00<br>(0.00 to<br>0.00)                           | 0.00<br>(0.00 to<br>0.00)                          | 0.00<br>(0.00 to<br>0.00)                         | 0.00<br>(0.00 to<br>0.00)                          | 0.00<br>(0.00 to<br>0.00)                      | 0.00<br>(0.00 to<br>0.00)                      | 0.00<br>(0.00 to<br>0.00)                      | 0.00<br>(0.00 to<br>0.00)                      |
| Schistosomiasis                                       | 0.00<br>(0.00 to<br>0.00)                           | 0.00<br>(0.00 to<br>0.00)                          | 0.00<br>(0.00 to<br>0.00)                         | 0.00<br>(0.00 to<br>0.00)                          | 0.00<br>(0.00 to<br>0.00)                      | 0.00<br>(0.00 to<br>0.00)                      | 0.00<br>(0.00 to<br>0.00)                      | 0.00<br>(0.00 to<br>0.00)                      |
| Cysticercosis                                         | 0.00<br>(0.00 to<br>0.00)                           | 0.00<br>(0.00 to<br>0.00)                          | 0.00<br>(0.00 to<br>0.00)                         | 0.00<br>(0.00 to<br>0.00)                          | 0.00<br>(0.00 to<br>0.00)                      | 0.00<br>(0.00 to<br>0.00)                      | 0.00<br>(0.00 to<br>0.00)                      | 0.00<br>(0.00 to<br>0.00)                      |
| Cystic echinococcosis                                 | 0.00<br>(0.00 to<br>0.00)                           | 0.00<br>(0.00 to<br>0.00)                          | 0.00<br>(0.00 to<br>0.00)                         | 0.00<br>(0.00 to<br>0.00)                          | 0.00<br>(0.00 to<br>0.00)                      | 0.00<br>(0.00 to<br>0.00)                      | 0.00<br>(0.00 to<br>0.00)                      | 0.00<br>(0.00 to<br>0.00)                      |
| Dengue                                                | 3.30<br>(1.09 to<br>6.18)                           | 18.70<br>(8.06 to<br>31.78)                        | 18.79<br>(8.33 to<br>31.01)                       | 18.63<br>(7.97 to<br>32.03)                        | 0.07<br>(0.03 to<br>0.14)                      | 0.58<br>(0.27 to<br>0.95)                      | 0.64<br>(0.32 to<br>1.03)                      | 0.54<br>(0.25 to<br>0.90)                      |
| Yellow fever                                          | 0.00<br>(0.00 to<br>0.00)                           | 0.00<br>(0.00 to<br>0.00)                          | 0.00<br>(0.00 to<br>0.00)                         | 0.00<br>(0.00 to<br>0.00)                          | 0.00<br>(0.00 to<br>0.00)                      | 0.00<br>(0.00 to<br>0.00)                      | 0.00<br>(0.00 to<br>0.00)                      | 0.00<br>(0.00 to<br>0.00)                      |
| Rabies                                                | 0.03<br>(0.01 to<br>0.06)                           | 0.02<br>(0.01 to<br>0.06)                          | 0.01<br>(0.00 to<br>0.03)                         | 0.03<br>(0.01 to<br>0.06)                          | 0.00<br>(0.00 to<br>0.00)                      | 0.00<br>(0.00 to<br>0.00)                      | 0.00<br>(0.00 to<br>0.00)                      | 0.00<br>(0.00 to<br>0.00)                      |
| Intestinal nematode infections                        | 1.10<br>(0.21 to<br>3.00)                           | 1.46<br>(0.38 to<br>3.37)                          | 1.26<br>(0.37 to<br>2.79)                         | 1.60<br>(0.38 to<br>3.77)                          | 0.02<br>(0.00 to<br>0.04)                      | 0.02<br>(0.01 to<br>0.05)                      | 0.02<br>(0.01 to<br>0.04)                      | 0.03<br>(0.01 to<br>0.05)                      |
| Other neglected tropical diseases                     | 3.36<br>(2.07 to<br>5.37)                           | 5.51<br>(2.97 to<br>8.77)                          | 4.50<br>(2.22 to<br>7.17)                         | 5.76<br>(3.14 to<br>9.18)                          | 0.09<br>(0.06 to<br>0.12)                      | 0.22<br>(0.11 to<br>0.35)                      | 0.21<br>(0.10 to<br>0.34)                      | 0.21<br>(0.11 to<br>0.33)                      |
| <b>Maternal disorders</b>                             | <b>128.42</b><br><b>(84.87 to</b><br><b>192.93)</b> | <b>81.98</b><br><b>(51.43 to</b><br><b>147.63)</b> | <b>43.01</b><br><b>(16.06 to</b><br><b>80.02)</b> | <b>96.64</b><br><b>(37.55 to</b><br><b>179.48)</b> | <b>2.36</b><br><b>(1.54 to</b><br><b>3.54)</b> | <b>1.54</b><br><b>(0.61 to</b><br><b>2.74)</b> | <b>0.81</b><br><b>(0.31 to</b><br><b>1.48)</b> | <b>1.82</b><br><b>(0.72 to</b><br><b>3.33)</b> |
| Maternal hemorrhage                                   | 41.75<br>(24.20 to<br>67.66)                        | 25.24<br>(9.10 to<br>47.71)                        | 13.22<br>(4.64 to<br>25.63)                       | 29.60<br>(10.56 to<br>58.07)                       | 0.76<br>(0.44 to<br>1.23)                      | 0.47<br>(0.17 to<br>0.91)                      | 0.25<br>(0.09 to<br>0.48)                      | 0.55<br>(0.20 to<br>1.08)                      |
| Maternal sepsis and other maternal infections         | 13.47<br>(5.95 to<br>24.64)                         | 7.92<br>(2.33 to<br>16.99)                         | 4.12<br>(1.16 to<br>9.12)                         | 9.30<br>(2.71 to<br>21.10)                         | 0.25<br>(0.11 to<br>0.47)                      | 0.15<br>(0.05 to<br>0.33)                      | 0.08<br>(0.02 to<br>0.18)                      | 0.18<br>(0.05 to<br>0.40)                      |
| Maternal hypertensive disorders                       | 18.21<br>(9.83 to<br>30.76)                         | 11.81<br>(3.85 to<br>23.67)                        | 6.14<br>(1.86 to<br>12.82)                        | 13.86<br>(4.39 to<br>30.05)                        | 0.33<br>(0.18 to<br>0.56)                      | 0.22<br>(0.07 to<br>0.44)                      | 0.12<br>(0.04 to<br>0.24)                      | 0.26<br>(0.09 to<br>0.56)                      |
| Maternal obstructed labor and uterine rupture         | 9.21<br>(3.92 to<br>18.21)                          | 6.29<br>(1.81 to<br>14.98)                         | 3.15<br>(0.86 to<br>7.73)                         | 7.45<br>(1.95 to<br>18.06)                         | 0.17<br>(0.07 to<br>0.33)                      | 0.12<br>(0.03 to<br>0.27)                      | 0.06<br>(0.02 to<br>0.14)                      | 0.14<br>(0.04 to<br>0.34)                      |
| Maternal abortion, miscarriage, and ectopic pregnancy | 4.98<br>(1.75 to<br>10.23)                          | 3.65<br>(1.05 to<br>8.53)                          | 1.91<br>(0.53 to<br>4.66)                         | 4.33<br>(1.27 to<br>10.32)                         | 0.09<br>(0.03 to<br>0.19)                      | 0.07<br>(0.02 to<br>0.16)                      | 0.04<br>(0.01 to<br>0.09)                      | 0.08<br>(0.02 to<br>0.20)                      |

|                                        |                              |                             |                            |                             |                           |                           |                           |                           |
|----------------------------------------|------------------------------|-----------------------------|----------------------------|-----------------------------|---------------------------|---------------------------|---------------------------|---------------------------|
| Indirect maternal deaths               | 13.76<br>(7.05 to<br>23.84)  | 9.69<br>(3.20 to<br>19.54)  | 5.09<br>(1.64 to<br>10.54) | 11.57<br>(3.67 to<br>23.61) | 0.25<br>(0.13 to<br>0.43) | 0.18<br>(0.06 to<br>0.36) | 0.09<br>(0.03 to<br>0.20) | 0.21<br>(0.07 to<br>0.44) |
| Late maternal deaths                   | 5.52<br>(2.29 to<br>11.01)   | 2.97<br>(0.85 to<br>6.77)   | 1.54<br>(0.40 to<br>3.68)  | 3.53<br>(0.99 to<br>8.27)   | 0.10<br>(0.04 to<br>0.20) | 0.06<br>(0.02 to<br>0.13) | 0.03<br>(0.01 to<br>0.07) | 0.07<br>(0.02 to<br>0.16) |
| Maternal deaths aggravated by HIV/AIDS | 0.06<br>(0.00 to<br>0.30)    | 0.47<br>(0.00 to<br>3.07)   | 0.25<br>(0.00 to<br>1.76)  | 0.57<br>(0.01 to<br>3.56)   | 0.00<br>(0.00 to<br>0.01) | 0.01<br>(0.00 to<br>0.06) | 0.00<br>(0.00 to<br>0.03) | 0.01<br>(0.00 to<br>0.07) |
| Other maternal disorders               | 21.46<br>(11.03 to<br>36.91) | 13.94<br>(4.80 to<br>27.86) | 7.59<br>(2.52 to<br>15.76) | 16.42<br>(5.70 to<br>33.54) | 0.39<br>(0.20 to<br>0.66) | 0.26<br>(0.09 to<br>0.52) | 0.14<br>(0.05 to<br>0.29) | 0.31<br>(0.11 to<br>0.61) |

| Marshall Islands                                                        |                                         |                                       |                                     |                                         |                                 |                                |                               |                                 |
|-------------------------------------------------------------------------|-----------------------------------------|---------------------------------------|-------------------------------------|-----------------------------------------|---------------------------------|--------------------------------|-------------------------------|---------------------------------|
| Cause                                                                   | YLLs (actual counts)                    |                                       |                                     |                                         | Deaths (actual counts)          |                                |                               |                                 |
|                                                                         | 2016                                    | 2040 Forecast                         | 2040 Better Scenario                | 2040 Worse Scenario                     | 2016                            | 2040 Forecast                  | 2040 Better Scenario          | 2040 Worse Scenario             |
| <b>Neonatal disorders</b>                                               | <b>1,550.94</b><br>(762.20 to 2,668.79) | <b>754.74</b><br>(334.58 to 1,402.81) | <b>384.83</b><br>(171.68 to 715.40) | <b>1,003.43</b><br>(445.57 to 1,906.96) | <b>17.92</b><br>(8.81 to 30.84) | <b>8.73</b><br>(3.87 to 16.22) | <b>4.45</b><br>(1.99 to 8.27) | <b>11.60</b><br>(5.16 to 22.05) |
| Neonatal preterm birth                                                  | 769.24<br>(359.04 to 1,404.53)          | 346.64<br>(145.11 to 669.44)          | 164.89<br>(68.89 to 321.72)         | 466.18<br>(196.09 to 893.02)            | 8.89<br>(4.15 to 16.23)         | 4.01<br>(1.68 to 7.74)         | 1.91<br>(0.80 to 3.72)        | 5.39<br>(2.27 to 10.32)         |
| Neonatal encephalopathy due to birth asphyxia and trauma                | 342.11<br>(148.68 to 657.60)            | 156.47<br>(59.36 to 327.37)           | 88.95<br>(33.56 to 188.31)          | 203.63<br>(76.60 to 429.34)             | 3.96<br>(1.72 to 7.60)          | 1.81<br>(0.69 to 3.78)         | 1.03<br>(0.39 to 2.18)        | 2.36<br>(0.89 to 4.97)          |
| Neonatal sepsis and other neonatal infections                           | 158.60<br>(71.73 to 318.06)             | 102.02<br>(41.33 to 215.56)           | 56.48<br>(23.02 to 119.89)          | 133.45<br>(54.21 to 281.13)             | 1.83<br>(0.83 to 3.68)          | 1.18<br>(0.48 to 2.49)         | 0.65<br>(0.27 to 1.39)        | 1.54<br>(0.63 to 3.25)          |
| Hemolytic disease and other neonatal jaundice                           | 14.41<br>(6.19 to 30.02)                | 4.86<br>(1.52 to 12.27)               | 2.47<br>(0.76 to 6.06)              | 6.52<br>(2.10 to 16.44)                 | 0.17<br>(0.07 to 0.35)          | 0.06<br>(0.02 to 0.14)         | 0.03<br>(0.01 to 0.07)        | 0.08<br>(0.02 to 0.19)          |
| Other neonatal disorders                                                | 266.57<br>(119.67 to 533.18)            | 144.75<br>(57.44 to 321.34)           | 72.05<br>(29.15 to 159.80)          | 193.66<br>(77.11 to 427.15)             | 3.08<br>(1.38 to 6.16)          | 1.67<br>(0.66 to 3.72)         | 0.83<br>(0.34 to 1.85)        | 2.24<br>(0.89 to 4.95)          |
| <b>Nutritional deficiencies</b>                                         | <b>124.67</b><br>(68.75 to 238.88)      | <b>54.36</b><br>(34.40 to 94.21)      | <b>36.20</b><br>(25.10 to 56.95)    | <b>62.06</b><br>(37.11 to 109.99)       | <b>2.35</b><br>(1.63 to 3.63)   | <b>1.82</b><br>(1.36 to 2.46)  | <b>1.87</b><br>(1.21 to 2.01) | <b>1.81</b><br>(1.30 to 2.55)   |
| Protein-energy malnutrition                                             | 121.58<br>(65.69 to 236.22)             | 50.63<br>(31.40 to 88.57)             | 33.52<br>(23.07 to 53.27)           | 57.98<br>(34.22 to 105.29)              | 2.27<br>(1.58 to 3.56)          | 1.70<br>(1.23 to 2.33)         | 1.47<br>(1.12 to 1.92)        | 1.69<br>(1.20 to 2.41)          |
| Iodine deficiency                                                       | 0.81<br>(0.05 to 3.50)                  | 1.72<br>(0.05 to 7.57)                | 1.96<br>(0.03 to 4.30)              | 1.96<br>(0.06 to 9.41)                  | 0.02<br>(0.00 to 0.06)          | 0.06<br>(0.00 to 0.21)         | 0.05<br>(0.00 to 0.18)        | 0.06<br>(0.00 to 0.21)          |
| Dietary iron deficiency                                                 | 0.60<br>(0.43 to 0.84)                  | 0.53<br>(0.34 to 0.90)                | 0.42<br>(0.27 to 0.73)              | 0.57<br>(0.35 to 0.95)                  | 0.01<br>(0.01 to 0.02)          | 0.01<br>(0.01 to 0.05)         | 0.01<br>(0.01 to 0.02)        | 0.01<br>(0.01 to 0.05)          |
| Other nutritional deficiencies                                          | 1.67<br>(1.18 to 2.40)                  | 1.49<br>(1.01 to 2.14)                | 1.16<br>(0.80 to 1.68)              | 1.56<br>(1.07 to 2.26)                  | 0.05<br>(0.03 to 0.07)          | 0.05<br>(0.04 to 0.08)         | 0.05<br>(0.03 to 0.07)        | 0.05<br>(0.04 to 0.08)          |
| <b>Other communicable, maternal, neonatal, and nutritional diseases</b> | <b>345.21</b><br>(165.70 to 643.93)     | <b>147.42</b><br>(97.09 to 229.00)    | <b>104.61</b><br>(70.69 to 156.41)  | <b>164.50</b><br>(103.07 to 260.15)     | <b>4.97</b><br>(2.83 to 8.53)   | <b>3.04</b><br>(2.20 to 4.12)  | <b>2.33</b><br>(1.70 to 3.17) | <b>3.25</b><br>(2.25 to 4.61)   |
| Sexually transmitted infections excluding HIV                           | 230.76<br>(68.76 to 508.63)             | 41.66<br>(12.27 to 98.97)             | 26.55<br>(9.01 to 60.34)            | 50.00<br>(14.07 to 119.91)              | 2.78<br>(0.87 to 6.01)          | 0.56<br>(0.20 to 1.23)         | 0.37<br>(0.15 to 0.79)        | 0.66<br>(0.22 to 1.49)          |
| Syphilis                                                                | 224.18<br>(62.97 to 504.81)             | 36.34<br>(7.58 to 94.98)              | 22.19<br>(4.99 to 55.70)            | 44.44<br>(9.13 to 114.78)               | 2.64<br>(0.76 to 5.90)          | 0.44<br>(0.10 to 1.15)         | 0.27<br>(0.07 to 0.66)        | 0.54<br>(0.12 to 1.36)          |
| Chlamydial infection                                                    | 1.29<br>(0.64 to 2.02)                  | 1.03<br>(0.43 to 1.79)                | 0.85<br>(0.36 to 1.48)              | 1.08<br>(0.46 to 1.85)                  | 0.03<br>(0.01 to 0.04)          | 0.02<br>(0.01 to 0.04)         | 0.02<br>(0.01 to 0.04)        | 0.02<br>(0.01 to 0.04)          |
| Gonococcal infection                                                    | 3.37<br>(1.68 to 5.33)                  | 2.74<br>(1.14 to 4.79)                | 2.26<br>(0.95 to 3.98)              | 2.86<br>(1.22 to 4.98)                  | 0.07<br>(0.04 to 0.11)          | 0.06<br>(0.03 to 0.11)         | 0.05<br>(0.02 to 0.09)        | 0.06<br>(0.03 to 0.11)          |
| Other sexually transmitted infections                                   | 1.91<br>(0.97 to 3.02)                  | 1.54<br>(0.67 to 2.67)                | 1.26<br>(0.55 to 2.17)              | 1.62<br>(0.71 to 2.78)                  | 0.04<br>(0.02 to 0.06)          | 0.03<br>(0.01 to 0.06)         | 0.03<br>(0.01 to 0.05)        | 0.04<br>(0.02 to 0.06)          |
| Acute hepatitis                                                         | 39.79<br>(30.62 to 50.58)               | 32.01<br>(22.02 to 45.07)             | 24.93<br>(16.76 to 35.68)           | 33.87<br>(22.61 to 48.14)               | 0.83<br>(0.64 to 1.04)          | 0.77<br>(0.54 to 1.06)         | 0.61<br>(0.42 to 0.87)        | 0.80<br>(0.55 to 1.11)          |
| Acute hepatitis A                                                       | 1.62<br>(0.92 to 2.76)                  | 0.73<br>(0.40 to 1.29)                | 0.52<br>(0.29 to 0.87)              | 0.81<br>(0.44 to 1.46)                  | 0.02<br>(0.01 to 0.04)          | 0.01<br>(0.01 to 0.02)         | 0.01<br>(0.01 to 0.02)        | 0.02<br>(0.01 to 0.02)          |
| Acute hepatitis B                                                       | 30.26<br>(23.10 to 38.99)               | 27.11<br>(18.35 to 38.71)             | 21.18<br>(14.05 to 30.88)           | 28.51<br>(19.01 to 41.57)               | 0.68<br>(0.52 to 0.87)          | 0.67<br>(0.46 to 0.94)         | 0.53<br>(0.36 to 0.76)        | 0.69<br>(0.47 to 1.00)          |

|                                       |                                                               |                                                               |                                                               |                                                               |                                                      |                                                      |                                                      |                                                      |
|---------------------------------------|---------------------------------------------------------------|---------------------------------------------------------------|---------------------------------------------------------------|---------------------------------------------------------------|------------------------------------------------------|------------------------------------------------------|------------------------------------------------------|------------------------------------------------------|
|                                       | 0.68<br>(0.42 to<br>1.01)                                     | 0.58<br>(0.36 to<br>0.91)                                     | 0.51<br>(0.32 to<br>0.80)                                     | 0.59<br>(0.36 to<br>0.94)                                     | 0.01<br>(0.01 to<br>0.02)                            | 0.02<br>(0.01 to<br>0.02)                            | 0.01<br>(0.01 to<br>0.02)                            | 0.02<br>(0.01 to<br>0.02)                            |
| Acute hepatitis C                     |                                                               |                                                               |                                                               |                                                               |                                                      |                                                      |                                                      |                                                      |
|                                       | 7.24<br>(4.34 to<br>11.26)                                    | 3.60<br>(1.91 to<br>6.09)                                     | 2.72<br>(1.49 to<br>4.53)                                     | 3.95<br>(2.05 to<br>6.76)                                     | 0.11<br>(0.07 to<br>0.16)                            | 0.07<br>(0.04 to<br>0.11)                            | 0.06<br>(0.03 to<br>0.09)                            | 0.07<br>(0.04 to<br>0.12)                            |
| Acute hepatitis E                     |                                                               |                                                               |                                                               |                                                               |                                                      |                                                      |                                                      |                                                      |
|                                       | 74.66<br>(43.57 to<br>170.17)                                 | 73.76<br>(47.51 to<br>117.19)                                 | 53.13<br>(34.83 to<br>83.48)                                  | 80.63<br>(50.77 to<br>127.93)                                 | 1.37<br>(0.90 to<br>2.47)                            | 1.71<br>(1.20 to<br>2.54)                            | 1.34<br>(0.94 to<br>1.95)                            | 1.79<br>(1.22 to<br>2.65)                            |
| Other unspecified infectious diseases |                                                               |                                                               |                                                               |                                                               |                                                      |                                                      |                                                      |                                                      |
| <b>Non-communicable diseases</b>      | <b>12,893.79</b><br><b>(10,950.25 to</b><br><b>14,957.55)</b> | <b>19,142.63</b><br><b>(14,849.33 to</b><br><b>24,282.81)</b> | <b>13,347.17</b><br><b>(10,443.50 to</b><br><b>17,134.85)</b> | <b>22,685.69</b><br><b>(17,615.44 to</b><br><b>28,555.34)</b> | <b>429.27</b><br><b>(368.84 to</b><br><b>492.08)</b> | <b>738.98</b><br><b>(629.13 to</b><br><b>870.55)</b> | <b>553.06</b><br><b>(469.30 to</b><br><b>653.27)</b> | <b>844.72</b><br><b>(712.55 to</b><br><b>988.09)</b> |

| Marshall Islands                     |                                       |                                       |                                       |                                       |                              |                              |                              |                               |
|--------------------------------------|---------------------------------------|---------------------------------------|---------------------------------------|---------------------------------------|------------------------------|------------------------------|------------------------------|-------------------------------|
| Cause                                | YLLs (actual counts)                  |                                       |                                       |                                       | Deaths (actual counts)       |                              |                              |                               |
|                                      | 2016                                  | 2040 Forecast                         | 2040 Better Scenario                  | 2040 Worse Scenario                   | 2016                         | 2040 Forecast                | 2040 Better Scenario         | 2040 Worse Scenario           |
| Neoplasms                            | 1,279.04<br>(1,012.31 to<br>1,548.85) | 1,994.97<br>(1,386.03 to<br>2,762.21) | 1,831.12<br>(1,314.61 to<br>2,463.62) | 2,223.17<br>(1,507.30 to<br>3,163.78) | 39.06<br>(31.03 to<br>46.87) | 69.81<br>(50.30 to<br>95.93) | 68.01<br>(50.78 to<br>90.12) | 75.48<br>(52.39 to<br>107.38) |
| Lip and oral cavity cancer           | 20.64<br>(15.64 to<br>27.36)          | 37.32<br>(19.46 to<br>70.66)          | 24.59<br>(14.67 to<br>41.85)          | 46.64<br>(22.61 to<br>91.74)          | 0.68<br>(0.53 to<br>0.87)    | 1.29<br>(0.74 to<br>2.28)    | 0.92<br>(0.60 to<br>1.46)    | 1.56<br>(0.82 to<br>2.94)     |
| Nasopharynx cancer                   | 18.24<br>(12.07 to<br>26.67)          | 40.34<br>(16.43 to<br>89.44)          | 23.66<br>(10.94 to<br>47.61)          | 52.17<br>(19.79 to<br>120.21)         | 0.54<br>(0.37 to<br>0.79)    | 1.24<br>(0.54 to<br>2.66)    | 0.76<br>(0.38 to<br>1.47)    | 1.58<br>(0.64 to<br>3.50)     |
| Other pharynx cancer                 | 15.62<br>(8.72 to<br>22.74)           | 21.28<br>(10.68 to<br>37.22)          | 17.11<br>(9.23 to<br>27.82)           | 22.60<br>(11.96 to<br>40.32)          | 0.50<br>(0.29 to<br>0.72)    | 0.75<br>(0.40 to<br>1.27)    | 0.64<br>(0.36 to<br>1.00)    | 0.78<br>(0.40 to<br>1.33)     |
| Esophageal cancer                    | 18.93<br>(14.24 to<br>24.78)          | 33.47<br>(16.44 to<br>65.44)          | 22.27<br>(12.68 to<br>40.48)          | 41.52<br>(19.01 to<br>84.52)          | 0.67<br>(0.52 to<br>0.86)    | 1.23<br>(0.64 to<br>2.31)    | 0.87<br>(0.53 to<br>1.50)    | 1.48<br>(0.73 to<br>2.93)     |
| Stomach cancer                       | 97.17<br>(79.00 to<br>118.50)         | 106.75<br>(81.42 to<br>137.66)        | 95.62<br>(73.72 to<br>120.38)         | 111.78<br>(83.49 to<br>148.05)        | 3.26<br>(2.71 to<br>3.90)    | 3.97<br>(3.17 to<br>4.95)    | 3.78<br>(3.01 to<br>4.63)    | 4.02<br>(3.15 to<br>5.16)     |
| Colon and rectum cancer              | 89.60<br>(64.25 to<br>119.03)         | 172.89<br>(97.28 to<br>291.82)        | 179.86<br>(103.72 to<br>297.56)       | 173.66<br>(97.58 to<br>296.48)        | 3.09<br>(2.27 to<br>4.09)    | 6.68<br>(3.94 to<br>11.33)   | 7.41<br>(4.47 to<br>12.40)   | 6.48<br>(3.82 to<br>11.14)    |
| Liver cancer                         | 91.17<br>(68.97 to<br>119.21)         | 173.86<br>(104.70 to<br>281.16)       | 153.52<br>(97.52 to<br>237.61)        | 216.10<br>(119.34 to<br>374.80)       | 2.95<br>(2.29 to<br>3.82)    | 6.08<br>(3.78 to<br>9.53)    | 5.69<br>(3.75 to<br>8.54)    | 7.26<br>(4.21 to<br>12.06)    |
| Liver cancer due to hepatitis B      | 52.38<br>(39.28 to<br>70.22)          | 95.92<br>(57.11 to<br>154.94)         | 85.25<br>(53.11 to<br>131.02)         | 119.19<br>(65.67 to<br>204.37)        | 1.61<br>(1.22 to<br>2.13)    | 3.17<br>(2.00 to<br>4.90)    | 2.97<br>(1.96 to<br>4.41)    | 3.81<br>(2.23 to<br>6.30)     |
| Liver cancer due to hepatitis C      | 11.62<br>(8.68 to<br>15.45)           | 23.29<br>(14.37 to<br>36.49)          | 21.79<br>(14.13 to<br>33.27)          | 27.79<br>(16.33 to<br>46.37)          | 0.46<br>(0.35 to<br>0.61)    | 1.00<br>(0.66 to<br>1.50)    | 1.00<br>(0.68 to<br>1.45)    | 1.13<br>(0.70 to<br>1.78)     |
| Liver cancer due to alcohol use      | 6.55<br>(4.80 to<br>9.02)             | 13.68<br>(7.98 to<br>23.30)           | 11.22<br>(6.99 to<br>18.58)           | 17.32<br>(9.44 to<br>30.93)           | 0.23<br>(0.18 to<br>0.32)    | 0.50<br>(0.31 to<br>0.82)    | 0.44<br>(0.29 to<br>0.68)    | 0.61<br>(0.35 to<br>1.09)     |
| Liver cancer due to other causes     | 20.61<br>(15.30 to<br>28.26)          | 40.98<br>(21.31 to<br>77.59)          | 35.27<br>(19.66 to<br>64.02)          | 51.80<br>(24.40 to<br>102.80)         | 0.65<br>(0.49 to<br>0.89)    | 1.40<br>(0.74 to<br>2.64)    | 1.28<br>(0.71 to<br>2.32)    | 1.71<br>(0.82 to<br>3.35)     |
| Gallbladder and biliary tract cancer | 8.99<br>(6.37 to<br>12.89)            | 10.16<br>(7.33 to<br>14.27)           | 11.18<br>(8.01 to<br>15.80)           | 9.60<br>(7.01 to<br>13.42)            | 0.34<br>(0.25 to<br>0.47)    | 0.42<br>(0.32 to<br>0.57)    | 0.49<br>(0.36 to<br>0.66)    | 0.39<br>(0.29 to<br>0.52)     |
| Pancreatic cancer                    | 29.86<br>(23.47 to<br>37.05)          | 62.21<br>(38.00 to<br>98.84)          | 65.51<br>(41.49 to<br>102.73)         | 63.04<br>(38.29 to<br>102.25)         | 1.15<br>(0.92 to<br>1.41)    | 2.55<br>(1.61 to<br>4.05)    | 2.83<br>(1.83 to<br>4.44)    | 2.50<br>(1.56 to<br>4.00)     |
| Larynx cancer                        | 15.42<br>(11.65 to<br>19.38)          | 23.23<br>(11.25 to<br>45.96)          | 13.84<br>(7.56 to<br>24.81)           | 31.03<br>(14.36 to<br>61.37)          | 0.52<br>(0.41 to<br>0.64)    | 0.84<br>(0.65 to<br>1.65)    | 0.52<br>(0.30 to<br>0.92)    | 1.10<br>(0.53 to<br>2.17)     |
| Tracheal, bronchus, and lung cancer  | 164.45<br>(108.07 to<br>230.48)       | 302.18<br>(119.16 to<br>639.05)       | 214.71<br>(96.97 to<br>421.35)        | 419.17<br>(161.05 to<br>892.65)       | 5.84<br>(3.95 to<br>8.03)    | 11.41<br>(4.90 to<br>23.78)  | 8.41<br>(4.06 to<br>16.36)   | 15.50<br>(6.39 to<br>32.59)   |
| Malignant skin melanoma              | 6.92<br>(4.88 to<br>10.83)            | 11.92<br>(8.64 to<br>18.28)           | 14.55<br>(10.37 to<br>23.19)          | 11.04<br>(8.06 to<br>16.76)           | 0.23<br>(0.17 to<br>0.36)    | 0.44<br>(0.33 to<br>0.66)    | 0.57<br>(0.43 to<br>0.87)    | 0.40<br>(0.30 to<br>0.58)     |
| Non-melanoma skin cancer             | 10.67<br>(6.97 to<br>15.03)           | 19.46<br>(12.98 to<br>26.59)          | 18.91<br>(12.52 to<br>26.04)          | 18.92<br>(12.68 to<br>25.93)          | 0.39<br>(0.27 to<br>0.53)    | 0.81<br>(0.57 to<br>1.04)    | 0.85<br>(0.61 to<br>1.10)    | 0.75<br>(0.53 to<br>0.98)     |
| Breast cancer                        | 147.47<br>(71.97 to<br>243.10)        | 223.30<br>(93.24 to<br>427.84)        | 220.55<br>(93.87 to<br>418.54)        | 233.40<br>(95.68 to<br>458.94)        | 4.41<br>(2.22 to<br>7.10)    | 7.51<br>(3.38 to<br>13.84)   | 7.78<br>(3.56 to<br>14.12)   | 7.62<br>(3.34 to<br>14.39)    |
| Cervical cancer                      | 79.48<br>(42.62 to<br>118.30)         | 91.76<br>(45.72 to<br>149.65)         | 80.09<br>(40.18 to<br>130.03)         | 95.36<br>(46.71 to<br>157.89)         | 2.26<br>(1.25 to<br>3.29)    | 2.81<br>(1.50 to<br>4.34)    | 2.52<br>(1.36 to<br>3.88)    | 2.87<br>(1.48 to<br>4.54)     |

|                   |                              |                               |                               |                              |                           |                           |                           |                           |
|-------------------|------------------------------|-------------------------------|-------------------------------|------------------------------|---------------------------|---------------------------|---------------------------|---------------------------|
|                   | 32.34<br>(21.57 to<br>44.16) | 48.24<br>(31.27 to<br>68.59)  | 42.29<br>(26.99 to<br>60.47)  | 48.52<br>(30.98 to<br>69.04) | 1.09<br>(0.75 to<br>1.45) | 1.79<br>(1.22 to<br>2.43) | 1.63<br>(1.10 to<br>2.23) | 1.77<br>(1.22 to<br>2.40) |
| Uterine cancer    |                              |                               |                               |                              |                           |                           |                           |                           |
|                   | 14.69<br>(9.44 to<br>24.94)  | 25.90<br>(12.72 to<br>49.83)  | 29.46<br>(14.35 to<br>56.34)  | 25.80<br>(12.58 to<br>50.55) | 0.49<br>(0.32 to<br>0.80) | 0.95<br>(0.49 to<br>1.81) | 1.12<br>(0.57 to<br>2.10) | 0.93<br>(0.48 to<br>1.78) |
| Ovarian cancer    |                              |                               |                               |                              |                           |                           |                           |                           |
|                   | 31.63<br>(23.75 to<br>44.14) | 78.05<br>(58.72 to<br>107.34) | 94.06<br>(72.81 to<br>129.10) | 70.87<br>(52.68 to<br>99.58) | 1.72<br>(1.31 to<br>2.33) | 4.59<br>(3.40 to<br>6.25) | 5.86<br>(4.50 to<br>7.92) | 4.04<br>(2.92 to<br>5.63) |
| Prostate cancer   |                              |                               |                               |                              |                           |                           |                           |                           |
|                   | 5.02<br>(3.50 to<br>6.63)    | 6.11<br>(4.12 to<br>8.38)     | 5.65<br>(3.80 to<br>7.73)     | 6.18<br>(4.19 to<br>8.49)    | 0.10<br>(0.07 to<br>0.14) | 0.14<br>(0.10 to<br>0.18) | 0.13<br>(0.09 to<br>0.17) | 0.14<br>(0.10 to<br>0.18) |
| Testicular cancer |                              |                               |                               |                              |                           |                           |                           |                           |



| Marshall Islands                |                                                  |                                                  |                                                  |                                                  |                                            |                                            |                                           |                                            |
|---------------------------------|--------------------------------------------------|--------------------------------------------------|--------------------------------------------------|--------------------------------------------------|--------------------------------------------|--------------------------------------------|-------------------------------------------|--------------------------------------------|
| Cause                           | YLLs (actual counts)                             |                                                  |                                                  |                                                  | Deaths (actual counts)                     |                                            |                                           |                                            |
|                                 | 2016                                             | 2040 Forecast                                    | 2040 Better Scenario                             | 2040 Worse Scenario                              | 2016                                       | 2040 Forecast                              | 2040 Better Scenario                      | 2040 Worse Scenario                        |
| Kidney cancer                   | 11.08<br>(8.54 to 14.34)                         | 20.95<br>(14.10 to 30.79)                        | 22.80<br>(15.83 to 32.30)                        | 21.28<br>(13.99 to 32.68)                        | 0.32<br>(0.25 to 0.42)                     | 0.71<br>(0.52 to 1.01)                     | 0.83<br>(0.61 to 1.14)                    | 0.70<br>(0.49 to 1.04)                     |
| Bladder cancer                  | 11.28<br>(7.87 to 16.24)                         | 18.83<br>(9.58 to 35.71)                         | 17.46<br>(9.25 to 31.81)                         | 20.08<br>(9.94 to 39.20)                         | 0.45<br>(0.33 to 0.64)                     | 0.81<br>(0.43 to 1.52)                     | 0.81<br>(0.45 to 1.45)                    | 0.83<br>(0.43 to 1.63)                     |
| Brain and nervous system cancer | 38.05<br>(29.55 to 52.44)                        | 54.85<br>(42.72 to 75.91)                        | 55.87<br>(43.53 to 77.78)                        | 54.96<br>(42.65 to 75.51)                        | 0.80<br>(0.63 to 1.10)                     | 1.37<br>(1.11 to 1.88)                     | 1.49<br>(1.21 to 2.04)                    | 1.33<br>(1.08 to 1.80)                     |
| Thyroid cancer                  | 6.28<br>(4.52 to 8.31)                           | 9.36<br>(6.32 to 13.69)                          | 8.48<br>(5.77 to 12.26)                          | 10.35<br>(6.83 to 15.44)                         | 0.22<br>(0.16 to 0.29)                     | 0.37<br>(0.25 to 0.52)                     | 0.35<br>(0.25 to 0.49)                    | 0.39<br>(0.27 to 0.56)                     |
| Mesothelioma                    | 2.95<br>(2.02 to 4.29)                           | 4.58<br>(3.18 to 6.62)                           | 4.66<br>(3.24 to 6.94)                           | 4.46<br>(3.10 to 6.36)                           | 0.09<br>(0.06 to 0.13)                     | 0.15<br>(0.11 to 0.21)                     | 0.16<br>(0.11 to 0.23)                    | 0.15<br>(0.10 to 0.20)                     |
| Hodgkin lymphoma                | 8.61<br>(5.73 to 11.16)                          | 8.75<br>(5.63 to 12.06)                          | 6.85<br>(4.39 to 9.60)                           | 9.21<br>(5.84 to 13.14)                          | 0.19<br>(0.13 to 0.24)                     | 0.22<br>(0.15 to 0.29)                     | 0.18<br>(0.12 to 0.24)                    | 0.22<br>(0.15 to 0.30)                     |
| Non-Hodgkin lymphoma            | 44.73<br>(34.42 to 59.02)                        | 64.22<br>(47.39 to 86.22)                        | 67.81<br>(50.45 to 89.96)                        | 66.12<br>(48.39 to 89.50)                        | 1.09<br>(0.86 to 1.41)                     | 1.90<br>(1.47 to 2.48)                     | 2.15<br>(1.69 to 2.77)                    | 1.88<br>(1.44 to 2.49)                     |
| Multiple myeloma                | 13.83<br>(10.15 to 17.83)                        | 26.20<br>(18.66 to 35.36)                        | 29.47<br>(21.24 to 39.29)                        | 26.43<br>(18.39 to 36.62)                        | 0.48<br>(0.36 to 0.61)                     | 1.00<br>(0.74 to 1.31)                     | 1.18<br>(0.88 to 1.52)                    | 0.98<br>(0.71 to 1.32)                     |
| Leukemia                        | 129.13<br>(97.16 to 166.75)                      | 143.46<br>(98.38 to 197.73)                      | 134.95<br>(94.34 to 182.33)                      | 157.93<br>(106.49 to 220.56)                     | 2.56<br>(1.97 to 3.23)                     | 3.52<br>(2.48 to 4.77)                     | 3.51<br>(2.54 to 4.61)                    | 3.77<br>(2.61 to 5.26)                     |
| Acute lymphoid leukemia         | 26.68<br>(18.25 to 39.50)                        | 24.79<br>(16.08 to 37.70)                        | 23.37<br>(15.48 to 35.67)                        | 27.15<br>(17.42 to 41.69)                        | 0.43<br>(0.31 to 0.62)                     | 0.48<br>(0.32 to 0.72)                     | 0.47<br>(0.33 to 0.70)                    | 0.52<br>(0.35 to 0.77)                     |
| Chronic lymphoid leukemia       | 1.82<br>(1.28 to 2.52)                           | 2.75<br>(1.78 to 4.05)                           | 2.79<br>(1.83 to 4.03)                           | 2.94<br>(1.84 to 4.47)                           | 0.06<br>(0.05 to 0.09)                     | 0.11<br>(0.07 to 0.16)                     | 0.12<br>(0.08 to 0.17)                    | 0.11<br>(0.07 to 0.17)                     |
| Acute myeloid leukemia          | 45.61<br>(32.70 to 59.42)                        | 61.50<br>(41.53 to 82.72)                        | 62.62<br>(43.52 to 83.49)                        | 66.49<br>(44.44 to 91.16)                        | 0.87<br>(0.63 to 1.11)                     | 1.43<br>(1.00 to 1.86)                     | 1.55<br>(1.12 to 1.99)                    | 1.51<br>(1.05 to 2.01)                     |
| Chronic myeloid leukemia        | 12.59<br>(7.22 to 18.29)                         | 12.99<br>(6.60 to 21.69)                         | 12.31<br>(6.36 to 20.04)                         | 14.41<br>(7.15 to 24.81)                         | 0.33<br>(0.19 to 0.47)                     | 0.38<br>(0.20 to 0.61)                     | 0.37<br>(0.20 to 0.58)                    | 0.41<br>(0.21 to 0.67)                     |
| Other leukemia                  | 42.44<br>(29.50 to 57.91)                        | 41.42<br>(24.33 to 61.89)                        | 33.86<br>(20.20 to 49.94)                        | 46.93<br>(27.15 to 70.99)                        | 0.86<br>(0.61 to 1.15)                     | 1.12<br>(0.71 to 1.62)                     | 1.00<br>(0.64 to 1.42)                    | 1.22<br>(0.75 to 1.81)                     |
| Other neoplasms                 | 114.78<br>(89.96 to 145.76)                      | 155.31<br>(114.99 to 193.07)                     | 155.34<br>(114.81 to 195.49)                     | 154.94<br>(114.85 to 193.25)                     | 2.60<br>(2.04 to 3.23)                     | 4.25<br>(3.35 to 5.08)                     | 4.37<br>(3.62 to 5.46)                    | 4.08<br>(3.18 to 4.88)                     |
| <b>Cardiovascular diseases</b>  | <b>3,927.36</b><br><b>(3,299.19 to 4,577.42)</b> | <b>5,176.54</b><br><b>(3,489.61 to 7,245.53)</b> | <b>2,771.18</b><br><b>(1,912.91 to 3,919.25)</b> | <b>6,938.47</b><br><b>(4,611.08 to 9,670.05)</b> | <b>133.79</b><br><b>(114.12 to 153.99)</b> | <b>199.64</b><br><b>(143.66 to 266.96)</b> | <b>117.62</b><br><b>(88.07 to 160.18)</b> | <b>257.65</b><br><b>(182.47 to 349.33)</b> |
| Rheumatic heart disease         | 232.00<br>(184.83 to 284.24)                     | 128.41<br>(94.42 to 166.00)                      | 93.47<br>(68.30 to 124.01)                       | 138.26<br>(99.59 to 181.52)                      | 5.45<br>(4.32 to 6.61)                     | 3.81<br>(3.00 to 4.67)                     | 3.00<br>(2.38 to 3.70)                    | 3.94<br>(3.06 to 4.95)                     |
| Ischemic heart disease          | 1,868.06<br>(1,513.93 to 2,280.83)               | 2,601.98<br>(1,392.00 to 4,295.41)               | 1,220.15<br>(621.92 to 2,160.30)                 | 3,687.04<br>(1,966.78 to 5,883.36)               | 66.96<br>(55.88 to 80.90)                  | 99.88<br>(56.81 to 163.61)                 | 51.86<br>(29.76 to 89.74)                 | 136.79<br>(77.58 to 219.16)                |
| Stroke                          | 1,227.82<br>(1,011.78 to 1,457.65)               | 1,516.96<br>(868.93 to 2,477.60)                 | 701.64<br>(408.23 to 1,193.41)                   | 2,113.48<br>(1,208.77 to 3,394.39)               | 42.14<br>(35.19 to 49.64)                  | 59.27<br>(37.16 to 93.66)                  | 30.87<br>(20.11 to 50.90)                 | 79.26<br>(48.80 to 124.44)                 |
| Ischemic stroke                 | 299.64<br>(248.56 to 357.60)                     | 361.72<br>(206.84 to 660.17)                     | 203.30<br>(117.96 to 386.76)                     | 467.42<br>(262.42 to 879.96)                     | 13.06<br>(11.01 to 15.38)                  | 17.94<br>(10.04 to 37.70)                  | 11.26<br>(6.54 to 24.79)                  | 22.18<br>(12.12 to 45.94)                  |

|                                |                                   |                                     |                                 |                                     |                              |                              |                              |                              |
|--------------------------------|-----------------------------------|-------------------------------------|---------------------------------|-------------------------------------|------------------------------|------------------------------|------------------------------|------------------------------|
|                                | 928.18<br>(758.84 to<br>1,112.87) | 1,155.24<br>(586.11 to<br>2,072.42) | 498.34<br>(259.91 to<br>922.92) | 1,646.07<br>(835.76 to<br>2,810.99) | 29.09<br>(23.93 to<br>34.61) | 41.33<br>(23.42 to<br>71.40) | 19.60<br>(11.70 to<br>33.33) | 57.08<br>(31.10 to<br>94.39) |
| Intracerebral hemorrhage       | 186.48<br>(112.25 to<br>238.04)   | 327.03<br>(196.40 to<br>469.81)     | 229.06<br>(142.96 to<br>308.99) | 370.17<br>(209.33 to<br>584.88)     | 7.10<br>(4.35 to<br>8.95)    | 14.13<br>(8.83 to<br>20.19)  | 10.71<br>(7.00 to<br>14.44)  | 15.26<br>(9.16 to<br>24.41)  |
| Hypertensive heart disease     | 135.88<br>(88.13 to<br>183.52)    | 168.50<br>(108.71 to<br>246.37)     | 163.08<br>(106.85 to<br>237.12) | 169.05<br>(108.27 to<br>248.31)     | 3.54<br>(2.34 to<br>4.79)    | 5.39<br>(3.49 to<br>7.64)    | 5.59<br>(3.68 to<br>7.90)    | 5.20<br>(3.34 to<br>7.47)    |
| Cardiomyopathy and myocarditis | 33.85<br>(24.26 to<br>48.03)      | 38.62<br>(27.52 to<br>52.97)        | 35.88<br>(25.97 to<br>48.64)    | 38.74<br>(27.36 to<br>53.31)        | 0.90<br>(0.65 to<br>1.27)    | 1.27<br>(0.93 to<br>1.71)    | 1.27<br>(0.93 to<br>1.69)    | 1.23<br>(0.90 to<br>1.64)    |
| Myocarditis                    |                                   |                                     |                                 |                                     |                              |                              |                              |                              |

| Marshall Islands                                              |                                      |                                        |                                      |                                          |                                   |                                   |                                   |                                   |
|---------------------------------------------------------------|--------------------------------------|----------------------------------------|--------------------------------------|------------------------------------------|-----------------------------------|-----------------------------------|-----------------------------------|-----------------------------------|
| Cause                                                         | YLLs (actual counts)                 |                                        |                                      |                                          | Deaths (actual counts)            |                                   |                                   |                                   |
|                                                               | 2016                                 | 2040 Forecast                          | 2040 Better Scenario                 | 2040 Worse Scenario                      | 2016                              | 2040 Forecast                     | 2040 Better Scenario              | 2040 Worse Scenario               |
| Alcoholic cardiomyopathy                                      | 7.19<br>(3.55 to 11.39)              | 9.07<br>(4.49 to 14.55)                | 8.98<br>(4.49 to 14.43)              | 9.08<br>(4.50 to 14.48)                  | 0.22<br>(0.11 to 0.34)            | 0.31<br>(0.16 to 0.46)            | 0.32<br>(0.17 to 0.48)            | 0.30<br>(0.15 to 0.45)            |
| Other cardiomyopathy                                          | 94.84<br>(57.43 to 130.37)           | 120.80<br>(72.01 to 188.76)            | 118.22<br>(72.24 to 183.43)          | 121.23<br>(71.44 to 188.97)              | 2.41<br>(1.48 to 3.33)            | 3.81<br>(2.24 to 5.83)            | 4.00<br>(2.41 to 6.09)            | 3.67<br>(2.13 to 5.75)            |
| Atrial fibrillation and flutter                               | 6.67<br>(5.13 to 8.56)               | 14.78<br>(11.11 to 19.86)              | 16.49<br>(12.52 to 21.63)            | 13.87<br>(10.08 to 18.93)                | 0.50<br>(0.38 to 0.65)            | 1.16<br>(0.81 to 1.61)            | 1.42<br>(1.03 to 1.93)            | 1.04<br>(0.70 to 1.47)            |
| Aortic aneurysm                                               | 40.31<br>(25.39 to 57.75)            | 60.81<br>(38.13 to 87.73)              | 59.95<br>(39.02 to 85.46)            | 62.04<br>(37.93 to 91.30)                | 1.51<br>(1.01 to 2.12)            | 2.53<br>(1.73 to 3.47)            | 2.74<br>(1.96 to 3.69)            | 2.45<br>(1.64 to 3.41)            |
| Peripheral artery disease                                     | 2.50<br>(1.54 to 3.80)               | 6.84<br>(3.84 to 11.81)                | 7.17<br>(4.22 to 11.82)              | 6.79<br>(3.78 to 11.96)                  | 0.12<br>(0.08 to 0.17)            | 0.35<br>(0.22 to 0.56)            | 0.42<br>(0.26 to 0.67)            | 0.33<br>(0.20 to 0.52)            |
| Endocarditis                                                  | 55.29<br>(41.29 to 74.85)            | 80.34<br>(56.62 to 113.30)             | 73.60<br>(51.75 to 103.22)           | 81.51<br>(57.59 to 115.74)               | 1.52<br>(1.18 to 1.98)            | 2.70<br>(1.97 to 3.63)            | 2.69<br>(1.97 to 3.60)            | 2.61<br>(1.90 to 3.54)            |
| Other cardiovascular and circulatory diseases                 | 172.34<br>(108.72 to 225.97)         | 270.88<br>(167.71 to 372.88)           | 206.58<br>(128.93 to 279.94)         | 296.26<br>(178.33 to 423.30)             | 4.95<br>(3.08 to 6.42)            | 9.83<br>(6.13 to 13.22)           | 8.32<br>(5.23 to 10.90)           | 10.18<br>(6.16 to 14.10)          |
| <b>Chronic respiratory diseases</b>                           | <b>811.71<br/>(657.53 to 979.80)</b> | <b>979.36<br/>(652.96 to 1,457.61)</b> | <b>679.46<br/>(488.21 to 943.47)</b> | <b>1,308.88<br/>(811.78 to 2,060.06)</b> | <b>26.09<br/>(21.20 to 31.44)</b> | <b>34.88<br/>(23.81 to 50.82)</b> | <b>25.29<br/>(18.83 to 34.11)</b> | <b>45.52<br/>(29.26 to 69.73)</b> |
| Chronic obstructive pulmonary disease                         | 451.49<br>(355.48 to 550.16)         | 605.93<br>(344.46 to 995.10)           | 364.38<br>(230.43 to 551.55)         | 876.09<br>(462.93 to 1,302.87)           | 15.82<br>(12.76 to 19.16)         | 23.08<br>(14.02 to 36.39)         | 14.85<br>(10.01 to 21.63)         | 32.21<br>(18.29 to 53.02)         |
| Pneumoconiosis                                                | 1.84<br>(1.26 to 2.64)               | 2.01<br>(1.37 to 2.96)                 | 1.96<br>(1.34 to 2.86)               | 2.05<br>(1.41 to 2.99)                   | 0.07<br>(0.05 to 0.11)            | 0.09<br>(0.07 to 0.14)            | 0.10<br>(0.07 to 0.16)            | 0.09<br>(0.06 to 0.14)            |
| Silicosis                                                     | 0.21<br>(0.10 to 0.38)               | 0.20<br>(0.09 to 0.36)                 | 0.18<br>(0.08 to 0.33)               | 0.20<br>(0.09 to 0.36)                   | 0.01<br>(0.00 to 0.02)            | 0.01<br>(0.00 to 0.02)            | 0.01<br>(0.00 to 0.02)            | 0.01<br>(0.00 to 0.02)            |
| Asbestosis                                                    | 0.53<br>(0.34 to 0.85)               | 0.70<br>(0.44 to 1.21)                 | 0.71<br>(0.44 to 1.16)               | 0.69<br>(0.43 to 1.19)                   | 0.02<br>(0.01 to 0.03)            | 0.03<br>(0.02 to 0.05)            | 0.03<br>(0.02 to 0.05)            | 0.03<br>(0.02 to 0.05)            |
| Coal workers pneumoconiosis                                   | 0.03<br>(0.01 to 0.07)               | 0.04<br>(0.01 to 0.08)                 | 0.03<br>(0.01 to 0.06)               | 0.04<br>(0.01 to 0.10)                   | 0.00<br>(0.00 to 0.00)            | 0.00<br>(0.00 to 0.00)            | 0.00<br>(0.00 to 0.00)            | 0.00<br>(0.00 to 0.00)            |
| Other pneumoconiosis                                          | 1.07<br>(0.72 to 1.56)               | 1.06<br>(0.70 to 1.59)                 | 1.04<br>(0.66 to 1.57)               | 1.12<br>(0.74 to 1.69)                   | 0.04<br>(0.03 to 0.07)            | 0.05<br>(0.04 to 0.08)            | 0.06<br>(0.04 to 0.09)            | 0.05<br>(0.04 to 0.08)            |
| Asthma                                                        | 213.25<br>(127.05 to 296.66)         | 157.37<br>(81.12 to 259.58)            | 115.01<br>(60.49 to 190.69)          | 205.37<br>(103.12 to 345.58)             | 6.54<br>(3.95 to 9.08)            | 5.58<br>(2.92 to 9.12)            | 4.43<br>(2.37 to 7.12)            | 6.92<br>(3.47 to 11.55)           |
| Interstitial lung disease and pulmonary sarcoidosis           | 46.92<br>(25.73 to 81.90)            | 66.08<br>(37.58 to 111.95)             | 74.49<br>(43.39 to 121.56)           | 64.35<br>(35.73 to 111.14)               | 1.06<br>(0.60 to 1.85)            | 1.80<br>(1.07 to 3.09)            | 2.16<br>(1.30 to 3.55)            | 1.69<br>(0.99 to 2.90)            |
| Other chronic respiratory diseases                            | 98.20<br>(57.19 to 152.15)           | 147.98<br>(83.98 to 251.84)            | 123.63<br>(73.42 to 200.22)          | 161.03<br>(87.28 to 284.96)              | 2.60<br>(1.51 to 4.03)            | 4.32<br>(2.47 to 7.41)            | 3.74<br>(2.28 to 6.10)            | 4.61<br>(2.53 to 8.16)            |
| <b>Cirrhosis and other chronic liver diseases</b>             | <b>403.17<br/>(280.41 to 657.16)</b> | <b>572.21<br/>(392.13 to 959.70)</b>   | <b>513.21<br/>(352.58 to 848.98)</b> | <b>579.68<br/>(393.25 to 980.51)</b>     | <b>10.29<br/>(7.24 to 16.89)</b>  | <b>16.11<br/>(11.58 to 26.46)</b> | <b>15.00<br/>(10.93 to 24.31)</b> | <b>15.98<br/>(11.40 to 26.45)</b> |
| Cirrhosis and other chronic liver diseases due to hepatitis B | 154.27<br>(101.32 to 264.11)         | 238.32<br>(156.88 to 407.20)           | 221.51<br>(148.21 to 372.80)         | 238.31<br>(156.65 to 412.90)             | 4.21<br>(2.85 to 7.12)            | 6.96<br>(4.79 to 11.72)           | 6.68<br>(4.70 to 11.07)           | 6.83<br>(4.70 to 11.66)           |
| Cirrhosis and other chronic liver diseases due to hepatitis C | 61.42<br>(39.91 to 106.71)           | 95.55<br>(62.06 to 165.42)             | 88.07<br>(57.60 to 149.88)           | 95.84<br>(62.00 to 166.09)               | 1.65<br>(1.10 to 2.82)            | 2.72<br>(1.86 to 4.54)            | 2.58<br>(1.79 to 4.27)            | 2.68<br>(1.82 to 4.53)            |

|                                                                |                                                      |                                                      |                                                      |                                                      |                                                 |                                                  |                                                 |                                                  |
|----------------------------------------------------------------|------------------------------------------------------|------------------------------------------------------|------------------------------------------------------|------------------------------------------------------|-------------------------------------------------|--------------------------------------------------|-------------------------------------------------|--------------------------------------------------|
|                                                                | 52.11<br>(34.06 to<br>90.48)                         | 81.02<br>(53.37 to<br>142.36)                        | 65.28<br>(42.85 to<br>114.30)                        | 84.00<br>(54.83 to<br>149.14)                        | 1.49<br>(1.01 to<br>2.53)                       | 2.44<br>(1.68 to<br>4.12)                        | 2.06<br>(1.44 to<br>3.46)                       | 2.48<br>(1.70 to<br>4.30)                        |
| Cirrhosis and other chronic liver diseases due to alcohol use  |                                                      |                                                      |                                                      |                                                      |                                                 |                                                  |                                                 |                                                  |
|                                                                | 135.37<br>(97.55 to<br>203.12)                       | 157.31<br>(107.86 to<br>243.38)                      | 138.35<br>(94.83 to<br>214.10)                       | 161.52<br>(109.88 to<br>252.38)                      | 2.95<br>(2.15 to<br>4.36)                       | 3.99<br>(2.94 to<br>5.99)                        | 3.69<br>(2.72 to<br>5.50)                       | 3.99<br>(2.89 to<br>6.04)                        |
| Cirrhosis and other chronic liver diseases due to other causes |                                                      |                                                      |                                                      |                                                      |                                                 |                                                  |                                                 |                                                  |
| <b>Digestive diseases</b>                                      | <b>284.91</b><br><b>(197.74 to</b><br><b>423.67)</b> | <b>322.64</b><br><b>(223.90 to</b><br><b>500.78)</b> | <b>262.01</b><br><b>(181.72 to</b><br><b>410.25)</b> | <b>346.56</b><br><b>(236.67 to</b><br><b>546.93)</b> | <b>8.02</b><br><b>(5.75 to</b><br><b>11.83)</b> | <b>11.05</b><br><b>(8.07 to</b><br><b>16.61)</b> | <b>9.67</b><br><b>(7.29 to</b><br><b>14.53)</b> | <b>11.41</b><br><b>(8.20 to</b><br><b>17.19)</b> |
| Peptic ulcer disease                                           | 75.01<br>(52.01 to<br>114.62)                        | 62.28<br>(41.50 to<br>95.33)                         | 45.36<br>(30.40 to<br>70.72)                         | 66.51<br>(43.95 to<br>103.35)                        | 2.33<br>(1.65 to<br>3.51)                       | 2.35<br>(1.62 to<br>3.46)                        | 1.83<br>(1.29 to<br>2.75)                       | 2.41<br>(1.65 to<br>3.62)                        |

| Marshall Islands                           |                              |                              |                              |                              |                        |                           |                           |                           |
|--------------------------------------------|------------------------------|------------------------------|------------------------------|------------------------------|------------------------|---------------------------|---------------------------|---------------------------|
| Cause                                      | YLLs (actual counts)         |                              |                              |                              | Deaths (actual counts) |                           |                           |                           |
|                                            | 2016                         | 2040 Forecast                | 2040 Better Scenario         | 2040 Worse Scenario          | 2016                   | 2040 Forecast             | 2040 Better Scenario      | 2040 Worse Scenario       |
| Gastritis and duodenitis                   | 1.59<br>(0.79 to 2.84)       | 2.39<br>(1.18 to 4.32)       | 2.11<br>(1.08 to 3.84)       | 2.40<br>(1.19 to 4.43)       | 0.05<br>(0.03 to 0.09) | 0.09<br>(0.05 to 0.16)    | 0.09<br>(0.05 to 0.15)    | 0.09<br>(0.05 to 0.16)    |
| Appendicitis                               | 38.71<br>(25.22 to 60.19)    | 39.34<br>(25.62 to 61.06)    | 31.12<br>(20.49 to 48.38)    | 41.17<br>(26.27 to 65.69)    | 0.90<br>(0.60 to 1.39) | 1.12<br>(0.75 to 1.69)    | 0.95<br>(0.64 to 1.45)    | 1.13<br>(0.75 to 1.74)    |
| Paralytic ileus and intestinal obstruction | 37.69<br>(23.15 to 64.66)    | 38.98<br>(26.30 to 64.82)    | 34.88<br>(23.97 to 57.29)    | 40.11<br>(26.66 to 66.92)    | 0.84<br>(0.58 to 1.35) | 1.24<br>(0.89 to 2.00)    | 1.26<br>(0.91 to 2.03)    | 1.19<br>(0.85 to 1.92)    |
| Inguinal, femoral, and abdominal hernia    | 5.73<br>(3.72 to 10.44)      | 6.53<br>(4.31 to 11.55)      | 5.96<br>(3.98 to 10.41)      | 6.42<br>(4.22 to 11.58)      | 0.22<br>(0.15 to 0.38) | 0.30<br>(0.20 to 0.50)    | 0.29<br>(0.20 to 0.49)    | 0.28<br>(0.19 to 0.48)    |
| Inflammatory bowel disease                 | 12.19<br>(6.91 to 20.81)     | 17.29<br>(10.18 to 29.16)    | 17.08<br>(10.33 to 28.20)    | 17.06<br>(9.92 to 28.73)     | 0.31<br>(0.19 to 0.51) | 0.53<br>(0.34 to 0.84)    | 0.55<br>(0.37 to 0.87)    | 0.50<br>(0.32 to 0.80)    |
| Vascular intestinal disorders              | 10.51<br>(5.74 to 15.71)     | 16.48<br>(9.85 to 23.91)     | 15.88<br>(9.64 to 22.89)     | 16.05<br>(9.39 to 23.31)     | 0.38<br>(0.22 to 0.55) | 0.71<br>(0.45 to 1.00)    | 0.73<br>(0.47 to 1.02)    | 0.66<br>(0.41 to 0.94)    |
| Gallbladder and biliary diseases           | 34.71<br>(22.52 to 53.62)    | 46.99<br>(23.74 to 86.24)    | 34.69<br>(18.39 to 62.97)    | 61.52<br>(30.59 to 117.27)   | 1.11<br>(0.76 to 1.67) | 1.78<br>(0.95 to 3.15)    | 1.41<br>(0.80 to 2.50)    | 2.21<br>(1.14 to 4.00)    |
| Pancreatitis                               | 22.38<br>(13.39 to 38.78)    | 34.64<br>(18.33 to 76.10)    | 26.80<br>(15.25 to 53.44)    | 36.34<br>(18.75 to 80.93)    | 0.57<br>(0.36 to 0.97) | 0.99<br>(0.56 to 1.99)    | 0.81<br>(0.50 to 1.50)    | 1.01<br>(0.56 to 2.09)    |
| Other digestive diseases                   | 46.39<br>(26.21 to 74.21)    | 57.72<br>(34.30 to 93.13)    | 48.14<br>(29.20 to 78.36)    | 58.98<br>(34.42 to 95.68)    | 1.29<br>(0.78 to 2.02) | 1.96<br>(1.27 to 3.05)    | 1.74<br>(1.17 to 2.69)    | 1.93<br>(1.23 to 2.97)    |
| Neurological disorders                     | 167.32<br>(136.69 to 199.58) | 299.09<br>(218.47 to 422.66) | 310.73<br>(238.53 to 441.59) | 384.65<br>(217.58 to 438.63) | 7.60<br>(6.36 to 9.08) | 17.11<br>(11.42 to 26.27) | 20.56<br>(13.89 to 31.33) | 16.49<br>(10.52 to 26.30) |
| Alzheimer's disease and other dementias    | 70.66<br>(56.37 to 89.13)    | 167.16<br>(98.03 to 285.35)  | 192.27<br>(118.46 to 321.48) | 168.43<br>(95.57 to 294.43)  | 5.46<br>(4.40 to 6.78) | 13.43<br>(7.66 to 22.59)  | 16.65<br>(10.01 to 27.23) | 12.92<br>(7.05 to 22.57)  |
| Parkinson's disease                        | 5.97<br>(4.45 to 7.84)       | 15.54<br>(11.54 to 19.96)    | 21.14<br>(15.99 to 26.95)    | 13.49<br>(9.83 to 17.56)     | 0.39<br>(0.29 to 0.52) | 1.08<br>(0.76 to 1.42)    | 1.55<br>(1.15 to 2.00)    | 0.91<br>(0.63 to 1.22)    |
| Epilepsy                                   | 63.09<br>(43.57 to 83.17)    | 75.45<br>(43.78 to 118.39)   | 53.17<br>(31.39 to 82.70)    | 82.49<br>(47.67 to 133.07)   | 1.13<br>(0.78 to 1.48) | 1.48<br>(0.88 to 2.31)    | 1.07<br>(0.65 to 1.64)    | 1.59<br>(0.95 to 2.52)    |
| Multiple sclerosis                         | 1.71<br>(0.89 to 3.19)       | 2.71<br>(1.37 to 5.08)       | 2.84<br>(1.43 to 5.41)       | 2.69<br>(1.35 to 4.99)       | 0.04<br>(0.02 to 0.08) | 0.07<br>(0.04 to 0.15)    | 0.08<br>(0.04 to 0.14)    | 0.07<br>(0.04 to 0.13)    |
| Motor neuron disease                       | 4.06<br>(3.09 to 5.59)       | 8.23<br>(6.34 to 11.33)      | 9.39<br>(7.25 to 12.96)      | 7.81<br>(6.00 to 10.60)      | 0.12<br>(0.10 to 0.17) | 0.28<br>(0.22 to 0.38)    | 0.33<br>(0.26 to 0.45)    | 0.26<br>(0.21 to 0.35)    |
| Other neurological disorders               | 21.84<br>(17.10 to 27.58)    | 30.00<br>(23.51 to 37.44)    | 31.93<br>(25.09 to 39.60)    | 29.74<br>(23.30 to 37.25)    | 0.46<br>(0.37 to 0.56) | 0.77<br>(0.63 to 0.91)    | 0.87<br>(0.73 to 1.03)    | 0.73<br>(0.61 to 0.87)    |
| Mental disorders                           | 43.84<br>(28.67 to 64.01)    | 76.76<br>(49.67 to 114.51)   | 75.04<br>(48.82 to 111.88)   | 76.68<br>(49.70 to 114.36)   | 0.96<br>(0.63 to 1.40) | 1.80<br>(1.22 to 2.64)    | 1.83<br>(1.24 to 2.67)    | 1.77<br>(1.19 to 2.58)    |
| Alcohol use disorders                      | 22.72<br>(13.14 to 39.94)    | 29.17<br>(15.46 to 55.98)    | 27.35<br>(14.37 to 52.32)    | 29.32<br>(15.60 to 56.18)    | 0.52<br>(0.30 to 0.92) | 0.71<br>(0.39 to 1.37)    | 0.68<br>(0.38 to 1.32)    | 0.71<br>(0.38 to 1.35)    |
| Drug use disorders                         | 20.89<br>(13.93 to 33.55)    | 47.21<br>(31.01 to 75.28)    | 47.32<br>(31.18 to 75.07)    | 46.98<br>(31.00 to 75.10)    | 0.43<br>(0.29 to 0.69) | 1.09<br>(0.74 to 1.71)    | 1.14<br>(0.79 to 1.77)    | 1.05<br>(0.72 to 1.67)    |
| Opioid use disorders                       | 12.19<br>(7.44 to 21.05)     | 23.26<br>(13.20 to 42.08)    | 23.01<br>(13.08 to 41.35)    | 23.27<br>(13.27 to 42.23)    | 0.23<br>(0.14 to 0.41) | 0.48<br>(0.29 to 0.86)    | 0.49<br>(0.29 to 0.86)    | 0.47<br>(0.28 to 0.85)    |



| Marshall Islands                                           |                                    |                                     |                                    |                                      |                              |                              |                              |                              |
|------------------------------------------------------------|------------------------------------|-------------------------------------|------------------------------------|--------------------------------------|------------------------------|------------------------------|------------------------------|------------------------------|
| Cause                                                      | YLLs (actual counts)               |                                     |                                    |                                      | Deaths (actual counts)       |                              |                              |                              |
|                                                            | 2016                               | 2040 Forecast                       | 2040 Better Scenario               | 2040 Worse Scenario                  | 2016                         | 2040 Forecast                | 2040 Better Scenario         | 2040 Worse Scenario          |
| Diabetes, urogenital, blood, and endocrine diseases        | 5,329.92<br>(4,421.60 to 6,299.90) | 9,134.63<br>(6,670.30 to 12,783.29) | 6,421.92<br>(4,634.29 to 9,302.10) | 10,263.90<br>(7,352.85 to 14,242.61) | 193.91<br>(163.88 to 226.50) | 376.54<br>(296.62 to 483.57) | 282.96<br>(222.57 to 374.50) | 408.16<br>(319.81 to 518.77) |
| Diabetes mellitus                                          | 4,297.12<br>(3,552.14 to 5,120.12) | 6,537.02<br>(4,334.98 to 9,249.83)  | 4,581.45<br>(3,103.71 to 6,427.34) | 7,309.78<br>(4,795.25 to 10,402.21)  | 161.73<br>(136.12 to 190.69) | 279.85<br>(197.10 to 374.67) | 210.78<br>(151.12 to 279.14) | 300.72<br>(210.55 to 410.09) |
| Acute glomerulonephritis                                   | 1.32<br>(0.92 to 1.90)             | 1.99<br>(1.16 to 3.27)              | 1.73<br>(1.00 to 2.87)             | 2.03<br>(1.20 to 3.30)               | 0.03<br>(0.02 to 0.05)       | 0.06<br>(0.03 to 0.09)       | 0.05<br>(0.03 to 0.08)       | 0.06<br>(0.03 to 0.09)       |
| Chronic kidney disease                                     | 798.71<br>(565.69 to 1,114.87)     | 2,245.84<br>(620.01 to 6,376.75)    | 1,514.63<br>(418.50 to 4,641.18)   | 2,599.28<br>(709.67 to 6,811.63)     | 26.13<br>(18.67 to 36.49)    | 85.37<br>(23.63 to 229.40)   | 60.82<br>(16.73 to 179.73)   | 96.51<br>(26.56 to 242.36)   |
| Chronic kidney disease due to diabetes mellitus            | 457.12<br>(319.89 to 645.91)       | 1,418.25<br>(368.19 to 4,178.11)    | 957.20<br>(245.29 to 3,030.78)     | 1,643.48<br>(421.04 to 4,417.46)     | 15.08<br>(10.70 to 21.33)    | 51.83<br>(14.02 to 143.71)   | 36.61<br>(9.67 to 109.93)    | 58.92<br>(15.63 to 149.87)   |
| Chronic kidney disease due to hypertension                 | 153.97<br>(105.99 to 220.00)       | 482.94<br>(129.07 to 1,309.79)      | 332.31<br>(89.87 to 985.77)        | 554.75<br>(146.72 to 1,420.92)       | 6.57<br>(4.60 to 9.37)       | 22.77<br>(6.30 to 58.73)     | 16.83<br>(4.59 to 46.30)     | 25.28<br>(6.92 to 60.34)     |
| Chronic kidney disease due to glomerulonephritis           | 92.56<br>(64.21 to 134.70)         | 158.42<br>(53.35 to 437.83)         | 103.23<br>(34.14 to 306.25)        | 184.24<br>(63.49 to 480.70)          | 2.06<br>(1.42 to 2.98)       | 4.55<br>(1.37 to 12.86)      | 3.08<br>(0.91 to 9.01)       | 5.23<br>(1.59 to 13.36)      |
| Chronic kidney disease due to other and unspecified causes | 95.06<br>(64.99 to 138.02)         | 186.23<br>(57.54 to 507.42)         | 121.89<br>(37.19 to 363.42)        | 216.81<br>(68.38 to 555.40)          | 2.42<br>(1.67 to 3.52)       | 6.22<br>(1.78 to 16.50)      | 4.30<br>(1.20 to 12.57)      | 7.08<br>(2.09 to 18.00)      |
| Urinary diseases and male infertility                      | 79.04<br>(63.36 to 102.25)         | 130.63<br>(103.48 to 168.59)        | 127.94<br>(100.39 to 167.06)       | 129.75<br>(103.18 to 166.49)         | 2.17<br>(1.78 to 2.70)       | 4.69<br>(3.89 to 5.72)       | 5.07<br>(4.20 to 6.17)       | 4.41<br>(3.63 to 5.41)       |
| Urinary tract infections                                   | 67.74<br>(52.03 to 89.20)          | 114.05<br>(87.99 to 149.08)         | 113.21<br>(87.03 to 148.29)        | 113.08<br>(87.01 to 147.96)          | 1.82<br>(1.46 to 2.32)       | 4.09<br>(3.32 to 5.06)       | 4.51<br>(3.65 to 5.56)       | 3.83<br>(3.09 to 4.74)       |
| Urolithiasis                                               | 2.17<br>(1.27 to 3.38)             | 4.55<br>(2.59 to 7.54)              | 4.76<br>(2.62 to 7.92)             | 4.42<br>(2.53 to 7.30)               | 0.07<br>(0.04 to 0.10)       | 0.16<br>(0.09 to 0.25)       | 0.17<br>(0.10 to 0.28)       | 0.15<br>(0.09 to 0.24)       |
| Other urinary diseases                                     | 9.13<br>(5.58 to 13.72)            | 12.02<br>(6.66 to 19.68)            | 9.97<br>(5.50 to 16.26)            | 12.25<br>(6.72 to 20.19)             | 0.28<br>(0.17 to 0.41)       | 0.44<br>(0.25 to 0.71)       | 0.39<br>(0.22 to 0.64)       | 0.43<br>(0.24 to 0.70)       |
| Gynecological diseases                                     | 0.85<br>(0.41 to 1.30)             | 0.91<br>(0.39 to 1.63)              | 0.71<br>(0.31 to 1.30)             | 0.96<br>(0.41 to 1.78)               | 0.02<br>(0.01 to 0.03)       | 0.02<br>(0.01 to 0.04)       | 0.02<br>(0.01 to 0.03)       | 0.02<br>(0.01 to 0.04)       |
| Uterine fibroids                                           | 0.07<br>(0.01 to 0.14)             | 0.07<br>(0.02 to 0.15)              | 0.05<br>(0.01 to 0.11)             | 0.07<br>(0.02 to 0.16)               | 0.00<br>(0.00 to 0.00)       | 0.00<br>(0.00 to 0.00)       | 0.00<br>(0.00 to 0.00)       | 0.00<br>(0.00 to 0.00)       |
| Polycystic ovarian syndrome                                | 0.02<br>(0.00 to 0.07)             | 0.02<br>(0.00 to 0.06)              | 0.01<br>(0.00 to 0.04)             | 0.02<br>(0.00 to 0.06)               | 0.00<br>(0.00 to 0.00)       | 0.00<br>(0.00 to 0.00)       | 0.00<br>(0.00 to 0.00)       | 0.00<br>(0.00 to 0.00)       |
| Endometriosis                                              | 0.01<br>(0.00 to 0.01)             | 0.01<br>(0.00 to 0.02)              | 0.01<br>(0.00 to 0.01)             | 0.01<br>(0.00 to 0.02)               | 0.00<br>(0.00 to 0.00)       | 0.00<br>(0.00 to 0.00)       | 0.00<br>(0.00 to 0.00)       | 0.00<br>(0.00 to 0.00)       |
| Genital prolapse                                           | 0.02<br>(0.01 to 0.05)             | 0.02<br>(0.01 to 0.06)              | 0.01<br>(0.00 to 0.04)             | 0.02<br>(0.01 to 0.06)               | 0.00<br>(0.00 to 0.00)       | 0.00<br>(0.00 to 0.00)       | 0.00<br>(0.00 to 0.00)       | 0.00<br>(0.00 to 0.00)       |
| Other gynecological diseases                               | 0.73<br>(0.33 to 1.11)             | 0.80<br>(0.33 to 1.44)              | 0.63<br>(0.26 to 1.17)             | 0.84<br>(0.34 to 1.58)               | 0.02<br>(0.01 to 0.03)       | 0.02<br>(0.01 to 0.03)       | 0.02<br>(0.01 to 0.03)       | 0.02<br>(0.01 to 0.04)       |
| Hemoglobinopathies and hemolytic anemias                   | 21.58<br>(16.55 to 27.88)          | 21.13<br>(15.33 to 27.92)           | 17.16<br>(12.40 to 23.08)          | 22.01<br>(15.78 to 29.59)            | 0.49<br>(0.38 to 0.64)       | 0.61<br>(0.46 to 0.79)       | 0.52<br>(0.38 to 0.67)       | 0.62<br>(0.46 to 0.81)       |
| Thalassemias                                               | 4.62<br>(3.05 to 6.93)             | 2.08<br>(1.22 to 3.23)              | 2.16<br>(1.29 to 3.34)             | 2.16<br>(1.27 to 3.37)               | 0.06<br>(0.04 to 0.09)       | 0.03<br>(0.02 to 0.04)       | 0.03<br>(0.02 to 0.04)       | 0.03<br>(0.02 to 0.04)       |

|                                                   |                                |                                 |                                 |                                 |                           |                           |                           |                           |
|---------------------------------------------------|--------------------------------|---------------------------------|---------------------------------|---------------------------------|---------------------------|---------------------------|---------------------------|---------------------------|
|                                                   | 0.02<br>(0.01 to<br>0.03)      | 0.02<br>(0.01 to<br>0.03)       | 0.02<br>(0.01 to<br>0.03)       | 0.02<br>(0.01 to<br>0.04)       | 0.00<br>(0.00 to<br>0.00) | 0.00<br>(0.00 to<br>0.00) | 0.00<br>(0.00 to<br>0.00) | 0.00<br>(0.00 to<br>0.00) |
| Sickle cell disorders                             |                                |                                 |                                 |                                 |                           |                           |                           |                           |
|                                                   | 12.01<br>(8.89 to<br>15.77)    | 14.40<br>(10.03 to<br>19.84)    | 11.03<br>(7.54 to<br>15.10)     | 15.20<br>(10.51 to<br>21.44)    | 0.26<br>(0.19 to<br>0.33) | 0.36<br>(0.26 to<br>0.48) | 0.28<br>(0.20 to<br>0.39) | 0.37<br>(0.27 to<br>0.51) |
| G6PD deficiency                                   |                                |                                 |                                 |                                 |                           |                           |                           |                           |
|                                                   | 4.93<br>(3.60 to<br>6.68)      | 4.63<br>(3.34 to<br>6.16)       | 3.95<br>(2.84 to<br>5.34)       | 4.62<br>(3.29 to<br>6.20)       | 0.18<br>(0.13 to<br>0.24) | 0.22<br>(0.16 to<br>0.29) | 0.20<br>(0.15 to<br>0.27) | 0.21<br>(0.15 to<br>0.28) |
| Other hemoglobinopathies and hemolytic anemias    |                                |                                 |                                 |                                 |                           |                           |                           |                           |
|                                                   | 131.31<br>(93.76 to<br>171.44) | 197.11<br>(141.58 to<br>264.68) | 178.30<br>(129.83 to<br>237.32) | 200.08<br>(142.14 to<br>269.14) | 3.34<br>(2.47 to<br>4.28) | 5.94<br>(4.43 to<br>7.46) | 5.71<br>(4.32 to<br>7.16) | 5.82<br>(4.31 to<br>7.40) |
| Endocrine, metabolic, blood, and immune disorders |                                |                                 |                                 |                                 |                           |                           |                           |                           |



| Marshall Islands                              |                                       |                                     |                                     |                                     |                                |                                 |                                 |                                 |
|-----------------------------------------------|---------------------------------------|-------------------------------------|-------------------------------------|-------------------------------------|--------------------------------|---------------------------------|---------------------------------|---------------------------------|
| Cause                                         | YLLs (actual counts)                  |                                     |                                     |                                     | Deaths (actual counts)         |                                 |                                 |                                 |
|                                               | 2016                                  | 2040 Forecast                       | 2040 Better Scenario                | 2040 Worse Scenario                 | 2016                           | 2040 Forecast                   | 2040 Better Scenario            | 2040 Worse Scenario             |
| <b>Musculoskeletal disorders</b>              | <b>45.27</b><br>(25.39 to 66.86)      | <b>60.52</b><br>(30.51 to 96.23)    | <b>64.62</b><br>(33.14 to 102.30)   | <b>59.61</b><br>(30.03 to 95.86)    | <b>0.91</b><br>(0.50 to 1.32)  | <b>1.46</b><br>(0.77 to 2.17)   | <b>1.64</b><br>(0.89 to 2.41)   | <b>1.39</b><br>(0.74 to 2.10)   |
| Rheumatoid arthritis                          | 2.01<br>(1.01 to 3.13)                | 3.54<br>(1.70 to 5.66)              | 3.04<br>(1.48 to 4.89)              | 3.58<br>(1.75 to 5.76)              | 0.07<br>(0.03 to 0.10)         | 0.15<br>(0.07 to 0.24)          | 0.14<br>(0.06 to 0.22)          | 0.14<br>(0.07 to 0.23)          |
| Other musculoskeletal disorders               | 43.26<br>(24.17 to 64.51)             | 56.98<br>(28.48 to 91.43)           | 61.58<br>(31.62 to 98.91)           | 56.03<br>(28.25 to 90.56)           | 0.85<br>(0.47 to 1.25)         | 1.31<br>(0.70 to 2.01)          | 1.50<br>(0.82 to 2.27)          | 1.25<br>(0.66 to 1.92)          |
| <b>Other non-communicable diseases</b>        | <b>601.25</b><br>(323.02 to 1,025.72) | <b>525.91</b><br>(321.74 to 819.48) | <b>417.87</b><br>(265.36 to 619.72) | <b>584.08</b><br>(348.94 to 939.92) | <b>8.63</b><br>(5.16 to 13.82) | <b>11.18</b><br>(7.40 to 15.67) | <b>10.48</b><br>(7.00 to 14.42) | <b>11.48</b><br>(7.61 to 16.36) |
| Congenital birth defects                      | 518.25<br>(261.78 to 926.88)          | 341.69<br>(167.89 to 609.89)        | 236.39<br>(119.77 to 416.82)        | 400.97<br>(197.33 to 725.81)        | 6.41<br>(3.39 to 11.32)        | 4.60<br>(2.37 to 7.92)          | 3.29<br>(1.75 to 5.64)          | 5.30<br>(2.71 to 9.36)          |
| Neural tube defects                           | 37.00<br>(11.88 to 85.92)             | 9.94<br>(2.73 to 24.88)             | 5.31<br>(1.47 to 13.07)             | 12.60<br>(3.39 to 32.65)            | 0.43<br>(0.14 to 1.00)         | 0.12<br>(0.03 to 0.29)          | 0.06<br>(0.02 to 0.15)          | 0.15<br>(0.04 to 0.38)          |
| Congenital heart anomalies                    | 208.89<br>(101.74 to 375.30)          | 141.85<br>(68.44 to 263.95)         | 100.66<br>(49.32 to 180.88)         | 164.22<br>(78.06 to 307.03)         | 2.63<br>(1.31 to 4.63)         | 1.96<br>(0.98 to 3.52)          | 1.44<br>(0.73 to 2.51)          | 2.23<br>(1.09 to 4.03)          |
| Orofacial clefts                              | 0.31<br>(0.09 to 0.85)                | 0.16<br>(0.04 to 0.48)              | 0.08<br>(0.02 to 0.23)              | 0.20<br>(0.05 to 0.61)              | 0.00<br>(0.00 to 0.01)         | 0.00<br>(0.00 to 0.01)          | 0.00<br>(0.00 to 0.00)          | 0.00<br>(0.00 to 0.01)          |
| Down syndrome                                 | 18.04<br>(7.65 to 36.87)              | 14.26<br>(6.38 to 28.53)            | 9.92<br>(4.47 to 19.07)             | 16.42<br>(7.12 to 33.47)            | 0.24<br>(0.11 to 0.48)         | 0.23<br>(0.11 to 0.44)          | 0.17<br>(0.08 to 0.31)          | 0.25<br>(0.12 to 0.51)          |
| Other chromosomal abnormalities               | 17.18<br>(5.75 to 39.07)              | 15.40<br>(4.86 to 34.62)            | 9.78<br>(3.11 to 22.13)             | 18.68<br>(5.83 to 41.92)            | 0.20<br>(0.07 to 0.46)         | 0.19<br>(0.06 to 0.42)          | 0.12<br>(0.04 to 0.27)          | 0.23<br>(0.07 to 0.50)          |
| Congenital musculoskeletal and limb anomalies | 13.59<br>(5.65 to 28.98)              | 10.00<br>(3.81 to 21.40)            | 7.18<br>(2.85 to 15.55)             | 11.69<br>(4.37 to 25.42)            | 0.16<br>(0.07 to 0.35)         | 0.13<br>(0.05 to 0.27)          | 0.09<br>(0.04 to 0.20)          | 0.15<br>(0.06 to 0.32)          |
| Urogenital congenital anomalies               | 14.73<br>(5.88 to 27.28)              | 10.59<br>(4.38 to 20.12)            | 7.72<br>(3.31 to 14.39)             | 12.19<br>(5.07 to 23.78)            | 0.20<br>(0.08 to 0.35)         | 0.17<br>(0.07 to 0.30)          | 0.13<br>(0.06 to 0.23)          | 0.19<br>(0.08 to 0.34)          |
| Digestive congenital anomalies                | 49.06<br>(15.82 to 114.28)            | 28.43<br>(8.48 to 69.86)            | 18.02<br>(5.54 to 43.60)            | 34.52<br>(10.10 to 85.26)           | 0.58<br>(0.19 to 1.33)         | 0.35<br>(0.11 to 0.85)          | 0.22<br>(0.07 to 0.53)          | 0.42<br>(0.13 to 1.02)          |
| Other congenital birth defects                | 159.44<br>(67.35 to 301.98)           | 111.05<br>(44.63 to 210.25)         | 77.71<br>(31.91 to 144.22)          | 130.44<br>(51.90 to 254.65)         | 1.95<br>(0.84 to 3.62)         | 1.46<br>(0.61 to 2.70)          | 1.05<br>(0.46 to 1.88)          | 1.69<br>(0.70 to 3.19)          |
| Skin and subcutaneous diseases                | 63.13<br>(38.74 to 95.42)             | 174.00<br>(108.00 to 254.10)        | 174.76<br>(108.14 to 252.51)        | 170.59<br>(105.26 to 250.81)        | 2.00<br>(1.22 to 3.02)         | 6.46<br>(4.01 to 9.58)          | 7.11<br>(4.47 to 10.44)         | 6.03<br>(3.75 to 8.87)          |
| Cellulitis                                    | 13.03<br>(5.28 to 20.11)              | 44.25<br>(18.36 to 65.71)           | 50.22<br>(21.40 to 74.93)           | 42.00<br>(17.45 to 62.79)           | 0.44<br>(0.17 to 0.67)         | 1.71<br>(0.70 to 2.54)          | 2.10<br>(0.89 to 3.06)          | 1.56<br>(0.63 to 2.32)          |
| Pyoderma                                      | 41.99<br>(26.39 to 66.39)             | 112.62<br>(70.86 to 174.42)         | 106.12<br>(65.13 to 164.23)         | 112.33<br>(70.75 to 175.69)         | 1.20<br>(0.78 to 1.96)         | 3.86<br>(2.46 to 6.13)          | 3.94<br>(2.53 to 6.26)          | 3.68<br>(2.37 to 5.84)          |
| Decubitus ulcer                               | 7.26<br>(3.52 to 14.43)               | 15.70<br>(7.32 to 32.03)            | 16.98<br>(7.89 to 34.13)            | 14.82<br>(6.83 to 30.43)            | 0.34<br>(0.16 to 0.67)         | 0.86<br>(0.39 to 1.77)          | 1.03<br>(0.48 to 2.08)          | 0.76<br>(0.34 to 1.57)          |
| Other skin and subcutaneous diseases          | 0.84<br>(0.47 to 1.34)                | 1.43<br>(0.80 to 2.30)              | 1.44<br>(0.82 to 2.35)              | 1.45<br>(0.81 to 2.35)              | 0.02<br>(0.01 to 0.03)         | 0.03<br>(0.02 to 0.05)          | 0.04<br>(0.02 to 0.06)          | 0.03<br>(0.02 to 0.05)          |
| Sudden infant death syndrome                  | 19.88<br>(7.98 to 40.92)              | 10.22<br>(3.34 to 23.75)            | 6.72<br>(2.17 to 14.90)             | 12.52<br>(4.13 to 28.74)            | 0.23<br>(0.09 to 0.47)         | 0.12<br>(0.04 to 0.28)          | 0.08<br>(0.03 to 0.17)          | 0.15<br>(0.05 to 0.33)          |

|                          |                                       |                                       |                                       |                                       |                              |                              |                              |                              |
|--------------------------|---------------------------------------|---------------------------------------|---------------------------------------|---------------------------------------|------------------------------|------------------------------|------------------------------|------------------------------|
| Injuries                 | 2,574.93<br>(2,125.53 to<br>3,079.64) | 2,929.82<br>(2,174.56 to<br>3,783.13) | 2,378.75<br>(1,803.91 to<br>3,020.98) | 3,104.20<br>(2,312.12 to<br>4,048.22) | 46.97<br>(38.77 to<br>55.63) | 58.52<br>(44.91 to<br>74.11) | 49.28<br>(38.38 to<br>61.10) | 60.88<br>(46.64 to<br>77.98) |
| Transport injuries       | 698.39<br>(556.00 to<br>884.81)       | 943.79<br>(672.16 to<br>1,284.96)     | 697.58<br>(504.33 to<br>940.25)       | 1,025.17<br>(728.59 to<br>1,409.25)   | 12.81<br>(10.19 to<br>16.06) | 18.65<br>(13.62 to<br>24.77) | 14.37<br>(10.72 to<br>18.93) | 19.88<br>(14.41 to<br>26.81) |
| Road injuries            | 611.42<br>(484.42 to<br>781.64)       | 820.00<br>(577.03 to<br>1,124.94)     | 599.54<br>(426.50 to<br>810.34)       | 893.79<br>(627.03 to<br>1,242.17)     | 11.21<br>(8.92 to<br>14.29)  | 16.16<br>(11.65 to<br>21.59) | 12.34<br>(9.12 to<br>16.22)  | 17.28<br>(12.45 to<br>23.31) |
| Pedestrian road injuries | 140.13<br>(95.45 to<br>186.94)        | 146.91<br>(91.74 to<br>213.61)        | 109.78<br>(69.42 to<br>158.27)        | 158.71<br>(97.88 to<br>233.55)        | 2.56<br>(1.79 to<br>3.37)    | 2.99<br>(1.92 to<br>4.21)    | 2.32<br>(1.55 to<br>3.22)    | 3.17<br>(2.04 to<br>4.59)    |

| Marshall Islands                                |                                                        |                                                        |                                                      |                                                        |                                                   |                                                   |                                                   |                                                   |
|-------------------------------------------------|--------------------------------------------------------|--------------------------------------------------------|------------------------------------------------------|--------------------------------------------------------|---------------------------------------------------|---------------------------------------------------|---------------------------------------------------|---------------------------------------------------|
| Cause                                           | YLLs (actual counts)                                   |                                                        |                                                      |                                                        | Deaths (actual counts)                            |                                                   |                                                   |                                                   |
|                                                 | 2016                                                   | 2040 Forecast                                          | 2040 Better Scenario                                 | 2040 Worse Scenario                                    | 2016                                              | 2040 Forecast                                     | 2040 Better Scenario                              | 2040 Worse Scenario                               |
| Cyclist road injuries                           | 8.52<br>(5.34 to<br>11.74)                             | 11.85<br>(7.44 to<br>17.74)                            | 8.71<br>(5.51 to<br>12.77)                           | 12.97<br>(8.04 to<br>19.53)                            | 0.16<br>(0.10 to<br>0.22)                         | 0.24<br>(0.15 to<br>0.35)                         | 0.19<br>(0.12 to<br>0.27)                         | 0.26<br>(0.16 to<br>0.38)                         |
| Motorcyclist road injuries                      | 60.81<br>(38.07 to<br>87.18)                           | 90.81<br>(52.29 to<br>138.75)                          | 72.65<br>(42.76 to<br>109.57)                        | 96.46<br>(55.55 to<br>149.48)                          | 1.08<br>(0.68 to<br>1.57)                         | 1.67<br>(0.96 to<br>2.54)                         | 1.36<br>(0.80 to<br>2.04)                         | 1.75<br>(1.02 to<br>2.71)                         |
| Motor vehicle road injuries                     | 394.54<br>(308.70 to<br>517.64)                        | 559.41<br>(387.47 to<br>776.57)                        | 400.56<br>(277.45 to<br>551.45)                      | 613.54<br>(425.81 to<br>858.12)                        | 7.28<br>(5.76 to<br>9.44)                         | 11.06<br>(7.91 to<br>15.07)                       | 8.32<br>(6.06 to<br>11.21)                        | 11.87<br>(8.42 to<br>16.26)                       |
| Other road injuries                             | 7.42<br>(4.60 to<br>10.43)                             | 11.02<br>(6.32 to<br>16.41)                            | 7.84<br>(4.65 to<br>11.33)                           | 12.13<br>(6.94 to<br>18.08)                            | 0.13<br>(0.08 to<br>0.18)                         | 0.21<br>(0.12 to<br>0.30)                         | 0.15<br>(0.09 to<br>0.21)                         | 0.22<br>(0.13 to<br>0.32)                         |
| Other transport injuries                        | 86.98<br>(55.76 to<br>119.42)                          | 123.78<br>(75.22 to<br>179.36)                         | 98.04<br>(59.71 to<br>141.26)                        | 131.38<br>(79.28 to<br>193.56)                         | 1.60<br>(1.05 to<br>2.16)                         | 2.50<br>(1.58 to<br>3.58)                         | 2.04<br>(1.32 to<br>2.89)                         | 2.60<br>(1.64 to<br>3.82)                         |
| <b>Unintentional injuries</b>                   | <b>998.36</b><br><b>(794.54 to</b><br><b>1,225.88)</b> | <b>817.89</b><br><b>(601.30 to</b><br><b>1,035.06)</b> | <b>664.33</b><br><b>(491.11 to</b><br><b>826.35)</b> | <b>866.43</b><br><b>(635.19 to</b><br><b>1,100.36)</b> | <b>18.17</b><br><b>(14.66 to</b><br><b>21.83)</b> | <b>17.53</b><br><b>(13.40 to</b><br><b>21.28)</b> | <b>15.09</b><br><b>(11.77 to</b><br><b>18.17)</b> | <b>18.02</b><br><b>(13.77 to</b><br><b>21.99)</b> |
| Falls                                           | 76.66<br>(52.78 to<br>111.07)                          | 82.28<br>(56.97 to<br>117.68)                          | 76.98<br>(53.54 to<br>110.04)                        | 82.98<br>(57.38 to<br>120.16)                          | 1.80<br>(1.27 to<br>2.52)                         | 2.42<br>(1.75 to<br>3.32)                         | 2.46<br>(1.81 to<br>3.33)                         | 2.33<br>(1.68 to<br>3.22)                         |
| Drowning                                        | 439.19<br>(331.48 to<br>556.74)                        | 319.11<br>(219.36 to<br>431.88)                        | 253.00<br>(176.07 to<br>343.04)                      | 340.41<br>(231.30 to<br>465.73)                        | 7.45<br>(5.63 to<br>9.28)                         | 6.05<br>(4.23 to<br>8.05)                         | 4.92<br>(3.45 to<br>6.53)                         | 6.36<br>(4.40 to<br>8.54)                         |
| Fire, heat, and hot substances                  | 63.37<br>(43.58 to<br>87.51)                           | 42.94<br>(26.04 to<br>65.65)                           | 32.30<br>(19.56 to<br>49.56)                         | 46.51<br>(28.18 to<br>70.86)                           | 1.12<br>(0.78 to<br>1.51)                         | 0.91<br>(0.60 to<br>1.33)                         | 0.73<br>(0.49 to<br>1.06)                         | 0.96<br>(0.62 to<br>1.40)                         |
| Poisonings                                      | 45.78<br>(25.83 to<br>69.41)                           | 26.20<br>(13.88 to<br>41.71)                           | 17.52<br>(9.42 to<br>26.93)                          | 29.29<br>(15.51 to<br>46.90)                           | 0.81<br>(0.47 to<br>1.18)                         | 0.54<br>(0.30 to<br>0.82)                         | 0.39<br>(0.23 to<br>0.57)                         | 0.58<br>(0.33 to<br>0.88)                         |
| Exposure to mechanical forces                   | 110.26<br>(82.89 to<br>140.91)                         | 96.31<br>(65.90 to<br>130.50)                          | 75.14<br>(51.71 to<br>100.91)                        | 102.83<br>(69.80 to<br>138.78)                         | 2.00<br>(1.49 to<br>2.58)                         | 1.99<br>(1.42 to<br>2.62)                         | 1.62<br>(1.17 to<br>2.12)                         | 2.07<br>(1.47 to<br>2.72)                         |
| Unintentional firearm injuries                  | 17.30<br>(12.20 to<br>24.23)                           | 13.30<br>(8.25 to<br>19.79)                            | 9.93<br>(6.11 to<br>14.72)                           | 14.33<br>(8.80 to<br>21.20)                            | 0.32<br>(0.24 to<br>0.44)                         | 0.29<br>(0.19 to<br>0.42)                         | 0.23<br>(0.15 to<br>0.33)                         | 0.31<br>(0.20 to<br>0.43)                         |
| Unintentional suffocation                       | 26.71<br>(15.99 to<br>39.21)                           | 22.64<br>(12.70 to<br>34.10)                           | 17.25<br>(9.66 to<br>26.21)                          | 24.61<br>(13.50 to<br>37.92)                           | 0.41<br>(0.25 to<br>0.59)                         | 0.38<br>(0.22 to<br>0.56)                         | 0.30<br>(0.17 to<br>0.44)                         | 0.41<br>(0.23 to<br>0.62)                         |
| Other exposure to mechanical forces             | 66.25<br>(46.23 to<br>88.07)                           | 60.38<br>(39.92 to<br>84.42)                           | 47.96<br>(32.04 to<br>67.37)                         | 63.89<br>(42.11 to<br>88.88)                           | 1.27<br>(0.88 to<br>1.66)                         | 1.31<br>(0.90 to<br>1.80)                         | 1.09<br>(0.75 to<br>1.48)                         | 1.36<br>(0.93 to<br>1.85)                         |
| Adverse effects of medical treatment            | 100.75<br>(73.10 to<br>130.53)                         | 100.02<br>(68.63 to<br>136.73)                         | 82.45<br>(57.04 to<br>113.11)                        | 105.24<br>(72.32 to<br>144.22)                         | 1.99<br>(1.49 to<br>2.52)                         | 2.35<br>(1.73 to<br>3.07)                         | 2.07<br>(1.53 to<br>2.69)                         | 2.39<br>(1.76 to<br>3.12)                         |
| Animal contact                                  | 5.31<br>(3.74 to<br>7.99)                              | 6.74<br>(4.23 to<br>10.95)                             | 5.07<br>(3.15 to<br>8.33)                            | 7.22<br>(4.44 to<br>11.84)                             | 0.11<br>(0.08 to<br>0.17)                         | 0.17<br>(0.11 to<br>0.26)                         | 0.14<br>(0.09 to<br>0.21)                         | 0.17<br>(0.11 to<br>0.27)                         |
| Venomous animal contact                         | 1.62<br>(0.97 to<br>2.84)                              | 1.76<br>(0.93 to<br>3.20)                              | 1.28<br>(0.67 to<br>2.30)                            | 1.91<br>(1.00 to<br>3.52)                              | 0.03<br>(0.02 to<br>0.06)                         | 0.04<br>(0.02 to<br>0.07)                         | 0.03<br>(0.02 to<br>0.06)                         | 0.04<br>(0.02 to<br>0.08)                         |
| Non-venomous animal contact                     | 3.69<br>(2.61 to<br>5.54)                              | 4.98<br>(3.02 to<br>8.11)                              | 3.78<br>(2.28 to<br>6.26)                            | 5.32<br>(3.23 to<br>8.66)                              | 0.08<br>(0.06 to<br>0.12)                         | 0.13<br>(0.08 to<br>0.20)                         | 0.10<br>(0.07 to<br>0.16)                         | 0.13<br>(0.08 to<br>0.20)                         |
| Foreign body                                    | 69.94<br>(42.11 to<br>105.59)                          | 62.72<br>(38.38 to<br>88.25)                           | 58.16<br>(36.76 to<br>79.34)                         | 65.57<br>(39.63 to<br>95.59)                           | 1.19<br>(0.77 to<br>1.67)                         | 1.34<br>(0.88 to<br>1.73)                         | 1.37<br>(0.89 to<br>1.72)                         | 1.34<br>(0.88 to<br>1.76)                         |
| Pulmonary aspiration and foreign body in airway | 65.30<br>(38.37 to<br>100.00)                          | 58.88<br>(35.60 to<br>84.22)                           | 55.06<br>(34.10 to<br>76.18)                         | 61.46<br>(36.25 to<br>91.02)                           | 1.11<br>(0.69 to<br>1.57)                         | 1.27<br>(0.80 to<br>1.64)                         | 1.30<br>(0.83 to<br>1.65)                         | 1.26<br>(0.80 to<br>1.67)                         |

|                                             |                                                        |                                                          |                                                          |                                                          |                                                   |                                                   |                                                   |                                                   |
|---------------------------------------------|--------------------------------------------------------|----------------------------------------------------------|----------------------------------------------------------|----------------------------------------------------------|---------------------------------------------------|---------------------------------------------------|---------------------------------------------------|---------------------------------------------------|
|                                             | 4.64<br>(2.88 to<br>7.81)                              | 3.84<br>(2.04 to<br>6.40)                                | 3.10<br>(1.65 to<br>5.24)                                | 4.11<br>(2.19 to<br>6.99)                                | 0.08<br>(0.05 to<br>0.13)                         | 0.07<br>(0.04 to<br>0.12)                         | 0.06<br>(0.03 to<br>0.10)                         | 0.08<br>(0.04 to<br>0.13)                         |
| Foreign body in other body part             |                                                        |                                                          |                                                          |                                                          |                                                   |                                                   |                                                   |                                                   |
| Environmental heat and cold exposure        | 29.86<br>(17.36 to<br>40.66)                           | 34.40<br>(19.18 to<br>50.19)                             | 24.23<br>(13.46 to<br>35.90)                             | 37.26<br>(21.20 to<br>55.12)                             | 0.61<br>(0.36 to<br>0.82)                         | 0.78<br>(0.45 to<br>1.10)                         | 0.57<br>(0.33 to<br>0.83)                         | 0.83<br>(0.47 to<br>1.18)                         |
| Other unintentional injuries                | 57.24<br>(37.39 to<br>77.31)                           | 47.18<br>(29.01 to<br>68.46)                             | 39.49<br>(24.23 to<br>57.22)                             | 49.21<br>(30.58 to<br>70.90)                             | 1.09<br>(0.72 to<br>1.47)                         | 0.97<br>(0.60 to<br>1.35)                         | 0.83<br>(0.52 to<br>1.17)                         | 0.99<br>(0.62 to<br>1.40)                         |
| <b>Self-harm and interpersonal violence</b> | <b>877.67</b><br><b>(659.08 to</b><br><b>1,088.40)</b> | <b>1,168.14</b><br><b>(778.94 to</b><br><b>1,681.28)</b> | <b>1,016.85</b><br><b>(716.13 to</b><br><b>1,389.68)</b> | <b>1,212.60</b><br><b>(797.75 to</b><br><b>1,767.29)</b> | <b>15.98</b><br><b>(11.96 to</b><br><b>19.90)</b> | <b>22.34</b><br><b>(14.93 to</b><br><b>31.71)</b> | <b>19.81</b><br><b>(13.92 to</b><br><b>26.67)</b> | <b>22.98</b><br><b>(15.21 to</b><br><b>32.81)</b> |

| Marshall Islands                                                                    |                                                |                                                |                                                |                                                |                                                |                                                |                                                |                                                |
|-------------------------------------------------------------------------------------|------------------------------------------------|------------------------------------------------|------------------------------------------------|------------------------------------------------|------------------------------------------------|------------------------------------------------|------------------------------------------------|------------------------------------------------|
| Cause                                                                               | YLLs (actual counts)                           |                                                |                                                |                                                | Deaths (actual counts)                         |                                                |                                                |                                                |
|                                                                                     | 2016                                           | 2040 Forecast                                  | 2040 Better Scenario                           | 2040 Worse Scenario                            | 2016                                           | 2040 Forecast                                  | 2040 Better Scenario                           | 2040 Worse Scenario                            |
| Self-harm                                                                           | 634.10<br>(435.83 to<br>798.34)                | 914.38<br>(561.21 to<br>1,387.72)              | 779.04<br>(497.80 to<br>1,109.98)              | 954.29<br>(581.02 to<br>1,469.17)              | 11.55<br>(8.03 to<br>14.51)                    | 17.50<br>(10.78 to<br>26.00)                   | 15.23<br>(9.96 to<br>21.24)                    | 18.08<br>(11.00 to<br>27.46)                   |
| Self-harm by firearm                                                                | 40.89<br>(13.98 to<br>88.16)                   | 51.20<br>(14.99 to<br>121.73)                  | 41.94<br>(12.42 to<br>98.01)                   | 53.66<br>(15.26 to<br>128.01)                  | 0.78<br>(0.27 to<br>1.68)                      | 1.01<br>(0.30 to<br>2.40)                      | 0.84<br>(0.26 to<br>1.91)                      | 1.05<br>(0.31 to<br>2.49)                      |
| Self-harm by other specified means                                                  | 593.21<br>(410.49 to<br>748.39)                | 863.18<br>(541.54 to<br>1,304.77)              | 737.11<br>(479.06 to<br>1,056.71)              | 900.63<br>(557.72 to<br>1,368.78)              | 10.77<br>(7.55 to<br>13.51)                    | 16.49<br>(10.33 to<br>24.39)                   | 14.39<br>(9.60 to<br>20.05)                    | 17.03<br>(10.63 to<br>25.48)                   |
| Interpersonal violence                                                              | 243.58<br>(151.98 to<br>322.58)                | 253.76<br>(144.48 to<br>361.76)                | 237.81<br>(135.39 to<br>337.68)                | 258.31<br>(146.47 to<br>367.65)                | 4.43<br>(2.75 to<br>5.93)                      | 4.84<br>(2.78 to<br>6.91)                      | 4.58<br>(2.65 to<br>6.49)                      | 4.90<br>(2.79 to<br>6.96)                      |
| Physical violence by firearm                                                        | 56.90<br>(25.00 to<br>90.68)                   | 58.71<br>(25.20 to<br>97.01)                   | 56.82<br>(24.54 to<br>93.47)                   | 59.23<br>(25.35 to<br>98.14)                   | 1.03<br>(0.45 to<br>1.63)                      | 1.10<br>(0.47 to<br>1.80)                      | 1.07<br>(0.47 to<br>1.74)                      | 1.11<br>(0.47 to<br>1.80)                      |
| Physical violence by sharp object                                                   | 65.43<br>(39.33 to<br>94.65)                   | 74.77<br>(42.79 to<br>110.86)                  | 76.25<br>(43.66 to<br>112.33)                  | 74.46<br>(42.57 to<br>110.29)                  | 1.20<br>(0.73 to<br>1.73)                      | 1.42<br>(0.82 to<br>2.11)                      | 1.46<br>(0.85 to<br>2.15)                      | 1.41<br>(0.82 to<br>2.10)                      |
| Physical violence by other means                                                    | 121.24<br>(69.34 to<br>171.69)                 | 120.28<br>(57.43 to<br>196.35)                 | 104.73<br>(50.37 to<br>167.55)                 | 124.63<br>(59.39 to<br>202.94)                 | 2.19<br>(1.25 to<br>3.07)                      | 2.32<br>(1.13 to<br>3.71)                      | 2.05<br>(1.01 to<br>3.22)                      | 2.38<br>(1.16 to<br>3.81)                      |
| <b>Forces of nature, conflict and terrorism, and executions and police conflict</b> | <b>0.50</b><br><b>(0.40 to</b><br><b>0.62)</b> | <b>0.00</b><br><b>(0.00 to</b><br><b>0.00)</b> | <b>0.00</b><br><b>(0.00 to</b><br><b>0.00)</b> | <b>0.00</b><br><b>(0.00 to</b><br><b>0.00)</b> | <b>0.01</b><br><b>(0.01 to</b><br><b>0.01)</b> | <b>0.00</b><br><b>(0.00 to</b><br><b>0.00)</b> | <b>0.00</b><br><b>(0.00 to</b><br><b>0.00)</b> | <b>0.00</b><br><b>(0.00 to</b><br><b>0.00)</b> |
| Exposure to forces of nature                                                        | 0.00<br>(0.00 to<br>0.00)                      | 0.00<br>(0.00 to<br>0.00)                      | 0.00<br>(0.00 to<br>0.00)                      | 0.00<br>(0.00 to<br>0.00)                      | 0.00<br>(0.00 to<br>0.00)                      | 0.00<br>(0.00 to<br>0.00)                      | 0.00<br>(0.00 to<br>0.00)                      | 0.00<br>(0.00 to<br>0.00)                      |
| Conflict and terrorism                                                              | 0.00<br>(0.00 to<br>0.00)                      | 0.00<br>(0.00 to<br>0.00)                      | 0.00<br>(0.00 to<br>0.00)                      | 0.00<br>(0.00 to<br>0.00)                      | 0.00<br>(0.00 to<br>0.00)                      | 0.00<br>(0.00 to<br>0.00)                      | 0.00<br>(0.00 to<br>0.00)                      | 0.00<br>(0.00 to<br>0.00)                      |
| Executions and police conflict                                                      | 0.50<br>(0.40 to<br>0.62)                      | 0.00<br>(0.00 to<br>0.00)                      | 0.00<br>(0.00 to<br>0.00)                      | 0.00<br>(0.00 to<br>0.00)                      | 0.01<br>(0.01 to<br>0.01)                      | 0.00<br>(0.00 to<br>0.00)                      | 0.00<br>(0.00 to<br>0.00)                      | 0.00<br>(0.00 to<br>0.00)                      |

| Northern Mariana Islands                                          |                                         |                                          |                                          |                                          |                                 |                                     |                                 |                                       |
|-------------------------------------------------------------------|-----------------------------------------|------------------------------------------|------------------------------------------|------------------------------------------|---------------------------------|-------------------------------------|---------------------------------|---------------------------------------|
| Cause                                                             | YLLs (actual counts)                    |                                          |                                          |                                          | Deaths (actual counts)          |                                     |                                 |                                       |
|                                                                   | 2016                                    | 2040 Forecast                            | 2040 Better Scenario                     | 2040 Worse Scenario                      | 2016                            | 2040 Forecast                       | 2040 Better Scenario            | 2040 Worse Scenario                   |
| All causes                                                        | 11,344.71<br>(9,312.87 to<br>13,568.84) | 25,128.79<br>(19,160.40 to<br>32,884.60) | 15,140.81<br>(11,714.39 to<br>20,359.84) | 31,851.06<br>(24,287.23 to<br>41,130.06) | 305.21<br>(255.44 to<br>362.14) | 1,056.02<br>(857.11 to<br>1,321.84) | 672.69<br>(544.84 to<br>872.56) | 1,303.89<br>(1,042.68 to<br>1,620.13) |
| Communicable, maternal, neonatal, and nutritional diseases        | 1,309.99<br>(888.93 to<br>2,455.95)     | 1,607.41<br>(1,134.09 to<br>2,830.87)    | 1,032.93<br>(710.25 to<br>2,161.66)      | 1,992.56<br>(1,441.97 to<br>3,239.03)    | 27.33<br>(19.59 to<br>51.39)    | 59.71<br>(44.62 to<br>92.02)        | 42.44<br>(31.23 to<br>72.45)    | 71.21<br>(53.25 to<br>104.13)         |
| HIV/AIDS and tuberculosis                                         | 300.72<br>(59.73 to<br>1,525.14)        | 345.81<br>(80.00 to<br>1,647.54)         | 174.21<br>(13.80 to<br>1,370.37)         | 467.96<br>(144.13 to<br>1,763.28)        | 6.38<br>(1.50 to<br>32.57)      | 9.93<br>(2.97 to<br>42.39)          | 4.99<br>(0.58 to<br>36.08)      | 13.06<br>(4.71 to<br>44.92)           |
| Tuberculosis                                                      | 44.91<br>(34.86 to<br>55.65)            | 75.71<br>(46.58 to<br>120.61)            | 18.20<br>(11.68 to<br>27.18)             | 100.58<br>(59.66 to<br>164.57)           | 1.20<br>(0.94 to<br>1.47)       | 3.14<br>(1.96 to<br>4.90)           | 0.79<br>(0.52 to<br>1.16)       | 4.07<br>(2.45 to<br>6.68)             |
| HIV/AIDS                                                          | 255.81<br>(13.04 to<br>1,490.15)        | 270.10<br>(10.18 to<br>1,565.34)         | 156.01<br>(0.00 to<br>1,343.46)          | 367.38<br>(50.49 to<br>1,639.70)         | 5.18<br>(0.24 to<br>31.52)      | 6.30<br>(0.19 to<br>39.46)          | 4.21<br>(0.00 to<br>35.28)      | 8.99<br>(1.07 to<br>40.72)            |
| Diarrhea, lower respiratory, and other common infectious diseases | 490.38<br>(372.98 to<br>628.87)         | 913.08<br>(667.51 to<br>1,252.91)        | 606.75<br>(453.36 to<br>826.13)          | 1,141.40<br>(805.09 to<br>1,672.23)      | 12.33<br>(9.79 to<br>15.45)     | 39.28<br>(29.18 to<br>53.05)        | 27.66<br>(20.65 to<br>38.27)    | 47.43<br>(34.35 to<br>66.62)          |
| Diarrheal diseases                                                | 16.91<br>(10.51 to<br>26.21)            | 50.95<br>(13.10 to<br>152.91)            | 106.82<br>(37.74 to<br>264.45)           | 42.91<br>(10.65 to<br>136.12)            | 0.51<br>(0.29 to<br>0.81)       | 2.71<br>(0.65 to<br>8.18)           | 6.07<br>(2.11 to<br>15.32)      | 2.21<br>(0.52 to<br>7.12)             |
| Intestinal infectious diseases                                    | 46.41<br>(15.67 to<br>105.64)           | 41.37<br>(15.01 to<br>91.49)             | 60.45<br>(25.97 to<br>118.24)            | 40.86<br>(14.34 to<br>92.76)             | 0.72<br>(0.24 to<br>1.65)       | 0.75<br>(0.28 to<br>1.68)           | 1.12<br>(0.47 to<br>2.25)       | 0.73<br>(0.26 to<br>1.64)             |
| Typhoid fever                                                     | 39.41<br>(13.11 to<br>89.17)            | 35.24<br>(12.91 to<br>78.74)             | 57.36<br>(24.79 to<br>111.46)            | 33.86<br>(11.90 to<br>75.96)             | 0.61<br>(0.20 to<br>1.40)       | 0.63<br>(0.23 to<br>1.41)           | 1.06<br>(0.45 to<br>2.15)       | 0.60<br>(0.21 to<br>1.35)             |
| Paratyphoid fever                                                 | 6.99<br>(2.01 to<br>17.58)              | 6.12<br>(1.94 to<br>14.53)               | 3.07<br>(1.05 to<br>7.06)                | 6.99<br>(2.16 to<br>17.29)               | 0.11<br>(0.03 to<br>0.29)       | 0.12<br>(0.04 to<br>0.29)           | 0.06<br>(0.02 to<br>0.14)       | 0.13<br>(0.04 to<br>0.32)             |
| Other intestinal infectious diseases                              | 0.01<br>(0.01 to<br>0.03)               | 0.01<br>(0.00 to<br>0.03)                | 0.01<br>(0.00 to<br>0.02)                | 0.01<br>(0.00 to<br>0.03)                | 0.00<br>(0.00 to<br>0.00)       | 0.00<br>(0.00 to<br>0.00)           | 0.00<br>(0.00 to<br>0.00)       | 0.00<br>(0.00 to<br>0.00)             |
| Lower respiratory infections                                      | 388.69<br>(295.69 to<br>496.29)         | 788.76<br>(566.29 to<br>1,100.50)        | 417.36<br>(297.53 to<br>575.07)          | 1,021.32<br>(708.54 to<br>1,515.81)      | 10.43<br>(8.22 to<br>13.13)     | 34.98<br>(25.49 to<br>48.04)        | 19.87<br>(13.87 to<br>27.57)    | 43.59<br>(31.17 to<br>62.87)          |
| Upper respiratory infections                                      | 0.36<br>(0.17 to<br>0.66)               | 0.60<br>(0.21 to<br>1.41)                | 0.18<br>(0.06 to<br>0.41)                | 0.72<br>(0.26 to<br>1.65)                | 0.01<br>(0.00 to<br>0.02)       | 0.02<br>(0.01 to<br>0.05)           | 0.01<br>(0.01 to<br>0.01)       | 0.03<br>(0.01 to<br>0.06)             |
| Otitis media                                                      | 0.01<br>(0.00 to<br>0.01)               | 0.00<br>(0.00 to<br>0.01)                | 0.01<br>(0.00 to<br>0.01)                | 0.00<br>(0.00 to<br>0.01)                | 0.00<br>(0.00 to<br>0.00)       | 0.00<br>(0.00 to<br>0.00)           | 0.00<br>(0.00 to<br>0.00)       | 0.00<br>(0.00 to<br>0.00)             |
| Meningitis                                                        | 17.86<br>(12.10 to<br>26.87)            | 11.28<br>(7.17 to<br>17.76)              | 5.25<br>(3.36 to<br>8.39)                | 12.76<br>(8.26 to<br>19.57)              | 0.34<br>(0.23 to<br>0.51)       | 0.31<br>(0.19 to<br>0.48)           | 0.15<br>(0.09 to<br>0.23)       | 0.34<br>(0.22 to<br>0.51)             |
| Pneumococcal meningitis                                           | 0.05<br>(0.03 to<br>0.08)               | 0.03<br>(0.02 to<br>0.05)                | 0.03<br>(0.02 to<br>0.05)                | 0.03<br>(0.02 to<br>0.04)                | 0.00<br>(0.00 to<br>0.00)       | 0.00<br>(0.00 to<br>0.00)           | 0.00<br>(0.00 to<br>0.00)       | 0.00<br>(0.00 to<br>0.00)             |
| H influenzae type B meningitis                                    | 1.86<br>(1.23 to<br>2.91)               | 1.07<br>(0.67 to<br>1.68)                | 1.07<br>(0.65 to<br>1.68)                | 1.08<br>(0.67 to<br>1.75)                | 0.04<br>(0.02 to<br>0.05)       | 0.03<br>(0.02 to<br>0.05)           | 0.03<br>(0.02 to<br>0.05)       | 0.03<br>(0.02 to<br>0.05)             |
| Meningococcal meningitis                                          | 3.62<br>(2.31 to<br>5.66)               | 2.42<br>(1.53 to<br>3.85)                | 1.06<br>(0.65 to<br>1.68)                | 2.73<br>(1.70 to<br>4.22)                | 0.07<br>(0.05 to<br>0.11)       | 0.07<br>(0.04 to<br>0.11)           | 0.03<br>(0.02 to<br>0.05)       | 0.08<br>(0.05 to<br>0.12)             |
| Other meningitis                                                  | 12.32<br>(8.20 to<br>18.59)             | 7.76<br>(4.83 to<br>12.13)               | 3.09<br>(1.92 to<br>4.83)                | 8.92<br>(5.77 to<br>13.79)               | 0.23<br>(0.15 to<br>0.36)       | 0.21<br>(0.13 to<br>0.33)           | 0.09<br>(0.05 to<br>0.13)       | 0.23<br>(0.15 to<br>0.36)             |
| Encephalitis                                                      | 9.66<br>(6.87 to<br>13.35)              | 13.37<br>(10.06 to<br>17.96)             | 12.06<br>(8.85 to<br>16.45)              | 13.64<br>(10.26 to<br>18.31)             | 0.18<br>(0.13 to<br>0.24)       | 0.39<br>(0.30 to<br>0.51)           | 0.36<br>(0.27 to<br>0.48)       | 0.39<br>(0.30 to<br>0.51)             |

|                |                            |                            |                            |                            |                           |                           |                           |                           |
|----------------|----------------------------|----------------------------|----------------------------|----------------------------|---------------------------|---------------------------|---------------------------|---------------------------|
| Diphtheria     | 0.04<br>(0.03 to<br>0.07)  | 0.01<br>(0.01 to<br>0.03)  | 0.01<br>(0.01 to<br>0.03)  | 0.02<br>(0.01 to<br>0.03)  | 0.00<br>(0.00 to<br>0.00) | 0.00<br>(0.00 to<br>0.00) | 0.00<br>(0.00 to<br>0.00) | 0.00<br>(0.00 to<br>0.00) |
| Whooping cough | 3.20<br>(0.27 to<br>10.14) | 1.20<br>(0.06 to<br>5.18)  | 0.46<br>(0.03 to<br>1.95)  | 2.64<br>(0.11 to<br>11.31) | 0.04<br>(0.00 to<br>0.12) | 0.01<br>(0.00 to<br>0.06) | 0.01<br>(0.00 to<br>0.02) | 0.03<br>(0.00 to<br>0.13) |
| Tetanus        | 0.65<br>(0.51 to<br>0.80)  | 0.08<br>(0.06 to<br>0.11)  | 0.08<br>(0.05 to<br>0.11)  | 0.09<br>(0.06 to<br>0.14)  | 0.01<br>(0.01 to<br>0.01) | 0.00<br>(0.00 to<br>0.00) | 0.00<br>(0.00 to<br>0.00) | 0.00<br>(0.00 to<br>0.00) |
| Measles        | 4.89<br>(1.06 to<br>14.14) | 4.42<br>(0.01 to<br>25.20) | 3.51<br>(0.01 to<br>18.50) | 5.28<br>(0.01 to<br>30.84) | 0.06<br>(0.01 to<br>0.17) | 0.07<br>(0.00 to<br>0.36) | 0.05<br>(0.00 to<br>0.27) | 0.08<br>(0.00 to<br>0.43) |

| Northern Mariana Islands                              |                                                   |                                                   |                                                   |                                                   |                                                |                                                |                                                |                                                |
|-------------------------------------------------------|---------------------------------------------------|---------------------------------------------------|---------------------------------------------------|---------------------------------------------------|------------------------------------------------|------------------------------------------------|------------------------------------------------|------------------------------------------------|
| Cause                                                 | YLLs (actual counts)                              |                                                   |                                                   |                                                   | Deaths (actual counts)                         |                                                |                                                |                                                |
|                                                       | 2016                                              | 2040 Forecast                                     | 2040 Better Scenario                              | 2040 Worse Scenario                               | 2016                                           | 2040 Forecast                                  | 2040 Better Scenario                           | 2040 Worse Scenario                            |
| Varicella and herpes zoster                           | 1.68<br>(0.83 to<br>3.22)                         | 1.04<br>(0.55 to<br>1.94)                         | 0.57<br>(0.31 to<br>1.05)                         | 1.16<br>(0.60 to<br>2.18)                         | 0.03<br>(0.02 to<br>0.05)                      | 0.03<br>(0.02 to<br>0.05)                      | 0.02<br>(0.01 to<br>0.04)                      | 0.04<br>(0.02 to<br>0.06)                      |
| <b>Neglected tropical diseases and malaria</b>        | <b>13.28</b><br><b>(2.40 to</b><br><b>26.55)</b>  | <b>14.44</b><br><b>(3.70 to</b><br><b>25.97)</b>  | <b>15.62</b><br><b>(4.40 to</b><br><b>26.59)</b>  | <b>14.17</b><br><b>(3.46 to</b><br><b>25.88)</b>  | <b>0.29</b><br><b>(0.06 to</b><br><b>0.56)</b> | <b>0.53</b><br><b>(0.17 to</b><br><b>0.84)</b> | <b>0.63</b><br><b>(0.22 to</b><br><b>0.96)</b> | <b>0.50</b><br><b>(0.15 to</b><br><b>0.81)</b> |
| Malaria                                               | 11.81<br>(1.03 to<br>24.84)                       | 9.89<br>(0.54 to<br>20.92)                        | 9.41<br>(0.52 to<br>19.76)                        | 9.94<br>(0.55 to<br>20.97)                        | 0.24<br>(0.02 to<br>0.51)                      | 0.28<br>(0.02 to<br>0.58)                      | 0.27<br>(0.01 to<br>0.56)                      | 0.28<br>(0.01 to<br>0.58)                      |
| Chagas disease                                        | 0.00<br>(0.00 to<br>0.00)                         | 0.00<br>(0.00 to<br>0.00)                         | 0.00<br>(0.00 to<br>0.00)                         | 0.00<br>(0.00 to<br>0.00)                         | 0.00<br>(0.00 to<br>0.00)                      | 0.00<br>(0.00 to<br>0.00)                      | 0.00<br>(0.00 to<br>0.00)                      | 0.00<br>(0.00 to<br>0.00)                      |
| Leishmaniasis                                         | 0.00<br>(0.00 to<br>0.00)                         | 0.00<br>(0.00 to<br>0.00)                         | 0.00<br>(0.00 to<br>0.00)                         | 0.00<br>(0.00 to<br>0.00)                         | 0.00<br>(0.00 to<br>0.00)                      | 0.00<br>(0.00 to<br>0.00)                      | 0.00<br>(0.00 to<br>0.00)                      | 0.00<br>(0.00 to<br>0.00)                      |
| African trypanosomiasis                               | 0.00<br>(0.00 to<br>0.00)                         | 0.00<br>(0.00 to<br>0.00)                         | 0.00<br>(0.00 to<br>0.00)                         | 0.00<br>(0.00 to<br>0.00)                         | 0.00<br>(0.00 to<br>0.00)                      | 0.00<br>(0.00 to<br>0.00)                      | 0.00<br>(0.00 to<br>0.00)                      | 0.00<br>(0.00 to<br>0.00)                      |
| Schistosomiasis                                       | 0.00<br>(0.00 to<br>0.00)                         | 0.00<br>(0.00 to<br>0.00)                         | 0.00<br>(0.00 to<br>0.00)                         | 0.00<br>(0.00 to<br>0.00)                         | 0.00<br>(0.00 to<br>0.00)                      | 0.00<br>(0.00 to<br>0.00)                      | 0.00<br>(0.00 to<br>0.00)                      | 0.00<br>(0.00 to<br>0.00)                      |
| Cysticercosis                                         | 0.13<br>(0.10 to<br>0.16)                         | 0.08<br>(0.06 to<br>0.10)                         | 0.07<br>(0.05 to<br>0.10)                         | 0.08<br>(0.06 to<br>0.10)                         | 0.00<br>(0.00 to<br>0.00)                      | 0.00<br>(0.00 to<br>0.00)                      | 0.00<br>(0.00 to<br>0.00)                      | 0.00<br>(0.00 to<br>0.00)                      |
| Cystic echinococcosis                                 | 0.00<br>(0.00 to<br>0.00)                         | 0.00<br>(0.00 to<br>0.00)                         | 0.00<br>(0.00 to<br>0.00)                         | 0.00<br>(0.00 to<br>0.00)                         | 0.00<br>(0.00 to<br>0.00)                      | 0.00<br>(0.00 to<br>0.00)                      | 0.00<br>(0.00 to<br>0.00)                      | 0.00<br>(0.00 to<br>0.00)                      |
| Dengue                                                | 0.02<br>(0.01 to<br>0.04)                         | 0.16<br>(0.07 to<br>0.33)                         | 0.17<br>(0.07 to<br>0.34)                         | 0.16<br>(0.07 to<br>0.31)                         | 0.00<br>(0.00 to<br>0.00)                      | 0.00<br>(0.00 to<br>0.01)                      | 0.01<br>(0.00 to<br>0.01)                      | 0.01<br>(0.00 to<br>0.01)                      |
| Yellow fever                                          | 0.00<br>(0.00 to<br>0.00)                         | 0.00<br>(0.00 to<br>0.00)                         | 0.00<br>(0.00 to<br>0.00)                         | 0.00<br>(0.00 to<br>0.00)                         | 0.00<br>(0.00 to<br>0.00)                      | 0.00<br>(0.00 to<br>0.00)                      | 0.00<br>(0.00 to<br>0.00)                      | 0.00<br>(0.00 to<br>0.00)                      |
| Rabies                                                | 0.01<br>(0.00 to<br>0.01)                         | 0.01<br>(0.01 to<br>0.02)                         | 0.01<br>(0.00 to<br>0.01)                         | 0.01<br>(0.01 to<br>0.02)                         | 0.00<br>(0.00 to<br>0.00)                      | 0.00<br>(0.00 to<br>0.00)                      | 0.00<br>(0.00 to<br>0.00)                      | 0.00<br>(0.00 to<br>0.00)                      |
| Intestinal nematode infections                        | 0.00<br>(0.00 to<br>0.00)                         | 0.00<br>(0.00 to<br>0.00)                         | 0.00<br>(0.00 to<br>0.00)                         | 0.00<br>(0.00 to<br>0.00)                         | 0.00<br>(0.00 to<br>0.00)                      | 0.00<br>(0.00 to<br>0.00)                      | 0.00<br>(0.00 to<br>0.00)                      | 0.00<br>(0.00 to<br>0.00)                      |
| Other neglected tropical diseases                     | 1.31<br>(1.00 to<br>1.75)                         | 4.30<br>(2.47 to<br>5.78)                         | 5.97<br>(3.22 to<br>8.09)                         | 3.98<br>(2.27 to<br>5.34)                         | 0.04<br>(0.03 to<br>0.05)                      | 0.23<br>(0.13 to<br>0.32)                      | 0.34<br>(0.18 to<br>0.48)                      | 0.21<br>(0.11 to<br>0.29)                      |
| <b>Maternal disorders</b>                             | <b>46.02</b><br><b>(28.56 to</b><br><b>69.64)</b> | <b>30.12</b><br><b>(18.29 to</b><br><b>45.55)</b> | <b>17.68</b><br><b>(10.65 to</b><br><b>26.46)</b> | <b>33.14</b><br><b>(19.82 to</b><br><b>58.01)</b> | <b>0.85</b><br><b>(0.54 to</b><br><b>1.30)</b> | <b>0.59</b><br><b>(0.35 to</b><br><b>0.88)</b> | <b>0.34</b><br><b>(0.21 to</b><br><b>0.53)</b> | <b>0.64</b><br><b>(0.39 to</b><br><b>0.97)</b> |
| Maternal hemorrhage                                   | 15.29<br>(8.53 to<br>24.84)                       | 9.11<br>(4.92 to<br>14.98)                        | 5.45<br>(2.86 to<br>8.93)                         | 9.97<br>(5.39 to<br>16.53)                        | 0.28<br>(0.16 to<br>0.45)                      | 0.18<br>(0.10 to<br>0.28)                      | 0.11<br>(0.06 to<br>0.17)                      | 0.19<br>(0.10 to<br>0.31)                      |
| Maternal sepsis and other maternal infections         | 4.62<br>(1.87 to<br>8.81)                         | 2.86<br>(1.17 to<br>5.50)                         | 1.67<br>(0.67 to<br>3.32)                         | 3.14<br>(1.27 to<br>6.06)                         | 0.09<br>(0.04 to<br>0.16)                      | 0.06<br>(0.02 to<br>0.11)                      | 0.03<br>(0.01 to<br>0.07)                      | 0.06<br>(0.03 to<br>0.13)                      |
| Maternal hypertensive disorders                       | 6.46<br>(3.41 to<br>11.62)                        | 4.28<br>(2.19 to<br>7.29)                         | 2.43<br>(1.21 to<br>4.17)                         | 4.71<br>(2.41 to<br>8.34)                         | 0.12<br>(0.06 to<br>0.21)                      | 0.08<br>(0.04 to<br>0.14)                      | 0.05<br>(0.02 to<br>0.08)                      | 0.09<br>(0.05 to<br>0.16)                      |
| Maternal obstructed labor and uterine rupture         | 3.24<br>(1.40 to<br>6.12)                         | 2.23<br>(0.92 to<br>4.32)                         | 1.17<br>(0.48 to<br>2.34)                         | 2.49<br>(1.05 to<br>4.96)                         | 0.06<br>(0.03 to<br>0.11)                      | 0.04<br>(0.02 to<br>0.09)                      | 0.02<br>(0.01 to<br>0.05)                      | 0.05<br>(0.02 to<br>0.10)                      |
| Maternal abortion, miscarriage, and ectopic pregnancy | 2.57<br>(1.09 to<br>4.94)                         | 2.00<br>(0.84 to<br>3.84)                         | 1.14<br>(0.49 to<br>2.23)                         | 2.19<br>(0.95 to<br>4.26)                         | 0.05<br>(0.02 to<br>0.09)                      | 0.04<br>(0.02 to<br>0.08)                      | 0.02<br>(0.01 to<br>0.05)                      | 0.04<br>(0.02 to<br>0.09)                      |



|                                        |                            |                           |                           |                           |                           |                           |                           |                           |
|----------------------------------------|----------------------------|---------------------------|---------------------------|---------------------------|---------------------------|---------------------------|---------------------------|---------------------------|
|                                        | 4.74<br>(2.28 to<br>8.50)  | 3.41<br>(1.60 to<br>5.75) | 1.91<br>(0.91 to<br>3.24) | 3.80<br>(1.76 to<br>6.52) | 0.09<br>(0.04 to<br>0.15) | 0.06<br>(0.03 to<br>0.11) | 0.04<br>(0.02 to<br>0.06) | 0.07<br>(0.03 to<br>0.13) |
| Indirect maternal deaths               |                            |                           |                           |                           |                           |                           |                           |                           |
|                                        | 1.75<br>(0.64 to<br>3.77)  | 0.99<br>(0.33 to<br>2.10) | 0.55<br>(0.19 to<br>1.15) | 1.10<br>(0.37 to<br>2.28) | 0.03<br>(0.01 to<br>0.07) | 0.02<br>(0.01 to<br>0.04) | 0.01<br>(0.00 to<br>0.02) | 0.02<br>(0.01 to<br>0.04) |
| Late maternal deaths                   |                            |                           |                           |                           |                           |                           |                           |                           |
|                                        | 0.01<br>(0.00 to<br>0.06)  | 0.09<br>(0.00 to<br>0.63) | 0.05<br>(0.00 to<br>0.41) | 0.10<br>(0.00 to<br>0.68) | 0.00<br>(0.00 to<br>0.00) | 0.00<br>(0.00 to<br>0.01) | 0.00<br>(0.00 to<br>0.01) | 0.00<br>(0.00 to<br>0.01) |
| Maternal deaths aggravated by HIV/AIDS |                            |                           |                           |                           |                           |                           |                           |                           |
|                                        | 7.36<br>(3.89 to<br>12.59) | 5.17<br>(2.62 to<br>8.70) | 3.31<br>(1.70 to<br>5.66) | 5.64<br>(2.85 to<br>9.68) | 0.14<br>(0.07 to<br>0.23) | 0.10<br>(0.05 to<br>0.17) | 0.06<br>(0.03 to<br>0.11) | 0.11<br>(0.06 to<br>0.19) |
| Other maternal disorders               |                            |                           |                           |                           |                           |                           |                           |                           |

| Northern Mariana Islands                                                |                                     |                                     |                                    |                                     |                               |                               |                               |                               |
|-------------------------------------------------------------------------|-------------------------------------|-------------------------------------|------------------------------------|-------------------------------------|-------------------------------|-------------------------------|-------------------------------|-------------------------------|
| Cause                                                                   | YLLs (actual counts)                |                                     |                                    |                                     | Deaths (actual counts)        |                               |                               |                               |
|                                                                         | 2016                                | 2040 Forecast                       | 2040 Better Scenario               | 2040 Worse Scenario                 | 2016                          | 2040 Forecast                 | 2040 Better Scenario          | 2040 Worse Scenario           |
| <b>Neonatal disorders</b>                                               | <b>185.97</b><br>(83.26 to 339.22)  | <b>87.35</b><br>(26.22 to 234.48)   | <b>43.95</b><br>(12.79 to 124.13)  | <b>108.69</b><br>(31.72 to 295.92)  | <b>2.15</b><br>(0.96 to 3.92) | <b>1.01</b><br>(0.30 to 2.71) | <b>0.51</b><br>(0.15 to 1.43) | <b>1.26</b><br>(0.37 to 3.42) |
| Neonatal preterm birth                                                  | 78.62<br>(34.74 to 150.32)          | 33.41<br>(10.01 to 92.94)           | 11.27<br>(3.49 to 30.32)           | 42.26<br>(12.66 to 115.36)          | 0.91<br>(0.40 to 1.74)        | 0.39<br>(0.12 to 1.07)        | 0.13<br>(0.04 to 0.35)        | 0.49<br>(0.15 to 1.33)        |
| Neonatal encephalopathy due to birth asphyxia and trauma                | 43.83<br>(18.35 to 86.49)           | 17.60<br>(4.64 to 50.86)            | 7.30<br>(1.90 to 20.97)            | 22.82<br>(5.75 to 69.83)            | 0.51<br>(0.21 to 1.00)        | 0.20<br>(0.05 to 0.59)        | 0.08<br>(0.02 to 0.24)        | 0.26<br>(0.07 to 0.81)        |
| Neonatal sepsis and other neonatal infections                           | 20.94<br>(8.31 to 42.33)            | 11.28<br>(3.05 to 33.42)            | 5.68<br>(1.54 to 16.79)            | 14.19<br>(3.76 to 42.49)            | 0.24<br>(0.10 to 0.49)        | 0.13<br>(0.04 to 0.39)        | 0.07<br>(0.02 to 0.19)        | 0.16<br>(0.04 to 0.49)        |
| Hemolytic disease and other neonatal jaundice                           | 2.16<br>(0.80 to 4.65)              | 0.73<br>(0.14 to 2.56)              | 0.35<br>(0.07 to 1.20)             | 0.93<br>(0.18 to 3.13)              | 0.03<br>(0.01 to 0.05)        | 0.01<br>(0.00 to 0.03)        | 0.00<br>(0.00 to 0.01)        | 0.01<br>(0.00 to 0.04)        |
| Other neonatal disorders                                                | 40.41<br>(17.01 to 77.36)           | 24.32<br>(6.35 to 77.38)            | 19.36<br>(5.24 to 58.96)           | 28.49<br>(7.37 to 90.69)            | 0.47<br>(0.20 to 0.89)        | 0.28<br>(0.07 to 0.89)        | 0.22<br>(0.06 to 0.68)        | 0.33<br>(0.09 to 1.05)        |
| <b>Nutritional deficiencies</b>                                         | <b>28.84</b><br>(20.18 to 41.91)    | <b>49.92</b><br>(41.26 to 59.86)    | <b>66.05</b><br>(54.70 to 77.85)   | <b>46.59</b><br>(37.99 to 56.71)    | <b>1.01</b><br>(0.82 to 1.22) | <b>3.25</b><br>(2.58 to 3.93) | <b>4.75</b><br>(3.82 to 5.65) | <b>2.90</b><br>(2.27 to 3.58) |
| Protein-energy malnutrition                                             | 27.18<br>(18.97 to 39.86)           | 46.19<br>(37.10 to 56.22)           | 62.70<br>(51.44 to 74.49)          | 42.85<br>(34.11 to 52.58)           | 0.97<br>(0.79 to 1.18)        | 3.07<br>(2.36 to 3.79)        | 4.59<br>(3.64 to 5.52)        | 2.73<br>(2.09 to 3.38)        |
| Iodine deficiency                                                       | 0.27<br>(0.01 to 0.91)              | 1.88<br>(0.04 to 6.82)              | 1.83<br>(0.02 to 7.87)             | 1.84<br>(0.04 to 6.56)              | 0.01<br>(0.00 to 0.02)        | 0.10<br>(0.00 to 0.44)        | 0.11<br>(0.00 to 0.54)        | 0.10<br>(0.00 to 0.41)        |
| Dietary iron deficiency                                                 | 0.60<br>(0.44 to 0.79)              | 0.63<br>(0.44 to 0.91)              | 0.69<br>(0.49 to 0.98)             | 0.63<br>(0.44 to 0.90)              | 0.01<br>(0.01 to 0.01)        | 0.02<br>(0.01 to 0.02)        | 0.02<br>(0.01 to 0.03)        | 0.02<br>(0.01 to 0.02)        |
| Other nutritional deficiencies                                          | 0.80<br>(0.58 to 1.05)              | 1.22<br>(0.84 to 1.70)              | 0.83<br>(0.57 to 1.16)             | 1.27<br>(0.89 to 1.78)              | 0.02<br>(0.01 to 0.03)        | 0.06<br>(0.04 to 0.08)        | 0.04<br>(0.03 to 0.06)        | 0.06<br>(0.04 to 0.08)        |
| <b>Other communicable, maternal, neonatal, and nutritional diseases</b> | <b>244.79</b><br>(132.54 to 422.49) | <b>166.69</b><br>(121.09 to 224.60) | <b>108.67</b><br>(81.03 to 141.51) | <b>180.61</b><br>(130.96 to 247.14) | <b>4.33</b><br>(2.86 to 6.49) | <b>5.12</b><br>(3.82 to 6.66) | <b>3.55</b><br>(2.68 to 4.53) | <b>5.42</b><br>(4.04 to 7.10) |
| Sexually transmitted infections excluding HIV                           | 122.74<br>(12.45 to 303.32)         | 23.11<br>(8.40 to 54.41)            | 13.63<br>(6.15 to 28.55)           | 26.81<br>(8.92 to 66.08)            | 1.53<br>(0.26 to 3.64)        | 0.38<br>(0.19 to 0.76)        | 0.25<br>(0.14 to 0.45)        | 0.43<br>(0.20 to 0.89)        |
| Syphilis                                                                | 114.08<br>(2.38 to 294.55)          | 16.05<br>(1.78 to 47.24)            | 7.68<br>(1.14 to 22.17)            | 19.52<br>(1.90 to 58.23)            | 1.35<br>(0.05 to 3.45)        | 0.21<br>(0.04 to 0.58)        | 0.10<br>(0.03 to 0.28)        | 0.25<br>(0.05 to 0.71)        |
| Chlamydial infection                                                    | 1.68<br>(1.10 to 2.39)              | 1.39<br>(0.88 to 2.10)              | 1.18<br>(0.74 to 1.80)             | 1.44<br>(0.92 to 2.18)              | 0.04<br>(0.02 to 0.05)        | 0.03<br>(0.02 to 0.05)        | 0.03<br>(0.02 to 0.04)        | 0.03<br>(0.02 to 0.05)        |
| Gonococcal infection                                                    | 4.49<br>(2.96 to 6.42)              | 3.64<br>(2.26 to 5.61)              | 3.08<br>(1.92 to 4.72)             | 3.76<br>(2.33 to 5.80)              | 0.10<br>(0.06 to 0.14)        | 0.09<br>(0.06 to 0.14)        | 0.08<br>(0.05 to 0.12)        | 0.09<br>(0.06 to 0.14)        |
| Other sexually transmitted infections                                   | 2.49<br>(1.64 to 3.56)              | 2.02<br>(1.28 to 3.12)              | 1.70<br>(1.06 to 2.59)             | 2.09<br>(1.32 to 3.19)              | 0.05<br>(0.03 to 0.08)        | 0.05<br>(0.03 to 0.08)        | 0.04<br>(0.03 to 0.06)        | 0.05<br>(0.03 to 0.08)        |
| Acute hepatitis                                                         | 78.88<br>(57.94 to 103.19)          | 81.67<br>(55.75 to 115.89)          | 37.48<br>(24.39 to 54.18)          | 91.51<br>(62.52 to 128.90)          | 1.87<br>(1.37 to 2.47)        | 2.61<br>(1.80 to 3.66)        | 1.22<br>(0.82 to 1.73)        | 2.89<br>(2.03 to 4.04)        |
| Acute hepatitis A                                                       | 1.69<br>(1.08 to 2.44)              | 1.26<br>(0.73 to 2.08)              | 0.75<br>(0.43 to 1.25)             | 1.36<br>(0.79 to 2.23)              | 0.03<br>(0.02 to 0.05)        | 0.04<br>(0.02 to 0.06)        | 0.02<br>(0.01 to 0.04)        | 0.04<br>(0.02 to 0.07)        |
| Acute hepatitis B                                                       | 70.54<br>(51.00 to 92.87)           | 73.25<br>(48.81 to 104.70)          | 33.25<br>(21.43 to 48.62)          | 82.20<br>(55.13 to 117.18)          | 1.68<br>(1.22 to 2.24)        | 2.32<br>(1.57 to 3.31)        | 1.07<br>(0.70 to 1.54)        | 2.59<br>(1.77 to 3.68)        |



| Northern Mariana Islands             |                                    |                                    |                                    |                                    |                           |                              |                              |                              |
|--------------------------------------|------------------------------------|------------------------------------|------------------------------------|------------------------------------|---------------------------|------------------------------|------------------------------|------------------------------|
| Cause                                | YLLs (actual counts)               |                                    |                                    |                                    | Deaths (actual counts)    |                              |                              |                              |
|                                      | 2016                               | 2040 Forecast                      | 2040 Better Scenario               | 2040 Worse Scenario                | 2016                      | 2040 Forecast                | 2040 Better Scenario         | 2040 Worse Scenario          |
| Neoplasms                            | 1,827.58<br>(1,486.94 to 2,207.04) | 5,592.19<br>(4,128.53 to 7,452.97) | 3,870.50<br>(2,925.76 to 5,119.77) | 6,953.11<br>(4,995.96 to 9,562.74) | 53.63<br>(44.35 to 64.20) | 237.66<br>(179.89 to 311.17) | 168.53<br>(131.28 to 218.29) | 289.67<br>(213.44 to 391.22) |
| Lip and oral cavity cancer           | 68.36<br>(52.25 to 87.09)          | 209.24<br>(115.63 to 355.63)       | 113.48<br>(67.13 to 180.18)        | 279.68<br>(148.24 to 489.96)       | 2.02<br>(1.59 to 2.53)    | 8.79<br>(5.13 to 14.56)      | 4.95<br>(3.11 to 7.46)       | 11.41<br>(6.32 to 19.25)     |
| Nasopharynx cancer                   | 27.49<br>(20.15 to 35.54)          | 96.66<br>(48.73 to 183.87)         | 41.00<br>(21.79 to 74.78)          | 137.22<br>(66.74 to 269.95)        | 0.77<br>(0.57 to 0.98)    | 3.55<br>(1.82 to 6.54)       | 1.55<br>(0.85 to 2.67)       | 4.93<br>(2.43 to 9.23)       |
| Other pharynx cancer                 | 18.66<br>(14.45 to 24.14)          | 57.79<br>(36.47 to 92.19)          | 50.85<br>(34.63 to 74.16)          | 60.01<br>(36.70 to 99.75)          | 0.54<br>(0.42 to 0.69)    | 2.25<br>(1.46 to 3.55)       | 2.05<br>(1.42 to 2.99)       | 2.30<br>(1.45 to 3.78)       |
| Esophageal cancer                    | 24.06<br>(18.05 to 30.72)          | 94.35<br>(46.85 to 172.34)         | 67.97<br>(36.91 to 118.13)         | 117.73<br>(55.58 to 219.87)        | 0.78<br>(0.61 to 0.98)    | 4.10<br>(2.14 to 7.17)       | 3.04<br>(1.73 to 5.08)       | 5.00<br>(2.51 to 9.12)       |
| Stomach cancer                       | 105.16<br>(82.94 to 130.26)        | 206.79<br>(151.66 to 275.38)       | 115.47<br>(85.20 to 152.88)        | 238.09<br>(169.32 to 329.58)       | 3.16<br>(2.56 to 3.84)    | 9.15<br>(6.91 to 11.92)      | 5.27<br>(3.99 to 6.76)       | 10.34<br>(7.51 to 13.84)     |
| Colon and rectum cancer              | 108.09<br>(82.66 to 137.46)        | 380.90<br>(249.61 to 588.49)       | 248.39<br>(164.58 to 371.28)       | 425.16<br>(270.85 to 667.11)       | 3.35<br>(2.65 to 4.16)    | 17.43<br>(11.53 to 26.66)    | 11.83<br>(8.03 to 17.49)     | 19.02<br>(12.29 to 29.07)    |
| Liver cancer                         | 127.61<br>(97.03 to 164.97)        | 356.27<br>(223.20 to 556.42)       | 365.02<br>(232.32 to 556.59)       | 454.17<br>(261.10 to 759.42)       | 3.63<br>(2.83 to 4.62)    | 14.39<br>(9.19 to 21.88)     | 15.16<br>(10.06 to 22.25)    | 17.87<br>(10.41 to 28.98)    |
| Liver cancer due to hepatitis B      | 75.74<br>(57.76 to 99.71)          | 187.05<br>(118.64 to 305.35)       | 192.60<br>(125.88 to 302.57)       | 237.19<br>(136.03 to 406.61)       | 2.07<br>(1.59 to 2.70)    | 7.23<br>(4.64 to 11.30)      | 7.63<br>(5.07 to 11.58)      | 8.95<br>(5.24 to 15.06)      |
| Liver cancer due to hepatitis C      | 14.24<br>(10.60 to 18.89)          | 56.38<br>(35.25 to 87.57)          | 58.71<br>(37.83 to 89.64)          | 69.90<br>(40.57 to 114.39)         | 0.48<br>(0.37 to 0.63)    | 2.55<br>(1.67 to 3.89)       | 2.74<br>(1.85 to 4.08)       | 3.07<br>(1.86 to 4.90)       |
| Liver cancer due to alcohol use      | 9.20<br>(6.56 to 12.60)            | 33.63<br>(20.30 to 54.64)          | 31.65<br>(19.55 to 50.16)          | 43.74<br>(24.19 to 75.29)          | 0.28<br>(0.20 to 0.38)    | 1.36<br>(0.85 to 2.18)       | 1.32<br>(0.85 to 2.04)       | 1.73<br>(0.99 to 2.89)       |
| Liver cancer due to other causes     | 28.44<br>(20.19 to 38.29)          | 79.21<br>(42.65 to 140.84)         | 82.06<br>(46.48 to 141.67)         | 103.33<br>(50.95 to 197.22)        | 0.80<br>(0.58 to 1.06)    | 3.25<br>(1.83 to 5.76)       | 3.46<br>(2.03 to 5.91)       | 4.13<br>(2.11 to 7.87)       |
| Gallbladder and biliary tract cancer | 7.48<br>(5.81 to 9.51)             | 19.23<br>(15.25 to 24.03)          | 17.76<br>(13.82 to 22.12)          | 18.86<br>(15.01 to 23.34)          | 0.25<br>(0.19 to 0.31)    | 0.85<br>(0.68 to 1.06)       | 0.81<br>(0.64 to 1.01)       | 0.82<br>(0.66 to 1.02)       |
| Pancreatic cancer                    | 62.39<br>(49.97 to 76.16)          | 271.06<br>(182.70 to 389.97)       | 245.73<br>(169.16 to 352.13)       | 300.93<br>(198.69 to 442.61)       | 2.03<br>(1.67 to 2.45)    | 11.78<br>(8.09 to 16.95)     | 10.94<br>(7.66 to 15.39)     | 12.86<br>(8.58 to 18.95)     |
| Larynx cancer                        | 19.59<br>(14.87 to 24.66)          | 66.86<br>(32.61 to 120.08)         | 32.27<br>(16.10 to 55.58)          | 91.77<br>(43.00 to 168.72)         | 0.63<br>(0.49 to 0.77)    | 2.98<br>(1.51 to 5.28)       | 1.46<br>(0.78 to 2.45)       | 4.01<br>(1.98 to 7.26)       |
| Tracheal, bronchus, and lung cancer  | 418.90<br>(330.11 to 521.02)       | 1,754.08<br>(1,056.54 to 2,725.02) | 1,008.29<br>(619.23 to 1,539.12)   | 2,571.94<br>(1,530.60 to 4,070.05) | 14.12<br>(11.41 to 17.29) | 79.24<br>(47.55 to 120.19)   | 46.44<br>(28.25 to 70.56)    | 112.93<br>(66.97 to 174.21)  |
| Malignant skin melanoma              | 9.65<br>(6.72 to 13.36)            | 27.25<br>(19.24 to 36.97)          | 41.90<br>(29.52 to 57.12)          | 24.61<br>(17.76 to 33.33)          | 0.29<br>(0.20 to 0.40)    | 1.16<br>(0.83 to 1.54)       | 1.85<br>(1.33 to 2.47)       | 1.03<br>(0.75 to 1.34)       |
| Non-melanoma skin cancer             | 18.08<br>(13.66 to 23.30)          | 57.15<br>(44.22 to 72.80)          | 35.69<br>(27.14 to 45.76)          | 59.02<br>(46.12 to 73.64)          | 0.61<br>(0.49 to 0.76)    | 2.71<br>(2.21 to 3.26)       | 1.79<br>(1.47 to 2.17)       | 2.72<br>(2.25 to 3.23)       |
| Breast cancer                        | 186.25<br>(132.45 to 250.56)       | 446.57<br>(278.01 to 669.50)       | 282.62<br>(179.40 to 424.15)       | 514.89<br>(310.46 to 811.62)       | 5.01<br>(3.60 to 6.68)    | 15.96<br>(10.20 to 23.89)    | 10.34<br>(6.71 to 15.51)     | 18.14<br>(11.26 to 28.16)    |
| Cervical cancer                      | 90.16<br>(55.31 to 127.22)         | 189.29<br>(105.14 to 296.25)       | 104.34<br>(59.74 to 159.94)        | 218.26<br>(119.42 to 352.85)       | 2.35<br>(1.44 to 3.29)    | 6.37<br>(3.53 to 9.92)       | 3.54<br>(2.01 to 5.38)       | 7.28<br>(3.98 to 11.71)      |

|                   |                              |                                 |                                 |                                 |                           |                              |                             |                             |
|-------------------|------------------------------|---------------------------------|---------------------------------|---------------------------------|---------------------------|------------------------------|-----------------------------|-----------------------------|
| Uterine cancer    | 38.01<br>(26.48 to<br>52.56) | 137.43<br>(92.12 to<br>186.89)  | 98.65<br>(66.81 to<br>134.29)   | 143.09<br>(96.87 to<br>195.95)  | 1.14<br>(0.81 to<br>1.55) | 5.04<br>(3.46 to<br>6.80)    | 3.68<br>(2.56 to<br>4.97)   | 5.22<br>(3.63 to<br>6.97)   |
| Ovarian cancer    | 23.02<br>(16.54 to<br>30.71) | 80.73<br>(51.84 to<br>122.73)   | 62.38<br>(40.48 to<br>93.30)    | 87.11<br>(55.08 to<br>134.28)   | 0.66<br>(0.48 to<br>0.88) | 2.86<br>(1.86 to<br>4.35)    | 2.24<br>(1.48 to<br>3.34)   | 3.07<br>(1.96 to<br>4.75)   |
| Prostate cancer   | 27.87<br>(20.16 to<br>36.41) | 229.19<br>(165.23 to<br>293.83) | 179.56<br>(129.10 to<br>233.00) | 229.02<br>(163.93 to<br>291.34) | 1.39<br>(1.00 to<br>1.73) | 13.98<br>(10.09 to<br>17.41) | 11.38<br>(8.17 to<br>14.07) | 13.68<br>(9.89 to<br>17.06) |
| Testicular cancer | 3.15<br>(2.00 to<br>4.38)    | 3.18<br>(2.19 to<br>4.38)       | 2.12<br>(1.46 to<br>2.94)       | 3.31<br>(2.27 to<br>4.48)       | 0.07<br>(0.04 to<br>0.09) | 0.10<br>(0.07 to<br>0.13)    | 0.07<br>(0.05 to<br>0.09)   | 0.10<br>(0.07 to<br>0.13)   |

| Northern Mariana Islands        |                                                  |                                                  |                                                  |                                                   |                                         |                                            |                                           |                                            |
|---------------------------------|--------------------------------------------------|--------------------------------------------------|--------------------------------------------------|---------------------------------------------------|-----------------------------------------|--------------------------------------------|-------------------------------------------|--------------------------------------------|
| Cause                           | YLLs (actual counts)                             |                                                  |                                                  |                                                   | Deaths (actual counts)                  |                                            |                                           |                                            |
|                                 | 2016                                             | 2040 Forecast                                    | 2040 Better Scenario                             | 2040 Worse Scenario                               | 2016                                    | 2040 Forecast                              | 2040 Better Scenario                      | 2040 Worse Scenario                        |
| Kidney cancer                   | 26.65<br>(19.46 to 35.28)                        | 83.57<br>(53.31 to 127.77)                       | 78.10<br>(51.98 to 115.31)                       | 90.06<br>(55.65 to 143.08)                        | 0.75<br>(0.55 to 0.98)                  | 3.51<br>(2.32 to 5.22)                     | 3.36<br>(2.33 to 4.81)                    | 3.71<br>(2.38 to 5.70)                     |
| Bladder cancer                  | 14.83<br>(11.90 to 18.32)                        | 52.79<br>(33.39 to 82.53)                        | 37.41<br>(24.45 to 56.94)                        | 62.27<br>(37.61 to 100.32)                        | 0.53<br>(0.44 to 0.65)                  | 2.46<br>(1.61 to 3.82)                     | 1.80<br>(1.22 to 2.68)                    | 2.84<br>(1.77 to 4.49)                     |
| Brain and nervous system cancer | 52.54<br>(40.73 to 67.52)                        | 101.89<br>(78.60 to 139.54)                      | 85.13<br>(64.96 to 117.44)                       | 102.95<br>(79.74 to 141.64)                       | 1.19<br>(0.91 to 1.58)                  | 3.44<br>(2.69 to 4.79)                     | 2.96<br>(2.29 to 4.15)                    | 3.42<br>(2.68 to 4.76)                     |
| Thyroid cancer                  | 4.22<br>(3.36 to 5.27)                           | 15.17<br>(11.00 to 20.79)                        | 11.05<br>(8.17 to 15.15)                         | 17.40<br>(12.24 to 24.60)                         | 0.14<br>(0.11 to 0.17)                  | 0.66<br>(0.49 to 0.91)                     | 0.50<br>(0.37 to 0.68)                    | 0.74<br>(0.53 to 1.05)                     |
| Mesothelioma                    | 2.44<br>(1.81 to 3.15)                           | 6.67<br>(5.05 to 8.40)                           | 6.95<br>(5.18 to 8.86)                           | 6.43<br>(4.91 to 8.02)                            | 0.07<br>(0.05 to 0.09)                  | 0.26<br>(0.20 to 0.32)                     | 0.28<br>(0.21 to 0.35)                    | 0.25<br>(0.19 to 0.31)                     |
| Hodgkin lymphoma                | 5.40<br>(3.78 to 7.19)                           | 6.48<br>(4.29 to 8.83)                           | 3.48<br>(2.25 to 4.70)                           | 6.98<br>(4.81 to 9.44)                            | 0.12<br>(0.08 to 0.16)                  | 0.22<br>(0.14 to 0.29)                     | 0.12<br>(0.08 to 0.16)                    | 0.24<br>(0.16 to 0.31)                     |
| Non-Hodgkin lymphoma            | 65.14<br>(49.47 to 82.88)                        | 111.74<br>(84.01 to 144.56)                      | 85.00<br>(64.73 to 109.43)                       | 120.47<br>(91.45 to 157.58)                       | 1.54<br>(1.18 to 1.94)                  | 4.29<br>(3.34 to 5.41)                     | 3.39<br>(2.64 to 4.26)                    | 4.53<br>(3.49 to 5.76)                     |
| Multiple myeloma                | 32.85<br>(25.25 to 41.90)                        | 113.96<br>(86.81 to 148.38)                      | 98.74<br>(75.01 to 127.94)                       | 120.93<br>(89.83 to 161.65)                       | 1.02<br>(0.80 to 1.27)                  | 4.82<br>(3.76 to 6.07)                     | 4.31<br>(3.38 to 5.40)                    | 5.00<br>(3.86 to 6.44)                     |
| Leukemia                        | 133.76<br>(100.85 to 172.09)                     | 219.56<br>(153.08 to 312.08)                     | 166.38<br>(116.34 to 237.32)                     | 256.69<br>(173.72 to 377.72)                      | 3.01<br>(2.30 to 3.86)                  | 8.02<br>(5.67 to 11.34)                    | 6.31<br>(4.49 to 8.83)                    | 9.18<br>(6.27 to 13.48)                    |
| Acute lymphoid leukemia         | 29.95<br>(21.82 to 39.77)                        | 36.38<br>(25.98 to 50.65)                        | 24.52<br>(17.62 to 34.20)                        | 42.98<br>(30.24 to 61.04)                         | 0.57<br>(0.43 to 0.74)                  | 0.98<br>(0.71 to 1.36)                     | 0.69<br>(0.49 to 0.95)                    | 1.16<br>(0.81 to 1.65)                     |
| Chronic lymphoid leukemia       | 1.91<br>(1.09 to 2.63)                           | 7.05<br>(3.48 to 11.32)                          | 6.07<br>(2.99 to 9.62)                           | 8.02<br>(3.92 to 13.18)                           | 0.06<br>(0.04 to 0.09)                  | 0.30<br>(0.16 to 0.46)                     | 0.27<br>(0.14 to 0.40)                    | 0.33<br>(0.17 to 0.53)                     |
| Acute myeloid leukemia          | 50.81<br>(37.16 to 71.76)                        | 94.30<br>(63.60 to 142.28)                       | 87.79<br>(59.92 to 131.02)                       | 106.33<br>(69.08 to 167.69)                       | 1.11<br>(0.81 to 1.59)                  | 3.38<br>(2.34 to 5.09)                     | 3.27<br>(2.32 to 4.81)                    | 3.73<br>(2.47 to 5.82)                     |
| Chronic myeloid leukemia        | 22.27<br>(14.70 to 31.52)                        | 26.18<br>(16.02 to 41.11)                        | 11.04<br>(6.83 to 16.88)                         | 33.51<br>(20.11 to 53.29)                         | 0.55<br>(0.37 to 0.77)                  | 0.92<br>(0.58 to 1.39)                     | 0.40<br>(0.25 to 0.60)                    | 1.15<br>(0.72 to 1.78)                     |
| Other leukemia                  | 28.81<br>(20.69 to 38.59)                        | 55.65<br>(34.26 to 84.34)                        | 36.95<br>(22.95 to 55.06)                        | 65.84<br>(39.19 to 103.22)                        | 0.71<br>(0.51 to 0.94)                  | 2.44<br>(1.54 to 3.69)                     | 1.69<br>(1.08 to 2.51)                    | 2.80<br>(1.68 to 4.41)                     |
| Other neoplasms                 | 105.79<br>(82.88 to 130.28)                      | 196.33<br>(158.91 to 238.00)                     | 184.77<br>(147.10 to 224.56)                     | 194.06<br>(157.78 to 234.06)                      | 2.47<br>(1.94 to 3.06)                  | 7.28<br>(5.96 to 8.70)                     | 7.12<br>(5.77 to 8.45)                    | 7.05<br>(5.79 to 8.36)                     |
| <b>Cardiovascular diseases</b>  | <b>2,426.51</b><br><b>(1,922.08 to 2,950.75)</b> | <b>5,484.96</b><br><b>(3,667.74 to 8,186.41)</b> | <b>2,157.81</b><br><b>(1,534.10 to 3,094.58)</b> | <b>8,404.98</b><br><b>(5,454.33 to 12,663.02)</b> | <b>76.64</b><br><b>(62.93 to 91.60)</b> | <b>243.83</b><br><b>(174.84 to 345.48)</b> | <b>105.48</b><br><b>(79.68 to 143.51)</b> | <b>353.62</b><br><b>(246.12 to 501.97)</b> |
| Rheumatic heart disease         | 92.02<br>(70.64 to 116.36)                       | 81.40<br>(63.23 to 106.81)                       | 46.50<br>(35.67 to 60.63)                        | 87.80<br>(66.97 to 113.77)                        | 2.26<br>(1.76 to 2.83)                  | 3.17<br>(2.55 to 4.01)                     | 1.90<br>(1.53 to 2.40)                    | 3.34<br>(2.66 to 4.21)                     |
| Ischemic heart disease          | 1,102.90<br>(861.38 to 1,375.74)                 | 2,324.16<br>(1,230.07 to 4,123.20)               | 793.24<br>(428.81 to 1,494.31)                   | 3,922.50<br>(2,020.91 to 6,892.34)                | 35.69<br>(28.90 to 43.23)               | 101.30<br>(57.14 to 174.76)                | 38.01<br>(21.95 to 67.11)                 | 161.27<br>(89.36 to 271.43)                |
| Stroke                          | 794.49<br>(627.94 to 981.12)                     | 1,848.22<br>(1,005.62 to 3,207.09)               | 543.65<br>(327.14 to 915.79)                     | 3,000.75<br>(1,630.84 to 5,178.09)                | 25.25<br>(20.46 to 30.54)               | 82.78<br>(49.69 to 139.67)                 | 27.48<br>(17.47 to 47.39)                 | 127.02<br>(74.58 to 210.66)                |
| Ischemic stroke                 | 145.24<br>(114.96 to 180.98)                     | 393.78<br>(208.00 to 833.15)                     | 141.18<br>(78.62 to 307.69)                      | 599.30<br>(308.34 to 1,170.72)                    | 5.78<br>(4.77 to 6.89)                  | 21.07<br>(11.47 to 46.68)                  | 8.44<br>(4.72 to 19.09)                   | 30.32<br>(15.79 to 63.91)                  |

|                                |                                 |                                     |                                 |                                       |                              |                               |                              |                               |
|--------------------------------|---------------------------------|-------------------------------------|---------------------------------|---------------------------------------|------------------------------|-------------------------------|------------------------------|-------------------------------|
| Intracerebral hemorrhage       | 649.25<br>(506.06 to<br>806.24) | 1,454.44<br>(737.62 to<br>2,704.64) | 402.47<br>(226.06 to<br>704.57) | 2,401.45<br>(1,220.05 to<br>4,387.70) | 19.47<br>(15.63 to<br>23.79) | 61.70<br>(34.94 to<br>110.94) | 19.04<br>(11.56 to<br>31.60) | 96.69<br>(53.49 to<br>174.25) |
| Hypertensive heart disease     | 72.67<br>(53.92 to<br>102.98)   | 291.03<br>(205.03 to<br>429.74)     | 199.45<br>(146.53 to<br>284.86) | 341.76<br>(223.73 to<br>560.99)       | 2.49<br>(1.90 to<br>3.49)    | 13.68<br>(9.93 to<br>20.18)   | 9.91<br>(7.51 to<br>14.08)   | 15.54<br>(10.55 to<br>25.20)  |
| Cardiomyopathy and myocarditis | 134.59<br>(94.77 to<br>173.71)  | 248.72<br>(164.96 to<br>344.45)     | 146.93<br>(99.75 to<br>197.32)  | 269.72<br>(178.83 to<br>383.39)       | 3.61<br>(2.53 to<br>4.62)    | 10.19<br>(6.79 to<br>13.90)   | 6.26<br>(4.19 to<br>8.29)    | 10.81<br>(7.19 to<br>15.04)   |
| Myocarditis                    | 22.59<br>(14.14 to<br>31.73)    | 51.47<br>(31.08 to<br>70.71)        | 47.83<br>(30.72 to<br>64.36)    | 50.68<br>(30.26 to<br>69.99)          | 0.62<br>(0.37 to<br>0.85)    | 2.11<br>(1.27 to<br>2.84)     | 2.03<br>(1.30 to<br>2.68)    | 2.04<br>(1.22 to<br>2.77)     |

| Northern Mariana Islands                                      |                                                      |                                                          |                                                        |                                                            |                                                   |                                                   |                                                   |                                                    |
|---------------------------------------------------------------|------------------------------------------------------|----------------------------------------------------------|--------------------------------------------------------|------------------------------------------------------------|---------------------------------------------------|---------------------------------------------------|---------------------------------------------------|----------------------------------------------------|
| Cause                                                         | YLLs (actual counts)                                 |                                                          |                                                        |                                                            | Deaths (actual counts)                            |                                                   |                                                   |                                                    |
|                                                               | 2016                                                 | 2040 Forecast                                            | 2040 Better Scenario                                   | 2040 Worse Scenario                                        | 2016                                              | 2040 Forecast                                     | 2040 Better Scenario                              | 2040 Worse Scenario                                |
| Alcoholic cardiomyopathy                                      | 10.41<br>(5.94 to<br>14.66)                          | 20.34<br>(11.11 to<br>28.91)                             | 18.28<br>(9.66 to<br>26.06)                            | 20.31<br>(11.06 to<br>28.98)                               | 0.29<br>(0.16 to<br>0.40)                         | 0.82<br>(0.44 to<br>1.17)                         | 0.77<br>(0.40 to<br>1.08)                         | 0.80<br>(0.43 to<br>1.15)                          |
| Other cardiomyopathy                                          | 101.59<br>(71.24 to<br>131.85)                       | 176.90<br>(110.85 to<br>261.46)                          | 80.83<br>(48.61 to<br>119.61)                          | 198.72<br>(121.22 to<br>300.94)                            | 2.70<br>(1.90 to<br>3.49)                         | 7.26<br>(4.55 to<br>10.49)                        | 3.47<br>(2.11 to<br>5.12)                         | 7.97<br>(5.00 to<br>11.60)                         |
| Atrial fibrillation and flutter                               | 6.85<br>(5.31 to<br>8.73)                            | 42.90<br>(31.98 to<br>56.40)                             | 36.99<br>(27.96 to<br>47.73)                           | 44.37<br>(32.18 to<br>59.52)                               | 0.53<br>(0.41 to<br>0.68)                         | 3.12<br>(2.31 to<br>4.07)                         | 2.90<br>(2.18 to<br>3.72)                         | 3.10<br>(2.30 to<br>4.08)                          |
| Aortic aneurysm                                               | 34.94<br>(27.65 to<br>43.58)                         | 105.25<br>(83.26 to<br>133.12)                           | 85.54<br>(68.29 to<br>106.88)                          | 113.74<br>(89.12 to<br>147.03)                             | 1.26<br>(1.03 to<br>1.52)                         | 5.03<br>(4.08 to<br>6.13)                         | 4.36<br>(3.53 to<br>5.24)                         | 5.25<br>(4.21 to<br>6.53)                          |
| Peripheral artery disease                                     | 7.64<br>(4.23 to<br>10.49)                           | 38.38<br>(20.09 to<br>56.94)                             | 32.54<br>(17.05 to<br>47.24)                           | 42.49<br>(21.92 to<br>64.77)                               | 0.39<br>(0.22 to<br>0.51)                         | 2.13<br>(1.11 to<br>3.03)                         | 1.99<br>(1.05 to<br>2.78)                         | 2.26<br>(1.18 to<br>3.27)                          |
| Endocarditis                                                  | 37.08<br>(26.95 to<br>47.98)                         | 82.39<br>(56.69 to<br>112.02)                            | 70.77<br>(49.09 to<br>95.72)                           | 84.40<br>(57.68 to<br>117.52)                              | 1.00<br>(0.73 to<br>1.28)                         | 3.34<br>(2.29 to<br>4.48)                         | 3.03<br>(2.11 to<br>4.05)                         | 3.35<br>(2.29 to<br>4.52)                          |
| Other cardiovascular and circulatory diseases                 | 143.33<br>(101.92 to<br>183.70)                      | 422.52<br>(286.27 to<br>566.24)                          | 202.20<br>(139.11 to<br>263.26)                        | 497.46<br>(327.45 to<br>686.70)                            | 4.18<br>(2.98 to<br>5.26)                         | 19.07<br>(13.14 to<br>24.97)                      | 9.64<br>(6.60 to<br>12.37)                        | 21.69<br>(14.60 to<br>29.33)                       |
| <b>Chronic respiratory diseases</b>                           | <b>474.30</b><br><b>(369.19 to</b><br><b>588.16)</b> | <b>1,238.50</b><br><b>(837.99 to</b><br><b>1,754.13)</b> | <b>829.38</b><br><b>(600.78 to</b><br><b>1,112.89)</b> | <b>1,750.07</b><br><b>(1,140.86 to</b><br><b>2,518.48)</b> | <b>14.70</b><br><b>(11.93 to</b><br><b>17.79)</b> | <b>56.94</b><br><b>(40.10 to</b><br><b>78.66)</b> | <b>37.63</b><br><b>(28.10 to</b><br><b>49.46)</b> | <b>78.47</b><br><b>(53.26 to</b><br><b>110.45)</b> |
| Chronic obstructive pulmonary disease                         | 286.51<br>(220.85 to<br>356.71)                      | 910.88<br>(561.46 to<br>1,372.70)                        | 453.26<br>(286.42 to<br>672.80)                        | 1,391.57<br>(829.94 to<br>2,111.44)                        | 9.60<br>(7.81 to<br>11.70)                        | 43.98<br>(28.66 to<br>63.88)                      | 22.57<br>(14.96 to<br>32.60)                      | 64.49<br>(40.81 to<br>94.75)                       |
| Pneumoconiosis                                                | 2.79<br>(2.10 to<br>3.67)                            | 6.44<br>(4.83 to<br>8.36)                                | 6.50<br>(4.84 to<br>8.66)                              | 6.47<br>(4.85 to<br>8.53)                                  | 0.12<br>(0.09 to<br>0.15)                         | 0.38<br>(0.28 to<br>0.51)                         | 0.38<br>(0.29 to<br>0.50)                         | 0.37<br>(0.27 to<br>0.50)                          |
| Silicosis                                                     | 0.28<br>(0.17 to<br>0.43)                            | 0.46<br>(0.26 to<br>0.73)                                | 0.18<br>(0.10 to<br>0.30)                              | 0.51<br>(0.30 to<br>0.79)                                  | 0.01<br>(0.01 to<br>0.02)                         | 0.03<br>(0.02 to<br>0.05)                         | 0.01<br>(0.01 to<br>0.02)                         | 0.03<br>(0.02 to<br>0.05)                          |
| Asbestosis                                                    | 0.84<br>(0.58 to<br>1.18)                            | 2.96<br>(1.80 to<br>4.35)                                | 4.25<br>(2.95 to<br>5.88)                              | 2.69<br>(1.60 to<br>4.04)                                  | 0.03<br>(0.02 to<br>0.04)                         | 0.16<br>(0.09 to<br>0.24)                         | 0.24<br>(0.16 to<br>0.34)                         | 0.14<br>(0.08 to<br>0.22)                          |
| Coal workers pneumoconiosis                                   | 0.01<br>(0.01 to<br>0.02)                            | 0.04<br>(0.02 to<br>0.06)                                | 0.03<br>(0.01 to<br>0.05)                              | 0.04<br>(0.02 to<br>0.07)                                  | 0.00<br>(0.00 to<br>0.00)                         | 0.00<br>(0.00 to<br>0.00)                         | 0.00<br>(0.00 to<br>0.00)                         | 0.00<br>(0.00 to<br>0.00)                          |
| Other pneumoconiosis                                          | 1.66<br>(1.20 to<br>2.23)                            | 2.98<br>(1.97 to<br>4.41)                                | 2.05<br>(1.30 to<br>3.04)                              | 3.23<br>(2.18 to<br>4.70)                                  | 0.07<br>(0.06 to<br>0.10)                         | 0.18<br>(0.12 to<br>0.28)                         | 0.12<br>(0.08 to<br>0.20)                         | 0.19<br>(0.13 to<br>0.29)                          |
| Asthma                                                        | 67.99<br>(50.82 to<br>90.40)                         | 76.57<br>(46.16 to<br>124.47)                            | 30.15<br>(17.71 to<br>50.17)                           | 112.40<br>(65.04 to<br>185.02)                             | 2.00<br>(1.51 to<br>2.58)                         | 3.25<br>(2.02 to<br>5.17)                         | 1.33<br>(0.82 to<br>2.10)                         | 4.59<br>(2.77 to<br>7.39)                          |
| Interstitial lung disease and pulmonary sarcoidosis           | 76.75<br>(56.35 to<br>100.26)                        | 142.45<br>(106.16 to<br>184.55)                          | 245.60<br>(186.55 to<br>311.61)                        | 129.01<br>(96.57 to<br>169.18)                             | 1.90<br>(1.43 to<br>2.45)                         | 5.45<br>(4.06 to<br>7.13)                         | 9.72<br>(7.61 to<br>12.12)                        | 4.85<br>(3.66 to<br>6.23)                          |
| Other chronic respiratory diseases                            | 40.25<br>(22.70 to<br>59.14)                         | 102.16<br>(52.93 to<br>167.10)                           | 93.86<br>(49.25 to<br>151.36)                          | 110.61<br>(56.36 to<br>183.95)                             | 1.09<br>(0.62 to<br>1.59)                         | 3.89<br>(2.00 to<br>6.32)                         | 3.62<br>(1.89 to<br>5.67)                         | 4.16<br>(2.12 to<br>6.87)                          |
| <b>Cirrhosis and other chronic liver diseases</b>             | <b>544.41</b><br><b>(407.45 to</b><br><b>712.36)</b> | <b>968.07</b><br><b>(741.44 to</b><br><b>1,219.17)</b>   | <b>655.42</b><br><b>(503.00 to</b><br><b>841.40)</b>   | <b>1,007.96</b><br><b>(794.63 to</b><br><b>1,268.45)</b>   | <b>13.75</b><br><b>(10.44 to</b><br><b>17.85)</b> | <b>34.40</b><br><b>(27.60 to</b><br><b>42.16)</b> | <b>23.97</b><br><b>(19.05 to</b><br><b>29.52)</b> | <b>35.29</b><br><b>(28.63 to</b><br><b>43.10)</b>  |
| Cirrhosis and other chronic liver diseases due to hepatitis B | 225.38<br>(161.98 to<br>301.60)                      | 410.79<br>(308.33 to<br>525.91)                          | 283.52<br>(210.74 to<br>371.82)                        | 423.79<br>(322.81 to<br>542.35)                            | 5.82<br>(4.27 to<br>7.70)                         | 14.98<br>(11.66 to<br>18.75)                      | 10.61<br>(8.24 to<br>13.50)                       | 15.24<br>(12.01 to<br>19.08)                       |
| Cirrhosis and other chronic liver diseases due to hepatitis C | 91.20<br>(66.29 to<br>121.55)                        | 163.39<br>(121.94 to<br>215.39)                          | 109.78<br>(81.31 to<br>144.95)                         | 169.59<br>(129.55 to<br>220.06)                            | 2.33<br>(1.72 to<br>3.08)                         | 5.70<br>(4.43 to<br>7.27)                         | 3.92<br>(3.03 to<br>5.03)                         | 5.85<br>(4.61 to<br>7.31)                          |



|                                                                |                                                      |                                                      |                                                      |                                                      |                                                |                                                   |                                                   |                                                   |
|----------------------------------------------------------------|------------------------------------------------------|------------------------------------------------------|------------------------------------------------------|------------------------------------------------------|------------------------------------------------|---------------------------------------------------|---------------------------------------------------|---------------------------------------------------|
| Cirrhosis and other chronic liver diseases due to alcohol use  | 80.32<br>(58.08 to<br>108.08)                        | 156.39<br>(116.75 to<br>201.65)                      | 100.71<br>(75.27 to<br>131.79)                       | 166.58<br>(127.12 to<br>214.02)                      | 2.15<br>(1.58 to<br>2.86)                      | 5.66<br>(4.41 to<br>7.13)                         | 3.77<br>(2.93 to<br>4.77)                         | 5.94<br>(4.70 to<br>7.48)                         |
| Cirrhosis and other chronic liver diseases due to other causes | 147.51<br>(112.59 to<br>189.62)                      | 237.51<br>(182.53 to<br>300.91)                      | 161.41<br>(124.70 to<br>207.33)                      | 248.00<br>(194.21 to<br>312.44)                      | 3.44<br>(2.66 to<br>4.37)                      | 8.05<br>(6.40 to<br>9.89)                         | 5.67<br>(4.47 to<br>6.98)                         | 8.27<br>(6.65 to<br>10.12)                        |
| <b>Digestive diseases</b>                                      | <b>179.73</b><br><b>(138.02 to</b><br><b>225.93)</b> | <b>404.48</b><br><b>(317.45 to</b><br><b>512.23)</b> | <b>278.53</b><br><b>(221.34 to</b><br><b>350.76)</b> | <b>448.65</b><br><b>(347.58 to</b><br><b>574.32)</b> | <b>5.05</b><br><b>(3.98 to</b><br><b>6.23)</b> | <b>17.73</b><br><b>(14.26 to</b><br><b>22.01)</b> | <b>12.82</b><br><b>(10.45 to</b><br><b>15.70)</b> | <b>19.18</b><br><b>(15.21 to</b><br><b>24.10)</b> |
| Peptic ulcer disease                                           | 30.46<br>(23.69 to<br>38.52)                         | 53.99<br>(40.48 to<br>69.65)                         | 24.02<br>(18.15 to<br>30.61)                         | 62.06<br>(47.08 to<br>79.75)                         | 0.94<br>(0.76 to<br>1.16)                      | 2.43<br>(1.91 to<br>3.08)                         | 1.14<br>(0.90 to<br>1.42)                         | 2.73<br>(2.12 to<br>3.42)                         |

| Northern Mariana Islands                   |                              |                              |                              |                                |                        |                           |                           |                           |
|--------------------------------------------|------------------------------|------------------------------|------------------------------|--------------------------------|------------------------|---------------------------|---------------------------|---------------------------|
| Cause                                      | YLLs (actual counts)         |                              |                              |                                | Deaths (actual counts) |                           |                           |                           |
|                                            | 2016                         | 2040 Forecast                | 2040 Better Scenario         | 2040 Worse Scenario            | 2016                   | 2040 Forecast             | 2040 Better Scenario      | 2040 Worse Scenario       |
| Gastritis and duodenitis                   | 0.56<br>(0.40 to 0.75)       | 1.70<br>(1.18 to 2.31)       | 1.02<br>(0.71 to 1.38)       | 1.76<br>(1.23 to 2.40)         | 0.02<br>(0.01 to 0.02) | 0.08<br>(0.06 to 0.11)    | 0.05<br>(0.04 to 0.07)    | 0.08<br>(0.06 to 0.11)    |
| Appendicitis                               | 13.39<br>(9.70 to 17.38)     | 19.34<br>(13.89 to 25.34)    | 9.49<br>(6.99 to 12.56)      | 21.03<br>(15.80 to 27.56)      | 0.33<br>(0.25 to 0.42) | 0.75<br>(0.56 to 0.97)    | 0.39<br>(0.29 to 0.50)    | 0.80<br>(0.62 to 1.02)    |
| Paralytic ileus and intestinal obstruction | 16.24<br>(12.06 to 22.80)    | 47.46<br>(36.90 to 63.81)    | 47.26<br>(36.47 to 63.28)    | 45.79<br>(35.78 to 61.71)      | 0.45<br>(0.35 to 0.62) | 2.19<br>(1.69 to 2.91)    | 2.30<br>(1.77 to 3.01)    | 2.05<br>(1.58 to 2.73)    |
| Inguinal, femoral, and abdominal hernia    | 1.62<br>(1.20 to 2.19)       | 3.67<br>(2.67 to 5.18)       | 2.45<br>(1.77 to 3.37)       | 5.74<br>(2.68 to 8.22)         | 0.05<br>(0.04 to 0.07) | 0.19<br>(0.13 to 0.26)    | 0.13<br>(0.09 to 0.18)    | 0.19<br>(0.13 to 0.26)    |
| Inflammatory bowel disease                 | 16.88<br>(11.18 to 24.05)    | 32.64<br>(23.52 to 44.75)    | 29.94<br>(21.61 to 41.06)    | 31.90<br>(23.09 to 44.06)      | 0.42<br>(0.29 to 0.58) | 1.32<br>(1.00 to 1.74)    | 1.26<br>(0.95 to 1.66)    | 1.26<br>(0.97 to 1.66)    |
| Vascular intestinal disorders              | 10.43<br>(7.70 to 13.46)     | 36.32<br>(28.31 to 45.38)    | 28.94<br>(22.58 to 36.49)    | 36.09<br>(28.33 to 45.32)      | 0.35<br>(0.27 to 0.44) | 1.78<br>(1.45 to 2.20)    | 1.48<br>(1.19 to 1.83)    | 1.73<br>(1.40 to 2.15)    |
| Gallbladder and biliary diseases           | 35.30<br>(26.62 to 45.32)    | 86.49<br>(48.65 to 144.14)   | 48.18<br>(27.71 to 80.35)    | 119.54<br>(65.85 to 199.08)    | 1.04<br>(0.80 to 1.30) | 3.95<br>(2.29 to 6.47)    | 2.30<br>(1.37 to 3.69)    | 5.26<br>(2.98 to 8.51)    |
| Pancreatitis                               | 20.33<br>(14.22 to 27.85)    | 40.71<br>(24.98 to 72.69)    | 22.40<br>(14.36 to 36.06)    | 44.28<br>(26.73 to 85.51)      | 0.51<br>(0.36 to 0.69) | 1.49<br>(0.96 to 2.57)    | 0.87<br>(0.60 to 1.38)    | 1.59<br>(1.03 to 2.86)    |
| Other digestive diseases                   | 34.53<br>(26.69 to 44.23)    | 82.16<br>(64.16 to 105.61)   | 64.83<br>(50.41 to 83.36)    | 82.46<br>(64.33 to 107.30)     | 0.95<br>(0.73 to 1.21) | 3.55<br>(2.78 to 4.55)    | 2.90<br>(2.28 to 3.69)    | 3.50<br>(2.72 to 4.53)    |
| Neurological disorders                     | 151.25<br>(124.03 to 181.13) | 496.63<br>(515.03 to 984.47) | 705.16<br>(528.79 to 975.03) | 743.04<br>(523.76 to 1,099.11) | 8.07<br>(6.77 to 9.61) | 45.58<br>(33.16 to 65.10) | 49.28<br>(37.13 to 67.85) | 47.34<br>(32.82 to 70.33) |
| Alzheimer's disease and other dementias    | 67.43<br>(54.74 to 83.39)    | 502.62<br>(337.29 to 775.64) | 508.26<br>(348.39 to 764.33) | 553.76<br>(347.84 to 899.61)   | 5.94<br>(4.88 to 7.26) | 37.27<br>(25.35 to 56.57) | 40.12<br>(28.35 to 58.66) | 39.51<br>(25.21 to 62.34) |
| Parkinson's disease                        | 6.71<br>(5.07 to 8.73)       | 56.19<br>(41.36 to 72.82)    | 66.89<br>(49.55 to 86.84)    | 51.55<br>(38.23 to 66.92)      | 0.41<br>(0.32 to 0.53) | 3.72<br>(2.73 to 4.81)    | 4.61<br>(3.44 to 5.93)    | 3.35<br>(2.42 to 4.36)    |
| Epilepsy                                   | 35.69<br>(26.57 to 45.25)    | 42.38<br>(27.37 to 63.93)    | 31.42<br>(21.26 to 45.66)    | 44.96<br>(28.44 to 69.05)      | 0.69<br>(0.52 to 0.87) | 1.10<br>(0.75 to 1.63)    | 0.84<br>(0.60 to 1.18)    | 1.15<br>(0.77 to 1.72)    |
| Multiple sclerosis                         | 3.22<br>(2.07 to 5.66)       | 6.01<br>(3.79 to 10.70)      | 6.30<br>(3.97 to 11.13)      | 6.04<br>(3.82 to 10.68)        | 0.08<br>(0.05 to 0.14) | 0.19<br>(0.13 to 0.35)    | 0.21<br>(0.13 to 0.36)    | 0.19<br>(0.12 to 0.34)    |
| Motor neuron disease                       | 7.64<br>(5.56 to 9.98)       | 24.94<br>(18.82 to 31.30)    | 24.54<br>(18.30 to 31.09)    | 24.15<br>(18.47 to 30.28)      | 0.22<br>(0.17 to 0.29) | 1.00<br>(0.78 to 1.24)    | 1.00<br>(0.77 to 1.25)    | 0.95<br>(0.75 to 1.18)    |
| Other neurological disorders               | 30.65<br>(24.03 to 38.26)    | 64.50<br>(51.31 to 78.43)    | 67.75<br>(53.27 to 83.28)    | 62.59<br>(50.04 to 75.31)      | 0.73<br>(0.57 to 0.91) | 2.29<br>(1.86 to 2.77)    | 2.49<br>(2.00 to 3.05)    | 2.17<br>(1.78 to 2.61)    |
| Mental disorders                           | 114.19<br>(71.21 to 158.23)  | 146.00<br>(98.91 to 202.94)  | 194.47<br>(135.80 to 264.29) | 138.51<br>(94.88 to 191.87)    | 2.57<br>(1.64 to 3.59) | 4.44<br>(3.15 to 6.00)    | 6.27<br>(4.53 to 8.28)    | 4.13<br>(2.94 to 5.54)    |
| Alcohol use disorders                      | 91.57<br>(53.85 to 133.08)   | 94.28<br>(56.83 to 145.84)   | 107.73<br>(65.16 to 166.89)  | 91.18<br>(56.25 to 140.01)     | 2.10<br>(1.27 to 3.05) | 2.78<br>(1.75 to 4.28)    | 3.26<br>(2.08 to 5.15)    | 2.65<br>(1.69 to 4.06)    |
| Drug use disorders                         | 22.32<br>(15.49 to 29.73)    | 51.45<br>(38.08 to 66.81)    | 86.49<br>(64.73 to 111.58)   | 47.06<br>(35.24 to 60.80)      | 0.47<br>(0.34 to 0.62) | 1.65<br>(1.25 to 2.14)    | 3.01<br>(2.27 to 3.85)    | 1.47<br>(1.12 to 1.90)    |
| Opioid use disorders                       | 11.68<br>(7.69 to 16.46)     | 16.42<br>(10.85 to 23.14)    | 18.89<br>(12.23 to 27.05)    | 15.87<br>(10.57 to 22.27)      | 0.23<br>(0.16 to 0.32) | 0.45<br>(0.30 to 0.61)    | 0.53<br>(0.35 to 0.74)    | 0.42<br>(0.29 to 0.58)    |

|                           |                            |                              |                              |                              |                           |                           |                           |                           |
|---------------------------|----------------------------|------------------------------|------------------------------|------------------------------|---------------------------|---------------------------|---------------------------|---------------------------|
| Cocaine use disorders     | 2.30<br>(1.43 to<br>3.55)  | 6.68<br>(4.31 to<br>10.06)   | 10.86<br>(7.14 to<br>16.34)  | 6.13<br>(3.94 to<br>9.24)    | 0.05<br>(0.03 to<br>0.07) | 0.20<br>(0.13 to<br>0.30) | 0.33<br>(0.22 to<br>0.50) | 0.18<br>(0.11 to<br>0.27) |
| Amphetamine use disorders | 0.98<br>(0.56 to<br>1.45)  | 5.09<br>(2.85 to<br>7.73)    | 11.07<br>(6.53 to<br>16.47)  | 4.48<br>(2.51 to<br>6.69)    | 0.02<br>(0.01 to<br>0.03) | 0.15<br>(0.08 to<br>0.22) | 0.32<br>(0.19 to<br>0.47) | 0.13<br>(0.07 to<br>0.19) |
| Other drug use disorders  | 7.36<br>(5.14 to<br>10.04) | 23.25<br>(16.32 to<br>31.76) | 45.68<br>(32.83 to<br>61.82) | 20.57<br>(14.57 to<br>27.81) | 0.17<br>(0.12 to<br>0.23) | 0.87<br>(0.61 to<br>1.25) | 1.82<br>(1.30 to<br>2.58) | 0.74<br>(0.51 to<br>1.05) |
| Eating disorders          | 0.30<br>(0.20 to<br>0.42)  | 0.27<br>(0.17 to<br>0.40)    | 0.26<br>(0.17 to<br>0.38)    | 0.28<br>(0.18 to<br>0.41)    | 0.01<br>(0.00 to<br>0.01) | 0.01<br>(0.00 to<br>0.01) | 0.01<br>(0.00 to<br>0.01) | 0.01<br>(0.00 to<br>0.01) |

| Northern Mariana Islands                                   |                                       |                                        |                                       |                                        |                              |                                 |                                |                                 |
|------------------------------------------------------------|---------------------------------------|----------------------------------------|---------------------------------------|----------------------------------------|------------------------------|---------------------------------|--------------------------------|---------------------------------|
| Cause                                                      | YLLs (actual counts)                  |                                        |                                       |                                        | Deaths (actual counts)       |                                 |                                |                                 |
|                                                            | 2016                                  | 2040 Forecast                          | 2040 Better Scenario                  | 2040 Worse Scenario                    | 2016                         | 2040 Forecast                   | 2040 Better Scenario           | 2040 Worse Scenario             |
|                                                            | 1,358.72<br>(1,106.41 to<br>1,639.30) | 5,760.30<br>(3,429.25 to<br>11,281.76) | 3,470.17<br>(2,013.76 to<br>7,194.58) | 6,909.10<br>(4,119.55 to<br>12,521.51) | 44.36<br>(37.09 to<br>52.57) | 261.38<br>(161.74 to<br>492.72) | 164.62<br>(97.00 to<br>331.73) | 365.53<br>(186.43 to<br>535.56) |
| Diabetes, urogenital, blood, and endocrine diseases        |                                       |                                        |                                       |                                        |                              |                                 |                                |                                 |
| Diabetes mellitus                                          | 693.68<br>(561.36 to<br>843.30)       | 2,185.08<br>(1,434.18 to<br>3,186.45)  | 1,141.52<br>(742.70 to<br>1,666.72)   | 2,622.19<br>(1,681.45 to<br>3,968.71)  | 24.32<br>(20.19 to<br>29.09) | 102.96<br>(69.65 to<br>146.76)  | 56.47<br>(37.82 to<br>80.48)   | 119.40<br>(77.96 to<br>174.07)  |
| Acute glomerulonephritis                                   | 1.14<br>(0.81 to<br>1.68)             | 2.06<br>(1.29 to<br>3.27)              | 1.35<br>(0.84 to<br>2.18)             | 2.15<br>(1.36 to<br>3.43)              | 0.03<br>(0.02 to<br>0.04)    | 0.07<br>(0.04 to<br>0.11)       | 0.04<br>(0.03 to<br>0.08)      | 0.07<br>(0.04 to<br>0.12)       |
| Chronic kidney disease                                     | 500.04<br>(399.46 to<br>616.73)       | 3,111.87<br>(826.35 to<br>8,925.34)    | 1,913.63<br>(511.61 to<br>5,828.19)   | 3,825.39<br>(1,032.15 to<br>9,689.00)  | 15.61<br>(12.72 to<br>19.00) | 139.46<br>(35.91 to<br>387.63)  | 90.83<br>(23.35 to<br>274.59)  | 167.57<br>(45.07 to<br>425.36)  |
| Chronic kidney disease due to diabetes mellitus            | 299.08<br>(231.75 to<br>375.20)       | 1,940.52<br>(497.22 to<br>5,680.54)    | 1,174.01<br>(302.85 to<br>3,513.32)   | 2,402.64<br>(629.58 to<br>6,239.11)    | 9.04<br>(7.13 to<br>11.17)   | 82.81<br>(21.01 to<br>237.90)   | 52.47<br>(13.45 to<br>162.99)  | 100.64<br>(26.29 to<br>255.54)  |
| Chronic kidney disease due to hypertension                 | 96.15<br>(74.46 to<br>124.83)         | 807.70<br>(205.71 to<br>2,340.55)      | 537.87<br>(140.54 to<br>1,662.34)     | 973.84<br>(251.57 to<br>2,521.92)      | 3.91<br>(3.14 to<br>4.93)    | 41.60<br>(10.66 to<br>116.62)   | 29.55<br>(7.50 to<br>87.06)    | 48.70<br>(13.01 to<br>123.20)   |
| Chronic kidney disease due to glomerulonephritis           | 52.25<br>(38.53 to<br>69.69)          | 148.28<br>(47.65 to<br>416.11)         | 77.88<br>(25.79 to<br>232.33)         | 183.31<br>(59.44 to<br>471.82)         | 1.23<br>(0.92 to<br>1.62)    | 5.75<br>(1.64 to<br>16.49)      | 3.16<br>(0.89 to<br>9.46)      | 7.02<br>(2.03 to<br>18.01)      |
| Chronic kidney disease due to other and unspecified causes | 52.55<br>(38.68 to<br>69.46)          | 215.36<br>(60.19 to<br>615.54)         | 123.87<br>(35.11 to<br>370.48)        | 265.61<br>(75.31 to<br>688.39)         | 1.44<br>(1.09 to<br>1.86)    | 9.29<br>(2.45 to<br>25.23)      | 5.65<br>(1.47 to<br>16.45)     | 11.20<br>(3.06 to<br>27.72)     |
| Urinary diseases and male infertility                      | 43.78<br>(34.77 to<br>53.85)          | 173.85<br>(141.70 to<br>209.29)        | 114.29<br>(93.76 to<br>138.79)        | 179.13<br>(146.68 to<br>214.38)        | 1.30<br>(1.07 to<br>1.57)    | 7.98<br>(6.69 to<br>9.29)       | 5.49<br>(4.64 to<br>6.51)      | 8.03<br>(6.71 to<br>9.50)       |
| Urinary tract infections                                   | 40.26<br>(32.09 to<br>49.62)          | 163.75<br>(133.39 to<br>197.50)        | 108.59<br>(88.76 to<br>131.54)        | 168.40<br>(138.42 to<br>202.31)        | 1.20<br>(0.99 to<br>1.44)    | 7.55<br>(6.33 to<br>8.92)       | 5.25<br>(4.42 to<br>6.20)      | 7.58<br>(6.35 to<br>9.02)       |
| Urolithiasis                                               | 1.68<br>(1.15 to<br>2.54)             | 5.73<br>(3.78 to<br>8.92)              | 3.39<br>(2.19 to<br>5.42)             | 6.09<br>(4.02 to<br>9.52)              | 0.05<br>(0.03 to<br>0.07)    | 0.23<br>(0.15 to<br>0.35)       | 0.14<br>(0.09 to<br>0.22)      | 0.24<br>(0.16 to<br>0.38)       |
| Other urinary diseases                                     | 1.83<br>(1.27 to<br>2.55)             | 4.37<br>(2.65 to<br>6.38)              | 2.31<br>(1.40 to<br>3.39)             | 4.64<br>(2.87 to<br>6.80)              | 0.05<br>(0.03 to<br>0.07)    | 0.20<br>(0.12 to<br>0.30)       | 0.11<br>(0.07 to<br>0.17)      | 0.20<br>(0.13 to<br>0.31)       |
| Gynecological diseases                                     | 0.12<br>(0.08 to<br>0.18)             | 0.18<br>(0.11 to<br>0.28)              | 0.06<br>(0.04 to<br>0.10)             | 0.21<br>(0.13 to<br>0.32)              | 0.00<br>(0.00 to<br>0.00)    | 0.01<br>(0.00 to<br>0.01)       | 0.00<br>(0.00 to<br>0.00)      | 0.01<br>(0.00 to<br>0.01)       |
| Uterine fibroids                                           | 0.01<br>(0.01 to<br>0.02)             | 0.03<br>(0.01 to<br>0.05)              | 0.01<br>(0.01 to<br>0.02)             | 0.03<br>(0.01 to<br>0.06)              | 0.00<br>(0.00 to<br>0.00)    | 0.00<br>(0.00 to<br>0.00)       | 0.00<br>(0.00 to<br>0.00)      | 0.00<br>(0.00 to<br>0.00)       |
| Polycystic ovarian syndrome                                | 0.01<br>(0.00 to<br>0.03)             | 0.01<br>(0.00 to<br>0.04)              | 0.00<br>(0.00 to<br>0.01)             | 0.02<br>(0.00 to<br>0.05)              | 0.00<br>(0.00 to<br>0.00)    | 0.00<br>(0.00 to<br>0.00)       | 0.00<br>(0.00 to<br>0.00)      | 0.00<br>(0.00 to<br>0.00)       |
| Endometriosis                                              | 0.01<br>(0.00 to<br>0.01)             | 0.01<br>(0.00 to<br>0.03)              | 0.00<br>(0.00 to<br>0.01)             | 0.01<br>(0.01 to<br>0.03)              | 0.00<br>(0.00 to<br>0.00)    | 0.00<br>(0.00 to<br>0.00)       | 0.00<br>(0.00 to<br>0.00)      | 0.00<br>(0.00 to<br>0.00)       |
| Genital prolapse                                           | 0.01<br>(0.00 to<br>0.02)             | 0.01<br>(0.01 to<br>0.02)              | 0.00<br>(0.00 to<br>0.01)             | 0.01<br>(0.01 to<br>0.02)              | 0.00<br>(0.00 to<br>0.00)    | 0.00<br>(0.00 to<br>0.00)       | 0.00<br>(0.00 to<br>0.00)      | 0.00<br>(0.00 to<br>0.00)       |
| Other gynecological diseases                               | 0.08<br>(0.05 to<br>0.13)             | 0.11<br>(0.06 to<br>0.19)              | 0.04<br>(0.02 to<br>0.06)             | 0.13<br>(0.07 to<br>0.22)              | 0.00<br>(0.00 to<br>0.00)    | 0.00<br>(0.00 to<br>0.01)       | 0.00<br>(0.00 to<br>0.00)      | 0.00<br>(0.00 to<br>0.01)       |
| Hemoglobinopathies and hemolytic anemias                   | 11.23<br>(8.17 to<br>14.76)           | 18.22<br>(13.12 to<br>24.36)           | 10.54<br>(7.58 to<br>14.45)           | 19.53<br>(13.99 to<br>25.83)           | 0.26<br>(0.19 to<br>0.34)    | 0.67<br>(0.49 to<br>0.89)       | 0.40<br>(0.29 to<br>0.53)      | 0.71<br>(0.52 to<br>0.93)       |
| Thalassemias                                               | 1.14<br>(0.80 to<br>1.58)             | 0.52<br>(0.34 to<br>0.78)              | 0.47<br>(0.31 to<br>0.69)             | 0.55<br>(0.35 to<br>0.82)              | 0.02<br>(0.01 to<br>0.02)    | 0.01<br>(0.00 to<br>0.01)       | 0.01<br>(0.00 to<br>0.01)      | 0.01<br>(0.00 to<br>0.01)       |

|                                                   |                                |                                 |                                 |                                 |                           |                             |                             |                            |
|---------------------------------------------------|--------------------------------|---------------------------------|---------------------------------|---------------------------------|---------------------------|-----------------------------|-----------------------------|----------------------------|
|                                                   | 0.02<br>(0.01 to<br>0.03)      | 0.03<br>(0.01 to<br>0.04)       | 0.01<br>(0.01 to<br>0.02)       | 0.03<br>(0.02 to<br>0.04)       | 0.00<br>(0.00 to<br>0.00) | 0.00<br>(0.00 to<br>0.00)   | 0.00<br>(0.00 to<br>0.00)   | 0.00<br>(0.00 to<br>0.00)  |
| Sickle cell disorders                             |                                |                                 |                                 |                                 |                           |                             |                             |                            |
| G6PD deficiency                                   | 7.01<br>(4.94 to<br>9.38)      | 11.17<br>(7.77 to<br>15.43)     | 6.06<br>(4.14 to<br>8.46)       | 12.13<br>(8.35 to<br>16.43)     | 0.15<br>(0.11 to<br>0.20) | 0.34<br>(0.24 to<br>0.47)   | 0.19<br>(0.13 to<br>0.26)   | 0.37<br>(0.26 to<br>0.50)  |
| Other hemoglobinopathies and hemolytic anemias    | 3.07<br>(2.16 to<br>4.21)      | 6.50<br>(4.66 to<br>8.83)       | 4.00<br>(2.88 to<br>5.47)       | 6.83<br>(4.90 to<br>9.20)       | 0.10<br>(0.07 to<br>0.13) | 0.32<br>(0.23 to<br>0.42)   | 0.20<br>(0.15 to<br>0.27)   | 0.33<br>(0.24 to<br>0.44)  |
| Endocrine, metabolic, blood, and immune disorders | 108.72<br>(82.47 to<br>140.76) | 269.05<br>(208.06 to<br>344.89) | 288.78<br>(224.76 to<br>365.81) | 260.50<br>(201.62 to<br>333.75) | 2.85<br>(2.20 to<br>3.65) | 10.24<br>(8.04 to<br>12.91) | 11.38<br>(9.02 to<br>14.31) | 9.75<br>(7.69 to<br>12.15) |

| Northern Mariana Islands                      |                                     |                                     |                                     |                                     |                               |                                  |                                 |                                  |
|-----------------------------------------------|-------------------------------------|-------------------------------------|-------------------------------------|-------------------------------------|-------------------------------|----------------------------------|---------------------------------|----------------------------------|
| Cause                                         | YLLs (actual counts)                |                                     |                                     |                                     | Deaths (actual counts)        |                                  |                                 |                                  |
|                                               | 2016                                | 2040 Forecast                       | 2040 Better Scenario                | 2040 Worse Scenario                 | 2016                          | 2040 Forecast                    | 2040 Better Scenario            | 2040 Worse Scenario              |
| <b>Musculoskeletal disorders</b>              | <b>32.79</b><br>(24.51 to 46.00)    | <b>48.75</b><br>(37.93 to 67.18)    | <b>35.16</b><br>(27.58 to 48.72)    | <b>51.05</b><br>(39.90 to 70.77)    | <b>0.70</b><br>(0.53 to 0.98) | <b>1.60</b><br>(1.31 to 2.16)    | <b>1.17</b><br>(0.95 to 1.59)   | <b>1.65</b><br>(1.34 to 2.22)    |
| Rheumatoid arthritis                          | 3.09<br>(2.26 to 4.24)              | 11.51<br>(8.39 to 15.67)            | 5.11<br>(3.58 to 7.05)              | 12.84<br>(9.32 to 17.47)            | 0.08<br>(0.06 to 0.11)        | 0.53<br>(0.39 to 0.70)           | 0.24<br>(0.18 to 0.33)          | 0.57<br>(0.43 to 0.76)           |
| Other musculoskeletal disorders               | 29.70<br>(21.96 to 42.89)           | 37.24<br>(28.13 to 54.43)           | 30.05<br>(23.12 to 43.15)           | 38.21<br>(28.96 to 55.93)           | 0.61<br>(0.46 to 0.89)        | 1.08<br>(0.85 to 1.54)           | 0.92<br>(0.74 to 1.32)          | 1.08<br>(0.85 to 1.57)           |
| <b>Other non-communicable diseases</b>        | <b>287.37</b><br>(198.30 to 418.80) | <b>491.02</b><br>(312.66 to 660.38) | <b>367.52</b><br>(228.29 to 496.24) | <b>512.92</b><br>(334.13 to 691.46) | <b>5.24</b><br>(3.69 to 7.10) | <b>18.61</b><br>(11.81 to 24.50) | <b>15.66</b><br>(9.15 to 20.92) | <b>18.52</b><br>(11.01 to 24.47) |
| Congenital birth defects                      | 169.79<br>(104.86 to 268.44)        | 412.02<br>(272.33 to 578.42)        | 49.11<br>(32.19 to 75.11)           | 132.56<br>(85.99 to 215.86)         | 2.39<br>(1.59 to 3.54)        | 2.05<br>(1.42 to 2.95)           | 0.96<br>(0.67 to 1.34)          | 2.36<br>(1.64 to 3.46)           |
| Neural tube defects                           | 8.77<br>(2.95 to 19.44)             | 1.92<br>(0.73 to 4.90)              | 0.52<br>(0.23 to 1.24)              | 2.48<br>(0.91 to 6.59)              | 0.11<br>(0.04 to 0.23)        | 0.03<br>(0.01 to 0.07)           | 0.01<br>(0.00 to 0.02)          | 0.04<br>(0.02 to 0.08)           |
| Congenital heart anomalies                    | 79.04<br>(50.63 to 121.70)          | 49.96<br>(32.53 to 76.95)           | 15.74<br>(10.15 to 23.42)           | 60.82<br>(40.62 to 94.51)           | 1.17<br>(0.80 to 1.68)        | 0.91<br>(0.62 to 1.30)           | 0.30<br>(0.20 to 0.42)          | 1.09<br>(0.76 to 1.58)           |
| Orofacial clefts                              | 0.10<br>(0.04 to 0.22)              | 0.04<br>(0.01 to 0.10)              | 0.01<br>(0.00 to 0.02)              | 0.05<br>(0.01 to 0.14)              | 0.00<br>(0.00 to 0.00)        | 0.00<br>(0.00 to 0.00)           | 0.00<br>(0.00 to 0.00)          | 0.00<br>(0.00 to 0.00)           |
| Down syndrome                                 | 5.99<br>(3.60 to 9.02)              | 7.93<br>(5.15 to 11.88)             | 8.80<br>(5.85 to 13.21)             | 7.89<br>(5.06 to 11.74)             | 0.10<br>(0.06 to 0.14)        | 0.18<br>(0.12 to 0.28)           | 0.21<br>(0.14 to 0.30)          | 0.18<br>(0.12 to 0.27)           |
| Other chromosomal abnormalities               | 12.05<br>(5.16 to 21.62)            | 11.57<br>(5.49 to 22.29)            | 7.38<br>(3.64 to 13.76)             | 13.04<br>(6.06 to 25.74)            | 0.15<br>(0.07 to 0.27)        | 0.19<br>(0.09 to 0.33)           | 0.13<br>(0.07 to 0.21)          | 0.20<br>(0.10 to 0.36)           |
| Congenital musculoskeletal and limb anomalies | 5.53<br>(2.43 to 10.67)             | 2.64<br>(1.23 to 5.54)              | 1.02<br>(0.50 to 2.10)              | 3.21<br>(1.47 to 7.07)              | 0.07<br>(0.03 to 0.13)        | 0.04<br>(0.02 to 0.07)           | 0.01<br>(0.01 to 0.03)          | 0.04<br>(0.02 to 0.09)           |
| Urogenital congenital anomalies               | 5.34<br>(3.22 to 8.76)              | 5.79<br>(3.83 to 8.30)              | 2.91<br>(1.92 to 4.20)              | 6.46<br>(4.30 to 9.38)              | 0.09<br>(0.06 to 0.13)        | 0.15<br>(0.10 to 0.21)           | 0.08<br>(0.05 to 0.11)          | 0.17<br>(0.11 to 0.23)           |
| Digestive congenital anomalies                | 10.87<br>(4.27 to 22.11)            | 4.99<br>(1.96 to 11.54)             | 1.64<br>(0.66 to 3.70)              | 6.29<br>(2.41 to 14.36)             | 0.13<br>(0.06 to 0.26)        | 0.07<br>(0.03 to 0.14)           | 0.02<br>(0.01 to 0.05)          | 0.08<br>(0.03 to 0.18)           |
| Other congenital birth defects                | 42.11<br>(23.73 to 71.55)           | 27.18<br>(16.28 to 45.83)           | 11.09<br>(6.82 to 18.31)            | 32.32<br>(18.89 to 56.07)           | 0.57<br>(0.35 to 0.92)        | 0.48<br>(0.32 to 0.75)           | 0.20<br>(0.14 to 0.31)          | 0.56<br>(0.36 to 0.87)           |
| Skin and subcutaneous diseases                | 83.41<br>(45.78 to 123.83)          | 367.94<br>(201.80 to 517.77)        | 313.81<br>(176.04 to 439.74)        | 366.14<br>(202.60 to 505.41)        | 2.45<br>(1.32 to 3.58)        | 16.43<br>(8.98 to 22.16)         | 14.65<br>(8.02 to 19.83)        | 15.99<br>(8.79 to 21.97)         |
| Cellulitis                                    | 29.38<br>(12.43 to 45.45)           | 161.67<br>(72.37 to 230.70)         | 152.11<br>(70.96 to 215.06)         | 157.31<br>(69.86 to 226.12)         | 0.86<br>(0.36 to 1.29)        | 7.22<br>(3.22 to 10.14)          | 7.10<br>(3.18 to 9.94)          | 6.86<br>(3.07 to 9.62)           |
| Pyoderma                                      | 49.42<br>(27.37 to 77.72)           | 191.54<br>(106.33 to 289.25)        | 152.78<br>(85.62 to 232.44)         | 193.33<br>(107.87 to 296.16)        | 1.39<br>(0.74 to 2.15)        | 8.36<br>(4.64 to 12.60)          | 7.00<br>(3.83 to 10.62)         | 8.26<br>(4.49 to 12.45)          |
| Decubitus ulcer                               | 3.66<br>(1.80 to 7.19)              | 13.11<br>(6.23 to 24.30)            | 7.71<br>(3.68 to 13.61)             | 13.83<br>(6.53 to 26.37)            | 0.18<br>(0.08 to 0.35)        | 0.80<br>(0.37 to 1.49)           | 0.51<br>(0.22 to 0.93)          | 0.82<br>(0.37 to 1.49)           |
| Other skin and subcutaneous diseases          | 0.96<br>(0.55 to 1.59)              | 1.62<br>(0.93 to 2.50)              | 1.21<br>(0.67 to 1.80)              | 1.68<br>(0.95 to 2.65)              | 0.02<br>(0.01 to 0.03)        | 0.05<br>(0.03 to 0.08)           | 0.04<br>(0.02 to 0.07)          | 0.05<br>(0.03 to 0.08)           |
| Sudden infant death syndrome                  | 34.17<br>(14.10 to 66.30)           | 11.06<br>(2.98 to 27.52)            | 4.60<br>(1.33 to 11.81)             | 14.23<br>(3.79 to 34.25)            | 0.40<br>(0.16 to 0.77)        | 0.13<br>(0.05 to 0.32)           | 0.05<br>(0.02 to 0.14)          | 0.16<br>(0.04 to 0.40)           |

|                          |                                       |                                       |                                       |                                       |                              |                              |                              |                               |
|--------------------------|---------------------------------------|---------------------------------------|---------------------------------------|---------------------------------------|------------------------------|------------------------------|------------------------------|-------------------------------|
| Injuries                 | 2,637.76<br>(1,964.10 to<br>3,318.53) | 2,690.48<br>(1,976.02 to<br>3,588.31) | 1,543.76<br>(1,152.91 to<br>1,998.32) | 2,939.12<br>(2,140.68 to<br>3,904.92) | 53.16<br>(39.67 to<br>66.55) | 74.15<br>(58.11 to<br>94.64) | 44.83<br>(35.39 to<br>55.91) | 79.28<br>(61.47 to<br>101.28) |
| Transport injuries       | 728.62<br>(539.01 to<br>933.02)       | 892.05<br>(633.50 to<br>1,242.14)     | 427.00<br>(307.32 to<br>578.03)       | 1,001.49<br>(703.00 to<br>1,420.49)   | 14.69<br>(10.88 to<br>18.80) | 24.24<br>(17.96 to<br>33.26) | 12.15<br>(9.21 to<br>16.06)  | 26.74<br>(19.59 to<br>37.15)  |
| Road injuries            | 645.56<br>(479.08 to<br>828.30)       | 772.59<br>(544.96 to<br>1,063.54)     | 374.63<br>(271.18 to<br>505.26)       | 866.31<br>(608.98 to<br>1,199.99)     | 12.93<br>(9.57 to<br>16.70)  | 20.65<br>(15.24 to<br>27.90) | 10.52<br>(7.97 to<br>13.85)  | 22.76<br>(16.70 to<br>31.32)  |
| Pedestrian road injuries | 278.08<br>(200.04 to<br>362.52)       | 278.52<br>(188.37 to<br>399.45)       | 85.79<br>(57.55 to<br>121.66)         | 330.61<br>(223.59 to<br>478.16)       | 5.72<br>(4.12 to<br>7.38)    | 8.00<br>(5.65 to<br>11.11)   | 2.60<br>(1.79 to<br>3.54)    | 9.32<br>(6.46 to<br>13.11)    |

| Northern Mariana Islands                        |                                              |                                              |                                            |                                              |                                         |                                         |                                         |                                         |
|-------------------------------------------------|----------------------------------------------|----------------------------------------------|--------------------------------------------|----------------------------------------------|-----------------------------------------|-----------------------------------------|-----------------------------------------|-----------------------------------------|
| Cause                                           | YLLs (actual counts)                         |                                              |                                            |                                              | Deaths (actual counts)                  |                                         |                                         |                                         |
|                                                 | 2016                                         | 2040 Forecast                                | 2040 Better Scenario                       | 2040 Worse Scenario                          | 2016                                    | 2040 Forecast                           | 2040 Better Scenario                    | 2040 Worse Scenario                     |
| Cyclist road injuries                           | 13.82<br>(9.83 to 18.13)                     | 22.80<br>(15.83 to 31.83)                    | 14.16<br>(9.94 to 19.39)                   | 24.50<br>(16.98 to 34.03)                    | 0.29<br>(0.21 to 0.38)                  | 0.66<br>(0.47 to 0.92)                  | 0.45<br>(0.32 to 0.60)                  | 0.69<br>(0.49 to 0.97)                  |
| Motorcyclist road injuries                      | 69.52<br>(41.00 to 99.60)                    | 77.05<br>(45.53 to 118.96)                   | 52.49<br>(30.62 to 81.14)                  | 82.11<br>(48.30 to 127.92)                   | 1.34<br>(0.79 to 1.91)                  | 1.70<br>(1.04 to 2.58)                  | 1.21<br>(0.73 to 1.83)                  | 1.79<br>(1.10 to 2.73)                  |
| Motor vehicle road injuries                     | 278.19<br>(201.56 to 368.37)                 | 386.66<br>(273.42 to 547.87)                 | 217.79<br>(157.51 to 295.56)               | 420.90<br>(295.69 to 600.41)                 | 5.47<br>(3.97 to 7.25)                  | 10.09<br>(7.39 to 13.94)                | 6.14<br>(4.66 to 8.15)                  | 10.75<br>(7.81 to 14.97)                |
| Other road injuries                             | 5.96<br>(3.74 to 8.67)                       | 7.56<br>(4.60 to 11.82)                      | 4.39<br>(2.75 to 6.48)                     | 8.20<br>(4.97 to 12.91)                      | 0.12<br>(0.07 to 0.17)                  | 0.20<br>(0.12 to 0.30)                  | 0.13<br>(0.08 to 0.18)                  | 0.21<br>(0.13 to 0.31)                  |
| Other transport injuries                        | 83.06<br>(58.99 to 110.93)                   | 119.45<br>(79.83 to 177.34)                  | 52.37<br>(35.24 to 74.33)                  | 135.18<br>(90.16 to 199.19)                  | 1.76<br>(1.25 to 2.33)                  | 3.59<br>(2.43 to 5.21)                  | 1.63<br>(1.13 to 2.30)                  | 3.99<br>(2.69 to 5.78)                  |
| <b>Unintentional injuries</b>                   | <b>901.36</b><br><b>(688.66 to 1,112.92)</b> | <b>842.30</b><br><b>(659.36 to 1,056.34)</b> | <b>531.51</b><br><b>(417.34 to 659.46)</b> | <b>900.49</b><br><b>(693.97 to 1,146.71)</b> | <b>18.68</b><br><b>(14.25 to 23.02)</b> | <b>26.50</b><br><b>(21.71 to 31.63)</b> | <b>17.83</b><br><b>(14.53 to 21.28)</b> | <b>27.57</b><br><b>(22.30 to 33.16)</b> |
| Falls                                           | 89.15<br>(64.81 to 116.64)                   | 143.92<br>(111.24 to 180.59)                 | 104.13<br>(79.64 to 129.14)                | 147.44<br>(113.37 to 183.91)                 | 2.41<br>(1.81 to 3.07)                  | 6.43<br>(5.09 to 7.91)                  | 4.90<br>(3.88 to 5.96)                  | 6.41<br>(5.00 to 7.87)                  |
| Drowning                                        | 425.13<br>(313.33 to 540.00)                 | 336.99<br>(240.16 to 458.64)                 | 206.01<br>(149.88 to 275.90)               | 363.62<br>(261.45 to 492.50)                 | 8.29<br>(6.05 to 10.59)                 | 8.58<br>(6.30 to 11.31)                 | 5.38<br>(3.98 to 7.03)                  | 9.13<br>(6.78 to 12.04)                 |
| Fire, heat, and hot substances                  | 38.96<br>(27.70 to 51.73)                    | 31.01<br>(21.67 to 42.18)                    | 15.88<br>(11.10 to 21.27)                  | 34.23<br>(23.72 to 46.53)                    | 0.77<br>(0.56 to 1.02)                  | 0.96<br>(0.70 to 1.27)                  | 0.52<br>(0.38 to 0.68)                  | 0.76<br>(0.57 to 1.37)                  |
| Poisonings                                      | 17.74<br>(11.27 to 23.93)                    | 12.14<br>(7.65 to 17.60)                     | 5.11<br>(3.32 to 7.09)                     | 13.80<br>(8.63 to 19.60)                     | 0.37<br>(0.23 to 0.50)                  | 0.39<br>(0.24 to 0.54)                  | 0.17<br>(0.11 to 0.23)                  | 0.43<br>(0.27 to 0.59)                  |
| Exposure to mechanical forces                   | 82.78<br>(62.13 to 104.53)                   | 81.03<br>(62.23 to 103.95)                   | 48.19<br>(36.65 to 61.52)                  | 87.02<br>(66.03 to 112.20)                   | 1.69<br>(1.28 to 2.14)                  | 2.47<br>(1.97 to 3.08)                  | 1.53<br>(1.21 to 1.90)                  | 2.60<br>(2.05 to 3.25)                  |
| Unintentional firearm injuries                  | 22.85<br>(16.66 to 31.68)                    | 25.54<br>(18.62 to 34.97)                    | 17.24<br>(12.51 to 23.29)                  | 26.89<br>(19.50 to 36.68)                    | 0.47<br>(0.35 to 0.63)                  | 0.84<br>(0.62 to 1.13)                  | 0.59<br>(0.44 to 0.76)                  | 0.86<br>(0.64 to 1.15)                  |
| Unintentional suffocation                       | 9.51<br>(6.46 to 13.00)                      | 7.94<br>(5.32 to 11.42)                      | 4.93<br>(3.29 to 7.08)                     | 8.58<br>(5.72 to 12.36)                      | 0.17<br>(0.12 to 0.23)                  | 0.16<br>(0.11 to 0.23)                  | 0.10<br>(0.07 to 0.14)                  | 0.17<br>(0.12 to 0.24)                  |
| Other exposure to mechanical forces             | 50.42<br>(35.40 to 66.35)                    | 47.56<br>(34.64 to 63.47)                    | 26.03<br>(19.13 to 34.15)                  | 51.55<br>(37.36 to 66.58)                    | 1.05<br>(0.74 to 1.39)                  | 1.48<br>(1.12 to 1.87)                  | 0.85<br>(0.65 to 1.06)                  | 1.56<br>(1.18 to 1.97)                  |
| Adverse effects of medical treatment            | 76.38<br>(56.46 to 98.89)                    | 85.81<br>(60.97 to 113.55)                   | 62.67<br>(44.56 to 81.76)                  | 89.32<br>(63.87 to 117.74)                   | 1.65<br>(1.20 to 2.14)                  | 2.87<br>(2.01 to 3.67)                  | 2.21<br>(1.55 to 2.80)                  | 2.92<br>(2.05 to 3.71)                  |
| Animal contact                                  | 4.55<br>(3.19 to 6.09)                       | 6.23<br>(4.22 to 8.51)                       | 3.98<br>(2.72 to 5.41)                     | 6.61<br>(4.61 to 8.96)                       | 0.10<br>(0.07 to 0.14)                  | 0.21<br>(0.15 to 0.28)                  | 0.14<br>(0.10 to 0.19)                  | 0.22<br>(0.15 to 0.29)                  |
| Venomous animal contact                         | 1.48<br>(0.93 to 2.17)                       | 1.75<br>(1.16 to 2.48)                       | 1.28<br>(0.87 to 1.78)                     | 1.81<br>(1.20 to 2.59)                       | 0.03<br>(0.02 to 0.05)                  | 0.06<br>(0.04 to 0.09)                  | 0.05<br>(0.03 to 0.07)                  | 0.06<br>(0.04 to 0.08)                  |
| Non-venomous animal contact                     | 3.06<br>(2.12 to 4.19)                       | 4.48<br>(2.94 to 6.24)                       | 2.70<br>(1.77 to 3.76)                     | 4.80<br>(3.16 to 6.71)                       | 0.07<br>(0.05 to 0.10)                  | 0.15<br>(0.10 to 0.21)                  | 0.10<br>(0.06 to 0.13)                  | 0.16<br>(0.11 to 0.22)                  |
| Foreign body                                    | 64.48<br>(46.37 to 88.32)                    | 74.27<br>(51.97 to 93.37)                    | 61.45<br>(42.55 to 77.50)                  | 75.59<br>(53.12 to 95.19)                    | 1.29<br>(0.92 to 1.67)                  | 2.57<br>(1.72 to 3.19)                  | 2.23<br>(1.49 to 2.78)                  | 2.53<br>(1.69 to 3.12)                  |
| Pulmonary aspiration and foreign body in airway | 58.28<br>(39.82 to 80.38)                    | 67.68<br>(46.60 to 85.84)                    | 54.46<br>(37.15 to 70.03)                  | 69.05<br>(47.64 to 88.27)                    | 1.18<br>(0.82 to 1.54)                  | 2.40<br>(1.58 to 3.00)                  | 2.05<br>(1.36 to 2.56)                  | 2.37<br>(1.56 to 2.94)                  |



|                                      |                                     |                                   |                                 |                                     |                              |                              |                              |                              |
|--------------------------------------|-------------------------------------|-----------------------------------|---------------------------------|-------------------------------------|------------------------------|------------------------------|------------------------------|------------------------------|
|                                      | 6.20<br>(3.83 to<br>9.35)           | 6.59<br>(3.87 to<br>9.96)         | 6.99<br>(4.18 to<br>10.28)      | 6.55<br>(3.87 to<br>9.96)           | 0.12<br>(0.07 to<br>0.17)    | 0.16<br>(0.09 to<br>0.25)    | 0.18<br>(0.10 to<br>0.26)    | 0.16<br>(0.09 to<br>0.25)    |
| Foreign body in other body part      |                                     |                                   |                                 |                                     |                              |                              |                              |                              |
|                                      | 13.04<br>(8.07 to<br>18.18)         | 17.04<br>(10.58 to<br>24.48)      | 8.59<br>(5.28 to<br>12.33)      | 18.62<br>(11.63 to<br>26.77)        | 0.29<br>(0.18 to<br>0.40)    | 0.57<br>(0.36 to<br>0.81)    | 0.30<br>(0.19 to<br>0.42)    | 0.61<br>(0.39 to<br>0.85)    |
| Environmental heat and cold exposure |                                     |                                   |                                 |                                     |                              |                              |                              |                              |
|                                      | 89.15<br>(59.19 to<br>121.69)       | 53.85<br>(35.50 to<br>76.31)      | 15.50<br>(10.21 to<br>21.59)    | 64.24<br>(42.91 to<br>88.87)        | 1.81<br>(1.21 to<br>2.46)    | 1.45<br>(1.00 to<br>1.98)    | 0.43<br>(0.30 to<br>0.58)    | 1.70<br>(1.20 to<br>2.28)    |
| Other unintentional injuries         |                                     |                                   |                                 |                                     |                              |                              |                              |                              |
|                                      | 1,007.17<br>(724.49 to<br>1,312.48) | 949.43<br>(638.51 to<br>1,369.61) | 578.68<br>(399.31 to<br>790.49) | 1,030.36<br>(681.32 to<br>1,505.59) | 19.78<br>(14.11 to<br>25.71) | 23.26<br>(16.37 to<br>32.60) | 14.71<br>(10.62 to<br>19.59) | 24.82<br>(17.19 to<br>34.65) |
| Self-harm and interpersonal violence |                                     |                                   |                                 |                                     |                              |                              |                              |                              |

| Northern Mariana Islands                                                            |                                                |                                                 |                                                 |                                                 |                                                |                                                |                                                |                                                |
|-------------------------------------------------------------------------------------|------------------------------------------------|-------------------------------------------------|-------------------------------------------------|-------------------------------------------------|------------------------------------------------|------------------------------------------------|------------------------------------------------|------------------------------------------------|
| Cause                                                                               | YLLs (actual counts)                           |                                                 |                                                 |                                                 | Deaths (actual counts)                         |                                                |                                                |                                                |
|                                                                                     | 2016                                           | 2040 Forecast                                   | 2040 Better Scenario                            | 2040 Worse Scenario                             | 2016                                           | 2040 Forecast                                  | 2040 Better Scenario                           | 2040 Worse Scenario                            |
| Self-harm                                                                           | 658.69<br>(438.12 to<br>874.59)                | 705.89<br>(439.43 to<br>1,087.39)               | 439.33<br>(286.94 to<br>628.45)                 | 765.06<br>(469.08 to<br>1,197.11)               | 12.97<br>(8.63 to<br>17.15)                    | 17.22<br>(11.41 to<br>25.31)                   | 11.12<br>(7.76 to<br>15.41)                    | 18.34<br>(11.98 to<br>27.07)                   |
| Self-harm by firearm                                                                | 39.33<br>(19.91 to<br>60.77)                   | 37.66<br>(18.23 to<br>69.44)                    | 18.94<br>(9.27 to<br>33.52)                     | 42.02<br>(19.76 to<br>77.54)                    | 0.81<br>(0.42 to<br>1.25)                      | 0.94<br>(0.46 to<br>1.69)                      | 0.48<br>(0.24 to<br>0.85)                      | 1.04<br>(0.51 to<br>1.90)                      |
| Self-harm by other specified means                                                  | 619.35<br>(413.49 to<br>818.72)                | 668.23<br>(416.31 to<br>1,025.20)               | 420.39<br>(273.96 to<br>599.14)                 | 723.04<br>(439.86 to<br>1,119.52)               | 12.16<br>(8.10 to<br>16.14)                    | 16.28<br>(10.75 to<br>23.80)                   | 10.63<br>(7.47 to<br>14.51)                    | 17.30<br>(11.34 to<br>25.44)                   |
| Interpersonal violence                                                              | 348.48<br>(254.70 to<br>475.98)                | 243.53<br>(167.54 to<br>333.83)                 | 139.35<br>(97.93 to<br>189.51)                  | 265.29<br>(182.14 to<br>364.58)                 | 6.81<br>(4.99 to<br>9.30)                      | 6.04<br>(4.26 to<br>8.00)                      | 3.59<br>(2.56 to<br>4.75)                      | 6.49<br>(4.55 to<br>8.73)                      |
| Physical violence by firearm                                                        | 95.18<br>(57.01 to<br>167.83)                  | 55.56<br>(33.09 to<br>97.99)                    | 24.91<br>(14.66 to<br>44.50)                    | 62.47<br>(35.77 to<br>109.59)                   | 1.87<br>(1.12 to<br>3.30)                      | 1.24<br>(0.75 to<br>2.17)                      | 0.56<br>(0.33 to<br>0.99)                      | 1.39<br>(0.82 to<br>2.40)                      |
| Physical violence by sharp object                                                   | 108.35<br>(69.43 to<br>156.40)                 | 71.24<br>(45.81 to<br>104.81)                   | 37.13<br>(25.11 to<br>52.04)                    | 78.30<br>(51.42 to<br>113.28)                   | 2.11<br>(1.37 to<br>3.06)                      | 1.63<br>(1.08 to<br>2.35)                      | 0.86<br>(0.58 to<br>1.20)                      | 1.79<br>(1.19 to<br>2.52)                      |
| Physical violence by other means                                                    | 144.95<br>(99.44 to<br>199.73)                 | 116.74<br>(73.91 to<br>168.61)                  | 77.31<br>(49.81 to<br>108.01)                   | 124.53<br>(77.95 to<br>181.32)                  | 2.83<br>(1.86 to<br>3.89)                      | 3.16<br>(1.97 to<br>4.43)                      | 2.17<br>(1.37 to<br>2.94)                      | 3.31<br>(2.08 to<br>4.65)                      |
| <b>Forces of nature, conflict and terrorism, and executions and police conflict</b> | <b>0.62</b><br><b>(0.49 to</b><br><b>0.75)</b> | <b>6.71</b><br><b>(0.00 to</b><br><b>89.68)</b> | <b>6.57</b><br><b>(0.00 to</b><br><b>87.42)</b> | <b>6.78</b><br><b>(0.00 to</b><br><b>90.88)</b> | <b>0.01</b><br><b>(0.01 to</b><br><b>0.01)</b> | <b>0.14</b><br><b>(0.00 to</b><br><b>1.74)</b> | <b>0.14</b><br><b>(0.00 to</b><br><b>1.73)</b> | <b>0.14</b><br><b>(0.00 to</b><br><b>1.74)</b> |
| Exposure to forces of nature                                                        | 0.00<br>(0.00 to<br>0.00)                      | 3.75<br>(0.00 to<br>0.00)                       | 3.68<br>(0.00 to<br>0.00)                       | 3.79<br>(0.00 to<br>0.00)                       | 0.00<br>(0.00 to<br>0.00)                      | 0.08<br>(0.00 to<br>0.00)                      | 0.08<br>(0.00 to<br>0.00)                      | 0.08<br>(0.00 to<br>0.00)                      |
| Conflict and terrorism                                                              | 0.00<br>(0.00 to<br>0.00)                      | 2.96<br>(0.00 to<br>42.83)                      | 2.89<br>(0.00 to<br>41.49)                      | 2.99<br>(0.00 to<br>43.42)                      | 0.00<br>(0.00 to<br>0.00)                      | 0.06<br>(0.00 to<br>0.83)                      | 0.06<br>(0.00 to<br>0.82)                      | 0.06<br>(0.00 to<br>0.83)                      |
| Executions and police conflict                                                      | 0.62<br>(0.49 to<br>0.75)                      | 0.00<br>(0.00 to<br>0.00)                       | 0.00<br>(0.00 to<br>0.00)                       | 0.00<br>(0.00 to<br>0.00)                       | 0.01<br>(0.01 to<br>0.01)                      | 0.00<br>(0.00 to<br>0.00)                      | 0.00<br>(0.00 to<br>0.00)                      | 0.00<br>(0.00 to<br>0.00)                      |

| Papua New Guinea                                                         |                                                       |                                                       |                                                       |                                                       |                                              |                                               |                                              |                                                 |
|--------------------------------------------------------------------------|-------------------------------------------------------|-------------------------------------------------------|-------------------------------------------------------|-------------------------------------------------------|----------------------------------------------|-----------------------------------------------|----------------------------------------------|-------------------------------------------------|
| Cause                                                                    | YLLs (actual counts)                                  |                                                       |                                                       |                                                       | Deaths (actual counts)                       |                                               |                                              |                                                 |
|                                                                          | 2016                                                  | 2040 Forecast                                         | 2040 Better Scenario                                  | 2040 Worse Scenario                                   | 2016                                         | 2040 Forecast                                 | 2040 Better Scenario                         | 2040 Worse Scenario                             |
| <b>All causes</b>                                                        | <b>2,930,710.52</b><br>(2,344,333.03 to 3,632,438.48) | <b>3,353,096.36</b><br>(2,721,090.66 to 4,100,799.25) | <b>2,078,518.28</b><br>(1,710,672.71 to 2,522,082.46) | <b>4,208,660.66</b><br>(3,436,439.21 to 5,101,487.62) | <b>69,162.32</b><br>(57,603.28 to 80,915.45) | <b>96,853.03</b><br>(84,535.90 to 110,290.90) | <b>66,326.97</b><br>(58,375.64 to 75,845.59) | <b>117,165.40</b><br>(102,022.27 to 132,136.01) |
| <b>Communicable, maternal, neonatal, and nutritional diseases</b>        | <b>1,114,318.76</b><br>(764,328.38 to 1,636,184.87)   | <b>882,448.27</b><br>(572,026.33 to 1,331,897.35)     | <b>426,461.39</b><br>(302,905.80 to 603,273.78)       | <b>1,212,317.73</b><br>(775,628.81 to 1,845,875.84)   | <b>17,461.69</b><br>(13,065.99 to 23,758.94) | <b>16,273.92</b><br>(11,257.52 to 23,245.88)  | <b>9,073.45</b><br>(6,515.22 to 12,536.61)   | <b>21,442.94</b><br>(14,461.40 to 31,061.68)    |
| <b>HIV/AIDS and tuberculosis</b>                                         | <b>43,270.03</b><br>(32,871.11 to 58,793.36)          | <b>60,187.05</b><br>(37,510.03 to 93,142.63)          | <b>39,608.42</b><br>(22,408.86 to 66,150.48)          | <b>85,286.94</b><br>(57,481.85 to 125,379.18)         | <b>942.87</b><br>(756.99 to 1,228.60)        | <b>1,292.15</b><br>(852.79 to 1,917.16)       | <b>855.31</b><br>(493.32 to 1,367.62)        | <b>1,777.76</b><br>(1,239.55 to 2,533.04)       |
| <b>Tuberculosis</b>                                                      | <b>14,611.76</b><br>(11,683.86 to 18,072.74)          | <b>12,948.32</b><br>(8,303.44 to 20,557.36)           | <b>5,786.45</b><br>(3,806.10 to 9,065.90)             | <b>18,056.96</b><br>(11,142.91 to 30,533.29)          | <b>409.04</b><br>(330.73 to 501.22)          | <b>406.65</b><br>(271.48 to 625.96)           | <b>197.89</b><br>(133.83 to 294.41)          | <b>538.53</b><br>(345.28 to 865.39)             |
| <b>HIV/AIDS</b>                                                          | <b>28,658.27</b><br>(18,779.03 to 43,881.83)          | <b>47,238.73</b><br>(25,663.66 to 78,883.43)          | <b>33,821.96</b><br>(16,674.55 to 59,817.36)          | <b>67,229.98</b><br>(41,525.20 to 104,496.15)         | <b>533.83</b><br>(376.09 to 798.62)          | <b>885.50</b><br>(489.81 to 1,502.63)         | <b>657.42</b><br>(307.01 to 1,154.81)        | <b>1,239.23</b><br>(777.42 to 1,927.99)         |
| <b>Diarrhea, lower respiratory, and other common infectious diseases</b> | <b>543,650.64</b><br>(368,776.67 to 789,205.01)       | <b>424,521.62</b><br>(242,324.36 to 681,228.63)       | <b>188,351.72</b><br>(116,679.55 to 289,956.25)       | <b>651,658.20</b><br>(349,983.00 to 1,087,478.34)     | <b>9,472.74</b><br>(7,131.26 to 12,695.95)   | <b>9,352.04</b><br>(5,655.16 to 14,893.02)    | <b>5,071.20</b><br>(3,184.50 to 8,093.75)    | <b>13,130.20</b><br>(7,782.65 to 20,809.85)     |
| <b>Diarrheal diseases</b>                                                | <b>78,711.89</b><br>(48,375.41 to 119,546.92)         | <b>62,602.70</b><br>(11,720.96 to 179,790.32)         | <b>29,528.91</b><br>(5,854.68 to 86,914.86)           | <b>87,555.45</b><br>(18,004.58 to 249,265.21)         | <b>2,075.11</b><br>(1,214.14 to 3,261.80)    | <b>2,186.14</b><br>(378.39 to 6,368.50)       | <b>1,240.44</b><br>(212.15 to 3,680.50)      | <b>2,929.53</b><br>(518.01 to 8,299.96)         |
| <b>Intestinal infectious diseases</b>                                    | <b>18,337.64</b><br>(8,978.41 to 31,716.27)           | <b>17,288.94</b><br>(7,581.71 to 31,758.88)           | <b>11,679.99</b><br>(5,329.36 to 21,277.63)           | <b>18,459.44</b><br>(8,010.16 to 33,526.55)           | <b>263.11</b><br>(130.84 to 455.64)          | <b>252.85</b><br>(115.55 to 457.16)           | <b>177.42</b><br>(83.03 to 316.95)           | <b>268.11</b><br>(120.00 to 490.87)             |
| <b>Typhoid fever</b>                                                     | <b>15,649.22</b><br>(7,225.69 to 27,842.69)           | <b>14,371.62</b><br>(6,052.60 to 26,979.96)           | <b>9,759.23</b><br>(4,323.16 to 17,593.47)            | <b>15,317.56</b><br>(6,345.10 to 28,831.94)           | <b>223.46</b><br>(105.40 to 398.85)          | <b>208.68</b><br>(91.61 to 384.56)            | <b>147.13</b><br>(67.00 to 264.05)           | <b>220.93</b><br>(97.15 to 411.29)              |
| <b>Paratyphoid fever</b>                                                 | <b>2,539.56</b><br>(1,104.17 to 5,257.19)             | <b>2,858.89</b><br>(1,144.28 to 6,061.80)             | <b>1,891.46</b><br>(773.60 to 3,872.44)               | <b>3,075.26</b><br>(1,212.41 to 6,538.87)             | <b>37.75</b><br>(16.43 to 76.92)             | <b>43.11</b><br>(18.07 to 90.23)              | <b>29.70</b><br>(9.54 to 59.45)              | <b>46.05</b><br>(18.77 to 96.38)                |
| <b>Other intestinal infectious diseases</b>                              | <b>128.86</b><br>(42.90 to 310.49)                    | <b>60.42</b><br>(14.11 to 174.49)                     | <b>29.31</b><br>(7.89 to 78.21)                       | <b>66.61</b><br>(14.53 to 189.12)                     | <b>1.90</b><br>(0.64 to 4.40)                | <b>1.05</b><br>(0.31 to 2.70)                 | <b>0.59</b><br>(0.19 to 1.42)                | <b>1.13</b><br>(0.33 to 2.93)                   |
| <b>Lower respiratory infections</b>                                      | <b>327,927.86</b><br>(214,611.11 to 504,875.90)       | <b>209,672.18</b><br>(100,956.30 to 392,368.72)       | <b>92,436.27</b><br>(53,225.70 to 158,662.73)         | <b>352,696.89</b><br>(148,121.08 to 695,046.31)       | <b>5,559.89</b><br>(3,988.33 to 7,838.99)    | <b>5,045.49</b><br>(3,009.04 to 8,446.15)     | <b>2,772.00</b><br>(1,864.40 to 4,211.38)    | <b>7,370.21</b><br>(3,898.42 to 12,397.15)      |
| <b>Upper respiratory infections</b>                                      | <b>342.94</b><br>(144.96 to 736.18)                   | <b>308.54</b><br>(102.56 to 792.13)                   | <b>146.11</b><br>(52.87 to 338.89)                    | <b>348.91</b><br>(111.86 to 905.41)                   | <b>5.99</b><br>(3.00 to 11.03)               | <b>6.46</b><br>(2.35 to 14.44)                | <b>3.46</b><br>(1.32 to 7.64)                | <b>7.08</b><br>(2.57 to 16.00)                  |
| <b>Otitis media</b>                                                      | <b>36.91</b><br>(14.40 to 82.81)                      | <b>11.13</b><br>(3.97 to 28.40)                       | <b>10.41</b><br>(3.80 to 27.44)                       | <b>11.20</b><br>(3.97 to 28.71)                       | <b>0.69</b><br>(0.31 to 1.38)                | <b>0.27</b><br>(0.11 to 0.70)                 | <b>0.28</b><br>(0.11 to 0.68)                | <b>0.26</b><br>(0.10 to 0.69)                   |
| <b>Meningitis</b>                                                        | <b>40,254.94</b><br>(25,242.60 to 68,280.85)          | <b>26,892.76</b><br>(12,013.46 to 53,150.22)          | <b>16,439.60</b><br>(9,549.69 to 27,640.17)           | <b>31,703.30</b><br>(13,036.38 to 68,767.98)          | <b>578.29</b><br>(386.78 to 924.77)          | <b>419.99</b><br>(225.14 to 749.61)           | <b>293.16</b><br>(181.39 to 455.82)          | <b>474.26</b><br>(233.83 to 903.48)             |
| <b>Pneumococcal meningitis</b>                                           | <b>122.06</b><br>(69.45 to 218.21)                    | <b>54.41</b><br>(27.14 to 103.65)                     | <b>36.47</b><br>(21.17 to 59.04)                      | <b>65.01</b><br>(30.94 to 129.07)                     | <b>1.76</b><br>(1.11 to 2.91)                | <b>0.94</b><br>(0.55 to 1.60)                 | <b>0.73</b><br>(0.47 to 1.11)                | <b>1.07</b><br>(0.47 to 1.87)                   |
| <b>H influenzae type B meningitis</b>                                    | <b>4,576.09</b><br>(2,620.91 to 8,401.54)             | <b>7,224.14</b><br>(1,300.29 to 23,344.30)            | <b>2,134.05</b><br>(883.35 to 5,259.06)               | <b>11,093.19</b><br>(1,534.36 to 35,812.21)           | <b>63.77</b><br>(40.21 to 109.28)            | <b>93.21</b><br>(23.06 to 284.12)             | <b>34.29</b><br>(17.58 to 74.39)             | <b>138.03</b><br>(25.74 to 428.86)              |
| <b>Meningococcal meningitis</b>                                          | <b>7,720.80</b><br>(4,589.82 to 13,422.73)            | <b>4,078.13</b><br>(2,213.45 to 7,195.30)             | <b>2,968.30</b><br>(1,737.83 to 4,930.33)             | <b>4,265.39</b><br>(2,300.47 to 7,612.39)             | <b>115.07</b><br>(74.02 to 188.82)           | <b>71.41</b><br>(43.08 to 113.06)             | <b>57.33</b><br>(36.66 to 86.36)             | <b>72.98</b><br>(43.02 to 116.65)               |
| <b>Other meningitis</b>                                                  | <b>27,835.99</b><br>(17,279.82 to 47,612.36)          | <b>15,536.07</b><br>(7,951.02 to 26,768.39)           | <b>11,300.79</b><br>(6,444.43 to 18,260.05)           | <b>16,279.71</b><br>(8,149.78 to 28,883.27)           | <b>397.69</b><br>(266.20 to 630.02)          | <b>254.44</b><br>(148.46 to 411.97)           | <b>200.81</b><br>(125.62 to 310.68)          | <b>262.18</b><br>(149.74 to 424.66)             |
| <b>Encephalitis</b>                                                      | <b>14,440.20</b><br>(9,400.67 to 24,230.80)           | <b>15,516.18</b><br>(8,257.04 to 26,404.59)           | <b>10,249.32</b><br>(5,915.16 to 15,921.84)           | <b>16,401.44</b><br>(8,546.00 to 28,319.71)           | <b>222.26</b><br>(157.11 to 335.98)          | <b>268.12</b><br>(165.47 to 400.52)           | <b>196.12</b><br>(128.94 to 272.41)          | <b>277.02</b><br>(167.56 to 420.47)             |

|                |                                          |                                          |                                         |                                           |                                 |                                  |                                  |                                    |
|----------------|------------------------------------------|------------------------------------------|-----------------------------------------|-------------------------------------------|---------------------------------|----------------------------------|----------------------------------|------------------------------------|
| Diphtheria     | 182.58<br>(88.03 to<br>345.99)           | 67.79<br>(18.78 to<br>181.19)            | 25.40<br>(14.12 to<br>42.14)            | 98.33<br>(19.18 to<br>292.45)             | 2.57<br>(1.41 to<br>4.53)       | 0.98<br>(0.35 to<br>2.34)        | 0.48<br>(0.27 to<br>0.78)        | 1.33<br>(0.36 to<br>3.62)          |
| Whooping cough | 27,062.28<br>(2,245.43 to<br>83,162.46)  | 29,867.84<br>(829.01 to<br>99,889.62)    | 4,699.04<br>(245.70 to<br>16,394.67)    | 31,588.77<br>(789.61 to<br>114,769.38)    | 320.09<br>(26.69 to<br>984.20)  | 353.56<br>(10.87 to<br>1,185.48) | 57.01<br>(3.08 to<br>198.52)     | 373.77<br>(9.73 to<br>1,356.21)    |
| Tetanus        | 416.00<br>(183.71 to<br>903.80)          | 107.62<br>(39.55 to<br>252.36)           | 38.87<br>(14.14 to<br>109.58)           | 113.25<br>(40.90 to<br>270.43)            | 7.54<br>(3.28 to<br>19.54)      | 1.76<br>(0.72 to<br>4.07)        | 1.03<br>(0.27 to<br>3.20)        | 1.79<br>(0.73 to<br>4.03)          |
| Measles        | 33,570.19<br>(10,054.61 to<br>75,616.94) | 60,549.13<br>(3,273.37 to<br>262,085.90) | 22,355.34<br>(2,334.80 to<br>82,193.51) | 110,849.68<br>(4,699.15 to<br>473,885.00) | 400.89<br>(120.58 to<br>902.08) | 787.40<br>(62.07 to<br>3,264.51) | 312.95<br>(42.68 to<br>1,030.93) | 1,396.22<br>(75.33 to<br>5,664.04) |

| Papua New Guinea                                      |                                                                |                                                               |                                                               |                                                               |                                                        |                                                        |                                                        |                                                        |
|-------------------------------------------------------|----------------------------------------------------------------|---------------------------------------------------------------|---------------------------------------------------------------|---------------------------------------------------------------|--------------------------------------------------------|--------------------------------------------------------|--------------------------------------------------------|--------------------------------------------------------|
| Cause                                                 | YLLs (actual counts)                                           |                                                               |                                                               |                                                               | Deaths (actual counts)                                 |                                                        |                                                        |                                                        |
|                                                       | 2016                                                           | 2040 Forecast                                                 | 2040 Better Scenario                                          | 2040 Worse Scenario                                           | 2016                                                   | 2040 Forecast                                          | 2040 Better Scenario                                   | 2040 Worse Scenario                                    |
| Varicella and herpes zoster                           | 2,367.22<br>(1,248.30 to<br>4,455.89)                          | 1,636.80<br>(562.06 to<br>3,676.83)                           | 742.46<br>(301.81 to<br>1,487.41)                             | 1,831.53<br>(619.43 to<br>4,235.86)                           | 36.32<br>(22.06 to<br>60.33)                           | 29.02<br>(13.75 to<br>54.72)                           | 16.85<br>(9.11 to<br>27.77)                            | 30.62<br>(13.94 to<br>59.81)                           |
| <b>Neglected tropical diseases and malaria</b>        | <b>54,865.95</b><br><b>(30,138.67 to</b><br><b>100,447.37)</b> | <b>43,801.04</b><br><b>(22,715.45 to</b><br><b>80,100.33)</b> | <b>36,573.63</b><br><b>(19,664.56 to</b><br><b>59,499.70)</b> | <b>45,365.19</b><br><b>(22,842.85 to</b><br><b>83,236.41)</b> | <b>962.90</b><br><b>(540.72 to</b><br><b>1,626.95)</b> | <b>841.63</b><br><b>(469.10 to</b><br><b>1,380.52)</b> | <b>747.06</b><br><b>(442.26 to</b><br><b>1,127.43)</b> | <b>850.87</b><br><b>(462.23 to</b><br><b>1,432.04)</b> |
| Malaria                                               | 50,134.59<br>(25,728.78 to<br>94,288.40)                       | 37,629.93<br>(17,400.82 to<br>70,309.50)                      | 32,065.35<br>(16,045.21 to<br>55,596.91)                      | 38,849.43<br>(17,427.75 to<br>74,809.99)                      | 889.31<br>(468.15 to<br>1,547.71)                      | 726.94<br>(377.28 to<br>1,265.84)                      | 650.21<br>(358.99 to<br>1,035.55)                      | 736.44<br>(365.73 to<br>1,276.30)                      |
| Chagas disease                                        | 0.00<br>(0.00 to<br>0.00)                                      | 0.00<br>(0.00 to<br>0.00)                                     | 0.00<br>(0.00 to<br>0.00)                                     | 0.00<br>(0.00 to<br>0.00)                                     | 0.00<br>(0.00 to<br>0.00)                              | 0.00<br>(0.00 to<br>0.00)                              | 0.00<br>(0.00 to<br>0.00)                              | 0.00<br>(0.00 to<br>0.00)                              |
| Leishmaniasis                                         | 0.00<br>(0.00 to<br>0.00)                                      | 0.00<br>(0.00 to<br>0.00)                                     | 0.00<br>(0.00 to<br>0.00)                                     | 0.00<br>(0.00 to<br>0.00)                                     | 0.00<br>(0.00 to<br>0.00)                              | 0.00<br>(0.00 to<br>0.00)                              | 0.00<br>(0.00 to<br>0.00)                              | 0.00<br>(0.00 to<br>0.00)                              |
| African trypanosomiasis                               | 0.00<br>(0.00 to<br>0.00)                                      | 0.00<br>(0.00 to<br>0.00)                                     | 0.00<br>(0.00 to<br>0.00)                                     | 0.00<br>(0.00 to<br>0.00)                                     | 0.00<br>(0.00 to<br>0.00)                              | 0.00<br>(0.00 to<br>0.00)                              | 0.00<br>(0.00 to<br>0.00)                              | 0.00<br>(0.00 to<br>0.00)                              |
| Schistosomiasis                                       | 0.00<br>(0.00 to<br>0.00)                                      | 0.00<br>(0.00 to<br>0.00)                                     | 0.00<br>(0.00 to<br>0.00)                                     | 0.00<br>(0.00 to<br>0.00)                                     | 0.00<br>(0.00 to<br>0.00)                              | 0.00<br>(0.00 to<br>0.00)                              | 0.00<br>(0.00 to<br>0.00)                              | 0.00<br>(0.00 to<br>0.00)                              |
| Cysticercosis                                         | 118.38<br>(87.99 to<br>153.59)                                 | 57.07<br>(42.47 to<br>73.45)                                  | 49.71<br>(36.63 to<br>64.25)                                  | 57.90<br>(43.09 to<br>74.59)                                  | 2.59<br>(1.94 to<br>3.37)                              | 1.38<br>(1.04 to<br>1.77)                              | 1.25<br>(0.94 to<br>1.61)                              | 1.37<br>(1.04 to<br>1.76)                              |
| Cystic echinococcosis                                 | 21.15<br>(15.26 to<br>28.68)                                   | 13.60<br>(9.45 to<br>19.41)                                   | 6.20<br>(4.17 to<br>8.79)                                     | 15.67<br>(10.62 to<br>21.75)                                  | 0.48<br>(0.34 to<br>0.65)                              | 0.37<br>(0.26 to<br>0.52)                              | 0.18<br>(0.13 to<br>0.25)                              | 0.41<br>(0.29 to<br>0.57)                              |
| Dengue                                                | 98.23<br>(33.95 to<br>263.11)                                  | 503.55<br>(187.22 to<br>1,261.73)                             | 461.38<br>(169.42 to<br>1,274.82)                             | 500.93<br>(181.38 to<br>1,350.78)                             | 2.06<br>(0.73 to<br>5.66)                              | 14.39<br>(5.17 to<br>39.25)                            | 15.46<br>(5.67 to<br>39.25)                            | 13.24<br>(4.77 to<br>34.76)                            |
| Yellow fever                                          | 0.00<br>(0.00 to<br>0.00)                                      | 0.00<br>(0.00 to<br>0.00)                                     | 0.00<br>(0.00 to<br>0.00)                                     | 0.00<br>(0.00 to<br>0.00)                                     | 0.00<br>(0.00 to<br>0.00)                              | 0.00<br>(0.00 to<br>0.00)                              | 0.00<br>(0.00 to<br>0.00)                              | 0.00<br>(0.00 to<br>0.00)                              |
| Rabies                                                | 11.42<br>(3.83 to<br>24.18)                                    | 8.40<br>(2.74 to<br>18.11)                                    | 3.22<br>(1.05 to<br>6.81)                                     | 9.98<br>(3.09 to<br>21.39)                                    | 0.31<br>(0.11 to<br>0.66)                              | 0.27<br>(0.09 to<br>0.58)                              | 0.12<br>(0.04 to<br>0.27)                              | 0.29<br>(0.09 to<br>0.63)                              |
| Intestinal nematode infections                        | 3,607.72<br>(1,977.95 to<br>6,235.85)                          | 4,620.86<br>(2,312.63 to<br>9,261.81)                         | 3,356.26<br>(1,737.69 to<br>6,524.83)                         | 4,905.23<br>(2,470.67 to<br>9,886.55)                         | 47.82<br>(27.50 to<br>79.34)                           | 65.27<br>(35.95 to<br>123.47)                          | 51.56<br>(29.91 to<br>88.64)                           | 67.87<br>(36.66 to<br>129.74)                          |
| Other neglected tropical diseases                     | 874.47<br>(329.13 to<br>1,898.66)                              | 967.62<br>(418.37 to<br>2,149.15)                             | 631.52<br>(295.36 to<br>1,475.13)                             | 1,026.06<br>(436.42 to<br>2,187.48)                           | 20.33<br>(8.83 to<br>43.17)                            | 33.01<br>(15.03 to<br>75.46)                           | 28.28<br>(12.53 to<br>69.04)                           | 31.24<br>(14.39 to<br>69.07)                           |
| <b>Maternal disorders</b>                             | <b>51,684.48</b><br><b>(37,184.94 to</b><br><b>70,062.44)</b>  | <b>42,624.43</b><br><b>(27,356.70 to</b><br><b>62,216.28)</b> | <b>30,923.39</b><br><b>(13,246.62 to</b><br><b>36,677.72)</b> | <b>49,555.73</b><br><b>(31,937.17 to</b><br><b>72,092.53)</b> | <b>925.17</b><br><b>(666.74 to</b><br><b>1,259.87)</b> | <b>766.84</b><br><b>(491.10 to</b><br><b>1,121.58)</b> | <b>577.85</b><br><b>(238.47 to</b><br><b>554.12)</b>   | <b>890.95</b><br><b>(572.71 to</b><br><b>1,300.55)</b> |
| Maternal hemorrhage                                   | 14,082.96<br>(8,372.37 to<br>21,736.89)                        | 11,162.63<br>(6,082.18 to<br>17,921.16)                       | 5,598.40<br>(3,008.37 to<br>9,208.97)                         | 12,861.78<br>(7,016.98 to<br>20,812.20)                       | 251.92<br>(147.32 to<br>385.65)                        | 200.62<br>(108.90 to<br>322.34)                        | 100.89<br>(54.41 to<br>164.70)                         | 231.03<br>(125.26 to<br>370.91)                        |
| Maternal sepsis and other maternal infections         | 5,197.42<br>(2,711.16 to<br>8,752.19)                          | 3,732.70<br>(1,665.84 to<br>6,836.98)                         | 1,841.88<br>(815.77 to<br>3,422.12)                           | 4,320.46<br>(1,947.16 to<br>7,790.02)                         | 94.74<br>(48.47 to<br>158.66)                          | 68.40<br>(30.68 to<br>122.83)                          | 33.87<br>(14.88 to<br>61.53)                           | 79.11<br>(35.50 to<br>142.60)                          |
| Maternal hypertensive disorders                       | 6,993.47<br>(3,985.53 to<br>11,193.28)                         | 5,892.67<br>(3,114.79 to<br>10,099.51)                        | 2,925.77<br>(1,546.66 to<br>5,011.51)                         | 6,799.39<br>(3,635.73 to<br>11,851.66)                        | 124.83<br>(71.53 to<br>200.89)                         | 105.86<br>(55.23 to<br>182.52)                         | 52.74<br>(27.54 to<br>90.57)                           | 122.07<br>(64.26 to<br>214.22)                         |
| Maternal obstructed labor and uterine rupture         | 4,173.24<br>(1,900.78 to<br>7,746.24)                          | 3,580.17<br>(1,480.36 to<br>7,194.02)                         | 1,706.00<br>(701.24 to<br>3,531.18)                           | 4,160.14<br>(1,709.40 to<br>8,230.47)                         | 75.43<br>(34.05 to<br>138.56)                          | 65.02<br>(26.41 to<br>128.90)                          | 31.07<br>(12.89 to<br>64.20)                           | 75.50<br>(31.19 to<br>148.58)                          |
| Maternal abortion, miscarriage, and ectopic pregnancy | 2,747.42<br>(1,056.81 to<br>5,551.49)                          | 2,652.77<br>(926.82 to<br>5,958.04)                           | 1,323.39<br>(457.10 to<br>2,876.82)                           | 3,133.45<br>(1,092.19 to<br>6,947.60)                         | 50.04<br>(20.03 to<br>99.74)                           | 48.55<br>(17.01 to<br>107.22)                          | 24.30<br>(8.75 to<br>51.06)                            | 57.33<br>(20.75 to<br>125.81)                          |

|                                        |                                        |                                        |                                       |                                        |                                |                                |                               |                                |
|----------------------------------------|----------------------------------------|----------------------------------------|---------------------------------------|----------------------------------------|--------------------------------|--------------------------------|-------------------------------|--------------------------------|
|                                        | 6,522.66<br>(3,299.76 to<br>10,873.17) | 5,918.48<br>(2,852.04 to<br>11,020.47) | 2,800.51<br>(1,308.98 to<br>5,254.25) | 6,946.97<br>(3,297.63 to<br>13,016.06) | 115.03<br>(58.60 to<br>193.77) | 104.69<br>(50.21 to<br>195.41) | 49.78<br>(23.43 to<br>95.03)  | 122.76<br>(58.61 to<br>231.25) |
| Indirect maternal deaths               | 2,976.64<br>(1,226.98 to<br>5,638.13)  | 1,970.69<br>(765.45 to<br>4,095.28)    | 941.38<br>(364.60 to<br>1,926.90)     | 2,307.61<br>(900.51 to<br>4,695.79)    | 53.00<br>(22.39 to<br>98.33)   | 35.12<br>(13.68 to<br>72.36)   | 16.85<br>(6.51 to<br>33.72)   | 41.09<br>(16.08 to<br>82.92)   |
| Late maternal deaths                   | 196.91<br>(95.91 to<br>348.08)         | 556.81<br>(150.74 to<br>1,442.66)      | 233.78<br>(17.23 to<br>646.14)        | 699.77<br>(243.92 to<br>1,721.46)      | 3.74<br>(1.83 to<br>6.60)      | 10.47<br>(2.81 to<br>26.09)    | 4.43<br>(0.30 to<br>12.05)    | 13.16<br>(4.55 to<br>30.36)    |
| Maternal deaths aggravated by HIV/AIDS | 8,793.76<br>(4,693.82 to<br>14,275.35) | 7,157.50<br>(3,642.80 to<br>12,712.00) | 3,552.28<br>(1,719.54 to<br>6,233.68) | 8,326.16<br>(4,210.25 to<br>14,863.96) | 156.44<br>(85.19 to<br>255.42) | 128.11<br>(64.57 to<br>225.29) | 63.91<br>(30.70 to<br>111.55) | 148.89<br>(74.53 to<br>261.08) |
| Other maternal disorders               |                                        |                                        |                                       |                                        |                                |                                |                               |                                |

| Papua New Guinea                                                        |                                                 |                                                 |                                                |                                                 |                                           |                                           |                                         |                                           |
|-------------------------------------------------------------------------|-------------------------------------------------|-------------------------------------------------|------------------------------------------------|-------------------------------------------------|-------------------------------------------|-------------------------------------------|-----------------------------------------|-------------------------------------------|
| Cause                                                                   | YLLs (actual counts)                            |                                                 |                                                |                                                 | Deaths (actual counts)                    |                                           |                                         |                                           |
|                                                                         | 2016                                            | 2040 Forecast                                   | 2040 Better Scenario                           | 2040 Worse Scenario                             | 2016                                      | 2040 Forecast                             | 2040 Better Scenario                    | 2040 Worse Scenario                       |
| <b>Neonatal disorders</b>                                               | <b>289,451.32</b><br>(156,785.28 to 492,821.25) | <b>252,801.37</b><br>(131,751.93 to 453,153.89) | <b>106,270.59</b><br>(55,493.67 to 192,076.21) | <b>314,066.70</b><br>(162,925.89 to 556,329.43) | <b>3,345.77</b><br>(1,812.20 to 5,695.94) | <b>2,923.08</b><br>(1,524.14 to 5,241.24) | <b>1,228.96</b><br>(642.04 to 2,220.59) | <b>3,631.24</b><br>(1,883.73 to 6,433.80) |
| Neonatal preterm birth                                                  | 127,147.10<br>(64,956.43 to 230,536.12)         | 103,477.07<br>(50,939.79 to 187,901.71)         | 41,061.15<br>(20,140.53 to 76,229.76)          | 130,423.08<br>(63,409.89 to 238,398.81)         | 1,469.26<br>(750.71 to 2,663.55)          | 1,196.00<br>(589.08 to 2,171.75)          | 474.68<br>(232.78 to 880.90)            | 1,507.36<br>(732.91 to 2,753.99)          |
| Neonatal encephalopathy due to birth asphyxia and trauma                | 61,796.82<br>(28,781.27 to 116,120.73)          | 50,277.26<br>(21,511.27 to 101,029.56)          | 23,438.15<br>(10,352.08 to 46,877.34)          | 61,132.34<br>(26,411.38 to 121,979.97)          | 714.44<br>(332.88 to 1,341.92)            | 581.63<br>(248.96 to 1,167.42)            | 271.18<br>(119.84 to 542.84)            | 707.15<br>(305.31 to 1,410.62)            |
| Neonatal sepsis and other neonatal infections                           | 27,909.61<br>(11,337.66 to 53,626.08)           | 32,062.78<br>(12,375.68 to 66,290.80)           | 14,511.66<br>(5,593.64 to 29,812.02)           | 39,095.63<br>(15,268.97 to 79,957.99)           | 322.58<br>(131.03 to 619.65)              | 370.71<br>(142.99 to 766.26)              | 167.79<br>(64.63 to 344.78)             | 452.01<br>(176.45 to 923.96)              |
| Hemolytic disease and other neonatal jaundice                           | 6,822.12<br>(3,042.82 to 14,289.60)             | 3,826.82<br>(1,462.81 to 8,636.38)              | 1,552.99<br>(596.08 to 3,533.73)               | 4,804.28<br>(1,821.65 to 10,967.98)             | 78.82<br>(35.16 to 165.09)                | 44.22<br>(16.90 to 99.76)                 | 17.94<br>(6.89 to 40.83)                | 55.51<br>(21.05 to 126.69)                |
| Other neonatal disorders                                                | 65,775.66<br>(31,552.57 to 123,077.19)          | 63,157.44<br>(28,694.48 to 123,209.64)          | 25,706.64<br>(11,525.93 to 49,854.44)          | 78,611.37<br>(35,262.98 to 152,216.39)          | 760.66<br>(364.83 to 1,423.38)            | 730.51<br>(331.90 to 1,424.31)            | 297.36<br>(133.37 to 576.48)            | 909.21<br>(408.11 to 1,760.82)            |
| <b>Nutritional deficiencies</b>                                         | <b>32,674.41</b><br>(16,730.56 to 58,496.14)    | <b>20,651.58</b><br>(11,437.80 to 36,282.54)    | <b>11,949.74</b><br>(7,346.42 to 19,383.76)    | <b>24,480.42</b><br>(12,659.46 to 45,077.94)    | <b>519.30</b><br>(316.52 to 826.11)       | <b>454.22</b><br>(303.21 to 667.76)       | <b>356.96</b><br>(255.79 to 489.50)     | <b>473.80</b><br>(300.33 to 733.33)       |
| Protein-energy malnutrition                                             | 28,173.52<br>(12,707.04 to 53,647.39)           | 14,076.27<br>(6,507.85 to 27,160.57)            | 7,430.04<br>(3,852.52 to 13,618.29)            | 17,398.12<br>(7,494.38 to 34,954.97)            | 416.34<br>(235.06 to 717.23)              | 290.81<br>(168.58 to 464.73)              | 219.76<br>(140.00 to 318.39)            | 311.35<br>(167.02 to 536.61)              |
| Iodine deficiency                                                       | 62.94<br>(1.58 to 313.12)                       | 381.00<br>(2.17 to 2,498.60)                    | 204.72<br>(1.26 to 1,157.69)                   | 443.09<br>(2.11 to 3,331.11)                    | 1.10<br>(0.04 to 4.44)                    | 9.27<br>(0.08 to 39.10)                   | 6.61<br>(0.05 to 30.53)                 | 9.59<br>(0.07 to 44.42)                   |
| Dietary iron deficiency                                                 | 4,281.25<br>(2,353.68 to 8,076.97)              | 6,004.72<br>(3,346.55 to 11,053.83)             | 4,181.80<br>(2,558.15 to 6,933.38)             | 6,440.69<br>(3,410.41 to 12,503.01)             | 97.88<br>(62.11 to 152.98)                | 147.91<br>(91.15 to 226.40)               | 125.04<br>(76.81 to 189.82)             | 146.99<br>(91.08 to 232.12)               |
| Other nutritional deficiencies                                          | 156.71<br>(77.07 to 361.19)                     | 189.58<br>(92.06 to 404.98)                     | 133.18<br>(68.27 to 281.80)                    | 198.52<br>(95.09 to 433.47)                     | 3.99<br>(2.16 to 7.73)                    | 6.23<br>(2.96 to 12.12)                   | 5.36<br>(2.55 to 10.80)                 | 5.88<br>(2.80 to 11.20)                   |
| <b>Other communicable, maternal, neonatal, and nutritional diseases</b> | <b>98,721.94</b><br>(43,810.12 to 196,458.54)   | <b>37,861.18</b><br>(21,115.71 to 64,876.82)    | <b>22,783.92</b><br>(13,770.41 to 36,791.77)   | <b>41,904.55</b><br>(22,780.16 to 73,682.50)    | <b>1,292.92</b><br>(633.83 to 2,445.04)   | <b>643.96</b><br>(415.92 to 980.77)       | <b>436.11</b><br>(298.73 to 616.11)     | <b>688.12</b><br>(439.71 to 1,077.60)     |
| Sexually transmitted infections excluding HIV                           | 82,424.28<br>(29,244.09 to 171,592.66)          | 20,619.26<br>(6,638.69 to 44,125.61)            | 10,806.38<br>(3,820.62 to 22,938.03)           | 23,504.66<br>(7,287.92 to 51,027.90)            | 977.58<br>(355.37 to 2,012.64)            | 253.42<br>(89.39 to 528.63)               | 136.75<br>(52.82 to 279.52)             | 287.37<br>(99.36 to 607.00)               |
| Syphilis                                                                | 81,260.07<br>(28,246.52 to 170,708.62)          | 19,668.28<br>(5,884.50 to 43,231.06)            | 10,033.00<br>(3,124.75 to 22,075.88)           | 22,518.82<br>(6,455.90 to 50,362.88)            | 952.39<br>(333.14 to 1,992.14)            | 232.61<br>(71.28 to 507.95)               | 119.58<br>(38.56 to 260.53)             | 265.92<br>(77.98 to 590.52)               |
| Chlamydial infection                                                    | 227.18<br>(100.45 to 339.98)                    | 186.91<br>(83.09 to 284.88)                     | 151.39<br>(67.73 to 234.77)                    | 193.99<br>(87.51 to 292.46)                     | 4.87<br>(2.14 to 7.31)                    | 4.05<br>(1.84 to 6.22)                    | 3.33<br>(1.51 to 5.16)                  | 4.18<br>(1.92 to 6.37)                    |
| Gonococcal infection                                                    | 599.49<br>(267.52 to 908.76)                    | 488.34<br>(217.12 to 747.38)                    | 398.65<br>(177.75 to 623.48)                   | 505.73<br>(225.85 to 779.53)                    | 13.05<br>(5.82 to 19.58)                  | 10.77<br>(4.88 to 16.43)                  | 8.92<br>(4.02 to 13.77)                 | 11.08<br>(5.03 to 17.09)                  |
| Other sexually transmitted infections                                   | 337.54<br>(151.17 to 511.06)                    | 275.73<br>(121.84 to 429.47)                    | 223.34<br>(99.50 to 348.56)                    | 286.11<br>(129.23 to 441.53)                    | 7.27<br>(3.25 to 10.91)                   | 5.99<br>(2.60 to 9.39)                    | 4.91<br>(2.17 to 7.79)                  | 6.18<br>(2.78 to 9.66)                    |
| Acute hepatitis                                                         | 5,972.38<br>(4,302.61 to 7,852.32)              | 5,319.91<br>(3,478.75 to 7,625.84)              | 4,012.08<br>(2,590.97 to 5,755.60)             | 5,560.63<br>(3,569.84 to 7,952.58)              | 127.36<br>(91.84 to 168.13)               | 128.05<br>(84.22 to 180.04)               | 100.42<br>(65.32 to 143.27)             | 131.38<br>(85.60 to 185.55)               |
| Acute hepatitis A                                                       | 386.59<br>(207.57 to 681.26)                    | 179.08<br>(86.28 to 332.27)                     | 105.71<br>(55.85 to 184.62)                    | 198.97<br>(95.97 to 373.93)                     | 5.36<br>(3.16 to 8.76)                    | 2.92<br>(1.61 to 4.87)                    | 1.94<br>(1.15 to 3.04)                  | 3.14<br>(1.71 to 5.33)                    |
| Acute hepatitis B                                                       | 4,389.27<br>(3,117.90 to 5,913.52)              | 4,322.83<br>(2,750.53 to 6,330.53)              | 3,310.04<br>(2,092.39 to 4,790.14)             | 4,496.24<br>(2,855.93 to 6,523.20)              | 102.66<br>(72.37 to 138.35)               | 109.12<br>(70.34 to 155.78)               | 85.63<br>(54.56 to 123.67)              | 111.85<br>(71.91 to 162.14)               |

|                                       |                                                                        |                                                                        |                                                                        |                                                                        |                                                               |                                                               |                                                               |                                                               |
|---------------------------------------|------------------------------------------------------------------------|------------------------------------------------------------------------|------------------------------------------------------------------------|------------------------------------------------------------------------|---------------------------------------------------------------|---------------------------------------------------------------|---------------------------------------------------------------|---------------------------------------------------------------|
|                                       | 104.89<br>(65.38 to<br>160.62)                                         | 105.93<br>(61.46 to<br>166.39)                                         | 91.82<br>(53.61 to<br>144.21)                                          | 106.98<br>(62.66 to<br>170.74)                                         | 2.37<br>(1.46 to<br>3.49)                                     | 2.81<br>(1.65 to<br>4.44)                                     | 2.56<br>(1.49 to<br>4.04)                                     | 2.77<br>(1.63 to<br>4.38)                                     |
| Acute hepatitis C                     |                                                                        |                                                                        |                                                                        |                                                                        |                                                               |                                                               |                                                               |                                                               |
|                                       | 1,091.63<br>(668.24 to<br>1,683.84)                                    | 712.07<br>(383.25 to<br>1,194.33)                                      | 504.51<br>(276.30 to<br>822.73)                                        | 758.44<br>(411.86 to<br>1,288.63)                                      | 16.96<br>(10.64 to<br>25.06)                                  | 13.20<br>(7.43 to<br>20.73)                                   | 10.29<br>(5.91 to<br>15.89)                                   | 13.61<br>(7.69 to<br>21.74)                                   |
| Acute hepatitis E                     |                                                                        |                                                                        |                                                                        |                                                                        |                                                               |                                                               |                                                               |                                                               |
|                                       | 10,325.28<br>(5,668.42 to<br>23,335.36)                                | 11,922.01<br>(7,283.62 to<br>19,839.23)                                | 7,965.45<br>(5,168.07 to<br>12,297.27)                                 | 12,839.26<br>(7,968.93 to<br>21,779.98)                                | 187.98<br>(118.11 to<br>340.40)                               | 262.49<br>(179.39 to<br>386.42)                               | 198.94<br>(138.86 to<br>276.05)                               | 269.38<br>(183.10 to<br>402.53)                               |
| Other unspecified infectious diseases |                                                                        |                                                                        |                                                                        |                                                                        |                                                               |                                                               |                                                               |                                                               |
| <b>Non-communicable diseases</b>      | <b>1,449,482.06</b><br><b>(1,192,023.16 to</b><br><b>1,734,187.77)</b> | <b>1,996,390.84</b><br><b>(1,619,516.15 to</b><br><b>2,404,831.11)</b> | <b>1,263,927.41</b><br><b>(1,035,604.46 to</b><br><b>1,533,106.62)</b> | <b>2,475,828.96</b><br><b>(2,023,513.83 to</b><br><b>2,975,526.06)</b> | <b>44,899.71</b><br><b>(37,775.27 to</b><br><b>52,659.95)</b> | <b>71,162.31</b><br><b>(61,372.30 to</b><br><b>81,672.46)</b> | <b>49,186.93</b><br><b>(42,702.08 to</b><br><b>56,401.97)</b> | <b>85,581.20</b><br><b>(73,659.91 to</b><br><b>97,217.31)</b> |



| Papua New Guinea                     |                                                 |                                                 |                                                 |                                                 |                                           |                                           |                                           |                                            |
|--------------------------------------|-------------------------------------------------|-------------------------------------------------|-------------------------------------------------|-------------------------------------------------|-------------------------------------------|-------------------------------------------|-------------------------------------------|--------------------------------------------|
| Cause                                | YLLs (actual counts)                            |                                                 |                                                 |                                                 | Deaths (actual counts)                    |                                           |                                           |                                            |
|                                      | 2016                                            | 2040 Forecast                                   | 2040 Better Scenario                            | 2040 Worse Scenario                             | 2016                                      | 2040 Forecast                             | 2040 Better Scenario                      | 2040 Worse Scenario                        |
| <b>Neoplasms</b>                     | <b>149,171.00</b><br>(116,518.02 to 188,674.90) | <b>230,928.12</b><br>(175,859.72 to 300,323.24) | <b>205,036.17</b><br>(161,044.39 to 256,853.73) | <b>254,623.92</b><br>(190,780.27 to 336,237.71) | <b>4,478.66</b><br>(3,561.63 to 5,577.55) | <b>7,844.97</b><br>(6,161.95 to 9,549.98) | <b>7,468.31</b><br>(6,151.17 to 9,093.09) | <b>8,359.59</b><br>(6,415.84 to 10,846.42) |
| Lip and oral cavity cancer           | 2,190.12<br>(1,674.06 to 2,855.88)              | 3,582.35<br>(1,895.12 to 6,633.42)              | 2,363.72<br>(1,364.76 to 4,114.64)              | 5,315.60<br>(2,610.42 to 10,213.16)             | 71.46<br>(55.95 to 92.62)                 | 125.88<br>(70.06 to 223.36)               | 90.29<br>(55.28 to 152.06)                | 177.50<br>(90.14 to 325.31)                |
| Nasopharynx cancer                   | 2,293.88<br>(1,486.87 to 3,207.02)              | 4,214.74<br>(1,968.90 to 8,295.84)              | 2,543.90<br>(1,271.68 to 4,870.47)              | 6,366.50<br>(2,779.05 to 13,049.48)             | 67.33<br>(44.01 to 92.89)                 | 132.49<br>(64.33 to 258.01)               | 83.33<br>(41.85 to 153.14)                | 195.22<br>(86.33 to 394.01)                |
| Other pharynx cancer                 | 2,257.32<br>(1,447.21 to 3,338.58)              | 2,812.35<br>(1,548.83 to 4,755.90)              | 2,381.67<br>(1,370.30 to 3,893.96)              | 3,612.43<br>(1,823.40 to 6,382.92)              | 71.81<br>(47.03 to 103.74)                | 97.27<br>(55.75 to 160.99)                | 87.27<br>(52.72 to 141.38)                | 120.31<br>(61.84 to 207.78)                |
| Esophageal cancer                    | 1,766.77<br>(1,378.83 to 2,260.04)              | 2,795.01<br>(1,572.11 to 4,837.64)              | 1,938.86<br>(1,173.53 to 3,162.38)              | 3,915.66<br>(1,994.54 to 7,085.91)              | 60.92<br>(48.52 to 76.36)                 | 104.65<br>(60.52 to 172.67)               | 77.86<br>(48.84 to 120.52)                | 140.40<br>(74.69 to 243.11)                |
| Stomach cancer                       | 14,479.29<br>(11,411.38 to 17,928.78)           | 17,012.51<br>(12,950.12 to 22,109.39)           | 15,142.57<br>(11,828.96 to 19,265.76)           | 17,409.84<br>(13,035.93 to 23,089.89)           | 475.80<br>(379.07 to 581.30)              | 622.01<br>(490.84 to 773.76)              | 595.16<br>(477.43 to 727.10)              | 610.43<br>(473.62 to 778.46)               |
| Colon and rectum cancer              | 8,388.13<br>(5,877.90 to 12,149.93)             | 15,816.20<br>(9,922.52 to 25,619.70)            | 16,509.43<br>(10,796.93 to 25,685.59)           | 16,504.26<br>(10,045.39 to 26,792.63)           | 288.40<br>(210.07 to 411.05)              | 609.93<br>(392.10 to 984.65)              | 685.06<br>(457.91 to 1,070.61)            | 606.02<br>(378.53 to 996.61)               |
| Liver cancer                         | 8,351.41<br>(5,928.21 to 12,351.55)             | 14,985.87<br>(9,567.58 to 23,852.10)            | 13,647.98<br>(9,165.18 to 21,187.89)            | 17,299.93<br>(10,490.33 to 28,600.79)           | 267.11<br>(192.27 to 395.47)              | 527.88<br>(352.75 to 835.07)              | 514.23<br>(356.43 to 791.56)              | 583.28<br>(365.85 to 946.79)               |
| Liver cancer due to hepatitis B      | 4,838.78<br>(3,396.55 to 7,380.95)              | 8,379.66<br>(5,361.80 to 13,593.87)             | 7,656.80<br>(5,024.59 to 11,921.58)             | 9,571.33<br>(5,843.23 to 16,116.20)             | 146.53<br>(103.57 to 222.05)              | 278.24<br>(183.94 to 436.95)              | 270.04<br>(184.82 to 409.57)              | 305.87<br>(191.47 to 501.28)               |
| Liver cancer due to hepatitis C      | 1,249.40<br>(873.44 to 1,996.47)                | 2,420.11<br>(1,589.47 to 4,025.04)              | 2,339.94<br>(1,604.79 to 3,830.34)              | 2,654.43<br>(1,631.15 to 4,511.56)              | 48.38<br>(34.56 to 77.24)                 | 102.42<br>(68.17 to 167.97)               | 107.06<br>(74.28 to 169.96)               | 106.61<br>(67.91 to 178.50)                |
| Liver cancer due to alcohol use      | 567.77<br>(377.63 to 902.63)                    | 1,066.18<br>(657.01 to 1,805.74)                | 911.17<br>(595.65 to 1,508.25)                  | 1,474.29<br>(854.33 to 2,570.08)                | 19.90<br>(13.64 to 31.34)                 | 39.89<br>(25.24 to 66.05)                 | 36.54<br>(24.26 to 59.05)                 | 52.05<br>(31.31 to 87.75)                  |
| Liver cancer due to other causes     | 1,695.45<br>(1,177.04 to 2,493.89)              | 3,119.93<br>(1,891.44 to 5,298.26)              | 2,740.07<br>(1,735.42 to 4,468.83)              | 3,599.87<br>(2,040.40 to 6,344.51)              | 52.29<br>(37.09 to 76.33)                 | 107.33<br>(64.30 to 181.81)               | 100.58<br>(63.48 to 164.17)               | 118.75<br>(66.62 to 212.53)                |
| Gallbladder and biliary tract cancer | 1,262.13<br>(845.11 to 1,876.06)                | 1,448.42<br>(1,016.10 to 2,050.34)              | 1,623.27<br>(1,154.26 to 2,280.95)              | 1,345.57<br>(937.19 to 1,906.42)                | 45.98<br>(32.23 to 66.41)                 | 57.74<br>(40.93 to 79.92)                 | 68.81<br>(49.91 to 93.69)                 | 51.71<br>(36.22 to 72.07)                  |
| Pancreatic cancer                    | 2,929.26<br>(2,323.33 to 3,638.59)              | 6,238.85<br>(4,396.62 to 8,656.76)              | 6,394.83<br>(4,714.37 to 8,617.10)              | 6,157.91<br>(4,250.67 to 8,623.18)              | 109.58<br>(89.31 to 134.36)               | 251.03<br>(181.64 to 346.50)              | 273.79<br>(205.37 to 365.27)              | 238.26<br>(170.64 to 333.16)               |
| Larynx cancer                        | 1,828.66<br>(1,438.26 to 2,258.75)              | 2,720.90<br>(1,348.60 to 4,777.19)              | 1,619.61<br>(862.92 to 2,926.31)                | 3,671.51<br>(1,776.76 to 6,474.94)              | 59.89<br>(47.45 to 73.51)                 | 98.87<br>(50.05 to 173.89)                | 60.94<br>(33.92 to 108.94)                | 129.48<br>(63.02 to 226.91)                |
| Tracheal, bronchus, and lung cancer  | 19,404.72<br>(14,735.28 to 26,543.48)           | 33,169.59<br>(18,144.70 to 58,929.85)           | 19,198.11<br>(11,485.63 to 33,636.58)           | 45,347.52<br>(24,450.74 to 79,124.90)           | 667.27<br>(514.57 to 898.38)              | 1,245.02<br>(700.54 to 2,216.18)          | 745.01<br>(458.98 to 1,283.49)            | 1,659.16<br>(916.92 to 2,895.89)           |
| Malignant skin melanoma              | 645.94<br>(391.06 to 1,131.08)                  | 1,163.63<br>(710.68 to 2,051.34)                | 1,437.57<br>(868.43 to 2,629.62)                | 1,063.77<br>(654.25 to 1,819.46)                | 20.99<br>(13.10 to 36.39)                 | 42.25<br>(26.34 to 74.02)                 | 56.10<br>(35.03 to 101.44)                | 37.02<br>(23.21 to 62.92)                  |
| Non-melanoma skin cancer             | 1,316.50<br>(921.93 to 1,808.05)                | 2,476.19<br>(1,803.81 to 3,248.52)              | 2,422.09<br>(1,771.51 to 3,185.66)              | 2,363.62<br>(1,718.87 to 3,073.49)              | 46.34<br>(33.95 to 60.93)                 | 100.71<br>(77.15 to 127.72)               | 109.18<br>(83.35 to 137.58)               | 90.79<br>(68.53 to 117.41)                 |
| Breast cancer                        | 17,275.08<br>(8,687.20 to 28,590.48)            | 27,499.01<br>(13,112.60 to 47,913.14)           | 26,516.46<br>(13,463.91 to 43,802.57)           | 29,069.11<br>(13,675.43 to 51,433.96)           | 506.59<br>(268.99 to 821.22)              | 883.45<br>(438.31 to 1,518.75)            | 898.48<br>(475.18 to 1,475.81)            | 905.18<br>(441.44 to 1,584.18)             |
| Cervical cancer                      | 15,712.56<br>(8,259.55 to 22,841.69)            | 19,503.58<br>(10,286.21 to 30,410.34)           | 16,610.09<br>(9,230.75 to 25,273.66)            | 20,357.46<br>(10,370.93 to 31,643.28)           | 444.28<br>(240.41 to 643.54)              | 582.84<br>(317.87 to 880.40)              | 514.74<br>(292.27 to 762.89)              | 598.52<br>(311.62 to 918.58)               |

|                   |                                       |                                        |                                        |                                        |                                 |                                 |                                 |                                 |
|-------------------|---------------------------------------|----------------------------------------|----------------------------------------|----------------------------------------|---------------------------------|---------------------------------|---------------------------------|---------------------------------|
|                   | 4,183.62<br>(2,793.60 to<br>5,729.76) | 6,691.82<br>(4,628.88 to<br>8,993.89)  | 5,981.95<br>(4,202.66 to<br>8,038.09)  | 6,600.86<br>(4,423.86 to<br>8,912.93)  | 139.74<br>(96.70 to<br>186.74)  | 240.97<br>(168.02 to<br>318.45) | 225.07<br>(162.42 to<br>294.62) | 231.83<br>(157.36 to<br>308.69) |
| Uterine cancer    |                                       |                                        |                                        |                                        |                                 |                                 |                                 |                                 |
| Ovarian cancer    | 1,879.13<br>(1,286.54 to<br>2,806.93) | 3,364.55<br>(2,124.23 to<br>5,493.41)  | 3,847.11<br>(2,477.12 to<br>6,166.13)  | 3,215.00<br>(2,020.93 to<br>5,266.80)  | 62.61<br>(43.66 to<br>92.45)    | 120.22<br>(75.91 to<br>194.06)  | 142.69<br>(93.35 to<br>225.18)  | 112.26<br>(70.40 to<br>183.71)  |
| Prostate cancer   | 2,924.14<br>(2,115.28 to<br>4,558.16) | 8,001.40<br>(5,713.52 to<br>12,214.15) | 9,853.71<br>(7,438.30 to<br>14,606.26) | 6,955.52<br>(4,812.64 to<br>10,886.20) | 152.69<br>(112.87 to<br>229.25) | 465.12<br>(321.28 to<br>705.08) | 615.61<br>(459.81 to<br>892.74) | 386.27<br>(252.90 to<br>610.42) |
| Testicular cancer | 596.86<br>(426.57 to<br>797.74)       | 776.50<br>(538.14 to<br>1,064.92)      | 711.98<br>(493.95 to<br>981.36)        | 779.44<br>(546.40 to<br>1,066.65)      | 12.39<br>(9.09 to<br>16.30)     | 17.21<br>(12.57 to<br>22.64)    | 16.40<br>(11.92 to<br>21.51)    | 16.87<br>(12.30 to<br>22.36)    |

| Papua New Guinea                |                                          |                                            |                                          |                                              |                                       |                                       |                                       |                                       |
|---------------------------------|------------------------------------------|--------------------------------------------|------------------------------------------|----------------------------------------------|---------------------------------------|---------------------------------------|---------------------------------------|---------------------------------------|
| Cause                           | YLLs (actual counts)                     |                                            |                                          |                                              | Deaths (actual counts)                |                                       |                                       |                                       |
|                                 | 2016                                     | 2040 Forecast                              | 2040 Better Scenario                     | 2040 Worse Scenario                          | 2016                                  | 2040 Forecast                         | 2040 Better Scenario                  | 2040 Worse Scenario                   |
| Kidney cancer                   | 817.28<br>(616.28 to 1,086.10)           | 1,542.11<br>(1,081.96 to 2,216.20)         | 1,642.28<br>(1,169.85 to 2,322.90)       | 1,523.68<br>(1,066.41 to 2,200.67)           | 22.64<br>(17.23 to 30.23)             | 50.86<br>(35.67 to 71.95)             | 59.53<br>(41.66 to 82.39)             | 48.00<br>(33.42 to 69.24)             |
| Bladder cancer                  | 1,236.31<br>(900.69 to 1,807.54)         | 2,131.45<br>(1,312.47 to 3,615.41)         | 1,907.30<br>(1,235.29 to 3,116.55)       | 2,190.69<br>(1,320.17 to 3,764.10)           | 47.75<br>(35.51 to 68.56)             | 90.14<br>(57.22 to 149.98)            | 87.30<br>(58.99 to 141.59)            | 88.33<br>(54.90 to 147.88)            |
| Brain and nervous system cancer | 3,393.24<br>(2,322.99 to 4,434.61)       | 5,676.49<br>(3,727.43 to 7,332.69)         | 5,550.08<br>(3,605.74 to 7,176.39)       | 5,612.89<br>(3,678.02 to 7,241.77)           | 71.57<br>(46.71 to 93.58)             | 136.01<br>(85.15 to 174.39)           | 146.47<br>(90.98 to 189.71)           | 129.28<br>(81.81 to 165.33)           |
| Thyroid cancer                  | 844.42<br>(582.16 to 1,171.68)           | 1,271.15<br>(870.82 to 1,818.50)           | 1,180.45<br>(826.22 to 1,654.42)         | 1,323.60<br>(876.35 to 1,955.53)             | 29.85<br>(20.70 to 41.33)             | 49.06<br>(34.16 to 69.25)             | 48.48<br>(34.39 to 66.91)             | 49.20<br>(32.86 to 71.52)             |
| Mesothelioma                    | 333.47<br>(218.10 to 541.52)             | 548.36<br>(368.50 to 885.30)               | 552.63<br>(370.61 to 919.67)             | 526.63<br>(355.75 to 846.49)                 | 10.23<br>(6.73 to 16.32)              | 18.24<br>(12.48 to 28.59)             | 19.25<br>(13.06 to 31.08)             | 17.02<br>(11.73 to 26.50)             |
| Hodgkin lymphoma                | 1,296.98<br>(941.20 to 1,687.86)         | 1,461.61<br>(1,020.15 to 2,005.67)         | 1,113.09<br>(775.66 to 1,523.32)         | 1,520.69<br>(1,059.72 to 2,078.97)           | 28.70<br>(21.17 to 37.30)             | 35.38<br>(25.90 to 47.52)             | 28.74<br>(20.87 to 38.70)             | 35.68<br>(25.87 to 48.06)             |
| Non-Hodgkin lymphoma            | 4,312.14<br>(3,360.12 to 5,784.20)       | 6,682.09<br>(5,175.76 to 8,955.99)         | 7,028.97<br>(5,498.45 to 9,553.32)       | 6,641.27<br>(5,071.76 to 9,015.97)           | 105.64<br>(83.46 to 142.58)           | 189.56<br>(149.30 to 249.47)          | 220.62<br>(174.00 to 291.07)          | 179.82<br>(139.61 to 241.99)          |
| Multiple myeloma                | 1,308.91<br>(878.50 to 1,762.56)         | 2,482.10<br>(1,689.89 to 3,436.93)         | 2,881.96<br>(1,983.96 to 3,948.41)       | 2,404.41<br>(1,629.00 to 3,324.61)           | 44.73<br>(31.01 to 59.65)             | 93.34<br>(65.38 to 129.51)            | 114.47<br>(81.30 to 157.09)           | 87.40<br>(60.32 to 121.34)            |
| Leukemia                        | 14,260.74<br>(9,191.15 to 20,530.93)     | 17,067.96<br>(11,088.47 to 24,680.54)      | 15,003.27<br>(10,056.58 to 21,043.36)    | 18,033.18<br>(11,547.82 to 26,516.73)        | 277.47<br>(183.25 to 383.92)          | 387.58<br>(261.97 to 541.05)          | 375.15<br>(261.62 to 510.84)          | 397.00<br>(262.98 to 569.08)          |
| Acute lymphoid leukemia         | 2,783.97<br>(1,611.38 to 5,109.05)       | 3,143.41<br>(1,800.74 to 5,632.47)         | 2,704.71<br>(1,592.94 to 4,595.30)       | 3,306.26<br>(1,895.36 to 5,962.53)           | 43.90<br>(26.73 to 76.15)             | 53.34<br>(34.19 to 93.98)             | 51.46<br>(32.05 to 83.11)             | 57.45<br>(35.02 to 98.69)             |
| Chronic lymphoid leukemia       | 173.88<br>(108.66 to 256.46)             | 273.30<br>(166.62 to 417.91)               | 281.48<br>(172.99 to 426.40)             | 276.04<br>(164.55 to 430.97)                 | 6.16<br>(3.80 to 9.08)                | 10.80<br>(6.58 to 16.44)              | 11.99<br>(7.42 to 18.18)              | 10.45<br>(6.20 to 16.31)              |
| Acute myeloid leukemia          | 3,689.49<br>(2,346.13 to 5,453.14)       | 5,443.64<br>(3,495.19 to 7,632.01)         | 5,341.66<br>(3,514.31 to 7,226.85)       | 5,619.21<br>(3,620.31 to 8,010.09)           | 68.02<br>(43.05 to 97.30)             | 116.81<br>(76.26 to 161.14)           | 125.59<br>(84.58 to 166.93)           | 117.33<br>(76.56 to 162.87)           |
| Chronic myeloid leukemia        | 1,887.52<br>(1,131.05 to 2,956.08)       | 1,929.80<br>(1,104.73 to 3,231.81)         | 1,859.50<br>(1,073.48 to 3,058.46)       | 2,038.22<br>(1,132.93 to 3,457.80)           | 49.73<br>(30.23 to 77.62)             | 55.65<br>(33.35 to 91.87)             | 56.16<br>(34.15 to 91.10)             | 57.17<br>(32.98 to 95.86)             |
| Other leukemia                  | 5,725.88<br>(3,056.84 to 9,391.08)       | 6,277.81<br>(3,232.94 to 10,793.74)        | 4,815.92<br>(2,529.98 to 8,189.74)       | 6,793.46<br>(3,462.41 to 11,964.36)          | 109.66<br>(61.89 to 172.15)           | 148.99<br>(83.06 to 240.51)           | 129.95<br>(73.50 to 205.28)           | 154.61<br>(83.55 to 251.43)           |
| Other neoplasms                 | 11,682.00<br>(8,978.58 to 14,404.41)     | 17,791.31<br>(14,006.26 to 21,448.92)      | 17,431.25<br>(13,814.56 to 20,980.19)    | 17,495.40<br>(13,822.14 to 21,188.91)        | 268.91<br>(207.82 to 330.29)          | 469.27<br>(377.28 to 559.09)          | 508.28<br>(408.58 to 603.89)          | 440.35<br>(350.72 to 526.46)          |
| Cardiovascular diseases         | 578,900.52<br>(478,359.21 to 698,622.91) | 750,821.91<br>(529,042.55 to 1,026,458.65) | 360,429.94<br>(259,403.78 to 505,098.62) | 1,048,497.63<br>(756,624.25 to 1,358,476.32) | 18,809.31<br>(15,656.19 to 22,305.02) | 27,930.50<br>(20,504.26 to 37,575.21) | 15,129.07<br>(11,414.42 to 21,610.39) | 37,741.24<br>(27,800.17 to 49,041.53) |
| Rheumatic heart disease         | 45,941.03<br>(32,784.79 to 61,134.66)    | 29,653.73<br>(20,002.62 to 41,365.28)      | 20,703.59<br>(14,168.49 to 28,199.64)    | 31,543.10<br>(21,276.90 to 42,891.14)        | 1,054.56<br>(731.13 to 1,421.01)      | 816.43<br>(561.51 to 1,021.07)        | 628.13<br>(443.29 to 832.90)          | 829.78<br>(560.08 to 1,114.21)        |
| Ischemic heart disease          | 254,670.74<br>(206,650.02 to 317,547.91) | 364,873.57<br>(192,314.89 to 612,304.09)   | 150,899.27<br>(79,579.03 to 278,287.76)  | 524,438.26<br>(305,652.87 to 802,297.36)     | 8,916.89<br>(7,328.77 to 10,899.96)   | 13,922.02<br>(7,847.47 to 24,178.16)  | 6,568.16<br>(3,686.05 to 12,190.29)   | 19,251.14<br>(11,679.44 to 31,109.77) |
| Stroke                          | 205,014.73<br>(163,969.89 to 251,962.21) | 243,252.59<br>(145,157.75 to 374,024.88)   | 101,284.44<br>(61,880.92 to 170,004.07)  | 365,675.16<br>(224,535.32 to 528,417.06)     | 6,619.78<br>(5,320.25 to 7,979.71)    | 9,105.51<br>(5,571.33 to 15,036.80)   | 4,378.54<br>(2,776.55 to 7,958.65)    | 13,202.54<br>(8,323.64 to 19,896.38)  |
| Ischemic stroke                 | 46,365.44<br>(37,010.69 to 56,689.40)    | 57,458.68<br>(31,616.07 to 130,904.37)     | 31,055.55<br>(16,506.18 to 72,079.04)    | 75,432.08<br>(42,660.91 to 152,513.85)       | 1,915.17<br>(1,546.20 to 2,294.09)    | 2,710.48<br>(1,390.29 to 7,226.51)    | 1,659.81<br>(847.03 to 4,391.81)      | 3,433.32<br>(1,766.32 to 7,956.31)    |

|                                |                                             |                                            |                                           |                                             |                                       |                                        |                                       |                                        |
|--------------------------------|---------------------------------------------|--------------------------------------------|-------------------------------------------|---------------------------------------------|---------------------------------------|----------------------------------------|---------------------------------------|----------------------------------------|
| Intracerebral hemorrhage       | 158,649.29<br>(126,859.39 to<br>195,566.31) | 185,793.92<br>(99,367.43 to<br>314,511.03) | 70,228.89<br>(39,353.24 to<br>125,921.75) | 290,243.08<br>(166,259.78 to<br>443,819.08) | 4,704.62<br>(3,748.43 to<br>5,731.18) | 6,395.03<br>(3,582.32 to<br>11,227.61) | 2,718.72<br>(1,619.74 to<br>4,860.50) | 9,769.22<br>(5,571.89 to<br>15,796.85) |
| Hypertensive heart disease     | 22,247.42<br>(12,685.31 to<br>30,880.31)    | 37,577.40<br>(20,901.98 to<br>59,223.88)   | 25,534.88<br>(15,418.96 to<br>37,590.46)  | 47,413.35<br>(25,219.58 to<br>80,195.47)    | 815.01<br>(477.67 to<br>1,120.81)     | 1,545.65<br>(895.51 to<br>2,339.89)    | 1,165.87<br>(713.32 to<br>1,662.21)   | 1,839.61<br>(1,005.00 to<br>3,077.95)  |
| Cardiomyopathy and myocarditis | 15,847.00<br>(8,275.01 to<br>23,900.52)     | 18,694.10<br>(10,279.80 to<br>27,492.10)   | 17,255.48<br>(9,773.84 to<br>24,725.71)   | 19,170.28<br>(10,299.77 to<br>28,535.29)    | 377.20<br>(215.41 to<br>540.90)       | 546.40<br>(313.80 to<br>788.28)        | 562.68<br>(334.13 to<br>796.82)       | 533.08<br>(299.36 to<br>778.29)        |
| Myocarditis                    | 4,074.07<br>(2,291.92 to<br>6,476.00)       | 4,753.36<br>(2,793.39 to<br>7,266.54)      | 4,227.32<br>(2,494.19 to<br>6,409.80)     | 4,753.81<br>(2,758.46 to<br>7,305.21)       | 101.84<br>(57.17 to<br>160.54)        | 145.30<br>(82.85 to<br>231.14)         | 143.64<br>(80.75 to<br>229.55)        | 137.97<br>(78.57 to<br>218.65)         |

| Papua New Guinea                                              |                                                        |                                                        |                                                        |                                                        |                                                   |                                                    |                                                  |                                                     |
|---------------------------------------------------------------|--------------------------------------------------------|--------------------------------------------------------|--------------------------------------------------------|--------------------------------------------------------|---------------------------------------------------|----------------------------------------------------|--------------------------------------------------|-----------------------------------------------------|
| Cause                                                         | YLLs (actual counts)                                   |                                                        |                                                        |                                                        | Deaths (actual counts)                            |                                                    |                                                  |                                                     |
|                                                               | 2016                                                   | 2040 Forecast                                          | 2040 Better Scenario                                   | 2040 Worse Scenario                                    | 2016                                              | 2040 Forecast                                      | 2040 Better Scenario                             | 2040 Worse Scenario                                 |
| Alcoholic cardiomyopathy                                      | 874.25<br>(385.69 to 1,682.35)                         | 941.88<br>(434.64 to 1,680.30)                         | 882.58<br>(411.55 to 1,499.30)                         | 1,228.03<br>(557.00 to 2,262.12)                       | 25.87<br>(11.80 to 46.90)                         | 30.99<br>(14.62 to 52.55)                          | 31.29<br>(14.90 to 51.28)                        | 37.90<br>(18.03 to 66.67)                           |
| Other cardiomyopathy                                          | 10,898.68<br>(5,383.26 to 16,693.32)                   | 12,998.87<br>(6,755.48 to 19,832.26)                   | 12,145.57<br>(6,573.12 to 18,550.81)                   | 13,188.43<br>(6,692.06 to 20,555.61)                   | 249.49<br>(135.73 to 362.01)                      | 370.11<br>(200.04 to 572.84)                       | 387.75<br>(217.95 to 597.20)                     | 357.21<br>(191.90 to 561.47)                        |
| Atrial fibrillation and flutter                               | 685.36<br>(507.32 to 906.77)                           | 1,485.05<br>(1,037.75 to 2,008.72)                     | 1,678.78<br>(1,234.43 to 2,230.16)                     | 1,423.62<br>(972.69 to 1,976.28)                       | 48.18<br>(35.99 to 63.24)                         | 110.97<br>(71.79 to 155.55)                        | 142.45<br>(96.90 to 193.37)                      | 98.53<br>(61.19 to 142.98)                          |
| Aortic aneurysm                                               | 4,598.35<br>(2,801.77 to 7,358.56)                     | 6,969.35<br>(4,276.60 to 11,140.90)                    | 6,661.52<br>(4,226.27 to 10,416.51)                    | 7,088.11<br>(4,238.60 to 11,350.64)                    | 165.78<br>(106.78 to 260.39)                      | 278.24<br>(181.86 to 423.93)                       | 297.96<br>(202.86 to 446.66)                     | 266.84<br>(170.48 to 408.86)                        |
| Peripheral artery disease                                     | 155.04<br>(62.19 to 376.14)                            | 486.17<br>(184.95 to 1,239.50)                         | 473.13<br>(192.77 to 1,159.32)                         | 488.37<br>(182.39 to 1,265.27)                         | 6.67<br>(2.79 to 14.97)                           | 23.38<br>(9.20 to 57.39)                           | 26.42<br>(11.28 to 63.67)                        | 21.85<br>(8.38 to 54.22)                            |
| Endocarditis                                                  | 6,842.54<br>(4,941.69 to 9,268.11)                     | 10,209.16<br>(7,386.77 to 13,850.99)                   | 9,297.43<br>(6,650.66 to 12,670.47)                    | 10,352.97<br>(7,448.42 to 14,122.92)                   | 187.06<br>(135.83 to 253.47)                      | 326.88<br>(231.94 to 450.45)                       | 335.09<br>(238.05 to 467.76)                     | 313.37<br>(223.84 to 437.44)                        |
| Other cardiovascular and circulatory diseases                 | 22,898.30<br>(13,849.82 to 32,050.11)                  | 37,620.77<br>(22,613.16 to 52,746.84)                  | 26,641.42<br>(16,419.53 to 36,699.15)                  | 40,904.42<br>(24,404.55 to 58,666.73)                  | 618.18<br>(370.36 to 848.64)                      | 1,255.01<br>(756.42 to 1,726.48)                   | 1,023.77<br>(637.07 to 1,398.83)                 | 1,284.48<br>(750.05 to 1,794.53)                    |
| <b>Chronic respiratory diseases</b>                           | <b>265,309.15</b><br><b>(213,103.93 to 319,415.77)</b> | <b>303,894.72</b><br><b>(218,526.82 to 431,863.78)</b> | <b>178,483.74</b><br><b>(138,862.27 to 232,012.56)</b> | <b>397,503.48</b><br><b>(270,598.61 to 590,169.87)</b> | <b>9,804.70</b><br><b>(7,780.74 to 11,775.55)</b> | <b>12,480.57</b><br><b>(9,039.66 to 17,403.30)</b> | <b>7,820.44</b><br><b>(6,102.09 to 9,852.41)</b> | <b>15,624.15</b><br><b>(10,757.24 to 22,529.47)</b> |
| Chronic obstructive pulmonary disease                         | 144,998.13<br>(106,372.56 to 181,909.03)               | 192,697.68<br>(118,505.46 to 311,609.95)               | 89,454.34<br>(60,591.40 to 131,785.72)                 | 270,864.42<br>(162,270.58 to 457,668.62)               | 5,723.24<br>(4,153.78 to 7,164.84)                | 8,332.06<br>(5,426.83 to 13,156.10)                | 4,224.76<br>(2,921.58 to 6,020.24)               | 11,096.63<br>(6,806.39 to 17,763.46)                |
| Pneumoconiosis                                                | 631.43<br>(410.01 to 924.78)                           | 747.98<br>(478.17 to 1,104.97)                         | 699.20<br>(438.89 to 1,028.84)                         | 737.29<br>(470.92 to 1,100.16)                         | 26.73<br>(17.47 to 38.32)                         | 37.38<br>(23.01 to 56.49)                          | 39.97<br>(24.33 to 60.20)                        | 34.53<br>(21.08 to 52.40)                           |
| Silicosis                                                     | 129.69<br>(62.11 to 216.40)                            | 129.88<br>(60.16 to 226.04)                            | 117.23<br>(53.56 to 205.03)                            | 123.98<br>(57.35 to 217.95)                            | 6.09<br>(2.96 to 10.03)                           | 7.17<br>(3.16 to 12.91)                            | 7.38<br>(3.05 to 13.57)                          | 6.41<br>(2.80 to 11.34)                             |
| Asbestosis                                                    | 136.81<br>(81.85 to 242.63)                            | 192.39<br>(114.41 to 330.19)                           | 188.19<br>(111.12 to 307.35)                           | 185.46<br>(109.11 to 321.45)                           | 4.62<br>(2.65 to 7.97)                            | 8.59<br>(4.37 to 13.57)                            | 8.59<br>(4.77 to 14.92)                          | 7.11<br>(3.96 to 12.62)                             |
| Coal workers pneumoconiosis                                   | 16.98<br>(6.47 to 33.49)                               | 23.21<br>(7.79 to 48.57)                               | 16.87<br>(5.52 to 33.61)                               | 24.48<br>(8.16 to 51.27)                               | 0.82<br>(0.30 to 1.57)                            | 1.30<br>(0.41 to 2.66)                             | 1.08<br>(0.33 to 2.21)                           | 1.29<br>(0.42 to 2.60)                              |
| Other pneumoconiosis                                          | 347.95<br>(209.09 to 535.64)                           | 402.50<br>(235.67 to 629.42)                           | 376.91<br>(210.88 to 595.89)                           | 403.37<br>(236.52 to 632.27)                           | 15.20<br>(9.02 to 25.30)                          | 21.09<br>(11.75 to 34.63)                          | 22.92<br>(12.33 to 38.08)                        | 19.72<br>(11.11 to 32.59)                           |
| Asthma                                                        | 93,879.53<br>(65,949.22 to 130,782.28)                 | 70,169.02<br>(44,409.93 to 110,333.91)                 | 51,826.35<br>(33,181.75 to 80,880.34)                  | 84,913.16<br>(50,865.23 to 141,042.02)                 | 3,320.91<br>(2,328.32 to 4,664.14)                | 2,800.16<br>(1,736.53 to 4,530.26)                 | 2,283.09<br>(1,438.30 to 3,611.72)               | 5,203.01<br>(3,888.70 to 5,582.32)                  |
| Interstitial lung disease and pulmonary sarcoidosis           | 6,845.72<br>(2,392.82 to 15,970.62)                    | 10,989.86<br>(4,278.05 to 23,412.15)                   | 12,214.06<br>(4,946.52 to 25,267.04)                   | 10,468.10<br>(4,022.47 to 22,655.49)                   | 177.73<br>(62.98 to 409.92)                       | 353.03<br>(127.76 to 757.95)                       | 436.61<br>(155.79 to 903.19)                     | 319.13<br>(115.69 to 688.91)                        |
| Other chronic respiratory diseases                            | 18,954.34<br>(9,717.56 to 29,282.16)                   | 29,290.18<br>(15,384.37 to 46,869.12)                  | 24,289.79<br>(13,711.83 to 36,989.99)                  | 30,520.49<br>(15,603.96 to 49,449.45)                  | 556.09<br>(298.73 to 863.85)                      | 957.94<br>(522.16 to 1,503.69)                     | 836.03<br>(480.47 to 1,238.98)                   | 970.85<br>(504.11 to 1,564.84)                      |
| <b>Cirrhosis and other chronic liver diseases</b>             | <b>78,756.29</b><br><b>(61,423.84 to 100,357.98)</b>   | <b>116,000.47</b><br><b>(91,919.10 to 145,208.76)</b>  | <b>103,711.35</b><br><b>(82,154.57 to 129,975.41)</b>  | <b>119,288.14</b><br><b>(95,006.62 to 151,059.33)</b>  | <b>2,036.74</b><br><b>(1,603.80 to 2,569.61)</b>  | <b>3,298.68</b><br><b>(2,679.29 to 4,040.82)</b>   | <b>3,102.68</b><br><b>(2,526.57 to 3,787.75)</b> | <b>3,298.87</b><br><b>(2,677.96 to 4,085.89)</b>    |
| Cirrhosis and other chronic liver diseases due to hepatitis B | 30,592.41<br>(23,335.43 to 39,811.47)                  | 47,963.18<br>(36,903.06 to 61,037.53)                  | 44,626.40<br>(34,107.06 to 56,276.00)                  | 47,338.25<br>(36,352.35 to 60,305.13)                  | 845.09<br>(650.65 to 1,081.16)                    | 1,436.04<br>(1,139.18 to 1,790.93)                 | 1,393.95<br>(1,105.62 to 1,726.77)               | 1,380.01<br>(1,096.88 to 1,727.00)                  |
| Cirrhosis and other chronic liver diseases due to hepatitis C | 12,631.17<br>(9,609.09 to 16,649.85)                   | 19,713.43<br>(15,263.69 to 25,651.24)                  | 18,175.80<br>(14,210.38 to 23,680.63)                  | 19,534.55<br>(15,134.04 to 25,316.43)                  | 343.18<br>(265.56 to 445.21)                      | 574.89<br>(457.67 to 724.23)                       | 549.30<br>(439.96 to 692.35)                     | 557.04<br>(441.35 to 704.23)                        |

|                                                                |                                                               |                                                               |                                                               |                                                               |                                                            |                                                            |                                                            |                                                            |
|----------------------------------------------------------------|---------------------------------------------------------------|---------------------------------------------------------------|---------------------------------------------------------------|---------------------------------------------------------------|------------------------------------------------------------|------------------------------------------------------------|------------------------------------------------------------|------------------------------------------------------------|
|                                                                | 9,721.35<br>(7,289.12 to<br>12,834.21)                        | 13,778.03<br>(10,510.99 to<br>18,074.42)                      | 11,196.54<br>(8,599.98 to<br>14,614.64)                       | 17,387.91<br>(13,173.31 to<br>22,751.99)                      | 279.55<br>(213.19 to<br>364.56)                            | 430.61<br>(340.04 to<br>548.31)                            | 368.82<br>(291.48 to<br>467.69)                            | 520.70<br>(408.24 to<br>668.89)                            |
| Cirrhosis and other chronic liver diseases due to alcohol use  |                                                               |                                                               |                                                               |                                                               |                                                            |                                                            |                                                            |                                                            |
|                                                                | 25,811.36<br>(20,312.02 to<br>32,730.88)                      | 34,545.84<br>(27,241.14 to<br>43,635.53)                      | 29,712.62<br>(23,502.54 to<br>37,604.22)                      | 35,027.43<br>(27,235.27 to<br>44,757.83)                      | 568.92<br>(452.00 to<br>716.40)                            | 857.14<br>(691.90 to<br>1,065.46)                          | 790.61<br>(641.25 to<br>977.68)                            | 841.12<br>(681.50 to<br>1,048.42)                          |
| Cirrhosis and other chronic liver diseases due to other causes |                                                               |                                                               |                                                               |                                                               |                                                            |                                                            |                                                            |                                                            |
|                                                                | <b>50,005.09</b><br><b>(37,378.26 to</b><br><b>71,996.52)</b> | <b>54,750.93</b><br><b>(42,055.76 to</b><br><b>78,017.50)</b> | <b>42,101.26</b><br><b>(32,648.93 to</b><br><b>59,703.77)</b> | <b>58,428.06</b><br><b>(44,347.33 to</b><br><b>83,966.84)</b> | <b>1,349.97</b><br><b>(1,056.95 to</b><br><b>1,926.59)</b> | <b>1,767.66</b><br><b>(1,359.14 to</b><br><b>2,464.56)</b> | <b>1,511.95</b><br><b>(1,164.70 to</b><br><b>2,082.43)</b> | <b>1,788.68</b><br><b>(1,371.11 to</b><br><b>2,513.20)</b> |
| Digestive diseases                                             |                                                               |                                                               |                                                               |                                                               |                                                            |                                                            |                                                            |                                                            |
|                                                                | 18,444.20<br>(13,235.79 to<br>27,525.84)                      | 16,362.21<br>(11,512.44 to<br>24,240.94)                      | 11,241.26<br>(7,823.29 to<br>16,446.50)                       | 17,348.97<br>(12,043.01 to<br>25,731.56)                      | 554.44<br>(401.60 to<br>821.77)                            | 584.19<br>(404.89 to<br>860.56)                            | 438.47<br>(303.73 to<br>637.91)                            | 591.56<br>(398.01 to<br>876.98)                            |
| Peptic ulcer disease                                           |                                                               |                                                               |                                                               |                                                               |                                                            |                                                            |                                                            |                                                            |

| Papua New Guinea                           |                                       |                                       |                                       |                                       |                              |                                    |                                    |                                    |
|--------------------------------------------|---------------------------------------|---------------------------------------|---------------------------------------|---------------------------------------|------------------------------|------------------------------------|------------------------------------|------------------------------------|
| Cause                                      | YLLs (actual counts)                  |                                       |                                       |                                       | Deaths (actual counts)       |                                    |                                    |                                    |
|                                            | 2016                                  | 2040 Forecast                         | 2040 Better Scenario                  | 2040 Worse Scenario                   | 2016                         | 2040 Forecast                      | 2040 Better Scenario               | 2040 Worse Scenario                |
| Gastritis and duodenitis                   | 291.31<br>(151.26 to 542.30)          | 462.13<br>(247.79 to 906.05)          | 405.05<br>(223.44 to 782.07)          | 455.61<br>(242.52 to 898.78)          | 9.37<br>(5.10 to 16.73)      | 16.84<br>(9.40 to 31.24)           | 16.23<br>(9.19 to 29.36)           | 15.79<br>(8.73 to 29.88)           |
| Appendicitis                               | 6,350.54<br>(4,139.85 to 9,628.32)    | 6,863.58<br>(4,644.79 to 10,557.38)   | 5,206.36<br>(3,541.44 to 8,011.68)    | 7,113.88<br>(4,690.67 to 10,995.14)   | 144.09<br>(99.96 to 217.68)  | 183.74<br>(133.55 to 283.38)       | 153.06<br>(112.03 to 233.71)       | 182.04<br>(131.43 to 284.75)       |
| Paralytic ileus and intestinal obstruction | 7,380.37<br>(3,802.31 to 13,793.67)   | 7,669.63<br>(4,515.15 to 12,975.57)   | 5,954.86<br>(3,819.50 to 9,554.81)    | 7,948.66<br>(4,502.78 to 13,993.36)   | 136.06<br>(84.55 to 219.38)  | 192.63<br>(129.90 to 308.44)       | 185.12<br>(128.15 to 285.79)       | 183.36<br>(119.83 to 294.64)       |
| Inguinal, femoral, and abdominal hernia    | 1,052.92<br>(745.49 to 1,748.25)      | 1,213.70<br>(866.37 to 1,941.20)      | 1,116.40<br>(795.63 to 1,764.09)      | 1,161.69<br>(824.86 to 1,848.49)      | 39.36<br>(27.49 to 60.07)    | 53.80<br>(36.20 to 81.91)          | 55.23<br>(37.40 to 83.43)          | 48.30<br>(31.98 to 74.20)          |
| Inflammatory bowel disease                 | 1,582.52<br>(934.67 to 3,018.19)      | 2,168.80<br>(1,366.99 to 3,811.52)    | 2,107.37<br>(1,385.39 to 3,517.38)    | 2,123.05<br>(1,305.93 to 3,825.55)    | 39.51<br>(25.38 to 66.45)    | 63.68<br>(43.64 to 100.30)         | 68.15<br>(48.16 to 101.09)         | 59.20<br>(39.47 to 96.56)          |
| Vascular intestinal disorders              | 1,144.96<br>(666.58 to 1,668.53)      | 1,694.36<br>(1,085.42 to 2,294.40)    | 1,628.00<br>(1,083.90 to 2,196.83)    | 1,620.53<br>(1,003.92 to 2,221.07)    | 38.94<br>(25.76 to 54.69)    | 69.72<br>(47.08 to 94.76)          | 74.14<br>(52.24 to 100.50)         | 63.04<br>(41.27 to 86.29)          |
| Gallbladder and biliary diseases           | 4,257.13<br>(3,021.70 to 6,378.14)    | 5,425.03<br>(3,162.84 to 9,271.09)    | 4,109.29<br>(2,409.30 to 6,961.85)    | 6,691.67<br>(3,705.03 to 11,813.74)   | 134.15<br>(92.85 to 200.36)  | 198.87<br>(110.09 to 339.36)       | 166.03<br>(94.51 to 278.49)        | 231.92<br>(122.87 to 418.17)       |
| Pancreatitis                               | 2,456.79<br>(1,561.73 to 3,727.52)    | 3,661.12<br>(1,462.48 to 8,161.13)    | 2,788.29<br>(1,183.10 to 6,052.52)    | 4,677.06<br>(1,681.91 to 11,017.64)   | 62.98<br>(39.57 to 96.60)    | 104.85<br>(43.79 to 228.90)        | 86.68<br>(38.70 to 175.89)         | 127.16<br>(48.20 to 287.96)        |
| Other digestive diseases                   | 7,044.34<br>(4,823.61 to 10,888.30)   | 9,230.37<br>(6,443.31 to 14,210.97)   | 7,544.38<br>(5,194.12 to 11,773.08)   | 9,286.95<br>(6,439.89 to 14,663.08)   | 191.06<br>(134.15 to 289.66) | 299.35<br>(208.31 to 441.53)       | 268.83<br>(184.23 to 394.03)       | 286.31<br>(198.57 to 426.48)       |
| Neurological disorders                     | 17,637.46<br>(13,946.34 to 22,493.64) | 31,530.77<br>(24,252.59 to 40,718.38) | 32,972.34<br>(26,061.30 to 41,529.98) | 31,748.85<br>(23,828.90 to 42,126.94) | 767.29<br>(624.64 to 938.23) | 1,694.60<br>(1,140.13 to 2,392.41) | 2,146.60<br>(1,543.74 to 2,859.79) | 1,533.25<br>(1,026.33 to 2,222.07) |
| Alzheimer's disease and other dementias    | 7,574.52<br>(5,976.30 to 9,532.11)    | 17,344.47<br>(11,260.88 to 26,057.73) | 20,803.64<br>(14,648.87 to 29,365.11) | 16,106.43<br>(9,927.17 to 25,269.06)  | 554.90<br>(438.70 to 701.46) | 1,334.31<br>(801.95 to 2,022.25)   | 1,768.84<br>(1,190.17 to 2,507.21) | 1,166.73<br>(666.20 to 1,849.86)   |
| Parkinson's disease                        | 525.25<br>(389.33 to 683.39)          | 1,390.79<br>(986.92 to 1,881.18)      | 2,004.25<br>(1,475.87 to 2,642.27)    | 1,147.90<br>(797.11 to 1,572.15)      | 33.53<br>(24.97 to 43.53)    | 94.30<br>(61.80 to 132.49)         | 146.38<br>(103.09 to 198.81)       | 74.42<br>(47.05 to 106.69)         |
| Epilepsy                                   | 7,192.74<br>(4,532.57 to 10,981.12)   | 9,018.36<br>(5,273.68 to 14,769.90)   | 6,264.44<br>(3,686.75 to 10,290.74)   | 10,800.88<br>(6,251.31 to 17,878.79)  | 127.54<br>(82.65 to 192.17)  | 169.87<br>(103.06 to 272.76)       | 122.71<br>(74.23 to 197.63)        | 201.74<br>(118.51 to 334.49)       |
| Multiple sclerosis                         | 174.12<br>(88.39 to 365.02)           | 290.35<br>(148.15 to 595.83)          | 298.35<br>(155.02 to 624.32)          | 287.90<br>(147.76 to 584.91)          | 4.56<br>(2.38 to 9.49)       | 8.02<br>(4.26 to 16.03)            | 4.62<br>(1.73 to 17.33)            | 7.82<br>(4.16 to 15.60)            |
| Motor neuron disease                       | 261.48<br>(175.12 to 395.90)          | 520.21<br>(348.57 to 810.20)          | 589.61<br>(390.62 to 904.08)          | 489.09<br>(329.30 to 751.50)          | 7.50<br>(5.02 to 11.67)      | 17.47<br>(11.59 to 27.60)          | 20.81<br>(13.76 to 32.90)          | 15.97<br>(10.66 to 25.49)          |
| Other neurological disorders               | 1,909.35<br>(1,478.81 to 2,430.01)    | 2,966.58<br>(2,299.63 to 3,726.67)    | 3,012.04<br>(2,293.17 to 3,800.63)    | 2,916.65<br>(2,268.67 to 3,665.68)    | 39.26<br>(30.41 to 49.97)    | 70.64<br>(54.16 to 89.12)          | 79.40<br>(59.19 to 101.07)         | 66.57<br>(51.27 to 83.54)          |
| Mental disorders                           | 4,031.65<br>(1,839.68 to 10,555.13)   | 7,676.45<br>(3,607.39 to 19,964.53)   | 7,387.39<br>(3,501.58 to 19,203.07)   | 7,903.75<br>(3,686.44 to 20,515.88)   | 87.95<br>(40.97 to 228.51)   | 173.51<br>(84.18 to 435.89)        | 173.87<br>(85.44 to 431.30)        | 174.91<br>(84.49 to 441.27)        |
| Alcohol use disorders                      | 2,507.91<br>(1,012.87 to 9,228.83)    | 3,617.59<br>(1,265.12 to 14,740.15)   | 3,375.47<br>(1,167.00 to 13,845.63)   | 3,869.55<br>(1,372.19 to 15,573.10)   | 56.87<br>(23.99 to 202.62)   | 84.39<br>(31.80 to 328.53)         | 80.83<br>(30.46 to 313.45)         | 88.78<br>(33.55 to 343.26)         |
| Drug use disorders                         | 1,510.70<br>(631.06 to 3,182.77)      | 4,036.80<br>(1,824.88 to 7,876.93)    | 3,990.59<br>(1,834.98 to 7,692.76)    | 4,012.18<br>(1,788.53 to 7,877.64)    | 30.83<br>(12.78 to 63.67)    | 88.68<br>(41.04 to 167.35)         | 92.61<br>(43.54 to 172.11)         | 85.71<br>(39.06 to 164.40)         |
| Opioid use disorders                       | 844.94<br>(260.43 to 2,037.84)        | 1,987.56<br>(619.63 to 4,549.49)      | 1,937.19<br>(616.47 to 4,409.43)      | 1,990.17<br>(615.34 to 4,646.23)      | 16.13<br>(4.81 to 38.85)     | 39.99<br>(12.31 to 90.45)          | 40.20<br>(12.76 to 90.21)          | 39.41<br>(11.85 to 90.25)          |

|                           |                                   |                                     |                                     |                                     |                             |                              |                              |                              |
|---------------------------|-----------------------------------|-------------------------------------|-------------------------------------|-------------------------------------|-----------------------------|------------------------------|------------------------------|------------------------------|
|                           | 124.26<br>(49.69 to<br>214.03)    | 358.59<br>(145.65 to<br>651.48)     | 331.25<br>(130.63 to<br>627.50)     | 359.29<br>(146.58 to<br>652.65)     | 2.53<br>(1.03 to<br>4.30)   | 7.72<br>(3.24 to<br>13.92)   | 7.40<br>(2.98 to<br>13.68)   | 7.58<br>(3.21 to<br>13.47)   |
| Cocaine use disorders     |                                   |                                     |                                     |                                     |                             |                              |                              |                              |
|                           | 45.71<br>(22.01 to<br>79.00)      | 182.09<br>(83.05 to<br>322.50)      | 159.51<br>(70.31 to<br>283.83)      | 184.41<br>(84.59 to<br>324.75)      | 0.97<br>(0.49 to<br>1.66)   | 4.01<br>(1.90 to<br>6.76)    | 3.60<br>(1.66 to<br>6.13)    | 4.00<br>(1.94 to<br>6.75)    |
| Amphetamine use disorders |                                   |                                     |                                     |                                     |                             |                              |                              |                              |
|                           | 495.79<br>(189.55 to<br>1,003.35) | 1,508.57<br>(615.03 to<br>3,012.13) | 1,562.63<br>(653.83 to<br>3,090.34) | 1,478.31<br>(590.49 to<br>2,962.89) | 11.20<br>(4.27 to<br>22.03) | 36.95<br>(15.11 to<br>71.60) | 41.42<br>(17.51 to<br>77.78) | 34.71<br>(13.88 to<br>67.67) |
| Other drug use disorders  |                                   |                                     |                                     |                                     |                             |                              |                              |                              |
|                           | 13.03<br>(7.76 to<br>21.64)       | 22.05<br>(12.28 to<br>36.63)        | 21.34<br>(12.25 to<br>36.44)        | 22.02<br>(12.22 to<br>36.19)        | 0.25<br>(0.15 to<br>0.42)   | 0.43<br>(0.24 to<br>0.75)    | 0.42<br>(0.24 to<br>0.72)    | 0.42<br>(0.24 to<br>0.71)    |
| Eating disorders          |                                   |                                     |                                     |                                     |                             |                              |                              |                              |



| Papua New Guinea                                           |                                                 |                                                 |                                                 |                                                 |                                           |                                             |                                             |                                             |
|------------------------------------------------------------|-------------------------------------------------|-------------------------------------------------|-------------------------------------------------|-------------------------------------------------|-------------------------------------------|---------------------------------------------|---------------------------------------------|---------------------------------------------|
| Cause                                                      | YLLs (actual counts)                            |                                                 |                                                 |                                                 | Deaths (actual counts)                    |                                             |                                             |                                             |
|                                                            | 2016                                            | 2040 Forecast                                   | 2040 Better Scenario                            | 2040 Worse Scenario                             | 2016                                      | 2040 Forecast                               | 2040 Better Scenario                        | 2040 Worse Scenario                         |
| <b>Diabetes, urogenital, blood, and endocrine diseases</b> | <b>174,154.93</b><br>(140,388.00 to 215,568.95) | <b>356,951.24</b><br>(231,968.63 to 588,405.49) | <b>244,219.54</b><br>(159,953.65 to 431,955.53) | <b>398,651.41</b><br>(257,190.85 to 638,381.77) | <b>5,835.61</b><br>(4,735.43 to 7,101.30) | <b>13,727.70</b><br>(8,964.47 to 22,741.75) | <b>10,150.28</b><br>(6,624.95 to 17,971.74) | <b>14,691.96</b><br>(9,293.96 to 23,378.50) |
| Diabetes mellitus                                          | 91,457.25<br>(73,189.33 to 112,570.40)          | 164,236.34<br>(107,807.15 to 234,476.57)        | 111,772.02<br>(74,786.14 to 162,183.44)         | 182,562.31<br>(111,977.04 to 263,138.16)        | 3,398.81<br>(2,752.58 to 4,133.45)        | 6,798.75<br>(4,390.91 to 9,275.59)          | 5,020.52<br>(3,347.47 to 6,948.60)          | 7,215.29<br>(4,517.19 to 10,028.52)         |
| Acute glomerulonephritis                                   | 250.44<br>(131.96 to 423.46)                    | 468.10<br>(222.11 to 893.90)                    | 400.26<br>(187.48 to 771.11)                    | 469.75<br>(224.91 to 885.43)                    | 7.04<br>(3.53 to 11.92)                   | 13.85<br>(6.21 to 26.35)                    | 12.35<br>(5.46 to 23.95)                    | 13.63<br>(6.12 to 26.02)                    |
| Chronic kidney disease                                     | 61,760.40<br>(44,526.08 to 85,666.01)           | 160,794.26<br>(103,621.41 to 218,967.11)        | 104,824.80<br>(68,553.16 to 141,096.44)         | 183,897.86<br>(118,801.18 to 248,894.54)        | 1,939.25<br>(1,415.06 to 2,463.44)        | 6,020.65<br>(4,097.75 to 7,943.55)          | 4,248.15<br>(2,898.46 to 5,600.04)          | 6,607.27<br>(4,467.09 to 8,747.45)          |
| Chronic kidney disease due to diabetes mellitus            | 33,108.63<br>(23,607.09 to 46,500.33)           | 94,660.50<br>(65,314.61 to 124,006.40)          | 61,969.88<br>(43,595.05 to 80,344.71)           | 109,023.70<br>(78,346.71 to 139,700.69)         | 1,070.80<br>(768.52 to 1,475.81)          | 3,470.66<br>(2,491.48 to 4,450.84)          | 2,419.86<br>(1,811.85 to 3,027.87)          | 3,856.00<br>(2,791.48 to 4,920.52)          |
| Chronic kidney disease due to hypertension                 | 12,263.21<br>(8,644.10 to 17,486.49)            | 37,049.50<br>(25,293.73 to 48,805.27)           | 25,021.46<br>(17,211.73 to 32,831.19)           | 41,497.65<br>(28,519.26 to 54,476.04)           | 499.69<br>(356.78 to 701.41)              | 1,699.38<br>(1,224.11 to 2,174.65)          | 1,263.93<br>(924.11 to 1,603.75)            | 1,804.84<br>(1,334.92 to 2,274.76)          |
| Chronic kidney disease due to glomerulonephritis           | 7,940.91<br>(5,509.93 to 11,389.51)             | 13,431.09<br>(9,064.62 to 17,800.56)            | 8,203.66<br>(5,538.96 to 10,868.36)             | 15,397.28<br>(10,311.20 to 20,483.46)           | 168.92<br>(117.92 to 220.92)              | 363.19<br>(251.55 to 474.83)                | 235.99<br>(167.40 to 304.58)                | 406.52<br>(281.70 to 531.34)                |
| Chronic kidney disease due to other and unspecified causes | 8,447.65<br>(5,824.66 to 12,077.04)             | 15,653.26<br>(10,354.37 to 20,952.15)           | 9,629.79<br>(6,547.84 to 12,711.74)             | 17,979.23<br>(12,464.64 to 23,493.82)           | 199.84<br>(139.37 to 260.31)              | 487.42<br>(335.35 to 639.49)                | 328.37<br>(228.94 to 427.80)                | 539.91<br>(377.10 to 702.72)                |
| Urinary diseases and male infertility                      | 6,749.13<br>(4,881.36 to 8,616.90)              | 10,735.59<br>(7,920.93 to 13,550.25)            | 9,521.37<br>(7,120.94 to 11,921.80)             | 10,757.07<br>(8,356.52 to 13,157.62)            | 160.71<br>(122.99 to 200.43)              | 317.63<br>(247.34 to 387.92)                | 329.77<br>(256.10 to 403.44)                | 296.56<br>(230.12 to 363.00)                |
| Urinary tract infections                                   | 4,865.52<br>(3,264.94 to 7,336.04)              | 8,263.00<br>(5,823.98 to 10,702.02)             | 7,450.70<br>(5,359.59 to 9,541.81)              | 8,277.49<br>(5,790.94 to 10,764.04)             | 107.79<br>(75.65 to 140.00)               | 234.43<br>(173.98 to 294.88)                | 252.86<br>(189.83 to 315.89)                | 217.55<br>(160.45 to 274.65)                |
| Urolithiasis                                               | 188.67<br>(116.03 to 331.47)                    | 422.98<br>(249.60 to 596.36)                    | 450.14<br>(304.97 to 595.31)                    | 405.09<br>(238.41 to 709.85)                    | 5.58<br>(3.29 to 9.93)                    | 13.74<br>(7.83 to 24.52)                    | 15.68<br>(8.88 to 28.40)                    | 12.63<br>(7.20 to 22.45)                    |
| Other urinary diseases                                     | 1,694.95<br>(988.75 to 2,449.27)                | 2,049.61<br>(1,048.72 to 2,959.49)              | 1,620.53<br>(800.29 to 2,344.06)                | 2,074.49<br>(1,043.16 to 3,020.11)              | 47.34<br>(28.04 to 65.46)                 | 69.47<br>(35.06 to 103.88)                  | 61.23<br>(30.23 to 89.68)                   | 66.38<br>(32.74 to 96.14)                   |
| Gynecological diseases                                     | 155.65<br>(72.08 to 242.66)                     | 186.66<br>(78.15 to 309.89)                     | 142.86<br>(63.95 to 238.79)                     | 194.94<br>(83.66 to 325.94)                     | 3.66<br>(1.71 to 5.66)                    | 4.46<br>(1.98 to 7.37)                      | 3.49<br>(1.61 to 5.74)                      | 4.60<br>(2.02 to 7.65)                      |
| Uterine fibroids                                           | 24.68<br>(3.68 to 52.08)                        | 24.95<br>(3.13 to 58.66)                        | 18.18<br>(2.47 to 44.51)                        | 26.13<br>(3.46 to 61.89)                        | 0.67<br>(0.10 to 1.41)                    | 0.70<br>(0.10 to 1.60)                      | 0.52<br>(0.08 to 1.22)                      | 0.72<br>(0.11 to 1.65)                      |
| Polycystic ovarian syndrome                                | 4.90<br>(1.62 to 12.15)                         | 3.61<br>(1.03 to 10.28)                         | 2.19<br>(0.61 to 6.21)                          | 3.95<br>(1.16 to 10.70)                         | 0.12<br>(0.04 to 0.29)                    | 0.09<br>(0.02 to 0.20)                      | 0.05<br>(0.01 to 0.14)                      | 0.09<br>(0.03 to 0.25)                      |
| Endometriosis                                              | 1.11<br>(0.29 to 3.03)                          | 1.80<br>(0.43 to 5.39)                          | 1.34<br>(0.32 to 4.11)                          | 1.90<br>(0.46 to 5.67)                          | 0.03<br>(0.01 to 0.07)                    | 0.04<br>(0.01 to 0.14)                      | 0.03<br>(0.01 to 0.11)                      | 0.04<br>(0.01 to 0.15)                      |
| Genital prolapse                                           | 9.05<br>(1.39 to 22.47)                         | 10.43<br>(1.55 to 26.38)                        | 7.42<br>(1.08 to 18.96)                         | 10.91<br>(1.62 to 28.30)                        | 0.28<br>(0.05 to 0.59)                    | 0.31<br>(0.04 to 0.68)                      | 0.23<br>(0.03 to 0.54)                      | 0.31<br>(0.04 to 0.70)                      |
| Other gynecological diseases                               | 115.91<br>(47.13 to 189.00)                     | 145.86<br>(56.12 to 252.68)                     | 113.73<br>(46.34 to 197.31)                     | 152.05<br>(57.97 to 264.45)                     | 2.56<br>(1.02 to 4.24)                    | 3.32<br>(1.28 to 5.78)                      | 2.65<br>(1.08 to 4.54)                      | 3.43<br>(1.34 to 5.99)                      |
| Hemoglobinopathies and hemolytic anemias                   | 3,082.76<br>(2,183.00 to 4,051.53)              | 3,418.77<br>(2,448.23 to 4,653.49)              | 2,718.48<br>(1,957.83 to 3,666.44)              | 3,505.92<br>(2,497.44 to 4,759.15)              | 68.00<br>(49.53 to 90.48)                 | 91.48<br>(66.54 to 125.21)                  | 76.72<br>(56.38 to 104.04)                  | 90.56<br>(65.75 to 125.04)                  |
| Thalassemias                                               | 867.07<br>(456.15 to 1,346.20)                  | 555.30<br>(306.89 to 869.18)                    | 505.07<br>(301.16 to 760.22)                    | 564.40<br>(305.38 to 872.79)                    | 10.91<br>(5.91 to 16.53)                  | 7.17<br>(4.03 to 11.12)                     | 6.61<br>(3.98 to 9.96)                      | 7.27<br>(4.01 to 10.99)                     |

|                                                   |                                         |                                          |                                          |                                          |                                 |                                 |                                 |                                 |
|---------------------------------------------------|-----------------------------------------|------------------------------------------|------------------------------------------|------------------------------------------|---------------------------------|---------------------------------|---------------------------------|---------------------------------|
|                                                   | 3.33<br>(1.96 to<br>4.84)               | 3.59<br>(2.01 to<br>5.59)                | 2.80<br>(1.56 to<br>4.38)                | 3.77<br>(2.14 to<br>5.85)                | 0.05<br>(0.03 to<br>0.08)       | 0.06<br>(0.03 to<br>0.09)       | 0.05<br>(0.03 to<br>0.07)       | 0.06<br>(0.03 to<br>0.10)       |
| Sickle cell disorders                             |                                         |                                          |                                          |                                          |                                 |                                 |                                 |                                 |
|                                                   | 1,543.81<br>(1,109.58 to<br>2,104.79)   | 2,186.52<br>(1,516.29 to<br>3,097.98)    | 1,635.93<br>(1,135.07 to<br>2,287.78)    | 2,281.81<br>(1,597.44 to<br>3,256.16)    | 33.40<br>(24.10 to<br>45.53)    | 54.03<br>(38.12 to<br>75.92)    | 41.92<br>(29.79 to<br>58.94)    | 55.24<br>(38.87 to<br>77.91)    |
| G6PD deficiency                                   |                                         |                                          |                                          |                                          |                                 |                                 |                                 |                                 |
|                                                   | 668.55<br>(470.66 to<br>939.97)         | 673.36<br>(469.51 to<br>955.17)          | 574.67<br>(411.47 to<br>810.43)          | 655.94<br>(456.47 to<br>946.15)          | 23.65<br>(17.28 to<br>33.28)    | 30.22<br>(21.23 to<br>43.62)    | 28.14<br>(20.15 to<br>40.03)    | 27.98<br>(19.34 to<br>40.44)    |
| Other hemoglobinopathies and hemolytic anemias    |                                         |                                          |                                          |                                          |                                 |                                 |                                 |                                 |
|                                                   | 10,699.30<br>(7,801.25 to<br>14,709.16) | 17,111.41<br>(12,239.10 to<br>24,158.85) | 14,839.76<br>(10,579.76 to<br>20,943.49) | 17,263.57<br>(12,465.75 to<br>24,389.63) | 258.14<br>(189.16 to<br>354.61) | 480.88<br>(347.84 to<br>669.51) | 459.28<br>(328.51 to<br>648.14) | 464.05<br>(338.38 to<br>645.60) |
| Endocrine, metabolic, blood, and immune disorders |                                         |                                          |                                          |                                          |                                 |                                 |                                 |                                 |

| Papua New Guinea                              |                                                |                                                |                                               |                                                |                                         |                                           |                                           |                                           |
|-----------------------------------------------|------------------------------------------------|------------------------------------------------|-----------------------------------------------|------------------------------------------------|-----------------------------------------|-------------------------------------------|-------------------------------------------|-------------------------------------------|
| Cause                                         | YLLs (actual counts)                           |                                                |                                               |                                                | Deaths (actual counts)                  |                                           |                                           |                                           |
|                                               | 2016                                           | 2040 Forecast                                  | 2040 Better Scenario                          | 2040 Worse Scenario                            | 2016                                    | 2040 Forecast                             | 2040 Better Scenario                      | 2040 Worse Scenario                       |
| <b>Musculoskeletal disorders</b>              | <b>3,668.32</b><br>(2,156.68 to 5,381.13)      | <b>5,817.80</b><br>(3,400.58 to 8,576.17)      | <b>6,028.98</b><br>(3,551.99 to 8,827.07)     | <b>5,711.87</b><br>(3,321.24 to 8,481.58)      | <b>73.37</b><br>(44.28 to 105.18)       | <b>131.38</b><br>(80.63 to 187.28)        | <b>144.49</b><br>(87.94 to 203.95)        | <b>125.08</b><br>(75.47 to 177.43)        |
| Rheumatoid arthritis                          | 328.05<br>(196.74 to 470.20)                   | 614.04<br>(353.83 to 912.90)                   | 515.70<br>(288.63 to 768.79)                  | 614.09<br>(357.24 to 915.12)                   | 10.35<br>(6.07 to 14.67)                | 23.65<br>(12.94 to 35.54)                 | 21.82<br>(11.77 to 32.62)                 | 22.54<br>(12.56 to 34.08)                 |
| Other musculoskeletal disorders               | 3,340.27<br>(1,947.38 to 4,928.24)             | 5,203.77<br>(2,986.88 to 7,724.14)             | 5,513.28<br>(3,178.85 to 8,106.36)            | 5,097.78<br>(2,888.86 to 7,599.33)             | 63.03<br>(37.16 to 91.11)               | 107.73<br>(63.59 to 155.44)               | 122.67<br>(74.03 to 172.59)               | 102.54<br>(59.60 to 147.86)               |
| <b>Other non-communicable diseases</b>        | <b>127,847.65</b><br>(52,307.22 to 241,601.36) | <b>138,018.42</b><br>(66,218.87 to 253,294.07) | <b>83,556.70</b><br>(46,210.19 to 144,231.46) | <b>153,471.84</b><br>(70,747.85 to 285,861.51) | <b>1,656.11</b><br>(775.78 to 2,986.41) | <b>2,112.74</b><br>(1,253.18 to 3,516.34) | <b>1,539.25</b><br>(1,031.03 to 2,328.45) | <b>2,243.46</b><br>(1,253.77 to 3,851.01) |
| Congenital birth defects                      | 116,950.97<br>(42,174.96 to 226,420.68)        | 117,241.21<br>(45,748.61 to 228,860.98)        | 64,980.97<br>(27,267.03 to 124,367.09)        | 132,676.45<br>(50,679.07 to 262,318.71)        | 1,409.71<br>(529.96 to 2,690.04)        | 1,458.74<br>(600.86 to 2,813.81)          | 836.39<br>(373.37 to 1,557.63)            | 1,640.35<br>(655.08 to 3,193.06)          |
| Neural tube defects                           | 15,518.68<br>(4,806.03 to 37,251.77)           | 6,784.77<br>(1,787.00 to 17,942.66)            | 2,948.64<br>(784.72 to 8,015.91)              | 8,041.23<br>(2,120.54 to 21,497.41)            | 180.01<br>(55.92 to 430.95)             | 78.93<br>(21.07 to 208.56)                | 34.41<br>(9.36 to 93.08)                  | 93.50<br>(25.01 to 248.82)                |
| Congenital heart anomalies                    | 45,702.35<br>(20,409.48 to 86,891.90)          | 45,178.98<br>(21,651.12 to 84,236.97)          | 26,212.25<br>(13,335.64 to 46,480.44)         | 50,599.16<br>(23,611.05 to 95,805.75)          | 558.96<br>(256.96 to 1,043.60)          | 573.62<br>(286.80 to 1,035.70)            | 345.47<br>(182.10 to 598.53)              | 637.92<br>(314.59 to 1,178.37)            |
| Orofacial clefts                              | 99.16<br>(25.75 to 275.18)                     | 90.34<br>(21.76 to 263.61)                     | 36.17<br>(9.26 to 101.27)                     | 108.59<br>(25.61 to 329.06)                    | 1.15<br>(0.30 to 3.19)                  | 1.05<br>(0.25 to 3.06)                    | 0.42<br>(0.11 to 1.17)                    | 1.26<br>(0.30 to 3.80)                    |
| Down syndrome                                 | 6,147.72<br>(1,079.78 to 26,140.42)            | 7,208.34<br>(1,413.25 to 28,933.45)            | 3,908.10<br>(883.14 to 15,310.12)             | 8,215.61<br>(1,554.89 to 33,547.87)            | 77.12<br>(15.04 to 315.87)              | 96.11<br>(21.37 to 367.02)                | 55.48<br>(14.06 to 198.30)                | 108.14<br>(23.33 to 423.52)               |
| Other chromosomal abnormalities               | 4,235.05<br>(875.89 to 12,135.28)              | 7,011.84<br>(1,380.29 to 19,127.08)            | 3,634.22<br>(886.42 to 9,839.04)              | 8,011.21<br>(1,539.23 to 22,664.63)            | 49.75<br>(10.45 to 142.08)              | 83.29<br>(16.49 to 225.80)                | 43.77<br>(8.41 to 117.24)                 | 94.93<br>(19.05 to 265.34)                |
| Congenital musculoskeletal and limb anomalies | 2,839.47<br>(693.34 to 7,789.73)               | 3,434.19<br>(936.46 to 6,360.85)               | 1,987.13<br>(578.34 to 5,292.18)              | 3,846.16<br>(1,040.06 to 10,546.05)            | 33.78<br>(8.56 to 91.51)                | 41.41<br>(11.75 to 112.85)                | 24.42<br>(7.26 to 64.92)                  | 46.22<br>(12.82 to 125.74)                |
| Urogenital congenital anomalies               | 3,092.65<br>(899.60 to 6,437.66)               | 3,172.01<br>(1,045.36 to 6,360.85)             | 1,816.63<br>(637.73 to 3,479.58)              | 3,568.34<br>(1,147.71 to 7,315.73)             | 39.58<br>(12.23 to 79.49)               | 43.59<br>(15.61 to 82.65)                 | 27.12<br>(10.57 to 48.98)                 | 48.17<br>(16.67 to 93.19)                 |
| Digestive congenital anomalies                | 5,463.46<br>(1,493.28 to 13,107.64)            | 5,332.98<br>(1,486.98 to 12,868.29)            | 2,701.75<br>(790.90 to 6,286.30)              | 6,130.47<br>(1,699.25 to 14,968.61)            | 63.83<br>(17.68 to 152.98)              | 62.83<br>(17.65 to 152.10)                | 32.15<br>(9.64 to 75.45)                  | 72.11<br>(20.31 to 174.86)                |
| Other congenital birth defects                | 33,852.43<br>(6,959.78 to 86,763.99)           | 39,027.77<br>(9,326.53 to 98,579.44)           | 21,736.09<br>(5,710.26 to 52,154.50)          | 44,155.68<br>(10,185.18 to 113,920.07)         | 405.52<br>(85.79 to 1,030.23)           | 477.92<br>(119.34 to 1,192.05)            | 273.13<br>(76.21 to 643.08)               | 538.11<br>(130.04 to 1,356.34)            |
| Skin and subcutaneous diseases                | 5,986.17<br>(3,657.15 to 9,736.98)             | 16,646.15<br>(10,721.59 to 25,848.61)          | 16,285.34<br>(10,538.37 to 25,311.02)         | 16,114.50<br>(10,232.09 to 25,217.84)          | 189.44<br>(116.12 to 305.84)            | 606.10<br>(390.43 to 941.41)              | 676.30<br>(444.57 to 1,055.01)            | 548.85<br>(350.26 to 866.78)              |
| Cellulitis                                    | 344.35<br>(86.82 to 692.25)                    | 1,253.00<br>(299.24 to 2,435.88)               | 1,440.64<br>(359.39 to 2,811.67)              | 1,172.22<br>(280.29 to 2,306.35)               | 10.53<br>(2.34 to 21.71)                | 46.25<br>(10.48 to 92.52)                 | 59.83<br>(13.84 to 118.05)                | 40.62<br>(9.26 to 81.23)                  |
| Pyoderma                                      | 4,444.02<br>(2,689.66 to 7,334.53)             | 12,760.45<br>(7,941.20 to 20,241.53)           | 11,951.37<br>(7,430.62 to 18,996.29)          | 12,501.45<br>(7,775.27 to 19,949.81)           | 127.62<br>(77.38 to 208.14)             | 432.31<br>(275.43 to 696.62)              | 454.92<br>(283.66 to 725.50)              | 398.55<br>(252.14 to 641.40)              |
| Decubitus ulcer                               | 1,140.58<br>(531.34 to 2,336.82)               | 2,512.29<br>(1,123.62 to 5,381.00)             | 2,775.47<br>(1,319.69 to 5,872.12)            | 2,321.36<br>(1,002.75 to 5,069.80)             | 50.15<br>(25.01 to 101.25)              | 124.88<br>(55.94 to 259.45)               | 158.59<br>(76.03 to 318.50)               | 107.18<br>(46.46 to 222.88)               |
| Other skin and subcutaneous diseases          | 57.21<br>(31.52 to 96.22)                      | 120.42<br>(70.25 to 197.88)                    | 117.86<br>(68.20 to 193.72)                   | 119.46<br>(68.77 to 189.80)                    | 1.14<br>(0.65 to 1.89)                  | 2.66<br>(1.55 to 4.32)                    | 2.97<br>(1.74 to 4.90)                    | 2.50<br>(1.46 to 4.08)                    |
| Sudden infant death syndrome                  | 4,910.51<br>(2,201.75 to 9,993.68)             | 4,131.06<br>(1,694.04 to 8,786.52)             | 2,290.39<br>(914.74 to 4,783.65)              | 4,680.89<br>(1,908.05 to 9,946.34)             | 56.95<br>(25.53 to 115.93)              | 47.90<br>(19.64 to 101.94)                | 26.56<br>(10.60 to 55.49)                 | 54.27<br>(22.12 to 113.36)                |

|                          |                                             |                                             |                                             |                                             |                                       |                                        |                                        |                                         |
|--------------------------|---------------------------------------------|---------------------------------------------|---------------------------------------------|---------------------------------------------|---------------------------------------|----------------------------------------|----------------------------------------|-----------------------------------------|
| Injuries                 | 366,909.69<br>(297,363.01 to<br>443,990.53) | 474,257.26<br>(363,180.72 to<br>622,260.76) | 388,129.47<br>(302,225.47 to<br>510,871.90) | 520,513.97<br>(393,661.67 to<br>684,939.38) | 6,800.93<br>(5,516.01 to<br>8,254.63) | 9,416.80<br>(7,401.82 to<br>12,230.85) | 8,066.58<br>(6,388.97 to<br>10,490.13) | 10,141.26<br>(7,865.38 to<br>13,182.53) |
| Transport injuries       | 117,689.47<br>(95,062.47 to<br>144,225.07)  | 192,698.93<br>(143,403.86 to<br>259,090.04) | 159,398.59<br>(119,674.34 to<br>211,078.12) | 214,866.73<br>(155,655.00 to<br>299,591.79) | 2,319.56<br>(1,863.64 to<br>2,851.68) | 3,913.47<br>(2,919.35 to<br>5,242.07)  | 3,347.31<br>(2,538.14 to<br>4,389.72)  | 4,308.33<br>(3,138.34 to<br>5,965.82)   |
| Road injuries            | 105,472.21<br>(84,748.68 to<br>130,077.67)  | 171,606.28<br>(126,136.33 to<br>232,219.59) | 142,843.62<br>(106,369.90 to<br>190,064.49) | 191,291.81<br>(136,307.38 to<br>264,131.12) | 2,087.39<br>(1,679.72 to<br>2,572.60) | 3,493.60<br>(2,593.67 to<br>4,681.41)  | 3,006.35<br>(2,262.24 to<br>3,945.76)  | 3,844.49<br>(2,780.41 to<br>5,295.51)   |
| Pedestrian road injuries | 31,133.35<br>(24,160.07 to<br>39,407.27)    | 43,438.99<br>(30,904.03 to<br>60,408.03)    | 35,968.39<br>(26,022.06 to<br>49,539.22)    | 48,313.39<br>(33,187.17 to<br>69,077.48)    | 637.95<br>(491.34 to<br>813.26)       | 941.90<br>(680.22 to<br>1,310.30)      | 805.89<br>(591.32 to<br>1,100.10)      | 1,032.09<br>(732.16 to<br>1,463.43)     |

| Papua New Guinea                                |                                                                  |                                                                  |                                                                 |                                                                  |                                                            |                                                            |                                                            |                                                            |
|-------------------------------------------------|------------------------------------------------------------------|------------------------------------------------------------------|-----------------------------------------------------------------|------------------------------------------------------------------|------------------------------------------------------------|------------------------------------------------------------|------------------------------------------------------------|------------------------------------------------------------|
| Cause                                           | YLLs (actual counts)                                             |                                                                  |                                                                 |                                                                  | Deaths (actual counts)                                     |                                                            |                                                            |                                                            |
|                                                 | 2016                                                             | 2040 Forecast                                                    | 2040 Better Scenario                                            | 2040 Worse Scenario                                              | 2016                                                       | 2040 Forecast                                              | 2040 Better Scenario                                       | 2040 Worse Scenario                                        |
| Cyclist road injuries                           | 792.74<br>(613.06 to<br>1,042.24)                                | 1,378.15<br>(961.15 to<br>1,857.61)                              | 1,150.89<br>(807.90 to<br>1,573.10)                             | 1,527.75<br>(1,041.33 to<br>2,126.48)                            | 15.92<br>(12.32 to<br>21.06)                               | 28.52<br>(20.14 to<br>39.46)                               | 24.94<br>(17.91 to<br>34.57)                               | 31.14<br>(21.51 to<br>43.77)                               |
| Motorcyclist road injuries                      | 20,913.77<br>(14,103.70 to<br>28,266.23)                         | 36,324.19<br>(22,382.90 to<br>54,652.92)                         | 31,118.97<br>(19,336.62 to<br>46,738.96)                        | 40,396.09<br>(24,205.57 to<br>63,221.22)                         | 391.14<br>(263.74 to<br>529.36)                            | 684.03<br>(422.28 to<br>1,026.67)                          | 598.86<br>(372.31 to<br>897.32)                            | 755.53<br>(458.84 to<br>1,192.23)                          |
| Motor vehicle road injuries                     | 50,295.17<br>(39,041.85 to<br>64,195.95)                         | 86,251.06<br>(61,839.78 to<br>115,628.65)                        | 71,199.10<br>(51,979.32 to<br>95,273.03)                        | 96,326.09<br>(67,583.41 to<br>135,090.66)                        | 999.38<br>(775.50 to<br>1,272.93)                          | 1,759.84<br>(1,286.21 to<br>2,347.43)                      | 1,509.79<br>(1,115.58 to<br>1,977.91)                      | 1,937.85<br>(1,376.99 to<br>2,657.77)                      |
| Other road injuries                             | 2,537.18<br>(1,014.41 to<br>3,289.27)                            | 4,213.90<br>(1,775.89 to<br>6,342.31)                            | 3,406.26<br>(1,442.14 to<br>5,062.46)                           | 4,728.50<br>(1,947.69 to<br>7,289.50)                            | 43.00<br>(18.72 to<br>59.87)                               | 43.00<br>(32.86 to<br>117.85)                              | 66.86<br>(28.31 to<br>97.99)                               | 87.87<br>(36.10 to<br>133.63)                              |
| Other transport injuries                        | 12,217.26<br>(6,576.73 to<br>19,849.56)                          | 21,092.65<br>(11,317.29 to<br>34,362.87)                         | 16,554.97<br>(8,850.88 to<br>27,440.44)                         | 23,574.92<br>(12,092.71 to<br>38,671.41)                         | 232.17<br>(128.78 to<br>380.02)                            | 419.87<br>(233.86 to<br>692.99)                            | 340.96<br>(187.74 to<br>567.83)                            | 463.84<br>(248.96 to<br>779.48)                            |
| <b>Unintentional injuries</b>                   | <b>158,079.88</b><br><b>(125,750.77 to</b><br><b>196,474.16)</b> | <b>146,155.26</b><br><b>(114,681.05 to</b><br><b>186,575.82)</b> | <b>109,832.84</b><br><b>(86,554.62 to</b><br><b>136,549.66)</b> | <b>155,889.02</b><br><b>(120,248.80 to</b><br><b>199,491.01)</b> | <b>2,819.90</b><br><b>(2,285.69 to</b><br><b>3,385.33)</b> | <b>2,976.57</b><br><b>(2,417.74 to</b><br><b>3,602.78)</b> | <b>2,440.25</b><br><b>(1,989.81 to</b><br><b>2,918.93)</b> | <b>3,067.64</b><br><b>(2,466.24 to</b><br><b>3,752.72)</b> |
| Falls                                           | 9,847.00<br>(6,390.72 to<br>15,168.91)                           | 11,239.15<br>(7,911.47 to<br>16,666.37)                          | 9,987.18<br>(7,153.21 to<br>14,356.23)                          | 11,284.81<br>(7,809.58 to<br>16,803.56)                          | 217.11<br>(151.15 to<br>315.03)                            | 303.83<br>(223.45 to<br>424.36)                            | 306.21<br>(226.80 to<br>423.34)                            | 286.83<br>(209.00 to<br>405.32)                            |
| Drowning                                        | 60,011.52<br>(45,329.98 to<br>78,550.03)                         | 49,805.58<br>(35,149.41 to<br>67,928.44)                         | 37,383.14<br>(26,748.91 to<br>50,297.12)                        | 54,181.69<br>(38,057.19 to<br>75,264.01)                         | 985.16<br>(764.41 to<br>1,252.58)                          | 888.68<br>(639.35 to<br>1,174.55)                          | 697.62<br>(511.39 to<br>918.70)                            | 954.44<br>(680.38 to<br>1,300.16)                          |
| Fire, heat, and hot substances                  | 12,618.18<br>(8,586.73 to<br>17,648.97)                          | 9,836.00<br>(6,621.47 to<br>14,315.44)                           | 6,903.39<br>(4,765.19 to<br>9,944.89)                           | 10,786.63<br>(7,189.96 to<br>15,648.44)                          | 217.51<br>(157.20 to<br>299.59)                            | 193.07<br>(141.50 to<br>271.13)                            | 149.22<br>(111.06 to<br>207.30)                            | 204.96<br>(147.24 to<br>292.24)                            |
| Poisonings                                      | 10,218.27<br>(4,434.50 to<br>17,421.71)                          | 6,909.00<br>(3,039.39 to<br>11,960.79)                           | 4,286.60<br>(1,920.59 to<br>7,190.69)                           | 7,760.64<br>(3,373.22 to<br>13,473.91)                           | 175.38<br>(79.27 to<br>275.15)                             | 131.33<br>(59.32 to<br>216.35)                             | 90.13<br>(40.95 to<br>140.32)                              | 142.79<br>(64.53 to<br>238.24)                             |
| Exposure to mechanical forces                   | 19,830.07<br>(15,278.99 to<br>25,394.40)                         | 19,047.86<br>(13,821.74 to<br>25,432.54)                         | 13,893.42<br>(10,248.02 to<br>18,525.80)                        | 20,178.97<br>(14,722.51 to<br>26,807.56)                         | 351.05<br>(271.86 to<br>452.90)                            | 374.86<br>(279.41 to<br>497.12)                            | 293.57<br>(219.25 to<br>399.91)                            | 385.98<br>(288.58 to<br>512.43)                            |
| Unintentional firearm injuries                  | 4,161.16<br>(2,658.69 to<br>6,085.31)                            | 3,773.46<br>(2,274.75 to<br>5,804.28)                            | 2,640.62<br>(1,586.93 to<br>4,041.39)                           | 4,012.91<br>(2,421.90 to<br>6,195.20)                            | 75.79<br>(49.83 to<br>107.01)                              | 78.04<br>(47.98 to<br>115.25)                              | 59.42<br>(37.15 to<br>87.76)                               | 80.07<br>(49.76 to<br>119.52)                              |
| Unintentional suffocation                       | 3,911.56<br>(2,325.20 to<br>6,040.57)                            | 3,929.76<br>(2,345.31 to<br>6,238.33)                            | 2,698.06<br>(1,632.54 to<br>4,296.63)                           | 4,245.68<br>(2,518.82 to<br>6,842.17)                            | 57.98<br>(35.57 to<br>87.92)                               | 61.32<br>(37.81 to<br>97.32)                               | 43.80<br>(27.22 to<br>68.73)                               | 65.57<br>(40.14 to<br>104.50)                              |
| Other exposure to mechanical forces             | 11,757.36<br>(8,731.32 to<br>16,018.41)                          | 11,344.65<br>(8,071.25 to<br>15,825.22)                          | 8,554.74<br>(6,084.25 to<br>12,397.65)                          | 11,920.38<br>(8,527.91 to<br>16,877.21)                          | 217.27<br>(160.52 to<br>307.98)                            | 235.51<br>(168.30 to<br>344.91)                            | 190.35<br>(137.31 to<br>285.23)                            | 240.34<br>(171.84 to<br>351.60)                            |
| Adverse effects of medical treatment            | 14,560.05<br>(10,428.15 to<br>19,929.36)                         | 15,665.15<br>(11,529.68 to<br>21,129.18)                         | 11,956.89<br>(9,056.38 to<br>15,795.04)                         | 16,423.36<br>(11,786.38 to<br>22,622.22)                         | 275.71<br>(210.01 to<br>356.34)                            | 340.97<br>(270.80 to<br>424.54)                            | 289.29<br>(231.02 to<br>354.91)                            | 342.66<br>(272.74 to<br>433.92)                            |
| Animal contact                                  | 5,724.74<br>(3,764.07 to<br>8,245.11)                            | 8,159.70<br>(5,569.06 to<br>11,808.16)                           | 5,821.12<br>(4,184.34 to<br>8,250.41)                           | 8,548.93<br>(5,763.60 to<br>12,708.47)                           | 138.10<br>(98.92 to<br>182.35)                             | 226.61<br>(167.21 to<br>311.24)                            | 182.81<br>(137.37 to<br>249.00)                            | 224.79<br>(165.76 to<br>313.80)                            |
| Venomous animal contact                         | 4,682.72<br>(2,971.91 to<br>7,156.52)                            | 6,510.24<br>(4,288.49 to<br>9,839.19)                            | 4,609.84<br>(3,195.62 to<br>6,692.15)                           | 6,820.37<br>(4,444.00 to<br>10,506.62)                           | 114.20<br>(78.40 to<br>155.40)                             | 183.55<br>(130.10 to<br>259.87)                            | 147.28<br>(105.84 to<br>205.54)                            | 181.91<br>(128.36 to<br>264.38)                            |
| Non-venomous animal contact                     | 1,042.02<br>(565.15 to<br>2,079.70)                              | 1,649.46<br>(893.87 to<br>3,024.17)                              | 1,211.28<br>(680.10 to<br>2,149.41)                             | 1,728.56<br>(920.34 to<br>3,209.72)                              | 23.90<br>(13.86 to<br>44.89)                               | 43.05<br>(25.46 to<br>76.25)                               | 35.53<br>(21.39 to<br>60.71)                               | 42.88<br>(24.65 to<br>77.49)                               |
| Foreign body                                    | 8,820.17<br>(4,949.68 to<br>15,430.31)                           | 9,222.82<br>(5,537.45 to<br>14,872.51)                           | 7,610.95<br>(4,820.76 to<br>11,245.39)                          | 9,546.51<br>(5,550.72 to<br>15,873.29)                           | 143.60<br>(87.40 to<br>220.76)                             | 175.90<br>(116.12 to<br>243.29)                            | 167.58<br>(114.49 to<br>220.12)                            | 173.25<br>(112.33 to<br>247.58)                            |
| Pulmonary aspiration and foreign body in airway | 8,118.01<br>(4,420.61 to<br>14,355.50)                           | 8,525.62<br>(4,986.29 to<br>13,936.57)                           | 7,099.13<br>(4,418.21 to<br>10,524.79)                          | 8,804.93<br>(5,059.56 to<br>14,867.60)                           | 131.91<br>(78.56 to<br>206.54)                             | 163.39<br>(105.70 to<br>225.90)                            | 157.72<br>(105.05 to<br>208.90)                            | 160.22<br>(101.87 to<br>229.06)                            |

|                                      |                                                                |                                                                 |                                                                 |                                                                 |                                                            |                                                            |                                                            |                                                            |
|--------------------------------------|----------------------------------------------------------------|-----------------------------------------------------------------|-----------------------------------------------------------------|-----------------------------------------------------------------|------------------------------------------------------------|------------------------------------------------------------|------------------------------------------------------------|------------------------------------------------------------|
|                                      | 702.17<br>(326.03 to<br>1,281.07)                              | 697.20<br>(324.25 to<br>1,275.51)                               | 511.82<br>(244.12 to<br>910.19)                                 | 741.58<br>(342.92 to<br>1,400.64)                               | 11.69<br>(5.69 to<br>20.30)                                | 12.50<br>(6.08 to<br>22.07)                                | 9.86<br>(4.98 to<br>16.79)                                 | 13.02<br>(6.32 to<br>23.31)                                |
| Foreign body in other body part      | 6,523.66<br>(3,482.62 to<br>9,636.51)                          | 7,975.11<br>(4,005.61 to<br>12,861.12)                          | 5,339.70<br>(2,700.63 to<br>8,431.97)                           | 8,561.25<br>(4,288.20 to<br>13,649.72)                          | 128.58<br>(68.98 to<br>184.67)                             | 173.85<br>(90.91 to<br>266.87)                             | 124.37<br>(64.43 to<br>188.24)                             | 180.92<br>(93.15 to<br>275.27)                             |
| Environmental heat and cold exposure | 9,926.22<br>(6,592.76 to<br>13,413.98)                         | 8,294.89<br>(5,399.63 to<br>11,590.45)                          | 6,650.44<br>(4,257.37 to<br>9,315.69)                           | 8,616.21<br>(5,583.63 to<br>12,064.78)                          | 187.71<br>(124.57 to<br>255.63)                            | 167.47<br>(110.49 to<br>231.36)                            | 139.46<br>(90.54 to<br>192.91)                             | 171.02<br>(110.75 to<br>236.20)                            |
| Other unintentional injuries         | <b>91,093.68</b><br><b>(64,628.79 to</b><br><b>116,382.82)</b> | <b>122,200.06</b><br><b>(79,819.70 to</b><br><b>171,279.22)</b> | <b>107,008.48</b><br><b>(71,650.12 to</b><br><b>146,537.62)</b> | <b>136,347.14</b><br><b>(86,917.26 to</b><br><b>199,324.58)</b> | <b>1,660.70</b><br><b>(1,185.84 to</b><br><b>2,121.34)</b> | <b>2,286.85</b><br><b>(1,516.33 to</b><br><b>3,182.88)</b> | <b>2,048.67</b><br><b>(1,401.71 to</b><br><b>2,796.33)</b> | <b>2,526.78</b><br><b>(1,607.64 to</b><br><b>3,700.11)</b> |
| Self-harm and interpersonal violence |                                                                |                                                                 |                                                                 |                                                                 |                                                            |                                                            |                                                            |                                                            |

| Papua New Guinea                                                                    |                                                   |                                                           |                                                           |                                                           |                                                |                                                      |                                                      |                                                      |
|-------------------------------------------------------------------------------------|---------------------------------------------------|-----------------------------------------------------------|-----------------------------------------------------------|-----------------------------------------------------------|------------------------------------------------|------------------------------------------------------|------------------------------------------------------|------------------------------------------------------|
| Cause                                                                               | YLLs (actual counts)                              |                                                           |                                                           |                                                           | Deaths (actual counts)                         |                                                      |                                                      |                                                      |
|                                                                                     | 2016                                              | 2040 Forecast                                             | 2040 Better Scenario                                      | 2040 Worse Scenario                                       | 2016                                           | 2040 Forecast                                        | 2040 Better Scenario                                 | 2040 Worse Scenario                                  |
| Self-harm                                                                           | 58,522.39<br>(36,398.48 to<br>77,887.23)          | 86,514.67<br>(47,710.81 to<br>131,609.79)                 | 73,969.48<br>(42,050.50 to<br>110,128.78)                 | 98,927.85<br>(53,385.89 to<br>157,225.36)                 | 1,068.99<br>(680.18 to<br>1,424.24)            | 1,620.56<br>(915.63 to<br>2,440.28)                  | 1,421.27<br>(833.20 to<br>2,092.75)                  | 1,832.33<br>(1,023.87 to<br>2,914.06)                |
| Self-harm by firearm                                                                | 6,221.11<br>(1,273.75 to<br>13,719.24)            | 7,703.45<br>(1,647.69 to<br>17,974.99)                    | 6,371.87<br>(1,373.48 to<br>14,631.13)                    | 8,939.00<br>(1,920.07 to<br>21,326.83)                    | 117.71<br>(24.64 to<br>260.86)                 | 149.17<br>(33.12 to<br>338.53)                       | 125.44<br>(28.20 to<br>277.23)                       | 171.60<br>(36.69 to<br>400.07)                       |
| Self-harm by other specified means                                                  | 52,301.27<br>(31,515.00 to<br>69,867.20)          | 78,811.22<br>(42,694.69 to<br>118,139.42)                 | 67,597.61<br>(37,661.70 to<br>100,052.36)                 | 89,988.84<br>(47,827.66 to<br>142,321.41)                 | 951.28<br>(579.65 to<br>1,268.65)              | 1,471.39<br>(811.06 to<br>2,201.43)                  | 1,295.83<br>(740.24 to<br>1,905.10)                  | 1,660.73<br>(891.12 to<br>2,631.68)                  |
| Interpersonal violence                                                              | 32,571.29<br>(19,879.39 to<br>43,303.84)          | 35,685.39<br>(20,258.97 to<br>50,141.47)                  | 33,039.00<br>(18,863.13 to<br>45,922.75)                  | 37,419.29<br>(20,827.70 to<br>53,433.07)                  | 591.71<br>(358.80 to<br>780.23)                | 666.28<br>(380.90 to<br>929.54)                      | 627.40<br>(365.21 to<br>870.54)                      | 694.45<br>(390.00 to<br>985.86)                      |
| Physical violence by firearm                                                        | 6,676.60<br>(3,211.12 to<br>11,569.92)            | 7,318.90<br>(3,334.53 to<br>12,945.88)                    | 6,984.87<br>(3,178.12 to<br>12,378.17)                    | 7,377.68<br>(3,364.92 to<br>13,118.07)                    | 121.11<br>(56.81 to<br>213.24)                 | 134.11<br>(61.58 to<br>236.19)                       | 129.40<br>(59.99 to<br>226.52)                       | 134.62<br>(61.25 to<br>240.81)                       |
| Physical violence by sharp object                                                   | 8,545.79<br>(4,911.99 to<br>12,238.25)            | 10,338.30<br>(5,982.79 to<br>15,153.85)                   | 10,417.46<br>(6,023.94 to<br>15,121.39)                   | 10,297.96<br>(5,935.19 to<br>15,174.32)                   | 157.38<br>(90.39 to<br>224.53)                 | 193.87<br>(112.26 to<br>281.58)                      | 197.37<br>(115.38 to<br>285.13)                      | 192.25<br>(110.40 to<br>281.33)                      |
| Physical violence by other means                                                    | 17,348.91<br>(9,940.57 to<br>24,177.61)           | 18,028.19<br>(9,187.40 to<br>28,706.23)                   | 15,636.66<br>(7,806.23 to<br>24,825.43)                   | 19,743.66<br>(9,968.35 to<br>31,778.74)                   | 313.22<br>(176.88 to<br>437.02)                | 338.30<br>(173.37 to<br>534.99)                      | 300.63<br>(154.23 to<br>466.11)                      | 367.58<br>(184.83 to<br>584.62)                      |
| <b>Forces of nature, conflict and terrorism, and executions and police conflict</b> | <b>46.67</b><br><b>(37.92 to</b><br><b>56.54)</b> | <b>13,203.00</b><br><b>(0.00 to</b><br><b>160,811.67)</b> | <b>11,889.57</b><br><b>(0.00 to</b><br><b>145,571.54)</b> | <b>13,411.08</b><br><b>(0.00 to</b><br><b>163,511.27)</b> | <b>0.77</b><br><b>(0.63 to</b><br><b>0.91)</b> | <b>239.91</b><br><b>(0.00 to</b><br><b>2,921.90)</b> | <b>230.35</b><br><b>(0.00 to</b><br><b>2,831.49)</b> | <b>238.51</b><br><b>(0.00 to</b><br><b>2,895.38)</b> |
| Exposure to forces of nature                                                        | 0.00<br>(0.00 to<br>0.00)                         | 12,947.65<br>(0.00 to<br>160,811.67)                      | 11,656.72<br>(0.00 to<br>145,571.54)                      | 13,151.80<br>(0.00 to<br>163,511.27)                      | 0.00<br>(0.00 to<br>0.00)                      | 235.58<br>(0.00 to<br>2,921.90)                      | 226.24<br>(0.00 to<br>2,831.49)                      | 234.18<br>(0.00 to<br>2,895.38)                      |
| Conflict and terrorism                                                              | 0.00<br>(0.00 to<br>0.00)                         | 255.35<br>(0.00 to<br>2,906.83)                           | 232.85<br>(0.00 to<br>2,640.45)                           | 259.28<br>(0.00 to<br>2,947.31)                           | 0.00<br>(0.00 to<br>0.00)                      | 4.33<br>(0.00 to<br>49.13)                           | 4.12<br>(0.00 to<br>46.75)                           | 4.33<br>(0.00 to<br>49.18)                           |
| Executions and police conflict                                                      | 46.67<br>(37.92 to<br>56.54)                      | 0.00<br>(0.00 to<br>0.00)                                 | 0.00<br>(0.00 to<br>0.00)                                 | 0.00<br>(0.00 to<br>0.00)                                 | 0.77<br>(0.63 to<br>0.91)                      | 0.00<br>(0.00 to<br>0.00)                            | 0.00<br>(0.00 to<br>0.00)                            | 0.00<br>(0.00 to<br>0.00)                            |

| Samoa                                                             |                                       |                                       |                                       |                                       |                                    |                                    |                                    |                                    |
|-------------------------------------------------------------------|---------------------------------------|---------------------------------------|---------------------------------------|---------------------------------------|------------------------------------|------------------------------------|------------------------------------|------------------------------------|
| Cause                                                             | YLLs (actual counts)                  |                                       |                                       |                                       | Deaths (actual counts)             |                                    |                                    |                                    |
|                                                                   | 2016                                  | 2040 Forecast                         | 2040 Better Scenario                  | 2040 Worse Scenario                   | 2016                               | 2040 Forecast                      | 2040 Better Scenario               | 2040 Worse Scenario                |
| All causes                                                        | 32,622.79<br>(27,968.65 to 38,114.54) | 36,831.51<br>(30,690.36 to 44,895.42) | 26,916.23<br>(22,558.37 to 33,314.92) | 42,850.10<br>(36,090.75 to 52,254.48) | 1,200.62<br>(1,058.28 to 1,334.00) | 1,628.76<br>(1,453.29 to 1,855.03) | 1,303.58<br>(1,153.40 to 1,507.72) | 1,827.81<br>(1,636.51 to 2,057.61) |
| Communicable, maternal, neonatal, and nutritional diseases        | 6,056.23<br>(3,964.38 to 9,255.40)    | 5,342.78<br>(3,512.98 to 8,439.55)    | 3,149.35<br>(2,162.25 to 4,953.50)    | 6,390.09<br>(4,233.01 to 9,951.87)    | 133.89<br>(102.09 to 178.82)       | 143.53<br>(105.48 to 196.32)       | 99.45<br>(74.71 to 136.84)         | 171.76<br>(124.22 to 234.48)       |
| HIV/AIDS and tuberculosis                                         | 417.35<br>(153.28 to 1,554.73)        | 551.65<br>(152.00 to 2,139.88)        | 376.70<br>(73.38 to 1,904.45)         | 672.53<br>(190.59 to 2,273.19)        | 11.12<br>(5.11 to 36.69)           | 14.04<br>(5.15 to 49.34)           | 9.52<br>(2.66 to 43.90)            | 16.92<br>(6.34 to 51.91)           |
| Tuberculosis                                                      | 152.81<br>(114.06 to 278.27)          | 145.64<br>(89.41 to 274.10)           | 69.16<br>(43.91 to 131.21)            | 183.27<br>(106.84 to 346.49)          | 5.42<br>(4.04 to 10.00)            | 6.00<br>(3.63 to 11.68)            | 3.05<br>(1.93 to 6.01)             | 7.26<br>(4.18 to 14.46)            |
| HIV/AIDS                                                          | 264.53<br>(14.21 to 1,411.04)         | 406.01<br>(27.96 to 1,985.88)         | 307.54<br>(13.01 to 1,805.93)         | 489.26<br>(47.29 to 2,129.22)         | 5.71<br>(0.26 to 30.41)            | 8.04<br>(0.48 to 41.92)            | 6.47<br>(0.25 to 41.24)            | 9.66<br>(0.86 to 44.85)            |
| Diarrhea, lower respiratory, and other common infectious diseases | 3,158.70<br>(2,201.66 to 4,496.97)    | 2,871.09<br>(1,948.72 to 4,337.39)    | 1,745.62<br>(1,238.27 to 2,494.01)    | 3,580.95<br>(2,417.28 to 5,522.28)    | 86.88<br>(66.92 to 113.74)         | 97.35<br>(67.10 to 138.11)         | 69.21<br>(49.23 to 96.59)          | 120.75<br>(82.23 to 172.67)        |
| Diarrheal diseases                                                | 126.60<br>(77.59 to 214.00)           | 106.94<br>(22.82 to 341.18)           | 56.29<br>(13.97 to 182.74)            | 136.73<br>(25.18 to 442.83)           | 5.64<br>(3.31 to 10.33)            | 6.57<br>(1.33 to 21.00)            | 3.95<br>(0.90 to 12.87)            | 7.98<br>(1.39 to 26.67)            |
| Intestinal infectious diseases                                    | 205.62<br>(101.37 to 385.49)          | 172.23<br>(77.56 to 320.63)           | 124.33<br>(58.43 to 232.91)           | 177.98<br>(77.56 to 334.88)           | 3.04<br>(1.52 to 5.68)             | 2.60<br>(1.23 to 4.82)             | 1.94<br>(0.96 to 3.54)             | 2.67<br>(1.23 to 4.96)             |
| Typhoid fever                                                     | 176.58<br>(84.52 to 331.82)           | 143.48<br>(62.05 to 274.02)           | 104.17<br>(46.55 to 197.18)           | 148.09<br>(63.39 to 284.07)           | 2.60<br>(1.27 to 4.83)             | 2.15<br>(0.99 to 4.05)             | 1.62<br>(0.78 to 3.04)             | 2.21<br>(1.01 to 4.31)             |
| Paratyphoid fever                                                 | 28.98<br>(12.18 to 59.96)             | 28.71<br>(11.72 to 61.32)             | 20.14<br>(8.28 to 42.51)              | 29.86<br>(11.83 to 65.41)             | 0.44<br>(0.19 to 0.91)             | 0.44<br>(0.19 to 0.93)             | 0.32<br>(0.14 to 0.67)             | 0.46<br>(0.19 to 0.97)             |
| Other intestinal infectious diseases                              | 0.06<br>(0.02 to 0.14)                | 0.04<br>(0.01 to 0.08)                | 0.02<br>(0.01 to 0.05)                | 0.04<br>(0.01 to 0.08)                | 0.00<br>(0.00 to 0.00)             | 0.00<br>(0.00 to 0.00)             | 0.00<br>(0.00 to 0.00)             | 0.00<br>(0.00 to 0.00)             |
| Lower respiratory infections                                      | 1,832.13<br>(1,332.06 to 2,570.19)    | 1,663.49<br>(1,108.03 to 2,526.09)    | 1,068.86<br>(753.48 to 1,535.67)      | 2,233.08<br>(1,441.42 to 3,540.81)    | 64.81<br>(48.44 to 90.96)          | 75.27<br>(50.36 to 112.11)         | 55.67<br>(38.37 to 81.62)          | 95.96<br>(62.99 to 145.27)         |
| Upper respiratory infections                                      | 1.99<br>(1.07 to 3.29)                | 1.98<br>(0.91 to 3.78)                | 1.12<br>(0.52 to 2.17)                | 2.10<br>(0.94 to 4.24)                | 0.05<br>(0.03 to 0.09)             | 0.06<br>(0.03 to 0.13)             | 0.04<br>(0.02 to 0.08)             | 0.07<br>(0.03 to 0.13)             |
| Otitis media                                                      | 0.05<br>(0.02 to 0.13)                | 0.02<br>(0.01 to 0.04)                | 0.02<br>(0.01 to 0.04)                | 0.02<br>(0.01 to 0.04)                | 0.00<br>(0.00 to 0.00)             | 0.00<br>(0.00 to 0.00)             | 0.00<br>(0.00 to 0.00)             | 0.00<br>(0.00 to 0.00)             |
| Meningitis                                                        | 200.40<br>(109.80 to 356.67)          | 148.70<br>(68.87 to 294.97)           | 100.81<br>(55.07 to 185.78)           | 163.85<br>(71.22 to 335.76)           | 3.46<br>(2.05 to 5.99)             | 2.78<br>(1.56 to 5.06)             | 2.21<br>(1.35 to 3.96)             | 2.91<br>(1.55 to 5.52)             |
| Pneumococcal meningitis                                           | 0.58<br>(0.30 to 1.05)                | 0.30<br>(0.15 to 0.57)                | 0.20<br>(0.11 to 0.38)                | 0.35<br>(0.17 to 0.69)                | 0.01<br>(0.01 to 0.02)             | 0.01<br>(0.00 to 0.01)             | 0.01<br>(0.00 to 0.01)             | 0.01<br>(0.00 to 0.02)             |
| H influenzae type B meningitis                                    | 21.34<br>(10.97 to 38.97)             | 41.58<br>(6.94 to 133.58)             | 13.77<br>(4.98 to 35.48)              | 55.14<br>(8.09 to 185.41)             | 0.36<br>(0.21 to 0.65)             | 0.58<br>(0.15 to 1.66)             | 0.26<br>(0.13 to 0.55)             | 0.73<br>(0.16 to 2.25)             |
| Meningococcal meningitis                                          | 40.12<br>(21.00 to 71.14)             | 23.46<br>(12.26 to 43.16)             | 19.06<br>(10.40 to 34.74)             | 23.78<br>(12.38 to 43.83)             | 0.76<br>(0.44 to 1.34)             | 0.55<br>(0.32 to 1.00)             | 0.49<br>(0.29 to 0.90)             | 0.54<br>(0.31 to 0.99)             |
| Other meningitis                                                  | 138.36<br>(75.79 to 247.09)           | 83.35<br>(44.46 to 154.15)            | 67.78<br>(37.64 to 123.12)            | 84.59<br>(45.02 to 160.17)            | 2.33<br>(1.38 to 4.11)             | 1.65<br>(0.99 to 3.03)             | 1.46<br>(0.89 to 2.61)             | 1.64<br>(0.96 to 3.03)             |
| Encephalitis                                                      | 30.99<br>(21.14 to 47.92)             | 34.24<br>(22.24 to 53.89)             | 26.01<br>(17.38 to 40.19)             | 34.90<br>(22.36 to 55.11)             | 0.64<br>(0.47 to 0.93)             | 0.80<br>(0.58 to 1.16)             | 0.67<br>(0.49 to 0.95)             | 0.80<br>(0.58 to 1.16)             |



|                |                                  |                                  |                                |                                  |                            |                            |                           |                            |
|----------------|----------------------------------|----------------------------------|--------------------------------|----------------------------------|----------------------------|----------------------------|---------------------------|----------------------------|
| Diphtheria     | 6.35<br>(3.41 to<br>11.08)       | 2.56<br>(0.93 to<br>6.50)        | 1.27<br>(0.70 to<br>2.17)      | 2.51<br>(0.92 to<br>6.20)        | 0.10<br>(0.06 to<br>0.17)  | 0.04<br>(0.02 to<br>0.09)  | 0.02<br>(0.01 to<br>0.04) | 0.04<br>(0.02 to<br>0.08)  |
| Whooping cough | 477.91<br>(53.97 to<br>1,323.09) | 426.20<br>(15.53 to<br>1,204.64) | 228.81<br>(13.99 to<br>637.30) | 426.62<br>(14.47 to<br>1,232.25) | 5.68<br>(0.64 to<br>15.73) | 5.07<br>(0.20 to<br>14.29) | 2.73<br>(0.18 to<br>7.59) | 5.07<br>(0.18 to<br>14.55) |
| Tetanus        | 2.31<br>(1.16 to<br>6.52)        | 0.42<br>(0.18 to<br>1.22)        | 0.31<br>(0.14 to<br>0.94)      | 0.42<br>(0.18 to<br>1.26)        | 0.06<br>(0.02 to<br>0.21)  | 0.01<br>(0.00 to<br>0.04)  | 0.01<br>(0.00 to<br>0.04) | 0.01<br>(0.00 to<br>0.04)  |
| Measles        | 265.62<br>(70.36 to<br>661.77)   | 307.76<br>(8.85 to<br>1,340.94)  | 134.17<br>(6.05 to<br>541.82)  | 395.96<br>(10.51 to<br>1,615.37) | 3.18<br>(0.86 to<br>7.90)  | 3.97<br>(0.15 to<br>16.00) | 1.84<br>(0.11 to<br>6.69) | 5.08<br>(0.19 to<br>19.41) |

| Samoa                                                 |                                                    |                                                     |                                                   |                                                     |                                                |                                                |                                                |                                                |
|-------------------------------------------------------|----------------------------------------------------|-----------------------------------------------------|---------------------------------------------------|-----------------------------------------------------|------------------------------------------------|------------------------------------------------|------------------------------------------------|------------------------------------------------|
| Cause                                                 | YLLs (actual counts)                               |                                                     |                                                   |                                                     | Deaths (actual counts)                         |                                                |                                                |                                                |
|                                                       | 2016                                               | 2040 Forecast                                       | 2040 Better Scenario                              | 2040 Worse Scenario                                 | 2016                                           | 2040 Forecast                                  | 2040 Better Scenario                           | 2040 Worse Scenario                            |
| Varicella and herpes zoster                           | 8.73<br>(4.70 to<br>16.69)                         | 6.55<br>(2.70 to<br>15.34)                          | 3.62<br>(1.66 to<br>7.89)                         | 6.79<br>(2.68 to<br>15.80)                          | 0.20<br>(0.13 to<br>0.31)                      | 0.18<br>(0.10 to<br>0.30)                      | 0.12<br>(0.07 to<br>0.20)                      | 0.17<br>(0.10 to<br>0.30)                      |
| <b>Neglected tropical diseases and malaria</b>        | <b>12.97</b><br><b>(8.58 to</b><br><b>19.42)</b>   | <b>45.02</b><br><b>(30.67 to</b><br><b>64.89)</b>   | <b>42.51</b><br><b>(29.12 to</b><br><b>61.43)</b> | <b>43.88</b><br><b>(29.38 to</b><br><b>63.24)</b>   | <b>0.51</b><br><b>(0.35 to</b><br><b>0.73)</b> | <b>2.22</b><br><b>(1.45 to</b><br><b>3.23)</b> | <b>2.28</b><br><b>(1.51 to</b><br><b>3.31)</b> | <b>2.06</b><br><b>(1.35 to</b><br><b>3.05)</b> |
| Malaria                                               | 0.00<br>(0.00 to<br>0.00)                          | 0.00<br>(0.00 to<br>0.00)                           | 0.00<br>(0.00 to<br>0.00)                         | 0.00<br>(0.00 to<br>0.00)                           | 0.00<br>(0.00 to<br>0.00)                      | 0.00<br>(0.00 to<br>0.00)                      | 0.00<br>(0.00 to<br>0.00)                      | 0.00<br>(0.00 to<br>0.00)                      |
| Chagas disease                                        | 0.00<br>(0.00 to<br>0.00)                          | 0.00<br>(0.00 to<br>0.00)                           | 0.00<br>(0.00 to<br>0.00)                         | 0.00<br>(0.00 to<br>0.00)                           | 0.00<br>(0.00 to<br>0.00)                      | 0.00<br>(0.00 to<br>0.00)                      | 0.00<br>(0.00 to<br>0.00)                      | 0.00<br>(0.00 to<br>0.00)                      |
| Leishmaniasis                                         | 0.00<br>(0.00 to<br>0.00)                          | 0.00<br>(0.00 to<br>0.00)                           | 0.00<br>(0.00 to<br>0.00)                         | 0.00<br>(0.00 to<br>0.00)                           | 0.00<br>(0.00 to<br>0.00)                      | 0.00<br>(0.00 to<br>0.00)                      | 0.00<br>(0.00 to<br>0.00)                      | 0.00<br>(0.00 to<br>0.00)                      |
| African trypanosomiasis                               | 0.00<br>(0.00 to<br>0.00)                          | 0.00<br>(0.00 to<br>0.00)                           | 0.00<br>(0.00 to<br>0.00)                         | 0.00<br>(0.00 to<br>0.00)                           | 0.00<br>(0.00 to<br>0.00)                      | 0.00<br>(0.00 to<br>0.00)                      | 0.00<br>(0.00 to<br>0.00)                      | 0.00<br>(0.00 to<br>0.00)                      |
| Schistosomiasis                                       | 0.00<br>(0.00 to<br>0.00)                          | 0.00<br>(0.00 to<br>0.00)                           | 0.00<br>(0.00 to<br>0.00)                         | 0.00<br>(0.00 to<br>0.00)                           | 0.00<br>(0.00 to<br>0.00)                      | 0.00<br>(0.00 to<br>0.00)                      | 0.00<br>(0.00 to<br>0.00)                      | 0.00<br>(0.00 to<br>0.00)                      |
| Cysticercosis                                         | 0.00<br>(0.00 to<br>0.00)                          | 0.00<br>(0.00 to<br>0.00)                           | 0.00<br>(0.00 to<br>0.00)                         | 0.00<br>(0.00 to<br>0.00)                           | 0.00<br>(0.00 to<br>0.00)                      | 0.00<br>(0.00 to<br>0.00)                      | 0.00<br>(0.00 to<br>0.00)                      | 0.00<br>(0.00 to<br>0.00)                      |
| Cystic echinococcosis                                 | 0.00<br>(0.00 to<br>0.00)                          | 0.00<br>(0.00 to<br>0.00)                           | 0.00<br>(0.00 to<br>0.00)                         | 0.00<br>(0.00 to<br>0.00)                           | 0.00<br>(0.00 to<br>0.00)                      | 0.00<br>(0.00 to<br>0.00)                      | 0.00<br>(0.00 to<br>0.00)                      | 0.00<br>(0.00 to<br>0.00)                      |
| Dengue                                                | 4.19<br>(1.86 to<br>8.43)                          | 28.55<br>(16.26 to<br>49.16)                        | 28.81<br>(17.17 to<br>48.09)                      | 27.58<br>(15.60 to<br>47.70)                        | 0.15<br>(0.07 to<br>0.33)                      | 1.34<br>(0.73 to<br>2.38)                      | 1.47<br>(0.84 to<br>2.50)                      | 1.24<br>(0.67 to<br>2.22)                      |
| Yellow fever                                          | 0.00<br>(0.00 to<br>0.00)                          | 0.00<br>(0.00 to<br>0.00)                           | 0.00<br>(0.00 to<br>0.00)                         | 0.00<br>(0.00 to<br>0.00)                           | 0.00<br>(0.00 to<br>0.00)                      | 0.00<br>(0.00 to<br>0.00)                      | 0.00<br>(0.00 to<br>0.00)                      | 0.00<br>(0.00 to<br>0.00)                      |
| Rabies                                                | 0.11<br>(0.04 to<br>0.24)                          | 0.11<br>(0.04 to<br>0.25)                           | 0.05<br>(0.02 to<br>0.11)                         | 0.12<br>(0.04 to<br>0.26)                           | 0.00<br>(0.00 to<br>0.01)                      | 0.01<br>(0.00 to<br>0.01)                      | 0.00<br>(0.00 to<br>0.01)                      | 0.01<br>(0.00 to<br>0.01)                      |
| Intestinal nematode infections                        | 1.58<br>(0.38 to<br>4.46)                          | 2.43<br>(0.74 to<br>5.83)                           | 2.09<br>(0.77 to<br>4.51)                         | 2.48<br>(0.74 to<br>6.05)                           | 0.03<br>(0.01 to<br>0.06)                      | 0.05<br>(0.02 to<br>0.09)                      | 0.05<br>(0.02 to<br>0.08)                      | 0.05<br>(0.02 to<br>0.09)                      |
| Other neglected tropical diseases                     | 7.09<br>(4.60 to<br>10.65)                         | 13.93<br>(7.64 to<br>22.45)                         | 11.56<br>(5.99 to<br>18.68)                       | 13.70<br>(7.47 to<br>22.01)                         | 0.33<br>(0.21 to<br>0.48)                      | 0.82<br>(0.39 to<br>1.40)                      | 0.76<br>(0.35 to<br>1.34)                      | 0.77<br>(0.37 to<br>1.31)                      |
| <b>Maternal disorders</b>                             | <b>99.57</b><br><b>(65.17 to</b><br><b>138.37)</b> | <b>100.46</b><br><b>(58.68 to</b><br><b>148.38)</b> | <b>50.63</b><br><b>(29.35 to</b><br><b>78.60)</b> | <b>111.55</b><br><b>(65.33 to</b><br><b>168.37)</b> | <b>1.77</b><br><b>(1.17 to</b><br><b>2.45)</b> | <b>1.78</b><br><b>(1.04 to</b><br><b>2.63)</b> | <b>0.90</b><br><b>(0.53 to</b><br><b>1.39)</b> | <b>1.98</b><br><b>(1.15 to</b><br><b>2.85)</b> |
| Maternal hemorrhage                                   | 29.30<br>(16.90 to<br>45.12)                       | 28.35<br>(14.67 to<br>48.71)                        | 14.54<br>(7.32 to<br>26.08)                       | 31.25<br>(15.10 to<br>53.26)                        | 0.52<br>(0.30 to<br>0.79)                      | 0.50<br>(0.26 to<br>0.86)                      | 0.26<br>(0.13 to<br>0.46)                      | 0.55<br>(0.27 to<br>0.95)                      |
| Maternal sepsis and other maternal infections         | 9.70<br>(4.47 to<br>17.76)                         | 8.45<br>(3.37 to<br>16.99)                          | 4.26<br>(1.68 to<br>8.63)                         | 9.34<br>(3.61 to<br>18.37)                          | 0.18<br>(0.08 to<br>0.32)                      | 0.15<br>(0.06 to<br>0.30)                      | 0.08<br>(0.03 to<br>0.15)                      | 0.17<br>(0.07 to<br>0.33)                      |
| Maternal hypertensive disorders                       | 12.93<br>(6.86 to<br>21.41)                        | 13.43<br>(6.61 to<br>24.27)                         | 6.82<br>(3.22 to<br>12.33)                        | 14.82<br>(6.92 to<br>26.72)                         | 0.23<br>(0.12 to<br>0.38)                      | 0.24<br>(0.12 to<br>0.43)                      | 0.12<br>(0.06 to<br>0.22)                      | 0.26<br>(0.12 to<br>0.47)                      |
| Maternal obstructed labor and uterine rupture         | 6.45<br>(2.85 to<br>12.01)                         | 6.76<br>(2.84 to<br>13.34)                          | 3.29<br>(1.32 to<br>6.70)                         | 7.49<br>(3.03 to<br>15.43)                          | 0.12<br>(0.05 to<br>0.22)                      | 0.12<br>(0.05 to<br>0.24)                      | 0.06<br>(0.02 to<br>0.12)                      | 0.13<br>(0.05 to<br>0.27)                      |
| Maternal abortion, miscarriage, and ectopic pregnancy | 9.82<br>(4.99 to<br>17.44)                         | 10.80<br>(4.75 to<br>20.22)                         | 5.46<br>(2.31 to<br>10.63)                        | 12.04<br>(5.14 to<br>24.09)                         | 0.18<br>(0.09 to<br>0.31)                      | 0.19<br>(0.09 to<br>0.36)                      | 0.10<br>(0.04 to<br>0.19)                      | 0.22<br>(0.09 to<br>0.42)                      |

|                                        |                             |                             |                            |                             |                           |                           |                           |                           |
|----------------------------------------|-----------------------------|-----------------------------|----------------------------|-----------------------------|---------------------------|---------------------------|---------------------------|---------------------------|
|                                        | 10.81<br>(5.63 to<br>18.35) | 11.67<br>(5.54 to<br>21.46) | 5.68<br>(2.66 to<br>10.59) | 13.11<br>(6.27 to<br>24.36) | 0.19<br>(0.10 to<br>0.32) | 0.20<br>(0.10 to<br>0.36) | 0.10<br>(0.05 to<br>0.18) | 0.23<br>(0.11 to<br>0.42) |
| Indirect maternal deaths               | 4.10<br>(1.72 to<br>7.92)   | 3.59<br>(1.37 to<br>7.60)   | 1.76<br>(0.67 to<br>3.71)  | 4.01<br>(1.56 to<br>8.55)   | 0.07<br>(0.03 to<br>0.14) | 0.06<br>(0.02 to<br>0.13) | 0.03<br>(0.01 to<br>0.06) | 0.07<br>(0.03 to<br>0.15) |
| Late maternal deaths                   | 0.05<br>(0.00 to<br>0.23)   | 0.55<br>(0.00 to<br>3.71)   | 0.26<br>(0.00 to<br>1.84)  | 0.64<br>(0.01 to<br>4.06)   | 0.00<br>(0.00 to<br>0.00) | 0.01<br>(0.00 to<br>0.07) | 0.00<br>(0.00 to<br>0.03) | 0.01<br>(0.00 to<br>0.07) |
| Maternal deaths aggravated by HIV/AIDS | 16.41<br>(8.84 to<br>26.64) | 16.87<br>(8.12 to<br>29.13) | 8.58<br>(4.03 to<br>14.95) | 18.84<br>(8.87 to<br>33.64) | 0.29<br>(0.16 to<br>0.47) | 0.30<br>(0.14 to<br>0.51) | 0.15<br>(0.07 to<br>0.26) | 0.33<br>(0.15 to<br>0.59) |
| Other maternal disorders               |                             |                             |                            |                             |                           |                           |                           |                           |

| Samoa                                                                   |                                            |                                            |                                          |                                            |                                    |                                    |                                   |                                    |
|-------------------------------------------------------------------------|--------------------------------------------|--------------------------------------------|------------------------------------------|--------------------------------------------|------------------------------------|------------------------------------|-----------------------------------|------------------------------------|
| Cause                                                                   | YLLs (actual counts)                       |                                            |                                          |                                            | Deaths (actual counts)             |                                    |                                   |                                    |
|                                                                         | 2016                                       | 2040 Forecast                              | 2040 Better Scenario                     | 2040 Worse Scenario                        | 2016                               | 2040 Forecast                      | 2040 Better Scenario              | 2040 Worse Scenario                |
| <b>Neonatal disorders</b>                                               | <b>1,925.13</b><br>(862.14 to<br>3,900.39) | <b>1,468.89</b><br>(601.63 to<br>3,168.91) | <b>717.55</b><br>(285.95 to<br>1,558.44) | <b>1,665.25</b><br>(675.02 to<br>3,570.02) | <b>22.26</b><br>(9.97 to<br>45.45) | <b>16.99</b><br>(6.96 to<br>36.63) | <b>8.30</b><br>(3.31 to<br>18.03) | <b>19.26</b><br>(7.81 to<br>41.28) |
| Neonatal preterm birth                                                  | 796.87<br>(337.28 to<br>1,634.85)          | 543.03<br>(214.83 to<br>1,174.41)          | 246.51<br>(98.12 to<br>530.86)           | 623.89<br>(251.52 to<br>1,326.13)          | 9.21<br>(3.90 to<br>18.89)         | 6.28<br>(2.48 to<br>13.58)         | 2.85<br>(1.13 to<br>6.14)         | 7.21<br>(2.91 to<br>15.33)         |
| Neonatal encephalopathy due to birth asphyxia and trauma                | 531.39<br>(224.28 to<br>1,117.34)          | 369.56<br>(131.53 to<br>837.29)            | 197.61<br>(70.67 to<br>441.19)           | 412.88<br>(147.49 to<br>950.75)            | 6.15<br>(2.60 to<br>12.92)         | 4.28<br>(1.52 to<br>9.68)          | 2.29<br>(0.82 to<br>5.11)         | 4.78<br>(1.71 to<br>11.00)         |
| Neonatal sepsis and other neonatal infections                           | 222.37<br>(82.92 to<br>513.27)             | 228.73<br>(79.73 to<br>544.39)             | 119.17<br>(41.38 to<br>284.04)           | 256.39<br>(88.79 to<br>592.92)             | 2.57<br>(0.96 to<br>5.93)          | 2.65<br>(0.92 to<br>6.29)          | 1.38<br>(0.48 to<br>3.29)         | 2.97<br>(1.03 to<br>6.85)          |
| Hemolytic disease and other neonatal jaundice                           | 13.29<br>(4.19 to<br>33.61)                | 7.37<br>(1.98 to<br>21.16)                 | 3.51<br>(0.94 to<br>9.99)                | 8.40<br>(2.25 to<br>24.31)                 | 0.15<br>(0.05 to<br>0.39)          | 0.09<br>(0.02 to<br>0.24)          | 0.04<br>(0.01 to<br>0.12)         | 0.10<br>(0.03 to<br>0.28)          |
| Other neonatal disorders                                                | 361.21<br>(141.25 to<br>763.00)            | 320.20<br>(108.82 to<br>755.66)            | 150.76<br>(50.81 to<br>355.44)           | 363.70<br>(124.35 to<br>845.37)            | 4.18<br>(1.63 to<br>8.83)          | 3.71<br>(1.26 to<br>8.74)          | 1.74<br>(0.59 to<br>4.11)         | 4.21<br>(1.44 to<br>9.78)          |
| <b>Nutritional deficiencies</b>                                         | <b>134.69</b><br>(80.34 to<br>247.49)      | <b>92.54</b><br>(61.24 to<br>149.93)       | <b>66.83</b><br>(47.81 to<br>98.17)      | <b>93.65</b><br>(60.96 to<br>153.00)       | <b>5.30</b><br>(4.08 to<br>7.09)   | <b>5.55</b><br>(3.76 to<br>7.46)   | <b>4.86</b><br>(3.43 to<br>6.40)  | <b>5.18</b><br>(3.46 to<br>7.17)   |
| Protein-energy malnutrition                                             | 130.31<br>(76.86 to<br>237.55)             | 86.20<br>(56.18 to<br>139.63)              | 62.21<br>(43.85 to<br>92.89)             | 87.22<br>(55.84 to<br>144.47)              | 5.15<br>(3.95 to<br>6.86)          | 5.24<br>(3.45 to<br>7.11)          | 4.61<br>(3.15 to<br>6.17)         | 4.88<br>(3.21 to<br>6.88)          |
| Iodine deficiency                                                       | 0.90<br>(0.05 to<br>3.06)                  | 2.72<br>(0.10 to<br>9.97)                  | 1.82<br>(0.06 to<br>7.20)                | 2.77<br>(0.11 to<br>10.53)                 | 0.03<br>(0.00 to<br>0.09)          | 0.15<br>(0.00 to<br>0.72)          | 0.12<br>(0.00 to<br>0.59)         | 0.14<br>(0.00 to<br>0.68)          |
| Dietary iron deficiency                                                 | 1.01<br>(0.64 to<br>1.65)                  | 1.07<br>(0.63 to<br>1.91)                  | 0.81<br>(0.48 to<br>1.52)                | 1.11<br>(0.65 to<br>1.97)                  | 0.02<br>(0.01 to<br>0.04)          | 0.02<br>(0.01 to<br>0.07)          | 0.02<br>(0.01 to<br>0.06)         | 0.02<br>(0.01 to<br>0.06)          |
| Other nutritional deficiencies                                          | 2.48<br>(1.65 to<br>3.83)                  | 2.56<br>(1.61 to<br>4.02)                  | 2.00<br>(1.26 to<br>3.19)                | 2.55<br>(1.62 to<br>4.07)                  | 0.10<br>(0.06 to<br>0.16)          | 0.13<br>(0.08 to<br>0.23)          | 0.12<br>(0.07 to<br>0.20)         | 0.12<br>(0.07 to<br>0.21)          |
| <b>Other communicable, maternal, neonatal, and nutritional diseases</b> | <b>307.84</b><br>(182.94 to<br>558.91)     | <b>213.12</b><br>(146.19 to<br>332.78)     | <b>149.50</b><br>(107.27 to<br>216.40)   | <b>222.29</b><br>(152.31 to<br>346.13)     | <b>6.04</b><br>(4.32 to<br>9.04)   | <b>5.60</b><br>(4.33 to<br>7.30)   | <b>4.37</b><br>(3.46 to<br>5.53)  | <b>5.61</b><br>(4.30 to<br>7.45)   |
| Sexually transmitted infections excluding HIV                           | 135.17<br>(37.74 to<br>338.34)             | 45.73<br>(14.94 to<br>112.07)              | 28.61<br>(10.84 to<br>66.04)             | 49.17<br>(15.70 to<br>118.27)              | 1.75<br>(0.62 to<br>4.13)          | 0.65<br>(0.27 to<br>1.44)          | 0.43<br>(0.21 to<br>0.88)         | 0.69<br>(0.28 to<br>1.50)          |
| Syphilis                                                                | 124.17<br>(27.24 to<br>328.72)             | 38.06<br>(7.74 to<br>103.31)               | 22.38<br>(4.92 to<br>57.34)              | 41.30<br>(8.21 to<br>109.90)               | 1.50<br>(0.37 to<br>3.89)          | 0.47<br>(0.12 to<br>1.24)          | 0.29<br>(0.08 to<br>0.71)         | 0.51<br>(0.12 to<br>1.31)          |
| Chlamydial infection                                                    | 2.14<br>(1.35 to<br>3.28)                  | 1.50<br>(0.90 to<br>2.35)                  | 1.21<br>(0.72 to<br>1.91)                | 1.54<br>(0.90 to<br>2.41)                  | 0.05<br>(0.03 to<br>0.07)          | 0.03<br>(0.02 to<br>0.05)          | 0.03<br>(0.02 to<br>0.04)         | 0.03<br>(0.02 to<br>0.05)          |
| Gonococcal infection                                                    | 5.67<br>(3.59 to<br>8.68)                  | 3.95<br>(2.39 to<br>6.29)                  | 3.22<br>(1.95 to<br>5.04)                | 4.05<br>(2.44 to<br>6.45)                  | 0.13<br>(0.08 to<br>0.20)          | 0.09<br>(0.06 to<br>0.14)          | 0.08<br>(0.05 to<br>0.12)         | 0.09<br>(0.06 to<br>0.15)          |
| Other sexually transmitted infections                                   | 3.19<br>(2.01 to<br>4.89)                  | 2.22<br>(1.31 to<br>3.58)                  | 1.80<br>(1.07 to<br>2.91)                | 2.28<br>(1.33 to<br>3.67)                  | 0.07<br>(0.05 to<br>0.11)          | 0.05<br>(0.03 to<br>0.08)          | 0.04<br>(0.02 to<br>0.07)         | 0.05<br>(0.03 to<br>0.08)          |
| Acute hepatitis                                                         | 45.71<br>(35.28 to<br>58.48)               | 35.66<br>(26.64 to<br>46.99)               | 27.51<br>(20.38 to<br>35.70)             | 36.46<br>(27.27 to<br>48.03)               | 1.24<br>(0.97 to<br>1.57)          | 1.10<br>(0.84 to<br>1.41)          | 0.88<br>(0.67 to<br>1.13)         | 1.10<br>(0.83 to<br>1.43)          |
| Acute hepatitis A                                                       | 1.60<br>(0.93 to<br>2.67)                  | 0.83<br>(0.49 to<br>1.38)                  | 0.58<br>(0.35 to<br>0.91)                | 0.87<br>(0.50 to<br>1.46)                  | 0.03<br>(0.02 to<br>0.04)          | 0.02<br>(0.01 to<br>0.03)          | 0.02<br>(0.01 to<br>0.02)         | 0.02<br>(0.01 to<br>0.03)          |
| Acute hepatitis B                                                       | 38.40<br>(29.52 to<br>49.29)               | 30.72<br>(22.58 to<br>41.15)               | 23.66<br>(17.05 to<br>31.20)             | 31.40<br>(23.14 to<br>42.33)               | 1.07<br>(0.83 to<br>1.38)          | 0.95<br>(0.71 to<br>1.24)          | 0.75<br>(0.56 to<br>0.98)         | 0.95<br>(0.71 to<br>1.26)          |



| Samoa                                |                                       |                                       |                                       |                                       |                                 |                                 |                                 |                                 |
|--------------------------------------|---------------------------------------|---------------------------------------|---------------------------------------|---------------------------------------|---------------------------------|---------------------------------|---------------------------------|---------------------------------|
| Cause                                | YLLs (actual counts)                  |                                       |                                       |                                       | Deaths (actual counts)          |                                 |                                 |                                 |
|                                      | 2016                                  | 2040 Forecast                         | 2040 Better Scenario                  | 2040 Worse Scenario                   | 2016                            | 2040 Forecast                   | 2040 Better Scenario            | 2040 Worse Scenario             |
| Neoplasms                            | 3,609.52<br>(3,080.26 to<br>4,136.26) | 4,420.43<br>(3,674.31 to<br>5,188.92) | 4,293.73<br>(3,602.71 to<br>5,004.54) | 4,654.08<br>(3,807.12 to<br>5,593.62) | 132.73<br>(113.70 to<br>151.64) | 190.24<br>(158.90 to<br>223.67) | 196.88<br>(167.01 to<br>229.17) | 192.36<br>(159.38 to<br>230.35) |
| Lip and oral cavity cancer           | 45.03<br>(35.23 to<br>55.19)          | 57.43<br>(36.79 to<br>87.29)          | 41.73<br>(29.45 to<br>60.35)          | 71.93<br>(42.99 to<br>117.24)         | 1.66<br>(1.33 to<br>1.99)       | 2.36<br>(1.60 to<br>3.55)       | 1.90<br>(1.37 to<br>2.67)       | 2.76<br>(1.74 to<br>4.36)       |
| Nasopharynx cancer                   | 55.29<br>(44.88 to<br>66.27)          | 73.38<br>(47.03 to<br>111.15)         | 49.57<br>(34.35 to<br>70.73)          | 94.42<br>(57.44 to<br>154.50)         | 1.67<br>(1.37 to<br>2.00)       | 2.47<br>(1.61 to<br>3.74)       | 1.80<br>(1.26 to<br>2.52)       | 3.04<br>(1.89 to<br>4.88)       |
| Other pharynx cancer                 | 45.06<br>(34.78 to<br>59.63)          | 45.38<br>(29.25 to<br>68.27)          | 36.99<br>(25.22 to<br>54.93)          | 51.26<br>(31.67 to<br>80.99)          | 1.77<br>(1.38 to<br>2.32)       | 2.02<br>(1.35 to<br>3.01)       | 1.73<br>(1.21 to<br>2.50)       | 2.21<br>(1.42 to<br>3.42)       |
| Esophageal cancer                    | 43.75<br>(36.12 to<br>52.00)          | 51.20<br>(32.79 to<br>73.86)          | 38.42<br>(26.70 to<br>52.57)          | 59.15<br>(36.22 to<br>89.57)          | 1.83<br>(1.55 to<br>2.13)       | 2.40<br>(1.58 to<br>3.41)       | 1.95<br>(1.40 to<br>2.65)       | 2.62<br>(1.63 to<br>3.87)       |
| Stomach cancer                       | 320.78<br>(262.65 to<br>381.70)       | 281.73<br>(228.25 to<br>337.73)       | 256.85<br>(211.04 to<br>304.25)       | 280.27<br>(224.87 to<br>338.76)       | 12.72<br>(10.64 to<br>14.81)    | 13.04<br>(10.54 to<br>15.46)    | 12.54<br>(10.37 to<br>14.62)    | 12.53<br>(10.06 to<br>14.97)    |
| Colon and rectum cancer              | 286.27<br>(225.04 to<br>353.43)       | 414.79<br>(271.54 to<br>609.95)       | 423.91<br>(281.03 to<br>625.69)       | 425.13<br>(277.02 to<br>639.28)       | 11.57<br>(9.20 to<br>14.19)     | 19.60<br>(12.77 to<br>29.80)    | 21.11<br>(13.75 to<br>31.86)    | 19.43<br>(12.40 to<br>29.96)    |
| Liver cancer                         | 221.91<br>(175.71 to<br>274.93)       | 288.44<br>(183.42 to<br>457.24)       | 264.62<br>(175.48 to<br>402.43)       | 353.78<br>(204.48 to<br>596.72)       | 7.58<br>(6.16 to<br>9.40)       | 11.37<br>(7.56 to<br>17.27)     | 11.03<br>(7.49 to<br>16.35)     | 13.29<br>(8.05 to<br>21.07)     |
| Liver cancer due to hepatitis B      | 124.04<br>(95.65 to<br>156.81)        | 155.40<br>(98.23 to<br>249.21)        | 143.16<br>(93.31 to<br>222.21)        | 189.43<br>(109.79 to<br>322.52)       | 4.01<br>(3.15 to<br>5.01)       | 5.73<br>(3.75 to<br>8.64)       | 5.56<br>(3.74 to<br>8.32)       | 6.68<br>(4.05 to<br>10.61)      |
| Liver cancer due to hepatitis C      | 28.53<br>(22.32 to<br>36.24)          | 40.49<br>(25.96 to<br>61.81)          | 38.98<br>(25.57 to<br>58.83)          | 47.18<br>(27.93 to<br>74.46)          | 1.23<br>(0.98 to<br>1.56)       | 2.05<br>(1.30 to<br>3.08)       | 2.07<br>(1.38 to<br>3.07)       | 2.24<br>(1.35 to<br>3.49)       |
| Liver cancer due to alcohol use      | 16.72<br>(12.36 to<br>21.95)          | 22.88<br>(13.35 to<br>37.51)          | 19.56<br>(11.98 to<br>31.28)          | 30.30<br>(16.31 to<br>52.23)          | 0.63<br>(0.48 to<br>0.83)       | 0.96<br>(0.59 to<br>1.53)       | 0.87<br>(0.55 to<br>1.36)       | 1.19<br>(0.69 to<br>2.01)       |
| Liver cancer due to other causes     | 52.62<br>(39.58 to<br>66.92)          | 69.68<br>(41.29 to<br>115.31)         | 62.92<br>(38.37 to<br>102.09)         | 86.87<br>(46.72 to<br>152.67)         | 1.72<br>(1.34 to<br>2.14)       | 2.65<br>(1.58 to<br>4.48)       | 2.53<br>(1.55 to<br>4.19)       | 3.17<br>(1.74 to<br>5.68)       |
| Gallbladder and biliary tract cancer | 34.68<br>(24.98 to<br>45.88)          | 29.38<br>(20.87 to<br>38.14)          | 31.90<br>(22.48 to<br>41.54)          | 27.82<br>(19.94 to<br>35.95)          | 1.58<br>(1.14 to<br>2.10)       | 1.54<br>(1.08 to<br>2.02)       | 1.75<br>(1.21 to<br>2.27)       | 1.43<br>(0.99 to<br>1.86)       |
| Pancreatic cancer                    | 165.12<br>(132.59 to<br>200.17)       | 245.81<br>(177.52 to<br>341.34)       | 263.58<br>(192.26 to<br>359.19)       | 244.46<br>(173.68 to<br>343.68)       | 7.18<br>(5.82 to<br>8.71)       | 11.96<br>(8.58 to<br>16.54)     | 13.39<br>(9.81 to<br>18.25)     | 11.55<br>(8.26 to<br>16.23)     |
| Larynx cancer                        | 22.60<br>(18.51 to<br>27.35)          | 25.89<br>(16.54 to<br>43.50)          | 18.22<br>(13.00 to<br>26.85)          | 32.42<br>(18.78 to<br>60.51)          | 0.93<br>(0.77 to<br>1.10)       | 1.20<br>(0.80 to<br>1.90)       | 0.94<br>(0.68 to<br>1.30)       | 1.40<br>(0.86 to<br>2.44)       |
| Tracheal, bronchus, and lung cancer  | 245.79<br>(197.00 to<br>299.72)       | 265.89<br>(170.33 to<br>405.80)       | 211.02<br>(146.98 to<br>292.86)       | 356.66<br>(213.31 to<br>562.69)       | 9.10<br>(7.42 to<br>10.83)      | 11.06<br>(7.30 to<br>16.28)     | 9.47<br>(6.62 to<br>12.83)      | 14.13<br>(8.82 to<br>21.67)     |
| Malignant skin melanoma              | 67.22<br>(44.13 to<br>99.15)          | 84.20<br>(55.31 to<br>122.55)         | 101.82<br>(67.38 to<br>148.79)        | 78.54<br>(51.87 to<br>114.08)         | 2.61<br>(1.77 to<br>3.90)       | 3.89<br>(2.49 to<br>5.75)       | 4.95<br>(3.26 to<br>7.33)       | 3.51<br>(2.26 to<br>5.20)       |
| Non-melanoma skin cancer             | 36.12<br>(28.50 to<br>44.80)          | 51.06<br>(40.69 to<br>62.92)          | 49.59<br>(39.88 to<br>60.87)          | 48.59<br>(38.66 to<br>59.81)          | 1.83<br>(1.49 to<br>2.20)       | 3.15<br>(2.34 to<br>3.95)       | 3.30<br>(2.53 to<br>4.11)       | 2.87<br>(2.12 to<br>3.60)       |
| Breast cancer                        | 458.84<br>(333.62 to<br>617.29)       | 559.39<br>(382.48 to<br>819.02)       | 549.66<br>(379.96 to<br>792.56)       | 585.37<br>(394.18 to<br>873.03)       | 16.83<br>(12.30 to<br>22.47)    | 23.99<br>(16.54 to<br>35.28)    | 24.68<br>(17.29 to<br>35.61)    | 24.40<br>(16.46 to<br>36.42)    |
| Cervical cancer                      | 200.25<br>(109.19 to<br>284.69)       | 176.86<br>(101.00 to<br>257.40)       | 154.22<br>(88.84 to<br>224.61)        | 179.30<br>(102.83 to<br>264.31)       | 6.13<br>(3.59 to<br>8.61)       | 5.76<br>(3.54 to<br>8.05)       | 5.12<br>(3.11 to<br>7.16)       | 5.76<br>(3.52 to<br>8.18)       |

|                   |                                |                                 |                                 |                                 |                            |                              |                              |                              |
|-------------------|--------------------------------|---------------------------------|---------------------------------|---------------------------------|----------------------------|------------------------------|------------------------------|------------------------------|
|                   | 113.60<br>(82.48 to<br>152.60) | 136.87<br>(100.60 to<br>181.59) | 118.64<br>(87.11 to<br>157.91)  | 136.14<br>(99.48 to<br>182.20)  | 4.44<br>(3.29 to<br>5.91)  | 5.97<br>(4.43 to<br>7.86)    | 5.32<br>(3.93 to<br>7.01)    | 5.85<br>(4.32 to<br>7.79)    |
| Uterine cancer    |                                |                                 |                                 |                                 |                            |                              |                              |                              |
|                   | 113.49<br>(83.52 to<br>149.48) | 128.37<br>(82.94 to<br>189.42)  | 139.78<br>(93.67 to<br>202.79)  | 130.96<br>(82.84 to<br>199.57)  | 3.68<br>(2.76 to<br>4.86)  | 4.62<br>(3.08 to<br>6.92)    | 5.17<br>(3.53 to<br>7.52)    | 4.63<br>(3.00 to<br>7.19)    |
| Ovarian cancer    |                                |                                 |                                 |                                 |                            |                              |                              |                              |
|                   | 137.54<br>(95.05 to<br>184.15) | 279.28<br>(195.47 to<br>370.18) | 325.11<br>(234.08 to<br>431.24) | 253.29<br>(177.09 to<br>336.13) | 8.70<br>(6.25 to<br>11.83) | 19.61<br>(13.69 to<br>26.72) | 23.78<br>(17.28 to<br>32.03) | 17.34<br>(11.88 to<br>23.58) |
| Prostate cancer   |                                |                                 |                                 |                                 |                            |                              |                              |                              |
|                   | 27.45<br>(20.65 to<br>35.67)   | 28.49<br>(21.76 to<br>37.29)    | 26.58<br>(20.12 to<br>34.69)    | 28.08<br>(21.40 to<br>36.51)    | 0.78<br>(0.59 to<br>1.01)  | 0.93<br>(0.71 to<br>1.21)    | 0.91<br>(0.68 to<br>1.18)    | 0.89<br>(0.67 to<br>1.15)    |
| Testicular cancer |                                |                                 |                                 |                                 |                            |                              |                              |                              |

| Samoa                           |                                                   |                                                   |                                                  |                                                    |                                            |                                            |                                            |                                            |
|---------------------------------|---------------------------------------------------|---------------------------------------------------|--------------------------------------------------|----------------------------------------------------|--------------------------------------------|--------------------------------------------|--------------------------------------------|--------------------------------------------|
| Cause                           | YLLs (actual counts)                              |                                                   |                                                  |                                                    | Deaths (actual counts)                     |                                            |                                            |                                            |
|                                 | 2016                                              | 2040 Forecast                                     | 2040 Better Scenario                             | 2040 Worse Scenario                                | 2016                                       | 2040 Forecast                              | 2040 Better Scenario                       | 2040 Worse Scenario                        |
| Kidney cancer                   | 27.71<br>(21.45 to 35.00)                         | 37.71<br>(28.64 to 47.36)                         | 42.79<br>(32.55 to 53.99)                        | 36.47<br>(27.57 to 46.34)                          | 1.04<br>(0.81 to 1.33)                     | 1.66<br>(1.26 to 2.12)                     | 2.01<br>(1.52 to 2.57)                     | 1.55<br>(1.16 to 1.96)                     |
| Bladder cancer                  | 44.60<br>(36.64 to 52.91)                         | 56.98<br>(39.12 to 83.38)                         | 55.72<br>(38.88 to 80.05)                        | 57.86<br>(38.72 to 87.49)                          | 2.06<br>(1.72 to 2.40)                     | 3.00<br>(2.11 to 4.38)                     | 3.11<br>(2.22 to 4.48)                     | 2.93<br>(1.99 to 4.41)                     |
| Brain and nervous system cancer | 133.10<br>(89.14 to 186.38)                       | 171.31<br>(114.16 to 240.42)                      | 168.32<br>(114.21 to 253.27)                     | 169.84<br>(112.85 to 239.49)                       | 3.20<br>(2.25 to 4.50)                     | 4.53<br>(3.30 to 6.36)                     | 4.78<br>(3.51 to 6.83)                     | 4.37<br>(3.19 to 6.14)                     |
| Thyroid cancer                  | 50.68<br>(40.29 to 62.08)                         | 61.72<br>(44.59 to 85.55)                         | 54.08<br>(39.52 to 73.59)                        | 67.50<br>(47.84 to 94.50)                          | 2.07<br>(1.65 to 2.59)                     | 2.86<br>(2.05 to 3.99)                     | 2.62<br>(1.92 to 3.63)                     | 3.04<br>(2.13 to 4.29)                     |
| Mesothelioma                    | 7.25<br>(5.32 to 9.64)                            | 8.62<br>(6.41 to 11.34)                           | 8.65<br>(6.37 to 11.56)                          | 8.32<br>(6.22 to 10.90)                            | 0.26<br>(0.19 to 0.35)                     | 0.26<br>(0.26 to 0.47)                     | 0.35<br>(0.27 to 0.50)                     | 0.33<br>(0.25 to 0.44)                     |
| Hodgkin lymphoma                | 16.60<br>(8.08 to 23.90)                          | 14.89<br>(7.52 to 21.46)                          | 11.55<br>(5.90 to 16.60)                         | 15.14<br>(7.91 to 21.72)                           | 0.47<br>(0.23 to 0.68)                     | 0.46<br>(0.24 to 0.65)                     | 0.37<br>(0.19 to 0.52)                     | 0.46<br>(0.24 to 0.66)                     |
| Non-Hodgkin lymphoma            | 166.32<br>(114.42 to 205.21)                      | 207.55<br>(149.63 to 263.40)                      | 219.28<br>(157.85 to 278.13)                     | 212.99<br>(152.31 to 272.31)                       | 5.49<br>(3.60 to 6.80)                     | 7.96<br>(5.58 to 10.23)                    | 8.86<br>(6.31 to 11.30)                    | 7.94<br>(5.50 to 10.34)                    |
| Multiple myeloma                | 49.18<br>(33.87 to 70.06)                         | 70.49<br>(46.95 to 103.67)                        | 76.98<br>(51.28 to 111.58)                       | 72.16<br>(47.62 to 108.28)                         | 2.01<br>(1.44 to 2.83)                     | 3.27<br>(2.25 to 4.77)                     | 3.72<br>(2.55 to 5.32)                     | 3.25<br>(2.22 to 4.83)                     |
| Leukemia                        | 232.92<br>(166.40 to 285.60)                      | 253.45<br>(184.73 to 326.20)                      | 237.00<br>(175.58 to 299.86)                     | 271.08<br>(192.16 to 354.25)                       | 5.83<br>(4.35 to 6.93)                     | 7.40<br>(5.70 to 9.38)                     | 7.50<br>(5.84 to 9.46)                     | 7.72<br>(5.84 to 9.96)                     |
| Acute lymphoid leukemia         | 40.71<br>(26.14 to 60.64)                         | 39.99<br>(25.71 to 59.95)                         | 37.19<br>(24.19 to 55.25)                        | 42.15<br>(27.05 to 63.73)                          | 0.79<br>(0.55 to 1.09)                     | 0.88<br>(0.61 to 1.21)                     | 0.88<br>(0.62 to 1.21)                     | 0.91<br>(0.64 to 1.30)                     |
| Chronic lymphoid leukemia       | 6.05<br>(3.59 to 8.04)                            | 7.02<br>(4.32 to 9.64)                            | 7.26<br>(4.55 to 9.94)                           | 7.25<br>(4.34 to 10.22)                            | 0.26<br>(0.16 to 0.34)                     | 0.36<br>(0.23 to 0.51)                     | 0.40<br>(0.26 to 0.57)                     | 0.36<br>(0.22 to 0.51)                     |
| Acute myeloid leukemia          | 74.03<br>(48.20 to 102.25)                        | 97.78<br>(64.66 to 136.29)                        | 100.86<br>(68.42 to 137.18)                      | 102.66<br>(66.05 to 144.18)                        | 1.86<br>(1.22 to 2.49)                     | 2.97<br>(1.98 to 4.00)                     | 3.36<br>(2.33 to 4.46)                     | 3.01<br>(1.99 to 4.09)                     |
| Chronic myeloid leukemia        | 23.92<br>(15.86 to 35.64)                         | 20.06<br>(12.37 to 30.89)                         | 19.59<br>(12.11 to 29.84)                        | 21.56<br>(13.10 to 33.95)                          | 0.81<br>(0.55 to 1.16)                     | 0.77<br>(0.49 to 1.16)                     | 0.78<br>(0.49 to 1.18)                     | 0.80<br>(0.51 to 1.22)                     |
| Other leukemia                  | 88.21<br>(49.48 to 111.90)                        | 88.61<br>(55.04 to 117.23)                        | 72.09<br>(45.70 to 95.94)                        | 97.46<br>(59.28 to 129.47)                         | 2.11<br>(1.33 to 2.63)                     | 2.43<br>(1.76 to 3.21)                     | 2.08<br>(1.53 to 2.80)                     | 2.63<br>(1.87 to 3.55)                     |
| Other neoplasms                 | 240.34<br>(198.29 to 289.66)                      | 313.87<br>(262.62 to 380.48)                      | 317.14<br>(263.21 to 385.21)                     | 305.07<br>(255.76 to 365.84)                       | 7.71<br>(6.15 to 9.63)                     | 11.81<br>(9.40 to 14.65)                   | 12.71<br>(10.19 to 15.76)                  | 11.12<br>(8.79 to 13.66)                   |
| <b>Cardiovascular diseases</b>  | <b>9,314.75</b><br><b>(7,797.93 to 10,755.73)</b> | <b>9,235.52</b><br><b>(6,700.91 to 13,165.49)</b> | <b>5,379.16</b><br><b>(3,999.12 to 7,784.33)</b> | <b>12,315.36</b><br><b>(9,010.77 to 16,901.75)</b> | <b>439.26</b><br><b>(377.80 to 498.04)</b> | <b>511.07</b><br><b>(380.32 to 745.64)</b> | <b>332.58</b><br><b>(251.79 to 498.96)</b> | <b>635.88</b><br><b>(470.99 to 891.39)</b> |
| Rheumatic heart disease         | 333.97<br>(241.40 to 444.28)                      | 199.52<br>(139.17 to 272.49)                      | 146.10<br>(100.66 to 200.05)                     | 203.34<br>(144.04 to 277.03)                       | 11.13<br>(8.16 to 14.70)                   | 8.46<br>(5.95 to 11.44)                    | 6.80<br>(4.80 to 9.19)                     | 8.22<br>(5.73 to 11.18)                    |
| Ischemic heart disease          | 4,582.51<br>(3,745.92 to 5,381.74)                | 4,228.37<br>(2,281.19 to 7,554.12)                | 2,158.24<br>(1,157.76 to 4,053.65)               | 6,023.89<br>(3,274.44 to 10,235.15)                | 220.02<br>(184.99 to 252.48)               | 234.63<br>(131.33 to 422.64)               | 134.84<br>(73.09 to 270.99)                | 310.35<br>(171.31 to 540.90)               |
| Stroke                          | 2,841.26<br>(2,318.58 to 3,407.03)                | 2,673.45<br>(1,667.38 to 4,592.44)                | 1,312.44<br>(818.86 to 2,439.77)                 | 3,806.07<br>(2,375.78 to 6,302.72)                 | 135.54<br>(111.74 to 159.48)               | 150.06<br>(93.78 to 281.77)                | 85.16<br>(51.92 to 169.58)                 | 196.94<br>(121.80 to 358.73)               |
| Ischemic stroke                 | 795.42<br>(641.15 to 971.15)                      | 763.69<br>(387.00 to 1,987.53)                    | 450.94<br>(228.70 to 1,214.23)                   | 989.76<br>(484.12 to 2,561.45)                     | 47.29<br>(38.34 to 56.75)                  | 52.97<br>(25.78 to 145.32)                 | 35.07<br>(16.61 to 100.51)                 | 64.34<br>(29.62 to 173.21)                 |



|                                |                                       |                                       |                                   |                                       |                               |                               |                              |                                |
|--------------------------------|---------------------------------------|---------------------------------------|-----------------------------------|---------------------------------------|-------------------------------|-------------------------------|------------------------------|--------------------------------|
| Intracerebral hemorrhage       | 2,045.85<br>(1,644.95 to<br>2,460.01) | 1,909.75<br>(1,102.35 to<br>3,332.43) | 861.50<br>(513.82 to<br>1,473.98) | 2,816.31<br>(1,610.51 to<br>4,815.11) | 88.25<br>(70.75 to<br>105.12) | 97.09<br>(58.63 to<br>169.15) | 50.09<br>(30.81 to<br>88.88) | 132.60<br>(78.29 to<br>238.68) |
| Hypertensive heart disease     | 520.77<br>(386.02 to<br>686.70)       | 743.05<br>(529.62 to<br>1,049.92)     | 535.14<br>(397.46 to<br>706.92)   | 856.65<br>(595.53 to<br>1,269.30)     | 26.52<br>(19.74 to<br>34.56)  | 44.33<br>(31.19 to<br>63.18)  | 34.38<br>(25.45 to<br>45.36) | 48.64<br>(33.40 to<br>71.62)   |
| Cardiomyopathy and myocarditis | 307.84<br>(191.18 to<br>413.71)       | 342.05<br>(212.31 to<br>494.19)       | 334.90<br>(214.03 to<br>480.81)   | 338.94<br>(206.78 to<br>495.86)       | 11.52<br>(7.00 to<br>15.55)   | 15.24<br>(9.12 to<br>22.21)   | 16.11<br>(9.78 to<br>23.56)  | 14.48<br>(8.54 to<br>21.22)    |
| Myocarditis                    | 78.44<br>(42.00 to<br>135.02)         | 85.06<br>(45.62 to<br>146.21)         | 79.14<br>(43.16 to<br>137.06)     | 83.21<br>(44.35 to<br>144.27)         | 3.06<br>(1.60 to<br>5.27)     | 3.91<br>(2.05 to<br>6.82)     | 3.91<br>(2.09 to<br>6.80)    | 3.68<br>(1.90 to<br>6.45)      |

| Samoa                                                         |                                                  |                                                  |                                                |                                                  |                                         |                                         |                                         |                                          |
|---------------------------------------------------------------|--------------------------------------------------|--------------------------------------------------|------------------------------------------------|--------------------------------------------------|-----------------------------------------|-----------------------------------------|-----------------------------------------|------------------------------------------|
| Cause                                                         | YLLs (actual counts)                             |                                                  |                                                |                                                  | Deaths (actual counts)                  |                                         |                                         |                                          |
|                                                               | 2016                                             | 2040 Forecast                                    | 2040 Better Scenario                           | 2040 Worse Scenario                              | 2016                                    | 2040 Forecast                           | 2040 Better Scenario                    | 2040 Worse Scenario                      |
| Alcoholic cardiomyopathy                                      | 14.76<br>(5.23 to 22.70)                         | 14.46<br>(5.17 to 22.50)                         | 14.58<br>(5.15 to 22.99)                       | 15.43<br>(5.50 to 23.82)                         | 0.59<br>(0.21 to 0.92)                  | 0.65<br>(0.23 to 1.02)                  | 0.70<br>(0.24 to 1.12)                  | 0.66<br>(0.23 to 1.05)                   |
| Other cardiomyopathy                                          | 214.65<br>(131.90 to 309.77)                     | 242.53<br>(147.28 to 370.82)                     | 241.18<br>(147.55 to 364.20)                   | 240.30<br>(142.25 to 369.33)                     | 7.88<br>(4.82 to 11.20)                 | 10.69<br>(6.12 to 17.35)                | 11.50<br>(6.70 to 18.26)                | 10.14<br>(5.75 to 16.68)                 |
| Atrial fibrillation and flutter                               | 47.96<br>(36.80 to 62.20)                        | 79.87<br>(55.73 to 107.94)                       | 84.40<br>(60.81 to 113.12)                     | 77.35<br>(53.17 to 106.11)                       | 4.61<br>(3.51 to 6.10)                  | 7.74<br>(4.98 to 10.60)                 | 8.70<br>(5.93 to 11.84)                 | 7.22<br>(4.57 to 10.07)                  |
| Aortic aneurysm                                               | 104.38<br>(80.92 to 138.88)                      | 116.03<br>(88.48 to 154.92)                      | 115.60<br>(88.95 to 154.96)                    | 117.90<br>(88.27 to 159.30)                      | 5.50<br>(4.31 to 7.19)                  | 6.99<br>(5.17 to 9.31)                  | 7.61<br>(5.74 to 10.09)                 | 6.72<br>(4.88 to 8.96)                   |
| Peripheral artery disease                                     | 11.48<br>(7.38 to 18.76)                         | 22.57<br>(13.00 to 37.96)                        | 24.72<br>(14.23 to 44.02)                      | 23.50<br>(13.23 to 39.77)                        | 0.75<br>(0.47 to 1.29)                  | 0.75<br>(0.94 to 3.02)                  | 1.69<br>(1.14 to 3.83)                  | 2.06<br>(0.94 to 2.92)                   |
| Endocarditis                                                  | 147.87<br>(111.91 to 191.66)                     | 194.41<br>(138.77 to 260.16)                     | 180.99<br>(130.04 to 243.19)                   | 193.87<br>(137.99 to 260.01)                     | 5.87<br>(4.45 to 7.59)                  | 9.01<br>(6.32 to 12.38)                 | 9.15<br>(6.46 to 12.53)                 | 8.58<br>(5.93 to 11.79)                  |
| Other cardiovascular and circulatory diseases                 | 416.70<br>(219.14 to 582.09)                     | 636.19<br>(340.86 to 911.38)                     | 486.64<br>(265.37 to 677.85)                   | 673.84<br>(354.58 to 976.68)                     | 17.80<br>(9.38 to 24.33)                | 32.93<br>(17.78 to 47.32)               | 27.78<br>(15.15 to 39.21)               | 33.08<br>(17.27 to 48.53)                |
| <b>Chronic respiratory diseases</b>                           | <b>1,580.17</b><br><b>(1,310.77 to 1,891.31)</b> | <b>1,509.94</b><br><b>(1,172.31 to 1,926.04)</b> | <b>1,159.42</b><br><b>(926.24 to 1,430.63)</b> | <b>1,820.39</b><br><b>(1,350.89 to 2,398.96)</b> | <b>69.03</b><br><b>(58.01 to 82.57)</b> | <b>74.37</b><br><b>(56.87 to 95.65)</b> | <b>61.29</b><br><b>(48.26 to 75.74)</b> | <b>85.14</b><br><b>(63.24 to 113.36)</b> |
| Chronic obstructive pulmonary disease                         | 836.86<br>(652.80 to 1,035.51)                   | 873.27<br>(621.95 to 1,207.73)                   | 625.56<br>(473.28 to 820.23)                   | 1,096.26<br>(741.38 to 1,605.61)                 | 40.34<br>(31.87 to 49.54)               | 47.48<br>(33.70 to 65.25)               | 37.63<br>(27.80 to 49.50)               | 55.37<br>(37.43 to 80.17)                |
| Pneumoconiosis                                                | 4.45<br>(3.02 to 6.28)                           | 4.39<br>(2.89 to 6.28)                           | 4.25<br>(2.75 to 5.99)                         | 4.40<br>(2.92 to 6.29)                           | 0.26<br>(0.17 to 0.36)                  | 0.31<br>(0.19 to 0.47)                  | 0.33<br>(0.20 to 0.49)                  | 0.30<br>(0.18 to 0.45)                   |
| Silicosis                                                     | 0.63<br>(0.35 to 1.03)                           | 0.56<br>(0.30 to 0.93)                           | 0.50<br>(0.26 to 0.86)                         | 0.53<br>(0.29 to 0.89)                           | 0.04<br>(0.02 to 0.07)                  | 0.04<br>(0.02 to 0.08)                  | 0.04<br>(0.02 to 0.08)                  | 0.04<br>(0.02 to 0.07)                   |
| Asbestosis                                                    | 1.19<br>(0.73 to 1.91)                           | 1.44<br>(0.87 to 2.39)                           | 1.48<br>(0.88 to 2.41)                         | 1.38<br>(0.82 to 2.27)                           | 0.05<br>(0.03 to 0.09)                  | 0.08<br>(0.04 to 0.14)                  | 0.09<br>(0.05 to 0.16)                  | 0.07<br>(0.04 to 0.13)                   |
| Coal workers pneumoconiosis                                   | 0.08<br>(0.04 to 0.15)                           | 0.09<br>(0.04 to 0.18)                           | 0.07<br>(0.03 to 0.14)                         | 0.10<br>(0.05 to 0.19)                           | 0.01<br>(0.00 to 0.01)                  | 0.01<br>(0.00 to 0.02)                  | 0.01<br>(0.00 to 0.02)                  | 0.01<br>(0.00 to 0.02)                   |
| Other pneumoconiosis                                          | 2.54<br>(1.67 to 3.63)                           | 2.30<br>(1.47 to 3.32)                           | 2.20<br>(1.38 to 3.25)                         | 2.40<br>(1.51 to 3.51)                           | 0.16<br>(0.10 to 0.23)                  | 0.18<br>(0.10 to 0.28)                  | 0.19<br>(0.11 to 0.29)                  | 0.17<br>(0.10 to 0.28)                   |
| Asthma                                                        | 468.87<br>(344.47 to 670.86)                     | 310.06<br>(172.78 to 523.58)                     | 225.49<br>(127.27 to 383.60)                   | 395.32<br>(215.00 to 669.55)                     | 20.20<br>(14.90 to 28.92)               | 15.53<br>(8.47 to 26.25)                | 12.26<br>(6.73 to 20.87)                | 18.68<br>(10.01 to 31.68)                |
| Interstitial lung disease and pulmonary sarcoidosis           | 77.95<br>(42.99 to 117.21)                       | 96.51<br>(54.68 to 141.46)                       | 107.61<br>(63.95 to 156.05)                    | 93.34<br>(52.58 to 137.96)                       | 2.29<br>(1.27 to 3.43)                  | 3.34<br>(1.86 to 4.94)                  | 4.03<br>(2.32 to 5.87)                  | 3.11<br>(1.72 to 4.59)                   |
| Other chronic respiratory diseases                            | 192.03<br>(130.88 to 297.20)                     | 225.71<br>(151.92 to 348.93)                     | 196.50<br>(134.95 to 294.97)                   | 230.86<br>(153.37 to 359.56)                     | 5.95<br>(3.95 to 9.18)                  | 7.72<br>(5.13 to 11.90)                 | 7.04<br>(4.73 to 10.67)                 | 7.69<br>(4.97 to 12.06)                  |
| <b>Cirrhosis and other chronic liver diseases</b>             | <b>765.52</b><br><b>(584.94 to 973.81)</b>       | <b>855.62</b><br><b>(656.77 to 1,078.08)</b>     | <b>764.31</b><br><b>(589.64 to 952.54)</b>     | <b>862.07</b><br><b>(671.83 to 1,075.46)</b>     | <b>24.04</b><br><b>(18.55 to 30.09)</b> | <b>30.30</b><br><b>(23.93 to 37.50)</b> | <b>28.52</b><br><b>(22.53 to 34.99)</b> | <b>29.64</b><br><b>(23.59 to 36.50)</b>  |
| Cirrhosis and other chronic liver diseases due to hepatitis B | 303.34<br>(225.53 to 394.95)                     | 349.48<br>(262.70 to 452.52)                     | 323.15<br>(243.12 to 416.07)                   | 344.70<br>(262.34 to 443.10)                     | 13.04<br>(7.60 to 12.75)                | 13.01<br>(10.09 to 16.46)               | 12.57<br>(9.74 to 15.76)                | 12.49<br>(9.72 to 15.84)                 |
| Cirrhosis and other chronic liver diseases due to hepatitis C | 119.16<br>(86.51 to 155.19)                      | 134.48<br>(100.11 to 173.70)                     | 123.17<br>(91.56 to 159.94)                    | 133.21<br>(99.47 to 172.75)                      | 3.77<br>(2.78 to 4.83)                  | 4.72<br>(3.63 to 5.92)                  | 4.49<br>(3.47 to 5.63)                  | 4.57<br>(3.55 to 5.74)                   |

|                                                                |                                                      |                                                      |                                                      |                                                      |                                                   |                                                   |                                                   |                                                   |
|----------------------------------------------------------------|------------------------------------------------------|------------------------------------------------------|------------------------------------------------------|------------------------------------------------------|---------------------------------------------------|---------------------------------------------------|---------------------------------------------------|---------------------------------------------------|
|                                                                | 109.13<br>(78.95 to<br>144.15)                       | 115.92<br>(85.39 to<br>147.80)                       | 95.01<br>(70.74 to<br>122.61)                        | 127.51<br>(94.50 to<br>162.80)                       | 3.72<br>(2.78 to<br>4.74)                         | 4.47<br>(3.46 to<br>5.62)                         | 3.89<br>(3.03 to<br>4.87)                         | 4.72<br>(3.65 to<br>5.96)                         |
| Cirrhosis and other chronic liver diseases due to alcohol use  |                                                      |                                                      |                                                      |                                                      |                                                   |                                                   |                                                   |                                                   |
|                                                                | 233.89<br>(180.69 to<br>298.11)                      | 255.74<br>(198.77 to<br>322.22)                      | 222.98<br>(174.31 to<br>283.39)                      | 256.66<br>(197.73 to<br>325.50)                      | 6.51<br>(5.15 to<br>8.13)                         | 8.09<br>(6.49 to<br>10.14)                        | 7.57<br>(6.06 to<br>9.35)                         | 7.86<br>(6.29 to<br>9.85)                         |
| Cirrhosis and other chronic liver diseases due to other causes |                                                      |                                                      |                                                      |                                                      |                                                   |                                                   |                                                   |                                                   |
| <b>Digestive diseases</b>                                      | <b>581.56</b><br><b>(445.35 to</b><br><b>837.77)</b> | <b>624.70</b><br><b>(466.02 to</b><br><b>922.40)</b> | <b>511.99</b><br><b>(393.61 to</b><br><b>752.60)</b> | <b>657.52</b><br><b>(491.95 to</b><br><b>977.45)</b> | <b>23.16</b><br><b>(17.98 to</b><br><b>33.36)</b> | <b>29.86</b><br><b>(21.76 to</b><br><b>44.11)</b> | <b>26.41</b><br><b>(19.79 to</b><br><b>38.57)</b> | <b>30.12</b><br><b>(21.79 to</b><br><b>44.99)</b> |
|                                                                | 140.43<br>(90.82 to<br>237.93)                       | 108.30<br>(66.31 to<br>185.00)                       | 77.04<br>(47.50 to<br>132.01)                        | 114.30<br>(69.15 to<br>200.98)                       | 6.03<br>(4.01 to<br>9.97)                         | 5.61<br>(3.40 to<br>9.40)                         | 4.27<br>(2.64 to<br>7.17)                         | 5.70<br>(3.45 to<br>9.70)                         |
| Peptic ulcer disease                                           |                                                      |                                                      |                                                      |                                                      |                                                   |                                                   |                                                   |                                                   |

| Samoa                                      |                              |                                  |                                  |                                  |                           |                            |                             |                            |
|--------------------------------------------|------------------------------|----------------------------------|----------------------------------|----------------------------------|---------------------------|----------------------------|-----------------------------|----------------------------|
| Cause                                      | YLLs (actual counts)         |                                  |                                  |                                  | Deaths (actual counts)    |                            |                             |                            |
|                                            | 2016                         | 2040 Forecast                    | 2040 Better Scenario             | 2040 Worse Scenario              | 2016                      | 2040 Forecast              | 2040 Better Scenario        | 2040 Worse Scenario        |
| Gastritis and duodenitis                   | 4.09<br>(2.69 to 7.45)       | 5.22<br>(3.43 to 9.73)           | 4.64<br>(3.00 to 8.83)           | 5.08<br>(3.31 to 9.63)           | 0.19<br>(0.13 to 0.34)    | 0.28<br>(0.18 to 0.53)     | 0.27<br>(0.17 to 0.51)      | 0.26<br>(0.17 to 0.48)     |
| Appendicitis                               | 58.73<br>(42.46 to 88.77)    | 58.79<br>(42.76 to 92.05)        | 46.30<br>(33.57 to 73.64)        | 59.28<br>(42.45 to 92.46)        | 1.89<br>(1.39 to 2.86)    | 2.30<br>(1.65 to 3.57)     | 1.97<br>(1.45 to 3.04)      | 2.22<br>(1.58 to 3.44)     |
| Paralytic ileus and intestinal obstruction | 80.60<br>(53.69 to 135.20)   | 91.92<br>(61.55 to 155.27)       | 82.95<br>(56.40 to 140.51)       | 90.23<br>(60.16 to 153.17)       | 2.81<br>(2.00 to 4.53)    | 4.09<br>(2.74 to 6.95)     | 4.13<br>(2.83 to 6.97)      | 3.80<br>(2.54 to 6.49)     |
| Inguinal, femoral, and abdominal hernia    | 13.75<br>(9.39 to 24.04)     | 13.24<br>(8.90 to 23.49)         | 12.05<br>(8.09 to 21.17)         | 12.68<br>(8.44 to 22.72)         | 0.72<br>(0.50 to 1.22)    | 0.81<br>(0.53 to 1.45)     | 0.79<br>(0.52 to 1.38)      | 0.75<br>(0.48 to 1.32)     |
| Inflammatory bowel disease                 | 31.68<br>(21.79 to 50.20)    | 36.70<br>(25.71 to 57.51)        | 36.27<br>(25.76 to 56.39)        | 35.59<br>(24.90 to 56.00)        | 1.09<br>(0.79 to 1.67)    | 1.54<br>(1.08 to 2.36)     | 1.63<br>(1.15 to 2.47)      | 1.44<br>(0.99 to 2.19)     |
| Vascular intestinal disorders              | 34.96<br>(20.40 to 56.03)    | 48.92<br>(28.03 to 77.05)        | 46.91<br>(27.24 to 73.61)        | 46.82<br>(26.58 to 75.72)        | 1.90<br>(1.08 to 3.03)    | 3.09<br>(1.66 to 4.92)     | 3.14<br>(1.72 to 4.97)      | 2.86<br>(1.52 to 4.64)     |
| Gallbladder and biliary diseases           | 82.44<br>(61.17 to 119.70)   | 102.56<br>(53.16 to 194.96)      | 76.16<br>(40.42 to 142.66)       | 129.32<br>(66.85 to 242.48)      | 3.60<br>(2.70 to 5.23)    | 5.32<br>(2.72 to 10.23)    | 4.23<br>(2.19 to 7.94)      | 6.35<br>(3.26 to 12.07)    |
| Pancreatitis                               | 47.41<br>(34.51 to 70.32)    | 58.99<br>(35.96 to 108.69)       | 46.45<br>(29.98 to 82.47)        | 65.09<br>(37.74 to 123.54)       | 1.57<br>(1.16 to 2.34)    | 2.21<br>(1.44 to 3.81)     | 1.89<br>(1.29 to 3.14)      | 2.32<br>(1.45 to 4.25)     |
| Other digestive diseases                   | 87.47<br>(63.80 to 125.06)   | 100.07<br>(74.82 to 142.66)      | 83.23<br>(62.35 to 117.74)       | 99.12<br>(72.45 to 141.81)       | 3.37<br>(2.51 to 4.88)    | 4.61<br>(3.38 to 6.67)     | 4.10<br>(3.01 to 5.88)      | 4.40<br>(3.16 to 6.49)     |
| Neurological disorders                     | 728.15<br>(611.57 to 866.44) | 1,182.38<br>(834.39 to 1,738.21) | 1,135.72<br>(899.42 to 1,774.06) | 1,238.52<br>(841.33 to 1,842.36) | 56.92<br>(47.25 to 69.09) | 98.48<br>(62.87 to 149.09) | 111.87<br>(77.04 to 162.93) | 99.26<br>(61.33 to 152.99) |
| Alzheimer's disease and other dementias    | 516.13<br>(420.40 to 633.56) | 902.72<br>(569.18 to 1,435.00)   | 966.49<br>(635.83 to 1,498.95)   | 953.74<br>(574.57 to 1,532.99)   | 50.04<br>(40.68 to 61.52) | 87.29<br>(52.79 to 137.16) | 98.92<br>(64.90 to 149.94)  | 88.80<br>(51.09 to 142.31) |
| Parkinson's disease                        | 36.06<br>(27.12 to 47.31)    | 71.46<br>(51.59 to 93.93)        | 92.62<br>(68.05 to 120.12)       | 63.77<br>(45.86 to 84.41)        | 2.88<br>(2.16 to 3.89)    | 5.88<br>(4.03 to 7.92)     | 5.78<br>(3.51 to 10.49)     | 5.14<br>(3.51 to 6.95)     |
| Epilepsy                                   | 110.69<br>(84.47 to 141.31)  | 124.60<br>(85.00 to 175.74)      | 88.32<br>(60.72 to 122.21)       | 139.28<br>(92.96 to 195.87)      | 2.16<br>(1.69 to 2.70)    | 2.59<br>(1.84 to 3.55)     | 1.91<br>(1.37 to 2.59)      | 2.85<br>(1.99 to 3.95)     |
| Multiple sclerosis                         | 4.74<br>(3.36 to 7.09)       | 5.17<br>(3.62 to 7.89)           | 5.33<br>(3.73 to 8.11)           | 5.22<br>(3.68 to 7.98)           | 0.14<br>(0.10 to 0.21)    | 0.17<br>(0.12 to 0.25)     | 0.18<br>(0.13 to 0.26)      | 0.16<br>(0.12 to 0.25)     |
| Motor neuron disease                       | 8.94<br>(5.78 to 15.95)      | 13.43<br>(8.81 to 23.46)         | 15.12<br>(9.99 to 26.72)         | 12.80<br>(8.34 to 22.79)         | 0.32<br>(0.21 to 0.57)    | 0.56<br>(0.36 to 0.99)     | 0.65<br>(0.43 to 1.17)      | 0.52<br>(0.33 to 0.95)     |
| Other neurological disorders               | 51.58<br>(36.11 to 69.85)    | 64.99<br>(45.51 to 85.81)        | 67.84<br>(49.06 to 88.49)        | 63.71<br>(44.56 to 84.71)        | 1.37<br>(1.00 to 1.79)    | 2.00<br>(1.45 to 2.60)     | 2.28<br>(1.67 to 2.93)      | 1.89<br>(1.37 to 2.47)     |
| Mental disorders                           | 88.63<br>(67.74 to 115.46)   | 133.10<br>(102.65 to 173.82)     | 130.31<br>(100.23 to 169.61)     | 133.05<br>(102.28 to 174.53)     | 2.21<br>(1.71 to 2.83)    | 3.62<br>(2.86 to 4.58)     | 3.76<br>(2.98 to 4.76)      | 3.51<br>(2.77 to 4.49)     |
| Alcohol use disorders                      | 38.64<br>(23.83 to 59.37)    | 35.06<br>(20.10 to 56.18)        | 32.76<br>(18.78 to 53.06)        | 36.08<br>(20.86 to 58.20)        | 0.99<br>(0.60 to 1.50)    | 0.98<br>(0.59 to 1.50)     | 0.95<br>(0.58 to 1.46)      | 0.99<br>(0.59 to 1.51)     |
| Drug use disorders                         | 49.59<br>(37.62 to 66.24)    | 97.49<br>(73.86 to 127.76)       | 97.01<br>(74.00 to 127.03)       | 96.40<br>(72.75 to 126.85)       | 1.21<br>(0.96 to 1.57)    | 2.63<br>(2.07 to 3.32)     | 2.79<br>(2.22 to 3.51)      | 2.52<br>(1.96 to 3.17)     |
| Opioid use disorders                       | 28.33<br>(19.85 to 41.23)    | 46.26<br>(31.41 to 71.18)        | 45.18<br>(30.84 to 69.16)        | 46.09<br>(31.26 to 71.22)        | 0.60<br>(0.43 to 0.86)    | 1.04<br>(0.74 to 1.58)     | 1.06<br>(0.76 to 1.60)      | 1.01<br>(0.71 to 1.55)     |

|                           |                              |                              |                              |                              |                           |                           |                           |                           |
|---------------------------|------------------------------|------------------------------|------------------------------|------------------------------|---------------------------|---------------------------|---------------------------|---------------------------|
| Cocaine use disorders     | 3.01<br>(1.72 to<br>4.44)    | 7.51<br>(4.48 to<br>11.32)   | 6.92<br>(4.14 to<br>10.69)   | 7.51<br>(4.49 to<br>11.40)   | 0.07<br>(0.04 to<br>0.10) | 0.18<br>(0.11 to<br>0.26) | 0.17<br>(0.10 to<br>0.25) | 0.18<br>(0.11 to<br>0.26) |
| Amphetamine use disorders | 1.40<br>(0.63 to<br>2.25)    | 4.82<br>(1.87 to<br>8.56)    | 4.52<br>(1.60 to<br>8.37)    | 4.82<br>(1.91 to<br>8.55)    | 0.03<br>(0.02 to<br>0.05) | 0.11<br>(0.05 to<br>0.17) | 0.10<br>(0.04 to<br>0.17) | 0.11<br>(0.05 to<br>0.17) |
| Other drug use disorders  | 16.85<br>(11.59 to<br>22.04) | 38.90<br>(26.66 to<br>52.27) | 40.40<br>(27.62 to<br>54.08) | 37.97<br>(25.94 to<br>50.92) | 0.51<br>(0.37 to<br>0.64) | 1.30<br>(0.93 to<br>1.71) | 1.46<br>(1.03 to<br>1.91) | 1.22<br>(0.86 to<br>1.59) |
| Eating disorders          | 0.40<br>(0.26 to<br>0.58)    | 0.56<br>(0.35 to<br>0.84)    | 0.54<br>(0.34 to<br>0.82)    | 0.56<br>(0.35 to<br>0.84)    | 0.01<br>(0.01 to<br>0.01) | 0.01<br>(0.01 to<br>0.02) | 0.01<br>(0.01 to<br>0.02) | 0.01<br>(0.01 to<br>0.02) |

| Samoa                                                      |                                           |                                            |                                           |                                            |                                     |                                     |                                     |                                     |
|------------------------------------------------------------|-------------------------------------------|--------------------------------------------|-------------------------------------------|--------------------------------------------|-------------------------------------|-------------------------------------|-------------------------------------|-------------------------------------|
| Cause                                                      | YLLs (actual counts)                      |                                            |                                           |                                            | Deaths (actual counts)              |                                     |                                     |                                     |
|                                                            | 2016                                      | 2040 Forecast                              | 2040 Better Scenario                      | 2040 Worse Scenario                        | 2016                                | 2040 Forecast                       | 2040 Better Scenario                | 2040 Worse Scenario                 |
| <b>Diabetes, urogenital, blood, and endocrine diseases</b> | <b>4,445.49</b><br>(3,764.22 to 5,105.67) | <b>7,223.74</b><br>(4,795.11 to 12,204.09) | <b>5,328.02</b><br>(3,529.04 to 9,490.71) | <b>8,075.67</b><br>(5,186.72 to 13,077.93) | <b>205.58</b><br>(175.53 to 233.92) | <b>395.99</b><br>(260.42 to 665.08) | <b>310.20</b><br>(204.83 to 552.85) | <b>425.67</b><br>(271.91 to 677.22) |
| Diabetes mellitus                                          | 2,320.66<br>(1,915.27 to 2,740.28)        | 3,044.39<br>(2,006.84 to 4,277.48)         | 2,146.42<br>(1,458.15 to 3,047.17)        | 3,298.79<br>(2,186.79 to 4,676.83)         | 113.19<br>(93.65 to 133.43)         | 173.60<br>(114.77 to 237.80)        | 130.22<br>(88.86 to 177.84)         | 180.78<br>(119.52 to 250.00)        |
| Acute glomerulonephritis                                   | 2.81<br>(2.04 to 3.98)                    | 3.14<br>(2.15 to 4.51)                     | 2.56<br>(1.77 to 3.77)                    | 3.18<br>(2.22 to 4.63)                     | 0.08<br>(0.05 to 0.11)              | 0.08<br>(0.06 to 0.13)              | 0.07<br>(0.05 to 0.11)              | 0.08<br>(0.05 to 0.12)              |
| Chronic kidney disease                                     | 1,560.74<br>(1,277.14 to 1,844.70)        | 3,364.74<br>(815.19 to 8,896.96)           | 2,420.57<br>(576.77 to 7,043.07)          | 3,977.87<br>(964.26 to 9,320.41)           | 71.22<br>(58.88 to 83.27)           | 186.03<br>(38.35 to 499.44)         | 142.77<br>(28.82 to 415.43)         | 210.71<br>(44.60 to 499.86)         |
| Chronic kidney disease due to diabetes mellitus            | 891.97<br>(716.87 to 1,068.76)            | 1,985.62<br>(445.33 to 5,504.28)           | 1,427.04<br>(316.92 to 4,197.55)          | 2,369.71<br>(545.64 to 5,750.15)           | 38.72<br>(31.25 to 46.25)           | 103.10<br>(20.65 to 277.25)         | 78.48<br>(15.34 to 231.99)          | 118.14<br>(24.32 to 280.45)         |
| Chronic kidney disease due to hypertension                 | 383.94<br>(309.98 to 473.29)              | 922.68<br>(192.41 to 2,543.26)             | 680.59<br>(138.37 to 2,048.43)            | 1,071.96<br>(229.78 to 2,591.11)           | 22.67<br>(18.41 to 27.45)           | 62.06<br>(12.28 to 165.89)          | 48.88<br>(9.41 to 142.28)           | 68.83<br>(14.53 to 164.28)          |
| Chronic kidney disease due to glomerulonephritis           | 132.47<br>(100.57 to 168.63)              | 196.66<br>(81.81 to 448.20)                | 133.08<br>(54.89 to 333.52)               | 230.64<br>(93.10 to 488.56)                | 4.06<br>(3.06 to 5.10)              | 7.94<br>(2.23 to 20.65)             | 5.73<br>(1.60 to 16.99)             | 9.10<br>(2.57 to 21.32)             |
| Chronic kidney disease due to other and unspecified causes | 152.36<br>(117.18 to 192.05)              | 259.78<br>(82.74 to 640.10)                | 179.86<br>(55.75 to 494.51)               | 305.56<br>(296.76 to 678.46)               | 5.77<br>(4.52 to 7.28)              | 12.94<br>(2.96 to 34.75)            | 9.67<br>(2.07 to 28.19)             | 14.65<br>(3.42 to 34.88)            |
| Urinary diseases and male infertility                      | 194.02<br>(151.26 to 247.96)              | 337.38<br>(263.91 to 421.03)               | 336.53<br>(264.81 to 424.08)              | 325.27<br>(253.26 to 406.85)               | 8.40<br>(6.54 to 10.68)             | 17.50<br>(13.01 to 22.17)           | 19.20<br>(14.38 to 24.30)           | 16.11<br>(11.91 to 20.45)           |
| Urinary tract infections                                   | 172.74<br>(133.92 to 222.47)              | 308.07<br>(239.30 to 386.56)               | 309.72<br>(242.77 to 391.12)              | 296.75<br>(229.36 to 373.77)               | 7.51<br>(5.87 to 9.63)              | 16.05<br>(11.98 to 20.53)           | 17.80<br>(13.29 to 22.60)           | 14.75<br>(10.88 to 19.04)           |
| Urolithiasis                                               | 5.85<br>(3.56 to 10.18)                   | 10.85<br>(6.42 to 19.34)                   | 11.44<br>(6.58 to 20.68)                  | 10.46<br>(6.18 to 18.57)                   | 0.23<br>(0.14 to 0.41)              | 0.48<br>(0.27 to 0.86)              | 0.53<br>(0.29 to 0.97)              | 0.45<br>(0.25 to 0.82)              |
| Other urinary diseases                                     | 15.44<br>(9.21 to 26.17)                  | 18.46<br>(10.43 to 33.74)                  | 15.38<br>(8.44 to 28.32)                  | 18.06<br>(10.26 to 33.10)                  | 0.66<br>(0.38 to 1.15)              | 0.97<br>(0.51 to 1.84)              | 0.86<br>(0.44 to 1.67)              | 0.90<br>(0.47 to 1.76)              |
| Gynecological diseases                                     | 1.37<br>(0.88 to 2.08)                    | 1.37<br>(0.82 to 2.16)                     | 1.07<br>(0.63 to 1.70)                    | 1.40<br>(0.85 to 2.20)                     | 0.04<br>(0.03 to 0.06)              | 0.04<br>(0.02 to 0.06)              | 0.03<br>(0.05 to 0.05)              | 0.04<br>(0.03 to 0.06)              |
| Uterine fibroids                                           | 0.12<br>(0.05 to 0.22)                    | 0.08<br>(0.03 to 0.16)                     | 0.06<br>(0.02 to 0.12)                    | 0.08<br>(0.03 to 0.17)                     | 0.00<br>(0.00 to 0.01)              | 0.00<br>(0.00 to 0.01)              | 0.00<br>(0.00 to 0.00)              | 0.00<br>(0.00 to 0.01)              |
| Polycystic ovarian syndrome                                | 0.06<br>(0.01 to 0.20)                    | 0.03<br>(0.00 to 0.14)                     | 0.02<br>(0.00 to 0.09)                    | 0.04<br>(0.00 to 0.14)                     | 0.00<br>(0.00 to 0.00)              | 0.00<br>(0.00 to 0.00)              | 0.00<br>(0.00 to 0.00)              | 0.00<br>(0.00 to 0.00)              |
| Endometriosis                                              | 0.01<br>(0.00 to 0.03)                    | 0.02<br>(0.01 to 0.04)                     | 0.01<br>(0.00 to 0.03)                    | 0.02<br>(0.01 to 0.04)                     | 0.00<br>(0.00 to 0.00)              | 0.00<br>(0.00 to 0.00)              | 0.00<br>(0.00 to 0.00)              | 0.00<br>(0.00 to 0.00)              |
| Genital prolapse                                           | 0.05<br>(0.02 to 0.12)                    | 0.04<br>(0.01 to 0.11)                     | 0.03<br>(0.01 to 0.08)                    | 0.04<br>(0.01 to 0.10)                     | 0.00<br>(0.00 to 0.01)              | 0.00<br>(0.00 to 0.00)              | 0.00<br>(0.00 to 0.00)              | 0.00<br>(0.00 to 0.00)              |
| Other gynecological diseases                               | 1.14<br>(0.70 to 1.69)                    | 1.19<br>(0.68 to 1.89)                     | 0.95<br>(0.54 to 1.52)                    | 1.22<br>(0.70 to 1.95)                     | 0.03<br>(0.02 to 0.05)              | 0.03<br>(0.02 to 0.05)              | 0.03<br>(0.02 to 0.04)              | 0.03<br>(0.02 to 0.05)              |
| Hemoglobinopathies and hemolytic anemias                   | 37.43<br>(29.60 to 47.96)                 | 37.08<br>(29.50 to 48.39)                  | 29.93<br>(23.65 to 39.08)                 | 37.32<br>(29.28 to 49.27)                  | 1.17<br>(0.94 to 1.50)              | 1.40<br>(1.11 to 1.81)              | 1.18<br>(0.94 to 1.53)              | 1.36<br>(1.07 to 1.77)              |
| Thalassemias                                               | 6.22<br>(4.14 to 9.45)                    | 3.64<br>(2.27 to 5.54)                     | 3.70<br>(2.34 to 5.56)                    | 3.64<br>(2.25 to 5.52)                     | 0.08<br>(0.06 to 0.12)              | 0.05<br>(0.03 to 0.07)              | 0.05<br>(0.03 to 0.08)              | 0.05<br>(0.03 to 0.07)              |

|                                                   |                                 |                                 |                                 |                                 |                             |                              |                              |                              |
|---------------------------------------------------|---------------------------------|---------------------------------|---------------------------------|---------------------------------|-----------------------------|------------------------------|------------------------------|------------------------------|
|                                                   | 0.04<br>(0.02 to<br>0.05)       | 0.04<br>(0.02 to<br>0.06)       | 0.03<br>(0.02 to<br>0.05)       | 0.04<br>(0.02 to<br>0.06)       | 0.00<br>(0.00 to<br>0.00)   | 0.00<br>(0.00 to<br>0.00)    | 0.00<br>(0.00 to<br>0.00)    | 0.00<br>(0.00 to<br>0.00)    |
| Sickle cell disorders                             |                                 |                                 |                                 |                                 |                             |                              |                              |                              |
|                                                   | 18.47<br>(14.02 to<br>24.17)    | 21.63<br>(16.24 to<br>29.13)    | 16.29<br>(12.13 to<br>22.03)    | 22.19<br>(16.37 to<br>30.66)    | 0.44<br>(0.34 to<br>0.58)   | 0.61<br>(0.47 to<br>0.81)    | 0.48<br>(0.36 to<br>0.64)    | 0.61<br>(0.47 to<br>0.83)    |
| G6PD deficiency                                   |                                 |                                 |                                 |                                 |                             |                              |                              |                              |
|                                                   | 12.69<br>(9.81 to<br>16.78)     | 11.77<br>(9.10 to<br>15.65)     | 9.90<br>(7.63 to<br>13.06)      | 11.45<br>(8.81 to<br>15.44)     | 0.64<br>(0.51 to<br>0.84)   | 0.74<br>(0.56 to<br>0.99)    | 0.66<br>(0.50 to<br>0.86)    | 0.70<br>(0.52 to<br>0.93)    |
| Other hemoglobinopathies and hemolytic anemias    |                                 |                                 |                                 |                                 |                             |                              |                              |                              |
|                                                   | 328.46<br>(242.91 to<br>426.70) | 435.64<br>(328.94 to<br>553.19) | 390.94<br>(295.71 to<br>496.31) | 431.84<br>(325.02 to<br>552.34) | 11.49<br>(8.54 to<br>14.74) | 17.34<br>(12.86 to<br>22.29) | 16.73<br>(12.48 to<br>21.14) | 16.58<br>(12.36 to<br>21.45) |
| Endocrine, metabolic, blood, and immune disorders |                                 |                                 |                                 |                                 |                             |                              |                              |                              |

| Samoa                                         |                                         |                                         |                                         |                                         |                                  |                                  |                                  |                                  |
|-----------------------------------------------|-----------------------------------------|-----------------------------------------|-----------------------------------------|-----------------------------------------|----------------------------------|----------------------------------|----------------------------------|----------------------------------|
| Cause                                         | YLLs (actual counts)                    |                                         |                                         |                                         | Deaths (actual counts)           |                                  |                                  |                                  |
|                                               | 2016                                    | 2040 Forecast                           | 2040 Better Scenario                    | 2040 Worse Scenario                     | 2016                             | 2040 Forecast                    | 2040 Better Scenario             | 2040 Worse Scenario              |
| <b>Musculoskeletal disorders</b>              | <b>87.37</b><br>(49.44 to 124.77)       | <b>118.01</b><br>(62.69 to 169.93)      | <b>124.18</b><br>(66.86 to 179.32)      | <b>115.84</b><br>(62.38 to 168.65)      | <b>2.28</b><br>(1.26 to 3.21)    | <b>3.62</b><br>(1.94 to 5.17)    | <b>4.11</b><br>(2.21 to 5.87)    | <b>3.42</b><br>(1.83 to 4.87)    |
| Rheumatoid arthritis                          | 6.55<br>(3.09 to 10.77)                 | 10.81<br>(4.96 to 17.79)                | 9.06<br>(3.98 to 15.44)                 | 10.83<br>(4.96 to 17.79)                | 0.28<br>(0.12 to 0.46)           | 0.57<br>(0.25 to 0.95)           | 0.51<br>(0.22 to 0.87)           | 0.56<br>(0.24 to 0.92)           |
| Other musculoskeletal disorders               | 80.82<br>(46.20 to 115.58)              | 107.20<br>(57.34 to 156.45)             | 115.12<br>(62.12 to 167.33)             | 105.02<br>(57.23 to 153.16)             | 2.00<br>(1.12 to 2.84)           | 3.04<br>(1.67 to 4.39)           | 3.59<br>(1.95 to 5.18)           | 2.86<br>(1.57 to 4.15)           |
| <b>Other non-communicable diseases</b>        | <b>1,103.11</b><br>(693.08 to 1,825.65) | <b>1,382.41</b><br>(943.96 to 2,134.24) | <b>1,097.05</b><br>(778.95 to 1,582.95) | <b>1,421.02</b><br>(956.87 to 2,232.70) | <b>21.90</b><br>(15.29 to 31.00) | <b>39.17</b><br>(27.67 to 55.21) | <b>38.15</b><br>(26.57 to 54.52) | <b>37.70</b><br>(26.74 to 53.26) |
| Congenital birth defects                      | 834.50<br>(446.60 to 1,565.63)          | 825.84<br>(467.05 to 1,512.53)          | 550.76<br>(324.83 to 975.94)            | 881.25<br>(493.89 to 1,620.31)          | 10.68<br>(6.09 to 19.21)         | 11.02<br>(6.69 to 19.11)         | 7.61<br>(4.79 to 12.46)          | 11.69<br>(7.02 to 20.38)         |
| Neural tube defects                           | 28.79<br>(10.78 to 68.18)               | 11.70<br>(4.22 to 28.47)                | 6.12<br>(2.32 to 14.98)                 | 12.94<br>(4.60 to 32.73)                | 0.34<br>(0.13 to 0.80)           | 0.14<br>(0.06 to 0.34)           | 0.08<br>(0.03 to 0.18)           | 0.16<br>(0.06 to 0.39)           |
| Congenital heart anomalies                    | 396.63<br>(218.14 to 740.82)            | 375.97<br>(219.00 to 689.11)            | 255.24<br>(151.53 to 450.19)            | 399.89<br>(229.39 to 734.60)            | 5.12<br>(3.01 to 9.17)           | 5.08<br>(3.10 to 8.80)           | 3.57<br>(2.23 to 5.85)           | 5.37<br>(3.25 to 9.35)           |
| Orofacial clefts                              | 0.51<br>(0.15 to 1.43)                  | 0.43<br>(0.11 to 1.24)                  | 0.21<br>(0.06 to 0.60)                  | 0.48<br>(0.12 to 1.38)                  | 0.01<br>(0.00 to 0.02)           | 0.01<br>(0.00 to 0.01)           | 0.00<br>(0.00 to 0.01)           | 0.01<br>(0.00 to 0.02)           |
| Down syndrome                                 | 44.53<br>(23.07 to 83.59)               | 50.64<br>(27.92 to 89.78)               | 33.75<br>(19.40 to 58.62)               | 53.94<br>(29.10 to 98.47)               | 0.63<br>(0.36 to 1.09)           | 0.77<br>(0.47 to 1.27)           | 0.54<br>(0.34 to 0.86)           | 0.81<br>(0.49 to 1.36)           |
| Other chromosomal abnormalities               | 38.84<br>(15.38 to 85.13)               | 60.32<br>(23.65 to 130.24)              | 36.40<br>(14.70 to 80.20)               | 65.36<br>(25.05 to 140.63)              | 0.47<br>(0.19 to 1.00)           | 0.73<br>(0.29 to 1.56)           | 0.45<br>(0.19 to 0.97)           | 0.79<br>(0.32 to 1.69)           |
| Congenital musculoskeletal and limb anomalies | 22.17<br>(10.54 to 45.45)               | 22.12<br>(10.66 to 45.09)               | 15.24<br>(7.62 to 30.00)                | 23.52<br>(11.17 to 48.12)               | 0.27<br>(0.14 to 0.54)           | 0.28<br>(0.14 to 0.55)           | 0.20<br>(0.10 to 0.38)           | 0.30<br>(0.15 to 0.59)           |
| Urogenital congenital anomalies               | 29.60<br>(15.32 to 55.09)               | 26.72<br>(14.60 to 48.06)               | 18.45<br>(10.52 to 32.15)               | 28.36<br>(15.34 to 51.64)               | 0.43<br>(0.25 to 0.73)           | 0.42<br>(0.25 to 0.68)           | 0.31<br>(0.19 to 0.48)           | 0.44<br>(0.27 to 0.72)           |
| Digestive congenital anomalies                | 39.53<br>(16.12 to 90.77)               | 36.33<br>(14.75 to 81.79)               | 21.90<br>(9.14 to 49.37)                | 39.39<br>(15.87 to 91.24)               | 0.47<br>(0.20 to 1.07)           | 0.44<br>(0.19 to 0.97)           | 0.27<br>(0.12 to 0.59)           | 0.47<br>(0.20 to 1.09)           |
| Other congenital birth defects                | 233.90<br>(120.49 to 448.68)            | 241.61<br>(121.77 to 468.20)            | 163.46<br>(85.73 to 310.17)             | 257.36<br>(128.27 to 499.35)            | 2.95<br>(1.58 to 5.46)           | 3.15<br>(1.73 to 5.82)           | 2.20<br>(1.24 to 3.92)           | 3.34<br>(1.80 to 6.19)           |
| Skin and subcutaneous diseases                | 252.32<br>(142.04 to 366.69)            | 527.50<br>(333.13 to 811.36)            | 528.00<br>(334.90 to 802.63)            | 508.29<br>(320.16 to 787.99)            | 10.81<br>(6.58 to 16.86)         | 27.81<br>(17.29 to 42.58)        | 30.33<br>(19.00 to 46.34)        | 25.64<br>(16.03 to 39.20)        |
| Cellulitis                                    | 48.36<br>(19.65 to 74.79)               | 125.84<br>(52.61 to 192.91)             | 142.97<br>(63.62 to 218.82)             | 118.81<br>(50.16 to 182.21)             | 2.19<br>(0.83 to 3.26)           | 6.66<br>(2.70 to 10.35)          | 8.16<br>(3.40 to 12.51)          | 6.03<br>(2.45 to 9.29)           |
| Pyoderma                                      | 146.26<br>(92.86 to 242.89)             | 333.08<br>(213.56 to 530.19)            | 311.84<br>(199.83 to 493.04)            | 324.99<br>(209.07 to 521.81)            | 6.02<br>(3.76 to 10.09)          | 16.05<br>(10.02 to 25.94)        | 16.26<br>(10.39 to 26.65)        | 15.03<br>(9.31 to 24.48)         |
| Decubitus ulcer                               | 35.08<br>(16.63 to 74.43)               | 64.01<br>(30.67 to 140.15)              | 68.72<br>(33.35 to 147.08)              | 59.95<br>(28.32 to 132.24)              | 2.53<br>(1.17 to 5.48)           | 4.97<br>(2.24 to 11.19)          | 5.78<br>(2.69 to 12.43)          | 4.47<br>(2.00 to 10.09)          |
| Other skin and subcutaneous diseases          | 2.62<br>(1.62 to 4.86)                  | 4.57<br>(2.91 to 8.18)                  | 4.47<br>(2.91 to 7.87)                  | 4.53<br>(2.83 to 8.19)                  | 0.06<br>(0.04 to 0.12)           | 0.12<br>(0.08 to 0.22)           | 0.13<br>(0.08 to 0.24)           | 0.12<br>(0.07 to 0.21)           |
| Sudden infant death syndrome                  | 36.29<br>(9.53 to 93.17)                | 29.08<br>(7.20 to 78.45)                | 18.29<br>(4.52 to 48.89)                | 31.48<br>(7.81 to 83.91)                | 0.42<br>(0.11 to 1.08)           | 0.34<br>(0.08 to 0.91)           | 0.21<br>(0.05 to 0.57)           | 0.36<br>(0.09 to 0.97)           |



|                          |                                       |                                       |                                       |                                       |                               |                                |                               |                                |
|--------------------------|---------------------------------------|---------------------------------------|---------------------------------------|---------------------------------------|-------------------------------|--------------------------------|-------------------------------|--------------------------------|
| Injuries                 | 4,262.31<br>(3,372.48 to<br>5,227.52) | 4,802.88<br>(3,470.71 to<br>6,416.41) | 3,742.98<br>(2,698.39 to<br>4,817.82) | 5,166.49<br>(3,739.82 to<br>7,026.20) | 89.62<br>(72.28 to<br>106.87) | 108.51<br>(82.86 to<br>136.69) | 90.35<br>(69.30 to<br>110.14) | 113.24<br>(85.99 to<br>144.89) |
| Transport injuries       | 1,047.59<br>(809.27 to<br>1,320.06)   | 1,208.90<br>(895.72 to<br>1,603.77)   | 690.91<br>(514.49 to<br>908.09)       | 1,395.45<br>(1,028.19 to<br>1,873.38) | 22.17<br>(17.63 to<br>27.07)  | 27.18<br>(20.85 to<br>34.69)   | 17.32<br>(13.34 to<br>21.79)  | 30.34<br>(22.97 to<br>39.71)   |
| Road injuries            | 928.63<br>(721.37 to<br>1,165.70)     | 1,039.49<br>(772.17 to<br>1,387.15)   | 555.89<br>(413.91 to<br>739.12)       | 1,215.56<br>(891.90 to<br>1,651.17)   | 19.52<br>(15.57 to<br>23.91)  | 23.06<br>(17.59 to<br>29.56)   | 13.81<br>(10.72 to<br>17.38)  | 26.09<br>(19.74 to<br>34.04)   |
| Pedestrian road injuries | 255.70<br>(164.06 to<br>364.61)       | 236.04<br>(142.01 to<br>356.20)       | 137.93<br>(85.70 to<br>200.56)        | 268.79<br>(159.00 to<br>410.69)       | 5.60<br>(3.65 to<br>7.74)     | 5.75<br>(3.59 to<br>8.15)      | 3.70<br>(2.40 to<br>5.12)     | 6.34<br>(3.91 to<br>9.13)      |

| Samoa                                           |                                                            |                                                            |                                                          |                                                            |                                                   |                                                   |                                                   |                                                   |
|-------------------------------------------------|------------------------------------------------------------|------------------------------------------------------------|----------------------------------------------------------|------------------------------------------------------------|---------------------------------------------------|---------------------------------------------------|---------------------------------------------------|---------------------------------------------------|
| Cause                                           | YLLs (actual counts)                                       |                                                            |                                                          |                                                            | Deaths (actual counts)                            |                                                   |                                                   |                                                   |
|                                                 | 2016                                                       | 2040 Forecast                                              | 2040 Better Scenario                                     | 2040 Worse Scenario                                        | 2016                                              | 2040 Forecast                                     | 2040 Better Scenario                              | 2040 Worse Scenario                               |
| Cyclist road injuries                           | 17.80<br>(11.28 to<br>25.81)                               | 19.91<br>(12.16 to<br>29.90)                               | 10.78<br>(6.73 to<br>16.14)                              | 23.19<br>(13.96 to<br>35.26)                               | 0.41<br>(0.26 to<br>0.58)                         | 0.49<br>(0.30 to<br>0.71)                         | 0.32<br>(0.20 to<br>0.46)                         | 0.54<br>(0.33 to<br>0.80)                         |
| Motorcyclist road injuries                      | 114.57<br>(71.32 to<br>174.65)                             | 141.07<br>(79.68 to<br>231.74)                             | 91.01<br>(52.72 to<br>148.99)                            | 160.10<br>(88.61 to<br>264.19)                             | 2.19<br>(1.41 to<br>3.31)                         | 2.72<br>(1.60 to<br>4.34)                         | 1.85<br>(1.13 to<br>2.90)                         | 3.04<br>(1.74 to<br>4.89)                         |
| Motor vehicle road injuries                     | 524.93<br>(388.55 to<br>714.46)                            | 623.03<br>(451.06 to<br>859.40)                            | 306.49<br>(220.01 to<br>429.95)                          | 740.41<br>(529.04 to<br>1,023.77)                          | 11.01<br>(8.25 to<br>14.81)                       | 13.67<br>(10.18 to<br>18.72)                      | 7.69<br>(5.76 to<br>10.49)                        | 15.69<br>(11.54 to<br>21.38)                      |
| Other road injuries                             | 15.64<br>(9.23 to<br>24.29)                                | 19.45<br>(10.69 to<br>31.64)                               | 9.68<br>(5.48 to<br>15.43)                               | 23.07<br>(12.43 to<br>38.23)                               | 0.52<br>(0.20 to<br>0.47)                         | 0.42<br>(0.25 to<br>0.65)                         | 0.24<br>(0.15 to<br>0.38)                         | 0.48<br>(0.27 to<br>0.75)                         |
| Other transport injuries                        | 118.96<br>(79.88 to<br>168.57)                             | 169.41<br>(109.91 to<br>245.69)                            | 135.01<br>(89.51 to<br>193.85)                           | 179.90<br>(116.05 to<br>263.74)                            | 2.64<br>(1.82 to<br>3.57)                         | 4.12<br>(2.78 to<br>5.83)                         | 3.51<br>(2.38 to<br>4.81)                         | 4.25<br>(2.82 to<br>6.03)                         |
| <b>Unintentional injuries</b>                   | <b>1,692.41</b><br><b>(1,306.81 to</b><br><b>2,227.65)</b> | <b>1,430.28</b><br><b>(1,086.32 to</b><br><b>1,826.46)</b> | <b>1,157.89</b><br><b>(892.29 to</b><br><b>1,476.18)</b> | <b>1,472.32</b><br><b>(1,117.25 to</b><br><b>1,916.11)</b> | <b>37.71</b><br><b>(29.92 to</b><br><b>47.48)</b> | <b>38.02</b><br><b>(30.07 to</b><br><b>46.30)</b> | <b>33.77</b><br><b>(26.92 to</b><br><b>40.40)</b> | <b>37.59</b><br><b>(29.43 to</b><br><b>45.84)</b> |
| Falls                                           | 152.95<br>(114.77 to<br>209.24)                            | 160.69<br>(120.54 to<br>216.30)                            | 150.36<br>(113.77 to<br>202.43)                          | 157.50<br>(117.92 to<br>212.28)                            | 5.50<br>(4.24 to<br>7.32)                         | 7.30<br>(5.37 to<br>9.76)                         | 7.43<br>(5.57 to<br>9.80)                         | 6.81<br>(4.98 to<br>9.10)                         |
| Drowning                                        | 698.58<br>(520.69 to<br>958.10)                            | 515.08<br>(358.12 to<br>721.22)                            | 404.32<br>(286.77 to<br>560.85)                          | 541.05<br>(377.16 to<br>765.56)                            | 12.79<br>(9.52 to<br>17.33)                       | 10.17<br>(7.25 to<br>13.77)                       | 8.27<br>(5.99 to<br>11.12)                        | 10.55<br>(7.46 to<br>14.50)                       |
| Fire, heat, and hot substances                  | 112.08<br>(80.03 to<br>159.52)                             | 88.28<br>(61.26 to<br>126.87)                              | 66.22<br>(46.94 to<br>94.57)                             | 92.64<br>(63.43 to<br>132.78)                              | 2.53<br>(1.90 to<br>3.42)                         | 2.36<br>(1.72 to<br>3.23)                         | 1.95<br>(1.45 to<br>2.65)                         | 2.37<br>(1.72 to<br>3.26)                         |
| Poisonings                                      | 68.70<br>(44.72 to<br>135.72)                              | 41.83<br>(25.93 to<br>85.99)                               | 28.80<br>(17.68 to<br>56.95)                             | 44.57<br>(27.76 to<br>94.05)                               | 1.53<br>(1.05 to<br>3.02)                         | 1.09<br>(0.73 to<br>2.19)                         | 0.82<br>(0.55 to<br>1.58)                         | 1.11<br>(0.73 to<br>2.25)                         |
| Exposure to mechanical forces                   | 205.71<br>(151.29 to<br>292.68)                            | 181.61<br>(130.89 to<br>260.98)                            | 139.96<br>(102.52 to<br>201.16)                          | 186.83<br>(135.77 to<br>270.91)                            | 4.48<br>(3.34 to<br>6.45)                         | 4.51<br>(3.38 to<br>6.46)                         | 3.75<br>(2.80 to<br>5.29)                         | 4.49<br>(3.35 to<br>6.43)                         |
| Unintentional firearm injuries                  | 34.37<br>(20.25 to<br>54.24)                               | 27.05<br>(15.75 to<br>42.59)                               | 20.00<br>(11.56 to<br>31.60)                             | 27.87<br>(16.11 to<br>44.61)                               | 0.79<br>(0.48 to<br>1.20)                         | 0.73<br>(0.44 to<br>1.13)                         | 0.59<br>(0.35 to<br>0.90)                         | 0.73<br>(0.44 to<br>1.11)                         |
| Unintentional suffocation                       | 38.67<br>(24.13 to<br>64.12)                               | 36.56<br>(22.50 to<br>59.78)                               | 26.97<br>(17.07 to<br>44.40)                             | 38.21<br>(23.63 to<br>63.78)                               | 0.62<br>(0.40 to<br>1.02)                         | 0.61<br>(0.40 to<br>1.01)                         | 0.47<br>(0.31 to<br>0.78)                         | 0.64<br>(0.41 to<br>1.04)                         |
| Other exposure to mechanical forces             | 132.68<br>(91.93 to<br>205.21)                             | 117.99<br>(81.12 to<br>184.58)                             | 92.99<br>(64.56 to<br>142.90)                            | 120.75<br>(82.45 to<br>189.28)                             | 3.07<br>(2.13 to<br>4.63)                         | 3.16<br>(2.26 to<br>4.86)                         | 2.69<br>(1.90 to<br>4.04)                         | 3.12<br>(2.19 to<br>4.85)                         |
| Adverse effects of medical treatment            | 177.10<br>(139.23 to<br>234.41)                            | 180.73<br>(142.08 to<br>225.55)                            | 147.70<br>(116.00 to<br>185.28)                          | 183.58<br>(143.34 to<br>229.78)                            | 4.65<br>(3.75 to<br>5.73)                         | 5.59<br>(4.46 to<br>6.86)                         | 5.02<br>(4.04 to<br>6.18)                         | 5.44<br>(4.34 to<br>6.68)                         |
| Animal contact                                  | 15.77<br>(9.95 to<br>22.41)                                | 19.84<br>(12.67 to<br>28.84)                               | 14.88<br>(9.41 to<br>21.67)                              | 20.35<br>(12.86 to<br>30.07)                               | 0.44<br>(0.29 to<br>0.62)                         | 0.65<br>(0.42 to<br>0.95)                         | 0.54<br>(0.34 to<br>0.81)                         | 0.64<br>(0.41 to<br>0.93)                         |
| Venomous animal contact                         | 4.25<br>(2.42 to<br>7.23)                                  | 5.02<br>(2.91 to<br>8.60)                                  | 3.64<br>(2.09 to<br>6.11)                                | 5.18<br>(3.00 to<br>8.67)                                  | 0.12<br>(0.07 to<br>0.19)                         | 0.16<br>(0.09 to<br>0.26)                         | 0.13<br>(0.07 to<br>0.22)                         | 0.16<br>(0.09 to<br>0.26)                         |
| Non-venomous animal contact                     | 11.52<br>(6.76 to<br>16.48)                                | 14.81<br>(8.78 to<br>21.79)                                | 11.24<br>(6.77 to<br>16.44)                              | 15.16<br>(8.94 to<br>22.37)                                | 0.32<br>(0.20 to<br>0.46)                         | 0.49<br>(0.29 to<br>0.72)                         | 0.41<br>(0.25 to<br>0.60)                         | 0.48<br>(0.28 to<br>0.69)                         |
| Foreign body                                    | 150.96<br>(78.27 to<br>249.29)                             | 145.16<br>(77.36 to<br>231.15)                             | 131.55<br>(70.92 to<br>200.75)                           | 146.10<br>(77.75 to<br>236.79)                             | 3.23<br>(1.71 to<br>4.78)                         | 3.83<br>(2.03 to<br>5.42)                         | 3.94<br>(2.11 to<br>5.46)                         | 3.67<br>(1.95 to<br>5.28)                         |
| Pulmonary aspiration and foreign body in airway | 142.73<br>(70.60 to<br>237.90)                             | 137.82<br>(70.46 to<br>224.32)                             | 125.75<br>(65.19 to<br>193.82)                           | 138.51<br>(69.95 to<br>226.35)                             | 3.07<br>(1.55 to<br>4.58)                         | 3.68<br>(1.88 to<br>5.27)                         | 3.82<br>(1.97 to<br>5.32)                         | 3.51<br>(1.79 to<br>5.12)                         |

|                                             |                                                            |                                                            |                                                            |                                                            |                                                   |                                                   |                                                   |                                                   |
|---------------------------------------------|------------------------------------------------------------|------------------------------------------------------------|------------------------------------------------------------|------------------------------------------------------------|---------------------------------------------------|---------------------------------------------------|---------------------------------------------------|---------------------------------------------------|
|                                             | 8.23<br>(5.45 to<br>13.27)                                 | 7.34<br>(4.76 to<br>11.87)                                 | 5.80<br>(3.75 to<br>9.24)                                  | 7.58<br>(4.92 to<br>12.25)                                 | 0.16<br>(0.11 to<br>0.25)                         | 0.15<br>(0.10 to<br>0.24)                         | 0.13<br>(0.09 to<br>0.20)                         | 0.15<br>(0.10 to<br>0.24)                         |
| Foreign body in other body part             |                                                            |                                                            |                                                            |                                                            |                                                   |                                                   |                                                   |                                                   |
| Environmental heat and cold exposure        | 40.17<br>(23.99 to<br>53.83)                               | 42.01<br>(26.00 to<br>57.91)                               | 29.35<br>(18.01 to<br>40.41)                               | 43.57<br>(26.88 to<br>60.83)                               | 1.02<br>(0.63 to<br>1.33)                         | 1.22<br>(0.77 to<br>1.62)                         | 0.91<br>(0.57 to<br>1.23)                         | 1.22<br>(0.77 to<br>1.63)                         |
| Other unintentional injuries                | 70.39<br>(45.13 to<br>102.35)                              | 55.06<br>(34.55 to<br>82.46)                               | 45.56<br>(28.25 to<br>67.57)                               | 56.13<br>(35.12 to<br>83.56)                               | 1.53<br>(0.99 to<br>2.13)                         | 1.30<br>(0.82 to<br>1.86)                         | 1.13<br>(0.72 to<br>1.61)                         | 1.29<br>(0.81 to<br>1.83)                         |
| <b>Self-harm and interpersonal violence</b> | <b>1,521.07</b><br><b>(1,152.57 to</b><br><b>1,892.68)</b> | <b>1,860.64</b><br><b>(1,283.24 to</b><br><b>2,592.98)</b> | <b>1,618.61</b><br><b>(1,156.02 to</b><br><b>2,181.63)</b> | <b>1,992.10</b><br><b>(1,337.53 to</b><br><b>2,843.86)</b> | <b>29.72</b><br><b>(22.64 to</b><br><b>36.69)</b> | <b>37.57</b><br><b>(27.10 to</b><br><b>51.01)</b> | <b>33.75</b><br><b>(25.05 to</b><br><b>44.31)</b> | <b>39.61</b><br><b>(27.93 to</b><br><b>55.22)</b> |

| Samoa                                                                               |                                                |                                                    |                                                    |                                                    |                                                |                                                 |                                                 |                                                 |
|-------------------------------------------------------------------------------------|------------------------------------------------|----------------------------------------------------|----------------------------------------------------|----------------------------------------------------|------------------------------------------------|-------------------------------------------------|-------------------------------------------------|-------------------------------------------------|
| Cause                                                                               | YLLs (actual counts)                           |                                                    |                                                    |                                                    | Deaths (actual counts)                         |                                                 |                                                 |                                                 |
|                                                                                     | 2016                                           | 2040 Forecast                                      | 2040 Better Scenario                               | 2040 Worse Scenario                                | 2016                                           | 2040 Forecast                                   | 2040 Better Scenario                            | 2040 Worse Scenario                             |
| Self-harm                                                                           | 1,104.91<br>(830.40 to<br>1,390.01)            | 1,484.94<br>(992.33 to<br>2,158.40)                | 1,271.18<br>(881.67 to<br>1,782.29)                | 1,605.63<br>(1,032.83 to<br>2,413.91)              | 21.70<br>(16.80 to<br>26.74)                   | 30.05<br>(21.08 to<br>41.89)                    | 26.66<br>(19.53 to<br>35.78)                    | 31.95<br>(21.76 to<br>46.23)                    |
| Self-harm by firearm                                                                | 77.03<br>(37.34 to<br>135.68)                  | 77.27<br>(33.11 to<br>151.42)                      | 63.75<br>(28.01 to<br>122.67)                      | 84.45<br>(35.86 to<br>166.89)                      | 1.56<br>(0.76 to<br>2.70)                      | 1.59<br>(0.71 to<br>2.99)                       | 1.34<br>(0.61 to<br>2.46)                       | 1.72<br>(0.75 to<br>3.30)                       |
| Self-harm by other specified means                                                  | 1,027.88<br>(767.01 to<br>1,282.72)            | 1,407.67<br>(940.24 to<br>2,051.00)                | 1,207.43<br>(838.25 to<br>1,682.14)                | 1,521.17<br>(976.87 to<br>2,270.15)                | 20.14<br>(15.50 to<br>24.76)                   | 28.47<br>(20.03 to<br>39.80)                    | 25.32<br>(18.53 to<br>34.02)                    | 30.23<br>(20.63 to<br>43.71)                    |
| Interpersonal violence                                                              | 416.16<br>(254.83 to<br>588.93)                | 375.70<br>(224.52 to<br>557.63)                    | 347.43<br>(210.43 to<br>512.65)                    | 386.47<br>(228.12 to<br>577.95)                    | 8.02<br>(4.91 to<br>11.29)                     | 7.52<br>(4.48 to<br>10.98)                      | 7.09<br>(4.30 to<br>10.28)                      | 7.67<br>(4.54 to<br>11.28)                      |
| Physical violence by firearm                                                        | 84.43<br>(37.15 to<br>148.44)                  | 74.39<br>(33.08 to<br>133.60)                      | 70.61<br>(31.38 to<br>125.93)                      | 74.92<br>(33.00 to<br>136.13)                      | 1.59<br>(0.68 to<br>2.78)                      | 1.42<br>(0.63 to<br>2.54)                       | 1.36<br>(0.60 to<br>2.40)                       | 1.42<br>(0.63 to<br>2.56)                       |
| Physical violence by sharp object                                                   | 114.57<br>(63.10 to<br>194.14)                 | 112.30<br>(62.81 to<br>198.14)                     | 112.09<br>(63.78 to<br>193.90)                     | 112.30<br>(62.38 to<br>199.06)                     | 2.20<br>(1.22 to<br>3.74)                      | 2.17<br>(1.24 to<br>3.75)                       | 2.19<br>(1.26 to<br>3.73)                       | 2.16<br>(1.23 to<br>3.76)                       |
| Physical violence by other means                                                    | 217.17<br>(121.56 to<br>319.37)                | 189.01<br>(99.22 to<br>306.28)                     | 164.72<br>(86.41 to<br>267.03)                     | 199.26<br>(103.03 to<br>326.82)                    | 4.24<br>(2.34 to<br>6.05)                      | 3.93<br>(2.06 to<br>6.25)                       | 3.53<br>(1.90 to<br>5.51)                       | 4.08<br>(2.12 to<br>6.57)                       |
| <b>Forces of nature, conflict and terrorism, and executions and police conflict</b> | <b>1.23</b><br><b>(0.95 to</b><br><b>1.55)</b> | <b>303.06</b><br><b>(0.00 to</b><br><b>594.22)</b> | <b>275.58</b><br><b>(0.00 to</b><br><b>539.63)</b> | <b>306.62</b><br><b>(0.00 to</b><br><b>601.07)</b> | <b>0.02</b><br><b>(0.02 to</b><br><b>0.03)</b> | <b>5.73</b><br><b>(0.00 to</b><br><b>11.07)</b> | <b>5.51</b><br><b>(0.00 to</b><br><b>10.54)</b> | <b>5.70</b><br><b>(0.00 to</b><br><b>11.03)</b> |
| Exposure to forces of nature                                                        | 0.00<br>(0.00 to<br>0.00)                      | 303.06<br>(0.00 to<br>594.22)                      | 275.58<br>(0.00 to<br>539.63)                      | 306.62<br>(0.00 to<br>601.07)                      | 0.00<br>(0.00 to<br>0.00)                      | 5.73<br>(0.00 to<br>11.07)                      | 5.51<br>(0.00 to<br>10.54)                      | 5.70<br>(0.00 to<br>11.03)                      |
| Conflict and terrorism                                                              | 0.00<br>(0.00 to<br>0.00)                      | 0.00<br>(0.00 to<br>0.00)                          | 0.00<br>(0.00 to<br>0.00)                          | 0.00<br>(0.00 to<br>0.00)                          | 0.00<br>(0.00 to<br>0.00)                      | 0.00<br>(0.00 to<br>0.00)                       | 0.00<br>(0.00 to<br>0.00)                       | 0.00<br>(0.00 to<br>0.00)                       |
| Executions and police conflict                                                      | 1.23<br>(0.95 to<br>1.55)                      | 0.00<br>(0.00 to<br>0.00)                          | 0.00<br>(0.00 to<br>0.00)                          | 0.00<br>(0.00 to<br>0.00)                          | 0.02<br>(0.02 to<br>0.03)                      | 0.00<br>(0.00 to<br>0.00)                       | 0.00<br>(0.00 to<br>0.00)                       | 0.00<br>(0.00 to<br>0.00)                       |

| Solomon Islands                                                   |                                          |                                          |                                          |                                          |                                    |                                    |                                    |                                    |
|-------------------------------------------------------------------|------------------------------------------|------------------------------------------|------------------------------------------|------------------------------------------|------------------------------------|------------------------------------|------------------------------------|------------------------------------|
| Cause                                                             | YLLs (actual counts)                     |                                          |                                          |                                          | Deaths (actual counts)             |                                    |                                    |                                    |
|                                                                   | 2016                                     | 2040 Forecast                            | 2040 Better Scenario                     | 2040 Worse Scenario                      | 2016                               | 2040 Forecast                      | 2040 Better Scenario               | 2040 Worse Scenario                |
| All causes                                                        | 171,540.82<br>(143,822.86 to 204,084.56) | 204,463.20<br>(171,076.33 to 245,947.37) | 133,364.34<br>(112,266.35 to 162,614.30) | 250,742.22<br>(208,789.35 to 300,098.49) | 4,678.54<br>(3,974.69 to 5,554.48) | 6,340.41<br>(5,615.24 to 7,215.52) | 4,491.47<br>(3,988.18 to 5,179.08) | 7,492.83<br>(6,628.21 to 8,461.25) |
| Communicable, maternal, neonatal, and nutritional diseases        | 44,402.37<br>(32,883.79 to 59,962.21)    | 35,868.20<br>(23,323.51 to 54,374.92)    | 19,210.30<br>(13,215.05 to 28,038.15)    | 48,452.55<br>(31,169.23 to 74,091.03)    | 778.49<br>(621.17 to 980.37)       | 710.71<br>(485.92 to 1,035.45)     | 436.19<br>(306.97 to 633.43)       | 913.97<br>(611.51 to 1,344.62)     |
| HIV/AIDS and tuberculosis                                         | 3,476.65<br>(2,377.20 to 6,576.06)       | 4,014.90<br>(2,024.55 to 9,715.00)       | 2,321.26<br>(974.65 to 7,624.21)         | 4,613.08<br>(2,373.07 to 10,631.82)      | 94.23<br>(67.35 to 161.50)         | 103.84<br>(56.68 to 224.53)        | 61.01<br>(29.37 to 175.33)         | 117.41<br>(65.59 to 242.99)        |
| Tuberculosis                                                      | 2,702.86<br>(2,109.40 to 3,390.60)       | 2,461.29<br>(1,514.47 to 3,774.16)       | 1,168.48<br>(737.75 to 1,729.39)         | 2,935.76<br>(1,799.29 to 4,487.13)       | 78.51<br>(61.89 to 97.68)          | 73.91<br>(45.95 to 111.19)         | 57.63<br>(23.97 to 55.55)          | 85.19<br>(52.36 to 128.45)         |
| HIV/AIDS                                                          | 773.79<br>(43.32 to 3,958.27)            | 1,553.61<br>(134.77 to 7,292.70)         | 1,152.77<br>(52.33 to 6,467.98)          | 1,677.31<br>(150.10 to 7,445.24)         | 15.72<br>(0.79 to 84.23)           | 15.72<br>(2.31 to 149.18)          | 29.93<br>(0.89 to 141.23)          | 32.21<br>(2.89 to 145.28)          |
| Diarrhea, lower respiratory, and other common infectious diseases | 18,479.39<br>(13,917.48 to 24,499.40)    | 15,942.13<br>(9,048.55 to 27,109.51)     | 8,185.69<br>(5,061.96 to 13,127.28)      | 22,873.40<br>(12,556.84 to 40,001.65)    | 379.41<br>(297.05 to 477.32)       | 378.23<br>(221.00 to 613.06)       | 234.53<br>(141.14 to 369.18)       | 509.37<br>(293.02 to 845.39)       |
| Diarrheal diseases                                                | 3,186.30<br>(1,930.18 to 4,907.28)       | 1,737.89<br>(255.24 to 5,407.91)         | 880.39<br>(156.95 to 2,940.79)           | 2,987.87<br>(506.10 to 8,823.88)         | 76.15<br>(44.67 to 128.86)         | 53.44<br>(8.55 to 179.24)          | 34.76<br>(5.90 to 118.93)          | 88.52<br>(14.81 to 297.52)         |
| Intestinal infectious diseases                                    | 936.26<br>(468.17 to 1,595.14)           | 854.62<br>(360.17 to 1,635.32)           | 626.80<br>(278.88 to 1,169.05)           | 965.44<br>(396.56 to 1,850.49)           | 13.48<br>(6.80 to 23.21)           | 12.57<br>(5.52 to 23.72)           | 9.54<br>(4.49 to 17.34)            | 14.00<br>(6.07 to 26.64)           |
| Typhoid fever                                                     | 802.46<br>(395.86 to 1,388.71)           | 711.69<br>(298.67 to 1,369.09)           | 524.41<br>(233.82 to 988.62)             | 803.04<br>(322.95 to 1,581.62)           | 11.50<br>(5.79 to 19.85)           | 10.40<br>(4.56 to 20.10)           | 7.92<br>(3.70 to 14.60)            | 11.58<br>(5.03 to 22.71)           |
| Paratyphoid fever                                                 | 132.23<br>(56.16 to 264.72)              | 142.08<br>(56.59 to 302.32)              | 101.88<br>(41.01 to 212.08)              | 161.40<br>(62.14 to 348.79)              | 1.95<br>(0.84 to 3.90)             | 2.15<br>(0.87 to 4.53)             | 1.60<br>(0.65 to 3.28)             | 2.41<br>(0.94 to 5.17)             |
| Other intestinal infectious diseases                              | 1.58<br>(0.59 to 3.54)                   | 0.85<br>(0.25 to 2.20)                   | 0.51<br>(0.16 to 1.25)                   | 1.00<br>(0.29 to 2.58)                   | 0.03<br>(0.01 to 0.06)             | 0.02<br>(0.01 to 0.04)             | 0.01<br>(0.00 to 0.03)             | 0.02<br>(0.01 to 0.05)             |
| Lower respiratory infections                                      | 11,228.55<br>(8,248.16 to 15,144.05)     | 8,973.60<br>(4,827.27 to 16,326.41)      | 4,863.65<br>(2,883.64 to 7,926.09)       | 12,570.08<br>(6,393.03 to 24,645.20)     | 246.62<br>(188.64 to 313.99)       | 250.90<br>(145.90 to 396.70)       | 160.17<br>(100.91 to 233.19)       | 321.65<br>(180.31 to 534.93)       |
| Upper respiratory infections                                      | 21.19<br>(10.80 to 37.06)                | 20.44<br>(7.16 to 46.91)                 | 11.80<br>(4.15 to 28.28)                 | 24.32<br>(8.27 to 59.20)                 | 0.45<br>(0.24 to 0.72)             | 0.49<br>(0.18 to 1.11)             | 0.30<br>(0.11 to 0.70)             | 0.56<br>(0.20 to 1.30)             |
| Otitis media                                                      | 1.22<br>(0.54 to 2.83)                   | 0.41<br>(0.16 to 1.07)                   | 0.44<br>(0.17 to 1.17)                   | 0.41<br>(0.16 to 1.08)                   | 0.03<br>(0.01 to 0.06)             | 0.01<br>(0.00 to 0.05)             | 0.01<br>(0.01 to 0.03)             | 0.01<br>(0.00 to 0.03)             |
| Meningitis                                                        | 1,264.35<br>(786.44 to 2,069.14)         | 789.45<br>(382.00 to 1,462.34)           | 606.55<br>(316.75 to 1,062.26)           | 984.50<br>(449.92 to 1,936.77)           | 19.10<br>(12.01 to 30.49)          | 13.28<br>(6.87 to 23.27)           | 11.22<br>(5.99 to 20.21)           | 15.48<br>(7.71 to 28.66)           |
| Pneumococcal meningitis                                           | 3.63<br>(2.02 to 6.30)                   | 1.64<br>(0.80 to 3.00)                   | 1.40<br>(0.72 to 2.53)                   | 2.08<br>(0.95 to 4.00)                   | 0.06<br>(0.03 to 0.09)             | 0.03<br>(0.02 to 0.05)             | 0.03<br>(0.02 to 0.05)             | 0.04<br>(0.02 to 0.07)             |
| H influenzae type B meningitis                                    | 135.54<br>(79.07 to 229.15)              | 133.68<br>(37.01 to 378.38)              | 72.22<br>(30.57 to 160.80)               | 267.22<br>(48.75 to 824.68)              | 1.98<br>(1.21 to 3.30)             | 1.89<br>(0.66 to 4.78)             | 1.22<br>(0.61 to 2.36)             | 3.43<br>(0.81 to 10.08)            |
| Meningococcal meningitis                                          | 248.80<br>(144.20 to 418.70)             | 138.01<br>(70.04 to 252.78)              | 112.59<br>(58.34 to 212.83)              | 150.32<br>(75.10 to 276.06)              | 3.94<br>(2.36 to 6.45)             | 2.56<br>(1.35 to 4.72)             | 2.27<br>(1.20 to 4.24)             | 2.67<br>(1.41 to 4.94)             |
| Other meningitis                                                  | 876.38<br>(538.27 to 1,412.30)           | 516.12<br>(258.54 to 919.86)             | 420.33<br>(218.77 to 738.53)             | 564.89<br>(279.00 to 1,034.75)           | 8.81<br>(8.17 to 21.03)            | 8.81<br>(4.59 to 15.42)            | 7.69<br>(4.15 to 13.97)            | 9.34<br>(4.82 to 16.41)            |
| Encephalitis                                                      | 156.27<br>(99.06 to 233.73)              | 177.90<br>(97.94 to 297.44)              | 139.99<br>(77.49 to 232.84)              | 193.53<br>(105.23 to 321.12)             | 2.77<br>(1.76 to 4.13)             | 3.48<br>(2.00 to 5.65)             | 2.94<br>(1.68 to 4.67)             | 3.66<br>(2.07 to 5.84)             |

|                |                                    |                                     |                                  |                                      |                             |                              |                             |                              |
|----------------|------------------------------------|-------------------------------------|----------------------------------|--------------------------------------|-----------------------------|------------------------------|-----------------------------|------------------------------|
| Diphtheria     | 3.02<br>(1.82 to<br>4.94)          | 1.01<br>(0.45 to<br>2.04)           | 0.73<br>(0.39 to<br>1.22)        | 1.76<br>(0.53 to<br>4.67)            | 0.05<br>(0.03 to<br>0.07)   | 0.02<br>(0.01 to<br>0.03)    | 0.01<br>(0.01 to<br>0.02)   | 0.03<br>(0.01 to<br>0.06)    |
| Whooping cough | 1,082.10<br>(83.85 to<br>3,594.69) | 1,076.92<br>(26.74 to<br>3,633.04)  | 167.21<br>(8.14 to<br>643.50)    | 1,427.71<br>(30.70 to<br>5,033.98)   | 12.84<br>(0.99 to<br>42.68) | 12.80<br>(0.32 to<br>43.10)  | 2.06<br>(0.10 to<br>7.81)   | 16.94<br>(0.40 to<br>59.53)  |
| Tetanus        | 10.11<br>(5.42 to<br>20.67)        | 1.96<br>(0.89 to<br>4.23)           | 1.54<br>(0.64 to<br>3.77)        | 2.47<br>(1.10 to<br>5.60)            | 0.21<br>(0.09 to<br>0.52)   | 0.04<br>(0.02 to<br>0.10)    | 0.04<br>(0.01 to<br>0.11)   | 0.05<br>(0.02 to<br>0.10)    |
| Measles        | 461.39<br>(146.99 to<br>1,142.91)  | 2,226.74<br>(120.35 to<br>9,192.57) | 844.14<br>(84.41 to<br>2,688.10) | 3,614.57<br>(140.08 to<br>13,915.53) | 5.53<br>(1.77 to<br>13.63)  | 29.68<br>(1.99 to<br>109.50) | 12.48<br>(1.50 to<br>35.88) | 46.73<br>(2.45 to<br>164.92) |

| Solomon Islands                                       |                                                            |                                                          |                                                        |                                                          |                                                   |                                                   |                                                  |                                                   |
|-------------------------------------------------------|------------------------------------------------------------|----------------------------------------------------------|--------------------------------------------------------|----------------------------------------------------------|---------------------------------------------------|---------------------------------------------------|--------------------------------------------------|---------------------------------------------------|
| Cause                                                 | YLLs (actual counts)                                       |                                                          |                                                        |                                                          | Deaths (actual counts)                            |                                                   |                                                  |                                                   |
|                                                       | 2016                                                       | 2040 Forecast                                            | 2040 Better Scenario                                   | 2040 Worse Scenario                                      | 2016                                              | 2040 Forecast                                     | 2040 Better Scenario                             | 2040 Worse Scenario                               |
| Varicella and herpes zoster                           | 128.64<br>(70.04 to<br>219.45)                             | 81.19<br>(28.96 to<br>169.15)                            | 42.46<br>(17.70 to<br>80.92)                           | 100.73<br>(33.15 to<br>213.92)                           | 2.18<br>(1.41 to<br>3.34)                         | 1.53<br>(0.75 to<br>2.75)                         | 0.99<br>(0.53 to<br>1.72)                        | 1.75<br>(0.80 to<br>3.32)                         |
| <b>Neglected tropical diseases and malaria</b>        | <b>656.90</b><br><b>(113.68 to</b><br><b>1,110.45)</b>     | <b>601.06</b><br><b>(94.81 to</b><br><b>1,058.98)</b>    | <b>601.74</b><br><b>(86.29 to</b><br><b>1,056.70)</b>  | <b>594.27</b><br><b>(98.22 to</b><br><b>1,037.74)</b>    | <b>17.61</b><br><b>(2.45 to</b><br><b>30.64)</b>  | <b>17.25</b><br><b>(2.32 to</b><br><b>30.74)</b>  | <b>18.13</b><br><b>(2.47 to</b><br><b>32.09)</b> | <b>16.50</b><br><b>(2.20 to</b><br><b>29.29)</b>  |
| Malaria                                               | 570.89<br>(34.76 to<br>1,019.53)                           | 492.90<br>(14.97 to<br>932.27)                           | 505.08<br>(14.31 to<br>945.48)                         | 480.52<br>(16.01 to<br>909.30)                           | 15.62<br>(0.59 to<br>28.81)                       | 14.19<br>(0.29 to<br>27.39)                       | 15.00<br>(0.30 to<br>28.97)                      | 13.57<br>(0.29 to<br>26.15)                       |
| Chagas disease                                        | 0.00<br>(0.00 to<br>0.00)                                  | 0.00<br>(0.00 to<br>0.00)                                | 0.00<br>(0.00 to<br>0.00)                              | 0.00<br>(0.00 to<br>0.00)                                | 0.00<br>(0.00 to<br>0.00)                         | 0.00<br>(0.00 to<br>0.00)                         | 0.00<br>(0.00 to<br>0.00)                        | 0.00<br>(0.00 to<br>0.00)                         |
| Leishmaniasis                                         | 0.00<br>(0.00 to<br>0.00)                                  | 0.00<br>(0.00 to<br>0.00)                                | 0.00<br>(0.00 to<br>0.00)                              | 0.00<br>(0.00 to<br>0.00)                                | 0.00<br>(0.00 to<br>0.00)                         | 0.00<br>(0.00 to<br>0.00)                         | 0.00<br>(0.00 to<br>0.00)                        | 0.00<br>(0.00 to<br>0.00)                         |
| African trypanosomiasis                               | 0.00<br>(0.00 to<br>0.00)                                  | 0.00<br>(0.00 to<br>0.00)                                | 0.00<br>(0.00 to<br>0.00)                              | 0.00<br>(0.00 to<br>0.00)                                | 0.00<br>(0.00 to<br>0.00)                         | 0.00<br>(0.00 to<br>0.00)                         | 0.00<br>(0.00 to<br>0.00)                        | 0.00<br>(0.00 to<br>0.00)                         |
| Schistosomiasis                                       | 0.00<br>(0.00 to<br>0.00)                                  | 0.00<br>(0.00 to<br>0.00)                                | 0.00<br>(0.00 to<br>0.00)                              | 0.00<br>(0.00 to<br>0.00)                                | 0.00<br>(0.00 to<br>0.00)                         | 0.00<br>(0.00 to<br>0.00)                         | 0.00<br>(0.00 to<br>0.00)                        | 0.00<br>(0.00 to<br>0.00)                         |
| Cysticercosis                                         | 0.00<br>(0.00 to<br>0.00)                                  | 0.00<br>(0.00 to<br>0.00)                                | 0.00<br>(0.00 to<br>0.00)                              | 0.00<br>(0.00 to<br>0.00)                                | 0.00<br>(0.00 to<br>0.00)                         | 0.00<br>(0.00 to<br>0.00)                         | 0.00<br>(0.00 to<br>0.00)                        | 0.00<br>(0.00 to<br>0.00)                         |
| Cystic echinococcosis                                 | 0.00<br>(0.00 to<br>0.00)                                  | 0.00<br>(0.00 to<br>0.00)                                | 0.00<br>(0.00 to<br>0.00)                              | 0.00<br>(0.00 to<br>0.00)                                | 0.00<br>(0.00 to<br>0.00)                         | 0.00<br>(0.00 to<br>0.00)                         | 0.00<br>(0.00 to<br>0.00)                        | 0.00<br>(0.00 to<br>0.00)                         |
| Dengue                                                | 7.52<br>(3.04 to<br>19.14)                                 | 32.34<br>(13.83 to<br>66.83)                             | 33.36<br>(14.32 to<br>68.72)                           | 31.87<br>(13.41 to<br>66.59)                             | 0.19<br>(0.07 to<br>0.44)                         | 0.97<br>(0.38 to<br>2.01)                         | 1.13<br>(0.47 to<br>2.30)                        | 0.89<br>(0.35 to<br>1.83)                         |
| Yellow fever                                          | 0.00<br>(0.00 to<br>0.00)                                  | 0.00<br>(0.00 to<br>0.00)                                | 0.00<br>(0.00 to<br>0.00)                              | 0.00<br>(0.00 to<br>0.00)                                | 0.00<br>(0.00 to<br>0.00)                         | 0.00<br>(0.00 to<br>0.00)                         | 0.00<br>(0.00 to<br>0.00)                        | 0.00<br>(0.00 to<br>0.00)                         |
| Rabies                                                | 0.41<br>(0.12 to<br>1.21)                                  | 0.24<br>(0.05 to<br>0.66)                                | 0.10<br>(0.03 to<br>0.29)                              | 0.30<br>(0.07 to<br>0.84)                                | 0.01<br>(0.00 to<br>0.03)                         | 0.01<br>(0.00 to<br>0.02)                         | 0.00<br>(0.00 to<br>0.01)                        | 0.01<br>(0.00 to<br>0.02)                         |
| Intestinal nematode infections                        | 35.40<br>(9.59 to<br>78.00)                                | 36.86<br>(10.86 to<br>83.04)                             | 32.25<br>(11.41 to<br>70.39)                           | 40.41<br>(11.05 to<br>94.43)                             | 0.52<br>(0.19 to<br>1.02)                         | 0.60<br>(0.24 to<br>1.19)                         | 0.58<br>(0.26 to<br>1.08)                        | 0.63<br>(0.24 to<br>1.30)                         |
| Other neglected tropical diseases                     | 42.68<br>(25.55 to<br>71.98)                               | 38.74<br>(22.07 to<br>63.73)                             | 30.95<br>(18.01 to<br>49.75)                           | 41.18<br>(23.62 to<br>67.57)                             | 1.27<br>(0.79 to<br>1.96)                         | 1.48<br>(0.78 to<br>2.38)                         | 1.41<br>(0.76 to<br>2.33)                        | 1.41<br>(0.76 to<br>2.24)                         |
| <b>Maternal disorders</b>                             | <b>1,795.92</b><br><b>(1,210.47 to</b><br><b>2,685.19)</b> | <b>1,400.85</b><br><b>(763.33 to</b><br><b>2,231.59)</b> | <b>770.99</b><br><b>(406.92 to</b><br><b>1,299.00)</b> | <b>1,679.32</b><br><b>(872.09 to</b><br><b>2,773.67)</b> | <b>33.33</b><br><b>(22.51 to</b><br><b>49.83)</b> | <b>26.09</b><br><b>(14.19 to</b><br><b>41.52)</b> | <b>14.45</b><br><b>(7.74 to</b><br><b>23.93)</b> | <b>31.18</b><br><b>(16.41 to</b><br><b>51.20)</b> |
| Maternal hemorrhage                                   | 568.27<br>(334.88 to<br>930.77)                            | 428.12<br>(212.94 to<br>749.29)                          | 237.94<br>(112.19 to<br>439.54)                        | 508.36<br>(244.51 to<br>917.31)                          | 10.50<br>(6.18 to<br>17.35)                       | 7.94<br>(3.94 to<br>14.06)                        | 4.44<br>(2.12 to<br>8.11)                        | 9.41<br>(4.49 to<br>17.28)                        |
| Maternal sepsis and other maternal infections         | 198.05<br>(88.25 to<br>374.43)                             | 138.68<br>(52.55 to<br>286.64)                           | 76.54<br>(28.23 to<br>157.83)                          | 165.24<br>(61.48 to<br>341.31)                           | 3.77<br>(1.66 to<br>7.10)                         | 2.65<br>(0.99 to<br>5.39)                         | 1.13<br>(0.55 to<br>3.08)                        | 0.89<br>(0.18 to<br>6.47)                         |
| Maternal hypertensive disorders                       | 250.31<br>(135.50 to<br>413.78)                            | 199.17<br>(91.89 to<br>349.98)                           | 109.78<br>(48.76 to<br>200.83)                         | 236.93<br>(103.51 to<br>414.97)                          | 4.64<br>(2.46 to<br>7.80)                         | 3.71<br>(1.68 to<br>6.53)                         | 2.05<br>(0.88 to<br>3.75)                        | 4.40<br>(1.92 to<br>7.67)                         |
| Maternal obstructed labor and uterine rupture         | 132.97<br>(57.30 to<br>251.29)                             | 107.70<br>(39.05 to<br>226.29)                           | 57.07<br>(19.76 to<br>119.41)                          | 129.22<br>(44.68 to<br>268.78)                           | 2.49<br>(1.09 to<br>4.63)                         | 2.02<br>(0.74 to<br>4.28)                         | 1.08<br>(0.37 to<br>2.27)                        | 2.42<br>(0.84 to<br>5.09)                         |
| Maternal abortion, miscarriage, and ectopic pregnancy | 66.70<br>(24.05 to<br>147.34)                              | 59.43<br>(19.38 to<br>138.81)                            | 33.05<br>(10.70 to<br>77.59)                           | 72.23<br>(23.63 to<br>168.86)                            | 1.26<br>(0.47 to<br>2.71)                         | 1.13<br>(0.37 to<br>2.60)                         | 0.63<br>(0.21 to<br>1.42)                        | 1.37<br>(0.45 to<br>3.21)                         |

|                                        |                                 |                                 |                                |                                 |                           |                           |                           |                           |
|----------------------------------------|---------------------------------|---------------------------------|--------------------------------|---------------------------------|---------------------------|---------------------------|---------------------------|---------------------------|
|                                        | 194.92<br>(101.60 to<br>342.81) | 165.26<br>(74.36 to<br>318.19)  | 88.56<br>(37.78 to<br>168.95)  | 202.25<br>(85.65 to<br>382.40)  | 3.57<br>(1.87 to<br>6.20) | 3.03<br>(1.35 to<br>5.88) | 1.64<br>(0.70 to<br>3.12) | 3.69<br>(1.57 to<br>7.01) |
| Indirect maternal deaths               |                                 |                                 |                                |                                 |                           |                           |                           |                           |
|                                        | 82.01<br>(33.48 to<br>165.58)   | 53.76<br>(18.75 to<br>120.42)   | 28.89<br>(9.66 to<br>67.25)    | 65.27<br>(22.71 to<br>148.37)   | 1.51<br>(0.60 to<br>3.05) | 0.99<br>(0.34 to<br>2.23) | 0.54<br>(0.18 to<br>1.22) | 1.20<br>(0.43 to<br>2.72) |
| Late maternal deaths                   |                                 |                                 |                                |                                 |                           |                           |                           |                           |
|                                        | 0.81<br>(0.04 to<br>4.40)       | 8.58<br>(0.07 to<br>54.28)      | 4.64<br>(0.00 to<br>30.79)     | 10.38<br>(0.12 to<br>66.62)     | 0.01<br>(0.00 to<br>0.08) | 0.16<br>(0.00 to<br>1.02) | 0.09<br>(0.00 to<br>0.58) | 0.19<br>(0.00 to<br>1.27) |
| Maternal deaths aggravated by HIV/AIDS |                                 |                                 |                                |                                 |                           |                           |                           |                           |
|                                        | 301.88<br>(160.55 to<br>509.38) | 240.15<br>(109.04 to<br>442.05) | 134.53<br>(58.17 to<br>249.64) | 289.44<br>(123.30 to<br>529.48) | 5.57<br>(2.99 to<br>9.37) | 4.46<br>(2.05 to<br>8.28) | 2.52<br>(1.11 to<br>4.71) | 5.35<br>(2.30 to<br>9.83) |
| Other maternal disorders               |                                 |                                 |                                |                                 |                           |                           |                           |                           |



| Solomon Islands                                                         |                                             |                                             |                                           |                                             |                                    |                                    |                                   |                                    |
|-------------------------------------------------------------------------|---------------------------------------------|---------------------------------------------|-------------------------------------------|---------------------------------------------|------------------------------------|------------------------------------|-----------------------------------|------------------------------------|
| Cause                                                                   | YLLs (actual counts)                        |                                             |                                           |                                             | Deaths (actual counts)             |                                    |                                   |                                    |
|                                                                         | 2016                                        | 2040 Forecast                               | 2040 Better Scenario                      | 2040 Worse Scenario                         | 2016                               | 2040 Forecast                      | 2040 Better Scenario              | 2040 Worse Scenario                |
| <b>Neonatal disorders</b>                                               | <b>13,839.80</b><br>(8,344.61 to 21,758.83) | <b>10,694.37</b><br>(5,807.95 to 18,475.51) | <b>5,167.77</b><br>(2,833.23 to 8,846.09) | <b>14,884.20</b><br>(8,191.34 to 25,681.45) | <b>159.95</b><br>(96.44 to 251.56) | <b>123.65</b><br>(67.14 to 213.62) | <b>59.76</b><br>(32.76 to 102.35) | <b>172.08</b><br>(94.68 to 297.04) |
| Neonatal preterm birth                                                  | 6,020.91<br>(3,101.79 to 10,221.22)         | 4,358.93<br>(2,157.23 to 7,876.93)          | 1,953.12<br>(965.49 to 3,565.46)          | 6,136.58<br>(3,102.55 to 10,917.43)         | 69.56<br>(35.83 to 118.07)         | 50.37<br>(24.93 to 91.00)          | 22.57<br>(11.16 to 41.21)         | 70.91<br>(35.84 to 126.13)         |
| Neonatal encephalopathy due to birth asphyxia and trauma                | 3,624.49<br>(1,777.30 to 6,336.42)          | 2,643.14<br>(1,172.99 to 5,223.01)          | 1,414.99<br>(640.48 to 2,711.35)          | 3,596.77<br>(1,617.40 to 7,031.71)          | 41.90<br>(20.55 to 73.22)          | 30.57<br>(13.57 to 60.39)          | 16.37<br>(7.42 to 31.37)          | 41.60<br>(18.73 to 81.24)          |
| Neonatal sepsis and other neonatal infections                           | 1,218.78<br>(686.86 to 2,168.16)            | 1,216.95<br>(522.13 to 2,405.38)            | 635.74<br>(272.73 to 1,282.10)            | 1,665.91<br>(703.00 to 3,253.98)            | 14.09<br>(7.01 to 25.05)           | 14.07<br>(6.04 to 27.79)           | 7.35<br>(3.15 to 14.82)           | 19.26<br>(8.13 to 37.60)           |
| Hemolytic disease and other neonatal jaundice                           | 175.02<br>(75.98 to 359.76)                 | 88.80<br>(29.96 to 218.18)                  | 41.82<br>(13.91 to 100.29)                | 125.75<br>(42.94 to 292.83)                 | 2.02<br>(0.88 to 4.16)             | 1.03<br>(0.35 to 2.52)             | 0.48<br>(0.16 to 1.16)            | 1.45<br>(0.50 to 3.38)             |
| Other neonatal disorders                                                | 2,800.59<br>(1,423.86 to 4,820.72)          | 2,386.57<br>(1,120.86 to 4,554.25)          | 1,122.11<br>(527.20 to 2,159.10)          | 3,359.18<br>(1,539.81 to 6,295.49)          | 32.39<br>(16.47 to 55.80)          | 27.61<br>(12.97 to 52.67)          | 12.98<br>(6.10 to 24.98)          | 38.85<br>(17.82 to 72.79)          |
| <b>Nutritional deficiencies</b>                                         | <b>1,172.84</b><br>(760.08 to 1,821.57)     | <b>658.76</b><br>(421.80 to 1,060.35)       | <b>444.18</b><br>(304.59 to 664.25)       | <b>769.74</b><br>(473.05 to 1,292.92)       | <b>25.83</b><br>(19.90 to 34.38)   | <b>19.39</b><br>(13.77 to 25.65)   | <b>17.19</b><br>(12.52 to 22.16)  | <b>19.56</b><br>(13.80 to 26.59)   |
| Protein-energy malnutrition                                             | 1,136.26<br>(731.60 to 1,783.13)            | 609.08<br>(377.62 to 985.59)                | 407.41<br>(270.10 to 622.86)              | 714.60<br>(421.82 to 1,209.46)              | 24.83<br>(18.95 to 33.48)          | 17.89<br>(12.70 to 23.86)          | 15.90<br>(11.56 to 20.70)         | 18.04<br>(12.57 to 24.82)          |
| Iodine deficiency                                                       | 8.65<br>(0.64 to 30.33)                     | 22.99<br>(0.59 to 107.84)                   | 14.86<br>(0.39 to 54.90)                  | 27.01<br>(0.69 to 141.87)                   | 0.21<br>(0.02 to 0.63)             | 0.21<br>(0.02 to 0.63)             | 0.54<br>(0.01 to 2.04)            | 0.71<br>(0.02 to 2.27)             |
| Dietary iron deficiency                                                 | 5.85<br>(4.02 to 8.61)                      | 5.99<br>(3.82 to 10.33)                     | 4.88<br>(3.06 to 8.67)                    | 6.45<br>(4.17 to 10.81)                     | 0.11<br>(0.07 to 0.21)             | 0.11<br>(0.08 to 0.26)             | 0.11<br>(0.06 to 0.27)            | 0.13<br>(0.08 to 0.26)             |
| Other nutritional deficiencies                                          | 22.09<br>(14.14 to 34.50)                   | 20.70<br>(12.37 to 32.82)                   | 17.03<br>(10.56 to 26.55)                 | 21.67<br>(13.06 to 35.14)                   | 0.68<br>(0.43 to 1.03)             | 0.69<br>(0.42 to 1.08)             | 0.64<br>(0.38 to 1.00)            | 0.68<br>(0.41 to 1.06)             |
| <b>Other communicable, maternal, neonatal, and nutritional diseases</b> | <b>4,980.86</b><br>(2,092.78 to 9,390.87)   | <b>2,556.12</b><br>(1,323.86 to 4,530.16)   | <b>1,718.67</b><br>(981.58 to 2,886.43)   | <b>3,038.54</b><br>(1,492.26 to 5,655.62)   | <b>68.13</b><br>(33.51 to 122.82)  | <b>42.27</b><br>(25.70 to 67.61)   | <b>31.13</b><br>(20.15 to 46.93)  | <b>47.87</b><br>(27.90 to 79.96)   |
| Sexually transmitted infections excluding HIV                           | 3,591.89<br>(1,181.53 to 8,202.73)          | 1,480.57<br>(403.21 to 3,307.89)            | 907.45<br>(279.72 to 1,972.95)            | 1,853.14<br>(481.81 to 4,123.15)            | 47.84<br>(15.02 to 97.93)          | 18.37<br>(5.95 to 39.61)           | 11.57<br>(4.25 to 23.90)          | 22.74<br>(6.83 to 49.16)           |
| Syphilis                                                                | 3,900.48<br>(1,101.18 to 8,067.15)          | 1,400.60<br>(324.03 to 3,237.93)            | 835.83<br>(207.35 to 1,894.83)            | 1,771.18<br>(397.32 to 4,053.44)            | 45.89<br>(13.03 to 94.99)          | 16.64<br>(3.97 to 38.21)           | 10.00<br>(2.60 to 22.45)          | 20.98<br>(4.84 to 47.73)           |
| Chlamydial infection                                                    | 17.80<br>(9.11 to 28.66)                    | 15.58<br>(7.48 to 27.77)                    | 13.89<br>(6.52 to 24.61)                  | 15.99<br>(7.60 to 28.83)                    | 0.38<br>(0.19 to 0.60)             | 0.33<br>(0.16 to 0.59)             | 0.30<br>(0.14 to 0.54)            | 0.34<br>(0.16 to 0.61)             |
| Gonococcal infection                                                    | 47.00<br>(23.76 to 76.63)                   | 41.10<br>(19.51 to 75.35)                   | 36.95<br>(17.18 to 68.19)                 | 42.05<br>(19.57 to 75.81)                   | 1.01<br>(0.51 to 1.65)             | 0.90<br>(0.42 to 1.62)             | 0.82<br>(0.38 to 1.48)            | 0.91<br>(0.42 to 1.65)             |
| Other sexually transmitted infections                                   | 26.61<br>(13.69 to 43.14)                   | 23.30<br>(10.99 to 40.61)                   | 20.78<br>(9.78 to 36.81)                  | 23.91<br>(11.07 to 41.86)                   | 0.57<br>(0.29 to 0.93)             | 0.50<br>(0.24 to 0.88)             | 0.45<br>(0.21 to 0.80)            | 0.51<br>(0.24 to 0.90)             |
| Acute hepatitis                                                         | 346.06<br>(254.14 to 454.37)                | 312.41<br>(196.82 to 447.40)                | 255.80<br>(161.25 to 374.65)              | 329.22<br>(203.46 to 473.52)                | 7.93<br>(5.82 to 10.43)            | 7.66<br>(4.88 to 11.05)            | 6.48<br>(4.12 to 9.45)            | 7.90<br>(4.89 to 11.50)            |
| Acute hepatitis A                                                       | 13.18<br>(8.04 to 20.05)                    | 7.49<br>(4.13 to 13.13)                     | 5.43<br>(3.04 to 9.08)                    | 8.61<br>(4.70 to 15.34)                     | 0.21<br>(0.14 to 0.31)             | 0.14<br>(0.08 to 0.23)             | 0.11<br>(0.07 to 0.18)            | 0.16<br>(0.09 to 0.26)             |
| Acute hepatitis B                                                       | 283.01<br>(203.81 to 378.07)                | 264.70<br>(163.83 to 388.67)                | 218.28<br>(134.48 to 324.52)              | 276.79<br>(165.98 to 405.26)                | 6.81<br>(4.93 to 9.09)             | 6.68<br>(4.18 to 9.68)             | 5.64<br>(3.52 to 8.38)            | 6.88<br>(4.18 to 10.06)            |

|                                       |                                                                 |                                                                  |                                                                |                                                                  |                                                            |                                                            |                                                            |                                                            |
|---------------------------------------|-----------------------------------------------------------------|------------------------------------------------------------------|----------------------------------------------------------------|------------------------------------------------------------------|------------------------------------------------------------|------------------------------------------------------------|------------------------------------------------------------|------------------------------------------------------------|
| Acute hepatitis C                     | 3.91<br>(2.52 to<br>5.90)                                       | 4.22<br>(2.48 to<br>6.73)                                        | 4.01<br>(2.35 to<br>6.43)                                      | 4.23<br>(2.48 to<br>6.80)                                        | 0.10<br>(0.07 to<br>0.16)                                  | 0.12<br>(0.07 to<br>0.19)                                  | 0.12<br>(0.07 to<br>0.20)                                  | 0.12<br>(0.07 to<br>0.19)                                  |
| Acute hepatitis E                     | 45.97<br>(29.50 to<br>68.59)                                    | 36.00<br>(19.25 to<br>61.10)                                     | 28.08<br>(14.79 to<br>46.63)                                   | 39.58<br>(20.82 to<br>69.29)                                     | 0.81<br>(0.53 to<br>1.15)                                  | 0.71<br>(0.40 to<br>1.13)                                  | 0.61<br>(0.34 to<br>1.00)                                  | 0.75<br>(0.41 to<br>1.20)                                  |
| Other unspecified infectious diseases | 642.91<br>(371.50 to<br>1,425.58)                               | 763.14<br>(450.44 to<br>1,319.42)                                | 555.42<br>(332.74 to<br>936.93)                                | 856.19<br>(498.14 to<br>1,520.25)                                | 12.36<br>(7.80 to<br>22.39)                                | 16.24<br>(10.48 to<br>25.65)                               | 13.08<br>(8.38 to<br>20.24)                                | 17.23<br>(11.00 to<br>27.70)                               |
| <b>Non-communicable diseases</b>      | <b>104,430.72</b><br><b>(86,433.44 to</b><br><b>127,523.54)</b> | <b>140,456.08</b><br><b>(113,958.21 to</b><br><b>170,816.79)</b> | <b>90,895.02</b><br><b>(74,620.89 to</b><br><b>112,716.49)</b> | <b>172,549.44</b><br><b>(140,530.71 to</b><br><b>206,466.27)</b> | <b>3,473.78</b><br><b>(2,919.99 to</b><br><b>4,187.87)</b> | <b>5,080.05</b><br><b>(4,411.09 to</b><br><b>5,856.43)</b> | <b>3,581.52</b><br><b>(3,111.21 to</b><br><b>4,197.50)</b> | <b>6,010.46</b><br><b>(5,218.03 to</b><br><b>6,813.58)</b> |

| Solomon Islands                      |                                       |                                       |                                       |                                       |                              |                              |                              |                              |
|--------------------------------------|---------------------------------------|---------------------------------------|---------------------------------------|---------------------------------------|------------------------------|------------------------------|------------------------------|------------------------------|
| Cause                                | YLLs (actual counts)                  |                                       |                                       |                                       | Deaths (actual counts)       |                              |                              |                              |
|                                      | 2016                                  | 2040 Forecast                         | 2040 Better Scenario                  | 2040 Worse Scenario                   | 2016                         | 2040 Forecast                | 2040 Better Scenario         | 2040 Worse Scenario          |
| Neoplasms                            | 13,788.55<br>(10,769.04 to 17,722.42) | 19,957.11<br>(14,749.31 to 26,711.59) | 17,502.65<br>(13,543.36 to 22,684.85) | 21,702.14<br>(15,790.06 to 29,268.26) | 436.06<br>(347.30 to 553.25) | 676.77<br>(519.37 to 884.99) | 632.40<br>(507.79 to 789.89) | 712.13<br>(530.14 to 940.51) |
| Lip and oral cavity cancer           | 193.57<br>(151.42 to 250.13)          | 324.89<br>(195.15 to 542.15)          | 209.49<br>(137.44 to 323.34)          | 393.44<br>(229.29 to 688.67)          | 6.68<br>(5.41 to 8.45)       | 11.11<br>(7.05 to 18.01)     | 7.76<br>(5.35 to 11.39)      | 12.99<br>(7.90 to 21.54)     |
| Nasopharynx cancer                   | 185.56<br>(127.12 to 281.01)          | 367.12<br>(176.54 to 725.45)          | 211.38<br>(113.26 to 403.16)          | 447.48<br>(210.65 to 900.11)          | 5.68<br>(3.93 to 8.43)       | 11.39<br>(5.67 to 22.75)     | 6.84<br>(3.80 to 13.07)      | 13.66<br>(6.60 to 27.28)     |
| Other pharynx cancer                 | 180.87<br>(119.30 to 279.69)          | 252.68<br>(138.60 to 392.27)          | 188.96<br>(121.43 to 298.76)          | 239.37<br>(139.45 to 412.16)          | 5.84<br>(4.01 to 8.74)       | 7.97<br>(4.91 to 13.00)      | 6.88<br>(4.57 to 10.55)      | 7.96<br>(4.84 to 13.13)      |
| Esophageal cancer                    | 182.14<br>(141.69 to 238.14)          | 274.96<br>(146.97 to 510.69)          | 179.05<br>(105.52 to 306.86)          | 333.68<br>(168.35 to 640.61)          | 6.65<br>(5.34 to 8.57)       | 10.12<br>(5.78 to 17.71)     | 7.04<br>(4.41 to 11.67)      | 11.92<br>(6.32 to 22.21)     |
| Stomach cancer                       | 1,222.78<br>(967.46 to 1,524.50)      | 1,198.22<br>(900.46 to 1,544.88)      | 1,061.47<br>(816.30 to 1,334.11)      | 1,257.60<br>(926.08 to 1,641.84)      | 42.45<br>(34.43 to 51.76)    | 43.87<br>(34.05 to 55.13)    | 41.72<br>(32.99 to 51.13)    | 44.33<br>(33.87 to 56.80)    |
| Colon and rectum cancer              | 768.57<br>(526.30 to 1,149.95)        | 1,356.25<br>(815.06 to 2,320.75)      | 1,374.16<br>(860.35 to 2,242.87)      | 1,311.64<br>(780.46 to 2,224.03)      | 27.66<br>(19.85 to 40.40)    | 51.85<br>(32.12 to 90.25)    | 56.48<br>(36.55 to 94.99)    | 48.14<br>(28.84 to 83.48)    |
| Liver cancer                         | 1,453.85<br>(641.49 to 2,217.66)      | 2,482.06<br>(1,011.08 to 4,164.32)    | 2,104.18<br>(895.25 to 3,406.40)      | 2,969.35<br>(1,167.46 to 5,188.74)    | 46.11<br>(21.99 to 66.25)    | 80.99<br>(36.51 to 131.64)   | 73.06<br>(34.67 to 113.04)   | 93.37<br>(39.69 to 158.88)   |
| Liver cancer due to hepatitis B      | 904.54<br>(406.37 to 1,350.19)        | 1,497.15<br>(608.45 to 2,559.40)      | 1,283.08<br>(542.36 to 2,090.62)      | 1,794.49<br>(702.40 to 3,152.91)      | 27.57<br>(13.14 to 39.60)    | 47.05<br>(20.78 to 76.99)    | 42.70<br>(19.87 to 66.53)    | 54.51<br>(23.06 to 92.82)    |
| Liver cancer due to hepatitis C      | 140.91<br>(70.20 to 210.69)           | 245.94<br>(114.06 to 405.53)          | 222.27<br>(108.05 to 347.02)          | 284.64<br>(125.27 to 489.53)          | 5.57<br>(2.92 to 7.91)       | 9.91<br>(4.98 to 15.61)      | 9.67<br>(5.05 to 14.71)      | 10.93<br>(5.17 to 17.91)     |
| Liver cancer due to alcohol use      | 78.04<br>(37.29 to 116.76)            | 144.75<br>(61.95 to 252.26)           | 113.77<br>(52.47 to 187.11)           | 174.45<br>(71.32 to 313.11)           | 2.77<br>(1.39 to 4.07)       | 5.06<br>(2.36 to 8.45)       | 4.28<br>(2.15 to 6.90)       | 3.87<br>(2.61 to 10.19)      |
| Liver cancer due to other causes     | 330.37<br>(127.63 to 520.91)          | 594.22<br>(205.77 to 1,086.24)        | 485.07<br>(177.75 to 843.41)          | 715.77<br>(238.80 to 1,362.79)        | 10.20<br>(4.25 to 15.35)     | 18.97<br>(7.06 to 33.85)     | 16.41<br>(6.56 to 27.83)     | 22.07<br>(7.81 to 41.15)     |
| Gallbladder and biliary tract cancer | 102.55<br>(65.38 to 156.63)           | 105.06<br>(68.73 to 153.42)           | 117.39<br>(77.78 to 170.20)           | 98.28<br>(63.67 to 143.99)            | 3.91<br>(2.63 to 5.80)       | 4.23<br>(2.81 to 6.06)       | 5.02<br>(3.43 to 7.06)       | 3.83<br>(2.48 to 5.54)       |
| Pancreatic cancer                    | 276.57<br>(223.15 to 348.58)          | 512.35<br>(347.53 to 744.78)          | 517.70<br>(365.45 to 724.85)          | 511.07<br>(342.46 to 749.36)          | 11.02<br>(9.16 to 13.54)     | 20.86<br>(14.27 to 30.28)    | 22.36<br>(16.11 to 30.84)    | 20.09<br>(13.62 to 29.67)    |
| Larynx cancer                        | 159.82<br>(128.40 to 199.70)          | 220.83<br>(113.54 to 397.40)          | 131.96<br>(73.74 to 245.14)           | 269.75<br>(138.00 to 472.37)          | 5.66<br>(4.63 to 6.91)       | 8.00<br>(4.08 to 14.65)      | 4.92<br>(2.74 to 9.12)       | 9.62<br>(4.86 to 16.57)      |
| Tracheal, bronchus, and lung cancer  | 1,711.90<br>(1,239.28 to 2,405.59)    | 2,706.73<br>(1,346.17 to 5,082.38)    | 1,527.96<br>(818.56 to 2,804.58)      | 3,539.19<br>(1,755.01 to 6,431.68)    | 62.53<br>(47.07 to 85.78)    | 101.15<br>(52.70 to 190.67)  | 58.40<br>(33.37 to 105.82)   | 130.23<br>(67.51 to 238.40)  |
| Malignant skin melanoma              | 58.07<br>(38.06 to 98.30)             | 89.75<br>(59.19 to 152.45)            | 110.18<br>(71.99 to 191.93)           | 82.35<br>(54.67 to 137.75)            | 2.00<br>(1.37 to 3.39)       | 3.27<br>(2.19 to 5.54)       | 4.33<br>(2.89 to 7.39)       | 2.89<br>(1.94 to 4.90)       |
| Non-melanoma skin cancer             | 116.85<br>(80.76 to 163.62)           | 178.22<br>(125.78 to 239.63)          | 175.12<br>(123.73 to 234.60)          | 173.58<br>(120.05 to 235.88)          | 4.59<br>(3.36 to 6.02)       | 7.42<br>(5.41 to 9.61)       | 8.10<br>(6.02 to 10.41)      | 6.84<br>(4.91 to 8.79)       |
| Breast cancer                        | 1,701.15<br>(962.46 to 2,761.51)      | 2,542.27<br>(1,284.94 to 4,594.01)    | 2,407.00<br>(1,293.45 to 4,199.05)    | 2,551.28<br>(1,266.82 to 4,625.86)    | 50.01<br>(29.57 to 80.49)    | 81.88<br>(43.61 to 150.10)   | 81.58<br>(46.39 to 143.49)   | 79.84<br>(40.97 to 146.11)   |
| Cervical cancer                      | 1,225.92<br>(597.34 to 1,775.05)      | 1,357.56<br>(672.41 to 2,090.97)      | 1,160.80<br>(603.13 to 1,717.86)      | 1,453.23<br>(705.58 to 2,298.13)      | 34.36<br>(17.22 to 49.04)    | 40.52<br>(20.40 to 60.20)    | 35.85<br>(18.83 to 51.89)    | 42.44<br>(20.71 to 64.95)    |

|                   |                                 |                                 |                                   |                                 |                              |                              |                              |                              |
|-------------------|---------------------------------|---------------------------------|-----------------------------------|---------------------------------|------------------------------|------------------------------|------------------------------|------------------------------|
| Uterine cancer    | 379.18<br>(239.02 to<br>533.05) | 559.93<br>(358.02 to<br>781.70) | 500.03<br>(330.72 to<br>696.87)   | 562.12<br>(348.99 to<br>779.36) | 12.62<br>(8.23 to<br>17.48)  | 20.08<br>(13.25 to<br>27.38) | 18.66<br>(12.68 to<br>25.49) | 19.68<br>(12.33 to<br>26.73) |
| Ovarian cancer    | 173.72<br>(125.35 to<br>259.20) | 308.74<br>(194.62 to<br>501.59) | 346.95<br>(224.82 to<br>551.57)   | 294.34<br>(185.62 to<br>484.60) | 5.82<br>(4.33 to<br>8.32)    | 11.06<br>(7.06 to<br>18.00)  | 12.88<br>(8.43 to<br>20.27)  | 10.31<br>(6.42 to<br>16.94)  |
| Prostate cancer   | 338.62<br>(252.66 to<br>482.27) | 631.87<br>(451.60 to<br>923.04) | 778.22<br>(583.51 to<br>1,104.22) | 562.69<br>(385.47 to<br>842.54) | 20.24<br>(15.38 to<br>27.75) | 38.08<br>(25.87 to<br>55.36) | 50.37<br>(36.20 to<br>69.63) | 32.57<br>(21.21 to<br>48.65) |
| Testicular cancer | 50.26<br>(34.36 to<br>68.28)    | 59.96<br>(40.70 to<br>83.32)    | 55.08<br>(36.87 to<br>76.27)      | 61.13<br>(41.22 to<br>84.18)    | 1.09<br>(0.76 to<br>1.47)    | 1.33<br>(0.93 to<br>1.79)    | 1.27<br>(0.88 to<br>1.70)    | 1.32<br>(0.93 to<br>1.78)    |

| Solomon Islands                 |                                                 |                                                 |                                                 |                                                  |                                              |                                              |                                            |                                              |
|---------------------------------|-------------------------------------------------|-------------------------------------------------|-------------------------------------------------|--------------------------------------------------|----------------------------------------------|----------------------------------------------|--------------------------------------------|----------------------------------------------|
| Cause                           | YLLs (actual counts)                            |                                                 |                                                 |                                                  | Deaths (actual counts)                       |                                              |                                            |                                              |
|                                 | 2016                                            | 2040 Forecast                                   | 2040 Better Scenario                            | 2040 Worse Scenario                              | 2016                                         | 2040 Forecast                                | 2040 Better Scenario                       | 2040 Worse Scenario                          |
| Kidney cancer                   | 83.53<br>(60.77 to<br>121.72)                   | 140.57<br>(93.52 to<br>224.02)                  | 150.65<br>(103.33 to<br>233.96)                 | 140.16<br>(92.01 to<br>226.56)                   | 2.59<br>(1.89 to<br>3.74)                    | 4.78<br>(3.16 to<br>7.57)                    | 5.55<br>(3.75 to<br>8.47)                  | 4.56<br>(2.96 to<br>7.35)                    |
| Bladder cancer                  | 115.78<br>(87.12 to<br>171.58)                  | 168.40<br>(101.89 to<br>286.35)                 | 148.18<br>(94.43 to<br>240.35)                  | 176.94<br>(104.62 to<br>305.60)                  | 4.82<br>(3.78 to<br>6.84)                    | 7.22<br>(4.50 to<br>11.97)                   | 6.85<br>(4.54 to<br>10.94)                 | 7.27<br>(4.37 to<br>12.27)                   |
| Brain and nervous system cancer | 296.92<br>(206.69 to<br>387.72)                 | 462.04<br>(322.80 to<br>604.52)                 | 465.93<br>(325.12 to<br>602.45)                 | 465.52<br>(324.00 to<br>605.01)                  | 6.58<br>(4.56 to<br>8.52)                    | 11.25<br>(7.87 to<br>14.37)                  | 12.27<br>(8.50 to<br>15.82)                | 10.84<br>(7.62 to<br>13.77)                  |
| Thyroid cancer                  | 70.45<br>(49.41 to<br>96.96)                    | 96.44<br>(65.28 to<br>137.54)                   | 87.15<br>(60.06 to<br>121.91)                   | 103.54<br>(68.00 to<br>150.04)                   | 2.56<br>(1.85 to<br>3.54)                    | 3.69<br>(2.52 to<br>5.21)                    | 3.54<br>(2.52 to<br>4.89)                  | 3.82<br>(2.59 to<br>5.51)                    |
| Mesothelioma                    | 27.18<br>(18.10 to<br>42.02)                    | 38.99<br>(26.62 to<br>59.25)                    | 39.37<br>(26.59 to<br>61.63)                    | 38.02<br>(25.94 to<br>57.90)                     | 0.87<br>(0.59 to<br>1.33)                    | 1.31<br>(0.92 to<br>1.93)                    | 1.39<br>(0.96 to<br>2.12)                  | 1.24<br>(0.87 to<br>1.83)                    |
| Hodgkin lymphoma                | 99.55<br>(71.79 to<br>130.19)                   | 102.89<br>(69.79 to<br>141.71)                  | 79.69<br>(54.24 to<br>111.28)                   | 110.52<br>(75.14 to<br>157.00)                   | 2.27<br>(1.65 to<br>2.97)                    | 2.48<br>(1.76 to<br>3.31)                    | 2.03<br>(1.45 to<br>2.70)                  | 2.58<br>(1.82 to<br>3.47)                    |
| Non-Hodgkin lymphoma            | 364.46<br>(277.36 to<br>520.79)                 | 531.39<br>(395.34 to<br>740.89)                 | 560.22<br>(419.95 to<br>788.89)                 | 537.95<br>(395.74 to<br>755.01)                  | 9.41<br>(7.20 to<br>13.19)                   | 15.16<br>(11.44 to<br>21.17)                 | 17.44<br>(13.29 to<br>24.21)               | 14.63<br>(11.00 to<br>20.46)                 |
| Multiple myeloma                | 119.31<br>(84.56 to<br>162.91)                  | 206.11<br>(145.70 to<br>278.29)                 | 233.98<br>(167.98 to<br>309.89)                 | 201.86<br>(142.26 to<br>273.86)                  | 4.24<br>(3.09 to<br>5.69)                    | 7.76<br>(5.54 to<br>10.30)                   | 9.32<br>(6.75 to<br>12.33)                 | 7.35<br>(5.17 to<br>9.78)                    |
| Leukemia                        | 1,138.50<br>(770.02 to<br>1,580.65)             | 1,325.33<br>(887.64 to<br>1,936.86)             | 1,208.84<br>(828.22 to<br>1,743.73)             | 1,439.19<br>(955.91 to<br>2,142.19)              | 23.87<br>(16.14 to<br>33.40)                 | 31.44<br>(21.14 to<br>46.29)                 | 30.76<br>(21.34 to<br>44.24)               | 33.03<br>(21.69 to<br>49.50)                 |
| Acute lymphoid leukemia         | 220.98<br>(143.94 to<br>320.73)                 | 239.97<br>(148.58 to<br>372.18)                 | 219.29<br>(136.81 to<br>330.90)                 | 260.77<br>(158.98 to<br>406.92)                  | 3.67<br>(2.42 to<br>5.37)                    | 4.46<br>(2.81 to<br>6.82)                    | 4.29<br>(2.73 to<br>6.48)                  | 4.76<br>(2.96 to<br>7.31)                    |
| Chronic lymphoid leukemia       | 17.71<br>(11.29 to<br>26.84)                    | 24.51<br>(14.52 to<br>39.80)                    | 24.58<br>(14.84 to<br>39.28)                    | 25.35<br>(14.76 to<br>42.15)                     | 0.67<br>(0.43 to<br>1.02)                    | 0.98<br>(0.58 to<br>1.57)                    | 1.06<br>(0.64 to<br>1.65)                  | 0.97<br>(0.56 to<br>1.61)                    |
| Acute myeloid leukemia          | 335.27<br>(199.93 to<br>477.19)                 | 485.52<br>(306.41 to<br>683.12)                 | 484.57<br>(311.97 to<br>673.36)                 | 513.33<br>(315.10 to<br>730.45)                  | 6.64<br>(3.96 to<br>9.34)                    | 10.79<br>(6.73 to<br>14.83)                  | 11.56<br>(7.32 to<br>15.53)                | 11.08<br>(6.80 to<br>15.59)                  |
| Chronic myeloid leukemia        | 153.36<br>(84.04 to<br>241.23)                  | 150.50<br>(75.23 to<br>256.27)                  | 141.11<br>(72.29 to<br>236.80)                  | 162.45<br>(79.68 to<br>284.49)                   | 4.14<br>(2.38 to<br>6.49)                    | 4.32<br>(2.27 to<br>7.24)                    | 4.24<br>(2.29 to<br>6.96)                  | 4.54<br>(2.32 to<br>7.72)                    |
| Other leukemia                  | 411.18<br>(236.95 to<br>640.28)                 | 424.83<br>(227.17 to<br>722.68)                 | 339.29<br>(181.56 to<br>581.76)                 | 477.30<br>(252.52 to<br>835.08)                  | 8.75<br>(5.11 to<br>13.67)                   | 10.89<br>(5.80 to<br>18.72)                  | 9.62<br>(5.23 to<br>16.23)                 | 11.69<br>(6.16 to<br>20.29)                  |
| Other neoplasms                 | 990.94<br>(765.60 to<br>1,228.55)               | 1,375.50<br>(1,073.89 to<br>1,672.76)           | 1,371.57<br>(1,065.42 to<br>1,670.59)           | 1,376.87<br>(1,077.70 to<br>1,682.94)            | 23.92<br>(18.51 to<br>29.59)                 | 36.50<br>(28.56 to<br>43.83)                 | 39.74<br>(30.95 to<br>47.78)               | 34.77<br>(27.58 to<br>43.02)                 |
| <b>Cardiovascular diseases</b>  | <b>45,481.87</b><br>(37,290.05 to<br>55,804.32) | <b>56,010.03</b><br>(39,464.32 to<br>76,339.80) | <b>26,550.23</b><br>(19,342.72 to<br>36,436.94) | <b>76,589.36</b><br>(55,261.57 to<br>100,205.35) | <b>1,611.22</b><br>(1,347.13 to<br>1,949.42) | <b>2,097.00</b><br>(1,585.19 to<br>2,734.92) | <b>1,128.57</b><br>(870.23 to<br>1,475.35) | <b>2,757.15</b><br>(2,089.35 to<br>3,521.85) |
| Rheumatic heart disease         | 3,246.17<br>(2,423.88 to<br>4,147.77)           | 1,812.63<br>(1,273.84 to<br>2,413.99)           | 1,298.20<br>(936.20 to<br>1,743.87)             | 1,997.98<br>(1,372.40 to<br>2,740.29)            | 80.55<br>(58.90 to<br>104.29)                | 51.11<br>(36.21 to<br>67.92)                 | 39.94<br>(28.90 to<br>52.67)               | 53.80<br>(37.84 to<br>72.56)                 |
| Ischemic heart disease          | 20,018.92<br>(16,138.75 to<br>25,347.00)        | 27,261.87<br>(14,642.52 to<br>43,162.01)        | 10,720.01<br>(5,828.11 to<br>19,608.88)         | 38,485.21<br>(22,357.56 to<br>57,636.77)         | 740.26<br>(608.95 to<br>911.61)              | 1,022.49<br>(602.12 to<br>1,610.01)          | 466.07<br>(277.41 to<br>799.56)            | 1,391.67<br>(855.08 to<br>2,116.61)          |
| Stroke                          | 16,033.62<br>(13,138.67 to<br>19,810.93)        | 18,178.33<br>(10,968.42 to<br>28,504.82)        | 7,593.12<br>(4,668.33 to<br>12,294.31)          | 26,434.81<br>(15,941.65 to<br>39,287.59)         | 578.31<br>(480.56 to<br>702.87)              | 694.47<br>(449.65 to<br>1,055.56)            | 334.60<br>(221.79 to<br>539.86)            | 966.98<br>(620.46 to<br>1,403.55)            |
| Ischemic stroke                 | 4,079.88<br>(3,246.15 to<br>5,042.99)           | 4,439.03<br>(2,618.75 to<br>7,655.06)           | 2,343.98<br>(1,324.54 to<br>4,403.45)           | 5,802.36<br>(3,328.41 to<br>9,679.28)            | 185.47<br>(151.03 to<br>225.13)              | 212.03<br>(121.79 to<br>427.44)              | 126.80<br>(72.42 to<br>294.19)             | 266.28<br>(149.43 to<br>506.60)              |

|                                |                                         |                                         |                                       |                                          |                                 |                                 |                                 |                                   |
|--------------------------------|-----------------------------------------|-----------------------------------------|---------------------------------------|------------------------------------------|---------------------------------|---------------------------------|---------------------------------|-----------------------------------|
| Intracerebral hemorrhage       | 11,953.74<br>(9,725.85 to<br>14,886.65) | 13,739.30<br>(7,376.37 to<br>23,714.59) | 5,249.14<br>(2,945.35 to<br>9,383.11) | 20,632.46<br>(11,270.11 to<br>32,418.68) | 392.84<br>(323.56 to<br>481.85) | 482.44<br>(284.66 to<br>806.66) | 207.80<br>(129.09 to<br>352.08) | 700.69<br>(405.52 to<br>1,110.92) |
| Hypertensive heart disease     | 2,181.00<br>(1,269.87 to<br>3,036.50)   | 3,258.37<br>(1,822.77 to<br>4,767.67)   | 2,234.77<br>(1,351.76 to<br>3,122.18) | 3,809.30<br>(2,053.68 to<br>6,135.86)    | 85.25<br>(52.28 to<br>116.32)   | 135.29<br>(77.83 to<br>198.46)  | 102.21<br>(62.24 to<br>143.25)  | 150.33<br>(82.01 to<br>245.07)    |
| Cardiomyopathy and myocarditis | 1,212.18<br>(698.37 to<br>1,778.97)     | 1,423.58<br>(827.02 to<br>2,108.82)     | 1,361.36<br>(805.46 to<br>1,986.32)   | 1,440.15<br>(822.30 to<br>2,132.46)      | 33.68<br>(19.71 to<br>48.50)    | 44.49<br>(25.93 to<br>65.70)    | 46.37<br>(27.91 to<br>68.22)    | 42.89<br>(24.80 to<br>63.48)      |
| Myocarditis                    | 327.55<br>(188.41 to<br>503.65)         | 361.70<br>(211.92 to<br>560.62)         | 333.08<br>(193.15 to<br>510.59)       | 365.88<br>(215.61 to<br>566.29)          | 9.33<br>(5.25 to<br>14.56)      | 11.63<br>(6.56 to<br>18.43)     | 11.67<br>(6.54 to<br>18.77)     | 11.21<br>(6.35 to<br>17.75)       |

| Solomon Islands                                               |                                                              |                                                              |                                                            |                                                              |                                                      |                                                      |                                                      |                                                      |
|---------------------------------------------------------------|--------------------------------------------------------------|--------------------------------------------------------------|------------------------------------------------------------|--------------------------------------------------------------|------------------------------------------------------|------------------------------------------------------|------------------------------------------------------|------------------------------------------------------|
| Cause                                                         | YLLs (actual counts)                                         |                                                              |                                                            |                                                              | Deaths (actual counts)                               |                                                      |                                                      |                                                      |
|                                                               | 2016                                                         | 2040 Forecast                                                | 2040 Better Scenario                                       | 2040 Worse Scenario                                          | 2016                                                 | 2040 Forecast                                        | 2040 Better Scenario                                 | 2040 Worse Scenario                                  |
| Alcoholic cardiomyopathy                                      | 70.44<br>(31.79 to<br>124.56)                                | 79.37<br>(36.68 to<br>136.10)                                | 74.80<br>(34.31 to<br>122.39)                              | 78.44<br>(36.41 to<br>136.83)                                | 2.20<br>(1.01 to<br>3.75)                            | 2.63<br>(1.24 to<br>4.32)                            | 2.67<br>(1.23 to<br>4.27)                            | 2.51<br>(1.16 to<br>4.18)                            |
| Other cardiomyopathy                                          | 814.19<br>(450.11 to<br>1,222.92)                            | 982.51<br>(519.23 to<br>1,526.61)                            | 953.47<br>(519.14 to<br>1,482.84)                          | 995.82<br>(527.24 to<br>1,589.09)                            | 22.15<br>(12.42 to<br>33.12)                         | 30.23<br>(16.28 to<br>48.62)                         | 32.02<br>(18.08 to<br>50.65)                         | 29.17<br>(15.40 to<br>46.97)                         |
| Atrial fibrillation and flutter                               | 77.66<br>(58.98 to<br>101.22)                                | 128.14<br>(90.93 to<br>170.72)                               | 145.76<br>(106.00 to<br>191.37)                            | 118.99<br>(83.69 to<br>160.81)                               | 6.03<br>(4.56 to<br>7.83)                            | 9.68<br>(6.19 to<br>13.55)                           | 12.32<br>(8.11 to<br>16.81)                          | 8.40<br>(5.38 to<br>11.88)                           |
| Aortic aneurysm                                               | 373.74<br>(237.15 to<br>569.78)                              | 481.52<br>(304.65 to<br>727.23)                              | 467.14<br>(303.42 to<br>695.89)                            | 495.13<br>(308.58 to<br>756.74)                              | 14.69<br>(9.94 to<br>21.82)                          | 19.54<br>(13.07 to<br>28.75)                         | 21.14<br>(14.69 to<br>30.79)                         | 18.99<br>(12.51 to<br>28.22)                         |
| Peripheral artery disease                                     | 18.94<br>(10.41 to<br>32.19)                                 | 43.20<br>(21.66 to<br>84.16)                                 | 42.15<br>(22.66 to<br>81.13)                               | 42.22<br>(20.67 to<br>85.50)                                 | 0.93<br>(0.54 to<br>1.51)                            | 2.17<br>(1.15 to<br>4.12)                            | 2.48<br>(1.36 to<br>4.96)                            | 1.99<br>(1.03 to<br>3.80)                            |
| Endocarditis                                                  | 544.96<br>(403.15 to<br>747.56)                              | 758.30<br>(547.01 to<br>1,040.63)                            | 698.06<br>(501.19 to<br>965.24)                            | 776.40<br>(557.13 to<br>1,070.20)                            | 16.00<br>(12.18 to<br>21.49)                         | 24.53<br>(17.79 to<br>32.74)                         | 25.06<br>(18.23 to<br>33.84)                         | 23.74<br>(17.32 to<br>31.96)                         |
| Other cardiovascular and circulatory diseases                 | 1,774.67<br>(1,083.51 to<br>2,415.69)                        | 2,664.09<br>(1,666.97 to<br>3,696.09)                        | 1,989.65<br>(1,265.90 to<br>2,709.58)                      | 2,989.17<br>(1,865.01 to<br>4,200.96)                        | 55.51<br>(33.00 to<br>74.93)                         | 93.22<br>(55.98 to<br>127.11)                        | 98.36<br>(47.54 to<br>106.43)                        | 98.36<br>(59.90 to<br>136.21)                        |
| <b>Chronic respiratory diseases</b>                           | <b>10,325.91</b><br><b>(7,745.15 to</b><br><b>12,926.62)</b> | <b>10,716.46</b><br><b>(7,158.42 to</b><br><b>15,480.30)</b> | <b>6,304.48</b><br><b>(4,554.36 to</b><br><b>8,506.27)</b> | <b>14,233.98</b><br><b>(9,070.44 to</b><br><b>21,943.94)</b> | <b>354.51</b><br><b>(270.74 to</b><br><b>432.98)</b> | <b>376.48</b><br><b>(257.40 to</b><br><b>540.76)</b> | <b>229.72</b><br><b>(168.13 to</b><br><b>302.32)</b> | <b>485.65</b><br><b>(314.36 to</b><br><b>728.00)</b> |
| Chronic obstructive pulmonary disease                         | 5,461.10<br>(3,925.13 to<br>6,902.66)                        | 6,520.68<br>(3,693.38 to<br>11,072.70)                       | 3,030.31<br>(1,875.32 to<br>4,600.16)                      | 9,242.18<br>(4,946.78 to<br>16,350.42)                       | 204.07<br>(147.54 to<br>252.42)                      | 242.89<br>(142.94 to<br>397.59)                      | 118.78<br>(74.26 to<br>175.45)                       | 332.27<br>(182.12 to<br>562.62)                      |
| Pneumoconiosis                                                | 22.87<br>(13.91 to<br>33.83)                                 | 22.36<br>(13.06 to<br>33.78)                                 | 30.36<br>(12.12 to<br>30.03)                               | 22.47<br>(12.99 to<br>34.13)                                 | 0.94<br>(0.60 to<br>1.37)                            | 0.99<br>(0.59 to<br>1.52)                            | 1.03<br>(0.61 to<br>1.58)                            | 0.93<br>(0.55 to<br>1.42)                            |
| Silicosis                                                     | 3.55<br>(1.54 to<br>6.01)                                    | 2.84<br>(1.15 to<br>4.96)                                    | 2.49<br>(1.02 to<br>4.32)                                  | 2.84<br>(1.11 to<br>5.01)                                    | 0.17<br>(0.08 to<br>0.30)                            | 0.15<br>(0.06 to<br>0.26)                            | 0.15<br>(0.06 to<br>0.27)                            | 0.14<br>(0.05 to<br>0.24)                            |
| Asbestosis                                                    | 5.85<br>(3.07 to<br>10.57)                                   | 6.83<br>(3.67 to<br>12.56)                                   | 6.47<br>(3.49 to<br>11.88)                                 | 6.82<br>(3.60 to<br>12.87)                                   | 0.18<br>(0.09 to<br>0.35)                            | 0.24<br>(0.12 to<br>0.48)                            | 0.25<br>(0.13 to<br>0.48)                            | 0.23<br>(0.12 to<br>0.46)                            |
| Coal workers pneumoconiosis                                   | 0.51<br>(0.16 to<br>1.11)                                    | 0.56<br>(0.17 to<br>1.23)                                    | 0.40<br>(0.12 to<br>0.87)                                  | 0.59<br>(0.18 to<br>1.33)                                    | 0.03<br>(0.01 to<br>0.05)                            | 0.03<br>(0.01 to<br>0.06)                            | 0.02<br>(0.01 to<br>0.05)                            | 0.03<br>(0.01 to<br>0.06)                            |
| Other pneumoconiosis                                          | 12.96<br>(7.93 to<br>19.46)                                  | 12.14<br>(6.96 to<br>18.22)                                  | 11.01<br>(6.10 to<br>16.72)                                | 12.21<br>(7.10 to<br>18.53)                                  | 0.56<br>(0.34 to<br>0.85)                            | 0.57<br>(0.32 to<br>0.91)                            | 0.61<br>(0.32 to<br>0.98)                            | 0.54<br>(0.30 to<br>0.85)                            |
| Asthma                                                        | 3,678.86<br>(2,531.82 to<br>4,944.83)                        | 2,503.93<br>(1,462.31 to<br>3,990.70)                        | 1,749.86<br>(1,040.60 to<br>2,694.94)                      | 3,216.50<br>(1,816.59 to<br>5,199.30)                        | 118.56<br>(82.78 to<br>159.74)                       | 85.49<br>(49.37 to<br>137.28)                        | 65.27<br>(40.21 to<br>101.23)                        | 104.35<br>(58.60 to<br>171.67)                       |
| Interstitial lung disease and pulmonary sarcoidosis           | 332.02<br>(143.95 to<br>696.79)                              | 514.42<br>(233.97 to<br>1,041.20)                            | 569.03<br>(263.80 to<br>1,019.60)                          | 499.36<br>(221.55 to<br>1,019.65)                            | 8.04<br>(3.50 to<br>16.86)                           | 13.89<br>(6.30 to<br>28.42)                          | 16.60<br>(7.52 to<br>32.74)                          | 12.89<br>(5.76 to<br>26.55)                          |
| Other chronic respiratory diseases                            | 831.06<br>(477.77 to<br>1,290.99)                            | 1,155.07<br>(645.31 to<br>1,968.35)                          | 934.92<br>(550.68 to<br>1,532.99)                          | 1,253.46<br>(676.73 to<br>2,197.96)                          | 22.91<br>(13.23 to<br>36.01)                         | 33.22<br>(18.36 to<br>55.90)                         | 28.03<br>(16.67 to<br>45.07)                         | 35.20<br>(19.07 to<br>59.98)                         |
| <b>Cirrhosis and other chronic liver diseases</b>             | <b>3,343.12</b><br><b>(2,290.77 to</b><br><b>5,511.14)</b>   | <b>4,503.32</b><br><b>(3,157.17 to</b><br><b>7,623.58)</b>   | <b>4,038.99</b><br><b>(2,816.52 to</b><br><b>6,621.28)</b> | <b>4,585.61</b><br><b>(3,165.35 to</b><br><b>7,843.00)</b>   | <b>87.91</b><br><b>(61.61 to</b><br><b>134.80)</b>   | <b>125.14</b><br><b>(90.72 to</b><br><b>196.69)</b>  | <b>117.86</b><br><b>(85.46 to</b><br><b>180.12)</b>  | <b>123.96</b><br><b>(89.12 to</b><br><b>197.05)</b>  |
| Cirrhosis and other chronic liver diseases due to hepatitis B | 1,486.89<br>(1,010.69 to<br>2,459.67)                        | 2,079.81<br>(1,413.87 to<br>3,529.31)                        | 1,931.49<br>(1,324.76 to<br>3,215.02)                      | 2,091.56<br>(1,412.20 to<br>3,500.76)                        | 41.77<br>(29.27 to<br>65.82)                         | 60.69<br>(43.71 to<br>96.05)                         | 58.88<br>(42.70 to<br>91.44)                         | 59.52<br>(42.34 to<br>94.78)                         |
| Cirrhosis and other chronic liver diseases due to hepatitis C | 441.81<br>(289.13 to<br>733.43)                              | 622.43<br>(424.31 to<br>1,080.37)                            | 573.25<br>(392.00 to<br>959.91)                            | 628.24<br>(420.71 to<br>1,073.09)                            | 12.14<br>(8.12 to<br>19.32)                          | 17.75<br>(12.54 to<br>28.97)                         | 16.94<br>(11.95 to<br>26.85)                         | 17.56<br>(12.29 to<br>28.74)                         |

|                                                                |                                                            |                                                            |                                                            |                                                            |                                                     |                                                     |                                                     |                                                     |
|----------------------------------------------------------------|------------------------------------------------------------|------------------------------------------------------------|------------------------------------------------------------|------------------------------------------------------------|-----------------------------------------------------|-----------------------------------------------------|-----------------------------------------------------|-----------------------------------------------------|
|                                                                | 383.66<br>(254.37 to<br>601.34)                            | 545.37<br>(368.34 to<br>862.62)                            | 445.05<br>(301.43 to<br>698.36)                            | 557.26<br>(373.29 to<br>906.70)                            | 11.20<br>(7.61 to<br>17.11)                         | 16.46<br>(11.54 to<br>24.80)                        | 14.14<br>(10.01 to<br>21.04)                        | 16.45<br>(11.49 to<br>25.14)                        |
| Cirrhosis and other chronic liver diseases due to alcohol use  |                                                            |                                                            |                                                            |                                                            |                                                     |                                                     |                                                     |                                                     |
|                                                                | 1,030.76<br>(703.41 to<br>1,758.52)                        | 1,255.70<br>(848.12 to<br>2,067.95)                        | 1,089.20<br>(734.00 to<br>1,789.87)                        | 1,308.55<br>(873.39 to<br>2,205.44)                        | 22.80<br>(16.00 to<br>34.69)                        | 30.24<br>(21.53 to<br>45.29)                        | 27.90<br>(19.85 to<br>41.46)                        | 30.45<br>(21.47 to<br>45.74)                        |
| Cirrhosis and other chronic liver diseases due to other causes |                                                            |                                                            |                                                            |                                                            |                                                     |                                                     |                                                     |                                                     |
| <b>Digestive diseases</b>                                      | <b>3,425.24</b><br><b>(2,665.31 to</b><br><b>4,892.45)</b> | <b>3,522.32</b><br><b>(2,702.17 to</b><br><b>5,130.68)</b> | <b>2,802.70</b><br><b>(2,163.16 to</b><br><b>4,083.27)</b> | <b>3,822.79</b><br><b>(2,897.83 to</b><br><b>5,610.11)</b> | <b>102.50</b><br><b>(80.42 to</b><br><b>143.90)</b> | <b>116.53</b><br><b>(89.63 to</b><br><b>165.38)</b> | <b>101.47</b><br><b>(77.74 to</b><br><b>143.56)</b> | <b>120.45</b><br><b>(91.48 to</b><br><b>172.52)</b> |
| Peptic ulcer disease                                           | 1,188.05<br>(850.30 to<br>1,825.92)                        | 906.27<br>(618.24 to<br>1,425.58)                          | 643.61<br>(442.10 to<br>988.35)                            | 999.40<br>(667.28 to<br>1,540.17)                          | 38.67<br>(28.35 to<br>58.09)                        | 32.74<br>(22.48 to<br>50.78)                        | 25.19<br>(17.44 to<br>38.48)                        | 34.56<br>(23.29 to<br>53.30)                        |



| Solomon Islands                            |                                                  |                                                  |                                                  |                                                  |                                         |                                           |                                            |                                           |
|--------------------------------------------|--------------------------------------------------|--------------------------------------------------|--------------------------------------------------|--------------------------------------------------|-----------------------------------------|-------------------------------------------|--------------------------------------------|-------------------------------------------|
| Cause                                      | YLLs (actual counts)                             |                                                  |                                                  |                                                  | Deaths (actual counts)                  |                                           |                                            |                                           |
|                                            | 2016                                             | 2040 Forecast                                    | 2040 Better Scenario                             | 2040 Worse Scenario                              | 2016                                    | 2040 Forecast                             | 2040 Better Scenario                       | 2040 Worse Scenario                       |
| Gastritis and duodenitis                   | 20.49<br>(11.05 to 35.82)                        | 29.85<br>(15.48 to 53.81)                        | 26.44<br>(14.02 to 47.58)                        | 30.15<br>(15.53 to 55.03)                        | 0.70<br>(0.41 to 1.17)                  | 1.10<br>(0.59 to 1.90)                    | 1.06<br>(0.58 to 1.80)                     | 1.06<br>(0.56 to 1.87)                    |
| Appendicitis                               | 455.93<br>(327.04 to 679.39)                     | 451.47<br>(309.49 to 693.73)                     | 352.31<br>(241.49 to 544.46)                     | 481.97<br>(327.11 to 753.19)                     | 11.11<br>(8.13 to 16.57)                | 12.31<br>(8.68 to 18.49)                  | 10.41<br>(7.46 to 15.83)                   | 12.57<br>(8.80 to 19.18)                  |
| Paralytic ileus and intestinal obstruction | 391.81<br>(245.40 to 614.87)                     | 427.93<br>(278.75 to 682.20)                     | 374.43<br>(250.62 to 596.54)                     | 451.24<br>(290.61 to 730.84)                     | 9.41<br>(6.43 to 14.27)                 | 12.57<br>(8.63 to 20.00)                  | 12.85<br>(8.77 to 20.41)                   | 12.12<br>(8.21 to 19.32)                  |
| Inguinal, femoral, and abdominal hernia    | 78.02<br>(56.98 to 131.38)                       | 75.85<br>(53.63 to 127.65)                       | 71.00<br>(50.09 to 117.10)                       | 74.54<br>(52.69 to 126.68)                       | 3.31<br>(2.38 to 5.28)                  | 3.41<br>(2.30 to 5.40)                    | 3.52<br>(2.43 to 5.49)                     | 3.17<br>(2.11 to 5.08)                    |
| Inflammatory bowel disease                 | 120.64<br>(79.72 to 204.93)                      | 158.80<br>(103.81 to 265.87)                     | 157.41<br>(103.97 to 260.97)                     | 157.16<br>(102.59 to 265.46)                     | 3.36<br>(2.38 to 5.36)                  | 4.77<br>(3.26 to 7.50)                    | 5.15<br>(3.63 to 7.87)                     | 4.50<br>(3.02 to 7.11)                    |
| Vascular intestinal disorders              | 95.49<br>(61.41 to 130.92)                       | 131.58<br>(87.19 to 177.20)                      | 128.83<br>(87.99 to 172.00)                      | 127.82<br>(82.35 to 174.39)                      | 3.66<br>(2.56 to 4.88)                  | 5.57<br>(3.87 to 7.41)                    | 5.94<br>(4.24 to 7.86)                     | 5.14<br>(3.45 to 6.95)                    |
| Gallbladder and biliary diseases           | 377.06<br>(272.03 to 541.74)                     | 459.55<br>(254.44 to 830.51)                     | 329.31<br>(187.83 to 580.95)                     | 587.98<br>(311.70 to 1,124.44)                   | 12.46<br>(9.32 to 17.54)                | 16.66<br>(9.29 to 30.00)                  | 13.11<br>(7.64 to 23.27)                   | 20.16<br>(10.79 to 38.15)                 |
| Pancreatitis                               | 216.41<br>(147.04 to 331.25)                     | 309.89<br>(191.48 to 568.32)                     | 243.57<br>(159.12 to 417.42)                     | 320.86<br>(197.76 to 580.41)                     | 5.74<br>(3.88 to 8.70)                  | 8.79<br>(5.52 to 15.80)                   | 7.39<br>(4.79 to 12.05)                    | 8.80<br>(5.48 to 15.57)                   |
| Other digestive diseases                   | 481.34<br>(326.27 to 683.60)                     | 571.12<br>(388.05 to 807.45)                     | 475.80<br>(322.60 to 669.82)                     | 591.68<br>(394.72 to 898.22)                     | 14.08<br>(10.06 to 19.28)               | 18.61<br>(12.85 to 25.38)                 | 16.86<br>(11.63 to 23.16)                  | 18.37<br>(12.80 to 25.28)                 |
| Neurological disorders                     | <b>1,644.02</b><br><b>(1,343.87 to 2,019.90)</b> | <b>2,592.56</b><br><b>(1,929.54 to 3,441.73)</b> | <b>2,662.94</b><br><b>(2,028.61 to 3,450.26)</b> | <b>2,509.01</b><br><b>(1,873.12 to 3,477.87)</b> | <b>83.02</b><br><b>(68.67 to 99.70)</b> | <b>140.77</b><br><b>(93.45 to 207.61)</b> | <b>172.06</b><br><b>(118.89 to 239.41)</b> | <b>128.52</b><br><b>(84.09 to 192.19)</b> |
| Alzheimer's disease and other dementias    | 797.03<br>(639.42 to 991.82)                     | 1,430.13<br>(895.50 to 2,264.46)                 | 1,651.45<br>(1,102.47 to 2,444.44)               | 1,360.31<br>(815.39 to 2,188.66)                 | 63.39<br>(51.62 to 77.99)               | 110.56<br>(64.78 to 178.08)               | 140.41<br>(90.04 to 207.89)                | 99.21<br>(56.22 to 161.97)                |
| Parkinson's disease                        | 59.71<br>(43.46 to 77.59)                        | 116.71<br>(82.62 to 154.97)                      | 166.83<br>(120.63 to 218.00)                     | 97.47<br>(67.56 to 133.93)                       | 4.18<br>(3.05 to 5.42)                  | 8.01<br>(5.27 to 10.96)                   | 12.28<br>(8.57 to 16.31)                   | 6.43<br>(4.24 to 9.05)                    |
| Epilepsy                                   | 592.76<br>(407.13 to 816.34)                     | 751.84<br>(468.65 to 1,112.27)                   | 530.50<br>(327.91 to 781.36)                     | 822.03<br>(508.04 to 1,213.88)                   | 10.85<br>(7.37 to 15.00)                | 14.46<br>(9.04 to 21.31)                  | 10.50<br>(6.65 to 15.32)                   | 15.58<br>(9.78 to 23.05)                  |
| Multiple sclerosis                         | 16.25<br>(8.46 to 34.45)                         | 24.60<br>(12.86 to 52.96)                        | 25.61<br>(13.63 to 55.61)                        | 24.43<br>(12.78 to 52.88)                        | 0.43<br>(0.23 to 0.88)                  | 0.67<br>(0.37 to 1.37)                    | 0.72<br>(0.40 to 1.46)                     | 0.66<br>(0.36 to 1.37)                    |
| Motor neuron disease                       | 24.19<br>(18.22 to 37.70)                        | 45.73<br>(35.19 to 73.89)                        | 52.61<br>(40.18 to 83.30)                        | 42.92<br>(32.88 to 69.66)                        | 0.77<br>(0.58 to 1.20)                  | 1.57<br>(1.22 to 2.53)                    | 1.88<br>(1.45 to 3.00)                     | 1.44<br>(1.10 to 2.32)                    |
| Other neurological disorders               | 154.08<br>(122.51 to 200.24)                     | 223.56<br>(181.25 to 280.77)                     | 235.95<br>(192.16 to 292.69)                     | 221.86<br>(179.34 to 280.39)                     | 3.41<br>(2.72 to 4.35)                  | 5.50<br>(4.47 to 6.71)                    | 6.28<br>(5.06 to 7.66)                     | 5.21<br>(4.28 to 6.38)                    |
| Mental disorders                           | <b>319.91</b><br><b>(190.66 to 512.90)</b>       | <b>551.73</b><br><b>(329.97 to 883.08)</b>       | <b>535.60</b><br><b>(319.84 to 853.45)</b>       | <b>553.13</b><br><b>(331.49 to 888.22)</b>       | <b>7.14</b><br><b>(4.28 to 11.49)</b>   | <b>12.40</b><br><b>(7.47 to 19.64)</b>    | <b>12.56</b><br><b>(7.54 to 19.62)</b>     | <b>12.16</b><br><b>(7.37 to 19.39)</b>    |
| Alcohol use disorders                      | 173.89<br>(100.52 to 332.43)                     | 205.96<br>(110.42 to 443.95)                     | 192.93<br>(102.28 to 415.24)                     | 206.85<br>(110.53 to 444.56)                     | 4.09<br>(2.42 to 7.69)                  | 4.93<br>(2.79 to 10.37)                   | 4.76<br>(2.67 to 10.06)                    | 4.88<br>(2.74 to 10.29)                   |
| Drug use disorders                         | 144.60<br>(73.03 to 272.24)                      | 343.58<br>(182.74 to 609.64)                     | 340.53<br>(183.05 to 603.15)                     | 344.06<br>(183.91 to 612.74)                     | 3.01<br>(1.52 to 5.66)                  | 7.42<br>(3.97 to 13.07)                   | 7.76<br>(4.20 to 13.51)                    | 7.24<br>(3.88 to 12.77)                   |
| Opioid use disorders                       | 81.42<br>(34.00 to 174.06)                       | 167.70<br>(69.44 to 346.16)                      | 164.19<br>(68.90 to 336.12)                      | 168.68<br>(69.81 to 348.91)                      | 1.57<br>(0.63 to 3.34)                  | 3.33<br>(1.37 to 6.81)                    | 3.36<br>(1.40 to 6.74)                     | 3.30<br>(1.34 to 6.74)                    |

|                           |                              |                                |                                |                                |                           |                           |                           |                           |
|---------------------------|------------------------------|--------------------------------|--------------------------------|--------------------------------|---------------------------|---------------------------|---------------------------|---------------------------|
|                           | 10.83<br>(4.69 to<br>18.79)  | 30.12<br>(13.42 to<br>53.72)   | 27.71<br>(12.02 to<br>50.48)   | 30.81<br>(13.57 to<br>54.95)   | 0.23<br>(0.10 to<br>0.38) | 0.64<br>(0.28 to<br>1.11) | 0.61<br>(0.26 to<br>1.08) | 0.64<br>(0.29 to<br>1.12) |
| Cocaine use disorders     |                              |                                |                                |                                |                           |                           |                           |                           |
|                           | 4.11<br>(1.92 to<br>6.75)    | 15.54<br>(6.94 to<br>26.48)    | 13.82<br>(5.96 to<br>23.75)    | 16.07<br>(7.23 to<br>27.57)    | 0.09<br>(0.04 to<br>0.14) | 0.33<br>(0.15 to<br>0.56) | 0.30<br>(0.14 to<br>0.51) | 0.34<br>(0.16 to<br>0.57) |
| Amphetamine use disorders |                              |                                |                                |                                |                           |                           |                           |                           |
|                           | 48.24<br>(23.18 to<br>87.91) | 130.22<br>(65.80 to<br>238.80) | 134.82<br>(68.55 to<br>246.65) | 128.50<br>(64.82 to<br>238.35) | 1.13<br>(0.56 to<br>2.06) | 3.12<br>(1.59 to<br>5.64) | 3.49<br>(1.81 to<br>6.25) | 2.96<br>(1.51 to<br>5.41) |
| Other drug use disorders  |                              |                                |                                |                                |                           |                           |                           |                           |
|                           | 1.41<br>(0.87 to<br>2.39)    | 2.20<br>(1.31 to<br>3.59)      | 2.14<br>(1.28 to<br>3.62)      | 2.22<br>(1.33 to<br>3.61)      | 0.03<br>(0.02 to<br>0.05) | 0.04<br>(0.03 to<br>0.07) | 0.04<br>(0.03 to<br>0.07) | 0.04<br>(0.03 to<br>0.07) |
| Eating disorders          |                              |                                |                                |                                |                           |                           |                           |                           |

| Solomon Islands                                            |                                              |                                              |                                              |                                              |                                     |                                           |                                         |                                           |
|------------------------------------------------------------|----------------------------------------------|----------------------------------------------|----------------------------------------------|----------------------------------------------|-------------------------------------|-------------------------------------------|-----------------------------------------|-------------------------------------------|
| Cause                                                      | YLLs (actual counts)                         |                                              |                                              |                                              | Deaths (actual counts)              |                                           |                                         |                                           |
|                                                            | 2016                                         | 2040 Forecast                                | 2040 Better Scenario                         | 2040 Worse Scenario                          | 2016                                | 2040 Forecast                             | 2040 Better Scenario                    | 2040 Worse Scenario                       |
| <b>Diabetes, urogenital, blood, and endocrine diseases</b> | <b>18,985.93</b><br>(15,397.84 to 23,585.12) | <b>35,228.61</b><br>(24,664.87 to 55,217.25) | <b>24,969.21</b><br>(17,202.72 to 40,884.36) | <b>39,967.39</b><br>(27,505.72 to 60,255.49) | <b>687.61</b><br>(570.17 to 838.26) | <b>1,400.29</b><br>(1,005.29 to 2,150.19) | <b>1,068.07</b><br>(755.43 to 1,715.41) | <b>1,525.96</b><br>(1,086.07 to 2,249.78) |
| Diabetes mellitus                                          | 10,736.99<br>(8,602.80 to 13,340.18)         | 17,085.37<br>(11,042.95 to 24,521.20)        | 11,732.47<br>(7,816.37 to 16,750.46)         | 18,866.72<br>(12,169.89 to 27,396.73)        | 419.99<br>(345.50 to 510.49)        | 710.81<br>(470.54 to 991.01)              | 528.34<br>(363.19 to 724.14)            | 753.77<br>(490.43 to 1,054.11)            |
| Acute glomerulonephritis                                   | 14.77<br>(9.61 to 22.16)                     | 21.09<br>(12.22 to 34.92)                    | 18.24<br>(10.44 to 30.65)                    | 21.82<br>(12.75 to 36.70)                    | 0.41<br>(0.26 to 0.63)              | 0.60<br>(0.33 to 1.05)                    | 0.54<br>(0.29 to 0.94)                  | 0.61<br>(0.33 to 1.05)                    |
| Chronic kidney disease                                     | 6,314.94<br>(4,912.66 to 8,113.12)           | 15,435.42<br>(4,913.02 to 37,729.40)         | 10,759.79<br>(5,257.12 to 28,987.89)         | 18,337.21<br>(5,703.98 to 41,754.00)         | 214.60<br>(170.88 to 271.52)        | 607.45<br>(169.72 to 1,527.86)            | 457.52<br>(122.00 to 1,234.44)          | 692.69<br>(199.18 to 1,566.65)            |
| Chronic kidney disease due to diabetes mellitus            | 3,530.94<br>(2,705.96 to 4,658.56)           | 9,302.47<br>(2,682.14 to 23,641.84)          | 6,476.30<br>(1,815.03 to 17,910.59)          | 11,098.40<br>(3,176.55 to 25,957.13)         | 119.71<br>(92.71 to 156.58)         | 354.83<br>(93.33 to 914.40)               | 263.81<br>(67.77 to 732.75)             | 408.52<br>(107.47 to 939.33)              |
| Chronic kidney disease due to hypertension                 | 1,320.57<br>(999.82 to 1,739.00)             | 3,629.50<br>(991.90 to 9,430.40)             | 2,626.32<br>(700.91 to 7,355.89)             | 4,223.70<br>(1,178.14 to 10,086.95)          | 58.07<br>(44.99 to 75.06)           | 172.75<br>(45.38 to 427.66)               | 136.72<br>(34.52 to 374.54)             | 191.27<br>(53.05 to 445.13)               |
| Chronic kidney disease due to glomerulonephritis           | 719.93<br>(538.09 to 983.30)                 | 1,152.72<br>(516.27 to 2,552.19)             | 756.63<br>(335.12 to 1,734.36)               | 1,389.08<br>(625.37 to 2,855.84)             | 16.75<br>(12.46 to 22.49)           | 33.74<br>(12.67 to 81.22)                 | 23.56<br>(8.53 to 58.34)                | 39.56<br>(15.02 to 86.79)                 |
| Chronic kidney disease due to other and unspecified causes | 743.50<br>(556.98 to 990.44)                 | 1,350.74<br>(533.58 to 3,125.06)             | 900.53<br>(343.25 to 2,177.34)               | 1,626.03<br>(639.49 to 3,526.89)             | 20.07<br>(15.02 to 26.66)           | 46.13<br>(14.83 to 110.60)                | 33.44<br>(10.03 to 88.37)               | 53.34<br>(17.29 to 120.55)                |
| Urinary diseases and male infertility                      | 645.73<br>(510.75 to 872.12)                 | 961.72<br>(760.70 to 1,307.82)               | 930.58<br>(736.55 to 1,295.00)               | 966.13<br>(755.34 to 1,295.00)               | 18.86<br>(15.30 to 24.80)           | 31.29<br>(25.32 to 40.00)                 | 33.92<br>(27.55 to 45.61)               | 29.42<br>(23.66 to 37.65)                 |
| Urinary tract infections                                   | 497.85<br>(379.58 to 689.07)                 | 784.80<br>(611.21 to 1,067.41)               | 774.84<br>(599.35 to 1,085.46)               | 785.54<br>(607.17 to 1,060.28)               | 13.96<br>(10.92 to 18.54)           | 25.09<br>(19.98 to 32.22)                 | 28.02<br>(22.26 to 36.10)               | 23.39<br>(18.48 to 30.41)                 |
| Urolithiasis                                               | 20.61<br>(12.92 to 32.41)                    | 40.03<br>(24.67 to 63.52)                    | 42.73<br>(26.03 to 67.36)                    | 38.63<br>(24.08 to 60.82)                    | 0.64<br>(0.41 to 0.99)              | 1.30<br>(0.82 to 2.04)                    | 1.48<br>(0.94 to 2.32)                  | 1.21<br>(0.76 to 1.90)                    |
| Other urinary diseases                                     | 127.27<br>(71.33 to 181.95)                  | 136.88<br>(67.35 to 209.21)                  | 113.01<br>(54.25 to 175.25)                  | 141.96<br>(69.63 to 214.74)                  | 4.26<br>(2.38 to 6.07)              | 4.89<br>(2.38 to 7.37)                    | 4.42<br>(2.09 to 6.80)                  | 4.82<br>(2.36 to 7.21)                    |
| Gynecological diseases                                     | 12.89<br>(5.88 to 19.90)                     | 13.42<br>(5.70 to 21.95)                     | 10.37<br>(4.63 to 17.15)                     | 14.34<br>(6.18 to 23.81)                     | 0.30<br>(0.14 to 0.46)              | 0.32<br>(0.14 to 0.50)                    | 0.25<br>(0.11 to 0.40)                  | 0.34<br>(0.15 to 0.54)                    |
| Uterine fibroids                                           | 1.89<br>(0.23 to 4.29)                       | 1.72<br>(0.21 to 4.01)                       | 1.27<br>(0.16 to 3.05)                       | 1.85<br>(0.23 to 4.31)                       | 0.05<br>(0.01 to 0.11)              | 0.05<br>(0.01 to 0.11)                    | 0.04<br>(0.00 to 0.08)                  | 0.05<br>(0.01 to 0.11)                    |
| Polycystic ovarian syndrome                                | 0.27<br>(0.08 to 0.73)                       | 0.19<br>(0.05 to 0.51)                       | 0.12<br>(0.03 to 0.33)                       | 0.22<br>(0.06 to 0.58)                       | 0.01<br>(0.00 to 0.02)              | 0.00<br>(0.00 to 0.01)                    | 0.00<br>(0.00 to 0.01)                  | 0.01<br>(0.00 to 0.01)                    |
| Endometriosis                                              | 0.08<br>(0.02 to 0.24)                       | 0.11<br>(0.03 to 0.34)                       | 0.09<br>(0.02 to 0.26)                       | 0.12<br>(0.03 to 0.36)                       | 0.00<br>(0.00 to 0.01)              | 0.00<br>(0.00 to 0.01)                    | 0.00<br>(0.00 to 0.01)                  | 0.00<br>(0.00 to 0.01)                    |
| Genital prolapse                                           | 0.48<br>(0.11 to 1.16)                       | 0.51<br>(0.11 to 1.34)                       | 0.37<br>(0.08 to 0.96)                       | 0.56<br>(0.12 to 1.44)                       | 0.02<br>(0.00 to 0.03)              | 0.02<br>(0.00 to 0.03)                    | 0.01<br>(0.00 to 0.02)                  | 0.02<br>(0.00 to 0.03)                    |
| Other gynecological diseases                               | 10.16<br>(4.45 to 16.06)                     | 10.88<br>(4.84 to 18.41)                     | 8.54<br>(3.88 to 14.49)                      | 11.60<br>(5.27 to 19.83)                     | 0.22<br>(0.10 to 0.36)              | 0.25<br>(0.11 to 0.41)                    | 0.20<br>(0.09 to 0.33)                  | 0.26<br>(0.12 to 0.43)                    |
| Hemoglobinopathies and hemolytic anemias                   | 227.89<br>(169.27 to 299.97)                 | 196.25<br>(177.60 to 334.58)                 | 196.25<br>(140.21 to 270.82)                 | 259.61<br>(187.91 to 354.15)                 | 5.49<br>(4.15 to 7.36)              | 5.67<br>(4.94 to 9.20)                    | 6.71<br>(4.17 to 7.71)                  | 6.86<br>(4.96 to 9.30)                    |
| Thalassemias                                               | 37.34<br>(24.28 to 52.21)                    | 24.66<br>(14.98 to 37.21)                    | 24.77<br>(15.40 to 37.18)                    | 25.80<br>(15.76 to 38.41)                    | 0.49<br>(0.32 to 0.68)              | 0.33<br>(0.20 to 0.50)                    | 0.33<br>(0.21 to 0.50)                  | 0.34<br>(0.21 to 0.51)                    |

|                                                   |                                     |                                       |                                     |                                       |                              |                              |                              |                              |
|---------------------------------------------------|-------------------------------------|---------------------------------------|-------------------------------------|---------------------------------------|------------------------------|------------------------------|------------------------------|------------------------------|
|                                                   | 0.19<br>(0.10 to<br>0.30)           | 0.20<br>(0.10 to<br>0.34)             | 0.16<br>(0.08 to<br>0.27)           | 0.21<br>(0.11 to<br>0.36)             | 0.00<br>(0.00 to<br>0.00)    | 0.00<br>(0.00 to<br>0.01)    | 0.00<br>(0.00 to<br>0.00)    | 0.00<br>(0.00 to<br>0.01)    |
| Sickle cell disorders                             |                                     |                                       |                                     |                                       |                              |                              |                              |                              |
|                                                   | 138.86<br>(103.30 to<br>185.63)     | 175.50<br>(122.90 to<br>243.71)       | 133.11<br>(92.28 to<br>188.42)      | 188.98<br>(131.81 to<br>264.81)       | 3.04<br>(2.27 to<br>4.04)    | 4.35<br>(3.14 to<br>6.06)    | 3.43<br>(2.46 to<br>4.77)    | 4.57<br>(3.25 to<br>6.29)    |
| G6PD deficiency                                   |                                     |                                       |                                     |                                       |                              |                              |                              |                              |
|                                                   | 51.51<br>(36.00 to<br>71.09)        | 44.51<br>(30.48 to<br>62.80)          | 38.20<br>(26.63 to<br>54.28)        | 44.61<br>(29.49 to<br>63.19)          | 1.96<br>(1.44 to<br>2.68)    | 2.03<br>(1.43 to<br>2.93)    | 1.90<br>(1.37 to<br>2.69)    | 1.94<br>(1.33 to<br>2.83)    |
| Other hemoglobinopathies and hemolytic anemias    |                                     |                                       |                                     |                                       |                              |                              |                              |                              |
|                                                   | 1,032.71<br>(770.61 to<br>1,348.69) | 1,466.72<br>(1,103.38 to<br>1,908.86) | 1,321.51<br>(998.59 to<br>1,705.57) | 1,501.56<br>(1,123.62 to<br>1,950.49) | 27.96<br>(20.76 to<br>36.35) | 43.11<br>(32.75 to<br>54.68) | 41.83<br>(32.02 to<br>52.61) | 42.28<br>(31.64 to<br>54.61) |
| Endocrine, metabolic, blood, and immune disorders |                                     |                                       |                                     |                                       |                              |                              |                              |                              |

| Solomon Islands                               |                                            |                                            |                                           |                                            |                                   |                                    |                                    |                                    |
|-----------------------------------------------|--------------------------------------------|--------------------------------------------|-------------------------------------------|--------------------------------------------|-----------------------------------|------------------------------------|------------------------------------|------------------------------------|
| Cause                                         | YLLs (actual counts)                       |                                            |                                           |                                            | Deaths (actual counts)            |                                    |                                    |                                    |
|                                               | 2016                                       | 2040 Forecast                              | 2040 Better Scenario                      | 2040 Worse Scenario                        | 2016                              | 2040 Forecast                      | 2040 Better Scenario               | 2040 Worse Scenario                |
| <b>Musculoskeletal disorders</b>              | <b>374.21</b><br>(205.78 to 600.54)        | <b>542.66</b><br>(289.65 to 914.55)        | <b>570.76</b><br>(305.37 to 960.87)       | <b>536.44</b><br>(286.04 to 896.18)        | <b>7.66</b><br>(4.29 to 12.06)    | <b>12.13</b><br>(6.67 to 20.02)    | <b>13.43</b><br>(7.40 to 21.66)    | <b>11.65</b><br>(6.34 to 18.99)    |
| Rheumatoid arthritis                          | 28.76<br>(15.84 to 45.94)                  | 47.28<br>(25.93 to 76.86)                  | 40.58<br>(21.77 to 66.80)                 | 48.54<br>(26.26 to 77.50)                  | 0.96<br>(0.51 to 1.57)            | 1.86<br>(0.98 to 3.14)             | 1.73<br>(0.90 to 2.96)             | 1.82<br>(0.96 to 3.05)             |
| Other musculoskeletal disorders               | 345.45<br>(189.38 to 553.82)               | 495.38<br>(259.27 to 837.67)               | 530.19<br>(282.00 to 891.88)              | 487.90<br>(256.06 to 823.65)               | 6.69<br>(3.65 to 10.58)           | 10.28<br>(5.59 to 17.05)           | 11.70<br>(6.41 to 19.14)           | 9.83<br>(5.26 to 16.29)            |
| <b>Other non-communicable diseases</b>        | <b>6,741.96</b><br>(3,978.70 to 10,342.52) | <b>6,831.27</b><br>(4,201.49 to 10,681.52) | <b>4,957.46</b><br>(3,274.42 to 7,404.48) | <b>7,989.59</b><br>(4,687.92 to 12,724.38) | <b>96.15</b><br>(62.94 to 140.75) | <b>122.54</b><br>(85.21 to 175.99) | <b>105.39</b><br>(76.80 to 145.88) | <b>152.82</b><br>(89.11 to 197.98) |
| Congenital birth defects                      | 6,007.12<br>(3,261.73 to 9,592.63)         | 5,251.94<br>(2,602.73 to 8,750.57)         | 3,449.15<br>(1,784.43 to 5,622.20)        | 6,389.20<br>(3,091.12 to 10,882.20)        | 75.38<br>(41.62 to 117.07)        | 69.77<br>(35.57 to 112.62)         | 47.60<br>(25.48 to 75.14)          | 83.35<br>(41.56 to 137.39)         |
| Neural tube defects                           | 488.81<br>(186.88 to 1,000.24)             | 195.35<br>(55.58 to 494.23)                | 98.57<br>(27.57 to 255.85)                | 260.14<br>(71.72 to 660.62)                | 5.70<br>(2.20 to 11.64)           | 2.30<br>(0.68 to 5.75)             | 1.17<br>(0.34 to 2.98)             | 3.05<br>(0.87 to 7.68)             |
| Congenital heart anomalies                    | 2,578.94<br>(1,568.61 to 4,152.93)         | 2,251.78<br>(1,271.92 to 3,864.56)         | 1,524.04<br>(903.77 to 2,570.97)          | 2,698.34<br>(1,500.67 to 4,672.76)         | 32.93<br>(20.33 to 51.45)         | 30.51<br>(18.12 to 49.56)          | 21.43<br>(13.14 to 34.10)          | 35.90<br>(20.75 to 59.43)          |
| Orofacial clefts                              | 4.82<br>(1.48 to 14.95)                    | 3.86<br>(0.93 to 12.43)                    | 1.80<br>(0.45 to 5.64)                    | 5.26<br>(1.24 to 16.88)                    | 0.06<br>(0.02 to 0.17)            | 0.04<br>(0.01 to 0.14)             | 0.02<br>(0.01 to 0.07)             | 0.06<br>(0.01 to 0.20)             |
| Down syndrome                                 | 305.72<br>(109.68 to 694.12)               | 276.86<br>(92.42 to 668.78)                | 183.61<br>(64.05 to 422.51)               | 331.38<br>(108.87 to 802.11)               | 4.16<br>(1.55 to 9.21)            | 4.28<br>(1.53 to 9.77)             | 3.01<br>(1.12 to 6.64)             | 4.96<br>(1.71 to 11.40)            |
| Other chromosomal abnormalities               | 244.06<br>(62.50 to 544.70)                | 310.02<br>(74.86 to 691.98)                | 185.53<br>(44.16 to 409.83)               | 391.24<br>(92.30 to 872.60)                | 2.91<br>(0.74 to 6.42)            | 2.91<br>(0.92 to 8.24)             | 2.29<br>(0.56 to 4.97)             | 4.71<br>(1.11 to 10.41)            |
| Congenital musculoskeletal and limb anomalies | 156.18<br>(64.16 to 349.73)                | 170.21<br>(65.57 to 385.29)                | 115.07<br>(45.01 to 254.63)               | 206.33<br>(78.81 to 470.82)                | 1.91<br>(0.79 to 4.34)            | 2.14<br>(0.82 to 4.74)             | 1.48<br>(0.58 to 3.32)             | 2.56<br>(0.98 to 5.78)             |
| Urogenital congenital anomalies               | 184.76<br>(81.83 to 312.64)                | 178.11<br>(80.18 to 309.58)                | 122.17<br>(56.33 to 205.56)               | 213.39<br>(93.09 to 377.47)                | 2.55<br>(1.14 to 4.18)            | 2.74<br>(1.25 to 4.52)             | 2.03<br>(0.96 to 3.31)             | 3.16<br>(1.41 to 5.32)             |
| Digestive congenital anomalies                | 331.75<br>(134.36 to 644.54)               | 266.23<br>(96.47 to 577.79)                | 157.15<br>(57.92 to 333.74)               | 338.31<br>(117.46 to 738.21)               | 3.92<br>(1.60 to 7.57)            | 3.21<br>(1.19 to 6.88)             | 1.92<br>(0.72 to 3.98)             | 4.05<br>(1.42 to 8.70)             |
| Other congenital birth defects                | 1,712.08<br>(629.90 to 3,193.91)           | 1,599.52<br>(575.51 to 3,054.33)           | 1,061.21<br>(397.38 to 1,978.44)          | 1,944.82<br>(681.69 to 3,718.05)           | 21.26<br>(7.82 to 38.91)          | 20.80<br>(7.64 to 38.78)           | 14.26<br>(5.43 to 25.88)           | 24.90<br>(8.92 to 46.82)           |
| Skin and subcutaneous diseases                | 548.54<br>(322.58 to 854.33)               | 1,434.86<br>(901.16 to 2,154.50)           | 1,417.14<br>(890.89 to 2,116.50)          | 1,417.80<br>(882.71 to 2,155.59)           | 18.61<br>(10.94 to 28.96)         | 51.10<br>(32.35 to 78.20)          | 56.74<br>(35.89 to 86.59)          | 47.34<br>(29.54 to 72.85)          |
| Cellulitis                                    | 46.53<br>(12.98 to 90.42)                  | 154.81<br>(44.22 to 285.14)                | 178.52<br>(51.08 to 331.65)               | 145.91<br>(41.11 to 268.90)                | 1.56<br>(0.39 to 3.06)            | 5.64<br>(1.49 to 10.50)            | 7.21<br>(1.97 to 13.37)            | 5.02<br>(1.32 to 9.41)             |
| Pyoderma                                      | 390.58<br>(232.12 to 628.67)               | 1,063.66<br>(673.76 to 1,650.93)           | 1,002.46<br>(637.59 to 1,543.06)          | 1,068.35<br>(672.68 to 1,665.88)           | 11.97<br>(7.20 to 19.14)          | 35.20<br>(22.45 to 54.68)          | 36.76<br>(23.40 to 57.15)          | 33.36<br>(21.24 to 51.27)          |
| Decubitus ulcer                               | 105.11<br>(53.15 to 205.31)                | 203.86<br>(95.80 to 412.12)                | 223.69<br>(108.71 to 438.64)              | 190.79<br>(87.95 to 389.25)                | 4.95<br>(2.64 to 9.08)            | 9.99<br>(4.66 to 20.01)            | 12.47<br>(6.19 to 23.97)           | 8.71<br>(3.95 to 17.60)            |
| Other skin and subcutaneous diseases          | 6.32<br>(3.54 to 9.99)                     | 12.54<br>(7.26 to 19.74)                   | 12.47<br>(7.39 to 20.07)                  | 12.75<br>(7.30 to 20.21)                   | 0.13<br>(0.08 to 0.20)            | 0.27<br>(0.16 to 0.42)             | 0.30<br>(0.18 to 0.46)             | 0.26<br>(0.15 to 0.41)             |
| Sudden infant death syndrome                  | 186.29<br>(72.40 to 367.88)                | 144.47<br>(47.99 to 311.65)                | 91.16<br>(29.86 to 195.84)                | 182.59<br>(60.75 to 396.00)                | 2.16<br>(0.84 to 4.27)            | 1.67<br>(0.56 to 3.61)             | 1.06<br>(0.35 to 2.27)             | 2.12<br>(0.70 to 4.59)             |

|                          |                                          |                                          |                                          |                                          |                                 |                                 |                                 |                                 |
|--------------------------|------------------------------------------|------------------------------------------|------------------------------------------|------------------------------------------|---------------------------------|---------------------------------|---------------------------------|---------------------------------|
| Injuries                 | 22,707.73<br>(18,599.93 to<br>27,799.02) | 28,138.93<br>(22,137.12 to<br>40,619.78) | 23,259.01<br>(18,284.25 to<br>34,559.84) | 29,740.23<br>(23,095.11 to<br>42,618.49) | 426.27<br>(345.22 to<br>520.45) | 549.66<br>(437.43 to<br>765.84) | 473.75<br>(378.67 to<br>679.51) | 568.40<br>(448.83 to<br>788.36) |
| Transport injuries       | 5,835.66<br>(4,515.72 to<br>7,630.45)    | 8,521.65<br>(6,391.25 to<br>11,341.02)   | 6,744.60<br>(5,089.10 to<br>8,985.52)    | 9,068.87<br>(6,810.33 to<br>12,034.89)   | 109.81<br>(85.25 to<br>144.53)  | 164.86<br>(125.56 to<br>217.51) | 136.10<br>(105.01 to<br>177.93) | 171.81<br>(130.31 to<br>226.73) |
| Road injuries            | 5,403.30<br>(4,160.87 to<br>7,043.67)    | 7,825.22<br>(5,858.28 to<br>10,445.13)   | 6,192.56<br>(4,672.31 to<br>8,215.89)    | 8,328.50<br>(6,225.52 to<br>11,127.61)   | 101.46<br>(78.58 to<br>133.62)  | 150.83<br>(114.49 to<br>200.40) | 124.50<br>(95.70 to<br>164.64)  | 157.24<br>(119.41 to<br>208.96) |
| Pedestrian road injuries | 1,744.03<br>(1,220.53 to<br>2,539.24)    | 1,962.64<br>(1,262.49 to<br>2,984.37)    | 1,555.16<br>(1,025.61 to<br>2,378.53)    | 2,083.27<br>(1,338.02 to<br>3,152.96)    | 33.40<br>(23.60 to<br>48.48)    | 40.10<br>(26.63 to<br>60.21)    | 33.22<br>(22.51 to<br>50.20)    | 41.59<br>(27.53 to<br>62.95)    |

| Solomon Islands                                 |                                                             |                                                             |                                                            |                                                             |                                                      |                                                      |                                                      |                                                      |
|-------------------------------------------------|-------------------------------------------------------------|-------------------------------------------------------------|------------------------------------------------------------|-------------------------------------------------------------|------------------------------------------------------|------------------------------------------------------|------------------------------------------------------|------------------------------------------------------|
| Cause                                           | YLLs (actual counts)                                        |                                                             |                                                            |                                                             | Deaths (actual counts)                               |                                                      |                                                      |                                                      |
|                                                 | 2016                                                        | 2040 Forecast                                               | 2040 Better Scenario                                       | 2040 Worse Scenario                                         | 2016                                                 | 2040 Forecast                                        | 2040 Better Scenario                                 | 2040 Worse Scenario                                  |
| Cyclist road injuries                           | 96.41<br>(59.62 to<br>139.20)                               | 144.18<br>(87.20 to<br>215.40)                              | 114.91<br>(70.61 to<br>170.93)                             | 153.78<br>(92.02 to<br>230.00)                              | 1.93<br>(1.19 to<br>2.77)                            | 2.96<br>(1.80 to<br>4.43)                            | 2.51<br>(1.55 to<br>3.71)                            | 3.07<br>(1.86 to<br>4.56)                            |
| Motorcyclist road injuries                      | 797.86<br>(547.37 to<br>1,185.59)                           | 1,277.30<br>(831.69 to<br>1,924.84)                         | 1,063.89<br>(693.83 to<br>1,593.98)                        | 1,336.58<br>(867.85 to<br>2,043.97)                         | 14.58<br>(9.99 to<br>21.39)                          | 23.44<br>(15.39 to<br>34.72)                         | 19.98<br>(13.30 to<br>29.61)                         | 24.25<br>(15.88 to<br>36.32)                         |
| Motor vehicle road injuries                     | 2,664.88<br>(1,836.93 to<br>3,730.45)                       | 4,275.74<br>(2,937.96 to<br>6,137.90)                       | 3,330.95<br>(2,303.06 to<br>4,799.41)                      | 4,577.03<br>(3,152.14 to<br>6,585.24)                       | 49.73<br>(34.40 to<br>70.08)                         | 81.29<br>(56.15 to<br>116.04)                        | 66.32<br>(46.45 to<br>94.21)                         | 85.14<br>(58.97 to<br>121.53)                        |
| Other road injuries                             | 100.12<br>(63.39 to<br>151.26)                              | 165.35<br>(100.47 to<br>254.93)                             | 127.65<br>(78.95 to<br>195.63)                             | 177.85<br>(107.34 to<br>275.47)                             | 1.82<br>(1.17 to<br>2.70)                            | 3.04<br>(1.86 to<br>4.61)                            | 2.47<br>(1.55 to<br>3.88)                            | 3.20<br>(1.96 to<br>4.82)                            |
| Other transport injuries                        | 432.35<br>(213.35 to<br>730.71)                             | 696.43<br>(334.90 to<br>1,164.67)                           | 552.04<br>(265.13 to<br>929.02)                            | 740.36<br>(358.90 to<br>1,248.24)                           | 8.34<br>(4.16 to<br>14.11)                           | 14.03<br>(6.80 to<br>23.24)                          | 11.61<br>(5.73 to<br>19.29)                          | 14.57<br>(7.08 to<br>24.29)                          |
| <b>Unintentional injuries</b>                   | <b>9,946.74</b><br><b>(8,111.47 to</b><br><b>12,057.57)</b> | <b>8,755.07</b><br><b>(6,767.04 to</b><br><b>10,895.32)</b> | <b>6,960.85</b><br><b>(5,418.17 to</b><br><b>8,726.55)</b> | <b>9,439.11</b><br><b>(7,205.10 to</b><br><b>11,951.45)</b> | <b>188.95</b><br><b>(153.76 to</b><br><b>228.28)</b> | <b>182.18</b><br><b>(146.29 to</b><br><b>218.68)</b> | <b>155.08</b><br><b>(125.19 to</b><br><b>188.00)</b> | <b>189.67</b><br><b>(151.36 to</b><br><b>233.00)</b> |
| Falls                                           | 669.23<br>(471.50 to<br>996.34)                             | 730.08<br>(516.46 to<br>1,097.69)                           | 679.28<br>(490.37 to<br>1,012.30)                          | 743.07<br>(523.79 to<br>1,118.42)                           | 16.87<br>(12.08 to<br>24.72)                         | 20.68<br>(14.97 to<br>30.31)                         | 21.32<br>(15.61 to<br>30.71)                         | 19.84<br>(14.35 to<br>29.20)                         |
| Drowning                                        | 4,047.04<br>(3,148.52 to<br>4,970.38)                       | 3,279.20<br>(2,371.63 to<br>4,278.81)                       | 2,569.19<br>(1,896.42 to<br>3,350.09)                      | 3,540.07<br>(2,562.16 to<br>4,674.72)                       | 70.30<br>(55.45 to<br>86.52)                         | 60.82<br>(44.62 to<br>78.62)                         | 49.14<br>(36.67 to<br>63.35)                         | 64.49<br>(47.34 to<br>83.61)                         |
| Fire, heat, and hot substances                  | 791.67<br>(581.94 to<br>1,075.81)                           | 599.43<br>(412.26 to<br>873.42)                             | 444.40<br>(308.56 to<br>651.12)                            | 659.29<br>(445.20 to<br>973.18)                             | 14.77<br>(11.01 to<br>19.74)                         | 12.35<br>(8.85 to<br>17.44)                          | 9.85<br>(7.15 to<br>13.95)                           | 13.07<br>(9.25 to<br>18.41)                          |
| Poisonings                                      | 602.52<br>(310.91 to<br>914.11)                             | 381.72<br>(182.82 to<br>603.55)                             | 251.16<br>(119.96 to<br>389.67)                            | 435.77<br>(208.73 to<br>700.19)                             | 11.12<br>(5.77 to<br>16.35)                          | 7.60<br>(3.79 to<br>11.44)                           | 5.43<br>(2.80 to<br>8.08)                            | 8.33<br>(4.24 to<br>12.76)                           |
| Exposure to mechanical forces                   | 1,220.39<br>(921.18 to<br>1,604.88)                         | 1,133.81<br>(814.01 to<br>1,545.09)                         | 872.13<br>(613.35 to<br>1,203.50)                          | 1,236.45<br>(862.89 to<br>1,709.37)                         | 23.10<br>(17.38 to<br>30.95)                         | 22.95<br>(16.87 to<br>31.30)                         | 18.66<br>(13.51 to<br>25.50)                         | 24.30<br>(17.48 to<br>33.07)                         |
| Unintentional firearm injuries                  | 239.71<br>(161.16 to<br>333.96)                             | 204.95<br>(123.90 to<br>317.33)                             | 150.67<br>(92.31 to<br>236.20)                             | 226.40<br>(136.18 to<br>347.47)                             | 4.68<br>(3.23 to<br>6.50)                            | 4.34<br>(2.73 to<br>6.47)                            | 3.43<br>(2.19 to<br>5.14)                            | 4.62<br>(2.96 to<br>6.86)                            |
| Unintentional suffocation                       | 260.22<br>(159.39 to<br>391.09)                             | 252.99<br>(143.38 to<br>401.99)                             | 187.64<br>(108.68 to<br>303.78)                            | 282.22<br>(158.51 to<br>455.24)                             | 4.05<br>(2.52 to<br>6.12)                            | 4.12<br>(2.43 to<br>6.46)                            | 3.13<br>(1.87 to<br>5.02)                            | 4.53<br>(2.63 to<br>7.16)                            |
| Other exposure to mechanical forces             | 720.46<br>(518.86 to<br>1,032.50)                           | 675.88<br>(470.70 to<br>1,002.17)                           | 533.82<br>(369.63 to<br>797.85)                            | 727.83<br>(500.80 to<br>1,067.76)                           | 14.49<br>(10.27 to<br>21.06)                         | 14.49<br>(10.29 to<br>21.16)                         | 12.10<br>(8.60 to<br>17.89)                          | 15.15<br>(10.65 to<br>22.11)                         |
| Adverse effects of medical treatment            | 1,000.58<br>(765.45 to<br>1,273.16)                         | 1,047.04<br>(766.72 to<br>1,377.65)                         | 852.16<br>(623.24 to<br>1,119.90)                          | 1,120.67<br>(812.27 to<br>1,494.92)                         | 20.88<br>(16.10 to<br>26.52)                         | 23.91<br>(18.48 to<br>30.19)                         | 21.04<br>(16.29 to<br>26.61)                         | 24.52<br>(18.56 to<br>31.43)                         |
| Animal contact                                  | 80.19<br>(40.82 to<br>140.91)                               | 106.55<br>(51.80 to<br>192.09)                              | 79.29<br>(38.60 to<br>146.04)                              | 116.94<br>(56.56 to<br>213.26)                              | 1.80<br>(0.91 to<br>3.15)                            | 2.55<br>(1.21 to<br>4.46)                            | 2.08<br>(1.02 to<br>3.68)                            | 2.66<br>(1.30 to<br>4.75)                            |
| Venomous animal contact                         | 24.39<br>(12.42 to<br>49.28)                                | 28.96<br>(13.99 to<br>60.52)                                | 20.83<br>(10.04 to<br>43.88)                               | 32.13<br>(15.10 to<br>66.50)                                | 0.54<br>(0.28 to<br>1.11)                            | 0.68<br>(0.33 to<br>1.46)                            | 0.54<br>(0.26 to<br>1.17)                            | 0.71<br>(0.35 to<br>1.53)                            |
| Non-venomous animal contact                     | 55.81<br>(27.03 to<br>96.85)                                | 77.60<br>(35.70 to<br>142.47)                               | 58.46<br>(26.82 to<br>109.59)                              | 84.80<br>(37.90 to<br>158.08)                               | 1.26<br>(0.62 to<br>2.17)                            | 1.87<br>(0.86 to<br>3.31)                            | 1.54<br>(0.71 to<br>2.70)                            | 1.95<br>(0.89 to<br>3.52)                            |
| Foreign body                                    | 554.36<br>(359.50 to<br>784.54)                             | 547.21<br>(356.47 to<br>753.59)                             | 498.33<br>(332.68 to<br>664.92)                            | 579.93<br>(376.43 to<br>820.73)                             | 10.15<br>(6.79 to<br>13.74)                          | 11.47<br>(7.71 to<br>14.92)                          | 11.72<br>(7.76 to<br>15.05)                          | 11.44<br>(7.67 to<br>15.09)                          |
| Pulmonary aspiration and foreign body in airway | 507.83<br>(317.79 to<br>736.33)                             | 503.35<br>(316.69 to<br>700.82)                             | 463.21<br>(301.30 to<br>625.52)                            | 532.27<br>(334.06 to<br>765.03)                             | 9.32<br>(5.92 to<br>12.79)                           | 10.63<br>(6.87 to<br>14.09)                          | 11.01<br>(7.15 to<br>14.28)                          | 10.55<br>(6.83 to<br>14.18)                          |

|                                             |                                                            |                                                             |                                                             |                                                              |                                                     |                                                      |                                                      |                                                      |
|---------------------------------------------|------------------------------------------------------------|-------------------------------------------------------------|-------------------------------------------------------------|--------------------------------------------------------------|-----------------------------------------------------|------------------------------------------------------|------------------------------------------------------|------------------------------------------------------|
|                                             | 46.53<br>(28.41 to<br>78.24)                               | 43.85<br>(24.50 to<br>76.22)                                | 35.12<br>(19.35 to<br>61.71)                                | 47.66<br>(26.50 to<br>82.74)                                 | 0.83<br>(0.51 to<br>1.39)                           | 0.84<br>(0.48 to<br>1.44)                            | 0.70<br>(0.40 to<br>1.21)                            | 0.89<br>(0.50 to<br>1.54)                            |
| Foreign body in other body part             |                                                            |                                                             |                                                             |                                                              |                                                     |                                                      |                                                      |                                                      |
|                                             | 349.34<br>(223.07 to<br>482.22)                            | 415.54<br>(259.76 to<br>621.24)                             | 290.51<br>(182.16 to<br>431.00)                             | 461.30<br>(284.03 to<br>696.72)                              | 7.52<br>(4.84 to<br>10.31)                          | 9.32<br>(6.07 to<br>13.62)                           | 6.88<br>(4.42 to<br>10.03)                           | 10.04<br>(6.34 to<br>14.63)                          |
| Environmental heat and cold exposure        |                                                            |                                                             |                                                             |                                                              |                                                     |                                                      |                                                      |                                                      |
|                                             | 631.42<br>(439.66 to<br>869.84)                            | 514.50<br>(335.98 to<br>726.20)                             | 424.39<br>(273.17 to<br>601.94)                             | 545.61<br>(353.55 to<br>764.29)                              | 12.43<br>(8.56 to<br>16.89)                         | 10.54<br>(6.95 to<br>14.50)                          | 8.97<br>(5.89 to<br>12.38)                           | 10.98<br>(7.26 to<br>15.38)                          |
| Other unintentional injuries                |                                                            |                                                             |                                                             |                                                              |                                                     |                                                      |                                                      |                                                      |
| <b>Self-harm and interpersonal violence</b> | <b>6,921.07</b><br><b>(5,061.31 to</b><br><b>8,880.70)</b> | <b>9,743.87</b><br><b>(6,806.88 to</b><br><b>13,232.98)</b> | <b>8,517.77</b><br><b>(6,113.03 to</b><br><b>11,262.44)</b> | <b>10,062.86</b><br><b>(6,995.50 to</b><br><b>13,757.03)</b> | <b>127.45</b><br><b>(92.98 to</b><br><b>164.71)</b> | <b>182.17</b><br><b>(127.37 to</b><br><b>246.67)</b> | <b>162.57</b><br><b>(117.88 to</b><br><b>213.73)</b> | <b>186.15</b><br><b>(129.45 to</b><br><b>253.96)</b> |



| Solomon Islands                                                                     |                                                |                                                        |                                                        |                                                        |                                                |                                                   |                                                   |                                                   |
|-------------------------------------------------------------------------------------|------------------------------------------------|--------------------------------------------------------|--------------------------------------------------------|--------------------------------------------------------|------------------------------------------------|---------------------------------------------------|---------------------------------------------------|---------------------------------------------------|
| Cause                                                                               | YLLs (actual counts)                           |                                                        |                                                        |                                                        | Deaths (actual counts)                         |                                                   |                                                   |                                                   |
|                                                                                     | 2016                                           | 2040 Forecast                                          | 2040 Better Scenario                                   | 2040 Worse Scenario                                    | 2016                                           | 2040 Forecast                                     | 2040 Better Scenario                              | 2040 Worse Scenario                               |
| Self-harm                                                                           | 4,970.57<br>(3,264.44 to<br>6,565.26)          | 7,569.12<br>(4,777.38 to<br>10,695.94)                 | 6,497.09<br>(4,272.78 to<br>8,880.46)                  | 7,846.84<br>(4,937.19 to<br>11,109.66)                 | 91.48<br>(60.19 to<br>120.75)                  | 141.37<br>(89.91 to<br>198.16)                    | 124.20<br>(82.16 to<br>167.43)                    | 144.88<br>(91.88 to<br>204.46)                    |
| Self-harm by firearm                                                                | 461.76<br>(112.60 to<br>919.09)                | 591.93<br>(125.69 to<br>1,284.24)                      | 489.25<br>(106.77 to<br>1,041.82)                      | 617.16<br>(130.66 to<br>1,356.72)                      | 8.79<br>(2.16 to<br>17.36)                     | 11.37<br>(2.52 to<br>24.21)                       | 9.55<br>(2.16 to<br>19.72)                        | 11.77<br>(2.55 to<br>25.55)                       |
| Self-harm by other specified means                                                  | 4,508.81<br>(2,905.88 to<br>5,897.32)          | 6,977.18<br>(4,383.91 to<br>9,736.15)                  | 6,007.84<br>(3,883.57 to<br>8,239.98)                  | 7,229.68<br>(4,530.53 to<br>10,110.92)                 | 82.69<br>(53.05 to<br>108.67)                  | 130.00<br>(82.45 to<br>180.53)                    | 114.66<br>(75.32 to<br>154.64)                    | 133.12<br>(84.01 to<br>187.28)                    |
| Interpersonal violence                                                              | 1,950.50<br>(1,112.49 to<br>2,650.97)          | 2,174.75<br>(1,193.27 to<br>3,097.85)                  | 2,020.68<br>(1,126.82 to<br>2,860.05)                  | 2,216.01<br>(1,204.89 to<br>3,165.69)                  | 35.97<br>(20.30 to<br>48.98)                   | 40.79<br>(22.75 to<br>58.14)                      | 38.57<br>(21.77 to<br>54.19)                      | 41.26<br>(22.86 to<br>58.66)                      |
| Physical violence by firearm                                                        | 441.44<br>(185.88 to<br>709.00)                | 482.48<br>(206.88 to<br>822.16)                        | 465.39<br>(201.51 to<br>786.40)                        | 488.76<br>(208.42 to<br>835.17)                        | 8.09<br>(3.40 to<br>13.06)                     | 8.37<br>(3.84 to<br>14.78)                        | 8.63<br>(3.75 to<br>14.24)                        | 8.95<br>(3.84 to<br>15.01)                        |
| Physical violence by sharp object                                                   | 505.31<br>(282.89 to<br>757.70)                | 613.00<br>(337.08 to<br>923.72)                        | 621.31<br>(345.26 to<br>936.17)                        | 611.73<br>(337.49 to<br>923.54)                        | 9.38<br>(5.20 to<br>13.95)                     | 11.51<br>(6.39 to<br>17.19)                       | 11.75<br>(6.57 to<br>17.44)                       | 11.43<br>(6.25 to<br>17.12)                       |
| Physical violence by other means                                                    | 1,003.75<br>(538.03 to<br>1,420.89)            | 1,079.28<br>(516.63 to<br>1,668.85)                    | 933.98<br>(450.61 to<br>1,421.34)                      | 1,115.53<br>(545.54 to<br>1,719.74)                    | 18.49<br>(9.81 to<br>26.23)                    | 20.41<br>(10.02 to<br>31.35)                      | 17.99<br>(8.96 to<br>27.22)                       | 20.89<br>(10.34 to<br>32.07)                      |
| <b>Forces of nature, conflict and terrorism, and executions and police conflict</b> | <b>4.26</b><br><b>(3.51 to</b><br><b>5.13)</b> | <b>1,118.34</b><br><b>(0.00 to</b><br><b>9,197.95)</b> | <b>1,035.79</b><br><b>(0.00 to</b><br><b>8,510.74)</b> | <b>1,169.40</b><br><b>(0.00 to</b><br><b>9,627.36)</b> | <b>0.07</b><br><b>(0.06 to</b><br><b>0.08)</b> | <b>20.45</b><br><b>(0.00 to</b><br><b>165.76)</b> | <b>19.99</b><br><b>(0.00 to</b><br><b>163.36)</b> | <b>20.77</b><br><b>(0.00 to</b><br><b>168.27)</b> |
| Exposure to forces of nature                                                        | 0.00<br>(0.00 to<br>0.00)                      | 1,109.03<br>(0.00 to<br>9,197.95)                      | 1,027.07<br>(0.00 to<br>8,510.74)                      | 1,159.73<br>(0.00 to<br>9,627.36)                      | 0.00<br>(0.00 to<br>0.00)                      | 20.29<br>(0.00 to<br>165.76)                      | 19.84<br>(0.00 to<br>163.36)                      | 20.61<br>(0.00 to<br>168.27)                      |
| Conflict and terrorism                                                              | 0.00<br>(0.00 to<br>0.00)                      | 9.30<br>(0.00 to<br>39.67)                             | 8.72<br>(0.00 to<br>37.10)                             | 9.67<br>(0.00 to<br>41.23)                             | 0.00<br>(0.00 to<br>0.00)                      | 0.16<br>(0.00 to<br>0.68)                         | 0.15<br>(0.00 to<br>0.65)                         | 0.16<br>(0.00 to<br>0.69)                         |
| Executions and police conflict                                                      | 4.26<br>(3.51 to<br>5.13)                      | 0.00<br>(0.00 to<br>0.00)                              | 0.00<br>(0.00 to<br>0.00)                              | 0.00<br>(0.00 to<br>0.00)                              | 0.07<br>(0.06 to<br>0.08)                      | 0.00<br>(0.00 to<br>0.00)                         | 0.00<br>(0.00 to<br>0.00)                         | 0.00<br>(0.00 to<br>0.00)                         |

| Tonga                                                             |                                       |                                       |                                       |                                       |                              |                                  |                              |                                    |
|-------------------------------------------------------------------|---------------------------------------|---------------------------------------|---------------------------------------|---------------------------------------|------------------------------|----------------------------------|------------------------------|------------------------------------|
| Cause                                                             | YLLs (actual counts)                  |                                       |                                       |                                       | Deaths (actual counts)       |                                  |                              |                                    |
|                                                                   | 2016                                  | 2040 Forecast                         | 2040 Better Scenario                  | 2040 Worse Scenario                   | 2016                         | 2040 Forecast                    | 2040 Better Scenario         | 2040 Worse Scenario                |
| All causes                                                        | 21,173.43<br>(17,825.26 to 25,151.16) | 27,416.22<br>(23,241.51 to 32,353.23) | 22,244.28<br>(18,742.04 to 26,227.99) | 32,816.02<br>(27,825.04 to 38,831.43) | 773.68<br>(677.79 to 874.32) | 1,049.33<br>(950.65 to 1,153.88) | 888.72<br>(803.25 to 985.97) | 1,211.50<br>(1,101.52 to 1,337.37) |
| Communicable, maternal, neonatal, and nutritional diseases        | 5,080.78<br>(3,525.11 to 7,429.48)    | 5,729.60<br>(4,284.85 to 8,076.99)    | 4,709.98<br>(3,559.33 to 6,526.86)    | 6,777.10<br>(4,937.77 to 9,713.13)    | 106.22<br>(84.69 to 135.78)  | 146.89<br>(119.64 to 184.74)     | 129.81<br>(106.49 to 161.10) | 163.88<br>(131.96 to 208.27)       |
| HIV/AIDS and tuberculosis                                         | 188.17<br>(48.95 to 810.24)           | 321.09<br>(63.15 to 1,361.94)         | 241.13<br>(36.98 to 1,292.72)         | 397.86<br>(84.23 to 1,517.01)         | 4.56<br>(1.53 to 18.24)      | 7.27<br>(1.82 to 30.82)          | 5.61<br>(1.15 to 29.40)      | 8.85<br>(2.46 to 32.58)            |
| Tuberculosis                                                      | 40.13<br>(31.61 to 49.54)             | 50.46<br>(31.15 to 77.31)             | 52.26<br>(20.07 to 48.51)             | 62.99<br>(38.13 to 98.80)             | 1.38<br>(1.11 to 1.69)       | 1.74<br>(1.10 to 2.66)           | 1.17<br>(0.75 to 1.78)       | 2.07<br>(1.27 to 3.26)             |
| HIV/AIDS                                                          | 148.04<br>(8.73 to 777.09)            | 270.63<br>(16.02 to 1,306.78)         | 208.87<br>(7.88 to 1,253.84)          | 334.88<br>(30.43 to 1,424.36)         | 3.18<br>(0.16 to 16.86)      | 5.53<br>(0.27 to 29.13)          | 4.45<br>(0.13 to 27.92)      | 6.78<br>(0.57 to 30.52)            |
| Diarrhea, lower respiratory, and other common infectious diseases | 1,946.10<br>(1,477.81 to 2,644.08)    | 2,047.80<br>(1,465.38 to 2,963.00)    | 1,725.85<br>(1,247.38 to 2,461.87)    | 2,547.85<br>(1,768.03 to 3,873.35)    | 53.73<br>(44.15 to 65.01)    | 69.47<br>(50.73 to 92.35)        | 61.24<br>(44.17 to 80.11)    | 81.01<br>(58.71 to 109.29)         |
| Diarrheal diseases                                                | 101.62<br>(63.09 to 158.56)           | 76.54<br>(16.18 to 232.03)            | 53.90<br>(12.19 to 156.58)            | 124.69<br>(23.46 to 360.59)           | 3.86<br>(2.28 to 6.54)       | 4.17<br>(0.89 to 12.81)          | 3.25<br>(0.72 to 9.86)       | 6.24<br>(1.19 to 19.78)            |
| Intestinal infectious diseases                                    | 90.36<br>(41.06 to 171.08)            | 108.79<br>(47.57 to 207.23)           | 96.11<br>(42.24 to 179.66)            | 116.62<br>(50.05 to 230.39)           | 1.31<br>(0.61 to 2.46)       | 1.65<br>(0.75 to 3.05)           | 1.48<br>(0.67 to 2.72)       | 1.74<br>(0.78 to 3.33)             |
| Typhoid fever                                                     | 77.78<br>(34.45 to 149.49)            | 90.67<br>(38.46 to 181.21)            | 80.52<br>(34.12 to 156.87)            | 97.01<br>(40.97 to 191.79)            | 1.12<br>(0.50 to 2.14)       | 1.36<br>(0.60 to 2.65)           | 1.23<br>(0.55 to 2.34)       | 1.44<br>(0.62 to 2.79)             |
| Paratyphoid fever                                                 | 12.30<br>(5.03 to 26.14)              | 18.06<br>(6.99 to 38.80)              | 15.54<br>(6.11 to 33.65)              | 19.54<br>(7.62 to 42.87)              | 0.19<br>(0.08 to 0.39)       | 0.28<br>(0.12 to 0.61)           | 0.25<br>(0.10 to 0.53)       | 0.30<br>(0.12 to 0.65)             |
| Other intestinal infectious diseases                              | 0.09<br>(0.03 to 0.20)                | 0.06<br>(0.02 to 0.15)                | 0.05<br>(0.01 to 0.12)                | 0.07<br>(0.02 to 0.17)                | 0.00<br>(0.00 to 0.00)       | 0.00<br>(0.00 to 0.00)           | 0.00<br>(0.00 to 0.00)       | 0.00<br>(0.00 to 0.00)             |
| Lower respiratory infections                                      | 1,168.86<br>(899.29 to 1,588.97)      | 1,265.58<br>(885.69 to 1,884.69)      | 1,035.38<br>(734.03 to 1,497.74)      | 1,546.34<br>(1,051.61 to 2,460.60)    | 38.88<br>(31.74 to 46.65)    | 52.66<br>(37.53 to 71.74)        | 46.11<br>(32.19 to 61.77)    | 60.32<br>(42.61 to 82.85)          |
| Upper respiratory infections                                      | 1.43<br>(0.70 to 2.78)                | 1.93<br>(0.75 to 4.57)                | 1.45<br>(0.56 to 3.38)                | 2.20<br>(0.85 to 5.25)                | 0.03<br>(0.02 to 0.06)       | 0.05<br>(0.02 to 0.11)           | 0.04<br>(0.02 to 0.09)       | 0.06<br>(0.02 to 0.12)             |
| Otitis media                                                      | 0.03<br>(0.01 to 0.07)                | 0.01<br>(0.01 to 0.03)                | 0.01<br>(0.01 to 0.03)                | 0.01<br>(0.01 to 0.03)                | 0.00<br>(0.00 to 0.00)       | 0.00<br>(0.00 to 0.00)           | 0.00<br>(0.00 to 0.00)       | 0.00<br>(0.00 to 0.00)             |
| Meningitis                                                        | 530.15<br>(345.48 to 785.37)          | 418.67<br>(254.02 to 665.51)          | 391.64<br>(238.71 to 620.96)          | 454.66<br>(253.93 to 755.53)          | 8.74<br>(6.17 to 12.16)      | 8.16<br>(5.55 to 11.93)          | 7.94<br>(5.46 to 11.59)      | 8.37<br>(5.43 to 12.69)            |
| Pneumococcal meningitis                                           | 1.51<br>(0.95 to 2.43)                | 0.70<br>(0.43 to 1.12)                | 0.71<br>(0.44 to 1.14)                | 0.72<br>(0.43 to 1.20)                | 0.03<br>(0.02 to 0.04)       | 0.02<br>(0.01 to 0.02)           | 0.02<br>(0.01 to 0.03)       | 0.02<br>(0.01 to 0.02)             |
| H influenzae type B meningitis                                    | 55.72<br>(33.26 to 89.86)             | 60.50<br>(23.77 to 126.11)            | 58.80<br>(23.91 to 122.57)            | 84.45<br>(25.48 to 206.06)            | 0.89<br>(0.59 to 1.31)       | 0.97<br>(0.50 to 1.79)           | 0.98<br>(0.53 to 1.78)       | 1.22<br>(0.51 to 2.67)             |
| Meningococcal meningitis                                          | 106.45<br>(65.46 to 165.15)           | 77.66<br>(47.71 to 121.72)            | 72.00<br>(44.34 to 114.33)            | 80.06<br>(48.25 to 128.46)            | 1.95<br>(1.34 to 2.76)       | 1.77<br>(1.19 to 2.65)           | 1.72<br>(1.14 to 2.64)       | 1.73<br>(1.17 to 2.63)             |
| Other meningitis                                                  | 366.47<br>(239.07 to 552.49)          | 279.82<br>(172.62 to 438.11)          | 260.14<br>(161.57 to 409.26)          | 289.43<br>(171.67 to 460.73)          | 5.87<br>(4.07 to 8.25)       | 5.40<br>(3.70 to 8.05)           | 5.22<br>(3.56 to 7.68)       | 5.40<br>(3.60 to 8.09)             |
| Encephalitis                                                      | 35.28<br>(23.80 to 49.64)             | 61.52<br>(36.77 to 94.00)             | 56.01<br>(32.54 to 86.62)             | 64.02<br>(38.23 to 96.81)             | 0.62<br>(0.45 to 0.81)       | 1.20<br>(0.78 to 1.73)           | 1.13<br>(0.72 to 1.64)       | 1.21<br>(0.78 to 1.74)             |

|                |                            |                               |                              |                               |                           |                           |                           |                            |
|----------------|----------------------------|-------------------------------|------------------------------|-------------------------------|---------------------------|---------------------------|---------------------------|----------------------------|
| Diphtheria     | 0.14<br>(0.07 to<br>0.24)  | 0.05<br>(0.02 to<br>0.10)     | 0.05<br>(0.02 to<br>0.10)    | 0.12<br>(0.02 to<br>0.38)     | 0.00<br>(0.00 to<br>0.00) | 0.00<br>(0.00 to<br>0.00) | 0.00<br>(0.00 to<br>0.00) | 0.00<br>(0.00 to<br>0.00)  |
| Whooping cough | 8.26<br>(0.54 to<br>32.73) | 7.06<br>(0.18 to<br>29.04)    | 5.33<br>(0.15 to<br>22.23)   | 61.43<br>(0.33 to<br>244.39)  | 0.10<br>(0.01 to<br>0.39) | 0.08<br>(0.00 to<br>0.34) | 0.06<br>(0.00 to<br>0.27) | 0.72<br>(0.00 to<br>2.87)  |
| Tetanus        | 0.76<br>(0.59 to<br>1.03)  | 0.17<br>(0.10 to<br>0.27)     | 0.17<br>(0.10 to<br>0.26)    | 0.36<br>(0.16 to<br>0.89)     | 0.01<br>(0.01 to<br>0.02) | 0.00<br>(0.00 to<br>0.00) | 0.00<br>(0.00 to<br>0.00) | 0.00<br>(0.00 to<br>0.01)  |
| Measles        | 3.85<br>(1.08 to<br>10.47) | 103.14<br>(1.04 to<br>524.82) | 82.50<br>(0.98 to<br>376.36) | 172.45<br>(1.57 to<br>895.30) | 0.05<br>(0.01 to<br>0.12) | 1.38<br>(0.02 to<br>6.32) | 1.13<br>(0.02 to<br>4.62) | 2.22<br>(0.02 to<br>10.73) |

| Tonga                                                 |                                            |                                              |                                              |                                              |                                      |                                        |                                        |                                        |
|-------------------------------------------------------|--------------------------------------------|----------------------------------------------|----------------------------------------------|----------------------------------------------|--------------------------------------|----------------------------------------|----------------------------------------|----------------------------------------|
| Cause                                                 | YLLs (actual counts)                       |                                              |                                              |                                              | Deaths (actual counts)               |                                        |                                        |                                        |
|                                                       | 2016                                       | 2040 Forecast                                | 2040 Better Scenario                         | 2040 Worse Scenario                          | 2016                                 | 2040 Forecast                          | 2040 Better Scenario                   | 2040 Worse Scenario                    |
| Varicella and herpes zoster                           | 5.36<br>(2.93 to 9.58)                     | 4.33<br>(1.70 to 9.34)                       | 3.30<br>(1.37 to 7.30)                       | 4.94<br>(1.78 to 11.08)                      | 0.12<br>(0.08 to 0.18)               | 0.11<br>(0.06 to 0.19)                 | 0.09<br>(0.05 to 0.16)                 | 0.12<br>(0.06 to 0.20)                 |
| <b>Neglected tropical diseases and malaria</b>        | <b>99.36</b><br><b>(19.18 to 238.93)</b>   | <b>633.10</b><br><b>(178.10 to 1,290.76)</b> | <b>628.86</b><br><b>(190.04 to 1,259.76)</b> | <b>626.80</b><br><b>(164.26 to 1,299.55)</b> | <b>2.86</b><br><b>(0.69 to 6.84)</b> | <b>20.74</b><br><b>(6.78 to 42.44)</b> | <b>21.56</b><br><b>(7.40 to 42.32)</b> | <b>19.50</b><br><b>(5.91 to 41.32)</b> |
| Malaria                                               | 0.00<br>(0.00 to 0.00)                     | 0.00<br>(0.00 to 0.00)                       | 0.00<br>(0.00 to 0.00)                       | 0.00<br>(0.00 to 0.00)                       | 0.00<br>(0.00 to 0.00)               | 0.00<br>(0.00 to 0.00)                 | 0.00<br>(0.00 to 0.00)                 | 0.00<br>(0.00 to 0.00)                 |
| Chagas disease                                        | 0.00<br>(0.00 to 0.00)                     | 0.00<br>(0.00 to 0.00)                       | 0.00<br>(0.00 to 0.00)                       | 0.00<br>(0.00 to 0.00)                       | 0.00<br>(0.00 to 0.00)               | 0.00<br>(0.00 to 0.00)                 | 0.00<br>(0.00 to 0.00)                 | 0.00<br>(0.00 to 0.00)                 |
| Leishmaniasis                                         | 0.00<br>(0.00 to 0.00)                     | 0.00<br>(0.00 to 0.00)                       | 0.00<br>(0.00 to 0.00)                       | 0.00<br>(0.00 to 0.00)                       | 0.00<br>(0.00 to 0.00)               | 0.00<br>(0.00 to 0.00)                 | 0.00<br>(0.00 to 0.00)                 | 0.00<br>(0.00 to 0.00)                 |
| African trypanosomiasis                               | 0.00<br>(0.00 to 0.00)                     | 0.00<br>(0.00 to 0.00)                       | 0.00<br>(0.00 to 0.00)                       | 0.00<br>(0.00 to 0.00)                       | 0.00<br>(0.00 to 0.00)               | 0.00<br>(0.00 to 0.00)                 | 0.00<br>(0.00 to 0.00)                 | 0.00<br>(0.00 to 0.00)                 |
| Schistosomiasis                                       | 0.00<br>(0.00 to 0.00)                     | 0.00<br>(0.00 to 0.00)                       | 0.00<br>(0.00 to 0.00)                       | 0.00<br>(0.00 to 0.00)                       | 0.00<br>(0.00 to 0.00)               | 0.00<br>(0.00 to 0.00)                 | 0.00<br>(0.00 to 0.00)                 | 0.00<br>(0.00 to 0.00)                 |
| Cysticercosis                                         | 0.00<br>(0.00 to 0.00)                     | 0.00<br>(0.00 to 0.00)                       | 0.00<br>(0.00 to 0.00)                       | 0.00<br>(0.00 to 0.00)                       | 0.00<br>(0.00 to 0.00)               | 0.00<br>(0.00 to 0.00)                 | 0.00<br>(0.00 to 0.00)                 | 0.00<br>(0.00 to 0.00)                 |
| Cystic echinococcosis                                 | 0.00<br>(0.00 to 0.00)                     | 0.00<br>(0.00 to 0.00)                       | 0.00<br>(0.00 to 0.00)                       | 0.00<br>(0.00 to 0.00)                       | 0.00<br>(0.00 to 0.00)               | 0.00<br>(0.00 to 0.00)                 | 0.00<br>(0.00 to 0.00)                 | 0.00<br>(0.00 to 0.00)                 |
| Dengue                                                | 94.47<br>(13.94 to 234.96)                 | 623.43<br>(162.58 to 1,283.90)               | 620.09<br>(175.05 to 1,251.76)               | 616.88<br>(149.88 to 1,293.27)               | 2.65<br>(0.49 to 6.64)               | 20.30<br>(6.21 to 42.12)               | 21.12<br>(6.83 to 42.07)               | 19.08<br>(5.42 to 41.03)               |
| Yellow fever                                          | 0.00<br>(0.00 to 0.00)                     | 0.00<br>(0.00 to 0.00)                       | 0.00<br>(0.00 to 0.00)                       | 0.00<br>(0.00 to 0.00)                       | 0.00<br>(0.00 to 0.00)               | 0.00<br>(0.00 to 0.00)                 | 0.00<br>(0.00 to 0.00)                 | 0.00<br>(0.00 to 0.00)                 |
| Rabies                                                | 0.02<br>(0.01 to 0.05)                     | 0.02<br>(0.01 to 0.06)                       | 0.02<br>(0.00 to 0.04)                       | 0.03<br>(0.01 to 0.08)                       | 0.00<br>(0.00 to 0.00)               | 0.00<br>(0.00 to 0.00)                 | 0.00<br>(0.00 to 0.00)                 | 0.00<br>(0.00 to 0.00)                 |
| Intestinal nematode infections                        | 0.67<br>(0.13 to 1.80)                     | 1.40<br>(0.31 to 3.76)                       | 1.37<br>(0.31 to 3.68)                       | 1.43<br>(0.30 to 3.93)                       | 0.01<br>(0.00 to 0.02)               | 0.02<br>(0.01 to 0.05)                 | 0.02<br>(0.01 to 0.05)                 | 0.02<br>(0.01 to 0.05)                 |
| Other neglected tropical diseases                     | 4.21<br>(2.74 to 6.35)                     | 8.24<br>(4.64 to 13.78)                      | 7.38<br>(4.04 to 12.74)                      | 8.46<br>(4.87 to 14.12)                      | 0.20<br>(0.12 to 0.29)               | 0.42<br>(0.20 to 0.77)                 | 0.41<br>(0.19 to 0.78)                 | 0.40<br>(0.20 to 0.72)                 |
| <b>Maternal disorders</b>                             | <b>213.98</b><br><b>(142.97 to 299.27)</b> | <b>234.08</b><br><b>(139.58 to 349.19)</b>   | <b>164.36</b><br><b>(95.70 to 250.12)</b>    | <b>281.44</b><br><b>(170.28 to 419.72)</b>   | <b>3.85</b><br><b>(2.57 to 6.34)</b> | <b>4.25</b><br><b>(2.51 to 6.33)</b>   | <b>2.99</b><br><b>(1.74 to 4.55)</b>   | <b>5.11</b><br><b>(3.08 to 7.59)</b>   |
| Maternal hemorrhage                                   | 72.79<br>(44.70 to 109.73)                 | 76.26<br>(41.16 to 125.01)                   | 53.37<br>(27.44 to 89.10)                    | 91.35<br>(50.03 to 152.35)                   | 1.31<br>(0.82 to 1.96)               | 1.38<br>(0.74 to 2.27)                 | 0.97<br>(0.50 to 1.61)                 | 1.66<br>(0.91 to 2.70)                 |
| Maternal sepsis and other maternal infections         | 20.87<br>(8.57 to 37.89)                   | 20.52<br>(7.79 to 41.68)                     | 14.35<br>(5.48 to 29.90)                     | 24.69<br>(9.67 to 50.44)                     | 0.38<br>(0.16 to 0.70)               | 0.38<br>(0.15 to 0.76)                 | 0.27<br>(0.10 to 0.55)                 | 0.46<br>(0.19 to 0.92)                 |
| Maternal hypertensive disorders                       | 31.41<br>(17.79 to 49.99)                  | 34.94<br>(17.22 to 59.20)                    | 24.32<br>(11.79 to 41.64)                    | 41.97<br>(20.74 to 70.98)                    | 0.56<br>(0.32 to 0.90)               | 0.63<br>(0.32 to 1.09)                 | 0.44<br>(0.21 to 0.76)                 | 0.76<br>(0.38 to 1.29)                 |
| Maternal obstructed labor and uterine rupture         | 15.00<br>(6.90 to 26.86)                   | 17.17<br>(6.76 to 34.95)                     | 11.67<br>(4.63 to 23.82)                     | 20.87<br>(8.25 to 41.25)                     | 0.27<br>(0.12 to 0.49)               | 0.31<br>(0.13 to 0.65)                 | 0.21<br>(0.09 to 0.43)                 | 0.38<br>(0.16 to 0.76)                 |
| Maternal abortion, miscarriage, and ectopic pregnancy | 8.71<br>(3.28 to 16.82)                    | 10.71<br>(3.64 to 22.85)                     | 7.47<br>(2.53 to 15.86)                      | 12.99<br>(4.58 to 27.95)                     | 0.16<br>(0.06 to 0.30)               | 0.20<br>(0.07 to 0.41)                 | 0.14<br>(0.05 to 0.29)                 | 0.24<br>(0.09 to 0.50)                 |

|                                        |                              |                              |                              |                              |                           |                           |                           |                           |
|----------------------------------------|------------------------------|------------------------------|------------------------------|------------------------------|---------------------------|---------------------------|---------------------------|---------------------------|
| Indirect maternal deaths               | 22.37<br>(11.66 to<br>37.99) | 26.64<br>(13.11 to<br>48.85) | 18.87<br>(8.93 to<br>34.62)  | 32.21<br>(16.31 to<br>57.19) | 0.40<br>(0.21 to<br>0.67) | 0.48<br>(0.24 to<br>0.87) | 0.34<br>(0.16 to<br>0.62) | 0.58<br>(0.29 to<br>1.02) |
| Late maternal deaths                   | 8.62<br>(3.43 to<br>16.58)   | 8.04<br>(2.93 to<br>16.37)   | 5.63<br>(2.03 to<br>11.59)   | 9.73<br>(3.60 to<br>19.56)   | 0.15<br>(0.06 to<br>0.29) | 0.14<br>(0.05 to<br>0.30) | 0.10<br>(0.04 to<br>0.21) | 0.18<br>(0.07 to<br>0.35) |
| Maternal deaths aggravated by HIV/AIDS | 0.10<br>(0.01 to<br>0.51)    | 1.33<br>(0.00 to<br>8.50)    | 0.90<br>(0.00 to<br>6.18)    | 1.66<br>(0.02 to<br>10.17)   | 0.00<br>(0.00 to<br>0.01) | 0.02<br>(0.00 to<br>0.16) | 0.02<br>(0.00 to<br>0.11) | 0.03<br>(0.00 to<br>0.19) |
| Other maternal disorders               | 34.11<br>(18.44 to<br>54.64) | 38.48<br>(18.90 to<br>68.26) | 27.79<br>(13.48 to<br>49.72) | 45.98<br>(22.36 to<br>80.57) | 0.61<br>(0.33 to<br>0.98) | 0.69<br>(0.34 to<br>1.22) | 0.50<br>(0.25 to<br>0.90) | 0.83<br>(0.41 to<br>1.45) |

| Tonga                                                                   |                                           |                                         |                                         |                                         |                                  |                                  |                                  |                                  |
|-------------------------------------------------------------------------|-------------------------------------------|-----------------------------------------|-----------------------------------------|-----------------------------------------|----------------------------------|----------------------------------|----------------------------------|----------------------------------|
| Cause                                                                   | YLLs (actual counts)                      |                                         |                                         |                                         | Deaths (actual counts)           |                                  |                                  |                                  |
|                                                                         | 2016                                      | 2040 Forecast                           | 2040 Better Scenario                    | 2040 Worse Scenario                     | 2016                             | 2040 Forecast                    | 2040 Better Scenario             | 2040 Worse Scenario              |
| <b>Neonatal disorders</b>                                               | <b>1,931.64</b><br>(1,006.16 to 3,385.89) | <b>1,539.72</b><br>(752.71 to 2,855.37) | <b>1,105.64</b><br>(536.90 to 2,079.26) | <b>1,913.71</b><br>(925.74 to 3,710.76) | <b>22.33</b><br>(11.63 to 39.13) | <b>17.81</b><br>(8.71 to 33.01)  | <b>12.79</b><br>(6.21 to 24.06)  | <b>22.13</b><br>(10.70 to 42.89) |
| Neonatal preterm birth                                                  | 923.02<br>(447.77 to 1,682.48)            | 650.82<br>(312.52 to 1,207.53)          | 424.86<br>(201.19 to 790.66)            | 807.94<br>(379.15 to 1,509.98)          | 10.66<br>(5.17 to 19.44)         | 7.52<br>(3.61 to 13.95)          | 4.91<br>(2.32 to 9.14)           | 9.34<br>(4.38 to 17.45)          |
| Neonatal encephalopathy due to birth asphyxia and trauma                | 178.39<br>(74.19 to 355.87)               | 130.26<br>(47.27 to 269.41)             | 103.56<br>(38.59 to 218.38)             | 159.18<br>(57.48 to 331.62)             | 2.06<br>(0.86 to 4.11)           | 1.51<br>(0.55 to 3.12)           | 1.20<br>(0.45 to 2.53)           | 1.84<br>(0.67 to 3.84)           |
| Neonatal sepsis and other neonatal infections                           | 330.28<br>(153.88 to 623.23)              | 340.10<br>(146.35 to 662.75)            | 266.17<br>(113.95 to 525.01)            | 418.18<br>(180.24 to 821.38)            | 3.82<br>(1.78 to 7.20)           | 3.94<br>(1.69 to 7.68)           | 3.08<br>(1.32 to 6.08)           | 4.84<br>(2.08 to 9.50)           |
| Hemolytic disease and other neonatal jaundice                           | 25.48<br>(11.07 to 51.03)                 | 12.55<br>(4.27 to 30.26)                | 9.31<br>(3.15 to 22.38)                 | 15.98<br>(5.38 to 38.04)                | 0.29<br>(0.13 to 0.59)           | 0.15<br>(0.05 to 0.35)           | 0.11<br>(0.04 to 0.26)           | 0.18<br>(0.06 to 0.44)           |
| Other neonatal disorders                                                | 474.48<br>(215.11 to 944.04)              | 405.99<br>(171.63 to 818.42)            | 301.73<br>(127.45 to 607.90)            | 512.43<br>(219.55 to 1,038.89)          | 5.49<br>(2.49 to 10.92)          | 4.70<br>(1.99 to 9.46)           | 3.49<br>(1.47 to 7.04)           | 5.93<br>(2.54 to 12.03)          |
| <b>Nutritional deficiencies</b>                                         | <b>202.27</b><br>(124.30 to 338.30)       | <b>245.00</b><br>(147.11 to 433.20)     | <b>218.75</b><br>(134.67 to 382.96)     | <b>261.27</b><br>(151.70 to 470.62)     | <b>6.78</b><br>(5.39 to 8.44)    | <b>8.24</b><br>(6.10 to 11.21)   | <b>8.11</b><br>(6.06 to 10.84)   | <b>7.89</b><br>(5.75 to 10.92)   |
| Protein-energy malnutrition                                             | 92.07<br>(44.61 to 191.16)                | 69.44<br>(33.25 to 174.49)              | 61.15<br>(30.60 to 150.46)              | 73.38<br>(33.17 to 190.17)              | 4.04<br>(3.00 to 5.72)           | 3.75<br>(2.32 to 5.93)           | 3.70<br>(2.32 to 5.68)           | 3.50<br>(2.12 to 5.63)           |
| Iodine deficiency                                                       | 0.47<br>(0.01 to 2.89)                    | 4.72<br>(0.02 to 29.28)                 | 4.01<br>(0.01 to 23.22)                 | 5.11<br>(0.02 to 31.38)                 | 0.01<br>(0.00 to 0.06)           | 0.19<br>(0.00 to 0.96)           | 0.18<br>(0.00 to 0.93)           | 0.19<br>(0.00 to 0.97)           |
| Dietary iron deficiency                                                 | 108.84<br>(27.30 to 202.11)               | 169.41<br>(56.35 to 348.88)             | 152.26<br>(56.04 to 304.93)             | 181.36<br>(54.36 to 371.77)             | 2.67<br>(1.25 to 3.87)           | 4.22<br>(2.24 to 6.37)           | 4.15<br>(2.30 to 6.06)           | 4.13<br>(2.06 to 6.51)           |
| Other nutritional deficiencies                                          | 0.90<br>(0.47 to 2.49)                    | 1.42<br>(0.67 to 4.45)                  | 1.33<br>(0.63 to 4.13)                  | 1.42<br>(0.65 to 4.60)                  | 0.05<br>(0.03 to 0.10)           | 0.08<br>(0.04 to 0.18)           | 0.08<br>(0.04 to 0.17)           | 0.07<br>(0.04 to 0.17)           |
| <b>Other communicable, maternal, neonatal, and nutritional diseases</b> | <b>499.25</b><br>(378.53 to 711.08)       | <b>708.82</b><br>(519.79 to 974.16)     | <b>625.39</b><br>(453.07 to 866.50)     | <b>748.18</b><br>(548.23 to 1,036.02)   | <b>12.13</b><br>(9.75 to 15.33)  | <b>19.11</b><br>(14.78 to 24.68) | <b>17.52</b><br>(13.38 to 22.70) | <b>19.39</b><br>(15.04 to 25.09) |
| Sexually transmitted infections excluding HIV                           | 28.79<br>(9.10 to 70.55)                  | 15.68<br>(6.86 to 34.58)                | 13.54<br>(6.12 to 29.45)                | 17.19<br>(7.26 to 39.92)                | 0.41<br>(0.18 to 0.91)           | 0.27<br>(0.14 to 0.52)           | 0.24<br>(0.13 to 0.44)           | 0.29<br>(0.15 to 0.56)           |
| Syphilis                                                                | 23.75<br>(4.19 to 65.17)                  | 10.10<br>(2.18 to 28.99)                | 8.43<br>(1.92 to 24.34)                 | 11.42<br>(2.42 to 33.71)                | 0.29<br>(0.06 to 0.78)           | 0.14<br>(0.04 to 0.36)           | 0.11<br>(0.03 to 0.30)           | 0.15<br>(0.04 to 0.41)           |
| Chlamydial infection                                                    | 0.99<br>(0.63 to 1.52)                    | 1.08<br>(0.63 to 1.76)                  | 0.99<br>(0.57 to 1.63)                  | 1.12<br>(0.66 to 1.82)                  | 0.02<br>(0.01 to 0.03)           | 0.03<br>(0.02 to 0.04)           | 0.02<br>(0.01 to 0.04)           | 0.03<br>(0.02 to 0.04)           |
| Gonococcal infection                                                    | 2.59<br>(1.65 to 4.01)                    | 2.89<br>(1.67 to 4.71)                  | 2.65<br>(1.52 to 4.34)                  | 2.98<br>(1.77 to 4.79)                  | 0.06<br>(0.04 to 0.09)           | 0.07<br>(0.04 to 0.11)           | 0.06<br>(0.04 to 0.10)           | 0.07<br>(0.04 to 0.11)           |
| Other sexually transmitted infections                                   | 1.46<br>(0.92 to 2.27)                    | 1.61<br>(0.93 to 2.62)                  | 1.46<br>(0.84 to 2.40)                  | 1.67<br>(0.96 to 2.71)                  | 0.03<br>(0.02 to 0.05)           | 0.04<br>(0.02 to 0.06)           | 0.03<br>(0.02 to 0.06)           | 0.04<br>(0.02 to 0.06)           |
| Acute hepatitis                                                         | 268.91<br>(207.02 to 343.29)              | 365.94<br>(264.16 to 503.80)            | 329.19<br>(230.75 to 459.29)            | 379.71<br>(271.91 to 524.81)            | 7.15<br>(5.59 to 9.04)           | 10.37<br>(7.74 to 13.98)         | 9.52<br>(7.05 to 12.78)          | 10.53<br>(7.76 to 14.13)         |
| Acute hepatitis A                                                       | 12.00<br>(7.36 to 19.45)                  | 8.48<br>(5.00 to 14.86)                 | 7.41<br>(4.41 to 12.63)                 | 9.12<br>(5.28 to 15.87)                 | 0.21<br>(0.14 to 0.30)           | 0.19<br>(0.12 to 0.28)           | 0.17<br>(0.11 to 0.26)           | 0.19<br>(0.12 to 0.29)           |
| Acute hepatitis B                                                       | 223.05<br>(168.70 to 290.45)              | 320.00<br>(224.67 to 445.33)            | 287.22<br>(199.03 to 400.62)            | 332.04<br>(232.58 to 464.60)            | 6.14<br>(4.75 to 7.87)           | 9.10<br>(6.66 to 12.36)          | 8.29<br>(5.97 to 11.32)          | 9.28<br>(6.76 to 12.60)          |



| Tonga                                |                                       |                                       |                                       |                                       |                                 |                                 |                                 |                                 |
|--------------------------------------|---------------------------------------|---------------------------------------|---------------------------------------|---------------------------------------|---------------------------------|---------------------------------|---------------------------------|---------------------------------|
| Cause                                | YLLs (actual counts)                  |                                       |                                       |                                       | Deaths (actual counts)          |                                 |                                 |                                 |
|                                      | 2016                                  | 2040 Forecast                         | 2040 Better Scenario                  | 2040 Worse Scenario                   | 2016                            | 2040 Forecast                   | 2040 Better Scenario            | 2040 Worse Scenario             |
| Neoplasms                            | 3,201.27<br>(2,724.59 to<br>3,739.63) | 5,116.30<br>(4,107.35 to<br>6,473.20) | 4,504.84<br>(3,694.40 to<br>5,569.00) | 5,841.44<br>(4,572.45 to<br>7,626.88) | 132.11<br>(114.56 to<br>151.88) | 209.21<br>(174.57 to<br>255.45) | 191.11<br>(162.86 to<br>226.80) | 229.98<br>(185.63 to<br>286.55) |
| Lip and oral cavity cancer           | 43.88<br>(35.47 to<br>54.20)          | 67.66<br>(43.73 to<br>103.22)         | 47.51<br>(32.60 to<br>68.67)          | 89.51<br>(54.50 to<br>145.18)         | 1.98<br>(1.61 to<br>2.40)       | 2.81<br>(1.85 to<br>4.14)       | 2.05<br>(1.43 to<br>2.85)       | 3.59<br>(2.25 to<br>5.55)       |
| Nasopharynx cancer                   | 25.09<br>(18.53 to<br>32.24)          | 48.79<br>(26.27 to<br>86.94)          | 31.54<br>(18.01 to<br>52.62)          | 66.14<br>(34.37 to<br>121.46)         | 0.87<br>(0.65 to<br>1.11)       | 1.66<br>(0.93 to<br>2.85)       | 1.09<br>(0.65 to<br>1.74)       | 2.21<br>(1.18 to<br>3.92)       |
| Other pharynx cancer                 | 22.20<br>(16.38 to<br>28.93)          | 28.61<br>(19.41 to<br>42.08)          | 25.20<br>(17.63 to<br>35.79)          | 31.43<br>(20.67 to<br>46.94)          | 0.93<br>(0.70 to<br>1.20)       | 1.18<br>(0.83 to<br>1.69)       | 1.08<br>(0.78 to<br>1.51)       | 1.26<br>(0.86 to<br>1.85)       |
| Esophageal cancer                    | 32.98<br>(24.18 to<br>42.86)          | 52.16<br>(26.41 to<br>95.42)          | 35.02<br>(19.56 to<br>58.44)          | 67.17<br>(32.38 to<br>123.89)         | 1.50<br>(1.12 to<br>1.88)       | 2.21<br>(1.20 to<br>3.79)       | 1.53<br>(0.90 to<br>2.46)       | 2.76<br>(1.43 to<br>4.89)       |
| Stomach cancer                       | 267.92<br>(225.12 to<br>313.69)       | 297.53<br>(228.75 to<br>379.20)       | 267.15<br>(209.22 to<br>333.73)       | 319.48<br>(238.96 to<br>421.50)       | 11.95<br>(10.29 to<br>13.74)    | 12.83<br>(10.23 to<br>15.85)    | 12.00<br>(9.77 to<br>14.44)     | 13.29<br>(10.27 to<br>16.97)    |
| Colon and rectum cancer              | 120.55<br>(99.35 to<br>144.51)        | 210.83<br>(142.01 to<br>316.48)       | 204.57<br>(140.74 to<br>302.09)       | 214.64<br>(142.15 to<br>325.54)       | 5.95<br>(4.99 to<br>7.12)       | 10.13<br>(6.73 to<br>15.17)     | 10.24<br>(7.00 to<br>15.05)     | 9.91<br>(6.49 to<br>14.93)      |
| Liver cancer                         | 581.71<br>(465.01 to<br>717.96)       | 1,131.35<br>(628.06 to<br>1,925.65)   | 929.33<br>(555.06 to<br>1,508.42)     | 1,443.14<br>(716.22 to<br>2,587.37)   | 21.53<br>(17.85 to<br>25.77)    | 40.94<br>(23.59 to<br>66.29)    | 34.79<br>(22.00 to<br>54.02)    | 50.30<br>(26.79 to<br>86.78)    |
| Liver cancer due to hepatitis B      | 322.62<br>(252.23 to<br>405.40)       | 616.36<br>(341.03 to<br>1,049.39)     | 511.25<br>(303.63 to<br>831.09)       | 784.45<br>(394.32 to<br>1,397.92)     | 11.23<br>(8.95 to<br>13.75)     | 21.10<br>(12.40 to<br>34.73)    | 18.03<br>(11.49 to<br>28.18)    | 25.97<br>(13.98 to<br>44.75)    |
| Liver cancer due to hepatitis C      | 79.76<br>(62.43 to<br>98.63)          | 149.69<br>(88.39 to<br>245.98)        | 127.57<br>(81.10 to<br>200.30)        | 184.03<br>(100.58 to<br>313.88)       | 3.72<br>(3.00 to<br>4.48)       | 6.71<br>(4.29 to<br>10.37)      | 5.98<br>(4.00 to<br>8.83)       | 7.87<br>(4.68 to<br>12.80)      |
| Liver cancer due to alcohol use      | 37.41<br>(27.96 to<br>49.98)          | 74.05<br>(39.95 to<br>130.17)         | 58.53<br>(33.59 to<br>97.48)          | 98.46<br>(48.70 to<br>185.23)         | 1.48<br>(1.14 to<br>1.91)       | 2.78<br>(1.61 to<br>4.62)       | 2.29<br>(1.42 to<br>3.59)       | 3.55<br>(1.89 to<br>6.24)       |
| Liver cancer due to other causes     | 141.92<br>(109.97 to<br>182.02)       | 291.26<br>(145.17 to<br>539.74)       | 231.98<br>(127.07 to<br>408.03)       | 376.19<br>(171.92 to<br>736.11)       | 5.10<br>(4.04 to<br>6.34)       | 10.35<br>(5.35 to<br>18.53)     | 8.50<br>(4.82 to<br>14.30)      | 12.91<br>(5.99 to<br>24.34)     |
| Gallbladder and biliary tract cancer | 15.54<br>(12.04 to<br>19.36)          | 16.51<br>(12.97 to<br>20.26)          | 17.52<br>(13.71 to<br>21.48)          | 15.58<br>(12.22 to<br>19.15)          | 0.76<br>(0.59 to<br>0.92)       | 0.79<br>(0.62 to<br>0.95)       | 0.87<br>(0.69 to<br>1.04)       | 0.72<br>(0.57 to<br>0.87)       |
| Pancreatic cancer                    | 86.87<br>(74.29 to<br>102.66)         | 164.89<br>(116.54 to<br>236.02)       | 154.84<br>(113.56 to<br>217.49)       | 171.45<br>(119.16 to<br>249.34)       | 4.06<br>(3.49 to<br>4.73)       | 7.41<br>(5.28 to<br>10.66)      | 7.17<br>(5.33 to<br>10.06)      | 7.48<br>(5.26 to<br>10.87)      |
| Larynx cancer                        | 21.99<br>(17.39 to<br>26.98)          | 30.05<br>(15.58 to<br>53.77)          | 19.06<br>(10.26 to<br>33.70)          | 39.51<br>(20.11 to<br>72.77)          | 0.99<br>(0.80 to<br>1.21)       | 1.31<br>(0.88 to<br>2.30)       | 0.84<br>(0.45 to<br>1.44)       | 1.68<br>(0.84 to<br>2.99)       |
| Tracheal, bronchus, and lung cancer  | 485.45<br>(407.33 to<br>570.05)       | 739.08<br>(485.45 to<br>1,104.89)     | 484.68<br>(331.14 to<br>703.69)       | 1,005.76<br>(647.87 to<br>1,524.87)   | 21.88<br>(18.77 to<br>25.35)    | 32.77<br>(22.26 to<br>47.94)    | 21.67<br>(15.17 to<br>30.74)    | 43.83<br>(29.03 to<br>65.87)    |
| Malignant skin melanoma              | 12.37<br>(8.92 to<br>18.55)           | 20.56<br>(14.86 to<br>32.25)          | 23.27<br>(16.65 to<br>36.35)          | 18.80<br>(13.61 to<br>29.18)          | 0.55<br>(0.41 to<br>0.81)       | 0.90<br>(0.65 to<br>1.39)       | 1.06<br>(0.78 to<br>1.63)       | 0.79<br>(0.57 to<br>1.21)       |
| Non-melanoma skin cancer             | 37.25<br>(31.66 to<br>43.58)          | 61.63<br>(53.25 to<br>71.38)          | 61.22<br>(52.51 to<br>69.36)          | 59.87<br>(51.16 to<br>69.36)          | 2.32<br>(1.97 to<br>2.74)       | 3.50<br>(2.83 to<br>4.17)       | 3.70<br>(3.04 to<br>4.40)       | 3.21<br>(2.58 to<br>3.86)       |
| Breast cancer                        | 476.42<br>(347.80 to<br>635.22)       | 730.58<br>(468.57 to<br>1,125.02)     | 691.94<br>(456.33 to<br>1,034.11)     | 768.73<br>(482.63 to<br>1,201.49)     | 17.76<br>(13.46 to<br>23.00)    | 27.57<br>(18.21 to<br>41.99)    | 26.89<br>(18.23 to<br>39.71)    | 28.19<br>(18.28 to<br>43.19)    |
| Cervical cancer                      | 188.89<br>(137.61 to<br>247.28)       | 231.92<br>(163.54 to<br>321.20)       | 210.39<br>(151.62 to<br>285.67)       | 246.39<br>(169.76 to<br>351.93)       | 8.83<br>(5.32 to<br>11.46)      | 10.50<br>(6.43 to<br>14.11)     | 9.85<br>(5.95 to<br>12.99)      | 10.81<br>(6.57 to<br>14.87)     |



|                   |                                 |                                 |                                 |                                 |                            |                              |                              |                              |
|-------------------|---------------------------------|---------------------------------|---------------------------------|---------------------------------|----------------------------|------------------------------|------------------------------|------------------------------|
|                   | 47.01<br>(33.33 to<br>63.20)    | 70.11<br>(50.28 to<br>92.38)    | 64.66<br>(46.27 to<br>85.91)    | 71.94<br>(52.27 to<br>94.73)    | 1.95<br>(1.39 to<br>2.60)  | 2.93<br>(2.14 to<br>3.82)    | 2.76<br>(2.02 to<br>3.64)    | 2.95<br>(2.17 to<br>3.83)    |
| Uterine cancer    |                                 |                                 |                                 |                                 |                            |                              |                              |                              |
|                   | 30.11<br>(21.46 to<br>42.13)    | 51.09<br>(31.69 to<br>83.62)    | 52.98<br>(33.68 to<br>85.15)    | 50.37<br>(30.58 to<br>83.34)    | 1.22<br>(0.87 to<br>1.67)  | 2.10<br>(1.28 to<br>3.52)    | 2.21<br>(1.36 to<br>3.61)    | 2.03<br>(1.21 to<br>3.47)    |
| Ovarian cancer    |                                 |                                 |                                 |                                 |                            |                              |                              |                              |
|                   | 140.84<br>(106.29 to<br>172.89) | 284.95<br>(214.90 to<br>352.03) | 313.93<br>(242.81 to<br>382.57) | 258.28<br>(191.42 to<br>323.99) | 9.78<br>(7.40 to<br>12.00) | 18.82<br>(13.81 to<br>23.20) | 21.55<br>(16.47 to<br>26.04) | 16.40<br>(11.71 to<br>20.57) |
| Prostate cancer   |                                 |                                 |                                 |                                 |                            |                              |                              |                              |
|                   | 4.64<br>(3.08 to<br>6.16)       | 6.01<br>(3.90 to<br>7.94)       | 5.75<br>(3.73 to<br>7.63)       | 6.09<br>(3.93 to<br>8.09)       | 0.11<br>(0.07 to<br>0.14)  | 0.15<br>(0.10 to<br>0.19)    | 0.15<br>(0.10 to<br>0.19)    | 0.15<br>(0.10 to<br>0.19)    |
| Testicular cancer |                                 |                                 |                                 |                                 |                            |                              |                              |                              |

| Tonga                           |                                               |                                               |                                                  |                                                  |                                            |                                            |                                           |                                            |
|---------------------------------|-----------------------------------------------|-----------------------------------------------|--------------------------------------------------|--------------------------------------------------|--------------------------------------------|--------------------------------------------|-------------------------------------------|--------------------------------------------|
| Cause                           | YLLs (actual counts)                          |                                               |                                                  |                                                  | Deaths (actual counts)                     |                                            |                                           |                                            |
|                                 | 2016                                          | 2040 Forecast                                 | 2040 Better Scenario                             | 2040 Worse Scenario                              | 2016                                       | 2040 Forecast                              | 2040 Better Scenario                      | 2040 Worse Scenario                        |
| Kidney cancer                   | 22.30<br>(12.91 to 31.93)                     | 44.17<br>(22.69 to 72.69)                     | 44.23<br>(23.22 to 70.98)                        | 44.67<br>(22.41 to 75.55)                        | 0.84<br>(0.49 to 1.19)                     | 1.68<br>(0.88 to 2.72)                     | 1.75<br>(0.94 to 2.74)                    | 1.65<br>(0.84 to 2.71)                     |
| Bladder cancer                  | 21.91<br>(15.75 to 28.61)                     | 32.59<br>(19.08 to 53.39)                     | 27.91<br>(16.90 to 44.03)                        | 35.70<br>(20.50 to 59.43)                        | 1.18<br>(0.86 to 1.49)                     | 1.66<br>(1.00 to 2.69)                     | 1.48<br>(0.93 to 2.34)                    | 1.76<br>(1.02 to 2.88)                     |
| Brain and nervous system cancer | 79.53<br>(59.15 to 100.55)                    | 133.16<br>(101.22 to 170.82)                  | 135.49<br>(103.90 to 173.45)                     | 132.15<br>(100.59 to 171.41)                     | 1.86<br>(1.46 to 2.30)                     | 3.39<br>(2.72 to 4.22)                     | 3.57<br>(2.88 to 4.41)                    | 3.26<br>(2.60 to 4.05)                     |
| Thyroid cancer                  | 10.29<br>(8.09 to 12.69)                      | 15.08<br>(10.49 to 21.02)                     | 13.77<br>(9.75 to 19.02)                         | 16.70<br>(11.18 to 23.77)                        | 0.48<br>(0.38 to 0.59)                     | 0.68<br>(0.49 to 0.95)                     | 0.64<br>(0.47 to 0.87)                    | 0.73<br>(0.50 to 1.01)                     |
| Mesothelioma                    | 3.66<br>(2.70 to 4.82)                        | 5.92<br>(4.39 to 7.84)                        | 6.00<br>(4.43 to 8.00)                           | 5.76<br>(4.25 to 7.60)                           | 0.13<br>(0.10 to 0.18)                     | 0.22<br>(0.17 to 0.29)                     | 0.23<br>(0.17 to 0.30)                    | 0.21<br>(0.16 to 0.27)                     |
| Hodgkin lymphoma                | 7.32<br>(4.81 to 9.90)                        | 8.28<br>(5.32 to 11.23)                       | 7.17<br>(4.72 to 9.70)                           | 8.85<br>(5.66 to 12.11)                          | 0.20<br>(0.13 to 0.26)                     | 0.23<br>(0.16 to 0.30)                     | 0.21<br>(0.14 to 0.27)                    | 0.24<br>(0.16 to 0.32)                     |
| Non-Hodgkin lymphoma            | 170.64<br>(137.31 to 214.26)                  | 269.55<br>(206.41 to 347.50)                  | 271.91<br>(210.86 to 347.39)                     | 275.11<br>(207.05 to 361.22)                     | 5.42<br>(4.48 to 6.58)                     | 9.16<br>(7.13 to 11.53)                    | 9.71<br>(7.62 to 12.13)                   | 8.94<br>(6.79 to 11.43)                    |
| Multiple myeloma                | 34.12<br>(27.31 to 42.52)                     | 64.70<br>(49.70 to 82.57)                     | 68.11<br>(52.28 to 86.69)                        | 64.59<br>(48.65 to 84.22)                        | 1.51<br>(1.24 to 1.86)                     | 2.81<br>(2.20 to 3.56)                     | 3.07<br>(2.41 to 3.84)                    | 2.70<br>(2.08 to 3.49)                     |
| Leukemia                        | 143.16<br>(113.22 to 181.11)                  | 194.59<br>(142.52 to 259.27)                  | 184.03<br>(136.92 to 243.34)                     | 211.75<br>(152.95 to 288.02)                     | 3.40<br>(2.78 to 4.09)                     | 5.23<br>(3.96 to 6.99)                     | 5.07<br>(3.96 to 6.56)                    | 5.55<br>(4.07 to 7.58)                     |
| Acute lymphoid leukemia         | 33.28<br>(23.52 to 46.95)                     | 38.52<br>(26.50 to 55.57)                     | 37.22<br>(25.78 to 52.92)                        | 41.17<br>(28.30 to 59.52)                        | 0.58<br>(0.43 to 0.78)                     | 0.75<br>(0.54 to 1.04)                     | 0.73<br>(0.52 to 1.00)                    | 0.80<br>(0.56 to 1.11)                     |
| Chronic lymphoid leukemia       | 3.31<br>(2.46 to 4.42)                        | 4.64<br>(3.19 to 6.84)                        | 4.44<br>(3.13 to 6.38)                           | 4.95<br>(3.31 to 7.42)                           | 0.15<br>(0.11 to 0.19)                     | 0.22<br>(0.15 to 0.33)                     | 0.22<br>(0.15 to 0.31)                    | 0.22<br>(0.15 to 0.34)                     |
| Acute myeloid leukemia          | 55.32<br>(39.50 to 74.04)                     | 89.90<br>(62.44 to 126.44)                    | 88.48<br>(62.74 to 122.09)                       | 96.05<br>(65.06 to 136.33)                       | 1.26<br>(0.91 to 1.65)                     | 2.29<br>(1.62 to 3.13)                     | 2.32<br>(1.67 to 3.11)                    | 2.39<br>(1.64 to 3.32)                     |
| Chronic myeloid leukemia        | 12.29<br>(8.02 to 17.22)                      | 14.26<br>(8.36 to 23.21)                      | 13.03<br>(7.90 to 20.61)                         | 16.00<br>(9.20 to 26.86)                         | 0.39<br>(0.26 to 0.54)                     | 0.46<br>(0.28 to 0.72)                     | 0.43<br>(0.27 to 0.66)                    | 0.50<br>(0.30 to 0.82)                     |
| Other leukemia                  | 38.96<br>(29.07 to 52.34)                     | 47.27<br>(31.84 to 70.81)                     | 40.86<br>(27.79 to 59.36)                        | 53.59<br>(35.54 to 82.42)                        | 1.03<br>(0.81 to 1.35)                     | 1.51<br>(1.03 to 2.22)                     | 1.37<br>(0.95 to 1.98)                    | 1.64<br>(1.09 to 2.47)                     |
| Other neoplasms                 | 66.63<br>(55.58 to 79.77)                     | 103.93<br>(87.60 to 123.38)                   | 105.64<br>(88.93 to 125.35)                      | 101.89<br>(85.91 to 120.73)                      | 2.17<br>(1.81 to 2.57)                     | 3.64<br>(3.12 to 4.18)                     | 3.87<br>(3.33 to 4.47)                    | 3.41<br>(2.92 to 3.95)                     |
| <b>Cardiovascular diseases</b>  | <b>3748.19</b><br><b>(3194.28 to 4292.91)</b> | <b>3915.88</b><br><b>(2784.11 to 5439.52)</b> | <b>2,443.05</b><br><b>(1,787.05 to 3,427.98)</b> | <b>5,848.90</b><br><b>(4,099.85 to 8,130.09)</b> | <b>186.35</b><br><b>(163.84 to 209.68)</b> | <b>188.34</b><br><b>(141.35 to 261.45)</b> | <b>128.85</b><br><b>(87.20 to 187.20)</b> | <b>262.05</b><br><b>(190.49 to 359.92)</b> |
| Rheumatic heart disease         | 121.71<br>(97.61 to 147.27)                   | 72.41<br>(57.23 to 91.60)                     | 59.91<br>(47.26 to 75.27)                        | 79.55<br>(61.75 to 102.29)                       | 3.87<br>(3.23 to 4.60)                     | 2.59<br>(2.14 to 3.12)                     | 2.28<br>(1.88 to 2.71)                    | 2.70<br>(2.18 to 3.32)                     |
| Ischemic heart disease          | 2,133.49<br>(1,796.83 to 2,481.62)            | 2,261.25<br>(1,289.55 to 3,728.05)            | 1,291.61<br>(750.23 to 2,205.95)                 | 3,597.99<br>(2,068.86 to 5,495.85)               | 106.40<br>(93.10 to 120.34)                | 105.81<br>(65.13 to 177.32)                | 66.75<br>(41.15 to 116.12)                | 156.82<br>(94.69 to 246.03)                |
| Stroke                          | 1,114.82<br>(953.55 to 1,291.25)              | 1,003.72<br>(655.91 to 1,560.61)              | 582.42<br>(390.39 to 932.96)                     | 1,543.79<br>(976.34 to 2,389.47)                 | 57.00<br>(49.51 to 64.84)                  | 51.51<br>(34.93 to 86.91)                  | 33.33<br>(22.32 to 56.17)                 | 73.25<br>(47.62 to 120.18)                 |
| Ischemic stroke                 | 348.92<br>(296.32 to 407.46)                  | 308.93<br>(178.03 to 646.82)                  | 203.15<br>(116.38 to 432.81)                     | 430.38<br>(243.38 to 908.54)                     | 22.74<br>(19.44 to 26.48)                  | 19.69<br>(10.77 to 44.04)                  | 14.12<br>(7.76 to 32.75)                  | 25.80<br>(13.71 to 59.09)                  |

|                                |                                 |                                   |                                 |                                     |                              |                              |                              |                              |
|--------------------------------|---------------------------------|-----------------------------------|---------------------------------|-------------------------------------|------------------------------|------------------------------|------------------------------|------------------------------|
| Intracerebral hemorrhage       | 765.90<br>(643.98 to<br>890.88) | 694.79<br>(416.45 to<br>1,154.76) | 379.26<br>(241.75 to<br>613.01) | 1,113.41<br>(654.19 to<br>1,808.82) | 34.26<br>(29.29 to<br>39.26) | 31.82<br>(20.40 to<br>49.32) | 19.21<br>(12.76 to<br>31.05) | 47.45<br>(29.71 to<br>75.66) |
| Hypertensive heart disease     | 136.45<br>(110.13 to<br>175.04) | 211.85<br>(157.03 to<br>290.27)   | 161.46<br>(124.63 to<br>213.23) | 253.54<br>(175.14 to<br>387.81)     | 7.29<br>(5.97 to<br>9.35)    | 11.02<br>(8.22 to<br>15.42)  | 8.88<br>(6.84 to<br>11.79)   | 12.53<br>(8.83 to<br>19.49)  |
| Cardiomyopathy and myocarditis | 59.38<br>(45.06 to<br>74.55)    | 85.54<br>(60.01 to<br>116.79)     | 85.16<br>(60.31 to<br>114.44)   | 85.01<br>(59.01 to<br>118.14)       | 1.97<br>(1.56 to<br>2.42)    | 3.03<br>(2.21 to<br>3.93)    | 3.18<br>(2.33 to<br>4.08)    | 2.86<br>(2.06 to<br>3.78)    |
| Myocarditis                    | 13.41<br>(8.84 to<br>21.58)     | 18.09<br>(11.82 to<br>30.16)      | 17.78<br>(11.58 to<br>29.84)    | 17.92<br>(11.71 to<br>29.83)        | 0.48<br>(0.32 to<br>0.77)    | 0.69<br>(0.44 to<br>1.14)    | 0.71<br>(0.46 to<br>1.18)    | 0.65<br>(0.41 to<br>1.08)    |

| Tonga                                                         |                                                        |                                                        |                                                      |                                                          |                                                   |                                                   |                                                   |                                                   |
|---------------------------------------------------------------|--------------------------------------------------------|--------------------------------------------------------|------------------------------------------------------|----------------------------------------------------------|---------------------------------------------------|---------------------------------------------------|---------------------------------------------------|---------------------------------------------------|
| Cause                                                         | YLLs (actual counts)                                   |                                                        |                                                      |                                                          | Deaths (actual counts)                            |                                                   |                                                   |                                                   |
|                                                               | 2016                                                   | 2040 Forecast                                          | 2040 Better Scenario                                 | 2040 Worse Scenario                                      | 2016                                              | 2040 Forecast                                     | 2040 Better Scenario                              | 2040 Worse Scenario                               |
| Alcoholic cardiomyopathy                                      | 2.29<br>(1.11 to<br>3.72)                              | 3.31<br>(1.52 to<br>5.49)                              | 3.53<br>(1.60 to<br>5.81)                            | 3.20<br>(1.46 to<br>5.23)                                | 0.09<br>(0.04 to<br>0.15)                         | 0.13<br>(0.06 to<br>0.21)                         | 0.14<br>(0.07 to<br>0.23)                         | 0.12<br>(0.05 to<br>0.19)                         |
| Other cardiomyopathy                                          | 43.68<br>(30.17 to<br>57.14)                           | 64.14<br>(39.89 to<br>92.71)                           | 63.85<br>(40.24 to<br>90.70)                         | 1.40<br>(39.23 to<br>94.04)                              | 2.21<br>(0.98 to<br>1.79)                         | 2.21<br>(1.43 to<br>3.15)                         | 2.32<br>(1.47 to<br>3.28)                         | 2.09<br>(1.33 to<br>2.98)                         |
| Atrial fibrillation and flutter                               | 26.75<br>(20.24 to<br>34.88)                           | 37.15<br>(27.48 to<br>48.16)                           | 38.16<br>(28.97 to<br>49.01)                         | 35.77<br>(25.88 to<br>47.35)                             | 2.75<br>(2.05 to<br>3.58)                         | 3.40<br>(2.33 to<br>4.59)                         | 3.68<br>(2.62 to<br>4.90)                         | 3.12<br>(2.10 to<br>4.28)                         |
| Aortic aneurysm                                               | 35.09<br>(28.90 to<br>42.78)                           | 52.53<br>(39.73 to<br>68.99)                           | 49.09<br>(38.28 to<br>62.10)                         | 53.99<br>(39.82 to<br>73.06)                             | 1.72<br>(1.42 to<br>2.00)                         | 2.41<br>(1.89 to<br>3.00)                         | 2.40<br>(1.92 to<br>2.93)                         | 2.34<br>(1.78 to<br>2.99)                         |
| Peripheral artery disease                                     | 7.74<br>(4.31 to<br>12.61)                             | 17.78<br>(9.26 to<br>30.37)                            | 16.67<br>(8.79 to<br>28.77)                          | 17.60<br>(8.96 to<br>30.43)                              | 0.54<br>(0.30 to<br>0.91)                         | 1.15<br>(0.60 to<br>1.97)                         | 1.19<br>(0.62 to<br>2.07)                         | 1.06<br>(0.54 to<br>1.84)                         |
| Endocarditis                                                  | 83.80<br>(64.25 to<br>107.26)                          | 125.94<br>(88.45 to<br>165.61)                         | 118.55<br>(84.46 to<br>155.31)                       | 129.30<br>(89.74 to<br>172.71)                           | 3.28<br>(2.52 to<br>4.31)                         | 4.90<br>(3.45 to<br>6.56)                         | 4.89<br>(3.47 to<br>6.50)                         | 4.76<br>(3.29 to<br>6.42)                         |
| Other cardiovascular and circulatory diseases                 | 28.37<br>(17.42 to<br>35.32)                           | 47.70<br>(25.84 to<br>64.09)                           | 40.03<br>(21.69 to<br>53.28)                         | 52.35<br>(28.23 to<br>72.34)                             | 1.54<br>(0.70 to<br>1.97)                         | 2.52<br>(1.10 to<br>3.42)                         | 2.28<br>(1.00 to<br>3.05)                         | 2.60<br>(1.14 to<br>3.61)                         |
| <b>Chronic respiratory diseases</b>                           | <b>912.48</b><br><b>(775.85 to</b><br><b>1,061.02)</b> | <b>963.11</b><br><b>(723.20 to</b><br><b>1,226.06)</b> | <b>698.23</b><br><b>(538.63 to</b><br><b>864.76)</b> | <b>1,285.14</b><br><b>(935.86 to</b><br><b>1,680.34)</b> | <b>45.56</b><br><b>(39.09 to</b><br><b>52.08)</b> | <b>44.22</b><br><b>(33.82 to</b><br><b>55.64)</b> | <b>32.14</b><br><b>(25.28 to</b><br><b>39.18)</b> | <b>58.04</b><br><b>(42.69 to</b><br><b>75.35)</b> |
| Chronic obstructive pulmonary disease                         | 537.55<br>(440.52 to<br>640.18)                        | 578.37<br>(383.27 to<br>815.96)                        | 367.73<br>(250.95 to<br>508.22)                      | 839.04<br>(553.49 to<br>1,232.01)                        | 30.20<br>(25.15 to<br>35.34)                      | 29.37<br>(20.35 to<br>40.77)                      | 19.06<br>(13.51 to<br>25.70)                      | 41.30<br>(28.03 to<br>58.90)                      |
| Pneumoconiosis                                                | 2.70<br>(2.03 to<br>3.62)                              | 2.74<br>(2.03 to<br>3.76)                              | 2.67<br>(1.95 to<br>3.63)                            | 2.71<br>(2.00 to<br>3.71)                                | 0.19<br>(0.14 to<br>0.27)                         | 0.19<br>(0.13 to<br>0.26)                         | 0.19<br>(0.13 to<br>0.28)                         | 0.17<br>(0.12 to<br>0.24)                         |
| Silicosis                                                     | 0.47<br>(0.25 to<br>0.74)                              | 0.36<br>(0.19 to<br>0.58)                              | 0.36<br>(0.18 to<br>0.60)                            | 0.34<br>(0.18 to<br>0.56)                                | 0.04<br>(0.02 to<br>0.06)                         | 0.03<br>(0.01 to<br>0.05)                         | 0.03<br>(0.01 to<br>0.05)                         | 0.03<br>(0.01 to<br>0.04)                         |
| Asbestosis                                                    | 0.56<br>(0.38 to<br>0.91)                              | 0.78<br>(0.51 to<br>1.26)                              | 0.79<br>(0.51 to<br>1.28)                            | 0.76<br>(0.50 to<br>1.23)                                | 0.03<br>(0.02 to<br>0.05)                         | 0.04<br>(0.02 to<br>0.07)                         | 0.04<br>(0.03 to<br>0.08)                         | 0.04<br>(0.02 to<br>0.07)                         |
| Coal workers pneumoconiosis                                   | 0.04<br>(0.02 to<br>0.07)                              | 0.04<br>(0.02 to<br>0.07)                              | 0.03<br>(0.01 to<br>0.06)                            | 0.04<br>(0.02 to<br>0.08)                                | 0.00<br>(0.00 to<br>0.01)                         | 0.00<br>(0.00 to<br>0.01)                         | 0.00<br>(0.00 to<br>0.01)                         | 0.00<br>(0.00 to<br>0.01)                         |
| Other pneumoconiosis                                          | 1.63<br>(1.15 to<br>2.24)                              | 1.56<br>(1.07 to<br>2.21)                              | 1.49<br>(1.02 to<br>2.12)                            | 1.57<br>(1.09 to<br>2.21)                                | 0.13<br>(0.09 to<br>0.18)                         | 0.11<br>(0.07 to<br>0.17)                         | 0.12<br>(0.07 to<br>0.18)                         | 0.11<br>(0.07 to<br>0.16)                         |
| Asthma                                                        | 227.41<br>(173.67 to<br>313.49)                        | 171.35<br>(98.50 to<br>293.97)                         | 130.38<br>(77.11 to<br>218.40)                       | 221.48<br>(123.50 to<br>385.93)                          | 10.79<br>(8.20 to<br>15.17)                       | 7.97<br>(4.61 to<br>13.67)                        | 6.42<br>(3.83 to<br>10.82)                        | 9.70<br>(5.49 to<br>17.03)                        |
| Interstitial lung disease and pulmonary sarcoidosis           | 47.32<br>(29.49 to<br>73.57)                           | 68.80<br>(43.92 to<br>102.18)                          | 74.99<br>(48.48 to<br>109.71)                        | 65.53<br>(41.12 to<br>98.71)                             | 1.42<br>(0.88 to<br>2.15)                         | 2.24<br>(1.42 to<br>3.29)                         | 2.55<br>(1.64 to<br>3.69)                         | 2.03<br>(1.28 to<br>3.04)                         |
| Other chronic respiratory diseases                            | 97.50<br>(66.43 to<br>135.42)                          | 141.84<br>(91.00 to<br>210.47)                         | 122.46<br>(80.22 to<br>174.49)                       | 156.38<br>(97.84 to<br>235.97)                           | 2.96<br>(1.96 to<br>4.16)                         | 4.46<br>(2.82 to<br>6.63)                         | 3.91<br>(2.57 to<br>5.62)                         | 4.83<br>(2.99 to<br>7.38)                         |
| <b>Cirrhosis and other chronic liver diseases</b>             | <b>454.14</b><br><b>(359.99 to</b><br><b>555.63)</b>   | <b>643.09</b><br><b>(503.99 to</b><br><b>784.68)</b>   | <b>603.88</b><br><b>(471.59 to</b><br><b>737.01)</b> | <b>658.78</b><br><b>(519.68 to</b><br><b>800.52)</b>     | <b>14.00</b><br><b>(11.47 to</b><br><b>16.82)</b> | <b>20.24</b><br><b>(16.72 to</b><br><b>23.84)</b> | <b>19.55</b><br><b>(16.20 to</b><br><b>22.91)</b> | <b>20.19</b><br><b>(16.73 to</b><br><b>23.78)</b> |
| Cirrhosis and other chronic liver diseases due to hepatitis B | 173.98<br>(134.17 to<br>216.65)                        | 268.99<br>(208.75 to<br>334.35)                        | 257.49<br>(197.55 to<br>319.01)                      | 271.03<br>(212.12 to<br>334.43)                          | 5.75<br>(4.60 to<br>7.01)                         | 8.75<br>(7.18 to<br>10.38)                        | 8.58<br>(7.02 to<br>10.21)                        | 8.60<br>(7.04 to<br>10.23)                        |
| Cirrhosis and other chronic liver diseases due to hepatitis C | 70.19<br>(54.81 to<br>88.59)                           | 111.26<br>(85.88 to<br>140.39)                         | 105.93<br>(81.69 to<br>134.51)                       | 112.55<br>(86.30 to<br>142.51)                           | 2.21<br>(1.77 to<br>2.72)                         | 3.47<br>(2.82 to<br>4.23)                         | 3.37<br>(2.72 to<br>4.10)                         | 3.44<br>(2.78 to<br>4.20)                         |

|                                                                |                                                      |                                                        |                                                      |                                                        |                                                   |                                                   |                                                   |                                                   |
|----------------------------------------------------------------|------------------------------------------------------|--------------------------------------------------------|------------------------------------------------------|--------------------------------------------------------|---------------------------------------------------|---------------------------------------------------|---------------------------------------------------|---------------------------------------------------|
|                                                                | 58.48<br>(45.18 to<br>74.09)                         | 85.14<br>(66.08 to<br>108.08)                          | 76.02<br>(58.89 to<br>96.93)                         | 91.61<br>(70.78 to<br>116.90)                          | 2.01<br>(1.59 to<br>2.46)                         | 2.86<br>(2.32 to<br>3.48)                         | 2.64<br>(2.13 to<br>3.20)                         | 2.99<br>(2.42 to<br>3.65)                         |
| Cirrhosis and other chronic liver diseases due to alcohol use  |                                                      |                                                        |                                                      |                                                        |                                                   |                                                   |                                                   |                                                   |
|                                                                | 151.49<br>(119.78 to<br>186.49)                      | 177.70<br>(142.49 to<br>217.51)                        | 164.44<br>(131.66 to<br>199.84)                      | 183.58<br>(146.26 to<br>225.60)                        | 4.03<br>(3.30 to<br>4.81)                         | 5.16<br>(4.29 to<br>6.05)                         | 4.96<br>(4.11 to<br>5.82)                         | 5.16<br>(4.27 to<br>6.07)                         |
| Cirrhosis and other chronic liver diseases due to other causes |                                                      |                                                        |                                                      |                                                        |                                                   |                                                   |                                                   |                                                   |
| <b>Digestive diseases</b>                                      | <b>753.70</b><br><b>(620.70 to</b><br><b>896.37)</b> | <b>889.28</b><br><b>(714.93 to</b><br><b>1,080.18)</b> | <b>782.84</b><br><b>(633.19 to</b><br><b>945.94)</b> | <b>964.52</b><br><b>(764.89 to</b><br><b>1,188.26)</b> | <b>30.00</b><br><b>(25.43 to</b><br><b>34.84)</b> | <b>36.82</b><br><b>(30.17 to</b><br><b>43.92)</b> | <b>34.03</b><br><b>(28.18 to</b><br><b>40.26)</b> | <b>38.10</b><br><b>(30.87 to</b><br><b>46.00)</b> |
| Peptic ulcer disease                                           | 181.88<br>(136.93 to<br>232.63)                      | 148.38<br>(105.94 to<br>203.00)                        | 118.63<br>(83.83 to<br>163.23)                       | 163.90<br>(116.05 to<br>225.45)                        | 8.09<br>(6.06 to<br>10.27)                        | 6.89<br>(4.87 to<br>9.38)                         | 5.76<br>(4.01 to<br>7.82)                         | 7.31<br>(5.06 to<br>10.05)                        |

| Tonga                                      |                              |                              |                              |                              |                           |                           |                           |                           |
|--------------------------------------------|------------------------------|------------------------------|------------------------------|------------------------------|---------------------------|---------------------------|---------------------------|---------------------------|
| Cause                                      | YLLs (actual counts)         |                              |                              |                              | Deaths (actual counts)    |                           |                           |                           |
|                                            | 2016                         | 2040 Forecast                | 2040 Better Scenario         | 2040 Worse Scenario          | 2016                      | 2040 Forecast             | 2040 Better Scenario      | 2040 Worse Scenario       |
| Gastritis and duodenitis                   | 5.08<br>(3.75 to 7.18)       | 7.46<br>(5.35 to 10.83)      | 7.02<br>(4.96 to 10.14)      | 7.50<br>(5.36 to 10.92)      | 0.25<br>(0.19 to 0.37)    | 0.35<br>(0.25 to 0.52)    | 0.35<br>(0.25 to 0.52)    | 0.34<br>(0.24 to 0.50)    |
| Appendicitis                               | 83.53<br>(62.84 to 106.96)   | 91.45<br>(68.38 to 117.26)   | 80.06<br>(59.64 to 103.54)   | 96.70<br>(72.63 to 125.16)   | 2.65<br>(2.05 to 3.31)    | 3.14<br>(2.47 to 3.92)    | 2.89<br>(2.25 to 3.65)    | 3.16<br>(2.46 to 4.00)    |
| Paralytic ileus and intestinal obstruction | 123.89<br>(86.73 to 183.90)  | 143.32<br>(106.97 to 201.43) | 136.83<br>(103.04 to 189.64) | 145.82<br>(107.76 to 208.99) | 4.05<br>(3.13 to 5.47)    | 5.42<br>(4.28 to 7.31)    | 5.57<br>(4.44 to 7.50)    | 5.12<br>(3.99 to 6.92)    |
| Inguinal, femoral, and abdominal hernia    | 17.15<br>(12.85 to 24.17)    | 16.88<br>(12.45 to 24.14)    | 16.19<br>(11.99 to 23.53)    | 16.64<br>(12.19 to 23.76)    | 0.96<br>(0.71 to 1.34)    | 0.94<br>(0.68 to 1.32)    | 0.95<br>(0.68 to 1.35)    | 0.88<br>(0.62 to 1.23)    |
| Inflammatory bowel disease                 | 38.47<br>(28.30 to 50.74)    | 55.49<br>(41.89 to 72.65)    | 55.67<br>(42.20 to 72.34)    | 54.48<br>(41.06 to 72.11)    | 1.34<br>(1.06 to 1.68)    | 2.02<br>(1.59 to 2.52)    | 2.12<br>(1.68 to 2.65)    | 1.90<br>(1.49 to 2.38)    |
| Vascular intestinal disorders              | 28.35<br>(19.17 to 36.33)    | 41.93<br>(29.02 to 52.48)    | 41.47<br>(28.54 to 51.92)    | 40.83<br>(28.30 to 51.24)    | 1.56<br>(1.06 to 1.97)    | 2.26<br>(1.58 to 2.82)    | 2.33<br>(1.62 to 2.91)    | 2.10<br>(1.44 to 2.64)    |
| Gallbladder and biliary diseases           | 103.16<br>(80.83 to 128.12)  | 148.50<br>(80.98 to 255.30)  | 116.08<br>(65.04 to 198.54)  | 190.35<br>(102.20 to 326.88) | 4.74<br>(3.77 to 5.85)    | 6.85<br>(3.73 to 11.63)   | 5.65<br>(3.17 to 9.60)    | 8.28<br>(4.49 to 14.00)   |
| Pancreatitis                               | 64.58<br>(46.74 to 88.91)    | 97.49<br>(64.80 to 148.21)   | 85.49<br>(58.21 to 123.72)   | 105.64<br>(68.20 to 167.21)  | 2.15<br>(1.60 to 2.87)    | 3.26<br>(2.27 to 4.84)    | 2.98<br>(2.12 to 4.19)    | 3.40<br>(2.28 to 5.15)    |
| Other digestive diseases                   | 107.62<br>(77.73 to 139.87)  | 138.40<br>(100.10 to 182.32) | 125.40<br>(91.12 to 164.23)  | 142.65<br>(102.59 to 186.97) | 4.22<br>(3.05 to 5.38)    | 5.70<br>(4.17 to 7.25)    | 5.41<br>(3.94 to 6.89)    | 5.61<br>(4.06 to 7.18)    |
| Neurological disorders                     | 402.85<br>(338.49 to 486.16) | 614.61<br>(445.11 to 905.73) | 614.36<br>(457.25 to 873.49) | 622.09<br>(433.97 to 935.91) | 34.86<br>(29.04 to 42.04) | 47.97<br>(31.44 to 72.85) | 50.60<br>(35.13 to 73.47) | 46.18<br>(29.11 to 72.10) |
| Alzheimer's disease and other dementias    | 302.24<br>(248.49 to 377.09) | 457.28<br>(292.68 to 740.96) | 457.01<br>(303.96 to 722.19) | 464.02<br>(276.88 to 767.37) | 31.29<br>(25.73 to 38.36) | 42.06<br>(25.83 to 66.37) | 44.03<br>(28.81 to 67.19) | 40.73<br>(24.00 to 66.48) |
| Parkinson's disease                        | 20.18<br>(15.17 to 26.29)    | 36.90<br>(27.68 to 47.23)    | 44.13<br>(33.45 to 56.26)    | 31.79<br>(23.59 to 41.15)    | 1.71<br>(1.27 to 2.28)    | 2.86<br>(2.09 to 3.80)    | 3.54<br>(2.63 to 4.65)    | 2.39<br>(1.70 to 3.20)    |
| Epilepsy                                   | 39.84<br>(31.38 to 50.04)    | 56.00<br>(38.78 to 78.77)    | 45.74<br>(32.07 to 63.41)    | 63.54<br>(43.49 to 90.55)    | 0.74<br>(0.60 to 0.91)    | 1.12<br>(0.79 to 1.54)    | 0.94<br>(0.67 to 1.27)    | 1.25<br>(0.87 to 1.76)    |
| Multiple sclerosis                         | 2.81<br>(1.95 to 4.25)       | 4.56<br>(3.10 to 7.20)       | 4.58<br>(3.11 to 7.24)       | 4.54<br>(3.08 to 7.19)       | 0.08<br>(0.06 to 0.13)    | 0.14<br>(0.10 to 0.21)    | 0.14<br>(0.10 to 0.22)    | 0.13<br>(0.09 to 0.21)    |
| Motor neuron disease                       | 5.26<br>(3.97 to 7.45)       | 10.49<br>(8.14 to 14.87)     | 11.33<br>(8.71 to 15.99)     | 9.90<br>(7.64 to 14.10)      | 0.19<br>(0.14 to 0.27)    | 0.39<br>(0.31 to 0.55)    | 0.43<br>(0.34 to 0.60)    | 0.36<br>(0.28 to 0.51)    |
| Other neurological disorders               | 32.51<br>(24.84 to 43.03)    | 49.39<br>(38.67 to 62.93)    | 51.57<br>(40.79 to 64.88)    | 48.30<br>(37.47 to 61.93)    | 0.84<br>(0.66 to 1.07)    | 1.39<br>(1.13 to 1.76)    | 1.52<br>(1.23 to 1.89)    | 1.31<br>(1.06 to 1.65)    |
| Mental disorders                           | 45.72<br>(31.60 to 60.30)    | 88.93<br>(61.57 to 117.01)   | 88.42<br>(61.63 to 116.74)   | 88.91<br>(61.61 to 117.20)   | 1.15<br>(0.83 to 1.46)    | 2.27<br>(1.65 to 2.90)    | 2.33<br>(1.71 to 2.98)    | 2.21<br>(1.60 to 2.81)    |
| Alcohol use disorders                      | 21.00<br>(9.83 to 31.19)     | 29.21<br>(11.58 to 45.57)    | 28.34<br>(11.08 to 44.48)    | 29.72<br>(11.86 to 46.42)    | 0.53<br>(0.27 to 0.77)    | 0.75<br>(0.33 to 1.13)    | 0.74<br>(0.33 to 1.12)    | 0.75<br>(0.33 to 1.13)    |
| Drug use disorders                         | 24.52<br>(17.94 to 33.43)    | 59.31<br>(43.40 to 80.33)    | 59.67<br>(43.41 to 80.88)    | 58.77<br>(42.86 to 79.85)    | 0.61<br>(0.47 to 0.79)    | 1.51<br>(1.15 to 1.97)    | 1.58<br>(1.20 to 2.05)    | 1.45<br>(1.09 to 1.89)    |
| Opioid use disorders                       | 14.03<br>(9.39 to 20.87)     | 28.72<br>(18.43 to 42.67)    | 28.56<br>(18.41 to 42.42)    | 28.68<br>(18.32 to 42.80)    | 0.30<br>(0.20 to 0.43)    | 0.63<br>(0.41 to 0.92)    | 0.64<br>(0.42 to 0.94)    | 0.62<br>(0.40 to 0.90)    |

|                           |                            |                              |                              |                              |                           |                           |                           |                           |
|---------------------------|----------------------------|------------------------------|------------------------------|------------------------------|---------------------------|---------------------------|---------------------------|---------------------------|
| Cocaine use disorders     | 1.49<br>(0.79 to<br>2.29)  | 4.61<br>(2.38 to<br>7.18)    | 4.42<br>(2.28 to<br>6.90)    | 4.69<br>(2.43 to<br>7.26)    | 0.03<br>(0.02 to<br>0.05) | 0.11<br>(0.06 to<br>0.16) | 0.11<br>(0.06 to<br>0.16) | 0.11<br>(0.06 to<br>0.16) |
| Amphetamine use disorders | 0.67<br>(0.33 to<br>1.03)  | 2.73<br>(1.28 to<br>4.29)    | 2.60<br>(1.20 to<br>4.14)    | 2.79<br>(1.31 to<br>4.39)    | 0.02<br>(0.01 to<br>0.02) | 0.06<br>(0.03 to<br>0.10) | 0.06<br>(0.03 to<br>0.09) | 0.06<br>(0.03 to<br>0.10) |
| Other drug use disorders  | 8.32<br>(5.60 to<br>11.50) | 23.24<br>(15.15 to<br>32.94) | 24.09<br>(15.71 to<br>34.29) | 22.60<br>(14.58 to<br>32.12) | 0.27<br>(0.20 to<br>0.35) | 0.71<br>(0.50 to<br>0.97) | 0.77<br>(0.55 to<br>1.05) | 0.66<br>(0.47 to<br>0.90) |
| Eating disorders          | 0.21<br>(0.14 to<br>0.30)  | 0.41<br>(0.26 to<br>0.60)    | 0.41<br>(0.25 to<br>0.60)    | 0.42<br>(0.26 to<br>0.60)    | 0.00<br>(0.00 to<br>0.01) | 0.01<br>(0.01 to<br>0.01) | 0.01<br>(0.01 to<br>0.01) | 0.01<br>(0.01 to<br>0.01) |

| Tonga                                                      |                                       |                                       |                                       |                                       |                                 |                                 |                                 |                                 |
|------------------------------------------------------------|---------------------------------------|---------------------------------------|---------------------------------------|---------------------------------------|---------------------------------|---------------------------------|---------------------------------|---------------------------------|
| Cause                                                      | YLLs (actual counts)                  |                                       |                                       |                                       | Deaths (actual counts)          |                                 |                                 |                                 |
|                                                            | 2016                                  | 2040 Forecast                         | 2040 Better Scenario                  | 2040 Worse Scenario                   | 2016                            | 2040 Forecast                   | 2040 Better Scenario            | 2040 Worse Scenario             |
|                                                            | 3,159.88<br>(2,690.39 to<br>3,660.68) | 5,332.67<br>(3,876.73 to<br>7,930.99) | 4,215.77<br>(3,074.73 to<br>6,577.12) | 6,314.81<br>(4,541.32 to<br>9,243.02) | 153.79<br>(133.17 to<br>175.72) | 259.40<br>(192.55 to<br>378.79) | 213.83<br>(157.76 to<br>324.04) | 294.49<br>(216.64 to<br>412.05) |
| Diabetes, urogenital, blood, and endocrine diseases        |                                       |                                       |                                       |                                       |                                 |                                 |                                 |                                 |
| Diabetes mellitus                                          | 1,951.27<br>(1,662.01 to<br>2,273.04) | 2,712.44<br>(1,871.74 to<br>3,754.77) | 2,065.60<br>(1,432.29 to<br>2,854.02) | 3,113.88<br>(2,097.03 to<br>4,352.28) | 100.09<br>(86.63 to<br>115.06)  | 137.95<br>(96.10 to<br>184.38)  | 110.25<br>(78.53 to<br>147.11)  | 151.51<br>(103.56 to<br>205.45) |
| Acute glomerulonephritis                                   | 1.53<br>(1.11 to<br>2.15)             | 2.20<br>(1.45 to<br>3.29)             | 2.00<br>(1.29 to<br>2.98)             | 2.30<br>(1.53 to<br>3.44)             | 0.04<br>(0.03 to<br>0.06)       | 0.06<br>(0.04 to<br>0.09)       | 0.06<br>(0.03 to<br>0.09)       | 0.06<br>(0.04 to<br>0.09)       |
| Chronic kidney disease                                     | 882.45<br>(703.57 to<br>1,079.98)     | 2,100.33<br>(684.66 to<br>5,241.76)   | 1,652.99<br>(551.99 to<br>4,415.96)   | 2,675.11<br>(872.27 to<br>5,982.95)   | 42.08<br>(34.31 to<br>50.80)    | 101.90<br>(29.99 to<br>249.59)  | 83.90<br>(24.99 to<br>218.49)   | 124.19<br>(37.64 to<br>272.82)  |
| Chronic kidney disease due to diabetes mellitus            | 481.16<br>(382.71 to<br>596.21)       | 1,261.42<br>(392.11 to<br>3,323.75)   | 990.50<br>(313.94 to<br>2,669.01)     | 1,618.89<br>(509.95 to<br>3,795.91)   | 21.91<br>(17.60 to<br>26.88)    | 57.46<br>(17.09 to<br>145.58)   | 46.92<br>(14.11 to<br>124.51)   | 70.94<br>(21.39 to<br>161.10)   |
| Chronic kidney disease due to hypertension                 | 221.88<br>(173.87 to<br>279.07)       | 539.42<br>(158.45 to<br>1,388.97)     | 431.47<br>(128.80 to<br>1,209.58)     | 675.91<br>(198.82 to<br>1,569.73)     | 14.11<br>(11.18 to<br>17.44)    | 32.43<br>(9.21 to<br>81.39)     | 27.33<br>(7.62 to<br>72.65)     | 38.50<br>(11.30 to<br>86.31)    |
| Chronic kidney disease due to glomerulonephritis           | 83.78<br>(62.15 to<br>108.16)         | 130.48<br>(56.42 to<br>291.56)        | 100.11<br>(44.15 to<br>234.31)        | 165.46<br>(70.42 to<br>352.50)        | 2.49<br>(1.91 to<br>3.20)       | 4.71<br>(1.63 to<br>11.61)      | 3.73<br>(1.30 to<br>9.67)       | 5.84<br>(2.03 to<br>13.06)      |
| Chronic kidney disease due to other and unspecified causes | 95.64<br>(72.69 to<br>123.07)         | 169.01<br>(63.78 to<br>375.84)        | 130.91<br>(50.35 to<br>302.46)        | 214.85<br>(81.09 to<br>452.92)        | 3.57<br>(2.71 to<br>4.62)       | 7.30<br>(2.23 to<br>16.87)      | 5.92<br>(1.80 to<br>14.76)      | 8.92<br>(2.78 to<br>19.35)      |
| Urinary diseases and male infertility                      | 94.16<br>(75.93 to<br>117.17)         | 162.93<br>(135.72 to<br>196.94)       | 160.28<br>(133.41 to<br>191.71)       | 160.96<br>(132.36 to<br>196.58)       | 3.75<br>(3.20 to<br>4.35)       | 7.16<br>(5.89 to<br>8.42)       | 7.50<br>(6.24 to<br>8.77)       | 6.62<br>(5.42 to<br>7.92)       |
| Urinary tract infections                                   | 80.69<br>(63.03 to<br>103.14)         | 142.41<br>(117.16 to<br>172.35)       | 141.24<br>(116.00 to<br>170.35)       | 140.26<br>(113.96 to<br>173.95)       | 3.16<br>(2.63 to<br>3.73)       | 6.25<br>(5.07 to<br>7.47)       | 6.61<br>(5.39 to<br>7.84)       | 5.75<br>(4.59 to<br>6.88)       |
| Urolithiasis                                               | 2.21<br>(1.54 to<br>3.45)             | 4.48<br>(3.00 to<br>7.62)             | 4.42<br>(2.94 to<br>7.37)             | 4.41<br>(2.96 to<br>7.54)             | 0.09<br>(0.06 to<br>0.15)       | 0.18<br>(0.12 to<br>0.32)       | 0.19<br>(0.12 to<br>0.34)       | 0.17<br>(0.11 to<br>0.30)       |
| Other urinary diseases                                     | 11.27<br>(6.47 to<br>19.69)           | 16.03<br>(8.34 to<br>28.96)           | 14.62<br>(7.50 to<br>26.60)           | 16.30<br>(8.67 to<br>28.99)           | 0.50<br>(0.28 to<br>0.88)       | 0.73<br>(0.37 to<br>1.32)       | 0.70<br>(0.35 to<br>1.31)       | 0.70<br>(0.36 to<br>1.26)       |
| Gynecological diseases                                     | 0.69<br>(0.44 to<br>1.02)             | 0.90<br>(0.53 to<br>1.37)             | 0.77<br>(0.45 to<br>1.18)             | 0.97<br>(0.57 to<br>1.49)             | 0.02<br>(0.01 to<br>0.03)       | 0.02<br>(0.01 to<br>0.04)       | 0.02<br>(0.01 to<br>0.03)       | 0.03<br>(0.02 to<br>0.04)       |
| Uterine fibroids                                           | 0.06<br>(0.03 to<br>0.11)             | 0.06<br>(0.03 to<br>0.11)             | 0.05<br>(0.02 to<br>0.09)             | 0.06<br>(0.03 to<br>0.12)             | 0.00<br>(0.00 to<br>0.00)       | 0.00<br>(0.00 to<br>0.00)       | 0.00<br>(0.00 to<br>0.00)       | 0.00<br>(0.00 to<br>0.00)       |
| Polycystic ovarian syndrome                                | 0.01<br>(0.00 to<br>0.04)             | 0.01<br>(0.00 to<br>0.03)             | 0.01<br>(0.00 to<br>0.02)             | 0.01<br>(0.00 to<br>0.04)             | 0.00<br>(0.00 to<br>0.00)       | 0.00<br>(0.00 to<br>0.00)       | 0.00<br>(0.00 to<br>0.00)       | 0.00<br>(0.00 to<br>0.00)       |
| Endometriosis                                              | 0.01<br>(0.00 to<br>0.01)             | 0.01<br>(0.00 to<br>0.02)             | 0.01<br>(0.00 to<br>0.02)             | 0.01<br>(0.00 to<br>0.02)             | 0.00<br>(0.00 to<br>0.00)       | 0.00<br>(0.00 to<br>0.00)       | 0.00<br>(0.00 to<br>0.00)       | 0.00<br>(0.00 to<br>0.00)       |
| Genital prolapse                                           | 0.02<br>(0.01 to<br>0.05)             | 0.02<br>(0.01 to<br>0.05)             | 0.02<br>(0.01 to<br>0.04)             | 0.02<br>(0.01 to<br>0.06)             | 0.00<br>(0.00 to<br>0.00)       | 0.00<br>(0.00 to<br>0.00)       | 0.00<br>(0.00 to<br>0.00)       | 0.00<br>(0.00 to<br>0.00)       |
| Other gynecological diseases                               | 0.59<br>(0.35 to<br>0.89)             | 0.80<br>(0.46 to<br>1.25)             | 0.69<br>(0.40 to<br>1.07)             | 0.86<br>(0.49 to<br>1.33)             | 0.02<br>(0.01 to<br>0.02)       | 0.02<br>(0.01 to<br>0.03)       | 0.02<br>(0.01 to<br>0.03)       | 0.02<br>(0.01 to<br>0.03)       |
| Hemoglobinopathies and hemolytic anemias                   | 20.58<br>(15.93 to<br>26.90)          | 22.20<br>(17.12 to<br>30.03)          | 19.79<br>(15.35 to<br>26.93)          | 23.30<br>(18.01 to<br>31.47)          | 0.63<br>(0.50 to<br>0.83)       | 0.75<br>(0.59 to<br>1.01)       | 0.69<br>(0.54 to<br>0.93)       | 0.76<br>(0.60 to<br>1.02)       |
| Thalassemias                                               | 4.50<br>(2.74 to<br>7.02)             | 2.57<br>(1.54 to<br>4.02)             | 2.70<br>(1.63 to<br>4.30)             | 2.57<br>(1.51 to<br>4.05)             | 0.06<br>(0.04 to<br>0.09)       | 0.03<br>(0.02 to<br>0.05)       | 0.04<br>(0.02 to<br>0.06)       | 0.03<br>(0.02 to<br>0.05)       |



|                                                   |                                 |                                 |                                 |                                 |                           |                             |                             |                             |
|---------------------------------------------------|---------------------------------|---------------------------------|---------------------------------|---------------------------------|---------------------------|-----------------------------|-----------------------------|-----------------------------|
|                                                   | 0.02<br>(0.01 to<br>0.03)       | 0.02<br>(0.01 to<br>0.04)       | 0.02<br>(0.01 to<br>0.03)       | 0.03<br>(0.02 to<br>0.04)       | 0.00<br>(0.00 to<br>0.00) | 0.00<br>(0.00 to<br>0.00)   | 0.00<br>(0.00 to<br>0.00)   | 0.00<br>(0.00 to<br>0.00)   |
| Sickle cell disorders                             |                                 |                                 |                                 |                                 |                           |                             |                             |                             |
|                                                   | 9.38<br>(7.13 to<br>12.43)      | 13.22<br>(9.77 to<br>18.27)     | 11.24<br>(8.17 to<br>15.75)     | 14.24<br>(10.46 to<br>19.86)    | 0.22<br>(0.17 to<br>0.29) | 0.35<br>(0.27 to<br>0.49)   | 0.31<br>(0.23 to<br>0.43)   | 0.37<br>(0.28 to<br>0.52)   |
| G6PD deficiency                                   |                                 |                                 |                                 |                                 |                           |                             |                             |                             |
|                                                   | 6.68<br>(5.19 to<br>9.11)       | 6.39<br>(4.80 to<br>8.88)       | 5.82<br>(4.38 to<br>8.04)       | 6.47<br>(4.86 to<br>9.05)       | 0.35<br>(0.28 to<br>0.47) | 0.36<br>(0.27 to<br>0.51)   | 0.35<br>(0.26 to<br>0.48)   | 0.35<br>(0.26 to<br>0.50)   |
| Other hemoglobinopathies and hemolytic anemias    |                                 |                                 |                                 |                                 |                           |                             |                             |                             |
|                                                   | 209.20<br>(151.46 to<br>289.95) | 331.68<br>(241.17 to<br>456.51) | 314.34<br>(228.02 to<br>425.59) | 338.30<br>(244.93 to<br>463.41) | 7.19<br>(5.40 to<br>9.60) | 11.56<br>(8.44 to<br>15.24) | 11.41<br>(8.40 to<br>15.05) | 11.32<br>(8.31 to<br>14.97) |
| Endocrine, metabolic, blood, and immune disorders |                                 |                                 |                                 |                                 |                           |                             |                             |                             |

| Tonga                                         |                                |                                |                                |                                  |                          |                           |                           |                           |
|-----------------------------------------------|--------------------------------|--------------------------------|--------------------------------|----------------------------------|--------------------------|---------------------------|---------------------------|---------------------------|
| Cause                                         | YLLs (actual counts)           |                                |                                |                                  | Deaths (actual counts)   |                           |                           |                           |
|                                               | 2016                           | 2040 Forecast                  | 2040 Better Scenario           | 2040 Worse Scenario              | 2016                     | 2040 Forecast             | 2040 Better Scenario      | 2040 Worse Scenario       |
| Musculoskeletal disorders                     | 49.70<br>(27.07 to 74.09)      | 76.58<br>(40.69 to 117.19)     | 79.97<br>(42.89 to 122.63)     | 74.37<br>(39.11 to 113.79)       | 1.33<br>(0.72 to 1.99)   | 2.21<br>(1.20 to 3.37)    | 2.43<br>(1.32 to 3.69)    | 2.05<br>(1.11 to 3.14)    |
| Rheumatoid arthritis                          | 1.47<br>(0.66 to 2.53)         | 2.52<br>(1.17 to 4.38)         | 2.26<br>(1.05 to 3.91)         | 2.61<br>(1.22 to 4.57)           | 0.07<br>(0.03 to 0.12)   | 0.13<br>(0.06 to 0.21)    | 0.12<br>(0.05 to 0.20)    | 0.13<br>(0.06 to 0.21)    |
| Other musculoskeletal disorders               | 48.24<br>(26.17 to 71.72)      | 74.06<br>(39.28 to 113.11)     | 77.70<br>(41.64 to 118.87)     | 71.75<br>(37.66 to 109.96)       | 1.26<br>(0.69 to 1.87)   | 2.08<br>(1.12 to 3.16)    | 2.31<br>(1.24 to 3.49)    | 1.93<br>(1.03 to 2.93)    |
| Other non-communicable diseases               | 733.20<br>(458.10 to 1,143.35) | 936.15<br>(644.30 to 1,390.69) | 850.49<br>(594.00 to 1,260.01) | 1,009.29<br>(683.61 to 1,532.70) | 13.56<br>(9.49 to 19.39) | 22.95<br>(16.14 to 31.95) | 22.86<br>(15.99 to 31.70) | 22.80<br>(16.21 to 31.94) |
| Congenital birth defects                      | 573.22<br>(332.06 to 970.94)   | 585.03<br>(344.15 to 980.16)   | 500.22<br>(293.25 to 842.36)   | 661.97<br>(384.38 to 1,121.36)   | 7.05<br>(4.21 to 11.64)  | 7.60<br>(4.69 to 12.29)   | 6.54<br>(4.06 to 10.58)   | 8.53<br>(5.26 to 13.90)   |
| Neural tube defects                           | 37.57<br>(13.07 to 89.99)      | 15.42<br>(4.80 to 39.40)       | 11.81<br>(3.67 to 30.17)       | 18.61<br>(5.66 to 49.06)         | 0.44<br>(0.16 to 1.04)   | 0.18<br>(0.06 to 0.46)    | 0.14<br>(0.05 to 0.35)    | 0.22<br>(0.07 to 0.57)    |
| Congenital heart anomalies                    | 290.18<br>(168.43 to 484.13)   | 290.38<br>(171.59 to 484.19)   | 248.53<br>(146.89 to 410.82)   | 327.02<br>(189.85 to 553.00)     | 3.61<br>(2.19 to 5.91)   | 3.84<br>(2.40 to 6.14)    | 3.31<br>(2.08 to 5.25)    | 4.28<br>(2.64 to 6.98)    |
| Orofacial clefts                              | 0.42<br>(0.13 to 1.21)         | 0.38<br>(0.11 to 1.09)         | 0.27<br>(0.08 to 0.76)         | 0.47<br>(0.13 to 1.33)           | 0.00<br>(0.00 to 0.01)   | 0.00<br>(0.00 to 0.01)    | 0.00<br>(0.00 to 0.01)    | 0.01<br>(0.00 to 0.02)    |
| Down syndrome                                 | 35.01<br>(17.82 to 64.98)      | 41.90<br>(22.36 to 79.75)      | 34.73<br>(18.91 to 65.93)      | 48.02<br>(25.28 to 92.58)        | 0.46<br>(0.25 to 0.82)   | 0.61<br>(0.36 to 1.08)    | 0.51<br>(0.31 to 0.90)    | 0.69<br>(0.40 to 1.25)    |
| Other chromosomal abnormalities               | 33.04<br>(11.98 to 71.67)      | 53.49<br>(19.56 to 116.83)     | 45.03<br>(16.49 to 99.05)      | 61.50<br>(22.58 to 134.85)       | 0.39<br>(0.15 to 0.85)   | 0.39<br>(0.25 to 1.40)    | 0.55<br>(0.21 to 1.19)    | 0.74<br>(0.28 to 1.59)    |
| Congenital musculoskeletal and limb anomalies | 19.69<br>(9.20 to 39.66)       | 22.24<br>(10.16 to 45.41)      | 19.70<br>(9.06 to 39.97)       | 24.83<br>(11.31 to 51.53)        | 0.23<br>(0.11 to 0.46)   | 0.27<br>(0.13 to 0.54)    | 0.24<br>(0.11 to 0.47)    | 0.30<br>(0.14 to 0.61)    |
| Urogenital congenital anomalies               | 18.67<br>(9.74 to 33.94)       | 19.24<br>(10.36 to 33.99)      | 17.22<br>(9.33 to 30.64)       | 21.23<br>(11.59 to 37.71)        | 0.25<br>(0.14 to 0.42)   | 0.29<br>(0.17 to 0.46)    | 0.26<br>(0.16 to 0.42)    | 0.31<br>(0.18 to 0.51)    |
| Digestive congenital anomalies                | 50.95<br>(22.17 to 102.93)     | 46.84<br>(19.38 to 100.58)     | 38.73<br>(16.03 to 83.45)      | 54.37<br>(22.03 to 117.37)       | 0.60<br>(0.26 to 1.20)   | 0.56<br>(0.24 to 1.18)    | 0.46<br>(0.20 to 0.98)    | 0.65<br>(0.27 to 1.39)    |
| Other congenital birth defects                | 87.68<br>(43.21 to 164.88)     | 95.13<br>(47.07 to 169.95)     | 84.20<br>(41.70 to 150.37)     | 105.94<br>(52.22 to 194.27)      | 1.07<br>(0.54 to 1.97)   | 1.21<br>(0.64 to 2.10)    | 1.07<br>(0.57 to 1.85)    | 1.33<br>(0.69 to 2.36)    |
| Skin and subcutaneous diseases                | 123.68<br>(77.14 to 190.18)    | 328.59<br>(209.39 to 496.98)   | 330.55<br>(212.02 to 497.71)   | 321.58<br>(204.77 to 489.26)     | 6.20<br>(3.80 to 9.58)   | 15.09<br>(9.57 to 23.05)  | 16.09<br>(10.14 to 24.58) | 13.97<br>(8.86 to 21.40)  |
| Cellulitis                                    | 23.21<br>(8.68 to 36.88)       | 75.79<br>(29.62 to 117.99)     | 82.57<br>(33.21 to 128.59)     | 70.94<br>(27.25 to 111.30)       | 1.15<br>(0.41 to 1.76)   | 3.52<br>(1.34 to 5.39)    | 4.04<br>(1.59 to 6.14)    | 3.12<br>(1.19 to 4.75)    |
| Pyoderma                                      | 79.75<br>(50.96 to 131.86)     | 216.50<br>(140.85 to 346.72)   | 209.91<br>(135.96 to 335.63)   | 216.40<br>(140.36 to 342.74)     | 3.46<br>(2.20 to 5.99)   | 9.06<br>(5.94 to 14.80)   | 9.26<br>(6.07 to 15.24)   | 8.61<br>(5.59 to 14.08)   |
| Decubitus ulcer                               | 19.37<br>(9.80 to 39.22)       | 33.63<br>(18.12 to 69.41)      | 35.40<br>(19.10 to 71.32)      | 31.58<br>(16.63 to 65.82)        | 1.56<br>(0.74 to 3.10)   | 2.44<br>(1.21 to 5.08)    | 2.72<br>(1.38 to 5.65)    | 2.17<br>(1.08 to 4.61)    |
| Other skin and subcutaneous diseases          | 1.36<br>(0.83 to 2.40)         | 2.66<br>(1.66 to 4.53)         | 2.68<br>(1.71 to 4.51)         | 2.65<br>(1.65 to 4.56)           | 0.03<br>(0.02 to 0.06)   | 0.07<br>(0.04 to 0.11)    | 0.07<br>(0.05 to 0.12)    | 0.06<br>(0.04 to 0.11)    |
| Sudden infant death syndrome                  | 26.30<br>(10.81 to 53.12)      | 22.54<br>(8.16 to 51.39)       | 19.71<br>(7.10 to 45.32)       | 25.74<br>(9.24 to 59.10)         | 0.31<br>(0.13 to 0.62)   | 0.26<br>(0.09 to 0.60)    | 0.23<br>(0.08 to 0.53)    | 0.30<br>(0.11 to 0.69)    |

|                          |                                       |                                       |                                       |                                       |                              |                              |                              |                              |
|--------------------------|---------------------------------------|---------------------------------------|---------------------------------------|---------------------------------------|------------------------------|------------------------------|------------------------------|------------------------------|
| Injuries                 | 2,641.51<br>(2,130.04 to<br>3,185.02) | 3,110.00<br>(2,472.60 to<br>3,858.91) | 2,652.44<br>(2,109.25 to<br>3,277.52) | 3,330.67<br>(2,623.38 to<br>4,167.56) | 54.75<br>(45.36 to<br>64.59) | 68.82<br>(56.64 to<br>82.32) | 61.19<br>(50.20 to<br>72.52) | 71.53<br>(58.48 to<br>86.28) |
| Transport injuries       | 787.97<br>(628.31 to<br>966.06)       | 1,192.90<br>(912.46 to<br>1,511.92)   | 934.99<br>(717.94 to<br>1,178.69)     | 1,286.03<br>(969.89 to<br>1,641.49)   | 15.58<br>(12.61 to<br>18.63) | 24.73<br>(19.44 to<br>30.58) | 20.21<br>(16.09 to<br>24.76) | 26.05<br>(20.30 to<br>32.60) |
| Road injuries            | 711.83<br>(558.17 to<br>869.93)       | 1,064.39<br>(800.57 to<br>1,359.15)   | 822.92<br>(624.57 to<br>1,047.45)     | 1,146.87<br>(857.73 to<br>1,475.35)   | 13.99<br>(11.21 to<br>16.72) | 21.88<br>(17.04 to<br>27.28) | 17.64<br>(13.89 to<br>21.87) | 23.05<br>(17.76 to<br>29.01) |
| Pedestrian road injuries | 208.59<br>(134.14 to<br>288.81)       | 246.06<br>(153.20 to<br>360.09)       | 195.66<br>(123.66 to<br>284.90)       | 264.41<br>(164.29 to<br>389.81)       | 4.21<br>(2.79 to<br>5.69)    | 5.49<br>(3.54 to<br>7.85)    | 4.54<br>(2.97 to<br>6.37)    | 5.75<br>(3.72 to<br>8.29)    |

| Tonga                                           |                                                            |                                                          |                                                          |                                                          |                                                   |                                                   |                                                   |                                                   |
|-------------------------------------------------|------------------------------------------------------------|----------------------------------------------------------|----------------------------------------------------------|----------------------------------------------------------|---------------------------------------------------|---------------------------------------------------|---------------------------------------------------|---------------------------------------------------|
| Cause                                           | YLLs (actual counts)                                       |                                                          |                                                          |                                                          | Deaths (actual counts)                            |                                                   |                                                   |                                                   |
|                                                 | 2016                                                       | 2040 Forecast                                            | 2040 Better Scenario                                     | 2040 Worse Scenario                                      | 2016                                              | 2040 Forecast                                     | 2040 Better Scenario                              | 2040 Worse Scenario                               |
| Cyclist road injuries                           | 14.17<br>(9.25 to<br>21.48)                                | 22.43<br>(14.40 to<br>35.51)                             | 17.41<br>(11.15 to<br>27.74)                             | 24.07<br>(15.22 to<br>38.30)                             | 0.31<br>(0.20 to<br>0.45)                         | 0.50<br>(0.33 to<br>0.76)                         | 0.41<br>(0.28 to<br>0.63)                         | 0.52<br>(0.34 to<br>0.80)                         |
| Motorcyclist road injuries                      | 100.87<br>(64.46 to<br>151.99)                             | 162.79<br>(98.06 to<br>253.02)                           | 135.04<br>(81.56 to<br>212.06)                           | 173.30<br>(103.61 to<br>269.30)                          | 1.83<br>(1.18 to<br>2.74)                         | 3.04<br>(1.87 to<br>4.75)                         | 2.58<br>(1.61 to<br>4.02)                         | 3.20<br>(1.95 to<br>5.03)                         |
| Motor vehicle road injuries                     | 374.10<br>(261.25 to<br>512.56)                            | 610.16<br>(427.07 to<br>845.05)                          | 457.60<br>(321.21 to<br>635.77)                          | 660.22<br>(457.65 to<br>925.09)                          | 7.38<br>(5.24 to<br>9.90)                         | 12.40<br>(8.95 to<br>16.90)                       | 9.75<br>(7.09 to<br>13.26)                        | 13.10<br>(9.32 to<br>17.98)                       |
| Other road injuries                             | 14.11<br>(8.09 to<br>21.40)                                | 22.96<br>(12.78 to<br>36.45)                             | 17.22<br>(9.79 to<br>27.31)                              | 24.87<br>(13.69 to<br>39.20)                             | 0.27<br>(0.16 to<br>0.39)                         | 0.45<br>(0.27 to<br>0.70)                         | 0.36<br>(0.21 to<br>0.55)                         | 0.48<br>(0.28 to<br>0.75)                         |
| Other transport injuries                        | 76.14<br>(37.73 to<br>122.45)                              | 128.51<br>(61.38 to<br>216.59)                           | 112.07<br>(52.97 to<br>185.47)                           | 139.16<br>(66.16 to<br>235.77)                           | 1.59<br>(0.83 to<br>2.44)                         | 2.85<br>(1.41 to<br>4.64)                         | 2.57<br>(1.27 to<br>4.07)                         | 3.00<br>(1.47 to<br>4.90)                         |
| <b>Unintentional injuries</b>                   | <b>1,302.15</b><br><b>(1,011.03 to</b><br><b>1,616.05)</b> | <b>1,198.24</b><br><b>(910.64 to</b><br><b>1,522.96)</b> | <b>1,056.81</b><br><b>(802.92 to</b><br><b>1,338.35)</b> | <b>1,284.55</b><br><b>(975.84 to</b><br><b>1,645.09)</b> | <b>28.61</b><br><b>(23.31 to</b><br><b>34.01)</b> | <b>29.69</b><br><b>(23.82 to</b><br><b>35.57)</b> | <b>27.50</b><br><b>(22.21 to</b><br><b>32.71)</b> | <b>30.47</b><br><b>(24.37 to</b><br><b>36.68)</b> |
| Falls                                           | 99.61<br>(77.87 to<br>129.27)                              | 116.14<br>(92.65 to<br>141.67)                           | 110.52<br>(88.67 to<br>133.72)                           | 117.53<br>(93.29 to<br>146.64)                           | 4.60<br>(3.70 to<br>5.78)                         | 5.60<br>(4.26 to<br>7.13)                         | 5.68<br>(4.37 to<br>7.17)                         | 5.30<br>(3.98 to<br>6.82)                         |
| Drowning                                        | 472.25<br>(351.61 to<br>603.57)                            | 399.70<br>(281.70 to<br>540.98)                          | 349.15<br>(244.48 to<br>468.85)                          | 431.82<br>(303.98 to<br>583.16)                          | 8.16<br>(6.13 to<br>10.18)                        | 7.64<br>(5.48 to<br>10.16)                        | 6.77<br>(4.79 to<br>8.90)                         | 8.15<br>(5.83 to<br>10.84)                        |
| Fire, heat, and hot substances                  | 184.24<br>(134.98 to<br>241.98)                            | 159.73<br>(112.68 to<br>222.38)                          | 137.15<br>(97.52 to<br>188.77)                           | 174.25<br>(122.13 to<br>244.10)                          | 3.78<br>(2.91 to<br>4.79)                         | 3.74<br>(2.80 to<br>4.94)                         | 3.36<br>(2.53 to<br>4.40)                         | 3.91<br>(2.89 to<br>5.23)                         |
| Poisonings                                      | 92.96<br>(61.45 to<br>143.22)                              | 58.53<br>(38.62 to<br>91.32)                             | 46.53<br>(30.76 to<br>72.01)                             | 66.68<br>(43.41 to<br>104.59)                            | 1.95<br>(1.44 to<br>2.68)                         | 1.36<br>(0.97 to<br>1.88)                         | 1.15<br>(0.83 to<br>1.57)                         | 1.47<br>(1.05 to<br>2.07)                         |
| Exposure to mechanical forces                   | 114.27<br>(82.46 to<br>147.84)                             | 110.91<br>(76.75 to<br>148.14)                           | 95.70<br>(66.59 to<br>128.27)                            | 119.80<br>(84.51 to<br>160.45)                           | 2.33<br>(1.73 to<br>2.94)                         | 2.49<br>(1.80 to<br>3.19)                         | 2.23<br>(1.62 to<br>2.86)                         | 2.60<br>(1.89 to<br>3.33)                         |
| Unintentional firearm injuries                  | 17.07<br>(9.54 to<br>25.70)                                | 14.55<br>(7.75 to<br>23.35)                              | 12.23<br>(6.54 to<br>19.67)                              | 15.90<br>(8.48 to<br>25.84)                              | 0.37<br>(0.22 to<br>0.55)                         | 0.30<br>(0.20 to<br>0.55)                         | 0.31<br>(0.18 to<br>0.48)                         | 0.37<br>(0.21 to<br>0.58)                         |
| Unintentional suffocation                       | 26.75<br>(16.48 to<br>39.60)                               | 25.26<br>(15.77 to<br>38.26)                             | 21.44<br>(13.31 to<br>31.83)                             | 27.72<br>(17.37 to<br>41.44)                             | 0.42<br>(0.27 to<br>0.60)                         | 0.42<br>(0.27 to<br>0.62)                         | 0.36<br>(0.23 to<br>0.53)                         | 0.46<br>(0.29 to<br>0.68)                         |
| Other exposure to mechanical forces             | 70.45<br>(49.21 to<br>93.15)                               | 71.11<br>(47.71 to<br>96.38)                             | 62.03<br>(42.08 to<br>83.88)                             | 76.17<br>(51.34 to<br>103.30)                            | 1.54<br>(1.11 to<br>1.98)                         | 1.71<br>(1.22 to<br>2.19)                         | 1.55<br>(1.11 to<br>2.00)                         | 1.77<br>(1.25 to<br>2.27)                         |
| Adverse effects of medical treatment            | 108.76<br>(77.61 to<br>150.69)                             | 122.74<br>(88.11 to<br>166.02)                           | 109.98<br>(79.48 to<br>147.86)                           | 130.01<br>(92.43 to<br>178.24)                           | 2.72<br>(2.05 to<br>3.54)                         | 3.30<br>(2.52 to<br>4.27)                         | 3.10<br>(2.38 to<br>3.98)                         | 3.34<br>(2.53 to<br>4.37)                         |
| Animal contact                                  | 6.95<br>(5.06 to<br>10.06)                                 | 9.91<br>(6.69 to<br>15.56)                               | 8.41<br>(5.71 to<br>12.89)                               | 10.77<br>(7.27 to<br>16.65)                              | 0.20<br>(0.15 to<br>0.28)                         | 0.29<br>(0.21 to<br>0.43)                         | 0.26<br>(0.18 to<br>0.39)                         | 0.30<br>(0.21 to<br>0.44)                         |
| Venomous animal contact                         | 2.16<br>(1.40 to<br>3.65)                                  | 2.76<br>(1.63 to<br>4.88)                                | 2.30<br>(1.39 to<br>4.03)                                | 3.04<br>(1.80 to<br>5.40)                                | 0.06<br>(0.04 to<br>0.10)                         | 0.08<br>(0.05 to<br>0.14)                         | 0.07<br>(0.04 to<br>0.12)                         | 0.08<br>(0.05 to<br>0.14)                         |
| Non-venomous animal contact                     | 4.79<br>(3.27 to<br>6.88)                                  | 7.15<br>(4.74 to<br>11.30)                               | 6.11<br>(3.93 to<br>9.48)                                | 7.73<br>(5.04 to<br>12.23)                               | 0.14<br>(0.09 to<br>0.19)                         | 0.21<br>(0.14 to<br>0.31)                         | 0.19<br>(0.13 to<br>0.28)                         | 0.22<br>(0.15 to<br>0.33)                         |
| Foreign body                                    | 89.87<br>(51.87 to<br>141.05)                              | 96.15<br>(54.73 to<br>144.80)                            | 93.62<br>(53.62 to<br>139.11)                            | 98.84<br>(57.02 to<br>150.16)                            | 1.80<br>(1.08 to<br>2.53)                         | 2.21<br>(1.30 to<br>2.99)                         | 2.28<br>(1.33 to<br>3.06)                         | 2.16<br>(1.26 to<br>2.94)                         |
| Pulmonary aspiration and foreign body in airway | 84.97<br>(47.15 to<br>135.56)                              | 91.27<br>(50.26 to<br>140.42)                            | 89.29<br>(49.29 to<br>133.83)                            | 93.58<br>(52.22 to<br>145.83)                            | 1.71<br>(0.98 to<br>2.44)                         | 2.12<br>(1.18 to<br>2.89)                         | 2.19<br>(1.22 to<br>2.97)                         | 2.05<br>(1.15 to<br>2.84)                         |

|                                             |                                                      |                                                        |                                                      |                                                        |                                                  |                                                   |                                                  |                                                   |
|---------------------------------------------|------------------------------------------------------|--------------------------------------------------------|------------------------------------------------------|--------------------------------------------------------|--------------------------------------------------|---------------------------------------------------|--------------------------------------------------|---------------------------------------------------|
|                                             | 4.90<br>(3.18 to<br>7.95)                            | 4.88<br>(3.04 to<br>8.16)                              | 4.33<br>(2.67 to<br>7.14)                            | 5.26<br>(3.29 to<br>8.75)                              | 0.09<br>(0.06 to<br>0.14)                        | 0.10<br>(0.06 to<br>0.15)                         | 0.09<br>(0.06 to<br>0.13)                        | 0.10<br>(0.07 to<br>0.16)                         |
| Foreign body in other body part             |                                                      |                                                        |                                                      |                                                        |                                                  |                                                   |                                                  |                                                   |
| Environmental heat and cold exposure        | 29.46<br>(16.42 to<br>41.20)                         | 36.62<br>(20.07 to<br>52.96)                           | 29.70<br>(16.21 to<br>42.47)                         | 40.58<br>(21.87 to<br>58.53)                           | 0.72<br>(0.42 to<br>0.96)                        | 0.92<br>(0.54 to<br>1.27)                         | 0.78<br>(0.45 to<br>1.06)                        | 0.99<br>(0.56 to<br>1.36)                         |
| Other unintentional injuries                | 103.78<br>(49.59 to<br>142.26)                       | 87.82<br>(41.71 to<br>124.91)                          | 76.05<br>(36.58 to<br>108.22)                        | 94.27<br>(44.48 to<br>134.60)                          | 2.36<br>(1.07 to<br>3.24)                        | 2.15<br>(0.97 to<br>3.03)                         | 1.91<br>(0.87 to<br>2.66)                        | 2.25<br>(1.00 to<br>3.15)                         |
| <b>Self-harm and interpersonal violence</b> | <b>550.71</b><br><b>(407.47 to</b><br><b>833.50)</b> | <b>709.74</b><br><b>(501.60 to</b><br><b>1,100.82)</b> | <b>651.75</b><br><b>(467.96 to</b><br><b>996.21)</b> | <b>750.78</b><br><b>(526.26 to</b><br><b>1,181.72)</b> | <b>10.54</b><br><b>(7.96 to</b><br><b>15.86)</b> | <b>14.22</b><br><b>(10.38 to</b><br><b>21.75)</b> | <b>13.30</b><br><b>(9.86 to</b><br><b>19.94)</b> | <b>14.83</b><br><b>(10.76 to</b><br><b>22.97)</b> |

| Tonga                                                                               |                                      |                                       |                                       |                                       |                                      |                                      |                                      |                                      |
|-------------------------------------------------------------------------------------|--------------------------------------|---------------------------------------|---------------------------------------|---------------------------------------|--------------------------------------|--------------------------------------|--------------------------------------|--------------------------------------|
| Cause                                                                               | YLLs (actual counts)                 |                                       |                                       |                                       | Deaths (actual counts)               |                                      |                                      |                                      |
|                                                                                     | 2016                                 | 2040 Forecast                         | 2040 Better Scenario                  | 2040 Worse Scenario                   | 2016                                 | 2040 Forecast                        | 2040 Better Scenario                 | 2040 Worse Scenario                  |
| Self-harm                                                                           | 382.20<br>(288.06 to 476.16)         | 519.10<br>(371.08 to 707.64)          | 471.03<br>(343.08 to 623.35)          | 553.65<br>(392.57 to 773.76)          | 7.42<br>(5.77 to 9.13)               | 10.47<br>(7.78 to 13.95)             | 9.70<br>(7.32 to 12.48)              | 10.99<br>(8.05 to 15.00)             |
| Self-harm by firearm                                                                | 25.31<br>(10.22 to 44.22)            | 30.21<br>(11.26 to 55.95)             | 26.78<br>(10.21 to 48.94)             | 32.63<br>(11.83 to 60.53)             | 0.49<br>(0.20 to 0.83)               | 0.61<br>(0.23 to 1.10)               | 0.55<br>(0.21 to 0.97)               | 0.65<br>(0.25 to 1.19)               |
| Self-harm by other specified means                                                  | 356.90<br>(267.09 to 448.02)         | 488.89<br>(351.58 to 671.61)          | 444.24<br>(326.03 to 588.97)          | 521.02<br>(366.84 to 729.13)          | 6.93<br>(5.32 to 8.54)               | 9.86<br>(7.26 to 13.10)              | 9.16<br>(6.97 to 11.82)              | 10.34<br>(7.55 to 14.04)             |
| Interpersonal violence                                                              | 168.50<br>(97.96 to 410.40)          | 190.64<br>(105.45 to 494.05)          | 180.73<br>(99.71 to 467.73)           | 197.13<br>(108.49 to 515.23)          | 3.12<br>(1.82 to 7.70)               | 3.75<br>(2.12 to 9.74)               | 3.60<br>(2.02 to 9.34)               | 3.84<br>(2.15 to 10.07)              |
| Physical violence by firearm                                                        | 35.92<br>(14.41 to 107.15)           | 40.92<br>(16.44 to 131.36)            | 39.42<br>(15.84 to 123.37)            | 41.61<br>(16.64 to 134.21)            | 0.65<br>(0.27 to 1.97)               | 0.78<br>(0.31 to 2.46)               | 0.75<br>(0.31 to 2.36)               | 0.78<br>(0.31 to 2.53)               |
| Physical violence by sharp object                                                   | 43.71<br>(22.72 to 123.72)           | 56.53<br>(28.22 to 164.85)            | 56.09<br>(28.13 to 159.71)            | 56.63<br>(28.02 to 166.05)            | 0.81<br>(0.43 to 2.31)               | 1.10<br>(0.56 to 3.19)               | 1.09<br>(0.56 to 3.08)               | 1.09<br>(0.55 to 3.20)               |
| Physical violence by other means                                                    | 88.87<br>(45.39 to 221.31)           | 93.19<br>(43.44 to 240.37)            | 85.21<br>(39.67 to 218.55)            | 98.88<br>(45.56 to 259.71)            | 1.66<br>(0.87 to 4.10)               | 1.88<br>(0.91 to 4.82)               | 1.75<br>(0.85 to 4.45)               | 1.97<br>(0.94 to 5.12)               |
| <b>Forces of nature, conflict and terrorism, and executions and police conflict</b> | <b>0.68</b><br><b>(0.54 to 0.83)</b> | <b>9.12</b><br><b>(0.00 to 95.79)</b> | <b>8.90</b><br><b>(0.00 to 92.40)</b> | <b>9.30</b><br><b>(0.00 to 98.07)</b> | <b>0.01</b><br><b>(0.01 to 0.01)</b> | <b>0.18</b><br><b>(0.00 to 1.72)</b> | <b>0.18</b><br><b>(0.00 to 1.69)</b> | <b>0.18</b><br><b>(0.00 to 1.73)</b> |
| Exposure to forces of nature                                                        | 0.00<br>(0.00 to 0.00)               | 7.66<br>(0.00 to 82.97)               | 7.46<br>(0.00 to 79.95)               | 7.81<br>(0.00 to 85.00)               | 0.00<br>(0.00 to 0.00)               | 0.15<br>(0.00 to 1.65)               | 0.15<br>(0.00 to 1.65)               | 0.15<br>(0.00 to 1.65)               |
| Conflict and terrorism                                                              | 0.00<br>(0.00 to 0.00)               | 1.47<br>(0.00 to 0.00)                | 1.44<br>(0.00 to 0.00)                | 1.49<br>(0.00 to 0.00)                | 0.00<br>(0.00 to 0.00)               | 0.03<br>(0.00 to 0.00)               | 0.03<br>(0.00 to 0.00)               | 0.03<br>(0.00 to 0.00)               |
| Executions and police conflict                                                      | 0.68<br>(0.54 to 0.83)               | 0.00<br>(0.00 to 0.00)                | 0.00<br>(0.00 to 0.00)                | 0.00<br>(0.00 to 0.00)                | 0.01<br>(0.01 to 0.01)               | 0.00<br>(0.00 to 0.00)               | 0.00<br>(0.00 to 0.00)               | 0.00<br>(0.00 to 0.00)               |

| Vanuatu                                                           |                                           |                                           |                                          |                                            |                                       |                                       |                                       |                                       |
|-------------------------------------------------------------------|-------------------------------------------|-------------------------------------------|------------------------------------------|--------------------------------------------|---------------------------------------|---------------------------------------|---------------------------------------|---------------------------------------|
| Cause                                                             | YLLs (actual counts)                      |                                           |                                          |                                            | Deaths (actual counts)                |                                       |                                       |                                       |
|                                                                   | 2016                                      | 2040 Forecast                             | 2040 Better Scenario                     | 2040 Worse Scenario                        | 2016                                  | 2040 Forecast                         | 2040 Better Scenario                  | 2040 Worse Scenario                   |
| All causes                                                        | 84,654.45<br>(71,669.41 to<br>101,785.38) | 98,733.85<br>(80,176.26 to<br>120,842.04) | 64,887.78<br>(53,298.89 to<br>80,079.06) | 122,812.33<br>(99,387.11 to<br>152,652.18) | 2,317.45<br>(1,993.57 to<br>2,747.43) | 3,244.41<br>(2,838.96 to<br>3,708.84) | 2,350.83<br>(2,070.95 to<br>2,705.16) | 3,866.85<br>(3,369.08 to<br>4,417.00) |
| Communicable, maternal, neonatal, and nutritional diseases        | 24,186.86<br>(18,218.88 to<br>32,987.38)  | 17,547.46<br>(11,582.94 to<br>26,758.32)  | 9,012.75<br>(6,329.44 to<br>13,248.58)   | 23,012.09<br>(14,584.79 to<br>36,636.10)   | 407.88<br>(327.32 to<br>520.01)       | 356.30<br>(255.92 to<br>513.31)       | 217.51<br>(163.02 to<br>303.93)       | 445.81<br>(306.29 to<br>659.84)       |
| HIV/AIDS and tuberculosis                                         | 1,498.73<br>(1,014.33 to<br>3,204.19)     | 1,677.05<br>(881.86 to<br>4,317.32)       | 1,026.66<br>(449.12 to<br>3,548.15)      | 1,948.40<br>(1,035.53 to<br>4,850.46)      | 41.68<br>(30.00 to<br>77.77)          | 45.51<br>(26.72 to<br>104.07)         | 28.36<br>(14.33 to<br>87.75)          | 51.57<br>(30.32 to<br>108.81)         |
| Tuberculosis                                                      | 1,123.84<br>(895.90 to<br>1,429.05)       | 972.88<br>(683.64 to<br>1,318.97)         | 501.46<br>(353.04 to<br>684.79)          | 1,174.12<br>(804.46 to<br>1,649.46)        | 33.90<br>(27.29 to<br>42.38)          | 31.47<br>(22.09 to<br>42.83)          | 17.29<br>(12.32 to<br>23.48)          | 36.24<br>(25.03 to<br>49.99)          |
| HIV/AIDS                                                          | 374.90<br>(23.14 to<br>1,954.83)          | 704.16<br>(61.28 to<br>3,242.05)          | 525.20<br>(22.24 to<br>3,063.41)         | 774.28<br>(77.97 to<br>3,460.56)           | 7.79<br>(0.42 to<br>42.27)            | 14.04<br>(0.99 to<br>70.11)           | 11.07<br>(0.37 to<br>67.78)           | 15.32<br>(1.38 to<br>72.82)           |
| Diarrhea, lower respiratory, and other common infectious diseases | 10,901.34<br>(7,708.24 to<br>16,356.48)   | 8,006.09<br>(4,427.09 to<br>14,344.16)    | 3,929.23<br>(2,561.59 to<br>6,110.66)    | 11,301.68<br>(5,835.62 to<br>21,462.28)    | 210.50<br>(164.33 to<br>277.28)       | 196.61<br>(124.50 to<br>318.83)       | 121.76<br>(83.82 to<br>180.62)        | 258.67<br>(152.89 to<br>445.70)       |
| Diarrheal diseases                                                | 1,405.90<br>(870.26 to<br>2,336.36)       | 810.50<br>(148.80 to<br>2,402.04)         | 400.15<br>(77.65 to<br>1,211.40)         | 1,297.54<br>(252.51 to<br>3,713.02)        | 36.45<br>(22.27 to<br>62.77)          | 31.61<br>(5.33 to<br>98.37)           | 19.03<br>(3.24 to<br>58.20)           | 47.68<br>(8.15 to<br>148.26)          |
| Intestinal infectious diseases                                    | 381.27<br>(194.17 to<br>662.05)           | 306.59<br>(134.08 to<br>606.37)           | 217.52<br>(97.98 to<br>418.47)           | 336.06<br>(147.60 to<br>670.36)            | 5.51<br>(2.85 to<br>9.54)             | 4.65<br>(2.17 to<br>8.81)             | 3.44<br>(1.63 to<br>6.29)             | 5.04<br>(2.32 to<br>9.80)             |
| Typhoid fever                                                     | 327.02<br>(162.70 to<br>584.04)           | 254.01<br>(110.05 to<br>508.11)           | 181.04<br>(78.32 to<br>351.71)           | 278.08<br>(117.84 to<br>558.86)            | 4.71<br>(2.36 to<br>8.35)             | 3.83<br>(1.71 to<br>7.51)             | 2.84<br>(1.33 to<br>5.25)             | 4.14<br>(1.83 to<br>8.08)             |
| Paratyphoid fever                                                 | 53.68<br>(23.08 to<br>113.88)             | 52.30<br>(21.21 to<br>111.88)             | 36.32<br>(15.06 to<br>77.76)             | 57.66<br>(22.94 to<br>124.37)              | 0.80<br>(0.34 to<br>1.65)             | 0.82<br>(0.35 to<br>1.71)             | 0.59<br>(0.25 to<br>1.24)             | 0.89<br>(0.37 to<br>1.91)             |
| Other intestinal infectious diseases                              | 0.58<br>(0.20 to<br>1.39)                 | 0.28<br>(0.08 to<br>0.72)                 | 0.16<br>(0.05 to<br>0.37)                | 0.32<br>(0.09 to<br>0.83)                  | 0.01<br>(0.00 to<br>0.02)             | 0.01<br>(0.00 to<br>0.01)             | 0.00<br>(0.00 to<br>0.01)             | 0.01<br>(0.00 to<br>0.02)             |
| Lower respiratory infections                                      | 6,879.87<br>(4,869.58 to<br>9,995.89)     | 4,171.19<br>(2,433.80 to<br>7,699.12)     | 2,364.52<br>(1,604.69 to<br>3,656.98)    | 6,037.53<br>(3,068.80 to<br>13,001.15)     | 139.20<br>(109.09 to<br>181.97)       | 123.56<br>(81.82 to<br>186.23)        | 83.79<br>(61.24 to<br>115.07)         | 157.98<br>(98.22 to<br>260.86)        |
| Upper respiratory infections                                      | 9.38<br>(4.27 to<br>19.00)                | 8.70<br>(3.54 to<br>19.43)                | 4.75<br>(1.99 to<br>9.96)                | 9.98<br>(3.98 to<br>22.58)                 | 0.19<br>(0.10 to<br>0.32)             | 0.21<br>(0.10 to<br>0.42)             | 0.13<br>(0.06 to<br>0.25)             | 0.23<br>(0.10 to<br>0.49)             |
| Otitis media                                                      | 0.55<br>(0.23 to<br>1.27)                 | 0.18<br>(0.07 to<br>0.41)                 | 0.18<br>(0.07 to<br>0.42)                | 0.17<br>(0.07 to<br>0.41)                  | 0.01<br>(0.01 to<br>0.03)             | 0.01<br>(0.00 to<br>0.01)             | 0.01<br>(0.00 to<br>0.01)             | 0.00<br>(0.00 to<br>0.01)             |
| Meningitis                                                        | 745.66<br>(436.03 to<br>1,257.27)         | 432.85<br>(196.27 to<br>886.17)           | 281.18<br>(152.32 to<br>486.51)          | 497.68<br>(214.82 to<br>1,083.12)          | 10.73<br>(6.59 to<br>17.32)           | 7.10<br>(3.77 to<br>12.88)            | 5.30<br>(3.10 to<br>9.22)             | 7.80<br>(3.93 to<br>14.98)            |
| Pneumococcal meningitis                                           | 2.27<br>(1.19 to<br>4.13)                 | 0.81<br>(0.37 to<br>1.59)                 | 0.56<br>(0.30 to<br>1.02)                | 0.94<br>(0.41 to<br>1.90)                  | 0.03<br>(0.02 to<br>0.06)             | 0.02<br>(0.01 to<br>0.03)             | 0.01<br>(0.01 to<br>0.02)             | 0.02<br>(0.01 to<br>0.03)             |
| H influenzae type B meningitis                                    | 85.19<br>(45.46 to<br>151.45)             | 111.29<br>(20.25 to<br>428.56)            | 33.82<br>(13.67 to<br>91.52)             | 153.92<br>(24.08 to<br>597.94)             | 1.18<br>(0.68 to<br>2.02)             | 1.46<br>(0.36 to<br>5.28)             | 0.58<br>(0.29 to<br>1.30)             | 1.95<br>(0.41 to<br>7.12)             |
| Meningococcal meningitis                                          | 143.45<br>(79.44 to<br>247.15)            | 67.70<br>(35.63 to<br>121.38)             | 52.29<br>(28.23 to<br>92.02)             | 72.21<br>(36.91 to<br>132.57)              | 2.17<br>(1.28 to<br>3.59)             | 1.28<br>(0.74 to<br>2.28)             | 1.09<br>(0.63 to<br>1.92)             | 1.32<br>(0.75 to<br>2.35)             |
| Other meningitis                                                  | 514.76<br>(296.27 to<br>858.32)           | 253.06<br>(128.95 to<br>476.12)           | 194.52<br>(106.36 to<br>341.69)          | 270.61<br>(136.49 to<br>499.17)            | 7.35<br>(4.46 to<br>11.89)            | 4.34<br>(2.46 to<br>7.80)             | 3.62<br>(2.10 to<br>6.23)             | 4.52<br>(2.55 to<br>8.18)             |
| Encephalitis                                                      | 77.20<br>(49.08 to<br>117.07)             | 82.77<br>(48.61 to<br>134.27)             | 62.20<br>(37.45 to<br>98.97)             | 88.38<br>(51.77 to<br>144.68)              | 1.36<br>(0.89 to<br>2.00)             | 1.69<br>(1.08 to<br>2.57)             | 1.38<br>(0.87 to<br>2.05)             | 1.75<br>(1.11 to<br>2.69)             |

|                |                                  |                                    |                                  |                                    |                             |                             |                            |                              |
|----------------|----------------------------------|------------------------------------|----------------------------------|------------------------------------|-----------------------------|-----------------------------|----------------------------|------------------------------|
| Diphtheria     | 5.75<br>(3.12 to<br>10.29)       | 1.74<br>(0.71 to<br>4.20)          | 0.94<br>(0.55 to<br>1.59)        | 2.14<br>(0.73 to<br>5.77)          | 0.09<br>(0.05 to<br>0.14)   | 0.03<br>(0.01 to<br>0.06)   | 0.02<br>(0.01 to<br>0.03)  | 0.03<br>(0.01 to<br>0.08)    |
| Whooping cough | 936.09<br>(81.25 to<br>2,917.40) | 807.26<br>(13.98 to<br>2,864.37)   | 133.38<br>(5.87 to<br>531.90)    | 893.55<br>(14.83 to<br>3,338.86)   | 11.08<br>(0.96 to<br>34.51) | 9.56<br>(0.18 to<br>33.81)  | 1.63<br>(0.08 to<br>6.37)  | 10.58<br>(0.20 to<br>39.48)  |
| Tetanus        | 6.59<br>(3.66 to<br>11.95)       | 1.36<br>(0.63 to<br>2.81)          | 0.72<br>(0.37 to<br>1.63)        | 1.44<br>(0.66 to<br>3.03)          | 0.13<br>(0.07 to<br>0.26)   | 0.03<br>(0.01 to<br>0.05)   | 0.02<br>(0.01 to<br>0.05)  | 0.03<br>(0.01 to<br>0.05)    |
| Measles        | 383.40<br>(120.32 to<br>946.94)  | 1,342.73<br>(57.26 to<br>6,175.18) | 443.10<br>(40.48 to<br>1,652.48) | 2,090.64<br>(66.96 to<br>9,560.61) | 4.58<br>(1.44 to<br>11.34)  | 17.51<br>(1.03 to<br>72.96) | 6.47<br>(0.72 to<br>21.02) | 26.64<br>(1.20 to<br>113.11) |



| Vanuatu                                               |                                                        |                                                      |                                                      |                                                        |                                                  |                                                  |                                                 |                                                  |
|-------------------------------------------------------|--------------------------------------------------------|------------------------------------------------------|------------------------------------------------------|--------------------------------------------------------|--------------------------------------------------|--------------------------------------------------|-------------------------------------------------|--------------------------------------------------|
| Cause                                                 | YLLs (actual counts)                                   |                                                      |                                                      |                                                        | Deaths (actual counts)                           |                                                  |                                                 |                                                  |
|                                                       | 2016                                                   | 2040 Forecast                                        | 2040 Better Scenario                                 | 2040 Worse Scenario                                    | 2016                                             | 2040 Forecast                                    | 2040 Better Scenario                            | 2040 Worse Scenario                              |
| Varicella and herpes zoster                           | 69.68<br>(36.07 to<br>122.21)                          | 40.23<br>(16.00 to<br>87.94)                         | 20.60<br>(9.79 to<br>41.77)                          | 46.55<br>(16.99 to<br>105.81)                          | 1.16<br>(0.74 to<br>1.82)                        | 0.85<br>(0.47 to<br>1.47)                        | 0.56<br>(0.33 to<br>0.89)                       | 0.90<br>(0.49 to<br>1.65)                        |
| <b>Neglected tropical diseases and malaria</b>        | <b>280.41</b><br><b>(56.36 to</b><br><b>547.16)</b>    | <b>307.94</b><br><b>(59.15 to</b><br><b>599.95)</b>  | <b>281.62</b><br><b>(50.46 to</b><br><b>556.71)</b>  | <b>311.35</b><br><b>(62.30 to</b><br><b>604.80)</b>    | <b>7.41</b><br><b>(1.20 to</b><br><b>15.49)</b>  | <b>8.68</b><br><b>(1.53 to</b><br><b>17.66)</b>  | <b>8.52</b><br><b>(1.51 to</b><br><b>17.14)</b> | <b>8.41</b><br><b>(1.48 to</b><br><b>17.29)</b>  |
| Malaria                                               | 214.52<br>(10.19 to<br>470.98)                         | 208.91<br>(4.95 to<br>474.17)                        | 201.99<br>(4.51 to<br>455.00)                        | 205.80<br>(5.09 to<br>466.90)                          | 6.14<br>(0.19 to<br>13.98)                       | 6.32<br>(0.10 to<br>15.02)                       | 6.33<br>(0.10 to<br>14.76)                      | 6.10<br>(0.10 to<br>14.61)                       |
| Chagas disease                                        | 0.00<br>(0.00 to<br>0.00)                              | 0.00<br>(0.00 to<br>0.00)                            | 0.00<br>(0.00 to<br>0.00)                            | 0.00<br>(0.00 to<br>0.00)                              | 0.00<br>(0.00 to<br>0.00)                        | 0.00<br>(0.00 to<br>0.00)                        | 0.00<br>(0.00 to<br>0.00)                       | 0.00<br>(0.00 to<br>0.00)                        |
| Leishmaniasis                                         | 0.00<br>(0.00 to<br>0.00)                              | 0.00<br>(0.00 to<br>0.00)                            | 0.00<br>(0.00 to<br>0.00)                            | 0.00<br>(0.00 to<br>0.00)                              | 0.00<br>(0.00 to<br>0.00)                        | 0.00<br>(0.00 to<br>0.00)                        | 0.00<br>(0.00 to<br>0.00)                       | 0.00<br>(0.00 to<br>0.00)                        |
| African trypanosomiasis                               | 0.00<br>(0.00 to<br>0.00)                              | 0.00<br>(0.00 to<br>0.00)                            | 0.00<br>(0.00 to<br>0.00)                            | 0.00<br>(0.00 to<br>0.00)                              | 0.00<br>(0.00 to<br>0.00)                        | 0.00<br>(0.00 to<br>0.00)                        | 0.00<br>(0.00 to<br>0.00)                       | 0.00<br>(0.00 to<br>0.00)                        |
| Schistosomiasis                                       | 0.00<br>(0.00 to<br>0.00)                              | 0.00<br>(0.00 to<br>0.00)                            | 0.00<br>(0.00 to<br>0.00)                            | 0.00<br>(0.00 to<br>0.00)                              | 0.00<br>(0.00 to<br>0.00)                        | 0.00<br>(0.00 to<br>0.00)                        | 0.00<br>(0.00 to<br>0.00)                       | 0.00<br>(0.00 to<br>0.00)                        |
| Cysticercosis                                         | 0.00<br>(0.00 to<br>0.00)                              | 0.00<br>(0.00 to<br>0.00)                            | 0.00<br>(0.00 to<br>0.00)                            | 0.00<br>(0.00 to<br>0.00)                              | 0.00<br>(0.00 to<br>0.00)                        | 0.00<br>(0.00 to<br>0.00)                        | 0.00<br>(0.00 to<br>0.00)                       | 0.00<br>(0.00 to<br>0.00)                        |
| Cystic echinococcosis                                 | 0.00<br>(0.00 to<br>0.00)                              | 0.00<br>(0.00 to<br>0.00)                            | 0.00<br>(0.00 to<br>0.00)                            | 0.00<br>(0.00 to<br>0.00)                              | 0.00<br>(0.00 to<br>0.00)                        | 0.00<br>(0.00 to<br>0.00)                        | 0.00<br>(0.00 to<br>0.00)                       | 0.00<br>(0.00 to<br>0.00)                        |
| Dengue                                                | 2.88<br>(1.11 to<br>7.89)                              | 14.19<br>(5.55 to<br>30.75)                          | 13.92<br>(5.57 to<br>29.50)                          | 13.99<br>(5.39 to<br>30.99)                            | 0.07<br>(0.03 to<br>0.20)                        | 0.47<br>(0.18 to<br>1.06)                        | 0.52<br>(0.21 to<br>1.12)                       | 0.43<br>(0.16 to<br>0.99)                        |
| Yellow fever                                          | 0.00<br>(0.00 to<br>0.00)                              | 0.00<br>(0.00 to<br>0.00)                            | 0.00<br>(0.00 to<br>0.00)                            | 0.00<br>(0.00 to<br>0.00)                              | 0.00<br>(0.00 to<br>0.00)                        | 0.00<br>(0.00 to<br>0.00)                        | 0.00<br>(0.00 to<br>0.00)                       | 0.00<br>(0.00 to<br>0.00)                        |
| Rabies                                                | 0.21<br>(0.08 to<br>0.50)                              | 0.17<br>(0.04 to<br>0.40)                            | 0.07<br>(0.02 to<br>0.17)                            | 0.20<br>(0.06 to<br>0.48)                              | 0.01<br>(0.00 to<br>0.02)                        | 0.01<br>(0.00 to<br>0.01)                        | 0.00<br>(0.00 to<br>0.01)                       | 0.01<br>(0.00 to<br>0.02)                        |
| Intestinal nematode infections                        | 42.46<br>(8.99 to<br>101.58)                           | 61.20<br>(12.64 to<br>171.21)                        | 48.22<br>(11.85 to<br>132.62)                        | 66.64<br>(13.10 to<br>187.84)                          | 0.60<br>(0.19 to<br>1.29)                        | 0.92<br>(0.28 to<br>2.28)                        | 0.79<br>(0.28 to<br>1.84)                       | 0.97<br>(0.28 to<br>2.45)                        |
| Other neglected tropical diseases                     | 20.34<br>(11.61 to<br>35.63)                           | 23.48<br>(12.61 to<br>41.45)                         | 17.42<br>(9.71 to<br>30.67)                          | 24.72<br>(13.05 to<br>43.94)                           | 0.59<br>(0.35 to<br>0.95)                        | 0.97<br>(0.46 to<br>1.67)                        | 0.88<br>(0.44 to<br>1.60)                       | 0.91<br>(0.44 to<br>1.57)                        |
| <b>Maternal disorders</b>                             | <b>687.76</b><br><b>(446.22 to</b><br><b>1,027.21)</b> | <b>569.15</b><br><b>(336.87 to</b><br><b>919.75)</b> | <b>300.65</b><br><b>(168.70 to</b><br><b>490.09)</b> | <b>667.28</b><br><b>(385.02 to</b><br><b>1,061.39)</b> | <b>12.68</b><br><b>(8.25 to</b><br><b>18.96)</b> | <b>10.72</b><br><b>(6.30 to</b><br><b>17.23)</b> | <b>5.69</b><br><b>(3.26 to</b><br><b>9.37)</b>  | <b>12.55</b><br><b>(7.22 to</b><br><b>19.92)</b> |
| Maternal hemorrhage                                   | 202.52<br>(117.28 to<br>329.93)                        | 162.28<br>(84.56 to<br>286.46)                       | 86.28<br>(44.89 to<br>153.95)                        | 188.42<br>(95.82 to<br>335.61)                         | 3.71<br>(2.16 to<br>6.12)                        | 3.04<br>(1.60 to<br>5.40)                        | 1.62<br>(0.84 to<br>2.90)                       | 3.52<br>(1.81 to<br>6.24)                        |
| Maternal sepsis and other maternal infections         | 69.93<br>(31.70 to<br>129.77)                          | 52.23<br>(21.56 to<br>100.34)                        | 27.56<br>(11.11 to<br>52.66)                         | 61.01<br>(24.95 to<br>120.91)                          | 1.32<br>(0.60 to<br>2.41)                        | 1.01<br>(0.42 to<br>1.94)                        | 0.54<br>(0.22 to<br>1.02)                       | 1.18<br>(0.48 to<br>2.29)                        |
| Maternal hypertensive disorders                       | 88.87<br>(47.32 to<br>148.86)                          | 75.20<br>(35.28 to<br>132.30)                        | 39.67<br>(17.88 to<br>71.47)                         | 87.54<br>(39.49 to<br>156.86)                          | 1.63<br>(0.88 to<br>2.75)                        | 1.41<br>(0.66 to<br>2.50)                        | 0.75<br>(0.34 to<br>1.34)                       | 1.64<br>(0.75 to<br>2.95)                        |
| Maternal obstructed labor and uterine rupture         | 46.54<br>(19.75 to<br>87.83)                           | 40.35<br>(15.95 to<br>80.11)                         | 20.44<br>(8.01 to<br>41.47)                          | 47.38<br>(18.63 to<br>94.50)                           | 0.86<br>(0.37 to<br>1.61)                        | 0.77<br>(0.30 to<br>1.51)                        | 0.39<br>(0.15 to<br>0.78)                       | 0.90<br>(0.35 to<br>1.82)                        |
| Maternal abortion, miscarriage, and ectopic pregnancy | 70.95<br>(34.04 to<br>123.91)                          | 64.57<br>(29.48 to<br>118.41)                        | 34.28<br>(15.52 to<br>64.16)                         | 76.10<br>(34.23 to<br>141.13)                          | 1.33<br>(0.65 to<br>2.28)                        | 1.24<br>(0.56 to<br>2.26)                        | 0.66<br>(0.29 to<br>1.22)                       | 1.46<br>(0.66 to<br>2.65)                        |

|                                        |                                |                               |                              |                                |                           |                           |                           |                           |
|----------------------------------------|--------------------------------|-------------------------------|------------------------------|--------------------------------|---------------------------|---------------------------|---------------------------|---------------------------|
|                                        | 70.20<br>(35.15 to<br>120.25)  | 62.40<br>(27.50 to<br>113.34) | 32.38<br>(14.52 to<br>61.46) | 74.54<br>(33.93 to<br>137.05)  | 1.27<br>(0.64 to<br>2.20) | 1.15<br>(0.50 to<br>2.11) | 0.60<br>(0.27 to<br>1.15) | 1.38<br>(0.63 to<br>2.52) |
| Indirect maternal deaths               |                                |                               |                              |                                |                           |                           |                           |                           |
|                                        | 29.24<br>(12.15 to<br>56.67)   | 19.26<br>(7.23 to<br>39.70)   | 9.97<br>(3.85 to<br>20.97)   | 22.86<br>(8.68 to<br>47.85)    | 0.53<br>(0.22 to<br>1.02) | 0.36<br>(0.13 to<br>0.74) | 0.19<br>(0.07 to<br>0.39) | 0.43<br>(0.16 to<br>0.87) |
| Late maternal deaths                   |                                |                               |                              |                                |                           |                           |                           |                           |
|                                        | 0.33<br>(0.02 to<br>1.75)      | 3.28<br>(0.02 to<br>23.03)    | 1.70<br>(0.00 to<br>12.52)   | 3.90<br>(0.03 to<br>25.92)     | 0.01<br>(0.00 to<br>0.03) | 0.06<br>(0.00 to<br>0.43) | 0.03<br>(0.00 to<br>0.24) | 0.07<br>(0.00 to<br>0.50) |
| Maternal deaths aggravated by HIV/AIDS |                                |                               |                              |                                |                           |                           |                           |                           |
|                                        | 109.19<br>(59.72 to<br>180.96) | 89.56<br>(41.69 to<br>160.13) | 48.38<br>(22.02 to<br>87.17) | 105.52<br>(47.66 to<br>188.15) | 2.00<br>(1.08 to<br>3.30) | 1.68<br>(0.78 to<br>3.00) | 0.91<br>(0.42 to<br>1.64) | 1.97<br>(0.90 to<br>3.53) |
| Other maternal disorders               |                                |                               |                              |                                |                           |                           |                           |                           |

| Vanuatu                                                                 |                                            |                                           |                                           |                                            |                                   |                                   |                                  |                                   |
|-------------------------------------------------------------------------|--------------------------------------------|-------------------------------------------|-------------------------------------------|--------------------------------------------|-----------------------------------|-----------------------------------|----------------------------------|-----------------------------------|
| Cause                                                                   | YLLs (actual counts)                       |                                           |                                           |                                            | Deaths (actual counts)            |                                   |                                  |                                   |
|                                                                         | 2016                                       | 2040 Forecast                             | 2040 Better Scenario                      | 2040 Worse Scenario                        | 2016                              | 2040 Forecast                     | 2040 Better Scenario             | 2040 Worse Scenario               |
| <b>Neonatal disorders</b>                                               | <b>8,199.66</b><br>(6,076.25 to 11,002.79) | <b>5,792.55</b><br>(3,479.43 to 8,912.36) | <b>2,678.27</b><br>(1,574.75 to 4,272.55) | <b>7,439.25</b><br>(4,463.10 to 11,293.32) | <b>94.77</b><br>(70.20 to 127.24) | <b>66.98</b><br>(40.22 to 103.09) | <b>30.97</b><br>(18.20 to 49.47) | <b>86.01</b><br>(51.60 to 130.57) |
| Neonatal preterm birth                                                  | 3,782.91<br>(2,495.35 to 5,376.79)         | 2,493.10<br>(1,437.14 to 3,925.06)        | 1,055.28<br>(585.91 to 1,714.37)          | 3,188.32<br>(1,823.33 to 5,038.42)         | 43.70<br>(28.82 to 62.14)         | 28.81<br>(16.60 to 45.38)         | 12.20<br>(6.78 to 19.82)         | 36.84<br>(21.07 to 58.23)         |
| Neonatal encephalopathy due to birth asphyxia and trauma                | 1,939.71<br>(1,128.27 to 2,980.73)         | 1,283.30<br>(604.13 to 2,353.69)          | 667.65<br>(319.59 to 1,218.29)            | 1,634.57<br>(773.42 to 2,980.88)           | 22.42<br>(13.04 to 34.45)         | 14.84<br>(6.99 to 27.20)          | 7.72<br>(3.70 to 14.09)          | 18.91<br>(8.95 to 34.45)          |
| Neonatal sepsis and other neonatal infections                           | 727.54<br>(385.86 to 1,171.87)             | 671.04<br>(311.00 to 1,256.79)            | 340.19<br>(157.51 to 641.07)              | 858.48<br>(392.03 to 1,592.01)             | 8.41<br>(4.46 to 13.56)           | 7.76<br>(3.59 to 14.54)           | 3.93<br>(1.82 to 7.42)           | 9.93<br>(4.53 to 18.42)           |
| Hemolytic disease and other neonatal jaundice                           | 109.03<br>(54.97 to 200.45)                | 47.44<br>(17.35 to 103.07)                | 21.73<br>(8.08 to 47.61)                  | 62.58<br>(23.49 to 135.63)                 | 1.26<br>(0.64 to 2.32)            | 0.55<br>(0.20 to 1.19)            | 0.25<br>(0.09 to 0.55)           | 0.72<br>(0.27 to 1.57)            |
| Other neonatal disorders                                                | 1,640.46<br>(936.36 to 2,577.87)           | 1,297.68<br>(620.19 to 2,356.08)          | 593.42<br>(282.49 to 1,108.82)            | 1,695.29<br>(806.90 to 3,077.70)           | 18.97<br>(10.82 to 29.83)         | 15.01<br>(7.18 to 27.29)          | 6.87<br>(3.27 to 12.83)          | 19.61<br>(9.34 to 35.58)          |
| <b>Nutritional deficiencies</b>                                         | <b>716.45</b><br>(423.41 to 1,227.90)      | <b>363.57</b><br>(221.93 to 632.08)       | <b>235.37</b><br>(159.24 to 375.96)       | <b>417.68</b><br>(238.13 to 745.94)        | <b>14.12</b><br>(10.31 to 20.41)  | <b>11.52</b><br>(8.16 to 15.39)   | <b>9.98</b><br>(7.48 to 12.76)   | <b>11.35</b><br>(7.70 to 16.01)   |
| Protein-energy malnutrition                                             | 699.13<br>(409.12 to 1,210.08)             | 339.03<br>(200.67 to 601.80)              | 218.29<br>(145.03 to 356.55)              | 390.86<br>(216.23 to 714.34)               | 13.67<br>(9.94 to 19.92)          | 10.73<br>(7.45 to 14.79)          | 9.33<br>(6.81 to 12.10)          | 10.57<br>(7.06 to 14.98)          |
| Iodine deficiency                                                       | 5.19<br>(0.34 to 24.31)                    | 12.09<br>(0.31 to 35.60)                  | 7.34<br>(0.18 to 28.76)                   | 13.88<br>(0.35 to 67.84)                   | 0.11<br>(0.01 to 0.41)            | 0.29<br>(0.01 to 1.36)            | 0.38<br>(0.01 to 1.21)           | 0.38<br>(0.01 to 1.39)            |
| Dietary iron deficiency                                                 | 2.51<br>(1.77 to 3.70)                     | 2.68<br>(1.73 to 4.33)                    | 2.10<br>(1.35 to 3.68)                    | 2.83<br>(1.84 to 4.56)                     | 0.05<br>(0.03 to 0.09)            | 0.06<br>(0.04 to 0.15)            | 0.05<br>(0.03 to 0.12)           | 0.06<br>(0.04 to 0.12)            |
| Other nutritional deficiencies                                          | 9.62<br>(6.48 to 14.88)                    | 9.77<br>(6.59 to 14.93)                   | 7.64<br>(5.00 to 11.82)                   | 10.11<br>(6.78 to 15.94)                   | 0.30<br>(0.20 to 0.46)            | 0.35<br>(0.22 to 0.57)            | 0.31<br>(0.20 to 0.51)           | 0.34<br>(0.22 to 0.54)            |
| <b>Other communicable, maternal, neonatal, and nutritional diseases</b> | <b>1,902.51</b><br>(730.42 to 3,855.39)    | <b>831.10</b><br>(498.25 to 1,444.33)     | <b>560.94</b><br>(357.50 to 896.12)       | <b>926.45</b><br>(526.96 to 1,659.01)      | <b>26.72</b><br>(12.82 to 49.65)  | <b>16.28</b><br>(11.52 to 24.04)  | <b>12.24</b><br>(8.89 to 16.92)  | <b>17.27</b><br>(11.74 to 25.79)  |
| Sexually transmitted infections excluding HIV                           | 1,464.14<br>(348.09 to 3,404.93)           | 352.49<br>(84.97 to 903.66)               | 207.94<br>(59.29 to 508.39)               | 415.29<br>(93.03 to 1,040.79)              | 17.56<br>(4.49 to 40.22)          | 4.52<br>(1.39 to 10.92)           | 2.77<br>(0.63 to 6.33)           | 5.26<br>(1.52 to 12.52)           |
| Syphilis                                                                | 1,430.46<br>(316.47 to 3,367.95)           | 322.09<br>(52.89 to 871.55)               | 182.38<br>(31.98 to 476.75)               | 383.86<br>(62.27 to 1,003.65)              | 16.83<br>(3.78 to 39.43)          | 3.85<br>(0.68 to 10.30)           | 2.20<br>(0.43 to 5.66)           | 4.57<br>(0.80 to 11.84)           |
| Chlamydial infection                                                    | 6.56<br>(3.59 to 10.22)                    | 5.92<br>(3.26 to 9.91)                    | 4.96<br>(2.71 to 8.29)                    | 6.13<br>(3.36 to 10.06)                    | 0.14<br>(0.08 to 0.22)            | 0.13<br>(0.07 to 0.22)            | 0.11<br>(0.06 to 0.22)           | 0.13<br>(0.07 to 0.22)            |
| Gonococcal infection                                                    | 17.36<br>(9.49 to 26.92)                   | 15.64<br>(8.48 to 25.60)                  | 13.20<br>(7.04 to 21.75)                  | 16.16<br>(8.83 to 26.23)                   | 0.38<br>(0.20 to 0.59)            | 0.35<br>(0.19 to 0.57)            | 0.30<br>(0.16 to 0.48)           | 0.36<br>(0.20 to 0.58)            |
| Other sexually transmitted infections                                   | 9.75<br>(5.31 to 15.15)                    | 8.83<br>(4.84 to 14.19)                   | 7.40<br>(4.05 to 12.05)                   | 9.14<br>(5.02 to 14.81)                    | 0.21<br>(0.11 to 0.33)            | 0.19<br>(0.10 to 0.31)            | 0.16<br>(0.09 to 0.27)           | 0.20<br>(0.11 to 0.33)            |
| Acute hepatitis                                                         | 155.45<br>(119.33 to 202.91)               | 150.06<br>(110.09 to 203.86)              | 117.63<br>(86.21 to 160.09)               | 156.43<br>(113.45 to 210.16)               | 3.56<br>(2.76 to 4.62)            | 3.83<br>(2.83 to 5.13)            | 3.10<br>(2.30 to 4.19)           | 3.91<br>(2.89 to 5.28)            |
| Acute hepatitis A                                                       | 8.84<br>(5.07 to 14.95)                    | 4.04<br>(2.11 to 8.06)                    | 2.71<br>(1.54 to 5.07)                    | 4.54<br>(2.30 to 9.36)                     | 0.13<br>(0.08 to 0.20)            | 0.08<br>(0.05 to 0.15)            | 0.06<br>(0.03 to 0.09)           | 0.08<br>(0.05 to 0.14)            |
| Acute hepatitis B                                                       | 122.09<br>(92.18 to 163.49)                | 128.50<br>(93.30 to 177.44)               | 101.24<br>(72.38 to 141.26)               | 133.34<br>(95.21 to 183.44)                | 2.99<br>(2.27 to 3.97)            | 3.35<br>(2.47 to 4.56)            | 2.70<br>(1.98 to 3.66)           | 3.43<br>(2.49 to 4.71)            |

|                                       |                                                   |                                                   |                                                   |                                                    |                                                |                                                |                                                |                                                |
|---------------------------------------|---------------------------------------------------|---------------------------------------------------|---------------------------------------------------|----------------------------------------------------|------------------------------------------------|------------------------------------------------|------------------------------------------------|------------------------------------------------|
|                                       | 2.39<br>(1.67 to<br>3.49)                         | 2.65<br>(1.70 to<br>4.17)                         | 2.39<br>(1.50 to<br>3.74)                         | 2.65<br>(1.69 to<br>4.18)                          | 0.06<br>(0.04 to<br>0.09)                      | 0.08<br>(0.05 to<br>0.12)                      | 0.07<br>(0.04 to<br>0.11)                      | 0.07<br>(0.05 to<br>0.12)                      |
| Acute hepatitis C                     |                                                   |                                                   |                                                   |                                                    |                                                |                                                |                                                |                                                |
|                                       | 22.13<br>(14.82 to<br>32.60)                      | 14.87<br>(9.27 to<br>23.87)                       | 11.30<br>(6.98 to<br>17.59)                       | 15.90<br>(9.80 to<br>25.73)                        | 0.38<br>(0.26 to<br>0.55)                      | 0.32<br>(0.21 to<br>0.50)                      | 0.27<br>(0.17 to<br>0.42)                      | 0.33<br>(0.21 to<br>0.51)                      |
| Acute hepatitis E                     |                                                   |                                                   |                                                   |                                                    |                                                |                                                |                                                |                                                |
|                                       | 282.92<br>(168.20 to<br>609.54)                   | 328.55<br>(213.34 to<br>535.50)                   | 235.37<br>(154.67 to<br>377.30)                   | 354.73<br>(227.13 to<br>582.99)                    | 5.60<br>(3.71 to<br>9.93)                      | 7.93<br>(5.48 to<br>11.60)                     | 6.37<br>(4.42 to<br>9.07)                      | 8.09<br>(5.57 to<br>11.95)                     |
| Other unspecified infectious diseases |                                                   |                                                   |                                                   |                                                    |                                                |                                                |                                                |                                                |
| <b>Non-communicable diseases</b>      | <b>50,563.44<br/>(42,607.18 to<br/>61,422.78)</b> | <b>69,051.47<br/>(54,905.36 to<br/>85,858.57)</b> | <b>46,120.86<br/>(37,516.80 to<br/>57,155.12)</b> | <b>86,805.98<br/>(69,018.66 to<br/>107,798.53)</b> | <b>1,723.79<br/>(1,470.52 to<br/>2,075.88)</b> | <b>2,643.99<br/>(2,285.70 to<br/>3,063.17)</b> | <b>1,926.09<br/>(1,677.94 to<br/>2,237.48)</b> | <b>3,166.50<br/>(2,727.66 to<br/>3,640.61)</b> |

| Vanuatu                              |                                           |                                            |                                            |                                             |                                     |                                     |                                     |                                     |
|--------------------------------------|-------------------------------------------|--------------------------------------------|--------------------------------------------|---------------------------------------------|-------------------------------------|-------------------------------------|-------------------------------------|-------------------------------------|
| Cause                                | YLLs (actual counts)                      |                                            |                                            |                                             | Deaths (actual counts)              |                                     |                                     |                                     |
|                                      | 2016                                      | 2040 Forecast                              | 2040 Better Scenario                       | 2040 Worse Scenario                         | 2016                                | 2040 Forecast                       | 2040 Better Scenario                | 2040 Worse Scenario                 |
| <b>Neoplasms</b>                     | <b>6,006.65</b><br>(4,867.44 to 7,641.74) | <b>9,032.63</b><br>(6,895.51 to 11,879.62) | <b>8,335.46</b><br>(6,564.26 to 10,702.56) | <b>10,008.22</b><br>(7,408.80 to 13,713.70) | <b>199.76</b><br>(165.54 to 248.96) | <b>326.81</b><br>(256.48 to 422.97) | <b>320.40</b><br>(261.13 to 397.72) | <b>347.90</b><br>(262.38 to 460.69) |
| Lip and oral cavity cancer           | 95.47<br>(73.28 to 127.27)                | 142.13<br>(86.39 to 245.09)                | 110.89<br>(70.70 to 183.72)                | 192.99<br>(105.75 to 357.01)                | 3.44<br>(2.76 to 4.44)              | 5.29<br>(3.39 to 8.56)              | 4.35<br>(2.99 to 6.71)              | 6.73<br>(3.96 to 11.55)             |
| Nasopharynx cancer                   | 88.39<br>(60.90 to 128.18)                | 147.88<br>(74.57 to 283.53)                | 107.24<br>(56.08 to 200.43)                | 210.26<br>(99.75 to 418.88)                 | 2.80<br>(1.95 to 3.93)              | 4.82<br>(2.50 to 9.01)              | 3.57<br>(1.95 to 6.57)              | 6.56<br>(3.16 to 12.93)             |
| Other pharynx cancer                 | 79.42<br>(50.52 to 118.44)                | 103.70<br>(62.84 to 161.69)                | 93.97<br>(57.93 to 147.35)                 | 109.10<br>(63.28 to 175.97)                 | 2.69<br>(1.81 to 3.93)              | 3.75<br>(2.37 to 5.69)              | 3.58<br>(2.35 to 5.40)              | 3.80<br>(2.29 to 5.92)              |
| Esophageal cancer                    | 81.11<br>(64.15 to 102.39)                | 114.77<br>(65.42 to 199.84)                | 85.56<br>(52.52 to 140.57)                 | 149.37<br>(79.98 to 275.09)                 | 3.08<br>(2.49 to 3.79)              | 4.51<br>(2.66 to 7.58)              | 3.51<br>(2.26 to 5.54)              | 5.55<br>(3.06 to 9.75)              |
| Stomach cancer                       | 508.54<br>(413.34 to 638.08)              | 555.25<br>(423.73 to 740.89)               | 506.56<br>(392.50 to 660.12)               | 583.83<br>(432.76 to 807.23)                | 18.74<br>(15.51 to 23.07)           | 21.71<br>(17.01 to 27.90)           | 21.14<br>(16.87 to 26.39)           | 21.82<br>(16.64 to 28.67)           |
| Colon and rectum cancer              | 377.25<br>(269.20 to 537.27)              | 691.28<br>(422.15 to 1,102.98)             | 722.70<br>(460.62 to 1,099.57)             | 682.99<br>(411.92 to 1,107.61)              | 14.18<br>(10.60 to 19.66)           | 28.15<br>(17.66 to 44.67)           | 31.37<br>(20.75 to 47.88)           | 26.54<br>(16.46 to 42.74)           |
| Liver cancer                         | 361.68<br>(272.32 to 478.10)              | 616.94<br>(398.49 to 935.48)               | 558.69<br>(379.96 to 818.77)               | 736.60<br>(446.52 to 1,180.41)              | 12.61<br>(9.64 to 16.56)            | 22.53<br>(15.03 to 33.20)           | 21.64<br>(15.16 to 30.65)           | 25.58<br>(16.14 to 39.62)           |
| Liver cancer due to hepatitis B      | 205.92<br>(152.31 to 283.01)              | 342.42<br>(217.24 to 527.93)               | 311.59<br>(206.11 to 464.92)               | 410.73<br>(243.51 to 675.67)                | 6.78<br>(5.11 to 9.28)              | 11.80<br>(7.70 to 17.59)            | 11.32<br>(7.81 to 16.31)            | 13.52<br>(8.32 to 21.42)            |
| Liver cancer due to hepatitis C      | 50.10<br>(36.87 to 71.18)                 | 88.39<br>(57.51 to 133.54)                 | 84.25<br>(57.22 to 124.63)                 | 101.26<br>(62.61 to 162.76)                 | 2.12<br>(1.60 to 2.97)              | 3.93<br>(2.63 to 5.86)              | 4.02<br>(2.79 to 5.80)              | 4.25<br>(2.67 to 6.55)              |
| Liver cancer due to alcohol use      | 21.65<br>(15.31 to 30.73)                 | 38.28<br>(22.92 to 60.54)                  | 34.79<br>(22.22 to 53.69)                  | 47.00<br>(26.24 to 78.61)                   | 0.82<br>(0.60 to 1.15)              | 1.48<br>(0.93 to 2.32)              | 1.42<br>(0.94 to 2.14)              | 1.72<br>(0.99 to 2.75)              |
| Liver cancer due to other causes     | 84.02<br>(63.11 to 113.98)                | 147.85<br>(86.86 to 240.96)                | 128.07<br>(80.45 to 198.76)                | 177.61<br>(96.56 to 305.54)                 | 2.88<br>(2.20 to 3.83)              | 5.32<br>(3.21 to 8.65)              | 4.88<br>(3.12 to 7.38)              | 6.08<br>(3.44 to 10.31)             |
| Gallbladder and biliary tract cancer | 48.28<br>(32.17 to 71.74)                 | 54.67<br>(37.35 to 77.73)                  | 60.80<br>(41.78 to 86.91)                  | 50.82<br>(34.12 to 72.87)                   | 1.94<br>(1.35 to 2.80)              | 2.30<br>(1.60 to 3.19)              | 2.72<br>(1.94 to 3.71)              | 2.07<br>(1.41 to 2.88)              |
| Pancreatic cancer                    | 141.09<br>(112.01 to 180.61)              | 273.59<br>(191.20 to 393.04)               | 283.89<br>(206.44 to 389.12)               | 278.18<br>(190.34 to 409.05)                | 5.85<br>(4.79 to 7.32)              | 11.68<br>(8.15 to 16.88)            | 12.76<br>(9.47 to 17.59)            | 11.39<br>(7.82 to 16.67)            |
| Larynx cancer                        | 70.58<br>(54.51 to 90.44)                 | 90.39<br>(47.66 to 162.78)                 | 61.47<br>(34.43 to 110.93)                 | 124.95<br>(63.72 to 219.96)                 | 2.66<br>(2.10 to 3.33)              | 3.52<br>(1.82 to 6.25)              | 2.44<br>(1.38 to 4.33)              | 4.68<br>(2.34 to 8.12)              |
| Tracheal, bronchus, and lung cancer  | 800.34<br>(577.95 to 1,127.24)            | 1,245.11<br>(637.22 to 2,329.52)           | 786.84<br>(437.52 to 1,434.54)             | 1,826.40<br>(890.13 to 3,465.08)            | 30.95<br>(23.41 to 42.33)           | 49.74<br>(27.33 to 89.77)           | 31.89<br>(19.04 to 55.21)           | 70.02<br>(37.17 to 127.82)          |
| Malignant skin melanoma              | 32.13<br>(20.97 to 53.96)                 | 53.55<br>(35.64 to 88.16)                  | 65.80<br>(43.28 to 110.53)                 | 48.80<br>(32.28 to 79.27)                   | 1.15<br>(0.77 to 1.91)              | 2.05<br>(1.36 to 3.31)              | 2.71<br>(1.80 to 4.41)              | 1.79<br>(1.19 to 2.84)              |
| Non-melanoma skin cancer             | 56.52<br>(39.06 to 77.12)                 | 100.26<br>(70.33 to 130.97)                | 99.21<br>(69.81 to 130.18)                 | 95.46<br>(66.75 to 124.54)                  | 2.29<br>(1.69 to 2.94)              | 4.46<br>(3.17 to 5.59)              | 4.88<br>(3.52 to 6.15)              | 4.00<br>(2.81 to 5.08)              |
| Breast cancer                        | 724.94<br>(486.21 to 1,129.78)            | 1,137.07<br>(696.69 to 1,878.88)           | 1,127.80<br>(708.48 to 1,797.30)           | 1,168.08<br>(703.28 to 1,973.92)            | 22.32<br>(15.51 to 33.95)           | 38.42<br>(24.21 to 61.15)           | 39.93<br>(25.89 to 61.51)           | 38.15<br>(23.69 to 61.46)           |
| Cervical cancer                      | 487.48<br>(240.22 to 714.08)              | 636.35<br>(319.43 to 976.78)               | 553.46<br>(287.04 to 841.53)               | 681.72<br>(335.54 to 1,085.58)              | 14.40<br>(7.39 to 20.56)            | 19.57<br>(10.45 to 29.38)           | 17.53<br>(9.59 to 25.99)            | 20.48<br>(10.57 to 31.56)           |

|                   |                                 |                                 |                                 |                                 |                             |                              |                              |                              |
|-------------------|---------------------------------|---------------------------------|---------------------------------|---------------------------------|-----------------------------|------------------------------|------------------------------|------------------------------|
|                   | 166.25<br>(116.58 to<br>226.15) | 275.26<br>(199.10 to<br>363.31) | 243.77<br>(176.16 to<br>323.96) | 273.45<br>(195.34 to<br>359.44) | 5.77<br>(4.12 to<br>7.73)   | 10.16<br>(7.51 to<br>13.09)  | 9.35<br>(6.94 to<br>12.04)   | 9.86<br>(7.18 to<br>12.71)   |
| Uterine cancer    |                                 |                                 |                                 |                                 |                             |                              |                              |                              |
|                   | 90.97<br>(65.06 to<br>131.49)   | 167.87<br>(110.12 to<br>274.24) | 186.86<br>(125.27 to<br>296.82) | 161.14<br>(105.26 to<br>260.25) | 3.21<br>(2.38 to<br>4.44)   | 6.26<br>(4.18 to<br>10.01)   | 7.20<br>(4.92 to<br>11.16)   | 5.87<br>(3.87 to<br>9.27)    |
| Ovarian cancer    |                                 |                                 |                                 |                                 |                             |                              |                              |                              |
|                   | 184.02<br>(139.57 to<br>260.34) | 359.06<br>(261.53 to<br>512.34) | 443.12<br>(337.21 to<br>607.25) | 316.49<br>(226.88 to<br>466.25) | 10.92<br>(8.41 to<br>14.87) | 22.29<br>(15.21 to<br>31.77) | 29.47<br>(21.33 to<br>40.63) | 18.84<br>(12.57 to<br>27.91) |
| Prostate cancer   |                                 |                                 |                                 |                                 |                             |                              |                              |                              |
|                   | 19.82<br>(12.47 to<br>27.26)    | 25.57<br>(15.64 to<br>36.47)    | 23.68<br>(14.32 to<br>34.00)    | 25.67<br>(15.51 to<br>37.15)    | 0.44<br>(0.28 to<br>0.59)   | 0.59<br>(0.37 to<br>0.80)    | 0.57<br>(0.35 to<br>0.78)    | 0.57<br>(0.36 to<br>0.78)    |
| Testicular cancer |                                 |                                 |                                 |                                 |                             |                              |                              |                              |

| Vanuatu                         |                                              |                                              |                                              |                                              |                                       |                                         |                                     |                                           |
|---------------------------------|----------------------------------------------|----------------------------------------------|----------------------------------------------|----------------------------------------------|---------------------------------------|-----------------------------------------|-------------------------------------|-------------------------------------------|
| Cause                           | YLLs (actual counts)                         |                                              |                                              |                                              | Deaths (actual counts)                |                                         |                                     |                                           |
|                                 | 2016                                         | 2040 Forecast                                | 2040 Better Scenario                         | 2040 Worse Scenario                          | 2016                                  | 2040 Forecast                           | 2040 Better Scenario                | 2040 Worse Scenario                       |
| Kidney cancer                   | 40.38<br>(30.27 to 54.10)                    | 69.07<br>(48.23 to 98.02)                    | 76.77<br>(54.36 to 107.49)                   | 70.51<br>(47.62 to 104.88)                   | 1.29<br>(0.95 to 1.72)                | 2.46<br>(1.70 to 3.53)                  | 2.95<br>(2.05 to 4.11)              | 2.40<br>(1.60 to 3.56)                    |
| Bladder cancer                  | 57.19<br>(43.56 to 80.38)                    | 87.61<br>(54.69 to 144.17)                   | 80.57<br>(52.88 to 126.51)                   | 94.09<br>(56.55 to 157.92)                   | 2.50<br>(1.97 to 3.44)                | 3.99<br>(2.55 to 6.41)                  | 3.92<br>(2.63 to 6.13)              | 4.07<br>(2.52 to 6.79)                    |
| Brain and nervous system cancer | 144.15<br>(97.19 to 190.57)                  | 230.12<br>(153.47 to 307.41)                 | 232.06<br>(153.67 to 311.91)                 | 227.76<br>(151.84 to 302.88)                 | 3.25<br>(2.14 to 4.30)                | 5.90<br>(3.90 to 7.70)                  | 6.44<br>(4.29 to 8.39)              | 5.60<br>(3.71 to 7.32)                    |
| Thyroid cancer                  | 33.18<br>(23.10 to 46.35)                    | 49.31<br>(32.90 to 70.09)                    | 44.91<br>(30.84 to 63.28)                    | 52.35<br>(33.29 to 76.46)                    | 1.25<br>(0.89 to 1.72)                | 1.98<br>(1.34 to 2.78)                  | 1.91<br>(1.33 to 2.63)              | 2.02<br>(1.33 to 2.89)                    |
| Mesothelioma                    | 13.56<br>(9.33 to 20.10)                     | 20.90<br>(14.78 to 30.73)                    | 21.15<br>(14.87 to 32.03)                    | 20.10<br>(14.27 to 29.09)                    | 0.45<br>(0.32 to 0.66)                | 0.72<br>(0.51 to 1.04)                  | 0.77<br>(0.55 to 1.13)              | 0.67<br>(0.48 to 0.96)                    |
| Hodgkin lymphoma                | 45.74<br>(32.83 to 59.88)                    | 50.64<br>(35.15 to 67.42)                    | 39.51<br>(27.57 to 52.99)                    | 52.97<br>(36.95 to 71.34)                    | 1.07<br>(0.78 to 1.38)                | 1.28<br>(0.92 to 1.67)                  | 1.06<br>(0.77 to 1.39)              | 1.29<br>(0.93 to 1.70)                    |
| Non-Hodgkin lymphoma            | 183.40<br>(142.59 to 245.60)                 | 280.23<br>(211.21 to 381.59)                 | 296.52<br>(224.09 to 400.15)                 | 280.08<br>(208.78 to 383.08)                 | 4.92<br>(3.87 to 6.55)                | 8.50<br>(6.54 to 11.14)                 | 9.82<br>(7.62 to 12.78)             | 8.10<br>(6.14 to 10.83)                   |
| Multiple myeloma                | 61.00<br>(42.34 to 83.51)                    | 112.23<br>(78.11 to 153.98)                  | 127.56<br>(91.58 to 171.69)                  | 109.99<br>(75.31 to 154.12)                  | 2.24<br>(1.58 to 3.05)                | 4.36<br>(3.12 to 5.81)                  | 5.24<br>(3.82 to 6.99)              | 4.13<br>(2.89 to 5.63)                    |
| Leukemia                        | 526.98<br>(383.30 to 702.84)                 | 627.91<br>(437.87 to 876.93)                 | 582.44<br>(415.04 to 794.13)                 | 680.40<br>(462.75 to 971.32)                 | 11.22<br>(8.15 to 14.79)              | 15.74<br>(11.07 to 21.53)               | 15.81<br>(11.35 to 21.21)           | 16.48<br>(11.23 to 23.39)                 |
| Acute lymphoid leukemia         | 106.36<br>(74.69 to 153.55)                  | 113.45<br>(75.28 to 171.65)                  | 103.93<br>(69.83 to 156.36)                  | 122.17<br>(80.54 to 184.93)                  | 1.78<br>(1.27 to 2.51)                | 2.20<br>(1.50 to 3.22)                  | 2.15<br>(1.48 to 3.13)              | 2.33<br>(1.57 to 3.45)                    |
| Chronic lymphoid leukemia       | 8.30<br>(5.68 to 11.78)                      | 12.61<br>(7.99 to 19.01)                     | 12.95<br>(8.23 to 19.19)                     | 13.20<br>(7.97 to 20.40)                     | 0.32<br>(0.22 to 0.45)                | 0.52<br>(0.33 to 0.77)                  | 0.57<br>(0.37 to 0.85)              | 0.52<br>(0.32 to 0.79)                    |
| Acute myeloid leukemia          | 163.78<br>(105.75 to 225.36)                 | 238.67<br>(159.65 to 325.46)                 | 241.80<br>(165.66 to 321.76)                 | 253.45<br>(166.93 to 353.08)                 | 3.30<br>(2.12 to 4.50)                | 5.59<br>(3.75 to 7.45)                  | 6.14<br>(4.19 to 8.04)              | 5.76<br>(3.79 to 7.92)                    |
| Chronic myeloid leukemia        | 59.75<br>(36.63 to 90.38)                    | 62.29<br>(35.35 to 100.26)                   | 60.35<br>(34.63 to 95.30)                    | 67.82<br>(36.64 to 110.83)                   | 1.70<br>(1.10 to 2.50)                | 1.90<br>(1.13 to 2.91)                  | 1.92<br>(1.16 to 2.92)              | 2.00<br>(1.14 to 3.14)                    |
| Other leukemia                  | 188.79<br>(113.22 to 283.11)                 | 200.89<br>(110.50 to 325.86)                 | 163.42<br>(89.69 to 262.13)                  | 223.76<br>(121.80 to 368.22)                 | 4.12<br>(2.54 to 6.06)                | 5.53<br>(3.15 to 8.68)                  | 5.03<br>(2.85 to 7.90)              | 5.87<br>(3.21 to 9.46)                    |
| Other neoplasms                 | 486.78<br>(373.85 to 597.97)                 | 713.90<br>(560.84 to 878.93)                 | 711.67<br>(559.23 to 872.30)                 | 703.69<br>(547.85 to 862.75)                 | 12.13<br>(9.46 to 14.92)              | 20.06<br>(15.50 to 24.01)               | 21.87<br>(17.02 to 26.23)           | 18.85<br>(14.57 to 22.43)                 |
| <b>Cardiovascular diseases</b>  | <b>24,318.96</b><br>(20,196.93 to 29,835.73) | <b>30,476.46</b><br>(20,972.40 to 42,735.25) | <b>15,697.92</b><br>(11,308.05 to 21,793.46) | <b>42,876.31</b><br>(29,697.64 to 58,794.57) | <b>888.52</b><br>(751.86 to 1,061.66) | <b>1,218.42</b><br>(927.48 to 1,615.46) | <b>707.23</b><br>(548.36 to 973.08) | <b>1,615.52</b><br>(1,203.94 to 2,120.18) |
| Rheumatic heart disease         | 1,573.41<br>(1,170.40 to 2,067.46)           | 974.24<br>(708.17 to 1,308.89)               | 705.43<br>(505.91 to 959.57)                 | 1,041.52<br>(739.75 to 1,424.45)             | 40.12<br>(29.42 to 52.36)             | 28.99<br>(21.21 to 37.26)               | 22.85<br>(16.57 to 29.78)           | 29.60<br>(21.06 to 38.88)                 |
| Ischemic heart disease          | 11,895.31<br>(9,620.32 to 14,794.58)         | 15,940.99<br>(8,948.62 to 26,156.08)         | 7,122.50<br>(3,950.95 to 12,714.04)          | 23,888.58<br>(13,231.94 to 36,738.35)        | 457.57<br>(378.74 to 552.26)          | 645.99<br>(382.92 to 1,049.25)          | 330.44<br>(197.34 to 564.99)        | 908.83<br>(536.07 to 1,404.53)            |
| Stroke                          | 7,816.07<br>(6,302.41 to 9,795.97)           | 9,127.57<br>(5,383.89 to 14,781.77)          | 4,123.26<br>(2,531.43 to 6,916.78)           | 13,131.92<br>(7,571.20 to 21,079.50)         | 286.73<br>(233.25 to 351.01)          | 370.13<br>(235.43 to 591.88)            | 193.21<br>(126.68 to 345.28)        | 498.72<br>(305.14 to 775.46)              |
| Ischemic stroke                 | 2,135.26<br>(1,680.19 to 2,696.43)           | 2,459.58<br>(1,299.53 to 4,915.84)           | 1,354.83<br>(731.16 to 3,013.31)             | 3,194.60<br>(1,697.73 to 6,196.34)           | 98.75<br>(79.28 to 119.96)            | 124.53<br>(65.20 to 290.31)             | 78.13<br>(42.06 to 196.76)          | 152.72<br>(78.84 to 329.60)               |

|                                |                                       |                                        |                                       |                                        |                                 |                                 |                                |                                 |
|--------------------------------|---------------------------------------|----------------------------------------|---------------------------------------|----------------------------------------|---------------------------------|---------------------------------|--------------------------------|---------------------------------|
|                                | 5,680.82<br>(4,558.38 to<br>7,164.46) | 6,667.99<br>(3,550.08 to<br>11,752.31) | 2,768.43<br>(1,575.08 to<br>4,900.01) | 9,937.31<br>(5,244.06 to<br>17,146.21) | 187.98<br>(152.06 to<br>233.99) | 245.60<br>(144.27 to<br>424.66) | 115.08<br>(72.00 to<br>191.95) | 346.00<br>(194.52 to<br>581.48) |
| Intracerebral hemorrhage       |                                       |                                        |                                       |                                        |                                 |                                 |                                |                                 |
|                                | 986.46<br>(599.89 to<br>1,354.34)     | 1,495.85<br>(898.40 to<br>2,158.67)    | 1,146.89<br>(719.46 to<br>1,603.62)   | 1,745.63<br>(985.81 to<br>2,835.20)    | 39.45<br>(25.53 to<br>53.06)    | 65.38<br>(39.95 to<br>98.43)    | 54.14<br>(35.09 to<br>76.66)   | 72.35<br>(41.27 to<br>120.00)   |
| Hypertensive heart disease     |                                       |                                        |                                       |                                        |                                 |                                 |                                |                                 |
|                                | 623.53<br>(379.82 to<br>886.95)       | 752.33<br>(435.37 to<br>1,138.14)      | 725.42<br>(432.74 to<br>1,077.83)     | 762.32<br>(437.25 to<br>1,173.68)      | 17.03<br>(10.39 to<br>23.60)    | 24.00<br>(14.35 to<br>34.85)    | 25.28<br>(15.34 to<br>37.14)   | 23.13<br>(13.57 to<br>33.96)    |
| Cardiomyopathy and myocarditis |                                       |                                        |                                       |                                        |                                 |                                 |                                |                                 |
|                                | 153.72<br>(90.67 to<br>228.02)        | 180.32<br>(109.32 to<br>265.76)        | 165.90<br>(100.76 to<br>245.06)       | 179.61<br>(108.81 to<br>266.48)        | 4.36<br>(2.57 to<br>6.55)       | 5.99<br>(3.52 to<br>9.06)       | 6.00<br>(3.55 to<br>9.07)      | 5.68<br>(3.35 to<br>8.60)       |
| Myocarditis                    |                                       |                                        |                                       |                                        |                                 |                                 |                                |                                 |



| Vanuatu                                                       |                                                  |                                                  |                                                  |                                                   |                                            |                                            |                                           |                                            |
|---------------------------------------------------------------|--------------------------------------------------|--------------------------------------------------|--------------------------------------------------|---------------------------------------------------|--------------------------------------------|--------------------------------------------|-------------------------------------------|--------------------------------------------|
| Cause                                                         | YLLs (actual counts)                             |                                                  |                                                  |                                                   | Deaths (actual counts)                     |                                            |                                           |                                            |
|                                                               | 2016                                             | 2040 Forecast                                    | 2040 Better Scenario                             | 2040 Worse Scenario                               | 2016                                       | 2040 Forecast                              | 2040 Better Scenario                      | 2040 Worse Scenario                        |
| Alcoholic cardiomyopathy                                      | 37.32<br>(18.84 to 60.54)                        | 38.00<br>(18.97 to 59.41)                        | 38.93<br>(19.34 to 59.27)                        | 38.54<br>(19.25 to 61.31)                         | 1.18<br>(0.59 to 1.87)                     | 1.31<br>(0.66 to 2.03)                     | 1.43<br>(0.73 to 2.19)                    | 1.27<br>(0.65 to 1.99)                     |
| Other cardiomyopathy                                          | 432.48<br>(255.12 to 640.48)                     | 534.00<br>(290.32 to 864.08)                     | 520.58<br>(291.13 to 847.67)                     | 544.17<br>(292.28 to 906.26)                      | 11.48<br>(6.94 to 16.28)                   | 16.70<br>(9.24 to 26.46)                   | 17.85<br>(9.96 to 28.28)                  | 16.18<br>(8.74 to 26.05)                   |
| Atrial fibrillation and flutter                               | 42.16<br>(31.16 to 54.93)                        | 78.62<br>(54.47 to 106.46)                       | 91.84<br>(65.92 to 120.22)                       | 72.08<br>(48.21 to 97.95)                         | 3.12<br>(2.34 to 4.09)                     | 6.22<br>(3.86 to 8.95)                     | 7.95<br>(5.26 to 10.90)                   | 5.38<br>(3.28 to 7.64)                     |
| Aortic aneurysm                                               | 203.38<br>(138.40 to 303.02)                     | 269.89<br>(188.25 to 396.73)                     | 276.26<br>(197.69 to 399.29)                     | 273.20<br>(185.56 to 404.43)                      | 8.11<br>(5.79 to 11.69)                    | 11.46<br>(8.23 to 16.24)                   | 12.89<br>(9.51 to 18.17)                  | 10.94<br>(7.75 to 15.70)                   |
| Peripheral artery disease                                     | 8.54<br>(4.35 to 16.87)                          | 21.13<br>(10.24 to 44.85)                        | 21.46<br>(10.94 to 43.16)                        | 20.59<br>(9.73 to 44.40)                          | 0.43<br>(0.23 to 0.79)                     | 1.11<br>(0.53 to 2.19)                     | 1.29<br>(0.65 to 2.53)                    | 1.01<br>(0.48 to 2.03)                     |
| Endocarditis                                                  | 284.12<br>(208.35 to 385.62)                     | 425.46<br>(292.02 to 607.04)                     | 392.21<br>(270.76 to 556.93)                     | 436.10<br>(297.82 to 617.93)                      | 8.43<br>(6.38 to 11.24)                    | 14.34<br>(10.04 to 20.44)                  | 14.66<br>(10.40 to 20.53)                 | 13.89<br>(9.76 to 20.17)                   |
| Other cardiovascular and circulatory diseases                 | 885.98<br>(545.63 to 1,231.59)                   | 1,390.39<br>(869.35 to 1,958.41)                 | 1,092.65<br>(677.35 to 1,534.95)                 | 1,504.38<br>(924.98 to 2,161.89)                  | 27.52<br>(16.33 to 37.56)                  | 50.78<br>(30.64 to 69.77)                  | 44.55<br>(27.51 to 60.85)                 | 51.67<br>(31.12 to 72.37)                  |
| <b>Chronic respiratory diseases</b>                           | <b>4,646.87</b><br><b>(3,599.30 to 5,855.53)</b> | <b>4,835.91</b><br><b>(3,243.46 to 7,122.95)</b> | <b>3,162.09</b><br><b>(2,232.78 to 4,276.47)</b> | <b>6,772.74</b><br><b>(4,274.38 to 10,642.67)</b> | <b>167.72</b><br><b>(131.31 to 208.96)</b> | <b>182.45</b><br><b>(127.37 to 260.40)</b> | <b>123.22</b><br><b>(90.87 to 162.19)</b> | <b>245.80</b><br><b>(160.53 to 374.56)</b> |
| Chronic obstructive pulmonary disease                         | 2,506.75<br>(1,850.07 to 3,206.56)               | 2,853.98<br>(1,692.42 to 4,757.08)               | 1,521.03<br>(953.35 to 2,319.28)                 | 4,460.54<br>(2,482.42 to 7,300.94)                | 98.70<br>(73.89 to 123.94)                 | 115.40<br>(70.94 to 185.18)                | 64.26<br>(42.16 to 94.27)                 | 170.60<br>(99.10 to 283.35)                |
| Pneumoconiosis                                                | 9.32<br>(5.96 to 13.56)                          | 10.65<br>(6.55 to 15.95)                         | 9.75<br>(6.03 to 14.39)                          | 10.88<br>(6.55 to 16.39)                          | 0.42<br>(0.28 to 0.61)                     | 0.53<br>(0.32 to 0.79)                     | 0.55<br>(0.33 to 0.83)                    | 0.50<br>(0.30 to 0.75)                     |
| Silicosis                                                     | 1.40<br>(0.65 to 2.32)                           | 1.36<br>(0.56 to 2.32)                           | 1.22<br>(0.53 to 2.09)                           | 1.32<br>(0.52 to 2.32)                            | 0.07<br>(0.04 to 0.12)                     | 0.08<br>(0.03 to 0.13)                     | 0.08<br>(0.04 to 0.14)                    | 0.07<br>(0.03 to 0.12)                     |
| Asbestosis                                                    | 2.31<br>(1.33 to 3.92)                           | 3.22<br>(1.80 to 5.66)                           | 3.13<br>(1.76 to 5.38)                           | 3.16<br>(1.75 to 5.71)                            | 0.08<br>(0.04 to 0.14)                     | 0.16<br>(0.07 to 0.23)                     | 0.13<br>(0.07 to 0.24)                    | 0.12<br>(0.06 to 0.22)                     |
| Coal workers pneumoconiosis                                   | 0.21<br>(0.07 to 0.44)                           | 0.27<br>(0.09 to 0.53)                           | 0.19<br>(0.06 to 0.38)                           | 0.29<br>(0.09 to 0.58)                            | 0.01<br>(0.00 to 0.02)                     | 0.02<br>(0.01 to 0.03)                     | 0.01<br>(0.00 to 0.03)                    | 0.02<br>(0.01 to 0.03)                     |
| Other pneumoconiosis                                          | 5.41<br>(3.43 to 8.22)                           | 5.81<br>(3.55 to 8.86)                           | 5.20<br>(3.14 to 8.05)                           | 6.12<br>(3.67 to 9.51)                            | 0.26<br>(0.16 to 0.40)                     | 0.31<br>(0.18 to 0.49)                     | 0.32<br>(0.18 to 0.52)                    | 0.30<br>(0.18 to 0.47)                     |
| Asthma                                                        | 1,530.22<br>(1,087.75 to 2,121.29)               | 1,139.24<br>(665.87 to 1,773.05)                 | 857.30<br>(513.61 to 1,329.29)                   | 1,418.59<br>(781.58 to 2,320.21)                  | 52.77<br>(37.03 to 73.56)                  | 42.23<br>(24.89 to 66.41)                  | 34.66<br>(21.04 to 53.14)                 | 49.74<br>(27.56 to 81.53)                  |
| Interstitial lung disease and pulmonary sarcoidosis           | 168.24<br>(78.17 to 321.97)                      | 252.26<br>(119.49 to 469.73)                     | 281.81<br>(138.13 to 514.46)                     | 243.41<br>(114.50 to 459.03)                      | 4.12<br>(1.97 to 7.90)                     | 7.18<br>(3.51 to 13.28)                    | 8.68<br>(4.40 to 15.83)                   | 6.62<br>(3.17 to 12.49)                    |
| Other chronic respiratory diseases                            | 412.34<br>(244.69 to 639.15)                     | 579.77<br>(329.93 to 963.88)                     | 492.21<br>(296.36 to 799.85)                     | 639.31<br>(355.55 to 1,097.66)                    | 11.70<br>(6.92 to 18.22)                   | 17.11<br>(9.91 to 28.17)                   | 15.07<br>(9.15 to 24.03)                  | 18.33<br>(10.25 to 31.22)                  |
| <b>Cirrhosis and other chronic liver diseases</b>             | <b>1,438.23</b><br><b>(1,030.96 to 2,015.96)</b> | <b>2,119.02</b><br><b>(1,565.61 to 2,942.97)</b> | <b>1,929.95</b><br><b>(1,418.14 to 2,699.44)</b> | <b>2,129.63</b><br><b>(1,564.13 to 2,973.30)</b>  | <b>39.17</b><br><b>(28.38 to 54.11)</b>    | <b>61.79</b><br><b>(46.46 to 82.38)</b>    | <b>59.09</b><br><b>(44.69 to 79.56)</b>   | <b>60.30</b><br><b>(45.20 to 80.73)</b>    |
| Cirrhosis and other chronic liver diseases due to hepatitis B | 547.02<br>(388.80 to 803.11)                     | 859.49<br>(619.87 to 1,236.59)                   | 803.52<br>(583.38 to 1,154.82)                   | 849.86<br>(615.34 to 1,216.13)                    | 16.03<br>(11.62 to 22.82)                  | 26.22<br>(19.45 to 35.63)                  | 25.58<br>(18.99 to 34.73)                 | 25.24<br>(18.76 to 34.86)                  |
| Cirrhosis and other chronic liver diseases due to hepatitis C | 224.04<br>(157.06 to 327.92)                     | 354.61<br>(251.91 to 521.31)                     | 328.76<br>(236.62 to 477.17)                     | 351.86<br>(252.66 to 511.00)                      | 6.39<br>(4.55 to 9.14)                     | 10.50<br>(7.66 to 14.66)                   | 10.08<br>(7.41 to 14.20)                  | 10.18<br>(7.39 to 14.21)                   |

|                                                                |                                                            |                                                            |                                                            |                                                            |                                                   |                                                   |                                                   |                                                   |
|----------------------------------------------------------------|------------------------------------------------------------|------------------------------------------------------------|------------------------------------------------------------|------------------------------------------------------------|---------------------------------------------------|---------------------------------------------------|---------------------------------------------------|---------------------------------------------------|
|                                                                | 177.31<br>(123.25 to<br>260.04)                            | 261.08<br>(185.48 to<br>376.01)                            | 234.70<br>(166.71 to<br>338.88)                            | 272.12<br>(192.05 to<br>391.29)                            | 5.40<br>(3.86 to<br>7.74)                         | 8.33<br>(6.05 to<br>11.43)                        | 7.81<br>(5.67 to<br>10.70)                        | 8.41<br>(6.02 to<br>11.56)                        |
| Cirrhosis and other chronic liver diseases due to alcohol use  |                                                            |                                                            |                                                            |                                                            |                                                   |                                                   |                                                   |                                                   |
|                                                                | 489.85<br>(361.46 to<br>668.12)                            | 643.84<br>(470.82 to<br>868.50)                            | 562.98<br>(413.80 to<br>761.61)                            | 655.79<br>(482.98 to<br>892.21)                            | 11.34<br>(8.37 to<br>15.17)                       | 16.74<br>(12.77 to<br>21.70)                      | 15.61<br>(11.96 to<br>20.31)                      | 16.46<br>(12.48 to<br>21.58)                      |
| Cirrhosis and other chronic liver diseases due to other causes |                                                            |                                                            |                                                            |                                                            |                                                   |                                                   |                                                   |                                                   |
| <b>Digestive diseases</b>                                      | <b>1,634.10</b><br><b>(1,257.71 to</b><br><b>2,333.29)</b> | <b>1,827.79</b><br><b>(1,397.02 to</b><br><b>2,610.44)</b> | <b>1,498.77</b><br><b>(1,147.43 to</b><br><b>2,151.99)</b> | <b>1,935.73</b><br><b>(1,462.62 to</b><br><b>2,806.13)</b> | <b>50.13</b><br><b>(38.86 to</b><br><b>71.17)</b> | <b>64.28</b><br><b>(49.44 to</b><br><b>89.14)</b> | <b>57.72</b><br><b>(44.45 to</b><br><b>79.97)</b> | <b>64.61</b><br><b>(48.89 to</b><br><b>90.47)</b> |
| Peptic ulcer disease                                           | 525.05<br>(375.60 to<br>775.39)                            | 447.27<br>(310.53 to<br>643.58)                            | 331.23<br>(227.53 to<br>487.48)                            | 473.99<br>(326.62 to<br>704.96)                            | 17.81<br>(12.99 to<br>25.57)                      | 17.16<br>(11.84 to<br>24.40)                      | 13.72<br>(9.51 to<br>19.60)                       | 17.39<br>(11.96 to<br>25.32)                      |

| Vanuatu                                    |                                |                                    |                                    |                                    |                           |                            |                             |                            |
|--------------------------------------------|--------------------------------|------------------------------------|------------------------------------|------------------------------------|---------------------------|----------------------------|-----------------------------|----------------------------|
| Cause                                      | YLLs (actual counts)           |                                    |                                    |                                    | Deaths (actual counts)    |                            |                             |                            |
|                                            | 2016                           | 2040 Forecast                      | 2040 Better Scenario               | 2040 Worse Scenario                | 2016                      | 2040 Forecast              | 2040 Better Scenario        | 2040 Worse Scenario        |
| Gastritis and duodenitis                   | 10.04<br>(5.73 to 17.94)       | 15.93<br>(8.77 to 29.25)           | 14.15<br>(7.99 to 25.83)           | 15.76<br>(8.53 to 28.90)           | 0.36<br>(0.21 to 0.61)    | 0.62<br>(0.36 to 1.09)     | 0.60<br>(0.35 to 1.04)      | 0.58<br>(0.33 to 1.03)     |
| Appendicitis                               | 204.07<br>(142.90 to 309.15)   | 223.94<br>(153.20 to 344.48)       | 175.82<br>(120.49 to 272.51)       | 232.81<br>(157.94 to 362.71)       | 5.07<br>(3.65 to 7.73)    | 6.44<br>(4.66 to 9.96)     | 5.49<br>(3.94 to 8.54)      | 6.40<br>(4.57 to 9.80)     |
| Paralytic ileus and intestinal obstruction | 226.48<br>(134.79 to 403.21)   | 241.31<br>(155.51 to 391.00)       | 206.63<br>(137.24 to 327.53)       | 248.84<br>(156.65 to 413.49)       | 5.17<br>(3.44 to 7.95)    | 7.24<br>(4.86 to 11.31)    | 7.32<br>(5.00 to 11.55)     | 6.83<br>(4.60 to 10.66)    |
| Inguinal, femoral, and abdominal hernia    | 39.40<br>(27.41 to 64.84)      | 42.47<br>(29.18 to 70.11)          | 39.68<br>(27.12 to 63.21)          | 40.80<br>(27.95 to 68.59)          | 1.70<br>(1.33 to 2.66)    | 2.00<br>(1.33 to 3.21)     | 2.06<br>(1.36 to 3.21)      | 1.82<br>(1.18 to 2.89)     |
| Inflammatory bowel disease                 | 64.91<br>(38.82 to 126.06)     | 91.41<br>(56.72 to 175.49)         | 90.75<br>(57.78 to 167.97)         | 89.21<br>(54.96 to 172.93)         | 1.82<br>(1.19 to 3.31)    | 2.86<br>(1.88 to 5.06)     | 3.08<br>(2.07 to 5.27)      | 2.66<br>(1.71 to 4.75)     |
| Vascular intestinal disorders              | 72.12<br>(32.76 to 111.50)     | 111.14<br>(53.34 to 167.22)        | 108.27<br>(54.12 to 162.22)        | 106.19<br>(50.00 to 161.68)        | 2.93<br>(1.42 to 4.40)    | 5.14<br>(2.49 to 7.79)     | 5.44<br>(2.74 to 8.14)      | 4.68<br>(2.22 to 7.15)     |
| Gallbladder and biliary diseases           | 168.79<br>(122.29 to 249.82)   | 225.23<br>(124.11 to 407.84)       | 168.85<br>(94.68 to 303.08)        | 285.04<br>(147.81 to 530.37)       | 5.82<br>(4.17 to 8.51)    | 8.67<br>(4.75 to 15.73)    | 8.67<br>(4.75 to 15.73)     | 10.34<br>(5.40 to 18.99)   |
| Pancreatitis                               | 96.51<br>(66.04 to 148.67)     | 137.60<br>(85.62 to 225.74)        | 119.44<br>(73.67 to 195.77)        | 148.70<br>(89.48 to 263.84)        | 2.62<br>(1.78 to 3.99)    | 4.09<br>(2.63 to 6.49)     | 3.77<br>(2.42 to 5.85)      | 4.23<br>(2.61 to 7.42)     |
| Other digestive diseases                   | 226.74<br>(159.50 to 333.32)   | 291.49<br>(207.73 to 419.97)       | 243.98<br>(172.45 to 351.20)       | 294.38<br>(208.70 to 425.20)       | 6.84<br>(4.99 to 9.80)    | 10.05<br>(7.35 to 13.99)   | 9.13<br>(6.56 to 12.79)     | 9.68<br>(7.03 to 13.56)    |
| Neurological disorders                     | 840.60<br>(682.75 to 1,035.17) | 1,431.02<br>(1,082.47 to 1,998.19) | 1,530.93<br>(1,182.42 to 1,981.68) | 1,405.69<br>(1,043.83 to 1,930.15) | 43.07<br>(35.42 to 52.50) | 86.70<br>(56.93 to 124.71) | 106.80<br>(74.20 to 145.17) | 78.63<br>(50.20 to 115.65) |
| Alzheimer's disease and other dementias    | 432.72<br>(346.78 to 546.82)   | 865.79<br>(551.46 to 1,314.53)     | 1,003.49<br>(685.78 to 1,439.15)   | 817.27<br>(495.95 to 1,303.47)     | 33.31<br>(26.86 to 41.51) | 70.68<br>(42.67 to 107.62) | 88.92<br>(57.79 to 126.40)  | 63.26<br>(35.10 to 99.99)  |
| Parkinson's disease                        | 33.92<br>(24.51 to 44.10)      | 71.13<br>(50.19 to 95.11)          | 100.02<br>(72.40 to 128.68)        | 59.43<br>(40.31 to 79.34)          | 2.33<br>(1.69 to 3.06)    | 5.09<br>(3.32 to 7.00)     | 7.63<br>(5.30 to 10.18)     | 4.09<br>(2.55 to 5.75)     |
| Epilepsy                                   | 266.97<br>(193.50 to 374.13)   | 325.94<br>(210.08 to 475.56)       | 248.82<br>(158.05 to 363.86)       | 364.85<br>(231.17 to 539.23)       | 4.87<br>(3.51 to 6.88)    | 6.39<br>(4.23 to 9.12)     | 5.04<br>(3.31 to 7.24)      | 7.03<br>(4.57 to 10.34)    |
| Multiple sclerosis                         | 9.01<br>(4.99 to 17.51)        | 14.77<br>(8.16 to 29.62)           | 15.79<br>(8.98 to 31.24)           | 14.46<br>(8.00 to 28.75)           | 0.25<br>(0.14 to 0.46)    | 0.41<br>(0.24 to 0.80)     | 0.45<br>(0.27 to 0.87)      | 0.40<br>(0.23 to 0.76)     |
| Motor neuron disease                       | 13.77<br>(10.37 to 21.91)      | 26.29<br>(20.22 to 40.96)          | 29.94<br>(23.12 to 46.73)          | 24.64<br>(18.96 to 38.59)          | 0.44<br>(0.33 to 0.68)    | 0.91<br>(0.71 to 1.43)     | 1.08<br>(0.84 to 1.68)      | 0.85<br>(0.64 to 1.32)     |
| Other neurological disorders               | 84.22<br>(63.74 to 110.86)     | 127.10<br>(94.16 to 167.60)        | 132.86<br>(99.71 to 172.44)        | 125.04<br>(92.45 to 165.55)        | 1.88<br>(1.41 to 2.42)    | 3.21<br>(2.43 to 4.13)     | 3.66<br>(2.77 to 4.69)      | 3.02<br>(2.28 to 3.86)     |
| Mental disorders                           | 153.29<br>(94.55 to 238.37)    | 283.02<br>(175.73 to 440.00)       | 279.62<br>(172.37 to 434.51)       | 282.64<br>(176.40 to 441.23)       | 3.51<br>(2.13 to 5.52)    | 6.61<br>(4.17 to 10.01)    | 6.82<br>(4.32 to 10.41)     | 6.44<br>(4.04 to 9.87)     |
| Alcohol use disorders                      | 86.68<br>(50.93 to 157.99)     | 108.95<br>(56.47 to 220.52)        | 106.18<br>(55.60 to 216.81)        | 109.95<br>(57.08 to 219.90)        | 2.07<br>(1.23 to 3.78)    | 2.67<br>(1.43 to 5.38)     | 2.68<br>(1.46 to 5.31)      | 2.65<br>(1.41 to 5.36)     |
| Drug use disorders                         | 65.93<br>(34.30 to 120.51)     | 172.92<br>(94.90 to 302.62)        | 172.32<br>(94.96 to 301.45)        | 171.54<br>(93.47 to 300.60)        | 1.42<br>(0.74 to 2.55)    | 3.91<br>(2.23 to 6.60)     | 4.12<br>(2.38 to 6.90)      | 3.76<br>(2.11 to 6.38)     |
| Opioid use disorders                       | 37.17<br>(15.83 to 77.02)      | 83.99<br>(35.13 to 170.25)         | 82.67<br>(34.80 to 165.86)         | 83.85<br>(35.09 to 169.87)         | 0.73<br>(0.31 to 1.50)    | 1.71<br>(0.73 to 3.42)     | 1.74<br>(0.75 to 3.41)      | 1.68<br>(0.71 to 3.36)     |

|                           |                              |                               |                               |                               |                           |                           |                           |                           |
|---------------------------|------------------------------|-------------------------------|-------------------------------|-------------------------------|---------------------------|---------------------------|---------------------------|---------------------------|
| Cocaine use disorders     | 5.02<br>(2.30 to<br>8.50)    | 15.32<br>(6.97 to<br>26.83)   | 14.15<br>(6.37 to<br>25.26)   | 15.44<br>(7.07 to<br>26.88)   | 0.11<br>(0.05 to<br>0.18) | 0.34<br>(0.15 to<br>0.58) | 0.32<br>(0.14 to<br>0.57) | 0.33<br>(0.15 to<br>0.57) |
| Amphetamine use disorders | 1.93<br>(0.96 to<br>3.13)    | 8.16<br>(3.78 to<br>14.07)    | 7.24<br>(3.28 to<br>12.62)    | 8.29<br>(3.87 to<br>14.43)    | 0.04<br>(0.02 to<br>0.07) | 0.18<br>(0.09 to<br>0.30) | 0.17<br>(0.08 to<br>0.27) | 0.18<br>(0.09 to<br>0.30) |
| Other drug use disorders  | 21.82<br>(11.04 to<br>39.90) | 65.45<br>(33.84 to<br>121.87) | 68.27<br>(35.40 to<br>127.62) | 63.96<br>(32.85 to<br>118.17) | 0.54<br>(0.28 to<br>0.97) | 1.68<br>(0.89 to<br>2.92) | 1.90<br>(1.02 to<br>3.24) | 1.57<br>(0.82 to<br>2.75) |
| Eating disorders          | 0.67<br>(0.43 to<br>1.03)    | 1.15<br>(0.69 to<br>1.79)     | 1.12<br>(0.67 to<br>1.77)     | 1.15<br>(0.70 to<br>1.77)     | 0.01<br>(0.01 to<br>0.02) | 0.02<br>(0.01 to<br>0.04) | 0.02<br>(0.01 to<br>0.04) | 0.02<br>(0.01 to<br>0.03) |

| Vanuatu                                                    |                                           |                                             |                                             |                                              |                                     |                                       |                                     |                                       |
|------------------------------------------------------------|-------------------------------------------|---------------------------------------------|---------------------------------------------|----------------------------------------------|-------------------------------------|---------------------------------------|-------------------------------------|---------------------------------------|
| Cause                                                      | YLLs (actual counts)                      |                                             |                                             |                                              | Deaths (actual counts)              |                                       |                                     |                                       |
|                                                            | 2016                                      | 2040 Forecast                               | 2040 Better Scenario                        | 2040 Worse Scenario                          | 2016                                | 2040 Forecast                         | 2040 Better Scenario                | 2040 Worse Scenario                   |
| <b>Diabetes, urogenital, blood, and endocrine diseases</b> | <b>7,349.46</b><br>(6,010.03 to 9,152.61) | <b>14,862.78</b><br>(9,937.04 to 24,517.92) | <b>10,667.70</b><br>(7,132.25 to 18,388.82) | <b>16,730.98</b><br>(11,243.04 to 26,450.49) | <b>273.07</b><br>(227.76 to 336.42) | <b>619.63</b><br>(416.19 to 1,002.55) | <b>477.55</b><br>(320.71 to 835.41) | <b>667.08</b><br>(448.15 to 1,041.75) |
| Diabetes mellitus                                          | 3,898.97<br>(3,193.87 to 4,886.24)        | 6,514.73<br>(4,285.64 to 9,482.04)          | 4,607.75<br>(3,047.97 to 6,654.76)          | 7,222.45<br>(4,662.85 to 10,665.39)          | 158.06<br>(131.21 to 194.85)        | 286.19<br>(190.59 to 403.30)          | 218.33<br>(149.20 to 301.82)        | 301.82<br>(197.31 to 427.12)          |
| Acute glomerulonephritis                                   | 6.74<br>(4.29 to 10.08)                   | 10.64<br>(6.05 to 18.78)                    | 9.21<br>(5.14 to 16.41)                     | 10.72<br>(6.13 to 18.24)                     | 0.19<br>(0.11 to 0.29)              | 0.31<br>(0.17 to 0.56)                | 0.28<br>(0.15 to 0.51)              | 0.30<br>(0.17 to 0.55)                |
| Chronic kidney disease                                     | 2,586.08<br>(1,960.41 to 3,376.34)        | 7,063.73<br>(2,100.16 to 17,524.27)         | 4,889.86<br>(1,422.55 to 13,673.93)         | 8,220.00<br>(2,472.04 to 18,659.48)          | 91.43<br>(70.37 to 120.06)          | 292.80<br>(73.26 to 746.18)           | 218.38<br>(52.57 to 616.12)         | 326.62<br>(84.59 to 757.86)           |
| Chronic kidney disease due to diabetes mellitus            | 1,352.41<br>(998.46 to 1,787.50)          | 4,010.42<br>(1,120.74 to 10,408.33)         | 2,771.78<br>(768.99 to 8,018.67)            | 4,693.54<br>(1,330.16 to 11,189.71)          | 47.99<br>(35.86 to 63.20)           | 159.39<br>(38.81 to 411.26)           | 117.13<br>(28.23 to 335.75)         | 179.90<br>(46.07 to 424.53)           |
| Chronic kidney disease due to hypertension                 | 594.33<br>(437.55 to 798.92)              | 1,864.26<br>(442.57 to 4,904.50)            | 1,333.65<br>(316.19 to 3,826.31)            | 2,128.75<br>(529.72 to 5,085.79)             | 27.10<br>(20.54 to 35.26)           | 93.12<br>(21.33 to 236.90)            | 72.59<br>(16.07 to 206.90)          | 101.00<br>(24.15 to 236.68)           |
| Chronic kidney disease due to glomerulonephritis           | 308.85<br>(227.59 to 415.30)              | 532.99<br>(234.59 to 1,140.08)              | 349.08<br>(151.12 to 810.38)                | 627.50<br>(276.74 to 1,307.14)               | 7.30<br>(5.32 to 9.92)              | 16.53<br>(5.68 to 40.03)              | 11.52<br>(3.76 to 29.87)            | 18.94<br>(6.52 to 43.08)              |
| Chronic kidney disease due to other and unspecified causes | 331.09<br>(237.06 to 452.04)              | 656.06<br>(246.93 to 1,521.95)              | 435.35<br>(156.62 to 1,129.19)              | 770.21<br>(1,648.15)                         | 9.05<br>(6.45 to 12.29)             | 23.76<br>(6.79 to 58.21)              | 17.13<br>(4.61 to 45.65)            | 26.78<br>(7.91 to 60.83)              |
| Urinary diseases and male infertility                      | 284.52<br>(215.14 to 367.81)              | 447.45<br>(343.03 to 623.87)                | 428.28<br>(330.58 to 596.32)                | 443.29<br>(336.94 to 617.08)                 | 8.18<br>(6.48 to 10.66)             | 15.41<br>(12.04 to 20.28)             | 16.73<br>(13.26 to 21.85)           | 14.23<br>(11.11 to 18.87)             |
| Urinary tract infections                                   | 224.58<br>(165.82 to 315.42)              | 369.48<br>(278.02 to 530.28)                | 359.56<br>(272.25 to 509.64)                | 365.57<br>(272.72 to 522.88)                 | 6.17<br>(4.77 to 8.20)              | 12.55<br>(9.64 to 16.73)              | 14.00<br>(10.89 to 18.51)           | 11.52<br>(8.87 to 15.40)              |
| Urolithiasis                                               | 7.79<br>(5.18 to 12.73)                   | 17.33<br>(11.06 to 28.79)                   | 18.51<br>(11.77 to 30.87)                   | 16.60<br>(10.56 to 27.40)                    | 0.26<br>(0.17 to 0.42)              | 0.59<br>(0.38 to 0.96)                | 0.67<br>(0.44 to 1.10)              | 0.55<br>(0.35 to 0.89)                |
| Other urinary diseases                                     | 52.15<br>(29.32 to 74.34)                 | 60.63<br>(31.01 to 91.66)                   | 50.20<br>(24.79 to 76.27)                   | 61.13<br>(31.83 to 92.20)                    | 1.75<br>(0.98 to 2.47)              | 2.27<br>(1.14 to 3.44)                | 2.06<br>(0.99 to 3.12)              | 2.17<br>(1.09 to 3.29)                |
| Gynecological diseases                                     | 5.35<br>(2.27 to 8.82)                    | 6.85<br>(2.83 to 11.87)                     | 5.33<br>(2.26 to 9.43)                      | 7.19<br>(2.97 to 12.72)                      | 0.13<br>(0.06 to 0.21)              | 0.17<br>(0.07 to 0.29)                | 0.13<br>(0.06 to 0.23)              | 0.17<br>(0.08 to 0.29)                |
| Uterine fibroids                                           | 0.75<br>(0.08 to 1.74)                    | 0.85<br>(0.10 to 2.18)                      | 0.63<br>(0.07 to 1.64)                      | 0.90<br>(0.10 to 2.31)                       | 0.02<br>(0.00 to 0.05)              | 0.02<br>(0.00 to 0.06)                | 0.02<br>(0.00 to 0.05)              | 0.03<br>(0.00 to 0.06)                |
| Polycystic ovarian syndrome                                | 0.13<br>(0.03 to 0.37)                    | 0.11<br>(0.02 to 0.36)                      | 0.07<br>(0.01 to 0.23)                      | 0.12<br>(0.02 to 0.41)                       | 0.00<br>(0.00 to 0.01)              | 0.00<br>(0.00 to 0.01)                | 0.00<br>(0.00 to 0.01)              | 0.00<br>(0.00 to 0.01)                |
| Endometriosis                                              | 0.03<br>(0.01 to 0.08)                    | 0.05<br>(0.01 to 0.14)                      | 0.04<br>(0.01 to 0.11)                      | 0.05<br>(0.01 to 0.15)                       | 0.00<br>(0.00 to 0.00)              | 0.00<br>(0.00 to 0.00)                | 0.00<br>(0.00 to 0.00)              | 0.00<br>(0.00 to 0.00)                |
| Genital prolapse                                           | 0.20<br>(0.05 to 0.45)                    | 0.23<br>(0.05 to 0.59)                      | 0.17<br>(0.04 to 0.42)                      | 0.24<br>(0.05 to 0.62)                       | 0.01<br>(0.00 to 0.01)              | 0.01<br>(0.00 to 0.02)                | 0.01<br>(0.00 to 0.01)              | 0.01<br>(0.00 to 0.02)                |
| Other gynecological diseases                               | 4.24<br>(1.65 to 6.89)                    | 5.61<br>(2.17 to 9.82)                      | 4.43<br>(1.68 to 7.77)                      | 5.87<br>(2.25 to 10.43)                      | 0.10<br>(0.04 to 0.16)              | 0.13<br>(0.05 to 0.23)                | 0.11<br>(0.04 to 0.18)              | 0.14<br>(0.06 to 0.23)                |
| Hemoglobinopathies and hemolytic anemias                   | 101.47<br>(76.93 to 136.53)               | 109.81<br>(81.08 to 148.25)                 | 88.45<br>(65.13 to 120.96)                  | 113.53<br>(82.88 to 154.29)                  | 2.48<br>(1.89 to 3.34)              | 3.18<br>(2.40 to 4.27)                | 2.70<br>(2.05 to 3.70)              | 3.16<br>(2.39 to 4.30)                |
| Thalassemias                                               | 22.01<br>(13.61 to 32.81)                 | 12.28<br>(7.32 to 19.41)                    | 11.89<br>(7.28 to 18.44)                    | 12.68<br>(7.55 to 20.15)                     | 0.28<br>(0.18 to 0.41)              | 0.16<br>(0.10 to 0.25)                | 0.16<br>(0.10 to 0.24)              | 0.17<br>(0.10 to 0.27)                |

|                                                   |                                 |                                 |                                 |                                 |                             |                              |                              |                              |
|---------------------------------------------------|---------------------------------|---------------------------------|---------------------------------|---------------------------------|-----------------------------|------------------------------|------------------------------|------------------------------|
|                                                   | 0.10<br>(0.06 to<br>0.16)       | 0.11<br>(0.06 to<br>0.18)       | 0.09<br>(0.05 to<br>0.15)       | 0.11<br>(0.06 to<br>0.19)       | 0.00<br>(0.00 to<br>0.00)   | 0.00<br>(0.00 to<br>0.00)    | 0.00<br>(0.00 to<br>0.00)    | 0.00<br>(0.00 to<br>0.00)    |
| Sickle cell disorders                             |                                 |                                 |                                 |                                 |                             |                              |                              |                              |
|                                                   | 51.68<br>(38.88 to<br>71.12)    | 71.51<br>(50.92 to<br>97.32)    | 54.26<br>(38.33 to<br>75.64)    | 75.28<br>(53.09 to<br>104.49)   | 1.13<br>(0.85 to<br>1.56)   | 1.78<br>(1.31 to<br>2.41)    | 1.40<br>(1.02 to<br>1.93)    | 1.84<br>(1.35 to<br>2.52)    |
| G6PD deficiency                                   |                                 |                                 |                                 |                                 |                             |                              |                              |                              |
|                                                   | 27.68<br>(20.57 to<br>38.49)    | 25.92<br>(18.89 to<br>36.25)    | 22.22<br>(16.24 to<br>30.95)    | 25.46<br>(18.62 to<br>35.77)    | 1.07<br>(0.81 to<br>1.46)   | 1.24<br>(0.89 to<br>1.73)    | 1.15<br>(0.85 to<br>1.61)    | 1.16<br>(0.83 to<br>1.65)    |
| Other hemoglobinopathies and hemolytic anemias    |                                 |                                 |                                 |                                 |                             |                              |                              |                              |
|                                                   | 465.72<br>(348.48 to<br>624.76) | 709.56<br>(531.94 to<br>939.16) | 638.82<br>(473.10 to<br>854.97) | 713.80<br>(533.56 to<br>945.23) | 12.60<br>(9.50 to<br>16.73) | 21.57<br>(16.33 to<br>28.52) | 20.99<br>(15.67 to<br>28.12) | 20.77<br>(15.57 to<br>27.34) |
| Endocrine, metabolic, blood, and immune disorders |                                 |                                 |                                 |                                 |                             |                              |                              |                              |

| Vanuatu                                       |                                           |                                           |                                           |                                           |                                  |                                   |                                  |                                   |
|-----------------------------------------------|-------------------------------------------|-------------------------------------------|-------------------------------------------|-------------------------------------------|----------------------------------|-----------------------------------|----------------------------------|-----------------------------------|
| Cause                                         | YLLs (actual counts)                      |                                           |                                           |                                           | Deaths (actual counts)           |                                   |                                  |                                   |
|                                               | 2016                                      | 2040 Forecast                             | 2040 Better Scenario                      | 2040 Worse Scenario                       | 2016                             | 2040 Forecast                     | 2040 Better Scenario             | 2040 Worse Scenario               |
| <b>Musculoskeletal disorders</b>              | <b>158.06</b><br>(94.93 to 223.27)        | <b>235.42</b><br>(140.39 to 340.46)       | <b>247.94</b><br>(147.03 to 356.67)       | <b>230.76</b><br>(135.96 to 333.50)       | <b>3.33</b><br>(2.03 to 4.61)    | <b>5.72</b><br>(3.50 to 7.78)     | <b>6.39</b><br>(3.93 to 8.75)    | <b>5.41</b><br>(3.28 to 7.37)     |
| Rheumatoid arthritis                          | 12.03<br>(6.96 to 16.73)                  | 22.22<br>(12.55 to 30.96)                 | 19.36<br>(10.56 to 27.25)                 | 22.14<br>(12.44 to 30.92)                 | 0.43<br>(0.24 to 0.59)           | 0.94<br>(0.50 to 1.34)            | 0.89<br>(0.45 to 1.27)           | 0.90<br>(0.47 to 1.26)            |
| Other musculoskeletal disorders               | 146.03<br>(87.01 to 208.86)               | 213.20<br>(123.95 to 312.95)              | 228.58<br>(133.15 to 332.10)              | 208.62<br>(121.82 to 305.91)              | 2.90<br>(1.75 to 4.10)           | 4.77<br>(2.87 to 6.71)            | 5.51<br>(3.32 to 7.66)           | 4.51<br>(2.69 to 6.33)            |
| <b>Other non-communicable diseases</b>        | <b>4,017.23</b><br>(2,113.98 to 6,495.29) | <b>3,947.42</b><br>(2,342.34 to 6,278.41) | <b>2,770.47</b><br>(1,803.25 to 4,203.82) | <b>4,433.29</b><br>(2,557.49 to 7,246.99) | <b>55.52</b><br>(33.25 to 85.65) | <b>71.58</b><br>(49.48 to 102.19) | <b>60.88</b><br>(44.33 to 83.89) | <b>74.81</b><br>(49.98 to 109.81) |
| Congenital birth defects                      | 3,625.37<br>(1,764.58 to 5,981.22)        | 3,074.45<br>(1,498.48 to 5,333.74)        | 1,932.42<br>(977.83 to 3,273.17)          | 3,570.34<br>(1,718.85 to 6,324.88)        | 44.36<br>(22.08 to 72.70)        | 39.86<br>(20.20 to 66.97)         | 26.02<br>(13.67 to 41.98)        | 45.73<br>(22.54 to 78.84)         |
| Neural tube defects                           | 302.80<br>(108.25 to 625.60)              | 107.22<br>(30.98 to 274.26)               | 52.95<br>(15.21 to 135.15)                | 132.55<br>(37.92 to 335.22)               | 3.52<br>(1.27 to 7.27)           | 1.26<br>(0.38 to 3.19)            | 0.63<br>(0.19 to 1.58)           | 1.56<br>(0.46 to 3.90)            |
| Congenital heart anomalies                    | 1,534.10<br>(830.50 to 2,511.22)          | 1,286.62<br>(693.19 to 2,194.88)          | 832.71<br>(474.91 to 1,369.84)            | 1,479.38<br>(789.13 to 2,567.60)          | 19.04<br>(10.62 to 30.53)        | 17.01<br>(9.61 to 27.95)          | 11.44<br>(6.82 to 18.07)         | 19.31<br>(10.72 to 32.39)         |
| Orofacial clefts                              | 2.83<br>(0.91 to 7.89)                    | 2.14<br>(0.58 to 6.12)                    | 0.98<br>(0.27 to 2.86)                    | 2.70<br>(0.73 to 7.84)                    | 0.03<br>(0.01 to 0.09)           | 0.02<br>(0.01 to 0.07)            | 0.01<br>(0.00 to 0.03)           | 0.03<br>(0.01 to 0.09)            |
| Down syndrome                                 | 142.56<br>(50.85 to 332.71)               | 153.66<br>(59.01 to 354.23)               | 97.07<br>(39.53 to 211.52)                | 177.20<br>(66.89 to 418.82)               | 1.86<br>(0.71 to 4.16)           | 2.27<br>(0.94 to 4.82)            | 1.53<br>(0.66 to 3.05)           | 2.55<br>(1.04 to 5.56)            |
| Other chromosomal abnormalities               | 125.50<br>(38.93 to 279.67)               | 176.93<br>(51.29 to 385.09)               | 102.35<br>(29.21 to 221.69)               | 210.36<br>(60.39 to 459.37)               | 1.48<br>(0.46 to 3.31)           | 2.15<br>(0.62 to 4.58)            | 1.26<br>(0.36 to 2.72)           | 2.52<br>(0.73 to 5.46)            |
| Congenital musculoskeletal and limb anomalies | 106.16<br>(36.54 to 260.97)               | 105.59<br>(35.28 to 256.87)               | 68.27<br>(23.27 to 164.35)                | 122.10<br>(40.07 to 295.41)               | 1.27<br>(0.44 to 3.17)           | 1.30<br>(0.44 to 3.17)            | 0.86<br>(0.30 to 2.08)           | 1.49<br>(0.51 to 3.63)            |
| Urogenital congenital anomalies               | 119.88<br>(46.64 to 215.42)               | 105.39<br>(40.37 to 187.12)               | 69.23<br>(27.96 to 118.08)                | 120.99<br>(44.94 to 221.71)               | 1.58<br>(0.63 to 2.74)           | 1.57<br>(0.63 to 2.63)            | 1.12<br>(0.48 to 1.75)           | 1.75<br>(0.69 to 3.00)            |
| Digestive congenital anomalies                | 198.26<br>(73.48 to 406.37)               | 148.35<br>(51.19 to 326.02)               | 84.59<br>(29.69 to 183.31)                | 177.06<br>(60.45 to 396.68)               | 2.32<br>(0.87 to 4.74)           | 1.77<br>(0.62 to 3.85)            | 1.02<br>(0.37 to 2.20)           | 2.11<br>(0.73 to 4.68)            |
| Other congenital birth defects                | 1,093.29<br>(372.26 to 2,192.17)          | 988.54<br>(352.73 to 2,091.05)            | 624.29<br>(229.81 to 1,230.46)            | 1,148.02<br>(403.45 to 2,462.74)          | 13.24<br>(4.61 to 26.18)         | 12.52<br>(4.56 to 25.77)          | 8.15<br>(3.10 to 15.44)          | 14.40<br>(5.15 to 29.89)          |
| Skin and subcutaneous diseases                | 284.19<br>(169.16 to 447.54)              | 796.93<br>(495.71 to 1,212.97)            | 791.66<br>(495.18 to 1,197.31)            | 772.84<br>(480.54 to 1,171.75)            | 9.91<br>(5.84 to 15.38)          | 30.84<br>(18.92 to 46.83)         | 34.32<br>(21.63 to 52.54)        | 28.04<br>(17.08 to 43.06)         |
| Cellulitis                                    | 28.92<br>(8.17 to 54.75)                  | 102.82<br>(29.34 to 185.22)               | 117.71<br>(35.18 to 211.89)               | 96.34<br>(27.06 to 173.92)                | 0.99<br>(0.27 to 1.86)           | 3.96<br>(1.06 to 7.19)            | 5.01<br>(1.38 to 9.07)           | 3.50<br>(0.91 to 6.39)            |
| Pyoderma                                      | 202.31<br>(121.84 to 318.23)              | 576.07<br>(358.97 to 895.34)              | 544.57<br>(341.20 to 867.44)              | 567.25<br>(350.47 to 883.76)              | 6.34<br>(3.83 to 10.12)          | 20.47<br>(12.95 to 32.12)         | 21.40<br>(13.66 to 33.60)        | 19.00<br>(11.92 to 29.97)         |
| Decubitus ulcer                               | 49.83<br>(24.14 to 92.83)                 | 111.77<br>(50.42 to 216.69)               | 123.14<br>(56.99 to 232.93)               | 102.98<br>(45.65 to 203.10)               | 2.50<br>(1.27 to 4.54)           | 6.27<br>(2.75 to 12.39)           | 7.75<br>(3.58 to 14.78)          | 5.40<br>(2.32 to 10.91)           |
| Other skin and subcutaneous diseases          | 3.13<br>(1.75 to 5.00)                    | 6.27<br>(3.51 to 10.12)                   | 6.24<br>(3.58 to 9.96)                    | 6.27<br>(3.52 to 10.12)                   | 0.07<br>(0.04 to 0.11)           | 0.15<br>(0.08 to 0.23)            | 0.16<br>(0.10 to 0.26)           | 0.14<br>(0.08 to 0.21)            |
| Sudden infant death syndrome                  | 107.68<br>(43.67 to 219.85)               | 76.03<br>(22.88 to 182.00)                | 46.39<br>(14.10 to 112.20)                | 90.10<br>(27.32 to 214.58)                | 1.25<br>(0.51 to 2.55)           | 0.88<br>(0.27 to 2.11)            | 0.54<br>(0.16 to 1.30)           | 1.04<br>(0.32 to 2.49)            |

|                          |                                        |                                         |                                        |                                         |                                 |                                 |                                 |                                 |
|--------------------------|----------------------------------------|-----------------------------------------|----------------------------------------|-----------------------------------------|---------------------------------|---------------------------------|---------------------------------|---------------------------------|
| Injuries                 | 9,904.15<br>(8,188.19 to<br>11,980.17) | 12,134.93<br>(9,314.47 to<br>17,936.18) | 9,754.17<br>(7,422.14 to<br>15,108.34) | 12,994.26<br>(9,871.25 to<br>18,955.53) | 185.79<br>(152.80 to<br>223.42) | 244.12<br>(191.35 to<br>355.07) | 207.22<br>(162.75 to<br>316.09) | 254.54<br>(198.97 to<br>367.24) |
| Transport injuries       | 2,736.76<br>(2,154.83 to<br>3,476.67)  | 3,783.46<br>(2,831.07 to<br>4,899.30)   | 2,627.09<br>(1,955.75 to<br>3,444.18)  | 4,135.59<br>(3,066.51 to<br>5,471.98)   | 51.38<br>(40.96 to<br>65.30)    | 74.67<br>(57.89 to<br>96.21)    | 55.16<br>(42.76 to<br>71.76)    | 79.74<br>(60.97 to<br>103.99)   |
| Road injuries            | 2,512.64<br>(1,979.53 to<br>3,205.47)  | 3,436.69<br>(2,556.24 to<br>4,534.55)   | 2,341.83<br>(1,724.97 to<br>3,115.35)  | 3,761.37<br>(2,764.92 to<br>5,006.67)   | 47.08<br>(37.42 to<br>60.62)    | 67.47<br>(51.59 to<br>88.32)    | 48.91<br>(37.29 to<br>64.50)    | 72.17<br>(54.51 to<br>95.76)    |
| Pedestrian road injuries | 807.76<br>(568.37 to<br>1,226.56)      | 861.21<br>(564.03 to<br>1,361.77)       | 612.45<br>(401.00 to<br>972.72)        | 935.63<br>(607.81 to<br>1,489.28)       | 15.36<br>(10.80 to<br>23.41)    | 17.97<br>(12.16 to<br>27.77)    | 13.54<br>(9.22 to<br>21.17)     | 19.03<br>(12.79 to<br>29.69)    |



| Vanuatu                                         |                                                            |                                                            |                                                            |                                                            |                                                    |                                                    |                                                   |                                                    |
|-------------------------------------------------|------------------------------------------------------------|------------------------------------------------------------|------------------------------------------------------------|------------------------------------------------------------|----------------------------------------------------|----------------------------------------------------|---------------------------------------------------|----------------------------------------------------|
| Cause                                           | YLLs (actual counts)                                       |                                                            |                                                            |                                                            | Deaths (actual counts)                             |                                                    |                                                   |                                                    |
|                                                 | 2016                                                       | 2040 Forecast                                              | 2040 Better Scenario                                       | 2040 Worse Scenario                                        | 2016                                               | 2040 Forecast                                      | 2040 Better Scenario                              | 2040 Worse Scenario                                |
| Cyclist road injuries                           | 42.58<br>(26.10 to<br>64.49)                               | 60.91<br>(36.64 to<br>93.11)                               | 41.04<br>(24.83 to<br>63.13)                               | 66.35<br>(39.55 to<br>102.39)                              | 0.85<br>(0.52 to<br>1.27)                          | 1.28<br>(0.77 to<br>1.92)                          | 0.95<br>(0.58 to<br>1.42)                         | 1.35<br>(0.81 to<br>2.05)                          |
| Motorcyclist road injuries                      | 360.48<br>(246.82 to<br>525.40)                            | 547.94<br>(348.05 to<br>823.83)                            | 416.75<br>(260.17 to<br>640.23)                            | 593.16<br>(372.92 to<br>903.34)                            | 6.53<br>(4.44 to<br>9.53)                          | 10.08<br>(6.55 to<br>15.36)                        | 7.94<br>(5.10 to<br>12.31)                        | 10.78<br>(6.88 to<br>16.47)                        |
| Motor vehicle road injuries                     | 1,255.21<br>(908.14 to<br>1,701.29)                        | 1,894.03<br>(1,325.21 to<br>2,620.75)                      | 1,225.07<br>(842.14 to<br>1,716.41)                        | 2,085.90<br>(1,449.44 to<br>2,919.78)                      | 23.50<br>(17.15 to<br>32.17)                       | 36.78<br>(26.42 to<br>50.34)                       | 25.54<br>(18.20 to<br>35.48)                      | 39.54<br>(28.05 to<br>54.34)                       |
| Other road injuries                             | 46.62<br>(29.39 to<br>68.84)                               | 72.60<br>(43.80 to<br>111.01)                              | 46.52<br>(28.57 to<br>70.58)                               | 80.34<br>(48.61 to<br>121.95)                              | 0.85<br>(0.53 to<br>1.23)                          | 1.36<br>(0.84 to<br>2.02)                          | 0.94<br>(0.59 to<br>1.38)                         | 1.47<br>(0.90 to<br>2.20)                          |
| Other transport injuries                        | 224.12<br>(119.66 to<br>365.14)                            | 346.78<br>(183.90 to<br>577.19)                            | 285.26<br>(152.42 to<br>480.08)                            | 374.22<br>(195.20 to<br>628.98)                            | 4.30<br>(2.33 to<br>6.95)                          | 7.20<br>(3.88 to<br>11.97)                         | 6.25<br>(3.40 to<br>10.34)                        | 7.56<br>(4.03 to<br>12.57)                         |
| <b>Unintentional injuries</b>                   | <b>4,750.92</b><br><b>(3,842.76 to</b><br><b>5,830.49)</b> | <b>4,290.68</b><br><b>(3,326.40 to</b><br><b>5,407.34)</b> | <b>3,429.41</b><br><b>(2,699.22 to</b><br><b>4,270.90)</b> | <b>4,561.22</b><br><b>(3,533.69 to</b><br><b>5,779.51)</b> | <b>89.53</b><br><b>(73.00 to</b><br><b>108.96)</b> | <b>92.44</b><br><b>(75.63 to</b><br><b>111.25)</b> | <b>79.86</b><br><b>(65.47 to</b><br><b>96.72)</b> | <b>94.56</b><br><b>(76.55 to</b><br><b>115.24)</b> |
| Falls                                           | 332.27<br>(237.95 to<br>499.59)                            | 381.02<br>(278.47 to<br>544.53)                            | 352.80<br>(260.56 to<br>495.30)                            | 381.16<br>(278.58 to<br>548.91)                            | 8.38<br>(6.23 to<br>12.05)                         | 11.66<br>(8.74 to<br>16.25)                        | 12.02<br>(9.07 to<br>16.59)                       | 10.94<br>(8.22 to<br>15.47)                        |
| Drowning                                        | 1,898.69<br>(1,481.70 to<br>2,361.98)                      | 1,535.13<br>(1,140.92 to<br>1,984.60)                      | 1,223.58<br>(914.79 to<br>1,581.79)                        | 1,653.47<br>(1,205.46 to<br>2,155.93)                      | 32.54<br>(25.51 to<br>40.14)                       | 28.75<br>(21.70 to<br>36.57)                       | 23.76<br>(17.88 to<br>30.37)                      | 30.44<br>(22.68 to<br>38.45)                       |
| Fire, heat, and hot substances                  | 347.37<br>(262.13 to<br>463.99)                            | 257.89<br>(187.16 to<br>362.53)                            | 194.05<br>(140.16 to<br>271.58)                            | 280.17<br>(196.59 to<br>394.62)                            | 6.41<br>(4.93 to<br>8.45)                          | 5.54<br>(4.25 to<br>7.47)                          | 4.55<br>(3.53 to<br>6.11)                         | 5.78<br>(4.33 to<br>7.89)                          |
| Poisonings                                      | 283.15<br>(145.76 to<br>430.48)                            | 180.04<br>(91.74 to<br>275.38)                             | 120.42<br>(61.14 to<br>178.59)                             | 201.87<br>(101.60 to<br>314.16)                            | 5.21<br>(2.73 to<br>7.41)                          | 3.73<br>(1.95 to<br>5.23)                          | 2.74<br>(1.51 to<br>3.82)                         | 4.80<br>(2.09 to<br>5.77)                          |
| Exposure to mechanical forces                   | 579.06<br>(442.51 to<br>767.78)                            | 560.88<br>(406.10 to<br>781.88)                            | 428.74<br>(307.28 to<br>603.31)                            | 597.45<br>(429.87 to<br>843.02)                            | 10.86<br>(8.32 to<br>14.54)                        | 11.65<br>(8.71 to<br>15.79)                        | 9.49<br>(7.08 to<br>13.26)                        | 12.02<br>(8.98 to<br>16.52)                        |
| Unintentional firearm injuries                  | 109.60<br>(80.39 to<br>148.28)                             | 97.91<br>(65.00 to<br>141.53)                              | 71.66<br>(47.47 to<br>104.36)                              | 105.12<br>(69.10 to<br>152.48)                             | 2.15<br>(1.60 to<br>2.88)                          | 2.16<br>(1.51 to<br>3.01)                          | 1.70<br>(1.19 to<br>2.39)                         | 2.22<br>(1.54 to<br>3.10)                          |
| Unintentional suffocation                       | 124.96<br>(76.08 to<br>190.13)                             | 123.35<br>(73.23 to<br>194.50)                             | 90.26<br>(54.35 to<br>141.87)                              | 134.29<br>(79.83 to<br>210.18)                             | 1.92<br>(1.18 to<br>2.86)                          | 2.01<br>(1.23 to<br>3.08)                          | 1.52<br>(0.94 to<br>2.36)                         | 2.16<br>(1.31 to<br>3.36)                          |
| Other exposure to mechanical forces             | 344.50<br>(249.67 to<br>501.31)                            | 339.62<br>(236.61 to<br>504.39)                            | 266.82<br>(184.99 to<br>402.92)                            | 358.04<br>(251.14 to<br>534.92)                            | 6.80<br>(4.91 to<br>9.92)                          | 7.48<br>(5.32 to<br>11.17)                         | 6.26<br>(4.50 to<br>9.41)                         | 7.63<br>(5.49 to<br>11.31)                         |
| Adverse effects of medical treatment            | 492.18<br>(375.62 to<br>646.92)                            | 533.17<br>(405.03 to<br>687.70)                            | 429.40<br>(327.50 to<br>555.00)                            | 559.69<br>(424.18 to<br>737.12)                            | 10.17<br>(8.03 to<br>12.75)                        | 12.71<br>(10.11 to<br>15.77)                       | 11.20<br>(8.85 to<br>13.96)                       | 12.74<br>(10.06 to<br>15.81)                       |
| Animal contact                                  | 32.82<br>(16.94 to<br>55.39)                               | 48.38<br>(23.97 to<br>85.04)                               | 36.00<br>(17.80 to<br>63.69)                               | 51.55<br>(25.57 to<br>91.56)                               | 0.75<br>(0.38 to<br>1.22)                          | 1.22<br>(0.60 to<br>2.09)                          | 1.01<br>(0.51 to<br>1.71)                         | 1.24<br>(0.63 to<br>2.12)                          |
| Venomous animal contact                         | 9.98<br>(5.13 to<br>20.11)                                 | 13.10<br>(6.49 to<br>27.61)                                | 9.43<br>(4.62 to<br>20.17)                                 | 14.11<br>(7.01 to<br>30.34)                                | 0.22<br>(0.12 to<br>0.44)                          | 0.32<br>(0.16 to<br>0.66)                          | 0.26<br>(0.13 to<br>0.54)                         | 0.33<br>(0.17 to<br>0.69)                          |
| Non-venomous animal contact                     | 22.84<br>(11.10 to<br>38.58)                               | 35.28<br>(16.54 to<br>61.93)                               | 26.57<br>(12.56 to<br>47.05)                               | 37.45<br>(17.90 to<br>66.40)                               | 0.52<br>(0.26 to<br>0.87)                          | 0.90<br>(0.43 to<br>1.54)                          | 0.75<br>(0.36 to<br>1.28)                         | 0.91<br>(0.42 to<br>1.56)                          |
| Foreign body                                    | 308.37<br>(191.83 to<br>472.80)                            | 310.13<br>(197.64 to<br>476.75)                            | 274.93<br>(180.10 to<br>391.27)                            | 322.83<br>(203.37 to<br>506.69)                            | 5.49<br>(3.67 to<br>7.92)                          | 6.56<br>(4.51 to<br>8.80)                          | 6.62<br>(4.60 to<br>8.56)                         | 6.43<br>(4.40 to<br>8.93)                          |
| Pulmonary aspiration and foreign body in airway | 284.59<br>(173.30 to<br>444.63)                            | 287.04<br>(179.85 to<br>447.14)                            | 256.82<br>(164.67 to<br>367.70)                            | 298.15<br>(183.82 to<br>475.59)                            | 5.08<br>(3.34 to<br>7.36)                          | 6.11<br>(4.12 to<br>8.26)                          | 6.25<br>(4.32 to<br>8.11)                         | 5.97<br>(3.98 to<br>8.34)                          |

|                                             |                                                            |                                                            |                                                            |                                                            |                                                   |                                                   |                                                   |                                                   |
|---------------------------------------------|------------------------------------------------------------|------------------------------------------------------------|------------------------------------------------------------|------------------------------------------------------------|---------------------------------------------------|---------------------------------------------------|---------------------------------------------------|---------------------------------------------------|
|                                             | 23.78<br>(14.22 to<br>38.17)                               | 23.09<br>(13.31 to<br>38.26)                               | 18.11<br>(10.48 to<br>29.47)                               | 24.68<br>(14.37 to<br>41.13)                               | 0.41<br>(0.25 to<br>0.65)                         | 0.44<br>(0.26 to<br>0.69)                         | 0.37<br>(0.22 to<br>0.58)                         | 0.46<br>(0.27 to<br>0.74)                         |
| Foreign body in other body part             |                                                            |                                                            |                                                            |                                                            |                                                   |                                                   |                                                   |                                                   |
|                                             | 183.58<br>(113.37 to<br>253.58)                            | 236.51<br>(140.32 to<br>330.80)                            | 165.34<br>(97.12 to<br>238.02)                             | 255.13<br>(153.46 to<br>358.12)                            | 3.96<br>(2.47 to<br>5.43)                         | 5.47<br>(3.23 to<br>7.50)                         | 4.07<br>(2.46 to<br>5.64)                         | 5.71<br>(3.50 to<br>7.92)                         |
| Environmental heat and cold exposure        |                                                            |                                                            |                                                            |                                                            |                                                   |                                                   |                                                   |                                                   |
|                                             | 293.42<br>(208.79 to<br>395.74)                            | 247.53<br>(167.62 to<br>346.27)                            | 204.16<br>(137.26 to<br>285.89)                            | 257.90<br>(174.26 to<br>359.14)                            | 5.74<br>(4.11 to<br>7.76)                         | 5.15<br>(3.52 to<br>7.12)                         | 4.40<br>(3.03 to<br>6.08)                         | 5.26<br>(3.60 to<br>7.22)                         |
| Other unintentional injuries                |                                                            |                                                            |                                                            |                                                            |                                                   |                                                   |                                                   |                                                   |
| <b>Self-harm and interpersonal violence</b> | <b>2,414.49</b><br><b>(1,725.60 to</b><br><b>3,110.11)</b> | <b>3,520.12</b><br><b>(2,421.43 to</b><br><b>4,777.45)</b> | <b>3,204.68</b><br><b>(2,256.71 to</b><br><b>4,308.56)</b> | <b>3,740.22</b><br><b>(2,530.03 to</b><br><b>5,201.97)</b> | <b>44.85</b><br><b>(32.37 to</b><br><b>57.53)</b> | <b>67.03</b><br><b>(47.03 to</b><br><b>90.41)</b> | <b>62.57</b><br><b>(44.83 to</b><br><b>82.77)</b> | <b>70.24</b><br><b>(48.57 to</b><br><b>96.82)</b> |

| Vanuatu                                                                             |                                      |                                            |                                            |                                            |                                      |                                        |                                        |                                         |
|-------------------------------------------------------------------------------------|--------------------------------------|--------------------------------------------|--------------------------------------------|--------------------------------------------|--------------------------------------|----------------------------------------|----------------------------------------|-----------------------------------------|
| Cause                                                                               | YLLs (actual counts)                 |                                            |                                            |                                            | Deaths (actual counts)               |                                        |                                        |                                         |
|                                                                                     | 2016                                 | 2040 Forecast                              | 2040 Better Scenario                       | 2040 Worse Scenario                        | 2016                                 | 2040 Forecast                          | 2040 Better Scenario                   | 2040 Worse Scenario                     |
| Self-harm                                                                           | 2,206.71<br>(1,522.25 to 2,878.14)   | 3,290.59<br>(2,203.56 to 4,541.43)         | 2,987.93<br>(2,037.53 to 4,087.29)         | 3,503.43<br>(2,305.83 to 4,963.74)         | 41.08<br>(28.75 to 53.68)            | 62.71<br>(42.86 to 85.54)              | 58.42<br>(40.96 to 78.49)              | 65.82<br>(44.20 to 91.97)               |
| Self-harm by firearm                                                                | 192.55<br>(48.99 to 357.39)          | 248.28<br>(62.49 to 494.85)                | 219.73<br>(56.27 to 434.94)                | 267.33<br>(67.01 to 547.38)                | 3.69<br>(0.97 to 6.83)               | 4.85<br>(1.28 to 9.51)                 | 4.36<br>(1.18 to 8.46)                 | 5.16<br>(1.32 to 10.59)                 |
| Self-harm by other specified means                                                  | 2,014.17<br>(1,376.08 to 2,577.69)   | 3,042.31<br>(2,026.96 to 4,126.26)         | 2,768.20<br>(1,877.56 to 3,726.13)         | 3,236.10<br>(2,110.53 to 4,533.80)         | 37.38<br>(25.65 to 47.78)            | 57.86<br>(39.26 to 77.46)              | 54.06<br>(37.41 to 71.94)              | 60.66<br>(40.11 to 83.76)               |
| Interpersonal violence                                                              | 207.77<br>(144.58 to 271.71)         | 229.53<br>(154.13 to 319.01)               | 216.75<br>(143.95 to 304.99)               | 236.79<br>(157.25 to 330.60)               | 3.77<br>(2.65 to 4.95)               | 4.32<br>(2.92 to 6.05)                 | 4.16<br>(2.78 to 5.85)                 | 4.42<br>(2.96 to 6.15)                  |
| Physical violence by firearm                                                        | 44.27<br>(23.25 to 71.32)            | 50.03<br>(25.74 to 84.32)                  | 48.04<br>(24.70 to 81.65)                  | 50.47<br>(25.84 to 85.51)                  | 0.80<br>(0.42 to 1.29)               | 0.80<br>(0.49 to 1.54)                 | 0.92<br>(0.48 to 1.52)                 | 0.92<br>(0.49 to 1.55)                  |
| Physical violence by sharp object                                                   | 52.42<br>(34.12 to 77.45)            | 65.02<br>(41.17 to 98.92)                  | 65.49<br>(41.30 to 100.42)                 | 64.82<br>(41.22 to 98.41)                  | 0.96<br>(0.63 to 1.43)               | 1.22<br>(0.79 to 1.86)                 | 1.24<br>(0.80 to 1.91)                 | 1.21<br>(0.78 to 1.83)                  |
| Physical violence by other means                                                    | 111.08<br>(72.29 to 154.23)          | 114.47<br>(68.93 to 171.35)                | 103.22<br>(61.51 to 155.59)                | 121.50<br>(71.97 to 184.99)                | 2.01<br>(1.33 to 2.77)               | 2.18<br>(1.32 to 3.23)                 | 2.02<br>(1.21 to 3.01)                 | 2.28<br>(1.37 to 3.41)                  |
| <b>Forces of nature, conflict and terrorism, and executions and police conflict</b> | <b>1.98</b><br><b>(1.64 to 2.39)</b> | <b>540.67</b><br><b>(0.00 to 6,137.19)</b> | <b>492.99</b><br><b>(0.00 to 5,661.05)</b> | <b>557.22</b><br><b>(0.00 to 6,304.04)</b> | <b>0.03</b><br><b>(0.03 to 0.04)</b> | <b>9.97</b><br><b>(0.00 to 119.34)</b> | <b>9.63</b><br><b>(0.00 to 117.39)</b> | <b>10.01</b><br><b>(0.00 to 118.75)</b> |
| Exposure to forces of nature                                                        | 0.00<br>(0.00 to 0.00)               | 540.67<br>(0.00 to 6,137.19)               | 492.99<br>(0.00 to 5,661.05)               | 557.22<br>(0.00 to 6,304.04)               | 0.00<br>(0.00 to 0.00)               | 9.97<br>(0.00 to 119.34)               | 9.63<br>(0.00 to 117.39)               | 10.01<br>(0.00 to 118.75)               |
| Conflict and terrorism                                                              | 0.00<br>(0.00 to 0.00)               | 0.00<br>(0.00 to 0.00)                     | 0.00<br>(0.00 to 0.00)                     | 0.00<br>(0.00 to 0.00)                     | 0.00<br>(0.00 to 0.00)               | 0.00<br>(0.00 to 0.00)                 | 0.00<br>(0.00 to 0.00)                 | 0.00<br>(0.00 to 0.00)                  |
| Executions and police conflict                                                      | 1.98<br>(1.64 to 2.39)               | 0.00<br>(0.00 to 0.00)                     | 0.00<br>(0.00 to 0.00)                     | 0.00<br>(0.00 to 0.00)                     | 0.03<br>(0.03 to 0.04)               | 0.00<br>(0.00 to 0.00)                 | 0.00<br>(0.00 to 0.00)                 | 0.00<br>(0.00 to 0.00)                  |

| Central Europe, Eastern Europe, and Central Asia                  |                                         |                                        |                                       |                                         |                                    |                                    |                                    |                                    |
|-------------------------------------------------------------------|-----------------------------------------|----------------------------------------|---------------------------------------|-----------------------------------------|------------------------------------|------------------------------------|------------------------------------|------------------------------------|
| Cause                                                             | YLLs (in 1000s)                         |                                        |                                       |                                         | Deaths (in 1000s)                  |                                    |                                    |                                    |
|                                                                   | 2016                                    | 2040 Forecast                          | 2040 Better Scenario                  | 2040 Worse Scenario                     | 2016                               | 2040 Forecast                      | 2040 Better Scenario               | 2040 Worse Scenario                |
| All causes                                                        | 102,315.64<br>(91,121.90 to 116,183.39) | 85,815.76<br>(64,514.74 to 114,711.18) | 60,532.97<br>(45,518.24 to 81,135.84) | 107,640.91<br>(80,284.47 to 143,227.69) | 4,843.26<br>(4,355.31 to 5,435.53) | 4,967.87<br>(4,035.40 to 6,016.59) | 3,755.07<br>(3,029.56 to 4,628.09) | 5,876.98<br>(4,787.14 to 7,119.36) |
| Communicable, maternal, neonatal, and nutritional diseases        | 9,516.46<br>(8,529.42 to 10,576.77)     | 5,359.38<br>(4,107.98 to 7,190.25)     | 3,047.21<br>(2,371.33 to 3,995.49)    | 7,432.30<br>(5,667.21 to 10,111.60)     | 198.96<br>(181.16 to 220.35)       | 150.25<br>(120.33 to 192.86)       | 99.29<br>(81.60 to 123.70)         | 195.43<br>(154.76 to 255.31)       |
| HIV/AIDS and tuberculosis                                         | 2,331.80<br>(2,131.22 to 2,571.99)      | 1,326.71<br>(1,047.80 to 1,849.24)     | 618.21<br>(481.82 to 796.73)          | 2,079.89<br>(1,567.15 to 2,758.44)      | 52.93<br>(48.01 to 58.87)          | 30.50<br>(23.55 to 44.22)          | 13.63<br>(10.30 to 18.10)          | 47.91<br>(34.88 to 66.35)          |
| Tuberculosis                                                      | 981.76<br>(806.86 to 1,215.22)          | 480.02<br>(250.17 to 955.17)           | 168.68<br>(91.37 to 305.59)           | 648.66<br>(337.56 to 1,266.22)          | 25.95<br>(21.25 to 31.88)          | 13.97<br>(7.52 to 25.77)           | 5.06<br>(2.89 to 8.88)             | 18.54<br>(10.02 to 34.48)          |
| HIV/AIDS                                                          | 1,250.04<br>(1,263.53 to 1,446.63)      | 846.69<br>(712.64 to 1,114.18)         | 449.53<br>(359.57 to 541.77)          | 1,431.23<br>(1,093.93 to 1,985.96)      | 26.98<br>(25.32 to 28.82)          | 16.53<br>(13.81 to 22.73)          | 8.57<br>(6.50 to 10.56)            | 29.36<br>(21.67 to 43.59)          |
| Diarrhea, lower respiratory, and other common infectious diseases | 4,270.69<br>(3,716.82 to 4,894.01)      | 2,722.50<br>(1,797.40 to 4,269.85)     | 1,657.95<br>(1,146.54 to 2,426.96)    | 3,784.33<br>(2,398.64 to 6,192.49)      | 109.16<br>(97.25 to 123.99)        | 101.64<br>(76.59 to 139.77)        | 73.88<br>(58.76 to 96.64)          | 126.56<br>(91.80 to 182.22)        |
| Diarrheal diseases                                                | 202.58<br>(156.08 to 269.27)            | 121.82<br>(35.59 to 310.32)            | 102.07<br>(36.68 to 250.80)           | 140.81<br>(37.46 to 374.16)             | 3.37<br>(2.81 to 4.15)             | 4.98<br>(1.74 to 12.06)            | 5.92<br>(2.44 to 13.21)            | 4.67<br>(1.47 to 11.90)            |
| Intestinal infectious diseases                                    | 0.81<br>(0.41 to 1.53)                  | 0.59<br>(0.27 to 1.20)                 | 0.67<br>(0.29 to 1.42)                | 0.59<br>(0.18 to 1.18)                  | 0.02<br>(0.01 to 0.04)             | 0.02<br>(0.01 to 0.03)             | 0.02<br>(0.01 to 0.04)             | 0.02<br>(0.01 to 0.03)             |
| Typhoid fever                                                     | 0.42<br>(0.19 to 0.84)                  | 0.38<br>(0.19 to 0.79)                 | 0.52<br>(0.22 to 1.00)                | 0.36<br>(0.16 to 0.73)                  | 0.01<br>(0.00 to 0.02)             | 0.01<br>(0.00 to 0.02)             | 0.01<br>(0.00 to 0.03)             | 0.01<br>(0.00 to 0.02)             |
| Paratyphoid fever                                                 | 0.31<br>(0.12 to 0.67)                  | 0.18<br>(0.07 to 0.41)                 | 0.13<br>(0.04 to 0.32)                | 0.19<br>(0.07 to 0.43)                  | 0.01<br>(0.00 to 0.02)             | 0.01<br>(0.00 to 0.01)             | 0.01<br>(0.00 to 0.01)             | 0.01<br>(0.00 to 0.01)             |
| Other intestinal infectious diseases                              | 0.08<br>(0.03 to 0.17)                  | 0.04<br>(0.01 to 0.07)                 | 0.03<br>(0.01 to 0.06)                | 0.04<br>(0.01 to 0.08)                  | 0.00<br>(0.00 to 0.00)             | 0.00<br>(0.00 to 0.00)             | 0.00<br>(0.00 to 0.00)             | 0.00<br>(0.00 to 0.00)             |
| Lower respiratory infections                                      | 3,617.56<br>(3,114.08 to 4,158.92)      | 2,262.34<br>(1,420.96 to 3,622.29)     | 1,315.59<br>(868.76 to 2,002.10)      | 3,211.79<br>(1,919.47 to 5,284.81)      | 97.15<br>(86.02 to 110.40)         | 89.45<br>(65.73 to 124.01)         | 62.22<br>(47.26 to 83.11)          | 113.62<br>(80.21 to 163.41)        |
| Upper respiratory infections                                      | 2.63<br>(2.05 to 3.50)                  | 1.89<br>(1.31 to 2.72)                 | 0.92<br>(0.64 to 1.34)                | 2.08<br>(1.47 to 2.98)                  | 0.08<br>(0.06 to 0.11)             | 0.08<br>(0.06 to 0.11)             | 0.04<br>(0.03 to 0.06)             | 0.08<br>(0.03 to 0.11)             |
| Otitis media                                                      | 0.20<br>(0.16 to 0.26)                  | 0.06<br>(0.04 to 0.10)                 | 0.06<br>(0.04 to 0.11)                | 0.06<br>(0.03 to 0.10)                  | 0.01<br>(0.01 to 0.01)             | 0.00<br>(0.00 to 0.00)             | 0.00<br>(0.00 to 0.00)             | 0.00<br>(0.00 to 0.00)             |
| Meningitis                                                        | 203.83<br>(177.34 to 241.48)            | 93.62<br>(71.01 to 126.89)             | 61.68<br>(47.43 to 82.10)             | 108.51<br>(78.77 to 152.11)             | 3.99<br>(3.48 to 4.71)             | 2.11<br>(1.70 to 2.76)             | 1.50<br>(1.19 to 1.93)             | 2.29<br>(1.82 to 3.01)             |
| Pneumococcal meningitis                                           | 9.67<br>(8.02 to 11.81)                 | 4.27<br>(3.15 to 6.18)                 | 4.24<br>(3.00 to 6.09)                | 4.43<br>(3.22 to 6.22)                  | 0.26<br>(0.22 to 0.32)             | 0.15<br>(0.11 to 0.20)             | 0.15<br>(0.11 to 0.20)             | 0.15<br>(0.11 to 0.19)             |
| H influenzae type B meningitis                                    | 25.95<br>(21.47 to 32.18)               | 21.19<br>(11.07 to 40.82)              | 14.45<br>(9.21 to 23.11)              | 31.70<br>(13.48 to 68.08)               | 0.46<br>(0.39 to 0.55)             | 0.37<br>(0.24 to 0.61)             | 0.30<br>(0.22 to 0.41)             | 0.48<br>(0.27 to 0.91)             |
| Meningococcal meningitis                                          | 100.29<br>(86.58 to 119.10)             | 35.88<br>(27.01 to 47.85)              | 22.38<br>(16.81 to 29.73)             | 38.28<br>(28.58 to 50.60)               | 1.80<br>(1.57 to 2.12)             | 0.80<br>(0.64 to 1.04)             | 0.52<br>(0.41 to 0.68)             | 0.83<br>(0.66 to 1.06)             |
| Other meningitis                                                  | 67.91<br>(57.79 to 82.35)               | 32.19<br>(24.63 to 43.22)              | 20.61<br>(15.61 to 27.65)             | 34.10<br>(26.08 to 45.58)               | 1.46<br>(1.24 to 1.77)             | 0.80<br>(0.64 to 1.05)             | 0.53<br>(0.41 to 0.70)             | 0.83<br>(0.66 to 1.08)             |
| Encephalitis                                                      | 216.74<br>(171.01 to 309.17)            | 157.87<br>(114.76 to 230.58)           | 137.97<br>(99.58 to 200.85)           | 165.72<br>(118.73 to 238.97)            | 4.16<br>(3.27 to 5.83)             | 3.79<br>(2.85 to 5.31)             | 3.56<br>(2.63 to 5.01)             | 3.81<br>(2.87 to 5.30)             |

|                |                             |                              |                              |                               |                           |                           |                           |                           |
|----------------|-----------------------------|------------------------------|------------------------------|-------------------------------|---------------------------|---------------------------|---------------------------|---------------------------|
| Diphtheria     | 0.73<br>(0.57 to<br>0.93)   | 0.14<br>(0.09 to<br>0.22)    | 0.11<br>(0.07 to<br>0.19)    | 0.21<br>(0.11 to<br>0.38)     | 0.01<br>(0.01 to<br>0.02) | 0.00<br>(0.00 to<br>0.00) | 0.00<br>(0.00 to<br>0.00) | 0.00<br>(0.00 to<br>0.01) |
| Whooping cough | 17.92<br>(6.35 to<br>44.53) | 12.31<br>(1.91 to<br>40.44)  | 3.02<br>(0.42 to<br>9.34)    | 24.70<br>(4.05 to<br>76.30)   | 0.21<br>(0.08 to<br>0.53) | 0.15<br>(0.02 to<br>0.48) | 0.04<br>(0.01 to<br>0.11) | 0.29<br>(0.05 to<br>0.91) |
| Tetanus        | 0.80<br>(0.69 to<br>1.09)   | 0.07<br>(0.05 to<br>0.09)    | 0.07<br>(0.05 to<br>0.09)    | 0.08<br>(0.06 to<br>0.11)     | 0.03<br>(0.02 to<br>0.04) | 0.00<br>(0.00 to<br>0.00) | 0.00<br>(0.00 to<br>0.00) | 0.00<br>(0.00 to<br>0.00) |
| Measles        | 3.32<br>(2.20 to<br>5.09)   | 70.17<br>(2.89 to<br>355.13) | 34.77<br>(2.30 to<br>170.14) | 128.10<br>(3.48 to<br>679.71) | 0.04<br>(0.03 to<br>0.06) | 0.98<br>(0.05 to<br>4.45) | 0.51<br>(0.04 to<br>2.20) | 1.69<br>(0.06 to<br>8.18) |

| Central Europe, Eastern Europe, and Central Asia      |                                         |                                         |                                         |                                         |                                      |                                      |                                      |                                      |
|-------------------------------------------------------|-----------------------------------------|-----------------------------------------|-----------------------------------------|-----------------------------------------|--------------------------------------|--------------------------------------|--------------------------------------|--------------------------------------|
| Cause                                                 | YLLs (in 1000s)                         |                                         |                                         |                                         | Deaths (in 1000s)                    |                                      |                                      |                                      |
|                                                       | 2016                                    | 2040 Forecast                           | 2040 Better Scenario                    | 2040 Worse Scenario                     | 2016                                 | 2040 Forecast                        | 2040 Better Scenario                 | 2040 Worse Scenario                  |
| Varicella and herpes zoster                           | 3.57<br>(2.08 to 4.62)                  | 1.62<br>(1.03 to 2.39)                  | 1.01<br>(0.66 to 1.42)                  | 1.69<br>(1.02 to 2.54)                  | 0.09<br>(0.06 to 0.12)               | 0.07<br>(0.05 to 0.11)               | 0.06<br>(0.04 to 0.09)               | 0.07<br>(0.05 to 0.11)               |
| <b>Neglected tropical diseases and malaria</b>        | <b>22.66</b><br><b>(11.28 to 32.51)</b> | <b>14.78</b><br><b>(6.09 to 22.79)</b>  | <b>10.57</b><br><b>(5.12 to 15.10)</b>  | <b>15.08</b><br><b>(6.26 to 23.58)</b>  | <b>0.47</b><br><b>(0.29 to 0.61)</b> | <b>0.34</b><br><b>(0.18 to 0.48)</b> | <b>0.28</b><br><b>(0.16 to 0.38)</b> | <b>0.33</b><br><b>(0.17 to 0.48)</b> |
| Malaria                                               | 0.31<br>(0.13 to 1.04)                  | 0.16<br>(0.05 to 0.60)                  | 0.11<br>(0.04 to 0.32)                  | 0.16<br>(0.06 to 0.60)                  | 0.00<br>(0.00 to 0.01)               | 0.00<br>(0.00 to 0.01)               | 0.00<br>(0.00 to 0.00)               | 0.00<br>(0.00 to 0.01)               |
| Chagas disease                                        | 0.00<br>(0.00 to 0.00)                  | 0.00<br>(0.00 to 0.00)                  | 0.00<br>(0.00 to 0.00)                  | 0.00<br>(0.00 to 0.00)                  | 0.00<br>(0.00 to 0.00)               | 0.00<br>(0.00 to 0.00)               | 0.00<br>(0.00 to 0.00)               | 0.00<br>(0.00 to 0.00)               |
| Leishmaniasis                                         | 2.38<br>(1.44 to 3.74)                  | 0.53<br>(0.26 to 1.76)                  | 0.33<br>(0.16 to 1.19)                  | 0.55<br>(0.27 to 1.80)                  | 0.08<br>(0.05 to 0.13)               | 0.02<br>(0.01 to 0.07)               | 0.01<br>(0.01 to 0.05)               | 0.02<br>(0.01 to 0.07)               |
| African trypanosomiasis                               | 0.00<br>(0.00 to 0.00)                  | 0.00<br>(0.00 to 0.00)                  | 0.00<br>(0.00 to 0.00)                  | 0.00<br>(0.00 to 0.00)                  | 0.00<br>(0.00 to 0.00)               | 0.00<br>(0.00 to 0.00)               | 0.00<br>(0.00 to 0.00)               | 0.00<br>(0.00 to 0.00)               |
| Schistosomiasis                                       | 0.00<br>(0.00 to 0.00)                  | 0.00<br>(0.00 to 0.00)                  | 0.00<br>(0.00 to 0.00)                  | 0.00<br>(0.00 to 0.00)                  | 0.00<br>(0.00 to 0.00)               | 0.00<br>(0.00 to 0.00)               | 0.00<br>(0.00 to 0.00)               | 0.00<br>(0.00 to 0.00)               |
| Cysticercosis                                         | 0.29<br>(0.23 to 0.36)                  | 0.08<br>(0.06 to 0.11)                  | 0.08<br>(0.05 to 0.11)                  | 0.08<br>(0.06 to 0.11)                  | 0.01<br>(0.01 to 0.01)               | 0.00<br>(0.00 to 0.00)               | 0.00<br>(0.00 to 0.00)               | 0.00<br>(0.00 to 0.00)               |
| Cystic echinococcosis                                 | 2.18<br>(1.77 to 2.66)                  | 1.15<br>(0.87 to 1.51)                  | 0.78<br>(0.59 to 1.03)                  | 1.18<br>(0.91 to 1.53)                  | 0.08<br>(0.07 to 0.09)               | 0.06<br>(0.05 to 0.07)               | 0.04<br>(0.03 to 0.05)               | 0.06<br>(0.05 to 0.07)               |
| Dengue                                                | 0.00<br>(0.00 to 0.00)                  | 0.00<br>(0.00 to 0.00)                  | 0.00<br>(0.00 to 0.00)                  | 0.00<br>(0.00 to 0.00)                  | 0.00<br>(0.00 to 0.00)               | 0.00<br>(0.00 to 0.00)               | 0.00<br>(0.00 to 0.00)               | 0.00<br>(0.00 to 0.00)               |
| Yellow fever                                          | 0.00<br>(0.00 to 0.00)                  | 0.00<br>(0.00 to 0.00)                  | 0.00<br>(0.00 to 0.00)                  | 0.00<br>(0.00 to 0.00)                  | 0.00<br>(0.00 to 0.00)               | 0.00<br>(0.00 to 0.00)               | 0.00<br>(0.00 to 0.00)               | 0.00<br>(0.00 to 0.00)               |
| Rabies                                                | 0.72<br>(0.53 to 0.95)                  | 0.32<br>(0.22 to 0.47)                  | 0.20<br>(0.14 to 0.29)                  | 0.35<br>(0.24 to 0.51)                  | 0.01<br>(0.01 to 0.02)               | 0.01<br>(0.00 to 0.01)               | 0.00<br>(0.00 to 0.01)               | 0.01<br>(0.00 to 0.01)               |
| Intestinal nematode infections                        | 0.13<br>(0.07 to 0.22)                  | 0.11<br>(0.06 to 0.20)                  | 0.08<br>(0.05 to 0.14)                  | 0.11<br>(0.06 to 0.21)                  | 0.00<br>(0.00 to 0.00)               | 0.00<br>(0.00 to 0.00)               | 0.00<br>(0.00 to 0.00)               | 0.00<br>(0.00 to 0.00)               |
| Other neglected tropical diseases                     | 16.65<br>(5.63 to 26.19)                | 12.43<br>(4.06 to 20.31)                | 8.99<br>(3.52 to 13.28)                 | 12.64<br>(4.06 to 20.71)                | 0.28<br>(0.11 to 0.42)               | 0.25<br>(0.10 to 0.37)               | 0.21<br>(0.10 to 0.30)               | 0.25<br>(0.09 to 0.36)               |
| <b>Maternal disorders</b>                             | <b>61.63</b><br><b>(51.30 to 76.32)</b> | <b>37.12</b><br><b>(25.51 to 55.72)</b> | <b>24.54</b><br><b>(16.37 to 37.56)</b> | <b>41.19</b><br><b>(28.57 to 62.01)</b> | <b>1.13</b><br><b>(0.93 to 1.40)</b> | <b>0.68</b><br><b>(0.47 to 1.01)</b> | <b>0.45</b><br><b>(0.31 to 0.69)</b> | <b>0.76</b><br><b>(0.52 to 1.11)</b> |
| Maternal hemorrhage                                   | 14.17<br>(10.77 to 18.11)               | 8.52<br>(5.66 to 12.60)                 | 5.57<br>(3.69 to 8.47)                  | 9.51<br>(6.42 to 14.23)                 | 0.26<br>(0.20 to 0.34)               | 0.16<br>(0.11 to 0.23)               | 0.10<br>(0.07 to 0.16)               | 0.18<br>(0.12 to 0.26)               |
| Maternal sepsis and other maternal infections         | 4.33<br>(3.02 to 5.96)                  | 2.04<br>(1.23 to 3.21)                  | 1.38<br>(0.83 to 2.20)                  | 2.28<br>(1.40 to 3.64)                  | 0.08<br>(0.05 to 0.11)               | 0.04<br>(0.02 to 0.06)               | 0.03<br>(0.02 to 0.04)               | 0.04<br>(0.03 to 0.06)               |
| Maternal hypertensive disorders                       | 8.88<br>(6.69 to 11.53)                 | 4.90<br>(3.10 to 7.40)                  | 3.09<br>(1.89 to 4.83)                  | 5.44<br>(3.47 to 8.17)                  | 0.16<br>(0.12 to 0.20)               | 0.09<br>(0.05 to 0.13)               | 0.05<br>(0.03 to 0.08)               | 0.10<br>(0.06 to 0.14)               |
| Maternal obstructed labor and uterine rupture         | 1.12<br>(0.68 to 1.68)                  | 0.68<br>(0.37 to 1.06)                  | 0.42<br>(0.23 to 0.67)                  | 0.77<br>(0.42 to 1.23)                  | 0.02<br>(0.01 to 0.03)               | 0.01<br>(0.01 to 0.02)               | 0.01<br>(0.00 to 0.01)               | 0.01<br>(0.01 to 0.02)               |
| Maternal abortion, miscarriage, and ectopic pregnancy | 11.10<br>(8.27 to 14.99)                | 8.15<br>(4.72 to 14.81)                 | 5.48<br>(3.10 to 9.90)                  | 9.08<br>(5.18 to 16.89)                 | 0.21<br>(0.16 to 0.28)               | 0.15<br>(0.09 to 0.27)               | 0.10<br>(0.06 to 0.19)               | 0.17<br>(0.10 to 0.31)               |

|                                        |                             |                            |                           |                            |                           |                           |                           |                           |
|----------------------------------------|-----------------------------|----------------------------|---------------------------|----------------------------|---------------------------|---------------------------|---------------------------|---------------------------|
| Indirect maternal deaths               | 9.35<br>(6.54 to<br>13.33)  | 5.92<br>(3.22 to<br>10.80) | 3.78<br>(1.96 to<br>7.17) | 6.43<br>(3.49 to<br>11.77) | 0.16<br>(0.12 to<br>0.23) | 0.10<br>(0.06 to<br>0.19) | 0.07<br>(0.03 to<br>0.12) | 0.11<br>(0.06 to<br>0.21) |
| Late maternal deaths                   | 0.69<br>(0.44 to<br>1.06)   | 0.41<br>(0.24 to<br>0.69)  | 0.27<br>(0.15 to<br>0.45) | 0.47<br>(0.27 to<br>0.79)  | 0.01<br>(0.01 to<br>0.02) | 0.01<br>(0.00 to<br>0.01) | 0.00<br>(0.00 to<br>0.01) | 0.01<br>(0.01 to<br>0.01) |
| Maternal deaths aggravated by HIV/AIDS | 0.06<br>(0.03 to<br>0.11)   | 0.20<br>(0.07 to<br>0.51)  | 0.14<br>(0.05 to<br>0.37) | 0.22<br>(0.08 to<br>0.57)  | 0.00<br>(0.00 to<br>0.00) | 0.00<br>(0.00 to<br>0.01) | 0.00<br>(0.00 to<br>0.01) | 0.00<br>(0.00 to<br>0.01) |
| Other maternal disorders               | 11.93<br>(8.76 to<br>16.21) | 6.30<br>(4.02 to<br>9.74)  | 4.41<br>(2.78 to<br>6.91) | 6.98<br>(4.44 to<br>10.74) | 0.22<br>(0.16 to<br>0.30) | 0.12<br>(0.08 to<br>0.18) | 0.08<br>(0.05 to<br>0.13) | 0.13<br>(0.08 to<br>0.20) |

| Central Europe, Eastern Europe, and Central Asia                        |                                           |                                         |                                     |                                         |                                  |                                 |                                |                                  |
|-------------------------------------------------------------------------|-------------------------------------------|-----------------------------------------|-------------------------------------|-----------------------------------------|----------------------------------|---------------------------------|--------------------------------|----------------------------------|
| Cause                                                                   | YLLs (in 1000s)                           |                                         |                                     |                                         | Deaths (in 1000s)                |                                 |                                |                                  |
|                                                                         | 2016                                      | 2040 Forecast                           | 2040 Better Scenario                | 2040 Worse Scenario                     | 2016                             | 2040 Forecast                   | 2040 Better Scenario           | 2040 Worse Scenario              |
| <b>Neonatal disorders</b>                                               | <b>2,586.86</b><br>(2,217.57 to 3,032.46) | <b>1,121.56</b><br>(790.60 to 1,620.28) | <b>625.18</b><br>(438.50 to 930.42) | <b>1,368.51</b><br>(959.30 to 1,950.02) | <b>29.89</b><br>(25.62 to 35.04) | <b>12.96</b><br>(9.14 to 18.72) | <b>7.23</b><br>(5.07 to 10.75) | <b>15.81</b><br>(11.09 to 22.54) |
| Neonatal preterm birth                                                  | 1,000.49<br>(866.48 to 1,147.20)          | 360.64<br>(283.33 to 455.52)            | 171.93<br>(136.91 to 215.31)        | 472.35<br>(375.60 to 594.01)            | 11.56<br>(10.01 to 13.25)        | 4.17<br>(3.27 to 5.26)          | 1.99<br>(1.58 to 2.49)         | 5.46<br>(4.34 to 6.86)           |
| Neonatal encephalopathy due to birth asphyxia and trauma                | 934.45<br>(752.61 to 1,181.65)            | 406.11<br>(241.18 to 658.13)            | 219.90<br>(131.63 to 358.50)        | 487.52<br>(288.48 to 805.11)            | 10.80<br>(8.70 to 13.65)         | 4.69<br>(2.79 to 7.60)          | 2.54<br>(1.52 to 4.14)         | 5.63<br>(3.34 to 9.30)           |
| Neonatal sepsis and other neonatal infections                           | 251.15<br>(204.49 to 327.91)              | 128.64<br>(82.64 to 206.79)             | 75.64<br>(48.15 to 121.33)          | 151.21<br>(95.71 to 245.37)             | 2.90<br>(2.36 to 3.79)           | 1.49<br>(0.96 to 2.39)          | 0.87<br>(0.56 to 1.40)         | 1.75<br>(1.11 to 2.84)           |
| Hemolytic disease and other neonatal jaundice                           | 17.65<br>(14.23 to 22.07)                 | 6.60<br>(3.40 to 13.92)                 | 3.53<br>(1.88 to 7.48)              | 7.76<br>(3.95 to 16.11)                 | 0.20<br>(0.16 to 0.26)           | 0.08<br>(0.04 to 0.16)          | 0.04<br>(0.02 to 0.09)         | 0.09<br>(0.05 to 0.19)           |
| Other neonatal disorders                                                | 383.11<br>(323.69 to 437.76)              | 219.57<br>(126.44 to 389.50)            | 154.18<br>(89.53 to 280.21)         | 249.67<br>(142.33 to 450.17)            | 4.43<br>(3.74 to 5.06)           | 2.54<br>(1.46 to 4.50)          | 1.78<br>(1.04 to 3.24)         | 2.89<br>(1.65 to 5.20)           |
| <b>Nutritional deficiencies</b>                                         | <b>54.28</b><br>(47.08 to 63.34)          | <b>33.28</b><br>(26.69 to 40.28)        | <b>30.75</b><br>(24.37 to 38.11)    | <b>33.16</b><br>(26.77 to 39.96)        | <b>1.72</b><br>(1.50 to 1.98)    | <b>1.39</b><br>(1.21 to 1.61)   | <b>1.45</b><br>(1.23 to 1.70)  | <b>1.29</b><br>(1.14 to 1.47)    |
| Protein-energy malnutrition                                             | 27.91<br>(20.40 to 34.27)                 | 15.49<br>(10.75 to 20.44)               | 15.65<br>(10.51 to 20.18)           | 15.06<br>(10.37 to 19.68)               | 0.80<br>(0.54 to 0.98)           | 0.66<br>(0.44 to 0.82)          | 0.77<br>(0.51 to 0.95)         | 0.59<br>(0.38 to 0.73)           |
| Iodine deficiency                                                       | 1.95<br>(1.04 to 3.34)                    | 1.95<br>(1.03 to 3.36)                  | 1.70<br>(0.85 to 3.04)              | 1.96<br>(1.05 to 3.33)                  | 0.06<br>(0.03 to 0.11)           | 0.09<br>(0.04 to 0.16)          | 0.09<br>(0.04 to 0.17)         | 0.09<br>(0.04 to 0.15)           |
| Dietary iron deficiency                                                 | 3.30<br>(2.74 to 4.73)                    | 2.71<br>(2.05 to 3.95)                  | 2.77<br>(2.03 to 4.30)              | 2.72<br>(2.06 to 3.91)                  | 0.08<br>(0.06 to 0.13)           | 0.07<br>(0.05 to 0.12)          | 0.07<br>(0.06 to 0.14)         | 0.07<br>(0.05 to 0.11)           |
| Other nutritional deficiencies                                          | 21.11<br>(15.63 to 25.93)                 | 13.12<br>(9.36 to 16.58)                | 10.64<br>(7.47 to 14.04)            | 13.43<br>(9.70 to 16.72)                | 0.79<br>(0.57 to 0.98)           | 0.57<br>(0.42 to 0.72)          | 0.51<br>(0.36 to 0.67)         | 0.55<br>(0.41 to 0.68)           |
| <b>Other communicable, maternal, neonatal, and nutritional diseases</b> | <b>188.55</b><br>(149.24 to 230.01)       | <b>103.43</b><br>(82.67 to 129.46)      | <b>80.01</b><br>(64.64 to 97.50)    | <b>110.14</b><br>(87.91 to 137.79)      | <b>3.65</b><br>(3.11 to 4.21)    | <b>2.74</b><br>(2.37 to 3.15)   | <b>2.38</b><br>(2.05 to 2.73)  | <b>2.77</b><br>(2.40 to 3.17)    |
| Sexually transmitted infections excluding HIV                           | 18.54<br>(12.70 to 26.63)                 | 5.91<br>(4.18 to 8.61)                  | 4.51<br>(3.27 to 6.56)              | 6.20<br>(4.33 to 9.10)                  | 0.37<br>(0.28 to 0.50)           | 0.17<br>(0.13 to 0.23)          | 0.14<br>(0.11 to 0.20)         | 0.17<br>(0.13 to 0.23)           |
| Syphilis                                                                | 11.86<br>(6.89 to 19.54)                  | 3.02<br>(1.83 to 4.98)                  | 1.91<br>(1.20 to 3.10)              | 3.26<br>(1.96 to 5.42)                  | 0.18<br>(0.12 to 0.28)           | 0.06<br>(0.04 to 0.10)          | 0.04<br>(0.03 to 0.07)         | 0.07<br>(0.05 to 0.10)           |
| Chlamydial infection                                                    | 1.26<br>(0.89 to 1.83)                    | 0.54<br>(0.38 to 0.82)                  | 0.49<br>(0.34 to 0.75)              | 0.55<br>(0.39 to 0.83)                  | 0.04<br>(0.03 to 0.05)           | 0.02<br>(0.02 to 0.03)          | 0.02<br>(0.01 to 0.03)         | 0.02<br>(0.01 to 0.03)           |
| Gonococcal infection                                                    | 3.57<br>(2.50 to 5.14)                    | 1.59<br>(1.10 to 2.39)                  | 1.43<br>(0.98 to 2.17)              | 1.60<br>(1.11 to 2.41)                  | 0.11<br>(0.08 to 0.15)           | 0.06<br>(0.04 to 0.08)          | 0.06<br>(0.04 to 0.08)         | 0.06<br>(0.04 to 0.08)           |
| Other sexually transmitted infections                                   | 1.84<br>(1.28 to 2.67)                    | 0.77<br>(0.52 to 1.19)                  | 0.68<br>(0.45 to 1.07)              | 0.78<br>(0.53 to 1.21)                  | 0.05<br>(0.04 to 0.07)           | 0.02<br>(0.02 to 0.04)          | 0.02<br>(0.02 to 0.03)         | 0.02<br>(0.02 to 0.03)           |
| Acute hepatitis                                                         | 62.80<br>(57.10 to 69.07)                 | 32.98<br>(26.90 to 39.35)               | 22.07<br>(17.64 to 26.99)           | 35.82<br>(29.46 to 42.73)               | 1.37<br>(1.25 to 1.49)           | 0.87<br>(0.74 to 1.01)          | 0.61<br>(0.51 to 0.73)         | 0.92<br>(0.79 to 1.06)           |
| Acute hepatitis A                                                       | 9.36<br>(7.26 to 12.36)                   | 3.12<br>(2.04 to 4.66)                  | 1.94<br>(1.27 to 2.98)              | 3.53<br>(2.35 to 5.27)                  | 0.12<br>(0.10 to 0.16)           | 0.05<br>(0.03 to 0.07)          | 0.03<br>(0.02 to 0.04)         | 0.05<br>(0.04 to 0.07)           |
| Acute hepatitis B                                                       | 42.30<br>(37.99 to 47.11)                 | 24.07<br>(19.44 to 29.56)               | 16.26<br>(12.79 to 20.33)           | 26.01<br>(21.02 to 31.91)               | 1.02<br>(0.93 to 1.13)           | 0.67<br>(0.56 to 0.80)          | 0.47<br>(0.38 to 0.57)         | 0.71<br>(0.60 to 0.84)           |



|                                       |                                                               |                                                               |                                                               |                                                                |                                                            |                                                            |                                                            |                                                            |
|---------------------------------------|---------------------------------------------------------------|---------------------------------------------------------------|---------------------------------------------------------------|----------------------------------------------------------------|------------------------------------------------------------|------------------------------------------------------------|------------------------------------------------------------|------------------------------------------------------------|
|                                       | 1.73<br>(1.35 to<br>2.16)                                     | 1.99<br>(0.81 to<br>1.49)                                     | 0.77<br>(0.56 to<br>1.06)                                     | 1.16<br>(0.86 to<br>1.59)                                      | 0.04<br>(0.03 to<br>0.06)                                  | 0.03<br>(0.02 to<br>0.04)                                  | 0.02<br>(0.02 to<br>0.03)                                  | 0.03<br>(0.02 to<br>0.04)                                  |
| Acute hepatitis C                     |                                                               |                                                               |                                                               |                                                                |                                                            |                                                            |                                                            |                                                            |
|                                       | 9.41<br>(7.56 to<br>11.50)                                    | 4.70<br>(3.38 to<br>6.40)                                     | 3.10<br>(2.20 to<br>4.22)                                     | 5.12<br>(3.75 to<br>6.90)                                      | 0.17<br>(0.14 to<br>0.22)                                  | 0.12<br>(0.09 to<br>0.15)                                  | 0.09<br>(0.06 to<br>0.12)                                  | 0.12<br>(0.09 to<br>0.16)                                  |
| Acute hepatitis E                     |                                                               |                                                               |                                                               |                                                                |                                                            |                                                            |                                                            |                                                            |
|                                       | 107.20<br>(71.06 to<br>146.57)                                | 64.54<br>(46.04 to<br>86.96)                                  | 53.43<br>(39.89 to<br>66.32)                                  | 68.12<br>(47.56 to<br>93.20)                                   | 1.91<br>(1.41 to<br>2.40)                                  | 1.71<br>(1.38 to<br>2.02)                                  | 1.63<br>(1.35 to<br>1.88)                                  | 1.69<br>(1.35 to<br>2.01)                                  |
| Other unspecified infectious diseases |                                                               |                                                               |                                                               |                                                                |                                                            |                                                            |                                                            |                                                            |
| <b>Non-communicable diseases</b>      | <b>79,200.49</b><br><b>(70,295.63 to</b><br><b>89,993.75)</b> | <b>70,877.30</b><br><b>(51,902.63 to</b><br><b>96,170.16)</b> | <b>50,780.48</b><br><b>(37,719.08 to</b><br><b>68,892.53)</b> | <b>88,733.25</b><br><b>(64,265.02 to</b><br><b>120,378.91)</b> | <b>4,305.14</b><br><b>(3,878.34 to</b><br><b>4,816.36)</b> | <b>4,537.77</b><br><b>(3,678.05 to</b><br><b>5,540.30)</b> | <b>3,446.27</b><br><b>(2,778.08 to</b><br><b>4,269.51)</b> | <b>5,363.04</b><br><b>(4,356.20 to</b><br><b>6,503.59)</b> |

| Central Europe, Eastern Europe, and Central Asia |                                              |                                              |                                              |                                              |                                     |                                       |                                     |                                         |
|--------------------------------------------------|----------------------------------------------|----------------------------------------------|----------------------------------------------|----------------------------------------------|-------------------------------------|---------------------------------------|-------------------------------------|-----------------------------------------|
| Cause                                            | YLLs (in 1000s)                              |                                              |                                              |                                              | Deaths (in 1000s)                   |                                       |                                     |                                         |
|                                                  | 2016                                         | 2040 Forecast                                | 2040 Better Scenario                         | 2040 Worse Scenario                          | 2016                                | 2040 Forecast                         | 2040 Better Scenario                | 2040 Worse Scenario                     |
| <b>Neoplasms</b>                                 | <b>18,324.84</b><br>(16,359.74 to 20,862.21) | <b>18,855.03</b><br>(14,697.56 to 23,746.57) | <b>15,325.95</b><br>(11,896.78 to 19,665.55) | <b>21,866.80</b><br>(17,034.13 to 27,549.79) | <b>810.22</b><br>(728.98 to 912.55) | <b>968.09</b><br>(813.41 to 1,138.18) | <b>829.89</b><br>(689.34 to 994.82) | <b>1,081.10</b><br>(914.37 to 1,266.20) |
| Lip and oral cavity cancer                       | 388.39<br>(332.25 to 448.98)                 | 380.88<br>(215.68 to 646.00)                 | 233.28<br>(134.91 to 392.11)                 | 531.60<br>(311.19 to 840.56)                 | 15.27<br>(13.26 to 17.45)           | 16.60<br>(10.23 to 26.49)             | 10.74<br>(6.76 to 16.37)            | 22.68<br>(13.98 to 34.96)               |
| Nasopharynx cancer                               | 64.07<br>(56.38 to 73.15)                    | 63.78<br>(38.08 to 101.75)                   | 33.46<br>(20.36 to 53.77)                    | 90.72<br>(54.36 to 140.31)                   | 2.16<br>(1.90 to 2.45)              | 2.30<br>(1.43 to 3.56)                | 1.24<br>(0.77 to 1.95)              | 3.25<br>(2.02 to 5.00)                  |
| Other pharynx cancer                             | 280.04<br>(242.86 to 323.23)                 | 273.68<br>(159.22 to 445.75)                 | 250.66<br>(141.67 to 408.42)                 | 308.12<br>(178.33 to 487.63)                 | 10.25<br>(8.92 to 11.77)            | 10.95<br>(6.73 to 16.86)              | 10.23<br>(6.26 to 15.91)            | 12.15<br>(7.51 to 18.48)                |
| Esophageal cancer                                | 481.36<br>(417.14 to 553.91)                 | 596.84<br>(340.13 to 1,071.12)               | 442.46<br>(260.74 to 772.47)                 | 812.47<br>(446.19 to 1,463.31)               | 20.41<br>(17.80 to 23.31)           | 28.25<br>(17.00 to 47.03)             | 22.02<br>(13.87 to 35.64)           | 37.21<br>(21.20 to 62.49)               |
| Stomach cancer                                   | 1,670.61<br>(1,461.47 to 1,922.44)           | 1,307.28<br>(918.30 to 1,849.42)             | 937.89<br>(661.53 to 1,322.01)               | 1,406.27<br>(987.58 to 1,981.22)             | 77.20<br>(67.98 to 88.39)           | 68.82<br>(52.68 to 90.53)             | 52.03<br>(39.58 to 68.68)           | 71.63<br>(54.08 to 93.43)               |
| Colon and rectum cancer                          | 2,083.18<br>(1,838.85 to 2,374.95)           | 2,370.73<br>(1,632.97 to 3,377.11)           | 1,794.03<br>(1,232.74 to 2,577.41)           | 2,656.69<br>(1,809.29 to 3,774.47)           | 107.69<br>(95.78 to 121.74)         | 143.54<br>(103.89 to 199.88)          | 115.12<br>(83.37 to 158.84)         | 155.22<br>(112.34 to 219.47)            |
| Liver cancer                                     | 698.49<br>(627.57 to 783.39)                 | 1,006.80<br>(646.93 to 1,538.30)             | 926.89<br>(615.12 to 1,396.76)               | 1,234.52<br>(736.50 to 1,998.89)             | 31.40<br>(28.37 to 34.88)           | 51.52<br>(34.87 to 74.73)             | 50.20<br>(35.30 to 71.18)           | 60.43<br>(38.08 to 92.29)               |
| Liver cancer due to hepatitis B                  | 236.11<br>(187.24 to 285.29)                 | 318.00<br>(200.50 to 527.38)                 | 311.47<br>(200.93 to 503.09)                 | 367.54<br>(217.44 to 635.61)                 | 9.86<br>(7.83 to 12.01)             | 15.19<br>(9.92 to 23.78)              | 15.66<br>(10.53 to 23.95)           | 16.86<br>(10.45 to 27.33)               |
| Liver cancer due to hepatitis C                  | 134.79<br>(110.37 to 160.06)                 | 216.54<br>(139.83 to 325.28)                 | 211.80<br>(141.94 to 308.15)                 | 241.91<br>(149.40 to 377.38)                 | 6.63<br>(5.55 to 7.92)              | 12.04<br>(8.14 to 17.36)              | 12.41<br>(8.67 to 17.35)            | 12.90<br>(8.40 to 19.29)                |
| Liver cancer due to alcohol use                  | 209.60<br>(178.59 to 243.49)                 | 297.74<br>(186.08 to 462.80)                 | 233.51<br>(148.83 to 351.88)                 | 422.97<br>(250.64 to 673.96)                 | 9.81<br>(8.46 to 11.27)             | 15.55<br>(10.32 to 22.88)             | 13.12<br>(8.95 to 18.96)            | 20.96<br>(13.18 to 31.97)               |
| Liver cancer due to other causes                 | 118.00<br>(101.34 to 135.99)                 | 174.52<br>(105.38 to 281.78)                 | 170.10<br>(107.40 to 269.66)                 | 202.10<br>(111.11 to 343.63)                 | 5.11<br>(4.39 to 5.87)              | 8.75<br>(5.47 to 13.51)               | 9.01<br>(5.95 to 13.56)             | 9.72<br>(5.71 to 15.80)                 |
| Gallbladder and biliary tract cancer             | 245.91<br>(223.25 to 275.04)                 | 206.81<br>(174.11 to 241.27)                 | 207.17<br>(169.58 to 247.92)                 | 196.80<br>(169.19 to 223.92)                 | 13.06<br>(11.89 to 14.54)           | 12.96<br>(11.66 to 14.28)             | 13.52<br>(11.75 to 15.27)           | 12.00<br>(11.02 to 13.09)               |
| Pancreatic cancer                                | 983.34<br>(865.91 to 1,125.26)               | 1,153.86<br>(885.60 to 1,508.68)             | 1,125.33<br>(858.30 to 1,500.51)             | 1,199.92<br>(915.12 to 1,561.77)             | 46.55<br>(41.30 to 52.80)           | 62.47<br>(51.00 to 77.54)             | 63.63<br>(51.55 to 80.10)           | 62.70<br>(50.38 to 77.96)               |
| Larynx cancer                                    | 333.89<br>(288.86 to 386.41)                 | 299.06<br>(135.39 to 639.24)                 | 156.40<br>(73.59 to 323.26)                  | 435.19<br>(199.84 to 859.51)                 | 13.37<br>(11.65 to 15.31)           | 12.72<br>(6.25 to 24.86)              | 6.87<br>(3.59 to 13.28)             | 18.38<br>(8.82 to 33.72)                |
| Tracheal, bronchus, and lung cancer              | 3,449.64<br>(3,049.66 to 3,885.70)           | 3,346.71<br>(2,271.33 to 4,712.99)           | 2,187.71<br>(1,491.40 to 3,170.93)           | 4,938.17<br>(3,396.64 to 6,930.93)           | 151.08<br>(134.22 to 169.14)        | 160.82<br>(118.50 to 214.57)          | 109.59<br>(80.28 to 147.76)         | 231.82<br>(168.64 to 315.06)            |
| Malignant skin melanoma                          | 264.37<br>(212.82 to 317.90)                 | 289.75<br>(214.52 to 376.43)                 | 363.37<br>(267.25 to 481.24)                 | 263.66<br>(197.80 to 336.62)                 | 10.61<br>(8.55 to 12.65)            | 14.31<br>(11.32 to 17.06)             | 18.65<br>(14.73 to 23.09)           | 12.56<br>(9.98 to 14.71)                |
| Non-melanoma skin cancer                         | 103.00<br>(90.81 to 117.19)                  | 122.92<br>(104.81 to 140.88)                 | 101.77<br>(85.25 to 121.11)                  | 119.44<br>(103.97 to 135.34)                 | 5.80<br>(5.22 to 6.49)              | 8.72<br>(7.96 to 9.61)                | 7.81<br>(7.01 to 8.66)              | 8.16<br>(7.26 to 9.06)                  |
| Breast cancer                                    | 1,403.80<br>(1,169.21 to 1,745.70)           | 1,431.17<br>(996.02 to 2,117.91)             | 1,068.08<br>(744.66 to 1,577.37)             | 1,578.01<br>(1,097.69 to 2,375.46)           | 59.01<br>(49.70 to 72.31)           | 69.68<br>(52.28 to 94.98)             | 54.92<br>(41.28 to 75.04)           | 74.61<br>(55.31 to 103.16)              |
| Cervical cancer                                  | 558.01<br>(463.00 to 682.86)                 | 374.25<br>(267.19 to 551.27)                 | 276.43<br>(198.35 to 398.62)                 | 402.70<br>(287.53 to 587.02)                 | 20.20<br>(17.12 to 24.36)           | 16.11<br>(12.51 to 21.30)             | 12.37<br>(9.57 to 16.46)            | 16.86<br>(13.13 to 22.28)               |

|                   |                                 |                                 |                                 |                                 |                              |                              |                              |                              |
|-------------------|---------------------------------|---------------------------------|---------------------------------|---------------------------------|------------------------------|------------------------------|------------------------------|------------------------------|
|                   | 276.39<br>(217.03 to<br>358.56) | 283.84<br>(204.35 to<br>387.69) | 241.12<br>(170.26 to<br>340.34) | 284.57<br>(209.26 to<br>379.74) | 13.03<br>(10.38 to<br>16.69) | 15.60<br>(12.24 to<br>19.52) | 13.80<br>(10.66 to<br>17.84) | 15.30<br>(12.27 to<br>18.64) |
| Uterine cancer    |                                 |                                 |                                 |                                 |                              |                              |                              |                              |
|                   | 545.80<br>(441.45 to<br>683.03) | 504.97<br>(338.36 to<br>736.84) | 441.83<br>(296.42 to<br>651.98) | 529.55<br>(353.87 to<br>774.33) | 22.29<br>(18.19 to<br>27.57) | 23.40<br>(16.73 to<br>32.39) | 20.98<br>(15.07 to<br>29.16) | 24.17<br>(17.18 to<br>33.64) |
| Ovarian cancer    |                                 |                                 |                                 |                                 |                              |                              |                              |                              |
|                   | 564.89<br>(463.85 to<br>657.74) | 737.24<br>(612.17 to<br>849.84) | 696.97<br>(567.50 to<br>830.60) | 691.32<br>(577.32 to<br>801.39) | 35.42<br>(30.11 to<br>40.65) | 54.50<br>(46.12 to<br>62.24) | 54.42<br>(46.82 to<br>61.95) | 49.27<br>(39.87 to<br>57.28) |
| Prostate cancer   |                                 |                                 |                                 |                                 |                              |                              |                              |                              |
|                   | 41.35<br>(35.39 to<br>47.83)    | 27.69<br>(20.59 to<br>37.03)    | 22.43<br>(16.64 to<br>30.35)    | 28.22<br>(21.31 to<br>37.93)    | 1.00<br>(0.86 to<br>1.15)    | 0.82<br>(0.67 to<br>1.00)    | 0.70<br>(0.57 to<br>0.86)    | 0.80<br>(0.66 to<br>0.96)    |
| Testicular cancer |                                 |                                 |                                 |                                 |                              |                              |                              |                              |

| Central Europe, Eastern Europe, and Central Asia |                                                     |                                                     |                                                     |                                                     |                                                  |                                                  |                                                  |                                                  |
|--------------------------------------------------|-----------------------------------------------------|-----------------------------------------------------|-----------------------------------------------------|-----------------------------------------------------|--------------------------------------------------|--------------------------------------------------|--------------------------------------------------|--------------------------------------------------|
| Cause                                            | YLLs (in 1000s)                                     |                                                     |                                                     |                                                     | Deaths (in 1000s)                                |                                                  |                                                  |                                                  |
|                                                  | 2016                                                | 2040 Forecast                                       | 2040 Better Scenario                                | 2040 Worse Scenario                                 | 2016                                             | 2040 Forecast                                    | 2040 Better Scenario                             | 2040 Worse Scenario                              |
| Kidney cancer                                    | 500.05<br>(437.46 to 571.36)                        | 584.87<br>(407.53 to 802.16)                        | 589.20<br>(416.04 to 813.24)                        | 597.89<br>(406.19 to 829.45)                        | 22.24<br>(19.65 to 25.29)                        | 29.95<br>(22.35 to 38.75)                        | 31.74<br>(24.04 to 40.10)                        | 29.50<br>(21.30 to 39.68)                        |
| Bladder cancer                                   | 392.24<br>(350.53 to 439.37)                        | 423.56<br>(318.02 to 564.73)                        | 368.47<br>(280.65 to 478.32)                        | 459.22<br>(336.67 to 638.31)                        | 22.01<br>(19.90 to 24.35)                        | 28.02<br>(22.16 to 35.59)                        | 26.00<br>(21.12 to 32.45)                        | 29.08<br>(21.89 to 38.54)                        |
| Brain and nervous system cancer                  | 728.05<br>(615.00 to 829.78)                        | 759.48<br>(593.99 to 954.68)                        | 705.50<br>(543.90 to 906.04)                        | 749.91<br>(591.87 to 931.39)                        | 23.11<br>(19.04 to 26.29)                        | 27.86<br>(21.66 to 33.49)                        | 26.79<br>(20.57 to 33.15)                        | 26.86<br>(20.97 to 31.61)                        |
| Thyroid cancer                                   | 59.10<br>(50.90 to 69.63)                           | 63.09<br>(42.61 to 95.47)                           | 53.97<br>(36.01 to 82.07)                           | 68.60<br>(45.01 to 105.16)                          | 2.83<br>(2.45 to 3.36)                           | 3.48<br>(2.46 to 5.05)                           | 3.10<br>(2.19 to 4.44)                           | 3.66<br>(2.19 to 5.37)                           |
| Mesothelioma                                     | 43.13<br>(37.45 to 49.53)                           | 44.98<br>(35.33 to 56.64)                           | 47.55<br>(36.24 to 62.20)                           | 42.58<br>(34.16 to 52.57)                           | 1.81<br>(1.59 to 2.08)                           | 2.19<br>(1.84 to 2.59)                           | 2.41<br>(1.96 to 2.96)                           | 2.02<br>(1.72 to 2.32)                           |
| Hodgkin lymphoma                                 | 87.32<br>(74.98 to 103.06)                          | 58.68<br>(43.95 to 78.44)                           | 41.44<br>(30.91 to 56.56)                           | 61.09<br>(46.76 to 80.33)                           | 2.52<br>(2.20 to 2.93)                           | 1.99<br>(1.61 to 2.48)                           | 1.47<br>(1.16 to 1.88)                           | 2.02<br>(1.65 to 2.50)                           |
| Non-Hodgkin lymphoma                             | 365.17<br>(314.50 to 415.92)                        | 349.30<br>(269.92 to 455.63)                        | 310.27<br>(238.42 to 407.64)                        | 360.12<br>(275.36 to 471.58)                        | 14.09<br>(12.29 to 15.88)                        | 16.13<br>(13.03 to 20.03)                        | 14.99<br>(12.09 to 18.74)                        | 16.13<br>(12.91 to 20.15)                        |
| Multiple myeloma                                 | 163.10<br>(130.74 to 193.74)                        | 182.42<br>(131.00 to 242.91)                        | 173.36<br>(123.80 to 232.03)                        | 187.00<br>(132.63 to 254.41)                        | 7.50<br>(6.14 to 8.83)                           | 9.54<br>(7.19 to 12.22)                          | 9.40<br>(7.02 to 12.06)                          | 9.51<br>(7.12 to 12.26)                          |
| Leukemia                                         | 690.65<br>(618.24 to 772.00)                        | 660.71<br>(498.12 to 862.60)                        | 574.88<br>(437.14 to 743.25)                        | 720.80<br>(533.99 to 955.89)                        | 24.97<br>(22.61 to 27.84)                        | 29.32<br>(22.56 to 37.37)                        | 26.91<br>(21.06 to 33.87)                        | 31.00<br>(23.57 to 40.41)                        |
| Acute lymphoid leukemia                          | 137.03<br>(120.95 to 154.44)                        | 103.95<br>(80.14 to 136.04)                         | 84.16<br>(65.09 to 110.56)                          | 114.17<br>(87.35 to 150.67)                         | 3.36<br>(2.95 to 3.83)                           | 3.11<br>(2.39 to 4.01)                           | 2.61<br>(2.02 to 3.42)                           | 3.38<br>(2.55 to 4.45)                           |
| Chronic lymphoid leukemia                        | 106.13<br>(92.67 to 122.75)                         | 109.34<br>(77.12 to 149.14)                         | 102.30<br>(73.24 to 138.26)                         | 117.08<br>(80.59 to 163.95)                         | 5.66<br>(5.02 to 6.45)                           | 6.74<br>(5.09 to 8.71)                           | 6.63<br>(5.11 to 8.42)                           | 6.94<br>(5.01 to 9.31)                           |
| Acute myeloid leukemia                           | 230.50<br>(196.44 to 261.43)                        | 254.64<br>(188.57 to 332.15)                        | 240.33<br>(178.87 to 316.05)                        | 275.27<br>(198.80 to 369.97)                        | 7.84<br>(6.75 to 8.86)                           | 10.24<br>(7.82 to 13.16)                         | 10.04<br>(7.72 to 12.95)                         | 10.81<br>(8.04 to 14.16)                         |
| Chronic myeloid leukemia                         | 44.05<br>(38.30 to 51.46)                           | 25.85<br>(17.88 to 36.15)                           | 16.59<br>(11.80 to 23.03)                           | 29.86<br>(20.18 to 42.40)                           | 1.82<br>(1.60 to 2.09)                           | 1.25<br>(0.91 to 1.67)                           | 0.85<br>(0.64 to 1.11)                           | 1.39<br>(1.00 to 1.92)                           |
| Other leukemia                                   | 172.93<br>(150.53 to 198.98)                        | 166.93<br>(125.50 to 219.06)                        | 131.49<br>(99.40 to 172.09)                         | 184.41<br>(134.04 to 243.28)                        | 6.29<br>(5.52 to 7.17)                           | 7.97<br>(6.20 to 10.11)                          | 6.79<br>(5.37 to 8.56)                           | 8.47<br>(6.37 to 11.08)                          |
| Other neoplasms                                  | 859.47<br>(750.11 to 986.32)                        | 949.69<br>(759.58 to 1,163.84)                      | 954.03<br>(747.51 to 1,207.46)                      | 911.65<br>(739.63 to 1,100.65)                      | 33.34<br>(29.32 to 38.28)                        | 45.51<br>(39.53 to 51.97)                        | 48.27<br>(40.77 to 56.87)                        | 42.14<br>(37.25 to 46.82)                        |
| <b>Cardiovascular diseases</b>                   | <b>42,931.46</b><br><b>(38,017.74 to 48,952.98)</b> | <b>33,678.01</b><br><b>(21,862.39 to 52,217.83)</b> | <b>19,196.60</b><br><b>(12,806.63 to 29,441.86)</b> | <b>46,851.99</b><br><b>(29,642.62 to 70,330.77)</b> | <b>2,731.72</b><br><b>(2,452.30 to 3,063.59)</b> | <b>2,538.08</b><br><b>(1,890.54 to 3,388.11)</b> | <b>1,622.48</b><br><b>(1,193.31 to 2,219.11)</b> | <b>3,204.28</b><br><b>(2,365.86 to 4,267.23)</b> |
| Rheumatic heart disease                          | 348.26<br>(308.31 to 397.63)                        | 218.60<br>(147.28 to 327.71)                        | 156.96<br>(105.48 to 238.41)                        | 232.39<br>(159.67 to 341.59)                        | 13.14<br>(11.64 to 15.03)                        | 9.58<br>(6.98 to 13.69)                          | 7.31<br>(5.30 to 10.50)                          | 9.86<br>(7.22 to 13.91)                          |
| Ischemic heart disease                           | 25,450.72<br>(22,697.64 to 28,896.66)               | 18,575.46<br>(10,970.93 to 30,947.17)               | 9,835.04<br>(5,834.72 to 16,493.85)                 | 27,245.12<br>(15,316.54 to 44,545.47)               | 1,690.09<br>(1,523.34 to 1,882.51)               | 1,448.23<br>(952.94 to 2,112.40)                 | 872.26<br>(561.67 to 1,300.67)                   | 1,904.43<br>(1,238.47 to 2,721.89)               |
| Stroke                                           | 10,964.81<br>(9,621.22 to 12,596.03)                | 8,314.43<br>(5,109.12 to 13,155.91)                 | 4,139.66<br>(2,579.93 to 6,631.84)                  | 11,708.78<br>(7,223.48 to 18,588.45)                | 712.04<br>(629.00 to 813.59)                     | 639.42<br>(426.98 to 969.43)                     | 367.50<br>(240.01 to 569.44)                     | 806.92<br>(530.79 to 1,188.65)                   |
| Ischemic stroke                                  | 6,486.96<br>(5,642.31 to 7,508.84)                  | 4,710.15<br>(2,787.78 to 7,984.41)                  | 2,592.18<br>(1,515.66 to 4,422.80)                  | 6,131.03<br>(3,514.85 to 10,340.94)                 | 481.32<br>(422.43 to 554.39)                     | 417.36<br>(252.95 to 707.79)                     | 257.66<br>(153.02 to 443.07)                     | 496.92<br>(298.16 to 874.47)                     |

|                                |                                       |                                       |                                     |                                       |                                 |                                 |                                |                                 |
|--------------------------------|---------------------------------------|---------------------------------------|-------------------------------------|---------------------------------------|---------------------------------|---------------------------------|--------------------------------|---------------------------------|
| Intracerebral hemorrhage       | 4,477.84<br>(3,974.53 to<br>5,072.85) | 3,604.28<br>(2,019.69 to<br>6,319.28) | 1,547.48<br>(917.48 to<br>2,627.57) | 5,577.75<br>(3,106.94 to<br>9,834.77) | 230.71<br>(207.44 to<br>259.48) | 222.07<br>(141.54 to<br>344.59) | 109.84<br>(73.27 to<br>164.87) | 310.00<br>(194.22 to<br>490.17) |
| Hypertensive heart disease     | 1,457.11<br>(924.96 to<br>1,811.57)   | 2,331.49<br>(1,159.65 to<br>5,011.95) | 1,705.08<br>(887.98 to<br>3,627.06) | 2,894.86<br>(1,399.83 to<br>6,320.25) | 91.76<br>(57.19 to<br>114.76)   | 169.81<br>(85.00 to<br>361.45)  | 136.74<br>(72.11 to<br>281.93) | 201.21<br>(97.19 to<br>444.28)  |
| Cardiomyopathy and myocarditis | 2,954.27<br>(2,246.68 to<br>3,753.22) | 2,238.45<br>(1,330.61 to<br>3,479.99) | 1,707.63<br>(999.95 to<br>2,712.58) | 2,641.01<br>(1,587.34 to<br>4,061.95) | 120.37<br>(88.64 to<br>146.86)  | 115.22<br>(71.05 to<br>161.26)  | 95.17<br>(58.76 to<br>133.92)  | 126.42<br>(79.47 to<br>174.26)  |
| Myocarditis                    | 127.87<br>(102.63 to<br>154.05)       | 139.77<br>(114.09 to<br>172.11)       | 143.23<br>(115.37 to<br>178.75)     | 133.17<br>(108.42 to<br>162.80)       | 6.52<br>(5.11 to<br>7.60)       | 10.71<br>(8.74 to<br>12.64)     | 12.16<br>(9.94 to<br>14.38)    | 9.51<br>(7.51 to<br>11.28)      |

| Central Europe, Eastern Europe, and Central Asia              |                                                            |                                                            |                                                            |                                                            |                                                      |                                                      |                                                     |                                                      |
|---------------------------------------------------------------|------------------------------------------------------------|------------------------------------------------------------|------------------------------------------------------------|------------------------------------------------------------|------------------------------------------------------|------------------------------------------------------|-----------------------------------------------------|------------------------------------------------------|
| Cause                                                         | YLLs (in 1000s)                                            |                                                            |                                                            |                                                            | Deaths (in 1000s)                                    |                                                      |                                                     |                                                      |
|                                                               | 2016                                                       | 2040 Forecast                                              | 2040 Better Scenario                                       | 2040 Worse Scenario                                        | 2016                                                 | 2040 Forecast                                        | 2040 Better Scenario                                | 2040 Worse Scenario                                  |
| Alcoholic cardiomyopathy                                      | 1,837.68<br>(1,336.84 to<br>2,484.38)                      | 1,381.50<br>(704.00 to<br>2,065.57)                        | 1,071.46<br>(525.53 to<br>1,900.64)                        | 1,722.25<br>(897.73 to<br>2,845.17)                        | 58.33<br>(43.72 to<br>77.11)                         | 49.57<br>(30.25 to<br>74.51)                         | 40.79<br>(24.02 to<br>63.15)                        | 59.33<br>(36.77 to<br>88.01)                         |
| Other cardiomyopathy                                          | 988.73<br>(675.29 to<br>1,199.01)                          | 717.18<br>(387.54 to<br>1,148.18)                          | 492.93<br>(263.07 to<br>774.92)                            | 785.59<br>(426.27 to<br>1,265.52)                          | 55.52<br>(34.65 to<br>65.94)                         | 54.94<br>(25.47 to<br>90.17)                         | 42.21<br>(19.47 to<br>71.83)                        | 57.57<br>(27.03 to<br>95.10)                         |
| Atrial fibrillation and flutter                               | 221.24<br>(171.14 to<br>279.90)                            | 353.86<br>(265.93 to<br>456.38)                            | 337.88<br>(255.18 to<br>438.11)                            | 351.68<br>(263.26 to<br>452.77)                            | 22.91<br>(17.63 to<br>29.25)                         | 41.00<br>(30.89 to<br>53.49)                         | 41.45<br>(31.48 to<br>54.25)                        | 39.21<br>(28.74 to<br>52.01)                         |
| Aortic aneurysm                                               | 348.05<br>(302.14 to<br>401.47)                            | 251.35<br>(179.09 to<br>355.54)                            | 214.19<br>(156.18 to<br>302.95)                            | 263.62<br>(185.10 to<br>374.43)                            | 17.56<br>(15.57 to<br>19.92)                         | 15.93<br>(12.70 to<br>20.32)                         | 14.96<br>(11.94 to<br>19.02)                        | 15.71<br>(12.30 to<br>19.99)                         |
| Peripheral artery disease                                     | 198.61<br>(137.99 to<br>284.22)                            | 381.44<br>(234.84 to<br>599.72)                            | 374.62<br>(232.84 to<br>595.47)                            | 382.57<br>(232.86 to<br>603.14)                            | 14.72<br>(10.33 to<br>22.89)                         | 14.72<br>(22.56 to<br>57.91)                         | 34.81<br>(23.91 to<br>62.43)                        | 36.96<br>(20.96 to<br>54.60)                         |
| Endocarditis                                                  | 135.33<br>(104.68 to<br>190.46)                            | 140.80<br>(84.01 to<br>228.49)                             | 132.46<br>(78.62 to<br>222.01)                             | 144.32<br>(86.15 to<br>235.58)                             | 4.80<br>(3.81 to<br>6.95)                            | 6.45<br>(4.24 to<br>10.33)                           | 6.47<br>(4.24 to<br>10.45)                          | 6.31<br>(4.14 to<br>9.94)                            |
| Other cardiovascular and circulatory diseases                 | 853.07<br>(752.86 to<br>972.23)                            | 872.13<br>(593.22 to<br>1,284.38)                          | 593.09<br>(415.85 to<br>837.14)                            | 987.65<br>(667.75 to<br>1,462.28)                          | 44.33<br>(39.89 to<br>49.63)                         | 57.64<br>(44.02 to<br>76.36)                         | 43.67<br>(33.38 to<br>57.91)                        | 61.13<br>(46.50 to<br>81.24)                         |
| <b>Chronic respiratory diseases</b>                           | <b>2,044.61</b><br><b>(1,848.26 to</b><br><b>2,259.63)</b> | <b>2,183.30</b><br><b>(1,485.95 to</b><br><b>3,078.56)</b> | <b>1,571.47</b><br><b>(1,115.66 to</b><br><b>2,150.69)</b> | <b>2,999.17</b><br><b>(1,957.42 to</b><br><b>4,393.77)</b> | <b>117.83</b><br><b>(107.90 to</b><br><b>128.84)</b> | <b>145.20</b><br><b>(107.22 to</b><br><b>192.94)</b> | <b>114.04</b><br><b>(87.31 to</b><br><b>146.45)</b> | <b>186.54</b><br><b>(130.82 to</b><br><b>255.39)</b> |
| Chronic obstructive pulmonary disease                         | 1,742.16<br>(1,570.00 to<br>1,932.58)                      | 1,877.65<br>(1,231.86 to<br>2,773.68)                      | 1,250.84<br>(838.83 to<br>1,790.65)                        | 2,686.04<br>(1,695.38 to<br>4,027.44)                      | 103.81<br>(94.85 to<br>113.15)                       | 128.20<br>(90.94 to<br>173.84)                       | 95.08<br>(69.77 to<br>124.36)                       | 169.97<br>(115.47 to<br>237.26)                      |
| Pneumoconiosis                                                | 10.74<br>(9.44 to<br>12.24)                                | 9.99<br>(8.22 to<br>11.82)                                 | 10.48<br>(8.21 to<br>13.21)                                | 10.07<br>(8.52 to<br>11.84)                                | 0.60<br>(0.53 to<br>0.68)                            | 0.74<br>(0.62 to<br>0.89)                            | 0.84<br>(0.68 to<br>1.04)                           | 0.72<br>(0.61 to<br>0.85)                            |
| Silicosis                                                     | 2.11<br>(1.79 to<br>2.77)                                  | 0.91<br>(0.70 to<br>1.18)                                  | 0.63<br>(0.46 to<br>0.89)                                  | 0.97<br>(0.74 to<br>1.29)                                  | 0.12<br>(0.10 to<br>0.16)                            | 0.06<br>(0.05 to<br>0.09)                            | 0.05<br>(0.04 to<br>0.07)                           | 0.07<br>(0.05 to<br>0.09)                            |
| Asbestosis                                                    | 2.03<br>(1.53 to<br>2.46)                                  | 2.81<br>(2.00 to<br>3.65)                                  | 3.47<br>(2.48 to<br>4.72)                                  | 2.53<br>(1.81 to<br>3.23)                                  | 0.09<br>(0.06 to<br>0.11)                            | 0.16<br>(0.11 to<br>0.19)                            | 0.20<br>(0.15 to<br>0.25)                           | 0.14<br>(0.10 to<br>0.16)                            |
| Coal workers pneumoconiosis                                   | 1.88<br>(1.03 to<br>2.30)                                  | 1.03<br>(0.64 to<br>1.34)                                  | 0.82<br>(0.55 to<br>1.07)                                  | 1.19<br>(0.73 to<br>1.57)                                  | 0.11<br>(0.06 to<br>0.13)                            | 0.07<br>(0.05 to<br>0.10)                            | 0.07<br>(0.04 to<br>0.09)                           | 0.08<br>(0.04 to<br>0.11)                            |
| Other pneumoconiosis                                          | 4.72<br>(3.95 to<br>5.80)                                  | 5.24<br>(4.10 to<br>6.74)                                  | 5.55<br>(4.09 to<br>7.55)                                  | 5.38<br>(4.29 to<br>6.81)                                  | 0.28<br>(0.24 to<br>0.35)                            | 0.44<br>(0.35 to<br>0.58)                            | 0.52<br>(0.39 to<br>0.71)                           | 0.44<br>(0.34 to<br>0.57)                            |
| Asthma                                                        | 162.67<br>(140.96 to<br>210.07)                            | 98.15<br>(50.08 to<br>188.48)                              | 56.84<br>(29.08 to<br>110.07)                              | 124.57<br>(60.38 to<br>242.29)                             | 7.79<br>(6.78 to<br>9.95)                            | 5.58<br>(2.90 to<br>10.48)                           | 3.47<br>(1.83 to<br>6.47)                           | 6.73<br>(3.33 to<br>12.94)                           |
| Interstitial lung disease and pulmonary sarcoidosis           | 88.29<br>(67.41 to<br>108.71)                              | 148.32<br>(116.16 to<br>188.77)                            | 205.30<br>(160.17 to<br>259.48)                            | 128.30<br>(99.01 to<br>165.05)                             | 4.10<br>(3.22 to<br>5.22)                            | 8.40<br>(6.89 to<br>10.91)                           | 12.22<br>(10.02 to<br>15.36)                        | 6.93<br>(5.57 to<br>8.97)                            |
| Other chronic respiratory diseases                            | 40.74<br>(30.79 to<br>63.11)                               | 49.19<br>(32.15 to<br>77.59)                               | 48.01<br>(31.55 to<br>75.24)                               | 50.20<br>(32.32 to<br>81.33)                               | 1.52<br>(1.11 to<br>2.31)                            | 2.28<br>(1.53 to<br>3.40)                            | 2.44<br>(1.66 to<br>3.65)                           | 2.19<br>(1.47 to<br>3.28)                            |
| <b>Cirrhosis and other chronic liver diseases</b>             | <b>4,323.38</b><br><b>(3,789.63 to</b><br><b>4,962.74)</b> | <b>3,358.04</b><br><b>(2,633.96 to</b><br><b>4,222.72)</b> | <b>2,560.06</b><br><b>(1,986.98 to</b><br><b>3,316.28)</b> | <b>3,710.14</b><br><b>(2,959.72 to</b><br><b>4,562.03)</b> | <b>139.00</b><br><b>(123.19 to</b><br><b>157.27)</b> | <b>127.97</b><br><b>(106.57 to</b><br><b>152.31)</b> | <b>101.09</b><br><b>(82.09 to</b><br><b>124.00)</b> | <b>138.00</b><br><b>(117.36 to</b><br><b>160.13)</b> |
| Cirrhosis and other chronic liver diseases due to hepatitis B | 988.49<br>(850.58 to<br>1,142.29)                          | 826.72<br>(644.21 to<br>1,030.48)                          | 695.31<br>(532.62 to<br>886.10)                            | 829.74<br>(657.11 to<br>1,020.01)                          | 31.36<br>(27.26 to<br>36.02)                         | 31.54<br>(26.00 to<br>37.57)                         | 27.35<br>(22.03 to<br>33.43)                        | 30.89<br>(25.87 to<br>36.49)                         |
| Cirrhosis and other chronic liver diseases due to hepatitis C | 1,016.90<br>(845.59 to<br>1,213.33)                        | 787.30<br>(588.67 to<br>1,015.67)                          | 644.69<br>(472.85 to<br>857.46)                            | 794.47<br>(599.44 to<br>1,014.23)                          | 32.32<br>(27.18 to<br>38.07)                         | 29.10<br>(23.12 to<br>35.61)                         | 24.48<br>(19.04 to<br>30.99)                        | 28.82<br>(23.01 to<br>34.73)                         |

|                                                                |                                                            |                                                            |                                                          |                                                            |                                                    |                                                    |                                                    |                                                    |
|----------------------------------------------------------------|------------------------------------------------------------|------------------------------------------------------------|----------------------------------------------------------|------------------------------------------------------------|----------------------------------------------------|----------------------------------------------------|----------------------------------------------------|----------------------------------------------------|
| Cirrhosis and other chronic liver diseases due to alcohol use  | 1,447.90<br>(1,236.43 to<br>1,732.96)                      | 1,126.17<br>(859.98 to<br>1,468.89)                        | 712.57<br>(541.71 to<br>951.53)                          | 1,457.28<br>(1,138.22 to<br>1,866.46)                      | 48.22<br>(41.63 to<br>56.85)                       | 43.78<br>(35.54 to<br>54.33)                       | 29.20<br>(23.21 to<br>36.66)                       | 54.92<br>(45.21 to<br>66.38)                       |
| Cirrhosis and other chronic liver diseases due to other causes | 870.10<br>(740.77 to<br>1,039.89)                          | 617.85<br>(479.67 to<br>792.85)                            | 507.49<br>(388.74 to<br>669.40)                          | 628.66<br>(494.20 to<br>807.19)                            | 27.11<br>(23.17 to<br>32.32)                       | 23.54<br>(19.30 to<br>28.67)                       | 20.06<br>(16.06 to<br>25.05)                       | 23.36<br>(19.27 to<br>28.14)                       |
| <b>Digestive diseases</b>                                      | <b>1,986.50</b><br><b>(1,637.22 to</b><br><b>2,421.12)</b> | <b>1,706.14</b><br><b>(1,238.68 to</b><br><b>2,397.03)</b> | <b>1,340.73</b><br><b>(993.87 to</b><br><b>1,834.48)</b> | <b>1,821.02</b><br><b>(1,342.07 to</b><br><b>2,557.18)</b> | <b>86.62</b><br><b>(73.28 to</b><br><b>103.40)</b> | <b>94.38</b><br><b>(77.78 to</b><br><b>116.96)</b> | <b>82.47</b><br><b>(68.20 to</b><br><b>101.48)</b> | <b>95.57</b><br><b>(78.74 to</b><br><b>120.49)</b> |
| Peptic ulcer disease                                           | 424.19<br>(354.79 to<br>519.59)                            | 213.23<br>(155.01 to<br>286.37)                            | 137.06<br>(98.45 to<br>186.22)                           | 230.89<br>(170.24 to<br>310.47)                            | 18.31<br>(15.44 to<br>21.84)                       | 11.27<br>(8.96 to<br>13.96)                        | 7.79<br>(6.19 to<br>9.68)                          | 11.75<br>(9.36 to<br>14.65)                        |

| Central Europe, Eastern Europe, and Central Asia |                                    |                                    |                                    |                                    |                              |                              |                              |                              |
|--------------------------------------------------|------------------------------------|------------------------------------|------------------------------------|------------------------------------|------------------------------|------------------------------|------------------------------|------------------------------|
| Cause                                            | YLLs (in 1000s)                    |                                    |                                    |                                    | Deaths (in 1000s)            |                              |                              |                              |
|                                                  | 2016                               | 2040 Forecast                      | 2040 Better Scenario               | 2040 Worse Scenario                | 2016                         | 2040 Forecast                | 2040 Better Scenario         | 2040 Worse Scenario          |
| Gastritis and duodenitis                         | 25.46<br>(19.67 to 33.33)          | 20.55<br>(14.81 to 29.21)          | 16.15<br>(11.53 to 23.56)          | 20.65<br>(15.01 to 28.81)          | 1.15<br>(0.91 to 1.51)       | 1.18<br>(0.93 to 1.70)       | 1.01<br>(0.79 to 1.49)       | 1.14<br>(0.91 to 1.60)       |
| Appendicitis                                     | 39.59<br>(32.07 to 58.18)          | 29.85<br>(22.91 to 45.75)          | 20.06<br>(15.02 to 31.72)          | 31.07<br>(24.17 to 47.68)          | 1.34<br>(1.09 to 2.06)       | 1.26<br>(1.01 to 1.93)       | 0.92<br>(0.71 to 1.43)       | 1.27<br>(1.02 to 1.99)       |
| Paralytic ileus and intestinal obstruction       | 218.66<br>(175.56 to 272.76)       | 218.23<br>(174.70 to 277.39)       | 221.96<br>(176.08 to 285.89)       | 207.14<br>(167.41 to 260.77)       | 9.67<br>(7.78 to 11.79)      | 13.51<br>(11.04 to 16.33)    | 14.87<br>(12.08 to 17.85)    | 12.17<br>(9.91 to 14.86)     |
| Inguinal, femoral, and abdominal hernia          | 46.69<br>(36.81 to 74.14)          | 34.94<br>(26.95 to 54.47)          | 30.71<br>(22.89 to 48.57)          | 35.93<br>(26.82 to 52.82)          | 2.74<br>(2.17 to 4.37)       | 2.56<br>(2.04 to 3.95)       | 2.42<br>(1.89 to 3.78)       | 2.39<br>(1.91 to 3.78)       |
| Inflammatory bowel disease                       | 63.57<br>(46.12 to 77.98)          | 58.84<br>(41.49 to 76.21)          | 58.51<br>(40.54 to 78.06)          | 56.41<br>(40.16 to 71.43)          | 2.59<br>(1.78 to 3.16)       | 2.59<br>(2.07 to 3.62)       | 3.01<br>(2.16 to 3.93)       | 2.77<br>(1.92 to 3.30)       |
| Vascular intestinal disorders                    | 283.38<br>(229.74 to 356.55)       | 320.19<br>(261.20 to 391.32)       | 301.22<br>(236.82 to 379.12)       | 301.29<br>(250.14 to 360.95)       | 17.56<br>(14.44 to 21.45)    | 23.72<br>(20.21 to 28.02)    | 23.67<br>(19.68 to 28.16)    | 21.69<br>(18.27 to 25.48)    |
| Gallbladder and biliary diseases                 | 117.48<br>(99.30 to 141.53)        | 138.90<br>(74.06 to 247.88)        | 101.36<br>(54.49 to 182.85)        | 173.09<br>(89.79 to 312.22)        | 7.13<br>(6.12 to 8.47)       | 10.33<br>(5.63 to 18.64)     | 8.18<br>(4.57 to 14.64)      | 12.25<br>(6.47 to 22.63)     |
| Pancreatitis                                     | 642.43<br>(473.32 to 827.53)       | 561.98<br>(294.10 to 1,123.35)     | 354.55<br>(192.70 to 716.12)       | 659.84<br>(350.28 to 1,320.04)     | 20.65<br>(15.69 to 25.99)    | 21.10<br>(12.52 to 36.76)    | 14.11<br>(8.66 to 23.66)     | 24.12<br>(14.53 to 42.28)    |
| Other digestive diseases                         | 125.05<br>(88.95 to 155.80)        | 109.43<br>(80.50 to 139.90)        | 99.15<br>(72.25 to 129.53)         | 106.71<br>(78.86 to 133.88)        | 5.48<br>(4.15 to 6.61)       | 6.45<br>(5.15 to 7.49)       | 6.33<br>(5.11 to 7.50)       | 6.02<br>(4.75 to 6.98)       |
| Neurological disorders                           | 2,344.55<br>(2,015.45 to 2,757.85) | 3,658.86<br>(2,938.18 to 4,692.55) | 3,911.40<br>(3,157.53 to 4,895.82) | 3,627.34<br>(2,857.20 to 4,844.54) | 194.53<br>(162.69 to 235.32) | 368.45<br>(284.26 to 483.04) | 422.71<br>(336.70 to 536.40) | 351.56<br>(257.70 to 481.14) |
| Alzheimer's disease and other dementias          | 1,485.08<br>(1,209.28 to 1,842.35) | 2,586.32<br>(1,929.76 to 3,575.51) | 2,816.44<br>(2,131.69 to 3,755.64) | 2,579.29<br>(1,817.32 to 3,756.03) | 156.16<br>(127.45 to 193.11) | 305.54<br>(223.58 to 422.38) | 349.75<br>(266.00 to 462.88) | 294.84<br>(202.86 to 425.00) |
| Parkinson's disease                              | 283.70<br>(209.33 to 369.48)       | 490.24<br>(369.34 to 635.67)       | 589.59<br>(442.57 to 767.52)       | 429.41<br>(322.37 to 563.95)       | 23.76<br>(17.73 to 30.87)    | 45.57<br>(34.47 to 59.31)    | 56.78<br>(43.30 to 73.73)    | 39.00<br>(28.33 to 51.59)    |
| Epilepsy                                         | 319.74<br>(289.72 to 364.85)       | 329.02<br>(220.18 to 482.72)       | 245.90<br>(169.36 to 353.80)       | 370.71<br>(245.11 to 549.26)       | 6.94<br>(6.32 to 7.82)       | 8.16<br>(5.70 to 11.52)      | 6.37<br>(4.51 to 8.84)       | 9.03<br>(6.16 to 12.88)      |
| Multiple sclerosis                               | 81.17<br>(63.02 to 113.28)         | 77.60<br>(50.58 to 120.62)         | 78.97<br>(51.33 to 123.02)         | 77.86<br>(50.82 to 120.85)         | 2.45<br>(1.94 to 3.35)       | 2.71<br>(1.92 to 3.97)       | 2.86<br>(2.01 to 4.19)       | 2.65<br>(1.86 to 3.90)       |
| Motor neuron disease                             | 42.42<br>(37.57 to 48.12)          | 48.82<br>(38.52 to 61.89)          | 49.46<br>(38.11 to 64.26)          | 47.12<br>(37.80 to 58.68)          | 1.53<br>(1.37 to 1.72)       | 1.99<br>(1.64 to 2.40)       | 2.06<br>(1.66 to 2.56)       | 1.88<br>(1.58 to 2.22)       |
| Other neurological disorders                     | 132.44<br>(118.61 to 148.97)       | 126.86<br>(103.74 to 156.63)       | 131.06<br>(105.35 to 166.11)       | 122.95<br>(101.80 to 150.10)       | 3.69<br>(3.31 to 4.16)       | 4.48<br>(3.87 to 5.18)       | 4.88<br>(4.15 to 5.79)       | 4.17<br>(3.65 to 4.77)       |
| Mental disorders                                 | 3,052.72<br>(2,405.94 to 3,844.37) | 3,472.92<br>(2,087.28 to 5,265.58) | 4,021.71<br>(2,412.98 to 6,255.94) | 3,450.38<br>(2,104.64 to 5,235.17) | 80.10<br>(63.84 to 99.38)    | 101.05<br>(65.82 to 144.80)  | 120.76<br>(78.77 to 177.81)  | 98.48<br>(65.97 to 138.37)   |
| Alcohol use disorders                            | 1,983.63<br>(1,576.57 to 2,476.56) | 1,752.20<br>(1,030.20 to 2,711.29) | 1,818.83<br>(1,055.45 to 2,962.30) | 1,834.21<br>(1,091.47 to 2,774.48) | 53.68<br>(42.93 to 66.30)    | 51.32<br>(31.61 to 76.18)    | 54.30<br>(32.50 to 83.17)    | 53.04<br>(33.27 to 77.07)    |
| Drug use disorders                               | 1,068.13<br>(805.49 to 1,387.97)   | 1,719.97<br>(1,068.99 to 2,615.97) | 2,202.03<br>(1,356.12 to 3,411.61) | 1,615.45<br>(1,005.93 to 2,445.60) | 26.40<br>(20.34 to 33.71)    | 49.72<br>(33.80 to 69.11)    | 66.44<br>(45.29 to 93.51)    | 45.42<br>(31.20 to 61.92)    |
| Opioid use disorders                             | 730.63<br>(545.73 to 970.18)       | 974.79<br>(602.68 to 1,556.72)     | 1,070.61<br>(646.96 to 1,753.53)   | 940.57<br>(580.71 to 1,488.40)     | 17.40<br>(13.16 to 22.83)    | 26.46<br>(17.15 to 39.91)    | 30.00<br>(18.80 to 47.37)    | 25.03<br>(16.48 to 37.32)    |



|                           |                                 |                                 |                                   |                                 |                           |                              |                              |                             |
|---------------------------|---------------------------------|---------------------------------|-----------------------------------|---------------------------------|---------------------------|------------------------------|------------------------------|-----------------------------|
|                           | 61.83<br>(29.11 to<br>86.13)    | 120.34<br>(54.97 to<br>196.39)  | 166.15<br>(76.46 to<br>279.38)    | 112.17<br>(51.81 to<br>184.33)  | 1.51<br>(0.71 to<br>2.06) | 3.24<br>(1.54 to<br>5.13)    | 4.55<br>(2.17 to<br>7.44)    | 2.97<br>(1.41 to<br>4.64)   |
| Cocaine use disorders     |                                 |                                 |                                   |                                 |                           |                              |                              |                             |
|                           | 37.53<br>(17.88 to<br>53.51)    | 110.00<br>(59.31 to<br>172.44)  | 175.44<br>(94.02 to<br>277.61)    | 98.81<br>(52.57 to<br>150.34)   | 0.88<br>(0.42 to<br>1.23) | 2.73<br>(1.48 to<br>4.13)    | 4.45<br>(2.42 to<br>6.85)    | 2.43<br>(1.30 to<br>3.58)   |
| Amphetamine use disorders |                                 |                                 |                                   |                                 |                           |                              |                              |                             |
|                           | 238.13<br>(137.46 to<br>320.66) | 514.84<br>(298.20 to<br>781.76) | 789.84<br>(453.46 to<br>1,232.86) | 463.90<br>(263.38 to<br>697.17) | 6.62<br>(3.95 to<br>8.63) | 17.29<br>(11.17 to<br>23.59) | 27.44<br>(18.20 to<br>38.26) | 14.99<br>(9.61 to<br>20.13) |
| Other drug use disorders  |                                 |                                 |                                   |                                 |                           |                              |                              |                             |
|                           | 0.96<br>(0.76 to<br>1.22)       | 0.75<br>(0.52 to<br>1.09)       | 0.84<br>(0.57 to<br>1.28)         | 0.72<br>(0.50 to<br>1.06)       | 0.02<br>(0.01 to<br>0.02) | 0.01<br>(0.01 to<br>0.02)    | 0.02<br>(0.01 to<br>0.02)    | 0.01<br>(0.01 to<br>0.02)   |
| Eating disorders          |                                 |                                 |                                   |                                 |                           |                              |                              |                             |

| Central Europe, Eastern Europe, and Central Asia           |                                           |                                           |                                           |                                           |                                     |                                     |                                     |                                     |
|------------------------------------------------------------|-------------------------------------------|-------------------------------------------|-------------------------------------------|-------------------------------------------|-------------------------------------|-------------------------------------|-------------------------------------|-------------------------------------|
| Cause                                                      | YLLs (in 1000s)                           |                                           |                                           |                                           | Deaths (in 1000s)                   |                                     |                                     |                                     |
|                                                            | 2016                                      | 2040 Forecast                             | 2040 Better Scenario                      | 2040 Worse Scenario                       | 2016                                | 2040 Forecast                       | 2040 Better Scenario                | 2040 Worse Scenario                 |
| <b>Diabetes, urogenital, blood, and endocrine diseases</b> | <b>2,607.28</b><br>(2,398.55 to 2,858.95) | <b>3,116.57</b><br>(2,211.54 to 4,392.65) | <b>2,306.55</b><br>(1,637.83 to 3,266.11) | <b>3,465.01</b><br>(2,447.50 to 4,869.21) | <b>120.42</b><br>(111.58 to 131.01) | <b>174.64</b><br>(130.54 to 230.79) | <b>137.33</b><br>(102.43 to 183.53) | <b>186.90</b><br>(139.52 to 248.34) |
| Diabetes mellitus                                          | 1,082.92<br>(1,010.35 to 1,172.44)        | 1,143.61<br>(677.86 to 1,867.56)          | 770.79<br>(467.72 to 1,231.60)            | 1,355.02<br>(773.79 to 2,209.76)          | 54.20<br>(50.71 to 58.59)           | 64.82<br>(41.60 to 98.13)           | 46.71<br>(30.43 to 69.63)           | 73.12<br>(45.76 to 110.11)          |
| Acute glomerulonephritis                                   | 15.33<br>(13.48 to 17.66)                 | 23.92<br>(16.45 to 33.76)                 | 19.40<br>(13.04 to 28.38)                 | 24.42<br>(17.12 to 34.02)                 | 0.41<br>(0.36 to 0.48)              | 0.73<br>(0.52 to 1.00)              | 0.61<br>(0.42 to 0.87)              | 0.72<br>(0.52 to 0.98)              |
| Chronic kidney disease                                     | 896.75<br>(822.17 to 981.42)              | 1,180.37<br>(675.73 to 2,013.19)          | 852.64<br>(502.85 to 1,424.70)            | 1,330.89<br>(751.91 to 2,305.60)          | 40.99<br>(38.10 to 44.42)           | 69.51<br>(40.88 to 114.31)          | 53.91<br>(32.09 to 88.58)           | 75.80<br>(43.61 to 125.97)          |
| Chronic kidney disease due to diabetes mellitus            | 291.99<br>(266.43 to 323.44)              | 455.82<br>(256.51 to 803.06)              | 333.75<br>(192.93 to 573.39)              | 517.08<br>(285.86 to 917.48)              | 13.41<br>(12.26 to 14.72)           | 25.13<br>(14.45 to 42.85)           | 19.46<br>(11.33 to 32.06)           | 27.68<br>(15.55 to 47.26)           |
| Chronic kidney disease due to hypertension                 | 59.69<br>(52.62 to 67.85)                 | 103.23<br>(58.34 to 170.29)               | 84.57<br>(49.17 to 140.45)                | 112.72<br>(62.83 to 189.08)               | 4.70<br>(4.11 to 5.39)              | 10.01<br>(5.72 to 16.76)            | 8.77<br>(5.19 to 14.37)             | 10.54<br>(5.85 to 17.46)            |
| Chronic kidney disease due to glomerulonephritis           | 280.19<br>(244.94 to 321.64)              | 310.32<br>(175.62 to 544.46)              | 209.89<br>(120.68 to 362.43)              | 350.07<br>(195.94 to 611.15)              | 10.98<br>(9.63 to 12.53)            | 15.88<br>(9.00 to 27.18)            | 11.40<br>(6.67 to 19.26)            | 17.40<br>(9.94 to 29.88)            |
| Chronic kidney disease due to other and unspecified causes | 264.88<br>(235.58 to 296.70)              | 311.00<br>(181.82 to 522.56)              | 224.43<br>(133.02 to 375.69)              | 351.02<br>(198.97 to 594.97)              | 11.90<br>(10.62 to 13.27)           | 18.48<br>(10.93 to 30.88)           | 14.28<br>(8.53 to 23.80)            | 20.18<br>(11.64 to 33.01)           |
| Urinary diseases and male infertility                      | 380.48<br>(331.69 to 435.45)              | 564.63<br>(445.60 to 708.73)              | 469.92<br>(359.55 to 606.65)              | 552.08<br>(445.73 to 675.27)              | 17.72<br>(15.53 to 20.18)           | 31.05<br>(27.00 to 35.15)           | 27.46<br>(22.81 to 32.59)           | 29.17<br>(25.88 to 32.72)           |
| Urinary tract infections                                   | 321.15<br>(280.57 to 373.80)              | 499.28<br>(392.80 to 625.81)              | 422.12<br>(323.72 to 547.01)              | 488.11<br>(395.06 to 605.55)              | 14.45<br>(12.68 to 16.86)           | 26.87<br>(23.11 to 31.09)           | 24.18<br>(20.13 to 28.88)           | 25.24<br>(22.26 to 28.50)           |
| Urolithiasis                                               | 36.77<br>(24.87 to 49.20)                 | 44.11<br>(28.32 to 64.18)                 | 31.92<br>(19.83 to 48.30)                 | 43.18<br>(28.11 to 60.77)                 | 2.04<br>(1.46 to 2.79)              | 2.73<br>(1.88 to 3.74)              | 2.10<br>(1.40 to 2.99)              | 2.58<br>(1.76 to 3.50)              |
| Other urinary diseases                                     | 22.56<br>(12.81 to 29.25)                 | 21.24<br>(12.34 to 28.21)                 | 15.88<br>(9.35 to 21.88)                  | 20.79<br>(12.37 to 27.11)                 | 1.23<br>(0.69 to 1.58)              | 1.45<br>(0.83 to 1.82)              | 1.17<br>(0.67 to 1.50)              | 1.35<br>(0.77 to 1.70)              |
| Gynecological diseases                                     | 5.11<br>(1.69 to 7.89)                    | 2.48<br>(0.85 to 4.81)                    | 1.47<br>(0.53 to 2.83)                    | 2.70<br>(0.95 to 5.00)                    | 0.15<br>(0.06 to 0.23)              | 0.09<br>(0.04 to 0.15)              | 0.05<br>(0.03 to 0.09)              | 0.09<br>(0.04 to 0.16)              |
| Uterine fibroids                                           | 2.97<br>(0.93 to 4.63)                    | 1.36<br>(0.42 to 2.82)                    | 0.87<br>(0.28 to 1.85)                    | 1.45<br>(0.48 to 2.88)                    | 0.08<br>(0.03 to 0.13)              | 0.04<br>(0.02 to 0.08)              | 0.03<br>(0.01 to 0.05)              | 0.04<br>(0.02 to 0.08)              |
| Polycystic ovarian syndrome                                | 0.22<br>(0.12 to 0.30)                    | 0.07<br>(0.03 to 0.12)                    | 0.03<br>(0.01 to 0.05)                    | 0.09<br>(0.04 to 0.16)                    | 0.01<br>(0.00 to 0.01)              | 0.00<br>(0.00 to 0.00)              | 0.00<br>(0.00 to 0.00)              | 0.00<br>(0.00 to 0.00)              |
| Endometriosis                                              | 0.19<br>(0.03 to 0.42)                    | 0.16<br>(0.02 to 0.46)                    | 0.08<br>(0.01 to 0.24)                    | 0.17<br>(0.02 to 0.46)                    | 0.00<br>(0.00 to 0.01)              | 0.00<br>(0.00 to 0.01)              | 0.00<br>(0.00 to 0.01)              | 0.00<br>(0.00 to 0.01)              |
| Genital prolapse                                           | 0.19<br>(0.07 to 0.32)                    | 0.11<br>(0.04 to 0.22)                    | 0.06<br>(0.02 to 0.12)                    | 0.12<br>(0.04 to 0.23)                    | 0.01<br>(0.00 to 0.01)              | 0.01<br>(0.00 to 0.01)              | 0.00<br>(0.00 to 0.01)              | 0.01<br>(0.00 to 0.01)              |
| Other gynecological diseases                               | 1.54<br>(0.55 to 2.37)                    | 0.78<br>(0.33 to 1.35)                    | 0.43<br>(0.19 to 0.74)                    | 0.87<br>(0.36 to 1.52)                    | 0.05<br>(0.02 to 0.07)              | 0.04<br>(0.02 to 0.05)              | 0.02<br>(0.01 to 0.03)              | 0.04<br>(0.02 to 0.05)              |
| Hemoglobinopathies and hemolytic anemias                   | 80.11<br>(66.99 to 89.23)                 | 51.66<br>(40.66 to 62.76)                 | 38.63<br>(30.57 to 47.71)                 | 53.48<br>(42.78 to 64.15)                 | 2.78<br>(2.27 to 3.17)              | 2.58<br>(2.11 to 2.97)              | 2.12<br>(1.73 to 2.48)              | 2.55<br>(2.08 to 2.91)              |
| Thalassemias                                               | 13.68<br>(11.36 to 16.88)                 | 4.20<br>(3.00 to 5.99)                    | 3.53<br>(2.55 to 4.93)                    | 4.42<br>(3.16 to 6.22)                    | 0.17<br>(0.14 to 0.20)              | 0.05<br>(0.04 to 0.07)              | 0.04<br>(0.03 to 0.06)              | 0.05<br>(0.04 to 0.08)              |

|                                                   |                                 |                                 |                                 |                                 |                           |                           |                           |                           |
|---------------------------------------------------|---------------------------------|---------------------------------|---------------------------------|---------------------------------|---------------------------|---------------------------|---------------------------|---------------------------|
|                                                   | 15.29<br>(12.36 to<br>17.39)    | 10.69<br>(7.85 to<br>14.19)     | 7.42<br>(5.34 to<br>10.10)      | 11.46<br>(8.49 to<br>15.20)     | 0.29<br>(0.23 to<br>0.33) | 0.22<br>(0.16 to<br>0.29) | 0.15<br>(0.11 to<br>0.21) | 0.23<br>(0.17 to<br>0.31) |
| Sickle cell disorders                             |                                 |                                 |                                 |                                 |                           |                           |                           |                           |
|                                                   | 15.48<br>(11.89 to<br>17.89)    | 11.87<br>(8.58 to<br>15.42)     | 7.86<br>(5.71 to<br>10.47)      | 12.73<br>(9.33 to<br>16.48)     | 0.40<br>(0.30 to<br>0.46) | 0.38<br>(0.29 to<br>0.48) | 0.26<br>(0.20 to<br>0.34) | 0.40<br>(0.30 to<br>0.50) |
| G6PD deficiency                                   |                                 |                                 |                                 |                                 |                           |                           |                           |                           |
|                                                   | 35.66<br>(28.41 to<br>41.18)    | 24.89<br>(19.92 to<br>29.40)    | 19.82<br>(15.77 to<br>23.99)    | 24.87<br>(19.91 to<br>29.13)    | 1.93<br>(1.55 to<br>2.23) | 1.93<br>(1.57 to<br>2.27) | 1.66<br>(1.35 to<br>1.93) | 1.86<br>(1.49 to<br>2.19) |
| Other hemoglobinopathies and hemolytic anemias    |                                 |                                 |                                 |                                 |                           |                           |                           |                           |
|                                                   | 146.57<br>(113.85 to<br>168.15) | 149.90<br>(113.97 to<br>191.95) | 153.69<br>(115.84 to<br>203.49) | 146.43<br>(112.23 to<br>184.85) | 4.17<br>(3.27 to<br>4.80) | 5.87<br>(4.62 to<br>7.10) | 6.46<br>(5.03 to<br>8.04) | 5.45<br>(4.32 to<br>6.48) |
| Endocrine, metabolic, blood, and immune disorders |                                 |                                 |                                 |                                 |                           |                           |                           |                           |

| Central Europe, Eastern Europe, and Central Asia |                                        |                                      |                                     |                                      |                                  |                                  |                                 |                                  |
|--------------------------------------------------|----------------------------------------|--------------------------------------|-------------------------------------|--------------------------------------|----------------------------------|----------------------------------|---------------------------------|----------------------------------|
| Cause                                            | YLLs (in 1000s)                        |                                      |                                     |                                      | Deaths (in 1000s)                |                                  |                                 |                                  |
|                                                  | 2016                                   | 2040 Forecast                        | 2040 Better Scenario                | 2040 Worse Scenario                  | 2016                             | 2040 Forecast                    | 2040 Better Scenario            | 2040 Worse Scenario              |
| <b>Musculoskeletal disorders</b>                 | <b>102.10</b><br>(80.37 to 126.01)     | <b>110.75</b><br>(83.48 to 147.83)   | <b>93.05</b><br>(69.37 to 125.02)   | <b>111.94</b><br>(84.21 to 146.72)   | <b>4.09</b><br>(3.29 to 4.97)    | <b>5.44</b><br>(4.38 to 6.58)    | <b>4.71</b><br>(3.80 to 5.75)   | <b>5.35</b><br>(4.35 to 6.34)    |
| Rheumatoid arthritis                             | 37.13<br>(29.56 to 53.99)              | 41.41<br>(29.90 to 58.96)            | 27.61<br>(19.74 to 40.39)           | 43.99<br>(31.50 to 62.79)            | 1.73<br>(1.40 to 2.46)           | 2.32<br>(1.81 to 3.11)           | 1.61<br>(1.25 to 2.25)          | 2.39<br>(1.87 to 3.22)           |
| Other musculoskeletal disorders                  | 64.97<br>(45.85 to 81.43)              | 69.33<br>(47.42 to 94.20)            | 65.44<br>(45.60 to 90.31)           | 67.95<br>(46.57 to 91.41)            | 2.36<br>(1.58 to 2.90)           | 3.12<br>(2.13 to 3.79)           | 3.10<br>(2.18 to 3.83)          | 2.96<br>(1.99 to 3.55)           |
| <b>Other non-communicable diseases</b>           | <b>1483.04</b><br>(1270.41 to 1757.12) | <b>1577.69</b><br>(564.99 to 943.20) | <b>452.95</b><br>(336.71 to 573.83) | <b>829.44</b><br>(628.18 to 1046.68) | <b>20.63</b><br>(17.15 to 24.01) | <b>14.47</b><br>(10.50 to 17.85) | <b>10.80</b><br>(7.24 to 14.21) | <b>15.26</b><br>(11.23 to 18.84) |
| Congenital birth defects                         | 1324.99<br>(1121.36 to 1644.35)        | 585.02<br>(441.17 to 766.09)         | 318.42<br>(239.81 to 421.87)        | 676.31<br>(510.40 to 898.57)         | 16.74<br>(14.22 to 20.64)        | 7.94<br>(6.15 to 10.17)          | 4.45<br>(3.41 to 5.88)          | 9.06<br>(6.97 to 11.80)          |
| Neural tube defects                              | 52.92<br>(37.48 to 75.05)              | 14.79<br>(9.61 to 22.76)             | 6.87<br>(4.33 to 10.96)             | 17.55<br>(11.29 to 27.01)            | 0.64<br>(0.45 to 0.89)           | 0.19<br>(0.12 to 0.28)           | 0.09<br>(0.06 to 0.14)          | 0.22<br>(0.14 to 0.33)           |
| Congenital heart anomalies                       | 689.05<br>(579.15 to 875.37)           | 298.87<br>(222.53 to 395.43)         | 145.90<br>(106.77 to 196.69)        | 348.96<br>(261.91 to 465.63)         | 8.81<br>(7.47 to 11.13)          | 4.07<br>(3.07 to 5.34)           | 2.00<br>(1.49 to 2.68)          | 4.70<br>(3.57 to 6.24)           |
| Orofacial clefts                                 | 1.60<br>(1.08 to 2.63)                 | 0.69<br>(0.41 to 1.20)               | 0.26<br>(0.15 to 0.45)              | 0.82<br>(0.49 to 1.40)               | 0.02<br>(0.01 to 0.03)           | 0.01<br>(0.00 to 0.01)           | 0.00<br>(0.00 to 0.01)          | 0.01<br>(0.01 to 0.02)           |
| Down syndrome                                    | 40.75<br>(31.82 to 49.21)              | 31.29<br>(24.01 to 41.95)            | 30.60<br>(23.34 to 42.41)           | 31.94<br>(24.47 to 42.34)            | 0.65<br>(0.53 to 0.81)           | 0.59<br>(0.45 to 0.82)           | 0.60<br>(0.45 to 0.87)          | 0.60<br>(0.45 to 0.80)           |
| Other chromosomal abnormalities                  | 49.48<br>(37.66 to 70.59)              | 30.52<br>(22.27 to 43.02)            | 22.09<br>(16.00 to 30.60)           | 33.93<br>(24.54 to 49.01)            | 0.61<br>(0.47 to 0.86)           | 0.40<br>(0.29 to 0.56)           | 0.30<br>(0.21 to 0.40)          | 0.44<br>(0.32 to 0.62)           |
| Congenital musculoskeletal and limb anomalies    | 24.77<br>(19.88 to 38.38)              | 11.85<br>(8.52 to 17.27)             | 6.37<br>(4.65 to 9.15)              | 13.75<br>(9.85 to 19.66)             | 0.30<br>(0.24 to 0.46)           | 0.15<br>(0.11 to 0.21)           | 0.08<br>(0.06 to 0.11)          | 0.17<br>(0.12 to 0.24)           |
| Urogenital congenital anomalies                  | 17.46<br>(12.95 to 27.05)              | 8.46<br>(6.00 to 13.39)              | 5.27<br>(3.67 to 8.42)              | 9.45<br>(6.71 to 15.18)              | 0.25<br>(0.18 to 0.37)           | 0.14<br>(0.10 to 0.22)           | 0.09<br>(0.06 to 0.14)          | 0.15<br>(0.11 to 0.24)           |
| Digestive congenital anomalies                   | 103.11<br>(77.05 to 151.56)            | 47.40<br>(32.27 to 71.47)            | 23.75<br>(16.11 to 35.77)           | 55.93<br>(37.78 to 83.90)            | 1.23<br>(0.93 to 1.80)           | 0.58<br>(0.40 to 0.86)           | 0.29<br>(0.20 to 0.44)          | 0.68<br>(0.46 to 1.01)           |
| Other congenital birth defects                   | 345.86<br>(290.23 to 412.93)           | 141.15<br>(105.93 to 190.84)         | 77.31<br>(56.99 to 104.72)          | 163.97<br>(121.26 to 224.61)         | 4.24<br>(3.57 to 5.05)           | 1.82<br>(1.38 to 2.41)           | 1.01<br>(0.75 to 1.34)          | 2.10<br>(1.58 to 2.82)           |
| Skin and subcutaneous diseases                   | 73.81<br>(21.83 to 113.61)             | 122.62<br>(42.55 to 198.44)          | 115.02<br>(42.04 to 187.38)         | 119.07<br>(41.59 to 189.15)          | 2.91<br>(0.97 to 4.35)           | 6.18<br>(2.38 to 8.95)           | 6.12<br>(2.46 to 9.02)          | 5.80<br>(2.19 to 8.18)           |
| Cellulitis                                       | 42.60<br>(10.02 to 69.12)              | 71.64<br>(21.19 to 123.14)           | 69.04<br>(21.24 to 120.40)          | 68.93<br>(20.18 to 116.89)           | 1.52<br>(0.40 to 2.41)           | 3.15<br>(1.05 to 4.92)           | 3.18<br>(1.10 to 5.04)          | 2.95<br>(0.97 to 4.50)           |
| Pyoderma                                         | 23.79<br>(8.01 to 35.51)               | 44.34<br>(16.69 to 66.96)            | 40.33<br>(15.92 to 62.13)           | 43.54<br>(16.46 to 65.31)            | 1.01<br>(0.37 to 1.48)           | 2.56<br>(1.03 to 3.56)           | 2.52<br>(1.04 to 3.58)          | 2.41<br>(0.97 to 3.27)           |
| Decubitus ulcer                                  | 4.96<br>(2.10 to 6.56)                 | 4.15<br>(1.89 to 5.64)               | 3.44<br>(1.62 to 4.68)              | 4.13<br>(1.90 to 5.52)               | 0.28<br>(0.12 to 0.37)           | 0.33<br>(0.15 to 0.44)           | 0.30<br>(0.14 to 0.39)          | 0.31<br>(0.14 to 0.42)           |
| Other skin and subcutaneous diseases             | 2.46<br>(1.03 to 3.42)                 | 2.49<br>(1.15 to 3.48)               | 2.21<br>(1.06 to 3.11)              | 2.48<br>(1.16 to 3.47)               | 0.09<br>(0.04 to 0.13)           | 0.13<br>(0.06 to 0.17)           | 0.13<br>(0.06 to 0.17)          | 0.12<br>(0.06 to 0.16)           |
| Sudden infant death syndrome                     | 84.24<br>(69.35 to 100.64)             | 30.04<br>(19.13 to 44.82)            | 19.52<br>(12.22 to 29.12)           | 34.07<br>(21.39 to 51.11)            | 0.98<br>(0.80 to 1.17)           | 0.35<br>(0.22 to 0.52)           | 0.23<br>(0.14 to 0.34)          | 0.40<br>(0.25 to 0.59)           |

|                          |                                          |                                        |                                        |                                         |                                 |                                 |                                 |                                 |
|--------------------------|------------------------------------------|----------------------------------------|----------------------------------------|-----------------------------------------|---------------------------------|---------------------------------|---------------------------------|---------------------------------|
| Injuries                 | 13,598.69<br>(11,238.52 to<br>16,321.56) | 9,579.08<br>(5,882.84 to<br>16,206.46) | 6,705.29<br>(4,200.10 to<br>11,335.10) | 11,475.36<br>(7,015.04 to<br>19,314.83) | 339.16<br>(281.87 to<br>407.33) | 279.85<br>(189.99 to<br>420.14) | 209.50<br>(145.71 to<br>305.92) | 318.51<br>(211.22 to<br>487.85) |
| Transport injuries       | 3,017.97<br>(2,563.93 to<br>3,555.53)    | 1,645.08<br>(935.40 to<br>2,954.05)    | 854.76<br>(501.52 to<br>1,487.32)      | 2,878.33<br>(1,546.12 to<br>5,269.95)   | 68.25<br>(58.39 to<br>80.52)    | 41.93<br>(24.93 to<br>70.45)    | 23.10<br>(14.36 to<br>36.84)    | 69.75<br>(39.68 to<br>120.09)   |
| Road injuries            | 2,746.77<br>(2,336.32 to<br>3,231.05)    | 1,395.42<br>(815.20 to<br>2,425.34)    | 706.64<br>(427.95 to<br>1,171.26)      | 2,598.00<br>(1,405.66 to<br>4,695.59)   | 61.76<br>(52.89 to<br>72.18)    | 35.29<br>(21.61 to<br>58.95)    | 19.04<br>(12.12 to<br>29.44)    | 62.42<br>(35.81 to<br>106.23)   |
| Pedestrian road injuries | 813.35<br>(668.57 to<br>988.80)          | 380.56<br>(224.04 to<br>656.97)        | 161.11<br>(98.85 to<br>268.21)         | 641.27<br>(359.27 to<br>1,143.76)       | 20.68<br>(17.31 to<br>25.09)    | 11.19<br>(7.01 to<br>17.88)     | 5.02<br>(3.27 to<br>7.85)       | 18.25<br>(10.87 to<br>30.25)    |

| Central Europe, Eastern Europe, and Central Asia |                                                  |                                                  |                                                  |                                                  |                                            |                                           |                                          |                                           |
|--------------------------------------------------|--------------------------------------------------|--------------------------------------------------|--------------------------------------------------|--------------------------------------------------|--------------------------------------------|-------------------------------------------|------------------------------------------|-------------------------------------------|
| Cause                                            | YLLs (in 1000s)                                  |                                                  |                                                  |                                                  | Deaths (in 1000s)                          |                                           |                                          |                                           |
|                                                  | 2016                                             | 2040 Forecast                                    | 2040 Better Scenario                             | 2040 Worse Scenario                              | 2016                                       | 2040 Forecast                             | 2040 Better Scenario                     | 2040 Worse Scenario                       |
| Cyclist road injuries                            | 100.98<br>(84.04 to 118.94)                      | 69.13<br>(37.74 to 127.51)                       | 43.02<br>(24.89 to 76.79)                        | 114.89<br>(62.17 to 217.21)                      | 2.66<br>(2.22 to 3.11)                     | 2.22<br>(1.30 to 3.79)                    | 1.57<br>(0.96 to 2.61)                   | 3.36<br>(1.89 to 6.03)                    |
| Motorcyclist road injuries                       | 233.12<br>(189.95 to 282.01)                     | 173.90<br>(89.48 to 353.57)                      | 118.49<br>(61.96 to 230.29)                      | 261.10<br>(129.73 to 529.54)                     | 4.54<br>(3.69 to 5.49)                     | 3.66<br>(1.95 to 7.05)                    | 2.62<br>(1.41 to 5.06)                   | 5.28<br>(2.71 to 10.36)                   |
| Motor vehicle road injuries                      | 1,578.42<br>(1,294.25 to 1,897.92)               | 756.37<br>(441.23 to 1,282.85)                   | 375.87<br>(227.01 to 619.27)                     | 1,553.97<br>(842.58 to 2,813.65)                 | 33.36<br>(27.28 to 40.14)                  | 17.78<br>(10.87 to 29.33)                 | 9.57<br>(6.09 to 14.92)                  | 34.80<br>(19.70 to 60.95)                 |
| Other road injuries                              | 20.90<br>(16.03 to 27.39)                        | 15.46<br>(8.32 to 29.47)                         | 8.15<br>(4.55 to 14.89)                          | 26.77<br>(13.90 to 51.72)                        | 0.52<br>(0.40 to 0.66)                     | 0.44<br>(0.25 to 0.82)                    | 0.26<br>(0.15 to 0.47)                   | 0.73<br>(0.39 to 1.42)                    |
| Other transport injuries                         | 271.20<br>(223.05 to 335.48)                     | 249.66<br>(118.47 to 501.94)                     | 148.11<br>(73.80 to 292.16)                      | 280.33<br>(135.55 to 564.69)                     | 6.48<br>(5.37 to 7.95)                     | 6.64<br>(3.41 to 12.62)                   | 4.06<br>(2.20 to 7.47)                   | 7.33<br>(3.83 to 13.94)                   |
| <b>Unintentional injuries</b>                    | <b>4,983.65</b><br><b>(4,205.21 to 6,007.99)</b> | <b>3,429.13</b><br><b>(2,370.23 to 4,901.75)</b> | <b>2,585.43</b><br><b>(1,795.00 to 3,612.43)</b> | <b>3,543.67</b><br><b>(2,472.87 to 5,032.23)</b> | <b>135.38</b><br><b>(114.65 to 163.22)</b> | <b>116.83</b><br><b>(89.59 to 154.24)</b> | <b>95.29</b><br><b>(73.59 to 122.83)</b> | <b>116.15</b><br><b>(89.33 to 152.27)</b> |
| Falls                                            | 1,026.19<br>(872.48 to 1,255.80)                 | 867.56<br>(675.69 to 1,136.49)                   | 747.72<br>(578.35 to 994.60)                     | 860.73<br>(669.97 to 1,122.90)                   | 37.05<br>(32.44 to 42.95)                  | 42.73<br>(36.32 to 50.20)                 | 39.64<br>(33.55 to 46.81)                | 40.69<br>(34.46 to 47.70)                 |
| Drowning                                         | 1,044.70<br>(896.80 to 1,219.29)                 | 677.16<br>(387.77 to 1,127.98)                   | 485.87<br>(285.22 to 793.32)                     | 728.33<br>(417.40 to 1,217.39)                   | 22.13<br>(18.91 to 25.93)                  | 16.25<br>(9.66 to 27.16)                  | 12.03<br>(7.27 to 19.43)                 | 17.13<br>(10.04 to 28.83)                 |
| Fire, heat, and hot substances                   | 573.52<br>(476.34 to 693.15)                     | 347.46<br>(211.00 to 581.24)                     | 222.46<br>(136.44 to 357.63)                     | 373.02<br>(222.84 to 614.91)                     | 15.81<br>(13.07 to 19.03)                  | 11.49<br>(7.55 to 17.69)                  | 7.83<br>(5.21 to 11.66)                  | 11.91<br>(7.56 to 18.45)                  |
| Poisonings                                       | 235.60<br>(190.99 to 300.66)                     | 90.93<br>(52.50 to 148.51)                       | 50.44<br>(30.73 to 79.99)                        | 101.17<br>(58.17 to 165.64)                      | 3.35<br>(4.33 to 7.03)                     | 2.46<br>(1.48 to 3.92)                    | 1.43<br>(0.91 to 2.24)                   | 2.66<br>(1.56 to 4.28)                    |
| Exposure to mechanical forces                    | 402.01<br>(329.98 to 495.63)                     | 256.96<br>(162.78 to 341.00)                     | 166.66<br>(115.38 to 242.77)                     | 247.08<br>(171.64 to 349.40)                     | 9.29<br>(7.63 to 11.30)                    | 8.40<br>(4.54 to 8.85)                    | 4.72<br>(3.40 to 6.47)                   | 6.49<br>(4.72 to 8.72)                    |
| Unintentional firearm injuries                   | 69.05<br>(56.99 to 84.83)                        | 37.75<br>(26.84 to 50.70)                        | 28.15<br>(19.91 to 38.09)                        | 39.00<br>(28.24 to 52.89)                        | 1.69<br>(1.40 to 2.05)                     | 1.13<br>(0.85 to 1.46)                    | 0.91<br>(0.68 to 1.16)                   | 1.13<br>(0.86 to 1.42)                    |
| Unintentional suffocation                        | 79.21<br>(65.14 to 110.67)                       | 42.05<br>(28.91 to 60.62)                        | 30.66<br>(20.68 to 44.00)                        | 45.07<br>(31.05 to 64.87)                        | 1.31<br>(1.07 to 1.77)                     | 0.77<br>(0.52 to 1.13)                    | 0.59<br>(0.39 to 0.84)                   | 0.81<br>(0.55 to 1.14)                    |
| Other exposure to mechanical forces              | 253.75<br>(202.34 to 329.14)                     | 157.16<br>(102.48 to 235.69)                     | 107.84<br>(70.58 to 161.47)                      | 163.00<br>(107.70 to 241.66)                     | 6.29<br>(5.03 to 8.06)                     | 4.50<br>(3.10 to 6.38)                    | 3.23<br>(2.23 to 4.54)                   | 4.56<br>(3.19 to 6.36)                    |
| Adverse effects of medical treatment             | 196.71<br>(145.28 to 240.14)                     | 151.07<br>(106.28 to 197.65)                     | 128.61<br>(89.98 to 170.57)                      | 151.48<br>(107.48 to 196.56)                     | 6.32<br>(4.69 to 7.58)                     | 6.01<br>(4.51 to 7.45)                    | 5.47<br>(4.06 to 7.12)                   | 5.78<br>(4.31 to 7.12)                    |
| Animal contact                                   | 39.28<br>(29.80 to 55.29)                        | 33.51<br>(23.53 to 48.58)                        | 25.19<br>(17.28 to 36.92)                        | 34.60<br>(24.54 to 49.54)                        | 1.04<br>(0.81 to 1.53)                     | 1.04<br>(0.75 to 1.53)                    | 0.82<br>(0.58 to 1.20)                   | 1.04<br>(0.77 to 1.48)                    |
| Venomous animal contact                          | 19.06<br>(13.25 to 28.30)                        | 15.63<br>(9.47 to 24.57)                         | 12.66<br>(7.74 to 20.30)                         | 15.87<br>(10.03 to 25.19)                        | 0.50<br>(0.35 to 0.77)                     | 0.47<br>(0.30 to 0.74)                    | 0.39<br>(0.25 to 0.64)                   | 0.46<br>(0.30 to 0.73)                    |
| Non-venomous animal contact                      | 20.22<br>(14.49 to 29.17)                        | 17.88<br>(12.10 to 25.93)                        | 12.53<br>(8.46 to 18.45)                         | 18.73<br>(12.75 to 27.27)                        | 0.54<br>(0.40 to 0.82)                     | 0.57<br>(0.40 to 0.86)                    | 0.43<br>(0.30 to 0.66)                   | 0.58<br>(0.41 to 0.86)                    |
| Foreign body                                     | 598.15<br>(500.37 to 798.33)                     | 413.19<br>(291.64 to 591.45)                     | 367.07<br>(254.59 to 531.12)                     | 412.87<br>(293.11 to 579.26)                     | 14.81<br>(12.28 to 19.80)                  | 12.04<br>(8.71 to 16.41)                  | 11.20<br>(8.02 to 15.72)                 | 11.68<br>(8.58 to 15.89)                  |
| Pulmonary aspiration and foreign body in airway  | 549.41<br>(455.16 to 744.43)                     | 372.21<br>(258.89 to 530.42)                     | 325.03<br>(223.07 to 474.89)                     | 372.09<br>(261.02 to 520.60)                     | 13.69<br>(11.26 to 18.54)                  | 10.90<br>(7.79 to 15.08)                  | 9.96<br>(7.05 to 14.09)                  | 10.59<br>(7.67 to 14.57)                  |

|                                      |                                       |                                       |                                       |                                        |                                 |                                |                               |                                |
|--------------------------------------|---------------------------------------|---------------------------------------|---------------------------------------|----------------------------------------|---------------------------------|--------------------------------|-------------------------------|--------------------------------|
|                                      | 48.74<br>(38.86 to<br>72.62)          | 40.98<br>(30.07 to<br>59.67)          | 42.04<br>(30.55 to<br>61.31)          | 40.78<br>(30.13 to<br>59.56)           | 1.12<br>(0.89 to<br>1.66)       | 1.15<br>(0.87 to<br>1.62)      | 1.25<br>(0.93 to<br>1.79)     | 1.10<br>(0.83 to<br>1.57)      |
| Foreign body in other body part      |                                       |                                       |                                       |                                        |                                 |                                |                               |                                |
|                                      | 601.61<br>(391.78 to<br>1,080.76)     | 491.08<br>(252.36 to<br>944.04)       | 329.00<br>(161.85 to<br>667.41)       | 503.92<br>(254.38 to<br>967.52)        | 17.43<br>(11.58 to<br>31.20)    | 15.37<br>(8.44 to<br>28.56)    | 10.55<br>(5.57 to<br>20.47)   | 15.53<br>(8.47 to<br>29.12)    |
| Environmental heat and cold exposure |                                       |                                       |                                       |                                        |                                 |                                |                               |                                |
|                                      | 265.87<br>(220.93 to<br>316.25)       | 120.21<br>(85.32 to<br>168.73)        | 62.41<br>(44.94 to<br>85.26)          | 130.48<br>(92.22 to<br>183.02)         | 6.16<br>(5.08 to<br>7.42)       | 3.04<br>(2.23 to<br>4.20)      | 1.59<br>(1.18 to<br>2.15)     | 3.23<br>(2.37 to<br>4.37)      |
| Other unintentional injuries         |                                       |                                       |                                       |                                        |                                 |                                |                               |                                |
|                                      | 5,587.35<br>(4,401.83 to<br>7,116.27) | 4,475.06<br>(2,148.50 to<br>9,024.92) | 3,236.14<br>(1,602.07 to<br>6,434.95) | 5,023.64<br>(2,312.88 to<br>10,329.33) | 135.34<br>(107.43 to<br>173.01) | 120.39<br>(62.21 to<br>227.98) | 90.39<br>(49.04 to<br>162.77) | 131.93<br>(66.31 to<br>247.81) |
| Self-harm and interpersonal violence |                                       |                                       |                                       |                                        |                                 |                                |                               |                                |

| Central Europe, Eastern Europe, and Central Asia                                    |                                                 |                                                   |                                                   |                                                   |                                                |                                                |                                                |                                                |
|-------------------------------------------------------------------------------------|-------------------------------------------------|---------------------------------------------------|---------------------------------------------------|---------------------------------------------------|------------------------------------------------|------------------------------------------------|------------------------------------------------|------------------------------------------------|
| Cause                                                                               | YLLs (in 1000s)                                 |                                                   |                                                   |                                                   | Deaths (in 1000s)                              |                                                |                                                |                                                |
|                                                                                     | 2016                                            | 2040 Forecast                                     | 2040 Better Scenario                              | 2040 Worse Scenario                               | 2016                                           | 2040 Forecast                                  | 2040 Better Scenario                           | 2040 Worse Scenario                            |
| Self-harm                                                                           | 3,968.02<br>(3,140.50 to<br>5,046.25)           | 3,585.59<br>(1,553.19 to<br>7,620.76)             | 2,590.32<br>(1,194.59 to<br>5,448.23)             | 4,077.79<br>(1,715.79 to<br>8,680.80)             | 98.23<br>(78.15 to<br>127.34)                  | 97.87<br>(46.92 to<br>190.30)                  | 73.57<br>(37.65 to<br>135.96)                  | 108.34<br>(50.13 to<br>214.30)                 |
| Self-harm by firearm                                                                | 144.92<br>(99.81 to<br>209.69)                  | 98.48<br>(40.31 to<br>222.45)                     | 61.71<br>(26.96 to<br>140.89)                     | 113.39<br>(45.86 to<br>259.62)                    | 3.69<br>(2.59 to<br>5.32)                      | 2.76<br>(1.26 to<br>5.78)                      | 1.80<br>(0.88 to<br>3.62)                      | 3.09<br>(1.38 to<br>6.57)                      |
| Self-harm by other specified means                                                  | 3,823.09<br>(3,006.32 to<br>4,866.12)           | 3,487.11<br>(1,511.91 to<br>7,412.94)             | 2,528.61<br>(1,163.26 to<br>5,324.99)             | 3,964.40<br>(1,669.90 to<br>8,439.60)             | 94.55<br>(75.13 to<br>122.67)                  | 95.12<br>(45.76 to<br>184.50)                  | 71.77<br>(36.81 to<br>132.56)                  | 105.25<br>(48.72 to<br>208.30)                 |
| Interpersonal violence                                                              | 1,619.34<br>(1,043.58 to<br>2,562.88)           | 889.47<br>(460.45 to<br>1,712.41)                 | 645.83<br>(335.07 to<br>1,217.15)                 | 945.85<br>(478.27 to<br>1,812.58)                 | 37.11<br>(23.82 to<br>58.23)                   | 22.51<br>(11.75 to<br>41.27)                   | 16.82<br>(8.86 to<br>30.33)                    | 23.58<br>(12.20 to<br>43.74)                   |
| Physical violence by firearm                                                        | 154.22<br>(86.70 to<br>371.33)                  | 71.29<br>(38.58 to<br>163.41)                     | 45.87<br>(25.88 to<br>100.25)                     | 75.36<br>(40.95 to<br>173.66)                     | 3.12<br>(1.77 to<br>7.53)                      | 3.12<br>(0.83 to<br>3.32)                      | 0.99<br>(0.57 to<br>2.12)                      | 1.58<br>(0.88 to<br>3.69)                      |
| Physical violence by sharp object                                                   | 608.06<br>(378.76 to<br>1,058.39)               | 323.97<br>(176.72 to<br>605.89)                   | 229.92<br>(130.67 to<br>415.26)                   | 337.33<br>(186.62 to<br>645.05)                   | 13.42<br>(8.32 to<br>22.95)                    | 7.71<br>(4.36 to<br>13.64)                     | 5.60<br>(3.29 to<br>9.67)                      | 7.93<br>(4.46 to<br>14.35)                     |
| Physical violence by other means                                                    | 857.05<br>(530.03 to<br>1,380.50)               | 494.21<br>(209.51 to<br>1,029.87)                 | 370.04<br>(160.23 to<br>751.00)                   | 533.15<br>(226.10 to<br>1,099.71)                 | 20.56<br>(12.74 to<br>32.41)                   | 13.29<br>(6.09 to<br>26.22)                    | 10.24<br>(4.81 to<br>19.71)                    | 14.08<br>(6.33 to<br>28.25)                    |
| <b>Forces of nature, conflict and terrorism, and executions and police conflict</b> | <b>9.72</b><br><b>(4.52 to</b><br><b>12.83)</b> | <b>29.81</b><br><b>(0.00 to</b><br><b>296.49)</b> | <b>28.96</b><br><b>(0.00 to</b><br><b>296.87)</b> | <b>29.72</b><br><b>(0.00 to</b><br><b>298.62)</b> | <b>0.20</b><br><b>(0.00 to</b><br><b>0.26)</b> | <b>0.70</b><br><b>(0.10 to</b><br><b>7.93)</b> | <b>0.72</b><br><b>(0.00 to</b><br><b>7.69)</b> | <b>0.68</b><br><b>(0.00 to</b><br><b>7.80)</b> |
| Exposure to forces of nature                                                        | 0.00<br>(0.00 to<br>0.00)                       | 11.33<br>(0.00 to<br>96.13)                       | 11.08<br>(0.00 to<br>86.35)                       | 11.32<br>(0.00 to<br>96.13)                       | 0.00<br>(0.00 to<br>0.00)                      | 0.29<br>(0.00 to<br>1.90)                      | 0.30<br>(0.00 to<br>1.81)                      | 0.28<br>(0.00 to<br>1.85)                      |
| Conflict and terrorism                                                              | 0.00<br>(0.00 to<br>0.00)                       | 18.48<br>(0.00 to<br>132.79)                      | 17.89<br>(0.00 to<br>124.54)                      | 18.40<br>(0.00 to<br>132.97)                      | 0.00<br>(0.00 to<br>0.00)                      | 0.41<br>(0.00 to<br>2.65)                      | 0.42<br>(0.00 to<br>2.61)                      | 0.40<br>(0.00 to<br>2.62)                      |
| Executions and police conflict                                                      | 9.72<br>(4.52 to<br>12.83)                      | 0.00<br>(0.00 to<br>0.00)                         | 0.00<br>(0.00 to<br>0.00)                         | 0.00<br>(0.00 to<br>0.00)                         | 0.20<br>(0.10 to<br>0.26)                      | 0.00<br>(0.00 to<br>0.00)                      | 0.00<br>(0.00 to<br>0.00)                      | 0.00<br>(0.00 to<br>0.00)                      |



| Central Asia                                                      |                                          |                                          |                                          |                                          |                                 |                                   |                                 |                                     |
|-------------------------------------------------------------------|------------------------------------------|------------------------------------------|------------------------------------------|------------------------------------------|---------------------------------|-----------------------------------|---------------------------------|-------------------------------------|
| Cause                                                             | YLLs (in 1000s)                          |                                          |                                          |                                          | Deaths (in 1000s)               |                                   |                                 |                                     |
|                                                                   | 2016                                     | 2040 Forecast                            | 2040 Better Scenario                     | 2040 Worse Scenario                      | 2016                            | 2040 Forecast                     | 2040 Better Scenario            | 2040 Worse Scenario                 |
| All causes                                                        | 18,242.52<br>(17,009.89 to<br>19,595.46) | 19,918.45<br>(15,302.14 to<br>25,164.40) | 13,342.59<br>(10,291.98 to<br>16,911.52) | 25,413.07<br>(19,169.22 to<br>32,081.76) | 615.59<br>(584.65 to<br>648.79) | 886.80<br>(709.04 to<br>1,080.83) | 634.68<br>(504.54 to<br>788.50) | 1,080.64<br>(861.65 to<br>1,317.87) |
| Communicable, maternal, neonatal, and nutritional diseases        | 4,155.72<br>(3,470.72 to<br>5,054.39)    | 2,293.78<br>(1,639.52 to<br>3,337.93)    | 1,229.20<br>(899.96 to<br>1,750.22)      | 3,156.40<br>(2,179.97 to<br>4,893.34)    | 59.42<br>(51.26 to<br>69.78)    | 42.41<br>(32.22 to<br>57.05)      | 24.98<br>(19.62 to<br>32.50)    | 56.12<br>(41.37 to<br>79.47)        |
| HIV/AIDS and tuberculosis                                         | 331.05<br>(306.99 to<br>365.43)          | 273.29<br>(190.35 to<br>417.53)          | 130.67<br>(89.56 to<br>190.67)           | 381.21<br>(259.65 to<br>585.60)          | 7.55<br>(6.99 to<br>8.33)       | 6.70<br>(4.58 to<br>10.27)        | 3.15<br>(2.09 to<br>4.52)       | 9.23<br>(6.18 to<br>14.35)          |
| Tuberculosis                                                      | 260.12<br>(236.73 to<br>293.83)          | 196.14<br>(112.94 to<br>340.78)          | 78.18<br>(45.94 to<br>133.51)            | 274.19<br>(151.81 to<br>482.59)          | 6.15<br>(5.60 to<br>6.93)       | 5.17<br>(3.04 to<br>8.76)         | 2.10<br>(1.24 to<br>3.50)       | 7.09<br>(4.00 to<br>12.24)          |
| HIV/AIDS                                                          | 70.93<br>(66.75 to<br>76.29)             | 77.15<br>(60.79 to<br>89.26)             | 52.49<br>(33.46 to<br>64.70)             | 107.03<br>(90.14 to<br>122.69)           | 1.40<br>(1.31 to<br>1.51)       | 1.53<br>(1.14 to<br>1.80)         | 1.04<br>(0.61 to<br>1.33)       | 2.14<br>(1.73 to<br>2.49)           |
| Diarrhea, lower respiratory, and other common infectious diseases | 2,011.74<br>(1,637.36 to<br>2,522.22)    | 1,130.49<br>(667.25 to<br>1,989.10)      | 619.02<br>(398.25 to<br>1,009.80)        | 1,679.58<br>(933.36 to<br>3,191.32)      | 30.14<br>(25.75 to<br>35.92)    | 24.59<br>(17.19 to<br>36.19)      | 15.60<br>(11.48 to<br>21.60)    | 33.39<br>(22.02 to<br>53.16)        |
| Diarrheal diseases                                                | 160.62<br>(115.24 to<br>226.03)          | 62.77<br>(11.32 to<br>163.70)            | 25.71<br>(5.44 to<br>75.39)              | 83.33<br>(15.42 to<br>217.60)            | 2.04<br>(1.50 to<br>2.81)       | 1.00<br>(0.22 to<br>2.79)         | 0.54<br>(0.14 to<br>1.60)       | 1.30<br>(0.26 to<br>3.71)           |
| Intestinal infectious diseases                                    | 0.20<br>(0.11 to<br>0.32)                | 0.14<br>(0.07 to<br>0.24)                | 0.14<br>(0.07 to<br>0.23)                | 0.14<br>(0.08 to<br>0.24)                | 0.00<br>(0.00 to<br>0.01)       | 0.00<br>(0.00 to<br>0.01)         | 0.00<br>(0.00 to<br>0.01)       | 0.00<br>(0.00 to<br>0.01)           |
| Typhoid fever                                                     | 0.13<br>(0.06 to<br>0.23)                | 0.11<br>(0.05 to<br>0.19)                | 0.12<br>(0.06 to<br>0.20)                | 0.11<br>(0.05 to<br>0.19)                | 0.00<br>(0.00 to<br>0.00)       | 0.00<br>(0.00 to<br>0.00)         | 0.00<br>(0.00 to<br>0.00)       | 0.00<br>(0.00 to<br>0.00)           |
| Paratyphoid fever                                                 | 0.02<br>(0.01 to<br>0.05)                | 0.02<br>(0.01 to<br>0.03)                | 0.01<br>(0.00 to<br>0.02)                | 0.02<br>(0.01 to<br>0.03)                | 0.00<br>(0.00 to<br>0.00)       | 0.00<br>(0.00 to<br>0.00)         | 0.00<br>(0.00 to<br>0.00)       | 0.00<br>(0.00 to<br>0.00)           |
| Other intestinal infectious diseases                              | 0.04<br>(0.02 to<br>0.10)                | 0.02<br>(0.01 to<br>0.04)                | 0.01<br>(0.00 to<br>0.02)                | 0.02<br>(0.01 to<br>0.04)                | 0.00<br>(0.00 to<br>0.00)       | 0.00<br>(0.00 to<br>0.00)         | 0.00<br>(0.00 to<br>0.00)       | 0.00<br>(0.00 to<br>0.00)           |
| Lower respiratory infections                                      | 1,623.15<br>(1,311.77 to<br>2,075.22)    | 861.86<br>(452.65 to<br>1,645.32)        | 460.27<br>(267.48 to<br>814.11)          | 1,306.29<br>(648.49 to<br>2,714.92)      | 24.70<br>(20.92 to<br>29.87)    | 20.18<br>(13.46 to<br>30.76)      | 12.65<br>(9.04 to<br>17.83)     | 27.66<br>(17.28 to<br>45.70)        |
| Upper respiratory infections                                      | 0.99<br>(0.68 to<br>1.55)                | 0.74<br>(0.49 to<br>1.20)                | 0.40<br>(0.25 to<br>0.65)                | 0.85<br>(0.54 to<br>1.38)                | 0.02<br>(0.02 to<br>0.03)       | 0.02<br>(0.02 to<br>0.03)         | 0.01<br>(0.01 to<br>0.02)       | 0.03<br>(0.02 to<br>0.04)           |
| Otitis media                                                      | 0.02<br>(0.02 to<br>0.03)                | 0.01<br>(0.01 to<br>0.02)                | 0.01<br>(0.01 to<br>0.03)                | 0.01<br>(0.01 to<br>0.02)                | 0.00<br>(0.00 to<br>0.00)       | 0.00<br>(0.00 to<br>0.00)         | 0.00<br>(0.00 to<br>0.00)       | 0.00<br>(0.00 to<br>0.00)           |
| Meningitis                                                        | 90.17<br>(73.03 to<br>118.65)            | 52.82<br>(36.46 to<br>76.42)             | 36.14<br>(26.02 to<br>51.16)             | 64.29<br>(42.38 to<br>100.60)            | 1.38<br>(1.16 to<br>1.77)       | 0.96<br>(0.73 to<br>1.32)         | 0.71<br>(0.55 to<br>0.97)       | 1.10<br>(0.81 to<br>1.58)           |
| Pneumococcal meningitis                                           | 0.41<br>(0.31 to<br>0.53)                | 0.20<br>(0.14 to<br>0.29)                | 0.18<br>(0.13 to<br>0.27)                | 0.22<br>(0.15 to<br>0.31)                | 0.01<br>(0.01 to<br>0.01)       | 0.00<br>(0.00 to<br>0.01)         | 0.00<br>(0.00 to<br>0.01)       | 0.00<br>(0.00 to<br>0.01)           |
| H influenzae type B meningitis                                    | 15.65<br>(11.80 to<br>21.14)             | 13.79<br>(6.84 to<br>27.70)              | 9.43<br>(5.66 to<br>16.24)               | 22.45<br>(9.02 to<br>50.07)              | 0.23<br>(0.18 to<br>0.30)       | 0.21<br>(0.13 to<br>0.38)         | 0.16<br>(0.11 to<br>0.25)       | 0.31<br>(0.15 to<br>0.63)           |
| Meningococcal meningitis                                          | 42.79<br>(33.94 to<br>57.66)             | 19.87<br>(13.78 to<br>28.90)             | 13.25<br>(9.48 to<br>18.95)              | 21.40<br>(14.69 to<br>30.53)             | 0.64<br>(0.52 to<br>0.84)       | 0.37<br>(0.28 to<br>0.51)         | 0.26<br>(0.20 to<br>0.36)       | 0.39<br>(0.29 to<br>0.53)           |
| Other meningitis                                                  | 31.32<br>(25.18 to<br>40.24)             | 18.96<br>(13.66 to<br>26.88)             | 13.28<br>(9.52 to<br>18.79)              | 20.23<br>(14.40 to<br>28.43)             | 0.50<br>(0.42 to<br>0.64)       | 0.38<br>(0.29 to<br>0.52)         | 0.28<br>(0.21 to<br>0.39)       | 0.40<br>(0.31 to<br>0.53)           |
| Encephalitis                                                      | 116.44<br>(88.04 to<br>165.51)           | 81.47<br>(54.26 to<br>116.93)            | 65.78<br>(43.82 to<br>93.55)             | 89.79<br>(58.20 to<br>129.51)            | 1.74<br>(1.31 to<br>2.35)       | 1.46<br>(1.04 to<br>1.96)         | 1.25<br>(0.88 to<br>1.63)       | 1.56<br>(1.09 to<br>2.10)           |

|                |                             |                              |                              |                               |                           |                           |                           |                           |
|----------------|-----------------------------|------------------------------|------------------------------|-------------------------------|---------------------------|---------------------------|---------------------------|---------------------------|
| Diphtheria     | 0.18<br>(0.14 to<br>0.24)   | 0.05<br>(0.03 to<br>0.08)    | 0.03<br>(0.02 to<br>0.05)    | 0.11<br>(0.04 to<br>0.23)     | 0.00<br>(0.00 to<br>0.00) | 0.00<br>(0.00 to<br>0.00) | 0.00<br>(0.00 to<br>0.00) | 0.00<br>(0.00 to<br>0.00) |
| Whooping cough | 15.49<br>(4.48 to<br>41.38) | 10.95<br>(1.39 to<br>38.15)  | 2.76<br>(0.28 to<br>8.94)    | 22.47<br>(3.03 to<br>72.37)   | 0.18<br>(0.05 to<br>0.49) | 0.13<br>(0.02 to<br>0.45) | 0.03<br>(0.00 to<br>0.11) | 0.27<br>(0.04 to<br>0.86) |
| Tetanus        | 0.20<br>(0.18 to<br>0.23)   | 0.02<br>(0.01 to<br>0.03)    | 0.02<br>(0.01 to<br>0.02)    | 0.03<br>(0.02 to<br>0.04)     | 0.00<br>(0.00 to<br>0.00) | 0.00<br>(0.00 to<br>0.00) | 0.00<br>(0.00 to<br>0.00) | 0.00<br>(0.00 to<br>0.00) |
| Measles        | 2.92<br>(1.83 to<br>4.76)   | 58.89<br>(0.82 to<br>304.41) | 27.37<br>(0.66 to<br>144.79) | 111.45<br>(1.01 to<br>601.07) | 0.03<br>(0.02 to<br>0.06) | 0.79<br>(0.01 to<br>3.72) | 0.38<br>(0.01 to<br>1.85) | 1.44<br>(0.02 to<br>7.26) |

| Central Asia                                          |                                  |                                  |                                 |                                  |                               |                               |                               |                               |
|-------------------------------------------------------|----------------------------------|----------------------------------|---------------------------------|----------------------------------|-------------------------------|-------------------------------|-------------------------------|-------------------------------|
| Cause                                                 | YLLs (in 1000s)                  |                                  |                                 |                                  | Deaths (in 1000s)             |                               |                               |                               |
|                                                       | 2016                             | 2040 Forecast                    | 2040 Better Scenario            | 2040 Worse Scenario              | 2016                          | 2040 Forecast                 | 2040 Better Scenario          | 2040 Worse Scenario           |
| Varicella and herpes zoster                           | 1.37<br>(0.98 to 1.91)           | 0.77<br>(0.45 to 1.25)           | 0.40<br>(0.26 to 0.59)          | 0.81<br>(0.47 to 1.36)           | 0.02<br>(0.02 to 0.03)        | 0.03<br>(0.02 to 0.03)        | 0.02<br>(0.01 to 0.02)        | 0.02<br>(0.02 to 0.03)        |
| <b>Neglected tropical diseases and malaria</b>        | <b>14.86</b><br>(5.79 to 24.22)  | <b>9.77</b><br>(2.44 to 17.84)   | <b>5.65</b><br>(1.61 to 9.64)   | <b>10.13</b><br>(2.61 to 18.18)  | <b>0.25</b><br>(0.12 to 0.38) | <b>0.17</b><br>(0.04 to 0.30) | <b>0.11</b><br>(0.03 to 0.19) | <b>0.17</b><br>(0.05 to 0.30) |
| Malaria                                               | 0.00<br>(0.13 to 1.04)           | 0.00<br>(0.05 to 0.60)           | 0.00<br>(0.04 to 0.32)          | 0.00<br>(0.06 to 0.60)           | 0.00<br>(0.00 to 0.01)        | 0.00<br>(0.00 to 0.01)        | 0.00<br>(0.00 to 0.00)        | 0.00<br>(0.00 to 0.01)        |
| Chagas disease                                        | 0.00<br>(0.00 to 0.00)           | 0.00<br>(0.00 to 0.00)           | 0.00<br>(0.00 to 0.00)          | 0.00<br>(0.00 to 0.00)           | 0.00<br>(0.00 to 0.00)        | 0.00<br>(0.00 to 0.00)        | 0.00<br>(0.00 to 0.00)        | 0.00<br>(0.00 to 0.00)        |
| Leishmaniasis                                         | 2.09<br>(1.24 to 3.25)           | 0.49<br>(0.24 to 1.58)           | 0.30<br>(0.14 to 1.06)          | 0.51<br>(0.25 to 1.63)           | 0.07<br>(0.04 to 0.11)        | 0.02<br>(0.01 to 0.06)        | 0.01<br>(0.00 to 0.04)        | 0.02<br>(0.01 to 0.06)        |
| African trypanosomiasis                               | 0.00<br>(0.00 to 0.00)           | 0.00<br>(0.00 to 0.00)           | 0.00<br>(0.00 to 0.00)          | 0.00<br>(0.00 to 0.00)           | 0.00<br>(0.00 to 0.00)        | 0.00<br>(0.00 to 0.00)        | 0.00<br>(0.00 to 0.00)        | 0.00<br>(0.00 to 0.00)        |
| Schistosomiasis                                       | 0.00<br>(0.00 to 0.00)           | 0.00<br>(0.00 to 0.00)           | 0.00<br>(0.00 to 0.00)          | 0.00<br>(0.00 to 0.00)           | 0.00<br>(0.00 to 0.00)        | 0.00<br>(0.00 to 0.00)        | 0.00<br>(0.00 to 0.00)        | 0.00<br>(0.00 to 0.00)        |
| Cysticercosis                                         | 0.02<br>(0.01 to 0.03)           | 0.01<br>(0.00 to 0.01)           | 0.01<br>(0.00 to 0.01)          | 0.01<br>(0.00 to 0.01)           | 0.00<br>(0.00 to 0.00)        | 0.00<br>(0.00 to 0.00)        | 0.00<br>(0.00 to 0.00)        | 0.00<br>(0.00 to 0.00)        |
| Cystic echinococcosis                                 | 0.09<br>(0.07 to 0.11)           | 0.05<br>(0.04 to 0.07)           | 0.04<br>(0.03 to 0.05)          | 0.06<br>(0.04 to 0.08)           | 0.00<br>(0.00 to 0.00)        | 0.00<br>(0.00 to 0.00)        | 0.00<br>(0.00 to 0.00)        | 0.00<br>(0.00 to 0.00)        |
| Dengue                                                | 0.00<br>(0.00 to 0.00)           | 0.00<br>(0.00 to 0.00)           | 0.00<br>(0.00 to 0.00)          | 0.00<br>(0.00 to 0.00)           | 0.00<br>(0.00 to 0.00)        | 0.00<br>(0.00 to 0.00)        | 0.00<br>(0.00 to 0.00)        | 0.00<br>(0.00 to 0.00)        |
| Yellow fever                                          | 0.00<br>(0.00 to 0.00)           | 0.00<br>(0.00 to 0.00)           | 0.00<br>(0.00 to 0.00)          | 0.00<br>(0.00 to 0.00)           | 0.00<br>(0.00 to 0.00)        | 0.00<br>(0.00 to 0.00)        | 0.00<br>(0.00 to 0.00)        | 0.00<br>(0.00 to 0.00)        |
| Rabies                                                | 0.54<br>(0.36 to 0.76)           | 0.22<br>(0.13 to 0.37)           | 0.13<br>(0.08 to 0.22)          | 0.25<br>(0.15 to 0.40)           | 0.01<br>(0.01 to 0.01)        | 0.00<br>(0.00 to 0.01)        | 0.00<br>(0.00 to 0.00)        | 0.00<br>(0.00 to 0.01)        |
| Intestinal nematode infections                        | 0.12<br>(0.06 to 0.21)           | 0.10<br>(0.05 to 0.19)           | 0.08<br>(0.04 to 0.13)          | 0.11<br>(0.05 to 0.20)           | 0.00<br>(0.00 to 0.00)        | 0.00<br>(0.00 to 0.00)        | 0.00<br>(0.00 to 0.00)        | 0.00<br>(0.00 to 0.00)        |
| Other neglected tropical diseases                     | 11.69<br>(2.79 to 20.98)         | 8.73<br>(1.79 to 16.44)          | 4.98<br>(1.14 to 8.66)          | 9.04<br>(1.87 to 16.87)          | 0.17<br>(0.04 to 0.29)        | 0.14<br>(0.03 to 0.25)        | 0.09<br>(0.02 to 0.15)        | 0.14<br>(0.03 to 0.25)        |
| <b>Maternal disorders</b>                             | <b>30.37</b><br>(26.71 to 34.53) | <b>18.25</b><br>(13.33 to 24.59) | <b>11.35</b><br>(8.06 to 15.68) | <b>21.06</b><br>(15.13 to 28.45) | <b>0.55</b><br>(0.48 to 0.62) | <b>0.33</b><br>(0.25 to 0.45) | <b>0.21</b><br>(0.15 to 0.29) | <b>0.39</b><br>(0.28 to 0.53) |
| Maternal hemorrhage                                   | 8.80<br>(6.88 to 10.98)          | 5.59<br>(3.82 to 7.97)           | 3.46<br>(2.33 to 5.06)          | 6.40<br>(4.36 to 9.32)           | 0.16<br>(0.13 to 0.20)        | 0.10<br>(0.07 to 0.15)        | 0.06<br>(0.04 to 0.09)        | 0.12<br>(0.08 to 0.17)        |
| Maternal sepsis and other maternal infections         | 2.21<br>(1.55 to 2.99)           | 1.03<br>(0.60 to 1.53)           | 0.64<br>(0.37 to 1.01)          | 1.20<br>(0.69 to 1.89)           | 0.04<br>(0.03 to 0.05)        | 0.02<br>(0.01 to 0.03)        | 0.01<br>(0.01 to 0.02)        | 0.02<br>(0.01 to 0.03)        |
| Maternal hypertensive disorders                       | 5.65<br>(4.32 to 7.28)           | 3.05<br>(1.96 to 4.60)           | 1.81<br>(1.13 to 2.70)          | 3.48<br>(2.21 to 5.11)           | 0.10<br>(0.08 to 0.13)        | 0.05<br>(0.03 to 0.08)        | 0.03<br>(0.02 to 0.05)        | 0.06<br>(0.04 to 0.09)        |
| Maternal obstructed labor and uterine rupture         | 0.66<br>(0.41 to 0.99)           | 0.45<br>(0.24 to 0.74)           | 0.27<br>(0.14 to 0.45)          | 0.52<br>(0.28 to 0.85)           | 0.01<br>(0.01 to 0.02)        | 0.00<br>(0.00 to 0.01)        | 0.00<br>(0.00 to 0.01)        | 0.01<br>(0.01 to 0.02)        |
| Maternal abortion, miscarriage, and ectopic pregnancy | 4.16<br>(3.15 to 5.35)           | 3.16<br>(1.86 to 5.30)           | 2.03<br>(1.17 to 3.34)          | 3.71<br>(2.13 to 6.27)           | 0.08<br>(0.06 to 0.10)        | 0.06<br>(0.04 to 0.10)        | 0.04<br>(0.02 to 0.06)        | 0.07<br>(0.04 to 0.12)        |



| Central Asia                                                            |                                           |                                       |                                     |                                       |                                  |                                |                               |                                 |
|-------------------------------------------------------------------------|-------------------------------------------|---------------------------------------|-------------------------------------|---------------------------------------|----------------------------------|--------------------------------|-------------------------------|---------------------------------|
| Cause                                                                   | YLLs (in 1000s)                           |                                       |                                     |                                       | Deaths (in 1000s)                |                                |                               |                                 |
|                                                                         | 2016                                      | 2040 Forecast                         | 2040 Better Scenario                | 2040 Worse Scenario                   | 2016                             | 2040 Forecast                  | 2040 Better Scenario          | 2040 Worse Scenario             |
| <b>Neonatal disorders</b>                                               | <b>1,658.89</b><br>(1,336.63 to 2,084.73) | <b>795.48</b><br>(564.04 to 1,116.22) | <b>415.86</b><br>(291.73 to 597.68) | <b>991.34</b><br>(701.53 to 1,418.72) | <b>19.17</b><br>(15.44 to 24.09) | <b>9.19</b><br>(6.52 to 12.90) | <b>4.81</b><br>(3.37 to 6.91) | <b>11.46</b><br>(8.11 to 16.39) |
| Neonatal preterm birth                                                  | 615.21<br>(501.60 to 744.88)              | 262.30<br>(193.71 to 348.25)          | 120.35<br>(87.96 to 160.83)         | 347.93<br>(261.10 to 461.12)          | 7.11<br>(5.80 to 8.61)           | 3.03<br>(2.24 to 4.02)         | 1.39<br>(1.02 to 1.86)        | 4.02<br>(3.02 to 5.33)          |
| Neonatal encephalopathy due to birth asphyxia and trauma                | 701.07<br>(530.78 to 936.20)              | 334.46<br>(202.65 to 528.61)          | 182.06<br>(107.53 to 294.24)        | 406.05<br>(242.87 to 644.71)          | 8.10<br>(6.13 to 10.82)          | 3.86<br>(2.34 to 6.11)         | 2.10<br>(1.24 to 3.40)        | 4.69<br>(2.81 to 7.45)          |
| Neonatal sepsis and other neonatal infections                           | 134.34<br>(101.63 to 184.43)              | 77.87<br>(50.69 to 115.70)            | 43.70<br>(28.07 to 66.54)           | 94.29<br>(61.37 to 142.77)            | 1.55<br>(1.18 to 2.13)           | 0.90<br>(0.59 to 1.34)         | 0.51<br>(0.32 to 0.77)        | 1.09<br>(0.71 to 1.65)          |
| Hemolytic disease and other neonatal jaundice                           | 9.29<br>(7.09 to 12.00)                   | 3.84<br>(2.09 to 7.08)                | 1.87<br>(1.04 to 3.33)              | 4.63<br>(2.49 to 8.61)                | 0.11<br>(0.08 to 0.14)           | 0.04<br>(0.02 to 0.08)         | 0.02<br>(0.01 to 0.04)        | 0.05<br>(0.03 to 0.10)          |
| Other neonatal disorders                                                | 198.98<br>(159.29 to 243.06)              | 117.01<br>(67.59 to 195.41)           | 67.88<br>(40.58 to 113.16)          | 138.43<br>(79.23 to 232.96)           | 2.30<br>(1.84 to 2.81)           | 1.35<br>(0.78 to 2.26)         | 0.78<br>(0.47 to 1.31)        | 1.60<br>(0.92 to 2.69)          |
| <b>Nutritional deficiencies</b>                                         | <b>19.28</b><br>(15.65 to 24.26)          | <b>12.67</b><br>(9.95 to 16.11)       | <b>9.60</b><br>(7.58 to 11.93)      | <b>13.38</b><br>(10.49 to 17.18)      | <b>0.36</b><br>(0.31 to 0.42)    | <b>0.32</b><br>(0.26 to 0.38)  | <b>0.27</b><br>(0.23 to 0.33) | <b>0.32</b><br>(0.26 to 0.39)   |
| Protein-energy malnutrition                                             | 11.92<br>(8.59 to 16.69)                  | 5.57<br>(3.78 to 8.32)                | 4.10<br>(2.92 to 5.56)              | 5.78<br>(3.97 to 8.85)                | 0.20<br>(0.15 to 0.26)           | 0.13<br>(0.10 to 0.17)         | 0.12<br>(0.09 to 0.15)        | 0.12<br>(0.09 to 0.17)          |
| Iodine deficiency                                                       | 0.63<br>(0.28 to 1.22)                    | 0.64<br>(0.28 to 1.32)                | 0.47<br>(0.22 to 0.90)              | 0.69<br>(0.31 to 1.40)                | 0.01<br>(0.01 to 0.02)           | 0.02<br>(0.01 to 0.02)         | 0.02<br>(0.01 to 0.03)        | 0.02<br>(0.01 to 0.03)          |
| Dietary iron deficiency                                                 | 1.20<br>(1.05 to 1.40)                    | 0.97<br>(0.74 to 1.27)                | 0.84<br>(0.65 to 1.09)              | 1.02<br>(0.77 to 1.34)                | 0.02<br>(0.02 to 0.02)           | 0.02<br>(0.01 to 0.02)         | 0.02<br>(0.01 to 0.02)        | 0.02<br>(0.01 to 0.02)          |
| Other nutritional deficiencies                                          | 5.54<br>(4.59 to 6.30)                    | 5.49<br>(4.24 to 7.02)                | 4.19<br>(3.18 to 5.39)              | 5.89<br>(4.51 to 7.59)                | 0.13<br>(0.10 to 0.14)           | 0.15<br>(0.12 to 0.19)         | 0.12<br>(0.10 to 0.16)        | 0.16<br>(0.12 to 0.19)          |
| <b>Other communicable, maternal, neonatal, and nutritional diseases</b> | <b>89.53</b><br>(67.17 to 127.30)         | <b>53.83</b><br>(40.42 to 75.18)      | <b>37.05</b><br>(28.74 to 48.47)    | <b>59.70</b><br>(44.37 to 83.33)      | <b>1.41</b><br>(1.13 to 1.85)    | <b>1.10</b><br>(0.91 to 1.37)  | <b>0.84</b><br>(0.69 to 1.01) | <b>1.18</b><br>(0.96 to 1.47)   |
| Sexually transmitted infections excluding HIV                           | 6.24<br>(3.69 to 10.09)                   | 2.70<br>(1.80 to 4.19)                | 1.91<br>(1.32 to 2.92)              | 2.90<br>(1.92 to 4.51)                | 0.10<br>(0.07 to 0.15)           | 0.06<br>(0.04 to 0.09)         | 0.05<br>(0.04 to 0.07)        | 0.06<br>(0.05 to 0.09)          |
| Syphilis                                                                | 5.08<br>(2.53 to 8.93)                    | 1.69<br>(0.91 to 3.00)                | 1.02<br>(0.59 to 1.78)              | 1.85<br>(0.97 to 3.29)                | 0.07<br>(0.04 to 0.11)           | 0.03<br>(0.02 to 0.05)         | 0.02<br>(0.01 to 0.03)        | 0.03<br>(0.02 to 0.05)          |
| Chlamydial infection                                                    | 0.22<br>(0.19 to 0.30)                    | 0.19<br>(0.14 to 0.28)                | 0.17<br>(0.12 to 0.25)              | 0.20<br>(0.14 to 0.29)                | 0.01<br>(0.00 to 0.01)           | 0.01<br>(0.01 to 0.01)         | 0.01<br>(0.00 to 0.01)        | 0.01<br>(0.00 to 0.01)          |
| Gonococcal infection                                                    | 0.62<br>(0.53 to 0.83)                    | 0.55<br>(0.40 to 0.82)                | 0.48<br>(0.34 to 0.72)              | 0.57<br>(0.41 to 0.85)                | 0.02<br>(0.01 to 0.02)           | 0.02<br>(0.01 to 0.03)         | 0.02<br>(0.01 to 0.02)        | 0.02<br>(0.01 to 0.03)          |
| Other sexually transmitted infections                                   | 0.32<br>(0.28 to 0.44)                    | 0.27<br>(0.20 to 0.41)                | 0.24<br>(0.17 to 0.36)              | 0.28<br>(0.20 to 0.42)                | 0.01<br>(0.01 to 0.01)           | 0.01<br>(0.01 to 0.01)         | 0.01<br>(0.01 to 0.01)        | 0.01<br>(0.01 to 0.01)          |
| Acute hepatitis                                                         | 36.81<br>(32.86 to 41.32)                 | 23.19<br>(18.60 to 28.37)             | 15.94<br>(12.39 to 19.97)           | 25.42<br>(20.26 to 31.16)             | 0.66<br>(0.60 to 0.73)           | 0.53<br>(0.45 to 0.63)         | 0.38<br>(0.31 to 0.47)        | 0.57<br>(0.47 to 0.67)          |
| Acute hepatitis A                                                       | 6.62<br>(4.69 to 9.37)                    | 2.46<br>(1.44 to 3.90)                | 1.50<br>(0.89 to 2.51)              | 2.83<br>(1.68 to 4.47)                | 0.08<br>(0.06 to 0.11)           | 0.03<br>(0.02 to 0.05)         | 0.02<br>(0.01 to 0.03)        | 0.04<br>(0.02 to 0.06)          |
| Acute hepatitis B                                                       | 22.59<br>(20.10 to 25.35)                 | 16.35<br>(13.04 to 20.25)             | 11.51<br>(8.78 to 14.76)            | 17.82<br>(13.97 to 22.19)             | 0.46<br>(0.41 to 0.51)           | 0.41<br>(0.34 to 0.50)         | 0.30<br>(0.24 to 0.38)        | 0.44<br>(0.36 to 0.53)          |



| Central Asia                         |                                           |                                           |                                           |                                           |                                  |                                     |                                    |                                     |
|--------------------------------------|-------------------------------------------|-------------------------------------------|-------------------------------------------|-------------------------------------------|----------------------------------|-------------------------------------|------------------------------------|-------------------------------------|
| Cause                                | YLLs (in 1000s)                           |                                           |                                           |                                           | Deaths (in 1000s)                |                                     |                                    |                                     |
|                                      | 2016                                      | 2040 Forecast                             | 2040 Better Scenario                      | 2040 Worse Scenario                       | 2016                             | 2040 Forecast                       | 2040 Better Scenario               | 2040 Worse Scenario                 |
| <b>Neoplasms</b>                     | <b>2,051.89</b><br>(1,911.03 to 2,198.09) | <b>3,159.24</b><br>(2,519.60 to 3,791.91) | <b>2,569.81</b><br>(2,039.17 to 3,104.54) | <b>3,560.67</b><br>(2,827.51 to 4,264.34) | <b>72.15</b><br>(67.75 to 76.88) | <b>131.11</b><br>(108.32 to 152.55) | <b>111.69</b><br>(92.41 to 130.69) | <b>143.48</b><br>(119.11 to 167.41) |
| Lip and oral cavity cancer           | 34.85<br>(31.63 to 38.04)                 | 58.60<br>(35.79 to 91.18)                 | 34.51<br>(22.57 to 52.18)                 | 77.77<br>(46.54 to 120.96)                | 1.24<br>(1.13 to 1.34)           | 2.32<br>(1.45 to 3.52)              | 1.47<br>(0.98 to 2.19)             | 2.98<br>(1.82 to 4.58)              |
| Nasopharynx cancer                   | 11.08<br>(10.08 to 12.19)                 | 16.94<br>(10.95 to 25.53)                 | 8.94<br>(6.01 to 12.84)                   | 22.67<br>(14.30 to 34.11)                 | 0.30<br>(0.28 to 0.33)           | 0.53<br>(0.34 to 0.78)              | 0.29<br>(0.20 to 0.41)             | 0.70<br>(0.44 to 1.06)              |
| Other pharynx cancer                 | 17.63<br>(16.03 to 19.23)                 | 27.81<br>(16.13 to 44.97)                 | 23.26<br>(13.85 to 36.53)                 | 30.55<br>(17.71 to 49.81)                 | 0.61<br>(0.56 to 0.66)           | 1.09<br>(0.64 to 1.72)              | 0.94<br>(0.57 to 1.45)             | 1.17<br>(0.68 to 1.89)              |
| Esophageal cancer                    | 101.94<br>(94.37 to 109.57)               | 199.23<br>(121.07 to 308.69)              | 144.20<br>(91.44 to 217.53)               | 259.59<br>(151.96 to 416.49)              | 4.20<br>(3.91 to 4.50)           | 9.32<br>(5.83 to 14.35)             | 7.25<br>(4.74 to 10.88)            | 11.64<br>(6.93 to 18.42)            |
| Stomach cancer                       | 246.05<br>(229.44 to 263.21)              | 308.00<br>(230.88 to 405.51)              | 236.20<br>(176.91 to 314.67)              | 330.06<br>(247.62 to 440.15)              | 9.59<br>(8.97 to 10.23)          | 13.90<br>(10.90 to 17.72)           | 11.06<br>(8.60 to 14.27)           | 14.44<br>(11.30 to 18.38)           |
| Colon and rectum cancer              | 130.19<br>(120.13 to 143.35)              | 249.47<br>(168.41 to 362.90)              | 198.66<br>(133.78 to 286.56)              | 268.81<br>(180.94 to 390.75)              | 5.33<br>(4.94 to 5.83)           | 11.82<br>(8.21 to 16.92)            | 9.83<br>(6.89 to 14.05)            | 12.31<br>(8.52 to 17.60)            |
| Liver cancer                         | 165.51<br>(149.81 to 179.00)              | 318.26<br>(207.16 to 471.50)              | 283.87<br>(196.04 to 403.68)              | 365.21<br>(227.00 to 553.65)              | 6.38<br>(5.74 to 6.88)           | 13.95<br>(9.55 to 19.79)            | 13.14<br>(9.41 to 18.11)           | 15.45<br>(9.94 to 22.71)            |
| Liver cancer due to hepatitis B      | 51.98<br>(42.57 to 62.17)                 | 91.42<br>(57.90 to 142.27)                | 84.89<br>(55.57 to 126.94)                | 102.30<br>(61.57 to 164.92)               | 1.82<br>(1.47 to 2.18)           | 3.68<br>(2.37 to 5.52)              | 3.58<br>(2.39 to 5.20)             | 3.98<br>(2.48 to 6.22)              |
| Liver cancer due to hepatitis C      | 51.16<br>(42.17 to 59.89)                 | 101.76<br>(66.06 to 152.06)               | 97.13<br>(65.12 to 139.63)                | 111.59<br>(69.33 to 174.03)               | 2.18<br>(1.83 to 2.52)           | 4.88<br>(3.29 to 6.91)              | 4.90<br>(3.41 to 6.76)             | 5.16<br>(3.35 to 7.58)              |
| Liver cancer due to alcohol use      | 34.73<br>(29.59 to 40.21)                 | 73.00<br>(46.14 to 109.15)                | 53.95<br>(35.52 to 78.32)                 | 93.29<br>(56.97 to 144.72)                | 1.39<br>(1.19 to 1.59)           | 3.21<br>(2.11 to 4.68)              | 2.54<br>(1.73 to 3.60)             | 3.96<br>(2.50 to 5.91)              |
| Liver cancer due to other causes     | 27.65<br>(24.30 to 31.57)                 | 52.08<br>(33.37 to 78.23)                 | 47.90<br>(32.65 to 69.58)                 | 58.04<br>(35.57 to 90.69)                 | 0.99<br>(0.87 to 1.13)           | 2.18<br>(1.43 to 3.19)              | 2.12<br>(1.46 to 3.01)             | 2.35<br>(1.47 to 3.60)              |
| Gallbladder and biliary tract cancer | 19.84<br>(17.98 to 21.99)                 | 23.91<br>(19.01 to 28.33)                 | 23.97<br>(18.55 to 28.91)                 | 22.74<br>(18.39 to 26.37)                 | 0.84<br>(0.77 to 0.93)           | 1.19<br>(1.01 to 1.35)              | 1.24<br>(1.01 to 1.44)             | 1.10<br>(0.95 to 1.22)              |
| Pancreatic cancer                    | 75.33<br>(68.40 to 82.15)                 | 137.31<br>(106.05 to 172.24)              | 135.45<br>(104.27 to 168.50)              | 137.29<br>(106.06 to 171.67)              | 3.12<br>(2.86 to 3.38)           | 6.54<br>(5.30 to 8.01)              | 6.76<br>(5.46 to 8.21)             | 6.30<br>(5.11 to 7.71)              |
| Larynx cancer                        | 31.31<br>(28.57 to 34.29)                 | 46.22<br>(23.12 to 82.58)                 | 22.93<br>(13.00 to 39.69)                 | 65.06<br>(31.17 to 118.52)                | 1.16<br>(1.06 to 1.25)           | 1.87<br>(0.97 to 3.23)              | 1.00<br>(0.59 to 1.62)             | 2.55<br>(1.26 to 4.52)              |
| Tracheal, bronchus, and lung cancer  | 272.59<br>(247.95 to 298.70)              | 444.07<br>(312.06 to 607.60)              | 270.67<br>(195.44 to 357.45)              | 620.93<br>(438.13 to 852.05)              | 10.56<br>(9.67 to 11.56)         | 18.93<br>(14.00 to 25.25)           | 12.35<br>(9.37 to 15.99)           | 25.67<br>(18.88 to 34.84)           |
| Malignant skin melanoma              | 12.09<br>(10.67 to 14.83)                 | 20.83<br>(16.41 to 26.94)                 | 26.24<br>(20.19 to 34.10)                 | 18.64<br>(14.93 to 23.93)                 | 0.44<br>(0.39 to 0.54)           | 0.93<br>(0.78 to 1.19)              | 1.24<br>(1.01 to 1.59)             | 0.80<br>(0.68 to 0.99)              |
| Non-melanoma skin cancer             | 10.76<br>(9.79 to 11.81)                  | 17.43<br>(14.87 to 20.03)                 | 14.77<br>(12.09 to 17.39)                 | 17.11<br>(14.86 to 19.47)                 | 0.46<br>(0.42 to 0.49)           | 0.88<br>(0.80 to 0.97)              | 0.79<br>(0.69 to 0.89)             | 0.83<br>(0.75 to 0.92)              |
| Breast cancer                        | 167.35<br>(149.68 to 188.60)              | 259.97<br>(180.14 to 364.00)              | 204.40<br>(141.72 to 282.70)              | 281.86<br>(197.19 to 400.44)              | 5.55<br>(4.98 to 6.20)           | 10.02<br>(7.22 to 13.53)            | 8.09<br>(5.84 to 10.87)            | 10.61<br>(7.60 to 14.57)            |
| Cervical cancer                      | 91.32<br>(81.04 to 102.89)                | 90.93<br>(66.06 to 117.51)                | 71.60<br>(51.32 to 93.54)                 | 97.48<br>(71.37 to 127.69)                | 2.82<br>(2.52 to 3.16)           | 3.31<br>(2.49 to 4.12)              | 2.66<br>(1.98 to 3.35)             | 3.46<br>(2.64 to 4.33)              |

|                   |                              |                              |                              |                              |                           |                           |                           |                           |
|-------------------|------------------------------|------------------------------|------------------------------|------------------------------|---------------------------|---------------------------|---------------------------|---------------------------|
|                   | 27.55<br>(24.29 to<br>31.34) | 38.91<br>(29.27 to<br>48.35) | 32.79<br>(24.02 to<br>41.60) | 39.82<br>(30.10 to<br>48.92) | 1.02<br>(0.91 to<br>1.16) | 1.72<br>(1.36 to<br>2.07) | 1.49<br>(1.15 to<br>1.83) | 1.72<br>(1.38 to<br>2.03) |
| Uterine cancer    |                              |                              |                              |                              |                           |                           |                           |                           |
|                   | 48.37<br>(41.28 to<br>54.64) | 70.24<br>(47.41 to<br>95.06) | 64.78<br>(43.67 to<br>87.24) | 71.56<br>(48.22 to<br>97.17) | 1.62<br>(1.38 to<br>1.83) | 2.73<br>(1.91 to<br>3.57) | 2.56<br>(1.80 to<br>3.37) | 2.73<br>(1.90 to<br>3.67) |
| Ovarian cancer    |                              |                              |                              |                              |                           |                           |                           |                           |
|                   | 31.18<br>(26.08 to<br>34.98) | 70.36<br>(58.95 to<br>80.16) | 69.21<br>(57.10 to<br>79.69) | 64.76<br>(55.35 to<br>74.27) | 1.81<br>(1.48 to<br>2.02) | 4.49<br>(3.76 to<br>5.09) | 4.66<br>(3.87 to<br>5.25) | 3.97<br>(3.19 to<br>4.58) |
| Prostate cancer   |                              |                              |                              |                              |                           |                           |                           |                           |
|                   | 6.10<br>(5.40 to<br>6.88)    | 7.01<br>(5.23 to<br>9.59)    | 5.85<br>(4.33 to<br>8.02)    | 7.23<br>(5.46 to<br>9.90)    | 0.13<br>(0.12 to<br>0.15) | 0.17<br>(0.14 to<br>0.22) | 0.15<br>(0.12 to<br>0.19) | 0.18<br>(0.14 to<br>0.22) |
| Testicular cancer |                              |                              |                              |                              |                           |                           |                           |                           |



| Central Asia                    |                                                  |                                                   |                                                  |                                                    |                                            |                                            |                                            |                                            |
|---------------------------------|--------------------------------------------------|---------------------------------------------------|--------------------------------------------------|----------------------------------------------------|--------------------------------------------|--------------------------------------------|--------------------------------------------|--------------------------------------------|
| Cause                           | YLLs (in 1000s)                                  |                                                   |                                                  |                                                    | Deaths (in 1000s)                          |                                            |                                            |                                            |
|                                 | 2016                                             | 2040 Forecast                                     | 2040 Better Scenario                             | 2040 Worse Scenario                                | 2016                                       | 2040 Forecast                              | 2040 Better Scenario                       | 2040 Worse Scenario                        |
| Kidney cancer                   | 40.92<br>(37.43 to 44.46)                        | 68.26<br>(50.58 to 87.99)                         | 68.59<br>(51.49 to 86.10)                        | 67.44<br>(49.53 to 87.40)                          | 1.37<br>(1.26 to 1.48)                     | 2.68<br>(2.06 to 3.38)                     | 2.83<br>(2.20 to 3.48)                     | 2.56<br>(1.96 to 3.29)                     |
| Bladder cancer                  | 28.61<br>(25.92 to 31.32)                        | 46.74<br>(36.33 to 60.96)                         | 40.11<br>(31.62 to 50.71)                        | 48.65<br>(37.11 to 64.46)                          | 1.34<br>(1.23 to 1.46)                     | 2.48<br>(2.00 to 3.11)                     | 2.28<br>(1.89 to 2.78)                     | 2.47<br>(1.93 to 3.17)                     |
| Brain and nervous system cancer | 126.29<br>(105.30 to 139.03)                     | 177.42<br>(138.41 to 215.85)                      | 166.48<br>(127.71 to 205.22)                     | 175.70<br>(137.12 to 211.76)                       | 3.06<br>(2.59 to 3.36)                     | 5.12<br>(4.11 to 5.97)                     | 4.98<br>(3.95 to 5.89)                     | 4.94<br>(3.99 to 5.71)                     |
| Thyroid cancer                  | 5.84<br>(5.33 to 6.45)                           | 8.37<br>(5.74 to 12.18)                           | 7.07<br>(4.90 to 10.18)                          | 9.01<br>(6.09 to 13.43)                            | 0.23<br>(0.21 to 0.25)                     | 0.38<br>(0.28 to 0.54)                     | 0.33<br>(0.24 to 0.47)                     | 0.40<br>(0.28 to 0.58)                     |
| Mesothelioma                    | 3.57<br>(3.24 to 3.86)                           | 4.97<br>(3.96 to 5.84)                            | 5.14<br>(4.00 to 6.15)                           | 4.78<br>(3.89 to 5.56)                             | 0.13<br>(0.11 to 0.14)                     | 0.20<br>(0.17 to 0.23)                     | 0.22<br>(0.17 to 0.25)                     | 0.19<br>(0.16 to 0.21)                     |
| Hodgkin lymphoma                | 14.26<br>(12.67 to 15.64)                        | 12.19<br>(9.75 to 14.71)                          | 8.86<br>(6.90 to 10.95)                          | 13.05<br>(10.48 to 15.86)                          | 0.34<br>(0.31 to 0.37)                     | 0.35<br>(0.29 to 0.40)                     | 0.26<br>(0.21 to 0.31)                     | 0.36<br>(0.31 to 0.42)                     |
| Non-Hodgkin lymphoma            | 50.90<br>(46.35 to 55.54)                        | 73.08<br>(57.22 to 94.12)                         | 66.61<br>(51.34 to 85.06)                        | 74.14<br>(57.69 to 96.35)                          | 1.36<br>(1.25 to 1.48)                     | 2.45<br>(1.98 to 3.09)                     | 2.32<br>(1.85 to 2.93)                     | 2.41<br>(1.94 to 3.07)                     |
| Multiple myeloma                | 10.84<br>(9.48 to 12.55)                         | 19.94<br>(14.72 to 26.34)                         | 19.24<br>(14.04 to 25.34)                        | 19.91<br>(14.82 to 26.56)                          | 0.39<br>(0.34 to 0.46)                     | 0.84<br>(0.65 to 1.09)                     | 0.84<br>(0.64 to 1.07)                     | 0.81<br>(0.63 to 1.07)                     |
| Leukemia                        | 135.37<br>(121.24 to 148.64)                     | 151.89<br>(118.83 to 191.58)                      | 128.17<br>(99.92 to 161.80)                      | 162.31<br>(126.01 to 207.23)                       | 2.95<br>(2.69 to 3.20)                     | 4.18<br>(3.35 to 5.23)                     | 3.67<br>(2.94 to 4.55)                     | 4.37<br>(3.46 to 5.55)                     |
| Acute lymphoid leukemia         | 36.32<br>(31.38 to 40.83)                        | 33.50<br>(25.57 to 42.72)                         | 27.67<br>(21.25 to 35.29)                        | 35.79<br>(27.15 to 45.59)                          | 0.64<br>(0.56 to 0.71)                     | 0.72<br>(0.57 to 0.90)                     | 0.61<br>(0.48 to 0.76)                     | 0.76<br>(0.60 to 0.96)                     |
| Chronic lymphoid leukemia       | 6.48<br>(5.46 to 7.65)                           | 8.87<br>(6.25 to 12.17)                           | 7.88<br>(5.57 to 10.65)                          | 9.53<br>(6.65 to 13.21)                            | 0.21<br>(0.18 to 0.25)                     | 0.33<br>(0.24 to 0.44)                     | 0.30<br>(0.22 to 0.40)                     | 0.34<br>(0.25 to 0.47)                     |
| Acute myeloid leukemia          | 40.90<br>(36.66 to 45.11)                        | 54.54<br>(41.96 to 69.08)                         | 50.83<br>(39.24 to 64.69)                        | 56.91<br>(43.72 to 73.14)                          | 0.89<br>(0.80 to 0.98)                     | 1.43<br>(1.11 to 1.81)                     | 1.38<br>(1.08 to 1.74)                     | 1.47<br>(1.13 to 1.89)                     |
| Chronic myeloid leukemia        | 5.86<br>(5.12 to 6.65)                           | 5.26<br>(3.70 to 7.23)                            | 3.72<br>(2.65 to 5.04)                           | 6.00<br>(4.16 to 8.48)                             | 0.17<br>(0.15 to 0.19)                     | 0.18<br>(0.13 to 0.24)                     | 0.13<br>(0.09 to 0.17)                     | 0.20<br>(0.14 to 0.27)                     |
| Other leukemia                  | 45.81<br>(38.46 to 52.72)                        | 49.71<br>(37.84 to 65.30)                         | 38.07<br>(29.19 to 49.97)                        | 54.08<br>(41.07 to 71.48)                          | 1.05<br>(0.92 to 1.18)                     | 1.53<br>(1.21 to 1.95)                     | 1.26<br>(1.00 to 1.57)                     | 1.60<br>(1.25 to 2.08)                     |
| Other neoplasms                 | 134.27<br>(120.19 to 145.12)                     | 190.88<br>(157.97 to 225.20)                      | 187.24<br>(152.32 to 223.76)                     | 186.53<br>(155.65 to 217.43)                       | 3.80<br>(3.44 to 4.11)                     | 6.74<br>(5.80 to 7.59)                     | 6.99<br>(5.89 to 8.05)                     | 6.34<br>(5.52 to 7.03)                     |
| <b>Cardiovascular diseases</b>  | <b>6,029.70</b><br><b>(5,683.34 to 6,402.19)</b> | <b>7,552.66</b><br><b>(4,832.94 to 11,226.31)</b> | <b>4,246.15</b><br><b>(2,707.21 to 6,617.32)</b> | <b>10,908.14</b><br><b>(6,984.37 to 15,982.48)</b> | <b>319.22</b><br><b>(303.93 to 336.43)</b> | <b>460.72</b><br><b>(327.46 to 634.13)</b> | <b>284.62</b><br><b>(200.92 to 407.02)</b> | <b>610.02</b><br><b>(441.15 to 821.55)</b> |
| Rheumatic heart disease         | 121.81<br>(111.16 to 132.70)                     | 84.50<br>(61.13 to 117.90)                        | 61.63<br>(43.27 to 88.47)                        | 93.39<br>(67.37 to 134.25)                         | 3.61<br>(3.33 to 3.91)                     | 2.98<br>(2.26 to 4.07)                     | 2.26<br>(1.67 to 3.12)                     | 3.17<br>(2.41 to 4.42)                     |
| Ischemic heart disease          | 3,666.98<br>(3,430.50 to 3,945.43)               | 4,280.28<br>(2,500.50 to 6,727.75)                | 2,293.41<br>(1,334.41 to 3,746.09)               | 6,437.78<br>(3,659.07 to 9,835.53)                 | 205.80<br>(194.17 to 219.75)               | 274.63<br>(180.18 to 402.28)               | 164.12<br>(106.13 to 246.63)               | 374.60<br>(242.96 to 538.52)               |
| Stroke                          | 1,449.74<br>(1,357.22 to 1,560.29)               | 1,768.02<br>(1,082.79 to 2,724.18)                | 871.68<br>(542.62 to 1,354.25)                   | 2,682.68<br>(1,644.33 to 4,230.99)                 | 73.15<br>(68.71 to 78.55)                  | 103.98<br>(71.06 to 148.32)                | 57.17<br>(39.64 to 82.84)                  | 142.77<br>(97.01 to 205.92)                |
| Ischemic stroke                 | 511.85<br>(472.88 to 557.93)                     | 620.35<br>(369.58 to 1,022.00)                    | 352.60<br>(216.38 to 585.81)                     | 865.78<br>(512.35 to 1,397.31)                     | 30.31<br>(28.09 to 32.85)                  | 41.89<br>(26.20 to 66.93)                  | 26.05<br>(16.69 to 41.33)                  | 53.44<br>(33.44 to 84.44)                  |

|                                |                                   |                                     |                                   |                                       |                              |                               |                               |                               |
|--------------------------------|-----------------------------------|-------------------------------------|-----------------------------------|---------------------------------------|------------------------------|-------------------------------|-------------------------------|-------------------------------|
| Intracerebral hemorrhage       | 937.89<br>(878.63 to<br>1,007.01) | 1,147.67<br>(670.84 to<br>1,917.18) | 519.08<br>(306.10 to<br>847.09)   | 1,816.91<br>(1,047.12 to<br>2,995.65) | 42.84<br>(40.37 to<br>45.83) | 62.09<br>(39.82 to<br>92.90)  | 31.12<br>(20.34 to<br>47.04)  | 89.33<br>(56.60 to<br>137.27) |
| Hypertensive heart disease     | 470.58<br>(268.44 to<br>575.92)   | 1,016.20<br>(417.85 to<br>2,387.23) | 706.44<br>(307.38 to<br>1,679.34) | 1,236.63<br>(493.92 to<br>2,837.24)   | 24.83<br>(13.79 to<br>30.41) | 59.28<br>(24.52 to<br>139.22) | 44.17<br>(19.03 to<br>101.57) | 68.65<br>(28.34 to<br>161.25) |
| Cardiomyopathy and myocarditis | 165.15<br>(137.57 to<br>192.32)   | 169.82<br>(118.00 to<br>236.64)     | 132.41<br>(89.40 to<br>183.05)    | 199.20<br>(136.01 to<br>283.68)       | 4.77<br>(3.94 to<br>5.56)    | 6.26<br>(4.56 to<br>8.36)     | 5.09<br>(3.62 to<br>6.78)     | 7.03<br>(5.09 to<br>9.49)     |
| Myocarditis                    | 30.66<br>(25.48 to<br>36.24)      | 27.51<br>(20.63 to<br>36.50)        | 25.17<br>(18.65 to<br>33.72)      | 28.02<br>(21.26 to<br>37.24)          | 0.72<br>(0.61 to<br>0.86)    | 0.84<br>(0.67 to<br>1.08)     | 0.82<br>(0.65 to<br>1.06)     | 0.82<br>(0.66 to<br>1.06)     |

| Central Asia                                                  |                                                |                                                  |                                                |                                                  |                                         |                                         |                                         |                                         |
|---------------------------------------------------------------|------------------------------------------------|--------------------------------------------------|------------------------------------------------|--------------------------------------------------|-----------------------------------------|-----------------------------------------|-----------------------------------------|-----------------------------------------|
| Cause                                                         | YLLs (in 1000s)                                |                                                  |                                                |                                                  | Deaths (in 1000s)                       |                                         |                                         |                                         |
|                                                               | 2016                                           | 2040 Forecast                                    | 2040 Better Scenario                           | 2040 Worse Scenario                              | 2016                                    | 2040 Forecast                           | 2040 Better Scenario                    | 2040 Worse Scenario                     |
| Alcoholic cardiomyopathy                                      | 56.68<br>(42.66 to 69.60)                      | 59.31<br>(39.49 to 81.01)                        | 50.86<br>(32.35 to 71.04)                      | 76.05<br>(50.91 to 103.32)                       | 1.74<br>(1.28 to 2.13)                  | 2.19<br>(1.50 to 2.82)                  | 1.95<br>(1.28 to 2.55)                  | 2.70<br>(1.88 to 3.48)                  |
| Other cardiomyopathy                                          | 77.80<br>(63.29 to 91.89)                      | 83.00<br>(52.26 to 131.05)                       | 56.38<br>(35.04 to 87.12)                      | 95.14<br>(58.50 to 151.92)                       | 2.30<br>(1.88 to 2.69)                  | 3.23<br>(2.05 to 4.80)                  | 2.32<br>(1.47 to 3.41)                  | 3.51<br>(2.21 to 5.32)                  |
| Atrial fibrillation and flutter                               | 18.60<br>(14.54 to 22.90)                      | 45.12<br>(34.03 to 58.17)                        | 43.69<br>(32.89 to 55.84)                      | 43.99<br>(32.97 to 56.73)                        | 1.79<br>(1.39 to 2.23)                  | 4.53<br>(3.35 to 5.88)                  | 4.64<br>(3.47 to 5.99)                  | 4.22<br>(3.08 to 5.55)                  |
| Aortic aneurysm                                               | 26.69<br>(24.57 to 28.99)                      | 33.53<br>(24.23 to 45.77)                        | 28.43<br>(20.60 to 38.31)                      | 35.34<br>(25.15 to 48.56)                        | 1.22<br>(1.13 to 1.31)                  | 1.81<br>(1.44 to 2.28)                  | 1.68<br>(1.34 to 2.10)                  | 1.79<br>(1.41 to 2.27)                  |
| Peripheral artery disease                                     | 1.32<br>(0.94 to 1.70)                         | 4.22<br>(2.68 to 6.31)                           | 4.33<br>(2.70 to 6.54)                         | 4.10<br>(2.58 to 6.09)                           | 0.09<br>(0.06 to 0.12)                  | 0.32<br>(0.21 to 0.47)                  | 0.36<br>(0.23 to 0.55)                  | 0.29<br>(0.19 to 0.42)                  |
| Endocarditis                                                  | 14.89<br>(12.32 to 18.94)                      | 18.32<br>(12.69 to 26.66)                        | 16.83<br>(11.69 to 24.43)                      | 19.22<br>(13.22 to 28.12)                        | 0.40<br>(0.34 to 0.52)                  | 0.67<br>(0.47 to 0.97)                  | 0.67<br>(0.47 to 0.97)                  | 0.67<br>(0.47 to 0.96)                  |
| Other cardiovascular and circulatory diseases                 | 93.93<br>(85.17 to 103.55)                     | 132.66<br>(85.68 to 196.67)                      | 87.31<br>(56.95 to 127.51)                     | 155.79<br>(100.94 to 234.92)                     | 3.56<br>(3.25 to 3.88)                  | 6.24<br>(4.52 to 8.60)                  | 4.46<br>(3.24 to 6.04)                  | 6.83<br>(4.94 to 9.57)                  |
| <b>Chronic respiratory diseases</b>                           | <b>396.66</b><br><b>(370.16 to 427.00)</b>     | <b>588.29</b><br><b>(399.07 to 887.40)</b>       | <b>423.59</b><br><b>(301.56 to 598.55)</b>     | <b>788.83</b><br><b>(513.62 to 1,248.03)</b>     | <b>19.53</b><br><b>(18.35 to 20.89)</b> | <b>33.21</b><br><b>(23.28 to 48.19)</b> | <b>26.50</b><br><b>(19.59 to 36.21)</b> | <b>41.29</b><br><b>(27.70 to 62.84)</b> |
| Chronic obstructive pulmonary disease                         | 305.39<br>(283.08 to 331.15)                   | 467.01<br>(294.97 to 732.72)                     | 300.36<br>(196.41 to 458.55)                   | 662.17<br>(396.69 to 1,107.42)                   | 15.74<br>(14.72 to 16.93)               | 27.24<br>(17.91 to 41.51)               | 20.01<br>(14.00 to 28.79)               | 35.33<br>(22.24 to 55.87)               |
| Pneumoconiosis                                                | 1.57<br>(1.31 to 1.89)                         | 2.15<br>(1.57 to 2.82)                           | 2.18<br>(1.53 to 2.98)                         | 2.20<br>(1.64 to 2.82)                           | 0.07<br>(0.06 to 0.08)                  | 0.12<br>(0.09 to 0.16)                  | 0.13<br>(0.09 to 0.17)                  | 0.12<br>(0.09 to 0.15)                  |
| Silicosis                                                     | 0.04<br>(0.03 to 0.05)                         | 0.04<br>(0.02 to 0.06)                           | 0.03<br>(0.02 to 0.04)                         | 0.04<br>(0.03 to 0.06)                           | 0.00<br>(0.00 to 0.00)                  | 0.00<br>(0.00 to 0.00)                  | 0.00<br>(0.00 to 0.00)                  | 0.00<br>(0.00 to 0.00)                  |
| Asbestosis                                                    | 0.40<br>(0.25 to 0.52)                         | 0.75<br>(0.43 to 1.07)                           | 0.93<br>(0.55 to 1.34)                         | 0.67<br>(0.38 to 0.94)                           | 0.01<br>(0.01 to 0.02)                  | 0.03<br>(0.02 to 0.05)                  | 0.04<br>(0.03 to 0.06)                  | 0.03<br>(0.02 to 0.04)                  |
| Coal workers pneumoconiosis                                   | 0.10<br>(0.03 to 0.15)                         | 0.12<br>(0.05 to 0.21)                           | 0.07<br>(0.03 to 0.12)                         | 0.15<br>(0.06 to 0.25)                           | 0.00<br>(0.00 to 0.00)                  | 0.00<br>(0.00 to 0.01)                  | 0.00<br>(0.00 to 0.00)                  | 0.01<br>(0.00 to 0.01)                  |
| Other pneumoconiosis                                          | 1.04<br>(0.84 to 1.28)                         | 1.24<br>(0.86 to 1.73)                           | 1.16<br>(0.77 to 1.72)                         | 1.35<br>(0.97 to 1.83)                           | 0.05<br>(0.04 to 0.06)                  | 0.08<br>(0.05 to 0.11)                  | 0.08<br>(0.05 to 0.12)                  | 0.08<br>(0.06 to 0.11)                  |
| Asthma                                                        | 48.33<br>(42.18 to 54.45)                      | 45.41<br>(23.90 to 85.35)                        | 29.30<br>(15.11 to 56.27)                      | 56.03<br>(28.82 to 109.09)                       | 2.08<br>(1.82 to 2.35)                  | 2.34<br>(1.25 to 4.37)                  | 1.59<br>(0.84 to 2.94)                  | 2.75<br>(1.42 to 5.17)                  |
| Interstitial lung disease and pulmonary sarcoidosis           | 27.56<br>(21.51 to 32.70)                      | 53.53<br>(41.11 to 67.57)                        | 72.56<br>(55.08 to 92.34)                      | 47.92<br>(36.84 to 60.44)                        | 1.16<br>(0.93 to 1.42)                  | 2.65<br>(2.14 to 3.35)                  | 3.87<br>(3.08 to 4.86)                  | 2.27<br>(1.82 to 2.84)                  |
| Other chronic respiratory diseases                            | 13.80<br>(10.26 to 17.83)                      | 20.19<br>(13.11 to 28.38)                        | 19.19<br>(12.27 to 26.41)                      | 20.51<br>(13.37 to 29.00)                        | 0.47<br>(0.32 to 0.59)                  | 0.86<br>(0.54 to 1.19)                  | 0.90<br>(0.57 to 1.21)                  | 0.83<br>(0.51 to 1.16)                  |
| <b>Cirrhosis and other chronic liver diseases</b>             | <b>1,009.81</b><br><b>(932.54 to 1,092.14)</b> | <b>1,247.69</b><br><b>(1,030.03 to 1,430.49)</b> | <b>1,004.99</b><br><b>(810.53 to 1,186.04)</b> | <b>1,321.27</b><br><b>(1,106.30 to 1,508.68)</b> | <b>31.61</b><br><b>(29.30 to 34.08)</b> | <b>47.78</b><br><b>(41.41 to 53.33)</b> | <b>39.71</b><br><b>(33.40 to 45.43)</b> | <b>49.18</b><br><b>(43.52 to 54.40)</b> |
| Cirrhosis and other chronic liver diseases due to hepatitis B | 355.11<br>(320.52 to 391.10)                   | 430.96<br>(349.41 to 509.84)                     | 374.64<br>(295.59 to 451.24)                   | 433.88<br>(358.95 to 508.62)                     | 11.27<br>(10.22 to 12.36)               | 16.78<br>(14.45 to 19.08)               | 14.99<br>(12.37 to 17.35)               | 16.39<br>(14.31 to 18.46)               |
| Cirrhosis and other chronic liver diseases due to hepatitis C | 198.84<br>(174.37 to 226.22)                   | 253.99<br>(200.00 to 305.28)                     | 218.32<br>(169.52 to 268.69)                   | 256.83<br>(205.77 to 306.43)                     | 6.21<br>(5.52 to 7.01)                  | 9.44<br>(7.78 to 11.02)                 | 8.30<br>(6.66 to 9.92)                  | 9.31<br>(7.80 to 10.74)                 |

|                                                                |                                                      |                                                      |                                                      |                                                      |                                                |                                                  |                                                 |                                                  |
|----------------------------------------------------------------|------------------------------------------------------|------------------------------------------------------|------------------------------------------------------|------------------------------------------------------|------------------------------------------------|--------------------------------------------------|-------------------------------------------------|--------------------------------------------------|
| Cirrhosis and other chronic liver diseases due to alcohol use  | 256.93<br>(226.49 to<br>288.87)                      | 346.62<br>(280.07 to<br>414.42)                      | 228.91<br>(180.82 to<br>280.27)                      | 408.90<br>(332.18 to<br>483.11)                      | 8.55<br>(7.64 to<br>9.54)                      | 13.71<br>(11.65 to<br>15.71)                     | 9.51<br>(7.82 to<br>11.18)                      | 15.71<br>(13.33 to<br>17.83)                     |
| Cirrhosis and other chronic liver diseases due to other causes | 198.93<br>(178.65 to<br>219.86)                      | 216.12<br>(179.17 to<br>255.22)                      | 183.13<br>(149.20 to<br>219.41)                      | 221.66<br>(185.50 to<br>260.76)                      | 5.57<br>(4.99 to<br>6.16)                      | 7.85<br>(6.67 to<br>9.01)                        | 6.90<br>(5.79 to<br>8.11)                       | 7.77<br>(6.72 to<br>8.87)                        |
| <b>Digestive diseases</b>                                      | <b>243.64</b><br><b>(211.45 to</b><br><b>294.39)</b> | <b>269.93</b><br><b>(197.47 to</b><br><b>367.93)</b> | <b>204.08</b><br><b>(150.02 to</b><br><b>274.93)</b> | <b>298.20</b><br><b>(216.04 to</b><br><b>416.75)</b> | <b>7.58</b><br><b>(6.74 to</b><br><b>8.85)</b> | <b>10.91</b><br><b>(8.44 to</b><br><b>14.48)</b> | <b>8.86</b><br><b>(6.83 to</b><br><b>11.51)</b> | <b>11.50</b><br><b>(8.79 to</b><br><b>15.63)</b> |
| Peptic ulcer disease                                           | 73.53<br>(65.41 to<br>95.24)                         | 58.37<br>(44.05 to<br>75.81)                         | 39.42<br>(28.81 to<br>52.19)                         | 64.28<br>(48.18 to<br>84.15)                         | 2.43<br>(2.20 to<br>3.08)                      | 2.33<br>(1.83 to<br>2.98)                        | 1.62<br>(1.24 to<br>2.09)                       | 2.48<br>(1.94 to<br>3.18)                        |

| Central Asia                               |                              |                              |                              |                              |                           |                           |                           |                           |
|--------------------------------------------|------------------------------|------------------------------|------------------------------|------------------------------|---------------------------|---------------------------|---------------------------|---------------------------|
| Cause                                      | YLLs (in 1000s)              |                              |                              |                              | Deaths (in 1000s)         |                           |                           |                           |
|                                            | 2016                         | 2040 Forecast                | 2040 Better Scenario         | 2040 Worse Scenario          | 2016                      | 2040 Forecast             | 2040 Better Scenario      | 2040 Worse Scenario       |
| Gastritis and duodenitis                   | 1.43<br>(1.14 to 1.72)       | 2.23<br>(1.62 to 2.87)       | 1.78<br>(1.26 to 2.30)       | 2.25<br>(1.67 to 2.87)       | 0.06<br>(0.05 to 0.07)    | 0.12<br>(0.09 to 0.15)    | 0.10<br>(0.08 to 0.13)    | 0.12<br>(0.09 to 0.14)    |
| Appendicitis                               | 11.48<br>(9.69 to 16.03)     | 10.86<br>(8.21 to 16.50)     | 7.39<br>(5.46 to 11.56)      | 11.67<br>(8.76 to 17.99)     | 0.24<br>(0.21 to 0.35)    | 0.29<br>(0.22 to 0.45)    | 0.21<br>(0.15 to 0.34)    | 0.30<br>(0.23 to 0.46)    |
| Paralytic ileus and intestinal obstruction | 49.90<br>(38.33 to 67.90)    | 42.95<br>(33.48 to 57.26)    | 38.52<br>(29.98 to 51.37)    | 43.35<br>(33.71 to 58.50)    | 1.11<br>(0.87 to 1.39)    | 1.50<br>(1.19 to 1.84)    | 1.53<br>(1.22 to 1.88)    | 1.42<br>(1.12 to 1.76)    |
| Inguinal, femoral, and abdominal hernia    | 5.65<br>(4.56 to 7.48)       | 5.53<br>(4.24 to 7.72)       | 4.66<br>(3.53 to 6.60)       | 5.57<br>(4.36 to 7.82)       | 0.22<br>(0.18 to 0.29)    | 0.28<br>(0.22 to 0.39)    | 0.25<br>(0.19 to 0.35)    | 0.26<br>(0.21 to 0.37)    |
| Inflammatory bowel disease                 | 8.78<br>(7.19 to 10.71)      | 9.95<br>(7.41 to 12.87)      | 9.53<br>(6.96 to 12.41)      | 9.84<br>(7.38 to 12.67)      | 0.23<br>(0.19 to 0.27)    | 0.34<br>(0.27 to 0.43)    | 0.35<br>(0.26 to 0.44)    | 0.32<br>(0.26 to 0.41)    |
| Vascular intestinal disorders              | 11.34<br>(9.62 to 13.17)     | 19.44<br>(15.69 to 23.66)    | 18.16<br>(14.23 to 22.62)    | 18.65<br>(15.22 to 22.31)    | 0.61<br>(0.51 to 0.69)    | 1.24<br>(1.03 to 1.48)    | 1.22<br>(1.01 to 1.49)    | 1.14<br>(0.95 to 1.36)    |
| Gallbladder and biliary diseases           | 15.49<br>(13.51 to 19.54)    | 25.37<br>(13.18 to 46.00)    | 17.37<br>(9.23 to 31.41)     | 31.71<br>(16.04 to 58.89)    | 0.64<br>(0.57 to 0.79)    | 1.27<br>(0.68 to 2.30)    | 0.92<br>(0.51 to 1.67)    | 1.52<br>(0.79 to 2.81)    |
| Pancreatitis                               | 46.09<br>(33.80 to 57.26)    | 70.39<br>(34.47 to 139.49)   | 46.00<br>(23.35 to 88.41)    | 85.87<br>(40.37 to 167.62)   | 1.37<br>(1.01 to 1.68)    | 2.45<br>(1.25 to 4.62)    | 1.66<br>(0.89 to 3.07)    | 2.90<br>(1.42 to 5.58)    |
| Other digestive diseases                   | 19.96<br>(15.78 to 23.25)    | 24.85<br>(19.52 to 30.50)    | 21.26<br>(16.34 to 26.53)    | 25.01<br>(19.64 to 30.46)    | 0.66<br>(0.55 to 0.76)    | 1.09<br>(0.91 to 1.29)    | 1.00<br>(0.82 to 1.21)    | 1.05<br>(0.88 to 1.24)    |
| Neurological disorders                     | 351.89<br>(318.07 to 390.91) | 615.80<br>(502.75 to 753.12) | 602.83<br>(498.00 to 729.67) | 613.32<br>(489.83 to 776.42) | 18.53<br>(16.18 to 21.41) | 43.75<br>(33.73 to 57.63) | 48.50<br>(38.88 to 61.39) | 40.49<br>(29.81 to 55.82) |
| Alzheimer's disease and other dementias    | 126.82<br>(105.98 to 154.78) | 324.28<br>(236.03 to 456.58) | 346.09<br>(261.90 to 466.28) | 309.70<br>(214.30 to 452.07) | 12.67<br>(10.56 to 15.41) | 33.07<br>(23.24 to 46.54) | 37.21<br>(27.66 to 49.55) | 30.39<br>(20.24 to 45.22) |
| Parkinson's disease                        | 23.00<br>(17.23 to 29.36)    | 63.12<br>(47.31 to 80.88)    | 77.83<br>(57.96 to 99.60)    | 54.04<br>(39.56 to 69.94)    | 1.83<br>(1.35 to 2.40)    | 5.25<br>(3.89 to 6.86)    | 6.73<br>(5.08 to 8.69)    | 4.38<br>(3.15 to 5.80)    |
| Epilepsy                                   | 171.75<br>(152.32 to 197.63) | 184.76<br>(126.02 to 268.66) | 133.84<br>(90.73 to 193.26)  | 207.50<br>(139.47 to 305.09) | 3.23<br>(2.89 to 3.66)    | 3.89<br>(2.68 to 5.55)    | 2.88<br>(2.00 to 4.02)    | 4.32<br>(2.97 to 6.16)    |
| Multiple sclerosis                         | 3.84<br>(2.80 to 5.98)       | 5.82<br>(3.82 to 9.58)       | 6.14<br>(4.00 to 9.87)       | 5.62<br>(3.70 to 9.28)       | 0.12<br>(0.09 to 0.18)    | 0.23<br>(0.17 to 0.34)    | 0.26<br>(0.19 to 0.37)    | 0.21<br>(0.15 to 0.32)    |
| Motor neuron disease                       | 3.74<br>(3.27 to 4.31)       | 7.04<br>(5.49 to 8.67)       | 7.21<br>(5.55 to 9.01)       | 6.76<br>(5.33 to 8.24)       | 0.11<br>(0.10 to 0.13)    | 0.25<br>(0.20 to 0.30)    | 0.26<br>(0.21 to 0.32)    | 0.23<br>(0.19 to 0.27)    |
| Other neurological disorders               | 22.75<br>(20.43 to 25.46)    | 30.79<br>(26.15 to 36.15)    | 31.71<br>(26.68 to 37.29)    | 29.70<br>(25.51 to 34.97)    | 0.57<br>(0.52 to 0.63)    | 1.05<br>(0.93 to 1.17)    | 1.17<br>(1.04 to 1.29)    | 0.96<br>(0.85 to 1.07)    |
| Mental disorders                           | 223.51<br>(197.57 to 255.39) | 362.92<br>(271.04 to 476.22) | 413.53<br>(297.16 to 549.83) | 349.71<br>(263.18 to 453.50) | 5.62<br>(4.98 to 6.42)    | 10.38<br>(8.00 to 12.80)  | 12.31<br>(9.27 to 15.43)  | 9.79<br>(7.71 to 11.86)   |
| Alcohol use disorders                      | 132.70<br>(114.61 to 157.65) | 128.44<br>(94.75 to 165.40)  | 131.33<br>(95.63 to 171.48)  | 132.37<br>(98.28 to 170.50)  | 3.50<br>(3.02 to 4.12)    | 4.07<br>(3.14 to 5.02)    | 4.42<br>(3.32 to 5.56)    | 4.08<br>(3.20 to 5.01)    |
| Drug use disorders                         | 90.74<br>(77.84 to 102.34)   | 234.39<br>(167.02 to 322.03) | 282.11<br>(193.22 to 386.12) | 217.25<br>(157.84 to 285.12) | 2.11<br>(1.84 to 2.38)    | 6.31<br>(4.73 to 8.17)    | 7.88<br>(5.66 to 10.20)   | 5.71<br>(4.34 to 7.17)    |
| Opioid use disorders                       | 66.03<br>(54.11 to 75.54)    | 136.33<br>(96.00 to 183.71)  | 145.53<br>(99.97 to 202.10)  | 131.41<br>(93.04 to 176.32)  | 1.48<br>(1.25 to 1.71)    | 3.48<br>(2.54 to 4.58)    | 3.79<br>(2.70 to 5.14)    | 3.29<br>(2.43 to 4.32)    |

|                           |                              |                              |                               |                              |                           |                           |                           |                           |
|---------------------------|------------------------------|------------------------------|-------------------------------|------------------------------|---------------------------|---------------------------|---------------------------|---------------------------|
|                           | 5.03<br>(4.01 to<br>6.58)    | 20.77<br>(13.39 to<br>30.35) | 26.27<br>(16.75 to<br>39.22)  | 18.76<br>(12.38 to<br>26.95) | 0.12<br>(0.10 to<br>0.16) | 0.56<br>(0.36 to<br>0.80) | 0.72<br>(0.47 to<br>1.03) | 0.50<br>(0.34 to<br>0.68) |
| Cocaine use disorders     |                              |                              |                               |                              |                           |                           |                           |                           |
|                           | 3.33<br>(2.50 to<br>4.86)    | 19.17<br>(12.05 to<br>29.99) | 28.11<br>(16.77 to<br>45.07)  | 16.49<br>(10.71 to<br>25.83) | 0.08<br>(0.06 to<br>0.11) | 0.48<br>(0.31 to<br>0.72) | 0.72<br>(0.45 to<br>1.09) | 0.41<br>(0.27 to<br>0.60) |
| Amphetamine use disorders |                              |                              |                               |                              |                           |                           |                           |                           |
|                           | 16.36<br>(13.45 to<br>21.08) | 58.13<br>(39.45 to<br>82.09) | 82.21<br>(54.38 to<br>115.27) | 50.58<br>(34.76 to<br>69.27) | 0.43<br>(0.36 to<br>0.53) | 1.79<br>(1.31 to<br>2.32) | 2.65<br>(1.92 to<br>3.44) | 1.51<br>(1.13 to<br>1.90) |
| Other drug use disorders  |                              |                              |                               |                              |                           |                           |                           |                           |
|                           | 0.07<br>(0.06 to<br>0.08)    | 0.09<br>(0.06 to<br>0.13)    | 0.09<br>(0.06 to<br>0.13)     | 0.09<br>(0.06 to<br>0.13)    | 0.00<br>(0.00 to<br>0.00) | 0.00<br>(0.00 to<br>0.00) | 0.00<br>(0.00 to<br>0.00) | 0.00<br>(0.00 to<br>0.00) |
| Eating disorders          |                              |                              |                               |                              |                           |                           |                           |                           |

| Central Asia                                               |                              |                                  |                                |                                  |                           |                           |                           |                           |
|------------------------------------------------------------|------------------------------|----------------------------------|--------------------------------|----------------------------------|---------------------------|---------------------------|---------------------------|---------------------------|
| Cause                                                      | YLLs (in 1000s)              |                                  |                                |                                  | Deaths (in 1000s)         |                           |                           |                           |
|                                                            | 2016                         | 2040 Forecast                    | 2040 Better Scenario           | 2040 Worse Scenario              | 2016                      | 2040 Forecast             | 2040 Better Scenario      | 2040 Worse Scenario       |
|                                                            | 828.29<br>(778.60 to 880.82) | 1,196.86<br>(834.79 to 1,638.12) | 867.59<br>(602.23 to 1,203.30) | 1,347.80<br>(933.77 to 1,875.49) | 27.99<br>(26.35 to 29.71) | 50.18<br>(36.07 to 67.29) | 37.44<br>(26.61 to 50.75) | 54.68<br>(39.41 to 74.31) |
| Diabetes, urogenital, blood, and endocrine diseases        |                              |                                  |                                |                                  |                           |                           |                           |                           |
| Diabetes mellitus                                          | 343.03<br>(320.31 to 368.32) | 487.73<br>(271.23 to 821.62)     | 327.03<br>(181.26 to 538.12)   | 582.62<br>(312.43 to 965.60)     | 13.32<br>(12.46 to 14.21) | 21.59<br>(12.55 to 34.36) | 14.94<br>(8.85 to 23.82)  | 24.85<br>(14.10 to 39.65) |
| Acute glomerulonephritis                                   | 7.11<br>(6.15 to 8.26)       | 12.31<br>(8.69 to 16.70)         | 10.28<br>(7.02 to 14.51)       | 12.90<br>(9.16 to 17.47)         | 0.16<br>(0.14 to 0.18)    | 0.33<br>(0.24 to 0.44)    | 0.29<br>(0.20 to 0.39)    | 0.33<br>(0.24 to 0.45)    |
| Chronic kidney disease                                     | 299.97<br>(278.73 to 321.97) | 445.86<br>(270.60 to 711.00)     | 312.45<br>(191.32 to 489.76)   | 498.95<br>(307.29 to 794.10)     | 9.68<br>(9.05 to 10.34)   | 19.21<br>(11.51 to 31.43) | 13.97<br>(8.50 to 22.39)  | 20.74<br>(12.52 to 33.26) |
| Chronic kidney disease due to diabetes mellitus            | 108.54<br>(95.19 to 122.82)  | 204.96<br>(115.71 to 350.50)     | 144.97<br>(83.36 to 239.84)    | 228.91<br>(130.18 to 392.81)     | 4.03<br>(3.58 to 4.50)    | 9.21<br>(5.25 to 15.45)   | 6.72<br>(3.91 to 11.10)   | 9.96<br>(5.65 to 16.87)   |
| Chronic kidney disease due to hypertension                 | 12.31<br>(10.36 to 14.65)    | 25.54<br>(14.48 to 42.32)        | 19.24<br>(10.88 to 31.33)      | 27.46<br>(15.41 to 45.07)        | 0.67<br>(0.56 to 0.80)    | 1.75<br>(0.98 to 2.90)    | 1.40<br>(0.80 to 2.32)    | 1.79<br>(1.01 to 2.90)    |
| Chronic kidney disease due to glomerulonephritis           | 86.73<br>(74.67 to 99.29)    | 97.80<br>(62.46 to 151.03)       | 66.52<br>(43.11 to 100.49)     | 110.71<br>(71.60 to 172.08)      | 2.26<br>(1.94 to 2.59)    | 3.44<br>(2.11 to 5.63)    | 2.39<br>(1.47 to 3.87)    | 3.79<br>(2.32 to 6.19)    |
| Chronic kidney disease due to other and unspecified causes | 92.40<br>(79.60 to 106.30)   | 117.56<br>(71.25 to 182.95)      | 81.72<br>(50.92 to 125.82)     | 131.87<br>(79.90 to 206.89)      | 2.72<br>(2.33 to 3.13)    | 4.81<br>(2.88 to 7.76)    | 3.46<br>(2.09 to 5.55)    | 5.20<br>(3.11 to 8.36)    |
| Urinary diseases and male infertility                      | 107.42<br>(100.09 to 115.61) | 193.00<br>(156.28 to 231.25)     | 168.18<br>(131.53 to 206.50)   | 192.94<br>(157.86 to 229.54)     | 3.38<br>(3.18 to 3.61)    | 7.43<br>(6.29 to 8.41)    | 6.76<br>(5.55 to 7.84)    | 7.12<br>(6.17 to 7.98)    |
| Urinary tract infections                                   | 98.56<br>(91.60 to 105.91)   | 180.80<br>(145.96 to 217.25)     | 158.90<br>(123.51 to 196.01)   | 180.43<br>(147.62 to 215.77)     | 2.95<br>(2.75 to 3.16)    | 6.74<br>(5.66 to 7.71)    | 6.21<br>(5.05 to 7.23)    | 6.46<br>(5.54 to 7.26)    |
| Urolithiasis                                               | 3.15<br>(2.49 to 4.35)       | 4.98<br>(3.54 to 6.78)           | 3.76<br>(2.63 to 5.21)         | 5.14<br>(3.78 to 6.91)           | 0.16<br>(0.12 to 0.26)    | 0.27<br>(0.20 to 0.41)    | 0.21<br>(0.15 to 0.32)    | 0.26<br>(0.20 to 0.39)    |
| Other urinary diseases                                     | 5.70<br>(4.28 to 7.46)       | 7.22<br>(5.02 to 9.29)           | 5.53<br>(3.86 to 7.16)         | 7.36<br>(5.31 to 9.26)           | 0.26<br>(0.18 to 0.34)    | 0.42<br>(0.27 to 0.54)    | 0.34<br>(0.21 to 0.44)    | 0.40<br>(0.26 to 0.51)    |
| Gynecological diseases                                     | 0.85<br>(0.24 to 1.11)       | 0.50<br>(0.17 to 0.81)           | 0.31<br>(0.10 to 0.50)         | 0.60<br>(0.21 to 0.98)           | 0.02<br>(0.01 to 0.03)    | 0.01<br>(0.01 to 0.02)    | 0.01<br>(0.01 to 0.01)    | 0.02<br>(0.01 to 0.02)    |
| Uterine fibroids                                           | 0.55<br>(0.15 to 0.73)       | 0.28<br>(0.10 to 0.45)           | 0.19<br>(0.07 to 0.31)         | 0.32<br>(0.11 to 0.51)           | 0.01<br>(0.00 to 0.02)    | 0.01<br>(0.00 to 0.01)    | 0.01<br>(0.00 to 0.01)    | 0.01<br>(0.00 to 0.01)    |
| Polycystic ovarian syndrome                                | 0.08<br>(0.14 to 0.00)       | 0.04<br>(0.01 to 0.08)           | 0.01<br>(0.00 to 0.03)         | 0.05<br>(0.01 to 0.11)           | 0.00<br>(0.00 to 0.00)    | 0.00<br>(0.00 to 0.00)    | 0.00<br>(0.00 to 0.00)    | 0.00<br>(0.00 to 0.00)    |
| Endometriosis                                              | 0.00<br>(0.00 to 0.00)       | 0.00<br>(0.00 to 0.00)           | 0.00<br>(0.00 to 0.00)         | 0.00<br>(0.00 to 0.01)           | 0.00<br>(0.00 to 0.00)    | 0.00<br>(0.00 to 0.00)    | 0.00<br>(0.00 to 0.00)    | 0.00<br>(0.00 to 0.00)    |
| Genital prolapse                                           | 0.01<br>(0.00 to 0.01)       | 0.01<br>(0.01 to 0.02)           | 0.01<br>(0.00 to 0.01)         | 0.01<br>(0.01 to 0.02)           | 0.00<br>(0.00 to 0.00)    | 0.00<br>(0.00 to 0.00)    | 0.00<br>(0.00 to 0.00)    | 0.00<br>(0.00 to 0.00)    |
| Other gynecological diseases                               | 0.20<br>(0.05 to 0.29)       | 0.17<br>(0.05 to 0.34)           | 0.09<br>(0.03 to 0.18)         | 0.21<br>(0.06 to 0.43)           | 0.00<br>(0.00 to 0.01)    | 0.00<br>(0.00 to 0.01)    | 0.00<br>(0.00 to 0.00)    | 0.01<br>(0.00 to 0.01)    |
| Hemoglobinopathies and hemolytic anemias                   | 30.99<br>(26.19 to 35.57)    | 22.28<br>(17.11 to 27.37)        | 16.54<br>(12.60 to 20.57)      | 23.65<br>(18.24 to 28.90)        | 0.67<br>(0.56 to 0.75)    | 0.68<br>(0.53 to 0.81)    | 0.53<br>(0.41 to 0.64)    | 0.70<br>(0.54 to 0.81)    |
| Thalassemias                                               | 10.16<br>(7.96 to 13.21)     | 3.55<br>(2.42 to 5.21)           | 2.93<br>(2.03 to 4.24)         | 3.73<br>(2.57 to 5.39)           | 0.12<br>(0.10 to 0.16)    | 0.04<br>(0.03 to 0.06)    | 0.04<br>(0.03 to 0.05)    | 0.05<br>(0.03 to 0.07)    |

|                                                   |                              |                              |                              |                              |                           |                           |                           |                           |
|---------------------------------------------------|------------------------------|------------------------------|------------------------------|------------------------------|---------------------------|---------------------------|---------------------------|---------------------------|
|                                                   | 7.95<br>(6.61 to<br>9.13)    | 7.10<br>(5.18 to<br>9.27)    | 5.07<br>(3.61 to<br>6.75)    | 7.68<br>(5.58 to<br>10.02)   | 0.14<br>(0.11 to<br>0.16) | 0.14<br>(0.10 to<br>0.18) | 0.10<br>(0.07 to<br>0.13) | 0.15<br>(0.11 to<br>0.19) |
| Sickle cell disorders                             |                              |                              |                              |                              |                           |                           |                           |                           |
|                                                   | 4.76<br>(3.84 to<br>5.49)    | 4.64<br>(3.30 to<br>5.94)    | 3.18<br>(2.22 to<br>4.16)    | 5.09<br>(3.64 to<br>6.58)    | 0.10<br>(0.08 to<br>0.12) | 0.12<br>(0.09 to<br>0.15) | 0.09<br>(0.06 to<br>0.11) | 0.13<br>(0.09 to<br>0.17) |
| G6PD deficiency                                   |                              |                              |                              |                              |                           |                           |                           |                           |
|                                                   | 8.12<br>(6.53 to<br>9.14)    | 7.00<br>(5.28 to<br>8.39)    | 5.35<br>(3.95 to<br>6.67)    | 7.15<br>(5.45 to<br>8.51)    | 0.31<br>(0.24 to<br>0.34) | 0.38<br>(0.30 to<br>0.44) | 0.31<br>(0.24 to<br>0.37) | 0.37<br>(0.30 to<br>0.43) |
| Other hemoglobinopathies and hemolytic anemias    |                              |                              |                              |                              |                           |                           |                           |                           |
|                                                   | 38.93<br>(28.60 to<br>46.43) | 35.18<br>(26.90 to<br>43.99) | 32.81<br>(24.88 to<br>41.10) | 36.15<br>(27.69 to<br>44.97) | 0.76<br>(0.57 to<br>0.86) | 0.93<br>(0.74 to<br>1.11) | 0.95<br>(0.75 to<br>1.16) | 0.91<br>(0.73 to<br>1.07) |
| Endocrine, metabolic, blood, and immune disorders |                              |                              |                              |                              |                           |                           |                           |                           |



| Central Asia                                  |                                     |                                     |                                     |                                     |                               |                               |                               |                               |
|-----------------------------------------------|-------------------------------------|-------------------------------------|-------------------------------------|-------------------------------------|-------------------------------|-------------------------------|-------------------------------|-------------------------------|
| Cause                                         | YLLs (in 1000s)                     |                                     |                                     |                                     | Deaths (in 1000s)             |                               |                               |                               |
|                                               | 2016                                | 2040 Forecast                       | 2040 Better Scenario                | 2040 Worse Scenario                 | 2016                          | 2040 Forecast                 | 2040 Better Scenario          | 2040 Worse Scenario           |
| <b>Musculoskeletal disorders</b>              | <b>13.26</b><br>(11.61 to 14.80)    | <b>23.34</b><br>(18.66 to 28.52)    | <b>20.94</b><br>(16.66 to 26.08)    | <b>23.21</b><br>(18.64 to 28.19)    | <b>0.41</b><br>(0.37 to 0.46) | <b>0.96</b><br>(0.82 to 1.15) | <b>0.89</b><br>(0.74 to 1.10) | <b>0.92</b><br>(0.78 to 1.10) |
| Rheumatoid arthritis                          | 4.98<br>(4.20 to 6.13)              | 11.11<br>(8.51 to 14.47)            | 8.79<br>(6.34 to 12.11)             | 11.40<br>(8.66 to 14.89)            | 0.20<br>(0.17 to 0.24)        | 0.56<br>(0.45 to 0.70)        | 0.47<br>(0.37 to 0.60)        | 0.54<br>(0.44 to 0.68)        |
| Other musculoskeletal disorders               | 8.28<br>(6.83 to 9.21)              | 12.23<br>(9.52 to 14.95)            | 12.14<br>(9.46 to 14.96)            | 11.81<br>(9.22 to 14.27)            | 0.21<br>(0.19 to 0.24)        | 0.40<br>(0.33 to 0.49)        | 0.42<br>(0.35 to 0.52)        | 0.38<br>(0.31 to 0.45)        |
| <b>Other non-communicable diseases</b>        | <b>583.86</b><br>(459.43 to 735.98) | <b>332.17</b><br>(242.65 to 450.47) | <b>185.24</b><br>(134.73 to 254.28) | <b>392.44</b><br>(284.71 to 532.06) | <b>7.08</b><br>(5.65 to 8.88) | <b>4.35</b><br>(3.27 to 5.79) | <b>2.56</b><br>(1.92 to 3.39) | <b>5.07</b><br>(3.79 to 6.71) |
| Congenital birth defects                      | 555.04<br>(434.73 to 702.99)        | 312.14<br>(225.35 to 424.51)        | 170.74<br>(123.49 to 236.33)        | 370.18<br>(267.63 to 503.58)        | 6.69<br>(5.28 to 8.46)        | 3.93<br>(2.88 to 5.27)        | 2.19<br>(1.61 to 2.97)        | 4.63<br>(3.40 to 6.21)        |
| Neural tube defects                           | 29.90<br>(19.22 to 44.92)           | 9.07<br>(5.23 to 14.79)             | 4.59<br>(2.44 to 8.15)              | 11.06<br>(6.38 to 18.25)            | 0.35<br>(0.23 to 0.52)        | 0.11<br>(0.06 to 0.17)        | 0.05<br>(0.03 to 0.10)        | 0.13<br>(0.08 to 0.22)        |
| Congenital heart anomalies                    | 305.03<br>(238.51 to 392.34)        | 172.21<br>(122.46 to 237.04)        | 91.36<br>(63.78 to 126.16)          | 204.61<br>(146.11 to 281.22)        | 3.71<br>(2.93 to 4.73)        | 2.19<br>(1.59 to 2.97)        | 1.18<br>(0.85 to 1.60)        | 2.58<br>(1.88 to 3.50)        |
| Orofacial clefts                              | 0.83<br>(0.50 to 1.37)              | 0.48<br>(0.26 to 0.90)              | 0.18<br>(0.10 to 0.35)              | 0.57<br>(0.33 to 1.05)              | 0.01<br>(0.01 to 0.02)        | 0.01<br>(0.00 to 0.01)        | 0.00<br>(0.00 to 0.00)        | 0.01<br>(0.00 to 0.01)        |
| Down syndrome                                 | 9.17<br>(6.87 to 11.51)             | 7.58<br>(5.57 to 10.40)             | 6.18<br>(4.52 to 8.49)              | 8.22<br>(5.96 to 11.41)             | 0.12<br>(0.09 to 0.15)        | 0.12<br>(0.09 to 0.15)        | 0.10<br>(0.07 to 0.13)        | 0.12<br>(0.09 to 0.17)        |
| Other chromosomal abnormalities               | 8.40<br>(5.80 to 19.51)             | 7.69<br>(5.23 to 14.41)             | 5.05<br>(3.37 to 8.95)              | 8.97<br>(5.99 to 17.38)             | 0.10<br>(0.07 to 0.23)        | 0.11<br>(0.07 to 0.18)        | 0.07<br>(0.05 to 0.11)        | 0.12<br>(0.08 to 0.21)        |
| Congenital musculoskeletal and limb anomalies | 11.23<br>(8.33 to 14.39)            | 6.90<br>(4.67 to 9.87)              | 3.77<br>(2.52 to 5.43)              | 8.13<br>(5.45 to 11.51)             | 0.13<br>(0.10 to 0.17)        | 0.08<br>(0.06 to 0.12)        | 0.05<br>(0.03 to 0.06)        | 0.10<br>(0.07 to 0.14)        |
| Urogenital congenital anomalies               | 6.20<br>(4.52 to 10.32)             | 4.45<br>(3.06 to 7.58)              | 2.80<br>(1.91 to 4.80)              | 4.99<br>(3.45 to 8.44)              | 0.08<br>(0.06 to 0.13)        | 0.07<br>(0.05 to 0.11)        | 0.04<br>(0.03 to 0.07)        | 0.07<br>(0.05 to 0.12)        |
| Digestive congenital anomalies                | 43.28<br>(29.65 to 63.58)           | 27.28<br>(17.75 to 41.45)           | 13.87<br>(8.97 to 21.04)            | 32.62<br>(20.61 to 50.44)           | 0.51<br>(0.35 to 0.74)        | 0.32<br>(0.21 to 0.49)        | 0.16<br>(0.11 to 0.25)        | 0.38<br>(0.24 to 0.59)        |
| Other congenital birth defects                | 141.01<br>(108.56 to 179.97)        | 76.48<br>(53.25 to 107.99)          | 42.94<br>(30.05 to 61.61)           | 90.99<br>(64.10 to 127.50)          | 1.68<br>(1.29 to 2.13)        | 0.94<br>(0.66 to 1.31)        | 0.53<br>(0.38 to 0.75)        | 1.11<br>(0.79 to 1.54)        |
| Skin and subcutaneous diseases                | 3.63<br>(1.65 to 4.68)              | 7.35<br>(3.65 to 9.76)              | 6.62<br>(3.20 to 8.94)              | 7.30<br>(3.63 to 9.67)              | 0.10<br>(0.04 to 0.12)        | 0.28<br>(0.13 to 0.35)        | 0.27<br>(0.13 to 0.35)        | 0.26<br>(0.13 to 0.33)        |
| Cellulitis                                    | 1.16<br>(0.45 to 1.54)              | 2.64<br>(1.10 to 3.72)              | 2.61<br>(1.08 to 3.72)              | 2.58<br>(1.09 to 3.62)              | 0.03<br>(0.01 to 0.04)        | 0.09<br>(0.04 to 0.13)        | 0.10<br>(0.04 to 0.13)        | 0.09<br>(0.04 to 0.12)        |
| Pyoderma                                      | 1.92<br>(0.86 to 2.54)              | 3.93<br>(1.93 to 5.20)              | 3.32<br>(1.62 to 4.44)              | 3.95<br>(1.94 to 5.22)              | 0.05<br>(0.02 to 0.06)        | 0.15<br>(0.07 to 0.19)        | 0.14<br>(0.07 to 0.18)        | 0.14<br>(0.07 to 0.18)        |
| Decubitus ulcer                               | 0.28<br>(0.13 to 0.35)              | 0.40<br>(0.20 to 0.52)              | 0.33<br>(0.16 to 0.44)              | 0.39<br>(0.19 to 0.51)              | 0.01<br>(0.00 to 0.01)        | 0.02<br>(0.01 to 0.03)        | 0.02<br>(0.01 to 0.03)        | 0.02<br>(0.01 to 0.03)        |
| Other skin and subcutaneous diseases          | 0.27<br>(0.13 to 0.35)              | 0.39<br>(0.19 to 0.52)              | 0.35<br>(0.17 to 0.47)              | 0.38<br>(0.19 to 0.51)              | 0.01<br>(0.00 to 0.01)        | 0.01<br>(0.01 to 0.02)        | 0.01<br>(0.01 to 0.02)        | 0.01<br>(0.01 to 0.02)        |
| Sudden infant death syndrome                  | 25.20<br>(19.05 to 32.78)           | 12.68<br>(7.65 to 20.60)            | 7.88<br>(4.74 to 13.07)             | 14.95<br>(9.00 to 24.56)            | 0.29<br>(0.22 to 0.38)        | 0.15<br>(0.09 to 0.24)        | 0.09<br>(0.05 to 0.15)        | 0.17<br>(0.10 to 0.28)        |

|                          |                                       |                                       |                                       |                                       |                              |                              |                              |                              |
|--------------------------|---------------------------------------|---------------------------------------|---------------------------------------|---------------------------------------|------------------------------|------------------------------|------------------------------|------------------------------|
| Injuries                 | 2,354.27<br>(2,172.83 to<br>2,557.82) | 2,275.75<br>(1,608.77 to<br>3,403.42) | 1,574.64<br>(1,127.08 to<br>2,319.83) | 2,653.08<br>(1,852.37 to<br>4,077.85) | 46.44<br>(42.85 to<br>50.77) | 51.04<br>(37.18 to<br>73.04) | 36.63<br>(27.18 to<br>51.52) | 58.11<br>(41.70 to<br>85.14) |
| Transport injuries       | 641.78<br>(586.67 to<br>698.57)       | 635.37<br>(407.65 to<br>1,011.99)     | 333.77<br>(220.12 to<br>523.27)       | 843.40<br>(527.41 to<br>1,334.24)     | 12.85<br>(11.74 to<br>13.94) | 14.14<br>(9.16 to<br>22.27)  | 7.73<br>(5.22 to<br>11.78)   | 18.28<br>(11.66 to<br>28.98) |
| Road injuries            | 612.76<br>(559.74 to<br>667.36)       | 594.05<br>(382.83 to<br>941.71)       | 306.64<br>(202.71 to<br>476.86)       | 795.32<br>(500.22 to<br>1,263.00)     | 12.26<br>(11.19 to<br>13.32) | 13.22<br>(8.62 to<br>20.81)  | 7.13<br>(4.85 to<br>10.74)   | 17.23<br>(11.06 to<br>27.23) |
| Pedestrian road injuries | 190.17<br>(155.98 to<br>217.43)       | 165.51<br>(102.91 to<br>268.48)       | 81.63<br>(52.53 to<br>124.28)         | 216.87<br>(135.51 to<br>354.24)       | 3.90<br>(3.23 to<br>4.45)    | 3.99<br>(2.56 to<br>6.29)    | 2.04<br>(1.33 to<br>3.01)    | 5.10<br>(3.25 to<br>8.09)    |

| Central Asia                                    |                                                        |                                                      |                                                      |                                                        |                                                   |                                                   |                                                   |                                                   |
|-------------------------------------------------|--------------------------------------------------------|------------------------------------------------------|------------------------------------------------------|--------------------------------------------------------|---------------------------------------------------|---------------------------------------------------|---------------------------------------------------|---------------------------------------------------|
| Cause                                           | YLLs (in 1000s)                                        |                                                      |                                                      |                                                        | Deaths (in 1000s)                                 |                                                   |                                                   |                                                   |
|                                                 | 2016                                                   | 2040 Forecast                                        | 2040 Better Scenario                                 | 2040 Worse Scenario                                    | 2016                                              | 2040 Forecast                                     | 2040 Better Scenario                              | 2040 Worse Scenario                               |
| Cyclist road injuries                           | 11.94<br>(10.20 to<br>13.82)                           | 13.88<br>(8.24 to<br>24.01)                          | 7.92<br>(4.81 to<br>13.24)                           | 17.86<br>(10.51 to<br>31.73)                           | 0.25<br>(0.22 to<br>0.29)                         | 0.33<br>(0.19 to<br>0.56)                         | 0.20<br>(0.12 to<br>0.34)                         | 0.40<br>(0.24 to<br>0.71)                         |
| Motorcyclist road injuries                      | 56.99<br>(50.05 to<br>66.93)                           | 68.70<br>(39.69 to<br>118.70)                        | 45.50<br>(27.37 to<br>78.36)                         | 83.29<br>(47.58 to<br>147.30)                          | 1.07<br>(0.94 to<br>1.25)                         | 1.35<br>(0.79 to<br>2.34)                         | 0.93<br>(0.56 to<br>1.58)                         | 1.61<br>(0.93 to<br>2.83)                         |
| Motor vehicle road injuries                     | 347.62<br>(301.35 to<br>387.34)                        | 338.73<br>(214.22 to<br>548.46)                      | 167.70<br>(111.28 to<br>256.56)                      | 467.70<br>(292.63 to<br>761.47)                        | 6.91<br>(6.02 to<br>7.73)                         | 7.38<br>(4.84 to<br>11.61)                        | 3.86<br>(2.65 to<br>5.67)                         | 9.90<br>(6.28 to<br>15.65)                        |
| Other road injuries                             | 6.04<br>(4.82 to<br>7.16)                              | 7.23<br>(4.24 to<br>13.45)                           | 3.89<br>(2.33 to<br>6.75)                            | 9.59<br>(5.45 to<br>18.32)                             | 0.13<br>(0.10 to<br>0.15)                         | 0.17<br>(0.10 to<br>0.32)                         | 0.10<br>(0.06 to<br>0.17)                         | 0.22<br>(0.12 to<br>0.41)                         |
| Other transport injuries                        | 29.02<br>(25.78 to<br>32.89)                           | 41.32<br>(24.29 to<br>71.15)                         | 27.13<br>(16.06 to<br>46.29)                         | 48.09<br>(27.25 to<br>85.99)                           | 0.58<br>(0.52 to<br>0.66)                         | 0.91<br>(0.54 to<br>1.55)                         | 0.61<br>(0.37 to<br>0.98)                         | 1.04<br>(0.61 to<br>1.84)                         |
| <b>Unintentional injuries</b>                   | <b>946.28</b><br><b>(866.99 to</b><br><b>1,034.93)</b> | <b>736.82</b><br><b>(566.75 to</b><br><b>979.93)</b> | <b>554.21</b><br><b>(423.82 to</b><br><b>730.92)</b> | <b>796.11</b><br><b>(600.29 to</b><br><b>1,063.06)</b> | <b>17.89</b><br><b>(16.58 to</b><br><b>19.28)</b> | <b>16.91</b><br><b>(13.34 to</b><br><b>21.73)</b> | <b>13.39</b><br><b>(10.54 to</b><br><b>17.14)</b> | <b>17.73</b><br><b>(13.84 to</b><br><b>23.14)</b> |
| Falls                                           | 132.49<br>(116.49 to<br>163.47)                        | 135.33<br>(107.62 to<br>174.97)                      | 114.96<br>(90.11 to<br>149.66)                       | 138.95<br>(111.05 to<br>179.18)                        | 2.96<br>(2.65 to<br>3.53)                         | 3.76<br>(3.15 to<br>4.64)                         | 3.35<br>(2.77 to<br>4.15)                         | 3.71<br>(3.14 to<br>4.61)                         |
| Drowning                                        | 282.39<br>(254.69 to<br>319.30)                        | 212.58<br>(141.88 to<br>324.93)                      | 156.08<br>(103.88 to<br>237.26)                      | 233.73<br>(153.69 to<br>355.18)                        | 4.71<br>(4.30 to<br>5.22)                         | 4.10<br>(2.74 to<br>6.22)                         | 3.11<br>(2.07 to<br>4.73)                         | 4.44<br>(2.91 to<br>6.91)                         |
| Fire, heat, and hot substances                  | 127.89<br>(114.42 to<br>146.29)                        | 91.85<br>(63.75 to<br>134.29)                        | 61.96<br>(42.81 to<br>90.58)                         | 102.14<br>(69.53 to<br>150.05)                         | 2.50<br>(2.26 to<br>2.82)                         | 2.25<br>(1.56 to<br>3.29)                         | 1.59<br>(1.11 to<br>2.27)                         | 2.43<br>(1.66 to<br>3.57)                         |
| Poisonings                                      | 61.86<br>(51.51 to<br>75.84)                           | 30.73<br>(19.41 to<br>47.86)                         | 18.72<br>(11.88 to<br>29.02)                         | 35.87<br>(22.30 to<br>56.16)                           | 1.20<br>(0.97 to<br>1.44)                         | 0.69<br>(0.43 to<br>1.08)                         | 0.43<br>(0.28 to<br>0.66)                         | 0.79<br>(0.48 to<br>1.24)                         |
| Exposure to mechanical forces                   | 69.14<br>(53.44 to<br>80.74)                           | 49.29<br>(36.18 to<br>64.11)                         | 35.66<br>(26.04 to<br>47.03)                         | 53.58<br>(39.35 to<br>70.03)                           | 1.27<br>(1.01 to<br>1.45)                         | 1.05<br>(0.79 to<br>1.30)                         | 0.79<br>(0.60 to<br>1.00)                         | 1.10<br>(0.84 to<br>1.40)                         |
| Unintentional firearm injuries                  | 19.23<br>(16.61 to<br>22.46)                           | 13.02<br>(9.95 to<br>16.96)                          | 9.48<br>(7.12 to<br>12.40)                           | 13.82<br>(10.37 to<br>18.14)                           | 0.41<br>(0.35 to<br>0.48)                         | 0.34<br>(0.27 to<br>0.42)                         | 0.26<br>(0.20 to<br>0.32)                         | 0.35<br>(0.27 to<br>0.43)                         |
| Unintentional suffocation                       | 23.18<br>(13.28 to<br>31.24)                           | 15.15<br>(8.38 to<br>22.63)                          | 10.68<br>(5.95 to<br>16.12)                          | 17.12<br>(9.59 to<br>25.79)                            | 0.33<br>(0.20 to<br>0.43)                         | 0.23<br>(0.14 to<br>0.34)                         | 0.17<br>(0.10 to<br>0.25)                         | 0.26<br>(0.15 to<br>0.38)                         |
| Other exposure to mechanical forces             | 26.73<br>(20.51 to<br>31.58)                           | 21.12<br>(15.47 to<br>27.21)                         | 15.50<br>(11.18 to<br>20.40)                         | 22.64<br>(16.52 to<br>29.47)                           | 0.53<br>(0.40 to<br>0.63)                         | 0.48<br>(0.35 to<br>0.60)                         | 0.36<br>(0.27 to<br>0.46)                         | 0.50<br>(0.37 to<br>0.63)                         |
| Adverse effects of medical treatment            | 48.00<br>(34.49 to<br>56.20)                           | 39.93<br>(28.57 to<br>50.70)                         | 32.92<br>(23.15 to<br>42.68)                         | 41.79<br>(29.63 to<br>53.77)                           | 1.06<br>(0.78 to<br>1.23)                         | 1.17<br>(0.89 to<br>1.42)                         | 1.04<br>(0.78 to<br>1.28)                         | 1.17<br>(0.88 to<br>1.42)                         |
| Animal contact                                  | 8.85<br>(7.05 to<br>11.55)                             | 8.13<br>(5.93 to<br>10.95)                           | 5.77<br>(4.20 to<br>7.75)                            | 8.96<br>(6.63 to<br>12.04)                             | 0.16<br>(0.13 to<br>0.21)                         | 0.18<br>(0.13 to<br>0.24)                         | 0.14<br>(0.10 to<br>0.18)                         | 0.19<br>(0.14 to<br>0.26)                         |
| Venomous animal contact                         | 3.17<br>(2.16 to<br>4.34)                              | 2.90<br>(1.85 to<br>4.07)                            | 2.19<br>(1.39 to<br>3.19)                            | 3.15<br>(2.04 to<br>4.47)                              | 0.06<br>(0.04 to<br>0.08)                         | 0.06<br>(0.04 to<br>0.09)                         | 0.05<br>(0.03 to<br>0.07)                         | 0.07<br>(0.04 to<br>0.09)                         |
| Non-venomous animal contact                     | 5.68<br>(4.57 to<br>7.54)                              | 5.24<br>(3.84 to<br>7.24)                            | 3.58<br>(2.60 to<br>4.95)                            | 5.81<br>(4.25 to<br>8.07)                              | 0.10<br>(0.08 to<br>0.14)                         | 0.12<br>(0.09 to<br>0.16)                         | 0.09<br>(0.06 to<br>0.12)                         | 0.13<br>(0.09 to<br>0.17)                         |
| Foreign body                                    | 111.15<br>(93.80 to<br>128.94)                         | 81.07<br>(63.15 to<br>102.15)                        | 69.12<br>(54.25 to<br>87.22)                         | 85.07<br>(66.45 to<br>106.71)                          | 1.87<br>(1.58 to<br>2.12)                         | 1.68<br>(1.35 to<br>2.04)                         | 1.54<br>(1.23 to<br>1.89)                         | 1.70<br>(1.36 to<br>2.06)                         |
| Pulmonary aspiration and foreign body in airway | 86.13<br>(70.45 to<br>101.40)                          | 60.85<br>(45.03 to<br>79.06)                         | 50.16<br>(37.55 to<br>65.40)                         | 64.19<br>(47.72 to<br>83.14)                           | 1.39<br>(1.13 to<br>1.59)                         | 1.21<br>(0.93 to<br>1.50)                         | 1.07<br>(0.82 to<br>1.34)                         | 1.23<br>(0.94 to<br>1.53)                         |

|                                             |                                                      |                                                        |                                                        |                                                        |                                                   |                                                   |                                                  |                                                   |
|---------------------------------------------|------------------------------------------------------|--------------------------------------------------------|--------------------------------------------------------|--------------------------------------------------------|---------------------------------------------------|---------------------------------------------------|--------------------------------------------------|---------------------------------------------------|
|                                             | 25.02<br>(19.35 to<br>37.86)                         | 20.22<br>(15.06 to<br>30.13)                           | 18.96<br>(13.98 to<br>28.15)                           | 20.88<br>(15.52 to<br>31.30)                           | 0.48<br>(0.37 to<br>0.72)                         | 0.47<br>(0.35 to<br>0.68)                         | 0.47<br>(0.35 to<br>0.66)                        | 0.47<br>(0.35 to<br>0.69)                         |
| Foreign body in other body part             |                                                      |                                                        |                                                        |                                                        |                                                   |                                                   |                                                  |                                                   |
|                                             | 45.94<br>(30.45 to<br>60.24)                         | 46.25<br>(29.28 to<br>62.13)                           | 31.77<br>(19.76 to<br>44.05)                           | 50.32<br>(32.00 to<br>68.96)                           | 1.09<br>(0.72 to<br>1.44)                         | 1.23<br>(0.79 to<br>1.67)                         | 0.86<br>(0.55 to<br>1.20)                        | 1.31<br>(0.84 to<br>1.78)                         |
| Environmental heat and cold exposure        |                                                      |                                                        |                                                        |                                                        |                                                   |                                                   |                                                  |                                                   |
|                                             | 58.56<br>(52.04 to<br>64.35)                         | 41.65<br>(31.03 to<br>55.17)                           | 27.25<br>(18.97 to<br>38.80)                           | 45.70<br>(34.07 to<br>61.74)                           | 1.07<br>(0.96 to<br>1.18)                         | 0.82<br>(0.62 to<br>1.05)                         | 0.54<br>(0.39 to<br>0.76)                        | 0.89<br>(0.68 to<br>1.17)                         |
| Other unintentional injuries                |                                                      |                                                        |                                                        |                                                        |                                                   |                                                   |                                                  |                                                   |
| <b>Self-harm and interpersonal violence</b> | <b>765.03</b><br><b>(664.08 to</b><br><b>906.97)</b> | <b>886.25</b><br><b>(515.74 to</b><br><b>1,559.23)</b> | <b>670.38</b><br><b>(410.90 to</b><br><b>1,119.51)</b> | <b>996.23</b><br><b>(558.96 to</b><br><b>1,771.70)</b> | <b>15.68</b><br><b>(13.63 to</b><br><b>18.75)</b> | <b>19.62</b><br><b>(11.66 to</b><br><b>33.74)</b> | <b>15.13</b><br><b>(9.48 to</b><br><b>24.52)</b> | <b>21.74</b><br><b>(12.55 to</b><br><b>37.68)</b> |

| Central Asia                                                                        |                                      |                                         |                                         |                                         |                                      |                                      |                                      |                                      |
|-------------------------------------------------------------------------------------|--------------------------------------|-----------------------------------------|-----------------------------------------|-----------------------------------------|--------------------------------------|--------------------------------------|--------------------------------------|--------------------------------------|
| Cause                                                                               | YLLs (in 1000s)                      |                                         |                                         |                                         | Deaths (in 1000s)                    |                                      |                                      |                                      |
|                                                                                     | 2016                                 | 2040 Forecast                           | 2040 Better Scenario                    | 2040 Worse Scenario                     | 2016                                 | 2040 Forecast                        | 2040 Better Scenario                 | 2040 Worse Scenario                  |
| Self-harm                                                                           | 527.67<br>(418.09 to 616.84)         | 686.04<br>(361.32 to 1,305.53)          | 516.08<br>(289.37 to 947.27)            | 780.26<br>(395.65 to 1,534.80)          | 10.90<br>(8.76 to 12.68)             | 15.26<br>(8.41 to 28.07)             | 11.71<br>(6.76 to 20.72)             | 17.09<br>(9.08 to 32.29)             |
| Self-harm by firearm                                                                | 12.10<br>(9.21 to 15.53)             | 13.57<br>(7.25 to 26.44)                | 9.26<br>(5.31 to 17.33)                 | 15.58<br>(7.93 to 30.67)                | 0.27<br>(0.21 to 0.36)               | 0.34<br>(0.19 to 0.61)               | 0.24<br>(0.14 to 0.42)               | 0.38<br>(0.20 to 0.71)               |
| Self-harm by other specified means                                                  | 515.56<br>(401.55 to 603.45)         | 672.47<br>(353.99 to 1,285.29)          | 506.82<br>(283.88 to 923.03)            | 764.68<br>(386.93 to 1,488.86)          | 10.63<br>(8.49 to 12.37)             | 14.92<br>(8.20 to 27.54)             | 11.47<br>(6.61 to 20.05)             | 16.71<br>(8.87 to 31.58)             |
| Interpersonal violence                                                              | 237.36<br>(187.93 to 386.07)         | 200.21<br>(127.42 to 373.28)            | 154.30<br>(98.36 to 285.60)             | 215.97<br>(135.67 to 411.64)            | 4.78<br>(3.76 to 7.75)               | 4.36<br>(2.84 to 7.81)               | 3.42<br>(2.26 to 6.10)               | 4.65<br>(2.97 to 8.41)               |
| Physical violence by firearm                                                        | 32.30<br>(19.11 to 54.18)            | 24.15<br>(13.31 to 46.63)               | 18.96<br>(9.80 to 31.27)                | 26.01<br>(14.57 to 50.09)               | 0.61<br>(0.36 to 1.03)               | 0.47<br>(0.27 to 0.88)               | 0.34<br>(0.21 to 0.61)               | 0.50<br>(0.29 to 0.95)               |
| Physical violence by sharp object                                                   | 118.92<br>(91.71 to 205.86)          | 104.62<br>(68.72 to 200.67)             | 81.84<br>(53.91 to 153.61)              | 110.85<br>(71.94 to 219.06)             | 2.41<br>(1.87 to 4.10)               | 2.26<br>(1.50 to 4.16)               | 1.80<br>(1.21 to 3.21)               | 2.37<br>(1.57 to 4.50)               |
| Physical violence by other means                                                    | 86.14<br>(63.78 to 152.43)           | 71.44<br>(37.33 to 151.59)              | 55.49<br>(29.65 to 111.63)              | 79.11<br>(39.40 to 164.04)              | 1.77<br>(1.29 to 3.09)               | 1.63<br>(0.87 to 3.23)               | 1.29<br>(0.71 to 2.43)               | 1.78<br>(0.93 to 3.63)               |
| <b>Forces of nature, conflict and terrorism, and executions and police conflict</b> | <b>1.18</b><br><b>(0.97 to 1.45)</b> | <b>17.31</b><br><b>(0.00 to 296.48)</b> | <b>16.28</b><br><b>(0.00 to 296.86)</b> | <b>17.34</b><br><b>(0.00 to 298.61)</b> | <b>0.02</b><br><b>(0.02 to 0.03)</b> | <b>0.37</b><br><b>(0.00 to 7.27)</b> | <b>0.37</b><br><b>(0.00 to 6.85)</b> | <b>0.37</b><br><b>(0.00 to 7.20)</b> |
| Exposure to forces of nature                                                        | 0.00<br>(0.00 to 0.00)               | 8.93<br>(0.00 to 94.23)                 | 8.63<br>(0.00 to 84.38)                 | 8.95<br>(0.00 to 94.18)                 | 0.00<br>(0.00 to 0.00)               | 0.22<br>(0.00 to 1.85)               | 0.22<br>(0.00 to 1.77)               | 0.21<br>(0.00 to 1.81)               |
| Conflict and terrorism                                                              | 0.00<br>(0.00 to 0.00)               | 8.38<br>(0.00 to 68.19)                 | 7.65<br>(0.00 to 61.25)                 | 8.39<br>(0.00 to 68.35)                 | 0.00<br>(0.00 to 0.00)               | 0.15<br>(0.00 to 1.21)               | 0.15<br>(0.00 to 1.13)               | 0.15<br>(0.00 to 1.21)               |
| Executions and police conflict                                                      | 1.18<br>(0.97 to 1.45)               | 0.00<br>(0.00 to 0.00)                  | 0.00<br>(0.00 to 0.00)                  | 0.00<br>(0.00 to 0.00)                  | 0.02<br>(0.02 to 0.03)               | 0.00<br>(0.00 to 0.00)               | 0.00<br>(0.00 to 0.00)               | 0.00<br>(0.00 to 0.00)               |

| Armenia                                                           |                                             |                                             |                                             |                                             |                                          |                                          |                                          |                                          |
|-------------------------------------------------------------------|---------------------------------------------|---------------------------------------------|---------------------------------------------|---------------------------------------------|------------------------------------------|------------------------------------------|------------------------------------------|------------------------------------------|
| Cause                                                             | YLLs (actual counts)                        |                                             |                                             |                                             | Deaths (actual counts)                   |                                          |                                          |                                          |
|                                                                   | 2016                                        | 2040 Forecast                               | 2040 Better Scenario                        | 2040 Worse Scenario                         | 2016                                     | 2040 Forecast                            | 2040 Better Scenario                     | 2040 Worse Scenario                      |
| All causes                                                        | 533,844.30<br>(483,091.93 to<br>584,826.94) | 542,324.36<br>(413,684.05 to<br>711,288.00) | 359,147.97<br>(272,411.60 to<br>474,788.86) | 647,290.03<br>(494,600.84 to<br>845,696.63) | 27,220.49<br>(24,773.21 to<br>29,525.20) | 33,362.91<br>(27,032.05 to<br>40,803.15) | 23,528.43<br>(19,039.91 to<br>29,651.75) | 38,392.46<br>(31,808.26 to<br>46,162.83) |
| Communicable, maternal, neonatal, and nutritional diseases        | 40,382.01<br>(31,932.10 to<br>50,881.87)    | 17,139.09<br>(11,276.10 to<br>26,441.50)    | 10,134.59<br>(6,897.06 to<br>15,135.37)     | 22,059.12<br>(13,783.31 to<br>37,435.19)    | 788.48<br>(676.91 to<br>921.00)          | 595.13<br>(412.31 to<br>859.05)          | 384.25<br>(274.79 to<br>545.80)          | 693.88<br>(474.32 to<br>1,031.80)        |
| HIV/AIDS and tuberculosis                                         | 4,053.65<br>(3,584.30 to<br>4,659.52)       | 2,984.78<br>(1,962.52 to<br>4,615.55)       | 1,449.69<br>(1,111.37 to<br>1,957.37)       | 3,366.76<br>(2,172.65 to<br>5,449.02)       | 106.45<br>(93.78 to<br>123.77)           | 83.17<br>(51.69 to<br>131.95)            | 36.70<br>(26.88 to<br>51.73)             | 92.93<br>(57.14 to<br>153.46)            |
| Tuberculosis                                                      | 2,816.27<br>(2,367.32 to<br>3,416.96)       | 1,850.00<br>(825.22 to<br>3,520.05)         | 502.36<br>(222.15 to<br>973.02)             | 2,141.01<br>(981.03 to<br>4,277.49)         | 82.70<br>(70.15 to<br>99.99)             | 59.65<br>(28.57 to<br>108.53)            | 16.91<br>(8.09 to<br>31.66)              | 67.76<br>(31.75 to<br>129.20)            |
| HIV/AIDS                                                          | 1,237.38<br>(1,097.43 to<br>1,382.33)       | 1,134.79<br>(920.55 to<br>1,366.46)         | 947.34<br>(767.29 to<br>1,105.64)           | 1,225.75<br>(1,010.71 to<br>1,477.63)       | 23.75<br>(21.14 to<br>26.64)             | 23.52<br>(18.89 to<br>28.53)             | 19.79<br>(15.66 to<br>23.37)             | 25.16<br>(20.52 to<br>30.60)             |
| Diarrhea, lower respiratory, and other common infectious diseases | 18,764.23<br>(15,187.76 to<br>23,169.45)    | 9,600.73<br>(5,594.03 to<br>17,459.73)      | 5,817.84<br>(3,659.66 to<br>9,875.55)       | 13,083.28<br>(6,828.99 to<br>27,147.88)     | 463.62<br>(408.43 to<br>531.16)          | 447.86<br>(290.35 to<br>693.29)          | 304.44<br>(207.65 to<br>455.29)          | 524.87<br>(326.65 to<br>845.43)          |
| Diarrheal diseases                                                | 915.01<br>(637.36 to<br>1,325.05)           | 244.50<br>(56.63 to<br>883.97)              | 425.08<br>(110.39 to<br>1,486.94)           | 429.19<br>(74.58 to<br>1,818.22)            | 15.23<br>(11.88 to<br>20.19)             | 8.19<br>(2.24 to<br>26.39)               | 16.88<br>(4.92 to<br>53.54)              | 12.04<br>(2.63 to<br>44.92)              |
| Intestinal infectious diseases                                    | 4.49<br>(2.38 to<br>7.86)                   | 2.53<br>(1.25 to<br>4.59)                   | 3.49<br>(1.74 to<br>6.38)                   | 2.54<br>(1.26 to<br>4.55)                   | 0.11<br>(0.06 to<br>0.20)                | 0.08<br>(0.04 to<br>0.14)                | 0.11<br>(0.00 to<br>0.20)                | 0.08<br>(0.04 to<br>0.14)                |
| Typhoid fever                                                     | 3.62<br>(1.83 to<br>6.52)                   | 2.11<br>(1.01 to<br>3.87)                   | 3.20<br>(1.57 to<br>5.86)                   | 2.11<br>(1.02 to<br>3.87)                   | 0.09<br>(0.04 to<br>0.16)                | 0.06<br>(0.05 to<br>0.12)                | 0.10<br>(0.05 to<br>0.18)                | 0.06<br>(0.03 to<br>0.11)                |
| Paratyphoid fever                                                 | 0.62<br>(0.25 to<br>1.28)                   | 0.32<br>(0.12 to<br>0.68)                   | 0.21<br>(0.07 to<br>0.44)                   | 0.33<br>(0.12 to<br>0.70)                   | 0.02<br>(0.01 to<br>0.05)                | 0.01<br>(0.00 to<br>0.02)                | 0.01<br>(0.00 to<br>0.02)                | 0.01<br>(0.00 to<br>0.02)                |
| Other intestinal infectious diseases                              | 0.25<br>(0.09 to<br>0.52)                   | 0.10<br>(0.04 to<br>0.23)                   | 0.09<br>(0.03 to<br>0.20)                   | 0.10<br>(0.04 to<br>0.23)                   | 0.01<br>(0.00 to<br>0.02)                | 0.01<br>(0.00 to<br>0.01)                | 0.01<br>(0.00 to<br>0.01)                | 0.01<br>(0.00 to<br>0.01)                |
| Lower respiratory infections                                      | 16,649.12<br>(13,352.96 to<br>20,631.58)    | 8,682.59<br>(4,817.39 to<br>16,408.04)      | 4,891.94<br>(2,919.07 to<br>8,674.48)       | 11,810.03<br>(5,833.32 to<br>25,660.18)     | 424.25<br>(371.88 to<br>485.25)          | 422.03<br>(268.36 to<br>666.55)          | 273.94<br>(180.34 to<br>419.22)          | 493.44<br>(299.90 to<br>803.78)          |
| Upper respiratory infections                                      | 18.26<br>(9.51 to<br>30.53)                 | 15.79<br>(6.34 to<br>30.93)                 | 6.87<br>(2.70 to<br>14.56)                  | 16.43<br>(6.79 to<br>32.36)                 | 0.61<br>(0.31 to<br>1.01)                | 0.79<br>(0.29 to<br>1.61)                | 0.37<br>(0.13 to<br>0.84)                | 0.79<br>(0.30 to<br>1.61)                |
| Otitis media                                                      | 0.80<br>(0.60 to<br>1.06)                   | 0.33<br>(0.17 to<br>0.63)                   | 0.36<br>(0.19 to<br>0.71)                   | 0.31<br>(0.16 to<br>0.60)                   | 0.03<br>(0.02 to<br>0.04)                | 0.02<br>(0.01 to<br>0.04)                | 0.02<br>(0.01 to<br>0.05)                | 0.02<br>(0.01 to<br>0.04)                |
| Meningitis                                                        | 488.11<br>(414.41 to<br>580.38)             | 255.09<br>(181.08 to<br>354.56)             | 154.08<br>(105.71 to<br>221.13)             | 270.16<br>(197.39 to<br>375.13)             | 10.82<br>(9.27 to<br>13.01)              | 7.57<br>(5.81 to<br>9.92)                | 4.80<br>(3.57 to<br>6.59)                | 7.61<br>(5.95 to<br>9.81)                |
| Pneumococcal meningitis                                           | 2.03<br>(1.59 to<br>2.56)                   | 0.98<br>(0.68 to<br>1.44)                   | 1.02<br>(0.70 to<br>1.49)                   | 1.03<br>(0.71 to<br>1.51)                   | 0.05<br>(0.04 to<br>0.07)                | 0.03<br>(0.02 to<br>0.04)                | 0.04<br>(0.03 to<br>0.05)                | 0.03<br>(0.02 to<br>0.04)                |
| H influenzae type B meningitis                                    | 60.14<br>(47.80 to<br>76.38)                | 30.19<br>(19.89 to<br>46.51)                | 28.92<br>(20.11 to<br>42.42)                | 38.33<br>(22.52 to<br>67.61)                | 1.28<br>(1.05 to<br>1.59)                | 0.82<br>(0.60 to<br>1.12)                | 0.85<br>(0.65 to<br>1.15)                | 0.88<br>(0.62 to<br>1.27)                |
| Meningococcal meningitis                                          | 210.91<br>(176.02 to<br>253.58)             | 101.94<br>(70.46 to<br>144.04)              | 58.02<br>(38.25 to<br>86.74)                | 105.39<br>(75.72 to<br>149.03)              | 4.52<br>(3.85 to<br>5.52)                | 2.98<br>(2.21 to<br>3.93)                | 1.78<br>(1.25 to<br>2.51)                | 2.97<br>(2.27 to<br>3.85)                |
| Other meningitis                                                  | 215.03<br>(181.08 to<br>259.78)             | 121.98<br>(86.50 to<br>176.87)              | 66.12<br>(43.24 to<br>101.45)               | 125.41<br>(89.03 to<br>180.70)              | 4.97<br>(4.20 to<br>6.01)                | 3.75<br>(2.85 to<br>5.01)                | 2.13<br>(1.49 to<br>3.05)                | 3.72<br>(2.83 to<br>4.90)                |
| Encephalitis                                                      | 666.33<br>(477.59 to<br>888.06)             | 298.48<br>(175.41 to<br>421.27)             | 271.02<br>(161.70 to<br>374.27)             | 312.41<br>(183.14 to<br>435.45)             | 12.08<br>(8.16 to<br>14.79)              | 7.62<br>(4.35 to<br>10.32)               | 7.26<br>(4.24 to<br>9.74)                | 7.68<br>(4.40 to<br>10.39)               |

|                |                            |                              |                              |                                 |                           |                            |                           |                            |
|----------------|----------------------------|------------------------------|------------------------------|---------------------------------|---------------------------|----------------------------|---------------------------|----------------------------|
| Diphtheria     | 1.92<br>(1.13 to<br>3.10)  | 0.34<br>(0.18 to<br>0.61)    | 0.30<br>(0.15 to<br>0.52)    | 0.64<br>(0.25 to<br>1.56)       | 0.03<br>(0.02 to<br>0.05) | 0.01<br>(0.00 to<br>0.01)  | 0.01<br>(0.00 to<br>0.01) | 0.01<br>(0.00 to<br>0.02)  |
| Whooping cough | 6.55<br>(0.75 to<br>14.73) | 1.59<br>(0.12 to<br>4.63)    | 1.09<br>(0.08 to<br>3.41)    | 4.56<br>(0.31 to<br>15.08)      | 0.11<br>(0.01 to<br>0.24) | 0.04<br>(0.00 to<br>0.11)  | 0.03<br>(0.00 to<br>0.10) | 0.07<br>(0.00 to<br>0.21)  |
| Tetanus        | 2.21<br>(1.70 to<br>3.01)  | 0.30<br>(0.19 to<br>0.49)    | 0.32<br>(0.20 to<br>0.50)    | 0.34<br>(0.22 to<br>0.54)       | 0.07<br>(0.05 to<br>0.09) | 0.01<br>(0.01 to<br>0.02)  | 0.01<br>(0.01 to<br>0.02) | 0.01<br>(0.01 to<br>0.02)  |
| Measles        | 2.12<br>(1.39 to<br>3.31)  | 95.00<br>(0.09 to<br>781.28) | 60.54<br>(0.09 to<br>477.42) | 232.20<br>(0.11 to<br>2,231.83) | 0.03<br>(0.02 to<br>0.04) | 1.31<br>(0.00 to<br>11.09) | 0.86<br>(0.00 to<br>6.39) | 2.94<br>(0.00 to<br>27.42) |

| Armenia                                               |                                                      |                                                     |                                                     |                                                      |                                                |                                                |                                                |                                                |
|-------------------------------------------------------|------------------------------------------------------|-----------------------------------------------------|-----------------------------------------------------|------------------------------------------------------|------------------------------------------------|------------------------------------------------|------------------------------------------------|------------------------------------------------|
| Cause                                                 | YLLs (actual counts)                                 |                                                     |                                                     |                                                      | Deaths (actual counts)                         |                                                |                                                |                                                |
|                                                       | 2016                                                 | 2040 Forecast                                       | 2040 Better Scenario                                | 2040 Worse Scenario                                  | 2016                                           | 2040 Forecast                                  | 2040 Better Scenario                           | 2040 Worse Scenario                            |
| Varicella and herpes zoster                           | 9.32<br>(3.05 to<br>13.99)                           | 4.18<br>(1.14 to<br>8.57)                           | 2.74<br>(0.77 to<br>5.41)                           | 4.46<br>(1.12 to<br>9.22)                            | 0.25<br>(0.10 to<br>0.36)                      | 0.18<br>(0.08 to<br>0.32)                      | 0.14<br>(0.06 to<br>0.24)                      | 0.18<br>(0.07 to<br>0.31)                      |
| <b>Neglected tropical diseases and malaria</b>        | <b>168.01</b><br><b>(105.02 to</b><br><b>245.62)</b> | <b>16.48</b><br><b>(6.74 to</b><br><b>95.19)</b>    | <b>14.10</b><br><b>(5.84 to</b><br><b>80.54)</b>    | <b>17.19</b><br><b>(7.16 to</b><br><b>96.88)</b>     | <b>5.15</b><br><b>(3.21 to</b><br><b>7.63)</b> | <b>0.50</b><br><b>(0.17 to</b><br><b>3.54)</b> | <b>0.44</b><br><b>(0.15 to</b><br><b>3.11)</b> | <b>0.50</b><br><b>(0.17 to</b><br><b>3.59)</b> |
| Malaria                                               | 0.00<br>(0.00 to<br>0.00)                            | 0.00<br>(0.00 to<br>0.00)                           | 0.00<br>(0.00 to<br>0.00)                           | 0.00<br>(0.00 to<br>0.00)                            | 0.00<br>(0.00 to<br>0.00)                      | 0.00<br>(0.00 to<br>0.00)                      | 0.00<br>(0.00 to<br>0.00)                      | 0.00<br>(0.00 to<br>0.00)                      |
| Chagas disease                                        | 0.00<br>(0.00 to<br>0.00)                            | 0.00<br>(0.00 to<br>0.00)                           | 0.00<br>(0.00 to<br>0.00)                           | 0.00<br>(0.00 to<br>0.00)                            | 0.00<br>(0.00 to<br>0.00)                      | 0.00<br>(0.00 to<br>0.00)                      | 0.00<br>(0.00 to<br>0.00)                      | 0.00<br>(0.00 to<br>0.00)                      |
| Leishmaniasis                                         | 146.51<br>(85.02 to<br>223.52)                       | 10.62<br>(2.13 to<br>85.07)                         | 8.59<br>(1.67 to<br>68.32)                          | 10.92<br>(2.24 to<br>85.91)                          | 4.71<br>(2.82 to<br>7.15)                      | 0.37<br>(0.06 to<br>3.31)                      | 0.31<br>(0.05 to<br>2.79)                      | 0.37<br>(0.06 to<br>3.28)                      |
| African trypanosomiasis                               | 0.00<br>(0.00 to<br>0.00)                            | 0.00<br>(0.00 to<br>0.00)                           | 0.00<br>(0.00 to<br>0.00)                           | 0.00<br>(0.00 to<br>0.00)                            | 0.00<br>(0.00 to<br>0.00)                      | 0.00<br>(0.00 to<br>0.00)                      | 0.00<br>(0.00 to<br>0.00)                      | 0.00<br>(0.00 to<br>0.00)                      |
| Schistosomiasis                                       | 0.00<br>(0.00 to<br>0.00)                            | 0.00<br>(0.00 to<br>0.00)                           | 0.00<br>(0.00 to<br>0.00)                           | 0.00<br>(0.00 to<br>0.00)                            | 0.00<br>(0.00 to<br>0.00)                      | 0.00<br>(0.00 to<br>0.00)                      | 0.00<br>(0.00 to<br>0.00)                      | 0.00<br>(0.00 to<br>0.00)                      |
| Cysticercosis                                         | 2.12<br>(1.64 to<br>2.66)                            | 0.28<br>(0.14 to<br>0.69)                           | 0.24<br>(0.11 to<br>0.71)                           | 0.28<br>(0.13 to<br>0.68)                            | 0.07<br>(0.05 to<br>0.08)                      | 0.01<br>(0.00 to<br>0.03)                      | 0.01<br>(0.00 to<br>0.03)                      | 0.01<br>(0.00 to<br>0.02)                      |
| Cystic echinococcosis                                 | 0.00<br>(0.00 to<br>0.00)                            | 0.00<br>(0.00 to<br>0.00)                           | 0.00<br>(0.00 to<br>0.00)                           | 0.00<br>(0.00 to<br>0.00)                            | 0.00<br>(0.00 to<br>0.00)                      | 0.00<br>(0.00 to<br>0.00)                      | 0.00<br>(0.00 to<br>0.00)                      | 0.00<br>(0.00 to<br>0.00)                      |
| Dengue                                                | 0.00<br>(0.00 to<br>0.00)                            | 0.00<br>(0.00 to<br>0.00)                           | 0.00<br>(0.00 to<br>0.00)                           | 0.00<br>(0.00 to<br>0.00)                            | 0.00<br>(0.00 to<br>0.00)                      | 0.00<br>(0.00 to<br>0.00)                      | 0.00<br>(0.00 to<br>0.00)                      | 0.00<br>(0.00 to<br>0.00)                      |
| Yellow fever                                          | 0.00<br>(0.00 to<br>0.00)                            | 0.00<br>(0.00 to<br>0.00)                           | 0.00<br>(0.00 to<br>0.00)                           | 0.00<br>(0.00 to<br>0.00)                            | 0.00<br>(0.00 to<br>0.00)                      | 0.00<br>(0.00 to<br>0.00)                      | 0.00<br>(0.00 to<br>0.00)                      | 0.00<br>(0.00 to<br>0.00)                      |
| Rabies                                                | 0.40<br>(0.30 to<br>0.55)                            | 0.07<br>(0.04 to<br>0.14)                           | 0.05<br>(0.02 to<br>0.10)                           | 0.08<br>(0.04 to<br>0.16)                            | 0.01<br>(0.01 to<br>0.01)                      | 0.00<br>(0.00 to<br>0.00)                      | 0.00<br>(0.00 to<br>0.00)                      | 0.00<br>(0.00 to<br>0.00)                      |
| Intestinal nematode infections                        | 1.27<br>(0.40 to<br>2.90)                            | 0.46<br>(0.11 to<br>1.16)                           | 0.42<br>(0.11 to<br>1.10)                           | 0.49<br>(0.12 to<br>1.27)                            | 0.03<br>(0.01 to<br>0.05)                      | 0.01<br>(0.00 to<br>0.03)                      | 0.01<br>(0.01 to<br>0.04)                      | 0.01<br>(0.00 to<br>0.03)                      |
| Other neglected tropical diseases                     | 17.71<br>(14.90 to<br>21.73)                         | 5.05<br>(3.05 to<br>9.77)                           | 4.80<br>(2.92 to<br>10.54)                          | 5.42<br>(3.27 to<br>10.43)                           | 0.34<br>(0.29 to<br>0.39)                      | 0.11<br>(0.06 to<br>0.25)                      | 0.10<br>(0.06 to<br>0.26)                      | 0.11<br>(0.07 to<br>0.23)                      |
| <b>Maternal disorders</b>                             | <b>448.21</b><br><b>(359.73 to</b><br><b>560.46)</b> | <b>176.79</b><br><b>(97.48 to</b><br><b>286.24)</b> | <b>117.72</b><br><b>(64.39 to</b><br><b>192.14)</b> | <b>191.60</b><br><b>(105.02 to</b><br><b>315.21)</b> | <b>8.06</b><br><b>(6.49 to</b><br><b>9.98)</b> | <b>3.26</b><br><b>(1.80 to</b><br><b>5.16)</b> | <b>2.17</b><br><b>(1.22 to</b><br><b>3.47)</b> | <b>3.52</b><br><b>(2.00 to</b><br><b>5.70)</b> |
| Maternal hemorrhage                                   | 175.28<br>(129.52 to<br>226.84)                      | 65.42<br>(32.37 to<br>118.50)                       | 44.06<br>(22.20 to<br>79.50)                        | 70.41<br>(35.36 to<br>126.20)                        | 3.20<br>(2.40 to<br>4.11)                      | 1.22<br>(0.61 to<br>2.16)                      | 0.82<br>(0.42 to<br>1.46)                      | 1.31<br>(0.67 to<br>2.29)                      |
| Maternal sepsis and other maternal infections         | 6.35<br>(3.16 to<br>11.15)                           | 1.89<br>(0.76 to<br>3.85)                           | 1.24<br>(0.49 to<br>2.47)                           | 2.03<br>(0.81 to<br>4.18)                            | 0.11<br>(0.06 to<br>0.19)                      | 0.03<br>(0.01 to<br>0.07)                      | 0.02<br>(0.01 to<br>0.05)                      | 0.04<br>(0.02 to<br>0.08)                      |
| Maternal hypertensive disorders                       | 54.89<br>(37.64 to<br>76.36)                         | 21.28<br>(9.15 to<br>41.51)                         | 13.78<br>(6.05 to<br>26.81)                         | 23.05<br>(10.06 to<br>45.42)                         | 0.95<br>(0.65 to<br>1.31)                      | 0.37<br>(0.17 to<br>0.71)                      | 0.24<br>(0.11 to<br>0.45)                      | 0.40<br>(0.18 to<br>0.77)                      |
| Maternal obstructed labor and uterine rupture         | 3.68<br>(1.54 to<br>7.28)                            | 1.64<br>(0.56 to<br>3.55)                           | 1.00<br>(0.34 to<br>2.18)                           | 1.78<br>(0.58 to<br>3.90)                            | 0.07<br>(0.03 to<br>0.13)                      | 0.03<br>(0.01 to<br>0.07)                      | 0.02<br>(0.01 to<br>0.04)                      | 0.03<br>(0.01 to<br>0.07)                      |
| Maternal abortion, miscarriage, and ectopic pregnancy | 72.51<br>(51.06 to<br>100.36)                        | 36.92<br>(18.31 to<br>68.97)                        | 24.26<br>(11.53 to<br>44.45)                        | 40.31<br>(20.14 to<br>74.28)                         | 1.35<br>(0.97 to<br>1.86)                      | 0.72<br>(0.36 to<br>1.32)                      | 0.47<br>(0.23 to<br>0.85)                      | 0.78<br>(0.39 to<br>1.44)                      |



|                                        |                              |                              |                             |                              |                           |                           |                           |                           |
|----------------------------------------|------------------------------|------------------------------|-----------------------------|------------------------------|---------------------------|---------------------------|---------------------------|---------------------------|
|                                        | 61.15<br>(40.51 to<br>88.60) | 23.30<br>(10.12 to<br>44.92) | 14.89<br>(6.34 to<br>28.05) | 25.51<br>(10.94 to<br>48.97) | 1.04<br>(0.70 to<br>1.50) | 0.40<br>(0.18 to<br>0.76) | 0.26<br>(0.11 to<br>0.47) | 0.44<br>(0.19 to<br>0.83) |
| Indirect maternal deaths               |                              |                              |                             |                              |                           |                           |                           |                           |
|                                        | 3.70<br>(1.53 to<br>7.28)    | 1.40<br>(0.48 to<br>3.24)    | 0.90<br>(0.31 to<br>2.14)   | 1.53<br>(0.52 to<br>3.66)    | 0.07<br>(0.03 to<br>0.13) | 0.03<br>(0.01 to<br>0.06) | 0.02<br>(0.01 to<br>0.04) | 0.03<br>(0.01 to<br>0.06) |
| Late maternal deaths                   |                              |                              |                             |                              |                           |                           |                           |                           |
|                                        | 0.07<br>(0.03 to<br>0.13)    | 0.05<br>(0.01 to<br>0.19)    | 0.04<br>(0.01 to<br>0.13)   | 0.06<br>(0.01 to<br>0.20)    | 0.00<br>(0.00 to<br>0.00) | 0.00<br>(0.00 to<br>0.00) | 0.00<br>(0.00 to<br>0.00) | 0.00<br>(0.00 to<br>0.00) |
| Maternal deaths aggravated by HIV/AIDS |                              |                              |                             |                              |                           |                           |                           |                           |
|                                        | 70.58<br>(48.82 to<br>97.86) | 24.89<br>(12.37 to<br>44.72) | 17.55<br>(8.89 to<br>31.18) | 26.92<br>(12.69 to<br>49.61) | 1.27<br>(0.89 to<br>1.76) | 0.46<br>(0.24 to<br>0.80) | 0.32<br>(0.17 to<br>0.57) | 0.49<br>(0.24 to<br>0.90) |
| Other maternal disorders               |                              |                              |                             |                              |                           |                           |                           |                           |

| Armenia                                                                 |                                              |                                           |                                           |                                           |                                     |                                  |                                  |                                   |
|-------------------------------------------------------------------------|----------------------------------------------|-------------------------------------------|-------------------------------------------|-------------------------------------------|-------------------------------------|----------------------------------|----------------------------------|-----------------------------------|
| Cause                                                                   | YLLs (actual counts)                         |                                           |                                           |                                           | Deaths (actual counts)              |                                  |                                  |                                   |
|                                                                         | 2016                                         | 2040 Forecast                             | 2040 Better Scenario                      | 2040 Worse Scenario                       | 2016                                | 2040 Forecast                    | 2040 Better Scenario             | 2040 Worse Scenario               |
| <b>Neonatal disorders</b>                                               | <b>16,000.67</b><br>(11,066.32 to 22,133.20) | <b>3,847.77</b><br>(1,880.05 to 7,126.99) | <b>2,323.23</b><br>(1,150.28 to 4,291.44) | <b>4,866.44</b><br>(2,355.75 to 8,797.37) | <b>184.91</b><br>(127.89 to 255.77) | <b>44.48</b><br>(21.76 to 82.40) | <b>26.86</b><br>(13.31 to 49.59) | <b>56.25</b><br>(27.23 to 101.68) |
| Neonatal preterm birth                                                  | 8,009.69<br>(5,386.32 to 11,391.07)          | 1,469.27<br>(713.68 to 2,726.38)          | 717.62<br>(343.77 to 1,368.87)            | 1,966.03<br>(956.16 to 3,581.86)          | 92.54<br>(62.22 to 131.61)          | 16.98<br>(8.25 to 31.49)         | 8.29<br>(3.97 to 15.82)          | 22.72<br>(11.05 to 41.38)         |
| Neonatal encephalopathy due to birth asphyxia and trauma                | 732.28<br>(485.14 to 1,050.04)               | 174.71<br>(68.58 to 400.09)               | 93.43<br>(37.23 to 209.04)                | 214.72<br>(84.26 to 494.49)               | 8.46<br>(5.61 to 12.14)             | 2.02<br>(0.79 to 4.62)           | 1.08<br>(0.43 to 2.42)           | 2.48<br>(0.98 to 5.71)            |
| Neonatal sepsis and other neonatal infections                           | 4,492.80<br>(2,695.20 to 6,608.84)           | 1,456.25<br>(681.07 to 2,595.19)          | 895.00<br>(418.30 to 1,609.79)            | 1,773.55<br>(836.89 to 3,215.91)          | 51.93<br>(31.17 to 76.39)           | 16.84<br>(7.88 to 29.99)         | 10.35<br>(4.84 to 18.60)         | 20.50<br>(9.67 to 37.18)          |
| Hemolytic disease and other neonatal jaundice                           | 127.96<br>(77.14 to 198.66)                  | 34.92<br>(11.88 to 89.65)                 | 20.32<br>(6.86 to 49.69)                  | 43.31<br>(14.85 to 110.29)                | 1.48<br>(0.89 to 2.30)              | 0.40<br>(0.14 to 1.04)           | 0.23<br>(0.08 to 0.57)           | 0.50<br>(0.17 to 1.27)            |
| Other neonatal disorders                                                | 2,637.94<br>(1,739.57 to 3,833.14)           | 712.61<br>(273.33 to 1,666.67)            | 596.86<br>(236.65 to 1,310.55)            | 869.03<br>(333.06 to 2,072.94)            | 30.49<br>(20.11 to 44.30)           | 8.24<br>(3.16 to 19.26)          | 6.90<br>(2.74 to 15.14)          | 10.05<br>(3.86 to 23.95)          |
| <b>Nutritional deficiencies</b>                                         | <b>147.69</b><br>(127.61 to 169.07)          | <b>173.86</b><br>(121.09 to 250.00)       | <b>160.10</b><br>(111.21 to 231.75)       | <b>176.71</b><br>(123.12 to 255.50)       | <b>4.07</b><br>(3.55 to 4.60)       | <b>5.56</b><br>(4.19 to 7.19)    | <b>5.29</b><br>(4.05 to 6.82)    | <b>5.48</b><br>(4.14 to 7.11)     |
| Protein-energy malnutrition                                             | 44.58<br>(36.32 to 54.36)                    | 35.81<br>(22.10 to 55.43)                 | 41.08<br>(25.59 to 64.05)                 | 36.18<br>(22.24 to 56.70)                 | 1.25<br>(0.89 to 1.52)              | 1.26<br>(0.71 to 1.81)           | 1.55<br>(0.90 to 2.23)           | 1.21<br>(0.70 to 1.74)            |
| Iodine deficiency                                                       | 8.22<br>(1.06 to 20.36)                      | 10.02<br>(0.57 to 29.12)                  | 8.24<br>(0.37 to 25.28)                   | 10.23<br>(0.57 to 29.53)                  | 0.24<br>(0.03 to 0.54)              | 0.37<br>(0.02 to 1.01)           | 0.32<br>(0.02 to 0.88)           | 0.37<br>(0.02 to 0.99)            |
| Dietary iron deficiency                                                 | 38.23<br>(31.67 to 45.35)                    | 49.04<br>(30.76 to 74.74)                 | 51.54<br>(32.81 to 80.44)                 | 49.91<br>(31.06 to 77.62)                 | 0.85<br>(0.70 to 1.01)              | 0.85<br>(0.75 to 1.01)           | 1.24<br>(0.81 to 1.80)           | 1.16<br>(0.76 to 1.68)            |
| Other nutritional deficiencies                                          | 56.65<br>(47.04 to 66.69)                    | 79.00<br>(51.62 to 115.37)                | 59.24<br>(38.99 to 86.75)                 | 80.39<br>(53.95 to 116.48)                | 1.73<br>(1.43 to 2.12)              | 2.78<br>(1.92 to 3.81)           | 2.18<br>(1.46 to 3.07)           | 2.74<br>(1.92 to 3.74)            |
| <b>Other communicable, maternal, neonatal, and nutritional diseases</b> | <b>799.55</b><br>(503.54 to 1,694.93)        | <b>338.68</b><br>(226.27 to 583.33)       | <b>251.91</b><br>(171.04 to 423.75)       | <b>357.15</b><br>(241.61 to 655.07)       | <b>16.23</b><br>(11.87 to 27.00)    | <b>10.30</b><br>(7.84 to 13.88)  | <b>8.36</b><br>(6.39 to 10.86)   | <b>10.33</b><br>(7.89 to 14.35)   |
| Sexually transmitted infections excluding HIV                           | 56.61<br>(44.71 to 74.58)                    | 42.38<br>(28.80 to 62.57)                 | 35.55<br>(24.05 to 51.95)                 | 42.56<br>(28.96 to 64.81)                 | 2.07<br>(1.68 to 2.67)              | 1.89<br>(1.32 to 2.72)           | 1.66<br>(1.16 to 2.33)           | 1.85<br>(1.30 to 2.69)            |
| Syphilis                                                                | 17.08<br>(11.52 to 31.34)                    | 12.26<br>(7.63 to 25.40)                  | 8.62<br>(5.13 to 16.53)                   | 12.45<br>(7.78 to 25.40)                  | 0.57<br>(0.44 to 0.97)              | 0.54<br>(0.34 to 1.05)           | 0.41<br>(0.25 to 0.72)           | 0.53<br>(0.33 to 0.98)            |
| Chlamydial infection                                                    | 7.55<br>(6.11 to 9.58)                       | 5.62<br>(3.49 to 8.41)                    | 5.06<br>(3.19 to 7.55)                    | 5.61<br>(3.60 to 8.47)                    | 0.29<br>(0.24 to 0.35)              | 0.26<br>(0.17 to 0.37)           | 0.24<br>(0.16 to 0.35)           | 0.25<br>(0.17 to 0.36)            |
| Gonococcal infection                                                    | 21.67<br>(17.52 to 27.42)                    | 17.07<br>(10.79 to 25.74)                 | 15.31<br>(9.68 to 22.95)                  | 17.04<br>(10.98 to 25.58)                 | 0.85<br>(0.70 to 1.05)              | 0.79<br>(0.51 to 1.17)           | 0.74<br>(0.48 to 1.11)           | 0.77<br>(0.50 to 1.16)            |
| Other sexually transmitted infections                                   | 10.30<br>(8.24 to 13.28)                     | 7.43<br>(4.79 to 11.09)                   | 6.56<br>(4.26 to 9.97)                    | 7.46<br>(4.79 to 11.28)                   | 0.36<br>(0.29 to 0.45)              | 0.30<br>(0.20 to 0.42)           | 0.27<br>(0.18 to 0.38)           | 0.29<br>(0.20 to 0.42)            |
| Acute hepatitis                                                         | 267.24<br>(226.45 to 316.55)                 | 130.34<br>(88.23 to 188.05)               | 74.56<br>(47.61 to 113.23)                | 135.24<br>(93.81 to 191.57)               | 6.27<br>(5.34 to 7.39)              | 3.79<br>(2.70 to 5.30)           | 2.23<br>(1.50 to 3.18)           | 3.85<br>(2.80 to 5.27)            |
| Acute hepatitis A                                                       | 27.81<br>(15.09 to 46.14)                    | 6.13<br>(2.62 to 13.01)                   | 3.83<br>(1.70 to 8.26)                    | 6.75<br>(2.91 to 14.09)                   | 0.37<br>(0.22 to 0.59)              | 0.11<br>(0.06 to 0.19)           | 0.07<br>(0.03 to 0.13)           | 0.12<br>(0.06 to 0.21)            |
| Acute hepatitis B                                                       | 200.89<br>(166.27 to 245.05)                 | 108.23<br>(70.03 to 162.18)               | 61.36<br>(37.46 to 94.96)                 | 111.83<br>(74.41 to 163.39)               | 5.06<br>(4.22 to 6.10)              | 3.16<br>(2.12 to 4.56)           | 1.83<br>(1.16 to 2.71)           | 3.22<br>(2.24 to 4.52)            |

|                                       |                                                                  |                                                                  |                                                                  |                                                                  |                                                               |                                                               |                                                               |                                                               |
|---------------------------------------|------------------------------------------------------------------|------------------------------------------------------------------|------------------------------------------------------------------|------------------------------------------------------------------|---------------------------------------------------------------|---------------------------------------------------------------|---------------------------------------------------------------|---------------------------------------------------------------|
|                                       | 7.93<br>(5.68 to<br>10.74)                                       | 4.74<br>(2.88 to<br>7.57)                                        | 2.80<br>(1.64 to<br>4.85)                                        | 4.86<br>(3.03 to<br>7.66)                                        | 0.20<br>(0.14 to<br>0.29)                                     | 0.15<br>(0.09 to<br>0.23)                                     | 0.09<br>(0.05 to<br>0.15)                                     | 0.15<br>(0.09 to<br>0.23)                                     |
| Acute hepatitis C                     |                                                                  |                                                                  |                                                                  |                                                                  |                                                               |                                                               |                                                               |                                                               |
|                                       | 30.62<br>(23.00 to<br>40.25)                                     | 11.23<br>(7.04 to<br>17.12)                                      | 6.57<br>(3.96 to<br>10.82)                                       | 11.80<br>(7.46 to<br>18.31)                                      | 0.63<br>(0.47 to<br>0.81)                                     | 0.37<br>(0.24 to<br>0.55)                                     | 0.24<br>(0.15 to<br>0.36)                                     | 0.37<br>(0.24 to<br>0.54)                                     |
| Acute hepatitis E                     |                                                                  |                                                                  |                                                                  |                                                                  |                                                               |                                                               |                                                               |                                                               |
|                                       | 475.71<br>(183.38 to<br>1,359.21)                                | 165.97<br>(79.43 to<br>405.84)                                   | 141.80<br>(75.89 to<br>317.31)                                   | 179.34<br>(85.72 to<br>457.93)                                   | 7.89<br>(3.77 to<br>18.54)                                    | 4.62<br>(2.81 to<br>7.64)                                     | 4.47<br>(2.95 to<br>6.58)                                     | 4.63<br>(2.80 to<br>8.19)                                     |
| Other unspecified infectious diseases |                                                                  |                                                                  |                                                                  |                                                                  |                                                               |                                                               |                                                               |                                                               |
| <b>Non-communicable diseases</b>      | <b>449,102.93</b><br><b>(406,851.82 to</b><br><b>491,810.55)</b> | <b>481,004.16</b><br><b>(366,968.71 to</b><br><b>597,453.48)</b> | <b>316,702.24</b><br><b>(241,864.14 to</b><br><b>393,030.43)</b> | <b>579,729.24</b><br><b>(443,376.51 to</b><br><b>719,179.07)</b> | <b>25,327.79</b><br><b>(23,008.03 to</b><br><b>27,476.76)</b> | <b>31,452.47</b><br><b>(25,410.69 to</b><br><b>37,407.93)</b> | <b>22,131.01</b><br><b>(18,011.00 to</b><br><b>26,856.77)</b> | <b>36,389.82</b><br><b>(29,961.27 to</b><br><b>43,135.38)</b> |

| Armenia                              |                                                 |                                                 |                                                |                                                 |                                           |                                           |                                           |                                           |
|--------------------------------------|-------------------------------------------------|-------------------------------------------------|------------------------------------------------|-------------------------------------------------|-------------------------------------------|-------------------------------------------|-------------------------------------------|-------------------------------------------|
| Cause                                | YLLs (actual counts)                            |                                                 |                                                |                                                 | Deaths (actual counts)                    |                                           |                                           |                                           |
|                                      | 2016                                            | 2040 Forecast                                   | 2040 Better Scenario                           | 2040 Worse Scenario                             | 2016                                      | 2040 Forecast                             | 2040 Better Scenario                      | 2040 Worse Scenario                       |
| <b>Neoplasms</b>                     | <b>124,258.09</b><br>(111,464.26 to 137,481.88) | <b>148,226.13</b><br>(116,067.15 to 183,179.94) | <b>113,542.63</b><br>(89,002.56 to 139,076.91) | <b>169,262.98</b><br>(133,244.50 to 207,998.76) | <b>5,412.82</b><br>(4,886.22 to 5,943.80) | <b>7,384.24</b><br>(6,081.40 to 8,844.28) | <b>5,967.17</b><br>(4,942.56 to 7,038.59) | <b>8,253.05</b><br>(6,779.53 to 9,881.53) |
| Lip and oral cavity cancer           | 1,106.08<br>(966.29 to 1,263.10)                | 1,464.06<br>(825.62 to 2,351.54)                | 777.00<br>(466.21 to 1,205.89)                 | 1,879.49<br>(1,018.22 to 3,094.69)              | 46.46<br>(41.17 to 52.37)                 | 69.23<br>(40.44 to 109.62)                | 39.39<br>(25.24 to 58.50)                 | 87.08<br>(48.91 to 136.99)                |
| Nasopharynx cancer                   | 325.29<br>(282.75 to 367.59)                    | 477.04<br>(250.41 to 818.75)                    | 212.33<br>(116.08 to 358.97)                   | 613.04<br>(317.88 to 1,031.79)                  | 10.52<br>(9.19 to 11.79)                  | 16.95<br>(9.59 to 28.31)                  | 7.75<br>(4.62 to 12.43)                   | 21.79<br>(12.23 to 35.54)                 |
| Other pharynx cancer                 | 471.08<br>(394.03 to 556.61)                    | 701.22<br>(390.50 to 1,165.56)                  | 551.55<br>(331.14 to 864.00)                   | 712.26<br>(390.64 to 1,182.36)                  | 18.40<br>(15.53 to 21.46)                 | 29.89<br>(17.04 to 47.92)                 | 24.45<br>(15.12 to 36.81)                 | 29.86<br>(16.92 to 49.06)                 |
| Esophageal cancer                    | 1,299.63<br>(1,136.43 to 1,469.35)              | 1,621.72<br>(892.95 to 2,864.06)                | 1,108.69<br>(653.18 to 1,850.23)               | 2,087.09<br>(1,105.17 to 3,793.91)              | 62.90<br>(55.85 to 70.33)                 | 87.17<br>(51.79 to 143.17)                | 63.34<br>(40.21 to 98.56)                 | 109.78<br>(62.15 to 191.46)               |
| Stomach cancer                       | 10,461.81<br>(9,343.57 to 11,720.89)            | 9,020.14<br>(6,405.22 to 12,284.93)             | 5,978.49<br>(4,206.02 to 8,221.50)             | 9,802.31<br>(6,949.39 to 13,485.32)             | 490.21<br>(440.51 to 543.51)              | 471.70<br>(347.90 to 624.59)              | 327.76<br>(236.60 to 442.92)              | 498.99<br>(367.58 to 669.19)              |
| Colon and rectum cancer              | 9,971.35<br>(8,771.33 to 11,347.10)             | 14,275.38<br>(9,609.92 to 21,268.48)            | 10,021.26<br>(6,820.40 to 14,883.37)           | 15,063.70<br>(10,112.41 to 22,561.00)           | 489.18<br>(431.43 to 554.55)              | 782.55<br>(534.25 to 1,143.29)            | 579.07<br>(405.85 to 854.60)              | 802.64<br>(550.69 to 1,179.92)            |
| Liver cancer                         | 8,115.94<br>(7,049.10 to 9,228.84)              | 11,167.58<br>(7,308.96 to 16,446.29)            | 10,606.91<br>(7,183.95 to 15,046.47)           | 13,060.39<br>(8,081.19 to 19,928.63)            | 400.37<br>(350.43 to 454.19)              | 647.81<br>(438.57 to 922.58)              | 652.36<br>(457.25 to 894.50)              | 728.35<br>(467.99 to 1,089.55)            |
| Liver cancer due to hepatitis B      | 2,385.40<br>(1,890.73 to 2,954.50)              | 2,966.92<br>(1,867.92 to 4,678.86)              | 2,940.45<br>(1,891.36 to 4,478.25)             | 3,451.07<br>(2,062.89 to 5,699.86)              | 106.73<br>(82.54 to 132.60)               | 158.27<br>(100.81 to 240.82)              | 165.32<br>(107.97 to 246.95)              | 177.23<br>(106.55 to 282.38)              |
| Liver cancer due to hepatitis C      | 2,766.87<br>(2,235.35 to 3,316.10)              | 3,870.36<br>(2,483.03 to 5,743.70)              | 3,927.64<br>(2,608.39 to 5,664.56)             | 4,406.27<br>(2,686.31 to 6,736.67)              | 149.83<br>(123.66 to 178.87)              | 244.92<br>(160.53 to 355.55)              | 261.53<br>(177.18 to 372.33)              | 268.07<br>(167.52 to 405.24)              |
| Liver cancer due to alcohol use      | 1,595.52<br>(1,330.49 to 1,904.49)              | 2,517.49<br>(1,617.80 to 3,753.56)              | 1,948.07<br>(1,284.83 to 2,833.42)             | 3,086.15<br>(1,869.85 to 4,727.68)              | 78.70<br>(65.91 to 92.95)                 | 141.28<br>(93.18 to 207.68)               | 117.61<br>(78.87 to 169.24)               | 166.77<br>(104.45 to 253.55)              |
| Liver cancer due to other causes     | 1,568.15<br>(1,144.77 to 1,614.50)              | 1,812.81<br>(1,115.44 to 2,846.00)              | 1,790.75<br>(1,160.69 to 2,693.75)             | 2,116.89<br>(1,213.93 to 3,410.96)              | 65.10<br>(54.90 to 76.68)                 | 103.34<br>(65.73 to 158.50)               | 107.90<br>(70.77 to 158.89)               | 116.28<br>(69.40 to 185.73)               |
| Gallbladder and biliary tract cancer | 967.77<br>(850.16 to 1,111.21)                  | 612.06<br>(511.21 to 711.91)                    | 598.66<br>(487.73 to 716.13)                   | 582.48<br>(491.28 to 675.55)                    | 51.91<br>(45.71 to 58.80)                 | 38.36<br>(33.24 to 44.13)                 | 39.20<br>(33.76 to 45.48)                 | 35.56<br>(31.18 to 40.74)                 |
| Pancreatic cancer                    | 7,358.55<br>(6,463.51 to 8,276.79)              | 10,338.36<br>(7,845.81 to 13,343.71)            | 9,974.10<br>(7,666.93 to 12,705.93)            | 10,888.76<br>(8,189.21 to 14,298.84)            | 363.03<br>(322.55 to 403.16)              | 578.42<br>(457.13 to 729.49)              | 583.93<br>(468.26 to 727.71)              | 591.14<br>(461.11 to 754.14)              |
| Larynx cancer                        | 2,312.42<br>(1,951.57 to 2,672.06)              | 2,825.55<br>(1,255.02 to 5,757.64)              | 1,347.68<br>(655.13 to 2,686.71)               | 3,805.58<br>(1,689.73 to 7,537.74)              | 97.78<br>(83.98 to 111.80)                | 130.26<br>(59.67 to 250.07)               | 65.29<br>(33.41 to 123.70)                | 177.61<br>(81.77 to 353.59)               |
| Tracheal, bronchus, and lung cancer  | 26,258.34<br>(22,843.85 to 30,106.89)           | 30,466.65<br>(19,162.93 to 44,506.08)           | 18,293.08<br>(11,863.77 to 25,859.70)          | 43,925.91<br>(28,409.45 to 60,863.83)           | 1,150.84<br>(1,017.58 to 1,316.34)        | 1,447.87<br>(972.77 to 2,042.68)          | 907.91<br>(635.04 to 1,240.75)            | 2,092.76<br>(1,413.93 to 2,881.14)        |
| Malignant skin melanoma              | 365.18<br>(284.64 to 429.56)                    | 283.63<br>(225.77 to 353.76)                    | 370.70<br>(286.94 to 471.46)                   | 267.39<br>(214.54 to 330.75)                    | 14.24<br>(12.03 to 16.92)                 | 14.98<br>(12.70 to 19.49)                 | 20.55<br>(16.83 to 26.35)                 | 13.62<br>(11.45 to 17.53)                 |
| Non-melanoma skin cancer             | 492.76<br>(436.31 to 552.10)                    | 473.14<br>(395.54 to 557.91)                    | 362.09<br>(290.10 to 441.85)                   | 448.37<br>(380.51 to 522.40)                    | 30.11<br>(27.05 to 33.36)                 | 34.92<br>(28.87 to 41.95)                 | 28.44<br>(23.17 to 34.86)                 | 31.88<br>(26.14 to 38.29)                 |
| Breast cancer                        | 12,585.67<br>(10,469.42 to 15,045.55)           | 17,021.79<br>(10,655.39 to 26,784.79)           | 11,984.78<br>(7,626.09 to 17,948.70)           | 17,893.72<br>(11,031.82 to 28,680.57)           | 494.13<br>(411.54 to 588.26)              | 753.55<br>(498.88 to 1,148.17)            | 551.72<br>(370.96 to 799.42)              | 775.66<br>(501.03 to 1,215.00)            |
| Cervical cancer                      | 4,240.22<br>(3,515.02 to 5,112.08)              | 3,557.70<br>(2,436.44 to 4,835.82)              | 2,431.88<br>(1,609.14 to 3,421.12)             | 3,755.73<br>(2,562.57 to 5,212.54)              | 153.79<br>(128.31 to 183.52)              | 146.89<br>(107.55 to 191.61)              | 103.54<br>(73.06 to 140.36)               | 151.68<br>(110.74 to 201.97)              |

|                   |                                       |                                       |                                       |                                       |                                 |                                 |                                 |                                 |
|-------------------|---------------------------------------|---------------------------------------|---------------------------------------|---------------------------------------|---------------------------------|---------------------------------|---------------------------------|---------------------------------|
|                   | 1,580.71<br>(1,290.89 to<br>1,906.02) | 1,648.88<br>(1,224.26 to<br>2,103.44) | 1,314.85<br>(957.15 to<br>1,703.26)   | 1,642.40<br>(1,229.73 to<br>2,101.31) | 70.66<br>(58.35 to<br>84.86)    | 84.13<br>(65.54 to<br>103.75)   | 69.35<br>(53.58 to<br>87.30)    | 82.27<br>(65.44 to<br>100.78)   |
| Uterine cancer    |                                       |                                       |                                       |                                       |                                 |                                 |                                 |                                 |
|                   | 2,917.91<br>(2,336.74 to<br>3,560.28) | 3,736.08<br>(2,476.86 to<br>5,234.33) | 3,159.53<br>(2,097.50 to<br>4,368.82) | 3,910.78<br>(2,553.68 to<br>5,623.48) | 115.84<br>(93.79 to<br>140.35)  | 171.64<br>(119.74 to<br>237.49) | 148.53<br>(103.14 to<br>201.93) | 178.09<br>(123.63 to<br>249.24) |
| Ovarian cancer    |                                       |                                       |                                       |                                       |                                 |                                 |                                 |                                 |
|                   | 3,550.49<br>(1,812.96 to<br>4,219.60) | 4,557.46<br>(2,383.60 to<br>5,616.20) | 4,026.62<br>(2,158.72 to<br>4,942.67) | 4,323.19<br>(2,275.64 to<br>5,375.35) | 223.41<br>(116.24 to<br>260.99) | 316.49<br>(171.77 to<br>385.78) | 294.89<br>(164.73 to<br>357.50) | 290.30<br>(152.74 to<br>358.08) |
| Prostate cancer   |                                       |                                       |                                       |                                       |                                 |                                 |                                 |                                 |
|                   | 129.29<br>(102.62 to<br>163.09)       | 82.58<br>(52.92 to<br>128.60)         | 61.78<br>(38.35 to<br>94.99)          | 83.13<br>(53.76 to<br>130.76)         | 3.12<br>(2.53 to<br>3.83)       | 2.30<br>(1.62 to<br>3.18)       | 1.79<br>(1.25 to<br>2.46)       | 2.26<br>(1.62 to<br>3.15)       |
| Testicular cancer |                                       |                                       |                                       |                                       |                                 |                                 |                                 |                                 |

| Armenia                         |                                                                  |                                                                  |                                                                 |                                                                  |                                                               |                                                               |                                                             |                                                               |
|---------------------------------|------------------------------------------------------------------|------------------------------------------------------------------|-----------------------------------------------------------------|------------------------------------------------------------------|---------------------------------------------------------------|---------------------------------------------------------------|-------------------------------------------------------------|---------------------------------------------------------------|
| Cause                           | YLLs (actual counts)                                             |                                                                  |                                                                 |                                                                  | Deaths (actual counts)                                        |                                                               |                                                             |                                                               |
|                                 | 2016                                                             | 2040 Forecast                                                    | 2040 Better Scenario                                            | 2040 Worse Scenario                                              | 2016                                                          | 2040 Forecast                                                 | 2040 Better Scenario                                        | 2040 Worse Scenario                                           |
| Kidney cancer                   | 1,675.76<br>(1,452.54 to<br>1,894.10)                            | 1,369.18<br>(954.50 to<br>1,920.05)                              | 1,381.57<br>(981.65 to<br>1,841.64)                             | 1,412.86<br>(961.62 to<br>2,015.59)                              | 77.55<br>(68.18 to<br>86.79)                                  | 73.60<br>(53.66 to<br>98.85)                                  | 78.89<br>(58.90 to<br>101.87)                               | 73.57<br>(52.38 to<br>101.05)                                 |
| Bladder cancer                  | 3,400.29<br>(2,981.47 to<br>3,863.36)                            | 4,377.88<br>(3,118.60 to<br>6,213.36)                            | 3,570.97<br>(2,595.57 to<br>4,873.99)                           | 4,811.04<br>(3,274.03 to<br>7,057.71)                            | 190.99<br>(168.59 to<br>215.72)                               | 278.73<br>(204.99 to<br>388.17)                               | 241.10<br>(182.63 to<br>319.90)                             | 297.22<br>(210.13 to<br>422.49)                               |
| Brain and nervous system cancer | 6,756.83<br>(5,560.75 to<br>7,838.14)                            | 7,757.13<br>(5,792.58 to<br>9,622.25)                            | 6,941.65<br>(5,162.87 to<br>8,625.42)                           | 7,634.71<br>(5,720.98 to<br>9,407.79)                            | 210.49<br>(167.01 to<br>245.43)                               | 297.95<br>(225.31 to<br>355.18)                               | 276.61<br>(206.10 to<br>333.23)                             | 286.40<br>(214.38 to<br>340.87)                               |
| Thyroid cancer                  | 350.85<br>(298.84 to<br>404.83)                                  | 276.04<br>(185.02 to<br>404.17)                                  | 225.67<br>(154.69 to<br>321.66)                                 | 289.52<br>(194.10 to<br>436.77)                                  | 18.49<br>(15.90 to<br>21.13)                                  | 16.99<br>(11.80 to<br>24.67)                                  | 14.41<br>(10.14 to<br>20.54)                                | 17.29<br>(11.90 to<br>25.30)                                  |
| Mesothelioma                    | 461.46<br>(401.43 to<br>529.33)                                  | 531.21<br>(422.82 to<br>635.33)                                  | 553.88<br>(434.83 to<br>670.39)                                 | 513.61<br>(410.42 to<br>614.70)                                  | 19.51<br>(16.75 to<br>21.94)                                  | 27.23<br>(22.19 to<br>32.47)                                  | 29.78<br>(23.80 to<br>36.16)                                | 25.56<br>(21.04 to<br>30.11)                                  |
| Hodgkin lymphoma                | 273.04<br>(139.22 to<br>322.90)                                  | 131.05<br>(67.15 to<br>175.39)                                   | 84.47<br>(43.53 to<br>113.94)                                   | 132.67<br>(68.77 to<br>174.60)                                   | 8.25<br>(4.26 to<br>9.63)                                     | 5.09<br>(2.66 to<br>6.32)                                     | 3.41<br>(1.80 to<br>4.39)                                   | 5.03<br>(2.68 to<br>6.20)                                     |
| Non-Hodgkin lymphoma            | 1,925.58<br>(1,568.77 to<br>2,210.99)                            | 2,428.53<br>(1,775.48 to<br>3,157.21)                            | 2,046.88<br>(1,467.05 to<br>2,675.58)                           | 2,443.28<br>(1,801.64 to<br>3,215.91)                            | 73.54<br>(57.79 to<br>83.97)                                  | 115.22<br>(82.77 to<br>146.38)                                | 101.28<br>(72.43 to<br>129.30)                              | 112.71<br>(81.29 to<br>145.15)                                |
| Multiple myeloma                | 570.20<br>(400.65 to<br>674.36)                                  | 699.70<br>(469.79 to<br>931.34)                                  | 635.75<br>(430.30 to<br>834.97)                                 | 712.17<br>(477.92 to<br>974.80)                                  | 23.17<br>(16.89 to<br>27.04)                                  | 32.95<br>(23.60 to<br>42.94)                                  | 31.10<br>(22.32 to<br>39.71)                                | 32.76<br>(23.43 to<br>43.70)                                  |
| Leukemia                        | 5,903.16<br>(5,183.70 to<br>6,651.87)                            | 5,700.40<br>(4,100.31 to<br>7,709.99)                            | 4,518.92<br>(3,284.47 to<br>6,010.77)                           | 6,241.89<br>(4,410.51 to<br>8,506.70)                            | 188.49<br>(165.93 to<br>211.29)                               | 228.42<br>(171.47 to<br>300.98)                               | 186.35<br>(140.33 to<br>238.92)                             | 244.83<br>(179.68 to<br>330.76)                               |
| Acute lymphoid leukemia         | 1,305.98<br>(1,011.93 to<br>1,575.90)                            | 926.26<br>(639.95 to<br>1,288.32)                                | 706.61<br>(475.16 to<br>990.59)                                 | 1,019.31<br>(693.05 to<br>1,433.68)                              | 29.41<br>(23.43 to<br>35.10)                                  | 26.17<br>(18.42 to<br>35.55)                                  | 20.43<br>(14.16 to<br>27.77)                                | 28.56<br>(19.77 to<br>39.53)                                  |
| Chronic lymphoid leukemia       | 344.20<br>(249.06 to<br>510.21)                                  | 343.54<br>(213.69 to<br>545.70)                                  | 293.02<br>(184.41 to<br>462.89)                                 | 376.90<br>(227.69 to<br>617.74)                                  | 13.16<br>(9.69 to<br>18.81)                                   | 14.81<br>(9.60 to<br>22.48)                                   | 13.08<br>(8.59 to<br>19.86)                                 | 15.92<br>(10.09 to<br>24.81)                                  |
| Acute myeloid leukemia          | 1,612.13<br>(1,316.99 to<br>1,892.13)                            | 1,677.47<br>(1,190.10 to<br>2,299.86)                            | 1,524.68<br>(1,094.37 to<br>2,058.46)                           | 1,825.70<br>(1,281.66 to<br>2,560.60)                            | 45.58<br>(38.11 to<br>53.66)                                  | 56.38<br>(41.85 to<br>75.64)                                  | 52.73<br>(39.57 to<br>69.55)                                | 60.54<br>(43.98 to<br>82.41)                                  |
| Chronic myeloid leukemia        | 304.31<br>(201.66 to<br>392.22)                                  | 219.38<br>(124.11 to<br>334.26)                                  | 122.47<br>(67.55 to<br>185.05)                                  | 245.76<br>(140.61 to<br>384.87)                                  | 10.38<br>(7.20 to<br>13.19)                                   | 8.55<br>(5.23 to<br>12.81)                                    | 4.96<br>(2.95 to<br>7.27)                                   | 9.38<br>(5.74 to<br>14.12)                                    |
| Other leukemia                  | 2,336.54<br>(2,011.36 to<br>2,684.52)                            | 2,533.76<br>(1,747.42 to<br>3,564.38)                            | 1,872.13<br>(1,299.47 to<br>2,566.44)                           | 2,774.21<br>(1,889.42 to<br>3,916.16)                            | 89.96<br>(77.86 to<br>101.91)                                 | 122.51<br>(90.23 to<br>164.74)                                | 95.15<br>(70.73 to<br>125.89)                               | 130.42<br>(96.30 to<br>179.15)                                |
| Other neoplasms                 | 8,430.45<br>(7,405.78 to<br>9,532.12)                            | 10,623.98<br>(8,557.39 to<br>12,518.36)                          | 10,400.88<br>(8,306.51 to<br>12,373.96)                         | 10,325.52<br>(8,396.86 to<br>12,099.57)                          | 315.45<br>(275.44 to<br>355.79)                               | 482.95<br>(406.88 to<br>547.58)                               | 494.98<br>(413.54 to<br>568.62)                             | 456.36<br>(388.68 to<br>512.82)                               |
| <b>Cardiovascular diseases</b>  | <b>201,640.21</b><br><b>(182,839.48 to</b><br><b>219,903.23)</b> | <b>199,119.55</b><br><b>(126,827.84 to</b><br><b>295,328.21)</b> | <b>101,046.63</b><br><b>(65,148.66 to</b><br><b>155,958.68)</b> | <b>264,922.54</b><br><b>(171,415.10 to</b><br><b>384,531.69)</b> | <b>13,345.06</b><br><b>(12,158.34 to</b><br><b>14,416.40)</b> | <b>14,991.78</b><br><b>(10,457.41 to</b><br><b>20,969.13)</b> | <b>8,492.37</b><br><b>(5,829.00 to</b><br><b>12,301.50)</b> | <b>18,563.41</b><br><b>(13,076.69 to</b><br><b>25,141.89)</b> |
| Rheumatic heart disease         | 3,064.01<br>(2,653.65 to<br>3,568.03)                            | 1,801.12<br>(1,240.55 to<br>2,586.06)                            | 1,195.36<br>(816.24 to<br>1,750.51)                             | 1,872.52<br>(1,311.32 to<br>2,663.07)                            | 131.73<br>(114.30 to<br>151.75)                               | 91.41<br>(66.56 to<br>124.89)                                 | 64.29<br>(46.03 to<br>90.30)                                | 92.06<br>(68.71 to<br>124.76)                                 |
| Ischemic heart disease          | 142,376.08<br>(128,205.16 to<br>156,176.53)                      | 128,756.11<br>(76,021.90 to<br>201,378.97)                       | 61,250.24<br>(34,880.08 to<br>99,715.92)                        | 178,338.35<br>(104,552.07 to<br>272,788.72)                      | 9,577.05<br>(8,704.80 to<br>10,450.53)                        | 9,375.72<br>(6,159.18 to<br>14,246.44)                        | 5,184.88<br>(3,177.11 to<br>8,020.66)                       | 12,484.59<br>(7,919.50 to<br>18,232.78)                       |
| Stroke                          | 37,406.77<br>(33,425.39 to<br>41,629.98)                         | 41,240.46<br>(25,826.32 to<br>62,565.58)                         | 17,650.64<br>(10,896.95 to<br>28,303.97)                        | 54,345.71<br>(34,654.15 to<br>83,959.20)                         | 2,355.30<br>(2,096.53 to<br>2,614.65)                         | 2,932.96<br>(1,936.82 to<br>4,422.60)                         | 1,407.43<br>(901.82 to<br>2,198.10)                         | 3,583.20<br>(2,397.31 to<br>5,401.31)                         |
| Ischemic stroke                 | 20,080.21<br>(17,849.96 to<br>22,309.70)                         | 21,813.85<br>(13,043.36 to<br>36,103.45)                         | 10,445.15<br>(6,273.71 to<br>17,447.98)                         | 27,285.83<br>(16,130.51 to<br>45,262.92)                         | 1,433.14<br>(1,272.84 to<br>1,605.95)                         | 1,737.66<br>(1,041.62 to<br>2,977.77)                         | 909.55<br>(554.43 to<br>1,536.87)                           | 2,040.53<br>(1,243.69 to<br>3,332.54)                         |

|                                |                                          |                                          |                                         |                                          |                                   |                                     |                                   |                                     |
|--------------------------------|------------------------------------------|------------------------------------------|-----------------------------------------|------------------------------------------|-----------------------------------|-------------------------------------|-----------------------------------|-------------------------------------|
| Intracerebral hemorrhage       | 17,326.56<br>(15,227.15 to<br>19,378.83) | 19,426.61<br>(11,150.18 to<br>32,441.28) | 7,205.50<br>(4,202.96 to<br>11,680.17)  | 27,059.88<br>(15,692.33 to<br>46,049.59) | 922.16<br>(816.79 to<br>1,026.04) | 1,195.31<br>(757.10 to<br>1,838.85) | 497.88<br>(308.79 to<br>766.92)   | 1,542.66<br>(962.02 to<br>2,395.13) |
| Hypertensive heart disease     | 6,434.27<br>(3,371.59 to<br>8,153.01)    | 13,356.26<br>(4,211.77 to<br>35,913.50)  | 10,070.98<br>(3,172.95 to<br>27,477.46) | 15,962.67<br>(5,112.67 to<br>44,429.00)  | 529.55<br>(210.60 to<br>721.36)   | 1,218.74<br>(312.03 to<br>3,830.88) | 977.20<br>(248.04 to<br>2,940.05) | 1,409.84<br>(358.87 to<br>4,310.62) |
| Cardiomyopathy and myocarditis | 2,071.71<br>(1,707.70 to<br>2,771.83)    | 2,375.79<br>(1,711.12 to<br>3,359.35)    | 1,580.47<br>(1,124.63 to<br>2,253.55)   | 2,453.55<br>(1,754.11 to<br>3,495.44)    | 94.53<br>(78.35 to<br>108.35)     | 134.84<br>(91.92 to<br>192.94)      | 95.35<br>(62.26 to<br>138.31)     | 133.40<br>(91.34 to<br>191.42)      |
| Myocarditis                    | 138.68<br>(78.79 to<br>289.66)           | 156.46<br>(89.21 to<br>314.96)           | 145.27<br>(86.76 to<br>283.02)          | 154.91<br>(86.99 to<br>317.26)           | 4.66<br>(3.12 to<br>8.26)         | 7.20<br>(5.05 to<br>11.80)          | 7.39<br>(5.35 to<br>11.29)        | 6.77<br>(4.64 to<br>11.42)          |

| Armenia                                                       |                                                     |                                                     |                                                     |                                                     |                                                  |                                                  |                                                |                                                  |
|---------------------------------------------------------------|-----------------------------------------------------|-----------------------------------------------------|-----------------------------------------------------|-----------------------------------------------------|--------------------------------------------------|--------------------------------------------------|------------------------------------------------|--------------------------------------------------|
| Cause                                                         | YLLs (actual counts)                                |                                                     |                                                     |                                                     | Deaths (actual counts)                           |                                                  |                                                |                                                  |
|                                                               | 2016                                                | 2040 Forecast                                       | 2040 Better Scenario                                | 2040 Worse Scenario                                 | 2016                                             | 2040 Forecast                                    | 2040 Better Scenario                           | 2040 Worse Scenario                              |
| Alcoholic cardiomyopathy                                      | 340.01<br>(228.36 to 740.72)                        | 531.22<br>(371.36 to 974.84)                        | 409.20<br>(289.49 to 713.35)                        | 538.59<br>(378.32 to 1,006.06)                      | 15.92<br>(11.60 to 26.88)                        | 29.15<br>(20.86 to 42.82)                        | 23.83<br>(16.43 to 33.00)                      | 28.67<br>(20.40 to 42.66)                        |
| Other cardiomyopathy                                          | 1,593.02<br>(1,336.71 to 1,951.91)                  | 1,688.11<br>(1,037.40 to 2,611.89)                  | 1,026.00<br>(581.46 to 1,646.94)                    | 1,760.05<br>(1,090.60 to 2,714.63)                  | 73.96<br>(55.88 to 86.38)                        | 98.49<br>(55.07 to 159.64)                       | 64.14<br>(33.84 to 105.69)                     | 97.96<br>(56.37 to 157.60)                       |
| Atrial fibrillation and flutter                               | 1,463.16<br>(1,107.76 to 1,838.18)                  | 2,592.40<br>(1,884.90 to 3,471.78)                  | 2,305.98<br>(1,662.60 to 3,099.27)                  | 2,535.10<br>(1,829.10 to 3,424.81)                  | 155.71<br>(117.59 to 198.65)                     | 282.00<br>(199.68 to 378.46)                     | 263.28<br>(191.20 to 354.72)                   | 266.85<br>(182.25 to 365.28)                     |
| Aortic aneurysm                                               | 5,751.30<br>(5,079.83 to 6,488.93)                  | 6,069.14<br>(4,405.48 to 8,096.94)                  | 5,048.23<br>(3,692.92 to 6,803.28)                  | 6,324.48<br>(4,541.72 to 8,465.44)                  | 520.49<br>(286.03 to 359.20)                     | 386.58<br>(304.83 to 491.90)                     | 349.88<br>(269.57 to 456.25)                   | 384.01<br>(296.63 to 492.57)                     |
| Peripheral artery disease                                     | 44.30<br>(26.86 to 58.06)                           | 104.50<br>(53.72 to 160.18)                         | 105.02<br>(53.29 to 163.60)                         | 103.30<br>(52.98 to 158.79)                         | 4.09<br>(2.10 to 5.36)                           | 10.33<br>(4.90 to 16.69)                         | 11.04<br>(5.22 to 17.44)                       | 9.78<br>(4.53 to 15.91)                          |
| Endocarditis                                                  | 220.81<br>(152.90 to 269.57)                        | 234.53<br>(135.49 to 350.54)                        | 220.64<br>(127.44 to 327.43)                        | 243.56<br>(141.04 to 361.68)                        | 9.40<br>(5.78 to 11.43)                          | 13.46<br>(7.31 to 20.80)                         | 13.56<br>(7.43 to 20.83)                       | 13.28<br>(7.23 to 20.77)                         |
| Other cardiovascular and circulatory diseases                 | 2,807.80<br>(2,454.81 to 3,155.01)                  | 2,589.24<br>(1,843.43 to 3,617.36)                  | 1,619.07<br>(1,077.54 to 2,340.07)                  | 2,743.31<br>(1,939.72 to 3,802.56)                  | 167.21<br>(145.47 to 189.21)                     | 185.76<br>(138.51 to 252.86)                     | 125.46<br>(88.36 to 177.11)                    | 186.40<br>(140.20 to 252.59)                     |
| <b>Chronic respiratory diseases</b>                           | <b>16,721.82</b><br><b>(14,970.13 to 18,419.53)</b> | <b>20,768.83</b><br><b>(13,269.28 to 32,429.62)</b> | <b>16,042.22</b><br><b>(10,829.30 to 23,207.88)</b> | <b>28,281.90</b><br><b>(17,325.33 to 45,845.62)</b> | <b>1,232.14</b><br><b>(1,112.43 to 1,347.77)</b> | <b>1,633.95</b><br><b>(1,068.87 to 2,414.13)</b> | <b>1,369.10</b><br><b>(951.53 to 1,941.13)</b> | <b>2,145.11</b><br><b>(1,306.84 to 3,338.76)</b> |
| Chronic obstructive pulmonary disease                         | 14,459.28<br>(12,878.25 to 16,082.29)               | 17,494.60<br>(10,331.35 to 28,348.85)               | 11,109.12<br>(6,632.01 to 17,955.65)                | 25,231.79<br>(14,434.84 to 42,502.95)               | 1,083.44<br>(969.95 to 1,204.54)                 | 1,384.05<br>(840.11 to 2,199.44)                 | 970.80<br>(602.07 to 1,519.49)                 | 1,920.23<br>(1,115.66 to 3,114.72)               |
| Pneumoconiosis                                                | 30.03<br>(24.39 to 36.50)                           | 33.34<br>(24.25 to 47.11)                           | 26.95<br>(18.17 to 41.41)                           | 32.56<br>(24.08 to 44.99)                           | 2.10<br>(1.69 to 2.56)                           | 2.67<br>(1.92 to 3.94)                           | 2.20<br>(1.44 to 3.69)                         | 2.55<br>(1.79 to 3.73)                           |
| Silicosis                                                     | 7.30<br>(1.76 to 10.04)                             | 5.98<br>(1.60 to 11.47)                             | 2.67<br>(0.66 to 5.61)                              | 5.52<br>(1.49 to 10.26)                             | 0.60<br>(0.13 to 0.84)                           | 0.57<br>(0.12 to 1.09)                           | 0.26<br>(0.05 to 0.57)                         | 0.51<br>(0.10 to 0.96)                           |
| Asbestosis                                                    | 5.24<br>(4.04 to 6.80)                              | 6.44<br>(4.25 to 9.66)                              | 8.16<br>(5.11 to 12.59)                             | 6.18<br>(4.06 to 9.36)                              | 0.20<br>(0.16 to 0.26)                           | 0.28<br>(0.19 to 0.42)                           | 0.37<br>(0.24 to 0.56)                         | 0.26<br>(0.18 to 0.39)                           |
| Coal workers pneumoconiosis                                   | 0.10<br>(0.07 to 0.17)                              | 0.16<br>(0.07 to 0.36)                              | 0.15<br>(0.06 to 0.37)                              | 0.16<br>(0.08 to 0.35)                              | 0.01<br>(0.00 to 0.01)                           | 0.01<br>(0.00 to 0.03)                           | 0.01<br>(0.00 to 0.03)                         | 0.01<br>(0.01 to 0.03)                           |
| Other pneumoconiosis                                          | 17.39<br>(13.51 to 23.28)                           | 20.77<br>(13.73 to 32.88)                           | 15.97<br>(9.28 to 28.97)                            | 20.70<br>(13.68 to 31.97)                           | 1.29<br>(1.01 to 1.78)                           | 1.81<br>(1.18 to 2.91)                           | 1.55<br>(0.89 to 2.87)                         | 1.77<br>(1.14 to 2.91)                           |
| Asthma                                                        | 345.13<br>(290.52 to 400.38)                        | 259.25<br>(124.82 to 496.06)                        | 136.61<br>(65.55 to 278.70)                         | 309.97<br>(147.39 to 625.35)                        | 19.39<br>(15.84 to 22.63)                        | 17.29<br>(8.44 to 32.39)                         | 9.60<br>(4.69 to 18.82)                        | 19.85<br>(9.47 to 38.74)                         |
| Interstitial lung disease and pulmonary sarcoidosis           | 1,820.64<br>(1,131.12 to 2,220.07)                  | 2,912.61<br>(1,648.34 to 3,926.18)                  | 4,701.44<br>(2,768.96 to 6,473.08)                  | 2,635.08<br>(1,555.08 to 3,471.68)                  | 124.41<br>(62.40 to 157.10)                      | 236.11<br>(109.28 to 313.29)                     | 382.44<br>(200.59 to 532.49)                   | 198.71<br>(96.93 to 273.40)                      |
| Other chronic respiratory diseases                            | 66.75<br>(43.62 to 91.58)                           | 69.02<br>(39.72 to 108.53)                          | 68.10<br>(38.09 to 105.65)                          | 72.10<br>(41.34 to 115.72)                          | 2.81<br>(1.64 to 3.76)                           | 3.82<br>(1.99 to 5.85)                           | 4.07<br>(2.12 to 6.26)                         | 3.79<br>(1.99 to 5.83)                           |
| <b>Cirrhosis and other chronic liver diseases</b>             | <b>20,891.58</b><br><b>(18,431.53 to 23,623.53)</b> | <b>21,421.90</b><br><b>(17,676.59 to 25,082.75)</b> | <b>15,788.84</b><br><b>(12,715.67 to 19,088.12)</b> | <b>21,225.98</b><br><b>(17,875.07 to 24,657.96)</b> | <b>990.42</b><br><b>(886.94 to 1,100.69)</b>     | <b>1,225.96</b><br><b>(1,032.19 to 1,438.58)</b> | <b>952.89</b><br><b>(784.31 to 1,158.89)</b>   | <b>1,178.20</b><br><b>(1,001.96 to 1,367.66)</b> |
| Cirrhosis and other chronic liver diseases due to hepatitis B | 7,599.09<br>(6,618.78 to 8,682.47)                  | 7,516.53<br>(6,078.40 to 9,042.88)                  | 6,006.30<br>(4,723.49 to 7,393.28)                  | 7,285.42<br>(5,961.86 to 8,680.64)                  | 361.83<br>(316.85 to 409.81)                     | 432.59<br>(351.41 to 525.23)                     | 361.86<br>(286.54 to 451.25)                   | 406.41<br>(334.00 to 491.49)                     |
| Cirrhosis and other chronic liver diseases due to hepatitis C | 4,294.37<br>(3,591.09 to 5,021.87)                  | 4,236.41<br>(3,363.89 to 5,185.80)                  | 3,302.47<br>(2,512.37 to 4,108.68)                  | 4,136.64<br>(3,323.98 to 5,033.52)                  | 188.86<br>(159.86 to 217.40)                     | 223.21<br>(181.08 to 273.78)                     | 181.78<br>(141.99 to 225.76)                   | 211.52<br>(172.48 to 255.53)                     |



|                                                                |                                                              |                                                              |                                                             |                                                              |                                                      |                                                      |                                                      |                                                      |
|----------------------------------------------------------------|--------------------------------------------------------------|--------------------------------------------------------------|-------------------------------------------------------------|--------------------------------------------------------------|------------------------------------------------------|------------------------------------------------------|------------------------------------------------------|------------------------------------------------------|
|                                                                | 5,803.86<br>(4,933.88 to<br>6,737.36)                        | 6,553.30<br>(5,206.16 to<br>7,949.81)                        | 3,997.00<br>(3,115.59 to<br>4,962.94)                       | 6,768.74<br>(5,525.11 to<br>8,120.40)                        | 277.74<br>(240.35 to<br>317.63)                      | 370.43<br>(304.28 to<br>447.80)                      | 242.07<br>(193.05 to<br>300.46)                      | 371.97<br>(308.45 to<br>447.23)                      |
| Cirrhosis and other chronic liver diseases due to alcohol use  |                                                              |                                                              |                                                             |                                                              |                                                      |                                                      |                                                      |                                                      |
|                                                                | 3,194.26<br>(2,770.80 to<br>3,694.74)                        | 3,115.65<br>(2,465.73 to<br>3,811.96)                        | 2,483.08<br>(1,909.81 to<br>3,154.27)                       | 3,035.18<br>(2,454.88 to<br>3,711.31)                        | 161.99<br>(138.86 to<br>187.11)                      | 199.74<br>(156.18 to<br>251.45)                      | 167.18<br>(128.92 to<br>215.32)                      | 188.30<br>(148.53 to<br>235.85)                      |
| Cirrhosis and other chronic liver diseases due to other causes |                                                              |                                                              |                                                             |                                                              |                                                      |                                                      |                                                      |                                                      |
| <b>Digestive diseases</b>                                      | <b>11,664.80</b><br><b>(9,864.13 to</b><br><b>13,658.44)</b> | <b>10,793.83</b><br><b>(7,840.13 to</b><br><b>14,626.21)</b> | <b>8,233.54</b><br><b>(5,891.94 to</b><br><b>10,963.59)</b> | <b>11,034.62</b><br><b>(8,052.90 to</b><br><b>15,139.76)</b> | <b>572.61</b><br><b>(440.44 to</b><br><b>662.17)</b> | <b>697.42</b><br><b>(470.06 to</b><br><b>936.22)</b> | <b>573.00</b><br><b>(386.00 to</b><br><b>760.32)</b> | <b>683.91</b><br><b>(469.45 to</b><br><b>931.80)</b> |
| Peptic ulcer disease                                           | 3,746.58<br>(3,185.26 to<br>4,630.83)                        | 2,234.61<br>(1,510.47 to<br>3,152.00)                        | 1,292.00<br>(846.08 to<br>1,878.84)                         | 2,327.73<br>(1,594.51 to<br>3,309.94)                        | 190.97<br>(159.29 to<br>223.57)                      | 136.68<br>(94.29 to<br>188.61)                       | 82.93<br>(55.98 to<br>117.87)                        | 136.96<br>(96.42 to<br>190.88)                       |

| Armenia                                    |                                       |                                       |                                       |                                       |                                    |                                    |                                    |                                    |
|--------------------------------------------|---------------------------------------|---------------------------------------|---------------------------------------|---------------------------------------|------------------------------------|------------------------------------|------------------------------------|------------------------------------|
| Cause                                      | YLLs (actual counts)                  |                                       |                                       |                                       | Deaths (actual counts)             |                                    |                                    |                                    |
|                                            | 2016                                  | 2040 Forecast                         | 2040 Better Scenario                  | 2040 Worse Scenario                   | 2016                               | 2040 Forecast                      | 2040 Better Scenario               | 2040 Worse Scenario                |
| Gastritis and duodenitis                   | 166.13<br>(83.40 to 212.33)           | 208.21<br>(89.27 to 290.53)           | 156.39<br>(64.88 to 222.44)           | 201.60<br>(88.07 to 280.81)           | 10.48<br>(3.80 to 13.52)           | 15.33<br>(5.32 to 22.00)           | 12.17<br>(4.05 to 17.72)           | 14.42<br>(4.94 to 20.44)           |
| Appendicitis                               | 300.77<br>(228.38 to 437.71)          | 209.46<br>(141.39 to 309.97)          | 124.04<br>(80.15 to 193.67)           | 215.10<br>(148.17 to 318.15)          | 8.27<br>(6.39 to 11.04)            | 7.82<br>(5.57 to 10.69)            | 4.86<br>(3.31 to 6.93)             | 7.77<br>(5.71 to 10.47)            |
| Paralytic ileus and intestinal obstruction | 1,710.18<br>(1,215.39 to 2,233.22)    | 1,230.32<br>(767.78 to 1,679.12)      | 1,223.20<br>(758.41 to 1,694.80)      | 1,201.93<br>(761.18 to 1,621.09)      | 53.12<br>(34.03 to 69.59)          | 71.04<br>(39.03 to 104.13)         | 75.78<br>(42.07 to 112.60)         | 65.89<br>(36.62 to 95.52)          |
| Inguinal, femoral, and abdominal hernia    | 466.62<br>(140.88 to 650.15)          | 470.19<br>(119.94 to 717.42)          | 382.22<br>(96.42 to 603.28)           | 448.32<br>(114.33 to 683.02)          | 28.47<br>(6.81 to 40.42)           | 33.99<br>(7.32 to 53.95)           | 29.27<br>(6.29 to 46.89)           | 31.41<br>(6.75 to 49.57)           |
| Inflammatory bowel disease                 | 293.51<br>(201.11 to 362.64)          | 257.42<br>(165.57 to 335.54)          | 248.49<br>(159.08 to 326.87)          | 250.32<br>(161.13 to 326.70)          | 10.23<br>(6.79 to 12.46)           | 11.72<br>(7.52 to 14.90)           | 11.97<br>(7.62 to 15.44)           | 11.02<br>(7.03 to 13.98)           |
| Vascular intestinal disorders              | 2,092.77<br>(1,589.78 to 2,462.10)    | 3,076.58<br>(2,138.07 to 3,865.16)    | 2,810.08<br>(1,954.48 to 3,584.08)    | 2,898.18<br>(2,059.20 to 3,611.51)    | 136.04<br>(95.86 to 159.56)        | 237.82<br>(149.20 to 301.26)       | 229.55<br>(145.81 to 294.21)       | 217.69<br>(136.31 to 276.44)       |
| Gallbladder and biliary diseases           | 1,698.74<br>(1,430.35 to 2,035.61)    | 1,626.10<br>(797.02 to 3,255.03)      | 1,038.17<br>(500.45 to 2,050.40)      | 1,986.28<br>(929.70 to 3,997.05)      | 85.43<br>(69.77 to 99.90)          | 101.54<br>(49.78 to 199.73)        | 69.32<br>(33.52 to 138.21)         | 118.77<br>(56.04 to 233.42)        |
| Pancreatitis                               | 778.70<br>(609.93 to 1,033.37)        | 1,052.99<br>(552.54 to 2,039.70)      | 584.15<br>(336.77 to 1,040.65)        | 1,089.53<br>(567.21 to 2,132.88)      | 30.39<br>(22.08 to 36.57)          | 54.27<br>(28.02 to 106.75)         | 31.44<br>(17.30 to 58.11)          | 54.61<br>(28.28 to 113.84)         |
| Other digestive diseases                   | 410.79<br>(298.63 to 512.16)          | 427.96<br>(302.61 to 561.96)          | 374.79<br>(267.21 to 490.16)          | 415.63<br>(295.93 to 539.86)          | 19.21<br>(14.03 to 23.26)          | 27.20<br>(19.00 to 35.06)          | 25.70<br>(18.19 to 33.12)          | 25.37<br>(17.64 to 32.42)          |
| Neurological disorders                     | 13,251.47<br>(11,310.34 to 15,824.52) | 22,468.87<br>(17,524.75 to 30,071.98) | 23,700.34<br>(18,688.76 to 30,583.56) | 22,331.77<br>(16,922.41 to 30,687.44) | 1,249.62<br>(1,055.58 to 1,495.99) | 2,227.15<br>(1,623.57 to 3,054.42) | 2,487.03<br>(1,930.34 to 3,255.66) | 2,150.97<br>(1,466.95 to 3,104.91) |
| Alzheimer's disease and other dementias    | 9,698.36<br>(8,001.96 to 11,974.53)   | 17,032.55<br>(12,428.04 to 24,586.37) | 17,965.51<br>(13,378.18 to 24,509.63) | 17,159.74<br>(11,837.87 to 25,467.10) | 1,059.51<br>(875.69 to 1,307.16)   | 1,874.14<br>(1,295.84 to 2,687.47) | 2,070.02<br>(1,509.79 to 2,811.84) | 1,832.96<br>(1,172.57 to 2,739.32) |
| Parkinson's disease                        | 1,628.32<br>(1,211.21 to 2,140.01)    | 3,117.97<br>(2,279.12 to 4,125.71)    | 3,759.60<br>(2,779.54 to 4,944.96)    | 2,795.54<br>(2,041.11 to 3,686.66)    | 141.61<br>(105.83 to 187.78)       | 282.22<br>(206.43 to 375.85)       | 352.31<br>(260.58 to 465.33)       | 247.79<br>(176.99 to 333.26)       |
| Epilepsy                                   | 761.68<br>(659.79 to 867.14)          | 1,154.64<br>(664.43 to 2,067.89)      | 802.31<br>(484.98 to 1,413.25)        | 1,219.88<br>(699.98 to 2,197.60)      | 17.26<br>(15.18 to 19.54)          | 31.15<br>(19.59 to 50.01)          | 22.84<br>(15.23 to 35.32)          | 32.02<br>(20.37 to 51.32)          |
| Multiple sclerosis                         | 241.58<br>(160.44 to 289.25)          | 235.08<br>(160.29 to 312.14)          | 246.03<br>(167.93 to 326.30)          | 234.02<br>(156.31 to 315.69)          | 7.90<br>(6.02 to 9.30)             | 9.58<br>(7.22 to 12.39)            | 10.68<br>(8.06 to 13.92)           | 9.20<br>(6.95 to 11.99)            |
| Motor neuron disease                       | 133.79<br>(116.05 to 151.98)          | 195.25<br>(154.08 to 235.61)          | 192.78<br>(150.09 to 233.39)          | 189.75<br>(149.31 to 226.99)          | 4.72<br>(4.12 to 5.34)             | 7.67<br>(6.37 to 8.91)             | 7.83<br>(6.11 to 9.20)             | 7.31<br>(6.11 to 8.51)             |
| Other neurological disorders               | 787.73<br>(679.44 to 900.67)          | 733.39<br>(560.61 to 1,033.52)        | 724.11<br>(552.63 to 1,023.43)        | 732.84<br>(557.33 to 1,047.58)        | 18.63<br>(16.42 to 20.97)          | 23.59<br>(18.27 to 27.76)          | 23.37<br>(18.87 to 28.93)          | 21.69<br>(17.81 to 26.74)          |
| Mental disorders                           | 3,002.73<br>(2,557.92 to 3,494.74)    | 3,858.83<br>(2,933.71 to 5,128.90)    | 4,366.09<br>(3,309.20 to 5,725.20)    | 3,769.89<br>(2,881.64 to 5,090.48)    | 97.27<br>(84.80 to 110.74)         | 150.95<br>(127.20 to 179.28)       | 181.44<br>(149.28 to 219.66)       | 142.92<br>(121.38 to 170.32)       |
| Alcohol use disorders                      | 1,334.89<br>(1,141.88 to 1,556.76)    | 1,376.90<br>(1,067.07 to 1,779.74)    | 1,479.26<br>(1,133.79 to 1,906.82)    | 1,350.28<br>(1,065.94 to 1,747.25)    | 47.61<br>(41.76 to 53.66)          | 62.50<br>(52.60 to 74.82)          | 72.39<br>(59.68 to 87.67)          | 59.12<br>(50.31 to 70.49)          |
| Drug use disorders                         | 1,666.64<br>(1,378.84 to 1,978.71)    | 2,480.82<br>(1,829.91 to 3,370.17)    | 2,885.68<br>(2,137.58 to 3,898.53)    | 2,418.49<br>(1,794.62 to 3,308.46)    | 49.63<br>(41.88 to 57.91)          | 88.43<br>(71.47 to 109.47)         | 109.03<br>(86.23 to 137.22)        | 83.78<br>(68.19 to 104.75)         |
| Opioid use disorders                       | 1,509.62<br>(1,233.06 to 1,796.88)    | 2,098.82<br>(1,518.59 to 2,935.98)    | 2,299.24<br>(1,649.26 to 3,199.58)    | 2,051.07<br>(1,486.31 to 2,885.47)    | 43.71<br>(36.16 to 51.20)          | 70.29<br>(55.20 to 89.76)          | 80.34<br>(62.49 to 103.22)         | 66.81<br>(52.56 to 86.33)          |



| Armenia                                                    |                                              |                                              |                                              |                                              |                                           |                                           |                                           |                                           |
|------------------------------------------------------------|----------------------------------------------|----------------------------------------------|----------------------------------------------|----------------------------------------------|-------------------------------------------|-------------------------------------------|-------------------------------------------|-------------------------------------------|
| Cause                                                      | YLLs (actual counts)                         |                                              |                                              |                                              | Deaths (actual counts)                    |                                           |                                           |                                           |
|                                                            | 2016                                         | 2040 Forecast                                | 2040 Better Scenario                         | 2040 Worse Scenario                          | 2016                                      | 2040 Forecast                             | 2040 Better Scenario                      | 2040 Worse Scenario                       |
| <b>Diabetes, urogenital, blood, and endocrine diseases</b> | <b>41,689.70</b><br>(37,434.66 to 46,210.06) | <b>48,969.18</b><br>(32,177.17 to 70,878.31) | <b>31,180.99</b><br>(21,124.09 to 45,009.42) | <b>52,838.61</b><br>(35,632.52 to 76,426.51) | <b>2,210.65</b><br>(1,988.75 to 2,432.09) | <b>3,032.74</b><br>(2,089.28 to 4,178.38) | <b>2,041.48</b><br>(1,442.71 to 2,833.33) | <b>3,157.58</b><br>(2,210.04 to 4,407.48) |
| Diabetes mellitus                                          | 24,767.50<br>(22,075.95 to 27,942.98)        | 29,898.74<br>(16,662.38 to 49,009.95)        | 17,460.57<br>(9,741.99 to 28,534.53)         | 32,992.56<br>(18,194.51 to 54,517.69)        | 1,271.15<br>(1,136.05 to 1,424.07)        | 1,759.64<br>(1,005.24 to 2,778.25)        | 1,075.77<br>(632.48 to 1,694.79)          | 1,879.00<br>(1,078.90 to 3,029.84)        |
| Acute glomerulonephritis                                   | 25.63<br>(22.06 to 29.70)                    | 73.23<br>(47.50 to 109.67)                   | 55.79<br>(35.13 to 82.56)                    | 72.77<br>(47.82 to 109.65)                   | 0.80<br>(0.67 to 0.96)                    | 3.35<br>(2.17 to 5.14)                    | 2.69<br>(1.68 to 4.19)                    | 3.21<br>(2.08 to 4.81)                    |
| Chronic kidney disease                                     | 7,223.05<br>(6,414.18 to 8,012.16)           | 9,400.03<br>(5,227.78 to 17,207.55)          | 6,283.34<br>(3,616.55 to 11,473.99)          | 10,539.05<br>(5,882.99 to 19,086.19)         | 594.49<br>(351.67 to 434.48)              | 623.83<br>(351.97 to 1,123.90)            | 441.24<br>(250.29 to 816.78)              | 677.98<br>(375.97 to 1,221.96)            |
| Chronic kidney disease due to diabetes mellitus            | 3,175.91<br>(2,722.26 to 3,656.13)           | 4,715.16<br>(2,499.19 to 9,060.76)           | 3,177.38<br>(1,721.65 to 6,178.62)           | 5,308.12<br>(2,791.85 to 10,253.49)          | 173.35<br>(146.91 to 200.60)              | 298.09<br>(156.68 to 576.81)              | 211.35<br>(114.95 to 406.91)              | 325.50<br>(169.13 to 629.24)              |
| Chronic kidney disease due to hypertension                 | 524.28<br>(414.99 to 641.01)                 | 820.66<br>(431.99 to 1,551.29)               | 612.20<br>(333.36 to 1,157.68)               | 895.79<br>(461.84 to 1,693.04)               | 43.88<br>(34.93 to 54.87)                 | 76.15<br>(39.53 to 139.33)                | 60.07<br>(32.23 to 109.81)                | 80.35<br>(41.58 to 147.48)                |
| Chronic kidney disease due to glomerulonephritis           | 1,559.35<br>(1,289.36 to 1,841.04)           | 1,595.29<br>(885.64 to 2,885.80)             | 994.46<br>(570.36 to 1,860.21)               | 1,796.67<br>(988.71 to 3,218.53)             | 72.29<br>(57.82 to 89.24)                 | 95.95<br>(50.34 to 183.86)                | 62.68<br>(33.99 to 121.77)                | 105.38<br>(55.19 to 203.23)               |
| Chronic kidney disease due to other and unspecified causes | 1,963.52<br>(1,637.19 to 2,334.71)           | 2,268.92<br>(1,260.44 to 4,058.71)           | 1,499.31<br>(855.37 to 2,675.24)             | 2,538.47<br>(1,374.55 to 4,500.91)           | 104.98<br>(83.70 to 127.48)               | 153.63<br>(82.17 to 274.66)               | 107.14<br>(58.71 to 196.66)               | 166.75<br>(88.94 to 301.05)               |
| Urinary diseases and male infertility                      | 8,401.66<br>(7,487.78 to 9,343.62)           | 8,796.87<br>(7,145.37 to 10,405.22)          | 6,634.43<br>(5,164.27 to 8,275.13)           | 8,431.89<br>(7,006.27 to 9,893.57)           | 507.23<br>(453.77 to 561.70)              | 611.67<br>(499.70 to 729.10)              | 487.96<br>(389.66 to 599.87)              | 564.55<br>(461.93 to 668.84)              |
| Urinary tract infections                                   | 6,338.77<br>(4,796.12 to 7,367.47)           | 6,769.99<br>(4,593.76 to 8,530.97)           | 5,224.57<br>(3,575.02 to 6,801.94)           | 6,500.67<br>(4,510.51 to 8,086.41)           | 361.51<br>(232.56 to 431.05)              | 450.13<br>(274.38 to 584.08)              | 368.33<br>(222.30 to 489.51)              | 416.25<br>(257.47 to 539.56)              |
| Urolithiasis                                               | 950.64<br>(583.27 to 1,907.49)               | 1,091.16<br>(598.07 to 2,362.03)             | 767.22<br>(387.76 to 1,744.06)               | 1,029.10<br>(571.97 to 2,207.32)             | 74.83<br>(44.03 to 165.81)                | 91.06<br>(47.00 to 213.87)                | 67.79<br>(33.14 to 168.57)                | 83.16<br>(42.19 to 195.96)                |
| Other urinary diseases                                     | 1,112.25<br>(797.63 to 1,987.47)             | 935.72<br>(562.10 to 1,784.89)               | 642.65<br>(362.03 to 1,305.94)               | 902.12<br>(566.70 to 1,748.52)               | 70.89<br>(49.49 to 137.53)                | 70.47<br>(40.06 to 149.19)                | 51.84<br>(27.80 to 117.51)                | 65.14<br>(37.09 to 144.18)                |
| Gynecological diseases                                     | 71.32<br>(6.09 to 102.48)                    | 17.62<br>(1.46 to 33.49)                     | 9.58<br>(0.77 to 18.84)                      | 18.27<br>(1.50 to 34.29)                     | 2.29<br>(0.21 to 3.24)                    | 0.71<br>(0.06 to 1.23)                    | 0.40<br>(0.00 to 0.73)                    | 0.72<br>(0.07 to 1.25)                    |
| Uterine fibroids                                           | 61.88<br>(5.27 to 89.98)                     | 14.03<br>(1.09 to 27.97)                     | 7.98<br>(0.61 to 16.21)                      | 14.60<br>(1.15 to 28.45)                     | 1.90<br>(0.17 to 2.71)                    | 0.50<br>(0.05 to 0.94)                    | 0.29<br>(0.03 to 0.56)                    | 0.51<br>(0.05 to 0.96)                    |
| Polycystic ovarian syndrome                                | -4.04<br>(0.18 to 9.10)                      | 0.79<br>(0.03 to 2.24)                       | 0.25<br>(0.01 to 0.70)                       | 0.86<br>(0.03 to 2.28)                       | 0.09<br>(0.00 to 0.21)                    | 0.02<br>(0.00 to 0.05)                    | 0.01<br>(0.00 to 0.02)                    | 0.02<br>(0.00 to 0.05)                    |
| Endometriosis                                              | 0.23<br>(0.03 to 0.48)                       | 0.10<br>(0.01 to 0.28)                       | 0.05<br>(0.00 to 0.14)                       | 0.11<br>(0.01 to 0.30)                       | 0.01<br>(0.00 to 0.01)                    | 0.00<br>(0.00 to 0.01)                    | 0.00<br>(0.00 to 0.00)                    | 0.00<br>(0.00 to 0.01)                    |
| Genital prolapse                                           | 2.75<br>(0.22 to 4.21)                       | 1.07<br>(0.08 to 2.24)                       | 0.53<br>(0.03 to 1.19)                       | 1.10<br>(0.07 to 2.27)                       | 0.17<br>(0.01 to 0.26)                    | 0.07<br>(0.00 to 0.14)                    | 0.03<br>(0.00 to 0.08)                    | 0.07<br>(0.00 to 0.15)                    |
| Other gynecological diseases                               | 2.42<br>(0.28 to 3.78)                       | 1.63<br>(0.14 to 3.36)                       | 0.79<br>(0.06 to 1.79)                       | 1.62<br>(0.15 to 3.24)                       | 0.12<br>(0.01 to 0.20)                    | 0.12<br>(0.01 to 0.27)                    | 0.06<br>(0.00 to 0.15)                    | 0.12<br>(0.01 to 0.27)                    |
| Hemoglobinopathies and hemolytic anemias                   | 250.07<br>(206.69 to 302.39)                 | 190.53<br>(140.23 to 252.71)                 | 126.62<br>(92.64 to 172.82)                  | 192.85<br>(142.83 to 258.67)                 | 8.06<br>(6.55 to 9.72)                    | 8.98<br>(6.80 to 11.26)                   | 6.41<br>(4.80 to 8.37)                    | 8.66<br>(6.67 to 10.85)                   |
| Thalassemias                                               | 39.82<br>(25.42 to 55.61)                    | 9.92<br>(5.41 to 16.97)                      | 8.67<br>(4.94 to 14.36)                      | 10.82<br>(5.91 to 18.33)                     | 0.49<br>(0.31 to 0.68)                    | 0.13<br>(0.07 to 0.22)                    | 0.11<br>(0.07 to 0.18)                    | 0.14<br>(0.08 to 0.23)                    |

|                                                   |                                   |                                 |                                 |                                 |                              |                              |                              |                              |
|---------------------------------------------------|-----------------------------------|---------------------------------|---------------------------------|---------------------------------|------------------------------|------------------------------|------------------------------|------------------------------|
|                                                   | 65.20<br>(50.32 to<br>80.95)      | 52.35<br>(33.41 to<br>83.21)    | 32.24<br>(19.65 to<br>51.29)    | 54.74<br>(34.51 to<br>87.33)    | 1.19<br>(0.96 to<br>1.50)    | 1.09<br>(0.72 to<br>1.68)    | 0.68<br>(0.42 to<br>1.07)    | 1.13<br>(0.74 to<br>1.72)    |
| Sickle cell disorders                             |                                   |                                 |                                 |                                 |                              |                              |                              |                              |
|                                                   | 41.97<br>(33.78 to<br>54.36)      | 37.26<br>(25.40 to<br>52.69)    | 22.15<br>(14.47 to<br>32.84)    | 38.55<br>(26.79 to<br>55.16)    | 1.02<br>(0.82 to<br>1.34)    | 1.15<br>(0.82 to<br>1.59)    | 0.70<br>(0.48 to<br>1.00)    | 1.17<br>(0.85 to<br>1.60)    |
| G6PD deficiency                                   |                                   |                                 |                                 |                                 |                              |                              |                              |                              |
|                                                   | 103.08<br>(83.09 to<br>130.07)    | 91.01<br>(68.15 to<br>116.45)   | 63.56<br>(47.98 to<br>84.66)    | 88.74<br>(68.38 to<br>113.30)   | 5.36<br>(4.24 to<br>6.49)    | 6.60<br>(4.91 to<br>8.30)    | 4.91<br>(3.60 to<br>6.43)    | 6.21<br>(4.75 to<br>7.85)    |
| Other hemoglobinopathies and hemolytic anemias    |                                   |                                 |                                 |                                 |                              |                              |                              |                              |
|                                                   | 950.46<br>(614.10 to<br>1,103.91) | 592.15<br>(354.45 to<br>770.27) | 610.66<br>(377.81 to<br>804.33) | 591.21<br>(360.82 to<br>776.71) | 26.63<br>(17.21 to<br>30.58) | 24.57<br>(15.54 to<br>29.73) | 27.01<br>(17.03 to<br>33.19) | 23.46<br>(14.87 to<br>28.41) |
| Endocrine, metabolic, blood, and immune disorders |                                   |                                 |                                 |                                 |                              |                              |                              |                              |

| Armenia                                       |                                              |                                           |                                           |                                           |                                     |                                   |                                  |                                   |
|-----------------------------------------------|----------------------------------------------|-------------------------------------------|-------------------------------------------|-------------------------------------------|-------------------------------------|-----------------------------------|----------------------------------|-----------------------------------|
| Cause                                         | YLLs (actual counts)                         |                                           |                                           |                                           | Deaths (actual counts)              |                                   |                                  |                                   |
|                                               | 2016                                         | 2040 Forecast                             | 2040 Better Scenario                      | 2040 Worse Scenario                       | 2016                                | 2040 Forecast                     | 2040 Better Scenario             | 2040 Worse Scenario               |
| <b>Musculoskeletal disorders</b>              | <b>495.14</b><br>(291.46 to 586.63)          | <b>551.79</b><br>(327.08 to 702.20)       | <b>409.66</b><br>(253.86 to 532.84)       | <b>545.92</b><br>(325.62 to 694.87)       | <b>19.98</b><br>(12.96 to 23.31)    | <b>29.51</b><br>(20.30 to 36.62)  | <b>22.21</b><br>(16.15 to 28.49) | <b>28.35</b><br>(19.53 to 35.28)  |
| Rheumatoid arthritis                          | 155.01<br>(91.92 to 201.11)                  | 227.12<br>(137.19 to 325.18)              | 122.65<br>(69.88 to 191.73)               | 229.98<br>(170.46 to 331.08)              | 7.72<br>(4.68 to 9.61)              | 13.88<br>(8.65 to 19.07)          | 7.80<br>(4.73 to 11.63)          | 13.66<br>(8.49 to 18.86)          |
| Other musculoskeletal disorders               | 340.12<br>(183.54 to 411.72)                 | 324.67<br>(185.93 to 417.46)              | 287.01<br>(170.46 to 367.74)              | 315.94<br>(206.07 to 406.07)              | 12.26<br>(7.92 to 14.53)            | 15.63<br>(11.30 to 19.21)         | 14.41<br>(10.54 to 17.88)        | 14.70<br>(10.35 to 18.30)         |
| <b>Other non-communicable diseases</b>        | <b>15,487.40</b><br>(10,601.45 to 21,915.09) | <b>4,825.25</b><br>(2,928.86 to 7,452.64) | <b>2,391.29</b><br>(1,407.90 to 3,745.54) | <b>5,515.04</b><br>(3,367.31 to 8,661.57) | <b>197.22</b><br>(138.07 to 271.08) | <b>78.75</b><br>(48.18 to 111.69) | <b>44.33</b><br>(26.34 to 63.15) | <b>86.32</b><br>(54.74 to 123.27) |
| Congenital birth defects                      | 15,086.30<br>(10,345.05 to 21,550.18)        | 4,585.46<br>(2,767.35 to 7,224.37)        | 2,202.77<br>(1,275.69 to 3,536.71)        | 5,270.66<br>(3,228.12 to 8,352.65)        | 188.45<br>(133.66 to 262.50)        | 67.34<br>(42.71 to 97.54)         | 34.14<br>(20.80 to 50.66)        | 75.62<br>(48.96 to 111.99)        |
| Neural tube defects                           | 1,016.67<br>(634.50 to 1,532.58)             | 134.49<br>(63.89 to 268.65)               | 53.36<br>(24.33 to 108.11)                | 162.16<br>(76.99 to 316.17)               | 11.96<br>(7.53 to 17.95)            | 1.67<br>(0.84 to 3.24)            | 0.67<br>(0.32 to 1.33)           | 2.00<br>(1.00 to 3.79)            |
| Congenital heart anomalies                    | 6,558.94<br>(4,269.81 to 9,549.61)           | 2,038.55<br>(1,217.85 to 3,287.70)        | 850.83<br>(468.73 to 1,478.60)            | 2,337.34<br>(1,384.63 to 3,786.79)        | 83.09<br>(55.34 to 118.16)          | 30.30<br>(18.45 to 46.02)         | 12.92<br>(7.49 to 21.12)         | 33.99<br>(21.19 to 51.50)         |
| Orofacial clefts                              | 34.65<br>(14.92 to 89.40)                    | 11.45<br>(3.36 to 38.27)                  | 3.45<br>(1.01 to 10.77)                   | 14.14<br>(4.24 to 45.24)                  | 0.40<br>(0.17 to 1.03)              | 0.13<br>(0.04 to 0.44)            | 0.04<br>(0.01 to 0.12)           | 0.16<br>(0.05 to 0.52)            |
| Down syndrome                                 | 219.05<br>(162.09 to 361.95)                 | 203.89<br>(120.48 to 284.18)              | 210.22<br>(124.73 to 288.77)              | 4.33<br>(2.67 to 5.99)                    | 4.99<br>(3.04 to 5.59)              | 5.22<br>(2.73 to 7.08)            | 5.09<br>(2.73 to 7.25)           | 5.09<br>(2.64 to 7.14)            |
| Other chromosomal abnormalities               | 85.00<br>(51.43 to 132.23)                   | 43.05<br>(21.73 to 82.08)                 | 29.49<br>(14.79 to 56.92)                 | 49.87<br>(25.36 to 93.24)                 | 1.01<br>(0.61 to 1.55)              | 0.54<br>(0.27 to 0.99)            | 0.37<br>(0.19 to 0.69)           | 0.62<br>(0.31 to 1.12)            |
| Congenital musculoskeletal and limb anomalies | 1,039.89<br>(656.75 to 1,619.12)             | 337.89<br>(181.31 to 587.32)              | 168.06<br>(87.44 to 296.73)               | 389.60<br>(209.74 to 685.93)              | 12.62<br>(8.14 to 19.29)            | 4.64<br>(2.59 to 7.59)            | 2.34<br>(1.28 to 3.96)           | 5.26<br>(3.02 to 8.78)            |
| Urogenital congenital anomalies               | 90.94<br>(33.80 to 165.68)                   | 38.35<br>(15.99 to 65.68)                 | 22.56<br>(9.36 to 39.07)                  | 41.44<br>(17.11 to 72.28)                 | 1.42<br>(0.57 to 2.36)              | 0.84<br>(0.36 to 1.34)            | 0.51<br>(0.22 to 0.82)           | 0.87<br>(0.37 to 1.40)            |
| Digestive congenital anomalies                | 1,988.11<br>(726.41 to 3,123.14)             | 629.58<br>(207.92 to 1,246.51)            | 283.81<br>(85.50 to 584.28)               | 747.16<br>(242.36 to 1,505.37)            | 23.36<br>(8.64 to 36.47)            | 7.65<br>(2.68 to 14.82)           | 3.48<br>(1.15 to 6.97)           | 9.03<br>(3.04 to 17.85)           |
| Other congenital birth defects                | 4,053.05<br>(2,785.61 to 6,456.66)           | 1,148.22<br>(688.06 to 1,896.35)          | 580.99<br>(323.74 to 1,023.56)            | 1,318.21<br>(769.27 to 2,235.32)          | 50.25<br>(35.39 to 78.57)           | 16.58<br>(10.53 to 25.76)         | 8.58<br>(5.16 to 13.75)          | 18.61<br>(11.77 to 29.55)         |
| Skin and subcutaneous diseases                | 133.47<br>(37.73 to 190.99)                  | 177.17<br>(45.89 to 265.82)               | 151.15<br>(40.12 to 230.14)               | 171.04<br>(45.71 to 253.49)               | 5.66<br>(1.39 to 8.33)              | 10.68<br>(2.56 to 16.02)          | 9.75<br>(4.63 to 14.63)          | 9.85<br>(2.33 to 14.83)           |
| Cellulitis                                    | 26.50<br>(5.00 to 41.47)                     | 42.26<br>(6.70 to 71.78)                  | 39.51<br>(6.34 to 66.56)                  | 40.60<br>(6.57 to 68.21)                  | 1.08<br>(0.15 to 1.81)              | 2.26<br>(0.28 to 4.01)            | 2.18<br>(0.28 to 3.91)           | 2.11<br>(0.26 to 3.75)            |
| Pyoderma                                      | 80.23<br>(22.39 to 113.57)                   | 106.75<br>(26.94 to 158.85)               | 89.94<br>(23.36 to 135.90)                | 103.17<br>(26.29 to 152.26)               | 3.31<br>(0.84 to 4.81)              | 6.58<br>(1.55 to 9.90)            | 6.06<br>(1.48 to 9.08)           | 6.02<br>(1.44 to 9.22)            |
| Decubitus ulcer                               | 10.46<br>(3.73 to 14.34)                     | 12.50<br>(4.16 to 19.41)                  | 9.05<br>(2.98 to 14.20)                   | 12.01<br>(4.04 to 18.62)                  | 0.56<br>(0.16 to 0.82)              | 0.96<br>(0.27 to 1.55)            | 0.75<br>(0.21 to 1.21)           | 0.88<br>(0.24 to 1.42)            |
| Other skin and subcutaneous diseases          | 16.27<br>(4.67 to 25.42)                     | 15.66<br>(4.70 to 26.05)                  | 12.65<br>(3.85 to 21.14)                  | 15.26<br>(4.60 to 24.97)                  | 0.71<br>(0.18 to 1.16)              | 0.89<br>(0.24 to 1.55)            | 0.76<br>(0.22 to 1.34)           | 0.84<br>(0.23 to 1.42)            |
| Sudden infant death syndrome                  | 267.64<br>(146.49 to 434.41)                 | 62.61<br>(22.55 to 145.88)                | 37.37<br>(13.15 to 92.14)                 | 73.34<br>(26.65 to 165.11)                | 3.11<br>(1.70 to 5.04)              | 0.73<br>(0.26 to 1.69)            | 0.43<br>(0.15 to 1.07)           | 0.85<br>(0.31 to 1.92)            |

|                          |                                          |                                          |                                          |                                          |                                     |                                     |                                     |                                     |
|--------------------------|------------------------------------------|------------------------------------------|------------------------------------------|------------------------------------------|-------------------------------------|-------------------------------------|-------------------------------------|-------------------------------------|
| Injuries                 | 44,359.36<br>(38,337.15 to<br>51,011.75) | 44,181.11<br>(24,090.66 to<br>86,975.60) | 32,311.14<br>(17,214.21 to<br>57,193.50) | 45,501.67<br>(24,952.59 to<br>89,984.45) | 1,104.23<br>(966.96 to<br>1,251.68) | 1,315.31<br>(847.97 to<br>2,105.66) | 1,013.17<br>(629.37 to<br>1,430.48) | 1,308.77<br>(835.88 to<br>2,069.72) |
| Transport injuries       | 12,900.06<br>(11,032.85 to<br>15,057.16) | 14,364.83<br>(7,442.74 to<br>30,643.31)  | 10,152.64<br>(5,546.24 to<br>20,927.56)  | 15,118.92<br>(7,765.70 to<br>32,152.91)  | 290.47<br>(251.92 to<br>338.55)     | 371.29<br>(219.18 to<br>657.24)     | 267.20<br>(164.03 to<br>474.53)     | 381.98<br>(222.06 to<br>698.63)     |
| Road injuries            | 12,210.93<br>(10,477.97 to<br>14,233.67) | 13,579.93<br>(7,074.94 to<br>28,456.95)  | 9,741.89<br>(5,327.75 to<br>20,007.34)   | 14,297.44<br>(7,338.41 to<br>30,258.35)  | 275.83<br>(239.60 to<br>318.08)     | 352.58<br>(208.69 to<br>622.75)     | 257.08<br>(158.31 to<br>453.52)     | 362.80<br>(212.52 to<br>661.76)     |
| Pedestrian road injuries | 3,361.95<br>(2,794.24 to<br>4,312.39)    | 3,538.32<br>(2,000.67 to<br>6,707.86)    | 1,751.74<br>(971.96 to<br>3,062.15)      | 3,729.96<br>(2,071.41 to<br>7,083.58)    | 90.59<br>(75.89 to<br>110.64)       | 114.84<br>(72.34 to<br>185.21)      | 60.14<br>(37.50 to<br>91.30)        | 117.41<br>(73.78 to<br>192.15)      |

| Armenia                                         |                                                               |                                                              |                                                             |                                                              |                                                      |                                                      |                                                      |                                                      |
|-------------------------------------------------|---------------------------------------------------------------|--------------------------------------------------------------|-------------------------------------------------------------|--------------------------------------------------------------|------------------------------------------------------|------------------------------------------------------|------------------------------------------------------|------------------------------------------------------|
| Cause                                           | YLLs (actual counts)                                          |                                                              |                                                             |                                                              | Deaths (actual counts)                               |                                                      |                                                      |                                                      |
|                                                 | 2016                                                          | 2040 Forecast                                                | 2040 Better Scenario                                        | 2040 Worse Scenario                                          | 2016                                                 | 2040 Forecast                                        | 2040 Better Scenario                                 | 2040 Worse Scenario                                  |
| Cyclist road injuries                           | 347.10<br>(273.05 to<br>426.31)                               | 301.08<br>(145.26 to<br>664.22)                              | 244.38<br>(126.21 to<br>511.33)                             | 315.20<br>(152.39 to<br>691.95)                              | 7.84<br>(6.04 to<br>9.59)                            | 7.69<br>(4.06 to<br>14.69)                           | 6.53<br>(3.70 to<br>11.71)                           | 7.88<br>(4.12 to<br>14.99)                           |
| Motorcyclist road injuries                      | 1,960.62<br>(1,518.97 to<br>2,512.31)                         | 2,371.58<br>(923.93 to<br>6,111.62)                          | 1,943.82<br>(816.85 to<br>4,842.81)                         | 2,473.17<br>(945.93 to<br>6,409.27)                          | 36.75<br>(28.82 to<br>46.38)                         | 46.16<br>(19.64 to<br>107.87)                        | 38.36<br>(17.65 to<br>85.39)                         | 47.81<br>(20.40 to<br>111.60)                        |
| Motor vehicle road injuries                     | 6,321.69<br>(4,837.70 to<br>7,587.58)                         | 7,075.63<br>(3,639.54 to<br>15,196.78)                       | 5,567.88<br>(3,079.12 to<br>11,395.82)                      | 7,470.28<br>(3,786.73 to<br>16,059.35)                       | 135.54<br>(106.70 to<br>160.36)                      | 176.03<br>(102.06 to<br>324.49)                      | 145.34<br>(90.67 to<br>256.40)                       | 181.72<br>(104.01 to<br>355.53)                      |
| Other road injuries                             | 219.57<br>(142.34 to<br>286.08)                               | 293.52<br>(131.33 to<br>668.90)                              | 234.07<br>(110.57 to<br>518.82)                             | 308.83<br>(137.60 to<br>720.24)                              | 5.12<br>(3.56 to<br>6.60)                            | 7.85<br>(3.76 to<br>15.77)                           | 6.71<br>(3.45 to<br>12.80)                           | 7.99<br>(3.81 to<br>16.14)                           |
| Other transport injuries                        | 689.13<br>(554.25 to<br>841.22)                               | 784.90<br>(350.98 to<br>1,834.59)                            | 410.75<br>(187.72 to<br>939.82)                             | 821.49<br>(355.57 to<br>1,946.82)                            | 14.64<br>(12.01 to<br>17.66)                         | 18.72<br>(9.60 to<br>37.82)                          | 10.12<br>(5.31 to<br>19.65)                          | 19.18<br>(9.82 to<br>39.73)                          |
| <b>Unintentional injuries</b>                   | <b>16,782.89</b><br><b>(14,282.08 to</b><br><b>21,365.64)</b> | <b>13,185.62</b><br><b>(8,796.85 to</b><br><b>21,845.03)</b> | <b>9,284.09</b><br><b>(6,253.11 to</b><br><b>15,474.77)</b> | <b>13,460.59</b><br><b>(9,008.46 to</b><br><b>23,294.56)</b> | <b>445.89</b><br><b>(391.92 to</b><br><b>530.86)</b> | <b>473.35</b><br><b>(372.95 to</b><br><b>634.51)</b> | <b>365.49</b><br><b>(289.29 to</b><br><b>469.71)</b> | <b>460.37</b><br><b>(361.62 to</b><br><b>624.54)</b> |
| Falls                                           | 2,780.49<br>(2,169.35 to<br>5,042.10)                         | 2,916.51<br>(2,030.02 to<br>4,988.13)                        | 2,335.92<br>(1,608.48 to<br>3,918.69)                       | 2,882.81<br>(2,021.94 to<br>5,043.31)                        | 98.70<br>(83.50 to<br>140.47)                        | 138.98<br>(111.36 to<br>177.17)                      | 117.85<br>(94.03 to<br>151.39)                       | 130.76<br>(104.21 to<br>171.64)                      |
| Drowning                                        | 3,111.34<br>(2,643.51 to<br>3,636.42)                         | 2,628.05<br>(1,226.64 to<br>6,318.67)                        | 1,739.05<br>(809.12 to<br>4,100.41)                         | 2,749.92<br>(1,258.00 to<br>6,660.15)                        | 61.28<br>(53.01 to<br>70.84)                         | 60.09<br>(33.51 to<br>122.93)                        | 41.65<br>(23.74 to<br>83.48)                         | 61.21<br>(32.90 to<br>123.81)                        |
| Fire, heat, and hot substances                  | 1,549.82<br>(1,261.09 to<br>2,469.40)                         | 1,233.58<br>(737.03 to<br>2,255.04)                          | 733.74<br>(435.09 to<br>1,319.47)                           | 1,273.04<br>(753.61 to<br>2,319.74)                          | 42.92<br>(36.21 to<br>62.76)                         | 47.06<br>(31.94 to<br>73.72)                         | 30.53<br>(20.70 to<br>45.60)                         | 46.33<br>(31.26 to<br>72.62)                         |
| Poisonings                                      | 1,621.10<br>(815.58 to<br>1,500.63)                           | 456.57<br>(235.80 to<br>899.16)                              | 231.86<br>(119.54 to<br>461.09)                             | 484.40<br>(250.32 to<br>960.45)                              | 23.32<br>(18.95 to<br>33.11)                         | 12.62<br>(7.40 to<br>22.12)                          | 6.80<br>(3.96 to<br>11.72)                           | 12.99<br>(7.55 to<br>22.76)                          |
| Exposure to mechanical forces                   | 1,858.81<br>(1,516.68 to<br>2,186.48)                         | 1,183.87<br>(753.70 to<br>2,022.29)                          | 826.00<br>(517.38 to<br>1,313.97)                           | 1,214.90<br>(788.11 to<br>2,097.98)                          | 47.79<br>(36.08 to<br>55.76)                         | 40.30<br>(24.92 to<br>55.20)                         | 31.27<br>(18.01 to<br>42.26)                         | 39.39<br>(24.87 to<br>54.93)                         |
| Unintentional firearm injuries                  | 802.35<br>(655.75 to<br>979.32)                               | 514.94<br>(344.81 to<br>819.37)                              | 378.34<br>(248.20 to<br>581.62)                             | 520.77<br>(345.87 to<br>859.38)                              | 25.13<br>(18.27 to<br>29.23)                         | 22.16<br>(12.57 to<br>29.56)                         | 18.34<br>(9.84 to<br>23.95)                          | 21.28<br>(12.57 to<br>28.58)                         |
| Unintentional suffocation                       | 478.44<br>(321.70 to<br>605.33)                               | 280.47<br>(133.14 to<br>494.99)                              | 198.57<br>(91.43 to<br>349.51)                              | 294.09<br>(139.72 to<br>520.79)                              | 8.93<br>(5.41 to<br>11.27)                           | 6.09<br>(2.67 to<br>10.16)                           | 4.53<br>(1.91 to<br>7.57)                            | 6.18<br>(2.74 to<br>10.11)                           |
| Other exposure to mechanical forces             | 578.02<br>(422.80 to<br>692.21)                               | 388.47<br>(241.38 to<br>696.99)                              | 249.09<br>(154.32 to<br>431.21)                             | 400.03<br>(249.31 to<br>725.16)                              | 13.73<br>(10.54 to<br>16.04)                         | 12.06<br>(7.99 to<br>17.08)                          | 8.40<br>(5.43 to<br>11.98)                           | 11.93<br>(8.06 to<br>17.26)                          |
| Adverse effects of medical treatment            | 1,352.91<br>(1,064.07 to<br>1,985.79)                         | 1,284.21<br>(941.93 to<br>1,884.62)                          | 1,068.93<br>(776.59 to<br>1,544.99)                         | 1,276.56<br>(936.94 to<br>1,885.94)                          | 46.14<br>(36.60 to<br>61.96)                         | 60.74<br>(45.72 to<br>78.09)                         | 53.75<br>(40.33 to<br>68.44)                         | 57.79<br>(43.39 to<br>76.11)                         |
| Animal contact                                  | 384.00<br>(298.42 to<br>573.17)                               | 385.04<br>(182.51 to<br>459.50)                              | 199.19<br>(128.07 to<br>308.79)                             | 295.60<br>(189.47 to<br>468.08)                              | 9.42<br>(6.87 to<br>12.75)                           | 9.07<br>(5.71 to<br>12.46)                           | 6.68<br>(4.24 to<br>9.14)                            | 9.02<br>(5.72 to<br>12.53)                           |
| Venomous animal contact                         | 166.65<br>(110.78 to<br>248.76)                               | 108.63<br>(59.57 to<br>169.21)                               | 83.29<br>(47.02 to<br>126.43)                               | 113.46<br>(65.00 to<br>177.56)                               | 3.77<br>(2.41 to<br>5.45)                            | 3.14<br>(1.70 to<br>4.54)                            | 2.53<br>(1.41 to<br>3.55)                            | 3.16<br>(1.81 to<br>4.60)                            |
| Non-venomous animal contact                     | 217.36<br>(162.04 to<br>366.22)                               | 176.41<br>(110.40 to<br>296.64)                              | 115.90<br>(71.77 to<br>194.49)                              | 182.14<br>(113.63 to<br>303.10)                              | 5.65<br>(3.98 to<br>8.48)                            | 5.93<br>(3.65 to<br>8.43)                            | 4.16<br>(2.59 to<br>5.93)                            | 5.86<br>(3.70 to<br>8.49)                            |
| Foreign body                                    | 2,100.72<br>(1,741.90 to<br>2,797.10)                         | 1,177.54<br>(879.32 to<br>1,611.97)                          | 1,092.65<br>(813.76 to<br>1,508.20)                         | 1,191.92<br>(886.82 to<br>1,649.73)                          | 48.04<br>(40.77 to<br>57.85)                         | 40.36<br>(30.18 to<br>49.89)                         | 40.74<br>(29.78 to<br>50.35)                         | 38.67<br>(29.15 to<br>47.85)                         |
| Pulmonary aspiration and foreign body in airway | 1,422.47<br>(1,136.29 to<br>1,947.25)                         | 764.87<br>(562.57 to<br>1,052.51)                            | 653.35<br>(478.91 to<br>880.53)                             | 776.95<br>(574.24 to<br>1,070.66)                            | 31.14<br>(25.51 to<br>36.55)                         | 26.50<br>(17.56 to<br>33.07)                         | 24.90<br>(15.60 to<br>31.55)                         | 25.36<br>(17.25 to<br>31.61)                         |



|                                             |                                                               |                                                              |                                                             |                                                              |                                                      |                                                      |                                                      |                                                      |
|---------------------------------------------|---------------------------------------------------------------|--------------------------------------------------------------|-------------------------------------------------------------|--------------------------------------------------------------|------------------------------------------------------|------------------------------------------------------|------------------------------------------------------|------------------------------------------------------|
|                                             | 678.24<br>(513.77 to<br>1,034.44)                             | 412.67<br>(286.40 to<br>683.78)                              | 439.31<br>(306.11 to<br>701.06)                             | 414.97<br>(285.49 to<br>691.28)                              | 16.90<br>(13.09 to<br>24.95)                         | 13.87<br>(10.09 to<br>21.55)                         | 15.84<br>(11.39 to<br>23.35)                         | 13.32<br>(9.72 to<br>20.96)                          |
| Foreign body in other body part             |                                                               |                                                              |                                                             |                                                              |                                                      |                                                      |                                                      |                                                      |
|                                             | 1,139.74<br>(799.33 to<br>2,267.77)                           | 1,067.04<br>(654.81 to<br>2,042.22)                          | 656.30<br>(379.29 to<br>1,279.76)                           | 1,095.11<br>(660.67 to<br>2,117.40)                          | 35.01<br>(24.20 to<br>65.17)                         | 39.03<br>(24.47 to<br>66.20)                         | 25.19<br>(15.20 to<br>42.65)                         | 38.79<br>(24.96 to<br>66.54)                         |
| Environmental heat and cold exposure        |                                                               |                                                              |                                                             |                                                              |                                                      |                                                      |                                                      |                                                      |
|                                             | 1,483.96<br>(1,255.82 to<br>1,722.39)                         | 953.22<br>(564.33 to<br>1,663.16)                            | 400.46<br>(215.52 to<br>744.24)                             | 996.33<br>(604.71 to<br>1,778.39)                            | 33.26<br>(28.55 to<br>38.24)                         | 25.08<br>(16.74 to<br>37.67)                         | 11.02<br>(6.68 to<br>17.31)                          | 25.42<br>(17.54 to<br>38.44)                         |
| Other unintentional injuries                |                                                               |                                                              |                                                             |                                                              |                                                      |                                                      |                                                      |                                                      |
| <b>Self-harm and interpersonal violence</b> | <b>14,656.53</b><br><b>(10,078.11 to</b><br><b>17,835.16)</b> | <b>11,148.09</b><br><b>(5,826.52 to</b><br><b>21,610.55)</b> | <b>7,390.31</b><br><b>(3,897.48 to</b><br><b>13,533.47)</b> | <b>11,400.58</b><br><b>(5,904.48 to</b><br><b>22,301.62)</b> | <b>367.49</b><br><b>(252.85 to</b><br><b>440.09)</b> | <b>321.60</b><br><b>(177.42 to</b><br><b>554.78)</b> | <b>224.71</b><br><b>(126.86 to</b><br><b>366.30)</b> | <b>320.72</b><br><b>(177.24 to</b><br><b>557.77)</b> |

| Armenia                                                                             |                                                   |                                                        |                                                        |                                                        |                                                |                                                   |                                                   |                                                   |
|-------------------------------------------------------------------------------------|---------------------------------------------------|--------------------------------------------------------|--------------------------------------------------------|--------------------------------------------------------|------------------------------------------------|---------------------------------------------------|---------------------------------------------------|---------------------------------------------------|
| Cause                                                                               | YLLs (actual counts)                              |                                                        |                                                        |                                                        | Deaths (actual counts)                         |                                                   |                                                   |                                                   |
|                                                                                     | 2016                                              | 2040 Forecast                                          | 2040 Better Scenario                                   | 2040 Worse Scenario                                    | 2016                                           | 2040 Forecast                                     | 2040 Better Scenario                              | 2040 Worse Scenario                               |
| Self-harm                                                                           | 9,491.37<br>(5,972.26 to<br>11,683.94)            | 7,863.96<br>(3,619.23 to<br>16,091.88)                 | 5,226.75<br>(2,538.36 to<br>10,041.31)                 | 8,053.22<br>(3,664.18 to<br>16,446.97)                 | 252.23<br>(161.34 to<br>307.51)                | 238.41<br>(115.27 to<br>432.72)                   | 167.53<br>(84.91 to<br>281.15)                    | 237.38<br>(112.65 to<br>435.96)                   |
| Self-harm by firearm                                                                | 634.70<br>(320.00 to<br>919.06)                   | 393.99<br>(145.09 to<br>919.14)                        | 226.56<br>(89.54 to<br>506.27)                         | 407.18<br>(150.46 to<br>950.57)                        | 16.51<br>(9.63 to<br>22.58)                    | 11.77<br>(5.30 to<br>23.39)                       | 7.26<br>(3.42 to<br>13.49)                        | 11.77<br>(5.29 to<br>23.50)                       |
| Self-harm by other specified means                                                  | 8,856.68<br>(5,521.67 to<br>10,972.54)            | 7,469.97<br>(3,455.80 to<br>15,108.57)                 | 5,000.19<br>(2,428.43 to<br>9,587.72)                  | 7,646.04<br>(3,473.94 to<br>15,524.22)                 | 235.72<br>(149.18 to<br>287.49)                | 226.64<br>(109.86 to<br>412.94)                   | 160.28<br>(80.99 to<br>269.23)                    | 225.60<br>(107.80 to<br>412.86)                   |
| Interpersonal violence                                                              | 5,165.16<br>(3,229.27 to<br>7,540.36)             | 3,284.14<br>(1,602.01 to<br>7,025.11)                  | 2,163.57<br>(1,090.40 to<br>4,374.01)                  | 3,347.36<br>(1,645.60 to<br>7,171.83)                  | 115.26<br>(72.51 to<br>164.27)                 | 83.19<br>(42.70 to<br>151.83)                     | 57.18<br>(30.10 to<br>100.96)                     | 83.35<br>(43.75 to<br>154.88)                     |
| Physical violence by firearm                                                        | 1,195.34<br>(438.20 to<br>1,956.26)               | 695.00<br>(237.07 to<br>1,568.24)                      | 403.09<br>(143.89 to<br>923.33)                        | 712.50<br>(249.63 to<br>1,633.48)                      | 23.82<br>(9.00 to<br>38.80)                    | 14.74<br>(5.49 to<br>30.77)                       | 8.89<br>(3.48 to<br>18.40)                        | 14.96<br>(5.46 to<br>31.32)                       |
| Physical violence by sharp object                                                   | 1,230.80<br>(685.76 to<br>1,863.50)               | 811.39<br>(418.78 to<br>1,618.11)                      | 526.43<br>(262.58 to<br>998.76)                        | 815.86<br>(417.90 to<br>1,602.94)                      | 29.01<br>(16.00 to<br>42.46)                   | 22.35<br>(11.73 to<br>37.65)                      | 15.29<br>(8.08 to<br>24.89)                       | 22.01<br>(11.69 to<br>37.28)                      |
| Physical violence by other means                                                    | 2,739.01<br>(1,609.58 to<br>4,305.58)             | 1,777.75<br>(745.39 to<br>4,102.21)                    | 1,234.04<br>(543.86 to<br>2,740.63)                    | 1,819.00<br>(766.43 to<br>4,129.93)                    | 62.43<br>(36.12 to<br>97.62)                   | 46.11<br>(20.74 to<br>94.12)                      | 33.00<br>(15.73 to<br>65.07)                      | 46.38<br>(20.92 to<br>94.30)                      |
| <b>Forces of nature, conflict and terrorism, and executions and police conflict</b> | <b>19.88</b><br><b>(16.52 to</b><br><b>24.25)</b> | <b>5,482.57</b><br><b>(0.00 to</b><br><b>1,159.76)</b> | <b>5,484.10</b><br><b>(0.00 to</b><br><b>1,119.28)</b> | <b>5,521.57</b><br><b>(0.00 to</b><br><b>1,187.93)</b> | <b>0.38</b><br><b>(0.32 to</b><br><b>0.47)</b> | <b>149.07</b><br><b>(0.00 to</b><br><b>19.43)</b> | <b>155.77</b><br><b>(0.00 to</b><br><b>18.90)</b> | <b>145.70</b><br><b>(0.00 to</b><br><b>19.80)</b> |
| Exposure to forces of nature                                                        | 0.00<br>(0.00 to<br>0.00)                         | 5,424.52<br>(0.00 to<br>48.29)                         | 5,427.19<br>(0.00 to<br>47.95)                         | 5,462.52<br>(0.00 to<br>48.55)                         | 0.00<br>(0.00 to<br>0.00)                      | 147.91<br>(0.00 to<br>1.32)                       | 154.60<br>(0.00 to<br>1.37)                       | 144.53<br>(0.00 to<br>1.28)                       |
| Conflict and terrorism                                                              | 0.00<br>(0.00 to<br>0.00)                         | 58.05<br>(0.00 to<br>439.15)                           | 58.92<br>(0.00 to<br>427.60)                           | 59.05<br>(0.00 to<br>446.72)                           | 0.00<br>(0.00 to<br>0.00)                      | 1.17<br>(0.00 to<br>8.27)                         | 1.18<br>(0.00 to<br>8.41)                         | 1.16<br>(0.00 to<br>8.25)                         |
| Executions and police conflict                                                      | 19.88<br>(16.52 to<br>24.25)                      | 0.00<br>(0.00 to<br>0.00)                              | 0.00<br>(0.00 to<br>0.00)                              | 0.00<br>(0.00 to<br>0.00)                              | 0.38<br>(0.32 to<br>0.47)                      | 0.00<br>(0.00 to<br>0.00)                         | 0.00<br>(0.00 to<br>0.00)                         | 0.00<br>(0.00 to<br>0.00)                         |

| Azerbaijan                                                        |                                                   |                                                   |                                                 |                                                   |                                          |                                            |                                          |                                             |
|-------------------------------------------------------------------|---------------------------------------------------|---------------------------------------------------|-------------------------------------------------|---------------------------------------------------|------------------------------------------|--------------------------------------------|------------------------------------------|---------------------------------------------|
| Cause                                                             | YLLs (actual counts)                              |                                                   |                                                 |                                                   | Deaths (actual counts)                   |                                            |                                          |                                             |
|                                                                   | 2016                                              | 2040 Forecast                                     | 2040 Better Scenario                            | 2040 Worse Scenario                               | 2016                                     | 2040 Forecast                              | 2040 Better Scenario                     | 2040 Worse Scenario                         |
| All causes                                                        | 2,023,576.17<br>(1,717,210.31 to<br>2,395,107.20) | 2,165,607.09<br>(1,610,023.55 to<br>2,777,517.18) | 1,265,160.31<br>(937,007.91 to<br>1,602,477.35) | 2,692,989.54<br>(1,942,251.50 to<br>3,455,215.14) | 69,962.35<br>(60,580.54 to<br>81,219.27) | 111,991.49<br>(89,713.47 to<br>135,384.18) | 71,383.56<br>(56,756.68 to<br>86,954.16) | 131,147.19<br>(104,452.49 to<br>158,293.46) |
| Communicable, maternal, neonatal, and nutritional diseases        | 462,961.72<br>(327,260.96 to<br>641,732.03)       | 183,733.59<br>(117,008.64 to<br>292,927.28)       | 81,520.73<br>(52,557.21 to<br>124,769.69)       | 285,424.34<br>(169,120.36 to<br>492,840.85)       | 6,401.17<br>(4,794.85 to<br>8,481.18)    | 3,871.86<br>(2,680.93 to<br>5,836.70)      | 1,978.20<br>(1,402.05 to<br>2,771.96)    | 5,408.83<br>(3,630.51 to<br>8,547.62)       |
| HIV/AIDS and tuberculosis                                         | 29,365.91<br>(22,361.51 to<br>42,419.88)          | 21,279.54<br>(9,396.28 to<br>43,864.87)           | 6,327.41<br>(2,639.31 to<br>13,470.01)          | 27,319.93<br>(12,096.61 to<br>56,697.52)          | 665.78<br>(509.04 to<br>959.51)          | 570.07<br>(264.13 to<br>1,115.70)          | 172.93<br>(76.35 to<br>348.33)           | 713.54<br>(327.93 to<br>1,438.07)           |
| Tuberculosis                                                      | 27,549.43<br>(20,695.12 to<br>40,259.81)          | 19,291.07<br>(7,520.16 to<br>41,457.50)           | 5,216.64<br>(1,905.34 to<br>12,572.31)          | 24,253.30<br>(9,206.32 to<br>53,561.76)           | 628.68<br>(479.01 to<br>920.42)          | 526.96<br>(219.61 to<br>1,062.37)          | 147.96<br>(58.76 to<br>322.98)           | 648.38<br>(263.93 to<br>1,364.42)           |
| HIV/AIDS                                                          | 1,816.48<br>(1,147.25 to<br>3,574.16)             | 1,988.46<br>(720.83 to<br>4,011.42)               | 1,110.78<br>(227.37 to<br>3,161.19)             | 3,086.63<br>(1,445.75 to<br>5,280.23)             | 37.10<br>(22.46 to<br>78.55)             | 43.11<br>(13.26 to<br>89.69)               | 24.97<br>(4.12 to<br>74.06)              | 65.16<br>(28.45 to<br>115.80)               |
| Diarrhea, lower respiratory, and other common infectious diseases | 221,099.27<br>(152,438.52 to<br>315,806.38)       | 93,825.35<br>(48,417.77 to<br>185,124.92)         | 44,242.80<br>(25,098.24 to<br>80,305.57)        | 169,503.75<br>(77,417.57 to<br>355,132.23)        | 3,208.93<br>(2,385.68 to<br>4,339.65)    | 2,435.83<br>(1,548.19 to<br>4,015.10)      | 1,388.43<br>(923.15 to<br>2,123.45)      | 3,601.15<br>(2,142.92 to<br>6,281.59)       |
| Diarrheal diseases                                                | 16,106.78<br>(8,776.66 to<br>27,712.87)           | 1,697.38<br>(111.46 to<br>7,335.39)               | 2,009.02<br>(213.18 to<br>7,600.16)             | 3,098.10<br>(177.18 to<br>13,052.27)              | 199.35<br>(112.85 to<br>332.56)          | 32.69<br>(4.67 to<br>116.23)               | 52.81<br>(10.29 to<br>170.44)            | 55.82<br>(6.07 to<br>203.84)                |
| Intestinal infectious diseases                                    | 20.18<br>(10.14 to<br>35.20)                      | 7.75<br>(1.64 to<br>19.51)                        | 9.70<br>(2.10 to<br>24.59)                      | 7.89<br>(1.58 to<br>19.66)                        | 0.41<br>(0.21 to<br>0.71)                | 0.26<br>(0.10 to<br>0.55)                  | 0.34<br>(0.13 to<br>0.74)                | 0.25<br>(0.09 to<br>0.54)                   |
| Typhoid fever                                                     | 12.64<br>(5.73 to<br>24.54)                       | 5.65<br>(0.96 to<br>15.59)                        | 8.29<br>(1.56 to<br>22.08)                      | 5.72<br>(0.96 to<br>15.60)                        | 0.27<br>(0.13 to<br>0.53)                | 0.17<br>(0.05 to<br>0.39)                  | 0.27<br>(0.09 to<br>0.61)                | 0.17<br>(0.05 to<br>0.39)                   |
| Paratyphoid fever                                                 | 2.20<br>(0.79 to<br>4.91)                         | 0.87<br>(0.12 to<br>2.56)                         | 0.51<br>(0.08 to<br>1.49)                       | 0.90<br>(0.13 to<br>2.69)                         | 0.05<br>(0.02 to<br>0.10)                | 0.05<br>(0.01 to<br>0.06)                  | 0.02<br>(0.00 to<br>0.04)                | 0.03<br>(0.01 to<br>0.07)                   |
| Other intestinal infectious diseases                              | 3.34<br>(1.82 to<br>13.23)                        | 1.23<br>(0.27 to<br>3.53)                         | 0.91<br>(0.20 to<br>2.59)                       | 1.28<br>(0.26 to<br>3.77)                         | 0.09<br>(0.03 to<br>0.21)                | 0.06<br>(0.02 to<br>0.15)                  | 0.05<br>(0.02 to<br>0.14)                | 0.06<br>(0.02 to<br>0.14)                   |
| Lower respiratory infections                                      | 184,395.55<br>(124,523.65 to<br>267,482.76)       | 57,665.96<br>(19,502.79 to<br>148,511.42)         | 25,531.43<br>(10,344.42 to<br>57,217.75)        | 104,755.42<br>(28,742.20 to<br>287,659.14)        | 2,712.82<br>(1,994.17 to<br>3,708.62)    | 1,873.65<br>(1,013.28 to<br>3,296.56)      | 1,061.86<br>(650.18 to<br>1,711.46)      | 2,673.06<br>(1,272.31 to<br>5,375.13)       |
| Upper respiratory infections                                      | 69.81<br>(31.84 to<br>139.24)                     | 37.53<br>(9.87 to<br>90.52)                       | 14.21<br>(3.50 to<br>35.65)                     | 39.18<br>(9.88 to<br>98.40)                       | 1.52<br>(0.80 to<br>2.69)                | 1.74<br>(0.55 to<br>3.87)                  | 0.73<br>(0.22 to<br>1.71)                | 1.71<br>(0.55 to<br>3.91)                   |
| Otitis media                                                      | 3.00<br>(1.27 to<br>7.54)                         | 0.99<br>(0.22 to<br>3.06)                         | 1.10<br>(0.25 to<br>3.34)                       | 0.93<br>(0.20 to<br>2.86)                         | 0.08<br>(0.03 to<br>0.19)                | 0.06<br>(0.02 to<br>0.16)                  | 0.07<br>(0.02 to<br>0.20)                | 0.05<br>(0.01 to<br>0.14)                   |
| Meningitis                                                        | 8,072.49<br>(5,561.68 to<br>12,785.13)            | 2,045.85<br>(419.08 to<br>4,974.81)               | 1,130.94<br>(243.14 to<br>2,690.23)             | 3,428.53<br>(635.17 to<br>9,370.73)               | 127.56<br>(89.37 to<br>193.90)           | 46.95<br>(18.09 to<br>96.34)               | 28.48<br>(11.79 to<br>57.40)             | 61.77<br>(20.07 to<br>145.34)               |
| Pneumococcal meningitis                                           | 35.25<br>(23.27 to<br>55.65)                      | 8.02<br>(1.76 to<br>19.54)                        | 7.67<br>(1.81 to<br>18.32)                      | 12.62<br>(2.45 to<br>32.01)                       | 0.63<br>(0.41 to<br>0.99)                | 0.23<br>(0.09 to<br>0.46)                  | 0.25<br>(0.11 to<br>0.48)                | 0.32<br>(0.12 to<br>0.66)                   |
| H influenzae type B meningitis                                    | 1,348.70<br>(880.28 to<br>2,304.86)               | 473.46<br>(73.36 to<br>1,571.21)                  | 364.34<br>(66.27 to<br>1,060.02)                | 1,743.29<br>(202.37 to<br>6,461.89)               | 20.58<br>(13.83 to<br>33.00)             | 8.56<br>(2.69 to<br>22.01)                 | 7.69<br>(2.90 to<br>17.81)               | 23.14<br>(4.28 to<br>79.34)                 |
| Meningococcal meningitis                                          | 4,912.42<br>(3,361.30 to<br>7,888.54)             | 1,068.57<br>(208.66 to<br>2,611.26)               | 524.06<br>(102.63 to<br>1,277.03)               | 1,152.37<br>(213.37 to<br>2,814.00)               | 76.32<br>(53.47 to<br>117.00)            | 25.37<br>(9.80 to<br>50.18)                | 13.84<br>(5.51 to<br>27.67)              | 25.66<br>(9.31 to<br>52.03)                 |
| Other meningitis                                                  | 1,776.13<br>(1,206.47 to<br>2,712.45)             | 495.80<br>(95.84 to<br>1,198.92)                  | 234.88<br>(47.93 to<br>578.18)                  | 520.25<br>(97.31 to<br>1,252.31)                  | 30.03<br>(20.13 to<br>47.21)             | 12.78<br>(4.79 to<br>26.53)                | 6.69<br>(2.64 to<br>13.75)               | 12.65<br>(4.51 to<br>26.46)                 |
| Encephalitis                                                      | 8,216.95<br>(3,914.29 to<br>15,326.67)            | 2,387.73<br>(325.99 to<br>6,484.73)               | 1,815.94<br>(287.21 to<br>4,813.38)             | 2,671.46<br>(339.45 to<br>7,411.99)               | 113.30<br>(58.28 to<br>198.80)           | 43.98<br>(13.48 to<br>101.16)              | 36.58<br>(12.25 to<br>77.76)             | 46.84<br>(13.25 to<br>108.71)               |

|                |                                      |                                      |                                     |                                      |                              |                                 |                               |                                 |
|----------------|--------------------------------------|--------------------------------------|-------------------------------------|--------------------------------------|------------------------------|---------------------------------|-------------------------------|---------------------------------|
| Diphtheria     | 30.06<br>(15.87 to<br>52.76)         | 7.48<br>(0.06 to<br>22.24)           | 6.32<br>(0.05 to<br>18.17)          | 15.28<br>(0.08 to<br>53.06)          | 0.44<br>(0.26 to<br>0.74)    | 0.13<br>(0.00 to<br>0.37)       | 0.12<br>(0.00 to<br>0.34)     | 0.23<br>(0.00 to<br>0.73)       |
| Whooping cough | 3,801.83<br>(315.78 to<br>12,746.20) | 2,420.42<br>(0.19 to<br>10,696.13)   | 1,525.71<br>(0.14 to<br>6,583.48)   | 3,023.02<br>(0.21 to<br>14,163.47)   | 45.01<br>(3.73 to<br>150.80) | 28.70<br>(0.00 to<br>126.65)    | 18.14<br>(0.00 to<br>77.79)   | 35.80<br>(0.00 to<br>168.41)    |
| Tetanus        | 64.46<br>(51.25 to<br>87.96)         | 2.98<br>(0.51 to<br>6.87)            | 2.70<br>(0.45 to<br>6.21)           | 3.36<br>(0.61 to<br>7.67)            | 1.15<br>(0.93 to<br>1.55)    | 0.06<br>(0.02 to<br>0.13)       | 0.06<br>(0.02 to<br>0.13)     | 0.07<br>(0.02 to<br>0.14)       |
| Measles        | 4.89<br>(0.00 to<br>26.99)           | 27,417.69<br>(0.00 to<br>106,084.49) | 12,111.60<br>(0.00 to<br>44,061.68) | 52,323.47<br>(0.00 to<br>209,993.35) | 0.06<br>(0.00 to<br>0.32)    | 398.90<br>(0.00 to<br>1,446.57) | 182.75<br>(0.00 to<br>617.24) | 717.47<br>(0.00 to<br>2,703.61) |

| Azerbaijan                                            |                                                            |                                                          |                                                        |                                                          |                                                   |                                                   |                                                  |                                                   |
|-------------------------------------------------------|------------------------------------------------------------|----------------------------------------------------------|--------------------------------------------------------|----------------------------------------------------------|---------------------------------------------------|---------------------------------------------------|--------------------------------------------------|---------------------------------------------------|
| Cause                                                 | YLLs (actual counts)                                       |                                                          |                                                        |                                                          | Deaths (actual counts)                            |                                                   |                                                  |                                                   |
|                                                       | 2016                                                       | 2040 Forecast                                            | 2040 Better Scenario                                   | 2040 Worse Scenario                                      | 2016                                              | 2040 Forecast                                     | 2040 Better Scenario                             | 2040 Worse Scenario                               |
| Varicella and herpes zoster                           | 313.29<br>(177.67 to<br>555.22)                            | 133.60<br>(49.98 to<br>269.63)                           | 84.12<br>(34.67 to<br>155.14)                          | 137.12<br>(47.45 to<br>281.75)                           | 7.21<br>(4.83 to<br>10.66)                        | 8.72<br>(4.51 to<br>15.01)                        | 6.50<br>(3.39 to<br>11.12)                       | 8.08<br>(3.97 to<br>14.16)                        |
| <b>Neglected tropical diseases and malaria</b>        | <b>463.24</b><br><b>(314.77 to</b><br><b>668.88)</b>       | <b>121.41</b><br><b>(56.96 to</b><br><b>292.38)</b>      | <b>85.42</b><br><b>(41.38 to</b><br><b>207.80)</b>     | <b>130.80</b><br><b>(62.22 to</b><br><b>308.31)</b>      | <b>11.46</b><br><b>(7.72 to</b><br><b>16.50)</b>  | <b>2.70</b><br><b>(1.24 to</b><br><b>9.49)</b>    | <b>2.00</b><br><b>(0.95 to</b><br><b>7.38)</b>   | <b>2.82</b><br><b>(1.30 to</b><br><b>9.12)</b>    |
| Malaria                                               | 24.97<br>(19.80 to<br>31.29)                               | 7.98<br>(4.78 to<br>14.28)                               | 7.03<br>(4.00 to<br>13.21)                             | 8.00<br>(4.82 to<br>14.14)                               | 0.60<br>(0.48 to<br>0.73)                         | 0.22<br>(0.13 to<br>0.45)                         | 0.20<br>(0.12 to<br>0.46)                        | 0.21<br>(0.13 to<br>0.43)                         |
| Chagas disease                                        | 0.00<br>(0.00 to<br>0.00)                                  | 0.00<br>(0.00 to<br>0.00)                                | 0.00<br>(0.00 to<br>0.00)                              | 0.00<br>(0.00 to<br>0.00)                                | 0.00<br>(0.00 to<br>0.00)                         | 0.00<br>(0.00 to<br>0.00)                         | 0.00<br>(0.00 to<br>0.00)                        | 0.00<br>(0.00 to<br>0.00)                         |
| Leishmaniasis                                         | 236.28<br>(137.30 to<br>368.54)                            | 34.37<br>(12.19 to<br>167.05)                            | 23.27<br>(8.07 to<br>114.64)                           | 35.98<br>(12.77 to<br>165.83)                            | 7.49<br>(4.37 to<br>11.59)                        | 1.13<br>(0.34 to<br>7.09)                         | 0.82<br>(0.24 to<br>5.31)                        | 1.13<br>(0.36 to<br>6.91)                         |
| African trypanosomiasis                               | 0.00<br>(0.00 to<br>0.00)                                  | 0.00<br>(0.00 to<br>0.00)                                | 0.00<br>(0.00 to<br>0.00)                              | 0.00<br>(0.00 to<br>0.00)                                | 0.00<br>(0.00 to<br>0.00)                         | 0.00<br>(0.00 to<br>0.00)                         | 0.00<br>(0.00 to<br>0.00)                        | 0.00<br>(0.00 to<br>0.00)                         |
| Schistosomiasis                                       | 0.00<br>(0.00 to<br>0.00)                                  | 0.00<br>(0.00 to<br>0.00)                                | 0.00<br>(0.00 to<br>0.00)                              | 0.00<br>(0.00 to<br>0.00)                                | 0.00<br>(0.00 to<br>0.00)                         | 0.00<br>(0.00 to<br>0.00)                         | 0.00<br>(0.00 to<br>0.00)                        | 0.00<br>(0.00 to<br>0.00)                         |
| Cysticercosis                                         | 1.10<br>(0.41 to<br>2.38)                                  | 0.18<br>(0.06 to<br>0.44)                                | 0.15<br>(0.05 to<br>0.37)                              | 0.18<br>(0.06 to<br>0.43)                                | 0.03<br>(0.01 to<br>0.06)                         | 0.01<br>(0.00 to<br>0.01)                         | 0.00<br>(0.00 to<br>0.01)                        | 0.01<br>(0.00 to<br>0.01)                         |
| Cystic echinococcosis                                 | 0.00<br>(0.00 to<br>0.00)                                  | 0.00<br>(0.00 to<br>0.00)                                | 0.00<br>(0.00 to<br>0.00)                              | 0.00<br>(0.00 to<br>0.00)                                | 0.00<br>(0.00 to<br>0.00)                         | 0.00<br>(0.00 to<br>0.00)                         | 0.00<br>(0.00 to<br>0.00)                        | 0.00<br>(0.00 to<br>0.00)                         |
| Dengue                                                | 0.00<br>(0.00 to<br>0.00)                                  | 0.00<br>(0.00 to<br>0.00)                                | 0.00<br>(0.00 to<br>0.00)                              | 0.00<br>(0.00 to<br>0.00)                                | 0.00<br>(0.00 to<br>0.00)                         | 0.00<br>(0.00 to<br>0.00)                         | 0.00<br>(0.00 to<br>0.00)                        | 0.00<br>(0.00 to<br>0.00)                         |
| Yellow fever                                          | 0.00<br>(0.00 to<br>0.00)                                  | 0.00<br>(0.00 to<br>0.00)                                | 0.00<br>(0.00 to<br>0.00)                              | 0.00<br>(0.00 to<br>0.00)                                | 0.00<br>(0.00 to<br>0.00)                         | 0.00<br>(0.00 to<br>0.00)                         | 0.00<br>(0.00 to<br>0.00)                        | 0.00<br>(0.00 to<br>0.00)                         |
| Rabies                                                | 128.53<br>(33.68 to<br>297.35)                             | 48.19<br>(10.18 to<br>124.48)                            | 27.95<br>(5.00 to<br>79.81)                            | 53.53<br>(10.91 to<br>137.38)                            | 2.09<br>(0.55 to<br>4.71)                         | 0.79<br>(0.17 to<br>1.95)                         | 0.46<br>(0.08 to<br>1.27)                        | 0.87<br>(0.18 to<br>2.19)                         |
| Intestinal nematode infections                        | 13.53<br>(2.95 to<br>31.08)                                | 5.86<br>(1.38 to<br>13.33)                               | 4.68<br>(1.16 to<br>10.65)                             | 6.48<br>(1.46 to<br>15.20)                               | 0.20<br>(0.07 to<br>0.41)                         | 0.10<br>(0.03 to<br>0.21)                         | 0.09<br>(0.03 to<br>0.19)                        | 0.11<br>(0.03 to<br>0.23)                         |
| Other neglected tropical diseases                     | 58.83<br>(50.13 to<br>70.92)                               | 24.82<br>(16.56 to<br>39.37)                             | 22.33<br>(14.91 to<br>36.64)                           | 26.63<br>(17.73 to<br>42.72)                             | 1.05<br>(0.90 to<br>1.24)                         | 0.46<br>(0.31 to<br>0.81)                         | 0.42<br>(0.28 to<br>0.79)                        | 0.49<br>(0.32 to<br>0.87)                         |
| <b>Maternal disorders</b>                             | <b>2,536.18</b><br><b>(1,758.36 to</b><br><b>3,520.81)</b> | <b>1,217.09</b><br><b>(611.76 to</b><br><b>2,172.22)</b> | <b>738.78</b><br><b>(366.38 to</b><br><b>1,343.55)</b> | <b>1,316.94</b><br><b>(660.71 to</b><br><b>2,380.22)</b> | <b>46.23</b><br><b>(32.18 to</b><br><b>64.24)</b> | <b>22.35</b><br><b>(11.29 to</b><br><b>39.19)</b> | <b>13.60</b><br><b>(6.77 to</b><br><b>24.31)</b> | <b>24.16</b><br><b>(12.19 to</b><br><b>43.70)</b> |
| Maternal hemorrhage                                   | 1,091.34<br>(723.42 to<br>1,577.05)                        | 481.06<br>(217.61 to<br>888.56)                          | 294.10<br>(131.25 to<br>543.13)                        | 519.30<br>(230.39 to<br>1,008.16)                        | 20.02<br>(13.36 to<br>29.01)                      | 8.87<br>(4.07 to<br>16.23)                        | 5.43<br>(2.43 to<br>9.90)                        | 9.57<br>(4.30 to<br>18.12)                        |
| Maternal sepsis and other maternal infections         | 103.73<br>(56.47 to<br>174.17)                             | 40.51<br>(16.62 to<br>81.80)                             | 24.09<br>(9.56 to<br>48.54)                            | 43.82<br>(16.72 to<br>90.57)                             | 1.87<br>(1.03 to<br>3.06)                         | 0.74<br>(0.30 to<br>1.49)                         | 0.44<br>(0.18 to<br>0.90)                        | 0.80<br>(0.31 to<br>1.61)                         |
| Maternal hypertensive disorders                       | 256.41<br>(151.21 to<br>405.27)                            | 120.28<br>(48.19 to<br>256.25)                           | 70.48<br>(27.42 to<br>151.57)                          | 130.36<br>(52.31 to<br>275.62)                           | 4.46<br>(2.65 to<br>7.04)                         | 2.08<br>(0.84 to<br>4.31)                         | 1.22<br>(0.49 to<br>2.59)                        | 2.26<br>(0.92 to<br>4.70)                         |
| Maternal obstructed labor and uterine rupture         | 33.35<br>(14.58 to<br>61.49)                               | 17.00<br>(5.52 to<br>38.20)                              | 9.33<br>(3.24 to<br>20.97)                             | 18.48<br>(6.25 to<br>44.46)                              | 0.61<br>(0.27 to<br>1.11)                         | 0.31<br>(0.10 to<br>0.70)                         | 0.17<br>(0.06 to<br>0.38)                        | 0.34<br>(0.11 to<br>0.82)                         |
| Maternal abortion, miscarriage, and ectopic pregnancy | 420.27<br>(265.30 to<br>645.69)                            | 234.62<br>(99.65 to<br>452.35)                           | 138.60<br>(60.83 to<br>269.80)                         | 254.06<br>(109.74 to<br>522.21)                          | 7.89<br>(5.00 to<br>12.11)                        | 4.48<br>(1.97 to<br>8.55)                         | 2.65<br>(1.15 to<br>5.10)                        | 4.85<br>(2.13 to<br>9.97)                         |

|                                        |                                 |                                 |                                |                                 |                            |                           |                           |                            |
|----------------------------------------|---------------------------------|---------------------------------|--------------------------------|---------------------------------|----------------------------|---------------------------|---------------------------|----------------------------|
|                                        | 91.89<br>(49.37 to<br>155.94)   | 52.67<br>(20.00 to<br>109.53)   | 30.06<br>(11.32 to<br>62.44)   | 57.51<br>(21.90 to<br>120.36)   | 1.61<br>(0.86 to<br>2.74)  | 0.92<br>(0.35 to<br>1.88) | 0.53<br>(0.20 to<br>1.10) | 1.01<br>(0.40 to<br>2.08)  |
| Indirect maternal deaths               |                                 |                                 |                                |                                 |                            |                           |                           |                            |
|                                        | 22.78<br>(9.45 to<br>44.81)     | 9.40<br>(2.96 to<br>21.39)      | 5.39<br>(1.62 to<br>12.97)     | 10.22<br>(3.15 to<br>24.29)     | 0.41<br>(0.17 to<br>0.80)  | 0.17<br>(0.05 to<br>0.39) | 0.10<br>(0.03 to<br>0.24) | 0.18<br>(0.06 to<br>0.44)  |
| Late maternal deaths                   |                                 |                                 |                                |                                 |                            |                           |                           |                            |
|                                        | 0.49<br>(0.19 to<br>0.96)       | 1.33<br>(0.19 to<br>5.01)       | 0.86<br>(0.12 to<br>3.10)      | 1.49<br>(0.21 to<br>5.74)       | 0.01<br>(0.00 to<br>0.02)  | 0.02<br>(0.00 to<br>0.08) | 0.02<br>(0.00 to<br>0.05) | 0.03<br>(0.00 to<br>0.10)  |
| Maternal deaths aggravated by HIV/AIDS |                                 |                                 |                                |                                 |                            |                           |                           |                            |
|                                        | 515.93<br>(324.48 to<br>796.06) | 260.22<br>(114.18 to<br>495.99) | 165.87<br>(72.11 to<br>329.77) | 281.70<br>(117.58 to<br>557.00) | 9.35<br>(5.89 to<br>14.26) | 4.74<br>(2.10 to<br>9.23) | 3.04<br>(1.35 to<br>5.97) | 5.13<br>(2.18 to<br>10.02) |
| Other maternal disorders               |                                 |                                 |                                |                                 |                            |                           |                           |                            |

| Azerbaijan                                                              |                                                 |                                              |                                              |                                               |                                           |                                       |                                     |                                       |
|-------------------------------------------------------------------------|-------------------------------------------------|----------------------------------------------|----------------------------------------------|-----------------------------------------------|-------------------------------------------|---------------------------------------|-------------------------------------|---------------------------------------|
| Cause                                                                   | YLLs (actual counts)                            |                                              |                                              |                                               | Deaths (actual counts)                    |                                       |                                     |                                       |
|                                                                         | 2016                                            | 2040 Forecast                                | 2040 Better Scenario                         | 2040 Worse Scenario                           | 2016                                      | 2040 Forecast                         | 2040 Better Scenario                | 2040 Worse Scenario                   |
| <b>Neonatal disorders</b>                                               | <b>197,071.74</b><br>(131,050.31 to 283,608.98) | <b>62,060.98</b><br>(37,062.07 to 99,630.30) | <b>26,466.13</b><br>(15,783.68 to 43,423.64) | <b>81,286.68</b><br>(49,976.57 to 131,214.97) | <b>2,276.61</b><br>(1,513.89 to 3,276.27) | <b>717.02</b><br>(428.13 to 1,151.04) | <b>305.79</b><br>(182.34 to 501.69) | <b>939.12</b><br>(577.34 to 1,515.73) |
| Neonatal preterm birth                                                  | 72,912.48<br>(39,717.42 to 117,024.58)          | 21,785.93<br>(10,942.04 to 37,619.04)        | 8,729.32<br>(4,246.42 to 15,089.45)          | 31,046.29<br>(15,742.34 to 53,117.28)         | 842.18<br>(458.75 to 1,351.65)            | 251.67<br>(126.41 to 434.54)          | 100.84<br>(49.06 to 174.29)         | 358.63<br>(181.85 to 613.55)          |
| Neonatal encephalopathy due to birth asphyxia and trauma                | 106,457.64<br>(64,766.09 to 164,075.55)         | 32,873.16<br>(15,843.58 to 62,728.64)        | 13,696.70<br>(6,814.96 to 26,276.90)         | 41,036.80<br>(19,997.33 to 78,233.26)         | 1,229.86<br>(748.16 to 1,895.68)          | 379.80<br>(183.06 to 724.62)          | 158.25<br>(78.75 to 303.63)         | 474.12<br>(231.06 to 903.74)          |
| Neonatal sepsis and other neonatal infections                           | 11,575.04<br>(6,165.02 to 19,588.89)            | 5,109.61<br>(2,469.55 to 9,534.94)           | 2,546.68<br>(1,305.45 to 4,696.55)           | 6,328.80<br>(3,122.49 to 11,681.66)           | 133.77<br>(71.23 to 226.31)               | 59.06<br>(28.53 to 110.20)            | 29.43<br>(15.08 to 54.29)           | 73.15<br>(36.07 to 134.98)            |
| Hemolytic disease and other neonatal jaundice                           | 1,372.56<br>(628.59 to 2,639.30)                | 378.18<br>(113.36 to 986.45)                 | 176.23<br>(53.20 to 457.69)                  | 475.45<br>(139.59 to 1,218.04)                | 15.85<br>(7.26 to 30.48)                  | 4.37<br>(1.31 to 11.39)               | 2.04<br>(0.61 to 5.29)              | 5.49<br>(1.61 to 14.07)               |
| Other neonatal disorders                                                | 4,754.03<br>(2,393.97 to 8,546.52)              | 1,914.11<br>(727.65 to 4,392.81)             | 1,317.20<br>(505.78 to 2,995.69)             | 2,399.33<br>(912.59 to 5,412.89)              | 54.94<br>(27.66 to 98.76)                 | 22.12<br>(8.42 to 50.75)              | 15.22<br>(5.85 to 34.61)            | 27.73<br>(10.55 to 62.52)             |
| <b>Nutritional deficiencies</b>                                         | <b>2,443.63</b><br>(1,567.68 to 3,924.57)       | <b>1,020.44</b><br>(649.73 to 1,596.95)      | <b>891.78</b><br>(582.25 to 1,352.48)        | <b>1,112.94</b><br>(685.53 to 1,805.96)       | <b>40.19</b><br>(28.30 to 58.12)          | <b>26.41</b><br>(18.87 to 36.67)      | <b>26.16</b><br>(18.87 to 36.17)    | <b>26.78</b><br>(18.64 to 38.52)      |
| Protein-energy malnutrition                                             | 1,650.33<br>(913.86 to 2,922.59)                | 556.45<br>(321.16 to 1,002.42)               | 539.25<br>(331.16 to 897.37)                 | 617.23<br>(339.08 to 1,133.60)                | 25.95<br>(16.55 to 41.04)                 | 14.43<br>(9.35 to 21.70)              | 16.28<br>(10.82 to 23.79)           | 14.75<br>(9.35 to 23.26)              |
| Iodine deficiency                                                       | 142.41<br>(10.49 to 614.37)                     | 70.04<br>(5.58 to 249.87)                    | 54.14<br>(3.81 to 186.78)                    | 77.00<br>(6.17 to 298.53)                     | 2.30<br>(0.27 to 7.91)                    | 1.98<br>(0.20 to 5.31)                | 1.74<br>(0.12 to 4.92)              | 2.01<br>(0.21 to 5.47)                |
| Dietary iron deficiency                                                 | 215.86<br>(155.03 to 297.34)                    | 119.77<br>(71.47 to 185.59)                  | 114.73<br>(70.48 to 173.68)                  | 127.63<br>(74.82 to 201.85)                   | 3.65<br>(2.74 to 4.75)                    | 3.25<br>(1.42 to 3.35)                | 2.28<br>(1.45 to 3.38)              | 2.34<br>(1.47 to 3.53)                |
| Other nutritional deficiencies                                          | 435.03<br>(262.25 to 723.26)                    | 274.18<br>(159.70 to 437.64)                 | 183.66<br>(107.10 to 290.28)                 | 291.08<br>(168.65 to 474.18)                  | 8.29<br>(5.39 to 12.05)                   | 7.75<br>(4.66 to 11.50)               | 5.86<br>(3.48 to 8.89)              | 7.68<br>(4.65 to 11.64)               |
| <b>Other communicable, maternal, neonatal, and nutritional diseases</b> | <b>9,981.74</b><br>(4,783.43 to 29,263.45)      | <b>4,208.78</b><br>(2,343.62 to 8,988.21)    | <b>2,768.40</b><br>(1,606.08 to 5,454.62)    | <b>4,753.31</b><br>(2,477.85 to 11,527.77)    | <b>151.98</b><br>(90.32 to 375.25)        | <b>97.48</b><br>(68.39 to 154.77)     | <b>69.29</b><br>(48.43 to 103.59)   | <b>101.26</b><br>(67.62 to 180.87)    |
| Sexually transmitted infections excluding HIV                           | 368.85<br>(108.69 to 824.70)                    | 152.28<br>(75.20 to 362.62)                  | 107.49<br>(51.96 to 263.43)                  | 158.90<br>(75.69 to 374.16)                   | 6.64<br>(2.96 to 15.03)                   | 5.32<br>(2.85 to 12.22)               | 4.38<br>(2.24 to 9.81)              | 5.21<br>(2.82 to 12.13)               |
| Syphilis                                                                | 288.00<br>(45.34 to 723.75)                     | 77.61<br>(30.02 to 187.58)                   | 42.49<br>(17.03 to 107.29)                   | 84.56<br>(31.31 to 200.70)                    | 4.18<br>(1.13 to 9.99)                    | 2.07<br>(1.04 to 4.92)                | 1.34<br>(0.68 to 3.19)              | 2.09<br>(1.01 to 4.80)                |
| Chlamydial infection                                                    | 15.25<br>(7.81 to 42.69)                        | 13.98<br>(6.52 to 37.20)                     | 12.37<br>(5.48 to 32.52)                     | 13.92<br>(6.27 to 36.34)                      | 0.47<br>(0.25 to 1.22)                    | 0.62<br>(0.30 to 1.36)                | 0.60<br>(0.29 to 1.30)              | 0.60<br>(0.29 to 1.38)                |
| Gonococcal infection                                                    | 43.60<br>(22.85 to 120.90)                      | 42.06<br>(19.67 to 103.19)                   | 36.73<br>(16.96 to 89.81)                    | 41.74<br>(19.40 to 105.08)                    | 1.37<br>(0.75 to 3.54)                    | 1.91<br>(0.95 to 4.08)                | 1.79<br>(0.88 to 3.75)              | 1.83<br>(0.90 to 3.97)                |
| Other sexually transmitted infections                                   | 21.99<br>(11.48 to 62.77)                       | 18.63<br>(8.29 to 49.70)                     | 15.90<br>(6.82 to 42.25)                     | 18.68<br>(8.19 to 49.63)                      | 0.62<br>(0.33 to 1.68)                    | 0.71<br>(0.34 to 1.75)                | 0.65<br>(0.31 to 1.54)              | 0.69<br>(0.33 to 1.67)                |
| Acute hepatitis                                                         | 2,622.61<br>(2,029.32 to 3,391.97)              | 1,355.60<br>(938.88 to 1,908.93)             | 744.37<br>(470.73 to 1,097.25)               | 1,392.48<br>(959.76 to 1,980.13)              | 55.83<br>(44.40 to 69.24)                 | 46.38<br>(34.04 to 63.32)             | 27.87<br>(19.23 to 39.67)           | 45.09<br>(32.84 to 60.84)             |
| Acute hepatitis A                                                       | 555.99<br>(278.99 to 953.74)                    | 109.34<br>(48.84 to 233.05)                  | 59.60<br>(27.31 to 122.56)                   | 127.07<br>(55.27 to 270.65)                   | 6.99<br>(3.75 to 11.59)                   | 1.87<br>(1.04 to 3.36)                | 1.15<br>(0.64 to 2.00)              | 2.03<br>(1.08 to 3.74)                |
| Acute hepatitis B                                                       | 1,583.62<br>(1,237.36 to 2,055.68)              | 994.88<br>(666.74 to 1,486.85)               | 546.98<br>(328.26 to 838.29)                 | 1,004.71<br>(659.29 to 1,448.88)              | 39.58<br>(31.16 to 50.35)                 | 35.74<br>(25.02 to 49.74)             | 21.04<br>(13.62 to 31.01)           | 34.71<br>(24.32 to 48.38)             |





| Azerbaijan                           |                                                 |                                                 |                                                 |                                                 |                                            |                                              |                                              |                                              |
|--------------------------------------|-------------------------------------------------|-------------------------------------------------|-------------------------------------------------|-------------------------------------------------|--------------------------------------------|----------------------------------------------|----------------------------------------------|----------------------------------------------|
| Cause                                | YLLs (actual counts)                            |                                                 |                                                 |                                                 | Deaths (actual counts)                     |                                              |                                              |                                              |
|                                      | 2016                                            | 2040 Forecast                                   | 2040 Better Scenario                            | 2040 Worse Scenario                             | 2016                                       | 2040 Forecast                                | 2040 Better Scenario                         | 2040 Worse Scenario                          |
| <b>Neoplasms</b>                     | <b>284,705.02</b><br>(234,240.77 to 343,682.43) | <b>410,926.98</b><br>(286,138.45 to 557,457.42) | <b>302,826.51</b><br>(217,137.18 to 396,209.29) | <b>457,468.90</b><br>(316,350.58 to 622,554.91) | <b>9,638.50</b><br>(7,972.90 to 11,555.61) | <b>17,675.68</b><br>(13,453.45 to 22,563.60) | <b>13,949.70</b><br>(10,832.42 to 17,232.06) | <b>19,045.78</b><br>(14,183.42 to 24,715.94) |
| Lip and oral cavity cancer           | 3,106.58<br>(2,420.75 to 3,887.97)              | 4,371.49<br>(2,076.23 to 7,842.60)              | 2,488.72<br>(1,278.13 to 4,304.84)              | 5,944.26<br>(2,738.42 to 10,971.01)             | 108.23<br>(84.63 to 133.75)                | 182.86<br>(93.90 to 317.87)                  | 113.38<br>(63.27 to 186.64)                  | 238.85<br>(116.12 to 418.26)                 |
| Nasopharynx cancer                   | 1,044.67<br>(804.15 to 1,326.66)                | 1,252.86<br>(602.54 to 2,313.97)                | 583.13<br>(283.82 to 1,043.72)                  | 1,725.10<br>(846.25 to 3,174.90)                | 26.34<br>(20.35 to 33.35)                  | 38.79<br>(18.80 to 71.97)                    | 18.57<br>(9.59 to 32.61)                     | 52.79<br>(25.26 to 97.17)                    |
| Other pharynx cancer                 | 1,496.94<br>(1,005.65 to 2,062.05)              | 1,656.30<br>(802.76 to 2,948.46)                | 1,478.39<br>(743.15 to 2,582.08)                | 1,938.91<br>(934.65 to 3,436.99)                | 48.64<br>(32.30 to 66.59)                  | 62.84<br>(31.17 to 112.62)                   | 59.08<br>(30.52 to 100.10)                   | 72.99<br>(35.37 to 130.66)                   |
| Esophageal cancer                    | 16,294.68<br>(13,225.84 to 19,799.40)           | 26,177.94<br>(14,077.63 to 44,930.96)           | 18,677.10<br>(10,831.48 to 30,078.29)           | 35,058.67<br>(18,226.54 to 60,801.60)           | 651.95<br>(531.14 to 786.04)               | 1,243.60<br>(714.09 to 2,023.49)             | 967.27<br>(591.72 to 1,462.63)               | 1,597.09<br>(866.11 to 2,643.81)             |
| Stomach cancer                       | 38,327.20<br>(31,199.00 to 46,348.33)           | 47,085.07<br>(32,455.85 to 66,631.43)           | 30,501.50<br>(20,882.00 to 42,911.45)           | 48,450.37<br>(33,486.25 to 68,740.09)           | 1,527.33<br>(1,260.75 to 1,814.38)         | 2,336.72<br>(1,709.26 to 3,102.64)           | 1,618.65<br>(1,158.64 to 2,200.14)           | 2,326.27<br>(1,713.18 to 3,090.13)           |
| Colon and rectum cancer              | 18,334.40<br>(14,555.96 to 23,044.17)           | 30,532.71<br>(19,361.18 to 46,352.52)           | 21,642.35<br>(13,808.76 to 32,407.36)           | 32,435.42<br>(20,302.15 to 49,135.95)           | 667.62<br>(532.23 to 834.04)               | 1,421.11<br>(940.24 to 2,053.26)             | 1,073.45<br>(715.37 to 1,557.82)             | 1,455.50<br>(936.16 to 2,130.87)             |
| Liver cancer                         | 17,669.28<br>(13,810.28 to 21,809.01)           | 33,610.21<br>(20,153.48 to 51,363.05)           | 30,985.82<br>(19,843.42 to 44,841.05)           | 37,813.11<br>(22,135.81 to 59,395.86)           | 691.15<br>(544.46 to 847.29)               | 1,617.27<br>(1,013.41 to 2,358.71)           | 1,605.98<br>(1,078.86 to 2,263.39)           | 1,744.48<br>(1,074.49 to 2,636.68)           |
| Liver cancer due to hepatitis B      | 5,608.48<br>(4,092.85 to 7,469.20)              | 9,599.85<br>(5,414.10 to 15,488.80)             | 9,044.98<br>(5,486.70 to 12,816.12)             | 10,431.69<br>(5,690.28 to 17,190.41)            | 199.63<br>(145.08 to 264.09)               | 422.22<br>(256.85 to 659.78)                 | 426.40<br>(273.72 to 633.33)                 | 442.01<br>(259.15 to 714.05)                 |
| Liver cancer due to hepatitis C      | 5,416.12<br>(4,047.88 to 6,974.55)              | 11,009.80<br>(6,588.65 to 17,384.18)            | 10,761.12<br>(6,719.55 to 16,065.68)            | 11,697.82<br>(6,850.46 to 18,880.05)            | 234.91<br>(176.67 to 297.92)               | 580.10<br>(361.83 to 870.57)                 | 608.97<br>(394.25 to 873.36)                 | 592.31<br>(362.85 to 903.04)                 |
| Liver cancer due to alcohol use      | 3,578.81<br>(2,700.15 to 4,572.05)              | 7,376.01<br>(4,242.34 to 11,749.63)             | 5,886.35<br>(3,261.60 to 9,054.43)              | 9,635.01<br>(5,408.38 to 15,642.92)             | 144.94<br>(111.09 to 184.24)               | 355.45<br>(215.35 to 552.10)                 | 307.03<br>(195.04 to 461.05)                 | 441.93<br>(261.33 to 699.62)                 |
| Liver cancer due to other causes     | 3,065.88<br>(2,332.41 to 3,925.60)              | 5,624.54<br>(3,176.71 to 9,131.46)              | 5,293.38<br>(3,261.60 to 8,149.34)              | 6,048.59<br>(3,377.69 to 10,129.18)             | 111.66<br>(85.32 to 142.75)                | 299.51<br>(155.22 to 402.22)                 | 263.59<br>(171.23 to 392.06)                 | 268.23<br>(155.70 to 426.58)                 |
| Gallbladder and biliary tract cancer | 4,084.80<br>(3,008.72 to 5,411.77)              | 4,284.26<br>(3,101.79 to 5,808.49)              | 4,160.29<br>(2,948.00 to 5,703.29)              | 4,072.47<br>(2,973.64 to 5,502.43)              | 160.11<br>(119.03 to 214.22)               | 208.02<br>(155.72 to 276.67)                 | 211.38<br>(154.41 to 281.69)                 | 192.78<br>(145.36 to 255.81)                 |
| Pancreatic cancer                    | 10,922.68<br>(8,742.39 to 13,348.62)            | 19,145.86<br>(13,384.77 to 26,343.46)           | 18,398.14<br>(12,983.13 to 24,883.12)           | 19,101.55<br>(13,182.06 to 26,354.21)           | 436.47<br>(350.69 to 528.44)               | 932.14<br>(690.94 to 1,231.20)               | 954.32<br>(722.04 to 1,234.94)               | 897.98<br>(665.10 to 1,181.92)               |
| Larynx cancer                        | 5,746.97<br>(4,346.60 to 7,656.28)              | 8,697.49<br>(3,300.72 to 19,469.22)             | 3,944.42<br>(1,677.16 to 8,179.52)              | 12,041.85<br>(4,484.37 to 25,755.50)            | 198.60<br>(152.53 to 260.07)               | 344.88<br>(144.13 to 732.99)                 | 168.38<br>(80.34 to 332.35)                  | 470.14<br>(186.88 to 963.28)                 |
| Tracheal, bronchus, and lung cancer  | 44,616.61<br>(32,736.85 to 58,751.17)           | 77,172.77<br>(35,906.81 to 140,529.18)          | 41,770.18<br>(21,571.44 to 71,530.13)           | 100,170.75<br>(46,421.37 to 179,837.36)         | 1,593.65<br>(1,170.04 to 2,058.99)         | 3,200.36<br>(1,618.48 to 5,652.31)           | 1,860.71<br>(1,091.78 to 3,038.03)           | 4,060.31<br>(2,034.41 to 7,097.10)           |
| Malignant skin melanoma              | 1,482.45<br>(1,063.91 to 1,940.26)              | 1,971.17<br>(1,431.54 to 2,669.70)              | 2,714.34<br>(1,859.47 to 3,677.45)              | 1,854.23<br>(1,341.67 to 2,473.71)              | 49.92<br>(36.81 to 65.06)                  | 87.62<br>(66.57 to 116.37)                   | 127.26<br>(92.05 to 169.82)                  | 79.75<br>(60.76 to 104.64)                   |
| Non-melanoma skin cancer             | 1,600.32<br>(1,245.62 to 2,056.78)              | 2,492.92<br>(1,904.71 to 3,157.68)              | 1,786.85<br>(1,282.53 to 2,381.07)              | 2,392.27<br>(1,847.00 to 3,010.57)              | 58.80<br>(46.41 to 74.48)                  | 117.00<br>(96.05 to 143.01)                  | 89.48<br>(70.36 to 113.50)                   | 108.39<br>(89.52 to 131.19)                  |
| Breast cancer                        | 20,544.42<br>(14,236.09 to 28,567.82)           | 29,414.52<br>(16,729.37 to 45,801.13)           | 20,115.52<br>(11,581.83 to 30,910.45)           | 31,616.67<br>(18,102.27 to 50,081.04)           | 629.69<br>(435.41 to 873.09)               | 1,123.07<br>(670.84 to 1,699.74)             | 797.15<br>(475.14 to 1,193.95)               | 1,179.42<br>(699.37 to 1,804.69)             |
| Cervical cancer                      | 8,230.38<br>(5,587.84 to 11,590.19)             | 8,022.71<br>(4,752.02 to 12,243.45)             | 5,328.60<br>(3,137.10 to 8,358.40)              | 8,279.40<br>(4,877.21 to 12,799.99)             | 254.14<br>(176.11 to 353.51)               | 308.24<br>(196.32 to 453.29)                 | 212.53<br>(133.63 to 317.66)                 | 309.55<br>(199.11 to 464.72)                 |

|                   |                                       |                                         |                                         |                                         |                                 |                                 |                                 |                                 |
|-------------------|---------------------------------------|-----------------------------------------|-----------------------------------------|-----------------------------------------|---------------------------------|---------------------------------|---------------------------------|---------------------------------|
|                   | 2,759.20<br>(1,977.57 to<br>3,648.67) | 4,327.17<br>(2,898.32 to<br>6,149.63)   | 3,359.52<br>(2,172.02 to<br>4,777.43)   | 4,272.12<br>(2,932.76 to<br>5,993.40)   | 99.20<br>(72.75 to<br>131.49)   | 196.25<br>(141.20 to<br>272.02) | 158.47<br>(109.51 to<br>218.54) | 189.73<br>(137.79 to<br>261.99) |
| Uterine cancer    | 6,091.83<br>(4,374.28 to<br>8,208.79) | 7,764.72<br>(4,976.80 to<br>11,317.66)  | 6,505.62<br>(4,133.88 to<br>9,612.17)   | 7,742.82<br>(4,897.78 to<br>11,369.14)  | 189.36<br>(137.29 to<br>255.48) | 295.97<br>(195.60 to<br>425.94) | 254.88<br>(166.02 to<br>370.78) | 290.45<br>(192.62 to<br>418.78) |
| Ovarian cancer    | 4,946.21<br>(3,368.18 to<br>6,464.15) | 12,241.14<br>(8,677.48 to<br>15,752.02) | 11,109.49<br>(7,844.40 to<br>14,415.90) | 11,156.67<br>(7,828.38 to<br>14,424.10) | 274.87<br>(193.69 to<br>358.73) | 789.94<br>(577.95 to<br>997.66) | 765.26<br>(565.57 to<br>963.27) | 696.08<br>(496.42 to<br>896.39) |
| Prostate cancer   | 1,023.72<br>(677.09 to<br>1,549.51)   | 857.59<br>(466.70 to<br>1,496.39)       | 612.43<br>(325.76 to<br>1,058.91)       | 866.34<br>(467.32 to<br>1,522.09)       | 19.06<br>(12.78 to<br>28.26)    | 17.05<br>(10.01 to<br>28.18)    | 12.39<br>(7.25 to<br>20.41)     | 17.07<br>(9.98 to<br>27.89)     |
| Testicular cancer |                                       |                                         |                                         |                                         |                                 |                                 |                                 |                                 |

| Azerbaijan                      |                                                      |                                                        |                                                      |                                                          |                                                   |                                                   |                                                   |                                                    |
|---------------------------------|------------------------------------------------------|--------------------------------------------------------|------------------------------------------------------|----------------------------------------------------------|---------------------------------------------------|---------------------------------------------------|---------------------------------------------------|----------------------------------------------------|
| Cause                           | YLLs (actual counts)                                 |                                                        |                                                      |                                                          | Deaths (actual counts)                            |                                                   |                                                   |                                                    |
|                                 | 2016                                                 | 2040 Forecast                                          | 2040 Better Scenario                                 | 2040 Worse Scenario                                      | 2016                                              | 2040 Forecast                                     | 2040 Better Scenario                              | 2040 Worse Scenario                                |
| Kidney cancer                   | 6,154.47<br>(4,869.97 to<br>7,598.92)                | 9,849.65<br>(6,197.26 to<br>14,999.97)                 | 9,431.23<br>(6,182.34 to<br>13,559.66)               | 9,889.43<br>(6,169.90 to<br>15,249.82)                   | 196.30<br>(156.72 to<br>241.45)                   | 384.78<br>(255.64 to<br>557.69)                   | 392.67<br>(275.23 to<br>542.98)                   | 375.16<br>(248.79 to<br>560.03)                    |
| Bladder cancer                  | 4,213.47<br>(3,099.76 to<br>5,359.72)                | 7,304.07<br>(4,416.57 to<br>11,174.26)                 | 5,698.71<br>(3,622.45 to<br>8,190.73)                | 7,429.75<br>(4,447.27 to<br>11,515.67)                   | 178.61<br>(133.71 to<br>223.10)                   | 374.17<br>(258.01 to<br>530.09)                   | 320.86<br>(228.89 to<br>430.74)                   | 364.82<br>(246.87 to<br>526.39)                    |
| Brain and nervous system cancer | 16,680.17<br>(13,429.45 to<br>20,524.09)             | 21,871.96<br>(16,004.06 to<br>28,345.69)               | 19,181.89<br>(13,929.39 to<br>25,225.58)             | 21,502.64<br>(15,900.11 to<br>27,532.93)                 | 422.60<br>(336.68 to<br>525.31)                   | 704.61<br>(538.50 to<br>891.56)                   | 648.30<br>(490.52 to<br>836.63)                   | 674.19<br>(522.36 to<br>853.29)                    |
| Thyroid cancer                  | 842.25<br>(663.39 to<br>1,057.62)                    | 1,222.27<br>(775.22 to<br>1,857.23)                    | 932.98<br>(593.26 to<br>1,385.18)                    | 1,264.39<br>(792.15 to<br>1,943.79)                      | 28.61<br>(22.47 to<br>36.55)                      | 52.60<br>(34.75 to<br>78.53)                      | 42.14<br>(27.57 to<br>62.01)                      | 52.79<br>(34.02 to<br>80.07)                       |
| Mesothelioma                    | 323.96<br>(249.39 to<br>423.63)                      | 432.08<br>(317.60 to<br>559.65)                        | 450.72<br>(322.45 to<br>593.12)                      | 416.76<br>(307.48 to<br>536.76)                          | 10.76<br>(8.39 to<br>13.78)                       | 18.12<br>(13.88 to<br>22.94)                      | 19.75<br>(14.83 to<br>25.22)                      | 17.03<br>(13.20 to<br>21.43)                       |
| Hodgkin lymphoma                | 1,785.69<br>(1,118.34 to<br>2,401.69)                | 1,470.17<br>(924.18 to<br>2,135.99)                    | 883.78<br>(515.26 to<br>1,311.56)                    | 1,490.26<br>(954.50 to<br>2,130.45)                      | 41.64<br>(27.68 to<br>55.11)                      | 43.05<br>(29.63 to<br>58.34)                      | 27.10<br>(17.35 to<br>38.00)                      | 42.50<br>(29.36 to<br>57.27)                       |
| Non-Hodgkin lymphoma            | 6,083.41<br>(4,977.21 to<br>7,339.89)                | 7,103.46<br>(5,150.85 to<br>9,428.11)                  | 5,750.25<br>(4,099.12 to<br>7,663.29)                | 7,091.30<br>(5,180.15 to<br>9,427.90)                    | 163.86<br>(132.20 to<br>200.44)                   | 269.87<br>(203.13 to<br>357.26)                   | 232.80<br>(174.28 to<br>309.82)                   | 260.04<br>(196.20 to<br>345.64)                    |
| Multiple myeloma                | 1,460.62<br>(1,147.83 to<br>1,842.92)                | 2,423.76<br>(1,723.29 to<br>3,275.57)                  | 2,196.31<br>(1,561.96 to<br>3,002.56)                | 2,384.73<br>(1,691.01 to<br>3,225.07)                    | 51.94<br>(41.08 to<br>67.05)                      | 108.51<br>(80.96 to<br>148.21)                    | 103.60<br>(77.04 to<br>138.20)                    | 103.81<br>(77.08 to<br>141.42)                     |
| Leukemia                        | 21,785.90<br>(14,747.15 to<br>27,762.76)             | 18,500.45<br>(12,213.97 to<br>26,544.76)               | 13,530.11<br>(8,958.08 to<br>19,321.25)              | 19,669.67<br>(12,904.72 to<br>28,223.89)                 | 430.04<br>(318.54 to<br>532.21)                   | 517.05<br>(369.12 to<br>705.58)                   | 402.48<br>(288.24 to<br>541.32)                   | 532.60<br>(378.18 to<br>731.38)                    |
| Acute lymphoid leukemia         | 4,068.91<br>(2,948.47 to<br>5,357.31)                | 2,800.58<br>(1,827.97 to<br>4,110.67)                  | 1,986.90<br>(1,289.89 to<br>2,951.05)                | 2,984.53<br>(1,941.81 to<br>4,374.90)                    | 69.23<br>(51.78 to<br>88.14)                      | 63.77<br>(44.28 to<br>89.84)                      | 47.37<br>(31.81 to<br>66.35)                      | 66.43<br>(46.10 to<br>93.78)                       |
| Chronic lymphoid leukemia       | 620.88<br>(418.76 to<br>856.27)                      | 809.58<br>(489.54 to<br>1,225.70)                      | 663.51<br>(407.69 to<br>984.47)                      | 846.85<br>(508.85 to<br>1,292.84)                        | 19.24<br>(13.49 to<br>26.10)                      | 32.08<br>(20.33 to<br>46.51)                      | 27.49<br>(17.83 to<br>39.49)                      | 32.67<br>(20.40 to<br>48.17)                       |
| Acute myeloid leukemia          | 4,781.47<br>(3,506.14 to<br>6,495.61)                | 4,905.89<br>(3,311.99 to<br>7,005.02)                  | 4,297.44<br>(2,912.06 to<br>6,101.25)                | 5,145.39<br>(3,465.03 to<br>7,360.19)                    | 99.95<br>(75.68 to<br>129.58)                     | 137.96<br>(95.22 to<br>190.93)                    | 126.53<br>(89.01 to<br>172.06)                    | 141.26<br>(97.47 to<br>197.43)                     |
| Chronic myeloid leukemia        | 584.43<br>(413.00 to<br>830.88)                      | 483.02<br>(299.68 to<br>741.28)                        | 251.90<br>(152.75 to<br>396.85)                      | 510.67<br>(312.85 to<br>793.88)                          | 17.22<br>(11.90 to<br>22.74)                      | 17.27<br>(11.12 to<br>25.25)                      | 9.50<br>(6.04 to<br>14.40)                        | 17.73<br>(11.39 to<br>26.43)                       |
| Other leukemia                  | 11,730.21<br>(6,891.31 to<br>16,017.89)              | 9,501.39<br>(5,835.88 to<br>14,573.64)                 | 6,330.35<br>(3,918.98 to<br>9,623.47)                | 10,182.23<br>(6,258.02 to<br>15,538.35)                  | 225.31<br>(154.32 to<br>293.79)                   | 265.98<br>(183.07 to<br>378.80)                   | 191.59<br>(128.79 to<br>279.97)                   | 274.51<br>(187.33 to<br>397.06)                    |
| Other neoplasms                 | 17,051.73<br>(14,315.93 to<br>20,447.09)             | 19,690.20<br>(15,261.64 to<br>24,735.42)               | 18,608.13<br>(13,985.70 to<br>23,591.39)             | 19,397.00<br>(15,043.64 to<br>24,238.81)                 | 429.03<br>(357.14 to<br>523.39)                   | 679.22<br>(551.00 to<br>851.61)                   | 691.41<br>(546.28 to<br>881.92)                   | 643.21<br>(531.79 to<br>797.89)                    |
| <b>Cardiovascular diseases</b>  | <b>703,238.64<br/>(589,510.31 to<br/>834,043.29)</b> | <b>923,832.64<br/>(777,274.98 to<br/>1,392,962.50)</b> | <b>415,007.47<br/>(261,687.57 to<br/>618,183.10)</b> | <b>1,248,905.59<br/>(762,585.15 to<br/>1,823,589.99)</b> | <b>36,729.41<br/>(31,481.22 to<br/>42,444.51)</b> | <b>59,978.40<br/>(42,702.01 to<br/>82,848.97)</b> | <b>30,400.86<br/>(20,656.87 to<br/>42,331.06)</b> | <b>75,428.83<br/>(53,572.61 to<br/>100,410.94)</b> |
| Rheumatic heart disease         | 9,395.98<br>(7,529.34 to<br>11,798.59)               | 6,169.02<br>(4,251.46 to<br>8,974.01)                  | 3,905.27<br>(2,526.92 to<br>5,742.84)                | 292.54<br>(4,272.28 to<br>9,245.24)                      | 292.54<br>(237.32 to<br>366.70)                   | 291.65<br>(213.12 to<br>419.05)                   | 203.34<br>(143.22 to<br>304.37)                   | 284.15<br>(207.45 to<br>413.39)                    |
| Ischemic heart disease          | 492,239.49<br>(407,812.11 to<br>583,753.66)          | 625,362.21<br>(359,193.55 to<br>985,932.95)            | 270,566.22<br>(155,210.95 to<br>427,258.19)          | 859,647.67<br>(487,924.24 to<br>1,305,831.00)            | 26,410.40<br>(22,477.65 to<br>30,695.79)          | 41,174.27<br>(26,937.42 to<br>59,679.54)          | 20,294.90<br>(12,733.25 to<br>29,850.42)          | 52,570.59<br>(33,831.94 to<br>74,255.92)           |
| Stroke                          | 152,560.22<br>(125,889.04 to<br>181,560.48)          | 212,157.72<br>(130,051.31 to<br>332,456.66)            | 83,335.58<br>(51,078.25 to<br>130,823.64)            | 292,959.03<br>(174,277.14 to<br>461,553.50)              | 8,021.63<br>(6,725.64 to<br>9,483.54)             | 13,799.56<br>(9,138.51 to<br>20,521.34)           | 6,158.37<br>(3,992.36 to<br>9,146.66)             | 17,479.45<br>(11,370.49 to<br>25,773.92)           |
| Ischemic stroke                 | 39,793.09<br>(32,349.91 to<br>47,587.98)             | 52,299.77<br>(31,592.24 to<br>88,063.49)               | 23,917.91<br>(14,348.77 to<br>38,656.67)             | 65,963.91<br>(39,498.43 to<br>106,471.07)                | 2,397.19<br>(1,966.14 to<br>2,849.14)             | 3,808.87<br>(2,349.86 to<br>6,114.60)             | 1,949.42<br>(1,196.14 to<br>3,146.99)             | 4,455.11<br>(2,785.98 to<br>7,121.86)              |

|                                |                                            |                                            |                                          |                                             |                                       |                                        |                                       |                                         |
|--------------------------------|--------------------------------------------|--------------------------------------------|------------------------------------------|---------------------------------------------|---------------------------------------|----------------------------------------|---------------------------------------|-----------------------------------------|
| Intracerebral hemorrhage       | 112,767.12<br>(93,260.50 to<br>134,690.07) | 159,857.94<br>(93,546.98 to<br>257,000.79) | 59,417.66<br>(34,979.59 to<br>96,900.33) | 226,995.12<br>(131,143.01 to<br>378,031.39) | 5,624.45<br>(4,721.15 to<br>6,664.57) | 9,990.69<br>(6,289.23 to<br>15,351.38) | 4,208.94<br>(2,628.80 to<br>6,632.22) | 13,024.35<br>(8,081.49 to<br>20,416.65) |
| Hypertensive heart disease     | 12,634.30<br>(9,744.35 to<br>17,432.06)    | 28,573.73<br>(14,615.42 to<br>68,112.39)   | 20,820.32<br>(10,800.51 to<br>50,703.07) | 36,147.20<br>(17,578.47 to<br>86,744.05)    | 660.79<br>(511.82 to<br>899.79)       | 1,931.33<br>(999.10 to<br>4,680.82)    | 1,544.55<br>(812.65 to<br>3,772.55)   | 2,352.37<br>(1,155.83 to<br>5,723.22)   |
| Cardiomyopathy and myocarditis | 19,973.97<br>(13,874.19 to<br>34,171.87)   | 23,021.96<br>(14,251.24 to<br>41,115.27)   | 15,868.67<br>(9,935.46 to<br>28,573.43)  | 24,786.31<br>(15,328.68 to<br>45,073.45)    | 597.10<br>(421.54 to<br>999.93)       | 981.80<br>(628.62 to<br>1,630.20)      | 727.20<br>(479.93 to<br>1,199.63)     | 1,006.42<br>(645.70 to<br>1,713.29)     |
| Myocarditis                    | 4,492.31<br>(3,029.81 to<br>7,406.88)      | 3,677.47<br>(2,216.54 to<br>6,974.19)      | 3,238.73<br>(1,993.44 to<br>5,829.06)    | 3,703.97<br>(2,241.04 to<br>7,036.79)       | 107.17<br>(70.65 to<br>185.08)        | 123.32<br>(80.24 to<br>218.04)         | 119.47<br>(79.47 to<br>196.80)        | 118.92<br>(77.54 to<br>213.36)          |

| Azerbaijan                                                    |                                                      |                                                        |                                                      |                                                        |                                                  |                                                  |                                                  |                                                  |
|---------------------------------------------------------------|------------------------------------------------------|--------------------------------------------------------|------------------------------------------------------|--------------------------------------------------------|--------------------------------------------------|--------------------------------------------------|--------------------------------------------------|--------------------------------------------------|
| Cause                                                         | YLLs (actual counts)                                 |                                                        |                                                      |                                                        | Deaths (actual counts)                           |                                                  |                                                  |                                                  |
|                                                               | 2016                                                 | 2040 Forecast                                          | 2040 Better Scenario                                 | 2040 Worse Scenario                                    | 2016                                             | 2040 Forecast                                    | 2040 Better Scenario                             | 2040 Worse Scenario                              |
| Alcoholic cardiomyopathy                                      | 4,550.20<br>(2,676.71 to 9,955.45)                   | 5,778.50<br>(3,503.99 to 12,502.13)                    | 4,804.81<br>(2,959.42 to 10,070.00)                  | 6,864.88<br>(4,140.15 to 15,191.20)                    | 149.24<br>(94.26 to 298.78)                      | 244.08<br>(162.36 to 445.92)                     | 218.62<br>(148.49 to 382.66)                     | 275.52<br>(182.50 to 512.76)                     |
| Other cardiomyopathy                                          | 10,931.45<br>(7,619.79 to 18,876.61)                 | 13,565.98<br>(7,655.81 to 24,862.15)                   | 7,825.13<br>(4,357.66 to 14,589.77)                  | 14,217.46<br>(7,799.74 to 26,355.02)                   | 340.69<br>(238.48 to 579.87)                     | 614.40<br>(351.19 to 1,060.62)                   | 389.10<br>(216.51 to 681.89)                     | 611.98<br>(346.75 to 1,077.11)                   |
| Atrial fibrillation and flutter                               | 2,163.25<br>(1,648.75 to 2,757.14)                   | 6,068.26<br>(4,560.09 to 7,883.85)                     | 5,688.97<br>(4,306.87 to 7,423.51)                   | 5,908.67<br>(4,363.96 to 7,778.85)                     | 201.67<br>(153.36 to 258.85)                     | 602.12<br>(437.00 to 787.01)                     | 601.86<br>(449.96 to 782.49)                     | 565.96<br>(396.48 to 756.70)                     |
| Aortic aneurysm                                               | 2,976.49<br>(2,312.19 to 3,759.11)                   | 4,556.09<br>(3,198.77 to 6,370.47)                     | 5,554.28<br>(2,512.01 to 4,988.91)                   | 4,517.57<br>(3,110.99 to 6,362.62)                     | 137.18<br>(107.55 to 171.81)                     | 268.65<br>(202.23 to 357.67)                     | 230.95<br>(175.29 to 305.41)                     | 253.73<br>(188.60 to 337.69)                     |
| Peripheral artery disease                                     | 81.89<br>(56.85 to 106.50)                           | 295.54<br>(168.60 to 437.46)                           | 304.43<br>(169.55 to 458.20)                         | 280.62<br>(163.89 to 420.73)                           | 6.49<br>(3.93 to 8.62)                           | 27.06<br>(14.28 to 42.65)                        | 30.38<br>(15.75 to 47.28)                        | 24.58<br>(13.18 to 39.21)                        |
| Endocarditis                                                  | 2,662.93<br>(1,959.14 to 3,773.07)                   | 3,181.31<br>(2,084.40 to 4,977.67)                     | 2,919.81<br>(1,903.84 to 4,601.80)                   | 3,325.54<br>(2,169.98 to 5,272.98)                     | 73.07<br>(54.87 to 105.48)                       | 133.51<br>(91.08 to 210.60)                      | 135.04<br>(90.79 to 214.96)                      | 132.36<br>(89.46 to 210.39)                      |
| Other cardiovascular and circulatory diseases                 | 8,550.13<br>(4,399.62 to 11,873.40)                  | 14,446.82<br>(7,035.11 to 23,118.05)                   | 8,043.93<br>(3,897.88 to 13,114.50)                  | 15,025.77<br>(7,238.09 to 24,180.92)                   | 328.54<br>(171.77 to 450.56)                     | 768.45<br>(389.43 to 1,166.69)                   | 474.27<br>(249.02 to 721.98)                     | 759.22<br>(390.81 to 1,140.83)                   |
| <b>Chronic respiratory diseases</b>                           | <b>43,882.65</b><br><b>(36,221.31 to 53,539.31)</b>  | <b>75,141.15</b><br><b>(41,999.58 to 128,935.63)</b>   | <b>49,276.69</b><br><b>(30,061.40 to 76,686.06)</b>  | <b>93,889.17</b><br><b>(50,075.06 to 170,072.88)</b>   | <b>2,186.36</b><br><b>(1,815.90 to 2,679.07)</b> | <b>4,591.96</b><br><b>(2,826.10 to 7,298.85)</b> | <b>3,445.65</b><br><b>(2,289.32 to 5,100.89)</b> | <b>5,348.25</b><br><b>(3,115.72 to 8,780.92)</b> |
| Chronic obstructive pulmonary disease                         | 34,027.93<br>(27,623.48 to 41,081.37)                | 62,030.40<br>(32,412.42 to 113,567.98)                 | 36,194.52<br>(20,192.76 to 60,914.85)                | 80,619.28<br>(40,166.52 to 150,728.42)                 | 1,777.66<br>(1,464.50 to 2,196.47)               | 3,867.62<br>(2,241.89 to 6,427.43)               | 2,653.03<br>(1,618.49 to 4,178.30)               | 4,648.99<br>(2,573.95 to 7,994.83)               |
| Pneumoconiosis                                                | 87.42<br>(61.01 to 124.57)                           | 94.38<br>(61.36 to 140.63)                             | 89.37<br>(54.41 to 143.67)                           | 97.56<br>(63.46 to 147.97)                             | 3.22<br>(2.38 to 4.36)                           | 5.52<br>(3.50 to 9.27)                           | 5.66<br>(3.29 to 9.84)                           | 5.38<br>(3.50 to 9.57)                           |
| Silicosis                                                     | 14.42<br>(5.29 to 25.70)                             | 10.97<br>(4.87 to 21.58)                               | 5.98<br>(2.41 to 12.31)                              | 10.95<br>(4.82 to 22.01)                               | 0.38<br>(0.21 to 0.64)                           | 0.47<br>(0.23 to 0.92)                           | 0.32<br>(0.13 to 0.76)                           | 0.45<br>(0.22 to 0.89)                           |
| Asbestosis                                                    | 23.99<br>(16.11 to 36.42)                            | 23.56<br>(14.47 to 36.74)                              | 29.83<br>(17.75 to 45.81)                            | 22.94<br>(14.38 to 35.76)                              | 0.67<br>(0.46 to 0.97)                           | 0.94<br>(0.59 to 1.58)                           | 1.31<br>(0.78 to 2.15)                           | 0.92<br>(0.56 to 1.53)                           |
| Coal workers pneumoconiosis                                   | 3.42<br>(1.78 to 6.69)                               | 6.18<br>(2.58 to 13.29)                                | 6.31<br>(2.36 to 14.21)                              | 6.63<br>(2.69 to 14.45)                                | 0.15<br>(0.08 to 0.28)                           | 0.42<br>(0.15 to 0.97)                           | 0.47<br>(0.16 to 1.17)                           | 0.43<br>(0.16 to 1.04)                           |
| Other pneumoconiosis                                          | 45.59<br>(32.15 to 64.17)                            | 53.68<br>(33.76 to 86.39)                              | 47.26<br>(25.17 to 87.30)                            | 57.03<br>(36.08 to 92.75)                              | 2.02<br>(1.46 to 2.74)                           | 3.66<br>(2.17 to 6.58)                           | 3.55<br>(1.78 to 7.14)                           | 3.78<br>(2.18 to 7.15)                           |
| Asthma                                                        | 3,723.88<br>(2,608.30 to 5,033.86)                   | 3,909.85<br>(1,810.95 to 7,781.89)                     | 1,748.18<br>(754.99 to 3,563.61)                     | 4,280.50<br>(1,910.15 to 8,478.06)                     | 179.28<br>(121.82 to 243.60)                     | 242.86<br>(113.84 to 475.97)                     | 120.69<br>(52.20 to 243.34)                      | 254.12<br>(115.30 to 501.63)                     |
| Interstitial lung disease and pulmonary sarcoidosis           | 2,436.38<br>(1,434.15 to 3,579.32)                   | 3,874.47<br>(2,163.10 to 5,934.90)                     | 6,343.43<br>(3,504.68 to 9,869.69)                   | 3,615.56<br>(2,043.25 to 5,436.43)                     | 100.11<br>(58.71 to 150.15)                      | 225.89<br>(126.29 to 341.32)                     | 401.42<br>(226.44 to 611.20)                     | 201.80<br>(110.96 to 305.01)                     |
| Other chronic respiratory diseases                            | 3,607.05<br>(2,431.29 to 5,530.25)                   | 5,232.06<br>(2,722.67 to 9,404.77)                     | 4,901.19<br>(2,547.84 to 8,436.14)                   | 5,276.28<br>(2,733.08 to 9,479.03)                     | 126.09<br>(77.60 to 187.44)                      | 250.07<br>(124.86 to 433.74)                     | 264.86<br>(138.53 to 445.66)                     | 237.75<br>(118.73 to 423.51)                     |
| <b>Cirrhosis and other chronic liver diseases</b>             | <b>87,474.84</b><br><b>(70,412.34 to 108,551.34)</b> | <b>131,514.29</b><br><b>(103,298.58 to 162,349.72)</b> | <b>96,992.10</b><br><b>(73,598.00 to 121,604.60)</b> | <b>135,174.85</b><br><b>(106,754.60 to 166,386.74)</b> | <b>3,390.94</b><br><b>(2,752.46 to 4,129.27)</b> | <b>6,673.53</b><br><b>(5,423.12 to 8,029.96)</b> | <b>5,228.83</b><br><b>(4,051.59 to 6,436.43)</b> | <b>6,605.99</b><br><b>(5,393.32 to 7,993.21)</b> |
| Cirrhosis and other chronic liver diseases due to hepatitis B | 31,008.28<br>(24,610.27 to 39,281.03)                | 46,884.71<br>(36,514.76 to 59,405.54)                  | 36,700.44<br>(27,291.98 to 46,773.83)                | 45,028.59<br>(34,984.35 to 57,003.85)                  | 1,222.42<br>(975.33 to 1,521.73)                 | 2,405.36<br>(1,894.19 to 2,949.61)               | 1,991.10<br>(1,513.81 to 2,516.03)               | 2,236.86<br>(1,767.79 to 2,765.66)               |
| Cirrhosis and other chronic liver diseases due to hepatitis C | 17,710.09<br>(13,892.53 to 22,645.11)                | 26,635.06<br>(20,335.00 to 33,961.43)                  | 20,282.22<br>(14,812.88 to 26,561.57)                | 25,752.99<br>(19,698.20 to 32,837.78)                  | 663.90<br>(520.77 to 838.95)                     | 1,267.54<br>(984.41 to 1,563.88)                 | 1,016.75<br>(759.60 to 1,292.96)                 | 1,189.37<br>(935.42 to 1,469.76)                 |

|                                                                |                                                               |                                                               |                                                               |                                                               |                                                      |                                                          |                                                        |                                                          |
|----------------------------------------------------------------|---------------------------------------------------------------|---------------------------------------------------------------|---------------------------------------------------------------|---------------------------------------------------------------|------------------------------------------------------|----------------------------------------------------------|--------------------------------------------------------|----------------------------------------------------------|
|                                                                | 23,146.94<br>(18,148.78 to<br>29,018.95)                      | 36,372.63<br>(27,562.20 to<br>45,385.26)                      | 23,366.91<br>(17,073.10 to<br>29,866.23)                      | 43,397.88<br>(33,355.04 to<br>54,192.75)                      | 932.41<br>(734.93 to<br>1,142.79)                    | 1,869.58<br>(1,455.04 to<br>2,323.40)                    | 1,291.35<br>(969.78 to<br>1,606.19)                    | 2,121.35<br>(1,660.17 to<br>2,608.35)                    |
| Cirrhosis and other chronic liver diseases due to alcohol use  |                                                               |                                                               |                                                               |                                                               |                                                      |                                                          |                                                        |                                                          |
|                                                                | 15,609.52<br>(12,614.87 to<br>19,205.25)                      | 21,621.89<br>(16,555.61 to<br>27,012.28)                      | 16,642.52<br>(12,313.87 to<br>21,296.41)                      | 20,995.39<br>(16,288.64 to<br>26,164.60)                      | 572.21<br>(462.13 to<br>705.39)                      | 1,131.05<br>(879.28 to<br>1,425.55)                      | 929.63<br>(704.79 to<br>1,173.21)                      | 1,058.41<br>(828.64 to<br>1,337.15)                      |
| Cirrhosis and other chronic liver diseases due to other causes |                                                               |                                                               |                                                               |                                                               |                                                      |                                                          |                                                        |                                                          |
|                                                                | <b>21,706.21</b><br><b>(17,634.89 to</b><br><b>26,852.66)</b> | <b>23,919.79</b><br><b>(17,382.87 to</b><br><b>32,013.22)</b> | <b>17,269.25</b><br><b>(12,520.43 to</b><br><b>23,524.20)</b> | <b>24,296.55</b><br><b>(17,864.79 to</b><br><b>33,586.17)</b> | <b>690.58</b><br><b>(559.57 to</b><br><b>842.84)</b> | <b>1,089.46</b><br><b>(835.20 to</b><br><b>1,406.01)</b> | <b>855.08</b><br><b>(643.31 to</b><br><b>1,113.18)</b> | <b>1,061.63</b><br><b>(808.16 to</b><br><b>1,394.70)</b> |
| Digestive diseases                                             |                                                               |                                                               |                                                               |                                                               |                                                      |                                                          |                                                        |                                                          |
|                                                                | 6,645.43<br>(4,753.98 to<br>8,954.25)                         | 5,520.90<br>(3,413.03 to<br>8,516.75)                         | 2,879.17<br>(1,692.78 to<br>4,565.95)                         | 5,617.27<br>(3,534.37 to<br>8,603.35)                         | 214.29<br>(152.72 to<br>285.55)                      | 238.76<br>(152.06 to<br>356.93)                          | 132.19<br>(81.28 to<br>205.04)                         | 234.80<br>(154.14 to<br>347.57)                          |
| Peptic ulcer disease                                           |                                                               |                                                               |                                                               |                                                               |                                                      |                                                          |                                                        |                                                          |

| Azerbaijan                                 |                                       |                                       |                                       |                                       |                                    |                                    |                                    |                                    |
|--------------------------------------------|---------------------------------------|---------------------------------------|---------------------------------------|---------------------------------------|------------------------------------|------------------------------------|------------------------------------|------------------------------------|
| Cause                                      | YLLs (actual counts)                  |                                       |                                       |                                       | Deaths (actual counts)             |                                    |                                    |                                    |
|                                            | 2016                                  | 2040 Forecast                         | 2040 Better Scenario                  | 2040 Worse Scenario                   | 2016                               | 2040 Forecast                      | 2040 Better Scenario               | 2040 Worse Scenario                |
| Gastritis and duodenitis                   | 31.85<br>(23.51 to 43.00)             | 50.13<br>(34.52 to 71.72)             | 34.70<br>(23.33 to 50.05)             | 48.52<br>(33.83 to 69.94)             | 1.16<br>(0.88 to 1.54)             | 2.63<br>(1.88 to 3.62)             | 2.00<br>(1.36 to 2.75)             | 2.42<br>(1.72 to 3.34)             |
| Appendicitis                               | 851.92<br>(590.10 to 1,380.04)        | 731.74<br>(445.48 to 1,275.11)        | 398.92<br>(228.18 to 704.45)          | 748.27<br>(455.67 to 1,303.48)        | 18.06<br>(12.20 to 30.89)          | 21.01<br>(12.91 to 38.91)          | 12.25<br>(7.06 to 22.97)           | 20.73<br>(12.98 to 37.49)          |
| Paralytic ileus and intestinal obstruction | 4,165.86<br>(3,033.09 to 6,160.53)    | 3,114.90<br>(2,338.37 to 4,361.64)    | 2,946.63<br>(2,161.99 to 4,100.00)    | 3,104.30<br>(2,346.82 to 4,364.76)    | 97.04<br>(75.52 to 133.49)         | 132.53<br>(100.32 to 182.94)       | 139.88<br>(105.16 to 188.14)       | 123.80<br>(94.71 to 171.45)        |
| Inguinal, femoral, and abdominal hernia    | 292.75<br>(163.20 to 421.08)          | 283.82<br>(150.51 to 422.84)          | 204.59<br>(109.20 to 312.86)          | 276.16<br>(143.65 to 418.63)          | 10.79<br>(6.01 to 15.12)           | 13.54<br>(7.65 to 19.15)           | 10.68<br>(6.07 to 15.54)           | 12.65<br>(7.03 to 18.10)           |
| Inflammatory bowel disease                 | 417.35<br>(303.68 to 550.23)          | 463.14<br>(323.10 to 636.45)          | 444.19<br>(304.93 to 618.23)          | 446.81<br>(316.34 to 613.75)          | 13.11<br>(9.69 to 16.95)           | 20.22<br>(14.30 to 27.52)          | 21.28<br>(14.64 to 29.16)          | 18.58<br>(13.40 to 25.27)          |
| Vascular intestinal disorders              | 769.02<br>(525.41 to 994.56)          | 1,313.61<br>(924.89 to 1,709.83)      | 1,148.50<br>(798.81 to 1,514.91)      | 1,242.66<br>(860.02 to 1,611.77)      | 35.97<br>(27.59 to 45.26)          | 77.39<br>(59.30 to 98.05)          | 72.72<br>(55.04 to 94.15)          | 70.74<br>(53.28 to 89.90)          |
| Gallbladder and biliary diseases           | 1,172.92<br>(836.69 to 1,926.56)      | 2,150.54<br>(890.60 to 4,911.92)      | 1,209.85<br>(494.29 to 2,655.88)      | 2,420.60<br>(987.74 to 5,521.90)      | 46.06<br>(31.81 to 79.68)          | 111.76<br>(47.94 to 249.51)        | 68.39<br>(29.55 to 152.65)         | 120.29<br>(50.50 to 267.32)        |
| Pancreatitis                               | 1,519.24<br>(1,077.07 to 2,049.51)    | 2,130.26<br>(936.08 to 4,423.21)      | 1,240.30<br>(557.49 to 2,532.47)      | 2,425.22<br>(1,009.46 to 5,213.44)    | 46.06<br>(33.71 to 61.88)          | 83.37<br>(41.88 to 163.09)         | 51.75<br>(26.61 to 97.92)          | 91.12<br>(43.94 to 186.22)         |
| Other digestive diseases                   | 5,839.86<br>(4,311.79 to 7,501.92)    | 8,160.74<br>(5,774.18 to 10,915.59)   | 6,762.39<br>(4,733.62 to 9,206.47)    | 7,966.75<br>(5,706.40 to 10,598.49)   | 208.04<br>(154.58 to 262.25)       | 388.27<br>(291.49 to 501.85)       | 343.95<br>(255.97 to 444.02)       | 366.49<br>(269.20 to 473.35)       |
| Neurological disorders                     | 36,740.87<br>(30,381.43 to 44,474.53) | 60,318.07<br>(54,055.34 to 89,882.43) | 70,423.62<br>(56,911.54 to 87,702.84) | 67,610.11<br>(51,228.61 to 90,711.08) | 2,479.76<br>(1,708.11 to 2,502.89) | 5,607.01<br>(4,143.21 to 7,750.36) | 6,314.88<br>(4,945.96 to 8,114.68) | 5,181.54<br>(3,628.49 to 7,466.53) |
| Alzheimer's disease and other dementias    | 15,739.92<br>(12,526.73 to 19,706.37) | 45,075.96<br>(32,035.71 to 64,976.95) | 47,471.65<br>(35,477.09 to 63,684.04) | 42,750.00<br>(29,054.95 to 63,436.52) | 1,506.07<br>(1,197.45 to 1,883.31) | 4,513.48<br>(3,103.63 to 6,576.49) | 5,044.36<br>(3,708.75 to 6,820.02) | 4,161.44<br>(2,704.05 to 6,370.01) |
| Parkinson's disease                        | 2,983.37<br>(2,110.19 to 3,985.49)    | 8,537.27<br>(6,149.11 to 11,346.57)   | 10,868.52<br>(7,978.05 to 14,327.45)  | 7,524.26<br>(5,448.32 to 10,198.52)   | 235.49<br>(165.11 to 318.47)       | 716.80<br>(505.01 to 962.14)       | 952.83<br>(695.65 to 1,252.32)     | 618.35<br>(428.83 to 860.80)       |
| Epilepsy                                   | 14,834.26<br>(11,167.79 to 19,963.66) | 12,284.05<br>(7,010.38 to 21,876.38)  | 8,603.95<br>(4,929.30 to 14,625.05)   | 13,982.22<br>(7,841.57 to 25,360.78)  | 259.96<br>(199.17 to 339.00)       | 260.66<br>(156.83 to 443.74)       | 191.31<br>(115.76 to 314.22)       | 291.94<br>(170.30 to 508.99)       |
| Multiple sclerosis                         | 359.78<br>(279.06 to 452.37)          | 422.87<br>(297.70 to 573.67)          | 439.72<br>(312.02 to 592.52)          | 414.46<br>(294.63 to 564.65)          | 10.34<br>(7.93 to 13.38)           | 15.50<br>(11.28 to 21.77)          | 17.05<br>(12.26 to 24.15)          | 14.77<br>(10.80 to 20.83)          |
| Motor neuron disease                       | 431.44<br>(347.19 to 525.24)          | 650.01<br>(479.97 to 831.83)          | 651.74<br>(474.70 to 841.60)          | 627.42<br>(468.16 to 799.25)          | 13.45<br>(10.89 to 16.38)          | 24.51<br>(19.00 to 30.56)          | 25.52<br>(19.54 to 31.96)          | 23.16<br>(18.15 to 28.62)          |
| Other neurological disorders               | 2,392.10<br>(1,820.89 to 3,169.67)    | 2,347.91<br>(1,796.69 to 3,084.24)    | 2,388.04<br>(1,800.72 to 3,143.07)    | 2,320.74<br>(1,776.68 to 3,031.75)    | 54.45<br>(43.17 to 68.34)          | 76.06<br>(60.99 to 94.20)          | 83.80<br>(67.42 to 103.95)         | 71.89<br>(58.16 to 88.49)          |
| Mental disorders                           | 35,347.15<br>(23,443.22 to 71,022.29) | 44,504.68<br>(29,386.00 to 82,301.18) | 52,488.43<br>(35,790.12 to 89,202.65) | 45,140.12<br>(29,817.59 to 85,425.11) | 1,013.13<br>(691.19 to 1,863.57)   | 1,737.65<br>(1,267.41 to 2,586.89) | 2,234.07<br>(1,645.32 to 3,047.27) | 1,685.14<br>(1,221.97 to 2,621.53) |
| Alcohol use disorders                      | 24,909.17<br>(14,424.35 to 60,335.88) | 28,690.64<br>(16,799.93 to 64,687.60) | 32,005.65<br>(19,238.41 to 67,487.77) | 29,568.70<br>(17,211.71 to 68,598.18) | 773.02<br>(495.24 to 1,599.21)     | 1,269.34<br>(832.55 to 2,051.70)   | 1,569.88<br>(1,043.53 to 2,241.51) | 1,235.79<br>(806.45 to 2,151.05)   |
| Drug use disorders                         | 10,428.00<br>(6,967.22 to 14,262.27)  | 15,801.97<br>(10,734.91 to 22,636.11) | 20,471.49<br>(13,857.07 to 29,823.00) | 15,558.91<br>(10,610.39 to 22,178.06) | 239.93<br>(169.95 to 320.02)       | 468.11<br>(340.17 to 655.89)       | 663.99<br>(474.52 to 936.41)       | 449.15<br>(332.31 to 622.76)       |
| Opioid use disorders                       | 7,940.95<br>(4,184.89 to 11,637.70)   | 9,444.72<br>(5,274.55 to 14,854.78)   | 10,239.01<br>(5,638.15 to 16,051.65)  | 9,403.91<br>(5,226.77 to 14,602.88)   | 163.75<br>(97.46 to 232.94)        | 225.06<br>(139.90 to 342.63)       | 250.90<br>(151.14 to 384.38)       | 221.05<br>(137.15 to 328.27)       |

|                           |                                       |                                       |                                        |                                       |                              |                                 |                                 |                                 |
|---------------------------|---------------------------------------|---------------------------------------|----------------------------------------|---------------------------------------|------------------------------|---------------------------------|---------------------------------|---------------------------------|
|                           | 497.40<br>(313.17 to<br>997.99)       | 1,237.26<br>(761.48 to<br>2,120.50)   | 1,741.68<br>(1,040.62 to<br>2,888.23)  | 1,217.20<br>(748.95 to<br>2,113.31)   | 12.99<br>(8.64 to<br>23.91)  | 37.82<br>(23.45 to<br>58.81)    | 54.71<br>(33.21 to<br>84.36)    | 36.67<br>(23.05 to<br>57.90)    |
| Cocaine use disorders     | 273.88<br>(171.70 to<br>538.15)       | 997.75<br>(594.79 to<br>1,820.54)     | 1,745.63<br>(999.48 to<br>3,083.28)    | 981.98<br>(587.52 to<br>1,776.30)     | 7.06<br>(4.59 to<br>12.71)   | 29.63<br>(18.44 to<br>48.26)    | 53.28<br>(31.67 to<br>88.15)    | 28.76<br>(18.06 to<br>47.97)    |
| Amphetamine use disorders | 1,715.77<br>(1,148.04 to<br>3,079.99) | 4,122.24<br>(2,766.87 to<br>6,550.99) | 6,745.19<br>(4,346.83 to<br>10,703.34) | 3,955.82<br>(2,623.22 to<br>6,424.74) | 56.13<br>(40.43 to<br>84.90) | 175.60<br>(126.58 to<br>245.11) | 305.11<br>(204.28 to<br>441.04) | 162.66<br>(115.56 to<br>227.32) |
| Other drug use disorders  | 9.98<br>(7.13 to<br>14.69)            | 12.07<br>(6.98 to<br>20.28)           | 11.29<br>(6.68 to<br>18.89)            | 12.52<br>(7.20 to<br>21.26)           | 0.17<br>(0.12 to<br>0.27)    | 0.21<br>(0.12 to<br>0.35)       | 0.20<br>(0.12 to<br>0.35)       | 0.21<br>(0.13 to<br>0.35)       |
| Eating disorders          |                                       |                                       |                                        |                                       |                              |                                 |                                 |                                 |



| Azerbaijan                                                 |                                                |                                                |                                               |                                                 |                                           |                                           |                                           |                                            |
|------------------------------------------------------------|------------------------------------------------|------------------------------------------------|-----------------------------------------------|-------------------------------------------------|-------------------------------------------|-------------------------------------------|-------------------------------------------|--------------------------------------------|
| Cause                                                      | YLLs (actual counts)                           |                                                |                                               |                                                 | Deaths (actual counts)                    |                                           |                                           |                                            |
|                                                            | 2016                                           | 2040 Forecast                                  | 2040 Better Scenario                          | 2040 Worse Scenario                             | 2016                                      | 2040 Forecast                             | 2040 Better Scenario                      | 2040 Worse Scenario                        |
| <b>Diabetes, urogenital, blood, and endocrine diseases</b> | <b>107,344.60</b><br>(90,012.21 to 127,310.09) | <b>146,201.60</b><br>(98,256.62 to 205,347.39) | <b>91,016.64</b><br>(60,443.91 to 129,527.61) | <b>157,773.72</b><br>(105,329.84 to 225,506.62) | <b>3,596.34</b><br>(3,008.67 to 4,235.00) | <b>7,126.32</b><br>(5,024.70 to 9,736.92) | <b>4,705.16</b><br>(3,216.99 to 6,469.32) | <b>7,402.43</b><br>(5,176.65 to 10,142.53) |
| Diabetes mellitus                                          | 45,461.42<br>(36,956.00 to 54,821.09)          | 66,829.45<br>(36,197.09 to 115,719.47)         | 37,216.15<br>(20,203.23 to 64,057.88)         | 75,130.36<br>(38,642.09 to 133,006.01)          | 1,763.53<br>(1,444.67 to 2,117.37)        | 3,263.61<br>(1,846.78 to 5,416.39)        | 1,926.84<br>(1,134.45 to 3,142.59)        | 3,534.37<br>(1,957.71 to 5,851.54)         |
| Acute glomerulonephritis                                   | 1,094.53<br>(691.87 to 1,727.23)               | 1,623.77<br>(994.56 to 2,613.11)               | 1,107.55<br>(667.49 to 1,771.26)              | 1,687.75<br>(1,002.03 to 2,750.60)              | 22.08<br>(15.93 to 31.22)                 | 46.60<br>(30.35 to 70.46)                 | 35.57<br>(22.20 to 54.39)                 | 45.51<br>(29.67 to 69.36)                  |
| Chronic kidney disease                                     | 33,537.58<br>(27,072.16 to 40,835.96)          | 51,316.11<br>(28,885.98 to 84,002.43)          | 32,346.35<br>(18,811.99 to 51,869.48)         | 54,610.86<br>(30,390.71 to 89,831.51)           | 1,177.26<br>(915.45 to 1,411.62)          | 2,741.69<br>(1,505.10 to 4,615.70)        | 1,854.57<br>(1,036.84 to 3,009.34)        | 2,816.05<br>(1,542.05 to 4,567.46)         |
| Chronic kidney disease due to diabetes mellitus            | 12,556.55<br>(9,709.17 to 15,852.58)           | 24,682.62<br>(13,285.25 to 43,207.89)          | 15,815.15<br>(8,734.56 to 27,323.67)          | 26,307.72<br>(14,166.17 to 46,271.32)           | 502.56<br>(383.59 to 621.46)              | 1,325.56<br>(698.02 to 2,308.56)          | 900.90<br>(483.86 to 1,520.06)            | 1,368.49<br>(715.82 to 2,354.26)           |
| Chronic kidney disease due to hypertension                 | 1,505.41<br>(1,119.36 to 1,959.31)             | 3,589.05<br>(1,904.96 to 6,139.57)             | 2,575.95<br>(1,362.80 to 4,405.00)            | 3,696.42<br>(1,942.64 to 6,293.21)              | 91.04<br>(65.01 to 116.98)                | 286.55<br>(153.33 to 490.07)              | 222.11<br>(118.10 to 387.21)              | 283.70<br>(152.15 to 482.18)               |
| Chronic kidney disease due to glomerulonephritis           | 9,248.70<br>(7,265.20 to 11,476.11)            | 10,002.42<br>(5,824.01 to 16,444.84)           | 5,849.02<br>(3,446.53 to 9,486.16)            | 10,711.33<br>(6,083.74 to 17,503.89)            | 258.10<br>(201.06 to 321.57)              | 451.33<br>(246.36 to 789.23)              | 279.42<br>(154.24 to 480.23)              | 467.90<br>(251.23 to 821.90)               |
| Chronic kidney disease due to other and unspecified causes | 10,226.91<br>(8,030.94 to 12,772.70)           | 13,042.03<br>(7,421.54 to 21,503.75)           | 8,106.23<br>(4,607.72 to 13,088.92)           | 13,895.38<br>(7,790.29 to 23,057.39)            | 325.56<br>(250.44 to 404.48)              | 678.45<br>(371.64 to 1,178.96)            | 452.14<br>(248.33 to 773.98)              | 695.95<br>(376.46 to 1,193.83)             |
| Urinary diseases and male infertility                      | 9,699.75<br>(8,047.22 to 11,581.89)            | 15,815.81<br>(12,115.63 to 19,531.62)          | 11,770.14<br>(8,744.02 to 15,141.42)          | 15,246.28<br>(11,977.88 to 18,542.43)           | 324.72<br>(271.98 to 386.73)              | 771.23<br>(634.35 to 922.76)              | 623.89<br>(489.09 to 770.95)              | 709.23<br>(583.30 to 847.90)               |
| Urinary tract infections                                   | 9,290.27<br>(7,684.82 to 11,115.37)            | 15,035.23<br>(11,557.98 to 18,575.79)          | 11,221.23<br>(8,274.29 to 14,463.70)          | 14,520.25<br>(11,350.90 to 17,793.18)           | 302.81<br>(252.85 to 363.12)              | 710.28<br>(573.22 to 858.99)              | 576.00<br>(445.29 to 717.02)              | 655.63<br>(532.75 to 795.71)               |
| Urolithiasis                                               | 119.67<br>(76.39 to 168.21)                    | 311.06<br>(161.42 to 492.00)                   | 233.27<br>(106.02 to 395.62)                  | 287.03<br>(155.86 to 459.75)                    | 7.09<br>(2.90 to 11.18)                   | 25.42<br>(8.61 to 46.32)                  | 21.16<br>(6.39 to 39.82)                  | 22.46<br>(7.98 to 41.60)                   |
| Other urinary diseases                                     | 289.81<br>(188.09 to 396.83)                   | 469.52<br>(280.99 to 684.14)                   | 315.64<br>(173.46 to 488.84)                  | 439.00<br>(271.70 to 638.02)                    | 14.82<br>(7.90 to 21.15)                  | 35.53<br>(17.64 to 60.50)                 | 26.72<br>(11.83 to 45.56)                 | 31.15<br>(16.19 to 53.82)                  |
| Gynecological diseases                                     | 23.59<br>(13.80 to 35.00)                      | 19.98<br>(9.88 to 34.17)                       | 8.87<br>(3.99 to 16.02)                       | 20.33<br>(9.87 to 35.17)                        | 0.66<br>(0.40 to 0.97)                    | 0.74<br>(0.41 to 1.18)                    | 0.35<br>(0.18 to 0.61)                    | 0.73<br>(0.40 to 1.18)                     |
| Uterine fibroids                                           | 5.84<br>(2.85 to 9.97)                         | 4.91<br>(1.62 to 12.18)                        | 2.64<br>(0.89 to 6.36)                        | 5.03<br>(1.63 to 12.57)                         | 0.18<br>(0.08 to 0.30)                    | 0.16<br>(0.06 to 0.39)                    | 0.09<br>(0.03 to 0.20)                    | 0.17<br>(0.06 to 0.39)                     |
| Polycystic ovarian syndrome                                | 5.17<br>(1.74 to 9.88)                         | 2.76<br>(0.67 to 6.53)                         | 0.75<br>(0.14 to 2.21)                        | 2.91<br>(0.72 to 7.04)                          | 0.12<br>(0.04 to 0.24)                    | 0.07<br>(0.02 to 0.16)                    | 0.02<br>(0.00 to 0.16)                    | 0.07<br>(0.02 to 0.18)                     |
| Endometriosis                                              | 0.25<br>(0.11 to 0.55)                         | 0.22<br>(0.06 to 0.58)                         | 0.10<br>(0.03 to 0.28)                        | 0.23<br>(0.06 to 0.60)                          | 0.01<br>(0.00 to 0.01)                    | 0.01<br>(0.00 to 0.01)                    | 0.00<br>(0.00 to 0.01)                    | 0.01<br>(0.00 to 0.01)                     |
| Genital prolapse                                           | 1.07<br>(0.51 to 1.95)                         | 1.15<br>(0.41 to 2.36)                         | 0.53<br>(0.19 to 1.13)                        | 1.16<br>(0.43 to 2.43)                          | 0.04<br>(0.02 to 0.08)                    | 0.06<br>(0.02 to 0.12)                    | 0.03<br>(0.01 to 0.06)                    | 0.06<br>(0.02 to 0.12)                     |
| Other gynecological diseases                               | 11.27<br>(6.24 to 17.99)                       | 10.94<br>(5.30 to 19.23)                       | 4.84<br>(2.11 to 9.09)                        | 11.00<br>(5.34 to 19.77)                        | 0.31<br>(0.18 to 0.48)                    | 0.44<br>(0.25 to 0.74)                    | 0.21<br>(0.10 to 0.37)                    | 0.43<br>(0.24 to 0.72)                     |
| Hemoglobinopathies and hemolytic anemias                   | 8,273.67<br>(6,187.37 to 11,197.61)            | 4,299.18<br>(2,985.10 to 5,691.59)             | 2,789.84<br>(1,926.23 to 3,892.25)            | 4,412.31<br>(3,094.69 to 5,862.25)              | 156.83<br>(117.05 to 199.14)              | 143.41<br>(99.08 to 182.46)               | 98.33<br>(65.84 to 131.87)                | 138.93<br>(95.69 to 176.56)                |
| Thalassemias                                               | 4,255.87<br>(2,747.73 to 6,692.87)             | 947.36<br>(501.34 to 1,685.73)                 | 742.93<br>(407.97 to 1,263.92)                | 1,055.23<br>(557.65 to 1,844.39)                | 51.00<br>(33.15 to 79.89)                 | 11.59<br>(6.19 to 20.37)                  | 9.13<br>(5.09 to 15.36)                   | 12.87<br>(6.89 to 22.19)                   |

|                                                   |                                        |                                       |                                       |                                       |                                 |                                 |                                 |                                 |
|---------------------------------------------------|----------------------------------------|---------------------------------------|---------------------------------------|---------------------------------------|---------------------------------|---------------------------------|---------------------------------|---------------------------------|
|                                                   | 1,604.95<br>(1,200.75 to<br>2,000.76)  | 1,148.56<br>(718.71 to<br>1,638.87)   | 649.86<br>(391.31 to<br>985.74)       | 1,193.99<br>(755.45 to<br>1,714.10)   | 27.45<br>(20.14 to<br>34.30)    | 22.58<br>(14.17 to<br>32.23)    | 13.15<br>(7.83 to<br>19.61)     | 23.23<br>(14.44 to<br>32.76)    |
| Sickle cell disorders                             |                                        |                                       |                                       |                                       |                                 |                                 |                                 |                                 |
|                                                   | 899.73<br>(633.15 to<br>1,161.80)      | 766.87<br>(471.74 to<br>1,089.93)     | 427.36<br>(244.08 to<br>647.53)       | 783.31<br>(471.22 to<br>1,104.06)     | 19.82<br>(13.46 to<br>25.63)    | 22.13<br>(13.41 to<br>30.84)    | 12.79<br>(7.22 to<br>18.93)     | 22.18<br>(13.42 to<br>30.73)    |
| G6PD deficiency                                   |                                        |                                       |                                       |                                       |                                 |                                 |                                 |                                 |
|                                                   | 1,513.12<br>(1,025.24 to<br>1,934.66)  | 1,436.39<br>(925.02 to<br>1,910.75)   | 969.69<br>(587.52 to<br>1,331.44)     | 1,379.79<br>(880.04 to<br>1,826.00)   | 58.56<br>(38.65 to<br>75.64)    | 87.11<br>(57.61 to<br>112.95)   | 63.26<br>(39.91 to<br>85.29)    | 80.64<br>(53.31 to<br>105.13)   |
| Other hemoglobinopathies and hemolytic anemias    |                                        |                                       |                                       |                                       |                                 |                                 |                                 |                                 |
|                                                   | 9,254.07<br>(5,108.91 to<br>13,600.55) | 6,297.31<br>(4,403.43 to<br>8,544.67) | 5,777.74<br>(4,174.85 to<br>7,616.07) | 6,665.82<br>(4,573.09 to<br>9,020.13) | 151.26<br>(102.14 to<br>203.90) | 159.04<br>(123.00 to<br>206.08) | 165.62<br>(126.27 to<br>217.81) | 157.61<br>(121.67 to<br>202.00) |
| Endocrine, metabolic, blood, and immune disorders |                                        |                                       |                                       |                                       |                                 |                                 |                                 |                                 |

| Azerbaijan                                    |                                               |                                              |                                             |                                              |                                       |                                     |                                    |                                     |
|-----------------------------------------------|-----------------------------------------------|----------------------------------------------|---------------------------------------------|----------------------------------------------|---------------------------------------|-------------------------------------|------------------------------------|-------------------------------------|
| Cause                                         | YLLs (actual counts)                          |                                              |                                             |                                              | Deaths (actual counts)                |                                     |                                    |                                     |
|                                               | 2016                                          | 2040 Forecast                                | 2040 Better Scenario                        | 2040 Worse Scenario                          | 2016                                  | 2040 Forecast                       | 2040 Better Scenario               | 2040 Worse Scenario                 |
| <b>Musculoskeletal disorders</b>              | <b>464.77</b><br>(316.58 to 581.09)           | <b>742.88</b><br>(519.49 to 955.86)          | <b>602.35</b><br>(419.76 to 794.58)         | <b>718.73</b><br>(497.23 to 919.96)          | <b>14.85</b><br>(10.92 to 18.53)      | <b>34.84</b><br>(25.93 to 43.26)    | <b>29.42</b><br>(22.08 to 37.22)   | <b>32.47</b><br>(24.34 to 39.81)    |
| Rheumatoid arthritis                          | 95.03<br>(58.72 to 127.20)                    | 200.06<br>(127.69 to 278.20)                 | 105.67<br>(61.35 to 162.63)                 | 196.47<br>(124.59 to 274.20)                 | 3.56<br>(2.39 to 4.70)                | 11.23<br>(7.50 to 15.61)            | 6.32<br>(3.83 to 9.63)             | 10.63<br>(7.19 to 14.89)            |
| Other musculoskeletal disorders               | 369.74<br>(251.78 to 467.41)                  | 542.82<br>(365.03 to 710.65)                 | 496.68<br>(344.62 to 654.38)                | 522.26<br>(347.41 to 684.05)                 | 11.29<br>(8.18 to 14.16)              | 23.62<br>(16.81 to 29.88)           | 23.10<br>(17.23 to 29.27)          | 21.84<br>(15.53 to 27.81)           |
| <b>Other non-communicable diseases</b>        | <b>68,510.57</b><br>(37,578.94 to 110,289.31) | <b>27,647.85</b><br>(15,399.33 to 45,672.25) | <b>10,659.64</b><br>(5,753.40 to 18,627.31) | <b>32,256.08</b><br>(18,030.25 to 53,980.42) | <b>818.46</b><br>(454.77 to 1,324.92) | <b>356.20</b><br>(203.65 to 574.55) | <b>147.82</b><br>(85.07 to 244.94) | <b>408.79</b><br>(234.75 to 674.26) |
| Congenital birth defects                      | 66,185.04<br>(35,554.52 to 107,977.29)        | 26,623.18<br>(14,401.40 to 44,477.22)        | 9,930.57<br>(5,108.74 to 17,792.81)         | 31,123.49<br>(16,911.12 to 52,488.17)        | 788.45<br>(429.27 to 1,292.57)        | 331.23<br>(178.79 to 545.88)        | 126.97<br>(66.33 to 227.34)        | 383.91<br>(211.12 to 645.26)        |
| Neural tube defects                           | 2,433.16<br>(867.15 to 5,598.13)              | 613.54<br>(193.05 to 1,555.77)               | 187.38<br>(57.39 to 454.13)                 | 736.99<br>(235.77 to 1,850.81)               | 28.50<br>(10.34 to 65.57)             | 7.34<br>(2.42 to 18.36)             | 2.27<br>(0.73 to 5.42)             | 8.78<br>(2.93 to 21.66)             |
| Congenital heart anomalies                    | 47,055.72<br>(24,402.77 to 77,241.72)         | 18,248.34<br>(9,451.17 to 29,909.81)         | 6,183.64<br>(2,959.24 to 11,082.98)         | 21,368.55<br>(10,745.98 to 35,661.76)        | 558.29<br>(293.49 to 905.88)          | 223.35<br>(117.60 to 360.66)        | 76.60<br>(37.36 to 136.83)         | 259.93<br>(131.09 to 427.98)        |
| Orofacial clefts                              | 57.41<br>(16.58 to 179.99)                    | 25.08<br>(5.35 to 81.13)                     | 6.34<br>(1.27 to 22.96)                     | 30.77<br>(6.30 to 104.03)                    | 0.66<br>(0.19 to 2.08)                | 0.29<br>(0.06 to 0.94)              | 0.07<br>(0.01 to 0.27)             | 0.36<br>(0.07 to 1.20)              |
| Down syndrome                                 | 802.77<br>(406.81 to 1,469.15)                | 470.59<br>(231.33 to 858.04)                 | 417.44<br>(204.26 to 738.28)                | 529.28<br>(255.34 to 973.53)                 | 10.51<br>(5.52 to 18.84)              | 7.26<br>(3.71 to 12.61)             | 6.73<br>(3.43 to 11.62)            | 7.97<br>(3.94 to 14.20)             |
| Other chromosomal abnormalities               | 494.85<br>(186.56 to 1,122.49)                | 344.38<br>(124.04 to 831.80)                 | 198.74<br>(70.15 to 473.11)                 | 407.67<br>(144.08 to 971.75)                 | 5.76<br>(2.18 to 9.73)                | 4.04<br>(1.46 to 9.73)              | 2.34<br>(0.83 to 5.56)             | 4.78<br>(1.69 to 11.44)             |
| Congenital musculoskeletal and limb anomalies | 1,368.84<br>(639.67 to 2,521.46)              | 680.05<br>(270.64 to 1,422.73)               | 275.52<br>(107.14 to 566.19)                | 799.28<br>(319.72 to 1,711.41)               | 15.92<br>(7.47 to 29.25)              | 7.96<br>(3.19 to 16.59)             | 3.24<br>(1.27 to 6.60)             | 9.35<br>(3.77 to 19.90)             |
| Urogenital congenital anomalies               | 1,287.01<br>(557.00 to 3,840.42)              | 807.22<br>(388.83 to 2,094.22)               | 408.69<br>(188.26 to 994.78)                | 889.08<br>(415.09 to 2,422.73)               | 18.29<br>(9.01 to 48.98)              | 13.92<br>(7.26 to 30.61)            | 7.46<br>(3.69 to 15.23)            | 14.87<br>(7.66 to 34.25)            |
| Digestive congenital anomalies                | 1,942.62<br>(862.64 to 4,610.21)              | 859.84<br>(335.62 to 2,183.36)               | 321.53<br>(126.11 to 833.34)                | 1,016.63<br>(407.59 to 2,585.04)             | 22.63<br>(10.11 to 53.49)             | 10.11<br>(4.00 to 25.49)            | 3.80<br>(1.50 to 9.71)             | 11.93<br>(4.87 to 30.07)            |
| Other congenital birth defects                | 10,742.66<br>(4,386.07 to 27,774.28)          | 4,574.14<br>(1,852.03 to 11,219.93)          | 1,931.29<br>(766.91 to 4,779.99)            | 5,345.24<br>(2,126.36 to 13,469.31)          | 127.88<br>(53.07 to 328.57)           | 56.94<br>(23.86 to 138.33)          | 24.45<br>(10.14 to 60.21)          | 65.95<br>(26.94 to 163.45)          |
| Skin and subcutaneous diseases                | 157.96<br>(91.69 to 212.03)                   | 340.89<br>(171.90 to 457.42)                 | 284.36<br>(140.46 to 394.56)                | 329.84<br>(169.47 to 438.02)                 | 4.86<br>(2.37 to 6.61)                | 17.03<br>(7.42 to 23.43)            | 15.69<br>(6.80 to 21.90)           | 15.57<br>(7.01 to 21.47)            |
| Cellulitis                                    | 29.03<br>(17.17 to 43.54)                     | 66.35<br>(36.05 to 102.20)                   | 63.17<br>(33.49 to 95.33)                   | 63.66<br>(35.22 to 98.33)                    | 0.87<br>(0.44 to 1.28)                | 2.92<br>(1.30 to 4.25)              | 3.03<br>(1.30 to 4.30)             | 2.67<br>(1.23 to 3.86)              |
| Pyoderma                                      | 91.17<br>(46.85 to 129.15)                    | 214.42<br>(94.25 to 306.69)                  | 174.91<br>(74.89 to 258.11)                 | 208.57<br>(93.16 to 294.30)                  | 2.72<br>(1.18 to 3.84)                | 10.82<br>(4.28 to 15.73)            | 9.87<br>(3.83 to 14.57)            | 9.94<br>(4.01 to 14.45)             |
| Decubitus ulcer                               | 19.74<br>(12.13 to 26.35)                     | 33.00<br>(16.58 to 48.05)                    | 24.04<br>(11.31 to 36.84)                   | 31.33<br>(16.20 to 45.13)                    | 0.74<br>(0.35 to 1.08)                | 2.07<br>(0.81 to 3.42)              | 1.68<br>(0.64 to 2.78)             | 1.84<br>(0.72 to 3.05)              |
| Other skin and subcutaneous diseases          | 18.01<br>(11.54 to 23.92)                     | 27.13<br>(14.36 to 38.27)                    | 22.25<br>(11.36 to 32.41)                   | 26.27<br>(14.26 to 36.43)                    | 0.53<br>(0.27 to 0.75)                | 1.23<br>(0.51 to 1.88)              | 1.12<br>(0.48 to 1.69)             | 1.12<br>(0.48 to 1.70)              |
| Sudden infant death syndrome                  | 2,167.56<br>(1,105.65 to 3,987.82)            | 683.79<br>(284.85 to 1,393.27)               | 444.70<br>(186.49 to 874.51)                | 802.75<br>(338.56 to 1,652.90)               | 25.15<br>(12.83 to 46.29)             | 7.93<br>(3.30 to 16.16)             | 5.16<br>(2.16 to 10.15)            | 9.31<br>(3.93 to 19.18)             |

|                          |                                             |                                            |                                           |                                            |                                       |                                       |                                       |                                       |
|--------------------------|---------------------------------------------|--------------------------------------------|-------------------------------------------|--------------------------------------------|---------------------------------------|---------------------------------------|---------------------------------------|---------------------------------------|
| Injuries                 | 171,199.15<br>(140,491.48 to<br>212,211.00) | 128,123.57<br>(80,909.86 to<br>200,654.28) | 77,076.88<br>(48,579.20 to<br>120,234.99) | 144,322.37<br>(90,963.07 to<br>229,132.51) | 3,402.85<br>(2,811.47 to<br>4,228.01) | 3,248.56<br>(2,252.22 to<br>4,660.78) | 2,093.89<br>(1,424.90 to<br>3,022.46) | 3,537.52<br>(2,412.37 to<br>5,203.80) |
| Transport injuries       | 41,154.11<br>(32,479.60 to<br>52,535.36)    | 38,114.10<br>(20,039.60 to<br>72,880.06)   | 18,572.37<br>(9,868.19 to<br>35,624.37)   | 49,616.00<br>(25,453.67 to<br>96,341.51)   | 857.42<br>(687.84 to<br>1,082.97)     | 968.52<br>(560.59 to<br>1,720.98)     | 500.99<br>(294.20 to<br>875.00)       | 1,214.12<br>(680.80 to<br>2,196.76)   |
| Road injuries            | 39,155.20<br>(30,827.09 to<br>49,831.98)    | 35,776.04<br>(18,682.50 to<br>68,332.79)   | 17,365.45<br>(9,102.49 to<br>33,402.37)   | 47,068.21<br>(23,952.97 to<br>91,858.06)   | 815.41<br>(651.85 to<br>1,029.53)     | 905.88<br>(520.71 to<br>1,615.50)     | 466.66<br>(273.31 to<br>814.28)       | 1,147.99<br>(644.02 to<br>2,066.81)   |
| Pedestrian road injuries | 9,052.08<br>(6,753.34 to<br>11,918.54)      | 7,950.43<br>(4,576.10 to<br>14,086.47)     | 2,629.37<br>(1,472.19 to<br>4,625.18)     | 10,117.25<br>(5,685.65 to<br>18,276.47)    | 208.58<br>(155.78 to<br>267.91)       | 248.28<br>(152.96 to<br>410.52)       | 90.54<br>(55.81 to<br>148.33)         | 302.62<br>(181.43 to<br>506.17)       |

| Azerbaijan                                      |                                                                |                                                               |                                                               |                                                               |                                                            |                                                            |                                                          |                                                            |
|-------------------------------------------------|----------------------------------------------------------------|---------------------------------------------------------------|---------------------------------------------------------------|---------------------------------------------------------------|------------------------------------------------------------|------------------------------------------------------------|----------------------------------------------------------|------------------------------------------------------------|
| Cause                                           | YLLs (actual counts)                                           |                                                               |                                                               |                                                               | Deaths (actual counts)                                     |                                                            |                                                          |                                                            |
|                                                 | 2016                                                           | 2040 Forecast                                                 | 2040 Better Scenario                                          | 2040 Worse Scenario                                           | 2016                                                       | 2040 Forecast                                              | 2040 Better Scenario                                     | 2040 Worse Scenario                                        |
| Cyclist road injuries                           | 2,434.80<br>(1,493.63 to<br>3,484.60)                          | 2,330.25<br>(966.93 to<br>5,096.97)                           | 1,270.50<br>(546.91 to<br>2,663.00)                           | 3,057.91<br>(1,252.75 to<br>6,748.36)                         | 51.88<br>(32.24 to<br>74.16)                               | 57.42<br>(26.67 to<br>120.18)                              | 34.77<br>(16.69 to<br>67.26)                             | 72.57<br>(32.67 to<br>154.19)                              |
| Motorcyclist road injuries                      | 9,699.29<br>(6,420.80 to<br>13,783.27)                         | 9,998.21<br>(4,475.28 to<br>21,608.26)                        | 6,364.91<br>(2,854.28 to<br>13,962.56)                        | 12,400.28<br>(5,577.16 to<br>26,909.73)                       | 185.80<br>(121.42 to<br>261.09)                            | 209.42<br>(98.10 to<br>435.62)                             | 138.69<br>(64.69 to<br>283.80)                           | 255.82<br>(118.04 to<br>524.11)                            |
| Motor vehicle road injuries                     | 17,048.79<br>(12,544.41 to<br>23,719.33)                       | 14,555.01<br>(7,708.21 to<br>26,869.05)                       | 6,640.93<br>(3,655.25 to<br>12,017.64)                        | 20,212.36<br>(10,450.23 to<br>37,910.31)                      | 348.54<br>(259.99 to<br>490.11)                            | 365.19<br>(209.42 to<br>626.15)                            | 188.42<br>(114.27 to<br>310.43)                          | 483.91<br>(267.99 to<br>846.62)                            |
| Other road injuries                             | 920.24<br>(621.86 to<br>1,322.27)                              | 942.14<br>(414.50 to<br>2,025.67)                             | 459.74<br>(213.36 to<br>954.05)                               | 1,280.40<br>(546.15 to<br>2,824.42)                           | 20.61<br>(14.01 to<br>29.19)                               | 25.57<br>(12.11 to<br>51.47)                               | 14.24<br>(7.13 to<br>27.00)                              | 33.07<br>(14.89 to<br>68.60)                               |
| Other transport injuries                        | 1,998.92<br>(1,367.95 to<br>2,703.33)                          | 2,338.05<br>(1,177.18 to<br>4,750.10)                         | 1,206.91<br>(581.54 to<br>2,457.24)                           | 2,547.79<br>(1,254.60 to<br>5,130.33)                         | 42.00<br>(29.43 to<br>55.40)                               | 62.63<br>(34.47 to<br>118.59)                              | 34.33<br>(18.20 to<br>62.59)                             | 66.12<br>(35.03 to<br>126.10)                              |
| <b>Unintentional injuries</b>                   | <b>88,701.68</b><br><b>(72,934.76 to</b><br><b>108,203.03)</b> | <b>56,190.78</b><br><b>(37,376.88 to</b><br><b>82,169.59)</b> | <b>36,731.93</b><br><b>(23,765.04 to</b><br><b>54,285.03)</b> | <b>58,832.78</b><br><b>(39,056.39 to</b><br><b>86,645.83)</b> | <b>1,703.38</b><br><b>(1,395.69 to</b><br><b>2,089.51)</b> | <b>1,480.74</b><br><b>(1,055.66 to</b><br><b>2,034.71)</b> | <b>1,053.31</b><br><b>(727.65 to</b><br><b>1,450.94)</b> | <b>1,488.29</b><br><b>(1,055.77 to</b><br><b>2,076.97)</b> |
| Falls                                           | 12,088.78<br>(8,262.63 to<br>17,075.15)                        | 9,675.14<br>(6,222.63 to<br>14,330.68)                        | 7,432.66<br>(4,606.91 to<br>11,020.84)                        | 9,664.39<br>(6,205.20 to<br>14,253.58)                        | 272.21<br>(187.99 to<br>380.66)                            | 318.44<br>(229.96 to<br>435.11)                            | 263.01<br>(185.73 to<br>358.79)                          | 303.75<br>(218.07 to<br>415.27)                            |
| Drowning                                        | 20,712.66<br>(16,056.23 to<br>28,136.51)                       | 13,048.35<br>(7,108.92 to<br>23,426.05)                       | 8,379.51<br>(4,489.32 to<br>15,040.85)                        | 13,986.87<br>(7,421.96 to<br>25,365.24)                       | 359.35<br>(281.52 to<br>482.04)                            | 273.95<br>(156.49 to<br>467.62)                            | 184.13<br>(102.97 to<br>321.20)                          | 287.37<br>(162.38 to<br>500.31)                            |
| Fire, heat, and hot substances                  | 18,549.84<br>(14,593.86 to<br>24,318.90)                       | 11,084.80<br>(6,593.06 to<br>18,241.93)                       | 6,171.94<br>(3,584.84 to<br>10,192.49)                        | 11,859.91<br>(7,100.73 to<br>19,557.05)                       | 359.23<br>(283.96 to<br>477.47)                            | 303.93<br>(186.49 to<br>487.13)                            | 182.95<br>(111.64 to<br>307.20)                          | 312.46<br>(191.52 to<br>511.21)                            |
| Poisonings                                      | 41,329.88<br>(2,775.13 to<br>7,286.04)                         | 1,889.42<br>(927.64 to<br>3,796.77)                           | 893.69<br>(425.78 to<br>1,844.19)                             | 2,061.86<br>(1,027.98 to<br>4,279.78)                         | 77.58<br>(52.42 to<br>136.84)                              | 44.30<br>(22.95 to<br>87.03)                               | 22.01<br>(11.07 to<br>43.60)                             | 47.20<br>(24.22 to<br>96.21)                               |
| Exposure to mechanical forces                   | 10,035.20<br>(7,485.00 to<br>13,266.63)                        | 6,040.95<br>(4,110.49 to<br>8,712.10)                         | 3,895.39<br>(2,505.08 to<br>5,669.91)                         | 6,279.06<br>(4,195.38 to<br>9,043.62)                         | 197.23<br>(151.44 to<br>256.77)                            | 156.33<br>(112.57 to<br>211.30)                            | 108.95<br>(77.17 to<br>149.74)                           | 156.90<br>(113.71 to<br>213.88)                            |
| Unintentional firearm injuries                  | 6,149.18<br>(4,507.36 to<br>8,435.85)                          | 3,875.28<br>(2,518.66 to<br>5,842.97)                         | 2,613.88<br>(1,652.02 to<br>3,940.31)                         | 3,976.41<br>(2,597.03 to<br>5,916.20)                         | 131.58<br>(98.05 to<br>178.09)                             | 107.21<br>(74.79 to<br>149.93)                             | 77.72<br>(53.67 to<br>110.11)                            | 106.73<br>(74.59 to<br>149.84)                             |
| Unintentional suffocation                       | 1,308.67<br>(277.16 to<br>2,755.70)                            | 513.09<br>(133.17 to<br>1,109.48)                             | 286.68<br>(81.98 to<br>599.88)                                | 585.38<br>(143.61 to<br>1,285.83)                             | 16.35<br>(4.00 to<br>33.50)                                | 6.83<br>(2.26 to<br>14.20)                                 | 3.91<br>(1.44 to<br>7.72)                                | 7.71<br>(2.38 to<br>16.20)                                 |
| Other exposure to mechanical forces             | 2,577.35<br>(2,027.93 to<br>3,297.52)                          | 1,652.58<br>(1,135.37 to<br>2,276.70)                         | 994.83<br>(649.88 to<br>1,403.64)                             | 1,717.27<br>(1,179.81 to<br>2,361.25)                         | 49.30<br>(39.44 to<br>62.25)                               | 42.29<br>(30.21 to<br>56.30)                               | 27.32<br>(19.00 to<br>37.34)                             | 42.46<br>(30.49 to<br>56.01)                               |
| Adverse effects of medical treatment            | 7,726.46<br>(5,270.46 to<br>10,951.90)                         | 5,026.13<br>(3,588.87 to<br>6,891.25)                         | 3,813.87<br>(2,685.62 to<br>5,338.96)                         | 5,184.89<br>(3,727.67 to<br>7,156.60)                         | 152.40<br>(117.73 to<br>194.85)                            | 157.41<br>(117.67 to<br>210.26)                            | 131.73<br>(95.09 to<br>181.53)                           | 153.10<br>(115.48 to<br>204.07)                            |
| Animal contact                                  | 841.07<br>(641.35 to<br>1,161.40)                              | 639.26<br>(417.53 to<br>965.44)                               | 402.23<br>(259.54 to<br>616.88)                               | 675.48<br>(430.87 to<br>1,037.64)                             | 14.93<br>(11.64 to<br>19.96)                               | 15.05<br>(10.60 to<br>21.23)                               | 10.11<br>(6.94 to<br>14.45)                              | 15.30<br>(10.65 to<br>21.92)                               |
| Venomous animal contact                         | 233.01<br>(160.11 to<br>368.29)                                | 172.10<br>(100.83 to<br>307.38)                               | 121.11<br>(69.89 to<br>220.51)                                | 181.29<br>(104.96 to<br>318.62)                               | 4.19<br>(2.96 to<br>6.67)                                  | 3.72<br>(2.19 to<br>6.41)                                  | 2.74<br>(1.54 to<br>4.63)                                | 3.81<br>(2.22 to<br>6.59)                                  |
| Non-venomous animal contact                     | 608.07<br>(454.47 to<br>827.52)                                | 467.16<br>(305.75 to<br>692.61)                               | 281.11<br>(183.00 to<br>411.22)                               | 494.19<br>(317.69 to<br>725.06)                               | 10.74<br>(8.32 to<br>14.11)                                | 11.33<br>(8.07 to<br>15.49)                                | 7.37<br>(5.02 to<br>10.27)                               | 11.49<br>(8.02 to<br>15.98)                                |
| Foreign body                                    | 7,295.44<br>(5,536.04 to<br>9,755.00)                          | 4,066.18<br>(2,934.99 to<br>5,358.99)                         | 3,568.45<br>(2,601.42 to<br>4,753.43)                         | 4,243.59<br>(3,070.46 to<br>5,528.62)                         | 126.88<br>(97.45 to<br>161.41)                             | 98.86<br>(74.44 to<br>126.10)                              | 95.18<br>(71.44 to<br>121.82)                            | 98.39<br>(73.31 to<br>125.12)                              |
| Pulmonary aspiration and foreign body in airway | 4,545.05<br>(3,284.79 to<br>6,443.76)                          | 2,330.77<br>(1,677.09 to<br>3,200.92)                         | 1,832.32<br>(1,335.02 to<br>2,506.79)                         | 2,465.68<br>(1,764.25 to<br>3,418.57)                         | 73.22<br>(56.32 to<br>97.73)                               | 54.30<br>(42.15 to<br>69.31)                               | 47.77<br>(36.74 to<br>59.88)                             | 54.24<br>(41.67 to<br>69.64)                               |

|                                             |                                                               |                                                               |                                                               |                                                               |                                                        |                                                        |                                                      |                                                        |
|---------------------------------------------|---------------------------------------------------------------|---------------------------------------------------------------|---------------------------------------------------------------|---------------------------------------------------------------|--------------------------------------------------------|--------------------------------------------------------|------------------------------------------------------|--------------------------------------------------------|
|                                             | 2,750.39<br>(1,698.35 to<br>3,778.10)                         | 1,735.41<br>(1,033.67 to<br>2,501.42)                         | 1,736.13<br>(1,071.86 to<br>2,510.31)                         | 1,777.90<br>(1,051.80 to<br>2,556.99)                         | 53.66<br>(33.58 to<br>72.65)                           | 44.55<br>(26.95 to<br>62.02)                           | 47.41<br>(29.87 to<br>65.32)                         | 44.15<br>(27.11 to<br>62.05)                           |
| Foreign body in other body part             |                                                               |                                                               |                                                               |                                                               |                                                        |                                                        |                                                      |                                                        |
| Environmental heat and cold exposure        | 2,108.11<br>(1,180.92 to<br>2,991.09)                         | 2,005.46<br>(1,087.18 to<br>3,162.61)                         | 1,134.32<br>(606.31 to<br>1,849.88)                           | 2,063.97<br>(1,128.94 to<br>3,229.99)                         | 48.37<br>(28.60 to<br>67.84)                           | 55.88<br>(33.04 to<br>81.98)                           | 32.92<br>(18.97 to<br>49.47)                         | 56.15<br>(33.23 to<br>81.39)                           |
| Other unintentional injuries                | 5,214.24<br>(3,454.53 to<br>7,122.25)                         | 2,715.09<br>(1,519.94 to<br>4,600.09)                         | 1,039.87<br>(511.77 to<br>1,928.06)                           | 2,813.77<br>(1,609.30 to<br>4,655.04)                         | 95.22<br>(62.98 to<br>130.06)                          | 56.59<br>(34.14 to<br>89.97)                           | 22.32<br>(11.73 to<br>39.30)                         | 57.67<br>(34.34 to<br>91.52)                           |
| <b>Self-harm and interpersonal violence</b> | <b>41,238.05</b><br><b>(30,551.36 to</b><br><b>55,380.79)</b> | <b>33,486.62</b><br><b>(18,554.13 to</b><br><b>60,663.05)</b> | <b>21,447.28</b><br><b>(11,864.67 to</b><br><b>38,824.30)</b> | <b>35,538.64</b><br><b>(19,209.43 to</b><br><b>64,811.19)</b> | <b>840.19</b><br><b>(627.89 to</b><br><b>1,116.92)</b> | <b>792.04</b><br><b>(474.60 to</b><br><b>1,326.73)</b> | <b>532.14</b><br><b>(316.73 to</b><br><b>890.05)</b> | <b>827.97</b><br><b>(480.19 to</b><br><b>1,406.60)</b> |

| Azerbaijan                                                                          |                                          |                                         |                                         |                                         |                                  |                                   |                                   |                                   |
|-------------------------------------------------------------------------------------|------------------------------------------|-----------------------------------------|-----------------------------------------|-----------------------------------------|----------------------------------|-----------------------------------|-----------------------------------|-----------------------------------|
| Cause                                                                               | YLLs (actual counts)                     |                                         |                                         |                                         | Deaths (actual counts)           |                                   |                                   |                                   |
|                                                                                     | 2016                                     | 2040 Forecast                           | 2040 Better Scenario                    | 2040 Worse Scenario                     | 2016                             | 2040 Forecast                     | 2040 Better Scenario              | 2040 Worse Scenario               |
| Self-harm                                                                           | 19,782.98<br>(13,261.35 to<br>26,822.10) | 18,592.88<br>(8,584.68 to<br>36,530.56) | 12,423.64<br>(5,897.33 to<br>24,354.00) | 20,423.27<br>(9,086.73 to<br>40,311.75) | 423.42<br>(286.80 to<br>566.18)  | 463.71<br>(235.04 to<br>846.74)   | 323.23<br>(171.45 to<br>585.91)   | 499.15<br>(243.16 to<br>943.22)   |
| Self-harm by firearm                                                                | 1,585.04<br>(862.37 to<br>2,337.75)      | 1,222.33<br>(498.28 to<br>2,644.24)     | 709.47<br>(305.39 to<br>1,454.94)       | 1,345.43<br>(535.08 to<br>2,954.25)     | 35.39<br>(20.32 to<br>51.29)     | 33.22<br>(15.27 to<br>64.82)      | 20.36<br>(9.93 to<br>38.58)       | 35.65<br>(15.70 to<br>71.99)      |
| Self-harm by other specified means                                                  | 18,197.94<br>(12,024.14 to<br>24,727.59) | 17,370.55<br>(8,024.08 to<br>34,171.31) | 11,714.17<br>(5,507.46 to<br>22,921.81) | 19,077.84<br>(8,488.05 to<br>37,650.40) | 388.03<br>(261.88 to<br>520.78)  | 430.49<br>(218.41 to<br>786.06)   | 302.87<br>(159.41 to<br>550.46)   | 463.51<br>(228.49 to<br>869.56)   |
| Interpersonal violence                                                              | 21,455.07<br>(15,113.12 to<br>31,712.56) | 14,893.74<br>(8,765.63 to<br>26,552.70) | 9,023.64<br>(5,107.17 to<br>16,817.87)  | 15,115.37<br>(8,862.56 to<br>27,256.83) | 416.77<br>(295.11 to<br>619.10)  | 328.33<br>(203.85 to<br>577.39)   | 208.90<br>(126.07 to<br>359.20)   | 328.82<br>(204.14 to<br>586.45)   |
| Physical violence by firearm                                                        | 6,641.80<br>(1,761.17 to<br>11,836.96)   | 4,296.74<br>(1,149.30 to<br>9,729.46)   | 2,446.57<br>(669.94 to<br>5,492.57)     | 4,350.31<br>(1,127.53 to<br>9,896.83)   | 119.00<br>(33.82 to<br>205.44)   | 81.43<br>(25.73 to<br>171.61)     | 48.10<br>(16.14 to<br>99.78)      | 82.01<br>(25.31 to<br>170.01)     |
| Physical violence by sharp object                                                   | 11,531.10<br>(6,927.17 to<br>21,768.96)  | 8,326.77<br>(4,484.13 to<br>16,254.53)  | 4,971.71<br>(2,638.84 to<br>9,875.67)   | 8,338.38<br>(4,463.30 to<br>16,300.75)  | 231.68<br>(144.74 to<br>425.73)  | 187.52<br>(112.15 to<br>356.08)   | 116.04<br>(68.05 to<br>212.73)    | 185.37<br>(110.05 to<br>354.87)   |
| Physical violence by other means                                                    | 3,282.17<br>(1,817.57 to<br>8,188.36)    | 2,270.23<br>(955.39 to<br>6,499.31)     | 1,605.36<br>(693.99 to<br>4,561.36)     | 2,426.69<br>(1,017.53 to<br>7,007.81)   | 66.09<br>(37.51 to<br>165.34)    | 59.38<br>(28.80 to<br>148.37)     | 44.76<br>(22.56 to<br>106.95)     | 61.44<br>(28.81 to<br>158.81)     |
| <b>Forces of nature, conflict and terrorism, and executions and police conflict</b> | <b>105.30</b><br>(59.57 to<br>178.20)    | <b>332.07</b><br>(0.00 to<br>3,381.03)  | <b>325.30</b><br>(0.00 to<br>3,303.84)  | <b>334.95</b><br>(0.00 to<br>3,407.06)  | <b>1.86</b><br>(1.09 to<br>3.04) | <b>7.25</b><br>(0.00 to<br>72.62) | <b>7.45</b><br>(0.00 to<br>74.82) | <b>7.14</b><br>(0.00 to<br>71.33) |
| Exposure to forces of nature                                                        | 0.00<br>(0.00 to<br>0.00)                | 30.72<br>(0.00 to<br>271.96)            | 30.32<br>(0.00 to<br>267.81)            | 30.82<br>(0.00 to<br>273.33)            | 0.00<br>(0.00 to<br>0.00)        | 0.78<br>(0.00 to<br>7.19)         | 0.81<br>(0.00 to<br>7.48)         | 0.76<br>(0.00 to<br>7.00)         |
| Conflict and terrorism                                                              | 0.00<br>(0.00 to<br>0.00)                | 301.35<br>(0.00 to<br>3,381.03)         | 294.98<br>(0.00 to<br>3,303.84)         | 304.13<br>(0.00 to<br>3,407.06)         | 0.00<br>(0.00 to<br>0.00)        | 6.48<br>(0.00 to<br>72.62)        | 6.64<br>(0.00 to<br>74.82)        | 6.38<br>(0.00 to<br>71.33)        |
| Executions and police conflict                                                      | 105.30<br>(59.57 to<br>178.20)           | 0.00<br>(0.00 to<br>0.00)               | 0.00<br>(0.00 to<br>0.00)               | 0.00<br>(0.00 to<br>0.00)               | 1.86<br>(1.09 to<br>3.04)        | 0.00<br>(0.00 to<br>0.00)         | 0.00<br>(0.00 to<br>0.00)         | 0.00<br>(0.00 to<br>0.00)         |

| Georgia                                                           |                                               |                                             |                                             |                                               |                                          |                                          |                                          |                                          |
|-------------------------------------------------------------------|-----------------------------------------------|---------------------------------------------|---------------------------------------------|-----------------------------------------------|------------------------------------------|------------------------------------------|------------------------------------------|------------------------------------------|
| Cause                                                             | YLLs (actual counts)                          |                                             |                                             |                                               | Deaths (actual counts)                   |                                          |                                          |                                          |
|                                                                   | 2016                                          | 2040 Forecast                               | 2040 Better Scenario                        | 2040 Worse Scenario                           | 2016                                     | 2040 Forecast                            | 2040 Better Scenario                     | 2040 Worse Scenario                      |
| All causes                                                        | 919,417.29<br>(792,500.78 to<br>1,064,039.59) | 725,332.96<br>(522,526.51 to<br>933,031.81) | 417,281.59<br>(310,345.05 to<br>548,767.68) | 861,336.71<br>(632,418.18 to<br>1,111,649.53) | 47,932.57<br>(41,834.91 to<br>54,266.28) | 44,896.88<br>(36,142.80 to<br>54,886.06) | 28,731.03<br>(22,852.11 to<br>35,782.48) | 50,977.33<br>(41,366.95 to<br>61,381.32) |
| Communicable, maternal, neonatal, and nutritional diseases        | 89,418.86<br>(70,618.94 to<br>113,289.06)     | 32,551.52<br>(22,061.26 to<br>49,115.89)    | 16,561.17<br>(11,634.98 to<br>24,433.78)    | 39,244.77<br>(26,432.23 to<br>60,991.64)      | 1,574.94<br>(1,326.08 to<br>1,885.73)    | 874.09<br>(649.07 to<br>1,193.79)        | 508.93<br>(395.33 to<br>661.51)          | 1,009.97<br>(722.35 to<br>1,415.98)      |
| HIV/AIDS and tuberculosis                                         | 8,694.50<br>(7,116.25 to<br>10,675.26)        | 5,343.73<br>(3,379.86 to<br>8,726.12)       | 2,259.50<br>(1,760.83 to<br>3,160.16)       | 6,010.06<br>(3,830.83 to<br>9,980.06)         | 218.38<br>(177.31 to<br>267.25)          | 143.40<br>(89.11 to<br>230.51)           | 57.99<br>(44.20 to<br>84.03)             | 159.14<br>(100.59 to<br>259.30)          |
| Tuberculosis                                                      | 6,861.64<br>(5,209.23 to<br>8,852.67)         | 3,545.29<br>(1,627.69 to<br>6,900.38)       | 851.66<br>(391.34 to<br>1,770.64)           | 4,037.61<br>(1,872.36 to<br>8,042.55)         | 181.39<br>(141.37 to<br>231.32)          | 104.42<br>(49.33 to<br>191.30)           | 26.53<br>(13.40 to<br>52.86)             | 116.80<br>(58.14 to<br>219.52)           |
| HIV/AIDS                                                          | 1,832.86<br>(1,657.65 to<br>2,010.26)         | 1,798.45<br>(1,586.48 to<br>2,074.57)       | 1,407.84<br>(1,231.05 to<br>1,611.93)       | 1,972.46<br>(1,753.83 to<br>2,238.30)         | 36.99<br>(33.49 to<br>40.63)             | 38.98<br>(34.16 to<br>45.05)             | 31.46<br>(27.60 to<br>35.92)             | 42.34<br>(37.33 to<br>48.27)             |
| Diarrhea, lower respiratory, and other common infectious diseases | 20,061.92<br>(16,551.71 to<br>24,285.80)      | 11,909.94<br>(6,766.46 to<br>21,502.00)     | 6,128.15<br>(3,745.28 to<br>10,109.14)      | 15,570.76<br>(8,369.48 to<br>30,069.93)       | 590.07<br>(503.98 to<br>682.55)          | 508.55<br>(340.04 to<br>759.98)          | 310.97<br>(219.15 to<br>433.26)          | 603.82<br>(382.73 to<br>950.97)          |
| Diarrheal diseases                                                | 1,185.43<br>(795.87 to<br>1,767.23)           | 277.69<br>(56.28 to<br>981.76)              | 416.89<br>(96.19 to<br>1,364.29)            | 420.25<br>(68.66 to<br>1,500.06)              | 20.80<br>(15.72 to<br>27.61)             | 10.08<br>(2.34 to<br>31.51)              | 19.71<br>(5.03 to<br>61.53)              | 13.89<br>(2.64 to<br>46.54)              |
| Intestinal infectious diseases                                    | 6.11<br>(3.11 to<br>10.60)                    | 3.07<br>(1.52 to<br>5.76)                   | 4.24<br>(2.12 to<br>8.14)                   | 3.06<br>(1.51 to<br>5.65)                     | 0.16<br>(0.08 to<br>0.28)                | 0.09<br>(0.05 to<br>0.17)                | 0.14<br>(0.07 to<br>0.25)                | 0.09<br>(0.05 to<br>0.16)                |
| Typhoid fever                                                     | 4.89<br>(2.34 to<br>8.85)                     | 2.59<br>(1.23 to<br>4.93)                   | 3.94<br>(1.91 to<br>7.52)                   | 2.57<br>(1.23 to<br>4.86)                     | 0.13<br>(0.06 to<br>0.23)                | 0.08<br>(0.04 to<br>0.14)                | 0.12<br>(0.06 to<br>0.23)                | 0.07<br>(0.04 to<br>0.14)                |
| Paratyphoid fever                                                 | 0.83<br>(0.33 to<br>1.72)                     | 0.36<br>(0.13 to<br>0.80)                   | 0.21<br>(0.07 to<br>0.47)                   | 0.37<br>(0.14 to<br>0.81)                     | 0.02<br>(0.01 to<br>0.04)                | 0.01<br>(0.00 to<br>0.02)                | 0.01<br>(0.00 to<br>0.01)                | 0.01<br>(0.00 to<br>0.02)                |
| Other intestinal infectious diseases                              | 0.40<br>(0.15 to<br>0.87)                     | 0.13<br>(0.05 to<br>0.27)                   | 0.10<br>(0.03 to<br>0.22)                   | 0.13<br>(0.05 to<br>0.27)                     | 0.01<br>(0.00 to<br>0.03)                | 0.01<br>(0.00 to<br>0.02)                | 0.01<br>(0.00 to<br>0.02)                | 0.01<br>(0.00 to<br>0.02)                |
| Lower respiratory infections                                      | 15,495.79<br>(12,871.61 to<br>18,713.55)      | 10,156.77<br>(5,399.93 to<br>19,064.06)     | 4,730.34<br>(2,643.63 to<br>8,029.55)       | 13,438.41<br>(6,828.01 to<br>27,077.55)       | 502.49<br>(428.15 to<br>583.49)          | 458.98<br>(299.11 to<br>704.99)          | 261.46<br>(178.52 to<br>373.97)          | 548.35<br>(338.79 to<br>884.46)          |
| Upper respiratory infections                                      | 31.04<br>(16.17 to<br>52.22)                  | 21.84<br>(9.07 to<br>43.32)                 | 8.32<br>(3.26 to<br>17.26)                  | 22.59<br>(9.30 to<br>44.61)                   | 1.03<br>(0.53 to<br>1.74)                | 1.03<br>(0.40 to<br>2.12)                | 0.44<br>(0.16 to<br>0.94)                | 1.03<br>(0.39 to<br>2.15)                |
| Otitis media                                                      | 0.41<br>(0.25 to<br>0.72)                     | 0.03<br>(0.01 to<br>0.07)                   | 0.03<br>(0.01 to<br>0.06)                   | 0.03<br>(0.01 to<br>0.07)                     | 0.01<br>(0.00 to<br>0.01)                | 0.00<br>(0.00 to<br>0.00)                | 0.00<br>(0.00 to<br>0.00)                | 0.00<br>(0.00 to<br>0.00)                |
| Meningitis                                                        | 1,760.43<br>(1,406.15 to<br>2,236.68)         | 653.19<br>(442.21 to<br>965.66)             | 348.79<br>(229.36 to<br>528.43)             | 758.97<br>(495.11 to<br>1,178.66)             | 35.07<br>(28.58 to<br>42.99)             | 17.10<br>(12.82 to<br>22.30)             | 10.08<br>(7.40 to<br>13.77)              | 18.07<br>(13.69 to<br>24.23)             |
| Pneumococcal meningitis                                           | 5.55<br>(4.26 to<br>7.20)                     | 1.70<br>(1.15 to<br>2.54)                   | 1.62<br>(1.09 to<br>2.47)                   | 1.91<br>(1.29 to<br>2.85)                     | 0.13<br>(0.10 to<br>0.16)                | 0.05<br>(0.04 to<br>0.07)                | 0.05<br>(0.04 to<br>0.07)                | 0.06<br>(0.04 to<br>0.08)                |
| H influenzae type B meningitis                                    | 326.92<br>(250.11 to<br>436.63)               | 140.19<br>(70.85 to<br>282.15)              | 101.37<br>(63.74 to<br>163.74)              | 230.44<br>(88.84 to<br>544.52)                | 6.10<br>(4.84 to<br>7.73)                | 2.96<br>(1.97 to<br>4.70)                | 2.67<br>(1.96 to<br>3.63)                | 3.95<br>(2.16 to<br>7.59)                |
| Meningococcal meningitis                                          | 592.56<br>(470.15 to<br>760.50)               | 183.18<br>(122.28 to<br>267.45)             | 90.89<br>(57.01 to<br>140.98)               | 189.24<br>(129.27 to<br>274.70)               | 11.38<br>(9.29 to<br>14.08)              | 4.89<br>(3.62 to<br>6.39)                | 2.65<br>(1.89 to<br>3.68)                | 4.90<br>(3.76 to<br>6.34)                |
| Other meningitis                                                  | 835.41<br>(675.45 to<br>1,053.88)             | 328.12<br>(218.84 to<br>474.60)             | 154.90<br>(98.53 to<br>243.90)              | 337.38<br>(234.02 to<br>492.14)               | 17.47<br>(14.24 to<br>21.56)             | 9.19<br>(6.75 to<br>12.18)               | 4.71<br>(3.24 to<br>6.71)                | 9.17<br>(6.99 to<br>12.08)               |
| Encephalitis                                                      | 1,474.45<br>(1,060.46 to<br>2,404.08)         | 640.11<br>(418.84 to<br>1,001.54)           | 547.18<br>(359.18 to<br>818.82)             | 654.29<br>(441.04 to<br>1,045.58)             | 28.83<br>(20.22 to<br>38.08)             | 18.77<br>(10.09 to<br>24.80)             | 17.82<br>(8.91 to<br>24.24)              | 18.47<br>(10.06 to<br>24.46)             |



|                |                               |                               |                              |                                 |                           |                            |                           |                            |
|----------------|-------------------------------|-------------------------------|------------------------------|---------------------------------|---------------------------|----------------------------|---------------------------|----------------------------|
| Diphtheria     | 6.08<br>(3.65 to<br>10.00)    | 1.17<br>(0.59 to<br>2.10)     | 0.94<br>(0.46 to<br>1.70)    | 1.80<br>(0.76 to<br>3.97)       | 0.10<br>(0.06 to<br>0.16) | 0.02<br>(0.01 to<br>0.04)  | 0.02<br>(0.01 to<br>0.04) | 0.03<br>(0.01 to<br>0.06)  |
| Whooping cough | 75.48<br>(21.32 to<br>146.11) | 18.66<br>(3.43 to<br>58.94)   | 5.10<br>(1.38 to<br>14.53)   | 25.56<br>(4.43 to<br>81.12)     | 0.94<br>(0.29 to<br>1.87) | 0.24<br>(0.06 to<br>0.75)  | 0.09<br>(0.03 to<br>0.25) | 0.32<br>(0.07 to<br>0.99)  |
| Tetanus        | 3.56<br>(2.64 to<br>5.89)     | 0.33<br>(0.21 to<br>0.59)     | 0.33<br>(0.21 to<br>0.59)    | 0.34<br>(0.22 to<br>0.60)       | 0.11<br>(0.08 to<br>0.17) | 0.01<br>(0.01 to<br>0.02)  | 0.01<br>(0.01 to<br>0.02) | 0.01<br>(0.01 to<br>0.02)  |
| Measles        | 3.29<br>(2.27 to<br>4.81)     | 132.40<br>(0.22 to<br>951.79) | 63.23<br>(0.18 to<br>377.24) | 240.81<br>(0.24 to<br>1,953.80) | 0.05<br>(0.04 to<br>0.07) | 1.99<br>(0.00 to<br>12.73) | 1.03<br>(0.00 to<br>5.83) | 3.34<br>(0.00 to<br>24.37) |

| Georgia                                               |                                                          |                                                      |                                                      |                                                      |                                                   |                                                 |                                                |                                                 |
|-------------------------------------------------------|----------------------------------------------------------|------------------------------------------------------|------------------------------------------------------|------------------------------------------------------|---------------------------------------------------|-------------------------------------------------|------------------------------------------------|-------------------------------------------------|
| Cause                                                 | YLLs (actual counts)                                     |                                                      |                                                      |                                                      | Deaths (actual counts)                            |                                                 |                                                |                                                 |
|                                                       | 2016                                                     | 2040 Forecast                                        | 2040 Better Scenario                                 | 2040 Worse Scenario                                  | 2016                                              | 2040 Forecast                                   | 2040 Better Scenario                           | 2040 Worse Scenario                             |
| Varicella and herpes zoster                           | 19.84<br>(6.43 to<br>33.66)                              | 4.65<br>(1.69 to<br>8.87)                            | 2.77<br>(1.08 to<br>5.00)                            | 4.84<br>(1.71 to<br>9.50)                            | 0.48<br>(0.21 to<br>0.68)                         | 0.23<br>(0.11 to<br>0.38)                       | 0.17<br>(0.08 to<br>0.30)                      | 0.21<br>(0.10 to<br>0.37)                       |
| <b>Neglected tropical diseases and malaria</b>        | <b>815.50</b><br><b>(495.55 to</b><br><b>1,315.87)</b>   | <b>70.96</b><br><b>(26.33 to</b><br><b>357.80)</b>   | <b>49.19</b><br><b>(19.02 to</b><br><b>248.98)</b>   | <b>74.13</b><br><b>(28.77 to</b><br><b>371.13)</b>   | <b>24.32</b><br><b>(14.48 to</b><br><b>40.09)</b> | <b>1.83</b><br><b>(0.56 to</b><br><b>11.91)</b> | <b>1.33</b><br><b>(0.41 to</b><br><b>8.74)</b> | <b>1.86</b><br><b>(0.59 to</b><br><b>11.87)</b> |
| Malaria                                               | 0.00<br>(0.00 to<br>0.00)                                | 0.00<br>(0.00 to<br>0.00)                            | 0.00<br>(0.00 to<br>0.00)                            | 0.00<br>(0.00 to<br>0.00)                            | 0.00<br>(0.00 to<br>0.00)                         | 0.00<br>(0.00 to<br>0.00)                       | 0.00<br>(0.00 to<br>0.00)                      | 0.00<br>(0.00 to<br>0.00)                       |
| Chagas disease                                        | 0.00<br>(0.00 to<br>0.00)                                | 0.00<br>(0.00 to<br>0.00)                            | 0.00<br>(0.00 to<br>0.00)                            | 0.00<br>(0.00 to<br>0.00)                            | 0.00<br>(0.00 to<br>0.00)                         | 0.00<br>(0.00 to<br>0.00)                       | 0.00<br>(0.00 to<br>0.00)                      | 0.00<br>(0.00 to<br>0.00)                       |
| Leishmaniasis                                         | 699.04<br>(393.37 to<br>1,185.02)                        | 44.44<br>(10.33 to<br>308.81)                        | 29.77<br>(6.69 to<br>208.62)                         | 45.90<br>(10.42 to<br>313.44)                        | 22.18<br>(12.51 to<br>37.79)                      | 1.37<br>(0.27 to<br>10.86)                      | 0.97<br>(0.19 to<br>7.82)                      | 1.38<br>(0.27 to<br>10.78)                      |
| African trypanosomiasis                               | 0.00<br>(0.00 to<br>0.00)                                | 0.00<br>(0.00 to<br>0.00)                            | 0.00<br>(0.00 to<br>0.00)                            | 0.00<br>(0.00 to<br>0.00)                            | 0.00<br>(0.00 to<br>0.00)                         | 0.00<br>(0.00 to<br>0.00)                       | 0.00<br>(0.00 to<br>0.00)                      | 0.00<br>(0.00 to<br>0.00)                       |
| Schistosomiasis                                       | 0.00<br>(0.00 to<br>0.00)                                | 0.00<br>(0.00 to<br>0.00)                            | 0.00<br>(0.00 to<br>0.00)                            | 0.00<br>(0.00 to<br>0.00)                            | 0.00<br>(0.00 to<br>0.00)                         | 0.00<br>(0.00 to<br>0.00)                       | 0.00<br>(0.00 to<br>0.00)                      | 0.00<br>(0.00 to<br>0.00)                       |
| Cysticercosis                                         | 2.53<br>(1.92 to<br>3.29)                                | 0.21<br>(0.08 to<br>0.76)                            | 0.18<br>(0.06 to<br>0.71)                            | 0.21<br>(0.08 to<br>0.76)                            | 0.08<br>(0.06 to<br>0.10)                         | 0.01<br>(0.00 to<br>0.03)                       | 0.01<br>(0.00 to<br>0.03)                      | 0.01<br>(0.00 to<br>0.03)                       |
| Cystic echinococcosis                                 | 0.00<br>(0.00 to<br>0.00)                                | 0.00<br>(0.00 to<br>0.00)                            | 0.00<br>(0.00 to<br>0.00)                            | 0.00<br>(0.00 to<br>0.00)                            | 0.00<br>(0.00 to<br>0.00)                         | 0.00<br>(0.00 to<br>0.00)                       | 0.00<br>(0.00 to<br>0.00)                      | 0.00<br>(0.00 to<br>0.00)                       |
| Dengue                                                | 0.00<br>(0.00 to<br>0.00)                                | 0.00<br>(0.00 to<br>0.00)                            | 0.00<br>(0.00 to<br>0.00)                            | 0.00<br>(0.00 to<br>0.00)                            | 0.00<br>(0.00 to<br>0.00)                         | 0.00<br>(0.00 to<br>0.00)                       | 0.00<br>(0.00 to<br>0.00)                      | 0.00<br>(0.00 to<br>0.00)                       |
| Yellow fever                                          | 0.00<br>(0.00 to<br>0.00)                                | 0.00<br>(0.00 to<br>0.00)                            | 0.00<br>(0.00 to<br>0.00)                            | 0.00<br>(0.00 to<br>0.00)                            | 0.00<br>(0.00 to<br>0.00)                         | 0.00<br>(0.00 to<br>0.00)                       | 0.00<br>(0.00 to<br>0.00)                      | 0.00<br>(0.00 to<br>0.00)                       |
| Rabies                                                | 69.80<br>(45.33 to<br>106.05)                            | 15.68<br>(6.16 to<br>33.03)                          | 9.71<br>(3.76 to<br>21.29)                           | 16.82<br>(6.51 to<br>36.55)                          | 1.28<br>(0.86 to<br>1.81)                         | 0.27<br>(0.11 to<br>0.58)                       | 0.17<br>(0.07 to<br>0.38)                      | 0.29<br>(0.12 to<br>0.61)                       |
| Intestinal nematode infections                        | 0.00<br>(0.00 to<br>0.00)                                | 0.00<br>(0.00 to<br>0.00)                            | 0.00<br>(0.00 to<br>0.00)                            | 0.00<br>(0.00 to<br>0.00)                            | 0.00<br>(0.00 to<br>0.00)                         | 0.00<br>(0.00 to<br>0.00)                       | 0.00<br>(0.00 to<br>0.00)                      | 0.00<br>(0.00 to<br>0.00)                       |
| Other neglected tropical diseases                     | 44.13<br>(23.01 to<br>67.62)                             | 10.62<br>(4.29 to<br>25.07)                          | 9.53<br>(3.89 to<br>23.24)                           | 11.20<br>(4.37 to<br>26.14)                          | 0.80<br>(0.43 to<br>1.13)                         | 0.19<br>(0.07 to<br>0.53)                       | 0.18<br>(0.07 to<br>0.56)                      | 0.19<br>(0.07 to<br>0.54)                       |
| <b>Maternal disorders</b>                             | <b>1,188.76</b><br><b>(896.18 to</b><br><b>1,597.96)</b> | <b>326.22</b><br><b>(177.38 to</b><br><b>584.05)</b> | <b>200.48</b><br><b>(106.32 to</b><br><b>363.24)</b> | <b>347.55</b><br><b>(178.00 to</b><br><b>651.61)</b> | <b>217.3</b><br><b>(16.29 to</b><br><b>28.93)</b> | <b>5.93</b><br><b>(3.24 to</b><br><b>10.64)</b> | <b>3.66</b><br><b>(1.99 to</b><br><b>6.48)</b> | <b>6.31</b><br><b>(3.27 to</b><br><b>11.73)</b> |
| Maternal hemorrhage                                   | 269.68<br>(180.39 to<br>389.40)                          | 63.03<br>(29.61 to<br>116.90)                        | 39.53<br>(18.88 to<br>73.39)                         | 66.76<br>(30.34 to<br>129.82)                        | 5.00<br>(3.33 to<br>7.18)                         | 1.16<br>(0.55 to<br>2.16)                       | 0.73<br>(0.36 to<br>1.36)                      | 1.23<br>(0.56 to<br>2.39)                       |
| Maternal sepsis and other maternal infections         | 91.05<br>(57.95 to<br>137.36)                            | 22.73<br>(9.84 to<br>45.04)                          | 13.86<br>(6.32 to<br>27.30)                          | 24.16<br>(10.50 to<br>48.54)                         | 1.66<br>(1.07 to<br>2.49)                         | 0.41<br>(0.19 to<br>0.79)                       | 0.25<br>(0.12 to<br>0.48)                      | 0.44<br>(0.19 to<br>0.87)                       |
| Maternal hypertensive disorders                       | 213.56<br>(146.97 to<br>304.75)                          | 51.26<br>(23.59 to<br>105.52)                        | 30.66<br>(13.97 to<br>63.48)                         | 54.65<br>(24.54 to<br>114.54)                        | 3.73<br>(2.56 to<br>5.29)                         | 0.89<br>(0.41 to<br>1.78)                       | 0.53<br>(0.24 to<br>1.07)                      | 0.94<br>(0.44 to<br>1.95)                       |
| Maternal obstructed labor and uterine rupture         | 35.26<br>(20.27 to<br>53.66)                             | 9.89<br>(4.14 to<br>20.02)                           | 5.57<br>(2.31 to<br>11.08)                           | 10.57<br>(4.29 to<br>21.82)                          | 0.65<br>(0.38 to<br>1.02)                         | 0.18<br>(0.08 to<br>0.36)                       | 0.10<br>(0.04 to<br>0.20)                      | 0.19<br>(0.08 to<br>0.40)                       |
| Maternal abortion, miscarriage, and ectopic pregnancy | 224.46<br>(153.05 to<br>320.79)                          | 71.66<br>(33.44 to<br>144.87)                        | 43.33<br>(21.32 to<br>85.72)                         | 76.58<br>(36.49 to<br>155.51)                        | 4.31<br>(2.95 to<br>6.10)                         | 1.38<br>(0.66 to<br>2.77)                       | 0.84<br>(0.41 to<br>1.64)                      | 1.47<br>(0.69 to<br>3.04)                       |

|                                        |                                 |                               |                              |                               |                           |                           |                           |                           |
|----------------------------------------|---------------------------------|-------------------------------|------------------------------|-------------------------------|---------------------------|---------------------------|---------------------------|---------------------------|
|                                        | 120.78<br>(78.38 to<br>178.88)  | 38.68<br>(16.33 to<br>78.34)  | 22.71<br>(9.45 to<br>45.12)  | 41.51<br>(17.33 to<br>85.55)  | 2.10<br>(1.37 to<br>3.09) | 0.66<br>(0.28 to<br>1.32) | 0.39<br>(0.16 to<br>0.78) | 0.71<br>(0.30 to<br>1.41) |
| Indirect maternal deaths               |                                 |                               |                              |                               |                           |                           |                           |                           |
|                                        | 18.27<br>(9.38 to<br>32.17)     | 5.17<br>(2.00 to<br>12.12)    | 3.05<br>(1.18 to<br>6.88)    | 5.52<br>(2.08 to<br>12.92)    | 0.33<br>(0.18 to<br>0.58) | 0.09<br>(0.04 to<br>0.21) | 0.06<br>(0.02 to<br>0.12) | 0.10<br>(0.04 to<br>0.23) |
| Late maternal deaths                   |                                 |                               |                              |                               |                           |                           |                           |                           |
|                                        | 0.09<br>(0.04 to<br>0.18)       | 0.10<br>(0.02 to<br>0.36)     | 0.07<br>(0.01 to<br>0.23)    | 0.11<br>(0.02 to<br>0.40)     | 0.00<br>(0.00 to<br>0.00) | 0.00<br>(0.00 to<br>0.01) | 0.00<br>(0.00 to<br>0.00) | 0.00<br>(0.00 to<br>0.01) |
| Maternal deaths aggravated by HIV/AIDS |                                 |                               |                              |                               |                           |                           |                           |                           |
|                                        | 215.61<br>(146.12 to<br>316.72) | 63.70<br>(30.50 to<br>121.52) | 41.70<br>(20.54 to<br>81.52) | 67.68<br>(31.68 to<br>131.27) | 3.95<br>(2.68 to<br>5.76) | 1.15<br>(0.56 to<br>2.14) | 0.76<br>(0.37 to<br>1.45) | 1.22<br>(0.56 to<br>2.32) |
| Other maternal disorders               |                                 |                               |                              |                               |                           |                           |                           |                           |

| Georgia                                                                 |                                              |                                             |                                            |                                             |                                     |                                    |                                   |                                     |
|-------------------------------------------------------------------------|----------------------------------------------|---------------------------------------------|--------------------------------------------|---------------------------------------------|-------------------------------------|------------------------------------|-----------------------------------|-------------------------------------|
| Cause                                                                   | YLLs (actual counts)                         |                                             |                                            |                                             | Deaths (actual counts)              |                                    |                                   |                                     |
|                                                                         | 2016                                         | 2040 Forecast                               | 2040 Better Scenario                       | 2040 Worse Scenario                         | 2016                                | 2040 Forecast                      | 2040 Better Scenario              | 2040 Worse Scenario                 |
| <b>Neonatal disorders</b>                                               | <b>55,961.51</b><br>(40,069.95 to 77,202.05) | <b>13,504.80</b><br>(7,421.79 to 23,501.19) | <b>6,788.10</b><br>(3,673.13 to 11,945.19) | <b>15,834.40</b><br>(8,938.32 to 26,844.64) | <b>646.88</b><br>(463.17 to 892.55) | <b>156.13</b><br>(85.80 to 271.61) | <b>78.48</b><br>(42.48 to 138.09) | <b>183.06</b><br>(103.32 to 310.42) |
| Neonatal preterm birth                                                  | 18,599.22<br>(12,619.10 to 26,052.27)        | 3,783.05<br>(2,113.79 to 6,292.83)          | 1,608.10<br>(870.51 to 2,781.43)           | 4,945.21<br>(2,844.84 to 8,251.69)          | 214.94<br>(145.84 to 301.06)        | 43.73<br>(24.43 to 72.72)          | 18.59<br>(10.06 to 32.15)         | 57.15<br>(32.88 to 95.34)           |
| Neonatal encephalopathy due to birth asphyxia and trauma                | 16,316.17<br>(11,177.26 to 23,220.73)        | 4,516.92<br>(2,172.58 to 8,581.19)          | 1,951.76<br>(956.66 to 3,686.21)           | 5,075.68<br>(2,418.06 to 9,594.95)          | 188.59<br>(129.19 to 268.38)        | 52.22<br>(25.11 to 99.19)          | 22.56<br>(11.06 to 42.72)         | 58.68<br>(27.96 to 110.85)          |
| Neonatal sepsis and other neonatal infections                           | 7,840.67<br>(4,951.60 to 12,850.28)          | 2,503.20<br>(1,220.72 to 4,710.93)          | 1,307.19<br>(622.29 to 2,590.21)           | 2,797.50<br>(1,368.06 to 5,150.02)          | 90.69<br>(57.27 to 148.56)          | 28.96<br>(14.11 to 54.53)          | 15.12<br>(7.19 to 28.93)          | 32.36<br>(15.81 to 59.59)           |
| Hemolytic disease and other neonatal jaundice                           | 375.74<br>(224.56 to 616.25)                 | 65.88<br>(26.09 to 150.04)                  | 32.24<br>(12.70 to 74.42)                  | 74.04<br>(29.66 to 167.74)                  | 4.34<br>(2.59 to 7.12)              | 0.76<br>(0.30 to 1.73)             | 0.37<br>(0.15 to 0.86)            | 0.86<br>(0.34 to 1.94)              |
| Other neonatal disorders                                                | 12,829.70<br>(8,584.57 to 18,644.48)         | 2,635.75<br>(1,132.50 to 5,495.81)          | 1,888.81<br>(855.65 to 3,807.37)           | 2,941.97<br>(1,267.70 to 6,232.42)          | 148.32<br>(99.24 to 215.50)         | 30.47<br>(13.10 to 63.48)          | 21.84<br>(9.89 to 43.99)          | 34.01<br>(14.65 to 72.08)           |
| <b>Nutritional deficiencies</b>                                         | <b>282.62</b><br>(238.40 to 333.16)          | <b>136.29</b><br>(99.02 to 180.71)          | <b>113.88</b><br>(83.86 to 151.88)         | <b>137.32</b><br>(99.30 to 183.26)          | <b>8.91</b><br>(7.51 to 10.40)      | <b>5.54</b><br>(4.19 to 7.09)      | <b>5.09</b><br>(3.88 to 6.50)     | <b>5.36</b><br>(4.01 to 6.90)       |
| Protein-energy malnutrition                                             | 68.24<br>(50.55 to 88.20)                    | 21.09<br>(12.32 to 30.45)                   | 24.23<br>(13.74 to 34.93)                  | 21.01<br>(12.21 to 30.89)                   | 2.18<br>(1.13 to 2.80)              | 1.02<br>(0.37 to 1.55)             | 1.34<br>(0.50 to 1.98)            | 0.97<br>(0.37 to 1.47)              |
| Iodine deficiency                                                       | 13.83<br>(2.34 to 33.87)                     | 10.00<br>(1.10 to 25.35)                    | 7.66<br>(0.64 to 19.83)                    | 10.10<br>(1.08 to 25.76)                    | 0.43<br>(0.07 to 1.04)              | 0.44<br>(0.04 to 1.22)             | 0.37<br>(0.03 to 1.04)            | 0.42<br>(0.04 to 1.21)              |
| Dietary iron deficiency                                                 | 39.01<br>(31.45 to 48.40)                    | 21.59<br>(13.97 to 32.83)                   | 21.99<br>(14.49 to 33.09)                  | 22.02<br>(14.43 to 33.21)                   | 0.81<br>(0.65 to 1.01)              | 0.49<br>(0.34 to 0.73)             | 0.53<br>(0.36 to 0.77)            | 0.49<br>(0.34 to 0.72)              |
| Other nutritional deficiencies                                          | 161.54<br>(130.69 to 197.59)                 | 83.61<br>(58.39 to 115.64)                  | 59.99<br>(41.59 to 84.80)                  | 84.18<br>(58.71 to 117.86)                  | 5.50<br>(4.44 to 6.98)              | 3.59<br>(2.49 to 4.86)             | 2.86<br>(1.92 to 4.18)            | 3.47<br>(2.38 to 4.81)              |
| <b>Other communicable, maternal, neonatal, and nutritional diseases</b> | <b>2,414.05</b><br>(1,856.57 to 3,469.26)    | <b>1,259.58</b><br>(956.37 to 1,690.02)     | <b>1,021.87</b><br>(791.13 to 1,349.10)    | <b>1,270.56</b><br>(954.93 to 1,731.90)     | <b>64.64</b><br>(53.61 to 78.16)    | <b>52.70</b><br>(37.45 to 66.60)   | <b>51.40</b><br>(34.17 to 64.18)  | <b>50.42</b><br>(35.86 to 64.35)    |
| Sexually transmitted infections excluding HIV                           | 106.60<br>(51.44 to 194.19)                  | 30.33<br>(17.73 to 50.48)                   | 21.06<br>(13.09 to 33.72)                  | 31.20<br>(17.94 to 53.77)                   | 2.37<br>(1.61 to 3.51)              | 1.04<br>(0.73 to 1.44)             | 0.85<br>(0.60 to 1.22)            | 1.02<br>(0.72 to 1.43)              |
| Syphilis                                                                | 80.70<br>(27.24 to 166.97)                   | 17.22<br>(7.19 to 34.73)                    | 9.39<br>(4.30 to 18.65)                    | 18.17<br>(7.60 to 38.36)                    | 1.45<br>(0.77 to 2.51)              | 0.44<br>(0.26 to 0.72)             | 0.28<br>(0.17 to 0.43)            | 0.44<br>(0.25 to 0.73)              |
| Chlamydial infection                                                    | 4.82<br>(3.51 to 6.45)                       | 2.50<br>(1.44 to 4.01)                      | 2.26<br>(1.32 to 3.65)                     | 2.48<br>(1.44 to 3.99)                      | 0.18<br>(0.13 to 0.23)              | 0.12<br>(0.08 to 0.18)             | 0.12<br>(0.08 to 0.18)            | 0.11<br>(0.07 to 0.17)              |
| Gonococcal infection                                                    | 14.01<br>(10.32 to 18.55)                    | 7.28<br>(4.33 to 11.60)                     | 6.52<br>(3.82 to 10.60)                    | 7.23<br>(4.34 to 11.55)                     | 0.52<br>(0.40 to 0.68)              | 0.35<br>(0.22 to 0.53)             | 0.34<br>(0.22 to 0.52)            | 0.34<br>(0.21 to 0.51)              |
| Other sexually transmitted infections                                   | 7.07<br>(5.26 to 9.37)                       | 3.33<br>(1.93 to 5.58)                      | 2.90<br>(1.64 to 4.75)                     | 3.33<br>(1.99 to 5.59)                      | 0.23<br>(0.17 to 0.30)              | 0.13<br>(0.09 to 0.20)             | 0.12<br>(0.08 to 0.19)            | 0.13<br>(0.09 to 0.20)              |
| Acute hepatitis                                                         | 1,184.35<br>(924.79 to 1,501.93)             | 383.81<br>(249.03 to 570.90)                | 210.53<br>(130.31 to 317.53)               | 393.08<br>(254.17 to 580.79)                | 29.40<br>(22.92 to 37.62)           | 11.93<br>(8.37 to 16.67)           | 6.94<br>(4.65 to 9.85)            | 11.92<br>(8.30 to 16.75)            |
| Acute hepatitis A                                                       | 148.15<br>(80.84 to 238.97)                  | 19.56<br>(8.83 to 47.42)                    | 11.45<br>(5.26 to 26.59)                   | 20.93<br>(9.44 to 52.00)                    | 2.00<br>(1.20 to 3.05)              | 0.38<br>(0.21 to 0.71)             | 0.25<br>(0.14 to 0.44)            | 0.39<br>(0.21 to 0.75)              |
| Acute hepatitis B                                                       | 873.23<br>(657.41 to 1,152.86)               | 314.33<br>(197.33 to 484.75)                | 171.03<br>(101.70 to 272.16)               | 321.25<br>(195.90 to 485.48)                | 23.60<br>(17.99 to 30.98)           | 9.82<br>(6.55 to 14.36)            | 5.58<br>(3.51 to 8.22)            | 9.85<br>(6.54 to 14.25)             |

|                                       |                                                                  |                                                                  |                                                                  |                                                                  |                                                               |                                                               |                                                               |                                                               |
|---------------------------------------|------------------------------------------------------------------|------------------------------------------------------------------|------------------------------------------------------------------|------------------------------------------------------------------|---------------------------------------------------------------|---------------------------------------------------------------|---------------------------------------------------------------|---------------------------------------------------------------|
| Acute hepatitis C                     | 34.16<br>(22.97 to<br>50.50)                                     | 14.31<br>(8.09 to<br>23.96)                                      | 8.09<br>(4.44 to<br>14.26)                                       | 14.51<br>(8.36 to<br>24.07)                                      | 0.92<br>(0.61 to<br>1.38)                                     | 0.45<br>(0.27 to<br>0.74)                                     | 0.27<br>(0.15 to<br>0.44)                                     | 0.45<br>(0.27 to<br>0.72)                                     |
| Acute hepatitis E                     | 128.80<br>(93.49 to<br>176.46)                                   | 35.60<br>(21.55 to<br>57.94)                                     | 19.95<br>(11.93 to<br>32.27)                                     | 36.40<br>(21.90 to<br>60.34)                                     | 2.89<br>(2.05 to<br>3.86)                                     | 1.28<br>(0.79 to<br>1.90)                                     | 0.84<br>(0.49 to<br>1.29)                                     | 1.23<br>(0.75 to<br>1.84)                                     |
| Other unspecified infectious diseases | 1,123.10<br>(793.05 to<br>2,155.23)                              | 845.43<br>(646.45 to<br>1,211.96)                                | 790.28<br>(617.93 to<br>1,056.87)                                | 846.27<br>(638.59 to<br>1,228.49)                                | 32.87<br>(27.02 to<br>39.42)                                  | 39.73<br>(25.50 to<br>51.68)                                  | 43.61<br>(26.91 to<br>56.02)                                  | 37.48<br>(24.28 to<br>49.55)                                  |
| <b>Non-communicable diseases</b>      | <b>739,327.53</b><br><b>(631,555.03 to</b><br><b>858,275.68)</b> | <b>639,860.54</b><br><b>(459,460.47 to</b><br><b>841,593.12)</b> | <b>371,375.43</b><br><b>(275,778.78 to</b><br><b>486,404.00)</b> | <b>760,362.68</b><br><b>(549,832.81 to</b><br><b>983,862.32)</b> | <b>44,173.72</b><br><b>(38,490.78 to</b><br><b>50,115.80)</b> | <b>42,538.70</b><br><b>(34,137.17 to</b><br><b>52,202.66)</b> | <b>27,302.89</b><br><b>(21,569.28 to</b><br><b>34,187.80)</b> | <b>48,319.66</b><br><b>(39,048.47 to</b><br><b>58,650.37)</b> |

| Georgia                              |                                                 |                                                 |                                                |                                                 |                                           |                                           |                                           |                                           |
|--------------------------------------|-------------------------------------------------|-------------------------------------------------|------------------------------------------------|-------------------------------------------------|-------------------------------------------|-------------------------------------------|-------------------------------------------|-------------------------------------------|
| Cause                                | YLLs (actual counts)                            |                                                 |                                                |                                                 | Deaths (actual counts)                    |                                           |                                           |                                           |
|                                      | 2016                                            | 2040 Forecast                                   | 2040 Better Scenario                           | 2040 Worse Scenario                             | 2016                                      | 2040 Forecast                             | 2040 Better Scenario                      | 2040 Worse Scenario                       |
| <b>Neoplasms</b>                     | <b>157,341.47</b><br>(132,900.98 to 187,131.63) | <b>153,138.26</b><br>(109,787.36 to 201,965.26) | <b>107,580.87</b><br>(77,756.51 to 139,495.43) | <b>165,709.81</b><br>(119,778.14 to 218,455.07) | <b>6,579.95</b><br>(5,606.44 to 7,659.95) | <b>7,212.46</b><br>(5,581.85 to 8,957.96) | <b>5,463.67</b><br>(4,274.23 to 6,641.48) | <b>7,601.03</b><br>(5,904.42 to 9,492.73) |
| Lip and oral cavity cancer           | 2,991.33<br>(2,406.24 to 3,703.72)              | 3,677.89<br>(1,814.05 to 6,794.83)              | 1,800.39<br>(965.90 to 3,182.07)               | 4,246.20<br>(2,054.84 to 7,650.87)              | 121.39<br>(100.34 to 146.55)              | 158.35<br>(82.68 to 276.12)               | 84.13<br>(48.98 to 136.27)                | 179.67<br>(93.61 to 307.94)               |
| Nasopharynx cancer                   | 472.78<br>(386.00 to 582.11)                    | 747.57<br>(372.46 to 1,391.28)                  | 306.60<br>(163.65 to 550.23)                   | 878.07<br>(437.80 to 1,561.14)                  | 15.21<br>(12.54 to 18.49)                 | 26.21<br>(13.86 to 46.64)                 | 11.18<br>(6.42 to 19.16)                  | 30.45<br>(16.12 to 53.30)                 |
| Other pharynx cancer                 | 1,354.11<br>(1,049.84 to 1,735.34)              | 1,119.15<br>(588.93 to 1,933.53)                | 949.64<br>(507.61 to 1,659.93)                 | 1,192.77<br>(630.56 to 2,081.77)                | 51.45<br>(40.49 to 64.49)                 | 47.00<br>(25.64 to 79.94)                 | 41.76<br>(23.98 to 68.90)                 | 49.27<br>(26.73 to 83.47)                 |
| Esophageal cancer                    | 2,921.72<br>(2,376.89 to 3,587.60)              | 3,242.68<br>(1,568.13 to 6,179.97)              | 2,056.48<br>(1,080.63 to 3,630.62)             | 3,792.62<br>(1,758.40 to 7,324.40)              | 129.10<br>(107.65 to 154.04)              | 150.77<br>(79.30 to 275.37)               | 104.06<br>(60.30 to 174.93)               | 172.82<br>(89.26 to 321.38)               |
| Stomach cancer                       | 15,804.41<br>(13,056.99 to 19,055.02)           | 11,122.76<br>(7,698.76 to 15,748.73)            | 6,904.04<br>(4,805.34 to 9,675.70)             | 11,483.34<br>(7,948.06 to 16,107.44)            | 750.14<br>(631.94 to 883.55)              | 580.64<br>(427.19 to 779.20)              | 388.63<br>(283.90 to 523.29)              | 585.47<br>(433.80 to 784.25)              |
| Colon and rectum cancer              | 10,193.00<br>(8,511.10 to 12,121.79)            | 12,264.62<br>(7,693.48 to 18,500.15)            | 8,348.03<br>(5,307.72 to 12,408.02)            | 12,513.30<br>(7,932.67 to 18,793.86)            | 489.31<br>(415.96 to 570.77)              | 658.25<br>(437.61 to 981.48)              | 484.03<br>(326.79 to 714.16)              | 652.93<br>(441.55 to 974.17)              |
| Liver cancer                         | 8,221.85<br>(6,760.99 to 10,003.67)             | 9,363.28<br>(5,640.24 to 15,205.15)             | 8,498.11<br>(5,485.18 to 12,687.98)            | 10,662.99<br>(6,090.18 to 17,696.45)            | 368.69<br>(311.19 to 437.67)              | 459.00<br>(291.35 to 703.41)              | 451.28<br>(312.44 to 645.24)              | 506.13<br>(309.24 to 802.28)              |
| Liver cancer due to hepatitis B      | 2,469.73<br>(1,868.86 to 3,258.71)              | 2,606.37<br>(1,493.97 to 4,382.92)              | 2,466.46<br>(1,498.48 to 3,824.20)             | 2,918.41<br>(1,578.15 to 5,086.98)              | 99.47<br>(75.76 to 127.47)                | 116.99<br>(69.94 to 185.72)               | 118.55<br>(76.00 to 175.97)               | 127.30<br>(74.37 to 211.57)               |
| Liver cancer due to hepatitis C      | 2,574.01<br>(2,013.28 to 3,242.29)              | 2,950.53<br>(1,807.53 to 4,672.94)              | 2,895.33<br>(1,877.35 to 4,296.48)             | 3,252.46<br>(1,889.70 to 5,391.92)              | 128.58<br>(101.94 to 157.55)              | 160.33<br>(103.90 to 241.91)              | 169.20<br>(114.41 to 239.33)              | 171.19<br>(105.55 to 266.04)              |
| Liver cancer due to alcohol use      | 1,792.17<br>(1,402.67 to 2,208.20)              | 2,211.66<br>(1,289.83 to 3,635.26)              | 1,638.88<br>(1,025.52 to 2,465.95)             | 2,718.35<br>(1,496.18 to 4,699.87)              | 82.12<br>(65.77 to 99.40)                 | 107.10<br>(65.90 to 166.97)               | 88.03<br>(57.94 to 127.83)                | 127.10<br>(74.93 to 206.28)               |
| Liver cancer due to other causes     | 1,385.95<br>(1,079.91 to 1,743.29)              | 1,594.72<br>(909.90 to 2,712.64)                | 1,497.44<br>(914.59 to 2,355.26)               | 1,773.76<br>(976.45 to 3,114.15)                | 58.52<br>(47.40 to 71.57)                 | 74.58<br>(44.94 to 120.51)                | 75.50<br>(49.10 to 113.66)                | 80.55<br>(46.72 to 132.57)                |
| Gallbladder and biliary tract cancer | 2,306.05<br>(1,841.93 to 2,805.94)              | 1,284.80<br>(973.39 to 1,644.24)                | 1,230.51<br>(910.31 to 1,593.28)               | 1,240.72<br>(954.89 to 1,582.92)                | 108.10<br>(86.90 to 128.61)               | 69.92<br>(56.91 to 84.25)                 | 70.49<br>(55.73 to 85.83)                 | 66.11<br>(54.45 to 79.50)                 |
| Pancreatic cancer                    | 6,075.49<br>(5,048.60 to 7,330.66)              | 6,797.61<br>(4,963.83 to 9,366.71)              | 6,324.82<br>(4,646.29 to 8,468.10)             | 6,726.79<br>(4,888.87 to 9,285.60)              | 290.29<br>(244.33 to 341.04)              | 356.23<br>(275.11 to 459.26)              | 355.85<br>(279.40 to 448.83)              | 343.67<br>(266.48 to 446.83)              |
| Larynx cancer                        | 3,886.27<br>(2,997.84 to 4,934.10)              | 5,114.03<br>(1,876.84 to 11,164.62)             | 1,935.09<br>(818.81 to 3,919.49)               | 5,956.85<br>(2,259.50 to 12,572.71)             | 157.88<br>(124.97 to 195.62)              | 217.79<br>(88.25 to 456.51)               | 88.24<br>(62.71 to 168.20)                | 251.70<br>(101.58 to 517.51)              |
| Tracheal, bronchus, and lung cancer  | 29,459.25<br>(22,953.76 to 36,887.31)           | 34,207.47<br>(18,612.11 to 55,787.58)           | 17,116.78<br>(10,125.75 to 27,230.86)          | 42,276.16<br>(23,319.72 to 68,125.87)           | 1,231.72<br>(981.61 to 1,518.78)          | 1,523.99<br>(889.99 to 2,385.86)          | 803.36<br>(508.77 to 1,215.13)            | 1,855.18<br>(1,086.06 to 2,851.55)        |
| Malignant skin melanoma              | 1,694.91<br>(1,361.37 to 2,124.03)              | 1,562.80<br>(1,206.97 to 1,978.07)              | 2,149.06<br>(1,633.35 to 2,791.99)             | 1,481.53<br>(1,170.08 to 1,867.38)              | 75.62<br>(61.28 to 93.82)                 | 86.31<br>(69.24 to 106.91)                | 127.17<br>(100.63 to 156.84)              | 79.10<br>(63.73 to 97.79)                 |
| Non-melanoma skin cancer             | 1,272.70<br>(1,030.82 to 1,554.43)              | 1,076.67<br>(867.45 to 1,291.58)                | 782.37<br>(611.78 to 972.94)                   | 1,039.90<br>(851.23 to 1,235.14)                | 67.26<br>(57.20 to 78.39)                 | 68.25<br>(55.70 to 80.63)                 | 54.47<br>(44.34 to 65.25)                 | 63.69<br>(52.11 to 76.14)                 |
| Breast cancer                        | 14,780.69<br>(10,573.48 to 19,541.37)           | 14,705.70<br>(8,459.97 to 23,374.81)            | 10,329.92<br>(5,896.63 to 16,319.90)           | 15,398.47<br>(8,921.58 to 24,716.02)            | 570.75<br>(414.90 to 737.31)              | 670.26<br>(434.03 to 988.04)              | 492.18<br>(317.27 to 735.87)              | 685.25<br>(445.48 to 1,023.32)            |
| Cervical cancer                      | 5,730.43<br>(4,139.85 to 7,616.31)              | 3,501.54<br>(2,002.63 to 5,468.24)              | 2,266.27<br>(1,299.88 to 3,611.94)             | 3,605.77<br>(2,046.76 to 5,821.71)              | 204.04<br>(148.09 to 265.96)              | 144.58<br>(92.10 to 208.00)               | 97.26<br>(59.89 to 142.22)                | 145.68<br>(93.16 to 211.61)               |

|                   |                                       |                                       |                                       |                                       |                                 |                                 |                                 |                                 |
|-------------------|---------------------------------------|---------------------------------------|---------------------------------------|---------------------------------------|---------------------------------|---------------------------------|---------------------------------|---------------------------------|
|                   | 3,634.26<br>(2,590.36 to<br>4,796.50) | 3,015.91<br>(1,895.17 to<br>4,290.84) | 2,298.46<br>(1,390.42 to<br>3,397.87) | 3,013.73<br>(1,868.71 to<br>4,267.65) | 147.07<br>(105.97 to<br>191.67) | 141.99<br>(98.70 to<br>189.62)  | 112.20<br>(74.69 to<br>153.95)  | 139.68<br>(96.04 to<br>185.05)  |
| Uterine cancer    |                                       |                                       |                                       |                                       |                                 |                                 |                                 |                                 |
|                   | 3,862.46<br>(2,666.82 to<br>5,242.49) | 3,081.84<br>(1,779.95 to<br>4,890.38) | 2,509.81<br>(1,433.18 to<br>3,959.60) | 3,158.64<br>(1,822.76 to<br>4,958.73) | 142.41<br>(99.24 to<br>192.29)  | 131.00<br>(80.59 to<br>196.82)  | 108.65<br>(66.16 to<br>161.51)  | 133.13<br>(82.17 to<br>198.64)  |
| Ovarian cancer    |                                       |                                       |                                       |                                       |                                 |                                 |                                 |                                 |
|                   | 4,326.74<br>(2,862.23 to<br>5,398.41) | 5,056.85<br>(3,455.73 to<br>6,215.50) | 4,502.03<br>(3,086.62 to<br>5,522.42) | 4,731.38<br>(3,122.19 to<br>5,821.32) | 276.52<br>(185.81 to<br>337.76) | 336.70<br>(223.41 to<br>418.12) | 327.13<br>(229.10 to<br>393.50) | 306.10<br>(196.61 to<br>382.90) |
| Prostate cancer   |                                       |                                       |                                       |                                       |                                 |                                 |                                 |                                 |
|                   | 592.60<br>(413.69 to<br>791.87)       | 373.50<br>(240.08 to<br>561.49)       | 273.45<br>(173.00 to<br>407.90)       | 371.82<br>(238.88 to<br>559.25)       | 15.66<br>(11.01 to<br>20.51)    | 11.65<br>(8.30 to<br>15.68)     | 9.15<br>(6.38 to<br>12.45)      | 11.27<br>(7.93 to<br>15.21)     |
| Testicular cancer |                                       |                                       |                                       |                                       |                                 |                                 |                                 |                                 |

| Georgia                         |                                                                  |                                                                  |                                                                  |                                                                  |                                                               |                                                               |                                                              |                                                               |
|---------------------------------|------------------------------------------------------------------|------------------------------------------------------------------|------------------------------------------------------------------|------------------------------------------------------------------|---------------------------------------------------------------|---------------------------------------------------------------|--------------------------------------------------------------|---------------------------------------------------------------|
| Cause                           | YLLs (actual counts)                                             |                                                                  |                                                                  |                                                                  | Deaths (actual counts)                                        |                                                               |                                                              |                                                               |
|                                 | 2016                                                             | 2040 Forecast                                                    | 2040 Better Scenario                                             | 2040 Worse Scenario                                              | 2016                                                          | 2040 Forecast                                                 | 2040 Better Scenario                                         | 2040 Worse Scenario                                           |
| Kidney cancer                   | 2,973.11<br>(2,384.22 to<br>3,709.15)                            | 3,573.30<br>(2,214.81 to<br>5,690.68)                            | 3,291.65<br>(2,143.34 to<br>4,860.06)                            | 3,536.96<br>(2,195.07 to<br>5,703.30)                            | 117.31<br>(95.65 to<br>144.12)                                | 154.33<br>(102.47 to<br>230.79)                               | 153.19<br>(107.14 to<br>213.19)                              | 149.41<br>(98.46 to<br>228.25)                                |
| Bladder cancer                  | 3,802.29<br>(3,050.48 to<br>4,730.13)                            | 3,980.82<br>(2,681.28 to<br>5,781.95)                            | 3,009.39<br>(2,150.89 to<br>4,153.87)                            | 3,967.85<br>(2,643.08 to<br>5,801.54)                            | 206.47<br>(169.47 to<br>250.31)                               | 229.76<br>(165.65 to<br>319.26)                               | 192.20<br>(148.15 to<br>249.72)                              | 223.05<br>(158.14 to<br>322.80)                               |
| Brain and nervous system cancer | 6,386.75<br>(4,254.88 to<br>8,024.24)                            | 5,229.47<br>(3,384.39 to<br>6,824.75)                            | 4,556.30<br>(2,915.46 to<br>6,073.06)                            | 5,149.95<br>(3,354.96 to<br>6,658.61)                            | 196.21<br>(129.14 to<br>247.16)                               | 187.22<br>(120.96 to<br>234.75)                               | 171.31<br>(108.50 to<br>217.79)                              | 180.75<br>(117.24 to<br>225.28)                               |
| Thyroid cancer                  | 498.36<br>(393.71 to<br>614.72)                                  | 381.88<br>(252.93 to<br>556.44)                                  | 298.31<br>(195.30 to<br>433.20)                                  | 409.09<br>(268.03 to<br>610.56)                                  | 21.43<br>(17.21 to<br>25.85)                                  | 19.29<br>(13.33 to<br>27.72)                                  | 15.74<br>(10.96 to<br>22.25)                                 | 20.16<br>(13.78 to<br>29.55)                                  |
| Mesothelioma                    | 344.11<br>(266.31 to<br>416.87)                                  | 243.68<br>(179.06 to<br>306.49)                                  | 253.15<br>(183.60 to<br>322.19)                                  | 237.10<br>(176.65 to<br>297.87)                                  | 14.92<br>(12.16 to<br>17.56)                                  | 12.81<br>(10.04 to<br>15.75)                                  | 14.01<br>(10.81 to<br>17.42)                                 | 12.18<br>(9.58 to<br>14.95)                                   |
| Hodgkin lymphoma                | 1,441.58<br>(1,164.63 to<br>1,765.32)                            | 1,103.29<br>(810.68 to<br>1,423.40)                              | 672.98<br>(468.05 to<br>904.30)                                  | 1,110.03<br>(825.20 to<br>1,469.73)                              | 46.36<br>(37.28 to<br>55.84)                                  | 41.48<br>(31.86 to<br>50.99)                                  | 26.71<br>(19.45 to<br>34.13)                                 | 40.80<br>(31.79 to<br>50.08)                                  |
| Non-Hodgkin lymphoma            | 3,438.28<br>(2,507.03 to<br>4,155.42)                            | 2,691.50<br>(1,865.73 to<br>3,575.81)                            | 2,188.45<br>(1,498.57 to<br>2,960.12)                            | 2,746.24<br>(1,902.30 to<br>3,705.59)                            | 121.84<br>(89.79 to<br>146.75)                                | 116.94<br>(84.34 to<br>150.03)                                | 100.70<br>(73.57 to<br>129.88)                               | 116.49<br>(84.78 to<br>151.38)                                |
| Multiple myeloma                | 965.09<br>(721.19 to<br>1,193.47)                                | 1,015.16<br>(723.14 to<br>1,373.59)                              | 913.12<br>(641.27 to<br>1,243.08)                                | 1,035.67<br>(728.67 to<br>1,414.84)                              | 38.32<br>(30.64 to<br>48.49)                                  | 46.80<br>(35.62 to<br>62.89)                                  | 44.53<br>(33.51 to<br>61.82)                                 | 46.65<br>(35.16 to<br>64.03)                                  |
| Leukemia                        | 8,593.65<br>(7,278.14 to<br>10,178.75)                           | 6,597.09<br>(4,673.60 to<br>9,428.99)                            | 4,985.37<br>(3,554.56 to<br>6,961.76)                            | 6,935.37<br>(4,863.27 to<br>9,942.88)                            | 253.50<br>(215.58 to<br>296.62)                               | 239.60<br>(177.53 to<br>328.55)                               | 192.41<br>(146.36 to<br>252.69)                              | 246.88<br>(181.66 to<br>338.70)                               |
| Acute lymphoid leukemia         | 1,663.82<br>(1,378.38 to<br>2,129.58)                            | 1,319.57<br>(907.09 to<br>1,903.40)                              | 948.65<br>(647.41 to<br>1,346.07)                                | 1,285.12<br>(943.12 to<br>2,009.72)                              | 39.96<br>(32.87 to<br>48.92)                                  | 39.36<br>(26.92 to<br>56.73)                                  | 29.43<br>(20.53 to<br>41.09)                                 | 40.89<br>(27.97 to<br>58.85)                                  |
| Chronic lymphoid leukemia       | 672.85<br>(487.75 to<br>862.01)                                  | 525.92<br>(328.25 to<br>775.35)                                  | 430.85<br>(267.41 to<br>624.27)                                  | 562.49<br>(350.73 to<br>845.79)                                  | 24.28<br>(16.87 to<br>30.86)                                  | 21.11<br>(13.69 to<br>29.76)                                  | 18.09<br>(11.62 to<br>25.26)                                 | 22.13<br>(14.36 to<br>32.20)                                  |
| Acute myeloid leukemia          | 2,182.77<br>(1,765.52 to<br>2,693.36)                            | 1,899.98<br>(1,301.50 to<br>2,743.14)                            | 1,677.34<br>(1,173.27 to<br>2,363.47)                            | 1,978.74<br>(1,357.07 to<br>2,882.73)                            | 62.24<br>(49.10 to<br>76.80)                                  | 65.42<br>(45.94 to<br>92.89)                                  | 61.08<br>(44.38 to<br>82.49)                                 | 66.97<br>(46.77 to<br>94.86)                                  |
| Chronic myeloid leukemia        | 317.65<br>(251.07 to<br>404.04)                                  | 148.67<br>(95.29 to<br>231.77)                                   | 76.27<br>(47.96 to<br>118.04)                                    | 158.53<br>(102.08 to<br>246.95)                                  | 10.49<br>(8.42 to<br>13.11)                                   | 5.77<br>(3.90 to<br>8.40)                                     | 3.17<br>(2.10 to<br>4.59)                                    | 6.00<br>(4.01 to<br>8.80)                                     |
| Other leukemia                  | 3,756.56<br>(3,124.54 to<br>4,499.71)                            | 2,702.95<br>(1,883.56 to<br>4,018.97)                            | 1,852.27<br>(1,269.35 to<br>2,668.28)                            | 2,850.51<br>(1,950.84 to<br>4,206.77)                            | 116.53<br>(98.30 to<br>138.48)                                | 107.93<br>(79.31 to<br>148.23)                                | 80.64<br>(60.07 to<br>107.30)                                | 110.89<br>(79.58 to<br>152.59)                                |
| Other neoplasms                 | 9,317.19<br>(7,792.24 to<br>11,043.94)                           | 7,005.40<br>(5,529.55 to<br>8,538.97)                            | 6,830.31<br>(5,248.68 to<br>8,496.50)                            | 6,810.48<br>(5,423.52 to<br>8,250.68)                            | 350.98<br>(292.72 to<br>411.51)                               | 325.36<br>(266.09 to<br>373.71)                               | 341.66<br>(276.28 to<br>397.06)                              | 307.37<br>(256.07 to<br>350.67)                               |
| <b>Cardiovascular diseases</b>  | <b>425,737.26</b><br><b>(365,654.00 to</b><br><b>490,399.71)</b> | <b>352,121.14</b><br><b>(229,511.44 to</b><br><b>513,172.04)</b> | <b>159,532.64</b><br><b>(103,713.67 to</b><br><b>245,836.17)</b> | <b>451,301.04</b><br><b>(297,569.94 to</b><br><b>632,575.91)</b> | <b>29,572.14</b><br><b>(25,888.68 to</b><br><b>33,338.26)</b> | <b>26,649.41</b><br><b>(19,382.16 to</b><br><b>35,987.90)</b> | <b>14,043.83</b><br><b>(9,997.89 to</b><br><b>20,166.35)</b> | <b>31,816.52</b><br><b>(23,510.14 to</b><br><b>42,205.35)</b> |
| Rheumatic heart disease         | 8,052.28<br>(6,917.57 to<br>9,395.71)                            | 3,239.35<br>(2,334.02 to<br>4,571.00)                            | 2,098.98<br>(1,530.68 to<br>2,982.50)                            | 3,278.60<br>(2,414.46 to<br>4,515.72)                            | 434.08<br>(374.83 to<br>499.75)                               | 210.95<br>(161.12 to<br>280.13)                               | 153.12<br>(115.52 to<br>210.27)                              | 204.86<br>(158.64 to<br>274.72)                               |
| Ischemic heart disease          | 237,084.60<br>(203,355.23 to<br>277,100.12)                      | 193,221.76<br>(113,840.59 to<br>303,948.12)                      | 83,755.50<br>(49,749.17 to<br>137,611.13)                        | 258,175.58<br>(151,799.76 to<br>383,546.46)                      | 16,825.41<br>(14,731.82 to<br>19,043.88)                      | 14,793.43<br>(9,476.57 to<br>21,641.60)                       | 7,471.88<br>(4,798.95 to<br>11,310.73)                       | 18,243.17<br>(11,907.17 to<br>25,863.68)                      |
| Stroke                          | 131,518.00<br>(112,007.79 to<br>152,820.41)                      | 109,498.02<br>(64,371.81 to<br>170,519.24)                       | 40,824.35<br>(24,797.20 to<br>63,914.99)                         | 139,294.02<br>(84,336.49 to<br>213,848.26)                       | 8,977.82<br>(7,769.90 to<br>10,276.19)                        | 8,008.43<br>(5,349.28 to<br>11,731.75)                        | 3,510.10<br>(2,332.81 to<br>5,135.61)                        | 9,487.08<br>(6,377.23 to<br>13,479.78)                        |
| Ischemic stroke                 | 47,530.28<br>(40,494.79 to<br>55,178.01)                         | 34,402.87<br>(20,862.51 to<br>55,352.67)                         | 14,811.25<br>(8,967.18 to<br>24,747.51)                          | 41,595.01<br>(25,277.53 to<br>67,083.66)                         | 3,595.75<br>(3,107.18 to<br>4,138.63)                         | 2,801.37<br>(1,794.41 to<br>4,416.67)                         | 1,383.98<br>(871.18 to<br>2,186.54)                          | 3,178.58<br>(2,022.17 to<br>4,999.13)                         |



|                                |                                          |                                           |                                          |                                           |                                       |                                       |                                       |                                       |
|--------------------------------|------------------------------------------|-------------------------------------------|------------------------------------------|-------------------------------------------|---------------------------------------|---------------------------------------|---------------------------------------|---------------------------------------|
|                                | 83,987.72<br>(70,707.88 to<br>98,640.88) | 75,095.14<br>(40,128.58 to<br>123,290.20) | 26,013.10<br>(14,582.07 to<br>42,870.40) | 97,699.02<br>(55,196.57 to<br>156,357.74) | 5,382.07<br>(4,618.49 to<br>6,153.32) | 5,207.05<br>(3,171.91 to<br>8,019.58) | 2,126.11<br>(1,315.73 to<br>3,264.52) | 6,308.50<br>(3,857.62 to<br>9,677.22) |
| Intracerebral hemorrhage       |                                          |                                           |                                          |                                           |                                       |                                       |                                       |                                       |
|                                | 26,539.21<br>(13,452.32 to<br>34,651.04) | 28,030.87<br>(10,252.48 to<br>74,967.81)  | 20,238.18<br>(7,458.03 to<br>53,903.05)  | 32,127.16<br>(11,956.74 to<br>85,433.17)  | 2,132.78<br>(918.94 to<br>2,874.53)   | 2,412.63<br>(784.92 to<br>6,411.80)   | 1,933.08<br>(628.80 to<br>5,036.66)   | 2,691.44<br>(866.45 to<br>7,126.35)   |
| Hypertensive heart disease     |                                          |                                           |                                          |                                           |                                       |                                       |                                       |                                       |
|                                | 6,604.23<br>(4,669.40 to<br>8,547.43)    | 4,781.40<br>(3,069.11 to<br>6,838.11)     | 3,226.98<br>(2,070.04 to<br>4,663.34)    | 4,928.23<br>(3,193.30 to<br>7,066.16)     | 251.73<br>(186.83 to<br>313.58)       | 226.30<br>(152.07 to<br>317.26)       | 158.08<br>(107.47 to<br>221.79)       | 225.26<br>(152.23 to<br>316.51)       |
| Cardiomyopathy and myocarditis |                                          |                                           |                                          |                                           |                                       |                                       |                                       |                                       |
|                                | 2,624.95<br>(997.98 to<br>4,207.73)      | 1,610.19<br>(606.85 to<br>2,660.67)       | 1,380.99<br>(590.85 to<br>2,255.32)      | 1,616.11<br>(602.03 to<br>2,677.68)       | 78.80<br>(29.05 to<br>124.13)         | 52.68<br>(21.28 to<br>80.99)          | 47.78<br>(22.69 to<br>70.27)          | 51.82<br>(20.33 to<br>80.42)          |
| Myocarditis                    |                                          |                                           |                                          |                                           |                                       |                                       |                                       |                                       |

| Georgia                                                       |                                               |                                               |                                               |                                               |                                            |                                            |                                          |                                            |
|---------------------------------------------------------------|-----------------------------------------------|-----------------------------------------------|-----------------------------------------------|-----------------------------------------------|--------------------------------------------|--------------------------------------------|------------------------------------------|--------------------------------------------|
| Cause                                                         | YLLs (actual counts)                          |                                               |                                               |                                               | Deaths (actual counts)                     |                                            |                                          |                                            |
|                                                               | 2016                                          | 2040 Forecast                                 | 2040 Better Scenario                          | 2040 Worse Scenario                           | 2016                                       | 2040 Forecast                              | 2040 Better Scenario                     | 2040 Worse Scenario                        |
| Alcoholic cardiomyopathy                                      | 433.64<br>(270.03 to 699.89)                  | 321.16<br>(196.03 to 534.46)                  | 246.10<br>(147.02 to 423.07)                  | 341.65<br>(209.26 to 567.97)                  | 17.76<br>(11.51 to 26.14)                  | 15.03<br>(8.90 to 22.72)                   | 12.74<br>(7.41 to 18.92)                 | 15.30<br>(9.20 to 23.09)                   |
| Other cardiomyopathy                                          | 3,545.65<br>(2,527.19 to 5,547.15)            | 2,850.04<br>(1,604.73 to 4,780.77)            | 1,599.90<br>(845.07 to 2,853.38)              | 2,970.47<br>(1,673.39 to 4,932.00)            | 155.17<br>(120.04 to 221.70)               | 158.59<br>(94.51 to 245.98)                | 97.56<br>(54.12 to 156.94)               | 158.15<br>(95.82 to 244.61)                |
| Atrial fibrillation and flutter                               | 2,498.36<br>(1,865.44 to 3,235.17)            | 3,344.95<br>(2,440.97 to 4,349.24)            | 3,080.30<br>(2,234.12 to 4,052.99)            | 3,261.23<br>(2,371.41 to 4,246.52)            | 274.27<br>(201.86 to 355.51)               | 375.89<br>(263.17 to 505.58)               | 371.78<br>(267.57 to 495.80)             | 356.22<br>(242.72 to 484.51)               |
| Aortic aneurysm                                               | 2,939.12<br>(2,375.45 to 3,612.77)            | 1,901.99<br>(1,380.62 to 2,579.00)            | 1,446.09<br>(1,058.79 to 1,942.17)            | 1,891.52<br>(1,372.91 to 2,569.11)            | 155.68<br>(130.30 to 186.59)               | 118.52<br>(92.25 to 148.26)                | 103.72<br>(82.50 to 130.47)              | 112.97<br>(87.98 to 142.76)                |
| Peripheral artery disease                                     | 204.74<br>(81.76 to 297.63)                   | 290.13<br>(107.83 to 477.58)                  | 271.17<br>(103.93 to 438.80)                  | 278.07<br>(102.25 to 456.25)                  | 16.31<br>(6.56 to 23.18)                   | 26.14<br>(10.08 to 42.65)                  | 27.29<br>(11.04 to 42.97)                | 24.23<br>(9.03 to 39.10)                   |
| Endocarditis                                                  | 943.06<br>(646.16 to 1,238.18)                | 882.65<br>(559.84 to 1,349.48)                | 827.79<br>(518.10 to 1,251.51)                | 910.03<br>(571.64 to 1,376.49)                | 40.38<br>(27.28 to 51.29)                  | 45.78<br>(28.82 to 66.71)                  | 47.40<br>(30.24 to 70.81)                | 45.11<br>(28.14 to 66.13)                  |
| Other cardiovascular and circulatory diseases                 | 9,353.66<br>(7,860.83 to 11,258.74)           | 6,930.02<br>(4,569.46 to 9,890.72)            | 3,763.30<br>(2,581.12 to 5,675.92)            | 7,156.60<br>(4,922.95 to 10,159.46)           | 463.69<br>(397.38 to 540.26)               | 431.33<br>(318.40 to 581.12)               | 267.36<br>(196.33 to 377.85)             | 426.17<br>(319.71 to 571.15)               |
| <b>Chronic respiratory diseases</b>                           | <b>29,313.59<br/>(24,579.28 to 34,376.58)</b> | <b>26,122.93<br/>(14,851.04 to 43,369.04)</b> | <b>18,138.50<br/>(11,456.39 to 27,600.65)</b> | <b>31,781.74<br/>(17,320.87 to 53,816.19)</b> | <b>1,823.36<br/>(1,569.23 to 2,076.71)</b> | <b>1,730.14<br/>(1,072.26 to 2,723.29)</b> | <b>1,379.21<br/>(933.47 to 1,983.43)</b> | <b>2,000.09<br/>(1,175.97 to 3,303.42)</b> |
| Chronic obstructive pulmonary disease                         | 22,982.64<br>(19,138.02 to 27,086.06)         | 20,521.56<br>(10,360.45 to 37,349.50)         | 11,221.38<br>(6,037.11 to 19,096.58)          | 26,227.78<br>(12,716.76 to 48,244.78)         | 1,498.73<br>(1,289.27 to 1,716.09)         | 1,391.71<br>(778.03 to 2,347.18)           | 908.21<br>(534.23 to 1,465.28)           | 1,677.52<br>(886.87 to 2,902.78)           |
| Pneumoconiosis                                                | 65.83<br>(51.70 to 83.27)                     | 38.19<br>(27.86 to 51.15)                     | 30.75<br>(20.86 to 43.98)                     | 38.99<br>(28.97 to 52.12)                     | 4.04<br>(3.24 to 4.90)                     | 3.86<br>(2.08 to 3.87)                     | 2.49<br>(1.75 to 3.60)                   | 2.83<br>(2.01 to 3.88)                     |
| Silicosis                                                     | 4.82<br>(3.24 to 6.64)                        | 4.56<br>(2.17 to 8.75)                        | 4.01<br>(1.62 to 8.33)                        | 4.43<br>(2.08 to 8.57)                        | 0.48<br>(0.24 to 0.66)                     | 0.51<br>(0.18 to 1.06)                     | 0.49<br>(0.15 to 1.09)                   | 0.48<br>(0.17 to 1.02)                     |
| Asbestosis                                                    | 7.79<br>(5.79 to 10.19)                       | 5.22<br>(3.36 to 7.90)                        | 6.78<br>(4.25 to 10.52)                       | 5.07<br>(3.29 to 7.58)                        | 0.33<br>(0.24 to 0.49)                     | 0.33<br>(0.17 to 0.52)                     | 0.40<br>(0.23 to 0.72)                   | 0.27<br>(0.16 to 0.49)                     |
| Coal workers pneumoconiosis                                   | 5.95<br>(3.03 to 8.47)                        | 3.02<br>(1.48 to 5.33)                        | 2.53<br>(1.13 to 4.87)                        | 3.22<br>(1.53 to 5.64)                        | 0.30<br>(0.17 to 0.43)                     | 0.20<br>(0.10 to 0.36)                     | 0.18<br>(0.08 to 0.35)                   | 0.20<br>(0.10 to 0.36)                     |
| Other pneumoconiosis                                          | 47.27<br>(35.52 to 61.10)                     | 25.39<br>(17.62 to 35.38)                     | 17.43<br>(11.16 to 25.56)                     | 26.27<br>(18.71 to 36.26)                     | 2.93<br>(2.25 to 3.68)                     | 1.86<br>(1.26 to 2.65)                     | 1.42<br>(0.96 to 2.11)                   | 1.87<br>(1.26 to 2.66)                     |
| Asthma                                                        | 2,134.51<br>(1,658.93 to 3,720.73)            | 1,155.34<br>(550.02 to 2,453.15)              | 493.21<br>(228.05 to 1,060.21)                | 1,346.78<br>(639.71 to 2,911.10)              | 103.90<br>(79.54 to 192.78)                | 70.25<br>(34.34 to 141.20)                 | 34.07<br>(15.92 to 70.62)                | 78.59<br>(36.55 to 161.38)                 |
| Interstitial lung disease and pulmonary sarcoidosis           | 2,664.93<br>(1,872.98 to 3,499.64)            | 2,991.52<br>(2,119.51 to 4,114.78)            | 5,049.42<br>(3,514.68 to 6,878.59)            | 2,771.82<br>(1,947.02 to 3,755.13)            | 147.57<br>(107.52 to 193.94)               | 189.87<br>(135.65 to 261.52)               | 352.18<br>(250.25 to 471.72)             | 169.77<br>(119.30 to 239.58)               |
| Other chronic respiratory diseases                            | 1,465.68<br>(811.22 to 2,019.64)              | 1,416.31<br>(653.42 to 2,455.74)              | 1,343.74<br>(599.86 to 2,327.58)              | 1,396.37<br>(649.86 to 2,421.28)              | 69.11<br>(33.10 to 97.33)                  | 75.46<br>(32.36 to 125.25)                 | 82.26<br>(35.39 to 135.83)               | 71.39<br>(30.20 to 118.80)                 |
| <b>Cirrhosis and other chronic liver diseases</b>             | <b>35,367.53<br/>(27,826.95 to 45,131.57)</b> | <b>28,980.94<br/>(22,665.47 to 36,063.81)</b> | <b>20,239.09<br/>(15,474.48 to 25,566.06)</b> | <b>29,612.64<br/>(23,281.42 to 36,821.46)</b> | <b>1,275.32<br/>(1,034.12 to 1,568.73)</b> | <b>1,249.92<br/>(1,038.61 to 1,468.64)</b> | <b>930.51<br/>(764.31 to 1,125.37)</b>   | <b>1,244.62<br/>(1,039.80 to 1,460.68)</b> |
| Cirrhosis and other chronic liver diseases due to hepatitis B | 13,153.93<br>(10,127.47 to 16,833.03)         | 10,262.34<br>(7,793.95 to 13,049.52)          | 7,868.40<br>(5,947.70 to 10,169.32)           | 10,093.03<br>(7,812.33 to 12,614.39)          | 475.58<br>(377.37 to 590.77)               | 448.25<br>(364.30 to 538.33)               | 362.14<br>(288.65 to 445.63)             | 430.77<br>(353.62 to 511.21)               |
| Cirrhosis and other chronic liver diseases due to hepatitis C | 7,856.11<br>(5,952.58 to 10,500.90)           | 6,253.35<br>(4,632.75 to 8,151.14)            | 4,674.43<br>(3,401.86 to 6,126.43)            | 6,179.65<br>(4,619.71 to 7,958.92)            | 271.33<br>(211.86 to 349.10)               | 255.56<br>(202.95 to 313.87)               | 199.97<br>(157.76 to 250.34)             | 247.45<br>(197.26 to 304.80)               |

|                                                                |                                                              |                                                            |                                                            |                                                            |                                                      |                                                      |                                                      |                                                      |
|----------------------------------------------------------------|--------------------------------------------------------------|------------------------------------------------------------|------------------------------------------------------------|------------------------------------------------------------|------------------------------------------------------|------------------------------------------------------|------------------------------------------------------|------------------------------------------------------|
|                                                                | 9,810.83<br>(7,515.26 to<br>12,916.89)                       | 8,799.10<br>(6,725.16 to<br>11,458.56)                     | 4,919.13<br>(3,706.39 to<br>6,355.00)                      | 9,718.34<br>(7,418.06 to<br>12,604.78)                     | 358.74<br>(283.58 to<br>455.68)                      | 374.85<br>(301.12 to<br>459.59)                      | 231.30<br>(183.66 to<br>286.96)                      | 401.32<br>(322.36 to<br>492.30)                      |
| Cirrhosis and other chronic liver diseases due to alcohol use  |                                                              |                                                            |                                                            |                                                            |                                                      |                                                      |                                                      |                                                      |
|                                                                | 4,546.67<br>(3,648.19 to<br>5,642.41)                        | 3,666.15<br>(2,855.21 to<br>4,584.18)                      | 2,777.13<br>(2,096.48 to<br>3,517.05)                      | 3,621.62<br>(2,825.66 to<br>4,559.26)                      | 169.67<br>(138.47 to<br>206.39)                      | 171.25<br>(136.77 to<br>206.65)                      | 137.11<br>(106.24 to<br>167.66)                      | 165.07<br>(132.58 to<br>199.81)                      |
| Cirrhosis and other chronic liver diseases due to other causes |                                                              |                                                            |                                                            |                                                            |                                                      |                                                      |                                                      |                                                      |
| <b>Digestive diseases</b>                                      | <b>10,928.04</b><br><b>(8,963.96 to</b><br><b>13,323.49)</b> | <b>7,379.46</b><br><b>(5,577.78 to</b><br><b>9,707.81)</b> | <b>5,517.29</b><br><b>(4,104.14 to</b><br><b>7,157.13)</b> | <b>7,392.67</b><br><b>(5,480.50 to</b><br><b>9,719.19)</b> | <b>513.13</b><br><b>(419.48 to</b><br><b>603.42)</b> | <b>457.72</b><br><b>(344.73 to</b><br><b>591.19)</b> | <b>380.04</b><br><b>(282.67 to</b><br><b>491.86)</b> | <b>443.79</b><br><b>(328.81 to</b><br><b>583.86)</b> |
| Peptic ulcer disease                                           | 3,839.90<br>(3,007.97 to<br>5,294.37)                        | 1,968.32<br>(1,279.15 to<br>2,972.51)                      | 1,016.70<br>(646.29 to<br>1,575.23)                        | 1,971.70<br>(1,306.29 to<br>2,958.10)                      | 176.82<br>(143.74 to<br>228.66)                      | 111.39<br>(76.08 to<br>162.14)                       | 62.08<br>(41.04 to<br>92.31)                         | 108.34<br>(75.80 to<br>152.46)                       |

| Georgia                                    |                                       |                                       |                                       |                                       |                                    |                                    |                                    |                                    |
|--------------------------------------------|---------------------------------------|---------------------------------------|---------------------------------------|---------------------------------------|------------------------------------|------------------------------------|------------------------------------|------------------------------------|
| Cause                                      | YLLs (actual counts)                  |                                       |                                       |                                       | Deaths (actual counts)             |                                    |                                    |                                    |
|                                            | 2016                                  | 2040 Forecast                         | 2040 Better Scenario                  | 2040 Worse Scenario                   | 2016                               | 2040 Forecast                      | 2040 Better Scenario               | 2040 Worse Scenario                |
| Gastritis and duodenitis                   | 140.31<br>(96.67 to 183.85)           | 119.69<br>(85.19 to 160.41)           | 82.54<br>(56.52 to 117.01)            | 117.46<br>(84.54 to 157.44)           | 6.61<br>(4.53 to 8.42)             | 7.10<br>(4.83 to 9.81)             | 5.40<br>(3.65 to 7.53)             | 6.73<br>(4.57 to 9.21)             |
| Appendicitis                               | 384.06<br>(302.14 to 523.82)          | 199.45<br>(138.47 to 283.76)          | 111.77<br>(73.87 to 167.19)           | 200.44<br>(141.76 to 284.47)          | 12.51<br>(9.51 to 15.80)           | 8.54<br>(5.85 to 11.31)            | 5.23<br>(3.45 to 7.33)             | 8.30<br>(5.68 to 11.06)            |
| Paralytic ileus and intestinal obstruction | 2,652.91<br>(1,716.33 to 3,479.42)    | 1,729.42<br>(1,052.86 to 2,338.25)    | 1,730.12<br>(1,060.60 to 2,378.54)    | 1,673.79<br>(1,023.94 to 2,282.22)    | 104.31<br>(61.41 to 140.47)        | 98.32<br>(55.64 to 141.00)         | 108.63<br>(62.58 to 153.29)        | 91.40<br>(51.49 to 132.73)         |
| Inguinal, femoral, and abdominal hernia    | 488.95<br>(313.48 to 614.15)          | 288.46<br>(193.08 to 375.95)          | 220.86<br>(148.18 to 304.37)          | 279.37<br>(189.52 to 368.02)          | 24.96<br>(16.58 to 31.11)          | 18.81<br>(12.54 to 24.83)          | 16.16<br>(10.82 to 22.03)          | 17.52<br>(11.65 to 23.45)          |
| Inflammatory bowel disease                 | 325.58<br>(234.95 to 407.75)          | 260.92<br>(170.66 to 338.33)          | 256.31<br>(162.00 to 341.16)          | 251.20<br>(164.65 to 326.37)          | 14.54<br>(8.45 to 18.36)           | 14.53<br>(7.91 to 19.50)           | 15.56<br>(8.30 to 21.16)           | 13.54<br>(7.40 to 18.10)           |
| Vascular intestinal disorders              | 765.52<br>(586.54 to 932.33)          | 817.77<br>(594.68 to 1,046.31)        | 745.02<br>(541.67 to 981.54)          | 775.20<br>(567.22 to 994.10)          | 53.72<br>(40.38 to 65.33)          | 66.65<br>(46.80 to 87.66)          | 65.35<br>(47.06 to 86.44)          | 61.67<br>(41.65 to 80.93)          |
| Gallbladder and biliary diseases           | 551.70<br>(443.12 to 745.34)          | 541.03<br>(270.66 to 1,007.19)        | 334.79<br>(168.41 to 634.38)          | 321.21<br>(313.79 to 1,178.45)        | 32.21<br>(26.30 to 40.57)          | 39.97<br>(19.82 to 75.13)          | 27.62<br>(13.81 to 52.79)          | 45.55<br>(21.71 to 85.36)          |
| Pancreatitis                               | 881.95<br>(641.16 to 1,125.44)        | 820.93<br>(391.79 to 1,713.80)        | 457.31<br>(231.37 to 922.87)          | 875.39<br>(402.46 to 1,896.02)        | 38.21<br>(25.23 to 47.57)          | 45.00<br>(21.10 to 92.76)          | 27.64<br>(13.62 to 53.21)          | 46.55<br>(21.93 to 100.79)         |
| Other digestive diseases                   | 897.15<br>(628.21 to 1,127.21)        | 633.48<br>(444.99 to 814.03)          | 561.89<br>(398.99 to 744.35)          | 610.07<br>(431.62 to 783.58)          | 49.24<br>(36.83 to 60.20)          | 47.43<br>(34.28 to 61.50)          | 46.37<br>(34.70 to 60.66)          | 44.18<br>(31.05 to 58.31)          |
| Neurological disorders                     | 21,912.77<br>(18,375.04 to 26,434.25) | 28,531.21<br>(21,963.34 to 37,582.69) | 31,003.98<br>(24,483.28 to 39,576.94) | 28,340.52<br>(21,039.73 to 38,873.85) | 2,123.37<br>(1,757.41 to 2,552.02) | 2,978.99<br>(2,138.29 to 4,092.87) | 3,485.63<br>(2,690.28 to 4,560.97) | 2,889.46<br>(1,958.48 to 4,174.03) |
| Alzheimer's disease and other dementias    | 16,145.38<br>(13,149.65 to 20,230.03) | 22,140.15<br>(15,872.61 to 30,996.94) | 23,985.10<br>(18,092.02 to 32,564.72) | 22,235.21<br>(15,234.66 to 32,483.94) | 1,806.40<br>(1,460.67 to 2,233.93) | 2,544.31<br>(1,738.02 to 3,660.13) | 2,940.54<br>(2,180.33 to 4,001.92) | 2,493.20<br>(1,600.69 to 3,767.67) |
| Parkinson's disease                        | 2,692.63<br>(1,939.29 to 3,587.79)    | 3,924.59<br>(2,832.09 to 5,186.97)    | 4,953.99<br>(3,695.02 to 6,453.35)    | 3,570.40<br>(2,579.04 to 4,747.25)    | 236.15<br>(170.73 to 314.86)       | 354.89<br>(251.22 to 480.22)       | 469.98<br>(350.86 to 620.50)       | 317.09<br>(218.05 to 427.39)       |
| Epilepsy                                   | 1,803.69<br>(1,498.94 to 2,158.50)    | 1,438.74<br>(875.36 to 2,417.60)      | 1,007.91<br>(619.56 to 1,602.07)      | 1,530.99<br>(916.86 to 2,557.98)      | 39.70<br>(32.91 to 47.57)          | 38.59<br>(24.74 to 59.00)          | 29.21<br>(19.46 to 42.83)          | 40.12<br>(25.39 to 62.00)          |
| Multiple sclerosis                         | 202.76<br>(127.57 to 266.18)          | 159.38<br>(96.63 to 218.18)           | 169.47<br>(101.41 to 233.03)          | 155.74<br>(94.96 to 215.49)           | 8.04<br>(4.83 to 10.39)            | 7.62<br>(4.37 to 10.16)            | 8.84<br>(4.88 to 11.91)            | 7.21<br>(4.15 to 9.61)             |
| Motor neuron disease                       | 268.32<br>(216.56 to 330.03)          | 285.38<br>(212.80 to 366.01)          | 284.85<br>(208.85 to 370.93)          | 277.76<br>(209.49 to 354.06)          | 9.21<br>(7.58 to 11.16)            | 11.68<br>(9.23 to 14.43)           | 12.21<br>(9.62 to 15.16)           | 11.16<br>(8.94 to 13.64)           |
| Other neurological disorders               | 799.99<br>(669.04 to 953.37)          | 82.97<br>(451.39 to 769.72)           | 602.65<br>(463.19 to 786.48)          | 570.42<br>(444.77 to 748.75)          | 23.86<br>(20.34 to 28.00)          | 21.90<br>(18.35 to 25.92)          | 24.86<br>(20.76 to 29.34)          | 20.68<br>(17.51 to 24.47)          |
| Mental disorders                           | 3,875.00<br>(3,015.21 to 4,974.70)    | 4,306.90<br>(3,178.18 to 5,885.36)    | 5,334.52<br>(3,830.18 to 7,259.88)    | 4,262.81<br>(3,172.39 to 5,781.83)    | 109.64<br>(87.64 to 136.86)        | 138.46<br>(109.52 to 173.73)       | 186.23<br>(145.04 to 235.16)       | 133.73<br>(106.70 to 166.87)       |
| Alcohol use disorders                      | 1,529.67<br>(1,148.51 to 2,002.68)    | 1,193.91<br>(837.83 to 1,609.35)      | 1,241.01<br>(867.74 to 1,702.29)      | 1,214.96<br>(857.96 to 1,652.42)      | 44.03<br>(34.18 to 56.59)          | 39.55<br>(30.49 to 50.14)          | 44.29<br>(33.99 to 57.09)          | 39.29<br>(30.37 to 50.20)          |
| Drug use disorders                         | 2,342.77<br>(1,813.02 to 2,965.52)    | 3,110.74<br>(2,254.94 to 4,319.75)    | 4,091.09<br>(2,954.84 to 5,683.54)    | 3,045.61<br>(2,222.54 to 4,181.44)    | 65.55<br>(52.00 to 81.08)          | 98.86<br>(77.27 to 125.04)         | 141.89<br>(108.48 to 180.40)       | 94.39<br>(74.32 to 119.89)         |
| Opioid use disorders                       | 1,584.50<br>(1,180.05 to 2,060.34)    | 1,944.05<br>(1,322.40 to 2,834.81)    | 2,137.27<br>(1,449.11 to 3,116.71)    | 1,917.78<br>(1,315.50 to 2,776.33)    | 40.37<br>(30.95 to 51.93)          | 55.01<br>(40.28 to 73.86)          | 63.73<br>(45.54 to 88.37)          | 53.28<br>(39.41 to 71.13)          |

|                           |                                 |                                   |                                     |                                 |                              |                              |                              |                              |
|---------------------------|---------------------------------|-----------------------------------|-------------------------------------|---------------------------------|------------------------------|------------------------------|------------------------------|------------------------------|
|                           | 134.84<br>(89.03 to<br>186.24)  | 216.49<br>(133.90 to<br>322.64)   | 312.96<br>(188.81 to<br>468.21)     | 212.22<br>(129.34 to<br>315.70) | 3.54<br>(2.36 to<br>4.89)    | 6.29<br>(3.97 to<br>9.24)    | 9.35<br>(5.70 to<br>13.54)   | 6.09<br>(3.84 to<br>8.84)    |
| Cocaine use disorders     |                                 |                                   |                                     |                                 |                              |                              |                              |                              |
|                           | 108.48<br>(62.32 to<br>161.29)  | 216.16<br>(124.20 to<br>335.67)   | 389.52<br>(223.93 to<br>631.05)     | 211.44<br>(122.84 to<br>331.38) | 2.69<br>(1.55 to<br>3.94)    | 5.80<br>(3.41 to<br>8.76)    | 10.74<br>(6.33 to<br>16.68)  | 5.61<br>(3.36 to<br>8.46)    |
| Amphetamine use disorders |                                 |                                   |                                     |                                 |                              |                              |                              |                              |
|                           | 514.94<br>(356.01 to<br>682.68) | 734.05<br>(489.05 to<br>1,041.43) | 1,251.35<br>(816.64 to<br>1,795.19) | 704.17<br>(473.70 to<br>988.75) | 18.96<br>(13.61 to<br>23.82) | 31.76<br>(22.44 to<br>40.79) | 58.06<br>(40.25 to<br>76.83) | 29.42<br>(20.95 to<br>37.82) |
| Other drug use disorders  |                                 |                                   |                                     |                                 |                              |                              |                              |                              |
|                           | 2.55<br>(1.98 to<br>3.33)       | 2.25<br>(1.46 to<br>3.48)         | 2.42<br>(1.53 to<br>3.94)           | 2.25<br>(1.48 to<br>3.45)       | 0.05<br>(0.04 to<br>0.07)    | 0.05<br>(0.03 to<br>0.07)    | 0.05<br>(0.03 to<br>0.08)    | 0.05<br>(0.03 to<br>0.07)    |
| Eating disorders          |                                 |                                   |                                     |                                 |                              |                              |                              |                              |

| Georgia                                                    |                                              |                                              |                                              |                                              |                                           |                                           |                                         |                                           |
|------------------------------------------------------------|----------------------------------------------|----------------------------------------------|----------------------------------------------|----------------------------------------------|-------------------------------------------|-------------------------------------------|-----------------------------------------|-------------------------------------------|
| Cause                                                      | YLLs (actual counts)                         |                                              |                                              |                                              | Deaths (actual counts)                    |                                           |                                         |                                           |
|                                                            | 2016                                         | 2040 Forecast                                | 2040 Better Scenario                         | 2040 Worse Scenario                          | 2016                                      | 2040 Forecast                             | 2040 Better Scenario                    | 2040 Worse Scenario                       |
| <b>Diabetes, urogenital, blood, and endocrine diseases</b> | <b>40,823.15</b><br>(34,406.88 to 47,883.19) | <b>34,072.07</b><br>(23,162.85 to 48,557.44) | <b>21,422.84</b><br>(14,098.36 to 31,287.66) | <b>36,468.76</b><br>(24,780.50 to 52,221.04) | <b>1,976.34</b><br>(1,685.04 to 2,277.79) | <b>2,013.18</b><br>(1,410.58 to 2,754.85) | <b>1,364.19</b><br>(946.37 to 1,887.52) | <b>2,081.07</b><br>(1,492.92 to 2,798.67) |
| Diabetes mellitus                                          | 21,213.09<br>(17,469.45 to 25,198.35)        | 16,736.74<br>(9,832.85 to 28,169.27)         | 9,806.53<br>(5,543.06 to 16,108.72)          | 18,522.54<br>(10,905.43 to 30,453.96)        | 1,059.26<br>(884.84 to 1,231.14)          | 955.12<br>(597.40 to 1,503.68)            | 599.08<br>(370.77 to 923.55)            | 1,016.98<br>(626.86 to 1,585.04)          |
| Acute glomerulonephritis                                   | 30.26<br>(25.16 to 36.39)                    | 58.76<br>(38.66 to 87.01)                    | 42.22<br>(26.55 to 63.55)                    | 58.99<br>(38.23 to 87.23)                    | 0.83<br>(0.67 to 1.02)                    | 2.00<br>(1.27 to 3.07)                    | 1.52<br>(0.93 to 2.34)                  | 1.96<br>(1.26 to 2.97)                    |
| Chronic kidney disease                                     | 14,573.02<br>(12,216.24 to 17,252.87)        | 13,441.62<br>(7,589.63 to 22,205.39)         | 8,543.79<br>(4,994.59 to 13,569.32)          | 14,132.86<br>(8,045.66 to 23,453.38)         | 720.54<br>(614.45 to 831.65)              | 848.31<br>(480.66 to 1,384.36)            | 585.02<br>(339.46 to 943.84)            | 866.77<br>(499.02 to 1,415.02)            |
| Chronic kidney disease due to diabetes mellitus            | 6,982.60<br>(5,748.75 to 8,414.39)           | 7,023.42<br>(3,818.52 to 12,076.52)          | 4,513.35<br>(2,555.84 to 7,377.89)           | 7,401.44<br>(4,080.27 to 12,585.26)          | 343.94<br>(288.81 to 404.33)              | 423.14<br>(236.22 to 710.49)              | 292.35<br>(169.15 to 479.84)            | 434.12<br>(250.63 to 739.78)              |
| Chronic kidney disease due to hypertension                 | 719.85<br>(574.54 to 889.89)                 | 866.73<br>(474.98 to 1,508.24)               | 634.22<br>(357.43 to 1,120.39)               | 887.40<br>(481.64 to 1,553.24)               | 58.19<br>(46.00 to 72.07)                 | 82.36<br>(44.60 to 145.77)                | 65.69<br>(37.31 to 113.67)              | 81.85<br>(44.24 to 141.78)                |
| Chronic kidney disease due to glomerulonephritis           | 2,994.30<br>(2,409.38 to 3,663.28)           | 2,308.61<br>(1,318.03 to 3,847.10)           | 1,355.15<br>(764.79 to 2,272.18)             | 2,441.18<br>(1,396.83 to 4,134.29)           | 127.79<br>(102.07 to 156.59)              | 131.32<br>(71.83 to 226.04)               | 87.72<br>(45.55 to 143.15)              | 135.29<br>(73.70 to 227.56)               |
| Chronic kidney disease due to other and unspecified causes | 3,876.27<br>(3,159.98 to 4,685.78)           | 3,242.86<br>(1,824.17 to 5,293.20)           | 2,041.08<br>(1,182.62 to 3,268.93)           | 3,402.84<br>(1,943.07 to 5,616.91)           | 190.62<br>(156.41 to 227.23)              | 211.48<br>(117.50 to 351.79)              | 144.26<br>(80.75 to 244.01)             | 215.51<br>(117.96 to 362.54)              |
| Urinary diseases and male infertility                      | 1,379.09<br>(1,168.14 to 1,637.53)           | 1,668.67<br>(1,320.99 to 2,044.75)           | 1,249.53<br>(960.49 to 1,569.99)             | 1,612.65<br>(1,289.00 to 1,950.88)           | 68.06<br>(58.64 to 78.74)                 | 104.44<br>(86.16 to 124.10)               | 86.73<br>(70.23 to 104.68)              | 96.94<br>(79.11 to 116.22)                |
| Urinary tract infections                                   | 1,109.34<br>(918.44 to 1,347.50)             | 1,459.23<br>(1,146.31 to 1,812.43)           | 1,107.60<br>(823.81 to 1,415.94)             | 1,413.07<br>(1,099.39 to 1,751.69)           | 51.43<br>(42.84 to 62.96)                 | 89.08<br>(70.65 to 108.80)                | 75.12<br>(59.01 to 93.57)               | 82.89<br>(65.88 to 101.50)                |
| Urolithiasis                                               | 68.22<br>(40.55 to 91.66)                    | 68.06<br>(33.50 to 99.50)                    | 44.89<br>(20.97 to 68.90)                    | 65.56<br>(33.25 to 94.06)                    | 4.14<br>(2.37 to 5.50)                    | 4.68<br>(2.12 to 7.22)                    | 3.45<br>(1.47 to 5.54)                  | 4.34<br>(1.98 to 6.69)                    |
| Other urinary diseases                                     | 201.53<br>(117.46 to 269.38)                 | 141.38<br>(72.81 to 199.83)                  | 97.05<br>(47.89 to 140.79)                   | 134.02<br>(70.20 to 188.09)                  | 12.48<br>(6.91 to 16.33)                  | 10.67<br>(5.09 to 15.97)                  | 8.16<br>(3.75 to 12.25)                 | 9.71<br>(4.65 to 14.68)                   |
| Gynecological diseases                                     | 23.83<br>(6.55 to 35.26)                     | 10.16<br>(2.58 to 19.48)                     | 4.70<br>(1.28 to 9.12)                       | 10.42<br>(2.74 to 19.55)                     | 0.81<br>(0.22 to 1.20)                    | 0.42<br>(0.13 to 0.72)                    | 0.20<br>(0.07 to 0.36)                  | 0.43<br>(0.13 to 0.71)                    |
| Uterine fibroids                                           | 12.79<br>(3.74 to 19.49)                     | 5.17<br>(1.35 to 10.53)                      | 2.74<br>(0.73 to 5.74)                       | 5.30<br>(1.38 to 10.26)                      | 0.42<br>(0.12 to 0.63)                    | 0.20<br>(0.05 to 0.37)                    | 0.11<br>(0.03 to 0.21)                  | 0.20<br>(0.05 to 0.36)                    |
| Polycystic ovarian syndrome                                | 3.90<br>(0.67 to 8.53)                       | 1.08<br>(0.12 to 3.50)                       | 0.28<br>(0.03 to 0.98)                       | 1.15<br>(0.12 to 3.46)                       | 0.10<br>(0.02 to 0.22)                    | 0.05<br>(0.00 to 0.09)                    | 0.01<br>(0.00 to 0.03)                  | 0.03<br>(0.00 to 0.09)                    |
| Endometriosis                                              | 0.13<br>(0.03 to 0.29)                       | 0.08<br>(0.01 to 0.27)                       | 0.04<br>(0.01 to 0.12)                       | 0.08<br>(0.01 to 0.28)                       | 0.00<br>(0.00 to 0.01)                    | 0.00<br>(0.00 to 0.01)                    | 0.00<br>(0.00 to 0.00)                  | 0.00<br>(0.00 to 0.01)                    |
| Genital prolapse                                           | 0.35<br>(0.09 to 0.56)                       | 0.14<br>(0.04 to 0.25)                       | 0.06<br>(0.02 to 0.12)                       | 0.14<br>(0.04 to 0.26)                       | 0.02<br>(0.00 to 0.03)                    | 0.01<br>(0.00 to 0.01)                    | 0.00<br>(0.00 to 0.01)                  | 0.01<br>(0.00 to 0.01)                    |
| Other gynecological diseases                               | 6.67<br>(1.72 to 10.28)                      | 3.69<br>(0.94 to 7.77)                       | 1.58<br>(0.40 to 3.36)                       | 3.74<br>(0.95 to 7.86)                       | 0.27<br>(0.07 to 0.39)                    | 0.19<br>(0.06 to 0.33)                    | 0.09<br>(0.03 to 0.16)                  | 0.19<br>(0.06 to 0.33)                    |
| Hemoglobinopathies and hemolytic anemias                   | 1,795.43<br>(1,338.06 to 2,257.72)           | 1,157.45<br>(777.90 to 1,516.68)             | 732.10<br>(471.68 to 994.54)                 | 1,148.07<br>(795.29 to 1,497.36)             | 69.82<br>(45.76 to 87.59)                 | 60.53<br>(36.66 to 78.46)                 | 43.36<br>(24.70 to 58.73)               | 57.64<br>(35.56 to 74.18)                 |
| Thalassemias                                               | 81.12<br>(56.06 to 121.97)                   | 17.56<br>(9.38 to 30.09)                     | 14.72<br>(7.98 to 25.28)                     | 18.08<br>(9.88 to 31.36)                     | 1.00<br>(0.69 to 1.47)                    | 0.23<br>(0.12 to 0.39)                    | 0.19<br>(0.10 to 0.33)                  | 0.23<br>(0.13 to 0.40)                    |

|                                                   |                                     |                                   |                                     |                                   |                              |                              |                              |                              |
|---------------------------------------------------|-------------------------------------|-----------------------------------|-------------------------------------|-----------------------------------|------------------------------|------------------------------|------------------------------|------------------------------|
|                                                   | 445.22<br>(334.01 to<br>646.03)     | 289.94<br>(178.76 to<br>479.96)   | 163.17<br>(97.47 to<br>269.11)      | 297.32<br>(186.10 to<br>487.43)   | 8.82<br>(6.72 to<br>12.24)   | 6.28<br>(3.95 to<br>9.49)    | 3.61<br>(2.20 to<br>5.53)    | 6.41<br>(4.16 to<br>9.73)    |
| Sickle cell disorders                             |                                     |                                   |                                     |                                   |                              |                              |                              |                              |
|                                                   | 347.09<br>(258.27 to<br>466.70)     | 233.71<br>(154.42 to<br>331.70)   | 129.15<br>(79.98 to<br>189.73)      | 237.96<br>(158.46 to<br>336.19)   | 8.93<br>(6.35 to<br>11.95)   | 7.41<br>(4.72 to<br>10.05)   | 4.28<br>(2.64 to<br>6.14)    | 7.44<br>(4.84 to<br>10.06)   |
| G6PD deficiency                                   |                                     |                                   |                                     |                                   |                              |                              |                              |                              |
|                                                   | 921.99<br>(608.34 to<br>1,169.85)   | 616.24<br>(370.29 to<br>814.06)   | 425.07<br>(245.80 to<br>583.43)     | 594.71<br>(363.22 to<br>779.44)   | 51.07<br>(30.57 to<br>65.55) | 46.62<br>(26.29 to<br>62.67) | 35.27<br>(19.11 to<br>48.82) | 43.56<br>(24.71 to<br>57.93) |
| Other hemoglobinopathies and hemolytic anemias    |                                     |                                   |                                     |                                   |                              |                              |                              |                              |
|                                                   | 1,808.43<br>(766.37 to<br>2,256.78) | 998.66<br>(367.02 to<br>1,335.10) | 1,043.95<br>(382.15 to<br>1,430.87) | 983.24<br>(358.75 to<br>1,314.00) | 57.03<br>(20.66 to<br>71.53) | 42.36<br>(13.95 to<br>54.64) | 48.26<br>(16.29 to<br>62.86) | 40.34<br>(13.12 to<br>51.80) |
| Endocrine, metabolic, blood, and immune disorders |                                     |                                   |                                     |                                   |                              |                              |                              |                              |

| Georgia                                       |                                             |                                           |                                           |                                           |                                     |                                   |                                  |                                   |
|-----------------------------------------------|---------------------------------------------|-------------------------------------------|-------------------------------------------|-------------------------------------------|-------------------------------------|-----------------------------------|----------------------------------|-----------------------------------|
| Cause                                         | YLLs (actual counts)                        |                                           |                                           |                                           | Deaths (actual counts)              |                                   |                                  |                                   |
|                                               | 2016                                        | 2040 Forecast                             | 2040 Better Scenario                      | 2040 Worse Scenario                       | 2016                                | 2040 Forecast                     | 2040 Better Scenario             | 2040 Worse Scenario               |
| <b>Musculoskeletal disorders</b>              | <b>626.82</b><br>(406.53 to 775.29)         | <b>609.94</b><br>(398.45 to 791.42)       | <b>485.50</b><br>(330.95 to 638.55)       | <b>599.16</b><br>(399.91 to 772.10)       | <b>24.09</b><br>(17.93 to 29.37)    | <b>30.74</b><br>(23.10 to 38.45)  | <b>25.72</b><br>(19.54 to 32.35) | <b>29.28</b><br>(21.88 to 36.34)  |
| Rheumatoid arthritis                          | 130.71<br>(95.49 to 208.75)                 | 159.02<br>(102.44 to 255.49)              | 80.73<br>(48.61 to 141.02)                | 159.38<br>(106.15 to 245.86)              | 6.27<br>(4.56 to 10.43)             | 9.10<br>(6.14 to 15.00)           | 4.92<br>(3.04 to 8.93)           | 8.88<br>(5.97 to 14.37)           |
| Other musculoskeletal disorders               | 496.11<br>(300.46 to 621.58)                | 450.92<br>(283.58 to 598.85)              | 404.77<br>(264.15 to 552.40)              | 439.78<br>(272.69 to 582.19)              | 17.83<br>(12.15 to 22.11)           | 21.64<br>(14.73 to 27.61)         | 20.80<br>(15.12 to 26.00)        | 20.40<br>(13.52 to 25.79)         |
| <b>Other non-communicable diseases</b>        | <b>13,401.90</b><br>(8,443.02 to 18,902.94) | <b>4,597.69</b><br>(2,567.64 to 7,029.44) | <b>2,120.19</b><br>(1,141.34 to 3,341.93) | <b>4,893.54</b><br>(2,751.77 to 7,682.63) | <b>176.37</b><br>(106.99 to 244.62) | <b>77.68</b><br>(38.78 to 112.51) | <b>43.86</b><br>(19.71 to 64.83) | <b>80.09</b><br>(41.53 to 116.83) |
| Congenital birth defects                      | 12,597.60<br>(7,897.21 to 18,003.23)        | 4,188.72<br>(2,420.37 to 6,515.25)        | 1,798.22<br>(1,002.54 to 2,934.85)        | 4,490.58<br>(2,615.73 to 7,151.65)        | 158.13<br>(98.25 to 220.65)         | 57.19<br>(31.85 to 86.06)         | 25.18<br>(13.73 to 39.46)        | 60.92<br>(34.42 to 92.12)         |
| Neural tube defects                           | 554.17<br>(339.31 to 861.51)                | 82.24<br>(41.95 to 155.56)                | 29.98<br>(15.07 to 59.70)                 | 89.95<br>(45.03 to 169.21)                | 6.60<br>(4.07 to 10.12)             | 1.04<br>(0.55 to 1.91)            | 0.39<br>(0.20 to 0.74)           | 1.14<br>(0.59 to 2.08)            |
| Congenital heart anomalies                    | 6,774.90<br>(3,932.14 to 9,572.62)          | 2,322.42<br>(1,259.31 to 3,635.35)        | 854.37<br>(425.24 to 1,401.81)            | 2,488.69<br>(1,365.29 to 3,869.94)        | 87.05<br>(49.75 to 119.84)          | 32.49<br>(16.79 to 48.89)         | 12.16<br>(5.80 to 19.78)         | 34.61<br>(18.05 to 52.15)         |
| Orofacial clefts                              | 15.50<br>(3.98 to 32.47)                    | 5.16<br>(1.05 to 15.65)                   | 1.32<br>(0.28 to 3.75)                    | 5.77<br>(1.25 to 16.48)                   | 0.18<br>(0.05 to 0.38)              | 0.06<br>(0.01 to 0.18)            | 0.02<br>(0.00 to 0.04)           | 0.07<br>(0.01 to 0.19)            |
| Down syndrome                                 | 457.35<br>(164.06 to 732.35)                | 158.07<br>(68.44 to 261.47)               | 153.74<br>(67.53 to 244.99)               | 164.44<br>(70.34 to 272.40)               | 6.14<br>(2.44 to 9.40)              | 2.66<br>(1.29 to 4.08)            | 2.67<br>(1.33 to 4.01)           | 2.73<br>(1.31 to 4.20)            |
| Other chromosomal abnormalities               | 303.01<br>(104.01 to 514.49)                | 202.66<br>(70.80 to 399.83)               | 132.03<br>(48.92 to 260.95)               | 216.56<br>(73.44 to 420.89)               | 3.54<br>(1.23 to 6.01)              | 2.39<br>(0.87 to 4.65)            | 1.56<br>(0.61 to 3.06)           | 2.56<br>(0.92 to 4.95)            |
| Congenital musculoskeletal and limb anomalies | 176.53<br>(97.05 to 276.85)                 | 61.65<br>(31.31 to 111.02)                | 27.12<br>(13.58 to 50.16)                 | 66.23<br>(34.00 to 117.99)                | 2.08<br>(1.14 to 3.24)              | 0.74<br>(0.38 to 1.31)            | 0.33<br>(0.17 to 0.60)           | 0.80<br>(0.42 to 1.40)            |
| Urogenital congenital anomalies               | 306.93<br>(88.59 to 524.57)                 | 103.33<br>(32.02 to 191.50)               | 52.94<br>(16.74 to 98.71)                 | 109.09<br>(33.29 to 204.82)               | 4.40<br>(1.32 to 7.17)              | 1.81<br>(0.55 to 3.10)            | 0.97<br>(0.30 to 1.68)           | 1.88<br>(0.58 to 3.22)            |
| Digestive congenital anomalies                | 1,157.85<br>(490.11 to 1,881.23)            | 325.82<br>(120.12 to 667.72)              | 130.02<br>(48.91 to 271.70)               | 353.67<br>(131.64 to 739.45)              | 13.57<br>(5.87 to 21.95)            | 3.91<br>(1.49 to 7.87)            | 1.57<br>(0.61 to 3.20)           | 4.24<br>(1.64 to 8.76)            |
| Other congenital birth defects                | 2,851.35<br>(1,839.94 to 4,494.35)          | 927.38<br>(551.47 to 1,590.20)            | 416.70<br>(242.41 to 754.31)              | 996.19<br>(596.55 to 1,702.15)            | 34.57<br>(22.80 to 53.55)           | 12.09<br>(7.48 to 20.11)          | 5.52<br>(3.37 to 9.52)           | 12.91<br>(7.97 to 21.51)          |
| Skin and subcutaneous diseases                | 280.90<br>(58.91 to 427.26)                 | 344.89<br>(66.97 to 526.45)               | 288.57<br>(57.23 to 450.85)               | 333.51<br>(65.50 to 506.41)               | 12.17<br>(2.21 to 18.56)            | 19.74<br>(3.57 to 30.28)          | 18.29<br>(3.42 to 27.83)         | 18.36<br>(3.30 to 28.37)          |
| Cellulitis                                    | 57.37<br>(8.38 to 93.94)                    | 70.95<br>(10.01 to 119.23)                | 68.32<br>(9.34 to 114.69)                 | 67.86<br>(9.93 to 113.15)                 | 2.28<br>(0.25 to 3.81)              | 3.48<br>(0.41 to 5.88)            | 3.68<br>(0.41 to 6.17)           | 3.22<br>(0.38 to 5.47)            |
| Pyoderma                                      | 166.23<br>(34.78 to 255.52)                 | 226.54<br>(42.59 to 351.12)               | 184.38<br>(35.55 to 291.12)               | 220.13<br>(40.94 to 343.15)               | 6.59<br>(1.19 to 10.23)             | 12.78<br>(2.28 to 19.92)          | 11.70<br>(2.17 to 18.22)         | 11.95<br>(2.16 to 18.65)          |
| Decubitus ulcer                               | 38.22<br>(7.81 to 57.40)                    | 31.48<br>(6.42 to 49.50)                  | 23.01<br>(4.61 to 36.39)                  | 29.98<br>(4.17 to 47.17)                  | 2.60<br>(0.47 to 3.95)              | 2.69<br>(0.48 to 4.49)            | 2.19<br>(0.42 to 3.55)           | 2.45<br>(0.42 to 4.18)            |
| Other skin and subcutaneous diseases          | 19.07<br>(4.67 to 28.36)                    | 15.92<br>(3.93 to 24.79)                  | 12.84<br>(3.15 to 20.21)                  | 15.53<br>(3.85 to 24.83)                  | 0.70<br>(0.15 to 1.06)              | 0.78<br>(0.17 to 1.22)            | 0.71<br>(0.16 to 1.09)           | 0.73<br>(0.16 to 1.15)            |
| Sudden infant death syndrome                  | 523.40<br>(325.03 to 843.02)                | 64.08<br>(23.62 to 158.14)                | 33.40<br>(13.03 to 73.97)                 | 69.44<br>(25.79 to 167.42)                | 6.07<br>(3.77 to 9.79)              | 0.74<br>(0.27 to 1.84)            | 0.39<br>(0.15 to 0.86)           | 0.81<br>(0.30 to 1.94)            |



|                          |                                           |                                          |                                          |                                           |                                       |                                     |                                   |                                       |
|--------------------------|-------------------------------------------|------------------------------------------|------------------------------------------|-------------------------------------------|---------------------------------------|-------------------------------------|-----------------------------------|---------------------------------------|
| Injuries                 | 90,670.91<br>(73,212.28 to<br>111,459.15) | 52,920.90<br>(31,957.40 to<br>90,992.85) | 29,344.99<br>(17,931.24 to<br>50,613.24) | 61,729.25<br>(36,961.55 to<br>108,301.63) | 2,183.91<br>(1,783.75 to<br>2,684.49) | 1,484.08<br>(994.67 to<br>2,258.79) | 919.22<br>(642.68 to<br>1,411.64) | 1,647.70<br>(1,079.64 to<br>2,584.58) |
| Transport injuries       | 33,292.09<br>(26,031.66 to<br>41,526.09)  | 16,765.53<br>(8,058.39 to<br>34,060.75)  | 5,826.73<br>(2,904.01 to<br>11,545.33)   | 24,564.57<br>(12,118.42 to<br>51,102.44)  | 739.09<br>(584.48 to<br>914.30)       | 416.81<br>(225.89 to<br>779.74)     | 161.05<br>(91.09 to<br>292.45)    | 581.95<br>(316.05 to<br>1,103.74)     |
| Road injuries            | 30,999.11<br>(24,271.18 to<br>38,655.24)  | 14,728.24<br>(7,162.58 to<br>29,494.67)  | 4,816.90<br>(2,416.14 to<br>9,420.85)    | 22,423.49<br>(11,096.06 to<br>45,586.99)  | 684.68<br>(543.11 to<br>851.54)       | 361.69<br>(197.39 to<br>667.47)     | 131.94<br>(75.92 to<br>237.35)    | 525.38<br>(287.43 to<br>1,010.24)     |
| Pedestrian road injuries | 6,857.38<br>(5,260.96 to<br>9,385.25)     | 3,056.20<br>(1,574.29 to<br>5,899.34)    | 739.36<br>(396.48 to<br>1,424.57)        | 4,333.06<br>(2,196.08 to<br>8,418.71)     | 177.78<br>(137.50 to<br>234.46)       | 94.57<br>(54.79 to<br>169.71)       | 26.64<br>(16.09 to<br>45.98)      | 127.22<br>(73.26 to<br>231.03)        |

| Georgia                                         |                                                     |                                                     |                                                    |                                                     |                                              |                                            |                                            |                                            |
|-------------------------------------------------|-----------------------------------------------------|-----------------------------------------------------|----------------------------------------------------|-----------------------------------------------------|----------------------------------------------|--------------------------------------------|--------------------------------------------|--------------------------------------------|
| Cause                                           | YLLs (actual counts)                                |                                                     |                                                    |                                                     | Deaths (actual counts)                       |                                            |                                            |                                            |
|                                                 | 2016                                                | 2040 Forecast                                       | 2040 Better Scenario                               | 2040 Worse Scenario                                 | 2016                                         | 2040 Forecast                              | 2040 Better Scenario                       | 2040 Worse Scenario                        |
| Cyclist road injuries                           | 830.43<br>(600.07 to 1,108.51)                      | 465.58<br>(197.41 to 1,044.44)                      | 186.67<br>(84.04 to 403.70)                        | 682.00<br>(289.19 to 1,543.22)                      | 18.74<br>(13.90 to 24.52)                    | 11.84<br>(5.56 to 24.73)                   | 5.73<br>(2.91 to 11.09)                    | 16.29<br>(7.65 to 34.68)                   |
| Motorcyclist road injuries                      | 4,452.44<br>(3,187.26 to 6,007.68)                  | 2,433.10<br>(964.12 to 5,971.48)                    | 1,228.92<br>(490.00 to 2,819.92)                   | 3,207.02<br>(1,293.73 to 7,843.73)                  | 83.71<br>(60.17 to 112.37)                   | 47.33<br>(19.88 to 109.89)                 | 25.78<br>(11.21 to 57.70)                  | 60.94<br>(26.09 to 140.66)                 |
| Motor vehicle road injuries                     | 18,500.26<br>(13,612.27 to 23,483.52)               | 8,547.14<br>(4,246.82 to 17,066.84)                 | 2,579.48<br>(1,327.81 to 4,948.23)                 | 13,854.01<br>(6,892.24 to 28,173.56)                | 395.19<br>(293.22 to 499.19)                 | 200.98<br>(109.62 to 375.66)               | 70.43<br>(41.46 to 120.60)                 | 311.20<br>(166.65 to 588.13)               |
| Other road injuries                             | 358.61<br>(259.78 to 535.54)                        | 226.22<br>(97.42 to 500.02)                         | 82.47<br>(37.74 to 167.09)                         | 347.40<br>(147.64 to 787.73)                        | 9.26<br>(6.71 to 12.87)                      | 6.98<br>(4.24 to 14.24)                    | 3.36<br>(1.64 to 6.13)                     | 9.74<br>(4.45 to 20.43)                    |
| Other transport injuries                        | 2,292.97<br>(1,754.19 to 2,959.84)                  | 2,037.29<br>(921.33 to 4,630.56)                    | 1,009.83<br>(464.87 to 2,218.62)                   | 2,141.08<br>(1,000.11 to 4,738.56)                  | 54.41<br>(42.19 to 68.55)                    | 55.12<br>(28.29 to 112.45)                 | 56.58<br>(15.23 to 56.82)                  | 56.58<br>(29.83 to 113.33)                 |
| <b>Unintentional injuries</b>                   | <b>38,108.31</b><br><b>(31,362.50 to 46,055.88)</b> | <b>20,770.26</b><br><b>(13,601.54 to 33,170.96)</b> | <b>13,692.62</b><br><b>(8,974.08 to 21,666.93)</b> | <b>21,161.74</b><br><b>(13,670.30 to 34,274.59)</b> | <b>976.98</b><br><b>(798.43 to 1,181.85)</b> | <b>655.83</b><br><b>(469.49 to 928.83)</b> | <b>477.55</b><br><b>(345.67 to 665.99)</b> | <b>646.09</b><br><b>(457.88 to 918.90)</b> |
| Falls                                           | 6,251.92<br>(5,070.33 to 7,765.06)                  | 4,136.76<br>(3,030.76 to 5,569.62)                  | 3,220.83<br>(2,287.07 to 4,490.19)                 | 4,088.43<br>(3,009.41 to 5,549.41)                  | 213.81<br>(161.77 to 255.13)                 | 177.80<br>(123.23 to 226.21)               | 149.76<br>(104.88 to 196.10)               | 169.32<br>(118.57 to 216.04)               |
| Drowning                                        | 7,239.13<br>(5,703.45 to 8,989.23)                  | 4,185.67<br>(2,043.79 to 8,633.44)                  | 2,655.15<br>(1,357.29 to 5,376.58)                 | 4,351.51<br>(2,105.37 to 8,795.68)                  | 148.73<br>(117.66 to 184.78)                 | 95.96<br>(52.01 to 183.22)                 | 63.80<br>(35.89 to 117.37)                 | 98.22<br>(51.29 to 186.53)                 |
| Fire, heat, and hot substances                  | 7,218.10<br>(5,707.21 to 9,174.01)                  | 3,905.64<br>(2,211.48 to 7,022.41)                  | 2,159.21<br>(1,253.15 to 3,884.78)                 | 4,039.76<br>(2,235.87 to 7,295.10)                  | 194.26<br>(158.78 to 237.82)                 | 129.79<br>(82.90 to 210.86)                | 79.15<br>(51.53 to 125.78)                 | 129.99<br>(79.60 to 216.63)                |
| Poisonings                                      | 1,596.83<br>(1,221.83 to 2,183.93)                  | 566.25<br>(305.61 to 1,088.02)                      | 262.23<br>(136.13 to 504.88)                       | 600.43<br>(320.28 to 1,199.43)                      | 32.62<br>(25.31 to 45.36)                    | 13.51<br>(7.42 to 24.55)                   | 6.63<br>(3.63 to 12.48)                    | 14.06<br>(7.59 to 26.68)                   |
| Exposure to mechanical forces                   | 5,128.79<br>(3,504.28 to 6,632.86)                  | 2,241.89<br>(1,362.61 to 3,474.34)                  | 1,388.01<br>(837.65 to 2,250.04)                   | 2,283.65<br>(1,379.87 to 3,529.71)                  | 116.84<br>(79.77 to 151.84)                  | 60.47<br>(39.08 to 85.84)                  | 40.24<br>(25.34 to 58.95)                  | 60.10<br>(38.36 to 85.10)                  |
| Unintentional firearm injuries                  | 1,513.15<br>(1,040.54 to 1,927.35)                  | 651.38<br>(371.47 to 1,111.06)                      | 426.42<br>(249.26 to 743.26)                       | 664.23<br>(375.82 to 1,149.82)                      | 33.83<br>(24.73 to 42.79)                    | 16.70<br>(10.95 to 25.63)                  | 11.78<br>(7.83 to 18.16)                   | 16.67<br>(11.00 to 25.34)                  |
| Unintentional suffocation                       | 492.45<br>(370.39 to 706.35)                        | 196.85<br>(120.56 to 315.61)                        | 129.13<br>(75.90 to 217.16)                        | 202.97<br>(123.33 to 329.02)                        | 8.70<br>(6.51 to 11.48)                      | 3.97<br>(2.44 to 6.04)                     | 2.77<br>(1.62 to 4.24)                     | 4.01<br>(2.42 to 6.13)                     |
| Other exposure to mechanical forces             | 3,123.19<br>(1,813.26 to 4,168.15)                  | 1,393.66<br>(741.36 to 2,150.40)                    | 832.45<br>(452.95 to 1,370.68)                     | 1,416.45<br>(771.87 to 2,200.68)                    | 74.30<br>(42.59 to 98.70)                    | 39.81<br>(22.32 to 56.61)                  | 25.69<br>(14.33 to 37.82)                  | 39.43<br>(22.44 to 56.00)                  |
| Adverse effects of medical treatment            | 2,911.49<br>(1,702.91 to 3,888.01)                  | 1,395.97<br>(879.43 to 2,435.98)                    | 1,300.31<br>(698.81 to 2,011.87)                   | 1,582.50<br>(871.99 to 2,423.31)                    | 93.39<br>(53.84 to 125.68)                   | 64.96<br>(35.41 to 92.43)                  | 58.41<br>(31.39 to 83.62)                  | 61.93<br>(34.11 to 88.09)                  |
| Animal contact                                  | 369.02<br>(271.46 to 487.18)                        | 221.61<br>(136.18 to 341.75)                        | 144.92<br>(89.66 to 231.13)                        | 225.97<br>(140.27 to 353.98)                        | 9.70<br>(7.16 to 12.32)                      | 7.18<br>(4.60 to 10.23)                    | 5.30<br>(3.41 to 7.53)                     | 7.06<br>(4.68 to 9.76)                     |
| Venomous animal contact                         | 68.60<br>(46.65 to 129.37)                          | 44.65<br>(25.98 to 87.31)                           | 33.31<br>(19.22 to 61.40)                          | 45.40<br>(25.78 to 85.57)                           | 1.90<br>(1.30 to 3.11)                       | 1.41<br>(0.83 to 2.40)                     | 1.14<br>(0.68 to 1.81)                     | 1.40<br>(0.83 to 2.34)                     |
| Non-venomous animal contact                     | 300.41<br>(212.00 to 387.41)                        | 176.96<br>(102.37 to 286.73)                        | 111.61<br>(64.98 to 181.04)                        | 180.57<br>(105.13 to 293.73)                        | 7.80<br>(5.33 to 9.76)                       | 5.76<br>(3.59 to 8.17)                     | 4.16<br>(2.49 to 6.00)                     | 5.66<br>(3.43 to 8.07)                     |
| Foreign body                                    | 3,274.41<br>(2,388.83 to 4,065.64)                  | 1,603.64<br>(1,040.77 to 2,292.59)                  | 1,440.39<br>(939.12 to 2,083.18)                   | 1,617.54<br>(1,052.73 to 2,287.36)                  | 66.09<br>(49.92 to 81.04)                    | 41.43<br>(29.04 to 55.30)                  | 40.36<br>(28.50 to 53.80)                  | 40.56<br>(28.38 to 54.19)                  |
| Pulmonary aspiration and foreign body in airway | 2,100.29<br>(1,513.71 to 2,625.13)                  | 993.11<br>(608.64 to 1,493.97)                      | 817.27<br>(484.12 to 1,277.32)                     | 1,000.06<br>(610.08 to 1,500.28)                    | 42.38<br>(30.41 to 53.35)                    | 26.52<br>(17.33 to 37.49)                  | 24.12<br>(15.12 to 34.39)                  | 25.84<br>(16.86 to 36.42)                  |

|                                             |                                                               |                                                              |                                                             |                                                              |                                                      |                                                      |                                                      |                                                      |
|---------------------------------------------|---------------------------------------------------------------|--------------------------------------------------------------|-------------------------------------------------------------|--------------------------------------------------------------|------------------------------------------------------|------------------------------------------------------|------------------------------------------------------|------------------------------------------------------|
|                                             | 1,174.12<br>(696.12 to<br>1,615.47)                           | 610.53<br>(366.39 to<br>940.36)                              | 623.12<br>(387.29 to<br>957.91)                             | 617.48<br>(371.55 to<br>948.67)                              | 23.71<br>(15.57 to<br>35.15)                         | 14.91<br>(10.00 to<br>24.75)                         | 16.24<br>(11.07 to<br>26.86)                         | 14.72<br>(9.83 to<br>24.10)                          |
| Foreign body in other body part             |                                                               |                                                              |                                                             |                                                              |                                                      |                                                      |                                                      |                                                      |
|                                             | 2,292.73<br>(1,196.50 to<br>3,681.11)                         | 1,285.13<br>(638.33 to<br>2,251.50)                          | 735.38<br>(357.11 to<br>1,282.82)                           | 1,314.31<br>(651.41 to<br>2,322.11)                          | 60.17<br>(33.17 to<br>100.54)                        | 38.04<br>(20.65 to<br>67.68)                         | 23.19<br>(11.92 to<br>40.46)                         | 38.01<br>(20.32 to<br>68.72)                         |
| Environmental heat and cold exposure        |                                                               |                                                              |                                                             |                                                              |                                                      |                                                      |                                                      |                                                      |
|                                             | 1,825.89<br>(1,383.29 to<br>2,362.45)                         | 1,027.69<br>(612.95 to<br>1,733.58)                          | 386.18<br>(214.64 to<br>686.92)                             | 1,057.64<br>(642.57 to<br>1,737.77)                          | 41.36<br>(31.93 to<br>52.79)                         | 26.70<br>(17.88 to<br>39.91)                         | 10.71<br>(6.68 to<br>17.27)                          | 26.84<br>(17.94 to<br>39.42)                         |
| Other unintentional injuries                |                                                               |                                                              |                                                             |                                                              |                                                      |                                                      |                                                      |                                                      |
| <b>Self-harm and interpersonal violence</b> | <b>19,249.06</b><br><b>(14,339.90 to</b><br><b>25,465.30)</b> | <b>14,812.90</b><br><b>(7,259.76 to</b><br><b>29,544.84)</b> | <b>9,260.68</b><br><b>(4,669.17 to</b><br><b>18,106.53)</b> | <b>15,431.77</b><br><b>(7,656.42 to</b><br><b>31,231.08)</b> | <b>467.42</b><br><b>(351.45 to</b><br><b>606.78)</b> | <b>398.39</b><br><b>(212.80 to</b><br><b>731.58)</b> | <b>267.05</b><br><b>(150.46 to</b><br><b>480.54)</b> | <b>406.85</b><br><b>(216.11 to</b><br><b>748.05)</b> |

| Georgia                                                                             |                                                   |                                                      |                                                      |                                                      |                                                |                                                   |                                                   |                                                   |
|-------------------------------------------------------------------------------------|---------------------------------------------------|------------------------------------------------------|------------------------------------------------------|------------------------------------------------------|------------------------------------------------|---------------------------------------------------|---------------------------------------------------|---------------------------------------------------|
| Cause                                                                               | YLLs (actual counts)                              |                                                      |                                                      |                                                      | Deaths (actual counts)                         |                                                   |                                                   |                                                   |
|                                                                                     | 2016                                              | 2040 Forecast                                        | 2040 Better Scenario                                 | 2040 Worse Scenario                                  | 2016                                           | 2040 Forecast                                     | 2040 Better Scenario                              | 2040 Worse Scenario                               |
| Self-harm                                                                           | 11,896.07<br>(8,904.55 to<br>15,540.10)           | 10,537.81<br>(4,720.67 to<br>22,311.07)              | 6,739.87<br>(3,241.57 to<br>14,060.89)               | 11,067.78<br>(4,887.32 to<br>23,539.55)              | 309.51<br>(231.32 to<br>396.01)                | 299.81<br>(150.38 to<br>586.07)                   | 206.12<br>(108.74 to<br>386.69)                   | 307.29<br>(149.17 to<br>614.39)                   |
| Self-harm by firearm                                                                | 842.54<br>(465.74 to<br>1,318.76)                 | 555.98<br>(204.10 to<br>1,288.62)                    | 297.49<br>(113.09 to<br>698.86)                      | 591.51<br>(204.94 to<br>1,415.32)                    | 19.63<br>(11.18 to<br>29.80)                   | 14.22<br>(5.83 to<br>30.36)                       | 8.07<br>(3.61 to<br>16.97)                        | 14.83<br>(5.92 to<br>33.01)                       |
| Self-harm by other specified means                                                  | 11,053.53<br>(8,335.71 to<br>14,342.07)           | 9,981.83<br>(4,504.24 to<br>21,344.31)               | 6,442.37<br>(3,126.02 to<br>13,134.71)               | 10,476.27<br>(4,668.04 to<br>22,550.40)              | 289.89<br>(215.00 to<br>370.52)                | 285.59<br>(143.77 to<br>551.57)                   | 198.05<br>(104.80 to<br>372.65)                   | 292.46<br>(143.09 to<br>586.46)                   |
| Interpersonal violence                                                              | 7,352.99<br>(4,421.91 to<br>11,229.03)            | 4,275.09<br>(2,095.49 to<br>7,829.12)                | 2,520.81<br>(1,229.35 to<br>4,681.56)                | 4,363.99<br>(2,087.37 to<br>8,028.55)                | 157.91<br>(96.09 to<br>241.51)                 | 98.58<br>(52.02 to<br>172.71)                     | 60.93<br>(32.42 to<br>108.02)                     | 99.57<br>(51.79 to<br>175.73)                     |
| Physical violence by firearm                                                        | 3,490.09<br>(1,923.20 to<br>6,761.98)             | 1,977.33<br>(915.12 to<br>4,226.45)                  | 1,064.01<br>(486.93 to<br>2,375.35)                  | 2,011.34<br>(910.68 to<br>4,442.23)                  | 70.74<br>(40.00 to<br>135.66)                  | 41.57<br>(20.95 to<br>88.96)                      | 23.16<br>(11.63 to<br>48.70)                      | 41.94<br>(21.16 to<br>89.58)                      |
| Physical violence by sharp object                                                   | 1,691.23<br>(739.39 to<br>2,649.72)               | 1,023.20<br>(403.56 to<br>1,910.80)                  | 590.73<br>(255.88 to<br>1,139.80)                    | 1,031.21<br>(408.19 to<br>1,893.67)                  | 37.30<br>(17.63 to<br>58.06)                   | 24.25<br>(10.94 to<br>43.38)                      | 14.65<br>(7.18 to<br>26.25)                       | 24.13<br>(10.74 to<br>41.90)                      |
| Physical violence by other means                                                    | 2,171.67<br>(854.66 to<br>3,327.13)               | 1,274.57<br>(428.12 to<br>2,672.91)                  | 866.07<br>(297.91 to<br>1,794.01)                    | 1,321.44<br>(428.20 to<br>2,737.39)                  | 49.87<br>(21.21 to<br>76.41)                   | 32.76<br>(12.33 to<br>64.22)                      | 23.12<br>(9.12 to<br>44.25)                       | 33.50<br>(12.72 to<br>65.52)                      |
| <b>Forces of nature, conflict and terrorism, and executions and police conflict</b> | <b>21.45</b><br><b>(18.50 to</b><br><b>25.01)</b> | <b>572.22</b><br><b>(0.00 to</b><br><b>7,347.94)</b> | <b>564.96</b><br><b>(0.00 to</b><br><b>7,259.22)</b> | <b>571.18</b><br><b>(0.00 to</b><br><b>7,352.98)</b> | <b>0.43</b><br><b>(0.37 to</b><br><b>0.50)</b> | <b>13.05</b><br><b>(0.00 to</b><br><b>166.65)</b> | <b>13.56</b><br><b>(0.00 to</b><br><b>171.46)</b> | <b>12.80</b><br><b>(0.00 to</b><br><b>164.44)</b> |
| Exposure to forces of nature                                                        | 0.00<br>(0.00 to<br>0.00)                         | 58.95<br>(0.00 to<br>137.89)                         | 58.95<br>(0.00 to<br>136.77)                         | 58.52<br>(0.00 to<br>137.46)                         | 0.00<br>(0.00 to<br>0.00)                      | 1.57<br>(0.00 to<br>2.97)                         | 1.66<br>(0.00 to<br>3.07)                         | 1.53<br>(0.00 to<br>2.91)                         |
| Conflict and terrorism                                                              | 0.00<br>(0.00 to<br>0.00)                         | 513.26<br>(0.00 to<br>7,347.94)                      | 506.00<br>(0.00 to<br>7,259.22)                      | 512.66<br>(0.00 to<br>7,352.98)                      | 0.00<br>(0.00 to<br>0.00)                      | 11.48<br>(0.00 to<br>166.60)                      | 11.91<br>(0.00 to<br>171.46)                      | 11.27<br>(0.00 to<br>164.15)                      |
| Executions and police conflict                                                      | 21.45<br>(18.50 to<br>25.01)                      | 0.00<br>(0.00 to<br>0.00)                            | 0.00<br>(0.00 to<br>0.00)                            | 0.00<br>(0.00 to<br>0.00)                            | 0.43<br>(0.37 to<br>0.50)                      | 0.00<br>(0.00 to<br>0.00)                         | 0.00<br>(0.00 to<br>0.00)                         | 0.00<br>(0.00 to<br>0.00)                         |

| Kazakhstan                                                               |                                                       |                                                       |                                                       |                                                       |                                                 |                                                 |                                                |                                                 |
|--------------------------------------------------------------------------|-------------------------------------------------------|-------------------------------------------------------|-------------------------------------------------------|-------------------------------------------------------|-------------------------------------------------|-------------------------------------------------|------------------------------------------------|-------------------------------------------------|
| Cause                                                                    | YLLs (actual counts)                                  |                                                       |                                                       |                                                       | Deaths (actual counts)                          |                                                 |                                                |                                                 |
|                                                                          | 2016                                                  | 2040 Forecast                                         | 2040 Better Scenario                                  | 2040 Worse Scenario                                   | 2016                                            | 2040 Forecast                                   | 2040 Better Scenario                           | 2040 Worse Scenario                             |
| <b>All causes</b>                                                        | <b>3,672,509.24</b><br>(3,162,760.00 to 4,258,616.13) | <b>3,786,113.92</b><br>(2,319,045.63 to 5,591,216.83) | <b>2,610,660.95</b><br>(1,620,075.37 to 3,811,173.42) | <b>5,261,143.26</b><br>(3,202,453.13 to 7,735,713.67) | <b>134,521.75</b><br>(117,082.51 to 156,092.04) | <b>174,821.90</b><br>(121,522.52 to 231,045.49) | <b>128,591.45</b><br>(91,245.51 to 170,334.73) | <b>230,247.16</b><br>(163,644.94 to 299,115.65) |
| <b>Communicable, maternal, neonatal, and nutritional diseases</b>        | <b>427,086.76</b><br>(340,493.34 to 527,602.13)       | <b>258,661.75</b><br>(154,725.42 to 437,389.94)       | <b>145,554.02</b><br>(88,724.81 to 239,426.65)        | <b>391,816.13</b><br>(231,844.74 to 692,408.01)       | <b>7,478.51</b><br>(6,230.24 to 8,818.48)       | <b>6,449.52</b><br>(4,006.69 to 10,486.83)      | <b>3,893.43</b><br>(2,509.77 to 6,025.98)      | <b>9,301.70</b><br>(5,646.62 to 15,347.35)      |
| <b>HIV/AIDS and tuberculosis</b>                                         | <b>60,880.11</b><br>(52,029.48 to 71,204.12)          | <b>62,704.61</b><br>(32,725.78 to 128,589.72)         | <b>24,067.15</b><br>(13,620.50 to 48,462.33)          | <b>101,267.87</b><br>(50,777.58 to 225,580.47)        | <b>1,384.20</b><br>(1,173.54 to 1,626.70)       | <b>1,416.65</b><br>(718.10 to 2,857.82)         | <b>529.49</b><br>(286.15 to 1,038.75)          | <b>2,322.12</b><br>(1,132.51 to 5,009.64)       |
| <b>Tuberculosis</b>                                                      | <b>45,837.64</b><br>(36,913.91 to 55,873.63)          | <b>38,072.47</b><br>(9,678.48 to 104,948.60)          | <b>13,747.17</b><br>(5,728.62 to 38,541.53)           | <b>68,863.06</b><br>(19,805.06 to 198,263.16)         | <b>1,089.82</b><br>(882.61 to 1,327.21)         | <b>935.80</b><br>(277.58 to 2,450.26)           | <b>341.54</b><br>(103.75 to 866.45)            | <b>1,675.00</b><br>(541.81 to 4,574.68)         |
| <b>HIV/AIDS</b>                                                          | <b>15,042.47</b><br>(13,804.04 to 16,347.24)          | <b>24,632.14</b><br>(16,845.34 to 37,386.24)          | <b>10,319.99</b><br>(7,779.40 to 13,069.60)           | <b>32,404.80</b><br>(21,615.20 to 49,494.77)          | <b>294.38</b><br>(270.66 to 320.06)             | <b>480.85</b><br>(313.07 to 763.99)             | <b>187.95</b><br>(139.39 to 241.32)            | <b>647.11</b><br>(407.51 to 1,052.23)           |
| <b>Diarrhea, lower respiratory, and other common infectious diseases</b> | <b>164,550.70</b><br>(133,499.93 to 202,791.33)       | <b>123,096.17</b><br>(59,629.74 to 235,264.91)        | <b>74,460.95</b><br>(37,264.71 to 136,351.91)         | <b>188,320.49</b><br>(86,013.34 to 377,832.40)        | <b>3,641.87</b><br>(3,060.53 to 4,290.90)       | <b>4,049.39</b><br>(2,273.22 to 6,803.68)       | <b>2,682.36</b><br>(1,609.93 to 4,370.10)      | <b>5,658.65</b><br>(3,025.90 to 10,074.38)      |
| <b>Diarrheal diseases</b>                                                | <b>5,734.90</b><br>(3,750.21 to 8,518.46)             | <b>2,069.44</b><br>(359.58 to 7,751.34)               | <b>2,747.07</b><br>(558.84 to 8,891.83)               | <b>2,736.68</b><br>(378.76 to 10,207.62)              | <b>78.37</b><br>(54.77 to 111.28)               | <b>55.62</b><br>(12.22 to 190.71)               | <b>90.27</b><br>(23.00 to 282.18)              | <b>60.04</b><br>(10.65 to 210.41)               |
| <b>Intestinal infectious diseases</b>                                    | <b>20.47</b><br>(9.94 to 35.98)                       | <b>16.01</b><br>(6.93 to 33.27)                       | <b>21.23</b><br>(8.89 to 44.35)                       | <b>14.26</b><br>(6.03 to 27.84)                       | <b>0.43</b><br>(0.22 to 0.79)                   | <b>0.44</b><br>(0.20 to 0.83)                   | <b>0.60</b><br>(0.28 to 1.15)                  | <b>0.37</b><br>(0.18 to 0.70)                   |
| <b>Typhoid fever</b>                                                     | <b>15.40</b><br>(6.95 to 28.69)                       | <b>13.69</b><br>(5.50 to 29.65)                       | <b>19.49</b><br>(7.71 to 41.12)                       | <b>11.59</b><br>(4.50 to 23.42)                       | <b>0.33</b><br>(0.15 to 0.62)                   | <b>0.36</b><br>(0.15 to 0.71)                   | <b>0.53</b><br>(0.23 to 1.05)                  | <b>0.29</b><br>(0.12 to 0.57)                   |
| <b>Paratyphoid fever</b>                                                 | <b>2.59</b><br>(1.00 to 5.65)                         | <b>1.26</b><br>(0.38 to 2.99)                         | <b>0.84</b><br>(0.25 to 2.01)                         | <b>1.54</b><br>(0.51 to 3.59)                         | <b>0.05</b><br>(0.02 to 0.12)                   | <b>0.05</b><br>(0.01 to 0.08)                   | <b>0.02</b><br>(0.01 to 0.05)                  | <b>0.04</b><br>(0.01 to 0.09)                   |
| <b>Other intestinal infectious diseases</b>                              | <b>2.47</b><br>(0.95 to 5.42)                         | <b>1.05</b><br>(0.34 to 2.61)                         | <b>0.90</b><br>(0.28 to 2.24)                         | <b>1.13</b><br>(0.40 to 2.67)                         | <b>0.05</b><br>(0.02 to 0.11)                   | <b>0.05</b><br>(0.02 to 0.11)                   | <b>0.04</b><br>(0.01 to 0.11)                  | <b>0.04</b><br>(0.02 to 0.10)                   |
| <b>Lower respiratory infections</b>                                      | <b>131,608.69</b><br>(106,641.07 to 160,315.80)       | <b>106,803.40</b><br>(48,954.18 to 210,152.90)        | <b>60,755.47</b><br>(29,746.97 to 112,647.31)         | <b>167,936.01</b><br>(74,653.42 to 345,515.88)        | <b>3,133.68</b><br>(2,624.73 to 3,704.87)       | <b>3,704.14</b><br>(2,017.09 to 6,250.38)       | <b>2,356.70</b><br>(1,338.77 to 3,886.58)      | <b>5,262.81</b><br>(2,742.35 to 9,537.97)       |
| <b>Upper respiratory infections</b>                                      | <b>86.49</b><br>(44.87 to 154.59)                     | <b>60.48</b><br>(22.11 to 129.28)                     | <b>29.53</b><br>(11.37 to 62.37)                      | <b>83.44</b><br>(30.93 to 182.45)                     | <b>2.16</b><br>(1.17 to 3.52)                   | <b>2.36</b><br>(0.87 to 5.28)                   | <b>1.23</b><br>(0.48 to 2.64)                  | <b>3.04</b><br>(1.21 to 6.39)                   |
| <b>Otitis media</b>                                                      | <b>6.88</b><br>(5.03 to 9.31)                         | <b>7.64</b><br>(3.28 to 17.76)                        | <b>8.03</b><br>(3.35 to 18.93)                        | <b>7.30</b><br>(3.16 to 16.18)                        | <b>0.18</b><br>(0.13 to 0.25)                   | <b>0.25</b><br>(0.11 to 0.55)                   | <b>0.27</b><br>(0.12 to 0.59)                  | <b>0.23</b><br>(0.10 to 0.50)                   |
| <b>Meningitis</b>                                                        | <b>11,762.84</b><br>(9,047.65 to 14,855.40)           | <b>4,356.34</b><br>(2,492.28 to 7,268.89)             | <b>2,735.69</b><br>(1,581.23 to 4,759.14)             | <b>5,855.31</b><br>(3,412.67 to 10,145.65)            | <b>197.87</b><br>(157.89 to 239.78)             | <b>99.54</b><br>(61.38 to 154.51)               | <b>65.91</b><br>(40.85 to 102.33)              | <b>124.32</b><br>(78.56 to 194.82)              |
| <b>Pneumococcal meningitis</b>                                           | <b>44.11</b><br>(33.05 to 57.60)                      | <b>20.98</b><br>(11.56 to 35.53)                      | <b>20.94</b><br>(10.94 to 36.55)                      | <b>21.71</b><br>(12.21 to 36.70)                      | <b>0.85</b><br>(0.64 to 1.07)                   | <b>0.56</b><br>(0.32 to 0.89)                   | <b>0.58</b><br>(0.33 to 0.95)                  | <b>0.55</b><br>(0.32 to 0.86)                   |
| <b>H influenzae type B meningitis</b>                                    | <b>1,709.16</b><br>(1,222.89 to 2,291.84)             | <b>989.20</b><br>(437.66 to 2,159.15)                 | <b>763.38</b><br>(390.80 to 1,499.38)                 | <b>1,461.65</b><br>(520.60 to 3,570.55)               | <b>27.20</b><br>(20.62 to 35.31)                | <b>18.20</b><br>(10.04 to 34.24)                | <b>16.11</b><br>(9.51 to 27.16)                | <b>23.19</b><br>(11.09 to 48.46)                |
| <b>Meningococcal meningitis</b>                                          | <b>6,140.69</b><br>(4,713.61 to 7,866.91)             | <b>1,889.64</b><br>(1,027.88 to 3,205.32)             | <b>1,121.16</b><br>(627.83 to 1,921.25)               | <b>2,461.68</b><br>(1,459.60 to 4,247.00)             | <b>100.57</b><br>(79.84 to 123.01)              | <b>44.29</b><br>(26.03 to 69.39)                | <b>27.50</b><br>(16.45 to 43.13)               | <b>54.89</b><br>(34.12 to 85.80)                |
| <b>Other meningitis</b>                                                  | <b>3,868.88</b><br>(3,018.05 to 4,821.19)             | <b>1,456.52</b><br>(775.59 to 2,503.01)               | <b>830.21</b><br>(450.72 to 1,448.26)                 | <b>1,910.27</b><br>(1,110.86 to 3,177.71)             | <b>69.25</b><br>(55.16 to 83.85)                | <b>36.49</b><br>(20.97 to 58.83)                | <b>21.72</b><br>(13.00 to 34.61)               | <b>45.69</b><br>(28.19 to 70.11)                |
| <b>Encephalitis</b>                                                      | <b>14,956.45</b><br>(10,583.23 to 23,724.60)          | <b>8,125.12</b><br>(4,617.85 to 13,919.57)            | <b>7,289.50</b><br>(4,148.67 to 12,540.08)            | <b>8,905.34</b><br>(5,132.54 to 15,192.06)            | <b>223.97</b><br>(165.11 to 339.69)             | <b>163.86</b><br>(101.46 to 259.75)             | <b>154.11</b><br>(94.14 to 245.51)             | <b>170.88</b><br>(106.59 to 272.95)             |

|                |                                |                                    |                                 |                                    |                           |                              |                             |                              |
|----------------|--------------------------------|------------------------------------|---------------------------------|------------------------------------|---------------------------|------------------------------|-----------------------------|------------------------------|
| Diphtheria     | 23.85<br>(13.56 to<br>38.74)   | 5.21<br>(2.27 to<br>9.95)          | 4.38<br>(1.92 to<br>8.40)       | 7.25<br>(2.95 to<br>15.17)         | 0.39<br>(0.23 to<br>0.59) | 0.10<br>(0.05 to<br>0.20)    | 0.10<br>(0.04 to<br>0.19)   | 0.13<br>(0.05 to<br>0.25)    |
| Whooping cough | 244.89<br>(72.49 to<br>465.14) | 55.61<br>(9.37 to<br>181.97)       | 15.31<br>(3.88 to<br>36.00)     | 148.10<br>(19.56 to<br>493.93)     | 3.13<br>(0.96 to<br>5.70) | 0.77<br>(0.16 to<br>2.32)    | 0.31<br>(0.08 to<br>0.66)   | 1.85<br>(0.30 to<br>5.94)    |
| Tetanus        | 10.03<br>(7.55 to<br>16.80)    | 2.01<br>(1.00 to<br>4.20)          | 1.96<br>(0.93 to<br>4.37)       | 2.25<br>(1.21 to<br>4.45)          | 0.25<br>(0.19 to<br>0.44) | 0.06<br>(0.04 to<br>0.12)    | 0.07<br>(0.04 to<br>0.13)   | 0.06<br>(0.04 to<br>0.12)    |
| Measles        | 18.13<br>(10.73 to<br>29.27)   | 1,571.11<br>(1.51 to<br>11,540.38) | 836.72<br>(1.42 to<br>5,664.78) | 2,593.97<br>(1.57 to<br>19,726.41) | 0.22<br>(0.13 to<br>0.36) | 21.49<br>(0.03 to<br>151.81) | 12.20<br>(0.02 to<br>82.34) | 34.11<br>(0.03 to<br>245.33) |

| Kazakhstan                                            |                                                |                                                |                                              |                                                |                                       |                                        |                                       |                                        |
|-------------------------------------------------------|------------------------------------------------|------------------------------------------------|----------------------------------------------|------------------------------------------------|---------------------------------------|----------------------------------------|---------------------------------------|----------------------------------------|
| Cause                                                 | YLLs (actual counts)                           |                                                |                                              |                                                | Deaths (actual counts)                |                                        |                                       |                                        |
|                                                       | 2016                                           | 2040 Forecast                                  | 2040 Better Scenario                         | 2040 Worse Scenario                            | 2016                                  | 2040 Forecast                          | 2040 Better Scenario                  | 2040 Worse Scenario                    |
| Varicella and herpes zoster                           | 77.09<br>(24.61 to<br>138.53)                  | 23.80<br>(7.46 to<br>49.79)                    | 16.05<br>(5.46 to<br>32.64)                  | 30.58<br>(9.08 to<br>67.00)                    | 1.23<br>(0.47 to<br>1.98)             | 0.76<br>(0.34 to<br>1.31)              | 0.61<br>(0.28 to<br>1.07)             | 0.81<br>(0.34 to<br>1.43)              |
| <b>Neglected tropical diseases and malaria</b>        | <b>692.11<br/>(490.36 to<br/>1,015.86)</b>     | <b>439.18<br/>(267.66 to<br/>725.95)</b>       | <b>472.22<br/>(280.67 to<br/>798.79)</b>     | <b>436.72<br/>(274.89 to<br/>703.21)</b>       | <b>13.00<br/>(9.00 to<br/>17.29)</b>  | <b>12.08<br/>(6.80 to<br/>17.48)</b>   | <b>14.15<br/>(7.61 to<br/>20.49)</b>  | <b>11.05<br/>(6.56 to<br/>15.87)</b>   |
| Malaria                                               | 0.00<br>(0.00 to<br>0.00)                      | 0.00<br>(0.00 to<br>0.00)                      | 0.00<br>(0.00 to<br>0.00)                    | 0.00<br>(0.00 to<br>0.00)                      | 0.00<br>(0.00 to<br>0.00)             | 0.00<br>(0.00 to<br>0.00)              | 0.00<br>(0.00 to<br>0.00)             | 0.00<br>(0.00 to<br>0.00)              |
| Chagas disease                                        | 0.00<br>(0.00 to<br>0.00)                      | 0.00<br>(0.00 to<br>0.00)                      | 0.00<br>(0.00 to<br>0.00)                    | 0.00<br>(0.00 to<br>0.00)                      | 0.00<br>(0.00 to<br>0.00)             | 0.00<br>(0.00 to<br>0.00)              | 0.00<br>(0.00 to<br>0.00)             | 0.00<br>(0.00 to<br>0.00)              |
| Leishmaniasis                                         | 5.58<br>(3.07 to<br>8.78)                      | 2.85<br>(1.36 to<br>5.16)                      | 2.26<br>(1.05 to<br>4.03)                    | 3.13<br>(1.50 to<br>5.64)                      | 0.18<br>(0.09 to<br>0.27)             | 0.11<br>(0.06 to<br>0.19)              | 0.09<br>(0.05 to<br>0.16)             | 0.11<br>(0.06 to<br>0.19)              |
| African trypanosomiasis                               | 0.00<br>(0.00 to<br>0.00)                      | 0.00<br>(0.00 to<br>0.00)                      | 0.00<br>(0.00 to<br>0.00)                    | 0.00<br>(0.00 to<br>0.00)                      | 0.00<br>(0.00 to<br>0.00)             | 0.00<br>(0.00 to<br>0.00)              | 0.00<br>(0.00 to<br>0.00)             | 0.00<br>(0.00 to<br>0.00)              |
| Schistosomiasis                                       | 0.00<br>(0.00 to<br>0.00)                      | 0.00<br>(0.00 to<br>0.00)                      | 0.00<br>(0.00 to<br>0.00)                    | 0.00<br>(0.00 to<br>0.00)                      | 0.00<br>(0.00 to<br>0.00)             | 0.00<br>(0.00 to<br>0.00)              | 0.00<br>(0.00 to<br>0.00)             | 0.00<br>(0.00 to<br>0.00)              |
| Cysticercosis                                         | 5.12<br>(2.95 to<br>8.45)                      | 1.91<br>(1.02 to<br>3.40)                      | 1.87<br>(0.99 to<br>3.46)                    | 1.90<br>(1.01 to<br>3.35)                      | 0.13<br>(0.07 to<br>0.22)             | 0.06<br>(0.03 to<br>0.10)              | 0.06<br>(0.03 to<br>0.10)             | 0.06<br>(0.03 to<br>0.09)              |
| Cystic echinococcosis                                 | 0.00<br>(0.00 to<br>0.00)                      | 0.00<br>(0.00 to<br>0.00)                      | 0.00<br>(0.00 to<br>0.00)                    | 0.00<br>(0.00 to<br>0.00)                      | 0.00<br>(0.00 to<br>0.00)             | 0.00<br>(0.00 to<br>0.00)              | 0.00<br>(0.00 to<br>0.00)             | 0.00<br>(0.00 to<br>0.00)              |
| Dengue                                                | 0.00<br>(0.00 to<br>0.00)                      | 0.00<br>(0.00 to<br>0.00)                      | 0.00<br>(0.00 to<br>0.00)                    | 0.00<br>(0.00 to<br>0.00)                      | 0.00<br>(0.00 to<br>0.00)             | 0.00<br>(0.00 to<br>0.00)              | 0.00<br>(0.00 to<br>0.00)             | 0.00<br>(0.00 to<br>0.00)              |
| Yellow fever                                          | 0.00<br>(0.00 to<br>0.00)                      | 0.00<br>(0.00 to<br>0.00)                      | 0.00<br>(0.00 to<br>0.00)                    | 0.00<br>(0.00 to<br>0.00)                      | 0.00<br>(0.00 to<br>0.00)             | 0.00<br>(0.00 to<br>0.00)              | 0.00<br>(0.00 to<br>0.00)             | 0.00<br>(0.00 to<br>0.00)              |
| Rabies                                                | 177.35<br>(120.83 to<br>274.55)                | 77.33<br>(39.34 to<br>142.86)                  | 61.81<br>(30.64 to<br>117.41)                | 87.71<br>(46.75 to<br>163.48)                  | 3.21<br>(2.32 to<br>4.66)             | 1.70<br>(0.95 to<br>2.95)              | 1.40<br>(0.75 to<br>2.51)             | 1.85<br>(1.06 to<br>3.18)              |
| Intestinal nematode infections                        | 20.94<br>(5.15 to<br>50.19)                    | 13.91<br>(5.04 to<br>31.11)                    | 13.18<br>(5.02 to<br>28.13)                  | 14.67<br>(5.02 to<br>33.99)                    | 0.34<br>(0.13 to<br>0.69)             | 0.33<br>(0.15 to<br>0.59)              | 0.34<br>(0.16 to<br>0.60)             | 0.32<br>(0.15 to<br>0.57)              |
| Other neglected tropical diseases                     | 483.13<br>(297.12 to<br>795.43)                | 343.19<br>(183.02 to<br>564.48)                | 393.09<br>(211.12 to<br>660.50)              | 329.31<br>(180.38 to<br>543.88)                | 9.14<br>(5.35 to<br>13.35)            | 9.88<br>(4.61 to<br>14.18)             | 12.25<br>(5.74 to<br>17.71)           | 8.71<br>(4.23 to<br>12.40)             |
| <b>Maternal disorders</b>                             | <b>3,553.32<br/>(2,607.27 to<br/>4,756.20)</b> | <b>2,812.15<br/>(1,097.94 to<br/>5,994.11)</b> | <b>2,032.95<br/>(768.18 to<br/>4,427.23)</b> | <b>3,363.23<br/>(1,297.77 to<br/>7,266.92)</b> | <b>65.14<br/>(47.85 to<br/>86.78)</b> | <b>51.84<br/>(20.88 to<br/>109.42)</b> | <b>37.48<br/>(14.73 to<br/>78.97)</b> | <b>61.98<br/>(24.67 to<br/>133.76)</b> |
| Maternal hemorrhage                                   | 698.36<br>(469.65 to<br>1,000.26)              | 577.61<br>(214.33 to<br>1,304.54)              | 427.41<br>(157.19 to<br>967.09)              | 675.97<br>(249.83 to<br>1,453.69)              | 12.97<br>(8.74 to<br>18.60)           | 10.69<br>(4.07 to<br>23.62)            | 7.91<br>(2.98 to<br>18.20)            | 12.52<br>(4.83 to<br>26.64)            |
| Maternal sepsis and other maternal infections         | 177.03<br>(109.67 to<br>270.58)                | 73.16<br>(26.03 to<br>157.23)                  | 53.07<br>(18.84 to<br>116.90)                | 86.48<br>(30.05 to<br>184.13)                  | 3.26<br>(2.04 to<br>4.89)             | 1.35<br>(0.48 to<br>2.88)              | 0.98<br>(0.36 to<br>2.10)             | 1.59<br>(0.57 to<br>3.43)              |
| Maternal hypertensive disorders                       | 402.81<br>(258.93 to<br>606.10)                | 369.00<br>(128.59 to<br>886.52)                | 264.78<br>(87.58 to<br>613.39)               | 438.67<br>(147.54 to<br>1,055.18)              | 7.13<br>(4.64 to<br>10.63)            | 6.52<br>(2.34 to<br>15.66)             | 4.68<br>(1.60 to<br>11.06)            | 7.75<br>(2.72 to<br>18.15)             |
| Maternal obstructed labor and uterine rupture         | 171.47<br>(104.41 to<br>265.82)                | 123.80<br>(42.80 to<br>277.07)                 | 84.48<br>(28.84 to<br>191.88)                | 150.48<br>(55.17 to<br>322.95)                 | 3.17<br>(1.95 to<br>4.90)             | 2.29<br>(0.79 to<br>5.01)              | 1.56<br>(0.56 to<br>3.56)             | 2.79<br>(1.06 to<br>6.00)              |
| Maternal abortion, miscarriage, and ectopic pregnancy | 894.18<br>(620.81 to<br>1,259.35)              | 999.12<br>(367.61 to<br>2,315.85)              | 717.19<br>(257.58 to<br>1,605.61)            | 1,210.66<br>(443.99 to<br>2,898.39)            | 16.99<br>(11.87 to<br>23.74)          | 19.00<br>(7.25 to<br>41.78)            | 13.64<br>(5.03 to<br>29.89)           | 23.01<br>(8.73 to<br>54.66)            |





| Kazakhstan                                                              |                                                 |                                               |                                              |                                               |                                           |                                       |                                     |                                         |
|-------------------------------------------------------------------------|-------------------------------------------------|-----------------------------------------------|----------------------------------------------|-----------------------------------------------|-------------------------------------------|---------------------------------------|-------------------------------------|-----------------------------------------|
| Cause                                                                   | YLLs (actual counts)                            |                                               |                                              |                                               | Deaths (actual counts)                    |                                       |                                     |                                         |
|                                                                         | 2016                                            | 2040 Forecast                                 | 2040 Better Scenario                         | 2040 Worse Scenario                           | 2016                                      | 2040 Forecast                         | 2040 Better Scenario                | 2040 Worse Scenario                     |
| <b>Neonatal disorders</b>                                               | <b>184,114.02</b><br>(124,645.68 to 251,698.11) | <b>62,687.17</b><br>(28,292.34 to 117,621.41) | <b>38,473.00</b><br>(17,964.96 to 72,920.84) | <b>90,793.40</b><br>(41,019.92 to 171,583.04) | <b>2,128.14</b><br>(1,440.86 to 2,909.35) | <b>724.53</b><br>(326.90 to 1,359.56) | <b>444.69</b><br>(207.88 to 842.50) | <b>1,049.34</b><br>(474.36 to 1,982.45) |
| Neonatal preterm birth                                                  | 91,503.85<br>(62,726.26 to 127,208.64)          | 23,279.65<br>(11,833.23 to 41,295.36)         | 11,971.66<br>(6,055.29 to 20,761.84)         | 39,023.32<br>(19,352.89 to 69,004.70)         | 1,057.48<br>(724.84 to 1,470.03)          | 269.02<br>(136.76 to 477.22)          | 138.35<br>(69.98 to 239.93)         | 450.93<br>(223.59 to 797.60)            |
| Neonatal encephalopathy due to birth asphyxia and trauma                | 32,220.84<br>(20,949.68 to 45,530.30)           | 10,378.93<br>(3,663.47 to 23,067.04)          | 5,415.17<br>(2,000.39 to 11,809.41)          | 15,094.88<br>(5,046.22 to 34,024.50)          | 372.40<br>(242.14 to 526.25)              | 119.95<br>(42.36 to 266.54)           | 62.59<br>(23.15 to 136.43)          | 174.45<br>(58.36 to 393.04)             |
| Neonatal sepsis and other neonatal infections                           | 19,499.33<br>(12,349.84 to 29,049.56)           | 8,771.41<br>(3,486.90 to 16,967.56)           | 5,283.76<br>(2,146.58 to 10,172.51)          | 12,010.53<br>(4,704.09 to 23,149.86)          | 225.48<br>(142.82 to 335.90)              | 101.40<br>(40.30 to 196.27)           | 61.08<br>(24.83 to 117.63)          | 138.85<br>(54.43 to 267.67)             |
| Hemolytic disease and other neonatal jaundice                           | 1,100.06<br>(641.17 to 1,650.39)                | 424.16<br>(116.99 to 1,179.30)                | 243.81<br>(68.05 to 668.37)                  | 592.93<br>(150.89 to 1,683.82)                | 12.71<br>(7.41 to 19.08)                  | 4.90<br>(1.35 to 13.62)               | 2.82<br>(0.79 to 7.72)              | 6.85<br>(1.75 to 19.45)                 |
| Other neonatal disorders                                                | 39,789.95<br>(25,319.20 to 55,995.40)           | 19,833.02<br>(7,497.79 to 44,042.10)          | 15,558.61<br>(6,190.38 to 33,661.39)         | 24,071.74<br>(8,865.29 to 55,088.03)          | 460.06<br>(292.82 to 647.35)              | 229.26<br>(86.71 to 508.81)           | 179.85<br>(71.64 to 388.88)         | 278.26<br>(102.50 to 636.41)            |
| <b>Nutritional deficiencies</b>                                         | <b>3,357.15</b><br>(2,731.55 to 4,047.78)       | <b>2,151.71</b><br>(1,337.36 to 3,319.86)     | <b>2,203.89</b><br>(1,347.68 to 3,481.10)    | <b>2,138.86</b><br>(1,351.23 to 3,298.82)     | <b>83.90</b><br>(70.60 to 98.20)          | <b>78.38</b><br>(54.60 to 109.18)     | <b>84.75</b><br>(58.53 to 117.84)   | <b>72.84</b><br>(51.21 to 101.70)       |
| Protein-energy malnutrition                                             | 2,559.57<br>(1,936.92 to 3,211.51)              | 1,347.25<br>(770.57 to 2,186.04)              | 1,517.10<br>(869.96 to 2,455.76)             | 1,286.54<br>(742.77 to 2,103.80)              | 58.36<br>(43.99 to 71.72)                 | 44.18<br>(27.70 to 66.70)             | 54.02<br>(34.70 to 80.13)           | 38.77<br>(24.61 to 59.51)               |
| Iodine deficiency                                                       | 75.26<br>(5.00 to 237.14)                       | 97.58<br>(3.82 to 319.83)                     | 88.41<br>(3.10 to 296.35)                    | 102.47<br>(5.06 to 340.65)                    | 1.80<br>(0.15 to 4.93)                    | 3.84<br>(0.12 to 12.41)               | 3.69<br>(0.10 to 12.35)             | 3.76<br>(0.14 to 11.76)                 |
| Dietary iron deficiency                                                 | 122.09<br>(86.46 to 206.79)                     | 79.68<br>(43.27 to 153.21)                    | 83.12<br>(43.41 to 167.87)                   | 79.58<br>(43.58 to 149.14)                    | 2.14<br>(1.53 to 3.56)                    | 1.60<br>(0.88 to 2.86)                | 1.73<br>(0.91 to 3.10)              | 1.55<br>(0.86 to 2.70)                  |
| Other nutritional deficiencies                                          | 600.23<br>(361.07 to 894.36)                    | 627.20<br>(304.15 to 1,043.86)                | 515.27<br>(232.57 to 865.54)                 | 670.27<br>(335.24 to 1,087.57)                | 21.61<br>(11.91 to 31.42)                 | 28.76<br>(15.16 to 43.68)             | 25.32<br>(11.59 to 40.11)           | 28.76<br>(15.47 to 43.62)               |
| <b>Other communicable, maternal, neonatal, and nutritional diseases</b> | <b>9,939.34</b><br>(7,420.72 to 13,067.45)      | <b>4,770.74</b><br>(3,127.22 to 7,613.58)     | <b>3,843.86</b><br>(2,527.97 to 6,020.80)    | <b>5,495.56</b><br>(3,652.33 to 8,671.08)     | <b>162.27</b><br>(126.48 to 201.24)       | <b>116.65</b><br>(82.53 to 164.58)    | <b>100.52</b><br>(71.09 to 140.67)  | <b>125.72</b><br>(90.28 to 176.52)      |
| Sexually transmitted infections excluding HIV                           | 783.06<br>(337.55 to 1,520.60)                  | 258.07<br>(131.55 to 456.70)                  | 194.10<br>(105.69 to 330.60)                 | 309.02<br>(155.14 to 560.79)                  | 13.74<br>(8.12 to 22.41)                  | 6.53<br>(3.95 to 10.30)               | 5.37<br>(3.25 to 8.25)              | 7.24<br>(4.40 to 11.57)                 |
| Syphilis                                                                | 559.31<br>(118.33 to 1,296.11)                  | 125.83<br>(40.46 to 291.52)                   | 76.74<br>(29.06 to 162.55)                   | 169.53<br>(51.51 to 394.08)                   | 7.92<br>(2.76 to 16.43)                   | 2.45<br>(1.17 to 4.52)                | 1.64<br>(0.86 to 2.88)              | 3.05<br>(1.43 to 5.75)                  |
| Chlamydial infection                                                    | 43.16<br>(31.67 to 55.91)                       | 24.73<br>(13.24 to 43.39)                     | 22.05<br>(11.45 to 39.35)                    | 26.02<br>(13.63 to 46.42)                     | 1.10<br>(0.83 to 1.43)                    | 0.76<br>(0.45 to 1.25)                | 0.70<br>(0.41 to 1.15)              | 0.78<br>(0.46 to 1.27)                  |
| Gonococcal infection                                                    | 118.66<br>(88.31 to 152.32)                     | 72.25<br>(38.30 to 123.58)                    | 64.29<br>(33.74 to 113.00)                   | 76.03<br>(40.67 to 131.57)                    | 3.17<br>(2.40 to 4.07)                    | 2.32<br>(1.35 to 3.68)                | 2.13<br>(1.22 to 3.46)              | 2.37<br>(1.40 to 3.78)                  |
| Other sexually transmitted infections                                   | 61.92<br>(45.73 to 79.55)                       | 35.26<br>(18.04 to 63.50)                     | 31.01<br>(15.87 to 56.10)                    | 37.45<br>(19.75 to 66.72)                     | 1.54<br>(1.16 to 1.99)                    | 1.00<br>(0.57 to 1.65)                | 0.90<br>(0.50 to 1.53)              | 1.04<br>(0.60 to 1.73)                  |
| Acute hepatitis                                                         | 1,973.92<br>(1,623.62 to 2,405.08)              | 1,218.87<br>(698.64 to 2,102.78)              | 744.75<br>(424.91 to 1,253.97)               | 1,538.52<br>(907.20 to 2,621.80)              | 38.09<br>(31.71 to 45.81)                 | 32.89<br>(20.48 to 51.74)             | 21.02<br>(12.99 to 31.73)           | 39.57<br>(25.75 to 59.40)               |
| Acute hepatitis A                                                       | 390.45<br>(226.38 to 617.44)                    | 100.78<br>(36.32 to 240.61)                   | 61.71<br>(23.23 to 150.99)                   | 137.49<br>(48.73 to 323.94)                   | 4.86<br>(2.94 to 7.52)                    | 1.48<br>(0.68 to 3.15)                | 0.96<br>(0.46 to 2.02)              | 1.93<br>(0.86 to 4.11)                  |
| Acute hepatitis B                                                       | 1,229.25<br>(1,005.49 to 1,518.12)              | 956.47<br>(483.02 to 1,714.22)                | 584.59<br>(307.29 to 1,039.00)               | 1,194.27<br>(643.29 to 2,067.38)              | 27.29<br>(22.60 to 33.27)                 | 26.64<br>(15.14 to 43.29)             | 16.82<br>(9.86 to 26.73)            | 32.12<br>(19.91 to 50.78)               |

|                                       |                                                                        |                                                                        |                                                                        |                                                                        |                                                                 |                                                                  |                                                                 |                                                                  |
|---------------------------------------|------------------------------------------------------------------------|------------------------------------------------------------------------|------------------------------------------------------------------------|------------------------------------------------------------------------|-----------------------------------------------------------------|------------------------------------------------------------------|-----------------------------------------------------------------|------------------------------------------------------------------|
|                                       | 51.38<br>(36.39 to<br>69.84)                                           | 35.38<br>(19.12 to<br>60.25)                                           | 21.93<br>(11.72 to<br>37.92)                                           | 44.06<br>(24.28 to<br>72.69)                                           | 1.08<br>(0.78 to<br>1.45)                                       | 1.05<br>(0.62 to<br>1.67)                                        | 0.68<br>(0.39 to<br>1.10)                                       | 1.25<br>(0.75 to<br>1.97)                                        |
| Acute hepatitis C                     |                                                                        |                                                                        |                                                                        |                                                                        |                                                                 |                                                                  |                                                                 |                                                                  |
|                                       | 302.84<br>(217.21 to<br>418.62)                                        | 126.24<br>(69.30 to<br>213.44)                                         | 76.51<br>(43.33 to<br>126.98)                                          | 162.70<br>(89.33 to<br>268.10)                                         | 4.85<br>(3.61 to<br>6.39)                                       | 3.72<br>(2.22 to<br>5.76)                                        | 2.56<br>(1.49 to<br>4.00)                                       | 4.27<br>(2.57 to<br>6.54)                                        |
| Acute hepatitis E                     |                                                                        |                                                                        |                                                                        |                                                                        |                                                                 |                                                                  |                                                                 |                                                                  |
|                                       | 7,182.36<br>(5,014.71 to<br>9,791.12)                                  | 3,293.80<br>(2,069.29 to<br>5,328.44)                                  | 2,905.01<br>(1,836.15 to<br>4,635.45)                                  | 3,648.02<br>(2,278.78 to<br>6,052.32)                                  | 110.45<br>(80.92 to<br>142.49)                                  | 77.22<br>(52.83 to<br>109.66)                                    | 74.13<br>(51.48 to<br>102.57)                                   | 78.91<br>(53.89 to<br>112.82)                                    |
| Other unspecified infectious diseases |                                                                        |                                                                        |                                                                        |                                                                        |                                                                 |                                                                  |                                                                 |                                                                  |
| <b>Non-communicable diseases</b>      | <b>2,579,790.94</b><br><b>(2,210,150.59 to</b><br><b>3,013,829.40)</b> | <b>2,929,215.86</b><br><b>(1,782,868.15 to</b><br><b>4,265,014.39)</b> | <b>2,080,771.88</b><br><b>(1,284,784.02 to</b><br><b>2,939,845.14)</b> | <b>4,090,522.92</b><br><b>(2,506,191.93 to</b><br><b>5,832,582.14)</b> | <b>113,071.49</b><br><b>(97,923.21 to</b><br><b>131,301.17)</b> | <b>154,234.55</b><br><b>(107,275.16 to</b><br><b>203,632.61)</b> | <b>115,189.70</b><br><b>(81,769.06 to</b><br><b>152,793.77)</b> | <b>203,191.29</b><br><b>(145,500.63 to</b><br><b>265,716.81)</b> |

| Kazakhstan                           |                                                 |                                                 |                                                 |                                                   |                                              |                                              |                                              |                                              |
|--------------------------------------|-------------------------------------------------|-------------------------------------------------|-------------------------------------------------|---------------------------------------------------|----------------------------------------------|----------------------------------------------|----------------------------------------------|----------------------------------------------|
| Cause                                | YLLs (actual counts)                            |                                                 |                                                 |                                                   | Deaths (actual counts)                       |                                              |                                              |                                              |
|                                      | 2016                                            | 2040 Forecast                                   | 2040 Better Scenario                            | 2040 Worse Scenario                               | 2016                                         | 2040 Forecast                                | 2040 Better Scenario                         | 2040 Worse Scenario                          |
| <b>Neoplasms</b>                     | <b>483,712.30</b><br>(408,494.24 to 570,019.30) | <b>697,435.79</b><br>(428,954.22 to 955,330.83) | <b>568,036.78</b><br>(346,106.06 to 777,530.62) | <b>846,827.44</b><br>(526,441.98 to 1,164,816.87) | <b>18,382.29</b><br>(15,676.64 to 21,585.78) | <b>31,466.76</b><br>(21,754.63 to 40,268.79) | <b>26,863.18</b><br>(18,417.67 to 34,679.25) | <b>36,805.23</b><br>(25,787.10 to 46,970.13) |
| Lip and oral cavity cancer           | 9,600.81<br>(7,752.35 to 11,835.33)             | 12,000.32<br>(4,828.16 to 23,006.32)            | 7,582.06<br>(3,332.86 to 14,404.92)             | 18,870.32<br>(7,784.95 to 36,467.56)              | 362.96<br>(297.47 to 440.90)                 | 521.32<br>(238.72 to 949.20)                 | 353.03<br>(174.14 to 628.52)                 | 785.76<br>(350.98 to 1,418.83)               |
| Nasopharynx cancer                   | 2,437.37<br>(1,982.32 to 3,039.30)              | 2,458.01<br>(1,004.80 to 4,804.87)              | 1,338.53<br>(560.29 to 2,598.90)                | 4,132.54<br>(1,707.22 to 8,238.57)                | 75.87<br>(62.13 to 93.24)                    | 87.07<br>(40.17 to 165.70)                   | 49.39<br>(23.39 to 90.53)                    | 143.46<br>(65.48 to 264.15)                  |
| Other pharynx cancer                 | 4,723.22<br>(3,716.34 to 5,824.96)              | 7,792.45<br>(3,398.49 to 14,279.40)             | 7,252.81<br>(3,186.27 to 13,797.53)             | 8,837.00<br>(3,839.12 to 16,192.19)               | 169.21<br>(135.21 to 207.15)                 | 313.74<br>(144.27 to 545.67)                 | 300.57<br>(142.72 to 547.66)                 | 346.21<br>(157.82 to 615.20)                 |
| Esophageal cancer                    | 26,678.76<br>(22,264.77 to 32,123.00)           | 41,787.81<br>(20,004.38 to 75,272.02)           | 32,950.67<br>(16,293.88 to 59,083.49)           | 59,543.99<br>(28,058.20 to 107,101.78)            | 1,190.81<br>(1,002.01 to 1,420.33)           | 2,163.37<br>(1,152.01 to 3,749.07)           | 1,821.48<br>(998.62 to 3,105.65)             | 2,941.37<br>(1,510.54 to 5,111.00)           |
| Stomach cancer                       | 55,192.50<br>(46,026.85 to 66,361.12)           | 59,933.18<br>(35,330.91 to 91,962.58)           | 43,278.26<br>(25,912.79 to 66,295.26)           | 70,993.55<br>(43,451.13 to 106,053.96)            | 2,249.73<br>(1,894.72 to 2,686.19)           | 2,851.20<br>(1,814.69 to 4,150.92)           | 2,151.52<br>(1,384.57 to 3,136.35)           | 3,241.14<br>(2,175.37 to 4,534.21)           |
| Colon and rectum cancer              | 40,811.42<br>(34,116.18 to 49,314.78)           | 72,988.18<br>(41,669.87 to 114,267.66)          | 54,469.92<br>(31,437.58 to 84,221.56)           | 86,044.53<br>(48,860.90 to 135,244.52)            | 1,810.49<br>(1,535.31 to 2,165.14)           | 3,794.61<br>(2,364.99 to 5,625.47)           | 2,969.74<br>(1,885.43 to 4,364.47)           | 4,269.91<br>(2,661.85 to 6,452.20)           |
| Liver cancer                         | 25,681.95<br>(21,233.10 to 31,046.15)           | 52,326.37<br>(29,564.39 to 82,937.23)           | 50,912.98<br>(29,392.57 to 80,611.30)           | 63,729.45<br>(34,226.03 to 108,203.37)            | 1,030.47<br>(865.95 to 1,228.35)             | 2,410.93<br>(1,488.15 to 3,638.39)           | 2,458.45<br>(1,554.59 to 3,673.46)           | 2,798.25<br>(1,634.30 to 4,438.05)           |
| Liver cancer due to hepatitis B      | 7,422.04<br>(5,660.10 to 9,765.54)              | 14,294.20<br>(7,585.40 to 24,229.90)            | 14,520.08<br>(7,873.25 to 24,132.67)            | 16,125.91<br>(8,111.09 to 28,959.90)              | 272.30<br>(206.36 to 354.04)                 | 605.28<br>(345.02 to 985.31)                 | 640.73<br>(380.76 to 1,016.02)               | 655.45<br>(360.41 to 1,115.37)               |
| Liver cancer due to hepatitis C      | 7,650.60<br>(5,836.48 to 9,636.08)              | 16,449.35<br>(9,137.00 to 25,911.52)            | 17,048.94<br>(9,611.16 to 26,819.96)            | 18,095.08<br>(9,669.87 to 29,844.19)              | 334.28<br>(259.56 to 418.53)                 | 821.37<br>(497.17 to 1,245.91)               | 889.83<br>(548.63 to 1,342.35)               | 862.38<br>(500.88 to 1,356.41)               |
| Liver cancer due to alcohol use      | 6,854.22<br>(5,459.37 to 8,469.07)              | 13,812.69<br>(7,639.53 to 23,005.61)            | 11,426.46<br>(6,483.53 to 18,538.75)            | 20,796.93<br>(10,924.22 to 35,609.80)             | 280.61<br>(226.37 to 343.22)                 | 636.24<br>(381.65 to 981.09)                 | 556.21<br>(344.87 to 864.30)                 | 907.27<br>(513.66 to 1,483.77)               |
| Liver cancer due to other causes     | 3,755.09<br>(2,956.91 to 4,707.75)              | 7,770.13<br>(4,179.94 to 12,962.65)             | 7,917.50<br>(4,359.43 to 12,930.81)             | 8,711.53<br>(4,491.33 to 15,235.19)               | 143.29<br>(114.00 to 177.43)                 | 348.05<br>(203.38 to 549.18)                 | 371.68<br>(226.21 to 578.76)                 | 373.14<br>(204.61 to 624.69)                 |
| Gallbladder and biliary tract cancer | 5,281.73<br>(4,325.78 to 6,366.83)              | 7,464.22<br>(5,182.79 to 9,643.64)              | 7,408.06<br>(4,956.13 to 9,783.91)              | 7,107.93<br>(5,060.34 to 8,954.52)                | 235.54<br>(194.18 to 281.52)                 | 385.53<br>(291.23 to 470.69)                 | 395.61<br>(286.81 to 491.21)                 | 354.80<br>(277.30 to 419.55)                 |
| Pancreatic cancer                    | 24,826.53<br>(20,306.87 to 30,061.52)           | 43,455.88<br>(27,519.05 to 59,635.20)           | 42,602.07<br>(26,729.07 to 58,670.80)           | 44,186.93<br>(28,001.66 to 61,100.31)             | 1,013.57<br>(830.96 to 1,218.07)             | 2,059.42<br>(1,458.32 to 2,689.09)           | 2,102.46<br>(1,458.39 to 2,756.61)           | 2,011.42<br>(1,437.56 to 2,609.95)           |
| Larynx cancer                        | 6,372.69<br>(5,079.07 to 7,929.89)              | 7,220.42<br>(2,599.73 to 15,603.37)             | 3,836.63<br>(1,464.05 to 8,353.19)              | 12,437.81<br>(4,430.36 to 27,571.24)              | 244.23<br>(196.34 to 302.88)                 | 304.96<br>(120.82 to 627.84)                 | 171.71<br>(73.61 to 353.39)                  | 513.68<br>(202.57 to 1,074.42)               |
| Tracheal, bronchus, and lung cancer  | 78,792.26<br>(63,666.96 to 96,463.93)           | 110,233.21<br>(58,390.12 to 178,215.30)         | 70,638.48<br>(38,076.61 to 113,574.85)          | 170,761.91<br>(92,149.39 to 271,364.32)           | 3,180.96<br>(2,616.36 to 3,854.34)           | 4,915.78<br>(2,918.15 to 7,493.19)           | 3,381.71<br>(2,085.12 to 5,096.18)           | 7,421.19<br>(4,420.39 to 11,206.25)          |
| Malignant skin melanoma              | 4,003.86<br>(3,120.51 to 6,100.35)              | 8,533.56<br>(5,576.65 to 12,993.98)             | 10,981.63<br>(6,938.73 to 16,985.47)            | 7,222.98<br>(4,804.80 to 11,218.67)               | 147.82<br>(118.30 to 216.63)                 | 400.91<br>(296.92 to 582.81)                 | 539.41<br>(388.41 to 802.01)                 | 322.81<br>(247.12 to 468.04)                 |
| Non-melanoma skin cancer             | 1,971.60<br>(1,598.93 to 2,420.72)              | 2,535.36<br>(1,778.29 to 3,329.84)              | 2,037.47<br>(1,384.69 to 2,739.25)              | 2,628.07<br>(1,932.23 to 3,374.30)                | 86.32<br>(71.60 to 104.54)                   | 140.74<br>(111.63 to 173.52)                 | 120.22<br>(94.01 to 148.72)                  | 137.34<br>(111.37 to 164.28)                 |
| Breast cancer                        | 37,544.59<br>(28,872.22 to 48,692.61)           | 55,242.29<br>(29,518.14 to 93,842.74)           | 41,368.47<br>(21,843.02 to 68,563.40)           | 65,834.50<br>(34,827.59 to 112,553.70)            | 1,366.29<br>(1,067.42 to 1,748.38)           | 2,347.66<br>(1,389.07 to 3,793.60)           | 1,823.91<br>(1,078.24 to 2,883.86)           | 2,702.56<br>(1,627.22 to 4,344.06)           |
| Cervical cancer                      | 22,611.87<br>(17,241.17 to 29,142.43)           | 20,220.33<br>(11,080.53 to 31,555.76)           | 14,840.92<br>(8,134.20 to 23,008.05)            | 23,340.18<br>(12,787.38 to 35,877.03)             | 716.92<br>(549.35 to 918.11)                 | 791.60<br>(484.02 to 1,163.53)               | 599.17<br>(365.74 to 868.33)                 | 884.40<br>(553.49 to 1,267.40)               |

|                   |                                          |                                          |                                          |                                          |                                 |                                     |                                     |                                   |
|-------------------|------------------------------------------|------------------------------------------|------------------------------------------|------------------------------------------|---------------------------------|-------------------------------------|-------------------------------------|-----------------------------------|
|                   | 7,149.21<br>(5,500.31 to<br>9,186.06)    | 11,922.53<br>(7,223.86 to<br>17,293.53)  | 10,061.84<br>(5,884.71 to<br>14,889.96)  | 12,541.31<br>(7,764.04 to<br>17,810.90)  | 292.44<br>(225.24 to<br>371.68) | 565.50<br>(376.69 to<br>765.65)     | 490.90<br>(314.60 to<br>688.99)     | 578.83<br>(393.59 to<br>770.40)   |
| Uterine cancer    |                                          |                                          |                                          |                                          |                                 |                                     |                                     |                                   |
|                   | 15,825.87<br>(11,668.10 to<br>20,595.64) | 22,380.94<br>(12,152.24 to<br>33,122.92) | 19,383.73<br>(10,297.91 to<br>28,926.74) | 24,088.17<br>(13,191.69 to<br>36,144.70) | 554.91<br>(417.53 to<br>717.32) | 909.27<br>(536.18 to<br>1,307.80)   | 801.51<br>(462.26 to<br>1,163.08)   | 958.31<br>(565.19 to<br>1,379.27) |
| Ovarian cancer    |                                          |                                          |                                          |                                          |                                 |                                     |                                     |                                   |
|                   | 8,051.95<br>(5,516.86 to<br>10,440.08)   | 16,880.06<br>(11,246.61 to<br>21,808.84) | 15,792.18<br>(10,039.87 to<br>20,555.28) | 16,080.63<br>(10,788.77 to<br>20,297.50) | 442.66<br>(304.37 to<br>568.28) | 1,060.97<br>(739.13 to<br>1,332.39) | 1,046.53<br>(714.65 to<br>1,300.87) | 958.74<br>(656.37 to<br>1,197.86) |
| Prostate cancer   |                                          |                                          |                                          |                                          |                                 |                                     |                                     |                                   |
|                   | 973.30<br>(698.78 to<br>1,401.76)        | 1,381.21<br>(712.31 to<br>2,562.68)      | 1,109.90<br>(566.94 to<br>2,095.13)      | 1,496.42<br>(795.06 to<br>2,760.28)      | 24.69<br>(18.18 to<br>35.19)    | 40.25<br>(26.02 to<br>63.59)        | 34.17<br>(21.69 to<br>54.70)        | 41.16<br>(26.61 to<br>66.60)      |
| Testicular cancer |                                          |                                          |                                          |                                          |                                 |                                     |                                     |                                   |

| Kazakhstan                      |                                                              |                                                            |                                                          |                                                              |                                                     |                                                      |                                                     |                                                       |
|---------------------------------|--------------------------------------------------------------|------------------------------------------------------------|----------------------------------------------------------|--------------------------------------------------------------|-----------------------------------------------------|------------------------------------------------------|-----------------------------------------------------|-------------------------------------------------------|
| Cause                           | YLLs (actual counts)                                         |                                                            |                                                          |                                                              | Deaths (actual counts)                              |                                                      |                                                     |                                                       |
|                                 | 2016                                                         | 2040 Forecast                                              | 2040 Better Scenario                                     | 2040 Worse Scenario                                          | 2016                                                | 2040 Forecast                                        | 2040 Better Scenario                                | 2040 Worse Scenario                                   |
| Kidney cancer                   | 11,318.98<br>(9,345.55 to 13,684.13)                         | 18,026.16<br>(10,926.83 to 27,125.81)                      | 18,233.26<br>(10,967.16 to 27,171.42)                    | 18,094.21<br>(10,697.31 to 27,714.53)                        | 416.46<br>(347.53 to 499.07)                        | 787.56<br>(524.19 to 1,112.13)                       | 836.88<br>(554.54 to 1,166.34)                      | 756.51<br>(490.92 to 1,089.60)                        |
| Bladder cancer                  | 7,060.72<br>(5,700.22 to 8,747.27)                           | 11,172.01<br>(7,408.11 to 16,204.48)                       | 9,766.65<br>(6,440.04 to 13,814.48)                      | 12,275.32<br>(8,044.47 to 18,279.69)                         | 332.43<br>(273.90 to 402.47)                        | 623.43<br>(459.19 to 856.87)                         | 583.11<br>(427.90 to 777.15)                        | 648.39<br>(472.02 to 914.40)                          |
| Brain and nervous system cancer | 20,728.43<br>(16,585.02 to 24,600.82)                        | 27,734.94<br>(17,395.01 to 38,891.24)                      | 25,154.73<br>(15,621.21 to 35,462.07)                    | 28,486.13<br>(18,502.55 to 38,708.62)                        | 526.91<br>(426.09 to 631.45)                        | 867.84<br>(574.92 to 1,144.25)                       | 815.46<br>(532.25 to 1,087.77)                      | 858.77<br>(593.40 to 1,110.19)                        |
| Thyroid cancer                  | 1,760.43<br>(1,445.39 to 2,143.14)                           | 2,383.24<br>(1,430.14 to 3,671.59)                         | 2,038.04<br>(1,205.42 to 3,065.42)                       | 2,685.31<br>(1,623.88 to 4,152.84)                           | 71.76<br>(58.98 to 86.49)                           | 114.93<br>(75.66 to 168.49)                          | 101.52<br>(65.11 to 145.91)                         | 124.30<br>(82.36 to 182.77)                           |
| Mesothelioma                    | 1,106.56<br>(904.68 to 1,330.33)                             | 1,615.20<br>(1,076.22 to 2,110.49)                         | 1,719.89<br>(1,119.89 to 2,306.29)                       | 1,499.60<br>(1,031.18 to 1,928.63)                           | 41.46<br>(33.72 to 49.71)                           | 70.68<br>(50.85 to 88.78)                            | 77.56<br>(54.03 to 99.53)                           | 63.50<br>(47.06 to 77.80)                             |
| Hodgkin lymphoma                | 2,352.62<br>(1,949.76 to 2,855.47)                           | 1,859.66<br>(1,101.60 to 2,916.73)                         | 1,301.83<br>(770.52 to 1,985.35)                         | 2,153.73<br>(1,330.98 to 3,268.08)                           | 61.74<br>(50.99 to 74.45)                           | 58.60<br>(37.81 to 83.91)                            | 42.44<br>(27.56 to 59.60)                           | 65.44<br>(44.85 to 89.86)                             |
| Non-Hodgkin lymphoma            | 8,522.46<br>(6,649.24 to 11,510.27)                          | 12,295.32<br>(7,628.98 to 18,823.81)                       | 10,572.68<br>(6,390.27 to 16,353.38)                     | 13,328.95<br>(8,310.21 to 20,184.39)                         | 249.65<br>(196.31 to 336.12)                        | 448.87<br>(299.77 to 647.64)                         | 402.99<br>(263.91 to 585.42)                        | 465.79<br>(319.73 to 671.42)                          |
| Multiple myeloma                | 2,670.35<br>(2,019.95 to 3,876.85)                           | 5,100.07<br>(3,093.93 to 8,052.71)                         | 4,787.46<br>(2,829.16 to 7,596.55)                       | 5,285.87<br>(3,222.24 to 8,342.33)                           | 99.21<br>(76.19 to 141.68)                          | 218.93<br>(145.22 to 327.00)                         | 212.63<br>(139.38 to 319.09)                        | 218.97<br>(147.55 to 324.82)                          |
| Leukemia                        | 23,479.40<br>(19,120.40 to 27,985.90)                        | 24,986.51<br>(16,028.44 to 36,175.59)                      | 21,397.50<br>(13,324.96 to 30,799.10)                    | 28,564.69<br>(18,451.80 to 41,672.09)                        | 599.02<br>(496.87 to 707.63)                        | 829.91<br>(563.75 to 1,127.54)                       | 737.88<br>(498.23 to 1,004.32)                      | 915.05<br>(626.09 to 1,277.43)                        |
| Acute lymphoid leukemia         | 7,204.39<br>(5,567.88 to 8,885.51)                           | 5,406.02<br>(3,395.93 to 8,010.02)                         | 4,262.10<br>(2,595.45 to 6,394.45)                       | 6,411.95<br>(4,041.08 to 9,473.63)                           | 138.63<br>(105.54 to 169.87)                        | 133.47<br>(85.73 to 190.20)                          | 109.03<br>(68.38 to 156.02)                         | 154.60<br>(101.23 to 220.92)                          |
| Chronic lymphoid leukemia       | 1,686.21<br>(1,251.38 to 2,328.22)                           | 2,191.15<br>(1,220.98 to 3,455.00)                         | 1,942.38<br>(1,089.89 to 3,059.98)                       | 2,473.29<br>(1,374.64 to 3,955.69)                           | 58.01<br>(44.04 to 79.23)                           | 85.26<br>(51.67 to 129.14)                           | 77.89<br>(47.53 to 118.38)                          | 93.31<br>(57.12 to 144.25)                            |
| Acute myeloid leukemia          | 8,762.46<br>(7,207.94 to 10,607.34)                          | 11,296.93<br>(6,913.44 to 16,799.13)                       | 10,522.27<br>(6,459.32 to 15,871.62)                     | 12,408.76<br>(7,595.90 to 18,365.94)                         | 214.26<br>(175.28 to 258.16)                        | 334.94<br>(212.88 to 472.55)                         | 321.18<br>(202.00 to 452.45)                        | 359.43<br>(227.66 to 511.09)                          |
| Chronic myeloid leukemia        | 1,784.49<br>(1,289.20 to 2,290.49)                           | 1,292.02<br>(666.63 to 2,182.04)                           | 786.08<br>(400.35 to 1,266.60)                           | 1,750.28<br>(919.19 to 2,926.59)                             | 53.92<br>(39.24 to 69.24)                           | 45.14<br>(25.12 to 73.27)                            | 28.39<br>(15.79 to 44.21)                           | 59.29<br>(33.35 to 95.57)                             |
| Other leukemia                  | 4,041.85<br>(3,194.60 to 4,957.93)                           | 4,800.39<br>(3,205.81 to 6,965.33)                         | 3,884.67<br>(2,563.44 to 5,468.69)                       | 5,520.41<br>(3,726.61 to 7,935.90)                           | 134.20<br>(108.47 to 162.83)                        | 231.10<br>(166.18 to 310.91)                         | 201.39<br>(145.70 to 265.28)                        | 248.43<br>(178.10 to 339.12)                          |
| Other neoplasms                 | 26,180.86<br>(19,524.97 to 32,656.04)                        | 35,506.24<br>(22,919.71 to 49,151.30)                      | 35,218.16<br>(22,238.45 to 49,444.44)                    | 34,575.42<br>(22,927.14 to 47,408.20)                        | 787.77<br>(607.37 to 971.07)                        | 1,381.18<br>(993.00 to 1,765.75)                     | 1,441.21<br>(1,030.02 to 1,875.28)                  | 1,277.17<br>(942.32 to 1,596.79)                      |
| <b>Cardiovascular diseases</b>  | <b>1,305,956.09</b><br><b>(1,112,688.14 to 1,541,140.68)</b> | <b>1,343,864.25</b><br><b>(723,247.07 to 2,208,120.75)</b> | <b>757,940.99</b><br><b>(423,639.53 to 1,241,459.19)</b> | <b>2,196,979.86</b><br><b>(1,198,942.06 to 3,498,697.84)</b> | <b>67,664.89</b><br><b>(58,441.58 to 78,784.07)</b> | <b>81,630.91</b><br><b>(52,054.62 to 121,923.41)</b> | <b>50,900.57</b><br><b>(32,408.78 to 78,974.62)</b> | <b>120,573.54</b><br><b>(77,993.55 to 172,494.39)</b> |
| Rheumatic heart disease         | 18,862.76<br>(15,574.24 to 23,168.69)                        | 14,192.38<br>(7,946.86 to 23,441.73)                       | 10,206.38<br>(5,674.49 to 16,831.75)                     | 16,507.54<br>(9,343.84 to 26,938.52)                         | 631.93<br>(524.56 to 769.40)                        | 566.91<br>(350.61 to 869.39)                         | 429.21<br>(273.48 to 675.50)                        | 628.73<br>(406.28 to 950.43)                          |
| Ischemic heart disease          | 777,658.13<br>(658,765.16 to 917,380.24)                     | 761,845.48<br>(377,828.14 to 1,324,483.71)                 | 406,339.37<br>(206,835.84 to 706,504.64)                 | 1,307,275.02<br>(645,877.79 to 2,218,742.25)                 | 43,080.46<br>(37,205.59 to 50,044.97)               | 48,867.15<br>(28,843.78 to 76,432.03)                | 29,390.56<br>(17,015.32 to 47,247.79)               | 74,601.91<br>(43,951.80 to 114,662.47)                |
| Stroke                          | 345,661.01<br>(293,150.32 to 411,774.46)                     | 329,745.24<br>(160,519.73 to 567,649.00)                   | 164,745.61<br>(87,285.34 to 284,834.13)                  | 562,467.94<br>(278,967.03 to 932,420.91)                     | 17,699.25<br>(15,215.79 to 20,895.40)               | 20,171.40<br>(11,525.15 to 32,149.74)                | 11,310.65<br>(6,678.94 to 18,076.64)                | 30,709.89<br>(18,018.82 to 47,182.67)                 |
| Ischemic stroke                 | 177,307.70<br>(151,246.05 to 210,301.14)                     | 172,916.30<br>(88,011.36 to 306,257.51)                    | 95,242.80<br>(50,895.67 to 163,348.69)                   | 265,723.57<br>(137,298.59 to 454,580.44)                     | 10,419.77<br>(8,946.32 to 12,286.59)                | 12,078.89<br>(6,801.40 to 20,596.70)                 | 7,316.62<br>(4,158.09 to 12,390.90)                 | 16,824.49<br>(9,375.47 to 28,593.32)                  |

|                                |                                             |                                            |                                           |                                             |                                       |                                        |                                        |                                         |
|--------------------------------|---------------------------------------------|--------------------------------------------|-------------------------------------------|---------------------------------------------|---------------------------------------|----------------------------------------|----------------------------------------|-----------------------------------------|
| Intracerebral hemorrhage       | 168,353.31<br>(140,926.58 to<br>202,501.34) | 156,828.94<br>(67,497.98 to<br>310,194.90) | 69,502.80<br>(32,008.27 to<br>129,892.35) | 296,744.37<br>(131,463.80 to<br>549,156.09) | 7,279.49<br>(6,175.43 to<br>8,737.34) | 8,092.51<br>(4,136.46 to<br>14,671.34) | 3,994.04<br>(2,122.26 to<br>6,918.65)  | 13,885.40<br>(7,125.82 to<br>23,880.35) |
| Hypertensive heart disease     | 40,177.10<br>(28,567.68 to<br>71,978.18)    | 90,746.20<br>(36,200.28 to<br>238,806.20)  | 69,930.54<br>(28,117.62 to<br>188,164.66) | 124,667.32<br>(49,467.89 to<br>310,578.93)  | 1,977.68<br>(1,355.05 to<br>3,804.55) | 5,340.91<br>(2,208.08 to<br>14,085.98) | 4,463.26<br>(1,838.61 to<br>12,388.06) | 6,893.52<br>(2,833.09 to<br>17,922.77)  |
| Cardiomyopathy and myocarditis | 74,219.11<br>(49,595.73 to<br>98,969.72)    | 67,694.80<br>(34,177.65 to<br>109,164.79)  | 50,351.17<br>(25,008.64 to<br>83,691.50)  | 87,389.07<br>(45,107.19 to<br>144,120.21)   | 2,280.82<br>(1,444.04 to<br>3,067.99) | 2,603.88<br>(1,332.75 to<br>3,967.53)  | 2,044.87<br>(1,039.38 to<br>3,201.48)  | 3,192.23<br>(1,683.26 to<br>4,959.38)   |
| Myocarditis                    | 7,056.24<br>(4,902.99 to<br>9,829.70)       | 6,306.10<br>(3,408.33 to<br>10,281.40)     | 6,018.54<br>(3,258.35 to<br>9,891.97)     | 6,362.75<br>(3,559.44 to<br>10,420.46)      | 181.27<br>(119.53 to<br>246.57)       | 223.67<br>(117.13 to<br>326.17)        | 233.32<br>(116.55 to<br>339.23)        | 208.57<br>(113.09 to<br>302.66)         |

| Kazakhstan                                                    |                                                      |                                                      |                                                     |                                                      |                                                |                                                 |                                                 |                                                  |
|---------------------------------------------------------------|------------------------------------------------------|------------------------------------------------------|-----------------------------------------------------|------------------------------------------------------|------------------------------------------------|-------------------------------------------------|-------------------------------------------------|--------------------------------------------------|
| Cause                                                         | YLLs (actual counts)                                 |                                                      |                                                     |                                                      | Deaths (actual counts)                         |                                                 |                                                 |                                                  |
|                                                               | 2016                                                 | 2040 Forecast                                        | 2040 Better Scenario                                | 2040 Worse Scenario                                  | 2016                                           | 2040 Forecast                                   | 2040 Better Scenario                            | 2040 Worse Scenario                              |
| Alcoholic cardiomyopathy                                      | 33,183.39<br>(22,666.21 to<br>44,546.38)             | 31,624.74<br>(17,192.12 to<br>48,806.31)             | 25,451.46<br>(13,097.72 to<br>40,417.61)            | 42,437.60<br>(23,802.03 to<br>63,781.72)             | 1,059.87<br>(690.39 to<br>1,417.15)            | 1,223.99<br>(669.79 to<br>1,766.09)             | 1,033.66<br>(536.73 to<br>1,494.38)             | 1,571.67<br>(912.48 to<br>2,234.44)              |
| Other cardiomyopathy                                          | 33,979.49<br>(17,535.13 to<br>47,236.72)             | 29,763.96<br>(10,904.30 to<br>57,828.83)             | 18,881.17<br>(6,929.70 to<br>37,226.22)             | 38,588.72<br>(14,329.32 to<br>74,562.86)             | 1,039.68<br>(522.50 to<br>1,441.27)            | 1,156.22<br>(462.50 to<br>2,102.74)             | 777.88<br>(312.79 to<br>1,436.29)               | 1,411.99<br>(561.27 to<br>2,647.89)              |
| Atrial fibrillation and flutter                               | 3,894.50<br>(2,900.58 to<br>5,036.91)                | 9,615.19<br>(6,808.42 to<br>12,996.91)               | 9,175.84<br>(6,444.24 to<br>12,664.08)              | 9,709.89<br>(6,783.28 to<br>13,351.50)               | 351.91<br>(263.85 to<br>457.17)                | 982.17<br>(699.21 to<br>1,365.97)               | 992.11<br>(705.17 to<br>1,354.71)               | 935.64<br>(636.85 to<br>1,319.17)                |
| Aortic aneurysm                                               | 8,016.76<br>(6,533.43 to<br>9,744.89)                | 10,583.68<br>(6,147.58 to<br>16,784.25)              | 8,608.89<br>(4,929.01 to<br>13,775.48)              | 11,955.36<br>(7,044.02 to<br>18,817.26)              | 309.28<br>(255.67 to<br>371.50)                | 485.51<br>(328.02 to<br>697.96)                 | 427.18<br>(286.76 to<br>619.39)                 | 511.36<br>(351.23 to<br>726.26)                  |
| Peripheral artery disease                                     | 282.34<br>(192.85 to<br>397.32)                      | 881.25<br>(493.65 to<br>1,420.28)                    | 876.37<br>(475.73 to<br>1,446.25)                   | 866.63<br>(489.37 to<br>1,394.28)                    | 18.15<br>(11.69 to<br>26.28)                   | 70.43<br>(40.36 to<br>111.40)                   | 75.58<br>(41.61 to<br>121.85)                   | 63.96<br>(37.10 to<br>101.63)                    |
| Endocarditis                                                  | 3,305.80<br>(2,156.86 to<br>4,285.74)                | 3,984.14<br>(2,045.79 to<br>6,891.82)                | 3,758.23<br>(1,926.83 to<br>6,514.01)               | 4,283.21<br>(2,204.28 to<br>7,405.21)                | 86.38<br>(59.39 to<br>110.18)                  | 138.79<br>(85.10 to<br>215.75)                  | 139.66<br>(85.25 to<br>222.81)                  | 139.60<br>(85.59 to<br>216.16)                   |
| Other cardiovascular and circulatory diseases                 | 33,878.60<br>(27,919.60 to<br>41,177.81)             | 54,575.87<br>(28,378.72 to<br>91,699.07)             | 33,948.58<br>(18,349.80 to<br>58,088.14)            | 70,957.88<br>(38,005.48 to<br>121,386.11)            | 1,229.01<br>(1,028.91 to<br>1,469.20)          | 2,403.77<br>(1,453.66 to<br>3,746.58)           | 1,627.49<br>(1,017.22 to<br>2,526.91)           | 2,895.70<br>(1,828.58 to<br>4,470.84)            |
| <b>Chronic respiratory diseases</b>                           | <b>125,266.99<br/>(105,163.80 to<br/>148,794.41)</b> | <b>153,947.51<br/>(82,013.69 to<br/>254,983.28)</b>  | <b>107,232.51<br/>(59,860.59 to<br/>169,784.85)</b> | <b>230,174.47<br/>(119,747.51 to<br/>397,378.74)</b> | <b>6,155.86<br/>(5,203.48 to<br/>7,202.07)</b> | <b>8,909.45<br/>(5,473.21 to<br/>14,022.03)</b> | <b>6,893.81<br/>(4,424.75 to<br/>10,363.29)</b> | <b>12,375.79<br/>(7,162.48 to<br/>20,728.49)</b> |
| Chronic obstructive pulmonary disease                         | 107,240.91<br>(89,551.12 to<br>127,019.84)           | 134,913.68<br>(68,579.52 to<br>231,990.88)           | 88,025.73<br>(46,728.28 to<br>147,033.92)           | 208,915.06<br>(105,239.48 to<br>373,842.24)          | 5,368.17<br>(4,530.80 to<br>6,286.05)          | 5,368.17<br>(4,656.14 to<br>12,340.27)          | 5,848.78<br>(3,627.88 to<br>9,050.38)           | 11,291.93<br>(6,177.71 to<br>19,435.20)          |
| Pneumoconiosis                                                | 957.59<br>(749.67 to<br>1,246.15)                    | 1,452.95<br>(951.62 to<br>2,065.49)                  | 1,539.81<br>(977.48 to<br>2,264.43)                 | 1,486.02<br>(994.42 to<br>2,047.11)                  | 41.83<br>(32.71 to<br>53.96)                   | 81.67<br>(56.62 to<br>114.66)                   | 92.12<br>(61.07 to<br>136.28)                   | 79.50<br>(56.91 to<br>110.46)                    |
| Silicosis                                                     | 3.94<br>(2.27 to<br>8.50)                            | 3.74<br>(1.29 to<br>13.89)                           | 2.60<br>(0.89 to<br>9.78)                           | 4.46<br>(1.64 to<br>14.41)                           | 0.15<br>(0.09 to<br>0.37)                      | 0.18<br>(0.07 to<br>0.71)                       | 0.14<br>(0.05 to<br>0.61)                       | 0.20<br>(0.08 to<br>0.72)                        |
| Asbestosis                                                    | 257.48<br>(114.75 to<br>367.42)                      | 562.86<br>(242.25 to<br>870.84)                      | 716.07<br>(348.33 to<br>1,101.44)                   | 481.20<br>(202.37 to<br>729.64)                      | 9.95<br>(3.88 to<br>14.31)                     | 27.66<br>(11.97 to<br>41.85)                    | 37.05<br>(19.01 to<br>54.81)                    | 22.42<br>(9.53 to<br>33.47)                      |
| Coal workers pneumoconiosis                                   | 53.47<br>(12.10 to<br>94.18)                         | 56.52<br>(15.87 to<br>132.03)                        | 29.62<br>(8.53 to<br>74.74)                         | 81.18<br>(22.46 to<br>181.53)                        | 1.59<br>(0.41 to<br>2.82)                      | 1.86<br>(0.62 to<br>4.34)                       | 1.05<br>(0.37 to<br>2.52)                       | 2.59<br>(0.80 to<br>5.70)                        |
| Other pneumoconiosis                                          | 642.71<br>(475.49 to<br>869.52)                      | 829.82<br>(498.48 to<br>1,293.90)                    | 791.52<br>(448.52 to<br>1,321.53)                   | 919.18<br>(582.88 to<br>1,368.88)                    | 30.14<br>(22.77 to<br>39.54)                   | 51.96<br>(32.21 to<br>79.91)                    | 53.88<br>(30.94 to<br>89.42)                    | 54.28<br>(35.12 to<br>81.68)                     |
| Asthma                                                        | 11,081.02<br>(8,845.05 to<br>14,098.83)              | 7,277.96<br>(3,275.34 to<br>14,595.93)               | 4,162.23<br>(1,896.63 to<br>8,001.03)               | 10,875.96<br>(4,986.53 to<br>21,998.27)              | 515.06<br>(407.15 to<br>640.39)                | 425.96<br>(200.79 to<br>814.87)                 | 261.27<br>(123.79 to<br>493.28)                 | 593.68<br>(282.43 to<br>1,152.58)                |
| Interstitial lung disease and pulmonary sarcoidosis           | 3,169.73<br>(2,337.48 to<br>4,274.45)                | 6,336.60<br>(3,884.49 to<br>9,585.21)                | 9,464.26<br>(5,791.67 to<br>14,112.27)              | 4,950.51<br>(3,093.22 to<br>7,382.44)                | 120.35<br>(90.45 to<br>178.70)                 | 297.46<br>(195.14 to<br>485.02)                 | 465.39<br>(297.49 to<br>761.79)                 | 221.10<br>(151.58 to<br>363.28)                  |
| Other chronic respiratory diseases                            | 2,817.74<br>(1,802.29 to<br>3,971.60)                | 3,966.33<br>(2,009.99 to<br>6,461.23)                | 4,040.46<br>(1,982.22 to<br>6,646.91)               | 3,946.92<br>(2,014.02 to<br>6,567.96)                | 110.45<br>(55.92 to<br>151.89)                 | 205.51<br>(88.27 to<br>327.47)                  | 226.25<br>(92.74 to<br>358.01)                  | 189.59<br>(82.91 to<br>306.46)                   |
| <b>Cirrhosis and other chronic liver diseases</b>             | <b>231,278.65<br/>(191,711.13 to<br/>275,607.85)</b> | <b>194,128.63<br/>(123,952.12 to<br/>261,181.33)</b> | <b>150,454.72<br/>(97,779.66 to<br/>206,159.71)</b> | <b>228,317.79<br/>(151,528.41 to<br/>301,264.49)</b> | <b>7,793.15<br/>(6,551.27 to<br/>9,116.62)</b> | <b>7,993.27<br/>(5,833.50 to<br/>9,963.89)</b>  | <b>6,460.83<br/>(4,667.67 to<br/>8,171.60)</b>  | <b>9,005.89<br/>(6,939.13 to<br/>10,984.73)</b>  |
| Cirrhosis and other chronic liver diseases due to hepatitis B | 81,690.56<br>(66,078.35 to<br>99,074.03)             | 69,866.91<br>(44,251.11 to<br>95,140.58)             | 57,672.39<br>(36,888.32 to<br>80,185.24)            | 73,784.09<br>(48,698.17 to<br>99,274.68)             | 2,753.12<br>(2,276.34 to<br>3,300.01)          | 2,875.82<br>(2,062.70 to<br>3,628.32)           | 2,469.19<br>(1,751.76 to<br>3,174.07)           | 2,142.42<br>(2,181.35 to<br>3,597.44)            |
| Cirrhosis and other chronic liver diseases due to hepatitis C | 44,656.58<br>(35,380.96 to<br>55,947.99)             | 39,053.10<br>(24,089.05 to<br>54,856.09)             | 31,648.80<br>(19,258.99 to<br>44,975.30)            | 41,688.24<br>(26,237.31 to<br>57,516.93)             | 1,465.37<br>(1,187.62 to<br>1,803.27)          | 1,522.74<br>(1,057.38 to<br>1,976.71)           | 1,276.37<br>(873.47 to<br>1,699.74)             | 1,568.38<br>(1,134.30 to<br>2,003.16)            |

|                                                                |                                                               |                                                                |                                                               |                                                                |                                                            |                                                            |                                                            |                                                            |
|----------------------------------------------------------------|---------------------------------------------------------------|----------------------------------------------------------------|---------------------------------------------------------------|----------------------------------------------------------------|------------------------------------------------------------|------------------------------------------------------------|------------------------------------------------------------|------------------------------------------------------------|
|                                                                | 66,572.91<br>(53,911.77 to<br>81,173.70)                      | 53,686.41<br>(34,241.43 to<br>74,098.94)                       | 35,343.33<br>(22,569.17 to<br>49,165.76)                      | 79,155.57<br>(52,925.92 to<br>106,548.29)                      | 2,303.79<br>(1,894.18 to<br>2,784.11)                      | 2,265.18<br>(1,663.71 to<br>2,904.37)                      | 1,577.38<br>(1,137.59 to<br>2,046.86)                      | 3,168.59<br>(2,413.07 to<br>3,973.01)                      |
| Cirrhosis and other chronic liver diseases due to alcohol use  |                                                               |                                                                |                                                               |                                                                |                                                            |                                                            |                                                            |                                                            |
|                                                                | 38,358.60<br>(31,570.81 to<br>46,254.04)                      | 31,522.22<br>(20,631.26 to<br>43,236.78)                       | 25,790.20<br>(17,001.89 to<br>35,342.83)                      | 33,689.89<br>(22,887.99 to<br>45,468.25)                       | 1,270.86<br>(1,052.79 to<br>1,532.08)                      | 1,329.52<br>(980.86 to<br>1,671.62)                        | 1,137.89<br>(822.06 to<br>1,454.25)                        | 1,356.49<br>(1,039.93 to<br>1,696.69)                      |
| Cirrhosis and other chronic liver diseases due to other causes |                                                               |                                                                |                                                               |                                                                |                                                            |                                                            |                                                            |                                                            |
|                                                                | <b>62,620.04</b><br><b>(46,483.11 to</b><br><b>81,249.39)</b> | <b>72,611.41</b><br><b>(35,046.99 to</b><br><b>140,351.86)</b> | <b>53,752.24</b><br><b>(27,372.42 to</b><br><b>96,711.64)</b> | <b>88,235.45</b><br><b>(41,718.74 to</b><br><b>171,000.58)</b> | <b>2,075.56</b><br><b>(1,572.30 to</b><br><b>2,645.05)</b> | <b>3,044.94</b><br><b>(1,744.77 to</b><br><b>5,274.21)</b> | <b>2,419.30</b><br><b>(1,432.88 to</b><br><b>3,973.17)</b> | <b>3,481.69</b><br><b>(1,956.51 to</b><br><b>6,094.76)</b> |
| Digestive diseases                                             |                                                               |                                                                |                                                               |                                                                |                                                            |                                                            |                                                            |                                                            |
|                                                                | 11,071.90<br>(8,133.85 to<br>14,611.26)                       | 7,017.66<br>(3,826.21 to<br>11,472.77)                         | 4,341.71<br>(2,323.72 to<br>7,087.93)                         | 8,781.97<br>(4,784.02 to<br>13,931.38)                         | 388.15<br>(294.04 to<br>503.00)                            | 289.89<br>(176.20 to<br>445.06)                            | 186.77<br>(112.87 to<br>282.11)                            | 347.48<br>(213.47 to<br>512.96)                            |
| Peptic ulcer disease                                           |                                                               |                                                                |                                                               |                                                                |                                                            |                                                            |                                                            |                                                            |



| Kazakhstan                                 |                                        |                                         |                                          |                                         |                                    |                                     |                                      |                                     |
|--------------------------------------------|----------------------------------------|-----------------------------------------|------------------------------------------|-----------------------------------------|------------------------------------|-------------------------------------|--------------------------------------|-------------------------------------|
| Cause                                      | YLLs (actual counts)                   |                                         |                                          |                                         | Deaths (actual counts)             |                                     |                                      |                                     |
|                                            | 2016                                   | 2040 Forecast                           | 2040 Better Scenario                     | 2040 Worse Scenario                     | 2016                               | 2040 Forecast                       | 2040 Better Scenario                 | 2040 Worse Scenario                 |
| Gastritis and duodenitis                   | 502.13<br>(317.73 to 668.43)           | 658.28<br>(356.31 to 1,023.15)          | 504.23<br>(269.81 to 775.74)             | 712.19<br>(399.11 to 1,094.93)          | 21.02<br>(12.73 to 27.55)          | 33.62<br>(20.37 to 48.07)           | 27.46<br>(15.59 to 39.36)            | 34.26<br>(20.97 to 47.97)           |
| Appendicitis                               | 1,680.44<br>(1,060.20 to 2,867.29)     | 1,402.39<br>(713.52 to 2,730.97)        | 900.10<br>(443.70 to 1,797.92)           | 1,699.64<br>(879.78 to 3,203.90)        | 39.50<br>(25.70 to 66.27)          | 43.48<br>(24.36 to 81.15)           | 29.19<br>(15.78 to 54.74)            | 50.30<br>(28.44 to 90.36)           |
| Paralytic ileus and intestinal obstruction | 9,512.98<br>(6,285.13 to 13,838.92)    | 8,308.83<br>(5,134.08 to 12,342.01)     | 8,209.43<br>(5,008.40 to 12,262.53)      | 8,199.59<br>(5,138.78 to 12,234.90)     | 242.76<br>(169.87 to 315.58)       | 332.54<br>(223.56 to 454.89)        | 354.14<br>(238.12 to 487.38)         | 303.45<br>(208.07 to 414.43)        |
| Inguinal, femoral, and abdominal hernia    | 1,506.29<br>(969.43 to 2,555.08)       | 1,423.70<br>(811.86 to 2,824.93)        | 1,196.18<br>(665.13 to 2,300.81)         | 1,478.37<br>(852.97 to 2,889.93)        | 63.05<br>(41.28 to 110.34)         | 75.75<br>(45.84 to 148.98)          | 67.85<br>(39.12 to 135.08)           | 74.21<br>(45.72 to 145.65)          |
| Inflammatory bowel disease                 | 2,545.49<br>(1,780.45 to 3,347.19)     | 3,011.41<br>(1,648.98 to 4,576.28)      | 2,927.37<br>(1,567.71 to 4,502.32)       | 2,960.72<br>(1,658.68 to 4,473.16)      | 76.39<br>(52.42 to 99.44)          | 115.13<br>(69.66 to 163.27)         | 117.30<br>(70.01 to 168.17)          | 108.03<br>(67.25 to 151.51)         |
| Vascular intestinal disorders              | 3,907.34<br>(2,593.05 to 5,837.36)     | 6,587.34<br>(4,173.03 to 8,901.73)      | 6,110.45<br>(3,770.11 to 8,527.19)       | 6,399.97<br>(4,179.20 to 8,533.55)      | 200.18<br>(139.90 to 255.18)       | 405.55<br>(274.99 to 535.74)        | 396.09<br>(261.78 to 538.70)         | 375.12<br>(262.70 to 490.20)        |
| Gallbladder and biliary diseases           | 3,532.77<br>(2,662.85 to 4,450.39)     | 5,633.68<br>(2,483.68 to 11,006.59)     | 3,930.03<br>(1,764.56 to 7,443.42)       | 7,776.66<br>(3,505.25 to 15,131.50)     | 163.31<br>(125.09 to 203.47)       | 311.05<br>(147.19 to 587.02)        | 230.17<br>(111.54 to 433.16)         | 403.73<br>(194.17 to 764.42)        |
| Pancreatitis                               | 24,238.85<br>(14,523.39 to 34,092.80)  | 34,058.69<br>(9,372.46 to 93,212.60)    | 21,644.05<br>(6,384.71 to 56,849.68)     | 45,597.81<br>(12,538.08 to 116,290.24)  | 746.52<br>(455.44 to 1,019.19)     | 1,241.68<br>(407.55 to 3,132.22)    | 824.87<br>(285.93 to 1,973.29)       | 1,595.40<br>(509.42 to 3,853.36)    |
| Other digestive diseases                   | 4,121.86<br>(2,637.91 to 5,449.67)     | 4,509.43<br>(2,562.78 to 6,983.21)      | 3,988.68<br>(2,268.43 to 6,067.77)       | 4,628.52<br>(2,712.49 to 6,983.52)      | 134.68<br>(91.72 to 174.43)        | 196.44<br>(127.96 to 274.68)        | 185.47<br>(119.17 to 258.82)         | 189.71<br>(125.97 to 256.09)        |
| Neurological disorders                     | 55,562.06<br>(45,742.45 to 67,477.36)  | 113,520.48<br>(86,489.91 to 153,618.50) | 118,909.58<br>(90,828.01 to 157,876.92)  | 111,751.72<br>(82,284.52 to 157,448.00) | 3,485.41<br>(2,891.54 to 4,347.00) | 9,284.76<br>(6,857.23 to 12,505.73) | 10,640.03<br>(8,225.48 to 13,656.78) | 8,391.55<br>(5,701.60 to 11,802.70) |
| Alzheimer's disease and other dementias    | 27,780.89<br>(22,191.46 to 36,129.16)  | 71,160.16<br>(50,258.98 to 100,406.53)  | 77,773.23<br>(56,768.03 to 106,899.11)   | 67,659.34<br>(44,905.99 to 99,706.62)   | 2,603.14<br>(2,097.41 to 3,357.77) | 7,394.82<br>(5,000.90 to 10,366.84) | 8,514.10<br>(6,112.21 to 11,506.38)  | 6,679.75<br>(4,090.56 to 10,108.82) |
| Parkinson's disease                        | 5,218.27<br>(3,815.68 to 6,886.27)     | 13,552.43<br>(9,866.79 to 17,647.92)    | 16,396.33<br>(11,844.02 to 21,483.57)    | 11,156.89<br>(8,058.80 to 14,442.64)    | 396.73<br>(287.75 to 530.49)       | 1,154.06<br>(845.43 to 1,511.30)    | 1,449.09<br>(1,062.95 to 1,897.36)   | 916.05<br>(649.16 to 1,241.02)      |
| Epilepsy                                   | 16,279.19<br>(12,208.30 to 23,533.30)  | 19,917.67<br>(8,180.42 to 42,580.18)    | 15,628.64<br>(6,436.66 to 33,588.08)     | 24,297.30<br>(10,177.16 to 52,382.04)   | 316.10<br>(238.79 to 451.93)       | 424.72<br>(188.01 to 884.21)        | 338.35<br>(151.11 to 677.55)         | 510.21<br>(229.12 to 1,032.06)      |
| Multiple sclerosis                         | 1,430.52<br>(776.63 to 2,879.40)       | 2,188.69<br>(1,073.61 to 4,514.51)      | 2,319.24<br>(1,176.72 to 4,687.22)       | 2,096.47<br>(1,018.03 to 4,409.89)      | 46.98<br>(28.30 to 88.38)          | 94.46<br>(59.57 to 159.04)          | 108.50<br>(70.20 to 173.67)          | 83.77<br>(51.38 to 148.55)          |
| Motor neuron disease                       | 1,091.51<br>(748.74 to 1,550.34)       | 2,153.20<br>(1,257.39 to 3,365.28)      | 2,154.60<br>(1,243.60 to 3,399.96)       | 2,089.91<br>(1,232.69 to 3,212.62)      | 33.74<br>(23.39 to 47.38)          | 75.66<br>(47.28 to 112.35)          | 77.71<br>(47.21 to 104.73)           | 71.49<br>(45.70 to 104.73)          |
| Other neurological disorders               | 3,761.67<br>(2,902.86 to 4,707.51)     | 4,548.34<br>(3,039.23 to 6,721.52)      | 4,637.55<br>(3,029.25 to 6,900.61)       | 4,451.80<br>(2,995.91 to 6,560.52)      | 88.73<br>(68.54 to 114.09)         | 141.04<br>(101.52 to 192.49)        | 152.27<br>(107.63 to 211.15)         | 130.27<br>(95.72 to 176.92)         |
| Mental disorders                           | 84,563.68<br>(67,297.38 to 105,187.07) | 148,542.88<br>(84,464.31 to 236,990.58) | 186,512.90<br>(103,154.75 to 300,779.35) | 134,163.42<br>(76,415.46 to 208,801.81) | 2,124.36<br>(1,705.74 to 2,629.81) | 4,311.37<br>(2,526.11 to 6,116.39)  | 5,309.19<br>(3,231.99 to 7,636.82)   | 3,621.22<br>(2,289.93 to 5,174.85)  |
| Alcohol use disorders                      | 48,326.35<br>(38,076.81 to 61,078.11)  | 36,269.90<br>(19,339.98 to 56,361.11)   | 38,588.96<br>(20,267.73 to 60,660.47)    | 36,826.52<br>(20,212.21 to 56,274.75)   | 1,265.24<br>(1,001.90 to 1,586.78) | 1,045.97<br>(589.39 to 1,543.05)    | 1,134.91<br>(633.93 to 1,707.48)     | 1,041.90<br>(600.74 to 1,544.44)    |
| Drug use disorders                         | 36,208.04<br>(28,214.28 to 45,527.14)  | 112,235.88<br>(62,203.24 to 181,591.00) | 147,886.66<br>(80,694.07 to 231,021.99)  | 97,299.89<br>(54,913.19 to 154,105.58)  | 858.52<br>(676.99 to 1,077.46)     | 3,064.64<br>(1,895.90 to 4,526.55)  | 4,173.53<br>(2,584.12 to 6,093.76)   | 2,578.58<br>(1,631.31 to 3,726.40)  |
| Opioid use disorders                       | 24,678.00<br>(17,844.03 to 32,289.08)  | 57,180.10<br>(30,368.53 to 95,662.41)   | 63,627.29<br>(33,626.77 to 106,595.07)   | 53,339.12<br>(28,843.50 to 87,917.30)   | 567.76<br>(415.72 to 724.91)       | 1,483.06<br>(850.46 to 2,282.50)    | 1,686.65<br>(940.84 to 2,667.89)     | 1,354.17<br>(773.27 to 2,056.89)    |

|                           |                                        |                                          |                                          |                                          |                                 |                                   |                                       |                                   |
|---------------------------|----------------------------------------|------------------------------------------|------------------------------------------|------------------------------------------|---------------------------------|-----------------------------------|---------------------------------------|-----------------------------------|
|                           | 2,423.33<br>(1,738.17 to<br>3,715.66)  | 11,729.09<br>(5,942.98 to<br>19,809.86)  | 16,270.75<br>(8,364.03 to<br>28,016.59)  | 9,810.83<br>(5,022.68 to<br>16,322.52)   | 58.36<br>(42.31 to<br>88.15)    | 319.07<br>(169.69 to<br>512.70)   | 449.93<br>(242.44 to<br>730.71)       | 261.92<br>(142.76 to<br>411.64)   |
| Cocaine use disorders     |                                        |                                          |                                          |                                          |                                 |                                   |                                       |                                   |
|                           | 1,503.03<br>(1,022.37 to<br>2,523.48)  | 11,456.69<br>(5,468.47 to<br>21,236.26)  | 18,718.51<br>(9,250.52 to<br>34,359.84)  | 8,884.72<br>(4,274.45 to<br>16,549.36)   | 34.86<br>(24.00 to<br>56.03)    | 288.75<br>(147.32 to<br>495.32)   | 478.77<br>(248.09 to<br>820.91)       | 230.33<br>(115.65 to<br>381.79)   |
| Amphetamine use disorders |                                        |                                          |                                          |                                          |                                 |                                   |                                       |                                   |
|                           | 7,603.67<br>(5,582.67 to<br>10,865.61) | 31,870.01<br>(17,601.82 to<br>52,054.95) | 49,270.12<br>(27,163.02 to<br>78,711.46) | 25,265.22<br>(13,895.75 to<br>40,358.62) | 197.54<br>(149.68 to<br>266.62) | 973.76<br>(618.08 to<br>1,431.59) | 1,558.18<br>(1,001.07 to<br>2,278.25) | 742.16<br>(482.09 to<br>1,071.94) |
| Other drug use disorders  |                                        |                                          |                                          |                                          |                                 |                                   |                                       |                                   |
|                           | 29.30<br>(21.79 to<br>37.65)           | 37.11<br>(16.70 to<br>67.65)             | 37.29<br>(16.53 to<br>68.18)             | 37.00<br>(16.20 to<br>66.09)             | 0.60<br>(0.45 to<br>0.77)       | 0.75<br>(0.34 to<br>1.34)         | 0.76<br>(0.34 to<br>1.41)             | 0.75<br>(0.33 to<br>1.32)         |
| Eating disorders          |                                        |                                          |                                          |                                          |                                 |                                   |                                       |                                   |

| Kazakhstan                                                 |                                                |                                                |                                                |                                                 |                                           |                                            |                                           |                                            |
|------------------------------------------------------------|------------------------------------------------|------------------------------------------------|------------------------------------------------|-------------------------------------------------|-------------------------------------------|--------------------------------------------|-------------------------------------------|--------------------------------------------|
| Cause                                                      | YLLs (actual counts)                           |                                                |                                                |                                                 | Deaths (actual counts)                    |                                            |                                           |                                            |
|                                                            | 2016                                           | 2040 Forecast                                  | 2040 Better Scenario                           | 2040 Worse Scenario                             | 2016                                      | 2040 Forecast                              | 2040 Better Scenario                      | 2040 Worse Scenario                        |
| <b>Diabetes, urogenital, blood, and endocrine diseases</b> | <b>102,016.65</b><br>(86,886.10 to 120,714.92) | <b>154,586.50</b><br>(86,530.50 to 240,195.71) | <b>111,194.61</b><br>(62,992.62 to 173,973.19) | <b>181,450.69</b><br>(104,819.29 to 280,413.05) | <b>3,778.43</b><br>(3,223.62 to 4,455.66) | <b>7,023.34</b><br>(4,271.17 to 10,353.16) | <b>5,244.50</b><br>(3,207.95 to 7,974.97) | <b>7,884.71</b><br>(4,858.92 to 11,453.81) |
| Diabetes mellitus                                          | 31,448.69<br>(26,325.60 to 37,678.97)          | 43,716.78<br>(20,564.38 to 84,233.86)          | 28,078.41<br>(13,250.20 to 52,978.43)          | 57,130.67<br>(26,965.55 to 110,976.33)          | 1,305.42<br>(1,091.56 to 1,568.31)        | 2,105.10<br>(1,084.40 to 3,823.00)         | 1,424.25<br>(727.10 to 2,544.16)          | 2,618.80<br>(1,342.35 to 4,735.74)         |
| Acute glomerulonephritis                                   | 193.16<br>(154.49 to 240.44)                   | 146.20<br>(85.17 to 238.00)                    | 113.90<br>(64.52 to 183.80)                    | 163.55<br>(97.99 to 260.16)                     | 4.96<br>(3.93 to 6.20)                    | 4.06<br>(2.41 to 6.42)                     | 3.34<br>(1.97 to 5.17)                    | 4.29<br>(2.66 to 6.64)                     |
| Chronic kidney disease                                     | 44,655.15<br>(37,778.40 to 52,895.46)          | 74,736.04<br>(37,178.84 to 134,996.28)         | 53,340.48<br>(27,239.20 to 94,024.02)          | 85,689.96<br>(42,788.61 to 149,906.69)          | 1,689.44<br>(1,441.95 to 1,987.48)        | 3,491.80<br>(1,868.36 to 6,017.37)         | 2,604.92<br>(1,371.50 to 4,480.45)        | 3,809.15<br>(2,046.16 to 6,485.22)         |
| Chronic kidney disease due to diabetes mellitus            | 19,224.26<br>(15,623.78 to 23,299.66)          | 37,349.78<br>(17,294.47 to 68,624.97)          | 26,970.37<br>(12,770.36 to 49,612.68)          | 42,503.42<br>(20,096.72 to 76,962.63)           | 767.28<br>(634.30 to 919.26)              | 1,742.58<br>(880.71 to 3,071.93)           | 1,305.58<br>(671.15 to 2,341.15)          | 1,901.17<br>(965.78 to 3,288.03)           |
| Chronic kidney disease due to hypertension                 | 2,270.06<br>(1,781.64 to 2,849.60)             | 4,773.34<br>(2,401.66 to 8,471.48)             | 3,749.90<br>(1,894.65 to 6,741.62)             | 5,088.83<br>(2,613.07 to 8,896.23)              | 128.64<br>(101.06 to 161.44)              | 335.27<br>(174.07 to 593.93)               | 278.90<br>(148.03 to 496.03)              | 336.86<br>(179.17 to 597.69)               |
| Chronic kidney disease due to glomerulonephritis           | 10,773.99<br>(8,621.33 to 13,520.79)           | 14,154.57<br>(6,813.92 to 25,739.39)           | 9,556.78<br>(4,788.46 to 17,239.29)            | 16,816.96<br>(8,476.83 to 31,001.99)            | 347.37<br>(275.00 to 434.22)              | 569.16<br>(286.20 to 1,034.71)             | 396.93<br>(205.55 to 719.41)              | 646.65<br>(328.88 to 1,202.08)             |
| Chronic kidney disease due to other and unspecified causes | 12,386.83<br>(9,943.81 to 15,461.80)           | 18,458.35<br>(9,327.94 to 32,782.44)           | 13,063.42<br>(23,039.24)                       | 21,280.76<br>(10,534.92 to 38,601.74)           | 446.15<br>(349.67 to 555.04)              | 844.78<br>(426.25 to 1,304.92)             | 623.52<br>(321.16 to 1,140.61)            | 924.46<br>(492.10 to 1,646.30)             |
| Urinary diseases and male infertility                      | 13,131.99<br>(11,167.03 to 16,080.81)          | 24,655.26<br>(15,704.60 to 34,692.87)          | 19,305.17<br>(12,246.69 to 27,358.07)          | 26,603.48<br>(17,652.63 to 36,183.68)           | 488.22<br>(412.31 to 586.76)              | 1,065.90<br>(756.73 to 1,393.09)           | 871.43<br>(613.85 to 1,175.40)            | 1,097.40<br>(824.77 to 1,373.50)           |
| Urinary tract infections                                   | 10,467.89<br>(8,562.35 to 12,981.91)           | 20,254.20<br>(12,436.83 to 28,950.30)          | 16,080.43<br>(9,978.81 to 23,290.95)           | 21,816.29<br>(13,667.26 to 30,599.77)           | 349.60<br>(283.48 to 447.70)              | 811.89<br>(542.20 to 1,123.61)             | 672.86<br>(443.99 to 943.51)              | 837.89<br>(592.37 to 1,113.95)             |
| Urolithiasis                                               | 1,354.89<br>(886.36 to 1,832.33)               | 2,116.17<br>(1,190.27 to 3,381.24)             | 1,490.82<br>(817.42 to 2,360.36)               | 2,385.26<br>(1,353.22 to 3,672.96)              | 57.88<br>(41.14 to 76.03)                 | 100.19<br>(61.86 to 148.44)                | 74.38<br>(45.56 to 111.98)                | 107.42<br>(69.33 to 154.95)                |
| Other urinary diseases                                     | 1,491.21<br>(602.68 to 2,135.26)               | 2,284.89<br>(680.98 to 3,491.05)               | 1,733.92<br>(499.32 to 2,696.81)               | 2,401.93<br>(785.28 to 3,557.24)                | 80.74<br>(24.57 to 113.50)                | 153.83<br>(36.81 to 232.11)                | 124.20<br>(27.64 to 195.41)               | 152.09<br>(37.35 to 230.02)                |
| Gynecological diseases                                     | 325.52<br>(130.15 to 475.20)                   | 258.57<br>(85.32 to 524.07)                    | 145.51<br>(52.01 to 288.10)                    | 340.31<br>(113.27 to 651.65)                    | 7.88<br>(3.81 to 11.19)                   | 6.97<br>(3.04 to 12.55)                    | 4.04<br>(1.82 to 7.15)                    | 8.91<br>(3.92 to 15.44)                    |
| Uterine fibroids                                           | 162.32<br>(83.94 to 237.36)                    | 114.42<br>(44.45 to 216.87)                    | 72.65<br>(29.06 to 136.27)                     | 141.76<br>(56.88 to 269.20)                     | 4.24<br>(2.40 to 6.09)                    | 3.24<br>(1.42 to 5.99)                     | 2.08<br>(0.96 to 3.79)                    | 3.95<br>(1.75 to 7.24)                     |
| Polycystic ovarian syndrome                                | 37.67<br>(8.63 to 75.56)                       | 18.49<br>(2.94 to 51.08)                       | 6.56<br>(1.00 to 18.13)                        | 29.81<br>(5.23 to 79.91)                        | 0.83<br>(0.20 to 1.68)                    | 0.41<br>(0.07 to 1.15)                     | 0.15<br>(0.02 to 0.41)                    | 0.66<br>(0.12 to 1.82)                     |
| Endometriosis                                              | 0.92<br>(0.37 to 1.55)                         | 1.08<br>(0.26 to 2.72)                         | 0.60<br>(0.14 to 1.57)                         | 1.42<br>(0.36 to 3.58)                          | 0.02<br>(0.01 to 0.03)                    | 0.02<br>(0.01 to 0.06)                     | 0.01<br>(0.00 to 0.04)                    | 0.03<br>(0.01 to 0.08)                     |
| Genital prolapse                                           | 3.56<br>(2.06 to 5.61)                         | 5.47<br>(2.32 to 10.75)                        | 3.10<br>(1.32 to 5.83)                         | 6.87<br>(3.02 to 12.93)                         | 0.18<br>(0.10 to 0.29)                    | 0.32<br>(0.14 to 0.63)                     | 0.19<br>(0.08 to 0.36)                    | 0.39<br>(0.17 to 0.75)                     |
| Other gynecological diseases                               | 121.06<br>(31.92 to 188.60)                    | 119.11<br>(26.82 to 287.35)                    | 62.60<br>(15.94 to 150.90)                     | 160.45<br>(38.87 to 366.15)                     | 2.60<br>(0.97 to 3.91)                    | 2.97<br>(1.12 to 6.12)                     | 1.60<br>(0.65 to 3.21)                    | 3.88<br>(1.45 to 7.68)                     |
| Hemoglobinopathies and hemolytic anemias                   | 4,704.24<br>(3,823.72 to 6,029.20)             | 3,690.46<br>(2,244.72 to 5,669.46)             | 2,621.49<br>(1,599.27 to 4,053.61)             | 4,273.21<br>(2,686.32 to 6,512.70)              | 120.09<br>(95.67 to 160.51)               | 128.24<br>(85.94 to 186.79)                | 96.62<br>(65.65 to 143.18)                | 140.10<br>(96.63 to 202.63)                |
| Thalassemias                                               | 860.83<br>(639.59 to 1,153.99)                 | 262.30<br>(155.89 to 414.05)                   | 222.69<br>(133.28 to 353.67)                   | 298.93<br>(176.94 to 472.99)                    | 10.54<br>(7.91 to 14.09)                  | 3.33<br>(2.02 to 5.16)                     | 2.85<br>(1.76 to 4.48)                    | 3.77<br>(2.27 to 5.89)                     |

|                                                   |                                       |                                        |                                        |                                        |                                |                                 |                                 |                                 |
|---------------------------------------------------|---------------------------------------|----------------------------------------|----------------------------------------|----------------------------------------|--------------------------------|---------------------------------|---------------------------------|---------------------------------|
|                                                   | 1,105.40<br>(863.28 to<br>1,470.12)   | 1,012.82<br>(516.77 to<br>1,797.33)    | 678.16<br>(343.19 to<br>1,231.30)      | 1,225.19<br>(645.75 to<br>2,185.60)    | 21.00<br>(16.34 to<br>28.24)   | 20.65<br>(10.48 to<br>35.67)    | 13.97<br>(7.11 to<br>24.23)     | 24.77<br>(13.16 to<br>42.27)    |
| Sickle cell disorders                             |                                       |                                        |                                        |                                        |                                |                                 |                                 |                                 |
|                                                   | 916.85<br>(707.65 to<br>1,212.86)     | 909.85<br>(464.15 to<br>1,550.63)      | 593.30<br>(308.13 to<br>984.84)        | 1,100.91<br>(599.16 to<br>1,812.85)    | 21.12<br>(16.25 to<br>28.08)   | 34.43<br>(13.09 to<br>38.78)    | 16.25<br>(8.91 to<br>26.15)     | 28.98<br>(17.04 to<br>44.87)    |
| G6PD deficiency                                   |                                       |                                        |                                        |                                        |                                |                                 |                                 |                                 |
|                                                   | 1,821.17<br>(1,413.93 to<br>2,472.50) | 1,505.48<br>(975.34 to<br>2,198.13)    | 1,127.34<br>(732.34 to<br>1,729.44)    | 1,648.20<br>(1,127.15 to<br>2,393.13)  | 67.42<br>(52.81 to<br>93.96)   | 79.83<br>(57.20 to<br>115.75)   | 63.55<br>(45.02 to<br>93.37)    | 82.58<br>(61.30 to<br>117.22)   |
| Other hemoglobinopathies and hemolytic anemias    |                                       |                                        |                                        |                                        |                                |                                 |                                 |                                 |
|                                                   | 7,375.89<br>(4,395.42 to<br>9,648.03) | 7,383.19<br>(3,909.91 to<br>11,026.79) | 7,589.67<br>(4,025.59 to<br>11,565.65) | 7,249.50<br>(3,880.07 to<br>10,743.84) | 162.43<br>(95.43 to<br>205.13) | 221.28<br>(124.50 to<br>313.80) | 239.88<br>(134.98 to<br>346.88) | 206.07<br>(116.88 to<br>286.82) |
| Endocrine, metabolic, blood, and immune disorders |                                       |                                        |                                        |                                        |                                |                                 |                                 |                                 |

| Kazakhstan                                    |                                                |                                              |                                              |                                               |                                           |                                       |                                     |                                       |
|-----------------------------------------------|------------------------------------------------|----------------------------------------------|----------------------------------------------|-----------------------------------------------|-------------------------------------------|---------------------------------------|-------------------------------------|---------------------------------------|
| Cause                                         | YLLs (actual counts)                           |                                              |                                              |                                               | Deaths (actual counts)                    |                                       |                                     |                                       |
|                                               | 2016                                           | 2040 Forecast                                | 2040 Better Scenario                         | 2040 Worse Scenario                           | 2016                                      | 2040 Forecast                         | 2040 Better Scenario                | 2040 Worse Scenario                   |
| <b>Musculoskeletal disorders</b>              | <b>915.34</b><br>(701.32 to 1,255.91)          | <b>1,459.96</b><br>(1,002.87 to 2,119.60)    | <b>1,298.81</b><br>(874.01 to 1,909.73)      | <b>1,500.69</b><br>(1,041.49 to 2,114.53)     | <b>35.92</b><br>(28.16 to 47.34)          | <b>75.49</b><br>(56.60 to 96.43)      | <b>70.20</b><br>(53.08 to 91.05)    | <b>73.83</b><br>(55.49 to 92.90)      |
| Rheumatoid arthritis                          | 517.62<br>(371.49 to 682.21)                   | 387.61<br>(358.56 to 851.54)                 | 406.57<br>(256.60 to 586.26)                 | 667.01<br>(418.17 to 934.60)                  | 24.94<br>(18.37 to 32.43)                 | 24.94<br>(27.06 to 53.61)             | 28.84<br>(19.81 to 40.93)           | 41.33<br>(28.37 to 56.14)             |
| Other musculoskeletal disorders               | 397.71<br>(282.22 to 759.60)                   | 872.34<br>(546.12 to 1,408.79)               | 892.23<br>(556.09 to 1,437.51)               | 833.68<br>(524.78 to 1,316.98)                | 10.98<br>(7.98 to 18.30)                  | 36.78<br>(25.10 to 49.57)             | 41.36<br>(28.31 to 56.37)           | 32.50<br>(22.49 to 44.38)             |
| <b>Other non-communicable diseases</b>        | <b>127,899.13</b><br>(85,428.68 to 210,594.32) | <b>49,118.46</b><br>(26,491.98 to 88,992.13) | <b>25,438.73</b><br>(14,916.36 to 44,115.21) | <b>72,021.38</b><br>(41,426.72 to 125,662.34) | <b>1,575.62</b><br>(1,070.89 to 2,545.08) | <b>694.27</b><br>(410.98 to 1,172.08) | <b>588.08</b><br>(245.49 to 617.25) | <b>978.84</b><br>(590.97 to 1,621.69) |
| Congenital birth defects                      | 120,454.35<br>(78,431.88 to 203,152.39)        | 45,633.01<br>(24,558.21 to 83,638.63)        | 22,985.98<br>(13,286.09 to 39,835.32)        | 67,512.06<br>(38,248.74 to 118,946.20)        | 1,481.13<br>(992.19 to 2,444.96)          | 619.38<br>(348.78 to 1,081.52)        | 324.77<br>(195.09 to 531.86)        | 895.18<br>(524.60 to 1,516.73)        |
| Neural tube defects                           | 1,179.98<br>(728.15 to 1,810.66)               | 375.44<br>(169.60 to 733.03)                 | 164.92<br>(80.07 to 324.92)                  | 591.15<br>(270.25 to 1,134.76)                | 14.30<br>(8.92 to 21.74)                  | 4.88<br>(2.33 to 9.13)                | 2.20<br>(1.14 to 4.12)              | 7.57<br>(3.66 to 14.05)               |
| Congenital heart anomalies                    | 57,484.24<br>(38,310.70 to 98,064.69)          | 21,244.90<br>(11,157.40 to 39,075.20)        | 9,346.29<br>(5,169.99 to 16,052.87)          | 32,885.66<br>(17,524.58 to 57,865.89)         | 717.21<br>(489.17 to 1,191.12)            | 290.84<br>(157.18 to 514.18)          | 130.63<br>(73.46 to 219.58)         | 442.31<br>(249.27 to 742.09)          |
| Orofacial clefts                              | 130.27<br>(29.24 to 271.33)                    | 22.11<br>(3.42 to 64.04)                     | 7.74<br>(1.27 to 20.59)                      | 38.47<br>(10.70 to 102.70)                    | 1.51<br>(0.34 to 3.14)                    | 0.26<br>(0.04 to 0.74)                | 0.09<br>(0.01 to 0.24)              | 0.45<br>(0.07 to 1.19)                |
| Down syndrome                                 | 1,966.34<br>(1,255.02 to 3,255.93)             | 1,446.82<br>(870.29 to 2,365.63)             | 1,454.46<br>(868.98 to 2,378.40)             | 1,492.37<br>(891.63 to 2,456.08)              | 29.11<br>(19.84 to 41.85)                 | 26.41<br>(16.07 to 41.85)             | 27.34<br>(16.59 to 43.98)           | 26.45<br>(16.21 to 41.75)             |
| Other chromosomal abnormalities               | 3,592.53<br>(1,610.60 to 15,631.63)            | 3,013.19<br>(1,395.76 to 9,585.14)           | 2,171.51<br>(1,055.08 to 6,398.98)           | 3,683.47<br>(1,667.91 to 12,909.21)           | 48.10<br>(25.13 to 183.68)                | 50.46<br>(27.15 to 122.26)            | 38.26<br>(21.09 to 82.54)           | 59.10<br>(31.64 to 158.92)            |
| Congenital musculoskeletal and limb anomalies | 2,796.58<br>(1,690.39 to 4,250.00)             | 1,124.85<br>(505.99 to 2,070.38)             | 563.92<br>(275.24 to 1,036.76)               | 1,656.37<br>(779.09 to 2,981.53)              | 33.28<br>(20.27 to 50.05)                 | 14.00<br>(6.55 to 25.58)              | 7.11<br>(3.58 to 12.71)             | 20.40<br>(9.82 to 36.02)              |
| Urogenital congenital anomalies               | 622.35<br>(278.51 to 990.85)                   | 302.29<br>(138.30 to 530.34)                 | 179.32<br>(86.42 to 302.28)                  | 402.14<br>(188.67 to 720.23)                  | 8.62<br>(4.39 to 13.07)                   | 5.08<br>(2.69 to 8.40)                | 3.13<br>(1.67 to 5.19)              | 6.54<br>(3.52 to 10.64)               |
| Digestive congenital anomalies                | 11,082.59<br>(5,817.44 to 28,984.95)           | 4,423.12<br>(1,761.76 to 11,486.93)          | 2,054.17<br>(840.75 to 5,058.03)             | 6,787.64<br>(2,901.37 to 16,731.24)           | 130.38<br>(68.78 to 339.12)               | 53.43<br>(22.17 to 136.06)            | 25.04<br>(10.61 to 60.39)           | 81.46<br>(35.76 to 197.82)            |
| Other congenital birth defects                | 41,599.49<br>(22,649.17 to 61,578.24)          | 13,680.30<br>(6,663.40 to 25,845.65)         | 7,043.84<br>(3,503.37 to 12,997.83)          | 19,974.79<br>(9,983.60 to 35,900.19)          | 498.61<br>(277.19 to 730.02)              | 174.01<br>(89.75 to 316.13)           | 90.97<br>(48.28 to 160.72)          | 250.90<br>(132.53 to 443.28)          |
| Skin and subcutaneous diseases                | 432.08<br>(246.13 to 644.45)                   | 1,055.44<br>(549.32 to 1,545.76)             | 970.93<br>(499.58 to 1,449.18)               | 1,070.24<br>(563.22 to 1,559.94)              | 13.10<br>(6.80 to 18.35)                  | 46.70<br>(22.38 to 63.53)             | 46.12<br>(21.99 to 63.78)           | 43.76<br>(21.46 to 58.69)             |
| Cellulitis                                    | 246.15<br>(138.09 to 416.01)                   | 715.19<br>(351.32 to 1,103.17)               | 682.47<br>(336.70 to 1,054.10)               | 708.16<br>(346.41 to 1,113.29)                | 7.83<br>(4.00 to 11.90)                   | 30.33<br>(14.01 to 42.67)             | 30.41<br>(14.17 to 42.66)           | 28.42<br>(13.50 to 39.66)             |
| Pyoderma                                      | 135.53<br>(48.64 to 198.82)                    | 252.77<br>(87.01 to 415.84)                  | 216.71<br>(75.30 to 347.00)                  | 268.69<br>(89.55 to 434.96)                   | 3.60<br>(1.21 to 5.12)                    | 11.82<br>(3.74 to 17.68)              | 11.60<br>(3.62 to 17.50)            | 11.00<br>(3.55 to 16.38)              |
| Decubitus ulcer                               | 22.80<br>(15.89 to 41.91)                      | 41.23<br>(24.88 to 78.57)                    | 32.45<br>(18.49 to 60.71)                    | 44.15<br>(26.87 to 85.01)                     | 0.99<br>(0.59 to 1.73)                    | 2.81<br>(1.45 to 5.05)                | 2.48<br>(1.33 to 4.49)              | 2.67<br>(1.37 to 4.90)                |
| Other skin and subcutaneous diseases          | 27.59<br>(17.10 to 48.52)                      | 46.25<br>(26.53 to 86.93)                    | 39.30<br>(21.84 to 76.60)                    | 49.24<br>(28.26 to 90.62)                     | 0.68<br>(0.39 to 1.14)                    | 1.73<br>(0.96 to 3.08)                | 1.63<br>(0.89 to 2.97)              | 1.67<br>(0.93 to 2.97)                |
| Sudden infant death syndrome                  | 7,012.70<br>(4,392.89 to 10,351.38)            | 2,430.01<br>(899.05 to 5,586.79)             | 1,481.82<br>(582.95 to 3,228.38)             | 3,439.09<br>(1,272.07 to 7,586.86)            | 81.38<br>(50.97 to 120.14)                | 28.19<br>(10.43 to 64.83)             | 17.19<br>(6.76 to 37.46)            | 39.90<br>(14.75 to 88.04)             |

|                          |                                             |                                               |                                             |                                               |                                          |                                         |                                        |                                         |
|--------------------------|---------------------------------------------|-----------------------------------------------|---------------------------------------------|-----------------------------------------------|------------------------------------------|-----------------------------------------|----------------------------------------|-----------------------------------------|
| Injuries                 | 665,631.54<br>(552,125.14 to<br>804,017.67) | 598,236.31<br>(271,786.70 to<br>1,217,257.96) | 384,335.06<br>(177,395.92 to<br>778,627.40) | 778,804.22<br>(342,277.00 to<br>1,618,318.23) | 13,971.75<br>(11,502.04 to<br>17,004.73) | 14,137.83<br>(7,131.51 to<br>26,621.31) | 9,508.31<br>(4,956.93 to<br>17,624.57) | 17,754.17<br>(8,868.72 to<br>34,291.65) |
| Transport injuries       | 162,418.63<br>(132,002.16 to<br>196,546.67) | 136,364.68<br>(57,396.62 to<br>300,692.63)    | 46,250.16<br>(19,521.78 to<br>101,577.20)   | 215,548.05<br>(91,877.48 to<br>479,629.51)    | 3,312.58<br>(2,685.38 to<br>4,024.78)    | 3,031.57<br>(1,389.69 to<br>6,102.64)   | 1,090.16<br>(508.70 to<br>2,197.21)    | 4,649.15<br>(2,103.47 to<br>9,598.72)   |
| Road injuries            | 153,520.50<br>(125,017.40 to<br>185,819.39) | 122,521.57<br>(52,749.14 to<br>272,976.83)    | 37,886.15<br>(16,480.99 to<br>83,032.80)    | 197,063.21<br>(84,799.30 to<br>439,975.71)    | 3,126.82<br>(2,528.30 to<br>3,788.80)    | 2,725.94<br>(1,274.48 to<br>5,541.44)   | 903.59<br>(421.23 to<br>1,801.29)      | 4,246.71<br>(1,939.07 to<br>8,743.08)   |
| Pedestrian road injuries | 44,445.28<br>(35,256.70 to<br>56,620.36)    | 26,315.22<br>(11,132.28 to<br>54,934.97)      | 7,043.71<br>(3,264.09 to<br>14,126.85)      | 45,733.19<br>(20,254.52 to<br>97,648.63)      | 948.12<br>(748.36 to<br>1,209.23)        | 662.88<br>(301.73 to<br>1,297.64)       | 190.82<br>(97.06 to<br>349.21)         | 1,106.77<br>(524.01 to<br>2,305.31)     |

| Kazakhstan                                      |                                                                  |                                                                 |                                                                 |                                                                 |                                                            |                                                            |                                                            |                                                            |
|-------------------------------------------------|------------------------------------------------------------------|-----------------------------------------------------------------|-----------------------------------------------------------------|-----------------------------------------------------------------|------------------------------------------------------------|------------------------------------------------------------|------------------------------------------------------------|------------------------------------------------------------|
| Cause                                           | YLLs (actual counts)                                             |                                                                 |                                                                 |                                                                 | Deaths (actual counts)                                     |                                                            |                                                            |                                                            |
|                                                 | 2016                                                             | 2040 Forecast                                                   | 2040 Better Scenario                                            | 2040 Worse Scenario                                             | 2016                                                       | 2040 Forecast                                              | 2040 Better Scenario                                       | 2040 Worse Scenario                                        |
| Cyclist road injuries                           | 2,452.96<br>(1,893.62 to<br>3,235.25)                            | 2,302.25<br>(935.36 to<br>5,085.45)                             | 912.21<br>(371.13 to<br>1,954.32)                               | 3,390.84<br>(1,348.36 to<br>7,585.88)                           | 52.12<br>(40.35 to<br>69.94)                               | 56.76<br>(24.45 to<br>122.04)                              | 26.98<br>(12.29 to<br>54.24)                               | 77.63<br>(32.59 to<br>171.44)                              |
| Motorcyclist road injuries                      | 9,630.50<br>(7,167.78 to<br>13,048.02)                           | 12,274.00<br>(4,080.42 to<br>32,737.71)                         | 6,563.13<br>(2,173.23 to<br>16,830.55)                          | 16,262.21<br>(5,432.61 to<br>43,287.24)                         | 183.08<br>(135.14 to<br>248.64)                            | 239.92<br>(83.48 to<br>613.83)                             | 134.23<br>(47.68 to<br>331.77)                             | 311.86<br>(107.97 to<br>798.35)                            |
| Motor vehicle road injuries                     | 95,906.91<br>(71,974.48 to<br>118,684.05)                        | 80,498.47<br>(35,351.24 to<br>175,901.09)                       | 23,009.79<br>(10,188.23 to<br>49,240.72)                        | 129,908.14<br>(56,356.27 to<br>284,997.39)                      | 1,920.07<br>(1,461.17 to<br>2,368.43)                      | 1,739.02<br>(811.54 to<br>3,511.35)                        | 541.67<br>(259.11 to<br>1,031.63)                          | 2,710.01<br>(1,243.57 to<br>5,575.84)                      |
| Other road injuries                             | 1,084.84<br>(750.26 to<br>1,496.59)                              | 1,131.64<br>(387.05 to<br>2,666.65)                             | 357.32<br>(125.76 to<br>847.96)                                 | 1,768.83<br>(599.07 to<br>4,263.24)                             | 23.44<br>(15.97 to<br>31.95)                               | 27.35<br>(9.80 to<br>64.47)                                | 9.89<br>(3.71 to<br>23.00)                                 | 40.44<br>(14.08 to<br>97.19)                               |
| Other transport injuries                        | 8,898.13<br>(6,944.11 to<br>11,274.72)                           | 13,843.11<br>(5,125.16 to<br>30,640.70)                         | 8,364.01<br>(3,322.04 to<br>18,436.42)                          | 18,484.85<br>(7,176.66 to<br>41,331.72)                         | 185.76<br>(144.94 to<br>234.34)                            | 305.63<br>(120.32 to<br>644.00)                            | 186.57<br>(77.61 to<br>380.42)                             | 402.44<br>(165.87 to<br>864.77)                            |
| <b>Unintentional injuries</b>                   | <b>209,155.60</b><br><b>(174,101.68 to</b><br><b>247,432.10)</b> | <b>145,620.33</b><br><b>(82,985.74 to</b><br><b>247,138.01)</b> | <b>109,575.34</b><br><b>(63,824.68 to</b><br><b>182,908.86)</b> | <b>169,338.61</b><br><b>(99,031.78 to</b><br><b>297,067.41)</b> | <b>4,334.38</b><br><b>(3,576.85 to</b><br><b>5,146.75)</b> | <b>3,750.86</b><br><b>(2,335.84 to</b><br><b>5,817.83)</b> | <b>2,961.93</b><br><b>(1,846.98 to</b><br><b>4,595.44)</b> | <b>4,169.29</b><br><b>(2,615.84 to</b><br><b>6,704.51)</b> |
| Falls                                           | 32,371.05<br>(24,245.29 to<br>40,797.77)                         | 27,666.88<br>(15,922.20 to<br>43,165.46)                        | 22,975.17<br>(13,054.91 to<br>36,528.81)                        | 29,774.41<br>(17,790.92 to<br>45,673.63)                        | 774.88<br>(577.18 to<br>955.26)                            | 850.11<br>(545.48 to<br>1,190.23)                          | 738.43<br>(469.38 to<br>1,049.94)                          | 869.65<br>(581.27 to<br>1,241.96)                          |
| Drowning                                        | 54,676.24<br>(45,348.51 to<br>64,845.68)                         | 38,873.98<br>(18,076.28 to<br>80,555.63)                        | 28,176.11<br>(13,305.75 to<br>59,245.50)                        | 46,712.14<br>(21,405.44 to<br>101,049.08)                       | 997.97<br>(821.27 to<br>1,202.33)                          | 820.42<br>(389.99 to<br>1,664.33)                          | 608.71<br>(292.16 to<br>1,197.54)                          | 964.34<br>(448.39 to<br>1,992.44)                          |
| Fire, heat, and hot substances                  | 21,825.89<br>(17,622.62 to<br>27,673.26)                         | 14,649.28<br>(7,049.09 to<br>28,267.39)                         | 9,481.58<br>(4,608.96 to<br>17,792.29)                          | 18,336.32<br>(8,845.34 to<br>35,463.54)                         | 483.45<br>(393.88 to<br>600.94)                            | 409.76<br>(216.62 to<br>745.48)                            | 278.28<br>(152.50 to<br>503.12)                            | 490.70<br>(262.83 to<br>883.10)                            |
| Poisonings                                      | 20,182.28<br>(15,416.60 to<br>26,054.82)                         | 8,176.39<br>(3,707.73 to<br>16,806.72)                          | 4,742.99<br>(2,138.05 to<br>9,672.22)                           | 10,862.68<br>(4,992.45 to<br>22,595.31)                         | 434.33<br>(317.15 to<br>546.95)                            | 206.53<br>(95.56 to<br>391.19)                             | 124.33<br>(58.44 to<br>244.70)                             | 265.30<br>(122.78 to<br>520.70)                            |
| Exposure to mechanical forces                   | 13,165.91<br>(9,633.61 to<br>16,153.81)                          | 8,415.99<br>(4,725.71 to<br>14,526.42)                          | 6,165.81<br>(3,391.49 to<br>10,828.84)                          | 9,833.86<br>(5,551.09 to<br>16,886.83)                          | 241.45<br>(178.96 to<br>298.20)                            | 177.38<br>(102.92 to<br>286.01)                            | 133.88<br>(77.51 to<br>218.93)                             | 201.25<br>(119.31 to<br>328.59)                            |
| Unintentional firearm injuries                  | 4,607.30<br>(3,130.42 to<br>5,894.70)                            | 2,808.65<br>(1,404.24 to<br>4,895.69)                           | 2,086.39<br>(1,060.79 to<br>3,734.34)                           | 3,230.26<br>(1,666.69 to<br>5,785.11)                           | 96.90<br>(67.00 to<br>122.26)                              | 66.71<br>(37.23 to<br>107.10)                              | 51.59<br>(29.24 to<br>83.94)                               | 74.12<br>(44.24 to<br>122.60)                              |
| Unintentional suffocation                       | 6,350.13<br>(4,151.87 to<br>8,243.13)                            | 4,002.88<br>(2,009.69 to<br>7,024.48)                           | 2,978.33<br>(1,524.61 to<br>5,310.29)                           | 4,694.18<br>(2,503.28 to<br>8,168.12)                           | 99.69<br>(64.90 to<br>128.21)                              | 71.47<br>(35.26 to<br>125.44)                              | 54.26<br>(27.06 to<br>97.37)                               | 82.19<br>(42.50 to<br>146.09)                              |
| Other exposure to mechanical forces             | 2,208.48<br>(1,582.71 to<br>3,402.66)                            | 1,604.49<br>(822.55 to<br>2,992.80)                             | 1,101.09<br>(572.85 to<br>2,014.46)                             | 1,909.42<br>(1,004.87 to<br>3,517.47)                           | 44.86<br>(33.00 to<br>68.40)                               | 39.20<br>(22.94 to<br>68.05)                               | 28.03<br>(16.35 to<br>48.20)                               | 44.95<br>(26.29 to<br>77.36)                               |
| Adverse effects of medical treatment            | 11,189.42<br>(7,477.20 to<br>15,235.87)                          | 9,562.89<br>(5,345.57 to<br>14,966.24)                          | 8,235.95<br>(4,514.01 to<br>12,818.51)                          | 10,100.48<br>(5,789.39 to<br>15,520.76)                         | 286.15<br>(186.68 to<br>368.86)                            | 321.00<br>(187.78 to<br>450.87)                            | 292.14<br>(170.32 to<br>420.61)                            | 320.03<br>(195.95 to<br>451.94)                            |
| Animal contact                                  | 2,497.79<br>(1,860.25 to<br>3,923.03)                            | 2,462.47<br>(1,397.44 to<br>4,099.67)                           | 1,845.85<br>(1,060.42 to<br>3,009.30)                           | 2,833.71<br>(1,692.30 to<br>4,593.59)                           | 51.02<br>(37.61 to<br>75.56)                               | 61.48<br>(35.74 to<br>95.85)                               | 47.68<br>(27.25 to<br>74.96)                               | 68.29<br>(41.12 to<br>104.60)                              |
| Venomous animal contact                         | 924.58<br>(592.79 to<br>1,569.07)                                | 934.73<br>(453.89 to<br>1,672.75)                               | 765.32<br>(364.62 to<br>1,321.62)                               | 1,024.26<br>(518.95 to<br>1,804.17)                             | 20.09<br>(11.90 to<br>31.43)                               | 23.38<br>(11.20 to<br>39.65)                               | 19.63<br>(9.38 to<br>31.86)                                | 24.91<br>(12.32 to<br>41.24)                               |
| Non-venomous animal contact                     | 1,573.21<br>(1,120.23 to<br>2,663.67)                            | 1,527.74<br>(867.82 to<br>2,717.00)                             | 1,080.52<br>(608.00 to<br>1,931.50)                             | 1,809.45<br>(1,046.65 to<br>3,123.39)                           | 30.93<br>(22.24 to<br>50.27)                               | 38.10<br>(22.25 to<br>65.64)                               | 28.05<br>(16.24 to<br>47.49)                               | 43.37<br>(25.67 to<br>69.87)                               |
| Foreign body                                    | 33,616.57<br>(26,243.34 to<br>43,078.73)                         | 22,017.08<br>(14,200.05 to<br>32,219.14)                        | 19,456.01<br>(12,396.62 to<br>28,895.03)                        | 23,618.78<br>(15,506.59 to<br>34,530.50)                        | 613.18<br>(474.51 to<br>760.70)                            | 538.59<br>(356.21 to<br>765.04)                            | 504.82<br>(324.97 to<br>721.76)                            | 546.11<br>(366.15 to<br>760.43)                            |
| Pulmonary aspiration and foreign body in airway | 29,736.39<br>(22,319.24 to<br>38,540.52)                         | 18,444.74<br>(11,751.58 to<br>27,694.37)                        | 15,652.11<br>(9,859.67 to<br>23,398.12)                         | 20,161.80<br>(13,244.16 to<br>29,904.66)                        | 527.01<br>(396.03 to<br>668.66)                            | 439.85<br>(283.17 to<br>632.44)                            | 394.80<br>(250.28 to<br>576.00)                            | 454.77<br>(300.87 to<br>644.46)                            |

|                                             |                                                                  |                                                                  |                                                                 |                                                                  |                                                            |                                                             |                                                             |                                                             |
|---------------------------------------------|------------------------------------------------------------------|------------------------------------------------------------------|-----------------------------------------------------------------|------------------------------------------------------------------|------------------------------------------------------------|-------------------------------------------------------------|-------------------------------------------------------------|-------------------------------------------------------------|
|                                             | 3,880.18<br>(2,784.82 to<br>7,061.59)                            | 3,572.34<br>(2,031.56 to<br>6,434.22)                            | 3,803.90<br>(2,209.30 to<br>6,706.24)                           | 3,456.98<br>(1,987.39 to<br>6,389.50)                            | 86.18<br>(62.11 to<br>142.40)                              | 98.74<br>(59.99 to<br>154.23)                               | 110.01<br>(66.17 to<br>171.49)                              | 91.34<br>(56.34 to<br>144.69)                               |
| Foreign body in other body part             |                                                                  |                                                                  |                                                                 |                                                                  |                                                            |                                                             |                                                             |                                                             |
|                                             | 10,391.42<br>(5,828.92 to<br>16,411.04)                          | 9,892.97<br>(4,398.33 to<br>17,878.03)                           | 6,657.55<br>(2,999.72 to<br>12,183.60)                          | 11,757.96<br>(5,620.30 to<br>21,792.94)                          | 264.86<br>(145.23 to<br>402.69)                            | 279.60<br>(128.56 to<br>468.61)                             | 192.42<br>(90.73 to<br>333.57)                              | 324.51<br>(159.03 to<br>552.87)                             |
| Environmental heat and cold exposure        |                                                                  |                                                                  |                                                                 |                                                                  |                                                            |                                                             |                                                             |                                                             |
|                                             | 9,239.02<br>(7,340.29 to<br>11,450.87)                           | 3,902.39<br>(1,865.37 to<br>7,535.23)                            | 1,838.33<br>(925.17 to<br>3,518.09)                             | 5,508.27<br>(2,729.34 to<br>10,403.47)                           | 187.08<br>(148.20 to<br>232.18)                            | 85.99<br>(43.05 to<br>154.95)                               | 41.24<br>(21.70 to<br>73.90)                                | 119.13<br>(64.00 to<br>214.55)                              |
| Other unintentional injuries                |                                                                  |                                                                  |                                                                 |                                                                  |                                                            |                                                             |                                                             |                                                             |
| <b>Self-harm and interpersonal violence</b> | <b>293,954.04</b><br><b>(230,156.06 to</b><br><b>382,984.55)</b> | <b>316,113.64</b><br><b>(114,199.07 to</b><br><b>721,107.82)</b> | <b>228,373.76</b><br><b>(85,085.01 to</b><br><b>530,043.32)</b> | <b>393,778.49</b><br><b>(140,254.74 to</b><br><b>923,441.34)</b> | <b>6,322.84</b><br><b>(4,963.30 to</b><br><b>8,239.34)</b> | <b>7,352.49</b><br><b>(2,976.13 to</b><br><b>15,928.97)</b> | <b>5,453.27</b><br><b>(2,330.53 to</b><br><b>11,550.60)</b> | <b>8,932.89</b><br><b>(3,523.68 to</b><br><b>19,439.95)</b> |



| Kazakhstan                                                                          |                                           |                                            |                                          |                                            |                                      |                                       |                                       |                                       |
|-------------------------------------------------------------------------------------|-------------------------------------------|--------------------------------------------|------------------------------------------|--------------------------------------------|--------------------------------------|---------------------------------------|---------------------------------------|---------------------------------------|
| Cause                                                                               | YLLs (actual counts)                      |                                            |                                          |                                            | Deaths (actual counts)               |                                       |                                       |                                       |
|                                                                                     | 2016                                      | 2040 Forecast                              | 2040 Better Scenario                     | 2040 Worse Scenario                        | 2016                                 | 2040 Forecast                         | 2040 Better Scenario                  | 2040 Worse Scenario                   |
| Self-harm                                                                           | 205,279.11<br>(156,045.98 to 268,154.37)  | 251,782.68<br>(82,633.00 to 603,072.90)    | 183,240.89<br>(62,533.08 to 444,381.32)  | 316,638.43<br>(103,291.51 to 794,199.90)   | 4,460.57<br>(3,412.69 to 5,819.42)   | 5,877.71<br>(2,195.76 to 13,019.68)   | 4,390.10<br>(1,721.31 to 9,710.66)    | 7,200.32<br>(2,640.66 to 16,154.97)   |
| Self-harm by firearm                                                                | 3,463.68<br>(2,137.25 to 5,419.78)        | 3,597.75<br>(1,079.24 to 9,188.39)         | 2,315.89<br>(728.59 to 5,930.72)         | 4,760.11<br>(1,394.54 to 12,093.99)        | 82.03<br>(52.61 to 124.18)           | 93.31<br>(32.49 to 224.96)            | 61.79<br>(22.66 to 147.18)            | 120.02<br>(40.54 to 292.81)           |
| Self-harm by other specified means                                                  | 201,815.43<br>(152,806.79 to 263,877.62)  | 248,184.93<br>(81,547.84 to 595,966.13)    | 180,925.00<br>(61,757.81 to 438,794.32)  | 311,878.32<br>(101,866.18 to 779,405.82)   | 4,378.54<br>(3,323.23 to 5,710.12)   | 5,784.40<br>(2,166.20 to 12,850.04)   | 4,328.32<br>(1,702.36 to 9,631.21)    | 7,080.30<br>(2,603.14 to 15,923.94)   |
| Interpersonal violence                                                              | 88,674.93<br>(61,739.61 to 160,084.39)    | 64,330.96<br>(25,992.12 to 158,467.50)     | 45,132.88<br>(18,839.88 to 107,092.02)   | 77,140.07<br>(32,256.80 to 186,209.84)     | 1,862.26<br>(1,282.65 to 3,316.99)   | 1,474.78<br>(655.39 to 3,299.75)      | 1,063.17<br>(495.90 to 2,292.92)      | 1,732.57<br>(780.29 to 3,882.08)      |
| Physical violence by firearm                                                        | 8,153.47<br>(4,134.45 to 20,397.69)       | 5,208.25<br>(1,776.63 to 15,694.27)        | 3,216.45<br>(1,182.78 to 8,802.90)       | 6,512.45<br>(2,304.43 to 18,925.09)        | 157.83<br>(80.41 to 388.72)          | 105.79<br>(40.39 to 292.81)           | 66.70<br>(27.10 to 176.34)            | 130.44<br>(49.59 to 355.87)           |
| Physical violence by sharp object                                                   | 43,403.09<br>(28,313.10 to 85,085.53)     | 30,883.12<br>(13,228.41 to 73,772.83)      | 20,542.77<br>(8,949.98 to 47,193.05)     | 37,082.99<br>(16,435.99 to 88,982.02)      | 907.15<br>(595.56 to 1,789.89)       | 693.05<br>(317.95 to 1,576.58)        | 473.19<br>(228.47 to 1,010.45)        | 816.08<br>(389.84 to 1,857.15)        |
| Physical violence by other means                                                    | 37,118.38<br>(23,634.77 to 70,927.97)     | 28,239.59<br>(10,009.46 to 73,682.14)      | 21,373.66<br>(7,784.13 to 53,405.09)     | 33,544.63<br>(12,060.02 to 87,164.33)      | 797.29<br>(496.67 to 1,486.33)       | 675.95<br>(255.47 to 1,589.00)        | 523.28<br>(210.39 to 1,210.14)        | 786.04<br>(301.20 to 1,914.29)        |
| <b>Forces of nature, conflict and terrorism, and executions and police conflict</b> | <b>103.27</b><br><b>(87.51 to 121.11)</b> | <b>137.67</b><br><b>(0.00 to 1,011.71)</b> | <b>135.80</b><br><b>(0.00 to 994.40)</b> | <b>139.06</b><br><b>(0.00 to 1,027.62)</b> | <b>1.95</b><br><b>(1.63 to 2.33)</b> | <b>2.90</b><br><b>(0.00 to 20.87)</b> | <b>2.95</b><br><b>(0.00 to 21.07)</b> | <b>2.84</b><br><b>(0.00 to 20.57)</b> |
| Exposure to forces of nature                                                        | 0.00<br>(0.00 to 0.00)                    | 61.42<br>(0.00 to 187.51)                  | 60.96<br>(0.00 to 184.97)                | 61.65<br>(0.00 to 189.92)                  | 0.00<br>(0.00 to 0.00)               | 1.45<br>(0.00 to 4.35)                | 1.49<br>(0.00 to 4.45)                | 1.40<br>(0.00 to 4.25)                |
| Conflict and terrorism                                                              | 0.00<br>(0.00 to 0.00)                    | 76.25<br>(0.00 to 593.69)                  | 74.83<br>(0.00 to 580.17)                | 77.41<br>(0.00 to 602.66)                  | 0.00<br>(0.00 to 0.00)               | 1.45<br>(0.00 to 11.66)               | 1.46<br>(0.00 to 11.84)               | 1.44<br>(0.00 to 11.50)               |
| Executions and police conflict                                                      | 103.27<br>(87.51 to 121.11)               | 0.00<br>(0.00 to 0.00)                     | 0.00<br>(0.00 to 0.00)                   | 0.00<br>(0.00 to 0.00)                     | 1.95<br>(1.63 to 2.33)               | 0.00<br>(0.00 to 0.00)                | 0.00<br>(0.00 to 0.00)                | 0.00<br>(0.00 to 0.00)                |

| Kyrgyzstan                                                        |                                                   |                                                 |                                               |                                                   |                                          |                                          |                                          |                                          |
|-------------------------------------------------------------------|---------------------------------------------------|-------------------------------------------------|-----------------------------------------------|---------------------------------------------------|------------------------------------------|------------------------------------------|------------------------------------------|------------------------------------------|
| Cause                                                             | YLLs (actual counts)                              |                                                 |                                               |                                                   | Deaths (actual counts)                   |                                          |                                          |                                          |
|                                                                   | 2016                                              | 2040 Forecast                                   | 2040 Better Scenario                          | 2040 Worse Scenario                               | 2016                                     | 2040 Forecast                            | 2040 Better Scenario                     | 2040 Worse Scenario                      |
| All causes                                                        | 1,186,343.08<br>(1,078,954.70 to<br>1,296,767.24) | 1,430,095.68<br>(986,190.39 to<br>1,989,570.27) | 967,608.89<br>(651,049.15 to<br>1,357,191.76) | 1,731,948.14<br>(1,190,270.97 to<br>2,421,194.86) | 36,006.19<br>(33,276.08 to<br>38,809.88) | 59,178.15<br>(42,736.16 to<br>77,715.70) | 43,330.65<br>(30,877.96 to<br>57,814.32) | 69,499.56<br>(49,561.58 to<br>90,961.73) |
| Communicable, maternal, neonatal, and nutritional diseases        | 353,938.27<br>(295,031.62 to<br>420,615.78)       | 227,721.69<br>(171,105.55 to<br>309,118.63)     | 111,507.52<br>(84,360.03 to<br>148,358.29)    | 277,276.49<br>(204,293.37 to<br>388,753.78)       | 4,721.96<br>(4,025.88 to<br>5,507.41)    | 3,503.47<br>(2,611.38 to<br>4,785.85)    | 1,858.08<br>(1,390.08 to<br>2,475.30)    | 4,279.87<br>(3,151.72 to<br>5,978.67)    |
| HIV/AIDS and tuberculosis                                         | 29,603.61<br>(26,819.11 to<br>32,692.40)          | 28,000.37<br>(17,287.08 to<br>47,051.85)        | 13,606.54<br>(7,924.15 to<br>22,777.75)       | 37,522.35<br>(23,767.70 to<br>65,056.25)          | 670.14<br>(606.89 to<br>744.00)          | 680.10<br>(402.59 to<br>1,167.66)        | 331.35<br>(187.31 to<br>576.51)          | 904.31<br>(550.61 to<br>1,607.74)        |
| Tuberculosis                                                      | 20,079.42<br>(17,455.71 to<br>22,949.00)          | 17,198.95<br>(7,355.72 to<br>36,495.74)         | 7,867.75<br>(3,309.79 to<br>16,661.54)        | 22,673.39<br>(9,328.08 to<br>49,839.80)           | 486.47<br>(424.79 to<br>556.19)          | 466.08<br>(302.77 to<br>954.80)          | 217.56<br>(92.72 to<br>449.37)           | 606.87<br>(259.13 to<br>1,320.26)        |
| HIV/AIDS                                                          | 9,524.19<br>(8,582.04 to<br>10,542.98)            | 10,801.41<br>(6,532.52 to<br>15,021.23)         | 5,738.79<br>(2,879.71 to<br>8,773.60)         | 14,848.96<br>(11,134.44 to<br>20,344.92)          | 183.68<br>(165.66 to<br>203.56)          | 214.02<br>(118.64 to<br>306.39)          | 113.78<br>(47.72 to<br>184.63)           | 297.44<br>(212.46 to<br>426.97)          |
| Diarrhea, lower respiratory, and other common infectious diseases | 118,459.65<br>(94,916.35 to<br>146,424.60)        | 68,773.85<br>(35,196.13 to<br>124,413.56)       | 32,472.82<br>(18,923.92 to<br>54,938.44)      | 94,569.64<br>(47,165.57 to<br>176,232.37)         | 1,621.07<br>(1,346.33 to<br>1,943.88)    | 1,258.91<br>(737.78 to<br>2,113.33)      | 734.09<br>(463.82 to<br>1,131.81)        | 1,647.47<br>(940.06 to<br>2,847.73)      |
| Diarrheal diseases                                                | 17,004.91<br>(12,661.01 to<br>22,519.49)          | 5,450.49<br>(761.26 to<br>19,068.68)            | 1,584.35<br>(252.75 to<br>5,606.99)           | 8,845.85<br>(1,178.01 to<br>29,678.24)            | 208.44<br>(157.54 to<br>272.31)          | 76.04<br>(12.37 to<br>261.87)            | 25.65<br>(4.56 to<br>91.06)              | 120.85<br>(18.26 to<br>406.21)           |
| Intestinal infectious diseases                                    | 13.52<br>(7.35 to<br>22.62)                       | 9.80<br>(4.79 to<br>17.79)                      | 7.59<br>(3.72 to<br>13.99)                    | 9.78<br>(4.85 to<br>18.11)                        | 0.26<br>(0.14 to<br>0.43)                | 0.22<br>(0.12 to<br>0.40)                | 0.19<br>(0.11 to<br>0.33)                | 0.22<br>(0.11 to<br>0.38)                |
| Typhoid fever                                                     | 9.40<br>(4.49 to<br>17.35)                        | 7.53<br>(3.39 to<br>15.02)                      | 6.12<br>(2.83 to<br>12.08)                    | 7.49<br>(3.41 to<br>14.82)                        | 0.19<br>(0.09 to<br>0.34)                | 0.17<br>(0.08 to<br>0.32)                | 0.15<br>(0.07 to<br>0.28)                | 0.16<br>(0.08 to<br>0.31)                |
| Paratyphoid fever                                                 | 1.59<br>(0.63 to<br>3.42)                         | 1.17<br>(0.41 to<br>2.59)                       | 0.86<br>(0.30 to<br>1.96)                     | 1.17<br>(0.40 to<br>2.52)                         | 0.03<br>(0.01 to<br>0.07)                | 0.03<br>(0.01 to<br>0.06)                | 0.02<br>(0.01 to<br>0.05)                | 0.03<br>(0.01 to<br>0.06)                |
| Other intestinal infectious diseases                              | 2.53<br>(0.90 to<br>6.11)                         | 1.10<br>(0.37 to<br>2.74)                       | 0.60<br>(0.21 to<br>1.46)                     | 1.12<br>(0.37 to<br>2.74)                         | 0.04<br>(0.02 to<br>0.09)                | 0.03<br>(0.01 to<br>0.06)                | 0.02<br>(0.01 to<br>0.04)                | 0.03<br>(0.01 to<br>0.06)                |
| Lower respiratory infections                                      | 90,291.48<br>(71,634.85 to<br>110,686.47)         | 52,884.51<br>(22,770.51 to<br>105,415.65)       | 24,750.68<br>(12,825.44 to<br>45,108.05)      | 73,807.53<br>(31,076.56 to<br>153,914.79)         | 1,249.96<br>(1,028.05 to<br>1,497.18)    | 1,016.14<br>(551.30 to<br>1,803.81)      | 597.24<br>(364.28 to<br>967.63)          | 1,344.25<br>(690.08 to<br>2,424.88)      |
| Upper respiratory infections                                      | 102.89<br>(45.60 to<br>208.22)                    | 87.54<br>(37.81 to<br>181.27)                   | 46.17<br>(19.39 to<br>95.09)                  | 88.44<br>(36.78 to<br>178.07)                     | 2.02<br>(1.07 to<br>3.43)                | 2.66<br>(1.13 to<br>5.28)                | 1.56<br>(0.63 to<br>3.17)                | 2.58<br>(1.10 to<br>4.96)                |
| Otitis media                                                      | 1.93<br>(1.18 to<br>3.22)                         | 0.15<br>(0.05 to<br>0.41)                       | 0.13<br>(0.04 to<br>0.31)                     | 0.16<br>(0.05 to<br>0.40)                         | 0.03<br>(0.02 to<br>0.04)                | 0.00<br>(0.00 to<br>0.01)                | 0.00<br>(0.00 to<br>0.00)                | 0.00<br>(0.00 to<br>0.01)                |
| Meningitis                                                        | 4,907.13<br>(3,906.86 to<br>6,269.76)             | 3,424.53<br>(2,090.96 to<br>5,663.31)           | 2,106.92<br>(1,395.54 to<br>3,102.12)         | 3,969.39<br>(2,389.39 to<br>6,862.45)             | 71.37<br>(58.65 to<br>88.23)             | 55.96<br>(37.58 to<br>83.27)             | 39.74<br>(27.19 to<br>55.74)             | 61.63<br>(39.92 to<br>100.87)            |
| Pneumococcal meningitis                                           | 28.33<br>(21.51 to<br>37.95)                      | 13.77<br>(8.93 to<br>20.76)                     | 11.41<br>(7.42 to<br>17.12)                   | 14.94<br>(9.51 to<br>22.27)                       | 0.46<br>(0.37 to<br>0.60)                | 0.29<br>(0.20 to<br>0.43)                | 0.27<br>(0.18 to<br>0.40)                | 0.31<br>(0.21 to<br>0.45)                |
| H influenzae type B meningitis                                    | 675.96<br>(507.71 to<br>889.93)                   | 1,148.77<br>(305.86 to<br>3,221.34)             | 412.71<br>(176.15 to<br>981.98)               | 1,681.60<br>(403.60 to<br>4,668.34)               | 9.47<br>(7.45 to<br>12.06)               | 14.92<br>(5.06 to<br>39.23)              | 6.45<br>(3.40 to<br>12.97)               | 21.05<br>(6.17 to<br>55.87)              |
| Meningococcal meningitis                                          | 3,158.42<br>(2,513.61 to<br>4,091.71)             | 1,630.92<br>(1,086.60 to<br>2,317.94)           | 1,193.43<br>(792.28 to<br>1,729.37)           | 1,641.81<br>(1,071.45 to<br>2,378.37)             | 45.37<br>(37.05 to<br>56.64)             | 28.64<br>(19.99 to<br>39.06)             | 22.81<br>(15.71 to<br>31.71)             | 28.37<br>(19.72 to<br>38.85)             |
| Other meningitis                                                  | 1,044.42<br>(829.20 to<br>1,319.22)               | 631.07<br>(424.99 to<br>896.26)                 | 489.37<br>(330.97 to<br>703.92)               | 631.03<br>(428.46 to<br>890.09)                   | 16.07<br>(13.20 to<br>19.77)             | 12.12<br>(8.53 to<br>16.84)              | 10.21<br>(7.02 to<br>14.18)              | 11.90<br>(8.36 to<br>16.36)              |
| Encephalitis                                                      | 6,033.85<br>(4,439.99 to<br>9,204.45)             | 4,809.55<br>(3,081.94 to<br>7,397.66)           | 3,206.17<br>(2,109.26 to<br>4,923.46)         | 4,884.46<br>(3,123.25 to<br>7,662.13)             | 87.57<br>(67.41 to<br>128.00)            | 82.14<br>(56.02 to<br>120.60)            | 59.83<br>(41.23 to<br>86.00)             | 82.01<br>(57.05 to<br>121.23)            |

|                |                              |                                    |                                 |                                    |                           |                              |                            |                              |
|----------------|------------------------------|------------------------------------|---------------------------------|------------------------------------|---------------------------|------------------------------|----------------------------|------------------------------|
| Diphtheria     | 24.46<br>(12.98 to<br>41.79) | 6.88<br>(2.70 to<br>14.67)         | 2.70<br>(1.33 to<br>4.78)       | 10.46<br>(3.35 to<br>25.12)        | 0.35<br>(0.20 to<br>0.56) | 0.10<br>(0.05 to<br>0.20)    | 0.05<br>(0.03 to<br>0.10)  | 0.14<br>(0.05 to<br>0.32)    |
| Whooping cough | 28.30<br>(12.09 to<br>64.33) | 35.92<br>(9.99 to<br>93.98)        | 4.07<br>(1.40 to<br>8.71)       | 36.64<br>(10.25 to<br>96.24)       | 0.36<br>(0.15 to<br>0.81) | 0.44<br>(0.13 to<br>1.11)    | 0.07<br>(0.02 to<br>0.16)  | 0.45<br>(0.13 to<br>1.13)    |
| Tetanus        | 3.79<br>(2.77 to<br>4.80)    | 0.53<br>(0.31 to<br>0.83)          | 0.37<br>(0.18 to<br>0.63)       | 0.56<br>(0.35 to<br>0.84)          | 0.08<br>(0.05 to<br>0.10) | 0.01<br>(0.01 to<br>0.02)    | 0.01<br>(0.01 to<br>0.02)  | 0.01<br>(0.01 to<br>0.02)    |
| Measles        | 10.63<br>(7.20 to<br>15.97)  | 2,046.82<br>(0.71 to<br>22,375.23) | 755.91<br>(0.53 to<br>7,790.50) | 2,898.67<br>(0.71 to<br>31,935.35) | 0.13<br>(0.09 to<br>0.19) | 24.91<br>(0.01 to<br>262.62) | 9.59<br>(0.01 to<br>91.45) | 35.03<br>(0.01 to<br>383.56) |

| Kyrgyzstan                                            |                                                            |                                                            |                                                          |                                                            |                                                   |                                                   |                                                   |                                                   |
|-------------------------------------------------------|------------------------------------------------------------|------------------------------------------------------------|----------------------------------------------------------|------------------------------------------------------------|---------------------------------------------------|---------------------------------------------------|---------------------------------------------------|---------------------------------------------------|
| Cause                                                 | YLLs (actual counts)                                       |                                                            |                                                          |                                                            | Deaths (actual counts)                            |                                                   |                                                   |                                                   |
|                                                       | 2016                                                       | 2040 Forecast                                              | 2040 Better Scenario                                     | 2040 Worse Scenario                                        | 2016                                              | 2040 Forecast                                     | 2040 Better Scenario                              | 2040 Worse Scenario                               |
| Varicella and herpes zoster                           | 36.76<br>(11.54 to<br>59.12)                               | 17.11<br>(4.83 to<br>33.70)                                | 7.76<br>(2.26 to<br>15.04)                               | 17.70<br>(4.73 to<br>35.35)                                | 0.50<br>(0.18 to<br>0.75)                         | 0.29<br>(0.11 to<br>0.51)                         | 0.16<br>(0.06 to<br>0.28)                         | 0.29<br>(0.10 to<br>0.51)                         |
| <b>Neglected tropical diseases and malaria</b>        | <b>359.33</b><br><b>(140.00 to</b><br><b>485.62)</b>       | <b>248.15</b><br><b>(85.09 to</b><br><b>373.05)</b>        | <b>144.90</b><br><b>(48.11 to</b><br><b>216.98)</b>      | <b>253.99</b><br><b>(87.87 to</b><br><b>379.88)</b>        | <b>5.66</b><br><b>(2.28 to</b><br><b>7.53)</b>    | <b>4.16</b><br><b>(1.36 to</b><br><b>6.18)</b>    | <b>2.62</b><br><b>(0.87 to</b><br><b>3.90)</b>    | <b>4.21</b><br><b>(1.38 to</b><br><b>6.27)</b>    |
| Malaria                                               | 0.00<br>(0.00 to<br>0.00)                                  | 0.00<br>(0.00 to<br>0.00)                                  | 0.00<br>(0.00 to<br>0.00)                                | 0.00<br>(0.00 to<br>0.00)                                  | 0.00<br>(0.00 to<br>0.00)                         | 0.00<br>(0.00 to<br>0.00)                         | 0.00<br>(0.00 to<br>0.00)                         | 0.00<br>(0.00 to<br>0.00)                         |
| Chagas disease                                        | 0.00<br>(0.00 to<br>0.00)                                  | 0.00<br>(0.00 to<br>0.00)                                  | 0.00<br>(0.00 to<br>0.00)                                | 0.00<br>(0.00 to<br>0.00)                                  | 0.00<br>(0.00 to<br>0.00)                         | 0.00<br>(0.00 to<br>0.00)                         | 0.00<br>(0.00 to<br>0.00)                         | 0.00<br>(0.00 to<br>0.00)                         |
| Leishmaniasis                                         | 12.07<br>(6.74 to<br>18.25)                                | 5.23<br>(2.37 to<br>10.57)                                 | 3.26<br>(1.48 to<br>7.19)                                | 5.23<br>(2.40 to<br>10.59)                                 | 0.39<br>(0.21 to<br>0.59)                         | 0.16<br>(0.07 to<br>0.42)                         | 0.11<br>(0.05 to<br>0.32)                         | 0.15<br>(0.07 to<br>0.41)                         |
| African trypanosomiasis                               | 0.00<br>(0.00 to<br>0.00)                                  | 0.00<br>(0.00 to<br>0.00)                                  | 0.00<br>(0.00 to<br>0.00)                                | 0.00<br>(0.00 to<br>0.00)                                  | 0.00<br>(0.00 to<br>0.00)                         | 0.00<br>(0.00 to<br>0.00)                         | 0.00<br>(0.00 to<br>0.00)                         | 0.00<br>(0.00 to<br>0.00)                         |
| Schistosomiasis                                       | 0.00<br>(0.00 to<br>0.00)                                  | 0.00<br>(0.00 to<br>0.00)                                  | 0.00<br>(0.00 to<br>0.00)                                | 0.00<br>(0.00 to<br>0.00)                                  | 0.00<br>(0.00 to<br>0.00)                         | 0.00<br>(0.00 to<br>0.00)                         | 0.00<br>(0.00 to<br>0.00)                         | 0.00<br>(0.00 to<br>0.00)                         |
| Cysticercosis                                         | 0.66<br>(0.28 to<br>1.31)                                  | 0.19<br>(0.09 to<br>0.40)                                  | 0.18<br>(0.08 to<br>0.37)                                | 0.19<br>(0.09 to<br>0.39)                                  | 0.02<br>(0.01 to<br>0.03)                         | 0.01<br>(0.00 to<br>0.01)                         | 0.01<br>(0.01 to<br>0.01)                         | 0.01<br>(0.00 to<br>0.01)                         |
| Cystic echinococcosis                                 | 0.00<br>(0.00 to<br>0.00)                                  | 0.00<br>(0.00 to<br>0.00)                                  | 0.00<br>(0.00 to<br>0.00)                                | 0.00<br>(0.00 to<br>0.00)                                  | 0.00<br>(0.00 to<br>0.00)                         | 0.00<br>(0.00 to<br>0.00)                         | 0.00<br>(0.00 to<br>0.00)                         | 0.00<br>(0.00 to<br>0.00)                         |
| Dengue                                                | 0.00<br>(0.00 to<br>0.00)                                  | 0.00<br>(0.00 to<br>0.00)                                  | 0.00<br>(0.00 to<br>0.00)                                | 0.00<br>(0.00 to<br>0.00)                                  | 0.00<br>(0.00 to<br>0.00)                         | 0.00<br>(0.00 to<br>0.00)                         | 0.00<br>(0.00 to<br>0.00)                         | 0.00<br>(0.00 to<br>0.00)                         |
| Yellow fever                                          | 0.00<br>(0.00 to<br>0.00)                                  | 0.00<br>(0.00 to<br>0.00)                                  | 0.00<br>(0.00 to<br>0.00)                                | 0.00<br>(0.00 to<br>0.00)                                  | 0.00<br>(0.00 to<br>0.00)                         | 0.00<br>(0.00 to<br>0.00)                         | 0.00<br>(0.00 to<br>0.00)                         | 0.00<br>(0.00 to<br>0.00)                         |
| Rabies                                                | 17.80<br>(11.50 to<br>28.93)                               | 7.02<br>(3.38 to<br>13.60)                                 | 2.32<br>(1.12 to<br>4.71)                                | 7.38<br>(3.60 to<br>14.67)                                 | 0.26<br>(0.17 to<br>0.42)                         | 0.11<br>(0.05 to<br>0.20)                         | 0.04<br>(0.02 to<br>0.07)                         | 0.11<br>(0.06 to<br>0.22)                         |
| Intestinal nematode infections                        | 20.00<br>(3.25 to<br>50.08)                                | 18.90<br>(2.84 to<br>47.71)                                | 14.44<br>(2.78 to<br>35.47)                              | 19.07<br>(2.84 to<br>48.21)                                | 0.28<br>(0.08 to<br>0.64)                         | 0.28<br>(0.07 to<br>0.62)                         | 0.23<br>(0.07 to<br>0.50)                         | 0.27<br>(0.07 to<br>0.62)                         |
| Other neglected tropical diseases                     | 308.79<br>(90.15 to<br>436.48)                             | 216.81<br>(58.18 to<br>328.42)                             | 124.70<br>(32.72 to<br>187.99)                           | 222.12<br>(59.12 to<br>330.89)                             | 4.72<br>(1.33 to<br>6.52)                         | 3.61<br>(0.89 to<br>5.50)                         | 2.23<br>(0.55 to<br>3.39)                         | 3.66<br>(0.93 to<br>5.53)                         |
| <b>Maternal disorders</b>                             | <b>3,969.14</b><br><b>(3,268.92 to</b><br><b>4,767.80)</b> | <b>2,656.89</b><br><b>(1,553.92 to</b><br><b>4,092.40)</b> | <b>1,384.22</b><br><b>(761.18 to</b><br><b>2,110.04)</b> | <b>2,764.12</b><br><b>(1,634.60 to</b><br><b>4,384.09)</b> | <b>71.21</b><br><b>(58.66 to</b><br><b>85.21)</b> | <b>47.71</b><br><b>(27.46 to</b><br><b>73.62)</b> | <b>24.38</b><br><b>(13.75 to</b><br><b>37.83)</b> | <b>49.64</b><br><b>(29.45 to</b><br><b>78.32)</b> |
| Maternal hemorrhage                                   | 828.51<br>(606.12 to<br>1,076.79)                          | 536.12<br>(283.29 to<br>934.23)                            | 274.74<br>(143.00 to<br>474.96)                          | 555.54<br>(285.20 to<br>987.44)                            | 15.25<br>(11.15 to<br>19.83)                      | 9.88<br>(5.20 to<br>17.16)                        | 5.07<br>(2.65 to<br>8.65)                         | 10.24<br>(5.31 to<br>17.96)                       |
| Maternal sepsis and other maternal infections         | 308.32<br>(217.24 to<br>418.50)                            | 176.70<br>(83.88 to<br>325.12)                             | 89.26<br>(42.03 to<br>169.14)                            | 183.03<br>(88.82 to<br>344.79)                             | 5.51<br>(3.90 to<br>7.35)                         | 3.16<br>(1.52 to<br>5.71)                         | 1.60<br>(0.76 to<br>2.99)                         | 3.28<br>(1.57 to<br>6.07)                         |
| Maternal hypertensive disorders                       | 969.70<br>(718.86 to<br>1,241.10)                          | 583.20<br>(290.65 to<br>1,039.86)                          | 294.09<br>(150.25 to<br>515.42)                          | 603.40<br>(314.76 to<br>1,074.49)                          | 16.89<br>(12.49 to<br>21.75)                      | 10.16<br>(5.08 to<br>18.15)                       | 5.13<br>(2.64 to<br>8.97)                         | 10.51<br>(5.51 to<br>18.16)                       |
| Maternal obstructed labor and uterine rupture         | 148.33<br>(92.43 to<br>216.76)                             | 111.32<br>(52.12 to<br>204.41)                             | 53.87<br>(24.51 to<br>103.55)                            | 115.44<br>(53.26 to<br>213.35)                             | 2.71<br>(1.69 to<br>3.93)                         | 2.04<br>(0.96 to<br>3.70)                         | 0.99<br>(0.45 to<br>1.83)                         | 2.11<br>(0.97 to<br>3.82)                         |
| Maternal abortion, miscarriage, and ectopic pregnancy | 370.14<br>(253.61 to<br>509.91)                            | 330.01<br>(162.82 to<br>592.45)                            | 168.23<br>(82.03 to<br>288.58)                           | 346.88<br>(167.89 to<br>632.97)                            | 6.92<br>(4.83 to<br>9.45)                         | 6.20<br>(3.04 to<br>10.77)                        | 3.17<br>(1.53 to<br>5.38)                         | 6.52<br>(3.18 to<br>11.72)                        |

|                                        |                                 |                                  |                                 |                                 |                             |                            |                           |                            |
|----------------------------------------|---------------------------------|----------------------------------|---------------------------------|---------------------------------|-----------------------------|----------------------------|---------------------------|----------------------------|
|                                        | 682.26<br>(472.08 to<br>928.80) | -498.10<br>(237.48 to<br>902.48) | 251.80<br>(120.18 to<br>453.31) | 520.47<br>(247.43 to<br>937.10) | 11.86<br>(8.25 to<br>16.16) | 8.62<br>(4.14 to<br>15.57) | 4.37<br>(2.09 to<br>7.86) | 9.00<br>(4.32 to<br>16.13) |
| Indirect maternal deaths               |                                 |                                  |                                 |                                 |                             |                            |                           |                            |
|                                        | 50.15<br>(27.65 to<br>82.29)    | -42.14<br>(17.92 to<br>83.30)    | 21.16<br>(8.88 to<br>41.94)     | -43.92<br>(18.63 to<br>88.10)   | 0.91<br>(0.51 to<br>1.46)   | 0.76<br>(0.33 to<br>1.48)  | 0.38<br>(0.16 to<br>0.75) | 0.79<br>(0.34 to<br>1.55)  |
| Late maternal deaths                   |                                 |                                  |                                 |                                 |                             |                            |                           |                            |
|                                        | 3.02<br>(1.36 to<br>5.59)       | 7.84<br>(1.42 to<br>26.07)       | 4.25<br>(0.73 to<br>14.86)      | 8.32<br>(1.52 to<br>27.99)      | 0.06<br>(0.03 to<br>0.10)   | 0.14<br>(0.03 to<br>0.48)  | 0.08<br>(0.01 to<br>0.27) | 0.15<br>(0.03 to<br>0.51)  |
| Maternal deaths aggravated by HIV/AIDS |                                 |                                  |                                 |                                 |                             |                            |                           |                            |
|                                        | 608.72<br>(432.74 to<br>821.06) | 371.46<br>(193.33 to<br>641.42)  | 196.83<br>(102.94 to<br>343.42) | 387.12<br>(204.64 to<br>684.97) | 11.11<br>(7.86 to<br>15.03) | 6.76<br>(3.63 to<br>11.50) | 3.60<br>(1.90 to<br>6.37) | 7.04<br>(3.77 to<br>12.30) |
| Other maternal disorders               |                                 |                                  |                                 |                                 |                             |                            |                           |                            |

| Kyrgyzstan                                                              |                                                 |                                                |                                              |                                                 |                                           |                                           |                                     |                                           |
|-------------------------------------------------------------------------|-------------------------------------------------|------------------------------------------------|----------------------------------------------|-------------------------------------------------|-------------------------------------------|-------------------------------------------|-------------------------------------|-------------------------------------------|
| Cause                                                                   | YLLs (actual counts)                            |                                                |                                              |                                                 | Deaths (actual counts)                    |                                           |                                     |                                           |
|                                                                         | 2016                                            | 2040 Forecast                                  | 2040 Better Scenario                         | 2040 Worse Scenario                             | 2016                                      | 2040 Forecast                             | 2040 Better Scenario                | 2040 Worse Scenario                       |
| <b>Neonatal disorders</b>                                               | <b>193,078.30</b><br>(155,299.50 to 234,695.02) | <b>121,839.22</b><br>(90,731.50 to 158,377.94) | <b>60,252.02</b><br>(43,787.19 to 79,452.33) | <b>135,828.48</b><br>(101,451.86 to 175,855.88) | <b>2,230.45</b><br>(1,793.95 to 2,711.31) | <b>1,407.72</b><br>(1,048.30 to 1,829.89) | <b>696.16</b><br>(505.95 to 918.00) | <b>1,569.31</b><br>(1,172.08 to 2,031.89) |
| Neonatal preterm birth                                                  | 84,335.43<br>(66,631.43 to 104,837.33)          | 46,525.47<br>(29,937.01 to 67,712.86)          | 21,658.52<br>(13,658.10 to 31,781.63)        | 54,612.56<br>(35,527.63 to 78,090.35)           | 974.06<br>(769.58 to 1,210.79)            | 537.42<br>(345.83 to 782.16)              | 250.19<br>(157.78 to 367.10)        | 630.83<br>(410.38 to 901.99)              |
| Neonatal encephalopathy due to birth asphyxia and trauma                | 66,072.07<br>(51,811.12 to 83,770.96)           | 44,243.71<br>(27,100.73 to 66,157.38)          | 23,563.82<br>(14,605.02 to 35,604.58)        | 47,674.29<br>(29,497.76 to 72,800.51)           | 763.32<br>(598.55 to 967.80)              | 511.22<br>(313.14 to 764.27)              | 272.27<br>(168.81 to 411.34)        | 550.85<br>(340.88 to 841.13)              |
| Neonatal sepsis and other neonatal infections                           | 7,833.57<br>(5,041.65 to 12,840.32)             | 7,199.44<br>(4,154.23 to 12,654.71)            | 3,732.72<br>(2,105.04 to 6,528.96)           | 7,653.77<br>(4,298.01 to 13,425.05)             | 90.58<br>(58.30 to 148.39)                | 83.26<br>(48.01 to 146.55)                | 43.17<br>(24.34 to 75.54)           | 88.51<br>(49.69 to 155.31)                |
| Hemolytic disease and other neonatal jaundice                           | 856.40<br>(537.25 to 1,345.81)                  | 619.54<br>(287.12 to 1,186.88)                 | 291.40<br>(134.56 to 563.89)                 | 667.18<br>(306.08 to 1,251.65)                  | 9.90<br>(6.21 to 15.56)                   | 7.16<br>(3.32 to 13.71)                   | 3.37<br>(1.56 to 6.51)              | 7.71<br>(3.54 to 14.46)                   |
| Other neonatal disorders                                                | 33,980.82<br>(25,396.23 to 44,599.95)           | 23,251.05<br>(11,882.98 to 39,972.13)          | 11,005.56<br>(5,685.06 to 18,530.16)         | 25,220.67<br>(12,969.50 to 42,564.79)           | 392.58<br>(293.41 to 515.24)              | 268.66<br>(137.31 to 461.81)              | 127.16<br>(65.71 to 214.05)         | 291.41<br>(149.87 to 491.72)              |
| <b>Nutritional deficiencies</b>                                         | <b>1,012.61</b><br>(856.15 to 1,185.05)         | <b>842.05</b><br>(556.77 to 1,188.60)          | <b>593.97</b><br>(388.86 to 828.76)          | <b>841.52</b><br>(557.72 to 1,167.05)           | <b>21.48</b><br>(18.58 to 24.57)          | <b>22.22</b><br>(15.10 to 30.70)          | <b>16.98</b><br>(11.41 to 23.20)    | <b>21.63</b><br>(14.95 to 29.38)          |
| Protein-energy malnutrition                                             | 457.12<br>(300.72 to 586.99)                    | 362.00<br>(190.42 to 574.45)                   | 258.08<br>(131.05 to 409.83)                 | 361.41<br>(188.04 to 570.30)                    | 10.00<br>(6.13 to 12.44)                  | 9.81<br>(5.10 to 15.50)                   | 7.49<br>(3.79 to 11.64)             | 9.59<br>(4.94 to 15.00)                   |
| Iodine deficiency                                                       | 33.35<br>(1.87 to 115.05)                       | 45.40<br>(2.13 to 147.11)                      | 28.97<br>(1.38 to 143.48)                    | 45.55<br>(1.92 to 143.48)                       | 0.66<br>(0.06 to 1.92)                    | 1.26<br>(0.08 to 3.76)                    | 0.89<br>(0.05 to 2.88)              | 1.23<br>(0.08 to 3.72)                    |
| Dietary iron deficiency                                                 | 42.60<br>(33.88 to 55.74)                       | 36.05<br>(22.13 to 55.34)                      | 26.92<br>(16.81 to 41.28)                    | 36.27<br>(22.53 to 55.86)                       | 0.76<br>(0.61 to 1.04)                    | 0.69<br>(0.43 to 1.04)                    | 0.54<br>(0.31 to 0.81)              | 0.68<br>(0.43 to 1.04)                    |
| Other nutritional deficiencies                                          | 479.54<br>(369.56 to 607.70)                    | 398.60<br>(251.61 to 598.74)                   | 280.00<br>(171.86 to 435.43)                 | 398.28<br>(251.47 to 593.75)                    | 10.06<br>(7.73 to 13.25)                  | 10.46<br>(6.47 to 15.47)                  | 8.06<br>(4.95 to 12.35)             | 10.13<br>(6.29 to 15.05)                  |
| <b>Other communicable, maternal, neonatal, and nutritional diseases</b> | <b>7,455.63</b><br>(3,589.43 to 16,107.47)      | <b>5,361.16</b><br>(2,263.22 to 14,207.34)     | <b>3,083.05</b><br>(1,476.25 to 7,451.46)    | <b>5,496.38</b><br>(2,318.43 to 14,718.97)      | <b>101.95</b><br>(57.52 to 202.86)        | <b>82.66</b><br>(44.47 to 186.36)         | <b>52.50</b><br>(31.33 to 102.69)   | <b>83.30</b><br>(44.35 to 193.76)         |
| Sexually transmitted infections excluding HIV                           | 238.40<br>(131.95 to 403.61)                    | 156.98<br>(94.26 to 258.05)                    | 111.40<br>(68.96 to 174.24)                  | 158.27<br>(93.80 to 263.78)                     | 3.89<br>(2.59 to 5.88)                    | 3.28<br>(2.13 to 5.02)                    | 2.55<br>(1.68 to 3.79)              | 3.24<br>(2.11 to 4.91)                    |
| Syphilis                                                                | 182.99<br>(78.11 to 348.77)                     | 97.44<br>(44.41 to 186.76)                     | 62.18<br>(30.40 to 116.86)                   | 98.95<br>(45.16 to 193.13)                      | 2.55<br>(1.32 to 4.47)                    | 1.64<br>(0.91 to 2.82)                    | 1.16<br>(0.67 to 1.91)              | 1.64<br>(0.90 to 2.82)                    |
| Chlamydial infection                                                    | 10.73<br>(8.75 to 13.94)                        | 11.36<br>(6.94 to 18.93)                       | 9.34<br>(5.63 to 15.89)                      | 11.33<br>(6.92 to 18.63)                        | 0.26<br>(0.21 to 0.34)                    | 0.30<br>(0.19 to 0.50)                    | 0.26<br>(0.16 to 0.42)              | 0.30<br>(0.18 to 0.48)                    |
| Gonococcal infection                                                    | 29.16<br>(24.13 to 38.17)                       | 31.92<br>(19.21 to 51.74)                      | 26.52<br>(15.91 to 43.32)                    | 31.76<br>(18.99 to 52.12)                       | 0.72<br>(0.60 to 0.99)                    | 0.91<br>(0.56 to 1.51)                    | 0.78<br>(0.48 to 1.30)              | 0.89<br>(0.55 to 1.47)                    |
| Other sexually transmitted infections                                   | 15.53<br>(12.81 to 20.04)                       | 16.26<br>(9.58 to 26.89)                       | 13.37<br>(7.86 to 21.98)                     | 16.23<br>(9.71 to 26.77)                        | 0.37<br>(0.30 to 0.50)                    | 0.42<br>(0.25 to 0.70)                    | 0.36<br>(0.21 to 0.58)              | 0.42<br>(0.24 to 0.69)                    |
| Acute hepatitis                                                         | 2,542.65<br>(2,125.87 to 3,002.89)              | 1,569.68<br>(1,090.27 to 2,168.82)             | 1,084.13<br>(732.04 to 1,482.62)             | 1,579.27<br>(1,094.86 to 2,162.40)              | 41.72<br>(35.77 to 48.17)                 | 33.01<br>(23.36 to 43.91)                 | 24.53<br>(16.89 to 33.12)           | 32.54<br>(23.04 to 43.42)                 |
| Acute hepatitis A                                                       | 637.82<br>(417.31 to 920.09)                    | 261.90<br>(116.40 to 538.58)                   | 145.47<br>(66.93 to 285.34)                  | 269.82<br>(119.89 to 554.78)                    | 7.69<br>(5.12 to 11.01)                   | 3.29<br>(1.56 to 6.53)                    | 1.89<br>(0.93 to 3.53)              | 3.37<br>(1.58 to 6.74)                    |
| Acute hepatitis B                                                       | 1,347.25<br>(1,118.06 to 1,620.17)              | 1,014.41<br>(662.70 to 1,439.19)               | 739.97<br>(474.07 to 1,063.78)               | 1,013.66<br>(671.10 to 1,431.28)                | 26.11<br>(22.24 to 30.45)                 | 24.44<br>(16.69 to 33.78)                 | 18.64<br>(12.43 to 26.15)           | 23.98<br>(16.43 to 33.33)                 |

|                                       |                                                                  |                                                                      |                                                                    |                                                                      |                                                               |                                                               |                                                               |                                                               |
|---------------------------------------|------------------------------------------------------------------|----------------------------------------------------------------------|--------------------------------------------------------------------|----------------------------------------------------------------------|---------------------------------------------------------------|---------------------------------------------------------------|---------------------------------------------------------------|---------------------------------------------------------------|
|                                       | 64.45<br>(43.61 to<br>91.39)                                     | 46.87<br>(25.44 to<br>82.00)                                         | 36.61<br>(20.51 to<br>63.08)                                       | 46.57<br>(24.75 to<br>83.82)                                         | 1.12<br>(0.80 to<br>1.51)                                     | 1.05<br>(0.62 to<br>1.72)                                     | 0.88<br>(0.52 to<br>1.43)                                     | 1.02<br>(0.60 to<br>1.69)                                     |
| Acute hepatitis C                     |                                                                  |                                                                      |                                                                    |                                                                      |                                                               |                                                               |                                                               |                                                               |
|                                       | 493.13<br>(354.71 to<br>672.35)                                  | 246.50<br>(135.53 to<br>440.43)                                      | 162.08<br>(92.80 to<br>281.49)                                     | 249.21<br>(136.56 to<br>440.53)                                      | 6.80<br>(5.01 to<br>9.01)                                     | 4.24<br>(2.64 to<br>6.88)                                     | 3.12<br>(1.96 to<br>4.92)                                     | 4.17<br>(2.55 to<br>6.71)                                     |
| Acute hepatitis E                     |                                                                  |                                                                      |                                                                    |                                                                      |                                                               |                                                               |                                                               |                                                               |
|                                       | 4,674.58<br>(908.95 to<br>13,395.25)                             | 3,634.49<br>(716.63 to<br>12,495.04)                                 | 1,887.51<br>(416.03 to<br>6,308.38)                                | 3,758.84<br>(730.68 to<br>13,345.15)                                 | 56.34<br>(12.87 to<br>157.08)                                 | 46.37<br>(12.41 to<br>148.24)                                 | 25.42<br>(8.18 to<br>76.42)                                   | 47.52<br>(12.50 to<br>157.72)                                 |
| Other unspecified infectious diseases |                                                                  |                                                                      |                                                                    |                                                                      |                                                               |                                                               |                                                               |                                                               |
| <b>Non-communicable diseases</b>      | <b>675,350.93</b><br><b>(618,272.37 to</b><br><b>735,215.72)</b> | <b>1,042,034.05</b><br><b>(658,878.80 to</b><br><b>1,535,745.96)</b> | <b>733,295.47</b><br><b>(462,625.06 to</b><br><b>1,058,776.74)</b> | <b>1,278,266.08</b><br><b>(803,961.13 to</b><br><b>1,860,652.86)</b> | <b>28,213.84</b><br><b>(26,061.04 to</b><br><b>30,376.70)</b> | <b>52,037.82</b><br><b>(37,071.25 to</b><br><b>69,419.43)</b> | <b>38,542.68</b><br><b>(27,233.29 to</b><br><b>51,704.08)</b> | <b>61,271.69</b><br><b>(43,117.40 to</b><br><b>80,898.95)</b> |

| Kyrgyzstan                           |                                                |                                                 |                                                 |                                                 |                                           |                                           |                                           |                                           |
|--------------------------------------|------------------------------------------------|-------------------------------------------------|-------------------------------------------------|-------------------------------------------------|-------------------------------------------|-------------------------------------------|-------------------------------------------|-------------------------------------------|
| Cause                                | YLLs (actual counts)                           |                                                 |                                                 |                                                 | Deaths (actual counts)                    |                                           |                                           |                                           |
|                                      | 2016                                           | 2040 Forecast                                   | 2040 Better Scenario                            | 2040 Worse Scenario                             | 2016                                      | 2040 Forecast                             | 2040 Better Scenario                      | 2040 Worse Scenario                       |
| <b>Neoplasms</b>                     | <b>105,617.69</b><br>(95,398.90 to 116,679.94) | <b>164,930.33</b><br>(113,214.32 to 218,043.42) | <b>154,917.82</b><br>(103,689.18 to 211,514.90) | <b>186,925.10</b><br>(129,868.05 to 248,413.46) | <b>3,639.64</b><br>(3,309.48 to 4,000.44) | <b>6,900.48</b><br>(5,085.07 to 8,796.91) | <b>6,780.75</b><br>(4,869.04 to 8,918.01) | <b>7,589.97</b><br>(5,565.72 to 9,612.71) |
| Lip and oral cavity cancer           | 1,829.30<br>(1,575.10 to 2,096.12)             | 2,582.16<br>(1,303.67 to 4,353.17)              | 1,915.05<br>(1,003.83 to 3,172.24)              | 4,070.73<br>(243.34 to 6,935.43)                | 66.81<br>(58.25 to 75.94)                 | 108.60<br>(60.10 to 174.20)               | 85.63<br>(49.40 to 135.40)                | 162.59<br>(81.60 to 272.60)               |
| Nasopharynx cancer                   | 491.78<br>(426.18 to 573.21)                   | 653.22<br>(345.35 to 1,094.03)                  | 448.69<br>(243.34 to 759.18)                    | 1,021.79<br>(503.18 to 1,798.35)                | 13.85<br>(12.06 to 16.01)                 | 21.75<br>(12.02 to 35.64)                 | 15.69<br>(8.93 to 25.54)                  | 33.41<br>(17.28 to 55.88)                 |
| Other pharynx cancer                 | 888.85<br>(766.21 to 1,009.53)                 | 1,239.55<br>(617.66 to 2,078.90)                | 1,160.80<br>(577.58 to 1,974.26)                | 1,567.95<br>(758.49 to 2,663.76)                | 31.53<br>(27.18 to 35.59)                 | 50.44<br>(26.22 to 83.62)                 | 48.69<br>(25.06 to 80.67)                 | 62.43<br>(31.46 to 107.08)                |
| Esophageal cancer                    | 3,422.91<br>(2,968.05 to 3,927.90)             | 6,299.85<br>(3,506.19 to 10,772.62)             | 4,923.40<br>(2,778.24 to 8,611.24)              | 8,955.69<br>(4,745.86 to 15,977.85)             | 147.73<br>(129.68 to 168.27)              | 313.79<br>(186.64 to 510.03)              | 260.63<br>(156.27 to 427.26)              | 419.60<br>(235.41 to 702.32)              |
| Stomach cancer                       | 16,666.62<br>(14,865.42 to 18,662.63)          | 23,581.94<br>(14,663.51 to 34,839.95)           | 20,878.73<br>(12,501.00 to 32,050.30)           | 24,377.76<br>(14,954.33 to 35,708.03)           | 624.49<br>(559.30 to 694.54)              | 1,024.24<br>(680.28 to 1,444.76)          | 942.04<br>(606.70 to 1,377.67)            | 1,028.09<br>(689.21 to 1,439.69)          |
| Colon and rectum cancer              | 6,036.86<br>(5,374.78 to 7,000.23)             | 13,161.17<br>(8,161.33 to 19,416.49)            | 15,516.30<br>(8,200.08 to 20,203.09)            | 14,321.59<br>(8,937.77 to 21,154.39)            | 240.28<br>(214.71 to 275.35)              | 624.52<br>(418.79 to 887.99)              | 670.16<br>(434.67 to 949.80)              | 654.89<br>(437.22 to 932.01)              |
| Liver cancer                         | 8,140.48<br>(7,026.98 to 9,228.38)             | 13,226.79<br>(7,936.48 to 20,429.44)            | 12,590.54<br>(7,472.64 to 19,351.76)            | 16,485.17<br>(9,456.21 to 26,340.24)            | 304.69<br>(263.92 to 344.85)              | 580.16<br>(378.02 to 859.18)              | 573.86<br>(368.28 to 851.25)              | 695.49<br>(430.05 to 1,063.74)            |
| Liver cancer due to hepatitis B      | 2,619.45<br>(2,052.98 to 3,208.54)             | 4,002.69<br>(2,327.01 to 6,491.85)              | 3,848.65<br>(2,219.00 to 6,180.69)              | 4,751.65<br>(2,659.03 to 8,092.18)              | 89.71<br>(69.85 to 111.20)                | 161.41<br>(99.20 to 250.66)               | 160.68<br>(97.15 to 251.78)               | 185.50<br>(108.38 to 301.94)              |
| Liver cancer due to hepatitis C      | 2,481.70<br>(1,994.81 to 3,020.90)             | 4,391.28<br>(2,669.62 to 6,894.44)              | 4,307.03<br>(2,565.21 to 6,674.55)              | 5,088.11<br>(2,936.93 to 8,421.83)              | 102.18<br>(82.91 to 123.09)               | 208.94<br>(133.29 to 315.36)              | 212.66<br>(134.79 to 323.91)              | 233.00<br>(141.62 to 363.29)              |
| Liver cancer due to alcohol use      | 1,602.70<br>(1,324.93 to 1,929.44)             | 2,560.06<br>(1,507.03 to 4,058.19)              | 2,295.30<br>(1,340.44 to 3,708.79)              | 3,948.55<br>(2,206.01 to 6,545.08)              | 62.72<br>(52.35 to 75.07)                 | 114.71<br>(71.56 to 175.42)               | 107.17<br>(65.78 to 165.25)               | 167.87<br>(98.67 to 268.17)               |
| Liver cancer due to other causes     | 1,437.63<br>(1,199.01 to 1,717.23)             | 2,272.75<br>(1,383.85 to 3,460.36)              | 2,139.56<br>(1,287.77 to 3,265.67)              | 2,696.86<br>(1,566.07 to 4,336.78)              | 50.08<br>(41.55 to 59.60)                 | 95.10<br>(60.99 to 140.89)                | 93.34<br>(59.14 to 138.60)                | 109.12<br>(66.73 to 172.69)               |
| Gallbladder and biliary tract cancer | 899.88<br>(801.35 to 1,008.55)                 | 1,198.92<br>(831.61 to 1,590.44)                | 1,299.37<br>(873.34 to 1,763.56)                | 1,126.60<br>(803.72 to 1,458.65)                | 37.99<br>(33.75 to 42.44)                 | 58.62<br>(44.20 to 73.55)                 | 65.80<br>(47.76 to 85.12)                 | 53.85<br>(41.87 to 66.32)                 |
| Pancreatic cancer                    | 4,166.91<br>(3,601.74 to 4,710.99)             | 7,981.58<br>(5,465.15 to 10,689.78)             | 8,495.00<br>(5,648.09 to 11,587.98)             | 8,082.15<br>(5,560.79 to 10,689.44)             | 163.84<br>(142.92 to 184.01)              | 362.06<br>(267.72 to 462.60)              | 401.39<br>(289.47 to 523.01)              | 354.57<br>(263.66 to 450.68)              |
| Larynx cancer                        | 892.99<br>(779.46 to 1,015.00)                 | 1,312.48<br>(615.14 to 2,517.42)                | 832.87<br>(409.03 to 1,559.49)                  | 2,207.59<br>(965.33 to 4,488.32)                | 33.02<br>(28.96 to 37.38)                 | 54.63<br>(27.44 to 101.03)                | 36.74<br>(64.02 to 168.77)                | 87.17<br>(40.52 to 168.77)                |
| Tracheal, bronchus, and lung cancer  | 12,170.23<br>(10,725.06 to 13,860.32)          | 19,560.61<br>(12,227.61 to 29,432.67)           | 14,866.03<br>(9,081.27 to 22,383.24)            | 29,829.83<br>(18,081.61 to 46,374.41)           | 466.92<br>(413.12 to 526.24)              | 859.27<br>(563.68 to 1,251.40)            | 689.70<br>(454.66 to 990.95)              | 1,246.36<br>(794.37 to 1,856.42)          |
| Malignant skin melanoma              | 680.53<br>(525.60 to 798.87)                   | 1,057.37<br>(694.94 to 1,407.28)                | 1,277.04<br>(823.64 to 1,730.89)                | 994.29<br>(663.37 to 1,308.66)                  | 23.52<br>(18.43 to 27.34)                 | 45.22<br>(33.53 to 57.03)                 | 57.53<br>(41.48 to 72.96)                 | 41.14<br>(30.81 to 50.79)                 |
| Non-melanoma skin cancer             | 721.72<br>(621.81 to 840.91)                   | 1,732.67<br>(1,283.61 to 2,212.22)              | 1,671.19<br>(1,172.66 to 2,193.47)              | 1,611.64<br>(1,222.17 to 2,019.78)              | 33.64<br>(29.59 to 38.57)                 | 96.28<br>(78.29 to 117.67)                | 98.34<br>(75.81 to 122.16)                | 86.56<br>(70.89 to 105.36)                |
| Breast cancer                        | 7,511.61<br>(6,350.95 to 8,898.28)             | 13,153.95<br>(7,609.24 to 20,557.69)            | 12,912.91<br>(7,270.72 to 20,654.69)            | 14,702.86<br>(8,341.71 to 23,028.05)            | 250.48<br>(213.83 to 293.13)              | 523.36<br>(325.05 to 772.66)              | 531.08<br>(323.05 to 794.18)              | 570.65<br>(351.89 to 839.57)              |
| Cervical cancer                      | 6,977.19<br>(5,965.87 to 8,120.12)             | 8,099.97<br>(4,655.88 to 12,081.73)             | 7,030.91<br>(3,971.31 to 10,490.74)             | 8,054.71<br>(4,646.63 to 11,901.73)             | 214.85<br>(184.46 to 248.92)              | 296.98<br>(185.02 to 416.74)              | 265.32<br>(161.24 to 377.46)              | 289.60<br>(182.80 to 403.75)              |





| Kyrgyzstan                      |                                                        |                                                        |                                                        |                                                          |                                                     |                                                     |                                                     |                                                     |
|---------------------------------|--------------------------------------------------------|--------------------------------------------------------|--------------------------------------------------------|----------------------------------------------------------|-----------------------------------------------------|-----------------------------------------------------|-----------------------------------------------------|-----------------------------------------------------|
| Cause                           | YLLs (actual counts)                                   |                                                        |                                                        |                                                          | Deaths (actual counts)                              |                                                     |                                                     |                                                     |
|                                 | 2016                                                   | 2040 Forecast                                          | 2040 Better Scenario                                   | 2040 Worse Scenario                                      | 2016                                                | 2040 Forecast                                       | 2040 Better Scenario                                | 2040 Worse Scenario                                 |
| Kidney cancer                   | 2,268.66<br>(1,965.61 to 2,564.10)                     | 3,830.40<br>(2,502.86 to 5,252.89)                     | 4,287.45<br>(2,743.99 to 5,958.53)                     | 3,875.84<br>(2,540.21 to 5,475.21)                       | 72.71<br>(63.56 to 82.01)                           | 150.84<br>(105.00 to 200.07)                        | 177.70<br>(121.42 to 238.02)                        | 148.18<br>(103.11 to 203.59)                        |
| Bladder cancer                  | 1,193.33<br>(1,013.09 to 1,373.97)                     | 2,249.96<br>(1,587.91 to 3,016.96)                     | 2,188.83<br>(1,517.89 to 2,940.88)                     | 2,339.23<br>(1,636.65 to 3,222.45)                       | 54.46<br>(46.61 to 62.16)                           | 120.31<br>(92.61 to 153.91)                         | 124.38<br>(95.08 to 155.31)                         | 118.50<br>(90.00 to 154.76)                         |
| Brain and nervous system cancer | 5,249.85<br>(3,628.62 to 6,192.71)                     | 6,963.58<br>(4,340.56 to 9,646.71)                     | 7,148.15<br>(4,398.66 to 10,102.77)                    | 6,753.06<br>(4,263.26 to 9,227.11)                       | 126.24<br>(85.60 to 149.49)                         | 204.81<br>(128.81 to 274.12)                        | 221.45<br>(137.89 to 304.22)                        | 194.48<br>(123.37 to 256.57)                        |
| Thyroid cancer                  | 416.92<br>(361.88 to 481.14)                           | 690.21<br>(431.32 to 1,043.82)                         | 621.04<br>(378.86 to 962.65)                           | 736.04<br>(453.99 to 1,137.18)                           | 15.39<br>(13.43 to 17.71)                           | 31.11<br>(20.55 to 45.45)                           | 29.03<br>(18.90 to 43.26)                           | 32.29<br>(21.26 to 48.54)                           |
| Mesothelioma                    | 154.96<br>(132.82 to 174.81)                           | 215.10<br>(138.47 to 284.96)                           | 214.42<br>(135.53 to 294.56)                           | 205.08<br>(134.20 to 268.92)                             | 4.98<br>(4.25 to 5.61)                              | 8.22<br>(5.78 to 10.53)                             | 8.48<br>(5.82 to 11.27)                             | 7.66<br>(5.50 to 9.63)                              |
| Hodgkin lymphoma                | 503.67<br>(440.93 to 571.35)                           | 578.12<br>(398.26 to 787.13)                           | 445.07<br>(291.77 to 620.82)                           | 566.22<br>(392.15 to 768.69)                             | 12.38<br>(10.89 to 14.01)                           | 17.71<br>(12.47 to 23.03)                           | 14.24<br>(9.63 to 19.32)                            | 16.97<br>(12.11 to 22.01)                           |
| Non-Hodgkin lymphoma            | 1,992.65<br>(1,705.38 to 2,296.18)                     | 2,951.62<br>(2,005.17 to 3,930.16)                     | 3,141.82<br>(2,093.05 to 4,244.28)                     | 2,956.39<br>(2,037.48 to 3,980.72)                       | 55.94<br>(48.31 to 63.70)                           | 108.61<br>(78.00 to 140.54)                         | 122.88<br>(85.43 to 161.31)                         | 105.96<br>(76.48 to 139.04)                         |
| Multiple myeloma                | 428.40<br>(318.29 to 502.85)                           | 876.46<br>(517.69 to 1,226.11)                         | 997.21<br>(577.11 to 1,406.76)                         | 879.83<br>(522.31 to 1,253.59)                           | 16.11<br>(11.24 to 18.98)                           | 38.74<br>(23.99 to 52.82)                           | 45.54<br>(27.58 to 62.17)                           | 37.98<br>(23.33 to 52.54)                           |
| Leukemia                        | 6,643.35<br>(5,681.57 to 7,552.84)                     | 6,989.06<br>(4,788.75 to 9,513.15)                     | 6,404.31<br>(4,347.97 to 8,749.94)                     | 7,395.20<br>(5,028.94 to 10,188.69)                      | 139.11<br>(121.23 to 157.11)                        | 195.03<br>(141.75 to 256.98)                        | 190.83<br>(134.30 to 253.14)                        | 203.51<br>(145.62 to 271.70)                        |
| Acute lymphoid leukemia         | 1,968.07<br>(1,633.62 to 2,319.60)                     | 1,529.93<br>(1,035.67 to 2,160.97)                     | 1,378.08<br>(927.14 to 1,943.32)                       | 1,589.32<br>(1,083.13 to 2,243.46)                       | 32.50<br>(27.29 to 37.61)                           | 30.45<br>(21.40 to 40.96)                           | 29.45<br>(20.79 to 39.66)                           | 31.73<br>(22.62 to 42.75)                           |
| Chronic lymphoid leukemia       | 223.73<br>(180.86 to 281.61)                           | 370.24<br>(235.90 to 537.99)                           | 365.30<br>(228.02 to 533.77)                           | 399.66<br>(250.26 to 584.73)                             | 7.25<br>(5.90 to 9.09)                              | 14.46<br>(9.59 to 20.41)                            | 14.77<br>(9.62 to 20.84)                            | 15.20<br>(9.96 to 21.64)                            |
| Acute myeloid leukemia          | 2,045.48<br>(1,590.01 to 2,428.67)                     | 2,250.26<br>(1,449.87 to 3,168.37)                     | 2,308.59<br>(1,456.00 to 3,252.93)                     | 2,389.44<br>(1,518.81 to 3,372.62)                       | 43.20<br>(33.93 to 50.61)                           | 59.51<br>(39.84 to 82.31)                           | 64.42<br>(42.33 to 89.42)                           | 62.85<br>(41.52 to 87.26)                           |
| Chronic myeloid leukemia        | 244.58<br>(208.73 to 285.09)                           | 249.68<br>(151.06 to 360.04)                           | 238.43<br>(140.81 to 350.61)                           | 272.32<br>(160.55 to 399.59)                             | 7.01<br>(6.00 to 8.16)                              | 8.75<br>(5.75 to 12.18)                             | 8.70<br>(5.52 to 12.33)                             | 9.29<br>(5.92 to 13.28)                             |
| Other leukemia                  | 2,161.49<br>(1,832.65 to 2,530.87)                     | 2,588.94<br>(1,768.32 to 3,553.91)                     | 2,113.92<br>(1,418.59 to 2,930.44)                     | 2,744.47<br>(1,859.25 to 3,887.12)                       | 49.15<br>(42.45 to 56.88)                           | 81.86<br>(60.02 to 107.12)                          | 73.49<br>(52.72 to 97.86)                           | 84.44<br>(61.08 to 113.56)                          |
| Other neoplasms                 | 8,948.70<br>(7,702.31 to 10,068.87)                    | 13,386.85<br>(9,389.14 to 17,399.85)                   | 13,525.48<br>(9,153.49 to 17,915.94)                   | 12,872.02<br>(9,217.87 to 16,537.14)                     | 248.18<br>(215.30 to 279.56)                        | 471.72<br>(351.36 to 650.63)                        | 505.51<br>(367.48 to 650.55)                        | 441.25<br>(334.58 to 542.47)                        |
| <b>Cardiovascular diseases</b>  | <b>323,362.15</b><br><b>(294,588.65 to 350,650.96)</b> | <b>534,351.81</b><br><b>(293,054.13 to 882,184.15)</b> | <b>295,515.65</b><br><b>(162,459.98 to 500,494.63)</b> | <b>716,984.07</b><br><b>(385,576.91 to 1,161,118.68)</b> | <b>17,159.87</b><br><b>(15,844.13 to 18,458.72)</b> | <b>31,412.56</b><br><b>(20,566.07 to 45,525.12)</b> | <b>19,342.40</b><br><b>(12,476.52 to 28,624.99)</b> | <b>39,083.78</b><br><b>(25,376.36 to 55,641.93)</b> |
| Rheumatic heart disease         | 7,318.28<br>(6,422.44 to 8,229.49)                     | 6,176.39<br>(3,392.41 to 10,044.14)                    | 4,340.38<br>(2,346.24 to 7,304.60)                     | 6,303.82<br>(3,485.84 to 10,307.12)                      | 192.91<br>(170.14 to 217.49)                        | 186.61<br>(109.30 to 295.40)                        | 134.85<br>(79.53 to 217.35)                         | 187.48<br>(109.16 to 298.49)                        |
| Ischemic heart disease          | 189,261.81<br>(172,275.33 to 206,162.01)               | 307,040.29<br>(158,328.71 to 537,267.77)               | 162,417.21<br>(83,790.86 to 285,666.30)                | 407,387.74<br>(205,481.92 to 685,629.54)                 | 11,316.11<br>(10,468.30 to 12,119.95)               | 19,589.17<br>(11,628.26 to 29,738.95)               | 11,736.24<br>(6,959.07 to 18,359.21)                | 24,087.67<br>(14,664.37 to 35,556.86)               |
| Stroke                          | 98,670.77<br>(89,089.50 to 108,441.08)                 | 172,076.88<br>(90,461.63 to 325,506.69)                | 88,846.80<br>(46,263.53 to 167,707.51)                 | 244,508.77<br>(122,720.05 to 438,401.91)                 | 4,588.35<br>(4,179.59 to 5,023.28)                  | 9,237.06<br>(5,576.48 to 15,613.89)                 | 5,390.20<br>(3,250.15 to 8,945.93)                  | 12,071.77<br>(7,167.26 to 19,246.57)                |
| Ischemic stroke                 | 41,124.00<br>(36,952.91 to 45,436.45)                  | 69,640.41<br>(38,417.17 to 129,080.40)                 | 41,561.65<br>(22,444.87 to 76,820.91)                  | 89,995.78<br>(48,931.56 to 160,374.93)                   | 2,269.79<br>(2,061.77 to 2,496.11)                  | 4,457.66<br>(2,738.87 to 7,129.63)                  | 2,949.88<br>(1,772.16 to 4,802.27)                  | 5,350.52<br>(3,256.39 to 8,594.62)                  |

|                                |                                          |                                            |                                           |                                            |                                       |                                       |                                       |                                        |
|--------------------------------|------------------------------------------|--------------------------------------------|-------------------------------------------|--------------------------------------------|---------------------------------------|---------------------------------------|---------------------------------------|----------------------------------------|
| Intracerebral hemorrhage       | 57,546.77<br>(51,671.88 to<br>63,470.15) | 102,436.47<br>(45,730.48 to<br>210,549.69) | -47,283.16<br>(21,072.06 to<br>96,006.03) | 154,513.00<br>(65,463.35 to<br>300,235.08) | 2,318.56<br>(2,096.51 to<br>2,546.20) | 4,779.40<br>(2,563.65 to<br>8,708.44) | 2,440.32<br>(1,300.00 to<br>4,368.46) | 6,721.24<br>(3,379.27 to<br>11,943.37) |
| Hypertensive heart disease     | 8,364.18<br>(5,973.26 to<br>11,721.92)   | 21,757.26<br>(9,225.90 to<br>53,522.04)    | 15,408.52<br>(6,531.92 to<br>38,790.38)   | 27,630.85<br>(11,586.10 to<br>69,815.54)   | -408.08<br>(294.00 to<br>553.01)      | 1,228.39<br>(568.65 to<br>3,015.43)   | 940.35<br>(439.64 to<br>2,340.76)     | 1,491.51<br>(672.91 to<br>3,605.03)    |
| Cardiomyopathy and myocarditis | 11,874.86<br>(4,770.89 to<br>16,146.97)  | 11,744.46<br>(4,010.05 to<br>18,558.16)    | 11,648.10<br>(4,160.92 to<br>18,852.28)   | 15,101.03<br>(5,004.99 to<br>23,792.75)    | 317.89<br>(132.46 to<br>429.38)       | 361.30<br>(152.68 to<br>544.56)       | 370.12<br>(164.13 to<br>571.36)       | 451.42<br>(178.53 to<br>687.90)        |
| Myocarditis                    | 830.64<br>(434.99 to<br>1,118.13)        | 972.44<br>(427.56 to<br>1,552.53)          | 865.92<br>(379.28 to<br>1,419.95)         | 963.13<br>(418.23 to<br>1,542.92)          | 18.45<br>(9.54 to<br>25.20)           | 26.55<br>(13.77 to<br>40.35)          | 24.87<br>(13.50 to<br>38.30)          | 25.66<br>(12.85 to<br>39.45)           |

| Kyrgyzstan                                                    |                                                               |                                                                |                                                                |                                                                |                                                            |                                                            |                                                            |                                                            |
|---------------------------------------------------------------|---------------------------------------------------------------|----------------------------------------------------------------|----------------------------------------------------------------|----------------------------------------------------------------|------------------------------------------------------------|------------------------------------------------------------|------------------------------------------------------------|------------------------------------------------------------|
| Cause                                                         | YLLs (actual counts)                                          |                                                                |                                                                |                                                                | Deaths (actual counts)                                     |                                                            |                                                            |                                                            |
|                                                               | 2016                                                          | 2040 Forecast                                                  | 2040 Better Scenario                                           | 2040 Worse Scenario                                            | 2016                                                       | 2040 Forecast                                              | 2040 Better Scenario                                       | 2040 Worse Scenario                                        |
| Alcoholic cardiomyopathy                                      | 10,144.11<br>(3,510.80 to<br>14,006.00)                       | 9,763.95<br>(2,783.03 to<br>15,914.85)                         | 9,816.02<br>(2,948.10 to<br>16,235.96)                         | 13,109.40<br>(3,730.62 to<br>21,262.67)                        | 276.87<br>(100.11 to<br>380.12)                            | 296.89<br>(99.74 to<br>462.39)                             | 305.50<br>(109.83 to<br>487.38)                            | 388.83<br>(125.52 to<br>603.47)                            |
| Other cardiomyopathy                                          | 900.10<br>(625.66 to<br>1,099.35)                             | 1,008.07<br>(574.55 to<br>1,677.31)                            | 966.16<br>(537.68 to<br>1,635.72)                              | 1,028.50<br>(577.48 to<br>1,760.04)                            | 22.57<br>(17.37 to<br>26.87)                               | 37.85<br>(23.54 to<br>59.60)                               | 39.74<br>(23.69 to<br>63.58)                               | 36.94<br>(22.64 to<br>58.60)                               |
| Atrial fibrillation and flutter                               | 1,003.57<br>(788.38 to<br>1,245.58)                           | 2,636.35<br>(1,934.72 to<br>3,498.75)                          | 2,812.78<br>(2,038.39 to<br>3,811.66)                          | 2,611.13<br>(1,900.03 to<br>3,470.65)                          | 95.08<br>(74.27 to<br>119.85)                              | 251.65<br>(184.02 to<br>334.58)                            | 286.65<br>(215.47 to<br>379.34)                            | 239.12<br>(167.60 to<br>321.63)                            |
| Aortic aneurysm                                               | 688.33<br>(604.61 to<br>785.25)                               | 1,250.29<br>(788.23 to<br>1,940.35)                            | 1,180.98<br>(722.87 to<br>1,800.17)                            | 1,260.38<br>(773.88 to<br>1,955.70)                            | 29.09<br>(25.94 to<br>32.61)                               | 62.02<br>(44.93 to<br>84.02)                               | 64.41<br>(46.34 to<br>88.80)                               | 59.45<br>(42.91 to<br>80.39)                               |
| Peripheral artery disease                                     | 250.08<br>(181.46 to<br>355.23)                               | 936.27<br>(512.52 to<br>1,609.27)                              | 1,022.35<br>(549.47 to<br>1,765.43)                            | 954.03<br>(520.53 to<br>1,609.85)                              | 13.72<br>(10.43 to<br>22.86)                               | 58.76<br>(35.44 to<br>105.78)                              | 72.36<br>(42.72 to<br>131.88)                              | 56.47<br>(33.64 to<br>97.44)                               |
| Endocarditis                                                  | 556.30<br>(439.95 to<br>736.74)                               | 814.35<br>(507.19 to<br>1,236.71)                              | 740.57<br>(441.41 to<br>1,144.99)                              | 834.13<br>(512.57 to<br>1,269.14)                              | 14.66<br>(11.43 to<br>19.22)                               | 28.58<br>(18.71 to<br>41.90)                               | 28.23<br>(18.24 to<br>42.10)                               | 28.18<br>(18.21 to<br>41.73)                               |
| Other cardiovascular and circulatory diseases                 | 5,373.98<br>(4,702.66 to<br>6,087.83)                         | 9,919.28<br>(5,380.64 to<br>16,531.73)                         | 7,097.96<br>(3,924.02 to<br>12,094.97)                         | 10,392.19<br>(5,648.71 to<br>17,658.72)                        | 183.99<br>(162.59 to<br>206.10)                            | 409.01<br>(258.62 to<br>630.69)                            | 318.98<br>(200.52 to<br>494.41)                            | 410.71<br>(258.17 to<br>628.23)                            |
| <b>Chronic respiratory diseases</b>                           | <b>27,820.58</b><br><b>(25,092.34 to</b><br><b>30,677.13)</b> | <b>50,534.50</b><br><b>(30,329.27 to</b><br><b>80,064.88)</b>  | <b>34,629.08</b><br><b>(21,688.11 to</b><br><b>52,536.78)</b>  | <b>69,042.86</b><br><b>(38,276.57 to</b><br><b>116,901.40)</b> | <b>1,543.43</b><br><b>(1,413.83 to</b><br><b>1,679.69)</b> | <b>3,180.26</b><br><b>(2,004.42 to</b><br><b>4,702.05)</b> | <b>2,474.58</b><br><b>(1,641.09 to</b><br><b>3,509.21)</b> | <b>3,901.17</b><br><b>(2,314.02 to</b><br><b>6,179.77)</b> |
| Chronic obstructive pulmonary disease                         | 25,810.10<br>(23,240.32 to<br>28,544.59)                      | 48,140.73<br>(28,400.64 to<br>77,243.53)                       | 32,411.84<br>(19,974.12 to<br>49,770.28)                       | 66,390.13<br>(36,442.05 to<br>115,916.44)                      | 1,464.78<br>(1,336.12 to<br>1,595.93)                      | 3,063.05<br>(1,907.59 to<br>4,572.55)                      | 2,356.92<br>(1,554.50 to<br>3,364.73)                      | 3,777.12<br>(2,195.78 to<br>6,063.59)                      |
| Pneumoconiosis                                                | 14.10<br>(12.16 to<br>16.46)                                  | 21.37<br>(15.49 to<br>27.56)                                   | 22.24<br>(15.59 to<br>29.27)                                   | 20.66<br>(15.42 to<br>26.40)                                   | 0.71<br>(0.61 to<br>0.82)                                  | 1.30<br>(1.00 to<br>1.71)                                  | 1.42<br>(1.09 to<br>1.83)                                  | 1.23<br>(0.92 to<br>1.65)                                  |
| Silicosis                                                     | 0.39<br>(0.28 to<br>0.53)                                     | 0.52<br>(0.27 to<br>0.92)                                      | 0.49<br>(0.23 to<br>0.88)                                      | 0.48<br>(0.25 to<br>0.82)                                      | 0.02<br>(0.01 to<br>0.03)                                  | 0.03<br>(0.02 to<br>0.06)                                  | 0.03<br>(0.02 to<br>0.06)                                  | 0.03<br>(0.01 to<br>0.05)                                  |
| Asbestosis                                                    | 6.81<br>(5.72 to<br>8.05)                                     | 9.61<br>(6.18 to<br>13.63)                                     | 9.95<br>(6.23 to<br>14.28)                                     | 9.16<br>(6.03 to<br>12.75)                                     | 0.22<br>(0.18 to<br>0.26)                                  | 0.42<br>(0.27 to<br>0.55)                                  | 0.42<br>(0.28 to<br>0.61)                                  | 0.36<br>(0.25 to<br>0.51)                                  |
| Coal workers pneumoconiosis                                   | 0.20<br>(0.12 to<br>0.27)                                     | 0.24<br>(0.12 to<br>0.42)                                      | 0.17<br>(0.08 to<br>0.31)                                      | 0.26<br>(0.13 to<br>0.44)                                      | 0.01<br>(0.01 to<br>0.01)                                  | 0.01<br>(0.01 to<br>0.02)                                  | 0.01<br>(0.00 to<br>0.02)                                  | 0.01<br>(0.01 to<br>0.02)                                  |
| Other pneumoconiosis                                          | 6.71<br>(5.59 to<br>7.97)                                     | 10.98<br>(7.53 to<br>15.40)                                    | 11.63<br>(7.81 to<br>16.55)                                    | 10.76<br>(7.42 to<br>15.03)                                    | 0.47<br>(0.39 to<br>0.55)                                  | 0.87<br>(0.59 to<br>1.24)                                  | 0.96<br>(0.65 to<br>1.35)                                  | 0.83<br>(0.54 to<br>1.20)                                  |
| Asthma                                                        | 1,492.02<br>(1,229.44 to<br>1,806.71)                         | 1,461.73<br>(738.90 to<br>2,829.94)                            | 1,112.91<br>(542.18 to<br>2,161.18)                            | 1,773.73<br>(853.50 to<br>3,544.94)                            | 59.09<br>(49.14 to<br>72.00)                               | 71.45<br>(37.51 to<br>131.47)                              | 58.05<br>(29.66 to<br>107.25)                              | 82.98<br>(42.27 to<br>159.34)                              |
| Interstitial lung disease and pulmonary sarcoidosis           | 357.12<br>(268.66 to<br>620.12)                               | 735.34<br>(466.19 to<br>1,321.99)                              | 930.81<br>(575.83 to<br>1,715.88)                              | 678.02<br>(433.62 to<br>1,210.79)                              | 15.33<br>(11.67 to<br>26.47)                               | 38.97<br>(27.15 to<br>66.93)                               | 32.98<br>(36.60 to<br>90.55)                               | 34.44<br>(23.85 to<br>57.60)                               |
| Other chronic respiratory diseases                            | 147.25<br>(95.22 to<br>185.46)                                | 175.34<br>(105.10 to<br>262.47)                                | 151.29<br>(92.52 to<br>231.61)                                 | 180.33<br>(107.04 to<br>271.37)                                | 3.52<br>(2.34 to<br>4.94)                                  | 5.48<br>(3.55 to<br>8.72)                                  | 5.22<br>(3.36 to<br>8.45)                                  | 5.40<br>(3.46 to<br>8.36)                                  |
| <b>Cirrhosis and other chronic liver diseases</b>             | <b>71,927.21</b><br><b>(63,812.10 to</b><br><b>80,978.18)</b> | <b>91,963.00</b><br><b>(61,845.26 to</b><br><b>119,967.57)</b> | <b>81,663.29</b><br><b>(52,604.96 to</b><br><b>109,410.35)</b> | <b>97,311.73</b><br><b>(66,288.58 to</b><br><b>125,913.98)</b> | <b>2,132.48</b><br><b>(1,901.06 to</b><br><b>2,394.05)</b> | <b>3,282.86</b><br><b>(2,383.45 to</b><br><b>4,068.34)</b> | <b>3,008.48</b><br><b>(2,099.15 to</b><br><b>3,832.78)</b> | <b>3,390.90</b><br><b>(2,481.80 to</b><br><b>4,182.05)</b> |
| Cirrhosis and other chronic liver diseases due to hepatitis B | 25,618.92<br>(22,214.00 to<br>29,398.86)                      | 34,219.97<br>(22,639.44 to<br>45,217.43)                       | 31,563.78<br>(20,383.34 to<br>42,819.46)                       | 33,098.55<br>(22,315.76 to<br>43,132.79)                       | 764.35<br>(664.93 to<br>870.57)                            | 1,226.29<br>(873.87 to<br>1,538.20)                        | 1,163.88<br>(803.48 to<br>1,519.78)                        | 1,161.26<br>(838.62 to<br>1,433.77)                        |
| Cirrhosis and other chronic liver diseases due to hepatitis C | 14,997.19<br>(12,762.11 to<br>17,775.26)                      | 20,641.11<br>(13,204.77 to<br>28,189.42)                       | 18,914.74<br>(11,464.61 to<br>26,508.60)                       | 20,006.27<br>(12,965.11 to<br>27,042.07)                       | 444.34<br>(383.87 to<br>521.67)                            | 714.29<br>(489.72 to<br>938.00)                            | 670.43<br>(440.65 to<br>896.99)                            | 680.17<br>(471.16 to<br>874.62)                            |

|                                                                |                                                               |                                                              |                                                              |                                                              |                                                      |                                                      |                                                      |                                                      |
|----------------------------------------------------------------|---------------------------------------------------------------|--------------------------------------------------------------|--------------------------------------------------------------|--------------------------------------------------------------|------------------------------------------------------|------------------------------------------------------|------------------------------------------------------|------------------------------------------------------|
|                                                                | 18,865.84<br>(16,230.80 to<br>21,813.71)                      | 21,779.69<br>(14,066.80 to<br>29,392.62)                     | 17,641.09<br>(11,238.44 to<br>24,175.44)                     | 29,257.37<br>(18,952.73 to<br>39,173.09)                     | 582.67<br>(504.31 to<br>671.23)                      | 809.20<br>(574.64 to<br>1,031.93)                    | 682.50<br>(475.00 to<br>902.69)                      | 1,041.25<br>(737.57 to<br>1,323.47)                  |
| Cirrhosis and other chronic liver diseases due to alcohol use  |                                                               |                                                              |                                                              |                                                              |                                                      |                                                      |                                                      |                                                      |
|                                                                | 12,445.26<br>(10,900.72 to<br>14,134.72)                      | 15,322.23<br>(10,676.74 to<br>20,510.68)                     | 13,543.67<br>(8,999.82 to<br>18,708.74)                      | 14,949.53<br>(10,543.13 to<br>19,681.09)                     | 341.12<br>(300.56 to<br>387.94)                      | 533.08<br>(388.37 to<br>682.96)                      | 491.66<br>(345.56 to<br>656.26)                      | 508.21<br>(374.22 to<br>638.35)                      |
| Cirrhosis and other chronic liver diseases due to other causes |                                                               |                                                              |                                                              |                                                              |                                                      |                                                      |                                                      |                                                      |
| <b>Digestive diseases</b>                                      | <b>12,041.36</b><br><b>(10,181.01 to</b><br><b>15,359.55)</b> | <b>15,388.09</b><br><b>(9,379.49 to</b><br><b>23,474.33)</b> | <b>12,268.19</b><br><b>(7,357.56 to</b><br><b>18,898.90)</b> | <b>16,589.46</b><br><b>(9,870.56 to</b><br><b>26,350.59)</b> | <b>356.99</b><br><b>(304.85 to</b><br><b>435.44)</b> | <b>586.95</b><br><b>(393.67 to</b><br><b>836.33)</b> | <b>499.89</b><br><b>(334.36 to</b><br><b>712.59)</b> | <b>609.21</b><br><b>(403.85 to</b><br><b>888.54)</b> |
| Peptic ulcer disease                                           | 2,866.71<br>(2,418.96 to<br>3,714.71)                         | 3,485.13<br>(2,044.41 to<br>5,221.61)                        | 2,368.86<br>(1,348.06 to<br>3,721.99)                        | 3,480.15<br>(2,055.09 to<br>5,405.05)                        | 92.13<br>(79.04 to<br>117.32)                        | 133.38<br>(87.30 to<br>188.17)                       | 94.41<br>(60.27 to<br>138.84)                        | 129.76<br>(84.81 to<br>188.82)                       |

| Kyrgyzstan                                 |                                       |                                       |                                       |                                       |                                |                                    |                                    |                                    |
|--------------------------------------------|---------------------------------------|---------------------------------------|---------------------------------------|---------------------------------------|--------------------------------|------------------------------------|------------------------------------|------------------------------------|
| Cause                                      | YLLs (actual counts)                  |                                       |                                       |                                       | Deaths (actual counts)         |                                    |                                    |                                    |
|                                            | 2016                                  | 2040 Forecast                         | 2040 Better Scenario                  | 2040 Worse Scenario                   | 2016                           | 2040 Forecast                      | 2040 Better Scenario               | 2040 Worse Scenario                |
| Gastritis and duodenitis                   | 134.17<br>(101.49 to 198.88)          | 249.75<br>(151.22 to 401.24)          | 219.77<br>(126.04 to 353.37)          | 238.26<br>(147.94 to 379.29)          | 4.43<br>(3.44 to 7.00)         | 10.26<br>(6.99 to 16.76)           | 9.57<br>(6.23 to 15.71)            | 9.44<br>(6.54 to 14.92)            |
| Appendicitis                               | 461.10<br>(337.68 to 917.12)          | 535.20<br>(322.74 to 1,048.65)        | 403.05<br>(238.65 to 748.63)          | 525.76<br>(315.07 to 1,036.54)        | 10.57<br>(7.98 to 19.35)       | 15.97<br>(10.22 to 28.17)          | 12.71<br>(7.77 to 22.87)           | 15.31<br>(9.73 to 27.62)           |
| Paralytic ileus and intestinal obstruction | 2,449.12<br>(1,810.93 to 4,032.54)    | 2,459.23<br>(1,642.75 to 3,645.86)    | 2,137.24<br>(1,404.48 to 3,053.70)    | 2,383.08<br>(1,620.24 to 3,634.85)    | 56.40<br>(42.38 to 79.11)      | 85.03<br>(60.81 to 111.16)         | 83.50<br>(58.49 to 109.28)         | 78.82<br>(57.08 to 102.72)         |
| Inguinal, femoral, and abdominal hernia    | 241.13<br>(180.67 to 317.68)          | 279.77<br>(173.26 to 389.34)          | 251.49<br>(150.23 to 356.05)          | 264.26<br>(166.96 to 364.83)          | 9.86<br>(7.23 to 12.85)        | 13.72<br>(9.28 to 18.64)           | 13.17<br>(8.63 to 17.96)           | 12.56<br>(8.56 to 16.98)           |
| Inflammatory bowel disease                 | 521.36<br>(396.19 to 705.16)          | 701.16<br>(438.59 to 1,072.38)        | 670.82<br>(405.96 to 1,062.57)        | 677.73<br>(426.07 to 1,031.16)        | 12.65<br>(9.65 to 18.06)       | 22.28<br>(14.43 to 34.69)          | 22.67<br>(14.26 to 35.62)          | 20.92<br>(13.82 to 32.15)          |
| Vascular intestinal disorders              | 448.72<br>(361.27 to 581.86)          | 913.80<br>(631.75 to 1,250.94)        | 878.75<br>(594.01 to 1,213.34)        | 850.43<br>(597.55 to 1,156.23)        | 21.52<br>(17.83 to 27.44)      | 51.65<br>(39.46 to 68.18)          | 52.63<br>(38.92 to 69.69)          | 46.48<br>(35.65 to 61.86)          |
| Gallbladder and biliary diseases           | 927.52<br>(786.82 to 1,140.20)        | 1,704.71<br>(834.96 to 3,266.54)      | 1,324.18<br>(640.33 to 2,532.83)      | 2,136.37<br>(998.06 to 4,233.19)      | 36.97<br>(31.80 to 44.44)      | 82.93<br>(43.48 to 154.01)         | 68.14<br>(35.44 to 127.04)         | 100.03<br>(49.85 to 188.65)        |
| Pancreatitis                               | 3,189.88<br>(2,349.67 to 3,964.54)    | 4,030.86<br>(1,572.03 to 9,225.75)    | 3,165.43<br>(1,298.07 to 6,976.14)    | 5,045.57<br>(1,852.41 to 11,790.23)   | 87.23<br>(67.74 to 106.72)     | 128.84<br>(57.86 to 267.17)        | 104.93<br>(215.08)                 | 156.29<br>(64.96 to 332.46)        |
| Other digestive diseases                   | 801.64<br>(548.20 to 1,013.83)        | 1,028.48<br>(638.41 to 1,468.67)      | 848.59<br>(517.73 to 1,232.14)        | 987.85<br>(618.14 to 1,399.67)        | 25.23<br>(18.62 to 31.36)      | 42.89<br>(30.76 to 56.95)          | 38.16<br>(26.73 to 50.93)          | 39.61<br>(28.60 to 52.31)          |
| Neurological disorders                     | 19,784.26<br>(17,714.10 to 22,362.66) | 35,046.45<br>(27,545.19 to 45,129.34) | 35,459.93<br>(27,554.38 to 45,156.53) | 36,556.80<br>(27,863.65 to 48,275.76) | 996.38<br>(864.28 to 1,146.98) | 2,312.67<br>(1,824.82 to 3,008.82) | 2,714.95<br>(2,135.57 to 3,458.46) | 2,265.00<br>(1,702.40 to 3,114.00) |
| Alzheimer's disease and other dementias    | 6,796.12<br>(5,588.18 to 8,260.05)    | 17,691.97<br>(13,021.06 to 24,473.56) | 20,237.38<br>(14,924.86 to 27,343.24) | 17,730.06<br>(12,531.31 to 25,935.93) | 676.76<br>(556.68 to 816.34)   | 1,730.36<br>(1,229.89 to 2,438.58) | 2,086.58<br>(1,534.61 to 2,815.91) | 1,682.60<br>(1,128.44 to 2,504.97) |
| Parkinson's disease                        | 1,138.17<br>(855.96 to 1,455.97)      | 3,365.91<br>(2,434.60 to 4,388.23)    | 4,482.31<br>(3,186.99 to 5,946.92)    | 2,962.24<br>(2,161.77 to 3,958.36)    | 89.82<br>(66.53 to 117.12)     | 270.85<br>(196.40 to 360.61)       | 375.49<br>(274.45 to 496.27)       | 233.12<br>(165.63 to 313.95)       |
| Epilepsy                                   | 10,239.26<br>(8,988.14 to 12,023.43)  | 12,044.29<br>(7,120.06 to 19,735.02)  | 8,719.39<br>(5,031.49 to 14,460.89)   | 13,967.57<br>(8,120.43 to 23,805.22)  | 194.60<br>(170.18 to 227.89)   | 256.04<br>(157.16 to 417.81)       | 191.39<br>(114.80 to 310.77)       | 296.55<br>(174.92 to 497.92)       |
| Multiple sclerosis                         | 159.49<br>(123.52 to 191.34)          | 256.85<br>(151.76 to 373.66)          | 267.20<br>(155.30 to 391.88)          | 252.87<br>(152.03 to 369.87)          | 4.45<br>(3.60 to 5.36)         | 8.30<br>(5.25 to 11.75)            | 8.95<br>(5.56 to 13.02)            | 8.00<br>(5.10 to 11.33)            |
| Motor neuron disease                       | 255.82<br>(202.44 to 267.14)          | 427.88<br>(280.63 to 577.21)          | 470.05<br>(299.38 to 656.04)          | 412.14<br>(273.74 to 549.32)          | 6.43<br>(5.62 to 7.23)         | 14.49<br>(9.98 to 18.87)           | 16.44<br>(12.05 to 22.05)          | 13.71<br>(9.72 to 17.61)           |
| Other neurological disorders               | 1,215.40<br>(1,036.51 to 1,401.56)    | 1,259.55<br>(928.59 to 1,673.40)      | 1,283.60<br>(918.91 to 1,713.57)      | 1,271.93<br>(906.26 to 1,621.11)      | 24.32<br>(20.89 to 27.56)      | 32.62<br>(24.81 to 41.34)          | 36.10<br>(26.75 to 45.91)          | 31.02<br>(23.73 to 38.50)          |
| Mental disorders                           | 22,988.52<br>(19,365.46 to 26,429.35) | 40,902.82<br>(25,252.24 to 57,168.72) | 40,551.88<br>(24,569.80 to 57,124.75) | 41,901.98<br>(25,914.92 to 58,338.37) | 588.94<br>(501.71 to 676.67)   | 1,176.37<br>(757.90 to 1,600.12)   | 1,188.62<br>(745.20 to 1,638.29)   | 1,187.77<br>(770.46 to 1,607.57)   |
| Alcohol use disorders                      | 14,982.61<br>(12,508.10 to 17,629.74) | 17,520.56<br>(10,329.22 to 25,571.02) | 16,608.97<br>(9,644.32 to 24,771.77)  | 19,152.26<br>(11,440.96 to 27,748.19) | 389.85<br>(328.66 to 459.12)   | 504.94<br>(300.72 to 724.06)       | 485.22<br>(281.80 to 711.77)       | 544.87<br>(328.70 to 784.08)       |
| Drug use disorders                         | 8,003.12<br>(6,561.98 to 9,381.28)    | 23,378.21<br>(14,906.26 to 32,425.61) | 23,938.90<br>(14,972.00 to 33,924.77) | 22,745.72<br>(14,552.14 to 31,630.38) | 199.04<br>(164.41 to 230.85)   | 671.35<br>(437.76 to 898.17)       | 703.32<br>(451.59 to 968.08)       | 642.82<br>(425.87 to 856.17)       |
| Opioid use disorders                       | 5,691.69<br>(4,630.96 to 6,965.50)    | 14,202.93<br>(8,578.85 to 20,394.03)  | 14,507.97<br>(8,472.08 to 21,073.16)  | 13,831.04<br>(8,441.48 to 19,811.09)  | 139.04<br>(114.20 to 169.14)   | 398.71<br>(250.87 to 555.59)       | 415.34<br>(256.23 to 587.47)       | 382.81<br>(242.00 to 533.69)       |

|                           |                                     |                                       |                                       |                                       |                              |                                |                                 |                                |
|---------------------------|-------------------------------------|---------------------------------------|---------------------------------------|---------------------------------------|------------------------------|--------------------------------|---------------------------------|--------------------------------|
|                           | 513.34<br>(270.79 to<br>709.57)     | 2,185.44<br>(1,051.26 to<br>3,411.94) | 2,085.57<br>(997.64 to<br>3,328.22)   | 2,132.29<br>(1,046.06 to<br>3,284.60) | 12.78<br>(6.73 to<br>17.43)  | 61.11<br>(30.98 to<br>95.05)   | 59.00<br>(28.76 to<br>93.32)    | 59.03<br>(30.26 to<br>92.05)   |
| Cocaine use disorders     |                                     |                                       |                                       |                                       |                              |                                |                                 |                                |
|                           | 293.99<br>(162.02 to<br>396.62)     | 1,779.98<br>(913.49 to<br>2,831.04)   | 1,657.10<br>(822.78 to<br>2,676.96)   | 1,746.91<br>(893.75 to<br>2,736.71)   | 7.07<br>(3.88 to<br>9.51)    | 46.98<br>(24.41 to<br>73.05)   | 44.17<br>(22.10 to<br>71.15)    | 45.71<br>(23.82 to<br>71.06)   |
| Amphetamine use disorders |                                     |                                       |                                       |                                       |                              |                                |                                 |                                |
|                           | 1,504.10<br>(815.48 to<br>1,937.26) | 5,209.86<br>(2,824.69 to<br>7,561.68) | 5,688.26<br>(3,032.70 to<br>8,419.84) | 5,035.48<br>(2,714.63 to<br>7,301.60) | 40.15<br>(23.61 to<br>50.38) | 164.56<br>(95.98 to<br>229.19) | 184.80<br>(105.41 to<br>263.36) | 155.26<br>(92.24 to<br>215.69) |
| Other drug use disorders  |                                     |                                       |                                       |                                       |                              |                                |                                 |                                |
|                           | 2.80<br>(2.32 to<br>3.43)           | 4.05<br>(2.47 to<br>6.31)             | 4.01<br>(2.42 to<br>6.27)             | 4.00<br>(2.46 to<br>6.20)             | 0.05<br>(0.04 to<br>0.07)    | 0.08<br>(0.05 to<br>0.13)      | 0.08<br>(0.05 to<br>0.13)       | 0.08<br>(0.05 to<br>0.13)      |
| Eating disorders          |                                     |                                       |                                       |                                       |                              |                                |                                 |                                |

| Kyrgyzstan                                                 |                                          |                                          |                                          |                                           |                                     |                                       |                                       |                                       |
|------------------------------------------------------------|------------------------------------------|------------------------------------------|------------------------------------------|-------------------------------------------|-------------------------------------|---------------------------------------|---------------------------------------|---------------------------------------|
| Cause                                                      | YLLs (actual counts)                     |                                          |                                          |                                           | Deaths (actual counts)              |                                       |                                       |                                       |
|                                                            | 2016                                     | 2040 Forecast                            | 2040 Better Scenario                     | 2040 Worse Scenario                       | 2016                                | 2040 Forecast                         | 2040 Better Scenario                  | 2040 Worse Scenario                   |
|                                                            | 36,989.54<br>(33,602.14 to<br>40,427.25) | 64,633.41<br>(38,920.37 to<br>99,556.88) | 49,736.74<br>(28,805.07 to<br>77,511.14) | 68,162.32<br>(40,835.76 to<br>104,829.22) | 1,077.43<br>(982.01 to<br>1,176.87) | 2,446.00<br>(1,562.74 to<br>3,628.73) | 1,977.04<br>(1,202.90 to<br>2,968.12) | 2,519.87<br>(1,606.96 to<br>3,713.58) |
| Diabetes, urogenital, blood, and endocrine diseases        |                                          |                                          |                                          |                                           |                                     |                                       |                                       |                                       |
| Diabetes mellitus                                          | 7,598.46<br>(6,803.28 to<br>8,395.98)    | 16,029.64<br>(7,552.68 to<br>31,256.40)  | 10,776.45<br>(4,982.89 to<br>20,963.09)  | 18,198.71<br>(8,342.87 to<br>34,661.85)   | 280.45<br>(252.19 to<br>309.88)     | 704.02<br>(355.66 to<br>1,252.32)     | 493.17<br>(244.68 to<br>900.59)       | 769.76<br>(383.70 to<br>1,394.37)     |
| Acute glomerulonephritis                                   | 409.79<br>(324.75 to<br>518.78)          | 765.86<br>(457.08 to<br>1,222.94)        | 608.49<br>(349.65 to<br>1,000.92)        | 762.53<br>(454.02 to<br>1,203.85)         | 8.02<br>(6.51 to<br>9.90)           | 16.94<br>(10.13 to<br>27.50)          | 14.20<br>(8.27 to<br>23.39)           | 16.62<br>(9.99 to<br>26.49)           |
| Chronic kidney disease                                     | 17,392.52<br>(15,597.85 to<br>19,178.04) | 28,343.86<br>(15,125.44 to<br>49,908.85) | 19,861.87<br>(10,266.95 to<br>36,014.00) | 30,400.82<br>(16,480.49 to<br>54,311.84)  | 477.43<br>(429.41 to<br>526.60)     | 1,008.21<br>(549.17 to<br>1,772.09)   | 738.79<br>(384.17 to<br>1,315.55)     | 1,066.54<br>(571.69 to<br>1,871.46)   |
| Chronic kidney disease due to diabetes mellitus            | 5,978.72<br>(4,997.44 to<br>6,925.45)    | 12,636.45<br>(6,220.35 to<br>23,867.15)  | 9,106.85<br>(4,359.79 to<br>17,974.72)   | 13,669.29<br>(6,547.36 to<br>26,427.88)   | 192.16<br>(163.41 to<br>220.79)     | 481.84<br>(246.17 to<br>872.37)       | 358.01<br>(176.19 to<br>671.48)       | 512.96<br>(261.45 to<br>950.41)       |
| Chronic kidney disease due to hypertension                 | 605.47<br>(488.71 to<br>741.31)          | 1,322.22<br>(675.56 to<br>2,333.97)      | 975.79<br>(485.88 to<br>1,749.17)        | 1,401.27<br>(696.63 to<br>2,465.52)       | 26.32<br>(21.64 to<br>31.44)        | 72.21<br>(38.77 to<br>123.80)         | 56.76<br>(29.80 to<br>99.74)          | 74.09<br>(39.04 to<br>125.20)         |
| Chronic kidney disease due to glomerulonephritis           | 5,231.15<br>(4,387.64 to<br>6,134.17)    | 6,616.63<br>(3,627.13 to<br>10,882.77)   | 4,476.90<br>(2,430.97 to<br>7,659.85)    | 7,046.86<br>(3,864.93 to<br>11,822.33)    | 120.38<br>(99.89 to<br>140.41)      | 196.56<br>(105.77 to<br>337.34)       | 138.60<br>(74.07 to<br>245.94)        | 208.00<br>(112.25 to<br>353.90)       |
| Chronic kidney disease due to other and unspecified causes | 5,577.19<br>(4,655.44 to<br>6,446.36)    | 7,768.56<br>(4,339.91 to<br>13,279.52)   | 5,302.33<br>(2,794.47 to<br>9,452.02)    | 8,283.40<br>(4,485.36 to<br>14,398.87)    | 138.57<br>(116.40 to<br>160.75)     | 257.61<br>(142.42 to<br>443.06)       | 185.43<br>(99.23 to<br>327.18)        | 271.48<br>(144.17 to<br>475.43)       |
| Urinary diseases and male infertility                      | 8,339.23<br>(7,407.14 to<br>9,277.17)    | 16,523.51<br>(11,253.38 to<br>22,010.99) | 16,074.74<br>(10,240.77 to<br>22,074.94) | 15,858.98<br>(10,928.72 to<br>20,911.48)  | 250.71<br>(224.12 to<br>276.11)     | 642.05<br>(472.19 to<br>809.12)       | 665.04<br>(461.85 to<br>867.08)       | 595.01<br>(447.64 to<br>743.88)       |
| Urinary tract infections                                   | 7,910.07<br>(7,059.06 to<br>8,789.82)    | 15,636.35<br>(10,626.18 to<br>21,088.82) | 15,285.40<br>(9,824.39 to<br>21,135.57)  | 15,008.01<br>(10,239.29 to<br>19,956.99)  | 237.43<br>(213.27 to<br>264.13)     | 608.76<br>(443.52 to<br>772.24)       | 633.55<br>(438.16 to<br>830.91)       | 564.14<br>(418.31 to<br>708.50)       |
| Urolithiasis                                               | 244.56<br>(166.61 to<br>406.36)          | 611.97<br>(321.97 to<br>1,070.94)        | 567.03<br>(292.12 to<br>1,037.31)        | 589.29<br>(316.74 to<br>1,033.24)         | 7.25<br>(5.07 to<br>11.94)          | 21.64<br>(12.39 to<br>37.65)          | 21.45<br>(11.73 to<br>39.45)          | 20.22<br>(11.88 to<br>35.29)          |
| Other urinary diseases                                     | 184.59<br>(134.94 to<br>257.04)          | 275.19<br>(164.00 to<br>414.23)          | 222.31<br>(127.08 to<br>348.89)          | 261.67<br>(162.16 to<br>377.57)           | 11.65<br>(4.42 to<br>8.68)          | 11.65<br>(7.34 to<br>18.12)           | 10.05<br>(5.98 to<br>16.08)           | 10.65<br>(6.81 to<br>16.14)           |
| Gynecological diseases                                     | 38.57<br>(7.59 to<br>55.20)              | 19.73<br>(5.32 to<br>39.04)              | 13.87<br>(3.87 to<br>27.69)              | 19.76<br>(5.18 to<br>38.73)               | 0.85<br>(0.21 to<br>1.20)           | 0.53<br>(0.21 to<br>0.97)             | 0.39<br>(0.16 to<br>0.70)             | 0.52<br>(0.20 to<br>0.97)             |
| Uterine fibroids                                           | 13.58<br>(3.76 to<br>20.32)              | 11.82<br>(3.51 to<br>24.03)              | 8.34<br>(2.40 to<br>17.61)               | 11.82<br>(3.40 to<br>24.24)               | 0.33<br>(0.11 to<br>0.48)           | 0.33<br>(0.13 to<br>0.64)             | 0.24<br>(0.09 to<br>0.45)             | 0.32<br>(0.13 to<br>0.62)             |
| Polycystic ovarian syndrome                                | 7.85<br>(1.65 to<br>15.12)               | 2.92<br>(0.44 to<br>7.49)                | 1.74<br>(0.26 to<br>4.76)                | 2.96<br>(0.46 to<br>7.54)                 | 0.18<br>(0.04 to<br>0.35)           | 0.07<br>(0.01 to<br>0.19)             | 0.04<br>(0.01 to<br>0.12)             | 0.07<br>(0.01 to<br>0.19)             |
| Endometriosis                                              | 0.21<br>(0.04 to<br>0.40)                | 0.14<br>(0.02 to<br>0.34)                | 0.10<br>(0.02 to<br>0.25)                | 0.14<br>(0.02 to<br>0.34)                 | 0.00<br>(0.00 to<br>0.01)           | 0.00<br>(0.00 to<br>0.01)             | 0.00<br>(0.00 to<br>0.01)             | 0.00<br>(0.00 to<br>0.01)             |
| Genital prolapse                                           | 0.22<br>(0.10 to<br>0.34)                | 0.21<br>(0.10 to<br>0.39)                | 0.14<br>(0.06 to<br>0.27)                | 0.20<br>(0.10 to<br>0.37)                 | 0.01<br>(0.00 to<br>0.01)           | 0.01<br>(0.00 to<br>0.02)             | 0.01<br>(0.00 to<br>0.01)             | 0.01<br>(0.00 to<br>0.02)             |
| Other gynecological diseases                               | 16.71<br>(1.62 to<br>25.35)              | 4.64<br>(0.91 to<br>9.65)                | 3.54<br>(0.72 to<br>7.53)                | 4.63<br>(0.89 to<br>9.71)                 | 0.33<br>(0.04 to<br>0.50)           | 0.12<br>(0.05 to<br>0.22)             | 0.10<br>(0.04 to<br>0.18)             | 0.12<br>(0.05 to<br>0.21)             |
| Hemoglobinopathies and hemolytic anemias                   | 1,050.28<br>(784.80 to<br>1,261.57)      | 762.95<br>(517.87 to<br>1,063.26)        | 614.80<br>(411.80 to<br>864.69)          | 754.19<br>(517.87 to<br>1,050.65)         | 19.17<br>(15.21 to<br>22.25)        | 19.80<br>(14.24 to<br>26.26)          | 16.60<br>(11.52 to<br>22.21)          | 18.95<br>(13.75 to<br>25.22)          |
| Thalassemias                                               | 418.89<br>(301.83 to<br>561.12)          | 163.98<br>(97.55 to<br>264.89)           | 146.15<br>(88.93 to<br>232.86)           | 163.98<br>(99.40 to<br>262.42)            | 5.05<br>(3.63 to<br>6.73)           | 2.00<br>(1.20 to<br>3.21)             | 1.79<br>(1.10 to<br>2.80)             | 2.00<br>(1.21 to<br>3.19)             |



|                                                   |                                       |                                       |                                       |                                       |                              |                              |                              |                              |
|---------------------------------------------------|---------------------------------------|---------------------------------------|---------------------------------------|---------------------------------------|------------------------------|------------------------------|------------------------------|------------------------------|
|                                                   | 277.85<br>(181.03 to<br>355.30)       | 239.57<br>(134.27 to<br>376.15)       | 187.85<br>(102.02 to<br>292.27)       | 240.44<br>(134.79 to<br>377.01)       | 4.50<br>(2.99 to<br>5.68)    | 4.26<br>(2.42 to<br>6.60)    | 3.42<br>(1.90 to<br>5.34)    | 4.26<br>(2.42 to<br>6.56)    |
| Sickle cell disorders                             |                                       |                                       |                                       |                                       |                              |                              |                              |                              |
|                                                   | 146.83<br>(102.20 to<br>180.38)       | 165.21<br>(95.58 to<br>251.73)        | 121.72<br>(68.66 to<br>186.89)        | 164.64<br>(95.07 to<br>250.06)        | 3.01<br>(2.15 to<br>3.65)    | 4.06<br>(2.44 to<br>5.95)    | 3.08<br>(1.78 to<br>4.60)    | 4.00<br>(2.42 to<br>5.85)    |
| G6PD deficiency                                   |                                       |                                       |                                       |                                       |                              |                              |                              |                              |
|                                                   | 206.71<br>(159.41 to<br>242.14)       | 194.19<br>(130.25 to<br>272.73)       | 159.08<br>(101.59 to<br>227.41)       | 185.13<br>(126.42 to<br>259.10)       | 6.61<br>(5.41 to<br>7.97)    | 9.49<br>(7.00 to<br>13.08)   | 8.32<br>(5.80 to<br>11.60)   | 8.69<br>(6.57 to<br>11.83)   |
| Other hemoglobinopathies and hemolytic anemias    |                                       |                                       |                                       |                                       |                              |                              |                              |                              |
|                                                   | 2,160.68<br>(1,523.84 to<br>2,578.52) | 2,187.85<br>(1,451.24 to<br>3,007.34) | 1,786.52<br>(1,135.50 to<br>2,494.06) | 2,167.33<br>(1,414.68 to<br>2,968.92) | 40.79<br>(29.04 to<br>47.37) | 54.46<br>(36.18 to<br>72.64) | 48.84<br>(31.17 to<br>66.74) | 52.47<br>(34.80 to<br>69.00) |
| Endocrine, metabolic, blood, and immune disorders |                                       |                                       |                                       |                                       |                              |                              |                              |                              |

| Kyrgyzstan                                    |                                              |                                              |                                              |                                              |                                     |                                     |                                     |                                     |
|-----------------------------------------------|----------------------------------------------|----------------------------------------------|----------------------------------------------|----------------------------------------------|-------------------------------------|-------------------------------------|-------------------------------------|-------------------------------------|
| Cause                                         | YLLs (actual counts)                         |                                              |                                              |                                              | Deaths (actual counts)              |                                     |                                     |                                     |
|                                               | 2016                                         | 2040 Forecast                                | 2040 Better Scenario                         | 2040 Worse Scenario                          | 2016                                | 2040 Forecast                       | 2040 Better Scenario                | 2040 Worse Scenario                 |
| <b>Musculoskeletal disorders</b>              | <b>2,101.95</b><br>(1,768.37 to 2,510.79)    | <b>3,974.06</b><br>(2,855.57 to 5,253.79)    | <b>3,824.20</b><br>(2,585.06 to 5,173.73)    | <b>3,773.69</b><br>(2,767.41 to 4,972.04)    | <b>81.27</b><br>(64.40 to 93.00)    | <b>221.39</b><br>(155.87 to 280.30) | <b>220.82</b><br>(147.50 to 279.97) | <b>199.61</b><br>(142.17 to 257.26) |
| Rheumatoid arthritis                          | 960.66<br>(796.03 to 1,239.97)               | 2,373.33<br>(1,732.47 to 3,144.14)           | 2,083.17<br>(1,416.71 to 2,806.53)           | 2,212.70<br>(1,610.33 to 2,927.06)           | 54.61<br>(39.09 to 63.20)           | 173.72<br>(110.33 to 231.74)        | 165.74<br>(97.25 to 219.51)         | 154.47<br>(98.17 to 207.87)         |
| Other musculoskeletal disorders               | 1,141.30<br>(858.12 to 1,591.94)             | 1,600.73<br>(1,020.49 to 2,263.55)           | 1,741.03<br>(1,094.05 to 2,467.26)           | 1,560.99<br>(999.39 to 2,173.93)             | 26.67<br>(20.69 to 32.71)           | 47.67<br>(32.89 to 65.67)           | 55.07<br>(37.22 to 75.43)           | 45.15<br>(31.11 to 60.86)           |
| <b>Other non-communicable diseases</b>        | <b>52,717.67</b><br>(39,347.37 to 81,619.87) | <b>40,309.57</b><br>(27,875.68 to 63,056.33) | <b>34,728.68</b><br>(16,759.34 to 37,436.98) | <b>41,018.07</b><br>(28,406.49 to 64,783.52) | <b>637.41</b><br>(480.95 to 973.56) | <b>518.28</b><br>(371.29 to 772.92) | <b>335.16</b><br>(233.49 to 481.93) | <b>524.42</b><br>(372.08 to 798.50) |
| Congenital birth defects                      | 49,376.02<br>(36,380.70 to 78,427.99)        | 37,428.45<br>(25,506.30 to 60,482.77)        | 22,867.67<br>(15,067.79 to 35,603.15)        | 38,127.08<br>(26,100.21 to 62,120.87)        | 591.73<br>(441.08 to 930.18)        | 462.36<br>(319.21 to 730.99)        | 285.19<br>(192.92 to 444.40)        | 470.20<br>(324.76 to 754.06)        |
| Neural tube defects                           | 2,570.85<br>(1,688.75 to 3,659.81)           | 1,019.27<br>(475.54 to 1,894.42)             | 490.59<br>(226.06 to 941.07)                 | 1,047.49<br>(489.59 to 1,974.53)             | 30.04<br>(19.80 to 42.67)           | 12.04<br>(5.70 to 22.20)            | 5.84<br>(2.76 to 11.05)             | 12.37<br>(5.85 to 23.07)            |
| Congenital heart anomalies                    | 25,894.53<br>(18,486.03 to 44,839.07)        | 19,059.10<br>(12,018.62 to 35,139.76)        | 11,720.81<br>(7,326.92 to 20,585.33)         | 19,403.02<br>(12,229.47 to 35,698.74)        | 315.16<br>(227.38 to 536.45)        | 242.06<br>(156.05 to 427.90)        | 153.27<br>(99.01 to 256.00)         | 245.89<br>(158.32 to 430.29)        |
| Orofacial clefts                              | 64.62<br>(31.24 to 145.95)                   | 69.62<br>(25.76 to 169.26)                   | 32.62<br>(11.84 to 80.61)                    | 71.80<br>(26.47 to 172.60)                   | 0.75<br>(0.36 to 1.69)              | 0.81<br>(0.30 to 1.96)              | 0.38<br>(0.14 to 0.93)              | 0.83<br>(0.31 to 2.00)              |
| Down syndrome                                 | 842.12<br>(517.68 to 1,184.44)               | 826.56<br>(491.42 to 1,236.53)               | 515.34<br>(318.86 to 759.98)                 | 841.79<br>(500.02 to 1,265.10)               | 10.75<br>(6.96 to 14.86)            | 11.60<br>(7.14 to 16.73)            | 7.63<br>(4.91 to 11.14)             | 11.75<br>(7.36 to 17.38)            |
| Other chromosomal abnormalities               | 317.84<br>(189.81 to 600.64)                 | 384.98<br>(197.73 to 764.35)                 | 221.12<br>(113.37 to 440.85)                 | 392.98<br>(200.03 to 791.73)                 | 3.73<br>(2.24 to 7.02)              | 4.55<br>(2.37 to 8.92)              | 2.64<br>(1.38 to 5.15)              | 4.64<br>(2.39 to 9.24)              |
| Congenital musculoskeletal and limb anomalies | 855.92<br>(498.43 to 1,236.31)               | 712.16<br>(359.18 to 1,200.79)               | 443.99<br>(223.16 to 736.75)                 | 721.87<br>(361.31 to 1,224.61)               | 10.02<br>(5.84 to 14.44)            | 8.39<br>(4.26 to 13.97)             | 5.26<br>(2.68 to 8.63)              | 8.50<br>(4.30 to 14.25)             |
| Urogenital congenital anomalies               | 459.02<br>(275.48 to 724.64)                 | 390.11<br>(210.23 to 668.75)                 | 258.29<br>(145.70 to 448.94)                 | 394.86<br>(215.62 to 667.26)                 | 5.77<br>(3.56 to 9.00)              | 5.38<br>(3.11 to 9.16)              | 3.76<br>(2.22 to 6.44)              | 5.41<br>(3.11 to 9.12)              |
| Digestive congenital anomalies                | 6,637.14<br>(3,989.83 to 14,875.63)          | 5,909.89<br>(3,040.10 to 13,099.76)          | 3,387.73<br>(1,677.88 to 7,491.02)           | 6,040.81<br>(3,092.75 to 13,363.08)          | 77.46<br>(46.92 to 172.85)          | 69.41<br>(36.31 to 152.68)          | 40.00<br>(20.11 to 87.25)           | 70.91<br>(36.61 to 155.21)          |
| Other congenital birth defects                | 11,733.99<br>(7,734.32 to 15,781.37)         | 9,056.75<br>(5,381.64 to 13,555.11)          | 5,497.18<br>(3,281.12 to 8,178.30)           | 9,212.45<br>(5,463.18 to 13,798.18)          | 138.06<br>(91.17 to 184.96)         | 108.13<br>(65.24 to 160.15)         | 66.41<br>(40.41 to 97.84)           | 109.89<br>(66.37 to 163.25)         |
| Skin and subcutaneous diseases                | 631.30<br>(154.33 to 905.09)                 | 1,157.15<br>(312.90 to 1,826.51)             | 1,114.59<br>(302.90 to 1,775.74)             | 1,125.96<br>(298.69 to 1,763.09)             | 14.24<br>(3.90 to 19.88)            | 35.92<br>(11.69 to 52.96)           | 37.83<br>(12.80 to 56.82)           | 33.74<br>(10.61 to 49.46)           |
| Cellulitis                                    | 281.29<br>(52.75 to 416.72)                  | 566.17<br>(124.12 to 945.10)                 | 605.64<br>(135.55 to 1,028.19)               | 547.57<br>(118.40 to 903.92)                 | 6.57<br>(1.37 to 9.52)              | 17.09<br>(4.62 to 27.06)            | 19.42<br>(5.39 to 30.83)            | 15.12<br>(4.33 to 25.12)            |
| Pyoderma                                      | 287.72<br>(75.18 to 418.30)                  | 515.41<br>(138.72 to 823.39)                 | 436.12<br>(120.13 to 704.20)                 | 505.23<br>(135.19 to 812.03)                 | 6.22<br>(1.76 to 8.73)              | 16.11<br>(5.37 to 23.60)            | 15.38<br>(5.32 to 23.00)            | 15.14<br>(4.88 to 22.23)            |
| Decubitus ulcer                               | 30.00<br>(7.82 to 42.78)                     | 35.79<br>(9.88 to 56.58)                     | 33.63<br>(9.88 to 52.74)                     | 34.48<br>(9.56 to 54.29)                     | 0.74<br>(0.21 to 1.04)              | 1.49<br>(0.46 to 2.29)              | 1.66<br>(0.53 to 2.59)              | 1.34<br>(0.41 to 2.06)              |
| Other skin and subcutaneous diseases          | 32.29<br>(8.20 to 46.54)                     | 39.79<br>(10.61 to 65.10)                    | 39.20<br>(10.47 to 64.12)                    | 38.68<br>(10.18 to 63.15)                    | 0.71<br>(0.19 to 1.01)              | 1.23<br>(0.36 to 1.88)              | 1.37<br>(0.42 to 2.11)              | 1.14<br>(0.33 to 1.75)              |
| Sudden infant death syndrome                  | 2,710.34<br>(1,886.13 to 3,731.50)           | 1,723.96<br>(1,004.37 to 2,849.23)           | 1,046.43<br>(604.61 to 1,728.86)             | 1,765.03<br>(1,037.35 to 2,919.13)           | 31.45<br>(21.88 to 43.29)           | 20.00<br>(11.64 to 33.06)           | 12.14<br>(7.01 to 20.06)            | 20.47<br>(12.03 to 33.88)           |

|                          |                                             |                                             |                                            |                                             |                                       |                                       |                                       |                                       |
|--------------------------|---------------------------------------------|---------------------------------------------|--------------------------------------------|---------------------------------------------|---------------------------------------|---------------------------------------|---------------------------------------|---------------------------------------|
| Injuries                 | 157,853.88<br>(140,702.04 to<br>176,614.52) | 160,339.94<br>(100,338.39 to<br>259,437.53) | 122,805.91<br>(76,820.57 to<br>198,788.51) | 176,405.57<br>(108,593.54 to<br>293,529.11) | 3,070.39<br>(2,727.65 to<br>3,474.40) | 3,636.86<br>(2,249.78 to<br>5,799.09) | 2,929.89<br>(1,808.63 to<br>4,665.20) | 3,948.00<br>(2,388.71 to<br>6,506.27) |
| Transport injuries       | 50,028.21<br>(43,871.00 to<br>56,688.44)    | 53,701.76<br>(31,035.64 to<br>97,136.17)    | 33,657.32<br>(19,199.04 to<br>62,041.20)   | 62,365.23<br>(34,775.86 to<br>116,722.43)   | 1,007.46<br>(881.30 to<br>1,147.46)   | 1,199.14<br>(691.30 to<br>2,153.04)   | 793.63<br>(457.71 to<br>1,432.62)     | 1,378.01<br>(779.24 to<br>2,597.49)   |
| Road injuries            | 47,941.91<br>(42,018.28 to<br>54,466.48)    | 50,866.50<br>(29,449.07 to<br>91,942.87)    | 31,401.18<br>(17,849.43 to<br>57,768.52)   | 59,244.24<br>(32,931.59 to<br>110,726.71)   | 965.45<br>(845.26 to<br>1,098.83)     | 1,134.01<br>(654.26 to<br>2,032.38)   | 740.12<br>(426.23 to<br>1,331.48)     | 1,306.91<br>(740.64 to<br>2,447.00)   |
| Pedestrian road injuries | 15,601.97<br>(12,245.43 to<br>18,451.17)    | 13,659.60<br>(7,731.49 to<br>24,141.51)     | 8,714.13<br>(4,922.60 to<br>15,697.50)     | 15,632.70<br>(8,662.54 to<br>28,475.48)     | 320.18<br>(254.67 to<br>376.93)       | 333.74<br>(190.73 to<br>594.73)       | 225.40<br>(130.26 to<br>396.09)       | 377.25<br>(210.18 to<br>702.89)       |

| Kyrgyzstan                                      |                                                   |                                                   |                                                   |                                                   |                                              |                                              |                                            |                                              |
|-------------------------------------------------|---------------------------------------------------|---------------------------------------------------|---------------------------------------------------|---------------------------------------------------|----------------------------------------------|----------------------------------------------|--------------------------------------------|----------------------------------------------|
| Cause                                           | YLLs (actual counts)                              |                                                   |                                                   |                                                   | Deaths (actual counts)                       |                                              |                                            |                                              |
|                                                 | 2016                                              | 2040 Forecast                                     | 2040 Better Scenario                              | 2040 Worse Scenario                               | 2016                                         | 2040 Forecast                                | 2040 Better Scenario                       | 2040 Worse Scenario                          |
| Cyclist road injuries                           | 776.36<br>(624.17 to<br>1,004.86)                 | 1,057.47<br>(575.80 to<br>2,105.02)               | 672.15<br>(354.93 to<br>1,377.69)                 | 1,224.48<br>(643.40 to<br>2,478.80)               | 16.46<br>(13.20 to<br>21.50)                 | 24.50<br>(12.64 to<br>49.55)                 | 16.89<br>(8.60 to<br>34.89)                | 28.06<br>(14.00 to<br>58.85)                 |
| Motorcyclist road injuries                      | 4,865.18<br>(3,740.96 to<br>6,469.79)             | 6,482.45<br>(3,171.21 to<br>13,938.00)            | 4,810.09<br>(2,268.59 to<br>10,479.57)            | 7,445.24<br>(3,500.22 to<br>16,663.08)            | 92.43<br>(71.76 to<br>123.71)                | 127.32<br>(60.52 to<br>278.16)               | 97.63<br>(45.48 to<br>215.55)              | 145.80<br>(66.44 to<br>329.02)               |
| Motor vehicle road injuries                     | 25,522.61<br>(21,079.45 to<br>29,773.65)          | 28,148.83<br>(16,327.03 to<br>49,085.21)          | 16,330.78<br>(9,157.33 to<br>28,973.18)           | 33,165.72<br>(18,525.38 to<br>60,010.98)          | 512.80<br>(427.05 to<br>597.38)              | 615.05<br>(353.23 to<br>1,077.61)            | 379.25<br>(216.44 to<br>665.35)            | 717.14<br>(402.85 to<br>1,318.51)            |
| Other road injuries                             | 1,175.78<br>(659.43 to<br>1,492.01)               | 1,518.16<br>(680.72 to<br>3,260.11)               | 874.03<br>(380.80 to<br>1,948.30)                 | 1,776.10<br>(762.61 to<br>3,974.04)               | 23.57<br>(13.72 to<br>30.17)                 | 33.40<br>(14.60 to<br>74.82)                 | 20.95<br>(9.32 to<br>46.52)                | 38.66<br>(16.69 to<br>89.60)                 |
| Other transport injuries                        | 2,086.30<br>(1,736.06 to<br>2,505.18)             | 2,835.26<br>(1,599.91 to<br>5,537.05)             | 2,256.13<br>(1,219.62 to<br>4,452.00)             | 3,121.00<br>(1,706.76 to<br>6,287.46)             | 42.01<br>(35.12 to<br>50.04)                 | 65.13<br>(36.44 to<br>126.09)                | 53.50<br>(28.58 to<br>104.79)              | 71.10<br>(38.31 to<br>141.48)                |
| <b>Unintentional injuries</b>                   | <b>59,111.14<br/>(52,449.89 to<br/>67,356.43)</b> | <b>51,735.03<br/>(35,948.56 to<br/>73,743.26)</b> | <b>39,635.53<br/>(26,537.47 to<br/>57,680.24)</b> | <b>52,437.23<br/>(35,958.99 to<br/>75,191.48)</b> | <b>1,066.07<br/>(946.74 to<br/>1,194.79)</b> | <b>1,155.77<br/>(803.20 to<br/>1,630.24)</b> | <b>948.15<br/>(645.24 to<br/>1,349.32)</b> | <b>1,149.20<br/>(792.19 to<br/>1,645.80)</b> |
| Falls                                           | 7,230.24<br>(5,822.06 to<br>12,254.87)            | 8,435.26<br>(5,569.73 to<br>13,248.22)            | 7,410.54<br>(4,751.17 to<br>11,588.72)            | 8,275.29<br>(5,478.80 to<br>13,140.90)            | 151.54<br>(123.87 to<br>243.80)              | 226.82<br>(156.28 to<br>339.60)              | 214.11<br>(144.97 to<br>318.59)            | 215.77<br>(149.78 to<br>330.41)              |
| Drowning                                        | 19,385.46<br>(16,920.87 to<br>21,960.43)          | 15,092.02<br>(9,292.38 to<br>23,884.03)           | 11,318.31<br>(6,729.82 to<br>18,173.06)           | 15,733.52<br>(9,479.37 to<br>25,160.22)           | 320.79<br>(284.88 to<br>359.59)              | 300.88<br>(181.93 to<br>476.41)              | 239.78<br>(141.49 to<br>383.74)            | 311.25<br>(184.68 to<br>508.18)              |
| Fire, heat, and hot substances                  | 6,143.61<br>(5,151.16 to<br>7,442.51)             | 5,083.33<br>(3,266.15 to<br>8,014.42)             | 3,692.04<br>(2,230.33 to<br>5,907.37)             | 5,281.51<br>(3,346.22 to<br>8,346.69)             | 114.40<br>(98.56 to<br>134.70)               | 125.32<br>(79.80 to<br>194.78)               | 99.24<br>(60.46 to<br>153.97)              | 127.63<br>(79.96 to<br>202.88)               |
| Poisonings                                      | 2,653.13<br>(2,093.25 to<br>4,391.50)             | 1,626.60<br>(988.03 to<br>3,023.20)               | 1,032.45<br>(598.66 to<br>1,956.70)               | 1,709.29<br>(992.21 to<br>3,192.26)               | 45.92<br>(36.66 to<br>76.73)                 | 33.95<br>(20.27 to<br>62.02)                 | 23.12<br>(13.30 to<br>42.19)               | 35.33<br>(20.53 to<br>65.50)                 |
| Exposure to mechanical forces                   | 4,311.66<br>(3,236.22 to<br>5,119.34)             | 3,428.53<br>(2,216.35 to<br>4,920.45)             | 2,505.44<br>(1,575.71 to<br>3,616.03)             | 3,428.06<br>(2,234.97 to<br>4,906.00)             | 78.79<br>(57.97 to<br>93.44)                 | 72.00<br>(47.10 to<br>101.59)                | 55.80<br>(34.52 to<br>79.80)               | 70.79<br>(46.42 to<br>98.85)                 |
| Unintentional firearm injuries                  | 1,084.62<br>(802.65 to<br>1,309.67)               | 770.83<br>(479.53 to<br>1,124.94)                 | 578.93<br>(357.91 to<br>856.76)                   | 765.42<br>(479.69 to<br>1,116.43)                 | 23.05<br>(16.53 to<br>27.60)                 | 19.22<br>(12.22 to<br>27.05)                 | 15.13<br>(9.32 to<br>21.69)                | 18.69<br>(11.75 to<br>26.35)                 |
| Unintentional suffocation                       | 1,232.18<br>(850.58 to<br>1,640.31)               | 903.35<br>(543.69 to<br>1,377.17)                 | 589.13<br>(359.61 to<br>892.04)                   | 915.97<br>(556.38 to<br>1,404.54)                 | 16.91<br>(11.91 to<br>22.05)                 | 13.30<br>(8.18 to<br>19.89)                  | 9.13<br>(5.70 to<br>13.64)                 | 13.41<br>(8.26 to<br>19.87)                  |
| Other exposure to mechanical forces             | 1,994.86<br>(1,322.34 to<br>2,410.10)             | 1,754.34<br>(1,032.56 to<br>2,580.02)             | 1,337.38<br>(762.69 to<br>2,009.10)               | 1,746.67<br>(1,027.03 to<br>2,595.13)             | 38.82<br>(25.59 to<br>47.25)                 | 39.48<br>(23.56 to<br>57.85)                 | 31.55<br>(18.40 to<br>46.58)               | 38.69<br>(23.19 to<br>56.35)                 |
| Adverse effects of medical treatment            | 1,920.27<br>(1,205.72 to<br>2,386.41)             | 1,884.82<br>(1,082.75 to<br>2,728.15)             | 1,519.28<br>(855.73 to<br>2,341.41)               | 1,859.55<br>(1,076.47 to<br>2,682.50)             | 40.44<br>(26.11 to<br>49.86)                 | 50.44<br>(30.92 to<br>70.13)                 | 43.78<br>(26.80 to<br>61.45)               | 48.35<br>(29.69 to<br>67.86)                 |
| Animal contact                                  | 495.50<br>(354.03 to<br>627.33)                   | 492.71<br>(315.67 to<br>728.05)                   | 330.04<br>(212.38 to<br>484.91)                   | 495.69<br>(323.96 to<br>728.91)                   | 8.55<br>(6.04 to<br>10.76)                   | 9.94<br>(6.44 to<br>14.47)                   | 7.19<br>(4.63 to<br>10.71)                 | 9.83<br>(6.49 to<br>14.59)                   |
| Venomous animal contact                         | 231.40<br>(126.53 to<br>301.25)                   | 242.71<br>(124.47 to<br>373.78)                   | 163.87<br>(84.86 to<br>253.06)                    | 243.96<br>(128.55 to<br>380.28)                   | 4.25<br>(2.31 to<br>5.43)                    | 4.97<br>(2.58 to<br>7.68)                    | 3.56<br>(1.88 to<br>5.53)                  | 4.94<br>(2.66 to<br>7.50)                    |
| Non-venomous animal contact                     | 264.10<br>(191.74 to<br>372.58)                   | 250.00<br>(159.31 to<br>399.63)                   | 166.17<br>(104.35 to<br>261.53)                   | 251.73<br>(159.50 to<br>393.10)                   | 4.30<br>(3.18 to<br>6.07)                    | 4.97<br>(3.26 to<br>7.61)                    | 3.63<br>(2.37 to<br>5.46)                  | 4.89<br>(3.21 to<br>7.63)                    |
| Foreign body                                    | 9,990.34<br>(6,852.62 to<br>13,154.35)            | 7,745.67<br>(5,125.46 to<br>10,619.17)            | 6,070.22<br>(4,101.07 to<br>8,207.18)             | 7,756.21<br>(5,068.58 to<br>10,668.23)            | 148.28<br>(107.67 to<br>186.07)              | 133.73<br>(93.86 to<br>176.85)               | 114.99<br>(80.95 to<br>152.77)             | 131.53<br>(91.59 to<br>173.36)               |
| Pulmonary aspiration and foreign body in airway | 8,477.10<br>(5,460.56 to<br>11,567.29)            | 6,434.06<br>(4,047.30 to<br>9,095.78)             | 5,029.14<br>(3,315.53 to<br>6,914.85)             | 6,446.38<br>(4,008.31 to<br>9,195.21)             | 120.21<br>(83.77 to<br>156.57)               | 104.68<br>(71.00 to<br>141.06)               | 90.37<br>(62.71 to<br>122.12)              | 103.07<br>(69.97 to<br>137.89)               |

|                                             |                                                               |                                                               |                                                               |                                                                |                                                        |                                                          |                                                          |                                                          |
|---------------------------------------------|---------------------------------------------------------------|---------------------------------------------------------------|---------------------------------------------------------------|----------------------------------------------------------------|--------------------------------------------------------|----------------------------------------------------------|----------------------------------------------------------|----------------------------------------------------------|
|                                             | 1,513.25<br>(944.73 to<br>2,226.99)                           | 1,311.61<br>(781.05 to<br>2,050.13)                           | 1,041.09<br>(626.70 to<br>1,603.10)                           | 1,309.83<br>(792.40 to<br>2,053.65)                            | 28.07<br>(17.55 to<br>40.93)                           | 29.05<br>(16.98 to<br>43.09)                             | 24.62<br>(14.19 to<br>36.32)                             | 28.46<br>(16.80 to<br>42.76)                             |
| Foreign body in other body part             |                                                               |                                                               |                                                               |                                                                |                                                        |                                                          |                                                          |                                                          |
|                                             | 4,427.20<br>(2,156.63 to<br>5,873.50)                         | 5,494.93<br>(2,326.29 to<br>8,913.21)                         | 3,843.86<br>(1,549.42 to<br>6,399.61)                         | 5,457.82<br>(2,317.57 to<br>8,859.48)                          | 109.59<br>(52.01 to<br>145.02)                         | 150.86<br>(65.42 to<br>242.97)                           | 107.99<br>(44.38 to<br>178.03)                           | 147.82<br>(63.51 to<br>236.65)                           |
| Environmental heat and cold exposure        |                                                               |                                                               |                                                               |                                                                |                                                        |                                                          |                                                          |                                                          |
|                                             | 2,553.73<br>(2,201.66 to<br>2,930.08)                         | 2,451.17<br>(1,583.58 to<br>3,554.73)                         | 1,913.34<br>(1,176.05 to<br>2,791.64)                         | 2,440.28<br>(1,572.50 to<br>3,502.49)                          | 47.76<br>(41.28 to<br>54.87)                           | 51.81<br>(33.34 to<br>74.74)                             | 42.17<br>(26.29 to<br>60.93)                             | 50.89<br>(33.02 to<br>72.57)                             |
| Other unintentional injuries                |                                                               |                                                               |                                                               |                                                                |                                                        |                                                          |                                                          |                                                          |
| <b>Self-harm and interpersonal violence</b> | <b>47,877.62</b><br><b>(40,172.58 to</b><br><b>65,350.81)</b> | <b>54,151.12</b><br><b>(27,702.98 to</b><br><b>95,212.51)</b> | <b>48,802.16</b><br><b>(25,723.66 to</b><br><b>85,165.61)</b> | <b>60,855.85</b><br><b>(29,109.10 to</b><br><b>111,594.18)</b> | <b>996.25</b><br><b>(830.35 to</b><br><b>1,362.98)</b> | <b>1,266.93</b><br><b>(644.66 to</b><br><b>2,188.29)</b> | <b>1,173.34</b><br><b>(622.80 to</b><br><b>2,007.85)</b> | <b>1,406.05</b><br><b>(685.72 to</b><br><b>2,523.45)</b> |

| Kyrgyzstan                                                                          |                                                   |                                                      |                                                      |                                                      |                                                |                                                   |                                                   |                                                   |
|-------------------------------------------------------------------------------------|---------------------------------------------------|------------------------------------------------------|------------------------------------------------------|------------------------------------------------------|------------------------------------------------|---------------------------------------------------|---------------------------------------------------|---------------------------------------------------|
| Cause                                                                               | YLLs (actual counts)                              |                                                      |                                                      |                                                      | Deaths (actual counts)                         |                                                   |                                                   |                                                   |
|                                                                                     | 2016                                              | 2040 Forecast                                        | 2040 Better Scenario                                 | 2040 Worse Scenario                                  | 2016                                           | 2040 Forecast                                     | 2040 Better Scenario                              | 2040 Worse Scenario                               |
| Self-harm                                                                           | 31,958.29<br>(26,360.91 to<br>43,522.24)          | 40,610.56<br>(18,817.74 to<br>77,613.41)             | 35,924.15<br>(17,245.81 to<br>68,438.96)             | 46,917.71<br>(21,013.64 to<br>93,427.58)             | 671.82<br>(551.84 to<br>916.67)                | 958.44<br>(451.71 to<br>1,771.01)                 | 873.40<br>(427.91 to<br>1,598.72)                 | 1,091.49<br>(495.26 to<br>2,072.47)               |
| Self-harm by firearm                                                                | 632.80<br>(396.14 to<br>1,100.31)                 | 760.65<br>(309.53 to<br>1,645.77)                    | 652.18<br>(270.68 to<br>1,394.01)                    | 883.03<br>(341.90 to<br>1,979.08)                    | 14.57<br>(9.27 to<br>25.20)                    | 20.22<br>(8.76 to<br>42.17)                       | 17.92<br>(7.85 to<br>36.62)                       | 22.95<br>(9.28 to<br>50.27)                       |
| Self-harm by other specified means                                                  | 31,325.49<br>(25,831.11 to<br>42,599.49)          | 39,849.91<br>(18,493.37 to<br>76,247.20)             | 35,271.97<br>(16,933.41 to<br>67,171.89)             | 46,034.68<br>(20,650.06 to<br>91,774.07)             | 657.24<br>(539.54 to<br>899.09)                | 938.21<br>(443.54 to<br>1,731.69)                 | 855.49<br>(419.23 to<br>1,570.85)                 | 1,068.53<br>(486.15 to<br>2,041.39)               |
| Interpersonal violence                                                              | 15,919.33<br>(11,646.00 to<br>25,579.60)          | 13,540.56<br>(7,223.77 to<br>26,228.60)              | 12,878.01<br>(6,845.07 to<br>24,260.43)              | 13,938.14<br>(7,383.07 to<br>27,326.81)              | 524.43<br>(237.98 to<br>510.78)                | 308.50<br>(167.44 to<br>582.08)                   | 299.93<br>(160.47 to<br>553.55)                   | 314.56<br>(167.70 to<br>602.96)                   |
| Physical violence by firearm                                                        | 1,987.47<br>(972.92 to<br>4,238.39)               | 1,572.77<br>(718.19 to<br>3,572.85)                  | 1,493.70<br>(679.98 to<br>3,356.08)                  | 1,561.11<br>(702.28 to<br>3,563.25)                  | 38.17<br>(19.06 to<br>80.40)                   | 32.34<br>(15.05 to<br>70.60)                      | 31.11<br>(14.27 to<br>67.63)                      | 31.93<br>(14.76 to<br>70.16)                      |
| Physical violence by sharp object                                                   | 7,056.74<br>(4,597.67 to<br>11,805.92)            | 6,424.78<br>(3,503.78 to<br>11,712.02)               | 6,448.74<br>(3,504.22 to<br>11,797.81)               | 6,331.05<br>(3,457.29 to<br>11,604.85)               | 147.56<br>(93.99 to<br>242.99)                 | 148.71<br>(80.62 to<br>267.11)                    | 151.84<br>(82.33 to<br>270.34)                    | 145.05<br>(78.74 to<br>260.46)                    |
| Physical violence by other means                                                    | 6,875.12<br>(4,655.16 to<br>12,293.65)            | 5,543.01<br>(2,540.02 to<br>12,534.01)               | 4,935.57<br>(2,258.75 to<br>10,925.05)               | 6,045.97<br>(2,701.57 to<br>14,003.04)               | 138.70<br>(91.63 to<br>245.80)                 | 127.45<br>(59.00 to<br>272.17)                    | 116.98<br>(54.40 to<br>250.14)                    | 137.58<br>(62.85 to<br>311.78)                    |
| <b>Forces of nature, conflict and terrorism, and executions and police conflict</b> | <b>36.91</b><br><b>(33.45 to</b><br><b>40.57)</b> | <b>752.03</b><br><b>(0.00 to</b><br><b>7,981.79)</b> | <b>710.91</b><br><b>(0.00 to</b><br><b>7,387.99)</b> | <b>747.26</b><br><b>(0.00 to</b><br><b>7,925.81)</b> | <b>0.62</b><br><b>(0.57 to</b><br><b>0.68)</b> | <b>15.01</b><br><b>(0.00 to</b><br><b>163.05)</b> | <b>14.78</b><br><b>(0.00 to</b><br><b>160.16)</b> | <b>14.75</b><br><b>(0.00 to</b><br><b>159.33)</b> |
| Exposure to forces of nature                                                        | 0.00<br>(0.00 to<br>0.00)                         | 387.44<br>(0.00 to<br>3,485.30)                      | 356.07<br>(0.00 to<br>2,995.00)                      | 385.04<br>(0.00 to<br>3,480.24)                      | 0.00<br>(0.00 to<br>0.00)                      | 7.63<br>(0.00 to<br>62.52)                        | 7.42<br>(0.00 to<br>59.45)                        | 7.47<br>(0.00 to<br>61.21)                        |
| Conflict and terrorism                                                              | 0.00<br>(0.00 to<br>0.00)                         | 364.60<br>(0.00 to<br>5,818.89)                      | 354.84<br>(0.00 to<br>5,413.61)                      | 362.22<br>(0.00 to<br>5,805.18)                      | 0.00<br>(0.00 to<br>0.00)                      | 7.38<br>(0.00 to<br>106.00)                       | 7.36<br>(0.00 to<br>102.50)                       | 7.27<br>(0.00 to<br>104.60)                       |
| Executions and police conflict                                                      | 36.91<br>(33.45 to<br>40.57)                      | 0.00<br>(0.00 to<br>0.00)                            | 0.00<br>(0.00 to<br>0.00)                            | 0.00<br>(0.00 to<br>0.00)                            | 0.62<br>(0.57 to<br>0.68)                      | 0.00<br>(0.00 to<br>0.00)                         | 0.00<br>(0.00 to<br>0.00)                         | 0.00<br>(0.00 to<br>0.00)                         |

| Mongolia                                                          |                                          |                                            |                                          |                                              |                                       |                                       |                                       |                                       |
|-------------------------------------------------------------------|------------------------------------------|--------------------------------------------|------------------------------------------|----------------------------------------------|---------------------------------------|---------------------------------------|---------------------------------------|---------------------------------------|
| Cause                                                             | YLLs (actual counts)                     |                                            |                                          |                                              | Deaths (actual counts)                |                                       |                                       |                                       |
|                                                                   | 2016                                     | 2040 Forecast                              | 2040 Better Scenario                     | 2040 Worse Scenario                          | 2016                                  | 2040 Forecast                         | 2040 Better Scenario                  | 2040 Worse Scenario                   |
| All causes                                                        | 727,533.26<br>(634,706.52 to 816,276.77) | 882,018.58<br>(646,378.67 to 1,169,449.09) | 565,354.70<br>(410,479.39 to 748,267.54) | 1,052,431.00<br>(767,329.49 to 1,385,500.84) | 21,425.35<br>(19,001.88 to 23,950.93) | 35,063.22<br>(27,203.30 to 44,081.98) | 24,058.64<br>(18,496.32 to 30,239.57) | 40,793.75<br>(31,694.61 to 50,724.36) |
| Communicable, maternal, neonatal, and nutritional diseases        | 134,278.18<br>(107,067.43 to 165,070.52) | 68,555.14<br>(44,560.98 to 106,290.45)     | 30,438.96<br>(20,029.85 to 46,672.57)    | 86,389.79<br>(54,933.28 to 144,720.95)       | 1,879.11<br>(1,525.95 to 2,277.56)    | 1,230.07<br>(798.36 to 1,888.18)      | 576.97<br>(384.81 to 867.77)          | 1,513.68<br>(963.18 to 2,451.44)      |
| HIV/AIDS and tuberculosis                                         | 14,034.38<br>(11,359.67 to 17,971.05)    | 11,625.05<br>(5,928.60 to 21,001.56)       | 3,863.17<br>(1,922.92 to 7,090.40)       | 13,903.93<br>(7,110.95 to 24,546.68)         | 312.15<br>(252.12 to 398.43)          | 290.63<br>(141.83 to 536.00)          | 97.68<br>(47.90 to 178.68)            | 344.68<br>(176.08 to 630.94)          |
| Tuberculosis                                                      | 13,829.55<br>(11,158.29 to 17,783.43)    | 11,375.07<br>(5,625.12 to 20,721.74)       | 3,683.57<br>(1,744.65 to 6,945.69)       | 13,506.53<br>(6,742.50 to 24,173.86)         | 308.46<br>(249.31 to 395.03)          | 285.94<br>(138.13 to 532.17)          | 94.28<br>(43.78 to 175.99)            | 336.79<br>(169.72 to 625.32)          |
| HIV/AIDS                                                          | 204.83<br>(11.39 to 884.54)              | 249.98<br>(32.62 to 958.64)                | 179.60<br>(13.16 to 822.85)              | 397.40<br>(60.76 to 1,240.93)                | 3.69<br>(0.20 to 15.71)               | 4.69<br>(0.61 to 17.83)               | 3.40<br>(0.23 to 15.32)               | 7.90<br>(1.18 to 24.11)               |
| Diarrhea, lower respiratory, and other common infectious diseases | 50,771.09<br>(36,681.49 to 69,151.21)    | 26,571.87<br>(11,936.64 to 54,571.64)      | 12,236.38<br>(6,171.19 to 23,390.25)     | 37,636.60<br>(15,715.32 to 82,497.63)        | 734.95<br>(552.37 to 994.54)          | 564.48<br>(287.17 to 1,068.19)        | 295.14<br>(167.21 to 515.45)          | 740.98<br>(359.92 to 1,482.93)        |
| Diarrheal diseases                                                | 241.32<br>(148.34 to 372.00)             | 107.72<br>(10.79 to 442.72)                | 76.46<br>(10.18 to 288.95)               | 154.40<br>(16.91 to 584.69)                  | 3.75<br>(2.58 to 5.58)                | 2.72<br>(0.28 to 10.56)               | 2.34<br>(0.31 to 8.96)                | 3.63<br>(0.38 to 13.87)               |
| Intestinal infectious diseases                                    | 17.41<br>(9.98 to 28.43)                 | 11.51<br>(6.16 to 19.86)                   | 12.17<br>(6.33 to 21.84)                 | 11.72<br>(6.27 to 20.12)                     | 0.34<br>(0.20 to 0.56)                | 0.27<br>(0.15 to 0.46)                | 0.30<br>(0.16 to 0.51)                | 0.27<br>(0.15 to 0.45)                |
| Typhoid fever                                                     | 10.97<br>(5.53 to 19.99)                 | 8.56<br>(4.15 to 15.80)                    | 10.18<br>(4.97 to 18.91)                 | 8.66<br>(4.19 to 15.89)                      | 0.22<br>(0.11 to 0.35)                | 0.19<br>(0.10 to 0.32)                | 0.24<br>(0.12 to 0.44)                | 0.19<br>(0.10 to 0.35)                |
| Paratyphoid fever                                                 | 1.86<br>(0.77 to 3.96)                   | 1.37<br>(0.53 to 2.92)                     | 0.88<br>(0.34 to 1.89)                   | 1.40<br>(0.55 to 2.94)                       | 0.04<br>(0.02 to 0.08)                | 0.04<br>(0.01 to 0.06)                | 0.02<br>(0.01 to 0.04)                | 0.03<br>(0.01 to 0.06)                |
| Other intestinal infectious diseases                              | 4.57<br>(1.70 to 9.92)                   | 1.59<br>(0.54 to 3.61)                     | 1.11<br>(0.35 to 2.61)                   | 1.66<br>(0.57 to 3.74)                       | 0.08<br>(0.03 to 0.17)                | 0.05<br>(0.02 to 0.10)                | 0.04<br>(0.01 to 0.08)                | 0.05<br>(0.02 to 0.10)                |
| Lower respiratory infections                                      | 41,278.51<br>(29,611.03 to 56,417.42)    | 20,884.22<br>(8,634.92 to 45,993.60)       | 9,118.82<br>(4,102.57 to 18,757.80)      | 29,978.57<br>(11,633.90 to 71,196.12)        | 600.26<br>(453.05 to 810.69)          | 467.64<br>(222.70 to 920.44)          | 234.81<br>(123.85 to 433.22)          | 621.18<br>(284.20 to 1,300.87)        |
| Upper respiratory infections                                      | 31.89<br>(15.16 to 57.12)                | 26.84<br>(10.53 to 56.92)                  | 12.72<br>(4.67 to 29.24)                 | 28.91<br>(11.34 to 62.16)                    | 0.68<br>(0.37 to 1.14)                | 0.80<br>(0.33 to 1.66)                | 0.41<br>(0.15 to 0.90)                | 0.84<br>(0.33 to 1.75)                |
| Otitis media                                                      | 1.46<br>(0.56 to 3.71)                   | 1.05<br>(0.26 to 3.44)                     | 1.08<br>(0.26 to 3.65)                   | 1.02<br>(0.25 to 3.35)                       | 0.03<br>(0.01 to 0.09)                | 0.03<br>(0.01 to 0.11)                | 0.04<br>(0.01 to 0.12)                | 0.03<br>(0.01 to 0.10)                |
| Meningitis                                                        | 3,132.19<br>(1,613.40 to 6,163.99)       | 2,635.32<br>(1,191.55 to 5,488.18)         | 1,549.82<br>(697.20 to 3,329.76)         | 2,810.45<br>(1,251.97 to 5,824.32)           | 52.47<br>(27.68 to 109.01)            | 50.01<br>(24.12 to 108.03)            | 31.97<br>(69.94 to 112.29)            | 51.59<br>(24.51 to 112.29)            |
| Pneumococcal meningitis                                           | 11.66<br>(5.49 to 25.54)                 | 7.50<br>(3.22 to 17.41)                    | 6.89<br>(3.01 to 15.49)                  | 7.75<br>(3.29 to 18.29)                      | 0.21<br>(0.10 to 0.48)                | 0.17<br>(0.08 to 0.39)                | 0.16<br>(0.08 to 0.38)                | 0.17<br>(0.07 to 0.41)                |
| H influenzae type B meningitis                                    | 381.47<br>(185.98 to 746.73)             | 558.45<br>(172.36 to 1,374.75)             | 341.99<br>(128.38 to 747.60)             | 731.87<br>(192.03 to 1,889.31)               | 6.20<br>(3.12 to 12.74)               | 8.40<br>(3.10 to 18.93)               | 5.98<br>(2.64 to 12.50)               | 10.36<br>(3.25 to 25.03)              |
| Meningococcal meningitis                                          | 1,479.46<br>(759.01 to 2,893.21)         | 1,046.13<br>(464.41 to 2,256.60)           | 610.27<br>(271.93 to 1,373.58)           | 1,046.49<br>(459.34 to 2,281.29)             | 24.28<br>(12.76 to 50.41)             | 20.46<br>(9.81 to 45.50)              | 12.85<br>(6.00 to 28.83)              | 20.29<br>(9.49 to 45.43)              |
| Other meningitis                                                  | 1,259.61<br>(647.37 to 2,539.12)         | 1,023.25<br>(462.96 to 2,243.68)           | 590.67<br>(259.38 to 1,333.51)           | 1,024.33<br>(457.18 to 2,302.07)             | 21.77<br>(11.36 to 46.31)             | 20.98<br>(10.06 to 46.57)             | 12.98<br>(6.03 to 29.28)              | 20.78<br>(9.81 to 47.01)              |
| Encephalitis                                                      | 2,186.12<br>(1,086.29 to 4,164.56)       | 1,429.83<br>(706.10 to 2,803.55)           | 1,007.31<br>(542.12 to 1,767.29)         | 1,459.61<br>(714.14 to 2,833.57)             | 30.01<br>(16.42 to 53.16)             | 23.31<br>(13.71 to 38.79)             | 18.03<br>(11.37 to 27.33)             | 23.58<br>(13.68 to 39.44)             |

|                |                                       |                                  |                                 |                                    |                              |                            |                            |                              |
|----------------|---------------------------------------|----------------------------------|---------------------------------|------------------------------------|------------------------------|----------------------------|----------------------------|------------------------------|
| Diphtheria     | 6.60<br>(3.82 to<br>10.76)            | 1.63<br>(0.79 to<br>3.19)        | 1.12<br>(0.59 to<br>1.88)       | 2.39<br>(0.95 to<br>5.39)          | 0.10<br>(0.06 to<br>0.16)    | 0.03<br>(0.02 to<br>0.05)  | 0.02<br>(0.01 to<br>0.04)  | 0.04<br>(0.02 to<br>0.08)    |
| Whooping cough | 960.95<br>(58.04 to<br>3,325.61)      | 769.00<br>(36.52 to<br>3,079.39) | 111.45<br>(6.13 to<br>434.78)   | 1,670.83<br>(73.95 to<br>6,181.61) | 11.37<br>(0.69 to<br>39.25)  | 9.16<br>(0.44 to<br>36.61) | 1.38<br>(0.08 to<br>5.32)  | 19.81<br>(0.89 to<br>73.36)  |
| Tetanus        | 19.65<br>(16.96 to<br>22.68)          | 1.51<br>(0.93 to<br>2.41)        | 1.23<br>(0.77 to<br>1.89)       | 1.79<br>(1.01 to<br>3.09)          | 0.33<br>(0.29 to<br>0.38)    | 0.03<br>(0.02 to<br>0.04)  | 0.02<br>(0.02 to<br>0.03)  | 0.03<br>(0.02 to<br>0.05)    |
| Measles        | 2,715.75<br>(1,636.68 to<br>4,530.76) | 598.75<br>(0.59 to<br>5,403.60)  | 286.31<br>(0.51 to<br>2,377.92) | 1,407.90<br>(0.79 to<br>11,193.19) | 32.40<br>(19.60 to<br>53.94) | 7.50<br>(0.01 to<br>64.30) | 3.68<br>(0.01 to<br>27.82) | 17.06<br>(0.01 to<br>132.28) |



| Mongolia                                              |                                                            |                                                          |                                                        |                                                          |                                                   |                                                   |                                                  |                                                   |
|-------------------------------------------------------|------------------------------------------------------------|----------------------------------------------------------|--------------------------------------------------------|----------------------------------------------------------|---------------------------------------------------|---------------------------------------------------|--------------------------------------------------|---------------------------------------------------|
| Cause                                                 | YLLs (actual counts)                                       |                                                          |                                                        |                                                          | Deaths (actual counts)                            |                                                   |                                                  |                                                   |
|                                                       | 2016                                                       | 2040 Forecast                                            | 2040 Better Scenario                                   | 2040 Worse Scenario                                      | 2016                                              | 2040 Forecast                                     | 2040 Better Scenario                             | 2040 Worse Scenario                               |
| Varicella and herpes zoster                           | 179.23<br>(96.91 to<br>315.91)                             | 104.49<br>(52.82 to<br>201.41)                           | 57.89<br>(31.21 to<br>107.81)                          | 109.01<br>(52.71 to<br>222.23)                           | 3.20<br>(2.09 to<br>4.85)                         | 2.99<br>(1.79 to<br>4.68)                         | 2.14<br>(1.27 to<br>3.39)                        | 2.93<br>(1.69 to<br>4.64)                         |
| <b>Neglected tropical diseases and malaria</b>        | <b>118.70</b><br><b>(98.94 to</b><br><b>141.94)</b>        | <b>76.47</b><br><b>(56.55 to</b><br><b>99.53)</b>        | <b>59.47</b><br><b>(44.65 to</b><br><b>76.24)</b>      | <b>82.83</b><br><b>(62.16 to</b><br><b>107.91)</b>       | <b>2.71</b><br><b>(2.27 to</b><br><b>3.23)</b>    | <b>2.06</b><br><b>(1.54 to</b><br><b>2.67)</b>    | <b>1.58</b><br><b>(1.20 to</b><br><b>2.01)</b>   | <b>2.19</b><br><b>(1.67 to</b><br><b>2.79)</b>    |
| Malaria                                               | 0.00<br>(0.00 to<br>0.00)                                  | 0.00<br>(0.00 to<br>0.00)                                | 0.00<br>(0.00 to<br>0.00)                              | 0.00<br>(0.00 to<br>0.00)                                | 0.00<br>(0.00 to<br>0.00)                         | 0.00<br>(0.00 to<br>0.00)                         | 0.00<br>(0.00 to<br>0.00)                        | 0.00<br>(0.00 to<br>0.00)                         |
| Chagas disease                                        | 0.00<br>(0.00 to<br>0.00)                                  | 0.00<br>(0.00 to<br>0.00)                                | 0.00<br>(0.00 to<br>0.00)                              | 0.00<br>(0.00 to<br>0.00)                                | 0.00<br>(0.00 to<br>0.00)                         | 0.00<br>(0.00 to<br>0.00)                         | 0.00<br>(0.00 to<br>0.00)                        | 0.00<br>(0.00 to<br>0.00)                         |
| Leishmaniasis                                         | 0.00<br>(0.00 to<br>0.00)                                  | 0.00<br>(0.00 to<br>0.00)                                | 0.00<br>(0.00 to<br>0.00)                              | 0.00<br>(0.00 to<br>0.00)                                | 0.00<br>(0.00 to<br>0.00)                         | 0.00<br>(0.00 to<br>0.00)                         | 0.00<br>(0.00 to<br>0.00)                        | 0.00<br>(0.00 to<br>0.00)                         |
| African trypanosomiasis                               | 0.00<br>(0.00 to<br>0.00)                                  | 0.00<br>(0.00 to<br>0.00)                                | 0.00<br>(0.00 to<br>0.00)                              | 0.00<br>(0.00 to<br>0.00)                                | 0.00<br>(0.00 to<br>0.00)                         | 0.00<br>(0.00 to<br>0.00)                         | 0.00<br>(0.00 to<br>0.00)                        | 0.00<br>(0.00 to<br>0.00)                         |
| Schistosomiasis                                       | 0.00<br>(0.00 to<br>0.00)                                  | 0.00<br>(0.00 to<br>0.00)                                | 0.00<br>(0.00 to<br>0.00)                              | 0.00<br>(0.00 to<br>0.00)                                | 0.00<br>(0.00 to<br>0.00)                         | 0.00<br>(0.00 to<br>0.00)                         | 0.00<br>(0.00 to<br>0.00)                        | 0.00<br>(0.00 to<br>0.00)                         |
| Cysticercosis                                         | 4.04<br>(3.05 to<br>5.26)                                  | 1.67<br>(1.18 to<br>2.27)                                | 1.75<br>(1.19 to<br>2.44)                              | 1.65<br>(1.16 to<br>2.23)                                | 0.09<br>(0.07 to<br>0.12)                         | 0.04<br>(0.03 to<br>0.06)                         | 0.05<br>(0.03 to<br>0.06)                        | 0.04<br>(0.03 to<br>0.06)                         |
| Cystic echinococcosis                                 | 89.43<br>(72.60 to<br>109.37)                              | 53.87<br>(38.13 to<br>73.44)                             | 36.40<br>(26.01 to<br>49.44)                           | 59.29<br>(42.87 to<br>79.63)                             | 2.16<br>(1.76 to<br>2.62)                         | 1.58<br>(1.15 to<br>2.11)                         | 1.08<br>(0.81 to<br>1.43)                        | 1.70<br>(1.27 to<br>2.22)                         |
| Dengue                                                | 0.00<br>(0.00 to<br>0.00)                                  | 0.00<br>(0.00 to<br>0.00)                                | 0.00<br>(0.00 to<br>0.00)                              | 0.00<br>(0.00 to<br>0.00)                                | 0.00<br>(0.00 to<br>0.00)                         | 0.00<br>(0.00 to<br>0.00)                         | 0.00<br>(0.00 to<br>0.00)                        | 0.00<br>(0.00 to<br>0.00)                         |
| Yellow fever                                          | 0.00<br>(0.00 to<br>0.00)                                  | 0.00<br>(0.00 to<br>0.00)                                | 0.00<br>(0.00 to<br>0.00)                              | 0.00<br>(0.00 to<br>0.00)                                | 0.00<br>(0.00 to<br>0.00)                         | 0.00<br>(0.00 to<br>0.00)                         | 0.00<br>(0.00 to<br>0.00)                        | 0.00<br>(0.00 to<br>0.00)                         |
| Rabies                                                | 0.57<br>(0.27 to<br>1.10)                                  | 0.27<br>(0.12 to<br>0.56)                                | 0.15<br>(0.07 to<br>0.33)                              | 0.32<br>(0.14 to<br>0.67)                                | 0.01<br>(0.00 to<br>0.02)                         | 0.00<br>(0.00 to<br>0.01)                         | 0.00<br>(0.00 to<br>0.01)                        | 0.01<br>(0.00 to<br>0.01)                         |
| Intestinal nematode infections                        | 0.00<br>(0.00 to<br>0.00)                                  | 0.00<br>(0.00 to<br>0.00)                                | 0.00<br>(0.00 to<br>0.00)                              | 0.00<br>(0.00 to<br>0.00)                                | 0.00<br>(0.00 to<br>0.00)                         | 0.00<br>(0.00 to<br>0.00)                         | 0.00<br>(0.00 to<br>0.00)                        | 0.00<br>(0.00 to<br>0.00)                         |
| Other neglected tropical diseases                     | 24.67<br>(20.33 to<br>30.88)                               | 20.66<br>(15.18 to<br>27.54)                             | 21.17<br>(14.90 to<br>28.54)                           | 21.57<br>(15.71 to<br>28.51)                             | 0.45<br>(0.36 to<br>0.56)                         | 0.42<br>(0.30 to<br>0.57)                         | 0.45<br>(0.31 to<br>0.60)                        | 0.44<br>(0.31 to<br>0.58)                         |
| <b>Maternal disorders</b>                             | <b>2,152.95</b><br><b>(1,541.52 to</b><br><b>2,908.63)</b> | <b>1,264.27</b><br><b>(897.63 to</b><br><b>2,419.73)</b> | <b>783.40</b><br><b>(349.54 to</b><br><b>1,464.11)</b> | <b>1,438.26</b><br><b>(641.83 to</b><br><b>2,804.56)</b> | <b>38.84</b><br><b>(27.85 to</b><br><b>52.33)</b> | <b>22.44</b><br><b>(10.59 to</b><br><b>42.83)</b> | <b>13.94</b><br><b>(6.37 to</b><br><b>25.72)</b> | <b>25.53</b><br><b>(11.66 to</b><br><b>48.88)</b> |
| Maternal hemorrhage                                   | 1,044.25<br>(709.50 to<br>1,453.77)                        | 575.22<br>(248.23 to<br>1,154.94)                        | 361.06<br>(152.93 to<br>705.64)                        | 652.19<br>(264.76 to<br>1,266.10)                        | 18.90<br>(12.85 to<br>26.14)                      | 10.23<br>(4.47 to<br>20.16)                       | 6.43<br>(2.82 to<br>12.37)                       | 11.60<br>(4.89 to<br>22.50)                       |
| Maternal sepsis and other maternal infections         | 219.09<br>(136.89 to<br>336.76)                            | 106.00<br>(40.80 to<br>216.18)                           | 65.23<br>(25.82 to<br>131.64)                          | 120.65<br>(45.53 to<br>242.97)                           | 3.89<br>(2.42 to<br>5.98)                         | 1.85<br>(0.74 to<br>3.72)                         | 1.14<br>(0.46 to<br>2.28)                        | 2.10<br>(0.82 to<br>4.25)                         |
| Maternal hypertensive disorders                       | 137.50<br>(80.70 to<br>214.65)                             | 83.95<br>(31.73 to<br>179.37)                            | 51.06<br>(19.07 to<br>112.38)                          | 95.31<br>(36.38 to<br>207.78)                            | 2.37<br>(1.40 to<br>3.73)                         | 1.42<br>(0.55 to<br>2.97)                         | 0.87<br>(0.33 to<br>1.87)                        | 1.62<br>(0.64 to<br>3.43)                         |
| Maternal obstructed labor and uterine rupture         | 15.14<br>(5.90 to<br>29.87)                                | 10.24<br>(3.12 to<br>24.60)                              | 5.94<br>(1.79 to<br>14.56)                             | 11.72<br>(3.52 to<br>28.16)                              | 0.27<br>(0.11 to<br>0.54)                         | 0.18<br>(0.06 to<br>0.45)                         | 0.11<br>(0.03 to<br>0.25)                        | 0.21<br>(0.06 to<br>0.49)                         |
| Maternal abortion, miscarriage, and ectopic pregnancy | 539.46<br>(352.11 to<br>793.12)                            | 362.70<br>(142.29 to<br>791.14)                          | 221.14<br>(90.09 to<br>478.84)                         | 414.88<br>(157.37 to<br>890.18)                          | 9.92<br>(6.49 to<br>14.62)                        | 6.57<br>(2.63 to<br>13.61)                        | 4.02<br>(1.67 to<br>8.62)                        | 7.51<br>(2.94 to<br>15.85)                        |

|                                        |                                |                               |                              |                               |                           |                           |                           |                           |
|----------------------------------------|--------------------------------|-------------------------------|------------------------------|-------------------------------|---------------------------|---------------------------|---------------------------|---------------------------|
|                                        | 63.89<br>(33.13 to<br>111.31)  | 44.23<br>(15.76 to<br>103.46) | 26.41<br>(9.49 to<br>63.70)  | 50.59<br>(17.53 to<br>119.70) | 1.11<br>(0.58 to<br>1.92) | 0.76<br>(0.28 to<br>1.78) | 0.45<br>(0.16 to<br>1.08) | 0.86<br>(0.31 to<br>2.02) |
| Indirect maternal deaths               | 15.44<br>(6.21 to<br>33.04)    | 8.53<br>(2.49 to<br>22.43)    | 5.12<br>(1.51 to<br>13.30)   | 9.76<br>(2.79 to<br>25.89)    | 0.27<br>(0.11 to<br>0.58) | 0.15<br>(0.05 to<br>0.38) | 0.09<br>(0.03 to<br>0.23) | 0.17<br>(0.05 to<br>0.45) |
| Late maternal deaths                   | 0.08<br>(0.01 to<br>0.29)      | 0.46<br>(0.00 to<br>2.77)     | 0.30<br>(0.00 to<br>1.82)    | 0.55<br>(0.00 to<br>3.19)     | 0.00<br>(0.00 to<br>0.01) | 0.01<br>(0.00 to<br>0.05) | 0.01<br>(0.00 to<br>0.03) | 0.01<br>(0.00 to<br>0.05) |
| Maternal deaths aggravated by HIV/AIDS | 118.10<br>(67.10 to<br>191.99) | 72.94<br>(28.31 to<br>152.94) | 47.14<br>(17.90 to<br>98.95) | 82.61<br>(30.86 to<br>183.49) | 2.11<br>(1.20 to<br>3.41) | 1.28<br>(0.51 to<br>2.61) | 0.83<br>(0.32 to<br>1.68) | 1.45<br>(0.56 to<br>3.11) |
| Other maternal disorders               |                                |                               |                              |                               |                           |                           |                           |                           |

| Mongolia                                                                |                                              |                                              |                                             |                                              |                                     |                                     |                                    |                                     |
|-------------------------------------------------------------------------|----------------------------------------------|----------------------------------------------|---------------------------------------------|----------------------------------------------|-------------------------------------|-------------------------------------|------------------------------------|-------------------------------------|
| Cause                                                                   | YLLs (actual counts)                         |                                              |                                             |                                              | Deaths (actual counts)              |                                     |                                    |                                     |
|                                                                         | 2016                                         | 2040 Forecast                                | 2040 Better Scenario                        | 2040 Worse Scenario                          | 2016                                | 2040 Forecast                       | 2040 Better Scenario               | 2040 Worse Scenario                 |
| <b>Neonatal disorders</b>                                               | <b>63,978.62</b><br>(49,255.94 to 82,041.75) | <b>27,197.09</b><br>(18,086.68 to 39,530.51) | <b>12,284.26</b><br>(7,938.28 to 18,491.03) | <b>31,437.03</b><br>(20,997.58 to 46,707.57) | <b>739.40</b><br>(569.20 to 948.16) | <b>314.39</b><br>(209.02 to 456.96) | <b>142.01</b><br>(91.75 to 213.73) | <b>363.37</b><br>(242.67 to 539.90) |
| Neonatal preterm birth                                                  | 22,422.15<br>(15,019.28 to 31,456.98)        | 8,252.86<br>(4,861.78 to 12,688.45)          | 3,668.53<br>(2,183.76 to 5,706.82)          | 10,900.52<br>(6,696.90 to 16,457.74)         | 259.07<br>(173.52 to 363.43)        | 95.37<br>(56.18 to 146.60)          | 42.40<br>(25.24 to 65.95)          | 125.96<br>(77.38 to 190.17)         |
| Neonatal encephalopathy due to birth asphyxia and trauma                | 33,986.09<br>(23,332.60 to 45,783.59)        | 14,607.45<br>(7,877.44 to 24,600.47)         | 6,376.48<br>(3,327.20 to 10,891.88)         | 15,815.61<br>(8,170.83 to 26,643.49)         | 392.77<br>(269.63 to 529.11)        | 168.85<br>(91.09 to 284.48)         | 73.71<br>(38.46 to 125.96)         | 182.81<br>(94.48 to 308.09)         |
| Neonatal sepsis and other neonatal infections                           | 3,628.35<br>(2,095.91 to 5,884.02)           | 2,294.36<br>(1,151.52 to 4,134.49)           | 1,102.88<br>(555.19 to 1,945.26)            | 2,470.74<br>(1,247.58 to 4,350.04)           | 41.96<br>(24.23 to 68.15)           | 26.54<br>(13.32 to 47.83)           | 12.76<br>(6.42 to 22.50)           | 28.58<br>(14.43 to 50.31)           |
| Hemolytic disease and other neonatal jaundice                           | 545.17<br>(312.04 to 899.41)                 | 228.35<br>(95.95 to 459.72)                  | 104.60<br>(43.80 to 211.30)                 | 249.24<br>(103.51 to 503.70)                 | 6.31<br>(3.61 to 10.41)             | 2.64<br>(1.11 to 5.32)              | 1.21<br>(0.51 to 2.44)             | 2.88<br>(1.20 to 5.82)              |
| Other neonatal disorders                                                | 3,396.86<br>(2,039.81 to 5,183.43)           | 1,814.06<br>(833.28 to 3,465.96)             | 1,031.77<br>(479.11 to 1,938.85)            | 2,000.91<br>(896.50 to 3,838.16)             | 39.29<br>(23.59 to 59.94)           | 20.99<br>(9.63 to 40.07)            | 11.94<br>(5.54 to 22.42)           | 23.15<br>(10.37 to 44.36)           |
| <b>Nutritional deficiencies</b>                                         | <b>560.77</b><br>(431.27 to 730.15)          | <b>432.38</b><br>(281.35 to 631.59)          | <b>350.24</b><br>(225.08 to 509.06)         | <b>448.19</b><br>(292.58 to 666.31)          | <b>11.43</b><br>(9.03 to 14.44)     | <b>10.67</b><br>(7.25 to 15.07)     | <b>6.34</b><br>(3.37 to 13.37)     | <b>10.84</b><br>(7.48 to 15.31)     |
| Protein-energy malnutrition                                             | 222.74<br>(157.19 to 306.30)                 | 131.48<br>(77.38 to 208.44)                  | 122.83<br>(71.94 to 196.08)                 | 136.93<br>(81.48 to 219.97)                  | 4.40<br>(3.22 to 5.91)              | 3.37<br>(2.02 to 5.34)              | 3.44<br>(2.08 to 5.47)             | 3.42<br>(2.09 to 5.60)              |
| Iodine deficiency                                                       | 28.97<br>(2.69 to 81.94)                     | 26.58<br>(1.49 to 80.59)                     | 19.98<br>(0.94 to 60.76)                    | 27.85<br>(1.66 to 83.19)                     | 0.58<br>(0.07 to 1.49)              | 0.70<br>(0.05 to 1.98)              | 0.57<br>(0.04 to 1.77)             | 0.72<br>(0.05 to 2.02)              |
| Dietary iron deficiency                                                 | 59.43<br>(44.49 to 80.59)                    | 45.66<br>(27.73 to 72.72)                    | 40.23<br>(24.48 to 62.95)                   | 47.03<br>(28.45 to 76.52)                    | 1.02<br>(0.77 to 1.34)              | 0.80<br>(0.50 to 1.24)              | 0.74<br>(0.46 to 1.10)             | 0.82<br>(0.52 to 1.28)              |
| Other nutritional deficiencies                                          | 249.63<br>(172.66 to 330.48)                 | 228.66<br>(139.15 to 344.08)                 | 167.19<br>(98.55 to 256.59)                 | 236.38<br>(143.41 to 362.35)                 | 5.43<br>(3.75 to 7.09)              | 3.80<br>(3.73 to 8.39)              | 4.54<br>(2.79 to 6.67)             | 5.88<br>(3.72 to 8.65)              |
| <b>Other communicable, maternal, neonatal, and nutritional diseases</b> | <b>2,661.67</b><br>(1,906.41 to 3,736.05)    | <b>1,388.02</b><br>(970.68 to 1,953.77)      | <b>862.04</b><br>(593.72 to 1,206.29)       | <b>1,442.94</b><br>(999.58 to 2,016.91)      | <b>39.63</b><br>(29.91 to 52.42)    | <b>25.40</b><br>(18.55 to 33.80)    | <b>17.34</b><br>(12.34 to 23.46)   | <b>26.08</b><br>(19.11 to 34.98)    |
| Sexually transmitted infections excluding HIV                           | 762.91<br>(207.43 to 1,628.63)               | 179.77<br>(60.06 to 397.51)                  | 101.51<br>(38.99 to 213.99)                 | 185.07<br>(61.33 to 413.35)                  | 10.03<br>(3.32 to 20.09)            | 2.87<br>(1.24 to 5.67)              | 1.85<br>(0.86 to 3.38)             | 2.94<br>(1.25 to 5.84)              |
| Syphilis                                                                | 692.38<br>(138.27 to 1,560.44)               | 141.95<br>(29.98 to 354.39)                  | 69.08<br>(16.41 to 177.81)                  | 146.14<br>(30.84 to 370.15)                  | 8.35<br>(1.88 to 18.53)             | 1.85<br>(0.54 to 4.38)              | 0.96<br>(0.31 to 2.23)             | 1.91<br>(0.55 to 4.53)              |
| Chlamydial infection                                                    | 13.74<br>(5.24 to 20.46)                     | 7.16<br>(2.46 to 13.38)                      | 6.15<br>(2.19 to 11.32)                     | 7.38<br>(2.47 to 13.73)                      | 0.32<br>(0.13 to 0.48)              | 0.19<br>(0.08 to 0.35)              | 0.16<br>(0.07 to 0.30)             | 0.19<br>(0.08 to 0.35)              |
| Gonococcal infection                                                    | 37.21<br>(14.57 to 54.80)                    | 20.46<br>(7.44 to 37.02)                     | 17.60<br>(6.55 to 32.19)                    | 21.03<br>(7.41 to 38.54)                     | 0.90<br>(0.38 to 1.32)              | 0.57<br>(0.24 to 1.02)              | 0.50<br>(0.21 to 0.90)             | 0.58<br>(0.24 to 1.04)              |
| Other sexually transmitted infections                                   | 19.58<br>(7.59 to 28.92)                     | 10.20<br>(3.61 to 19.36)                     | 8.68<br>(3.13 to 16.64)                     | 10.52<br>(3.58 to 19.87)                     | 0.46<br>(0.19 to 0.67)              | 0.26<br>(0.10 to 0.49)              | 0.23<br>(0.09 to 0.42)             | 0.27<br>(0.10 to 0.51)              |
| Acute hepatitis                                                         | 1,465.23<br>(1,198.34 to 1,784.66)           | 927.36<br>(638.54 to 1,357.69)               | 540.98<br>(345.02 to 806.53)                | 966.95<br>(656.82 to 1,416.66)               | 22.69<br>(18.71 to 27.35)           | 16.06<br>(11.43 to 22.97)           | 9.77<br>(6.47 to 14.43)            | 16.61<br>(11.54 to 23.83)           |
| Acute hepatitis A                                                       | 234.12<br>(145.37 to 355.01)                 | 75.35<br>(33.38 to 143.88)                   | 40.51<br>(18.61 to 78.91)                   | 77.96<br>(35.85 to 145.86)                   | 2.87<br>(1.83 to 4.31)              | 0.98<br>(0.46 to 1.82)              | 0.54<br>(0.27 to 1.02)             | 1.01<br>(0.49 to 1.84)              |
| Acute hepatitis B                                                       | 850.01<br>(678.22 to 1,063.71)               | 612.37<br>(395.27 to 927.91)                 | 370.45<br>(225.93 to 583.73)                | 641.94<br>(408.41 to 992.20)                 | 14.58<br>(11.69 to 18.07)           | 11.51<br>(7.82 to 16.61)            | 7.20<br>(4.65 to 10.85)            | 11.95<br>(7.89 to 17.53)            |



| Mongolia                             |                                                 |                                                 |                                                 |                                                 |                                           |                                             |                                            |                                             |
|--------------------------------------|-------------------------------------------------|-------------------------------------------------|-------------------------------------------------|-------------------------------------------------|-------------------------------------------|---------------------------------------------|--------------------------------------------|---------------------------------------------|
| Cause                                | YLLs (actual counts)                            |                                                 |                                                 |                                                 | Deaths (actual counts)                    |                                             |                                            |                                             |
|                                      | 2016                                            | 2040 Forecast                                   | 2040 Better Scenario                            | 2040 Worse Scenario                             | 2016                                      | 2040 Forecast                               | 2040 Better Scenario                       | 2040 Worse Scenario                         |
| <b>Neoplasms</b>                     | <b>122,587.89</b><br>(105,574.49 to 139,815.20) | <b>238,532.29</b><br>(170,664.50 to 323,478.62) | <b>182,209.60</b><br>(130,575.99 to 243,074.28) | <b>261,304.36</b><br>(186,134.87 to 360,030.92) | <b>4,598.90</b><br>(3,941.67 to 5,239.37) | <b>10,309.64</b><br>(7,628.94 to 13,215.38) | <b>8,177.71</b><br>(6,169.68 to 10,364.95) | <b>11,037.96</b><br>(8,167.41 to 14,294.25) |
| Lip and oral cavity cancer           | 1,177.94<br>(961.57 to 1,408.29)                | 3,848.43<br>(1,791.66 to 7,425.45)              | 1,723.74<br>(874.24 to 3,183.93)                | 4,449.80<br>(2,067.44 to 8,471.42)              | 40.17<br>(33.41 to 47.32)                 | 145.76<br>(71.55 to 270.43)                 | 67.58<br>(36.47 to 120.06)                 | 166.67<br>(79.90 to 304.79)                 |
| Nasopharynx cancer                   | 203.70<br>(161.94 to 252.15)                    | 531.23<br>(233.57 to 1,025.78)                  | 206.50<br>(94.67 to 378.17)                     | 611.90<br>(273.98 to 1,182.40)                  | 6.21<br>(4.94 to 7.61)                    | 18.07<br>(8.25 to 34.03)                    | 7.16<br>(3.42 to 12.80)                    | 20.51<br>(9.30 to 38.61)                    |
| Other pharynx cancer                 | 189.27<br>(154.40 to 227.54)                    | 494.43<br>(247.37 to 908.36)                    | 396.38<br>(208.19 to 705.55)                    | 507.22<br>(252.41 to 913.35)                    | 8.01<br>(6.59 to 9.57)                    | 24.47<br>(12.60 to 43.58)                   | 20.40<br>(10.98 to 35.80)                  | 24.65<br>(12.43 to 44.26)                   |
| Esophageal cancer                    | 7,796.71<br>(6,546.04 to 8,997.08)              | 19,007.37<br>(9,883.22 to 33,407.67)            | 11,117.62<br>(6,068.20 to 19,252.40)            | 22,037.75<br>(10,946.26 to 39,327.07)           | 359.62<br>(307.52 to 411.93)              | 950.46<br>(503.79 to 1,603.82)              | 582.25<br>(327.59 to 964.27)               | 1,080.65<br>(569.72 to 1,860.59)            |
| Stomach cancer                       | 19,839.36<br>(16,891.91 to 23,013.00)           | 29,187.27<br>(19,378.76 to 42,148.00)           | 20,530.96<br>(13,309.97 to 30,247.44)           | 29,980.58<br>(20,045.67 to 42,950.36)           | 746.78<br>(644.80 to 852.91)              | 1,281.81<br>(916.97 to 1,732.90)            | 943.43<br>(654.02 to 1,313.12)             | 1,284.03<br>(921.18 to 1,729.66)            |
| Colon and rectum cancer              | 3,433.05<br>(2,872.99 to 4,027.14)              | 8,148.56<br>(4,971.71 to 12,685.29)             | 6,247.53<br>(3,760.19 to 9,670.77)              | 8,442.55<br>(5,180.07 to 13,061.90)             | 124.26<br>(105.08 to 144.53)              | 350.24<br>(225.13 to 526.36)                | 281.41<br>(182.77 to 412.38)               | 353.90<br>(230.53 to 526.27)                |
| Liver cancer                         | 49,296.45<br>(38,705.94 to 58,286.77)           | 97,884.72<br>(58,053.21 to 158,190.65)          | 82,977.09<br>(51,770.98 to 125,796.06)          | 110,802.59<br>(62,688.88 to 185,791.97)         | 1,921.50<br>(1,436.97 to 2,239.49)        | 4,239.33<br>(2,603.47 to 6,376.23)          | 3,779.63<br>(2,406.31 to 5,389.33)         | 4,651.15<br>(2,767.49 to 7,269.27)          |
| Liver cancer due to hepatitis B      | 14,925.41<br>(11,115.62 to 18,994.99)           | 26,917.22<br>(15,571.82 to 45,781.18)           | 23,991.72<br>(14,115.84 to 38,361.48)           | 30,156.56<br>(16,572.24 to 52,877.80)           | 531.61<br>(384.21 to 669.71)              | 1,082.66<br>(643.23 to 1,709.93)            | 1,007.07<br>(611.85 to 1,518.94)           | 1,177.72<br>(678.17 to 1,942.99)            |
| Liver cancer due to hepatitis C      | 17,085.80<br>(12,642.68 to 21,145.70)           | 34,253.48<br>(19,789.62 to 53,126.44)           | 31,390.38<br>(19,081.93 to 46,907.60)           | 37,719.37<br>(21,095.06 to 60,618.77)           | 720.36<br>(509.46 to 872.22)              | 1,593.77<br>(926.42 to 2,324.62)            | 1,529.39<br>(948.18 to 2,173.65)           | 1,698.84<br>(974.69 to 2,552.28)            |
| Liver cancer due to alcohol use      | 10,195.84<br>(7,684.86 to 12,479.22)            | 22,464.46<br>(12,781.28 to 37,035.42)           | 15,118.26<br>(8,968.79 to 23,462.12)            | 27,019.44<br>(14,699.35 to 45,240.19)           | 404.50<br>(292.24 to 494.87)              | 965.13<br>(564.19 to 1,491.93)              | 694.58<br>(427.22 to 1,025.30)             | 1,128.24<br>(621.76 to 1,774.84)            |
| Liver cancer due to other causes     | 7,089.41<br>(5,514.48 to 8,841.61)              | 14,249.56<br>(8,033.83 to 23,796.38)            | 12,476.73<br>(7,656.79 to 19,528.20)            | 15,907.22<br>(8,621.02 to 27,206.85)            | 265.04<br>(208.08 to 322.19)              | 597.77<br>(358.92 to 928.69)                | 548.58<br>(357.85 to 823.10)               | 646.35<br>(372.66 to 1,044.46)              |
| Gallbladder and biliary tract cancer | 1,051.70<br>(775.82 to 1,467.28)                | 1,385.38<br>(893.10 to 2,059.69)                | 1,370.95<br>(866.27 to 2,035.83)                | 1,315.34<br>(857.88 to 1,928.88)                | 40.26<br>(29.42 to 57.05)                 | 63.06<br>(42.88 to 91.74)                   | 64.53<br>(43.13 to 94.05)                  | 58.55<br>(40.55 to 84.57)                   |
| Pancreatic cancer                    | 2,281.06<br>(1,929.56 to 2,655.46)              | 4,798.27<br>(3,510.78 to 6,428.81)              | 4,388.77<br>(3,203.13 to 5,834.69)              | 4,708.89<br>(3,483.66 to 6,303.81)              | 85.02<br>(73.30 to 98.37)                 | 205.31<br>(161.05 to 260.62)                | 194.63<br>(150.81 to 246.66)               | 197.01<br>(155.01 to 249.34)                |
| Larynx cancer                        | 449.43<br>(377.50 to 528.38)                    | 1,083.90<br>(473.72 to 2,107.22)                | 472.74<br>(216.32 to 878.77)                    | 1,195.06<br>(523.84 to 2,343.85)                | 23.40<br>(19.88 to 27.30)                 | 58.18<br>(26.52 to 110.90)                  | 27.08<br>(13.21 to 49.75)                  | 62.05<br>(28.87 to 117.89)                  |
| Tracheal, bronchus, and lung cancer  | 11,290.88<br>(9,403.94 to 13,261.10)            | 28,526.62<br>(17,498.77 to 43,793.68)           | 14,102.05<br>(8,845.27 to 21,479.22)            | 34,258.13<br>(21,450.90 to 51,886.83)           | 484.02<br>(408.68 to 559.13)              | 1,336.26<br>(891.33 to 1,939.96)            | 692.71<br>(471.94 to 976.19)               | 1,566.40<br>(1,045.75 to 2,228.41)          |
| Malignant skin melanoma              | 105.20<br>(84.10 to 148.15)                     | 180.98<br>(135.65 to 250.54)                    | 228.49<br>(164.79 to 320.82)                    | 168.76<br>(127.74 to 233.96)                    | 3.49<br>(2.86 to 4.57)                    | 7.52<br>(6.15 to 9.50)                      | 10.02<br>(7.88 to 12.99)                   | 6.77<br>(5.54 to 8.51)                      |
| Non-melanoma skin cancer             | 531.15<br>(441.02 to 632.49)                    | 1,096.42<br>(851.88 to 1,346.73)                | 894.12<br>(655.68 to 1,157.15)                  | 1,055.86<br>(835.51 to 1,288.26)                | 19.95<br>(17.05 to 23.00)                 | 52.00<br>(42.20 to 62.81)                   | 45.19<br>(35.23 to 56.32)                  | 48.16<br>(39.74 to 58.10)                   |
| Breast cancer                        | 2,867.13<br>(2,107.87 to 3,785.32)              | 5,343.35<br>(2,952.02 to 8,738.23)              | 4,042.16<br>(2,196.22 to 6,495.89)              | 5,498.64<br>(3,005.00 to 8,977.07)              | 89.59<br>(66.68 to 114.98)                | 203.26<br>(121.13 to 317.21)                | 158.69<br>(93.89 to 242.11)                | 204.71<br>(122.94 to 321.17)                |
| Cervical cancer                      | 4,319.46<br>(3,161.12 to 5,742.23)              | 5,372.22<br>(3,036.55 to 8,145.71)              | 3,976.70<br>(2,172.43 to 6,131.24)              | 5,452.13<br>(3,060.29 to 8,153.83)              | 131.39<br>(95.03 to 175.19)               | 201.28<br>(120.91 to 293.59)                | 152.06<br>(90.12 to 222.81)                | 200.73<br>(122.26 to 292.84)                |

|                   |                                     |                                       |                                       |                                       |                              |                               |                               |                               |
|-------------------|-------------------------------------|---------------------------------------|---------------------------------------|---------------------------------------|------------------------------|-------------------------------|-------------------------------|-------------------------------|
| Uterine cancer    | 848.93<br>(637.02 to<br>1,114.42)   | 1,330.60<br>(869.27 to<br>1,845.24)   | 1,098.52<br>(695.99 to<br>1,556.41)   | 1,324.29<br>(885.79 to<br>1,816.93)   | 26.56<br>(20.28 to<br>34.37) | 54.22<br>(37.56 to<br>73.17)  | 46.41<br>(31.48 to<br>63.89)  | 52.66<br>(36.96 to<br>70.14)  |
| Ovarian cancer    | 1,272.72<br>(974.50 to<br>1,595.89) | 1,919.22<br>(1,147.89 to<br>2,800.80) | 1,791.82<br>(1,046.30 to<br>2,634.66) | 1,881.22<br>(1,136.91 to<br>2,754.97) | 40.55<br>(31.63 to<br>50.28) | 73.53<br>(47.67 to<br>102.35) | 70.59<br>(45.18 to<br>98.26)  | 70.70<br>(46.33 to<br>97.71)  |
| Prostate cancer   | 523.93<br>(326.17 to<br>668.07)     | 1,642.63<br>(981.50 to<br>2,116.93)   | 1,606.07<br>(936.88 to<br>2,138.82)   | 1,481.28<br>(892.48 to<br>1,906.26)   | 28.35<br>(16.75 to<br>36.24) | 94.92<br>(55.51 to<br>122.76) | 98.12<br>(56.76 to<br>127.80) | 83.05<br>(48.60 to<br>109.60) |
| Testicular cancer | 34.53<br>(25.75 to<br>44.33)        | 41.70<br>(28.73 to<br>59.81)          | 33.17<br>(22.65 to<br>48.86)          | 41.91<br>(29.02 to<br>60.60)          | 0.71<br>(0.53 to<br>0.90)    | 0.95<br>(0.69 to<br>1.31)     | 0.79<br>(0.56 to<br>1.09)     | 0.94<br>(0.69 to<br>1.30)     |

| Mongolia                        |                                                  |                                                  |                                                 |                                                  |                                            |                                              |                                             |                                               |
|---------------------------------|--------------------------------------------------|--------------------------------------------------|-------------------------------------------------|--------------------------------------------------|--------------------------------------------|----------------------------------------------|---------------------------------------------|-----------------------------------------------|
| Cause                           | YLLs (actual counts)                             |                                                  |                                                 |                                                  | Deaths (actual counts)                     |                                              |                                             |                                               |
|                                 | 2016                                             | 2040 Forecast                                    | 2040 Better Scenario                            | 2040 Worse Scenario                              | 2016                                       | 2040 Forecast                                | 2040 Better Scenario                        | 2040 Worse Scenario                           |
| Kidney cancer                   | 1,037.61<br>(833.24 to 1,210.16)                 | 1,855.08<br>(1,209.03 to 2,602.47)               | 1,835.77<br>(1,224.28 to 2,505.07)              | 1,771.74<br>(1,156.17 to 2,455.06)               | 37.22<br>(28.24 to 43.24)                  | 81.11<br>(53.43 to 110.57)                   | 84.03<br>(56.30 to 111.02)                  | 75.58<br>(49.08 to 103.27)                    |
| Bladder cancer                  | 414.07<br>(348.36 to 488.45)                     | 914.39<br>(645.44 to 1,270.13)                   | 722.63<br>(513.89 to 986.62)                    | 911.97<br>(649.85 to 1,261.71)                   | 17.73<br>(15.18 to 20.69)                  | 45.59<br>(33.71 to 60.38)                    | 37.64<br>(28.62 to 48.87)                   | 44.15<br>(32.24 to 58.98)                     |
| Brain and nervous system cancer | 2,989.21<br>(2,357.03 to 3,736.71)               | 4,439.22<br>(3,012.75 to 5,728.26)               | 4,126.28<br>(2,730.65 to 5,461.63)              | 4,269.13<br>(2,939.81 to 5,452.75)               | 75.60<br>(54.45 to 93.25)                  | 137.76<br>(87.93 to 178.52)                  | 134.86<br>(84.64 to 181.43)                 | 129.64<br>(84.54 to 165.63)                   |
| Thyroid cancer                  | 254.83<br>(118.96 to 316.59)                     | 493.36<br>(194.88 to 752.37)                     | 424.57<br>(169.00 to 657.34)                    | 522.47<br>(210.62 to 829.78)                     | 9.89<br>(3.59 to 12.40)                    | 21.21<br>(8.12 to 32.24)                     | 18.53<br>(7.36 to 27.96)                    | 22.08<br>(8.31 to 34.84)                      |
| Mesothelioma                    | 82.79<br>(63.72 to 99.53)                        | 153.15<br>(101.02 to 200.46)                     | 157.10<br>(102.55 to 210.52)                    | 148.62<br>(98.69 to 191.03)                      | 2.48<br>(1.87 to 2.97)                     | 5.38<br>(3.70 to 6.85)                       | 5.70<br>(3.91 to 7.49)                      | 5.13<br>(3.58 to 6.42)                        |
| Hodgkin lymphoma                | 152.24<br>(91.37 to 195.01)                      | 186.55<br>(97.88 to 261.80)                      | 129.97<br>(63.94 to 189.89)                     | 189.66<br>(99.03 to 265.14)                      | 3.76<br>(2.09 to 4.88)                     | 5.63<br>(2.81 to 7.83)                       | 4.06<br>(1.95 to 5.96)                      | 5.62<br>(2.79 to 7.79)                        |
| Non-Hodgkin lymphoma            | 1,656.03<br>(1,387.15 to 2,008.23)               | 2,922.79<br>(2,128.32 to 3,816.71)               | 2,662.21<br>(1,894.93 to 3,580.96)              | 2,882.92<br>(2,117.68 to 3,777.50)               | 47.40<br>(38.64 to 56.24)                  | 107.28<br>(79.00 to 135.58)                  | 103.37<br>(73.71 to 133.16)                 | 102.87<br>(76.53 to 132.42)                   |
| Multiple myeloma                | 251.48<br>(179.88 to 308.09)                     | 559.77<br>(349.51 to 765.74)                     | 552.92<br>(347.05 to 770.37)                    | 551.08<br>(341.98 to 754.21)                     | 8.71<br>(5.93 to 10.64)                    | 23.16<br>(14.33 to 30.56)                    | 23.73<br>(14.52 to 31.85)                   | 22.28<br>(13.74 to 30.11)                     |
| Leukemia                        | 3,066.53<br>(2,531.52 to 3,688.74)               | 3,823.15<br>(2,736.61 to 5,092.23)               | 3,117.65<br>(2,248.82 to 4,167.90)              | 3,942.60<br>(2,797.54 to 5,290.59)               | 66.59<br>(53.99 to 78.81)                  | 108.35<br>(77.24 to 144.04)                  | 92.09<br>(65.85 to 121.49)                  | 110.35<br>(78.36 to 148.53)                   |
| Acute lymphoid leukemia         | 1,085.39<br>(829.31 to 1,385.77)                 | 1,041.21<br>(707.07 to 1,455.04)                 | 784.29<br>(526.32 to 1,113.04)                  | 1,062.32<br>(722.08 to 1,493.42)                 | 18.67<br>(14.61 to 23.50)                  | 22.67<br>(15.91 to 30.49)                    | 17.90<br>(12.43 to 24.52)                   | 23.05<br>(16.13 to 31.35)                     |
| Chronic lymphoid leukemia       | 212.11<br>(150.45 to 274.53)                     | 293.90<br>(186.74 to 429.35)                     | 254.30<br>(162.81 to 368.97)                    | 310.20<br>(196.39 to 457.38)                     | 6.40<br>(4.51 to 8.20)                     | 10.60<br>(6.97 to 15.00)                     | 9.42<br>(6.22 to 13.23)                     | 10.95<br>(7.13 to 15.71)                      |
| Acute myeloid leukemia          | 1,194.64<br>(959.03 to 1,455.02)                 | 1,673.94<br>(1,180.09 to 2,261.04)               | 1,496.16<br>(1,051.41 to 2,018.61)              | 1,715.39<br>(1,200.92 to 2,347.07)               | 25.27<br>(20.19 to 30.41)                  | 44.21<br>(31.42 to 59.04)                    | 41.02<br>(28.96 to 53.62)                   | 44.90<br>(31.81 to 60.32)                     |
| Chronic myeloid leukemia        | 251.27<br>(177.19 to 325.36)                     | 244.95<br>(152.23 to 368.23)                     | 157.00<br>(90.68 to 237.74)                     | 259.90<br>(158.53 to 396.90)                     | 6.73<br>(4.66 to 8.71)                     | 7.81<br>(4.90 to 11.78)                      | 5.15<br>(3.02 to 7.69)                      | 8.13<br>(5.01 to 12.36)                       |
| Other leukemia                  | 323.11<br>(228.98 to 454.66)                     | 569.15<br>(367.21 to 836.97)                     | 425.90<br>(275.79 to 631.59)                    | 594.79<br>(379.53 to 887.74)                     | 9.53<br>(6.57 to 12.51)                    | 23.07<br>(13.68 to 33.81)                    | 18.59<br>(10.60 to 26.87)                   | 23.32<br>(13.78 to 34.29)                     |
| Other neoplasms                 | 5,170.48<br>(4,275.59 to 7,254.59)               | 11,361.52<br>(8,697.02 to 14,374.83)             | 11,275.11<br>(8,295.13 to 14,349.17)            | 10,900.27<br>(8,399.59 to 13,642.53)             | 149.65<br>(125.82 to 187.73)               | 413.51<br>(330.48 to 491.73)                 | 431.01<br>(333.91 to 531.56)                | 386.99<br>(315.68 to 455.99)                  |
| <b>Cardiovascular diseases</b>  | <b>197,560.17<br/>(172,841.20 to 226,015.38)</b> | <b>256,871.82<br/>(147,087.83 to 412,128.04)</b> | <b>121,220.25<br/>(71,575.45 to 196,578.98)</b> | <b>366,007.82<br/>(216,083.78 to 561,440.38)</b> | <b>8,365.60<br/>(7,453.02 to 9,379.25)</b> | <b>13,180.21<br/>(8,598.57 to 19,284.81)</b> | <b>7,052.98<br/>(4,649.00 to 10,410.93)</b> | <b>17,576.43<br/>(11,699.17 to 25,079.68)</b> |
| Rheumatic heart disease         | 3,905.75<br>(3,252.38 to 4,643.26)               | 4,754.45<br>(3,234.24 to 7,029.16)               | 3,417.02<br>(2,248.23 to 5,338.36)              | 4,915.28<br>(3,362.51 to 7,247.63)               | 128.78<br>(109.72 to 150.36)               | 217.96<br>(162.41 to 306.42)                 | 168.57<br>(118.94 to 243.75)                | 216.23<br>(159.10 to 301.36)                  |
| Ischemic heart disease          | 94,551.83<br>(81,822.91 to 107,760.37)           | 131,198.25<br>(68,990.93 to 221,913.48)          | 60,786.65<br>(32,554.48 to 108,854.89)          | 188,973.79<br>(103,608.69 to 299,592.26)         | 4,382.58<br>(3,904.33 to 4,920.29)         | 7,264.52<br>(4,361.39 to 11,292.07)          | 3,853.00<br>(2,329.43 to 6,115.96)          | 9,760.05<br>(6,000.86 to 14,351.74)           |
| Stroke                          | 85,344.32<br>(73,249.85 to 98,626.67)            | 90,327.02<br>(43,946.96 to 164,664.56)           | 35,297.61<br>(17,249.35 to 65,821.21)           | 137,697.91<br>(67,876.83 to 249,194.49)          | 3,337.81<br>(2,918.13 to 3,785.02)         | 4,195.03<br>(2,382.65 to 7,042.89)           | 1,859.67<br>(1,065.13 to 3,109.98)          | 5,970.93<br>(3,342.42 to 9,849.94)            |
| Ischemic stroke                 | 6,584.93<br>(5,643.21 to 7,644.67)               | 6,947.46<br>(3,900.03 to 11,432.19)              | 3,468.92<br>(1,920.67 to 5,872.41)              | 9,463.51<br>(5,222.15 to 15,635.55)              | 311.90<br>(271.90 to 354.58)               | 407.83<br>(242.97 to 674.50)                 | 228.92<br>(137.40 to 377.60)                | 518.08<br>(309.22 to 838.37)                  |

|                                |                                          |                                           |                                          |                                            |                                       |                                       |                                     |                                       |
|--------------------------------|------------------------------------------|-------------------------------------------|------------------------------------------|--------------------------------------------|---------------------------------------|---------------------------------------|-------------------------------------|---------------------------------------|
| Intracerebral hemorrhage       | 78,759.39<br>(67,741.48 to<br>91,152.58) | 83,379.56<br>(39,551.10 to<br>156,269.38) | 31,828.69<br>(15,158.38 to<br>60,990.21) | 128,234.41<br>(61,088.60 to<br>236,519.57) | 3,025.91<br>(2,638.95 to<br>3,445.77) | 3,787.19<br>(2,075.19 to<br>6,560.94) | 1,630.76<br>(907.22 to<br>2,793.86) | 5,452.85<br>(2,947.97 to<br>9,308.43) |
| Hypertensive heart disease     | 3,800.87<br>(3,025.27 to<br>4,643.50)    | 10,999.35<br>(5,081.89 to<br>27,146.62)   | 7,522.32<br>(3,589.05 to<br>18,791.86)   | 13,923.04<br>(6,222.30 to<br>33,610.21)    | 166.56<br>(132.03 to<br>203.13)       | 575.60<br>(284.50 to<br>1,403.84)     | 433.63<br>(221.29 to<br>1,085.35)   | 704.90<br>(338.30 to<br>1,696.94)     |
| Cardiomyopathy and myocarditis | 5,859.95<br>(4,736.95 to<br>7,309.19)    | 8,039.42<br>(5,144.27 to<br>12,125.16)    | 6,040.00<br>(3,700.54 to<br>9,192.54)    | 8,305.37<br>(5,245.23 to<br>12,662.49)     | 170.70<br>(134.65 to<br>209.42)       | 305.80<br>(185.13 to<br>436.70)       | 242.95<br>(142.59 to<br>357.30)     | 304.51<br>(184.02 to<br>438.91)       |
| Myocarditis                    | 1,232.67<br>(579.21 to<br>1,825.22)      | 1,466.84<br>(568.09 to<br>2,498.27)       | 1,320.64<br>(517.72 to<br>2,248.51)      | 1,465.26<br>(563.22 to<br>2,476.81)        | 31.03<br>(13.27 to<br>47.46)          | 44.31<br>(17.09 to<br>74.37)          | 41.53<br>(16.72 to<br>69.92)        | 43.46<br>(16.48 to<br>72.79)          |



| Mongolia                                                      |                                                               |                                                               |                                                               |                                                               |                                                            |                                                            |                                                            |                                                            |
|---------------------------------------------------------------|---------------------------------------------------------------|---------------------------------------------------------------|---------------------------------------------------------------|---------------------------------------------------------------|------------------------------------------------------------|------------------------------------------------------------|------------------------------------------------------------|------------------------------------------------------------|
| Cause                                                         | YLLs (actual counts)                                          |                                                               |                                                               |                                                               | Deaths (actual counts)                                     |                                                            |                                                            |                                                            |
|                                                               | 2016                                                          | 2040 Forecast                                                 | 2040 Better Scenario                                          | 2040 Worse Scenario                                           | 2016                                                       | 2040 Forecast                                              | 2040 Better Scenario                                       | 2040 Worse Scenario                                        |
| Alcoholic cardiomyopathy                                      | 508.04<br>(315.82 to<br>1,065.17)                             | 795.10<br>(474.10 to<br>1,505.26)                             | 607.20<br>(353.16 to<br>1,152.96)                             | 819.33<br>(492.01 to<br>1,570.72)                             | 15.56<br>(10.43 to<br>29.00)                               | 30.10<br>(20.14 to<br>50.03)                               | 24.36<br>(15.90 to<br>39.50)                               | 30.22<br>(20.42 to<br>50.88)                               |
| Other cardiomyopathy                                          | 4,119.24<br>(3,239.83 to<br>5,351.89)                         | 5,777.48<br>(3,277.65 to<br>9,232.09)                         | 4,112.16<br>(2,236.94 to<br>6,851.67)                         | 6,020.79<br>(3,384.64 to<br>9,756.39)                         | 124.10<br>(96.89 to<br>158.28)                             | 231.39<br>(123.92 to<br>354.74)                            | 177.05<br>(91.85 to<br>285.16)                             | 230.83<br>(123.80 to<br>352.92)                            |
| Atrial fibrillation and flutter                               | 431.41<br>(337.77 to<br>546.92)                               | 1,346.71<br>(969.11 to<br>1,994.79)                           | 1,265.20<br>(909.72 to<br>1,673.17)                           | 1,306.87<br>(940.52 to<br>1,740.63)                           | 37.19<br>(28.76 to<br>48.23)                               | 120.35<br>(85.60 to<br>159.99)                             | 121.77<br>(88.40 to<br>161.37)                             | 111.54<br>(77.70 to<br>150.49)                             |
| Aortic aneurysm                                               | 387.26<br>(328.14 to<br>456.23)                               | 724.99<br>(499.57 to<br>1,039.09)                             | 642.43<br>(441.84 to<br>931.29)                               | 733.25<br>(500.47 to<br>1,042.22)                             | 17.33<br>(14.90 to<br>20.00)                               | 39.00<br>(29.70 to<br>51.35)                               | 58.11<br>(28.98 to<br>50.19)                               | 37.53<br>(28.55 to<br>48.68)                               |
| Peripheral artery disease                                     | 45.22<br>(32.73 to<br>59.07)                                  | 143.76<br>(83.25 to<br>240.13)                                | 138.05<br>(81.33 to<br>235.71)                                | 145.91<br>(82.29 to<br>248.79)                                | 2.24<br>(1.75 to<br>2.84)                                  | 8.57<br>(5.54 to<br>13.18)                                 | 9.20<br>(6.07 to<br>14.33)                                 | 8.14<br>(5.34 to<br>12.52)                                 |
| Endocarditis                                                  | 240.82<br>(179.97 to<br>292.42)                               | 465.68<br>(242.87 to<br>738.11)                               | 446.25<br>(221.73 to<br>719.43)                               | 483.55<br>(253.88 to<br>765.89)                               | 8.16<br>(5.38 to<br>10.39)                                 | 21.19<br>(9.39 to<br>32.88)                                | 21.69<br>(9.55 to<br>34.55)                                | 21.21<br>(9.42 to<br>33.10)                                |
| Other cardiovascular and circulatory diseases                 | 2,992.74<br>(2,199.87 to<br>5,469.73)                         | 8,872.18<br>(5,449.27 to<br>14,884.09)                        | 5,664.71<br>(3,328.83 to<br>9,704.12)                         | 9,522.84<br>(5,776.55 to<br>16,370.36)                        | 114.25<br>(90.82 to<br>178.78)                             | 432.21<br>(285.89 to<br>636.53)                            | 304.39<br>(200.26 to<br>453.41)                            | 441.39<br>(293.59 to<br>659.76)                            |
| <b>Chronic respiratory diseases</b>                           | <b>8,575.07</b><br><b>(7,291.72 to</b><br><b>10,525.54)</b>   | <b>15,412.59</b><br><b>(8,987.81 to</b><br><b>25,245.76)</b>  | <b>10,319.20</b><br><b>(6,558.71 to</b><br><b>15,779.01)</b>  | <b>18,512.85</b><br><b>(10,561.00 to</b><br><b>31,350.99)</b> | <b>373.24</b><br><b>(320.63 to</b><br><b>455.06)</b>       | <b>791.40</b><br><b>(493.24 to</b><br><b>1,287.72)</b>     | <b>556.93</b><br><b>(378.43 to</b><br><b>827.12)</b>       | <b>922.91</b><br><b>(554.32 to</b><br><b>1,531.08)</b>     |
| Chronic obstructive pulmonary disease                         | 5,078.53<br>(4,253.35 to<br>6,261.89)                         | 10,193.88<br>(5,081.05 to<br>18,792.16)                       | 4,666.70<br>(2,410.11 to<br>8,508.51)                         | 13,172.38<br>(6,523.37 to<br>24,705.41)                       | 229.30<br>(193.16 to<br>287.79)                            | 530.26<br>(278.76 to<br>947.39)                            | 259.08<br>(139.12 to<br>448.39)                            | 663.76<br>(333.24 to<br>1,221.37)                          |
| Pneumoconiosis                                                | 57.35<br>(40.79 to<br>82.77)                                  | 78.25<br>(44.74 to<br>128.99)                                 | 55.56<br>(29.04 to<br>95.95)                                  | 80.84<br>(45.73 to<br>132.74)                                 | 2.06<br>(1.47 to<br>2.95)                                  | 3.10<br>(1.86 to<br>5.08)                                  | 2.27<br>(1.28 to<br>3.77)                                  | 3.14<br>(1.87 to<br>5.08)                                  |
| Silicosis                                                     | 0.45<br>(0.21 to<br>2.14)                                     | 0.55<br>(0.22 to<br>2.19)                                     | 0.31<br>(0.12 to<br>0.94)                                     | 0.53<br>(0.22 to<br>2.20)                                     | 0.02<br>(0.01 to<br>0.09)                                  | 0.03<br>(0.01 to<br>0.11)                                  | 0.02<br>(0.01 to<br>0.05)                                  | 0.02<br>(0.01 to<br>0.10)                                  |
| Asbestosis                                                    | 8.36<br>(5.01 to<br>20.96)                                    | 13.47<br>(6.52 to<br>37.88)                                   | 15.19<br>(7.47 to<br>33.01)                                   | 13.19<br>(6.30 to<br>37.89)                                   | 0.24<br>(0.14 to<br>0.67)                                  | 0.46<br>(0.23 to<br>1.34)                                  | 0.54<br>(0.28 to<br>1.18)                                  | 0.45<br>(0.22 to<br>1.33)                                  |
| Coal workers pneumoconiosis                                   | 35.01<br>(7.09 to<br>55.96)                                   | 44.83<br>(5.64 to<br>90.16)                                   | 24.51<br>(1.93 to<br>55.46)                                   | 47.24<br>(6.14 to<br>93.28)                                   | 1.24<br>(0.24 to<br>2.00)                                  | 1.65<br>(0.24 to<br>3.34)                                  | 0.91<br>(0.09 to<br>2.11)                                  | 1.73<br>(0.27 to<br>3.48)                                  |
| Other pneumoconiosis                                          | 13.53<br>(8.01 to<br>37.30)                                   | 19.39<br>(10.25 to<br>44.72)                                  | 15.56<br>(8.22 to<br>30.65)                                   | 19.87<br>(10.52 to<br>47.43)                                  | 0.56<br>(0.35 to<br>1.46)                                  | 0.96<br>(0.57 to<br>2.06)                                  | 0.81<br>(0.47 to<br>1.43)                                  | 0.94<br>(0.55 to<br>2.09)                                  |
| Asthma                                                        | 1,737.04<br>(1,307.06 to<br>2,169.02)                         | 2,071.89<br>(970.47 to<br>3,934.87)                           | 1,247.76<br>(561.27 to<br>2,383.58)                           | 2,430.62<br>(1,106.82 to<br>4,676.88)                         | 83.90<br>(56.86 to<br>105.65)                              | 118.45<br>(57.21 to<br>214.94)                             | 77.76<br>(35.76 to<br>141.69)                              | 132.91<br>(63.03 to<br>247.45)                             |
| Interstitial lung disease and pulmonary sarcoidosis           | 1,609.23<br>(1,251.61 to<br>2,186.86)                         | 2,960.66<br>(2,102.61 to<br>4,249.14)                         | 4,257.60<br>(2,947.06 to<br>6,112.24)                         | 2,720.95<br>(1,942.74 to<br>3,935.66)                         | 56.26<br>(44.49 to<br>77.65)                               | 137.03<br>(101.76 to<br>193.01)                            | 215.48<br>(154.37 to<br>299.88)                            | 120.58<br>(88.48 to<br>173.33)                             |
| Other chronic respiratory diseases                            | 92.92<br>(63.84 to<br>147.47)                                 | 107.91<br>(63.64 to<br>180.16)                                | 91.57<br>(54.75 to<br>152.51)                                 | 108.07<br>(63.12 to<br>180.27)                                | 1.72<br>(1.22 to<br>2.38)                                  | 2.55<br>(1.54 to<br>3.96)                                  | 2.33<br>(1.38 to<br>3.69)                                  | 2.52<br>(1.52 to<br>3.91)                                  |
| <b>Cirrhosis and other chronic liver diseases</b>             | <b>40,266.72</b><br><b>(33,875.16 to</b><br><b>48,843.02)</b> | <b>61,130.93</b><br><b>(46,981.26 to</b><br><b>75,688.62)</b> | <b>46,994.48</b><br><b>(34,505.76 to</b><br><b>60,700.25)</b> | <b>61,569.05</b><br><b>(48,236.90 to</b><br><b>75,259.98)</b> | <b>1,322.16</b><br><b>(1,126.83 to</b><br><b>1,572.35)</b> | <b>2,497.84</b><br><b>(2,067.65 to</b><br><b>3,018.13)</b> | <b>2,024.68</b><br><b>(1,589.97 to</b><br><b>2,505.36)</b> | <b>2,444.01</b><br><b>(2,047.88 to</b><br><b>2,919.32)</b> |
| Cirrhosis and other chronic liver diseases due to hepatitis B | 14,714.41<br>(12,010.24 to<br>18,222.14)                      | 21,111.60<br>(16,201.07 to<br>26,864.05)                      | 17,847.29<br>(13,080.68 to<br>23,212.88)                      | 20,584.81<br>(15,872.43 to<br>26,044.00)                      | 486.26<br>(402.15 to<br>587.86)                            | 874.84<br>(708.22 to<br>1,086.10)                          | 775.16<br>(601.75 to<br>967.87)                            | 829.60<br>(671.99 to<br>1,017.61)                          |
| Cirrhosis and other chronic liver diseases due to hepatitis C | 8,312.35<br>(6,671.25 to<br>10,419.28)                        | 12,629.29<br>(9,429.97 to<br>16,354.62)                       | 10,489.48<br>(7,569.51 to<br>14,267.00)                       | 12,375.78<br>(9,340.49 to<br>15,892.22)                       | 266.46<br>(218.05 to<br>326.72)                            | 493.05<br>(387.44 to<br>612.05)                            | 426.63<br>(324.24 to<br>556.62)                            | 470.59<br>(371.71 to<br>579.51)                            |

|                                                                |                                                               |                                                               |                                                               |                                                               |                                                      |                                                        |                                                      |                                                        |
|----------------------------------------------------------------|---------------------------------------------------------------|---------------------------------------------------------------|---------------------------------------------------------------|---------------------------------------------------------------|------------------------------------------------------|--------------------------------------------------------|------------------------------------------------------|--------------------------------------------------------|
|                                                                | 10,440.61<br>(8,423.03 to<br>12,966.79)                       | 18,211.45<br>(13,428.30 to<br>23,566.33)                      | 11,133.43<br>(8,019.63 to<br>14,846.56)                       | 19,581.08<br>(14,710.31 to<br>25,031.56)                      | 355.88<br>(294.33 to<br>430.90)                      | 749.68<br>(597.76 to<br>924.72)                        | 491.18<br>(378.46 to<br>631.50)                      | 784.59<br>(635.39 to<br>956.43)                        |
| Cirrhosis and other chronic liver diseases due to alcohol use  |                                                               |                                                               |                                                               |                                                               |                                                      |                                                        |                                                      |                                                        |
|                                                                | 6,799.34<br>(5,628.85 to<br>8,093.99)                         | 9,178.59<br>(6,881.01 to<br>11,646.09)                        | 7,524.28<br>(5,399.70 to<br>9,677.64)                         | 9,027.39<br>(6,873.11 to<br>11,355.49)                        | 213.56<br>(178.58 to<br>251.84)                      | 380.27<br>(302.00 to<br>463.93)                        | 331.71<br>(252.58 to<br>414.83)                      | 361.23<br>(290.54 to<br>443.69)                        |
| Cirrhosis and other chronic liver diseases due to other causes |                                                               |                                                               |                                                               |                                                               |                                                      |                                                        |                                                      |                                                        |
| <b>Digestive diseases</b>                                      | <b>16,809.87</b><br><b>(13,257.04 to</b><br><b>23,157.10)</b> | <b>21,351.99</b><br><b>(14,828.41 to</b><br><b>31,174.16)</b> | <b>15,487.26</b><br><b>(10,530.72 to</b><br><b>22,934.14)</b> | <b>22,293.32</b><br><b>(15,431.88 to</b><br><b>32,826.82)</b> | <b>495.81</b><br><b>(407.02 to</b><br><b>642.50)</b> | <b>827.35</b><br><b>(617.53 to</b><br><b>1,121.76)</b> | <b>635.98</b><br><b>(464.08 to</b><br><b>870.85)</b> | <b>841.53</b><br><b>(620.46 to</b><br><b>1,146.91)</b> |
| Peptic ulcer disease                                           | 5,371.24<br>(4,234.18 to<br>7,713.15)                         | 5,357.96<br>(3,610.66 to<br>7,649.58)                         | 3,312.40<br>(2,141.39 to<br>4,896.14)                         | 5,585.11<br>(3,745.71 to<br>7,949.43)                         | 194.98<br>(159.26 to<br>250.04)                      | 250.96<br>(184.04 to<br>337.50)                        | 164.55<br>(116.72 to<br>224.92)                      | 252.30<br>(185.04 to<br>338.98)                        |

| Mongolia                                   |                                      |                                       |                                       |                                       |                              |                                  |                                  |                                  |
|--------------------------------------------|--------------------------------------|---------------------------------------|---------------------------------------|---------------------------------------|------------------------------|----------------------------------|----------------------------------|----------------------------------|
| Cause                                      | YLLs (actual counts)                 |                                       |                                       |                                       | Deaths (actual counts)       |                                  |                                  |                                  |
|                                            | 2016                                 | 2040 Forecast                         | 2040 Better Scenario                  | 2040 Worse Scenario                   | 2016                         | 2040 Forecast                    | 2040 Better Scenario             | 2040 Worse Scenario              |
| Gastritis and duodenitis                   | 166.78<br>(127.97 to 212.95)         | 436.45<br>(296.70 to 647.14)          | 357.46<br>(230.17 to 538.69)          | 418.39<br>(278.96 to 616.00)          | 8.98<br>(6.30 to 12.18)      | 28.58<br>(18.42 to 43.32)        | 24.93<br>(15.55 to 38.25)        | 26.43<br>(17.01 to 39.43)        |
| Appendicitis                               | 2,480.15<br>(1,808.26 to 3,504.92)   | 2,288.79<br>(1,467.69 to 3,405.55)    | 1,435.47<br>(863.76 to 2,286.53)      | 2,360.98<br>(1,516.54 to 3,545.26)    | 47.28<br>(34.22 to 63.94)    | 55.11<br>(34.39 to 82.88)        | 36.27<br>(21.12 to 58.16)        | 56.03<br>(35.14 to 84.52)        |
| Paralytic ileus and intestinal obstruction | 3,469.44<br>(2,472.99 to 5,016.34)   | 3,826.59<br>(2,700.33 to 5,198.54)    | 3,597.99<br>(2,489.38 to 4,970.32)    | 3,761.34<br>(2,671.69 to 5,120.41)    | 79.37<br>(59.07 to 105.29)   | 129.77<br>(90.49 to 168.57)      | 131.00<br>(93.19 to 174.01)      | 124.01<br>(87.10 to 161.21)      |
| Inguinal, femoral, and abdominal hernia    | 209.56<br>(110.08 to 481.31)         | 239.83<br>(120.82 to 605.83)          | 194.61<br>(96.22 to 496.15)           | 235.42<br>(118.96 to 594.66)          | 6.38<br>(3.50 to 15.14)      | 9.81<br>(5.43 to 22.61)          | 8.63<br>(4.67 to 19.87)          | 9.30<br>(5.13 to 21.42)          |
| Inflammatory bowel disease                 | 470.33<br>(310.20 to 776.16)         | 530.62<br>(351.56 to 874.38)          | 503.21<br>(326.83 to 845.05)          | 519.04<br>(347.23 to 852.29)          | 10.78<br>(7.66 to 17.09)     | 16.44<br>(11.79 to 25.49)        | 16.50<br>(11.67 to 25.87)        | 15.69<br>(11.34 to 24.27)        |
| Vascular intestinal disorders              | 309.78<br>(249.09 to 410.56)         | 711.64<br>(522.72 to 936.26)          | 657.40<br>(468.19 to 893.33)          | 678.30<br>(511.89 to 884.64)          | 13.46<br>(10.93 to 16.31)    | 35.81<br>(27.34 to 44.79)        | 34.95<br>(25.92 to 44.99)        | 33.15<br>(25.68 to 41.11)        |
| Gallbladder and biliary diseases           | 1,280.92<br>(947.10 to 2,271.04)     | 2,580.62<br>(1,359.26 to 5,028.54)    | 1,771.61<br>(903.52 to 3,437.30)      | 3,165.15<br>(1,565.24 to 6,215.00)    | 46.65<br>(36.81 to 69.96)    | 118.66<br>(65.06 to 209.17)      | 86.88<br>(48.14 to 154.67)       | 140.04<br>(73.94 to 256.46)      |
| Pancreatitis                               | 1,878.90<br>(1,163.47 to 3,171.68)   | 3,444.71<br>(1,388.81 to 8,276.38)    | 1,995.26<br>(879.81 to 4,536.97)      | 3,640.47<br>(1,443.71 to 8,606.98)    | 49.53<br>(31.70 to 79.26)    | 105.25<br>(44.97 to 246.44)      | 63.44<br>(30.29 to 140.71)       | 109.42<br>(46.24 to 259.05)      |
| Other digestive diseases                   | 1,172.76<br>(924.96 to 1,579.90)     | 1,934.78<br>(1,335.97 to 2,667.41)    | 1,661.85<br>(1,124.54 to 2,323.96)    | 1,929.13<br>(1,355.49 to 2,621.94)    | 38.39<br>(30.40 to 49.21)    | 76.95<br>(52.96 to 104.00)       | 68.83<br>(47.44 to 93.80)        | 75.17<br>(52.50 to 101.20)       |
| Neurological disorders                     | 8,724.01<br>(7,422.37 to 10,045.94)  | 16,828.06<br>(13,547.57 to 20,820.92) | 16,612.30<br>(13,484.93 to 20,424.31) | 16,717.59<br>(13,272.39 to 21,181.35) | 411.32<br>(348.80 to 481.69) | 1,083.09<br>(849.22 to 1,381.71) | 1,231.41<br>(989.30 to 1,536.04) | 1,018.94<br>(766.18 to 1,340.70) |
| Alzheimer's disease and other dementias    | 2,933.44<br>(2,350.53 to 3,592.17)   | 8,606.10<br>(6,438.09 to 11,906.60)   | 9,461.89<br>(7,153.59 to 12,668.48)   | 8,403.41<br>(6,031.36 to 12,299.49)   | 264.94<br>(212.97 to 326.53) | 800.04<br>(570.88 to 1,103.26)   | 934.28<br>(699.11 to 1,247.70)   | 751.41<br>(500.58 to 1,076.36)   |
| Parkinson's disease                        | 545.53<br>(403.03 to 713.94)         | 1,716.76<br>(1,260.22 to 2,244.68)    | 2,185.65<br>(1,595.72 to 2,845.66)    | 1,488.47<br>(1,074.38 to 1,960.25)    | 39.93<br>(28.94 to 53.00)    | 131.25<br>(93.98 to 175.24)      | 174.31<br>(127.38 to 227.63)     | 110.92<br>(76.40 to 152.15)      |
| Epilepsy                                   | 4,310.48<br>(3,327.62 to 5,168.89)   | 4,960.55<br>(2,921.63 to 8,123.96)    | 3,366.37<br>(2,011.86 to 5,485.80)    | 5,336.82<br>(3,123.14 to 8,837.12)    | 82.74<br>(64.06 to 99.86)    | 104.76<br>(62.05 to 167.10)      | 72.26<br>(43.96 to 114.13)       | 111.83<br>(66.54 to 178.19)      |
| Multiple sclerosis                         | 133.08<br>(98.29 to 213.63)          | 223.29<br>(145.17 to 364.61)          | 232.39<br>(150.04 to 384.90)          | 218.65<br>(141.66 to 360.05)          | 3.80<br>(2.91 to 5.76)       | 8.01<br>(5.72 to 12.03)          | 8.81<br>(6.28 to 13.23)          | 7.59<br>(5.36 to 11.55)          |
| Motor neuron disease                       | 107.86<br>(89.77 to 127.46)          | 208.97<br>(152.09 to 270.87)          | 216.41<br>(151.91 to 289.88)          | 199.02<br>(145.02 to 258.59)          | 3.13<br>(2.63 to 3.69)       | 7.21<br>(5.43 to 9.10)           | 7.70<br>(5.67 to 9.89)           | 6.76<br>(5.15 to 8.49)           |
| Other neurological disorders               | 693.62<br>(585.90 to 808.18)         | 1,112.38<br>(846.28 to 1,392.67)      | 1,149.60<br>(849.46 to 1,483.09)      | 1,071.21<br>(822.52 to 1,327.17)      | 16.77<br>(14.10 to 19.50)    | 31.83<br>(24.20 to 39.51)        | 34.05<br>(25.12 to 43.63)        | 30.24<br>(23.30 to 37.27)        |
| Mental disorders                           | 22,206.93<br>(8,586.55 to 30,928.83) | 18,903.78<br>(7,194.08 to 28,990.40)  | 18,703.46<br>(7,254.93 to 28,661.47)  | 19,150.09<br>(7,339.49 to 29,334.76)  | 512.02<br>(202.07 to 710.94) | 479.77<br>(189.75 to 726.80)     | 484.81<br>(198.75 to 730.56)     | 480.99<br>(191.38 to 727.50)     |
| Alcohol use disorders                      | 20,372.34<br>(7,240.23 to 28,743.83) | 15,186.77<br>(4,834.51 to 24,260.31)  | 14,439.82<br>(4,526.02 to 23,383.97)  | 15,485.80<br>(5,001.40 to 24,718.13)  | 470.99<br>(170.20 to 662.69) | 385.24<br>(127.47 to 618.19)     | 373.21<br>(122.40 to 589.88)     | 389.25<br>(130.59 to 625.02)     |
| Drug use disorders                         | 1,832.74<br>(1,187.96 to 2,419.21)   | 3,714.07<br>(2,280.78 to 5,207.16)    | 4,260.65<br>(2,621.67 to 6,067.88)    | 3,661.35<br>(2,255.90 to 5,106.92)    | 40.99<br>(27.36 to 53.17)    | 94.47<br>(60.56 to 128.10)       | 111.55<br>(71.66 to 153.85)      | 91.69<br>(59.52 to 123.43)       |
| Opioid use disorders                       | 1,429.83<br>(998.04 to 1,871.21)     | 2,515.58<br>(1,623.73 to 3,580.06)    | 2,648.25<br>(1,728.55 to 3,763.70)    | 2,479.73<br>(1,604.39 to 3,521.71)    | 31.91<br>(22.39 to 41.22)    | 63.70<br>(42.16 to 89.31)        | 69.15<br>(46.03 to 96.91)        | 61.82<br>(41.30 to 86.36)        |

|                           |                                |                                   |                                   |                                   |                           |                             |                              |                             |
|---------------------------|--------------------------------|-----------------------------------|-----------------------------------|-----------------------------------|---------------------------|-----------------------------|------------------------------|-----------------------------|
| Cocaine use disorders     | 82.62<br>(34.56 to<br>126.43)  | 224.59<br>(104.18 to<br>364.86)   | 284.24<br>(127.54 to<br>441.52)   | 234.25<br>(103.53 to<br>365.74)   | 1.84<br>(0.81 to<br>2.74) | 5.95<br>(2.77 to<br>8.87)   | 7.38<br>(3.37 to<br>11.22)   | 5.86<br>(2.72 to<br>8.72)   |
| Amphetamine use disorders | 56.05<br>(28.06 to<br>83.79)   | 250.49<br>(129.58 to<br>384.25)   | 351.11<br>(185.10 to<br>544.90)   | 249.26<br>(127.08 to<br>389.98)   | 1.28<br>(0.66 to<br>1.84) | 6.58<br>(3.44 to<br>9.95)   | 9.52<br>(4.78 to<br>14.58)   | 6.43<br>(3.35 to<br>9.68)   |
| Other drug use disorders  | 264.25<br>(95.71 to<br>381.74) | 713.41<br>(255.69 to<br>1,116.73) | 977.06<br>(359.15 to<br>1,558.03) | 698.11<br>(248.15 to<br>1,097.09) | 5.95<br>(2.56 to<br>8.33) | 18.24<br>(7.97 to<br>27.26) | 25.49<br>(11.40 to<br>39.19) | 17.57<br>(7.62 to<br>26.12) |
| Eating disorders          | 1.85<br>(1.42 to<br>2.70)      | 2.95<br>(1.89 to<br>4.66)         | 3.00<br>(1.85 to<br>5.00)         | 2.93<br>(1.90 to<br>4.62)         | 0.04<br>(0.03 to<br>0.05) | 0.06<br>(0.04 to<br>0.10)   | 0.06<br>(0.04 to<br>0.11)    | 0.06<br>(0.04 to<br>0.10)   |

| Mongolia                                                   |                                              |                                              |                                              |                                              |                                     |                                           |                                         |                                           |
|------------------------------------------------------------|----------------------------------------------|----------------------------------------------|----------------------------------------------|----------------------------------------------|-------------------------------------|-------------------------------------------|-----------------------------------------|-------------------------------------------|
| Cause                                                      | YLLs (actual counts)                         |                                              |                                              |                                              | Deaths (actual counts)              |                                           |                                         |                                           |
|                                                            | 2016                                         | 2040 Forecast                                | 2040 Better Scenario                         | 2040 Worse Scenario                          | 2016                                | 2040 Forecast                             | 2040 Better Scenario                    | 2040 Worse Scenario                       |
| <b>Diabetes, urogenital, blood, and endocrine diseases</b> | <b>21,833.26</b><br>(18,282.90 to 28,416.89) | <b>41,880.93</b><br>(26,880.61 to 62,819.94) | <b>30,047.15</b><br>(18,878.81 to 45,372.74) | <b>44,627.65</b><br>(29,308.13 to 65,933.24) | <b>626.10</b><br>(531.14 to 794.14) | <b>1,658.85</b><br>(1,114.32 to 2,429.89) | <b>1,251.72</b><br>(831.20 to 1,838.18) | <b>1,715.60</b><br>(1,159.63 to 2,446.46) |
| Diabetes mellitus                                          | 3,761.56<br>(3,153.27 to 4,440.56)           | 5,641.17<br>(2,939.94 to 10,267.31)          | 3,468.56<br>(1,784.31 to 6,261.20)           | 6,615.28<br>(3,393.59 to 12,298.17)          | 114.35<br>(97.92 to 132.74)         | 217.58<br>(123.05 to 361.18)              | 142.03<br>(81.21 to 236.66)             | 244.59<br>(133.84 to 420.26)              |
| Acute glomerulonephritis                                   | 19.07<br>(16.50 to 21.85)                    | 21.28<br>(14.93 to 29.10)                    | 15.19<br>(10.42 to 21.40)                    | 21.75<br>(9.69 to 29.69)                     | 0.32<br>(0.28 to 0.37)              | 0.41<br>(0.30 to 0.56)                    | 0.31<br>(0.21 to 0.44)                  | 0.42<br>(0.30 to 0.57)                    |
| Chronic kidney disease                                     | 12,447.42<br>(10,022.51 to 18,808.81)        | 26,702.11<br>(15,145.11 to 44,945.38)        | 18,526.27<br>(10,346.39 to 32,134.66)        | 28,689.46<br>(16,371.65 to 48,297.46)        | 573.14<br>(308.62 to 530.69)        | 1,099.06<br>(641.56 to 1,815.77)          | 801.41<br>(465.12 to 1,331.41)          | 1,148.73<br>(671.43 to 1,853.04)          |
| Chronic kidney disease due to diabetes mellitus            | 4,646.96<br>(3,596.08 to 6,896.57)           | 12,334.77<br>(6,596.13 to 22,028.14)         | 8,734.08<br>(4,611.65 to 15,674.61)          | 13,256.07<br>(7,091.18 to 23,113.83)         | 152.02<br>(120.42 to 219.41)        | 515.38<br>(286.92 to 871.66)              | 378.80<br>(212.18 to 651.79)            | 540.74<br>(296.77 to 923.32)              |
| Chronic kidney disease due to hypertension                 | 603.50<br>(470.82 to 865.83)                 | 1,858.61<br>(1,016.36 to 3,212.86)           | 1,408.50<br>(779.58 to 2,436.94)             | 1,947.59<br>(1,065.10 to 3,331.42)           | 28.27<br>(22.47 to 37.37)           | 113.69<br>(64.36 to 192.67)               | 91.95<br>(52.77 to 155.90)              | 114.42<br>(63.50 to 190.14)               |
| Chronic kidney disease due to glomerulonephritis           | 3,477.72<br>(2,675.32 to 5,477.14)           | 5,635.35<br>(3,273.40 to 9,732.34)           | 3,692.39<br>(2,122.50 to 6,460.80)           | 6,089.53<br>(3,575.19 to 10,306.14)          | 88.55<br>(69.76 to 132.24)          | 198.18<br>(111.89 to 332.13)              | 135.42<br>(76.45 to 233.38)             | 209.23<br>(120.97 to 354.86)              |
| Chronic kidney disease due to other and unspecified causes | 3,719.23<br>(2,832.74 to 5,629.89)           | 6,873.37<br>(3,910.19 to 11,690.74)          | 4,691.30<br>(2,610.32 to 8,004.73)           | 7,396.28<br>(4,235.88 to 12,416.11)          | 104.31<br>(81.01 to 148.57)         | 271.80<br>(155.59 to 455.56)              | 195.25<br>(112.26 to 326.07)            | 284.34<br>(160.90 to 479.85)              |
| Urinary diseases and male infertility                      | 2,102.92<br>(1,788.87 to 2,439.62)           | 5,930.38<br>(4,519.60 to 7,308.30)           | 4,938.83<br>(3,533.44 to 6,346.82)           | 5,692.36<br>(4,449.03 to 6,968.67)           | 69.31<br>(59.55 to 79.22)           | 248.71<br>(204.48 to 299.21)              | 231.55<br>(172.98 to 275.27)            | 230.31<br>(191.74 to 274.41)              |
| Urinary tract infections                                   | 1,947.82<br>(1,635.65 to 2,300.37)           | 5,539.08<br>(4,162.76 to 6,970.13)           | 4,646.49<br>(3,284.52 to 6,101.17)           | 5,216.40<br>(4,087.11 to 6,637.91)           | 63.32<br>(53.54 to 75.49)           | 231.14<br>(187.37 to 287.21)              | 207.87<br>(161.30 to 264.56)            | 213.80<br>(174.45 to 261.36)              |
| Urolithiasis                                               | 35.00<br>(13.49 to 57.65)                    | 83.22<br>(37.15 to 137.12)                   | 60.12<br>(26.41 to 100.70)                   | 80.93<br>(35.50 to 133.04)                   | 0.92<br>(0.43 to 1.40)              | 2.90<br>(1.58 to 4.40)                    | 2.26<br>(1.25 to 3.48)                  | 2.71<br>(1.44 to 4.11)                    |
| Other urinary diseases                                     | 120.10<br>(28.76 to 186.59)                  | 308.08<br>(47.67 to 533.12)                  | 232.22<br>(34.10 to 432.86)                  | 295.03<br>(47.07 to 507.85)                  | 5.06<br>(1.03 to 7.89)              | 14.67<br>(2.35 to 24.87)                  | 11.42<br>(1.81 to 21.37)                | 13.79<br>(2.17 to 23.35)                  |
| Gynecological diseases                                     | 25.84<br>(14.03 to 38.40)                    | 32.05<br>(14.56 to 61.54)                    | 18.47<br>(7.98 to 35.93)                     | 34.03<br>(14.96 to 64.27)                    | 0.57<br>(0.34 to 0.84)              | 0.70<br>(0.34 to 1.34)                    | 0.41<br>(0.19 to 0.77)                  | 0.74<br>(0.35 to 1.39)                    |
| Uterine fibroids                                           | 18.49<br>(9.48 to 29.09)                     | 21.94<br>(8.28 to 46.63)                     | 13.62<br>(4.95 to 28.73)                     | 23.20<br>(8.68 to 48.29)                     | 0.41<br>(0.23 to 0.64)              | 0.49<br>(0.20 to 1.05)                    | 0.31<br>(0.13 to 0.62)                  | 0.51<br>(0.21 to 1.04)                    |
| Polycystic ovarian syndrome                                | 4.55<br>(1.24 to 9.43)                       | 4.98<br>(1.06 to 12.78)                      | 1.98<br>(0.36 to 5.57)                       | 5.44<br>(1.12 to 14.33)                      | 0.09<br>(0.03 to 0.19)              | 0.10<br>(0.02 to 0.25)                    | 0.04<br>(0.01 to 0.11)                  | 0.11<br>(0.02 to 0.28)                    |
| Endometriosis                                              | 0.20<br>(0.07 to 0.57)                       | 0.41<br>(0.10 to 1.48)                       | 0.24<br>(0.06 to 0.79)                       | 0.44<br>(0.11 to 1.54)                       | 0.00<br>(0.00 to 0.01)              | 0.01<br>(0.00 to 0.03)                    | 0.00<br>(0.00 to 0.01)                  | 0.01<br>(0.00 to 0.03)                    |
| Genital prolapse                                           | 0.96<br>(0.37 to 2.18)                       | 1.37<br>(0.45 to 3.48)                       | 0.77<br>(0.25 to 1.98)                       | 1.45<br>(0.48 to 3.85)                       | 0.03<br>(0.01 to 0.05)              | 0.04<br>(0.02 to 0.09)                    | 0.02<br>(0.01 to 0.05)                  | 0.04<br>(0.02 to 0.09)                    |
| Other gynecological diseases                               | 1.65<br>(0.71 to 3.62)                       | 3.35<br>(1.07 to 8.10)                       | 1.87<br>(0.57 to 4.87)                       | 3.50<br>(1.10 to 8.36)                       | 0.03<br>(0.01 to 0.07)              | 0.07<br>(0.02 to 0.16)                    | 0.04<br>(0.01 to 0.09)                  | 0.07<br>(0.03 to 0.16)                    |
| Hemoglobinopathies and hemolytic anemias                   | 938.18<br>(715.01 to 1,301.07)               | 761.71<br>(508.50 to 1,106.65)               | 531.38<br>(342.35 to 792.20)                 | 768.69<br>(521.97 to 1,115.88)               | 19.58<br>(14.84 to 27.83)           | 21.74<br>(15.14 to 31.02)                 | 16.10<br>(10.69 to 23.47)               | 21.43<br>(15.12 to 29.92)                 |
| Thalassemias                                               | 225.11<br>(147.58 to 353.31)                 | 77.86<br>(41.64 to 137.94)                   | 59.57<br>(31.69 to 104.80)                   | 74.23<br>(39.93 to 129.13)                   | 2.74<br>(1.83 to 4.28)              | 0.98<br>(0.53 to 1.71)                    | 0.76<br>(0.41 to 1.31)                  | 0.94<br>(0.51 to 1.61)                    |

|                                                   |                                       |                                       |                                       |                                       |                              |                              |                              |                              |
|---------------------------------------------------|---------------------------------------|---------------------------------------|---------------------------------------|---------------------------------------|------------------------------|------------------------------|------------------------------|------------------------------|
|                                                   | 256.97<br>(191.35 to<br>362.41)       | 243.79<br>(156.16 to<br>370.58)       | 161.72<br>(98.58 to<br>251.98)        | 249.85<br>(160.75 to<br>378.28)       | 4.51<br>(3.31 to<br>6.46)    | 4.56<br>(2.85 to<br>6.91)    | 3.09<br>(1.85 to<br>4.79)    | 4.66<br>(2.91 to<br>7.10)    |
| Sickle cell disorders                             |                                       |                                       |                                       |                                       |                              |                              |                              |                              |
|                                                   | 180.66<br>(129.99 to<br>266.43)       | 189.15<br>(117.16 to<br>299.99)       | 123.21<br>(73.91 to<br>199.84)        | 195.74<br>(122.61 to<br>303.16)       | 3.88<br>(2.78 to<br>5.73)    | 4.84<br>(3.01 to<br>7.59)    | 3.24<br>(1.94 to<br>5.18)    | 4.96<br>(3.12 to<br>7.62)    |
| G6PD deficiency                                   |                                       |                                       |                                       |                                       |                              |                              |                              |                              |
|                                                   | 275.43<br>(200.33 to<br>396.49)       | 250.90<br>(163.85 to<br>370.15)       | 186.89<br>(117.85 to<br>285.40)       | 248.87<br>(167.56 to<br>357.08)       | 8.44<br>(6.25 to<br>12.02)   | 11.36<br>(8.07 to<br>16.28)  | 9.02<br>(6.08 to<br>13.10)   | 10.88<br>(7.81 to<br>15.32)  |
| Other hemoglobinopathies and hemolytic anemias    |                                       |                                       |                                       |                                       |                              |                              |                              |                              |
|                                                   | 2,538.27<br>(2,009.68 to<br>3,238.09) | 2,792.23<br>(1,999.64 to<br>3,850.32) | 2,548.43<br>(1,780.70 to<br>3,525.04) | 2,806.10<br>(2,010.93 to<br>3,813.48) | 48.83<br>(39.66 to<br>61.53) | 70.66<br>(51.15 to<br>96.58) | 69.90<br>(49.09 to<br>98.62) | 69.39<br>(51.03 to<br>93.76) |
| Endocrine, metabolic, blood, and immune disorders |                                       |                                       |                                       |                                       |                              |                              |                              |                              |

| Mongolia                                      |                                              |                                             |                                            |                                              |                                     |                                     |                                    |                                     |
|-----------------------------------------------|----------------------------------------------|---------------------------------------------|--------------------------------------------|----------------------------------------------|-------------------------------------|-------------------------------------|------------------------------------|-------------------------------------|
| Cause                                         | YLLs (actual counts)                         |                                             |                                            |                                              | Deaths (actual counts)              |                                     |                                    |                                     |
|                                               | 2016                                         | 2040 Forecast                               | 2040 Better Scenario                       | 2040 Worse Scenario                          | 2016                                | 2040 Forecast                       | 2040 Better Scenario               | 2040 Worse Scenario                 |
| <b>Musculoskeletal disorders</b>              | <b>550.48</b><br>(304.44 to 732.98)          | <b>858.53</b><br>(519.90 to 1,203.25)       | <b>770.18</b><br>(472.99 to 1,098.44)      | <b>829.69</b><br>(498.87 to 1,165.20)        | <b>13.80</b><br>(8.76 to 17.53)     | <b>28.94</b><br>(19.88 to 37.43)    | <b>26.44</b><br>(18.66 to 35.26)   | <b>27.12</b><br>(18.48 to 34.74)    |
| Rheumatoid arthritis                          | 60.88<br>(45.20 to 97.67)                    | 127.64<br>(82.77 to 211.33)                 | 84.47<br>(50.87 to 148.71)                 | 124.92<br>(80.90 to 204.63)                  | 2.65<br>(1.96 to 4.12)              | 7.97<br>(5.20 to 12.08)             | 5.72<br>(3.51 to 9.24)             | 7.42<br>(4.83 to 11.48)             |
| Other musculoskeletal disorders               | 489.60<br>(251.70 to 665.94)                 | 730.89<br>(396.08 to 1,064.94)              | 685.71<br>(390.09 to 992.36)               | 704.76<br>(378.03 to 1,027.05)               | 11.14<br>(6.50 to 14.55)            | 20.97<br>(12.94 to 28.63)           | 20.72<br>(13.67 to 28.36)          | 19.69<br>(12.08 to 26.99)           |
| <b>Other non-communicable diseases</b>        | <b>22,790.83</b><br>(16,312.02 to 32,706.75) | <b>14,294.39</b><br>(9,845.78 to 20,591.09) | <b>6,953.66</b><br>(4,626.92 to 10,308.52) | <b>14,626.16</b><br>(10,019.72 to 21,093.20) | <b>283.39</b><br>(207.27 to 400.27) | <b>207.19</b><br>(151.16 to 278.66) | <b>112.43</b><br>(79.02 to 156.04) | <b>209.88</b><br>(152.11 to 285.64) |
| Congenital birth defects                      | 21,732.10<br>(15,396.22 to 31,800.90)        | 13,008.55<br>(8,734.32 to 19,214.94)        | 5,990.20<br>(3,816.22 to 9,235.09)         | 13,359.65<br>(8,866.73 to 19,639.04)         | 267.92<br>(193.71 to 383.53)        | 172.07<br>(119.69 to 244.96)        | 82.16<br>(53.98 to 122.01)         | 176.42<br>(120.74 to 251.39)        |
| Neural tube defects                           | 230.62<br>(123.38 to 416.17)                 | 79.04<br>(36.16 to 171.84)                  | 29.40<br>(13.12 to 63.98)                  | 84.33<br>(38.76 to 179.44)                   | 2.78<br>(1.52 to 4.92)              | 1.02<br>(0.51 to 2.10)              | 0.39<br>(0.19 to 0.80)             | 1.08<br>(0.54 to 2.22)              |
| Congenital heart anomalies                    | 10,541.49<br>(6,803.16 to 19,790.52)         | 6,524.29<br>(4,135.20 to 11,177.52)         | 2,869.38<br>(1,648.62 to 4,926.97)         | 6,697.39<br>(4,175.43 to 11,622.06)          | 135.07<br>(91.26 to 240.64)         | 92.25<br>(63.06 to 144.30)          | 42.53<br>(25.88 to 68.51)          | 94.52<br>(64.49 to 149.70)          |
| Orofacial clefts                              | 203.46<br>(33.77 to 565.55)                  | 119.48<br>(18.18 to 400.46)                 | 34.84<br>(5.66 to 125.15)                  | 129.73<br>(19.03 to 425.57)                  | 2.36<br>(0.39 to 6.55)              | 1.38<br>(0.21 to 4.63)              | 0.40<br>(0.07 to 1.45)             | 1.50<br>(0.22 to 4.92)              |
| Down syndrome                                 | 1,231.03<br>(444.17 to 2,193.21)             | 624.18<br>(257.17 to 1,173.93)              | 454.29<br>(218.88 to 788.90)               | 643.53<br>(270.28 to 1,200.21)               | 15.34<br>(6.59 to 26.49)            | 8.61<br>(4.45 to 14.68)             | 6.60<br>(3.73 to 10.58)            | 8.86<br>(4.62 to 15.25)             |
| Other chromosomal abnormalities               | 1,076.17<br>(258.86 to 1,867.08)             | 804.95<br>(204.66 to 1,587.07)              | 434.56<br>(118.29 to 828.14)               | 832.51<br>(214.74 to 1,641.16)               | 12.48<br>(3.03 to 21.64)            | 9.39<br>(2.48 to 18.39)             | 5.09<br>(1.41 to 9.62)             | 9.70<br>(2.57 to 19.06)             |
| Congenital musculoskeletal and limb anomalies | 627.24<br>(281.69 to 1,023.50)               | 419.43<br>(192.05 to 783.87)                | 185.09<br>(86.21 to 356.65)                | 428.44<br>(195.01 to 790.75)                 | 7.30<br>(3.30 to 11.90)             | 4.91<br>(2.28 to 9.12)              | 2.18<br>(1.02 to 4.17)             | 3.01<br>(2.32 to 9.20)              |
| Urogenital congenital anomalies               | 172.50<br>(112.58 to 268.82)                 | 120.93<br>(75.65 to 190.43)                 | 65.97<br>(40.40 to 102.20)                 | 123.62<br>(76.18 to 193.04)                  | 2.30<br>(1.55 to 3.45)              | 1.96<br>(1.30 to 2.99)              | 1.15<br>(0.73 to 1.80)             | 1.99<br>(1.32 to 3.03)              |
| Digestive congenital anomalies                | 2,739.23<br>(937.50 to 4,575.26)             | 1,469.98<br>(520.61 to 2,673.60)            | 601.13<br>(216.31 to 1,188.35)             | 1,521.32<br>(535.20 to 2,802.92)             | 31.76<br>(10.88 to 53.04)           | 17.11<br>(6.09 to 31.16)            | 7.01<br>(2.54 to 13.85)            | 17.70<br>(6.25 to 32.56)            |
| Other congenital birth defects                | 4,910.36<br>(3,012.40 to 7,519.77)           | 2,846.27<br>(1,581.74 to 4,853.55)          | 1,315.55<br>(687.69 to 2,253.12)           | 2,898.78<br>(1,608.48 to 4,869.46)           | 58.55<br>(36.34 to 89.08)           | 35.45<br>(20.42 to 58.35)           | 16.80<br>(9.35 to 27.83)           | 36.06<br>(20.72 to 59.48)           |
| Skin and subcutaneous diseases                | 447.81<br>(180.07 to 715.66)                 | 1,065.94<br>(525.98 to 1,548.26)            | 847.65<br>(451.22 to 1,230.83)             | 1,044.29<br>(514.67 to 1,505.48)             | 9.06<br>(4.34 to 12.84)             | 32.57<br>(18.37 to 45.33)           | 28.93<br>(17.34 to 41.25)          | 30.88<br>(16.95 to 42.69)           |
| Cellulitis                                    | 29.79<br>(13.60 to 45.43)                    | 97.10<br>(37.55 to 166.68)                  | 96.16<br>(36.38 to 167.68)                 | 91.40<br>(35.66 to 154.24)                   | 0.74<br>(0.31 to 1.13)              | 3.12<br>(1.06 to 5.67)              | 3.26<br>(1.12 to 5.87)             | 2.87<br>(1.00 to 5.17)              |
| Pyoderma                                      | 373.63<br>(141.49 to 620.80)                 | 895.88<br>(439.62 to 1,341.66)              | 694.04<br>(364.21 to 1,029.83)             | 882.54<br>(430.27 to 1,312.01)               | 7.30<br>(3.31 to 10.71)             | 26.92<br>(15.14 to 38.34)           | 23.36<br>(13.91 to 34.05)          | 25.72<br>(14.14 to 35.76)           |
| Decubitus ulcer                               | 20.35<br>(12.37 to 32.19)                    | 36.00<br>(22.62 to 59.86)                   | 27.82<br>(17.45 to 49.23)                  | 34.50<br>(21.64 to 56.80)                    | 0.55<br>(0.35 to 1.00)              | 1.51<br>(0.92 to 3.01)              | 1.37<br>(0.82 to 2.85)             | 1.35<br>(0.83 to 2.69)              |
| Other skin and subcutaneous diseases          | 24.04<br>(12.75 to 38.02)                    | 36.97<br>(21.50 to 58.77)                   | 29.64<br>(18.02 to 46.43)                  | 35.85<br>(20.68 to 56.76)                    | 0.48<br>(0.28 to 0.76)              | 1.01<br>(0.65 to 1.76)              | 0.94<br>(0.61 to 1.75)             | 0.93<br>(0.60 to 1.59)              |
| Sudden infant death syndrome                  | 550.92<br>(303.70 to 988.67)                 | 219.90<br>(98.51 to 482.60)                 | 115.81<br>(49.68 to 262.80)                | 222.22<br>(99.82 to 489.76)                  | 6.39<br>(3.52 to 11.48)             | 2.55<br>(1.14 to 5.60)              | 1.34<br>(0.58 to 3.05)             | 2.58<br>(1.16 to 5.68)              |

|                          |                                             |                                            |                                           |                                            |                                       |                                       |                                       |                                       |
|--------------------------|---------------------------------------------|--------------------------------------------|-------------------------------------------|--------------------------------------------|---------------------------------------|---------------------------------------|---------------------------------------|---------------------------------------|
| Injuries                 | 131,409.86<br>(110,245.89 to<br>154,374.42) | 127,398.12<br>(90,791.08 to<br>185,887.49) | 85,598.20<br>(60,418.59 to<br>127,139.61) | 140,402.62<br>(99,642.15 to<br>203,238.96) | 2,543.90<br>(2,137.49 to<br>2,978.08) | 2,768.86<br>(1,988.91 to<br>3,951.17) | 1,926.58<br>(1,372.24 to<br>2,779.19) | 3,004.89<br>(2,167.27 to<br>4,275.15) |
| Transport injuries       | 34,772.37<br>(29,072.41 to<br>41,202.93)    | 26,212.08<br>(16,582.11 to<br>40,359.57)   | 14,504.45<br>(9,391.51 to<br>22,206.14)   | 36,845.17<br>(23,328.62 to<br>56,286.41)   | 676.96<br>(562.95 to<br>803.40)       | 567.46<br>(356.92 to<br>865.43)       | 325.56<br>(209.47 to<br>496.68)       | 776.82<br>(489.85 to<br>1,182.21)     |
| Road injuries            | 32,840.88<br>(27,304.12 to<br>39,125.42)    | 24,062.05<br>(15,278.68 to<br>36,941.65)   | 13,251.16<br>(8,580.16 to<br>20,133.68)   | 34,621.81<br>(22,142.58 to<br>52,781.29)   | 641.68<br>(533.74 to<br>764.34)       | 522.65<br>(328.25 to<br>796.08)       | 298.68<br>(192.62 to<br>450.95)       | 730.92<br>(462.01 to<br>1,105.89)     |
| Pedestrian road injuries | 8,588.49<br>(6,537.84 to<br>11,987.55)      | 5,417.55<br>(3,393.00 to<br>8,848.80)      | 2,328.79<br>(1,420.80 to<br>3,814.63)     | 7,370.95<br>(4,598.23 to<br>12,133.89)     | 167.64<br>(128.57 to<br>236.12)       | 129.42<br>(82.45 to<br>205.36)        | 59.28<br>(36.44 to<br>93.68)          | 170.84<br>(108.86 to<br>270.56)       |



| Mongolia                                        |                                                     |                                                     |                                                     |                                                     |                                              |                                              |                                            |                                              |
|-------------------------------------------------|-----------------------------------------------------|-----------------------------------------------------|-----------------------------------------------------|-----------------------------------------------------|----------------------------------------------|----------------------------------------------|--------------------------------------------|----------------------------------------------|
| Cause                                           | YLLs (actual counts)                                |                                                     |                                                     |                                                     | Deaths (actual counts)                       |                                              |                                            |                                              |
|                                                 | 2016                                                | 2040 Forecast                                       | 2040 Better Scenario                                | 2040 Worse Scenario                                 | 2016                                         | 2040 Forecast                                | 2040 Better Scenario                       | 2040 Worse Scenario                          |
| Cyclist road injuries                           | 206.24<br>(150.25 to 330.53)                        | 189.88<br>(104.46 to 353.73)                        | 114.24<br>(63.32 to 212.35)                         | 271.18<br>(152.95 to 491.48)                        | 4.34<br>(3.19 to 6.91)                       | 4.80<br>(2.66 to 8.78)                       | 3.20<br>(1.80 to 5.77)                     | 6.40<br>(3.59 to 11.59)                      |
| Motorcyclist road injuries                      | 6,390.43<br>(4,280.22 to 9,216.82)                  | 6,349.79<br>(3,323.84 to 11,227.91)                 | 4,475.25<br>(2,486.16 to 7,676.68)                  | 7,842.08<br>(4,105.58 to 14,104.53)                 | 125.94<br>(82.31 to 179.78)                  | 132.02<br>(67.18 to 234.37)                  | 95.83<br>(52.14 to 163.40)                 | 159.49<br>(81.58 to 284.72)                  |
| Motor vehicle road injuries                     | 16,877.39<br>(12,066.19 to 21,214.12)               | 11,362.65<br>(6,799.92 to 17,691.15)                | 5,920.03<br>(3,536.95 to 8,997.29)                  | 18,021.78<br>(10,871.12 to 28,180.20)               | 325.99<br>(233.31 to 407.43)                 | 238.25<br>(143.20 to 361.32)                 | 129.96<br>(79.06 to 195.33)                | 367.44<br>(222.20 to 562.22)                 |
| Other road injuries                             | 778.34<br>(364.88 to 1,161.79)                      | 742.18<br>(279.64 to 1,612.90)                      | 412.85<br>(157.26 to 868.81)                        | 1,115.83<br>(424.65 to 2,424.15)                    | 17.77<br>(7.38 to 26.69)                     | 18.15<br>(6.49 to 39.11)                     | 10.41<br>(3.95 to 21.71)                   | 26.74<br>(9.55 to 57.71)                     |
| Other transport injuries                        | 1,931.48<br>(1,411.16 to 2,773.08)                  | 2,150.02<br>(1,230.52 to 3,764.53)                  | 1,253.29<br>(686.33 to 2,163.58)                    | 2,223.35<br>(1,263.74 to 3,914.13)                  | 35.29<br>(25.73 to 50.21)                    | 44.81<br>(25.22 to 78.33)                    | 26.88<br>(14.58 to 46.38)                  | 45.90<br>(25.85 to 79.67)                    |
| <b>Unintentional injuries</b>                   | <b>48,315.05</b><br><b>(38,164.41 to 58,086.81)</b> | <b>40,226.27</b><br><b>(28,885.27 to 52,847.66)</b> | <b>28,129.24</b><br><b>(20,069.87 to 37,883.21)</b> | <b>41,128.34</b><br><b>(29,566.78 to 54,883.47)</b> | <b>931.93</b><br><b>(752.78 to 1,110.02)</b> | <b>950.54</b><br><b>(696.96 to 1,229.79)</b> | <b>701.66</b><br><b>(510.75 to 930.84)</b> | <b>957.02</b><br><b>(701.34 to 1,255.72)</b> |
| Falls                                           | 10,406.47<br>(7,165.37 to 13,273.14)                | 10,064.41<br>(6,557.64 to 13,280.00)                | 8,316.97<br>(5,322.80 to 11,168.71)                 | 9,989.07<br>(6,485.96 to 13,217.47)                 | 222.15<br>(150.93 to 281.92)                 | 269.05<br>(177.73 to 344.82)                 | 233.17<br>(151.75 to 305.54)               | 261.44<br>(169.92 to 335.46)                 |
| Drowning                                        | 9,022.93<br>(7,485.64 to 10,889.64)                 | 6,875.42<br>(4,328.57 to 10,942.65)                 | 4,717.99<br>(2,892.81 to 7,378.17)                  | 7,060.13<br>(4,356.86 to 11,184.86)                 | 161.32<br>(133.20 to 193.64)                 | 140.53<br>(88.50 to 221.87)                  | 100.65<br>(62.95 to 157.97)                | 142.63<br>(88.76 to 229.02)                  |
| Fire, heat, and hot substances                  | 6,336.19<br>(3,006.47 to 9,632.24)                  | 3,174.04<br>(1,584.23 to 5,211.37)                  | 1,863.09<br>(974.85 to 3,031.27)                    | 3,284.71<br>(1,589.52 to 5,434.99)                  | 101.68<br>(56.27 to 143.82)                  | 64.54<br>(37.48 to 100.08)                   | 40.58<br>(24.29 to 62.55)                  | 65.81<br>(36.95 to 103.74)                   |
| Poisonings                                      | 3,526.03<br>(2,481.91 to 6,750.53)                  | 3,252.71<br>(1,764.87 to 6,267.15)                  | 1,840.17<br>(984.32 to 3,674.63)                    | 3,424.36<br>(1,848.53 to 6,581.70)                  | 69.69<br>(50.55 to 120.91)                   | 75.78<br>(43.08 to 140.35)                   | 44.37<br>(24.77 to 84.66)                  | 79.12<br>(44.46 to 146.86)                   |
| Exposure to mechanical forces                   | 2,300.97<br>(1,109.83 to 3,528.46)                  | 1,442.69<br>(819.01 to 2,245.47)                    | 921.21<br>(550.15 to 1,389.25)                      | 1,486.28<br>(833.57 to 2,317.19)                    | 37.09<br>(21.83 to 52.83)                    | 27.85<br>(18.10 to 39.30)                    | 19.05<br>(12.69 to 26.62)                  | 28.35<br>(18.51 to 39.90)                    |
| Unintentional firearm injuries                  | 260.37<br>(188.84 to 442.75)                        | 245.07<br>(161.22 to 418.48)                        | 176.04<br>(114.29 to 311.44)                        | 253.22<br>(167.84 to 428.49)                        | 5.31<br>(3.85 to 8.86)                       | 5.67<br>(3.86 to 9.41)                       | 4.27<br>(2.93 to 7.24)                     | 5.77<br>(3.99 to 9.54)                       |
| Unintentional suffocation                       | 1,080.69<br>(69.55 to 2,274.30)                     | 465.56<br>(44.55 to 1,085.99)                       | 247.61<br>(29.04 to 584.60)                         | 482.97<br>(45.23 to 1,162.71)                       | 12.70<br>(0.75 to 26.60)                     | 5.57<br>(0.75 to 12.77)                      | 3.00<br>(0.51 to 6.92)                     | 5.77<br>(0.76 to 13.63)                      |
| Other exposure to mechanical forces             | 959.91<br>(662.42 to 1,217.21)                      | 732.06<br>(459.14 to 1,024.80)                      | 497.56<br>(299.28 to 716.50)                        | 750.09<br>(467.92 to 1,058.92)                      | 19.09<br>(13.21 to 24.39)                    | 16.61<br>(10.61 to 22.92)                    | 11.78<br>(7.37 to 16.69)                   | 16.81<br>(10.77 to 23.07)                    |
| Adverse effects of medical treatment            | 939.56<br>(737.12 to 1,195.63)                      | 940.25<br>(649.24 to 1,246.87)                      | 770.37<br>(518.16 to 1,055.15)                      | 941.81<br>(649.67 to 1,253.86)                      | 21.14<br>(15.59 to 26.33)                    | 27.87<br>(18.54 to 35.45)                    | 24.44<br>(15.88 to 31.81)                  | 27.13<br>(18.12 to 34.78)                    |
| Animal contact                                  | 337.47<br>(218.82 to 483.48)                        | 237.68<br>(122.62 to 412.32)                        | 133.57<br>(72.53 to 230.43)                         | 247.37<br>(128.97 to 434.49)                        | 4.67<br>(3.08 to 6.59)                       | 3.78<br>(2.18 to 6.18)                       | 2.31<br>(1.38 to 3.62)                     | 3.89<br>(2.20 to 6.38)                       |
| Venomous animal contact                         | 61.07<br>(27.70 to 112.40)                          | 36.14<br>(16.95 to 77.40)                           | 22.52<br>(11.26 to 46.13)                           | 37.19<br>(16.80 to 80.59)                           | 0.86<br>(0.45 to 1.47)                       | 0.61<br>(0.32 to 1.15)                       | 0.41<br>(0.23 to 0.71)                     | 0.62<br>(0.32 to 1.18)                       |
| Non-venomous animal contact                     | 276.40<br>(176.38 to 399.38)                        | 201.54<br>(102.01 to 357.31)                        | 111.05<br>(57.54 to 197.43)                         | 210.19<br>(105.53 to 373.98)                        | 3.81<br>(2.48 to 5.42)                       | 3.17<br>(1.80 to 5.24)                       | 1.90<br>(1.12 to 3.05)                     | 3.27<br>(1.79 to 5.45)                       |
| Foreign body                                    | 4,101.93<br>(2,607.28 to 5,948.54)                  | 2,717.92<br>(1,696.74 to 4,004.46)                  | 2,160.04<br>(1,406.33 to 3,040.10)                  | 2,682.55<br>(1,670.10 to 3,985.66)                  | 63.99<br>(42.67 to 89.21)                    | 52.78<br>(36.05 to 71.72)                    | 45.60<br>(31.77 to 60.28)                  | 51.50<br>(34.97 to 69.99)                    |
| Pulmonary aspiration and foreign body in airway | 3,786.21<br>(2,327.44 to 5,575.72)                  | 2,469.87<br>(1,472.44 to 3,723.72)                  | 1,923.00<br>(1,188.67 to 2,770.85)                  | 2,432.05<br>(1,435.87 to 3,670.81)                  | 57.98<br>(36.99 to 81.97)                    | 47.00<br>(30.83 to 64.80)                    | 39.75<br>(26.84 to 53.68)                  | 45.74<br>(29.71 to 63.59)                    |

|                                             |                                                               |                                                               |                                                               |                                                                |                                                        |                                                          |                                                        |                                                          |
|---------------------------------------------|---------------------------------------------------------------|---------------------------------------------------------------|---------------------------------------------------------------|----------------------------------------------------------------|--------------------------------------------------------|----------------------------------------------------------|--------------------------------------------------------|----------------------------------------------------------|
|                                             | 315.72<br>(224.69 to<br>437.34)                               | 248.05<br>(173.02 to<br>359.10)                               | 237.03<br>(164.03 to<br>353.24)                               | 250.51<br>(174.79 to<br>362.12)                                | 6.01<br>(4.32 to<br>8.23)                              | 5.78<br>(4.02 to<br>8.22)                                | 5.85<br>(4.06 to<br>8.32)                              | 5.75<br>(4.01 to<br>8.00)                                |
| Foreign body in other body part             |                                                               |                                                               |                                                               |                                                                |                                                        |                                                          |                                                        |                                                          |
|                                             | 9,054.61<br>(5,837.22 to<br>12,790.41)                        | 10,325.15<br>(6,302.96 to<br>15,265.54)                       | 6,793.59<br>(3,971.11 to<br>10,604.51)                        | 10,776.52<br>(6,660.67 to<br>16,082.26)                        | 209.63<br>(132.89 to<br>293.12)                        | 265.90<br>(162.50 to<br>390.45)                          | 179.71<br>(105.32 to<br>277.79)                        | 274.23<br>(170.01 to<br>401.79)                          |
| Environmental heat and cold exposure        |                                                               |                                                               |                                                               |                                                                |                                                        |                                                          |                                                        |                                                          |
|                                             | 2,288.89<br>(1,202.69 to<br>2,971.00)                         | 1,196.00<br>(660.72 to<br>1,693.59)                           | 612.25<br>(325.61 to<br>960.76)                               | 1,225.53<br>(661.33 to<br>1,736.75)                            | 40.57<br>(22.69 to<br>52.93)                           | 22.46<br>(13.15 to<br>31.58)                             | 11.77<br>(6.38 to<br>18.30)                            | 22.91<br>(13.33 to<br>32.63)                             |
| Other unintentional injuries                |                                                               |                                                               |                                                               |                                                                |                                                        |                                                          |                                                        |                                                          |
| <b>Self-harm and interpersonal violence</b> | <b>48,303.32</b><br><b>(36,802.11 to</b><br><b>58,964.26)</b> | <b>59,659.82</b><br><b>(35,854.79 to</b><br><b>97,947.53)</b> | <b>41,747.12</b><br><b>(26,479.47 to</b><br><b>65,350.42)</b> | <b>61,140.14</b><br><b>(36,455.61 to</b><br><b>101,852.82)</b> | <b>934.68</b><br><b>(740.23 to</b><br><b>1,143.13)</b> | <b>1,223.34</b><br><b>(750.40 to</b><br><b>1,924.96)</b> | <b>872.16</b><br><b>(564.50 to</b><br><b>1,338.31)</b> | <b>1,244.09</b><br><b>(756.74 to</b><br><b>1,984.92)</b> |

| Mongolia                                                                            |                                                   |                                                        |                                                        |                                                        |                                                |                                                  |                                                  |                                                  |
|-------------------------------------------------------------------------------------|---------------------------------------------------|--------------------------------------------------------|--------------------------------------------------------|--------------------------------------------------------|------------------------------------------------|--------------------------------------------------|--------------------------------------------------|--------------------------------------------------|
| Cause                                                                               | YLLs (actual counts)                              |                                                        |                                                        |                                                        | Deaths (actual counts)                         |                                                  |                                                  |                                                  |
|                                                                                     | 2016                                              | 2040 Forecast                                          | 2040 Better Scenario                                   | 2040 Worse Scenario                                    | 2016                                           | 2040 Forecast                                    | 2040 Better Scenario                             | 2040 Worse Scenario                              |
| Self-harm                                                                           | 32,597.99<br>(23,596.70 to<br>40,559.80)          | 45,063.75<br>(24,642.12 to<br>77,006.10)               | 31,087.07<br>(18,491.75 to<br>50,754.51)               | 46,446.46<br>(24,972.48 to<br>80,415.04)               | 625.90<br>(478.33 to<br>772.84)                | 915.83<br>(512.27 to<br>1,535.06)                | 643.58<br>(382.63 to<br>1,037.36)                | 936.26<br>(520.32 to<br>1,601.51)                |
| Self-harm by firearm                                                                | 1,096.21<br>(431.66 to<br>1,608.50)               | 1,288.55<br>(495.57 to<br>2,555.69)                    | 798.51<br>(334.99 to<br>1,537.27)                      | 1,335.93<br>(495.40 to<br>2,676.76)                    | 22.26<br>(9.85 to<br>32.20)                    | 28.32<br>(12.37 to<br>54.18)                     | 17.87<br>(8.30 to<br>33.15)                      | 29.09<br>(12.31 to<br>55.99)                     |
| Self-harm by other specified means                                                  | 31,501.77<br>(23,007.42 to<br>39,154.59)          | 43,775.20<br>(23,998.45 to<br>74,274.46)               | 30,288.56<br>(18,026.28 to<br>48,906.98)               | 45,110.53<br>(24,315.97 to<br>77,731.32)               | 603.63<br>(466.54 to<br>745.07)                | 887.51<br>(499.99 to<br>1,489.89)                | 625.71<br>(373.58 to<br>1,008.61)                | 907.17<br>(497.94 to<br>1,551.13)                |
| Interpersonal violence                                                              | 15,705.33<br>(11,476.17 to<br>20,659.32)          | 14,596.08<br>(8,729.30 to<br>22,835.07)                | 10,660.05<br>(6,380.38 to<br>16,466.49)                | 14,693.68<br>(8,741.25 to<br>23,051.54)                | 308.78<br>(224.51 to<br>406.99)                | 307.51<br>(187.15 to<br>475.31)                  | 228.58<br>(140.36 to<br>351.74)                  | 307.84<br>(184.66 to<br>480.04)                  |
| Physical violence by firearm                                                        | 434.57<br>(145.23 to<br>794.86)                   | 382.21<br>(125.69 to<br>785.58)                        | 257.97<br>(86.35 to<br>542.01)                         | 381.81<br>(125.88 to<br>795.22)                        | 7.88<br>(2.76 to<br>14.25)                     | 7.16<br>(2.60 to<br>14.35)                       | 4.94<br>(1.84 to<br>9.98)                        | 7.13<br>(2.56 to<br>14.40)                       |
| Physical violence by sharp object                                                   | 5,553.25<br>(2,792.30 to<br>7,829.08)             | 5,092.62<br>(2,627.81 to<br>7,585.59)                  | 3,654.94<br>(1,991.84 to<br>5,730.28)                  | 5,032.91<br>(2,590.27 to<br>7,523.38)                  | 105.97<br>(54.88 to<br>150.15)                 | 101.21<br>(56.66 to<br>150.68)                   | 73.82<br>(41.97 to<br>114.17)                    | 99.57<br>(54.91 to<br>147.21)                    |
| Physical violence by other means                                                    | 9,717.52<br>(6,896.95 to<br>13,447.31)            | 9,121.25<br>(4,776.05 to<br>15,544.65)                 | 6,747.15<br>(3,634.43 to<br>11,230.87)                 | 9,278.96<br>(4,848.12 to<br>16,203.12)                 | 194.93<br>(137.98 to<br>268.99)                | 199.14<br>(105.48 to<br>340.43)                  | 149.82<br>(80.92 to<br>247.53)                   | 201.13<br>(105.87 to<br>341.85)                  |
| <b>Forces of nature, conflict and terrorism, and executions and police conflict</b> | <b>19.12</b><br><b>(16.49 to</b><br><b>22.01)</b> | <b>1,299.95</b><br><b>(0.00 to</b><br><b>2,771.16)</b> | <b>1,217.38</b><br><b>(0.00 to</b><br><b>2,610.23)</b> | <b>1,288.97</b><br><b>(0.00 to</b><br><b>2,732.33)</b> | <b>0.33</b><br><b>(0.28 to</b><br><b>0.37)</b> | <b>27.53</b><br><b>(0.00 to</b><br><b>58.30)</b> | <b>27.20</b><br><b>(0.00 to</b><br><b>58.21)</b> | <b>26.96</b><br><b>(0.00 to</b><br><b>56.45)</b> |
| Exposure to forces of nature                                                        | 0.00<br>(0.00 to<br>0.00)                         | 1,292.30<br>(0.00 to<br>2,771.16)                      | 1,210.21<br>(0.00 to<br>2,610.23)                      | 1,281.37<br>(0.00 to<br>2,732.33)                      | 0.00<br>(0.00 to<br>0.00)                      | 27.38<br>(0.00 to<br>58.30)                      | 27.06<br>(0.00 to<br>58.21)                      | 26.82<br>(0.00 to<br>56.45)                      |
| Conflict and terrorism                                                              | 0.00<br>(0.00 to<br>0.00)                         | 7.64<br>(0.00 to<br>82.48)                             | 7.17<br>(0.00 to<br>77.15)                             | 7.60<br>(0.00 to<br>81.89)                             | 0.00<br>(0.00 to<br>0.00)                      | 0.14<br>(0.00 to<br>1.55)                        | 0.14<br>(0.00 to<br>1.52)                        | 0.14<br>(0.00 to<br>1.53)                        |
| Executions and police conflict                                                      | 19.12<br>(16.49 to<br>22.01)                      | 0.00<br>(0.00 to<br>0.00)                              | 0.00<br>(0.00 to<br>0.00)                              | 0.00<br>(0.00 to<br>0.00)                              | 0.33<br>(0.28 to<br>0.37)                      | 0.00<br>(0.00 to<br>0.00)                        | 0.00<br>(0.00 to<br>0.00)                        | 0.00<br>(0.00 to<br>0.00)                        |

| Tajikistan                                                               |                                                   |                                                   |                                                 |                                                   |                                          |                                          |                                          |                                           |
|--------------------------------------------------------------------------|---------------------------------------------------|---------------------------------------------------|-------------------------------------------------|---------------------------------------------------|------------------------------------------|------------------------------------------|------------------------------------------|-------------------------------------------|
| Cause                                                                    | YLLs (actual counts)                              |                                                   |                                                 |                                                   | Deaths (actual counts)                   |                                          |                                          |                                           |
|                                                                          | 2016                                              | 2040 Forecast                                     | 2040 Better Scenario                            | 2040 Worse Scenario                               | 2016                                     | 2040 Forecast                            | 2040 Better Scenario                     | 2040 Worse Scenario                       |
| <b>All causes</b>                                                        | 1,728,173.94<br>(1,391,305.52 to<br>2,163,723.13) | 1,982,526.00<br>(1,425,292.49 to<br>2,721,533.59) | 1,275,077.74<br>(934,133.28 to<br>1,712,309.06) | 2,364,008.11<br>(1,717,329.79 to<br>3,294,889.92) | 41,347.04<br>(36,173.57 to<br>47,846.49) | 72,136.69<br>(54,057.65 to<br>93,314.13) | 52,069.26<br>(38,474.29 to<br>67,168.73) | 84,272.06<br>(63,089.10 to<br>107,608.14) |
| <b>Communicable, maternal, neonatal, and nutritional diseases</b>        | 805,652.96<br>(544,132.97 to<br>1,147,368.38)     | 520,999.99<br>(310,031.27 to<br>877,119.47)       | 214,457.30<br>(137,561.03 to<br>342,772.26)     | 629,342.84<br>(370,031.99 to<br>1,087,210.22)     | 10,670.39<br>(7,569.77 to<br>14,574.38)  | 8,369.69<br>(5,542.18 to<br>12,860.89)   | 4,210.69<br>(2,989.02 to<br>6,045.82)    | 9,923.16<br>(6,435.12 to<br>15,777.83)    |
| <b>HIV/AIDS and tuberculosis</b>                                         | 21,292.74<br>(17,157.24 to<br>28,478.22)          | 18,944.71<br>(12,176.51 to<br>28,476.33)          | 9,674.94<br>(5,833.74 to<br>16,284.07)          | 23,697.03<br>(15,379.52 to<br>35,838.19)          | 464.85<br>(375.73 to<br>615.85)          | 466.12<br>(303.29 to<br>706.15)          | 242.38<br>(148.92 to<br>403.94)          | 567.57<br>(366.05 to<br>872.86)           |
| <b>Tuberculosis</b>                                                      | 18,944.67<br>(15,195.99 to<br>25,533.53)          | 14,727.72<br>(8,970.69 to<br>22,986.40)           | 6,971.01<br>(4,285.99 to<br>11,251.88)          | 17,408.98<br>(10,577.64 to<br>28,319.49)          | 416.60<br>(337.17 to<br>556.75)          | 416.60<br>(243.24 to<br>597.87)          | 383.65<br>(116.85 to<br>293.24)          | 186.36<br>(277.43 to<br>715.68)           |
| <b>HIV/AIDS</b>                                                          | 2,348.07<br>(1,246.74 to<br>5,927.57)             | 4,216.99<br>(1,481.18 to<br>10,298.02)            | 2,703.93<br>(667.84 to<br>8,386.93)             | 6,288.05<br>(3,186.54 to<br>12,516.51)            | 48.24<br>(24.39 to<br>127.96)            | 82.46<br>(23.10 to<br>223.37)            | 56.01<br>(10.58 to<br>188.70)            | 119.18<br>(50.80 to<br>261.20)            |
| <b>Diarrhea, lower respiratory, and other common infectious diseases</b> | 444,046.82<br>(297,688.62 to<br>641,551.92)       | 268,697.13<br>(119,895.94 to<br>558,642.04)       | 107,180.72<br>(57,473.66 to<br>203,034.09)      | 343,626.98<br>(150,402.01 to<br>719,125.53)       | 6,124.24<br>(4,344.29 to<br>8,406.02)    | 5,023.62<br>(2,881.71 to<br>8,927.68)    | 2,708.22<br>(1,762.77 to<br>4,176.91)    | 6,146.74<br>(3,356.73 to<br>11,079.10)    |
| <b>Diarrheal diseases</b>                                                | 96,116.54<br>(54,828.48 to<br>159,413.51)         | 45,562.28<br>(7,386.69 to<br>116,894.99)          | 11,751.62<br>(1,735.30 to<br>36,699.21)         | 51,820.80<br>(8,959.72 to<br>135,908.75)          | 1,205.48<br>(717.16 to<br>1,960.54)      | 691.43<br>(124.50 to<br>1,827.08)        | 204.01<br>(34.65 to<br>641.20)           | 789.29<br>(146.12 to<br>2,188.13)         |
| <b>Intestinal infectious diseases</b>                                    | 45.87<br>(24.39 to<br>79.13)                      | 37.11<br>(18.48 to<br>67.20)                      | 26.23<br>(13.53 to<br>47.45)                    | 37.43<br>(18.97 to<br>65.69)                      | 0.78<br>(0.43 to<br>1.31)                | 0.80<br>(0.42 to<br>1.36)                | 0.61<br>(0.33 to<br>1.08)                | 0.79<br>(0.43 to<br>1.38)                 |
| <b>Typhoid fever</b>                                                     | 24.17<br>(11.76 to<br>45.82)                      | 26.64<br>(12.88 to<br>51.31)                      | 20.45<br>(9.91 to<br>38.61)                     | 26.76<br>(12.72 to<br>49.80)                      | 0.46<br>(0.23 to<br>0.85)                | 0.47<br>(0.28 to<br>1.05)                | 0.47<br>(0.24 to<br>0.85)                | 0.57<br>(0.28 to<br>1.03)                 |
| <b>Paratyphoid fever</b>                                                 | 4.17<br>(1.70 to<br>8.80)                         | 4.32<br>(1.62 to<br>9.47)                         | 3.05<br>(1.14 to<br>6.57)                       | 4.36<br>(1.61 to<br>9.47)                         | 0.08<br>(0.03 to<br>0.16)                | 0.09<br>(0.04 to<br>0.20)                | 0.07<br>(0.03 to<br>0.15)                | 0.09<br>(0.04 to<br>0.20)                 |
| <b>Other intestinal infectious diseases</b>                              | 17.52<br>(5.55 to<br>42.60)                       | 6.16<br>(1.91 to<br>15.67)                        | 2.73<br>(0.85 to<br>6.72)                       | 6.30<br>(1.95 to<br>16.29)                        | 0.24<br>(0.08 to<br>0.54)                | 0.13<br>(0.05 to<br>0.28)                | 0.07<br>(0.02 to<br>0.16)                | 0.13<br>(0.04 to<br>0.29)                 |
| <b>Lower respiratory infections</b>                                      | 297,036.67<br>(197,932.62 to<br>433,086.91)       | 178,754.55<br>(69,909.33 to<br>399,289.01)        | 74,703.98<br>(37,980.91 to<br>140,118.14)       | 231,259.42<br>(89,167.37 to<br>511,428.86)        | 4,221.03<br>(3,038.59 to<br>5,822.81)    | 3,676.82<br>(1,979.61 to<br>6,664.86)    | 2,142.07<br>(1,371.41 to<br>3,362.79)    | 4,514.77<br>(2,333.46 to<br>8,341.59)     |
| <b>Upper respiratory infections</b>                                      | 241.30<br>(81.57 to<br>641.32)                    | 162.89<br>(58.62 to<br>373.47)                    | 72.24<br>(27.69 to<br>157.51)                   | 167.75<br>(59.43 to<br>393.77)                    | 3.76<br>(1.64 to<br>8.62)                | 4.05<br>(1.65 to<br>8.52)                | 2.11<br>(0.87 to<br>4.29)                | 4.06<br>(1.70 to<br>7.97)                 |
| <b>Otitis media</b>                                                      | 3.09<br>(1.45 to<br>6.98)                         | 1.97<br>(0.71 to<br>5.03)                         | 1.92<br>(0.66 to<br>4.81)                       | 1.95<br>(0.69 to<br>5.01)                         | 0.06<br>(0.03 to<br>0.12)                | 0.06<br>(0.02 to<br>0.16)                | 0.07<br>(0.02 to<br>0.16)                | 0.06<br>(0.02 to<br>0.15)                 |
| <b>Meningitis</b>                                                        | 32,271.00<br>(20,451.87 to<br>54,080.33)          | 19,001.90<br>(10,442.81 to<br>35,275.49)          | 12,363.20<br>(7,130.81 to<br>21,494.06)         | 21,777.04<br>(11,378.83 to<br>42,569.05)          | 458.84<br>(305.28 to<br>750.40)          | 317.31<br>(197.40 to<br>553.86)          | 232.96<br>(149.14 to<br>393.46)          | 347.29<br>(206.59 to<br>632.22)           |
| <b>Pneumococcal meningitis</b>                                           | 121.57<br>(73.72 to<br>203.04)                    | 48.65<br>(27.11 to<br>86.70)                      | 40.31<br>(23.09 to<br>71.12)                    | 52.89<br>(29.45 to<br>96.36)                      | 1.88<br>(1.21 to<br>3.04)                | 0.99<br>(0.61 to<br>1.71)                | 0.91<br>(0.56 to<br>1.54)                | 1.05<br>(0.64 to<br>1.86)                 |
| <b>H influenzae type B meningitis</b>                                    | 5,207.90<br>(3,082.24 to<br>9,078.52)             | 4,451.50<br>(1,576.03 to<br>11,372.34)            | 2,290.30<br>(1,076.99 to<br>4,838.49)           | 7,022.02<br>(1,954.33 to<br>19,465.35)            | 71.44<br>(44.57 to<br>119.29)            | 62.91<br>(27.55 to<br>144.67)            | 298.30<br>(21.04 to<br>72.22)            | 92.56<br>(32.95 to<br>241.96)             |
| <b>Meningococcal meningitis</b>                                          | 15,797.75<br>(9,682.65 to<br>27,052.76)           | 7,863.06<br>(4,167.84 to<br>14,334.47)            | 5,272.68<br>(2,888.35 to<br>9,147.55)           | 7,985.34<br>(4,205.30 to<br>14,562.50)            | 221.41<br>(143.10 to<br>367.86)          | 132.92<br>(79.37 to<br>225.97)           | 98.58<br>(60.57 to<br>166.29)            | 133.41<br>(78.47 to<br>231.18)            |
| <b>Other meningitis</b>                                                  | 11,143.78<br>(7,052.97 to<br>18,200.41)           | 6,638.69<br>(3,710.02 to<br>11,850.85)            | 4,759.90<br>(2,770.81 to<br>8,269.93)           | 6,716.79<br>(3,726.34 to<br>12,155.76)            | 164.10<br>(109.41 to<br>260.51)          | 120.49<br>(74.29 to<br>201.76)           | 95.36<br>(60.44 to<br>157.47)            | 120.28<br>(73.76 to<br>205.90)            |
| <b>Encephalitis</b>                                                      | 8,684.39<br>(5,577.40 to<br>13,206.07)            | 7,459.90<br>(4,137.50 to<br>12,480.63)            | 4,278.00<br>(2,465.97 to<br>6,997.47)           | 7,576.84<br>(4,079.21 to<br>12,728.13)            | 117.11<br>(80.24 to<br>170.09)           | 114.24<br>(70.14 to<br>175.98)           | 71.76<br>(45.95 to<br>106.18)            | 115.25<br>(69.21 to<br>178.76)            |

|                |                                      |                                      |                                    |                                       |                               |                                 |                              |                                 |
|----------------|--------------------------------------|--------------------------------------|------------------------------------|---------------------------------------|-------------------------------|---------------------------------|------------------------------|---------------------------------|
| Diphtheria     | 31.33<br>(14.04 to<br>61.54)         | 7.97<br>(3.08 to<br>20.09)           | 3.31<br>(1.66 to<br>6.05)          | 16.84<br>(4.37 to<br>52.00)           | 0.41<br>(0.20 to<br>0.77)     | 0.11<br>(0.05 to<br>0.26)       | 0.06<br>(0.03 to<br>0.10)    | 0.22<br>(0.07 to<br>0.63)       |
| Whooping cough | 8,964.65<br>(591.90 to<br>32,269.39) | 7,184.43<br>(363.77 to<br>29,286.74) | 941.94<br>(51.89 to<br>3,764.17)   | 15,060.86<br>(821.62 to<br>59,004.21) | 105.87<br>(6.99 to<br>380.97) | 85.38<br>(4.52 to<br>349.02)    | 11.70<br>(0.66 to<br>46.46)  | 178.15<br>(9.73 to<br>700.96)   |
| Tetanus        | 61.32<br>(49.50 to<br>76.81)         | 6.48<br>(3.53 to<br>11.27)           | 4.87<br>(2.77 to<br>8.68)          | 8.68<br>(4.41 to<br>16.05)            | 0.98<br>(0.82 to<br>1.20)     | 0.11<br>(0.07 to<br>0.18)       | 0.09<br>(0.06 to<br>0.15)    | 0.14<br>(0.08 to<br>0.23)       |
| Measles        | 1.35<br>(0.00 to<br>3.61)            | 10,098.16<br>(0.00 to<br>102,571.12) | 2,848.89<br>(0.00 to<br>24,457.88) | 15,470.36<br>(0.00 to<br>146,223.83)  | 0.02<br>(0.00 to<br>0.04)     | 122.51<br>(0.00 to<br>1,210.52) | 36.35<br>(0.00 to<br>290.42) | 186.28<br>(0.00 to<br>1,712.69) |

| Tajikistan                                            |                                                    |                                                   |                                                |                                                   |                                           |                                           |                                          |                                           |
|-------------------------------------------------------|----------------------------------------------------|---------------------------------------------------|------------------------------------------------|---------------------------------------------------|-------------------------------------------|-------------------------------------------|------------------------------------------|-------------------------------------------|
| Cause                                                 | YLLs (actual counts)                               |                                                   |                                                |                                                   | Deaths (actual counts)                    |                                           |                                          |                                           |
|                                                       | 2016                                               | 2040 Forecast                                     | 2040 Better Scenario                           | 2040 Worse Scenario                               | 2016                                      | 2040 Forecast                             | 2040 Better Scenario                     | 2040 Worse Scenario                       |
| Varicella and herpes zoster                           | 589.32<br>(295.26 to 1,049.88)                     | 419.48<br>(193.05 to 815.87)                      | 184.54<br>(91.70 to 341.38)                    | 429.00<br>(187.33 to 894.95)                      | 9.91<br>(6.10 to 15.63)                   | 10.81<br>(6.25 to 17.14)                  | 6.43<br>(3.87 to 9.88)                   | 10.44<br>(6.00 to 16.95)                  |
| <b>Neglected tropical diseases and malaria</b>        | <b>11,552.32</b><br><b>(2,731.59 to 20,731.34)</b> | <b>8,526.49</b><br><b>(1,440.34 to 16,469.47)</b> | <b>4,581.15</b><br><b>(743.50 to 8,442.21)</b> | <b>8,819.86</b><br><b>(1,497.28 to 16,916.72)</b> | <b>175.19</b><br><b>(51.46 to 300.98)</b> | <b>139.46</b><br><b>(22.93 to 257.29)</b> | <b>82.63</b><br><b>(14.73 to 145.39)</b> | <b>142.30</b><br><b>(24.60 to 255.37)</b> |
| Malaria                                               | 281.14<br>(105.17 to 1,019.54)                     | 149.90<br>(47.97 to 592.71)                       | 99.70<br>(38.32 to 317.62)                     | 152.81<br>(47.84 to 592.10)                       | 4.25<br>(1.89 to 13.51)                   | 2.44<br>(0.93 to 7.95)                    | 1.78<br>(0.80 to 4.60)                   | 2.45<br>(0.93 to 7.91)                    |
| Chagas disease                                        | 0.00<br>(0.00 to 0.00)                             | 0.00<br>(0.00 to 0.00)                            | 0.00<br>(0.00 to 0.00)                         | 0.00<br>(0.00 to 0.00)                            | 0.00<br>(0.00 to 0.00)                    | 0.00<br>(0.00 to 0.00)                    | 0.00<br>(0.00 to 0.00)                   | 0.00<br>(0.00 to 0.00)                    |
| Leishmaniasis                                         | 677.16<br>(385.25 to 1,145.68)                     | 335.65<br>(161.61 to 736.26)                      | 183.82<br>(92.64 to 415.16)                    | 341.18<br>(162.38 to 726.03)                      | 21.37<br>(11.81 to 36.18)                 | 10.88<br>(4.72 to 28.63)                  | 6.45<br>(2.94 to 18.22)                  | 10.77<br>(4.79 to 27.90)                  |
| African trypanosomiasis                               | 0.00<br>(0.00 to 0.00)                             | 0.00<br>(0.00 to 0.00)                            | 0.00<br>(0.00 to 0.00)                         | 0.00<br>(0.00 to 0.00)                            | 0.00<br>(0.00 to 0.00)                    | 0.00<br>(0.00 to 0.00)                    | 0.00<br>(0.00 to 0.00)                   | 0.00<br>(0.00 to 0.00)                    |
| Schistosomiasis                                       | 0.00<br>(0.00 to 0.00)                             | 0.00<br>(0.00 to 0.00)                            | 0.00<br>(0.00 to 0.00)                         | 0.00<br>(0.00 to 0.00)                            | 0.00<br>(0.00 to 0.00)                    | 0.00<br>(0.00 to 0.00)                    | 0.00<br>(0.00 to 0.00)                   | 0.00<br>(0.00 to 0.00)                    |
| Cysticercosis                                         | 0.89<br>(0.33 to 1.88)                             | 0.32<br>(0.11 to 0.69)                            | 0.26<br>(0.09 to 0.57)                         | 0.32<br>(0.12 to 0.68)                            | 0.02<br>(0.01 to 0.04)                    | 0.01<br>(0.00 to 0.02)                    | 0.01<br>(0.01 to 0.01)                   | 0.01<br>(0.00 to 0.02)                    |
| Cystic echinococcosis                                 | 0.00<br>(0.00 to 0.00)                             | 0.00<br>(0.00 to 0.00)                            | 0.00<br>(0.00 to 0.00)                         | 0.00<br>(0.00 to 0.00)                            | 0.00<br>(0.00 to 0.00)                    | 0.00<br>(0.00 to 0.00)                    | 0.00<br>(0.00 to 0.00)                   | 0.00<br>(0.00 to 0.00)                    |
| Dengue                                                | 0.00<br>(0.00 to 0.00)                             | 0.00<br>(0.00 to 0.00)                            | 0.00<br>(0.00 to 0.00)                         | 0.00<br>(0.00 to 0.00)                            | 0.00<br>(0.00 to 0.00)                    | 0.00<br>(0.00 to 0.00)                    | 0.00<br>(0.00 to 0.00)                   | 0.00<br>(0.00 to 0.00)                    |
| Yellow fever                                          | 0.00<br>(0.00 to 0.00)                             | 0.00<br>(0.00 to 0.00)                            | 0.00<br>(0.00 to 0.00)                         | 0.00<br>(0.00 to 0.00)                            | 0.00<br>(0.00 to 0.00)                    | 0.00<br>(0.00 to 0.00)                    | 0.00<br>(0.00 to 0.00)                   | 0.00<br>(0.00 to 0.00)                    |
| Rabies                                                | 103.59<br>(21.28 to 241.60)                        | 58.17<br>(10.42 to 158.71)                        | 19.61<br>(3.57 to 54.39)                       | 61.22<br>(11.59 to 161.26)                        | 1.56<br>(0.33 to 3.63)                    | 0.90<br>(0.16 to 2.35)                    | 0.31<br>(0.06 to 0.84)                   | 0.94<br>(0.18 to 2.41)                    |
| Intestinal nematode infections                        | 42.57<br>(6.25 to 116.01)                          | 44.77<br>(7.84 to 122.72)                         | 28.22<br>(6.24 to 75.19)                       | 45.79<br>(7.93 to 127.82)                         | 0.55<br>(0.11 to 1.43)                    | 0.60<br>(0.15 to 1.52)                    | 0.40<br>(0.12 to 0.98)                   | 0.61<br>(0.15 to 1.60)                    |
| Other neglected tropical diseases                     | 10,446.96<br>(1,635.38 to 19,602.06)               | 7,937.69<br>(1,105.22 to 15,584.11)               | 4,249.54<br>(527.05 to 7,942.27)               | 8,218.54<br>(1,115.95 to 16,033.00)               | 147.45<br>(22.61 to 268.77)               | 124.65<br>(15.07 to 231.13)               | 73.68<br>(13.94 to 131.94)               | 127.51<br>(8.98 to 235.68)                |
| <b>Maternal disorders</b>                             | <b>4,945.18</b><br><b>(3,264.91 to 7,018.48)</b>   | <b>3,917.30</b><br><b>(7,054.98)</b>              | <b>1,839.75</b><br><b>(925.16 to 3,230.56)</b> | <b>4,131.19</b><br><b>(2,034.18 to 7,449.63)</b>  | <b>90.05</b><br><b>(59.49 to 127.43)</b>  | <b>72.81</b><br><b>(37.31 to 128.07)</b>  | <b>34.35</b><br><b>(17.71 to 60.10)</b>  | <b>76.77</b><br><b>(38.75 to 139.39)</b>  |
| Maternal hemorrhage                                   | 1,968.05<br>(1,228.89 to 2,896.75)                 | 1,483.25<br>(713.08 to 2,789.80)                  | 703.41<br>(324.75 to 1,283.51)                 | 1,559.88<br>(727.67 to 2,974.14)                  | 36.45<br>(22.88 to 52.60)                 | 28.17<br>(13.74 to 52.89)                 | 13.39<br>(6.27 to 24.06)                 | 29.62<br>(13.83 to 55.45)                 |
| Maternal sepsis and other maternal infections         | 230.34<br>(118.90 to 389.45)                       | 157.45<br>(64.71 to 320.71)                       | 73.22<br>(31.19 to 147.89)                     | 165.68<br>(68.89 to 336.46)                       | 4.20<br>(2.17 to 6.97)                    | 2.94<br>(1.23 to 5.98)                    | 1.37<br>(0.59 to 2.75)                   | 3.09<br>(1.37 to 6.23)                    |
| Maternal hypertensive disorders                       | 1,130.67<br>(694.03 to 1,737.62)                   | 877.40<br>(363.33 to 1,714.48)                    | 407.74<br>(173.43 to 808.20)                   | 924.20<br>(384.87 to 1,813.66)                    | 19.78<br>(12.54 to 30.47)                 | 15.50<br>(6.51 to 30.15)                  | 7.23<br>(3.16 to 14.05)                  | 16.33<br>(6.95 to 31.80)                  |
| Maternal obstructed labor and uterine rupture         | 84.26<br>(38.55 to 155.08)                         | 72.54<br>(25.95 to 166.26)                        | 32.45<br>(11.32 to 75.74)                      | 76.62<br>(26.73 to 176.74)                        | 1.55<br>(0.73 to 2.88)                    | 1.37<br>(0.49 to 3.08)                    | 0.61<br>(0.21 to 1.41)                   | 1.45<br>(0.52 to 3.27)                    |
| Maternal abortion, miscarriage, and ectopic pregnancy | 409.38<br>(234.44 to 649.90)                       | 385.21<br>(177.01 to 758.97)                      | 180.67<br>(84.59 to 357.93)                    | 406.97<br>(180.29 to 820.93)                      | 7.80<br>(4.56 to 12.18)                   | 7.55<br>(3.58 to 14.66)                   | 3.56<br>(1.67 to 7.10)                   | 7.98<br>(3.60 to 15.78)                   |

|                                        |                                   |                                   |                                 |                                   |                             |                             |                           |                             |
|----------------------------------------|-----------------------------------|-----------------------------------|---------------------------------|-----------------------------------|-----------------------------|-----------------------------|---------------------------|-----------------------------|
|                                        | 364.35<br>(199.08 to<br>580.91)   | 317.17<br>(129.20 to<br>649.80)   | 143.19<br>(58.84 to<br>284.01)  | 337.21<br>(136.46 to<br>707.92)   | 6.38<br>(3.51 to<br>10.10)  | 5.60<br>(2.30 to<br>11.37)  | 2.55<br>(1.05 to<br>4.97) | 5.95<br>(2.47 to<br>12.24)  |
| Indirect maternal deaths               |                                   |                                   |                                 |                                   |                             |                             |                           |                             |
|                                        | 75.69<br>(33.04 to<br>142.31)     | 51.57<br>(17.21 to<br>118.98)     | 23.56<br>(7.51 to<br>55.37)     | 54.44<br>(17.49 to<br>122.77)     | 1.38<br>(0.61 to<br>2.60)   | 0.96<br>(0.31 to<br>2.21)   | 0.44<br>(0.14 to<br>0.99) | 1.01<br>(0.33 to<br>2.24)   |
| Late maternal deaths                   |                                   |                                   |                                 |                                   |                             |                             |                           |                             |
|                                        | 1.86<br>(0.78 to<br>3.41)         | 16.64<br>(0.83 to<br>61.33)       | 7.85<br>(0.14 to<br>28.74)      | 18.68<br>(1.71 to<br>69.23)       | 0.04<br>(0.02 to<br>0.07)   | 0.33<br>(0.01 to<br>1.25)   | 0.16<br>(0.00 to<br>0.59) | 0.38<br>(0.03 to<br>1.33)   |
| Maternal deaths aggravated by HIV/AIDS |                                   |                                   |                                 |                                   |                             |                             |                           |                             |
|                                        | 680.57<br>(390.47 to<br>1,051.72) | 356.07<br>(249.73 to<br>1,070.99) | 267.66<br>(120.05 to<br>519.53) | 587.51<br>(256.46 to<br>1,131.64) | 12.47<br>(7.19 to<br>18.98) | 10.39<br>(4.74 to<br>19.96) | 5.04<br>(2.28 to<br>9.78) | 10.97<br>(4.91 to<br>20.79) |
| Other maternal disorders               |                                   |                                   |                                 |                                   |                             |                             |                           |                             |

| Tajikistan                                                              |                                                 |                                                 |                                               |                                                 |                                           |                                           |                                       |                                           |
|-------------------------------------------------------------------------|-------------------------------------------------|-------------------------------------------------|-----------------------------------------------|-------------------------------------------------|-------------------------------------------|-------------------------------------------|---------------------------------------|-------------------------------------------|
| Cause                                                                   | YLLs (actual counts)                            |                                                 |                                               |                                                 | Deaths (actual counts)                    |                                           |                                       |                                           |
|                                                                         | 2016                                            | 2040 Forecast                                   | 2040 Better Scenario                          | 2040 Worse Scenario                             | 2016                                      | 2040 Forecast                             | 2040 Better Scenario                  | 2040 Worse Scenario                       |
| <b>Neonatal disorders</b>                                               | <b>298,453.27</b><br>(183,914.14 to 451,384.42) | <b>204,217.88</b><br>(117,754.63 to 334,925.84) | <b>82,121.81</b><br>(47,354.55 to 133,444.19) | <b>231,794.37</b><br>(133,989.25 to 372,525.86) | <b>3,448.59</b><br>(2,124.52 to 5,217.83) | <b>2,359.95</b><br>(1,360.43 to 3,871.91) | <b>949.02</b><br>(547.21 to 1,542.22) | <b>2,678.52</b><br>(1,548.13 to 4,304.88) |
| Neonatal preterm birth                                                  | 133,386.91<br>(77,340.39 to 207,882.08)         | 83,661.78<br>(45,085.38 to 141,170.04)          | 32,244.83<br>(17,031.29 to 54,214.58)         | 100,316.83<br>(53,039.22 to 170,444.46)         | 1,541.02<br>(893.54 to 2,401.17)          | 966.63<br>(520.97 to 1,630.92)            | 372.57<br>(196.78 to 626.45)          | 1,159.00<br>(613.02 to 1,968.99)          |
| Neonatal encephalopathy due to birth asphyxia and trauma                | 99,472.19<br>(59,742.35 to 157,306.43)          | 66,764.45<br>(30,211.63 to 118,522.36)          | 28,896.27<br>(12,964.60 to 51,707.62)         | 72,825.03<br>(32,849.70 to 130,291.59)          | 1,149.34<br>(690.18 to 1,817.03)          | 771.50<br>(349.05 to 1,369.77)            | 333.91<br>(149.82 to 597.47)          | 841.52<br>(379.66 to 1,505.88)            |
| Neonatal sepsis and other neonatal infections                           | 20,940.26<br>(10,505.01 to 37,304.44)           | 19,095.49<br>(8,751.34 to 35,605.96)            | 8,015.67<br>(3,665.46 to 14,917.03)           | 20,628.84<br>(9,392.40 to 38,842.60)            | 242.11<br>(121.44 to 431.62)              | 220.80<br>(101.17 to 412.12)              | 92.68<br>(42.38 to 172.48)            | 238.52<br>(108.60 to 448.98)              |
| Hemolytic disease and other neonatal jaundice                           | 2,189.98<br>(1,115.94 to 3,882.20)              | 1,198.28<br>(416.74 to 2,630.50)                | 453.18<br>(165.80 to 976.74)                  | 1,316.54<br>(487.56 to 2,930.17)                | 25.30<br>(12.89 to 44.85)                 | 13.85<br>(4.82 to 30.38)                  | 5.24<br>(1.92 to 11.28)               | 15.21<br>(5.63 to 33.86)                  |
| Other neonatal disorders                                                | 42,463.93<br>(21,975.10 to 71,623.30)           | 33,497.87<br>(13,085.10 to 66,550.75)           | 12,511.85<br>(4,945.13 to 25,135.94)          | 36,707.15<br>(14,227.33 to 70,876.28)           | 490.82<br>(253.95 to 827.66)              | 387.18<br>(151.24 to 768.89)              | 144.62<br>(57.16 to 290.38)           | 424.27<br>(164.48 to 818.88)              |
| <b>Nutritional deficiencies</b>                                         | <b>7,418.85</b><br>(4,492.74 to 12,024.16)      | <b>4,359.87</b><br>(2,695.04 to 7,316.76)       | <b>2,329.01</b><br>(1,551.54 to 3,529.16)     | <b>4,511.84</b><br>(2,773.83 to 7,648.81)       | <b>108.91</b><br>(72.99 to 163.87)        | <b>83.55</b><br>(57.08 to 123.52)         | <b>52.03</b><br>(37.38 to 71.68)      | <b>84.56</b><br>(57.22 to 126.76)         |
| Protein-energy malnutrition                                             | 5,938.56<br>(3,144.30 to 10,464.90)             | 2,656.41<br>(1,355.63 to 5,267.23)              | 1,169.63<br>(655.78 to 2,141.21)              | 2,786.66<br>(1,391.77 to 5,592.88)              | 78.38<br>(45.12 to 131.67)                | 43.09<br>(25.07 to 75.44)                 | 22.81<br>(14.29 to 36.23)             | 44.29<br>(25.72 to 78.47)                 |
| Iodine deficiency                                                       | 109.48<br>(9.77 to 296.85)                      | 171.96<br>(9.58 to 587.62)                      | 99.14<br>(4.88 to 299.66)                     | 175.80<br>(9.69 to 601.54)                      | 2.25<br>(0.29 to 5.69)                    | 4.25<br>(0.34 to 11.06)                   | 2.73<br>(0.17 to 7.29)                | 4.24<br>(0.33 to 11.02)                   |
| Dietary iron deficiency                                                 | 335.49<br>(262.06 to 428.72)                    | 309.75<br>(171.22 to 538.38)                    | 221.47<br>(127.10 to 379.17)                  | 314.32<br>(171.57 to 548.36)                    | 5.75<br>(4.57 to 7.29)                    | 5.42<br>(3.30 to 8.77)                    | 4.01<br>(2.48 to 6.54)                | 5.48<br>(3.31 to 8.96)                    |
| Other nutritional deficiencies                                          | 1,035.31<br>(767.86 to 1,339.67)                | 1,221.74<br>(747.39 to 1,896.86)                | 838.77<br>(517.99 to 1,286.53)                | 1,235.06<br>(739.27 to 1,937.29)                | 22.53<br>(16.83 to 28.74)                 | 30.79<br>(19.77 to 45.03)                 | 22.48<br>(14.56 to 32.37)             | 30.55<br>(19.97 to 44.16)                 |
| <b>Other communicable, maternal, neonatal, and nutritional diseases</b> | <b>17,943.78</b><br>(10,440.80 to 40,111.17)    | <b>12,336.60</b><br>(7,168.51 to 27,831.62)     | <b>6,729.90</b><br>(4,244.66 to 12,896.21)    | <b>12,761.56</b><br>(7,302.13 to 29,392.21)     | <b>258.56</b><br>(166.79 to 513.52)       | <b>224.17</b><br>(151.85 to 402.67)       | <b>142.06</b><br>(103.72 to 218.78)   | <b>226.71</b><br>(151.13 to 426.76)       |
| Sexually transmitted infections excluding HIV                           | 2,186.12<br>(974.25 to 4,100.85)                | 1,015.53<br>(505.64 to 1,897.75)                | 633.55<br>(347.20 to 1,128.34)                | 1,037.46<br>(512.12 to 1,957.42)                | 31.83<br>(16.68 to 56.06)                 | 20.02<br>(11.62 to 34.13)                 | 14.44<br>(8.93 to 24.29)              | 20.03<br>(11.49 to 34.44)                 |
| Syphilis                                                                | 1,951.84<br>(758.84 to 3,804.62)                | 778.17<br>(312.43 to 1,606.97)                  | 441.70<br>(201.84 to 878.99)                  | 799.69<br>(322.28 to 1,693.51)                  | 26.10<br>(11.59 to 49.38)                 | 12.85<br>(6.22 to 24.23)                  | 8.41<br>(4.27 to 15.85)               | 12.97<br>(6.23 to 24.82)                  |
| Chlamydial infection                                                    | 41.27<br>(28.60 to 71.25)                       | 42.14<br>(24.91 to 74.18)                       | 33.55<br>(20.10 to 59.34)                     | 42.27<br>(24.84 to 74.99)                       | 1.01<br>(0.72 to 1.68)                    | 1.28<br>(0.81 to 2.13)                    | 1.07<br>(0.68 to 1.80)                | 1.26<br>(0.80 to 2.10)                    |
| Gonococcal infection                                                    | 126.26<br>(90.26 to 208.08)                     | 129.98<br>(75.76 to 230.90)                     | 105.68<br>(62.64 to 187.77)                   | 130.00<br>(76.99 to 228.72)                     | 3.14<br>(2.27 to 5.17)                    | 4.07<br>(2.49 to 6.95)                    | 3.44<br>(2.12 to 5.85)                | 3.99<br>(2.44 to 6.82)                    |
| Other sexually transmitted infections                                   | 66.75<br>(47.65 to 111.25)                      | 65.24<br>(38.68 to 117.88)                      | 52.62<br>(31.29 to 95.03)                     | 65.49<br>(38.21 to 117.36)                      | 1.58<br>(1.14 to 2.63)                    | 1.83<br>(1.12 to 3.25)                    | 1.52<br>(0.95 to 2.66)                | 1.81<br>(1.11 to 3.20)                    |
| Acute hepatitis                                                         | 6,979.48<br>(5,337.05 to 9,402.94)              | 4,945.83<br>(3,306.48 to 7,312.92)              | 3,236.22<br>(2,191.59 to 4,627.46)            | 5,026.91<br>(3,392.24 to 7,332.32)              | 116.87<br>(93.41 to 148.07)               | 112.05<br>(80.73 to 154.11)               | 80.57<br>(58.41 to 108.72)            | 111.45<br>(80.68 to 152.23)               |
| Acute hepatitis A                                                       | 1,537.18<br>(593.86 to 2,965.61)                | 623.22<br>(210.92 to 1,378.35)                  | 290.02<br>(108.02 to 606.66)                  | 650.21<br>(221.73 to 1,473.90)                  | 18.52<br>(7.46 to 35.16)                  | 8.17<br>(3.36 to 17.05)                   | 4.11<br>(1.89 to 7.83)                | 8.46<br>(3.40 to 18.07)                   |
| Acute hepatitis B                                                       | 3,841.16<br>(3,003.59 to 5,081.14)              | 3,227.89<br>(2,141.63 to 4,732.52)              | 2,246.26<br>(1,519.78 to 3,228.59)            | 3,264.04<br>(2,182.78 to 4,711.00)              | 74.94<br>(60.46 to 94.33)                 | 82.79<br>(58.34 to 114.52)                | 60.90<br>(42.79 to 84.21)             | 82.17<br>(58.73 to 112.54)                |





| Tajikistan                           |                                          |                                          |                                          |                                          |                                    |                                     |                                     |                                     |
|--------------------------------------|------------------------------------------|------------------------------------------|------------------------------------------|------------------------------------------|------------------------------------|-------------------------------------|-------------------------------------|-------------------------------------|
| Cause                                | YLLs (actual counts)                     |                                          |                                          |                                          | Deaths (actual counts)             |                                     |                                     |                                     |
|                                      | 2016                                     | 2040 Forecast                            | 2040 Better Scenario                     | 2040 Worse Scenario                      | 2016                               | 2040 Forecast                       | 2040 Better Scenario                | 2040 Worse Scenario                 |
| Neoplasms                            | 119,157.67<br>(102,690.67 to 138,054.55) | 218,124.25<br>(163,551.55 to 280,487.90) | 210,956.34<br>(155,558.17 to 271,904.67) | 241,664.68<br>(180,173.80 to 315,341.34) | 3,655.42<br>(3,157.27 to 4,270.02) | 8,267.73<br>(6,433.13 to 10,350.18) | 8,380.81<br>(6,377.71 to 10,554.25) | 8,927.73<br>(6,911.65 to 11,387.14) |
| Lip and oral cavity cancer           | 1,734.59<br>(1,313.33 to 2,293.20)       | 3,111.24<br>(1,932.96 to 4,820.96)       | 2,812.13<br>(1,737.61 to 4,313.53)       | 4,369.04<br>(2,492.56 to 7,319.82)       | 58.76<br>(45.41 to 77.08)          | 125.17<br>(81.02 to 188.24)         | 117.59<br>(75.93 to 176.99)         | 165.28<br>(97.85 to 274.07)         |
| Nasopharynx cancer                   | 688.91<br>(511.90 to 932.76)             | 1,056.84<br>(641.30 to 1,689.53)         | 867.50<br>(516.54 to 1,399.24)           | 1,493.60<br>(839.94 to 2,570.17)         | 17.04<br>(12.61 to 23.83)          | 31.18<br>(19.11 to 50.28)           | 26.88<br>(16.38 to 43.30)           | 43.60<br>(24.47 to 78.54)           |
| Other pharynx cancer                 | 822.14<br>(578.56 to 1,227.11)           | 1,416.89<br>(800.72 to 2,466.66)         | 1,381.95<br>(766.06 to 2,426.31)         | 1,705.90<br>(901.69 to 3,076.20)         | 27.78<br>(19.67 to 41.10)          | 55.47<br>(31.30 to 94.47)           | 55.63<br>(31.00 to 95.78)           | 65.18<br>(34.97 to 117.08)          |
| Esophageal cancer                    | 10,115.25<br>(8,542.21 to 12,122.60)     | 17,810.56<br>(10,302.85 to 30,028.45)    | 16,382.49<br>(9,390.60 to 27,461.35)     | 23,880.13<br>(12,651.25 to 41,835.25)    | 389.78<br>(332.09 to 464.98)       | 817.93<br>(476.23 to 1,321.11)      | 782.30<br>(454.43 to 1,286.69)      | 1,029.75<br>(554.48 to 1,780.94)    |
| Stomach cancer                       | 17,142.44<br>(14,562.91 to 20,563.54)    | 29,828.81<br>(20,301.14 to 42,716.79)    | 26,593.95<br>(17,899.49 to 39,600.68)    | 30,608.33<br>(20,941.29 to 43,768.57)    | 631.61<br>(543.13 to 747.93)       | 1,305.57<br>(913.73 to 1,821.28)    | 1,204.83<br>(819.43 to 1,743.80)    | 1,305.71<br>(917.16 to 1,812.33)    |
| Colon and rectum cancer              | 6,795.92<br>(5,579.10 to 8,253.06)       | 14,619.38<br>(9,198.18 to 22,456.95)     | 15,918.28<br>(9,971.36 to 24,524.78)     | 15,620.41<br>(9,653.55 to 24,127.18)     | 216.19<br>(179.95 to 262.33)       | 588.14<br>(381.46 to 890.26)        | 665.27<br>(429.46 to 1,002.57)      | 610.67<br>(398.14 to 916.40)        |
| Liver cancer                         | 7,940.06<br>(5,686.47 to 10,119.10)      | 17,693.83<br>(10,674.48 to 27,384.22)    | 16,968.88<br>(10,270.86 to 26,204.22)    | 20,813.05<br>(11,820.58 to 34,300.22)    | 278.53<br>(199.83 to 356.90)       | 734.63<br>(455.95 to 1,109.77)      | 727.08<br>(450.27 to 1,088.83)      | 836.44<br>(500.65 to 1,325.62)      |
| Liver cancer due to hepatitis B      | 2,605.79<br>(1,821.38 to 3,435.04)       | 5,360.13<br>(3,167.71 to 8,446.03)       | 5,164.00<br>(3,014.13 to 8,067.21)       | 6,226.98<br>(3,447.58 to 10,362.19)      | 83.55<br>(57.53 to 110.61)         | 204.57<br>(121.39 to 318.85)        | 202.85<br>(119.61 to 311.94)        | 230.82<br>(131.35 to 378.70)        |
| Liver cancer due to hepatitis C      | 2,204.03<br>(1,523.36 to 2,976.43)       | 5,395.23<br>(3,301.30 to 8,430.08)       | 5,269.09<br>(3,222.16 to 8,153.22)       | 6,114.33<br>(3,536.72 to 9,943.25)       | 86.47<br>(61.55 to 115.75)         | 245.92<br>(154.86 to 381.80)        | 247.77<br>(154.83 to 376.18)        | 269.42<br>(162.70 to 431.48)        |
| Liver cancer due to alcohol use      | 1,406.61<br>(988.81 to 1,838.05)         | 3,279.88<br>(1,967.81 to 5,268.51)       | 3,097.43<br>(1,870.56 to 4,931.12)       | 4,218.37<br>(2,383.16 to 7,131.26)       | 52.45<br>(37.17 to 67.91)          | 139.99<br>(85.75 to 218.58)         | 135.91<br>(83.41 to 212.75)         | 173.36<br>(101.40 to 283.48)        |
| Liver cancer due to other causes     | 1,723.63<br>(1,141.94 to 2,227.55)       | 3,658.59<br>(2,162.29 to 5,710.24)       | 3,438.36<br>(2,002.60 to 5,382.12)       | 4,253.37<br>(2,358.14 to 7,089.12)       | 56.06<br>(37.00 to 72.73)          | 144.16<br>(85.97 to 224.91)         | 140.55<br>(83.89 to 217.67)         | 162.85<br>(92.32 to 267.91)         |
| Gallbladder and biliary tract cancer | 1,240.99<br>(960.89 to 1,584.99)         | 2,080.47<br>(1,479.53 to 2,777.42)       | 2,211.77<br>(1,556.42 to 3,018.75)       | 1,985.37<br>(1,435.42 to 2,622.67)       | 48.53<br>(37.55 to 61.56)          | 95.07<br>(68.82 to 123.18)          | 104.67<br>(75.49 to 137.56)         | 88.95<br>(65.49 to 114.21)          |
| Pancreatic cancer                    | 3,574.05<br>(3,037.81 to 4,238.82)       | 9,014.69<br>(6,633.88 to 11,647.36)      | 9,835.18<br>(7,131.72 to 12,745.07)      | 9,043.52<br>(6,718.39 to 11,804.18)      | 137.46<br>(117.63 to 161.35)       | 402.97<br>(306.12 to 505.97)        | 454.76<br>(342.60 to 578.76)        | 392.08<br>(302.86 to 501.59)        |
| Larynx cancer                        | 888.12<br>(738.97 to 1,080.31)           | 1,299.07<br>(771.77 to 2,251.83)         | 1,155.85<br>(687.75 to 1,982.21)         | 2,278.26<br>(1,127.09 to 4,771.11)       | 30.26<br>(25.41 to 36.40)          | 52.36<br>(33.17 to 82.79)           | 48.43<br>(30.64 to 76.08)           | 83.16<br>(43.93 to 158.46)          |
| Tracheal, bronchus, and lung cancer  | 8,130.72<br>(6,828.70 to 9,741.03)       | 14,387.56<br>(9,026.97 to 22,787.70)     | 13,377.42<br>(8,767.39 to 20,643.31)     | 23,518.79<br>(13,776.22 to 40,674.49)    | 285.27<br>(242.03 to 341.27)       | 601.68<br>(390.41 to 895.96)        | 583.53<br>(396.54 to 848.66)        | 911.42<br>(556.81 to 1,485.68)      |
| Malignant skin melanoma              | 777.53<br>(535.21 to 1,049.40)           | 1,559.97<br>(1,001.96 to 2,218.16)       | 1,828.05<br>(1,155.49 to 2,636.44)       | 1,489.88<br>(936.90 to 2,126.68)         | 24.22<br>(16.70 to 32.47)          | 61.20<br>(40.82 to 84.47)           | 75.19<br>(48.81 to 104.30)          | 56.95<br>(37.89 to 78.28)           |
| Non-melanoma skin cancer             | 618.87<br>(474.80 to 788.57)             | 1,476.01<br>(1,056.85 to 1,973.59)       | 1,358.36<br>(955.59 to 1,856.41)         | 1,413.04<br>(1,030.02 to 1,857.08)       | 23.69<br>(18.61 to 29.83)          | 68.85<br>(52.16 to 87.74)           | 67.14<br>(50.13 to 86.17)           | 63.93<br>(49.17 to 81.48)           |
| Breast cancer                        | 6,979.94<br>(5,257.37 to 9,209.72)       | 13,343.18<br>(8,539.94 to 19,363.36)     | 13,368.98<br>(8,484.39 to 19,550.81)     | 14,452.13<br>(9,066.00 to 21,158.27)     | 205.59<br>(156.79 to 270.80)       | 468.00<br>(304.22 to 690.68)        | 480.83<br>(310.40 to 690.20)        | 498.40<br>(317.66 to 732.84)        |
| Cervical cancer                      | 2,766.96<br>(2,085.61 to 3,726.08)       | 4,544.11<br>(3,109.92 to 6,434.12)       | 3,923.78<br>(2,656.62 to 5,660.93)       | 4,569.61<br>(3,141.63 to 6,540.85)       | 83.42<br>(62.68 to 111.84)         | 163.83<br>(112.33 to 228.89)        | 145.13<br>(100.01 to 207.21)        | 161.83<br>(113.11 to 228.74)        |

|                   |                                       |                                       |                                       |                                       |                               |                                 |                                 |                                 |
|-------------------|---------------------------------------|---------------------------------------|---------------------------------------|---------------------------------------|-------------------------------|---------------------------------|---------------------------------|---------------------------------|
|                   | 1,178.49<br>(891.11 to<br>1,496.53)   | 2,399.96<br>(1,639.53 to<br>3,342.57) | 2,001.38<br>(1,353.74 to<br>2,784.68) | 2,365.24<br>(1,640.13 to<br>3,263.25) | 38.05<br>(29.12 to<br>48.22)  | 94.95<br>(68.51 to<br>131.88)   | 81.62<br>(57.42 to<br>112.57)   | 92.14<br>(66.78 to<br>124.86)   |
| Uterine cancer    |                                       |                                       |                                       |                                       |                               |                                 |                                 |                                 |
|                   | 2,952.38<br>(2,166.32 to<br>3,834.47) | 5,747.43<br>(3,724.47 to<br>8,147.75) | 6,414.89<br>(4,200.26 to<br>9,244.17) | 5,748.92<br>(3,771.56 to<br>8,202.70) | 88.18<br>(64.79 to<br>114.11) | 202.52<br>(133.86 to<br>283.23) | 230.85<br>(151.24 to<br>331.05) | 200.55<br>(132.10 to<br>281.63) |
| Ovarian cancer    |                                       |                                       |                                       |                                       |                               |                                 |                                 |                                 |
|                   | 1,590.30<br>(1,103.20 to<br>2,524.60) | 5,380.65<br>(3,675.95 to<br>8,390.72) | 6,162.48<br>(4,189.24 to<br>9,713.86) | 4,971.26<br>(3,440.04 to<br>7,759.55) | 89.83<br>(64.86 to<br>136.99) | 327.33<br>(233.15 to<br>493.34) | 393.36<br>(282.52 to<br>593.16) | 293.75<br>(210.88 to<br>449.79) |
| Prostate cancer   |                                       |                                       |                                       |                                       |                               |                                 |                                 |                                 |
|                   | 468.77<br>(329.45 to<br>631.68)       | 658.70<br>(400.90 to<br>1,019.59)     | 585.27<br>(353.73 to<br>907.23)       | 652.84<br>(398.97 to<br>995.81)       | 9.30<br>(6.74 to<br>12.40)    | 14.66<br>(9.70 to<br>21.91)     | 13.37<br>(8.80 to<br>19.81)     | 14.32<br>(9.36 to<br>20.90)     |
| Testicular cancer |                                       |                                       |                                       |                                       |                               |                                 |                                 |                                 |

| Tajikistan                      |                                                  |                                                  |                                                  |                                                    |                                               |                                               |                                               |                                               |
|---------------------------------|--------------------------------------------------|--------------------------------------------------|--------------------------------------------------|----------------------------------------------------|-----------------------------------------------|-----------------------------------------------|-----------------------------------------------|-----------------------------------------------|
| Cause                           | YLLs (actual counts)                             |                                                  |                                                  |                                                    | Deaths (actual counts)                        |                                               |                                               |                                               |
|                                 | 2016                                             | 2040 Forecast                                    | 2040 Better Scenario                             | 2040 Worse Scenario                                | 2016                                          | 2040 Forecast                                 | 2040 Better Scenario                          | 2040 Worse Scenario                           |
| Kidney cancer                   | 1,993.88<br>(1,417.37 to 2,644.53)               | 4,139.60<br>(2,620.07 to 6,195.48)               | 4,674.11<br>(2,910.15 to 7,089.85)               | 4,145.73<br>(2,593.98 to 6,223.41)                 | 57.30<br>(39.81 to 78.29)                     | 150.41<br>(94.47 to 221.32)                   | 180.17<br>(112.24 to 270.90)                  | 146.65<br>(91.25 to 217.36)                   |
| Bladder cancer                  | 1,334.43<br>(1,101.10 to 1,648.92)               | 3,106.03<br>(2,280.08 to 4,136.70)               | 3,137.88<br>(2,250.16 to 4,194.38)               | 3,162.38<br>(2,301.55 to 4,251.56)                 | 60.75<br>(50.33 to 74.56)                     | 162.94<br>(125.12 to 208.64)                  | 171.94<br>(130.00 to 221.87)                  | 158.59<br>(122.24 to 204.98)                  |
| Brain and nervous system cancer | 9,411.55<br>(7,030.57 to 11,950.88)              | 16,863.82<br>(10,840.69 to 23,710.12)            | 16,486.81<br>(10,363.78 to 23,534.08)            | 16,537.90<br>(10,716.17 to 23,447.38)              | 203.01<br>(143.06 to 262.30)                  | 441.79<br>(280.10 to 611.09)                  | 460.46<br>(289.29 to 645.07)                  | 426.00<br>(272.79 to 584.03)                  |
| Thyroid cancer                  | 380.25<br>(277.29 to 488.63)                     | 775.41<br>(480.58 to 1,199.58)                   | 681.04<br>(418.82 to 1,042.66)                   | 823.86<br>(495.90 to 1,308.41)                     | 12.98<br>(9.55 to 16.58)                      | 31.96<br>(20.49 to 48.69)                     | 29.03<br>(18.45 to 43.87)                     | 33.22<br>(20.95 to 51.82)                     |
| Mesothelioma                    | 168.38<br>(119.86 to 226.35)                     | 305.68<br>(203.29 to 435.33)                     | 291.68<br>(191.75 to 419.10)                     | 297.21<br>(198.61 to 417.65)                       | 4.94<br>(3.52 to 6.64)                        | 10.74<br>(7.32 to 15.03)                      | 10.56<br>(7.05 to 14.24)                      | 10.25<br>(7.05 to 14.24)                      |
| Hodgkin lymphoma                | 1,062.62<br>(769.04 to 1,348.48)                 | 1,318.05<br>(846.14 to 2,001.26)                 | 955.33<br>(608.43 to 1,428.78)                   | 1,318.22<br>(845.37 to 1,983.54)                   | 22.63<br>(16.49 to 28.82)                     | 33.87<br>(22.73 to 47.83)                     | 25.65<br>(16.76 to 37.15)                     | 33.35<br>(22.42 to 47.19)                     |
| Non-Hodgkin lymphoma            | 3,357.12<br>(2,422.03 to 4,158.34)               | 5,930.95<br>(3,799.46 to 8,323.21)               | 6,065.16<br>(3,865.11 to 8,510.17)               | 5,976.07<br>(3,814.23 to 8,400.76)                 | 82.49<br>(56.54 to 102.15)                    | 187.40<br>(122.04 to 253.60)                  | 204.24<br>(133.00 to 279.08)                  | 185.32<br>(119.14 to 254.38)                  |
| Multiple myeloma                | 551.03<br>(346.88 to 840.24)                     | 1,371.62<br>(795.94 to 2,266.77)                 | 1,520.75<br>(871.47 to 2,504.73)                 | 1,381.80<br>(782.15 to 2,311.18)                   | 18.29<br>(11.70 to 27.61)                     | 54.33<br>(32.63 to 87.74)                     | 62.14<br>(36.60 to 100.30)                    | 53.69<br>(31.22 to 88.14)                     |
| Leukemia                        | 12,094.07<br>(9,473.37 to 15,373.30)             | 15,944.05<br>(9,964.80 to 24,789.06)             | 13,974.76<br>(8,976.19 to 21,835.46)             | 16,566.52<br>(10,410.15 to 26,045.52)              | 215.94<br>(173.60 to 264.26)                  | 354.41<br>(243.72 to 500.11)                  | 333.32<br>(231.86 to 469.05)                  | 366.21<br>(254.53 to 517.41)                  |
| Acute lymphoid leukemia         | 3,738.54<br>(2,695.66 to 5,168.33)               | 4,218.76<br>(2,355.39 to 7,364.82)               | 3,716.99<br>(2,128.26 to 6,302.41)               | 4,242.18<br>(2,441.44 to 7,429.01)                 | 58.19<br>(43.47 to 77.88)                     | 75.59<br>(46.22 to 120.43)                    | 71.39<br>(45.23 to 108.07)                    | 78.08<br>(48.41 to 122.46)                    |
| Chronic lymphoid leukemia       | 361.95<br>(278.97 to 484.67)                     | 632.66<br>(423.36 to 929.58)                     | 612.94<br>(407.85 to 897.25)                     | 669.13<br>(445.72 to 987.50)                       | 10.29<br>(8.06 to 13.64)                      | 21.56<br>(14.81 to 30.62)                     | 21.51<br>(14.51 to 30.93)                     | 22.41<br>(15.17 to 32.38)                     |
| Acute myeloid leukemia          | 3,109.15<br>(2,327.99 to 4,022.39)               | 4,820.21<br>(2,974.49 to 7,637.80)               | 4,783.16<br>(3,032.00 to 7,482.37)               | 4,995.30<br>(3,081.74 to 7,938.63)                 | 56.45<br>(42.46 to 71.72)                     | 104.09<br>(68.69 to 150.72)                   | 109.87<br>(73.80 to 155.93)                   | 107.85<br>(71.37 to 155.12)                   |
| Chronic myeloid leukemia        | 333.23<br>(246.90 to 451.00)                     | 406.46<br>(268.50 to 600.57)                     | 389.26<br>(253.88 to 576.52)                     | 434.92<br>(279.58 to 646.62)                       | 8.31<br>(6.33 to 11.22)                       | 12.27<br>(8.28 to 17.52)                      | 12.15<br>(8.08 to 17.80)                      | 12.89<br>(8.67 to 18.76)                      |
| Other leukemia                  | 4,551.21<br>(3,432.18 to 5,883.98)               | 5,865.97<br>(3,528.81 to 9,842.94)               | 4,472.40<br>(2,710.10 to 7,348.38)               | 6,124.98<br>(3,620.38 to 10,199.62)                | 82.70<br>(65.24 to 103.44)                    | 140.90<br>(94.11 to 205.84)                   | 118.39<br>(79.04 to 171.84)                   | 144.98<br>(96.67 to 211.92)                   |
| Other neoplasms                 | 12,397.91<br>(8,817.05 to 15,446.76)             | 20,939.73<br>(13,342.02 to 28,457.69)            | 20,020.22<br>(12,533.29 to 27,445.38)            | 20,475.67<br>(13,107.41 to 27,768.89)              | 293.61<br>(197.92 to 361.27)                  | 628.35<br>(404.13 to 812.97)                  | 644.83<br>(407.38 to 853.77)                  | 600.33<br>(389.61 to 853.77)                  |
| <b>Cardiovascular diseases</b>  | <b>315,450.26<br/>(276,719.96 to 364,624.62)</b> | <b>585,870.34<br/>(350,609.75 to 939,731.73)</b> | <b>337,388.86<br/>(200,906.10 to 558,931.45)</b> | <b>789,788.99<br/>(459,284.16 to 1,254,423.21)</b> | <b>15,969.42<br/>(14,272.88 to 18,309.68)</b> | <b>34,981.64<br/>(23,217.49 to 50,667.16)</b> | <b>21,845.47<br/>(14,492.26 to 32,783.71)</b> | <b>43,850.43<br/>(29,852.19 to 63,084.66)</b> |
| Rheumatic heart disease         | 11,836.94<br>(9,537.92 to 14,633.23)             | 9,832.52<br>(6,306.24 to 15,380.56)              | 6,221.22<br>(4,229.17 to 10,203.87)              | 10,148.89<br>(6,524.27 to 15,722.11)               | 295.53<br>(239.89 to 364.51)                  | 297.06<br>(195.19 to 459.18)                  | 207.00<br>(135.56 to 319.09)                  | 301.86<br>(197.24 to 462.10)                  |
| Ischemic heart disease          | 185,719.60<br>(160,979.23 to 216,371.91)         | 351,471.50<br>(189,375.90 to 584,584.98)         | 191,354.29<br>(103,544.41 to 328,563.08)         | 484,019.30<br>(256,003.56 to 813,671.33)           | 9,885.62<br>(8,809.30 to 11,336.41)           | 21,611.04<br>(13,352.03 to 32,877.60)         | 12,923.52<br>(7,744.40 to 20,079.43)          | 27,509.67<br>(16,942.31 to 41,887.25)         |
| Stroke                          | 93,758.84<br>(80,669.00 to 110,228.20)           | 168,384.50<br>(96,212.72 to 289,564.62)          | 92,713.12<br>(54,424.39 to 157,256.38)           | 231,999.96<br>(129,885.57 to 398,630.70)           | 4,801.47<br>(4,214.34 to 5,562.33)            | 10,118.51<br>(6,466.26 to 15,449.55)          | 6,137.24<br>(3,909.85 to 9,501.69)            | 12,803.25<br>(8,103.76 to 19,692.68)          |
| Ischemic stroke                 | 35,215.80<br>(30,058.70 to 41,699.47)            | 62,120.16<br>(34,140.57 to 106,088.15)           | 39,000.29<br>(21,635.11 to 67,522.93)            | 79,855.25<br>(43,415.27 to 132,736.02)             | 2,159.81<br>(1,872.11 to 2,515.05)            | 4,338.44<br>(2,601.25 to 7,041.58)            | 2,959.18<br>(1,789.54 to 4,864.27)            | 5,170.39<br>(3,060.53 to 8,264.53)            |

|                                |                                          |                                            |                                          |                                            |                                       |                                       |                                       |                                        |
|--------------------------------|------------------------------------------|--------------------------------------------|------------------------------------------|--------------------------------------------|---------------------------------------|---------------------------------------|---------------------------------------|----------------------------------------|
| Intracerebral hemorrhage       | 58,543.04<br>(49,910.12 to<br>69,237.04) | 106,264.34<br>(53,696.77 to<br>192,843.73) | 53,712.84<br>(28,235.24 to<br>96,649.70) | 152,144.71<br>(75,885.45 to<br>275,360.24) | 2,641.66<br>(2,280.93 to<br>3,099.82) | 5,780.07<br>(3,300.60 to<br>9,616.93) | 3,178.06<br>(1,880.11 to<br>5,245.44) | 7,632.86<br>(4,325.17 to<br>12,563.10) |
| Hypertensive heart disease     | 10,894.52<br>(7,404.97 to<br>15,043.60)  | 31,459.45<br>(12,888.92 to<br>91,459.94)   | 23,397.90<br>(9,792.37 to<br>73,256.85)  | 38,009.12<br>(15,122.80 to<br>103,744.53)  | 541.50<br>(361.93 to<br>731.57)       | 1,855.28<br>(747.26 to<br>5,745.24)   | 1,455.53<br>(593.98 to<br>4,484.87)   | 2,144.78<br>(867.23 to<br>6,239.71)    |
| Cardiomyopathy and myocarditis | 7,900.88<br>(5,496.57 to<br>11,341.32)   | 12,588.72<br>(7,633.55 to<br>20,862.81)    | 12,214.57<br>(7,341.82 to<br>20,165.58)  | 13,134.36<br>(7,882.96 to<br>22,002.26)    | 204.80<br>(140.32 to<br>298.00)       | 410.16<br>(255.33 to<br>673.30)       | 420.04<br>(259.95 to<br>697.86)       | 418.02<br>(257.39 to<br>690.26)        |
| Myocarditis                    | 1,948.69<br>(1,110.99 to<br>3,367.72)    | 2,714.33<br>(1,364.13 to<br>5,324.59)      | 2,362.54<br>(1,174.02 to<br>4,762.41)    | 2,710.36<br>(1,357.11 to<br>5,347.23)      | 43.19<br>(23.85 to<br>78.08)          | 73.79<br>(37.64 to<br>144.57)         | 67.35<br>(34.24 to<br>133.56)         | 72.31<br>(36.72 to<br>144.30)          |

| Tajikistan                                                    |                                                               |                                                                |                                                               |                                                                |                                                            |                                                            |                                                            |                                                            |
|---------------------------------------------------------------|---------------------------------------------------------------|----------------------------------------------------------------|---------------------------------------------------------------|----------------------------------------------------------------|------------------------------------------------------------|------------------------------------------------------------|------------------------------------------------------------|------------------------------------------------------------|
| Cause                                                         | YLLs (actual counts)                                          |                                                                |                                                               |                                                                | Deaths (actual counts)                                     |                                                            |                                                            |                                                            |
|                                                               | 2016                                                          | 2040 Forecast                                                  | 2040 Better Scenario                                          | 2040 Worse Scenario                                            | 2016                                                       | 2040 Forecast                                              | 2040 Better Scenario                                       | 2040 Worse Scenario                                        |
| Alcoholic cardiomyopathy                                      | 1,920.33<br>(792.34 to<br>3,388.04)                           | 2,843.45<br>(1,068.34 to<br>5,422.84)                          | 3,078.35<br>(1,159.22 to<br>5,749.34)                         | 3,122.82<br>(1,169.57 to<br>5,872.77)                          | 53.98<br>(22.58 to<br>94.87)                               | 93.99<br>(37.12 to<br>172.17)                              | 104.55<br>(41.64 to<br>192.53)                             | 100.97<br>(40.51 to<br>184.33)                             |
| Other cardiomyopathy                                          | 4,031.86<br>(3,000.98 to<br>5,309.55)                         | 7,030.94<br>(3,978.85 to<br>12,018.80)                         | 6,773.67<br>(3,886.93 to<br>11,498.68)                        | 7,301.19<br>(4,067.47 to<br>12,504.82)                         | 107.64<br>(79.32 to<br>144.44)                             | 242.38<br>(141.94 to<br>397.23)                            | 248.14<br>(146.16 to<br>400.35)                            | 244.74<br>(141.58 to<br>396.16)                            |
| Atrial fibrillation and flutter                               | 1,020.95<br>(793.40 to<br>1,287.89)                           | 3,244.49<br>(2,410.55 to<br>4,317.51)                          | 3,492.25<br>(2,530.26 to<br>4,599.21)                         | 3,177.48<br>(2,378.02 to<br>4,175.09)                          | 94.05<br>(71.79 to<br>118.70)                              | 299.27<br>(228.69 to<br>396.38)                            | 340.87<br>(256.00 to<br>443.96)                            | 282.52<br>(209.65 to<br>372.10)                            |
| Aortic aneurysm                                               | 1,121.88<br>(897.27 to<br>1,421.85)                           | 2,044.92<br>(1,367.27 to<br>2,999.49)                          | 2,080.36<br>(1,379.30 to<br>3,116.34)                         | 2,999.63<br>(1,411.82 to<br>3,067.31)                          | 45.44<br>(37.15 to<br>57.10)                               | 102.12<br>(74.06 to<br>142.83)                             | 110.50<br>(80.05 to<br>156.99)                             | 99.95<br>(72.38 to<br>139.20)                              |
| Peripheral artery disease                                     | 51.68<br>(20.80 to<br>89.20)                                  | 227.56<br>(87.60 to<br>429.83)                                 | 267.19<br>(103.71 to<br>485.45)                               | 231.88<br>(86.11 to<br>442.04)                                 | 3.20<br>(1.29 to<br>5.33)                                  | 15.80<br>(6.34 to<br>27.24)                                | 20.23<br>(8.03 to<br>34.73)                                | 15.25<br>(5.98 to<br>26.54)                                |
| Endocarditis                                                  | 866.98<br>(676.10 to<br>1,118.87)                             | 1,480.01<br>(970.51 to<br>2,212.60)                            | 1,308.42<br>(843.55 to<br>1,991.65)                           | 1,534.37<br>(1,005.68 to<br>2,334.57)                          | 21.79<br>(16.87 to<br>27.82)                               | 49.18<br>(33.84 to<br>70.39)                               | 46.79<br>(31.92 to<br>68.05)                               | 49.50<br>(33.48 to<br>69.64)                               |
| Other cardiovascular and circulatory diseases                 | 2,277.99<br>(1,326.54 to<br>2,979.44)                         | 5,136.67<br>(2,699.29 to<br>8,063.59)                          | 3,939.55<br>(2,108.83 to<br>6,381.08)                         | 5,434.00<br>(2,809.80 to<br>8,645.71)                          | 76.00<br>(44.67 to<br>98.74)                               | 223.23<br>(124.18 to<br>331.97)                            | 183.76<br>(102.76 to<br>275.09)                            | 225.63<br>(121.82 to<br>333.22)                            |
| <b>Chronic respiratory diseases</b>                           | <b>35,533.46</b><br><b>(30,278.94 to</b><br><b>41,906.92)</b> | <b>58,417.67</b><br><b>(31,972.01 to</b><br><b>102,203.88)</b> | <b>42,377.90</b><br><b>(24,349.71 to</b><br><b>69,302.36)</b> | <b>79,189.35</b><br><b>(41,490.32 to</b><br><b>145,142.41)</b> | <b>1,550.72</b><br><b>(1,331.80 to</b><br><b>1,817.69)</b> | <b>3,152.31</b><br><b>(1,843.90 to</b><br><b>5,342.00)</b> | <b>2,463.36</b><br><b>(1,516.95 to</b><br><b>3,845.80)</b> | <b>3,849.51</b><br><b>(2,190.76 to</b><br><b>6,748.03)</b> |
| Chronic obstructive pulmonary disease                         | 29,022.86<br>(24,730.54 to<br>34,045.88)                      | 49,396.46<br>(24,962.16 to<br>92,220.12)                       | 33,946.57<br>(18,142.59 to<br>59,048.12)                      | 69,527.70<br>(33,766.06 to<br>134,246.48)                      | 1,332.59<br>(1,151.52 to<br>1,555.00)                      | 2,764.02<br>(1,539.26 to<br>4,916.68)                      | 2,071.70<br>(1,203.36 to<br>3,400.74)                      | 3,448.30<br>(1,799.41 to<br>6,318.37)                      |
| Pneumoconiosis                                                | 31.47<br>(23.09 to<br>43.65)                                  | 56.32<br>(37.61 to<br>86.27)                                   | 53.65<br>(34.45 to<br>81.94)                                  | 55.90<br>(37.75 to<br>85.24)                                   | 1.48<br>(1.09 to<br>2.03)                                  | 3.16<br>(2.14 to<br>4.85)                                  | 3.17<br>(2.14 to<br>4.86)                                  | 3.06<br>(2.08 to<br>4.62)                                  |
| Silicosis                                                     | 0.64<br>(0.35 to<br>1.13)                                     | 1.36<br>(0.62 to<br>2.99)                                      | 1.16<br>(0.52 to<br>2.52)                                     | 1.29<br>(0.60 to<br>2.80)                                      | 0.04<br>(0.02 to<br>0.07)                                  | 0.09<br>(0.04 to<br>0.20)                                  | 0.09<br>(0.04 to<br>0.19)                                  | 0.09<br>(0.04 to<br>0.18)                                  |
| Asbestosis                                                    | 10.43<br>(7.45 to<br>14.61)                                   | 19.13<br>(11.43 to<br>29.50)                                   | 18.87<br>(10.98 to<br>30.20)                                  | 18.57<br>(11.36 to<br>28.67)                                   | 0.32<br>(0.23 to<br>0.45)                                  | 0.72<br>(0.45 to<br>1.10)                                  | 0.73<br>(0.45 to<br>1.13)                                  | 0.69<br>(0.44 to<br>1.04)                                  |
| Coal workers pneumoconiosis                                   | 0.58<br>(0.28 to<br>1.24)                                     | 1.35<br>(0.54 to<br>3.34)                                      | 0.88<br>(0.34 to<br>2.23)                                     | 1.40<br>(0.58 to<br>3.47)                                      | 0.03<br>(0.01 to<br>0.06)                                  | 0.07<br>(0.03 to<br>0.18)                                  | 0.05<br>(0.02 to<br>0.13)                                  | 0.07<br>(0.03 to<br>0.18)                                  |
| Other pneumoconiosis                                          | 19.82<br>(14.42 to<br>27.77)                                  | 34.48<br>(22.17 to<br>54.12)                                   | 32.74<br>(20.43 to<br>51.82)                                  | 34.63<br>(22.65 to<br>54.01)                                   | 1.09<br>(0.79 to<br>1.50)                                  | 2.27<br>(1.47 to<br>3.57)                                  | 2.30<br>(1.49 to<br>3.64)                                  | 2.21<br>(1.40 to<br>3.45)                                  |
| Asthma                                                        | 4,010.92<br>(3,069.16 to<br>5,548.75)                         | 4,234.14<br>(2,150.91 to<br>8,066.16)                          | 3,136.70<br>(1,625.16 to<br>5,892.10)                         | 5,004.57<br>(2,428.55 to<br>9,988.57)                          | 138.63<br>(105.62 to<br>192.10)                            | 186.70<br>(96.44 to<br>356.59)                             | 147.92<br>(77.84 to<br>277.57)                             | 212.84<br>(103.38 to<br>424.44)                            |
| Interstitial lung disease and pulmonary sarcoidosis           | 1,636.50<br>(978.10 to<br>2,360.73)                           | 3,577.54<br>(1,985.18 to<br>5,624.86)                          | 4,266.75<br>(2,397.07 to<br>6,684.29)                         | 3,407.40<br>(1,871.34 to<br>5,349.20)                          | 58.83<br>(34.65 to<br>85.33)                               | 162.42<br>(92.83 to<br>248.14)                             | 207.01<br>(118.11 to<br>320.97)                            | 149.50<br>(84.22 to<br>226.84)                             |
| Other chronic respiratory diseases                            | 831.72<br>(522.53 to<br>1,281.34)                             | 1,153.21<br>(669.21 to<br>1,926.58)                            | 974.24<br>(557.96 to<br>1,650.99)                             | 1,193.79<br>(686.96 to<br>2,034.22)                            | 19.19<br>(12.40 to<br>29.48)                               | 36.01<br>(21.97 to<br>59.53)                               | 33.57<br>(20.18 to<br>55.20)                               | 35.81<br>(21.47 to<br>60.05)                               |
| <b>Cirrhosis and other chronic liver diseases</b>             | <b>46,457.35</b><br><b>(38,404.21 to</b><br><b>55,331.12)</b> | <b>83,493.17</b><br><b>(62,813.30 to</b><br><b>107,582.34)</b> | <b>73,028.68</b><br><b>(54,059.98 to</b><br><b>95,687.15)</b> | <b>84,528.39</b><br><b>(63,954.52 to</b><br><b>108,171.72)</b> | <b>1,352.79</b><br><b>(1,126.48 to</b><br><b>1,616.51)</b> | <b>3,002.78</b><br><b>(2,323.99 to</b><br><b>3,751.39)</b> | <b>2,731.71</b><br><b>(2,071.85 to</b><br><b>3,493.08)</b> | <b>2,979.84</b><br><b>(2,336.19 to</b><br><b>3,705.93)</b> |
| Cirrhosis and other chronic liver diseases due to hepatitis B | 14,425.20<br>(11,712.07 to<br>17,636.37)                      | 27,448.82<br>(20,285.70 to<br>35,933.35)                       | 24,739.10<br>(18,089.64 to<br>32,546.61)                      | 26,861.07<br>(20,258.47 to<br>34,592.25)                       | 440.47<br>(361.86 to<br>532.55)                            | 1,022.95<br>(784.57 to<br>1,295.96)                        | 953.28<br>(715.54 to<br>1,242.44)                          | 980.54<br>(761.47 to<br>1,235.30)                          |
| Cirrhosis and other chronic liver diseases due to hepatitis C | 9,682.17<br>(7,755.10 to<br>11,921.44)                        | 18,882.81<br>(13,490.39 to<br>24,835.18)                       | 16,912.88<br>(11,969.99 to<br>22,703.17)                      | 18,523.16<br>(13,425.00 to<br>24,370.27)                       | 293.23<br>(237.14 to<br>357.83)                            | 678.26<br>(501.29 to<br>877.84)                            | 625.19<br>(455.79 to<br>823.16)                            | 653.67<br>(492.20 to<br>840.82)                            |

|                                                                |                                                               |                                                               |                                                               |                                                               |                                                      |                                                        |                                                      |                                                        |
|----------------------------------------------------------------|---------------------------------------------------------------|---------------------------------------------------------------|---------------------------------------------------------------|---------------------------------------------------------------|------------------------------------------------------|--------------------------------------------------------|------------------------------------------------------|--------------------------------------------------------|
|                                                                | 10,590.02<br>(8,546.52 to<br>13,106.07)                       | 19,106.72<br>(14,043.77 to<br>24,761.53)                      | 16,343.30<br>(11,927.21 to<br>21,645.44)                      | 21,226.26<br>(15,831.74 to<br>27,206.47)                      | 342.15<br>(279.57 to<br>420.59)                      | 740.66<br>(564.83 to<br>938.84)                        | 654.58<br>(485.65 to<br>848.12)                      | 802.15<br>(617.70 to<br>1,011.37)                      |
| Cirrhosis and other chronic liver diseases due to alcohol use  |                                                               |                                                               |                                                               |                                                               |                                                      |                                                        |                                                      |                                                        |
|                                                                | 11,759.96<br>(9,712.02 to<br>14,006.36)                       | 18,054.82<br>(13,302.91 to<br>24,971.07)                      | 15,033.39<br>(11,050.87 to<br>20,691.84)                      | 17,907.90<br>(13,201.48 to<br>24,722.89)                      | 276.93<br>(232.65 to<br>329.68)                      | 560.92<br>(437.56 to<br>725.78)                        | 498.66<br>(382.90 to<br>647.08)                      | 543.49<br>(431.12 to<br>691.60)                        |
| Cirrhosis and other chronic liver diseases due to other causes |                                                               |                                                               |                                                               |                                                               |                                                      |                                                        |                                                      |                                                        |
|                                                                | <b>26,374.24</b><br><b>(18,838.38 to</b><br><b>38,296.79)</b> | <b>26,744.39</b><br><b>(18,550.91 to</b><br><b>37,719.89)</b> | <b>19,543.88</b><br><b>(13,678.74 to</b><br><b>27,508.50)</b> | <b>27,934.55</b><br><b>(19,302.62 to</b><br><b>40,473.20)</b> | <b>584.74</b><br><b>(451.24 to</b><br><b>755.15)</b> | <b>841.45</b><br><b>(594.92 to</b><br><b>1,170.97)</b> | <b>678.95</b><br><b>(475.12 to</b><br><b>953.64)</b> | <b>857.81</b><br><b>(602.78 to</b><br><b>1,249.09)</b> |
| Digestive diseases                                             |                                                               |                                                               |                                                               |                                                               |                                                      |                                                        |                                                      |                                                        |
|                                                                | 7,259.62<br>(5,043.62 to<br>9,766.76)                         | 7,117.82<br>(4,480.70 to<br>10,447.30)                        | 4,957.43<br>(3,083.82 to<br>7,580.48)                         | 7,273.40<br>(4,618.54 to<br>10,689.06)                        | 201.78<br>(140.47 to<br>279.28)                      | 250.40<br>(160.97 to<br>367.07)                        | 181.54<br>(115.05 to<br>279.32)                      | 249.97<br>(158.91 to<br>372.32)                        |
| Peptic ulcer disease                                           |                                                               |                                                               |                                                               |                                                               |                                                      |                                                        |                                                      |                                                        |

| Tajikistan                                 |                                       |                                       |                                       |                                       |                                    |                                    |                                    |                                    |
|--------------------------------------------|---------------------------------------|---------------------------------------|---------------------------------------|---------------------------------------|------------------------------------|------------------------------------|------------------------------------|------------------------------------|
| Cause                                      | YLLs (actual counts)                  |                                       |                                       |                                       | Deaths (actual counts)             |                                    |                                    |                                    |
|                                            | 2016                                  | 2040 Forecast                         | 2040 Better Scenario                  | 2040 Worse Scenario                   | 2016                               | 2040 Forecast                      | 2040 Better Scenario               | 2040 Worse Scenario                |
| Gastritis and duodenitis                   | 115.73<br>(70.68 to 179.25)           | 220.91<br>(129.65 to 359.51)          | 181.81<br>(106.88 to 297.52)          | 215.74<br>(126.95 to 349.12)          | 3.51<br>(2.22 to 5.17)             | 8.75<br>(5.31 to 13.57)            | 7.77<br>(4.64 to 12.17)            | 8.27<br>(5.02 to 12.83)            |
| Appendicitis                               | 1,902.39<br>(1,454.58 to 2,632.84)    | 1,949.05<br>(1,185.38 to 3,105.29)    | 1,350.71<br>(833.45 to 2,111.00)      | 1,963.87<br>(1,192.08 to 3,188.73)    | 35.19<br>(26.72 to 46.95)          | 44.12<br>(28.73 to 66.43)          | 32.56<br>(21.35 to 48.12)          | 43.69<br>(28.68 to 65.70)          |
| Paralytic ileus and intestinal obstruction | 10,598.23<br>(5,613.59 to 20,469.00)  | 8,191.84<br>(5,016.40 to 13,744.30)   | 5,609.12<br>(3,613.13 to 8,670.65)    | 8,247.81<br>(4,945.48 to 14,150.51)   | 163.20<br>(98.85 to 278.76)        | 187.18<br>(129.36 to 270.41)       | 155.65<br>(108.80 to 222.20)       | 181.70<br>(125.30 to 263.69)       |
| Inguinal, femoral, and abdominal hernia    | 499.28<br>(349.26 to 777.07)          | 575.72<br>(385.65 to 875.32)          | 474.55<br>(316.91 to 729.30)          | 561.88<br>(374.82 to 864.02)          | 15.47<br>(11.62 to 23.05)          | 24.00<br>(16.78 to 35.76)          | 21.73<br>(14.60 to 33.41)          | 22.66<br>(15.65 to 33.91)          |
| Inflammatory bowel disease                 | 897.89<br>(598.61 to 1,474.28)        | 985.77<br>(623.97 to 1,493.95)        | 881.53<br>(561.01 to 1,303.56)        | 970.72<br>(615.84 to 1,490.55)        | 18.87<br>(13.30 to 27.32)          | 28.60<br>(19.06 to 40.82)          | 27.70<br>(18.02 to 39.39)          | 27.47<br>(18.47 to 38.96)          |
| Vascular intestinal disorders              | 550.68<br>(429.43 to 764.17)          | 1,172.62<br>(843.44 to 1,694.98)      | 1,083.77<br>(774.72 to 1,605.47)      | 1,116.24<br>(819.38 to 1,597.44)      | 23.98<br>(19.05 to 34.24)          | 64.17<br>(47.58 to 94.52)          | 63.01<br>(45.78 to 94.76)          | 59.25<br>(44.13 to 87.15)          |
| Gallbladder and biliary diseases           | 1,046.89<br>(794.18 to 1,505.83)      | 1,830.98<br>(907.65 to 3,438.64)      | 1,299.22<br>(658.19 to 2,511.08)      | 2,239.26<br>(1,056.19 to 4,394.54)    | 34.66<br>(25.61 to 53.56)          | 78.17<br>(38.18 to 153.45)         | 58.81<br>(29.32 to 118.43)         | 92.69<br>(42.64 to 183.00)         |
| Pancreatitis                               | 2,090.42<br>(1,444.45 to 3,237.89)    | 3,059.64<br>(1,543.84 to 7,542.31)    | 2,490.66<br>(1,279.13 to 5,768.76)    | 3,721.81<br>(1,624.60 to 10,829.45)   | 54.77<br>(38.64 to 83.81)          | 98.27<br>(51.94 to 232.90)         | 82.49<br>(44.55 to 188.14)         | 116.95<br>(52.77 to 341.20)        |
| Other digestive diseases                   | 1,413.13<br>(949.49 to 2,449.93)      | 1,640.04<br>(1,083.51 to 2,565.51)    | 1,215.09<br>(808.91 to 1,830.55)      | 1,623.81<br>(1,066.65 to 2,554.11)    | 33.30<br>(24.39 to 48.50)          | 57.81<br>(40.54 to 82.91)          | 47.68<br>(33.28 to 68.90)          | 55.18<br>(38.99 to 78.23)          |
| Neurological disorders                     | 32,843.86<br>(27,022.00 to 40,501.24) | 56,739.38<br>(43,726.78 to 73,674.95) | 52,296.33<br>(40,936.84 to 66,282.56) | 58,459.78<br>(44,196.83 to 76,761.64) | 1,185.83<br>(1,010.55 to 1,390.20) | 3,021.76<br>(2,385.42 to 3,818.00) | 3,266.84<br>(2,728.03 to 4,157.22) | 2,951.47<br>(2,223.82 to 3,843.90) |
| Alzheimer's disease and other dementias    | 6,732.80<br>(5,530.87 to 8,229.35)    | 21,990.09<br>(16,290.33 to 29,941.84) | 24,420.10<br>(18,503.64 to 32,052.02) | 21,902.77<br>(15,835.52 to 31,486.40) | 655.09<br>(534.55 to 806.37)       | 2,074.79<br>(1,499.64 to 2,827.57) | 2,430.84<br>(1,850.34 to 3,188.01) | 2,003.85<br>(1,332.59 to 2,867.83) |
| Parkinson's disease                        | 1,193.41<br>(892.59 to 1,538.26)      | 4,470.23<br>(3,315.72 to 5,868.88)    | 5,832.89<br>(4,223.41 to 7,576.45)    | 4,030.04<br>(2,905.22 to 5,310.52)    | 92.21<br>(68.73 to 120.95)         | 349.29<br>(255.20 to 458.30)       | 473.82<br>(352.95 to 616.13)       | 308.58<br>(222.90 to 408.76)       |
| Epilepsy                                   | 22,929.04<br>(18,127.99 to 29,882.59) | 27,228.12<br>(16,828.95 to 44,228.22) | 18,997.94<br>(11,882.30 to 30,528.23) | 29,521.81<br>(18,121.53 to 47,167.70) | 398.49<br>(317.53 to 514.00)       | 519.06<br>(336.81 to 783.90)       | 377.18<br>(243.76 to 564.43)       | 563.19<br>(358.81 to 863.95)       |
| Multiple sclerosis                         | 196.95<br>(154.10 to 248.20)          | 348.13<br>(248.87 to 456.84)          | 374.33<br>(267.85 to 501.92)          | 343.55<br>(248.68 to 452.40)          | 5.36<br>(4.21 to 6.77)             | 11.41<br>(8.46 to 14.88)           | 12.68<br>(9.31 to 16.95)           | 11.05<br>(8.25 to 14.30)           |
| Motor neuron disease                       | 213.83<br>(165.31 to 288.94)          | 446.10<br>(312.20 to 668.89)          | 477.84<br>(333.25 to 734.85)          | 434.45<br>(307.96 to 648.80)          | 5.46<br>(4.34 to 7.65)             | 14.41<br>(10.16 to 21.85)          | 16.06<br>(11.36 to 24.60)          | 13.82<br>(9.90 to 21.19)           |
| Other neurological disorders               | 1,577.83<br>(1,215.15 to 1,984.88)    | 2,256.72<br>(1,487.65 to 3,400.77)    | 2,193.23<br>(1,416.34 to 3,279.66)    | 2,227.16<br>(1,466.01 to 3,354.42)    | 29.21<br>(21.57 to 36.16)          | 52.81<br>(34.80 to 72.10)          | 56.26<br>(36.10 to 77.55)          | 50.98<br>(33.97 to 69.28)          |
| Mental disorders                           | 14,243.35<br>(10,585.76 to 18,799.85) | 26,402.34<br>(17,829.44 to 37,279.05) | 25,658.72<br>(17,243.24 to 36,501.89) | 26,402.82<br>(17,827.93 to 37,190.24) | 328.13<br>(243.22 to 433.97)       | 682.63<br>(462.72 to 944.94)       | 674.53<br>(457.21 to 938.96)       | 676.23<br>(461.02 to 935.92)       |
| Alcohol use disorders                      | 6,269.73<br>(3,698.85 to 10,015.96)   | 7,896.20<br>(3,916.88 to 13,728.15)   | 7,477.66<br>(3,642.87 to 13,254.65)   | 8,111.25<br>(4,078.27 to 13,989.64)   | 152.37<br>(90.24 to 243.08)        | 218.33<br>(111.70 to 381.51)       | 209.70<br>(104.40 to 373.27)       | 222.14<br>(113.94 to 384.25)       |
| Drug use disorders                         | 7,969.79<br>(5,835.24 to 10,850.56)   | 18,498.79<br>(12,525.00 to 26,510.77) | 18,174.08<br>(12,254.01 to 26,285.78) | 18,284.27<br>(12,378.53 to 26,032.09) | 175.69<br>(128.77 to 243.16)       | 464.16<br>(318.66 to 662.91)       | 464.70<br>(319.68 to 671.06)       | 453.96<br>(313.07 to 640.55)       |
| Opioid use disorders                       | 6,094.79<br>(4,355.86 to 8,586.39)    | 12,362.10<br>(7,930.94 to 18,440.12)  | 12,148.51<br>(7,823.67 to 18,126.28)  | 12,226.71<br>(7,862.78 to 18,208.41)  | 131.39<br>(93.38 to 189.06)        | 299.83<br>(196.30 to 445.83)       | 299.44<br>(195.49 to 444.61)       | 293.99<br>(193.79 to 436.61)       |



|                           |                                     |                                       |                                       |                                       |                              |                                |                                |                                |
|---------------------------|-------------------------------------|---------------------------------------|---------------------------------------|---------------------------------------|------------------------------|--------------------------------|--------------------------------|--------------------------------|
|                           | 356.82<br>(197.75 to<br>540.76)     | 1,222.42<br>(685.24 to<br>1,946.62)   | 1,114.21<br>(620.79 to<br>1,768.13)   | 1,213.72<br>(677.38 to<br>1,928.25)   | 8.01<br>(4.56 to<br>12.10)   | 30.63<br>(17.33 to<br>48.63)   | 28.29<br>(16.20 to<br>45.60)   | 30.20<br>(17.09 to<br>47.85)   |
| Cocaine use disorders     |                                     |                                       |                                       |                                       |                              |                                |                                |                                |
|                           | 221.79<br>(122.86 to<br>336.77)     | 1,047.65<br>(577.92 to<br>1,683.11)   | 932.68<br>(513.49 to<br>1,519.64)     | 1,044.53<br>(570.65 to<br>1,697.75)   | 4.80<br>(2.78 to<br>7.32)    | 34.80<br>(13.81 to<br>39.77)   | 22.38<br>(12.52 to<br>36.16)   | 24.57<br>(13.69 to<br>40.07)   |
| Amphetamine use disorders |                                     |                                       |                                       |                                       |                              |                                |                                |                                |
|                           | 1,296.39<br>(896.77 to<br>1,806.04) | 3,866.62<br>(2,458.19 to<br>5,676.42) | 3,978.67<br>(2,527.07 to<br>5,863.90) | 3,799.31<br>(2,455.95 to<br>5,600.64) | 31.48<br>(22.50 to<br>43.99) | 108.90<br>(73.03 to<br>157.05) | 114.59<br>(75.58 to<br>166.55) | 105.20<br>(71.08 to<br>152.18) |
| Other drug use disorders  |                                     |                                       |                                       |                                       |                              |                                |                                |                                |
|                           | 3.84<br>(2.71 to<br>5.18)           | 7.34<br>(4.49 to<br>11.37)            | 6.98<br>(4.16 to<br>10.92)            | 7.31<br>(4.49 to<br>11.28)            | 0.07<br>(0.05 to<br>0.10)    | 0.14<br>(0.08 to<br>0.22)      | 0.14<br>(0.08 to<br>0.22)      | 0.14<br>(0.09 to<br>0.22)      |
| Eating disorders          |                                     |                                       |                                       |                                       |                              |                                |                                |                                |

| Tajikistan                                                 |                                              |                                                |                                               |                                                |                                           |                                           |                                           |                                           |
|------------------------------------------------------------|----------------------------------------------|------------------------------------------------|-----------------------------------------------|------------------------------------------------|-------------------------------------------|-------------------------------------------|-------------------------------------------|-------------------------------------------|
| Cause                                                      | YLLs (actual counts)                         |                                                |                                               |                                                | Deaths (actual counts)                    |                                           |                                           |                                           |
|                                                            | 2016                                         | 2040 Forecast                                  | 2040 Better Scenario                          | 2040 Worse Scenario                            | 2016                                      | 2040 Forecast                             | 2040 Better Scenario                      | 2040 Worse Scenario                       |
| <b>Diabetes, urogenital, blood, and endocrine diseases</b> | <b>62,692.54</b><br>(54,375.92 to 72,733.99) | <b>124,716.72</b><br>(82,623.55 to 182,839.54) | <b>91,799.48</b><br>(60,190.98 to 136,605.83) | <b>133,486.88</b><br>(88,640.48 to 196,641.74) | <b>1,754.96</b><br>(1,534.74 to 2,056.71) | <b>4,596.91</b><br>(3,119.23 to 6,588.25) | <b>3,538.65</b><br>(2,353.13 to 5,094.95) | <b>4,843.79</b><br>(3,277.31 to 7,045.14) |
| Diabetes mellitus                                          | 23,407.44<br>(19,936.35 to 27,807.59)        | 51,701.03<br>(26,744.15 to 94,575.04)          | 36,170.23<br>(18,458.72 to 67,974.81)         | 57,307.92<br>(28,736.78 to 104,023.13)         | 792.78<br>(676.35 to 946.37)              | 2,108.71<br>(1,142.16 to 3,676.57)        | 1,525.55<br>(822.41 to 2,746.94)          | 2,280.57<br>(1,211.11 to 4,059.70)        |
| Acute glomerulonephritis                                   | 114.54<br>(83.99 to 162.10)                  | 210.22<br>(122.58 to 343.84)                   | 166.70<br>(96.50 to 279.19)                   | 208.83<br>(120.86 to 346.34)                   | 2.65<br>(1.90 to 3.69)                    | 5.94<br>(3.48 to 9.46)                    | 5.07<br>(2.87 to 8.27)                    | 5.76<br>(3.38 to 9.20)                    |
| Chronic kidney disease                                     | 22,005.35<br>(18,455.04 to 26,424.14)        | 41,362.57<br>(25,059.87 to 66,931.63)          | 27,196.52<br>(16,079.69 to 43,965.40)         | 45,029.92<br>(26,819.64 to 73,455.87)          | 569.30<br>(484.43 to 676.04)              | 1,479.12<br>(847.77 to 2,441.34)          | 1,021.99<br>(585.74 to 1,711.18)          | 1,601.29<br>(929.35 to 2,665.16)          |
| Chronic kidney disease due to diabetes mellitus            | 6,434.15<br>(5,125.93 to 7,991.73)           | 16,494.62<br>(8,885.97 to 28,753.06)           | 11,233.81<br>(6,065.78 to 20,029.83)          | 18,234.11<br>(9,856.92 to 32,092.60)           | 205.67<br>(166.02 to 251.65)              | 662.42<br>(348.65 to 1,147.10)            | 464.63<br>(244.07 to 819.21)              | 723.83<br>(386.51 to 1,272.81)            |
| Chronic kidney disease due to hypertension                 | 695.56<br>(547.24 to 872.80)                 | 1,938.72<br>(1,051.86 to 3,307.44)             | 1,351.44<br>(734.83 to 2,331.98)              | 2,106.84<br>(1,139.34 to 3,522.12)             | 31.69<br>(25.57 to 39.69)                 | 114.61<br>(61.18 to 195.81)               | 85.40<br>(45.14 to 146.63)                | 121.10<br>(64.37 to 203.97)               |
| Chronic kidney disease due to glomerulonephritis           | 7,346.94<br>(5,809.61 to 9,056.87)           | 10,713.07<br>(6,426.91 to 17,153.10)           | 6,831.21<br>(4,059.76 to 11,084.96)           | 11,508.04<br>(6,973.67 to 18,601.91)           | 156.96<br>(126.09 to 191.41)              | 305.44<br>(181.35 to 491.71)              | 203.46<br>(122.80 to 330.29)              | 329.13<br>(193.10 to 530.12)              |
| Chronic kidney disease due to other and unspecified causes | 7,538.70<br>(5,978.30 to 9,495.78)           | 12,216.16<br>(7,247.95 to 19,630.84)           | 7,790.05<br>(4,590.27 to 12,764.04)           | 13,180.93<br>(7,751.61 to 21,368.64)           | 174.98<br>(141.87 to 216.53)              | 396.66<br>(233.56 to 645.13)              | 268.49<br>(156.50 to 453.88)              | 427.23<br>(245.93 to 693.04)              |
| Urinary diseases and male infertility                      | 11,735.70<br>(9,972.70 to 13,897.51)         | 25,854.88<br>(19,449.79 to 34,402.95)          | 24,026.82<br>(17,742.73 to 31,701.32)         | 25,340.70<br>(19,261.10 to 33,362.48)          | 298.80<br>(255.84 to 347.89)              | 876.88<br>(696.30 to 1,079.30)            | 882.89<br>(679.35 to 1,102.51)            | 832.48<br>(669.15 to 1,019.58)            |
| Urinary tract infections                                   | 11,376.65<br>(9,646.29 to 13,426.93)         | 25,164.05<br>(18,926.75 to 33,336.23)          | 23,452.93<br>(17,304.01 to 31,115.09)         | 24,670.19<br>(18,735.41 to 32,606.36)          | 286.77<br>(245.28 to 335.65)              | 846.51<br>(662.50 to 1,043.10)            | 855.57<br>(653.14 to 1,071.82)            | 804.10<br>(642.11 to 988.64)              |
| Urolithiasis                                               | 81.47<br>(46.63 to 112.70)                   | 231.47<br>(109.43 to 360.59)                   | 220.95<br>(103.25 to 348.23)                  | 224.14<br>(106.57 to 347.38)                   | 2.52<br>(1.28 to 3.50)                    | 9.19<br>(4.06 to 14.25)                   | 9.50<br>(4.11 to 14.99)                   | 8.61<br>(3.79 to 13.10)                   |
| Other urinary diseases                                     | 277.57<br>(146.89 to 492.03)                 | 459.36<br>(215.50 to 829.82)                   | 352.94<br>(162.91 to 640.31)                  | 446.37<br>(211.94 to 800.65)                   | 9.52<br>(4.84 to 15.25)                   | 21.18<br>(9.80 to 35.97)                  | 17.82<br>(8.25 to 30.79)                  | 19.78<br>(9.02 to 34.17)                  |
| Gynecological diseases                                     | 4.41<br>(3.04 to 6.47)                       | 6.71<br>(3.81 to 11.46)                        | 4.77<br>(2.70 to 8.49)                        | 6.73<br>(3.75 to 11.49)                        | 0.13<br>(0.09 to 0.19)                    | 0.24<br>(0.15 to 0.39)                    | 0.18<br>(0.11 to 0.30)                    | 0.24<br>(0.14 to 0.39)                    |
| Uterine fibroids                                           | 2.29<br>(1.42 to 3.59)                       | 3.52<br>(1.68 to 6.54)                         | 2.45<br>(1.13 to 4.71)                        | 3.55<br>(1.70 to 6.69)                         | 0.07<br>(0.04 to 0.10)                    | 0.12<br>(0.06 to 0.21)                    | 0.08<br>(0.04 to 0.15)                    | 0.12<br>(0.06 to 0.21)                    |
| Polycystic ovarian syndrome                                | 0.73<br>(0.18 to 1.36)                       | 0.70<br>(0.14 to 1.59)                         | 0.41<br>(0.08 to 0.93)                        | 0.72<br>(0.15 to 1.65)                         | 0.02<br>(0.00 to 0.03)                    | 0.02<br>(0.00 to 0.04)                    | 0.01<br>(0.00 to 0.02)                    | 0.02<br>(0.00 to 0.04)                    |
| Endometriosis                                              | 0.03<br>(0.01 to 0.05)                       | 0.05<br>(0.02 to 0.13)                         | 0.04<br>(0.01 to 0.10)                        | 0.05<br>(0.02 to 0.13)                         | 0.00<br>(0.00 to 0.00)                    | 0.00<br>(0.00 to 0.00)                    | 0.00<br>(0.00 to 0.00)                    | 0.00<br>(0.00 to 0.00)                    |
| Genital prolapse                                           | 0.22<br>(0.12 to 0.40)                       | 0.42<br>(0.17 to 0.91)                         | 0.29<br>(0.11 to 0.65)                        | 0.41<br>(0.16 to 0.90)                         | 0.01<br>(0.01 to 0.02)                    | 0.02<br>(0.01 to 0.05)                    | 0.02<br>(0.01 to 0.04)                    | 0.02<br>(0.01 to 0.05)                    |
| Other gynecological diseases                               | 1.15<br>(0.70 to 1.85)                       | 2.02<br>(1.06 to 3.79)                         | 1.59<br>(0.84 to 2.91)                        | 2.00<br>(1.04 to 3.72)                         | 0.03<br>(0.02 to 0.05)                    | 0.08<br>(0.05 to 0.14)                    | 0.07<br>(0.04 to 0.12)                    | 0.08<br>(0.05 to 0.13)                    |
| Hemoglobinopathies and hemolytic anemias                   | 3,234.70<br>(2,387.30 to 4,313.20)           | 2,741.91<br>(1,848.32 to 4,086.44)             | 2,132.37<br>(1,428.46 to 3,193.81)            | 2,740.12<br>(1,849.05 to 4,093.01)             | 54.68<br>(42.80 to 69.52)                 | 63.90<br>(47.25 to 88.09)                 | 51.46<br>(36.88 to 71.54)                 | 62.47<br>(46.32 to 86.00)                 |
| Thalassemias                                               | 1,644.40<br>(973.68 to 2,532.69)             | 813.47<br>(402.81 to 1,481.14)                 | 661.33<br>(331.46 to 1,223.96)                | 814.60<br>(406.81 to 1,470.35)                 | 19.82<br>(11.88 to 30.37)                 | 9.99<br>(4.98 to 18.29)                   | 8.21<br>(4.10 to 15.27)                   | 9.99<br>(5.01 to 18.20)                   |

|                                                   |                                       |                                       |                                       |                                       |                              |                              |                              |                              |
|---------------------------------------------------|---------------------------------------|---------------------------------------|---------------------------------------|---------------------------------------|------------------------------|------------------------------|------------------------------|------------------------------|
|                                                   | 795.08<br>(630.62 to<br>1,018.96)     | 931.57<br>(551.54 to<br>1,535.78)     | 716.77<br>(422.88 to<br>1,179.83)     | 939.99<br>(566.19 to<br>1,578.86)     | 13.05<br>(10.38 to<br>16.76) | 16.46<br>(10.21 to<br>26.33) | 12.96<br>(8.06 to<br>20.75)  | 16.58<br>(10.35 to<br>26.35) |
| Sickle cell disorders                             |                                       |                                       |                                       |                                       |                              |                              |                              |                              |
|                                                   | 338.18<br>(267.67 to<br>439.79)       | 462.02<br>(305.72 to<br>678.61)       | 331.54<br>(216.50 to<br>497.35)       | 465.62<br>(307.09 to<br>699.83)       | 6.94<br>(5.46 to<br>9.10)    | 11.37<br>(7.72 to<br>16.30)  | 8.36<br>(5.54 to<br>12.03)   | 11.36<br>(7.65 to<br>16.18)  |
| G6PD deficiency                                   |                                       |                                       |                                       |                                       |                              |                              |                              |                              |
|                                                   | 457.04<br>(367.00 to<br>596.47)       | 534.85<br>(382.86 to<br>735.02)       | 422.73<br>(292.43 to<br>587.41)       | 519.91<br>(373.87 to<br>712.01)       | 14.88<br>(12.02 to<br>18.91) | 26.08<br>(19.65 to<br>34.77) | 21.93<br>(15.96 to<br>29.69) | 24.54<br>(18.65 to<br>32.48) |
| Other hemoglobinopathies and hemolytic anemias    |                                       |                                       |                                       |                                       |                              |                              |                              |                              |
|                                                   | 2,190.39<br>(1,640.09 to<br>3,151.06) | 2,839.39<br>(1,911.34 to<br>4,273.41) | 2,102.07<br>(1,417.79 to<br>3,103.31) | 2,852.66<br>(1,945.15 to<br>4,289.73) | 36.60<br>(28.74 to<br>49.40) | 62.12<br>(45.01 to<br>85.57) | 51.51<br>(36.48 to<br>70.77) | 60.98<br>(44.72 to<br>84.59) |
| Endocrine, metabolic, blood, and immune disorders |                                       |                                       |                                       |                                       |                              |                              |                              |                              |

| Tajikistan                                    |                                               |                                               |                                              |                                               |                                       |                                       |                                     |                                       |
|-----------------------------------------------|-----------------------------------------------|-----------------------------------------------|----------------------------------------------|-----------------------------------------------|---------------------------------------|---------------------------------------|-------------------------------------|---------------------------------------|
| Cause                                         | YLLs (actual counts)                          |                                               |                                              |                                               | Deaths (actual counts)                |                                       |                                     |                                       |
|                                               | 2016                                          | 2040 Forecast                                 | 2040 Better Scenario                         | 2040 Worse Scenario                           | 2016                                  | 2040 Forecast                         | 2040 Better Scenario                | 2040 Worse Scenario                   |
| <b>Musculoskeletal disorders</b>              | <b>579.01</b><br>(438.99 to 814.11)           | <b>1,190.87</b><br>(797.44 to 1,794.87)       | <b>1,175.08</b><br>(778.46 to 1,788.64)      | <b>1,163.89</b><br>(782.30 to 1,754.74)       | <b>15.82</b><br>(11.73 to 22.41)      | <b>43.50</b><br>(30.21 to 64.75)      | <b>44.37</b><br>(30.27 to 65.45)    | <b>41.41</b><br>(28.88 to 61.94)      |
| Rheumatoid arthritis                          | 176.01<br>(120.48 to 270.38)                  | 440.55<br>(270.43 to 697.25)                  | 365.83<br>(219.65 to 590.20)                 | 431.05<br>(270.15 to 676.95)                  | 6.57<br>(4.47 to 9.94)                | 21.46<br>(13.70 to 33.59)             | 18.79<br>(11.68 to 29.74)           | 20.45<br>(12.96 to 31.74)             |
| Other musculoskeletal disorders               | 402.99<br>(299.21 to 552.19)                  | 750.33<br>(482.14 to 1,153.98)                | 809.25<br>(524.61 to 1,256.34)               | 732.84<br>(465.03 to 1,132.78)                | 9.25<br>(6.79 to 13.29)               | 22.04<br>(14.78 to 34.69)             | 25.58<br>(17.25 to 40.05)           | 20.96<br>(13.98 to 33.07)             |
| <b>Other non-communicable diseases</b>        | <b>71,085.80</b><br>(38,426.10 to 125,529.87) | <b>60,316.65</b><br>(32,605.88 to 104,008.04) | <b>31,333.65</b><br>(17,490.39 to 53,228.52) | <b>62,293.97</b><br>(33,249.37 to 109,017.05) | <b>844.80</b><br>(464.13 to 1,476.45) | <b>739.13</b><br>(410.52 to 1,255.77) | <b>397.09</b><br>(230.97 to 660.84) | <b>761.56</b><br>(418.53 to 1,309.39) |
| Congenital birth defects                      | 67,252.83<br>(35,531.73 to 120,665.27)        | 57,628.88<br>(30,356.87 to 100,972.93)        | 29,854.51<br>(16,397.61 to 51,313.62)        | 59,524.34<br>(31,249.13 to 105,730.37)        | 798.95<br>(430.20 to 1,422.78)        | 700.22<br>(378.01 to 1,209.77)        | 371.59<br>(209.58 to 632.92)        | 723.33<br>(391.61 to 1,266.81)        |
| Neural tube defects                           | 3,391.14<br>(1,505.49 to 7,292.45)            | 1,594.91<br>(571.05 to 3,757.28)              | 648.19<br>(235.14 to 1,497.84)               | 1,670.09<br>(582.34 to 4,114.91)              | 39.68<br>(17.74 to 84.84)             | 18.96<br>(6.96 to 44.14)              | 7.81<br>(2.96 to 17.68)             | 19.85<br>(7.11 to 48.22)              |
| Congenital heart anomalies                    | 37,136.10<br>(18,155.78 to 69,974.89)         | 31,287.99<br>(14,789.04 to 56,620.71)         | 16,599.59<br>(8,117.20 to 29,124.05)         | 32,280.41<br>(15,128.14 to 57,890.40)         | 445.28<br>(222.90 to 827.00)          | 385.81<br>(188.99 to 675.69)          | 210.69<br>(107.46 to 360.31)        | 397.43<br>(193.84 to 697.66)          |
| Orofacial clefts                              | 154.07<br>(49.22 to 415.78)                   | 119.29<br>(29.98 to 355.44)                   | 43.26<br>(11.57 to 122.75)                   | 126.15<br>(32.58 to 365.21)                   | 1.78<br>(0.57 to 4.82)                | 1.38<br>(0.35 to 4.11)                | 0.50<br>(0.13 to 1.42)              | 1.46<br>(0.38 to 4.22)                |
| Down syndrome                                 | 846.36<br>(436.10 to 1,666.73)                | 996.52<br>(517.35 to 1,932.18)                | 524.99<br>(291.43 to 951.52)                 | 1,031.02<br>(533.70 to 2,055.14)              | 10.66<br>(5.09 to 20.33)              | 13.75<br>(7.09 to 24.84)              | 7.79<br>(4.57 to 13.76)             | 14.16<br>(8.03 to 26.74)              |
| Other chromosomal abnormalities               | 489.17<br>(194.70 to 1,051.05)                | 787.26<br>(277.68 to 1,769.60)                | 373.39<br>(132.94 to 819.55)                 | 817.93<br>(284.53 to 1,871.12)                | 5.70<br>(2.27 to 12.22)               | 9.23<br>(3.20 to 20.70)               | 4.41<br>(1.61 to 9.61)              | 9.59<br>(3.43 to 21.74)               |
| Congenital musculoskeletal and limb anomalies | 1,302.98<br>(614.02 to 2,501.16)              | 1,329.42<br>(540.47 to 2,746.23)              | 703.37<br>(290.93 to 1,455.01)               | 1,368.25<br>(551.20 to 2,852.47)              | 15.19<br>(7.19 to 29.06)              | 15.57<br>(6.37 to 32.02)              | 8.29<br>(3.45 to 17.00)             | 16.02<br>(6.52 to 33.34)              |
| Urogenital congenital anomalies               | 669.22<br>(354.71 to 1,244.88)                | 646.15<br>(320.24 to 1,142.77)                | 370.82<br>(191.10 to 653.12)                 | 662.86<br>(327.49 to 1,174.65)                | 8.28<br>(4.60 to 14.91)               | 8.60<br>(4.60 to 14.78)               | 5.29<br>(2.92 to 8.98)              | 8.78<br>(4.66 to 15.06)               |
| Digestive congenital anomalies                | 6,388.80<br>(3,004.70 to 12,498.25)           | 6,041.80<br>(2,501.87 to 12,616.39)           | 2,885.15<br>(1,198.31 to 5,861.61)           | 6,261.84<br>(2,603.81 to 12,667.10)           | 74.12<br>(34.94 to 144.81)            | 70.22<br>(29.15 to 146.56)            | 33.60<br>(13.99 to 68.09)           | 72.77<br>(30.35 to 146.98)            |
| Other congenital birth defects                | 16,874.99<br>(8,654.48 to 31,527.18)          | 14,825.54<br>(7,104.94 to 28,543.48)          | 7,705.75<br>(3,783.29 to 14,645.58)          | 15,305.79<br>(7,347.95 to 29,740.94)          | 198.26<br>(102.39 to 369.31)          | 176.69<br>(86.29 to 337.03)           | 93.21<br>(47.08 to 175.10)          | 182.27<br>(89.31 to 350.81)           |
| Skin and subcutaneous diseases                | 113.07<br>(83.38 to 179.56)                   | 330.53<br>(220.63 to 493.79)                  | 296.55<br>(190.66 to 429.02)                 | 323.72<br>(219.49 to 484.65)                  | 2.68<br>(1.80 to 3.85)                | 11.56<br>(6.89 to 15.51)              | 11.78<br>(6.60 to 15.82)            | 10.86<br>(6.58 to 14.73)              |
| Cellulitis                                    | 20.53<br>(14.13 to 32.19)                     | 71.22<br>(40.73 to 113.07)                    | 74.54<br>(41.73 to 118.48)                   | 69.25<br>(39.49 to 110.56)                    | 0.49<br>(0.29 to 0.73)                | 2.25<br>(1.11 to 3.41)                | 2.57<br>(1.23 to 3.93)              | 2.14<br>(1.08 to 3.21)                |
| Pyoderma                                      | 70.45<br>(47.70 to 115.52)                    | 208.96<br>(132.77 to 320.39)                  | 174.17<br>(104.68 to 263.07)                 | 205.40<br>(133.55 to 318.11)                  | 1.62<br>(1.04 to 2.39)                | 7.48<br>(4.06 to 10.41)               | 7.19<br>(3.79 to 9.98)              | 7.04<br>(3.88 to 9.87)                |
| Decubitus ulcer                               | 11.33<br>(8.85 to 15.81)                      | 26.18<br>(17.36 to 41.36)                     | 24.60<br>(16.14 to 38.66)                    | 25.37<br>(16.69 to 40.12)                     | 0.33<br>(0.22 to 0.46)                | 1.13<br>(0.61 to 1.71)                | 1.26<br>(0.64 to 1.93)              | 1.03<br>(0.57 to 1.55)                |
| Other skin and subcutaneous diseases          | 10.76<br>(8.33 to 15.15)                      | 24.16<br>(15.62 to 38.67)                     | 23.24<br>(15.45 to 36.60)                    | 23.70<br>(15.27 to 37.56)                     | 0.23<br>(0.17 to 0.32)                | 0.69<br>(0.43 to 1.01)                | 0.76<br>(0.47 to 1.08)              | 0.65<br>(0.42 to 0.93)                |
| Sudden infant death syndrome                  | 3,719.90<br>(1,658.83 to 6,919.41)            | 2,357.24<br>(898.86 to 4,821.50)              | 1,182.59<br>(444.43 to 2,341.37)             | 2,445.91<br>(927.68 to 5,108.75)              | 43.17<br>(19.25 to 80.31)             | 27.35<br>(10.42 to 55.94)             | 13.72<br>(5.15 to 27.16)            | 28.37<br>(10.76 to 59.27)             |

|                          |                                             |                                             |                                             |                                             |                                       |                                       |                                       |                                       |
|--------------------------|---------------------------------------------|---------------------------------------------|---------------------------------------------|---------------------------------------------|---------------------------------------|---------------------------------------|---------------------------------------|---------------------------------------|
| Injuries                 | 198,103.44<br>(166,019.12 to<br>238,102.52) | 219,510.23<br>(138,193.62 to<br>379,918.30) | 175,061.52<br>(108,525.67 to<br>316,816.24) | 229,751.95<br>(143,684.82 to<br>399,494.94) | 3,434.02<br>(2,892.73 to<br>4,057.55) | 4,437.16<br>(2,940.72 to<br>7,544.99) | 3,736.79<br>(2,493.43 to<br>6,357.39) | 4,609.12<br>(3,065.64 to<br>7,648.33) |
| Transport injuries       | 35,421.46<br>(29,106.97 to<br>42,701.24)    | 56,215.49<br>(33,234.38 to<br>91,783.71)    | 47,771.50<br>(28,063.43 to<br>76,820.11)    | 60,916.09<br>(34,498.86 to<br>103,760.18)   | 665.23<br>(546.34 to<br>799.26)       | 1,168.01<br>(714.33 to<br>1,826.11)   | 1,034.21<br>(629.68 to<br>1,579.06)   | 1,260.47<br>(737.55 to<br>2,044.29)   |
| Road injuries            | 32,516.13<br>(26,742.59 to<br>39,510.89)    | 51,602.18<br>(30,462.73 to<br>81,620.46)    | 44,152.28<br>(26,231.25 to<br>70,330.57)    | 55,944.53<br>(31,826.16 to<br>93,963.33)    | 612.69<br>(499.54 to<br>739.39)       | 1,075.77<br>(665.25 to<br>1,689.56)   | 959.41<br>(593.13 to<br>1,460.41)     | 1,161.27<br>(683.37 to<br>1,874.00)   |
| Pedestrian road injuries | 9,834.56<br>(7,579.86 to<br>12,720.18)      | 13,257.40<br>(7,943.08 to<br>21,696.63)     | 10,949.64<br>(6,471.73 to<br>17,948.36)     | 14,247.90<br>(8,305.76 to<br>24,107.31)     | 184.76<br>(141.46 to<br>238.54)       | 299.65<br>(185.13 to<br>462.68)       | 262.43<br>(162.03 to<br>402.54)       | 319.94<br>(190.37 to<br>504.90)       |

| Tajikistan                                      |                                                        |                                                       |                                                      |                                                       |                                                  |                                                  |                                                  |                                                  |
|-------------------------------------------------|--------------------------------------------------------|-------------------------------------------------------|------------------------------------------------------|-------------------------------------------------------|--------------------------------------------------|--------------------------------------------------|--------------------------------------------------|--------------------------------------------------|
| Cause                                           | YLLs (actual counts)                                   |                                                       |                                                      |                                                       | Deaths (actual counts)                           |                                                  |                                                  |                                                  |
|                                                 | 2016                                                   | 2040 Forecast                                         | 2040 Better Scenario                                 | 2040 Worse Scenario                                   | 2016                                             | 2040 Forecast                                    | 2040 Better Scenario                             | 2040 Worse Scenario                              |
| Cyclist road injuries                           | 640.30<br>(462.07 to 840.46)                           | 1,238.51<br>(644.44 to 2,224.56)                      | 1,056.53<br>(544.23 to 1,890.49)                     | 1,337.20<br>(675.80 to 2,471.55)                      | 12.40<br>(8.78 to 16.26)                         | 26.02<br>(13.56 to 44.86)                        | 23.40<br>(12.01 to 40.00)                        | 28.03<br>(13.88 to 49.73)                        |
| Motorcyclist road injuries                      | 3,536.64<br>(2,476.24 to 5,031.06)                     | 6,189.47<br>(3,122.75 to 11,202.03)                   | 5,527.72<br>(2,754.66 to 10,159.96)                  | 6,708.88<br>(3,258.51 to 12,790.74)                   | 63.27<br>(43.58 to 90.73)                        | 114.06<br>(58.19 to 204.72)                      | 104.18<br>(52.64 to 184.04)                      | 123.72<br>(61.20 to 229.60)                      |
| Motor vehicle road injuries                     | 18,046.83<br>(13,938.09 to 22,674.65)                  | 29,998.29<br>(17,117.70 to 48,996.17)                 | 25,845.90<br>(14,826.47 to 41,862.47)                | 32,658.96<br>(17,845.91 to 56,635.21)                 | 343.32<br>(264.60 to 436.31)                     | 616.51<br>(364.03 to 984.58)                     | 551.94<br>(328.62 to 863.91)                     | 668.59<br>(379.97 to 1,123.72)                   |
| Other road injuries                             | 457.78<br>(323.72 to 676.82)                           | 918.51<br>(450.65 to 1,891.13)                        | 772.49<br>(379.63 to 1,576.21)                       | 991.59<br>(470.04 to 2,121.37)                        | 8.93<br>(6.34 to 13.87)                          | 19.53<br>(9.87 to 39.60)                         | 17.47<br>(8.59 to 35.14)                         | 20.99<br>(10.17 to 43.34)                        |
| Other transport injuries                        | 2,905.33<br>(2,173.54 to 3,804.55)                     | 4,613.31<br>(2,484.01 to 8,005.72)                    | 3,619.21<br>(1,920.56 to 6,450.50)                   | 4,971.56<br>(2,574.06 to 8,937.73)                    | 52.54<br>(39.64 to 68.83)                        | 92.24<br>(51.13 to 155.63)                       | 74.81<br>(40.91 to 126.87)                       | 99.20<br>(52.18 to 175.55)                       |
| <b>Unintentional injuries</b>                   | <b>129,703.57</b><br><b>(102,699.77 to 165,255.23)</b> | <b>113,334.66</b><br><b>(71,322.78 to 171,414.87)</b> | <b>81,790.46</b><br><b>(51,155.51 to 125,298.33)</b> | <b>116,258.68</b><br><b>(72,920.96 to 179,309.87)</b> | <b>2,133.37</b><br><b>(1,712.53 to 2,590.95)</b> | <b>2,230.16</b><br><b>(1,466.28 to 3,243.33)</b> | <b>1,735.39</b><br><b>(1,146.25 to 2,526.66)</b> | <b>2,264.19</b><br><b>(1,483.71 to 3,330.60)</b> |
| Falls                                           | 18,531.50<br>(14,534.59 to 24,963.50)                  | 21,648.79<br>(14,516.25 to 31,454.20)                 | 18,029.27<br>(11,916.10 to 26,212.41)                | 21,631.16<br>(14,479.87 to 31,549.56)                 | 342.31<br>(275.71 to 438.04)                     | 499.19<br>(357.11 to 684.39)                     | 445.43<br>(318.88 to 607.88)                     | 489.06<br>(347.57 to 670.81)                     |
| Drowning                                        | 51,370.69<br>(40,524.09 to 67,336.52)                  | 40,831.47<br>(23,054.48 to 71,696.68)                 | 28,896.36<br>(16,287.47 to 50,411.34)                | 42,623.53<br>(23,851.58 to 75,552.38)                 | 795.19<br>(641.04 to 1,014.23)                   | 715.83<br>(418.84 to 1,215.86)                   | 535.71<br>(314.32 to 906.43)                     | 745.50<br>(432.32 to 1,270.30)                   |
| Fire, heat, and hot substances                  | 18,151.93<br>(12,188.62 to 25,885.84)                  | 14,499.29<br>(7,806.16 to 23,466.53)                  | 9,984.85<br>(5,161.96 to 16,278.08)                  | 15,207.40<br>(8,182.08 to 24,549.27)                  | 306.82<br>(207.26 to 424.20)                     | 304.31<br>(164.39 to 487.00)                     | 304.31<br>(119.31 to 363.43)                     | 315.88<br>(170.87 to 506.32)                     |
| Poisonings                                      | 6,951.23<br>(4,296.24 to 11,807.98)                    | 4,307.01<br>(2,171.25 to 7,841.91)                    | 2,596.18<br>(1,305.46 to 4,666.65)                   | 4,563.72<br>(2,372.96 to 8,460.17)                    | 115.91<br>(72.75 to 184.76)                      | 82.87<br>(41.65 to 144.46)                       | 53.16<br>(27.10 to 93.35)                        | 87.58<br>(44.97 to 158.35)                       |
| Exposure to mechanical forces                   | 7,964.01<br>(5,498.93 to 11,234.15)                    | 6,814.72<br>(3,827.14 to 11,014.75)                   | 4,525.09<br>(2,574.45 to 7,265.65)                   | 6,931.46<br>(4,017.17 to 11,028.47)                   | 129.26<br>(90.48 to 178.67)                      | 126.29<br>(75.54 to 197.04)                      | 89.74<br>(52.93 to 144.65)                       | 126.97<br>(76.81 to 198.87)                      |
| Unintentional firearm injuries                  | 1,992.75<br>(1,305.16 to 3,235.23)                     | 1,717.13<br>(867.10 to 3,156.49)                      | 1,193.98<br>(590.46 to 2,255.03)                     | 1,739.43<br>(901.36 to 3,177.47)                      | 36.75<br>(23.80 to 61.69)                        | 36.52<br>(19.29 to 66.76)                        | 26.69<br>(13.92 to 50.48)                        | 36.47<br>(19.83 to 65.95)                        |
| Unintentional suffocation                       | 2,692.78<br>(1,361.97 to 5,118.79)                     | 2,107.90<br>(955.48 to 4,333.45)                      | 1,217.85<br>(557.33 to 2,442.93)                     | 2,164.46<br>(975.44 to 4,357.37)                      | 35.26<br>(18.35 to 64.11)                        | 29.43<br>(13.76 to 57.41)                        | 17.89<br>(8.59 to 33.76)                         | 30.11<br>(14.20 to 57.90)                        |
| Other exposure to mechanical forces             | 3,278.48<br>(2,328.30 to 4,710.11)                     | 2,989.69<br>(1,701.27 to 4,908.28)                    | 2,113.26<br>(1,204.02 to 3,608.48)                   | 3,027.57<br>(1,754.84 to 5,053.21)                    | 57.24<br>(40.61 to 87.55)                        | 60.34<br>(36.35 to 103.63)                       | 45.16<br>(26.96 to 78.53)                        | 60.39<br>(35.85 to 102.29)                       |
| Adverse effects of medical treatment            | 5,057.63<br>(3,629.89 to 6,741.23)                     | 4,981.72<br>(3,220.08 to 7,046.61)                    | 3,604.83<br>(2,316.69 to 5,120.11)                   | 5,010.17<br>(3,282.85 to 7,142.67)                    | 90.62<br>(67.69 to 112.71)                       | 119.19<br>(81.72 to 159.52)                      | 96.10<br>(64.70 to 133.04)                       | 116.77<br>(80.31 to 157.12)                      |
| Animal contact                                  | 1,140.04<br>(658.73 to 1,846.50)                       | 1,374.33<br>(662.70 to 2,664.82)                      | 854.67<br>(401.30 to 1,624.81)                       | 1,401.26<br>(695.80 to 2,651.89)                      | 18.65<br>(10.62 to 29.66)                        | 26.28<br>(12.44 to 47.76)                        | 17.70<br>(8.42 to 32.31)                         | 26.46<br>(13.02 to 47.82)                        |
| Venomous animal contact                         | 362.81<br>(190.02 to 599.73)                           | 446.53<br>(184.06 to 840.28)                          | 277.40<br>(115.91 to 520.47)                         | 455.08<br>(194.71 to 860.71)                          | 6.22<br>(3.10 to 10.12)                          | 8.75<br>(3.54 to 15.85)                          | 5.84<br>(2.28 to 10.79)                          | 8.83<br>(3.63 to 16.03)                          |
| Non-venomous animal contact                     | 777.23<br>(448.73 to 1,257.07)                         | 927.80<br>(452.54 to 1,766.59)                        | 577.27<br>(278.37 to 1,080.40)                       | 946.18<br>(460.13 to 1,735.64)                        | 12.43<br>(7.14 to 19.95)                         | 17.54<br>(8.64 to 32.05)                         | 11.85<br>(5.77 to 21.61)                         | 17.63<br>(8.99 to 31.32)                         |
| Foreign body                                    | 11,871.92<br>(7,999.06 to 18,241.94)                   | 10,301.43<br>(6,501.31 to 16,320.28)                  | 7,489.80<br>(4,838.97 to 11,255.48)                  | 10,410.61<br>(6,610.74 to 16,364.65)                  | 174.55<br>(124.82 to 246.68)                     | 176.86<br>(117.65 to 253.89)                     | 142.44<br>(94.20 to 201.07)                      | 176.33<br>(117.87 to 253.50)                     |
| Pulmonary aspiration and foreign body in airway | 9,002.99<br>(5,579.11 to 14,596.54)                    | 7,556.19<br>(4,615.64 to 12,334.80)                   | 5,475.54<br>(3,461.27 to 8,544.86)                   | 7,633.38<br>(4,665.45 to 12,439.47)                   | 125.86<br>(85.04 to 188.71)                      | 123.21<br>(81.04 to 182.26)                      | 100.39<br>(66.22 to 144.08)                      | 122.72<br>(81.64 to 182.35)                      |

|                                             |                                                               |                                                               |                                                               |                                                               |                                                      |                                                        |                                                        |                                                        |
|---------------------------------------------|---------------------------------------------------------------|---------------------------------------------------------------|---------------------------------------------------------------|---------------------------------------------------------------|------------------------------------------------------|--------------------------------------------------------|--------------------------------------------------------|--------------------------------------------------------|
|                                             | 2,868.93<br>(1,673.98 to<br>3,968.36)                         | 2,745.24<br>(1,484.64 to<br>4,336.98)                         | 2,014.26<br>(1,081.58 to<br>3,195.53)                         | 2,777.24<br>(1,465.24 to<br>4,433.51)                         | 48.69<br>(28.40 to<br>65.26)                         | 53.65<br>(30.19 to<br>79.21)                           | 42.05<br>(23.10 to<br>62.77)                           | 53.61<br>(29.96 to<br>80.10)                           |
| Foreign body in other body part             |                                                               |                                                               |                                                               |                                                               |                                                      |                                                        |                                                        |                                                        |
|                                             | 3,473.31<br>(2,448.33 to<br>4,886.24)                         | 4,022.79<br>(2,337.33 to<br>6,543.70)                         | 2,599.92<br>(1,490.93 to<br>4,264.37)                         | 4,077.79<br>(2,360.02 to<br>6,614.75)                         | 74.14<br>(51.54 to<br>106.65)                        | 99.18<br>(60.12 to<br>156.60)                          | 66.69<br>(39.21 to<br>105.62)                          | 99.22<br>(59.03 to<br>157.81)                          |
| Environmental heat and cold exposure        |                                                               |                                                               |                                                               |                                                               |                                                      |                                                        |                                                        |                                                        |
|                                             | 5,191.32<br>(3,835.69 to<br>6,969.51)                         | 4,353.12<br>(2,425.64 to<br>7,738.66)                         | 3,209.49<br>(1,715.77 to<br>5,752.53)                         | 4,401.57<br>(2,437.75 to<br>7,921.00)                         | 85.93<br>(63.50 to<br>115.09)                        | 80.17<br>(45.91 to<br>138.34)                          | 61.75<br>(34.94 to<br>106.02)                          | 80.42<br>(45.54 to<br>139.51)                          |
| Other unintentional injuries                |                                                               |                                                               |                                                               |                                                               |                                                      |                                                        |                                                        |                                                        |
| <b>Self-harm and interpersonal violence</b> | <b>32,921.30</b><br><b>(25,633.70 to</b><br><b>44,614.63)</b> | <b>41,584.17</b><br><b>(25,682.81 to</b><br><b>67,824.76)</b> | <b>37,809.56</b><br><b>(23,425.75 to</b><br><b>61,548.32)</b> | <b>44,001.06</b><br><b>(26,451.78 to</b><br><b>75,604.77)</b> | <b>634.47</b><br><b>(499.17 to</b><br><b>859.79)</b> | <b>883.92</b><br><b>(565.75 to</b><br><b>1,413.44)</b> | <b>821.23</b><br><b>(528.77 to</b><br><b>1,299.58)</b> | <b>930.69</b><br><b>(577.11 to</b><br><b>1,585.03)</b> |

| Tajikistan                                                                          |                                         |                                               |                                               |                                               |                                      |                                            |                                            |                                            |
|-------------------------------------------------------------------------------------|-----------------------------------------|-----------------------------------------------|-----------------------------------------------|-----------------------------------------------|--------------------------------------|--------------------------------------------|--------------------------------------------|--------------------------------------------|
| Cause                                                                               | YLLs (actual counts)                    |                                               |                                               |                                               | Deaths (actual counts)               |                                            |                                            |                                            |
|                                                                                     | 2016                                    | 2040 Forecast                                 | 2040 Better Scenario                          | 2040 Worse Scenario                           | 2016                                 | 2040 Forecast                              | 2040 Better Scenario                       | 2040 Worse Scenario                        |
| Self-harm                                                                           | 19,869.94<br>(15,627.65 to 25,530.15)   | 28,524.14<br>(16,502.70 to 48,526.28)         | 25,486.83<br>(14,827.22 to 43,270.97)         | 30,666.42<br>(17,214.54 to 54,800.94)         | 395.60<br>(313.47 to 505.14)         | 624.45<br>(375.15 to 1,036.50)             | 571.96<br>(345.79 to 955.53)               | 666.68<br>(384.91 to 1,164.88)             |
| Self-harm by firearm                                                                | 927.22<br>(533.61 to 1,696.22)          | 1,169.97<br>(552.48 to 2,459.06)              | 1,017.19<br>(488.43 to 2,114.85)              | 1,266.96<br>(579.23 to 2,684.99)              | 19.33<br>(11.53 to 35.21)            | 27.55<br>(13.65 to 55.10)                  | 24.53<br>(12.29 to 48.96)                  | 29.48<br>(14.13 to 60.73)                  |
| Self-harm by other specified means                                                  | 18,942.73<br>(14,785.55 to 24,272.08)   | 27,354.17<br>(15,775.45 to 46,473.18)         | 24,469.64<br>(14,205.02 to 41,476.08)         | 29,399.45<br>(16,497.90 to 53,149.67)         | 376.27<br>(296.73 to 479.89)         | 596.90<br>(359.35 to 995.59)               | 547.42<br>(331.54 to 902.23)               | 637.20<br>(363.51 to 1,115.63)             |
| Interpersonal violence                                                              | 13,051.35<br>(9,294.43 to 22,233.99)    | 13,060.03<br>(7,212.25 to 25,152.95)          | 12,322.72<br>(6,825.35 to 23,553.37)          | 13,334.64<br>(7,221.37 to 26,232.59)          | 238.87<br>(170.21 to 414.79)         | 259.47<br>(146.37 to 493.77)               | 249.28<br>(140.19 to 467.64)               | 264.01<br>(145.75 to 506.83)               |
| Physical violence by firearm                                                        | 2,770.46<br>(1,460.72 to 5,077.70)      | 2,692.37<br>(1,154.61 to 5,821.41)            | 2,542.86<br>(1,086.84 to 5,469.46)            | 2,687.22<br>(1,147.94 to 5,815.92)            | 49.03<br>(26.25 to 91.55)            | 49.58<br>(23.48 to 104.62)                 | 47.28<br>(22.40 to 99.51)                  | 49.37<br>(23.06 to 105.53)                 |
| Physical violence by sharp object                                                   | 5,208.78<br>(3,442.01 to 9,526.28)      | 5,644.31<br>(3,176.65 to 10,677.03)           | 5,627.68<br>(3,175.19 to 10,579.90)           | 5,604.19<br>(3,164.43 to 10,705.90)           | 97.52<br>(65.33 to 177.42)           | 114.36<br>(66.43 to 214.80)                | 115.55<br>(67.35 to 214.88)                | 112.96<br>(65.79 to 213.57)                |
| Physical violence by other means                                                    | 5,072.11<br>(3,427.87 to 9,232.60)      | 4,723.35<br>(2,252.76 to 9,843.27)            | 4,152.18<br>(1,934.07 to 8,689.54)            | 5,043.23<br>(2,302.90 to 10,736.77)           | 92.32<br>(62.76 to 169.81)           | 95.53<br>(46.80 to 199.12)                 | 86.45<br>(41.88 to 178.96)                 | 101.68<br>(47.15 to 217.53)                |
| <b>Forces of nature, conflict and terrorism, and executions and police conflict</b> | <b>57.12</b><br><b>(47.71 to 69.88)</b> | <b>8,575.91</b><br><b>(0.00 to 68,015.38)</b> | <b>7,690.01</b><br><b>(0.00 to 61,082.89)</b> | <b>8,576.13</b><br><b>(0.00 to 68,172.12)</b> | <b>0.95</b><br><b>(0.80 to 1.14)</b> | <b>155.07</b><br><b>(0.00 to 1,206.18)</b> | <b>145.95</b><br><b>(0.00 to 1,130.95)</b> | <b>153.77</b><br><b>(0.00 to 1,203.74)</b> |
| Exposure to forces of nature                                                        | 0.00<br>(0.00 to 0.00)                  | 1,644.89<br>(0.00 to 16,284.56)               | 1,456.62<br>(0.00 to 14,465.12)               | 1,642.49<br>(0.00 to 16,224.05)               | 0.00<br>(0.00 to 0.00)               | 32.26<br>(0.00 to 318.88)                  | 30.59<br>(0.00 to 305.71)                  | 31.82<br>(0.00 to 315.90)                  |
| Conflict and terrorism                                                              | 0.00<br>(0.00 to 0.00)                  | 6,931.03<br>(0.00 to 68,015.38)               | 6,233.39<br>(0.00 to 61,082.89)               | 6,933.64<br>(0.00 to 68,172.12)               | 0.00<br>(0.00 to 0.00)               | 122.81<br>(0.00 to 1,206.18)               | 115.36<br>(0.00 to 1,130.95)               | 121.96<br>(0.00 to 1,203.74)               |
| Executions and police conflict                                                      | 57.12<br>(47.71 to 69.88)               | 0.00<br>(0.00 to 0.00)                        | 0.00<br>(0.00 to 0.00)                        | 0.00<br>(0.00 to 0.00)                        | 0.95<br>(0.80 to 1.14)               | 0.00<br>(0.00 to 0.00)                     | 0.00<br>(0.00 to 0.00)                     | 0.00<br>(0.00 to 0.00)                     |



| Turkmenistan                                                      |                                                   |                                                 |                                               |                                                   |                                          |                                          |                                          |                                          |
|-------------------------------------------------------------------|---------------------------------------------------|-------------------------------------------------|-----------------------------------------------|---------------------------------------------------|------------------------------------------|------------------------------------------|------------------------------------------|------------------------------------------|
| Cause                                                             | YLLs (actual counts)                              |                                                 |                                               |                                                   | Deaths (actual counts)                   |                                          |                                          |                                          |
|                                                                   | 2016                                              | 2040 Forecast                                   | 2040 Better Scenario                          | 2040 Worse Scenario                               | 2016                                     | 2040 Forecast                            | 2040 Better Scenario                     | 2040 Worse Scenario                      |
| All causes                                                        | 1,193,878.49<br>(1,056,422.32 to<br>1,377,033.48) | 1,197,443.55<br>(876,571.05 to<br>1,609,805.16) | 764,382.83<br>(570,408.66 to<br>1,034,797.10) | 1,696,346.46<br>(1,258,684.86 to<br>2,224,381.97) | 32,824.09<br>(30,670.67 to<br>35,283.31) | 52,610.85<br>(37,247.85 to<br>76,586.95) | 36,620.49<br>(25,926.62 to<br>55,431.58) | 69,499.91<br>(51,000.32 to<br>96,463.94) |
| Communicable, maternal, neonatal, and nutritional diseases        | 324,158.45<br>(231,782.38 to<br>451,384.79)       | 136,505.41<br>(87,160.79 to<br>208,963.45)      | 76,397.67<br>(50,967.25 to<br>112,741.35)     | 232,043.91<br>(150,139.93 to<br>367,360.64)       | 4,335.26<br>(3,255.73 to<br>5,812.27)    | 2,258.65<br>(1,553.08 to<br>3,318.20)    | 1,337.59<br>(956.77 to<br>1,878.22)      | 3,681.45<br>(2,560.23 to<br>5,453.02)    |
| HIV/AIDS and tuberculosis                                         | 31,809.19<br>(29,152.83 to<br>35,564.56)          | 17,366.40<br>(9,999.29 to<br>32,090.45)         | 8,373.22<br>(5,199.44 to<br>14,592.00)        | 37,299.80<br>(22,647.84 to<br>60,880.96)          | 678.56<br>(621.64 to<br>759.61)          | 401.55<br>(221.24 to<br>737.71)          | 189.72<br>(116.07 to<br>330.24)          | 841.03<br>(500.93 to<br>1,378.37)        |
| Tuberculosis                                                      | 21,860.06<br>(19,356.24 to<br>25,378.24)          | 12,657.50<br>(5,222.82 to<br>27,621.08)         | 4,969.62<br>(2,182.67 to<br>10,688.20)        | 22,034.10<br>(9,797.09 to<br>45,303.84)           | 487.88<br>(435.29 to<br>563.28)          | 316.54<br>(134.96 to<br>634.21)          | 128.33<br>(58.50 to<br>261.04)           | 540.48<br>(247.85 to<br>1,061.47)        |
| HIV/AIDS                                                          | 9,949.12<br>(8,683.72 to<br>11,316.68)            | 4,708.90<br>(3,157.97 to<br>6,339.18)           | 3,403.60<br>(2,032.20 to<br>4,926.41)         | 15,265.70<br>(8,912.24 to<br>22,780.92)           | 190.68<br>(166.39 to<br>216.26)          | 85.01<br>(55.20 to<br>116.22)            | 61.39<br>(35.64 to<br>90.49)             | 300.55<br>(161.18 to<br>464.54)          |
| Diarrhea, lower respiratory, and other common infectious diseases | 143,139.40<br>(99,001.61 to<br>204,012.19)        | 55,953.36<br>(30,619.83 to<br>103,086.52)       | 32,775.26<br>(18,870.87 to<br>57,118.44)      | 102,988.72<br>(50,452.30 to<br>202,328.69)        | 1,883.15<br>(1,364.23 to<br>2,592.65)    | 1,072.50<br>(677.87 to<br>1,736.89)      | 694.96<br>(460.71 to<br>1,086.43)        | 1,720.13<br>(1,012.26 to<br>3,000.80)    |
| Diarrheal diseases                                                | 10,093.54<br>(6,043.95 to<br>16,595.57)           | 2,255.49<br>(325.26 to<br>7,559.29)             | 3,139.03<br>(477.98 to<br>10,191.01)          | 5,273.71<br>(794.61 to<br>14,485.74)              | 125.85<br>(78.82 to<br>202.33)           | 37.06<br>(6.20 to<br>124.17)             | 58.65<br>(10.68 to<br>191.06)            | 78.55<br>(13.09 to<br>228.25)            |
| Intestinal infectious diseases                                    | 9.53<br>(4.92 to<br>16.44)                        | 6.54<br>(3.06 to<br>12.05)                      | 7.74<br>(3.58 to<br>14.75)                    | 6.74<br>(3.15 to<br>12.45)                        | 0.17<br>(0.09 to<br>0.29)                | 0.15<br>(0.07 to<br>0.26)                | 0.18<br>(0.09 to<br>0.33)                | 0.14<br>(0.07 to<br>0.26)                |
| Typhoid fever                                                     | 5.88<br>(2.70 to<br>11.52)                        | 5.11<br>(2.22 to<br>10.06)                      | 6.74<br>(2.94 to<br>13.20)                    | 4.95<br>(2.15 to<br>9.56)                         | 0.11<br>(0.05 to<br>0.22)                | 0.11<br>(0.05 to<br>0.21)                | 0.15<br>(0.07 to<br>0.20)                | 0.10<br>(0.05 to<br>0.20)                |
| Paratyphoid fever                                                 | 0.99<br>(0.37 to<br>2.11)                         | 0.65<br>(0.22 to<br>1.41)                       | 0.41<br>(0.14 to<br>0.92)                     | 0.78<br>(0.26 to<br>1.73)                         | 0.02<br>(0.01 to<br>0.04)                | 0.01<br>(0.00 to<br>0.05)                | 0.01<br>(0.00 to<br>0.02)                | 0.02<br>(0.01 to<br>0.05)                |
| Other intestinal infectious diseases                              | 2.66<br>(0.89 to<br>6.33)                         | 0.79<br>(0.26 to<br>1.99)                       | 0.59<br>(0.18 to<br>1.43)                     | 1.00<br>(0.33 to<br>2.55)                         | 0.04<br>(0.01 to<br>0.09)                | 0.02<br>(0.01 to<br>0.05)                | 0.02<br>(0.01 to<br>0.04)                | 0.02<br>(0.01 to<br>0.05)                |
| Lower respiratory infections                                      | 120,028.31<br>(81,423.41 to<br>171,478.50)        | 46,267.46<br>(22,467.09 to<br>91,427.53)        | 24,921.60<br>(13,079.20 to<br>45,868.63)      | 86,010.16<br>(36,536.51 to<br>183,648.06)         | 1,580.48<br>(1,126.85 to<br>2,178.91)    | 923.86<br>(561.61 to<br>1,542.67)        | 561.70<br>(352.00 to<br>882.54)          | 1,477.82<br>(790.67 to<br>2,652.49)      |
| Upper respiratory infections                                      | 54.15<br>(22.79 to<br>123.45)                     | 29.56<br>(11.53 to<br>65.47)                    | 14.13<br>(5.67 to<br>31.94)                   | 42.92<br>(17.67 to<br>99.23)                      | 0.96<br>(0.48 to<br>1.79)                | 0.85<br>(0.35 to<br>1.82)                | 0.45<br>(0.18 to<br>0.97)                | 1.15<br>(0.50 to<br>2.40)                |
| Otitis media                                                      | 1.18<br>(0.82 to<br>1.76)                         | 0.36<br>(0.17 to<br>0.77)                       | 0.37<br>(0.17 to<br>0.78)                     | 0.36<br>(0.16 to<br>0.76)                         | 0.02<br>(0.02 to<br>0.05)                | 0.01<br>(0.01 to<br>0.02)                | 0.01<br>(0.01 to<br>0.02)                | 0.01<br>(0.01 to<br>0.02)                |
| Meningitis                                                        | 6,752.36<br>(4,868.71 to<br>9,353.09)             | 3,201.02<br>(1,972.24 to<br>5,052.11)           | 1,813.25<br>(1,185.62 to<br>2,781.13)         | 4,396.78<br>(2,629.07 to<br>7,083.82)             | 94.73<br>(72.21 to<br>126.06)            | 51.82<br>(34.41 to<br>77.61)             | 31.20<br>(21.36 to<br>45.72)             | 67.24<br>(44.63 to<br>101.77)            |
| Pneumococcal meningitis                                           | 22.14<br>(15.64 to<br>31.44)                      | 8.28<br>(5.28 to<br>12.96)                      | 7.44<br>(4.76 to<br>11.43)                    | 9.30<br>(5.88 to<br>14.80)                        | 0.34<br>(0.25 to<br>0.45)                | 0.16<br>(0.11 to<br>0.24)                | 0.15<br>(0.11 to<br>0.22)                | 0.17<br>(0.12 to<br>0.26)                |
| H influenzae type B meningitis                                    | 973.37<br>(640.69 to<br>1,412.58)                 | 809.80<br>(294.13 to<br>1,888.90)               | 496.76<br>(240.58 to<br>985.10)               | 1,399.56<br>(383.38 to<br>3,502.17)               | 13.20<br>(9.28 to<br>18.40)              | 11.13<br>(4.94 to<br>23.32)              | 7.57<br>(4.40 to<br>13.33)               | 17.93<br>(5.93 to<br>42.26)              |
| Meningococcal meningitis                                          | 3,693.51<br>(2,632.38 to<br>5,146.21)             | 1,432.28<br>(881.82 to<br>2,321.47)             | 795.29<br>(495.29 to<br>1,255.40)             | 1,800.28<br>(1,150.12 to<br>2,771.30)             | 51.17<br>(38.55 to<br>69.13)             | 23.75<br>(15.80 to<br>36.44)             | 13.90<br>(9.06 to<br>21.04)              | 28.88<br>(19.97 to<br>41.68)             |
| Other meningitis                                                  | 2,063.34<br>(1,488.68 to<br>2,895.77)             | 950.66<br>(574.75 to<br>1,510.05)               | 513.76<br>(314.65 to<br>809.65)               | 1,187.64<br>(778.06 to<br>1,810.64)               | 30.02<br>(23.04 to<br>40.57)             | 16.78<br>(10.94 to<br>25.68)             | 9.58<br>(6.32 to<br>14.77)               | 20.25<br>(14.32 to<br>29.31)             |
| Encephalitis                                                      | 5,003.77<br>(2,084.72 to<br>8,420.70)             | 2,632.36<br>(1,131.09 to<br>4,646.07)           | 2,120.52<br>(954.70 to<br>3,637.89)           | 3,116.36<br>(1,280.30 to<br>5,551.81)             | 66.56<br>(30.35 to<br>107.30)            | 39.27<br>(19.51 to<br>62.94)             | 32.92<br>(17.39 to<br>51.91)             | 45.32<br>(21.65 to<br>74.94)             |

|                |                                    |                                    |                                 |                                    |                             |                              |                            |                              |
|----------------|------------------------------------|------------------------------------|---------------------------------|------------------------------------|-----------------------------|------------------------------|----------------------------|------------------------------|
| Diphtheria     | 19.42<br>(9.05 to<br>38.32)        | 3.87<br>(1.64 to<br>8.31)          | 2.02<br>(1.05 to<br>3.54)       | 8.04<br>(2.45 to<br>21.19)         | 0.26<br>(0.14 to<br>0.48)   | 0.06<br>(0.03 to<br>0.11)    | 0.04<br>(0.02 to<br>0.06)  | 0.11<br>(0.04 to<br>0.26)    |
| Whooping cough | 1,128.39<br>(36.70 to<br>2,793.31) | 334.05<br>(9.57 to<br>1,153.36)    | 46.26<br>(2.81 to<br>138.43)    | 812.13<br>(20.57 to<br>2,613.93)   | 13.32<br>(0.47 to<br>32.70) | 3.98<br>(0.14 to<br>13.62)   | 0.61<br>(0.06 to<br>1.67)  | 9.57<br>(0.27 to<br>30.61)   |
| Tetanus        | 18.24<br>(12.07 to<br>24.72)       | 2.03<br>(0.90 to<br>3.21)          | 1.66<br>(0.55 to<br>2.80)       | 2.92<br>(1.48 to<br>5.10)          | 0.36<br>(0.20 to<br>0.48)   | 0.05<br>(0.02 to<br>0.07)    | 0.05<br>(0.02 to<br>0.07)  | 0.06<br>(0.03 to<br>0.09)    |
| Measles        | 1.08<br>(0.74 to<br>1.56)          | 1,209.68<br>(0.77 to<br>11,870.31) | 701.96<br>(0.65 to<br>6,147.00) | 3,303.36<br>(0.93 to<br>34,844.95) | 0.01<br>(0.01 to<br>0.02)   | 15.15<br>(0.01 to<br>139.06) | 8.97<br>(0.01 to<br>71.62) | 39.86<br>(0.01 to<br>407.92) |

| Turkmenistan                                          |                                            |                                            |                                            |                                              |                                         |                                        |                                       |                                        |
|-------------------------------------------------------|--------------------------------------------|--------------------------------------------|--------------------------------------------|----------------------------------------------|-----------------------------------------|----------------------------------------|---------------------------------------|----------------------------------------|
| Cause                                                 | YLLs (actual counts)                       |                                            |                                            |                                              | Deaths (actual counts)                  |                                        |                                       |                                        |
|                                                       | 2016                                       | 2040 Forecast                              | 2040 Better Scenario                       | 2040 Worse Scenario                          | 2016                                    | 2040 Forecast                          | 2040 Better Scenario                  | 2040 Worse Scenario                    |
| Varicella and herpes zoster                           | 29.42<br>(14.16 to 66.08)                  | 10.93<br>(4.34 to 27.28)                   | 6.73<br>(2.87 to 15.95)                    | 15.26<br>(5.91 to 36.59)                     | 0.41<br>(0.22 to 0.86)                  | 0.24<br>(0.12 to 0.50)                 | 0.18<br>(0.09 to 0.36)                | 0.29<br>(0.13 to 0.59)                 |
| <b>Neglected tropical diseases and malaria</b>        | <b>87.52</b><br><b>(54.41 to 130.56)</b>   | <b>61.52</b><br><b>(35.75 to 100.54)</b>   | <b>57.54</b><br><b>(33.53 to 95.17)</b>    | <b>68.62</b><br><b>(39.00 to 113.88)</b>     | <b>1.29</b><br><b>(0.88 to 1.82)</b>    | <b>0.97</b><br><b>(0.62 to 1.52)</b>   | <b>0.93</b><br><b>(0.60 to 1.41)</b>  | <b>1.06</b><br><b>(0.66 to 1.65)</b>   |
| Malaria                                               | 0.00<br>(0.00 to 0.00)                     | 0.00<br>(0.00 to 0.00)                     | 0.00<br>(0.00 to 0.00)                     | 0.00<br>(0.00 to 0.00)                       | 0.00<br>(0.00 to 0.00)                  | 0.00<br>(0.00 to 0.00)                 | 0.00<br>(0.00 to 0.00)                | 0.00<br>(0.00 to 0.00)                 |
| Chagas disease                                        | 0.00<br>(0.00 to 0.00)                     | 0.00<br>(0.00 to 0.00)                     | 0.00<br>(0.00 to 0.00)                     | 0.00<br>(0.00 to 0.00)                       | 0.00<br>(0.00 to 0.00)                  | 0.00<br>(0.00 to 0.00)                 | 0.00<br>(0.00 to 0.00)                | 0.00<br>(0.00 to 0.00)                 |
| Leishmaniasis                                         | 0.71<br>(0.39 to 1.06)                     | 0.31<br>(0.17 to 0.50)                     | 0.24<br>(0.13 to 0.39)                     | 0.37<br>(0.21 to 0.59)                       | 0.02<br>(0.01 to 0.03)                  | 0.01<br>(0.01 to 0.02)                 | 0.01<br>(0.00 to 0.02)                | 0.01<br>(0.01 to 0.02)                 |
| African trypanosomiasis                               | 0.00<br>(0.00 to 0.00)                     | 0.00<br>(0.00 to 0.00)                     | 0.00<br>(0.00 to 0.00)                     | 0.00<br>(0.00 to 0.00)                       | 0.00<br>(0.00 to 0.00)                  | 0.00<br>(0.00 to 0.00)                 | 0.00<br>(0.00 to 0.00)                | 0.00<br>(0.00 to 0.00)                 |
| Schistosomiasis                                       | 0.00<br>(0.00 to 0.00)                     | 0.00<br>(0.00 to 0.00)                     | 0.00<br>(0.00 to 0.00)                     | 0.00<br>(0.00 to 0.00)                       | 0.00<br>(0.00 to 0.00)                  | 0.00<br>(0.00 to 0.00)                 | 0.00<br>(0.00 to 0.00)                | 0.00<br>(0.00 to 0.00)                 |
| Cysticercosis                                         | 0.81<br>(0.33 to 1.65)                     | 0.24<br>(0.10 to 0.50)                     | 0.22<br>(0.09 to 0.46)                     | 0.25<br>(0.10 to 0.50)                       | 0.02<br>(0.01 to 0.04)                  | 0.01<br>(0.00 to 0.01)                 | 0.01<br>(0.01 to 0.01)                | 0.01<br>(0.00 to 0.01)                 |
| Cystic echinococcosis                                 | 0.00<br>(0.00 to 0.00)                     | 0.00<br>(0.00 to 0.00)                     | 0.00<br>(0.00 to 0.00)                     | 0.00<br>(0.00 to 0.00)                       | 0.00<br>(0.00 to 0.00)                  | 0.00<br>(0.00 to 0.00)                 | 0.00<br>(0.00 to 0.00)                | 0.00<br>(0.00 to 0.00)                 |
| Dengue                                                | 0.00<br>(0.00 to 0.00)                     | 0.00<br>(0.00 to 0.00)                     | 0.00<br>(0.00 to 0.00)                     | 0.00<br>(0.00 to 0.00)                       | 0.00<br>(0.00 to 0.00)                  | 0.00<br>(0.00 to 0.00)                 | 0.00<br>(0.00 to 0.00)                | 0.00<br>(0.00 to 0.00)                 |
| Yellow fever                                          | 0.00<br>(0.00 to 0.00)                     | 0.00<br>(0.00 to 0.00)                     | 0.00<br>(0.00 to 0.00)                     | 0.00<br>(0.00 to 0.00)                       | 0.00<br>(0.00 to 0.00)                  | 0.00<br>(0.00 to 0.00)                 | 0.00<br>(0.00 to 0.00)                | 0.00<br>(0.00 to 0.00)                 |
| Rabies                                                | 6.39<br>(3.33 to 11.42)                    | 3.76<br>(1.36 to 9.29)                     | 2.77<br>(0.95 to 7.69)                     | 4.95<br>(1.83 to 11.72)                      | 0.10<br>(0.05 to 0.17)                  | 0.06<br>(0.02 to 0.14)                 | 0.04<br>(0.02 to 0.12)                | 0.08<br>(0.03 to 0.18)                 |
| Intestinal nematode infections                        | 16.53<br>(2.16 to 44.46)                   | 12.27<br>(2.43 to 33.47)                   | 9.87<br>(2.14 to 26.44)                    | 13.32<br>(2.53 to 35.21)                     | 0.22<br>(0.04 to 0.55)                  | 0.18<br>(0.06 to 0.44)                 | 0.15<br>(0.06 to 0.36)                | 0.19<br>(0.05 to 0.46)                 |
| Other neglected tropical diseases                     | 63.08<br>(36.83 to 95.04)                  | 44.94<br>(24.70 to 75.06)                  | 44.43<br>(24.25 to 75.87)                  | 49.74<br>(27.06 to 84.20)                    | 0.94<br>(0.60 to 1.34)                  | 0.72<br>(0.44 to 1.14)                 | 0.72<br>(0.44 to 1.17)                | 0.78<br>(0.46 to 1.26)                 |
| <b>Maternal disorders</b>                             | <b>738.73</b><br><b>(617.18 to 878.30)</b> | <b>573.90</b><br><b>(385.90 to 950.61)</b> | <b>419.45</b><br><b>(224.53 to 714.06)</b> | <b>763.15</b><br><b>(397.64 to 1,284.89)</b> | <b>13.52</b><br><b>(11.38 to 15.85)</b> | <b>10.71</b><br><b>(6.00 to 17.38)</b> | <b>7.85</b><br><b>(4.41 to 13.04)</b> | <b>14.23</b><br><b>(7.72 to 23.59)</b> |
| Maternal hemorrhage                                   | 240.17<br>(176.23 to 320.16)               | 181.51<br>(90.83 to 315.20)                | 135.28<br>(66.66 to 240.52)                | 238.57<br>(114.94 to 421.88)                 | 4.42<br>(3.24 to 5.85)                  | 3.41<br>(1.76 to 5.82)                 | 2.54<br>(1.29 to 4.45)                | 4.47<br>(2.21 to 7.75)                 |
| Maternal sepsis and other maternal infections         | 10.08<br>(4.50 to 17.66)                   | 7.02<br>(2.59 to 14.35)                    | 5.13<br>(1.89 to 11.40)                    | 9.28<br>(3.48 to 20.45)                      | 0.18<br>(0.08 to 0.32)                  | 0.13<br>(0.05 to 0.27)                 | 0.10<br>(0.04 to 0.20)                | 0.17<br>(0.07 to 0.38)                 |
| Maternal hypertensive disorders                       | 139.60<br>(100.61 to 189.98)               | 105.48<br>(46.55 to 199.71)                | 75.91<br>(32.85 to 147.22)                 | 140.56<br>(58.60 to 274.43)                  | 2.43<br>(1.74 to 3.30)                  | 1.86<br>(0.86 to 3.50)                 | 1.34<br>(0.60 to 2.52)                | 2.48<br>(1.08 to 4.70)                 |
| Maternal obstructed labor and uterine rupture         | 7.19<br>(2.86 to 14.22)                    | 5.97<br>(1.85 to 13.82)                    | 4.12<br>(1.23 to 9.36)                     | 8.12<br>(2.44 to 18.71)                      | 0.13<br>(0.05 to 0.26)                  | 0.11<br>(0.04 to 0.26)                 | 0.08<br>(0.02 to 0.17)                | 0.15<br>(0.05 to 0.35)                 |
| Maternal abortion, miscarriage, and ectopic pregnancy | 240.69<br>(182.77 to 305.12)               | 192.07<br>(96.34 to 364.60)                | 139.67<br>(67.31 to 261.27)                | 257.81<br>(123.77 to 509.52)                 | 4.53<br>(3.45 to 5.73)                  | 3.71<br>(1.91 to 6.85)                 | 2.71<br>(1.40 to 5.09)                | 4.97<br>(2.50 to 9.58)                 |

|                                        |                              |                              |                              |                               |                           |                           |                           |                           |
|----------------------------------------|------------------------------|------------------------------|------------------------------|-------------------------------|---------------------------|---------------------------|---------------------------|---------------------------|
|                                        | 34.95<br>(21.55 to<br>52.48) | 29.23<br>(11.87 to<br>58.92) | 20.21<br>(8.42 to<br>42.28)  | 39.06<br>(14.91 to<br>81.06)  | 0.61<br>(0.38 to<br>0.91) | 0.52<br>(0.22 to<br>1.03) | 0.36<br>(0.15 to<br>0.74) | 0.69<br>(0.28 to<br>1.40) |
| Indirect maternal deaths               |                              |                              |                              |                               |                           |                           |                           |                           |
|                                        | 10.08<br>(4.57 to<br>17.95)  | 6.55<br>(2.37 to<br>14.15)   | 4.62<br>(1.66 to<br>10.30)   | 8.77<br>(3.01 to<br>19.24)    | 0.18<br>(0.09 to<br>0.32) | 0.12<br>(0.04 to<br>0.26) | 0.09<br>(0.03 to<br>0.19) | 0.16<br>(0.06 to<br>0.34) |
| Late maternal deaths                   |                              |                              |                              |                               |                           |                           |                           |                           |
|                                        | 0.24<br>(0.10 to<br>0.52)    | 1.87<br>(0.17 to<br>8.36)    | 1.20<br>(0.10 to<br>4.71)    | 3.93<br>(0.55 to<br>13.31)    | 0.00<br>(0.00 to<br>0.01) | 0.03<br>(0.00 to<br>0.15) | 0.02<br>(0.00 to<br>0.08) | 0.08<br>(0.01 to<br>0.26) |
| Maternal deaths aggravated by HIV/AIDS |                              |                              |                              |                               |                           |                           |                           |                           |
|                                        | 55.71<br>(34.48 to<br>81.83) | 44.19<br>(19.55 to<br>82.16) | 33.34<br>(14.88 to<br>59.33) | 57.03<br>(24.92 to<br>105.33) | 1.02<br>(0.62 to<br>1.50) | 0.82<br>(0.38 to<br>1.50) | 0.62<br>(0.29 to<br>1.10) | 1.06<br>(0.47 to<br>1.94) |
| Other maternal disorders               |                              |                              |                              |                               |                           |                           |                           |                           |

| Turkmenistan                                                            |                                                |                                              |                                              |                                               |                                           |                                       |                                     |                                       |
|-------------------------------------------------------------------------|------------------------------------------------|----------------------------------------------|----------------------------------------------|-----------------------------------------------|-------------------------------------------|---------------------------------------|-------------------------------------|---------------------------------------|
| Cause                                                                   | YLLs (actual counts)                           |                                              |                                              |                                               | Deaths (actual counts)                    |                                       |                                     |                                       |
|                                                                         | 2016                                           | 2040 Forecast                                | 2040 Better Scenario                         | 2040 Worse Scenario                           | 2016                                      | 2040 Forecast                         | 2040 Better Scenario                | 2040 Worse Scenario                   |
| <b>Neonatal disorders</b>                                               | <b>136,887.55</b><br>(91,761.82 to 200,521.75) | <b>56,325.03</b><br>(31,850.45 to 93,368.47) | <b>30,301.84</b><br>(17,509.30 to 50,166.51) | <b>83,245.14</b><br>(48,466.87 to 132,448.98) | <b>1,581.83</b><br>(1,060.33 to 2,317.26) | <b>650.98</b><br>(368.07 to 1,078.98) | <b>350.23</b><br>(202.43 to 579.93) | <b>962.06</b><br>(560.17 to 1,530.44) |
| Neonatal preterm birth                                                  | 59,627.67<br>(38,653.80 to 90,607.74)          | 19,476.36<br>(10,437.87 to 32,684.28)        | 9,671.48<br>(5,397.34 to 15,737.34)          | 33,050.88<br>(18,682.84 to 53,441.44)         | 688.87<br>(446.54 to 1,046.62)            | 225.04<br>(120.62 to 377.68)          | 111.75<br>(62.36 to 181.83)         | 381.86<br>(215.87 to 617.44)          |
| Neonatal encephalopathy due to birth asphyxia and trauma                | 46,621.35<br>(27,720.48 to 73,746.72)          | 21,292.67<br>(9,712.15 to 42,174.68)         | 10,448.26<br>(5,011.10 to 19,979.63)         | 29,565.38<br>(13,923.28 to 56,445.01)         | 538.78<br>(320.37 to 852.22)              | 246.10<br>(112.32 to 487.39)          | 120.77<br>(57.93 to 230.89)         | 341.72<br>(161.02 to 652.20)          |
| Neonatal sepsis and other neonatal infections                           | 11,301.58<br>(6,623.02 to 17,766.61)           | 5,722.63<br>(2,994.05 to 10,138.26)          | 3,219.30<br>(1,679.64 to 5,516.26)           | 7,772.43<br>(3,981.21 to 13,567.60)           | 130.66<br>(76.60 to 205.42)               | 66.17<br>(34.63 to 117.24)            | 37.23<br>(19.42 to 63.78)           | 89.87<br>(46.02 to 156.91)            |
| Hemolytic disease and other neonatal jaundice                           | 858.49<br>(380.13 to 1,497.83)                 | 302.03<br>(99.16 to 679.14)                  | 160.91<br>(54.41 to 371.42)                  | 423.59<br>(144.40 to 978.63)                  | 9.92<br>(4.39 to 17.31)                   | 3.49<br>(1.15 to 7.85)                | 1.86<br>(0.63 to 4.29)              | 4.90<br>(1.67 to 11.31)               |
| Other neonatal disorders                                                | 18,478.46<br>(10,009.90 to 30,592.57)          | 9,531.34<br>(3,682.76 to 20,520.53)          | 6,801.91<br>(2,796.86 to 13,814.68)          | 12,432.86<br>(4,741.19 to 27,070.77)          | 213.60<br>(115.69 to 353.65)              | 110.17<br>(42.58 to 237.12)           | 78.63<br>(32.34 to 159.70)          | 143.71<br>(54.83 to 312.77)           |
| <b>Nutritional deficiencies</b>                                         | <b>954.32</b><br>(712.84 to 1,320.22)          | <b>597.99</b><br>(405.80 to 846.53)          | <b>348.80</b><br>(237.34 to 460.26)          | <b>696.96</b><br>(459.69 to 1,001.60)         | <b>16.27</b><br>(13.02 to 20.69)          | <b>14.29</b><br>(10.39 to 19.13)      | <b>13.56</b><br>(9.54 to 18.30)     | <b>15.57</b><br>(10.98 to 21.11)      |
| Protein-energy malnutrition                                             | 419.55<br>(255.48 to 649.32)                   | 201.68<br>(108.23 to 356.44)                 | 202.46<br>(116.20 to 342.99)                 | 236.43<br>(119.78 to 429.60)                  | 6.32<br>(4.20 to 9.47)                    | 4.62<br>(2.85 to 8.02)                | 5.29<br>(3.28 to 8.84)              | 4.88<br>(2.98 to 8.34)                |
| Iodine deficiency                                                       | 54.91<br>(4.68 to 194.78)                      | 37.26<br>(2.53 to 121.71)                    | 30.08<br>(1.80 to 99.52)                     | 45.56<br>(3.19 to 156.80)                     | 0.92<br>(0.13 to 2.54)                    | 0.93<br>(0.07 to 2.56)                | 0.82<br>(0.06 to 2.23)              | 1.05<br>(0.09 to 2.93)                |
| Dietary iron deficiency                                                 | 103.51<br>(78.66 to 131.68)                    | 76.22<br>(46.09 to 124.81)                   | 73.28<br>(44.38 to 119.49)                   | 82.18<br>(49.57 to 135.08)                    | 1.72<br>(1.28 to 2.12)                    | 1.36<br>(0.86 to 2.11)                | 1.36<br>(0.84 to 2.09)              | 1.44<br>(0.92 to 2.26)                |
| Other nutritional deficiencies                                          | 376.35<br>(244.94 to 538.45)                   | 282.84<br>(178.51 to 422.95)                 | 214.40<br>(128.20 to 328.57)                 | 332.79<br>(203.45 to 501.84)                  | 7.31<br>(4.76 to 9.58)                    | 7.38<br>(4.64 to 10.63)               | 6.09<br>(3.45 to 9.09)              | 8.19<br>(5.05 to 11.92)               |
| <b>Other communicable, maternal, neonatal, and nutritional diseases</b> | <b>10,541.75</b><br>(7,078.76 to 19,817.00)    | <b>5,627.21</b><br>(3,716.03 to 8,996.77)    | <b>3,950.13</b><br>(2,645.89 to 6,138.14)    | <b>6,981.51</b><br>(4,551.25 to 11,850.61)    | <b>160.64</b><br>(118.32 to 272.28)       | <b>107.64</b><br>(78.55 to 152.55)    | <b>80.33</b><br>(58.98 to 113.12)   | <b>127.36</b><br>(91.27 to 189.81)    |
| Sexually transmitted infections excluding HIV                           | 307.47<br>(34.43 to 927.26)                    | 99.51<br>(29.05 to 255.00)                   | 65.24<br>(24.68 to 158.46)                   | 125.06<br>(31.85 to 321.10)                   | 4.07<br>(0.83 to 11.37)                   | 1.91<br>(0.90 to 4.29)                | 1.45<br>(0.79 to 3.16)              | 2.23<br>(0.97 to 4.98)                |
| Syphilis                                                                | 281.07<br>(10.13 to 904.89)                    | 71.56<br>(7.59 to 222.44)                    | 40.25<br>(5.59 to 123.85)                    | 95.06<br>(8.72 to 290.85)                     | 3.40<br>(0.22 to 10.68)                   | 1.02<br>(0.23 to 2.84)                | 0.62<br>(0.18 to 1.62)              | 1.31<br>(0.25 to 3.64)                |
| Chlamydial infection                                                    | 5.33<br>(4.34 to 6.37)                         | 5.39<br>(3.17 to 9.52)                       | 4.81<br>(2.82 to 8.06)                       | 5.79<br>(3.35 to 10.03)                       | 0.13<br>(0.11 to 0.15)                    | 0.17<br>(0.10 to 0.35)                | 0.16<br>(0.09 to 0.33)              | 0.17<br>(0.10 to 0.31)                |
| Gonococcal infection                                                    | 13.82<br>(11.27 to 16.22)                      | 15.18<br>(8.93 to 26.39)                     | 13.63<br>(7.88 to 24.41)                     | 16.24<br>(9.66 to 27.85)                      | 0.36<br>(0.30 to 0.42)                    | 0.51<br>(0.29 to 0.93)                | 0.47<br>(0.27 to 0.91)              | 0.52<br>(0.30 to 0.93)                |
| Other sexually transmitted infections                                   | 7.25<br>(5.90 to 8.52)                         | 7.38<br>(4.37 to 12.79)                      | 6.54<br>(3.78 to 11.50)                      | 7.97<br>(4.67 to 13.68)                       | 0.18<br>(0.14 to 0.20)                    | 0.21<br>(0.13 to 0.38)                | 0.20<br>(0.12 to 0.36)              | 0.22<br>(0.14 to 0.40)                |
| Acute hepatitis                                                         | 4,318.57<br>(3,660.68 to 5,229.21)             | 2,498.84<br>(1,647.53 to 3,765.79)           | 1,518.72<br>(963.37 to 2,356.78)             | 3,094.35<br>(2,145.86 to 4,505.35)            | 76.60<br>(66.19 to 89.13)                 | 54.33<br>(37.31 to 76.73)             | 34.73<br>(22.99 to 50.79)           | 64.97<br>(46.92 to 90.75)             |
| Acute hepatitis A                                                       | 788.62<br>(435.62 to 1,327.93)                 | 276.46<br>(119.21 to 572.73)                 | 165.20<br>(74.40 to 348.46)                  | 366.98<br>(164.30 to 760.97)                  | 9.74<br>(5.65 to 16.05)                   | 3.70<br>(1.82 to 7.11)                | 2.30<br>(1.19 to 4.33)              | 4.80<br>(2.38 to 9.29)                |
| Acute hepatitis B                                                       | 2,657.69<br>(2,253.52 to 3,134.51)             | 1,755.82<br>(1,099.36 to 2,836.15)           | 1,085.89<br>(669.65 to 1,801.25)             | 2,150.10<br>(1,429.27 to 3,302.25)            | 53.65<br>(45.95 to 62.72)                 | 41.37<br>(27.52 to 61.59)             | 26.54<br>(17.08 to 39.81)           | 49.35<br>(34.16 to 72.21)             |

|                                       |                                                                  |                                                                    |                                                                  |                                                                      |                                                               |                                                               |                                                               |                                                               |
|---------------------------------------|------------------------------------------------------------------|--------------------------------------------------------------------|------------------------------------------------------------------|----------------------------------------------------------------------|---------------------------------------------------------------|---------------------------------------------------------------|---------------------------------------------------------------|---------------------------------------------------------------|
|                                       | 116.47<br>(82.84 to<br>163.34)                                   | 82.25<br>(46.58 to<br>143.96)                                      | 49.47<br>(28.27 to<br>87.32)                                     | 97.97<br>(56.58 to<br>169.13)                                        | 2.19<br>(1.60 to<br>2.88)                                     | 1.88<br>(1.17 to<br>2.94)                                     | 1.21<br>(0.75 to<br>1.95)                                     | 2.16<br>(1.36 to<br>3.29)                                     |
| Acute hepatitis C                     |                                                                  |                                                                    |                                                                  |                                                                      |                                                               |                                                               |                                                               |                                                               |
|                                       | 755.78<br>(542.94 to<br>1,094.74)                                | 384.30<br>(195.94 to<br>721.53)                                    | 218.16<br>(113.18 to<br>403.73)                                  | 479.30<br>(255.38 to<br>897.62)                                      | 11.03<br>(8.26 to<br>15.39)                                   | 7.38<br>(4.30 to<br>12.13)                                    | 4.69<br>(2.70 to<br>7.77)                                     | 8.66<br>(5.17 to<br>14.31)                                    |
| Acute hepatitis E                     |                                                                  |                                                                    |                                                                  |                                                                      |                                                               |                                                               |                                                               |                                                               |
|                                       | 5,915.71<br>(2,891.84 to<br>14,997.64)                           | 3,028.86<br>(1,668.34 to<br>6,217.06)                              | 2,366.18<br>(1,405.98 to<br>4,331.83)                            | 3,762.09<br>(1,943.42 to<br>8,504.05)                                | 79.97<br>(42.13 to<br>186.93)                                 | 51.40<br>(32.32 to<br>89.60)                                  | 44.14<br>(29.06 to<br>69.35)                                  | 60.16<br>(35.98 to<br>116.37)                                 |
| Other unspecified infectious diseases |                                                                  |                                                                    |                                                                  |                                                                      |                                                               |                                                               |                                                               |                                                               |
| <b>Non-communicable diseases</b>      | <b>749,573.93</b><br><b>(687,712.31 to</b><br><b>815,725.35)</b> | <b>945,688.70</b><br><b>(676,205.77 to</b><br><b>1,270,384.29)</b> | <b>617,559.64</b><br><b>(448,651.30 to</b><br><b>852,693.25)</b> | <b>1,318,869.41</b><br><b>(940,919.68 to</b><br><b>1,748,699.06)</b> | <b>26,340.02</b><br><b>(24,976.84 to</b><br><b>27,709.21)</b> | <b>47,993.99</b><br><b>(33,710.93 to</b><br><b>71,422.22)</b> | <b>33,772.14</b><br><b>(23,691.48 to</b><br><b>52,170.74)</b> | <b>62,917.06</b><br><b>(44,673.67 to</b><br><b>89,276.27)</b> |

| Turkmenistan                         |                                                |                                                 |                                                 |                                                 |                                           |                                           |                                           |                                           |
|--------------------------------------|------------------------------------------------|-------------------------------------------------|-------------------------------------------------|-------------------------------------------------|-------------------------------------------|-------------------------------------------|-------------------------------------------|-------------------------------------------|
| Cause                                | YLLs (actual counts)                           |                                                 |                                                 |                                                 | Deaths (actual counts)                    |                                           |                                           |                                           |
|                                      | 2016                                           | 2040 Forecast                                   | 2040 Better Scenario                            | 2040 Worse Scenario                             | 2016                                      | 2040 Forecast                             | 2040 Better Scenario                      | 2040 Worse Scenario                       |
| <b>Neoplasms</b>                     | <b>103,036.55</b><br>(96,892.31 to 109,055.88) | <b>159,118.80</b><br>(128,173.85 to 193,243.98) | <b>131,462.71</b><br>(106,320.41 to 156,675.88) | <b>183,745.65</b><br>(149,049.26 to 223,840.20) | <b>3,110.40</b><br>(2,943.99 to 3,284.50) | <b>6,189.33</b><br>(5,089.20 to 7,304.48) | <b>5,422.67</b><br>(4,432.25 to 6,461.17) | <b>6,877.43</b><br>(5,663.41 to 8,268.44) |
| Lip and oral cavity cancer           | 2,402.50<br>(2,164.34 to 2,660.77)             | 3,649.58<br>(2,040.33 to 6,240.32)              | 2,594.38<br>(1,532.09 to 4,248.65)              | 5,418.96<br>(2,829.00 to 9,472.97)              | 81.88<br>(74.20 to 89.99)                 | 153.26<br>(90.05 to 253.37)               | 118.39<br>(73.45 to 191.81)               | 212.94<br>(115.50 to 369.77)              |
| Nasopharynx cancer                   | 895.16<br>(810.43 to 990.04)                   | 1,112.02<br>(639.73 to 2,012.82)                | 675.97<br>(403.42 to 1,150.66)                  | 1,693.27<br>(973.23 to 3,084.69)                | 22.47<br>(20.54 to 24.71)                 | 32.99<br>(19.81 to 54.79)                 | 21.00<br>(13.20 to 33.60)                 | 49.47<br>(28.95 to 83.62)                 |
| Other pharynx cancer                 | 1,432.10<br>(1,275.10 to 1,603.20)             | 2,183.46<br>(1,145.12 to 3,738.06)              | 2,020.86<br>(1,090.47 to 3,394.06)              | 2,603.53<br>(1,332.84 to 4,549.50)              | 48.67<br>(43.51 to 54.41)                 | 87.39<br>(46.34 to 148.18)                | 84.16<br>(47.95 to 139.95)                | 101.12<br>(51.77 to 178.04)               |
| Esophageal cancer                    | 7,899.81<br>(7,211.80 to 8,620.21)             | 15,313.66<br>(9,092.24 to 23,991.48)            | 13,106.88<br>(8,170.39 to 19,957.29)            | 21,588.87<br>(11,682.54 to 35,295.03)           | 303.73<br>(278.28 to 331.54)              | 711.73<br>(433.83 to 1,095.68)            | 649.32<br>(409.51 to 977.35)              | 975.53<br>(523.87 to 1,513.77)            |
| Stomach cancer                       | 8,880.28<br>(8,153.41 to 9,615.08)             | 12,349.57<br>(8,995.44 to 16,235.19)            | 9,190.05<br>(6,646.06 to 12,267.78)             | 13,999.01<br>(10,708.51 to 17,931.23)           | 327.94<br>(300.65 to 355.26)              | 557.35<br>(422.11 to 728.73)              | 433.22<br>(320.11 to 585.06)              | 608.48<br>(479.89 to 776.68)              |
| Colon and rectum cancer              | 4,843.81<br>(4,372.03 to 5,401.60)             | 10,066.14<br>(6,724.07 to 14,789.15)            | 7,691.93<br>(5,181.51 to 11,136.01)             | 11,327.75<br>(7,450.24 to 16,301.89)            | 175.48<br>(159.46 to 195.05)              | 475.03<br>(321.98 to 697.97)              | 386.06<br>(262.46 to 571.20)              | 507.92<br>(340.55 to 745.17)              |
| Liver cancer                         | 6,512.18<br>(5,937.07 to 7,126.58)             | 12,153.36<br>(8,242.04 to 18,295.93)            | 11,185.40<br>(7,782.47 to 16,111.69)            | 13,190.93<br>(8,516.14 to 19,934.10)            | 214.27<br>(196.02 to 233.46)              | 481.67<br>(322.73 to 708.56)              | 463.53<br>(328.27 to 656.87)              | 504.21<br>(328.57 to 741.93)              |
| Liver cancer due to hepatitis B      | 2,239.84<br>(1,855.00 to 2,666.38)             | 3,858.88<br>(2,434.97 to 6,121.32)              | 3,596.41<br>(2,368.00 to 5,515.50)              | 4,051.51<br>(2,520.57 to 6,550.47)              | 67.58<br>(55.08 to 81.58)                 | 139.65<br>(89.72 to 220.21)               | 135.40<br>(88.85 to 203.72)               | 141.96<br>(89.61 to 225.15)               |
| Liver cancer due to hepatitis C      | 1,825.81<br>(1,493.46 to 2,170.67)             | 3,717.01<br>(2,405.31 to 5,816.63)              | 3,543.01<br>(2,398.07 to 5,141.16)              | 3,829.95<br>(2,450.74 to 5,981.64)              | 67.53<br>(55.17 to 79.37)                 | 164.78<br>(110.75 to 251.56)              | 164.55<br>(115.20 to 236.10)              | 163.33<br>(106.70 to 248.31)              |
| Liver cancer due to alcohol use      | 1,132.03<br>(969.02 to 1,321.84)               | 2,201.81<br>(1,425.11 to 3,437.35)              | 1,837.40<br>(1,243.80 to 2,698.70)              | 2,837.13<br>(1,803.13 to 4,470.06)              | 40.32<br>(34.52 to 46.78)                 | 91.06<br>(59.45 to 140.18)                | 79.89<br>(54.48 to 115.31)                | 112.44<br>(72.69 to 173.44)               |
| Liver cancer due to other causes     | 1,324.49<br>(1,151.64 to 1,527.95)             | 2,375.66<br>(1,520.66 to 3,796.29)              | 2,208.58<br>(1,470.35 to 3,311.38)              | 2,472.34<br>(1,582.22 to 3,975.68)              | 38.84<br>(33.96 to 44.69)                 | 86.18<br>(55.54 to 132.42)                | 83.69<br>(57.20 to 124.87)                | 86.48<br>(54.77 to 134.74)                |
| Gallbladder and biliary tract cancer | 1,482.34<br>(1,354.50 to 1,626.91)             | 2,011.17<br>(1,657.55 to 2,320.87)              | 1,966.44<br>(1,578.90 to 2,277.35)              | 1,935.15<br>(1,618.41 to 2,202.92)              | 56.01<br>(51.49 to 61.40)                 | 93.58<br>(79.55 to 109.12)                | 95.42<br>(78.37 to 114.74)                | 86.89<br>(75.41 to 99.93)                 |
| Pancreatic cancer                    | 2,557.22<br>(2,348.36 to 2,778.31)             | 5,283.80<br>(4,285.30 to 6,375.39)              | 5,326.88<br>(4,277.45 to 6,412.54)              | 5,120.68<br>(4,227.33 to 6,169.48)              | 96.35<br>(88.83 to 104.15)                | 258.76<br>(211.11 to 318.80)              | 275.14<br>(221.76 to 347.12)              | 238.24<br>(196.32 to 292.41)              |
| Larynx cancer                        | 1,016.44<br>(925.46 to 1,111.62)               | 1,593.45<br>(832.86 to 2,816.35)                | 989.16<br>(581.22 to 1,635.81)                  | 2,609.00<br>(1,213.78 to 5,036.65)              | 36.38<br>(33.30 to 39.51)                 | 67.16<br>(38.38 to 115.65)                | 46.16<br>(27.89 to 72.99)                 | 102.21<br>(50.74 to 190.82)               |
| Tracheal, bronchus, and lung cancer  | 8,566.08<br>(7,658.08 to 9,570.52)             | 16,433.35<br>(11,317.32 to 23,415.48)           | 10,942.28<br>(7,978.51 to 14,698.31)            | 23,424.68<br>(15,804.25 to 34,182.17)           | 298.42<br>(267.08 to 330.72)              | 676.35<br>(474.41 to 937.97)              | 491.85<br>(361.63 to 649.64)              | 911.67<br>(605.59 to 1,312.88)            |
| Malignant skin melanoma              | 620.22<br>(513.11 to 826.42)                   | 1,273.51<br>(968.06 to 1,728.60)                | 1,588.20<br>(1,181.97 to 2,149.74)              | 1,119.70<br>(876.22 to 1,501.78)                | 19.14<br>(15.87 to 26.03)                 | 50.77<br>(38.99 to 71.33)                 | 66.22<br>(49.12 to 95.68)                 | 42.81<br>(33.94 to 59.65)                 |
| Non-melanoma skin cancer             | 627.10<br>(561.88 to 702.51)                   | 994.79<br>(767.65 to 1,277.94)                  | 769.00<br>(578.53 to 988.22)                    | 1,066.99<br>(852.79 to 1,323.47)                | 19.43<br>(17.60 to 21.57)                 | 40.35<br>(32.76 to 49.88)                 | 33.33<br>(26.26 to 42.34)                 | 41.12<br>(34.68 to 49.09)                 |
| Breast cancer                        | 8,819.55<br>(7,740.36 to 10,114.98)            | 12,091.46<br>(8,514.51 to 16,320.76)            | 9,254.53<br>(6,597.74 to 12,363.97)             | 14,045.04<br>(10,095.91 to 19,117.85)           | 259.53<br>(228.76 to 294.21)              | 442.94<br>(311.12 to 610.47)              | 351.95<br>(246.43 to 481.92)              | 496.78<br>(355.62 to 686.04)              |
| Cervical cancer                      | 5,729.14<br>(5,042.94 to 6,520.33)             | 5,008.44<br>(3,843.32 to 6,221.76)              | 3,724.05<br>(2,820.85 to 4,679.35)              | 5,644.39<br>(4,488.58 to 6,851.39)              | 167.86<br>(148.41 to 190.92)              | 177.24<br>(135.97 to 220.29)              | 135.86<br>(102.13 to 173.76)              | 194.17<br>(157.74 to 232.34)              |

|                   |                                       |                                       |                                       |                                       |                              |                                 |                                 |                                 |
|-------------------|---------------------------------------|---------------------------------------|---------------------------------------|---------------------------------------|------------------------------|---------------------------------|---------------------------------|---------------------------------|
|                   | 554.71<br>(486.28 to<br>638.92)       | 1,089.80<br>(843.38 to<br>1,340.52)   | 925.72<br>(700.99 to<br>1,145.03)     | 1,164.96<br>(931.53 to<br>1,400.07)   | 20.79<br>(18.29 to<br>23.88) | 53.37<br>(41.81 to<br>69.19)    | 47.56<br>(35.81 to<br>64.47)    | 54.77<br>(44.91 to<br>68.16)    |
| Uterine cancer    |                                       |                                       |                                       |                                       |                              |                                 |                                 |                                 |
|                   | 2,593.83<br>(2,131.09 to<br>2,991.38) | 3,882.75<br>(2,810.58 to<br>5,228.18) | 3,303.04<br>(2,425.20 to<br>4,255.17) | 3,920.50<br>(2,833.71 to<br>5,193.24) | 73.89<br>(61.32 to<br>84.86) | 135.90<br>(98.48 to<br>180.80)  | 118.65<br>(86.02 to<br>157.56)  | 134.02<br>(96.72 to<br>177.49)  |
| Ovarian cancer    |                                       |                                       |                                       |                                       |                              |                                 |                                 |                                 |
|                   | 1,128.26<br>(982.62 to<br>1,425.17)   | 3,211.05<br>(2,627.12 to<br>4,436.20) | 3,033.50<br>(2,485.91 to<br>4,132.22) | 2,990.55<br>(2,402.51 to<br>4,158.50) | 58.37<br>(50.98 to<br>74.60) | 209.99<br>(162.26 to<br>286.60) | 211.70<br>(169.01 to<br>291.16) | 185.97<br>(136.63 to<br>252.27) |
| Prostate cancer   |                                       |                                       |                                       |                                       |                              |                                 |                                 |                                 |
|                   | 900.06<br>(691.39 to<br>1,100.49)     | 862.55<br>(499.81 to<br>1,647.66)     | 668.12<br>(385.43 to<br>1,262.61)     | 946.20<br>(558.15 to<br>1,809.69)     | 17.02<br>(13.20 to<br>20.59) | 17.68<br>(11.24 to<br>30.82)    | 14.12<br>(9.09 to<br>24.16)     | 19.00<br>(12.15 to<br>32.99)    |
| Testicular cancer |                                       |                                       |                                       |                                       |                              |                                 |                                 |                                 |



| Turkmenistan                    |                                                                  |                                                                  |                                                                  |                                                                    |                                                               |                                                               |                                                               |                                                               |
|---------------------------------|------------------------------------------------------------------|------------------------------------------------------------------|------------------------------------------------------------------|--------------------------------------------------------------------|---------------------------------------------------------------|---------------------------------------------------------------|---------------------------------------------------------------|---------------------------------------------------------------|
| Cause                           | YLLs (actual counts)                                             |                                                                  |                                                                  |                                                                    | Deaths (actual counts)                                        |                                                               |                                                               |                                                               |
|                                 | 2016                                                             | 2040 Forecast                                                    | 2040 Better Scenario                                             | 2040 Worse Scenario                                                | 2016                                                          | 2040 Forecast                                                 | 2040 Better Scenario                                          | 2040 Worse Scenario                                           |
| Kidney cancer                   | 2,912.38<br>(2,635.37 to<br>3,221.56)                            | 4,982.80<br>(3,926.32 to<br>6,152.73)                            | 4,961.96<br>(3,893.27 to<br>6,035.53)                            | 4,865.63<br>(3,856.74 to<br>6,116.44)                              | 84.25<br>(76.65 to<br>91.98)                                  | 184.05<br>(150.62 to<br>222.77)                               | 194.55<br>(157.25 to<br>233.43)                               | 172.03<br>(138.35 to<br>214.83)                               |
| Bladder cancer                  | 1,032.15<br>(940.50 to<br>1,133.41)                              | 1,600.63<br>(1,263.40 to<br>2,015.11)                            | 1,436.29<br>(1,142.46 to<br>1,764.06)                            | 1,672.98<br>(1,311.92 to<br>2,162.78)                              | 41.83<br>(38.30 to<br>45.67)                                  | 85.04<br>(67.27 to<br>107.68)                                 | 82.17<br>(65.66 to<br>104.06)                                 | 83.09<br>(65.16 to<br>105.45)                                 |
| Brain and nervous system cancer | 8,492.98<br>(6,973.98 to<br>11,066.50)                           | 12,044.89<br>(9,066.94 to<br>16,269.00)                          | 10,469.78<br>(7,849.74 to<br>13,919.12)                          | 12,261.57<br>(9,199.02 to<br>16,577.49)                            | 189.42<br>(157.46 to<br>248.94)                               | 336.76<br>(270.74 to<br>436.70)                               | 311.55<br>(247.75 to<br>397.80)                               | 328.79<br>(265.84 to<br>425.34)                               |
| Thyroid cancer                  | 414.74<br>(370.10 to<br>461.26)                                  | 623.22<br>(421.12 to<br>954.21)                                  | 492.59<br>(345.99 to<br>718.21)                                  | 671.92<br>(465.76 to<br>1,017.97)                                  | 12.95<br>(11.65 to<br>14.30)                                  | 24.19<br>(16.58 to<br>35.85)                                  | 19.91<br>(14.09 to<br>28.52)                                  | 25.28<br>(17.74 to<br>37.80)                                  |
| Mesothelioma                    | 154.27<br>(136.44 to<br>175.52)                                  | 235.87<br>(187.77 to<br>295.42)                                  | 243.86<br>(189.60 to<br>307.37)                                  | 230.69<br>(185.00 to<br>288.29)                                    | 4.77<br>(4.22 to<br>5.42)                                     | 8.88<br>(7.28 to<br>10.65)                                    | 9.54<br>(7.67 to<br>11.64)                                    | 8.42<br>(7.00 to<br>10.09)                                    |
| Hodgkin lymphoma                | 906.31<br>(617.54 to<br>1,039.07)                                | 732.16<br>(475.55 to<br>1,119.25)                                | 495.67<br>(319.09 to<br>774.87)                                  | 871.05<br>(566.23 to<br>1,324.14)                                  | 18.93<br>(13.78 to<br>21.27)                                  | 17.96<br>(12.63 to<br>25.11)                                  | 12.65<br>(8.98 to<br>18.13)                                   | 20.79<br>(15.23 to<br>28.75)                                  |
| Non-Hodgkin lymphoma            | 2,010.81<br>(1,742.95 to<br>2,211.18)                            | 2,934.10<br>(2,205.35 to<br>3,813.46)                            | 2,414.97<br>(1,818.09 to<br>3,114.88)                            | 2,986.47<br>(2,266.83 to<br>3,865.36)                              | 52.90<br>(45.26 to<br>57.72)                                  | 107.17<br>(81.48 to<br>137.10)                                | 93.74<br>(72.10 to<br>120.04)                                 | 104.33<br>(79.96 to<br>133.24)                                |
| Multiple myeloma                | 1,323.27<br>(935.56 to<br>1,529.85)                              | 2,039.98<br>(1,465.35 to<br>2,853.81)                            | 1,797.25<br>(1,308.97 to<br>2,474.38)                            | 2,030.88<br>(1,473.16 to<br>2,850.79)                              | 35.65<br>(31.42 to<br>43.09)                                  | 70.88<br>(51.99 to<br>105.67)                                 | 65.52<br>(48.04 to<br>96.60)                                  | 68.06<br>(50.34 to<br>99.53)                                  |
| Leukemia                        | 8,464.11<br>(7,367.26 to<br>9,938.53)                            | 9,450.81<br>(6,766.21 to<br>13,325.72)                           | 7,357.37<br>(5,250.53 to<br>10,239.77)                           | 10,275.12<br>(7,333.13 to<br>14,286.09)                            | 155.51<br>(139.27 to<br>175.77)                               | 229.14<br>(175.46 to<br>299.07)                               | 189.53<br>(145.83 to<br>246.05)                               | 240.68<br>(185.94 to<br>316.17)                               |
| Acute lymphoid leukemia         | 2,269.42<br>(1,702.00 to<br>3,060.69)                            | 2,100.93<br>(1,326.40 to<br>3,330.11)                            | 1,540.71<br>(955.51 to<br>2,488.82)                              | 2,288.47<br>(1,435.64 to<br>3,645.31)                              | 35.48<br>(27.54 to<br>45.94)                                  | 39.48<br>(27.04 to<br>56.66)                                  | 30.18<br>(20.80 to<br>43.88)                                  | 42.15<br>(28.63 to<br>61.35)                                  |
| Chronic lymphoid leukemia       | 255.33<br>(202.95 to<br>326.64)                                  | 379.75<br>(259.33 to<br>542.12)                                  | 323.38<br>(223.76 to<br>460.09)                                  | 402.53<br>(275.62 to<br>582.65)                                    | 7.45<br>(5.97 to<br>9.44)                                     | 13.77<br>(9.83 to<br>19.06)                                   | 12.24<br>(8.75 to<br>16.56)                                   | 14.11<br>(10.03 to<br>19.74)                                  |
| Acute myeloid leukemia          | 2,498.44<br>(2,039.09 to<br>3,090.97)                            | 3,322.54<br>(2,372.74 to<br>4,739.68)                            | 2,877.65<br>(2,069.09 to<br>4,108.39)                            | 3,400.80<br>(2,400.02 to<br>4,828.73)                              | 46.27<br>(39.27 to<br>55.20)                                  | 76.56<br>(57.72 to<br>100.98)                                 | 69.54<br>(52.53 to<br>90.81)                                  | 76.40<br>(57.19 to<br>101.57)                                 |
| Chronic myeloid leukemia        | 269.86<br>(203.40 to<br>334.83)                                  | 255.30<br>(161.54 to<br>377.96)                                  | 153.62<br>(96.41 to<br>228.60)                                   | 299.12<br>(433.74 to<br>433.74)                                    | 7.06<br>(5.26 to<br>8.70)                                     | 8.48<br>(5.59 to<br>12.14)                                    | 5.35<br>(3.46 to<br>7.81)                                     | 9.59<br>(6.49 to<br>13.45)                                    |
| Other leukemia                  | 3,171.05<br>(2,599.89 to<br>3,794.63)                            | 3,392.30<br>(2,322.33 to<br>5,015.99)                            | 2,462.01<br>(1,665.20 to<br>3,640.81)                            | 3,884.19<br>(2,690.26 to<br>5,680.93)                              | 59.25<br>(50.92 to<br>67.62)                                  | 90.85<br>(66.70 to<br>122.45)                                 | 72.21<br>(53.59 to<br>97.55)                                  | 98.44<br>(73.13 to<br>131.92)                                 |
| Other neoplasms                 | 9,864.61<br>(8,854.89 to<br>11,059.26)                           | 13,910.42<br>(10,885.15 to<br>18,214.11)                         | 12,836.56<br>(9,929.95 to<br>16,585.39)                          | 14,069.16<br>(10,973.70 to<br>18,457.78)                           | 216.58<br>(197.87 to<br>237.23)                               | 401.74<br>(334.31 to<br>487.72)                               | 399.87<br>(326.90 to<br>497.25)                               | 386.64<br>(326.53 to<br>466.65)                               |
| <b>Cardiovascular diseases</b>  | <b>349,554.81</b><br><b>(349,846.95 to</b><br><b>389,268.80)</b> | <b>497,270.47</b><br><b>(390,587.21 to</b><br><b>776,837.22)</b> | <b>265,769.59</b><br><b>(161,671.40 to</b><br><b>432,007.57)</b> | <b>795,588.47</b><br><b>(489,691.40 to</b><br><b>1,186,770.22)</b> | <b>16,447.83</b><br><b>(15,616.28 to</b><br><b>17,257.40)</b> | <b>29,951.05</b><br><b>(18,345.93 to</b><br><b>49,587.92)</b> | <b>18,078.77</b><br><b>(10,710.73 to</b><br><b>32,386.32)</b> | <b>43,315.15</b><br><b>(27,277.89 to</b><br><b>66,413.85)</b> |
| Rheumatic heart disease         | 8,018.47<br>(7,229.45 to<br>8,950.17)                            | 4,885.60<br>(3,280.44 to<br>7,097.29)                            | 3,378.26<br>(2,163.45 to<br>4,967.64)                            | 5,981.86<br>(4,003.20 to<br>8,832.28)                              | 181.82<br>(164.67 to<br>201.94)                               | 151.99<br>(105.57 to<br>225.75)                               | 113.82<br>(75.49 to<br>172.10)                                | 176.60<br>(124.37 to<br>251.29)                               |
| Ischemic heart disease          | 222,877.59<br>(209,477.29 to<br>235,522.79)                      | 327,620.73<br>(181,079.66 to<br>538,106.95)                      | 169,199.37<br>(91,614.04 to<br>291,143.39)                       | 520,687.07<br>(300,953.77 to<br>799,331.51)                        | 10,984.71<br>(10,387.22 to<br>11,563.60)                      | 21,207.26<br>(11,992.46 to<br>37,969.48)                      | 12,556.18<br>(6,778.30 to<br>24,105.97)                       | 30,304.38<br>(17,981.21 to<br>50,034.16)                      |
| Stroke                          | 102,945.47<br>(95,501.24 to<br>110,341.30)                       | 107,602.22<br>(58,327.57 to<br>177,199.41)                       | 50,070.60<br>(29,392.51 to<br>82,153.03)                         | 197,981.21<br>(112,107.97 to<br>325,058.18)                        | 4,145.32<br>(3,842.82 to<br>4,435.80)                         | 5,699.15<br>(3,302.88 to<br>9,115.03)                         | 2,986.21<br>(1,797.25 to<br>4,969.96)                         | 9,444.37<br>(5,582.43 to<br>15,050.90)                        |
| Ischemic stroke                 | 4,119.28<br>(3,701.07 to<br>4,558.83)                            | 6,055.57<br>(3,522.81 to<br>10,313.06)                           | 3,603.24<br>(2,077.83 to<br>6,166.09)                            | 8,417.30<br>(4,977.14 to<br>14,069.68)                             | 276.43<br>(245.93 to<br>308.81)                               | 549.48<br>(298.66 to<br>1,044.30)                             | 361.45<br>(195.03 to<br>718.54)                               | 692.58<br>(393.56 to<br>1,272.21)                             |

|                                |                                           |                                            |                                          |                                             |                                       |                                       |                                       |                                        |
|--------------------------------|-------------------------------------------|--------------------------------------------|------------------------------------------|---------------------------------------------|---------------------------------------|---------------------------------------|---------------------------------------|----------------------------------------|
| Intracerebral hemorrhage       | 98,826.20<br>(91,590.65 to<br>106,020.73) | 101,546.65<br>(53,865.82 to<br>170,637.63) | 46,467.35<br>(26,572.12 to<br>77,041.89) | 189,563.92<br>(105,814.78 to<br>312,849.16) | 3,868.90<br>(3,589.41 to<br>4,141.40) | 5,149.67<br>(2,932.58 to<br>8,384.80) | 2,624.76<br>(1,550.35 to<br>4,407.79) | 8,751.79<br>(5,109.80 to<br>13,968.84) |
| Hypertensive heart disease     | 11,990.65<br>(7,086.66 to<br>15,238.20)   | 26,503.37<br>(12,498.56 to<br>63,389.18)   | 19,970.51<br>(9,709.78 to<br>47,305.74)  | 35,922.75<br>(16,337.64 to<br>83,106.95)    | 507.17<br>(326.65 to<br>679.37)       | 1,556.64<br>(698.93 to<br>4,125.11)   | 1,271.58<br>(570.77 to<br>3,590.20)   | 1,983.59<br>(867.69 to<br>4,931.42)    |
| Cardiomyopathy and myocarditis | 17,523.14<br>(13,376.97 to<br>26,113.67)  | 20,107.29<br>(12,561.04 to<br>35,803.79)   | 14,545.02<br>(9,384.51 to<br>25,740.89)  | 23,359.79<br>(15,120.54 to<br>41,541.18)    | 392.50<br>(295.20 to<br>627.62)       | 647.28<br>(409.45 to<br>1,155.81)     | 504.14<br>(323.69 to<br>903.74)       | 719.04<br>(461.81 to<br>1,291.53)      |
| Myocarditis                    | 3,782.46<br>(2,666.79 to<br>5,702.11)     | 2,935.02<br>(1,672.65 to<br>6,130.85)      | 2,536.24<br>(1,459.04 to<br>5,323.45)    | 3,179.70<br>(1,811.89 to<br>6,564.33)       | 66.22<br>(43.90 to<br>119.01)         | 75.77<br>(43.66 to<br>167.49)         | 72.24<br>(41.77 to<br>157.47)         | 77.30<br>(43.94 to<br>172.67)          |

| Turkmenistan                                                  |                                               |                                                |                                               |                                                |                                            |                                            |                                            |                                            |
|---------------------------------------------------------------|-----------------------------------------------|------------------------------------------------|-----------------------------------------------|------------------------------------------------|--------------------------------------------|--------------------------------------------|--------------------------------------------|--------------------------------------------|
| Cause                                                         | YLLs (actual counts)                          |                                                |                                               |                                                | Deaths (actual counts)                     |                                            |                                            |                                            |
|                                                               | 2016                                          | 2040 Forecast                                  | 2040 Better Scenario                          | 2040 Worse Scenario                            | 2016                                       | 2040 Forecast                              | 2040 Better Scenario                       | 2040 Worse Scenario                        |
| Alcoholic cardiomyopathy                                      | 4,748.71<br>(3,374.81 to 8,784.00)            | 6,514.96<br>(4,179.07 to 12,396.54)            | 5,605.35<br>(3,633.81 to 10,170.04)           | 7,695.36<br>(4,959.29 to 14,573.58)            | 132.90<br>(95.19 to 244.80)                | 226.25<br>(153.48 to 412.64)               | 205.28<br>(141.51 to 361.54)               | 259.15<br>(175.75 to 474.68)               |
| Other cardiomyopathy                                          | 8,991.97<br>(6,939.24 to 13,183.77)           | 10,657.30<br>(5,923.52 to 20,584.33)           | 6,403.42<br>(3,577.64 to 12,249.82)           | 12,484.73<br>(7,345.47 to 23,367.40)           | 193.39<br>(149.45 to 306.05)               | 345.27<br>(183.23 to 670.64)               | 226.62<br>(119.91 to 434.26)               | 382.59<br>(216.68 to 728.53)               |
| Atrial fibrillation and flutter                               | 799.30<br>(631.54 to 982.00)                  | 2,845.58<br>(1,988.03 to 4,337.40)             | 2,818.04<br>(1,919.05 to 4,457.68)            | 2,809.81<br>(2,003.85 to 4,149.73)             | 73.30<br>(56.93 to 92.32)                  | 316.85<br>(204.14 to 580.44)               | 332.60<br>(207.41 to 645.71)               | 297.08<br>(192.77 to 523.71)               |
| Aortic aneurysm                                               | 1,353.57<br>(1,154.56 to 1,586.22)            | 1,924.47<br>(1,379.96 to 2,654.61)             | 1,626.60<br>(1,164.65 to 2,227.20)            | 2,038.36<br>(1,492.73 to 2,813.15)             | 52.56<br>(45.61 to 60.05)                  | 103.10<br>(77.23 to 143.93)                | 97.18<br>(71.16 to 144.66)                 | 100.91<br>(77.04 to 138.04)                |
| Peripheral artery disease                                     | 103.46<br>(54.19 to 140.50)                   | 401.28<br>(176.38 to 674.39)                   | 381.11<br>(164.22 to 667.29)                  | 368.27<br>(165.08 to 610.43)                   | 6.30<br>(3.19 to 8.42)                     | 32.97<br>(13.61 to 63.37)                  | 34.66<br>(13.72 to 72.92)                  | 28.00<br>(12.05 to 49.80)                  |
| Endocarditis                                                  | 1,020.43<br>(756.51 to 1,521.61)              | 1,247.19<br>(809.98 to 1,950.44)               | 1,103.51<br>(718.13 to 1,722.29)              | 1,338.37<br>(867.45 to 2,108.06)               | 22.47<br>(17.25 to 30.92)                  | 41.80<br>(27.74 to 63.04)                  | 40.75<br>(26.56 to 62.51)                  | 41.91<br>(27.92 to 63.32)                  |
| Other cardiovascular and circulatory diseases                 | 2,922.73<br>(2,387.37 to 3,713.21)            | 4,132.74<br>(2,776.53 to 6,012.96)             | 2,676.58<br>(1,782.28 to 4,074.59)            | 5,100.98<br>(3,517.63 to 7,213.03)             | 81.69<br>(69.27 to 97.36)                  | 194.01<br>(125.74 to 299.64)               | 141.65<br>(90.04 to 234.43)                | 219.29<br>(154.62 to 324.86)               |
| <b>Chronic respiratory diseases</b>                           | <b>12,360.26<br/>(11,458.50 to 13,378.19)</b> | <b>21,130.78<br/>(13,773.89 to 32,886.17)</b>  | <b>15,573.67<br/>(10,640.36 to 23,073.03)</b> | <b>29,107.98<br/>(17,790.77 to 46,636.92)</b>  | <b>435.79<br/>(406.08 to 467.38)</b>       | <b>1,065.86<br/>(696.72 to 1,639.71)</b>   | <b>911.44<br/>(605.39 to 1,382.81)</b>     | <b>1,307.81<br/>(815.15 to 2,076.77)</b>   |
| Chronic obstructive pulmonary disease                         | 9,995.83<br>(9,085.30 to 10,956.42)           | 18,046.06<br>(10,922.88 to 29,032.94)          | 12,407.46<br>(7,884.34 to 19,088.43)          | 25,897.55<br>(14,752.82 to 43,234.68)          | 369.83<br>(338.89 to 401.27)               | 942.59<br>(587.86 to 1,494.43)             | 770.70<br>(486.51 to 1,211.10)             | 1,188.50<br>(711.44 to 1,905.19)           |
| Pneumoconiosis                                                | 9.94<br>(7.56 to 12.77)                       | 17.68<br>(11.92 to 24.13)                      | 18.64<br>(12.10 to 26.22)                     | 17.89<br>(12.26 to 24.24)                      | 0.38<br>(0.29 to 0.49)                     | 0.99<br>(0.65 to 1.49)                     | 1.09<br>(0.67 to 1.76)                     | 0.98<br>(0.63 to 1.42)                     |
| Silicosis                                                     | 0.15<br>(0.09 to 0.22)                        | 0.23<br>(0.11 to 0.45)                         | 0.18<br>(0.07 to 0.39)                        | 0.26<br>(0.12 to 0.51)                         | 0.01<br>(0.00 to 0.01)                     | 0.02<br>(0.01 to 0.04)                     | 0.01<br>(0.00 to 0.03)                     | 0.02<br>(0.01 to 0.04)                     |
| Asbestosis                                                    | 5.65<br>(4.24 to 7.33)                        | 9.06<br>(5.75 to 13.09)                        | 10.79<br>(6.68 to 15.52)                      | 8.56<br>(5.55 to 12.22)                        | 0.15<br>(0.11 to 0.20)                     | 0.32<br>(0.21 to 0.46)                     | 0.39<br>(0.25 to 0.58)                     | 0.29<br>(0.19 to 0.41)                     |
| Coal workers pneumoconiosis                                   | 0.15<br>(0.09 to 0.29)                        | 0.27<br>(0.12 to 0.51)                         | 0.24<br>(0.11 to 0.48)                        | 0.32<br>(0.15 to 0.60)                         | 0.01<br>(0.00 to 0.01)                     | 0.02<br>(0.01 to 0.03)                     | 0.02<br>(0.01 to 0.04)                     | 0.02<br>(0.01 to 0.03)                     |
| Other pneumoconiosis                                          | 3.99<br>(2.82 to 5.44)                        | 8.12<br>(5.07 to 12.07)                        | 7.44<br>(4.24 to 11.96)                       | 8.75<br>(5.52 to 12.84)                        | 0.22<br>(0.15 to 0.29)                     | 0.64<br>(0.37 to 1.05)                     | 0.66<br>(0.35 to 1.23)                     | 0.65<br>(0.38 to 1.01)                     |
| Asthma                                                        | 1,152.94<br>(747.92 to 1,497.48)              | 1,054.58<br>(463.96 to 2,099.73)               | 530.58<br>(251.70 to 1,037.40)                | 1,389.87<br>(642.27 to 2,665.41)               | 33.51<br>(21.88 to 43.98)                  | 42.23<br>(18.38 to 86.35)                  | 23.35<br>(8.25 to 48.25)                   | 52.35<br>(23.53 to 103.13)                 |
| Interstitial lung disease and pulmonary sarcoidosis           | 805.58<br>(602.46 to 1,166.57)                | 1,589.04<br>(1,061.05 to 2,279.14)             | 2,226.42<br>(1,536.16 to 3,183.47)            | 1,345.82<br>(934.38 to 1,990.15)               | 24.60<br>(18.58 to 35.52)                  | 68.69<br>(46.11 to 98.17)                  | 104.74<br>(68.46 to 155.15)                | 54.47<br>(37.88 to 77.95)                  |
| Other chronic respiratory diseases                            | 395.97<br>(274.49 to 606.23)                  | 423.43<br>(276.88 to 661.52)                   | 390.56<br>(251.95 to 603.77)                  | 456.85<br>(298.02 to 715.58)                   | 7.46<br>(5.37 to 11.25)                    | 11.36<br>(7.58 to 17.71)                   | 11.56<br>(7.57 to 18.20)                   | 11.54<br>(7.59 to 17.88)                   |
| <b>Cirrhosis and other chronic liver diseases</b>             | <b>83,015.21<br/>(75,334.19 to 90,312.67)</b> | <b>86,624.63<br/>(68,927.05 to 104,899.37)</b> | <b>67,992.58<br/>(52,915.49 to 84,273.30)</b> | <b>98,737.49<br/>(81,308.74 to 118,564.46)</b> | <b>2,244.86<br/>(2,046.34 to 2,425.96)</b> | <b>3,000.94<br/>(2,483.25 to 3,548.21)</b> | <b>2,446.50<br/>(1,951.30 to 3,010.72)</b> | <b>3,323.71<br/>(2,815.53 to 3,849.96)</b> |
| Cirrhosis and other chronic liver diseases due to hepatitis B | 28,815.73<br>(25,602.01 to 31,949.40)         | 31,152.43<br>(24,045.09 to 39,167.33)          | 25,378.65<br>(19,041.05 to 32,518.99)         | 33,267.78<br>(26,585.58 to 41,377.93)          | 796.97<br>(714.06 to 877.69)               | 1,098.01<br>(878.40 to 1,322.15)           | 926.43<br>(730.12 to 1,151.04)             | 1,137.40<br>(948.80 to 1,345.18)           |
| Cirrhosis and other chronic liver diseases due to hepatitis C | 16,946.55<br>(14,562.43 to 19,312.68)         | 18,936.30<br>(14,394.17 to 23,587.40)          | 15,199.06<br>(11,387.25 to 19,254.18)         | 20,342.90<br>(16,141.15 to 25,088.13)          | 471.69<br>(411.24 to 535.42)               | 648.82<br>(509.61 to 784.07)               | 536.14<br>(413.12 to 669.62)               | 679.33<br>(549.70 to 812.93)               |

|                                                                |                                                               |                                                               |                                                              |                                                               |                                                      |                                                      |                                                      |                                                      |
|----------------------------------------------------------------|---------------------------------------------------------------|---------------------------------------------------------------|--------------------------------------------------------------|---------------------------------------------------------------|------------------------------------------------------|------------------------------------------------------|------------------------------------------------------|------------------------------------------------------|
| Cirrhosis and other chronic liver diseases due to alcohol use  | 19,049.83<br>(16,578.60 to<br>21,628.47)                      | 19,849.98<br>(15,444.57 to<br>24,426.00)                      | 14,301.73<br>(10,877.98 to<br>17,596.11)                     | 26,823.88<br>(21,490.54 to<br>32,345.23)                      | 558.51<br>(489.33 to<br>629.08)                      | 733.24<br>(592.63 to<br>885.21)                      | 552.19<br>(429.18 to<br>682.09)                      | 957.54<br>(787.94 to<br>1,143.75)                    |
| Cirrhosis and other chronic liver diseases due to other causes | 18,203.10<br>(16,039.22 to<br>20,437.78)                      | 16,685.91<br>(12,924.52 to<br>21,397.34)                      | 13,113.14<br>(10,038.32 to<br>17,158.61)                     | 18,302.93<br>(14,510.29 to<br>22,994.52)                      | 417.69<br>(371.67 to<br>462.98)                      | 520.86<br>(420.94 to<br>649.59)                      | 431.74<br>(338.01 to<br>554.55)                      | 549.44<br>(453.35 to<br>667.72)                      |
| <b>Digestive diseases</b>                                      | <b>14,230.43</b><br><b>(11,928.32 to</b><br><b>18,074.45)</b> | <b>14,031.93</b><br><b>(10,036.98 to</b><br><b>20,822.85)</b> | <b>10,586.99</b><br><b>(7,558.90 to</b><br><b>15,567.54)</b> | <b>16,292.67</b><br><b>(11,570.30 to</b><br><b>23,878.80)</b> | <b>348.35</b><br><b>(301.58 to</b><br><b>454.82)</b> | <b>519.85</b><br><b>(375.43 to</b><br><b>778.76)</b> | <b>429.70</b><br><b>(304.55 to</b><br><b>643.02)</b> | <b>566.28</b><br><b>(409.80 to</b><br><b>848.69)</b> |
| Peptic ulcer disease                                           | 4,141.54<br>(3,463.80 to<br>5,325.15)                         | 2,869.47<br>(1,871.98 to<br>4,248.52)                         | 1,820.59<br>(1,189.17 to<br>2,733.57)                        | 3,558.87<br>(2,476.03 to<br>5,152.41)                         | 112.44<br>(93.93 to<br>149.97)                       | 101.92<br>(69.81 to<br>148.61)                       | 68.00<br>(45.50 to<br>102.58)                        | 121.34<br>(86.93 to<br>171.73)                       |

| Turkmenistan                               |                                              |                                              |                                              |                                              |                                     |                                           |                                           |                                           |
|--------------------------------------------|----------------------------------------------|----------------------------------------------|----------------------------------------------|----------------------------------------------|-------------------------------------|-------------------------------------------|-------------------------------------------|-------------------------------------------|
| Cause                                      | YLLs (actual counts)                         |                                              |                                              |                                              | Deaths (actual counts)              |                                           |                                           |                                           |
|                                            | 2016                                         | 2040 Forecast                                | 2040 Better Scenario                         | 2040 Worse Scenario                          | 2016                                | 2040 Forecast                             | 2040 Better Scenario                      | 2040 Worse Scenario                       |
| Gastritis and duodenitis                   | 62.68<br>(40.67 to 101.22)                   | 112.35<br>(63.46 to 180.49)                  | 85.53<br>(48.90 to 139.37)                   | 121.88<br>(71.34 to 198.64)                  | 2.13<br>(1.41 to 3.32)              | 5.31<br>(3.13 to 8.20)                    | 4.40<br>(2.52 to 7.17)                    | 5.42<br>(3.27 to 8.20)                    |
| Appendicitis                               | 910.81<br>(726.05 to 1,156.06)               | 834.25<br>(519.20 to 1,337.68)               | 520.62<br>(318.40 to 860.41)                 | 1,015.62<br>(647.11 to 1,592.38)             | 17.19<br>(13.80 to 22.98)           | 19.56<br>(12.54 to 32.05)                 | 12.82<br>(8.01 to 22.04)                  | 23.06<br>(15.32 to 37.47)                 |
| Paralytic ileus and intestinal obstruction | 4,424.38<br>(3,114.63 to 6,247.79)           | 3,407.45<br>(2,466.49 to 4,988.29)           | 3,061.76<br>(2,242.12 to 4,418.72)           | 3,652.54<br>(2,605.26 to 5,334.58)           | 75.40<br>(57.62 to 102.36)          | 102.38<br>(73.91 to 159.00)               | 105.26<br>(74.16 to 165.59)               | 99.62<br>(72.67 to 153.28)                |
| Inguinal, femoral, and abdominal hernia    | 391.87<br>(252.42 to 506.31)                 | 421.64<br>(264.62 to 589.88)                 | 351.31<br>(208.21 to 503.02)                 | 447.10<br>(280.16 to 612.78)                 | 13.77<br>(8.77 to 17.26)            | 20.92<br>(13.33 to 30.06)                 | 19.10<br>(11.55 to 30.02)                 | 20.70<br>(13.42 to 28.78)                 |
| Inflammatory bowel disease                 | 510.26<br>(390.02 to 777.59)                 | 604.52<br>(431.01 to 911.25)                 | 566.79<br>(396.68 to 869.94)                 | 611.79<br>(440.58 to 943.51)                 | 11.71<br>(9.38 to 17.89)            | 19.61<br>(14.33 to 30.37)                 | 19.66<br>(13.87 to 30.18)                 | 18.90<br>(14.17 to 29.45)                 |
| Vascular intestinal disorders              | 458.57<br>(373.13 to 727.24)                 | 943.43<br>(688.47 to 1,475.61)               | 879.61<br>(626.39 to 1,326.62)               | 935.68<br>(695.52 to 1,464.09)               | 21.04<br>(17.22 to 32.20)           | 60.89<br>(43.18 to 94.98)                 | 61.36<br>(41.51 to 97.92)                 | 56.93<br>(41.19 to 84.92)                 |
| Gallbladder and biliary diseases           | 866.62<br>(737.35 to 1,067.36)               | 1,551.35<br>(764.66 to 2,924.92)             | 914.93<br>(478.38 to 1,734.78)               | 1,915.46<br>(964.30 to 3,599.29)             | 28.47<br>(24.43 to 37.03)           | 70.26<br>(33.93 to 135.46)                | 44.90<br>(22.48 to 89.43)                 | 82.15<br>(40.58 to 158.73)                |
| Pancreatitis                               | 1,705.85<br>(1,350.92 to 2,319.75)           | 2,430.09<br>(1,189.66 to 5,388.85)           | 1,641.90<br>(836.21 to 3,458.45)             | 3,110.40<br>(1,446.70 to 6,975.18)           | 45.59<br>(36.13 to 63.37)           | 81.20<br>(41.73 to 174.50)                | 57.59<br>(30.43 to 119.85)                | 100.47<br>(49.08 to 217.40)               |
| Other digestive diseases                   | 757.85<br>(585.07 to 1,062.48)               | 857.39<br>(588.39 to 1,199.96)               | 743.93<br>(499.34 to 1,042.30)               | 923.34<br>(638.31 to 1,344.09)               | 20.61<br>(15.62 to 28.35)           | 37.81<br>(25.86 to 54.79)                 | 36.61<br>(24.26 to 55.35)                 | 37.69<br>(26.80 to 53.10)                 |
| Neurological disorders                     | <b>15,968.43</b><br>(13,722.92 to 18,248.80) | <b>36,553.82</b><br>(27,410.86 to 50,038.16) | <b>35,939.27</b><br>(27,198.46 to 49,656.00) | <b>35,752.30</b><br>(26,356.74 to 48,040.62) | <b>761.15</b><br>(663.66 to 870.10) | <b>3,018.68</b><br>(2,010.35 to 4,882.85) | <b>3,299.23</b><br>(2,180.74 to 5,627.55) | <b>2,642.77</b><br>(1,752.99 to 4,351.26) |
| Alzheimer's disease and other dementias    | 5,253.79<br>(4,437.79 to 6,358.23)           | 21,425.62<br>(14,072.93 to 33,284.07)        | 22,036.70<br>(14,846.36 to 33,885.92)        | 19,311.85<br>(12,574.98 to 30,105.65)        | 506.02<br>(424.33 to 608.38)        | 2,432.05<br>(1,472.49 to 4,261.53)        | 2,653.56<br>(1,614.99 to 4,940.47)        | 2,095.22<br>(1,230.06 to 3,710.84)        |
| Parkinson's disease                        | 1,050.52<br>(797.50 to 1,346.30)             | 3,971.65<br>(2,888.10 to 5,198.86)           | 4,762.14<br>(3,488.25 to 6,273.71)           | 3,293.08<br>(2,338.63 to 4,406.78)           | 79.34<br>(59.73 to 103.47)          | 345.98<br>(243.76 to 484.73)              | 432.79<br>(306.99 to 634.43)              | 276.91<br>(190.41 to 387.12)              |
| Epilepsy                                   | 7,550.65<br>(6,018.92 to 9,434.36)           | 8,245.11<br>(4,546.73 to 15,082.56)          | 6,287.58<br>(3,466.35 to 11,254.52)          | 10,306.95<br>(5,580.95 to 18,986.03)         | 127.82<br>(103.44 to 156.15)        | 150.79<br>(85.84 to 266.94)               | 117.73<br>(68.24 to 195.98)               | 187.36<br>(104.59 to 330.83)              |
| Multiple sclerosis                         | 313.31<br>(184.95 to 530.46)                 | 535.35<br>(327.80 to 777.28)                 | 572.00<br>(345.40 to 801.71)                 | 503.98<br>(307.29 to 756.09)                 | 10.59<br>(6.77 to 14.78)            | 24.87<br>(14.45 to 34.17)                 | 28.33<br>(15.64 to 39.80)                 | 22.15<br>(13.38 to 29.81)                 |
| Motor neuron disease                       | 291.76<br>(222.84 to 357.89)                 | 498.14<br>(372.54 to 619.33)                 | 488.37<br>(365.85 to 611.79)                 | 482.20<br>(361.32 to 601.38)                 | 7.98<br>(6.19 to 9.57)              | 16.88<br>(12.91 to 20.86)                 | 17.10<br>(13.00 to 21.53)                 | 15.92<br>(12.13 to 19.73)                 |
| Other neurological disorders               | 1,508.40<br>(1,034.01 to 2,528.91)           | 1,877.14<br>(1,301.68 to 3,081.63)           | 1,792.48<br>(1,265.55 to 2,862.97)           | 1,857.23<br>(1,263.56 to 3,087.27)           | 29.41<br>(21.71 to 45.17)           | 48.11<br>(35.88 to 70.03)                 | 49.72<br>(37.29 to 70.86)                 | 45.20<br>(33.43 to 66.61)                 |
| Mental disorders                           | <b>10,481.53</b><br>(8,617.86 to 12,077.79)  | <b>15,859.18</b><br>(11,519.65 to 21,994.71) | <b>18,142.61</b><br>(13,155.96 to 24,966.28) | <b>15,645.45</b><br>(11,428.46 to 21,708.78) | <b>237.12</b><br>(197.77 to 271.69) | <b>395.71</b><br>(298.01 to 509.22)       | <b>464.08</b><br>(348.09 to 603.89)       | <b>384.18</b><br>(293.56 to 501.02)       |
| Alcohol use disorders                      | 5,705.54<br>(4,537.01 to 6,781.28)           | 6,338.25<br>(4,345.50 to 8,914.50)           | 6,670.18<br>(4,545.45 to 9,480.82)           | 6,620.06<br>(4,646.51 to 9,200.55)           | 133.41<br>(106.10 to 155.68)        | 161.38<br>(114.88 to 217.90)              | 172.28<br>(121.40 to 236.98)              | 166.81<br>(120.78 to 221.28)              |
| Drug use disorders                         | 4,771.72<br>(3,379.14 to 5,742.80)           | 9,514.91<br>(6,446.83 to 13,640.14)          | 11,466.12<br>(7,736.67 to 16,213.49)         | 9,019.44<br>(6,101.89 to 13,139.36)          | 103.63<br>(73.69 to 123.34)         | 234.20<br>(165.03 to 314.65)              | 291.67<br>(202.94 to 390.17)              | 217.26<br>(153.93 to 289.86)              |
| Opioid use disorders                       | 3,489.59<br>(2,459.73 to 4,303.44)           | 5,640.99<br>(3,644.74 to 8,705.55)           | 5,985.67<br>(3,836.56 to 9,272.71)           | 5,518.33<br>(3,574.66 to 8,480.50)           | 73.88<br>(52.08 to 89.92)           | 132.79<br>(90.12 to 189.06)               | 144.50<br>(94.87 to 206.91)               | 127.73<br>(87.41 to 183.10)               |

|                           |                                   |                                       |                                       |                                       |                              |                              |                               |                              |
|---------------------------|-----------------------------------|---------------------------------------|---------------------------------------|---------------------------------------|------------------------------|------------------------------|-------------------------------|------------------------------|
|                           | 226.58<br>(137.50 to<br>333.46)   | 770.58<br>(458.32 to<br>1,259.06)     | 997.30<br>(574.93 to<br>1,587.85)     | 724.92<br>(415.34 to<br>1,141.69)     | 5.07<br>(3.14 to<br>7.36)    | 18.42<br>(10.90 to<br>28.77) | 24.13<br>(14.27 to<br>37.37)  | 17.15<br>(10.19 to<br>26.43) |
| Cocaine use disorders     | 301.70<br>(96.35 to<br>536.41)    | 955.58<br>(314.00 to<br>1,902.87)     | 1,437.16<br>(498.18 to<br>2,782.74)   | 862.65<br>(293.00 to<br>1,659.08)     | 6.49<br>(2.07 to<br>11.62)   | 21.56<br>(7.44 to<br>42.21)  | 32.84<br>(11.57 to<br>62.93)  | 19.28<br>(6.81 to<br>37.00)  |
| Amphetamine use disorders | 753.86<br>(541.43 to<br>1,000.58) | 2,147.75<br>(1,387.53 to<br>3,173.56) | 3,045.98<br>(1,920.10 to<br>4,441.13) | 1,913.53<br>(1,237.80 to<br>2,779.46) | 18.19<br>(13.05 to<br>23.64) | 61.43<br>(40.75 to<br>85.73) | 90.19<br>(58.49 to<br>125.75) | 53.09<br>(35.72 to<br>71.72) |
| Other drug use disorders  | 4.27<br>(2.98 to<br>6.07)         | 6.03<br>(3.82 to<br>9.02)             | 6.31<br>(3.88 to<br>9.65)             | 5.95<br>(3.82 to<br>8.82)             | 0.08<br>(0.06 to<br>0.12)    | 0.12<br>(0.08 to<br>0.18)    | 0.13<br>(0.08 to<br>0.20)     | 0.12<br>(0.08 to<br>0.17)    |
| Eating disorders          |                                   |                                       |                                       |                                       |                              |                              |                               |                              |

| Turkmenistan                                               |                                          |                                           |                                          |                                           |                                       |                                       |                                       |                                       |
|------------------------------------------------------------|------------------------------------------|-------------------------------------------|------------------------------------------|-------------------------------------------|---------------------------------------|---------------------------------------|---------------------------------------|---------------------------------------|
| Cause                                                      | YLLs (actual counts)                     |                                           |                                          |                                           | Deaths (actual counts)                |                                       |                                       |                                       |
|                                                            | 2016                                     | 2040 Forecast                             | 2040 Better Scenario                     | 2040 Worse Scenario                       | 2016                                  | 2040 Forecast                         | 2040 Better Scenario                  | 2040 Worse Scenario                   |
|                                                            | 62,457.09<br>(58,369.53 to<br>67,309.59) | 79,171.34<br>(53,585.74 to<br>110,357.61) | 54,896.83<br>(37,642.34 to<br>78,432.13) | 95,209.45<br>(66,101.71 to<br>130,747.52) | 1,817.92<br>(1,710.87 to<br>1,924.48) | 3,388.11<br>(2,209.59 to<br>4,917.89) | 2,481.53<br>(1,636.90 to<br>3,857.77) | 3,884.19<br>(2,674.48 to<br>5,459.40) |
| Diabetes, urogenital, blood, and endocrine diseases        |                                          |                                           |                                          |                                           |                                       |                                       |                                       |                                       |
| Diabetes mellitus                                          | 19,079.91<br>(17,570.70 to<br>20,718.92) | 26,377.28<br>(13,899.84 to<br>46,808.95)  | 16,592.28<br>(9,297.14 to<br>28,259.24)  | 34,515.16<br>(18,455.87 to<br>59,621.33)  | 646.62<br>(594.89 to<br>703.21)       | 1,086.02<br>(601.70 to<br>1,840.03)   | 717.39<br>(415.39 to<br>1,193.77)     | 1,374.07<br>(772.42 to<br>2,260.54)   |
| Acute glomerulonephritis                                   | 1,184.39<br>(885.38 to<br>1,639.35)      | 807.66<br>(501.75 to<br>1,318.36)         | 581.13<br>(360.90 to<br>955.18)          | 933.37<br>(578.50 to<br>1,554.27)         | 20.72<br>(16.43 to<br>26.67)          | 16.58<br>(11.06 to<br>24.33)          | 12.76<br>(8.63 to<br>19.30)           | 18.43<br>(12.23 to<br>27.79)          |
| Chronic kidney disease                                     | 26,906.46<br>(24,961.26 to<br>28,958.73) | 35,992.09<br>(21,391.05 to<br>58,495.01)  | 25,074.20<br>(15,191.00 to<br>40,234.95) | 42,425.07<br>(25,504.60 to<br>67,497.29)  | 829.54<br>(776.55 to<br>885.79)       | 1,782.15<br>(983.20 to<br>3,148.25)   | 1,325.04<br>(720.22 to<br>2,443.19)   | 1,976.67<br>(1,120.08 to<br>3,402.64) |
| Chronic kidney disease due to diabetes mellitus            | 9,140.50<br>(7,935.19 to<br>10,402.95)   | 15,883.07<br>(8,874.64 to<br>26,498.10)   | 11,191.74<br>(6,587.91 to<br>18,556.31)  | 18,503.86<br>(10,515.02 to<br>31,252.82)  | 331.96<br>(293.83 to<br>373.37)       | 810.49<br>(443.68 to<br>1,460.93)     | 601.85<br>(332.77 to<br>1,070.00)     | 898.65<br>(505.82 to<br>1,606.38)     |
| Chronic kidney disease due to hypertension                 | 1,062.16<br>(889.58 to<br>1,268.60)      | 2,353.11<br>(1,256.81 to<br>4,130.95)     | 1,828.43<br>(958.15 to<br>3,166.82)      | 2,582.21<br>(1,389.97 to<br>4,429.15)     | 56.63<br>(46.95 to<br>67.24)          | 201.19<br>(94.75 to<br>436.41)        | 168.43<br>(78.30 to<br>376.18)        | 206.87<br>(101.98 to<br>430.04)       |
| Chronic kidney disease due to glomerulonephritis           | 8,123.44<br>(6,934.91 to<br>9,428.33)    | 8,017.00<br>(4,679.11 to<br>12,883.26)    | 5,312.40<br>(3,244.84 to<br>8,484.15)    | 9,750.93<br>(5,849.93 to<br>15,767.22)    | 201.60<br>(173.13 to<br>232.55)       | 312.44<br>(173.55 to<br>557.60)       | 217.11<br>(121.38 to<br>398.83)       | 359.93<br>(208.43 to<br>627.42)       |
| Chronic kidney disease due to other and unspecified causes | 8,580.37<br>(7,379.82 to<br>9,991.07)    | 9,738.91<br>(5,767.78 to<br>15,609.11)    | 6,741.62<br>(4,038.12 to<br>10,689.55)   | 11,588.07<br>(7,087.22 to<br>18,482.11)   | 239.35<br>(205.90 to<br>275.95)       | 458.03<br>(248.61 to<br>827.02)       | 337.65<br>(177.02 to<br>658.69)       | 511.23<br>(282.42 to<br>909.78)       |
| Urinary diseases and male infertility                      | 7,768.66<br>(7,151.19 to<br>8,540.90)    | 10,746.45<br>(8,106.26 to<br>13,684.03)   | 8,289.01<br>(6,245.34 to<br>10,701.02)   | 11,526.05<br>(9,040.81 to<br>14,312.45)   | 199.64<br>(185.41 to<br>216.90)       | 385.28<br>(301.01 to<br>481.92)       | 320.78<br>(247.39 to<br>414.07)       | 389.88<br>(322.01 to<br>473.00)       |
| Urinary tract infections                                   | 7,392.32<br>(6,767.41 to<br>8,074.96)    | 10,243.21<br>(7,667.48 to<br>13,149.56)   | 7,931.71<br>(5,903.33 to<br>10,166.33)   | 10,963.78<br>(8,532.63 to<br>13,682.13)   | 187.14<br>(172.09 to<br>202.47)       | 361.87<br>(282.48 to<br>453.53)       | 302.59<br>(232.08 to<br>393.25)       | 365.38<br>(300.39 to<br>445.50)       |
| Urolithiasis                                               | 86.16<br>(62.15 to<br>119.78)            | 149.85<br>(90.76 to<br>232.55)            | 102.56<br>(62.73 to<br>161.08)           | 163.82<br>(105.08 to<br>245.62)           | 2.54<br>(1.75 to<br>3.49)             | 8.86<br>(3.58 to<br>8.86)             | 4.39<br>(2.57 to<br>7.00)             | 6.01<br>(3.75 to<br>9.08)             |
| Other urinary diseases                                     | 290.18<br>(157.10 to<br>638.53)          | 353.39<br>(184.73 to<br>731.11)           | 254.74<br>(129.80 to<br>521.89)          | 398.45<br>(214.60 to<br>804.21)           | 9.96<br>(5.83 to<br>19.91)            | 17.56<br>(9.78 to<br>32.99)           | 13.80<br>(7.36 to<br>25.26)           | 18.49<br>(10.25 to<br>34.22)          |
| Gynecological diseases                                     | 20.96<br>(6.43 to<br>28.92)              | 13.59<br>(5.41 to<br>23.87)               | 7.73<br>(3.23 to<br>13.49)               | 17.58<br>(7.19 to<br>29.83)               | 0.46<br>(0.17 to<br>0.62)             | 0.37<br>(0.19 to<br>0.60)             | 0.22<br>(0.11 to<br>0.36)             | 0.46<br>(0.24 to<br>0.74)             |
| Uterine fibroids                                           | 10.88<br>(4.27 to<br>16.40)              | 7.16<br>(3.01 to<br>13.11)                | 4.54<br>(1.98 to<br>8.20)                | 8.94<br>(3.89 to<br>16.65)                | 0.25<br>(0.12 to<br>0.37)             | 0.19<br>(0.10 to<br>0.34)             | 0.13<br>(0.06 to<br>0.22)             | 0.24<br>(0.12 to<br>0.41)             |
| Polycystic ovarian syndrome                                | 4.20<br>(0.65 to<br>9.26)                | 2.01<br>(0.28 to<br>5.37)                 | 0.78<br>(0.10 to<br>2.15)                | 3.01<br>(0.44 to<br>7.40)                 | 0.09<br>(0.02 to<br>0.20)             | 0.05<br>(0.01 to<br>0.12)             | 0.02<br>(0.00 to<br>0.05)             | 0.07<br>(0.01 to<br>0.17)             |
| Endometriosis                                              | 0.11<br>(0.03 to<br>0.20)                | 0.11<br>(0.02 to<br>0.26)                 | 0.06<br>(0.01 to<br>0.15)                | 0.14<br>(0.03 to<br>0.33)                 | 0.00<br>(0.00 to<br>0.00)             | 0.00<br>(0.00 to<br>0.01)             | 0.00<br>(0.00 to<br>0.00)             | 0.00<br>(0.00 to<br>0.01)             |
| Genital prolapse                                           | 0.19<br>(0.12 to<br>0.28)                | 0.22<br>(0.10 to<br>0.45)                 | 0.13<br>(0.06 to<br>0.28)                | 0.27<br>(0.14 to<br>0.55)                 | 0.01<br>(0.00 to<br>0.01)             | 0.01<br>(0.00 to<br>0.02)             | 0.01<br>(0.00 to<br>0.01)             | 0.01<br>(0.01 to<br>0.03)             |
| Other gynecological diseases                               | 5.59<br>(1.43 to<br>8.45)                | 4.10<br>(1.33 to<br>7.79)                 | 2.22<br>(0.72 to<br>4.30)                | 5.21<br>(1.76 to<br>9.77)                 | 0.11<br>(0.04 to<br>0.17)             | 0.12<br>(0.05 to<br>0.21)             | 0.07<br>(0.03 to<br>0.13)             | 0.14<br>(0.06 to<br>0.25)             |
| Hemoglobinopathies and hemolytic anemias                   | 2,849.44<br>(2,266.18 to<br>3,912.45)    | 1,968.24<br>(1,408.61 to<br>2,683.84)     | 1,365.04<br>(983.07 to<br>1,889.94)      | 2,261.00<br>(1,678.37 to<br>3,043.38)     | 49.53<br>(41.49 to<br>63.22)          | 47.81<br>(35.53 to<br>63.04)          | 35.13<br>(25.86 to<br>49.04)          | 53.26<br>(41.85 to<br>70.35)          |
| Thalassemias                                               | 1,197.69<br>(699.88 to<br>2,152.57)      | 497.91<br>(255.05 to<br>924.62)           | 383.85<br>(204.52 to<br>700.82)          | 526.64<br>(267.07 to<br>978.91)           | 14.34<br>(8.46 to<br>25.54)           | 6.05<br>(3.15 to<br>11.09)            | 4.67<br>(2.51 to<br>8.45)             | 6.38<br>(3.24 to<br>11.86)            |

|                                                   |                                       |                                       |                                       |                                       |                              |                              |                              |                              |
|---------------------------------------------------|---------------------------------------|---------------------------------------|---------------------------------------|---------------------------------------|------------------------------|------------------------------|------------------------------|------------------------------|
|                                                   | 736.56<br>(600.89 to<br>909.95)       | 662.02<br>(417.54 to<br>1,006.63)     | 420.32<br>(260.57 to<br>653.58)       | 789.59<br>(523.31 to<br>1,167.59)     | 11.92<br>(9.72 to<br>14.28)  | 11.58<br>(7.37 to<br>17.35)  | 7.51<br>(4.81 to<br>11.32)   | 13.69<br>(9.30 to<br>19.73)  |
| Sickle cell disorders                             |                                       |                                       |                                       |                                       |                              |                              |                              |                              |
|                                                   | 402.23<br>(313.47 to<br>476.69)       | 389.89<br>(247.72 to<br>574.98)       | 250.15<br>(156.03 to<br>376.52)       | 475.28<br>(315.14 to<br>686.34)       | 8.07<br>(6.18 to<br>9.54)    | 9.18<br>(6.12 to<br>12.88)   | 6.04<br>(3.87 to<br>8.75)    | 11.00<br>(7.58 to<br>14.91)  |
| G6PD deficiency                                   |                                       |                                       |                                       |                                       |                              |                              |                              |                              |
|                                                   | 512.96<br>(411.95 to<br>611.31)       | 418.41<br>(304.71 to<br>548.99)       | 310.72<br>(222.11 to<br>432.17)       | 469.49<br>(358.91 to<br>605.55)       | 15.20<br>(12.32 to<br>18.46) | 21.02<br>(15.52 to<br>29.39) | 16.91<br>(12.10 to<br>25.65) | 22.19<br>(17.31 to<br>29.79) |
| Other hemoglobinopathies and hemolytic anemias    |                                       |                                       |                                       |                                       |                              |                              |                              |                              |
|                                                   | 4,647.26<br>(2,317.08 to<br>6,290.61) | 3,266.04<br>(1,917.95 to<br>4,566.41) | 2,987.44<br>(1,805.58 to<br>4,116.45) | 3,531.23<br>(2,014.58 to<br>5,025.20) | 71.40<br>(39.72 to<br>91.13) | 69.89<br>(47.35 to<br>88.93) | 70.21<br>(48.71 to<br>90.27) | 71.41<br>(47.64 to<br>92.65) |
| Endocrine, metabolic, blood, and immune disorders |                                       |                                       |                                       |                                       |                              |                              |                              |                              |



| Turkmenistan                                  |                                               |                                              |                                             |                                              |                                       |                                     |                                     |                                     |
|-----------------------------------------------|-----------------------------------------------|----------------------------------------------|---------------------------------------------|----------------------------------------------|---------------------------------------|-------------------------------------|-------------------------------------|-------------------------------------|
| Cause                                         | YLLs (actual counts)                          |                                              |                                             |                                              | Deaths (actual counts)                |                                     |                                     |                                     |
|                                               | 2016                                          | 2040 Forecast                                | 2040 Better Scenario                        | 2040 Worse Scenario                          | 2016                                  | 2040 Forecast                       | 2040 Better Scenario                | 2040 Worse Scenario                 |
| <b>Musculoskeletal disorders</b>              | <b>240.74</b><br>(204.47 to 270.98)           | <b>500.12</b><br>(356.37 to 605.50)          | <b>442.59</b><br>(320.86 to 546.99)         | <b>495.61</b><br>(357.51 to 590.41)          | <b>8.56</b><br>(5.96 to 9.61)         | <b>24.12</b><br>(14.53 to 32.78)    | <b>22.40</b><br>(13.81 to 31.34)    | <b>22.84</b><br>(13.76 to 29.59)    |
| Rheumatoid arthritis                          | 29.65<br>(14.11 to 45.56)                     | 68.52<br>(25.99 to 117.64)                   | 43.11<br>(14.55 to 77.75)                   | 78.87<br>(31.11 to 130.22)                   | 1.37<br>(0.44 to 2.15)                | 4.32<br>(1.15 to 7.78)              | 2.88<br>(0.72 to 5.62)              | 4.73<br>(1.33 to 8.06)              |
| Other musculoskeletal disorders               | 211.09<br>(182.49 to 239.33)                  | 431.61<br>(329.20 to 525.84)                 | 399.48<br>(296.28 to 493.61)                | 416.74<br>(317.85 to 505.58)                 | 7.19<br>(5.61 to 8.18)                | 19.81<br>(13.36 to 26.98)           | 19.52<br>(13.19 to 27.73)           | 18.11<br>(12.26 to 23.94)           |
| <b>Other non-communicable diseases</b>        | <b>78,228.89</b><br>(52,222.09 to 121,887.69) | <b>35,428.42</b><br>(15,916.45 to 58,888.77) | <b>16,752.80</b><br>(7,265.49 to 28,874.34) | <b>48,291.33</b><br>(22,125.30 to 78,491.87) | <b>928.05</b><br>(420.05 to 1,433.42) | <b>440.35</b><br>(302.95 to 716.82) | <b>215.82</b><br>(100.08 to 358.85) | <b>592.71</b><br>(281.43 to 943.56) |
| Congenital birth defects                      | 76,520.13<br>(32,736.23 to 119,527.18)        | 34,290.89<br>(14,018.27 to 57,549.63)        | 16,021.38<br>(6,417.73 to 27,862.63)        | 46,880.92<br>(20,476.21 to 77,364.78)        | 906.26<br>(391.80 to 1,404.25)        | 416.45<br>(173.56 to 690.01)        | 196.52<br>(79.69 to 337.42)         | 566.60<br>(252.16 to 920.83)        |
| Neural tube defects                           | 2,786.26<br>(928.92 to 5,577.88)              | 569.92<br>(171.28 to 1,352.33)               | 232.54<br>(64.45 to 536.09)                 | 848.30<br>(248.93 to 1,918.02)               | 32.55<br>(10.88 to 65.01)             | 6.74<br>(2.04 to 15.84)             | 2.76<br>(0.79 to 6.28)              | 12.60<br>(2.99 to 22.38)            |
| Congenital heart anomalies                    | 39,114.30<br>(19,698.09 to 61,139.22)         | 17,318.77<br>(8,020.13 to 31,253.12)         | 7,381.88<br>(3,421.41 to 13,591.00)         | 24,075.08<br>(11,983.56 to 39,899.32)        | 467.21<br>(236.47 to 724.20)          | 213.85<br>(100.27 to 380.48)        | 92.16<br>(43.52 to 164.50)          | 295.54<br>(149.77 to 481.50)        |
| Orofacial clefts                              | 116.64<br>(21.82 to 314.20)                   | 48.31<br>(7.33 to 138.58)                    | 17.12<br>(2.70 to 52.71)                    | 77.05<br>(11.37 to 230.38)                   | 1.35<br>(0.25 to 3.64)                | 0.56<br>(0.08 to 1.61)              | 0.20<br>(0.03 to 0.61)              | 0.89<br>(0.13 to 2.67)              |
| Down syndrome                                 | 1,309.01<br>(443.70 to 2,444.02)              | 817.62<br>(287.53 to 1,553.37)               | 719.03<br>(240.86 to 1,312.72)              | 946.46<br>(330.56 to 1,797.26)               | 16.21<br>(5.70 to 29.64)              | 11.04<br>(4.10 to 19.86)            | 9.97<br>(3.68 to 17.16)             | 12.60<br>(4.68 to 22.75)            |
| Other chromosomal abnormalities               | 885.80<br>(268.23 to 1,820.17)                | 681.84<br>(205.57 to 1,548.94)               | 440.18<br>(133.18 to 961.81)                | 862.37<br>(255.39 to 1,926.74)               | 10.33<br>(3.13 to 21.20)              | 8.05<br>(2.44 to 18.09)             | 5.20<br>(1.60 to 11.28)             | 10.15<br>(3.00 to 22.41)            |
| Congenital musculoskeletal and limb anomalies | 1,321.42<br>(531.55 to 2,274.02)              | 650.36<br>(270.80 to 1,216.02)               | 315.71<br>(123.60 to 594.34)                | 862.99<br>(356.62 to 1,581.86)               | 15.42<br>(6.21 to 26.44)              | 7.65<br>(3.18 to 14.24)             | 3.72<br>(1.46 to 6.95)              | 10.13<br>(4.21 to 18.53)            |
| Urogenital congenital anomalies               | 853.73<br>(262.96 to 1,541.38)                | 469.38<br>(143.11 to 925.08)                 | 256.02<br>(74.88 to 507.33)                 | 604.41<br>(181.18 to 1,149.37)               | 10.39<br>(3.28 to 18.48)              | 6.07<br>(1.94 to 11.52)             | 3.38<br>(1.06 to 6.39)              | 7.71<br>(2.45 to 14.26)             |
| Digestive congenital anomalies                | 7,682.42<br>(1,170.94 to 16,688.62)           | 4,074.82<br>(652.14 to 9,710.57)             | 1,860.95<br>(285.81 to 4,243.23)            | 5,689.52<br>(920.54 to 13,377.43)            | 89.17<br>(13.71 to 193.65)            | 47.42<br>(7.68 to 112.74)           | 21.68<br>(3.37 to 49.27)            | 66.16<br>(10.79 to 155.17)          |
| Other congenital birth defects                | 22,450.56<br>(8,077.87 to 38,825.97)          | 9,659.86<br>(3,381.47 to 18,430.95)          | 4,797.96<br>(1,594.70 to 9,329.92)          | 12,914.74<br>(4,663.55 to 24,048.63)         | 263.63<br>(95.58 to 454.93)           | 115.09<br>(41.05 to 217.82)         | 57.44<br>(19.35 to 109.91)          | 153.41<br>(56.75 to 283.32)         |
| Skin and subcutaneous diseases                | 135.77<br>(88.56 to 238.03)                   | 341.03<br>(210.17 to 525.53)                 | 293.28<br>(176.51 to 435.39)                | 353.16<br>(218.57 to 570.10)                 | 3.53<br>(2.03 to 5.49)                | 14.66<br>(7.77 to 21.68)            | 14.21<br>(7.18 to 21.73)            | 13.84<br>(7.42 to 20.10)            |
| Cellulitis                                    | 34.15<br>(21.13 to 72.12)                     | 108.50<br>(57.00 to 189.16)                  | 101.96<br>(50.95 to 165.66)                 | 105.06<br>(56.43 to 186.90)                  | 1.02<br>(0.52 to 1.76)                | 4.64<br>(2.00 to 6.94)              | 4.71<br>(1.89 to 7.15)              | 4.23<br>(1.84 to 6.47)              |
| Pyoderma                                      | 83.95<br>(46.26 to 142.25)                    | 192.23<br>(106.58 to 323.15)                 | 159.10<br>(89.60 to 254.41)                 | 206.91<br>(115.28 to 346.42)                 | 1.92<br>(1.05 to 3.20)                | 7.78<br>(4.01 to 12.09)             | 7.47<br>(3.73 to 12.27)             | 7.53<br>(4.02 to 11.83)             |
| Decubitus ulcer                               | 9.34<br>(6.09 to 16.31)                       | 21.77<br>(11.10 to 34.82)                    | 16.86<br>(8.01 to 29.00)                    | 22.39<br>(12.03 to 35.45)                    | 0.36<br>(0.17 to 0.52)                | 1.46<br>(0.50 to 2.79)              | 1.30<br>(0.43 to 2.66)              | 1.35<br>(0.49 to 2.52)              |
| Other skin and subcutaneous diseases          | 8.33<br>(5.79 to 15.49)                       | 18.53<br>(10.89 to 29.92)                    | 15.36<br>(8.67 to 23.42)                    | 18.81<br>(11.13 to 31.48)                    | 0.23<br>(0.13 to 0.34)                | 0.78<br>(0.33 to 1.31)              | 0.74<br>(0.30 to 1.30)              | 0.72<br>(0.32 to 1.15)              |
| Sudden infant death syndrome                  | 1,572.98<br>(604.70 to 3,568.00)              | 796.50<br>(269.74 to 2,081.98)               | 438.14<br>(158.65 to 1,075.08)              | 1,057.25<br>(366.17 to 2,689.80)             | 18.26<br>(7.02 to 41.41)              | 9.24<br>(3.13 to 24.15)             | 5.08<br>(1.84 to 12.48)             | 12.27<br>(4.25 to 31.21)            |

|                          |                                             |                                            |                                           |                                            |                                       |                                       |                                       |                                       |
|--------------------------|---------------------------------------------|--------------------------------------------|-------------------------------------------|--------------------------------------------|---------------------------------------|---------------------------------------|---------------------------------------|---------------------------------------|
| Injuries                 | 120,146.11<br>(106,818.65 to<br>139,819.70) | 115,249.44<br>(72,869.84 to<br>207,462.25) | 70,425.51<br>(45,727.92 to<br>125,933.50) | 145,433.14<br>(90,975.53 to<br>263,113.51) | 2,148.81<br>(1,933.71 to<br>2,468.11) | 2,358.20<br>(1,567.91 to<br>3,994.30) | 1,510.77<br>(1,025.64 to<br>2,459.15) | 2,901.40<br>(1,917.00 to<br>4,925.85) |
| Transport injuries       | 25,318.22<br>(22,484.31 to<br>28,247.10)    | 27,908.87<br>(16,417.02 to<br>54,450.39)   | 8,562.02<br>(5,027.77 to<br>16,260.33)    | 42,841.11<br>(24,686.31 to<br>82,929.44)   | 470.73<br>(421.98 to<br>520.81)       | 574.52<br>(347.11 to<br>1,041.83)     | 190.08<br>(114.92 to<br>331.94)       | 856.91<br>(508.14 to<br>1,559.62)     |
| Road injuries            | 24,442.42<br>(21,745.07 to<br>27,352.34)    | 26,624.82<br>(15,610.11 to<br>51,323.98)   | 7,794.17<br>(4,522.38 to<br>14,758.47)    | 41,216.91<br>(23,675.44 to<br>78,997.17)   | 454.69<br>(406.79 to<br>504.23)       | 549.29<br>(331.09 to<br>988.51)       | 174.74<br>(105.75 to<br>300.06)       | 825.24<br>(489.04 to<br>1,489.89)     |
| Pedestrian road injuries | 7,540.47<br>(5,803.78 to<br>9,514.77)       | 6,761.50<br>(3,541.38 to<br>12,967.31)     | 1,694.87<br>(894.46 to<br>3,059.16)       | 10,732.57<br>(5,539.99 to<br>20,011.52)    | 142.27<br>(109.25 to<br>177.81)       | 153.64<br>(84.96 to<br>275.47)        | 42.54<br>(23.47 to<br>72.91)          | 235.57<br>(129.52 to<br>417.62)       |

| Turkmenistan                                    |                                                     |                                                     |                                                     |                                                     |                                              |                                              |                                            |                                              |
|-------------------------------------------------|-----------------------------------------------------|-----------------------------------------------------|-----------------------------------------------------|-----------------------------------------------------|----------------------------------------------|----------------------------------------------|--------------------------------------------|----------------------------------------------|
| Cause                                           | YLLs (actual counts)                                |                                                     |                                                     |                                                     | Deaths (actual counts)                       |                                              |                                            |                                              |
|                                                 | 2016                                                | 2040 Forecast                                       | 2040 Better Scenario                                | 2040 Worse Scenario                                 | 2016                                         | 2040 Forecast                                | 2040 Better Scenario                       | 2040 Worse Scenario                          |
| Cyclist road injuries                           | 539.20<br>(403.69 to 696.25)                        | 650.94<br>(323.81 to 1,333.51)                      | 216.58<br>(107.82 to 436.61)                        | 975.58<br>(482.43 to 1,977.89)                      | 10.27<br>(7.76 to 13.12)                     | 13.89<br>(7.14 to 27.39)                     | 5.47<br>(2.88 to 10.14)                    | 19.76<br>(9.91 to 39.40)                     |
| Motorcyclist road injuries                      | 2,815.32<br>(2,067.28 to 3,839.12)                  | 4,318.62<br>(2,084.84 to 9,519.98)                  | 2,048.47<br>(991.82 to 4,385.28)                    | 5,776.93<br>(2,723.05 to 13,094.35)                 | 49.56<br>(36.73 to 67.19)                    | 78.14<br>(38.96 to 166.39)                   | 39.10<br>(19.66 to 80.71)                  | 102.69<br>(50.01 to 222.21)                  |
| Motor vehicle road injuries                     | 13,217.09<br>(10,785.76 to 15,586.18)               | 14,467.25<br>(8,400.18 to 27,595.46)                | 3,720.23<br>(2,195.70 to 6,924.52)                  | 23,056.19<br>(13,198.93 to 44,960.02)               | 246.40<br>(204.33 to 288.94)                 | 294.54<br>(181.10 to 530.48)                 | 84.69<br>(52.60 to 145.05)                 | 453.63<br>(272.22 to 839.50)                 |
| Other road injuries                             | 330.34<br>(226.90 to 498.40)                        | 426.52<br>(192.01 to 962.54)                        | 114.02<br>(53.33 to 253.41)                         | 675.63<br>(299.76 to 1,538.65)                      | 6.19<br>(4.37 to 9.14)                       | 9.08<br>(4.33 to 20.02)                      | 2.95<br>(1.40 to 6.25)                     | 13.58<br>(6.27 to 30.93)                     |
| Other transport injuries                        | 875.80<br>(653.17 to 1,107.36)                      | 1,284.05<br>(638.89 to 2,632.13)                    | 767.85<br>(383.86 to 1,596.56)                      | 1,624.21<br>(844.63 to 3,357.81)                    | 16.03<br>(12.13 to 20.04)                    | 25.23<br>(12.99 to 48.92)                    | 15.34<br>(8.00 to 30.02)                   | 31.67<br>(17.14 to 62.38)                    |
| <b>Unintentional injuries</b>                   | <b>54,788.70</b><br><b>(46,048.21 to 68,205.96)</b> | <b>39,386.85</b><br><b>(26,170.25 to 60,706.02)</b> | <b>27,702.89</b><br><b>(18,934.01 to 42,900.95)</b> | <b>46,533.77</b><br><b>(31,258.85 to 72,586.76)</b> | <b>916.96</b><br><b>(798.84 to 1,098.36)</b> | <b>823.78</b><br><b>(577.08 to 1,196.61)</b> | <b>621.56</b><br><b>(447.14 to 899.63)</b> | <b>935.26</b><br><b>(664.19 to 1,400.09)</b> |
| Falls                                           | 5,339.54<br>(4,293.50 to 8,353.61)                  | 5,412.83<br>(3,671.36 to 8,625.45)                  | 4,312.44<br>(2,928.95 to 6,896.04)                  | 5,871.12<br>(4,057.68 to 9,440.48)                  | 105.83<br>(88.40 to 157.46)                  | 105.83<br>(110.44 to 210.40)                 | 127.18<br>(93.76 to 183.93)                | 152.63<br>(116.11 to 218.69)                 |
| Drowning                                        | 14,544.20<br>(11,951.21 to 18,217.63)               | 10,702.56<br>(6,307.22 to 18,565.53)                | 7,252.30<br>(4,160.57 to 12,948.40)                 | 12,881.13<br>(7,526.23 to 23,712.39)                | 220.68<br>(187.58 to 266.95)                 | 188.56<br>(112.46 to 319.48)                 | 133.43<br>(79.64 to 230.44)                | 222.47<br>(130.69 to 392.24)                 |
| Fire, heat, and hot substances                  | 9,437.38<br>(7,810.08 to 13,226.41)                 | 6,773.59<br>(3,952.96 to 12,206.65)                 | 4,273.37<br>(2,480.64 to 7,423.17)                  | 8,461.01<br>(4,951.12 to 15,584.90)                 | 162.57<br>(137.28 to 230.00)                 | 144.12<br>(86.50 to 245.50)                  | 95.91<br>(58.49 to 163.35)                 | 174.53<br>(108.18 to 302.39)                 |
| Poisonings                                      | 2,411.41<br>(1,895.07 to 3,424.45)                  | 1,139.92<br>(625.87 to 2,110.76)                    | 644.11<br>(353.81 to 1,200.54)                      | 1,512.85<br>(843.27 to 2,739.46)                    | 41.31<br>(33.06 to 57.28)                    | 23.28<br>(12.98 to 41.92)                    | 13.80<br>(7.62 to 25.08)                   | 30.13<br>(16.84 to 53.14)                    |
| Exposure to mechanical forces                   | 3,630.08<br>(2,863.08 to 4,662.55)                  | 2,573.12<br>(1,632.65 to 4,047.05)                  | 1,710.68<br>(1,065.90 to 2,739.97)                  | 3,090.32<br>(1,973.21 to 4,798.12)                  | 58.70<br>(46.91 to 73.85)                    | 47.41<br>(31.08 to 72.64)                    | 32.74<br>(21.17 to 50.68)                  | 53.68<br>(37.12 to 84.44)                    |
| Unintentional firearm injuries                  | 125.91<br>(97.93 to 172.88)                         | 77.26<br>(47.44 to 129.98)                          | 54.96<br>(33.82 to 95.79)                           | 92.12<br>(56.79 to 160.19)                          | 2.18<br>(1.70 to 3.24)                       | 1.94<br>(1.28 to 3.03)                       | 1.59<br>(1.05 to 2.52)                     | 2.13<br>(1.40 to 3.38)                       |
| Unintentional suffocation                       | 1,495.64<br>(922.50 to 2,329.23)                    | 899.40<br>(515.01 to 1,508.38)                      | 605.14<br>(358.76 to 990.34)                        | 1,089.32<br>(635.03 to 1,824.07)                    | 20.69<br>(13.57 to 31.23)                    | 13.61<br>(8.26 to 22.06)                     | 9.43<br>(5.83 to 14.97)                    | 16.23<br>(9.93 to 26.62)                     |
| Other exposure to mechanical forces             | 2,008.53<br>(1,286.03 to 3,018.09)                  | 1,596.46<br>(914.23 to 2,729.20)                    | 1,050.58<br>(572.10 to 1,861.02)                    | 1,908.88<br>(1,102.44 to 3,246.58)                  | 35.83<br>(23.52 to 53.18)                    | 31.87<br>(19.33 to 52.98)                    | 21.72<br>(12.64 to 36.27)                  | 37.33<br>(22.88 to 60.40)                    |
| Adverse effects of medical treatment            | 5,428.89<br>(3,061.53 to 8,068.20)                  | 3,341.93<br>(1,989.06 to 4,850.60)                  | 2,617.72<br>(1,580.38 to 3,694.71)                  | 3,797.53<br>(2,229.50 to 5,615.42)                  | 95.28<br>(60.90 to 125.76)                   | 84.98<br>(54.63 to 113.68)                   | 73.43<br>(47.63 to 98.73)                  | 90.32<br>(59.67 to 120.29)                   |
| Animal contact                                  | 1,016.70<br>(657.09 to 1,377.29)                    | 704.13<br>(399.09 to 1,156.30)                      | 483.21<br>(281.56 to 801.74)                        | 854.40<br>(483.75 to 1,405.08)                      | 16.29<br>(10.77 to 21.07)                    | 13.48<br>(8.25 to 21.09)                     | 9.79<br>(6.26 to 15.18)                    | 15.82<br>(9.76 to 24.68)                     |
| Venomous animal contact                         | 355.58<br>(167.79 to 546.40)                        | 255.32<br>(104.70 to 446.36)                        | 191.43<br>(82.50 to 333.58)                         | 302.33<br>(127.76 to 558.99)                        | 6.02<br>(2.99 to 8.90)                       | 4.89<br>(2.17 to 8.21)                       | 3.84<br>(1.81 to 6.50)                     | 5.64<br>(2.60 to 9.86)                       |
| Non-venomous animal contact                     | 661.12<br>(441.78 to 923.75)                        | 448.81<br>(235.66 to 791.36)                        | 291.78<br>(159.68 to 525.73)                        | 552.07<br>(294.86 to 987.65)                        | 10.27<br>(7.02 to 14.14)                     | 8.59<br>(5.00 to 14.34)                      | 5.95<br>(3.59 to 10.23)                    | 10.18<br>(6.00 to 17.34)                     |
| Foreign body                                    | 8,533.79<br>(5,243.37 to 14,641.78)                 | 5,787.49<br>(3,633.00 to 9,373.71)                  | 4,777.80<br>(3,084.16 to 7,458.06)                  | 6,336.73<br>(3,877.43 to 10,506.10)                 | 131.54<br>(87.23 to 207.16)                  | 109.53<br>(76.37 to 162.20)                  | 97.62<br>(69.23 to 139.09)                 | 114.86<br>(78.71 to 174.25)                  |
| Pulmonary aspiration and foreign body in airway | 6,432.01<br>(3,700.13 to 11,959.68)                 | 4,241.60<br>(2,526.82 to 7,413.95)                  | 3,255.32<br>(2,010.86 to 5,552.17)                  | 4,701.15<br>(2,767.43 to 8,361.25)                  | 94.37<br>(60.29 to 163.72)                   | 76.62<br>(51.15 to 121.98)                   | 63.46<br>(43.58 to 96.16)                  | 81.19<br>(53.77 to 130.90)                   |

|                                             |                                                               |                                                                |                                                               |                                                                |                                                      |                                                        |                                                        |                                                          |
|---------------------------------------------|---------------------------------------------------------------|----------------------------------------------------------------|---------------------------------------------------------------|----------------------------------------------------------------|------------------------------------------------------|--------------------------------------------------------|--------------------------------------------------------|----------------------------------------------------------|
|                                             | 2,101.77<br>(1,293.74 to<br>3,251.03)                         | 1,545.89<br>(867.87 to<br>2,500.78)                            | 1,522.48<br>(885.99 to<br>2,378.10)                           | 1,635.58<br>(911.59 to<br>2,708.06)                            | 37.17<br>(23.96 to<br>57.41)                         | 32.91<br>(20.31 to<br>51.15)                           | 34.16<br>(21.32 to<br>50.61)                           | 33.67<br>(20.66 to<br>53.11)                             |
| Foreign body in other body part             |                                                               |                                                                |                                                               |                                                                |                                                      |                                                        |                                                        |                                                          |
|                                             | 1,662.49<br>(854.49 to<br>2,268.34)                           | 1,263.78<br>(595.76 to<br>2,047.20)                            | 839.14<br>(368.19 to<br>1,392.48)                             | 1,553.79<br>(724.88 to<br>2,540.37)                            | 36.75<br>(19.10 to<br>49.56)                         | 32.37<br>(15.68 to<br>49.41)                           | 22.40<br>(10.25 to<br>35.22)                           | 38.64<br>(18.73 to<br>59.26)                             |
| Environmental heat and cold exposure        |                                                               |                                                                |                                                               |                                                                |                                                      |                                                        |                                                        |                                                          |
|                                             | 2,784.22<br>(2,373.10 to<br>3,280.88)                         | 1,687.49<br>(957.31 to<br>3,057.90)                            | 792.12<br>(452.31 to<br>1,421.35)                             | 2,174.89<br>(1,390.94 to<br>3,597.55)                          | 48.00<br>(41.40 to<br>54.98)                         | 31.67<br>(18.41 to<br>54.98)                           | 15.26<br>(8.98 to<br>26.37)                            | 40.19<br>(26.94 to<br>64.23)                             |
| Other unintentional injuries                |                                                               |                                                                |                                                               |                                                                |                                                      |                                                        |                                                        |                                                          |
| <b>Self-harm and interpersonal violence</b> | <b>39,400.42</b><br><b>(33,476.12 to</b><br><b>50,093.09)</b> | <b>47,926.52</b><br><b>(24,556.10 to</b><br><b>103,292.40)</b> | <b>34,135.01</b><br><b>(18,294.14 to</b><br><b>70,637.40)</b> | <b>56,030.60</b><br><b>(27,853.34 to</b><br><b>122,541.49)</b> | <b>749.41</b><br><b>(640.94 to</b><br><b>966.72)</b> | <b>959.40</b><br><b>(516.48 to</b><br><b>1,920.48)</b> | <b>698.64</b><br><b>(393.03 to</b><br><b>1,351.48)</b> | <b>1,108.74</b><br><b>(584.74 to</b><br><b>2,304.70)</b> |

| Turkmenistan                                                                        |                                                      |                                                   |                                                   |                                                   |                                                  |                                                |                                                |                                                |
|-------------------------------------------------------------------------------------|------------------------------------------------------|---------------------------------------------------|---------------------------------------------------|---------------------------------------------------|--------------------------------------------------|------------------------------------------------|------------------------------------------------|------------------------------------------------|
| Cause                                                                               | YLLs (actual counts)                                 |                                                   |                                                   |                                                   | Deaths (actual counts)                           |                                                |                                                |                                                |
|                                                                                     | 2016                                                 | 2040 Forecast                                     | 2040 Better Scenario                              | 2040 Worse Scenario                               | 2016                                             | 2040 Forecast                                  | 2040 Better Scenario                           | 2040 Worse Scenario                            |
| Self-harm                                                                           | 24,514.45<br>(17,920.86 to<br>28,694.32)             | 34,763.81<br>(15,569.84 to<br>75,927.94)          | 25,112.58<br>(12,070.60 to<br>53,198.43)          | 41,113.71<br>(17,957.07 to<br>90,459.66)          | 466.93<br>(354.74 to<br>546.47)                  | 692.20<br>(328.31 to<br>1,400.33)              | 510.34<br>(264.09 to<br>1,005.57)              | 809.79<br>(366.38 to<br>1,706.71)              |
| Self-harm by firearm                                                                | 850.87<br>(437.54 to<br>1,486.99)                    | 1,072.98<br>(401.59 to<br>2,804.70)               | 694.34<br>(268.59 to<br>1,743.72)                 | 1,325.62<br>(474.99 to<br>3,494.49)               | 17.18<br>(8.88 to<br>30.38)                      | 23.13<br>(9.30 to<br>56.78)                    | 15.36<br>(6.40 to<br>35.38)                    | 28.14<br>(10.89 to<br>69.58)                   |
| Self-harm by other specified means                                                  | 23,663.58<br>(17,046.24 to<br>27,772.17)             | 33,690.84<br>(14,926.71 to<br>73,919.04)          | 24,418.24<br>(11,595.98 to<br>52,046.00)          | 39,788.09<br>(17,165.96 to<br>88,128.35)          | 449.75<br>(336.37 to<br>528.02)                  | 669.07<br>(317.57 to<br>1,365.21)              | 494.98<br>(254.81 to<br>977.50)                | 781.66<br>(351.43 to<br>1,641.60)              |
| Interpersonal violence                                                              | 14,885.97<br>(10,877.15 to<br>26,275.19)             | 13,162.70<br>(6,596.02 to<br>30,997.13)           | 9,022.43<br>(4,725.16 to<br>21,030.79)            | 14,916.89<br>(7,729.85 to<br>36,409.84)           | 282.47<br>(206.53 to<br>498.13)                  | 267.20<br>(140.40 to<br>603.45)                | 188.30<br>(104.56 to<br>410.97)                | 298.95<br>(159.93 to<br>692.14)                |
| Physical violence by firearm                                                        | 3,203.99<br>(1,576.63 to<br>6,948.62)                | 2,831.16<br>(1,067.27 to<br>7,770.01)             | 1,754.34<br>(638.84 to<br>4,800.62)               | 3,236.17<br>(1,197.80 to<br>8,436.81)             | 58.13<br>(28.68 to<br>124.19)                    | 52.27<br>(20.43 to<br>135.95)                  | 32.99<br>(12.89 to<br>86.61)                   | 59.30<br>(23.59 to<br>148.22)                  |
| Physical violence by sharp object                                                   | 6,091.40<br>(3,894.12 to<br>11,522.73)               | 5,657.35<br>(2,802.99 to<br>13,552.66)            | 3,760.36<br>(1,923.50 to<br>9,036.26)             | 6,261.71<br>(3,246.57 to<br>14,772.52)            | 117.81<br>(76.91 to<br>222.74)                   | 116.09<br>(61.00 to<br>265.08)                 | 79.14<br>(42.74 to<br>179.76)                  | 126.78<br>(68.93 to<br>290.09)                 |
| Physical violence by other means                                                    | 5,590.57<br>(3,679.74 to<br>10,925.55)               | 4,674.20<br>(1,995.47 to<br>12,441.04)            | 3,507.73<br>(1,572.97 to<br>9,305.00)             | 5,419.01<br>(2,254.46 to<br>14,706.78)            | 106.53<br>(69.96 to<br>210.12)                   | 98.83<br>(43.72 to<br>245.51)                  | 76.16<br>(35.68 to<br>183.35)                  | 112.87<br>(48.33 to<br>280.84)                 |
| <b>Forces of nature, conflict and terrorism, and executions and police conflict</b> | <b>638.77</b><br><b>(435.00 to</b><br><b>895.54)</b> | <b>27.20</b><br><b>(0.00 to</b><br><b>176.17)</b> | <b>25.60</b><br><b>(0.00 to</b><br><b>168.30)</b> | <b>27.65</b><br><b>(0.00 to</b><br><b>178.45)</b> | <b>11.71</b><br><b>(8.27 to</b><br><b>16.03)</b> | <b>0.50</b><br><b>(0.00 to</b><br><b>3.47)</b> | <b>0.48</b><br><b>(0.00 to</b><br><b>3.42)</b> | <b>0.49</b><br><b>(0.00 to</b><br><b>3.45)</b> |
| Exposure to forces of nature                                                        | 0.00<br>(0.00 to<br>0.00)                            | 4.81<br>(0.00 to<br>24.27)                        | 4.49<br>(0.00 to<br>22.31)                        | 4.90<br>(0.00 to<br>24.48)                        | 0.00<br>(0.00 to<br>0.00)                        | 0.10<br>(0.00 to<br>0.49)                      | 0.10<br>(0.00 to<br>0.47)                      | 0.10<br>(0.00 to<br>0.48)                      |
| Conflict and terrorism                                                              | 0.00<br>(0.00 to<br>0.00)                            | 22.39<br>(0.00 to<br>159.23)                      | 21.11<br>(0.00 to<br>152.02)                      | 22.75<br>(0.00 to<br>161.38)                      | 0.00<br>(0.00 to<br>0.00)                        | 0.40<br>(0.00 to<br>3.09)                      | 0.39<br>(0.00 to<br>3.05)                      | 0.40<br>(0.00 to<br>3.08)                      |
| Executions and police conflict                                                      | 638.77<br>(435.00 to<br>895.54)                      | 0.00<br>(0.00 to<br>0.00)                         | 0.00<br>(0.00 to<br>0.00)                         | 0.00<br>(0.00 to<br>0.00)                         | 11.71<br>(8.27 to<br>16.03)                      | 0.00<br>(0.00 to<br>0.00)                      | 0.00<br>(0.00 to<br>0.00)                      | 0.00<br>(0.00 to<br>0.00)                      |

| Uzbekistan                                                        |                                    |                                    |                                    |                                     |                              |                              |                              |                              |
|-------------------------------------------------------------------|------------------------------------|------------------------------------|------------------------------------|-------------------------------------|------------------------------|------------------------------|------------------------------|------------------------------|
| Cause                                                             | YLLs (in 1000s)                    |                                    |                                    |                                     | Deaths (in 1000s)            |                              |                              |                              |
|                                                                   | 2016                               | 2040 Forecast                      | 2040 Better Scenario               | 2040 Worse Scenario                 | 2016                         | 2040 Forecast                | 2040 Better Scenario         | 2040 Worse Scenario          |
| All causes                                                        | 6,257.24<br>(5,374.55 to 7,310.88) | 7,206.98<br>(5,350.35 to 9,530.11) | 5,117.92<br>(3,798.12 to 6,804.46) | 9,105.57<br>(6,556.09 to 11,932.68) | 204.35<br>(185.28 to 224.69) | 302.74<br>(239.36 to 380.67) | 226.36<br>(179.27 to 290.35) | 365.82<br>(286.87 to 452.45) |
| Communicable, maternal, neonatal, and nutritional diseases        | 1,517.84<br>(969.90 to 2,348.75)   | 847.91<br>(512.14 to 1,423.05)     | 542.63<br>(334.18 to 881.48)       | 1,192.80<br>(671.59 to 2,135.39)    | 21.57<br>(15.08 to 30.99)    | 15.26<br>(10.41 to 22.71)    | 10.24<br>(7.08 to 14.53)     | 20.31<br>(13.26 to 31.79)    |
| HIV/AIDS and tuberculosis                                         | 131.31<br>(115.82 to 148.43)       | 105.04<br>(64.74 to 166.21)        | 61.05<br>(36.08 to 92.59)          | 130.82<br>(79.57 to 211.88)         | 3.05<br>(2.68 to 3.46)       | 2.65<br>(1.58 to 4.19)       | 1.49<br>(0.87 to 2.34)       | 3.28<br>(1.95 to 5.27)       |
| Tuberculosis                                                      | 102.34<br>(87.20 to 119.05)        | 77.43<br>(38.56 to 138.18)         | 34.37<br>(16.97 to 65.03)          | 99.29<br>(48.22 to 180.18)          | 2.47<br>(2.11 to 2.87)       | 2.09<br>(1.05 to 3.72)       | 0.94<br>(0.48 to 1.75)       | 2.65<br>(1.29 to 4.60)       |
| HIV/AIDS                                                          | 28.97<br>(26.12 to 32.20)          | 27.62<br>(13.99 to 35.21)          | 26.68<br>(12.60 to 34.47)          | 31.54<br>(20.27 to 40.12)           | 0.58<br>(0.52 to 0.65)       | 0.56<br>(0.25 to 0.74)       | 0.55<br>(0.23 to 0.72)       | 0.63<br>(0.36 to 0.83)       |
| Diarrhea, lower respiratory, and other common infectious diseases | 830.85<br>(533.74 to 1,282.53)     | 472.06<br>(244.76 to 939.96)       | 303.71<br>(171.50 to 556.46)       | 714.28<br>(338.54 to 1,527.96)      | 11.87<br>(8.32 to 17.10)     | 9.23<br>(5.79 to 14.97)      | 6.48<br>(4.41 to 9.92)       | 12.75<br>(7.48 to 22.96)     |
| Diarrheal diseases                                                | 13.22<br>(7.46 to 21.87)           | 5.11<br>(0.90 to 18.37)            | 3.56<br>(0.70 to 12.03)            | 10.55<br>(1.52 to 35.30)            | 0.18<br>(0.11 to 0.28)       | 0.09<br>(0.02 to 0.29)       | 0.07<br>(0.02 to 0.23)       | 0.17<br>(0.03 to 0.55)       |
| Intestinal infectious diseases                                    | 0.06<br>(0.03 to 0.10)             | 0.04<br>(0.02 to 0.08)             | 0.04<br>(0.02 to 0.08)             | 0.05<br>(0.02 to 0.08)              | 0.00<br>(0.00 to 0.00)       | 0.00<br>(0.00 to 0.00)       | 0.00<br>(0.00 to 0.00)       | 0.00<br>(0.00 to 0.00)       |
| Typhoid fever                                                     | 0.04<br>(0.02 to 0.08)             | 0.04<br>(0.02 to 0.07)             | 0.04<br>(0.02 to 0.07)             | 0.04<br>(0.02 to 0.07)              | 0.00<br>(0.00 to 0.00)       | 0.00<br>(0.00 to 0.00)       | 0.00<br>(0.00 to 0.00)       | 0.00<br>(0.00 to 0.00)       |
| Paratyphoid fever                                                 | 0.01<br>(0.00 to 0.01)             | 0.01<br>(0.00 to 0.01)             | 0.01<br>(0.00 to 0.01)             | 0.01<br>(0.00 to 0.01)              | 0.00<br>(0.00 to 0.00)       | 0.00<br>(0.00 to 0.00)       | 0.00<br>(0.00 to 0.00)       | 0.00<br>(0.00 to 0.00)       |
| Other intestinal infectious diseases                              | 0.01<br>(0.00 to 0.02)             | 0.00<br>(0.00 to 0.01)             | 0.00<br>(0.00 to 0.01)             | 0.00<br>(0.00 to 0.01)              | 0.00<br>(0.00 to 0.00)       | 0.00<br>(0.00 to 0.00)       | 0.00<br>(0.00 to 0.00)       | 0.00<br>(0.00 to 0.00)       |
| Lower respiratory infections                                      | 726.36<br>(455.38 to 1,139.73)     | 379.76<br>(172.13 to 822.24)       | 230.87<br>(115.89 to 474.88)       | 587.30<br>(238.17 to 1,373.28)      | 10.28<br>(7.09 to 15.02)     | 7.64<br>(4.51 to 13.29)      | 5.16<br>(3.29 to 8.16)       | 10.72<br>(5.66 to 20.54)     |
| Upper respiratory infections                                      | 0.35<br>(0.16 to 0.68)             | 0.29<br>(0.12 to 0.64)             | 0.19<br>(0.08 to 0.42)             | 0.36<br>(0.14 to 0.79)              | 0.01<br>(0.00 to 0.01)       | 0.01<br>(0.00 to 0.02)       | 0.01<br>(0.00 to 0.01)       | 0.01<br>(0.00 to 0.02)       |
| Otitis media                                                      | 0.00<br>(0.00 to 0.00)             | 0.00<br>(0.00 to 0.00)             | 0.00<br>(0.00 to 0.00)             | 0.00<br>(0.00 to 0.00)              | 0.00<br>(0.00 to 0.00)       | 0.00<br>(0.00 to 0.00)       | 0.00<br>(0.00 to 0.00)       | 0.00<br>(0.00 to 0.00)       |
| Meningitis                                                        | 21.02<br>(15.73 to 28.75)          | 17.25<br>(11.68 to 25.47)          | 13.94<br>(9.18 to 20.89)           | 21.03<br>(12.92 to 32.56)           | 0.34<br>(0.26 to 0.45)       | 0.32<br>(0.23 to 0.46)       | 0.27<br>(0.19 to 0.40)       | 0.36<br>(0.25 to 0.53)       |
| Pneumococcal meningitis                                           | 0.14<br>(0.10 to 0.19)             | 0.09<br>(0.06 to 0.13)             | 0.09<br>(0.06 to 0.13)             | 0.09<br>(0.06 to 0.14)              | 0.00<br>(0.00 to 0.00)       | 0.00<br>(0.00 to 0.00)       | 0.00<br>(0.00 to 0.00)       | 0.00<br>(0.00 to 0.00)       |
| H influenzae type B meningitis                                    | 4.97<br>(3.47 to 7.35)             | 5.19<br>(2.83 to 9.10)             | 4.63<br>(2.58 to 7.96)             | 8.14<br>(3.41 to 16.29)             | 0.08<br>(0.06 to 0.11)       | 0.08<br>(0.05 to 0.13)       | 0.08<br>(0.05 to 0.12)       | 0.12<br>(0.06 to 0.21)       |
| Meningococcal meningitis                                          | 6.80<br>(4.99 to 9.59)             | 4.66<br>(3.16 to 6.78)             | 3.58<br>(2.29 to 5.52)             | 5.02<br>(3.39 to 7.43)              | 0.11<br>(0.08 to 0.15)       | 0.09<br>(0.06 to 0.13)       | 0.07<br>(0.05 to 0.11)       | 0.09<br>(0.07 to 0.14)       |
| Other meningitis                                                  | 9.12<br>(7.03 to 12.25)            | 7.31<br>(5.10 to 10.60)            | 5.64<br>(3.67 to 8.51)             | 7.77<br>(5.32 to 11.32)             | 0.15<br>(0.12 to 0.20)       | 0.15<br>(0.11 to 0.21)       | 0.12<br>(0.08 to 0.18)       | 0.15<br>(0.11 to 0.22)       |
| Encephalitis                                                      | 69.22<br>(46.54 to 113.45)         | 53.69<br>(34.10 to 84.68)          | 45.24<br>(28.83 to 69.19)          | 60.21<br>(37.08 to 96.87)           | 1.06<br>(0.76 to 1.60)       | 0.97<br>(0.65 to 1.37)       | 0.85<br>(0.57 to 1.16)       | 1.05<br>(0.68 to 1.52)       |

|                |                           |                              |                            |                              |                           |                           |                           |                           |
|----------------|---------------------------|------------------------------|----------------------------|------------------------------|---------------------------|---------------------------|---------------------------|---------------------------|
| Diphtheria     | 0.04<br>(0.02 to<br>0.07) | 0.01<br>(0.01 to<br>0.02)    | 0.01<br>(0.01 to<br>0.02)  | 0.04<br>(0.01 to<br>0.12)    | 0.00<br>(0.00 to<br>0.00) | 0.00<br>(0.00 to<br>0.00) | 0.00<br>(0.00 to<br>0.00) | 0.00<br>(0.00 to<br>0.00) |
| Whooping cough | 0.28<br>(0.06 to<br>1.13) | 0.13<br>(0.02 to<br>0.63)    | 0.11<br>(0.02 to<br>0.50)  | 1.69<br>(0.09 to<br>9.21)    | 0.00<br>(0.00 to<br>0.01) | 0.00<br>(0.00 to<br>0.01) | 0.00<br>(0.00 to<br>0.01) | 0.02<br>(0.00 to<br>0.11) |
| Tetanus        | 0.02<br>(0.01 to<br>0.02) | 0.00<br>(0.00 to<br>0.00)    | 0.00<br>(0.00 to<br>0.00)  | 0.01<br>(0.00 to<br>0.01)    | 0.00<br>(0.00 to<br>0.00) | 0.00<br>(0.00 to<br>0.00) | 0.00<br>(0.00 to<br>0.00) | 0.00<br>(0.00 to<br>0.00) |
| Measles        | 0.17<br>(0.09 to<br>0.31) | 15.72<br>(0.02 to<br>160.92) | 9.70<br>(0.02 to<br>91.82) | 32.98<br>(0.03 to<br>329.45) | 0.00<br>(0.00 to<br>0.00) | 0.20<br>(0.00 to<br>1.91) | 0.13<br>(0.00 to<br>1.09) | 0.40<br>(0.00 to<br>3.86) |

| Uzbekistan                                            |                                        |                                      |                                      |                                       |                                      |                                      |                                      |                                      |
|-------------------------------------------------------|----------------------------------------|--------------------------------------|--------------------------------------|---------------------------------------|--------------------------------------|--------------------------------------|--------------------------------------|--------------------------------------|
| Cause                                                 | YLLs (in 1000s)                        |                                      |                                      |                                       | Deaths (in 1000s)                    |                                      |                                      |                                      |
|                                                       | 2016                                   | 2040 Forecast                        | 2040 Better Scenario                 | 2040 Worse Scenario                   | 2016                                 | 2040 Forecast                        | 2040 Better Scenario                 | 2040 Worse Scenario                  |
| Varicella and herpes zoster                           | 0.11<br>(0.05 to 0.20)                 | 0.05<br>(0.02 to 0.11)               | 0.04<br>(0.01 to 0.07)               | 0.06<br>(0.02 to 0.14)                | 0.00<br>(0.00 to 0.00)               | 0.00<br>(0.00 to 0.00)               | 0.00<br>(0.00 to 0.00)               | 0.00<br>(0.00 to 0.00)               |
| <b>Neglected tropical diseases and malaria</b>        | <b>0.60</b><br><b>(0.44 to 0.82)</b>   | <b>0.21</b><br><b>(0.14 to 0.51)</b> | <b>0.18</b><br><b>(0.12 to 0.46)</b> | <b>0.25</b><br><b>(0.16 to 0.56)</b>  | <b>0.01</b><br><b>(0.01 to 0.02)</b> | <b>0.00</b><br><b>(0.00 to 0.02)</b> | <b>0.00</b><br><b>(0.00 to 0.01)</b> | <b>0.00</b><br><b>(0.00 to 0.02)</b> |
| Malaria                                               | 0.00<br>(0.00 to 0.00)                 | 0.00<br>(0.00 to 0.00)               | 0.00<br>(0.00 to 0.00)               | 0.00<br>(0.00 to 0.00)                | 0.00<br>(0.00 to 0.00)               | 0.00<br>(0.00 to 0.00)               | 0.00<br>(0.00 to 0.00)               | 0.00<br>(0.00 to 0.00)               |
| Chagas disease                                        | 0.00<br>(0.00 to 0.00)                 | 0.00<br>(0.00 to 0.00)               | 0.00<br>(0.00 to 0.00)               | 0.00<br>(0.00 to 0.00)                | 0.00<br>(0.00 to 0.00)               | 0.00<br>(0.00 to 0.00)               | 0.00<br>(0.00 to 0.00)               | 0.00<br>(0.00 to 0.00)               |
| Leishmaniasis                                         | 0.31<br>(0.18 to 0.48)                 | 0.06<br>(0.02 to 0.29)               | 0.05<br>(0.02 to 0.26)               | 0.07<br>(0.03 to 0.32)                | 0.01<br>(0.01 to 0.02)               | 0.00<br>(0.00 to 0.01)               | 0.00<br>(0.00 to 0.01)               | 0.00<br>(0.00 to 0.01)               |
| African trypanosomiasis                               | 0.00<br>(0.00 to 0.00)                 | 0.00<br>(0.00 to 0.00)               | 0.00<br>(0.00 to 0.00)               | 0.00<br>(0.00 to 0.00)                | 0.00<br>(0.00 to 0.00)               | 0.00<br>(0.00 to 0.00)               | 0.00<br>(0.00 to 0.00)               | 0.00<br>(0.00 to 0.00)               |
| Schistosomiasis                                       | 0.00<br>(0.00 to 0.00)                 | 0.00<br>(0.00 to 0.00)               | 0.00<br>(0.00 to 0.00)               | 0.00<br>(0.00 to 0.00)                | 0.00<br>(0.00 to 0.00)               | 0.00<br>(0.00 to 0.00)               | 0.00<br>(0.00 to 0.00)               | 0.00<br>(0.00 to 0.00)               |
| Cysticercosis                                         | 0.00<br>(0.00 to 0.01)                 | 0.00<br>(0.00 to 0.00)               | 0.00<br>(0.00 to 0.00)               | 0.00<br>(0.00 to 0.00)                | 0.00<br>(0.00 to 0.00)               | 0.00<br>(0.00 to 0.00)               | 0.00<br>(0.00 to 0.00)               | 0.00<br>(0.00 to 0.00)               |
| Cystic echinococcosis                                 | 0.00<br>(0.00 to 0.00)                 | 0.00<br>(0.00 to 0.00)               | 0.00<br>(0.00 to 0.00)               | 0.00<br>(0.00 to 0.00)                | 0.00<br>(0.00 to 0.00)               | 0.00<br>(0.00 to 0.00)               | 0.00<br>(0.00 to 0.00)               | 0.00<br>(0.00 to 0.00)               |
| Dengue                                                | 0.00<br>(0.00 to 0.00)                 | 0.00<br>(0.00 to 0.00)               | 0.00<br>(0.00 to 0.00)               | 0.00<br>(0.00 to 0.00)                | 0.00<br>(0.00 to 0.00)               | 0.00<br>(0.00 to 0.00)               | 0.00<br>(0.00 to 0.00)               | 0.00<br>(0.00 to 0.00)               |
| Yellow fever                                          | 0.00<br>(0.00 to 0.00)                 | 0.00<br>(0.00 to 0.00)               | 0.00<br>(0.00 to 0.00)               | 0.00<br>(0.00 to 0.00)                | 0.00<br>(0.00 to 0.00)               | 0.00<br>(0.00 to 0.00)               | 0.00<br>(0.00 to 0.00)               | 0.00<br>(0.00 to 0.00)               |
| Rabies                                                | 0.04<br>(0.02 to 0.08)                 | 0.01<br>(0.00 to 0.03)               | 0.01<br>(0.00 to 0.02)               | 0.02<br>(0.01 to 0.04)                | 0.00<br>(0.00 to 0.00)               | 0.00<br>(0.00 to 0.00)               | 0.00<br>(0.00 to 0.00)               | 0.00<br>(0.00 to 0.00)               |
| Intestinal nematode infections                        | 0.01<br>(0.00 to 0.02)                 | 0.01<br>(0.00 to 0.02)               | 0.01<br>(0.00 to 0.02)               | 0.01<br>(0.00 to 0.02)                | 0.00<br>(0.00 to 0.00)               | 0.00<br>(0.00 to 0.00)               | 0.00<br>(0.00 to 0.00)               | 0.00<br>(0.00 to 0.00)               |
| Other neglected tropical diseases                     | 0.25<br>(0.19 to 0.34)                 | 0.13<br>(0.09 to 0.20)               | 0.11<br>(0.08 to 0.18)               | 0.15<br>(0.10 to 0.23)                | 0.00<br>(0.00 to 0.01)               | 0.00<br>(0.00 to 0.00)               | 0.00<br>(0.00 to 0.00)               | 0.00<br>(0.00 to 0.00)               |
| <b>Maternal disorders</b>                             | <b>10.84</b><br><b>(8.46 to 13.53)</b> | <b>5.30</b><br><b>(2.76 to 8.81)</b> | <b>3.86</b><br><b>(1.96 to 6.64)</b> | <b>6.75</b><br><b>(3.33 to 11.66)</b> | <b>0.19</b><br><b>(0.15 to 0.24)</b> | <b>0.10</b><br><b>(0.05 to 0.16)</b> | <b>0.07</b><br><b>(0.04 to 0.12)</b> | <b>0.12</b><br><b>(0.06 to 0.21)</b> |
| Maternal hemorrhage                                   | 2.49<br>(1.77 to 3.43)                 | 1.63<br>(0.78 to 2.91)               | 1.18<br>(0.54 to 2.18)               | 2.06<br>(0.95 to 3.69)                | 0.05<br>(0.03 to 0.06)               | 0.02<br>(0.01 to 0.05)               | 0.02<br>(0.01 to 0.04)               | 0.04<br>(0.02 to 0.07)               |
| Maternal sepsis and other maternal infections         | 1.07<br>(0.71 to 1.49)                 | 0.44<br>(0.19 to 0.81)               | 0.32<br>(0.13 to 0.61)               | 0.56<br>(0.24 to 1.12)                | 0.02<br>(0.01 to 0.03)               | 0.01<br>(0.00 to 0.01)               | 0.01<br>(0.00 to 0.01)               | 0.01<br>(0.00 to 0.02)               |
| Maternal hypertensive disorders                       | 2.35<br>(1.58 to 3.14)                 | 0.84<br>(0.36 to 1.56)               | 0.60<br>(0.24 to 1.18)               | 1.07<br>(0.44 to 2.12)                | 0.04<br>(0.03 to 0.05)               | 0.01<br>(0.01 to 0.03)               | 0.01<br>(0.02 to 0.02)               | 0.02<br>(0.01 to 0.04)               |
| Maternal obstructed labor and uterine rupture         | 0.16<br>(0.09 to 0.26)                 | 0.10<br>(0.04 to 0.21)               | 0.07<br>(0.02 to 0.14)               | 0.13<br>(0.05 to 0.28)                | 0.00<br>(0.00 to 0.00)               | 0.00<br>(0.00 to 0.00)               | 0.00<br>(0.00 to 0.00)               | 0.00<br>(0.00 to 0.01)               |
| Maternal abortion, miscarriage, and ectopic pregnancy | 0.99<br>(0.67 to 1.38)                 | 0.55<br>(0.27 to 0.96)               | 0.40<br>(0.19 to 0.72)               | 0.70<br>(0.34 to 1.28)                | 0.02<br>(0.01 to 0.03)               | 0.01<br>(0.01 to 0.02)               | 0.01<br>(0.01 to 0.01)               | 0.01<br>(0.01 to 0.02)               |



|                                        |                           |                           |                           |                           |                           |                           |                           |                           |
|----------------------------------------|---------------------------|---------------------------|---------------------------|---------------------------|---------------------------|---------------------------|---------------------------|---------------------------|
|                                        | 0.59<br>(0.32 to<br>1.10) | 0.27<br>(0.11 to<br>0.57) | 0.19<br>(0.07 to<br>0.44) | 0.34<br>(0.13 to<br>0.77) | 0.01<br>(0.01 to<br>0.02) | 0.00<br>(0.00 to<br>0.01) | 0.00<br>(0.00 to<br>0.01) | 0.01<br>(0.00 to<br>0.01) |
| Indirect maternal deaths               |                           |                           |                           |                           |                           |                           |                           |                           |
|                                        | 0.15<br>(0.09 to<br>0.23) | 0.10<br>(0.04 to<br>0.19) | 0.07<br>(0.03 to<br>0.15) | 0.13<br>(0.05 to<br>0.27) | 0.00<br>(0.00 to<br>0.00) | 0.00<br>(0.00 to<br>0.00) | 0.00<br>(0.00 to<br>0.00) | 0.00<br>(0.00 to<br>0.00) |
| Late maternal deaths                   |                           |                           |                           |                           |                           |                           |                           |                           |
|                                        | 0.00<br>(0.00 to<br>0.00) | 0.01<br>(0.00 to<br>0.04) | 0.01<br>(0.00 to<br>0.03) | 0.02<br>(0.00 to<br>0.05) | 0.00<br>(0.00 to<br>0.00) | 0.00<br>(0.00 to<br>0.00) | 0.00<br>(0.00 to<br>0.00) | 0.00<br>(0.00 to<br>0.00) |
| Maternal deaths aggravated by HIV/AIDS |                           |                           |                           |                           |                           |                           |                           |                           |
|                                        | 3.04<br>(2.12 to<br>4.13) | 1.38<br>(0.67 to<br>2.44) | 1.02<br>(0.49 to<br>1.88) | 1.74<br>(0.81 to<br>3.18) | 0.05<br>(0.04 to<br>0.07) | 0.03<br>(0.01 to<br>0.04) | 0.02<br>(0.01 to<br>0.03) | 0.03<br>(0.01 to<br>0.06) |
| Other maternal disorders               |                           |                           |                           |                           |                           |                           |                           |                           |

| Uzbekistan                                                              |                                     |                                     |                                    |                                     |                                |                               |                               |                               |
|-------------------------------------------------------------------------|-------------------------------------|-------------------------------------|------------------------------------|-------------------------------------|--------------------------------|-------------------------------|-------------------------------|-------------------------------|
| Cause                                                                   | YLLs (in 1000s)                     |                                     |                                    |                                     | Deaths (in 1000s)              |                               |                               |                               |
|                                                                         | 2016                                | 2040 Forecast                       | 2040 Better Scenario               | 2040 Worse Scenario                 | 2016                           | 2040 Forecast                 | 2040 Better Scenario          | 2040 Worse Scenario           |
| <b>Neonatal disorders</b>                                               | <b>513.34</b><br>(268.84 to 893.85) | <b>243.80</b><br>(115.39 to 452.46) | <b>156.85</b><br>(72.39 to 288.18) | <b>316.25</b><br>(149.87 to 589.94) | <b>5.93</b><br>(3.11 to 10.33) | <b>2.82</b><br>(1.33 to 5.23) | <b>1.81</b><br>(0.84 to 3.33) | <b>3.65</b><br>(1.73 to 6.82) |
| Neonatal preterm birth                                                  | 124.42<br>(62.03 to 228.77)         | 54.06<br>(24.93 to 102.34)          | 30.08<br>(13.62 to 57.33)          | 72.07<br>(32.83 to 137.30)          | 1.44<br>(0.72 to 2.64)         | 0.62<br>(0.29 to 1.18)        | 0.35<br>(0.16 to 0.66)        | 0.83<br>(0.38 to 1.59)        |
| Neonatal encephalopathy due to birth asphyxia and trauma                | 299.20<br>(155.51 to 514.52)        | 139.61<br>(59.75 to 267.70)         | 91.62<br>(38.51 to 175.00)         | 178.75<br>(77.04 to 340.81)         | 3.46<br>(1.80 to 5.94)         | 1.61<br>(0.69 to 3.09)        | 1.06<br>(0.44 to 2.02)        | 2.07<br>(0.89 to 3.94)        |
| Neonatal sepsis and other neonatal infections                           | 47.23<br>(23.04 to 86.37)           | 25.71<br>(10.84 to 52.09)           | 17.60<br>(7.17 to 36.15)           | 32.85<br>(13.86 to 66.49)           | 0.55<br>(0.27 to 1.00)         | 0.30<br>(0.13 to 0.60)        | 0.20<br>(0.08 to 0.42)        | 0.38<br>(0.16 to 0.77)        |
| Hemolytic disease and other neonatal jaundice                           | 1.86<br>(0.93 to 3.39)              | 0.59<br>(0.22 to 1.31)              | 0.39<br>(0.15 to 0.85)             | 0.79<br>(0.30 to 1.69)              | 0.02<br>(0.01 to 0.04)         | 0.01<br>(0.00 to 0.02)        | 0.00<br>(0.00 to 0.01)        | 0.01<br>(0.00 to 0.02)        |
| Other neonatal disorders                                                | 40.64<br>(19.56 to 73.02)           | 23.82<br>(9.16 to 50.59)            | 17.16<br>(6.83 to 35.65)           | 31.79<br>(12.31 to 66.63)           | 0.47<br>(0.23 to 0.84)         | 0.28<br>(0.11 to 0.58)        | 0.20<br>(0.08 to 0.41)        | 0.37<br>(0.14 to 0.77)        |
| <b>Nutritional deficiencies</b>                                         | <b>3.11</b><br>(2.48 to 3.97)       | <b>2.95</b><br>(2.02 to 4.24)       | <b>2.44</b><br>(1.66 to 3.51)      | <b>3.32</b><br>(2.21 to 4.74)       | <b>0.06</b><br>(0.05 to 0.07)  | <b>0.07</b><br>(0.05 to 0.10) | <b>0.06</b><br>(0.04 to 0.09) | <b>0.08</b><br>(0.05 to 0.11) |
| Protein-energy malnutrition                                             | 0.56<br>(0.32 to 0.91)              | 0.26<br>(0.13 to 0.49)              | 0.22<br>(0.12 to 0.41)             | 0.30<br>(0.15 to 0.59)              | 0.01<br>(0.01 to 0.01)         | 0.01<br>(0.00 to 0.01)        | 0.01<br>(0.00 to 0.01)        | 0.01<br>(0.00 to 0.01)        |
| Iodine deficiency                                                       | 0.16<br>(0.02 to 0.48)              | 0.17<br>(0.02 to 0.40)              | 0.14<br>(0.01 to 0.40)             | 0.20<br>(0.02 to 0.54)              | 0.00<br>(0.00 to 0.01)         | 0.00<br>(0.00 to 0.01)        | 0.00<br>(0.00 to 0.01)        | 0.00<br>(0.00 to 0.01)        |
| Dietary iron deficiency                                                 | 0.25<br>(0.18 to 0.35)              | 0.23<br>(0.15 to 0.37)              | 0.21<br>(0.14 to 0.33)             | 0.26<br>(0.17 to 0.42)              | 0.00<br>(0.00 to 0.01)         | 0.00<br>(0.00 to 0.01)        | 0.00<br>(0.00 to 0.01)        | 0.00<br>(0.00 to 0.01)        |
| Other nutritional deficiencies                                          | 2.14<br>(1.70 to 2.65)              | 2.29<br>(1.53 to 3.31)              | 1.87<br>(1.23 to 2.75)             | 2.56<br>(1.68 to 3.77)              | 0.04<br>(0.04 to 0.05)         | 0.06<br>(0.04 to 0.08)        | 0.05<br>(0.03 to 0.07)        | 0.06<br>(0.04 to 0.08)        |
| <b>Other communicable, maternal, neonatal, and nutritional diseases</b> | <b>27.79</b><br>(19.72 to 44.83)    | <b>18.54</b><br>(12.72 to 27.29)    | <b>14.54</b><br>(9.89 to 21.70)    | <b>21.14</b><br>(13.95 to 32.74)    | <b>0.46</b><br>(0.35 to 0.66)  | <b>0.39</b><br>(0.29 to 0.52) | <b>0.32</b><br>(0.24 to 0.43) | <b>0.42</b><br>(0.31 to 0.58) |
| Sexually transmitted infections excluding HIV                           | 1.43<br>(0.60 to 3.04)              | 0.77<br>(0.43 to 1.48)              | 0.64<br>(0.36 to 1.22)             | 0.85<br>(0.46 to 1.64)              | 0.02<br>(0.01 to 0.05)         | 0.02<br>(0.01 to 0.03)        | 0.02<br>(0.01 to 0.03)        | 0.02<br>(0.01 to 0.04)        |
| Syphilis                                                                | 1.03<br>(0.23 to 2.59)              | 0.37<br>(0.14 to 0.89)              | 0.27<br>(0.10 to 0.66)             | 0.42<br>(0.15 to 1.04)              | 0.01<br>(0.00 to 0.03)         | 0.01<br>(0.00 to 0.02)        | 0.01<br>(0.00 to 0.01)        | 0.01<br>(0.00 to 0.02)        |
| Chlamydial infection                                                    | 0.08<br>(0.06 to 0.11)              | 0.08<br>(0.05 to 0.13)              | 0.07<br>(0.04 to 0.12)             | 0.08<br>(0.05 to 0.14)              | 0.00<br>(0.00 to 0.00)         | 0.00<br>(0.00 to 0.00)        | 0.00<br>(0.00 to 0.00)        | 0.00<br>(0.00 to 0.00)        |
| Gonococcal infection                                                    | 0.21<br>(0.17 to 0.28)              | 0.22<br>(0.12 to 0.37)              | 0.20<br>(0.11 to 0.34)             | 0.23<br>(0.13 to 0.41)              | 0.01<br>(0.00 to 0.01)         | 0.01<br>(0.00 to 0.01)        | 0.01<br>(0.00 to 0.01)        | 0.01<br>(0.00 to 0.01)        |
| Other sexually transmitted infections                                   | 0.11<br>(0.09 to 0.15)              | 0.11<br>(0.06 to 0.18)              | 0.10<br>(0.06 to 0.16)             | 0.11<br>(0.06 to 0.19)              | 0.00<br>(0.00 to 0.00)         | 0.00<br>(0.00 to 0.00)        | 0.00<br>(0.00 to 0.00)        | 0.00<br>(0.00 to 0.01)        |
| Acute hepatitis                                                         | 15.46<br>(12.66 to 19.07)           | 10.16<br>(7.37 to 13.67)            | 7.78<br>(5.22 to 10.98)            | 11.29<br>(8.05 to 15.15)            | 0.27<br>(0.23 to 0.33)         | 0.22<br>(0.17 to 0.30)        | 0.18<br>(0.12 to 0.25)        | 0.24<br>(0.18 to 0.32)        |
| Acute hepatitis A                                                       | 2.30<br>(1.11 to 4.32)              | 0.99<br>(0.43 to 2.18)              | 0.72<br>(0.30 to 1.60)             | 1.17<br>(0.50 to 2.58)              | 0.03<br>(0.01 to 0.05)         | 0.01<br>(0.01 to 0.03)        | 0.01<br>(0.00 to 0.02)        | 0.02<br>(0.01 to 0.03)        |
| Acute hepatitis B                                                       | 10.01<br>(8.23 to 11.92)            | 7.37<br>(5.13 to 10.16)             | 5.70<br>(3.64 to 8.35)             | 8.12<br>(5.53 to 11.24)             | 0.20<br>(0.16 to 0.23)         | 0.17<br>(0.13 to 0.24)        | 0.14<br>(0.09 to 0.20)        | 0.19<br>(0.13 to 0.26)        |



| Uzbekistan                           |                              |                                |                              |                                  |                           |                           |                           |                           |
|--------------------------------------|------------------------------|--------------------------------|------------------------------|----------------------------------|---------------------------|---------------------------|---------------------------|---------------------------|
| Cause                                | YLLs (in 1000s)              |                                |                              |                                  | Deaths (in 1000s)         |                           |                           |                           |
|                                      | 2016                         | 2040 Forecast                  | 2040 Better Scenario         | 2040 Worse Scenario              | 2016                      | 2040 Forecast             | 2040 Better Scenario      | 2040 Worse Scenario       |
| Neoplasms                            | 551.47<br>(491.36 to 617.20) | 968.80<br>(743.28 to 1,220.38) | 798.27<br>(612.66 to 999.54) | 1,047.76<br>(798.12 to 1,333.24) | 17.14<br>(15.42 to 19.03) | 35.71<br>(28.60 to 43.22) | 30.68<br>(24.97 to 36.74) | 37.34<br>(29.91 to 45.77) |
| Lip and oral cavity cancer           | 10.90<br>(9.53 to 12.45)     | 23.90<br>(12.58 to 42.42)      | 12.81<br>(7.56 to 21.23)     | 28.52<br>(14.65 to 51.80)        | 0.35<br>(0.31 to 0.40)    | 0.85<br>(0.47 to 1.48)    | 0.49<br>(0.30 to 0.80)    | 0.98<br>(0.51 to 1.70)    |
| Nasopharynx cancer                   | 4.52<br>(3.93 to 5.15)       | 8.65<br>(4.74 to 14.78)        | 4.31<br>(2.58 to 7.08)       | 10.50<br>(5.69 to 18.07)         | 0.12<br>(0.10 to 0.13)    | 0.25<br>(0.14 to 0.45)    | 0.13<br>(0.08 to 0.21)    | 0.30<br>(0.16 to 0.53)    |
| Other pharynx cancer                 | 6.25<br>(5.44 to 7.17)       | 11.23<br>(5.56 to 19.49)       | 8.07<br>(4.40 to 13.83)      | 11.48<br>(5.71 to 20.25)         | 0.21<br>(0.18 to 0.23)    | 0.42<br>(0.21 to 0.73)    | 0.31<br>(0.17 to 0.53)    | 0.42<br>(0.20 to 0.73)    |
| Esophageal cancer                    | 25.51<br>(22.08 to 28.82)    | 67.97<br>(37.68 to 111.25)     | 43.88<br>(26.27 to 69.76)    | 82.64<br>(43.95 to 137.85)       | 0.96<br>(0.85 to 1.08)    | 2.88<br>(1.66 to 4.68)    | 2.02<br>(1.24 to 3.17)    | 3.34<br>(1.84 to 5.49)    |
| Stomach cancer                       | 63.74<br>(56.14 to 73.00)    | 85.90<br>(62.24 to 119.52)     | 72.35<br>(51.53 to 101.58)   | 90.37<br>(64.67 to 123.47)       | 2.24<br>(1.99 to 2.53)    | 3.49<br>(2.66 to 4.57)    | 3.05<br>(2.25 to 4.09)    | 3.57<br>(2.71 to 4.63)    |
| Colon and rectum cancer              | 29.77<br>(26.27 to 33.95)    | 73.41<br>(46.26 to 108.61)     | 60.80<br>(39.93 to 90.66)    | 73.05<br>(46.21 to 107.94)       | 1.11<br>(0.99 to 1.26)    | 3.13<br>(2.08 to 4.48)    | 2.72<br>(1.85 to 3.97)    | 3.00<br>(1.95 to 4.31)    |
| Liver cancer                         | 33.93<br>(29.72 to 38.87)    | 70.84<br>(45.73 to 106.99)     | 59.14<br>(40.05 to 87.08)    | 78.66<br>(48.74 to 123.33)       | 1.17<br>(1.04 to 1.34)    | 2.78<br>(1.87 to 4.12)    | 2.43<br>(1.71 to 3.44)    | 2.99<br>(1.95 to 4.58)    |
| Liver cancer due to hepatitis B      | 11.71<br>(9.44 to 14.51)     | 21.81<br>(13.59 to 34.17)      | 19.32<br>(12.61 to 28.60)    | 24.18<br>(14.24 to 39.16)        | 0.37<br>(0.29 to 0.46)    | 0.79<br>(0.49 to 1.20)    | 0.73<br>(0.49 to 1.06)    | 0.85<br>(0.51 to 1.34)    |
| Liver cancer due to hepatitis C      | 9.16<br>(7.31 to 11.26)      | 19.73<br>(12.75 to 29.91)      | 17.99<br>(12.05 to 26.37)    | 21.58<br>(13.25 to 33.75)        | 0.36<br>(0.29 to 0.43)    | 0.86<br>(0.57 to 1.28)    | 0.82<br>(0.57 to 1.19)    | 0.90<br>(0.58 to 1.39)    |
| Liver cancer due to alcohol use      | 6.57<br>(5.46 to 7.88)       | 16.58<br>(10.49 to 25.59)      | 10.70<br>(7.05 to 15.93)     | 19.03<br>(11.65 to 30.48)        | 0.24<br>(0.20 to 0.29)    | 0.66<br>(0.43 to 1.00)    | 0.46<br>(0.31 to 0.66)    | 0.74<br>(0.47 to 1.16)    |
| Liver cancer due to other causes     | 6.50<br>(5.49 to 7.62)       | 12.72<br>(7.95 to 19.64)       | 11.14<br>(7.40 to 16.50)     | 14.06<br>(8.42 to 22.36)         | 0.20<br>(0.17 to 0.24)    | 0.47<br>(0.30 to 0.72)    | 0.43<br>(0.30 to 0.63)    | 0.51<br>(0.31 to 0.81)    |
| Gallbladder and biliary tract cancer | 2.52<br>(2.20 to 2.93)       | 3.59<br>(2.97 to 4.31)         | 3.72<br>(3.01 to 4.49)       | 3.37<br>(2.81 to 3.99)           | 0.11<br>(0.09 to 0.12)    | 0.18<br>(0.15 to 0.20)    | 0.19<br>(0.16 to 0.22)    | 0.16<br>(0.14 to 0.18)    |
| Pancreatic cancer                    | 13.57<br>(11.94 to 15.33)    | 30.49<br>(23.66 to 38.53)      | 30.10<br>(23.54 to 37.48)    | 29.43<br>(22.98 to 37.49)        | 0.54<br>(0.48 to 0.60)    | 1.38<br>(1.13 to 1.71)    | 1.43<br>(1.18 to 1.73)    | 1.28<br>(1.04 to 1.58)    |
| Larynx cancer                        | 9.74<br>(8.54 to 11.17)      | 17.07<br>(7.83 to 34.20)       | 8.41<br>(4.62 to 16.86)      | 22.53<br>(9.83 to 45.20)         | 0.34<br>(0.30 to 0.38)    | 0.64<br>(0.31 to 1.21)    | 0.34<br>(0.20 to 0.61)    | 0.80<br>(0.38 to 1.57)    |
| Tracheal, bronchus, and lung cancer  | 53.31<br>(46.59 to 61.36)    | 113.08<br>(73.60 to 169.93)    | 69.57<br>(49.17 to 97.88)    | 152.76<br>(98.26 to 235.46)      | 1.87<br>(1.64 to 2.13)    | 4.36<br>(3.00 to 6.36)    | 2.94<br>(2.19 to 3.99)    | 5.61<br>(3.74 to 8.40)    |
| Malignant skin melanoma              | 2.36<br>(1.98 to 2.93)       | 4.40<br>(3.45 to 5.58)         | 5.10<br>(3.93 to 6.57)       | 4.04<br>(3.23 to 5.13)           | 0.08<br>(0.07 to 0.10)    | 0.18<br>(0.15 to 0.22)    | 0.21<br>(0.17 to 0.27)    | 0.16<br>(0.13 to 0.20)    |
| Non-melanoma skin cancer             | 2.92<br>(2.54 to 3.36)       | 5.56<br>(4.47 to 6.68)         | 5.11<br>(3.99 to 6.36)       | 5.46<br>(4.40 to 6.55)           | 0.12<br>(0.10 to 0.13)    | 0.26<br>(0.22 to 0.31)    | 0.25<br>(0.21 to 0.31)    | 0.25<br>(0.21 to 0.29)    |
| Breast cancer                        | 55.71<br>(45.14 to 68.61)    | 99.66<br>(64.33 to 148.22)     | 81.02<br>(52.97 to 118.54)   | 102.42<br>(66.56 to 155.70)      | 1.69<br>(1.39 to 2.03)    | 3.49<br>(2.34 to 5.03)    | 2.90<br>(1.98 to 4.04)    | 3.50<br>(2.35 to 5.02)    |
| Cervical cancer                      | 30.71<br>(24.58 to 38.20)    | 32.60<br>(22.41 to 45.86)      | 28.08<br>(18.54 to 39.81)    | 34.78<br>(23.54 to 50.31)        | 0.89<br>(0.72 to 1.10)    | 1.08<br>(0.78 to 1.45)    | 0.94<br>(0.65 to 1.29)    | 1.13<br>(0.80 to 1.54)    |

|                   |                            |                              |                              |                              |                           |                           |                           |                           |
|-------------------|----------------------------|------------------------------|------------------------------|------------------------------|---------------------------|---------------------------|---------------------------|---------------------------|
| Uterine cancer    | 8.35<br>(6.74 to<br>10.27) | 10.52<br>(7.75 to<br>13.67)  | 9.44<br>(6.76 to<br>12.38)   | 10.91<br>(8.08 to<br>14.08)  | 0.27<br>(0.22 to<br>0.33) | 0.41<br>(0.32 to<br>0.51) | 0.38<br>(0.29 to<br>0.48) | 0.42<br>(0.33 to<br>0.52) |
| Ovarian cancer    | 9.67<br>(7.61 to<br>12.01) | 17.16<br>(11.61 to<br>24.51) | 16.61<br>(11.11 to<br>23.21) | 16.51<br>(11.20 to<br>23.66) | 0.31<br>(0.24 to<br>0.38) | 0.63<br>(0.43 to<br>0.87) | 0.62<br>(0.43 to<br>0.86) | 0.60<br>(0.42 to<br>0.83) |
| Prostate cancer   | 5.77<br>(4.87 to<br>7.84)  | 17.62<br>(14.22 to<br>23.78) | 18.58<br>(15.10 to<br>24.64) | 15.61<br>(12.30 to<br>21.32) | 0.35<br>(0.30 to<br>0.44) | 1.12<br>(0.83 to<br>1.43) | 1.24<br>(0.97 to<br>1.56) | 0.96<br>(0.68 to<br>1.26) |
| Testicular cancer | 1.63<br>(1.26 to<br>2.09)  | 2.39<br>(1.67 to<br>3.42)    | 2.17<br>(1.47 to<br>3.20)    | 2.43<br>(1.70 to<br>3.50)    | 0.04<br>(0.03 to<br>0.05) | 0.06<br>(0.04 to<br>0.08) | 0.06<br>(0.04 to<br>0.08) | 0.06<br>(0.04 to<br>0.08) |

| Uzbekistan                      |                                           |                                           |                                           |                                           |                                     |                                    |                           |                                     |
|---------------------------------|-------------------------------------------|-------------------------------------------|-------------------------------------------|-------------------------------------------|-------------------------------------|------------------------------------|---------------------------|-------------------------------------|
| Cause                           | YLLs (in 1000s)                           |                                           |                                           |                                           | Deaths (in 1000s)                   |                                    |                           |                                     |
|                                 | 2016                                      | 2040 Forecast                             | 2040 Better Scenario                      | 2040 Worse Scenario                       | 2016                                | 2040 Forecast                      | 2040 Better Scenario      | 2040 Worse Scenario                 |
| Kidney cancer                   | 10.58<br>(9.27 to 12.09)                  | 20.63<br>(14.91 to 27.46)                 | 20.49<br>(15.17 to 26.48)                 | 19.85<br>(14.53 to 26.49)                 | 0.31<br>(0.28 to 0.35)              | 0.71<br>(0.54 to 0.94)             | 0.74<br>(0.57 to 0.93)    | 0.67<br>(0.50 to 0.88)              |
| Bladder cancer                  | 6.16<br>(5.38 to 7.09)                    | 12.03<br>(9.05 to 15.82)                  | 10.58<br>(8.21 to 13.35)                  | 12.08<br>(8.97 to 16.12)                  | 0.26<br>(0.23 to 0.29)              | 0.56<br>(0.44 to 0.72)             | 0.53<br>(0.43 to 0.66)    | 0.54<br>(0.42 to 0.70)              |
| Brain and nervous system cancer | 49.59<br>(36.21 to 59.01)                 | 74.51<br>(53.54 to 94.99)                 | 72.42<br>(51.82 to 94.25)                 | 73.11<br>(52.60 to 93.18)                 | 1.11<br>(0.86 to 1.31)              | 1.94<br>(1.50 to 2.40)             | 1.94<br>(1.48 to 2.42)    | 1.86<br>(1.44 to 2.28)              |
| Thyroid cancer                  | 0.92<br>(0.79 to 1.06)                    | 1.52<br>(1.05 to 2.28)                    | 1.36<br>(0.94 to 1.98)                    | 1.61<br>(1.10 to 2.47)                    | 0.03<br>(0.03 to 0.04)              | 0.07<br>(0.05 to 0.10)             | 0.06<br>(0.05 to 0.09)    | 0.07<br>(0.05 to 0.10)              |
| Mesothelioma                    | 0.77<br>(0.66 to 0.88)                    | 1.24<br>(0.96 to 1.57)                    | 1.25<br>(0.95 to 1.59)                    | 1.23<br>(0.96 to 1.56)                    | 0.02<br>(0.02 to 0.02)              | 0.04<br>(0.03 to 0.05)             | 0.04<br>(0.03 to 0.05)    | 0.04<br>(0.03 to 0.05)              |
| Hodgkin lymphoma                | 5.78<br>(4.97 to 6.68)                    | 4.81<br>(3.62 to 6.24)                    | 3.89<br>(2.78 to 5.27)                    | 5.21<br>(3.89 to 6.80)                    | 0.13<br>(0.11 to 0.15)              | 0.13<br>(0.10 to 0.16)             | 0.11<br>(0.08 to 0.14)    | 0.13<br>(0.10 to 0.17)              |
| Non-Hodgkin lymphoma            | 21.91<br>(18.36 to 25.23)                 | 33.82<br>(25.63 to 45.10)                 | 31.77<br>(23.91 to 41.62)                 | 33.72<br>(25.57 to 45.10)                 | 0.52<br>(0.45 to 0.58)              | 0.99<br>(0.77 to 1.29)             | 0.96<br>(0.74 to 1.26)    | 0.95<br>(0.74 to 1.24)              |
| Multiple myeloma                | 2.62<br>(2.22 to 3.25)                    | 5.85<br>(4.31 to 7.65)                    | 5.84<br>(4.25 to 7.60)                    | 5.65<br>(4.18 to 7.51)                    | 0.09<br>(0.08 to 0.11)              | 0.24<br>(0.19 to 0.32)             | 0.25<br>(0.19 to 0.32)    | 0.23<br>(0.17 to 0.30)              |
| Leukemia                        | 45.34<br>(39.33 to 52.42)                 | 59.90<br>(44.37 to 78.76)                 | 52.89<br>(39.50 to 68.98)                 | 62.72<br>(46.10 to 82.80)                 | 0.91<br>(0.80 to 1.02)              | 1.48<br>(1.14 to 1.89)             | 1.35<br>(1.05 to 1.70)    | 1.51<br>(1.15 to 1.94)              |
| Acute lymphoid leukemia         | 13.02<br>(10.55 to 16.10)                 | 14.16<br>(10.13 to 19.06)                 | 12.35<br>(8.94 to 16.49)                  | 14.71<br>(10.54 to 19.90)                 | 0.22<br>(0.18 to 0.26)              | 0.29<br>(0.22 to 0.38)             | 0.26<br>(0.19 to 0.33)    | 0.29<br>(0.22 to 0.39)              |
| Chronic lymphoid leukemia       | 2.10<br>(1.65 to 2.64)                    | 3.33<br>(2.24 to 4.78)                    | 2.99<br>(2.06 to 4.28)                    | 3.49<br>(2.31 to 5.13)                    | 0.06<br>(0.05 to 0.08)              | 0.11<br>(0.08 to 0.16)             | 0.11<br>(0.08 to 0.15)    | 0.12<br>(0.08 to 0.17)              |
| Acute myeloid leukemia          | 14.71<br>(12.42 to 17.43)                 | 22.69<br>(16.70 to 30.17)                 | 21.34<br>(15.74 to 28.28)                 | 23.05<br>(16.89 to 30.57)                 | 0.30<br>(0.25 to 0.35)              | 0.55<br>(0.41 to 0.72)             | 0.53<br>(0.40 to 0.68)    | 0.55<br>(0.42 to 0.72)              |
| Chronic myeloid leukemia        | 1.77<br>(1.32 to 2.30)                    | 1.96<br>(1.27 to 2.88)                    | 1.55<br>(0.96 to 2.29)                    | 2.07<br>(1.31 to 3.09)                    | 0.05<br>(0.04 to 0.06)              | 0.06<br>(0.04 to 0.09)             | 0.05<br>(0.03 to 0.07)    | 0.06<br>(0.04 to 0.09)              |
| Other leukemia                  | 13.74<br>(11.13 to 16.76)                 | 17.76<br>(12.28 to 25.32)                 | 14.66<br>(10.06 to 20.86)                 | 19.40<br>(13.19 to 28.13)                 | 0.28<br>(0.24 to 0.34)              | 0.46<br>(0.34 to 0.62)             | 0.40<br>(0.30 to 0.54)    | 0.49<br>(0.35 to 0.66)              |
| Other neoplasms                 | 36.91<br>(32.27 to 41.69)                 | 58.45<br>(47.08 to 70.30)                 | 58.52<br>(46.84 to 71.27)                 | 57.11<br>(46.50 to 67.88)                 | 1.01<br>(0.89 to 1.13)              | 1.95<br>(1.64 to 2.25)             | 2.04<br>(1.69 to 2.37)    | 1.84<br>(1.57 to 2.10)              |
| <b>Cardiovascular diseases</b>  | <b>2,187.20</b><br>(1,977.13 to 2,433.61) | <b>2,859.36</b><br>(1,803.34 to 4,641.62) | <b>1,792.72</b><br>(1,116.15 to 2,877.96) | <b>4,078.56</b><br>(2,549.01 to 6,115.36) | <b>113.97</b><br>(104.82 to 124.16) | <b>167.94</b><br>(80.26 to 236.98) | <b>114.46</b><br>(66.68)  | <b>219.82</b><br>(159.50 to 297.85) |
| Rheumatic heart disease         | 51.35<br>(43.93 to 59.92)                 | 33.45<br>(22.52 to 49.44)                 | 26.46<br>(16.91 to 38.62)                 | 38.07<br>(25.36 to 56.30)                 | 1.33<br>(1.13 to 1.55)              | 0.97<br>(0.69 to 1.40)             | 0.79<br>(0.53 to 1.15)    | 1.08<br>(0.76 to 1.55)              |
| Ischemic heart disease          | 1,325.21<br>(1,158.76 to 1,540.12)        | 1,453.77<br>(828.04 to 2,353.04)          | 887.74<br>(500.55 to 1,461.50)            | 2,233.28<br>(1,299.45 to 3,497.96)        | 73.34<br>(65.45 to 83.74)           | 90.39<br>(59.53 to 129.20)         | 60.71<br>(39.23 to 89.37) | 125.04<br>(82.86 to 175.32)         |
| Stroke                          | 401.88<br>(347.31 to 473.69)              | 536.98<br>(314.79 to 906.55)              | 298.19<br>(176.43 to 480.30)              | 821.43<br>(475.31 to 1,361.24)            | 19.22<br>(16.85 to 22.31)           | 29.82<br>(19.69 to 45.34)          | 18.41<br>(12.16 to 27.44) | 41.22<br>(26.80 to 62.94)           |
| Ischemic stroke                 | 140.09<br>(120.56 to 165.06)              | 194.15<br>(113.81 to 336.48)              | 120.55<br>(71.11 to 204.66)               | 277.48<br>(161.98 to 468.14)              | 7.45<br>(6.47 to 8.65)              | 11.71<br>(7.42 to 19.67)           | 7.99<br>(5.04 to 12.80)   | 15.21<br>(9.45 to 24.88)            |

|                                |                                 |                                   |                                   |                                   |                              |                               |                              |                               |
|--------------------------------|---------------------------------|-----------------------------------|-----------------------------------|-----------------------------------|------------------------------|-------------------------------|------------------------------|-------------------------------|
|                                | 261.78<br>(226.83 to<br>308.63) | 342.83<br>(186.46 to<br>611.69)   | 177.64<br>(97.02 to<br>308.61)    | 543.95<br>(283.83 to<br>956.56)   | 11.78<br>(10.27 to<br>13.74) | 18.11<br>(11.23 to<br>29.33)  | 10.42<br>(6.36 to<br>16.37)  | 26.01<br>(15.50 to<br>41.64)  |
| Intracerebral hemorrhage       |                                 |                                   |                                   |                                   |                              |                               |                              |                               |
|                                | 349.75<br>(172.27 to<br>452.76) | 764.77<br>(263.03 to<br>1,845.88) | 519.08<br>(189.84 to<br>1,265.42) | 912.24<br>(297.88 to<br>2,158.77) | 17.90<br>(8.61 to<br>23.17)  | 43.16<br>(15.32 to<br>102.32) | 31.15<br>(11.72 to<br>72.70) | 48.98<br>(16.62 to<br>118.46) |
| Hypertensive heart disease     |                                 |                                   |                                   |                                   |                              |                               |                              |                               |
|                                | 19.12<br>(15.48 to<br>22.20)    | 19.46<br>(13.56 to<br>28.67)      | 16.94<br>(11.68 to<br>25.07)      | 19.74<br>(13.88 to<br>28.58)      | 0.46<br>(0.38 to<br>0.58)    | 0.59<br>(0.39 to<br>0.95)     | 0.53<br>(0.35 to<br>0.88)    | 0.58<br>(0.39 to<br>0.90)     |
| Cardiomyopathy and myocarditis |                                 |                                   |                                   |                                   |                              |                               |                              |                               |
|                                | 8.56<br>(6.57 to<br>10.48)      | 7.67<br>(5.52 to<br>10.97)        | 7.30<br>(5.23 to<br>10.61)        | 7.86<br>(5.76 to<br>10.99)        | 0.19<br>(0.16 to<br>0.26)    | 0.21<br>(0.15 to<br>0.34)     | 0.21<br>(0.15 to<br>0.34)    | 0.21<br>(0.15 to<br>0.33)     |
| Myocarditis                    |                                 |                                   |                                   |                                   |                              |                               |                              |                               |

| Uzbekistan                                                    |                                      |                                      |                                      |                                      |                                  |                                   |                                   |                                   |
|---------------------------------------------------------------|--------------------------------------|--------------------------------------|--------------------------------------|--------------------------------------|----------------------------------|-----------------------------------|-----------------------------------|-----------------------------------|
| Cause                                                         | YLLs (in 1000s)                      |                                      |                                      |                                      | Deaths (in 1000s)                |                                   |                                   |                                   |
|                                                               | 2016                                 | 2040 Forecast                        | 2040 Better Scenario                 | 2040 Worse Scenario                  | 2016                             | 2040 Forecast                     | 2040 Better Scenario              | 2040 Worse Scenario               |
| Alcoholic cardiomyopathy                                      | 0.85<br>(0.59 to 1.13)               | 1.13<br>(0.75 to 1.72)               | 0.84<br>(0.55 to 1.33)               | 1.12<br>(0.76 to 1.65)               | 0.02<br>(0.02 to 0.03)           | 0.03<br>(0.02 to 0.06)            | 0.03<br>(0.02 to 0.05)            | 0.03<br>(0.02 to 0.05)            |
| Other cardiomyopathy                                          | 9.71<br>(7.27 to 11.94)              | 10.66<br>(6.58 to 17.68)             | 8.79<br>(5.18 to 14.63)              | 10.76<br>(6.68 to 18.12)             | 0.24<br>(0.20 to 0.31)           | 0.34<br>(0.20 to 0.61)            | 0.30<br>(0.17 to 0.52)            | 0.33<br>(0.20 to 0.57)            |
| Atrial fibrillation and flutter                               | 5.33<br>(4.10 to 6.69)               | 13.43<br>(9.65 to 18.44)             | 13.05<br>(9.56 to 17.41)             | 12.67<br>(8.94 to 17.28)             | 0.51<br>(0.39 to 0.65)           | 1.30<br>(0.89 to 1.81)            | 1.33<br>(0.95 to 1.80)            | 1.17<br>(0.77 to 1.63)            |
| Aortic aneurysm                                               | 3.45<br>(3.00 to 4.04)               | 4.47<br>(3.34 to 6.02)               | 4.24<br>(3.16 to 5.76)               | 4.52<br>(3.36 to 6.04)               | 0.15<br>(0.13 to 0.18)           | 0.25<br>(0.20 to 0.32)            | 0.25<br>(0.20 to 0.33)            | 0.23<br>(0.18 to 0.30)            |
| Peripheral artery disease                                     | 0.26<br>(0.19 to 0.45)               | 0.94<br>(0.58 to 1.74)               | 0.96<br>(0.60 to 1.75)               | 0.87<br>(0.53 to 1.60)               | 0.02<br>(0.01 to 0.03)           | 0.07<br>(0.04 to 0.13)            | 0.08<br>(0.05 to 0.14)            | 0.06<br>(0.04 to 0.11)            |
| Endocarditis                                                  | 5.07<br>(3.96 to 7.29)               | 6.03<br>(3.89 to 9.73)               | 5.50<br>(3.58 to 9.16)               | 6.27<br>(4.07 to 10.02)              | 0.12<br>(0.10 to 0.19)           | 0.20<br>(0.13 to 0.35)            | 0.19<br>(0.13 to 0.34)            | 0.20<br>(0.13 to 0.34)            |
| Other cardiovascular and circulatory diseases                 | 25.77<br>(22.16 to 30.15)            | 26.05<br>(17.93 to 37.85)            | 20.56<br>(13.73 to 30.37)            | 29.46<br>(19.99 to 42.18)            | 0.91<br>(0.79 to 1.06)           | 1.20<br>(0.89 to 1.62)            | 1.02<br>(0.72 to 1.44)            | 1.27<br>(0.93 to 1.73)            |
| <b>Chronic respiratory diseases</b>                           | <b>97.19<br/>(86.44 to 109.28)</b>   | <b>166.82<br/>(104.54 to 259.34)</b> | <b>130.00<br/>(85.43 to 193.66)</b>  | <b>208.85<br/>(123.62 to 335.52)</b> | <b>4.23<br/>(3.80 to 4.70)</b>   | <b>8.15<br/>(5.27 to 12.31)</b>   | <b>7.00<br/>(4.84 to 10.10)</b>   | <b>9.44<br/>(5.82 to 15.06)</b>   |
| Chronic obstructive pulmonary disease                         | 56.77<br>(50.15 to 64.94)            | 106.27<br>(56.52 to 186.06)          | 70.37<br>(39.91 to 119.55)           | 146.18<br>(74.61 to 265.90)          | 2.62<br>(2.35 to 2.93)           | 5.40<br>(3.08 to 9.18)            | 4.17<br>(2.49 to 6.68)            | 6.71<br>(3.62 to 11.96)           |
| Pneumoconiosis                                                | 0.32<br>(0.26 to 0.38)               | 0.36<br>(0.25 to 0.49)               | 0.34<br>(0.24 to 0.48)               | 0.37<br>(0.27 to 0.51)               | 0.01<br>(0.01 to 0.01)           | 0.02<br>(0.01 to 0.02)            | 0.02<br>(0.01 to 0.02)            | 0.02<br>(0.01 to 0.02)            |
| Silicosis                                                     | 0.00<br>(0.00 to 0.01)               | 0.01<br>(0.00 to 0.02)               | 0.01<br>(0.00 to 0.02)               | 0.01<br>(0.00 to 0.02)               | 0.00<br>(0.00 to 0.00)           | 0.00<br>(0.00 to 0.00)            | 0.00<br>(0.00 to 0.00)            | 0.00<br>(0.00 to 0.00)            |
| Asbestosis                                                    | 0.07<br>(0.05 to 0.14)               | 0.10<br>(0.07 to 0.17)               | 0.11<br>(0.07 to 0.18)               | 0.10<br>(0.06 to 0.17)               | 0.00<br>(0.00 to 0.00)           | 0.00<br>(0.00 to 0.01)            | 0.00<br>(0.00 to 0.01)            | 0.00<br>(0.00 to 0.01)            |
| Coal workers pneumoconiosis                                   | 0.00<br>(0.00 to 0.00)               | 0.00<br>(0.00 to 0.01)               | 0.00<br>(0.00 to 0.01)               | 0.01<br>(0.00 to 0.01)               | 0.00<br>(0.00 to 0.00)           | 0.00<br>(0.00 to 0.00)            | 0.00<br>(0.00 to 0.00)            | 0.00<br>(0.00 to 0.00)            |
| Other pneumoconiosis                                          | 0.24<br>(0.18 to 0.29)               | 0.24<br>(0.16 to 0.34)               | 0.22<br>(0.14 to 0.32)               | 0.25<br>(0.17 to 0.36)               | 0.01<br>(0.01 to 0.01)           | 0.01<br>(0.01 to 0.02)            | 0.01<br>(0.01 to 0.02)            | 0.01<br>(0.01 to 0.02)            |
| Asthma                                                        | 22.65<br>(18.60 to 26.66)            | 23.99<br>(11.76 to 47.48)            | 16.74<br>(7.84 to 33.87)             | 28.62<br>(13.27 to 56.44)            | 0.95<br>(0.78 to 1.11)           | 1.16<br>(0.58 to 2.32)            | 0.86<br>(0.40 to 1.70)            | 1.32<br>(0.62 to 2.61)            |
| Interstitial lung disease and pulmonary sarcoidosis           | 13.06<br>(8.68 to 16.10)             | 28.55<br>(19.61 to 38.14)            | 35.32<br>(24.47 to 48.32)            | 25.80<br>(17.30 to 34.73)            | 0.51<br>(0.37 to 0.66)           | 1.30<br>(0.95 to 1.73)            | 1.69<br>(1.22 to 2.31)            | 1.12<br>(0.81 to 1.50)            |
| Other chronic respiratory diseases                            | 4.38<br>(2.84 to 6.27)               | 7.65<br>(4.65 to 11.85)              | 7.23<br>(4.41 to 11.26)              | 7.87<br>(4.81 to 12.32)              | 0.13<br>(0.09 to 0.20)           | 0.27<br>(0.17 to 0.44)            | 0.27<br>(0.17 to 0.45)            | 0.27<br>(0.17 to 0.43)            |
| <b>Cirrhosis and other chronic liver diseases</b>             | <b>393.13<br/>(341.88 to 447.83)</b> | <b>548.44<br/>(435.04 to 657.24)</b> | <b>451.83<br/>(349.74 to 556.59)</b> | <b>564.79<br/>(447.40 to 672.18)</b> | <b>11.11<br/>(9.71 to 12.56)</b> | <b>18.86<br/>(15.68 to 21.85)</b> | <b>15.93<br/>(12.75 to 19.07)</b> | <b>19.00<br/>(15.87 to 22.01)</b> |
| Cirrhosis and other chronic liver diseases due to hepatitis B | 138.08<br>(118.32 to 159.43)         | 166.86<br>(141.47 to 224.22)         | 183.88<br>(124.10 to 210.44)         | 183.88<br>(143.97 to 225.06)         | 3.97<br>(3.42 to 4.57)           | 6.40<br>(5.19 to 7.60)            | 5.99<br>(4.70 to 7.32)            | 6.30<br>(5.14 to 7.47)            |
| Cirrhosis and other chronic liver diseases due to hepatitis C | 74.39<br>(62.29 to 89.03)            | 106.72<br>(82.28 to 133.45)          | 96.89<br>(71.98 to 125.74)           | 107.83<br>(83.90 to 134.48)          | 2.15<br>(1.82 to 2.54)           | 3.64<br>(2.90 to 4.41)            | 3.37<br>(2.59 to 4.26)            | 3.61<br>(2.89 to 4.39)            |



|                                                                |                                                   |                                                    |                                                   |                                                    |                                                |                                                |                                                |                                                |
|----------------------------------------------------------------|---------------------------------------------------|----------------------------------------------------|---------------------------------------------------|----------------------------------------------------|------------------------------------------------|------------------------------------------------|------------------------------------------------|------------------------------------------------|
|                                                                | 92.65<br>(78.47 to<br>109.59)                     | 162.26<br>(126.24 to<br>198.66)                    | 101.86<br>(77.32 to<br>129.12)                    | 172.96<br>(134.53 to<br>211.67)                    | 2.84<br>(2.42 to<br>3.31)                      | 5.79<br>(4.68 to<br>6.93)                      | 3.79<br>(2.97 to<br>4.70)                      | 6.06<br>(4.88 to<br>7.22)                      |
| Cirrhosis and other chronic liver diseases due to alcohol use  |                                                   |                                                    |                                                   |                                                    |                                                |                                                |                                                |                                                |
|                                                                | 88.02<br>(75.41 to<br>101.55)                     | 96.95<br>(76.10 to<br>122.10)                      | 86.22<br>(66.45 to<br>110.07)                     | 100.13<br>(78.52 to<br>125.07)                     | 2.15<br>(1.84 to<br>2.48)                      | 3.03<br>(2.46 to<br>3.69)                      | 2.78<br>(2.19 to<br>3.44)                      | 3.04<br>(2.45 to<br>3.70)                      |
| Cirrhosis and other chronic liver diseases due to other causes |                                                   |                                                    |                                                   |                                                    |                                                |                                                |                                                |                                                |
| <b>Digestive diseases</b>                                      | <b>67.27</b><br><b>(55.34 to</b><br><b>95.56)</b> | <b>77.71</b><br><b>(52.41 to</b><br><b>115.67)</b> | <b>61.43</b><br><b>(41.60 to</b><br><b>92.19)</b> | <b>84.13</b><br><b>(57.27 to</b><br><b>125.72)</b> | <b>1.95</b><br><b>(1.64 to</b><br><b>2.72)</b> | <b>2.84</b><br><b>(2.07 to</b><br><b>4.22)</b> | <b>2.39</b><br><b>(1.73 to</b><br><b>3.57)</b> | <b>2.95</b><br><b>(2.12 to</b><br><b>4.40)</b> |
| Peptic ulcer disease                                           | 28.59<br>(23.77 to<br>39.26)                      | 22.80<br>(16.05 to<br>30.90)                       | 17.43<br>(11.51 to<br>25.27)                      | 25.69<br>(17.81 to<br>35.47)                       | 0.86<br>(0.71 to<br>1.19)                      | 0.82<br>(0.59 to<br>1.11)                      | 0.65<br>(0.45 to<br>0.92)                      | 0.90<br>(0.65 to<br>1.25)                      |

| Uzbekistan                                 |                              |                              |                              |                              |                        |                           |                           |                          |
|--------------------------------------------|------------------------------|------------------------------|------------------------------|------------------------------|------------------------|---------------------------|---------------------------|--------------------------|
| Cause                                      | YLLs (in 1000s)              |                              |                              |                              | Deaths (in 1000s)      |                           |                           |                          |
|                                            | 2016                         | 2040 Forecast                | 2040 Better Scenario         | 2040 Worse Scenario          | 2016                   | 2040 Forecast             | 2040 Better Scenario      | 2040 Worse Scenario      |
| Gastritis and duodenitis                   | 0.11<br>(0.08 to 0.17)       | 0.18<br>(0.13 to 0.27)       | 0.16<br>(0.11 to 0.25)       | 0.18<br>(0.13 to 0.27)       | 0.00<br>(0.00 to 0.01) | 0.01<br>(0.01 to 0.01)    | 0.01<br>(0.01 to 0.01)    | 0.01<br>(0.01 to 0.01)   |
| Appendicitis                               | 2.51<br>(1.88 to 4.83)       | 2.71<br>(1.71 to 5.16)       | 2.14<br>(1.27 to 4.32)       | 2.94<br>(1.83 to 5.57)       | 0.05<br>(0.04 to 0.10) | 0.07<br>(0.05 to 0.15)    | 0.06<br>(0.04 to 0.12)    | 0.08<br>(0.05 to 0.15)   |
| Paralytic ileus and intestinal obstruction | 10.91<br>(7.21 to 20.62)     | 10.68<br>(7.33 to 18.20)     | 10.00<br>(7.03 to 16.72)     | 11.12<br>(7.55 to 19.43)     | 0.24<br>(0.18 to 0.38) | 0.36<br>(0.27 to 0.53)    | 0.38<br>(0.28 to 0.53)    | 0.35<br>(0.25 to 0.53)   |
| Inguinal, femoral, and abdominal hernia    | 1.55<br>(1.09 to 2.17)       | 1.55<br>(1.06 to 2.43)       | 1.38<br>(0.93 to 2.19)       | 1.58<br>(1.07 to 2.47)       | 0.05<br>(0.04 to 0.08) | 0.07<br>(0.05 to 0.11)    | 0.06<br>(0.04 to 0.11)    | 0.06<br>(0.04 to 0.11)   |
| Inflammatory bowel disease                 | 2.80<br>(2.11 to 3.72)       | 3.14<br>(2.21 to 4.40)       | 3.03<br>(2.11 to 4.29)       | 3.15<br>(2.24 to 4.42)       | 0.06<br>(0.05 to 0.09) | 0.09<br>(0.07 to 0.14)    | 0.09<br>(0.06 to 0.15)    | 0.09<br>(0.06 to 0.14)   |
| Vascular intestinal disorders              | 2.04<br>(1.64 to 3.26)       | 3.90<br>(2.91 to 6.10)       | 3.84<br>(2.81 to 6.05)       | 3.75<br>(2.81 to 6.02)       | 0.10<br>(0.09 to 0.16) | 0.24<br>(0.18 to 0.37)    | 0.25<br>(0.18 to 0.38)    | 0.22<br>(0.16 to 0.34)   |
| Gallbladder and biliary diseases           | 4.41<br>(3.70 to 5.64)       | 7.75<br>(3.91 to 14.39)      | 5.55<br>(2.82 to 10.37)      | 9.43<br>(4.57 to 17.79)      | 0.17<br>(0.15 to 0.22) | 0.36<br>(0.18 to 0.66)    | 0.27<br>(0.14 to 0.50)    | 0.41<br>(0.20 to 0.79)   |
| Pancreatitis                               | 9.80<br>(7.43 to 13.36)      | 19.36<br>(8.32 to 42.95)     | 12.79<br>(6.17 to 25.93)     | 20.36<br>(8.87 to 43.71)     | 0.27<br>(0.21 to 0.38) | 0.61<br>(0.28 to 1.32)    | 0.42<br>(0.22 to 0.82)    | 0.63<br>(0.29 to 1.38)   |
| Other digestive diseases                   | 4.54<br>(3.53 to 6.68)       | 5.66<br>(4.07 to 8.47)       | 5.11<br>(3.57 to 7.66)       | 5.93<br>(4.20 to 8.69)       | 0.13<br>(0.11 to 0.20) | 0.22<br>(0.16 to 0.35)    | 0.21<br>(0.15 to 0.32)    | 0.21<br>(0.16 to 0.32)   |
| Neurological disorders                     | 147.11<br>(130.15 to 165.05) | 236.79<br>(185.56 to 297.98) | 218.48<br>(177.30 to 263.38) | 235.79<br>(182.47 to 302.95) | 6.24<br>(5.42 to 7.17) | 14.22<br>(10.44 to 18.47) | 14.96<br>(11.63 to 18.78) | 13.99<br>(9.25 to 17.49) |
| Alzheimer's disease and other dementias    | 35.74<br>(29.40 to 43.68)    | 99.16<br>(67.43 to 141.33)   | 102.74<br>(75.61 to 138.57)  | 92.54<br>(59.34 to 137.22)   | 3.59<br>(2.94 to 4.39) | 9.71<br>(6.16 to 14.03)   | 10.54<br>(7.37 to 14.33)  | 8.69<br>(5.26 to 13.02)  |
| Parkinson's disease                        | 6.55<br>(4.90 to 8.43)       | 20.46<br>(14.68 to 26.25)    | 24.59<br>(18.26 to 31.78)    | 17.22<br>(11.91 to 22.42)    | 0.52<br>(0.39 to 0.68) | 1.65<br>(1.12 to 2.19)    | 2.05<br>(1.45 to 2.65)    | 1.35<br>(0.87 to 1.85)   |
| Epilepsy                                   | 93.04<br>(80.44 to 105.99)   | 97.48<br>(58.79 to 156.70)   | 70.43<br>(44.64 to 108.57)   | 107.34<br>(65.29 to 169.41)  | 1.79<br>(1.55 to 2.03) | 2.11<br>(1.29 to 3.25)    | 1.54<br>(0.98 to 2.30)    | 2.29<br>(1.41 to 3.47)   |
| Multiple sclerosis                         | 0.80<br>(0.57 to 1.39)       | 1.45<br>(0.96 to 2.57)       | 1.52<br>(0.99 to 2.67)       | 1.40<br>(0.92 to 2.52)       | 0.02<br>(0.02 to 0.04) | 0.05<br>(0.03 to 0.09)    | 0.06<br>(0.04 to 0.10)    | 0.05<br>(0.03 to 0.09)   |
| Motor neuron disease                       | 0.96<br>(0.82 to 1.11)       | 2.17<br>(1.67 to 2.64)       | 2.28<br>(1.73 to 2.81)       | 2.05<br>(1.61 to 2.49)       | 0.03<br>(0.03 to 0.03) | 0.08<br>(0.06 to 0.09)    | 0.08<br>(0.06 to 0.10)    | 0.07<br>(0.06 to 0.08)   |
| Other neurological disorders               | 10.01<br>(8.62 to 11.54)     | 16.07<br>(13.41 to 18.68)    | 16.92<br>(14.11 to 19.82)    | 15.24<br>(12.86 to 17.78)    | 0.29<br>(0.26 to 0.32) | 0.62<br>(0.54 to 0.71)    | 0.70<br>(0.62 to 0.79)    | 0.55<br>(0.47 to 0.63)   |
| Mental disorders                           | 26.80<br>(22.35 to 31.68)    | 59.64<br>(45.26 to 77.61)    | 61.77<br>(45.66 to 82.48)    | 59.27<br>(45.30 to 77.30)    | 0.61<br>(0.51 to 0.72) | 1.51<br>(1.17 to 1.90)    | 1.59<br>(1.21 to 2.03)    | 1.48<br>(1.17 to 1.85)   |
| Alcohol use disorders                      | 9.27<br>(7.75 to 11.10)      | 13.96<br>(10.33 to 18.30)    | 12.81<br>(9.27 to 16.85)     | 14.04<br>(10.45 to 18.23)    | 0.23<br>(0.19 to 0.27) | 0.39<br>(0.29 to 0.50)    | 0.36<br>(0.27 to 0.47)    | 0.38<br>(0.29 to 0.49)   |
| Drug use disorders                         | 17.52<br>(14.32 to 21.02)    | 45.66<br>(34.00 to 60.88)    | 48.94<br>(35.88 to 65.64)    | 45.21<br>(33.92 to 60.06)    | 0.38<br>(0.31 to 0.45) | 1.12<br>(0.86 to 1.44)    | 1.22<br>(0.92 to 1.59)    | 1.09<br>(0.84 to 1.39)   |
| Opioid use disorders                       | 13.61<br>(10.83 to 16.64)    | 30.94<br>(22.36 to 42.30)    | 31.93<br>(22.95 to 43.90)    | 30.64<br>(22.19 to 41.87)    | 0.29<br>(0.23 to 0.35) | 0.75<br>(0.55 to 0.99)    | 0.78<br>(0.57 to 1.05)    | 0.73<br>(0.54 to 0.97)   |

|                           |                           |                            |                             |                            |                           |                           |                           |                           |
|---------------------------|---------------------------|----------------------------|-----------------------------|----------------------------|---------------------------|---------------------------|---------------------------|---------------------------|
| Cocaine use disorders     | 0.77<br>(0.51 to<br>1.06) | 3.13<br>(1.94 to<br>4.62)  | 3.40<br>(2.08 to<br>5.21)   | 3.18<br>(1.97 to<br>4.69)  | 0.02<br>(0.01 to<br>0.02) | 0.08<br>(0.05 to<br>0.11) | 0.08<br>(0.05 to<br>0.13) | 0.08<br>(0.05 to<br>0.11) |
| Amphetamine use disorders | 0.55<br>(0.35 to<br>0.85) | 2.43<br>(1.50 to<br>3.86)  | 2.80<br>(1.67 to<br>4.63)   | 2.47<br>(1.51 to<br>3.95)  | 0.01<br>(0.01 to<br>0.02) | 0.06<br>(0.04 to<br>0.09) | 0.07<br>(0.04 to<br>0.11) | 0.06<br>(0.04 to<br>0.09) |
| Other drug use disorders  | 2.59<br>(1.61 to<br>3.36) | 9.16<br>(5.29 to<br>13.20) | 10.80<br>(6.29 to<br>16.19) | 8.92<br>(5.25 to<br>12.78) | 0.06<br>(0.04 to<br>0.08) | 0.24<br>(0.14 to<br>0.32) | 0.29<br>(0.17 to<br>0.40) | 0.23<br>(0.14 to<br>0.31) |
| Eating disorders          | 0.01<br>(0.01 to<br>0.02) | 0.02<br>(0.01 to<br>0.03)  | 0.02<br>(0.01 to<br>0.03)   | 0.02<br>(0.01 to<br>0.03)  | 0.00<br>(0.00 to<br>0.00) | 0.00<br>(0.00 to<br>0.00) | 0.00<br>(0.00 to<br>0.00) | 0.00<br>(0.00 to<br>0.00) |

| Uzbekistan                                                 |                              |                              |                              |                              |                          |                           |                           |                           |
|------------------------------------------------------------|------------------------------|------------------------------|------------------------------|------------------------------|--------------------------|---------------------------|---------------------------|---------------------------|
| Cause                                                      | YLLs (in 1000s)              |                              |                              |                              | Deaths (in 1000s)        |                           |                           |                           |
|                                                            | 2016                         | 2040 Forecast                | 2040 Better Scenario         | 2040 Worse Scenario          | 2016                     | 2040 Forecast             | 2040 Better Scenario      | 2040 Worse Scenario       |
|                                                            | 352.44<br>(314.16 to 393.75) | 502.63<br>(341.31 to 730.41) | 386.30<br>(253.58 to 559.25) | 577.78<br>(386.36 to 832.92) | 11.15<br>(9.99 to 12.33) | 18.90<br>(13.29 to 26.39) | 14.84<br>(10.24 to 20.55) | 21.19<br>(14.75 to 29.53) |
| Diabetes, urogenital, blood, and endocrine diseases        |                              |                              |                              |                              |                          |                           |                           |                           |
| Diabetes mellitus                                          | 166.29<br>(147.76 to 186.35) | 230.80<br>(122.65 to 395.45) | 167.46<br>(89.41 to 283.15)  | 282.20<br>(149.31 to 472.21) | 6.09<br>(5.44 to 6.78)   | 9.39<br>(5.32 to 15.41)   | 7.03<br>(3.98 to 11.41)   | 11.13<br>(6.15 to 18.01)  |
| Acute glomerulonephritis                                   | 4.03<br>(3.28 to 4.90)       | 8.60<br>(5.35 to 12.67)      | 7.59<br>(4.66 to 11.56)      | 8.99<br>(5.65 to 13.23)      | 0.10<br>(0.08 to 0.12)   | 0.23<br>(0.15 to 0.34)    | 0.21<br>(0.13 to 0.31)    | 0.24<br>(0.15 to 0.36)    |
| Chronic kidney disease                                     | 121.23<br>(106.42 to 136.29) | 164.56<br>(100.89 to 264.81) | 121.27<br>(74.62 to 191.73)  | 187.43<br>(113.75 to 304.43) | 3.45<br>(3.04 to 3.86)   | 6.13<br>(3.63 to 10.17)   | 4.60<br>(2.82 to 7.35)    | 6.78<br>(4.05 to 11.15)   |
| Chronic kidney disease due to diabetes mellitus            | 40.41<br>(34.01 to 47.58)    | 73.84<br>(41.84 to 128.08)   | 54.24<br>(31.72 to 89.82)    | 83.73<br>(47.56 to 144.06)   | 1.36<br>(1.16 to 1.58)   | 2.95<br>(1.67 to 5.10)    | 2.21<br>(1.31 to 3.70)    | 3.26<br>(1.85 to 5.67)    |
| Chronic kidney disease due to hypertension                 | 4.32<br>(3.52 to 5.35)       | 8.02<br>(4.51 to 13.59)      | 6.11<br>(3.49 to 9.89)       | 8.85<br>(4.98 to 14.93)      | 0.20<br>(0.17 to 0.25)   | 0.47<br>(0.26 to 0.77)    | 0.37<br>(0.21 to 0.61)    | 0.49<br>(0.27 to 0.82)    |
| Chronic kidney disease due to glomerulonephritis           | 37.97<br>(31.06 to 45.30)    | 38.76<br>(24.20 to 60.51)    | 28.45<br>(17.59 to 44.18)    | 44.55<br>(27.37 to 70.75)    | 0.88<br>(0.74 to 1.05)   | 1.18<br>(0.73 to 1.91)    | 0.87<br>(0.53 to 1.39)    | 1.33<br>(0.81 to 2.15)    |
| Chronic kidney disease due to other and unspecified causes | 38.53<br>(31.70 to 46.42)    | 43.95<br>(26.63 to 69.86)    | 32.48<br>(19.92 to 51.05)    | 50.30<br>(29.99 to 79.15)    | 1.00<br>(0.83 to 1.19)   | 1.54<br>(0.89 to 2.53)    | 1.15<br>(0.69 to 1.87)    | 1.70<br>(1.00 to 2.77)    |
| Urinary diseases and male infertility                      | 44.68<br>(39.06 to 50.88)    | 83.01<br>(64.24 to 105.02)   | 75.90<br>(56.65 to 98.01)    | 82.63<br>(63.98 to 103.63)   | 1.17<br>(1.03 to 1.33)   | 2.72<br>(2.23 to 3.25)    | 2.60<br>(2.03 to 3.20)    | 2.61<br>(2.15 to 3.10)    |
| Urinary tract infections                                   | 42.73<br>(37.38 to 48.65)    | 80.70<br>(62.65 to 102.66)   | 73.95<br>(55.11 to 95.74)    | 80.22<br>(62.29 to 100.99)   | 1.11<br>(0.98 to 1.26)   | 2.65<br>(2.16 to 3.17)    | 2.52<br>(1.97 to 3.12)    | 2.52<br>(2.07 to 3.02)    |
| Urolithiasis                                               | 0.21<br>(0.15 to 0.34)       | 0.31<br>(0.21 to 0.51)       | 0.27<br>(0.17 to 0.44)       | 0.32<br>(0.21 to 0.52)       | 0.00<br>(0.00 to 0.01)   | 0.01<br>(0.01 to 0.01)    | 0.01<br>(0.01 to 0.01)    | 0.01<br>(0.01 to 0.01)    |
| Other urinary diseases                                     | 1.74<br>(1.30 to 2.71)       | 1.99<br>(1.34 to 3.21)       | 1.68<br>(1.06 to 2.78)       | 2.08<br>(1.39 to 3.43)       | 0.05<br>(0.04 to 0.08)   | 0.08<br>(0.05 to 0.12)    | 0.07<br>(0.04 to 0.12)    | 0.08<br>(0.05 to 0.13)    |
| Gynecological diseases                                     | 0.32<br>(0.03 to 0.47)       | 0.12<br>(0.01 to 0.22)       | 0.09<br>(0.01 to 0.17)       | 0.13<br>(0.01 to 0.24)       | 0.01<br>(0.00 to 0.01)   | 0.00<br>(0.00 to 0.01)    | 0.00<br>(0.00 to 0.00)    | 0.00<br>(0.00 to 0.01)    |
| Uterine fibroids                                           | 0.27<br>(0.03 to 0.39)       | 0.10<br>(0.01 to 0.18)       | 0.08<br>(0.01 to 0.15)       | 0.11<br>(0.01 to 0.21)       | 0.01<br>(0.00 to 0.01)   | 0.00<br>(0.00 to 0.01)    | 0.00<br>(0.00 to 0.00)    | 0.00<br>(0.00 to 0.01)    |
| Polycystic ovarian syndrome                                | 0.01<br>(0.00 to 0.03)       | 0.00<br>(0.00 to 0.01)       | 0.00<br>(0.00 to 0.01)       | 0.00<br>(0.00 to 0.01)       | 0.00<br>(0.00 to 0.00)   | 0.00<br>(0.00 to 0.00)    | 0.00<br>(0.00 to 0.00)    | 0.00<br>(0.00 to 0.00)    |
| Endometriosis                                              | 0.00<br>(0.00 to 0.00)       | 0.00<br>(0.00 to 0.00)       | 0.00<br>(0.00 to 0.00)       | 0.00<br>(0.00 to 0.00)       | 0.00<br>(0.00 to 0.00)   | 0.00<br>(0.00 to 0.00)    | 0.00<br>(0.00 to 0.00)    | 0.00<br>(0.00 to 0.00)    |
| Genital prolapse                                           | 0.00<br>(0.00 to 0.00)       | 0.00<br>(0.00 to 0.00)       | 0.00<br>(0.00 to 0.00)       | 0.00<br>(0.00 to 0.00)       | 0.00<br>(0.00 to 0.00)   | 0.00<br>(0.00 to 0.00)    | 0.00<br>(0.00 to 0.00)    | 0.00<br>(0.00 to 0.00)    |
| Other gynecological diseases                               | 0.04<br>(0.00 to 0.06)       | 0.02<br>(0.00 to 0.04)       | 0.01<br>(0.00 to 0.03)       | 0.02<br>(0.00 to 0.04)       | 0.00<br>(0.00 to 0.00)   | 0.00<br>(0.00 to 0.00)    | 0.00<br>(0.00 to 0.00)    | 0.00<br>(0.00 to 0.00)    |
| Hemoglobinopathies and hemolytic anemias                   | 7.89<br>(5.67 to 9.73)       | 6.71<br>(4.48 to 8.95)       | 5.62<br>(3.68 to 7.80)       | 7.10<br>(4.66 to 9.59)       | 0.17<br>(0.13 to 0.21)   | 0.19<br>(0.14 to 0.24)    | 0.17<br>(0.11 to 0.21)    | 0.19<br>(0.14 to 0.25)    |
| Thalassemias                                               | 1.43<br>(0.70 to 2.48)       | 0.76<br>(0.36 to 1.39)       | 0.69<br>(0.33 to 1.27)       | 0.77<br>(0.36 to 1.46)       | 0.02<br>(0.01 to 0.03)   | 0.01<br>(0.00 to 0.02)    | 0.01<br>(0.00 to 0.02)    | 0.01<br>(0.00 to 0.02)    |

|                                                   |                            |                            |                            |                            |                           |                           |                           |                           |
|---------------------------------------------------|----------------------------|----------------------------|----------------------------|----------------------------|---------------------------|---------------------------|---------------------------|---------------------------|
|                                                   | 2.66<br>(1.94 to<br>3.26)  | 2.52<br>(1.62 to<br>3.63)  | 2.06<br>(1.28 to<br>3.01)  | 2.69<br>(1.70 to<br>3.93)  | 0.05<br>(0.03 to<br>0.06) | 0.05<br>(0.03 to<br>0.07) | 0.04<br>(0.02 to<br>0.06) | 0.05<br>(0.03 to<br>0.07) |
| Sickle cell disorders                             |                            |                            |                            |                            |                           |                           |                           |                           |
|                                                   | 1.49<br>(1.10 to<br>1.83)  | 1.49<br>(0.92 to<br>2.08)  | 1.18<br>(0.72 to<br>1.72)  | 1.63<br>(1.00 to<br>2.30)  | 0.03<br>(0.02 to<br>0.04) | 0.04<br>(0.02 to<br>0.05) | 0.03<br>(0.02 to<br>0.04) | 0.04<br>(0.03 to<br>0.06) |
| G6PD deficiency                                   |                            |                            |                            |                            |                           |                           |                           |                           |
|                                                   | 2.31<br>(1.71 to<br>2.77)  | 1.95<br>(1.33 to<br>2.48)  | 1.69<br>(1.13 to<br>2.24)  | 2.01<br>(1.37 to<br>2.57)  | 0.08<br>(0.06 to<br>0.09) | 0.10<br>(0.07 to<br>0.12) | 0.09<br>(0.06 to<br>0.11) | 0.09<br>(0.07 to<br>0.12) |
| Other hemoglobinopathies and hemolytic anemias    |                            |                            |                            |                            |                           |                           |                           |                           |
|                                                   | 8.00<br>(6.40 to<br>11.18) | 8.83<br>(6.68 to<br>12.10) | 8.36<br>(6.28 to<br>11.33) | 9.30<br>(6.95 to<br>12.78) | 0.16<br>(0.13 to<br>0.21) | 0.23<br>(0.18 to<br>0.30) | 0.23<br>(0.18 to<br>0.30) | 0.23<br>(0.18 to<br>0.31) |
| Endocrine, metabolic, blood, and immune disorders |                            |                            |                            |                            |                           |                           |                           |                           |

| Uzbekistan                                    |                                    |                                   |                                   |                                    |                               |                               |                               |                               |
|-----------------------------------------------|------------------------------------|-----------------------------------|-----------------------------------|------------------------------------|-------------------------------|-------------------------------|-------------------------------|-------------------------------|
| Cause                                         | YLLs (in 1000s)                    |                                   |                                   |                                    | Deaths (in 1000s)             |                               |                               |                               |
|                                               | 2016                               | 2040 Forecast                     | 2040 Better Scenario              | 2040 Worse Scenario                | 2016                          | 2040 Forecast                 | 2040 Better Scenario          | 2040 Worse Scenario           |
| <b>Musculoskeletal disorders</b>              | <b>7.29</b><br>(6.15 to 8.42)      | <b>13.45</b><br>(10.31 to 17.34)  | <b>11.93</b><br>(8.81 to 15.94)   | <b>13.58</b><br>(10.36 to 17.46)   | <b>0.20</b><br>(0.17 to 0.25) | <b>0.47</b><br>(0.38 to 0.67) | <b>0.43</b><br>(0.33 to 0.62) | <b>0.46</b><br>(0.37 to 0.64) |
| Rheumatoid arthritis                          | 2.85<br>(2.29 to 3.63)             | 6.92<br>(4.99 to 9.58)            | 5.50<br>(3.58 to 8.15)            | 7.30<br>(5.25 to 10.00)            | 0.09<br>(0.07 to 0.12)        | 0.28<br>(0.20 to 0.41)        | 0.23<br>(0.15 to 0.35)        | 0.28<br>(0.21 to 0.41)        |
| Other musculoskeletal disorders               | 4.44<br>(3.67 to 5.19)             | 6.53<br>(4.81 to 8.42)            | 6.43<br>(4.72 to 8.41)            | 6.28<br>(4.63 to 8.11)             | 0.11<br>(0.09 to 0.13)        | 0.20<br>(0.15 to 0.28)        | 0.20<br>(0.15 to 0.29)        | 0.18<br>(0.14 to 0.26)        |
| <b>Other non-communicable diseases</b>        | <b>133.80</b><br>(71.34 to 219.20) | <b>95.63</b><br>(50.44 to 162.71) | <b>64.86</b><br>(34.17 to 110.24) | <b>111.52</b><br>(57.36 to 189.53) | <b>1.62</b><br>(0.89 to 2.62) | <b>1.24</b><br>(0.69 to 2.01) | <b>0.87</b><br>(0.51 to 1.41) | <b>1.42</b><br>(0.78 to 2.34) |
| Congenital birth defects                      | 125.83<br>(65.31 to 207.14)        | 88.75<br>(46.06 to 151.46)        | 59.39<br>(30.10 to 102.31)        | 103.89<br>(52.34 to 177.13)        | 1.51<br>(0.81 to 2.46)        | 1.10<br>(0.59 to 1.83)        | 0.75<br>(0.40 to 1.25)        | 1.28<br>(0.68 to 2.14)        |
| Neural tube defects                           | 15.73<br>(7.29 to 29.08)           | 4.60<br>(1.86 to 9.21)            | 2.75<br>(0.98 to 6.05)            | 5.83<br>(2.36 to 12.01)            | 0.18<br>(0.09 to 0.34)        | 0.05<br>(0.02 to 0.11)        | 0.03<br>(0.01 to 0.07)        | 0.07<br>(0.03 to 0.14)        |
| Congenital heart anomalies                    | 74.47<br>(38.45 to 127.48)         | 54.16<br>(27.00 to 95.61)         | 35.55<br>(17.26 to 63.19)         | 63.08<br>(31.30 to 112.12)         | 0.90<br>(0.47 to 1.52)        | 0.67<br>(0.35 to 1.17)        | 0.45<br>(0.23 to 0.77)        | 0.78<br>(0.41 to 1.35)        |
| Orofacial clefts                              | 0.05<br>(0.02 to 0.11)             | 0.06<br>(0.02 to 0.15)            | 0.04<br>(0.01 to 0.09)            | 0.08<br>(0.03 to 0.20)             | 0.00<br>(0.00 to 0.00)        | 0.00<br>(0.00 to 0.00)        | 0.00<br>(0.00 to 0.00)        | 0.00<br>(0.00 to 0.00)        |
| Down syndrome                                 | 1.50<br>(0.81 to 2.87)             | 2.03<br>(1.08 to 4.01)            | 1.73<br>(0.95 to 3.41)            | 2.36<br>(1.24 to 4.72)             | 0.02<br>(0.01 to 0.04)        | 0.03<br>(0.02 to 0.05)        | 0.03<br>(0.02 to 0.05)        | 0.03<br>(0.02 to 0.06)        |
| Other chromosomal abnormalities               | 1.15<br>(0.30 to 2.21)             | 1.43<br>(0.31 to 3.07)            | 1.05<br>(0.23 to 2.29)            | 1.71<br>(0.38 to 3.70)             | 0.01<br>(0.00 to 0.03)        | 0.02<br>(0.00 to 0.04)        | 0.01<br>(0.00 to 0.03)        | 0.02<br>(0.00 to 0.04)        |
| Congenital musculoskeletal and limb anomalies | 1.74<br>(0.79 to 3.24)             | 1.58<br>(0.67 to 3.27)            | 1.09<br>(0.44 to 2.25)            | 1.84<br>(0.77 to 3.79)             | 0.02<br>(0.01 to 0.04)        | 0.02<br>(0.01 to 0.04)        | 0.01<br>(0.01 to 0.03)        | 0.02<br>(0.01 to 0.04)        |
| Urogenital congenital anomalies               | 1.74<br>(0.87 to 4.54)             | 1.57<br>(0.83 to 3.75)            | 1.18<br>(0.63 to 2.67)            | 1.76<br>(0.91 to 4.32)             | 0.02<br>(0.01 to 0.06)        | 0.02<br>(0.01 to 0.05)        | 0.02<br>(0.01 to 0.04)        | 0.03<br>(0.02 to 0.06)        |
| Digestive congenital anomalies                | 3.66<br>(1.68 to 6.90)             | 3.55<br>(1.43 to 7.33)            | 2.35<br>(0.91 to 4.95)            | 4.20<br>(1.69 to 8.85)             | 0.04<br>(0.02 to 0.08)        | 0.04<br>(0.02 to 0.09)        | 0.03<br>(0.01 to 0.06)        | 0.05<br>(0.02 to 0.10)        |
| Other congenital birth defects                | 25.79<br>(13.04 to 46.45)          | 19.77<br>(9.52 to 35.60)          | 13.65<br>(6.19 to 25.60)          | 23.03<br>(11.02 to 41.82)          | 0.31<br>(0.16 to 0.55)        | 0.24<br>(0.12 to 0.42)        | 0.17<br>(0.08 to 0.31)        | 0.28<br>(0.14 to 0.50)        |
| Skin and subcutaneous diseases                | 1.29<br>(0.51 to 1.87)             | 2.54<br>(1.02 to 3.68)            | 2.37<br>(0.98 to 3.39)            | 2.55<br>(1.04 to 3.70)             | 0.03<br>(0.01 to 0.04)        | 0.09<br>(0.04 to 0.12)        | 0.09<br>(0.04 to 0.12)        | 0.08<br>(0.03 to 0.11)        |
| Cellulitis                                    | 0.43<br>(0.14 to 0.65)             | 0.90<br>(0.32 to 1.37)            | 0.88<br>(0.32 to 1.33)            | 0.89<br>(0.31 to 1.37)             | 0.01<br>(0.00 to 0.01)        | 0.03<br>(0.01 to 0.04)        | 0.03<br>(0.01 to 0.04)        | 0.03<br>(0.01 to 0.04)        |
| Pyoderma                                      | 0.63<br>(0.26 to 0.95)             | 1.32<br>(0.54 to 1.92)            | 1.19<br>(0.49 to 1.71)            | 1.35<br>(0.56 to 2.00)             | 0.02<br>(0.01 to 0.02)        | 0.05<br>(0.02 to 0.07)        | 0.05<br>(0.02 to 0.07)        | 0.05<br>(0.02 to 0.06)        |
| Decubitus ulcer                               | 0.12<br>(0.04 to 0.16)             | 0.16<br>(0.05 to 0.23)            | 0.14<br>(0.05 to 0.21)            | 0.15<br>(0.05 to 0.23)             | 0.00<br>(0.00 to 0.00)        | 0.01<br>(0.00 to 0.01)        | 0.01<br>(0.00 to 0.01)        | 0.01<br>(0.00 to 0.01)        |
| Other skin and subcutaneous diseases          | 0.11<br>(0.04 to 0.16)             | 0.16<br>(0.06 to 0.24)            | 0.16<br>(0.05 to 0.23)            | 0.16<br>(0.05 to 0.24)             | 0.00<br>(0.00 to 0.00)        | 0.01<br>(0.00 to 0.01)        | 0.01<br>(0.00 to 0.01)        | 0.00<br>(0.00 to 0.01)        |
| Sudden infant death syndrome                  | 6.67<br>(3.17 to 12.15)            | 4.34<br>(1.66 to 9.18)            | 3.10<br>(1.17 to 6.86)            | 5.08<br>(1.95 to 10.55)            | 0.08<br>(0.04 to 0.14)        | 0.05<br>(0.02 to 0.11)        | 0.04<br>(0.01 to 0.08)        | 0.06<br>(0.02 to 0.12)        |

|                          |                                 |                                   |                                 |                                   |                              |                              |                             |                              |
|--------------------------|---------------------------------|-----------------------------------|---------------------------------|-----------------------------------|------------------------------|------------------------------|-----------------------------|------------------------------|
| Injuries                 | 775.70<br>(667.11 to<br>891.08) | 829.79<br>(550.63 to<br>1,268.23) | 597.68<br>(401.72 to<br>876.82) | 930.73<br>(615.85 to<br>1,409.09) | 14.58<br>(12.51 to<br>16.59) | 17.65<br>(11.97 to<br>26.19) | 12.99<br>(9.07 to<br>18.60) | 19.40<br>(13.14 to<br>28.84) |
| Transport injuries       | 246.48<br>(205.52 to<br>289.19) | 265.72<br>(153.92 to<br>452.34)   | 148.47<br>(89.35 to<br>249.72)  | 335.59<br>(195.61 to<br>566.20)   | 4.83<br>(4.03 to<br>5.62)    | 5.84<br>(3.45 to<br>9.67)    | 3.37<br>(2.07 to<br>5.46)   | 7.18<br>(4.27 to<br>11.78)   |
| Road injuries            | 239.13<br>(199.65 to<br>279.35) | 254.29<br>(147.14 to<br>432.04)   | 140.23<br>(84.54 to<br>236.37)  | 323.44<br>(189.20 to<br>543.51)   | 4.69<br>(3.90 to<br>5.46)    | 5.60<br>(3.31 to<br>9.30)    | 3.20<br>(1.97 to<br>5.13)   | 6.92<br>(4.12 to<br>11.42)   |
| Pedestrian road injuries | 84.89<br>(59.13 to<br>104.56)   | 85.55<br>(47.14 to<br>145.72)     | 45.78<br>(26.48 to<br>78.20)    | 104.98<br>(58.21 to<br>179.07)    | 1.66<br>(1.19 to<br>2.05)    | 1.96<br>(1.11 to<br>3.27)    | 1.08<br>(0.64 to<br>1.76)   | 2.34<br>(1.32 to<br>3.93)    |

| Uzbekistan                                      |                                            |                                            |                                            |                                            |                                      |                                      |                                      |                                      |
|-------------------------------------------------|--------------------------------------------|--------------------------------------------|--------------------------------------------|--------------------------------------------|--------------------------------------|--------------------------------------|--------------------------------------|--------------------------------------|
| Cause                                           | YLLs (in 1000s)                            |                                            |                                            |                                            | Deaths (in 1000s)                    |                                      |                                      |                                      |
|                                                 | 2016                                       | 2040 Forecast                              | 2040 Better Scenario                       | 2040 Worse Scenario                        | 2016                                 | 2040 Forecast                        | 2040 Better Scenario                 | 2040 Worse Scenario                  |
| Cyclist road injuries                           | 3.71<br>(2.91 to 4.77)                     | 5.34<br>(2.74 to 9.89)                     | 3.24<br>(1.72 to 5.84)                     | 6.61<br>(3.42 to 12.11)                    | 0.08<br>(0.06 to 0.10)               | 0.12<br>(0.06 to 0.23)               | 0.08<br>(0.04 to 0.14)               | 0.15<br>(0.08 to 0.27)               |
| Motorcyclist road injuries                      | 13.64<br>(9.97 to 18.62)                   | 18.28<br>(9.18 to 33.90)                   | 12.54<br>(6.50 to 22.66)                   | 21.17<br>(10.87 to 38.64)                  | 0.25<br>(0.18 to 0.34)               | 0.36<br>(0.18 to 0.65)               | 0.25<br>(0.14 to 0.44)               | 0.41<br>(0.21 to 0.73)               |
| Motor vehicle road injuries                     | 136.18<br>(110.33 to 167.82)               | 144.08<br>(84.25 to 243.95)                | 78.09<br>(47.81 to 126.49)                 | 189.35<br>(110.88 to 314.81)               | 2.68<br>(2.17 to 3.28)               | 3.14<br>(1.90 to 5.15)               | 1.77<br>(1.12 to 2.75)               | 4.00<br>(2.43 to 6.56)               |
| Other road injuries                             | 0.72<br>(0.52 to 1.01)                     | 1.03<br>(0.49 to 2.01)                     | 0.58<br>(0.29 to 1.11)                     | 1.33<br>(0.64 to 2.56)                     | 0.01<br>(0.01 to 0.02)               | 0.02<br>(0.01 to 0.05)               | 0.01<br>(0.01 to 0.03)               | 0.03<br>(0.01 to 0.06)               |
| Other transport injuries                        | 7.34<br>(5.68 to 9.47)                     | 11.44<br>(6.06 to 20.42)                   | 8.24<br>(4.44 to 14.66)                    | 12.15<br>(6.39 to 21.52)                   | 0.14<br>(0.11 to 0.18)               | 0.24<br>(0.13 to 0.42)               | 0.18<br>(0.10 to 0.32)               | 0.25<br>(0.14 to 0.45)               |
| <b>Unintentional injuries</b>                   | <b>301.62</b><br><b>(253.59 to 366.74)</b> | <b>256.57</b><br><b>(177.96 to 360.71)</b> | <b>207.67</b><br><b>(144.24 to 298.99)</b> | <b>276.96</b><br><b>(192.07 to 390.93)</b> | <b>5.38</b><br><b>(4.64 to 6.27)</b> | <b>5.39</b><br><b>(3.86 to 7.53)</b> | <b>4.52</b><br><b>(3.23 to 6.38)</b> | <b>5.66</b><br><b>(4.04 to 7.87)</b> |
| Falls                                           | 37.49<br>(29.78 to 57.64)                  | 45.38<br>(31.62 to 70.35)                  | 40.93<br>(28.31 to 63.54)                  | 46.78<br>(32.61 to 72.54)                  | 0.77<br>(0.62 to 1.21)               | 1.13<br>(0.83 to 1.76)               | 1.06<br>(0.77 to 1.65)               | 1.12<br>(0.82 to 1.76)               |
| Drowning                                        | 102.33<br>(82.74 to 128.91)                | 80.34<br>(50.08 to 130.72)                 | 62.94<br>(38.75 to 100.05)                 | 87.63<br>(54.05 to 142.73)                 | 1.65<br>(1.38 to 1.97)               | 1.50<br>(0.94 to 2.46)               | 1.20<br>(0.75 to 1.94)               | 1.60<br>(0.99 to 2.64)               |
| Fire, heat, and hot substances                  | 38.68<br>(31.75 to 48.40)                  | 31.44<br>(19.65 to 49.97)                  | 23.60<br>(14.84 to 36.98)                  | 34.40<br>(21.31 to 54.78)                  | 0.73<br>(0.62 to 0.89)               | 0.72<br>(0.46 to 1.14)               | 0.56<br>(0.35 to 0.88)               | 0.76<br>(0.48 to 1.19)               |
| Poisonings                                      | 19.39<br>(14.01 to 24.54)                  | 9.32<br>(5.31 to 15.87)                    | 6.48<br>(3.54 to 11.20)                    | 10.64<br>(5.95 to 18.02)                   | 0.36<br>(0.25 to 0.45)               | 0.19<br>(0.11 to 0.32)               | 0.14<br>(0.08 to 0.23)               | 0.22<br>(0.12 to 0.37)               |
| Exposure to mechanical forces                   | 20.75<br>(14.55 to 27.58)                  | 17.15<br>(11.20 to 24.62)                  | 13.72<br>(8.80 to 20.46)                   | 19.03<br>(12.13 to 28.18)                  | 0.36<br>(0.27 to 0.45)               | 0.34<br>(0.23 to 0.45)               | 0.28<br>(0.19 to 0.39)               | 0.36<br>(0.25 to 0.50)               |
| Unintentional firearm injuries                  | 2.69<br>(2.13 to 4.13)                     | 2.36<br>(1.63 to 3.72)                     | 1.97<br>(1.32 to 3.04)                     | 2.58<br>(1.73 to 4.11)                     | 0.06<br>(0.05 to 0.08)               | 0.06<br>(0.04 to 0.09)               | 0.05<br>(0.04 to 0.08)               | 0.06<br>(0.05 to 0.09)               |
| Unintentional suffocation                       | 8.05<br>(3.28 to 13.96)                    | 5.78<br>(2.49 to 10.66)                    | 4.43<br>(1.93 to 8.10)                     | 6.69<br>(2.82 to 12.40)                    | 0.11<br>(0.05 to 0.18)               | 0.08<br>(0.04 to 0.14)               | 0.06<br>(0.03 to 0.11)               | 0.09<br>(0.04 to 0.16)               |
| Other exposure to mechanical forces             | 10.00<br>(7.31 to 12.36)                   | 9.01<br>(5.92 to 12.63)                    | 7.32<br>(4.64 to 10.83)                    | 9.76<br>(6.35 to 14.05)                    | 0.20<br>(0.14 to 0.24)               | 0.20<br>(0.13 to 0.26)               | 0.16<br>(0.10 to 0.23)               | 0.21<br>(0.14 to 0.28)               |
| Adverse effects of medical treatment            | 11.48<br>(7.74 to 14.81)                   | 11.31<br>(7.24 to 15.61)                   | 9.99<br>(6.39 to 14.03)                    | 12.03<br>(7.67 to 16.68)                   | 0.24<br>(0.17 to 0.30)               | 0.29<br>(0.20 to 0.39)               | 0.26<br>(0.19 to 0.37)               | 0.29<br>(0.20 to 0.39)               |
| Animal contact                                  | 1.77<br>(1.34 to 2.36)                     | 1.72<br>(1.12 to 2.48)                     | 1.37<br>(0.87 to 1.97)                     | 1.93<br>(1.24 to 2.85)                     | 0.03<br>(0.02 to 0.04)               | 0.03<br>(0.02 to 0.05)               | 0.03<br>(0.02 to 0.04)               | 0.04<br>(0.03 to 0.05)               |
| Venomous animal contact                         | 0.77<br>(0.48 to 1.06)                     | 0.66<br>(0.39 to 0.98)                     | 0.53<br>(0.31 to 0.82)                     | 0.75<br>(0.44 to 1.14)                     | 0.01<br>(0.01 to 0.02)               | 0.01<br>(0.01 to 0.02)               | 0.01<br>(0.01 to 0.02)               | 0.01<br>(0.01 to 0.02)               |
| Non-venomous animal contact                     | 1.00<br>(0.73 to 1.45)                     | 1.06<br>(0.68 to 1.57)                     | 0.84<br>(0.52 to 1.27)                     | 1.18<br>(0.74 to 1.76)                     | 0.02<br>(0.01 to 0.03)               | 0.02<br>(0.01 to 0.03)               | 0.02<br>(0.01 to 0.03)               | 0.02<br>(0.02 to 0.04)               |
| Foreign body                                    | 30.36<br>(22.60 to 41.60)                  | 25.65<br>(18.31 to 35.96)                  | 23.06<br>(16.58 to 32.03)                  | 27.21<br>(19.18 to 38.55)                  | 0.50<br>(0.39 to 0.65)               | 0.48<br>(0.36 to 0.65)               | 0.46<br>(0.34 to 0.60)               | 0.50<br>(0.37 to 0.67)               |
| Pulmonary aspiration and foreign body in airway | 20.63<br>(13.88 to 30.10)                  | 17.61<br>(11.68 to 26.32)                  | 15.52<br>(10.34 to 22.84)                  | 18.57<br>(12.12 to 28.26)                  | 0.31<br>(0.23 to 0.43)               | 0.31<br>(0.23 to 0.42)               | 0.28<br>(0.21 to 0.38)               | 0.31<br>(0.23 to 0.44)               |



|                                             |                                                      |                                                      |                                                      |                                                      |                                                |                                                 |                                                |                                                 |
|---------------------------------------------|------------------------------------------------------|------------------------------------------------------|------------------------------------------------------|------------------------------------------------------|------------------------------------------------|-------------------------------------------------|------------------------------------------------|-------------------------------------------------|
|                                             | 9.73<br>(6.91 to<br>16.64)                           | 8.04<br>(5.37 to<br>13.98)                           | 7.54<br>(5.04 to<br>13.04)                           | 8.64<br>(5.73 to<br>15.14)                           | 0.18<br>(0.13 to<br>0.31)                      | 0.18<br>(0.12 to<br>0.30)                       | 0.17<br>(0.11 to<br>0.29)                      | 0.18<br>(0.13 to<br>0.31)                       |
| Foreign body in other body part             |                                                      |                                                      |                                                      |                                                      |                                                |                                                 |                                                |                                                 |
|                                             | 11.39<br>(5.81 to<br>15.26)                          | 10.89<br>(5.11 to<br>17.04)                          | 8.51<br>(3.77 to<br>13.83)                           | 12.22<br>(5.66 to<br>19.36)                          | 0.25<br>(0.14 to<br>0.35)                      | 0.27<br>(0.13 to<br>0.43)                       | 0.21<br>(0.10 to<br>0.35)                      | 0.30<br>(0.15 to<br>0.47)                       |
| Environmental heat and cold exposure        |                                                      |                                                      |                                                      |                                                      |                                                |                                                 |                                                |                                                 |
|                                             | 27.98<br>(23.36 to<br>32.79)                         | 23.37<br>(15.20 to<br>34.50)                         | 17.06<br>(10.16 to<br>27.31)                         | 25.08<br>(16.34 to<br>37.44)                         | 0.49<br>(0.41 to<br>0.58)                      | 0.44<br>(0.30 to<br>0.62)                       | 0.33<br>(0.20 to<br>0.51)                      | 0.47<br>(0.32 to<br>0.67)                       |
| Other unintentional injuries                |                                                      |                                                      |                                                      |                                                      |                                                |                                                 |                                                |                                                 |
| <b>Self-harm and interpersonal violence</b> | <b>227.42</b><br><b>(181.11 to</b><br><b>280.39)</b> | <b>307.37</b><br><b>(168.81 to</b><br><b>572.38)</b> | <b>241.41</b><br><b>(142.61 to</b><br><b>418.07)</b> | <b>318.05</b><br><b>(172.39 to</b><br><b>596.06)</b> | <b>4.37</b><br><b>(3.53 to</b><br><b>5.39)</b> | <b>6.42</b><br><b>(3.63 to</b><br><b>11.57)</b> | <b>5.09</b><br><b>(3.07 to</b><br><b>8.42)</b> | <b>6.56</b><br><b>(3.66 to</b><br><b>11.94)</b> |



| Central Europe                                                    |                                       |                                       |                                       |                                       |                                    |                                    |                                  |                                    |
|-------------------------------------------------------------------|---------------------------------------|---------------------------------------|---------------------------------------|---------------------------------------|------------------------------------|------------------------------------|----------------------------------|------------------------------------|
| Cause                                                             | YLLs (in 1000s)                       |                                       |                                       |                                       | Deaths (in 1000s)                  |                                    |                                  |                                    |
|                                                                   | 2016                                  | 2040 Forecast                         | 2040 Better Scenario                  | 2040 Worse Scenario                   | 2016                               | 2040 Forecast                      | 2040 Better Scenario             | 2040 Worse Scenario                |
| All causes                                                        | 22,597.70<br>(21,884.26 to 23,372.82) | 18,002.09<br>(15,422.49 to 21,012.03) | 14,219.39<br>(12,236.04 to 16,472.02) | 23,064.77<br>(19,464.86 to 26,993.92) | 1,318.79<br>(1,281.56 to 1,359.63) | 1,345.97<br>(1,165.27 to 1,545.71) | 1,130.44<br>(976.80 to 1,304.69) | 1,612.68<br>(1,401.00 to 1,841.01) |
| Communicable, maternal, neonatal, and nutritional diseases        | 909.83<br>(854.89 to 977.26)          | 556.17<br>(455.20 to 700.44)          | 423.69<br>(355.95 to 517.90)          | 731.37<br>(578.62 to 954.01)          | 34.88<br>(32.78 to 37.14)          | 35.64<br>(29.49 to 43.68)          | 30.43<br>(25.75 to 36.37)        | 42.19<br>(33.65 to 53.53)          |
| HIV/AIDS and tuberculosis                                         | 80.57<br>(74.38 to 88.91)             | 31.32<br>(22.16 to 48.44)             | 18.01<br>(13.56 to 26.05)             | 48.06<br>(32.03 to 79.78)             | 2.69<br>(2.48 to 2.98)             | 1.20<br>(0.81 to 1.84)             | 0.67<br>(0.48 to 0.96)           | 1.79<br>(1.15 to 2.91)             |
| Tuberculosis                                                      | 62.12<br>(56.03 to 70.35)             | 19.41<br>(10.87 to 36.51)             | 9.45<br>(5.42 to 17.73)               | 32.03<br>(16.41 to 65.23)             | 2.28<br>(2.08 to 2.57)             | 0.96<br>(0.58 to 1.59)             | 0.49<br>(0.31 to 0.79)           | 1.45<br>(0.83 to 2.57)             |
| HIV/AIDS                                                          | 18.45<br>(17.54 to 19.44)             | 11.91<br>(9.61 to 14.11)              | 8.56<br>(7.10 to 10.04)               | 16.03<br>(13.23 to 18.63)             | 0.40<br>(0.39 to 0.43)             | 0.25<br>(0.20 to 0.30)             | 0.18<br>(0.14 to 0.22)           | 0.34<br>(0.27 to 0.40)             |
| Diarrhea, lower respiratory, and other common infectious diseases | 555.57<br>(523.20 to 592.49)          | 412.30<br>(325.30 to 535.09)          | 319.42<br>(261.24 to 399.59)          | 551.42<br>(414.43 to 760.76)          | 28.18<br>(26.23 to 30.26)          | 32.17<br>(26.19 to 39.94)          | 27.73<br>(23.14 to 33.58)        | 37.99<br>(29.76 to 48.78)          |
| Diarrheal diseases                                                | 16.85<br>(15.30 to 18.75)             | 34.09<br>(11.96 to 80.66)             | 39.65<br>(17.17 to 84.11)             | 29.16<br>(9.53 to 73.64)              | 0.78<br>(0.71 to 0.86)             | 2.86<br>(1.04 to 6.67)             | 3.50<br>(1.61 to 7.29)           | 2.25<br>(0.78 to 5.46)             |
| Intestinal infectious diseases                                    | 0.15<br>(0.08 to 0.27)                | 0.09<br>(0.05 to 0.16)                | 0.08<br>(0.04 to 0.14)                | 0.09<br>(0.05 to 0.17)                | 0.00<br>(0.00 to 0.01)             | 0.00<br>(0.00 to 0.01)             | 0.00<br>(0.00 to 0.01)           | 0.00<br>(0.00 to 0.01)             |
| Typhoid fever                                                     | 0.05<br>(0.02 to 0.09)                | 0.03<br>(0.01 to 0.06)                | 0.04<br>(0.02 to 0.07)                | 0.03<br>(0.01 to 0.05)                | 0.00<br>(0.00 to 0.00)             | 0.00<br>(0.00 to 0.00)             | 0.00<br>(0.00 to 0.00)           | 0.00<br>(0.00 to 0.00)             |
| Paratyphoid fever                                                 | 0.08<br>(0.03 to 0.17)                | 0.05<br>(0.02 to 0.09)                | 0.03<br>(0.01 to 0.07)                | 0.05<br>(0.02 to 0.11)                | 0.00<br>(0.00 to 0.00)             | 0.00<br>(0.00 to 0.00)             | 0.00<br>(0.00 to 0.00)           | 0.00<br>(0.00 to 0.00)             |
| Other intestinal infectious diseases                              | 0.02<br>(0.01 to 0.05)                | 0.01<br>(0.00 to 0.03)                | 0.01<br>(0.00 to 0.02)                | 0.01<br>(0.00 to 0.03)                | 0.00<br>(0.00 to 0.00)             | 0.00<br>(0.00 to 0.00)             | 0.00<br>(0.00 to 0.00)           | 0.00<br>(0.00 to 0.00)             |
| Lower respiratory infections                                      | 496.55<br>(466.49 to 529.71)          | 351.89<br>(265.03 to 469.42)          | 257.49<br>(196.06 to 336.03)          | 492.40<br>(354.35 to 695.99)          | 26.33<br>(24.43 to 28.35)          | 28.49<br>(22.43 to 36.40)          | 23.49<br>(18.72 to 29.63)        | 34.88<br>(26.44 to 45.92)          |
| Upper respiratory infections                                      | 0.39<br>(0.30 to 0.50)                | 0.23<br>(0.16 to 0.33)                | 0.14<br>(0.10 to 0.21)                | 0.28<br>(0.20 to 0.42)                | 0.02<br>(0.01 to 0.02)             | 0.01<br>(0.01 to 0.02)             | 0.01<br>(0.01 to 0.01)           | 0.02<br>(0.01 to 0.02)             |
| Otitis media                                                      | 0.04<br>(0.03 to 0.05)                | 0.01<br>(0.01 to 0.02)                | 0.01<br>(0.01 to 0.02)                | 0.01<br>(0.01 to 0.02)                | 0.00<br>(0.00 to 0.00)             | 0.00<br>(0.00 to 0.00)             | 0.00<br>(0.00 to 0.00)           | 0.00<br>(0.00 to 0.00)             |
| Meningitis                                                        | 20.19<br>(18.23 to 23.53)             | 7.19<br>(5.82 to 9.06)                | 5.82<br>(4.64 to 7.30)                | 8.09<br>(6.49 to 10.22)               | 0.52<br>(0.47 to 0.62)             | 0.24<br>(0.20 to 0.30)             | 0.21<br>(0.17 to 0.26)           | 0.26<br>(0.22 to 0.32)             |
| Pneumococcal meningitis                                           | 3.08<br>(2.73 to 3.77)                | 1.40<br>(1.10 to 1.84)                | 1.39<br>(1.07 to 1.84)                | 1.39<br>(1.11 to 1.83)                | 0.09<br>(0.08 to 0.12)             | 0.06<br>(0.04 to 0.07)             | 0.06<br>(0.04 to 0.07)           | 0.05<br>(0.04 to 0.07)             |
| H influenzae type B meningitis                                    | 3.12<br>(2.73 to 3.73)                | 2.06<br>(1.34 to 3.04)                | 1.82<br>(1.27 to 2.56)                | 2.27<br>(1.37 to 3.56)                | 0.08<br>(0.07 to 0.09)             | 0.05<br>(0.04 to 0.07)             | 0.05<br>(0.04 to 0.07)           | 0.05<br>(0.04 to 0.07)             |
| Meningococcal meningitis                                          | 7.10<br>(6.39 to 8.13)                | 1.68<br>(1.33 to 2.11)                | 1.21<br>(0.95 to 1.54)                | 2.01<br>(1.58 to 2.52)                | 0.16<br>(0.15 to 0.19)             | 0.06<br>(0.05 to 0.07)             | 0.04<br>(0.03 to 0.05)           | 0.06<br>(0.05 to 0.08)             |
| Other meningitis                                                  | 6.89<br>(6.15 to 8.30)                | 2.06<br>(1.67 to 2.72)                | 1.40<br>(1.11 to 1.82)                | 2.41<br>(1.96 to 3.14)                | 0.19<br>(0.17 to 0.23)             | 0.08<br>(0.06 to 0.10)             | 0.05<br>(0.04 to 0.07)           | 0.09<br>(0.07 to 0.11)             |
| Encephalitis                                                      | 18.98<br>(16.35 to 25.69)             | 14.85<br>(12.00 to 20.45)             | 13.97<br>(11.04 to 19.44)             | 15.23<br>(12.31 to 21.16)             | 0.47<br>(0.41 to 0.64)             | 0.48<br>(0.40 to 0.67)             | 0.47<br>(0.38 to 0.66)           | 0.48<br>(0.40 to 0.66)             |

|                |                           |                            |                           |                            |                           |                           |                           |                           |
|----------------|---------------------------|----------------------------|---------------------------|----------------------------|---------------------------|---------------------------|---------------------------|---------------------------|
| Diphtheria     | 0.04<br>(0.04 to<br>0.05) | 0.01<br>(0.01 to<br>0.01)  | 0.01<br>(0.01 to<br>0.01) | 0.01<br>(0.01 to<br>0.01)  | 0.00<br>(0.00 to<br>0.00) | 0.00<br>(0.00 to<br>0.00) | 0.00<br>(0.00 to<br>0.00) | 0.00<br>(0.00 to<br>0.00) |
| Whooping cough | 1.51<br>(0.58 to<br>3.11) | 0.74<br>(0.15 to<br>2.02)  | 0.18<br>(0.05 to<br>0.50) | 1.55<br>(0.29 to<br>4.13)  | 0.02<br>(0.01 to<br>0.04) | 0.01<br>(0.00 to<br>0.02) | 0.00<br>(0.00 to<br>0.01) | 0.02<br>(0.00 to<br>0.05) |
| Tetanus        | 0.26<br>(0.22 to<br>0.30) | 0.02<br>(0.02 to<br>0.03)  | 0.02<br>(0.02 to<br>0.03) | 0.02<br>(0.02 to<br>0.03)  | 0.01<br>(0.01 to<br>0.01) | 0.00<br>(0.00 to<br>0.00) | 0.00<br>(0.00 to<br>0.00) | 0.00<br>(0.00 to<br>0.00) |
| Measles        | 0.11<br>(0.08 to<br>0.15) | 2.89<br>(0.24 to<br>16.26) | 1.83<br>(0.20 to<br>9.20) | 4.27<br>(0.28 to<br>24.92) | 0.00<br>(0.00 to<br>0.00) | 0.04<br>(0.00 to<br>0.21) | 0.03<br>(0.00 to<br>0.13) | 0.06<br>(0.00 to<br>0.31) |

| Central Europe                                        |                                      |                                      |                                      |                                      |                                      |                                      |                                      |                                      |
|-------------------------------------------------------|--------------------------------------|--------------------------------------|--------------------------------------|--------------------------------------|--------------------------------------|--------------------------------------|--------------------------------------|--------------------------------------|
| Cause                                                 | YLLs (in 1000s)                      |                                      |                                      |                                      | Deaths (in 1000s)                    |                                      |                                      |                                      |
|                                                       | 2016                                 | 2040 Forecast                        | 2040 Better Scenario                 | 2040 Worse Scenario                  | 2016                                 | 2040 Forecast                        | 2040 Better Scenario                 | 2040 Worse Scenario                  |
| Varicella and herpes zoster                           | 0.50<br>(0.37 to 0.69)               | 0.29<br>(0.22 to 0.42)               | 0.23<br>(0.17 to 0.35)               | 0.30<br>(0.22 to 0.44)               | 0.02<br>(0.02 to 0.04)               | 0.02<br>(0.02 to 0.04)               | 0.02<br>(0.02 to 0.04)               | 0.02<br>(0.02 to 0.04)               |
| <b>Neglected tropical diseases and malaria</b>        | <b>1.83</b><br><b>(1.57 to 2.06)</b> | <b>1.18</b><br><b>(0.95 to 1.40)</b> | <b>1.19</b><br><b>(0.95 to 1.38)</b> | <b>1.17</b><br><b>(0.95 to 1.40)</b> | <b>0.06</b><br><b>(0.05 to 0.07)</b> | <b>0.05</b><br><b>(0.04 to 0.06)</b> | <b>0.06</b><br><b>(0.04 to 0.07)</b> | <b>0.05</b><br><b>(0.04 to 0.06)</b> |
| Malaria                                               | 0.00<br>(0.00 to 0.00)               | 0.00<br>(0.00 to 0.00)               | 0.00<br>(0.00 to 0.00)               | 0.00<br>(0.00 to 0.00)               | 0.00<br>(0.00 to 0.00)               | 0.00<br>(0.00 to 0.00)               | 0.00<br>(0.00 to 0.00)               | 0.00<br>(0.00 to 0.00)               |
| Chagas disease                                        | 0.00<br>(0.00 to 0.00)               | 0.00<br>(0.00 to 0.00)               | 0.00<br>(0.00 to 0.00)               | 0.00<br>(0.00 to 0.00)               | 0.00<br>(0.00 to 0.00)               | 0.00<br>(0.00 to 0.00)               | 0.00<br>(0.00 to 0.00)               | 0.00<br>(0.00 to 0.00)               |
| Leishmaniasis                                         | 0.30<br>(0.17 to 0.46)               | 0.04<br>(0.02 to 0.18)               | 0.03<br>(0.01 to 0.14)               | 0.04<br>(0.02 to 0.20)               | 0.01<br>(0.01 to 0.02)               | 0.00<br>(0.00 to 0.01)               | 0.00<br>(0.00 to 0.01)               | 0.00<br>(0.00 to 0.01)               |
| African trypanosomiasis                               | 0.00<br>(0.00 to 0.00)               | 0.00<br>(0.00 to 0.00)               | 0.00<br>(0.00 to 0.00)               | 0.00<br>(0.00 to 0.00)               | 0.00<br>(0.00 to 0.00)               | 0.00<br>(0.00 to 0.00)               | 0.00<br>(0.00 to 0.00)               | 0.00<br>(0.00 to 0.00)               |
| Schistosomiasis                                       | 0.00<br>(0.00 to 0.00)               | 0.00<br>(0.00 to 0.00)               | 0.00<br>(0.00 to 0.00)               | 0.00<br>(0.00 to 0.00)               | 0.00<br>(0.00 to 0.00)               | 0.00<br>(0.00 to 0.00)               | 0.00<br>(0.00 to 0.00)               | 0.00<br>(0.00 to 0.00)               |
| Cysticercosis                                         | 0.06<br>(0.05 to 0.07)               | 0.02<br>(0.01 to 0.02)               | 0.02<br>(0.01 to 0.02)               | 0.02<br>(0.01 to 0.02)               | 0.00<br>(0.00 to 0.00)               | 0.00<br>(0.00 to 0.00)               | 0.00<br>(0.00 to 0.00)               | 0.00<br>(0.00 to 0.00)               |
| Cystic echinococcosis                                 | 0.51<br>(0.44 to 0.58)               | 0.27<br>(0.22 to 0.32)               | 0.22<br>(0.18 to 0.26)               | 0.29<br>(0.24 to 0.35)               | 0.02<br>(0.02 to 0.03)               | 0.02<br>(0.01 to 0.02)               | 0.01<br>(0.01 to 0.02)               | 0.02<br>(0.01 to 0.02)               |
| Dengue                                                | 0.00<br>(0.00 to 0.00)               | 0.00<br>(0.00 to 0.00)               | 0.00<br>(0.00 to 0.00)               | 0.00<br>(0.00 to 0.00)               | 0.00<br>(0.00 to 0.00)               | 0.00<br>(0.00 to 0.00)               | 0.00<br>(0.00 to 0.00)               | 0.00<br>(0.00 to 0.00)               |
| Yellow fever                                          | 0.00<br>(0.00 to 0.00)               | 0.00<br>(0.00 to 0.00)               | 0.00<br>(0.00 to 0.00)               | 0.00<br>(0.00 to 0.00)               | 0.00<br>(0.00 to 0.00)               | 0.00<br>(0.00 to 0.00)               | 0.00<br>(0.00 to 0.00)               | 0.00<br>(0.00 to 0.00)               |
| Rabies                                                | 0.00<br>(0.00 to 0.00)               | 0.00<br>(0.00 to 0.00)               | 0.00<br>(0.00 to 0.00)               | 0.00<br>(0.00 to 0.00)               | 0.00<br>(0.00 to 0.00)               | 0.00<br>(0.00 to 0.00)               | 0.00<br>(0.00 to 0.00)               | 0.00<br>(0.00 to 0.00)               |
| Intestinal nematode infections                        | 0.01<br>(0.01 to 0.01)               | 0.01<br>(0.00 to 0.01)               | 0.01<br>(0.00 to 0.01)               | 0.01<br>(0.00 to 0.01)               | 0.00<br>(0.00 to 0.00)               | 0.00<br>(0.00 to 0.00)               | 0.00<br>(0.00 to 0.00)               | 0.00<br>(0.00 to 0.00)               |
| Other neglected tropical diseases                     | 0.96<br>(0.73 to 1.06)               | 0.84<br>(0.63 to 0.96)               | 0.92<br>(0.68 to 1.05)               | 0.81<br>(0.60 to 0.91)               | 0.03<br>(0.02 to 0.03)               | 0.03<br>(0.02 to 0.04)               | 0.04<br>(0.03 to 0.05)               | 0.03<br>(0.02 to 0.04)               |
| <b>Maternal disorders</b>                             | <b>5.81</b><br><b>(5.24 to 6.42)</b> | <b>2.80</b><br><b>(2.29 to 3.44)</b> | <b>2.25</b><br><b>(1.83 to 2.74)</b> | <b>3.19</b><br><b>(2.59 to 3.93)</b> | <b>0.11</b><br><b>(0.10 to 0.12)</b> | <b>0.05</b><br><b>(0.05 to 0.07)</b> | <b>0.04</b><br><b>(0.04 to 0.05)</b> | <b>0.06</b><br><b>(0.05 to 0.08)</b> |
| Maternal hemorrhage                                   | 1.01<br>(0.76 to 1.30)               | 0.49<br>(0.36 to 0.66)               | 0.40<br>(0.29 to 0.54)               | 0.56<br>(0.40 to 0.75)               | 0.02<br>(0.01 to 0.02)               | 0.01<br>(0.01 to 0.01)               | 0.01<br>(0.01 to 0.01)               | 0.01<br>(0.01 to 0.01)               |
| Maternal sepsis and other maternal infections         | 0.62<br>(0.47 to 0.81)               | 0.27<br>(0.19 to 0.37)               | 0.22<br>(0.16 to 0.30)               | 0.31<br>(0.22 to 0.43)               | 0.01<br>(0.01 to 0.02)               | 0.01<br>(0.00 to 0.01)               | 0.00<br>(0.00 to 0.01)               | 0.01<br>(0.00 to 0.01)               |
| Maternal hypertensive disorders                       | 0.55<br>(0.41 to 0.71)               | 0.24<br>(0.17 to 0.33)               | 0.18<br>(0.13 to 0.25)               | 0.27<br>(0.19 to 0.37)               | 0.01<br>(0.01 to 0.01)               | 0.00<br>(0.00 to 0.01)               | 0.00<br>(0.00 to 0.00)               | 0.00<br>(0.00 to 0.01)               |
| Maternal obstructed labor and uterine rupture         | 0.13<br>(0.08 to 0.19)               | 0.07<br>(0.04 to 0.11)               | 0.06<br>(0.03 to 0.09)               | 0.08<br>(0.05 to 0.13)               | 0.00<br>(0.00 to 0.00)               | 0.00<br>(0.00 to 0.00)               | 0.00<br>(0.00 to 0.00)               | 0.00<br>(0.00 to 0.00)               |
| Maternal abortion, miscarriage, and ectopic pregnancy | 1.58<br>(1.25 to 1.94)               | 0.85<br>(0.59 to 1.21)               | 0.68<br>(0.46 to 0.96)               | 0.99<br>(0.67 to 1.44)               | 0.03<br>(0.02 to 0.04)               | 0.02<br>(0.01 to 0.02)               | 0.01<br>(0.01 to 0.02)               | 0.02<br>(0.01 to 0.03)               |

|                                        |                           |                           |                           |                           |                           |                           |                           |                           |
|----------------------------------------|---------------------------|---------------------------|---------------------------|---------------------------|---------------------------|---------------------------|---------------------------|---------------------------|
| Indirect maternal deaths               | 0.54<br>(0.38 to<br>0.80) | 0.20<br>(0.13 to<br>0.30) | 0.15<br>(0.10 to<br>0.23) | 0.23<br>(0.14 to<br>0.35) | 0.01<br>(0.01 to<br>0.01) | 0.00<br>(0.00 to<br>0.01) | 0.00<br>(0.00 to<br>0.00) | 0.00<br>(0.00 to<br>0.01) |
| Late maternal deaths                   | 0.09<br>(0.05 to<br>0.15) | 0.04<br>(0.02 to<br>0.07) | 0.03<br>(0.02 to<br>0.06) | 0.05<br>(0.03 to<br>0.08) | 0.00<br>(0.00 to<br>0.00) | 0.00<br>(0.00 to<br>0.00) | 0.00<br>(0.00 to<br>0.00) | 0.00<br>(0.00 to<br>0.00) |
| Maternal deaths aggravated by HIV/AIDS | 0.00<br>(0.00 to<br>0.00) | 0.00<br>(0.00 to<br>0.01) | 0.00<br>(0.00 to<br>0.01) | 0.00<br>(0.00 to<br>0.01) | 0.00<br>(0.00 to<br>0.00) | 0.00<br>(0.00 to<br>0.00) | 0.00<br>(0.00 to<br>0.00) | 0.00<br>(0.00 to<br>0.00) |
| Other maternal disorders               | 1.30<br>(1.04 to<br>1.57) | 0.63<br>(0.48 to<br>0.82) | 0.52<br>(0.39 to<br>0.66) | 0.70<br>(0.53 to<br>0.90) | 0.03<br>(0.02 to<br>0.03) | 0.01<br>(0.01 to<br>0.02) | 0.01<br>(0.01 to<br>0.01) | 0.01<br>(0.01 to<br>0.02) |

| Central Europe                                                          |                                     |                                   |                                  |                                    |                               |                               |                               |                               |
|-------------------------------------------------------------------------|-------------------------------------|-----------------------------------|----------------------------------|------------------------------------|-------------------------------|-------------------------------|-------------------------------|-------------------------------|
| Cause                                                                   | YLLs (in 1000s)                     |                                   |                                  |                                    | Deaths (in 1000s)             |                               |                               |                               |
|                                                                         | 2016                                | 2040 Forecast                     | 2040 Better Scenario             | 2040 Worse Scenario                | 2016                          | 2040 Forecast                 | 2040 Better Scenario          | 2040 Worse Scenario           |
| <b>Neonatal disorders</b>                                               | <b>237.28</b><br>(202.43 to 282.81) | <b>88.53</b><br>(62.67 to 125.04) | <b>63.27</b><br>(44.38 to 89.45) | <b>107.50</b><br>(75.63 to 153.18) | <b>2.74</b><br>(2.34 to 3.27) | <b>1.02</b><br>(0.72 to 1.45) | <b>0.73</b><br>(0.51 to 1.03) | <b>1.24</b><br>(0.87 to 1.77) |
| Neonatal preterm birth                                                  | 140.12<br>(116.36 to 171.37)        | 36.95<br>(28.09 to 48.18)         | 22.39<br>(16.79 to 29.79)        | 49.53<br>(36.89 to 65.13)          | 1.62<br>(1.34 to 1.98)        | 0.43<br>(0.32 to 0.56)        | 0.26<br>(0.19 to 0.34)        | 0.57<br>(0.43 to 0.75)        |
| Neonatal encephalopathy due to birth asphyxia and trauma                | 35.49<br>(30.21 to 41.62)           | 11.59<br>(7.27 to 18.83)          | 7.48<br>(4.80 to 11.92)          | 13.96<br>(8.76 to 22.87)           | 0.41<br>(0.35 to 0.48)        | 0.13<br>(0.08 to 0.22)        | 0.09<br>(0.06 to 0.14)        | 0.16<br>(0.10 to 0.26)        |
| Neonatal sepsis and other neonatal infections                           | 11.86<br>(9.01 to 19.75)            | 7.01<br>(4.27 to 12.81)           | 5.19<br>(3.16 to 9.41)           | 8.12<br>(4.84 to 15.14)            | 0.14<br>(0.10 to 0.23)        | 0.08<br>(0.05 to 0.15)        | 0.06<br>(0.04 to 0.11)        | 0.09<br>(0.06 to 0.18)        |
| Hemolytic disease and other neonatal jaundice                           | 1.37<br>(1.04 to 1.77)              | 0.44<br>(0.23 to 0.86)            | 0.31<br>(0.17 to 0.61)           | 0.53<br>(0.28 to 1.06)             | 0.02<br>(0.01 to 0.02)        | 0.01<br>(0.00 to 0.01)        | 0.00<br>(0.00 to 0.01)        | 0.01<br>(0.00 to 0.01)        |
| Other neonatal disorders                                                | 48.43<br>(40.87 to 56.85)           | 32.55<br>(19.39 to 54.55)         | 27.91<br>(17.08 to 46.27)        | 35.36<br>(20.69 to 58.82)          | 0.56<br>(0.47 to 0.66)        | 0.38<br>(0.22 to 0.63)        | 0.32<br>(0.20 to 0.53)        | 0.41<br>(0.24 to 0.68)        |
| <b>Nutritional deficiencies</b>                                         | <b>9.59</b><br>(8.95 to 10.26)      | <b>6.31</b><br>(5.62 to 7.12)     | <b>6.67</b><br>(5.93 to 7.55)    | <b>5.90</b><br>(5.22 to 6.62)      | <b>0.47</b><br>(0.44 to 0.50) | <b>0.50</b><br>(0.43 to 0.59) | <b>0.57</b><br>(0.49 to 0.66) | <b>0.44</b><br>(0.37 to 0.52) |
| Protein-energy malnutrition                                             | 6.07<br>(4.02 to 6.82)              | 3.92<br>(2.37 to 4.78)            | 4.39<br>(2.73 to 5.31)           | 3.49<br>(2.07 to 4.28)             | 0.32<br>(0.20 to 0.36)        | 0.32<br>(0.18 to 0.41)        | 0.39<br>(0.23 to 0.48)        | 0.27<br>(0.15 to 0.35)        |
| Iodine deficiency                                                       | 0.30<br>(0.14 to 0.55)              | 0.39<br>(0.15 to 0.78)            | 0.39<br>(0.14 to 0.80)           | 0.38<br>(0.15 to 0.74)             | 0.01<br>(0.01 to 0.02)        | 0.03<br>(0.01 to 0.07)        | 0.03<br>(0.01 to 0.08)        | 0.03<br>(0.01 to 0.06)        |
| Dietary iron deficiency                                                 | 0.50<br>(0.42 to 0.81)              | 0.32<br>(0.26 to 0.48)            | 0.34<br>(0.27 to 0.50)           | 0.31<br>(0.25 to 0.45)             | 0.02<br>(0.01 to 0.02)        | 0.02<br>(0.01 to 0.02)        | 0.01<br>(0.01 to 0.02)        | 0.01<br>(0.01 to 0.02)        |
| Other nutritional deficiencies                                          | 2.72<br>(2.25 to 4.37)              | 1.69<br>(1.29 to 2.87)            | 1.55<br>(1.16 to 2.83)           | 1.73<br>(1.33 to 2.83)             | 0.13<br>(0.10 to 0.24)        | 0.13<br>(0.10 to 0.25)        | 0.13<br>(0.09 to 0.26)        | 0.13<br>(0.09 to 0.23)        |
| <b>Other communicable, maternal, neonatal, and nutritional diseases</b> | <b>19.17</b><br>(17.81 to 20.77)    | <b>13.73</b><br>(12.28 to 15.15)  | <b>12.87</b><br>(11.59 to 14.24) | <b>14.14</b><br>(12.64 to 15.59)   | <b>0.62</b><br>(0.57 to 0.67) | <b>0.63</b><br>(0.56 to 0.69) | <b>0.63</b><br>(0.56 to 0.69) | <b>0.62</b><br>(0.55 to 0.68) |
| Sexually transmitted infections excluding HIV                           | 1.47<br>(1.19 to 1.90)              | 0.55<br>(0.45 to 0.67)            | 0.50<br>(0.41 to 0.61)           | 0.58<br>(0.48 to 0.72)             | 0.04<br>(0.04 to 0.05)        | 0.02<br>(0.02 to 0.03)        | 0.02<br>(0.02 to 0.03)        | 0.02<br>(0.02 to 0.03)        |
| Syphilis                                                                | 0.71<br>(0.44 to 1.15)              | 0.18<br>(0.13 to 0.27)            | 0.14<br>(0.10 to 0.22)           | 0.20<br>(0.14 to 0.32)             | 0.02<br>(0.01 to 0.02)        | 0.01<br>(0.01 to 0.01)        | 0.01<br>(0.00 to 0.01)        | 0.01<br>(0.01 to 0.01)        |
| Chlamydial infection                                                    | 0.14<br>(0.13 to 0.16)              | 0.07<br>(0.06 to 0.09)            | 0.07<br>(0.06 to 0.08)           | 0.07<br>(0.06 to 0.09)             | 0.01<br>(0.00 to 0.01)        | 0.00<br>(0.00 to 0.00)        | 0.00<br>(0.00 to 0.00)        | 0.00<br>(0.00 to 0.00)        |
| Gonococcal infection                                                    | 0.41<br>(0.37 to 0.45)              | 0.21<br>(0.17 to 0.25)            | 0.20<br>(0.16 to 0.24)           | 0.21<br>(0.17 to 0.25)             | 0.02<br>(0.01 to 0.02)        | 0.01<br>(0.01 to 0.01)        | 0.01<br>(0.01 to 0.01)        | 0.01<br>(0.01 to 0.01)        |
| Other sexually transmitted infections                                   | 0.20<br>(0.18 to 0.22)              | 0.09<br>(0.08 to 0.12)            | 0.09<br>(0.07 to 0.11)           | 0.09<br>(0.08 to 0.12)             | 0.01<br>(0.01 to 0.01)        | 0.00<br>(0.00 to 0.00)        | 0.00<br>(0.00 to 0.00)        | 0.00<br>(0.00 to 0.00)        |
| Acute hepatitis                                                         | 7.30<br>(6.66 to 7.99)              | 2.83<br>(2.38 to 3.40)            | 2.17<br>(1.82 to 2.56)           | 3.28<br>(2.73 to 3.92)             | 0.24<br>(0.22 to 0.26)        | 0.12<br>(0.11 to 0.15)        | 0.10<br>(0.08 to 0.12)        | 0.14<br>(0.12 to 0.16)        |
| Acute hepatitis A                                                       | 0.55<br>(0.44 to 0.67)              | 0.16<br>(0.11 to 0.21)            | 0.13<br>(0.09 to 0.17)           | 0.18<br>(0.13 to 0.24)             | 0.01<br>(0.01 to 0.01)        | 0.00<br>(0.00 to 0.01)        | 0.00<br>(0.00 to 0.01)        | 0.01<br>(0.00 to 0.01)        |
| Acute hepatitis B                                                       | 5.45<br>(4.82 to 6.06)              | 2.13<br>(1.73 to 2.63)            | 1.62<br>(1.30 to 1.97)           | 2.49<br>(2.00 to 3.06)             | 0.19<br>(0.16 to 0.21)        | 0.09<br>(0.07 to 0.11)        | 0.07<br>(0.06 to 0.09)        | 0.10<br>(0.08 to 0.13)        |

|                                       |                                                               |                                                               |                                                               |                                                               |                                                            |                                                            |                                                          |                                                            |
|---------------------------------------|---------------------------------------------------------------|---------------------------------------------------------------|---------------------------------------------------------------|---------------------------------------------------------------|------------------------------------------------------------|------------------------------------------------------------|----------------------------------------------------------|------------------------------------------------------------|
|                                       | 0.28<br>(0.21 to<br>0.37)                                     | 0.12<br>(0.08 to<br>0.17)                                     | 0.09<br>(0.07 to<br>0.13)                                     | 0.14<br>(0.10 to<br>0.19)                                     | 0.01<br>(0.01 to<br>0.01)                                  | 0.01<br>(0.00 to<br>0.01)                                  | 0.00<br>(0.00 to<br>0.01)                                | 0.01<br>(0.00 to<br>0.01)                                  |
| Acute hepatitis C                     |                                                               |                                                               |                                                               |                                                               |                                                            |                                                            |                                                          |                                                            |
|                                       | 1.03<br>(0.79 to<br>1.34)                                     | 0.42<br>(0.29 to<br>0.59)                                     | 0.33<br>(0.23 to<br>0.48)                                     | 0.48<br>(0.32 to<br>0.68)                                     | 0.03<br>(0.02 to<br>0.05)                                  | 0.02<br>(0.02 to<br>0.03)                                  | 0.02<br>(0.01 to<br>0.03)                                | 0.03<br>(0.02 to<br>0.04)                                  |
| Acute hepatitis E                     |                                                               |                                                               |                                                               |                                                               |                                                            |                                                            |                                                          |                                                            |
|                                       | 10.40<br>(9.23 to<br>11.79)                                   | 10.35<br>(9.16 to<br>11.61)                                   | 10.21<br>(9.07 to<br>11.46)                                   | 10.28<br>(9.07 to<br>11.52)                                   | 0.34<br>(0.30 to<br>0.38)                                  | 0.48<br>(0.41 to<br>0.53)                                  | 0.51<br>(0.44 to<br>0.56)                                | 0.45<br>(0.38 to<br>0.51)                                  |
| Other unspecified infectious diseases |                                                               |                                                               |                                                               |                                                               |                                                            |                                                            |                                                          |                                                            |
| <b>Non-communicable diseases</b>      | <b>19,714.13</b><br><b>(19,096.54 to</b><br><b>20,392.44)</b> | <b>16,260.03</b><br><b>(13,814.09 to</b><br><b>19,095.84)</b> | <b>12,844.17</b><br><b>(11,003.96 to</b><br><b>15,017.95)</b> | <b>20,830.94</b><br><b>(17,413.36 to</b><br><b>24,585.32)</b> | <b>1,222.17</b><br><b>(1,186.54 to</b><br><b>1,259.12)</b> | <b>1,257.71</b><br><b>(1,081.89 to</b><br><b>1,455.70)</b> | <b>1,053.77</b><br><b>(902.00 to</b><br><b>1,229.25)</b> | <b>1,510.65</b><br><b>(1,299.38 to</b><br><b>1,737.53)</b> |



| Central Europe                       |                                           |                                           |                                           |                                           |                                     |                                     |                                     |                                     |
|--------------------------------------|-------------------------------------------|-------------------------------------------|-------------------------------------------|-------------------------------------------|-------------------------------------|-------------------------------------|-------------------------------------|-------------------------------------|
| Cause                                | YLLs (in 1000s)                           |                                           |                                           |                                           | Deaths (in 1000s)                   |                                     |                                     |                                     |
|                                      | 2016                                      | 2040 Forecast                             | 2040 Better Scenario                      | 2040 Worse Scenario                       | 2016                                | 2040 Forecast                       | 2040 Better Scenario                | 2040 Worse Scenario                 |
| <b>Neoplasms</b>                     | <b>6,331.43</b><br>(6,088.61 to 6,574.08) | <b>5,881.95</b><br>(5,190.26 to 6,665.13) | <b>4,892.93</b><br>(4,328.08 to 5,536.37) | <b>7,171.47</b><br>(6,277.45 to 8,200.51) | <b>304.38</b><br>(292.62 to 315.79) | <b>344.81</b><br>(311.44 to 383.18) | <b>300.66</b><br>(271.68 to 331.99) | <b>400.56</b><br>(358.28 to 448.78) |
| Lip and oral cavity cancer           | 128.99<br>(120.17 to 138.08)              | 104.25<br>(65.35 to 152.85)               | 69.43<br>(43.71 to 103.83)                | 155.09<br>(98.90 to 218.03)               | 5.25<br>(4.93 to 5.59)              | 4.94<br>(3.25 to 7.15)              | 3.35<br>(2.24 to 4.83)              | 7.23<br>(4.75 to 10.17)             |
| Nasopharynx cancer                   | 19.98<br>(18.51 to 21.75)                 | 14.08<br>(8.42 to 21.59)                  | 8.37<br>(5.06 to 13.33)                   | 22.09<br>(13.33 to 32.22)                 | 0.71<br>(0.66 to 0.77)              | 0.57<br>(0.35 to 0.86)              | 0.34<br>(0.22 to 0.52)              | 0.88<br>(0.54 to 1.29)              |
| Other pharynx cancer                 | 103.27<br>(96.14 to 110.16)               | 89.17<br>(57.84 to 136.25)                | 80.51<br>(52.16 to 124.84)                | 104.19<br>(68.14 to 161.42)               | 3.81<br>(3.57 to 4.07)              | 3.68<br>(2.46 to 5.49)              | 3.37<br>(2.23 to 5.09)              | 4.23<br>(2.80 to 6.38)              |
| Esophageal cancer                    | 126.30<br>(116.07 to 136.66)              | 122.91<br>(70.50 to 207.88)               | 93.13<br>(54.40 to 153.03)                | 181.01<br>(96.48 to 325.00)               | 5.50<br>(5.08 to 5.91)              | 6.15<br>(3.66 to 10.01)             | 4.73<br>(2.92 to 7.51)              | 8.84<br>(4.92 to 15.13)             |
| Stomach cancer                       | 359.02<br>(343.17 to 377.84)              | 219.48<br>(166.65 to 280.65)              | 171.44<br>(134.40 to 218.40)              | 255.55<br>(193.16 to 335.43)              | 18.41<br>(17.65 to 19.31)           | 13.87<br>(10.87 to 17.66)           | 11.37<br>(9.18 to 14.27)            | 15.48<br>(11.93 to 19.71)           |
| Colon and rectum cancer              | 792.67<br>(752.24 to 844.39)              | 795.17<br>(581.51 to 1,102.52)            | 626.02<br>(463.86 to 867.52)              | 944.83<br>(678.13 to 1,321.88)            | 43.59<br>(41.38 to 46.33)           | 53.96<br>(39.85 to 73.53)           | 44.68<br>(33.58 to 61.29)           | 61.42<br>(44.21 to 85.64)           |
| Liver cancer                         | 221.66<br>(207.28 to 235.36)              | 295.61<br>(196.25 to 436.16)              | 262.59<br>(181.61 to 375.74)              | 371.69<br>(228.66 to 576.14)              | 10.95<br>(10.28 to 11.60)           | 17.32<br>(11.81 to 24.81)           | 16.15<br>(11.54 to 22.42)           | 20.70<br>(13.23 to 31.10)           |
| Liver cancer due to hepatitis B      | 64.95<br>(49.24 to 81.71)                 | 83.12<br>(50.59 to 138.07)                | 78.15<br>(50.76 to 123.55)                | 96.10<br>(55.68 to 166.15)                | 2.97<br>(2.18 to 3.74)              | 4.51<br>(2.78 to 7.11)              | 4.43<br>(2.87 to 6.68)              | 5.00<br>(2.94 to 8.22)              |
| Liver cancer due to hepatitis C      | 50.38<br>(36.73 to 65.15)                 | 70.99<br>(43.10 to 110.96)                | 68.17<br>(43.30 to 103.31)                | 90.28<br>(45.89 to 132.31)                | 2.72<br>(2.03 to 3.49)              | 4.55<br>(2.87 to 6.87)              | 4.58<br>(2.97 to 6.68)              | 4.91<br>(2.96 to 7.70)              |
| Liver cancer due to alcohol use      | 69.17<br>(59.32 to 80.83)                 | 90.71<br>(59.10 to 135.51)                | 68.48<br>(45.79 to 99.22)                 | 136.05<br>(82.88 to 213.15)               | 3.48<br>(2.99 to 4.03)              | 5.35<br>(3.63 to 7.82)              | 4.29<br>(2.95 to 6.13)              | 7.55<br>(4.78 to 11.64)             |
| Liver cancer due to other causes     | 37.16<br>(32.22 to 42.80)                 | 50.79<br>(29.86 to 80.94)                 | 47.79<br>(29.89 to 73.88)                 | 59.26<br>(32.19 to 101.21)                | 1.78<br>(1.52 to 2.04)              | 2.90<br>(1.77 to 4.55)              | 2.85<br>(1.84 to 4.31)              | 3.24<br>(1.82 to 5.41)              |
| Gallbladder and biliary tract cancer | 113.55<br>(107.33 to 122.07)              | 90.87<br>(83.83 to 99.28)                 | 91.49<br>(83.50 to 101.13)                | 87.86<br>(81.67 to 94.98)                 | 6.49<br>(6.14 to 6.92)              | 6.40<br>(5.97 to 6.94)              | 6.67<br>(6.18 to 7.28)              | 5.99<br>(5.55 to 6.50)              |
| Pancreatic cancer                    | 364.21<br>(345.17 to 382.74)              | 416.24<br>(344.95 to 511.22)              | 396.12<br>(334.20 to 479.07)              | 445.98<br>(363.12 to 559.41)              | 18.49<br>(17.53 to 19.44)           | 24.96<br>(21.00 to 30.25)           | 24.67<br>(21.07 to 29.34)           | 25.73<br>(21.16 to 31.64)           |
| Larynx cancer                        | 116.39<br>(109.67 to 123.68)              | 84.55<br>(42.25 to 152.16)                | 50.25<br>(25.16 to 93.20)                 | 129.03<br>(63.90 to 222.14)               | 4.82<br>(4.56 to 5.11)              | 3.89<br>(1.99 to 6.88)              | 2.30<br>(1.20 to 4.15)              | 5.92<br>(2.99 to 10.27)             |
| Tracheal, bronchus, and lung cancer  | 1,473.94<br>(1,399.71 to 1,553.09)        | 1,253.11<br>(970.16 to 1,626.36)          | 821.45<br>(644.95 to 1,044.37)            | 1,947.68<br>(1,479.33 to 2,547.26)        | 66.91<br>(63.64 to 70.44)           | 64.45<br>(51.24 to 81.26)           | 42.98<br>(34.52 to 53.63)           | 98.00<br>(76.45 to 126.35)          |
| Malignant skin melanoma              | 86.55<br>(73.15 to 94.36)                 | 103.48<br>(87.81 to 118.12)               | 120.99<br>(102.57 to 137.17)              | 91.79<br>(77.67 to 103.36)                | 3.70<br>(3.08 to 4.00)              | 5.66<br>(4.71 to 6.32)              | 6.88<br>(5.73 to 7.68)              | 4.82<br>(4.00 to 5.35)              |
| Non-melanoma skin cancer             | 34.98<br>(32.86 to 37.19)                 | 40.36<br>(36.72 to 44.37)                 | 36.38<br>(33.05 to 39.87)                 | 40.95<br>(37.42 to 45.04)                 | 2.31<br>(2.19 to 2.45)              | 3.56<br>(3.22 to 3.92)              | 3.40<br>(3.08 to 3.73)              | 3.43<br>(3.03 to 3.84)              |
| Breast cancer                        | 421.16<br>(392.95 to 454.01)              | 358.62<br>(283.17 to 455.42)              | 283.99<br>(228.43 to 358.57)              | 418.60<br>(318.61 to 541.82)              | 19.54<br>(18.26 to 21.00)           | 20.83<br>(16.64 to 26.20)           | 17.43<br>(14.14 to 21.81)           | 23.33<br>(18.18 to 29.55)           |
| Cervical cancer                      | 172.93<br>(158.11 to 188.06)              | 93.77<br>(72.87 to 118.94)                | 74.15<br>(59.64 to 91.24)                 | 109.62<br>(82.41 to 144.57)               | 6.85<br>(6.29 to 7.49)              | 4.53<br>(3.64 to 5.57)              | 3.75<br>(3.09 to 4.49)              | 5.11<br>(3.98 to 6.53)              |

|                   |                                 |                                 |                                 |                                 |                              |                              |                              |                              |
|-------------------|---------------------------------|---------------------------------|---------------------------------|---------------------------------|------------------------------|------------------------------|------------------------------|------------------------------|
|                   | 71.21<br>(65.49 to<br>78.11)    | 69.03<br>(61.78 to<br>77.29)    | 62.68<br>(55.46 to<br>70.70)    | 71.58<br>(64.28 to<br>80.08)    | 3.68<br>(3.39 to<br>4.06)    | 4.31<br>(3.91 to<br>4.79)    | 4.05<br>(3.62 to<br>4.50)    | 4.34<br>(3.95 to<br>4.83)    |
| Uterine cancer    |                                 |                                 |                                 |                                 |                              |                              |                              |                              |
| Ovarian cancer    | 180.69<br>(160.95 to<br>199.25) | 144.69<br>(111.93 to<br>182.59) | 131.17<br>(103.55 to<br>163.31) | 155.33<br>(116.64 to<br>199.83) | 7.90<br>(7.02 to<br>8.66)    | 7.42<br>(5.80 to<br>9.33)    | 6.87<br>(5.45 to<br>8.50)    | 7.79<br>(5.96 to<br>9.95)    |
| Prostate cancer   | 228.23<br>(198.94 to<br>253.02) | 297.00<br>(255.56 to<br>337.85) | 287.58<br>(250.64 to<br>328.16) | 289.20<br>(245.68 to<br>331.28) | 15.76<br>(13.94 to<br>17.35) | 24.93<br>(21.02 to<br>28.26) | 25.25<br>(22.11 to<br>28.50) | 23.25<br>(19.04 to<br>26.63) |
| Testicular cancer | 15.46<br>(14.23 to<br>16.90)    | 7.47<br>(6.39 to<br>8.89)       | 6.45<br>(5.44 to<br>7.79)       | 7.93<br>(6.77 to<br>9.41)       | 0.39<br>(0.36 to<br>0.42)    | 0.25<br>(0.22 to<br>0.28)    | 0.23<br>(0.20 to<br>0.26)    | 0.25<br>(0.23 to<br>0.28)    |

| Central Europe                  |                                                  |                                                  |                                                  |                                                   |                                            |                                            |                                            |                                            |
|---------------------------------|--------------------------------------------------|--------------------------------------------------|--------------------------------------------------|---------------------------------------------------|--------------------------------------------|--------------------------------------------|--------------------------------------------|--------------------------------------------|
| Cause                           | YLLs (in 1000s)                                  |                                                  |                                                  |                                                   | Deaths (in 1000s)                          |                                            |                                            |                                            |
|                                 | 2016                                             | 2040 Forecast                                    | 2040 Better Scenario                             | 2040 Worse Scenario                               | 2016                                       | 2040 Forecast                              | 2040 Better Scenario                       | 2040 Worse Scenario                        |
| Kidney cancer                   | 168.81<br>(158.72 to 179.20)                     | 198.21<br>(146.95 to 262.62)                     | 195.05<br>(148.36 to 251.26)                     | 207.64<br>(147.87 to 282.87)                      | 8.24<br>(7.75 to 8.71)                     | 11.60<br>(8.87 to 14.82)                   | 11.87<br>(9.31 to 14.82)                   | 11.62<br>(8.56 to 15.33)                   |
| Bladder cancer                  | 158.96<br>(150.80 to 168.64)                     | 154.00<br>(118.39 to 201.77)                     | 135.70<br>(107.24 to 174.80)                     | 175.89<br>(129.65 to 239.18)                      | 9.50<br>(9.03 to 10.05)                    | 11.38<br>(8.91 to 14.54)                   | 10.52<br>(8.52 to 13.08)                   | 12.36<br>(9.19 to 16.36)                   |
| Brain and nervous system cancer | 256.13<br>(212.83 to 276.38)                     | 240.45<br>(198.68 to 266.26)                     | 228.56<br>(187.92 to 256.50)                     | 242.05<br>(199.99 to 266.32)                      | 9.33<br>(7.42 to 10.17)                    | 10.53<br>(8.03 to 11.69)                   | 10.31<br>(7.82 to 11.60)                   | 10.32<br>(7.88 to 11.37)                   |
| Thyroid cancer                  | 17.37<br>(16.23 to 18.59)                        | 17.48<br>(12.66 to 24.89)                        | 15.58<br>(11.40 to 21.75)                        | 19.61<br>(13.71 to 28.94)                         | 0.88<br>(0.83 to 0.95)                     | 1.07<br>(0.79 to 1.51)                     | 0.99<br>(0.74 to 1.37)                     | 1.16<br>(0.82 to 1.68)                     |
| Mesothelioma                    | 14.13<br>(12.81 to 15.18)                        | 13.49<br>(11.93 to 15.03)                        | 13.99<br>(12.28 to 15.73)                        | 12.86<br>(11.44 to 14.21)                         | 0.60<br>(0.54 to 0.64)                     | 0.68<br>(0.61 to 0.74)                     | 0.72<br>(0.64 to 0.80)                     | 0.63<br>(0.57 to 0.68)                     |
| Hodgkin lymphoma                | 22.39<br>(20.48 to 23.96)                        | 13.15<br>(11.60 to 15.25)                        | 10.50<br>(9.24 to 12.11)                         | 14.55<br>(12.74 to 16.62)                         | 0.75<br>(0.69 to 0.80)                     | 0.54<br>(0.49 to 0.62)                     | 0.45<br>(0.40 to 0.51)                     | 0.58<br>(0.52 to 0.66)                     |
| Non-Hodgkin lymphoma            | 129.34<br>(115.50 to 138.29)                     | 111.15<br>(91.11 to 137.65)                      | 102.15<br>(84.36 to 125.63)                      | 118.20<br>(94.42 to 149.09)                       | 5.73<br>(5.03 to 6.11)                     | 6.18<br>(5.06 to 7.57)                     | 5.91<br>(4.90 to 7.16)                     | 6.33<br>(5.06 to 7.93)                     |
| Multiple myeloma                | 64.08<br>(50.24 to 70.67)                        | 68.95<br>(51.16 to 87.03)                        | 66.34<br>(49.85 to 83.39)                        | 71.85<br>(52.59 to 93.54)                         | 3.23<br>(2.48 to 3.56)                     | 4.07<br>(2.96 to 5.12)                     | 4.04<br>(2.94 to 5.04)                     | 4.10<br>(2.95 to 5.26)                     |
| Leukemia                        | 209.23<br>(194.53 to 221.10)                     | 193.15<br>(150.86 to 247.59)                     | 175.31<br>(139.47 to 219.06)                     | 215.99<br>(162.32 to 287.56)                      | 9.36<br>(8.81 to 9.89)                     | 11.19<br>(8.86 to 14.09)                   | 10.59<br>(8.58 to 12.99)                   | 12.01<br>(9.14 to 15.81)                   |
| Acute lymphoid leukemia         | 28.82<br>(25.81 to 30.72)                        | 18.19<br>(14.60 to 22.94)                        | 15.38<br>(12.44 to 19.00)                        | 20.98<br>(16.23 to 27.44)                         | 0.84<br>(0.77 to 0.90)                     | 0.69<br>(0.55 to 0.88)                     | 0.60<br>(0.48 to 0.75)                     | 0.78<br>(0.59 to 1.03)                     |
| Chronic lymphoid leukemia       | 42.68<br>(38.45 to 46.80)                        | 42.04<br>(30.94 to 56.08)                        | 39.68<br>(30.02 to 51.46)                        | 45.90<br>(32.01 to 63.74)                         | 2.51<br>(2.28 to 2.73)                     | 3.01<br>(2.27 to 3.90)                     | 2.96<br>(2.33 to 3.72)                     | 3.14<br>(2.30 to 4.25)                     |
| Acute myeloid leukemia          | 78.87<br>(68.73 to 84.30)                        | 81.92<br>(64.43 to 103.72)                       | 77.37<br>(61.98 to 96.13)                        | 90.19<br>(68.50 to 117.39)                        | 3.21<br>(2.81 to 3.43)                     | 4.13<br>(3.25 to 5.20)                     | 4.03<br>(3.24 to 4.98)                     | 4.40<br>(3.34 to 5.72)                     |
| Chronic myeloid leukemia        | 12.90<br>(12.01 to 13.95)                        | 6.16<br>(4.50 to 8.38)                           | 4.55<br>(3.40 to 6.06)                           | 7.62<br>(5.26 to 10.72)                           | 0.62<br>(0.58 to 0.69)                     | 0.39<br>(0.29 to 0.51)                     | 0.31<br>(0.23 to 0.40)                     | 0.46<br>(0.33 to 0.64)                     |
| Other leukemia                  | 45.95<br>(42.15 to 50.40)                        | 44.84<br>(34.29 to 59.14)                        | 38.32<br>(29.78 to 49.29)                        | 51.30<br>(37.65 to 69.96)                         | 2.18<br>(2.02 to 2.39)                     | 2.98<br>(2.33 to 3.84)                     | 2.69<br>(2.16 to 3.40)                     | 3.24<br>(2.44 to 4.31)                     |
| Other neoplasms                 | 259.80<br>(241.90 to 273.72)                     | 272.07<br>(251.83 to 291.16)                     | 275.55<br>(253.72 to 298.85)                     | 262.87<br>(244.00 to 279.33)                      | 11.72<br>(10.93 to 12.33)                  | 15.87<br>(14.74 to 16.84)                  | 16.80<br>(15.43 to 17.97)                  | 14.72<br>(13.53 to 15.60)                  |
| <b>Cardiovascular diseases</b>  | <b>9,255.51</b><br><b>(8,950.34 to 9,594.50)</b> | <b>6,216.94</b><br><b>(4,512.06 to 8,423.21)</b> | <b>4,210.06</b><br><b>(3,127.44 to 5,694.27)</b> | <b>8,967.56</b><br><b>(6,381.22 to 12,106.99)</b> | <b>682.48</b><br><b>(661.52 to 704.27)</b> | <b>586.60</b><br><b>(443.98 to 775.03)</b> | <b>438.64</b><br><b>(331.74 to 585.53)</b> | <b>763.45</b><br><b>(577.97 to 987.80)</b> |
| Rheumatic heart disease         | 59.38<br>(54.52 to 64.53)                        | 33.97<br>(26.56 to 44.59)                        | 28.41<br>(22.22 to 36.96)                        | 37.42<br>(28.93 to 49.92)                         | 3.12<br>(2.88 to 3.38)                     | 2.31<br>(1.84 to 3.06)                     | 2.03<br>(1.62 to 2.68)                     | 2.43<br>(1.94 to 3.25)                     |
| Ischemic heart disease          | 5,022.85<br>(4,800.17 to 5,303.65)               | 2,965.14<br>(1,837.90 to 4,530.28)               | 1,859.51<br>(1,173.53 to 2,810.31)               | 4,644.98<br>(2,838.79 to 6,984.39)                | 381.54<br>(365.43 to 403.29)               | 288.23<br>(183.60 to 426.13)               | 202.39<br>(127.83 to 304.54)               | 400.91<br>(258.54 to 575.75)               |
| Stroke                          | 2,480.25<br>(2,347.47 to 2,651.75)               | 1,324.18<br>(855.57 to 1,984.19)                 | 778.67<br>(509.24 to 1,173.58)                   | 2,071.19<br>(1,307.42 to 3,113.71)                | 177.47<br>(166.45 to 191.26)               | 120.37<br>(79.76 to 183.82)                | 79.99<br>(52.31 to 122.43)                 | 166.90<br>(107.90 to 254.38)               |
| Ischemic stroke                 | 1,343.16<br>(1,262.93 to 1,444.12)               | 702.85<br>(426.50 to 1,211.29)                   | 457.29<br>(277.70 to 761.67)                     | 1,014.44<br>(600.44 to 1,748.31)                  | 108.84<br>(101.31 to 118.24)               | 71.97<br>(43.31 to 130.08)                 | 51.69<br>(30.33 to 90.29)                  | 94.43<br>(55.32 to 167.24)                 |

|                                |                                       |                                   |                                   |                                     |                              |                               |                               |                               |
|--------------------------------|---------------------------------------|-----------------------------------|-----------------------------------|-------------------------------------|------------------------------|-------------------------------|-------------------------------|-------------------------------|
| Intracerebral hemorrhage       | 1,137.09<br>(1,078.63 to<br>1,207.76) | 621.34<br>(381.21 to<br>949.02)   | 321.38<br>(205.10 to<br>481.27)   | 1,056.75<br>(627.38 to<br>1,655.17) | 68.62<br>(64.74 to<br>73.44) | 48.40<br>(31.38 to<br>72.35)  | 28.30<br>(18.91 to<br>41.36)  | 72.47<br>(45.90 to<br>108.55) |
| Hypertensive heart disease     | 417.23<br>(267.65 to<br>522.20)       | 580.86<br>(322.97 to<br>1,315.46) | 465.28<br>(268.64 to<br>1,043.94) | 752.27<br>(402.03 to<br>1,788.43)   | 32.32<br>(19.78 to<br>41.35) | 57.32<br>(30.79 to<br>140.91) | 49.52<br>(26.97 to<br>115.86) | 70.15<br>(36.16 to<br>173.27) |
| Cardiomyopathy and myocarditis | 614.90<br>(450.35 to<br>683.30)       | 541.59<br>(340.14 to<br>771.37)   | 439.94<br>(288.62 to<br>620.70)   | 603.41<br>(375.01 to<br>857.26)     | 44.05<br>(30.33 to<br>49.74) | 51.29<br>(28.69 to<br>77.31)  | 44.19<br>(26.77 to<br>67.57)  | 53.72<br>(29.93 to<br>82.02)  |
| Myocarditis                    | 60.73<br>(49.37 to<br>70.98)          | 77.76<br>(65.64 to<br>96.24)      | 82.63<br>(69.46 to<br>104.24)     | 72.29<br>(61.01 to<br>89.86)        | 4.29<br>(3.66 to<br>5.26)    | 7.65<br>(6.20 to<br>10.12)    | 8.70<br>(7.10 to<br>11.57)    | 6.70<br>(5.35 to<br>8.88)     |

| Central Europe                                                |                                            |                                            |                                            |                                              |                                         |                                         |                                         |                                         |
|---------------------------------------------------------------|--------------------------------------------|--------------------------------------------|--------------------------------------------|----------------------------------------------|-----------------------------------------|-----------------------------------------|-----------------------------------------|-----------------------------------------|
| Cause                                                         | YLLs (in 1000s)                            |                                            |                                            |                                              | Deaths (in 1000s)                       |                                         |                                         |                                         |
|                                                               | 2016                                       | 2040 Forecast                              | 2040 Better Scenario                       | 2040 Worse Scenario                          | 2016                                    | 2040 Forecast                           | 2040 Better Scenario                    | 2040 Worse Scenario                     |
| Alcoholic cardiomyopathy                                      | 135.55<br>(93.11 to 157.08)                | 96.50<br>(70.77 to 115.29)                 | 79.14<br>(58.42 to 95.89)                  | 124.88<br>(91.44 to 149.37)                  | 5.79<br>(4.16 to 6.96)                  | 5.10<br>(3.79 to 6.52)                  | 4.36<br>(3.25 to 5.34)                  | 6.27<br>(4.63 to 7.79)                  |
| Other cardiomyopathy                                          | 418.62<br>(293.96 to 471.24)               | 367.33<br>(181.95 to 589.21)               | 278.17<br>(142.62 to 454.00)               | 406.24<br>(204.49 to 645.54)                 | 33.97<br>(21.69 to 39.09)               | 38.54<br>(16.44 to 64.91)               | 31.13<br>(13.83 to 54.53)               | 40.74<br>(17.86 to 70.28)               |
| Atrial fibrillation and flutter                               | 80.67<br>(63.23 to 100.95)                 | 123.12<br>(91.74 to 158.67)                | 116.59<br>(86.43 to 151.44)                | 126.96<br>(94.88 to 163.84)                  | 8.62<br>(6.64 to 10.90)                 | 15.26<br>(11.39 to 20.27)               | 15.17<br>(11.34 to 19.90)               | 15.04<br>(11.13 to 20.00)               |
| Aortic aneurysm                                               | 111.92<br>(105.63 to 119.21)               | 85.91<br>(66.51 to 110.91)                 | 75.25<br>(59.85 to 95.54)                  | 93.84<br>(71.58 to 121.28)                   | 6.10<br>(5.78 to 6.45)                  | 5.95<br>(4.88 to 7.31)                  | 5.65<br>(4.65 to 6.94)                  | 6.05<br>(4.93 to 7.53)                  |
| Peripheral artery disease                                     | 54.32<br>(37.64 to 75.73)                  | 100.96<br>(65.53 to 155.21)                | 98.64<br>(64.46 to 153.72)                 | 106.20<br>(68.13 to 161.96)                  | 4.27<br>(3.00 to 6.37)                  | 10.20<br>(6.48 to 15.90)                | 10.58<br>(6.87 to 16.63)                | 9.92<br>(6.11 to 15.82)                 |
| Endocarditis                                                  | 30.51<br>(25.32 to 40.64)                  | 32.79<br>(22.84 to 48.19)                  | 31.59<br>(22.34 to 46.24)                  | 33.69<br>(23.25 to 49.50)                    | 1.43<br>(1.19 to 1.93)                  | 2.02<br>(1.40 to 3.06)                  | 2.06<br>(1.42 to 3.11)                  | 1.97<br>(1.37 to 2.96)                  |
| Other cardiovascular and circulatory diseases                 | 383.49<br>(357.23 to 423.57)               | 428.42<br>(319.03 to 581.84)               | 316.18<br>(238.87 to 422.57)               | 497.60<br>(364.75 to 672.06)                 | 23.56<br>(21.98 to 26.33)               | 33.64<br>(26.36 to 43.94)               | 27.09<br>(21.30 to 35.67)               | 36.34<br>(28.07 to 47.14)               |
| <b>Chronic respiratory diseases</b>                           | <b>636.92</b><br><b>(612.15 to 663.98)</b> | <b>580.28</b><br><b>(447.43 to 744.09)</b> | <b>435.53</b><br><b>(351.23 to 540.17)</b> | <b>828.49</b><br><b>(609.61 to 1,106.86)</b> | <b>41.80</b><br><b>(40.29 to 43.53)</b> | <b>46.71</b><br><b>(37.16 to 58.23)</b> | <b>36.89</b><br><b>(30.36 to 44.39)</b> | <b>62.55</b><br><b>(47.17 to 80.03)</b> |
| Chronic obstructive pulmonary disease                         | 565.59<br>(542.26 to 589.85)               | 500.97<br>(367.30 to 669.90)               | 345.43<br>(256.73 to 455.46)               | 754.54<br>(536.44 to 1,032.50)               | 37.84<br>(36.40 to 39.38)               | 41.21<br>(31.15 to 52.71)               | 30.41<br>(23.46 to 38.06)               | 57.62<br>(42.19 to 75.36)               |
| Pneumoconiosis                                                | 4.37<br>(4.07 to 4.69)                     | 3.32<br>(2.88 to 3.89)                     | 3.34<br>(2.87 to 3.92)                     | 3.41<br>(2.98 to 3.98)                       | 0.26<br>(0.24 to 0.28)                  | 0.28<br>(0.24 to 0.34)                  | 0.30<br>(0.25 to 0.36)                  | 0.27<br>(0.23 to 0.33)                  |
| Silicosis                                                     | 1.46<br>(1.26 to 1.89)                     | 0.56<br>(0.42 to 0.76)                     | 0.42<br>(0.30 to 0.58)                     | 0.63<br>(0.47 to 0.86)                       | 0.08<br>(0.07 to 0.11)                  | 0.04<br>(0.03 to 0.06)                  | 0.03<br>(0.02 to 0.05)                  | 0.04<br>(0.03 to 0.06)                  |
| Asbestosis                                                    | 0.70<br>(0.47 to 0.83)                     | 0.88<br>(0.69 to 1.08)                     | 1.03<br>(0.84 to 1.25)                     | 0.78<br>(0.59 to 0.96)                       | 0.04<br>(0.02 to 0.04)                  | 0.06<br>(0.05 to 0.08)                  | 0.08<br>(0.06 to 0.10)                  | 0.05<br>(0.04 to 0.07)                  |
| Coal workers pneumoconiosis                                   | 1.24<br>(0.78 to 1.45)                     | 0.67<br>(0.46 to 0.90)                     | 0.58<br>(0.39 to 0.76)                     | 0.79<br>(0.53 to 1.08)                       | 0.08<br>(0.05 to 0.09)                  | 0.05<br>(0.04 to 0.07)                  | 0.05<br>(0.03 to 0.06)                  | 0.06<br>(0.04 to 0.08)                  |
| Other pneumoconiosis                                          | 0.97<br>(0.85 to 1.13)                     | 1.21<br>(0.92 to 1.61)                     | 1.32<br>(0.99 to 1.76)                     | 1.21<br>(0.92 to 1.59)                       | 0.06<br>(0.06 to 0.07)                  | 0.12<br>(0.09 to 0.17)                  | 0.14<br>(0.10 to 0.20)                  | 0.12<br>(0.09 to 0.16)                  |
| Asthma                                                        | 30.04<br>(27.55 to 37.28)                  | 13.69<br>(7.26 to 24.84)                   | 8.82<br>(4.75 to 15.79)                    | 18.68<br>(9.10 to 34.41)                     | 1.77<br>(1.62 to 2.14)                  | 1.07<br>(0.57 to 1.95)                  | 0.74<br>(0.40 to 1.32)                  | 1.36<br>(0.69 to 2.51)                  |
| Interstitial lung disease and pulmonary sarcoidosis           | 31.99<br>(26.63 to 42.84)                  | 57.37<br>(46.60 to 79.39)                  | 73.10<br>(61.74 to 96.02)                  | 46.84<br>(37.86 to 64.67)                    | 1.72<br>(1.44 to 2.32)                  | 3.86<br>(3.11 to 5.30)                  | 5.14<br>(4.31 to 6.83)                  | 3.02<br>(2.43 to 4.22)                  |
| Other chronic respiratory diseases                            | 4.93<br>(3.91 to 6.97)                     | 4.92<br>(3.60 to 7.35)                     | 4.84<br>(3.59 to 7.18)                     | 5.02<br>(3.58 to 7.65)                       | 0.21<br>(0.16 to 0.30)                  | 0.29<br>(0.21 to 0.43)                  | 0.30<br>(0.23 to 0.45)                  | 0.28<br>(0.20 to 0.42)                  |
| <b>Cirrhosis and other chronic liver diseases</b>             | <b>863.04</b><br><b>(806.63 to 917.73)</b> | <b>599.78</b><br><b>(531.98 to 682.65)</b> | <b>489.74</b><br><b>(430.09 to 559.78)</b> | <b>723.64</b><br><b>(641.57 to 813.29)</b>   | <b>32.26</b><br><b>(30.32 to 34.16)</b> | <b>25.93</b><br><b>(23.63 to 28.53)</b> | <b>21.69</b><br><b>(19.51 to 24.24)</b> | <b>30.44</b><br><b>(27.67 to 33.30)</b> |
| Cirrhosis and other chronic liver diseases due to hepatitis B | 149.52<br>(123.68 to 180.95)               | 105.97<br>(85.41 to 134.24)                | 94.28<br>(75.75 to 118.48)                 | 112.09<br>(89.74 to 140.44)                  | 5.49<br>(4.58 to 6.66)                  | 4.47<br>(3.67 to 5.51)                  | 4.07<br>(3.33 to 4.97)                  | 4.62<br>(3.77 to 5.67)                  |
| Cirrhosis and other chronic liver diseases due to hepatitis C | 218.06<br>(163.90 to 284.65)               | 158.85<br>(119.28 to 208.94)               | 139.44<br>(104.11 to 181.70)               | 169.64<br>(124.18 to 226.00)                 | 7.98<br>(6.03 to 10.34)                 | 6.58<br>(4.90 to 8.45)                  | 5.89<br>(4.43 to 7.49)                  | 6.87<br>(5.03 to 9.01)                  |

|                                                                |                                                      |                                                      |                                                      |                                                      |                                                   |                                                   |                                                   |                                                   |
|----------------------------------------------------------------|------------------------------------------------------|------------------------------------------------------|------------------------------------------------------|------------------------------------------------------|---------------------------------------------------|---------------------------------------------------|---------------------------------------------------|---------------------------------------------------|
| Cirrhosis and other chronic liver diseases due to alcohol use  | 327.02<br>(266.05 to<br>383.81)                      | 217.12<br>(172.83 to<br>266.34)                      | 151.27<br>(118.81 to<br>185.95)                      | 316.38<br>(256.33 to<br>378.59)                      | 12.38<br>(10.14 to<br>14.59)                      | 9.54<br>(7.68 to<br>11.43)                        | 6.86<br>(5.47 to<br>8.30)                         | 13.40<br>(11.10 to<br>15.74)                      |
| Cirrhosis and other chronic liver diseases due to other causes | 168.44<br>(144.00 to<br>195.72)                      | 117.84<br>(97.05 to<br>141.81)                       | 104.76<br>(85.44 to<br>125.91)                       | 125.52<br>(102.85 to<br>152.13)                      | 6.41<br>(5.48 to<br>7.39)                         | 5.34<br>(4.48 to<br>6.29)                         | 4.87<br>(4.08 to<br>5.72)                         | 5.54<br>(4.67 to<br>6.55)                         |
| <b>Digestive diseases</b>                                      | <b>469.96</b><br><b>(428.18 to</b><br><b>545.48)</b> | <b>403.98</b><br><b>(347.94 to</b><br><b>506.40)</b> | <b>358.38</b><br><b>(309.53 to</b><br><b>446.80)</b> | <b>439.87</b><br><b>(373.68 to</b><br><b>570.58)</b> | <b>26.33</b><br><b>(23.97 to</b><br><b>29.82)</b> | <b>30.29</b><br><b>(26.53 to</b><br><b>36.30)</b> | <b>28.70</b><br><b>(25.11 to</b><br><b>34.05)</b> | <b>31.08</b><br><b>(26.73 to</b><br><b>38.30)</b> |
| Peptic ulcer disease                                           | 98.94<br>(89.54 to<br>116.62)                        | 45.32<br>(36.55 to<br>57.39)                         | 33.83<br>(27.53 to<br>42.25)                         | 52.21<br>(41.40 to<br>66.81)                         | 5.58<br>(5.04 to<br>6.29)                         | 3.48<br>(2.90 to<br>4.19)                         | 2.77<br>(2.33 to<br>3.31)                         | 3.79<br>(3.11 to<br>4.70)                         |

| Central Europe                             |                                     |                                           |                                           |                                         |                                  |                                     |                                     |                                     |
|--------------------------------------------|-------------------------------------|-------------------------------------------|-------------------------------------------|-----------------------------------------|----------------------------------|-------------------------------------|-------------------------------------|-------------------------------------|
| Cause                                      | YLLs (in 1000s)                     |                                           |                                           |                                         | Deaths (in 1000s)                |                                     |                                     |                                     |
|                                            | 2016                                | 2040 Forecast                             | 2040 Better Scenario                      | 2040 Worse Scenario                     | 2016                             | 2040 Forecast                       | 2040 Better Scenario                | 2040 Worse Scenario                 |
| Gastritis and duodenitis                   | 9.53<br>(7.74 to 12.42)             | 6.69<br>(5.38 to 9.44)                    | 5.90<br>(4.70 to 8.37)                    | 7.07<br>(5.67 to 9.58)                  | 0.52<br>(0.43 to 0.70)           | 0.50<br>(0.41 to 0.73)              | 0.47<br>(0.37 to 0.67)              | 0.50<br>(0.40 to 0.68)              |
| Appendicitis                               | 7.91<br>(6.70 to 12.00)             | 5.32<br>(4.34 to 8.55)                    | 4.19<br>(3.35 to 6.81)                    | 5.81<br>(4.71 to 9.46)                  | 0.40<br>(0.34 to 0.61)           | 0.36<br>(0.29 to 0.57)              | 0.30<br>(0.24 to 0.48)              | 0.38<br>(0.31 to 0.60)              |
| Paralytic ileus and intestinal obstruction | 69.33<br>(56.69 to 82.95)           | 79.24<br>(65.57 to 95.09)                 | 83.18<br>(69.24 to 98.97)                 | 74.04<br>(61.23 to 88.87)               | 4.25<br>(3.44 to 4.98)           | 6.48<br>(5.29 to 7.64)              | 7.13<br>(5.86 to 8.38)              | 5.80<br>(4.65 to 6.85)              |
| Inguinal, femoral, and abdominal hernia    | 14.39<br>(11.94 to 23.70)           | 10.80<br>(8.75 to 17.58)                  | 10.05<br>(8.06 to 16.43)                  | 10.75<br>(8.69 to 17.86)                | 0.99<br>(0.83 to 1.59)           | 0.96<br>(0.77 to 1.55)              | 0.94<br>(0.75 to 1.50)              | 0.91<br>(0.73 to 1.47)              |
| Inflammatory bowel disease                 | 18.56<br>(13.16 to 21.23)           | 16.60<br>(12.00 to 19.19)                 | 16.84<br>(12.24 to 19.62)                 | 15.98<br>(11.37 to 18.37)               | 0.93<br>(0.63 to 1.07)           | 1.12<br>(0.77 to 1.30)              | 1.19<br>(0.83 to 1.39)              | 1.03<br>(0.69 to 1.20)              |
| Vascular intestinal disorders              | 65.06<br>(56.36 to 77.71)           | 74.22<br>(63.82 to 88.41)                 | 72.42<br>(61.87 to 87.58)                 | 72.46<br>(62.18 to 87.70)               | 4.36<br>(3.80 to 5.06)           | 6.22<br>(5.32 to 7.31)              | 6.34<br>(5.44 to 7.50)              | 5.84<br>(4.95 to 6.88)              |
| Gallbladder and biliary diseases           | 34.50<br>(31.54 to 39.68)           | 38.99<br>(21.66 to 68.46)                 | 31.55<br>(17.91 to 55.18)                 | 49.86<br>(26.64 to 89.63)               | 2.56<br>(2.35 to 2.86)           | 3.69<br>(2.06 to 6.59)              | 3.17<br>(1.81 to 5.69)              | 4.47<br>(2.40 to 8.08)              |
| Pancreatitis                               | 119.19<br>(100.22 to 140.77)        | 95.42<br>(60.97 to 167.78)                | 69.93<br>(45.26 to 119.94)                | 120.91<br>(75.51 to 209.08)             | 4.85<br>(4.09 to 5.63)           | 4.99<br>(3.33 to 8.01)              | 3.83<br>(2.64 to 6.12)              | 6.03<br>(3.98 to 9.84)              |
| Other digestive diseases                   | 32.55<br>(25.59 to 36.62)           | 31.37<br>(25.56 to 35.60)                 | 30.50<br>(25.02 to 34.87)                 | 30.79<br>(24.83 to 34.99)               | 1.91<br>(1.55 to 2.13)           | 2.50<br>(2.08 to 2.83)              | 2.56<br>(2.14 to 2.91)              | 2.34<br>(1.92 to 2.66)              |
| Neurological disorders                     | <b>803.59</b><br>(707.43 to 923.09) | <b>1,264.03</b><br>(1,003.86 to 1,603.65) | <b>1,324.16</b><br>(1,063.57 to 1,643.01) | <b>1,251.14</b><br>(965.44 to 1,656.47) | <b>72.90</b><br>(62.44 to 85.04) | <b>142.03</b><br>(111.33 to 184.48) | <b>155.69</b><br>(123.84 to 195.64) | <b>135.02</b><br>(100.56 to 184.82) |
| Alzheimer's disease and other dementias    | 546.23<br>(458.96 to 658.33)        | 947.44<br>(705.42 to 1,285.99)            | 992.14<br>(754.22 to 1,296.22)            | 948.38<br>(675.62 to 1,350.03)          | 59.12<br>(49.16 to 71.24)        | 119.13<br>(88.43 to 161.44)         | 129.90<br>(98.56 to 169.30)         | 114.62<br>(80.95 to 164.35)         |
| Parkinson's disease                        | 104.82<br>(79.03 to 135.59)         | 178.47<br>(134.99 to 230.87)              | 203.01<br>(154.54 to 263.09)              | 156.45<br>(116.31 to 204.14)            | 9.06<br>(6.79 to 11.88)          | 17.60<br>(13.16 to 23.01)           | 20.62<br>(15.68 to 26.89)           | 15.00<br>(11.03 to 19.54)           |
| Epilepsy                                   | 66.31<br>(61.33 to 72.40)           | 55.39<br>(40.06 to 78.23)                 | 45.62<br>(33.47 to 64.05)                 | 64.49<br>(45.47 to 91.85)               | 1.85<br>(1.72 to 2.01)           | 1.95<br>(1.43 to 2.66)              | 1.68<br>(1.27 to 2.25)              | 2.19<br>(1.57 to 2.99)              |
| Multiple sclerosis                         | 30.85<br>(26.55 to 39.28)           | 29.62<br>(22.65 to 40.02)                 | 29.48<br>(22.86 to 39.44)                 | 29.97<br>(22.61 to 40.48)               | 1.04<br>(0.90 to 1.31)           | 1.17<br>(0.92 to 1.55)              | 1.21<br>(0.96 to 1.56)              | 1.15<br>(0.89 to 1.52)              |
| Motor neuron disease                       | 18.09<br>(16.68 to 19.39)           | 19.24<br>(17.05 to 21.59)                 | 19.32<br>(16.97 to 21.81)                 | 18.86<br>(16.85 to 21.05)               | 0.69<br>(0.64 to 0.74)           | 0.84<br>(0.75 to 0.95)              | 0.85<br>(0.76 to 0.95)              | 0.81<br>(0.73 to 0.89)              |
| Other neurological disorders               | 37.29<br>(34.31 to 39.72)           | 33.87<br>(30.86 to 37.11)                 | 34.59<br>(31.28 to 38.05)                 | 32.98<br>(30.08 to 35.93)               | 1.14<br>(1.06 to 1.20)           | 1.34<br>(1.24 to 1.44)              | 1.43<br>(1.31 to 1.55)              | 1.26<br>(1.17 to 1.34)              |
| Mental disorders                           | <b>289.54</b><br>(265.43 to 316.68) | <b>335.55</b><br>(288.94 to 385.63)       | <b>359.33</b><br>(310.58 to 413.51)       | <b>322.60</b><br>(279.99 to 371.34)     | <b>8.53</b><br>(7.87 to 9.30)    | <b>11.50</b><br>(10.16 to 12.99)    | <b>12.72</b><br>(11.25 to 14.34)    | <b>10.74</b><br>(9.50 to 12.17)     |
| Alcohol use disorders                      | 225.90<br>(204.57 to 250.80)        | 197.37<br>(163.42 to 236.64)              | 192.30<br>(159.39 to 231.36)              | 204.45<br>(170.99 to 244.13)            | 6.73<br>(6.13 to 7.44)           | 6.48<br>(5.47 to 7.67)              | 6.41<br>(5.40 to 7.58)              | 6.64<br>(5.67 to 7.83)              |
| Drug use disorders                         | 63.21<br>(55.19 to 68.08)           | 137.83<br>(116.82 to 159.40)              | 166.65<br>(142.96 to 191.01)              | 117.82<br>(100.51 to 135.75)            | 1.79<br>(1.59 to 1.91)           | 5.01<br>(4.36 to 5.72)              | 6.30<br>(5.54 to 7.04)              | 4.09<br>(3.53 to 4.64)              |
| Opioid use disorders                       | 34.48<br>(29.28 to 40.22)           | 40.78<br>(33.53 to 59.66)                 | 43.33<br>(35.65 to 64.02)                 | 38.69<br>(31.95 to 54.83)               | 0.88<br>(0.75 to 1.04)           | 1.25<br>(1.06 to 1.77)              | 1.36<br>(1.14 to 1.98)              | 1.15<br>(0.97 to 1.57)              |

|                           |                              |                              |                                |                              |                           |                           |                           |                           |
|---------------------------|------------------------------|------------------------------|--------------------------------|------------------------------|---------------------------|---------------------------|---------------------------|---------------------------|
|                           | 0.83<br>(0.58 to<br>0.96)    | 2.49<br>(1.86 to<br>3.00)    | 2.93<br>(2.24 to<br>3.55)      | 2.17<br>(1.61 to<br>2.66)    | 0.02<br>(0.01 to<br>0.02) | 0.08<br>(0.06 to<br>0.09) | 0.09<br>(0.07 to<br>0.11) | 0.06<br>(0.05 to<br>0.08) |
| Cocaine use disorders     | 2.97<br>(2.18 to<br>3.62)    | 15.47<br>(11.97 to<br>20.09) | 19.65<br>(15.52 to<br>24.93)   | 12.64<br>(9.42 to<br>16.51)  | 0.06<br>(0.05 to<br>0.07) | 0.34<br>(0.26 to<br>0.43) | 0.43<br>(0.34 to<br>0.54) | 0.27<br>(0.21 to<br>0.35) |
| Amphetamine use disorders | 24.93<br>(19.35 to<br>28.48) | 79.08<br>(63.74 to<br>95.38) | 100.74<br>(83.31 to<br>118.65) | 64.32<br>(51.49 to<br>76.67) | 0.83<br>(0.67 to<br>0.93) | 3.35<br>(2.76 to<br>3.99) | 4.42<br>(3.73 to<br>5.04) | 2.61<br>(2.12 to<br>3.06) |
| Other drug use disorders  | 0.43<br>(0.35 to<br>0.53)    | 0.35<br>(0.25 to<br>0.48)    | 0.38<br>(0.27 to<br>0.53)      | 0.32<br>(0.23 to<br>0.45)    | 0.01<br>(0.01 to<br>0.01) | 0.01<br>(0.00 to<br>0.01) | 0.01<br>(0.01 to<br>0.01) | 0.01<br>(0.00 to<br>0.01) |
| Eating disorders          |                              |                              |                                |                              |                           |                           |                           |                           |



| Central Europe                                             |                                     |                                       |                                     |                                       |                                  |                                  |                                  |                                  |
|------------------------------------------------------------|-------------------------------------|---------------------------------------|-------------------------------------|---------------------------------------|----------------------------------|----------------------------------|----------------------------------|----------------------------------|
| Cause                                                      | YLLs (in 1000s)                     |                                       |                                     |                                       | Deaths (in 1000s)                |                                  |                                  |                                  |
|                                                            | 2016                                | 2040 Forecast                         | 2040 Better Scenario                | 2040 Worse Scenario                   | 2016                             | 2040 Forecast                    | 2040 Better Scenario             | 2040 Worse Scenario              |
| <b>Diabetes, urogenital, blood, and endocrine diseases</b> | <b>808.05</b><br>(779.07 to 839.33) | <b>855.70</b><br>(666.58 to 1,097.20) | <b>677.90</b><br>(531.86 to 863.64) | <b>988.29</b><br>(759.70 to 1,291.77) | <b>48.53</b><br>(46.81 to 50.35) | <b>65.46</b><br>(51.27 to 83.84) | <b>54.80</b><br>(42.97 to 69.66) | <b>72.28</b><br>(56.24 to 92.55) |
| Diabetes mellitus                                          | 410.77<br>(393.90 to 429.29)        | 353.31<br>(233.79 to 530.07)          | 256.69<br>(170.81 to 381.23)        | 421.87<br>(273.45 to 646.48)          | 25.02<br>(23.99 to 26.09)        | 26.28<br>(18.18 to 37.46)        | 20.40<br>(14.22 to 29.19)        | 29.77<br>(19.79 to 42.88)        |
| Acute glomerulonephritis                                   | 0.95<br>(0.89 to 1.02)              | 0.78<br>(0.66 to 0.91)                | 0.68<br>(0.58 to 0.81)              | 0.82<br>(0.70 to 0.95)                | 0.03<br>(0.03 to 0.04)           | 0.03<br>(0.03 to 0.04)           | 0.03<br>(0.03 to 0.04)           | 0.03<br>(0.03 to 0.04)           |
| Chronic kidney disease                                     | 276.38<br>(264.45 to 288.69)        | 360.77<br>(213.88 to 585.47)          | 286.45<br>(174.06 to 455.13)        | 425.86<br>(243.54 to 705.95)          | 16.97<br>(16.20 to 17.70)        | 28.76<br>(16.96 to 46.49)        | 24.10<br>(14.60 to 38.35)        | 32.59<br>(18.56 to 53.78)        |
| Chronic kidney disease due to diabetes mellitus            | 102.44<br>(95.78 to 109.93)         | 143.48<br>(83.20 to 240.93)           | 113.74<br>(68.65 to 184.88)         | 171.05<br>(95.57 to 290.01)           | 5.75<br>(5.33 to 6.19)           | 10.12<br>(5.83 to 16.79)         | 8.40<br>(4.99 to 13.68)          | 11.62<br>(6.50 to 19.51)         |
| Chronic kidney disease due to hypertension                 | 33.85<br>(29.90 to 38.29)           | 56.49<br>(32.08 to 94.56)             | 48.37<br>(28.34 to 79.24)           | 63.38<br>(35.03 to 107.18)            | 3.02<br>(2.63 to 3.43)           | 6.21<br>(3.55 to 10.24)          | 5.59<br>(3.28 to 9.04)           | 6.71<br>(3.73 to 11.30)          |
| Chronic kidney disease due to glomerulonephritis           | 56.50<br>(52.08 to 61.27)           | 60.61<br>(36.47 to 99.29)             | 45.87<br>(28.98 to 74.11)           | 73.21<br>(42.30 to 119.90)            | 3.10<br>(2.80 to 3.41)           | 4.41<br>(2.61 to 7.22)           | 3.50<br>(2.11 to 5.56)           | 5.14<br>(2.91 to 8.52)           |
| Chronic kidney disease due to other and unspecified causes | 83.60<br>(77.60 to 90.38)           | 100.19<br>(59.20 to 164.60)           | 78.46<br>(47.81 to 125.99)          | 118.22<br>(67.21 to 197.06)           | 5.10<br>(4.66 to 5.61)           | 8.02<br>(4.66 to 13.25)          | 6.62<br>(3.92 to 10.78)          | 9.12<br>(5.13 to 15.20)          |
| Urinary diseases and male infertility                      | 53.45<br>(51.09 to 56.44)           | 74.98<br>(68.74 to 82.15)             | 68.53<br>(61.90 to 76.21)           | 75.23<br>(69.63 to 82.18)             | 3.71<br>(3.54 to 3.92)           | 6.66<br>(6.05 to 7.35)           | 6.41<br>(5.77 to 7.13)           | 6.38<br>(5.77 to 7.04)           |
| Urinary tract infections                                   | 45.98<br>(43.47 to 49.26)           | 67.32<br>(61.41 to 74.30)             | 62.09<br>(55.79 to 69.28)           | 67.41<br>(61.96 to 73.93)             | 3.21<br>(3.03 to 3.42)           | 6.00<br>(5.42 to 6.64)           | 5.82<br>(5.32 to 6.51)           | 5.74<br>(5.14 to 6.38)           |
| Urolithiasis                                               | 2.98<br>(1.94 to 4.92)              | 3.43<br>(2.16 to 6.04)                | 2.90<br>(1.79 to 5.31)              | 3.58<br>(2.18 to 6.34)                | 0.19<br>(0.13 to 0.34)           | 0.27<br>(0.18 to 0.51)           | 0.24<br>(0.16 to 0.48)           | 0.27<br>(0.17 to 0.52)           |
| Other urinary diseases                                     | 4.50<br>(2.79 to 5.56)              | 4.23<br>(2.64 to 5.34)                | 3.54<br>(2.23 to 4.49)              | 4.23<br>(2.57 to 5.37)                | 0.32<br>(0.19 to 0.39)           | 0.39<br>(0.24 to 0.50)           | 0.35<br>(0.22 to 0.44)           | 0.37<br>(0.23 to 0.48)           |
| Gynecological diseases                                     | 0.48<br>(0.41 to 0.73)              | 0.27<br>(0.21 to 0.42)                | 0.19<br>(0.14 to 0.29)              | 0.31<br>(0.24 to 0.48)                | 0.02<br>(0.02 to 0.03)           | 0.02<br>(0.01 to 0.03)           | 0.01<br>(0.02 to 0.02)           | 0.02<br>(0.01 to 0.03)           |
| Uterine fibroids                                           | 0.19<br>(0.16 to 0.29)              | 0.11<br>(0.08 to 0.17)                | 0.08<br>(0.06 to 0.13)              | 0.12<br>(0.09 to 0.19)                | 0.01<br>(0.01 to 0.01)           | 0.01<br>(0.00 to 0.01)           | 0.00<br>(0.00 to 0.01)           | 0.01<br>(0.00 to 0.01)           |
| Polycystic ovarian syndrome                                | 0.08<br>(0.05 to 0.14)              | 0.02<br>(0.01 to 0.03)                | 0.01<br>(0.00 to 0.02)              | 0.02<br>(0.01 to 0.04)                | 0.00<br>(0.00 to 0.00)           | 0.00<br>(0.00 to 0.00)           | 0.00<br>(0.00 to 0.00)           | 0.00<br>(0.00 to 0.00)           |
| Endometriosis                                              | 0.00<br>(0.00 to 0.01)              | 0.00<br>(0.00 to 0.01)                | 0.00<br>(0.00 to 0.00)              | 0.00<br>(0.01 to 0.01)                | 0.00<br>(0.00 to 0.00)           | 0.00<br>(0.00 to 0.00)           | 0.00<br>(0.00 to 0.00)           | 0.00<br>(0.00 to 0.00)           |
| Genital prolapse                                           | 0.02<br>(0.01 to 0.02)              | 0.01<br>(0.01 to 0.01)                | 0.01<br>(0.00 to 0.01)              | 0.01<br>(0.01 to 0.02)                | 0.00<br>(0.00 to 0.00)           | 0.00<br>(0.00 to 0.00)           | 0.00<br>(0.00 to 0.00)           | 0.00<br>(0.00 to 0.00)           |
| Other gynecological diseases                               | 0.20<br>(0.17 to 0.32)              | 0.14<br>(0.11 to 0.21)                | 0.09<br>(0.07 to 0.15)              | 0.16<br>(0.12 to 0.24)                | 0.01<br>(0.01 to 0.02)           | 0.01<br>(0.01 to 0.02)           | 0.01<br>(0.01 to 0.01)           | 0.01<br>(0.01 to 0.02)           |
| Hemoglobinopathies and hemolytic anemias                   | 21.96<br>(18.29 to 24.78)           | 14.51<br>(11.73 to 16.83)             | 12.21<br>(10.01 to 14.11)           | 15.24<br>(12.32 to 17.54)             | 1.17<br>(0.94 to 1.34)           | 1.15<br>(0.91 to 1.34)           | 1.04<br>(0.82 to 1.20)           | 1.15<br>(0.91 to 1.34)           |
| Thalassemias                                               | 1.06<br>(0.89 to 1.28)              | 0.25<br>(0.19 to 0.34)                | 0.23<br>(0.17 to 0.32)              | 0.26<br>(0.20 to 0.36)                | 0.01<br>(0.01 to 0.02)           | 0.00<br>(0.00 to 0.00)           | 0.00<br>(0.00 to 0.00)           | 0.00<br>(0.00 to 0.00)           |

|                                                   |                              |                              |                              |                              |                           |                           |                           |                           |
|---------------------------------------------------|------------------------------|------------------------------|------------------------------|------------------------------|---------------------------|---------------------------|---------------------------|---------------------------|
|                                                   | 2.12<br>(1.75 to<br>2.44)    | 1.07<br>(0.85 to<br>1.32)    | 0.83<br>(0.66 to<br>1.03)    | 1.19<br>(0.95 to<br>1.45)    | 0.05<br>(0.04 to<br>0.05) | 0.03<br>(0.02 to<br>0.04) | 0.02<br>(0.02 to<br>0.03) | 0.03<br>(0.03 to<br>0.04) |
| Sickle cell disorders                             |                              |                              |                              |                              |                           |                           |                           |                           |
|                                                   | 5.06<br>(3.93 to<br>6.00)    | 3.37<br>(2.63 to<br>4.13)    | 2.52<br>(1.98 to<br>3.10)    | 3.77<br>(2.90 to<br>4.62)    | 0.15<br>(0.12 to<br>0.18) | 0.14<br>(0.11 to<br>0.17) | 0.11<br>(0.08 to<br>0.13) | 0.15<br>(0.12 to<br>0.19) |
| G6PD deficiency                                   |                              |                              |                              |                              |                           |                           |                           |                           |
|                                                   | 13.73<br>(10.98 to<br>15.89) | 9.81<br>(7.79 to<br>11.46)   | 8.63<br>(6.86 to<br>10.06)   | 10.01<br>(7.95 to<br>11.73)  | 0.96<br>(0.76 to<br>1.11) | 0.98<br>(0.76 to<br>1.14) | 0.91<br>(0.70 to<br>1.05) | 0.96<br>(0.74 to<br>1.13) |
| Other hemoglobinopathies and hemolytic anemias    |                              |                              |                              |                              |                           |                           |                           |                           |
|                                                   | 44.05<br>(36.81 to<br>50.55) | 51.09<br>(42.81 to<br>57.97) | 53.15<br>(45.00 to<br>60.18) | 48.97<br>(41.03 to<br>55.90) | 1.61<br>(1.27 to<br>1.77) | 2.56<br>(2.00 to<br>2.84) | 2.80<br>(2.17 to<br>3.14) | 2.34<br>(1.85 to<br>2.60) |
| Endocrine, metabolic, blood, and immune disorders |                              |                              |                              |                              |                           |                           |                           |                           |

| Central Europe                                |                                     |                                   |                                  |                                    |                               |                               |                               |                               |
|-----------------------------------------------|-------------------------------------|-----------------------------------|----------------------------------|------------------------------------|-------------------------------|-------------------------------|-------------------------------|-------------------------------|
| Cause                                         | YLLs (in 1000s)                     |                                   |                                  |                                    | Deaths (in 1000s)             |                               |                               |                               |
|                                               | 2016                                | 2040 Forecast                     | 2040 Better Scenario             | 2040 Worse Scenario                | 2016                          | 2040 Forecast                 | 2040 Better Scenario          | 2040 Worse Scenario           |
| <b>Musculoskeletal disorders</b>              | <b>30.93</b><br>(24.61 to 33.76)    | <b>28.55</b><br>(23.29 to 32.73)  | <b>25.31</b><br>(20.80 to 28.85) | <b>30.35</b><br>(24.36 to 35.22)   | <b>1.47</b><br>(1.13 to 1.60) | <b>1.73</b><br>(1.34 to 1.98) | <b>1.59</b><br>(1.25 to 1.79) | <b>1.78</b><br>(1.37 to 2.05) |
| Rheumatoid arthritis                          | 10.61<br>(8.93 to 14.53)            | 9.59<br>(6.93 to 13.41)           | 7.23<br>(5.33 to 9.95)           | 11.40<br>(8.20 to 16.19)           | 0.59<br>(0.48 to 0.78)        | 0.65<br>(0.48 to 0.87)        | 0.50<br>(0.38 to 0.69)        | 0.74<br>(0.55 to 1.00)        |
| Other musculoskeletal disorders               | 20.32<br>(14.75 to 22.53)           | 18.96<br>(13.81 to 21.44)         | 18.08<br>(13.46 to 20.42)        | 18.95<br>(13.65 to 21.51)          | 0.88<br>(0.60 to 0.98)        | 1.08<br>(0.74 to 1.22)        | 1.09<br>(0.75 to 1.23)        | 1.04<br>(0.69 to 1.18)        |
| <b>Other non-communicable diseases</b>        | <b>225.15</b><br>(192.00 to 264.53) | <b>93.27</b><br>(76.25 to 115.04) | <b>70.82</b><br>(58.44 to 87.26) | <b>107.54</b><br>(86.81 to 133.43) | <b>3.48</b><br>(2.94 to 4.04) | <b>2.65</b><br>(1.99 to 3.33) | <b>2.38</b><br>(1.73 to 3.05) | <b>2.75</b><br>(2.08 to 3.45) |
| Congenital birth defects                      | 200.03<br>(169.12 to 238.72)        | 66.79<br>(53.15 to 85.50)         | 46.23<br>(36.56 to 59.09)        | 80.69<br>(62.82 to 103.00)         | 2.60<br>(2.21 to 3.07)        | 0.95<br>(0.77 to 1.18)        | 0.69<br>(0.56 to 0.87)        | 1.13<br>(0.90 to 1.43)        |
| Neural tube defects                           | 4.84<br>(3.74 to 6.28)              | 0.83<br>(0.56 to 1.25)            | 0.50<br>(0.33 to 0.79)           | 1.09<br>(0.72 to 1.71)             | 0.06<br>(0.05 to 0.08)        | 0.01<br>(0.01 to 0.02)        | 0.01<br>(0.00 to 0.01)        | 0.01<br>(0.01 to 0.02)        |
| Congenital heart anomalies                    | 98.75<br>(83.01 to 120.08)          | 25.88<br>(19.90 to 33.43)         | 14.71<br>(11.16 to 20.13)        | 33.09<br>(25.13 to 43.88)          | 1.29<br>(1.09 to 1.56)        | 0.36<br>(0.28 to 0.46)        | 0.21<br>(0.16 to 0.28)        | 0.46<br>(0.35 to 0.60)        |
| Orofacial clefts                              | 0.12<br>(0.08 to 0.19)              | 0.03<br>(0.02 to 0.05)            | 0.01<br>(0.01 to 0.02)           | 0.04<br>(0.02 to 0.07)             | 0.00<br>(0.00 to 0.00)        | 0.00<br>(0.00 to 0.00)        | 0.00<br>(0.00 to 0.00)        | 0.00<br>(0.00 to 0.00)        |
| Down syndrome                                 | 10.78<br>(8.85 to 13.65)            | 8.86<br>(7.19 to 11.24)           | 8.90<br>(7.30 to 11.22)          | 8.82<br>(7.19 to 11.24)            | 0.18<br>(0.15 to 0.23)        | 0.18<br>(0.14 to 0.22)        | 0.18<br>(0.15 to 0.22)        | 0.17<br>(0.14 to 0.22)        |
| Other chromosomal abnormalities               | 16.43<br>(11.45 to 23.04)           | 9.98<br>(6.99 to 14.65)           | 8.15<br>(5.61 to 11.88)          | 11.20<br>(7.75 to 16.43)           | 0.20<br>(0.14 to 0.28)        | 0.13<br>(0.09 to 0.18)        | 0.10<br>(0.07 to 0.15)        | 0.14<br>(0.10 to 0.20)        |
| Congenital musculoskeletal and limb anomalies | 4.26<br>(3.40 to 5.41)              | 1.42<br>(1.05 to 1.89)            | 0.90<br>(0.67 to 1.21)           | 1.72<br>(1.29 to 2.28)             | 0.05<br>(0.04 to 0.07)        | 0.02<br>(0.01 to 0.02)        | 0.01<br>(0.01 to 0.02)        | 0.02<br>(0.02 to 0.03)        |
| Urogenital congenital anomalies               | 4.01<br>(2.60 to 5.75)              | 1.30<br>(0.84 to 1.98)            | 0.94<br>(0.59 to 1.45)           | 1.56<br>(0.99 to 2.42)             | 0.06<br>(0.04 to 0.08)        | 0.02<br>(0.01 to 0.03)        | 0.02<br>(0.01 to 0.02)        | 0.03<br>(0.02 to 0.04)        |
| Digestive congenital anomalies                | 14.30<br>(9.74 to 19.76)            | 4.30<br>(2.63 to 6.49)            | 2.65<br>(1.63 to 4.07)           | 5.59<br>(3.43 to 8.53)             | 0.17<br>(0.12 to 0.23)        | 0.05<br>(0.03 to 0.08)        | 0.03<br>(0.02 to 0.05)        | 0.07<br>(0.04 to 0.10)        |
| Other congenital birth defects                | 46.55<br>(37.91 to 57.02)           | 14.20<br>(10.68 to 18.85)         | 9.46<br>(7.09 to 12.72)          | 17.58<br>(13.16 to 23.42)          | 0.58<br>(0.48 to 0.71)        | 0.19<br>(0.15 to 0.25)        | 0.13<br>(0.10 to 0.17)        | 0.23<br>(0.18 to 0.31)        |
| Skin and subcutaneous diseases                | 14.01<br>(8.34 to 19.03)            | 23.47<br>(14.18 to 32.55)         | 22.37<br>(13.69 to 31.37)        | 23.39<br>(14.23 to 32.77)          | 0.75<br>(0.43 to 1.05)        | 1.66<br>(0.96 to 2.34)        | 1.67<br>(0.96 to 2.37)        | 1.58<br>(0.91 to 2.22)        |
| Cellulitis                                    | 2.39<br>(1.37 to 3.70)              | 4.76<br>(2.82 to 7.50)            | 4.73<br>(2.80 to 7.38)           | 4.63<br>(2.78 to 7.28)             | 0.12<br>(0.07 to 0.18)        | 0.29<br>(0.17 to 0.47)        | 0.31<br>(0.17 to 0.48)        | 0.27<br>(0.15 to 0.45)        |
| Pyoderma                                      | 8.03<br>(4.58 to 11.64)             | 15.58<br>(9.04 to 22.50)          | 14.87<br>(8.53 to 21.87)         | 15.60<br>(9.02 to 22.63)           | 0.42<br>(0.23 to 0.63)        | 1.11<br>(0.60 to 1.63)        | 1.12<br>(0.61 to 1.66)        | 1.05<br>(0.58 to 1.57)        |
| Decubitus ulcer                               | 2.64<br>(1.45 to 3.44)              | 2.11<br>(1.17 to 2.75)            | 1.83<br>(1.01 to 2.42)           | 2.13<br>(1.18 to 2.82)             | 0.18<br>(0.09 to 0.22)        | 0.20<br>(0.10 to 0.27)        | 0.18<br>(0.10 to 0.25)        | 0.19<br>(0.10 to 0.26)        |
| Other skin and subcutaneous diseases          | 0.95<br>(0.59 to 1.40)              | 1.02<br>(0.64 to 1.54)            | 0.93<br>(0.58 to 1.44)           | 1.03<br>(0.64 to 1.59)             | 0.04<br>(0.03 to 0.07)        | 0.06<br>(0.04 to 0.10)        | 0.06<br>(0.04 to 0.10)        | 0.06<br>(0.04 to 0.10)        |
| Sudden infant death syndrome                  | 11.11<br>(8.64 to 13.94)            | 3.02<br>(1.95 to 4.50)            | 2.23<br>(1.44 to 3.43)           | 3.46<br>(2.20 to 5.15)             | 0.13<br>(0.10 to 0.16)        | 0.03<br>(0.02 to 0.05)        | 0.03<br>(0.02 to 0.04)        | 0.04<br>(0.03 to 0.06)        |

|                          |                                       |                                     |                                   |                                       |                              |                              |                              |                              |
|--------------------------|---------------------------------------|-------------------------------------|-----------------------------------|---------------------------------------|------------------------------|------------------------------|------------------------------|------------------------------|
| Injuries                 | 1,973.75<br>(1,852.18 to<br>2,100.29) | 1,185.88<br>(977.97 to<br>1,498.81) | 951.53<br>(800.67 to<br>1,172.67) | 1,502.46<br>(1,200.56 to<br>1,940.52) | 61.75<br>(57.93 to<br>65.61) | 52.63<br>(46.02 to<br>61.86) | 46.24<br>(41.03 to<br>53.52) | 59.85<br>(51.08 to<br>71.95) |
| Transport injuries       | 528.26<br>(498.59 to<br>564.32)       | 220.27<br>(154.76 to<br>323.60)     | 135.32<br>(96.22 to<br>192.35)    | 417.39<br>(288.28 to<br>611.30)       | 13.47<br>(12.77 to<br>14.29) | 7.06<br>(5.09 to<br>9.93)    | 4.70<br>(3.48 to<br>6.40)    | 12.23<br>(8.72 to<br>17.33)  |
| Road injuries            | 466.25<br>(439.90 to<br>498.73)       | 182.13<br>(128.71 to<br>265.37)     | 108.57<br>(78.36 to<br>153.04)    | 369.15<br>(255.75 to<br>538.21)       | 11.84<br>(11.22 to<br>12.57) | 5.85<br>(4.27 to<br>8.11)    | 3.82<br>(2.87 to<br>5.14)    | 10.74<br>(7.71 to<br>15.09)  |
| Pedestrian road injuries | 119.10<br>(103.20 to<br>137.03)       | 34.41<br>(24.46 to<br>51.01)        | 17.63<br>(12.91 to<br>24.93)      | 69.73<br>(47.89 to<br>105.08)         | 3.74<br>(3.35 to<br>4.32)    | 1.50<br>(1.10 to<br>2.12)    | 0.85<br>(0.65 to<br>1.17)    | 2.75<br>(1.97 to<br>4.00)    |

| Central Europe                                  |                                      |                                      |                                      |                                      |                                   |                                   |                                   |                                   |
|-------------------------------------------------|--------------------------------------|--------------------------------------|--------------------------------------|--------------------------------------|-----------------------------------|-----------------------------------|-----------------------------------|-----------------------------------|
| Cause                                           | YLLs (in 1000s)                      |                                      |                                      |                                      | Deaths (in 1000s)                 |                                   |                                   |                                   |
|                                                 | 2016                                 | 2040 Forecast                        | 2040 Better Scenario                 | 2040 Worse Scenario                  | 2016                              | 2040 Forecast                     | 2040 Better Scenario              | 2040 Worse Scenario               |
| Cyclist road injuries                           | 35.95<br>(31.04 to 41.00)            | 22.53<br>(14.96 to 34.32)            | 16.08<br>(10.89 to 24.14)            | 38.33<br>(24.76 to 60.08)            | 1.05<br>(0.91 to 1.20)            | 0.89<br>(0.60 to 1.32)            | 0.71<br>(0.50 to 1.03)            | 1.33<br>(0.88 to 2.05)            |
| Motorcyclist road injuries                      | 54.25<br>(44.45 to 60.73)            | 29.78<br>(19.39 to 47.93)            | 20.96<br>(13.99 to 32.07)            | 47.02<br>(29.92 to 76.21)            | 1.08<br>(0.89 to 1.21)            | 0.68<br>(0.45 to 1.05)            | 0.51<br>(0.35 to 0.76)            | 1.01<br>(0.65 to 1.59)            |
| Motor vehicle road injuries                     | 251.88<br>(231.09 to 288.82)         | 92.90<br>(67.21 to 135.10)           | 52.47<br>(38.08 to 74.58)            | 208.85<br>(146.13 to 307.81)         | 5.82<br>(5.28 to 6.64)            | 2.68<br>(2.02 to 3.69)            | 1.69<br>(1.30 to 2.29)            | 5.47<br>(3.96 to 7.66)            |
| Other road injuries                             | 5.07<br>(3.39 to 6.09)               | 2.52<br>(1.60 to 3.79)               | 1.43<br>(0.94 to 2.09)               | 5.23<br>(3.24 to 8.17)               | 0.15<br>(0.09 to 0.18)            | 0.10<br>(0.06 to 0.14)            | 0.06<br>(0.04 to 0.09)            | 0.18<br>(0.11 to 0.27)            |
| Other transport injuries                        | 62.01<br>(57.44 to 67.85)            | 38.14<br>(24.83 to 58.39)            | 26.75<br>(18.26 to 40.30)            | 48.23<br>(31.46 to 74.16)            | 1.63<br>(1.51 to 1.77)            | 1.22<br>(0.83 to 1.82)            | 0.88<br>(0.61 to 1.27)            | 1.49<br>(1.00 to 2.27)            |
| <b>Unintentional injuries</b>                   | <b>676.66<br/>(629.81 to 722.07)</b> | <b>468.49<br/>(425.08 to 536.89)</b> | <b>419.66<br/>(379.74 to 477.66)</b> | <b>493.43<br/>(440.27 to 571.22)</b> | <b>26.92<br/>(24.51 to 28.50)</b> | <b>28.92<br/>(25.81 to 31.79)</b> | <b>27.77<br/>(24.80 to 30.19)</b> | <b>28.48<br/>(25.32 to 31.84)</b> |
| Falls                                           | 257.75<br>(227.81 to 287.33)         | 247.18<br>(221.21 to 275.60)         | 233.52<br>(208.46 to 260.54)         | 248.35<br>(217.88 to 280.42)         | 14.20<br>(12.33 to 15.55)         | 19.97<br>(16.76 to 22.16)         | 19.80<br>(16.84 to 21.73)         | 19.07<br>(15.69 to 21.41)         |
| Drowning                                        | 104.20<br>(97.69 to 111.25)          | 50.28<br>(34.05 to 75.16)            | 41.39<br>(28.28 to 61.17)            | 58.26<br>(37.77 to 90.34)            | 2.61<br>(2.45 to 2.78)            | 1.54<br>(1.08 to 2.23)            | 1.31<br>(0.93 to 1.86)            | 1.73<br>(1.17 to 2.58)            |
| Fire, heat, and hot substances                  | 47.15<br>(40.09 to 51.80)            | 21.69<br>(15.59 to 30.46)            | 16.95<br>(12.38 to 23.07)            | 25.43<br>(17.86 to 36.55)            | 1.74<br>(1.55 to 1.94)            | 1.12<br>(0.82 to 1.54)            | 0.93<br>(0.70 to 1.28)            | 1.23<br>(0.89 to 1.73)            |
| Poisonings                                      | 12.98<br>(11.52 to 18.52)            | 4.64<br>(3.14 to 8.34)               | 3.16<br>(2.16 to 5.58)               | 5.55<br>(3.61 to 10.09)              | 0.39<br>(0.34 to 0.57)            | 0.19<br>(0.13 to 0.35)            | 0.14<br>(0.10 to 0.25)            | 0.22<br>(0.15 to 0.39)            |
| Exposure to mechanical forces                   | 62.21<br>(51.13 to 68.61)            | 29.76<br>(25.43 to 34.04)            | 23.95<br>(20.37 to 27.31)            | 33.08<br>(27.63 to 37.79)            | 1.73<br>(1.37 to 1.88)            | 1.10<br>(0.90 to 1.22)            | 0.94<br>(0.77 to 1.04)            | 1.16<br>(0.94 to 1.30)            |
| Unintentional firearm injuries                  | 9.71<br>(8.74 to 10.92)              | 4.77<br>(4.14 to 5.53)               | 4.02<br>(3.49 to 4.67)               | 5.11<br>(4.42 to 6.02)               | 0.28<br>(0.24 to 0.32)            | 0.20<br>(0.17 to 0.22)            | 0.18<br>(0.15 to 0.20)            | 0.20<br>(0.17 to 0.23)            |
| Unintentional suffocation                       | 5.37<br>(4.59 to 6.80)               | 2.46<br>(1.95 to 3.07)               | 2.05<br>(1.63 to 2.54)               | 2.73<br>(2.20 to 3.39)               | 0.10<br>(0.08 to 0.12)            | 0.06<br>(0.05 to 0.07)            | 0.05<br>(0.04 to 0.06)            | 0.06<br>(0.05 to 0.08)            |
| Other exposure to mechanical forces             | 47.12<br>(36.05 to 52.51)            | 22.54<br>(18.44 to 25.90)            | 17.88<br>(14.61 to 20.57)            | 25.23<br>(19.94 to 29.27)            | 1.34<br>(1.01 to 1.48)            | 0.84<br>(0.66 to 0.95)            | 0.71<br>(0.55 to 0.80)            | 0.90<br>(0.70 to 1.02)            |
| Adverse effects of medical treatment            | 37.13<br>(28.65 to 41.78)            | 28.82<br>(22.89 to 32.73)            | 26.85<br>(20.95 to 30.61)            | 29.19<br>(23.07 to 33.10)            | 1.64<br>(1.22 to 1.84)            | 1.69<br>(1.31 to 1.90)            | 1.66<br>(1.26 to 1.87)            | 1.63<br>(1.24 to 1.84)            |
| Animal contact                                  | 6.29<br>(4.96 to 8.33)               | 4.62<br>(3.79 to 6.25)               | 3.97<br>(3.24 to 5.47)               | 4.98<br>(4.01 to 6.78)               | 0.21<br>(0.16 to 0.27)            | 0.19<br>(0.16 to 0.26)            | 0.17<br>(0.14 to 0.24)            | 0.20<br>(0.16 to 0.27)            |
| Venomous animal contact                         | 2.54<br>(1.90 to 3.51)               | 1.98<br>(1.53 to 2.79)               | 1.77<br>(1.38 to 2.50)               | 2.07<br>(1.60 to 2.95)               | 0.08<br>(0.06 to 0.10)            | 0.08<br>(0.06 to 0.10)            | 0.07<br>(0.05 to 0.10)            | 0.08<br>(0.06 to 0.11)            |
| Non-venomous animal contact                     | 3.74<br>(2.71 to 5.18)               | 2.63<br>(2.03 to 3.82)               | 2.20<br>(1.71 to 3.25)               | 2.91<br>(2.23 to 4.21)               | 0.13<br>(0.10 to 0.18)            | 0.12<br>(0.09 to 0.17)            | 0.10<br>(0.08 to 0.15)            | 0.12<br>(0.10 to 0.18)            |
| Foreign body                                    | 75.12<br>(64.79 to 86.53)            | 47.83<br>(41.83 to 57.22)            | 45.42<br>(39.58 to 54.39)            | 49.12<br>(42.57 to 59.42)            | 2.19<br>(1.91 to 2.52)            | 1.84<br>(1.64 to 2.21)            | 1.84<br>(1.65 to 2.22)            | 1.81<br>(1.60 to 2.14)            |
| Pulmonary aspiration and foreign body in airway | 70.97<br>(60.53 to 82.34)            | 43.94<br>(37.85 to 53.67)            | 41.24<br>(35.40 to 49.98)            | 45.43<br>(39.18 to 55.34)            | 2.06<br>(1.77 to 2.42)            | 1.67<br>(1.47 to 2.02)            | 1.65<br>(1.45 to 2.01)            | 1.65<br>(1.45 to 1.99)            |

|                                             |                                                      |                                                      |                                                      |                                                      |                                                   |                                                   |                                                   |                                                   |
|---------------------------------------------|------------------------------------------------------|------------------------------------------------------|------------------------------------------------------|------------------------------------------------------|---------------------------------------------------|---------------------------------------------------|---------------------------------------------------|---------------------------------------------------|
|                                             | 4.15<br>(3.39 to<br>5.09)                            | 3.89<br>(3.26 to<br>4.98)                            | 4.18<br>(3.55 to<br>5.38)                            | 3.69<br>(3.09 to<br>4.74)                            | 0.13<br>(0.11 to<br>0.17)                         | 0.17<br>(0.15 to<br>0.23)                         | 0.20<br>(0.17 to<br>0.26)                         | 0.16<br>(0.13 to<br>0.21)                         |
| Foreign body in other body part             |                                                      |                                                      |                                                      |                                                      |                                                   |                                                   |                                                   |                                                   |
| Environmental heat and cold exposure        | 38.42<br>(22.80 to<br>52.88)                         | 22.08<br>(13.29 to<br>32.26)                         | 17.74<br>(10.68 to<br>26.23)                         | 25.24<br>(15.50 to<br>36.76)                         | 1.30<br>(0.78 to<br>1.75)                         | 0.89<br>(0.55 to<br>1.24)                         | 0.74<br>(0.45 to<br>1.06)                         | 0.98<br>(0.61 to<br>1.37)                         |
| Other unintentional injuries                | 35.41<br>(32.41 to<br>39.43)                         | 11.59<br>(9.62 to<br>14.38)                          | 6.72<br>(5.61 to<br>8.24)                            | 14.24<br>(11.74 to<br>17.72)                         | 0.92<br>(0.85 to<br>1.01)                         | 0.38<br>(0.33 to<br>0.46)                         | 0.23<br>(0.20 to<br>0.27)                         | 0.45<br>(0.38 to<br>0.54)                         |
| <b>Self-harm and interpersonal violence</b> | <b>768.28</b><br><b>(656.16 to</b><br><b>859.80)</b> | <b>493.46</b><br><b>(357.04 to</b><br><b>694.31)</b> | <b>392.86</b><br><b>(292.37 to</b><br><b>545.62)</b> | <b>587.99</b><br><b>(406.46 to</b><br><b>851.39)</b> | <b>21.35</b><br><b>(18.47 to</b><br><b>24.23)</b> | <b>16.54</b><br><b>(12.01 to</b><br><b>23.22)</b> | <b>13.67</b><br><b>(10.23 to</b><br><b>18.97)</b> | <b>19.05</b><br><b>(13.55 to</b><br><b>27.01)</b> |

| Central Europe                                                                      |                                                |                                                 |                                                 |                                                 |                                                |                                                |                                                |                                                |
|-------------------------------------------------------------------------------------|------------------------------------------------|-------------------------------------------------|-------------------------------------------------|-------------------------------------------------|------------------------------------------------|------------------------------------------------|------------------------------------------------|------------------------------------------------|
| Cause                                                                               | YLLs (in 1000s)                                |                                                 |                                                 |                                                 | Deaths (in 1000s)                              |                                                |                                                |                                                |
|                                                                                     | 2016                                           | 2040 Forecast                                   | 2040 Better Scenario                            | 2040 Worse Scenario                             | 2016                                           | 2040 Forecast                                  | 2040 Better Scenario                           | 2040 Worse Scenario                            |
| Self-harm                                                                           | 671.17<br>(550.21 to<br>745.97)                | 449.84<br>(317.28 to<br>637.51)                 | 358.35<br>(260.63 to<br>503.03)                 | 538.64<br>(368.33 to<br>781.86)                 | 18.89<br>(15.95 to<br>21.25)                   | 15.20<br>(10.82 to<br>21.49)                   | 12.57<br>(9.23 to<br>17.72)                    | 17.56<br>(12.14 to<br>25.11)                   |
| Self-harm by firearm                                                                | 34.36<br>(26.24 to<br>44.00)                   | 17.75<br>(11.90 to<br>30.03)                    | 11.86<br>(8.11 to<br>19.34)                     | 20.94<br>(13.56 to<br>35.68)                    | 0.95<br>(0.71 to<br>1.21)                      | 0.58<br>(0.40 to<br>0.94)                      | 0.41<br>(0.29 to<br>0.63)                      | 0.66<br>(0.44 to<br>1.06)                      |
| Self-harm by other specified means                                                  | 636.82<br>(521.63 to<br>710.58)                | 432.09<br>(304.81 to<br>612.86)                 | 346.49<br>(252.46 to<br>487.08)                 | 517.70<br>(353.00 to<br>746.71)                 | 17.93<br>(15.10 to<br>20.13)                   | 14.63<br>(10.41 to<br>20.74)                   | 12.16<br>(8.93 to<br>17.24)                    | 16.90<br>(11.65 to<br>24.24)                   |
| Interpersonal violence                                                              | 97.10<br>(77.72 to<br>145.08)                  | 43.61<br>(32.15 to<br>72.60)                    | 34.51<br>(25.25 to<br>57.70)                    | 49.35<br>(35.66 to<br>83.72)                    | 2.46<br>(1.96 to<br>3.66)                      | 1.34<br>(1.00 to<br>2.17)                      | 1.10<br>(0.82 to<br>1.79)                      | 1.48<br>(1.08 to<br>2.46)                      |
| Physical violence by firearm                                                        | 19.14<br>(15.22 to<br>28.65)                   | 7.87<br>(6.19 to<br>11.88)                      | 5.38<br>(4.25 to<br>8.27)                       | 8.53<br>(6.68 to<br>12.99)                      | 0.42<br>(0.33 to<br>0.63)                      | 0.19<br>(0.15 to<br>0.29)                      | 0.14<br>(0.11 to<br>0.20)                      | 0.21<br>(0.16 to<br>0.31)                      |
| Physical violence by sharp object                                                   | 30.34<br>(22.60 to<br>51.93)                   | 12.25<br>(9.41 to<br>20.65)                     | 9.82<br>(7.53 to<br>16.84)                      | 13.80<br>(10.43 to<br>24.32)                    | 0.76<br>(0.57 to<br>1.29)                      | 0.37<br>(0.29 to<br>0.59)                      | 0.31<br>(0.24 to<br>0.50)                      | 0.41<br>(0.31 to<br>0.68)                      |
| Physical violence by other means                                                    | 47.62<br>(35.79 to<br>74.81)                   | 23.50<br>(15.26 to<br>43.09)                    | 19.30<br>(12.82 to<br>35.75)                    | 27.02<br>(17.13 to<br>51.35)                    | 1.28<br>(0.96 to<br>1.98)                      | 0.78<br>(0.52 to<br>1.41)                      | 0.66<br>(0.45 to<br>1.19)                      | 0.87<br>(0.57 to<br>1.62)                      |
| <b>Forces of nature, conflict and terrorism, and executions and police conflict</b> | <b>0.55</b><br><b>(0.52 to</b><br><b>0.58)</b> | <b>3.66</b><br><b>(0.00 to</b><br><b>34.91)</b> | <b>3.69</b><br><b>(0.00 to</b><br><b>35.21)</b> | <b>3.65</b><br><b>(0.00 to</b><br><b>34.83)</b> | <b>0.01</b><br><b>(0.01 to</b><br><b>0.01)</b> | <b>0.09</b><br><b>(0.00 to</b><br><b>0.88)</b> | <b>0.10</b><br><b>(0.00 to</b><br><b>0.93)</b> | <b>0.09</b><br><b>(0.00 to</b><br><b>0.86)</b> |
| Exposure to forces of nature                                                        | 0.00<br>(0.00 to<br>0.00)                      | 0.89<br>(0.00 to<br>12.73)                      | 0.89<br>(0.00 to<br>12.78)                      | 0.88<br>(0.00 to<br>12.49)                      | 0.00<br>(0.00 to<br>0.00)                      | 0.02<br>(0.00 to<br>0.35)                      | 0.03<br>(0.00 to<br>0.37)                      | 0.02<br>(0.00 to<br>0.34)                      |
| Conflict and terrorism                                                              | 0.00<br>(0.00 to<br>0.00)                      | 2.78<br>(0.00 to<br>34.79)                      | 2.80<br>(0.00 to<br>35.09)                      | 2.77<br>(0.00 to<br>34.71)                      | 0.00<br>(0.00 to<br>0.00)                      | 0.07<br>(0.00 to<br>0.88)                      | 0.07<br>(0.00 to<br>0.93)                      | 0.07<br>(0.00 to<br>0.85)                      |
| Executions and police conflict                                                      | 0.55<br>(0.52 to<br>0.58)                      | 0.00<br>(0.00 to<br>0.00)                       | 0.00<br>(0.00 to<br>0.00)                       | 0.00<br>(0.00 to<br>0.00)                       | 0.01<br>(0.01 to<br>0.01)                      | 0.00<br>(0.00 to<br>0.00)                      | 0.00<br>(0.00 to<br>0.00)                      | 0.00<br>(0.00 to<br>0.00)                      |

| Albania                                                           |                                          |                                          |                                          |                                          |                                       |                                       |                                       |                                       |
|-------------------------------------------------------------------|------------------------------------------|------------------------------------------|------------------------------------------|------------------------------------------|---------------------------------------|---------------------------------------|---------------------------------------|---------------------------------------|
| Cause                                                             | YLLs (actual counts)                     |                                          |                                          |                                          | Deaths (actual counts)                |                                       |                                       |                                       |
|                                                                   | 2016                                     | 2040 Forecast                            | 2040 Better Scenario                     | 2040 Worse Scenario                      | 2016                                  | 2040 Forecast                         | 2040 Better Scenario                  | 2040 Worse Scenario                   |
| All causes                                                        | 436,410.36<br>(389,071.95 to 485,592.90) | 460,394.93<br>(349,843.88 to 583,794.13) | 323,107.85<br>(244,730.19 to 410,657.49) | 562,392.52<br>(422,697.58 to 709,744.89) | 22,399.84<br>(20,050.77 to 24,902.62) | 33,439.58<br>(26,295.62 to 41,652.08) | 24,877.07<br>(18,973.22 to 31,694.88) | 38,513.94<br>(30,237.58 to 47,173.91) |
| Communicable, maternal, neonatal, and nutritional diseases        | 34,480.85<br>(23,907.13 to 48,823.89)    | 20,116.96<br>(12,871.95 to 30,509.77)    | 13,574.84<br>(8,928.83 to 20,233.06)     | 25,494.20<br>(15,714.92 to 41,359.87)    | 738.10<br>(576.75 to 955.18)          | 1,006.20<br>(687.92 to 1,470.40)      | 740.38<br>(513.23 to 1,051.18)        | 1,133.87<br>(742.62 to 1,681.37)      |
| HIV/AIDS and tuberculosis                                         | 319.90<br>(281.68 to 365.65)             | 278.28<br>(169.40 to 452.93)             | 120.88<br>(75.88 to 193.46)              | 381.19<br>(96.39 to 593.74)              | 13.66<br>(11.85 to 15.93)             | 17.73<br>(10.29 to 29.40)             | 7.97<br>(4.83 to 13.23)               | 21.76<br>(13.12 to 35.85)             |
| Tuberculosis                                                      | 244.59<br>(209.87 to 289.85)             | 241.68<br>(134.95 to 422.63)             | 96.39<br>(54.28 to 169.80)               | 302.53<br>(171.37 to 521.46)             | 11.85<br>(10.07 to 14.16)             | 16.83<br>(9.32 to 28.34)              | 7.33<br>(4.25 to 12.60)               | 19.88<br>(11.32 to 34.05)             |
| HIV/AIDS                                                          | 75.31<br>(62.70 to 94.00)                | 36.60<br>(18.62 to 61.44)                | 24.49<br>(10.98 to 45.82)                | 78.66<br>(47.23 to 112.05)               | 1.80<br>(1.48 to 2.30)                | 0.90<br>(0.40 to 1.60)                | 0.63<br>(0.23 to 1.25)                | 1.88<br>(1.03 to 2.77)                |
| Diarrhea, lower respiratory, and other common infectious diseases | 15,220.51<br>(11,070.81 to 21,448.88)    | 12,876.94<br>(7,876.49 to 21,371.68)     | 8,353.65<br>(5,210.09 to 13,578.57)      | 16,386.64<br>(9,422.42 to 28,937.46)     | 473.02<br>(372.96 to 641.27)          | 857.09<br>(557.80 to 1,290.60)        | 620.76<br>(412.52 to 912.20)          | 962.59<br>(600.66 to 1,494.29)        |
| Diarrheal diseases                                                | 261.30<br>(168.23 to 429.85)             | 116.40<br>(24.10 to 344.34)              | 171.59<br>(37.03 to 496.03)              | 190.23<br>(34.25 to 621.66)              | 7.40<br>(4.71 to 12.80)               | 6.82<br>(1.53 to 20.24)               | 11.70<br>(2.70 to 35.69)              | 10.54<br>(1.86 to 35.54)              |
| Intestinal infectious diseases                                    | 6.86<br>(3.48 to 12.07)                  | 3.96<br>(2.06 to 7.25)                   | 3.18<br>(1.65 to 5.76)                   | 4.21<br>(2.14 to 7.52)                   | 0.17<br>(0.09 to 0.29)                | 0.13<br>(0.07 to 0.23)                | 0.11<br>(0.06 to 0.20)                | 0.13<br>(0.07 to 0.22)                |
| Typhoid fever                                                     | 1.91<br>(0.82 to 3.61)                   | 0.81<br>(0.36 to 1.58)                   | 0.99<br>(0.45 to 1.89)                   | 0.84<br>(0.38 to 1.63)                   | 0.04<br>(0.02 to 0.08)                | 0.02<br>(0.01 to 0.04)                | 0.03<br>(0.01 to 0.05)                | 0.02<br>(0.01 to 0.04)                |
| Paratyphoid fever                                                 | 3.51<br>(1.43 to 7.25)                   | 2.59<br>(1.15 to 5.39)                   | 1.74<br>(0.70 to 3.71)                   | 2.76<br>(1.19 to 5.61)                   | 0.08<br>(0.03 to 0.18)                | 0.07<br>(0.03 to 0.15)                | 0.05<br>(0.02 to 0.11)                | 0.08<br>(0.03 to 0.16)                |
| Other intestinal infectious diseases                              | 1.44<br>(0.55 to 3.12)                   | 0.57<br>(0.19 to 1.26)                   | 0.45<br>(0.15 to 1.00)                   | 0.60<br>(0.20 to 1.33)                   | 0.04<br>(0.02 to 0.09)                | 0.04<br>(0.01 to 0.08)                | 0.03<br>(0.01 to 0.07)                | 0.04<br>(0.01 to 0.08)                |
| Lower respiratory infections                                      | 12,047.39<br>(8,581.78 to 17,054.46)     | 10,971.00<br>(6,433.31 to 18,822.32)     | 6,756.81<br>(4,025.09 to 11,604.14)      | 14,057.98<br>(7,618.82 to 25,965.17)     | 407.74<br>(320.02 to 565.48)          | 798.79<br>(505.47 to 1,228.07)        | 564.73<br>(363.78 to 859.53)          | 897.64<br>(546.04 to 1,404.67)        |
| Upper respiratory infections                                      | 14.49<br>(7.66 to 25.17)                 | 11.38<br>(5.00 to 22.80)                 | 5.89<br>(2.49 to 12.17)                  | 12.56<br>(5.71 to 24.95)                 | 0.45<br>(0.24 to 0.73)                | 0.62<br>(0.23 to 1.33)                | 0.35<br>(0.12 to 0.80)                | 0.64<br>(0.25 to 1.38)                |
| Otitis media                                                      | 1.25<br>(0.59 to 2.82)                   | 0.66<br>(0.20 to 1.74)                   | 0.78<br>(0.23 to 2.04)                   | 0.59<br>(0.19 to 1.50)                   | 0.06<br>(0.03 to 0.10)                | 0.08<br>(0.02 to 0.20)                | 0.09<br>(0.02 to 0.24)                | 0.06<br>(0.02 to 0.17)                |
| Meningitis                                                        | 1,373.55<br>(845.09 to 2,389.25)         | 614.55<br>(306.59 to 1,205.13)           | 447.67<br>(260.09 to 880.40)             | 667.26<br>(385.39 to 1,312.25)           | 27.17<br>(18.15 to 48.16)             | 19.02<br>(13.20 to 34.49)             | 14.88<br>(10.23 to 26.51)             | 18.90<br>(12.85 to 34.65)             |
| Pneumococcal meningitis                                           | 186.24<br>(110.23 to 345.07)             | 81.52<br>(48.97 to 162.23)               | 79.51<br>(47.87 to 159.15)               | 83.42<br>(48.87 to 169.40)               | 4.20<br>(2.69 to 7.79)                | 2.92<br>(1.89 to 5.64)                | 3.08<br>(2.01 to 5.68)                | 2.79<br>(1.77 to 5.56)                |
| H influenzae type B meningitis                                    | 259.46<br>(145.68 to 467.32)             | 136.05<br>(63.94 to 298.50)              | 123.93<br>(59.85 to 270.94)              | 164.28<br>(71.54 to 384.79)              | 4.62<br>(2.90 to 7.97)                | 3.10<br>(1.96 to 5.92)                | 3.11<br>(2.00 to 5.80)                | 3.30<br>(1.94 to 6.45)                |
| Meningococcal meningitis                                          | 128.81<br>(74.55 to 228.17)              | 42.84<br>(25.14 to 80.71)                | 26.68<br>(14.71 to 53.07)                | 46.10<br>(26.28 to 88.50)                | 2.17<br>(1.37 to 3.70)                | 1.18<br>(0.80 to 2.09)                | 0.81<br>(0.53 to 1.45)                | 1.18<br>(0.79 to 2.10)                |
| Other meningitis                                                  | 799.04<br>(500.28 to 1,385.56)           | 354.14<br>(216.25 to 682.73)             | 217.56<br>(123.96 to 431.95)             | 373.46<br>(223.40 to 718.13)             | 16.18<br>(10.86 to 28.54)             | 11.82<br>(8.11 to 21.23)              | 7.88<br>(5.07 to 14.01)               | 11.63<br>(7.81 to 20.47)              |
| Encephalitis                                                      | 1,415.39<br>(967.25 to 2,075.89)         | 958.95<br>(628.31 to 1,525.06)           | 845.62<br>(552.43 to 1,307.60)           | 1,033.74<br>(658.32 to 1,641.90)         | 28.02<br>(19.95 to 42.19)             | 27.95<br>(20.22 to 42.49)             | 26.36<br>(19.13 to 38.41)             | 28.44<br>(20.31 to 44.30)             |



|                |                              |                                 |                              |                                 |                           |                            |                           |                            |
|----------------|------------------------------|---------------------------------|------------------------------|---------------------------------|---------------------------|----------------------------|---------------------------|----------------------------|
| Diphtheria     | 1.75<br>(1.00 to<br>2.95)    | 0.29<br>(0.14 to<br>0.58)       | 0.27<br>(0.13 to<br>0.52)    | 0.51<br>(0.18 to<br>1.36)       | 0.03<br>(0.02 to<br>0.04) | 0.00<br>(0.00 to<br>0.01)  | 0.00<br>(0.00 to<br>0.01) | 0.01<br>(0.00 to<br>0.02)  |
| Whooping cough | 35.80<br>(2.41 to<br>125.21) | 27.20<br>(1.37 to<br>120.93)    | 21.67<br>(1.15 to<br>90.77)  | 150.18<br>(6.92 to<br>616.73)   | 0.43<br>(0.03 to<br>1.49) | 0.33<br>(0.02 to<br>1.45)  | 0.26<br>(0.01 to<br>1.09) | 1.78<br>(0.08 to<br>7.27)  |
| Tetanus        | 18.04<br>(15.29 to<br>21.51) | 1.09<br>(0.76 to<br>1.57)       | 1.04<br>(0.72 to<br>1.49)    | 1.62<br>(0.97 to<br>3.06)       | 0.34<br>(0.30 to<br>0.40) | 0.02<br>(0.02 to<br>0.03)  | 0.02<br>(0.02 to<br>0.03) | 0.03<br>(0.02 to<br>0.05)  |
| Measles        | 16.31<br>(6.58 to<br>33.25)  | 153.47<br>(0.11 to<br>1,454.90) | 86.01<br>(0.10 to<br>683.06) | 248.37<br>(0.13 to<br>2,410.99) | 0.20<br>(0.08 to<br>0.40) | 1.92<br>(0.00 to<br>16.96) | 1.11<br>(0.00 to<br>8.03) | 3.05<br>(0.00 to<br>28.21) |

| Albania                                               |                                                      |                                                     |                                                    |                                                     |                                                  |                                                 |                                                |                                                 |
|-------------------------------------------------------|------------------------------------------------------|-----------------------------------------------------|----------------------------------------------------|-----------------------------------------------------|--------------------------------------------------|-------------------------------------------------|------------------------------------------------|-------------------------------------------------|
| Cause                                                 | YLLs (actual counts)                                 |                                                     |                                                    |                                                     | Deaths (actual counts)                           |                                                 |                                                |                                                 |
|                                                       | 2016                                                 | 2040 Forecast                                       | 2040 Better Scenario                               | 2040 Worse Scenario                                 | 2016                                             | 2040 Forecast                                   | 2040 Better Scenario                           | 2040 Worse Scenario                             |
| Varicella and herpes zoster                           | 28.38<br>(17.48 to<br>46.28)                         | 17.98<br>(11.14 to<br>29.63)                        | 13.12<br>(8.22 to<br>20.72)                        | 19.40<br>(12.00 to<br>32.31)                        | 1.03<br>(0.68 to<br>1.45)                        | 1.40<br>(0.79 to<br>2.39)                       | 1.15<br>(0.65 to<br>2.01)                      | 1.36<br>(0.77 to<br>2.37)                       |
| <b>Neglected tropical diseases and malaria</b>        | <b>301.02</b><br><b>(192.05 to</b><br><b>453.38)</b> | <b>51.94</b><br><b>(22.28 to</b><br><b>206.26)</b>  | <b>47.19</b><br><b>(19.33 to</b><br><b>170.21)</b> | <b>55.96</b><br><b>(24.40 to</b><br><b>225.62)</b>  | <b>11.43</b><br><b>(6.99 to</b><br><b>17.56)</b> | <b>2.73</b><br><b>(0.77 to</b><br><b>10.05)</b> | <b>2.76</b><br><b>(0.74 to</b><br><b>9.02)</b> | <b>2.73</b><br><b>(0.80 to</b><br><b>10.25)</b> |
| Malaria                                               | 0.00<br>(0.00 to<br>0.00)                            | 0.00<br>(0.00 to<br>0.00)                           | 0.00<br>(0.00 to<br>0.00)                          | 0.00<br>(0.00 to<br>0.00)                           | 0.00<br>(0.00 to<br>0.00)                        | 0.00<br>(0.00 to<br>0.00)                       | 0.00<br>(0.00 to<br>0.00)                      | 0.00<br>(0.00 to<br>0.00)                       |
| Chagas disease                                        | 0.00<br>(0.00 to<br>0.00)                            | 0.00<br>(0.00 to<br>0.00)                           | 0.00<br>(0.00 to<br>0.00)                          | 0.00<br>(0.00 to<br>0.00)                           | 0.00<br>(0.00 to<br>0.00)                        | 0.00<br>(0.00 to<br>0.00)                       | 0.00<br>(0.00 to<br>0.00)                      | 0.00<br>(0.00 to<br>0.00)                       |
| Leishmaniasis                                         | 238.32<br>(134.35 to<br>383.33)                      | 24.57<br>(7.10 to<br>150.18)                        | 18.97<br>(5.80 to<br>114.62)                       | 27.16<br>(7.87 to<br>170.49)                        | 9.20<br>(4.99 to<br>15.26)                       | 1.14<br>(0.32 to<br>6.80)                       | 0.92<br>(0.26 to<br>5.20)                      | 1.21<br>(0.34 to<br>7.17)                       |
| African trypanosomiasis                               | 0.00<br>(0.00 to<br>0.00)                            | 0.00<br>(0.00 to<br>0.00)                           | 0.00<br>(0.00 to<br>0.00)                          | 0.00<br>(0.00 to<br>0.00)                           | 0.00<br>(0.00 to<br>0.00)                        | 0.00<br>(0.00 to<br>0.00)                       | 0.00<br>(0.00 to<br>0.00)                      | 0.00<br>(0.00 to<br>0.00)                       |
| Schistosomiasis                                       | 0.00<br>(0.00 to<br>0.00)                            | 0.00<br>(0.00 to<br>0.00)                           | 0.00<br>(0.00 to<br>0.00)                          | 0.00<br>(0.00 to<br>0.00)                           | 0.00<br>(0.00 to<br>0.00)                        | 0.00<br>(0.00 to<br>0.00)                       | 0.00<br>(0.00 to<br>0.00)                      | 0.00<br>(0.00 to<br>0.00)                       |
| Cysticercosis                                         | 0.19<br>(0.09 to<br>0.37)                            | 0.03<br>(0.01 to<br>0.07)                           | 0.02<br>(0.01 to<br>0.06)                          | 0.03<br>(0.01 to<br>0.07)                           | 0.01<br>(0.00 to<br>0.01)                        | 0.00<br>(0.00 to<br>0.00)                       | 0.00<br>(0.00 to<br>0.00)                      | 0.00<br>(0.00 to<br>0.00)                       |
| Cystic echinococcosis                                 | 0.00<br>(0.00 to<br>0.00)                            | 0.00<br>(0.00 to<br>0.00)                           | 0.00<br>(0.00 to<br>0.00)                          | 0.00<br>(0.00 to<br>0.00)                           | 0.00<br>(0.00 to<br>0.00)                        | 0.00<br>(0.00 to<br>0.00)                       | 0.00<br>(0.00 to<br>0.00)                      | 0.00<br>(0.00 to<br>0.00)                       |
| Dengue                                                | 0.00<br>(0.00 to<br>0.00)                            | 0.00<br>(0.00 to<br>0.00)                           | 0.00<br>(0.00 to<br>0.00)                          | 0.00<br>(0.00 to<br>0.00)                           | 0.00<br>(0.00 to<br>0.00)                        | 0.00<br>(0.00 to<br>0.00)                       | 0.00<br>(0.00 to<br>0.00)                      | 0.00<br>(0.00 to<br>0.00)                       |
| Yellow fever                                          | 0.00<br>(0.00 to<br>0.00)                            | 0.00<br>(0.00 to<br>0.00)                           | 0.00<br>(0.00 to<br>0.00)                          | 0.00<br>(0.00 to<br>0.00)                           | 0.00<br>(0.00 to<br>0.00)                        | 0.00<br>(0.00 to<br>0.00)                       | 0.00<br>(0.00 to<br>0.00)                      | 0.00<br>(0.00 to<br>0.00)                       |
| Rabies                                                | 0.09<br>(0.06 to<br>0.19)                            | 0.03<br>(0.01 to<br>0.05)                           | 0.02<br>(0.01 to<br>0.04)                          | 0.03<br>(0.01 to<br>0.07)                           | 0.00<br>(0.00 to<br>0.01)                        | 0.00<br>(0.00 to<br>0.00)                       | 0.00<br>(0.00 to<br>0.00)                      | 0.00<br>(0.00 to<br>0.00)                       |
| Intestinal nematode infections                        | 1.23<br>(0.33 to<br>2.93)                            | 0.57<br>(0.12 to<br>1.45)                           | 0.51<br>(0.11 to<br>1.23)                          | 0.62<br>(0.12 to<br>1.62)                           | 0.02<br>(0.01 to<br>0.04)                        | 0.01<br>(0.00 to<br>0.03)                       | 0.01<br>(0.01 to<br>0.03)                      | 0.01<br>(0.00 to<br>0.03)                       |
| Other neglected tropical diseases                     | 61.18<br>(43.50 to<br>79.06)                         | 26.75<br>(13.31 to<br>52.53)                        | 27.66<br>(12.50 to<br>56.72)                       | 28.13<br>(13.99 to<br>53.76)                        | 2.19<br>(1.11 to<br>2.85)                        | 1.57<br>(0.40 to<br>3.11)                       | 1.82<br>(0.43 to<br>3.74)                      | 1.50<br>(0.39 to<br>2.97)                       |
| <b>Maternal disorders</b>                             | <b>194.86</b><br><b>(136.95 to</b><br><b>266.94)</b> | <b>102.16</b><br><b>(58.30 to</b><br><b>167.23)</b> | <b>71.22</b><br><b>(39.43 to</b><br><b>116.47)</b> | <b>119.18</b><br><b>(66.18 to</b><br><b>191.78)</b> | <b>3.62</b><br><b>(2.55 to</b><br><b>4.95)</b>   | <b>1.96</b><br><b>(1.13 to</b><br><b>3.20)</b>  | <b>1.37</b><br><b>(0.77 to</b><br><b>2.25)</b> | <b>2.29</b><br><b>(1.28 to</b><br><b>3.65)</b>  |
| Maternal hemorrhage                                   | 22.16<br>(12.81 to<br>34.52)                         | 12.85<br>(6.30 to<br>23.50)                         | 9.02<br>(4.30 to<br>16.74)                         | 14.97<br>(7.04 to<br>28.13)                         | 0.41<br>(0.24 to<br>0.63)                        | 0.25<br>(0.12 to<br>0.45)                       | 0.17<br>(0.08 to<br>0.32)                      | 0.29<br>(0.14 to<br>0.53)                       |
| Maternal sepsis and other maternal infections         | 31.62<br>(19.48 to<br>48.99)                         | 14.42<br>(6.99 to<br>26.60)                         | 9.93<br>(4.76 to<br>17.62)                         | 16.84<br>(7.87 to<br>29.85)                         | 0.57<br>(0.35 to<br>0.88)                        | 0.27<br>(0.13 to<br>0.49)                       | 0.19<br>(0.09 to<br>0.32)                      | 0.31<br>(0.15 to<br>0.55)                       |
| Maternal hypertensive disorders                       | 7.00<br>(3.90 to<br>11.50)                           | 4.11<br>(1.85 to<br>7.72)                           | 2.80<br>(1.26 to<br>5.40)                          | 4.80<br>(2.14 to<br>9.10)                           | 0.12<br>(0.07 to<br>0.20)                        | 0.07<br>(0.03 to<br>0.14)                       | 0.05<br>(0.02 to<br>0.10)                      | 0.09<br>(0.04 to<br>0.16)                       |
| Maternal obstructed labor and uterine rupture         | 2.12<br>(0.86 to<br>3.99)                            | 1.47<br>(0.55 to<br>3.15)                           | 0.96<br>(0.35 to<br>2.01)                          | 1.72<br>(0.65 to<br>3.67)                           | 0.04<br>(0.02 to<br>0.08)                        | 0.03<br>(0.01 to<br>0.06)                       | 0.02<br>(0.01 to<br>0.04)                      | 0.03<br>(0.01 to<br>0.07)                       |
| Maternal abortion, miscarriage, and ectopic pregnancy | 87.65<br>(58.71 to<br>125.45)                        | 41.73<br>(20.68 to<br>74.43)                        | 28.70<br>(13.87 to<br>52.07)                       | 48.81<br>(23.50 to<br>86.46)                        | 1.66<br>(1.13 to<br>2.36)                        | 0.82<br>(0.42 to<br>1.43)                       | 0.56<br>(0.28 to<br>1.03)                      | 0.96<br>(0.47 to<br>1.68)                       |

|                                        |                              |                              |                             |                              |                           |                           |                           |                           |
|----------------------------------------|------------------------------|------------------------------|-----------------------------|------------------------------|---------------------------|---------------------------|---------------------------|---------------------------|
|                                        | 4.31<br>(2.07 to<br>7.52)    | 3.02<br>(1.12 to<br>6.42)    | 2.05<br>(0.73 to<br>4.37)   | 3.56<br>(1.29 to<br>7.70)    | 0.08<br>(0.04 to<br>0.13) | 0.06<br>(0.02 to<br>0.12) | 0.04<br>(0.01 to<br>0.08) | 0.07<br>(0.02 to<br>0.14) |
| Indirect maternal deaths               |                              |                              |                             |                              |                           |                           |                           |                           |
|                                        | 2.36<br>(1.01 to<br>4.55)    | 1.18<br>(0.42 to<br>2.59)    | 0.80<br>(0.29 to<br>1.72)   | 1.39<br>(0.50 to<br>3.10)    | 0.04<br>(0.02 to<br>0.08) | 0.02<br>(0.01 to<br>0.05) | 0.02<br>(0.01 to<br>0.03) | 0.03<br>(0.01 to<br>0.06) |
| Late maternal deaths                   |                              |                              |                             |                              |                           |                           |                           |                           |
|                                        | 0.00<br>(0.00 to<br>0.00)    | 0.02<br>(0.00 to<br>0.18)    | 0.02<br>(0.00 to<br>0.13)   | 0.03<br>(0.00 to<br>0.22)    | 0.00<br>(0.00 to<br>0.00) | 0.00<br>(0.00 to<br>0.00) | 0.00<br>(0.00 to<br>0.00) | 0.00<br>(0.00 to<br>0.00) |
| Maternal deaths aggravated by HIV/AIDS |                              |                              |                             |                              |                           |                           |                           |                           |
|                                        | 37.63<br>(23.84 to<br>57.16) | 23.35<br>(12.19 to<br>41.49) | 16.95<br>(8.73 to<br>30.01) | 27.06<br>(13.71 to<br>47.24) | 0.70<br>(0.44 to<br>1.06) | 0.45<br>(0.24 to<br>0.78) | 0.33<br>(0.17 to<br>0.56) | 0.52<br>(0.27 to<br>0.88) |
| Other maternal disorders               |                              |                              |                             |                              |                           |                           |                           |                           |

| Albania                                                                 |                                              |                                            |                                           |                                            |                                     |                                   |                                  |                                   |
|-------------------------------------------------------------------------|----------------------------------------------|--------------------------------------------|-------------------------------------------|--------------------------------------------|-------------------------------------|-----------------------------------|----------------------------------|-----------------------------------|
| Cause                                                                   | YLLs (actual counts)                         |                                            |                                           |                                            | Deaths (actual counts)              |                                   |                                  |                                   |
|                                                                         | 2016                                         | 2040 Forecast                              | 2040 Better Scenario                      | 2040 Worse Scenario                        | 2016                                | 2040 Forecast                     | 2040 Better Scenario             | 2040 Worse Scenario               |
| <b>Neonatal disorders</b>                                               | <b>17,191.86</b><br>(10,125.74 to 26,515.31) | <b>5,685.29</b><br>(2,457.97 to 10,782.01) | <b>3,952.36</b><br>(1,664.38 to 7,309.48) | <b>7,377.36</b><br>(3,094.24 to 14,261.54) | <b>198.62</b><br>(116.96 to 306.32) | <b>65.69</b><br>(28.41 to 124.58) | <b>45.67</b><br>(19.24 to 84.47) | <b>85.24</b><br>(35.76 to 164.74) |
| Neonatal preterm birth                                                  | 5,036.70<br>(2,639.79 to 8,480.52)           | 1,379.56<br>(594.98 to 2,543.65)           | 746.87<br>(314.11 to 1,403.65)            | 1,906.75<br>(802.94 to 3,429.37)           | 58.19<br>(30.51 to 97.96)           | 15.94<br>(6.87 to 29.38)          | 8.63<br>(3.63 to 16.22)          | 22.03<br>(9.28 to 39.64)          |
| Neonatal encephalopathy due to birth asphyxia and trauma                | 1,848.40<br>(910.53 to 3,113.16)             | 546.12<br>(191.19 to 1,157.91)             | 320.88<br>(110.75 to 686.76)              | 679.96<br>(238.52 to 1,470.24)             | 21.36<br>(10.52 to 38.27)           | 6.31<br>(2.21 to 13.38)           | 3.71<br>(1.28 to 7.94)           | 7.86<br>(2.76 to 16.99)           |
| Neonatal sepsis and other neonatal infections                           | 582.39<br>(283.42 to 1,038.61)               | 255.27<br>(107.36 to 520.12)               | 167.42<br>(68.08 to 336.08)               | 316.40<br>(130.02 to 629.95)               | 6.73<br>(3.28 to 12.02)             | 2.95<br>(1.24 to 6.01)            | 1.94<br>(0.79 to 3.89)           | 3.66<br>(1.50 to 7.28)            |
| Hemolytic disease and other neonatal jaundice                           | 214.42<br>(95.84 to 400.28)                  | 57.86<br>(15.84 to 152.60)                 | 35.85<br>(10.64 to 90.41)                 | 73.74<br>(20.78 to 194.73)                 | 2.48<br>(1.11 to 4.63)              | 0.67<br>(0.18 to 1.76)            | 0.41<br>(0.12 to 1.04)           | 0.85<br>(0.24 to 2.25)            |
| Other neonatal disorders                                                | 9,509.96<br>(5,398.35 to 15,265.89)          | 3,446.48<br>(1,231.12 to 7,207.50)         | 2,681.34<br>(1,006.43 to 5,340.71)        | 4,400.50<br>(1,512.19 to 9,302.15)         | 109.87<br>(62.37 to 176.37)         | 39.82<br>(14.23 to 83.26)         | 30.98<br>(11.63 to 61.73)        | 50.84<br>(17.48 to 107.45)        |
| <b>Nutritional deficiencies</b>                                         | <b>226.04</b><br>(143.56 to 367.89)          | <b>112.28</b><br>(71.86 to 178.00)         | <b>105.61</b><br>(70.23 to 165.19)        | <b>123.31</b><br>(75.57 to 203.06)         | <b>5.09</b><br>(3.94 to 6.78)       | <b>5.37</b><br>(3.89 to 7.28)     | <b>5.83</b><br>(4.19 to 7.79)    | <b>5.26</b><br>(3.74 to 7.23)     |
| Protein-energy malnutrition                                             | 175.23<br>(102.04 to 294.65)                 | 75.42<br>(41.50 to 135.15)                 | 73.63<br>(43.64 to 127.55)                | 84.34<br>(44.04 to 157.76)                 | 3.59<br>(2.60 to 5.02)              | 3.40<br>(2.22 to 4.95)            | 3.99<br>(2.59 to 5.67)           | 3.35<br>(2.13 to 5.00)            |
| Iodine deficiency                                                       | 7.68<br>(0.78 to 42.19)                      | 6.79<br>(0.46 to 24.01)                    | 5.92<br>(0.33 to 19.39)                   | 7.39<br>(0.51 to 29.16)                    | 0.20<br>(0.03 to 0.61)              | 0.37<br>(0.02 to 1.32)            | 0.36<br>(0.01 to 1.39)           | 0.37<br>(0.02 to 1.26)            |
| Dietary iron deficiency                                                 | 14.69<br>(10.96 to 21.04)                    | 8.67<br>(6.29 to 12.50)                    | 8.49<br>(6.24 to 12.04)                   | 9.37<br>(6.68 to 13.63)                    | 0.30<br>(0.24 to 0.38)              | 0.21<br>(0.16 to 0.28)            | 0.22<br>(0.16 to 0.29)           | 0.22<br>(0.16 to 0.29)            |
| Other nutritional deficiencies                                          | 28.44<br>(17.80 to 46.90)                    | 21.40<br>(14.00 to 31.04)                  | 17.57<br>(11.26 to 25.96)                 | 22.22<br>(14.13 to 32.93)                  | 1.00<br>(0.66 to 1.31)              | 1.39<br>(0.83 to 2.03)            | 1.27<br>(0.76 to 1.87)           | 1.32<br>(0.79 to 1.93)            |
| <b>Other communicable, maternal, neonatal, and nutritional diseases</b> | <b>1,026.67</b><br>(838.11 to 1,367.74)      | <b>1,010.06</b><br>(800.91 to 1,252.81)    | <b>923.94</b><br>(730.48 to 1,149.53)     | <b>1,050.56</b><br>(830.36 to 1,316.49)    | <b>32.67</b><br>(27.22 to 38.73)    | <b>55.62</b><br>(36.65 to 70.20)  | <b>56.02</b><br>(35.99 to 70.11) | <b>53.99</b><br>(36.77 to 68.01)  |
| Sexually transmitted infections excluding HIV                           | 24.70<br>(19.81 to 33.88)                    | 12.73<br>(8.67 to 18.49)                   | 9.80<br>(6.69 to 14.27)                   | 13.06<br>(9.00 to 19.12)                   | 0.72<br>(0.55 to 0.94)              | 0.64<br>(0.39 to 0.96)            | 0.56<br>(0.33 to 0.83)           | 0.62<br>(0.39 to 0.93)            |
| Syphilis                                                                | 16.01<br>(11.45 to 24.24)                    | 6.70<br>(3.88 to 10.97)                    | 4.42<br>(2.61 to 7.24)                    | 6.96<br>(4.06 to 11.57)                    | 0.41<br>(0.28 to 0.58)              | 0.28<br>(0.15 to 0.49)            | 0.20<br>(0.11 to 0.35)           | 0.27<br>(0.15 to 0.47)            |
| Chlamydial infection                                                    | 1.55<br>(1.21 to 2.40)                       | 1.13<br>(0.71 to 1.83)                     | 1.04<br>(0.64 to 1.70)                    | 1.15<br>(0.72 to 1.85)                     | 0.06<br>(0.05 to 0.08)              | 0.07<br>(0.04 to 0.12)            | 0.07<br>(0.04 to 0.12)           | 0.07<br>(0.04 to 0.12)            |
| Gonococcal infection                                                    | 4.78<br>(3.87 to 7.10)                       | 3.44<br>(2.21 to 5.43)                     | 3.08<br>(1.95 to 4.89)                    | 3.47<br>(2.19 to 5.52)                     | 0.18<br>(0.14 to 0.24)              | 0.22<br>(0.12 to 0.34)            | 0.21<br>(0.11 to 0.34)           | 0.21<br>(0.12 to 0.33)            |
| Other sexually transmitted infections                                   | 2.36<br>(1.91 to 3.57)                       | 1.45<br>(0.92 to 2.39)                     | 1.27<br>(0.79 to 2.08)                    | 1.49<br>(0.93 to 2.44)                     | 0.07<br>(0.06 to 0.10)              | 0.07<br>(0.04 to 0.11)            | 0.07<br>(0.04 to 0.10)           | 0.07<br>(0.04 to 0.11)            |
| Acute hepatitis                                                         | 95.30<br>(79.46 to 113.79)                   | 82.26<br>(63.28 to 107.18)                 | 55.01<br>(40.30 to 72.92)                 | 85.57<br>(66.03 to 110.52)                 | 2.79<br>(2.34 to 3.33)              | 3.57<br>(2.74 to 4.62)            | 2.53<br>(1.83 to 3.34)           | 3.53<br>(2.74 to 4.56)            |
| Acute hepatitis A                                                       | 10.45<br>(5.03 to 18.16)                     | 4.48<br>(2.24 to 8.51)                     | 3.13<br>(1.58 to 6.02)                    | 5.00<br>(2.45 to 9.64)                     | 0.16<br>(0.10 to 0.26)              | 0.11<br>(0.06 to 0.18)            | 0.08<br>(0.05 to 0.14)           | 0.12<br>(0.07 to 0.19)            |
| Acute hepatitis B                                                       | 66.66<br>(55.15 to 80.29)                    | 61.93<br>(45.38 to 83.58)                  | 40.94<br>(28.58 to 56.37)                 | 64.27<br>(47.16 to 85.34)                  | 2.11<br>(1.72 to 2.56)              | 2.63<br>(1.90 to 3.61)            | 1.82<br>(1.24 to 2.56)           | 2.64<br>(1.92 to 3.62)            |



| Albania                              |                                                |                                                 |                                                |                                                 |                                           |                                           |                                           |                                           |
|--------------------------------------|------------------------------------------------|-------------------------------------------------|------------------------------------------------|-------------------------------------------------|-------------------------------------------|-------------------------------------------|-------------------------------------------|-------------------------------------------|
| Cause                                | YLLs (actual counts)                           |                                                 |                                                |                                                 | Deaths (actual counts)                    |                                           |                                           |                                           |
|                                      | 2016                                           | 2040 Forecast                                   | 2040 Better Scenario                           | 2040 Worse Scenario                             | 2016                                      | 2040 Forecast                             | 2040 Better Scenario                      | 2040 Worse Scenario                       |
| <b>Neoplasms</b>                     | <b>101,730.59</b><br>(90,079.57 to 114,184.53) | <b>130,546.31</b><br>(100,572.95 to 161,132.60) | <b>101,220.56</b><br>(78,584.39 to 124,785.83) | <b>143,313.23</b><br>(109,130.54 to 177,818.03) | <b>4,402.40</b><br>(3,869.39 to 4,993.98) | <b>7,184.16</b><br>(5,765.34 to 8,551.88) | <b>5,881.30</b><br>(4,696.18 to 7,020.29) | <b>7,549.98</b><br>(6,076.66 to 9,001.57) |
| Lip and oral cavity cancer           | 1,115.89<br>(953.30 to 1,306.35)               | 1,841.25<br>(979.24 to 3,394.13)                | 944.36<br>(536.10 to 1,618.95)                 | 2,344.15<br>(1,221.28 to 4,218.94)              | 53.18<br>(45.39 to 61.77)                 | 107.45<br>(59.32 to 191.70)               | 59.50<br>(35.83 to 98.55)                 | 129.74<br>(70.85 to 229.50)               |
| Nasopharynx cancer                   | 396.72<br>(328.18 to 478.11)                   | 678.11<br>(358.47 to 1,219.26)                  | 308.74<br>(179.38 to 520.24)                   | 879.47<br>(463.25 to 1,565.71)                  | 16.74<br>(13.92 to 20.03)                 | 35.67<br>(20.55 to 60.79)                 | 17.33<br>(10.52 to 27.38)                 | 43.88<br>(24.98 to 74.57)                 |
| Other pharynx cancer                 | 654.10<br>(516.61 to 793.81)                   | 830.79<br>(461.74 to 1,422.52)                  | 691.53<br>(405.19 to 1,160.85)                 | 935.86<br>(510.86 to 1,631.16)                  | 27.64<br>(22.08 to 33.35)                 | 43.13<br>(24.13 to 74.09)                 | 37.73<br>(22.71 to 61.30)                 | 46.83<br>(25.50 to 78.92)                 |
| Esophageal cancer                    | 1,149.97 to<br>(1,149.97 to 1,601.16)          | 1,757.89<br>(959.78 to 2,989.58)                | 1,066.20<br>(633.86 to 1,672.33)               | 2,257.60<br>(1,215.28 to 3,852.02)              | 62.08<br>(52.73 to 72.88)                 | 94.36<br>(54.71 to 154.98)                | 60.99<br>(38.19 to 94.38)                 | 115.90<br>(65.73 to 194.09)               |
| Stomach cancer                       | 10,283.71<br>(8,817.69 to 11,788.57)           | 9,195.86<br>(6,356.70 to 12,878.77)             | 6,503.53<br>(4,454.98 to 9,122.58)             | 9,658.39<br>(6,648.60 to 13,488.73)             | 467.56<br>(400.96 to 538.72)              | 519.96<br>(370.24 to 730.82)              | 387.44<br>(269.72 to 551.66)              | 527.08<br>(375.31 to 727.74)              |
| Colon and rectum cancer              | 5,850.79<br>(4,981.09 to 6,833.59)             | 8,847.93<br>(5,881.33 to 12,840.07)             | 6,636.00<br>(4,442.15 to 9,541.11)             | 9,347.34<br>(6,192.36 to 13,613.23)             | 270.22<br>(230.54 to 318.99)              | 524.29<br>(366.78 to 753.66)              | 417.61<br>(287.10 to 599.31)              | 531.46<br>(369.44 to 760.48)              |
| Liver cancer                         | 7,322.93<br>(6,079.69 to 8,800.54)             | 11,943.66<br>(7,294.89 to 18,938.91)            | 10,622.58<br>(6,782.42 to 16,217.99)           | 14,182.32<br>(8,307.80 to 23,358.63)            | 345.09<br>(283.48 to 425.39)              | 680.05<br>(433.32 to 1,047.77)            | 640.68<br>(416.04 to 954.80)              | 769.61<br>(467.88 to 1,236.41)            |
| Liver cancer due to hepatitis B      | 2,399.99<br>(1,810.48 to 3,077.24)             | 3,613.78<br>(2,113.23 to 5,969.77)              | 3,345.10<br>(2,028.95 to 5,237.58)             | 4,177.91<br>(2,534.21 to 7,161.45)              | 104.87<br>(75.58 to 136.93)               | 190.29<br>(110.44 to 306.07)              | 185.63<br>(112.68 to 288.84)              | 210.40<br>(116.18 to 349.63)              |
| Liver cancer due to hepatitis C      | 1,710.35<br>(1,150.14 to 2,394.46)             | 2,963.35<br>(1,711.24 to 4,848.16)              | 2,822.73<br>(1,668.92 to 4,517.72)             | 3,237.16<br>(1,848.55 to 5,695.05)              | 89.19<br>(61.49 to 122.48)                | 188.70<br>(110.34 to 301.79)              | 189.59<br>(112.78 to 301.82)              | 203.13<br>(114.74 to 335.32)              |
| Liver cancer due to alcohol use      | 1,542.22<br>(1,180.22 to 2,018.14)             | 2,762.97<br>(1,622.72 to 4,552.01)              | 2,055.52<br>(1,243.26 to 3,274.57)             | 3,639.21<br>(2,025.48 to 6,235.73)              | 74.67<br>(57.55 to 99.28)                 | 155.88<br>(92.43 to 252.29)               | 124.24<br>(74.86 to 195.92)               | 194.60<br>(111.62 to 324.21)              |
| Liver cancer due to other causes     | 1,670.36<br>(1,303.41 to 2,077.86)             | 2,603.55<br>(1,511.66 to 4,296.76)              | 2,399.24<br>(1,473.92 to 3,813.28)             | 3,028.04<br>(1,675.11 to 5,296.60)              | 76.36<br>(58.94 to 96.62)                 | 145.18<br>(84.98 to 231.17)               | 141.22<br>(87.92 to 217.75)               | 161.48<br>(89.95 to 269.26)               |
| Gallbladder and biliary tract cancer | 732.07<br>(556.04 to 1,100.17)                 | 728.29<br>(522.74 to 1,143.89)                  | 729.44<br>(509.39 to 1,157.46)                 | 686.24<br>(497.85 to 1,068.74)                  | 37.37<br>(27.90 to 59.26)                 | 46.78<br>(33.95 to 75.18)                 | 48.93<br>(35.22 to 78.69)                 | 42.68<br>(31.67 to 66.80)                 |
| Pancreatic cancer                    | 5,049.00<br>(4,304.33 to 5,829.59)             | 6,989.24<br>(5,136.38 to 9,236.84)              | 6,424.42<br>(4,682.36 to 8,345.50)             | 6,996.53<br>(5,169.79 to 9,157.33)              | 238.10<br>(202.37 to 273.83)              | 390.46<br>(295.43 to 501.45)              | 377.27<br>(284.20 to 479.36)              | 377.39<br>(290.79 to 483.33)              |
| Larynx cancer                        | 2,106.44<br>(1,738.38 to 2,569.36)             | 2,771.27<br>(1,144.05 to 5,516.45)              | 1,170.77<br>(522.86 to 2,270.78)               | 3,580.29<br>(1,462.47 to 7,084.61)              | 94.01<br>(77.97 to 114.11)                | 142.70<br>(61.17 to 267.53)               | 62.52<br>(119.32 to 119.32)               | 177.71<br>(75.73 to 334.70)               |
| Tracheal, bronchus, and lung cancer  | 21,708.53<br>(18,009.17 to 25,543.57)          | 28,224.84<br>(17,462.33 to 42,073.43)           | 15,015.73<br>(9,444.53 to 21,894.73)           | 36,682.72<br>(22,296.02 to 54,434.35)           | 1,011.22<br>(836.85 to 1,196.48)          | 1,535.89<br>(978.13 to 2,244.38)          | 846.38<br>(544.52 to 1,215.46)            | 1,914.55<br>(1,205.09 to 2,805.05)        |
| Malignant skin melanoma              | 628.52<br>(485.50 to 1,011.14)                 | 903.38<br>(704.55 to 1,381.19)                  | 1,139.02<br>(871.11 to 1,645.55)               | 831.76<br>(647.07 to 1,273.72)                  | 27.20<br>(21.73 to 39.54)                 | 54.48<br>(43.62 to 68.21)                 | 73.26<br>(56.52 to 92.25)                 | 47.75<br>(38.17 to 61.92)                 |
| Non-melanoma skin cancer             | 729.58<br>(604.79 to 871.90)                   | 1,264.74<br>(1,011.94 to 1,573.80)              | 1,068.85<br>(807.12 to 1,369.41)               | 1,194.22<br>(964.63 to 1,450.55)                | 45.15<br>(37.80 to 53.72)                 | 104.56<br>(83.87 to 128.30)               | 93.99<br>(72.79 to 118.26)                | 94.46<br>(75.63 to 115.98)                |
| Breast cancer                        | 6,375.56<br>(4,910.64 to 8,034.57)             | 8,041.12<br>(5,040.83 to 11,924.60)             | 6,114.71<br>(3,766.13 to 8,776.93)             | 8,276.69<br>(5,182.92 to 12,350.87)             | 229.87<br>(182.54 to 290.61)              | 370.11<br>(244.16 to 546.88)              | 294.54<br>(192.56 to 438.87)              | 369.32<br>(242.83 to 541.23)              |
| Cervical cancer                      | 1,835.14<br>(1,350.75 to 2,377.91)             | 1,561.81<br>(993.51 to 2,310.44)                | 1,151.80<br>(724.95 to 1,694.21)               | 1,629.15<br>(1,043.14 to 2,487.39)              | 63.58<br>(48.05 to 81.94)                 | 67.85<br>(46.21 to 97.51)                 | 52.02<br>(34.32 to 76.16)                 | 68.65<br>(47.01 to 98.34)                 |

|                   |                                       |                                        |                                        |                                        |                                 |                                   |                                   |                                   |
|-------------------|---------------------------------------|----------------------------------------|----------------------------------------|----------------------------------------|---------------------------------|-----------------------------------|-----------------------------------|-----------------------------------|
|                   | 1,004.38<br>(789.67 to<br>1,264.99)   | 1,240.47<br>(839.90 to<br>1,693.21)    | 1,044.13<br>(681.17 to<br>1,428.46)    | 1,258.44<br>(864.39 to<br>1,701.86)    | 39.57<br>(31.17 to<br>50.24)    | 62.03<br>(43.53 to<br>81.58)      | 53.98<br>(36.57 to<br>72.56)      | 61.43<br>(43.73 to<br>80.97)      |
| Uterine cancer    |                                       |                                        |                                        |                                        |                                 |                                   |                                   |                                   |
|                   | 1,628.38<br>(1,287.14 to<br>2,025.18) | 1,944.82<br>(1,271.95 to<br>2,794.04)  | 1,768.37<br>(1,140.15 to<br>2,547.11)  | 1,930.80<br>(1,262.63 to<br>2,772.59)  | 61.79<br>(49.02 to<br>78.03)    | 93.33<br>(61.90 to<br>133.59)     | 87.13<br>(57.50 to<br>123.81)     | 90.87<br>(61.35 to<br>128.65)     |
| Ovarian cancer    |                                       |                                        |                                        |                                        |                                 |                                   |                                   |                                   |
|                   | 5,064.44<br>(3,413.48 to<br>9,122.30) | 9,704.74<br>(6,660.64 to<br>16,890.71) | 9,126.25<br>(6,100.11 to<br>16,046.29) | 8,809.99<br>(6,029.41 to<br>15,653.41) | 336.74<br>(223.31 to<br>620.72) | 783.05<br>(530.94 to<br>1,379.21) | 775.91<br>(519.92 to<br>1,370.12) | 684.66<br>(449.57 to<br>1,244.39) |
| Prostate cancer   |                                       |                                        |                                        |                                        |                                 |                                   |                                   |                                   |
|                   | 319.72<br>(232.53 to<br>439.47)       | 229.52<br>(152.99 to<br>329.27)        | 190.06<br>(122.75 to<br>277.57)        | 228.39<br>(153.20 to<br>326.62)        | 7.81<br>(5.80 to<br>10.45)      | 8.16<br>(5.82 to<br>11.36)        | 7.35<br>(5.03 to<br>10.52)        | 7.64<br>(5.51 to<br>10.68)        |
| Testicular cancer |                                       |                                        |                                        |                                        |                                 |                                   |                                   |                                   |

| Albania                         |                                                  |                                                  |                                                 |                                                  |                                               |                                               |                                              |                                               |
|---------------------------------|--------------------------------------------------|--------------------------------------------------|-------------------------------------------------|--------------------------------------------------|-----------------------------------------------|-----------------------------------------------|----------------------------------------------|-----------------------------------------------|
| Cause                           | YLLs (actual counts)                             |                                                  |                                                 |                                                  | Deaths (actual counts)                        |                                               |                                              |                                               |
|                                 | 2016                                             | 2040 Forecast                                    | 2040 Better Scenario                            | 2040 Worse Scenario                              | 2016                                          | 2040 Forecast                                 | 2040 Better Scenario                         | 2040 Worse Scenario                           |
| Kidney cancer                   | 2,079.22<br>(1,762.49 to 2,429.20)               | 2,829.38<br>(1,888.71 to 4,245.08)               | 2,684.36<br>(1,848.26 to 3,837.86)              | 2,749.69<br>(1,841.30 to 4,122.45)               | 92.60<br>(78.09 to 108.78)                    | 157.51<br>(107.51 to 232.19)                  | 157.91<br>(111.29 to 221.41)                 | 147.04<br>(100.63 to 214.04)                  |
| Bladder cancer                  | 529.11<br>(444.30 to 628.49)                     | 769.68<br>(540.07 to 1,087.50)                   | 626.00<br>(440.83 to 858.29)                    | 774.40<br>(550.90 to 1,083.65)                   | 31.95<br>(26.55 to 38.22)                     | 59.08<br>(42.74 to 80.00)                     | 51.47<br>(37.59 to 68.31)                    | 56.84<br>(41.16 to 78.37)                     |
| Brain and nervous system cancer | 7,931.13<br>(6,339.48 to 9,229.88)               | 9,251.13<br>(6,753.03 to 11,255.59)              | 8,605.82<br>(6,172.49 to 10,674.09)             | 9,021.04<br>(6,653.26 to 10,941.25)              | 246.36<br>(186.26 to 292.78)                  | 359.43<br>(254.65 to 436.74)                  | 347.51<br>(244.16 to 434.06)                 | 339.88<br>(245.11 to 409.05)                  |
| Thyroid cancer                  | 417.86<br>(348.43 to 497.91)                     | 518.56<br>(345.25 to 780.98)                     | 450.78<br>(305.06 to 668.95)                    | 562.81<br>(365.90 to 876.18)                     | 17.81<br>(14.83 to 21.54)                     | 28.26<br>(19.35 to 41.40)                     | 25.77<br>(17.67 to 38.06)                    | 29.34<br>(19.67 to 43.93)                     |
| Mesothelioma                    | 207.09<br>(127.95 to 313.45)                     | 234.97<br>(136.56 to 369.92)                     | 243.57<br>(138.49 to 391.79)                    | 227.79<br>(134.46 to 356.89)                     | 8.41<br>(5.24 to 12.58)                       | 11.36<br>(6.89 to 17.54)                      | 12.20<br>(7.15 to 19.21)                     | 10.73<br>(6.62 to 16.29)                      |
| Hodgkin lymphoma                | 592.26<br>(432.60 to 1,034.30)                   | 489.52<br>(337.08 to 837.58)                     | 351.99<br>(234.69 to 624.80)                    | 508.46<br>(351.03 to 874.18)                     | 17.53<br>(13.12 to 29.36)                     | 19.19<br>(13.88 to 30.60)                     | 14.46<br>(10.11 to 23.81)                    | 19.25<br>(13.95 to 31.00)                     |
| Non-Hodgkin lymphoma            | 1,556.83<br>(1,308.43 to 1,995.85)               | 1,886.80<br>(1,396.41 to 2,564.49)               | 1,689.59<br>(1,255.00 to 2,355.69)              | 1,894.10<br>(1,405.01 to 2,613.26)               | 55.89<br>(46.37 to 76.37)                     | 90.90<br>(68.89 to 131.37)                    | 85.44<br>(63.19 to 124.63)                   | 87.83<br>(65.48 to 127.58)                    |
| Multiple myeloma                | 623.27<br>(519.08 to 735.42)                     | 871.93<br>(642.12 to 1,151.94)                   | 834.29<br>(612.08 to 1,110.90)                  | 870.39<br>(639.60 to 1,168.39)                   | 26.69<br>(22.45 to 34.49)                     | 45.39<br>(33.80 to 65.20)                     | 45.12<br>(33.10 to 63.94)                    | 43.95<br>(32.03 to 62.28)                     |
| Leukemia                        | 5,080.82<br>(4,129.24 to 5,976.51)               | 4,751.23<br>(3,409.16 to 6,359.63)               | 3,806.76<br>(2,768.90 to 5,187.16)              | 5,117.83<br>(3,694.34 to 6,977.45)               | 150.75<br>(126.88 to 190.31)                  | 212.15<br>(149.57 to 322.81)                  | 178.53<br>(126.90 to 271.54)                 | 219.35<br>(152.49 to 331.82)                  |
| Acute lymphoid leukemia         | 475.77<br>(360.78 to 661.65)                     | 397.04<br>(282.50 to 573.91)                     | 318.81<br>(227.47 to 450.92)                    | 425.47<br>(298.69 to 611.95)                     | 10.17<br>(7.95 to 14.37)                      | 11.83<br>(8.26 to 17.95)                      | 9.71<br>(6.88 to 14.46)                      | 12.40<br>(8.64 to 18.80)                      |
| Chronic lymphoid leukemia       | 77.21<br>(60.23 to 106.18)                       | 93.17<br>(62.05 to 142.10)                       | 82.55<br>(54.41 to 126.16)                      | 98.44<br>(64.06 to 153.20)                       | 3.09<br>(2.36 to 4.71)                        | 4.95<br>(3.22 to 8.68)                        | 4.60<br>(3.02 to 8.13)                       | 5.04<br>(3.23 to 8.75)                        |
| Acute myeloid leukemia          | 620.70<br>(497.44 to 898.52)                     | 845.31<br>(585.64 to 1,302.58)                   | 780.46<br>(550.55 to 1,219.97)                  | 883.12<br>(606.33 to 1,361.82)                   | 18.63<br>(13.97 to 30.61)                     | 34.85<br>(21.83 to 64.12)                     | 33.54<br>(21.39 to 60.96)                    | 35.15<br>(22.04 to 64.14)                     |
| Chronic myeloid leukemia        | 118.19<br>(93.49 to 151.09)                      | 106.15<br>(71.18 to 157.78)                      | 70.32<br>(45.67 to 105.67)                      | 112.17<br>(74.22 to 167.59)                      | 4.56<br>(3.58 to 6.40)                        | 5.54<br>(3.62 to 8.86)                        | 3.92<br>(2.56 to 6.37)                       | 5.56<br>(3.61 to 8.89)                        |
| Other leukemia                  | 3,788.96<br>(2,800.38 to 4,538.82)               | 3,309.57<br>(2,293.08 to 4,566.05)               | 2,554.62<br>(1,739.84 to 3,541.43)              | 3,598.63<br>(2,478.14 to 5,053.39)               | 114.31<br>(93.54 to 139.25)                   | 154.98<br>(107.89 to 228.30)                  | 126.77<br>(87.14 to 188.50)                  | 161.19<br>(110.67 to 240.41)                  |
| Other neoplasms                 | 8,547.81<br>(7,240.29 to 10,009.87)              | 10,243.41<br>(8,311.19 to 12,282.86)             | 10,210.90<br>(8,050.57 to 12,370.45)            | 9,876.37<br>(8,134.18 to 11,743.17)              | 319.53<br>(269.04 to 375.71)                  | 536.58<br>(450.22 to 629.98)                  | 568.31<br>(460.71 to 678.05)                 | 494.15<br>(422.70 to 579.10)                  |
| <b>Cardiovascular diseases</b>  | <b>194,845.06<br/>(172,167.60 to 218,562.10)</b> | <b>198,204.41<br/>(130,298.06 to 286,900.74)</b> | <b>116,959.67<br/>(76,211.93 to 173,488.91)</b> | <b>268,744.45<br/>(176,322.80 to 385,364.38)</b> | <b>13,001.72<br/>(11,584.11 to 14,538.83)</b> | <b>17,776.86<br/>(12,236.05 to 24,587.98)</b> | <b>11,406.25<br/>(7,660.27 to 16,561.82)</b> | <b>22,070.24<br/>(15,530.78 to 29,961.41)</b> |
| Rheumatic heart disease         | 1,379.72<br>(1,128.65 to 1,641.38)               | 1,103.65<br>(730.39 to 1,677.55)                 | 830.11<br>(518.16 to 1,260.55)                  | 1,154.99<br>(761.09 to 1,754.38)                 | 63.85<br>(52.43 to 77.95)                     | 81.76<br>(56.05 to 124.71)                    | 65.81<br>(42.63 to 101.21)                   | 81.79<br>(56.77 to 126.14)                    |
| Ischemic heart disease          | 99,558.25<br>(85,665.26 to 113,078.89)           | 78,890.04<br>(44,561.15 to 135,528.38)           | 43,323.71<br>(24,596.17 to 70,938.44)           | 121,412.06<br>(68,272.58 to 195,404.44)          | 6,476.36<br>(5,671.50 to 7,309.68)            | 9,626.09<br>(4,180.19 to 11,033.70)           | 4,215.21<br>(2,485.30 to 6,678.78)           | 9,555.40<br>(5,905.85 to 14,579.80)           |
| Stroke                          | 66,132.63<br>(57,205.79 to 74,910.82)            | 70,873.74<br>(42,488.05 to 111,769.26)           | 36,441.87<br>(21,361.59 to 57,699.32)           | 96,765.70<br>(57,941.83 to 150,242.47)           | 4,751.22<br>(4,107.97 to 5,373.78)            | 6,730.35<br>(4,211.37 to 10,199.61)           | 3,771.04<br>(2,269.76 to 5,757.09)           | 8,413.94<br>(5,315.24 to 12,605.52)           |
| Ischemic stroke                 | 10,122.23<br>(8,618.95 to 11,648.17)             | 9,042.98<br>(5,218.43 to 15,672.80)              | 5,291.71<br>(2,946.04 to 9,134.72)              | 11,752.83<br>(6,710.88 to 20,079.81)             | 731.08<br>(626.32 to 834.41)                  | 867.77<br>(506.59 to 1,536.26)                | 550.84<br>(308.69 to 978.76)                 | 1,039.57<br>(601.02 to 1,867.84)              |



|                                |                                          |                                          |                                          |                                           |                                       |                                       |                                       |                                        |
|--------------------------------|------------------------------------------|------------------------------------------|------------------------------------------|-------------------------------------------|---------------------------------------|---------------------------------------|---------------------------------------|----------------------------------------|
| Intracerebral hemorrhage       | 56,010.40<br>(48,509.54 to<br>63,146.36) | 61,830.76<br>(36,541.40 to<br>99,197.01) | 31,150.16<br>(17,808.39 to<br>50,436.40) | 85,012.88<br>(48,577.68 to<br>135,260.40) | 4,020.14<br>(3,470.38 to<br>4,528.73) | 5,862.58<br>(3,607.05 to<br>8,928.33) | 3,220.20<br>(1,914.85 to<br>5,101.65) | 7,374.37<br>(4,538.08 to<br>11,244.93) |
| Hypertensive heart disease     | 2,221.53<br>(1,630.07 to<br>3,873.98)    | 5,308.94<br>(2,319.36 to<br>15,041.68)   | 4,001.33<br>(1,849.66 to<br>10,760.28)   | 6,616.03<br>(2,847.68 to<br>18,241.27)    | 170.80<br>(127.35 to<br>290.33)       | 518.52<br>(238.81 to<br>1,420.74)     | 418.28<br>(200.89 to<br>1,139.85)     | 622.22<br>(269.96 to<br>1,785.35)      |
| Cardiomyopathy and myocarditis | 8,931.59<br>(7,206.69 to<br>12,031.55)   | 12,183.87<br>(8,778.87 to<br>17,525.14)  | 10,751.73<br>(7,703.99 to<br>15,355.97)  | 11,891.49<br>(8,545.35 to<br>17,433.27)   | 516.78<br>(414.53 to<br>701.34)       | 1,014.70<br>(710.96 to<br>1,497.61)   | 963.01<br>(679.21 to<br>1,407.24)     | 940.31<br>(656.30 to<br>1,420.11)      |
| Myocarditis                    | 4,747.73<br>(3,823.49 to<br>6,253.12)    | 6,146.12<br>(4,692.80 to<br>7,883.59)    | 6,264.90<br>(4,687.11 to<br>8,000.16)    | 5,831.26<br>(4,497.39 to<br>7,576.27)     | 284.92<br>(230.16 to<br>353.35)       | 530.05<br>(399.05 to<br>689.57)       | 579.51<br>(433.56 to<br>746.31)       | 479.70<br>(359.50 to<br>633.29)        |

| Albania                                                       |                                              |                                               |                                             |                                               |                                      |                                          |                                        |                                            |
|---------------------------------------------------------------|----------------------------------------------|-----------------------------------------------|---------------------------------------------|-----------------------------------------------|--------------------------------------|------------------------------------------|----------------------------------------|--------------------------------------------|
| Cause                                                         | YLLs (actual counts)                         |                                               |                                             |                                               | Deaths (actual counts)               |                                          |                                        |                                            |
|                                                               | 2016                                         | 2040 Forecast                                 | 2040 Better Scenario                        | 2040 Worse Scenario                           | 2016                                 | 2040 Forecast                            | 2040 Better Scenario                   | 2040 Worse Scenario                        |
| Alcoholic cardiomyopathy                                      | 378.35<br>(259.44 to 700.24)                 | 477.36<br>(309.97 to 824.96)                  | 417.55<br>(266.69 to 704.70)                | 511.35<br>(330.86 to 932.94)                  | 18.25<br>(12.69 to 29.66)            | 29.29<br>(18.59 to 44.95)                | 27.81<br>(16.71 to 42.64)              | 29.42<br>(19.26 to 45.05)                  |
| Other cardiomyopathy                                          | 3,805.51<br>(2,896.08 to 5,576.56)           | 5,560.38<br>(3,050.40 to 9,865.27)            | 4,069.28<br>(2,148.45 to 7,508.82)          | 5,548.88<br>(3,068.64 to 9,797.48)            | 213.62<br>(155.74 to 344.94)         | 455.36<br>(230.65 to 871.71)             | 355.69<br>(172.13 to 708.02)           | 431.19<br>(217.53 to 820.29)               |
| Atrial fibrillation and flutter                               | 1,430.23<br>(1,083.55 to 1,824.83)           | 3,402.16<br>(2,340.13 to 4,729.08)            | 3,091.43<br>(2,068.72 to 4,311.01)          | 3,319.29<br>(2,315.26 to 4,582.14)            | 143.82<br>(108.66 to 184.37)         | 392.16<br>(268.81 to 558.91)             | 376.06<br>(254.10 to 535.11)           | 368.17<br>(255.59 to 529.92)               |
| Aortic aneurysm                                               | 892.29<br>(731.11 to 1,081.11)               | 1,075.39<br>(734.94 to 1,498.54)              | 921.82<br>(619.84 to 1,295.69)              | 1,074.76<br>(735.17 to 1,481.49)              | 47.59<br>(39.41 to 57.92)            | 77.86<br>(55.57 to 102.58)               | 73.19<br>(51.44 to 97.91)              | 73.50<br>(53.94 to 95.78)                  |
| Peripheral artery disease                                     | 48.43<br>(35.34 to 61.81)                    | 149.67<br>(86.21 to 228.73)                   | 153.60<br>(82.84 to 239.67)                 | 139.82<br>(82.75 to 213.72)                   | 4.38<br>(2.90 to 5.60)               | 17.03<br>(9.08 to 26.58)                 | 18.71<br>(9.38 to 29.62)               | 15.16<br>(8.25 to 23.88)                   |
| Endocarditis                                                  | 732.09<br>(554.31 to 1,055.19)               | 930.18<br>(615.25 to 1,469.23)                | 894.65<br>(589.73 to 1,368.47)              | 957.27<br>(620.96 to 1,533.53)                | 31.40<br>(24.59 to 43.28)            | 60.93<br>(40.94 to 93.84)                | 63.38<br>(41.26 to 99.55)              | 58.81<br>(38.98 to 90.88)                  |
| Other cardiovascular and circulatory diseases                 | 13,518.29<br>(10,837.17 to 19,365.82)        | 24,286.78<br>(15,649.28 to 37,498.06)         | 16,549.41<br>(10,153.48 to 25,618.89)       | 25,413.03<br>(16,413.94 to 40,226.81)         | 795.52<br>(628.50 to 1,148.31)       | 1,957.45<br>(1,315.85 to 2,989.58)       | 1,441.57<br>(925.96 to 2,224.92)       | 1,940.95<br>(1,299.43 to 3,014.34)         |
| <b>Chronic respiratory diseases</b>                           | <b>11,218.86<br/>(9,533.40 to 13,077.96)</b> | <b>14,606.86<br/>(10,071.21 to 19,902.90)</b> | <b>9,976.46<br/>(7,051.03 to 13,159.42)</b> | <b>18,043.99<br/>(12,290.61 to 25,436.54)</b> | <b>767.36<br/>(651.36 to 899.32)</b> | <b>1,245.63<br/>(875.36 to 1,609.22)</b> | <b>892.30<br/>(649.63 to 1,170.35)</b> | <b>1,457.68<br/>(1,029.64 to 2,019.49)</b> |
| Chronic obstructive pulmonary disease                         | 7,368.13<br>(6,179.99 to 8,842.60)           | 10,281.44<br>(6,264.57 to 15,405.27)          | 5,724.97<br>(3,642.07 to 8,407.94)          | 13,554.12<br>(8,218.81 to 20,647.06)          | 536.94<br>(449.91 to 645.69)         | 906.27<br>(578.57 to 1,295.03)           | 559.09<br>(363.04 to 758.10)           | 1,119.86<br>(723.18 to 1,641.95)           |
| Pneumoconiosis                                                | 202.55<br>(143.60 to 270.87)                 | 138.17<br>(92.41 to 187.20)                   | 93.77<br>(62.20 to 135.18)                  | 137.29<br>(92.01 to 186.92)                   | 9.29<br>(6.74 to 11.96)              | 8.64<br>(5.98 to 11.96)                  | 6.66<br>(4.44 to 9.57)                 | 8.30<br>(5.64 to 11.34)                    |
| Silicosis                                                     | 103.86<br>(64.98 to 147.80)                  | 62.50<br>(34.10 to 103.21)                    | 33.10<br>(16.13 to 60.85)                   | 61.48<br>(33.15 to 102.69)                    | 4.52<br>(3.01 to 6.51)               | 3.24<br>(1.73 to 5.28)                   | 1.80<br>(0.91 to 3.33)                 | 3.09<br>(1.67 to 4.99)                     |
| Asbestosis                                                    | 8.53<br>(6.00 to 11.78)                      | 9.68<br>(6.09 to 14.95)                       | 11.46<br>(7.07 to 17.81)                    | 9.35<br>(5.93 to 14.31)                       | 0.34<br>(0.24 to 0.47)               | 0.56<br>(0.33 to 0.94)                   | 0.70<br>(0.40 to 1.19)                 | 0.52<br>(0.31 to 0.87)                     |
| Coal workers pneumoconiosis                                   | 17.92<br>(6.08 to 32.70)                     | 11.76<br>(3.89 to 21.76)                      | 7.97<br>(2.40 to 15.97)                     | 12.89<br>(4.38 to 24.18)                      | 0.83<br>(0.33 to 1.47)               | 0.84<br>(0.29 to 1.72)                   | 0.72<br>(0.20 to 1.63)                 | 0.86<br>(0.30 to 1.80)                     |
| Other pneumoconiosis                                          | 72.24<br>(47.68 to 101.75)                   | 54.24<br>(35.36 to 78.87)                     | 41.23<br>(25.80 to 61.60)                   | 54.08<br>(35.31 to 78.34)                     | 3.59<br>(2.43 to 4.93)               | 4.00<br>(2.53 to 6.07)                   | 3.44<br>(2.03 to 5.55)                 | 3.82<br>(2.41 to 5.78)                     |
| Asthma                                                        | 2,074.49<br>(1,317.47 to 2,659.22)           | 1,766.24<br>(816.03 to 3,255.52)              | 1,053.22<br>(484.84 to 1,992.59)            | 2,082.57<br>(915.66 to 3,944.94)              | 134.82<br>(84.04 to 172.44)          | 149.68<br>(65.96 to 273.18)              | 94.78<br>(42.90 to 178.86)             | 168.36<br>(73.55 to 312.81)                |
| Interstitial lung disease and pulmonary sarcoidosis           | 935.69<br>(635.07 to 1,288.64)               | 1,659.84<br>(1,017.63 to 2,294.66)            | 2,387.28<br>(1,465.65 to 3,275.90)          | 1,498.56<br>(925.21 to 2,032.12)              | 59.96<br>(34.37 to 80.54)            | 135.79<br>(68.43 to 197.27)              | 205.47<br>(107.40 to 296.13)           | 118.15<br>(59.54 to 171.56)                |
| Other chronic respiratory diseases                            | 638.00<br>(466.99 to 933.77)                 | 761.16<br>(486.63 to 1,157.52)                | 717.23<br>(458.62 to 1,068.06)              | 770.94<br>(494.17 to 1,185.50)                | 770.94<br>(18.67 to 37.62)           | 26.35<br>(27.75 to 69.22)                | 45.25<br>(28.53 to 72.57)              | 43.01<br>(26.55 to 66.05)                  |
| <b>Cirrhosis and other chronic liver diseases</b>             | <b>7,211.71<br/>(5,962.95 to 9,025.60)</b>   | <b>8,667.67<br/>(6,955.28 to 10,825.27)</b>   | <b>6,709.37<br/>(5,235.60 to 8,549.46)</b>  | <b>9,112.97<br/>(7,392.51 to 11,298.07)</b>   | <b>308.05<br/>(256.98 to 367.48)</b> | <b>465.91<br/>(381.40 to 558.21)</b>     | <b>379.01<br/>(299.03 to 463.36)</b>   | <b>470.37<br/>(392.51 to 555.55)</b>       |
| Cirrhosis and other chronic liver diseases due to hepatitis B | 1,286.28<br>(997.90 to 1,722.61)             | 1,483.64<br>(1,113.05 to 2,029.72)            | 1,254.42<br>(930.29 to 1,706.89)            | 1,456.90<br>(1,093.26 to 1,970.73)            | 54.62<br>(42.53 to 71.89)            | 77.57<br>(58.29 to 100.94)               | 68.44<br>(50.90 to 90.36)              | 73.67<br>(56.04 to 96.95)                  |
| Cirrhosis and other chronic liver diseases due to hepatitis C | 1,887.95<br>(1,299.24 to 2,648.90)           | 2,274.46<br>(1,533.19 to 3,159.18)            | 1,890.99<br>(1,261.14 to 2,716.94)          | 2,245.05<br>(1,506.35 to 3,120.42)            | 79.68<br>(55.24 to 108.61)           | 117.19<br>(78.78 to 162.93)              | 101.42<br>(67.73 to 142.55)            | 112.08<br>(75.32 to 155.67)                |

|                                                                |                                                            |                                                            |                                                            |                                                            |                                                      |                                                      |                                                      |                                                      |
|----------------------------------------------------------------|------------------------------------------------------------|------------------------------------------------------------|------------------------------------------------------------|------------------------------------------------------------|------------------------------------------------------|------------------------------------------------------|------------------------------------------------------|------------------------------------------------------|
|                                                                | 2,491.55<br>(1,883.78 to<br>3,365.30)                      | 3,205.28<br>(2,369.01 to<br>4,223.97)                      | 2,135.76<br>(1,540.55 to<br>2,862.71)                      | 3,720.06<br>(2,807.36 to<br>4,817.52)                      | 110.50<br>(83.59 to<br>144.79)                       | 173.90<br>(130.01 to<br>229.05)                      | 123.54<br>(88.96 to<br>164.32)                       | 191.82<br>(144.71 to<br>247.76)                      |
| Cirrhosis and other chronic liver diseases due to alcohol use  |                                                            |                                                            |                                                            |                                                            |                                                      |                                                      |                                                      |                                                      |
|                                                                | 1,545.93<br>(1,258.07 to<br>1,903.41)                      | 1,704.29<br>(1,288.84 to<br>2,226.94)                      | 1,428.21<br>(1,054.38 to<br>1,879.27)                      | 1,690.95<br>(1,275.69 to<br>2,194.73)                      | 63.25<br>(51.59 to<br>78.26)                         | 97.25<br>(74.10 to<br>124.71)                        | 85.61<br>(63.88 to<br>110.74)                        | 92.80<br>(71.58 to<br>117.72)                        |
| Cirrhosis and other chronic liver diseases due to other causes |                                                            |                                                            |                                                            |                                                            |                                                      |                                                      |                                                      |                                                      |
|                                                                | <b>3,884.90</b><br><b>(3,065.69 to</b><br><b>5,610.35)</b> | <b>4,700.86</b><br><b>(3,288.75 to</b><br><b>7,348.95)</b> | <b>3,872.51</b><br><b>(2,717.93 to</b><br><b>6,061.59)</b> | <b>4,830.66</b><br><b>(3,419.40 to</b><br><b>7,680.02)</b> | <b>187.22</b><br><b>(145.70 to</b><br><b>282.77)</b> | <b>333.14</b><br><b>(246.54 to</b><br><b>507.54)</b> | <b>294.88</b><br><b>(213.33 to</b><br><b>448.13)</b> | <b>325.07</b><br><b>(240.05 to</b><br><b>500.86)</b> |
| Digestive diseases                                             |                                                            |                                                            |                                                            |                                                            |                                                      |                                                      |                                                      |                                                      |
|                                                                | 562.11<br>(424.12 to<br>792.44)                            | 559.35<br>(388.65 to<br>815.15)                            | 362.26<br>(235.36 to<br>542.76)                            | 577.70<br>(397.34 to<br>836.46)                            | 32.44<br>(24.68 to<br>45.19)                         | 44.01<br>(30.98 to<br>62.64)                         | 30.06<br>(20.33 to<br>44.19)                         | 43.62<br>(30.31 to<br>62.67)                         |
| Peptic ulcer disease                                           |                                                            |                                                            |                                                            |                                                            |                                                      |                                                      |                                                      |                                                      |

| Albania                                    |                                          |                                          |                                          |                                          |                                       |                                       |                                       |                                       |
|--------------------------------------------|------------------------------------------|------------------------------------------|------------------------------------------|------------------------------------------|---------------------------------------|---------------------------------------|---------------------------------------|---------------------------------------|
| Cause                                      | YLLs (actual counts)                     |                                          |                                          |                                          | Deaths (actual counts)                |                                       |                                       |                                       |
|                                            | 2016                                     | 2040 Forecast                            | 2040 Better Scenario                     | 2040 Worse Scenario                      | 2016                                  | 2040 Forecast                         | 2040 Better Scenario                  | 2040 Worse Scenario                   |
| Gastritis and duodenitis                   | 31.96<br>(23.02 to<br>46.30)             | 46.14<br>(32.22 to<br>66.82)             | 36.74<br>(24.88 to<br>53.31)             | 44.88<br>(31.72 to<br>64.62)             | 1.61<br>(1.21 to<br>2.24)             | 3.20<br>(2.32 to<br>4.44)             | 2.74<br>(1.94 to<br>3.83)             | 2.96<br>(2.14 to<br>4.13)             |
| Appendicitis                               | 102.55<br>(80.92 to<br>139.17)           | 99.73<br>(72.43 to<br>150.25)            | 70.27<br>(48.00 to<br>106.74)            | 100.95<br>(75.00 to<br>149.42)           | 3.97<br>(3.07 to<br>5.81)             | 6.31<br>(4.62 to<br>9.31)             | 4.79<br>(3.33 to<br>7.21)             | 6.03<br>(4.46 to<br>8.96)             |
| Paralytic ileus and intestinal obstruction | 773.78<br>(522.99 to<br>1,170.08)        | 782.90<br>(544.81 to<br>1,383.69)        | 788.28<br>(547.26 to<br>1,380.04)        | 760.16<br>(531.43 to<br>1,332.57)        | 30.91<br>(22.52 to<br>52.46)          | 56.78<br>(39.88 to<br>99.60)          | 61.49<br>(43.42 to<br>105.83)         | 51.89<br>(35.98 to<br>91.52)          |
| Inguinal, femoral, and abdominal hernia    | 222.94<br>(140.62 to<br>460.28)          | 220.29<br>(125.49 to<br>482.49)          | 188.42<br>(104.53 to<br>418.17)          | 212.75<br>(123.34 to<br>470.74)          | 12.67<br>(7.28 to<br>28.73)           | 17.14<br>(9.14 to<br>40.05)           | 15.61<br>(8.07 to<br>35.38)           | 15.82<br>(8.38 to<br>36.94)           |
| Inflammatory bowel disease                 | 398.06<br>(250.51 to<br>641.50)          | 386.63<br>(244.85 to<br>733.16)          | 379.24<br>(240.73 to<br>706.33)          | 377.22<br>(239.40 to<br>717.23)          | 13.66<br>(9.30 to<br>24.89)           | 22.98<br>(15.70 to<br>42.89)          | 24.39<br>(16.62 to<br>44.30)          | 21.03<br>(14.23 to<br>39.73)          |
| Vascular intestinal disorders              | 347.43<br>(261.57 to<br>535.65)          | 561.22<br>(415.17 to<br>853.98)          | 528.00<br>(374.32 to<br>794.16)          | 532.20<br>(396.14 to<br>799.69)          | 22.72<br>(17.39 to<br>33.46)          | 47.53<br>(35.78 to<br>68.72)          | 47.12<br>(34.90 to<br>67.94)          | 43.50<br>(33.17 to<br>62.84)          |
| Gallbladder and biliary diseases           | 260.60<br>(190.42 to<br>439.98)          | 393.86<br>(187.88 to<br>814.12)          | 286.25<br>(139.27 to<br>595.49)          | 476.14<br>(216.89 to<br>998.59)          | 15.85<br>(11.54 to<br>27.94)          | 32.35<br>(15.01 to<br>68.85)          | 25.10<br>(12.18 to<br>51.64)          | 37.15<br>(16.58 to<br>78.12)          |
| Pancreatitis                               | 666.13<br>(510.10 to<br>993.16)          | 981.48<br>(458.29 to<br>1,997.00)        | 629.61<br>(313.85 to<br>1,234.72)        | 1,086.98<br>(487.49 to<br>2,260.87)      | 28.52<br>(21.76 to<br>38.34)          | 55.00<br>(27.15 to<br>109.48)         | 37.36<br>(20.20 to<br>73.62)          | 58.09<br>(27.64 to<br>116.09)         |
| Other digestive diseases                   | 519.34<br>(386.19 to<br>726.60)          | 669.27<br>(480.06 to<br>959.97)          | 603.44<br>(420.99 to<br>888.99)          | 661.68<br>(477.69 to<br>963.66)          | 24.87<br>(18.13 to<br>36.12)          | 47.84<br>(34.21 to<br>69.80)          | 46.21<br>(32.08 to<br>67.85)          | 44.99<br>(32.33 to<br>65.53)          |
| Neurological disorders                     | 16,873.45<br>(14,534.46 to<br>19,604.59) | 31,110.42<br>(23,860.49 to<br>40,169.92) | 32,419.24<br>(24,440.14 to<br>41,141.31) | 30,863.33<br>(23,717.14 to<br>41,122.31) | 1,265.79<br>(1,057.78 to<br>1,495.03) | 3,125.40<br>(2,315.94 to<br>4,203.87) | 3,452.96<br>(2,567.77 to<br>4,553.53) | 2,987.20<br>(2,135.29 to<br>4,209.60) |
| Alzheimer's disease and other dementias    | 9,348.86<br>(7,580.87 to<br>11,607.24)   | 21,130.22<br>(15,076.73 to<br>29,150.06) | 22,112.01<br>(15,628.51 to<br>30,268.57) | 21,198.74<br>(14,854.39 to<br>30,948.73) | 958.21<br>(771.98 to<br>1,164.95)     | 2,483.21<br>(1,717.29 to<br>3,513.95) | 2,716.64<br>(1,948.56 to<br>3,743.52) | 2,410.97<br>(1,626.72 to<br>3,579.62) |
| Parkinson's disease                        | 1,825.97<br>(1,342.59 to<br>2,411.54)    | 4,024.74<br>(2,912.14 to<br>5,344.69)    | 4,752.37<br>(3,400.09 to<br>6,414.86)    | 3,533.18<br>(2,548.17 to<br>4,717.59)    | 149.96<br>(111.21 to<br>202.14)       | 377.38<br>(277.96 to<br>500.32)       | 461.87<br>(336.00 to<br>621.04)       | 323.01<br>(233.26 to<br>430.49)       |
| Epilepsy                                   | 2,573.60<br>(2,101.25 to<br>3,174.07)    | 2,227.88<br>(1,362.79 to<br>3,441.59)    | 1,693.43<br>(1,070.38 to<br>2,511.10)    | 2,531.66<br>(1,546.90 to<br>3,822.76)    | 53.05<br>(44.84 to<br>63.75)          | 68.66<br>(46.25 to<br>100.98)         | 56.10<br>(38.22 to<br>80.96)          | 74.15<br>(49.16 to<br>109.49)         |
| Multiple sclerosis                         | 827.81<br>(496.59 to<br>1,720.71)        | 1,314.54<br>(812.71 to<br>2,348.37)      | 1,371.93<br>(861.39 to<br>2,327.48)      | 1,262.54<br>(767.65 to<br>2,314.71)      | 34.79<br>(25.36 to<br>55.34)          | 77.74<br>(55.17 to<br>102.64)         | 86.80<br>(57.51 to<br>117.31)         | 71.16<br>(51.39 to<br>94.61)          |
| Motor neuron disease                       | 173.06<br>(143.35 to<br>202.62)          | 250.06<br>(189.95 to<br>312.32)          | 251.29<br>(187.21 to<br>317.88)          | 240.12<br>(183.51 to<br>297.36)          | 6.18<br>(5.08 to<br>7.22)             | 10.39<br>(7.94 to<br>12.88)           | 10.73<br>(8.03 to<br>13.52)           | 9.77<br>(7.54 to<br>11.95)            |
| Other neurological disorders               | 2,124.15<br>(1,684.06 to<br>2,608.23)    | 2,162.97<br>(1,745.89 to<br>2,618.62)    | 2,238.21<br>(1,786.74 to<br>2,707.99)    | 2,097.09<br>(1,700.56 to<br>2,530.90)    | 63.60<br>(55.33 to<br>73.38)          | 108.02<br>(89.70 to<br>128.74)        | 120.83<br>(98.13 to<br>146.24)        | 98.14<br>(82.52 to<br>115.94)         |
| Mental disorders                           | 1,655.21<br>(1,311.95 to<br>2,152.33)    | 1,838.13<br>(1,363.42 to<br>2,452.85)    | 2,070.11<br>(1,499.41 to<br>2,740.61)    | 1,835.45<br>(1,373.36 to<br>2,433.52)    | 44.72<br>(35.57 to<br>55.99)          | 65.51<br>(48.57 to<br>81.76)          | 79.55<br>(56.06 to<br>100.67)         | 62.83<br>(47.78 to<br>77.79)          |
| Alcohol use disorders                      | 542.35<br>(402.44 to<br>932.57)          | 486.46<br>(322.49 to<br>980.46)          | 493.92<br>(320.25 to<br>988.97)          | 507.21<br>(338.47 to<br>1,009.35)        | 16.50<br>(12.22 to<br>28.58)          | 18.01<br>(12.97 to<br>32.54)          | 19.23<br>(13.62 to<br>34.09)          | 18.16<br>(12.98 to<br>32.87)          |
| Drug use disorders                         | 1,099.53<br>(821.17 to<br>1,459.89)      | 1,341.52<br>(929.86 to<br>1,797.91)      | 1,564.71<br>(1,073.96 to<br>2,098.64)    | 1,318.18<br>(922.82 to<br>1,778.26)      | 27.98<br>(19.70 to<br>36.53)          | 47.31<br>(29.69 to<br>61.90)          | 60.10<br>(35.31 to<br>80.10)          | 44.48<br>(28.47 to<br>57.87)          |
| Opioid use disorders                       | 879.68<br>(652.25 to<br>1,188.36)        | 916.43<br>(624.92 to<br>1,272.32)        | 968.89<br>(647.30 to<br>1,339.21)        | 908.11<br>(619.37 to<br>1,259.72)        | 20.57<br>(14.99 to<br>26.99)          | 27.82<br>(19.66 to<br>36.78)          | 31.21<br>(21.74 to<br>41.14)          | 26.57<br>(18.99 to<br>35.10)          |

|                           |                                 |                                 |                                 |                                 |                           |                             |                              |                             |
|---------------------------|---------------------------------|---------------------------------|---------------------------------|---------------------------------|---------------------------|-----------------------------|------------------------------|-----------------------------|
|                           | 26.19<br>(9.10 to<br>42.74)     | 40.64<br>(13.98 to<br>66.42)    | 49.98<br>(16.89 to<br>83.57)    | 41.16<br>(14.09 to<br>68.32)    | 0.57<br>(0.19 to<br>0.90) | 1.01<br>(0.38 to<br>1.59)   | 1.27<br>(0.49 to<br>2.05)    | 1.01<br>(0.37 to<br>1.58)   |
| Cocaine use disorders     |                                 |                                 |                                 |                                 |                           |                             |                              |                             |
|                           | 16.55<br>(10.23 to<br>33.13)    | 41.24<br>(24.34 to<br>72.58)    | 58.40<br>(33.05 to<br>101.53)   | 41.52<br>(24.50 to<br>74.40)    | 0.37<br>(0.23 to<br>0.63) | 1.11<br>(0.58 to<br>1.77)   | 1.64<br>(0.82 to<br>2.66)    | 1.09<br>(0.57 to<br>1.70)   |
| Amphetamine use disorders |                                 |                                 |                                 |                                 |                           |                             |                              |                             |
|                           | 177.10<br>(101.57 to<br>243.74) | 343.22<br>(178.09 to<br>483.72) | 487.44<br>(246.09 to<br>709.50) | 327.39<br>(173.39 to<br>459.41) | 6.46<br>(3.06 to<br>8.93) | 17.37<br>(7.23 to<br>24.80) | 25.99<br>(10.19 to<br>37.85) | 15.81<br>(6.86 to<br>22.34) |
| Other drug use disorders  |                                 |                                 |                                 |                                 |                           |                             |                              |                             |
|                           | 13.33<br>(7.12 to<br>19.71)     | 10.15<br>(5.31 to<br>16.47)     | 11.48<br>(5.76 to<br>18.71)     | 10.07<br>(5.36 to<br>16.29)     | 0.24<br>(0.13 to<br>0.34) | 0.19<br>(0.10 to<br>0.30)   | 0.22<br>(0.11 to<br>0.35)    | 0.19<br>(0.10 to<br>0.30)   |
| Eating disorders          |                                 |                                 |                                 |                                 |                           |                             |                              |                             |

| Albania                                                    |                                              |                                              |                                              |                                              |                                     |                                         |                                         |                                           |
|------------------------------------------------------------|----------------------------------------------|----------------------------------------------|----------------------------------------------|----------------------------------------------|-------------------------------------|-----------------------------------------|-----------------------------------------|-------------------------------------------|
| Cause                                                      | YLLs (actual counts)                         |                                              |                                              |                                              | Deaths (actual counts)              |                                         |                                         |                                           |
|                                                            | 2016                                         | 2040 Forecast                                | 2040 Better Scenario                         | 2040 Worse Scenario                          | 2016                                | 2040 Forecast                           | 2040 Better Scenario                    | 2040 Worse Scenario                       |
| <b>Diabetes, urogenital, blood, and endocrine diseases</b> | <b>15,172.58</b><br>(13,284.72 to 17,850.47) | <b>20,591.22</b><br>(14,120.99 to 28,603.30) | <b>15,677.95</b><br>(10,688.02 to 21,818.78) | <b>22,593.66</b><br>(15,603.78 to 31,516.38) | <b>686.58</b><br>(599.39 to 822.05) | <b>1,370.08</b><br>(955.45 to 1,952.55) | <b>1,096.27</b><br>(753.15 to 1,567.89) | <b>1,443.19</b><br>(1,012.64 to 2,031.45) |
| Diabetes mellitus                                          | 2,700.44<br>(2,302.30 to 3,111.72)           | 4,277.36<br>(2,627.97 to 6,671.17)           | 2,826.94<br>(1,741.48 to 4,338.09)           | 4,865.16<br>(2,942.49 to 7,704.46)           | 149.53<br>(126.63 to 173.57)        | 304.82<br>(193.84 to 458.14)            | 214.60<br>(136.58 to 318.30)            | 329.70<br>(212.05 to 493.71)              |
| Acute glomerulonephritis                                   | 18.63<br>(16.07 to 21.49)                    | 42.29<br>(30.36 to 57.88)                    | 33.79<br>(23.89 to 47.34)                    | 43.91<br>(31.50 to 60.14)                    | 0.42<br>(0.37 to 0.48)              | 1.49<br>(1.04 to 2.17)                  | 1.27<br>(0.86 to 1.89)                  | 1.46<br>(1.04 to 2.12)                    |
| Chronic kidney disease                                     | 8,501.00<br>(7,364.51 to 10,178.92)          | 11,714.29<br>(6,707.64 to 19,455.12)         | 8,608.37<br>(4,881.74 to 14,243.44)          | 13,177.91<br>(7,424.01 to 21,899.65)         | 389.61<br>(333.06 to 527.64)        | 783.36<br>(434.24 to 1,344.78)          | 606.25<br>(338.21 to 1,041.03)          | 851.27<br>(476.35 to 1,430.29)            |
| Chronic kidney disease due to diabetes mellitus            | 1,654.24<br>(1,364.79 to 2,054.92)           | 2,981.50<br>(1,633.99 to 5,112.35)           | 2,207.54<br>(1,220.54 to 3,732.71)           | 3,386.12<br>(1,845.78 to 5,880.74)           | 77.87<br>(63.88 to 105.07)          | 180.45<br>(98.21 to 315.51)             | 139.27<br>(76.74 to 247.69)             | 198.85<br>(106.86 to 346.40)              |
| Chronic kidney disease due to hypertension                 | 687.56<br>(561.91 to 932.73)                 | 1,490.24<br>(797.12 to 2,558.35)             | 1,197.97<br>(643.81 to 2,095.90)             | 1,625.38<br>(870.92 to 2,779.01)             | 50.02<br>(40.38 to 73.91)           | 143.49<br>(77.24 to 249.04)             | 121.46<br>(65.61 to 214.53)             | 150.80<br>(81.58 to 262.72)               |
| Chronic kidney disease due to glomerulonephritis           | 2,343.70<br>(2,001.74 to 2,751.65)           | 2,528.22<br>(1,471.81 to 4,191.57)           | 1,766.24<br>(1,007.80 to 2,902.99)           | 2,855.84<br>(1,613.04 to 4,813.15)           | 88.88<br>(74.34 to 112.32)          | 145.63<br>(79.24 to 250.44)             | 105.86<br>(56.61 to 183.30)             | 159.91<br>(87.46 to 276.27)               |
| Chronic kidney disease due to other and unspecified causes | 3,815.49<br>(3,284.98 to 4,505.21)           | 4,714.33<br>(2,716.77 to 7,799.85)           | 3,436.63<br>(1,939.52 to 5,843.68)           | 5,310.56<br>(2,975.67 to 8,956.82)           | 172.83<br>(145.66 to 233.11)        | 313.78<br>(172.44 to 543.35)            | 239.66<br>(130.17 to 425.43)            | 341.71<br>(187.03 to 596.32)              |
| Urinary diseases and male infertility                      | 561.45<br>(486.03 to 640.46)                 | 1,035.38<br>(846.23 to 1,239.28)             | 868.53<br>(677.49 to 1,072.17)               | 975.27<br>(805.10 to 1,158.27)               | 33.57<br>(29.02 to 39.04)           | 87.93<br>(71.13 to 107.47)              | 78.77<br>(61.36 to 99.62)               | 78.76<br>(63.01 to 96.90)                 |
| Urinary tract infections                                   | 319.54<br>(249.34 to 437.03)                 | 699.12<br>(526.69 to 930.09)                 | 607.69<br>(448.79 to 813.68)                 | 654.25<br>(500.91 to 862.87)                 | 19.02<br>(14.67 to 26.13)           | 58.98<br>(43.88 to 78.72)               | 54.65<br>(40.75 to 73.22)               | 52.61<br>(38.88 to 70.15)                 |
| Urolithiasis                                               | 22.14<br>(14.09 to 31.45)                    | 36.55<br>(18.46 to 56.86)                    | 26.92<br>(12.99 to 42.63)                    | 35.64<br>(18.45 to 55.03)                    | 0.80<br>(0.44 to 1.36)              | 2.09<br>(0.95 to 3.85)                  | 1.68<br>(0.75 to 3.10)                  | 1.90<br>(0.89 to 3.46)                    |
| Other urinary diseases                                     | 219.78<br>(132.85 to 305.39)                 | 299.71<br>(160.57 to 455.61)                 | 233.92<br>(120.45 to 362.04)                 | 285.37<br>(155.65 to 426.85)                 | 13.75<br>(8.44 to 19.16)            | 26.86<br>(14.68 to 40.89)               | 22.44<br>(11.68 to 34.66)               | 24.24<br>(12.95 to 37.08)                 |
| Gynecological diseases                                     | 76.16<br>(57.29 to 99.88)                    | 69.22<br>(43.23 to 101.80)                   | 43.99<br>(25.55 to 67.12)                    | 71.36<br>(44.50 to 104.27)                   | 3.37<br>(2.52 to 4.43)              | 4.65<br>(2.77 to 7.06)                  | 3.10<br>(1.77 to 4.75)                  | 4.57<br>(2.74 to 6.86)                    |
| Uterine fibroids                                           | 51.93<br>(35.91 to 70.53)                    | 38.23<br>(20.68 to 62.27)                    | 25.49<br>(13.25 to 42.46)                    | 40.02<br>(21.46 to 64.07)                    | 2.13<br>(1.39 to 2.97)              | 2.11<br>(1.03 to 3.92)                  | 1.46<br>(0.69 to 2.74)                  | 2.14<br>(1.05 to 3.87)                    |
| Polycystic ovarian syndrome                                | 4.39<br>(1.45 to 8.14)                       | 2.32<br>(0.61 to 5.52)                       | 0.96<br>(0.21 to 2.42)                       | 2.60<br>(0.69 to 6.05)                       | 0.10<br>(0.03 to 0.18)              | 0.05<br>(0.01 to 0.15)                  | 0.02<br>(0.00 to 0.05)                  | 0.06<br>(0.02 to 0.14)                    |
| Endometriosis                                              | 0.82<br>(0.32 to 2.20)                       | 0.80<br>(0.22 to 2.09)                       | 0.47<br>(0.13 to 1.21)                       | 0.86<br>(0.24 to 2.25)                       | 0.02<br>(0.01 to 0.04)              | 0.02<br>(0.00 to 0.04)                  | 0.01<br>(0.00 to 0.02)                  | 0.02<br>(0.00 to 0.04)                    |
| Genital prolapse                                           | 2.42<br>(1.09 to 4.15)                       | 2.25<br>(0.84 to 4.63)                       | 1.30<br>(0.47 to 2.57)                       | 2.42<br>(0.86 to 4.89)                       | 0.10<br>(0.05 to 0.18)              | 0.11<br>(0.04 to 0.24)                  | 0.07<br>(0.02 to 0.15)                  | 0.11<br>(0.04 to 0.25)                    |
| Other gynecological diseases                               | 16.61<br>(9.75 to 26.22)                     | 25.63<br>(12.33 to 43.33)                    | 15.78<br>(6.97 to 27.67)                     | 25.46<br>(12.59 to 42.86)                    | 1.04<br>(0.44 to 1.59)              | 2.36<br>(0.82 to 4.15)                  | 1.54<br>(0.49 to 2.79)                  | 2.24<br>(0.81 to 3.95)                    |
| Hemoglobinopathies and hemolytic anemias                   | 1,091.96<br>(897.72 to 1,355.42)             | 899.89<br>(692.06 to 1,223.18)               | 675.99<br>(497.30 to 938.51)                 | 909.60<br>(707.12 to 1,226.91)               | 35.81<br>(29.38 to 48.12)           | 52.19<br>(39.64 to 78.46)               | 42.15<br>(30.04 to 65.97)               | 49.69<br>(37.85 to 74.92)                 |
| Thalassemias                                               | 271.37<br>(174.82 to 444.44)                 | 74.56<br>(43.68 to 128.52)                   | 67.63<br>(39.51 to 117.41)                   | 79.35<br>(45.47 to 137.85)                   | 3.32<br>(2.16 to 5.35)              | 0.94<br>(0.55 to 1.62)                  | 0.85<br>(0.51 to 1.48)                  | 1.00<br>(0.58 to 1.72)                    |

|                                                   |                                       |                                       |                                       |                                       |                              |                                |                                 |                                |
|---------------------------------------------------|---------------------------------------|---------------------------------------|---------------------------------------|---------------------------------------|------------------------------|--------------------------------|---------------------------------|--------------------------------|
|                                                   | 194.50<br>(142.12 to<br>247.30)       | 145.15<br>(95.35 to<br>200.62)        | 100.60<br>(64.07 to<br>141.67)        | 153.04<br>(100.72 to<br>208.40)       | 3.52<br>(2.54 to<br>4.47)    | 3.24<br>(2.19 to<br>4.36)      | 2.30<br>(1.51 to<br>3.15)       | 3.37<br>(2.29 to<br>4.45)      |
| Sickle cell disorders                             |                                       |                                       |                                       |                                       |                              |                                |                                 |                                |
|                                                   | 243.51<br>(165.02 to<br>312.27)       | 251.71<br>(166.83 to<br>336.84)       | 167.54<br>(105.62 to<br>231.85)       | 263.21<br>(173.15 to<br>351.42)       | 5.91<br>(4.20 to<br>7.62)    | 8.87<br>(6.10 to<br>12.46)     | 6.16<br>(4.09 to<br>8.91)       | 8.96<br>(6.30 to<br>12.73)     |
| G6PD deficiency                                   |                                       |                                       |                                       |                                       |                              |                                |                                 |                                |
|                                                   | 382.59<br>(308.96 to<br>513.04)       | 428.47<br>(311.10 to<br>641.40)       | 340.22<br>(234.28 to<br>528.40)       | 414.00<br>(311.86 to<br>618.23)       | 23.07<br>(17.86 to<br>33.58) | 39.14<br>(27.98 to<br>61.74)   | 32.83<br>(22.36 to<br>54.11)    | 36.36<br>(25.79 to<br>58.42)   |
| Other hemoglobinopathies and hemolytic anemias    |                                       |                                       |                                       |                                       |                              |                                |                                 |                                |
|                                                   | 2,222.93<br>(1,734.09 to<br>3,701.34) | 2,552.78<br>(2,060.64 to<br>3,215.74) | 2,620.33<br>(2,092.48 to<br>3,209.37) | 2,550.46<br>(2,053.67 to<br>3,341.91) | 74.27<br>(61.75 to<br>89.63) | 135.64<br>(94.29 to<br>167.15) | 150.12<br>(101.09 to<br>187.33) | 127.73<br>(91.60 to<br>156.01) |
| Endocrine, metabolic, blood, and immune disorders |                                       |                                       |                                       |                                       |                              |                                |                                 |                                |

| Albania                                       |                                             |                                           |                                           |                                            |                                     |                                   |                                  |                                    |
|-----------------------------------------------|---------------------------------------------|-------------------------------------------|-------------------------------------------|--------------------------------------------|-------------------------------------|-----------------------------------|----------------------------------|------------------------------------|
| Cause                                         | YLLs (actual counts)                        |                                           |                                           |                                            | Deaths (actual counts)              |                                   |                                  |                                    |
|                                               | 2016                                        | 2040 Forecast                             | 2040 Better Scenario                      | 2040 Worse Scenario                        | 2016                                | 2040 Forecast                     | 2040 Better Scenario             | 2040 Worse Scenario                |
| <b>Musculoskeletal disorders</b>              | <b>364.21</b><br>(263.80 to 433.54)         | <b>651.57</b><br>(377.54 to 829.36)       | <b>538.25</b><br>(311.06 to 701.52)       | <b>629.72</b><br>(374.35 to 793.30)        | <b>16.90</b><br>(10.09 to 20.62)    | <b>44.08</b><br>(21.56 to 57.59)  | <b>38.19</b><br>(18.16 to 51.00) | <b>40.93</b><br>(20.43 to 53.29)   |
| Rheumatoid arthritis                          | 153.63<br>(97.99 to 190.92)                 | 291.83<br>(172.51 to 400.05)              | 191.84<br>(115.16 to 282.47)              | 292.81<br>(174.06 to 394.05)               | 7.50<br>(4.72 to 9.69)              | 20.04<br>(11.77 to 28.24)         | 13.84<br>(8.16 to 21.05)         | 19.38<br>(11.36 to 26.92)          |
| Other musculoskeletal disorders               | 210.58<br>(153.36 to 252.32)                | 359.74<br>(184.39 to 475.76)              | 346.42<br>(180.59 to 458.19)              | 336.91<br>(176.81 to 438.23)               | 9.39<br>(5.05 to 11.82)             | 24.04<br>(8.78 to 33.41)          | 24.35<br>(9.18 to 33.43)         | 21.55<br>(7.90 to 29.75)           |
| <b>Other non-communicable diseases</b>        | <b>14,303.24</b><br>(9,254.74 to 21,334.63) | <b>5,735.49</b><br>(3,622.04 to 9,080.51) | <b>3,332.19</b><br>(2,013.84 to 5,470.97) | <b>6,560.19</b><br>(3,984.41 to 10,563.99) | <b>178.32</b><br>(118.13 to 260.60) | <b>91.93</b><br>(63.55 to 132.28) | <b>61.14</b><br>(41.75 to 90.11) | <b>100.01</b><br>(67.89 to 146.82) |
| Congenital birth defects                      | 12,713.11<br>(8,160.88 to 18,973.60)        | 4,898.09<br>(2,953.63 to 7,858.08)        | 2,708.03<br>(1,516.58 to 4,592.61)        | 5,655.46<br>(3,321.77 to 9,204.79)         | 155.09<br>(101.17 to 228.64)        | 63.72<br>(39.33 to 98.90)         | 35.92<br>(21.26 to 57.78)        | 72.79<br>(44.67 to 115.41)         |
| Neural tube defects                           | 674.86<br>(331.34 to 1,292.86)              | 121.69<br>(53.70 to 265.59)               | 59.87<br>(24.39 to 137.44)                | 148.36<br>(64.21 to 325.85)                | 7.98<br>(3.97 to 15.17)             | 1.50<br>(0.69 to 3.21)            | 0.75<br>(0.32 to 1.67)           | 1.82<br>(0.83 to 3.86)             |
| Congenital heart anomalies                    | 9,082.37<br>(5,666.03 to 13,774.46)         | 3,373.65<br>(1,972.58 to 5,630.49)        | 1,742.57<br>(928.28 to 3,074.35)          | 3,891.25<br>(2,235.85 to 6,478.80)         | 110.68<br>(69.71 to 165.19)         | 43.46<br>(26.59 to 70.13)         | 22.65<br>(12.47 to 38.40)        | 49.68<br>(29.70 to 80.23)          |
| Orofacial clefts                              | 4.14<br>(1.52 to 10.25)                     | 2.34<br>(0.58 to 7.40)                    | 1.03<br>(0.25 to 3.43)                    | 2.88<br>(0.73 to 8.96)                     | 0.05<br>(0.02 to 0.12)              | 0.03<br>(0.01 to 0.09)            | 0.01<br>(0.00 to 0.04)           | 0.03<br>(0.01 to 0.10)             |
| Down syndrome                                 | 204.75<br>(127.77 to 334.58)                | 142.15<br>(90.79 to 235.63)               | 140.97<br>(90.26 to 222.15)               | 155.48<br>(97.49 to 249.79)                | 3.05<br>(2.07 to 4.58)              | 2.55<br>(1.64 to 3.72)            | 2.58<br>(1.66 to 3.80)           | 2.73<br>(1.76 to 4.06)             |
| Other chromosomal abnormalities               | 337.71<br>(82.08 to 621.12)                 | 231.73<br>(52.10 to 479.63)               | 165.64<br>(39.49 to 340.16)               | 273.63<br>(60.55 to 575.02)                | 3.93<br>(0.98 to 7.22)              | 2.72<br>(0.63 to 5.60)            | 1.95<br>(0.47 to 3.97)           | 3.21<br>(0.72 to 6.70)             |
| Congenital musculoskeletal and limb anomalies | 179.33<br>(95.16 to 354.28)                 | 85.67<br>(38.46 to 180.72)                | 50.17<br>(21.75 to 107.87)                | 98.31<br>(42.81 to 212.77)                 | 2.15<br>(1.17 to 4.18)              | 1.07<br>(0.52 to 2.18)            | 0.63<br>(0.30 to 1.30)           | 1.22<br>(0.59 to 2.57)             |
| Urogenital congenital anomalies               | 98.15<br>(58.83 to 159.51)                  | 44.10<br>(24.84 to 78.67)                 | 27.93<br>(15.41 to 50.48)                 | 50.49<br>(27.40 to 89.85)                  | 1.27<br>(0.81 to 2.00)              | 0.64<br>(0.40 to 1.06)            | 0.41<br>(0.25 to 0.70)           | 0.71<br>(0.43 to 1.20)             |
| Digestive congenital anomalies                | 672.98<br>(337.65 to 1,168.70)              | 259.16<br>(105.58 to 537.41)              | 140.07<br>(54.33 to 296.65)               | 306.19<br>(126.04 to 625.10)               | 7.83<br>(3.94 to 13.58)             | 3.03<br>(1.26 to 6.27)            | 1.64<br>(0.65 to 3.46)           | 3.58<br>(1.49 to 7.28)             |
| Other congenital birth defects                | 1,458.82<br>(691.84 to 2,934.96)            | 637.60<br>(306.07 to 1,296.60)            | 379.79<br>(174.78 to 771.47)              | 728.85<br>(336.51 to 1,516.85)             | 18.16<br>(9.19 to 34.92)            | 8.72<br>(4.75 to 16.02)           | 5.29<br>(2.80 to 9.76)           | 9.81<br>(5.15 to 18.74)            |
| Skin and subcutaneous diseases                | 153.42<br>(99.64 to 296.12)                 | 379.03<br>(240.47 to 708.72)              | 339.21<br>(211.63 to 642.04)              | 367.98<br>(235.78 to 696.69)               | 6.55<br>(4.18 to 12.95)             | 22.89<br>(14.63 to 44.63)         | 21.92<br>(13.92 to 41.42)        | 20.99<br>(13.34 to 41.16)          |
| Cellulitis                                    | 26.51<br>(15.35 to 63.54)                   | 73.40<br>(41.62 to 168.27)                | 72.35<br>(41.65 to 163.36)                | 69.39<br>(39.17 to 160.34)                 | 1.05<br>(0.59 to 2.61)              | 3.81<br>(2.20 to 8.36)            | 4.04<br>(2.34 to 8.74)           | 3.42<br>(1.96 to 7.56)             |
| Pyoderma                                      | 82.83<br>(50.80 to 160.39)                  | 221.91<br>(132.29 to 433.59)              | 195.34<br>(116.66 to 383.38)              | 219.31<br>(133.14 to 424.13)               | 3.26<br>(1.93 to 6.89)              | 12.91<br>(7.51 to 27.35)          | 12.27<br>(6.97 to 25.26)         | 12.05<br>(7.06 to 25.28)           |
| Decubitus ulcer                               | 25.31<br>(16.73 to 46.52)                   | 51.29<br>(27.88 to 98.31)                 | 42.61<br>(22.67 to 80.44)                 | 48.10<br>(27.46 to 91.52)                  | 1.52<br>(0.95 to 2.96)              | 4.47<br>(2.34 to 8.94)            | 3.97<br>(2.01 to 7.82)           | 3.97<br>(2.09 to 7.98)             |
| Other skin and subcutaneous diseases          | 18.77<br>(12.75 to 36.06)                   | 32.42<br>(20.43 to 61.71)                 | 28.91<br>(18.10 to 55.16)                 | 31.18<br>(19.92 to 59.60)                  | 0.71<br>(0.45 to 1.46)              | 1.70<br>(1.02 to 3.60)            | 1.63<br>(0.96 to 3.35)           | 1.54<br>(0.93 to 3.23)             |
| Sudden infant death syndrome                  | 1,436.71<br>(746.27 to 2,658.80)            | 458.38<br>(177.05 to 1,042.41)            | 284.95<br>(109.08 to 636.44)              | 536.76<br>(209.98 to 1,185.71)             | 16.67<br>(8.66 to 30.85)            | 5.32<br>(2.05 to 12.09)           | 3.30<br>(1.26 to 7.38)           | 6.22<br>(2.43 to 13.75)            |



|                          |                                          |                                          |                                          |                                          |                                 |                                   |                                 |                                   |
|--------------------------|------------------------------------------|------------------------------------------|------------------------------------------|------------------------------------------|---------------------------------|-----------------------------------|---------------------------------|-----------------------------------|
| Injuries                 | 34,669.70<br>(30,435.60 to<br>39,496.33) | 23,625.03<br>(15,690.86 to<br>35,226.48) | 16,756.70<br>(11,281.72 to<br>25,432.95) | 30,370.67<br>(19,948.77 to<br>46,030.47) | 802.68<br>(704.91 to<br>908.62) | 730.67<br>(533.12 to<br>1,015.95) | 554.84<br>(402.87 to<br>771.17) | 872.58<br>(624.80 to<br>1,232.82) |
| Transport injuries       | 12,241.06<br>(10,383.14 to<br>14,385.14) | 6,526.00<br>(3,608.64 to<br>11,345.64)   | 4,240.49<br>(2,425.93 to<br>7,109.58)    | 12,212.07<br>(6,738.92 to<br>21,010.50)  | 278.38<br>(238.37 to<br>321.47) | 199.71<br>(123.83 to<br>323.75)   | 136.93<br>(87.51 to<br>214.43)  | 333.69<br>(202.60 to<br>545.01)   |
| Road injuries            | 10,836.04<br>(9,150.87 to<br>12,730.01)  | 4,973.27<br>(2,781.92 to<br>8,634.30)    | 3,265.99<br>(1,900.07 to<br>5,478.86)    | 10,524.40<br>(5,870.90 to<br>18,117.85)  | 244.19<br>(209.05 to<br>282.53) | 150.07<br>(93.45 to<br>241.27)    | 104.45<br>(67.44 to<br>163.39)  | 281.64<br>(171.69 to<br>456.39)   |
| Pedestrian road injuries | 2,309.45<br>(1,732.01 to<br>2,847.39)    | 1,167.11<br>(685.15 to<br>1,929.15)      | 607.86<br>(356.82 to<br>1,006.58)        | 2,159.89<br>(1,222.50 to<br>3,668.55)    | 64.05<br>(49.70 to<br>77.89)    | 46.94<br>(30.63 to<br>71.58)      | 26.79<br>(16.97 to<br>41.06)    | 77.64<br>(49.35 to<br>121.88)     |

| Albania                                         |                                                              |                                                             |                                                            |                                                             |                                                      |                                                      |                                                      |                                                      |
|-------------------------------------------------|--------------------------------------------------------------|-------------------------------------------------------------|------------------------------------------------------------|-------------------------------------------------------------|------------------------------------------------------|------------------------------------------------------|------------------------------------------------------|------------------------------------------------------|
| Cause                                           | YLLs (actual counts)                                         |                                                             |                                                            |                                                             | Deaths (actual counts)                               |                                                      |                                                      |                                                      |
|                                                 | 2016                                                         | 2040 Forecast                                               | 2040 Better Scenario                                       | 2040 Worse Scenario                                         | 2016                                                 | 2040 Forecast                                        | 2040 Better Scenario                                 | 2040 Worse Scenario                                  |
| Cyclist road injuries                           | 809.64<br>(577.82 to<br>1,014.98)                            | 446.58<br>(235.60 to<br>837.81)                             | 328.60<br>(180.30 to<br>593.13)                            | 869.32<br>(452.12 to<br>1,616.26)                           | 21.07<br>(15.18 to<br>25.91)                         | 14.26<br>(7.95 to<br>25.68)                          | 11.12<br>(6.48 to<br>19.24)                          | 25.03<br>(13.72 to<br>45.57)                         |
| Motorcyclist road injuries                      | 1,743.10<br>(1,231.87 to<br>2,309.68)                        | 1,043.53<br>(455.72 to<br>2,153.75)                         | 803.21<br>(360.03 to<br>1,594.39)                          | 1,741.93<br>(749.76 to<br>3,513.73)                         | 32.47<br>(23.87 to<br>42.26)                         | 22.56<br>(10.45 to<br>44.56)                         | 18.15<br>(8.88 to<br>34.50)                          | 35.27<br>(16.09 to<br>68.25)                         |
| Motor vehicle road injuries                     | 5,716.69<br>(4,653.85 to<br>7,155.17)                        | 2,208.95<br>(1,218.51 to<br>3,779.14)                       | 1,455.11<br>(829.81 to<br>2,400.19)                        | 5,488.12<br>(2,937.87 to<br>9,247.39)                       | 121.75<br>(100.39 to<br>147.07)                      | 63.45<br>(38.18 to<br>101.04)                        | 46.20<br>(28.96 to<br>70.60)                         | 137.74<br>(81.75 to<br>224.39)                       |
| Other road injuries                             | 257.16<br>(168.58 to<br>353.37)                              | 107.09<br>(51.67 to<br>204.79)                              | 71.20<br>(35.64 to<br>131.23)                              | 265.14<br>(123.20 to<br>515.51)                             | 4.85<br>(3.62 to<br>6.38)                            | 2.87<br>(1.49 to<br>5.32)                            | 2.18<br>(1.19 to<br>4.03)                            | 5.96<br>(2.92 to<br>11.02)                           |
| Other transport injuries                        | 1,405.02<br>(1,096.20 to<br>1,734.12)                        | 1,552.74<br>(829.42 to<br>2,798.29)                         | 974.50<br>(528.74 to<br>1,728.89)                          | 1,687.67<br>(902.34 to<br>3,014.53)                         | 34.19<br>(28.27 to<br>41.53)                         | 49.64<br>(29.53 to<br>82.77)                         | 32.48<br>(19.08 to<br>54.29)                         | 52.05<br>(30.80 to<br>88.11)                         |
| <b>Unintentional injuries</b>                   | <b>11,086.49</b><br><b>(9,393.87 to</b><br><b>13,614.95)</b> | <b>8,387.71</b><br><b>(6,147.17 to</b><br><b>11,458.84)</b> | <b>6,196.29</b><br><b>(4,476.06 to</b><br><b>8,546.18)</b> | <b>8,772.70</b><br><b>(6,420.87 to</b><br><b>11,962.02)</b> | <b>272.99</b><br><b>(232.83 to</b><br><b>343.86)</b> | <b>298.02</b><br><b>(232.26 to</b><br><b>409.63)</b> | <b>242.08</b><br><b>(182.11 to</b><br><b>339.72)</b> | <b>294.34</b><br><b>(227.74 to</b><br><b>465.32)</b> |
| Falls                                           | 2,036.40<br>(1,682.32 to<br>2,457.31)                        | 1,874.36<br>(1,435.93 to<br>2,501.01)                       | 1,596.25<br>(1,184.66 to<br>2,145.59)                      | 1,862.73<br>(1,438.19 to<br>2,451.96)                       | 69.50<br>(56.58 to<br>98.03)                         | 95.38<br>(71.62 to<br>159.01)                        | 86.70<br>(63.45 to<br>145.80)                        | 89.80<br>(67.16 to<br>149.61)                        |
| Drowning                                        | 2,026.93<br>(1,643.24 to<br>2,812.35)                        | 1,233.38<br>(721.67 to<br>2,106.69)                         | 895.29<br>(523.59 to<br>1,503.09)                          | 1,347.79<br>(787.16 to<br>2,296.02)                         | 37.70<br>(31.31 to<br>50.84)                         | 28.83<br>(18.32 to<br>46.18)                         | 21.89<br>(13.88 to<br>35.23)                         | 30.48<br>(18.85 to<br>49.84)                         |
| Fire, heat, and hot substances                  | 557.78<br>(428.51 to<br>822.64)                              | 368.39<br>(228.96 to<br>631.49)                             | 251.93<br>(155.98 to<br>424.79)                            | 392.27<br>(241.77 to<br>665.48)                             | 15.95<br>(12.46 to<br>23.53)                         | 16.68<br>(10.63 to<br>28.41)                         | 12.47<br>(7.86 to<br>20.66)                          | 16.65<br>(10.41 to<br>28.33)                         |
| Poisonings                                      | 491.43<br>(369.96 to<br>741.91)                              | 236.42<br>(138.95 to<br>414.87)                             | 144.72<br>(85.07 to<br>262.00)                             | 261.25<br>(152.89 to<br>474.20)                             | 11.55<br>(9.03 to<br>17.62)                          | 8.80<br>(5.54 to<br>14.57)                           | 5.98<br>(3.70 to<br>9.71)                            | 9.03<br>(5.57 to<br>14.92)                           |
| Exposure to mechanical forces                   | 2,958.87<br>(2,352.16 to<br>4,075.68)                        | 2,235.88<br>(1,568.03 to<br>3,222.62)                       | 1,592.11<br>(1,088.14 to<br>2,341.40)                      | 2,376.04<br>(1,659.82 to<br>3,443.55)                       | 62.97<br>(51.37 to<br>86.06)                         | 62.64<br>(45.47 to<br>87.39)                         | 47.02<br>(33.48 to<br>67.32)                         | 64.08<br>(46.74 to<br>90.25)                         |
| Unintentional firearm injuries                  | 285.60<br>(202.25 to<br>478.09)                              | 196.72<br>(121.35 to<br>337.85)                             | 147.13<br>(89.91 to<br>254.35)                             | 209.70<br>(130.29 to<br>357.59)                             | 6.27<br>(4.61 to<br>9.93)                            | 5.73<br>(3.96 to<br>8.87)                            | 4.67<br>(3.21 to<br>7.22)                            | 5.85<br>(4.08 to<br>9.28)                            |
| Unintentional suffocation                       | 657.88<br>(409.21 to<br>1,059.67)                            | 296.64<br>(182.07 to<br>470.94)                             | 216.48<br>(133.45 to<br>341.77)                            | 330.42<br>(199.89 to<br>532.34)                             | 9.80<br>(6.67 to<br>14.63)                           | 5.52<br>(3.71 to<br>8.11)                            | 4.19<br>(2.84 to<br>6.05)                            | 5.93<br>(3.94 to<br>8.65)                            |
| Other exposure to mechanical forces             | 2,015.40<br>(1,602.95 to<br>2,887.88)                        | 1,742.52<br>(1,192.93 to<br>2,561.00)                       | 1,228.51<br>(800.75 to<br>1,866.12)                        | 1,835.92<br>(1,269.88 to<br>2,734.76)                       | 46.90<br>(37.49 to<br>66.57)                         | 51.39<br>(36.44 to<br>73.39)                         | 38.17<br>(26.37 to<br>56.31)                         | 52.30<br>(37.46 to<br>75.36)                         |
| Adverse effects of medical treatment            | 908.72<br>(740.36 to<br>1,125.68)                            | 725.32<br>(546.11 to<br>959.91)                             | 618.55<br>(456.99 to<br>830.24)                            | 743.01<br>(566.20 to<br>988.27)                             | 27.78<br>(22.71 to<br>36.71)                         | 34.81<br>(26.39 to<br>47.80)                         | 32.07<br>(24.26 to<br>43.67)                         | 33.51<br>(25.33 to<br>46.69)                         |
| Animal contact                                  | 55.02<br>(44.06 to<br>70.40)                                 | 58.64<br>(41.99 to<br>82.59)                                | 44.86<br>(31.80 to<br>64.27)                               | 62.20<br>(43.92 to<br>87.32)                                | 1.51<br>(1.22 to<br>2.00)                            | 2.19<br>(1.63 to<br>3.01)                            | 1.78<br>(1.30 to<br>2.49)                            | 2.21<br>(1.65 to<br>3.09)                            |
| Venomous animal contact                         | 19.86<br>(14.88 to<br>26.23)                                 | 18.35<br>(12.06 to<br>27.74)                                | 14.54<br>(9.45 to<br>22.19)                                | 19.85<br>(12.94 to<br>29.76)                                | 0.46<br>(0.34 to<br>0.64)                            | 0.56<br>(0.37 to<br>0.87)                            | 0.47<br>(0.31 to<br>0.73)                            | 0.58<br>(0.38 to<br>0.89)                            |
| Non-venomous animal contact                     | 35.16<br>(27.28 to<br>46.68)                                 | 40.29<br>(28.46 to<br>57.35)                                | 30.32<br>(20.85 to<br>44.50)                               | 42.35<br>(29.60 to<br>60.74)                                | 1.05<br>(0.83 to<br>1.39)                            | 1.63<br>(1.17 to<br>2.24)                            | 1.31<br>(0.93 to<br>1.87)                            | 1.63<br>(1.18 to<br>2.31)                            |
| Foreign body                                    | 630.97<br>(484.80 to<br>819.76)                              | 405.67<br>(306.30 to<br>546.07)                             | 365.95<br>(273.86 to<br>493.88)                            | 412.78<br>(309.38 to<br>555.02)                             | 14.56<br>(11.91 to<br>18.20)                         | 14.87<br>(11.53 to<br>18.66)                         | 14.66<br>(11.05 to<br>18.27)                         | 14.12<br>(11.10 to<br>18.02)                         |
| Pulmonary aspiration and foreign body in airway | 560.20<br>(425.02 to<br>741.15)                              | 369.68<br>(278.32 to<br>512.32)                             | 329.97<br>(245.98 to<br>455.99)                            | 374.96<br>(279.29 to<br>516.15)                             | 13.06<br>(10.56 to<br>16.81)                         | 13.66<br>(10.61 to<br>17.47)                         | 13.34<br>(10.17 to<br>16.85)                         | 12.92<br>(10.12 to<br>16.93)                         |

|                                             |                                                              |                                                             |                                                            |                                                             |                                                      |                                                      |                                                      |                                                      |
|---------------------------------------------|--------------------------------------------------------------|-------------------------------------------------------------|------------------------------------------------------------|-------------------------------------------------------------|------------------------------------------------------|------------------------------------------------------|------------------------------------------------------|------------------------------------------------------|
|                                             | 70.77<br>(25.48 to<br>108.00)                                | 36.00<br>(14.73 to<br>56.74)                                | 35.98<br>(15.07 to<br>56.49)                               | 37.82<br>(15.26 to<br>59.60)                                | 1.49<br>(0.64 to<br>2.10)                            | 1.22<br>(0.57 to<br>1.73)                            | 1.32<br>(0.61 to<br>1.89)                            | 1.20<br>(0.56 to<br>1.70)                            |
| Foreign body in other body part             |                                                              |                                                             |                                                            |                                                             |                                                      |                                                      |                                                      |                                                      |
| Environmental heat and cold exposure        | 176.79<br>(117.67 to<br>229.79)                              | 138.43<br>(87.22 to<br>197.96)                              | 93.27<br>(58.36 to<br>137.69)                              | 148.76<br>(93.69 to<br>217.61)                              | 4.77<br>(3.47 to<br>6.26)                            | 4.64<br>(3.20 to<br>6.46)                            | 3.30<br>(2.21 to<br>4.68)                            | 4.79<br>(3.33 to<br>6.62)                            |
| Other unintentional injuries                | 1,243.58<br>(963.76 to<br>2,008.62)                          | 1,111.20<br>(703.95 to<br>1,738.71)                         | 593.35<br>(347.19 to<br>999.23)                            | 1,165.88<br>(734.64 to<br>1,832.67)                         | 26.69<br>(20.84 to<br>40.73)                         | 29.16<br>(20.29 to<br>44.44)                         | 16.21<br>(10.15 to<br>26.19)                         | 29.67<br>(20.94 to<br>45.21)                         |
| <b>Self-harm and interpersonal violence</b> | <b>11,315.15</b><br><b>(9,354.89 to</b><br><b>13,421.12)</b> | <b>8,493.90</b><br><b>(4,928.02 to</b><br><b>13,785.65)</b> | <b>6,104.86</b><br><b>(3,603.96 to</b><br><b>9,607.48)</b> | <b>9,166.49</b><br><b>(5,193.53 to</b><br><b>15,068.19)</b> | <b>250.56</b><br><b>(206.57 to</b><br><b>296.41)</b> | <b>227.79</b><br><b>(140.85 to</b><br><b>357.11)</b> | <b>170.54</b><br><b>(108.23 to</b><br><b>262.69)</b> | <b>239.50</b><br><b>(144.69 to</b><br><b>382.62)</b> |

| Albania                                                                             |                                                   |                                                    |                                                    |                                                    |                                                |                                                 |                                                 |                                                 |
|-------------------------------------------------------------------------------------|---------------------------------------------------|----------------------------------------------------|----------------------------------------------------|----------------------------------------------------|------------------------------------------------|-------------------------------------------------|-------------------------------------------------|-------------------------------------------------|
| Cause                                                                               | YLLs (actual counts)                              |                                                    |                                                    |                                                    | Deaths (actual counts)                         |                                                 |                                                 |                                                 |
|                                                                                     | 2016                                              | 2040 Forecast                                      | 2040 Better Scenario                               | 2040 Worse Scenario                                | 2016                                           | 2040 Forecast                                   | 2040 Better Scenario                            | 2040 Worse Scenario                             |
| Self-harm                                                                           | 7,988.00<br>(5,792.11 to<br>9,756.81)             | 6,483.35<br>(3,287.65 to<br>11,433.06)             | 4,683.89<br>(2,539.27 to<br>7,856.98)              | 7,112.93<br>(3,490.57 to<br>12,752.91)             | 181.03<br>(136.76 to<br>220.13)                | 177.74<br>(98.15 to<br>301.35)                  | 133.84<br>(78.13 to<br>218.27)                  | 189.28<br>(100.50 to<br>325.20)                 |
| Self-harm by firearm                                                                | 2,082.37<br>(1,224.12 to<br>2,839.52)             | 1,325.15<br>(589.61 to<br>2,496.29)                | 878.64<br>(407.10 to<br>1,621.10)                  | 1,473.70<br>(637.42 to<br>2,811.34)                | 44.29<br>(26.62 to<br>60.11)                   | 34.63<br>(17.08 to<br>62.07)                    | 24.07<br>(12.44 to<br>42.64)                    | 37.24<br>(17.77 to<br>68.17)                    |
| Self-harm by other specified means                                                  | 5,905.63<br>(4,359.66 to<br>7,244.87)             | 5,158.21<br>(2,634.56 to<br>9,064.31)              | 3,805.25<br>(2,098.95 to<br>6,411.76)              | 5,639.23<br>(2,800.41 to<br>10,083.88)             | 136.74<br>(104.55 to<br>166.58)                | 143.11<br>(79.83 to<br>239.46)                  | 109.77<br>(64.49 to<br>181.86)                  | 152.04<br>(82.38 to<br>260.24)                  |
| Interpersonal violence                                                              | 3,327.16<br>(2,564.91 to<br>4,844.75)             | 2,010.55<br>(1,298.70 to<br>3,099.43)              | 1,420.97<br>(917.21 to<br>2,262.27)                | 2,053.56<br>(1,336.37 to<br>3,201.22)              | 69.53<br>(54.29 to<br>102.16)                  | 50.05<br>(34.65 to<br>76.06)                    | 36.70<br>(24.86 to<br>56.33)                    | 50.22<br>(34.93 to<br>77.43)                    |
| Physical violence by firearm                                                        | 2,442.12<br>(1,849.06 to<br>3,750.57)             | 1,431.35<br>(893.29 to<br>2,299.36)                | 986.61<br>(618.03 to<br>1,615.53)                  | 1,455.13<br>(906.04 to<br>2,408.46)                | 49.71<br>(37.83 to<br>76.37)                   | 33.09<br>(21.89 to<br>52.74)                    | 23.31<br>(14.97 to<br>37.57)                    | 33.21<br>(22.23 to<br>53.74)                    |
| Physical violence by sharp object                                                   | 436.84<br>(254.22 to<br>742.11)                   | 294.88<br>(163.19 to<br>507.15)                    | 214.80<br>(119.96 to<br>374.78)                    | 295.49<br>(163.13 to<br>514.21)                    | 9.35<br>(5.84 to<br>15.41)                     | 7.83<br>(4.64 to<br>12.92)                      | 5.98<br>(3.61 to<br>9.82)                       | 7.66<br>(4.55 to<br>12.70)                      |
| Physical violence by other means                                                    | 448.20<br>(296.86 to<br>774.63)                   | 284.33<br>(147.52 to<br>513.46)                    | 219.56<br>(117.48 to<br>399.36)                    | 302.94<br>(154.83 to<br>554.77)                    | 10.46<br>(7.02 to<br>17.65)                    | 9.13<br>(5.03 to<br>16.21)                      | 7.41<br>(4.18 to<br>12.86)                      | 9.35<br>(5.06 to<br>17.06)                      |
| <b>Forces of nature, conflict and terrorism, and executions and police conflict</b> | <b>27.01</b><br><b>(16.46 to</b><br><b>41.16)</b> | <b>217.42</b><br><b>(0.00 to</b><br><b>702.39)</b> | <b>215.06</b><br><b>(0.00 to</b><br><b>696.80)</b> | <b>219.40</b><br><b>(0.00 to</b><br><b>710.23)</b> | <b>0.75</b><br><b>(0.32 to</b><br><b>1.23)</b> | <b>5.15</b><br><b>(0.00 to</b><br><b>18.62)</b> | <b>5.30</b><br><b>(0.00 to</b><br><b>19.05)</b> | <b>5.05</b><br><b>(0.00 to</b><br><b>18.35)</b> |
| Exposure to forces of nature                                                        | 0.00<br>(0.00 to<br>0.00)                         | 26.11<br>(0.00 to<br>488.45)                       | 25.83<br>(0.00 to<br>485.07)                       | 26.34<br>(0.00 to<br>491.40)                       | 0.00<br>(0.00 to<br>0.00)                      | 0.69<br>(0.00 to<br>12.56)                      | 0.71<br>(0.00 to<br>12.97)                      | 0.68<br>(0.00 to<br>12.23)                      |
| Conflict and terrorism                                                              | 0.00<br>(0.00 to<br>0.00)                         | 191.31<br>(0.00 to<br>96.69)                       | 189.23<br>(0.00 to<br>99.43)                       | 193.06<br>(0.00 to<br>95.59)                       | 0.00<br>(0.00 to<br>0.00)                      | 4.46<br>(0.00 to<br>4.22)                       | 4.59<br>(0.00 to<br>4.97)                       | 4.37<br>(0.00 to<br>3.82)                       |
| Executions and police conflict                                                      | 27.01<br>(16.46 to<br>41.16)                      | 0.00<br>(0.00 to<br>0.00)                          | 0.00<br>(0.00 to<br>0.00)                          | 0.00<br>(0.00 to<br>0.00)                          | 0.75<br>(0.32 to<br>1.23)                      | 0.00<br>(0.00 to<br>0.00)                       | 0.00<br>(0.00 to<br>0.00)                       | 0.00<br>(0.00 to<br>0.00)                       |

| Bosnia and Herzegovina                                            |                                          |                                          |                                          |                                          |                                       |                                       |                                       |                                       |
|-------------------------------------------------------------------|------------------------------------------|------------------------------------------|------------------------------------------|------------------------------------------|---------------------------------------|---------------------------------------|---------------------------------------|---------------------------------------|
| Cause                                                             | YLLs (actual counts)                     |                                          |                                          |                                          | Deaths (actual counts)                |                                       |                                       |                                       |
|                                                                   | 2016                                     | 2040 Forecast                            | 2040 Better Scenario                     | 2040 Worse Scenario                      | 2016                                  | 2040 Forecast                         | 2040 Better Scenario                  | 2040 Worse Scenario                   |
| All causes                                                        | 684,483.19<br>(594,080.27 to 780,176.10) | 683,582.53<br>(551,901.02 to 811,635.38) | 435,971.82<br>(353,675.43 to 520,988.06) | 788,984.63<br>(632,322.64 to 946,026.07) | 38,740.66<br>(34,043.01 to 43,799.14) | 47,475.02<br>(40,270.26 to 55,305.78) | 32,642.67<br>(27,551.13 to 38,468.53) | 52,757.94<br>(45,026.60 to 60,952.11) |
| Communicable, maternal, neonatal, and nutritional diseases        | 19,182.39<br>(16,215.20 to 23,114.44)    | 12,174.02<br>(8,820.45 to 17,148.52)     | 6,489.23<br>(4,838.22 to 8,893.91)       | 14,819.95<br>(10,436.64 to 21,176.68)    | 662.27<br>(555.58 to 873.59)          | 678.15<br>(483.00 to 1,023.46)        | 389.68<br>(289.00 to 577.22)          | 783.95<br>(529.82 to 1,193.25)        |
| HIV/AIDS and tuberculosis                                         | 3,077.98<br>(2,576.33 to 3,649.29)       | 2,029.52<br>(987.79 to 4,264.43)         | 702.02<br>(371.07 to 1,351.77)           | 2,539.79<br>(1,193.47 to 5,362.21)       | 148.39<br>(124.62 to 173.73)          | 123.85<br>(244.55)                    | 45.65<br>(84.68)                      | 148.39<br>(72.30 to 309.47)           |
| Tuberculosis                                                      | 2,927.52<br>(2,415.04 to 3,501.58)       | 1,976.05<br>(927.78 to 4,209.29)         | 658.09<br>(322.19 to 1,311.14)           | 2,419.04<br>(1,065.57 to 5,236.36)       | 144.90<br>(121.02 to 170.40)          | 122.64<br>(61.71 to 243.08)           | 44.67<br>(23.07 to 83.74)             | 145.58<br>(68.28 to 306.24)           |
| HIV/AIDS                                                          | 150.66<br>(126.83 to 184.96)             | 53.47<br>(34.03 to 81.89)                | 43.93<br>(27.30 to 70.73)                | 120.76<br>(80.30 to 163.31)              | 3.49<br>(2.90 to 4.38)                | 1.21<br>(0.62 to 2.08)                | 0.98<br>(0.47 to 1.83)                | 2.82<br>(1.66 to 4.01)                |
| Diarrhea, lower respiratory, and other common infectious diseases | 8,162.59<br>(6,594.53 to 11,805.91)      | 7,071.09<br>(4,402.39 to 11,200.03)      | 3,831.05<br>(2,602.44 to 6,035.71)       | 8,816.58<br>(5,305.96 to 13,846.74)      | 393.71<br>(309.17 to 599.49)          | 490.67<br>(310.84 to 813.99)          | 293.98<br>(198.79 to 475.72)          | 568.75<br>(347.62 to 938.62)          |
| Diarrheal diseases                                                | 351.64<br>(249.45 to 471.12)             | 121.37<br>(26.08 to 349.27)              | 203.36<br>(49.34 to 539.48)              | 145.85<br>(29.62 to 438.45)              | 8.49<br>(5.04 to 12.49)               | 6.88<br>(1.30 to 22.49)               | 14.28<br>(3.25 to 39.57)              | 7.71<br>(1.38 to 24.89)               |
| Intestinal infectious diseases                                    | 4.70<br>(2.23 to 9.11)                   | 2.31<br>(1.08 to 4.46)                   | 1.85<br>(0.88 to 3.51)                   | 2.35<br>(1.11 to 4.49)                   | 0.13<br>(0.06 to 0.25)                | 0.08<br>(0.04 to 0.15)                | 0.07<br>(0.04 to 0.12)                | 0.08<br>(0.04 to 0.14)                |
| Typhoid fever                                                     | 1.50<br>(0.66 to 2.93)                   | 0.51<br>(0.22 to 1.01)                   | 0.72<br>(0.31 to 1.39)                   | 0.51<br>(0.22 to 1.02)                   | 0.04<br>(0.02 to 0.07)                | 0.02<br>(0.01 to 0.05)                | 0.02<br>(0.01 to 0.05)                | 0.02<br>(0.01 to 0.03)                |
| Paratyphoid fever                                                 | 2.85<br>(1.14 to 5.88)                   | 1.62<br>(0.65 to 3.32)                   | 0.98<br>(0.37 to 2.05)                   | 1.66<br>(0.67 to 3.37)                   | 0.08<br>(0.03 to 0.16)                | 0.05<br>(0.02 to 0.11)                | 0.03<br>(0.01 to 0.07)                | 0.05<br>(0.02 to 0.11)                |
| Other intestinal infectious diseases                              | 0.35<br>(0.14 to 0.73)                   | 0.19<br>(0.07 to 0.42)                   | 0.15<br>(0.05 to 0.35)                   | 0.19<br>(0.07 to 0.42)                   | 0.02<br>(0.01 to 0.04)                | 0.01<br>(0.00 to 0.03)                | 0.01<br>(0.00 to 0.03)                | 0.01<br>(0.00 to 0.03)                |
| Lower respiratory infections                                      | 6,356.92<br>(5,015.02 to 9,693.59)       | 6,163.54<br>(3,603.72 to 10,280.32)      | 3,077.36<br>(1,879.64 to 5,242.81)       | 7,609.14<br>(4,272.30 to 12,636.64)      | 350.18<br>(270.49 to 550.93)          | 457.54<br>(279.30 to 784.69)          | 258.49<br>(165.21 to 445.15)          | 532.06<br>(310.82 to 906.07)          |
| Upper respiratory infections                                      | 16.74<br>(8.14 to 29.13)                 | 13.77<br>(5.39 to 28.36)                 | 6.02<br>(2.37 to 12.32)                  | 14.01<br>(5.52 to 29.04)                 | 0.72<br>(0.34 to 1.25)                | 0.81<br>(0.31 to 1.77)                | 0.38<br>(0.14 to 0.85)                | 0.80<br>(0.30 to 1.72)                |
| Otitis media                                                      | 0.38<br>(0.19 to 0.82)                   | 0.24<br>(0.06 to 0.86)                   | 0.28<br>(0.07 to 1.02)                   | 0.22<br>(0.06 to 0.78)                   | 0.03<br>(0.01 to 0.08)                | 0.03<br>(0.01 to 0.11)                | 0.03<br>(0.01 to 0.13)                | 0.03<br>(0.01 to 0.10)                |
| Meningitis                                                        | 574.87<br>(426.08 to 972.66)             | 205.98<br>(142.67 to 364.84)             | 127.29<br>(84.68 to 227.85)              | 226.03<br>(149.14 to 410.33)             | 13.77<br>(10.28 to 22.78)             | 7.02<br>(5.02 to 12.34)               | 4.70<br>(3.22 to 8.38)                | 7.13<br>(5.07 to 12.51)               |
| Pneumococcal meningitis                                           | 55.60<br>(37.74 to 99.87)                | 17.74<br>(11.01 to 34.08)                | 17.72<br>(10.91 to 33.60)                | 18.26<br>(11.19 to 35.16)                | 1.61<br>(1.08 to 2.95)                | 0.72<br>(0.44 to 1.38)                | 0.76<br>(0.46 to 1.46)                | 0.72<br>(0.44 to 1.39)                |
| H influenzae type B meningitis                                    | 68.03<br>(48.44 to 117.45)               | 34.04<br>(16.50 to 67.25)                | 27.08<br>(15.50 to 48.52)                | 48.21<br>(18.96 to 110.35)               | 1.54<br>(1.11 to 2.52)                | 0.84<br>(0.52 to 1.48)                | 0.80<br>(0.53 to 1.43)                | 0.98<br>(0.55 to 1.80)                |
| Meningococcal meningitis                                          | 229.59<br>(168.24 to 383.74)             | 67.65<br>(45.30 to 115.61)               | 36.84<br>(23.57 to 65.99)                | 70.68<br>(46.59 to 125.97)               | 4.85<br>(3.62 to 7.99)                | 2.19<br>(1.49 to 3.82)                | 1.29<br>(0.85 to 2.33)                | 2.19<br>(1.50 to 3.85)                |
| Other meningitis                                                  | 221.65<br>(160.97 to 375.33)             | 86.55<br>(58.27 to 156.93)               | 45.65<br>(29.13 to 83.56)                | 88.88<br>(59.67 to 164.08)               | 5.76<br>(4.22 to 9.58)                | 3.27<br>(2.24 to 5.86)                | 1.84<br>(1.19 to 3.33)                | 3.24<br>(2.26 to 5.67)                |
| Encephalitis                                                      | 506.82<br>(360.61 to 817.62)             | 383.12<br>(284.41 to 555.31)             | 347.91<br>(256.14 to 485.66)             | 388.14<br>(285.29 to 582.26)             | 14.78<br>(11.19 to 20.81)             | 14.54<br>(11.14 to 18.59)             | 13.89<br>(10.76 to 17.83)             | 14.33<br>(10.92 to 18.90)             |

|                |                                |                               |                              |                                |                           |                           |                           |                            |
|----------------|--------------------------------|-------------------------------|------------------------------|--------------------------------|---------------------------|---------------------------|---------------------------|----------------------------|
| Diphtheria     | 1.24<br>(0.76 to<br>1.82)      | 0.21<br>(0.11 to<br>0.37)     | 0.20<br>(0.10 to<br>0.36)    | 0.25<br>(0.13 to<br>0.43)      | 0.03<br>(0.02 to<br>0.04) | 0.01<br>(0.00 to<br>0.01) | 0.00<br>(0.00 to<br>0.01) | 0.01<br>(0.00 to<br>0.01)  |
| Whooping cough | 262.27<br>(16.90 to<br>763.68) | 117.08<br>(6.94 to<br>358.53) | 30.45<br>(1.78 to<br>104.99) | 323.69<br>(20.23 to<br>876.97) | 3.16<br>(0.20 to<br>9.26) | 1.41<br>(0.08 to<br>4.31) | 0.39<br>(0.03 to<br>1.29) | 3.85<br>(0.26 to<br>10.43) |
| Tetanus        | 18.59<br>(16.20 to<br>21.13)   | 0.84<br>(0.59 to<br>1.15)     | 0.80<br>(0.55 to<br>1.11)    | 0.97<br>(0.68 to<br>1.38)      | 0.40<br>(0.35 to<br>0.46) | 0.02<br>(0.02 to<br>0.03) | 0.02<br>(0.02 to<br>0.03) | 0.02<br>(0.02 to<br>0.03)  |
| Measles        | 38.67<br>(21.77 to<br>62.70)   | 43.94<br>(0.13 to<br>303.32)  | 22.02<br>(0.11 to<br>127.36) | 87.37<br>(0.18 to<br>608.41)   | 0.47<br>(0.26 to<br>0.76) | 0.61<br>(0.00 to<br>4.01) | 0.32<br>(0.00 to<br>1.76) | 1.14<br>(0.00 to<br>7.65)  |

| Bosnia and Herzegovina                                |                                                     |                                                   |                                                   |                                                    |                                                |                                                |                                                |                                                |
|-------------------------------------------------------|-----------------------------------------------------|---------------------------------------------------|---------------------------------------------------|----------------------------------------------------|------------------------------------------------|------------------------------------------------|------------------------------------------------|------------------------------------------------|
| Cause                                                 | YLLs (actual counts)                                |                                                   |                                                   |                                                    | Deaths (actual counts)                         |                                                |                                                |                                                |
|                                                       | 2016                                                | 2040 Forecast                                     | 2040 Better Scenario                              | 2040 Worse Scenario                                | 2016                                           | 2040 Forecast                                  | 2040 Better Scenario                           | 2040 Worse Scenario                            |
| Varicella and herpes zoster                           | 29.73<br>(21.13 to<br>40.30)                        | 18.68<br>(12.15 to<br>28.10)                      | 13.50<br>(8.49 to<br>20.66)                       | 18.56<br>(11.88 to<br>28.79)                       | 1.57<br>(1.02 to<br>2.42)                      | 1.73<br>(0.95 to<br>2.96)                      | 1.40<br>(0.74 to<br>2.42)                      | 1.61<br>(0.87 to<br>2.69)                      |
| <b>Neglected tropical diseases and malaria</b>        | <b>96.29</b><br><b>(80.01 to</b><br><b>114.81)</b>  | <b>51.97</b><br><b>(41.46 to</b><br><b>63.78)</b> | <b>40.07</b><br><b>(31.89 to</b><br><b>48.40)</b> | <b>52.32</b><br><b>(41.49 to</b><br><b>64.08)</b>  | <b>3.91</b><br><b>(3.21 to</b><br><b>4.71)</b> | <b>2.80</b><br><b>(2.25 to</b><br><b>3.44)</b> | <b>2.16</b><br><b>(1.76 to</b><br><b>2.61)</b> | <b>2.74</b><br><b>(2.19 to</b><br><b>3.35)</b> |
| Malaria                                               | 0.00<br>(0.00 to<br>0.00)                           | 0.00<br>(0.00 to<br>0.00)                         | 0.00<br>(0.00 to<br>0.00)                         | 0.00<br>(0.00 to<br>0.00)                          | 0.00<br>(0.00 to<br>0.00)                      | 0.00<br>(0.00 to<br>0.00)                      | 0.00<br>(0.00 to<br>0.00)                      | 0.00<br>(0.00 to<br>0.00)                      |
| Chagas disease                                        | 0.00<br>(0.00 to<br>0.00)                           | 0.00<br>(0.00 to<br>0.00)                         | 0.00<br>(0.00 to<br>0.00)                         | 0.00<br>(0.00 to<br>0.00)                          | 0.00<br>(0.00 to<br>0.00)                      | 0.00<br>(0.00 to<br>0.00)                      | 0.00<br>(0.00 to<br>0.00)                      | 0.00<br>(0.00 to<br>0.00)                      |
| Leishmaniasis                                         | 1.15<br>(0.56 to<br>1.86)                           | 0.45<br>(0.23 to<br>0.73)                         | 0.33<br>(0.17 to<br>0.54)                         | 0.45<br>(0.23 to<br>0.76)                          | 0.05<br>(0.02 to<br>0.07)                      | 0.02<br>(0.01 to<br>0.03)                      | 0.02<br>(0.01 to<br>0.03)                      | 0.02<br>(0.01 to<br>0.03)                      |
| African trypanosomiasis                               | 0.00<br>(0.00 to<br>0.00)                           | 0.00<br>(0.00 to<br>0.00)                         | 0.00<br>(0.00 to<br>0.00)                         | 0.00<br>(0.00 to<br>0.00)                          | 0.00<br>(0.00 to<br>0.00)                      | 0.00<br>(0.00 to<br>0.00)                      | 0.00<br>(0.00 to<br>0.00)                      | 0.00<br>(0.00 to<br>0.00)                      |
| Schistosomiasis                                       | 0.00<br>(0.00 to<br>0.00)                           | 0.00<br>(0.00 to<br>0.00)                         | 0.00<br>(0.00 to<br>0.00)                         | 0.00<br>(0.00 to<br>0.00)                          | 0.00<br>(0.00 to<br>0.00)                      | 0.00<br>(0.00 to<br>0.00)                      | 0.00<br>(0.00 to<br>0.00)                      | 0.00<br>(0.00 to<br>0.00)                      |
| Cysticercosis                                         | 0.86<br>(0.56 to<br>1.28)                           | 0.24<br>(0.16 to<br>0.34)                         | 0.23<br>(0.15 to<br>0.32)                         | 0.23<br>(0.16 to<br>0.34)                          | 0.03<br>(0.02 to<br>0.04)                      | 0.01<br>(0.01 to<br>0.01)                      | 0.01<br>(0.01 to<br>0.01)                      | 0.01<br>(0.01 to<br>0.01)                      |
| Cystic echinococcosis                                 | 69.26<br>(56.95 to<br>84.13)                        | 36.65<br>(28.63 to<br>46.66)                      | 24.35<br>(18.78 to<br>30.59)                      | 36.83<br>(28.31 to<br>46.37)                       | 3.15<br>(2.59 to<br>3.82)                      | 2.26<br>(1.78 to<br>2.84)                      | 1.59<br>(1.26 to<br>1.99)                      | 2.21<br>(1.72 to<br>2.78)                      |
| Dengue                                                | 0.00<br>(0.00 to<br>0.00)                           | 0.00<br>(0.00 to<br>0.00)                         | 0.00<br>(0.00 to<br>0.00)                         | 0.00<br>(0.00 to<br>0.00)                          | 0.00<br>(0.00 to<br>0.00)                      | 0.00<br>(0.00 to<br>0.00)                      | 0.00<br>(0.00 to<br>0.00)                      | 0.00<br>(0.00 to<br>0.00)                      |
| Yellow fever                                          | 0.00<br>(0.00 to<br>0.00)                           | 0.00<br>(0.00 to<br>0.00)                         | 0.00<br>(0.00 to<br>0.00)                         | 0.00<br>(0.00 to<br>0.00)                          | 0.00<br>(0.00 to<br>0.00)                      | 0.00<br>(0.00 to<br>0.00)                      | 0.00<br>(0.00 to<br>0.00)                      | 0.00<br>(0.00 to<br>0.00)                      |
| Rabies                                                | 0.10<br>(0.03 to<br>0.15)                           | 0.04<br>(0.01 to<br>0.07)                         | 0.03<br>(0.01 to<br>0.05)                         | 0.04<br>(0.01 to<br>0.07)                          | 0.00<br>(0.00 to<br>0.01)                      | 0.00<br>(0.00 to<br>0.00)                      | 0.00<br>(0.00 to<br>0.00)                      | 0.00<br>(0.00 to<br>0.00)                      |
| Intestinal nematode infections                        | 0.00<br>(0.00 to<br>0.00)                           | 0.00<br>(0.00 to<br>0.00)                         | 0.00<br>(0.00 to<br>0.00)                         | 0.00<br>(0.00 to<br>0.00)                          | 0.00<br>(0.00 to<br>0.00)                      | 0.00<br>(0.00 to<br>0.00)                      | 0.00<br>(0.00 to<br>0.00)                      | 0.00<br>(0.00 to<br>0.00)                      |
| Other neglected tropical diseases                     | 24.91<br>(18.81 to<br>30.50)                        | 14.59<br>(9.87 to<br>18.45)                       | 15.13<br>(10.17 to<br>19.02)                      | 14.76<br>(10.00 to<br>18.80)                       | 0.68<br>(0.44 to<br>0.87)                      | 0.50<br>(0.30 to<br>0.64)                      | 0.54<br>(0.34 to<br>0.67)                      | 0.50<br>(0.31 to<br>0.64)                      |
| <b>Maternal disorders</b>                             | <b>119.15</b><br><b>(81.89 to</b><br><b>169.87)</b> | <b>63.69</b><br><b>(39.93 to</b><br><b>95.11)</b> | <b>43.35</b><br><b>(26.73 to</b><br><b>67.43)</b> | <b>66.98</b><br><b>(40.55 to</b><br><b>103.71)</b> | <b>2.27</b><br><b>(1.55 to</b><br><b>3.27)</b> | <b>1.24</b><br><b>(0.78 to</b><br><b>1.85)</b> | <b>0.84</b><br><b>(0.53 to</b><br><b>1.28)</b> | <b>1.30</b><br><b>(0.79 to</b><br><b>2.03)</b> |
| Maternal hemorrhage                                   | 23.04<br>(13.72 to<br>35.47)                        | 10.87<br>(6.04 to<br>18.32)                       | 7.33<br>(4.00 to<br>12.52)                        | 11.40<br>(6.09 to<br>20.45)                        | 0.44<br>(0.26 to<br>0.68)                      | 0.21<br>(0.12 to<br>0.35)                      | 0.14<br>(0.08 to<br>0.24)                      | 0.22<br>(0.12 to<br>0.39)                      |
| Maternal sepsis and other maternal infections         | 2.05<br>(0.97 to<br>3.69)                           | 0.97<br>(0.43 to<br>1.89)                         | 0.64<br>(0.27 to<br>1.24)                         | 1.02<br>(0.43 to<br>1.99)                          | 0.04<br>(0.02 to<br>0.07)                      | 0.02<br>(0.01 to<br>0.03)                      | 0.01<br>(0.01 to<br>0.02)                      | 0.02<br>(0.01 to<br>0.04)                      |
| Maternal hypertensive disorders                       | 6.99<br>(3.97 to<br>11.40)                          | 3.56<br>(1.76 to<br>6.65)                         | 2.32<br>(1.16 to<br>4.27)                         | 3.74<br>(1.82 to<br>7.01)                          | 0.13<br>(0.07 to<br>0.21)                      | 0.06<br>(0.03 to<br>0.12)                      | 0.04<br>(0.02 to<br>0.08)                      | 0.07<br>(0.03 to<br>0.12)                      |
| Maternal obstructed labor and uterine rupture         | 1.30<br>(0.52 to<br>2.60)                           | 0.72<br>(0.27 to<br>1.55)                         | 0.44<br>(0.17 to<br>0.97)                         | 0.76<br>(0.28 to<br>1.67)                          | 0.03<br>(0.01 to<br>0.05)                      | 0.01<br>(0.01 to<br>0.03)                      | 0.01<br>(0.00 to<br>0.02)                      | 0.02<br>(0.01 to<br>0.03)                      |
| Maternal abortion, miscarriage, and ectopic pregnancy | 27.77<br>(17.47 to<br>42.78)                        | 15.39<br>(8.15 to<br>26.52)                       | 10.07<br>(5.23 to<br>17.70)                       | 16.24<br>(8.20 to<br>29.18)                        | 0.54<br>(0.34 to<br>0.83)                      | 0.31<br>(0.17 to<br>0.53)                      | 0.20<br>(0.11 to<br>0.35)                      | 0.32<br>(0.17 to<br>0.58)                      |

|                                        |                              |                              |                              |                              |                           |                           |                           |                           |
|----------------------------------------|------------------------------|------------------------------|------------------------------|------------------------------|---------------------------|---------------------------|---------------------------|---------------------------|
|                                        | 3.22<br>(1.57 to<br>5.85)    | 1.83<br>(0.77 to<br>3.50)    | 1.18<br>(0.51 to<br>2.26)    | 1.93<br>(0.82 to<br>3.78)    | 0.06<br>(0.03 to<br>0.10) | 0.03<br>(0.01 to<br>0.06) | 0.02<br>(0.01 to<br>0.04) | 0.04<br>(0.02 to<br>0.07) |
| Indirect maternal deaths               |                              |                              |                              |                              |                           |                           |                           |                           |
|                                        | 1.26<br>(0.57 to<br>2.50)    | 0.58<br>(0.23 to<br>1.31)    | 0.38<br>(0.15 to<br>0.85)    | 0.62<br>(0.24 to<br>1.38)    | 0.02<br>(0.01 to<br>0.05) | 0.01<br>(0.00 to<br>0.02) | 0.01<br>(0.00 to<br>0.02) | 0.01<br>(0.00 to<br>0.03) |
| Late maternal deaths                   |                              |                              |                              |                              |                           |                           |                           |                           |
|                                        | 0.00<br>(0.00 to<br>0.00)    | 0.01<br>(0.00 to<br>0.07)    | 0.01<br>(0.00 to<br>0.05)    | 0.02<br>(0.00 to<br>0.08)    | 0.00<br>(0.00 to<br>0.00) | 0.00<br>(0.00 to<br>0.00) | 0.00<br>(0.00 to<br>0.00) | 0.00<br>(0.00 to<br>0.00) |
| Maternal deaths aggravated by HIV/AIDS |                              |                              |                              |                              |                           |                           |                           |                           |
|                                        | 53.51<br>(34.79 to<br>79.43) | 29.76<br>(17.13 to<br>48.58) | 20.99<br>(12.01 to<br>34.41) | 31.27<br>(17.16 to<br>51.72) | 1.02<br>(0.66 to<br>1.51) | 0.58<br>(0.34 to<br>0.95) | 0.41<br>(0.24 to<br>0.66) | 0.61<br>(0.33 to<br>1.01) |
| Other maternal disorders               |                              |                              |                              |                              |                           |                           |                           |                           |



| Bosnia and Herzegovina                                                  |                                           |                                           |                                         |                                           |                                   |                                  |                                  |                                  |
|-------------------------------------------------------------------------|-------------------------------------------|-------------------------------------------|-----------------------------------------|-------------------------------------------|-----------------------------------|----------------------------------|----------------------------------|----------------------------------|
| Cause                                                                   | YLLs (actual counts)                      |                                           |                                         |                                           | Deaths (actual counts)            |                                  |                                  |                                  |
|                                                                         | 2016                                      | 2040 Forecast                             | 2040 Better Scenario                    | 2040 Worse Scenario                       | 2016                              | 2040 Forecast                    | 2040 Better Scenario             | 2040 Worse Scenario              |
| <b>Neonatal disorders</b>                                               | <b>6,902.41</b><br>(5,321.46 to 8,703.82) | <b>2,385.75</b><br>(1,415.31 to 4,052.19) | <b>1,365.39</b><br>(792.61 to 2,358.84) | <b>2,779.53</b><br>(1,642.04 to 4,728.89) | <b>79.76</b><br>(61.49 to 100.59) | <b>27.57</b><br>(16.36 to 46.82) | <b>15.78</b><br>(9.16 to 27.26)  | <b>32.12</b><br>(18.98 to 54.64) |
| Neonatal preterm birth                                                  | 4,263.11<br>(3,248.92 to 5,390.09)        | 1,282.24<br>(752.47 to 2,012.67)          | 631.46<br>(365.88 to 1,021.74)          | 1,573.90<br>(934.11 to 2,507.97)          | 49.26<br>(37.54 to 62.27)         | 14.82<br>(8.69 to 23.26)         | 7.30<br>(4.23 to 11.80)          | 18.19<br>(10.79 to 28.97)        |
| Neonatal encephalopathy due to birth asphyxia and trauma                | 1,121.66<br>(749.93 to 1,564.14)          | 393.11<br>(177.83 to 853.38)              | 206.31<br>(90.45 to 434.71)             | 430.85<br>(189.79 to 934.64)              | 12.96<br>(8.67 to 18.07)          | 4.54<br>(2.06 to 9.86)           | 2.38<br>(1.05 to 5.02)           | 4.98<br>(2.19 to 10.80)          |
| Neonatal sepsis and other neonatal infections                           | 489.22<br>(279.85 to 795.18)              | 250.77<br>(100.37 to 532.68)              | 152.53<br>(64.23 to 319.98)             | 273.31<br>(108.61 to 581.35)              | 5.65<br>(3.23 to 9.19)            | 2.90<br>(1.16 to 6.15)           | 1.76<br>(0.74 to 3.70)           | 3.16<br>(1.26 to 6.72)           |
| Hemolytic disease and other neonatal jaundice                           | 15.35<br>(10.06 to 22.51)                 | 4.99<br>(1.85 to 13.62)                   | 2.90<br>(1.13 to 7.37)                  | 5.47<br>(2.03 to 14.83)                   | 0.18<br>(0.12 to 0.26)            | 0.06<br>(0.02 to 0.16)           | 0.03<br>(0.01 to 0.09)           | 0.06<br>(0.02 to 0.17)           |
| Other neonatal disorders                                                | 1,013.06<br>(683.61 to 1,440.99)          | 454.63<br>(205.93 to 901.15)              | 372.18<br>(179.33 to 698.89)            | 496.00<br>(223.05 to 963.46)              | 11.71<br>(7.90 to 16.65)          | 5.26<br>(2.38 to 10.41)          | 4.30<br>(2.07 to 8.08)           | 5.73<br>(2.58 to 11.13)          |
| <b>Nutritional deficiencies</b>                                         | <b>126.90</b><br>(107.68 to 150.02)       | <b>65.06</b><br>(49.91 to 84.83)          | <b>62.51</b><br>(47.47 to 81.28)        | <b>62.97</b><br>(47.74 to 82.37)          | <b>7.47</b><br>(6.26 to 8.89)     | <b>5.10</b><br>(3.70 to 7.14)    | <b>5.17</b><br>(3.76 to 7.07)    | <b>4.79</b><br>(3.43 to 6.67)    |
| Protein-energy malnutrition                                             | 50.80<br>(38.52 to 69.13)                 | 17.40<br>(10.90 to 28.35)                 | 21.36<br>(13.90 to 33.35)               | 16.70<br>(10.46 to 27.42)                 | 2.88<br>(2.20 to 4.37)            | 1.34<br>(0.82 to 2.41)           | 1.79<br>(1.12 to 3.02)           | 1.25<br>(0.77 to 2.25)           |
| Iodine deficiency                                                       | 6.86<br>(0.57 to 18.47)                   | 5.77<br>(0.31 to 17.52)                   | 5.09<br>(0.22 to 15.93)                 | 5.61<br>(0.32 to 16.84)                   | 0.38<br>(0.02 to 1.18)            | 0.44<br>(0.01 to 1.66)           | 0.41<br>(0.01 to 1.57)           | 0.42<br>(0.01 to 1.57)           |
| Dietary iron deficiency                                                 | 14.29<br>(11.40 to 18.11)                 | 5.84<br>(4.30 to 8.09)                    | 6.32<br>(4.63 to 8.77)                  | 5.81<br>(4.28 to 8.05)                    | 0.45<br>(0.35 to 0.62)            | 0.23<br>(0.16 to 0.37)           | 0.27<br>(0.18 to 0.41)           | 0.23<br>(0.16 to 0.36)           |
| Other nutritional deficiencies                                          | 54.94<br>(33.67 to 68.91)                 | 36.05<br>(20.64 to 53.23)                 | 29.74<br>(15.77 to 44.34)               | 34.85<br>(20.06 to 51.74)                 | 3.76<br>(2.06 to 4.84)            | 3.08<br>(1.64 to 4.84)           | 2.70<br>(1.36 to 4.36)           | 2.90<br>(1.55 to 4.60)           |
| <b>Other communicable, maternal, neonatal, and nutritional diseases</b> | <b>697.08</b><br>(550.92 to 835.86)       | <b>506.94</b><br>(350.39 to 628.70)       | <b>444.85</b><br>(298.26 to 556.12)     | <b>501.78</b><br>(345.19 to 634.71)       | <b>26.76</b><br>(18.79 to 32.69)  | <b>26.92</b><br>(16.43 to 34.05) | <b>26.08</b><br>(15.42 to 33.26) | <b>25.85</b><br>(15.80 to 33.25) |
| Sexually transmitted infections excluding HIV                           | 21.60<br>(16.92 to 30.48)                 | 7.47<br>(5.18 to 12.06)                   | 5.57<br>(3.80 to 9.29)                  | 7.58<br>(5.15 to 12.29)                   | 0.54<br>(0.44 to 0.77)            | 0.29<br>(0.20 to 0.47)           | 0.24<br>(0.16 to 0.43)           | 0.28<br>(0.19 to 0.46)           |
| Syphilis                                                                | 13.50<br>(9.89 to 21.22)                  | 3.62<br>(2.26 to 5.86)                    | 2.18<br>(1.35 to 3.52)                  | 3.73<br>(2.26 to 6.03)                    | 0.29<br>(0.23 to 0.40)            | 0.11<br>(0.07 to 0.17)           | 0.07<br>(0.05 to 0.12)           | 0.11<br>(0.07 to 0.17)           |
| Chlamydial infection                                                    | 1.41<br>(1.07 to 2.32)                    | 0.71<br>(0.46 to 1.29)                    | 0.65<br>(0.41 to 1.20)                  | 0.71<br>(0.45 to 1.29)                    | 0.05<br>(0.03 to 0.08)            | 0.03<br>(0.02 to 0.06)           | 0.03<br>(0.02 to 0.06)           | 0.03<br>(0.02 to 0.06)           |
| Gonococcal infection                                                    | 4.45<br>(3.50 to 7.01)                    | 2.18<br>(1.38 to 3.86)                    | 1.93<br>(1.18 to 3.54)                  | 2.17<br>(1.35 to 3.90)                    | 0.14<br>(0.11 to 0.25)            | 0.10<br>(0.06 to 0.20)           | 0.10<br>(0.06 to 0.19)           | 0.10<br>(0.06 to 0.18)           |
| Other sexually transmitted infections                                   | 2.24<br>(1.77 to 3.42)                    | 0.96<br>(0.63 to 1.58)                    | 0.82<br>(0.53 to 1.41)                  | 0.96<br>(0.63 to 1.61)                    | 0.06<br>(0.05 to 0.10)            | 0.04<br>(0.02 to 0.07)           | 0.03<br>(0.02 to 0.06)           | 0.04<br>(0.02 to 0.06)           |
| Acute hepatitis                                                         | 235.83<br>(191.87 to 287.92)              | 129.61<br>(96.13 to 171.85)               | 77.79<br>(54.14 to 106.57)              | 130.27<br>(94.66 to 171.73)               | 7.93<br>(6.45 to 9.78)            | 5.51<br>(4.16 to 7.17)           | 3.47<br>(2.48 to 4.68)           | 5.42<br>(4.04 to 7.07)           |
| Acute hepatitis A                                                       | 11.61<br>(8.61 to 14.93)                  | 4.24<br>(2.72 to 6.33)                    | 2.96<br>(1.86 to 4.47)                  | 4.29<br>(2.77 to 6.25)                    | 0.29<br>(0.21 to 0.38)            | 0.16<br>(0.09 to 0.24)           | 0.12<br>(0.07 to 0.18)           | 0.15<br>(0.09 to 0.24)           |
| Acute hepatitis B                                                       | 183.23<br>(144.84 to 226.80)              | 102.54<br>(72.33 to 140.14)               | 60.50<br>(41.26 to 86.60)               | 103.22<br>(70.97 to 140.58)               | 6.26<br>(4.98 to 7.77)            | 4.23<br>(3.00 to 5.74)           | 2.59<br>(1.77 to 3.59)           | 4.19<br>(2.92 to 5.68)           |

|                                       |                                                                  |                                                                  |                                                                  |                                                                  |                                                               |                                                               |                                                               |                                                               |
|---------------------------------------|------------------------------------------------------------------|------------------------------------------------------------------|------------------------------------------------------------------|------------------------------------------------------------------|---------------------------------------------------------------|---------------------------------------------------------------|---------------------------------------------------------------|---------------------------------------------------------------|
| Acute hepatitis C                     | 8.47<br>(5.76 to<br>12.08)                                       | 5.61<br>(3.46 to<br>8.60)                                        | 3.45<br>(2.08 to<br>5.46)                                        | 5.60<br>(3.47 to<br>8.60)                                        | 0.31<br>(0.21 to<br>0.46)                                     | 0.24<br>(0.15 to<br>0.37)                                     | 0.16<br>(0.09 to<br>0.24)                                     | 0.24<br>(0.15 to<br>0.36)                                     |
| Acute hepatitis E                     | 32.53<br>(22.78 to<br>45.82)                                     | 17.23<br>(10.45 to<br>26.44)                                     | 10.89<br>(6.44 to<br>16.82)                                      | 17.16<br>(10.44 to<br>26.23)                                     | 1.07<br>(0.68 to<br>1.57)                                     | 0.88<br>(0.49 to<br>1.38)                                     | 0.60<br>(0.33 to<br>0.97)                                     | 0.84<br>(0.47 to<br>1.31)                                     |
| Other unspecified infectious diseases | 439.65<br>(314.61 to<br>549.51)                                  | 369.85<br>(221.23 to<br>472.04)                                  | 361.49<br>(218.85 to<br>460.64)                                  | 363.93<br>(220.69 to<br>471.07)                                  | 18.28<br>(10.65 to<br>23.18)                                  | 21.13<br>(10.94 to<br>28.05)                                  | 22.37<br>(11.79 to<br>29.28)                                  | 20.14<br>(10.46 to<br>27.14)                                  |
| <b>Non-communicable diseases</b>      | <b>623,953.57</b><br><b>(541,496.70 to</b><br><b>713,023.41)</b> | <b>641,411.66</b><br><b>(513,276.93 to</b><br><b>767,292.60)</b> | <b>408,334.86</b><br><b>(329,119.48 to</b><br><b>489,388.63)</b> | <b>739,505.74</b><br><b>(589,945.89 to</b><br><b>891,159.85)</b> | <b>36,857.06</b><br><b>(32,270.53 to</b><br><b>41,721.04)</b> | <b>45,637.90</b><br><b>(38,537.04 to</b><br><b>53,433.73)</b> | <b>31,369.09</b><br><b>(26,291.74 to</b><br><b>37,165.81)</b> | <b>50,699.87</b><br><b>(43,150.31 to</b><br><b>58,794.24)</b> |

| Bosnia and Herzegovina               |                                                 |                                                 |                                                 |                                                 |                                            |                                              |                                            |                                              |
|--------------------------------------|-------------------------------------------------|-------------------------------------------------|-------------------------------------------------|-------------------------------------------------|--------------------------------------------|----------------------------------------------|--------------------------------------------|----------------------------------------------|
| Cause                                | YLLs (actual counts)                            |                                                 |                                                 |                                                 | Deaths (actual counts)                     |                                              |                                            |                                              |
|                                      | 2016                                            | 2040 Forecast                                   | 2040 Better Scenario                            | 2040 Worse Scenario                             | 2016                                       | 2040 Forecast                                | 2040 Better Scenario                       | 2040 Worse Scenario                          |
| <b>Neoplasms</b>                     | <b>206,405.30</b><br>(175,997.18 to 238,386.32) | <b>220,057.88</b><br>(171,499.88 to 276,261.69) | <b>158,893.37</b><br>(127,045.95 to 195,562.23) | <b>238,098.29</b><br>(184,771.59 to 299,204.77) | <b>9,499.48</b><br>(8,162.50 to 10,876.26) | <b>12,234.18</b><br>(10,112.48 to 14,701.30) | <b>9,345.57</b><br>(7,913.45 to 11,035.66) | <b>12,897.84</b><br>(10,533.30 to 15,523.56) |
| Lip and oral cavity cancer           | 2,358.59<br>(1,899.32 to 2,869.84)              | 2,486.56<br>(1,328.61 to 4,464.78)              | 1,303.41<br>(732.59 to 2,271.93)                | 3,238.17<br>(1,683.71 to 5,544.66)              | 102.94<br>(85.01 to 122.53)                | 132.16<br>(76.31 to 220.95)                  | 73.32<br>(44.87 to 116.07)                 | 169.43<br>(93.32 to 285.89)                  |
| Nasopharynx cancer                   | 346.45<br>(286.62 to 419.71)                    | 285.49<br>(164.37 to 464.69)                    | 127.34<br>(77.24 to 200.89)                     | 383.36<br>(222.46 to 620.09)                    | 13.97<br>(11.63 to 16.66)                  | 14.17<br>(8.60 to 22.20)                     | 6.66<br>(4.25 to 10.14)                    | 18.45<br>(11.04 to 29.26)                    |
| Other pharynx cancer                 | 1,824.63<br>(1,418.64 to 2,310.18)              | 1,449.62<br>(785.80 to 2,498.73)                | 1,341.08<br>(758.85 to 2,248.69)                | 1,793.59<br>(940.98 to 3,120.99)                | 70.03<br>(55.13 to 87.01)                  | 66.08<br>(37.27 to 111.56)                   | 64.00<br>(38.25 to 103.90)                 | 80.29<br>(48.55 to 139.46)                   |
| Esophageal cancer                    | 3,137.57<br>(2,570.30 to 3,781.73)              | 3,211.46<br>(1,652.37 to 5,959.98)              | 2,104.17<br>(1,150.33 to 3,755.82)              | 3,961.13<br>(1,950.59 to 7,426.33)              | 141.73<br>(117.92 to 168.29)               | 170.00<br>(91.73 to 301.69)                  | 115.52<br>(67.86 to 190.71)                | 205.22<br>(105.89 to 373.31)                 |
| Stomach cancer                       | 13,016.34<br>(11,007.13 to 15,202.53)           | 9,916.67<br>(7,076.04 to 13,735.24)             | 6,301.13<br>(4,552.61 to 8,660.49)              | 10,188.68<br>(7,190.86 to 14,158.97)            | 628.48<br>(538.08 to 726.34)               | 573.80<br>(426.51 to 765.45)                 | 385.01<br>(290.21 to 522.35)               | 578.29<br>(423.05 to 772.63)                 |
| Colon and rectum cancer              | 25,027.54<br>(21,203.24 to 29,025.09)           | 29,991.36<br>(19,745.83 to 44,486.26)           | 21,332.43<br>(14,560.55 to 30,194.34)           | 31,930.88<br>(20,349.41 to 49,204.77)           | 1,260.36<br>(1,077.87 to 1,447.73)         | 1,848.73<br>(1,271.41 to 2,622.18)           | 1,398.89<br>(998.67 to 1,912.22)           | 1,916.98<br>(1,260.43 to 2,855.57)           |
| Liver cancer                         | 10,216.64<br>(7,441.83 to 12,491.52)            | 11,976.71<br>(7,086.81 to 19,216.23)            | 10,640.51<br>(6,846.25 to 16,021.72)            | 13,811.89<br>(8,821.20 to 22,213.30)            | 503.52<br>(368.77 to 610.58)               | 683.54<br>(421.21 to 1,043.65)               | 643.90<br>(426.85 to 923.00)               | 764.14<br>(454.75 to 1,180.77)               |
| Liver cancer due to hepatitis B      | 3,250.01<br>(2,233.16 to 4,278.08)              | 3,711.19<br>(2,075.44 to 6,320.90)              | 3,370.88<br>(2,000.73 to 5,382.89)              | 4,046.90<br>(2,233.51 to 6,970.04)              | 148.78<br>(97.98 to 197.83)                | 197.91<br>(115.16 to 324.52)                 | 189.63<br>(114.68 to 295.82)               | 210.23<br>(119.07 to 349.70)                 |
| Liver cancer due to hepatitis C      | 2,405.48<br>(1,575.84 to 3,403.04)              | 3,015.49<br>(1,695.36 to 4,960.66)              | 2,808.56<br>(1,661.97 to 4,412.76)              | 3,241.66<br>(1,763.96 to 5,501.53)              | 129.11<br>(86.23 to 178.81)                | 186.80<br>(106.39 to 295.95)                 | 184.60<br>(110.67 to 283.53)               | 195.31<br>(110.13 to 317.95)                 |
| Liver cancer due to alcohol use      | 2,858.88<br>(1,836.19 to 3,689.78)              | 3,061.55<br>(1,731.81 to 4,936.25)              | 2,505.95<br>(1,459.87 to 3,907.84)              | 4,147.78<br>(2,248.85 to 6,873.25)              | 142.91<br>(92.26 to 183.29)                | 175.18<br>(100.57 to 280.92)                 | 152.98<br>(91.53 to 236.08)                | 227.84<br>(127.71 to 369.65)                 |
| Liver cancer due to other causes     | 1,702.27<br>(1,285.88 to 2,229.86)              | 2,188.49<br>(1,181.73 to 3,814.28)              | 1,955.12<br>(1,152.25 to 3,194.89)              | 2,375.54<br>(1,227.98 to 4,244.95)              | 82.72<br>(62.94 to 106.64)                 | 123.65<br>(69.78 to 208.25)                  | 116.70<br>(72.52 to 184.85)                | 130.76<br>(71.47 to 228.77)                  |
| Gallbladder and biliary tract cancer | 4,185.93<br>(3,171.69 to 6,671.44)              | 3,899.43<br>(2,970.50 to 6,340.32)              | 3,859.36<br>(2,895.18 to 6,265.46)              | 3,746.53<br>(2,855.00 to 6,137.86)              | 224.27<br>(171.49 to 355.34)               | 249.20<br>(193.55 to 407.73)                 | 259.27<br>(198.16 to 424.20)               | 234.67<br>(181.43 to 381.73)                 |
| Pancreatic cancer                    | 11,526.39<br>(9,706.30 to 13,385.07)            | 14,553.88<br>(10,940.55 to 19,374.56)           | 12,878.83<br>(9,974.99 to 16,613.89)            | 14,458.39<br>(10,849.44 to 19,229.12)           | 569.21<br>(484.43 to 656.27)               | 839.98<br>(655.21 to 1,066.48)               | 784.59<br>(630.84 to 977.51)               | 817.51<br>(634.34 to 1,045.95)               |
| Larynx cancer                        | 3,460.82<br>(2,824.18 to 4,241.02)              | 3,888.76<br>(1,600.36 to 8,152.53)              | 1,694.15<br>(723.82 to 3,522.20)                | 4,705.73<br>(1,905.07 to 9,632.58)              | 157.47<br>(130.02 to 190.40)               | 202.71<br>(84.12 to 404.81)                  | 88.27<br>(39.29 to 171.54)                 | 243.19<br>(98.87 to 486.11)                  |
| Tracheal, bronchus, and lung cancer  | 53,599.96<br>(44,295.97 to 64,544.71)           | 58,694.37<br>(36,454.96 to 90,023.33)           | 28,834.10<br>(18,146.20 to 43,771.37)           | 70,457.17<br>(43,873.63 to 102,796.16)          | 2,392.01<br>(1,994.39 to 2,846.89)         | 3,025.79<br>(1,968.69 to 4,426.97)           | 1,508.03<br>(1,014.52 to 2,169.19)         | 3,572.78<br>(2,347.93 to 5,132.59)           |
| Malignant skin melanoma              | 2,190.98<br>(1,769.19 to 2,789.43)              | 1,963.63<br>(1,603.78 to 2,532.75)              | 2,588.83<br>(2,073.28 to 3,392.64)              | 1,884.54<br>(1,560.11 to 2,424.58)              | 86.31<br>(70.51 to 112.85)                 | 102.77<br>(86.21 to 140.40)                  | 143.91<br>(51.06 to 201.81)                | 96.09<br>(117.43 to 80.06)                   |
| Non-melanoma skin cancer             | 1,002.21<br>(812.03 to 1,207.54)                | 1,028.20<br>(856.63 to 1,241.07)                | 797.42<br>(648.52 to 963.46)                    | 985.69<br>(814.02 to 1,183.11)                  | 58.08<br>(47.87 to 68.74)                  | 74.84<br>(62.21 to 90.91)                    | 62.17<br>(51.06 to 75.42)                  | 69.91<br>(56.58 to 84.60)                    |
| Breast cancer                        | 13,963.67<br>(9,627.63 to 17,600.99)            | 12,747.48<br>(7,911.58 to 19,858.43)            | 9,336.28<br>(5,842.37 to 14,090.22)             | 13,581.52<br>(8,018.30 to 22,144.15)            | 591.65<br>(411.41 to 740.69)               | 644.79<br>(405.21 to 974.11)                 | 496.49<br>(326.16 to 728.26)               | 668.74<br>(403.08 to 1,063.09)               |
| Cervical cancer                      | 4,498.84<br>(3,056.40 to 5,847.53)              | 3,053.17<br>(1,996.98 to 4,319.25)              | 1,996.28<br>(1,312.74 to 2,779.87)              | 3,136.25<br>(2,029.06 to 4,598.70)              | 167.60<br>(119.92 to 217.65)               | 139.53<br>(97.29 to 191.01)                  | 96.08<br>(68.01 to 129.88)                 | 140.19<br>(95.83 to 196.11)                  |

|                   |                                       |                                         |                                        |                                         |                                 |                                   |                                   |                                   |
|-------------------|---------------------------------------|-----------------------------------------|----------------------------------------|-----------------------------------------|---------------------------------|-----------------------------------|-----------------------------------|-----------------------------------|
|                   | 2,081.24<br>(1,600.86 to<br>2,646.48) | 1,903.46<br>(1,443.90 to<br>2,433.37)   | 1,544.52<br>(1,151.67 to<br>2,001.79)  | 1,880.22<br>(1,435.97 to<br>2,386.85)   | 94.71<br>(73.50 to<br>119.34)   | 105.20<br>(81.97 to<br>129.89)    | 89.00<br>(68.71 to<br>112.51)     | 102.10<br>(80.58 to<br>126.59)    |
| Uterine cancer    |                                       |                                         |                                        |                                         |                                 |                                   |                                   |                                   |
|                   | 5,513.75<br>(4,235.88 to<br>6,961.48) | 4,911.29<br>(3,429.07 to<br>6,734.74)   | 4,130.96<br>(2,939.44 to<br>5,548.47)  | 4,956.14<br>(3,457.82 to<br>6,833.52)   | 223.24<br>(173.74 to<br>279.45) | 229.99<br>(167.13 to<br>310.84)   | 199.00<br>(145.20 to<br>263.95)   | 229.09<br>(165.00 to<br>311.95)   |
| Ovarian cancer    |                                       |                                         |                                        |                                         |                                 |                                   |                                   |                                   |
|                   | 7,078.21<br>(5,084.90 to<br>9,053.18) | 10,980.90<br>(8,014.18 to<br>13,943.20) | 9,869.15<br>(7,223.95 to<br>12,438.72) | 10,308.86<br>(7,514.24 to<br>13,134.17) | 477.90<br>(347.98 to<br>613.55) | 885.33<br>(662.82 to<br>1,130.99) | 846.65<br>(636.16 to<br>1,054.86) | 813.97<br>(604.81 to<br>1,049.79) |
| Prostate cancer   |                                       |                                         |                                        |                                         |                                 |                                   |                                   |                                   |
|                   | 438.55<br>(337.44 to<br>569.19)       | 201.95<br>(149.16 to<br>265.57)         | 154.65<br>(108.55 to<br>205.33)        | 200.67<br>(147.36 to<br>260.43)         | 11.26<br>(8.66 to<br>14.47)     | 6.80<br>(5.20 to<br>8.62)         | 5.51<br>(4.08 to<br>7.08)         | 6.60<br>(5.13 to<br>8.35)         |
| Testicular cancer |                                       |                                         |                                        |                                         |                                 |                                   |                                   |                                   |

| Bosnia and Herzegovina          |                                                        |                                                        |                                                       |                                                        |                                                     |                                                     |                                                    |                                                     |
|---------------------------------|--------------------------------------------------------|--------------------------------------------------------|-------------------------------------------------------|--------------------------------------------------------|-----------------------------------------------------|-----------------------------------------------------|----------------------------------------------------|-----------------------------------------------------|
| Cause                           | YLLs (actual counts)                                   |                                                        |                                                       |                                                        | Deaths (actual counts)                              |                                                     |                                                    |                                                     |
|                                 | 2016                                                   | 2040 Forecast                                          | 2040 Better Scenario                                  | 2040 Worse Scenario                                    | 2016                                                | 2040 Forecast                                       | 2040 Better Scenario                               | 2040 Worse Scenario                                 |
| Kidney cancer                   | 4,444.38<br>(3,655.00 to 5,307.93)                     | 5,240.81<br>(3,467.40 to 7,963.30)                     | 4,864.76<br>(3,392.55 to 7,070.01)                    | 5,142.21<br>(3,378.50 to 7,880.85)                     | 201.54<br>(167.97 to 240.63)                        | 282.03<br>(193.61 to 409.06)                        | 277.64<br>(203.95 to 382.17)                       | 271.26<br>(185.73 to 399.38)                        |
| Bladder cancer                  | 4,347.69<br>(3,609.14 to 5,209.37)                     | 5,092.81<br>(3,513.26 to 7,372.98)                     | 3,756.81<br>(2,757.49 to 5,178.43)                    | 5,023.77<br>(3,433.65 to 7,314.46)                     | 252.83<br>(213.29 to 298.01)                        | 353.96<br>(251.79 to 498.29)                        | 279.30<br>(214.93 to 370.79)                       | 341.49<br>(241.08 to 480.26)                        |
| Brain and nervous system cancer | 10,801.95<br>(8,542.79 to 13,596.18)                   | 11,197.12<br>(8,514.25 to 13,798.60)                   | 10,178.11<br>(7,606.09 to 12,685.23)                  | 10,974.24<br>(8,366.58 to 13,506.30)                   | 390.00<br>(295.93 to 483.64)                        | 490.21<br>(354.10 to 598.77)                        | 463.90<br>(328.08 to 571.09)                       | 471.98<br>(341.00 to 574.16)                        |
| Thyroid cancer                  | 597.27<br>(473.20 to 711.35)                           | 618.05<br>(431.27 to 889.40)                           | 493.99<br>(346.57 to 702.84)                          | 646.71<br>(436.40 to 945.02)                           | 29.08<br>(23.02 to 34.44)                           | 36.10<br>(25.28 to 51.61)                           | 30.19<br>(21.13 to 42.56)                          | 36.87<br>(25.26 to 53.48)                           |
| Mesothelioma                    | 249.28<br>(199.73 to 320.59)                           | 250.15<br>(200.31 to 313.42)                           | 267.71<br>(210.07 to 339.93)                          | 241.91<br>(195.02 to 301.11)                           | 10.50<br>(8.47 to 13.36)                            | 12.76<br>(10.55 to 15.68)                           | 14.36<br>(11.79 to 17.52)                          | 12.09<br>(10.05 to 14.85)                           |
| Hodgkin lymphoma                | 693.33<br>(374.20 to 922.06)                           | 475.86<br>(255.37 to 652.67)                           | 314.63<br>(162.22 to 450.77)                          | 474.39<br>(251.75 to 646.51)                           | 23.81<br>(12.70 to 31.47)                           | 20.55<br>(10.82 to 27.64)                           | 14.19<br>(7.35 to 19.76)                           | 20.10<br>(10.52 to 26.98)                           |
| Non-Hodgkin lymphoma            | 3,567.57<br>(2,970.75 to 4,282.87)                     | 3,343.44<br>(2,629.54 to 4,376.94)                     | 2,812.92<br>(2,219.15 to 3,655.21)                    | 3,377.93<br>(2,639.95 to 4,457.82)                     | 138.65<br>(115.39 to 180.83)                        | 164.62<br>(130.55 to 228.04)                        | 145.71<br>(115.66 to 206.09)                       | 162.54<br>(127.18 to 223.01)                        |
| Multiple myeloma                | 1,359.04<br>(895.85 to 1,657.08)                       | 1,475.00<br>(992.82 to 1,934.82)                       | 1,352.89<br>(916.02 to 1,752.04)                      | 1,486.97<br>(1,005.88 to 1,969.22)                     | 63.01<br>(43.25 to 76.04)                           | 80.43<br>(58.33 to 103.57)                          | 77.20<br>(55.27 to 98.57)                          | 79.44<br>(57.41 to 104.80)                          |
| Leukemia                        | 6,446.44<br>(5,297.33 to 7,527.00)                     | 6,076.21<br>(4,335.58 to 8,558.75)                     | 4,865.47<br>(3,642.04 to 6,478.65)                    | 6,255.22<br>(4,443.71 to 8,342.74)                     | 255.91<br>(214.59 to 300.85)                        | 310.16<br>(224.63 to 434.93)                        | 261.43<br>(197.97 to 347.22)                       | 311.67<br>(224.13 to 445.14)                        |
| Acute lymphoid leukemia         | 1,150.67<br>(687.70 to 1,520.51)                       | 773.34<br>(440.66 to 1,145.07)                         | 573.03<br>(328.41 to 829.72)                          | 806.01<br>(459.80 to 1,210.30)                         | 31.40<br>(19.59 to 40.69)                           | 28.30<br>(17.41 to 41.38)                           | 21.50<br>(13.71 to 30.56)                          | 29.01<br>(17.81 to 42.99)                           |
| Chronic lymphoid leukemia       | 1,362.59<br>(975.04 to 1,708.49)                       | 1,359.81<br>(879.54 to 2,044.48)                       | 1,159.66<br>(777.47 to 1,657.10)                      | 1,378.26<br>(888.20 to 2,062.53)                       | 72.83<br>(53.28 to 89.50)                           | 86.06<br>(58.67 to 124.15)                          | 77.67<br>(54.88 to 106.84)                         | 83.30<br>(57.18 to 125.25)                          |
| Acute myeloid leukemia          | 2,248.53<br>(1,269.76 to 2,885.64)                     | 2,262.58<br>(1,212.47 to 3,226.77)                     | 1,994.95<br>(1,130.97 to 2,755.98)                    | 2,333.19<br>(1,249.94 to 3,366.92)                     | 83.26<br>(49.13 to 105.27)                          | 106.19<br>(59.69 to 149.33)                         | 97.70<br>(58.36 to 131.20)                         | 107.28<br>(60.13 to 151.03)                         |
| Chronic myeloid leukemia        | 553.89<br>(343.72 to 766.86)                           | 365.56<br>(198.95 to 583.32)                           | 203.32<br>(116.62 to 317.58)                          | 378.09<br>(207.43 to 606.87)                           | 23.71<br>(14.83 to 32.57)                           | 20.08<br>(11.85 to 30.87)                           | 11.88<br>(7.06 to 17.59)                           | 20.20<br>(11.97 to 31.74)                           |
| Other leukemia                  | 1,130.75<br>(820.00 to 2,557.53)                       | 1,314.93<br>(783.04 to 3,106.20)                       | 934.51<br>(576.38 to 2,301.01)                        | 1,359.67<br>(807.95 to 3,222.22)                       | 44.70<br>(31.95 to 109.04)                          | 69.53<br>(41.57 to 176.11)                          | 52.68<br>(32.71 to 131.51)                         | 69.88<br>(41.54 to 175.99)                          |
| Other neoplasms                 | 8,430.05<br>(7,123.19 to 9,897.07)                     | 9,144.02<br>(7,799.34 to 10,628.26)                    | 9,151.51<br>(7,716.86 to 10,671.02)                   | 8,865.53<br>(7,645.74 to 10,239.81)                    | 359.41<br>(204.37 to 422.06)                        | 487.98<br>(421.53 to 555.69)                        | 515.39<br>(443.63 to 592.88)                       | 462.76<br>(399.95 to 528.73)                        |
| <b>Cardiovascular diseases</b>  | <b>279,451.19</b><br><b>(244,149.85 to 319,245.57)</b> | <b>264,655.05</b><br><b>(191,500.65 to 360,586.94)</b> | <b>130,714.22</b><br><b>(93,703.46 to 181,895.29)</b> | <b>333,993.11</b><br><b>(237,532.94 to 458,226.88)</b> | <b>19,101.52</b><br><b>(16,823.28 to 21,620.67)</b> | <b>21,567.11</b><br><b>(16,401.15 to 29,250.14)</b> | <b>12,141.23</b><br><b>(8,736.70 to 17,022.58)</b> | <b>25,601.98</b><br><b>(19,247.70 to 34,365.35)</b> |
| Rheumatic heart disease         | 1,261.30<br>(1,052.33 to 1,486.55)                     | 724.82<br>(531.99 to 993.10)                           | 516.01<br>(364.00 to 733.42)                          | 726.09<br>(530.20 to 1,021.71)                         | 68.27<br>(57.49 to 80.98)                           | 51.74<br>(38.11 to 72.40)                           | 39.50<br>(28.22 to 56.48)                          | 50.47<br>(37.59 to 71.03)                           |
| Ischemic heart disease          | 146,702.09<br>(126,210.85 to 169,840.43)               | 136,847.78<br>(84,327.12 to 215,294.29)                | 60,943.85<br>(37,799.16 to 93,819.12)                 | 181,184.73<br>(110,900.19 to 280,032.69)               | 10,125.87<br>(8,834.04 to 11,554.75)                | 11,223.05<br>(7,197.60 to 16,656.96)                | 5,781.86<br>(3,585.16 to 8,809.33)                 | 13,881.98<br>(8,948.53 to 20,672.63)                |
| Stroke                          | 94,628.71<br>(81,612.35 to 109,588.08)                 | 71,382.52<br>(44,905.35 to 109,584.31)                 | 30,980.88<br>(19,593.56 to 48,378.87)                 | 93,314.61<br>(59,853.21 to 142,734.62)                 | 6,446.20<br>(5,608.29 to 7,433.85)                  | 5,770.77<br>(3,705.60 to 9,321.23)                  | 2,870.37<br>(1,805.47 to 4,636.58)                 | 7,043.93<br>(4,633.78 to 11,054.19)                 |
| Ischemic stroke                 | 69,212.05<br>(59,860.65 to 80,033.80)                  | 46,921.71<br>(28,579.76 to 77,496.17)                  | 22,058.79<br>(13,175.13 to 37,717.43)                 | 58,684.04<br>(35,728.40 to 98,671.66)                  | 5,039.66<br>(4,372.88 to 5,818.34)                  | 4,102.72<br>(2,547.79 to 7,269.20)                  | 2,165.53<br>(1,281.71 to 3,798.72)                 | 4,842.17<br>(2,935.40 to 8,645.13)                  |

|                                |                                          |                                          |                                        |                                          |                                       |                                       |                                   |                                       |
|--------------------------------|------------------------------------------|------------------------------------------|----------------------------------------|------------------------------------------|---------------------------------------|---------------------------------------|-----------------------------------|---------------------------------------|
|                                | 25,416.67<br>(21,360.40 to<br>29,863.48) | 24,460.81<br>(14,532.35 to<br>39,840.40) | 8,922.08<br>(5,309.02 to<br>14,328.57) | 34,630.56<br>(19,534.34 to<br>57,058.98) | 1,406.53<br>(1,194.40 to<br>1,629.16) | 1,668.04<br>(1,039.52 to<br>2,634.73) | 704.84<br>(432.17 to<br>1,099.84) | 2,201.76<br>(1,316.08 to<br>3,550.85) |
| Intracerebral hemorrhage       |                                          |                                          |                                        |                                          |                                       |                                       |                                   |                                       |
|                                | 4,700.19<br>(3,573.11 to<br>7,514.80)    | 6,939.18<br>(3,059.20 to<br>17,724.77)   | 5,094.55<br>(2,394.82 to<br>12,457.90) | 9,052.76<br>(3,644.85 to<br>24,402.92)   | 325.82<br>(237.29 to<br>557.25)       | 578.02<br>(251.78 to<br>1,536.48)     | 472.33<br>(217.40 to<br>1,266.16) | 732.75<br>(296.32 to<br>2,023.46)     |
| Hypertensive heart disease     |                                          |                                          |                                        |                                          |                                       |                                       |                                   |                                       |
|                                | 11,318.02<br>(8,082.37 to<br>15,664.58)  | 12,644.03<br>(8,023.30 to<br>18,685.36)  | 9,480.11<br>(6,113.11 to<br>14,088.92) | 13,057.45<br>(8,251.09 to<br>19,447.77)  | 725.54<br>(516.15 to<br>989.44)       | 1,044.11<br>(617.51 to<br>1,667.27)   | 840.67<br>(515.12 to<br>1,312.67) | 1,030.77<br>(602.98 to<br>1,628.69)   |
| Cardiomyopathy and myocarditis |                                          |                                          |                                        |                                          |                                       |                                       |                                   |                                       |
|                                | 2,141.37<br>(1,217.26 to<br>3,594.36)    | 2,380.32<br>(1,369.91 to<br>3,965.70)    | 2,484.72<br>(1,480.23 to<br>3,964.29)  | 2,246.41<br>(1,281.86 to<br>3,810.35)    | 155.12<br>(87.60 to<br>252.36)        | 217.99<br>(119.69 to<br>360.09)       | 246.93<br>(143.60 to<br>392.27)   | 199.65<br>(109.12 to<br>332.29)       |
| Myocarditis                    |                                          |                                          |                                        |                                          |                                       |                                       |                                   |                                       |

| Bosnia and Herzegovina                                        |                                                               |                                                               |                                                              |                                                               |                                                            |                                                            |                                                          |                                                            |
|---------------------------------------------------------------|---------------------------------------------------------------|---------------------------------------------------------------|--------------------------------------------------------------|---------------------------------------------------------------|------------------------------------------------------------|------------------------------------------------------------|----------------------------------------------------------|------------------------------------------------------------|
| Cause                                                         | YLLs (actual counts)                                          |                                                               |                                                              |                                                               | Deaths (actual counts)                                     |                                                            |                                                          |                                                            |
|                                                               | 2016                                                          | 2040 Forecast                                                 | 2040 Better Scenario                                         | 2040 Worse Scenario                                           | 2016                                                       | 2040 Forecast                                              | 2040 Better Scenario                                     | 2040 Worse Scenario                                        |
| Alcoholic cardiomyopathy                                      | 2,312.03<br>(1,221.08 to<br>4,179.25)                         | 1,856.98<br>(942.12 to<br>3,493.86)                           | 1,596.27<br>(838.67 to<br>2,843.57)                          | 2,280.01<br>(1,185.76 to<br>4,221.30)                         | 100.29<br>(54.36 to<br>176.46)                             | 97.34<br>(49.46 to<br>178.23)                              | 88.96<br>(46.66 to<br>158.95)                            | 115.40<br>(59.99 to<br>211.01)                             |
| Other cardiomyopathy                                          | 6,864.63<br>(4,759.34 to<br>9,390.70)                         | 8,406.73<br>(4,684.90 to<br>13,552.65)                        | 5,399.12<br>(2,828.20 to<br>9,008.04)                        | 8,531.03<br>(4,810.71 to<br>13,655.21)                        | 470.13<br>(319.10 to<br>669.21)                            | 728.79<br>(374.00 to<br>1,304.82)                          | 504.78<br>(246.10 to<br>919.27)                          | 715.73<br>(364.25 to<br>1,274.79)                          |
| Atrial fibrillation and flutter                               | 2,947.29<br>(2,250.39 to<br>3,785.66)                         | 5,021.16<br>(3,659.50 to<br>6,674.81)                         | 4,536.26<br>(3,332.06 to<br>6,105.64)                        | 5,251.95<br>(3,725.41 to<br>7,160.14)                         | 314.25<br>(237.70 to<br>414.18)                            | 579.32<br>(417.62 to<br>797.99)                            | 560.42<br>(410.54 to<br>776.00)                          | 589.87<br>(416.53 to<br>819.94)                            |
| Aortic aneurysm                                               | 3,688.04<br>(3,078.77 to<br>4,339.50)                         | 4,035.14<br>(2,990.44 to<br>5,439.68)                         | 3,108.87<br>(2,342.16 to<br>4,082.65)                        | 4,022.34<br>(2,947.54 to<br>5,448.38)                         | 208.42<br>(176.08 to<br>242.00)                            | 270.22<br>(207.15 to<br>348.55)                            | 231.81<br>(181.75 to<br>291.81)                          | 261.50<br>(199.98 to<br>337.38)                            |
| Peripheral artery disease                                     | 142.21<br>(98.03 to<br>181.59)                                | 339.15<br>(209.51 to<br>502.81)                               | 313.10<br>(189.28 to<br>464.56)                              | 329.97<br>(205.27 to<br>491.83)                               | 11.61<br>(7.95 to<br>14.77)                                | 32.63<br>(19.71 to<br>48.01)                               | 33.56<br>(19.17 to<br>49.55)                             | 30.70<br>(18.44 to<br>44.77)                               |
| Endocarditis                                                  | 559.31<br>(438.72 to<br>731.00)                               | 618.51<br>(421.61 to<br>906.56)                               | 598.00<br>(403.43 to<br>881.70)                              | 633.66<br>(424.45 to<br>940.83)                               | 28.27<br>(22.27 to<br>35.41)                               | 40.67<br>(26.62 to<br>61.68)                               | 42.37<br>(27.37 to<br>64.43)                             | 40.30<br>(26.34 to<br>61.46)                               |
| Other cardiovascular and circulatory diseases                 | 13,504.04<br>(10,514.14 to<br>19,543.22)                      | 26,102.75<br>(17,303.95 to<br>39,286.96)                      | 15,142.59<br>(10,102.25 to<br>22,865.25)                     | 26,419.55<br>(17,508.02 to<br>40,365.60)                      | 847.27<br>(666.59 to<br>1,196.51)                          | 1,976.59<br>(1,363.02 to<br>2,898.81)                      | 1,268.33<br>(875.24 to<br>1,898.51)                      | 1,939.70<br>(1,347.87 to<br>2,861.48)                      |
| <b>Chronic respiratory diseases</b>                           | <b>20,485.88</b><br><b>(17,339.13 to</b><br><b>23,647.88)</b> | <b>23,313.77</b><br><b>(15,406.39 to</b><br><b>34,060.25)</b> | <b>12,742.97</b><br><b>(9,268.45 to</b><br><b>17,633.05)</b> | <b>27,716.78</b><br><b>(18,029.51 to</b><br><b>41,525.98)</b> | <b>1,377.06</b><br><b>(1,180.71 to</b><br><b>1,579.24)</b> | <b>1,820.76</b><br><b>(1,242.29 to</b><br><b>2,610.87)</b> | <b>1,067.24</b><br><b>(795.94 to</b><br><b>1,414.67)</b> | <b>2,085.15</b><br><b>(1,387.20 to</b><br><b>3,044.30)</b> |
| Chronic obstructive pulmonary disease                         | 18,341.03<br>(15,498.52 to<br>21,216.91)                      | 21,141.39<br>(13,270.75 to<br>32,567.17)                      | 10,259.42<br>(6,663.94 to<br>15,146.82)                      | 25,540.46<br>(15,749.34 to<br>39,839.04)                      | 1,244.89<br>(1,068.87 to<br>1,431.87)                      | 1,659.99<br>(1,087.06 to<br>2,462.30)                      | 873.80<br>(598.59 to<br>1,229.35)                        | 1,927.81<br>(1,232.52 to<br>2,893.57)                      |
| Pneumoconiosis                                                | 70.77<br>(53.09 to<br>92.82)                                  | 59.11<br>(41.96 to<br>81.28)                                  | 55.42<br>(39.27 to<br>77.42)                                 | 56.91<br>(40.18 to<br>78.52)                                  | 3.03<br>(3.77 to<br>6.56)                                  | 5.25<br>(3.56 to<br>7.54)                                  | 5.29<br>(3.60 to<br>7.96)                                | 4.95<br>(3.23 to<br>7.20)                                  |
| Silicosis                                                     | 12.54<br>(7.05 to<br>20.40)                                   | 9.07<br>(4.13 to<br>17.79)                                    | 4.79<br>(2.11 to<br>9.51)                                    | 8.61<br>(3.98 to<br>16.85)                                    | 0.97<br>(0.51 to<br>1.58)                                  | 0.76<br>(0.34 to<br>1.47)                                  | 0.42<br>(0.18 to<br>0.82)                                | 0.72<br>(0.32 to<br>1.37)                                  |
| Asbestosis                                                    | 13.55<br>(9.51 to<br>20.18)                                   | 15.41<br>(9.47 to<br>23.63)                                   | 21.34<br>(13.50 to<br>33.29)                                 | 14.53<br>(8.83 to<br>22.58)                                   | 0.79<br>(0.53 to<br>1.23)                                  | 1.25<br>(0.68 to<br>2.19)                                  | 1.86<br>(1.05 to<br>3.13)                                | 1.15<br>(0.62 to<br>1.98)                                  |
| Coal workers pneumoconiosis                                   | 8.99<br>(3.56 to<br>16.52)                                    | 4.25<br>(1.96 to<br>8.84)                                     | 3.00<br>(1.38 to<br>5.95)                                    | 4.34<br>(1.96 to<br>9.03)                                     | 0.47<br>(0.22 to<br>0.83)                                  | 0.29<br>(0.14 to<br>0.53)                                  | 0.24<br>(0.11 to<br>0.48)                                | 0.28<br>(0.14 to<br>0.54)                                  |
| Other pneumoconiosis                                          | 35.69<br>(26.08 to<br>48.01)                                  | 30.38<br>(19.36 to<br>45.96)                                  | 26.29<br>(15.91 to<br>42.31)                                 | 29.43<br>(18.91 to<br>44.48)                                  | 2.80<br>(2.05 to<br>3.75)                                  | 2.95<br>(1.81 to<br>4.78)                                  | 2.77<br>(1.61 to<br>4.62)                                | 2.80<br>(1.70 to<br>4.55)                                  |
| Asthma                                                        | 1,088.05<br>(707.45 to<br>1,354.44)                           | 822.46<br>(384.15 to<br>1,505.62)                             | 377.26<br>(177.95 to<br>684.35)                              | 904.18<br>(423.80 to<br>1,701.17)                             | 69.80<br>(41.70 to<br>87.89)                               | 62.60<br>(29.05 to<br>114.97)                              | 30.79<br>(14.70 to<br>56.75)                             | 67.01<br>(31.10 to<br>123.12)                              |
| Interstitial lung disease and pulmonary sarcoidosis           | 902.71<br>(631.95 to<br>1,133.44)                             | 1,213.56<br>(790.15 to<br>1,560.73)                           | 1,978.48<br>(1,286.54 to<br>2,553.62)                        | 1,137.83<br>(730.15 to<br>1,474.94)                           | 54.13<br>(34.10 to<br>70.71)                               | 89.97<br>(52.48 to<br>123.45)                              | 153.36<br>(91.54 to<br>207.84)                           | 81.55<br>(47.61 to<br>113.15)                              |
| Other chronic respiratory diseases                            | 83.32<br>(44.67 to<br>124.97)                                 | 77.26<br>(38.63 to<br>127.89)                                 | 72.39<br>(37.46 to<br>116.98)                                | 77.41<br>(38.17 to<br>129.66)                                 | 3.21<br>(1.84 to<br>4.78)                                  | 3.95<br>(2.15 to<br>6.31)                                  | 4.00<br>(2.28 to<br>6.23)                                | 3.83<br>(2.06 to<br>6.13)                                  |
| <b>Cirrhosis and other chronic liver diseases</b>             | <b>15,068.25</b><br><b>(12,000.37 to</b><br><b>20,583.74)</b> | <b>13,626.01</b><br><b>(10,882.67 to</b><br><b>17,972.86)</b> | <b>10,045.82</b><br><b>(7,928.73 to</b><br><b>13,517.45)</b> | <b>15,224.05</b><br><b>(12,248.90 to</b><br><b>20,322.46)</b> | <b>593.95</b><br><b>(481.05 to</b><br><b>791.77)</b>       | <b>625.74</b><br><b>(523.83 to</b><br><b>617.95)</b>       | <b>481.21</b><br><b>(396.55 to</b><br><b>617.95)</b>     | <b>683.40</b><br><b>(570.82 to</b><br><b>876.86)</b>       |
| Cirrhosis and other chronic liver diseases due to hepatitis B | 2,437.86<br>(1,778.99 to<br>3,535.76)                         | 2,297.51<br>(1,693.43 to<br>3,407.20)                         | 1,814.54<br>(1,333.65 to<br>2,667.93)                        | 2,266.96<br>(1,647.93 to<br>3,404.11)                         | 94.13<br>(70.27 to<br>133.96)                              | 102.67<br>(78.84 to<br>146.18)                             | 84.12<br>(63.20 to<br>116.19)                            | 99.69<br>(76.04 to<br>142.74)                              |
| Cirrhosis and other chronic liver diseases due to hepatitis C | 2,816.97<br>(1,843.99 to<br>4,427.19)                         | 2,789.13<br>(1,812.14 to<br>4,234.09)                         | 2,158.83<br>(1,391.70 to<br>3,292.87)                        | 2,762.77<br>(1,781.99 to<br>4,275.91)                         | 108.12<br>(71.29 to<br>165.68)                             | 122.41<br>(80.36 to<br>179.03)                             | 97.96<br>(63.40 to<br>143.29)                            | 119.46<br>(78.28 to<br>177.97)                             |

|                                                                |                                                              |                                                              |                                                             |                                                              |                                                      |                                                        |                                                      |                                                        |
|----------------------------------------------------------------|--------------------------------------------------------------|--------------------------------------------------------------|-------------------------------------------------------------|--------------------------------------------------------------|------------------------------------------------------|--------------------------------------------------------|------------------------------------------------------|--------------------------------------------------------|
|                                                                | 6,952.77<br>(5,159.79 to<br>9,769.14)                        | 5,839.18<br>(4,325.69 to<br>8,264.68)                        | 3,945.38<br>(2,852.71 to<br>5,600.17)                       | 7,526.09<br>(5,630.52 to<br>10,461.26)                       | 276.54<br>(209.16 to<br>373.96)                      | 271.35<br>(204.49 to<br>364.46)                        | 193.15<br>(144.61 to<br>259.66)                      | 338.72<br>(261.59 to<br>454.99)                        |
| Cirrhosis and other chronic liver diseases due to alcohol use  |                                                              |                                                              |                                                             |                                                              |                                                      |                                                        |                                                      |                                                        |
|                                                                | 2,860.65<br>(2,209.47 to<br>3,741.31)                        | 2,700.19<br>(2,077.73 to<br>3,615.62)                        | 2,127.07<br>(1,614.69 to<br>2,866.41)                       | 2,668.24<br>(2,024.87 to<br>3,604.20)                        | 115.16<br>(88.91 to<br>150.86)                       | 129.31<br>(101.58 to<br>166.53)                        | 105.97<br>(82.05 to<br>138.72)                       | 125.53<br>(96.93 to<br>162.08)                         |
| Cirrhosis and other chronic liver diseases due to other causes |                                                              |                                                              |                                                             |                                                              |                                                      |                                                        |                                                      |                                                        |
|                                                                | <b>11,485.57</b><br><b>(9,442.02 to</b><br><b>15,177.43)</b> | <b>12,127.58</b><br><b>(9,215.81 to</b><br><b>16,997.52)</b> | <b>9,409.47</b><br><b>(7,213.89 to</b><br><b>12,646.07)</b> | <b>12,729.24</b><br><b>(9,370.63 to</b><br><b>18,703.53)</b> | <b>634.75</b><br><b>(523.92 to</b><br><b>817.78)</b> | <b>845.23</b><br><b>(661.02 to</b><br><b>1,140.14)</b> | <b>708.27</b><br><b>(559.21 to</b><br><b>934.30)</b> | <b>858.09</b><br><b>(652.38 to</b><br><b>1,199.07)</b> |
| Digestive diseases                                             |                                                              |                                                              |                                                             |                                                              |                                                      |                                                        |                                                      |                                                        |
|                                                                | 2,146.90<br>(1,645.05 to<br>3,103.59)                        | 1,845.36<br>(1,253.26 to<br>2,789.16)                        | 995.47<br>(667.45 to<br>1,537.44)                           | 1,823.18<br>(1,182.51 to<br>2,805.96)                        | 118.54<br>(91.12 to<br>165.77)                       | 124.70<br>(86.26 to<br>184.74)                         | 71.75<br>(49.53 to<br>108.69)                        | 120.42<br>(80.18 to<br>181.34)                         |
| Peptic ulcer disease                                           |                                                              |                                                              |                                                             |                                                              |                                                      |                                                        |                                                      |                                                        |



| Bosnia and Herzegovina                     |                                       |                                       |                                       |                                       |                                    |                                    |                                    |                                    |
|--------------------------------------------|---------------------------------------|---------------------------------------|---------------------------------------|---------------------------------------|------------------------------------|------------------------------------|------------------------------------|------------------------------------|
| Cause                                      | YLLs (actual counts)                  |                                       |                                       |                                       | Deaths (actual counts)             |                                    |                                    |                                    |
|                                            | 2016                                  | 2040 Forecast                         | 2040 Better Scenario                  | 2040 Worse Scenario                   | 2016                               | 2040 Forecast                      | 2040 Better Scenario               | 2040 Worse Scenario                |
| Gastritis and duodenitis                   | 94.82<br>(72.62 to 132.59)            | 125.18<br>(91.73 to 178.94)           | 96.70<br>(69.23 to 140.22)            | 118.67<br>(85.73 to 172.11)           | 6.65<br>(5.03 to 9.17)             | 10.49<br>(7.57 to 14.94)           | 8.61<br>(6.18 to 12.35)            | 9.71<br>(6.95 to 14.08)            |
| Appendicitis                               | 351.52<br>(256.04 to 683.51)          | 335.45<br>(225.08 to 725.77)          | 210.00<br>(137.90 to 465.12)          | 331.53<br>(223.08 to 726.77)          | 15.08<br>(10.48 to 32.25)          | 19.08<br>(12.54 to 45.67)          | 12.66<br>(8.12 to 30.86)           | 18.42<br>(11.91 to 43.81)          |
| Paralytic ileus and intestinal obstruction | 2,639.17<br>(1,984.44 to 3,441.42)    | 2,702.35<br>(2,128.39 to 3,501.61)    | 2,823.55<br>(2,251.54 to 3,631.43)    | 2,573.51<br>(2,041.63 to 3,405.16)    | 150.60<br>(115.46 to 197.75)       | 201.10<br>(158.66 to 263.12)       | 224.41<br>(178.70 to 288.08)       | 186.42<br>(146.84 to 249.40)       |
| Inguinal, femoral, and abdominal hernia    | 512.36<br>(315.24 to 1,133.40)        | 433.49<br>(259.88 to 1,015.99)        | 354.67<br>(206.39 to 834.78)          | 417.10<br>(243.18 to 971.99)          | 30.53<br>(18.26 to 67.80)          | 32.26<br>(18.60 to 76.12)          | 28.10<br>(15.91 to 66.75)          | 30.30<br>(16.98 to 72.59)          |
| Inflammatory bowel disease                 | 393.50<br>(251.95 to 500.95)          | 374.10<br>(228.28 to 481.70)          | 368.05<br>(223.89 to 477.64)          | 361.02<br>(222.36 to 466.51)          | 17.45<br>(10.91 to 22.47)          | 20.86<br>(13.51 to 26.62)          | 21.69<br>(14.19 to 28.08)          | 19.67<br>(12.80 to 25.03)          |
| Vascular intestinal disorders              | 1,194.11<br>(935.01 to 1,650.50)      | 1,495.47<br>(1,197.10 to 2,051.41)    | 1,374.99<br>(1,079.66 to 1,858.80)    | 1,421.86<br>(1,125.58 to 1,999.40)    | 77.48<br>(61.13 to 104.44)         | 117.82<br>(93.31 to 157.03)        | 114.95<br>(90.26 to 152.70)        | 109.63<br>(85.39 to 150.70)        |
| Gallbladder and biliary diseases           | 1,248.11<br>(943.34 to 2,021.80)      | 1,656.50<br>(853.11 to 3,197.36)      | 1,032.14<br>(551.09 to 1,964.99)      | 1,868.28<br>(932.90 to 3,638.77)      | 76.26<br>(58.43 to 120.01)         | 124.74<br>(65.23 to 232.81)        | 83.89<br>(45.03 to 153.83)         | 135.92<br>(69.20 to 258.47)        |
| Pancreatitis                               | 2,038.42<br>(1,284.78 to 2,643.69)    | 2,291.38<br>(754.46 to 5,888.03)      | 1,386.61<br>(470.93 to 3,425.68)      | 2,972.92<br>(936.07 to 7,785.57)      | 97.20<br>(52.52 to 131.88)         | 136.67<br>(41.29 to 355.62)        | 87.48<br>(27.14 to 216.12)         | 173.34<br>(49.82 to 456.90)        |
| Other digestive diseases                   | 866.67<br>(675.61 to 1,216.77)        | 868.29<br>(678.68 to 1,244.05)        | 767.30<br>(587.52 to 1,103.39)        | 841.18<br>(658.42 to 1,218.46)        | 44.97<br>(35.02 to 62.39)          | 57.51<br>(45.04 to 79.97)          | 54.73<br>(42.65 to 76.43)          | 54.27<br>(41.68 to 77.21)          |
| Neurological disorders                     | 24,175.52<br>(19,924.44 to 28,978.72) | 38,564.27<br>(30,336.15 to 50,835.17) | 40,167.11<br>(32,419.10 to 50,623.99) | 38,149.41<br>(29,290.06 to 51,338.47) | 2,138.79<br>(1,728.18 to 2,604.21) | 4,000.47<br>(3,001.86 to 5,364.11) | 4,443.07<br>(3,538.41 to 5,722.45) | 3,854.75<br>(2,813.34 to 5,330.44) |
| Alzheimer's disease and other dementias    | 16,591.05<br>(13,148.94 to 20,979.51) | 29,506.54<br>(21,654.52 to 41,197.57) | 30,300.19<br>(22,970.32 to 40,305.84) | 29,250.32<br>(20,845.39 to 41,938.94) | 1,750.53<br>(1,388.02 to 2,194.80) | 3,371.78<br>(2,400.66 to 4,744.60) | 3,682.99<br>(2,764.43 to 4,910.22) | 3,265.58<br>(2,248.94 to 4,769.90) |
| Parkinson's disease                        | 2,985.21<br>(2,195.36 to 3,924.47)    | 5,153.92<br>(3,803.26 to 6,757.06)    | 6,343.28<br>(4,803.80 to 8,200.59)    | 4,753.04<br>(3,469.30 to 6,295.42)    | 252.98<br>(185.61 to 334.22)       | 479.77<br>(351.79 to 636.53)       | 617.01<br>(464.51 to 807.77)       | 455.35<br>(313.83 to 586.81)       |
| Epilepsy                                   | 2,434.26<br>(2,027.53 to 2,928.56)    | 1,984.96<br>(1,175.45 to 3,203.82)    | 1,596.35<br>(974.57 to 2,522.60)      | 2,256.00<br>(1,249.95 to 3,854.10)    | 66.72<br>(56.10 to 80.00)          | 73.30<br>(44.76 to 114.36)         | 63.55<br>(40.93 to 95.39)          | 80.79<br>(46.21 to 131.58)         |
| Multiple sclerosis                         | 866.64<br>(653.01 to 1,374.99)        | 767.98<br>(507.65 to 1,302.68)        | 745.16<br>(503.45 to 1,249.74)        | 759.00<br>(503.61 to 1,283.39)        | 27.88<br>(20.63 to 47.03)          | 30.01<br>(19.86 to 52.93)          | 30.65<br>(20.91 to 53.82)          | 29.11<br>(19.26 to 51.03)          |
| Motor neuron disease                       | 346.08<br>(291.30 to 411.87)          | 361.23<br>(291.12 to 437.02)          | 359.23<br>(285.68 to 435.64)          | 353.93<br>(286.26 to 428.34)          | 12.75<br>(10.68 to 15.15)          | 15.82<br>(12.99 to 19.06)          | 16.23<br>(13.13 to 19.53)          | 15.29<br>(12.71 to 18.47)          |
| Other neurological disorders               | 952.28<br>(776.05 to 1,124.42)        | 789.65<br>(645.64 to 935.53)          | 822.90<br>(669.40 to 978.36)          | 777.12<br>(637.93 to 924.95)          | 27.94<br>(23.26 to 32.89)          | 29.80<br>(25.45 to 34.20)          | 32.64<br>(27.66 to 38.08)          | 28.63<br>(24.48 to 32.98)          |
| Mental disorders                           | 5,645.49<br>(3,985.61 to 10,804.95)   | 4,645.50<br>(3,283.63 to 9,090.15)    | 5,075.71<br>(3,606.53 to 9,547.46)    | 4,936.81<br>(3,504.14 to 9,667.92)    | 177.27<br>(125.94 to 337.99)       | 178.72<br>(130.77 to 336.51)       | 203.88<br>(149.28 to 371.82)       | 186.92<br>(137.30 to 358.26)       |
| Alcohol use disorders                      | 4,333.84<br>(2,733.77 to 10,136.66)   | 3,918.96<br>(2,560.15 to 8,573.34)    | 4,207.12<br>(2,756.27 to 9,125.82)    | 4,210.28<br>(2,763.08 to 9,177.76)    | 146.56<br>(96.26 to 324.04)        | 157.04<br>(108.70 to 326.21)       | 175.30<br>(121.35 to 358.55)       | 165.76<br>(115.20 to 349.00)       |
| Drug use disorders                         | 1,310.09<br>(241.19 to 1,872.58)      | 725.39<br>(130.29 to 1,070.27)        | 867.40<br>(166.50 to 1,281.39)        | 725.37<br>(127.04 to 1,081.23)        | 30.67<br>(5.98 to 42.73)           | 21.66<br>(4.24 to 30.46)           | 28.56<br>(5.84 to 40.00)           | 21.14<br>(3.96 to 29.68)           |
| Opioid use disorders                       | 1,057.73<br>(187.54 to 1,531.79)      | 533.07<br>(97.96 to 821.80)           | 566.57<br>(109.40 to 869.75)          | 536.99<br>(95.55 to 829.40)           | 22.97<br>(4.48 to 32.36)           | 13.55<br>(2.94 to 19.74)           | 15.01<br>(3.54 to 21.88)           | 13.46<br>(2.83 to 19.75)           |

|                           |                                |                                |                                |                                |                           |                            |                             |                           |
|---------------------------|--------------------------------|--------------------------------|--------------------------------|--------------------------------|---------------------------|----------------------------|-----------------------------|---------------------------|
|                           | 18.18<br>(3.52 to<br>28.84)    | 14.60<br>(2.59 to<br>24.24)    | 20.03<br>(3.45 to<br>33.36)    | 14.47<br>(2.54 to<br>23.59)    | 0.50<br>(0.08 to<br>0.80) | 0.47<br>(0.07 to<br>0.78)  | 0.66<br>(0.10 to<br>1.10)   | 0.46<br>(0.07 to<br>0.76) |
| Cocaine use disorders     |                                |                                |                                |                                |                           |                            |                             |                           |
|                           | 18.71<br>(5.51 to<br>27.75)    | 21.20<br>(5.52 to<br>33.60)    | 35.28<br>(9.07 to<br>55.60)    | 21.03<br>(5.30 to<br>33.04)    | 0.43<br>(0.11 to<br>0.64) | 0.60<br>(0.12 to<br>0.95)  | 1.03<br>(0.21 to<br>1.64)   | 0.58<br>(0.12 to<br>0.91) |
| Amphetamine use disorders |                                |                                |                                |                                |                           |                            |                             |                           |
|                           | 215.47<br>(39.13 to<br>318.71) | 156.52<br>(26.21 to<br>233.41) | 245.52<br>(42.87 to<br>366.64) | 152.87<br>(25.26 to<br>227.62) | 6.77<br>(1.17 to<br>9.65) | 7.04<br>(1.10 to<br>10.27) | 11.86<br>(1.92 to<br>17.52) | 6.64<br>(1.04 to<br>9.69) |
| Other drug use disorders  |                                |                                |                                |                                |                           |                            |                             |                           |
|                           | 1.56<br>(1.09 to<br>2.00)      | 1.15<br>(0.71 to<br>1.63)      | 1.19<br>(0.74 to<br>1.71)      | 1.16<br>(0.71 to<br>1.65)      | 0.03<br>(0.02 to<br>0.04) | 0.02<br>(0.01 to<br>0.03)  | 0.03<br>(0.02 to<br>0.04)   | 0.02<br>(0.01 to<br>0.04) |
| Eating disorders          |                                |                                |                                |                                |                           |                            |                             |                           |

| Bosnia and Herzegovina                                     |                                              |                                              |                                              |                                              |                                           |                                           |                                           |                                           |
|------------------------------------------------------------|----------------------------------------------|----------------------------------------------|----------------------------------------------|----------------------------------------------|-------------------------------------------|-------------------------------------------|-------------------------------------------|-------------------------------------------|
| Cause                                                      | YLLs (actual counts)                         |                                              |                                              |                                              | Deaths (actual counts)                    |                                           |                                           |                                           |
|                                                            | 2016                                         | 2040 Forecast                                | 2040 Better Scenario                         | 2040 Worse Scenario                          | 2016                                      | 2040 Forecast                             | 2040 Better Scenario                      | 2040 Worse Scenario                       |
| <b>Diabetes, urogenital, blood, and endocrine diseases</b> | <b>54,717.30</b><br>(47,372.50 to 62,564.24) | <b>60,465.01</b><br>(44,286.46 to 84,637.97) | <b>38,759.89</b><br>(28,087.29 to 52,887.08) | <b>64,566.31</b><br>(47,597.47 to 91,101.05) | <b>3,205.00</b><br>(2,791.64 to 3,643.67) | <b>4,239.27</b><br>(3,244.63 to 5,589.13) | <b>2,880.16</b><br>(2,154.91 to 3,827.84) | <b>4,407.78</b><br>(3,326.67 to 5,967.96) |
| Diabetes mellitus                                          | 40,696.56<br>(34,706.91 to 46,880.72)        | 37,754.98<br>(24,998.49 to 54,811.97)        | 23,410.48<br>(15,383.62 to 34,535.70)        | 40,556.46<br>(25,524.82 to 59,904.52)        | 2,446.81<br>(2,105.85 to 2,813.79)        | 2,706.14<br>(1,839.03 to 3,830.96)        | 1,783.01<br>(1,214.91 to 2,552.02)        | 2,822.64<br>(1,849.79 to 4,043.33)        |
| Acute glomerulonephritis                                   | 19.81<br>(17.16 to 22.82)                    | 14.30<br>(10.70 to 18.92)                    | 10.83<br>(8.01 to 14.60)                     | 14.45<br>(10.73 to 18.99)                    | 0.53<br>(0.43 to 0.67)                    | 0.43<br>(0.30 to 0.67)                    | 0.35<br>(0.23 to 0.55)                    | 0.43<br>(0.30 to 0.65)                    |
| Chronic kidney disease                                     | 11,510.39<br>(9,682.98 to 13,542.90)         | 18,843.33<br>(9,339.62 to 42,215.45)         | 11,919.81<br>(6,370.54 to 24,848.04)         | 20,278.20<br>(9,842.89 to 47,609.40)         | 635.21<br>(535.25 to 742.89)              | 1,270.49<br>(643.69 to 2,577.08)          | 855.08<br>(461.57 to 1,623.80)            | 1,338.91<br>(668.23 to 2,769.72)          |
| Chronic kidney disease due to diabetes mellitus            | 4,108.88<br>(3,395.40 to 4,901.64)           | 7,101.92<br>(3,377.65 to 18,372.14)          | 4,482.34<br>(2,317.64 to 10,726.02)          | 7,692.16<br>(3,537.30 to 19,637.65)          | 211.29<br>(174.68 to 250.11)              | 434.49<br>(213.97 to 988.44)              | 288.93<br>(151.45 to 621.04)              | 461.99<br>(219.67 to 1,064.10)            |
| Chronic kidney disease due to hypertension                 | 1,140.57<br>(921.81 to 1,397.00)             | 2,056.17<br>(1,039.56 to 4,059.80)           | 1,470.95<br>(795.98 to 2,744.13)             | 2,164.83<br>(1,079.65 to 4,439.43)           | 89.23<br>(72.01 to 109.39)                | 185.67<br>(97.16 to 354.55)               | 142.48<br>(78.28 to 254.89)               | 190.88<br>(99.01 to 365.55)               |
| Chronic kidney disease due to glomerulonephritis           | 2,224.24<br>(1,844.29 to 2,634.02)           | 3,359.10<br>(1,763.32 to 6,737.24)           | 2,000.83<br>(1,083.31 to 3,914.61)           | 3,619.31<br>(1,826.29 to 7,411.72)           | 110.77<br>(92.53 to 131.91)               | 215.83<br>(111.16 to 422.79)              | 134.94<br>(71.62 to 253.98)               | 228.43<br>(114.20 to 452.37)              |
| Chronic kidney disease due to other and unspecified causes | 4,036.70<br>(3,381.44 to 4,735.59)           | 6,326.14<br>(3,152.65 to 13,356.20)          | 3,965.69<br>(2,131.49 to 7,853.53)           | 6,801.91<br>(3,330.90 to 14,763.04)          | 223.91<br>(187.23 to 261.64)              | 434.50<br>(220.24 to 861.40)              | 288.73<br>(155.82 to 549.22)              | 457.61<br>(230.24 to 923.57)              |
| Urinary diseases and male infertility                      | 699.71<br>(598.98 to 808.91)                 | 1,938.18<br>(1,595.92 to 2,319.52)           | 1,585.11<br>(1,288.30 to 1,947.42)           | 1,845.53<br>(1,522.77 to 2,225.26)           | 46.36<br>(39.46 to 53.73)                 | 156.50<br>(127.33 to 191.51)              | 137.22<br>(110.85 to 167.88)              | 145.12<br>(117.47 to 177.80)              |
| Urinary tract infections                                   | 577.61<br>(455.10 to 747.32)                 | 1,748.50<br>(1,378.24 to 2,180.99)           | 1,450.26<br>(1,146.47 to 1,824.21)           | 1,664.04<br>(1,316.36 to 2,105.39)           | 38.60<br>(30.29 to 49.49)                 | 142.06<br>(110.61 to 179.06)              | 126.25<br>(99.81 to 158.00)               | 131.66<br>(101.96 to 168.18)              |
| Urolithiasis                                               | 27.40<br>(6.97 to 43.23)                     | 58.23<br>(12.29 to 95.79)                    | 38.59<br>(8.02 to 64.71)                     | 56.37<br>(12.03 to 92.94)                    | 1.34<br>(0.32 to 2.09)                    | 3.60<br>(0.75 to 5.97)                    | 2.55<br>(0.52 to 4.23)                    | 3.39<br>(0.71 to 5.59)                    |
| Other urinary diseases                                     | 94.70<br>(21.29 to 167.02)                   | 131.44<br>(24.92 to 247.26)                  | 96.27<br>(17.63 to 187.04)                   | 125.12<br>(23.63 to 237.18)                  | 6.42<br>(1.51 to 11.32)                   | 10.84<br>(2.31 to 20.81)                  | 8.43<br>(1.76 to 16.42)                   | 10.07<br>(2.07 to 19.15)                  |
| Gynecological diseases                                     | 7.38<br>(5.33 to 10.48)                      | 9.13<br>(5.98 to 14.08)                      | 4.42<br>(2.79 to 6.97)                       | 9.16<br>(5.92 to 14.58)                      | 0.31<br>(0.23 to 0.43)                    | 0.50<br>(0.34 to 0.74)                    | 0.27<br>(0.17 to 0.41)                    | 0.49<br>(0.33 to 0.73)                    |
| Uterine fibroids                                           | 0.71<br>(0.42 to 1.12)                       | 1.18<br>(0.56 to 2.24)                       | 0.71<br>(0.34 to 1.34)                       | 1.19<br>(0.56 to 2.31)                       | 0.03<br>(0.02 to 0.05)                    | 0.05<br>(0.03 to 0.10)                    | 0.03<br>(0.02 to 0.06)                    | 0.05<br>(0.03 to 0.10)                    |
| Polycystic ovarian syndrome                                | 2.64<br>(1.58 to 4.26)                       | 1.65<br>(0.58 to 3.78)                       | 0.52<br>(0.15 to 1.36)                       | 1.73<br>(0.59 to 3.91)                       | 0.07<br>(0.04 to 0.11)                    | 0.04<br>(0.01 to 0.10)                    | 0.01<br>(0.00 to 0.03)                    | 0.04<br>(0.01 to 0.10)                    |
| Endometriosis                                              | 0.10<br>(0.04 to 0.23)                       | 0.13<br>(0.04 to 0.39)                       | 0.07<br>(0.02 to 0.18)                       | 0.13<br>(0.04 to 0.40)                       | 0.00<br>(0.00 to 0.01)                    | 0.00<br>(0.00 to 0.01)                    | 0.00<br>(0.00 to 0.00)                    | 0.00<br>(0.00 to 0.01)                    |
| Genital prolapse                                           | 1.55<br>(0.68 to 2.29)                       | 2.12<br>(0.83 to 3.79)                       | 1.09<br>(0.41 to 1.96)                       | 2.12<br>(0.84 to 3.76)                       | 0.08<br>(0.04 to 0.12)                    | 0.13<br>(0.05 to 0.23)                    | 0.07<br>(0.03 to 0.12)                    | 0.13<br>(0.05 to 0.23)                    |
| Other gynecological diseases                               | 2.39<br>(1.51 to 3.80)                       | 4.04<br>(2.43 to 6.63)                       | 2.04<br>(1.19 to 3.45)                       | 3.99<br>(2.36 to 6.57)                       | 0.13<br>(0.09 to 0.21)                    | 0.28<br>(0.17 to 0.46)                    | 0.15<br>(0.09 to 0.26)                    | 0.27<br>(0.16 to 0.44)                    |
| Hemoglobinopathies and hemolytic anemias                   | 570.71<br>(439.65 to 688.32)                 | 576.11<br>(439.21 to 699.68)                 | 412.61<br>(310.58 to 516.70)                 | 559.95<br>(427.62 to 680.74)                 | 30.13<br>(22.94 to 36.50)                 | 40.72<br>(31.37 to 49.89)                 | 31.49<br>(24.03 to 39.92)                 | 38.48<br>(29.24 to 47.35)                 |
| Thalassemias                                               | 17.14<br>(13.43 to 22.62)                    | 5.09<br>(3.50 to 7.55)                       | 4.79<br>(3.34 to 6.91)                       | 5.30<br>(3.63 to 7.77)                       | 0.22<br>(0.17 to 0.29)                    | 0.07<br>(0.05 to 0.10)                    | 0.07<br>(0.05 to 0.09)                    | 0.07<br>(0.05 to 0.10)                    |

|                                                   |                                     |                                       |                                       |                                       |                              |                              |                              |                              |
|---------------------------------------------------|-------------------------------------|---------------------------------------|---------------------------------------|---------------------------------------|------------------------------|------------------------------|------------------------------|------------------------------|
|                                                   | 58.59<br>(45.24 to<br>74.00)        | 48.31<br>(34.31 to<br>63.39)          | 32.00<br>(22.06 to<br>43.62)          | 48.92<br>(33.95 to<br>65.56)          | 1.34<br>(1.00 to<br>1.71)    | 1.34<br>(0.93 to<br>1.80)    | 0.90<br>(0.61 to<br>1.24)    | 1.35<br>(0.93 to<br>1.82)    |
| Sickle cell disorders                             |                                     |                                       |                                       |                                       |                              |                              |                              |                              |
|                                                   | 115.07<br>(83.35 to<br>148.68)      | 133.32<br>(92.85 to<br>175.17)        | 82.24<br>(55.20 to<br>112.30)         | 132.81<br>(92.10 to<br>175.08)        | 3.57<br>(2.56 to<br>4.64)    | 5.84<br>(4.00 to<br>7.85)    | 3.74<br>(2.47 to<br>5.16)    | 5.72<br>(3.90 to<br>7.61)    |
| G6PD deficiency                                   |                                     |                                       |                                       |                                       |                              |                              |                              |                              |
|                                                   | 379.91<br>(287.93 to<br>464.63)     | 389.39<br>(294.74 to<br>480.51)       | 293.58<br>(219.36 to<br>372.16)       | 372.92<br>(282.32 to<br>464.34)       | 25.00<br>(19.07 to<br>30.49) | 33.46<br>(25.27 to<br>41.50) | 26.77<br>(20.30 to<br>34.04) | 31.34<br>(23.72 to<br>39.46) |
| Other hemoglobinopathies and hemolytic anemias    |                                     |                                       |                                       |                                       |                              |                              |                              |                              |
|                                                   | 1,212.74<br>(983.98 to<br>1,637.74) | 1,329.00<br>(1,045.67 to<br>1,730.27) | 1,416.62<br>(1,110.47 to<br>1,809.97) | 1,302.57<br>(1,031.27 to<br>1,713.48) | 45.65<br>(36.33 to<br>58.95) | 64.48<br>(50.74 to<br>83.51) | 72.75<br>(56.98 to<br>94.37) | 61.70<br>(48.63 to<br>79.34) |
| Endocrine, metabolic, blood, and immune disorders |                                     |                                       |                                       |                                       |                              |                              |                              |                              |

| Bosnia and Herzegovina                        |                                           |                                           |                                           |                                           |                                   |                                  |                                  |                                  |
|-----------------------------------------------|-------------------------------------------|-------------------------------------------|-------------------------------------------|-------------------------------------------|-----------------------------------|----------------------------------|----------------------------------|----------------------------------|
| Cause                                         | YLLs (actual counts)                      |                                           |                                           |                                           | Deaths (actual counts)            |                                  |                                  |                                  |
|                                               | 2016                                      | 2040 Forecast                             | 2040 Better Scenario                      | 2040 Worse Scenario                       | 2016                              | 2040 Forecast                    | 2040 Better Scenario             | 2040 Worse Scenario              |
| <b>Musculoskeletal disorders</b>              | <b>1,016.91</b><br>(361.60 to 1,349.63)   | <b>1,017.89</b><br>(350.54 to 1,375.29)   | <b>830.79</b><br>(286.22 to 1,118.65)     | <b>993.64</b><br>(344.58 to 1,330.69)     | <b>45.13</b><br>(15.78 to 60.28)  | <b>59.44</b><br>(20.09 to 78.67) | <b>50.37</b><br>(16.76 to 67.25) | <b>56.69</b><br>(19.05 to 75.01) |
| Rheumatoid arthritis                          | 304.87<br>(169.34 to 596.11)              | 306.65<br>(162.59 to 619.64)              | 176.39<br>(98.79 to 385.65)               | 301.47<br>(162.39 to 597.62)              | 17.09<br>(8.76 to 31.50)          | 21.61<br>(11.23 to 41.09)        | 13.20<br>(7.23 to 27.67)         | 20.80<br>(10.61 to 38.84)        |
| Other musculoskeletal disorders               | 712.04<br>(184.04 to 1,003.22)            | 711.24<br>(167.83 to 1,006.06)            | 654.40<br>(171.83 to 907.42)              | 692.17<br>(162.62 to 981.07)              | 28.04<br>(6.30 to 39.57)          | 37.83<br>(7.75 to 53.85)         | 37.17<br>(8.66 to 51.81)         | 35.89<br>(7.45 to 51.05)         |
| <b>Other non-communicable diseases</b>        | <b>5,502.14</b><br>(4,297.33 to 6,749.51) | <b>2,938.69</b><br>(2,084.97 to 3,912.08) | <b>1,695.49</b><br>(1,094.40 to 2,361.50) | <b>3,098.08</b><br>(2,183.67 to 4,147.51) | <b>84.11</b><br>(61.31 to 104.55) | <b>66.97</b><br>(38.62 to 93.89) | <b>48.07</b><br>(24.20 to 71.32) | <b>67.26</b><br>(39.47 to 93.31) |
| Congenital birth defects                      | 5,059.65<br>(3,978.95 to 6,205.00)        | 2,407.18<br>(1,807.47 to 3,212.84)        | 1,258.24<br>(902.35 to 1,715.54)          | 2,577.09<br>(1,926.88 to 3,443.62)        | 67.41<br>(53.32 to 80.70)         | 35.63<br>(26.94 to 45.83)        | 19.68<br>(14.16 to 25.79)        | 37.70<br>(27.91 to 49.12)        |
| Neural tube defects                           | 156.00<br>(99.00 to 233.62)               | 33.90<br>(18.39 to 60.86)                 | 14.96<br>(7.59 to 28.98)                  | 36.96<br>(19.80 to 66.33)                 | 1.95<br>(1.28 to 2.85)            | 0.46<br>(0.28 to 0.79)           | 0.21<br>(0.11 to 0.37)           | 0.50<br>(0.29 to 0.85)           |
| Congenital heart anomalies                    | 2,807.78<br>(2,095.19 to 3,524.28)        | 1,300.49<br>(931.80 to 1,779.05)          | 554.43<br>(371.63 to 791.86)              | 1,398.27<br>(992.31 to 1,903.51)          | 36.66<br>(27.61 to 45.43)         | 18.32<br>(13.33 to 24.32)        | 7.92<br>(5.43 to 11.03)          | 19.53<br>(14.09 to 25.85)        |
| Orofacial clefts                              | 2.16<br>(1.23 to 4.02)                    | 0.85<br>(0.34 to 2.06)                    | 0.29<br>(0.11 to 0.68)                    | 0.94<br>(0.37 to 2.21)                    | 0.03<br>(0.01 to 0.05)            | 0.01<br>(0.00 to 0.02)           | 0.00<br>(0.00 to 0.01)           | 0.01<br>(0.00 to 0.03)           |
| Down syndrome                                 | 399.33<br>(186.68 to 570.93)              | 248.33<br>(120.77 to 354.31)              | 246.95<br>(134.34 to 337.44)              | 255.79<br>(123.83 to 370.96)              | 6.75<br>(3.28 to 9.23)            | 5.01<br>(2.58 to 6.92)           | 5.10<br>(2.82 to 6.86)           | 5.11<br>(2.58 to 7.09)           |
| Other chromosomal abnormalities               | 115.95<br>(23.63 to 191.45)               | 88.63<br>(18.73 to 175.01)                | 60.82<br>(13.56 to 112.83)                | 96.01<br>(20.15 to 186.26)                | 1.35<br>(0.29 to 2.22)            | 1.03<br>(0.23 to 2.03)           | 0.71<br>(0.17 to 1.31)           | 1.12<br>(0.25 to 2.16)           |
| Congenital musculoskeletal and limb anomalies | 194.18<br>(121.42 to 292.17)              | 78.52<br>(43.65 to 137.27)                | 39.49<br>(21.28 to 68.72)                 | 84.79<br>(47.24 to 148.04)                | 2.35<br>(1.48 to 3.46)            | 0.99<br>(0.58 to 1.68)           | 0.50<br>(0.29 to 0.85)           | 1.07<br>(0.62 to 1.80)           |
| Urogenital congenital anomalies               | 57.70<br>(45.15 to 77.62)                 | 37.36<br>(22.81 to 49.52)                 | 22.51<br>(13.31 to 30.93)                 | 38.43<br>(23.79 to 50.86)                 | 1.26<br>(0.75 to 1.59)            | 1.07<br>(0.45 to 1.53)           | 0.66<br>(0.27 to 0.98)           | 1.08<br>(0.46 to 1.55)           |
| Digestive congenital anomalies                | 151.12<br>(98.53 to 228.77)               | 85.99<br>(44.64 to 152.98)                | 39.89<br>(19.77 to 71.72)                 | 93.87<br>(47.97 to 168.58)                | 1.77<br>(1.16 to 2.67)            | 1.02<br>(0.54 to 1.79)           | 0.47<br>(0.24 to 0.84)           | 1.11<br>(0.58 to 1.98)           |
| Other congenital birth defects                | 1,175.43<br>(924.61 to 1,490.42)          | 533.11<br>(387.79 to 748.80)              | 278.91<br>(198.36 to 394.66)              | 572.04<br>(415.20 to 796.62)              | 15.30<br>(12.27 to 19.14)         | 7.72<br>(5.77 to 10.33)          | 4.11<br>(3.02 to 5.58)           | 8.19<br>(6.11 to 10.92)          |
| Skin and subcutaneous diseases                | 295.56<br>(75.01 to 482.25)               | 468.15<br>(114.78 to 791.25)              | 399.86<br>(98.43 to 797.99)               | 452.14<br>(108.16 to 753.54)              | 14.99<br>(3.58 to 25.02)          | 30.61<br>(7.31 to 52.33)         | 27.95<br>(6.63 to 47.99)         | 28.76<br>(6.71 to 49.21)         |
| Cellulitis                                    | 46.66<br>(8.79 to 86.45)                  | 89.44<br>(14.11 to 175.55)                | 83.63<br>(13.27 to 162.88)                | 86.65<br>(13.72 to 167.02)                | 2.13<br>(0.29 to 4.09)            | 5.19<br>(0.66 to 10.32)          | 5.08<br>(0.70 to 9.98)           | 4.93<br>(0.63 to 9.80)           |
| Pyoderma                                      | 121.81<br>(27.50 to 204.59)               | 246.60<br>(55.07 to 416.95)               | 211.10<br>(47.30 to 360.56)               | 238.96<br>(52.79 to 401.94)               | 5.76<br>(1.20 to 10.01)           | 15.78<br>(3.49 to 27.33)         | 14.77<br>(3.34 to 25.91)         | 14.84<br>(3.29 to 25.54)         |
| Decubitus ulcer                               | 98.79<br>(22.57 to 165.27)                | 99.84<br>(23.80 to 178.66)                | 78.12<br>(18.55 to 142.48)                | 95.18<br>(22.47 to 170.78)                | 5.82<br>(1.35 to 9.74)            | 7.64<br>(1.79 to 14.22)          | 6.30<br>(1.49 to 11.63)          | 7.11<br>(1.63 to 13.16)          |
| Other skin and subcutaneous diseases          | 28.30<br>(10.04 to 46.29)                 | 32.27<br>(10.72 to 53.71)                 | 27.01<br>(9.13 to 45.31)                  | 31.36<br>(10.62 to 52.15)                 | 1.27<br>(0.37 to 2.16)            | 2.00<br>(0.57 to 3.51)           | 1.81<br>(0.53 to 3.14)           | 1.88<br>(0.55 to 3.29)           |
| Sudden infant death syndrome                  | 146.93<br>(96.10 to 218.80)               | 63.37<br>(33.86 to 109.65)                | 37.39<br>(20.03 to 63.93)                 | 68.85<br>(36.83 to 120.16)                | 1.70<br>(1.11 to 2.54)            | 0.73<br>(0.39 to 1.27)           | 0.43<br>(0.23 to 0.74)           | 0.80<br>(0.43 to 1.39)           |

|                          |                                          |                                          |                                          |                                          |                                       |                                     |                                   |                                     |
|--------------------------|------------------------------------------|------------------------------------------|------------------------------------------|------------------------------------------|---------------------------------------|-------------------------------------|-----------------------------------|-------------------------------------|
| Injuries                 | 41,347.24<br>(33,983.96 to<br>49,683.05) | 29,996.85<br>(21,863.82 to<br>48,754.03) | 21,147.73<br>(15,197.75 to<br>40,298.26) | 34,658.94<br>(24,853.60 to<br>53,341.89) | 1,221.33<br>(1,006.64 to<br>1,480.98) | 1,158.97<br>(889.42 to<br>1,632.71) | 883.90<br>(681.22 to<br>1,394.60) | 1,274.12<br>(963.20 to<br>1,793.91) |
| Transport injuries       | 12,502.96<br>(10,299.10 to<br>15,101.77) | 6,485.62<br>(3,948.41 to<br>10,292.66)   | 3,401.88<br>(2,085.16 to<br>5,342.14)    | 9,840.88<br>(5,806.91 to<br>16,131.78)   | 339.36<br>(278.68 to<br>403.47)       | 240.92<br>(156.92 to<br>367.04)     | 139.38<br>(92.68 to<br>209.34)    | 339.07<br>(210.31 to<br>551.40)     |
| Road injuries            | 11,287.01<br>(9,224.25 to<br>13,708.29)  | 5,302.05<br>(3,228.14 to<br>8,335.76)    | 2,729.03<br>(1,690.95 to<br>4,242.37)    | 8,551.92<br>(5,056.46 to<br>13,993.01)   | 305.66<br>(251.16 to<br>365.38)       | 198.19<br>(129.74 to<br>300.05)     | 113.91<br>(76.55 to<br>169.02)    | 293.62<br>(182.13 to<br>465.81)     |
| Pedestrian road injuries | 2,234.62<br>(1,794.94 to<br>2,734.70)    | 1,141.44<br>(731.52 to<br>1,724.36)      | 435.94<br>(284.94 to<br>646.49)          | 1,689.01<br>(1,025.31 to<br>2,723.74)    | 80.38<br>(65.92 to<br>96.99)          | 60.86<br>(40.45 to<br>90.13)        | 26.74<br>(17.90 to<br>39.09)      | 83.64<br>(53.34 to<br>129.38)       |

| Bosnia and Herzegovina                          |                                         |                                        |                                       |                                        |                                 |                                 |                                 |                                 |
|-------------------------------------------------|-----------------------------------------|----------------------------------------|---------------------------------------|----------------------------------------|---------------------------------|---------------------------------|---------------------------------|---------------------------------|
| Cause                                           | YLLs (actual counts)                    |                                        |                                       |                                        | Deaths (actual counts)          |                                 |                                 |                                 |
|                                                 | 2016                                    | 2040 Forecast                          | 2040 Better Scenario                  | 2040 Worse Scenario                    | 2016                            | 2040 Forecast                   | 2040 Better Scenario            | 2040 Worse Scenario             |
| Cyclist road injuries                           | 719.68<br>(522.83 to<br>935.40)         | 375.44<br>(189.01 to<br>678.94)        | 230.29<br>(121.53 to<br>397.64)       | 570.10<br>(277.36 to<br>1,064.56)      | 19.34<br>(14.41 to<br>25.06)    | 12.49<br>(6.74 to<br>22.01)     | 8.65<br>(4.92 to<br>14.70)      | 17.66<br>(9.05 to<br>31.92)     |
| Motorcyclist road injuries                      | 1,994.18<br>(1,383.86 to<br>2,608.94)   | 1,093.64<br>(550.99 to<br>1,952.15)    | 724.87<br>(380.35 to<br>1,268.89)     | 1,555.64<br>(766.16 to<br>2,881.25)    | 42.02<br>(29.99 to<br>53.45)    | 26.59<br>(14.39 to<br>45.34)    | 18.80<br>(10.58 to<br>30.84)    | 36.57<br>(19.32 to<br>64.39)    |
| Motor vehicle road injuries                     | 6,111.55<br>(4,863.60 to<br>7,532.36)   | 2,555.19<br>(1,584.66 to<br>3,897.68)  | 1,260.86<br>(812.12 to<br>1,871.75)   | 4,512.77<br>(2,718.92 to<br>7,170.75)  | 156.83<br>(124.76 to<br>192.99) | 91.74<br>(59.43 to<br>134.52)   | 55.14<br>(37.10 to<br>77.80)    | 146.22<br>(90.99 to<br>225.48)  |
| Other road injuries                             | 226.99<br>(145.08 to<br>292.23)         | 136.34<br>(58.39 to<br>282.02)         | 77.08<br>(33.97 to<br>150.48)         | 224.40<br>(91.98 to<br>471.96)         | 7.10<br>(4.26 to<br>9.02)       | 6.52<br>(2.71 to<br>12.83)      | 4.59<br>(1.90 to<br>8.73)       | 9.52<br>(3.87 to<br>19.75)      |
| Other transport injuries                        | 1,215.95<br>(945.59 to<br>1,593.03)     | 1,183.58<br>(656.19 to<br>2,068.19)    | 672.85<br>(380.59 to<br>1,137.90)     | 1,288.96<br>(702.33 to<br>2,294.19)    | 33.69<br>(26.63 to<br>44.15)    | 42.73<br>(25.09 to<br>70.97)    | 25.47<br>(15.07 to<br>41.38)    | 45.45<br>(25.94 to<br>78.81)    |
| Unintentional injuries                          | 12,224.31<br>(9,847.19 to<br>15,544.02) | 9,687.79<br>(7,648.18 to<br>12,957.59) | 7,563.39<br>(5,873.72 to<br>9,978.87) | 9,573.92<br>(7,365.38 to<br>13,060.95) | 425.54<br>(337.77 to<br>569.30) | 468.62<br>(370.76 to<br>634.69) | 397.46<br>(310.47 to<br>533.97) | 448.85<br>(350.15 to<br>618.58) |
| Falls                                           | 2,853.05<br>(2,311.29 to<br>3,418.52)   | 2,942.08<br>(2,396.17 to<br>3,505.76)  | 2,544.86<br>(2,012.76 to<br>3,085.58) | 2,819.06<br>(2,306.11 to<br>3,368.08)  | 128.73<br>(105.07 to<br>153.46) | 181.23<br>(153.53 to<br>212.22) | 166.98<br>(138.30 to<br>198.76) | 169.01<br>(142.05 to<br>200.56) |
| Drowning                                        | 1,282.07<br>(1,022.64 to<br>1,668.54)   | 670.88<br>(417.01 to<br>1,090.41)      | 487.42<br>(303.84 to<br>788.48)       | 698.16<br>(419.91 to<br>1,176.06)      | 35.09<br>(27.15 to<br>43.03)    | 23.34<br>(14.74 to<br>35.69)    | 17.79<br>(10.90 to<br>26.88)    | 23.79<br>(14.72 to<br>38.22)    |
| Fire, heat, and hot substances                  | 1,289.81<br>(1,052.94 to<br>1,581.52)   | 824.52<br>(552.78 to<br>1,304.86)      | 531.32<br>(355.30 to<br>819.38)       | 849.75<br>(541.45 to<br>1,369.24)      | 46.27<br>(37.50 to<br>59.18)    | 39.43<br>(27.01 to<br>61.55)    | 27.37<br>(18.42 to<br>42.10)    | 39.42<br>(25.93 to<br>62.37)    |
| Poisonings                                      | 711.89<br>(520.07 to<br>1,292.95)       | 479.55<br>(265.33 to<br>1,006.29)      | 267.39<br>(145.77 to<br>539.70)       | 504.17<br>(260.02 to<br>1,065.87)      | 20.46<br>(14.65 to<br>39.28)    | 18.47<br>(10.35 to<br>39.32)    | 11.11<br>(6.17 to<br>23.15)     | 18.85<br>(9.85 to<br>40.59)     |
| Exposure to mechanical forces                   | 1,509.87<br>(1,029.77 to<br>1,965.84)   | 922.31<br>(586.98 to<br>1,252.13)      | 617.75<br>(368.70 to<br>857.17)       | 916.42<br>(583.41 to<br>1,240.43)      | 41.82<br>(28.54 to<br>53.68)    | 32.38<br>(20.35 to<br>42.43)    | 23.19<br>(13.97 to<br>31.25)    | 31.45<br>(20.33 to<br>41.01)    |
| Unintentional firearm injuries                  | 103.10<br>(72.71 to<br>155.65)          | 58.24<br>(39.86 to<br>89.76)           | 48.44<br>(32.90 to<br>73.85)          | 57.69<br>(39.00 to<br>89.82)           | 3.62<br>(2.60 to<br>5.46)       | 2.94<br>(1.98 to<br>4.76)       | 2.71<br>(1.78 to<br>4.39)       | 2.81<br>(1.91 to<br>4.54)       |
| Unintentional suffocation                       | 92.67<br>(32.47 to<br>159.31)           | 38.85<br>(15.56 to<br>66.60)           | 27.22<br>(11.13 to<br>46.04)          | 40.42<br>(15.79 to<br>70.53)           | 1.43<br>(0.64 to<br>2.27)       | 0.70<br>(0.37 to<br>1.07)       | 0.52<br>(0.28 to<br>0.79)       | 0.72<br>(0.37 to<br>1.12)       |
| Other exposure to mechanical forces             | 1,314.10<br>(886.64 to<br>1,743.15)     | 825.22<br>(504.64 to<br>1,139.17)      | 542.09<br>(315.77 to<br>772.15)       | 818.31<br>(507.15 to<br>1,123.62)      | 36.76<br>(24.19 to<br>48.26)    | 28.74<br>(17.26 to<br>38.70)    | 19.96<br>(11.60 to<br>28.06)    | 27.93<br>(17.16 to<br>37.08)    |
| Adverse effects of medical treatment            | 2,181.23<br>(1,250.03 to<br>4,488.95)   | 2,209.52<br>(1,191.96 to<br>4,704.03)  | 1,886.62<br>(1,002.82 to<br>3,971.67) | 2,163.92<br>(1,145.71 to<br>4,616.73)  | 79.03<br>(39.57 to<br>183.34)   | 106.86<br>(52.76 to<br>251.27)  | 97.75<br>(47.71 to<br>226.11)   | 101.79<br>(49.19 to<br>242.34)  |
| Animal contact                                  | 206.89<br>(160.25 to<br>255.99)         | 221.07<br>(161.88 to<br>287.76)        | 174.66<br>(123.43 to<br>228.93)       | 219.34<br>(159.85 to<br>282.29)        | 6.61<br>(5.15 to<br>8.27)       | 9.13<br>(6.86 to<br>11.57)      | 7.67<br>(5.61 to<br>9.94)       | 8.81<br>(6.67 to<br>11.10)      |
| Venomous animal contact                         | 131.27<br>(100.12 to<br>165.10)         | 151.90<br>(106.46 to<br>201.84)        | 124.05<br>(85.08 to<br>165.04)        | 150.54<br>(106.79 to<br>196.81)        | 4.14<br>(3.16 to<br>5.24)       | 6.05<br>(4.45 to<br>7.81)       | 5.23<br>(3.66 to<br>6.82)       | 5.85<br>(4.29 to<br>7.55)       |
| Non-venomous animal contact                     | 75.62<br>(54.30 to<br>96.20)            | 69.17<br>(45.44 to<br>92.51)           | 50.60<br>(32.03 to<br>68.32)          | 68.79<br>(46.01 to<br>91.53)           | 2.48<br>(1.72 to<br>3.23)       | 3.08<br>(2.04 to<br>4.07)       | 2.44<br>(1.55 to<br>3.29)       | 2.96<br>(1.94 to<br>4.02)       |
| Foreign body                                    | 970.29<br>(776.29 to<br>1,165.05)       | 705.39<br>(549.17 to<br>859.90)        | 724.34<br>(556.52 to<br>883.95)       | 691.86<br>(537.38 to<br>840.21)        | 29.21<br>(23.54 to<br>34.86)    | 28.67<br>(23.14 to<br>33.71)    | 31.38<br>(24.58 to<br>37.15)    | 27.32<br>(22.08 to<br>32.21)    |
| Pulmonary aspiration and foreign body in airway | 593.66<br>(480.99 to<br>732.05)         | 364.17<br>(290.57 to<br>439.75)        | 334.80<br>(262.51 to<br>408.29)       | 358.26<br>(285.30 to<br>436.33)        | 17.63<br>(14.42 to<br>21.71)    | 15.06<br>(12.14 to<br>17.68)    | 14.92<br>(11.41 to<br>17.69)    | 14.36<br>(11.57 to<br>16.93)    |

|                                             |                                                               |                                                              |                                                             |                                                              |                                                      |                                                      |                                                      |                                                      |
|---------------------------------------------|---------------------------------------------------------------|--------------------------------------------------------------|-------------------------------------------------------------|--------------------------------------------------------------|------------------------------------------------------|------------------------------------------------------|------------------------------------------------------|------------------------------------------------------|
|                                             | 376.62<br>(260.39 to<br>476.84)                               | 341.22<br>(228.47 to<br>443.50)                              | 389.54<br>(261.99 to<br>508.02)                             | 333.60<br>(225.39 to<br>431.93)                              | 11.58<br>(8.16 to<br>14.82)                          | 13.60<br>(9.73 to<br>17.12)                          | 16.47<br>(11.70 to<br>20.95)                         | 12.96<br>(9.28 to<br>16.36)                          |
| Foreign body in other body part             |                                                               |                                                              |                                                             |                                                              |                                                      |                                                      |                                                      |                                                      |
|                                             | 146.37<br>(61.60 to<br>201.03)                                | 67.74<br>(26.67 to<br>97.06)                                 | 43.90<br>(16.10 to<br>65.02)                                | 67.00<br>(25.98 to<br>95.92)                                 | 4.69<br>(1.96 to<br>6.38)                            | 3.07<br>(1.21 to<br>4.23)                            | 2.14<br>(0.79 to<br>3.06)                            | 2.95<br>(1.15 to<br>4.08)                            |
| Environmental heat and cold exposure        |                                                               |                                                              |                                                             |                                                              |                                                      |                                                      |                                                      |                                                      |
|                                             | 1,072.83<br>(784.63 to<br>1,316.64)                           | 644.73<br>(415.69 to<br>855.12)                              | 285.15<br>(176.61 to<br>412.04)                             | 644.24<br>(421.51 to<br>842.65)                              | 33.63<br>(21.99 to<br>40.90)                         | 26.03<br>(16.14 to<br>33.69)                         | 12.08<br>(7.11 to<br>17.07)                          | 25.46<br>(16.33 to<br>32.61)                         |
| Other unintentional injuries                |                                                               |                                                              |                                                             |                                                              |                                                      |                                                      |                                                      |                                                      |
| <b>Self-harm and interpersonal violence</b> | <b>16,601.72</b><br><b>(13,321.38 to</b><br><b>20,921.96)</b> | <b>12,674.23</b><br><b>(7,935.66 to</b><br><b>19,745.49)</b> | <b>9,024.29</b><br><b>(5,799.68 to</b><br><b>13,418.29)</b> | <b>14,094.78</b><br><b>(8,320.47 to</b><br><b>22,709.76)</b> | <b>456.03</b><br><b>(365.42 to</b><br><b>575.48)</b> | <b>420.09</b><br><b>(274.94 to</b><br><b>628.46)</b> | <b>315.99</b><br><b>(208.06 to</b><br><b>457.07)</b> | <b>457.50</b><br><b>(285.75 to</b><br><b>699.47)</b> |



| Bosnia and Herzegovina                                                              |                                         |                                               |                                               |                                               |                                      |                                         |                                         |                                         |
|-------------------------------------------------------------------------------------|-----------------------------------------|-----------------------------------------------|-----------------------------------------------|-----------------------------------------------|--------------------------------------|-----------------------------------------|-----------------------------------------|-----------------------------------------|
| Cause                                                                               | YLLs (actual counts)                    |                                               |                                               |                                               | Deaths (actual counts)               |                                         |                                         |                                         |
|                                                                                     | 2016                                    | 2040 Forecast                                 | 2040 Better Scenario                          | 2040 Worse Scenario                           | 2016                                 | 2040 Forecast                           | 2040 Better Scenario                    | 2040 Worse Scenario                     |
| Self-harm                                                                           | 12,496.64<br>(9,759.15 to 16,277.90)    | 10,357.27<br>(5,900.02 to 17,401.40)          | 7,410.60<br>(4,425.56 to 11,865.18)           | 11,708.20<br>(6,235.61 to 20,060.73)          | 351.50<br>(272.84 to 459.22)         | 346.96<br>(206.95 to 557.85)            | 262.40<br>(162.92 to 404.69)            | 383.08<br>(220.57 to 629.43)            |
| Self-harm by firearm                                                                | 1,246.22<br>(510.75 to 1,751.87)        | 458.43<br>(164.17 to 848.61)                  | 277.75<br>(104.20 to 484.89)                  | 524.63<br>(183.83 to 1,006.43)                | 30.41<br>(12.87 to 43.03)            | 13.29<br>(6.10 to 24.23)                | 8.37<br>(4.00 to 14.76)                 | 14.98<br>(6.48 to 27.89)                |
| Self-harm by other specified means                                                  | 11,250.42<br>(8,731.61 to 15,094.70)    | 9,898.83<br>(5,724.99 to 16,565.53)           | 7,132.85<br>(4,259.34 to 11,361.81)           | 11,183.57<br>(5,945.93 to 19,128.01)          | 321.09<br>(247.62 to 425.96)         | 333.66<br>(199.69 to 532.05)            | 254.03<br>(158.11 to 391.58)            | 368.11<br>(213.59 to 600.36)            |
| Interpersonal violence                                                              | 4,105.07<br>(3,089.34 to 5,133.67)      | 2,316.96<br>(1,419.44 to 3,539.08)            | 1,613.69<br>(998.18 to 2,457.29)              | 2,386.58<br>(1,454.92 to 3,810.45)            | 104.53<br>(78.11 to 130.22)          | 73.13<br>(45.35 to 107.93)              | 53.60<br>(33.14 to 79.45)               | 74.42<br>(45.09 to 113.64)              |
| Physical violence by firearm                                                        | 1,130.67<br>(576.91 to 1,577.09)        | 546.06<br>(269.40 to 823.16)                  | 341.09<br>(170.91 to 510.22)                  | 546.57<br>(272.02 to 828.84)                  | 24.46<br>(12.33 to 33.36)            | 13.77<br>(6.67 to 19.86)                | 8.99<br>(4.30 to 13.25)                 | 13.64<br>(6.72 to 19.60)                |
| Physical violence by sharp object                                                   | 1,200.57<br>(888.99 to 1,791.97)        | 704.64<br>(498.77 to 1,004.04)                | 463.27<br>(317.80 to 662.71)                  | 698.87<br>(498.42 to 987.66)                  | 30.41<br>(22.45 to 43.32)            | 22.07<br>(15.64 to 29.62)               | 15.23<br>(10.49 to 20.57)               | 21.55<br>(15.40 to 29.47)               |
| Physical violence by other means                                                    | 1,773.83<br>(1,232.14 to 2,352.66)      | 1,066.27<br>(500.50 to 1,922.50)              | 809.33<br>(396.31 to 1,419.83)                | 1,141.15<br>(518.85 to 2,157.64)              | 49.66<br>(33.58 to 64.61)            | 37.29<br>(18.13 to 64.70)               | 29.37<br>(15.10 to 49.67)               | 39.23<br>(18.39 to 71.47)               |
| <b>Forces of nature, conflict and terrorism, and executions and police conflict</b> | <b>18.25</b><br><b>(15.90 to 20.77)</b> | <b>1,149.20</b><br><b>(0.00 to 20,162.01)</b> | <b>1,158.16</b><br><b>(0.00 to 20,344.21)</b> | <b>1,149.36</b><br><b>(0.00 to 20,162.18)</b> | <b>0.39</b><br><b>(0.34 to 0.45)</b> | <b>29.34</b><br><b>(0.00 to 508.57)</b> | <b>31.07</b><br><b>(0.00 to 538.68)</b> | <b>28.70</b><br><b>(0.00 to 497.75)</b> |
| Exposure to forces of nature                                                        | 0.00<br>(0.00 to 0.00)                  | 6.46<br>(0.00 to 134.70)                      | 6.57<br>(0.00 to 136.91)                      | 6.43<br>(0.00 to 133.78)                      | 0.00<br>(0.00 to 0.00)               | 0.19<br>(0.00 to 3.95)                  | 0.21<br>(0.00 to 4.23)                  | 0.19<br>(0.00 to 3.85)                  |
| Conflict and terrorism                                                              | 0.00<br>(0.00 to 0.00)                  | 1,142.74<br>(0.00 to 20,162.01)               | 1,151.59<br>(0.00 to 20,344.21)               | 1,142.93<br>(0.00 to 20,162.18)               | 0.00<br>(0.00 to 0.00)               | 29.15<br>(0.00 to 508.57)               | 30.86<br>(0.00 to 538.68)               | 28.51<br>(0.00 to 497.75)               |
| Executions and police conflict                                                      | 18.25<br>(15.90 to 20.77)               | 0.00<br>(0.00 to 0.00)                        | 0.00<br>(0.00 to 0.00)                        | 0.00<br>(0.00 to 0.00)                        | 0.39<br>(0.34 to 0.45)               | 0.00<br>(0.00 to 0.00)                  | 0.00<br>(0.00 to 0.00)                  | 0.00<br>(0.00 to 0.00)                  |

| Bulgaria                                                          |                                                |                                              |                                            |                                                |                                         |                                        |                                       |                                         |
|-------------------------------------------------------------------|------------------------------------------------|----------------------------------------------|--------------------------------------------|------------------------------------------------|-----------------------------------------|----------------------------------------|---------------------------------------|-----------------------------------------|
| Cause                                                             | YLLs (actual counts)                           |                                              |                                            |                                                | Deaths (actual counts)                  |                                        |                                       |                                         |
|                                                                   | 2016                                           | 2040 Forecast                                | 2040 Better Scenario                       | 2040 Worse Scenario                            | 2016                                    | 2040 Forecast                          | 2040 Better Scenario                  | 2040 Worse Scenario                     |
| All causes                                                        | 1,825,667.14<br>(1,586,699.29 to 2,091,201.73) | 1,186,787.54<br>(925,819.80 to 1,498,980.74) | 855,192.15<br>(689,009.91 to 1,068,278.12) | 1,505,794.61<br>(1,199,278.53 to 1,916,753.44) | 109,652.05<br>(96,413.12 to 123,959.89) | 89,133.96<br>(73,773.23 to 109,922.53) | 70,456.82<br>(58,631.29 to 87,839.54) | 105,345.43<br>(88,049.73 to 130,773.11) |
| Communicable, maternal, neonatal, and nutritional diseases        | 63,561.09<br>(51,914.52 to 79,159.03)          | 39,224.24<br>(28,496.88 to 54,262.25)        | 26,202.22<br>(19,835.97 to 34,342.34)      | 48,263.14<br>(33,942.33 to 67,960.19)          | 2,170.59<br>(1,889.39 to 2,507.48)      | 2,270.52<br>(1,660.66 to 3,094.96)     | 1,744.68<br>(1,326.66 to 2,278.59)    | 2,511.79<br>(1,792.31 to 3,497.40)      |
| HIV/AIDS and tuberculosis                                         | 5,035.53<br>(4,462.46 to 5,726.68)             | 2,038.27<br>(1,317.65 to 3,080.92)           | 823.35<br>(523.64 to 1,210.11)             | 3,085.96<br>(2,147.27 to 4,397.78)             | 169.75<br>(147.40 to 197.01)            | 74.50<br>(45.75 to 115.40)             | 29.85<br>(18.77 to 44.05)             | 105.93<br>(71.66 to 161.88)             |
| Tuberculosis                                                      | 2,812.29<br>(2,254.31 to 3,471.99)             | 957.48<br>(469.87 to 1,735.12)               | 329.10<br>(189.50 to 563.36)               | 1,280.01<br>(631.57 to 2,526.85)               | 118.89<br>(96.39 to 144.38)             | 49.42<br>(25.66 to 89.92)              | 18.99<br>(11.33 to 30.62)             | 64.08<br>(33.83 to 120.56)              |
| HIV/AIDS                                                          | 2,223.24<br>(2,006.27 to 2,461.06)             | 1,100.78<br>(619.77 to 1,714.98)             | 494.25<br>(267.12 to 801.95)               | 1,805.95<br>(1,140.31 to 2,641.15)             | 50.86<br>(45.70 to 56.48)               | 25.08<br>(12.90 to 41.22)              | 10.86<br>(4.32 to 19.19)              | 41.85<br>(25.35 to 64.65)               |
| Diarrhea, lower respiratory, and other common infectious diseases | 39,676.24<br>(33,635.13 to 46,877.12)          | 30,188.67<br>(20,697.67 to 43,560.98)        | 20,358.45<br>(14,830.86 to 28,049.41)      | 37,248.56<br>(24,562.51 to 55,476.37)          | 1,733.45<br>(1,486.59 to 2,006.26)      | 2,057.27<br>(1,469.60 to 2,869.23)     | 1,593.23<br>(1,192.78 to 2,125.94)    | 2,261.59<br>(1,572.97 to 3,244.58)      |
| Diarrheal diseases                                                | 1,038.83<br>(757.06 to 1,478.77)               | 1,487.91<br>(389.08 to 4,170.99)             | 2,239.07<br>(789.83 to 5,355.32)           | 1,321.27<br>(319.91 to 3,969.80)               | 25.23<br>(21.04 to 30.69)               | 77.49<br>(20.71 to 209.29)             | 139.89<br>(50.05 to 332.55)           | 61.48<br>(15.22 to 177.58)              |
| Intestinal infectious diseases                                    | 20.73<br>(9.65 to 38.85)                       | 9.57<br>(4.33 to 18.33)                      | 8.48<br>(3.86 to 16.45)                    | 9.95<br>(4.50 to 18.96)                        | 0.61<br>(0.29 to 1.16)                  | 0.36<br>(0.18 to 0.68)                 | 0.34<br>(0.17 to 0.64)                | 0.36<br>(0.17 to 0.68)                  |
| Typhoid fever                                                     | 5.34<br>(2.42 to 9.87)                         | 2.94<br>(1.33 to 5.52)                       | 3.97<br>(1.81 to 7.26)                     | 2.67<br>(1.17 to 5.03)                         | 0.14<br>(0.07 to 0.27)                  | 0.10<br>(0.05 to 0.19)                 | 0.14<br>(0.07 to 0.27)                | 0.09<br>(0.04 to 0.17)                  |
| Paratyphoid fever                                                 | 14.28<br>(5.56 to 29.00)                       | 6.06<br>(2.19 to 12.71)                      | 4.02<br>(1.44 to 8.85)                     | 6.72<br>(2.50 to 13.98)                        | 0.41<br>(0.16 to 0.87)                  | 0.22<br>(0.08 to 0.46)                 | 0.15<br>(0.06 to 0.33)                | 0.23<br>(0.09 to 0.47)                  |
| Other intestinal infectious diseases                              | 1.12<br>(0.44 to 2.38)                         | 0.57<br>(0.21 to 1.30)                       | 0.49<br>(0.17 to 1.13)                     | 0.56<br>(0.20 to 1.29)                         | 0.05<br>(0.02 to 0.12)                  | 0.05<br>(0.02 to 0.12)                 | 0.05<br>(0.02 to 0.12)                | 0.04<br>(0.01 to 0.11)                  |
| Lower respiratory infections                                      | 34,692.67<br>(29,657.29 to 40,766.58)          | 26,684.91<br>(17,294.25 to 39,966.63)        | 16,496.51<br>(11,229.79 to 23,921.04)      | 33,729.77<br>(21,504.80 to 51,599.79)          | 1,612.53<br>(1,376.42 to 1,867.06)      | 1,919.17<br>(1,322.89 to 2,713.50)     | 1,399.33<br>(1,000.70 to 1,917.22)    | 2,138.58<br>(1,461.42 to 3,104.01)      |
| Upper respiratory infections                                      | 32.59<br>(17.26 to 56.36)                      | 15.67<br>(5.64 to 33.47)                     | 7.84<br>(3.01 to 16.67)                    | 18.11<br>(6.77 to 38.72)                       | 1.42<br>(0.68 to 2.61)                  | 1.00<br>(0.33 to 2.32)                 | 0.55<br>(0.18 to 1.27)                | 1.09<br>(0.38 to 2.54)                  |
| Otitis media                                                      | 0.95<br>(0.60 to 1.63)                         | 0.42<br>(0.18 to 0.95)                       | 0.46<br>(0.20 to 1.13)                     | 0.38<br>(0.17 to 0.87)                         | 0.07<br>(0.04 to 0.14)                  | 0.04<br>(0.01 to 0.10)                 | 0.04<br>(0.02 to 0.12)                | 0.03<br>(0.01 to 0.09)                  |
| Meningitis                                                        | 1,889.02<br>(1,480.45 to 2,411.16)             | 516.27<br>(349.32 to 751.99)                 | 364.04<br>(243.38 to 497.20)               | 556.60<br>(375.64 to 809.13)                   | 44.70<br>(36.65 to 54.45)               | 16.07<br>(11.60 to 21.28)              | 12.50<br>(9.27 to 16.39)              | 16.63<br>(12.26 to 23.30)               |
| Pneumococcal meningitis                                           | 192.83<br>(139.31 to 260.13)                   | 75.77<br>(50.75 to 106.32)                   | 73.93<br>(48.19 to 104.23)                 | 74.39<br>(49.99 to 103.73)                     | 5.50<br>(3.92 to 7.59)                  | 2.86<br>(1.91 to 4.03)                 | 2.95<br>(1.92 to 4.19)                | 2.70<br>(1.81 to 3.84)                  |
| H influenzae type B meningitis                                    | 356.44<br>(268.32 to 477.21)                   | 170.79<br>(91.61 to 326.95)                  | 134.99<br>(85.79 to 217.13)                | 173.11<br>(89.32 to 339.50)                    | 8.01<br>(6.42 to 10.06)                 | 4.28<br>(2.99 to 6.21)                 | 4.06<br>(2.87 to 5.55)                | 4.14<br>(2.85 to 6.13)                  |
| Meningococcal meningitis                                          | 661.11<br>(501.87 to 880.62)                   | 121.36<br>(71.49 to 185.59)                  | 71.06<br>(43.64 to 102.38)                 | 138.82<br>(83.73 to 212.27)                    | 13.79<br>(11.13 to 17.12)               | 3.69<br>(2.41 to 5.32)                 | 2.33<br>(1.57 to 3.20)                | 4.02<br>(2.70 to 5.81)                  |
| Other meningitis                                                  | 678.64<br>(537.02 to 856.04)                   | 148.34<br>(88.80 to 228.26)                  | 84.06<br>(52.42 to 120.81)                 | 170.28<br>(105.59 to 255.59)                   | 17.40<br>(14.19 to 21.42)               | 5.24<br>(3.31 to 7.85)                 | 3.16<br>(2.12 to 4.36)                | 5.77<br>(3.81 to 8.64)                  |
| Encephalitis                                                      | 1,924.05<br>(1,210.52 to 2,522.44)             | 1,156.14<br>(734.76 to 1,531.62)             | 1,061.08<br>(680.23 to 1,434.20)           | 1,168.47<br>(733.25 to 1,571.73)               | 46.95<br>(30.97 to 58.67)               | 38.04<br>(25.63 to 48.02)              | 37.30<br>(24.66 to 47.94)             | 36.79<br>(24.76 to 45.84)               |

|                |                             |                                 |                                 |                                 |                           |                            |                            |                            |
|----------------|-----------------------------|---------------------------------|---------------------------------|---------------------------------|---------------------------|----------------------------|----------------------------|----------------------------|
|                | 3.91<br>(2.42 to<br>6.11)   | 0.63<br>(0.35 to<br>1.17)       | 0.51<br>(0.26 to<br>0.94)       | 0.64<br>(0.35 to<br>1.15)       | 0.08<br>(0.05 to<br>0.13) | 0.01<br>(0.01 to<br>0.03)  | 0.01<br>(0.01 to<br>0.02)  | 0.01<br>(0.01 to<br>0.03)  |
| Diphtheria     |                             |                                 |                                 |                                 |                           |                            |                            |                            |
| Whooping cough | 28.53<br>(2.20 to<br>67.70) | 6.04<br>(0.25 to<br>22.03)      | 1.28<br>(0.08 to<br>3.40)       | 6.25<br>(0.24 to<br>22.99)      | 0.35<br>(0.03 to<br>0.82) | 0.07<br>(0.00 to<br>0.26)  | 0.02<br>(0.00 to<br>0.05)  | 0.08<br>(0.00 to<br>0.27)  |
| Tetanus        | 5.79<br>(4.27 to<br>8.87)   | 0.65<br>(0.44 to<br>1.03)       | 0.64<br>(0.41 to<br>1.05)       | 0.62<br>(0.42 to<br>1.00)       | 0.23<br>(0.17 to<br>0.35) | 0.03<br>(0.02 to<br>0.05)  | 0.04<br>(0.02 to<br>0.06)  | 0.03<br>(0.02 to<br>0.05)  |
| Measles        | 15.60<br>(9.17 to<br>27.14) | 300.25<br>(0.62 to<br>2,193.86) | 170.75<br>(0.58 to<br>1,140.83) | 426.07<br>(0.76 to<br>3,122.21) | 0.20<br>(0.12 to<br>0.33) | 4.14<br>(0.01 to<br>27.39) | 2.47<br>(0.01 to<br>15.09) | 5.73<br>(0.01 to<br>37.93) |

| Bulgaria                                              |                                                      |                                                      |                                                      |                                                      |                                                  |                                                  |                                                  |                                                 |
|-------------------------------------------------------|------------------------------------------------------|------------------------------------------------------|------------------------------------------------------|------------------------------------------------------|--------------------------------------------------|--------------------------------------------------|--------------------------------------------------|-------------------------------------------------|
| Cause                                                 | YLLs (actual counts)                                 |                                                      |                                                      |                                                      | Deaths (actual counts)                           |                                                  |                                                  |                                                 |
|                                                       | 2016                                                 | 2040 Forecast                                        | 2040 Better Scenario                                 | 2040 Worse Scenario                                  | 2016                                             | 2040 Forecast                                    | 2040 Better Scenario                             | 2040 Worse Scenario                             |
| Varicella and herpes zoster                           | 23.57<br>(11.88 to<br>38.48)                         | 10.20<br>(5.24 to<br>19.06)                          | 7.79<br>(4.14 to<br>14.82)                           | 10.43<br>(5.50 to<br>18.66)                          | 1.08<br>(0.57 to<br>2.02)                        | 0.84<br>(0.46 to<br>1.73)                        | 0.74<br>(0.40 to<br>1.47)                        | 0.78<br>(0.41 to<br>1.60)                       |
| <b>Neglected tropical diseases and malaria</b>        | <b>216.91</b><br><b>(84.50 to</b><br><b>280.84)</b>  | <b>221.60</b><br><b>(71.24 to</b><br><b>294.23)</b>  | <b>261.82</b><br><b>(81.42 to</b><br><b>348.43)</b>  | <b>295.51</b><br><b>(67.09 to</b><br><b>267.30)</b>  | <b>8.37</b><br><b>(2.91 to</b><br><b>10.96)</b>  | <b>10.78</b><br><b>(3.23 to</b><br><b>14.17)</b> | <b>13.51</b><br><b>(4.16 to</b><br><b>18.16)</b> | <b>9.55</b><br><b>(2.94 to</b><br><b>12.72)</b> |
| Malaria                                               | 0.00<br>(0.00 to<br>0.00)                            | 0.00<br>(0.00 to<br>0.00)                            | 0.00<br>(0.00 to<br>0.00)                            | 0.00<br>(0.00 to<br>0.00)                            | 0.00<br>(0.00 to<br>0.00)                        | 0.00<br>(0.00 to<br>0.00)                        | 0.00<br>(0.00 to<br>0.00)                        | 0.00<br>(0.00 to<br>0.00)                       |
| Chagas disease                                        | 0.00<br>(0.00 to<br>0.00)                            | 0.00<br>(0.00 to<br>0.00)                            | 0.00<br>(0.00 to<br>0.00)                            | 0.00<br>(0.00 to<br>0.00)                            | 0.00<br>(0.00 to<br>0.00)                        | 0.00<br>(0.00 to<br>0.00)                        | 0.00<br>(0.00 to<br>0.00)                        | 0.00<br>(0.00 to<br>0.00)                       |
| Leishmaniasis                                         | 10.29<br>(5.16 to<br>16.39)                          | 3.95<br>(1.89 to<br>6.75)                            | 3.14<br>(1.57 to<br>5.39)                            | 4.10<br>(2.04 to<br>7.10)                            | 0.40<br>(0.19 to<br>0.65)                        | 0.17<br>(0.08 to<br>0.30)                        | 0.14<br>(0.07 to<br>0.25)                        | 0.17<br>(0.09 to<br>0.31)                       |
| African trypanosomiasis                               | 0.00<br>(0.00 to<br>0.00)                            | 0.00<br>(0.00 to<br>0.00)                            | 0.00<br>(0.00 to<br>0.00)                            | 0.00<br>(0.00 to<br>0.00)                            | 0.00<br>(0.00 to<br>0.00)                        | 0.00<br>(0.00 to<br>0.00)                        | 0.00<br>(0.00 to<br>0.00)                        | 0.00<br>(0.00 to<br>0.00)                       |
| Schistosomiasis                                       | 0.00<br>(0.00 to<br>0.00)                            | 0.00<br>(0.00 to<br>0.00)                            | 0.00<br>(0.00 to<br>0.00)                            | 0.00<br>(0.00 to<br>0.00)                            | 0.00<br>(0.00 to<br>0.00)                        | 0.00<br>(0.00 to<br>0.00)                        | 0.00<br>(0.00 to<br>0.00)                        | 0.00<br>(0.00 to<br>0.00)                       |
| Cysticercosis                                         | 3.61<br>(2.83 to<br>4.53)                            | 1.03<br>(0.81 to<br>1.29)                            | 1.01<br>(0.79 to<br>1.27)                            | 1.01<br>(0.80 to<br>1.27)                            | 0.13<br>(0.10 to<br>0.16)                        | 0.04<br>(0.04 to<br>0.06)                        | 0.05<br>(0.04 to<br>0.06)                        | 0.04<br>(0.03 to<br>0.05)                       |
| Cystic echinococcosis                                 | 0.00<br>(0.00 to<br>0.00)                            | 0.00<br>(0.00 to<br>0.00)                            | 0.00<br>(0.00 to<br>0.00)                            | 0.00<br>(0.00 to<br>0.00)                            | 0.00<br>(0.00 to<br>0.00)                        | 0.00<br>(0.00 to<br>0.00)                        | 0.00<br>(0.00 to<br>0.00)                        | 0.00<br>(0.00 to<br>0.00)                       |
| Dengue                                                | 0.00<br>(0.00 to<br>0.00)                            | 0.00<br>(0.00 to<br>0.00)                            | 0.00<br>(0.00 to<br>0.00)                            | 0.00<br>(0.00 to<br>0.00)                            | 0.00<br>(0.00 to<br>0.00)                        | 0.00<br>(0.00 to<br>0.00)                        | 0.00<br>(0.00 to<br>0.00)                        | 0.00<br>(0.00 to<br>0.00)                       |
| Yellow fever                                          | 0.00<br>(0.00 to<br>0.00)                            | 0.00<br>(0.00 to<br>0.00)                            | 0.00<br>(0.00 to<br>0.00)                            | 0.00<br>(0.00 to<br>0.00)                            | 0.00<br>(0.00 to<br>0.00)                        | 0.00<br>(0.00 to<br>0.00)                        | 0.00<br>(0.00 to<br>0.00)                        | 0.00<br>(0.00 to<br>0.00)                       |
| Rabies                                                | 0.23<br>(0.17 to<br>0.31)                            | 0.15<br>(0.11 to<br>0.20)                            | 0.12<br>(0.09 to<br>0.17)                            | 0.15<br>(0.10 to<br>0.21)                            | 0.01<br>(0.01 to<br>0.01)                        | 0.01<br>(0.01 to<br>0.01)                        | 0.01<br>(0.01 to<br>0.01)                        | 0.01<br>(0.01 to<br>0.01)                       |
| Intestinal nematode infections                        | 0.00<br>(0.00 to<br>0.00)                            | 0.00<br>(0.00 to<br>0.00)                            | 0.00<br>(0.00 to<br>0.00)                            | 0.00<br>(0.00 to<br>0.00)                            | 0.00<br>(0.00 to<br>0.00)                        | 0.00<br>(0.00 to<br>0.00)                        | 0.00<br>(0.00 to<br>0.00)                        | 0.00<br>(0.00 to<br>0.00)                       |
| Other neglected tropical diseases                     | 202.79<br>(70.79 to<br>264.04)                       | 216.47<br>(66.46 to<br>289.06)                       | 257.55<br>(76.86 to<br>344.16)                       | 200.25<br>(62.26 to<br>261.57)                       | 7.83<br>(2.37 to<br>10.33)                       | 10.55<br>(3.02 to<br>13.92)                      | 13.32<br>(7.92 to<br>17.92)                      | 9.32<br>(2.73 to<br>12.47)                      |
| <b>Maternal disorders</b>                             | <b>612.43</b><br><b>(460.52 to</b><br><b>831.47)</b> | <b>274.23</b><br><b>(170.44 to</b><br><b>410.12)</b> | <b>198.67</b><br><b>(128.38 to</b><br><b>289.05)</b> | <b>301.71</b><br><b>(191.24 to</b><br><b>453.21)</b> | <b>12.48</b><br><b>(9.37 to</b><br><b>16.84)</b> | <b>5.71</b><br><b>(3.51 to</b><br><b>8.56)</b>   | <b>4.14</b><br><b>(2.70 to</b><br><b>6.14)</b>   | <b>6.27</b><br><b>(4.02 to</b><br><b>9.47)</b>  |
| Maternal hemorrhage                                   | 108.28<br>(71.85 to<br>158.00)                       | 45.48<br>(24.94 to<br>76.21)                         | 33.34<br>(18.31 to<br>54.25)                         | 49.72<br>(27.63 to<br>82.10)                         | 2.20<br>(1.45 to<br>3.23)                        | 0.94<br>(0.51 to<br>1.57)                        | 0.69<br>(0.38 to<br>1.12)                        | 1.02<br>(0.56 to<br>1.66)                       |
| Maternal sepsis and other maternal infections         | 86.15<br>(57.82 to<br>120.17)                        | 30.96<br>(16.90 to<br>50.57)                         | 22.20<br>(12.59 to<br>35.39)                         | 34.05<br>(19.09 to<br>55.75)                         | 1.70<br>(1.13 to<br>2.37)                        | 0.62<br>(0.34 to<br>1.01)                        | 0.45<br>(0.26 to<br>0.71)                        | 0.68<br>(0.39 to<br>1.12)                       |
| Maternal hypertensive disorders                       | 57.63<br>(38.65 to<br>83.84)                         | 23.86<br>(12.96 to<br>40.15)                         | 16.88<br>(9.38 to<br>27.23)                          | 26.33<br>(14.36 to<br>44.58)                         | 1.08<br>(0.72 to<br>1.58)                        | 0.45<br>(0.25 to<br>0.75)                        | 0.32<br>(0.18 to<br>0.51)                        | 0.50<br>(0.28 to<br>0.82)                       |
| Maternal obstructed labor and uterine rupture         | 15.32<br>(8.50 to<br>25.25)                          | 7.80<br>(3.59 to<br>14.60)                           | 5.29<br>(2.47 to<br>9.71)                            | 8.71<br>(3.94 to<br>16.56)                           | 0.35<br>(0.19 to<br>0.58)                        | 0.18<br>(0.08 to<br>0.34)                        | 0.12<br>(0.06 to<br>0.23)                        | 0.20<br>(0.09 to<br>0.39)                       |
| Maternal abortion, miscarriage, and ectopic pregnancy | 174.94<br>(119.96 to<br>243.06)                      | 89.17<br>(46.73 to<br>151.94)                        | 63.57<br>(34.41 to<br>103.96)                        | 98.84<br>(53.04 to<br>164.73)                        | 3.69<br>(2.53 to<br>5.17)                        | 1.94<br>(1.00 to<br>3.35)                        | 1.38<br>(0.74 to<br>2.30)                        | 2.15<br>(1.13 to<br>3.62)                       |

|                                        |                                |                              |                              |                               |                           |                           |                           |                           |
|----------------------------------------|--------------------------------|------------------------------|------------------------------|-------------------------------|---------------------------|---------------------------|---------------------------|---------------------------|
|                                        | 34.13<br>(21.57 to<br>51.10)   | 16.08<br>(8.01 to<br>28.98)  | 11.24<br>(5.64 to<br>19.89)  | 17.93<br>(8.92 to<br>32.35)   | 0.65<br>(0.41 to<br>0.97) | 0.31<br>(0.15 to<br>0.55) | 0.21<br>(0.11 to<br>0.37) | 0.34<br>(0.17 to<br>0.61) |
| Indirect maternal deaths               |                                |                              |                              |                               |                           |                           |                           |                           |
|                                        | 5.29<br>(2.50 to<br>9.75)      | 2.18<br>(0.87 to<br>4.34)    | 1.53<br>(0.64 to<br>2.90)    | 2.42<br>(0.97 to<br>4.82)     | 0.11<br>(0.05 to<br>0.19) | 0.04<br>(0.02 to<br>0.09) | 0.03<br>(0.01 to<br>0.06) | 0.05<br>(0.02 to<br>0.10) |
| Late maternal deaths                   |                                |                              |                              |                               |                           |                           |                           |                           |
|                                        | 0.05<br>(0.02 to<br>0.09)      | 0.23<br>(0.04 to<br>1.03)    | 0.16<br>(0.01 to<br>0.75)    | 0.26<br>(0.05 to<br>1.15)     | 0.00<br>(0.00 to<br>0.00) | 0.00<br>(0.00 to<br>0.02) | 0.00<br>(0.00 to<br>0.01) | 0.00<br>(0.00 to<br>0.02) |
| Maternal deaths aggravated by HIV/AIDS |                                |                              |                              |                               |                           |                           |                           |                           |
|                                        | 130.63<br>(90.25 to<br>182.14) | 58.46<br>(33.85 to<br>94.66) | 44.48<br>(25.69 to<br>71.14) | 63.44<br>(36.43 to<br>102.86) | 2.71<br>(1.86 to<br>3.80) | 1.22<br>(0.70 to<br>2.01) | 0.93<br>(0.54 to<br>1.53) | 1.32<br>(0.76 to<br>2.17) |
| Other maternal disorders               |                                |                              |                              |                               |                           |                           |                           |                           |

| Bulgaria                                                                |                                             |                                           |                                           |                                            |                                     |                                   |                                  |                                   |
|-------------------------------------------------------------------------|---------------------------------------------|-------------------------------------------|-------------------------------------------|--------------------------------------------|-------------------------------------|-----------------------------------|----------------------------------|-----------------------------------|
| Cause                                                                   | YLLs (actual counts)                        |                                           |                                           |                                            | Deaths (actual counts)              |                                   |                                  |                                   |
|                                                                         | 2016                                        | 2040 Forecast                             | 2040 Better Scenario                      | 2040 Worse Scenario                        | 2016                                | 2040 Forecast                     | 2040 Better Scenario             | 2040 Worse Scenario               |
| <b>Neonatal disorders</b>                                               | <b>16,256.22</b><br>(9,494.46 to 26,486.09) | <b>5,346.98</b><br>(2,676.04 to 9,563.90) | <b>3,504.44</b><br>(1,756.87 to 6,203.05) | <b>6,265.68</b><br>(3,062.08 to 11,219.66) | <b>187.84</b><br>(109.69 to 306.02) | <b>61.79</b><br>(30.94 to 110.54) | <b>40.50</b><br>(20.31 to 71.69) | <b>72.41</b><br>(35.39 to 129.66) |
| Neonatal preterm birth                                                  | 9,578.93<br>(5,572.51 to 15,696.06)         | 2,193.52<br>(1,077.16 to 3,791.03)        | 1,170.91<br>(589.66 to 2,041.08)          | 2,828.84<br>(1,380.58 to 5,078.19)         | 110.67<br>(64.39 to 181.36)         | 25.35<br>(12.45 to 43.80)         | 13.53<br>(6.82 to 23.58)         | 32.69<br>(15.95 to 58.67)         |
| Neonatal encephalopathy due to birth asphyxia and trauma                | 3,635.02<br>(2,036.28 to 6,103.76)          | 998.21<br>(427.82 to 1,987.51)            | 573.90<br>(251.76 to 1,141.65)            | 1,159.49<br>(484.30 to 2,364.66)           | 42.00<br>(23.53 to 70.53)           | 11.54<br>(4.95 to 22.97)          | 6.63<br>(2.91 to 13.20)          | 13.40<br>(5.60 to 27.35)          |
| Neonatal sepsis and other neonatal infections                           | 843.66<br>(414.93 to 1,533.58)              | 344.94<br>(150.13 to 674.71)              | 226.77<br>(100.56 to 439.76)              | 386.21<br>(174.56 to 758.21)               | 9.75<br>(4.80 to 17.73)             | 3.99<br>(1.74 to 7.80)            | 2.62<br>(1.16 to 5.08)           | 4.47<br>(2.02 to 8.77)            |
| Hemolytic disease and other neonatal jaundice                           | 54.33<br>(26.76 to 94.38)                   | 20.73<br>(7.51 to 54.56)                  | 13.08<br>(4.64 to 34.50)                  | 23.57<br>(8.27 to 61.14)                   | 0.63<br>(0.31 to 1.09)              | 0.24<br>(0.09 to 0.63)            | 0.15<br>(0.05 to 0.40)           | 0.27<br>(0.10 to 0.71)            |
| Other neonatal disorders                                                | 2,144.29<br>(1,172.01 to 3,619.18)          | 1,789.57<br>(733.03 to 3,756.76)          | 1,519.77<br>(636.06 to 3,149.77)          | 1,867.57<br>(757.74 to 3,980.63)           | 24.78<br>(13.55 to 41.83)           | 20.68<br>(8.47 to 43.41)          | 17.56<br>(7.35 to 36.40)         | 21.58<br>(8.76 to 46.00)          |
| <b>Nutritional deficiencies</b>                                         | <b>326.41</b><br>(272.01 to 393.95)         | <b>167.81</b><br>(133.54 to 210.63)       | <b>178.21</b><br>(141.87 to 224.19)       | <b>157.70</b><br>(127.27 to 198.20)        | <b>14.23</b><br>(12.25 to 16.38)    | <b>12.95</b><br>(9.55 to 17.45)   | <b>15.44</b><br>(11.39 to 20.72) | <b>11.30</b><br>(8.15 to 15.34)   |
| Protein-energy malnutrition                                             | 119.20<br>(83.13 to 168.26)                 | 69.08<br>(42.22 to 102.59)                | 87.16<br>(55.64 to 123.75)                | 61.17<br>(37.18 to 89.71)                  | 5.13<br>(3.08 to 7.23)              | 5.98<br>(2.98 to 9.53)            | 8.45<br>(4.66 to 12.61)          | 4.91<br>(2.50 to 7.94)            |
| Iodine deficiency                                                       | 13.48<br>(1.39 to 34.02)                    | 12.68<br>(0.91 to 34.44)                  | 12.39<br>(0.72 to 35.47)                  | 12.13<br>(0.91 to 32.98)                   | 0.63<br>(0.05 to 1.87)              | 0.98<br>(0.05 to 3.42)            | 1.05<br>(0.02 to 4.94)           | 0.88<br>(0.03 to 3.01)            |
| Dietary iron deficiency                                                 | 27.97<br>(22.01 to 34.91)                   | 15.15<br>(11.16 to 20.36)                 | 16.42<br>(12.07 to 22.07)                 | 14.66<br>(10.79 to 19.32)                  | 0.71<br>(0.54 to 0.91)              | 0.49<br>(0.35 to 0.68)            | 0.56<br>(0.39 to 0.81)           | 0.46<br>(0.32 to 0.63)            |
| Other nutritional deficiencies                                          | 165.77<br>(115.02 to 211.80)                | 70.91<br>(46.97 to 101.85)                | 62.25<br>(40.09 to 93.60)                 | 69.73<br>(45.84 to 97.22)                  | 7.76<br>(5.77 to 9.95)              | 5.51<br>(3.40 to 8.84)            | 5.38<br>(3.27 to 9.16)           | 5.05<br>(3.14 to 7.97)            |
| <b>Other communicable, maternal, neonatal, and nutritional diseases</b> | <b>1,437.35</b><br>(1,205.52 to 1,754.19)   | <b>986.68</b><br>(793.40 to 1,240.65)     | <b>877.28</b><br>(714.63 to 1,098.34)     | <b>998.03</b><br>(801.40 to 1,259.43)      | <b>44.48</b><br>(37.83 to 53.26)    | <b>47.52</b><br>(39.72 to 57.32)  | <b>48.00</b><br>(40.14 to 57.95) | <b>44.74</b><br>(37.57 to 54.44)  |
| Sexually transmitted infections excluding HIV                           | 81.61<br>(58.73 to 112.41)                  | 25.97<br>(17.24 to 37.71)                 | 21.95<br>(14.92 to 31.21)                 | 27.06<br>(18.68 to 39.11)                  | 2.03<br>(1.61 to 2.58)              | 0.94<br>(0.64 to 1.33)            | 0.86<br>(0.58 to 1.25)           | 0.93<br>(0.65 to 1.32)            |
| Syphilis                                                                | 41.96<br>(23.60 to 70.80)                   | 8.62<br>(4.75 to 14.58)                   | 6.09<br>(3.52 to 9.90)                    | 9.44<br>(5.30 to 15.94)                    | 0.87<br>(0.59 to 1.26)              | 0.27<br>(0.17 to 0.40)            | 0.21<br>(0.13 to 0.31)           | 0.27<br>(0.18 to 0.41)            |
| Chlamydial infection                                                    | 7.71<br>(5.89 to 10.12)                     | 3.38<br>(2.15 to 5.29)                    | 3.10<br>(1.98 to 4.82)                    | 3.43<br>(2.19 to 5.27)                     | 0.22<br>(0.17 to 0.30)              | 0.13<br>(0.09 to 0.20)            | 0.13<br>(0.09 to 0.20)           | 0.13<br>(0.09 to 0.20)            |
| Gonococcal infection                                                    | 21.09<br>(16.18 to 27.58)                   | 9.50<br>(5.90 to 14.91)                   | 8.72<br>(5.40 to 13.52)                   | 9.62<br>(6.04 to 14.93)                    | 0.64<br>(0.49 to 0.85)              | 0.39<br>(0.25 to 0.60)            | 0.38<br>(0.24 to 0.59)           | 0.37<br>(0.25 to 0.57)            |
| Other sexually transmitted infections                                   | 10.84<br>(8.26 to 14.23)                    | 4.47<br>(2.75 to 6.97)                    | 4.03<br>(2.46 to 6.44)                    | 4.58<br>(2.82 to 7.29)                     | 0.29<br>(0.23 to 0.39)              | 0.15<br>(0.10 to 0.22)            | 0.14<br>(0.09 to 0.21)           | 0.15<br>(0.10 to 0.22)            |
| Acute hepatitis                                                         | 790.40<br>(659.37 to 938.52)                | 317.30<br>(212.44 to 444.32)              | 206.35<br>(141.66 to 281.49)              | 348.40<br>(235.86 to 494.20)               | 23.40<br>(19.51 to 27.83)           | 12.56<br>(8.47 to 17.60)          | 8.61<br>(6.04 to 11.90)          | 13.26<br>(9.00 to 18.81)          |
| Acute hepatitis A                                                       | 77.32<br>(41.56 to 127.92)                  | 20.91<br>(10.42 to 40.57)                 | 14.43<br>(7.55 to 27.17)                  | 23.05<br>(11.46 to 44.83)                  | 1.20<br>(0.77 to 1.82)              | 0.47<br>(0.27 to 0.78)            | 0.35<br>(0.21 to 0.57)           | 0.50<br>(0.29 to 0.82)            |
| Acute hepatitis B                                                       | 598.37<br>(490.85 to 722.07)                | 247.58<br>(158.07 to 361.88)              | 159.20<br>(101.32 to 222.00)              | 272.57<br>(176.31 to 398.87)               | 18.72<br>(15.36 to 22.68)           | 9.78<br>(6.33 to 14.41)           | 6.56<br>(4.19 to 9.41)           | 10.43<br>(6.85 to 15.15)          |

|                                       |                                                                        |                                                                      |                                                                  |                                                                        |                                                                 |                                                                |                                                               |                                                                 |
|---------------------------------------|------------------------------------------------------------------------|----------------------------------------------------------------------|------------------------------------------------------------------|------------------------------------------------------------------------|-----------------------------------------------------------------|----------------------------------------------------------------|---------------------------------------------------------------|-----------------------------------------------------------------|
| Acute hepatitis C                     | 17.89<br>(12.49 to<br>25.31)                                           | 9.01<br>(5.25 to<br>14.93)                                           | 5.98<br>(3.60 to<br>9.48)                                        | 9.75<br>(5.78 to<br>16.20)                                             | 0.65<br>(0.45 to<br>0.93)                                       | 0.40<br>(0.23 to<br>0.65)                                      | 0.28<br>(0.17 to<br>0.44)                                     | 0.42<br>(0.25 to<br>0.67)                                       |
| Acute hepatitis E                     | 96.82<br>(70.79 to<br>129.51)                                          | 39.80<br>(23.11 to<br>62.17)                                         | 26.74<br>(16.12 to<br>41.43)                                     | 43.04<br>(25.92 to<br>66.22)                                           | 2.82<br>(1.91 to<br>4.09)                                       | 1.90<br>(1.04 to<br>3.13)                                      | 1.42<br>(0.77 to<br>2.26)                                     | 1.91<br>(1.08 to<br>3.11)                                       |
| Other unspecified infectious diseases | 565.34<br>(445.97 to<br>790.61)                                        | 643.41<br>(522.66 to<br>843.62)                                      | 648.98<br>(527.55 to<br>832.69)                                  | 622.56<br>(501.36 to<br>819.60)                                        | 19.05<br>(15.51 to<br>26.57)                                    | 34.03<br>(27.83 to<br>42.69)                                   | 38.53<br>(31.75 to<br>48.43)                                  | 30.55<br>(24.10 to<br>39.09)                                    |
| <b>Non-communicable diseases</b>      | <b>1,650,291.35</b><br><b>(1,433,506.50 to</b><br><b>1,896,408.42)</b> | <b>1,091,302.19</b><br><b>(851,105.49 to</b><br><b>1,391,176.32)</b> | <b>788,302.67</b><br><b>(629,555.52 to</b><br><b>994,574.07)</b> | <b>1,387,772.20</b><br><b>(1,088,780.93 to</b><br><b>1,787,292.10)</b> | <b>104,025.32</b><br><b>(91,351.89 to</b><br><b>117,771.15)</b> | <b>84,556.52</b><br><b>(69,294.72 to</b><br><b>105,369.12)</b> | <b>66,877.40</b><br><b>(55,506.29 to</b><br><b>84,021.62)</b> | <b>100,248.87</b><br><b>(83,453.87 to</b><br><b>125,437.68)</b> |

| Bulgaria                             |                                          |                                          |                                          |                                          |                                       |                                       |                                       |                                       |
|--------------------------------------|------------------------------------------|------------------------------------------|------------------------------------------|------------------------------------------|---------------------------------------|---------------------------------------|---------------------------------------|---------------------------------------|
| Cause                                | YLLs (actual counts)                     |                                          |                                          |                                          | Deaths (actual counts)                |                                       |                                       |                                       |
|                                      | 2016                                     | 2040 Forecast                            | 2040 Better Scenario                     | 2040 Worse Scenario                      | 2016                                  | 2040 Forecast                         | 2040 Better Scenario                  | 2040 Worse Scenario                   |
| Neoplasms                            | 385,289.14<br>(329,410.90 to 448,792.51) | 309,774.97<br>(241,082.59 to 382,843.49) | 246,120.74<br>(193,979.70 to 302,286.27) | 358,542.50<br>(276,065.97 to 446,473.74) | 17,835.21<br>(15,393.79 to 20,475.49) | 16,817.80<br>(14,047.82 to 19,717.22) | 14,386.42<br>(12,141.73 to 16,687.41) | 18,479.53<br>(15,190.97 to 22,008.62) |
| Lip and oral cavity cancer           | 6,051.37<br>(4,925.65 to 7,342.08)       | 5,121.56<br>(2,623.83 to 8,976.70)       | 2,838.96<br>(1,532.50 to 5,018.22)       | 6,573.64<br>(3,303.47 to 10,818.23)      | 246.27<br>(204.82 to 291.39)          | 235.32<br>(128.70 to 381.08)          | 142.63<br>(85.82 to 223.63)           | 292.13<br>(161.59 to 462.93)          |
| Nasopharynx cancer                   | 1,001.31<br>(806.16 to 1,237.86)         | 714.70<br>(379.37 to 1,235.81)           | 343.72<br>(184.70 to 603.87)             | 966.28<br>(510.56 to 1,646.20)           | 36.58<br>(30.06 to 44.53)             | 29.06<br>(16.08 to 48.34)             | 14.86<br>(8.84 to 24.22)              | 38.26<br>(21.51 to 63.59)             |
| Other pharynx cancer                 | 4,217.58<br>(3,404.59 to 5,187.46)       | 3,406.18<br>(1,879.48 to 5,844.65)       | 2,873.74<br>(1,665.10 to 4,772.08)       | 3,656.65<br>(1,963.13 to 6,193.06)       | 155.75<br>(127.55 to 190.13)          | 142.26<br>(81.47 to 236.68)           | 123.75<br>(72.97 to 198.92)           | 149.16<br>(82.81 to 245.56)           |
| Esophageal cancer                    | 5,460.56<br>(4,434.26 to 6,689.55)       | 5,617.77<br>(2,781.77 to 10,522.58)      | 3,878.18<br>(2,040.89 to 7,026.39)       | 7,179.71<br>(3,423.66 to 13,665.72)      | 236.70<br>(195.34 to 285.81)          | 269.78<br>(145.48 to 486.65)          | 200.04<br>(116.79 to 341.37)          | 333.53<br>(169.61 to 604.73)          |
| Stomach cancer                       | 26,356.35<br>(22,269.67 to 30,738.99)    | 14,500.82<br>(10,317.19 to 19,742.74)    | 10,357.42<br>(7,556.35 to 14,084.94)     | 16,004.34<br>(11,313.44 to 21,671.75)    | 1,359.27<br>(1,160.34 to 1,569.83)    | 885.84<br>(663.50 to 1,167.22)        | 678.61<br>(521.20 to 894.15)          | 934.03<br>(699.16 to 1,212.62)        |
| Colon and rectum cancer              | 52,020.95<br>(44,243.07 to 60,525.83)    | 45,123.64<br>(30,206.19 to 66,254.98)    | 33,483.19<br>(23,277.71 to 49,139.56)    | 50,788.44<br>(34,535.41 to 74,717.60)    | 2,789.66<br>(2,388.33 to 3,207.46)    | 2,852.74<br>(1,955.38 to 4,110.78)    | 2,271.64<br>(1,602.31 to 3,259.22)    | 3,068.67<br>(2,080.87 to 4,410.60)    |
| Liver cancer                         | 17,435.10<br>(14,617.40 to 20,601.11)    | 21,431.04<br>(13,389.49 to 33,260.76)    | 20,060.17<br>(13,179.87 to 29,447.06)    | 25,916.58<br>(15,073.19 to 42,430.92)    | 836.25<br>(714.37 to 977.42)          | 1,177.82<br>(795.06 to 1,761.44)      | 1,185.53<br>(837.19 to 1,686.04)      | 1,345.89<br>(841.57 to 2,137.10)      |
| Liver cancer due to hepatitis B      | 5,347.51<br>(3,887.29 to 7,047.70)       | 6,120.44<br>(3,678.99 to 10,451.80)      | 6,177.28<br>(3,809.14 to 9,904.77)       | 7,124.79<br>(3,952.75 to 12,412.51)      | 235.91<br>(170.71 to 313.25)          | 311.49<br>(194.57 to 508.58)          | 334.95<br>(208.68 to 517.57)          | 344.66<br>(201.29 to 580.42)          |
| Liver cancer due to hepatitis C      | 3,751.08<br>(2,602.36 to 5,169.49)       | 4,725.96<br>(2,725.06 to 7,848.52)       | 4,906.33<br>(2,982.11 to 7,798.23)       | 5,354.48<br>(2,934.31 to 9,400.17)       | 198.41<br>(137.10 to 272.56)          | 286.70<br>(174.84 to 453.24)          | 318.88<br>(201.80 to 483.96)          | 306.58<br>(174.28 to 514.35)          |
| Liver cancer due to alcohol use      | 5,219.17<br>(4,279.35 to 6,383.78)       | 6,762.63<br>(4,235.88 to 10,573.28)      | 5,094.32<br>(3,302.30 to 7,576.64)       | 8,951.51<br>(5,184.55 to 14,668.14)      | 257.75<br>(210.01 to 315.51)          | 375.69<br>(245.02 to 580.45)          | 309.80<br>(211.65 to 455.73)          | 467.35<br>(284.02 to 743.48)          |
| Liver cancer due to other causes     | 3,117.35<br>(2,439.52 to 3,951.08)       | 3,822.01<br>(2,207.61 to 6,359.00)       | 3,882.25<br>(2,380.54 to 6,156.14)       | 4,485.80<br>(2,415.34 to 7,737.85)       | 144.17<br>(114.31 to 182.04)          | 203.94<br>(125.18 to 328.77)          | 221.91<br>(141.81 to 339.94)          | 227.30<br>(129.02 to 383.29)          |
| Gallbladder and biliary tract cancer | 4,181.01<br>(3,545.46 to 5,017.29)       | 2,475.36<br>(2,086.33 to 2,969.82)       | 2,457.51<br>(2,058.34 to 3,018.09)       | 2,372.34<br>(2,022.05 to 2,830.74)       | 222.32<br>(188.23 to 268.17)          | 155.43<br>(134.05 to 186.67)          | 162.54<br>(139.15 to 202.58)          | 143.70<br>(123.09 to 171.89)          |
| Pancreatic cancer                    | 23,370.27<br>(19,728.67 to 27,465.20)    | 22,992.80<br>(17,510.23 to 30,379.52)    | 22,153.79<br>(16,962.59 to 28,830.76)    | 23,551.76<br>(17,604.93 to 31,406.01)    | 1,141.78<br>(973.37 to 1,325.44)      | 1,268.57<br>(1,014.76 to 1,609.89)    | 1,303.68<br>(1,051.77 to 1,610.69)    | 1,245.40<br>(979.30 to 1,576.66)      |
| Larynx cancer                        | 8,533.80<br>(6,763.36 to 10,370.27)      | 5,882.84<br>(2,341.90 to 11,924.48)      | 2,819.55<br>(1,193.40 to 5,891.09)       | 8,020.93<br>(3,111.57 to 16,112.73)      | 343.95<br>(275.95 to 415.93)          | 251.62<br>(107.62 to 488.74)          | 725.01<br>(60.40 to 240.01)           | 342.00<br>(141.63 to 678.61)          |
| Tracheal, bronchus, and lung cancer  | 80,480.37<br>(66,308.78 to 95,439.75)    | 62,149.45<br>(38,819.87 to 94,882.12)    | 38,799.28<br>(24,888.27 to 58,503.95)    | 89,530.95<br>(55,429.79 to 135,179.86)   | 3,432.00<br>(2,858.45 to 4,038.74)    | 2,882.17<br>(1,908.02 to 4,204.15)    | 1,910.26<br>(1,327.63 to 2,705.71)    | 4,035.05<br>(2,634.79 to 5,860.09)    |
| Malignant skin melanoma              | 3,984.39<br>(3,134.09 to 4,870.30)       | 4,020.14<br>(3,005.18 to 4,983.72)       | 5,261.23<br>(3,969.76 to 6,428.23)       | 3,564.88<br>(2,686.30 to 4,393.46)       | 179.34<br>(138.27 to 216.95)          | 238.08<br>(172.54 to 295.77)          | 331.83<br>(246.32 to 398.46)          | 201.03<br>(147.96 to 249.20)          |
| Non-melanoma skin cancer             | 2,436.54<br>(2,066.07 to 2,852.09)       | 2,115.07<br>(1,685.64 to 2,607.19)       | 1,771.60<br>(1,467.93 to 2,111.69)       | 2,063.96<br>(1,687.13 to 2,512.89)       | 161.48<br>(140.17 to 184.64)          | 187.36<br>(144.47 to 236.91)          | 170.28<br>(137.47 to 209.53)          | 173.18<br>(131.64 to 220.21)          |
| Breast cancer                        | 28,730.61<br>(22,766.41 to 36,281.73)    | 21,534.86<br>(15,024.28 to 30,352.18)    | 15,476.50<br>(11,219.17 to 21,197.92)    | 23,773.90<br>(16,423.27 to 34,066.55)    | 1,307.51<br>(1,048.14 to 1,616.01)    | 1,203.01<br>(876.11 to 1,614.60)      | 929.35<br>(701.56 to 1,224.79)        | 1,267.84<br>(928.16 to 1,717.77)      |
| Cervical cancer                      | 12,078.68<br>(9,263.02 to 15,568.34)     | 5,384.80<br>(3,652.07 to 7,813.22)       | 3,833.67<br>(2,753.27 to 5,403.81)       | 6,004.58<br>(4,050.73 to 8,991.34)       | 442.00<br>(345.54 to 564.79)          | 237.92<br>(172.93 to 319.40)          | 179.28<br>(138.33 to 234.72)          | 254.48<br>(187.44 to 352.82)          |





| Bulgaria                        |                                                                    |                                                                  |                                                                  |                                                                    |                                                               |                                                               |                                                               |                                                               |
|---------------------------------|--------------------------------------------------------------------|------------------------------------------------------------------|------------------------------------------------------------------|--------------------------------------------------------------------|---------------------------------------------------------------|---------------------------------------------------------------|---------------------------------------------------------------|---------------------------------------------------------------|
| Cause                           | YLLs (actual counts)                                               |                                                                  |                                                                  |                                                                    | Deaths (actual counts)                                        |                                                               |                                                               |                                                               |
|                                 | 2016                                                               | 2040 Forecast                                                    | 2040 Better Scenario                                             | 2040 Worse Scenario                                                | 2016                                                          | 2040 Forecast                                                 | 2040 Better Scenario                                          | 2040 Worse Scenario                                           |
| Kidney cancer                   | 7,182.62<br>(6,021.86 to<br>8,489.12)                              | 6,026.22<br>(4,065.49 to<br>8,920.10)                            | 5,847.08<br>(4,124.00 to<br>8,333.87)                            | 6,072.33<br>(4,035.21 to<br>9,066.53)                              | 315.78<br>(266.52 to<br>367.45)                               | 304.92<br>(221.61 to<br>418.47)                               | 316.88<br>(240.18 to<br>420.99)                               | 295.03<br>(209.26 to<br>416.96)                               |
| Bladder cancer                  | 9,938.38<br>(8,360.96 to<br>11,737.50)                             | 8,141.81<br>(5,813.72 to<br>11,168.22)                           | 6,904.99<br>(5,156.81 to<br>9,117.66)                            | 8,656.90<br>(6,010.76 to<br>12,152.76)                             | 556.17<br>(472.52 to<br>652.34)                               | 528.83<br>(402.41 to<br>695.45)                               | 491.40<br>(387.63 to<br>620.37)                               | 532.42<br>(389.94 to<br>720.27)                               |
| Brain and nervous system cancer | 17,915.34<br>(12,253.47 to<br>21,873.01)                           | 13,734.82<br>(9,240.49 to<br>17,101.89)                          | 12,587.52<br>(8,424.19 to<br>15,912.02)                          | 13,706.14<br>(9,402.84 to<br>16,876.83)                            | 639.46<br>(429.05 to<br>783.75)                               | 565.21<br>(381.25 to<br>681.20)                               | 538.55<br>(360.11 to<br>656.17)                               | 548.41<br>(376.70 to<br>659.01)                               |
| Thyroid cancer                  | 1,167.59<br>(969.54 to<br>1,400.17)                                | 980.84<br>(675.33 to<br>1,446.06)                                | 848.56<br>(588.10 to<br>1,219.29)                                | 1,105.27<br>(729.83 to<br>1,690.20)                                | 53.88<br>(44.83 to<br>64.06)                                  | 52.62<br>(36.79 to<br>76.42)                                  | 47.40<br>(33.84 to<br>66.62)                                  | 56.82<br>(38.46 to<br>85.28)                                  |
| Mesothelioma                    | 259.62<br>(214.59 to<br>329.14)                                    | 240.96<br>(194.11 to<br>305.87)                                  | 252.95<br>(201.65 to<br>324.65)                                  | 229.98<br>(186.84 to<br>289.91)                                    | 10.25<br>(8.60 to<br>13.15)                                   | 11.16<br>(9.43 to<br>13.90)                                   | 12.28<br>(10.20 to<br>15.34)                                  | 10.30<br>(8.71 to<br>12.91)                                   |
| Hodgkin lymphoma                | 1,869.71<br>(1,550.72 to<br>2,229.47)                              | 869.85<br>(639.48 to<br>1,155.50)                                | 608.03<br>(453.92 to<br>788.41)                                  | 935.44<br>(692.45 to<br>1,251.34)                                  | 59.23<br>(48.76 to<br>71.76)                                  | 33.31<br>(25.05 to<br>44.57)                                  | 24.37<br>(18.81 to<br>32.24)                                  | 34.65<br>(26.56 to<br>46.38)                                  |
| Non-Hodgkin lymphoma            | 7,014.48<br>(5,809.18 to<br>8,333.67)                              | 4,498.41<br>(3,480.07 to<br>5,702.01)                            | 3,930.18<br>(3,061.84 to<br>4,952.01)                            | 4,765.52<br>(3,695.08 to<br>6,214.09)                              | 282.03<br>(239.31 to<br>332.14)                               | 220.88<br>(177.30 to<br>275.70)                               | 203.22<br>(163.64 to<br>253.29)                               | 225.10<br>(179.17 to<br>287.90)                               |
| Multiple myeloma                | 2,349.60<br>(1,913.82 to<br>3,067.74)                              | 1,965.97<br>(1,463.03 to<br>2,702.75)                            | 1,855.97<br>(1,380.11 to<br>2,584.58)                            | 2,051.50<br>(1,529.58 to<br>2,816.81)                              | 106.47<br>(85.50 to<br>155.58)                                | 104.51<br>(79.33 to<br>161.01)                                | 103.45<br>(78.93 to<br>159.28)                                | 105.10<br>(78.93 to<br>161.21)                                |
| Leukemia                        | 12,547.47<br>(10,760.09 to<br>14,539.59)                           | 9,373.04<br>(7,047.67 to<br>12,451.18)                           | 8,148.08<br>(6,200.68 to<br>10,560.67)                           | 10,323.40<br>(7,527.28 to<br>13,981.95)                            | 491.38<br>(420.64 to<br>567.18)                               | 446.13<br>(342.03 to<br>571.45)                               | 408.55<br>(321.41 to<br>505.37)                               | 473.41<br>(351.09 to<br>627.69)                               |
| Acute lymphoid leukemia         | 1,775.79<br>(1,470.62 to<br>2,104.94)                              | 968.85<br>(693.73 to<br>1,251.14)                                | 764.63<br>(560.25 to<br>1,038.51)                                | 1,098.03<br>(773.19 to<br>1,545.75)                                | 49.93<br>(40.95 to<br>59.59)                                  | 33.13<br>(24.08 to<br>46.27)                                  | 26.89<br>(19.68 to<br>36.29)                                  | 37.12<br>(25.97 to<br>52.51)                                  |
| Chronic lymphoid leukemia       | 1,519.19<br>(1,081.17 to<br>1,865.90)                              | 1,222.85<br>(801.01 to<br>1,737.18)                              | 1,151.91<br>(737.37 to<br>1,583.28)                              | 1,292.25<br>(830.71 to<br>1,891.52)                                | 75.97<br>(53.70 to<br>94.26)                                  | 73.67<br>(47.14 to<br>100.65)                                 | 74.70<br>(47.02 to<br>100.13)                                 | 73.82<br>(46.99 to<br>104.48)                                 |
| Acute myeloid leukemia          | 4,690.02<br>(4,005.59 to<br>5,531.03)                              | 4,260.20<br>(3,187.11 to<br>5,613.92)                            | 3,975.07<br>(2,982.77 to<br>5,126.04)                            | 4,629.80<br>(3,387.88 to<br>6,171.26)                              | 175.18<br>(145.61 to<br>213.59)                               | 186.66<br>(139.27 to<br>253.12)                               | 180.57<br>(135.42 to<br>242.56)                               | 198.07<br>(143.77 to<br>271.16)                               |
| Chronic myeloid leukemia        | 976.15<br>(789.04 to<br>1,189.09)                                  | 343.91<br>(226.10 to<br>512.75)                                  | 221.37<br>(156.32 to<br>308.76)                                  | 405.64<br>(258.56 to<br>616.34)                                    | 43.96<br>(34.63 to<br>53.43)                                  | 20.29<br>(13.36 to<br>28.81)                                  | 14.21<br>(9.55 to<br>19.12)                                   | 22.48<br>(14.91 to<br>33.01)                                  |
| Other leukemia                  | 3,586.33<br>(2,934.84 to<br>4,301.35)                              | 2,577.23<br>(1,806.98 to<br>3,587.13)                            | 2,035.09<br>(1,464.17 to<br>2,730.04)                            | 2,897.67<br>(1,982.07 to<br>4,147.71)                              | 146.33<br>(118.20 to<br>175.00)                               | 132.38<br>(92.43 to<br>179.43)                                | 112.19<br>(79.61 to<br>146.63)                                | 141.91<br>(99.97 to<br>197.23)                                |
| Other neoplasms                 | 14,916.65<br>(12,657.12 to<br>17,326.68)                           | 13,364.81<br>(11,408.34 to<br>15,468.53)                         | 13,391.91<br>(11,283.79 to<br>15,716.02)                         | 12,888.09<br>(11,049.03 to<br>14,717.28)                           | 623.90<br>(528.57 to<br>721.50)                               | 696.62<br>(607.73 to<br>786.68)                               | 742.46<br>(638.38 to<br>847.78)                               | 644.16<br>(564.24 to<br>729.29)                               |
| <b>Cardiovascular diseases</b>  | <b>984,603.55</b><br><b>(858,388.60 to</b><br><b>1,126,722.92)</b> | <b>547,620.00</b><br><b>(378,865.71 to</b><br><b>803,539.48)</b> | <b>337,734.95</b><br><b>(241,876.70 to</b><br><b>503,906.83)</b> | <b>771,107.45</b><br><b>(534,541.75 to</b><br><b>1,112,154.08)</b> | <b>69,930.09</b><br><b>(61,531.55 to</b><br><b>78,672.81)</b> | <b>49,386.01</b><br><b>(36,040.43 to</b><br><b>69,402.60)</b> | <b>34,305.18</b><br><b>(25,373.92 to</b><br><b>50,813.68)</b> | <b>62,872.28</b><br><b>(46,343.43 to</b><br><b>87,707.51)</b> |
| Rheumatic heart disease         | 6,383.37<br>(5,303.69 to<br>7,555.87)                              | 2,762.70<br>(1,863.77 to<br>3,970.40)                            | 1,988.94<br>(1,402.73 to<br>2,804.88)                            | 2,965.47<br>(2,011.70 to<br>4,298.79)                              | 262.86<br>(218.73 to<br>311.64)                               | 144.58<br>(103.31 to<br>196.54)                               | 110.62<br>(83.41 to<br>152.30)                                | 149.08<br>(109.48 to<br>207.11)                               |
| Ischemic heart disease          | 530,477.98<br>(458,286.60 to<br>608,681.44)                        | 247,713.83<br>(153,095.71 to<br>390,531.45)                      | 142,244.49<br>(88,604.28 to<br>220,712.06)                       | 386,045.16<br>(239,702.85 to<br>588,660.52)                        | 38,587.87<br>(33,918.55 to<br>43,598.76)                      | 23,470.75<br>(15,015.58 to<br>35,875.40)                      | 15,298.29<br>(9,874.55 to<br>23,185.36)                       | 32,318.30<br>(21,363.68 to<br>48,547.02)                      |
| Stroke                          | 286,503.18<br>(248,595.08 to<br>329,809.62)                        | 128,978.75<br>(80,185.21 to<br>201,737.69)                       | 68,210.96<br>(44,984.00 to<br>100,840.88)                        | 187,861.81<br>(115,773.90 to<br>283,423.52)                        | 20,458.40<br>(17,923.63 to<br>23,249.18)                      | 11,414.65<br>(7,314.72 to<br>17,339.54)                       | 6,904.46<br>(4,628.47 to<br>10,372.27)                        | 14,751.33<br>(9,573.12 to<br>21,997.18)                       |
| Ischemic stroke                 | 155,017.06<br>(134,670.06 to<br>178,231.25)                        | 61,259.45<br>(35,349.61 to<br>101,830.74)                        | 36,550.05<br>(22,401.49 to<br>59,164.43)                         | 83,061.64<br>(48,901.67 to<br>134,037.86)                          | 12,219.92<br>(10,724.63 to<br>13,951.43)                      | 6,102.30<br>(3,600.84 to<br>10,646.27)                        | 4,041.57<br>(2,504.93 to<br>6,770.54)                         | 7,495.23<br>(4,448.52 to<br>12,576.85)                        |

|                                |                                             |                                           |                                           |                                            |                                       |                                        |                                        |                                        |
|--------------------------------|---------------------------------------------|-------------------------------------------|-------------------------------------------|--------------------------------------------|---------------------------------------|----------------------------------------|----------------------------------------|----------------------------------------|
| Intracerebral hemorrhage       | 131,486.13<br>(111,983.13 to<br>152,419.55) | 67,719.30<br>(38,795.93 to<br>111,927.49) | 31,660.91<br>(19,804.09 to<br>50,368.57)  | 104,800.17<br>(59,371.42 to<br>175,565.58) | 8,238.48<br>(7,129.03 to<br>9,450.25) | 5,312.35<br>(3,289.83 to<br>8,316.91)  | 2,862.89<br>(1,878.31 to<br>4,411.87)  | 7,256.10<br>(4,447.33 to<br>11,226.97) |
| Hypertensive heart disease     | 77,912.01<br>(46,444.53 to<br>102,504.00)   | 91,055.81<br>(42,603.86 to<br>225,258.74) | 69,212.82<br>(34,136.92 to<br>168,421.11) | 110,452.87<br>(48,999.04 to<br>284,171.44) | 5,646.68<br>(3,423.97 to<br>7,492.85) | 8,392.03<br>(3,981.67 to<br>20,705.35) | 7,081.63<br>(3,521.65 to<br>16,490.01) | 9,644.22<br>(4,365.95 to<br>23,815.99) |
| Cardiomyopathy and myocarditis | 12,197.49<br>(9,981.55 to<br>15,284.46)     | 8,214.38<br>(6,133.75 to<br>11,548.35)    | 7,391.11<br>(5,560.45 to<br>10,426.85)    | 8,210.58<br>(6,012.26 to<br>11,510.74)     | 750.36<br>(612.47 to<br>998.90)       | 681.44<br>(482.62 to<br>1,018.78)      | 679.08<br>(482.49 to<br>1,006.99)      | 638.21<br>(439.40 to<br>968.15)        |
| Myocarditis                    | 4,774.88<br>(3,674.58 to<br>6,386.78)       | 4,447.03<br>(3,491.94 to<br>6,217.18)     | 4,768.11<br>(3,758.05 to<br>6,673.79)     | 4,081.80<br>(3,164.95 to<br>5,753.67)      | 313.52<br>(238.12 to<br>473.52)       | 389.44<br>(280.49 to<br>604.88)        | 458.18<br>(337.79 to<br>703.38)        | 336.91<br>(234.24 to<br>529.44)        |

| Bulgaria                                                      |                                                               |                                                               |                                                               |                                                               |                                                            |                                                            |                                                            |                                                            |
|---------------------------------------------------------------|---------------------------------------------------------------|---------------------------------------------------------------|---------------------------------------------------------------|---------------------------------------------------------------|------------------------------------------------------------|------------------------------------------------------------|------------------------------------------------------------|------------------------------------------------------------|
| Cause                                                         | YLLs (actual counts)                                          |                                                               |                                                               |                                                               | Deaths (actual counts)                                     |                                                            |                                                            |                                                            |
|                                                               | 2016                                                          | 2040 Forecast                                                 | 2040 Better Scenario                                          | 2040 Worse Scenario                                           | 2016                                                       | 2040 Forecast                                              | 2040 Better Scenario                                       | 2040 Worse Scenario                                        |
| Alcoholic cardiomyopathy                                      | 579.89<br>(388.75 to<br>1,190.85)                             | 515.82<br>(338.87 to<br>1,003.48)                             | 387.11<br>(247.00 to<br>764.48)                               | 570.29<br>(378.06 to<br>1,105.72)                             | 27.21<br>(19.19 to<br>48.19)                               | 29.17<br>(19.96 to<br>48.14)                               | 23.64<br>(16.24 to<br>38.39)                               | 30.57<br>(21.05 to<br>50.54)                               |
| Other cardiomyopathy                                          | 6,842.71<br>(5,575.45 to<br>8,546.77)                         | 3,251.53<br>(1,897.36 to<br>5,434.60)                         | 2,235.89<br>(1,283.06 to<br>3,705.40)                         | 3,558.48<br>(2,071.26 to<br>5,792.58)                         | 409.63<br>(330.88 to<br>534.06)                            | 262.83<br>(134.26 to<br>467.90)                            | 197.25<br>(101.57 to<br>350.01)                            | 270.73<br>(144.32 to<br>485.06)                            |
| Atrial fibrillation and flutter                               | 5,875.01<br>(4,457.28 to<br>7,525.20)                         | 7,455.76<br>(5,555.73 to<br>9,781.09)                         | 7,092.23<br>(5,288.57 to<br>9,204.10)                         | 7,190.03<br>(5,261.97 to<br>9,511.18)                         | 603.06<br>(461.08 to<br>777.48)                            | 895.96<br>(638.87 to<br>1,215.58)                          | 910.41<br>(657.78 to<br>1,220.25)                          | 826.40<br>(574.00 to<br>1,141.42)                          |
| Aortic aneurysm                                               | 6,862.78<br>(5,748.88 to<br>8,114.01)                         | 3,903.93<br>(2,802.37 to<br>5,411.38)                         | 3,118.18<br>(2,309.28 to<br>4,205.12)                         | 4,211.17<br>(2,960.97 to<br>5,810.57)                         | 312.77<br>(265.71 to<br>367.01)                            | 220.05<br>(170.82 to<br>280.00)                            | 199.09<br>(158.03 to<br>253.00)                            | 221.43<br>(171.68 to<br>284.29)                            |
| Peripheral artery disease                                     | 496.67<br>(185.40 to<br>717.27)                               | 601.16<br>(230.08 to<br>963.29)                               | 604.21<br>(233.50 to<br>954.13)                               | 601.65<br>(224.24 to<br>980.14)                               | 37.27<br>(14.92 to<br>52.43)                               | 60.26<br>(22.90 to<br>96.85)                               | 67.05<br>(26.24 to<br>109.23)                              | 56.14<br>(21.00 to<br>91.03)                               |
| Endocarditis                                                  | 3,446.06<br>(2,229.64 to<br>6,287.20)                         | 3,230.82<br>(1,804.58 to<br>6,467.91)                         | 3,134.94<br>(1,733.30 to<br>6,275.60)                         | 3,283.89<br>(1,801.82 to<br>6,471.98)                         | 163.28<br>(100.45 to<br>301.12)                            | 199.49<br>(106.57 to<br>409.80)                            | 208.75<br>(112.68 to<br>430.96)                            | 191.67<br>(101.93 to<br>389.32)                            |
| Other cardiovascular and circulatory diseases                 | 54,449.00<br>(46,222.97 to<br>63,996.02)                      | 53,702.86<br>(36,335.16 to<br>78,684.69)                      | 34,737.08<br>(24,619.22 to<br>49,264.41)                      | 60,284.82<br>(40,924.98 to<br>87,459.00)                      | 3,107.55<br>(2,663.63 to<br>3,582.97)                      | 3,906.81<br>(2,797.61 to<br>5,386.60)                      | 2,845.81<br>(2,130.73 to<br>3,933.96)                      | 4,075.52<br>(2,998.61 to<br>5,653.09)                      |
| <b>Chronic respiratory diseases</b>                           | <b>52,592.04</b><br><b>(45,127.74 to</b><br><b>60,840.69)</b> | <b>40,737.51</b><br><b>(28,983.11 to</b><br><b>56,518.63)</b> | <b>29,836.36</b><br><b>(18,209.37 to</b><br><b>38,764.42)</b> | <b>54,382.37</b><br><b>(36,644.93 to</b><br><b>79,045.38)</b> | <b>3,556.90</b><br><b>(3,106.32 to</b><br><b>4,074.27)</b> | <b>3,286.28</b><br><b>(2,438.72 to</b><br><b>4,359.03)</b> | <b>2,750.43</b><br><b>(2,142.86 to</b><br><b>3,443.82)</b> | <b>3,964.18</b><br><b>(2,797.96 to</b><br><b>5,495.33)</b> |
| Chronic obstructive pulmonary disease                         | 49,325.41<br>(42,532.69 to<br>56,866.14)                      | 38,016.33<br>(26,300.10 to<br>53,884.49)                      | 26,558.72<br>(19,217.28 to<br>35,463.43)                      | 51,761.64<br>(33,637.56 to<br>76,377.52)                      | 3,385.74<br>(2,962.90 to<br>3,879.84)                      | 3,107.57<br>(2,262.59 to<br>4,194.97)                      | 2,516.23<br>(1,907.90 to<br>3,203.98)                      | 3,801.35<br>(2,613.97 to<br>5,315.13)                      |
| Pneumoconiosis                                                | 538.30<br>(435.77 to<br>659.32)                               | 266.06<br>(193.49 to<br>366.25)                               | 283.75<br>(198.82 to<br>395.61)                               | 266.72<br>(193.22 to<br>362.54)                               | 32.21<br>(26.29 to<br>38.67)                               | 22.76<br>(15.30 to<br>34.21)                               | 27.25<br>(17.51 to<br>41.21)                               | 21.58<br>(14.10 to<br>31.96)                               |
| Silicosis                                                     | 160.81<br>(109.94 to<br>250.62)                               | 41.98<br>(18.16 to<br>89.99)                                  | 21.35<br>(9.25 to<br>50.73)                                   | 48.07<br>(20.85 to<br>107.69)                                 | 8.61<br>(5.96 to<br>13.71)                                 | 2.63<br>(1.13 to<br>5.89)                                  | 1.47<br>(0.64 to<br>4.07)                                  | 2.89<br>(1.29 to<br>6.36)                                  |
| Asbestosis                                                    | 100.65<br>(52.49 to<br>138.70)                                | 87.40<br>(46.33 to<br>130.19)                                 | 110.62<br>(60.04 to<br>166.07)                                | 78.00<br>(40.95 to<br>115.38)                                 | 5.71<br>(2.67 to<br>8.06)                                  | 7.00<br>(2.98 to<br>12.15)                                 | 9.61<br>(3.99 to<br>16.25)                                 | 5.94<br>(2.58 to<br>10.33)                                 |
| Coal workers pneumoconiosis                                   | 19.99<br>(12.66 to<br>44.47)                                  | 11.35<br>(5.47 to<br>29.10)                                   | 9.60<br>(4.52 to<br>28.45)                                    | 12.49<br>(6.10 to<br>31.04)                                   | 1.08<br>(0.68 to<br>2.67)                                  | 0.94<br>(0.42 to<br>2.74)                                  | 0.98<br>(0.40 to<br>3.22)                                  | 0.94<br>(0.45 to<br>2.64)                                  |
| Other pneumoconiosis                                          | 256.86<br>(163.07 to<br>322.40)                               | 125.33<br>(72.72 to<br>196.09)                                | 142.18<br>(78.52 to<br>230.66)                                | 128.16<br>(74.01 to<br>196.44)                                | 16.81<br>(10.70 to<br>20.96)                               | 12.19<br>(6.59 to<br>20.67)                                | 15.19<br>(7.65 to<br>26.49)                                | 11.80<br>(6.14 to<br>19.82)                                |
| Asthma                                                        | 966.39<br>(771.30 to<br>1,415.59)                             | 303.58<br>(143.20 to<br>609.97)                               | 173.91<br>(87.44 to<br>329.20)                                | 418.15<br>(182.25 to<br>863.39)                               | 55.10<br>(43.62 to<br>79.66)                               | 22.23<br>(10.37 to<br>44.68)                               | 14.17<br>(7.08 to<br>27.64)                                | 28.28<br>(12.44 to<br>57.47)                               |
| Interstitial lung disease and pulmonary sarcoidosis           | 823.40<br>(614.81 to<br>1,368.47)                             | 1,342.91<br>(884.88 to<br>2,319.61)                           | 2,022.89<br>(1,446.49 to<br>3,304.05)                         | 1,129.56<br>(733.95 to<br>1,927.95)                           | 45.26<br>(33.52 to<br>76.22)                               | 89.77<br>(57.06 to<br>156.98)                              | 144.55<br>(102.62 to<br>243.34)                            | 72.07<br>(45.39 to<br>124.88)                              |
| Other chronic respiratory diseases                            | 938.54<br>(680.40 to<br>1,520.50)                             | 808.63<br>(513.77 to<br>1,408.08)                             | 797.09<br>(518.34 to<br>1,352.83)                             | 806.31<br>(499.73 to<br>1,418.70)                             | 38.59<br>(27.42 to<br>67.74)                               | 43.96<br>(27.58 to<br>88.14)                               | 48.23<br>(31.26 to<br>88.14)                               | 40.91<br>(24.85 to<br>75.27)                               |
| <b>Cirrhosis and other chronic liver diseases</b>             | <b>50,600.94</b><br><b>(41,496.43 to</b><br><b>60,499.01)</b> | <b>32,066.22</b><br><b>(24,676.46 to</b><br><b>39,960.72)</b> | <b>23,334.78</b><br><b>(18,209.37 to</b><br><b>29,206.44)</b> | <b>35,137.93</b><br><b>(27,349.65 to</b><br><b>43,600.83)</b> | <b>1,901.70</b><br><b>(1,580.83 to</b><br><b>2,249.99)</b> | <b>1,369.48</b><br><b>(1,110.94 to</b><br><b>1,648.30)</b> | <b>1,038.38</b><br><b>(845.28 to</b><br><b>1,231.96)</b>   | <b>1,458.44</b><br><b>(1,201.89 to</b><br><b>1,735.62)</b> |
| Cirrhosis and other chronic liver diseases due to hepatitis B | 9,834.11<br>(7,463.38 to<br>12,734.34)                        | 6,046.59<br>(4,364.97 to<br>8,234.93)                         | 4,964.16<br>(3,568.31 to<br>6,669.83)                         | 6,183.95<br>(4,462.50 to<br>8,404.43)                         | 363.42<br>(278.05 to<br>468.02)                            | 252.40<br>(189.14 to<br>328.02)                            | 214.24<br>(160.28 to<br>276.71)                            | 251.66<br>(189.58 to<br>328.59)                            |
| Cirrhosis and other chronic liver diseases due to hepatitis C | 13,218.77<br>(9,065.94 to<br>18,382.55)                       | 8,432.00<br>(5,403.57 to<br>12,116.55)                        | 6,798.30<br>(4,584.00 to<br>9,608.54)                         | 8,674.89<br>(5,805.86 to<br>12,534.80)                        | 487.87<br>(339.72 to<br>666.05)                            | 347.78<br>(233.13 to<br>484.37)                            | 289.12<br>(198.03 to<br>395.13)                            | 349.65<br>(237.65 to<br>490.98)                            |

|                                                                |                                                               |                                                               |                                                               |                                                               |                                                            |                                                          |                                                          |                                                          |
|----------------------------------------------------------------|---------------------------------------------------------------|---------------------------------------------------------------|---------------------------------------------------------------|---------------------------------------------------------------|------------------------------------------------------------|----------------------------------------------------------|----------------------------------------------------------|----------------------------------------------------------|
|                                                                | 18,467.88<br>(13,548.92 to<br>23,781.54)                      | 12,125.56<br>(8,420.53 to<br>15,964.16)                       | 7,098.76<br>(4,974.21 to<br>9,504.58)                         | 14,676.09<br>(10,476.70 to<br>19,353.82)                      | 704.48<br>(527.55 to<br>898.33)                            | 523.90<br>(388.12 to<br>666.51)                          | 325.62<br>(243.01 to<br>420.70)                          | 612.72<br>(454.20 to<br>778.81)                          |
| Cirrhosis and other chronic liver diseases due to alcohol use  |                                                               |                                                               |                                                               |                                                               |                                                            |                                                          |                                                          |                                                          |
|                                                                | 9,080.18<br>(7,260.52 to<br>11,270.40)                        | 5,462.08<br>(4,073.54 to<br>7,175.86)                         | 4,473.57<br>(3,357.56 to<br>5,702.00)                         | 5,602.99<br>(4,180.53 to<br>7,354.81)                         | 345.95<br>(275.51 to<br>424.67)                            | 245.40<br>(189.21 to<br>312.27)                          | 209.39<br>(161.38 to<br>256.93)                          | 244.41<br>(188.55 to<br>311.50)                          |
| Cirrhosis and other chronic liver diseases due to other causes |                                                               |                                                               |                                                               |                                                               |                                                            |                                                          |                                                          |                                                          |
|                                                                | <b>26,309.79</b><br><b>(21,631.81 to</b><br><b>33,461.66)</b> | <b>17,401.27</b><br><b>(13,501.43 to</b><br><b>23,727.90)</b> | <b>14,691.87</b><br><b>(11,672.86 to</b><br><b>19,090.79)</b> | <b>17,816.98</b><br><b>(13,699.00 to</b><br><b>24,485.03)</b> | <b>1,450.17</b><br><b>(1,213.72 to</b><br><b>1,832.50)</b> | <b>1,210.80</b><br><b>(987.62 to</b><br><b>1,582.22)</b> | <b>1,119.55</b><br><b>(932.32 to</b><br><b>1,429.31)</b> | <b>1,173.72</b><br><b>(936.68 to</b><br><b>1,578.15)</b> |
| Digestive diseases                                             |                                                               |                                                               |                                                               |                                                               |                                                            |                                                          |                                                          |                                                          |
|                                                                | 5,644.01<br>(4,508.51 to<br>7,424.14)                         | 2,270.30<br>(1,558.52 to<br>3,361.38)                         | 1,437.90<br>(1,033.28 to<br>2,012.26)                         | 2,482.01<br>(1,663.50 to<br>3,720.26)                         | 316.05<br>(256.43 to<br>396.88)                            | 156.73<br>(110.96 to<br>223.01)                          | 107.32<br>(79.17 to<br>145.48)                           | 162.53<br>(113.59 to<br>230.52)                          |
| Peptic ulcer disease                                           |                                                               |                                                               |                                                               |                                                               |                                                            |                                                          |                                                          |                                                          |

| Bulgaria                                   |                                          |                                          |                                           |                                          |                                       |                                        |                                        |                                        |
|--------------------------------------------|------------------------------------------|------------------------------------------|-------------------------------------------|------------------------------------------|---------------------------------------|----------------------------------------|----------------------------------------|----------------------------------------|
| Cause                                      | YLLs (actual counts)                     |                                          |                                           |                                          | Deaths (actual counts)                |                                        |                                        |                                        |
|                                            | 2016                                     | 2040 Forecast                            | 2040 Better Scenario                      | 2040 Worse Scenario                      | 2016                                  | 2040 Forecast                          | 2040 Better Scenario                   | 2040 Worse Scenario                    |
| Gastritis and duodenitis                   | 925.63<br>(605.77 to<br>1,223.00)        | 490.59<br>(301.08 to<br>697.14)          | 385.31<br>(251.37 to<br>526.34)           | 495.15<br>(318.75 to<br>705.45)          | 52.31<br>(35.79 to<br>69.35)          | 34.61<br>(22.32 to<br>49.07)           | 29.26<br>(19.46 to<br>40.29)           | 33.34<br>(20.58 to<br>48.46)           |
| Appendicitis                               | 987.35<br>(710.79 to<br>1,270.03)        | 422.65<br>(273.67 to<br>616.98)          | 288.59<br>(195.80 to<br>401.49)           | 446.96<br>(290.22 to<br>650.62)          | 48.78<br>(35.59 to<br>61.84)          | 26.68<br>(17.19 to<br>37.30)           | 19.48<br>(13.09 to<br>27.01)           | 26.95<br>(17.27 to<br>38.93)           |
| Paralytic ileus and intestinal obstruction | 5,283.08<br>(3,887.44 to<br>6,654.77)    | 4,620.81<br>(3,474.66 to<br>5,938.13)    | 4,912.14<br>(3,772.65 to<br>6,387.90)     | 4,267.87<br>(3,211.59 to<br>5,479.55)    | 308.86<br>(231.11 to<br>389.02)       | 347.26<br>(265.17 to<br>440.77)        | 395.23<br>(310.98 to<br>494.61)        | 305.86<br>(229.49 to<br>394.47)        |
| Inguinal, femoral, and abdominal hernia    | 1,273.31<br>(864.86 to<br>2,629.47)      | 766.43<br>(483.61 to<br>1,615.24)        | 659.44<br>(420.85 to<br>1,374.64)         | 750.07<br>(485.03 to<br>1,612.82)        | 81.44<br>(54.02 to<br>178.55)         | 60.05<br>(37.98 to<br>135.50)          | 55.74<br>(34.47 to<br>123.06)          | 56.05<br>(34.98 to<br>126.77)          |
| Inflammatory bowel disease                 | 721.44<br>(503.30 to<br>909.63)          | 473.89<br>(348.85 to<br>597.18)          | 477.18<br>(348.33 to<br>606.05)           | 451.28<br>(332.89 to<br>563.96)          | 33.15<br>(24.60 to<br>41.23)          | 29.67<br>(22.47 to<br>37.66)           | 32.50<br>(24.56 to<br>41.22)           | 26.70<br>(19.94 to<br>33.62)           |
| Vascular intestinal disorders              | 3,172.04<br>(2,385.78 to<br>3,963.16)    | 2,624.47<br>(2,017.47 to<br>3,289.45)    | 2,454.13<br>(1,869.57 to<br>3,085.85)     | 2,511.00<br>(1,937.27 to<br>3,154.19)    | 200.78<br>(156.57 to<br>248.78)       | 200.18<br>(156.09 to<br>249.67)        | 199.37<br>(154.08 to<br>248.85)        | 184.04<br>(142.86 to<br>231.18)        |
| Gallbladder and biliary diseases           | 1,370.70<br>(1,105.28 to<br>1,791.70)    | 989.73<br>(520.72 to<br>1,862.72)        | 739.10<br>(397.23 to<br>1,340.18)         | 1,270.98<br>(628.11 to<br>2,448.32)      | 81.65<br>(73.70 to<br>117.72)         | 60.76<br>(43.37 to<br>155.25)          | 66.06<br>(35.88 to<br>122.41)          | 98.16<br>(49.27 to<br>184.78)          |
| Pancreatitis                               | 5,254.25<br>(4,161.93 to<br>7,158.59)    | 3,508.36<br>(1,753.78 to<br>6,788.68)    | 2,193.00<br>(1,195.19 to<br>4,280.88)     | 3,949.13<br>(1,975.37 to<br>7,721.48)    | 230.60<br>(182.91 to<br>292.91)       | 185.26<br>(103.22 to<br>330.35)        | 124.80<br>(75.84 to<br>213.49)         | 199.04<br>(109.14 to<br>364.80)        |
| Other digestive diseases                   | 1,677.98<br>(1,254.79 to<br>2,263.23)    | 1,234.02<br>(934.22 to<br>1,744.86)      | 1,145.09<br>(868.65 to<br>1,599.30)       | 1,192.52<br>(898.15 to<br>1,682.12)      | 87.43<br>(67.27 to<br>118.49)         | 88.70<br>(68.47 to<br>126.99)          | 89.79<br>(68.71 to<br>124.94)          | 81.04<br>(62.10 to<br>117.48)          |
| Neurological disorders                     | 55,723.57<br>(46,297.73 to<br>67,806.62) | 73,051.53<br>(57,455.47 to<br>94,041.22) | 81,838.66<br>(65,825.86 to<br>102,708.96) | 71,287.05<br>(53,474.97 to<br>96,253.78) | 5,043.70<br>(4,138.61 to<br>6,189.65) | 8,119.11<br>(5,885.26 to<br>10,719.41) | 9,715.81<br>(7,484.04 to<br>12,457.68) | 7,604.89<br>(5,158.74 to<br>10,619.74) |
| Alzheimer's disease and other dementias    | 40,055.23<br>(32,134.93 to<br>50,786.08) | 55,854.81<br>(40,714.85 to<br>75,029.12) | 62,960.11<br>(47,340.99 to<br>83,033.72)  | 55,347.56<br>(38,075.21 to<br>79,578.74) | 4,139.93<br>(3,319.67 to<br>5,246.76) | 6,315.15<br>(4,613.65 to<br>9,276.21)  | 8,131.47<br>(5,959.09 to<br>10,771.55) | 6,474.02<br>(4,183.00 to<br>9,418.45)  |
| Parkinson's disease                        | 7,747.80<br>(5,555.54 to<br>10,401.99)   | 10,810.14<br>(7,926.25 to<br>14,231.41)  | 13,130.33<br>(9,746.65 to<br>16,855.16)   | 9,372.04<br>(6,776.08 to<br>12,547.72)   | 664.56<br>(484.86 to<br>898.39)       | 1,050.63<br>(760.67 to<br>1,415.46)    | 1,332.68<br>(997.68 to<br>1,724.54)    | 884.33<br>(619.94 to<br>1,178.35)      |
| Epilepsy                                   | 3,933.13<br>(3,253.59 to<br>4,697.78)    | 2,950.36<br>(1,887.03 to<br>4,453.13)    | 2,214.03<br>(1,477.16 to<br>3,314.95)     | 3,226.89<br>(2,043.94 to<br>5,026.61)    | 104.48<br>(87.16 to<br>123.98)        | 96.93<br>(64.42 to<br>141.57)          | 77.08<br>(53.26 to<br>110.83)          | 102.29<br>(67.59 to<br>152.09)         |
| Multiple sclerosis                         | 1,756.85<br>(1,163.67 to<br>3,385.61)    | 1,648.02<br>(1,067.18 to<br>3,065.43)    | 1,706.09<br>(1,159.21 to<br>3,026.56)     | 1,602.81<br>(1,013.91 to<br>3,033.82)    | 66.38<br>(47.00 to<br>115.74)         | 86.38<br>(62.91 to<br>122.58)          | 98.71<br>(75.01 to<br>129.09)          | 78.92<br>(55.13 to<br>118.68)          |
| Motor neuron disease                       | 440.78<br>(366.63 to<br>528.17)          | 475.69<br>(384.28 to<br>582.49)          | 478.26<br>(381.02 to<br>594.32)           | 461.68<br>(375.49 to<br>558.37)          | 16.69<br>(13.97 to<br>20.19)          | 20.66<br>(17.22 to<br>24.39)           | 21.58<br>(17.81 to<br>25.83)           | 19.50<br>(16.21 to<br>23.92)           |
| Other neurological disorders               | 1,789.79<br>(1,501.26 to<br>2,107.76)    | 1,312.52<br>(1,089.87 to<br>1,551.61)    | 1,349.84<br>(1,123.41 to<br>1,606.69)     | 1,276.07<br>(1,063.05 to<br>1,500.51)    | 51.64<br>(44.27 to<br>59.55)          | 49.36<br>(42.57 to<br>57.10)           | 54.30<br>(46.62 to<br>62.81)           | 45.84<br>(39.55 to<br>52.40)           |
| Mental disorders                           | 6,047.82<br>(4,827.29 to<br>7,476.39)    | 6,407.60<br>(4,763.84 to<br>8,568.23)    | 7,880.70<br>(6,019.41 to<br>10,156.78)    | 6,066.01<br>(4,514.77 to<br>7,881.41)    | 170.58<br>(137.09 to<br>209.25)       | 214.28<br>(165.86 to<br>269.38)        | 281.72<br>(224.04 to<br>347.14)        | 195.02<br>(149.85 to<br>243.68)        |
| Alcohol use disorders                      | 3,194.71<br>(2,559.05 to<br>4,004.90)    | 2,866.44<br>(2,059.00 to<br>3,939.37)    | 2,831.97<br>(1,997.07 to<br>3,822.97)     | 2,896.57<br>(2,101.79 to<br>3,877.05)    | 91.79<br>(73.71 to<br>115.00)         | 91.69<br>(68.18 to<br>121.63)          | 92.68<br>(68.58 to<br>124.52)          | 91.17<br>(68.57 to<br>120.58)          |
| Drug use disorders                         | 2,847.72<br>(2,081.61 to<br>3,768.25)    | 3,536.73<br>(2,431.78 to<br>4,951.47)    | 5,043.74<br>(3,677.70 to<br>6,732.57)     | 3,165.12<br>(2,132.00 to<br>4,344.08)    | 78.68<br>(58.94 to<br>101.75)         | 122.50<br>(85.20 to<br>166.25)         | 188.94<br>(140.33 to<br>239.11)        | 103.76<br>(70.91 to<br>139.09)         |
| Opioid use disorders                       | 1,421.88<br>(792.11 to<br>1,946.06)      | 844.10<br>(430.81 to<br>1,209.97)        | 922.60<br>(473.32 to<br>1,327.32)         | 814.64<br>(419.57 to<br>1,181.00)        | 35.00<br>(20.50 to<br>46.64)          | 25.40<br>(13.72 to<br>34.79)           | 29.61<br>(15.68 to<br>40.14)           | 23.52<br>(12.91 to<br>32.19)           |

|                           |                                     |                                       |                                       |                                       |                              |                               |                                 |                               |
|---------------------------|-------------------------------------|---------------------------------------|---------------------------------------|---------------------------------------|------------------------------|-------------------------------|---------------------------------|-------------------------------|
|                           | 37.21<br>(21.77 to<br>57.29)        | 55.49<br>(28.29 to<br>91.06)          | 73.66<br>(38.84 to<br>119.10)         | 51.02<br>(25.50 to<br>84.42)          | 0.86<br>(0.52 to<br>1.30)    | 1.38<br>(0.79 to<br>2.12)     | 1.89<br>(1.13 to<br>2.82)       | 1.24<br>(0.69 to<br>1.88)     |
| Cocaine use disorders     |                                     |                                       |                                       |                                       |                              |                               |                                 |                               |
|                           | 155.90<br>(88.69 to<br>258.50)      | 304.98<br>(162.37 to<br>510.35)       | 472.01<br>(275.26 to<br>760.71)       | 269.70<br>(140.20 to<br>452.01)       | 2.90<br>(1.77 to<br>4.65)    | 6.06<br>(3.38 to<br>9.79)     | 9.56<br>(5.85 to<br>14.71)      | 5.29<br>(2.92 to<br>8.54)     |
| Amphetamine use disorders |                                     |                                       |                                       |                                       |                              |                               |                                 |                               |
|                           | 1,232.73<br>(847.61 to<br>1,814.45) | 2,332.17<br>(1,495.49 to<br>3,478.25) | 3,575.47<br>(2,510.07 to<br>4,922.67) | 2,029.76<br>(1,277.26 to<br>2,950.72) | 39.93<br>(28.81 to<br>54.39) | 89.66<br>(59.70 to<br>126.61) | 147.88<br>(107.12 to<br>191.34) | 73.71<br>(47.36 to<br>104.23) |
| Other drug use disorders  |                                     |                                       |                                       |                                       |                              |                               |                                 |                               |
|                           | 5.39<br>(4.18 to<br>7.05)           | 4.44<br>(2.94 to<br>6.64)             | 4.99<br>(3.25 to<br>7.72)             | 4.32<br>(2.95 to<br>6.31)             | 0.11<br>(0.08 to<br>0.14)    | 0.09<br>(0.06 to<br>0.14)     | 0.10<br>(0.07 to<br>0.16)       | 0.09<br>(0.06 to<br>0.13)     |
| Eating disorders          |                                     |                                       |                                       |                                       |                              |                               |                                 |                               |

| Bulgaria                                                   |                                              |                                              |                                              |                                              |                                           |                                           |                                           |                                           |
|------------------------------------------------------------|----------------------------------------------|----------------------------------------------|----------------------------------------------|----------------------------------------------|-------------------------------------------|-------------------------------------------|-------------------------------------------|-------------------------------------------|
| Cause                                                      | YLLs (actual counts)                         |                                              |                                              |                                              | Deaths (actual counts)                    |                                           |                                           |                                           |
|                                                            | 2016                                         | 2040 Forecast                                | 2040 Better Scenario                         | 2040 Worse Scenario                          | 2016                                      | 2040 Forecast                             | 2040 Better Scenario                      | 2040 Worse Scenario                       |
| <b>Diabetes, urogenital, blood, and endocrine diseases</b> | <b>69,737.12</b><br>(59,999.84 to 80,439.83) | <b>57,398.33</b><br>(42,529.66 to 76,915.71) | <b>42,422.39</b><br>(31,691.02 to 55,929.22) | <b>65,648.27</b><br>(48,341.24 to 87,527.06) | <b>3,825.43</b><br>(3,318.15 to 4,382.25) | <b>3,960.75</b><br>(3,037.25 to 5,154.21) | <b>3,122.35</b><br>(2,393.39 to 4,068.64) | <b>4,303.26</b><br>(3,288.74 to 5,585.39) |
| Diabetes mellitus                                          | 32,313.75<br>(27,711.04 to 37,298.52)        | 25,337.99<br>(15,083.50 to 40,538.33)        | 17,028.08<br>(10,495.86 to 26,677.92)        | 30,081.90<br>(17,548.55 to 48,984.31)        | 1,887.13<br>(1,629.17 to 2,177.19)        | 1,769.48<br>(1,102.23 to 2,707.82)        | 1,276.11<br>(826.47 to 1,924.18)          | 1,976.21<br>(1,192.90 to 3,104.55)        |
| Acute glomerulonephritis                                   | 64.83<br>(53.37 to 79.70)                    | 56.99<br>(38.37 to 82.46)                    | 46.13<br>(30.71 to 66.75)                    | 58.55<br>(38.58 to 85.06)                    | 2.31<br>(1.87 to 2.85)                    | 2.56<br>(1.64 to 3.86)                    | 2.23<br>(1.41 to 3.41)                    | 2.49<br>(1.59 to 3.76)                    |
| Chronic kidney disease                                     | 26,562.21<br>(22,759.50 to 31,080.09)        | 22,649.11<br>(13,464.05 to 36,493.24)        | 17,108.06<br>(10,518.49 to 27,301.50)        | 26,244.45<br>(15,404.14 to 42,813.29)        | 1,417.24<br>(1,231.20 to 1,636.95)        | 1,596.89<br>(977.02 to 2,520.04)          | 1,296.45<br>(813.31 to 2,033.10)          | 1,766.05<br>(1,052.17 to 2,761.52)        |
| Chronic kidney disease due to diabetes mellitus            | 9,518.28<br>(7,596.53 to 11,612.96)          | 9,075.82<br>(5,241.69 to 15,104.09)          | 6,838.07<br>(4,081.07 to 11,267.60)          | 10,630.85<br>(6,050.74 to 18,210.20)         | 481.28<br>(387.54 to 589.62)              | 566.73<br>(329.82 to 926.30)              | 453.18<br>(270.88 to 746.25)              | 637.51<br>(367.98 to 1,063.18)            |
| Chronic kidney disease due to hypertension                 | 2,690.51<br>(2,134.84 to 3,348.56)           | 3,182.61<br>(1,794.88 to 5,297.09)           | 2,690.02<br>(1,550.80 to 4,344.07)           | 3,490.33<br>(1,974.27 to 5,772.70)           | 208.32<br>(165.09 to 261.43)              | 319.29<br>(181.69 to 525.24)              | 288.99<br>(167.69 to 478.60)              | 334.02<br>(186.61 to 547.05)              |
| Chronic kidney disease due to glomerulonephritis           | 6,100.60<br>(4,868.46 to 7,625.02)           | 3,930.27<br>(2,279.40 to 6,711.93)           | 2,766.40<br>(1,688.61 to 4,547.40)           | 4,634.47<br>(2,667.47 to 7,828.87)           | 288.85<br>(228.16 to 360.26)              | 250.43<br>(142.94 to 423.92)              | 187.41<br>(110.69 to 313.86)              | 284.10<br>(161.88 to 478.61)              |
| Chronic kidney disease due to other and unspecified causes | 8,252.82<br>(6,680.16 to 10,105.91)          | 6,460.41<br>(3,749.53 to 10,661.71)          | 4,813.58<br>(2,889.99 to 7,635.42)           | 7,488.80<br>(4,241.63 to 12,281.46)          | 438.79<br>(351.35 to 540.49)              | 460.45<br>(266.84 to 767.20)              | 366.87<br>(220.72 to 602.15)              | 510.42<br>(291.03 to 845.37)              |
| Urinary diseases and male infertility                      | 3,042.36<br>(2,582.97 to 3,555.38)           | 4,044.71<br>(3,270.91 to 5,043.07)           | 3,335.35<br>(2,693.18 to 4,005.62)           | 4,022.01<br>(3,281.07 to 4,887.49)           | 173.23<br>(148.90 to 200.65)              | 289.27<br>(234.56 to 355.34)              | 257.43<br>(211.86 to 307.76)              | 273.17<br>(220.23 to 332.79)              |
| Urinary tract infections                                   | 2,670.35<br>(2,229.90 to 3,168.24)           | 3,652.53<br>(2,926.03 to 4,544.40)           | 3,045.73<br>(2,446.43 to 3,709.00)           | 3,620.58<br>(2,910.93 to 4,425.06)           | 151.92<br>(128.37 to 179.80)              | 261.31<br>(209.46 to 326.02)              | 234.98<br>(190.28 to 286.32)              | 246.17<br>(194.66 to 305.77)              |
| Urolithiasis                                               | 141.48<br>(46.56 to 198.95)                  | 170.04<br>(52.57 to 270.22)                  | 122.74<br>(35.96 to 185.64)                  | 177.39<br>(53.95 to 282.98)                  | 7.79<br>(2.21 to 11.21)                   | 11.10<br>(2.99 to 17.77)                  | 8.64<br>(2.29 to 13.27)                   | 11.03<br>(3.00 to 17.45)                  |
| Other urinary diseases                                     | 230.54<br>(75.21 to 355.15)                  | 222.14<br>(65.77 to 385.02)                  | 166.88<br>(47.85 to 275.95)                  | 224.04<br>(65.55 to 371.34)                  | 13.52<br>(3.81 to 20.90)                  | 16.86<br>(4.54 to 29.01)                  | 13.81<br>(3.64 to 23.27)                  | 15.98<br>(4.25 to 26.97)                  |
| Gynecological diseases                                     | 35.47<br>(24.78 to 53.95)                    | 14.02<br>(7.34 to 26.11)                     | 8.00<br>(4.67 to 14.16)                      | 15.97<br>(8.59 to 28.99)                     | 1.30<br>(0.91 to 2.23)                    | 0.73<br>(0.40 to 1.38)                    | 0.45<br>(0.27 to 0.91)                    | 0.79<br>(0.45 to 1.61)                    |
| Uterine fibroids                                           | 14.18<br>(9.58 to 21.33)                     | 6.28<br>(3.32 to 11.46)                      | 4.02<br>(2.27 to 7.02)                       | 6.95<br>(3.58 to 12.32)                      | 0.52<br>(0.35 to 0.86)                    | 0.28<br>(0.15 to 0.50)                    | 0.19<br>(0.11 to 0.35)                    | 0.30<br>(0.17 to 0.56)                    |
| Polycystic ovarian syndrome                                | 9.64<br>(4.73 to 15.93)                      | 1.42<br>(0.33 to 3.91)                       | 0.50<br>(0.12 to 1.30)                       | 1.85<br>(0.48 to 4.93)                       | 0.24<br>(0.12 to 0.39)                    | 0.04<br>(0.01 to 0.10)                    | 0.01<br>(0.00 to 0.03)                    | 0.05<br>(0.01 to 0.13)                    |
| Endometriosis                                              | 0.25<br>(0.08 to 1.04)                       | 0.49<br>(0.10 to 1.68)                       | 0.27<br>(0.06 to 0.98)                       | 0.57<br>(0.13 to 2.01)                       | 0.01<br>(0.00 to 0.03)                    | 0.01<br>(0.00 to 0.04)                    | 0.01<br>(0.00 to 0.02)                    | 0.01<br>(0.00 to 0.05)                    |
| Genital prolapse                                           | 0.48<br>(0.29 to 0.95)                       | 0.21<br>(0.09 to 0.46)                       | 0.12<br>(0.06 to 0.28)                       | 0.23<br>(0.10 to 0.55)                       | 0.03<br>(0.02 to 0.06)                    | 0.02<br>(0.01 to 0.05)                    | 0.01<br>(0.00 to 0.03)                    | 0.02<br>(0.01 to 0.05)                    |
| Other gynecological diseases                               | 10.92<br>(7.33 to 17.56)                     | 5.62<br>(2.77 to 10.96)                      | 3.09<br>(1.67 to 6.27)                       | 6.37<br>(3.33 to 12.74)                      | 0.50<br>(0.34 to 1.05)                    | 0.38<br>(0.19 to 0.86)                    | 0.23<br>(0.12 to 0.53)                    | 0.41<br>(0.21 to 0.93)                    |
| Hemoglobinopathies and hemolytic anemias                   | 4,608.41<br>(3,144.86 to 5,581.32)           | 2,294.40<br>(1,531.54 to 2,959.58)           | 1,737.94<br>(1,150.71 to 2,148.71)           | 2,347.15<br>(1,541.68 to 3,060.39)           | 238.14<br>(162.93 to 285.23)              | 172.24<br>(113.86 to 218.42)              | 144.20<br>(96.04 to 177.46)               | 165.50<br>(107.45 to 214.41)              |
| Thalassemias                                               | 235.85<br>(165.47 to 335.70)                 | 41.28<br>(24.83 to 66.04)                    | 36.41<br>(22.21 to 57.58)                    | 43.01<br>(25.86 to 69.10)                    | 2.90<br>(2.08 to 4.06)                    | 0.52<br>(0.32 to 0.81)                    | 0.46<br>(0.29 to 0.71)                    | 0.54<br>(0.33 to 0.85)                    |



|                                                   |                                       |                                       |                                       |                                       |                                 |                                |                                |                                |
|---------------------------------------------------|---------------------------------------|---------------------------------------|---------------------------------------|---------------------------------------|---------------------------------|--------------------------------|--------------------------------|--------------------------------|
|                                                   | 373.58<br>(228.89 to<br>468.61)       | 139.61<br>(83.05 to<br>203.86)        | 95.36<br>(56.17 to<br>128.30)         | 154.17<br>(89.09 to<br>219.64)        | 8.10<br>(4.97 to<br>10.21)      | 3.66<br>(2.21 to<br>5.24)      | 2.54<br>(1.53 to<br>3.42)      | 4.00<br>(2.38 to<br>5.70)      |
| Sickle cell disorders                             |                                       |                                       |                                       |                                       |                                 |                                |                                |                                |
|                                                   | 1,415.82<br>(856.56 to<br>1,812.85)   | 742.84<br>(457.93 to<br>1,040.88)     | 489.85<br>(305.50 to<br>661.88)       | 808.17<br>(492.36 to<br>1,138.62)     | 43.03<br>(26.68 to<br>54.90)    | 30.47<br>(19.84 to<br>41.14)   | 20.98<br>(13.55 to<br>27.46)   | 32.13<br>(20.90 to<br>43.96)   |
| G6PD deficiency                                   |                                       |                                       |                                       |                                       |                                 |                                |                                |                                |
|                                                   | 2,583.16<br>(1,760.41 to<br>3,113.21) | 1,370.67<br>(921.40 to<br>1,745.49)   | 1,116.32<br>(753.69 to<br>1,372.98)   | 1,341.81<br>(918.48 to<br>1,703.60)   | 184.11<br>(128.60 to<br>220.73) | 137.58<br>(88.34 to<br>177.63) | 120.22<br>(78.27 to<br>149.93) | 128.82<br>(81.40 to<br>168.17) |
| Other hemoglobinopathies and hemolytic anemias    |                                       |                                       |                                       |                                       |                                 |                                |                                |                                |
|                                                   | 3,110.10<br>(2,005.84 to<br>3,844.99) | 3,001.11<br>(1,846.35 to<br>3,733.68) | 3,158.82<br>(1,962.35 to<br>3,938.44) | 2,878.24<br>(1,768.33 to<br>3,563.68) | 106.08<br>(68.16 to<br>130.91)  | 129.57<br>(85.31 to<br>157.90) | 145.48<br>(99.46 to<br>177.33) | 119.05<br>(77.54 to<br>144.94) |
| Endocrine, metabolic, blood, and immune disorders |                                       |                                       |                                       |                                       |                                 |                                |                                |                                |

| Bulgaria                                      |                                              |                                           |                                           |                                            |                                     |                                     |                                    |                                     |
|-----------------------------------------------|----------------------------------------------|-------------------------------------------|-------------------------------------------|--------------------------------------------|-------------------------------------|-------------------------------------|------------------------------------|-------------------------------------|
| Cause                                         | YLLs (actual counts)                         |                                           |                                           |                                            | Deaths (actual counts)              |                                     |                                    |                                     |
|                                               | 2016                                         | 2040 Forecast                             | 2040 Better Scenario                      | 2040 Worse Scenario                        | 2016                                | 2040 Forecast                       | 2040 Better Scenario               | 2040 Worse Scenario                 |
| <b>Musculoskeletal disorders</b>              | <b>986.17</b><br>(734.98 to 1,202.44)        | <b>724.19</b><br>(539.48 to 905.72)       | <b>611.91</b><br>(466.50 to 745.31)       | <b>740.21</b><br>(552.10 to 916.97)        | <b>42.86</b><br>(33.26 to 52.08)    | <b>41.05</b><br>(30.88 to 51.00)    | <b>36.52</b><br>(27.84 to 43.96)   | <b>40.19</b><br>(30.20 to 49.68)    |
| Rheumatoid arthritis                          | 252.58<br>(190.03 to 418.36)                 | 190.06<br>(113.80 to 316.59)              | 115.21<br>(73.08 to 195.71)               | 210.05<br>(128.26 to 334.00)               | 13.62<br>(10.22 to 21.87)           | 12.73<br>(8.03 to 21.18)            | 8.29<br>(5.40 to 13.77)            | 13.43<br>(8.55 to 21.21)            |
| Other musculoskeletal disorders               | 733.59<br>(477.97 to 906.32)                 | 534.13<br>(370.80 to 662.47)              | 496.70<br>(353.79 to 611.75)              | 530.16<br>(361.57 to 656.05)               | 29.25<br>(19.69 to 35.96)           | 28.32<br>(18.92 to 34.71)           | 28.22<br>(19.81 to 34.37)          | 26.75<br>(17.68 to 33.08)           |
| <b>Other non-communicable diseases</b>        | <b>18,401.21</b><br>(12,531.87 to 27,421.79) | <b>6,120.57</b><br>(3,726.60 to 9,834.76) | <b>3,830.30</b><br>(2,563.22 to 5,880.27) | <b>7,043.43</b><br>(4,199.08 to 11,477.44) | <b>268.68</b><br>(195.15 to 384.05) | <b>150.96</b><br>(101.96 to 269.29) | <b>121.04</b><br>(82.98 to 222.39) | <b>157.36</b><br>(104.19 to 261.36) |
| Congenital birth defects                      | 17,112.24<br>(11,307.28 to 25,924.69)        | 4,637.61<br>(2,485.63 to 8,075.66)        | 2,513.48<br>(1,446.81 to 4,120.34)        | 5,567.17<br>(2,893.03 to 9,743.32)         | 220.45<br>(150.51 to 325.74)        | 62.78<br>(35.28 to 105.09)          | 35.24<br>(21.62 to 54.55)          | 74.69<br>(41.59 to 125.73)          |
| Neural tube defects                           | 303.66<br>(169.48 to 531.13)                 | 51.01<br>(18.30 to 109.76)                | 23.53<br>(9.25 to 50.75)                  | 63.49<br>(24.40 to 140.78)                 | 3.66<br>(2.09 to 6.36)              | 0.64<br>(0.25 to 1.36)              | 0.30<br>(0.13 to 0.63)             | 0.79<br>(0.33 to 1.74)              |
| Congenital heart anomalies                    | 10,273.28<br>(6,921.38 to 15,406.03)         | 2,274.06<br>(1,114.59 to 4,071.58)        | 1,025.05<br>(552.31 to 1,674.59)          | 2,844.09<br>(1,404.28 to 5,203.11)         | 134.29<br>(94.16 to 195.99)         | 30.83<br>(16.08 to 53.91)           | 14.10<br>(7.94 to 21.95)           | 38.37<br>(19.87 to 67.67)           |
| Orofacial clefts                              | 2.83<br>(1.12 to 6.67)                       | 0.51<br>(0.13 to 1.56)                    | 0.18<br>(0.05 to 0.50)                    | 0.68<br>(0.17 to 1.88)                     | 0.03<br>(0.01 to 0.08)              | 0.01<br>(0.00 to 0.02)              | 0.00<br>(0.00 to 0.01)             | 0.01<br>(0.00 to 0.02)              |
| Down syndrome                                 | 616.32<br>(400.01 to 1,061.59)               | 365.18<br>(235.47 to 629.30)              | 358.42<br>(236.89 to 624.25)              | 367.42<br>(232.37 to 637.35)               | 9.71<br>(6.65 to 16.05)             | 6.56<br>(4.43 to 11.12)             | 6.63<br>(4.55 to 11.32)            | 6.52<br>(4.37 to 10.98)             |
| Other chromosomal abnormalities               | 709.18<br>(329.33 to 1,268.92)               | 461.50<br>(206.51 to 877.46)              | 325.31<br>(148.38 to 617.23)              | 510.74<br>(230.80 to 995.86)               | 8.57<br>(4.08 to 15.16)             | 5.74<br>(2.67 to 10.71)             | 4.08<br>(1.95 to 7.40)             | 6.34<br>(2.89 to 12.15)             |
| Congenital musculoskeletal and limb anomalies | 293.42<br>(152.90 to 502.25)                 | 87.76<br>(36.74 to 180.19)                | 45.51<br>(19.64 to 89.33)                 | 106.07<br>(43.73 to 219.87)                | 3.51<br>(1.89 to 5.95)              | 1.08<br>(0.47 to 2.17)              | 0.57<br>(0.26 to 1.09)             | 1.30<br>(0.58 to 2.66)              |
| Urogenital congenital anomalies               | 328.01<br>(183.29 to 717.58)                 | 96.67<br>(47.06 to 204.57)                | 56.72<br>(28.82 to 121.95)                | 112.22<br>(53.61 to 240.48)                | 4.62<br>(2.81 to 9.41)              | 1.54<br>(0.82 to 3.13)              | 0.93<br>(0.52 to 1.91)             | 1.76<br>(0.94 to 3.55)              |
| Digestive congenital anomalies                | 717.47<br>(371.86 to 1,281.74)               | 218.93<br>(85.34 to 468.87)               | 105.41<br>(42.88 to 214.73)               | 269.28<br>(107.83 to 573.70)               | 8.55<br>(4.50 to 15.12)             | 2.64<br>(1.07 to 5.60)              | 1.28<br>(0.54 to 2.55)             | 3.24<br>(1.33 to 6.76)              |
| Other congenital birth defects                | 3,868.07<br>(2,312.36 to 6,157.17)           | 1,081.98<br>(544.89 to 1,993.12)          | 573.34<br>(301.92 to 1,023.34)            | 1,293.18<br>(621.64 to 2,378.16)           | 47.50<br>(29.44 to 73.96)           | 13.75<br>(7.23 to 24.66)            | 7.37<br>(4.12 to 12.83)            | 16.35<br>(8.35 to 29.35)            |
| Skin and subcutaneous diseases                | 944.95<br>(594.68 to 1,632.26)               | 1,394.44<br>(941.39 to 2,610.44)          | 1,255.47<br>(845.69 to 2,403.18)          | 1,375.89<br>(921.27 to 2,538.89)           | 44.24<br>(29.51 to 88.29)           | 87.15<br>(57.69 to 187.82)          | 85.09<br>(55.30 to 186.19)         | 81.51<br>(53.69 to 175.46)          |
| Cellulitis                                    | 86.86<br>(49.08 to 227.24)                   | 180.81<br>(88.86 to 528.49)               | 175.66<br>(85.90 to 508.31)               | 174.93<br>(88.08 to 498.85)                | 3.88<br>(1.75 to 11.78)             | 10.33<br>(4.34 to 32.84)            | 10.66<br>(4.51 to 34.14)           | 9.57<br>(4.06 to 30.36)             |
| Pyoderma                                      | 725.37<br>(425.23 to 1,195.69)               | 1,072.23<br>(660.06 to 1,930.71)          | 963.62<br>(594.27 to 1,795.76)            | 1,057.49<br>(638.97 to 1,941.84)           | 33.84<br>(21.84 to 68.45)           | 67.60<br>(43.90 to 148.88)          | 66.20<br>(42.54 to 146.94)         | 63.16<br>(40.81 to 138.02)          |
| Decubitus ulcer                               | 66.88<br>(33.75 to 124.77)                   | 56.51<br>(28.80 to 116.58)                | 44.60<br>(23.01 to 90.29)                 | 56.96<br>(28.45 to 118.35)                 | 3.71<br>(1.93 to 7.66)              | 4.85<br>(2.40 to 10.75)             | 4.19<br>(2.12 to 9.13)             | 4.60<br>(2.32 to 10.84)             |
| Other skin and subcutaneous diseases          | 65.84<br>(33.68 to 129.98)                   | 84.89<br>(42.96 to 180.74)                | 71.59<br>(36.40 to 157.59)                | 86.51<br>(43.76 to 177.93)                 | 2.81<br>(1.45 to 6.87)              | 4.37<br>(2.19 to 11.90)             | 4.04<br>(2.05 to 11.06)            | 4.19<br>(2.08 to 11.33)             |
| Sudden infant death syndrome                  | 344.03<br>(182.62 to 581.00)                 | 88.52<br>(36.19 to 179.91)                | 61.36<br>(25.20 to 129.05)                | 100.36<br>(41.86 to 207.81)                | 3.99<br>(2.12 to 6.74)              | 1.03<br>(0.42 to 2.09)              | 0.71<br>(0.29 to 1.50)             | 1.16<br>(0.49 to 2.41)              |

|                          |                                            |                                          |                                          |                                           |                                       |                                       |                                       |                                       |
|--------------------------|--------------------------------------------|------------------------------------------|------------------------------------------|-------------------------------------------|---------------------------------------|---------------------------------------|---------------------------------------|---------------------------------------|
| Injuries                 | 111,814.70<br>(91,963.59 to<br>140,109.99) | 56,261.12<br>(37,744.54 to<br>80,419.60) | 40,687.25<br>(27,379.96 to<br>57,143.07) | 69,759.27<br>(45,782.87 to<br>100,225.44) | 3,456.14<br>(2,837.17 to<br>4,531.46) | 2,306.91<br>(1,606.74 to<br>3,369.99) | 1,834.74<br>(1,302.94 to<br>2,694.43) | 2,584.77<br>(1,763.77 to<br>3,706.27) |
| Transport injuries       | 30,051.69<br>(24,394.59 to<br>36,970.59)   | 10,405.81<br>(5,826.91 to<br>17,410.92)  | 6,410.85<br>(3,761.46 to<br>10,385.31)   | 20,408.39<br>(11,606.48 to<br>33,507.73)  | 783.23<br>(641.77 to<br>953.61)       | 341.84<br>(209.87 to<br>544.10)       | 227.23<br>(147.01 to<br>351.53)       | 591.12<br>(363.41 to<br>939.83)       |
| Road injuries            | 26,964.58<br>(21,873.01 to<br>33,106.73)   | 8,527.84<br>(4,864.84 to<br>14,133.15)   | 5,312.46<br>(3,170.65 to<br>8,524.20)    | 18,246.86<br>(10,484.31 to<br>29,737.66)  | 692.24<br>(565.83 to<br>842.45)       | 271.06<br>(168.74 to<br>427.42)       | 182.89<br>(119.01 to<br>279.01)       | 513.45<br>(317.42 to<br>805.73)       |
| Pedestrian road injuries | 5,405.11<br>(4,116.91 to<br>7,462.11)      | 1,329.18<br>(758.59 to<br>2,259.02)      | 607.59<br>(367.73 to<br>969.86)          | 2,625.04<br>(1,427.98 to<br>4,471.56)     | 183.95<br>(144.39 to<br>248.05)       | 60.08<br>(36.43 to<br>100.15)         | 30.59<br>(19.72 to<br>47.33)          | 106.29<br>(63.48 to<br>171.81)        |

| Bulgaria                                        |                                                   |                                                   |                                                   |                                                   |                                                |                                            |                                            |                                            |
|-------------------------------------------------|---------------------------------------------------|---------------------------------------------------|---------------------------------------------------|---------------------------------------------------|------------------------------------------------|--------------------------------------------|--------------------------------------------|--------------------------------------------|
| Cause                                           | YLLs (actual counts)                              |                                                   |                                                   |                                                   | Deaths (actual counts)                         |                                            |                                            |                                            |
|                                                 | 2016                                              | 2040 Forecast                                     | 2040 Better Scenario                              | 2040 Worse Scenario                               | 2016                                           | 2040 Forecast                              | 2040 Better Scenario                       | 2040 Worse Scenario                        |
| Cyclist road injuries                           | 1,497.34<br>(1,007.45 to<br>2,008.41)             | 750.21<br>(374.09 to<br>1,398.43)                 | 542.77<br>(283.31 to<br>995.09)                   | 1,344.66<br>(673.51 to<br>2,473.52)               | 42.76<br>(29.27 to<br>56.76)                   | 26.65<br>(14.01 to<br>49.12)               | 20.79<br>(11.33 to<br>36.79)               | 42.56<br>(22.42 to<br>76.69)               |
| Motorcyclist road injuries                      | 3,280.80<br>(2,059.97 to<br>4,505.90)             | 1,646.79<br>(747.67 to<br>3,276.49)               | 1,205.87<br>(561.85 to<br>2,290.91)               | 2,712.01<br>(1,258.70 to<br>5,297.47)             | 63.32<br>(40.40 to<br>86.89)                   | 35.65<br>(17.11 to<br>68.66)               | 27.43<br>(13.49 to<br>51.40)               | 54.87<br>(26.71 to<br>106.23)              |
| Motor vehicle road injuries                     | 16,139.78<br>(12,818.69 to<br>20,113.00)          | 4,587.11<br>(2,656.79 to<br>7,537.43)             | 2,819.16<br>(1,726.85 to<br>4,465.48)             | 11,068.07<br>(6,383.44 to<br>18,343.39)           | 387.62<br>(308.73 to<br>483.17)                | 141.65<br>(89.18 to<br>221.04)             | 98.64<br>(65.39 to<br>145.84)              | 296.65<br>(182.24 to<br>473.95)            |
| Other road injuries                             | 641.56<br>(315.70 to<br>906.96)                   | 214.53<br>(102.19 to<br>397.01)                   | 137.07<br>(68.78 to<br>245.93)                    | 497.09<br>(228.28 to<br>941.44)                   | 14.60<br>(9.15 to<br>19.87)                    | 7.03<br>(3.64 to<br>12.84)                 | 5.44<br>(2.96 to<br>9.75)                  | 13.06<br>(6.55 to<br>23.86)                |
| Other transport injuries                        | 3,087.11<br>(2,325.68 to<br>4,242.89)             | 1,877.98<br>(952.27 to<br>3,440.58)               | 1,098.39<br>(592.04 to<br>1,932.49)               | 2,161.53<br>(1,119.16 to<br>3,942.11)             | 90.99<br>(69.42 to<br>118.67)                  | 70.78<br>(39.41 to<br>125.24)              | 44.34<br>(26.33 to<br>74.07)               | 77.68<br>(43.16 to<br>139.32)              |
| <b>Unintentional injuries</b>                   | <b>41,055.08<br/>(34,016.07 to<br/>50,893.72)</b> | <b>20,189.09<br/>(14,446.38 to<br/>28,396.84)</b> | <b>15,851.28<br/>(11,441.82 to<br/>21,994.46)</b> | <b>21,115.61<br/>(14,963.31 to<br/>29,840.64)</b> | <b>1,396.75<br/>(1,114.07 to<br/>2,002.04)</b> | <b>948.31<br/>(677.99 to<br/>1,623.19)</b> | <b>818.81<br/>(590.85 to<br/>1,413.81)</b> | <b>931.06<br/>(670.67 to<br/>1,573.21)</b> |
| Falls                                           | 12,688.35<br>(9,850.13 to<br>19,719.35)           | 8,223.92<br>(5,769.81 to<br>13,964.98)            | 7,120.24<br>(4,977.33 to<br>12,093.60)            | 8,208.70<br>(5,767.30 to<br>13,844.22)            | 548.02<br>(394.93 to<br>1,043.49)              | 486.16<br>(323.93 to<br>1,074.07)          | 452.62<br>(299.26 to<br>998.50)            | 458.64<br>(306.69 to<br>1,011.04)          |
| Drowning                                        | 5,613.34<br>(4,729.10 to<br>6,593.98)             | 2,371.92<br>(1,402.64 to<br>3,929.61)             | 1,711.47<br>(1,057.59 to<br>2,660.63)             | 2,598.07<br>(1,527.04 to<br>4,309.97)             | 140.13<br>(117.85 to<br>165.15)                | 73.00<br>(45.74 to<br>114.81)              | 56.03<br>(37.50 to<br>83.20)               | 76.75<br>(47.99 to<br>122.30)              |
| Fire, heat, and hot substances                  | 3,020.11<br>(2,599.59 to<br>3,691.60)             | 1,153.40<br>(724.15 to<br>1,822.89)               | 769.76<br>(515.02 to<br>1,179.33)                 | 1,264.48<br>(775.14 to<br>2,082.93)               | 112.75<br>(94.17 to<br>2,082.93)               | 59.92<br>(39.73 to<br>92.13)               | 44.31<br>(30.72 to<br>65.79)               | 61.40<br>(39.65 to<br>99.11)               |
| Poisonings                                      | 1,460.85<br>(1,117.03 to<br>2,623.85)             | 473.79<br>(259.39 to<br>923.36)                   | 280.23<br>(168.30 to<br>498.35)                   | 541.75<br>(289.16 to<br>1,070.73)                 | 47.00<br>(36.44 to<br>81.97)                   | 21.16<br>(12.36 to<br>38.78)               | 13.87<br>(9.00 to<br>23.30)                | 22.67<br>(13.01 to<br>42.56)               |
| Exposure to mechanical forces                   | 5,985.21<br>(4,370.16 to<br>7,323.30)             | 2,064.32<br>(1,345.58 to<br>2,834.08)             | 1,482.85<br>(989.87 to<br>1,962.51)               | 2,225.77<br>(1,466.43 to<br>3,055.79)             | 163.73<br>(117.19 to<br>197.66)                | 71.72<br>(47.45 to<br>93.78)               | 55.95<br>(37.56 to<br>71.35)               | 73.59<br>(49.69 to<br>95.87)               |
| Unintentional firearm injuries                  | 939.09<br>(616.72 to<br>1,201.39)                 | 306.63<br>(188.87 to<br>439.14)                   | 237.66<br>(143.43 to<br>327.79)                   | 324.55<br>(196.13 to<br>461.48)                   | 25.41<br>(17.66 to<br>31.54)                   | 11.18<br>(7.83 to<br>14.54)                | 9.73<br>(6.85 to<br>12.56)                 | 11.15<br>(7.64 to<br>14.82)                |
| Unintentional suffocation                       | 618.94<br>(386.18 to<br>1,265.72)                 | 287.12<br>(178.91 to<br>528.90)                   | 214.59<br>(138.58 to<br>374.49)                   | 309.55<br>(189.72 to<br>565.51)                   | 12.57<br>(8.86 to<br>21.85)                    | 7.03<br>(4.99 to<br>10.87)                 | 5.62<br>(4.03 to<br>8.37)                  | 7.27<br>(5.06 to<br>11.20)                 |
| Other exposure to mechanical forces             | 4,427.17<br>(2,798.97 to<br>5,499.13)             | 1,470.57<br>(810.37 to<br>2,076.07)               | 1,030.60<br>(593.76 to<br>1,406.56)               | 1,591.67<br>(898.67 to<br>2,251.37)               | 125.76<br>(80.76 to<br>154.36)                 | 53.51<br>(31.60 to<br>72.01)               | 40.59<br>(24.19 to<br>52.75)               | 55.18<br>(32.83 to<br>73.51)               |
| Adverse effects of medical treatment            | 2,190.20<br>(1,611.37 to<br>2,812.06)             | 1,257.12<br>(890.06 to<br>1,690.88)               | 1,097.38<br>(783.91 to<br>1,504.45)               | 1,232.13<br>(879.80 to<br>1,668.97)               | 89.95<br>(70.11 to<br>122.02)                  | 67.85<br>(51.25 to<br>93.97)               | 65.44<br>(49.55 to<br>90.95)               | 63.68<br>(48.15 to<br>89.71)               |
| Animal contact                                  | 406.65<br>(268.54 to<br>566.17)                   | 237.41<br>(144.05 to<br>359.63)                   | 187.72<br>(112.16 to<br>275.68)                   | 246.97<br>(149.04 to<br>356.37)                   | 13.76<br>(9.22 to<br>18.99)                    | 9.93<br>(6.12 to<br>14.14)                 | 8.38<br>(5.14 to<br>11.93)                 | 9.86<br>(6.17 to<br>13.75)                 |
| Venomous animal contact                         | 199.35<br>(110.71 to<br>282.10)                   | 112.08<br>(58.17 to<br>171.03)                    | 94.17<br>(48.32 to<br>143.80)                     | 115.20<br>(59.75 to<br>172.67)                    | 6.00<br>(3.26 to<br>8.37)                      | 4.12<br>(2.07 to<br>6.10)                  | 3.67<br>(1.79 to<br>5.32)                  | 4.06<br>(2.08 to<br>5.89)                  |
| Non-venomous animal contact                     | 207.30<br>(133.40 to<br>311.77)                   | 125.32<br>(74.29 to<br>194.33)                    | 93.55<br>(55.07 to<br>139.61)                     | 131.77<br>(77.25 to<br>195.36)                    | 7.76<br>(5.10 to<br>11.52)                     | 5.82<br>(3.58 to<br>8.57)                  | 4.71<br>(2.92 to<br>6.88)                  | 5.80<br>(3.61 to<br>8.51)                  |
| Foreign body                                    | 3,718.92<br>(2,878.86 to<br>4,922.17)             | 1,940.46<br>(1,401.67 to<br>2,763.55)             | 1,717.65<br>(1,244.70 to<br>2,460.49)             | 1,981.02<br>(1,414.16 to<br>2,810.56)             | 97.30<br>(72.14 to<br>144.80)                  | 64.76<br>(45.62 to<br>101.42)              | 62.06<br>(43.50 to<br>99.04)               | 63.01<br>(44.68 to<br>99.16)               |
| Pulmonary aspiration and foreign body in airway | 3,455.46<br>(2,620.24 to<br>4,673.76)             | 1,802.00<br>(1,279.25 to<br>2,619.51)             | 1,566.54<br>(1,104.30 to<br>2,320.18)             | 1,848.13<br>(1,284.94 to<br>2,688.94)             | 89.79<br>(65.32 to<br>136.95)                  | 59.45<br>(40.73 to<br>96.47)               | 55.75<br>(37.84 to<br>92.46)               | 58.19<br>(40.06 to<br>94.60)               |

|                                             |                                                               |                                                               |                                                               |                                                               |                                                            |                                                          |                                                        |                                                          |
|---------------------------------------------|---------------------------------------------------------------|---------------------------------------------------------------|---------------------------------------------------------------|---------------------------------------------------------------|------------------------------------------------------------|----------------------------------------------------------|--------------------------------------------------------|----------------------------------------------------------|
|                                             | 263.46<br>(169.27 to<br>329.78)                               | 138.46<br>(85.89 to<br>188.75)                                | 151.11<br>(93.57 to<br>202.67)                                | 132.89<br>(80.70 to<br>180.34)                                | 7.51<br>(5.39 to<br>9.51)                                  | 5.32<br>(3.63 to<br>7.18)                                | 6.31<br>(4.36 to<br>8.57)                              | 4.82<br>(3.28 to<br>6.61)                                |
| Foreign body in other body part             |                                                               |                                                               |                                                               |                                                               |                                                            |                                                          |                                                        |                                                          |
|                                             | 2,952.15<br>(1,874.92 to<br>5,240.22)                         | 1,460.96<br>(829.99 to<br>2,534.22)                           | 993.54<br>(575.76 to<br>1,685.82)                             | 1,585.72<br>(886.41 to<br>2,787.81)                           | 102.02<br>(66.62 to<br>177.19)                             | 59.24<br>(34.65 to<br>102.53)                            | 42.56<br>(26.58 to<br>71.40)                           | 61.79<br>(37.08 to<br>104.86)                            |
| Environmental heat and cold exposure        |                                                               |                                                               |                                                               |                                                               |                                                            |                                                          |                                                        |                                                          |
|                                             | 3,019.29<br>(2,441.42 to<br>3,730.91)                         | 1,025.79<br>(584.08 to<br>1,680.20)                           | 490.44<br>(305.95 to<br>736.65)                               | 1,230.99<br>(726.19 to<br>2,038.23)                           | 82.08<br>(66.54 to<br>101.14)                              | 34.55<br>(20.26 to<br>54.39)                             | 17.60<br>(11.40 to<br>25.05)                           | 39.67<br>(24.17 to<br>64.24)                             |
| Other unintentional injuries                |                                                               |                                                               |                                                               |                                                               |                                                            |                                                          |                                                        |                                                          |
| <b>Self-harm and interpersonal violence</b> | <b>40,671.85</b><br><b>(31,199.76 to</b><br><b>59,203.45)</b> | <b>25,649.22</b><br><b>(14,097.17 to</b><br><b>41,812.36)</b> | <b>18,407.95</b><br><b>(10,903.24 to</b><br><b>29,761.47)</b> | <b>28,218.50</b><br><b>(15,164.25 to</b><br><b>47,795.46)</b> | <b>1,275.37</b><br><b>(1,005.97 to</b><br><b>1,759.04)</b> | <b>1,016.30</b><br><b>(586.80 to</b><br><b>1,624.99)</b> | <b>788.23</b><br><b>(487.66 to</b><br><b>1,239.24)</b> | <b>1,062.15</b><br><b>(596.33 to</b><br><b>1,768.83)</b> |

| Bulgaria                                                                            |                                                   |                                                   |                                                   |                                                   |                                                |                                                |                                                |                                                |
|-------------------------------------------------------------------------------------|---------------------------------------------------|---------------------------------------------------|---------------------------------------------------|---------------------------------------------------|------------------------------------------------|------------------------------------------------|------------------------------------------------|------------------------------------------------|
| Cause                                                                               | YLLs (actual counts)                              |                                                   |                                                   |                                                   | Deaths (actual counts)                         |                                                |                                                |                                                |
|                                                                                     | 2016                                              | 2040 Forecast                                     | 2040 Better Scenario                              | 2040 Worse Scenario                               | 2016                                           | 2040 Forecast                                  | 2040 Better Scenario                           | 2040 Worse Scenario                            |
| Self-harm                                                                           | 33,306.27<br>(25,248.68 to<br>48,952.95)          | 22,950.27<br>(12,080.48 to<br>39,084.51)          | 16,453.68<br>(9,282.87 to<br>27,179.51)           | 25,275.60<br>(12,862.24 to<br>44,244.44)          | 1,080.77<br>(843.89 to<br>1,494.40)            | 927.60<br>(519.11 to<br>1,521.16)              | 720.30<br>(430.75 to<br>1,144.65)              | 968.68<br>(526.36 to<br>1,654.23)              |
| Self-harm by firearm                                                                | 2,713.98<br>(1,434.85 to<br>4,309.62)             | 1,079.19<br>(441.26 to<br>2,222.05)               | 666.32<br>(288.19 to<br>1,359.06)                 | 1,253.63<br>(498.38 to<br>2,646.14)               | 74.12<br>(41.43 to<br>114.67)                  | 35.17<br>(15.25 to<br>67.37)                   | 23.08<br>(10.81 to<br>44.10)                   | 39.21<br>(16.69 to<br>79.56)                   |
| Self-harm by other specified means                                                  | 30,592.30<br>(23,424.87 to<br>46,262.93)          | 21,871.08<br>(11,480.22 to<br>37,023.63)          | 15,787.37<br>(8,950.09 to<br>26,470.14)           | 24,021.97<br>(12,264.10 to<br>42,392.93)          | 1,006.64<br>(790.89 to<br>1,428.62)            | 892.43<br>(501.46 to<br>1,478.34)              | 697.22<br>(418.35 to<br>1,112.74)              | 929.47<br>(509.19 to<br>1,593.84)              |
| Interpersonal violence                                                              | 7,365.58<br>(5,173.51 to<br>12,148.22)            | 2,698.95<br>(1,594.88 to<br>4,847.83)             | 1,954.27<br>(1,200.87 to<br>3,375.18)             | 2,942.90<br>(1,719.47 to<br>5,263.15)             | 194.60<br>(139.77 to<br>312.06)                | 88.70<br>(55.25 to<br>149.75)                  | 67.93<br>(43.23 to<br>110.77)                  | 93.47<br>(57.22 to<br>159.98)                  |
| Physical violence by firearm                                                        | 1,889.04<br>(968.48 to<br>3,648.26)               | 497.92<br>(262.97 to<br>944.38)                   | 329.27<br>(176.58 to<br>635.07)                   | 556.44<br>(272.21 to<br>1,081.14)                 | 42.51<br>(22.16 to<br>80.46)                   | 12.59<br>(6.75 to<br>24.03)                    | 8.57<br>(4.84 to<br>15.85)                     | 13.85<br>(7.17 to<br>26.13)                    |
| Physical violence by sharp object                                                   | 1,940.29<br>(1,267.73 to<br>3,712.09)             | 651.63<br>(383.97 to<br>1,209.66)                 | 467.69<br>(286.67 to<br>831.71)                   | 708.51<br>(414.69 to<br>1,290.90)                 | 50.16<br>(33.41 to<br>95.29)                   | 20.51<br>(12.73 to<br>35.21)                   | 15.58<br>(10.33 to<br>25.70)                   | 21.57<br>(13.58 to<br>37.58)                   |
| Physical violence by other means                                                    | 5,536.26<br>(2,365.18 to<br>6,602.27)             | 1,549.41<br>(802.77 to<br>2,995.94)               | 1,157.30<br>(625.40 to<br>2,243.71)               | 1,677.95<br>(854.95 to<br>3,428.60)               | 101.93<br>(68.16 to<br>180.32)                 | 55.60<br>(30.16 to<br>103.61)                  | 43.78<br>(24.90 to<br>77.80)                   | 58.05<br>(31.22 to<br>111.27)                  |
| <b>Forces of nature, conflict and terrorism, and executions and police conflict</b> | <b>36.07</b><br><b>(29.77 to</b><br><b>47.71)</b> | <b>17.00</b><br><b>(0.00 to</b><br><b>107.56)</b> | <b>17.17</b><br><b>(0.00 to</b><br><b>108.21)</b> | <b>16.78</b><br><b>(0.00 to</b><br><b>106.58)</b> | <b>0.79</b><br><b>(0.66 to</b><br><b>1.03)</b> | <b>0.46</b><br><b>(0.00 to</b><br><b>2.87)</b> | <b>0.48</b><br><b>(0.00 to</b><br><b>3.06)</b> | <b>0.44</b><br><b>(0.00 to</b><br><b>2.78)</b> |
| Exposure to forces of nature                                                        | 0.00<br>(0.00 to<br>0.00)                         | 15.42<br>(0.00 to<br>99.13)                       | 15.58<br>(0.00 to<br>100.03)                      | 15.22<br>(0.00 to<br>97.73)                       | 0.00<br>(0.00 to<br>0.00)                      | 0.41<br>(0.00 to<br>2.87)                      | 0.43<br>(0.00 to<br>3.06)                      | 0.40<br>(0.00 to<br>2.78)                      |
| Conflict and terrorism                                                              | 0.00<br>(0.00 to<br>0.00)                         | 1.58<br>(0.00 to<br>28.01)                        | 1.59<br>(0.00 to<br>28.27)                        | 1.56<br>(0.00 to<br>27.74)                        | 0.00<br>(0.00 to<br>0.00)                      | 0.04<br>(0.00 to<br>0.75)                      | 0.05<br>(0.00 to<br>0.80)                      | 0.04<br>(0.00 to<br>0.71)                      |
| Executions and police conflict                                                      | 36.07<br>(29.77 to<br>47.71)                      | 0.00<br>(0.00 to<br>0.00)                         | 0.00<br>(0.00 to<br>0.00)                         | 0.00<br>(0.00 to<br>0.00)                         | 0.79<br>(0.66 to<br>1.03)                      | 0.00<br>(0.00 to<br>0.00)                      | 0.00<br>(0.00 to<br>0.00)                      | 0.00<br>(0.00 to<br>0.00)                      |

| Croatia                                                           |                                          |                                          |                                          |                                            |                                       |                                       |                                       |                                       |
|-------------------------------------------------------------------|------------------------------------------|------------------------------------------|------------------------------------------|--------------------------------------------|---------------------------------------|---------------------------------------|---------------------------------------|---------------------------------------|
| Cause                                                             | YLLs (actual counts)                     |                                          |                                          |                                            | Deaths (actual counts)                |                                       |                                       |                                       |
|                                                                   | 2016                                     | 2040 Forecast                            | 2040 Better Scenario                     | 2040 Worse Scenario                        | 2016                                  | 2040 Forecast                         | 2040 Better Scenario                  | 2040 Worse Scenario                   |
| All causes                                                        | 858,778.55<br>(760,677.72 to 954,151.71) | 674,515.20<br>(541,619.92 to 831,964.15) | 527,328.80<br>(428,585.02 to 649,118.37) | 823,748.87<br>(662,899.67 to 1,002,436.39) | 55,670.50<br>(49,532.24 to 61,136.77) | 52,261.59<br>(42,286.58 to 65,254.80) | 43,667.15<br>(34,545.03 to 55,557.16) | 59,560.65<br>(48,323.75 to 73,151.07) |
| Communicable, maternal, neonatal, and nutritional diseases        | 19,597.42<br>(17,594.70 to 21,815.50)    | 12,970.34<br>(9,230.31 to 18,137.53)     | 9,855.96<br>(7,098.17 to 13,504.26)      | 15,852.33<br>(10,907.02 to 22,858.83)      | 900.34<br>(784.27 to 1,015.40)        | 850.31<br>(566.18 to 1,218.75)        | 716.45<br>(490.42 to 1,023.15)        | 978.41<br>(627.39 to 1,438.70)        |
| HIV/AIDS and tuberculosis                                         | 1,516.48<br>(1,313.47 to 1,757.95)       | 691.88<br>(401.44 to 1,265.84)           | 333.30<br>(205.98 to 563.61)             | 992.76<br>(569.73 to 1,737.05)             | 71.49<br>(61.41 to 83.43)             | 38.57<br>(22.26 to 68.89)             | 19.25<br>(11.77 to 32.65)             | 51.39<br>(28.47 to 91.63)             |
| Tuberculosis                                                      | 1,271.38<br>(1,063.75 to 1,516.02)       | 576.90<br>(296.77 to 1,150.72)           | 256.96<br>(145.94 to 468.59)             | 797.25<br>(390.79 to 1,561.81)             | 65.43<br>(55.45 to 77.38)             | 35.83<br>(19.43 to 66.99)             | 17.17<br>(9.82 to 29.99)              | 46.95<br>(23.93 to 87.40)             |
| HIV/AIDS                                                          | 245.10<br>(220.58 to 272.23)             | 114.97<br>(58.32 to 172.69)              | 76.35<br>(29.31 to 133.34)               | 195.52<br>(108.24 to 281.97)               | 6.06<br>(5.46 to 6.71)                | 2.74<br>(1.16 to 4.37)                | 2.08<br>(0.70 to 3.75)                | 4.44<br>(2.12 to 6.59)                |
| Diarrhea, lower respiratory, and other common infectious diseases | 10,997.17<br>(9,410.33 to 12,551.87)     | 9,071.58<br>(5,875.36 to 13,591.74)      | 7,126.80<br>(4,739.03 to 10,435.08)      | 11,410.40<br>(6,950.16 to 18,044.29)       | 729.57<br>(622.75 to 842.52)          | 755.68<br>(490.36 to 1,110.80)        | 649.40<br>(434.49 to 942.38)          | 869.91<br>(541.28 to 1,318.99)        |
| Diarrheal diseases                                                | 452.54<br>(395.35 to 516.15)             | 875.55<br>(233.35 to 2,408.35)           | 1,333.09<br>(508.69 to 2,916.17)         | 808.63<br>(219.45 to 2,350.17)             | 23.35<br>(19.95 to 26.94)             | 67.71<br>(18.79 to 196.37)            | 112.12<br>(45.54 to 250.00)           | 58.66<br>(15.97 to 165.89)            |
| Intestinal infectious diseases                                    | 4.65<br>(1.60 to 11.05)                  | 2.24<br>(0.76 to 5.35)                   | 2.18<br>(0.73 to 5.25)                   | 2.23<br>(0.75 to 5.24)                     | 0.14<br>(0.05 to 0.33)                | 0.08<br>(0.03 to 0.19)                | 0.09<br>(0.02 to 0.20)                | 0.08<br>(0.03 to 0.19)                |
| Typhoid fever                                                     | 1.39<br>(0.44 to 3.35)                   | 0.86<br>(0.27 to 2.03)                   | 1.19<br>(0.38 to 2.78)                   | 0.83<br>(0.25 to 1.96)                     | 0.04<br>(0.01 to 0.09)                | 0.03<br>(0.01 to 0.07)                | 0.04<br>(0.01 to 0.10)                | 0.03<br>(0.01 to 0.06)                |
| Paratyphoid fever                                                 | 2.99<br>(0.87 to 7.62)                   | 1.24<br>(0.34 to 3.23)                   | 0.87<br>(0.23 to 2.37)                   | 1.27<br>(0.35 to 3.37)                     | 0.09<br>(0.03 to 0.24)                | 0.09<br>(0.01 to 0.24)                | 0.04<br>(0.01 to 0.09)                | 0.04<br>(0.01 to 0.11)                |
| Other intestinal infectious diseases                              | 0.27<br>(0.10 to 0.57)                   | 0.14<br>(0.05 to 0.30)                   | 0.12<br>(0.04 to 0.28)                   | 0.13<br>(0.05 to 0.29)                     | 0.02<br>(0.01 to 0.04)                | 0.01<br>(0.00 to 0.03)                | 0.01<br>(0.00 to 0.03)                | 0.01<br>(0.00 to 0.02)                |
| Lower respiratory infections                                      | 9,572.01<br>(8,157.99 to 11,003.66)      | 7,688.40<br>(4,632.87 to 11,841.46)      | 5,350.56<br>(3,337.25 to 8,219.94)       | 10,048.36<br>(5,719.28 to 16,428.95)       | 675.22<br>(573.36 to 779.58)          | 668.66<br>(419.42 to 1,003.14)        | 519.42<br>(326.47 to 792.81)          | 792.06<br>(477.03 to 1,235.01)        |
| Upper respiratory infections                                      | 13.06<br>(7.00 to 22.71)                 | 6.81<br>(2.47 to 14.38)                  | 3.59<br>(1.27 to 7.60)                   | 6.91<br>(2.56 to 14.96)                    | 0.64<br>(0.30 to 1.18)                | 0.45<br>(0.14 to 1.02)                | 0.25<br>(0.08 to 0.60)                | 0.43<br>(0.14 to 0.99)                |
| Otitis media                                                      | 1.18<br>(0.71 to 2.01)                   | 0.11<br>(0.03 to 0.39)                   | 0.11<br>(0.03 to 0.45)                   | 0.10<br>(0.03 to 0.38)                     | 0.04<br>(0.02 to 0.07)                | 0.00<br>(0.00 to 0.01)                | 0.00<br>(0.00 to 0.01)                | 0.00<br>(0.00 to 0.01)                |
| Meningitis                                                        | 521.14<br>(439.66 to 627.51)             | 179.32<br>(128.71 to 241.78)             | 143.03<br>(99.27 to 194.81)              | 208.96<br>(145.67 to 299.84)               | 17.07<br>(14.26 to 20.66)             | 7.09<br>(5.41 to 9.22)                | 6.05<br>(4.41 to 7.96)                | 7.25<br>(5.49 to 9.32)                |
| Pneumococcal meningitis                                           | 112.82<br>(91.56 to 144.01)              | 42.34<br>(30.13 to 59.41)                | 43.75<br>(29.53 to 62.72)                | 43.15<br>(30.80 to 60.76)                  | 4.00<br>(3.19 to 5.04)                | 1.90<br>(1.39 to 2.57)                | 2.05<br>(1.44 to 2.81)                | 1.87<br>(1.36 to 2.52)                |
| H influenzae type B meningitis                                    | 85.18<br>(69.93 to 101.78)               | 54.69<br>(32.93 to 86.70)                | 47.61<br>(30.71 to 70.21)                | 81.25<br>(38.22 to 149.29)                 | 2.69<br>(2.19 to 3.28)                | 1.60<br>(1.16 to 2.14)                | 1.62<br>(1.17 to 2.16)                | 1.84<br>(1.24 to 2.75)                |
| Meningococcal meningitis                                          | 169.71<br>(143.93 to 201.55)             | 40.40<br>(27.66 to 57.58)                | 25.86<br>(17.15 to 37.08)                | 41.58<br>(28.42 to 59.63)                  | 4.98<br>(4.17 to 5.98)                | 1.66<br>(1.18 to 2.32)                | 1.13<br>(0.79 to 1.53)                | 1.64<br>(1.17 to 2.22)                |
| Other meningitis                                                  | 153.42<br>(129.09 to 185.32)             | 41.89<br>(28.33 to 60.13)                | 25.81<br>(17.12 to 37.41)                | 42.99<br>(28.46 to 61.67)                  | 5.40<br>(4.41 to 6.57)                | 1.93<br>(1.35 to 2.70)                | 1.25<br>(0.82 to 1.72)                | 1.91<br>(1.31 to 2.61)                |
| Encephalitis                                                      | 409.66<br>(318.88 to 594.44)             | 275.90<br>(198.72 to 403.29)             | 262.46<br>(182.69 to 384.07)             | 273.83<br>(199.84 to 399.41)               | 11.98<br>(9.03 to 15.66)              | 10.51<br>(7.16 to 13.81)              | 10.50<br>(6.99 to 14.30)              | 10.06<br>(7.00 to 13.05)              |

|                |                           |                              |                              |                              |                           |                           |                           |                           |
|----------------|---------------------------|------------------------------|------------------------------|------------------------------|---------------------------|---------------------------|---------------------------|---------------------------|
| Diphtheria     | 1.32<br>(0.79 to<br>1.97) | 0.21<br>(0.10 to<br>0.38)    | 0.19<br>(0.09 to<br>0.36)    | 0.30<br>(0.13 to<br>0.60)    | 0.03<br>(0.02 to<br>0.05) | 0.00<br>(0.00 to<br>0.01) | 0.00<br>(0.00 to<br>0.01) | 0.01<br>(0.00 to<br>0.01) |
| Whooping cough | 2.60<br>(0.62 to<br>5.09) | 0.88<br>(0.10 to<br>2.80)    | 0.21<br>(0.05 to<br>0.62)    | 3.14<br>(0.29 to<br>9.53)    | 0.03<br>(0.01 to<br>0.06) | 0.01<br>(0.00 to<br>0.03) | 0.00<br>(0.00 to<br>0.01) | 0.04<br>(0.00 to<br>0.11) |
| Tetanus        | 5.20<br>(3.93 to<br>7.19) | 0.60<br>(0.37 to<br>0.98)    | 0.62<br>(0.36 to<br>1.04)    | 0.66<br>(0.42 to<br>1.05)    | 0.27<br>(0.19 to<br>0.39) | 0.04<br>(0.02 to<br>0.07) | 0.05<br>(0.03 to<br>0.08) | 0.04<br>(0.02 to<br>0.07) |
| Measles        | 0.43<br>(0.34 to<br>0.55) | 35.27<br>(0.18 to<br>217.96) | 25.77<br>(0.15 to<br>150.48) | 51.30<br>(0.20 to<br>332.33) | 0.01<br>(0.01 to<br>0.01) | 0.59<br>(0.00 to<br>3.51) | 0.46<br>(0.00 to<br>2.68) | 0.81<br>(0.00 to<br>4.92) |



| Croatia                                               |                                     |                                   |                                  |                                   |                               |                               |                               |                               |
|-------------------------------------------------------|-------------------------------------|-----------------------------------|----------------------------------|-----------------------------------|-------------------------------|-------------------------------|-------------------------------|-------------------------------|
| Cause                                                 | YLLs (actual counts)                |                                   |                                  |                                   | Deaths (actual counts)        |                               |                               |                               |
|                                                       | 2016                                | 2040 Forecast                     | 2040 Better Scenario             | 2040 Worse Scenario               | 2016                          | 2040 Forecast                 | 2040 Better Scenario          | 2040 Worse Scenario           |
| Varicella and herpes zoster                           | 13.38<br>(5.75 to 18.77)            | 6.29<br>(2.74 to 9.87)            | 4.99<br>(2.17 to 7.85)           | 5.97<br>(2.49 to 9.33)            | 0.79<br>(0.36 to 1.20)        | 0.53<br>(0.25 to 0.88)        | 0.46<br>(0.22 to 0.79)        | 0.47<br>(0.21 to 0.79)        |
| <b>Neglected tropical diseases and malaria</b>        | <b>37.88</b><br>(32.86 to 42.98)    | <b>21.81</b><br>(17.61 to 26.86)  | <b>20.57</b><br>(16.55 to 25.06) | <b>21.55</b><br>(17.47 to 26.02)  | <b>1.27</b><br>(1.08 to 1.46) | <b>0.89</b><br>(0.74 to 1.06) | <b>0.86</b><br>(0.72 to 1.03) | <b>0.84</b><br>(0.71 to 1.00) |
| Malaria                                               | 0.00<br>(0.00 to 0.00)              | 0.00<br>(0.00 to 0.00)            | 0.00<br>(0.00 to 0.00)           | 0.00<br>(0.00 to 0.00)            | 0.00<br>(0.00 to 0.00)        | 0.00<br>(0.00 to 0.00)        | 0.00<br>(0.00 to 0.00)        | 0.00<br>(0.00 to 0.00)        |
| Chagas disease                                        | 0.00<br>(0.00 to 0.00)              | 0.00<br>(0.00 to 0.00)            | 0.00<br>(0.00 to 0.00)           | 0.00<br>(0.00 to 0.00)            | 0.00<br>(0.00 to 0.00)        | 0.00<br>(0.00 to 0.00)        | 0.00<br>(0.00 to 0.00)        | 0.00<br>(0.00 to 0.00)        |
| Leishmaniasis                                         | 3.06<br>(1.47 to 5.06)              | 1.03<br>(0.55 to 1.84)            | 0.82<br>(0.45 to 1.44)           | 1.03<br>(0.56 to 1.83)            | 0.12<br>(0.06 to 0.20)        | 0.05<br>(0.02 to 0.08)        | 0.04<br>(0.02 to 0.07)        | 0.04<br>(0.02 to 0.08)        |
| African trypanosomiasis                               | 0.00<br>(0.00 to 0.00)              | 0.00<br>(0.00 to 0.00)            | 0.00<br>(0.00 to 0.00)           | 0.00<br>(0.00 to 0.00)            | 0.00<br>(0.00 to 0.00)        | 0.00<br>(0.00 to 0.00)        | 0.00<br>(0.00 to 0.00)        | 0.00<br>(0.00 to 0.00)        |
| Schistosomiasis                                       | 0.00<br>(0.00 to 0.00)              | 0.00<br>(0.00 to 0.00)            | 0.00<br>(0.00 to 0.00)           | 0.00<br>(0.00 to 0.00)            | 0.00<br>(0.00 to 0.00)        | 0.00<br>(0.00 to 0.00)        | 0.00<br>(0.00 to 0.00)        | 0.00<br>(0.00 to 0.00)        |
| Cysticercosis                                         | 1.94<br>(1.54 to 2.37)              | 0.50<br>(0.37 to 0.64)            | 0.48<br>(0.36 to 0.62)           | 0.48<br>(0.36 to 0.62)            | 0.07<br>(0.06 to 0.09)        | 0.02<br>(0.02 to 0.03)        | 0.02<br>(0.02 to 0.03)        | 0.02<br>(0.02 to 0.03)        |
| Cystic echinococcosis                                 | 13.40<br>(11.10 to 16.02)           | 7.07<br>(5.40 to 9.17)            | 5.32<br>(4.12 to 6.73)           | 6.95<br>(5.28 to 8.93)            | 0.62<br>(0.52 to 0.74)        | 0.43<br>(0.34 to 0.55)        | 0.35<br>(0.28 to 0.45)        | 0.40<br>(0.32 to 0.51)        |
| Dengue                                                | 0.00<br>(0.00 to 0.00)              | 0.00<br>(0.00 to 0.00)            | 0.00<br>(0.00 to 0.00)           | 0.00<br>(0.00 to 0.00)            | 0.00<br>(0.00 to 0.00)        | 0.00<br>(0.00 to 0.00)        | 0.00<br>(0.00 to 0.00)        | 0.00<br>(0.00 to 0.00)        |
| Yellow fever                                          | 0.00<br>(0.00 to 0.00)              | 0.00<br>(0.00 to 0.00)            | 0.00<br>(0.00 to 0.00)           | 0.00<br>(0.00 to 0.00)            | 0.00<br>(0.00 to 0.00)        | 0.00<br>(0.00 to 0.00)        | 0.00<br>(0.00 to 0.00)        | 0.00<br>(0.00 to 0.00)        |
| Rabies                                                | 0.13<br>(0.10 to 0.16)              | 0.07<br>(0.05 to 0.10)            | 0.06<br>(0.05 to 0.08)           | 0.07<br>(0.05 to 0.10)            | 0.00<br>(0.00 to 0.01)        | 0.00<br>(0.00 to 0.00)        | 0.00<br>(0.00 to 0.00)        | 0.00<br>(0.00 to 0.00)        |
| Intestinal nematode infections                        | 0.00<br>(0.00 to 0.00)              | 0.00<br>(0.00 to 0.00)            | 0.00<br>(0.00 to 0.00)           | 0.00<br>(0.00 to 0.00)            | 0.00<br>(0.00 to 0.00)        | 0.00<br>(0.00 to 0.00)        | 0.00<br>(0.00 to 0.00)        | 0.00<br>(0.00 to 0.00)        |
| Other neglected tropical diseases                     | 19.36<br>(17.17 to 21.54)           | 13.14<br>(10.42 to 16.16)         | 13.88<br>(10.98 to 17.20)        | 13.02<br>(10.38 to 16.04)         | 0.46<br>(0.40 to 0.51)        | 0.39<br>(0.31 to 0.47)        | 0.44<br>(0.36 to 0.55)        | 0.37<br>(0.30 to 0.45)        |
| <b>Maternal disorders</b>                             | <b>167.08</b><br>(129.85 to 210.23) | <b>83.82</b><br>(54.59 to 127.07) | <b>62.56</b><br>(41.33 to 93.31) | <b>87.35</b><br>(57.21 to 131.17) | <b>3.23</b><br>(2.52 to 4.05) | <b>1.64</b><br>(1.08 to 2.46) | <b>1.23</b><br>(0.82 to 1.84) | <b>1.71</b><br>(1.13 to 2.54) |
| Maternal hemorrhage                                   | 25.22<br>(16.87 to 36.27)           | 12.52<br>(6.56 to 21.45)          | 9.40<br>(5.12 to 15.91)          | 12.99<br>(6.98 to 21.96)          | 0.49<br>(0.33 to 0.70)        | 0.25<br>(0.13 to 0.42)        | 0.19<br>(0.10 to 0.31)        | 0.26<br>(0.14 to 0.43)        |
| Maternal sepsis and other maternal infections         | 29.75<br>(21.06 to 40.50)           | 12.04<br>(6.76 to 20.18)          | 8.88<br>(4.94 to 15.15)          | 12.54<br>(7.06 to 21.10)          | 0.56<br>(0.40 to 0.77)        | 0.23<br>(0.13 to 0.39)        | 0.17<br>(0.10 to 0.29)        | 0.24<br>(0.14 to 0.40)        |
| Maternal hypertensive disorders                       | 25.40<br>(17.41 to 34.64)           | 12.13<br>(6.56 to 21.37)          | 8.83<br>(4.79 to 15.21)          | 12.63<br>(6.88 to 21.68)          | 0.47<br>(0.32 to 0.65)        | 0.22<br>(0.12 to 0.39)        | 0.16<br>(0.09 to 0.28)        | 0.23<br>(0.13 to 0.40)        |
| Maternal obstructed labor and uterine rupture         | 1.83<br>(0.80 to 3.14)              | 1.01<br>(0.39 to 2.06)            | 0.70<br>(0.28 to 1.43)           | 1.06<br>(0.40 to 2.19)            | 0.04<br>(0.02 to 0.06)        | 0.02<br>(0.01 to 0.04)        | 0.01<br>(0.01 to 0.03)        | 0.02<br>(0.01 to 0.05)        |
| Maternal abortion, miscarriage, and ectopic pregnancy | 26.65<br>(18.35 to 37.84)           | 14.38<br>(7.72 to 25.15)          | 10.58<br>(5.68 to 18.12)         | 15.03<br>(7.98 to 26.27)          | 0.54<br>(0.37 to 0.75)        | 0.30<br>(0.16 to 0.51)        | 0.22<br>(0.12 to 0.37)        | 0.31<br>(0.17 to 0.54)        |

|                                        |                              |                              |                              |                              |                           |                           |                           |                           |
|----------------------------------------|------------------------------|------------------------------|------------------------------|------------------------------|---------------------------|---------------------------|---------------------------|---------------------------|
|                                        | 14.45<br>(9.16 to<br>20.54)  | 7.91<br>(3.89 to<br>14.57)   | 5.69<br>(2.79 to<br>10.36)   | 8.31<br>(4.13 to<br>15.28)   | 0.27<br>(0.17 to<br>0.38) | 0.15<br>(0.07 to<br>0.27) | 0.11<br>(0.05 to<br>0.19) | 0.15<br>(0.08 to<br>0.28) |
| Indirect maternal deaths               |                              |                              |                              |                              |                           |                           |                           |                           |
|                                        | 1.76<br>(0.79 to<br>3.32)    | 0.74<br>(0.28 to<br>1.64)    | 0.53<br>(0.20 to<br>1.14)    | 0.77<br>(0.29 to<br>1.70)    | 0.03<br>(0.02 to<br>0.06) | 0.01<br>(0.01 to<br>0.03) | 0.01<br>(0.00 to<br>0.02) | 0.01<br>(0.01 to<br>0.03) |
| Late maternal deaths                   |                              |                              |                              |                              |                           |                           |                           |                           |
|                                        | 0.01<br>(0.00 to<br>0.01)    | 0.04<br>(0.00 to<br>0.29)    | 0.03<br>(0.00 to<br>0.19)    | 0.05<br>(0.00 to<br>0.31)    | 0.00<br>(0.00 to<br>0.00) | 0.00<br>(0.00 to<br>0.00) | 0.00<br>(0.00 to<br>0.00) | 0.00<br>(0.00 to<br>0.00) |
| Maternal deaths aggravated by HIV/AIDS |                              |                              |                              |                              |                           |                           |                           |                           |
|                                        | 42.00<br>(28.74 to<br>56.89) | 23.05<br>(12.99 to<br>37.36) | 17.92<br>(10.15 to<br>29.34) | 23.98<br>(13.41 to<br>40.10) | 0.83<br>(0.58 to<br>1.14) | 0.46<br>(0.26 to<br>0.75) | 0.36<br>(0.20 to<br>0.58) | 0.48<br>(0.27 to<br>0.79) |
| Other maternal disorders               |                              |                              |                              |                              |                           |                           |                           |                           |

| Croatia                                                                 |                                           |                                           |                                           |                                           |                                  |                                  |                                  |                                  |
|-------------------------------------------------------------------------|-------------------------------------------|-------------------------------------------|-------------------------------------------|-------------------------------------------|----------------------------------|----------------------------------|----------------------------------|----------------------------------|
| Cause                                                                   | YLLs (actual counts)                      |                                           |                                           |                                           | Deaths (actual counts)           |                                  |                                  |                                  |
|                                                                         | 2016                                      | 2040 Forecast                             | 2040 Better Scenario                      | 2040 Worse Scenario                       | 2016                             | 2040 Forecast                    | 2040 Better Scenario             | 2040 Worse Scenario              |
|                                                                         | <b>6,408.83</b><br>(5,181.79 to 7,823.12) | <b>2,714.73</b><br>(1,660.81 to 4,288.20) | <b>1,940.87</b><br>(1,186.72 to 3,094.07) | <b>2,966.63</b><br>(1,821.96 to 4,689.63) | <b>74.04</b><br>(59.86 to 90.38) | <b>31.37</b><br>(19.20 to 49.55) | <b>22.43</b><br>(13.71 to 35.74) | <b>34.28</b><br>(21.06 to 54.18) |
| Neonatal disorders                                                      |                                           |                                           |                                           |                                           |                                  |                                  |                                  |                                  |
| Neonatal preterm birth                                                  | 2,152.09<br>(1,663.31 to 2,772.94)        | 723.07<br>(452.59 to 1,085.07)            | 387.18<br>(247.37 to 584.89)              | 845.15<br>(537.09 to 1,291.37)            | 24.86<br>(19.21 to 32.03)        | 8.35<br>(5.23 to 12.53)          | 4.47<br>(2.86 to 6.76)           | 9.76<br>(6.21 to 14.92)          |
| Neonatal encephalopathy due to birth asphyxia and trauma                | 1,716.45<br>(1,293.34 to 2,234.58)        | 467.81<br>(230.34 to 850.02)              | 284.46<br>(145.05 to 495.97)              | 510.10<br>(251.03 to 892.65)              | 19.83<br>(14.94 to 25.82)        | 5.41<br>(2.66 to 9.82)           | 3.29<br>(1.68 to 5.73)           | 5.89<br>(2.90 to 10.31)          |
| Neonatal sepsis and other neonatal infections                           | 674.90<br>(486.45 to 1,013.17)            | 312.26<br>(155.92 to 529.41)              | 215.11<br>(109.77 to 365.19)              | 335.23<br>(170.39 to 557.03)              | 7.80<br>(4.70 to 11.71)          | 3.61<br>(1.80 to 6.12)           | 2.49<br>(1.27 to 4.22)           | 3.87<br>(1.97 to 6.44)           |
| Hemolytic disease and other neonatal jaundice                           | 96.12<br>(53.74 to 161.27)                | 26.78<br>(9.45 to 59.97)                  | 17.61<br>(6.68 to 38.36)                  | 28.98<br>(10.41 to 65.57)                 | 1.11<br>(0.62 to 1.86)           | 0.31<br>(0.11 to 0.69)           | 0.20<br>(0.08 to 0.44)           | 0.33<br>(0.12 to 0.76)           |
| Other neonatal disorders                                                | 1,769.26<br>(1,334.04 to 2,260.59)        | 1,184.81<br>(572.31 to 2,214.46)          | 1,036.51<br>(525.07 to 1,879.34)          | 1,247.16<br>(596.88 to 2,335.03)          | 20.44<br>(15.41 to 26.12)        | 13.69<br>(6.61 to 25.58)         | 11.98<br>(6.07 to 21.71)         | 14.41<br>(6.90 to 26.98)         |
| <b>Nutritional deficiencies</b>                                         | <b>95.63</b><br>(83.61 to 108.08)         | <b>60.58</b><br>(47.51 to 76.09)          | <b>59.66</b><br>(46.59 to 75.09)          | <b>57.39</b><br>(45.32 to 71.64)          | <b>5.39</b><br>(4.64 to 6.19)    | <b>4.51</b><br>(3.38 to 5.86)    | <b>4.81</b><br>(3.56 to 6.35)    | <b>4.03</b><br>(3.02 to 5.22)    |
| Protein-energy malnutrition                                             | 20.97<br>(15.34 to 31.61)                 | 14.03<br>(8.65 to 22.06)                  | 17.16<br>(10.68 to 25.88)                 | 12.95<br>(8.15 to 20.08)                  | 1.12<br>(0.58 to 1.71)           | 1.14<br>(0.55 to 1.78)           | 1.56<br>(0.76 to 2.41)           | 0.98<br>(0.47 to 1.55)           |
| Iodine deficiency                                                       | 4.60<br>(0.49 to 11.17)                   | 4.91<br>(0.36 to 14.28)                   | 4.50<br>(0.31 to 13.46)                   | 4.66<br>(0.36 to 13.54)                   | 0.26<br>(0.02 to 0.78)           | 0.37<br>(0.01 to 1.25)           | 0.36<br>(0.01 to 1.29)           | 0.34<br>(0.01 to 1.14)           |
| Dietary iron deficiency                                                 | 12.73<br>(10.02 to 15.43)                 | 7.75<br>(5.47 to 10.21)                   | 8.37<br>(5.86 to 11.09)                   | 7.59<br>(5.37 to 9.92)                    | 0.45<br>(0.28 to 0.61)           | 0.30<br>(0.17 to 0.43)           | 0.34<br>(0.19 to 0.50)           | 0.28<br>(0.17 to 0.41)           |
| Other nutritional deficiencies                                          | 57.33<br>(46.24 to 67.96)                 | 33.90<br>(22.37 to 46.89)                 | 29.64<br>(18.90 to 42.59)                 | 32.19<br>(21.71 to 45.13)                 | 3.56<br>(2.81 to 4.40)           | 2.70<br>(1.67 to 4.00)           | 2.56<br>(1.49 to 3.95)           | 2.43<br>(1.54 to 3.56)           |
| <b>Other communicable, maternal, neonatal, and nutritional diseases</b> | <b>374.35</b><br>(321.20 to 428.08)       | <b>325.94</b><br>(262.80 to 400.23)       | <b>312.19</b><br>(250.48 to 384.94)       | <b>316.25</b><br>(257.23 to 388.47)       | <b>15.35</b><br>(12.57 to 17.69) | <b>17.64</b><br>(13.83 to 21.21) | <b>18.46</b><br>(14.30 to 22.69) | <b>16.25</b><br>(12.82 to 19.49) |
| Sexually transmitted infections excluding HIV                           | 18.99<br>(14.82 to 24.80)                 | 8.78<br>(5.73 to 12.66)                   | 7.90<br>(5.21 to 11.46)                   | 8.68<br>(5.82 to 12.54)                   | 0.76<br>(0.60 to 0.95)           | 0.47<br>(0.31 to 0.69)           | 0.45<br>(0.29 to 0.67)           | 0.45<br>(0.30 to 0.66)           |
| Syphilis                                                                | 6.85<br>(4.55 to 11.80)                   | 2.42<br>(1.45 to 3.85)                    | 1.93<br>(1.16 to 3.16)                    | 2.43<br>(1.44 to 3.88)                    | 0.22<br>(0.17 to 0.29)           | 0.12<br>(0.07 to 0.20)           | 0.10<br>(0.06 to 0.17)           | 0.12<br>(0.07 to 0.19)           |
| Chlamydial infection                                                    | 2.38<br>(1.86 to 2.99)                    | 1.22<br>(0.78 to 1.75)                    | 1.15<br>(0.74 to 1.68)                    | 1.19<br>(0.77 to 1.73)                    | 0.11<br>(0.08 to 0.14)           | 0.07<br>(0.04 to 0.11)           | 0.07<br>(0.04 to 0.11)           | 0.07<br>(0.04 to 0.10)           |
| Gonococcal infection                                                    | 6.74<br>(5.24 to 8.53)                    | 3.69<br>(2.28 to 5.79)                    | 3.48<br>(2.11 to 5.50)                    | 3.62<br>(2.29 to 5.62)                    | 0.32<br>(0.24 to 0.40)           | 0.21<br>(0.13 to 0.34)           | 0.21<br>(0.13 to 0.33)           | 0.20<br>(0.12 to 0.32)           |
| Other sexually transmitted infections                                   | 3.03<br>(2.37 to 3.79)                    | 1.46<br>(0.92 to 2.19)                    | 1.35<br>(0.84 to 2.03)                    | 1.44<br>(0.91 to 2.17)                    | 0.12<br>(0.09 to 0.15)           | 0.07<br>(0.04 to 0.10)           | 0.07<br>(0.04 to 0.10)           | 0.07<br>(0.04 to 0.10)           |
| Acute hepatitis                                                         | 89.14<br>(74.23 to 104.54)                | 39.66<br>(27.67 to 56.79)                 | 26.19<br>(18.47 to 37.09)                 | 40.21<br>(27.81 to 56.12)                 | 3.13<br>(2.62 to 3.69)           | 1.75<br>(1.24 to 2.48)           | 1.22<br>(0.87 to 1.71)           | 1.71<br>(1.20 to 2.32)           |
| Acute hepatitis A                                                       | 4.37<br>(3.43 to 5.45)                    | 1.42<br>(0.92 to 2.11)                    | 1.06<br>(0.70 to 1.60)                    | 1.44<br>(0.92 to 2.14)                    | 0.11<br>(0.08 to 0.14)           | 0.05<br>(0.03 to 0.08)           | 0.04<br>(0.03 to 0.07)           | 0.05<br>(0.03 to 0.08)           |
| Acute hepatitis B                                                       | 70.93<br>(57.81 to 85.35)                 | 32.16<br>(21.54 to 47.51)                 | 20.92<br>(13.98 to 29.93)                 | 32.73<br>(21.96 to 47.33)                 | 2.50<br>(2.04 to 2.97)           | 1.35<br>(0.91 to 1.99)           | 0.91<br>(0.63 to 1.31)           | 1.33<br>(0.89 to 1.89)           |



| Croatia                              |                                                 |                                                 |                                                 |                                                 |                                              |                                              |                                              |                                              |
|--------------------------------------|-------------------------------------------------|-------------------------------------------------|-------------------------------------------------|-------------------------------------------------|----------------------------------------------|----------------------------------------------|----------------------------------------------|----------------------------------------------|
| Cause                                | YLLs (actual counts)                            |                                                 |                                                 |                                                 | Deaths (actual counts)                       |                                              |                                              |                                              |
|                                      | 2016                                            | 2040 Forecast                                   | 2040 Better Scenario                            | 2040 Worse Scenario                             | 2016                                         | 2040 Forecast                                | 2040 Better Scenario                         | 2040 Worse Scenario                          |
| <b>Neoplasms</b>                     | <b>260,014.61</b><br>(227,478.09 to 292,260.81) | <b>232,791.34</b><br>(188,004.10 to 287,274.18) | <b>189,591.01</b><br>(152,831.36 to 232,251.83) | <b>277,357.24</b><br>(223,203.00 to 342,258.41) | <b>13,696.40</b><br>(12,037.83 to 15,239.13) | <b>14,591.59</b><br>(12,310.82 to 17,194.02) | <b>12,593.45</b><br>(10,541.78 to 14,878.19) | <b>16,468.31</b><br>(13,917.65 to 19,401.75) |
| Lip and oral cavity cancer           | 4,882.40<br>(4,057.16 to 5,880.82)              | 3,792.85<br>(2,020.77 to 6,919.43)              | 2,515.40<br>(1,362.68 to 4,602.31)              | 6,021.50<br>(3,232.95 to 9,787.11)              | 213.09<br>(180.64 to 250.66)                 | 187.86<br>(107.50 to 319.42)                 | 130.11<br>(76.91 to 216.17)                  | 292.89<br>(165.42 to 461.72)                 |
| Nasopharynx cancer                   | 494.96<br>(415.99 to 584.10)                    | 383.55<br>(200.71 to 664.14)                    | 222.60<br>(117.51 to 394.84)                    | 635.80<br>(332.88 to 1,063.75)                  | 19.22<br>(16.29 to 22.50)                    | 16.55<br>(9.03 to 27.70)                     | 9.82<br>(5.53 to 17.04)                      | 26.94<br>(14.94 to 44.62)                    |
| Other pharynx cancer                 | 4,170.84<br>(3,399.74 to 5,024.76)              | 3,415.54<br>(1,834.86 to 5,887.28)              | 3,396.97<br>(1,827.78 to 5,909.85)              | 4,413.77<br>(2,325.40 to 7,638.61)              | 163.10<br>(134.01 to 195.15)                 | 149.29<br>(83.92 to 255.25)                  | 152.48<br>(86.38 to 258.72)                  | 189.23<br>(103.45 to 330.64)                 |
| Esophageal cancer                    | 5,242.72<br>(4,340.89 to 6,332.65)              | 4,732.55<br>(2,409.36 to 9,028.32)              | 3,666.93<br>(1,959.03 to 6,862.70)              | 7,265.28<br>(3,557.69 to 14,008.98)             | 241.12<br>(203.22 to 285.96)                 | 243.83<br>(133.70 to 437.19)                 | 194.53<br>(113.18 to 332.84)                 | 364.56<br>(189.25 to 660.60)                 |
| Stomach cancer                       | 15,661.57<br>(13,520.07 to 17,904.01)           | 9,978.30<br>(7,059.77 to 13,614.27)             | 7,170.99<br>(5,302.03 to 9,676.26)              | 10,726.46<br>(7,484.24 to 14,878.52)            | 886.97<br>(770.75 to 1,006.04)               | 671.59<br>(487.09 to 902.29)                 | 510.67<br>(380.29 to 676.74)                 | 692.25<br>(496.66 to 926.77)                 |
| Colon and rectum cancer              | 36,427.21<br>(31,741.43 to 41,524.05)           | 32,164.88<br>(22,211.74 to 45,508.00)           | 24,704.64<br>(17,209.11 to 34,555.53)           | 36,866.50<br>(25,343.96 to 53,920.08)           | 2,148.99<br>(1,892.08 to 2,429.23)           | 2,274.82<br>(1,594.89 to 3,145.52)           | 1,851.83<br>(1,307.12 to 2,561.25)           | 2,492.94<br>(1,743.91 to 3,532.61)           |
| Liver cancer                         | 9,529.52<br>(8,112.60 to 11,068.39)             | 11,521.90<br>(7,218.81 to 18,373.32)            | 10,870.18<br>(7,069.40 to 16,661.93)            | 15,113.12<br>(8,796.08 to 24,966.50)            | 516.69<br>(442.31 to 596.64)                 | 731.31<br>(475.62 to 1,107.17)               | 729.60<br>(490.81 to 1,078.69)               | 906.00<br>(553.32 to 1,435.58)               |
| Liver cancer due to hepatitis B      | 3,134.68<br>(2,256.05 to 4,152.69)              | 3,867.59<br>(2,277.14 to 6,620.80)              | 3,734.67<br>(2,312.74 to 6,120.54)              | 4,531.84<br>(2,503.77 to 8,174.58)              | 160.31<br>(114.41 to 216.90)                 | 231.93<br>(139.38 to 373.29)                 | 236.25<br>(145.81 to 374.42)                 | 258.64<br>(147.31 to 433.38)                 |
| Liver cancer due to hepatitis C      | 1,542.01<br>(1,107.97 to 2,076.68)              | 2,070.11<br>(1,172.18 to 3,319.70)              | 2,046.82<br>(1,211.33 to 3,233.93)              | 2,356.77<br>(1,275.70 to 3,938.92)              | 93.36<br>(66.55 to 127.58)                   | 145.98<br>(86.46 to 229.67)                  | 152.65<br>(92.32 to 236.76)                  | 157.91<br>(88.78 to 253.39)                  |
| Liver cancer due to alcohol use      | 3,035.41<br>(2,317.18 to 3,836.91)              | 3,274.65<br>(1,866.98 to 5,199.58)              | 2,854.96<br>(1,702.80 to 4,473.28)              | 5,485.03<br>(3,006.19 to 9,226.43)              | 166.67<br>(125.05 to 212.23)                 | 209.34<br>(121.42 to 334.16)                 | 193.69<br>(117.03 to 303.25)                 | 326.55<br>(184.24 to 535.82)                 |
| Liver cancer due to other causes     | 1,817.43<br>(1,440.89 to 2,293.65)              | 2,309.56<br>(1,313.21 to 3,988.71)              | 2,233.73<br>(1,339.90 to 3,700.15)              | 2,739.48<br>(1,453.76 to 4,994.92)              | 96.35<br>(76.44 to 121.58)                   | 144.06<br>(84.44 to 240.81)                  | 147.01<br>(89.69 to 232.98)                  | 162.90<br>(90.16 to 282.84)                  |
| Gallbladder and biliary tract cancer | 4,707.96<br>(3,988.38 to 5,383.05)              | 3,267.35<br>(2,761.02 to 3,760.30)              | 3,263.11<br>(2,726.62 to 3,832.22)              | 3,078.92<br>(2,626.58 to 3,508.18)              | 290.91<br>(245.13 to 331.36)                 | 234.80<br>(198.99 to 268.29)                 | 245.73<br>(202.58 to 288.23)                 | 214.41<br>(183.68 to 243.06)                 |
| Pancreatic cancer                    | 14,047.04<br>(12,087.64 to 15,916.09)           | 14,969.04<br>(11,538.02 to 19,120.80)           | 14,322.94<br>(11,099.61 to 18,277.61)           | 16,066.15<br>(12,213.15 to 21,043.89)           | 764.69<br>(662.77 to 865.50)                 | 936.62<br>(746.16 to 1,164.11)               | 941.58<br>(742.64 to 1,165.45)               | 965.91<br>(757.98 to 1,222.23)               |
| Larynx cancer                        | 4,119.62<br>(3,418.14 to 4,976.31)              | 3,079.65<br>(1,231.92 to 6,381.03)              | 1,708.29<br>(718.34 to 3,580.68)                | 4,760.50<br>(1,941.73 to 9,086.15)              | 187.34<br>(157.41 to 221.68)                 | 158.19<br>(67.66 to 308.71)                  | 89.10<br>(40.47 to 176.73)                   | 243.29<br>(106.19 to 455.91)                 |
| Tracheal, bronchus, and lung cancer  | 57,520.03<br>(49,432.61 to 66,288.92)           | 49,301.92<br>(32,550.46 to 74,618.29)           | 29,909.32<br>(20,019.62 to 44,778.91)           | 74,924.60<br>(49,528.56 to 107,860.47)          | 2,740.31<br>(2,374.05 to 3,129.12)           | 2,666.25<br>(1,818.74 to 3,821.36)           | 1,659.34<br>(1,169.26 to 2,370.41)           | 3,942.46<br>(2,688.98 to 5,479.26)           |
| Malignant skin melanoma              | 4,429.03<br>(3,523.58 to 5,226.81)              | 4,575.07<br>(3,568.68 to 5,600.44)              | 5,766.65<br>(4,611.38 to 7,073.74)              | 4,270.20<br>(3,364.36 to 5,219.10)              | 196.99<br>(159.30 to 230.31)                 | 250.29<br>(199.70 to 303.25)                 | 333.17<br>(269.17 to 398.63)                 | 224.36<br>(177.27 to 266.23)                 |
| Non-melanoma skin cancer             | 1,411.62<br>(1,217.90 to 1,611.45)              | 1,576.47<br>(1,283.67 to 1,953.34)              | 1,334.83<br>(1,081.49 to 1,643.02)              | 1,458.89<br>(1,156.03 to 1,770.89)              | 110.62<br>(97.38 to 125.04)                  | 149.71<br>(117.77 to 186.75)                 | 135.66<br>(106.28 to 169.73)                 | 132.85<br>(102.44 to 167.56)                 |
| Breast cancer                        | 19,066.17<br>(15,340.10 to 23,062.17)           | 14,775.87<br>(10,465.92 to 20,435.00)           | 11,625.54<br>(8,265.90 to 15,725.29)            | 16,821.28<br>(11,716.98 to 23,630.85)           | 996.23<br>(814.06 to 1,203.73)               | 941.18<br>(696.02 to 1,241.35)               | 785.50<br>(578.31 to 1,032.11)               | 1,022.19<br>(751.93 to 1,372.35)             |
| Cervical cancer                      | 4,035.06<br>(3,210.52 to 4,930.06)              | 2,296.12<br>(1,575.45 to 3,174.92)              | 1,704.20<br>(1,215.44 to 2,287.96)              | 2,458.37<br>(1,689.13 to 3,451.56)              | 191.07<br>(152.84 to 232.46)                 | 134.57<br>(98.13 to 179.87)                  | 105.63<br>(78.07 to 136.61)                  | 137.68<br>(98.47 to 184.71)                  |

|                   |                                         |                                          |                                         |                                         |                                 |                                     |                                     |                                     |
|-------------------|-----------------------------------------|------------------------------------------|-----------------------------------------|-----------------------------------------|---------------------------------|-------------------------------------|-------------------------------------|-------------------------------------|
| Uterine cancer    | 2,613.99<br>(2,084.59 to<br>3,237.74)   | 2,501.63<br>(1,965.31 to<br>3,188.94)    | 2,166.76<br>(1,673.96 to<br>2,721.12)   | 2,431.32<br>(1,935.96 to<br>3,037.55)   | 157.36<br>(126.04 to<br>193.25) | 177.85<br>(142.12 to<br>220.36)     | 140.86<br>(126.09 to<br>198.41)     | 168.07<br>(135.82 to<br>205.12)     |
| Ovarian cancer    | 7,063.25<br>(5,469.89 to<br>8,906.10)   | 5,367.51<br>(3,710.78 to<br>7,169.61)    | 4,630.67<br>(3,275.69 to<br>6,193.66)   | 5,576.66<br>(3,888.71 to<br>7,682.76)   | 330.88<br>(258.00 to<br>414.26) | 297.81<br>(214.17 to<br>396.71)     | 264.43<br>(193.50 to<br>353.21)     | 303.63<br>(216.88 to<br>412.25)     |
| Prostate cancer   | 10,982.61<br>(8,162.03 to<br>13,147.96) | 13,680.19<br>(10,180.44 to<br>16,491.43) | 12,808.96<br>(9,645.32 to<br>15,776.35) | 12,638.30<br>(9,641.44 to<br>15,270.52) | 818.85<br>(601.63 to<br>985.77) | 1,197.57<br>(875.61 to<br>1,443.03) | 1,188.59<br>(890.40 to<br>1,460.24) | 1,062.64<br>(767.25 to<br>1,292.25) |
| Testicular cancer | 446.63<br>(343.98 to<br>561.57)         | 239.00<br>(163.65 to<br>341.97)          | 193.47<br>(134.15 to<br>275.29)         | 236.90<br>(166.78 to<br>334.13)         | 11.82<br>(9.38 to<br>14.78)     | 8.61<br>(6.39 to<br>11.27)          | 7.57<br>(5.64 to<br>9.97)           | 8.05<br>(6.18 to<br>10.42)          |

| Croatia                         |                                                  |                                                  |                                                 |                                                  |                                               |                                               |                                               |                                               |
|---------------------------------|--------------------------------------------------|--------------------------------------------------|-------------------------------------------------|--------------------------------------------------|-----------------------------------------------|-----------------------------------------------|-----------------------------------------------|-----------------------------------------------|
| Cause                           | YLLs (actual counts)                             |                                                  |                                                 |                                                  | Deaths (actual counts)                        |                                               |                                               |                                               |
|                                 | 2016                                             | 2040 Forecast                                    | 2040 Better Scenario                            | 2040 Worse Scenario                              | 2016                                          | 2040 Forecast                                 | 2040 Better Scenario                          | 2040 Worse Scenario                           |
| Kidney cancer                   | 6,493.95<br>(5,414.60 to 7,550.28)               | 6,450.81<br>(4,218.78 to 9,656.17)               | 6,323.65<br>(4,254.47 to 9,114.87)              | 6,668.13<br>(4,265.63 to 10,299.13)              | 344.18<br>(289.04 to 394.25)                  | 399.96<br>(274.39 to 557.01)                  | 416.24<br>(296.71 to 554.80)                  | 395.85<br>(265.48 to 565.48)                  |
| Bladder cancer                  | 6,167.72<br>(5,324.49 to 7,117.37)               | 5,976.26<br>(4,377.78 to 8,167.06)               | 5,109.26<br>(3,833.19 to 6,835.32)              | 6,466.03<br>(4,558.06 to 9,072.15)               | 415.18<br>(359.57 to 472.85)                  | 481.75<br>(364.91 to 636.75)                  | 440.10<br>(336.69 to 578.21)                  | 496.62<br>(359.91 to 673.61)                  |
| Brain and nervous system cancer | 10,639.10<br>(8,323.24 to 12,407.73)             | 9,985.65<br>(7,242.16 to 12,188.78)              | 9,240.04<br>(6,636.78 to 11,411.30)             | 9,715.99<br>(7,250.86 to 11,703.42)              | 434.44<br>(308.17 to 518.18)                  | 486.64<br>(323.85 to 585.90)                  | 468.68<br>(303.51 to 575.74)                  | 460.33<br>(307.25 to 550.04)                  |
| Thyroid cancer                  | 762.03<br>(637.17 to 888.18)                     | 727.10<br>(594.23 to 1,068.57)                   | 613.81<br>(435.47 to 876.64)                    | 765.08<br>(522.42 to 1,169.57)                   | 41.16<br>(34.87 to 47.81)                     | 45.72<br>(32.05 to 66.35)                     | 40.37<br>(28.83 to 58.07)                     | 46.20<br>(31.80 to 68.42)                     |
| Mesothelioma                    | 1,487.14<br>(922.49 to 1,796.80)                 | 1,261.46<br>(770.65 to 1,563.11)                 | 1,327.20<br>(831.34 to 1,675.17)                | 1,195.35<br>(727.04 to 1,478.80)                 | 68.58<br>(41.98 to 81.87)                     | 66.76<br>(41.84 to 80.65)                     | 72.53<br>(46.07 to 89.06)                     | 61.73<br>(38.03 to 73.98)                     |
| Hodgkin lymphoma                | 688.28<br>(585.96 to 814.23)                     | 417.13<br>(325.40 to 540.31)                     | 301.25<br>(239.50 to 377.57)                    | 414.27<br>(325.43 to 530.79)                     | 26.41<br>(22.52 to 31.31)                     | 20.27<br>(15.96 to 25.20)                     | 15.43<br>(12.48 to 19.00)                     | 19.39<br>(15.66 to 23.98)                     |
| Non-Hodgkin lymphoma            | 6,340.52<br>(5,133.54 to 7,360.07)               | 5,249.43<br>(3,953.06 to 6,873.02)               | 4,595.73<br>(3,444.28 to 5,975.99)              | 5,277.69<br>(3,954.93 to 6,914.21)               | 309.64<br>(250.72 to 357.85)                  | 314.72<br>(236.99 to 398.19)                  | 289.85<br>(215.85 to 361.27)                  | 304.80<br>(231.33 to 388.20)                  |
| Multiple myeloma                | 3,118.00<br>(2,262.49 to 3,732.46)               | 3,155.66<br>(2,135.72 to 4,087.58)               | 2,961.03<br>(1,986.59 to 3,834.58)              | 3,155.23<br>(2,148.43 to 4,144.68)               | 171.58<br>(118.56 to 204.93)                  | 199.88<br>(131.01 to 260.45)                  | 196.20<br>(128.73 to 254.62)                  | 193.27<br>(125.89 to 255.72)                  |
| Leukemia                        | 8,108.58<br>(7,084.43 to 9,153.97)               | 7,816.02<br>(5,823.07 to 10,351.58)              | 6,856.40<br>(5,204.23 to 9,014.29)              | 8,328.30<br>(5,983.50 to 11,203.78)              | 418.41<br>(367.48 to 469.22)                  | 500.80<br>(379.01 to 642.41)                  | 462.39<br>(353.01 to 588.29)                  | 510.14<br>(368.44 to 672.23)                  |
| Acute lymphoid leukemia         | 1,004.93<br>(851.06 to 1,163.38)                 | 656.51<br>(486.89 to 888.44)                     | 521.81<br>(390.07 to 696.45)                    | 724.08<br>(525.70 to 990.99)                     | 30.60<br>(26.12 to 35.57)                     | 25.44<br>(18.47 to 35.04)                     | 20.66<br>(15.35 to 27.93)                     | 27.55<br>(19.43 to 38.04)                     |
| Chronic lymphoid leukemia       | 2,005.20<br>(1,643.85 to 2,346.95)               | 1,986.19<br>(1,389.25 to 2,745.67)               | 1,829.96<br>(1,301.27 to 2,473.09)              | 2,072.38<br>(1,404.06 to 2,954.27)               | 132.52<br>(109.18 to 155.49)                  | 150.69<br>(108.50 to 203.91)                  | 146.57<br>(105.72 to 193.20)                  | 150.46<br>(105.83 to 210.18)                  |
| Acute myeloid leukemia          | 2,952.36<br>(2,449.11 to 3,422.26)               | 3,057.66<br>(2,273.09 to 3,990.58)               | 2,850.44<br>(2,159.66 to 3,696.47)              | 3,280.57<br>(2,380.38 to 4,405.25)               | 134.75<br>(111.37 to 157.00)                  | 170.75<br>(125.95 to 222.34)                  | 166.84<br>(124.84 to 215.83)                  | 176.21<br>(126.86 to 235.62)                  |
| Chronic myeloid leukemia        | 619.18<br>(526.89 to 725.89)                     | 306.57<br>(206.18 to 461.27)                     | 197.10<br>(136.23 to 279.67)                    | 337.15<br>(221.95 to 503.62)                     | 32.85<br>(27.47 to 40.31)                     | 20.27<br>(13.65 to 30.32)                     | 13.92<br>(9.62 to 20.49)                      | 21.10<br>(13.95 to 31.96)                     |
| Other leukemia                  | 1,526.91<br>(1,298.77 to 1,785.78)               | 1,809.09<br>(1,286.12 to 2,589.07)               | 1,457.08<br>(1,056.29 to 2,031.69)              | 1,914.12<br>(1,309.84 to 2,743.88)               | 87.69<br>(73.85 to 103.95)                    | 133.65<br>(95.79 to 184.21)                   | 114.41<br>(83.50 to 156.18)                   | 134.82<br>(94.54 to 190.57)                   |
| Other neoplasms                 | 9,357.05<br>(8,065.16 to 10,760.97)              | 10,132.45<br>(8,734.12 to 11,653.74)             | 10,280.20<br>(8,701.58 to 12,013.44)            | 9,606.64<br>(8,334.35 to 10,922.47)              | 480.59<br>(417.96 to 549.46)                  | 646.38<br>(561.77 to 746.66)                  | 695.48<br>(589.51 to 823.35)                  | 589.65<br>(515.06 to 674.85)                  |
| <b>Cardiovascular diseases</b>  | <b>346,387.60<br/>(306,037.16 to 383,788.15)</b> | <b>221,663.18<br/>(149,577.07 to 324,115.71)</b> | <b>146,296.97<br/>(98,378.03 to 215,991.10)</b> | <b>296,559.52<br/>(198,761.43 to 422,877.17)</b> | <b>27,711.99<br/>(24,541.19 to 30,513.18)</b> | <b>21,191.40<br/>(14,258.88 to 31,978.80)</b> | <b>15,527.19<br/>(10,319.81 to 24,811.66)</b> | <b>25,756.05<br/>(17,386.45 to 37,638.25)</b> |
| Rheumatic heart disease         | 1,721.68<br>(1,460.25 to 1,997.30)               | 997.51<br>(727.34 to 1,406.34)                   | 754.46<br>(553.44 to 1,047.33)                  | 987.08<br>(719.01 to 1,410.77)                   | 101.76<br>(86.81 to 117.45)                   | 70.93<br>(51.87 to 100.12)                    | 56.79<br>(41.14 to 79.13)                     | 67.81<br>(49.93 to 94.86)                     |
| Ischemic heart disease          | 193,836.07<br>(169,983.41 to 216,596.97)         | 107,633.52<br>(61,477.42 to 175,388.72)          | 63,523.98<br>(36,006.64 to 103,659.58)          | 150,429.09<br>(88,397.16 to 239,299.47)          | 15,950.34<br>(14,062.24 to 17,809.68)         | 10,489.61<br>(6,078.70 to 17,122.07)          | 6,919.11<br>(3,830.66 to 11,425.95)           | 13,220.18<br>(7,836.09 to 20,464.44)          |
| Stroke                          | 99,258.15<br>(86,215.90 to 111,268.73)           | 50,574.35<br>(32,019.09 to 78,102.98)            | 28,284.35<br>(18,103.09 to 43,267.26)           | 74,460.74<br>(45,429.06 to 114,244.68)           | 7,585.48<br>(6,608.06 to 8,546.55)            | 4,529.05<br>(2,769.73 to 7,160.72)            | 2,816.87<br>(1,759.30 to 4,433.06)            | 5,964.26<br>(3,670.45 to 9,266.42)            |
| Ischemic stroke                 | 51,447.23<br>(44,699.12 to 58,215.62)            | 25,500.48<br>(14,775.49 to 44,474.89)            | 15,679.75<br>(9,110.99 to 27,281.57)            | 34,037.48<br>(19,203.01 to 58,453.12)            | 4,423.69<br>(3,851.34 to 5,037.49)            | 2,542.05<br>(1,415.57 to 4,482.20)            | 1,695.61<br>(932.58 to 2,990.17)              | 3,120.04<br>(1,696.98 to 5,632.75)            |

|                                |                                          |                                          |                                          |                                          |                                       |                                       |                                       |                                       |
|--------------------------------|------------------------------------------|------------------------------------------|------------------------------------------|------------------------------------------|---------------------------------------|---------------------------------------|---------------------------------------|---------------------------------------|
|                                | 47,810.93<br>(41,366.76 to<br>53,864.51) | 25,073.87<br>(14,666.77 to<br>41,758.87) | 12,604.60<br>(7,698.89 to<br>20,933.97)  | 40,423.26<br>(22,823.39 to<br>67,305.60) | 3,161.79<br>(2,732.24 to<br>3,575.78) | 1,987.00<br>(1,181.43 to<br>3,282.97) | 1,121.26<br>(674.28 to<br>1,834.02)   | 2,844.22<br>(1,675.05 to<br>4,571.90) |
| Intracerebral hemorrhage       |                                          |                                          |                                          |                                          |                                       |                                       |                                       |                                       |
|                                | 16,095.26<br>(9,764.80 to<br>20,427.34)  | 22,755.33<br>(9,642.10 to<br>56,593.67)  | 18,950.74<br>(8,211.13 to<br>45,282.08)  | 29,404.33<br>(12,173.01 to<br>72,841.49) | 1,370.12<br>(766.34 to<br>1,761.68)   | 2,348.26<br>(919.00 to<br>6,259.27)   | 2,104.46<br>(858.40 to<br>5,554.45)   | 2,878.71<br>(1,092.48 to<br>7,750.88) |
| Hypertensive heart disease     |                                          |                                          |                                          |                                          |                                       |                                       |                                       |                                       |
|                                | 12,697.13<br>(10,562.71 to<br>16,642.65) | 13,211.93<br>(10,108.28 to<br>17,820.04) | 13,292.11<br>(10,096.92 to<br>17,907.02) | 13,777.08<br>(10,749.74 to<br>18,732.44) | 1,031.10<br>(881.59 to<br>1,246.21)   | 1,404.84<br>(1,034.08 to<br>1,931.76) | 1,525.42<br>(1,134.23 to<br>2,076.54) | 1,325.71<br>(972.27 to<br>1,818.61)   |
| Cardiomyopathy and myocarditis |                                          |                                          |                                          |                                          |                                       |                                       |                                       |                                       |
|                                | 4,795.30<br>(3,097.40 to<br>5,923.84)    | 6,956.37<br>(4,749.69 to<br>9,117.59)    | 7,930.59<br>(5,748.74 to<br>10,388.23)   | 6,169.43<br>(4,091.79 to<br>8,121.18)    | 508.76<br>(283.57 to<br>653.39)       | 872.59<br>(530.27 to<br>1,229.89)     | 1,052.83<br>(694.81 to<br>1,472.04)   | 745.17<br>(431.94 to<br>1,066.46)     |
| Myocarditis                    |                                          |                                          |                                          |                                          |                                       |                                       |                                       |                                       |



| Croatia                                                       |                                                               |                                                               |                                                               |                                                               |                                                            |                                                            |                                                            |                                                            |
|---------------------------------------------------------------|---------------------------------------------------------------|---------------------------------------------------------------|---------------------------------------------------------------|---------------------------------------------------------------|------------------------------------------------------------|------------------------------------------------------------|------------------------------------------------------------|------------------------------------------------------------|
| Cause                                                         | YLLs (actual counts)                                          |                                                               |                                                               |                                                               | Deaths (actual counts)                                     |                                                            |                                                            |                                                            |
|                                                               | 2016                                                          | 2040 Forecast                                                 | 2040 Better Scenario                                          | 2040 Worse Scenario                                           | 2016                                                       | 2040 Forecast                                              | 2040 Better Scenario                                       | 2040 Worse Scenario                                        |
| Alcoholic cardiomyopathy                                      | 4,722.13<br>(3,694.09 to<br>6,934.37)                         | 3,462.83<br>(2,615.86 to<br>5,117.18)                         | 3,257.01<br>(2,405.25 to<br>4,837.59)                         | 4,846.42<br>(3,739.58 to<br>7,153.76)                         | 242.31<br>(187.04 to<br>356.14)                            | 217.82<br>(154.05 to<br>329.61)                            | 218.19<br>(151.25 to<br>332.35)                            | 286.27<br>(210.56 to<br>423.02)                            |
| Other cardiomyopathy                                          | 3,179.71<br>(2,014.45 to<br>7,033.58)                         | 2,792.74<br>(1,123.08 to<br>7,070.70)                         | 2,104.51<br>(774.04 to<br>5,740.67)                           | 2,761.22<br>(1,072.07 to<br>7,165.01)                         | 280.03<br>(169.92 to<br>617.24)                            | 314.43<br>(110.82 to<br>798.83)                            | 254.40<br>(82.77 to<br>666.16)                             | 294.26<br>(102.11 to<br>745.86)                            |
| Atrial fibrillation and flutter                               | 3,560.87<br>(2,692.38 to<br>4,543.75)                         | 4,637.57<br>(3,273.60 to<br>6,384.40)                         | 4,532.36<br>(3,158.74 to<br>6,415.50)                         | 4,783.67<br>(3,380.40 to<br>6,473.28)                         | 388.48<br>(289.66 to<br>502.86)                            | 561.11<br>(387.30 to<br>797.34)                            | 580.27<br>(390.10 to<br>845.68)                            | 552.55<br>(380.82 to<br>791.00)                            |
| Aortic aneurysm                                               | 5,902.87<br>(5,033.71 to<br>6,839.09)                         | 3,811.94<br>(2,794.25 to<br>5,178.30)                         | 3,210.70<br>(2,404.48 to<br>4,281.85)                         | 3,968.48<br>(2,906.96 to<br>5,416.03)                         | 536.35<br>(291.54 to<br>383.82)                            | 261.67<br>(199.71 to<br>343.14)                            | 241.55<br>(183.38 to<br>319.27)                            | 256.20<br>(195.31 to<br>332.66)                            |
| Peripheral artery disease                                     | 2,152.24<br>(544.22 to<br>3,346.00)                           | 3,518.66<br>(791.07 to<br>6,433.84)                           | 3,586.58<br>(786.14 to<br>6,619.07)                           | 3,533.16<br>(786.04 to<br>6,449.29)                           | 197.94<br>(45.79 to<br>311.67)                             | 372.57<br>(80.19 to<br>707.04)                             | 407.20<br>(85.08 to<br>775.43)                             | 354.22<br>(74.24 to<br>660.77)                             |
| Endocarditis                                                  | 870.08<br>(657.70 to<br>1,370.00)                             | 942.23<br>(600.00 to<br>1,599.52)                             | 910.12<br>(578.33 to<br>1,543.15)                             | 950.62<br>(606.05 to<br>1,639.21)                             | 45.30<br>(34.36 to<br>69.94)                               | 61.44<br>(38.71 to<br>107.92)                              | 63.52<br>(39.52 to<br>114.56)                              | 58.91<br>(37.02 to<br>102.74)                              |
| Other cardiovascular and circulatory diseases                 | 10,293.25<br>(8,817.39 to<br>11,779.22)                       | 13,580.14<br>(9,236.14 to<br>19,492.12)                       | 9,251.57<br>(6,571.71 to<br>12,946.66)                        | 14,265.27<br>(9,496.50 to<br>20,607.57)                       | 705.12<br>(603.90 to<br>807.25)                            | 1,091.92<br>(751.79 to<br>1,557.02)                        | 812.00<br>(577.33 to<br>1,171.45)                          | 1,077.52<br>(750.48 to<br>1,518.22)                        |
| <b>Chronic respiratory diseases</b>                           | <b>25,873.93</b><br><b>(22,515.70 to</b><br><b>29,085.96)</b> | <b>22,759.30</b><br><b>(15,722.39 to</b><br><b>31,835.09)</b> | <b>15,744.64</b><br><b>(11,248.20 to</b><br><b>21,119.45)</b> | <b>31,969.78</b><br><b>(21,603.58 to</b><br><b>44,648.01)</b> | <b>2,008.07</b><br><b>(1,762.37 to</b><br><b>2,243.91)</b> | <b>2,007.22</b><br><b>(1,450.00 to</b><br><b>2,743.00)</b> | <b>1,479.03</b><br><b>(1,081.63 to</b><br><b>1,967.06)</b> | <b>2,669.53</b><br><b>(1,867.18 to</b><br><b>3,631.53)</b> |
| Chronic obstructive pulmonary disease                         | 24,139.51<br>(20,991.12 to<br>27,242.09)                      | 21,264.68<br>(14,159.16 to<br>30,258.40)                      | 14,043.82<br>(9,585.03 to<br>19,445.03)                       | 30,482.21<br>(20,084.97 to<br>42,962.73)                      | 1,894.96<br>(1,662.16 to<br>2,120.14)                      | 1,895.82<br>(1,317.93 to<br>2,614.18)                      | 1,350.76<br>(957.62 to<br>1,837.39)                        | 2,562.09<br>(1,769.01 to<br>3,517.58)                      |
| Pneumoconiosis                                                | 151.03<br>(124.16 to<br>179.13)                               | 136.32<br>(95.95 to<br>159.90)                                | 148.72<br>(111.63 to<br>193.25)                               | 117.64<br>(88.92 to<br>150.39)                                | 9.52<br>(7.94 to<br>11.28)                                 | 9.97<br>(7.31 to<br>12.92)                                 | 12.16<br>(8.82 to<br>16.04)                                | 9.02<br>(6.63 to<br>11.76)                                 |
| Silicosis                                                     | 17.27<br>(9.46 to<br>48.10)                                   | 9.73<br>(3.44 to<br>30.49)                                    | 7.29<br>(2.37 to<br>24.17)                                    | 9.22<br>(3.31 to<br>28.71)                                    | 1.10<br>(0.60 to<br>3.13)                                  | 0.82<br>(0.30 to<br>2.38)                                  | 0.66<br>(0.23 to<br>1.95)                                  | 0.75<br>(0.28 to<br>2.12)                                  |
| Asbestosis                                                    | 100.42<br>(30.32 to<br>136.00)                                | 81.56<br>(28.23 to<br>115.63)                                 | 103.57<br>(47.67 to<br>145.38)                                | 73.99<br>(25.22 to<br>107.94)                                 | 6.00<br>(1.55 to<br>8.20)                                  | 5.79<br>(1.76 to<br>8.47)                                  | 7.65<br>(3.20 to<br>10.99)                                 | 5.08<br>(1.55 to<br>7.51)                                  |
| Coal workers pneumoconiosis                                   | 3.51<br>(1.87 to<br>11.61)                                    | 4.92<br>(2.03 to<br>13.02)                                    | 5.35<br>(2.10 to<br>13.07)                                    | 4.74<br>(1.94 to<br>12.45)                                    | 0.25<br>(0.14 to<br>0.78)                                  | 0.48<br>(0.20 to<br>1.12)                                  | 0.56<br>(0.31 to<br>1.31)                                  | 0.45<br>(0.18 to<br>1.06)                                  |
| Other pneumoconiosis                                          | 29.84<br>(18.04 to<br>70.97)                                  | 30.11<br>(15.33 to<br>64.06)                                  | 32.50<br>(15.76 to<br>70.94)                                  | 29.68<br>(15.23 to<br>60.88)                                  | 2.18<br>(1.37 to<br>4.90)                                  | 2.88<br>(1.44 to<br>5.84)                                  | 3.30<br>(1.54 to<br>6.81)                                  | 2.74<br>(1.38 to<br>5.40)                                  |
| Asthma                                                        | 948.01<br>(776.41 to<br>1,353.24)                             | 456.01<br>(225.23 to<br>894.82)                               | 266.43<br>(135.94 to<br>505.46)                               | 531.79<br>(251.86 to<br>1,040.70)                             | 69.18<br>(56.40 to<br>91.35)                               | 41.07<br>(20.22 to<br>81.08)                               | 25.98<br>(13.20 to<br>51.40)                               | 45.18<br>(21.65 to<br>87.79)                               |
| Interstitial lung disease and pulmonary sarcoidosis           | 550.02<br>(414.56 to<br>783.82)                               | 823.71<br>(593.21 to<br>1,243.32)                             | 1,198.33<br>(901.42 to<br>1,736.67)                           | 746.35<br>(541.71 to<br>1,130.21)                             | 30.64<br>(23.85 to<br>45.30)                               | 55.30<br>(38.98 to<br>86.07)                               | 84.75<br>(62.69 to<br>127.15)                              | 48.32<br>(34.81 to<br>74.28)                               |
| Other chronic respiratory diseases                            | 85.36<br>(57.05 to<br>160.15)                                 | 88.58<br>(49.69 to<br>176.02)                                 | 87.33<br>(49.77 to<br>176.08)                                 | 91.79<br>(50.87 to<br>182.47)                                 | 3.76<br>(2.50 to<br>7.27)                                  | 5.06<br>(2.89 to<br>10.13)                                 | 5.38<br>(3.08 to<br>10.84)                                 | 4.92<br>(2.79 to<br>9.91)                                  |
| <b>Cirrhosis and other chronic liver diseases</b>             | <b>31,711.61</b><br><b>(26,657.23 to</b><br><b>37,355.08)</b> | <b>22,988.31</b><br><b>(18,577.86 to</b><br><b>28,819.51)</b> | <b>18,212.07</b><br><b>(14,764.43 to</b><br><b>22,678.84)</b> | <b>26,783.11</b><br><b>(21,744.33 to</b><br><b>33,051.71)</b> | <b>1,284.42</b><br><b>(1,095.51 to</b><br><b>1,499.52)</b> | <b>1,037.24</b><br><b>(860.48 to</b><br><b>1,246.59)</b>   | <b>849.45</b><br><b>(710.59 to</b><br><b>1,025.89)</b>     | <b>1,174.99</b><br><b>(991.10 to</b><br><b>1,403.01)</b>   |
| Cirrhosis and other chronic liver diseases due to hepatitis B | 5,962.68<br>(4,525.92 to<br>7,647.30)                         | 4,730.17<br>(3,480.31 to<br>6,411.77)                         | 3,897.45<br>(2,892.91 to<br>5,251.32)                         | 4,658.94<br>(3,426.22 to<br>6,290.87)                         | 237.62<br>(184.03 to<br>306.02)                            | 208.26<br>(160.04 to<br>273.33)                            | 177.08<br>(134.45 to<br>232.17)                            | 200.23<br>(152.42 to<br>262.76)                            |
| Cirrhosis and other chronic liver diseases due to hepatitis C | 7,298.48<br>(5,040.85 to<br>10,260.53)                        | 5,873.63<br>(3,971.79 to<br>8,453.84)                         | 4,761.24<br>(3,153.83 to<br>6,763.01)                         | 5,821.38<br>(3,811.33 to<br>8,319.69)                         | 287.77<br>(200.28 to<br>403.20)                            | 253.58<br>(173.97 to<br>356.60)                            | 211.55<br>(144.94 to<br>295.61)                            | 245.89<br>(164.81 to<br>344.40)                            |

|                                                                |                                                               |                                                               |                                                              |                                                               |                                                          |                                                          |                                                          |                                                          |
|----------------------------------------------------------------|---------------------------------------------------------------|---------------------------------------------------------------|--------------------------------------------------------------|---------------------------------------------------------------|----------------------------------------------------------|----------------------------------------------------------|----------------------------------------------------------|----------------------------------------------------------|
|                                                                | 12,499.71<br>(9,355.57 to<br>15,873.83)                       | 7,630.00<br>(5,584.85 to<br>10,193.49)                        | 5,639.72<br>(4,123.86 to<br>7,489.09)                        | 11,608.54<br>(8,684.24 to<br>15,064.95)                       | 510.44<br>(388.54 to<br>640.56)                          | 351.59<br>(267.87 to<br>454.03)                          | 270.03<br>(203.83 to<br>354.20)                          | 513.40<br>(398.29 to<br>644.85)                          |
| Cirrhosis and other chronic liver diseases due to alcohol use  |                                                               |                                                               |                                                              |                                                               |                                                          |                                                          |                                                          |                                                          |
|                                                                | 5,950.74<br>(4,729.34 to<br>7,363.18)                         | 4,754.50<br>(3,663.50 to<br>6,182.17)                         | 3,913.66<br>(3,040.04 to<br>5,011.37)                        | 4,694.25<br>(3,602.95 to<br>6,097.07)                         | 248.58<br>(200.30 to<br>304.44)                          | 223.80<br>(175.68 to<br>281.20)                          | 190.79<br>(150.36 to<br>236.24)                          | 215.46<br>(168.69 to<br>271.24)                          |
| Cirrhosis and other chronic liver diseases due to other causes |                                                               |                                                               |                                                              |                                                               |                                                          |                                                          |                                                          |                                                          |
| <b>Digestive diseases</b>                                      | <b>16,759.17</b><br><b>(13,602.36 to</b><br><b>19,509.72)</b> | <b>14,936.93</b><br><b>(11,455.30 to</b><br><b>19,012.47)</b> | <b>12,973.34</b><br><b>(9,967.09 to</b><br><b>16,446.10)</b> | <b>15,083.50</b><br><b>(11,576.58 to</b><br><b>19,285.54)</b> | <b>1,112.73</b><br><b>(892.78 to</b><br><b>1,283.91)</b> | <b>1,199.21</b><br><b>(911.46 to</b><br><b>1,492.36)</b> | <b>1,111.41</b><br><b>(842.37 to</b><br><b>1,380.11)</b> | <b>1,150.83</b><br><b>(879.08 to</b><br><b>1,427.63)</b> |
| Peptic ulcer disease                                           | 3,633.53<br>(3,073.41 to<br>4,350.96)                         | 1,942.50<br>(1,399.64 to<br>2,678.79)                         | 1,284.12<br>(961.50 to<br>1,712.85)                          | 1,968.52<br>(1,391.99 to<br>2,677.30)                         | 239.29<br>(201.65 to<br>278.28)                          | 154.84<br>(112.80 to<br>207.92)                          | 109.19<br>(82.78 to<br>143.02)                           | 149.40<br>(109.84 to<br>203.74)                          |

| Croatia                                    |                                                      |                                                      |                                                      |                                                      |                                                   |                                                   |                                                   |                                                   |
|--------------------------------------------|------------------------------------------------------|------------------------------------------------------|------------------------------------------------------|------------------------------------------------------|---------------------------------------------------|---------------------------------------------------|---------------------------------------------------|---------------------------------------------------|
| Cause                                      | YLLs (actual counts)                                 |                                                      |                                                      |                                                      | Deaths (actual counts)                            |                                                   |                                                   |                                                   |
|                                            | 2016                                                 | 2040 Forecast                                        | 2040 Better Scenario                                 | 2040 Worse Scenario                                  | 2016                                              | 2040 Forecast                                     | 2040 Better Scenario                              | 2040 Worse Scenario                               |
| Gastritis and duodenitis                   | 279.69<br>(118.22 to 340.81)                         | 165.68<br>(69.92 to 220.72)                          | 136.13<br>(57.00 to 183.00)                          | 154.95<br>(64.83 to 203.82)                          | 20.75<br>(6.33 to 25.62)                          | 14.54<br>(4.93 to 19.64)                          | 12.83<br>(4.32 to 17.74)                          | 13.03<br>(4.64 to 17.54)                          |
| Appendicitis                               | 249.56<br>(192.35 to 328.98)                         | 190.33<br>(133.17 to 268.25)                         | 135.09<br>(97.61 to 190.16)                          | 183.49<br>(131.47 to 259.15)                         | 14.83<br>(11.15 to 19.12)                         | 13.75<br>(9.59 to 19.33)                          | 10.35<br>(7.24 to 14.64)                          | 12.76<br>(9.07 to 17.92)                          |
| Paralytic ileus and intestinal obstruction | 2,302.95<br>(1,644.07 to 2,840.92)                   | 2,686.93<br>(1,871.91 to 3,357.08)                   | 2,865.86<br>(1,997.77 to 3,661.68)                   | 2,462.70<br>(1,716.52 to 3,029.48)                   | 158.43<br>(107.55 to 199.94)                      | 224.83<br>(150.66 to 291.24)                      | 254.09<br>(169.95 to 334.95)                      | 198.25<br>(130.96 to 255.81)                      |
| Inguinal, femoral, and abdominal hernia    | 659.44<br>(447.92 to 823.09)                         | 488.16<br>(318.76 to 646.91)                         | 427.53<br>(284.03 to 572.32)                         | 449.63<br>(294.47 to 591.32)                         | 48.92<br>(31.70 to 60.24)                         | 44.21<br>(27.16 to 59.23)                         | 41.33<br>(25.60 to 56.22)                         | 39.04<br>(24.53 to 51.80)                         |
| Inflammatory bowel disease                 | 710.99<br>(422.66 to 896.59)                         | 546.29<br>(336.60 to 700.09)                         | 546.36<br>(343.78 to 702.66)                         | 518.48<br>(319.33 to 653.94)                         | 34.79<br>(22.91 to 42.39)                         | 33.69<br>(23.04 to 41.15)                         | 36.00<br>(25.21 to 45.14)                         | 30.63<br>(20.45 to 37.40)                         |
| Vascular intestinal disorders              | 3,176.22<br>(2,389.57 to 3,760.54)                   | 3,776.62<br>(2,779.81 to 4,552.28)                   | 3,606.22<br>(2,660.90 to 4,418.39)                   | 3,501.16<br>(2,628.55 to 4,184.77)                   | 239.73<br>(182.04 to 283.42)                      | 324.54<br>(232.85 to 391.61)                      | 326.37<br>(232.60 to 401.81)                      | 291.72<br>(208.55 to 349.77)                      |
| Gallbladder and biliary diseases           | 1,644.99<br>(1,328.53 to 1,961.65)                   | 1,675.06<br>(841.80 to 3,148.60)                     | 1,219.30<br>(638.93 to 2,214.56)                     | 1,877.28<br>(922.72 to 3,460.01)                     | 132.82<br>(106.53 to 159.83)                      | 157.36<br>(79.21 to 299.56)                       | 122.42<br>(62.88 to 226.52)                       | 168.46<br>(82.99 to 315.74)                       |
| Pancreatitis                               | 2,943.08<br>(2,350.72 to 3,555.54)                   | 2,394.76<br>(1,293.70 to 4,597.14)                   | 1,736.67<br>(966.54 to 3,305.30)                     | 2,965.63<br>(1,561.19 to 5,872.48)                   | 146.97<br>(112.78 to 173.11)                      | 144.81<br>(82.89 to 269.78)                       | 110.98<br>(64.03 to 208.76)                       | 169.70<br>(90.21 to 324.67)                       |
| Other digestive diseases                   | 1,158.72<br>(890.78 to 1,380.36)                     | 1,070.61<br>(835.27 to 1,317.63)                     | 1,016.07<br>(794.65 to 1,263.74)                     | 1,001.66<br>(789.99 to 1,218.74)                     | 76.19<br>(60.29 to 90.56)                         | 86.63<br>(68.32 to 105.09)                        | 87.86<br>(67.81 to 109.45)                        | 77.85<br>(60.87 to 94.91)                         |
| Neurological disorders                     | <b>35,362.31</b><br>(29,693.42 to <b>41,867.73</b> ) | <b>48,701.41</b><br>(37,573.68 to <b>62,917.31</b> ) | <b>52,370.06</b><br>(41,030.69 to <b>66,640.17</b> ) | <b>47,904.17</b><br>(35,938.85 to <b>64,260.20</b> ) | <b>3,204.09</b><br>(2,735.06 to <b>3,962.26</b> ) | <b>5,303.10</b><br>(3,866.59 to <b>7,107.51</b> ) | <b>6,047.41</b><br>(4,517.86 to <b>7,997.89</b> ) | <b>5,010.24</b><br>(3,514.61 to <b>7,016.03</b> ) |
| Alzheimer's disease and other dementias    | 24,365.40<br>(19,766.33 to 30,488.48)                | 36,716.29<br>(25,910.19 to 50,729.43)                | 39,378.18<br>(28,680.56 to 52,986.80)                | 36,352.39<br>(24,919.51 to 52,590.87)                | 2,690.22<br>(2,172.43 to 3,335.43)                | 4,425.20<br>(3,052.21 to 6,184.43)                | 5,011.97<br>(3,560.36 to 6,920.66)                | 4,217.05<br>(2,771.53 to 6,136.01)                |
| Parkinson's disease                        | 4,558.96<br>(3,390.83 to 6,008.17)                   | 6,927.96<br>(5,177.35 to 9,121.92)                   | 8,215.36<br>(6,062.70 to 10,907.67)                  | 6,155.12<br>(4,532.73 to 8,292.57)                   | 401.88<br>(299.91 to 533.25)                      | 672.01<br>(495.89 to 913.22)                      | 830.61<br>(615.62 to 1,132.32)                    | 581.37<br>(420.14 to 790.70)                      |
| Epilepsy                                   | 2,789.10<br>(2,364.11 to 3,249.16)                   | 2,089.29<br>(1,344.08 to 3,236.68)                   | 1,774.77<br>(1,183.44 to 2,690.29)                   | 2,465.22<br>(1,552.11 to 3,831.13)                   | 86.49<br>(74.08 to 100.14)                        | 83.01<br>(56.79 to 122.59)                        | 75.37<br>(52.19 to 110.94)                        | 94.07<br>(62.01 to 140.56)                        |
| Multiple sclerosis                         | 1,146.04<br>(792.71 to 1,387.21)                     | 911.33<br>(604.82 to 1,214.71)                       | 918.52<br>(618.59 to 1,214.96)                       | 933.77<br>(610.56 to 1,268.27)                       | 39.81<br>(28.78 to 48.11)                         | 36.89<br>(25.88 to 47.91)                         | 38.85<br>(27.75 to 50.44)                         | 36.65<br>(25.78 to 48.28)                         |
| Motor neuron disease                       | 1,016.05<br>(871.83 to 1,163.08)                     | 933.26<br>(772.06 to 1,130.28)                       | 926.65<br>(765.47 to 1,136.86)                       | 906.02<br>(754.25 to 1,087.01)                       | 38.00<br>(32.19 to 43.56)                         | 40.67<br>(34.08 to 48.09)                         | 41.48<br>(34.53 to 49.61)                         | 38.70<br>(32.49 to 45.54)                         |
| Other neurological disorders               | 1,486.76<br>(1,265.07 to 1,716.03)                   | 1,123.27<br>(938.16 to 1,350.64)                     | 1,156.57<br>(960.27 to 1,401.33)                     | 1,091.66<br>(909.71 to 1,306.35)                     | 47.69<br>(41.01 to 54.81)                         | 45.31<br>(38.86 to 52.60)                         | 49.14<br>(41.41 to 57.88)                         | 42.41<br>(36.67 to 48.69)                         |
| Mental disorders                           | <b>10,844.83</b><br>(9,062.97 to <b>12,944.55</b> )  | <b>11,532.13</b><br>(9,840.25 to <b>14,793.32</b> )  | <b>14,122.28</b><br>(11,220.88 to <b>18,159.54</b> ) | <b>11,938.19</b><br>(9,376.91 to <b>15,211.29</b> )  | <b>357.42</b><br>(301.19 to <b>418.22</b> )       | <b>421.45</b><br>(348.19 to <b>511.76</b> )       | <b>529.20</b><br>(438.90 to <b>634.51</b> )       | <b>428.26</b><br>(350.47 to <b>514.86</b> )       |
| Alcohol use disorders                      | 6,919.42<br>(5,684.76 to 8,257.68)                   | 5,937.42<br>(4,623.58 to 7,623.46)                   | 6,446.84<br>(5,005.75 to 8,401.43)                   | 6,580.31<br>(5,161.73 to 8,365.45)                   | 259.85<br>(214.61 to 307.45)                      | 253.22<br>(204.03 to 312.66)                      | 284.34<br>(229.55 to 354.87)                      | 273.36<br>(220.64 to 333.29)                      |
| Drug use disorders                         | 3,900.31<br>(3,137.83 to 4,731.97)                   | 5,584.37<br>(4,042.44 to 7,844.60)                   | 7,663.42<br>(5,797.36 to 10,442.00)                  | 5,347.70<br>(3,845.26 to 7,412.85)                   | 97.08<br>(80.19 to 115.67)                        | 168.02<br>(128.43 to 218.48)                      | 244.62<br>(195.75 to 303.85)                      | 154.69<br>(116.34 to 199.10)                      |
| Opioid use disorders                       | 2,119.33<br>(976.64 to 2,745.18)                     | 1,606.39<br>(646.16 to 2,475.09)                     | 1,731.23<br>(687.20 to 2,702.46)                     | 1,584.10<br>(623.57 to 2,419.11)                     | 46.72<br>(23.71 to 59.21)                         | 39.31<br>(19.10 to 56.11)                         | 43.90<br>(21.87 to 62.90)                         | 37.94<br>(18.65 to 53.69)                         |

|                           |                                       |                                       |                                       |                                       |                              |                                |                                 |                                |
|---------------------------|---------------------------------------|---------------------------------------|---------------------------------------|---------------------------------------|------------------------------|--------------------------------|---------------------------------|--------------------------------|
|                           | 31.55<br>(22.63 to<br>51.87)          | 92.16<br>(61.65 to<br>140.31)         | 124.47<br>(84.64 to<br>184.16)        | 87.28<br>(57.35 to<br>132.47)         | 1.00<br>(0.76 to<br>1.41)    | 3.47<br>(2.37 to<br>4.96)      | 5.00<br>(3.52 to<br>6.90)       | 3.14<br>(2.16 to<br>4.38)      |
| Cocaine use disorders     |                                       |                                       |                                       |                                       |                              |                                |                                 |                                |
|                           | 233.89<br>(144.04 to<br>387.32)       | 740.61<br>(383.61 to<br>1,202.75)     | 1,128.53<br>(598.50 to<br>1,777.14)   | 709.29<br>(365.82 to<br>1,165.23)     | 4.40<br>(2.76 to<br>7.27)    | 14.25<br>(7.95 to<br>22.50)    | 21.87<br>(12.20 to<br>33.51)    | 13.58<br>(7.42 to<br>21.51)    |
| Amphetamine use disorders |                                       |                                       |                                       |                                       |                              |                                |                                 |                                |
|                           | 1,515.55<br>(1,121.07 to<br>2,383.70) | 3,145.21<br>(2,129.32 to<br>4,603.42) | 4,679.18<br>(3,364.62 to<br>6,575.14) | 2,967.04<br>(1,992.89 to<br>4,342.29) | 44.96<br>(35.43 to<br>63.12) | 110.99<br>(80.52 to<br>148.76) | 173.85<br>(134.49 to<br>220.08) | 100.03<br>(71.50 to<br>134.40) |
| Other drug use disorders  |                                       |                                       |                                       |                                       |                              |                                |                                 |                                |
|                           | 25.10<br>(17.19 to<br>34.30)          | 10.33<br>(6.21 to<br>15.73)           | 12.03<br>(7.10 to<br>19.04)           | 10.18<br>(6.26 to<br>15.77)           | 0.49<br>(0.33 to<br>0.67)    | 0.21<br>(0.13 to<br>0.32)      | 0.24<br>(0.14 to<br>0.38)       | 0.20<br>(0.12 to<br>0.31)      |
| Eating disorders          |                                       |                                       |                                       |                                       |                              |                                |                                 |                                |

| Croatia                                                    |                                              |                                              |                                              |                                              |                                           |                                           |                                           |                                           |
|------------------------------------------------------------|----------------------------------------------|----------------------------------------------|----------------------------------------------|----------------------------------------------|-------------------------------------------|-------------------------------------------|-------------------------------------------|-------------------------------------------|
| Cause                                                      | YLLs (actual counts)                         |                                              |                                              |                                              | Deaths (actual counts)                    |                                           |                                           |                                           |
|                                                            | 2016                                         | 2040 Forecast                                | 2040 Better Scenario                         | 2040 Worse Scenario                          | 2016                                      | 2040 Forecast                             | 2040 Better Scenario                      | 2040 Worse Scenario                       |
| <b>Diabetes, urogenital, blood, and endocrine diseases</b> | <b>33,046.56</b><br>(28,598.90 to 37,142.22) | <b>36,132.20</b><br>(26,449.10 to 47,905.77) | <b>28,209.55</b><br>(20,383.56 to 37,141.61) | <b>38,993.60</b><br>(28,392.21 to 51,995.75) | <b>2,306.23</b><br>(2,015.35 to 2,575.77) | <b>3,005.61</b><br>(2,204.91 to 3,958.53) | <b>2,482.74</b><br>(1,800.29 to 3,294.41) | <b>3,104.84</b><br>(2,274.26 to 4,080.94) |
| Diabetes mellitus                                          | 15,766.39<br>(13,378.78 to 18,250.19)        | 14,526.87<br>(8,866.54 to 22,575.72)         | 10,268.14<br>(6,331.75 to 15,424.94)         | 16,099.47<br>(9,596.48 to 25,544.19)         | 1,083.85<br>(924.36 to 1,247.89)          | 1,164.00<br>(748.21 to 1,761.17)          | 873.58<br>(559.85 to 1,288.82)            | 1,228.51<br>(752.03 to 1,901.83)          |
| Acute glomerulonephritis                                   | 23.54<br>(20.34 to 26.75)                    | 17.93<br>(12.68 to 25.22)                    | 14.50<br>(10.24 to 20.51)                    | 17.96<br>(12.69 to 24.80)                    | 0.73<br>(0.60 to 0.88)                    | 0.69<br>(0.44 to 1.11)                    | 0.59<br>(0.37 to 0.96)                    | 0.67<br>(0.44 to 1.06)                    |
| Chronic kidney disease                                     | 10,608.53<br>(9,209.78 to 11,951.60)         | 13,395.03<br>(7,539.56 to 22,424.80)         | 10,568.13<br>(6,064.18 to 17,527.60)         | 15,220.21<br>(8,387.50 to 26,159.66)         | 744.10<br>(648.37 to 840.97)              | 1,128.75<br>(634.00 to 1,854.59)          | 943.02<br>(525.38 to 1,560.58)            | 1,256.08<br>(665.00 to 2,101.12)          |
| Chronic kidney disease due to diabetes mellitus            | 4,053.88<br>(3,490.66 to 4,620.96)           | 5,122.88<br>(2,919.14 to 8,759.72)           | 4,021.16<br>(2,309.16 to 6,732.92)           | 5,908.95<br>(3,247.57 to 10,318.96)          | 253.03<br>(217.09 to 288.32)              | 382.79<br>(211.17 to 651.64)              | 316.74<br>(175.54 to 539.67)              | 425.99<br>(229.55 to 737.35)              |
| Chronic kidney disease due to hypertension                 | 1,561.02<br>(1,292.66 to 1,866.62)           | 2,285.59<br>(1,244.69 to 3,939.84)           | 1,982.27<br>(1,085.05 to 3,420.12)           | 2,502.32<br>(1,334.28 to 4,315.84)           | 147.58<br>(121.86 to 176.60)              | 248.00<br>(131.43 to 437.35)              | 226.49<br>(120.14 to 390.70)              | 262.35<br>(138.72 to 469.77)              |
| Chronic kidney disease due to glomerulonephritis           | 2,050.19<br>(1,718.83 to 2,401.28)           | 2,153.08<br>(1,241.38 to 3,627.04)           | 1,588.12<br>(927.40 to 2,603.44)             | 2,458.05<br>(1,377.88 to 4,198.95)           | 135.33<br>(111.83 to 160.54)              | 172.91<br>(97.87 to 290.53)               | 191.33<br>(75.36 to 225.90)               | 191.33<br>(103.40 to 331.77)              |
| Chronic kidney disease due to other and unspecified causes | 2,943.44<br>(2,504.48 to 3,372.58)           | 3,833.48<br>(2,129.74 to 6,457.88)           | 2,976.58<br>(1,677.70 to 5,000.03)           | 4,350.89<br>(2,335.87 to 7,441.96)           | 208.16<br>(175.61 to 241.72)              | 325.05<br>(176.02 to 547.12)              | 265.89<br>(143.32 to 450.04)              | 356.41<br>(186.23 to 603.24)              |
| Urinary diseases and male infertility                      | 4,769.40<br>(4,086.61 to 5,464.37)           | 6,167.45<br>(4,903.52 to 7,555.53)           | 5,371.02<br>(4,274.64 to 6,643.00)           | 5,710.68<br>(4,632.03 to 7,011.80)           | 394.31<br>(337.26 to 451.25)              | 598.41<br>(476.23 to 751.99)              | 550.32<br>(425.93 to 687.30)              | 535.20<br>(425.55 to 665.51)              |
| Urinary tract infections                                   | 4,458.21<br>(3,808.63 to 5,138.09)           | 5,872.69<br>(4,684.35 to 7,156.60)           | 5,142.62<br>(4,076.34 to 6,387.18)           | 5,435.38<br>(4,393.76 to 6,679.03)           | 371.67<br>(314.71 to 428.08)              | 571.69<br>(445.97 to 715.06)              | 528.17<br>(402.22 to 660.84)              | 511.33<br>(396.76 to 636.55)              |
| Urolithiasis                                               | 149.31<br>(105.60 to 252.08)                 | 120.06<br>(71.95 to 241.02)                  | 91.23<br>(54.62 to 183.87)                   | 114.55<br>(68.69 to 228.30)                  | 10.54<br>(6.72 to 20.09)                  | 9.96<br>(5.29 to 22.27)                   | 8.01<br>(4.21 to 18.03)                   | 9.16<br>(5.01 to 19.90)                   |
| Other urinary diseases                                     | 161.88<br>(94.15 to 352.98)                  | 174.70<br>(85.79 to 456.79)                  | 137.18<br>(66.12 to 343.06)                  | 160.76<br>(81.74 to 408.81)                  | 12.10<br>(6.14 to 28.60)                  | 16.76<br>(7.20 to 46.33)                  | 14.14<br>(5.89 to 39.26)                  | 14.71<br>(6.51 to 40.16)                  |
| Gynecological diseases                                     | 13.45<br>(8.51 to 18.29)                     | 5.72<br>(3.23 to 9.26)                       | 3.43<br>(2.08 to 5.35)                       | 5.80<br>(3.38 to 9.21)                       | 0.60<br>(0.39 to 0.81)                    | 0.36<br>(0.21 to 0.57)                    | 0.23<br>(0.13 to 0.36)                    | 0.35<br>(0.20 to 0.56)                    |
| Uterine fibroids                                           | 7.04<br>(4.06 to 9.73)                       | 2.83<br>(1.45 to 4.90)                       | 1.84<br>(0.98 to 3.09)                       | 2.89<br>(1.44 to 4.79)                       | 0.27<br>(0.17 to 0.37)                    | 0.12<br>(0.07 to 0.20)                    | 0.08<br>(0.05 to 0.14)                    | 0.12<br>(0.06 to 0.20)                    |
| Polycystic ovarian syndrome                                | 3.39<br>(2.01 to 5.18)                       | 0.60<br>(0.18 to 1.54)                       | 0.25<br>(0.07 to 0.56)                       | 0.66<br>(0.21 to 1.61)                       | 0.09<br>(0.05 to 0.14)                    | 0.02<br>(0.00 to 0.14)                    | 0.01<br>(0.00 to 0.02)                    | 0.02<br>(0.01 to 0.04)                    |
| Endometriosis                                              | 0.09<br>(0.03 to 0.19)                       | 0.06<br>(0.01 to 0.16)                       | 0.03<br>(0.01 to 0.09)                       | 0.06<br>(0.02 to 0.16)                       | 0.00<br>(0.00 to 0.00)                    | 0.00<br>(0.00 to 0.00)                    | 0.00<br>(0.00 to 0.00)                    | 0.00<br>(0.00 to 0.00)                    |
| Genital prolapse                                           | 0.64<br>(0.33 to 1.00)                       | 0.31<br>(0.13 to 0.60)                       | 0.18<br>(0.07 to 0.34)                       | 0.31<br>(0.13 to 0.61)                       | 0.04<br>(0.02 to 0.07)                    | 0.02<br>(0.01 to 0.05)                    | 0.01<br>(0.01 to 0.03)                    | 0.02<br>(0.01 to 0.04)                    |
| Other gynecological diseases                               | 2.30<br>(1.53 to 3.55)                       | 1.93<br>(0.97 to 3.14)                       | 1.16<br>(0.64 to 1.88)                       | 1.89<br>(0.99 to 3.30)                       | 0.20<br>(0.12 to 0.28)                    | 0.20<br>(0.10 to 0.35)                    | 0.13<br>(0.06 to 0.22)                    | 0.19<br>(0.09 to 0.33)                    |
| Hemoglobinopathies and hemolytic anemias                   | 539.70<br>(446.35 to 746.10)                 | 507.13<br>(399.11 to 676.36)                 | 396.10<br>(314.47 to 523.18)                 | 481.11<br>(374.42 to 645.02)                 | 35.91<br>(29.40 to 46.38)                 | 43.23<br>(33.20 to 55.05)                 | 36.38<br>(27.78 to 46.31)                 | 39.26<br>(29.96 to 50.27)                 |
| Thalassemias                                               | 14.33<br>(10.55 to 20.52)                    | 4.15<br>(2.60 to 6.94)                       | 3.88<br>(2.42 to 6.66)                       | 4.26<br>(2.68 to 7.04)                       | 0.18<br>(0.14 to 0.27)                    | 0.06<br>(0.04 to 0.10)                    | 0.05<br>(0.03 to 0.09)                    | 0.06<br>(0.04 to 0.10)                    |

|                                                   |                                       |                                       |                                       |                                       |                              |                               |                               |                               |
|---------------------------------------------------|---------------------------------------|---------------------------------------|---------------------------------------|---------------------------------------|------------------------------|-------------------------------|-------------------------------|-------------------------------|
|                                                   | 40.04<br>(28.77 to<br>74.63)          | 29.30<br>(18.96 to<br>55.10)          | 20.93<br>(13.72 to<br>41.00)          | 30.01<br>(19.20 to<br>56.51)          | 0.97<br>(0.71 to<br>1.77)    | 0.89<br>(0.60 to<br>1.58)     | 0.65<br>(0.43 to<br>1.17)     | 0.91<br>(0.59 to<br>1.62)     |
| Sickle cell disorders                             |                                       |                                       |                                       |                                       |                              |                               |                               |                               |
|                                                   | 89.25<br>(71.06 to<br>129.69)         | 97.67<br>(69.72 to<br>143.01)         | 64.66<br>(48.36 to<br>91.92)          | 97.15<br>(68.79 to<br>135.97)         | 3.10<br>(2.46 to<br>4.21)    | 4.63<br>(3.35 to<br>6.36)     | 3.19<br>(2.43 to<br>4.35)     | 4.47<br>(3.28 to<br>6.11)     |
| G6PD deficiency                                   |                                       |                                       |                                       |                                       |                              |                               |                               |                               |
|                                                   | 396.07<br>(320.32 to<br>544.82)       | 376.00<br>(292.70 to<br>494.12)       | 306.63<br>(237.30 to<br>398.11)       | 349.69<br>(269.97 to<br>461.83)       | 31.66<br>(25.39 to<br>40.14) | 37.65<br>(28.26 to<br>48.31)  | 32.50<br>(24.14 to<br>41.92)  | 33.83<br>(25.25 to<br>44.04)  |
| Other hemoglobinopathies and hemolytic anemias    |                                       |                                       |                                       |                                       |                              |                               |                               |                               |
|                                                   | 1,325.55<br>(1,079.43 to<br>1,957.49) | 1,512.07<br>(1,200.89 to<br>2,292.40) | 1,588.22<br>(1,247.28 to<br>2,389.21) | 1,458.38<br>(1,162.74 to<br>2,196.97) | 46.72<br>(38.24 to<br>72.20) | 70.16<br>(56.79 to<br>114.52) | 78.62<br>(62.55 to<br>125.64) | 64.77<br>(52.52 to<br>104.72) |
| Endocrine, metabolic, blood, and immune disorders |                                       |                                       |                                       |                                       |                              |                               |                               |                               |

| Croatia                                       |                                           |                                           |                                           |                                           |                                    |                                   |                                   |                                   |
|-----------------------------------------------|-------------------------------------------|-------------------------------------------|-------------------------------------------|-------------------------------------------|------------------------------------|-----------------------------------|-----------------------------------|-----------------------------------|
| Cause                                         | YLLs (actual counts)                      |                                           |                                           |                                           | Deaths (actual counts)             |                                   |                                   |                                   |
|                                               | 2016                                      | 2040 Forecast                             | 2040 Better Scenario                      | 2040 Worse Scenario                       | 2016                               | 2040 Forecast                     | 2040 Better Scenario              | 2040 Worse Scenario               |
| <b>Musculoskeletal disorders</b>              | <b>1,948.59</b><br>(1,243.14 to 2,315.28) | <b>1,628.25</b><br>(1,064.80 to 2,031.52) | <b>1,367.86</b><br>(897.79 to 1,705.36)   | <b>1,602.30</b><br>(1,038.08 to 1,987.87) | <b>98.37</b><br>(63.34 to 116.96)  | <b>99.98</b><br>(64.82 to 125.61) | <b>86.23</b><br>(56.97 to 107.98) | <b>95.20</b><br>(61.24 to 118.66) |
| Rheumatoid arthritis                          | 669.44<br>(433.05 to 901.87)              | 488.87<br>(297.57 to 717.85)              | 311.98<br>(193.70 to 470.10)              | 493.74<br>(301.23 to 739.15)              | 41.93<br>(26.26 to 55.34)          | 36.74<br>(22.39 to 54.05)         | 24.60<br>(15.26 to 36.78)         | 35.85<br>(21.51 to 53.42)         |
| Other musculoskeletal disorders               | 1,279.15<br>(758.44 to 1,551.82)          | 1,139.38<br>(704.57 to 1,440.84)          | 1,055.87<br>(681.38 to 1,328.54)          | 1,108.56<br>(681.99 to 1,380.22)          | 56.44<br>(32.98 to 68.50)          | 63.24<br>(39.03 to 80.67)         | 61.63<br>(39.71 to 78.04)         | 59.35<br>(36.30 to 74.72)         |
| <b>Other non-communicable diseases</b>        | <b>6,961.06</b><br>(5,819.02 to 8,214.38) | <b>3,420.47</b><br>(2,529.31 to 4,521.39) | <b>2,576.27</b><br>(1,954.20 to 3,315.46) | <b>3,549.16</b><br>(2,639.04 to 4,601.23) | <b>107.26</b><br>(89.52 to 124.25) | <b>83.53</b><br>(59.88 to 106.48) | <b>72.07</b><br>(49.26 to 91.68)  | <b>81.64</b><br>(58.24 to 102.47) |
| Congenital birth defects                      | 6,037.94<br>(4,960.68 to 7,339.99)        | 2,697.44<br>(1,893.49 to 3,659.21)        | 1,952.28<br>(1,420.61 to 2,620.56)        | 2,843.98<br>(1,998.03 to 3,821.44)        | 81.67<br>(67.39 to 96.79)          | 40.73<br>(29.02 to 53.73)         | 30.99<br>(22.83 to 40.21)         | 42.51<br>(30.47 to 55.64)         |
| Neural tube defects                           | 76.83<br>(51.25 to 108.92)                | 13.71<br>(6.99 to 25.59)                  | 7.14<br>(3.88 to 13.52)                   | 14.92<br>(7.54 to 27.95)                  | 0.95<br>(0.66 to 1.33)             | 0.19<br>(0.10 to 0.34)            | 0.10<br>(0.06 to 0.18)            | 0.20<br>(0.11 to 0.36)            |
| Congenital heart anomalies                    | 2,225.85<br>(1,716.55 to 3,476.20)        | 692.14<br>(384.26 to 1,192.52)            | 345.30<br>(196.02 to 628.92)              | 755.07<br>(423.66 to 1,392.49)            | 30.12<br>(23.92 to 45.27)          | 10.11<br>(5.95 to 16.41)          | 5.10<br>(3.06 to 8.64)            | 10.96<br>(6.48 to 18.82)          |
| Orofacial clefts                              | 1.06<br>(0.44 to 1.84)                    | 0.27<br>(0.08 to 0.59)                    | 0.11<br>(0.04 to 0.24)                    | 0.30<br>(0.09 to 0.68)                    | 0.01<br>(0.01 to 0.02)             | 0.00<br>(0.00 to 0.01)            | 0.00<br>(0.00 to 0.00)            | 0.00<br>(0.00 to 0.01)            |
| Down syndrome                                 | 962.19<br>(571.87 to 1,189.72)            | 785.47<br>(494.69 to 1,026.05)            | 808.53<br>(534.71 to 1,048.10)            | 789.77<br>(492.64 to 1,036.06)            | 15.94<br>(9.88 to 19.62)           | 14.69<br>(9.08 to 18.84)          | 15.37<br>(9.79 to 19.72)          | 14.65<br>(9.03 to 18.87)          |
| Other chromosomal abnormalities               | 782.69<br>(478.98 to 1,064.91)            | 547.35<br>(341.61 to 796.52)              | 414.62<br>(256.09 to 604.92)              | 574.23<br>(350.82 to 836.76)              | 9.66<br>(5.89 to 13.04)            | 7.02<br>(4.31 to 10.06)           | 5.35<br>(3.36 to 7.69)            | 7.34<br>(4.47 to 10.53)           |
| Congenital musculoskeletal and limb anomalies | 173.63<br>(62.62 to 244.87)               | 57.05<br>(20.81 to 104.77)                | 32.13<br>(12.48 to 58.84)                 | 61.74<br>(22.79 to 109.27)                | 2.06<br>(0.75 to 2.89)             | 0.69<br>(0.26 to 1.25)            | 0.39<br>(0.15 to 0.70)            | 0.75<br>(0.28 to 1.30)            |
| Urogenital congenital anomalies               | 101.55<br>(52.44 to 150.59)               | 37.65<br>(17.59 to 67.71)                 | 23.72<br>(11.54 to 41.26)                 | 39.88<br>(19.21 to 69.71)                 | 1.47<br>(0.77 to 2.07)             | 0.64<br>(0.31 to 1.08)            | 0.41<br>(0.20 to 0.68)            | 0.67<br>(0.33 to 1.07)            |
| Digestive congenital anomalies                | 487.25<br>(238.20 to 686.98)              | 169.13<br>(71.22 to 319.37)               | 90.11<br>(37.80 to 168.96)                | 183.89<br>(79.33 to 347.13)               | 5.81<br>(2.85 to 8.13)             | 2.05<br>(0.89 to 3.84)            | 1.10<br>(0.47 to 2.03)            | 2.23<br>(0.97 to 4.12)            |
| Other congenital birth defects                | 1,226.89<br>(913.20 to 1,549.31)          | 394.66<br>(242.05 to 602.89)              | 230.63<br>(137.00 to 345.89)              | 424.18<br>(258.27 to 619.48)              | 15.64<br>(11.65 to 19.32)          | 5.35<br>(3.32 to 7.94)            | 3.16<br>(1.97 to 4.56)            | 5.72<br>(3.55 to 8.28)            |
| Skin and subcutaneous diseases                | 301.34<br>(177.88 to 464.02)              | 559.27<br>(316.38 to 799.48)              | 509.86<br>(281.22 to 724.72)              | 529.98<br>(297.36 to 758.17)              | 18.38<br>(9.52 to 25.92)           | 40.91<br>(21.63 to 56.67)         | 39.76<br>(21.07 to 55.12)         | 37.10<br>(19.70 to 50.73)         |
| Cellulitis                                    | 40.56<br>(23.22 to 86.80)                 | 83.88<br>(44.99 to 173.25)                | 82.23<br>(43.42 to 173.63)                | 79.64<br>(43.44 to 167.58)                | 2.13<br>(1.15 to 4.48)             | 5.30<br>(2.67 to 10.94)           | 5.50<br>(2.76 to 11.32)           | 4.82<br>(2.49 to 10.07)           |
| Pyoderma                                      | 173.41<br>(96.82 to 261.81)               | 389.04<br>(206.99 to 546.90)              | 354.69<br>(186.16 to 490.68)              | 368.70<br>(198.29 to 517.92)              | 10.15<br>(5.20 to 14.71)           | 28.10<br>(14.00 to 39.16)         | 27.53<br>(13.61 to 39.26)         | 25.48<br>(12.55 to 35.29)         |
| Decubitus ulcer                               | 43.78<br>(20.61 to 65.54)                 | 52.75<br>(22.87 to 83.04)                 | 42.95<br>(18.36 to 65.96)                 | 49.58<br>(21.11 to 78.45)                 | 3.33<br>(1.41 to 4.86)             | 5.06<br>(2.03 to 8.17)            | 4.38<br>(1.78 to 7.00)            | 4.56<br>(1.77 to 7.33)            |
| Other skin and subcutaneous diseases          | 43.59<br>(17.46 to 69.12)                 | 33.61<br>(13.04 to 51.08)                 | 29.99<br>(11.15 to 44.99)                 | 32.06<br>(12.44 to 47.74)                 | 2.77<br>(0.86 to 4.23)             | 2.45<br>(0.77 to 3.93)            | 2.34<br>(0.73 to 3.69)            | 2.23<br>(0.69 to 3.56)            |
| Sudden infant death syndrome                  | 621.79<br>(420.65 to 860.43)              | 163.76<br>(84.24 to 296.76)               | 114.13<br>(58.33 to 209.89)               | 175.19<br>(89.44 to 315.10)               | 7.22<br>(4.88 to 9.99)             | 1.90<br>(0.98 to 3.44)            | 1.32<br>(0.68 to 2.43)            | 2.03<br>(1.04 to 3.66)            |

|                          |                                          |                                          |                                          |                                          |                                       |                                       |                                       |                                       |
|--------------------------|------------------------------------------|------------------------------------------|------------------------------------------|------------------------------------------|---------------------------------------|---------------------------------------|---------------------------------------|---------------------------------------|
| Injuries                 | 70,270.86<br>(59,885.56 to<br>81,244.51) | 44,991.36<br>(33,748.96 to<br>60,712.49) | 36,008.80<br>(27,068.16 to<br>48,360.95) | 56,155.97<br>(42,108.13 to<br>77,038.86) | 2,783.18<br>(2,172.60 to<br>3,196.29) | 2,470.96<br>(1,627.89 to<br>3,134.76) | 2,172.51<br>(1,397.10 to<br>2,729.72) | 2,642.34<br>(1,813.96 to<br>3,335.81) |
| Transport injuries       | 19,304.02<br>(16,479.26 to<br>22,658.87) | 6,969.90<br>(4,371.36 to<br>11,578.45)   | 4,601.19<br>(2,938.28 to<br>7,539.46)    | 15,699.55<br>(9,570.04 to<br>26,098.56)  | 508.30<br>(438.74 to<br>589.57)       | 229.24<br>(154.37 to<br>355.41)       | 158.75<br>(107.15 to<br>244.37)       | 450.59<br>(292.96 to<br>725.21)       |
| Road injuries            | 17,074.82<br>(14,546.31 to<br>20,004.46) | 5,500.65<br>(3,491.05 to<br>8,962.33)    | 3,659.33<br>(2,333.25 to<br>5,892.92)    | 13,988.63<br>(8,623.11 to<br>23,241.96)  | 442.26<br>(382.81 to<br>511.38)       | 177.39<br>(120.43 to<br>268.31)       | 124.17<br>(84.29 to<br>188.23)        | 392.01<br>(257.39 to<br>625.27)       |
| Pedestrian road injuries | 3,389.38<br>(2,687.47 to<br>4,645.91)    | 962.51<br>(631.44 to<br>1,517.59)        | 485.00<br>(331.34 to<br>742.58)          | 2,044.02<br>(1,256.76 to<br>3,373.24)    | 128.80<br>(104.69 to<br>163.70)       | 50.59<br>(35.23 to<br>74.45)          | 28.27<br>(20.13 to<br>40.93)          | 93.88<br>(60.66 to<br>146.73)         |



| Croatia                                         |                                                               |                                                               |                                                               |                                                               |                                                          |                                                          |                                                          |                                                          |
|-------------------------------------------------|---------------------------------------------------------------|---------------------------------------------------------------|---------------------------------------------------------------|---------------------------------------------------------------|----------------------------------------------------------|----------------------------------------------------------|----------------------------------------------------------|----------------------------------------------------------|
| Cause                                           | YLLs (actual counts)                                          |                                                               |                                                               |                                                               | Deaths (actual counts)                                   |                                                          |                                                          |                                                          |
|                                                 | 2016                                                          | 2040 Forecast                                                 | 2040 Better Scenario                                          | 2040 Worse Scenario                                           | 2016                                                     | 2040 Forecast                                            | 2040 Better Scenario                                     | 2040 Worse Scenario                                      |
| Cyclist road injuries                           | 1,188.55<br>(912.68 to<br>1,424.56)                           | 553.19<br>(323.64 to<br>934.88)                               | 434.15<br>(256.77 to<br>732.80)                               | 1,168.91<br>(658.90 to<br>2,054.42)                           | 36.67<br>(28.16 to<br>44.26)                             | 22.83<br>(13.66 to<br>38.40)                             | 19.85<br>(12.04 to<br>33.10)                             | 40.60<br>(23.04 to<br>70.00)                             |
| Motorcyclist road injuries                      | 3,078.24<br>(2,227.09 to<br>3,849.24)                         | 1,300.98<br>(697.53 to<br>2,378.05)                           | 1,024.67<br>(558.76 to<br>1,899.90)                           | 2,499.03<br>(1,289.63 to<br>4,772.56)                         | 60.48<br>(43.48 to<br>75.67)                             | 28.50<br>(15.92 to<br>52.41)                             | 23.52<br>(13.38 to<br>42.52)                             | 50.85<br>(27.32 to<br>95.42)                             |
| Motor vehicle road injuries                     | 9,357.75<br>(7,584.55 to<br>11,304.75)                        | 2,661.83<br>(1,727.97 to<br>4,260.04)                         | 1,700.30<br>(1,108.53 to<br>2,697.05)                         | 8,217.70<br>(5,079.15 to<br>13,665.18)                        | 214.88<br>(174.91 to<br>259.18)                          | 74.75<br>(50.08 to<br>114.83)                            | 51.96<br>(35.63 to<br>78.17)                             | 205.12<br>(131.57 to<br>330.67)                          |
| Other road injuries                             | 60.89<br>(42.53 to<br>106.55)                                 | 22.15<br>(11.05 to<br>45.32)                                  | 15.21<br>(7.53 to<br>31.87)                                   | 58.98<br>(29.76 to<br>116.38)                                 | 1.43<br>(0.96 to<br>2.78)                                | 0.72<br>(0.31 to<br>1.69)                                | 0.57<br>(0.24 to<br>1.37)                                | 1.57<br>(0.71 to<br>3.42)                                |
| Other transport injuries                        | 2,229.19<br>(1,840.45 to<br>2,696.50)                         | 1,469.25<br>(875.16 to<br>2,510.04)                           | 941.86<br>(571.80 to<br>1,607.46)                             | 1,710.92<br>(991.26 to<br>3,006.14)                           | 66.04<br>(54.51 to<br>79.57)                             | 51.85<br>(32.01 to<br>84.85)                             | 34.59<br>(21.50 to<br>56.16)                             | 58.57<br>(34.25 to<br>103.16)                            |
| <b>Unintentional injuries</b>                   | <b>22,891.31</b><br><b>(16,602.27 to</b><br><b>26,880.21)</b> | <b>19,055.58</b><br><b>(12,181.29 to</b><br><b>23,592.31)</b> | <b>16,439.12</b><br><b>(10,376.72 to</b><br><b>20,198.87)</b> | <b>18,268.83</b><br><b>(11,811.93 to</b><br><b>22,638.24)</b> | <b>1,386.45</b><br><b>(784.48 to</b><br><b>1,673.20)</b> | <b>1,524.31</b><br><b>(775.64 to</b><br><b>1,940.89)</b> | <b>1,418.59</b><br><b>(716.62 to</b><br><b>1,814.13)</b> | <b>1,382.39</b><br><b>(697.21 to</b><br><b>1,763.23)</b> |
| Falls                                           | 12,880.47<br>(7,041.16 to<br>15,711.99)                       | 12,726.38<br>(6,295.84 to<br>15,955.15)                       | 11,448.47<br>(5,663.58 to<br>14,521.24)                       | 11,836.24<br>(5,818.21 to<br>14,828.15)                       | 1,017.62<br>(442.21 to<br>1,273.17)                      | 1,218.35<br>(489.65 to<br>1,613.17)                      | 1,158.04<br>(469.11 to<br>1,540.35)                      | 1,086.99<br>(424.45 to<br>1,450.64)                      |
| Drowning                                        | 2,952.65<br>(2,533.52 to<br>3,424.05)                         | 1,537.99<br>(987.38 to<br>2,325.49)                           | 1,181.68<br>(774.52 to<br>1,763.33)                           | 1,659.44<br>(1,028.21 to<br>2,611.85)                         | 85.63<br>(73.61 to<br>98.75)                             | 54.19<br>(36.68 to<br>79.05)                             | 43.46<br>(30.06 to<br>62.23)                             | 56.67<br>(37.03 to<br>88.46)                             |
| Fire, heat, and hot substances                  | 933.81<br>(780.49 to<br>1,085.28)                             | 595.02<br>(412.25 to<br>856.76)                               | 434.51<br>(309.17 to<br>601.92)                               | 616.11<br>(415.16 to<br>902.36)                               | 49.64<br>(36.99 to<br>57.49)                             | 41.34<br>(27.44 to<br>57.47)                             | 32.71<br>(21.90 to<br>44.32)                             | 40.48<br>(26.07 to<br>57.21)                             |
| Poisonings                                      | 221.60<br>(164.78 to<br>313.33)                               | 96.23<br>(54.99 to<br>221.48)                                 | 61.76<br>(37.24 to<br>141.58)                                 | 103.41<br>(58.46 to<br>242.27)                                | 8.21<br>(6.19 to<br>17.93)                               | 4.99<br>(3.12 to<br>10.10)                               | 3.53<br>(2.31 to<br>6.96)                                | 5.02<br>(3.10 to<br>10.17)                               |
| Exposure to mechanical forces                   | 1,780.37<br>(1,313.86 to<br>2,168.69)                         | 973.76<br>(692.61 to<br>1,306.38)                             | 712.80<br>(509.39 to<br>927.48)                               | 979.12<br>(706.93 to<br>1,290.24)                             | 55.90<br>(39.96 to<br>66.58)                             | 41.65<br>(28.90 to<br>52.63)                             | 33.34<br>(23.52 to<br>41.33)                             | 39.78<br>(27.65 to<br>50.04)                             |
| Unintentional firearm injuries                  | 255.90<br>(211.94 to<br>323.22)                               | 148.58<br>(112.03 to<br>204.95)                               | 115.20<br>(88.23 to<br>154.10)                                | 150.47<br>(112.79 to<br>204.26)                               | 6.94<br>(5.77 to<br>9.67)                                | 5.16<br>(4.05 to<br>7.81)                                | 4.45<br>(3.53 to<br>6.78)                                | 4.97<br>(3.92 to<br>7.30)                                |
| Unintentional suffocation                       | 40.83<br>(29.96 to<br>74.66)                                  | 24.74<br>(16.04 to<br>47.15)                                  | 19.07<br>(12.60 to<br>34.39)                                  | 25.51<br>(16.53 to<br>47.99)                                  | 0.81<br>(0.60 to<br>1.43)                                | 0.62<br>(0.42 to<br>1.16)                                | 0.51<br>(0.35 to<br>0.93)                                | 0.62<br>(0.42 to<br>1.12)                                |
| Other exposure to mechanical forces             | 1,483.64<br>(1,021.39 to<br>1,835.21)                         | 800.45<br>(514.96 to<br>1,086.82)                             | 578.52<br>(377.87 to<br>760.63)                               | 803.14<br>(543.28 to<br>1,059.50)                             | 48.15<br>(31.66 to<br>58.20)                             | 35.87<br>(22.06 to<br>46.26)                             | 28.38<br>(17.53 to<br>35.74)                             | 34.19<br>(21.95 to<br>43.87)                             |
| Adverse effects of medical treatment            | 1,274.11<br>(974.62 to<br>1,636.10)                           | 1,125.47<br>(861.22 to<br>1,439.63)                           | 1,010.01<br>(771.94 to<br>1,277.40)                           | 1,081.45<br>(821.62 to<br>1,375.41)                           | 67.87<br>(50.62 to<br>83.26)                             | 73.51<br>(53.61 to<br>90.70)                             | 70.29<br>(51.08 to<br>87.15)                             | 67.52<br>(48.87 to<br>83.09)                             |
| Animal contact                                  | 152.72<br>(97.36 to<br>192.80)                                | 117.04<br>(70.93 to<br>161.35)                                | 91.90<br>(57.05 to<br>123.41)                                 | 116.13<br>(72.26 to<br>155.48)                                | 5.75<br>(3.61 to<br>7.13)                                | 5.34<br>(3.33 to<br>7.04)                                | 4.40<br>(2.80 to<br>5.71)                                | 5.10<br>(3.19 to<br>6.70)                                |
| Venomous animal contact                         | 64.56<br>(30.78 to<br>86.85)                                  | 40.43<br>(17.20 to<br>61.06)                                  | 33.73<br>(15.06 to<br>50.30)                                  | 40.54<br>(17.90 to<br>61.38)                                  | 1.96<br>(0.86 to<br>2.66)                                | 1.37<br>(0.56 to<br>2.04)                                | 1.20<br>(0.49 to<br>1.74)                                | 1.34<br>(0.56 to<br>2.00)                                |
| Non-venomous animal contact                     | 88.16<br>(61.19 to<br>124.07)                                 | 76.61<br>(49.83 to<br>106.33)                                 | 58.17<br>(38.29 to<br>78.86)                                  | 75.60<br>(49.31 to<br>104.82)                                 | 3.78<br>(2.56 to<br>4.93)                                | 3.97<br>(2.60 to<br>5.31)                                | 3.20<br>(2.14 to<br>4.20)                                | 3.76<br>(2.48 to<br>5.02)                                |
| Foreign body                                    | 1,455.38<br>(1,172.50 to<br>2,169.88)                         | 1,031.52<br>(841.58 to<br>1,422.06)                           | 949.57<br>(773.93 to<br>1,284.34)                             | 1,014.26<br>(822.20 to<br>1,438.96)                           | 50.73<br>(42.35 to<br>66.46)                             | 47.01<br>(38.85 to<br>56.51)                             | 46.72<br>(38.13 to<br>55.93)                             | 43.99<br>(36.28 to<br>53.19)                             |
| Pulmonary aspiration and foreign body in airway | 1,386.16<br>(1,100.10 to<br>2,116.46)                         | 980.82<br>(791.13 to<br>1,382.36)                             | 894.48<br>(726.02 to<br>1,233.53)                             | 965.01<br>(777.31 to<br>1,400.87)                             | 48.43<br>(40.26 to<br>64.61)                             | 44.65<br>(36.80 to<br>54.51)                             | 43.94<br>(35.93 to<br>52.95)                             | 41.83<br>(34.45 to<br>51.54)                             |

|                                             |                                                               |                                                               |                                                              |                                                               |                                                        |                                                        |                                                      |                                                        |
|---------------------------------------------|---------------------------------------------------------------|---------------------------------------------------------------|--------------------------------------------------------------|---------------------------------------------------------------|--------------------------------------------------------|--------------------------------------------------------|------------------------------------------------------|--------------------------------------------------------|
|                                             | 69.23<br>(37.16 to<br>90.27)                                  | 50.70<br>(27.73 to<br>67.78)                                  | 55.09<br>(30.78 to<br>73.19)                                 | 49.24<br>(26.87 to<br>65.53)                                  | 2.30<br>(1.30 to<br>2.95)                              | 2.36<br>(1.32 to<br>3.12)                              | 2.78<br>(1.60 to<br>3.64)                            | 2.16<br>(1.22 to<br>2.88)                              |
| Foreign body in other body part             |                                                               |                                                               |                                                              |                                                               |                                                        |                                                        |                                                      |                                                        |
|                                             | 769.17<br>(541.68 to<br>1,451.89)                             | 617.95<br>(396.86 to<br>1,158.43)                             | 430.35<br>(278.81 to<br>809.79)                              | 618.66<br>(409.86 to<br>1,202.57)                             | 30.37<br>(21.06 to<br>54.72)                           | 28.82<br>(18.63 to<br>51.45)                           | 21.19<br>(13.96 to<br>37.49)                         | 27.74<br>(18.98 to<br>49.57)                           |
| Environmental heat and cold exposure        |                                                               |                                                               |                                                              |                                                               |                                                        |                                                        |                                                      |                                                        |
|                                             | 471.01<br>(391.92 to<br>565.71)                               | 234.21<br>(154.24 to<br>361.73)                               | 118.07<br>(82.46 to<br>166.71)                               | 244.01<br>(157.40 to<br>361.30)                               | 14.73<br>(12.37 to<br>17.37)                           | 9.12<br>(6.24 to<br>13.56)                             | 4.90<br>(3.50 to<br>6.67)                            | 9.08<br>(6.13 to<br>13.06)                             |
| Other unintentional injuries                |                                                               |                                                               |                                                              |                                                               |                                                        |                                                        |                                                      |                                                        |
| <b>Self-harm and interpersonal violence</b> | <b>28,056.57</b><br><b>(22,937.27 to</b><br><b>37,201.75)</b> | <b>18,444.69</b><br><b>(11,836.12 to</b><br><b>28,267.32)</b> | <b>14,443.68</b><br><b>(9,454.12 to</b><br><b>21,919.50)</b> | <b>21,670.39</b><br><b>(12,805.84 to</b><br><b>34,292.40)</b> | <b>888.01</b><br><b>(733.84 to</b><br><b>1,149.64)</b> | <b>704.96</b><br><b>(468.97 to</b><br><b>1,028.94)</b> | <b>582.27</b><br><b>(395.77 to</b><br><b>847.49)</b> | <b>797.25</b><br><b>(503.89 to</b><br><b>1,216.44)</b> |

| Croatia                                                                             |                                                   |                                                      |                                                      |                                                      |                                                |                                                   |                                                   |                                                   |
|-------------------------------------------------------------------------------------|---------------------------------------------------|------------------------------------------------------|------------------------------------------------------|------------------------------------------------------|------------------------------------------------|---------------------------------------------------|---------------------------------------------------|---------------------------------------------------|
| Cause                                                                               | YLLs (actual counts)                              |                                                      |                                                      |                                                      | Deaths (actual counts)                         |                                                   |                                                   |                                                   |
|                                                                                     | 2016                                              | 2040 Forecast                                        | 2040 Better Scenario                                 | 2040 Worse Scenario                                  | 2016                                           | 2040 Forecast                                     | 2040 Better Scenario                              | 2040 Worse Scenario                               |
| Self-harm                                                                           | 25,682.94<br>(20,885.23 to<br>34,156.71)          | 17,389.51<br>(10,723.22 to<br>26,997.56)             | 13,652.08<br>(8,710.87 to<br>20,931.82)              | 20,546.85<br>(11,840.25 to<br>32,900.07)             | 824.94<br>(679.34 to<br>1,072.54)              | 670.67<br>(433.42 to<br>993.82)                   | 555.27<br>(365.37 to<br>813.82)                   | 761.51<br>(463.77 to<br>1,180.18)                 |
| Self-harm by firearm                                                                | 3,679.28<br>(2,358.26 to<br>5,686.84)             | 1,757.24<br>(884.81 to<br>3,214.97)                  | 1,222.04<br>(626.61 to<br>2,219.75)                  | 2,131.59<br>(1,005.40 to<br>4,067.34)                | 105.97<br>(67.96 to<br>156.30)                 | 57.95<br>(30.07 to<br>102.14)                     | 42.03<br>(22.50 to<br>74.59)                      | 68.12<br>(33.72 to<br>125.02)                     |
| Self-harm by other specified means                                                  | 22,003.66<br>(17,800.37 to<br>29,557.82)          | 15,632.27<br>(9,755.53 to<br>24,069.10)              | 12,430.04<br>(7,998.26 to<br>18,945.44)              | 18,415.26<br>(10,750.36 to<br>29,437.82)             | 718.97<br>(594.65 to<br>940.76)                | 612.73<br>(397.61 to<br>904.59)                   | 513.24<br>(338.82 to<br>761.62)                   | 693.40<br>(424.41 to<br>1,049.02)                 |
| Interpersonal violence                                                              | 2,373.63<br>(1,803.80 to<br>3,778.88)             | 1,055.18<br>(708.12 to<br>1,825.24)                  | 791.60<br>(539.89 to<br>1,359.32)                    | 1,123.54<br>(734.43 to<br>1,999.15)                  | 63.07<br>(48.12 to<br>102.45)                  | 34.28<br>(23.33 to<br>60.09)                      | 27.00<br>(18.60 to<br>46.90)                      | 35.73<br>(24.02 to<br>63.77)                      |
| Physical violence by firearm                                                        | 935.93<br>(635.70 to<br>1,697.75)                 | 356.84<br>(225.20 to<br>683.71)                      | 248.79<br>(160.21 to<br>447.02)                      | 370.47<br>(228.89 to<br>687.16)                      | 21.91<br>(15.00 to<br>40.51)                   | 9.44<br>(6.10 to<br>18.25)                        | 6.77<br>(4.43 to<br>12.51)                        | 9.66<br>(6.14 to<br>18.18)                        |
| Physical violence by sharp object                                                   | 608.27<br>(421.97 to<br>1,069.94)                 | 283.36<br>(186.81 to<br>509.71)                      | 211.09<br>(140.78 to<br>368.66)                      | 289.56<br>(189.99 to<br>521.72)                      | 16.79<br>(12.05 to<br>30.24)                   | 9.46<br>(6.51 to<br>17.00)                        | 7.39<br>(5.16 to<br>12.99)                        | 9.41<br>(6.45 to<br>16.99)                        |
| Physical violence by other means                                                    | 829.43<br>(598.16 to<br>1,529.25)                 | 414.99<br>(241.69 to<br>795.58)                      | 331.72<br>(199.37 to<br>638.46)                      | 463.51<br>(262.56 to<br>919.60)                      | 24.37<br>(17.87 to<br>44.60)                   | 15.38<br>(9.28 to<br>30.67)                       | 12.83<br>(7.94 to<br>24.66)                       | 16.66<br>(9.77 to<br>32.54)                       |
| <b>Forces of nature, conflict and terrorism, and executions and police conflict</b> | <b>18.97</b><br><b>(16.76 to</b><br><b>21.01)</b> | <b>521.18</b><br><b>(0.00 to</b><br><b>4,943.82)</b> | <b>524.81</b><br><b>(0.00 to</b><br><b>4,951.07)</b> | <b>517.19</b><br><b>(0.00 to</b><br><b>4,906.34)</b> | <b>0.42</b><br><b>(0.37 to</b><br><b>0.47)</b> | <b>12.45</b><br><b>(0.00 to</b><br><b>130.95)</b> | <b>12.90</b><br><b>(0.00 to</b><br><b>135.36)</b> | <b>12.11</b><br><b>(0.00 to</b><br><b>125.11)</b> |
| Exposure to forces of nature                                                        | 0.00<br>(0.00 to<br>0.00)                         | 2.87<br>(0.00 to<br>20.54)                           | 2.89<br>(0.00 to<br>20.68)                           | 2.84<br>(0.00 to<br>20.54)                           | 0.00<br>(0.00 to<br>0.00)                      | 0.08<br>(0.00 to<br>0.77)                         | 0.09<br>(0.00 to<br>0.91)                         | 0.08<br>(0.00 to<br>0.69)                         |
| Conflict and terrorism                                                              | 0.00<br>(0.00 to<br>0.00)                         | 518.32<br>(0.00 to<br>4,927.09)                      | 521.93<br>(0.00 to<br>4,934.63)                      | 514.35<br>(0.00 to<br>4,891.19)                      | 0.00<br>(0.00 to<br>0.00)                      | 12.36<br>(0.00 to<br>129.94)                      | 12.81<br>(0.00 to<br>134.27)                      | 12.03<br>(0.00 to<br>124.37)                      |
| Executions and police conflict                                                      | 18.97<br>(16.76 to<br>21.01)                      | 0.00<br>(0.00 to<br>0.00)                            | 0.00<br>(0.00 to<br>0.00)                            | 0.00<br>(0.00 to<br>0.00)                            | 0.42<br>(0.37 to<br>0.47)                      | 0.00<br>(0.00 to<br>0.00)                         | 0.00<br>(0.00 to<br>0.00)                         | 0.00<br>(0.00 to<br>0.00)                         |

| Czech Republic                                                           |                                                       |                                                       |                                                       |                                                       |                                                 |                                                 |                                                |                                                 |
|--------------------------------------------------------------------------|-------------------------------------------------------|-------------------------------------------------------|-------------------------------------------------------|-------------------------------------------------------|-------------------------------------------------|-------------------------------------------------|------------------------------------------------|-------------------------------------------------|
| Cause                                                                    | YLLs (actual counts)                                  |                                                       |                                                       |                                                       | Deaths (actual counts)                          |                                                 |                                                |                                                 |
|                                                                          | 2016                                                  | 2040 Forecast                                         | 2040 Better Scenario                                  | 2040 Worse Scenario                                   | 2016                                            | 2040 Forecast                                   | 2040 Better Scenario                           | 2040 Worse Scenario                             |
| <b>All causes</b>                                                        | <b>1,708,380.34</b><br>(1,625,470.82 to 1,788,655.95) | <b>1,553,652.36</b><br>(1,306,799.97 to 1,822,017.90) | <b>1,305,164.62</b><br>(1,110,902.37 to 1,516,033.53) | <b>1,996,303.92</b><br>(1,653,888.89 to 2,373,903.72) | <b>108,278.20</b><br>(103,474.67 to 112,916.94) | <b>130,105.17</b><br>(110,905.91 to 153,438.24) | <b>115,243.02</b><br>(98,911.90 to 135,731.50) | <b>155,457.02</b><br>(133,004.05 to 184,496.87) |
| <b>Communicable, maternal, neonatal, and nutritional diseases</b>        | <b>63,770.57</b><br>(57,637.30 to 70,480.98)          | <b>54,115.14</b><br>(43,168.09 to 68,545.02)          | <b>46,024.33</b><br>(37,639.51 to 56,537.35)          | <b>67,973.83</b><br>(51,255.55 to 90,149.74)          | <b>3,517.04</b><br>(3,181.27 to 3,904.28)       | <b>4,726.36</b><br>(3,796.72 to 5,869.52)       | <b>4,383.97</b><br>(3,578.26 to 5,331.26)      | <b>5,305.30</b><br>(4,114.63 to 6,876.40)       |
| <b>HIV/AIDS and tuberculosis</b>                                         | <b>1,895.07</b><br>(1,738.42 to 2,092.67)             | <b>961.86</b><br>(649.74 to 1,319.01)                 | <b>675.43</b><br>(433.96 to 931.04)                   | <b>1,424.22</b><br>(977.39 to 1,976.80)               | <b>72.12</b><br>(65.51 to 80.32)                | <b>47.00</b><br>(30.16 to 68.20)                | <b>33.97</b><br>(22.88 to 47.86)               | <b>69.17</b><br>(43.69 to 104.22)               |
| <b>Tuberculosis</b>                                                      | <b>992.82</b><br>(874.01 to 1,176.42)                 | <b>460.56</b><br>(206.44 to 776.10)                   | <b>302.70</b><br>(193.44 to 471.37)                   | <b>750.96</b><br>(413.20 to 1,219.61)                 | <b>50.86</b><br>(44.56 to 59.28)                | <b>34.65</b><br>(20.23 to 55.75)                | <b>24.33</b><br>(15.55 to 36.55)               | <b>52.91</b><br>(28.92 to 86.26)                |
| <b>HIV/AIDS</b>                                                          | <b>902.25</b><br>(818.36 to 999.35)                   | <b>501.30</b><br>(282.71 to 722.53)                   | <b>372.72</b><br>(186.33 to 558.83)                   | <b>673.26</b><br>(405.62 to 934.06)                   | <b>21.26</b><br>(19.35 to 23.52)                | <b>12.35</b><br>(6.75 to 18.31)                 | <b>9.65</b><br>(4.75 to 14.78)                 | <b>16.26</b><br>(9.29 to 23.40)                 |
| <b>Diarrhea, lower respiratory, and other common infectious diseases</b> | <b>47,610.14</b><br>(43,284.22 to 53,015.26)          | <b>45,697.81</b><br>(35,930.04 to 59,694.31)          | <b>38,798.01</b><br>(31,486.28 to 48,937.16)          | <b>58,201.47</b><br>(43,307.96 to 80,281.10)          | <b>3,150.45</b><br>(2,819.40 to 3,530.88)       | <b>4,449.55</b><br>(3,526.96 to 5,601.53)       | <b>4,112.38</b><br>(3,321.11 to 5,059.91)      | <b>5,013.10</b><br>(3,860.30 to 6,612.23)       |
| <b>Diarrheal diseases</b>                                                | <b>2,773.75</b><br>(2,512.77 to 3,068.89)             | <b>7,941.77</b><br>(2,721.21 to 18,903.02)            | <b>8,556.05</b><br>(3,981.15 to 17,574.96)            | <b>6,360.72</b><br>(2,040.81 to 17,023.69)            | <b>197.25</b><br>(176.17 to 223.87)             | <b>800.26</b><br>(281.23 to 1,883.76)           | <b>908.21</b><br>(425.65 to 1,801.60)          | <b>609.10</b><br>(200.16 to 1,538.34)           |
| <b>Intestinal infectious diseases</b>                                    | <b>12.86</b><br>(4.27 to 30.88)                       | <b>8.25</b><br>(2.71 to 19.64)                        | <b>8.04</b><br>(2.65 to 19.48)                        | <b>8.57</b><br>(2.83 to 20.95)                        | <b>0.35</b><br>(0.12 to 0.84)                   | <b>0.29</b><br>(0.10 to 0.67)                   | <b>0.29</b><br>(0.10 to 0.67)                  | <b>0.29</b><br>(0.10 to 0.65)                   |
| <b>Typhoid fever</b>                                                     | <b>3.54</b><br>(1.14 to 7.99)                         | <b>3.74</b><br>(1.17 to 8.47)                         | <b>4.32</b><br>(1.38 to 10.17)                        | <b>3.41</b><br>(1.07 to 7.61)                         | <b>0.10</b><br>(0.03 to 0.22)                   | <b>0.13</b><br>(0.04 to 0.29)                   | <b>0.15</b><br>(0.05 to 0.35)                  | <b>0.11</b><br>(0.04 to 0.25)                   |
| <b>Paratyphoid fever</b>                                                 | <b>8.98</b><br>(2.63 to 22.80)                        | <b>4.25</b><br>(1.15 to 11.69)                        | <b>3.47</b><br>(0.93 to 9.10)                         | <b>4.91</b><br>(1.38 to 12.87)                        | <b>0.24</b><br>(0.07 to 0.60)                   | <b>0.13</b><br>(0.04 to 0.36)                   | <b>0.11</b><br>(0.03 to 0.29)                  | <b>0.15</b><br>(0.04 to 0.39)                   |
| <b>Other intestinal infectious diseases</b>                              | <b>0.34</b><br>(0.13 to 0.69)                         | <b>0.25</b><br>(0.09 to 0.54)                         | <b>0.24</b><br>(0.09 to 0.53)                         | <b>0.26</b><br>(0.10 to 0.56)                         | <b>0.02</b><br>(0.01 to 0.04)                   | <b>0.02</b><br>(0.01 to 0.06)                   | <b>0.02</b><br>(0.01 to 0.06)                  | <b>0.02</b><br>(0.01 to 0.06)                   |
| <b>Lower respiratory infections</b>                                      | <b>42,676.69</b><br>(38,366.48 to 47,886.99)          | <b>36,305.93</b><br>(23,541.80 to 50,853.11)          | <b>28,925.35</b><br>(19,236.63 to 39,878.19)          | <b>50,224.95</b><br>(33,735.58 to 73,196.47)          | <b>2,886.74</b><br>(2,566.20 to 3,276.91)       | <b>3,594.62</b><br>(2,461.97 to 4,828.20)       | <b>3,152.20</b><br>(2,202.69 to 4,178.41)      | <b>4,346.79</b><br>(2,986.23 to 6,022.46)       |
| <b>Upper respiratory infections</b>                                      | <b>21.20</b><br>(11.40 to 35.87)                      | <b>15.70</b><br>(5.62 to 36.65)                       | <b>11.42</b><br>(4.22 to 24.36)                       | <b>19.14</b><br>(6.88 to 40.60)                       | <b>1.01</b><br>(0.47 to 1.77)                   | <b>1.08</b><br>(0.34 to 2.56)                   | <b>0.83</b><br>(0.27 to 1.91)                  | <b>1.26</b><br>(0.40 to 2.80)                   |
| <b>Otitis media</b>                                                      | <b>8.46</b><br>(6.11 to 11.99)                        | <b>0.49</b><br>(0.24 to 0.94)                         | <b>0.50</b><br>(0.25 to 0.97)                         | <b>0.48</b><br>(0.25 to 0.94)                         | <b>0.30</b><br>(0.23 to 0.39)                   | <b>0.03</b><br>(0.01 to 0.06)                   | <b>0.03</b><br>(0.01 to 0.07)                  | <b>0.03</b><br>(0.01 to 0.06)                   |
| <b>Meningitis</b>                                                        | <b>1,333.23</b><br>(1,153.19 to 1,580.22)             | <b>658.75</b><br>(476.66 to 868.09)                   | <b>592.53</b><br>(429.97 to 781.13)                   | <b>742.85</b><br>(538.46 to 996.37)                   | <b>41.20</b><br>(36.34 to 49.60)                | <b>24.71</b><br>(18.46 to 31.68)                | <b>23.20</b><br>(17.32 to 29.24)               | <b>26.12</b><br>(20.32 to 32.54)                |
| <b>Pneumococcal meningitis</b>                                           | <b>276.60</b><br>(237.80 to 335.47)                   | <b>136.38</b><br>(98.30 to 184.75)                    | <b>135.79</b><br>(96.37 to 183.84)                    | <b>138.26</b><br>(102.91 to 185.47)                   | <b>9.64</b><br>(8.32 to 11.75)                  | <b>6.18</b><br>(4.37 to 8.21)                   | <b>6.33</b><br>(4.41 to 8.50)                  | <b>6.07</b><br>(4.46 to 8.09)                   |
| <b>H influenzae type B meningitis</b>                                    | <b>370.24</b><br>(316.30 to 434.82)                   | <b>300.45</b><br>(191.83 to 443.84)                   | <b>281.68</b><br>(186.02 to 411.58)                   | <b>343.26</b><br>(205.51 to 537.79)                   | <b>10.99</b><br>(9.44 to 12.90)                 | <b>9.11</b><br>(6.80 to 11.62)                  | <b>9.16</b><br>(6.82 to 11.69)                 | <b>9.37</b><br>(7.08 to 12.18)                  |
| <b>Meningococcal meningitis</b>                                          | <b>370.27</b><br>(314.71 to 436.98)                   | <b>111.60</b><br>(76.76 to 160.18)                    | <b>88.85</b><br>(62.96 to 120.86)                     | <b>130.72</b><br>(92.53 to 178.19)                    | <b>10.17</b><br>(8.83 to 12.11)                 | <b>4.52</b><br>(3.16 to 6.20)                   | <b>3.76</b><br>(2.68 to 4.94)                  | <b>5.08</b><br>(3.70 to 6.69)                   |
| <b>Other meningitis</b>                                                  | <b>316.12</b><br>(274.05 to 377.73)                   | <b>110.32</b><br>(78.21 to 157.68)                    | <b>86.21</b><br>(61.36 to 116.23)                     | <b>130.61</b><br>(93.18 to 179.37)                    | <b>10.40</b><br>(9.01 to 12.65)                 | <b>4.90</b><br>(3.42 to 6.77)                   | <b>3.96</b><br>(2.79 to 5.26)                  | <b>5.60</b><br>(4.10 to 7.53)                   |
| <b>Encephalitis</b>                                                      | <b>726.74</b><br>(502.54 to 884.09)                   | <b>599.97</b><br>(363.96 to 769.23)                   | <b>574.35</b><br>(345.02 to 746.69)                   | <b>621.05</b><br>(387.95 to 778.56)                   | <b>21.09</b><br>(13.05 to 25.81)                | <b>23.41</b><br>(12.32 to 32.20)                | <b>23.08</b><br>(11.96 to 31.99)               | <b>23.49</b><br>(12.74 to 31.24)                |

|                |                             |                               |                               |                                 |                           |                            |                            |                            |
|----------------|-----------------------------|-------------------------------|-------------------------------|---------------------------------|---------------------------|----------------------------|----------------------------|----------------------------|
| Diphtheria     | 2.27<br>(1.47 to<br>3.37)   | 0.48<br>(0.25 to<br>0.84)     | 0.44<br>(0.23 to<br>0.78)     | 0.58<br>(0.30 to<br>1.04)       | 0.05<br>(0.03 to<br>0.08) | 0.01<br>(0.01 to<br>0.02)  | 0.01<br>(0.01 to<br>0.02)  | 0.01<br>(0.01 to<br>0.02)  |
| Whooping cough | 12.45<br>(3.44 to<br>21.58) | 4.13<br>(0.69 to<br>10.53)    | 1.97<br>(0.33 to<br>4.43)     | 10.21<br>(1.60 to<br>29.22)     | 0.16<br>(0.04 to<br>0.27) | 0.05<br>(0.01 to<br>0.13)  | 0.03<br>(0.00 to<br>0.06)  | 0.12<br>(0.02 to<br>0.35)  |
| Tetanus        | 4.63<br>(2.93 to<br>6.29)   | 0.49<br>(0.29 to<br>0.76)     | 0.45<br>(0.26 to<br>0.72)     | 0.59<br>(0.36 to<br>0.93)       | 0.15<br>(0.10 to<br>0.20) | 0.02<br>(0.01 to<br>0.03)  | 0.02<br>(0.01 to<br>0.03)  | 0.02<br>(0.01 to<br>0.03)  |
| Measles        | 2.66<br>(2.12 to<br>3.29)   | 139.49<br>(0.46 to<br>865.72) | 106.56<br>(0.41 to<br>604.87) | 188.91<br>(0.53 to<br>1,107.27) | 0.05<br>(0.04 to<br>0.06) | 2.65<br>(0.01 to<br>15.83) | 2.10<br>(0.01 to<br>12.73) | 3.52<br>(0.01 to<br>21.02) |

| Czech Republic                                        |                                                      |                                                      |                                                      |                                                      |                                                |                                                |                                                |                                                |
|-------------------------------------------------------|------------------------------------------------------|------------------------------------------------------|------------------------------------------------------|------------------------------------------------------|------------------------------------------------|------------------------------------------------|------------------------------------------------|------------------------------------------------|
| Cause                                                 | YLLs (actual counts)                                 |                                                      |                                                      |                                                      | Deaths (actual counts)                         |                                                |                                                |                                                |
|                                                       | 2016                                                 | 2040 Forecast                                        | 2040 Better Scenario                                 | 2040 Worse Scenario                                  | 2016                                           | 2040 Forecast                                  | 2040 Better Scenario                           | 2040 Worse Scenario                            |
| Varicella and herpes zoster                           | 35.21<br>(15.04 to<br>47.09)                         | 22.38<br>(9.43 to<br>34.13)                          | 20.35<br>(8.60 to<br>30.95)                          | 23.41<br>(10.35 to<br>34.56)                         | 2.10<br>(0.92 to<br>2.92)                      | 2.42<br>(1.04 to<br>3.81)                      | 2.37<br>(1.00 to<br>3.71)                      | 2.35<br>(0.98 to<br>3.71)                      |
| <b>Neglected tropical diseases and malaria</b>        | <b>82.60</b><br><b>(71.45 to</b><br><b>91.41)</b>    | <b>66.64</b><br><b>(56.44 to</b><br><b>75.61)</b>    | <b>65.70</b><br><b>(55.24 to</b><br><b>74.90)</b>    | <b>66.78</b><br><b>(56.77 to</b><br><b>75.77)</b>    | <b>2.55</b><br><b>(2.15 to</b><br><b>2.82)</b> | <b>2.81</b><br><b>(2.22 to</b><br><b>3.27)</b> | <b>2.85</b><br><b>(2.23 to</b><br><b>3.33)</b> | <b>2.71</b><br><b>(2.17 to</b><br><b>3.16)</b> |
| Malaria                                               | 0.00<br>(0.00 to<br>0.00)                            | 0.00<br>(0.00 to<br>0.00)                            | 0.00<br>(0.00 to<br>0.00)                            | 0.00<br>(0.00 to<br>0.00)                            | 0.00<br>(0.00 to<br>0.00)                      | 0.00<br>(0.00 to<br>0.00)                      | 0.00<br>(0.00 to<br>0.00)                      | 0.00<br>(0.00 to<br>0.00)                      |
| Chagas disease                                        | 0.00<br>(0.00 to<br>0.00)                            | 0.00<br>(0.00 to<br>0.00)                            | 0.00<br>(0.00 to<br>0.00)                            | 0.00<br>(0.00 to<br>0.00)                            | 0.00<br>(0.00 to<br>0.00)                      | 0.00<br>(0.00 to<br>0.00)                      | 0.00<br>(0.00 to<br>0.00)                      | 0.00<br>(0.00 to<br>0.00)                      |
| Leishmaniasis                                         | 0.00<br>(0.00 to<br>0.00)                            | 0.00<br>(0.00 to<br>0.00)                            | 0.00<br>(0.00 to<br>0.00)                            | 0.00<br>(0.00 to<br>0.00)                            | 0.00<br>(0.00 to<br>0.00)                      | 0.00<br>(0.00 to<br>0.00)                      | 0.00<br>(0.00 to<br>0.00)                      | 0.00<br>(0.00 to<br>0.00)                      |
| African trypanosomiasis                               | 0.00<br>(0.00 to<br>0.00)                            | 0.00<br>(0.00 to<br>0.00)                            | 0.00<br>(0.00 to<br>0.00)                            | 0.00<br>(0.00 to<br>0.00)                            | 0.00<br>(0.00 to<br>0.00)                      | 0.00<br>(0.00 to<br>0.00)                      | 0.00<br>(0.00 to<br>0.00)                      | 0.00<br>(0.00 to<br>0.00)                      |
| Schistosomiasis                                       | 0.00<br>(0.00 to<br>0.00)                            | 0.00<br>(0.00 to<br>0.00)                            | 0.00<br>(0.00 to<br>0.00)                            | 0.00<br>(0.00 to<br>0.00)                            | 0.00<br>(0.00 to<br>0.00)                      | 0.00<br>(0.00 to<br>0.00)                      | 0.00<br>(0.00 to<br>0.00)                      | 0.00<br>(0.00 to<br>0.00)                      |
| Cysticercosis                                         | 2.76<br>(2.17 to<br>3.42)                            | 0.90<br>(0.69 to<br>1.15)                            | 0.88<br>(0.67 to<br>1.13)                            | 0.90<br>(0.69 to<br>1.15)                            | 0.10<br>(0.08 to<br>0.12)                      | 0.04<br>(0.03 to<br>0.05)                      | 0.04<br>(0.03 to<br>0.05)                      | 0.04<br>(0.03 to<br>0.05)                      |
| Cystic echinococcosis                                 | 22.55<br>(19.05 to<br>26.28)                         | 14.77<br>(11.65 to<br>18.53)                         | 12.78<br>(10.38 to<br>15.72)                         | 15.94<br>(12.49 to<br>19.99)                         | 0.98<br>(0.84 to<br>1.15)                      | 0.94<br>(0.73 to<br>1.20)                      | 0.85<br>(0.68 to<br>1.08)                      | 0.97<br>(0.76 to<br>1.23)                      |
| Dengue                                                | 0.00<br>(0.00 to<br>0.00)                            | 0.00<br>(0.00 to<br>0.00)                            | 0.00<br>(0.00 to<br>0.00)                            | 0.00<br>(0.00 to<br>0.00)                            | 0.00<br>(0.00 to<br>0.00)                      | 0.00<br>(0.00 to<br>0.00)                      | 0.00<br>(0.00 to<br>0.00)                      | 0.00<br>(0.00 to<br>0.00)                      |
| Yellow fever                                          | 0.00<br>(0.00 to<br>0.00)                            | 0.00<br>(0.00 to<br>0.00)                            | 0.00<br>(0.00 to<br>0.00)                            | 0.00<br>(0.00 to<br>0.00)                            | 0.00<br>(0.00 to<br>0.00)                      | 0.00<br>(0.00 to<br>0.00)                      | 0.00<br>(0.00 to<br>0.00)                      | 0.00<br>(0.00 to<br>0.00)                      |
| Rabies                                                | 0.31<br>(0.25 to<br>0.38)                            | 0.23<br>(0.19 to<br>0.29)                            | 0.21<br>(0.17 to<br>0.26)                            | 0.24<br>(0.19 to<br>0.30)                            | 0.01<br>(0.01 to<br>0.01)                      | 0.01<br>(0.01 to<br>0.02)                      | 0.01<br>(0.01 to<br>0.02)                      | 0.01<br>(0.01 to<br>0.02)                      |
| Intestinal nematode infections                        | 0.00<br>(0.00 to<br>0.00)                            | 0.00<br>(0.00 to<br>0.00)                            | 0.00<br>(0.00 to<br>0.00)                            | 0.00<br>(0.00 to<br>0.00)                            | 0.00<br>(0.00 to<br>0.00)                      | 0.00<br>(0.00 to<br>0.00)                      | 0.00<br>(0.00 to<br>0.00)                      | 0.00<br>(0.00 to<br>0.00)                      |
| Other neglected tropical diseases                     | 56.97<br>(46.55 to<br>64.80)                         | 50.75<br>(40.29 to<br>58.57)                         | 51.83<br>(40.86 to<br>59.93)                         | 49.70<br>(39.70 to<br>57.52)                         | 1.46<br>(1.08 to<br>1.66)                      | 1.81<br>(1.18 to<br>2.19)                      | 1.94<br>(1.24 to<br>2.35)                      | 1.69<br>(1.12 to<br>2.04)                      |
| <b>Maternal disorders</b>                             | <b>307.14</b><br><b>(261.66 to</b><br><b>356.59)</b> | <b>187.54</b><br><b>(134.41 to</b><br><b>251.14)</b> | <b>162.86</b><br><b>(116.40 to</b><br><b>215.22)</b> | <b>207.17</b><br><b>(148.44 to</b><br><b>279.61)</b> | <b>5.99</b><br><b>(5.13 to</b><br><b>6.97)</b> | <b>3.65</b><br><b>(2.63 to</b><br><b>4.87)</b> | <b>3.17</b><br><b>(2.30 to</b><br><b>4.15)</b> | <b>4.03</b><br><b>(2.89 to</b><br><b>5.44)</b> |
| Maternal hemorrhage                                   | 54.12<br>(38.56 to<br>73.91)                         | 30.42<br>(18.24 to<br>47.40)                         | 26.52<br>(16.19 to<br>41.07)                         | 33.44<br>(20.43 to<br>52.57)                         | 1.05<br>(0.74 to<br>1.43)                      | 0.59<br>(0.36 to<br>0.90)                      | 0.51<br>(0.32 to<br>0.79)                      | 0.65<br>(0.40 to<br>1.00)                      |
| Maternal sepsis and other maternal infections         | 5.75<br>(3.06 to<br>9.26)                            | 3.20<br>(1.51 to<br>5.71)                            | 2.76<br>(1.33 to<br>4.96)                            | 3.54<br>(1.71 to<br>6.28)                            | 0.11<br>(0.06 to<br>0.18)                      | 0.06<br>(0.03 to<br>0.11)                      | 0.05<br>(0.03 to<br>0.09)                      | 0.07<br>(0.03 to<br>0.12)                      |
| Maternal hypertensive disorders                       | 16.98<br>(11.07 to<br>24.53)                         | 10.37<br>(5.54 to<br>17.41)                          | 8.91<br>(4.85 to<br>14.82)                           | 11.50<br>(6.32 to<br>19.14)                          | 0.31<br>(0.20 to<br>0.45)                      | 0.19<br>(0.10 to<br>0.31)                      | 0.16<br>(0.09 to<br>0.27)                      | 0.21<br>(0.12 to<br>0.34)                      |
| Maternal obstructed labor and uterine rupture         | 9.90<br>(5.47 to<br>15.11)                           | 5.94<br>(2.82 to<br>10.12)                           | 5.00<br>(2.48 to<br>8.30)                            | 6.70<br>(3.29 to<br>11.78)                           | 0.21<br>(0.12 to<br>0.32)                      | 0.13<br>(0.06 to<br>0.22)                      | 0.11<br>(0.05 to<br>0.18)                      | 0.14<br>(0.07 to<br>0.25)                      |
| Maternal abortion, miscarriage, and ectopic pregnancy | 64.78<br>(48.22 to<br>83.96)                         | 42.58<br>(24.29 to<br>68.48)                         | 36.47<br>(21.57 to<br>59.72)                         | 47.35<br>(27.61 to<br>79.93)                         | 1.29<br>(0.96 to<br>1.69)                      | 0.86<br>(0.49 to<br>1.37)                      | 0.73<br>(0.43 to<br>1.17)                      | 0.95<br>(0.55 to<br>1.58)                      |

|                                        |                                |                               |                              |                               |                           |                           |                           |                           |
|----------------------------------------|--------------------------------|-------------------------------|------------------------------|-------------------------------|---------------------------|---------------------------|---------------------------|---------------------------|
|                                        | 24.35<br>(16.19 to<br>33.68)   | 16.59<br>(9.09 to<br>26.54)   | 14.11<br>(7.58 to<br>23.00)  | 18.64<br>(9.87 to<br>29.91)   | 0.45<br>(0.30 to<br>0.61) | 0.30<br>(0.16 to<br>0.47) | 0.26<br>(0.14 to<br>0.41) | 0.34<br>(0.18 to<br>0.54) |
| Indirect maternal deaths               |                                |                               |                              |                               |                           |                           |                           |                           |
|                                        | 5.80<br>(3.33 to<br>9.57)      | 3.15<br>(1.55 to<br>5.81)     | 2.69<br>(1.36 to<br>4.93)    | 3.53<br>(1.71 to<br>6.55)     | 0.11<br>(0.07 to<br>0.18) | 0.06<br>(0.03 to<br>0.11) | 0.05<br>(0.03 to<br>0.09) | 0.07<br>(0.03 to<br>0.12) |
| Late maternal deaths                   |                                |                               |                              |                               |                           |                           |                           |                           |
|                                        | 0.02<br>(0.01 to<br>0.04)      | 0.09<br>(0.01 to<br>0.38)     | 0.07<br>(0.01 to<br>0.32)    | 0.11<br>(0.01 to<br>0.41)     | 0.00<br>(0.00 to<br>0.00) | 0.00<br>(0.00 to<br>0.01) | 0.00<br>(0.00 to<br>0.01) | 0.00<br>(0.00 to<br>0.01) |
| Maternal deaths aggravated by HIV/AIDS |                                |                               |                              |                               |                           |                           |                           |                           |
|                                        | 125.44<br>(99.62 to<br>157.30) | 75.19<br>(47.98 to<br>106.67) | 66.33<br>(41.98 to<br>94.64) | 82.37<br>(51.86 to<br>119.75) | 2.46<br>(1.96 to<br>3.06) | 1.47<br>(0.93 to<br>2.09) | 1.29<br>(0.82 to<br>1.83) | 1.60<br>(1.03 to<br>2.35) |
| Other maternal disorders               |                                |                               |                              |                               |                           |                           |                           |                           |

| Czech Republic                                                          |                                             |                                           |                                           |                                            |                                    |                                    |                                    |                                   |
|-------------------------------------------------------------------------|---------------------------------------------|-------------------------------------------|-------------------------------------------|--------------------------------------------|------------------------------------|------------------------------------|------------------------------------|-----------------------------------|
| Cause                                                                   | YLLs (actual counts)                        |                                           |                                           |                                            | Deaths (actual counts)             |                                    |                                    |                                   |
|                                                                         | 2016                                        | 2040 Forecast                             | 2040 Better Scenario                      | 2040 Worse Scenario                        | 2016                               | 2040 Forecast                      | 2040 Better Scenario               | 2040 Worse Scenario               |
| <b>Neonatal disorders</b>                                               | <b>10,880.65</b><br>(7,645.04 to 14,840.08) | <b>5,133.16</b><br>(2,631.97 to 8,923.95) | <b>4,185.96</b><br>(2,125.50 to 7,149.11) | <b>6,092.11</b><br>(3,047.92 to 10,744.47) | <b>125.84</b><br>(88.43 to 171.63) | <b>59.39</b><br>(30.47 to 103.16)  | <b>48.43</b><br>(24.60 to 82.79)   | <b>70.47</b><br>(35.25 to 124.18) |
| Neonatal preterm birth                                                  | 4,154.68<br>(2,918.01 to 5,701.02)          | 1,513.99<br>(807.24 to 2,558.84)          | 1,063.26<br>(571.48 to 1,778.58)          | 2,015.67<br>(1,019.14 to 3,442.64)         | 48.04<br>(33.74 to 65.92)          | 17.51<br>(9.34 to 29.57)           | 12.30<br>(6.61 to 20.57)           | 23.30<br>(11.78 to 39.79)         |
| Neonatal encephalopathy due to birth asphyxia and trauma                | 2,582.88<br>(1,696.45 to 3,659.52)          | 906.40<br>(398.72 to 1,748.45)            | 693.87<br>(304.82 to 1,305.24)            | 1,105.05<br>(461.85 to 2,139.04)           | 29.88<br>(19.63 to 42.33)          | 10.49<br>(4.62 to 20.23)           | 8.03<br>(3.53 to 15.10)            | 12.79<br>(5.35 to 24.74)          |
| Neonatal sepsis and other neonatal infections                           | 1,015.72<br>(592.84 to 1,579.88)            | 446.72<br>(200.91 to 847.33)              | 363.63<br>(164.44 to 668.76)              | 520.84<br>(228.24 to 988.31)               | 11.74<br>(6.85 to 18.27)           | 5.17<br>(2.32 to 9.80)             | 4.21<br>(1.90 to 7.73)             | 6.02<br>(2.64 to 11.43)           |
| Hemolytic disease and other neonatal jaundice                           | 59.30<br>(32.13 to 103.56)                  | 17.92<br>(6.28 to 42.28)                  | 14.26<br>(5.02 to 33.11)                  | 21.27<br>(7.34 to 49.86)                   | 0.69<br>(0.37 to 1.20)             | 0.21<br>(0.07 to 0.49)             | 0.17<br>(0.06 to 0.38)             | 0.25<br>(0.09 to 0.58)            |
| Other neonatal disorders                                                | 3,068.07<br>(2,063.82 to 4,272.17)          | 2,248.14<br>(1,036.69 to 4,349.82)        | 2,050.93<br>(962.77 to 3,913.91)          | 2,429.28<br>(1,095.66 to 4,766.82)         | 35.50<br>(23.88 to 49.41)          | 26.01<br>(12.02 to 50.31)          | 23.73<br>(11.15 to 45.29)          | 28.11<br>(12.68 to 55.10)         |
| <b>Nutritional deficiencies</b>                                         | <b>1,518.33</b><br>(1,382.89 to 1,646.82)   | <b>958.57</b><br>(752.12 to 1,210.15)     | <b>1,061.93</b><br>(841.04 to 1,364.65)   | <b>862.34</b><br>(669.12 to 1,107.09)      | <b>106.13</b><br>(96.10 to 116.52) | <b>105.88</b><br>(75.18 to 144.64) | <b>123.40</b><br>(90.34 to 168.13) | <b>90.52</b><br>(63.24 to 125.16) |
| Protein-energy malnutrition                                             | 1,207.85<br>(627.58 to 1,427.58)            | 690.32<br>(248.32 to 1,005.22)            | 789.07<br>(299.68 to 1,139.24)            | 606.25<br>(215.16 to 890.73)               | 87.25<br>(44.04 to 105.04)         | 78.23<br>(27.71 to 122.41)         | 93.88<br>(34.89 to 144.20)         | 65.44<br>(21.71 to 103.06)        |
| Iodine deficiency                                                       | 33.22<br>(1.67 to 116.69)                   | 54.64<br>(1.57 to 207.13)                 | 57.13<br>(1.40 to 228.43)                 | 51.25<br>(1.69 to 188.04)                  | 1.87<br>(0.06 to 7.98)             | 5.74<br>(0.07 to 26.54)            | 6.29<br>(0.06 to 30.38)            | 5.13<br>(0.07 to 24.18)           |
| Dietary iron deficiency                                                 | 66.74<br>(45.47 to 147.69)                  | 36.90<br>(24.54 to 69.61)                 | 38.61<br>(25.07 to 74.69)                 | 35.30<br>(23.76 to 65.85)                  | 2.15<br>(1.39 to 4.92)             | 2.15<br>(0.98 to 3.17)             | 1.62<br>(1.04 to 3.63)             | 1.49<br>(0.92 to 2.84)            |
| Other nutritional deficiencies                                          | 210.52<br>(111.74 to 661.65)                | 176.70<br>(78.36 to 322.69)               | 177.12<br>(76.21 to 356.99)               | 169.54<br>(77.08 to 483.42)                | 14.85<br>(6.54 to 54.96)           | 20.29<br>(7.79 to 66.02)           | 21.45<br>(7.90 to 72.54)           | 18.47<br>(7.33 to 57.61)          |
| <b>Other communicable, maternal, neonatal, and nutritional diseases</b> | <b>1,476.63</b><br>(1,238.19 to 1,648.73)   | <b>1,109.55</b><br>(906.85 to 1,295.51)   | <b>1,074.45</b><br>(881.12 to 1,260.07)   | <b>1,119.75</b><br>(922.32 to 1,318.82)    | <b>53.96</b><br>(45.03 to 59.43)   | <b>58.08</b><br>(45.49 to 68.72)   | <b>59.77</b><br>(46.43 to 70.34)   | <b>55.29</b><br>(43.78 to 65.52)  |
| Sexually transmitted infections excluding HIV                           | 113.11<br>(85.86 to 135.03)                 | 47.36<br>(32.60 to 64.14)                 | 45.26<br>(31.27 to 61.32)                 | 48.34<br>(33.14 to 65.17)                  | 4.45<br>(3.50 to 5.23)             | 2.59<br>(1.73 to 3.57)             | 2.57<br>(1.75 to 3.57)             | 2.54<br>(1.71 to 3.45)            |
| Syphilis                                                                | 28.96<br>(22.44 to 37.70)                   | 11.27<br>(7.55 to 16.42)                  | 10.19<br>(6.98 to 14.65)                  | 11.94<br>(8.06 to 17.27)                   | 1.11<br>(0.92 to 1.32)             | 0.62<br>(0.40 to 0.94)             | 0.58<br>(0.37 to 0.89)             | 0.63<br>(0.40 to 0.95)            |
| Chlamydial infection                                                    | 16.28<br>(12.43 to 19.67)                   | 6.98<br>(4.40 to 9.97)                    | 6.80<br>(4.33 to 9.97)                    | 7.02<br>(4.46 to 10.23)                    | 0.66<br>(0.51 to 0.78)             | 0.40<br>(0.24 to 0.59)             | 0.41<br>(0.25 to 0.60)             | 0.38<br>(0.23 to 0.57)            |
| Gonococcal infection                                                    | 46.21<br>(35.12 to 55.66)                   | 20.50<br>(12.78 to 30.03)                 | 19.97<br>(12.28 to 29.04)                 | 20.63<br>(12.71 to 30.17)                  | 1.92<br>(1.50 to 2.28)             | 1.17<br>(0.70 to 1.74)             | 1.18<br>(0.71 to 1.76)             | 1.13<br>(0.66 to 1.68)            |
| Other sexually transmitted infections                                   | 21.67<br>(16.19 to 26.38)                   | 8.61<br>(5.52 to 12.54)                   | 8.29<br>(5.31 to 12.17)                   | 8.76<br>(5.64 to 12.71)                    | 0.76<br>(0.58 to 0.91)             | 0.40<br>(0.26 to 0.57)             | 0.39<br>(0.26 to 0.58)             | 0.39<br>(0.26 to 0.57)            |
| Acute hepatitis                                                         | 409.47<br>(354.07 to 471.73)                | 194.09<br>(137.95 to 268.11)              | 161.27<br>(116.92 to 216.53)              | 216.34<br>(151.72 to 300.88)               | 16.17<br>(13.94 to 18.63)          | 9.38<br>(6.66 to 12.72)            | 8.02<br>(5.79 to 10.74)            | 10.14<br>(7.24 to 14.06)          |
| Acute hepatitis A                                                       | 12.58<br>(8.58 to 17.14)                    | 6.77<br>(3.74 to 11.22)                   | 5.96<br>(3.25 to 9.91)                    | 7.28<br>(4.03 to 11.94)                    | 0.40<br>(0.25 to 0.59)             | 0.30<br>(0.16 to 0.51)             | 0.27<br>(0.14 to 0.46)             | 0.31<br>(0.16 to 0.53)            |
| Acute hepatitis B                                                       | 332.37<br>(282.90 to 390.48)                | 154.26<br>(104.28 to 217.49)              | 127.13<br>(88.23 to 174.29)               | 173.06<br>(117.10 to 246.22)               | 12.90<br>(10.90 to 15.29)          | 7.02<br>(4.69 to 9.95)             | 5.91<br>(3.96 to 8.20)             | 7.69<br>(5.12 to 10.96)           |





| Czech Republic                       |                                                 |                                                 |                                                 |                                                 |                                              |                                              |                                              |                                              |
|--------------------------------------|-------------------------------------------------|-------------------------------------------------|-------------------------------------------------|-------------------------------------------------|----------------------------------------------|----------------------------------------------|----------------------------------------------|----------------------------------------------|
| Cause                                | YLLs (actual counts)                            |                                                 |                                                 |                                                 | Deaths (actual counts)                       |                                              |                                              |                                              |
|                                      | 2016                                            | 2040 Forecast                                   | 2040 Better Scenario                            | 2040 Worse Scenario                             | 2016                                         | 2040 Forecast                                | 2040 Better Scenario                         | 2040 Worse Scenario                          |
| <b>Neoplasms</b>                     | <b>531,354.49</b><br>(498,235.59 to 564,280.83) | <b>545,450.21</b><br>(471,931.32 to 625,076.33) | <b>473,758.05</b><br>(409,008.76 to 540,611.22) | <b>671,521.12</b><br>(572,463.23 to 780,917.96) | <b>27,867.02</b><br>(26,161.89 to 29,550.11) | <b>35,888.41</b><br>(31,963.48 to 40,632.70) | <b>32,670.76</b><br>(29,179.31 to 36,721.84) | <b>41,600.45</b><br>(36,251.55 to 47,857.55) |
| Lip and oral cavity cancer           | 9,725.19<br>(8,525.77 to 11,029.48)             | 6,607.41<br>(3,679.83 to 10,934.51)             | 4,457.93<br>(2,584.25 to 7,156.56)              | 11,660.72<br>(6,394.96 to 19,398.38)            | 413.49<br>(368.69 to 462.70)                 | 344.06<br>(203.17 to 545.33)                 | 243.48<br>(150.54 to 378.37)                 | 581.41<br>(333.76 to 942.31)                 |
| Nasopharynx cancer                   | 1,004.54<br>(892.56 to 1,163.89)                | 671.61<br>(395.37 to 1,152.05)                  | 424.96<br>(262.20 to 696.21)                    | 1,250.28<br>(725.61 to 2,094.16)                | 38.06<br>(33.84 to 43.60)                    | 29.97<br>(17.92 to 48.85)                    | 19.50<br>(12.31 to 30.64)                    | 54.11<br>(31.80 to 86.67)                    |
| Other pharynx cancer                 | 7,678.52<br>(6,741.79 to 8,681.97)              | 6,436.48<br>(3,595.20 to 10,702.44)             | 6,024.70<br>(3,395.92 to 9,764.22)              | 7,958.27<br>(4,348.26 to 13,138.29)             | 297.11<br>(263.42 to 334.51)                 | 279.86<br>(156.40 to 456.50)                 | 266.85<br>(151.12 to 431.94)                 | 341.45<br>(189.83 to 548.10)                 |
| Esophageal cancer                    | 12,624.90<br>(10,769.45 to 14,550.13)           | 10,661.01<br>(5,699.93 to 19,059.89)            | 7,718.96<br>(4,478.41 to 12,966.23)             | 16,823.52<br>(8,706.78 to 31,646.20)            | 570.40<br>(493.00 to 652.06)                 | 574.88<br>(321.90 to 998.25)                 | 430.39<br>(262.73 to 698.11)                 | 873.58<br>(473.67 to 1,567.43)               |
| Stomach cancer                       | 22,172.62<br>(20,359.67 to 24,149.70)           | 15,752.05<br>(12,128.59 to 20,483.29)           | 13,281.22<br>(10,417.14 to 16,815.00)           | 18,161.68<br>(13,437.52 to 23,873.54)           | 1,222.93<br>(1,125.25 to 1,325.61)           | 1,144.66<br>(891.09 to 1,482.83)             | 1,008.04<br>(801.45 to 1,283.93)             | 1,255.23<br>(948.21 to 1,661.03)             |
| Colon and rectum cancer              | 75,086.41<br>(68,563.68 to 84,595.48)           | 86,734.50<br>(60,053.36 to 124,817.20)          | 72,852.24<br>(50,540.33 to 103,798.43)          | 106,663.63<br>(71,642.71 to 158,294.42)         | 4,351.09<br>(3,990.04 to 4,869.76)           | 6,391.86<br>(4,489.43 to 9,128.17)           | 5,608.08<br>(3,963.88 to 7,906.84)           | 7,480.78<br>(5,115.49 to 10,965.82)          |
| Liver cancer                         | 17,051.23<br>(15,019.34 to 19,088.44)           | 24,716.57<br>(16,195.35 to 36,896.52)           | 23,039.93<br>(16,026.18 to 33,255.51)           | 33,254.95<br>(19,960.37 to 52,855.98)           | 900.81<br>(800.36 to 1,008.98)               | 1,572.55<br>(1,071.55 to 2,276.60)           | 1,530.72<br>(1,089.20 to 2,144.88)           | 1,985.17<br>(1,250.96 to 3,041.85)           |
| Liver cancer due to hepatitis B      | 5,598.97<br>(4,177.80 to 7,194.08)              | 8,084.66<br>(4,991.63 to 12,926.31)             | 7,654.53<br>(4,941.25 to 11,671.68)             | 9,879.40<br>(5,640.61 to 16,767.57)             | 276.19<br>(199.06 to 357.13)                 | 477.81<br>(297.63 to 755.73)                 | 470.77<br>(301.43 to 714.97)                 | 552.78<br>(328.40 to 904.23)                 |
| Liver cancer due to hepatitis C      | 4,041.07<br>(2,846.94 to 5,487.35)              | 6,422.38<br>(3,906.21 to 10,179.53)             | 6,200.97<br>(3,851.02 to 9,543.78)              | 7,646.41<br>(4,264.49 to 12,824.04)             | 233.63<br>(168.85 to 319.88)                 | 450.05<br>(277.39 to 689.40)                 | 453.70<br>(287.64 to 673.92)                 | 504.67<br>(291.75 to 800.84)                 |
| Liver cancer due to alcohol use      | 4,216.46<br>(3,368.66 to 5,135.46)              | 5,241.14<br>(3,350.41 to 7,979.76)              | 4,508.59<br>(2,981.14 to 6,673.33)              | 9,577.32<br>(5,718.29 to 15,070.92)             | 226.08<br>(181.72 to 277.50)                 | 335.65<br>(219.82 to 512.33)                 | 303.74<br>(202.78 to 465.03)                 | 565.97<br>(347.77 to 896.32)                 |
| Liver cancer due to other causes     | 3,194.73<br>(2,565.42 to 3,899.74)              | 4,968.39<br>(2,959.55 to 8,336.52)              | 4,675.85<br>(2,918.22 to 7,592.39)              | 6,151.82<br>(3,270.80 to 10,982.88)             | 164.92<br>(133.22 to 200.72)                 | 309.05<br>(190.48 to 502.02)                 | 302.52<br>(196.59 to 483.09)                 | 361.75<br>(200.84 to 622.73)                 |
| Gallbladder and biliary tract cancer | 14,260.09<br>(13,011.29 to 15,558.11)           | 12,270.68<br>(10,855.50 to 13,774.76)           | 12,462.98<br>(10,986.87 to 14,054.88)           | 11,798.77<br>(10,522.39 to 13,244.28)           | 856.23<br>(783.13 to 934.26)                 | 911.28<br>(805.76 to 1,021.13)               | 958.86<br>(847.34 to 1,076.31)               | 845.01<br>(745.23 to 948.29)                 |
| Pancreatic cancer                    | 40,899.79<br>(36,435.07 to 44,530.55)           | 47,806.00<br>(38,411.78 to 60,416.10)           | 45,219.33<br>(36,895.34 to 56,692.85)           | 51,994.87<br>(40,886.43 to 67,124.09)           | 2,193.15<br>(1,956.92 to 2,387.00)           | 3,069.21<br>(2,525.69 to 3,828.23)           | 3,010.25<br>(2,496.71 to 3,701.48)           | 3,196.70<br>(2,550.73 to 4,071.51)           |
| Larynx cancer                        | 5,534.07<br>(4,975.96 to 6,140.37)              | 3,612.04<br>(1,642.75 to 6,952.05)              | 2,162.92<br>(1,060.22 to 4,086.20)              | 6,461.57<br>(2,814.03 to 13,082.56)             | 257.92<br>(214.86 to 262.74)                 | 177.61<br>(84.73 to 329.87)                  | 108.37<br>(55.52 to 196.22)                  | 308.70<br>(141.38 to 600.05)                 |
| Tracheal, bronchus, and lung cancer  | 106,469.99<br>(97,711.35 to 115,822.55)         | 93,436.78<br>(69,417.53 to 125,313.20)          | 59,131.83<br>(44,845.22 to 78,471.65)           | 156,169.87<br>(113,257.20 to 213,111.53)        | 5,292.63<br>(4,877.63 to 5,742.14)           | 5,311.67<br>(4,026.11 to 7,018.12)           | 3,462.41<br>(2,676.41 to 4,522.14)           | 8,922.84<br>(6,294.66 to 11,354.02)          |
| Malignant skin melanoma              | 8,404.09<br>(6,817.54 to 9,878.90)              | 11,175.49<br>(8,883.92 to 13,462.50)            | 12,692.76<br>(10,183.51 to 15,300.19)           | 9,987.02<br>(7,870.17 to 11,907.09)             | 385.79<br>(312.79 to 437.42)                 | 661.08<br>(519.53 to 794.77)                 | 781.19<br>(629.82 to 915.45)                 | 566.50<br>(444.51 to 669.17)                 |
| Non-melanoma skin cancer             | 2,713.04<br>(2,420.65 to 3,048.29)              | 3,535.80<br>(2,876.26 to 4,333.55)              | 3,367.62<br>(2,767.90 to 4,075.68)              | 3,496.13<br>(2,881.77 to 4,259.78)              | 193.04<br>(172.96 to 215.10)                 | 354.03<br>(280.81 to 437.78)                 | 355.13<br>(283.55 to 434.12)                 | 332.89<br>(255.89 to 414.17)                 |
| Breast cancer                        | 31,806.77<br>(28,412.65 to 35,838.11)           | 30,816.95<br>(22,937.27 to 41,488.06)           | 26,810.15<br>(20,335.44 to 34,674.05)           | 37,447.70<br>(27,056.26 to 50,822.82)           | 1,668.32<br>(1,494.68 to 1,870.33)           | 2,128.58<br>(1,612.12 to 2,805.76)           | 1,937.27<br>(1,496.68 to 2,500.51)           | 2,458.35<br>(1,825.14 to 3,233.50)           |
| Cervical cancer                      | 10,680.07<br>(9,479.43 to 12,159.57)            | 6,775.63<br>(5,121.46 to 8,715.73)              | 5,794.80<br>(4,532.07 to 7,254.26)              | 7,685.57<br>(5,662.38 to 10,128.99)             | 470.02<br>(418.58 to 536.83)                 | 378.80<br>(296.24 to 480.58)                 | 336.54<br>(271.67 to 412.83)                 | 413.62<br>(312.31 to 537.63)                 |

|                   |                                          |                                          |                                          |                                          |                                       |                                       |                                       |                                       |
|-------------------|------------------------------------------|------------------------------------------|------------------------------------------|------------------------------------------|---------------------------------------|---------------------------------------|---------------------------------------|---------------------------------------|
|                   | 6,486.79<br>(5,537.25 to<br>7,583.38)    | 7,713.73<br>(6,298.53 to<br>9,338.85)    | 7,266.96<br>(5,971.68 to<br>8,752.10)    | 7,891.68<br>(6,473.94 to<br>9,564.73)    | 368.01<br>(315.71 to<br>427.68)       | 532.31<br>(433.73 to<br>638.11)       | 516.92<br>(422.70 to<br>617.32)       | 527.67<br>(426.72 to<br>638.21)       |
| Uterine cancer    |                                          |                                          |                                          |                                          |                                       |                                       |                                       |                                       |
|                   | 16,755.99<br>(13,810.95 to<br>19,941.07) | 14,430.19<br>(10,648.83 to<br>18,980.87) | 13,459.36<br>(9,968.07 to<br>17,466.63)  | 15,509.57<br>(11,042.41 to<br>20,949.09) | 792.91<br>(654.17 to<br>936.84)       | 808.54<br>(598.15 to<br>1,067.92)     | 769.63<br>(577.19 to<br>997.78)       | 848.13<br>(612.79 to<br>1,134.47)     |
| Ovarian cancer    |                                          |                                          |                                          |                                          |                                       |                                       |                                       |                                       |
|                   | 22,362.54<br>(15,901.90 to<br>26,255.28) | 32,191.79<br>(23,550.85 to<br>38,600.61) | 31,931.98<br>(24,522.51 to<br>38,048.64) | 31,164.82<br>(22,864.54 to<br>37,555.99) | 1,590.35<br>(1,143.93 to<br>1,855.25) | 2,929.10<br>(2,091.18 to<br>3,558.90) | 3,029.19<br>(2,238.21 to<br>3,619.97) | 2,711.13<br>(1,939.52 to<br>3,311.56) |
| Prostate cancer   |                                          |                                          |                                          |                                          |                                       |                                       |                                       |                                       |
|                   | 1,109.03<br>(930.14 to<br>1,315.62)      | 638.96<br>(495.41 to<br>822.87)          | 582.94<br>(452.30 to<br>739.62)          | 673.11<br>(518.84 to<br>868.38)          | 28.62<br>(24.47 to<br>33.62)          | 22.96<br>(18.39 to<br>28.67)          | 22.20<br>(17.69 to<br>27.27)          | 22.77<br>(18.39 to<br>28.22)          |
| Testicular cancer |                                          |                                          |                                          |                                          |                                       |                                       |                                       |                                       |

| Czech Republic                  |                                                  |                                                  |                                                  |                                                    |                                               |                                               |                                               |                                               |
|---------------------------------|--------------------------------------------------|--------------------------------------------------|--------------------------------------------------|----------------------------------------------------|-----------------------------------------------|-----------------------------------------------|-----------------------------------------------|-----------------------------------------------|
| Cause                           | YLLs (actual counts)                             |                                                  |                                                  |                                                    | Deaths (actual counts)                        |                                               |                                               |                                               |
|                                 | 2016                                             | 2040 Forecast                                    | 2040 Better Scenario                             | 2040 Worse Scenario                                | 2016                                          | 2040 Forecast                                 | 2040 Better Scenario                          | 2040 Worse Scenario                           |
| Kidney cancer                   | 23,754.97<br>(20,902.96 to 26,312.85)            | 30,286.81<br>(22,137.97 to 40,198.02)            | 29,628.02<br>(22,234.22 to 38,094.85)            | 31,601.35<br>(21,671.54 to 43,536.04)              | 1,271.69<br>(1,118.00 to 1,403.93)            | 1,964.48<br>(1,457.89 to 2,539.15)            | 2,004.62<br>(1,532.97 to 2,522.98)            | 1,949.80<br>(1,382.52 to 2,637.71)            |
| Bladder cancer                  | 12,510.58<br>(11,350.30 to 13,746.41)            | 13,250.89<br>(10,087.78 to 17,504.42)            | 11,806.03<br>(9,307.79 to 15,296.30)             | 15,099.60<br>(11,020.31 to 20,625.90)              | 811.28<br>(737.13 to 887.82)                  | 1,102.31<br>(842.55 to 1,424.87)              | 1,026.50<br>(814.86 to 1,300.59)              | 1,183.97<br>(873.03 to 1,593.19)              |
| Brain and nervous system cancer | 19,709.40<br>(15,794.43 to 22,727.14)            | 19,916.34<br>(15,510.26 to 23,356.05)            | 19,306.60<br>(15,014.40 to 22,550.14)            | 19,994.07<br>(15,565.12 to 23,500.70)              | 738.64<br>(573.70 to 837.84)                  | 902.37<br>(676.48 to 1,040.99)                | 897.57<br>(675.05 to 1,034.55)                | 880.99<br>(660.82 to 1,016.20)                |
| Thyroid cancer                  | 1,382.96<br>(1,225.07 to 1,570.67)               | 1,593.84<br>(1,098.35 to 2,330.21)               | 1,500.87<br>(1,055.76 to 2,165.11)               | 1,783.45<br>(1,186.19 to 2,682.41)                 | 78.31<br>(69.80 to 88.88)                     | 112.31<br>(78.81 to 160.73)                   | 109.66<br>(80.76 to 155.49)                   | 120.07<br>(80.76 to 173.33)                   |
| Mesothelioma                    | 1,134.76<br>(993.60 to 1,321.79)                 | 1,300.44<br>(1,085.64 to 1,559.32)               | 1,351.05<br>(1,123.28 to 1,636.55)               | 1,235.66<br>(1,038.98 to 1,476.59)                 | 51.40<br>(45.34 to 57.49)                     | 72.85<br>(62.18 to 85.16)                     | 78.24<br>(66.60 to 91.91)                     | 66.84<br>(56.94 to 77.82)                     |
| Hodgkin lymphoma                | 1,663.83<br>(1,506.91 to 1,958.61)               | 1,234.43<br>(991.04 to 1,560.65)                 | 1,074.24<br>(892.26 to 1,309.70)                 | 1,326.72<br>(1,080.72 to 1,663.80)                 | 66.07<br>(60.02 to 73.59)                     | 62.85<br>(51.61 to 76.98)                     | 56.62<br>(47.63 to 67.13)                     | 65.12<br>(53.53 to 78.82)                     |
| Non-Hodgkin lymphoma            | 12,215.14<br>(10,415.24 to 13,600.21)            | 12,062.47<br>(9,420.41 to 15,119.95)             | 11,516.44<br>(9,089.63 to 14,413.03)             | 12,740.04<br>(9,810.73 to 16,696.84)               | 617.40<br>(520.31 to 690.52)                  | 767.54<br>(587.59 to 969.34)                  | 759.35<br>(581.02 to 945.35)                  | 778.85<br>(581.50 to 1,006.19)                |
| Multiple myeloma                | 7,155.32<br>(5,876.06 to 8,624.02)               | 8,475.37<br>(6,528.29 to 10,895.44)              | 8,335.30<br>(6,398.53 to 10,577.86)              | 8,843.45<br>(6,619.74 to 11,688.11)                | 387.84<br>(302.09 to 442.88)                  | 538.91<br>(398.22 to 678.69)                  | 546.28<br>(408.19 to 685.04)                  | 542.72<br>(395.71 to 703.68)                  |
| Leukemia                        | 18,518.63<br>(16,707.84 to 20,342.18)            | 19,339.33<br>(15,147.47 to 24,428.04)            | 18,093.89<br>(14,382.52 to 22,348.56)            | 21,688.99<br>(16,213.03 to 28,445.92)              | 955.05<br>(864.67 to 1,052.23)                | 1,307.14<br>(1,035.21 to 1,643.85)            | 1,270.03<br>(1,021.23 to 1,557.34)            | 1,395.34<br>(1,053.89 to 1,811.36)            |
| Acute lymphoid leukemia         | 1,687.45<br>(1,445.23 to 2,438.63)               | 1,437.53<br>(1,109.59 to 2,041.19)               | 1,286.56<br>(1,000.39 to 1,870.55)               | 1,663.22<br>(1,226.01 to 2,343.93)                 | 61.38<br>(53.39 to 83.36)                     | 71.81<br>(55.14 to 96.84)                     | 66.71<br>(52.15 to 88.97)                     | 80.09<br>(59.31 to 109.16)                    |
| Chronic lymphoid leukemia       | 4,251.26<br>(3,218.61 to 4,979.07)               | 4,345.22<br>(3,108.37 to 6,011.04)               | 4,168.40<br>(3,029.95 to 5,541.36)               | 4,749.96<br>(3,186.49 to 6,929.58)                 | 269.16<br>(204.78 to 312.92)                  | 339.61<br>(238.51 to 451.87)                  | 339.30<br>(248.53 to 434.41)                  | 352.35<br>(238.44 to 490.96)                  |
| Acute myeloid leukemia          | 6,657.26<br>(5,629.47 to 7,515.45)               | 7,320.12<br>(5,736.58 to 9,167.68)               | 7,032.32<br>(5,546.65 to 8,673.91)               | 8,147.40<br>(6,125.99 to 10,578.46)                | 300.05<br>(251.55 to 339.46)                  | 411.21<br>(320.35 to 517.16)                  | 407.74<br>(323.79 to 510.16)                  | 459.95<br>(329.31 to 571.78)                  |
| Chronic myeloid leukemia        | 1,071.95<br>(929.35 to 1,208.82)                 | 500.24<br>(359.29 to 684.54)                     | 405.52<br>(301.27 to 547.54)                     | 617.68<br>(424.74 to 876.49)                       | 50.98<br>(44.56 to 59.97)                     | 33.48<br>(23.65 to 46.80)                     | 28.48<br>(19.18 to 39.18)                     | 38.73<br>(26.26 to 55.78)                     |
| Other leukemia                  | 4,850.70<br>(4,278.66 to 5,523.44)               | 5,736.23<br>(4,289.19 to 7,536.64)               | 5,201.10<br>(3,997.74 to 6,707.51)               | 6,510.72<br>(4,698.99 to 8,817.53)                 | 273.48<br>(239.41 to 311.84)                  | 451.03<br>(346.26 to 587.98)                  | 427.81<br>(337.60 to 557.07)                  | 484.23<br>(360.44 to 648.60)                  |
| Other neoplasms                 | 20,483.24<br>(18,013.52 to 22,714.51)            | 22,006.60<br>(19,005.93 to 24,642.83)            | 22,462.04<br>(19,346.54 to 25,249.79)            | 21,154.06<br>(18,241.04 to 23,617.77)              | 1,018.45<br>(892.47 to 1,128.35)              | 1,434.63<br>(1,224.55 to 1,604.88)            | 1,526.86<br>(1,307.85 to 1,704.27)            | 1,320.71<br>(1,115.06 to 1,485.63)            |
| <b>Cardiovascular diseases</b>  | <b>639,399.58<br/>(604,538.97 to 677,428.60)</b> | <b>496,560.37<br/>(341,582.40 to 705,618.07)</b> | <b>362,436.58<br/>(261,445.79 to 500,821.65)</b> | <b>728,452.16<br/>(495,229.44 to 1,034,691.65)</b> | <b>51,307.48<br/>(48,867.79 to 54,050.66)</b> | <b>52,586.48<br/>(36,900.80 to 74,994.06)</b> | <b>41,748.15<br/>(29,638.78 to 58,638.31)</b> | <b>69,174.65<br/>(48,920.52 to 96,658.75)</b> |
| Rheumatic heart disease         | 4,385.18<br>(3,923.77 to 4,889.34)               | 2,894.69<br>(2,149.33 to 3,984.86)               | 2,561.95<br>(1,948.02 to 3,415.50)               | 3,096.64<br>(2,317.97 to 4,307.14)                 | 265.81<br>(239.35 to 296.13)                  | 224.47<br>(168.64 to 312.74)                  | 207.87<br>(158.74 to 287.79)                  | 229.50<br>(173.48 to 322.23)                  |
| Ischemic heart disease          | 413,116.49<br>(389,619.01 to 437,914.24)         | 285,633.55<br>(172,829.10 to 448,926.80)         | 193,881.69<br>(121,794.96 to 294,404.55)         | 446,599.20<br>(269,676.21 to 700,991.29)           | 34,063.44<br>(32,416.45 to 35,809.98)         | 30,776.89<br>(18,980.34 to 46,887.07)         | 23,017.98<br>(14,436.39 to 35,158.11)         | 42,519.65<br>(26,478.20 to 63,851.90)         |
| Stroke                          | 123,102.24<br>(113,492.92 to 133,885.46)         | 94,964.23<br>(59,191.36 to 152,263.13)           | 66,919.60<br>(42,958.91 to 108,051.36)           | 145,529.44<br>(88,088.33 to 227,572.30)            | 10,169.44<br>(9,354.65 to 11,037.18)          | 10,739.05<br>(6,435.53 to 18,430.82)          | 8,333.49<br>(5,127.30 to 14,659.93)           | 14,518.65<br>(8,647.00 to 24,555.47)          |
| Ischemic stroke                 | 75,851.72<br>(69,454.55 to 82,518.13)            | 60,958.27<br>(34,903.38 to 113,412.06)           | 45,346.56<br>(26,836.08 to 85,101.54)            | 86,310.06<br>(47,693.78 to 154,628.03)             | 7,011.17<br>(6,397.96 to 7,658.47)            | 7,535.72<br>(4,215.73 to 14,669.72)           | 6,052.19<br>(3,445.94 to 11,706.69)           | 9,663.19<br>(5,245.63 to 18,536.61)           |

|                                |                                          |                                          |                                          |                                          |                                       |                                       |                                       |                                       |
|--------------------------------|------------------------------------------|------------------------------------------|------------------------------------------|------------------------------------------|---------------------------------------|---------------------------------------|---------------------------------------|---------------------------------------|
|                                | 47,250.53<br>(43,355.05 to<br>51,717.57) | 34,005.96<br>(19,963.67 to<br>55,491.07) | 21,573.04<br>(13,621.06 to<br>33,281.39) | 59,219.38<br>(33,692.82 to<br>95,421.82) | 3,158.27<br>(2,884.99 to<br>3,443.06) | 3,203.33<br>(1,932.56 to<br>5,231.18) | 2,281.30<br>(1,435.80 to<br>3,579.11) | 4,855.47<br>(2,814.79 to<br>7,895.58) |
| Intracerebral hemorrhage       |                                          |                                          |                                          |                                          |                                       |                                       |                                       |                                       |
|                                | 15,999.37<br>(12,157.48 to<br>25,445.39) | 24,204.08<br>(12,649.27 to<br>59,733.45) | 20,420.53<br>(11,167.80 to<br>47,594.53) | 33,410.34<br>(16,425.49 to<br>82,399.07) | 1,199.46<br>(938.39 to<br>1,979.33)   | 2,507.08<br>(1,298.46 to<br>6,340.74) | 2,260.27<br>(1,212.60 to<br>5,346.81) | 3,240.85<br>(1,570.90 to<br>8,258.48) |
| Hypertensive heart disease     |                                          |                                          |                                          |                                          |                                       |                                       |                                       |                                       |
|                                | 17,041.18<br>(14,516.48 to<br>23,336.90) | 12,576.07<br>(8,445.39 to<br>20,236.59)  | 11,515.81<br>(7,724.49 to<br>18,556.02)  | 13,896.83<br>(9,212.28 to<br>22,141.83)  | 1,002.93<br>(775.71 to<br>1,573.27)   | 1,109.46<br>(645.87 to<br>2,112.02)   | 1,094.40<br>(640.46 to<br>2,080.56)   | 1,116.97<br>(655.89 to<br>2,130.76)   |
| Cardiomyopathy and myocarditis |                                          |                                          |                                          |                                          |                                       |                                       |                                       |                                       |
|                                | 3,141.45<br>(2,413.56 to<br>4,655.33)    | 3,908.27<br>(2,899.19 to<br>6,768.23)    | 4,166.76<br>(3,060.31 to<br>7,166.99)    | 3,600.06<br>(2,675.39 to<br>6,074.17)    | 233.02<br>(172.11 to<br>439.47)       | 433.99<br>(282.39 to<br>853.78)       | 491.19<br>(322.61 to<br>960.51)       | 376.95<br>(238.60 to<br>747.47)       |
| Myocarditis                    |                                          |                                          |                                          |                                          |                                       |                                       |                                       |                                       |

| Czech Republic                                                |                                                               |                                                               |                                                               |                                                               |                                                            |                                                            |                                                            |                                                            |
|---------------------------------------------------------------|---------------------------------------------------------------|---------------------------------------------------------------|---------------------------------------------------------------|---------------------------------------------------------------|------------------------------------------------------------|------------------------------------------------------------|------------------------------------------------------------|------------------------------------------------------------|
| Cause                                                         | YLLs (actual counts)                                          |                                                               |                                                               |                                                               | Deaths (actual counts)                                     |                                                            |                                                            |                                                            |
|                                                               | 2016                                                          | 2040 Forecast                                                 | 2040 Better Scenario                                          | 2040 Worse Scenario                                           | 2016                                                       | 2040 Forecast                                              | 2040 Better Scenario                                       | 2040 Worse Scenario                                        |
| Alcoholic cardiomyopathy                                      | 2,518.13<br>(1,323.72 to<br>3,252.65)                         | 1,533.65<br>(880.46 to<br>2,116.19)                           | 1,357.77<br>(806.42 to<br>1,907.00)                           | 2,252.97<br>(1,337.45 to<br>3,083.93)                         | 89.32<br>(52.91 to<br>116.40)                              | 63.44<br>(43.85 to<br>92.66)                               | 57.67<br>(40.02 to<br>88.20)                               | 90.48<br>(62.34 to<br>131.53)                              |
| Other cardiomyopathy                                          | 11,381.60<br>(9,294.98 to<br>16,184.51)                       | 7,134.16<br>(3,769.85 to<br>13,923.91)                        | 5,991.28<br>(3,198.92 to<br>11,564.76)                        | 8,043.80<br>(4,294.76 to<br>15,000.64)                        | 680.59<br>(507.22 to<br>1,161.70)                          | 612.03<br>(270.28 to<br>1,419.79)                          | 545.54<br>(237.35 to<br>1,288.28)                          | 649.53<br>(292.57 to<br>1,467.00)                          |
| Atrial fibrillation and flutter                               | 7,101.92<br>(5,642.82 to<br>8,922.57)                         | 10,770.90<br>(8,034.77 to<br>14,123.04)                       | 10,653.81<br>(7,940.40 to<br>13,852.39)                       | 11,559.10<br>(8,502.84 to<br>15,395.49)                       | 753.54<br>(583.86 to<br>964.57)                            | 1,410.01<br>(1,024.87 to<br>1,896.16)                      | 1,455.47<br>(1,073.09 to<br>1,954.35)                      | 1,439.14<br>(1,022.45 to<br>1,974.69)                      |
| Aortic aneurysm                                               | 10,256.74<br>(9,322.06 to<br>11,406.10)                       | 7,657.10<br>(5,879.00 to<br>9,842.18)                         | 6,985.23<br>(5,489.82 to<br>8,827.52)                         | 8,387.87<br>(6,389.59 to<br>10,857.18)                        | 594.76<br>(540.12 to<br>657.37)                            | 574.08<br>(456.96 to<br>713.08)                            | 560.44<br>(449.97 to<br>695.19)                            | 584.09<br>(460.95 to<br>733.05)                            |
| Peripheral artery disease                                     | 3,271.09<br>(1,554.12 to<br>4,401.34)                         | 6,813.06<br>(2,877.99 to<br>10,385.63)                        | 6,687.49<br>(2,860.06 to<br>10,186.95)                        | 7,135.08<br>(3,032.52 to<br>11,034.98)                        | 275.43<br>(126.83 to<br>361.23)                            | 753.99<br>(323.12 to<br>1,185.31)                          | 788.41<br>(334.32 to<br>1,218.29)                          | 730.32<br>(303.76 to<br>1,160.60)                          |
| Endocarditis                                                  | 3,298.67<br>(2,033.15 to<br>3,991.07)                         | 3,459.24<br>(1,942.98 to<br>5,055.61)                         | 3,361.76<br>(1,909.59 to<br>4,906.09)                         | 3,569.70<br>(1,988.52 to<br>5,281.89)                         | 164.77<br>(96.91 to<br>200.21)                             | 229.63<br>(123.31 to<br>350.24)                            | 234.48<br>(126.59 to<br>359.02)                            | 224.78<br>(120.98 to<br>344.69)                            |
| Other cardiovascular and circulatory diseases                 | 41,726.69<br>(37,948.08 to<br>46,085.26)                      | 47,587.44<br>(34,748.95 to<br>65,438.23)                      | 39,448.71<br>(29,611.40 to<br>53,309.10)                      | 55,267.94<br>(39,873.91 to<br>76,886.96)                      | 2,817.89<br>(2,565.44 to<br>3,120.00)                      | 2,817.89<br>(3,218.28 to<br>5,761.28)                      | 3,795.34<br>(2,901.31 to<br>5,082.97)                      | 4,570.70<br>(3,392.85 to<br>6,176.00)                      |
| <b>Chronic respiratory diseases</b>                           | <b>53,458.70</b><br><b>(49,355.46 to</b><br><b>57,670.81)</b> | <b>43,593.95</b><br><b>(32,998.50 to</b><br><b>56,373.59)</b> | <b>33,029.83</b><br><b>(26,113.59 to</b><br><b>41,307.06)</b> | <b>65,170.57</b><br><b>(47,191.56 to</b><br><b>87,607.49)</b> | <b>3,463.36</b><br><b>(3,218.86 to</b><br><b>3,720.75)</b> | <b>3,619.54</b><br><b>(2,761.73 to</b><br><b>4,622.49)</b> | <b>2,825.33</b><br><b>(2,247.03 to</b><br><b>3,499.04)</b> | <b>5,025.47</b><br><b>(3,678.38 to</b><br><b>6,628.16)</b> |
| Chronic obstructive pulmonary disease                         | 46,129.53<br>(41,883.84 to<br>50,698.05)                      | 36,285.71<br>(25,442.30 to<br>49,284.50)                      | 24,861.04<br>(17,800.13 to<br>33,703.69)                      | 58,206.48<br>(40,550.42 to<br>80,566.45)                      | 3,065.90<br>(2,813.24 to<br>3,347.65)                      | 3,117.82<br>(2,235.25 to<br>4,176.54)                      | 2,246.71<br>(1,656.18 to<br>2,959.10)                      | 4,565.50<br>(3,192.16 to<br>6,171.72)                      |
| Pneumoconiosis                                                | 740.97<br>(634.04 to<br>880.87)                               | 412.39<br>(300.91 to<br>575.15)                               | 347.34<br>(256.93 to<br>462.57)                               | 478.21<br>(345.33 to<br>660.78)                               | 47.01<br>(40.33 to<br>55.30)                               | 33.84<br>(24.43 to<br>46.62)                               | 29.86<br>(22.16 to<br>39.91)                               | 37.37<br>(26.89 to<br>51.13)                               |
| Silicosis                                                     | 133.75<br>(93.65 to<br>225.92)                                | 63.78<br>(34.44 to<br>111.46)                                 | 54.40<br>(29.57 to<br>97.20)                                  | 69.75<br>(38.94 to<br>123.85)                                 | 8.69<br>(6.13 to<br>15.10)                                 | 5.46<br>(2.90 to<br>10.27)                                 | 4.85<br>(2.61 to<br>9.04)                                  | 3.74<br>(3.17 to<br>10.35)                                 |
| Asbestosis                                                    | 28.36<br>(21.11 to<br>42.09)                                  | 33.77<br>(21.93 to<br>61.06)                                  | 37.94<br>(24.64 to<br>71.67)                                  | 30.55<br>(20.20 to<br>52.92)                                  | 1.52<br>(1.08 to<br>2.41)                                  | 2.41<br>(1.40 to<br>4.79)                                  | 2.79<br>(1.60 to<br>5.68)                                  | 2.11<br>(1.23 to<br>4.18)                                  |
| Coal workers pneumoconiosis                                   | 510.28<br>(375.52 to<br>625.06)                               | 263.00<br>(165.91 to<br>396.92)                               | 201.95<br>(129.14 to<br>300.28)                               | 323.58<br>(198.84 to<br>491.68)                               | 32.20<br>(23.74 to<br>39.01)                               | 20.76<br>(13.08 to<br>31.64)                               | 16.65<br>(10.56 to<br>24.87)                               | 24.34<br>(15.12 to<br>37.19)                               |
| Other pneumoconiosis                                          | 68.57<br>(50.73 to<br>90.50)                                  | 51.84<br>(33.60 to<br>77.16)                                  | 53.06<br>(33.40 to<br>80.48)                                  | 54.32<br>(35.45 to<br>79.95)                                  | 4.61<br>(3.60 to<br>6.18)                                  | 5.20<br>(3.14 to<br>8.54)                                  | 5.58<br>(3.33 to<br>9.34)                                  | 5.18<br>(3.19 to<br>8.42)                                  |
| Asthma                                                        | 2,162.66<br>(1,830.92 to<br>3,382.30)                         | 781.14<br>(357.13 to<br>1,594.47)                             | 597.50<br>(284.46 to<br>1,262.32)                             | 1,150.33<br>(503.64 to<br>2,471.18)                           | 113.54<br>(94.63 to<br>189.67)                             | 57.35<br>(26.59 to<br>96.83)                               | 46.72<br>(22.09 to<br>96.83)                               | 78.01<br>(34.12 to<br>166.92)                              |
| Interstitial lung disease and pulmonary sarcoidosis           | 4,091.81<br>(1,716.25 to<br>5,318.49)                         | 5,817.68<br>(2,688.85 to<br>7,908.87)                         | 6,932.77<br>(3,416.97 to<br>9,155.14)                         | 5,024.83<br>(2,204.93 to<br>6,997.99)                         | 222.35<br>(97.85 to<br>287.57)                             | 392.00<br>(195.31 to<br>532.36)                            | 482.87<br>(255.45 to<br>629.82)                            | 326.41<br>(150.38 to<br>456.43)                            |
| Other chronic respiratory diseases                            | 333.74<br>(225.50 to<br>496.91)                               | 297.03<br>(198.07 to<br>444.48)                               | 291.18<br>(196.31 to<br>446.50)                               | 310.72<br>(198.17 to<br>462.64)                               | 14.56<br>(9.87 to<br>22.32)                                | 18.53<br>(11.89 to<br>27.84)                               | 19.17<br>(12.47 to<br>29.15)                               | 18.17<br>(11.19 to<br>27.12)                               |
| <b>Cirrhosis and other chronic liver diseases</b>             | <b>57,474.32</b><br><b>(51,802.49 to</b><br><b>62,915.89)</b> | <b>41,982.71</b><br><b>(34,918.23 to</b><br><b>49,558.27)</b> | <b>37,242.77</b><br><b>(30,758.13 to</b><br><b>43,721.54)</b> | <b>50,499.35</b><br><b>(41,739.89 to</b><br><b>59,817.58)</b> | <b>2,147.49</b><br><b>(1,944.51 to</b><br><b>2,345.58)</b> | <b>1,819.03</b><br><b>(1,556.15 to</b><br><b>2,109.62)</b> | <b>1,652.92</b><br><b>(1,405.62 to</b><br><b>1,909.68)</b> | <b>2,124.95</b><br><b>(1,807.14 to</b><br><b>2,449.12)</b> |
| Cirrhosis and other chronic liver diseases due to hepatitis B | 13,759.39<br>(11,332.24 to<br>16,463.34)                      | 10,757.70<br>(8,267.58 to<br>13,857.28)                       | 9,872.70<br>(7,648.91 to<br>12,621.53)                        | 11,237.66<br>(8,568.78 to<br>14,272.40)                       | 509.88<br>(422.42 to<br>605.64)                            | 457.51<br>(362.66 to<br>572.63)                            | 428.80<br>(343.35 to<br>532.47)                            | 466.91<br>(367.84 to<br>578.69)                            |
| Cirrhosis and other chronic liver diseases due to hepatitis C | 11,459.35<br>(8,945.33 to<br>14,748.70)                       | 9,076.71<br>(6,656.33 to<br>12,378.03)                        | 8,264.52<br>(6,022.64 to<br>11,241.41)                        | 9,543.24<br>(6,774.65 to<br>12,807.17)                        | 418.48<br>(327.68 to<br>531.99)                            | 374.67<br>(282.71 to<br>496.12)                            | 347.61<br>(261.71 to<br>455.81)                            | 385.79<br>(287.17 to<br>507.98)                            |

|                                                                |                                                               |                                                               |                                                               |                                                               |                                                            |                                                            |                                                            |                                                            |
|----------------------------------------------------------------|---------------------------------------------------------------|---------------------------------------------------------------|---------------------------------------------------------------|---------------------------------------------------------------|------------------------------------------------------------|------------------------------------------------------------|------------------------------------------------------------|------------------------------------------------------------|
| Cirrhosis and other chronic liver diseases due to alcohol use  | 17,094.62<br>(14,098.70 to<br>20,715.07)                      | 10,468.43<br>(8,143.69 to<br>13,484.15)                       | 8,403.92<br>(6,528.82 to<br>10,711.92)                        | 17,482.84<br>(13,619.62 to<br>22,094.67)                      | 640.64<br>(535.32 to<br>763.95)                            | 457.75<br>(366.02 to<br>571.48)                            | 379.20<br>(307.85 to<br>463.89)                            | 732.69<br>(587.97 to<br>892.61)                            |
| Cirrhosis and other chronic liver diseases due to other causes | 15,160.95<br>(13,087.90 to<br>17,465.98)                      | 11,679.86<br>(9,319.70 to<br>14,445.13)                       | 10,701.63<br>(8,534.70 to<br>13,006.20)                       | 12,235.62<br>(9,684.63 to<br>15,067.81)                       | 578.48<br>(498.29 to<br>667.04)                            | 529.09<br>(430.38 to<br>640.57)                            | 497.31<br>(410.95 to<br>589.28)                            | 539.56<br>(439.29 to<br>649.62)                            |
| <b>Digestive diseases</b>                                      | <b>38,130.10</b><br><b>(33,581.28 to</b><br><b>44,434.84)</b> | <b>36,604.39</b><br><b>(29,368.40 to</b><br><b>46,567.64)</b> | <b>34,230.71</b><br><b>(27,691.23 to</b><br><b>43,264.27)</b> | <b>40,195.51</b><br><b>(31,285.60 to</b><br><b>52,269.47)</b> | <b>2,343.05</b><br><b>(2,057.04 to</b><br><b>2,627.07)</b> | <b>3,083.25</b><br><b>(2,490.95 to</b><br><b>3,824.63)</b> | <b>3,043.53</b><br><b>(2,483.97 to</b><br><b>3,738.11)</b> | <b>3,190.84</b><br><b>(2,514.47 to</b><br><b>4,062.26)</b> |
| Peptic ulcer disease                                           | 7,923.96<br>(6,981.02 to<br>9,604.42)                         | 4,597.27<br>(3,514.22 to<br>6,089.55)                         | 3,795.35<br>(2,968.29 to<br>4,827.84)                         | 5,258.72<br>(3,862.02 to<br>7,017.98)                         | 478.68<br>(421.53 to<br>556.05)                            | 392.17<br>(301.04 to<br>503.86)                            | 342.34<br>(271.25 to<br>430.93)                            | 421.15<br>(314.30 to<br>551.01)                            |

| Czech Republic                             |                                       |                                         |                                         |                                         |                                    |                                       |                                       |                                      |
|--------------------------------------------|---------------------------------------|-----------------------------------------|-----------------------------------------|-----------------------------------------|------------------------------------|---------------------------------------|---------------------------------------|--------------------------------------|
| Cause                                      | YLLs (actual counts)                  |                                         |                                         |                                         | Deaths (actual counts)             |                                       |                                       |                                      |
|                                            | 2016                                  | 2040 Forecast                           | 2040 Better Scenario                    | 2040 Worse Scenario                     | 2016                               | 2040 Forecast                         | 2040 Better Scenario                  | 2040 Worse Scenario                  |
| Gastritis and duodenitis                   | 552.35<br>(432.09 to 825.60)          | 515.97<br>(372.26 to 772.59)            | 472.72<br>(346.00 to 723.90)            | 530.67<br>(388.44 to 782.68)            | 31.15<br>(25.11 to 46.48)          | 41.39<br>(30.08 to 65.24)             | 40.08<br>(29.24 to 63.65)             | 40.28<br>(28.62 to 61.46)            |
| Appendicitis                               | 592.96<br>(467.16 to 1,029.29)        | 492.54<br>(359.89 to 866.32)            | 426.83<br>(316.93 to 731.35)            | 525.79<br>(383.43 to 908.44)            | 33.41<br>(27.14 to 53.25)          | 38.21<br>(28.49 to 60.05)             | 34.73<br>(26.41 to 53.68)             | 38.87<br>(28.63 to 61.43)            |
| Paralytic ileus and intestinal obstruction | 5,205.77<br>(3,922.20 to 6,302.28)    | 6,558.94<br>(4,890.77 to 7,875.67)      | 6,887.22<br>(5,120.82 to 8,241.18)      | 6,120.02<br>(4,544.32 to 7,360.77)      | 340.87<br>(246.71 to 401.67)       | 584.78<br>(406.76 to 729.83)          | 641.88<br>(445.62 to 796.26)          | 521.44<br>(359.11 to 655.77)         |
| Inguinal, femoral, and abdominal hernia    | 1,003.38<br>(804.77 to 1,632.03)      | 818.82<br>(621.33 to 1,216.07)          | 790.13<br>(599.48 to 1,261.19)          | 806.28<br>(605.39 to 1,292.40)          | 72.02<br>(58.23 to 114.74)         | 78.84<br>(59.63 to 121.75)            | 79.89<br>(60.32 to 122.87)            | 73.94<br>(55.18 to 115.54)           |
| Inflammatory bowel disease                 | 2,203.77<br>(1,192.83 to 2,746.21)    | 2,017.72<br>(1,079.54 to 2,564.09)      | 2,057.42<br>(1,120.35 to 2,615.35)      | 1,937.81<br>(1,023.32 to 2,457.19)      | 121.30<br>(64.16 to 151.66)        | 145.81<br>(76.57 to 184.40)           | 155.33<br>(82.74 to 196.82)           | 133.82<br>(70.16 to 169.34)          |
| Vascular intestinal disorders              | 3,540.21<br>(2,971.44 to 4,530.69)    | 4,769.05<br>(3,887.95 to 6,077.70)      | 4,763.52<br>(3,886.41 to 6,025.01)      | 4,600.67<br>(3,763.33 to 5,977.50)      | 256.23<br>(216.66 to 313.73)       | 445.23<br>(365.38 to 548.83)          | 463.65<br>(379.78 to 571.02)          | 412.12<br>(331.52 to 513.02)         |
| Gallbladder and biliary diseases           | 4,370.71<br>(3,833.00 to 5,081.42)    | 5,190.51<br>(2,747.21 to 9,395.76)      | 4,592.77<br>(2,473.51 to 8,268.72)      | 6,720.84<br>(3,393.81 to 12,338.34)     | 349.31<br>(306.53 to 399.50)       | 545.79<br>(284.53 to 1,011.04)        | 509.65<br>(268.49 to 930.71)          | 667.10<br>(331.39 to 1,234.95)       |
| Pancreatitis                               | 8,164.48<br>(6,621.53 to 10,230.62)   | 6,820.92<br>(3,591.43 to 12,283.69)     | 5,662.13<br>(3,077.78 to 10,034.42)     | 8,999.02<br>(4,506.16 to 16,536.68)     | 364.04<br>(297.33 to 430.11)       | 393.98<br>(229.85 to 668.56)          | 341.91<br>(203.53 to 574.96)          | 495.16<br>(271.60 to 861.31)         |
| Other digestive diseases                   | 4,572.51<br>(3,260.40 to 5,454.75)    | 4,822.66<br>(3,537.76 to 5,884.66)      | 4,782.63<br>(3,515.92 to 5,808.07)      | 4,695.69<br>(3,374.74 to 5,699.73)      | 296.05<br>(226.55 to 346.05)       | 417.05<br>(317.82 to 500.72)          | 434.05<br>(335.75 to 519.12)          | 386.96<br>(286.21 to 466.67)         |
| Neurological disorders                     | 74,966.09<br>(64,569.56 to 85,308.29) | 117,139.32<br>(92,625.51 to 151,323.15) | 123,516.62<br>(98,554.95 to 156,736.71) | 119,084.85<br>(91,261.36 to 161,663.71) | 6,771.27<br>(5,781.37 to 7,874.17) | 13,919.40<br>(10,455.58 to 18,361.98) | 15,297.16<br>(11,773.80 to 19,776.74) | 13,591.65<br>(9,827.47 to 18,898.92) |
| Alzheimer's disease and other dementias    | 50,827.53<br>(42,290.37 to 61,849.62) | 88,494.18<br>(65,330.25 to 121,296.23)  | 93,416.76<br>(70,246.61 to 125,403.52)  | 91,431.84<br>(64,484.82 to 132,992.01)  | 5,474.01<br>(4,532.94 to 6,591.78) | 11,747.28<br>(8,296.39 to 16,114.58)  | 12,884.28<br>(9,355.06 to 17,255.41)  | 11,635.29<br>(7,920.12 to 16,916.51) |
| Parkinson's disease                        | 10,172.46<br>(7,628.20 to 13,211.09)  | 16,874.90<br>(12,515.06 to 21,881.25)   | 18,699.86<br>(13,978.15 to 23,995.59)   | 15,009.40<br>(11,059.44 to 19,726.03)   | 866.44<br>(647.41 to 1,133.17)     | 1,698.07<br>(1,270.06 to 2,221.65)    | 1,938.32<br>(1,478.10 to 2,534.99)    | 1,466.27<br>(1,068.90 to 1,936.67)   |
| Epilepsy                                   | 4,651.23<br>(4,165.70 to 5,317.03)    | 3,914.56<br>(2,535.91 to 5,845.52)      | 3,518.08<br>(2,348.20 to 5,212.36)      | 4,832.94<br>(3,039.32 to 7,373.40)      | 136.03<br>(122.77 to 155.59)       | 147.98<br>(99.64 to 214.28)           | 139.58<br>(95.01 to 204.21)           | 174.91<br>(114.04 to 262.86)         |
| Multiple sclerosis                         | 2,787.16<br>(2,210.56 to 3,768.23)    | 2,692.59<br>(1,982.48 to 3,643.42)      | 2,667.18<br>(1,963.16 to 3,584.29)      | 2,752.46<br>(1,989.71 to 3,792.67)      | 98.40<br>(78.47 to 125.94)         | 109.21<br>(82.33 to 143.65)           | 110.66<br>(84.17 to 143.99)           | 108.94<br>(80.42 to 143.29)          |
| Motor neuron disease                       | 2,007.43<br>(1,793.56 to 2,213.67)    | 1,935.46<br>(1,630.82 to 2,266.53)      | 1,938.55<br>(1,636.57 to 2,277.16)      | 1,903.14<br>(1,614.62 to 2,210.63)      | 77.28<br>(69.42 to 85.14)          | 84.72<br>(71.66 to 97.82)             | 86.12<br>(70.05 to 100.09)            | 81.90<br>(64.02 to 94.02)            |
| Other neurological disorders               | 3,620.28<br>(3,096.77 to 4,021.04)    | 3,227.62<br>(2,709.72 to 3,735.57)      | 3,276.20<br>(2,751.26 to 3,800.07)      | 3,155.07<br>(2,653.09 to 3,653.99)      | 119.11<br>(104.30 to 132.10)       | 131.74<br>(113.89 to 149.95)          | 138.21<br>(119.52 to 157.62)          | 124.34<br>(107.29 to 141.34)         |
| Mental disorders                           | 17,726.95<br>(15,864.96 to 19,512.78) | 19,554.15<br>(16,187.70 to 23,153.80)   | 21,375.97<br>(17,901.25 to 24,966.96)   | 19,395.60<br>(15,935.89 to 22,879.26)   | 521.75<br>(470.97 to 570.60)       | 685.69<br>(582.27 to 799.82)          | 773.61<br>(669.85 to 887.78)          | 658.12<br>(555.39 to 762.86)         |
| Alcohol use disorders                      | 11,169.69<br>(9,658.29 to 12,607.13)  | 8,335.45<br>(6,369.30 to 10,728.86)     | 8,408.64<br>(6,437.34 to 10,834.09)     | 9,303.25<br>(7,179.17 to 11,778.17)     | 334.75<br>(291.41 to 375.14)       | 276.85<br>(214.13 to 353.00)          | 282.12<br>(220.51 to 362.69)          | 305.12<br>(240.97 to 385.51)         |
| Drug use disorders                         | 6,493.77<br>(5,743.56 to 7,305.91)    | 11,180.58<br>(9,174.40 to 13,511.17)    | 12,925.91<br>(10,811.20 to 15,072.36)   | 10,056.38<br>(8,114.82 to 12,050.73)    | 185.83<br>(166.74 to 205.47)       | 408.14<br>(337.19 to 484.08)          | 490.72<br>(421.91 to 562.32)          | 353.23<br>(286.70 to 415.66)         |
| Opioid use disorders                       | 3,212.94<br>(2,227.98 to 3,788.82)    | 3,499.58<br>(2,320.79 to 4,398.60)      | 3,655.65<br>(2,413.99 to 4,643.76)      | 3,375.09<br>(2,249.08 to 4,296.61)      | 82.56<br>(60.80 to 96.75)          | 109.83<br>(80.56 to 138.57)           | 118.03<br>(87.68 to 150.72)           | 102.83<br>(74.98 to 129.28)          |



|                           |                                       |                                       |                                       |                                       |                               |                                 |                                 |                                 |
|---------------------------|---------------------------------------|---------------------------------------|---------------------------------------|---------------------------------------|-------------------------------|---------------------------------|---------------------------------|---------------------------------|
|                           | 71.65<br>(39.46 to<br>92.81)          | 151.92<br>(80.89 to<br>211.33)        | 172.43<br>(94.15 to<br>237.78)        | 138.40<br>(75.43 to<br>195.75)        | 1.76<br>(0.99 to<br>2.28)     | 4.09<br>(2.24 to<br>5.64)       | 4.70<br>(2.61 to<br>6.49)       | 3.68<br>(2.04 to<br>5.14)       |
| Cocaine use disorders     |                                       |                                       |                                       |                                       |                               |                                 |                                 |                                 |
|                           | 335.63<br>(218.95 to<br>441.37)       | 1,193.66<br>(712.97 to<br>1,733.46)   | 1,445.42<br>(933.30 to<br>1,975.00)   | 1,044.12<br>(627.62 to<br>1,479.47)   | 6.78<br>(4.54 to<br>8.84)     | 34.85<br>(14.92 to<br>34.61)    | 30.27<br>(19.84 to<br>40.51)    | 21.60<br>(13.07 to<br>30.28)    |
| Amphetamine use disorders |                                       |                                       |                                       |                                       |                               |                                 |                                 |                                 |
|                           | 2,873.54<br>(2,424.16 to<br>3,789.63) | 6,335.41<br>(4,900.38 to<br>8,036.62) | 7,652.41<br>(6,235.96 to<br>9,454.37) | 5,498.77<br>(4,178.35 to<br>7,017.96) | 94.74<br>(81.21 to<br>116.99) | 269.36<br>(210.81 to<br>335.81) | 337.73<br>(279.00 to<br>402.08) | 224.23<br>(171.03 to<br>278.63) |
| Other drug use disorders  |                                       |                                       |                                       |                                       |                               |                                 |                                 |                                 |
|                           | 63.49<br>(47.29 to<br>82.07)          | 38.12<br>(22.34 to<br>60.27)          | 41.42<br>(23.15 to<br>66.72)          | 35.96<br>(21.09 to<br>58.44)          | 1.17<br>(0.88 to<br>1.49)     | 0.71<br>(0.43 to<br>1.08)       | 0.77<br>(0.46 to<br>1.20)       | 0.67<br>(0.40 to<br>1.04)       |
| Eating disorders          |                                       |                                       |                                       |                                       |                               |                                 |                                 |                                 |

| Czech Republic                                             |                                              |                                               |                                              |                                               |                                           |                                           |                                           |                                            |
|------------------------------------------------------------|----------------------------------------------|-----------------------------------------------|----------------------------------------------|-----------------------------------------------|-------------------------------------------|-------------------------------------------|-------------------------------------------|--------------------------------------------|
| Cause                                                      | YLLs (actual counts)                         |                                               |                                              |                                               | Deaths (actual counts)                    |                                           |                                           |                                            |
|                                                            | 2016                                         | 2040 Forecast                                 | 2040 Better Scenario                         | 2040 Worse Scenario                           | 2016                                      | 2040 Forecast                             | 2040 Better Scenario                      | 2040 Worse Scenario                        |
| <b>Diabetes, urogenital, blood, and endocrine diseases</b> | <b>68,238.60</b><br>(63,446.47 to 73,389.13) | <b>78,758.31</b><br>(59,086.74 to 104,723.17) | <b>67,971.75</b><br>(52,342.53 to 88,131.33) | <b>90,029.99</b><br>(67,812.74 to 118,415.22) | <b>4,610.38</b><br>(4,297.92 to 4,960.93) | <b>7,025.85</b><br>(5,298.58 to 9,314.17) | <b>6,360.34</b><br>(4,920.34 to 8,274.91) | <b>7,632.07</b><br>(5,811.44 to 10,025.46) |
| Diabetes mellitus                                          | 37,590.11<br>(33,785.22 to 41,862.84)        | 31,248.01<br>(19,675.45 to 47,716.83)         | 25,510.11<br>(16,815.27 to 37,457.12)        | 37,169.87<br>(23,368.89 to 57,413.12)         | 2,604.06<br>(2,357.98 to 2,886.17)        | 2,781.13<br>(1,828.23 to 4,015.20)        | 2,407.77<br>(1,632.48 to 3,393.33)        | 3,105.36<br>(2,027.90 to 4,510.56)         |
| Acute glomerulonephritis                                   | 86.04<br>(76.35 to 96.64)                    | 93.60<br>(66.78 to 134.44)                    | 86.64<br>(61.21 to 122.20)                   | 96.79<br>(68.54 to 135.23)                    | 3.54<br>(3.03 to 4.11)                    | 5.08<br>(3.33 to 7.85)                    | 4.93<br>(3.25 to 7.65)                    | 5.01<br>(3.28 to 7.54)                     |
| Chronic kidney disease                                     | 17,754.86<br>(16,413.46 to 19,123.05)        | 29,300.06<br>(16,019.56 to 50,988.35)         | 24,630.26<br>(14,310.63 to 41,616.62)        | 34,984.84<br>(18,569.27 to 62,222.91)         | 1,228.38<br>(1,137.96 to 1,322.41)        | 2,679.03<br>(1,444.82 to 4,680.27)        | 2,355.60<br>(1,315.01 to 4,021.38)        | 3,057.02<br>(1,694.75 to 5,370.37)         |
| Chronic kidney disease due to diabetes mellitus            | 6,156.03<br>(5,150.13 to 7,137.44)           | 11,083.38<br>(6,065.39 to 20,224.03)          | 9,232.37<br>(5,224.37 to 16,092.11)          | 13,409.24<br>(7,006.87 to 24,670.82)          | 380.46<br>(314.86 to 452.73)              | 870.34<br>(456.94 to 1,563.47)            | 755.60<br>(410.22 to 1,325.05)            | 1,009.06<br>(510.53 to 1,850.90)           |
| Chronic kidney disease due to hypertension                 | 2,311.41<br>(1,866.02 to 2,819.81)           | 5,167.69<br>(2,683.64 to 9,198.67)            | 4,593.37<br>(2,475.52 to 7,981.88)           | 5,867.10<br>(2,968.98 to 10,521.55)           | 226.94<br>(181.57 to 278.04)              | 638.00<br>(327.39 to 1,127.96)            | 590.69<br>(317.47 to 1,020.07)            | 695.65<br>(345.72 to 1,237.47)             |
| Chronic kidney disease due to glomerulonephritis           | 3,772.08<br>(3,104.23 to 4,498.43)           | 4,717.35<br>(2,527.03 to 8,812.98)            | 3,838.80<br>(2,155.00 to 6,835.57)           | 5,745.86<br>(3,031.26 to 10,658.00)           | 237.91<br>(189.27 to 295.08)              | 400.10<br>(208.19 to 742.87)              | 338.01<br>(179.65 to 606.60)              | 469.00<br>(230.41 to 892.98)               |
| Chronic kidney disease due to other and unspecified causes | 5,515.34<br>(4,606.54 to 6,576.23)           | 8,331.65<br>(4,463.02 to 14,774.46)           | 6,965.71<br>(3,879.63 to 12,046.98)          | 9,962.64<br>(5,205.31 to 17,748.04)           | 383.07<br>(310.21 to 458.62)              | 770.58<br>(392.86 to 1,389.52)            | 671.30<br>(358.23 to 1,163.96)            | 883.31<br>(438.15 to 1,577.12)             |
| Urinary diseases and male infertility                      | 6,847.37<br>(6,262.14 to 7,501.15)           | 12,254.47<br>(9,938.00 to 14,724.56)          | 11,734.92<br>(9,631.80 to 13,976.13)         | 12,135.11<br>(9,928.86 to 14,391.20)          | 512.42<br>(467.06 to 565.74)              | 1,199.72<br>(948.66 to 1,469.34)          | 1,203.58<br>(967.47 to 1,468.96)          | 1,134.52<br>(886.59 to 1,378.83)           |
| Urinary tract infections                                   | 6,140.76<br>(5,608.54 to 6,710.05)           | 11,359.91<br>(9,172.46 to 13,585.61)          | 10,928.30<br>(8,953.79 to 13,127.20)         | 11,210.00<br>(9,111.23 to 13,267.43)          | 465.62<br>(422.59 to 513.21)              | 1,121.76<br>(881.41 to 1,386.39)          | 1,129.72<br>(903.35 to 1,385.27)          | 1,057.82<br>(829.87 to 1,296.71)           |
| Urolithiasis                                               | 377.68<br>(264.57 to 646.34)                 | 548.79<br>(345.34 to 985.12)                  | 493.42<br>(314.84 to 884.15)                 | 570.36<br>(367.46 to 982.00)                  | 26.43<br>(18.45 to 47.90)                 | 47.34<br>(28.85 to 89.83)                 | 44.53<br>(26.74 to 85.13)                 | 47.03<br>(28.15 to 87.37)                  |
| Other urinary diseases                                     | 328.94<br>(207.90 to 463.74)                 | 345.77<br>(212.70 to 576.62)                  | 313.21<br>(196.99 to 530.71)                 | 354.75<br>(222.87 to 566.40)                  | 20.37<br>(13.98 to 33.64)                 | 30.61<br>(17.98 to 58.35)                 | 29.34<br>(16.98 to 57.51)                 | 29.67<br>(17.65 to 55.47)                  |
| Gynecological diseases                                     | 14.93<br>(11.13 to 30.86)                    | 10.36<br>(6.16 to 22.07)                      | 8.31<br>(5.09 to 17.81)                      | 11.85<br>(6.93 to 24.82)                      | 0.64<br>(0.48 to 1.27)                    | 0.62<br>(0.38 to 1.27)                    | 0.52<br>(0.32 to 1.04)                    | 0.68<br>(0.41 to 1.35)                     |
| Uterine fibroids                                           | 7.91<br>(5.80 to 16.38)                      | 5.49<br>(3.01 to 12.22)                       | 4.57<br>(2.54 to 10.04)                      | 6.16<br>(3.43 to 13.46)                       | 0.29<br>(0.22 to 0.58)                    | 0.26<br>(0.15 to 0.53)                    | 0.23<br>(0.13 to 0.45)                    | 0.28<br>(0.16 to 0.59)                     |
| Polycystic ovarian syndrome                                | 2.34<br>(1.32 to 5.28)                       | 0.62<br>(0.18 to 1.77)                        | 0.39<br>(0.12 to 1.15)                       | 0.83<br>(0.24 to 2.27)                        | 0.06<br>(0.03 to 0.14)                    | 0.02<br>(0.00 to 0.04)                    | 0.01<br>(0.00 to 0.03)                    | 0.02<br>(0.00 to 0.06)                     |
| Endometriosis                                              | 0.10<br>(0.05 to 0.23)                       | 0.08<br>(0.02 to 0.20)                        | 0.06<br>(0.02 to 0.15)                       | 0.09<br>(0.03 to 0.23)                        | 0.00<br>(0.00 to 0.01)                    | 0.00<br>(0.00 to 0.01)                    | 0.00<br>(0.00 to 0.00)                    | 0.00<br>(0.00 to 0.01)                     |
| Genital prolapse                                           | 0.29<br>(0.18 to 0.65)                       | 0.20<br>(0.09 to 0.48)                        | 0.16<br>(0.08 to 0.38)                       | 0.23<br>(0.11 to 0.56)                        | 0.02<br>(0.01 to 0.04)                    | 0.01<br>(0.01 to 0.04)                    | 0.01<br>(0.01 to 0.03)                    | 0.01<br>(0.01 to 0.04)                     |
| Other gynecological diseases                               | 4.30<br>(3.08 to 8.98)                       | 3.97<br>(2.22 to 8.38)                        | 3.13<br>(1.77 to 6.48)                       | 4.54<br>(2.55 to 9.04)                        | 0.27<br>(0.20 to 0.57)                    | 0.33<br>(0.18 to 0.68)                    | 0.27<br>(0.15 to 0.57)                    | 0.36<br>(0.20 to 0.71)                     |
| Hemoglobinopathies and hemolytic anemias                   | 986.47<br>(837.04 to 1,241.66)               | 730.34<br>(581.63 to 979.91)                  | 660.17<br>(535.37 to 890.42)                 | 759.43<br>(608.64 to 1,007.06)                | 52.66<br>(45.56 to 70.04)                 | 59.36<br>(47.21 to 82.36)                 | 56.80<br>(45.29 to 78.92)                 | 58.36<br>(46.14 to 83.40)                  |
| Thalassemias                                               | 52.10<br>(39.32 to 66.21)                    | 13.42<br>(8.15 to 20.38)                      | 12.69<br>(7.73 to 19.22)                     | 13.89<br>(8.41 to 21.20)                      | 0.66<br>(0.51 to 0.84)                    | 0.18<br>(0.11 to 0.27)                    | 0.17<br>(0.10 to 0.25)                    | 0.18<br>(0.11 to 0.27)                     |

|                                                   |                                       |                                       |                                       |                                       |                                 |                                 |                                 |                                 |
|---------------------------------------------------|---------------------------------------|---------------------------------------|---------------------------------------|---------------------------------------|---------------------------------|---------------------------------|---------------------------------|---------------------------------|
|                                                   | 89.83<br>(71.46 to<br>113.66)         | 53.31<br>(39.01 to<br>74.66)          | 45.57<br>(33.62 to<br>62.06)          | 58.94<br>(42.49 to<br>81.76)          | 2.09<br>(1.67 to<br>2.71)       | 1.54<br>(1.13 to<br>2.17)       | 1.33<br>(0.98 to<br>1.84)       | 1.69<br>(1.22 to<br>2.35)       |
| Sickle cell disorders                             |                                       |                                       |                                       |                                       |                                 |                                 |                                 |                                 |
|                                                   | 200.36<br>(155.43 to<br>247.59)       | 158.33<br>(115.73 to<br>212.79)       | 132.22<br>(99.44 to<br>176.60)        | 175.81<br>(127.32 to<br>240.12)       | 6.00<br>(4.57 to<br>7.62)       | 6.54<br>(4.71 to<br>8.79)       | 5.58<br>(4.18 to<br>7.46)       | 7.09<br>(5.08 to<br>9.65)       |
| G6PD deficiency                                   |                                       |                                       |                                       |                                       |                                 |                                 |                                 |                                 |
|                                                   | 644.17<br>(553.24 to<br>851.34)       | 505.27<br>(401.50 to<br>707.15)       | 469.69<br>(375.60 to<br>648.39)       | 510.78<br>(408.20 to<br>715.86)       | 43.90<br>(37.56 to<br>59.74)    | 51.09<br>(39.79 to<br>72.92)    | 49.72<br>(38.95 to<br>70.66)    | 49.40<br>(38.45 to<br>72.22)    |
| Other hemoglobinopathies and hemolytic anemias    |                                       |                                       |                                       |                                       |                                 |                                 |                                 |                                 |
|                                                   | 4,958.82<br>(2,912.29 to<br>5,797.00) | 5,121.47<br>(2,837.14 to<br>6,158.71) | 5,341.34<br>(2,932.25 to<br>6,447.46) | 4,872.10<br>(2,692.88 to<br>5,893.18) | 208.68<br>(109.32 to<br>246.35) | 300.92<br>(145.79 to<br>367.34) | 331.13<br>(155.83 to<br>405.22) | 271.12<br>(131.61 to<br>332.29) |
| Endocrine, metabolic, blood, and immune disorders |                                       |                                       |                                       |                                       |                                 |                                 |                                 |                                 |

| Czech Republic                                |                                             |                                           |                                           |                                            |                                     |                                     |                                     |                                     |
|-----------------------------------------------|---------------------------------------------|-------------------------------------------|-------------------------------------------|--------------------------------------------|-------------------------------------|-------------------------------------|-------------------------------------|-------------------------------------|
| Cause                                         | YLLs (actual counts)                        |                                           |                                           |                                            | Deaths (actual counts)              |                                     |                                     |                                     |
|                                               | 2016                                        | 2040 Forecast                             | 2040 Better Scenario                      | 2040 Worse Scenario                        | 2016                                | 2040 Forecast                       | 2040 Better Scenario                | 2040 Worse Scenario                 |
| <b>Musculoskeletal disorders</b>              | <b>2,070.11</b><br>(1,444.40 to 2,378.28)   | <b>1,827.82</b><br>(1,297.19 to 2,197.30) | <b>1,749.27</b><br>(1,207.71 to 2,104.14) | <b>1,857.42</b><br>(1,269.12 to 2,248.89)  | <b>99.36</b><br>(68.65 to 113.97)   | <b>117.76</b><br>(79.52 to 141.48)  | <b>117.41</b><br>(79.71 to 140.07)  | <b>114.67</b><br>(76.90 to 138.61)  |
| Rheumatoid arthritis                          | 502.16<br>(400.94 to 729.93)                | 342.43<br>(221.67 to 513.96)              | 278.68<br>(183.34 to 418.72)              | 390.14<br>(255.79 to 605.57)               | 27.65<br>(21.96 to 40.40)           | 24.44<br>(16.22 to 37.33)           | 20.78<br>(14.02 to 32.89)           | 26.63<br>(17.65 to 41.69)           |
| Other musculoskeletal disorders               | 1,567.95<br>(980.98 to 1,827.06)            | 1,485.39<br>(954.97 to 1,812.29)          | 1,470.59<br>(967.41 to 1,798.36)          | 1,467.28<br>(918.40 to 1,788.59)           | 71.70<br>(43.78 to 83.65)           | 93.32<br>(58.05 to 113.97)          | 96.63<br>(60.93 to 116.84)          | 88.04<br>(54.02 to 107.78)          |
| <b>Other non-communicable diseases</b>        | <b>11,081.41</b><br>(8,580.73 to 14,059.38) | <b>7,104.53</b><br>(4,292.42 to 9,785.54) | <b>6,283.15</b><br>(3,713.39 to 8,608.68) | <b>7,700.84</b><br>(4,751.78 to 10,520.13) | <b>240.26</b><br>(146.03 to 305.07) | <b>310.38</b><br>(135.80 to 466.15) | <b>307.36</b><br>(106.51 to 464.27) | <b>302.90</b><br>(119.94 to 445.88) |
| Congenital birth defects                      | 8,269.96<br>(6,393.89 to 11,801.80)         | 3,895.66<br>(2,471.84 to 5,940.02)        | 3,163.41<br>(2,099.04 to 4,691.64)        | 4,514.33<br>(2,870.70 to 6,877.51)         | 113.01<br>(90.49 to 155.19)         | 59.65<br>(41.06 to 85.00)           | 49.94<br>(35.62 to 69.07)           | 67.77<br>(46.09 to 97.58)           |
| Neural tube defects                           | 116.21<br>(72.60 to 162.31)                 | 26.98<br>(13.82 to 50.15)                 | 19.46<br>(10.00 to 34.49)                 | 33.48<br>(16.44 to 57.96)                  | 1.49<br>(0.97 to 2.03)              | 0.39<br>(0.22 to 0.68)              | 0.29<br>(0.17 to 0.48)              | 0.48<br>(0.26 to 0.80)              |
| Congenital heart anomalies                    | 3,406.74<br>(2,522.81 to 5,498.56)          | 1,134.79<br>(637.76 to 2,052.71)          | 799.99<br>(448.21 to 1,395.77)            | 1,430.50<br>(788.57 to 2,465.26)           | 46.28<br>(35.38 to 71.44)           | 16.22<br>(9.64 to 27.66)            | 11.53<br>(6.98 to 18.74)            | 20.33<br>(11.82 to 33.07)           |
| Orofacial clefts                              | 5.57<br>(1.82 to 10.58)                     | 1.43<br>(0.39 to 3.53)                    | 0.91<br>(0.25 to 2.21)                    | 1.93<br>(0.48 to 4.83)                     | 0.06<br>(0.02 to 0.12)              | 0.02<br>(0.00 to 0.04)              | 0.01<br>(0.00 to 0.03)              | 0.02<br>(0.01 to 0.06)              |
| Down syndrome                                 | 1,074.02<br>(812.86 to 1,452.30)            | 874.44<br>(630.11 to 1,209.22)            | 872.87<br>(623.63 to 1,195.49)            | 872.70<br>(625.12 to 1,214.55)             | 18.58<br>(14.26 to 24.29)           | 18.03<br>(12.96 to 23.39)           | 18.23<br>(13.05 to 23.71)           | 17.81<br>(12.87 to 23.41)           |
| Other chromosomal abnormalities               | 710.93<br>(450.54 to 1,163.49)              | 643.71<br>(365.81 to 1,078.54)            | 551.47<br>(314.09 to 936.25)              | 713.34<br>(396.29 to 1,229.18)             | 8.68<br>(5.60 to 14.19)             | 8.08<br>(4.73 to 14.12)             | 6.95<br>(4.06 to 12.06)             | 8.94<br>(5.08 to 15.72)             |
| Congenital musculoskeletal and limb anomalies | 243.22<br>(139.31 to 359.76)                | 95.61<br>(45.05 to 179.47)                | 71.54<br>(33.65 to 135.63)                | 116.03<br>(53.63 to 221.02)                | 2.96<br>(1.74 to 4.31)              | 1.21<br>(0.59 to 2.21)              | 0.91<br>(0.45 to 1.66)              | 1.46<br>(0.70 to 2.70)              |
| Urogenital congenital anomalies               | 199.41<br>(86.40 to 303.35)                 | 87.72<br>(39.65 to 155.50)                | 69.36<br>(32.48 to 120.83)                | 102.34<br>(46.28 to 181.03)                | 2.87<br>(1.45 to 4.16)              | 1.54<br>(0.79 to 2.50)              | 1.24<br>(0.67 to 1.93)              | 1.77<br>(0.96 to 2.85)              |
| Digestive congenital anomalies                | 396.91<br>(224.09 to 701.40)                | 177.66<br>(78.72 to 347.36)               | 129.38<br>(57.47 to 248.77)               | 219.74<br>(96.86 to 430.39)                | 4.87<br>(2.83 to 8.39)              | 2.24<br>(1.06 to 4.23)              | 1.64<br>(0.79 to 3.04)              | 2.76<br>(1.32 to 5.26)              |
| Other congenital birth defects                | 2,116.95<br>(1,542.75 to 3,036.35)          | 853.33<br>(478.84 to 1,398.57)            | 648.44<br>(372.18 to 1,040.44)            | 1,024.29<br>(586.31 to 1,693.44)           | 27.21<br>(20.60 to 37.76)           | 11.91<br>(7.18 to 18.59)            | 9.14<br>(5.66 to 14.07)             | 14.19<br>(8.58 to 22.01)            |
| Skin and subcutaneous diseases                | 1,770.83<br>(505.74 to 2,463.92)            | 2,913.24<br>(752.26 to 4,426.89)          | 2,877.54<br>(726.57 to 4,339.69)          | 2,843.67<br>(744.36 to 4,275.55)           | 115.17<br>(26.67 to 167.36)         | 247.30<br>(53.78 to 389.86)         | 254.61<br>(54.49 to 403.99)         | 231.16<br>(50.71 to 367.22)         |
| Cellulitis                                    | 422.10<br>(102.97 to 620.99)                | 871.83<br>(222.05 to 1,310.90)            | 884.39<br>(222.26 to 1,330.67)            | 838.96<br>(213.55 to 1,270.05)             | 22.95<br>(4.72 to 35.01)            | 61.99<br>(4.72 to 97.21)            | 65.58<br>(13.78 to 102.52)          | 57.12<br>(13.00 to 89.57)           |
| Pyoderma                                      | 712.42<br>(135.75 to 1,091.40)              | 1,513.59<br>(266.06 to 2,494.39)          | 1,493.80<br>(258.29 to 2,481.47)          | 1,477.18<br>(266.12 to 2,421.21)           | 44.94<br>(5.96 to 73.41)            | 130.41<br>(16.35 to 225.44)         | 134.83<br>(16.93 to 235.70)         | 121.50<br>(15.77 to 210.37)         |
| Decubitus ulcer                               | 566.58<br>(195.89 to 752.43)                | 444.87<br>(146.80 to 719.08)              | 418.64<br>(136.30 to 680.89)              | 445.39<br>(144.78 to 709.94)               | 43.90<br>(13.03 to 61.23)           | 48.61<br>(14.19 to 78.64)           | 47.72<br>(13.63 to 76.94)           | 46.66<br>(13.34 to 74.41)           |
| Other skin and subcutaneous diseases          | 69.74<br>(32.58 to 96.55)                   | 82.94<br>(36.14 to 140.39)                | 80.72<br>(33.89 to 139.85)                | 82.14<br>(35.05 to 136.89)                 | 3.39<br>(1.23 to 4.67)              | 6.30<br>(2.11 to 11.46)             | 6.48<br>(2.13 to 12.00)             | 5.88<br>(2.01 to 10.51)             |
| Sudden infant death syndrome                  | 1,040.62<br>(642.46 to 1,518.84)            | 295.64<br>(111.28 to 557.32)              | 242.20<br>(88.31 to 460.36)               | 342.83<br>(128.50 to 661.59)               | 12.08<br>(7.46 to 17.63)            | 3.43<br>(1.29 to 6.47)              | 2.81<br>(1.02 to 5.34)              | 3.98<br>(1.49 to 7.68)              |

|                          |                                             |                                            |                                           |                                             |                                       |                                       |                                       |                                       |
|--------------------------|---------------------------------------------|--------------------------------------------|-------------------------------------------|---------------------------------------------|---------------------------------------|---------------------------------------|---------------------------------------|---------------------------------------|
| Injuries                 | 151,609.43<br>(139,763.25 to<br>167,925.00) | 110,961.48<br>(88,199.25 to<br>141,965.03) | 97,545.60<br>(78,506.23 to<br>123,458.89) | 134,422.68<br>(104,043.05 to<br>178,269.87) | 5,389.75<br>(4,941.41 to<br>5,902.91) | 6,323.42<br>(5,143.57 to<br>7,669.99) | 6,062.47<br>(4,898.96 to<br>7,291.43) | 6,735.96<br>(5,383.11 to<br>8,285.86) |
| Transport injuries       | 38,131.55<br>(34,740.65 to<br>41,918.88)    | 19,412.80<br>(12,270.13 to<br>29,775.90)   | 14,051.78<br>(9,061.35 to<br>21,462.83)   | 33,210.71<br>(20,528.61 to<br>52,078.34)    | 1,022.52<br>(942.50 to<br>1,115.41)   | 659.21<br>(446.14 to<br>972.16)       | 508.95<br>(349.65 to<br>745.38)       | 1,028.30<br>(666.05 to<br>1,586.76)   |
| Road injuries            | 31,987.14<br>(28,928.40 to<br>35,664.16)    | 15,521.38<br>(9,934.53 to<br>23,242.43)    | 10,975.67<br>(7,163.43 to<br>16,326.58)   | 28,208.06<br>(17,657.55 to<br>43,995.69)    | 864.43<br>(794.51 to<br>952.55)       | 532.24<br>(364.55 to<br>777.10)       | 405.27<br>(284.41 to<br>581.32)       | 870.89<br>(570.49 to<br>1,327.19)     |
| Pedestrian road injuries | 7,336.33<br>(5,491.32 to<br>8,816.92)       | 2,624.40<br>(1,695.26 to<br>4,041.61)      | 1,702.96<br>(1,172.36 to<br>2,498.40)     | 4,657.34<br>(2,917.10 to<br>7,336.40)       | 265.85<br>(217.61 to<br>313.85)       | 136.87<br>(94.68 to<br>206.57)        | 97.13<br>(69.71 to<br>137.72)         | 218.21<br>(145.27 to<br>333.70)       |

| Czech Republic                                  |                                                               |                                                               |                                                               |                                                               |                                                            |                                                            |                                                            |                                                            |
|-------------------------------------------------|---------------------------------------------------------------|---------------------------------------------------------------|---------------------------------------------------------------|---------------------------------------------------------------|------------------------------------------------------------|------------------------------------------------------------|------------------------------------------------------------|------------------------------------------------------------|
| Cause                                           | YLLs (actual counts)                                          |                                                               |                                                               |                                                               | Deaths (actual counts)                                     |                                                            |                                                            |                                                            |
|                                                 | 2016                                                          | 2040 Forecast                                                 | 2040 Better Scenario                                          | 2040 Worse Scenario                                           | 2016                                                       | 2040 Forecast                                              | 2040 Better Scenario                                       | 2040 Worse Scenario                                        |
| Cyclist road injuries                           | 2,740.73<br>(1,940.07 to<br>3,260.99)                         | 1,967.42<br>(1,126.87 to<br>3,325.22)                         | 1,550.50<br>(907.85 to<br>2,542.13)                           | 3,136.38<br>(1,712.45 to<br>5,413.57)                         | 83.85<br>(62.65 to<br>99.68)                               | 78.62<br>(47.66 to<br>129.55)                              | 67.36<br>(41.42 to<br>108.86)                              | 111.73<br>(63.51 to<br>190.32)                             |
| Motorcyclist road injuries                      | 3,883.53<br>(2,372.73 to<br>4,762.42)                         | 2,244.94<br>(1,164.11 to<br>3,889.85)                         | 1,790.84<br>(956.74 to<br>3,081.47)                           | 3,455.05<br>(1,706.71 to<br>6,166.23)                         | 79.38<br>(49.50 to<br>96.50)                               | 49.91<br>(27.36 to<br>85.47)                               | 41.51<br>(23.49 to<br>69.42)                               | 72.63<br>(38.19 to<br>128.62)                              |
| Motor vehicle road injuries                     | 17,891.97<br>(15,884.79 to<br>21,888.46)                      | 8,596.61<br>(5,520.35 to<br>12,861.90)                        | 5,866.17<br>(3,848.55 to<br>8,726.26)                         | 16,805.26<br>(10,348.09 to<br>25,834.04)                      | 431.59<br>(381.84 to<br>522.74)                            | 263.27<br>(180.59 to<br>374.51)                            | 196.25<br>(136.48 to<br>278.85)                            | 462.94<br>(302.68 to<br>682.45)                            |
| Other road injuries                             | 134.57<br>(74.54 to<br>215.63)                                | 88.01<br>(41.68 to<br>160.79)                                 | 65.19<br>(31.29 to<br>116.78)                                 | 154.03<br>(69.79 to<br>288.58)                                | 3.76<br>(2.21 to<br>5.79)                                  | 3.58<br>(1.77 to<br>6.37)                                  | 3.01<br>(1.50 to<br>5.20)                                  | 5.37<br>(2.49 to<br>9.95)                                  |
| Other transport injuries                        | 6,144.41<br>(5,339.69 to<br>6,992.47)                         | 3,891.41<br>(2,298.89 to<br>6,423.82)                         | 3,076.11<br>(1,849.50 to<br>5,022.83)                         | 5,002.65<br>(2,898.62 to<br>8,322.68)                         | 158.09<br>(140.10 to<br>178.47)                            | 126.97<br>(79.95 to<br>200.81)                             | 103.67<br>(66.41 to<br>163.40)                             | 157.41<br>(94.04 to<br>256.89)                             |
| <b>Unintentional injuries</b>                   | <b>54,028.18</b><br><b>(49,748.24 to</b><br><b>60,187.01)</b> | <b>51,737.81</b><br><b>(43,432.35 to</b><br><b>61,285.32)</b> | <b>49,274.97</b><br><b>(41,382.74 to</b><br><b>56,502.16)</b> | <b>52,328.13</b><br><b>(44,135.94 to</b><br><b>61,109.97)</b> | <b>2,671.36</b><br><b>(2,309.85 to</b><br><b>2,924.86)</b> | <b>4,211.65</b><br><b>(3,209.83 to</b><br><b>5,090.30)</b> | <b>4,251.08</b><br><b>(3,227.07 to</b><br><b>5,097.74)</b> | <b>3,994.52</b><br><b>(3,040.92 to</b><br><b>4,870.58)</b> |
| Falls                                           | 22,363.55<br>(19,818.53 to<br>29,563.82)                      | 31,631.74<br>(26,809.45 to<br>37,492.06)                      | 31,002.61<br>(26,366.53 to<br>36,153.31)                      | 30,830.68<br>(26,089.55 to<br>36,759.20)                      | 1,523.90<br>(1,341.03 to<br>1,729.24)                      | 3,188.13<br>(2,408.22 to<br>3,910.57)                      | 3,265.85<br>(2,471.00 to<br>3,966.53)                      | 2,963.99<br>(2,242.04 to<br>3,675.19)                      |
| Drowning                                        | 6,601.30<br>(6,003.71 to<br>7,212.50)                         | 3,746.38<br>(2,446.87 to<br>5,829.79)                         | 3,286.43<br>(2,200.82 to<br>4,949.50)                         | 4,278.83<br>(2,680.90 to<br>6,866.76)                         | 186.36<br>(170.80 to<br>203.16)                            | 135.86<br>(92.27 to<br>204.15)                             | 123.34<br>(86.03 to<br>182.01)                             | 149.66<br>(97.70 to<br>233.05)                             |
| Fire, heat, and hot substances                  | 2,681.48<br>(2,033.64 to<br>3,055.98)                         | 1,537.39<br>(956.52 to<br>2,254.87)                           | 1,334.52<br>(852.08 to<br>1,877.27)                           | 1,736.19<br>(1,067.55 to<br>2,563.75)                         | 132.37<br>(89.15 to<br>151.76)                             | 112.95<br>(62.29 to<br>158.88)                             | 104.64<br>(57.56 to<br>145.40)                             | 119.12<br>(65.30 to<br>175.72)                             |
| Poisonings                                      | 908.05<br>(726.74 to<br>1,738.82)                             | 385.64<br>(231.52 to<br>758.19)                               | 310.85<br>(191.41 to<br>598.58)                               | 463.14<br>(264.00 to<br>916.88)                               | 30.19<br>(24.79 to<br>55.59)                               | 19.50<br>(12.68 to<br>34.91)                               | 16.70<br>(8.25 to<br>28.25)                                | 21.97<br>(13.58 to<br>38.62)                               |
| Exposure to mechanical forces                   | 4,725.95<br>(3,605.98 to<br>5,553.15)                         | 2,588.38<br>(1,732.57 to<br>3,318.92)                         | 2,282.00<br>(1,520.74 to<br>2,834.35)                         | 2,780.57<br>(1,903.03 to<br>3,474.88)                         | 158.87<br>(106.34 to<br>186.14)                            | 129.22<br>(71.88 to<br>170.25)                             | 121.84<br>(66.00 to<br>160.32)                             | 129.89<br>(74.28 to<br>170.53)                             |
| Unintentional firearm injuries                  | 864.63<br>(682.09 to<br>1,034.70)                             | 494.24<br>(357.04 to<br>632.54)                               | 447.90<br>(317.69 to<br>558.41)                               | 521.99<br>(369.14 to<br>672.93)                               | 27.64<br>(20.81 to<br>32.34)                               | 23.08<br>(16.87 to<br>28.46)                               | 22.28<br>(16.21 to<br>27.31)                               | 22.92<br>(16.52 to<br>28.26)                               |
| Unintentional suffocation                       | 270.64<br>(195.92 to<br>549.01)                               | 175.14<br>(121.00 to<br>315.50)                               | 154.34<br>(108.38 to<br>272.83)                               | 190.18<br>(131.48 to<br>348.86)                               | 5.59<br>(4.35 to<br>9.82)                                  | 4.55<br>(3.37 to<br>7.42)                                  | 4.18<br>(3.13 to<br>6.91)                                  | 4.74<br>(3.49 to<br>7.95)                                  |
| Other exposure to mechanical forces             | 3,590.68<br>(2,455.70 to<br>4,320.56)                         | 1,918.99<br>(1,141.61 to<br>2,521.94)                         | 1,679.76<br>(965.94 to<br>2,160.46)                           | 2,068.40<br>(1,225.21 to<br>2,669.13)                         | 125.64<br>(74.20 to<br>150.37)                             | 101.59<br>(46.79 to<br>139.29)                             | 95.38<br>(43.08 to<br>131.73)                              | 102.23<br>(48.62 to<br>139.61)                             |
| Adverse effects of medical treatment            | 3,430.19<br>(1,684.01 to<br>4,558.24)                         | 2,785.13<br>(1,298.03 to<br>3,923.22)                         | 2,710.27<br>(1,253.73 to<br>3,809.56)                         | 2,756.54<br>(1,380.86 to<br>3,876.54)                         | 186.98<br>(82.05 to<br>262.27)                             | 207.78<br>(81.79 to<br>310.89)                             | 212.40<br>(82.23 to<br>319.68)                             | 195.22<br>(77.44 to<br>291.69)                             |
| Animal contact                                  | 465.65<br>(372.50 to<br>666.36)                               | 395.74<br>(296.92 to<br>585.90)                               | 359.47<br>(270.96 to<br>524.15)                               | 417.21<br>(313.00 to<br>607.92)                               | 15.01<br>(12.41 to<br>21.96)                               | 16.25<br>(12.54 to<br>24.31)                               | 15.30<br>(11.74 to<br>23.00)                               | 16.48<br>(12.67 to<br>25.33)                               |
| Venomous animal contact                         | 237.34<br>(177.06 to<br>384.54)                               | 218.73<br>(156.23 to<br>352.43)                               | 203.81<br>(143.24 to<br>321.86)                               | 226.77<br>(160.15 to<br>363.90)                               | 7.62<br>(5.69 to<br>12.58)                                 | 8.87<br>(6.36 to<br>14.46)                                 | 8.54<br>(6.17 to<br>14.09)                                 | 8.86<br>(6.35 to<br>14.34)                                 |
| Non-venomous animal contact                     | 228.31<br>(143.99 to<br>324.91)                               | 177.01<br>(112.26 to<br>266.41)                               | 155.66<br>(100.83 to<br>232.70)                               | 190.44<br>(121.54 to<br>286.42)                               | 7.40<br>(5.06 to<br>12.18)                                 | 7.38<br>(4.88 to<br>12.57)                                 | 6.76<br>(4.54 to<br>11.67)                                 | 7.61<br>(5.13 to<br>12.64)                                 |
| Foreign body                                    | 7,729.62<br>(6,600.12 to<br>11,128.19)                        | 5,831.65<br>(4,848.73 to<br>7,612.60)                         | 5,658.57<br>(4,687.84 to<br>7,344.50)                         | 5,873.81<br>(4,891.07 to<br>7,956.48)                         | 256.86<br>(224.02 to<br>331.18)                            | 272.54<br>(213.88 to<br>325.63)                            | 279.78<br>(216.09 to<br>331.74)                            | 259.21<br>(204.73 to<br>308.90)                            |
| Pulmonary aspiration and foreign body in airway | 7,353.60<br>(6,224.38 to<br>10,773.11)                        | 5,434.60<br>(4,472.21 to<br>7,275.46)                         | 5,240.18<br>(4,302.12 to<br>6,958.90)                         | 5,495.86<br>(4,531.53 to<br>7,608.34)                         | 244.33<br>(210.28 to<br>318.06)                            | 253.61<br>(193.23 to<br>306.43)                            | 258.79<br>(194.15 to<br>310.93)                            | 242.16<br>(187.31 to<br>293.63)                            |

|                                             |                                                               |                                                               |                                                               |                                                               |                                                            |                                                          |                                                          |                                                            |
|---------------------------------------------|---------------------------------------------------------------|---------------------------------------------------------------|---------------------------------------------------------------|---------------------------------------------------------------|------------------------------------------------------------|----------------------------------------------------------|----------------------------------------------------------|------------------------------------------------------------|
|                                             | 376.02<br>(262.36 to<br>530.44)                               | 397.04<br>(279.68 to<br>545.75)                               | 418.39<br>(295.98 to<br>578.96)                               | 377.95<br>(265.94 to<br>510.95)                               | 12.53<br>(9.13 to<br>18.22)                                | 18.93<br>(13.85 to<br>27.80)                             | 20.99<br>(15.48 to<br>31.19)                             | 17.05<br>(12.25 to<br>24.63)                               |
| Foreign body in other body part             |                                                               |                                                               |                                                               |                                                               |                                                            |                                                          |                                                          |                                                            |
|                                             | 3,188.81<br>(1,485.12 to<br>4,039.50)                         | 2,092.19<br>(903.15 to<br>3,021.79)                           | 1,785.10<br>(779.36 to<br>2,458.08)                           | 2,287.66<br>(994.55 to<br>3,250.24)                           | 121.99<br>(54.70 to<br>152.74)                             | 98.67<br>(41.77 to<br>137.36)                            | 87.58<br>(37.85 to<br>117.64)                            | 103.49<br>(44.34 to<br>142.37)                             |
| Environmental heat and cold exposure        |                                                               |                                                               |                                                               |                                                               |                                                            |                                                          |                                                          |                                                            |
|                                             | 1,933.58<br>(1,701.04 to<br>2,214.94)                         | 743.56<br>(512.54 to<br>1,069.66)                             | 545.15<br>(395.43 to<br>741.78)                               | 903.51<br>(609.92 to<br>1,308.21)                             | 58.81<br>(52.61 to<br>66.27)                               | 30.76<br>(21.72 to<br>44.01)                             | 23.65<br>(17.58 to<br>31.70)                             | 35.51<br>(24.99 to<br>50.01)                               |
| Other unintentional injuries                |                                                               |                                                               |                                                               |                                                               |                                                            |                                                          |                                                          |                                                            |
| <b>Self-harm and interpersonal violence</b> | <b>59,403.73</b><br><b>(48,732.64 to</b><br><b>75,327.77)</b> | <b>39,794.35</b><br><b>(24,705.34 to</b><br><b>63,337.93)</b> | <b>34,202.23</b><br><b>(21,561.03 to</b><br><b>51,924.73)</b> | <b>48,867.49</b><br><b>(28,721.87 to</b><br><b>78,454.37)</b> | <b>1,694.85</b><br><b>(1,462.20 to</b><br><b>2,201.45)</b> | <b>1,452.08</b><br><b>(914.97 to</b><br><b>2,196.62)</b> | <b>1,301.96</b><br><b>(835.45 to</b><br><b>1,970.29)</b> | <b>1,712.67</b><br><b>(1,027.68 to</b><br><b>2,677.79)</b> |

| Czech Republic                                                                      |                                                   |                                                   |                                                   |                                                   |                                                |                                                |                                                |                                                |
|-------------------------------------------------------------------------------------|---------------------------------------------------|---------------------------------------------------|---------------------------------------------------|---------------------------------------------------|------------------------------------------------|------------------------------------------------|------------------------------------------------|------------------------------------------------|
| Cause                                                                               | YLLs (actual counts)                              |                                                   |                                                   |                                                   | Deaths (actual counts)                         |                                                |                                                |                                                |
|                                                                                     | 2016                                              | 2040 Forecast                                     | 2040 Better Scenario                              | 2040 Worse Scenario                               | 2016                                           | 2040 Forecast                                  | 2040 Better Scenario                           | 2040 Worse Scenario                            |
| Self-harm                                                                           | 54,152.16<br>(42,464.24 to<br>69,047.20)          | 37,361.79<br>(22,469.89 to<br>60,562.16)          | 32,074.98<br>(19,746.59 to<br>49,747.73)          | 46,086.54<br>(26,338.80 to<br>75,741.02)          | 1,560.03<br>(1,303.61 to<br>2,055.82)          | 1,373.53<br>(846.14 to<br>2,128.38)            | 1,231.30<br>(772.57 to<br>1,892.23)            | 1,625.21<br>(950.98 to<br>2,592.01)            |
| Self-harm by firearm                                                                | 5,137.42<br>(2,830.80 to<br>7,391.32)             | 2,380.68<br>(1,153.04 to<br>4,182.67)             | 1,935.89<br>(930.22 to<br>3,334.54)               | 3,036.70<br>(1,409.58 to<br>5,479.82)             | 158.20<br>(84.49 to<br>229.07)                 | 89.40<br>(42.83 to<br>151.26)                  | 75.49<br>(35.53 to<br>126.37)                  | 109.93<br>(50.80 to<br>194.51)                 |
| Self-harm by other specified means                                                  | 49,014.74<br>(38,450.74 to<br>61,905.78)          | 34,981.10<br>(21,066.09 to<br>56,701.22)          | 30,139.09<br>(18,616.60 to<br>47,053.46)          | 43,049.83<br>(24,789.81 to<br>70,876.25)          | 1,401.83<br>(1,178.17 to<br>1,826.70)          | 1,284.12<br>(789.00 to<br>1,983.79)            | 1,155.81<br>(727.63 to<br>1,783.09)            | 1,515.28<br>(890.71 to<br>2,419.23)            |
| Interpersonal violence                                                              | 5,251.57<br>(3,852.77 to<br>8,001.18)             | 2,432.57<br>(1,643.58 to<br>3,917.21)             | 2,127.25<br>(1,436.73 to<br>3,417.48)             | 2,780.95<br>(1,819.61 to<br>4,578.72)             | 134.82<br>(101.25 to<br>211.37)                | 78.55<br>(53.16 to<br>128.90)                  | 70.66<br>(48.19 to<br>116.65)                  | 87.46<br>(57.97 to<br>147.13)                  |
| Physical violence by firearm                                                        | 1,005.43<br>(595.40 to<br>1,829.14)               | 387.88<br>(221.58 to<br>689.66)                   | 328.71<br>(193.27 to<br>587.44)                   | 434.84<br>(245.31 to<br>788.86)                   | 23.27<br>(14.10 to<br>41.83)                   | 10.32<br>(6.10 to<br>17.97)                    | 8.90<br>(5.35 to<br>16.07)                     | 11.36<br>(6.55 to<br>20.12)                    |
| Physical violence by sharp object                                                   | 1,715.42<br>(1,161.56 to<br>2,765.13)             | 793.65<br>(525.71 to<br>1,275.53)                 | 693.53<br>(467.66 to<br>1,124.32)                 | 869.55<br>(569.35 to<br>1,428.92)                 | 44.37<br>(30.84 to<br>71.49)                   | 25.35<br>(17.37 to<br>42.14)                   | 22.75<br>(15.91 to<br>37.18)                   | 26.99<br>(18.18 to<br>45.21)                   |
| Physical violence by other means                                                    | 2,530.72<br>(1,792.81 to<br>4,324.87)             | 1,251.04<br>(729.49 to<br>2,352.06)               | 1,105.01<br>(652.43 to<br>2,039.86)               | 1,476.56<br>(853.82 to<br>2,770.06)               | 67.18<br>(48.01 to<br>120.84)                  | 42.89<br>(25.02 to<br>82.17)                   | 39.01<br>(23.17 to<br>73.44)                   | 49.11<br>(28.06 to<br>91.91)                   |
| <b>Forces of nature, conflict and terrorism, and executions and police conflict</b> | <b>45.97</b><br><b>(42.57 to</b><br><b>49.66)</b> | <b>16.52</b><br><b>(0.00 to</b><br><b>174.46)</b> | <b>16.62</b><br><b>(0.00 to</b><br><b>177.38)</b> | <b>16.34</b><br><b>(0.00 to</b><br><b>171.26)</b> | <b>1.02</b><br><b>(0.95 to</b><br><b>1.09)</b> | <b>0.48</b><br><b>(0.00 to</b><br><b>5.23)</b> | <b>0.49</b><br><b>(0.00 to</b><br><b>5.29)</b> | <b>0.46</b><br><b>(0.00 to</b><br><b>5.12)</b> |
| Exposure to forces of nature                                                        | 0.00<br>(0.00 to<br>0.00)                         | 15.41<br>(0.00 to<br>169.68)                      | 15.50<br>(0.00 to<br>172.57)                      | 15.24<br>(0.00 to<br>166.37)                      | 0.00<br>(0.00 to<br>0.00)                      | 0.45<br>(0.00 to<br>5.23)                      | 0.46<br>(0.00 to<br>5.29)                      | 0.44<br>(0.00 to<br>5.12)                      |
| Conflict and terrorism                                                              | 0.00<br>(0.00 to<br>0.00)                         | 1.12<br>(0.00 to<br>10.52)                        | 1.12<br>(0.00 to<br>10.56)                        | 1.11<br>(0.00 to<br>10.42)                        | 0.00<br>(0.00 to<br>0.00)                      | 0.03<br>(0.00 to<br>0.32)                      | 0.03<br>(0.00 to<br>0.34)                      | 0.03<br>(0.00 to<br>0.29)                      |
| Executions and police conflict                                                      | 45.97<br>(42.57 to<br>49.66)                      | 0.00<br>(0.00 to<br>0.00)                         | 0.00<br>(0.00 to<br>0.00)                         | 0.00<br>(0.00 to<br>0.00)                         | 1.02<br>(0.95 to<br>1.09)                      | 0.00<br>(0.00 to<br>0.00)                      | 0.00<br>(0.00 to<br>0.00)                      | 0.00<br>(0.00 to<br>0.00)                      |



| Hungary                                                                  |                                                   |                                                   |                                                   |                                                   |                                             |                                             |                                            |                                             |
|--------------------------------------------------------------------------|---------------------------------------------------|---------------------------------------------------|---------------------------------------------------|---------------------------------------------------|---------------------------------------------|---------------------------------------------|--------------------------------------------|---------------------------------------------|
| Cause                                                                    | YLLs (actual counts)                              |                                                   |                                                   |                                                   | Deaths (actual counts)                      |                                             |                                            |                                             |
|                                                                          | 2016                                              | 2040 Forecast                                     | 2040 Better Scenario                              | 2040 Worse Scenario                               | 2016                                        | 2040 Forecast                               | 2040 Better Scenario                       | 2040 Worse Scenario                         |
| <b>All causes</b>                                                        | 2,242,705.96<br>(2,023,495.40 to<br>2,458,365.16) | 1,699,084.60<br>(1,422,042.88 to<br>2,088,792.43) | 1,366,678.25<br>(1,148,752.86 to<br>1,668,296.85) | 2,126,296.97<br>(1,747,569.82 to<br>2,640,094.99) | 130,718.54<br>(119,771.76 to<br>142,461.89) | 120,722.92<br>(105,529.57 to<br>142,597.20) | 102,930.00<br>(90,366.24 to<br>121,303.22) | 142,202.14<br>(124,276.29 to<br>166,670.43) |
| <b>Communicable, maternal, neonatal, and nutritional diseases</b>        | 50,185.49<br>(42,142.23 to<br>59,347.81)          | 30,257.10<br>(22,162.81 to<br>41,657.63)          | 24,432.69<br>(18,609.66 to<br>32,713.41)          | 37,564.14<br>(27,323.07 to<br>52,132.62)          | 1,732.77<br>(1,538.50 to<br>1,912.35)       | 1,666.92<br>(1,237.42 to<br>2,286.70)       | 1,535.45<br>(1,164.33 to<br>2,100.13)      | 1,876.33<br>(1,342.58 to<br>2,634.38)       |
| <b>HIV/AIDS and tuberculosis</b>                                         | 2,906.09<br>(2,635.50 to<br>3,216.66)             | 1,209.10<br>(673.76 to<br>2,053.36)               | 857.44<br>(426.45 to<br>1,363.95)                 | 2,425.55<br>(1,623.59 to<br>3,810.42)             | 117.61<br>(105.85 to<br>131.42)             | 62.09<br>(34.41 to<br>113.33)               | 42.54<br>(23.34 to<br>71.77)               | 102.82<br>(62.27 to<br>180.65)              |
| <b>Tuberculosis</b>                                                      | 1,382.84<br>(1,190.42 to<br>1,635.95)             | 644.27<br>(288.87 to<br>1,487.05)                 | 366.17<br>(165.52 to<br>808.11)                   | 1,003.29<br>(400.95 to<br>2,360.99)               | 76.37<br>(66.04 to<br>89.32)                | 45.51<br>(20.01 to<br>95.40)                | 27.63<br>(13.59 to<br>55.85)               | 66.89<br>(28.68 to<br>144.84)               |
| <b>HIV/AIDS</b>                                                          | 1,523.25<br>(1,365.75 to<br>1,705.91)             | 564.83<br>(217.75 to<br>855.87)                   | 491.28<br>(139.47 to<br>785.99)                   | 1,422.26<br>(963.84 to<br>1,897.10)               | 41.24<br>(36.73 to<br>46.20)                | 16.58<br>(5.96 to<br>25.45)                 | 14.91<br>(4.16 to<br>23.76)                | 35.94<br>(22.51 to<br>48.44)                |
| <b>Diarrhea, lower respiratory, and other common infectious diseases</b> | 24,396.56<br>(21,443.56 to<br>27,293.25)          | 18,914.97<br>(13,298.03 to<br>27,545.76)          | 15,694.57<br>(11,391.64 to<br>22,348.24)          | 23,550.56<br>(15,843.96 to<br>35,509.49)          | 1,261.84<br>(1,107.90 to<br>1,396.34)       | 1,395.56<br>(994.77 to<br>1,985.84)         | 1,302.51<br>(946.02 to<br>1,849.74)        | 1,555.75<br>(1,051.82 to<br>2,276.77)       |
| <b>Diarrheal diseases</b>                                                | 3,195.57<br>(2,799.93 to<br>3,623.44)             | 6,294.28<br>(2,401.55 to<br>13,456.96)            | 7,292.14<br>(3,789.69 to<br>13,024.29)            | 5,801.92<br>(2,011.09 to<br>13,097.00)            | 201.57<br>(173.48 to<br>229.96)             | 521.16<br>(202.06 to<br>1,094.98)           | 645.69<br>(343.89 to<br>1,146.46)          | 455.60<br>(162.88 to<br>1,014.29)           |
| <b>Intestinal infectious diseases</b>                                    | 9.30<br>(4.23 to<br>17.94)                        | 4.56<br>(1.94 to<br>9.06)                         | 4.16<br>(1.74 to<br>8.20)                         | 4.79<br>(2.13 to<br>9.38)                         | 0.29<br>(0.13 to<br>0.56)                   | 0.17<br>(0.07 to<br>0.33)                   | 0.16<br>(0.01 to<br>0.31)                  | 0.17<br>(0.08 to<br>0.33)                   |
| <b>Typhoid fever</b>                                                     | 2.99<br>(1.37 to<br>5.63)                         | 1.98<br>(0.85 to<br>3.85)                         | 2.27<br>(0.95 to<br>4.49)                         | 1.91<br>(0.82 to<br>3.72)                         | 0.08<br>(0.04 to<br>0.15)                   | 0.06<br>(0.05 to<br>0.12)                   | 0.07<br>(0.03 to<br>0.14)                  | 0.06<br>(0.03 to<br>0.11)                   |
| <b>Paratyphoid fever</b>                                                 | 5.81<br>(2.28 to<br>12.28)                        | 2.32<br>(0.79 to<br>5.24)                         | 1.68<br>(0.54 to<br>3.91)                         | 2.61<br>(0.92 to<br>5.86)                         | 0.18<br>(0.07 to<br>0.39)                   | 0.09<br>(0.05 to<br>0.20)                   | 0.06<br>(0.02 to<br>0.15)                  | 0.09<br>(0.03 to<br>0.21)                   |
| <b>Other intestinal infectious diseases</b>                              | 0.50<br>(0.20 to<br>1.03)                         | 0.26<br>(0.09 to<br>0.56)                         | 0.22<br>(0.07 to<br>0.49)                         | 0.27<br>(0.10 to<br>0.60)                         | 0.03<br>(0.01 to<br>0.06)                   | 0.02<br>(0.01 to<br>0.05)                   | 0.02<br>(0.01 to<br>0.04)                  | 0.02<br>(0.01 to<br>0.05)                   |
| <b>Lower respiratory infections</b>                                      | 18,236.71<br>(15,647.64 to<br>20,540.77)          | 11,026.24<br>(5,396.48 to<br>19,072.43)           | 7,086.54<br>(3,454.76 to<br>12,299.93)            | 16,010.56<br>(8,243.13 to<br>27,933.33)           | 969.04<br>(835.18 to<br>1,087.70)           | 819.32<br>(417.33 to<br>1,362.31)           | 609.85<br>(314.88 to<br>1,054.10)          | 1,042.28<br>(566.52 to<br>1,753.30)         |
| <b>Upper respiratory infections</b>                                      | 34.31<br>(16.17 to<br>59.07)                      | 15.90<br>(5.16 to<br>35.09)                       | 9.03<br>(2.71 to<br>21.63)                        | 19.53<br>(6.24 to<br>47.81)                       | 1.49<br>(0.71 to<br>2.57)                   | 0.89<br>(0.27 to<br>2.08)                   | 0.53<br>(0.15 to<br>1.26)                  | 1.04<br>(0.31 to<br>2.46)                   |
| <b>Otitis media</b>                                                      | 15.76<br>(11.42 to<br>22.49)                      | 2.43<br>(0.94 to<br>5.97)                         | 2.34<br>(0.87 to<br>5.85)                         | 2.42<br>(0.96 to<br>6.10)                         | 0.54<br>(0.42 to<br>0.70)                   | 0.13<br>(0.05 to<br>0.29)                   | 0.13<br>(0.05 to<br>0.29)                  | 0.12<br>(0.05 to<br>0.27)                   |
| <b>Meningitis</b>                                                        | 1,991.45<br>(1,683.75 to<br>2,420.83)             | 748.64<br>(450.82 to<br>1,129.75)                 | 599.79<br>(341.20 to<br>950.19)                   | 822.76<br>(508.24 to<br>1,243.89)                 | 62.22<br>(53.20 to<br>76.49)                | 27.08<br>(16.09 to<br>39.33)                | 22.34<br>(12.69 to<br>34.58)               | 28.79<br>(18.25 to<br>41.65)                |
| <b>Pneumococcal meningitis</b>                                           | 516.14<br>(432.83 to<br>655.07)                   | 238.04<br>(139.84 to<br>387.89)                   | 221.27<br>(121.84 to<br>376.63)                   | 244.58<br>(158.20 to<br>393.32)                   | 18.21<br>(15.49 to<br>22.85)                | 10.13<br>(6.04 to<br>14.91)                 | 9.69<br>(5.50 to<br>14.74)                 | 10.10<br>(6.51 to<br>14.74)                 |
| <b>H influenzae type B meningitis</b>                                    | 258.94<br>(211.34 to<br>314.47)                   | 212.23<br>(114.63 to<br>364.50)                   | 185.66<br>(96.09 to<br>316.93)                    | 228.02<br>(121.97 to<br>392.43)                   | 7.41<br>(6.15 to<br>8.94)                   | 5.06<br>(3.14 to<br>7.46)                   | 4.70<br>(2.76 to<br>7.05)                  | 5.19<br>(3.30 to<br>7.51)                   |
| <b>Meningococcal meningitis</b>                                          | 494.19<br>(406.03 to<br>605.44)                   | 109.83<br>(59.91 to<br>179.50)                    | 72.50<br>(37.27 to<br>124.08)                     | 128.11<br>(70.07 to<br>208.29)                    | 13.12<br>(11.08 to<br>15.85)                | 4.07<br>(2.30 to<br>6.23)                   | 2.79<br>(1.49 to<br>4.60)                  | 4.56<br>(2.70 to<br>7.05)                   |
| <b>Other meningitis</b>                                                  | 722.19<br>(607.56 to<br>883.35)                   | 188.53<br>(102.44 to<br>306.10)                   | 120.36<br>(59.41 to<br>208.48)                    | 222.05<br>(121.33 to<br>370.83)                   | 23.48<br>(19.97 to<br>29.09)                | 7.83<br>(4.28 to<br>12.20)                  | 5.16<br>(2.72 to<br>8.65)                  | 8.93<br>(5.16 to<br>14.01)                  |
| <b>Encephalitis</b>                                                      | 832.23<br>(506.75 to<br>1,577.15)                 | 663.47<br>(294.33 to<br>1,345.32)                 | 586.02<br>(246.63 to<br>1,239.28)                 | 697.59<br>(337.14 to<br>1,401.23)                 | 22.27<br>(14.36 to<br>40.26)                | 22.03<br>(10.68 to<br>43.10)                | 19.96<br>(9.29 to<br>40.49)                | 22.56<br>(11.47 to<br>43.38)                |

|                |                              |                               |                              |                                 |                           |                            |                           |                            |
|----------------|------------------------------|-------------------------------|------------------------------|---------------------------------|---------------------------|----------------------------|---------------------------|----------------------------|
| Diphtheria     | 3.41<br>(2.04 to<br>5.08)    | 0.61<br>(0.29 to<br>1.10)     | 0.53<br>(0.24 to<br>1.00)    | 0.66<br>(0.33 to<br>1.18)       | 0.08<br>(0.04 to<br>0.12) | 0.01<br>(0.01 to<br>0.03)  | 0.01<br>(0.01 to<br>0.03) | 0.02<br>(0.01 to<br>0.03)  |
| Whooping cough | 4.20<br>(1.15 to<br>8.37)    | 1.33<br>(0.23 to<br>3.96)     | 0.49<br>(0.13 to<br>1.29)    | 1.96<br>(0.30 to<br>5.88)       | 0.05<br>(0.02 to<br>0.10) | 0.02<br>(0.00 to<br>0.05)  | 0.01<br>(0.00 to<br>0.02) | 0.02<br>(0.00 to<br>0.07)  |
| Tetanus        | 15.29<br>(11.33 to<br>21.23) | 1.38<br>(0.69 to<br>2.30)     | 1.25<br>(0.59 to<br>2.18)    | 1.44<br>(0.77 to<br>2.33)       | 0.81<br>(0.58 to<br>1.13) | 0.08<br>(0.04 to<br>0.14)  | 0.07<br>(0.03 to<br>0.14) | 0.08<br>(0.04 to<br>0.13)  |
| Measles        | 1.41<br>(1.00 to<br>2.01)    | 126.74<br>(0.68 to<br>807.99) | 89.48<br>(0.58 to<br>530.25) | 155.68<br>(0.74 to<br>1,068.58) | 0.02<br>(0.02 to<br>0.03) | 2.00<br>(0.01 to<br>12.66) | 1.46<br>(0.01 to<br>8.91) | 2.46<br>(0.01 to<br>16.45) |

| Hungary                                               |                                                      |                                                      |                                                     |                                                      |                                                  |                                                |                                                |                                                |
|-------------------------------------------------------|------------------------------------------------------|------------------------------------------------------|-----------------------------------------------------|------------------------------------------------------|--------------------------------------------------|------------------------------------------------|------------------------------------------------|------------------------------------------------|
| Cause                                                 | YLLs (actual counts)                                 |                                                      |                                                     |                                                      | Deaths (actual counts)                           |                                                |                                                |                                                |
|                                                       | 2016                                                 | 2040 Forecast                                        | 2040 Better Scenario                                | 2040 Worse Scenario                                  | 2016                                             | 2040 Forecast                                  | 2040 Better Scenario                           | 2040 Worse Scenario                            |
| Varicella and herpes zoster                           | 56.92<br>(34.93 to<br>124.04)                        | 29.39<br>(13.88 to<br>71.84)                         | 22.81<br>(10.43 to<br>55.24)                        | 31.24<br>(14.72 to<br>75.24)                         | 3.45<br>(2.07 to<br>8.77)                        | 2.68<br>(1.18 to<br>7.36)                      | 2.29<br>(0.99 to<br>6.29)                      | 2.62<br>(1.16 to<br>7.09)                      |
| <b>Neglected tropical diseases and malaria</b>        | <b>118.12</b><br><b>(93.70 to</b><br><b>139.37)</b>  | <b>86.56</b><br><b>(71.62 to</b><br><b>101.65)</b>   | <b>84.71</b><br><b>(70.49 to</b><br><b>99.43)</b>   | <b>85.43</b><br><b>(70.77 to</b><br><b>100.75)</b>   | <b>4.41</b><br><b>(3.28 to</b><br><b>5.20)</b>   | <b>4.56</b><br><b>(3.20 to</b><br><b>5.49)</b> | <b>4.79</b><br><b>(3.33 to</b><br><b>5.73)</b> | <b>4.23</b><br><b>(2.96 to</b><br><b>5.11)</b> |
| Malaria                                               | 0.00<br>(0.00 to<br>0.00)                            | 0.00<br>(0.00 to<br>0.00)                            | 0.00<br>(0.00 to<br>0.00)                           | 0.00<br>(0.00 to<br>0.00)                            | 0.00<br>(0.00 to<br>0.00)                        | 0.00<br>(0.00 to<br>0.00)                      | 0.00<br>(0.00 to<br>0.00)                      | 0.00<br>(0.00 to<br>0.00)                      |
| Chagas disease                                        | 0.00<br>(0.00 to<br>0.00)                            | 0.00<br>(0.00 to<br>0.00)                            | 0.00<br>(0.00 to<br>0.00)                           | 0.00<br>(0.00 to<br>0.00)                            | 0.00<br>(0.00 to<br>0.00)                        | 0.00<br>(0.00 to<br>0.00)                      | 0.00<br>(0.00 to<br>0.00)                      | 0.00<br>(0.00 to<br>0.00)                      |
| Leishmaniasis                                         | 0.00<br>(0.00 to<br>0.00)                            | 0.00<br>(0.00 to<br>0.00)                            | 0.00<br>(0.00 to<br>0.00)                           | 0.00<br>(0.00 to<br>0.00)                            | 0.00<br>(0.00 to<br>0.00)                        | 0.00<br>(0.00 to<br>0.00)                      | 0.00<br>(0.00 to<br>0.00)                      | 0.00<br>(0.00 to<br>0.00)                      |
| African trypanosomiasis                               | 0.00<br>(0.00 to<br>0.00)                            | 0.00<br>(0.00 to<br>0.00)                            | 0.00<br>(0.00 to<br>0.00)                           | 0.00<br>(0.00 to<br>0.00)                            | 0.00<br>(0.00 to<br>0.00)                        | 0.00<br>(0.00 to<br>0.00)                      | 0.00<br>(0.00 to<br>0.00)                      | 0.00<br>(0.00 to<br>0.00)                      |
| Schistosomiasis                                       | 0.00<br>(0.00 to<br>0.00)                            | 0.00<br>(0.00 to<br>0.00)                            | 0.00<br>(0.00 to<br>0.00)                           | 0.00<br>(0.00 to<br>0.00)                            | 0.00<br>(0.00 to<br>0.00)                        | 0.00<br>(0.00 to<br>0.00)                      | 0.00<br>(0.00 to<br>0.00)                      | 0.00<br>(0.00 to<br>0.00)                      |
| Cysticercosis                                         | 6.12<br>(4.85 to<br>7.41)                            | 1.78<br>(1.37 to<br>2.24)                            | 1.73<br>(1.32 to<br>2.21)                           | 1.76<br>(1.38 to<br>2.20)                            | 0.21<br>(0.17 to<br>0.26)                        | 0.07<br>(0.06 to<br>0.09)                      | 0.07<br>(0.06 to<br>0.09)                      | 0.07<br>(0.06 to<br>0.09)                      |
| Cystic echinococcosis                                 | 40.83<br>(33.72 to<br>48.65)                         | 22.26<br>(17.24 to<br>28.85)                         | 17.85<br>(14.03 to<br>22.51)                        | 23.19<br>(18.28 to<br>29.27)                         | 1.78<br>(1.48 to<br>2.11)                        | 1.32<br>(1.05 to<br>1.68)                      | 1.12<br>(0.90 to<br>1.40)                      | 1.31<br>(1.05 to<br>1.64)                      |
| Dengue                                                | 0.00<br>(0.00 to<br>0.00)                            | 0.00<br>(0.00 to<br>0.00)                            | 0.00<br>(0.00 to<br>0.00)                           | 0.00<br>(0.00 to<br>0.00)                            | 0.00<br>(0.00 to<br>0.00)                        | 0.00<br>(0.00 to<br>0.00)                      | 0.00<br>(0.00 to<br>0.00)                      | 0.00<br>(0.00 to<br>0.00)                      |
| Yellow fever                                          | 0.00<br>(0.00 to<br>0.00)                            | 0.00<br>(0.00 to<br>0.00)                            | 0.00<br>(0.00 to<br>0.00)                           | 0.00<br>(0.00 to<br>0.00)                            | 0.00<br>(0.00 to<br>0.00)                        | 0.00<br>(0.00 to<br>0.00)                      | 0.00<br>(0.00 to<br>0.00)                      | 0.00<br>(0.00 to<br>0.00)                      |
| Rabies                                                | 0.54<br>(0.43 to<br>0.68)                            | 0.37<br>(0.28 to<br>0.47)                            | 0.32<br>(0.25 to<br>0.41)                           | 0.37<br>(0.30 to<br>0.48)                            | 0.02<br>(0.02 to<br>0.02)                        | 0.02<br>(0.02 to<br>0.03)                      | 0.02<br>(0.02 to<br>0.03)                      | 0.02<br>(0.02 to<br>0.02)                      |
| Intestinal nematode infections                        | 0.00<br>(0.00 to<br>0.00)                            | 0.00<br>(0.00 to<br>0.00)                            | 0.00<br>(0.00 to<br>0.00)                           | 0.00<br>(0.00 to<br>0.00)                            | 0.00<br>(0.00 to<br>0.00)                        | 0.00<br>(0.00 to<br>0.00)                      | 0.00<br>(0.00 to<br>0.00)                      | 0.00<br>(0.00 to<br>0.00)                      |
| Other neglected tropical diseases                     | 70.63<br>(48.87 to<br>88.70)                         | 62.17<br>(47.08 to<br>75.41)                         | 64.81<br>(49.68 to<br>78.03)                        | 60.10<br>(44.75 to<br>73.06)                         | 2.40<br>(1.34 to<br>3.00)                        | 3.15<br>(1.64 to<br>4.00)                      | 3.57<br>(1.87 to<br>4.48)                      | 2.83<br>(1.48 to<br>3.63)                      |
| <b>Maternal disorders</b>                             | <b>585.43</b><br><b>(466.22 to</b><br><b>710.97)</b> | <b>188.32</b><br><b>(118.88 to</b><br><b>274.11)</b> | <b>150.95</b><br><b>(93.16 to</b><br><b>223.58)</b> | <b>204.74</b><br><b>(126.27 to</b><br><b>301.23)</b> | <b>11.06</b><br><b>(8.86 to</b><br><b>13.47)</b> | <b>3.59</b><br><b>(2.32 to</b><br><b>5.17)</b> | <b>2.88</b><br><b>(1.83 to</b><br><b>4.28)</b> | <b>3.91</b><br><b>(2.46 to</b><br><b>5.66)</b> |
| Maternal hemorrhage                                   | 119.27<br>(83.99 to<br>163.59)                       | 36.79<br>(20.79 to<br>61.46)                         | 29.77<br>(16.44 to<br>48.87)                        | 39.76<br>(22.54 to<br>65.30)                         | 2.27<br>(1.59 to<br>3.13)                        | 0.71<br>(0.40 to<br>1.17)                      | 0.57<br>(0.32 to<br>0.93)                      | 0.77<br>(0.44 to<br>1.25)                      |
| Maternal sepsis and other maternal infections         | 83.13<br>(57.47 to<br>112.26)                        | 22.34<br>(11.80 to<br>38.21)                         | 17.81<br>(9.41 to<br>30.44)                         | 24.28<br>(13.02 to<br>40.86)                         | 1.54<br>(1.07 to<br>2.08)                        | 0.42<br>(0.23 to<br>0.71)                      | 0.33<br>(0.18 to<br>0.56)                      | 0.45<br>(0.25 to<br>0.76)                      |
| Maternal hypertensive disorders                       | 71.30<br>(50.45 to<br>97.94)                         | 21.68<br>(11.45 to<br>35.77)                         | 17.17<br>(8.91 to<br>28.69)                         | 23.65<br>(12.02 to<br>39.35)                         | 1.28<br>(0.90 to<br>1.75)                        | 0.39<br>(0.21 to<br>0.65)                      | 0.31<br>(0.16 to<br>0.51)                      | 0.43<br>(0.22 to<br>0.71)                      |
| Maternal obstructed labor and uterine rupture         | 12.03<br>(6.90 to<br>18.49)                          | 4.15<br>(1.98 to<br>7.42)                            | 3.19<br>(1.51 to<br>5.75)                           | 4.56<br>(2.16 to<br>8.30)                            | 0.25<br>(0.15 to<br>0.38)                        | 0.09<br>(0.04 to<br>0.15)                      | 0.07<br>(0.03 to<br>0.12)                      | 0.10<br>(0.05 to<br>0.17)                      |
| Maternal abortion, miscarriage, and ectopic pregnancy | 131.96<br>(94.84 to<br>175.11)                       | 41.08<br>(22.30 to<br>72.28)                         | 32.50<br>(17.38 to<br>57.81)                        | 44.99<br>(24.01 to<br>78.58)                         | 2.58<br>(1.86 to<br>3.38)                        | 0.82<br>(0.45 to<br>1.40)                      | 0.65<br>(0.36 to<br>1.13)                      | 0.90<br>(0.48 to<br>1.55)                      |

|                                        |                                |                              |                              |                              |                           |                           |                           |                           |
|----------------------------------------|--------------------------------|------------------------------|------------------------------|------------------------------|---------------------------|---------------------------|---------------------------|---------------------------|
|                                        | 54.54<br>(35.58 to<br>81.60)   | 18.15<br>(8.62 to<br>32.77)  | 14.19<br>(6.60 to<br>25.67)  | 19.94<br>(9.28 to<br>35.76)  | 0.98<br>(0.64 to<br>1.47) | 0.33<br>(0.16 to<br>0.59) | 0.26<br>(0.12 to<br>0.46) | 0.36<br>(0.17 to<br>0.65) |
| Indirect maternal deaths               |                                |                              |                              |                              |                           |                           |                           |                           |
|                                        | 7.35<br>(3.87 to<br>12.50)     | 2.15<br>(0.94 to<br>4.23)    | 1.68<br>(0.73 to<br>3.27)    | 2.35<br>(1.03 to<br>4.56)    | 0.14<br>(0.07 to<br>0.23) | 0.04<br>(0.02 to<br>0.08) | 0.03<br>(0.01 to<br>0.06) | 0.04<br>(0.02 to<br>0.09) |
| Late maternal deaths                   |                                |                              |                              |                              |                           |                           |                           |                           |
|                                        | 0.02<br>(0.01 to<br>0.04)      | 0.10<br>(0.01 to<br>0.49)    | 0.07<br>(0.00 to<br>0.36)    | 0.15<br>(0.02 to<br>0.62)    | 0.00<br>(0.00 to<br>0.00) | 0.00<br>(0.00 to<br>0.01) | 0.00<br>(0.00 to<br>0.01) | 0.00<br>(0.00 to<br>0.01) |
| Maternal deaths aggravated by HIV/AIDS |                                |                              |                              |                              |                           |                           |                           |                           |
|                                        | 105.74<br>(75.63 to<br>144.31) | 41.88<br>(23.20 to<br>69.15) | 34.58<br>(19.25 to<br>58.43) | 45.07<br>(24.99 to<br>75.85) | 2.02<br>(1.46 to<br>2.73) | 0.80<br>(0.46 to<br>1.30) | 0.66<br>(0.37 to<br>1.10) | 0.86<br>(0.48 to<br>1.44) |
| Other maternal disorders               |                                |                              |                              |                              |                           |                           |                           |                           |

| Hungary                                                                 |                                              |                                            |                                           |                                            |                                     |                                   |                                   |                                    |
|-------------------------------------------------------------------------|----------------------------------------------|--------------------------------------------|-------------------------------------------|--------------------------------------------|-------------------------------------|-----------------------------------|-----------------------------------|------------------------------------|
| Cause                                                                   | YLLs (actual counts)                         |                                            |                                           |                                            | Deaths (actual counts)              |                                   |                                   |                                    |
|                                                                         | 2016                                         | 2040 Forecast                              | 2040 Better Scenario                      | 2040 Worse Scenario                        | 2016                                | 2040 Forecast                     | 2040 Better Scenario              | 2040 Worse Scenario                |
| <b>Neonatal disorders</b>                                               | <b>19,478.83</b><br>(13,605.02 to 26,686.95) | <b>7,900.21</b><br>(4,211.89 to 13,349.21) | <b>5,720.94</b><br>(3,097.07 to 9,611.84) | <b>9,377.30</b><br>(4,947.76 to 15,693.59) | <b>225.21</b><br>(157.32 to 308.55) | <b>91.35</b><br>(48.72 to 154.34) | <b>66.16</b><br>(35.82 to 111.10) | <b>108.43</b><br>(57.23 to 181.42) |
| Neonatal preterm birth                                                  | 10,852.21<br>(7,618.11 to 14,973.14)         | 3,283.05<br>(1,694.51 to 5,539.89)         | 2,003.05<br>(1,033.13 to 3,492.32)        | 4,327.69<br>(2,174.98 to 7,415.03)         | 125.46<br>(88.06 to 173.07)         | 37.96<br>(19.60 to 64.05)         | 23.16<br>(11.95 to 40.37)         | 50.03<br>(25.15 to 85.72)          |
| Neonatal encephalopathy due to birth asphyxia and trauma                | 2,004.09<br>(1,282.07 to 2,961.70)           | 679.54<br>(313.39 to 1,283.50)             | 440.15<br>(203.44 to 854.86)              | 800.40<br>(368.51 to 1,512.72)             | 23.17<br>(14.82 to 34.23)           | 7.86<br>(3.63 to 14.84)           | 5.09<br>(2.35 to 9.65)            | 9.26<br>(4.26 to 17.50)            |
| Neonatal sepsis and other neonatal infections                           | 840.61<br>(481.52 to 1,333.37)               | 382.18<br>(185.39 to 704.47)               | 273.84<br>(130.31 to 502.43)              | 434.93<br>(210.49 to 807.78)               | 9.72<br>(5.57 to 15.42)             | 4.42<br>(2.14 to 8.15)            | 3.17<br>(1.51 to 5.81)            | 5.03<br>(2.43 to 9.35)             |
| Hemolytic disease and other neonatal jaundice                           | 89.63<br>(44.62 to 144.50)                   | 18.12<br>(6.45 to 39.58)                   | 12.49<br>(4.42 to 26.38)                  | 20.83<br>(7.16 to 46.66)                   | 1.04<br>(0.52 to 1.67)              | 0.21<br>(0.08 to 0.46)            | 0.14<br>(0.05 to 0.31)            | 0.24<br>(0.08 to 0.54)             |
| Other neonatal disorders                                                | 5,692.29<br>(3,842.06 to 8,003.66)           | 3,537.32<br>(1,689.14 to 6,629.09)         | 2,991.41<br>(1,463.41 to 5,510.35)        | 3,793.46<br>(1,787.01 to 7,293.39)         | 65.83<br>(44.43 to 92.57)           | 40.91<br>(19.55 to 76.65)         | 34.60<br>(16.94 to 63.72)         | 43.87<br>(20.69 to 84.29)          |
| <b>Nutritional deficiencies</b>                                         | <b>742.42</b><br>(653.47 to 835.36)          | <b>496.21</b><br>(398.79 to 624.98)        | <b>513.14</b><br>(409.38 to 642.46)       | <b>466.44</b><br>(373.10 to 586.92)        | <b>44.90</b><br>(39.76 to 50.76)    | <b>45.50</b><br>(33.36 to 62.45)  | <b>50.67</b><br>(37.40 to 69.31)  | <b>40.27</b><br>(29.02 to 56.28)   |
| Protein-energy malnutrition                                             | 333.70<br>(192.89 to 420.77)                 | 197.01<br>(99.10 to 273.41)                | 229.67<br>(118.44 to 312.10)              | 177.63<br>(87.20 to 246.50)                | 17.59<br>(7.96 to 22.71)            | 18.07<br>(7.39 to 27.75)          | 22.99<br>(10.17 to 34.54)         | 15.21<br>(6.11 to 23.46)           |
| Iodine deficiency                                                       | 28.26<br>(2.40 to 71.62)                     | 32.98<br>(1.64 to 102.77)                  | 32.00<br>(1.35 to 105.55)                 | 31.69<br>(1.58 to 95.82)                   | 1.51<br>(0.07 to 5.04)              | 2.81<br>(0.06 to 12.17)           | 2.91<br>(0.05 to 12.96)           | 2.55<br>(0.06 to 10.27)            |
| Dietary iron deficiency                                                 | 37.91<br>(30.26 to 46.34)                    | 23.30<br>(17.15 to 32.02)                  | 24.32<br>(17.85 to 33.59)                 | 22.72<br>(16.81 to 31.28)                  | 1.11<br>(0.73 to 1.45)              | 0.77<br>(0.50 to 1.07)            | 0.85<br>(0.55 to 1.17)            | 0.72<br>(0.48 to 0.99)             |
| Other nutritional deficiencies                                          | 342.55<br>(261.61 to 450.13)                 | 242.92<br>(164.25 to 355.95)               | 227.15<br>(146.82 to 350.46)              | 234.40<br>(156.33 to 341.37)               | 24.68<br>(18.43 to 34.01)           | 23.85<br>(14.07 to 39.42)         | 23.91<br>(13.85 to 40.88)         | 21.80<br>(12.83 to 36.52)          |
| <b>Other communicable, maternal, neonatal, and nutritional diseases</b> | <b>1,958.04</b><br>(1,530.88 to 2,247.36)    | <b>1,461.72</b><br>(1,187.53 to 1,702.03)  | <b>1,410.94</b><br>(1,155.44 to 1,648.30) | <b>1,454.12</b><br>(1,180.29 to 1,722.83)  | <b>67.74</b><br>(55.37 to 77.37)    | <b>64.26</b><br>(54.20 to 73.71)  | <b>65.91</b><br>(55.99 to 75.91)  | <b>60.92</b><br>(50.14 to 70.35)   |
| Sexually transmitted infections excluding HIV                           | 346.29<br>(270.95 to 419.98)                 | 136.99<br>(94.53 to 187.40)                | 129.04<br>(88.02 to 181.24)               | 137.60<br>(95.42 to 189.68)                | 13.68<br>(10.99 to 16.34)           | 7.09<br>(4.86 to 9.61)            | 7.05<br>(4.82 to 9.56)            | 6.82<br>(4.78 to 9.18)             |
| Syphilis                                                                | 75.18<br>(60.12 to 91.60)                    | 28.32<br>(18.07 to 40.50)                  | 24.91<br>(15.67 to 36.30)                 | 29.07<br>(18.48 to 41.43)                  | 3.13<br>(2.54 to 3.73)              | 1.57<br>(0.98 to 2.26)            | 1.46<br>(0.91 to 2.16)            | 1.54<br>(0.97 to 2.23)             |
| Chlamydial infection                                                    | 52.17<br>(40.43 to 63.81)                    | 20.90<br>(13.35 to 30.58)                  | 20.10<br>(12.80 to 29.40)                 | 20.82<br>(13.39 to 29.92)                  | 2.08<br>(1.66 to 2.49)              | 1.12<br>(0.72 to 1.62)            | 1.14<br>(0.73 to 1.67)            | 1.06<br>(0.69 to 1.54)             |
| Gonococcal infection                                                    | 148.04<br>(115.40 to 179.87)                 | 60.92<br>(38.38 to 90.00)                  | 58.62<br>(37.09 to 88.64)                 | 60.66<br>(37.86 to 90.96)                  | 6.01<br>(4.79 to 7.20)              | 3.23<br>(2.10 to 4.60)            | 3.29<br>(2.12 to 4.68)            | 3.08<br>(2.00 to 4.40)             |
| Other sexually transmitted infections                                   | 70.89<br>(54.91 to 87.07)                    | 26.85<br>(17.11 to 39.58)                  | 25.42<br>(16.27 to 37.58)                 | 27.05<br>(17.22 to 39.94)                  | 2.46<br>(1.96 to 2.97)              | 1.16<br>(0.75 to 1.65)            | 1.16<br>(0.75 to 1.66)            | 1.13<br>(0.74 to 1.60)             |
| Acute hepatitis                                                         | 236.88<br>(201.68 to 274.15)                 | 102.86<br>(73.44 to 141.20)                | 76.75<br>(53.62 to 106.08)                | 111.06<br>(78.02 to 154.11)                | 9.13<br>(7.77 to 10.70)             | 5.00<br>(3.66 to 6.78)            | 3.90<br>(2.80 to 5.35)            | 5.20<br>(3.75 to 7.15)             |
| Acute hepatitis A                                                       | 14.63<br>(9.55 to 20.29)                     | 4.97<br>(3.04 to 7.89)                     | 3.94<br>(2.38 to 6.24)                    | 5.33<br>(3.17 to 8.43)                     | 0.33<br>(0.23 to 0.45)              | 0.17<br>(0.10 to 0.28)            | 0.15<br>(0.09 to 0.23)            | 0.18<br>(0.11 to 0.29)             |
| Acute hepatitis B                                                       | 180.82<br>(151.14 to 212.10)                 | 79.08<br>(54.85 to 111.77)                 | 58.24<br>(39.73 to 84.62)                 | 85.88<br>(57.85 to 121.78)                 | 7.00<br>(5.83 to 8.32)              | 3.62<br>(2.56 to 5.06)            | 2.76<br>(1.86 to 3.91)            | 3.82<br>(2.58 to 5.37)             |



| Hungary                              |                                                 |                                                 |                                                 |                                                 |                                              |                                              |                                              |                                              |
|--------------------------------------|-------------------------------------------------|-------------------------------------------------|-------------------------------------------------|-------------------------------------------------|----------------------------------------------|----------------------------------------------|----------------------------------------------|----------------------------------------------|
| Cause                                | YLLs (actual counts)                            |                                                 |                                                 |                                                 | Deaths (actual counts)                       |                                              |                                              |                                              |
|                                      | 2016                                            | 2040 Forecast                                   | 2040 Better Scenario                            | 2040 Worse Scenario                             | 2016                                         | 2040 Forecast                                | 2040 Better Scenario                         | 2040 Worse Scenario                          |
| <b>Neoplasms</b>                     | <b>693,009.81</b><br>(621,650.92 to 761,670.55) | <b>624,760.80</b><br>(511,828.61 to 757,435.30) | <b>529,289.55</b><br>(437,486.51 to 651,766.30) | <b>740,542.80</b><br>(600,125.79 to 894,700.06) | <b>33,496.98</b><br>(30,283.74 to 36,651.97) | <b>35,561.36</b><br>(30,865.41 to 40,813.68) | <b>31,415.14</b><br>(27,496.87 to 35,810.66) | <b>40,729.07</b><br>(34,763.23 to 47,144.46) |
| Lip and oral cavity cancer           | 21,064.34<br>(17,825.73 to 24,470.59)           | 17,269.99<br>(8,332.12 to 29,301.74)            | 13,761.78<br>(6,447.61 to 24,467.97)            | 23,172.22<br>(12,445.58 to 35,179.93)           | 813.05<br>(701.40 to 934.72)                 | 694.13<br>(359.70 to 1,112.22)               | 544.14<br>(279.13 to 916.32)                 | 970.25<br>(553.27 to 1,402.94)               |
| Nasopharynx cancer                   | 2,591.51<br>(2,208.99 to 3,009.63)              | 1,764.07<br>(746.87 to 3,254.75)                | 1,281.97<br>(537.59 to 2,466.18)                | 2,492.81<br>(1,137.12 to 4,077.36)              | 91.47<br>(79.04 to 104.75)                   | 64.97<br>(29.22 to 114.93)                   | 46.44<br>(20.95 to 84.18)                    | 94.64<br>(45.01 to 149.41)                   |
| Other pharynx cancer                 | 17,056.37<br>(14,472.80 to 19,988.16)           | 12,670.11<br>(6,023.13 to 24,982.24)            | 12,868.71<br>(6,073.42 to 25,626.67)            | 16,292.43<br>(7,487.75 to 32,297.46)            | 607.53<br>(518.66 to 709.71)                 | 484.76<br>(244.89 to 903.46)                 | 499.59<br>(239.61 to 927.94)                 | 616.89<br>(301.48 to 1,159.59)               |
| Esophageal cancer                    | 16,177.36<br>(13,367.19 to 19,095.69)           | 15,748.68<br>(7,136.64 to 31,553.90)            | 13,621.10<br>(6,285.00 to 28,461.85)            | 21,684.49<br>(9,465.10 to 43,791.62)            | 662.15<br>(554.08 to 773.01)                 | 664.83<br>(321.08 to 1,250.00)               | 568.09<br>(284.50 to 1,117.06)               | 928.96<br>(436.01 to 1,746.33)               |
| Stomach cancer                       | 31,787.03<br>(28,146.26 to 35,427.92)           | 19,470.99<br>(14,348.02 to 25,847.33)           | 15,219.91<br>(11,644.25 to 19,795.34)           | 21,456.18<br>(15,280.35 to 28,879.85)           | 1,723.39<br>(1,548.52 to 1,904.33)           | 1,285.64<br>(993.48 to 1,698.02)             | 1,052.35<br>(830.83 to 1,360.52)             | 1,370.13<br>(1,019.37 to 1,819.93)           |
| Colon and rectum cancer              | 97,281.08<br>(85,976.59 to 108,312.22)          | 84,424.84<br>(56,508.66 to 124,376.44)          | 68,669.07<br>(47,202.23 to 103,097.75)          | 102,427.11<br>(64,875.86 to 156,541.22)         | 5,386.34<br>(4,810.79 to 5,963.95)           | 5,748.24<br>(4,033.60 to 8,281.86)           | 4,905.28<br>(3,522.45 to 7,025.93)           | 6,679.92<br>(4,457.64 to 9,955.99)           |
| Liver cancer                         | 18,375.16<br>(15,754.58 to 21,016.77)           | 22,739.50<br>(14,123.17 to 34,843.57)           | 22,240.09<br>(14,526.38 to 33,550.88)           | 32,722.86<br>(18,751.29 to 53,695.55)           | 895.45<br>(779.57 to 1,015.96)               | 1,297.79<br>(850.41 to 1,935.51)             | 1,313.00<br>(904.32 to 1,924.49)             | 1,782.28<br>(1,085.16 to 2,807.59)           |
| Liver cancer due to hepatitis B      | 4,624.65<br>(3,374.68 to 6,095.28)              | 5,957.46<br>(3,461.88 to 10,101.80)             | 5,980.66<br>(3,577.41 to 10,032.69)             | 7,155.10<br>(3,899.68 to 12,958.36)             | 209.36<br>(149.95 to 274.44)                 | 312.36<br>(191.08 to 500.57)                 | 322.71<br>(204.21 to 522.08)                 | 363.06<br>(208.57 to 623.46)                 |
| Liver cancer due to hepatitis C      | 3,885.02<br>(2,685.99 to 5,262.22)              | 5,439.09<br>(3,158.61 to 8,719.51)              | 5,497.05<br>(3,317.72 to 8,695.79)              | 6,434.41<br>(3,484.41 to 10,876.60)             | 208.96<br>(149.24 to 271.07)                 | 317.73<br>(205.75 to 519.74)                 | 353.80<br>(220.27 to 539.38)                 | 383.86<br>(218.94 to 624.83)                 |
| Liver cancer due to alcohol use      | 7,268.03<br>(5,965.11 to 8,777.70)              | 8,032.47<br>(4,930.90 to 12,406.01)             | 7,413.93<br>(4,643.61 to 11,293.21)             | 15,094.47<br>(8,697.25 to 24,750.16)            | 357.80<br>(299.25 to 426.62)                 | 465.80<br>(302.83 to 689.65)                 | 446.20<br>(301.14 to 647.48)                 | 819.73<br>(496.61 to 1,296.94)               |
| Liver cancer due to other causes     | 2,597.46<br>(2,064.15 to 3,185.45)              | 3,310.49<br>(1,899.58 to 5,392.61)              | 3,348.45<br>(1,972.55 to 5,363.47)              | 4,038.87<br>(2,129.84 to 7,073.98)              | 122.34<br>(98.29 to 149.05)                  | 182.41<br>(109.99 to 289.41)                 | 190.29<br>(119.84 to 293.64)                 | 215.63<br>(118.36 to 368.01)                 |
| Gallbladder and biliary tract cancer | 12,614.30<br>(11,173.37 to 14,402.46)           | 9,849.37<br>(8,710.25 to 11,159.09)             | 10,009.56<br>(8,827.49 to 11,409.16)            | 9,335.81<br>(8,278.14 to 10,624.90)             | 748.14<br>(663.14 to 849.23)                 | 698.71<br>(611.01 to 795.70)                 | 739.27<br>(650.65 to 843.16)                 | 639.99<br>(555.10 to 731.84)                 |
| Pancreatic cancer                    | 40,502.02<br>(35,708.23 to 45,243.49)           | 43,556.31<br>(34,186.74 to 56,071.52)           | 41,498.00<br>(33,144.58 to 53,224.90)           | 45,682.10<br>(35,040.10 to 59,807.84)           | 2,081.40<br>(1,853.31 to 2,323.98)           | 2,554.08<br>(2,045.53 to 3,183.68)           | 2,513.79<br>(2,065.83 to 3,120.36)           | 2,621.76<br>(2,042.31 to 3,338.07)           |
| Larynx cancer                        | 12,713.84<br>(10,871.08 to 14,740.90)           | 8,719.37<br>(3,618.73 to 16,670.22)             | 6,449.76<br>(2,723.41 to 12,529.47)             | 11,510.99<br>(4,889.25 to 19,314.02)            | 500.30<br>(430.76 to 577.22)                 | 357.69<br>(157.28 to 660.96)                 | 257.91<br>(115.43 to 487.85)                 | 490.16<br>(217.43 to 819.64)                 |
| Tracheal, bronchus, and lung cancer  | 187,758.78<br>(166,207.48 to 210,061.87)        | 165,282.00<br>(121,183.38 to 220,922.38)        | 113,617.28<br>(51,913.65)                       | 222,420.95<br>(162,958.86 to 293,763.93)        | 8,358.47<br>(7,457.47 to 9,305.40)           | 7,918.03<br>(5,980.34 to 10,336.42)          | 5,402.50<br>(4,085.63 to 7,056.15)           | 10,807.00<br>(8,020.90 to 14,102.10)         |
| Malignant skin melanoma              | 8,874.58<br>(7,440.61 to 10,828.70)             | 9,824.72<br>(8,022.35 to 12,568.13)             | 11,831.51<br>(9,660.21 to 14,954.81)            | 8,837.89<br>(7,146.93 to 11,508.56)             | 388.95<br>(326.15 to 456.05)                 | 541.71<br>(442.82 to 645.02)                 | 681.23<br>(563.62 to 809.48)                 | 467.69<br>(369.18 to 559.85)                 |
| Non-melanoma skin cancer             | 3,213.57<br>(2,810.28 to 3,612.35)              | 3,269.70<br>(2,694.48 to 3,898.36)              | 2,939.96<br>(2,436.81 to 3,547.10)              | 3,166.97<br>(2,556.22 to 3,889.05)              | 217.16<br>(192.23 to 240.29)                 | 292.97<br>(232.36 to 361.06)                 | 280.43<br>(224.09 to 348.20)                 | 269.41<br>(204.43 to 345.77)                 |
| Breast cancer                        | 44,492.22<br>(37,477.79 to 52,065.07)           | 35,286.28<br>(25,026.95 to 51,190.02)           | 29,023.93<br>(21,080.99 to 39,884.14)           | 41,816.72<br>(28,339.05 to 60,481.70)           | 2,178.28<br>(1,860.44 to 2,525.03)           | 2,155.00<br>(1,564.53 to 2,918.77)           | 1,875.60<br>(1,413.06 to 2,451.87)           | 2,411.10<br>(1,730.43 to 3,305.37)           |
| Cervical cancer                      | 13,041.25<br>(10,893.57 to 15,502.76)           | 6,770.07<br>(4,471.51 to 10,247.44)             | 5,166.00<br>(3,587.18 to 7,598.44)              | 7,543.12<br>(4,782.59 to 11,727.24)             | 520.36<br>(439.35 to 610.08)                 | 331.21<br>(232.83 to 476.36)                 | 264.59<br>(196.65 to 361.80)                 | 357.81<br>(242.23 to 518.59)                 |





| Hungary                         |                                          |                                          |                                          |                                            |                                       |                                       |                                       |                                       |
|---------------------------------|------------------------------------------|------------------------------------------|------------------------------------------|--------------------------------------------|---------------------------------------|---------------------------------------|---------------------------------------|---------------------------------------|
| Cause                           | YLLs (actual counts)                     |                                          |                                          |                                            | Deaths (actual counts)                |                                       |                                       |                                       |
|                                 | 2016                                     | 2040 Forecast                            | 2040 Better Scenario                     | 2040 Worse Scenario                        | 2016                                  | 2040 Forecast                         | 2040 Better Scenario                  | 2040 Worse Scenario                   |
| Kidney cancer                   | 16,605.33<br>(14,471.84 to 18,751.84)    | 19,598.76<br>(13,423.80 to 27,910.39)    | 19,546.38<br>(13,750.11 to 27,191.84)    | 19,588.14<br>(13,099.47 to 28,377.72)      | 836.24<br>(734.80 to 932.86)          | 1,156.06<br>(823.56 to 1,533.96)      | 1,205.52<br>(893.75 to 1,580.66)      | 1,121.69<br>(776.50 to 1,551.13)      |
| Bladder cancer                  | 15,601.32<br>(13,632.16 to 17,722.81)    | 14,706.35<br>(10,462.79 to 19,925.39)    | 12,878.19<br>(9,461.63 to 17,068.48)     | 16,048.46<br>(11,051.78 to 22,787.02)      | 925.33<br>(813.75 to 1,042.21)        | 1,045.81<br>(768.05 to 1,386.04)      | 960.93<br>(732.74 to 1,231.18)        | 1,109.56<br>(791.79 to 1,525.68)      |
| Brain and nervous system cancer | 20,353.31<br>(16,989.08 to 27,861.82)    | 20,404.76<br>(16,983.98 to 29,447.56)    | 19,484.26<br>(16,123.29 to 28,103.40)    | 20,133.11<br>(16,676.21 to 28,861.08)      | 761.31<br>(644.55 to 988.54)          | 925.07<br>(800.89 to 1,162.90)        | 912.18<br>(785.14 to 1,138.60)        | 886.85<br>(759.46 to 1,112.16)        |
| Thyroid cancer                  | 1,672.04<br>(1,454.22 to 1,915.40)       | 1,570.42<br>(1,136.35 to 2,231.78)       | 1,445.57<br>(1,034.36 to 2,077.86)       | 1,767.02<br>(1,219.84 to 2,619.25)         | 89.96<br>(78.56 to 102.03)            | 98.80<br>(72.47 to 137.80)            | 94.09<br>(69.12 to 132.30)            | 106.16<br>(74.88 to 154.22)           |
| Mesothelioma                    | 971.86<br>(831.00 to 1,127.72)           | 908.48<br>(759.43 to 1,120.90)           | 950.45<br>(787.67 to 1,175.93)           | 861.89<br>(728.65 to 1,051.20)             | 39.95<br>(34.69 to 46.24)             | 44.51<br>(38.30 to 52.99)             | 48.02<br>(41.08 to 57.68)             | 41.05<br>(35.45 to 48.49)             |
| Hodgkin lymphoma                | 1,228.14<br>(1,030.94 to 1,785.76)       | 790.37<br>(580.99 to 1,313.22)           | 630.49<br>(470.55 to 1,020.14)           | 828.75<br>(613.51 to 1,319.00)             | 44.37<br>(37.32 to 64.06)             | 35.25<br>(27.84 to 52.09)             | 29.18<br>(23.15 to 42.10)             | 35.72<br>(28.36 to 50.95)             |
| Non-Hodgkin lymphoma            | 13,122.48<br>(11,295.08 to 14,983.97)    | 11,115.53<br>(9,096.87 to 13,771.21)     | 10,387.70<br>(8,519.41 to 12,927.86)     | 11,633.63<br>(9,251.16 to 14,941.31)       | 624.88<br>(535.80 to 706.32)          | 658.72<br>(530.97 to 801.72)          | 641.28<br>(523.85 to 781.56)          | 661.55<br>(519.77 to 829.21)          |
| Multiple myeloma                | 5,910.33<br>(4,986.79 to 7,585.24)       | 6,136.08<br>(4,901.48 to 8,006.05)       | 6,011.28<br>(4,809.93 to 7,799.38)       | 6,386.51<br>(4,916.70 to 8,543.83)         | 302.23<br>(254.33 to 376.42)          | 358.59<br>(287.43 to 454.42)          | 362.74<br>(292.24 to 460.17)          | 360.67<br>(281.89 to 471.94)          |
| Leukemia                        | 21,449.00<br>(19,069.19 to 24,011.11)    | 19,731.72<br>(14,929.47 to 25,794.57)    | 18,352.53<br>(14,096.45 to 23,460.23)    | 21,644.74<br>(15,837.20 to 29,088.74)      | 1,015.18<br>(904.01 to 1,135.15)      | 1,172.07<br>(909.28 to 1,485.16)      | 1,135.67<br>(895.76 to 1,410.29)      | 1,238.78<br>(923.22 to 1,635.10)      |
| Acute lymphoid leukemia         | 2,337.59<br>(1,935.04 to 2,790.91)       | 1,457.27<br>(1,064.11 to 2,095.26)       | 1,255.45<br>(921.30 to 1,833.55)         | 1,636.00<br>(1,155.03 to 2,339.33)         | 66.91<br>(56.43 to 82.76)             | 54.93<br>(40.97 to 77.87)             | 49.01<br>(37.15 to 68.99)             | 60.49<br>(43.84 to 85.06)             |
| Chronic lymphoid leukemia       | 4,932.69<br>(4,120.86 to 5,891.77)       | 4,727.80<br>(3,307.87 to 6,662.24)       | 4,540.83<br>(3,281.85 to 6,250.80)       | 5,066.54<br>(3,466.43 to 7,261.17)         | 296.71<br>(253.99 to 350.14)          | 335.13<br>(246.73 to 445.83)          | 336.17<br>(254.05 to 439.38)          | 345.53<br>(243.34 to 477.88)          |
| Acute myeloid leukemia          | 8,723.10<br>(7,109.15 to 10,021.32)      | 8,790.45<br>(6,720.97 to 11,360.73)      | 8,493.54<br>(6,623.70 to 10,855.43)      | 9,595.21<br>(7,117.12 to 12,834.44)        | 373.16<br>(305.63 to 426.38)          | 459.16<br>(346.82 to 590.66)          | 459.35<br>(353.63 to 576.90)          | 486.11<br>(350.06 to 644.30)          |
| Chronic myeloid leukemia        | 1,291.43<br>(1,105.25 to 1,499.85)       | 587.75<br>(400.33 to 859.18)             | 433.24<br>(299.50 to 614.54)             | 701.84<br>(448.49 to 1,055.82)             | 60.92<br>(52.26 to 71.72)             | 34.61<br>(24.73 to 48.14)             | 26.67<br>(19.06 to 35.96)             | 39.63<br>(26.56 to 57.18)             |
| Other leukemia                  | 4,174.19<br>(3,591.32 to 4,798.20)       | 4,168.44<br>(3,024.41 to 5,667.99)       | 3,629.46<br>(2,695.19 to 4,835.18)       | 4,645.15<br>(3,241.68 to 6,497.95)         | 217.48<br>(187.54 to 251.62)          | 288.23<br>(217.75 to 373.55)          | 264.47<br>(203.37 to 336.63)          | 307.02<br>(222.01 to 413.17)          |
| Other neoplasms                 | 24,108.53<br>(21,074.34 to 27,538.73)    | 27,488.96<br>(24,306.75 to 31,505.11)    | 28,158.83<br>(24,766.77 to 32,345.73)    | 26,134.43<br>(23,215.36 to 29,819.03)      | 1,153.95<br>(1,022.05 to 1,305.52)    | 1,673.51<br>(1,482.68 to 1,877.98)    | 1,799.72<br>(1,596.48 to 2,027.69)    | 1,526.64<br>(1,340.13 to 1,722.73)    |
| Cardiovascular diseases         | 874,496.60<br>(789,772.00 to 955,920.85) | 529,530.03<br>(382,470.91 to 777,018.62) | 359,505.28<br>(264,760.22 to 511,842.96) | 745,727.46<br>(519,456.78 to 1,056,713.42) | 63,472.57<br>(58,248.12 to 69,098.26) | 48,420.99<br>(36,274.22 to 68,275.54) | 36,420.77<br>(27,391.33 to 52,483.91) | 61,422.72<br>(44,614.36 to 85,709.23) |
| Rheumatic heart disease         | 4,956.96<br>(4,263.88 to 5,727.25)       | 2,928.45<br>(2,198.62 to 3,949.94)       | 2,440.96<br>(1,833.15 to 3,198.77)       | 3,024.07<br>(2,221.57 to 4,180.90)         | 300.38<br>(258.93 to 346.43)          | 223.37<br>(168.70 to 306.31)          | 196.04<br>(148.74 to 266.43)          | 221.39<br>(164.82 to 315.51)          |
| Ischemic heart disease          | 515,014.53<br>(461,630.41 to 566,466.88) | 266,438.90<br>(168,228.99 to 405,668.20) | 154,754.11<br>(99,268.71 to 233,711.70)  | 395,521.77<br>(242,507.25 to 603,836.42)   | 38,839.24<br>(35,441.21 to 42,196.28) | 24,821.83<br>(15,899.87 to 36,659.27) | 16,404.77<br>(10,409.07 to 24,212.80) | 32,999.92<br>(21,316.46 to 48,444.12) |
| Stroke                          | 186,168.24<br>(164,106.65 to 208,605.98) | 89,212.82<br>(53,301.18 to 150,514.90)   | 54,736.74<br>(33,656.08 to 88,542.19)    | 138,258.04<br>(81,459.17 to 229,531.67)    | 13,188.24<br>(11,697.62 to 14,702.66) | 8,009.44<br>(4,926.19 to 13,275.17)   | 5,554.07<br>(3,450.68 to 9,205.94)    | 10,928.42<br>(6,585.03 to 18,473.31)  |
| Ischemic stroke                 | 121,326.40<br>(106,972.28 to 136,150.04) | 59,192.95<br>(34,080.43 to 105,740.35)   | 38,746.33<br>(23,239.66 to 67,795.50)    | 84,788.87<br>(47,869.25 to 148,644.67)     | 9,605.55<br>(8,474.72 to 10,723.13)   | 5,904.36<br>(3,391.69 to 10,587.89)   | 4,267.87<br>(2,497.82 to 7,718.58)    | 7,620.34<br>(4,259.47 to 14,053.42)   |

|                                |                                          |                                           |                                           |                                           |                                       |                                        |                                        |                                        |
|--------------------------------|------------------------------------------|-------------------------------------------|-------------------------------------------|-------------------------------------------|---------------------------------------|----------------------------------------|----------------------------------------|----------------------------------------|
|                                | 64,841.84<br>(56,785.77 to<br>73,179.84) | 30,019.87<br>(16,332.85 to<br>52,848.48)  | 15,990.41<br>(9,441.37 to<br>27,258.29)   | 53,469.18<br>(28,798.02 to<br>94,894.45)  | 3,582.70<br>(3,159.20 to<br>4,024.79) | 2,105.08<br>(1,244.23 to<br>3,518.50)  | 1,286.20<br>(803.09 to<br>2,060.41)    | 3,308.09<br>(1,899.77 to<br>5,482.44)  |
| Intracerebral hemorrhage       |                                          |                                           |                                           |                                           |                                       |                                        |                                        |                                        |
|                                | 54,235.71<br>(29,889.51 to<br>68,917.61) | 65,662.91<br>(31,593.19 to<br>158,877.07) | 56,177.62<br>(28,044.22 to<br>132,052.19) | 87,942.82<br>(43,148.05 to<br>214,466.27) | 4,185.66<br>(2,156.48 to<br>5,387.97) | 6,550.20<br>(2,917.27 to<br>17,842.07) | 6,055.21<br>(2,722.02 to<br>15,791.06) | 8,232.48<br>(3,776.71 to<br>22,688.59) |
| Hypertensive heart disease     |                                          |                                           |                                           |                                           |                                       |                                        |                                        |                                        |
|                                | 47,566.42<br>(39,991.63 to<br>58,615.71) | 30,338.01<br>(22,435.82 to<br>43,325.48)  | 27,730.37<br>(20,515.82 to<br>40,406.23)  | 39,984.21<br>(30,405.23 to<br>55,403.87)  | 2,647.05<br>(2,168.41 to<br>3,725.96) | 2,318.55<br>(1,487.56 to<br>4,084.79)  | 2,175.24<br>(1,405.26 to<br>3,836.11)  | 2,673.52<br>(1,804.71 to<br>4,422.64)  |
| Cardiomyopathy and myocarditis |                                          |                                           |                                           |                                           |                                       |                                        |                                        |                                        |
|                                | 3,706.76<br>(2,103.03 to<br>4,940.33)    | 2,931.70<br>(1,718.47 to<br>4,109.45)     | 3,182.78<br>(1,955.83 to<br>4,584.28)     | 2,649.31<br>(1,538.91 to<br>3,731.50)     | 332.16<br>(194.53 to<br>486.14)       | 348.98<br>(196.76 to<br>517.73)        | 400.26<br>(235.32 to<br>608.30)        | 301.98<br>(164.12 to<br>455.69)        |
| Myocarditis                    |                                          |                                           |                                           |                                           |                                       |                                        |                                        |                                        |

| Hungary                                                       |                                                                 |                                                               |                                                               |                                                                |                                                            |                                                            |                                                            |                                                            |
|---------------------------------------------------------------|-----------------------------------------------------------------|---------------------------------------------------------------|---------------------------------------------------------------|----------------------------------------------------------------|------------------------------------------------------------|------------------------------------------------------------|------------------------------------------------------------|------------------------------------------------------------|
| Cause                                                         | YLLs (actual counts)                                            |                                                               |                                                               |                                                                | Deaths (actual counts)                                     |                                                            |                                                            |                                                            |
|                                                               | 2016                                                            | 2040 Forecast                                                 | 2040 Better Scenario                                          | 2040 Worse Scenario                                            | 2016                                                       | 2040 Forecast                                              | 2040 Better Scenario                                       | 2040 Worse Scenario                                        |
| Alcoholic cardiomyopathy                                      | 31,997.00<br>(20,734.11 to<br>38,936.64)                        | 17,201.64<br>(12,028.75 to<br>22,023.06)                      | 16,398.30<br>(11,975.22 to<br>21,320.13)                      | 26,569.42<br>(18,946.26 to<br>33,906.13)                       | 1,306.78<br>(889.58 to<br>1,628.09)                        | 828.86<br>(612.63 to<br>1,098.32)                          | 816.59<br>(621.09 to<br>1,115.18)                          | 1,224.34<br>(905.16 to<br>1,572.21)                        |
| Other cardiomyopathy                                          | 11,862.66<br>(8,191.64 to<br>23,024.82)                         | 10,204.66<br>(4,308.97 to<br>22,230.86)                       | 8,149.29<br>(3,318.86 to<br>18,757.61)                        | 10,765.48<br>(4,632.68 to<br>23,630.88)                        | 1,008.12<br>(654.12 to<br>1,998.93)                        | 1,140.70<br>(416.76 to<br>2,639.26)                        | 958.40<br>(329.92 to<br>2,333.15)                          | 1,147.20<br>(412.23 to<br>2,690.83)                        |
| Atrial fibrillation and flutter                               | 7,480.92<br>(5,722.63 to<br>9,483.22)                           | 9,347.99<br>(6,860.69 to<br>12,370.61)                        | 9,218.56<br>(6,837.21 to<br>12,299.99)                        | 9,877.63<br>(7,146.98 to<br>13,383.51)                         | 797.14<br>(599.07 to<br>1,020.67)                          | 1,146.46<br>(837.52 to<br>1,553.78)                        | 1,188.38<br>(873.82 to<br>1,594.12)                        | 1,154.20<br>(816.07 to<br>1,613.66)                        |
| Aortic aneurysm                                               | 10,388.46<br>(9,095.64 to<br>11,762.50)                         | 7,401.13<br>(5,691.08 to<br>9,624.72)                         | 6,542.63<br>(5,182.67 to<br>8,436.36)                         | 7,767.80<br>(5,851.33 to<br>10,321.11)                         | 596.03<br>(528.42 to<br>666.66)                            | 531.09<br>(428.56 to<br>661.80)                            | 513.96<br>(417.95 to<br>643.22)                            | 520.07<br>(412.47 to<br>651.77)                            |
| Peripheral artery disease                                     | 7,467.44<br>(4,889.50 to<br>15,521.44)                          | 15,593.97<br>(8,397.74 to<br>34,679.79)                       | 15,273.48<br>(8,193.40 to<br>34,079.42)                       | 16,437.24<br>(8,881.51 to<br>35,918.99)                        | 559.76<br>(328.30 to<br>1,301.42)                          | 1,462.75<br>(725.27 to<br>3,587.98)                        | 1,552.16<br>(749.29 to<br>3,833.60)                        | 1,434.59<br>(716.56 to<br>3,514.40)                        |
| Endocarditis                                                  | 3,786.60<br>(2,332.35 to<br>4,730.62)                           | 3,689.91<br>(1,967.93 to<br>5,550.93)                         | 3,611.37<br>(1,936.72 to<br>5,337.22)                         | 3,769.50<br>(1,995.00 to<br>5,736.59)                          | 192.66<br>(112.31 to<br>245.08)                            | 234.72<br>(116.27 to<br>370.92)                            | 241.71<br>(122.16 to<br>380.97)                            | 227.91<br>(111.71 to<br>362.24)                            |
| Other cardiovascular and circulatory diseases                 | 37,431.33<br>(32,624.40 to<br>41,856.68)                        | 38,915.95<br>(28,384.01 to<br>52,850.43)                      | 29,019.44<br>(21,411.65 to<br>38,824.28)                      | 43,144.38<br>(30,523.48 to<br>61,221.64)                       | 2,436.41<br>(2,150.40 to<br>2,720.88)                      | 3,122.58<br>(2,342.97 to<br>4,110.19)                      | 2,539.22<br>(1,901.49 to<br>3,323.42)                      | 3,230.22<br>(2,257.01 to<br>4,368.02)                      |
| <b>Chronic respiratory diseases</b>                           | <b>91,997.35</b><br><b>(82,380.14 to</b><br><b>102,266.41)</b>  | <b>70,891.63</b><br><b>(50,600.71 to</b><br><b>98,685.21)</b> | <b>51,324.98</b><br><b>(37,955.58 to</b><br><b>69,830.70)</b> | <b>97,928.69</b><br><b>(69,123.85 to</b><br><b>138,465.27)</b> | <b>5,595.14</b><br><b>(5,050.29 to</b><br><b>6,193.63)</b> | <b>5,072.45</b><br><b>(3,770.53 to</b><br><b>6,712.58)</b> | <b>3,775.21</b><br><b>(2,913.54 to</b><br><b>4,829.43)</b> | <b>6,827.60</b><br><b>(4,921.05 to</b><br><b>9,250.21)</b> |
| Chronic obstructive pulmonary disease                         | 84,888.84<br>(76,101.44 to<br>94,234.66)                        | 63,978.28<br>(43,956.31 to<br>92,332.26)                      | 42,879.69<br>(29,060.67 to<br>61,259.84)                      | 91,412.03<br>(62,508.88 to<br>133,152.88)                      | 5,219.65<br>(4,711.94 to<br>5,775.26)                      | 4,619.74<br>(3,281.57 to<br>6,276.63)                      | 3,195.48<br>(2,293.35 to<br>4,303.06)                      | 6,420.26<br>(4,500.33 to<br>8,860.71)                      |
| Pneumoconiosis                                                | 621.75<br>(521.33 to<br>739.80)                                 | 245.29<br>(188.36 to<br>318.44)                               | 224.20<br>(171.48 to<br>288.29)                               | 256.73<br>(189.59 to<br>345.30)                                | 35.79<br>(30.27 to<br>42.37)                               | 18.56<br>(13.91 to<br>24.37)                               | 18.13<br>(13.40 to<br>24.40)                               | 18.48<br>(13.27 to<br>24.88)                               |
| Silicosis                                                     | 280.93<br>(208.89 to<br>387.74)                                 | 71.59<br>(38.37 to<br>121.26)                                 | 47.34<br>(24.51 to<br>82.25)                                  | 78.39<br>(38.24 to<br>138.98)                                  | 16.83<br>(12.64 to<br>23.23)                               | 5.19<br>(2.77 to<br>8.72)                                  | 3.58<br>(1.84 to<br>6.08)                                  | 5.47<br>(2.68 to<br>9.70)                                  |
| Asbestosis                                                    | 27.66<br>(20.17 to<br>59.84)                                    | 27.51<br>(18.07 to<br>56.60)                                  | 32.12<br>(21.61 to<br>63.85)                                  | 25.21<br>(16.25 to<br>52.61)                                   | 1.07<br>(0.75 to<br>2.52)                                  | 1.39<br>(0.89 to<br>3.06)                                  | 1.69<br>(1.10 to<br>3.56)                                  | 1.22<br>(0.76 to<br>2.67)                                  |
| Coal workers pneumoconiosis                                   | 282.57<br>(129.05 to<br>359.25)                                 | 115.35<br>(49.40 to<br>165.26)                                | 110.56<br>(44.85 to<br>161.70)                                | 121.78<br>(53.27 to<br>176.35)                                 | 15.79<br>(7.71 to<br>19.80)                                | 9.01<br>(3.96 to<br>13.67)                                 | 9.35<br>(3.97 to<br>14.49)                                 | 8.94<br>(4.05 to<br>13.36)                                 |
| Other pneumoconiosis                                          | 30.58<br>(21.45 to<br>82.77)                                    | 30.84<br>(18.04 to<br>71.15)                                  | 34.18<br>(19.33 to<br>80.26)                                  | 31.35<br>(18.56 to<br>71.98)                                   | 2.11<br>(1.50 to<br>5.23)                                  | 2.97<br>(1.68 to<br>5.95)                                  | 3.51<br>(1.88 to<br>7.08)                                  | 2.86<br>(1.62 to<br>5.76)                                  |
| Asthma                                                        | 2,402.55<br>(2,013.04 to<br>3,434.14)                           | 766.72<br>(375.19 to<br>1,500.59)                             | 523.48<br>(254.61 to<br>1,031.35)                             | 1,113.26<br>(497.73 to<br>2,362.83)                            | 126.15<br>(105.43 to<br>186.31)                            | 51.23<br>(24.89 to<br>101.72)                              | 37.65<br>(18.63 to<br>75.16)                               | 68.78<br>(31.24 to<br>145.59)                              |
| Interstitial lung disease and pulmonary sarcoidosis           | 3,591.94<br>(2,669.41 to<br>4,878.30)                           | 5,497.02<br>(3,882.59 to<br>7,598.43)                         | 7,302.33<br>(5,293.39 to<br>9,907.60)                         | 4,734.83<br>(3,230.03 to<br>6,684.32)                          | 193.76<br>(141.71 to<br>262.33)                            | 361.60<br>(246.78 to<br>493.78)                            | 501.97<br>(355.63 to<br>658.13)                            | 299.27<br>(201.92 to<br>413.47)                            |
| Other chronic respiratory diseases                            | 492.27<br>(287.72 to<br>649.57)                                 | 404.31<br>(243.98 to<br>650.21)                               | 395.28<br>(237.10 to<br>639.22)                               | 411.84<br>(247.50 to<br>659.85)                                | 19.78<br>(12.22 to<br>28.50)                               | 21.22<br>(13.19 to<br>33.95)                               | 21.97<br>(13.72 to<br>34.75)                               | 20.82<br>(12.72 to<br>33.25)                               |
| <b>Cirrhosis and other chronic liver diseases</b>             | <b>109,457.23</b><br><b>(93,075.40 to</b><br><b>126,118.20)</b> | <b>78,582.25</b><br><b>(61,861.54 to</b><br><b>99,719.58)</b> | <b>66,736.06</b><br><b>(52,309.35 to</b><br><b>86,016.29)</b> | <b>98,664.04</b><br><b>(77,216.97 to</b><br><b>125,584.24)</b> | <b>3,997.14</b><br><b>(3,429.78 to</b><br><b>4,572.95)</b> | <b>3,064.47</b><br><b>(2,545.97 to</b><br><b>3,661.38)</b> | <b>2,646.31</b><br><b>(2,182.99 to</b><br><b>3,201.96)</b> | <b>3,783.41</b><br><b>(3,131.20 to</b><br><b>4,561.98)</b> |
| Cirrhosis and other chronic liver diseases due to hepatitis B | 15,210.80<br>(12,084.37 to<br>19,123.18)                        | 12,447.10<br>(8,958.26 to<br>16,827.69)                       | 10,882.30<br>(7,833.65 to<br>14,760.75)                       | 12,702.06<br>(9,185.46 to<br>17,396.10)                        | 546.95<br>(433.67 to<br>684.96)                            | 476.30<br>(358.79 to<br>613.05)                            | 423.24<br>(320.60 to<br>550.16)                            | 478.06<br>(363.75 to<br>620.23)                            |
| Cirrhosis and other chronic liver diseases due to hepatitis C | 31,973.59<br>(24,611.04 to<br>40,408.47)                        | 26,261.26<br>(19,021.29 to<br>35,870.36)                      | 22,690.91<br>(16,399.21 to<br>31,243.27)                      | 27,034.88<br>(19,349.47 to<br>37,378.22)                       | 1,151.47<br>(884.97 to<br>1,447.65)                        | 997.44<br>(747.91 to<br>1,287.02)                          | 874.37<br>(658.74 to<br>1,147.04)                          | 1,011.74<br>(743.00 to<br>1,342.91)                        |

|                                                                |                                                               |                                                               |                                                               |                                                               |                                                            |                                                            |                                                            |                                                            |
|----------------------------------------------------------------|---------------------------------------------------------------|---------------------------------------------------------------|---------------------------------------------------------------|---------------------------------------------------------------|------------------------------------------------------------|------------------------------------------------------------|------------------------------------------------------------|------------------------------------------------------------|
|                                                                | 45,843.13<br>(37,828.79 to<br>54,841.81)                      | 26,608.36<br>(19,951.17 to<br>34,292.41)                      | 21,608.40<br>(16,254.24 to<br>28,384.37)                      | 45,303.86<br>(34,536.33 to<br>57,942.95)                      | 1,691.69<br>(1,406.79 to<br>2,009.33)                      | 1,063.68<br>(836.99 to<br>1,297.12)                        | 880.98<br>(705.99 to<br>1,095.56)                          | 1,761.76<br>(1,407.26 to<br>2,139.06)                      |
| Cirrhosis and other chronic liver diseases due to alcohol use  |                                                               |                                                               |                                                               |                                                               |                                                            |                                                            |                                                            |                                                            |
|                                                                | 16,429.71<br>(13,557.89 to<br>19,526.09)                      | 13,265.53<br>(10,081.51 to<br>17,106.20)                      | 11,554.46<br>(8,668.84 to<br>15,052.67)                       | 13,623.25<br>(10,204.00 to<br>17,718.25)                      | 607.03<br>(503.61 to<br>721.00)                            | 527.05<br>(415.44 to<br>652.26)                            | 467.71<br>(368.81 to<br>581.70)                            | 531.84<br>(416.74 to<br>673.04)                            |
| Cirrhosis and other chronic liver diseases due to other causes |                                                               |                                                               |                                                               |                                                               |                                                            |                                                            |                                                            |                                                            |
| <b>Digestive diseases</b>                                      | <b>52,020.70</b><br><b>(43,270.81 to</b><br><b>59,747.97)</b> | <b>39,611.27</b><br><b>(31,654.59 to</b><br><b>54,875.59)</b> | <b>35,639.07</b><br><b>(28,910.88 to</b><br><b>48,592.30)</b> | <b>43,076.27</b><br><b>(33,498.26 to</b><br><b>61,695.15)</b> | <b>2,986.69</b><br><b>(2,534.22 to</b><br><b>3,389.23)</b> | <b>2,953.54</b><br><b>(2,445.06 to</b><br><b>3,688.08)</b> | <b>2,826.95</b><br><b>(2,360.92 to</b><br><b>3,472.39)</b> | <b>3,022.68</b><br><b>(2,435.95 to</b><br><b>3,862.46)</b> |
| Peptic ulcer disease                                           | 13,076.43<br>(10,526.60 to<br>15,089.12)                      | 5,655.99<br>(4,218.80 to<br>7,547.58)                         | 4,107.03<br>(3,161.26 to<br>5,360.84)                         | 6,197.86<br>(4,492.12 to<br>8,435.21)                         | 720.90<br>(584.74 to<br>825.67)                            | 412.47<br>(311.03 to<br>535.39)                            | 319.56<br>(247.06 to<br>405.96)                            | 427.36<br>(308.57 to<br>564.08)                            |

| Hungary                                    |                                       |                                        |                                         |                                        |                                    |                                     |                                      |                                      |
|--------------------------------------------|---------------------------------------|----------------------------------------|-----------------------------------------|----------------------------------------|------------------------------------|-------------------------------------|--------------------------------------|--------------------------------------|
| Cause                                      | YLLs (actual counts)                  |                                        |                                         |                                        | Deaths (actual counts)             |                                     |                                      |                                      |
|                                            | 2016                                  | 2040 Forecast                          | 2040 Better Scenario                    | 2040 Worse Scenario                    | 2016                               | 2040 Forecast                       | 2040 Better Scenario                 | 2040 Worse Scenario                  |
| Gastritis and duodenitis                   | 793.94<br>(543.55 to 1,013.40)        | 552.71<br>(407.37 to 775.68)           | 476.76<br>(347.68 to 658.53)            | 552.50<br>(400.21 to 763.30)           | 43.83<br>(31.76 to 55.62)          | 41.20<br>(28.70 to 56.73)           | 37.83<br>(26.99 to 52.13)            | 39.16<br>(27.27 to 55.67)            |
| Appendicitis                               | 839.90<br>(663.90 to 1,172.59)        | 522.08<br>(379.67 to 811.86)           | 410.22<br>(299.96 to 639.62)            | 540.40<br>(388.22 to 804.56)           | 43.73<br>(34.87 to 61.01)          | 34.72<br>(25.19 to 52.15)           | 28.70<br>(21.17 to 42.86)            | 34.38<br>(24.77 to 52.02)            |
| Paralytic ileus and intestinal obstruction | 4,354.07<br>(3,324.92 to 5,439.25)    | 4,694.83<br>(3,615.80 to 6,025.35)     | 4,967.46<br>(3,887.70 to 6,350.66)      | 4,333.34<br>(3,303.44 to 5,544.36)     | 270.28<br>(207.13 to 334.34)       | 381.21<br>(291.39 to 479.53)        | 424.42<br>(327.09 to 528.51)         | 336.81<br>(248.11 to 424.03)         |
| Inguinal, femoral, and abdominal hernia    | 1,566.93<br>(1,056.61 to 2,031.46)    | 950.80<br>(673.55 to 1,254.55)         | 950.80<br>(624.85 to 1,255.76)          | 983.09<br>(637.36 to 1,314.17)         | 108.50<br>(71.00 to 140.75)        | 89.94<br>(55.91 to 117.91)          | 88.37<br>(54.95 to 115.89)           | 82.50<br>(50.52 to 109.49)           |
| Inflammatory bowel disease                 | 2,279.20<br>(1,676.91 to 2,715.55)    | 1,923.30<br>(1,505.79 to 2,370.04)     | 1,957.80<br>(1,537.16 to 2,433.49)      | 1,830.00<br>(1,423.52 to 2,222.10)     | 112.73<br>(82.19 to 134.75)        | 124.36<br>(91.14 to 153.44)         | 133.75<br>(99.57 to 165.87)          | 113.17<br>(81.85 to 138.19)          |
| Vascular intestinal disorders              | 8,698.41<br>(6,954.44 to 10,277.65)   | 8,995.02<br>(7,398.43 to 10,789.38)    | 8,774.28<br>(7,246.47 to 10,503.12)     | 8,569.36<br>(7,013.76 to 10,380.02)    | 575.38<br>(473.51 to 678.95)       | 737.34<br>(606.19 to 888.40)        | 757.18<br>(627.70 to 909.39)         | 675.22<br>(534.40 to 822.16)         |
| Gallbladder and biliary diseases           | 5,525.28<br>(4,565.51 to 6,383.84)    | 4,835.96<br>(2,714.63 to 8,544.22)     | 4,101.22<br>(2,277.03 to 7,289.35)      | 6,343.96<br>(3,317.78 to 11,441.32)    | 402.00<br>(336.95 to 463.58)       | 445.44<br>(245.76 to 806.61)        | 400.64<br>(219.37 to 709.82)         | 549.86<br>(282.71 to 999.61)         |
| Pancreatitis                               | 9,923.09<br>(8,195.69 to 12,601.61)   | 7,076.94<br>(2,764.46 to 20,460.23)    | 5,693.51<br>(2,290.39 to 15,926.94)     | 9,565.15<br>(3,600.23 to 28,295.49)    | 414.20<br>(347.22 to 513.93)       | 355.17<br>(159.24 to 860.37)        | 295.98<br>(136.29 to 706.73)         | 459.72<br>(188.25 to 1,168.07)       |
| Other digestive diseases                   | 4,963.46<br>(3,612.19 to 5,881.41)    | 4,332.04<br>(3,281.84 to 5,140.49)     | 4,199.99<br>(3,256.81 to 4,986.70)      | 4,160.62<br>(3,094.43 to 4,970.63)     | 295.14<br>(223.36 to 347.64)       | 331.68<br>(250.52 to 399.18)        | 340.53<br>(259.33 to 410.43)         | 304.50<br>(223.76 to 369.50)         |
| Neurological disorders                     | 72,103.43<br>(61,529.02 to 84,998.30) | 97,798.85<br>(77,374.19 to 124,219.31) | 107,052.96<br>(86,057.84 to 134,224.26) | 98,983.31<br>(75,099.10 to 132,528.47) | 8,719.85<br>(5,608.40 to 8,043.18) | 6,719.85<br>(8,259.53 to 14,247.82) | 10,883.26<br>(9,781.10 to 15,890.72) | 12,526.89<br>(7,526.72 to 14,647.20) |
| Alzheimer's disease and other dementias    | 50,798.85<br>(41,443.44 to 62,687.85) | 73,012.31<br>(53,563.03 to 98,859.43)  | 80,330.87<br>(60,283.01 to 106,531.29)  | 75,347.90<br>(51,984.81 to 109,524.01) | 5,523.28<br>(4,504.77 to 6,773.16) | 9,080.42<br>(6,511.92 to 12,439.83) | 10,447.96<br>(7,772.15 to 13,766.01) | 8,989.58<br>(6,065.96 to 13,053.01)  |
| Parkinson's disease                        | 9,542.62<br>(7,027.56 to 12,398.12)   | 14,361.83<br>(10,790.68 to 18,743.38)  | 16,569.55<br>(12,575.81 to 21,258.90)   | 12,602.59<br>(9,191.70 to 16,618.43)   | 821.96<br>(608.44 to 1,074.35)     | 1,397.50<br>(1,032.67 to 1,834.49)  | 1,666.65<br>(1,257.73 to 2,162.31)   | 1,192.51<br>(855.38 to 1,590.76)     |
| Epilepsy                                   | 3,931.68<br>(3,297.12 to 4,605.28)    | 3,278.42<br>(1,666.11 to 6,817.63)     | 2,930.83<br>(1,514.10 to 6,148.25)      | 4,031.27<br>(1,919.03 to 8,644.22)     | 106.97<br>(91.89 to 123.59)        | 110.42<br>(61.07 to 210.73)         | 102.82<br>(58.66 to 193.94)          | 131.83<br>(66.93 to 262.92)          |
| Multiple sclerosis                         | 2,556.78<br>(1,933.64 to 3,029.50)    | 2,149.18<br>(1,573.09 to 2,862.55)     | 2,126.02<br>(1,581.07 to 2,823.01)      | 2,160.60<br>(1,585.52 to 2,929.51)     | 86.59<br>(65.56 to 102.45)         | 81.89<br>(61.41 to 106.53)          | 83.23<br>(63.08 to 107.31)           | 80.62<br>(59.75 to 106.76)           |
| Motor neuron disease                       | 2,205.92<br>(1,936.01 to 2,492.64)    | 1,917.13<br>(1,606.85 to 2,293.77)     | 1,922.86<br>(1,589.74 to 2,327.48)      | 1,867.68<br>(1,567.76 to 2,206.93)     | 79.65<br>(70.41 to 90.11)          | 79.45<br>(68.27 to 92.69)           | 81.47<br>(69.22 to 94.88)            | 75.86<br>(65.21 to 89.07)            |
| Other neurological disorders               | 3,067.57<br>(2,535.09 to 3,530.01)    | 3,080.07<br>(2,620.20 to 3,591.07)     | 3,172.84<br>(2,684.32 to 3,704.98)      | 2,973.26<br>(2,528.20 to 3,463.31)     | 101.52<br>(88.19 to 114.62)        | 133.58<br>(117.29 to 151.47)        | 144.76<br>(126.79 to 164.58)         | 123.41<br>(108.22 to 140.21)         |
| Mental disorders                           | 17,100.84<br>(14,285.70 to 19,859.87) | 17,843.53<br>(13,723.41 to 23,865.40)  | 20,011.19<br>(15,400.09 to 27,016.31)   | 19,062.25<br>(14,686.60 to 25,071.74)  | 560.64<br>(473.87 to 645.70)       | 667.98<br>(549.35 to 813.50)        | 769.65<br>(630.87 to 939.46)         | 695.92<br>(573.23 to 850.40)         |
| Alcohol use disorders                      | 13,847.89<br>(11,498.40 to 16,208.37) | 13,005.48<br>(9,849.60 to 17,672.53)   | 13,920.43<br>(10,556.12 to 19,216.58)   | 14,656.40<br>(11,133.56 to 19,600.01)  | 462.71<br>(387.39 to 538.91)       | 482.76<br>(382.85 to 604.83)        | 525.86<br>(415.40 to 665.19)         | 533.98<br>(424.01 to 663.78)         |
| Drug use disorders                         | 3,227.20<br>(2,640.84 to 3,779.00)    | 4,824.84<br>(3,492.37 to 6,554.26)     | 6,076.07<br>(4,463.32 to 8,051.18)      | 4,393.09<br>(3,149.71 to 5,891.59)     | 97.43<br>(82.64 to 111.80)         | 184.96<br>(144.14 to 224.88)        | 243.49<br>(194.69 to 292.87)         | 161.68<br>(124.63 to 198.21)         |
| Opioid use disorders                       | 1,585.04<br>(1,168.33 to 1,948.97)    | 1,463.84<br>(1,046.99 to 2,219.90)     | 1,583.44<br>(1,130.13 to 2,472.63)      | 1,403.86<br>(1,002.47 to 2,118.73)     | 45.01<br>(32.40 to 54.55)          | 53.04<br>(37.16 to 67.65)           | 60.07<br>(41.64 to 77.50)            | 48.97<br>(34.31 to 62.38)            |

|                           |                                       |                                       |                                       |                                       |                              |                                |                                 |                                |
|---------------------------|---------------------------------------|---------------------------------------|---------------------------------------|---------------------------------------|------------------------------|--------------------------------|---------------------------------|--------------------------------|
|                           | 74.80<br>(17.19 to<br>99.83)          | 106.38<br>(39.03 to<br>161.83)        | 129.73<br>(47.61 to<br>199.55)        | 98.56<br>(33.15 to<br>148.66)         | 1.86<br>(0.45 to<br>2.48)    | 2.93<br>(1.11 to<br>4.27)      | 3.62<br>(1.36 to<br>5.35)       | 2.68<br>(0.96 to<br>3.94)      |
| Cocaine use disorders     |                                       |                                       |                                       |                                       |                              |                                |                                 |                                |
|                           | 200.19<br>(98.51 to<br>264.26)        | 496.22<br>(284.58 to<br>766.63)       | 673.33<br>(401.24 to<br>1,019.98)     | 445.52<br>(237.90 to<br>693.87)       | 4.13<br>(2.03 to<br>5.34)    | 11.28<br>(6.73 to<br>16.88)    | 15.55<br>(9.48 to<br>22.62)     | 10.01<br>(5.81 to<br>14.99)    |
| Amphetamine use disorders |                                       |                                       |                                       |                                       |                              |                                |                                 |                                |
|                           | 1,367.16<br>(1,058.50 to<br>1,686.25) | 2,758.42<br>(1,909.01 to<br>3,846.41) | 3,689.56<br>(2,601.06 to<br>5,022.30) | 2,445.16<br>(1,640.63 to<br>3,479.51) | 46.42<br>(37.45 to<br>57.72) | 117.70<br>(86.63 to<br>149.96) | 164.25<br>(125.49 to<br>207.13) | 100.02<br>(72.23 to<br>129.79) |
| Other drug use disorders  |                                       |                                       |                                       |                                       |                              |                                |                                 |                                |
|                           | 25.75<br>(19.74 to<br>32.72)          | 13.20<br>(8.42 to<br>21.91)           | 14.70<br>(9.21 to<br>24.04)           | 12.75<br>(8.02 to<br>20.31)           | 0.50<br>(0.39 to<br>0.65)    | 0.27<br>(0.17 to<br>0.44)      | 0.30<br>(0.18 to<br>0.48)       | 0.26<br>(0.16 to<br>0.42)      |
| Eating disorders          |                                       |                                       |                                       |                                       |                              |                                |                                 |                                |

| Hungary                                                    |                                              |                                               |                                              |                                               |                                           |                                           |                                           |                                           |
|------------------------------------------------------------|----------------------------------------------|-----------------------------------------------|----------------------------------------------|-----------------------------------------------|-------------------------------------------|-------------------------------------------|-------------------------------------------|-------------------------------------------|
| Cause                                                      | YLLs (actual counts)                         |                                               |                                              |                                               | Deaths (actual counts)                    |                                           |                                           |                                           |
|                                                            | 2016                                         | 2040 Forecast                                 | 2040 Better Scenario                         | 2040 Worse Scenario                           | 2016                                      | 2040 Forecast                             | 2040 Better Scenario                      | 2040 Worse Scenario                       |
| <b>Diabetes, urogenital, blood, and endocrine diseases</b> | <b>77,002.15</b><br>(68,503.21 to 85,382.34) | <b>72,520.60</b><br>(55,674.97 to 100,552.36) | <b>59,401.14</b><br>(45,532.15 to 84,418.25) | <b>80,481.39</b><br>(60,464.20 to 111,875.86) | <b>4,709.64</b><br>(4,249.85 to 5,202.23) | <b>5,647.73</b><br>(4,364.27 to 8,302.73) | <b>4,863.82</b><br>(3,733.62 to 7,330.22) | <b>5,976.42</b><br>(4,550.93 to 8,530.17) |
| Diabetes mellitus                                          | 38,847.06<br>(33,950.55 to 44,162.99)        | 29,995.94<br>(18,537.45 to 49,017.87)         | 22,472.81<br>(14,158.08 to 36,278.35)        | 35,418.62<br>(21,472.60 to 60,536.44)         | 2,359.54<br>(2,071.24 to 2,664.11)        | 2,189.84<br>(1,432.47 to 3,397.27)        | 1,745.19<br>(1,153.27 to 2,663.71)        | 2,445.14<br>(1,521.06 to 3,814.98)        |
| Acute glomerulonephritis                                   | 181.77<br>(152.85 to 213.85)                 | 174.64<br>(118.37 to 254.85)                  | 154.54<br>(102.73 to 227.67)                 | 176.49<br>(118.73 to 264.86)                  | 7.83<br>(6.51 to 9.24)                    | 9.05<br>(6.02 to 13.79)                   | 8.41<br>(5.54 to 12.79)                   | 8.78<br>(5.93 to 13.25)                   |
| Chronic kidney disease                                     | 21,762.17<br>(19,290.20 to 24,054.84)        | 25,272.33<br>(14,300.37 to 50,395.46)         | 20,372.61<br>(11,938.10 to 43,229.03)        | 28,354.44<br>(15,776.90 to 52,695.43)         | 1,501.53<br>(1,336.13 to 1,663.07)        | 2,272.15<br>(1,247.87 to 5,130.24)        | 1,938.87<br>(1,095.54 to 4,533.34)        | 2,432.57<br>(1,330.86 to 5,167.55)        |
| Chronic kidney disease due to diabetes mellitus            | 8,236.79<br>(7,054.66 to 9,435.71)           | 10,284.19<br>(5,704.23 to 19,767.49)          | 8,166.60<br>(4,643.26 to 16,006.36)          | 11,705.02<br>(6,377.40 to 21,935.86)          | 507.04<br>(433.25 to 591.57)              | 800.36<br>(431.27 to 1,824.78)            | 670.65<br>(365.11 to 1,623.46)            | 869.86<br>(471.62 to 1,877.91)            |
| Chronic kidney disease due to hypertension                 | 3,129.29<br>(2,524.44 to 3,811.19)           | 4,875.17<br>(2,593.97 to 10,549.30)           | 4,243.73<br>(2,278.54 to 9,976.64)           | 5,208.20<br>(2,734.62 to 10,798.61)           | 307.57<br>(246.31 to 379.37)              | 582.03<br>(306.05 to 1,241.52)            | 530.55<br>(285.72 to 1,241.52)            | 598.82<br>(313.09 to 1,360.59)            |
| Chronic kidney disease due to glomerulonephritis           | 3,605.17<br>(2,856.68 to 4,431.63)           | 3,034.19<br>(1,685.43 to 5,670.47)            | 2,323.52<br>(1,307.88 to 4,301.88)           | 3,481.44<br>(1,901.42 to 6,438.70)            | 222.10<br>(173.71 to 282.90)              | 250.50<br>(131.17 to 484.66)              | 201.42<br>(107.04 to 402.20)              | 275.93<br>(143.40 to 527.58)              |
| Chronic kidney disease due to other and unspecified causes | 6,790.92<br>(5,796.85 to 7,917.86)           | 7,078.78<br>(3,916.57 to 14,164.83)           | 5,638.75<br>(3,210.52 to 11,780.87)          | 7,959.77<br>(4,344.70 to 15,318.63)           | 464.81<br>(388.02 to 553.13)              | 639.26<br>(340.20 to 1,444.32)            | 536.25<br>(286.99 to 1,233.68)            | 687.96<br>(359.90 to 1,489.01)            |
| Urinary diseases and male infertility                      | 6,793.09<br>(6,035.02 to 7,590.71)           | 8,611.78<br>(7,088.80 to 10,314.14)           | 7,716.56<br>(6,339.20 to 9,254.76)           | 8,389.75<br>(6,797.36 to 10,222.53)           | 460.58<br>(409.67 to 514.83)              | 730.62<br>(591.90 to 880.51)              | 690.70<br>(559.53 to 833.09)              | 679.90<br>(534.60 to 840.71)              |
| Urinary tract infections                                   | 4,629.52<br>(3,942.33 to 5,606.49)           | 6,696.69<br>(5,342.66 to 8,120.68)            | 6,022.79<br>(4,853.74 to 7,449.25)           | 6,395.34<br>(5,025.00 to 7,944.99)            | 312.90<br>(268.90 to 375.41)              | 560.80<br>(443.89 to 701.79)              | 538.88<br>(429.22 to 667.23)              | 519.20<br>(400.49 to 654.91)              |
| Urolithiasis                                               | 1,119.12<br>(712.80 to 1,606.91)             | 1,136.73<br>(681.42 to 1,704.30)              | 954.19<br>(566.50 to 1,418.53)               | 1,145.98<br>(680.91 to 1,693.94)              | 76.20<br>(50.45 to 110.68)                | 91.14<br>(57.01 to 138.28)                | 80.55<br>(49.33 to 122.09)                | 88.08<br>(53.24 to 132.35)                |
| Other urinary diseases                                     | 1,044.45<br>(441.08 to 1,440.56)             | 868.37<br>(354.07 to 1,283.19)                | 739.59<br>(311.08 to 1,089.34)               | 848.43<br>(339.28 to 1,286.05)                | 71.47<br>(31.25 to 96.26)                 | 78.68<br>(30.88 to 117.17)                | 71.28<br>(29.63 to 106.46)                | 72.62<br>(26.90 to 111.13)                |
| Gynecological diseases                                     | 93.23<br>(67.76 to 170.68)                   | 48.86<br>(30.78 to 94.90)                     | 34.38<br>(21.00 to 65.15)                    | 53.85<br>(31.18 to 108.03)                    | 4.67<br>(3.52 to 7.28)                    | 3.34<br>(2.15 to 5.38)                    | 2.49<br>(1.58 to 4.09)                    | 3.50<br>(2.13 to 6.11)                    |
| Uterine fibroids                                           | 16.11<br>(10.72 to 37.04)                    | 14.16<br>(7.56 to 32.50)                      | 10.70<br>(5.59 to 25.38)                     | 15.37<br>(7.75 to 36.25)                      | 0.51<br>(0.35 to 1.20)                    | 0.65<br>(0.36 to 1.32)                    | 0.51<br>(0.28 to 1.04)                    | 0.68<br>(0.37 to 1.39)                    |
| Polycystic ovarian syndrome                                | 14.35<br>(7.52 to 34.66)                     | 2.43<br>(0.70 to 7.87)                        | 1.25<br>(0.33 to 3.93)                       | 3.09<br>(0.81 to 9.39)                        | 0.37<br>(0.19 to 0.87)                    | 0.06<br>(0.02 to 0.21)                    | 0.03<br>(0.01 to 0.10)                    | 0.08<br>(0.02 to 0.25)                    |
| Endometriosis                                              | 0.27<br>(0.12 to 0.67)                       | 0.21<br>(0.05 to 0.73)                        | 0.14<br>(0.03 to 0.49)                       | 0.24<br>(0.05 to 0.81)                        | 0.01<br>(0.00 to 0.02)                    | 0.01<br>(0.00 to 0.02)                    | 0.00<br>(0.00 to 0.01)                    | 0.01<br>(0.00 to 0.02)                    |
| Genital prolapse                                           | 3.02<br>(1.71 to 5.21)                       | 1.12<br>(0.53 to 2.24)                        | 0.79<br>(0.37 to 1.53)                       | 1.23<br>(0.55 to 2.56)                        | 0.19<br>(0.11 to 0.33)                    | 0.08<br>(0.04 to 0.16)                    | 0.06<br>(0.03 to 0.12)                    | 0.09<br>(0.04 to 0.18)                    |
| Other gynecological diseases                               | 59.48<br>(43.35 to 102.93)                   | 30.94<br>(19.20 to 56.34)                     | 21.52<br>(12.63 to 38.26)                    | 33.93<br>(19.13 to 64.03)                     | 3.59<br>(2.65 to 5.29)                    | 2.54<br>(1.47 to 4.08)                    | 1.88<br>(1.08 to 2.96)                    | 2.65<br>(1.51 to 4.53)                    |
| Hemoglobinopathies and hemolytic anemias                   | 1,506.11<br>(1,190.97 to 1,868.45)           | 804.69<br>(635.60 to 1,109.57)                | 677.44<br>(548.52 to 958.80)                 | 813.75<br>(644.79 to 1,110.80)                | 77.47<br>(63.94 to 108.84)                | 60.00<br>(47.12 to 88.74)                 | 53.95<br>(42.93 to 81.02)                 | 57.53<br>(44.42 to 83.47)                 |
| Thalassemias                                               | 74.59<br>(51.89 to 98.41)                    | 15.79<br>(10.25 to 23.19)                     | 14.56<br>(9.49 to 21.19)                     | 16.37<br>(10.58 to 24.08)                     | 0.95<br>(0.67 to 1.25)                    | 0.21<br>(0.14 to 0.30)                    | 0.19<br>(0.13 to 0.28)                    | 0.21<br>(0.14 to 0.31)                    |

|                                                   |                                       |                                       |                                       |                                       |                                 |                                 |                                 |                                 |
|---------------------------------------------------|---------------------------------------|---------------------------------------|---------------------------------------|---------------------------------------|---------------------------------|---------------------------------|---------------------------------|---------------------------------|
|                                                   | 158.55<br>(110.38 to<br>195.51)       | 63.73<br>(44.55 to<br>92.24)          | 49.98<br>(34.89 to<br>72.59)          | 68.93<br>(47.50 to<br>100.07)         | 3.51<br>(2.45 to<br>4.34)       | 1.70<br>(1.21 to<br>2.43)       | 1.35<br>(0.96 to<br>1.94)       | 1.82<br>(1.28 to<br>2.60)       |
| Sickle cell disorders                             |                                       |                                       |                                       |                                       |                                 |                                 |                                 |                                 |
|                                                   | 304.84<br>(223.75 to<br>383.49)       | 177.04<br>(127.27 to<br>243.36)       | 133.85<br>(96.47 to<br>180.05)        | 189.99<br>(136.77 to<br>258.15)       | 8.88<br>(6.62 to<br>11.30)      | 7.09<br>(5.15 to<br>9.67)       | 5.52<br>(4.04 to<br>7.49)       | 7.40<br>(5.30 to<br>10.03)      |
| G6PD deficiency                                   |                                       |                                       |                                       |                                       |                                 |                                 |                                 |                                 |
|                                                   | 968.12<br>(774.34 to<br>1,313.05)     | 548.14<br>(434.97 to<br>789.39)       | 479.05<br>(384.14 to<br>704.60)       | 538.46<br>(421.33 to<br>779.98)       | 64.13<br>(53.20 to<br>95.15)    | 51.00<br>(39.56 to<br>78.71)    | 46.90<br>(36.86 to<br>72.53)    | 48.10<br>(36.49 to<br>72.80)    |
| Other hemoglobinopathies and hemolytic anemias    |                                       |                                       |                                       |                                       |                                 |                                 |                                 |                                 |
|                                                   | 7,818.74<br>(3,987.66 to<br>9,221.11) | 7,612.35<br>(4,173.07 to<br>8,976.90) | 7,972.80<br>(4,531.17 to<br>9,384.15) | 7,274.48<br>(3,918.49 to<br>8,634.86) | 298.03<br>(149.04 to<br>351.25) | 382.73<br>(191.75 to<br>456.21) | 424.21<br>(214.39 to<br>504.84) | 349.00<br>(174.63 to<br>418.71) |
| Endocrine, metabolic, blood, and immune disorders |                                       |                                       |                                       |                                       |                                 |                                 |                                 |                                 |



| Hungary                                       |                                              |                                             |                                            |                                             |                                     |                                     |                                     |                                     |
|-----------------------------------------------|----------------------------------------------|---------------------------------------------|--------------------------------------------|---------------------------------------------|-------------------------------------|-------------------------------------|-------------------------------------|-------------------------------------|
| Cause                                         | YLLs (actual counts)                         |                                             |                                            |                                             | Deaths (actual counts)              |                                     |                                     |                                     |
|                                               | 2016                                         | 2040 Forecast                               | 2040 Better Scenario                       | 2040 Worse Scenario                         | 2016                                | 2040 Forecast                       | 2040 Better Scenario                | 2040 Worse Scenario                 |
| <b>Musculoskeletal disorders</b>              | <b>4,666.22</b><br>(3,869.52 to 5,431.19)    | <b>4,761.73</b><br>(3,917.95 to 5,719.60)   | <b>4,332.45</b><br>(3,603.53 to 5,223.35)  | <b>4,783.02</b><br>(3,871.81 to 5,889.90)   | <b>244.28</b><br>(189.82 to 281.93) | <b>319.13</b><br>(230.12 to 389.29) | <b>305.76</b><br>(217.96 to 372.05) | <b>307.14</b><br>(224.02 to 383.02) |
| Rheumatoid arthritis                          | 999.33<br>(747.95 to 1,475.00)               | 1,001.68<br>(634.81 to 1,526.13)            | 710.92<br>(457.37 to 1,134.26)             | 1,101.62<br>(677.86 to 1,754.11)            | 56.31<br>(42.55 to 91.62)           | 67.45<br>(43.18 to 112.01)          | 50.05<br>(32.27 to 88.74)           | 71.59<br>(44.70 to 119.69)          |
| Other musculoskeletal disorders               | 3,666.89<br>(2,931.59 to 4,308.39)           | 3,760.05<br>(2,996.79 to 4,470.15)          | 3,621.53<br>(2,930.81 to 4,350.93)         | 3,681.40<br>(2,938.66 to 4,502.25)          | 187.96<br>(136.68 to 219.93)        | 251.68<br>(170.57 to 310.59)        | 255.70<br>(172.07 to 312.33)        | 235.56<br>(158.71 to 293.30)        |
| <b>Other non-communicable diseases</b>        | <b>21,069.69</b><br>(16,801.73 to 27,294.09) | <b>10,433.98</b><br>(7,387.42 to 14,575.07) | <b>8,321.65</b><br>(6,006.37 to 11,262.50) | <b>11,368.16</b><br>(8,103.70 to 16,060.31) | <b>375.67</b><br>(288.67 to 454.80) | <b>317.19</b><br>(194.28 to 422.84) | <b>290.71</b><br>(169.15 to 382.92) | <b>316.76</b><br>(197.22 to 417.04) |
| Congenital birth defects                      | 17,820.36<br>(13,827.76 to 24,320.41)        | 7,130.22<br>(4,569.08 to 11,114.42)         | 5,263.10<br>(3,440.69 to 8,169.55)         | 8,086.99<br>(5,177.72 to 12,784.24)         | 253.40<br>(203.45 to 324.75)        | 111.74<br>(74.69 to 164.10)         | 86.20<br>(59.12 to 126.90)          | 124.40<br>(83.60 to 191.13)         |
| Neural tube defects                           | 255.85<br>(145.83 to 373.30)                 | 39.74<br>(18.92 to 74.46)                   | 23.90<br>(11.32 to 45.30)                  | 48.22<br>(22.66 to 92.39)                   | 3.23<br>(1.88 to 4.63)              | 0.56<br>(0.29 to 0.99)              | 0.34<br>(0.18 to 0.62)              | 0.67<br>(0.34 to 1.23)              |
| Congenital heart anomalies                    | 7,849.01<br>(5,961.77 to 10,725.54)          | 2,242.13<br>(1,260.46 to 3,860.49)          | 1,318.68<br>(729.39 to 2,347.09)           | 2,731.93<br>(1,487.04 to 4,841.23)          | 111.46<br>(87.82 to 143.96)         | 33.59<br>(19.83 to 54.36)           | 20.07<br>(11.50 to 33.66)           | 40.57<br>(23.59 to 66.74)           |
| Orofacial clefts                              | 5.08<br>(2.13 to 16.02)                      | 1.78<br>(0.51 to 6.06)                      | 0.90<br>(0.24 to 2.86)                     | 2.29<br>(0.62 to 7.76)                      | 0.06<br>(0.02 to 0.19)              | 0.02<br>(0.01 to 0.07)              | 0.01<br>(0.00 to 0.03)              | 0.03<br>(0.01 to 0.09)              |
| Down syndrome                                 | 2,620.61<br>(1,916.20 to 3,743.96)           | 1,863.23<br>(1,265.28 to 2,901.09)          | 1,852.81<br>(1,259.76 to 2,820.77)         | 1,866.55<br>(1,258.92 to 2,891.26)          | 45.35<br>(33.76 to 64.67)           | 36.16<br>(25.02 to 57.86)           | 36.67<br>(25.43 to 57.05)           | 35.79<br>(24.89 to 57.52)           |
| Other chromosomal abnormalities               | 1,385.56<br>(801.13 to 2,240.55)             | 877.00<br>(491.08 to 1,497.06)              | 694.60<br>(381.77 to 1,197.05)             | 959.42<br>(525.35 to 1,645.72)              | 18.24<br>(10.28 to 27.95)           | 12.07<br>(6.72 to 20.14)            | 9.69<br>(5.32 to 16.05)             | 13.12<br>(7.26 to 22.03)            |
| Congenital musculoskeletal and limb anomalies | 350.37<br>(189.15 to 959.51)                 | 153.95<br>(77.45 to 423.45)                 | 100.59<br>(47.70 to 286.57)                | 180.91<br>(85.96 to 481.01)                 | 4.73<br>(2.84 to 11.70)             | 2.26<br>(1.24 to 5.29)              | 1.50<br>(0.78 to 3.56)              | 2.63<br>(1.35 to 5.92)              |
| Urogenital congenital anomalies               | 312.70<br>(161.08 to 476.21)                 | 112.27<br>(55.02 to 211.25)                 | 78.32<br>(38.44 to 150.94)                 | 128.48<br>(61.59 to 251.85)                 | 4.67<br>(2.43 to 6.75)              | 1.90<br>(1.03 to 3.30)              | 1.36<br>(0.72 to 2.38)              | 2.14<br>(1.11 to 3.87)              |
| Digestive congenital anomalies                | 1,055.74<br>(576.83 to 2,358.20)             | 394.97<br>(165.29 to 969.48)                | 241.99<br>(97.16 to 603.43)                | 477.55<br>(188.68 to 1,157.46)              | 13.17<br>(7.51 to 28.29)            | 5.10<br>(2.36 to 11.65)             | 3.16<br>(1.38 to 7.33)              | 6.13<br>(2.64 to 13.94)             |
| Other congenital birth defects                | 3,985.45<br>(2,983.20 to 5,816.04)           | 1,445.14<br>(846.48 to 2,482.62)            | 951.30<br>(539.34 to 1,669.64)             | 1,691.64<br>(970.96 to 2,941.38)            | 52.49<br>(40.80 to 72.73)           | 20.07<br>(12.22 to 32.79)           | 13.39<br>(8.01 to 21.95)            | 23.32<br>(14.06 to 39.02)           |
| Skin and subcutaneous diseases                | 1,886.94<br>(712.21 to 2,502.97)             | 2,859.00<br>(1,137.84 to 3,933.38)          | 2,718.91<br>(1,091.72 to 3,748.02)         | 2,780.90<br>(1,096.86 to 3,776.42)          | 106.45<br>(38.48 to 142.04)         | 200.29<br>(73.66 to 283.64)         | 200.57<br>(283.64 to 283.95)        | 186.56<br>(68.13 to 266.61)         |
| Cellulitis                                    | 178.85<br>(102.17 to 444.39)                 | 436.29<br>(228.38 to 1,119.76)              | 432.02<br>(227.24 to 1,110.71)             | 419.38<br>(221.14 to 1,090.39)              | 8.62<br>(4.73 to 21.94)             | 26.03<br>(13.89 to 67.96)           | 27.01<br>(14.43 to 68.60)           | 24.03<br>(12.69 to 62.06)           |
| Pyoderma                                      | 1,194.93<br>(311.51 to 1,776.22)             | 2,038.27<br>(520.78 to 3,149.52)            | 1,939.66<br>(495.98 to 3,006.17)           | 1,984.13<br>(506.81 to 3,040.08)            | 63.97<br>(15.06 to 97.38)           | 141.27<br>(35.21 to 223.57)         | 142.30<br>(35.54 to 226.09)         | 131.56<br>(32.36 to 207.80)         |
| Decubitus ulcer                               | 333.81<br>(136.66 to 543.85)                 | 219.10<br>(91.43 to 394.25)                 | 192.27<br>(74.93 to 347.16)                | 215.84<br>(87.23 to 392.58)                 | 24.45<br>(9.55 to 39.95)            | 21.67<br>(7.97 to 39.27)            | 19.97<br>(7.30 to 36.86)            | 20.48<br>(7.24 to 36.95)            |
| Other skin and subcutaneous diseases          | 179.35<br>(81.68 to 283.62)                  | 165.34<br>(77.29 to 284.75)                 | 154.95<br>(72.42 to 263.35)                | 161.55<br>(76.66 to 271.85)                 | 9.41<br>(4.05 to 14.93)             | 11.32<br>(4.95 to 19.27)            | 11.29<br>(4.76 to 19.01)            | 10.49<br>(4.54 to 17.75)            |
| Sudden infant death syndrome                  | 1,362.39<br>(847.52 to 1,996.92)             | 444.76<br>(230.89 to 774.47)                | 339.65<br>(175.13 to 593.24)               | 500.27<br>(257.01 to 880.96)                | 15.81<br>(9.84 to 23.18)            | 5.16<br>(2.68 to 8.99)              | 3.94<br>(2.03 to 6.88)              | 5.80<br>(2.98 to 10.22)             |

|                          |                                             |                                            |                                            |                                            |                                       |                                       |                                       |                                       |
|--------------------------|---------------------------------------------|--------------------------------------------|--------------------------------------------|--------------------------------------------|---------------------------------------|---------------------------------------|---------------------------------------|---------------------------------------|
| Injuries                 | 179,596.45<br>(155,546.65 to<br>208,156.04) | 122,092.72<br>(79,315.38 to<br>212,243.50) | 100,631.22<br>(68,114.34 to<br>174,855.22) | 148,115.44<br>(89,672.94 to<br>283,507.74) | 6,557.07<br>(5,734.84 to<br>7,334.94) | 6,147.90<br>(4,681.85 to<br>8,377.75) | 5,553.35<br>(4,330.08 to<br>7,360.74) | 6,650.27<br>(4,792.15 to<br>9,907.99) |
| Transport injuries       | 34,310.67<br>(29,390.83 to<br>39,539.95)    | 16,824.61<br>(8,345.56 to<br>31,732.46)    | 8,555.96<br>(4,324.92 to<br>16,016.22)     | 29,434.85<br>(13,160.79 to<br>59,354.47)   | 943.69<br>(824.21 to<br>1,072.18)     | 559.33<br>(303.57 to<br>961.88)       | 322.93<br>(178.94 to<br>560.03)       | 891.10<br>(441.60 to<br>1,670.71)     |
| Road injuries            | 31,612.66<br>(27,073.94 to<br>36,333.19)    | 15,173.87<br>(7,604.27 to<br>28,340.12)    | 7,367.32<br>(3,790.58 to<br>13,586.36)     | 27,346.07<br>(12,364.47 to<br>53,824.39)   | 870.05<br>(758.03 to<br>987.67)       | 506.01<br>(280.16 to<br>872.83)       | 283.26<br>(161.01 to<br>481.56)       | 825.84<br>(413.75 to<br>1,527.14)     |
| Pedestrian road injuries | 6,876.94<br>(5,489.92 to<br>9,068.15)       | 2,392.41<br>(1,218.25 to<br>5,244.83)      | 984.93<br>(535.94 to<br>2,141.02)          | 4,226.51<br>(1,973.07 to<br>9,938.63)      | 239.82<br>(196.09 to<br>310.66)       | 109.42<br>(61.82 to<br>213.07)        | 51.13<br>(30.77 to<br>97.40)          | 176.57<br>(93.52 to<br>363.59)        |

| Hungary                                         |                                                               |                                                               |                                                               |                                                               |                                                            |                                                            |                                                            |                                                            |
|-------------------------------------------------|---------------------------------------------------------------|---------------------------------------------------------------|---------------------------------------------------------------|---------------------------------------------------------------|------------------------------------------------------------|------------------------------------------------------------|------------------------------------------------------------|------------------------------------------------------------|
| Cause                                           | YLLs (actual counts)                                          |                                                               |                                                               |                                                               | Deaths (actual counts)                                     |                                                            |                                                            |                                                            |
|                                                 | 2016                                                          | 2040 Forecast                                                 | 2040 Better Scenario                                          | 2040 Worse Scenario                                           | 2016                                                       | 2040 Forecast                                              | 2040 Better Scenario                                       | 2040 Worse Scenario                                        |
| Cyclist road injuries                           | 4,014.09<br>(3,113.69 to<br>4,815.81)                         | 3,001.74<br>(1,476.45 to<br>5,575.14)                         | 1,870.68<br>(954.81 to<br>3,376.85)                           | 4,660.59<br>(2,074.50 to<br>9,355.99)                         | 135.85<br>(102.26 to<br>162.81)                            | 124.48<br>(66.85 to<br>207.78)                             | 88.96<br>(48.23 to<br>147.04)                              | 175.60<br>(85.63 to<br>313.12)                             |
| Motorcyclist road injuries                      | 3,793.69<br>(2,630.50 to<br>4,694.57)                         | 2,274.60<br>(941.80 to<br>4,976.56)                           | 1,526.54<br>(671.40 to<br>3,238.86)                           | 3,428.60<br>(1,274.14 to<br>7,839.23)                         | 87.01<br>(62.54 to<br>106.78)                              | 61.12<br>(28.78 to<br>122.60)                              | 46.42<br>(23.11 to<br>92.93)                               | 84.82<br>(35.88 to<br>185.03)                              |
| Motor vehicle road injuries                     | 16,683.20<br>(12,942.13 to<br>19,485.94)                      | 7,348.46<br>(3,753.41 to<br>13,676.33)                        | 2,909.39<br>(1,545.65 to<br>5,412.44)                         | 14,752.56<br>(6,824.83 to<br>29,072.29)                       | 399.25<br>(322.28 to<br>465.97)                            | 204.80<br>(114.27 to<br>361.82)                            | 93.34<br>(55.22 to<br>163.05)                              | 378.78<br>(188.28 to<br>712.07)                            |
| Other road injuries                             | 244.74<br>(136.24 to<br>333.72)                               | 156.66<br>(73.56 to<br>288.39)                                | 75.78<br>(36.71 to<br>136.02)                                 | 277.81<br>(115.33 to<br>536.73)                               | 8.12<br>(3.99 to<br>11.22)                                 | 6.18<br>(3.03 to<br>10.71)                                 | 3.41<br>(1.74 to<br>5.83)                                  | 10.06<br>(4.55 to<br>18.24)                                |
| Other transport injuries                        | 2,698.02<br>(2,233.71 to<br>3,277.07)                         | 1,650.74<br>(689.01 to<br>3,530.66)                           | 1,188.65<br>(512.13 to<br>2,572.64)                           | 2,088.77<br>(812.79 to<br>4,915.24)                           | 73.64<br>(61.57 to<br>88.01)                               | 53.32<br>(24.55 to<br>109.66)                              | 39.67<br>(18.41 to<br>82.71)                               | 65.26<br>(28.05 to<br>143.59)                              |
| <b>Unintentional injuries</b>                   | <b>58,374.20</b><br><b>(47,572.28 to</b><br><b>65,868.01)</b> | <b>49,385.87</b><br><b>(40,213.01 to</b><br><b>59,500.63)</b> | <b>44,686.53</b><br><b>(36,460.98 to</b><br><b>53,543.19)</b> | <b>49,222.16</b><br><b>(40,240.60 to</b><br><b>60,298.95)</b> | <b>2,954.84</b><br><b>(2,146.86 to</b><br><b>3,378.40)</b> | <b>3,551.39</b><br><b>(2,509.20 to</b><br><b>4,375.04)</b> | <b>3,427.33</b><br><b>(2,409.45 to</b><br><b>4,192.91)</b> | <b>3,331.20</b><br><b>(2,355.41 to</b><br><b>4,157.68)</b> |
| Falls                                           | 28,949.84<br>(23,256.12 to<br>32,821.66)                      | 32,842.77<br>(25,467.78 to<br>39,475.73)                      | 30,718.31<br>(23,614.27 to<br>36,923.89)                      | 31,632.48<br>(24,153.75 to<br>37,821.01)                      | 1,958.92<br>(1,304.70 to<br>2,278.04)                      | 2,846.81<br>(1,799.85 to<br>3,618.24)                      | 2,797.57<br>(1,776.27 to<br>3,512.54)                      | 2,617.69<br>(1,594.49 to<br>3,404.29)                      |
| Drowning                                        | 5,506.80<br>(4,684.79 to<br>6,324.13)                         | 2,677.19<br>(1,285.32 to<br>5,425.23)                         | 2,198.34<br>(1,062.51 to<br>4,543.68)                         | 3,054.81<br>(1,389.60 to<br>6,665.92)                         | 138.98<br>(120.57 to<br>156.57)                            | 80.63<br>(41.92 to<br>158.62)                              | 68.60<br>(36.62 to<br>134.15)                              | 89.17<br>(44.31 to<br>183.82)                              |
| Fire, heat, and hot substances                  | 3,291.52<br>(2,439.10 to<br>3,890.61)                         | 1,786.36<br>(1,014.03 to<br>3,083.10)                         | 1,401.57<br>(808.63 to<br>2,353.00)                           | 2,010.51<br>(1,097.70 to<br>3,597.48)                         | 139.41<br>(103.74 to<br>162.69)                            | 95.65<br>(59.50 to<br>143.94)                              | 79.97<br>(49.99 to<br>119.31)                              | 101.47<br>(60.63 to<br>158.43)                             |
| Poisonings                                      | 892.03<br>(705.15 to<br>1,528.18)                             | 598.52<br>(129.67 to<br>891.31)                               | 213.45<br>(94.63 to<br>631.52)                                | 353.66<br>(145.62 to<br>1,109.65)                             | 29.13<br>(23.23 to<br>49.28)                               | 12.65<br>(6.14 to<br>33.39)                                | 9.65<br>(4.86 to<br>25.68)                                 | 14.14<br>(6.55 to<br>39.09)                                |
| Exposure to mechanical forces                   | 2,875.71<br>(1,828.67 to<br>3,415.11)                         | 1,325.30<br>(946.44 to<br>1,812.74)                           | 1,052.47<br>(748.08 to<br>1,474.50)                           | 1,414.75<br>(1,014.93 to<br>2,003.53)                         | 84.49<br>(55.67 to<br>98.48)                               | 50.34<br>(37.34 to<br>63.84)                               | 42.73<br>(31.99 to<br>53.90)                               | 51.17<br>(38.41 to<br>65.02)                               |
| Unintentional firearm injuries                  | 216.56<br>(148.91 to<br>265.68)                               | 108.85<br>(79.15 to<br>136.79)                                | 95.96<br>(69.60 to<br>119.78)                                 | 111.19<br>(82.03 to<br>141.47)                                | 7.91<br>(4.79 to<br>9.40)                                  | 5.97<br>(3.59 to<br>7.42)                                  | 5.80<br>(3.40 to<br>7.20)                                  | 5.70<br>(3.35 to<br>7.05)                                  |
| Unintentional suffocation                       | 119.86<br>(74.00 to<br>163.52)                                | 56.79<br>(37.02 to<br>84.94)                                  | 45.95<br>(30.17 to<br>69.05)                                  | 61.46<br>(39.83 to<br>91.93)                                  | 2.20<br>(1.55 to<br>2.78)                                  | 1.21<br>(0.90 to<br>1.62)                                  | 1.03<br>(0.77 to<br>1.37)                                  | 1.27<br>(0.93 to<br>1.71)                                  |
| Other exposure to mechanical forces             | 2,539.29<br>(1,579.92 to<br>3,030.85)                         | 1,159.66<br>(821.29 to<br>1,634.88)                           | 910.56<br>(629.63 to<br>1,290.59)                             | 1,242.11<br>(870.73 to<br>1,815.16)                           | 74.38<br>(49.93 to<br>86.97)                               | 43.16<br>(32.21 to<br>55.47)                               | 35.90<br>(26.90 to<br>46.53)                               | 44.20<br>(32.68 to<br>57.74)                               |
| Adverse effects of medical treatment            | 2,311.39<br>(1,656.26 to<br>2,744.35)                         | 1,803.56<br>(1,337.10 to<br>2,203.97)                         | 1,666.26<br>(1,213.20 to<br>2,072.24)                         | 1,787.61<br>(1,301.46 to<br>2,211.15)                         | 117.59<br>(78.94 to<br>141.99)                             | 110.74<br>(76.98 to<br>133.70)                             | 107.58<br>(74.33 to<br>130.80)                             | 105.07<br>(70.96 to<br>129.19)                             |
| Animal contact                                  | 532.14<br>(337.42 to<br>661.80)                               | 360.53<br>(243.42 to<br>483.10)                               | 304.80<br>(206.90 to<br>411.18)                               | 323.06<br>(248.59 to<br>512.53)                               | 19.56<br>(12.51 to<br>23.50)                               | 16.28<br>(11.01 to<br>21.17)                               | 14.43<br>(9.92 to<br>18.57)                                | 16.16<br>(10.71 to<br>21.03)                               |
| Venomous animal contact                         | 207.52<br>(89.89 to<br>280.91)                                | 118.80<br>(53.02 to<br>174.18)                                | 104.63<br>(46.50 to<br>152.89)                                | 122.47<br>(54.64 to<br>181.43)                                | 6.34<br>(2.55 to<br>8.59)                                  | 4.18<br>(1.77 to<br>6.06)                                  | 3.80<br>(1.64 to<br>5.52)                                  | 4.19<br>(1.74 to<br>6.11)                                  |
| Non-venomous animal contact                     | 324.61<br>(229.77 to<br>433.78)                               | 241.73<br>(174.66 to<br>357.49)                               | 200.17<br>(144.58 to<br>302.39)                               | 250.60<br>(177.45 to<br>371.67)                               | 13.22<br>(9.30 to<br>17.05)                                | 12.10<br>(8.57 to<br>16.77)                                | 10.63<br>(7.68 to<br>14.50)                                | 11.97<br>(8.45 to<br>16.13)                                |
| Foreign body                                    | 7,425.04<br>(6,086.61 to<br>9,445.20)                         | 4,904.45<br>(3,877.26 to<br>6,667.33)                         | 4,589.31<br>(3,591.27 to<br>6,165.55)                         | 4,919.57<br>(3,888.54 to<br>6,675.11)                         | 246.14<br>(192.67 to<br>297.00)                            | 202.49<br>(163.23 to<br>247.88)                            | 200.39<br>(162.38 to<br>246.36)                            | 194.19<br>(155.63 to<br>237.20)                            |
| Pulmonary aspiration and foreign body in airway | 7,322.63<br>(5,991.09 to<br>9,358.22)                         | 4,822.58<br>(3,800.37 to<br>6,593.83)                         | 4,500.74<br>(3,521.47 to<br>6,079.33)                         | 4,841.89<br>(3,814.94 to<br>6,604.18)                         | 242.46<br>(190.28 to<br>292.97)                            | 198.57<br>(159.87 to<br>244.29)                            | 195.89<br>(158.39 to<br>241.69)                            | 190.66<br>(152.72 to<br>233.54)                            |

|                                             |                                                                |                                                                |                                                                |                                                                |                                                            |                                                            |                                                          |                                                            |
|---------------------------------------------|----------------------------------------------------------------|----------------------------------------------------------------|----------------------------------------------------------------|----------------------------------------------------------------|------------------------------------------------------------|------------------------------------------------------------|----------------------------------------------------------|------------------------------------------------------------|
|                                             | 102.41<br>(67.55 to<br>125.10)                                 | 81.87<br>(54.92 to<br>103.80)                                  | 88.57<br>(59.88 to<br>112.73)                                  | 77.68<br>(51.85 to<br>98.53)                                   | 3.68<br>(2.03 to<br>4.68)                                  | 3.92<br>(2.15 to<br>5.07)                                  | 4.50<br>(2.49 to<br>5.76)                                | 3.53<br>(1.90 to<br>4.59)                                  |
| Foreign body in other body part             |                                                                |                                                                |                                                                |                                                                |                                                            |                                                            |                                                          |                                                            |
|                                             | 4,790.26<br>(2,122.87 to<br>6,358.00)                          | 2,968.54<br>(1,395.84 to<br>4,254.28)                          | 2,289.96<br>(1,066.25 to<br>3,242.08)                          | 3,179.27<br>(1,486.07 to<br>4,524.34)                          | 175.28<br>(78.61 to<br>229.63)                             | 123.40<br>(57.25 to<br>168.95)                             | 98.67<br>(46.06 to<br>135.26)                            | 127.89<br>(58.30 to<br>177.93)                             |
| Environmental heat and cold exposure        |                                                                |                                                                |                                                                |                                                                |                                                            |                                                            |                                                          |                                                            |
|                                             | 1,799.47<br>(1,471.59 to<br>2,154.17)                          | 418.65<br>(249.11 to<br>672.20)                                | 252.07<br>(151.10 to<br>402.06)                                | 496.44<br>(283.93 to<br>843.18)                                | 45.34<br>(38.07 to<br>53.67)                               | 12.40<br>(8.04 to<br>18.72)                                | 7.74<br>(5.11 to<br>11.48)                               | 14.25<br>(8.84 to<br>22.74)                                |
| Other unintentional injuries                |                                                                |                                                                |                                                                |                                                                |                                                            |                                                            |                                                          |                                                            |
| <b>Self-harm and interpersonal violence</b> | <b>86,866.72</b><br><b>(71,581.64 to</b><br><b>118,359.96)</b> | <b>55,706.74</b><br><b>(28,291.45 to</b><br><b>131,751.22)</b> | <b>47,212.97</b><br><b>(24,315.26 to</b><br><b>109,895.57)</b> | <b>69,284.11</b><br><b>(32,681.51 to</b><br><b>164,595.33)</b> | <b>2,657.55</b><br><b>(2,222.29 to</b><br><b>3,595.72)</b> | <b>2,032.93</b><br><b>(1,112.89 to</b><br><b>4,222.96)</b> | <b>1,798.73</b><br><b>(999.26 to</b><br><b>3,774.62)</b> | <b>2,423.85</b><br><b>(1,253.11 to</b><br><b>5,296.07)</b> |

| Hungary                                                                             |                                         |                                            |                                            |                                            |                                      |                                       |                                       |                                       |
|-------------------------------------------------------------------------------------|-----------------------------------------|--------------------------------------------|--------------------------------------------|--------------------------------------------|--------------------------------------|---------------------------------------|---------------------------------------|---------------------------------------|
| Cause                                                                               | YLLs (actual counts)                    |                                            |                                            |                                            | Deaths (actual counts)               |                                       |                                       |                                       |
|                                                                                     | 2016                                    | 2040 Forecast                              | 2040 Better Scenario                       | 2040 Worse Scenario                        | 2016                                 | 2040 Forecast                         | 2040 Better Scenario                  | 2040 Worse Scenario                   |
| Self-harm                                                                           | 79,650.83<br>(65,370.10 to 109,645.50)  | 52,488.23<br>(26,544.48 to 127,341.26)     | 44,530.09<br>(22,853.45 to 104,199.97)     | 65,609.93<br>(30,698.48 to 159,567.40)     | 2,459.90<br>(2,035.39 to 3,337.57)   | 1,925.97<br>(1,050.67 to 4,081.27)    | 1,706.10<br>(942.36 to 3,587.31)      | 2,305.28<br>(1,182.65 to 5,128.53)    |
| Self-harm by firearm                                                                | 2,373.69<br>(1,390.38 to 3,606.12)      | 974.27<br>(447.21 to 2,398.52)             | 755.76<br>(352.27 to 1,771.52)             | 1,268.99<br>(554.59 to 3,197.83)           | 70.74<br>(41.67 to 103.73)           | 33.24<br>(17.02 to 75.73)             | 26.87<br>(13.90 to 57.22)             | 41.56<br>(20.30 to 93.99)             |
| Self-harm by other specified means                                                  | 77,277.14<br>(63,369.45 to 105,022.09)  | 51,513.96<br>(26,024.56 to 120,312.29)     | 43,774.33<br>(22,452.97 to 103,161.63)     | 64,340.94<br>(30,129.25 to 154,899.85)     | 2,389.15<br>(1,980.43 to 3,241.87)   | 1,892.73<br>(1,029.39 to 4,007.64)    | 1,679.22<br>(927.16 to 3,530.32)      | 2,263.71<br>(1,163.66 to 5,015.92)    |
| Interpersonal violence                                                              | 7,215.89<br>(5,437.22 to 12,239.55)     | 3,218.51<br>(1,679.72 to 7,714.14)         | 2,682.88<br>(1,392.00 to 6,366.69)         | 3,674.18<br>(1,808.03 to 9,315.74)         | 197.65<br>(150.82 to 330.59)         | 106.96<br>(60.04 to 240.33)           | 92.63<br>(52.97 to 208.90)            | 118.57<br>(64.19 to 284.30)           |
| Physical violence by firearm                                                        | 505.25<br>(323.53 to 977.59)            | 173.83<br>(104.11 to 367.01)               | 136.30<br>(81.23 to 284.51)                | 189.33<br>(111.05 to 412.36)               | 11.85<br>(7.65 to 22.67)             | 4.69<br>(2.89 to 9.36)                | 3.77<br>(2.35 to 7.60)                | 5.03<br>(3.11 to 10.20)               |
| Physical violence by sharp object                                                   | 2,263.34<br>(1,577.29 to 4,271.33)      | 918.69<br>(548.63 to 1,968.48)             | 739.27<br>(452.26 to 1,533.44)             | 987.41<br>(574.72 to 2,116.06)             | 60.06<br>(42.06 to 113.21)           | 28.97<br>(18.86 to 56.83)             | 24.11<br>(15.80 to 46.47)             | 30.33<br>(19.56 to 60.27)             |
| Physical violence by other means                                                    | 4,447.30<br>(3,251.44 to 7,943.23)      | 2,125.99<br>(940.50 to 5,706.61)           | 1,807.31<br>(798.64 to 4,920.19)           | 2,497.44<br>(1,036.97 to 6,970.20)         | 125.75<br>(91.54 to 220.91)          | 73.30<br>(35.70 to 183.89)            | 64.75<br>(32.48 to 163.81)            | 83.20<br>(38.37 to 217.52)            |
| <b>Forces of nature, conflict and terrorism, and executions and police conflict</b> | <b>44.87</b><br><b>(39.04 to 50.02)</b> | <b>175.51</b><br><b>(0.00 to 2,828.27)</b> | <b>175.76</b><br><b>(0.00 to 2,839.34)</b> | <b>174.32</b><br><b>(0.00 to 2,801.33)</b> | <b>0.99</b><br><b>(0.88 to 1.09)</b> | <b>4.24</b><br><b>(0.00 to 78.37)</b> | <b>4.36</b><br><b>(0.00 to 81.29)</b> | <b>4.13</b><br><b>(0.00 to 75.56)</b> |
| Exposure to forces of nature                                                        | 0.00<br>(0.00 to 0.00)                  | 65.29<br>(0.00 to 785.86)                  | 65.48<br>(0.00 to 791.33)                  | 64.72<br>(0.00 to 777.53)                  | 0.00<br>(0.00 to 0.00)               | 1.81<br>(0.00 to 21.69)               | 1.87<br>(0.00 to 22.60)               | 1.75<br>(0.00 to 20.95)               |
| Conflict and terrorism                                                              | 0.00<br>(0.00 to 0.00)                  | 110.21<br>(0.00 to 53.02)                  | 110.28<br>(0.00 to 52.76)                  | 109.60<br>(0.00 to 53.03)                  | 0.00<br>(0.00 to 0.00)               | 2.43<br>(0.00 to 1.14)                | 2.48<br>(0.00 to 1.15)                | 2.37<br>(0.00 to 1.13)                |
| Executions and police conflict                                                      | 44.87<br>(39.04 to 50.02)               | 0.00<br>(0.00 to 0.00)                     | 0.00<br>(0.00 to 0.00)                     | 0.00<br>(0.00 to 0.00)                     | 0.99<br>(0.88 to 1.09)               | 0.00<br>(0.00 to 0.00)                | 0.00<br>(0.00 to 0.00)                | 0.00<br>(0.00 to 0.00)                |

| Macedonia                                                         |                                          |                                          |                                          |                                          |                                       |                                       |                                       |                                       |
|-------------------------------------------------------------------|------------------------------------------|------------------------------------------|------------------------------------------|------------------------------------------|---------------------------------------|---------------------------------------|---------------------------------------|---------------------------------------|
| Cause                                                             | YLLs (actual counts)                     |                                          |                                          |                                          | Deaths (actual counts)                |                                       |                                       |                                       |
|                                                                   | 2016                                     | 2040 Forecast                            | 2040 Better Scenario                     | 2040 Worse Scenario                      | 2016                                  | 2040 Forecast                         | 2040 Better Scenario                  | 2040 Worse Scenario                   |
| All causes                                                        | 401,571.41<br>(377,275.55 to 424,589.65) | 366,659.48<br>(287,986.27 to 455,921.42) | 254,804.08<br>(199,714.06 to 311,321.95) | 451,216.35<br>(352,668.33 to 552,524.71) | 21,798.01<br>(20,669.79 to 22,886.29) | 24,179.99<br>(18,983.71 to 30,745.08) | 18,392.03<br>(13,766.23 to 24,414.78) | 27,910.28<br>(22,047.95 to 34,364.25) |
| Communicable, maternal, neonatal, and nutritional diseases        | 17,383.73<br>(12,374.02 to 24,104.04)    | 8,216.69<br>(5,257.79 to 13,341.23)      | 5,296.22<br>(3,528.05 to 8,164.63)       | 10,507.98<br>(6,679.97 to 16,358.02)     | 351.95<br>(280.93 to 464.17)          | 254.09<br>(182.24 to 374.93)          | 184.67<br>(135.80 to 268.41)          | 302.35<br>(213.36 to 458.92)          |
| HIV/AIDS and tuberculosis                                         | 951.92<br>(854.95 to 1,072.13)           | 539.44<br>(308.29 to 889.72)             | 217.13<br>(138.71 to 332.03)             | 783.90<br>(454.86 to 1,286.80)           | 36.40<br>(32.62 to 40.55)             | 24.70<br>(14.33 to 40.32)             | 10.48<br>(6.49 to 16.21)              | 33.75<br>(19.01 to 56.31)             |
| Tuberculosis                                                      | 859.41<br>(763.19 to 975.58)             | 495.88<br>(266.02 to 846.19)             | 191.13<br>(112.58 to 305.79)             | 694.12<br>(362.85 to 1,182.15)           | 34.55<br>(30.53 to 38.36)             | 23.78<br>(13.43 to 39.15)             | 9.96<br>(5.92 to 15.80)               | 31.71<br>(17.13 to 54.35)             |
| HIV/AIDS                                                          | 92.50<br>(79.91 to 108.97)               | 43.56<br>(29.88 to 61.33)                | 26.00<br>(16.30 to 40.32)                | 89.78<br>(68.16 to 110.91)               | 2.04<br>(1.75 to 2.45)                | 0.93<br>(0.56 to 1.39)                | 0.53<br>(0.28 to 0.93)                | 2.04<br>(1.46 to 2.59)                |
| Diarrhea, lower respiratory, and other common infectious diseases | 5,345.71<br>(4,311.40 to 6,941.58)       | 3,308.52<br>(2,091.88 to 5,813.62)       | 2,315.65<br>(1,526.28 to 3,877.15)       | 4,510.22<br>(2,673.14 to 8,341.95)       | 179.56<br>(148.95 to 253.11)          | 170.73<br>(113.39 to 275.31)          | 133.82<br>(90.34 to 211.28)           | 200.70<br>(129.25 to 337.11)          |
| Diarrheal diseases                                                | 378.09<br>(233.23 to 589.96)             | 277.32<br>(55.48 to 933.14)              | 436.02<br>(118.85 to 1,197.32)           | 289.83<br>(47.20 to 1,066.66)            | 8.84<br>(5.45 to 14.92)               | 12.59<br>(2.96 to 38.74)              | 23.06<br>(7.20 to 55.51)              | 10.84<br>(2.29 to 33.37)              |
| Intestinal infectious diseases                                    | 3.31<br>(1.64 to 6.17)                   | 1.55<br>(0.71 to 2.96)                   | 1.35<br>(0.62 to 2.51)                   | 1.63<br>(0.74 to 3.05)                   | 0.09<br>(0.04 to 0.15)                | 0.05<br>(0.02 to 0.09)                | 0.04<br>(0.02 to 0.08)                | 0.05<br>(0.02 to 0.09)                |
| Typhoid fever                                                     | 0.99<br>(0.43 to 1.90)                   | 0.44<br>(0.19 to 0.87)                   | 0.61<br>(0.27 to 1.22)                   | 0.41<br>(0.18 to 0.80)                   | 0.02<br>(0.01 to 0.04)                | 0.01<br>(0.01 to 0.02)                | 0.02<br>(0.01 to 0.03)                | 0.01<br>(0.00 to 0.02)                |
| Paratyphoid fever                                                 | 1.87<br>(0.74 to 4.01)                   | 0.94<br>(0.36 to 2.04)                   | 0.60<br>(0.21 to 1.31)                   | 1.05<br>(0.39 to 2.25)                   | 0.05<br>(0.02 to 0.09)                | 0.05<br>(0.01 to 0.06)                | 0.02<br>(0.01 to 0.04)                | 0.03<br>(0.01 to 0.06)                |
| Other intestinal infectious diseases                              | 0.45<br>(0.17 to 0.94)                   | 0.16<br>(0.05 to 0.37)                   | 0.14<br>(0.04 to 0.32)                   | 0.16<br>(0.05 to 0.39)                   | 0.02<br>(0.01 to 0.04)                | 0.01<br>(0.00 to 0.02)                | 0.01<br>(0.00 to 0.02)                | 0.01<br>(0.00 to 0.02)                |
| Lower respiratory infections                                      | 3,799.80<br>(3,091.56 to 4,950.59)       | 2,339.32<br>(1,408.29 to 4,092.33)       | 1,427.58<br>(862.89 to 2,503.47)         | 3,210.33<br>(1,791.14 to 6,133.48)       | 149.41<br>(122.14 to 222.37)          | 143.52<br>(90.29 to 245.73)           | 99.64<br>(59.88 to 171.11)            | 171.55<br>(105.34 to 288.64)          |
| Upper respiratory infections                                      | 9.40<br>(4.91 to 16.05)                  | 6.47<br>(2.52 to 13.63)                  | 3.08<br>(1.23 to 6.45)                   | 7.45<br>(3.01 to 14.57)                  | 0.36<br>(0.18 to 0.62)                | 0.34<br>(0.13 to 0.75)                | 0.18<br>(0.06 to 0.39)                | 0.37<br>(0.14 to 0.75)                |
| Otitis media                                                      | 0.09<br>(0.05 to 0.18)                   | 0.02<br>(0.01 to 0.06)                   | 0.03<br>(0.01 to 0.07)                   | 0.02<br>(0.01 to 0.06)                   | 0.00<br>(0.00 to 0.01)                | 0.00<br>(0.00 to 0.00)                | 0.00<br>(0.00 to 0.00)                | 0.00<br>(0.00 to 0.00)                |
| Meningitis                                                        | 499.15<br>(348.97 to 742.35)             | 139.23<br>(76.87 to 261.73)              | 92.92<br>(51.44 to 166.95)               | 169.87<br>(87.40 to 333.70)              | 9.12<br>(6.88 to 13.13)               | 3.41<br>(2.26 to 5.62)                | 2.42<br>(1.59 to 4.01)                | 3.83<br>(2.45 to 6.32)                |
| Pneumococcal meningitis                                           | 48.55<br>(33.65 to 73.35)                | 13.32<br>(8.37 to 23.28)                 | 13.23<br>(8.16 to 23.00)                 | 13.84<br>(8.60 to 23.78)                 | 1.09<br>(0.78 to 1.65)                | 0.44<br>(0.28 to 0.76)                | 0.45<br>(0.28 to 0.81)                | 0.43<br>(0.28 to 0.76)                |
| H influenzae type B meningitis                                    | 78.74<br>(52.83 to 120.87)               | 37.65<br>(12.01 to 111.27)               | 28.07<br>(11.27 to 70.35)                | 54.90<br>(14.06 to 175.54)               | 1.33<br>(0.95 to 1.91)                | 0.68<br>(0.33 to 1.53)                | 0.59<br>(0.33 to 1.07)                | 0.86<br>(0.35 to 2.28)                |
| Meningococcal meningitis                                          | 171.42<br>(116.46 to 266.37)             | 35.24<br>(18.69 to 69.45)                | 21.29<br>(11.10 to 42.30)                | 40.32<br>(21.21 to 81.98)                | 2.79<br>(2.02 to 4.14)                | 0.82<br>(0.51 to 1.43)                | 0.51<br>(0.32 to 0.86)                | 0.90<br>(0.57 to 1.54)                |
| Other meningitis                                                  | 200.44<br>(141.18 to 295.92)             | 53.02<br>(30.97 to 94.19)                | 30.33<br>(17.88 to 53.46)                | 60.81<br>(35.94 to 111.38)               | 3.91<br>(2.97 to 5.72)                | 1.48<br>(0.97 to 2.48)                | 0.88<br>(0.57 to 1.45)                | 1.64<br>(1.10 to 2.69)                |
| Encephalitis                                                      | 313.72<br>(213.73 to 394.87)             | 203.99<br>(136.56 to 283.39)             | 191.62<br>(124.37 to 271.20)             | 207.67<br>(139.90 to 289.07)             | 7.02<br>(5.08 to 8.38)                | 5.91<br>(4.32 to 7.42)                | 5.77<br>(4.06 to 7.54)                | 5.82<br>(4.23 to 7.27)                |

|                |                                |                                 |                               |                                 |                            |                            |                           |                            |
|----------------|--------------------------------|---------------------------------|-------------------------------|---------------------------------|----------------------------|----------------------------|---------------------------|----------------------------|
| Diphtheria     | 1.21<br>(0.72 to<br>1.84)      | 0.20<br>(0.09 to<br>0.38)       | 0.16<br>(0.08 to<br>0.28)     | 0.27<br>(0.10 to<br>0.60)       | 0.02<br>(0.01 to<br>0.03)  | 0.00<br>(0.00 to<br>0.01)  | 0.00<br>(0.00 to<br>0.01) | 0.00<br>(0.00 to<br>0.01)  |
| Whooping cough | 306.15<br>(24.36 to<br>869.19) | 129.83<br>(3.05 to<br>515.72)   | 25.77<br>(1.29 to<br>91.98)   | 266.15<br>(4.39 to<br>995.89)   | 3.64<br>(0.29 to<br>10.42) | 1.55<br>(0.04 to<br>6.09)  | 0.32<br>(0.02 to<br>1.14) | 3.16<br>(0.06 to<br>11.74) |
| Tetanus        | 11.41<br>(10.25 to<br>12.93)   | 0.59<br>(0.39 to<br>0.91)       | 0.53<br>(0.34 to<br>0.82)     | 0.69<br>(0.43 to<br>1.15)       | 0.23<br>(0.21 to<br>0.25)  | 0.01<br>(0.01 to<br>0.02)  | 0.01<br>(0.01 to<br>0.02) | 0.01<br>(0.01 to<br>0.02)  |
| Measles        | 0.03<br>(0.00 to<br>0.08)      | 197.98<br>(0.00 to<br>1,080.30) | 127.48<br>(0.00 to<br>669.98) | 343.78<br>(0.00 to<br>1,937.38) | 0.00<br>(0.00 to<br>0.00)  | 2.58<br>(0.00 to<br>12.66) | 1.69<br>(0.00 to<br>8.06) | 4.34<br>(0.00 to<br>22.78) |

| Macedonia                                             |                                                    |                                                   |                                                   |                                                   |                                                |                                                |                                                |                                                |
|-------------------------------------------------------|----------------------------------------------------|---------------------------------------------------|---------------------------------------------------|---------------------------------------------------|------------------------------------------------|------------------------------------------------|------------------------------------------------|------------------------------------------------|
| Cause                                                 | YLLs (actual counts)                               |                                                   |                                                   |                                                   | Deaths (actual counts)                         |                                                |                                                |                                                |
|                                                       | 2016                                               | 2040 Forecast                                     | 2040 Better Scenario                              | 2040 Worse Scenario                               | 2016                                           | 2040 Forecast                                  | 2040 Better Scenario                           | 2040 Worse Scenario                            |
| Varicella and herpes zoster                           | 23.35<br>(15.22 to<br>35.46)                       | 12.02<br>(6.80 to<br>20.77)                       | 9.12<br>(5.10 to<br>15.47)                        | 12.54<br>(7.02 to<br>22.99)                       | 0.83<br>(0.57 to<br>1.17)                      | 0.76<br>(0.44 to<br>1.28)                      | 0.66<br>(0.36 to<br>1.15)                      | 0.72<br>(0.41 to<br>1.23)                      |
| <b>Neglected tropical diseases and malaria</b>        | <b>53.16</b><br><b>(38.38 to</b><br><b>70.17)</b>  | <b>15.21</b><br><b>(11.47 to</b><br><b>32.22)</b> | <b>13.26</b><br><b>(10.04 to</b><br><b>27.97)</b> | <b>15.61</b><br><b>(11.81 to</b><br><b>33.90)</b> | <b>1.87</b><br><b>(1.30 to</b><br><b>2.53)</b> | <b>0.55</b><br><b>(0.40 to</b><br><b>1.33)</b> | <b>0.48</b><br><b>(0.36 to</b><br><b>1.15)</b> | <b>0.54</b><br><b>(0.40 to</b><br><b>1.36)</b> |
| Malaria                                               | 0.00<br>(0.00 to<br>0.00)                          | 0.00<br>(0.00 to<br>0.00)                         | 0.00<br>(0.00 to<br>0.00)                         | 0.00<br>(0.00 to<br>0.00)                         | 0.00<br>(0.00 to<br>0.00)                      | 0.00<br>(0.00 to<br>0.00)                      | 0.00<br>(0.00 to<br>0.00)                      | 0.00<br>(0.00 to<br>0.00)                      |
| Chagas disease                                        | 0.00<br>(0.00 to<br>0.00)                          | 0.00<br>(0.00 to<br>0.00)                         | 0.00<br>(0.00 to<br>0.00)                         | 0.00<br>(0.00 to<br>0.00)                         | 0.00<br>(0.00 to<br>0.00)                      | 0.00<br>(0.00 to<br>0.00)                      | 0.00<br>(0.00 to<br>0.00)                      | 0.00<br>(0.00 to<br>0.00)                      |
| Leishmaniasis                                         | 29.01<br>(15.08 to<br>45.32)                       | 4.37<br>(2.10 to<br>16.63)                        | 3.43<br>(1.64 to<br>13.75)                        | 4.55<br>(2.19 to<br>17.57)                        | 1.13<br>(0.59 to<br>1.80)                      | 0.18<br>(0.08 to<br>0.76)                      | 0.15<br>(0.06 to<br>0.61)                      | 0.18<br>(0.08 to<br>0.77)                      |
| African trypanosomiasis                               | 0.00<br>(0.00 to<br>0.00)                          | 0.00<br>(0.00 to<br>0.00)                         | 0.00<br>(0.00 to<br>0.00)                         | 0.00<br>(0.00 to<br>0.00)                         | 0.00<br>(0.00 to<br>0.00)                      | 0.00<br>(0.00 to<br>0.00)                      | 0.00<br>(0.00 to<br>0.00)                      | 0.00<br>(0.00 to<br>0.00)                      |
| Schistosomiasis                                       | 0.00<br>(0.00 to<br>0.00)                          | 0.00<br>(0.00 to<br>0.00)                         | 0.00<br>(0.00 to<br>0.00)                         | 0.00<br>(0.00 to<br>0.00)                         | 0.00<br>(0.00 to<br>0.00)                      | 0.00<br>(0.00 to<br>0.00)                      | 0.00<br>(0.00 to<br>0.00)                      | 0.00<br>(0.00 to<br>0.00)                      |
| Cysticercosis                                         | 0.58<br>(0.42 to<br>0.79)                          | 0.11<br>(0.07 to<br>0.19)                         | 0.11<br>(0.07 to<br>0.18)                         | 0.11<br>(0.07 to<br>0.19)                         | 0.02<br>(0.01 to<br>0.03)                      | 0.00<br>(0.00 to<br>0.01)                      | 0.00<br>(0.00 to<br>0.01)                      | 0.00<br>(0.00 to<br>0.01)                      |
| Cystic echinococcosis                                 | 11.44<br>(9.89 to<br>13.25)                        | 4.09<br>(2.81 to<br>6.47)                         | 2.85<br>(1.97 to<br>4.79)                         | 4.32<br>(2.98 to<br>7.05)                         | 0.46<br>(0.40 to<br>0.54)                      | 0.21<br>(0.15 to<br>0.30)                      | 0.16<br>(0.11 to<br>0.27)                      | 0.21<br>(0.14 to<br>0.35)                      |
| Dengue                                                | 0.00<br>(0.00 to<br>0.00)                          | 0.00<br>(0.00 to<br>0.00)                         | 0.00<br>(0.00 to<br>0.00)                         | 0.00<br>(0.00 to<br>0.00)                         | 0.00<br>(0.00 to<br>0.00)                      | 0.00<br>(0.00 to<br>0.00)                      | 0.00<br>(0.00 to<br>0.00)                      | 0.00<br>(0.00 to<br>0.00)                      |
| Yellow fever                                          | 0.00<br>(0.00 to<br>0.00)                          | 0.00<br>(0.00 to<br>0.00)                         | 0.00<br>(0.00 to<br>0.00)                         | 0.00<br>(0.00 to<br>0.00)                         | 0.00<br>(0.00 to<br>0.00)                      | 0.00<br>(0.00 to<br>0.00)                      | 0.00<br>(0.00 to<br>0.00)                      | 0.00<br>(0.00 to<br>0.00)                      |
| Rabies                                                | 0.07<br>(0.04 to<br>0.09)                          | 0.03<br>(0.01 to<br>0.04)                         | 0.02<br>(0.01 to<br>0.03)                         | 0.03<br>(0.01 to<br>0.05)                         | 0.00<br>(0.00 to<br>0.00)                      | 0.00<br>(0.00 to<br>0.00)                      | 0.00<br>(0.00 to<br>0.00)                      | 0.00<br>(0.00 to<br>0.00)                      |
| Intestinal nematode infections                        | 0.45<br>(0.17 to<br>0.88)                          | 0.26<br>(0.10 to<br>0.53)                         | 0.26<br>(0.10 to<br>0.51)                         | 0.26<br>(0.10 to<br>0.54)                         | 0.01<br>(0.01 to<br>0.02)                      | 0.01<br>(0.00 to<br>0.02)                      | 0.01<br>(0.01 to<br>0.02)                      | 0.01<br>(0.00 to<br>0.02)                      |
| Other neglected tropical diseases                     | 11.61<br>(10.40 to<br>13.20)                       | 6.34<br>(4.99 to<br>8.56)                         | 6.60<br>(5.17 to<br>9.14)                         | 6.34<br>(4.97 to<br>8.51)                         | 0.24<br>(0.22 to<br>0.26)                      | 0.14<br>(0.11 to<br>0.20)                      | 0.16<br>(0.12 to<br>0.23)                      | 0.14<br>(0.11 to<br>0.19)                      |
| <b>Maternal disorders</b>                             | <b>91.28</b><br><b>(73.63 to</b><br><b>111.35)</b> | <b>43.62</b><br><b>(29.06 to</b><br><b>63.11)</b> | <b>30.97</b><br><b>(21.09 to</b><br><b>43.82)</b> | <b>47.57</b><br><b>(32.37 to</b><br><b>68.37)</b> | <b>1.67</b><br><b>(1.36 to</b><br><b>2.03)</b> | <b>0.81</b><br><b>(0.54 to</b><br><b>1.15)</b> | <b>0.58</b><br><b>(0.39 to</b><br><b>0.81)</b> | <b>0.88</b><br><b>(0.60 to</b><br><b>1.25)</b> |
| Maternal hemorrhage                                   | 32.12<br>(23.25 to<br>42.51)                       | 14.31<br>(8.18 to<br>22.64)                       | 10.23<br>(5.84 to<br>15.79)                       | 15.53<br>(9.04 to<br>23.65)                       | 0.59<br>(0.43 to<br>0.78)                      | 0.27<br>(0.15 to<br>0.41)                      | 0.19<br>(0.11 to<br>0.29)                      | 0.29<br>(0.17 to<br>0.44)                      |
| Maternal sepsis and other maternal infections         | 3.69<br>(2.16 to<br>5.74)                          | 1.47<br>(0.70 to<br>2.62)                         | 1.03<br>(0.50 to<br>1.85)                         | 1.60<br>(0.78 to<br>2.90)                         | 0.07<br>(0.04 to<br>0.10)                      | 0.03<br>(0.01 to<br>0.05)                      | 0.02<br>(0.01 to<br>0.03)                      | 0.03<br>(0.01 to<br>0.05)                      |
| Maternal hypertensive disorders                       | 13.42<br>(9.29 to<br>19.53)                        | 6.16<br>(3.49 to<br>10.35)                        | 4.27<br>(2.41 to<br>7.21)                         | 6.77<br>(3.74 to<br>11.46)                        | 0.23<br>(0.16 to<br>0.34)                      | 0.11<br>(0.06 to<br>0.18)                      | 0.07<br>(0.04 to<br>0.13)                      | 0.12<br>(0.07 to<br>0.20)                      |
| Maternal obstructed labor and uterine rupture         | 0.98<br>(0.41 to<br>1.80)                          | 0.55<br>(0.21 to<br>1.17)                         | 0.36<br>(0.14 to<br>0.74)                         | 0.61<br>(0.24 to<br>1.27)                         | 0.02<br>(0.01 to<br>0.03)                      | 0.01<br>(0.00 to<br>0.02)                      | 0.01<br>(0.00 to<br>0.01)                      | 0.01<br>(0.00 to<br>0.02)                      |
| Maternal abortion, miscarriage, and ectopic pregnancy | 19.75<br>(13.39 to<br>27.82)                       | 10.01<br>(5.47 to<br>17.55)                       | 6.94<br>(3.79 to<br>12.26)                        | 10.96<br>(6.13 to<br>19.77)                       | 0.37<br>(0.25 to<br>0.52)                      | 0.19<br>(0.11 to<br>0.34)                      | 0.13<br>(0.07 to<br>0.23)                      | 0.21<br>(0.12 to<br>0.38)                      |



|                                        |                              |                            |                            |                             |                           |                           |                           |                           |
|----------------------------------------|------------------------------|----------------------------|----------------------------|-----------------------------|---------------------------|---------------------------|---------------------------|---------------------------|
|                                        | 2.54<br>(1.39 to<br>4.05)    | 1.41<br>(0.62 to<br>2.55)  | 0.96<br>(0.42 to<br>1.80)  | 1.56<br>(0.69 to<br>2.95)   | 0.05<br>(0.02 to<br>0.07) | 0.03<br>(0.01 to<br>0.05) | 0.02<br>(0.01 to<br>0.03) | 0.03<br>(0.01 to<br>0.05) |
| Indirect maternal deaths               |                              |                            |                            |                             |                           |                           |                           |                           |
|                                        | 1.04<br>(0.37 to<br>1.96)    | 0.46<br>(0.16 to<br>0.95)  | 0.31<br>(0.11 to<br>0.65)  | 0.51<br>(0.17 to<br>1.07)   | 0.02<br>(0.01 to<br>0.03) | 0.01<br>(0.00 to<br>0.02) | 0.01<br>(0.00 to<br>0.01) | 0.01<br>(0.00 to<br>0.02) |
| Late maternal deaths                   |                              |                            |                            |                             |                           |                           |                           |                           |
|                                        | 0.00<br>(0.00 to<br>0.00)    | 0.02<br>(0.00 to<br>0.12)  | 0.01<br>(0.00 to<br>0.09)  | 0.02<br>(0.00 to<br>0.12)   | 0.00<br>(0.00 to<br>0.00) | 0.00<br>(0.00 to<br>0.00) | 0.00<br>(0.00 to<br>0.00) | 0.00<br>(0.00 to<br>0.00) |
| Maternal deaths aggravated by HIV/AIDS |                              |                            |                            |                             |                           |                           |                           |                           |
|                                        | 17.73<br>(12.31 to<br>24.42) | 9.23<br>(5.21 to<br>14.66) | 6.86<br>(4.02 to<br>10.91) | 10.00<br>(5.76 to<br>15.73) | 0.33<br>(0.23 to<br>0.45) | 0.17<br>(0.10 to<br>0.27) | 0.13<br>(0.08 to<br>0.20) | 0.19<br>(0.11 to<br>0.29) |
| Other maternal disorders               |                              |                            |                            |                             |                           |                           |                           |                           |

| Macedonia                                                               |                                             |                                           |                                           |                                           |                                    |                                  |                                  |                                   |
|-------------------------------------------------------------------------|---------------------------------------------|-------------------------------------------|-------------------------------------------|-------------------------------------------|------------------------------------|----------------------------------|----------------------------------|-----------------------------------|
| Cause                                                                   | YLLs (actual counts)                        |                                           |                                           |                                           | Deaths (actual counts)             |                                  |                                  |                                   |
|                                                                         | 2016                                        | 2040 Forecast                             | 2040 Better Scenario                      | 2040 Worse Scenario                       | 2016                               | 2040 Forecast                    | 2040 Better Scenario             | 2040 Worse Scenario               |
| <b>Neonatal disorders</b>                                               | <b>10,629.10</b><br>(6,581.93 to 16,187.32) | <b>4,084.56</b><br>(1,972.53 to 7,892.61) | <b>2,518.15</b><br>(1,225.33 to 4,778.23) | <b>4,922.81</b><br>(2,395.08 to 9,164.87) | <b>122.79</b><br>(76.03 to 187.00) | <b>47.19</b><br>(22.79 to 91.18) | <b>29.09</b><br>(14.16 to 55.20) | <b>56.87</b><br>(27.68 to 105.87) |
| Neonatal preterm birth                                                  | 7,876.26<br>(4,888.86 to 12,160.79)         | 2,547.92<br>(1,162.85 to 4,741.39)        | 1,310.46<br>(602.90 to 2,372.35)          | 3,192.62<br>(1,483.80 to 5,789.74)        | 90.98<br>(56.47 to 140.47)         | 29.43<br>(13.44 to 54.77)        | 15.14<br>(6.96 to 27.40)         | 36.88<br>(17.14 to 66.88)         |
| Neonatal encephalopathy due to birth asphyxia and trauma                | 1,072.02<br>(623.01 to 1,703.12)            | 412.81<br>(163.06 to 962.48)              | 243.05<br>(99.20 to 560.82)               | 495.99<br>(187.89 to 1,175.78)            | 12.39<br>(7.20 to 19.68)           | 4.77<br>(1.88 to 11.12)          | 2.81<br>(1.15 to 6.49)           | 5.73<br>(2.17 to 13.58)           |
| Neonatal sepsis and other neonatal infections                           | 371.28<br>(177.58 to 648.08)                | 147.74<br>(54.10 to 308.71)               | 100.28<br>(37.82 to 208.23)               | 170.36<br>(63.59 to 366.50)               | 4.29<br>(2.05 to 7.49)             | 1.71<br>(0.63 to 3.57)           | 1.16<br>(0.44 to 2.41)           | 1.97<br>(0.74 to 4.23)            |
| Hemolytic disease and other neonatal jaundice                           | 39.94<br>(20.34 to 73.33)                   | 13.03<br>(4.05 to 37.25)                  | 8.35<br>(2.80 to 22.78)                   | 15.35<br>(4.91 to 42.95)                  | 0.46<br>(0.24 to 0.85)             | 0.15<br>(0.05 to 0.43)           | 0.10<br>(0.03 to 0.26)           | 0.18<br>(0.06 to 0.50)            |
| Other neonatal disorders                                                | 1,269.61<br>(731.86 to 2,120.44)            | 963.06<br>(358.68 to 2,172.94)            | 856.01<br>(337.79 to 1,870.10)            | 1,048.49<br>(387.41 to 2,474.92)          | 14.67<br>(8.46 to 24.50)           | 11.13<br>(4.15 to 25.10)         | 9.89<br>(3.90 to 21.61)          | 12.11<br>(4.48 to 28.59)          |
| <b>Nutritional deficiencies</b>                                         | <b>40.12</b><br>(32.91 to 51.20)            | <b>21.28</b><br>(16.37 to 27.49)          | <b>22.01</b><br>(16.84 to 28.28)          | <b>20.73</b><br>(16.05 to 26.60)          | <b>1.28</b><br>(1.13 to 1.46)      | <b>1.03</b><br>(0.80 to 1.29)    | <b>1.20</b><br>(0.90 to 1.53)    | <b>0.94</b><br>(0.74 to 1.17)     |
| Protein-energy malnutrition                                             | 17.93<br>(12.42 to 25.90)                   | 8.35<br>(5.40 to 13.09)                   | 10.18<br>(6.81 to 14.85)                  | 7.83<br>(4.93 to 12.69)                   | 0.52<br>(0.43 to 0.66)             | 0.43<br>(0.28 to 0.62)           | 0.61<br>(0.40 to 0.87)           | 0.37<br>(0.24 to 0.52)            |
| Iodine deficiency                                                       | 2.26<br>(0.31 to 6.27)                      | 1.79<br>(0.15 to 4.84)                    | 1.70<br>(0.11 to 4.68)                    | 1.77<br>(0.15 to 4.85)                    | 0.08<br>(0.01 to 0.20)             | 0.09<br>(0.01 to 0.26)           | 0.10<br>(0.00 to 0.29)           | 0.09<br>(0.01 to 0.23)            |
| Dietary iron deficiency                                                 | 6.40<br>(5.25 to 8.24)                      | 3.65<br>(2.72 to 4.89)                    | 3.90<br>(2.99 to 5.12)                    | 3.58<br>(2.68 to 4.81)                    | 0.15<br>(0.12 to 0.19)             | 0.10<br>(0.08 to 0.14)           | 0.11<br>(0.08 to 0.15)           | 0.10<br>(0.07 to 0.13)            |
| Other nutritional deficiencies                                          | 13.52<br>(9.95 to 16.35)                    | 7.49<br>(4.74 to 10.38)                   | 6.23<br>(3.84 to 8.69)                    | 7.56<br>(4.80 to 10.41)                   | 0.53<br>(0.38 to 0.63)             | 0.40<br>(0.26 to 0.55)           | 0.37<br>(0.23 to 0.53)           | 0.38<br>(0.25 to 0.52)            |
| <b>Other communicable, maternal, neonatal, and nutritional diseases</b> | <b>272.45</b><br>(228.86 to 384.49)         | <b>204.06</b><br>(162.47 to 269.68)       | <b>179.04</b><br>(143.95 to 229.06)       | <b>207.14</b><br>(163.66 to 274.17)       | <b>8.39</b><br>(7.31 to 10.60)     | <b>9.09</b><br>(7.38 to 10.83)   | <b>9.02</b><br>(7.12 to 10.74)   | <b>8.67</b><br>(7.06 to 10.37)    |
| Sexually transmitted infections excluding HIV                           | 13.16<br>(10.49 to 20.33)                   | 4.20<br>(2.83 to 6.43)                    | 3.17<br>(2.18 to 4.82)                    | 4.50<br>(3.03 to 7.08)                    | 0.29<br>(0.25 to 0.38)             | 0.13<br>(0.09 to 0.19)           | 0.11<br>(0.08 to 0.16)           | 0.13<br>(0.09 to 0.18)            |
| Syphilis                                                                | 8.39<br>(5.90 to 15.18)                     | 2.18<br>(1.18 to 4.33)                    | 1.37<br>(0.78 to 2.82)                    | 2.45<br>(1.32 to 4.82)                    | 0.16<br>(0.13 to 0.24)             | 0.05<br>(0.03 to 0.08)           | 0.04<br>(0.02 to 0.06)           | 0.05<br>(0.03 to 0.09)            |
| Chlamydial infection                                                    | 0.85<br>(0.73 to 1.08)                      | 0.38<br>(0.27 to 0.56)                    | 0.35<br>(0.24 to 0.51)                    | 0.38<br>(0.27 to 0.55)                    | 0.02<br>(0.02 to 0.02)             | 0.01<br>(0.01 to 0.02)           | 0.01<br>(0.01 to 0.02)           | 0.01<br>(0.01 to 0.02)            |
| Gonococcal infection                                                    | 2.58<br>(2.25 to 3.21)                      | 1.11<br>(0.76 to 1.64)                    | 1.00<br>(0.67 to 1.45)                    | 1.13<br>(0.78 to 1.69)                    | 0.07<br>(0.06 to 0.10)             | 0.04<br>(0.03 to 0.07)           | 0.04<br>(0.03 to 0.07)           | 0.04<br>(0.03 to 0.07)            |
| Other sexually transmitted infections                                   | 1.34<br>(1.17 to 1.66)                      | 0.53<br>(0.36 to 0.74)                    | 0.46<br>(0.32 to 0.65)                    | 0.54<br>(0.38 to 0.77)                    | 0.03<br>(0.03 to 0.04)             | 0.02<br>(0.01 to 0.02)           | 0.02<br>(0.01 to 0.02)           | 0.02<br>(0.01 to 0.02)            |
| Acute hepatitis                                                         | 126.89<br>(109.02 to 148.69)                | 63.67<br>(45.43 to 85.55)                 | 40.13<br>(28.59 to 54.66)                 | 69.63<br>(50.91 to 92.23)                 | 3.62<br>(3.11 to 4.16)             | 2.41<br>(1.72 to 3.25)           | 1.58<br>(1.11 to 2.18)           | 2.55<br>(1.87 to 3.37)            |
| Acute hepatitis A                                                       | 16.47<br>(9.94 to 27.07)                    | 4.26<br>(2.02 to 9.39)                    | 2.97<br>(1.42 to 6.27)                    | 4.65<br>(2.25 to 9.75)                    | 0.26<br>(0.17 to 0.38)             | 0.10<br>(0.06 to 0.17)           | 0.07<br>(0.04 to 0.13)           | 0.10<br>(0.06 to 0.17)            |
| Acute hepatitis B                                                       | 85.53<br>(72.20 to 99.36)                   | 47.56<br>(32.34 to 66.48)                 | 29.49<br>(19.86 to 41.09)                 | 52.06<br>(36.65 to 70.96)                 | 2.70<br>(2.27 to 3.17)             | 1.84<br>(1.25 to 2.55)           | 1.18<br>(0.78 to 1.70)           | 1.96<br>(1.38 to 2.67)            |



| Macedonia                            |                                         |                                         |                                       |                                          |                                    |                                    |                                    |                                    |
|--------------------------------------|-----------------------------------------|-----------------------------------------|---------------------------------------|------------------------------------------|------------------------------------|------------------------------------|------------------------------------|------------------------------------|
| Cause                                | YLLs (actual counts)                    |                                         |                                       |                                          | Deaths (actual counts)             |                                    |                                    |                                    |
|                                      | 2016                                    | 2040 Forecast                           | 2040 Better Scenario                  | 2040 Worse Scenario                      | 2016                               | 2040 Forecast                      | 2040 Better Scenario               | 2040 Worse Scenario                |
| Neoplasms                            | 102,364.27<br>(95,184.51 to 109,717.64) | 108,234.84<br>(88,487.58 to 126,929.62) | 85,063.20<br>(69,435.95 to 98,681.03) | 122,750.93<br>(100,274.83 to 145,075.96) | 4,442.30<br>(4,150.25 to 4,742.30) | 5,376.48<br>(4,524.17 to 6,203.38) | 4,478.44<br>(3,691.88 to 5,119.90) | 5,876.81<br>(4,937.62 to 6,869.26) |
| Lip and oral cavity cancer           | 974.47<br>(862.94 to 1,086.22)          | 1,135.65<br>(681.67 to 1,861.25)        | 727.02<br>(458.26 to 1,134.29)        | 1,484.67<br>(846.89 to 2,470.82)         | 43.75<br>(39.18 to 48.38)          | 58.03<br>(35.88 to 92.56)          | 40.47<br>(26.91 to 58.76)          | 72.25<br>(42.11 to 118.13)         |
| Nasopharynx cancer                   | 217.17<br>(192.57 to 242.93)            | 236.73<br>(132.48 to 387.77)            | 128.75<br>(75.73 to 210.03)           | 330.45<br>(180.75 to 554.91)             | 7.59<br>(6.78 to 8.37)             | 9.17<br>(5.13 to 14.72)            | 5.19<br>(3.18 to 8.03)             | 12.43<br>(6.98 to 20.39)           |
| Other pharynx cancer                 | 614.10<br>(510.37 to 713.29)            | 525.47<br>(319.35 to 834.11)            | 506.21<br>(324.25 to 768.20)          | 618.00<br>(355.34 to 1,010.58)           | 22.16<br>(18.56 to 25.46)          | 21.07<br>(13.10 to 33.35)          | 21.03<br>(13.82 to 31.91)          | 24.13<br>(14.11 to 39.81)          |
| Esophageal cancer                    | 1,060.48<br>(933.66 to 1,199.46)        | 1,159.90<br>(640.14 to 2,026.28)        | 863.70<br>(503.64 to 1,431.45)        | 1,446.50<br>(770.97 to 2,550.44)         | 45.24<br>(39.93 to 50.58)          | 54.75<br>(30.93 to 91.43)          | 42.69<br>(25.83 to 66.90)          | 66.13<br>(35.65 to 112.77)         |
| Stomach cancer                       | 8,979.58<br>(8,229.81 to 9,822.86)      | 7,051.01<br>(4,888.13 to 9,649.05)      | 4,766.09<br>(3,357.44 to 6,303.04)    | 7,760.83<br>(5,315.85 to 10,647.00)      | 421.55<br>(386.87 to 460.10)       | 374.33<br>(265.79 to 497.23)       | 267.61<br>(191.84 to 349.49)       | 399.37<br>(283.71 to 538.74)       |
| Colon and rectum cancer              | 11,070.33<br>(9,986.00 to 12,168.23)    | 11,956.35<br>(8,318.90 to 17,040.53)    | 9,119.78<br>(6,410.39 to 12,831.36)   | 13,582.80<br>(9,184.11 to 19,675.97)     | 533.91<br>(481.83 to 585.42)       | 662.19<br>(467.20 to 939.95)       | 535.91<br>(380.19 to 756.45)       | 724.15<br>(495.65 to 1,037.94)     |
| Liver cancer                         | 5,271.37<br>(4,732.11 to 5,913.14)      | 7,488.18<br>(4,663.81 to 11,548.92)     | 7,129.87<br>(4,696.31 to 10,336.38)   | 8,655.47<br>(5,057.08 to 14,041.08)      | 243.27<br>(218.81 to 271.20)       | 385.00<br>(247.83 to 576.08)       | 386.12<br>(260.59 to 555.83)       | 428.47<br>(261.93 to 679.54)       |
| Liver cancer due to hepatitis B      | 1,684.35<br>(1,289.82 to 2,121.12)      | 2,312.48<br>(1,377.95 to 3,767.84)      | 2,215.99<br>(1,390.27 to 3,475.52)    | 2,607.78<br>(1,480.35 to 4,407.49)       | 72.61<br>(54.24 to 92.00)          | 111.38<br>(66.61 to 174.57)        | 111.87<br>(71.06 to 171.89)        | 121.42<br>(70.96 to 202.43)        |
| Liver cancer due to hepatitis C      | 1,279.36<br>(913.06 to 1,682.85)        | 1,901.60<br>(1,079.26 to 3,140.57)      | 1,860.21<br>(1,100.62 to 2,893.76)    | 2,103.10<br>(1,159.01 to 3,559.56)       | 64.21<br>(46.53 to 83.62)          | 106.24<br>(62.14 to 165.53)        | 109.95<br>(67.39 to 166.81)        | 112.95<br>(64.04 to 183.98)        |
| Liver cancer due to alcohol use      | 1,165.47<br>(953.43 to 1,417.87)        | 1,606.61<br>(961.69 to 2,541.01)        | 1,457.73<br>(902.49 to 2,222.59)      | 2,042.69<br>(1,154.19 to 3,341.78)       | 54.89<br>(44.32 to 66.97)          | 83.25<br>(50.66 to 130.71)         | 79.72<br>(50.11 to 120.21)         | 101.31<br>(59.16 to 163.95)        |
| Liver cancer due to other causes     | 1,142.19<br>(944.30 to 1,372.70)        | 1,667.50<br>(938.30 to 2,801.41)        | 1,595.95<br>(959.60 to 2,569.17)      | 1,901.90<br>(1,004.07 to 3,357.03)       | 51.55<br>(42.07 to 61.28)          | 84.13<br>(48.66 to 137.94)         | 84.58<br>(51.73 to 132.44)         | 92.79<br>(50.09 to 162.61)         |
| Gallbladder and biliary tract cancer | 1,301.15<br>(1,130.14 to 1,580.96)      | 1,079.25<br>(869.21 to 1,348.01)        | 1,065.24<br>(852.01 to 1,344.47)      | 1,039.40<br>(859.96 to 1,287.86)         | 66.15<br>(57.73 to 82.05)          | 62.40<br>(50.50 to 79.83)          | 64.61<br>(51.32 to 83.82)          | 58.34<br>(48.08 to 74.35)          |
| Pancreatic cancer                    | 5,486.48<br>(4,978.32 to 6,008.45)      | 6,833.85<br>(5,182.76 to 8,723.76)      | 6,390.79<br>(4,899.36 to 8,061.59)    | 6,938.69<br>(5,281.47 to 9,038.91)       | 255.95<br>(234.00 to 279.08)       | 353.50<br>(273.74 to 452.94)       | 349.36<br>(270.29 to 435.51)       | 347.95<br>(269.69 to 447.54)       |
| Larynx cancer                        | 2,493.47<br>(2,178.77 to 2,851.17)      | 2,513.32<br>(1,223.80 to 4,918.14)      | 1,316.50<br>(661.35 to 2,493.92)      | 3,215.36<br>(1,459.71 to 6,327.14)       | 102.54<br>(90.06 to 116.02)        | 112.33<br>(54.96 to 215.21)        | 59.01<br>(30.51 to 106.52)         | 141.96<br>(67.47 to 274.83)        |
| Tracheal, bronchus, and lung cancer  | 23,502.79<br>(20,992.01 to 26,212.25)   | 24,258.95<br>(16,372.81 to 33,974.74)   | 14,185.10<br>(9,652.67 to 19,564.21)  | 22,352.76<br>(21,637.41 to 45,187.33)    | 966.68<br>(865.56 to 1,071.98)     | 1,082.29<br>(746.87 to 1,490.03)   | 639.66<br>(447.90 to 857.09)       | 1,418.98<br>(980.85 to 1,972.38)   |
| Malignant skin melanoma              | 1,885.74<br>(1,623.38 to 2,342.65)      | 2,304.00<br>(1,859.62 to 2,823.14)      | 3,032.30<br>(2,458.24 to 3,677.95)    | 2,078.76<br>(1,716.83 to 2,558.80)       | 78.44<br>(67.90 to 91.38)          | 120.18<br>(93.91 to 147.27)        | 169.64<br>(130.75 to 205.90)       | 103.62<br>(83.95 to 124.65)        |
| Non-melanoma skin cancer             | 519.34<br>(464.60 to 576.68)            | 634.70<br>(518.53 to 757.44)            | 523.55<br>(419.80 to 629.10)          | 620.91<br>(514.13 to 746.99)             | 33.41<br>(29.93 to 37.10)          | 49.88<br>(39.54 to 61.73)          | 44.93<br>(34.91 to 55.43)          | 46.38<br>(36.66 to 57.08)          |
| Breast cancer                        | 8,471.78<br>(7,205.69 to 9,815.13)      | 8,079.30<br>(5,807.72 to 10,889.42)     | 6,130.16<br>(4,319.00 to 8,131.18)    | 9,235.39<br>(6,430.88 to 12,648.51)      | 344.31<br>(295.76 to 397.29)       | 385.17<br>(280.22 to 520.65)       | 309.27<br>(221.86 to 413.86)       | 422.80<br>(305.04 to 578.10)       |
| Cervical cancer                      | 2,384.31<br>(1,900.98 to 2,886.64)      | 1,700.25<br>(1,181.42 to 2,343.12)      | 1,170.60<br>(824.47 to 1,553.27)      | 1,873.65<br>(1,280.62 to 2,620.70)       | 87.63<br>(69.96 to 106.34)         | 71.99<br>(52.28 to 97.68)          | 52.25<br>(37.81 to 68.48)          | 76.65<br>(54.58 to 104.18)         |



| Macedonia                       |                                                                  |                                                                  |                                                                |                                                                  |                                                               |                                                              |                                                             |                                                               |
|---------------------------------|------------------------------------------------------------------|------------------------------------------------------------------|----------------------------------------------------------------|------------------------------------------------------------------|---------------------------------------------------------------|--------------------------------------------------------------|-------------------------------------------------------------|---------------------------------------------------------------|
| Cause                           | YLLs (actual counts)                                             |                                                                  |                                                                |                                                                  | Deaths (actual counts)                                        |                                                              |                                                             |                                                               |
|                                 | 2016                                                             | 2040 Forecast                                                    | 2040 Better Scenario                                           | 2040 Worse Scenario                                              | 2016                                                          | 2040 Forecast                                                | 2040 Better Scenario                                        | 2040 Worse Scenario                                           |
| Kidney cancer                   | 1,255.71<br>(1,118.40 to<br>1,405.29)                            | 1,353.16<br>(925.97 to<br>1,945.15)                              | 1,294.03<br>(924.10 to<br>1,793.77)                            | 1,343.87<br>(908.91 to<br>1,976.69)                              | 52.14<br>(46.51 to<br>58.19)                                  | 65.16<br>(45.70 to<br>92.21)                                 | 65.89<br>(47.95 to<br>89.42)                                | 62.73<br>(43.66 to<br>90.80)                                  |
| Bladder cancer                  | 2,588.71<br>(2,302.54 to<br>2,904.83)                            | 2,947.87<br>(2,056.09 to<br>4,157.67)                            | 2,333.65<br>(1,698.80 to<br>3,159.24)                          | 3,097.30<br>(2,090.41 to<br>4,445.40)                            | 135.17<br>(120.75 to<br>151.84)                               | 171.83<br>(122.67 to<br>236.62)                              | 145.68<br>(109.27 to<br>192.09)                             | 174.46<br>(122.25 to<br>244.77)                               |
| Brain and nervous system cancer | 5,361.83<br>(4,115.96 to<br>6,099.82)                            | 5,815.53<br>(4,206.01 to<br>6,988.62)                            | 5,290.71<br>(3,810.05 to<br>6,422.24)                          | 5,808.54<br>(4,219.56 to<br>6,948.60)                            | 181.14<br>(130.40 to<br>209.07)                               | 229.80<br>(157.96 to<br>277.76)                              | 217.11<br>(148.23 to<br>265.53)                             | 223.82<br>(154.92 to<br>269.82)                               |
| Thyroid cancer                  | 251.95<br>(218.02 to<br>284.85)                                  | 294.36<br>(198.68 to<br>443.68)                                  | 243.48<br>(166.64 to<br>362.51)                                | 328.78<br>(217.26 to<br>510.56)                                  | 10.88<br>(9.63 to<br>12.27)                                   | 14.31<br>(9.76 to<br>21.37)                                  | 12.40<br>(8.42 to<br>18.06)                                 | 15.44<br>(10.36 to<br>23.45)                                  |
| Mesothelioma                    | 53.76<br>(47.07 to<br>73.82)                                     | 63.01<br>(51.27 to<br>84.89)                                     | 66.27<br>(53.22 to<br>90.47)                                   | 60.48<br>(49.68 to<br>81.09)                                     | 2.03<br>(1.80 to<br>2.73)                                     | 2.81<br>(2.31 to<br>3.74)                                    | 3.13<br>(2.51 to<br>4.20)                                   | 2.61<br>(2.14 to<br>3.53)                                     |
| Hodgkin lymphoma                | 488.27<br>(312.85 to<br>583.36)                                  | 357.52<br>(223.12 to<br>482.07)                                  | 243.35<br>(149.51 to<br>323.37)                                | 383.43<br>(240.69 to<br>515.33)                                  | 15.01<br>(9.95 to<br>17.76)                                   | 12.92<br>(8.51 to<br>16.77)                                  | 9.14<br>(5.90 to<br>11.86)                                  | 13.50<br>(8.80 to<br>17.45)                                   |
| Non-Hodgkin lymphoma            | 1,490.78<br>(1,326.24 to<br>1,648.79)                            | 1,483.69<br>(1,169.54 to<br>1,916.03)                            | 1,262.29<br>(998.14 to<br>1,597.64)                            | 1,568.27<br>(1,232.96 to<br>2,010.38)                            | 54.80<br>(49.21 to<br>61.07)                                  | 65.67<br>(51.74 to<br>83.32)                                 | 58.83<br>(45.73 to<br>75.35)                                | 67.11<br>(53.05 to<br>86.28)                                  |
| Multiple myeloma                | 592.53<br>(498.14 to<br>698.52)                                  | 710.51<br>(546.35 to<br>944.29)                                  | 654.98<br>(500.29 to<br>857.98)                                | 737.72<br>(562.20 to<br>982.59)                                  | 25.60<br>(22.35 to<br>32.66)                                  | 34.77<br>(27.06 to<br>48.09)                                 | 33.54<br>(25.75 to<br>46.30)                                | 35.00<br>(26.84 to<br>48.14)                                  |
| Leukemia                        | 3,451.56<br>(2,604.05 to<br>3,903.92)                            | 3,401.55<br>(2,450.65 to<br>4,608.27)                            | 2,838.79<br>(2,092.64 to<br>3,755.94)                          | 3,691.15<br>(2,613.76 to<br>5,125.87)                            | 121.90<br>(103.30 to<br>135.72)                               | 148.79<br>(109.75 to<br>204.46)                              | 130.78<br>(98.69 to<br>173.77)                              | 156.28<br>(113.02 to<br>218.51)                               |
| Acute lymphoid leukemia         | 601.17<br>(422.31 to<br>730.00)                                  | 449.81<br>(306.34 to<br>609.55)                                  | 350.63<br>(241.74 to<br>476.73)                                | 497.09<br>(334.37 to<br>685.84)                                  | 14.43<br>(10.88 to<br>16.98)                                  | 13.84<br>(9.98 to<br>18.84)                                  | 11.04<br>(8.16 to<br>14.67)                                 | 15.07<br>(10.80 to<br>20.82)                                  |
| Chronic lymphoid leukemia       | 552.87<br>(474.03 to<br>663.96)                                  | 630.13<br>(427.18 to<br>931.62)                                  | 564.38<br>(396.32 to<br>806.69)                                | 660.85<br>(443.54 to<br>1,000.01)                                | 28.42<br>(24.32 to<br>37.02)                                  | 36.80<br>(25.21 to<br>55.64)                                 | 35.02<br>(24.75 to<br>53.32)                                | 37.21<br>(25.14 to<br>56.56)                                  |
| Acute myeloid leukemia          | 1,102.41<br>(764.60 to<br>1,326.57)                              | 1,299.14<br>(894.47 to<br>1,764.92)                              | 1,188.51<br>(824.12 to<br>1,585.66)                            | 1,384.10<br>(934.16 to<br>1,918.35)                              | 37.59<br>(28.26 to<br>44.44)                                  | 53.87<br>(38.57 to<br>72.96)                                 | 51.29<br>(37.37 to<br>67.50)                                | 55.87<br>(39.55 to<br>77.37)                                  |
| Chronic myeloid leukemia        | 281.00<br>(195.47 to<br>343.06)                                  | 182.79<br>(112.15 to<br>274.12)                                  | 109.74<br>(69.31 to<br>161.94)                                 | 213.49<br>(126.87 to<br>325.71)                                  | 11.18<br>(8.16 to<br>13.45)                                   | 8.76<br>(5.69 to<br>13.04)                                   | 5.61<br>(3.67 to<br>8.18)                                   | 9.81<br>(6.12 to<br>14.67)                                    |
| Other leukemia                  | 914.10<br>(645.71 to<br>1,055.10)                                | 839.69<br>(572.13 to<br>1,211.26)                                | 625.54<br>(434.09 to<br>874.94)                                | 935.61<br>(619.60 to<br>1,383.57)                                | 30.27<br>(24.57 to<br>34.66)                                  | 35.52<br>(24.29 to<br>51.30)                                 | 27.83<br>(19.85 to<br>39.24)                                | 38.32<br>(26.14 to<br>56.59)                                  |
| Other neoplasms                 | 4,631.81<br>(4,181.43 to<br>5,094.44)                            | 5,684.48<br>(4,927.14 to<br>6,438.57)                            | 5,673.33<br>(4,800.35 to<br>6,476.93)                          | 5,503.93<br>(4,811.99 to<br>6,195.96)                            | 185.79<br>(168.30 to<br>204.13)                               | 274.46<br>(234.50 to<br>309.56)                              | 291.21<br>(243.08 to<br>333.11)                             | 255.89<br>(222.63 to<br>286.72)                               |
| <b>Cardiovascular diseases</b>  | <b>197,380.52</b><br><b>(186,427.10 to</b><br><b>208,535.03)</b> | <b>165,344.57</b><br><b>(114,854.28 to</b><br><b>236,462.86)</b> | <b>99,979.14</b><br><b>(67,614.44 to</b><br><b>146,551.63)</b> | <b>222,800.44</b><br><b>(153,675.61 to</b><br><b>305,094.41)</b> | <b>12,980.50</b><br><b>(12,339.32 to</b><br><b>13,629.75)</b> | <b>13,274.31</b><br><b>(9,293.09 to</b><br><b>19,243.91)</b> | <b>9,143.77</b><br><b>(6,034.75 to</b><br><b>14,214.16)</b> | <b>16,140.75</b><br><b>(11,384.63 to</b><br><b>22,037.73)</b> |
| Rheumatic heart disease         | 852.11<br>(765.95 to<br>956.04)                                  | 523.07<br>(366.68 to<br>755.73)                                  | 372.79<br>(256.96 to<br>541.35)                                | 559.92<br>(399.17 to<br>807.90)                                  | 34.89<br>(30.98 to<br>40.42)                                  | 26.70<br>(18.53 to<br>38.60)                                 | 20.28<br>(13.84 to<br>29.96)                                | 27.51<br>(19.65 to<br>39.26)                                  |
| Ischemic heart disease          | 71,483.86<br>(64,437.29 to<br>81,078.31)                         | 46,496.66<br>(26,226.40 to<br>79,436.30)                         | 22,957.95<br>(12,967.46 to<br>38,025.05)                       | 75,668.65<br>(41,350.30 to<br>119,916.10)                        | 4,285.39<br>(3,795.16 to<br>5,113.74)                         | 3,302.33<br>(1,892.86 to<br>5,522.29)                        | 1,903.76<br>(1,059.21 to<br>3,150.78)                       | 4,791.56<br>(2,742.07 to<br>7,567.27)                         |
| Stroke                          | 71,124.27<br>(63,885.81 to<br>82,614.80)                         | 46,706.54<br>(28,367.04 to<br>74,389.01)                         | 23,378.42<br>(13,687.48 to<br>38,160.30)                       | 68,728.52<br>(43,107.87 to<br>106,308.37)                        | 4,596.17<br>(4,084.54 to<br>5,567.28)                         | 3,558.59<br>(2,124.73 to<br>5,561.89)                        | 2,039.59<br>(1,146.19 to<br>3,348.43)                       | 4,724.47<br>(2,948.51 to<br>7,252.18)                         |
| Ischemic stroke                 | 35,163.45<br>(31,063.09 to<br>41,998.20)                         | 22,821.00<br>(12,661.64 to<br>41,510.02)                         | 12,686.35<br>(6,719.05 to<br>23,570.01)                        | 31,249.81<br>(17,308.37 to<br>56,490.66)                         | 2,574.02<br>(2,246.65 to<br>3,188.04)                         | 1,944.95<br>(1,049.59 to<br>3,691.08)                        | 1,206.57<br>(610.74 to<br>2,305.13)                         | 2,446.74<br>(1,334.48 to<br>4,596.24)                         |

|                                |                                          |                                          |                                          |                                          |                                       |                                       |                                       |                                       |
|--------------------------------|------------------------------------------|------------------------------------------|------------------------------------------|------------------------------------------|---------------------------------------|---------------------------------------|---------------------------------------|---------------------------------------|
|                                | 35,960.82<br>(32,308.26 to<br>40,898.13) | 23,885.55<br>(14,076.93 to<br>38,313.19) | 10,692.08<br>(6,276.82 to<br>16,799.37)  | 37,478.72<br>(21,542.74 to<br>61,185.03) | 2,022.15<br>(1,786.18 to<br>2,407.17) | 1,613.63<br>(971.10 to<br>2,560.85)   | 833.02<br>(488.48 to<br>1,345.65)     | 2,277.73<br>(1,393.30 to<br>3,650.73) |
| Intracerebral hemorrhage       |                                          |                                          |                                          |                                          |                                       |                                       |                                       |                                       |
|                                | 7,937.38<br>(6,747.07 to<br>9,283.22)    | 13,119.66<br>(6,874.39 to<br>32,084.08)  | 10,840.22<br>(5,800.67 to<br>25,185.05)  | 15,734.61<br>(8,019.84 to<br>39,294.06)  | 599.27<br>(497.46 to<br>700.28)       | 1,196.41<br>(592.46 to<br>3,050.55)   | 1,089.03<br>(552.55 to<br>2,699.36)   | 1,365.82<br>(654.24 to<br>3,480.86)   |
| Hypertensive heart disease     |                                          |                                          |                                          |                                          |                                       |                                       |                                       |                                       |
|                                | 39,429.55<br>(20,643.45 to<br>48,357.20) | 47,266.81<br>(19,300.39 to<br>78,153.31) | 34,482.55<br>(13,831.51 to<br>55,505.64) | 50,180.87<br>(20,306.02 to<br>82,649.08) | 3,051.75<br>(1,336.20 to<br>3,831.53) | 4,336.60<br>(1,574.63 to<br>7,582.17) | 3,400.31<br>(1,214.57 to<br>5,928.61) | 4,381.93<br>(1,536.31 to<br>7,650.85) |
| Cardiomyopathy and myocarditis |                                          |                                          |                                          |                                          |                                       |                                       |                                       |                                       |
|                                | 1,162.85<br>(778.58 to<br>1,521.68)      | 1,400.49<br>(851.87 to<br>1,991.59)      | 1,480.68<br>(908.52 to<br>2,147.68)      | 1,303.44<br>(801.35 to<br>1,822.97)      | 70.15<br>(42.43 to<br>112.90)         | 108.47<br>(60.26 to<br>188.79)        | 126.48<br>(71.22 to<br>217.50)        | 95.19<br>(53.04 to<br>160.55)         |
| Myocarditis                    |                                          |                                          |                                          |                                          |                                       |                                       |                                       |                                       |

| Macedonia                                                     |                                                   |                                                   |                                                  |                                                    |                                            |                                            |                                            |                                              |
|---------------------------------------------------------------|---------------------------------------------------|---------------------------------------------------|--------------------------------------------------|----------------------------------------------------|--------------------------------------------|--------------------------------------------|--------------------------------------------|----------------------------------------------|
| Cause                                                         | YLLs (actual counts)                              |                                                   |                                                  |                                                    | Deaths (actual counts)                     |                                            |                                            |                                              |
|                                                               | 2016                                              | 2040 Forecast                                     | 2040 Better Scenario                             | 2040 Worse Scenario                                | 2016                                       | 2040 Forecast                              | 2040 Better Scenario                       | 2040 Worse Scenario                          |
| Alcoholic cardiomyopathy                                      | 3,938.06<br>(2,822.46 to 6,848.56)                | 4,296.14<br>(2,810.26 to 6,754.83)                | 4,178.78<br>(2,630.61 to 6,127.79)               | 4,528.52<br>(3,004.74 to 7,420.54)                 | 279.89<br>(192.87 to 498.42)               | 353.81<br>(216.95 to 560.33)               | 368.02<br>(210.67 to 557.71)               | 354.40<br>(216.69 to 568.34)                 |
| Other cardiomyopathy                                          | 34,328.64<br>(15,594.29 to 43,172.61)             | 41,570.17<br>(13,853.62 to 72,636.47)             | 28,823.09<br>(8,831.36 to 50,216.15)             | 44,348.91<br>(14,884.76 to 77,095.67)              | 2,701.71<br>(1,028.57 to 3,485.09)         | 3,874.31<br>(1,160.70 to 7,145.82)         | 2,905.81<br>(797.25 to 5,421.08)           | 3,932.34<br>(797.25 to 7,214.69)             |
| Atrial fibrillation and flutter                               | 1,064.57<br>(788.99 to 1,443.30)                  | 1,717.18<br>(1,150.06 to 2,547.49)                | 1,693.27<br>(1,098.08 to 2,597.52)               | 1,666.10<br>(1,144.20 to 2,396.45)                 | 103.06<br>(75.12 to 144.99)                | 184.21<br>(117.66 to 288.14)               | 197.40<br>(122.32 to 315.19)               | 170.26<br>(108.34 to 260.27)                 |
| Aortic aneurysm                                               | 1,074.52<br>(941.27 to 1,216.38)                  | 928.83<br>(655.80 to 1,297.83)                    | 720.29<br>(509.89 to 998.70)                     | 973.29<br>(671.61 to 1,341.65)                     | 52.56<br>(45.26 to 61.85)                  | 54.12<br>(37.59 to 73.97)                  | 47.53<br>(32.84 to 67.42)                  | 53.63<br>(37.77 to 71.94)                    |
| Peripheral artery disease                                     | 48.17<br>(32.18 to 59.27)                         | 94.88<br>(56.31 to 142.69)                        | 93.51<br>(56.27 to 142.02)                       | 93.69<br>(55.84 to 140.19)                         | 3.74<br>(2.55 to 4.62)                     | 8.93<br>(5.39 to 13.46)                    | 9.90<br>(5.88 to 15.34)                    | 8.28<br>(5.04 to 12.30)                      |
| Endocarditis                                                  | 251.16<br>(209.05 to 317.24)                      | 274.64<br>(192.90 to 405.48)                      | 263.54<br>(183.43 to 395.65)                     | 283.94<br>(196.75 to 411.51)                       | 9.84<br>(8.25 to 13.69)                    | 14.08<br>(9.42 to 22.47)                   | 14.78<br>(9.53 to 24.35)                   | 13.73<br>(9.24 to 21.72)                     |
| Other cardiovascular and circulatory diseases                 | 4,115.13<br>(2,864.19 to 9,027.88)                | 8,216.29<br>(4,111.18 to 19,376.14)               | 5,176.59<br>(2,614.76 to 12,167.33)              | 8,910.85<br>(4,634.12 to 20,273.18)                | 243.84<br>(164.24 to 562.91)               | 592.34<br>(302.92 to 1,459.28)             | 421.19<br>(207.74 to 1,067.28)             | 603.57<br>(317.46 to 1,435.36)               |
| <b>Chronic respiratory diseases</b>                           | <b>9,396.11</b><br><b>(8,543.94 to 10,498.85)</b> | <b>9,725.92</b><br><b>(6,895.11 to 13,335.14)</b> | <b>6,048.93</b><br><b>(4,477.26 to 8,071.39)</b> | <b>12,891.46</b><br><b>(8,835.20 to 18,590.09)</b> | <b>604.77</b><br><b>(552.34 to 672.53)</b> | <b>714.71</b><br><b>(514.87 to 985.93)</b> | <b>490.45</b><br><b>(364.59 to 643.96)</b> | <b>885.47</b><br><b>(614.08 to 1,248.68)</b> |
| Chronic obstructive pulmonary disease                         | 8,335.79<br>(7,540.57 to 9,381.57)                | 8,876.92<br>(6,038.39 to 12,617.39)               | 5,325.76<br>(3,779.06 to 7,262.21)               | 11,925.57<br>(7,848.60 to 17,566.16)               | 541.27<br>(493.34 to 608.22)               | 656.88<br>(456.31 to 917.29)               | 440.96<br>(317.72 to 588.98)               | 821.56<br>(552.10 to 1,179.29)               |
| Pneumoconiosis                                                | 19.94<br>(15.64 to 24.39)                         | 15.33<br>(10.76 to 21.14)                         | 11.93<br>(8.83 to 15.78)                         | 16.14<br>(11.53 to 22.52)                          | 1.12<br>(0.88 to 1.34)                     | 0.97<br>(0.69 to 1.31)                     | 0.80<br>(0.58 to 1.09)                     | 0.99<br>(0.70 to 1.34)                       |
| Silicosis                                                     | 3.09<br>(2.04 to 6.65)                            | 2.58<br>(0.96 to 5.99)                            | 1.04<br>(0.39 to 2.47)                           | 2.99<br>(1.10 to 6.72)                             | 0.17<br>(0.11 to 0.36)                     | 0.15<br>(0.06 to 0.34)                     | 0.07<br>(0.03 to 0.16)                     | 0.17<br>(0.07 to 0.37)                       |
| Asbestosis                                                    | 4.00<br>(2.36 to 5.06)                            | 4.31<br>(2.57 to 5.87)                            | 4.91<br>(3.27 to 6.54)                           | 4.05<br>(2.38 to 5.60)                             | 0.16<br>(0.09 to 0.21)                     | 0.24<br>(0.12 to 0.28)                     | 0.24<br>(0.16 to 0.33)                     | 0.18<br>(0.11 to 0.25)                       |
| Coal workers pneumoconiosis                                   | 0.10<br>(0.05 to 0.41)                            | 0.10<br>(0.04 to 0.41)                            | 0.08<br>(0.03 to 0.26)                           | 0.11<br>(0.05 to 0.46)                             | 0.01<br>(0.00 to 0.02)                     | 0.01<br>(0.00 to 0.03)                     | 0.01<br>(0.00 to 0.02)                     | 0.01<br>(0.00 to 0.03)                       |
| Other pneumoconiosis                                          | 12.75<br>(7.23 to 15.83)                          | 8.34<br>(4.97 to 11.86)                           | 5.90<br>(3.79 to 8.41)                           | 8.99<br>(5.40 to 12.94)                            | 0.78<br>(0.45 to 0.96)                     | 0.62<br>(0.36 to 0.87)                     | 0.49<br>(0.30 to 0.72)                     | 0.63<br>(0.37 to 0.90)                       |
| Asthma                                                        | 819.53<br>(639.38 to 956.93)                      | 532.06<br>(247.61 to 1,036.18)                    | 277.73<br>(129.96 to 519.65)                     | 682.09<br>(303.25 to 1,295.10)                     | 52.51<br>(36.58 to 61.95)                  | 40.45<br>(18.17 to 78.01)                  | 23.23<br>(10.58 to 44.78)                  | 49.02<br>(21.73 to 93.77)                    |
| Interstitial lung disease and pulmonary sarcoidosis           | 182.50<br>(145.03 to 242.03)                      | 262.24<br>(189.47 to 367.27)                      | 395.93<br>(300.21 to 545.20)                     | 228.04<br>(168.08 to 321.12)                       | 8.64<br>(6.92 to 11.99)                    | 14.76<br>(10.52 to 21.85)                  | 23.74<br>(17.31 to 34.80)                  | 12.35<br>(8.84 to 18.57)                     |
| Other chronic respiratory diseases                            | 38.35<br>(29.14 to 59.79)                         | 39.37<br>(26.08 to 70.18)                         | 37.58<br>(25.06 to 66.18)                        | 39.63<br>(26.06 to 70.82)                          | 1.24<br>(0.90 to 2.09)                     | 1.64<br>(1.02 to 3.12)                     | 1.71<br>(1.07 to 3.19)                     | 1.56<br>(0.97 to 2.95)                       |
| <b>Cirrhosis and other chronic liver diseases</b>             | <b>6,010.33</b><br><b>(5,072.92 to 6,903.47)</b>  | <b>5,283.81</b><br><b>(4,173.55 to 6,326.39)</b>  | <b>4,168.50</b><br><b>(3,297.77 to 5,034.57)</b> | <b>5,664.40</b><br><b>(4,585.84 to 6,776.19)</b>   | <b>229.73</b><br><b>(194.87 to 261.53)</b> | <b>225.06</b><br><b>(182.71 to 263.99)</b> | <b>184.67</b><br><b>(148.44 to 217.56)</b> | <b>234.91</b><br><b>(193.16 to 274.84)</b>   |
| Cirrhosis and other chronic liver diseases due to hepatitis B | 1,135.25<br>(883.07 to 1,443.03)                  | 1,029.50<br>(769.47 to 1,347.21)                  | 830.96<br>(611.41 to 1,074.12)                   | 1,052.96<br>(795.04 to 1,382.49)                   | 42.97<br>(33.59 to 54.64)                  | 42.96<br>(32.19 to 55.34)                  | 35.99<br>(27.05 to 46.29)                  | 42.88<br>(32.82 to 54.88)                    |
| Cirrhosis and other chronic liver diseases due to hepatitis C | 1,701.78<br>(1,172.79 to 2,282.61)                | 1,599.80<br>(1,085.36 to 2,164.34)                | 1,269.94<br>(846.15 to 1,749.05)                 | 1,644.38<br>(1,098.30 to 2,253.94)                 | 64.55<br>(44.24 to 85.48)                  | 66.41<br>(45.38 to 89.93)                  | 54.51<br>(36.93 to 73.95)                  | 66.75<br>(45.05 to 90.83)                    |



|                                                                |                                                            |                                                            |                                                            |                                                            |                                                      |                                                      |                                                      |                                                      |
|----------------------------------------------------------------|------------------------------------------------------------|------------------------------------------------------------|------------------------------------------------------------|------------------------------------------------------------|------------------------------------------------------|------------------------------------------------------|------------------------------------------------------|------------------------------------------------------|
|                                                                | 2,058.46<br>(1,559.48 to<br>2,590.30)                      | 1,687.02<br>(1,243.34 to<br>2,228.51)                      | 1,288.37<br>(936.94 to<br>1,667.04)                        | 1,974.74<br>(1,425.18 to<br>2,561.99)                      | 80.34<br>(60.53 to<br>100.85)                        | 73.40<br>(54.30 to<br>94.12)                         | 58.60<br>(42.30 to<br>75.80)                         | 83.08<br>(61.02 to<br>106.68)                        |
| Cirrhosis and other chronic liver diseases due to alcohol use  |                                                            |                                                            |                                                            |                                                            |                                                      |                                                      |                                                      |                                                      |
|                                                                | 1,114.84<br>(914.37 to<br>1,351.39)                        | 967.50<br>(739.41 to<br>1,216.91)                          | 779.23<br>(597.43 to<br>982.26)                            | 992.32<br>(764.04 to<br>1,258.34)                          | 41.88<br>(34.54 to<br>50.40)                         | 42.30<br>(32.85 to<br>52.55)                         | 35.57<br>(27.17 to<br>44.24)                         | 42.20<br>(32.95 to<br>52.87)                         |
| Cirrhosis and other chronic liver diseases due to other causes |                                                            |                                                            |                                                            |                                                            |                                                      |                                                      |                                                      |                                                      |
| <b>Digestive diseases</b>                                      | <b>4,689.81</b><br><b>(4,223.41 to</b><br><b>5,222.27)</b> | <b>4,770.57</b><br><b>(3,869.16 to</b><br><b>5,712.63)</b> | <b>4,065.92</b><br><b>(3,321.13 to</b><br><b>4,799.90)</b> | <b>4,901.33</b><br><b>(3,996.45 to</b><br><b>5,898.07)</b> | <b>242.65</b><br><b>(219.62 to</b><br><b>272.14)</b> | <b>298.76</b><br><b>(244.48 to</b><br><b>358.11)</b> | <b>275.79</b><br><b>(222.54 to</b><br><b>328.59)</b> | <b>292.39</b><br><b>(238.05 to</b><br><b>352.10)</b> |
| Peptic ulcer disease                                           | 952.95<br>(813.53 to<br>1,134.44)                          | 710.67<br>(478.27 to<br>1,006.32)                          | 421.66<br>(287.55 to<br>594.80)                            | 765.75<br>(517.42 to<br>1,091.85)                          | 50.62<br>(43.40 to<br>60.96)                         | 44.56<br>(30.57 to<br>61.53)                         | 28.50<br>(19.51 to<br>39.85)                         | 46.11<br>(31.69 to<br>64.67)                         |

| Macedonia                                  |                                      |                                       |                                       |                                       |                              |                                    |                                    |                                  |
|--------------------------------------------|--------------------------------------|---------------------------------------|---------------------------------------|---------------------------------------|------------------------------|------------------------------------|------------------------------------|----------------------------------|
| Cause                                      | YLLs (actual counts)                 |                                       |                                       |                                       | Deaths (actual counts)       |                                    |                                    |                                  |
|                                            | 2016                                 | 2040 Forecast                         | 2040 Better Scenario                  | 2040 Worse Scenario                   | 2016                         | 2040 Forecast                      | 2040 Better Scenario               | 2040 Worse Scenario              |
| Gastritis and duodenitis                   | 21.56<br>(17.94 to 25.74)            | 25.59<br>(19.58 to 32.78)             | 19.91<br>(15.21 to 25.91)             | 25.70<br>(19.78 to 32.58)             | 1.20<br>(0.99 to 1.45)       | 1.79<br>(1.33 to 2.34)             | 1.53<br>(1.13 to 2.04)             | 1.70<br>(1.27 to 2.19)           |
| Appendicitis                               | 82.47<br>(59.82 to 99.18)            | 65.56<br>(46.08 to 87.86)             | 43.59<br>(30.93 to 58.50)             | 68.99<br>(49.02 to 92.77)             | 3.90<br>(2.92 to 4.80)       | 3.85<br>(2.68 to 5.23)             | 2.73<br>(1.91 to 3.80)             | 3.88<br>(2.79 to 5.21)           |
| Paralytic ileus and intestinal obstruction | 1,372.96<br>(971.89 to 1,608.84)     | 1,468.07<br>(999.68 to 1,785.14)      | 1,544.21<br>(1,059.18 to 1,878.17)    | 1,375.13<br>(945.62 to 1,666.70)      | 74.19<br>(52.18 to 86.80)    | 97.81<br>(67.26 to 120.69)         | 110.39<br>(75.05 to 135.98)        | 87.71<br>(59.17 to 108.06)       |
| Inguinal, femoral, and abdominal hernia    | 150.44<br>(101.72 to 189.95)         | 123.22<br>(81.06 to 164.22)           | 104.30<br>(70.44 to 142.86)           | 120.70<br>(77.12 to 158.36)           | 9.06<br>(5.95 to 11.84)      | 8.79<br>(5.73 to 11.93)            | 7.98<br>(5.37 to 11.01)            | 8.26<br>(5.33 to 11.07)          |
| Inflammatory bowel disease                 | 125.33<br>(87.46 to 151.29)          | 107.87<br>(80.05 to 132.57)           | 105.93<br>(80.18 to 129.90)           | 104.91<br>(77.56 to 128.27)           | 4.65<br>(3.79 to 5.51)       | 5.22<br>(4.21 to 6.36)             | 5.55<br>(4.38 to 7.10)             | 4.85<br>(3.98 to 5.85)           |
| Vascular intestinal disorders              | 617.88<br>(523.76 to 838.78)         | 821.72<br>(650.62 to 1,156.86)        | 751.36<br>(577.00 to 1,080.91)        | 795.11<br>(640.88 to 1,087.01)        | 35.08<br>(29.10 to 49.79)    | 53.75<br>(42.36 to 78.92)          | 52.32<br>(39.88 to 78.96)          | 50.15<br>(39.80 to 71.44)        |
| Gallbladder and biliary diseases           | 218.78<br>(178.58 to 320.26)         | 294.38<br>(142.71 to 574.39)          | 200.03<br>(98.61 to 387.78)           | 367.68<br>(176.46 to 703.00)          | 13.33<br>(10.75 to 20.82)    | 21.08<br>(10.08 to 41.96)          | 15.64<br>(7.45 to 31.23)           | 24.89<br>(11.65 to 49.36)        |
| Pancreatitis                               | 940.43<br>(800.49 to 1,183.62)       | 904.72<br>(610.81 to 1,417.25)        | 646.09<br>(446.95 to 972.70)          | 1,036.11<br>(661.49 to 1,665.91)      | 39.42<br>(33.12 to 49.92)    | 45.33<br>(31.39 to 72.36)          | 34.43<br>(24.24 to 52.21)          | 49.57<br>(32.92 to 79.11)        |
| Other digestive diseases                   | 207.01<br>(176.06 to 251.48)         | 248.76<br>(201.65 to 316.68)          | 228.85<br>(180.35 to 298.56)          | 241.25<br>(197.65 to 301.32)          | 11.21<br>(9.44 to 13.99)     | 16.58<br>(13.18 to 21.55)          | 16.72<br>(12.83 to 22.39)          | 15.27<br>(12.29 to 19.68)        |
| Neurological disorders                     | 10,135.82<br>(8,857.80 to 11,834.18) | 15,626.87<br>(11,907.09 to 21,022.39) | 16,987.63<br>(12,928.66 to 22,193.98) | 15,379.46<br>(11,367.65 to 21,380.22) | 819.24<br>(703.53 to 965.02) | 1,489.88<br>(1,060.39 to 2,082.23) | 1,753.46<br>(1,257.27 to 2,391.10) | 1,402.85<br>(970.31 to 2,062.18) |
| Alzheimer's disease and other dementias    | 6,762.76<br>(5,606.00 to 8,388.08)   | 11,416.63<br>(7,953.38 to 16,480.13)  | 12,398.13<br>(8,689.55 to 17,424.80)  | 11,368.42<br>(7,763.58 to 17,216.58)  | 654.45<br>(543.18 to 798.22) | 1,223.49<br>(823.09 to 1,793.11)   | 1,429.82<br>(971.77 to 2,043.23)   | 1,165.91<br>(743.91 to 1,818.57) |
| Parkinson's disease                        | 1,359.53<br>(1,008.61 to 1,767.87)   | 2,293.22<br>(1,686.44 to 3,029.20)    | 2,809.13<br>(2,048.21 to 3,650.73)    | 2,012.36<br>(1,455.22 to 2,665.59)    | 108.39<br>(80.20 to 140.01)  | 199.97<br>(142.88 to 270.36)       | 258.24<br>(186.96 to 342.28)       | 170.13<br>(121.86 to 231.48)     |
| Epilepsy                                   | 936.76<br>(839.99 to 1,047.82)       | 878.66<br>(606.33 to 1,234.04)        | 737.66<br>(529.11 to 1,012.59)        | 977.95<br>(654.31 to 1,406.14)        | 24.71<br>(22.22 to 27.31)    | 29.46<br>(21.04 to 40.34)          | 26.31<br>(19.29 to 35.16)          | 31.58<br>(21.56 to 44.24)        |
| Multiple sclerosis                         | 420.79<br>(364.00 to 509.22)         | 399.74<br>(289.32 to 535.21)          | 392.84<br>(290.47 to 515.12)          | 394.64<br>(282.60 to 533.02)          | 13.63<br>(11.84 to 16.70)    | 15.24<br>(11.42 to 20.01)          | 16.00<br>(12.11 to 20.70)          | 14.55<br>(10.82 to 19.15)        |
| Motor neuron disease                       | 122.70<br>(107.47 to 138.01)         | 176.62<br>(146.43 to 208.30)          | 174.93<br>(142.33 to 208.98)          | 173.27<br>(144.61 to 204.38)          | 4.27<br>(3.73 to 4.76)       | 6.82<br>(5.68 to 7.98)             | 6.98<br>(5.68 to 8.27)             | 6.55<br>(5.51 to 7.67)           |
| Other neurological disorders               | 533.28<br>(473.68 to 598.38)         | 462.00<br>(387.17 to 553.99)          | 474.94<br>(395.56 to 571.05)          | 452.83<br>(382.45 to 541.54)          | 13.88<br>(12.58 to 15.33)    | 14.90<br>(12.84 to 17.01)          | 16.12<br>(13.69 to 18.56)          | 14.12<br>(12.23 to 16.11)        |
| Mental disorders                           | 1,207.23<br>(818.02 to 1,477.75)     | 1,291.69<br>(855.33 to 1,713.45)      | 1,563.94<br>(1,037.63 to 2,124.00)    | 1,247.18<br>(832.67 to 1,642.36)      | 32.32<br>(22.62 to 39.58)    | 38.11<br>(26.42 to 48.01)          | 47.04<br>(32.67 to 60.21)          | 36.18<br>(25.25 to 46.14)        |
| Alcohol use disorders                      | 670.67<br>(494.97 to 962.38)         | 651.89<br>(461.29 to 948.06)          | 719.05<br>(501.70 to 1,060.87)        | 648.28<br>(463.55 to 934.61)          | 20.92<br>(15.14 to 28.88)    | 22.65<br>(15.97 to 31.98)          | 25.72<br>(17.68 to 37.30)          | 22.08<br>(15.82 to 31.08)        |
| Drug use disorders                         | 535.37<br>(254.85 to 716.53)         | 638.44<br>(316.26 to 956.75)          | 843.42<br>(441.86 to 1,299.36)        | 597.57<br>(289.10 to 913.98)          | 11.38<br>(6.15 to 14.72)     | 15.43<br>(8.97 to 21.24)           | 21.30<br>(12.67 to 30.37)          | 14.08<br>(8.00 to 19.79)         |
| Opioid use disorders                       | 312.78<br>(171.60 to 413.41)         | 287.71<br>(171.92 to 440.39)          | 308.68<br>(191.85 to 486.10)          | 282.03<br>(165.49 to 434.14)          | 6.45<br>(3.93 to 8.36)       | 6.76<br>(4.46 to 9.73)             | 7.62<br>(5.29 to 10.95)            | 6.46<br>(4.22 to 9.30)           |

|                           |                                |                                |                                 |                                |                           |                            |                             |                           |
|---------------------------|--------------------------------|--------------------------------|---------------------------------|--------------------------------|---------------------------|----------------------------|-----------------------------|---------------------------|
|                           | 8.90<br>(2.81 to<br>14.61)     | 18.89<br>(6.01 to<br>36.05)    | 25.27<br>(8.64 to<br>48.28)     | 17.60<br>(5.54 to<br>33.57)    | 0.19<br>(0.07 to<br>0.29) | 0.41<br>(0.15 to<br>0.72)  | 0.56<br>(0.22 to<br>0.97)   | 0.38<br>(0.14 to<br>0.68) |
| Cocaine use disorders     | 22.64<br>(6.71 to<br>40.16)    | 54.82<br>(16.12 to<br>115.06)  | 86.50<br>(27.02 to<br>178.28)   | 49.15<br>(14.14 to<br>104.68)  | 0.42<br>(0.13 to<br>0.73) | 1.05<br>(0.33 to<br>2.11)  | 1.69<br>(0.59 to<br>3.28)   | 0.94<br>(0.30 to<br>1.87) |
| Amphetamine use disorders | 191.05<br>(56.70 to<br>284.94) | 277.03<br>(95.32 to<br>455.74) | 422.96<br>(158.69 to<br>700.15) | 248.79<br>(83.52 to<br>417.85) | 4.32<br>(1.65 to<br>5.99) | 7.21<br>(3.22 to<br>10.84) | 11.43<br>(5.57 to<br>16.88) | 6.30<br>(2.79 to<br>9.62) |
| Other drug use disorders  | 1.19<br>(0.93 to<br>1.91)      | 1.35<br>(0.95 to<br>2.11)      | 1.48<br>(1.00 to<br>2.46)       | 1.33<br>(0.94 to<br>2.07)      | 0.02<br>(0.02 to<br>0.04) | 0.03<br>(0.02 to<br>0.04)  | 0.03<br>(0.02 to<br>0.05)   | 0.03<br>(0.02 to<br>0.04) |
| Eating disorders          |                                |                                |                                 |                                |                           |                            |                             |                           |

| Macedonia                                                  |                                              |                                              |                                              |                                              |                                           |                                           |                                         |                                           |
|------------------------------------------------------------|----------------------------------------------|----------------------------------------------|----------------------------------------------|----------------------------------------------|-------------------------------------------|-------------------------------------------|-----------------------------------------|-------------------------------------------|
| Cause                                                      | YLLs (actual counts)                         |                                              |                                              |                                              | Deaths (actual counts)                    |                                           |                                         |                                           |
|                                                            | 2016                                         | 2040 Forecast                                | 2040 Better Scenario                         | 2040 Worse Scenario                          | 2016                                      | 2040 Forecast                             | 2040 Better Scenario                    | 2040 Worse Scenario                       |
| <b>Diabetes, urogenital, blood, and endocrine diseases</b> | <b>23,759.86</b><br>(21,805.12 to 25,568.74) | <b>27,518.76</b><br>(18,762.28 to 44,119.02) | <b>18,967.99</b><br>(12,800.20 to 30,166.02) | <b>31,695.53</b><br>(21,329.10 to 51,171.67) | <b>1,319.12</b><br>(1,208.05 to 1,423.14) | <b>1,790.28</b><br>(1,241.79 to 2,699.01) | <b>1,314.61</b><br>(886.83 to 2,031.60) | <b>1,977.79</b><br>(1,368.75 to 3,023.66) |
| Diabetes mellitus                                          | 15,996.86<br>(14,402.58 to 17,488.24)        | 16,151.38<br>(10,371.13 to 24,352.45)        | 10,651.75<br>(6,753.89 to 15,754.31)         | 18,326.93<br>(11,319.84 to 27,685.85)        | 930.25<br>(837.87 to 1,017.46)            | 1,087.75<br>(711.17 to 1,574.94)          | 768.87<br>(495.46 to 1,105.34)          | 1,180.01<br>(765.19 to 1,728.34)          |
| Acute glomerulonephritis                                   | 11.27<br>(10.14 to 12.72)                    | 9.00<br>(6.80 to 12.21)                      | 6.91<br>(5.22 to 9.26)                       | 9.56<br>(7.31 to 12.93)                      | 0.24<br>(0.22 to 0.26)                    | 0.22<br>(0.17 to 0.29)                    | 0.18<br>(0.14 to 0.25)                  | 0.23<br>(0.18 to 0.31)                    |
| Chronic kidney disease                                     | 6,766.40<br>(6,102.90 to 7,421.90)           | 10,230.15<br>(4,628.76 to 26,850.38)         | 7,281.70<br>(3,511.36 to 18,625.98)          | 12,247.90<br>(5,453.03 to 31,795.66)         | 346.96<br>(315.13 to 383.31)              | 635.95<br>(290.76 to 1,586.45)            | 482.01<br>(232.64 to 1,156.60)          | 735.34<br>(330.50 to 1,893.00)            |
| Chronic kidney disease due to diabetes mellitus            | 2,013.34<br>(1,707.46 to 2,317.89)           | 3,349.63<br>(1,467.85 to 9,936.55)           | 2,379.19<br>(1,096.80 to 7,055.00)           | 4,059.22<br>(1,732.68 to 12,363.83)          | 98.25<br>(83.98 to 113.72)                | 188.68<br>(80.51 to 554.73)               | 140.51<br>(63.15 to 403.29)             | 222.29<br>(93.59 to 637.37)               |
| Chronic kidney disease due to hypertension                 | 848.92<br>(710.92 to 1,026.16)               | 1,676.84<br>(742.48 to 4,394.42)             | 1,331.00<br>(619.11 to 3,253.30)             | 1,921.92<br>(826.87 to 5,040.99)             | 59.19<br>(49.54 to 71.55)                 | 134.92<br>(62.41 to 305.89)               | 114.96<br>(55.58 to 248.87)             | 148.36<br>(67.13 to 336.07)               |
| Chronic kidney disease due to glomerulonephritis           | 1,728.26<br>(1,484.23 to 1,972.98)           | 2,088.55<br>(995.32 to 5,384.56)             | 1,387.67<br>(707.10 to 3,517.45)             | 2,532.44<br>(1,185.08 to 6,344.91)           | 79.49<br>(68.46 to 92.18)                 | 120.25<br>(54.75 to 305.50)               | 83.96<br>(39.87 to 212.19)              | 141.86<br>(64.97 to 365.94)               |
| Chronic kidney disease due to other and unspecified causes | 2,175.88<br>(1,880.28 to 2,485.73)           | 3,115.13<br>(1,416.58 to 7,801.63)           | 2,183.83<br>(1,066.32 to 5,373.77)           | 3,734.33<br>(1,671.60 to 9,365.82)           | 110.03<br>(95.19 to 127.20)               | 192.10<br>(84.78 to 500.11)               | 142.58<br>(66.66 to 346.98)             | 222.84<br>(97.90 to 565.64)               |
| Urinary diseases and male infertility                      | 214.62<br>(194.10 to 235.72)                 | 364.25<br>(295.36 to 452.32)                 | 308.68<br>(239.84 to 381.50)                 | 354.39<br>(291.28 to 425.44)                 | 14.06<br>(12.60 to 15.56)                 | 29.99<br>(23.67 to 38.00)                 | 27.69<br>(21.00 to 35.63)               | 27.74<br>(21.61 to 34.25)                 |
| Urinary tract infections                                   | 177.24<br>(157.36 to 198.93)                 | 322.02<br>(258.92 to 405.58)                 | 277.24<br>(214.93 to 345.58)                 | 311.93<br>(253.52 to 380.89)                 | 11.91<br>(10.49 to 13.36)                 | 26.81<br>(21.16 to 34.43)                 | 25.06<br>(18.80 to 32.47)               | 24.74<br>(19.16 to 30.93)                 |
| Urolithiasis                                               | 9.56<br>(6.58 to 11.86)                      | 11.74<br>(7.28 to 16.86)                     | 8.20<br>(4.98 to 11.53)                      | 12.31<br>(7.67 to 17.24)                     | 0.40<br>(0.27 to 0.51)                    | 0.65<br>(0.40 to 0.94)                    | 0.49<br>(0.30 to 0.73)                  | 0.64<br>(0.39 to 0.93)                    |
| Other urinary diseases                                     | 27.82<br>(19.53 to 35.39)                    | 30.50<br>(18.48 to 45.32)                    | 23.24<br>(13.80 to 35.01)                    | 30.16<br>(18.61 to 45.04)                    | 1.76<br>(1.23 to 2.32)                    | 2.54<br>(1.55 to 3.84)                    | 2.14<br>(1.27 to 3.26)                  | 2.36<br>(1.39 to 3.61)                    |
| Gynecological diseases                                     | 1.70<br>(1.38 to 2.14)                       | 1.27<br>(0.82 to 1.97)                       | 0.65<br>(0.44 to 0.96)                       | 1.44<br>(0.95 to 2.22)                       | 0.07<br>(0.06 to 0.08)                    | 0.07<br>(0.05 to 0.11)                    | 0.04<br>(0.03 to 0.07)                  | 0.08<br>(0.05 to 0.12)                    |
| Uterine fibroids                                           | 0.14<br>(0.08 to 0.21)                       | 0.17<br>(0.08 to 0.31)                       | 0.11<br>(0.05 to 0.20)                       | 0.18<br>(0.09 to 0.33)                       | 0.01<br>(0.00 to 0.01)                    | 0.01<br>(0.00 to 0.02)                    | 0.01<br>(0.00 to 0.01)                  | 0.01<br>(0.00 to 0.02)                    |
| Polycystic ovarian syndrome                                | 0.62<br>(0.42 to 0.90)                       | 0.23<br>(0.09 to 0.49)                       | 0.08<br>(0.03 to 0.17)                       | 0.30<br>(0.12 to 0.61)                       | 0.02<br>(0.01 to 0.02)                    | 0.01<br>(0.00 to 0.01)                    | 0.00<br>(0.00 to 0.00)                  | 0.01<br>(0.00 to 0.01)                    |
| Endometriosis                                              | 0.03<br>(0.01 to 0.05)                       | 0.02<br>(0.01 to 0.06)                       | 0.01<br>(0.00 to 0.03)                       | 0.03<br>(0.01 to 0.07)                       | 0.00<br>(0.00 to 0.00)                    | 0.00<br>(0.00 to 0.00)                    | 0.00<br>(0.00 to 0.00)                  | 0.00<br>(0.00 to 0.00)                    |
| Genital prolapse                                           | 0.23<br>(0.09 to 0.35)                       | 0.13<br>(0.05 to 0.24)                       | 0.07<br>(0.03 to 0.13)                       | 0.15<br>(0.05 to 0.27)                       | 0.01<br>(0.00 to 0.02)                    | 0.01<br>(0.00 to 0.01)                    | 0.00<br>(0.00 to 0.01)                  | 0.01<br>(0.00 to 0.02)                    |
| Other gynecological diseases                               | 0.68<br>(0.51 to 0.94)                       | 0.71<br>(0.43 to 1.11)                       | 0.38<br>(0.24 to 0.60)                       | 0.79<br>(0.48 to 1.23)                       | 0.03<br>(0.03 to 0.05)                    | 0.05<br>(0.03 to 0.08)                    | 0.03<br>(0.02 to 0.05)                  | 0.05<br>(0.03 to 0.08)                    |
| Hemoglobinopathies and hemolytic anemias                   | 308.01<br>(240.77 to 353.97)                 | 262.20<br>(199.61 to 331.01)                 | 191.09<br>(146.24 to 240.56)                 | 270.33<br>(208.80 to 338.57)                 | 13.98<br>(11.38 to 17.11)                 | 16.27<br>(12.64 to 20.81)                 | 13.07<br>(9.81 to 16.83)                | 15.85<br>(12.48 to 20.48)                 |
| Thalassemias                                               | 16.84<br>(10.89 to 24.20)                    | 4.18<br>(2.29 to 7.34)                       | 3.84<br>(2.13 to 6.60)                       | 4.34<br>(2.37 to 7.51)                       | 0.21<br>(0.14 to 0.30)                    | 0.05<br>(0.03 to 0.09)                    | 0.05<br>(0.03 to 0.08)                  | 0.06<br>(0.03 to 0.10)                    |

|                                                   |                                 |                                 |                                 |                                 |                              |                              |                              |                              |
|---------------------------------------------------|---------------------------------|---------------------------------|---------------------------------|---------------------------------|------------------------------|------------------------------|------------------------------|------------------------------|
|                                                   | 50.83<br>(35.25 to<br>62.47)    | 35.72<br>(24.28 to<br>47.76)    | 23.86<br>(16.18 to<br>31.67)    | 39.16<br>(26.38 to<br>52.87)    | 1.04<br>(0.74 to<br>1.26)    | 0.91<br>(0.65 to<br>1.20)    | 0.62<br>(0.43 to<br>0.81)    | 0.99<br>(0.70 to<br>1.30)    |
| Sickle cell disorders                             |                                 |                                 |                                 |                                 |                              |                              |                              |                              |
|                                                   | 72.36<br>(50.21 to<br>89.94)    | 72.66<br>(49.72 to<br>99.26)    | 45.86<br>(32.79 to<br>61.06)    | 78.96<br>(53.89 to<br>106.49)   | 2.03<br>(1.46 to<br>2.58)    | 2.84<br>(1.97 to<br>3.93)    | 1.87<br>(1.31 to<br>2.57)    | 2.99<br>(2.08 to<br>4.06)    |
| G6PD deficiency                                   |                                 |                                 |                                 |                                 |                              |                              |                              |                              |
|                                                   | 167.97<br>(136.41 to<br>206.34) | 149.64<br>(114.68 to<br>195.67) | 117.53<br>(87.74 to<br>152.91)  | 147.86<br>(115.84 to<br>194.63) | 10.69<br>(8.82 to<br>13.38)  | 12.46<br>(9.48 to<br>16.19)  | 10.53<br>(7.87 to<br>13.84)  | 11.81<br>(9.05 to<br>15.58)  |
| Other hemoglobinopathies and hemolytic anemias    |                                 |                                 |                                 |                                 |                              |                              |                              |                              |
|                                                   | 461.01<br>(380.26 to<br>638.96) | 500.51<br>(405.39 to<br>702.38) | 527.21<br>(425.86 to<br>730.70) | 484.97<br>(395.03 to<br>680.73) | 13.57<br>(11.59 to<br>19.26) | 20.02<br>(16.23 to<br>28.27) | 22.75<br>(18.28 to<br>31.80) | 18.53<br>(15.10 to<br>25.52) |
| Endocrine, metabolic, blood, and immune disorders |                                 |                                 |                                 |                                 |                              |                              |                              |                              |

| Macedonia                                     |                                    |                                    |                                  |                                    |                           |                           |                           |                           |
|-----------------------------------------------|------------------------------------|------------------------------------|----------------------------------|------------------------------------|---------------------------|---------------------------|---------------------------|---------------------------|
| Cause                                         | YLLs (actual counts)               |                                    |                                  |                                    | Deaths (actual counts)    |                           |                           |                           |
|                                               | 2016                               | 2040 Forecast                      | 2040 Better Scenario             | 2040 Worse Scenario                | 2016                      | 2040 Forecast             | 2040 Better Scenario      | 2040 Worse Scenario       |
| Musculoskeletal disorders                     | 220.37<br>(176.87 to 263.02)       | 276.54<br>(213.84 to 351.49)       | 236.42<br>(182.54 to 300.91)     | 280.93<br>(213.94 to 358.00)       | 8.70<br>(7.21 to 11.09)   | 13.21<br>(10.32 to 17.79) | 11.76<br>(8.99 to 15.77)  | 13.01<br>(10.06 to 17.81) |
| Rheumatoid arthritis                          | 41.12<br>(30.67 to 58.38)          | 49.97<br>(30.75 to 78.33)          | 29.42<br>(18.79 to 47.00)        | 54.53<br>(33.87 to 86.29)          | 2.10<br>(1.54 to 2.98)    | 3.12<br>(1.93 to 4.92)    | 1.97<br>(1.23 to 3.06)    | 3.29<br>(2.10 to 5.17)    |
| Other musculoskeletal disorders               | 179.24<br>(142.77 to 213.08)       | 226.57<br>(175.14 to 285.27)       | 207.00<br>(159.72 to 259.95)     | 226.39<br>(174.97 to 280.91)       | 6.61<br>(5.47 to 8.41)    | 10.09<br>(7.84 to 13.58)  | 9.79<br>(7.51 to 13.13)   | 9.72<br>(7.61 to 12.97)   |
| Other non-communicable diseases               | 4,553.60<br>(3,032.70 to 6,829.09) | 2,181.12<br>(1,233.51 to 3,819.24) | 1,263.41<br>(743.16 to 2,155.08) | 2,556.92<br>(1,426.65 to 4,416.44) | 58.45<br>(40.64 to 84.74) | 33.67<br>(22.21 to 52.51) | 21.93<br>(15.16 to 32.56) | 37.97<br>(24.24 to 59.71) |
| Congenital birth defects                      | 4,151.31<br>(2,747.77 to 6,265.28) | 1,925.47<br>(1,056.23 to 3,434.29) | 1,061.00<br>(605.81 to 1,812.08) | 2,284.70<br>(1,248.89 to 4,036.54) | 51.59<br>(35.28 to 76.23) | 25.26<br>(14.86 to 42.55) | 14.23<br>(8.77 to 23.36)  | 29.75<br>(17.38 to 50.10) |
| Neural tube defects                           | 157.43<br>(90.06 to 256.82)        | 39.95<br>(15.54 to 86.12)          | 19.01<br>(7.52 to 42.17)         | 49.09<br>(19.15 to 104.93)         | 1.89<br>(1.11 to 3.04)    | 0.50<br>(0.21 to 1.04)    | 0.24<br>(0.10 to 0.50)    | 0.61<br>(0.26 to 1.25)    |
| Congenital heart anomalies                    | 2,162.52<br>(1,427.88 to 3,269.04) | 904.60<br>(469.27 to 1,633.94)     | 408.28<br>(218.41 to 722.05)     | 1,113.41<br>(590.75 to 1,959.70)   | 26.89<br>(18.31 to 39.72) | 11.80<br>(6.55 to 20.45)  | 5.37<br>(3.12 to 9.08)    | 14.47<br>(8.14 to 24.65)  |
| Orofacial clefts                              | 4.93<br>(2.49 to 9.12)             | 2.39<br>(0.80 to 5.30)             | 0.89<br>(0.30 to 1.99)           | 3.08<br>(0.99 to 6.83)             | 0.06<br>(0.03 to 0.11)    | 0.03<br>(0.01 to 0.06)    | 0.01<br>(0.00 to 0.02)    | 0.04<br>(0.01 to 0.08)    |
| Down syndrome                                 | 286.40<br>(105.76 to 529.68)       | 175.74<br>(63.95 to 356.39)        | 175.61<br>(67.68 to 339.00)      | 178.65<br>(62.94 to 366.58)        | 3.92<br>(1.63 to 6.32)    | 2.70<br>(1.15 to 4.90)    | 2.74<br>(1.25 to 4.78)    | 2.72<br>(1.14 to 4.96)    |
| Other chromosomal abnormalities               | 139.79<br>(54.76 to 469.76)        | 162.07<br>(55.35 to 526.89)        | 116.50<br>(40.81 to 352.73)      | 178.61<br>(61.29 to 568.01)        | 1.65<br>(0.64 to 5.62)    | 1.99<br>(0.68 to 6.48)    | 1.44<br>(0.51 to 4.53)    | 2.19<br>(0.76 to 7.12)    |
| Congenital musculoskeletal and limb anomalies | 160.39<br>(71.95 to 270.69)        | 78.26<br>(25.09 to 162.01)         | 41.37<br>(13.21 to 85.46)        | 93.57<br>(30.58 to 196.12)         | 1.88<br>(0.86 to 3.16)    | 0.92<br>(0.30 to 1.89)    | 0.49<br>(0.16 to 1.00)    | 1.10<br>(0.37 to 2.29)    |
| Urogenital congenital anomalies               | 71.11<br>(44.24 to 151.76)         | 36.12<br>(21.38 to 73.46)          | 21.62<br>(13.22 to 41.51)        | 41.30<br>(23.65 to 83.75)          | 1.07<br>(0.75 to 1.97)    | 0.65<br>(0.42 to 1.07)    | 0.40<br>(0.27 to 0.62)    | 0.73<br>(0.47 to 1.19)    |
| Digestive congenital anomalies                | 362.56<br>(185.88 to 594.41)       | 173.09<br>(63.45 to 377.10)        | 84.77<br>(30.31 to 186.79)       | 210.51<br>(74.88 to 466.83)        | 4.23<br>(2.17 to 6.92)    | 2.03<br>(0.75 to 4.39)    | 0.99<br>(0.36 to 2.18)    | 2.46<br>(0.89 to 5.45)    |
| Other congenital birth defects                | 806.18<br>(503.40 to 1,295.93)     | 353.25<br>(193.53 to 636.72)       | 192.95<br>(106.93 to 351.58)     | 416.48<br>(227.30 to 760.01)       | 10.02<br>(6.50 to 15.75)  | 4.64<br>(2.73 to 7.98)    | 2.56<br>(1.53 to 4.42)    | 5.44<br>(3.15 to 9.41)    |
| Skin and subcutaneous diseases                | 70.08<br>(43.98 to 103.47)         | 125.94<br>(79.65 to 184.73)        | 110.62<br>(70.04 to 160.86)      | 125.55<br>(78.68 to 185.80)        | 3.01<br>(1.85 to 4.45)    | 6.91<br>(4.18 to 9.91)    | 6.64<br>(3.88 to 9.45)    | 6.52<br>(3.94 to 9.65)    |
| Cellulitis                                    | 10.07<br>(6.85 to 17.80)           | 23.12<br>(15.07 to 40.87)          | 22.02<br>(14.34 to 38.41)        | 22.76<br>(14.90 to 40.11)          | 0.38<br>(0.25 to 0.75)    | 1.07<br>(0.67 to 2.05)    | 1.09<br>(0.68 to 2.08)    | 1.01<br>(0.63 to 1.96)    |
| Pyoderma                                      | 40.51<br>(23.41 to 58.33)          | 76.57<br>(43.93 to 113.11)         | 66.96<br>(38.86 to 99.31)        | 76.42<br>(44.19 to 114.07)         | 1.70<br>(1.00 to 2.48)    | 4.24<br>(2.36 to 6.02)    | 4.12<br>(2.22 to 5.89)    | 3.98<br>(2.23 to 5.80)    |
| Decubitus ulcer                               | 10.26<br>(6.41 to 15.18)           | 13.32<br>(7.50 to 20.26)           | 10.45<br>(5.88 to 16.08)         | 13.43<br>(7.65 to 20.95)           | 0.55<br>(0.30 to 0.82)    | 0.95<br>(0.47 to 1.48)    | 0.82<br>(0.39 to 1.27)    | 0.90<br>(0.46 to 1.43)    |
| Other skin and subcutaneous diseases          | 9.20<br>(5.99 to 13.97)            | 12.92<br>(8.15 to 19.31)           | 11.19<br>(6.86 to 16.76)         | 12.95<br>(8.12 to 19.39)           | 0.38<br>(0.23 to 0.58)    | 1.19<br>(0.36 to 0.99)    | 0.61<br>(0.33 to 0.92)    | 0.62<br>(0.34 to 0.96)    |
| Sudden infant death syndrome                  | 332.25<br>(186.24 to 572.23)       | 129.71<br>(37.59 to 351.24)        | 91.79<br>(25.96 to 245.80)       | 146.67<br>(44.81 to 365.35)        | 3.86<br>(2.16 to 6.64)    | 1.50<br>(0.44 to 4.08)    | 1.06<br>(0.30 to 2.85)    | 1.70<br>(0.52 to 4.24)    |

|                          |                                          |                                          |                                         |                                          |                                 |                                 |                                 |                                 |
|--------------------------|------------------------------------------|------------------------------------------|-----------------------------------------|------------------------------------------|---------------------------------|---------------------------------|---------------------------------|---------------------------------|
| Injuries                 | 24,469.77<br>(22,353.72 to<br>26,747.91) | 18,188.10<br>(14,196.62 to<br>24,412.59) | 11,162.77<br>(8,745.38 to<br>14,213.71) | 20,539.77<br>(16,061.47 to<br>27,961.28) | 708.17<br>(646.72 to<br>767.42) | 671.44<br>(543.35 to<br>830.79) | 485.44<br>(374.67 to<br>587.30) | 709.80<br>(572.51 to<br>894.58) |
| Transport injuries       | 8,050.15<br>(7,217.18 to<br>9,019.76)    | 5,646.54<br>(3,933.32 to<br>8,237.05)    | 1,615.91<br>(1,111.80 to<br>2,382.63)   | 6,948.27<br>(4,756.23 to<br>10,436.15)   | 192.48<br>(174.62 to<br>212.83) | 155.35<br>(114.34 to<br>210.93) | 51.77<br>(37.79 to<br>70.32)    | 184.43<br>(131.99 to<br>257.47) |
| Road injuries            | 7,394.70<br>(6,620.38 to<br>8,245.82)    | 5,164.52<br>(3,618.29 to<br>7,585.93)    | 1,329.57<br>(923.10 to<br>1,945.15)     | 6,381.96<br>(4,391.60 to<br>9,609.55)    | 176.48<br>(160.15 to<br>195.17) | 141.82<br>(104.49 to<br>193.11) | 43.38<br>(32.21 to<br>58.57)    | 168.95<br>(120.67 to<br>237.75) |
| Pedestrian road injuries | 1,653.85<br>(1,376.73 to<br>2,035.67)    | 981.56<br>(655.39 to<br>1,470.04)        | 222.65<br>(154.05 to<br>326.10)         | 1,269.48<br>(838.10 to<br>1,912.94)      | 46.50<br>(39.43 to<br>57.39)    | 34.25<br>(23.28 to<br>47.92)    | 9.28<br>(6.62 to<br>13.14)      | 42.16<br>(29.23 to<br>60.85)    |

| Macedonia                                       |                                                  |                                                  |                                                  |                                                  |                                            |                                            |                                            |                                            |
|-------------------------------------------------|--------------------------------------------------|--------------------------------------------------|--------------------------------------------------|--------------------------------------------------|--------------------------------------------|--------------------------------------------|--------------------------------------------|--------------------------------------------|
| Cause                                           | YLLs (actual counts)                             |                                                  |                                                  |                                                  | Deaths (actual counts)                     |                                            |                                            |                                            |
|                                                 | 2016                                             | 2040 Forecast                                    | 2040 Better Scenario                             | 2040 Worse Scenario                              | 2016                                       | 2040 Forecast                              | 2040 Better Scenario                       | 2040 Worse Scenario                        |
| Cyclist road injuries                           | 263.02<br>(213.68 to 338.85)                     | 203.16<br>(125.81 to 319.95)                     | 73.02<br>(46.83 to 113.74)                       | 239.76<br>(143.21 to 381.54)                     | 6.71<br>(5.51 to 8.61)                     | 5.94<br>(3.86 to 9.16)                     | 2.69<br>(1.74 to 4.10)                     | 6.71<br>(4.22 to 10.43)                    |
| Motorcyclist road injuries                      | 744.87<br>(564.50 to 927.47)                     | 549.39<br>(326.12 to 950.30)                     | 251.81<br>(151.69 to 423.12)                     | 634.71<br>(368.74 to 1,126.46)                   | 14.87<br>(11.39 to 18.53)                  | 11.76<br>(7.37 to 18.81)                   | 6.15<br>(3.82 to 9.67)                     | 13.27<br>(8.06 to 21.88)                   |
| Motor vehicle road injuries                     | 4,695.54<br>(4,045.26 to 5,331.38)               | 3,381.43<br>(2,339.13 to 4,913.11)               | 768.13<br>(528.84 to 1,132.56)                   | 4,179.01<br>(2,789.45 to 6,186.42)               | 107.45<br>(91.42 to 120.80)                | 88.35<br>(63.52 to 120.56)                 | 24.65<br>(17.62 to 33.44)                  | 105.10<br>(73.30 to 147.90)                |
| Other road injuries                             | 37.41<br>(23.83 to 97.31)                        | 48.99<br>(24.47 to 139.58)                       | 13.96<br>(7.22 to 36.06)                         | 58.99<br>(28.52 to 170.45)                       | 0.95<br>(0.65 to 2.35)                     | 1.53<br>(4.06)                             | 0.62<br>(1.50)                             | 1.72<br>(0.87 to 4.61)                     |
| Other transport injuries                        | 655.45<br>(550.93 to 886.24)                     | 482.01<br>(300.25 to 762.04)                     | 286.33<br>(185.46 to 454.41)                     | 566.32<br>(353.44 to 946.01)                     | 15.99<br>(13.51 to 21.13)                  | 13.53<br>(8.89 to 20.45)                   | 8.39<br>(5.69 to 12.52)                    | 15.48<br>(10.22 to 24.33)                  |
| <b>Unintentional injuries</b>                   | <b>7,307.12</b><br><b>(6,436.71 to 8,095.37)</b> | <b>5,266.58</b><br><b>(4,180.95 to 6,458.78)</b> | <b>3,946.24</b><br><b>(3,110.44 to 4,662.58)</b> | <b>5,526.05</b><br><b>(4,451.33 to 6,702.01)</b> | <b>263.51</b><br><b>(220.88 to 288.91)</b> | <b>276.23</b><br><b>(210.79 to 333.65)</b> | <b>237.04</b><br><b>(170.96 to 284.69)</b> | <b>269.00</b><br><b>(204.26 to 321.98)</b> |
| Falls                                           | 2,196.50<br>(1,831.82 to 2,443.10)               | 2,095.27<br>(1,567.11 to 2,502.94)               | 1,829.70<br>(1,372.44 to 2,186.57)               | 2,041.44<br>(1,529.67 to 2,421.02)               | 119.94<br>(88.43 to 135.60)                | 157.29<br>(102.67 to 196.98)               | 148.82<br>(95.02 to 186.37)                | 145.36<br>(93.94 to 181.19)                |
| Drowning                                        | 1,240.07<br>(1,005.61 to 1,422.24)               | 602.64<br>(410.81 to 848.59)                     | 433.55<br>(307.75 to 589.87)                     | 664.98<br>(447.95 to 948.23)                     | 28.61<br>(22.61 to 32.07)                  | 17.66<br>(12.08 to 24.33)                  | 13.52<br>(18.08)                           | 18.83<br>(12.97 to 26.20)                  |
| Fire, heat, and hot substances                  | 488.28<br>(350.75 to 574.24)                     | 253.14<br>(160.23 to 346.31)                     | 169.31<br>(110.81 to 226.01)                     | 278.77<br>(177.50 to 390.44)                     | 16.87<br>(11.81 to 19.39)                  | 12.36<br>(7.91 to 16.39)                   | 9.22<br>(5.94 to 12.07)                    | 12.77<br>(8.13 to 17.22)                   |
| Poisonings                                      | 310.89<br>(241.31 to 383.21)                     | 118.46<br>(76.05 to 175.45)                      | 69.55<br>(45.56 to 98.44)                        | 135.98<br>(84.96 to 202.51)                      | 9.12<br>(6.71 to 10.87)                    | 4.80<br>(3.09 to 6.68)                     | 3.16<br>(1.98 to 4.32)                     | 5.18<br>(3.24 to 7.42)                     |
| Exposure to mechanical forces                   | 975.88<br>(663.74 to 1,132.96)                   | 467.95<br>(292.21 to 630.66)                     | 316.64<br>(205.91 to 413.10)                     | 506.86<br>(310.80 to 670.89)                     | 24.82<br>(16.80 to 28.73)                  | 15.11<br>(9.45 to 19.34)                   | 11.06<br>(13.87)                           | 15.68<br>(9.65 to 20.02)                   |
| Unintentional firearm injuries                  | 219.13<br>(140.48 to 267.16)                     | 99.64<br>(58.95 to 142.58)                       | 70.75<br>(44.79 to 97.55)                        | 107.38<br>(61.92 to 151.67)                      | 4.99<br>(3.34 to 5.99)                     | 2.79<br>(1.82 to 3.73)                     | 2.14<br>(1.48 to 2.74)                     | 2.90<br>(1.87 to 3.82)                     |
| Unintentional suffocation                       | 35.18<br>(22.59 to 47.33)                        | 19.71<br>(10.87 to 29.95)                        | 14.04<br>(8.38 to 20.77)                         | 21.54<br>(11.45 to 33.43)                        | 0.56<br>(0.40 to 0.71)                     | 0.36<br>(0.24 to 0.51)                     | 0.26<br>(0.19 to 0.36)                     | 0.38<br>(0.25 to 0.55)                     |
| Other exposure to mechanical forces             | 721.56<br>(474.89 to 840.81)                     | 348.60<br>(210.64 to 469.19)                     | 231.85<br>(145.18 to 305.40)                     | 377.93<br>(224.25 to 510.80)                     | 19.28<br>(12.49 to 22.38)                  | 11.96<br>(6.91 to 15.48)                   | 8.66<br>(5.12 to 11.07)                    | 12.40<br>(7.15 to 16.06)                   |
| Adverse effects of medical treatment            | 444.14<br>(383.05 to 529.39)                     | 415.43<br>(321.30 to 503.79)                     | 362.64<br>(279.83 to 438.14)                     | 413.43<br>(326.57 to 492.73)                     | 18.55<br>(14.50 to 21.40)                  | 22.70<br>(15.78 to 27.87)                  | 21.56<br>(14.65 to 26.90)                  | 21.46<br>(15.45 to 26.10)                  |
| Animal contact                                  | 50.64<br>(43.74 to 58.29)                        | 43.06<br>(32.88 to 54.54)                        | 32.34<br>(25.03 to 40.04)                        | 45.05<br>(34.64 to 55.84)                        | 1.62<br>(1.34 to 1.86)                     | 1.77<br>(1.31 to 2.23)                     | 1.42<br>(1.04 to 1.76)                     | 1.77<br>(1.32 to 2.17)                     |
| Venomous animal contact                         | 19.47<br>(16.14 to 23.26)                        | 14.13<br>(10.17 to 19.28)                        | 11.25<br>(8.26 to 15.36)                         | 14.81<br>(10.68 to 20.29)                        | 0.46<br>(0.38 to 0.55)                     | 0.39<br>(0.29 to 0.53)                     | 0.32<br>(0.44)                             | 0.40<br>(0.29 to 0.55)                     |
| Non-venomous animal contact                     | 31.17<br>(26.13 to 36.00)                        | 28.93<br>(21.56 to 36.85)                        | 21.09<br>(15.48 to 26.46)                        | 30.24<br>(22.46 to 37.89)                        | 1.16<br>(0.92 to 1.34)                     | 1.38<br>(0.95 to 1.77)                     | 1.10<br>(0.75 to 1.41)                     | 1.36<br>(0.98 to 1.72)                     |
| Foreign body                                    | 493.50<br>(326.06 to 612.57)                     | 301.73<br>(188.08 to 390.82)                     | 266.15<br>(170.25 to 340.12)                     | 306.20<br>(188.23 to 397.64)                     | 13.07<br>(8.81 to 15.68)                   | 11.03<br>(6.72 to 13.74)                   | 10.70<br>(6.45 to 13.53)                   | 10.60<br>(6.53 to 13.14)                   |
| Pulmonary aspiration and foreign body in airway | 453.02<br>(306.06 to 560.11)                     | 281.27<br>(175.86 to 366.75)                     | 244.55<br>(158.24 to 312.85)                     | 286.16<br>(177.69 to 375.71)                     | 12.11<br>(8.23 to 14.48)                   | 10.37<br>(6.36 to 12.95)                   | 9.95<br>(5.97 to 12.62)                    | 9.99<br>(6.19 to 12.45)                    |



|                                             |                                                             |                                                            |                                                            |                                                             |                                                      |                                                      |                                                      |                                                      |
|---------------------------------------------|-------------------------------------------------------------|------------------------------------------------------------|------------------------------------------------------------|-------------------------------------------------------------|------------------------------------------------------|------------------------------------------------------|------------------------------------------------------|------------------------------------------------------|
|                                             | 40.48<br>(15.64 to<br>54.28)                                | 20.46<br>(8.48 to<br>28.58)                                | 21.60<br>(9.44 to<br>29.25)                                | 20.04<br>(8.16 to<br>27.93)                                 | 0.97<br>(0.40 to<br>1.24)                            | 0.65<br>(0.31 to<br>0.85)                            | 0.75<br>(0.37 to<br>0.98)                            | 0.61<br>(0.28 to<br>0.80)                            |
| Foreign body in other body part             |                                                             |                                                            |                                                            |                                                             |                                                      |                                                      |                                                      |                                                      |
|                                             | 200.39<br>(107.69 to<br>250.99)                             | 122.53<br>(61.59 to<br>171.85)                             | 80.04<br>(39.99 to<br>109.23)                              | 132.34<br>(67.08 to<br>185.80)                              | 6.60<br>(3.48 to<br>8.25)                            | 5.01<br>(2.49 to<br>6.88)                            | 3.57<br>(1.67 to<br>4.87)                            | 5.15<br>(2.48 to<br>7.05)                            |
| Environmental heat and cold exposure        |                                                             |                                                            |                                                            |                                                             |                                                      |                                                      |                                                      |                                                      |
|                                             | 906.84<br>(718.35 to<br>2,148.77)                           | 846.38<br>(524.47 to<br>1,728.66)                          | 386.33<br>(251.32 to<br>853.92)                            | 1,001.00<br>(638.21 to<br>2,123.90)                         | 24.32<br>(19.91 to<br>53.49)                         | 28.49<br>(18.80 to<br>55.05)                         | 14.00<br>(9.60 to<br>27.98)                          | 32.21<br>(21.54 to<br>63.75)                         |
| Other unintentional injuries                |                                                             |                                                            |                                                            |                                                             |                                                      |                                                      |                                                      |                                                      |
| <b>Self-harm and interpersonal violence</b> | <b>9,101.31</b><br><b>(7,985.45 to</b><br><b>10,550.46)</b> | <b>6,997.24</b><br><b>(4,958.45 to</b><br><b>9,942.78)</b> | <b>5,319.78</b><br><b>(3,978.37 to</b><br><b>7,239.17)</b> | <b>7,789.86</b><br><b>(5,377.73 to</b><br><b>11,749.51)</b> | <b>251.95</b><br><b>(217.37 to</b><br><b>288.17)</b> | <b>232.44</b><br><b>(168.64 to</b><br><b>322.70)</b> | <b>188.78</b><br><b>(141.63 to</b><br><b>248.88)</b> | <b>249.22</b><br><b>(176.68 to</b><br><b>354.37)</b> |

| Macedonia                                                                           |                                                   |                                                    |                                                    |                                                    |                                                |                                                |                                                |                                                |
|-------------------------------------------------------------------------------------|---------------------------------------------------|----------------------------------------------------|----------------------------------------------------|----------------------------------------------------|------------------------------------------------|------------------------------------------------|------------------------------------------------|------------------------------------------------|
| Cause                                                                               | YLLs (actual counts)                              |                                                    |                                                    |                                                    | Deaths (actual counts)                         |                                                |                                                |                                                |
|                                                                                     | 2016                                              | 2040 Forecast                                      | 2040 Better Scenario                               | 2040 Worse Scenario                                | 2016                                           | 2040 Forecast                                  | 2040 Better Scenario                           | 2040 Worse Scenario                            |
| Self-harm                                                                           | 7,182.29<br>(6,250.85 to<br>8,755.62)             | 5,978.99<br>(4,070.86 to<br>8,710.62)              | 4,623.08<br>(3,336.31 to<br>6,501.68)              | 6,663.84<br>(4,440.35 to<br>10,420.48)             | 206.84<br>(176.61 to<br>243.44)                | 204.61<br>(144.85 to<br>289.98)                | 168.65<br>(123.71 to<br>227.74)                | 219.14<br>(149.12 to<br>323.83)                |
| Self-harm by firearm                                                                | 787.57<br>(434.56 to<br>1,022.18)                 | 437.27<br>(209.61 to<br>723.97)                    | 292.83<br>(140.29 to<br>470.74)                    | 505.83<br>(238.49 to<br>889.93)                    | 20.07<br>(10.46 to<br>25.94)                   | 13.07<br>(5.95 to<br>20.77)                    | 9.22<br>(4.15 to<br>14.49)                     | 14.63<br>(6.57 to<br>24.29)                    |
| Self-harm by other specified means                                                  | 6,394.71<br>(5,541.64 to<br>8,066.65)             | 5,541.73<br>(3,787.26 to<br>8,146.34)              | 4,330.25<br>(3,139.53 to<br>6,103.89)              | 6,158.01<br>(4,079.97 to<br>9,596.93)              | 186.77<br>(160.63 to<br>224.06)                | 191.54<br>(135.96 to<br>269.15)                | 159.43<br>(117.50 to<br>213.32)                | 204.51<br>(140.13 to<br>299.97)                |
| Interpersonal violence                                                              | 1,919.03<br>(1,357.31 to<br>2,277.41)             | 1,018.25<br>(649.52 to<br>1,449.90)                | 696.70<br>(456.26 to<br>995.52)                    | 1,126.02<br>(713.46 to<br>1,622.90)                | 45.12<br>(32.34 to<br>52.69)                   | 27.83<br>(18.38 to<br>37.86)                   | 20.13<br>(13.46 to<br>27.19)                   | 30.07<br>(19.59 to<br>41.89)                   |
| Physical violence by firearm                                                        | 1,087.44<br>(525.09 to<br>1,376.56)               | 523.63<br>(237.57 to<br>810.15)                    | 324.71<br>(151.27 to<br>493.96)                    | 584.79<br>(260.75 to<br>902.60)                    | 23.52<br>(11.20 to<br>29.56)                   | 12.16<br>(5.58 to<br>18.22)                    | 7.67<br>(3.67 to<br>11.32)                     | 13.45<br>(6.15 to<br>20.42)                    |
| Physical violence by sharp object                                                   | 294.62<br>(183.44 to<br>468.60)                   | 170.76<br>(101.13 to<br>268.09)                    | 117.69<br>(70.46 to<br>175.85)                     | 184.47<br>(109.13 to<br>295.77)                    | 7.42<br>(4.56 to<br>11.19)                     | 5.11<br>(2.92 to<br>7.32)                      | 3.74<br>(2.25 to<br>5.27)                      | 5.36<br>(3.10 to<br>7.83)                      |
| Physical violence by other means                                                    | 536.96<br>(405.62 to<br>892.46)                   | 323.86<br>(186.32 to<br>560.04)                    | 254.29<br>(154.04 to<br>415.08)                    | 356.77<br>(199.41 to<br>609.15)                    | 14.18<br>(11.08 to<br>22.11)                   | 10.55<br>(6.35 to<br>16.80)                    | 8.72<br>(5.39 to<br>13.33)                     | 11.26<br>(6.48 to<br>18.29)                    |
| <b>Forces of nature, conflict and terrorism, and executions and police conflict</b> | <b>11.18</b><br><b>(10.07 to</b><br><b>12.62)</b> | <b>277.75</b><br><b>(0.00 to</b><br><b>244.07)</b> | <b>280.84</b><br><b>(0.00 to</b><br><b>245.53)</b> | <b>275.59</b><br><b>(0.00 to</b><br><b>241.47)</b> | <b>0.22</b><br><b>(0.20 to</b><br><b>0.24)</b> | <b>7.42</b><br><b>(0.00 to</b><br><b>6.78)</b> | <b>7.86</b><br><b>(0.00 to</b><br><b>7.11)</b> | <b>7.15</b><br><b>(0.00 to</b><br><b>6.55)</b> |
| Exposure to forces of nature                                                        | 0.00<br>(0.00 to<br>0.00)                         | 259.05<br>(0.00 to<br>167.19)                      | 262.09<br>(0.00 to<br>168.50)                      | 256.92<br>(0.00 to<br>166.87)                      | 0.00<br>(0.00 to<br>0.00)                      | 6.99<br>(0.00 to<br>4.66)                      | 7.42<br>(0.00 to<br>4.57)                      | 6.74<br>(0.00 to<br>4.50)                      |
| Conflict and terrorism                                                              | 0.00<br>(0.00 to<br>0.00)                         | 18.70<br>(0.00 to<br>157.32)                       | 18.75<br>(0.00 to<br>157.74)                       | 18.67<br>(0.00 to<br>157.53)                       | 0.00<br>(0.00 to<br>0.00)                      | 0.43<br>(0.00 to<br>3.60)                      | 0.45<br>(0.00 to<br>3.79)                      | 0.42<br>(0.00 to<br>3.49)                      |
| Executions and police conflict                                                      | 11.18<br>(10.07 to<br>12.62)                      | 0.00<br>(0.00 to<br>0.00)                          | 0.00<br>(0.00 to<br>0.00)                          | 0.00<br>(0.00 to<br>0.00)                          | 0.22<br>(0.20 to<br>0.24)                      | 0.00<br>(0.00 to<br>0.00)                      | 0.00<br>(0.00 to<br>0.00)                      | 0.00<br>(0.00 to<br>0.00)                      |

| Montenegro                                                        |                                            |                                            |                                          |                                            |                                       |                                       |                                       |                                       |
|-------------------------------------------------------------------|--------------------------------------------|--------------------------------------------|------------------------------------------|--------------------------------------------|---------------------------------------|---------------------------------------|---------------------------------------|---------------------------------------|
| Cause                                                             | YLLs (actual counts)                       |                                            |                                          |                                            | Deaths (actual counts)                |                                       |                                       |                                       |
|                                                                   | 2016                                       | 2040 Forecast                              | 2040 Better Scenario                     | 2040 Worse Scenario                        | 2016                                  | 2040 Forecast                         | 2040 Better Scenario                  | 2040 Worse Scenario                   |
| All causes                                                        | 106,937.93<br>(98,456.33 to<br>116,039.46) | 102,521.63<br>(81,173.01 to<br>124,229.42) | 64,773.78<br>(52,412.89 to<br>77,315.52) | 121,667.70<br>(94,762.30 to<br>150,575.26) | 5,955.00<br>(5,447.89 to<br>6,458.32) | 7,327.29<br>(6,154.88 to<br>8,663.67) | 5,115.98<br>(4,318.28 to<br>5,999.37) | 8,324.09<br>(6,896.60 to<br>9,884.24) |
| Communicable, maternal, neonatal, and nutritional diseases        | 3,558.50<br>(2,910.31 to<br>4,328.09)      | 2,272.78<br>(1,397.48 to<br>4,100.88)      | 1,242.35<br>(799.99 to<br>2,122.99)      | 2,621.45<br>(1,610.35 to<br>4,613.27)      | 92.36<br>(79.82 to<br>108.37)         | 96.17<br>(63.96 to<br>147.68)         | 56.73<br>(40.44 to<br>80.51)          | 103.68<br>(67.69 to<br>159.91)        |
| HIV/AIDS and tuberculosis                                         | 160.26<br>(140.34 to<br>195.96)            | 91.55<br>(54.32 to<br>151.92)              | 35.87<br>(24.71 to<br>51.66)             | 134.77<br>(86.98 to<br>211.86)             | 5.22<br>(4.52 to<br>6.47)             | 3.63<br>(1.98 to<br>6.56)             | 1.29<br>(0.81 to<br>2.07)             | 4.82<br>(2.93 to<br>8.07)             |
| Tuberculosis                                                      | 107.26<br>(89.87 to<br>141.93)             | 66.70<br>(30.54 to<br>128.59)              | 18.26<br>(9.47 to<br>32.37)              | 79.16<br>(37.58 to<br>156.15)              | 4.03<br>(3.37 to<br>5.27)             | 3.12<br>(1.49 to<br>6.01)             | 0.95<br>(0.52 to<br>1.69)             | 3.59<br>(1.75 to<br>6.83)             |
| HIV/AIDS                                                          | 53.00<br>(44.92 to<br>64.20)               | 24.85<br>(16.94 to<br>35.39)               | 17.61<br>(11.98 to<br>27.54)             | 55.61<br>(38.64 to<br>71.23)               | 1.19<br>(0.99 to<br>1.47)             | 0.51<br>(0.31 to<br>0.80)             | 0.35<br>(0.20 to<br>0.62)             | 1.23<br>(0.79 to<br>1.64)             |
| Diarrhea, lower respiratory, and other common infectious diseases | 1,387.77<br>(1,163.83 to<br>1,644.88)      | 1,202.07<br>(734.39 to<br>1,992.32)        | 601.57<br>(393.28 to<br>911.95)          | 1,413.40<br>(824.82 to<br>2,482.79)        | 60.44<br>(50.81 to<br>74.90)          | 77.71<br>(49.64 to<br>124.03)         | 44.85<br>(30.45 to<br>67.29)          | 83.14<br>(51.80 to<br>135.08)         |
| Diarrheal diseases                                                | 29.45<br>(19.71 to<br>45.44)               | 21.87<br>(5.15 to<br>68.59)                | 44.67<br>(13.37 to<br>117.54)            | 27.41<br>(5.67 to<br>94.09)                | 0.67<br>(0.46 to<br>0.98)             | 1.23<br>(0.28 to<br>3.77)             | 3.10<br>(0.88 to<br>8.36)             | 1.33<br>(0.27 to<br>4.53)             |
| Intestinal infectious diseases                                    | 0.76<br>(0.36 to<br>1.43)                  | 0.50<br>(0.23 to<br>0.94)                  | 0.44<br>(0.20 to<br>0.83)                | 0.51<br>(0.23 to<br>0.97)                  | 0.02<br>(0.01 to<br>0.04)             | 0.02<br>(0.01 to<br>0.03)             | 0.02<br>(0.01 to<br>0.03)             | 0.02<br>(0.01 to<br>0.03)             |
| Typhoid fever                                                     | 0.24<br>(0.11 to<br>0.46)                  | 0.15<br>(0.06 to<br>0.30)                  | 0.22<br>(0.09 to<br>0.42)                | 0.15<br>(0.06 to<br>0.29)                  | 0.01<br>(0.00 to<br>0.01)             | 0.00<br>(0.00 to<br>0.01)             | 0.01<br>(0.00 to<br>0.01)             | 0.00<br>(0.00 to<br>0.01)             |
| Paratyphoid fever                                                 | 0.46<br>(0.18 to<br>0.97)                  | 0.31<br>(0.12 to<br>0.65)                  | 0.18<br>(0.07 to<br>0.40)                | 0.32<br>(0.12 to<br>0.68)                  | 0.01<br>(0.00 to<br>0.02)             | 0.01<br>(0.00 to<br>0.02)             | 0.01<br>(0.00 to<br>0.01)             | 0.01<br>(0.00 to<br>0.02)             |
| Other intestinal infectious diseases                              | 0.06<br>(0.02 to<br>0.13)                  | 0.04<br>(0.02 to<br>0.09)                  | 0.04<br>(0.01 to<br>0.08)                | 0.04<br>(0.02 to<br>0.09)                  | 0.00<br>(0.00 to<br>0.01)             | 0.00<br>(0.00 to<br>0.01)             | 0.00<br>(0.00 to<br>0.01)             | 0.00<br>(0.00 to<br>0.01)             |
| Lower respiratory infections                                      | 1,162.49<br>(970.03 to<br>1,381.57)        | 1,059.30<br>(626.12 to<br>1,757.38)        | 491.82<br>(307.69 to<br>784.10)          | 1,233.71<br>(707.40 to<br>2,182.74)        | 55.81<br>(46.80 to<br>70.41)          | 73.68<br>(45.75 to<br>120.37)         | 39.81<br>(25.74 to<br>61.53)          | 78.69<br>(47.75 to<br>129.70)         |
| Upper respiratory infections                                      | 2.25<br>(1.25 to<br>3.76)                  | 1.62<br>(0.67 to<br>3.28)                  | 0.68<br>(0.29 to<br>1.35)                | 1.68<br>(0.74 to<br>3.25)                  | 0.09<br>(0.05 to<br>0.16)             | 0.09<br>(0.03 to<br>0.20)             | 0.04<br>(0.02 to<br>0.10)             | 0.09<br>(0.03 to<br>0.20)             |
| Otitis media                                                      | 0.01<br>(0.00 to<br>0.01)                  | 0.00<br>(0.00 to<br>0.00)                  | 0.00<br>(0.00 to<br>0.00)                | 0.00<br>(0.00 to<br>0.00)                  | 0.00<br>(0.00 to<br>0.00)             | 0.00<br>(0.00 to<br>0.00)             | 0.00<br>(0.00 to<br>0.00)             | 0.00<br>(0.00 to<br>0.00)             |
| Meningitis                                                        | 71.74<br>(52.13 to<br>106.43)              | 24.76<br>(15.44 to<br>43.74)               | 15.23<br>(9.52 to<br>26.33)              | 26.56<br>(16.48 to<br>45.73)               | 1.70<br>(1.23 to<br>2.55)             | 0.73<br>(0.50 to<br>1.19)             | 0.49<br>(0.33 to<br>0.78)             | 0.75<br>(0.50 to<br>1.18)             |
| Pneumococcal meningitis                                           | 7.43<br>(5.07 to<br>11.78)                 | 2.56<br>(1.59 to<br>4.37)                  | 2.50<br>(1.51 to<br>4.30)                | 2.57<br>(1.59 to<br>4.38)                  | 0.21<br>(0.14 to<br>0.33)             | 0.09<br>(0.06 to<br>0.15)             | 0.09<br>(0.06 to<br>0.16)             | 0.09<br>(0.05 to<br>0.15)             |
| H influenzae type B meningitis                                    | 7.75<br>(5.40 to<br>11.80)                 | 5.48<br>(2.25 to<br>14.41)                 | 4.03<br>(2.08 to<br>9.08)                | 6.42<br>(2.36 to<br>17.01)                 | 0.18<br>(0.12 to<br>0.28)             | 0.12<br>(0.07 to<br>0.22)             | 0.10<br>(0.07 to<br>0.18)             | 0.12<br>(0.07 to<br>0.25)             |
| Meningococcal meningitis                                          | 31.71<br>(22.71 to<br>47.49)               | 8.74<br>(5.26 to<br>15.30)                 | 4.66<br>(2.84 to<br>8.20)                | 9.19<br>(5.57 to<br>15.90)                 | 0.69<br>(0.50 to<br>1.03)             | 0.26<br>(0.17 to<br>0.41)             | 0.15<br>(0.10 to<br>0.23)             | 0.26<br>(0.17 to<br>0.42)             |
| Other meningitis                                                  | 24.86<br>(17.48 to<br>36.78)               | 7.98<br>(4.89 to<br>13.27)                 | 4.05<br>(2.48 to<br>6.81)                | 8.38<br>(5.10 to<br>13.77)                 | 0.63<br>(0.44 to<br>0.96)             | 0.27<br>(0.17 to<br>0.44)             | 0.15<br>(0.09 to<br>0.24)             | 0.27<br>(0.17 to<br>0.45)             |
| Encephalitis                                                      | 51.17<br>(37.88 to<br>66.71)               | 39.00<br>(27.20 to<br>56.66)               | 35.08<br>(24.35 to<br>52.01)             | 39.29<br>(27.19 to<br>57.37)               | 1.14<br>(0.89 to<br>1.45)             | 1.09<br>(0.85 to<br>1.44)             | 1.04<br>(0.79 to<br>1.38)             | 1.07<br>(0.83 to<br>1.41)             |

|                |                              |                              |                            |                              |                           |                           |                           |                           |
|----------------|------------------------------|------------------------------|----------------------------|------------------------------|---------------------------|---------------------------|---------------------------|---------------------------|
| Diphtheria     | 0.27<br>(0.18 to<br>0.40)    | 0.05<br>(0.03 to<br>0.09)    | 0.04<br>(0.02 to<br>0.07)  | 0.06<br>(0.03 to<br>0.12)    | 0.01<br>(0.00 to<br>0.01) | 0.00<br>(0.00 to<br>0.00) | 0.00<br>(0.00 to<br>0.00) | 0.00<br>(0.00 to<br>0.00) |
| Whooping cough | 61.20<br>(5.52 to<br>200.21) | 39.65<br>(2.32 to<br>164.37) | 6.64<br>(0.37 to<br>29.10) | 64.11<br>(3.28 to<br>265.88) | 0.73<br>(0.07 to<br>2.39) | 0.47<br>(0.03 to<br>1.95) | 0.08<br>(0.00 to<br>0.36) | 0.76<br>(0.04 to<br>3.16) |
| Tetanus        | 3.19<br>(2.85 to<br>3.58)    | 0.18<br>(0.11 to<br>0.27)    | 0.15<br>(0.10 to<br>0.24)  | 0.19<br>(0.12 to<br>0.32)    | 0.06<br>(0.06 to<br>0.07) | 0.00<br>(0.00 to<br>0.00) | 0.00<br>(0.00 to<br>0.00) | 0.00<br>(0.00 to<br>0.01) |
| Measles        | 0.79<br>(0.35 to<br>1.41)    | 12.00<br>(0.01 to<br>93.73)  | 4.57<br>(0.00 to<br>34.01) | 16.77<br>(0.01 to<br>136.24) | 0.01<br>(0.00 to<br>0.02) | 0.15<br>(0.00 to<br>1.10) | 0.06<br>(0.00 to<br>0.43) | 0.21<br>(0.00 to<br>1.64) |

| Montenegro                                            |                                         |                                         |                                         |                                         |                                      |                                      |                                      |                                      |
|-------------------------------------------------------|-----------------------------------------|-----------------------------------------|-----------------------------------------|-----------------------------------------|--------------------------------------|--------------------------------------|--------------------------------------|--------------------------------------|
| Cause                                                 | YLLs (actual counts)                    |                                         |                                         |                                         | Deaths (actual counts)               |                                      |                                      |                                      |
|                                                       | 2016                                    | 2040 Forecast                           | 2040 Better Scenario                    | 2040 Worse Scenario                     | 2016                                 | 2040 Forecast                        | 2040 Better Scenario                 | 2040 Worse Scenario                  |
| Varicella and herpes zoster                           | 4.46<br>(2.86 to 6.55)                  | 3.14<br>(1.87 to 5.52)                  | 2.24<br>(1.32 to 3.83)                  | 3.11<br>(1.86 to 5.26)                  | 0.19<br>(0.12 to 0.27)               | 0.24<br>(0.13 to 0.42)               | 0.20<br>(0.10 to 0.34)               | 0.22<br>(0.12 to 0.39)               |
| <b>Neglected tropical diseases and malaria</b>        | <b>28.23</b><br><b>(21.91 to 35.51)</b> | <b>18.10</b><br><b>(12.84 to 25.36)</b> | <b>21.38</b><br><b>(15.05 to 29.63)</b> | <b>17.59</b><br><b>(12.59 to 24.71)</b> | <b>0.92</b><br><b>(0.71 to 1.16)</b> | <b>0.70</b><br><b>(0.53 to 1.04)</b> | <b>0.89</b><br><b>(0.66 to 1.29)</b> | <b>0.65</b><br><b>(0.49 to 0.96)</b> |
| Malaria                                               | 0.00<br>(0.00 to 0.00)                  | 0.00<br>(0.00 to 0.00)                  | 0.00<br>(0.00 to 0.00)                  | 0.00<br>(0.00 to 0.00)                  | 0.00<br>(0.00 to 0.00)               | 0.00<br>(0.00 to 0.00)               | 0.00<br>(0.00 to 0.00)               | 0.00<br>(0.00 to 0.00)               |
| Chagas disease                                        | 0.00<br>(0.00 to 0.00)                  | 0.00<br>(0.00 to 0.00)                  | 0.00<br>(0.00 to 0.00)                  | 0.00<br>(0.00 to 0.00)                  | 0.00<br>(0.00 to 0.00)               | 0.00<br>(0.00 to 0.00)               | 0.00<br>(0.00 to 0.00)               | 0.00<br>(0.00 to 0.00)               |
| Leishmaniasis                                         | 7.37<br>(3.63 to 11.73)                 | 1.88<br>(0.91 to 5.08)                  | 1.48<br>(0.70 to 3.92)                  | 1.88<br>(0.94 to 5.03)                  | 0.29<br>(0.14 to 0.47)               | 0.08<br>(0.04 to 0.23)               | 0.07<br>(0.03 to 0.19)               | 0.08<br>(0.04 to 0.23)               |
| African trypanosomiasis                               | 0.00<br>(0.00 to 0.00)                  | 0.00<br>(0.00 to 0.00)                  | 0.00<br>(0.00 to 0.00)                  | 0.00<br>(0.00 to 0.00)                  | 0.00<br>(0.00 to 0.00)               | 0.00<br>(0.00 to 0.00)               | 0.00<br>(0.00 to 0.00)               | 0.00<br>(0.00 to 0.00)               |
| Schistosomiasis                                       | 0.00<br>(0.00 to 0.00)                  | 0.00<br>(0.00 to 0.00)                  | 0.00<br>(0.00 to 0.00)                  | 0.00<br>(0.00 to 0.00)                  | 0.00<br>(0.00 to 0.00)               | 0.00<br>(0.00 to 0.00)               | 0.00<br>(0.00 to 0.00)               | 0.00<br>(0.00 to 0.00)               |
| Cysticercosis                                         | 0.23<br>(0.18 to 0.29)                  | 0.05<br>(0.04 to 0.08)                  | 0.05<br>(0.04 to 0.07)                  | 0.05<br>(0.04 to 0.08)                  | 0.01<br>(0.01 to 0.01)               | 0.00<br>(0.00 to 0.00)               | 0.00<br>(0.00 to 0.00)               | 0.00<br>(0.00 to 0.00)               |
| Cystic echinococcosis                                 | 2.81<br>(2.36 to 3.30)                  | 1.43<br>(1.07 to 1.99)                  | 0.97<br>(0.73 to 1.35)                  | 1.44<br>(1.08 to 1.99)                  | 0.12<br>(0.10 to 0.14)               | 0.08<br>(0.06 to 0.12)               | 0.06<br>(0.05 to 0.09)               | 0.08<br>(0.06 to 0.11)               |
| Dengue                                                | 0.00<br>(0.00 to 0.00)                  | 0.00<br>(0.00 to 0.00)                  | 0.00<br>(0.00 to 0.00)                  | 0.00<br>(0.00 to 0.00)                  | 0.00<br>(0.00 to 0.00)               | 0.00<br>(0.00 to 0.00)               | 0.00<br>(0.00 to 0.00)               | 0.00<br>(0.00 to 0.00)               |
| Yellow fever                                          | 0.00<br>(0.00 to 0.00)                  | 0.00<br>(0.00 to 0.00)                  | 0.00<br>(0.00 to 0.00)                  | 0.00<br>(0.00 to 0.00)                  | 0.00<br>(0.00 to 0.00)               | 0.00<br>(0.00 to 0.00)               | 0.00<br>(0.00 to 0.00)               | 0.00<br>(0.00 to 0.00)               |
| Rabies                                                | 0.01<br>(0.01 to 0.02)                  | 0.01<br>(0.00 to 0.01)                  | 0.01<br>(0.00 to 0.01)                  | 0.01<br>(0.00 to 0.01)                  | 0.00<br>(0.00 to 0.00)               | 0.00<br>(0.00 to 0.00)               | 0.00<br>(0.00 to 0.00)               | 0.00<br>(0.00 to 0.00)               |
| Intestinal nematode infections                        | 0.15<br>(0.07 to 0.26)                  | 0.10<br>(0.05 to 0.19)                  | 0.11<br>(0.05 to 0.19)                  | 0.10<br>(0.05 to 0.19)                  | 0.00<br>(0.00 to 0.01)               | 0.00<br>(0.00 to 0.01)               | 0.00<br>(0.00 to 0.01)               | 0.00<br>(0.00 to 0.01)               |
| Other neglected tropical diseases                     | 17.66<br>(12.91 to 23.07)               | 14.61<br>(9.70 to 19.94)                | 18.77<br>(12.82 to 25.38)               | 14.10<br>(9.33 to 19.35)                | 0.50<br>(0.37 to 0.66)               | 0.53<br>(0.36 to 0.74)               | 0.76<br>(0.54 to 1.07)               | 0.49<br>(0.34 to 0.68)               |
| <b>Maternal disorders</b>                             | <b>20.95</b><br><b>(14.91 to 28.13)</b> | <b>14.90</b><br><b>(9.42 to 21.77)</b>  | <b>10.01</b><br><b>(6.44 to 14.25)</b>  | <b>15.57</b><br><b>(9.75 to 22.97)</b>  | <b>0.43</b><br><b>(0.30 to 0.58)</b> | <b>0.31</b><br><b>(0.19 to 0.45)</b> | <b>0.21</b><br><b>(0.13 to 0.30)</b> | <b>0.32</b><br><b>(0.20 to 0.48)</b> |
| Maternal hemorrhage                                   | 4.36<br>(2.72 to 6.45)                  | 2.92<br>(1.53 to 5.01)                  | 1.97<br>(1.10 to 3.27)                  | 3.04<br>(1.65 to 5.14)                  | 0.09<br>(0.05 to 0.13)               | 0.06<br>(0.03 to 0.10)               | 0.04<br>(0.02 to 0.07)               | 0.06<br>(0.03 to 0.11)               |
| Maternal sepsis and other maternal infections         | 0.70<br>(0.34 to 1.22)                  | 0.44<br>(0.19 to 0.81)                  | 0.29<br>(0.13 to 0.54)                  | 0.46<br>(0.19 to 0.86)                  | 0.01<br>(0.01 to 0.03)               | 0.01<br>(0.00 to 0.02)               | 0.01<br>(0.00 to 0.01)               | 0.01<br>(0.00 to 0.02)               |
| Maternal hypertensive disorders                       | 1.83<br>(1.06 to 2.87)                  | 1.25<br>(0.62 to 2.20)                  | 0.82<br>(0.42 to 1.44)                  | 1.31<br>(0.65 to 2.30)                  | 0.04<br>(0.02 to 0.05)               | 0.02<br>(0.01 to 0.04)               | 0.02<br>(0.01 to 0.03)               | 0.03<br>(0.01 to 0.05)               |
| Maternal obstructed labor and uterine rupture         | 0.52<br>(0.22 to 1.04)                  | 0.39<br>(0.14 to 0.84)                  | 0.24<br>(0.09 to 0.49)                  | 0.41<br>(0.15 to 0.85)                  | 0.01<br>(0.00 to 0.02)               | 0.01<br>(0.00 to 0.02)               | 0.00<br>(0.00 to 0.01)               | 0.01<br>(0.00 to 0.02)               |
| Maternal abortion, miscarriage, and ectopic pregnancy | 6.08<br>(3.99 to 8.88)                  | 4.56<br>(2.40 to 7.84)                  | 2.97<br>(1.59 to 4.88)                  | 4.79<br>(2.51 to 8.24)                  | 0.13<br>(0.08 to 0.18)               | 0.10<br>(0.05 to 0.17)               | 0.06<br>(0.03 to 0.10)               | 0.10<br>(0.05 to 0.17)               |

|                                        |                           |                           |                           |                           |                           |                           |                           |                           |
|----------------------------------------|---------------------------|---------------------------|---------------------------|---------------------------|---------------------------|---------------------------|---------------------------|---------------------------|
|                                        | 1.07<br>(0.54 to<br>1.81) | 0.81<br>(0.36 to<br>1.54) | 0.53<br>(0.24 to<br>0.98) | 0.86<br>(0.37 to<br>1.61) | 0.02<br>(0.01 to<br>0.04) | 0.02<br>(0.01 to<br>0.03) | 0.01<br>(0.00 to<br>0.02) | 0.02<br>(0.01 to<br>0.03) |
| Indirect maternal deaths               |                           |                           |                           |                           |                           |                           |                           |                           |
|                                        | 0.47<br>(0.17 to<br>0.91) | 0.28<br>(0.10 to<br>0.58) | 0.18<br>(0.06 to<br>0.37) | 0.29<br>(0.10 to<br>0.62) | 0.01<br>(0.00 to<br>0.02) | 0.01<br>(0.00 to<br>0.01) | 0.00<br>(0.00 to<br>0.01) | 0.01<br>(0.00 to<br>0.01) |
| Late maternal deaths                   |                           |                           |                           |                           |                           |                           |                           |                           |
|                                        | 0.00<br>(0.00 to<br>0.00) | 0.01<br>(0.00 to<br>0.04) | 0.00<br>(0.00 to<br>0.03) | 0.01<br>(0.00 to<br>0.04) | 0.00<br>(0.00 to<br>0.00) | 0.00<br>(0.00 to<br>0.00) | 0.00<br>(0.00 to<br>0.00) | 0.00<br>(0.00 to<br>0.00) |
| Maternal deaths aggravated by HIV/AIDS |                           |                           |                           |                           |                           |                           |                           |                           |
|                                        | 5.92<br>(3.87 to<br>8.70) | 4.24<br>(2.48 to<br>6.75) | 3.00<br>(1.78 to<br>4.76) | 4.42<br>(2.53 to<br>7.23) | 0.12<br>(0.08 to<br>0.18) | 0.09<br>(0.05 to<br>0.14) | 0.06<br>(0.04 to<br>0.10) | 0.09<br>(0.05 to<br>0.15) |
| Other maternal disorders               |                           |                           |                           |                           |                           |                           |                           |                           |

| Montenegro                                                              |                                           |                                       |                                       |                                       |                                  |                                |                                |                                 |
|-------------------------------------------------------------------------|-------------------------------------------|---------------------------------------|---------------------------------------|---------------------------------------|----------------------------------|--------------------------------|--------------------------------|---------------------------------|
| Cause                                                                   | YLLs (actual counts)                      |                                       |                                       |                                       | Deaths (actual counts)           |                                |                                |                                 |
|                                                                         | 2016                                      | 2040 Forecast                         | 2040 Better Scenario                  | 2040 Worse Scenario                   | 2016                             | 2040 Forecast                  | 2040 Better Scenario           | 2040 Worse Scenario             |
|                                                                         | <b>1,825.00</b><br>(1,301.57 to 2,457.63) | <b>853.82</b><br>(318.48 to 2,224.97) | <b>496.23</b><br>(190.61 to 1,240.91) | <b>947.68</b><br>(371.82 to 2,344.80) | <b>211.0</b><br>(15.04 to 28.40) | <b>9.87</b><br>(3.68 to 25.70) | <b>5.74</b><br>(2.20 to 14.34) | <b>10.95</b><br>(4.30 to 27.10) |
| Neonatal disorders                                                      |                                           |                                       |                                       |                                       |                                  |                                |                                |                                 |
| Neonatal preterm birth                                                  | 718.50<br>(474.27 to 1,030.22)            | 284.77<br>(120.30 to 596.10)          | 138.94<br>(58.21 to 290.39)           | 339.25<br>(142.60 to 714.86)          | 8.30<br>(5.48 to 11.91)          | 3.29<br>(1.39 to 6.89)         | 1.61<br>(0.67 to 3.35)         | 3.92<br>(1.65 to 8.26)          |
| Neonatal encephalopathy due to birth asphyxia and trauma                | 778.07<br>(518.16 to 1,103.80)            | 318.34<br>(93.38 to 906.20)           | 165.63<br>(52.82 to 432.87)           | 345.12<br>(107.50 to 921.07)          | 9.00<br>(5.99 to 12.76)          | 3.68<br>(1.08 to 10.47)        | 1.91<br>(0.61 to 5.00)         | 3.99<br>(1.24 to 10.64)         |
| Neonatal sepsis and other neonatal infections                           | 94.82<br>(51.20 to 211.71)                | 71.76<br>(24.21 to 201.77)            | 44.32<br>(15.21 to 120.59)            | 76.52<br>(25.53 to 211.37)            | 1.10<br>(0.59 to 2.45)           | 0.83<br>(0.28 to 2.33)         | 0.51<br>(0.18 to 1.40)         | 0.88<br>(0.30 to 2.44)          |
| Hemolytic disease and other neonatal jaundice                           | 5.85<br>(3.18 to 10.84)                   | 3.15<br>(0.67 to 12.55)               | 1.82<br>(0.40 to 7.19)                | 3.38<br>(0.72 to 13.73)               | 0.07<br>(0.04 to 0.13)           | 0.04<br>(0.01 to 0.14)         | 0.02<br>(0.00 to 0.08)         | 0.04<br>(0.01 to 0.16)          |
| Other neonatal disorders                                                | 227.76<br>(130.64 to 359.75)              | 175.80<br>(46.60 to 548.13)           | 145.52<br>(40.64 to 444.82)           | 183.41<br>(47.58 to 567.52)           | 2.63<br>(1.51 to 4.16)           | 2.03<br>(0.54 to 6.33)         | 1.68<br>(0.47 to 5.14)         | 2.12<br>(0.55 to 6.56)          |
| <b>Nutritional deficiencies</b>                                         | <b>25.68</b><br>(21.86 to 30.70)          | <b>19.79</b><br>(15.58 to 26.14)      | <b>21.09</b><br>(16.46 to 27.67)      | <b>19.11</b><br>(15.08 to 25.08)      | <b>0.99</b><br>(0.85 to 1.16)    | <b>1.13</b><br>(0.85 to 1.46)  | <b>1.37</b><br>(1.02 to 1.77)  | <b>1.03</b><br>(0.78 to 1.33)   |
| Protein-energy malnutrition                                             | 14.61<br>(11.40 to 18.14)                 | 10.36<br>(6.94 to 14.67)              | 12.97<br>(8.97 to 17.76)              | 9.83<br>(6.69 to 13.77)               | 0.57<br>(0.40 to 0.70)           | 0.62<br>(0.37 to 0.87)         | 0.88<br>(0.56 to 1.21)         | 0.56<br>(0.33 to 0.78)          |
| Iodine deficiency                                                       | 0.87<br>(0.08 to 2.49)                    | 1.22<br>(0.10 to 3.51)                | 1.16<br>(0.07 to 3.54)                | 1.18<br>(0.10 to 3.41)                | 0.04<br>(0.00 to 0.11)           | 0.08<br>(0.00 to 0.25)         | 0.08<br>(0.00 to 0.28)         | 0.07<br>(0.00 to 0.23)          |
| Dietary iron deficiency                                                 | 2.02<br>(1.69 to 2.46)                    | 1.47<br>(1.07 to 2.02)                | 1.55<br>(1.14 to 2.14)                | 1.46<br>(1.06 to 2.03)                | 0.05<br>(0.04 to 0.05)           | 0.04<br>(0.03 to 0.05)         | 0.04<br>(0.03 to 0.05)         | 0.04<br>(0.03 to 0.05)          |
| Other nutritional deficiencies                                          | 8.19<br>(6.51 to 10.36)                   | 6.74<br>(4.67 to 9.48)                | 5.43<br>(3.66 to 7.91)                | 6.64<br>(4.62 to 9.27)                | 0.34<br>(0.26 to 0.46)           | 0.40<br>(0.25 to 0.62)         | 0.36<br>(0.22 to 0.60)         | 0.37<br>(0.23 to 0.57)          |
| <b>Other communicable, maternal, neonatal, and nutritional diseases</b> | <b>110.60</b><br>(88.96 to 163.02)        | <b>72.57</b><br>(54.82 to 103.83)     | <b>56.21</b><br>(43.32 to 80.19)      | <b>73.33</b><br>(55.89 to 105.61)     | <b>3.27</b><br>(2.77 to 4.03)    | <b>2.83</b><br>(2.31 to 3.50)  | <b>2.38</b><br>(1.97 to 2.92)  | <b>2.76</b><br>(2.27 to 3.38)   |
| Sexually transmitted infections excluding HIV                           | 8.60<br>(6.29 to 11.63)                   | 2.75<br>(1.87 to 3.88)                | 2.05<br>(1.43 to 2.85)                | 2.81<br>(1.91 to 4.01)                | 0.22<br>(0.17 to 0.28)           | 0.10<br>(0.07 to 0.14)         | 0.08<br>(0.06 to 0.11)         | 0.10<br>(0.07 to 0.13)          |
| Syphilis                                                                | 5.63<br>(3.66 to 8.62)                    | 1.32<br>(0.77 to 2.26)                | 0.79<br>(0.48 to 1.37)                | 1.37<br>(0.78 to 2.34)                | 0.13<br>(0.09 to 0.18)           | 0.04<br>(0.02 to 0.07)         | 0.03<br>(0.02 to 0.04)         | 0.04<br>(0.02 to 0.07)          |
| Chlamydial infection                                                    | 0.53<br>(0.39 to 0.67)                    | 0.27<br>(0.18 to 0.39)                | 0.24<br>(0.16 to 0.35)                | 0.27<br>(0.18 to 0.39)                | 0.02<br>(0.01 to 0.02)           | 0.01<br>(0.01 to 0.02)         | 0.01<br>(0.01 to 0.02)         | 0.01<br>(0.01 to 0.02)          |
| Gonococcal infection                                                    | 1.61<br>(1.22 to 1.99)                    | 0.80<br>(0.53 to 1.14)                | 0.70<br>(0.46 to 1.03)                | 0.79<br>(0.52 to 1.16)                | 0.05<br>(0.04 to 0.06)           | 0.03<br>(0.02 to 0.05)         | 0.03<br>(0.02 to 0.05)         | 0.03<br>(0.02 to 0.05)          |
| Other sexually transmitted infections                                   | 0.83<br>(0.63 to 1.03)                    | 0.37<br>(0.24 to 0.55)                | 0.32<br>(0.20 to 0.47)                | 0.38<br>(0.24 to 0.56)                | 0.02<br>(0.02 to 0.03)           | 0.01<br>(0.01 to 0.02)         | 0.01<br>(0.01 to 0.02)         | 0.01<br>(0.01 to 0.02)          |
| Acute hepatitis                                                         | 55.34<br>(46.49 to 66.05)                 | 30.67<br>(22.34 to 42.17)             | 18.12<br>(13.17 to 25.08)             | 31.45<br>(23.06 to 42.03)             | 1.87<br>(1.56 to 2.28)           | 1.31<br>(0.97 to 1.78)         | 0.83<br>(0.59 to 1.16)         | 1.31<br>(0.97 to 1.75)          |
| Acute hepatitis A                                                       | 4.47<br>(2.86 to 6.77)                    | 1.74<br>(0.89 to 3.50)                | 1.18<br>(0.61 to 2.47)                | 1.78<br>(0.89 to 3.57)                | 0.09<br>(0.06 to 0.12)           | 0.05<br>(0.03 to 0.08)         | 0.03<br>(0.02 to 0.06)         | 0.05<br>(0.03 to 0.08)          |
| Acute hepatitis B                                                       | 41.53<br>(34.13 to 50.64)                 | 23.53<br>(16.54 to 33.59)             | 13.58<br>(9.50 to 18.86)              | 24.18<br>(17.44 to 33.19)             | 1.46<br>(1.19 to 1.79)           | 0.99<br>(0.71 to 1.37)         | 0.60<br>(0.41 to 0.86)         | 0.99<br>(0.71 to 1.37)          |

|                                       |                                                                |                                                                |                                                               |                                                                 |                                                            |                                                            |                                                            |                                                            |
|---------------------------------------|----------------------------------------------------------------|----------------------------------------------------------------|---------------------------------------------------------------|-----------------------------------------------------------------|------------------------------------------------------------|------------------------------------------------------------|------------------------------------------------------------|------------------------------------------------------------|
|                                       | 1.82<br>(1.28 to<br>2.56)                                      | 1.11<br>(0.70 to<br>1.78)                                      | 0.66<br>(0.41 to<br>1.09)                                     | 1.13<br>(0.71 to<br>1.82)                                       | 0.07<br>(0.05 to<br>0.10)                                  | 0.05<br>(0.03 to<br>0.08)                                  | 0.03<br>(0.02 to<br>0.05)                                  | 0.05<br>(0.03 to<br>0.08)                                  |
| Acute hepatitis C                     |                                                                |                                                                |                                                               |                                                                 |                                                            |                                                            |                                                            |                                                            |
|                                       | 7.52<br>(5.30 to<br>10.22)                                     | 4.29<br>(2.59 to<br>6.73)                                      | 2.69<br>(1.57 to<br>4.30)                                     | 4.36<br>(2.60 to<br>6.86)                                       | 0.26<br>(0.16 to<br>0.40)                                  | 0.23<br>(0.12 to<br>0.37)                                  | 0.16<br>(0.09 to<br>0.26)                                  | 0.22<br>(0.12 to<br>0.37)                                  |
| Acute hepatitis E                     |                                                                |                                                                |                                                               |                                                                 |                                                            |                                                            |                                                            |                                                            |
|                                       | 46.66<br>(29.65 to<br>96.78)                                   | 39.14<br>(27.35 to<br>69.20)                                   | 36.03<br>(26.25 to<br>60.06)                                  | 39.07<br>(27.15 to<br>69.13)                                    | 1.18<br>(0.89 to<br>1.79)                                  | 1.42<br>(1.14 to<br>1.85)                                  | 1.47<br>(1.19 to<br>1.85)                                  | 1.35<br>(1.07 to<br>1.79)                                  |
| Other unspecified infectious diseases |                                                                |                                                                |                                                               |                                                                 |                                                            |                                                            |                                                            |                                                            |
| <b>Non-communicable diseases</b>      | <b>93,198.94</b><br><b>(85,230.41 to</b><br><b>101,664.79)</b> | <b>92,924.97</b><br><b>(73,028.04 to</b><br><b>114,448.40)</b> | <b>59,410.52</b><br><b>(47,857.40 to</b><br><b>71,592.29)</b> | <b>111,228.88</b><br><b>(86,182.47 to</b><br><b>139,002.49)</b> | <b>5,583.14</b><br><b>(5,090.88 to</b><br><b>6,059.91)</b> | <b>6,976.47</b><br><b>(5,831.48 to</b><br><b>8,284.63)</b> | <b>4,890.29</b><br><b>(4,113.42 to</b><br><b>5,729.46)</b> | <b>7,960.04</b><br><b>(6,572.43 to</b><br><b>9,446.09)</b> |



| Montenegro                           |                                       |                                       |                                       |                                       |                                    |                                    |                                    |                                    |
|--------------------------------------|---------------------------------------|---------------------------------------|---------------------------------------|---------------------------------------|------------------------------------|------------------------------------|------------------------------------|------------------------------------|
| Cause                                | YLLs (actual counts)                  |                                       |                                       |                                       | Deaths (actual counts)             |                                    |                                    |                                    |
|                                      | 2016                                  | 2040 Forecast                         | 2040 Better Scenario                  | 2040 Worse Scenario                   | 2016                               | 2040 Forecast                      | 2040 Better Scenario               | 2040 Worse Scenario                |
| Neoplasms                            | 27,832.91<br>(25,246.86 to 30,612.03) | 30,709.58<br>(24,802.64 to 37,095.78) | 21,754.42<br>(17,544.93 to 25,911.11) | 33,415.42<br>(26,680.69 to 40,700.05) | 1,246.04<br>(1,126.99 to 1,374.86) | 1,697.45<br>(1,437.56 to 1,985.58) | 1,289.39<br>(1,095.42 to 1,482.63) | 1,781.20<br>(1,500.57 to 2,107.81) |
| Lip and oral cavity cancer           | 430.62<br>(364.08 to 509.61)          | 548.52<br>(287.11 to 913.25)          | 272.02<br>(141.51 to 485.18)          | 614.77<br>(328.24 to 995.38)          | 17.21<br>(14.65 to 20.21)          | 25.54<br>(14.31 to 43.46)          | 12.83<br>(7.33 to 21.70)           | 28.19<br>(15.89 to 47.35)          |
| Nasopharynx cancer                   | 35.37<br>(30.60 to 41.27)             | 42.40<br>(23.42 to 68.10)             | 16.88<br>(9.24 to 27.44)              | 51.54<br>(28.23 to 80.53)             | 1.29<br>(1.12 to 1.49)             | 1.80<br>(1.01 to 2.92)             | 0.74<br>(0.43 to 1.19)             | 2.13<br>(1.18 to 3.35)             |
| Other pharynx cancer                 | 188.59<br>(151.44 to 230.64)          | 198.77<br>(103.16 to 347.36)          | 163.96<br>(86.08 to 284.46)           | 211.64<br>(108.12 to 371.43)          | 6.77<br>(5.46 to 8.24)             | 8.07<br>(4.25 to 13.78)            | 6.90<br>(3.71 to 11.61)            | 8.46<br>(4.46 to 14.30)            |
| Esophageal cancer                    | 509.88<br>(433.94 to 603.20)          | 656.80<br>(320.89 to 1,248.90)        | 427.74<br>(218.41 to 782.41)          | 746.65<br>(359.88 to 1,422.19)        | 21.65<br>(18.49 to 25.50)          | 31.96<br>(16.86 to 58.92)          | 21.02<br>(11.98 to 36.74)          | 35.61<br>(18.70 to 65.20)          |
| Stomach cancer                       | 1,152.22<br>(1,020.54 to 1,301.47)    | 837.14<br>(584.66 to 1,167.79)        | 536.85<br>(389.08 to 733.10)          | 866.11<br>(610.34 to 1,198.14)        | 57.47<br>(50.94 to 64.66)          | 51.79<br>(37.66 to 70.18)          | 35.77<br>(27.17 to 47.25)          | 51.98<br>(38.32 to 70.53)          |
| Colon and rectum cancer              | 2,477.60<br>(2,166.37 to 2,820.29)    | 3,034.04<br>(2,116.28 to 4,390.58)    | 2,041.69<br>(1,442.79 to 2,836.45)    | 3,273.71<br>(2,241.98 to 4,738.75)    | 129.88<br>(113.82 to 146.71)       | 198.89<br>(144.50 to 282.19)       | 145.54<br>(108.01 to 200.01)       | 207.65<br>(147.19 to 293.65)       |
| Liver cancer                         | 1,126.30<br>(963.82 to 1,309.18)      | 1,683.67<br>(1,054.73 to 2,627.04)    | 1,481.29<br>(966.52 to 2,211.80)      | 1,979.89<br>(1,172.88 to 3,165.87)    | 53.80<br>(46.39 to 62.68)          | 96.98<br>(62.82 to 144.38)         | 91.85<br>(62.86 to 129.81)         | 109.39<br>(66.87 to 168.39)        |
| Liver cancer due to hepatitis B      | 345.17<br>(256.25 to 447.68)          | 463.06<br>(268.19 to 777.84)          | 446.01<br>(274.63 to 708.19)          | 518.11<br>(289.55 to 899.32)          | 15.16<br>(11.05 to 20.02)          | 24.70<br>(14.57 to 40.24)          | 25.25<br>(15.72 to 38.93)          | 26.59<br>(15.36 to 45.08)          |
| Liver cancer due to hepatitis C      | 254.19<br>(174.52 to 338.28)          | 387.84<br>(216.34 to 635.68)          | 382.61<br>(225.91 to 588.83)          | 424.99<br>(228.31 to 717.16)          | 13.43<br>(9.47 to 18.09)           | 24.94<br>(14.63 to 38.54)          | 26.40<br>(16.23 to 39.64)          | 26.25<br>(14.85 to 42.26)          |
| Liver cancer due to alcohol use      | 319.98<br>(256.92 to 393.84)          | 527.36<br>(321.61 to 822.19)          | 357.58<br>(230.27 to 542.69)          | 693.14<br>(400.06 to 1,108.61)        | 15.64<br>(12.51 to 19.23)          | 30.10<br>(18.94 to 46.37)          | 22.55<br>(14.71 to 33.53)          | 37.83<br>(22.71 to 59.58)          |
| Liver cancer due to other causes     | 206.95<br>(165.72 to 255.71)          | 305.40<br>(172.99 to 512.48)          | 295.09<br>(175.80 to 469.34)          | 343.66<br>(184.46 to 603.38)          | 9.58<br>(7.68 to 11.89)            | 17.25<br>(10.09 to 28.43)          | 17.65<br>(11.14 to 27.93)          | 18.72<br>(10.41 to 32.47)          |
| Gallbladder and biliary tract cancer | 364.85<br>(305.52 to 440.32)          | 284.80<br>(235.13 to 349.97)          | 284.06<br>(232.43 to 348.28)          | 272.78<br>(225.38 to 335.40)          | 19.55<br>(16.40 to 23.74)          | 18.99<br>(15.86 to 23.16)          | 20.21<br>(16.67 to 24.66)          | 17.68<br>(14.76 to 21.78)          |
| Pancreatic cancer                    | 1,491.11<br>(1,327.62 to 1,675.63)    | 1,883.42<br>(1,459.50 to 2,413.48)    | 1,714.53<br>(1,335.16 to 2,150.85)    | 1,879.62<br>(1,452.19 to 2,427.50)    | 72.30<br>(64.06 to 81.24)          | 109.00<br>(87.44 to 135.55)        | 105.86<br>(86.20 to 128.70)        | 105.76<br>(83.79 to 133.39)        |
| Larynx cancer                        | 939.95<br>(800.83 to 1,106.71)        | 946.27<br>(412.40 to 1,747.34)        | 432.96<br>(188.16 to 791.08)          | 1,039.54<br>(463.22 to 1,898.38)      | 38.21<br>(32.53 to 45.02)          | 44.37<br>(19.64 to 80.34)          | 19.45<br>(15.10 to 25.10)          | 48.38<br>(21.57 to 88.11)          |
| Tracheal, bronchus, and lung cancer  | 8,613.61<br>(7,510.32 to 9,899.17)    | 9,315.72<br>(6,255.60 to 13,212.22)   | 4,885.03<br>(3,281.23 to 6,996.48)    | 11,064.60<br>(7,408.58 to 15,865.64)  | 370.56<br>(323.95 to 426.70)       | 466.82<br>(321.49 to 644.58)       | 244.33<br>(168.61 to 334.77)       | 539.45<br>(372.47 to 753.32)       |
| Malignant skin melanoma              | 284.83<br>(237.73 to 335.82)          | 301.80<br>(243.47 to 368.61)          | 402.93<br>(324.13 to 493.83)          | 284.96<br>(230.51 to 351.97)          | 11.30<br>(9.47 to 13.34)           | 15.82<br>(12.84 to 19.27)          | 22.84<br>(18.84 to 27.58)          | 14.41<br>(11.63 to 17.41)          |
| Non-melanoma skin cancer             | 138.50<br>(121.10 to 159.36)          | 185.90<br>(156.76 to 223.39)          | 147.15<br>(123.16 to 175.04)          | 178.30<br>(148.86 to 211.16)          | 8.47<br>(7.47 to 9.72)             | 14.99<br>(12.17 to 18.34)          | 13.05<br>(10.76 to 15.88)          | 13.83<br>(11.06 to 17.47)          |
| Breast cancer                        | 2,344.32<br>(1,859.91 to 2,947.11)    | 2,381.18<br>(1,575.57 to 3,563.54)    | 1,637.51<br>(1,132.83 to 2,405.56)    | 2,584.85<br>(1,648.74 to 4,119.80)    | 95.56<br>(75.79 to 119.14)         | 125.52<br>(87.20 to 181.30)        | 94.38<br>(68.52 to 133.06)         | 131.23<br>(89.15 to 197.70)        |
| Cervical cancer                      | 657.51<br>(517.32 to 879.39)          | 455.43<br>(303.81 to 673.49)          | 290.58<br>(199.20 to 408.71)          | 477.92<br>(312.57 to 700.75)          | 24.11<br>(18.99 to 33.20)          | 20.89<br>(14.54 to 30.09)          | 14.53<br>(10.57 to 19.77)          | 21.12<br>(14.54 to 29.77)          |

|                   |                                     |                                       |                                       |                                       |                               |                                 |                                 |                                |
|-------------------|-------------------------------------|---------------------------------------|---------------------------------------|---------------------------------------|-------------------------------|---------------------------------|---------------------------------|--------------------------------|
|                   | 228.54<br>(181.31 to<br>279.61)     | 265.45<br>(208.62 to<br>327.25)       | 219.43<br>(169.72 to<br>273.41)       | 261.91<br>(205.15 to<br>324.18)       | 10.67<br>(8.50 to<br>13.00)   | 15.95<br>(12.96 to<br>19.46)    | 14.11<br>(11.30 to<br>17.31)    | 15.28<br>(12.26 to<br>18.42)   |
| Uterine cancer    |                                     |                                       |                                       |                                       |                               |                                 |                                 |                                |
|                   | 652.46<br>(517.21 to<br>803.89)     | 556.81<br>(411.27 to<br>746.11)       | 475.43<br>(350.62 to<br>638.07)       | 578.56<br>(420.02 to<br>798.15)       | 25.53<br>(20.40 to<br>30.86)  | 26.91<br>(20.27 to<br>35.87)    | 24.13<br>(18.00 to<br>32.14)    | 27.34<br>(20.28 to<br>37.07)   |
| Ovarian cancer    |                                     |                                       |                                       |                                       |                               |                                 |                                 |                                |
|                   | 1,127.28<br>(879.32 to<br>1,573.37) | 1,724.86<br>(1,333.24 to<br>2,375.99) | 1,557.15<br>(1,214.84 to<br>2,117.24) | 1,618.02<br>(1,253.63 to<br>2,214.48) | 78.50<br>(62.03 to<br>108.70) | 143.88<br>(111.41 to<br>198.80) | 139.51<br>(111.41 to<br>183.38) | 131.34<br>(99.33 to<br>183.85) |
| Prostate cancer   |                                     |                                       |                                       |                                       |                               |                                 |                                 |                                |
|                   | 68.07<br>(50.65 to<br>88.00)        | 45.75<br>(30.67 to<br>64.48)          | 34.65<br>(22.99 to<br>48.32)          | 46.31<br>(31.42 to<br>65.59)          | 1.63<br>(1.25 to<br>2.07)     | 1.38<br>(0.99 to<br>1.85)       | 1.13<br>(0.82 to<br>1.52)       | 1.35<br>(0.99 to<br>1.77)      |
| Testicular cancer |                                     |                                       |                                       |                                       |                               |                                 |                                 |                                |

| Montenegro                      |                                                     |                                                     |                                                     |                                                     |                                                  |                                                  |                                                  |                                                  |
|---------------------------------|-----------------------------------------------------|-----------------------------------------------------|-----------------------------------------------------|-----------------------------------------------------|--------------------------------------------------|--------------------------------------------------|--------------------------------------------------|--------------------------------------------------|
| Cause                           | YLLs (actual counts)                                |                                                     |                                                     |                                                     | Deaths (actual counts)                           |                                                  |                                                  |                                                  |
|                                 | 2016                                                | 2040 Forecast                                       | 2040 Better Scenario                                | 2040 Worse Scenario                                 | 2016                                             | 2040 Forecast                                    | 2040 Better Scenario                             | 2040 Worse Scenario                              |
| Kidney cancer                   | 456.96<br>(399.23 to 531.74)                        | 576.76<br>(395.17 to 845.50)                        | 549.59<br>(392.08 to 764.76)                        | 561.95<br>(380.83 to 827.19)                        | 20.73<br>(18.15 to 24.21)                        | 31.76<br>(22.37 to 44.73)                        | 32.35<br>(24.15 to 42.36)                        | 30.07<br>(20.99 to 43.00)                        |
| Bladder cancer                  | 516.91<br>(453.51 to 596.59)                        | 636.53<br>(456.82 to 885.39)                        | 487.81<br>(364.66 to 649.76)                        | 633.19<br>(452.19 to 878.29)                        | 30.26<br>(26.41 to 34.73)                        | 46.25<br>(34.03 to 62.28)                        | 38.54<br>(30.40 to 49.26)                        | 44.56<br>(31.99 to 60.16)                        |
| Brain and nervous system cancer | 1,535.62<br>(1,313.89 to 1,915.51)                  | 1,595.14<br>(1,307.70 to 1,954.09)                  | 1,433.75<br>(1,154.72 to 1,769.52)                  | 1,577.74<br>(1,296.44 to 1,940.37)                  | 50.91<br>(43.55 to 62.86)                        | 65.22<br>(54.62 to 77.22)                        | 61.73<br>(50.71 to 73.57)                        | 62.98<br>(52.86 to 75.29)                        |
| Thyroid cancer                  | 101.30<br>(87.47 to 114.51)                         | 107.15<br>(75.51 to 156.42)                         | 89.18<br>(63.97 to 129.46)                          | 116.32<br>(78.84 to 178.26)                         | 4.78<br>(4.14 to 5.41)                           | 6.24<br>(4.46 to 8.89)                           | 5.51<br>(3.97 to 7.83)                           | 6.53<br>(4.45 to 9.63)                           |
| Mesothelioma                    | 35.89<br>(30.87 to 41.70)                           | 37.20<br>(30.51 to 44.27)                           | 39.36<br>(31.71 to 47.57)                           | 35.95<br>(29.80 to 42.74)                           | 1.43<br>(1.22 to 1.66)                           | 1.80<br>(1.49 to 2.14)                           | 2.01<br>(1.64 to 2.39)                           | 1.70<br>(1.41 to 1.99)                           |
| Hodgkin lymphoma                | 205.79<br>(165.44 to 285.37)                        | 144.39<br>(105.41 to 205.84)                        | 93.74<br>(69.67 to 135.23)                          | 146.98<br>(109.06 to 206.59)                        | 6.48<br>(5.18 to 9.03)                           | 5.58<br>(4.16 to 8.00)                           | 3.83<br>(2.86 to 5.42)                           | 5.54<br>(4.16 to 7.82)                           |
| Non-Hodgkin lymphoma            | 426.37<br>(373.58 to 484.55)                        | 408.61<br>(323.23 to 512.67)                        | 346.59<br>(274.30 to 435.07)                        | 422.19<br>(329.74 to 532.94)                        | 17.05<br>(14.80 to 19.82)                        | 21.09<br>(17.14 to 26.33)                        | 17.05<br>(15.38 to 23.72)                        | 21.12<br>(16.70 to 26.79)                        |
| Multiple myeloma                | 152.34<br>(130.55 to 184.65)                        | 177.28<br>(138.93 to 228.56)                        | 166.15<br>(129.26 to 211.90)                        | 182.08<br>(141.17 to 239.43)                        | 7.28<br>(6.24 to 8.79)                           | 10.15<br>(8.09 to 12.99)                         | 10.07<br>(8.04 to 12.74)                         | 10.12<br>(7.96 to 13.17)                         |
| Leukemia                        | 1,040.66<br>(901.72 to 1,198.74)                    | 1,080.29<br>(787.67 to 1,458.46)                    | 919.79<br>(688.46 to 1,190.44)                      | 1,130.93<br>(820.62 to 1,538.36)                    | 40.61<br>(34.99 to 47.38)                        | 56.19<br>(41.41 to 75.81)                        | 50.99<br>(38.86 to 64.98)                        | 56.75<br>(41.20 to 77.78)                        |
| Acute lymphoid leukemia         | 217.81<br>(173.44 to 264.18)                        | 162.78<br>(112.55 to 222.14)                        | 123.85<br>(86.15 to 167.45)                         | 173.59<br>(121.26 to 238.53)                        | 5.38<br>(4.37 to 6.56)                           | 5.34<br>(3.81 to 7.32)                           | 4.20<br>(3.03 to 5.57)                           | 5.58<br>(3.94 to 7.70)                           |
| Chronic lymphoid leukemia       | 219.88<br>(181.24 to 272.70)                        | 264.49<br>(178.67 to 387.28)                        | 236.24<br>(166.29 to 330.02)                        | 269.99<br>(180.19 to 400.43)                        | 12.21<br>(10.13 to 15.09)                        | 18.11<br>(12.54 to 25.60)                        | 17.38<br>(12.88 to 23.36)                        | 17.87<br>(12.35 to 25.91)                        |
| Acute myeloid leukemia          | 417.47<br>(344.49 to 492.39)                        | 494.06<br>(365.77 to 661.96)                        | 451.67<br>(337.43 to 589.11)                        | 519.49<br>(382.81 to 703.70)                        | 14.86<br>(12.37 to 17.64)                        | 22.68<br>(16.94 to 29.86)                        | 21.85<br>(16.79 to 28.05)                        | 23.14<br>(17.10 to 31.05)                        |
| Chronic myeloid leukemia        | 109.88<br>(83.79 to 145.23)                         | 65.14<br>(40.20 to 105.03)                          | 36.73<br>(23.43 to 55.59)                           | 70.66<br>(43.08 to 110.74)                          | 4.59<br>(3.46 to 6.04)                           | 3.60<br>(2.25 to 5.76)                           | 2.19<br>(1.43 to 3.24)                           | 3.74<br>(2.29 to 5.82)                           |
| Other leukemia                  | 75.62<br>(62.30 to 105.22)                          | 93.81<br>(64.31 to 140.30)                          | 71.30<br>(50.98 to 101.75)                          | 97.20<br>(65.73 to 145.22)                          | 3.56<br>(2.96 to 4.55)                           | 6.46<br>(4.47 to 9.15)                           | 5.38<br>(3.85 to 7.30)                           | 6.41<br>(4.33 to 9.27)                           |
| Other neoplasms                 | 529.65<br>(467.81 to 597.54)                        | 597.52<br>(517.34 to 681.19)                        | 606.62<br>(518.12 to 698.91)                        | 576.41<br>(503.92 to 652.17)                        | 22.08<br>(19.46 to 24.66)                        | 35.60<br>(29.59 to 38.16)                        | 37.09<br>(32.35 to 42.17)                        | 31.26<br>(27.49 to 35.56)                        |
| <b>Cardiovascular diseases</b>  | <b>51,227.05</b><br><b>(46,538.39 to 56,063.50)</b> | <b>43,868.74</b><br><b>(30,340.78 to 60,025.31)</b> | <b>21,647.34</b><br><b>(15,534.35 to 30,112.67)</b> | <b>58,486.95</b><br><b>(39,399.18 to 82,307.86)</b> | <b>3,512.35</b><br><b>(3,194.77 to 3,825.97)</b> | <b>3,828.45</b><br><b>(2,819.18 to 5,098.71)</b> | <b>2,192.21</b><br><b>(1,636.83 to 2,972.51)</b> | <b>4,706.50</b><br><b>(3,476.64 to 6,250.53)</b> |
| Rheumatic heart disease         | 286.56<br>(245.81 to 333.14)                        | 165.13<br>(118.06 to 234.86)                        | 114.19<br>(80.19 to 164.48)                         | 168.52<br>(119.15 to 245.60)                        | 12.65<br>(10.83 to 14.67)                        | 9.87<br>(7.32 to 13.77)                          | 7.46<br>(5.49 to 10.32)                          | 9.70<br>(7.13 to 13.57)                          |
| Ischemic heart disease          | 23,619.72<br>(21,279.31 to 26,303.01)               | 16,683.52<br>(9,957.98 to 26,911.51)                | 7,773.67<br>(4,817.38 to 12,402.18)                 | 24,049.58<br>(14,177.37 to 37,072.98)               | 1,573.29<br>(1,417.63 to 1,743.05)               | 1,399.87<br>(903.27 to 2,084.15)                 | 776.99<br>(503.33 to 1,200.41)                   | 1,849.05<br>(1,187.71 to 2,731.52)               |
| Stroke                          | 20,926.09<br>(18,367.96 to 23,268.41)               | 18,758.18<br>(11,372.72 to 29,039.54)               | 7,748.00<br>(4,876.22 to 11,916.90)                 | 25,472.34<br>(15,121.68 to 39,308.43)               | 1,499.63<br>(1,319.01 to 1,662.28)               | 1,700.68<br>(1,112.07 to 2,484.45)               | 817.77<br>(525.52 to 1,212.53)                   | 2,114.12<br>(1,350.04 to 3,136.22)               |
| Ischemic stroke                 | 2,854.93<br>(2,453.15 to 3,263.41)                  | 1,980.29<br>(1,194.00 to 3,277.06)                  | 1,021.39<br>(606.80 to 1,761.50)                    | 2,503.96<br>(1,467.36 to 4,334.74)                  | 231.68<br>(199.10 to 263.55)                     | 205.34<br>(122.66 to 355.42)                     | 119.75<br>(71.16 to 209.54)                      | 241.35<br>(142.01 to 441.41)                     |

|                                |                                          |                                         |                                        |                                          |                                       |                                     |                                   |                                       |
|--------------------------------|------------------------------------------|-----------------------------------------|----------------------------------------|------------------------------------------|---------------------------------------|-------------------------------------|-----------------------------------|---------------------------------------|
| Intracerebral hemorrhage       | 18,071.16<br>(15,831.63 to<br>20,123.91) | 16,777.89<br>(9,999.72 to<br>26,845.96) | 6,726.61<br>(4,141.76 to<br>10,624.20) | 22,968.37<br>(13,236.44 to<br>36,412.21) | 1,267.95<br>(1,112.51 to<br>1,408.34) | 1,495.35<br>(950.14 to<br>2,277.09) | 698.02<br>(430.25 to<br>1,068.76) | 1,872.78<br>(1,145.80 to<br>2,855.65) |
| Hypertensive heart disease     | 292.96<br>(232.72 to<br>414.87)          | 622.73<br>(316.67 to<br>1,571.19)       | 470.21<br>(247.21 to<br>1,177.14)      | 753.07<br>(362.86 to<br>1,921.54)        | 24.84<br>(20.21 to<br>32.32)          | 66.62<br>(33.99 to<br>174.32)       | 56.56<br>(30.22 to<br>141.00)     | 78.29<br>(36.94 to<br>209.92)         |
| Cardiomyopathy and myocarditis | 2,897.40<br>(2,407.95 to<br>3,692.64)    | 3,089.74<br>(2,388.00 to<br>4,117.30)   | 2,192.36<br>(1,681.16 to<br>2,913.13)  | 3,431.90<br>(2,657.59 to<br>4,519.09)    | 187.15<br>(154.58 to<br>238.32)       | 256.22<br>(189.37 to<br>358.05)     | 201.20<br>(149.32 to<br>279.69)   | 271.30<br>(197.84 to<br>380.19)       |
| Myocarditis                    | 127.69<br>(94.98 to<br>165.84)           | 169.96<br>(122.47 to<br>230.21)         | 187.68<br>(135.46 to<br>249.88)        | 157.37<br>(112.01 to<br>213.94)          | 9.73<br>(7.05 to<br>12.90)            | 17.58<br>(11.74 to<br>25.97)        | 21.65<br>(14.88 to<br>31.18)      | 15.55<br>(9.92 to<br>23.37)           |

| Montenegro                                                    |                                                |                                              |                                          |                                              |                                       |                                        |                                       |                                        |
|---------------------------------------------------------------|------------------------------------------------|----------------------------------------------|------------------------------------------|----------------------------------------------|---------------------------------------|----------------------------------------|---------------------------------------|----------------------------------------|
| Cause                                                         | YLLs (actual counts)                           |                                              |                                          |                                              | Deaths (actual counts)                |                                        |                                       |                                        |
|                                                               | 2016                                           | 2040 Forecast                                | 2040 Better Scenario                     | 2040 Worse Scenario                          | 2016                                  | 2040 Forecast                          | 2040 Better Scenario                  | 2040 Worse Scenario                    |
| Alcoholic cardiomyopathy                                      | 1,957.03<br>(1,621.52 to<br>2,586.58)          | 2,097.79<br>(1,662.72 to<br>2,729.39)        | 1,467.12<br>(1,131.61 to<br>1,904.01)    | 2,422.24<br>(1,946.20 to<br>3,145.80)        | 117.09<br>(96.02 to<br>152.11)        | 157.22<br>(122.02 to<br>203.48)        | 121.07<br>(93.71 to<br>154.69)        | 175.00<br>(133.17 to<br>229.57)        |
| Other cardiomyopathy                                          | 812.68<br>(604.66 to<br>1,199.87)              | 821.99<br>(423.56 to<br>1,455.15)            | 537.56<br>(275.18 to<br>939.35)          | 852.29<br>(452.47 to<br>1,474.04)            | 60.33<br>(42.72 to<br>92.55)          | 81.41<br>(38.12 to<br>159.64)          | 58.48<br>(27.16 to<br>111.14)         | 80.75<br>(37.45 to<br>159.59)          |
| Atrial fibrillation and flutter                               | 674.90<br>(520.37 to<br>851.30)                | 1,332.51<br>(954.71 to<br>1,863.18)          | 1,169.82<br>(851.24 to<br>1,580.84)      | 1,319.50<br>(932.30 to<br>1,874.45)          | 71.01<br>(54.68 to<br>90.15)          | 159.16<br>(110.38 to<br>224.96)        | 151.58<br>(108.57 to<br>206.09)       | 152.91<br>(104.14 to<br>220.79)        |
| Aortic aneurysm                                               | 1,289.49<br>(1,109.14 to<br>1,531.87)          | 1,296.45<br>(909.43 to<br>1,814.94)          | 985.48<br>(713.06 to<br>1,329.14)        | 1,313.12<br>(909.14 to<br>1,800.04)          | 67.97<br>(58.42 to<br>79.52)          | 84.64<br>(63.90 to<br>110.02)          | 73.40<br>(56.40 to<br>93.61)          | 82.17<br>(62.01 to<br>105.73)          |
| Peripheral artery disease                                     | 27.67<br>(20.65 to<br>35.37)                   | 64.21<br>(41.03 to<br>93.65)                 | 63.60<br>(40.77 to<br>93.34)             | 64.36<br>(40.95 to<br>94.23)                 | 2.39<br>(1.78 to<br>3.02)             | 6.82<br>(4.34 to<br>9.85)              | 7.54<br>(4.79 to<br>10.79)            | 6.52<br>(4.08 to<br>9.52)              |
| Endocarditis                                                  | 88.40<br>(73.55 to<br>113.36)                  | 110.97<br>(79.26 to<br>155.50)               | 109.87<br>(77.50 to<br>156.35)           | 113.96<br>(79.01 to<br>160.74)               | 4.46<br>(3.64 to<br>5.50)             | 7.56<br>(5.19 to<br>11.12)             | 8.22<br>(5.67 to<br>12.22)            | 7.39<br>(5.07 to<br>10.92)             |
| Other cardiovascular and circulatory diseases                 | 1,123.86<br>(893.99 to<br>1,504.39)            | 1,745.30<br>(1,161.88 to<br>2,612.05)        | 1,020.14<br>(672.92 to<br>1,509.25)      | 1,800.60<br>(1,169.39 to<br>2,728.93)        | 68.95<br>(54.17 to<br>95.80)          | 137.01<br>(95.33 to<br>203.68)         | 91.48<br>(63.65 to<br>135.64)         | 135.05<br>(92.22 to<br>199.00)         |
| <b>Chronic respiratory diseases</b>                           | <b>851.50<br/>(730.96 to<br/>980.23)</b>       | <b>1,093.47<br/>(762.33 to<br/>1,551.32)</b> | <b>659.32<br/>(498.34 to<br/>871.50)</b> | <b>1,219.46<br/>(834.39 to<br/>1,759.56)</b> | <b>58.98<br/>(51.02 to<br/>67.45)</b> | <b>93.22<br/>(65.18 to<br/>130.98)</b> | <b>59.07<br/>(44.92 to<br/>77.11)</b> | <b>99.21<br/>(68.04 to<br/>140.28)</b> |
| Chronic obstructive pulmonary disease                         | 692.39<br>(593.79 to<br>799.72)                | 915.39<br>(597.49 to<br>1,386.90)            | 446.46<br>(302.76 to<br>652.23)          | 1,043.81<br>(669.49 to<br>1,582.72)          | 50.51<br>(43.64 to<br>58.00)          | 80.94<br>(53.15 to<br>119.56)          | 43.25<br>(29.64 to<br>61.14)          | 87.54<br>(56.25 to<br>129.83)          |
| Pneumoconiosis                                                | 30.67<br>(23.92 to<br>38.95)                   | 46.66<br>(33.73 to<br>63.95)                 | 59.78<br>(43.79 to<br>80.53)             | 43.70<br>(31.33 to<br>60.59)                 | 1.83<br>(1.41 to<br>2.34)             | 3.73<br>(2.50 to<br>5.51)              | 5.15<br>(3.60 to<br>7.33)             | 3.38<br>(2.23 to<br>5.06)              |
| Silicosis                                                     | 3.89<br>(2.32 to<br>6.28)                      | 4.48<br>(1.94 to<br>9.33)                    | 4.00<br>(1.64 to<br>8.98)                | 4.34<br>(1.91 to<br>8.95)                    | 0.24<br>(0.14 to<br>0.40)             | 0.35<br>(0.14 to<br>0.77)              | 0.34<br>(0.13 to<br>0.79)             | 0.33<br>(0.13 to<br>0.72)              |
| Asbestosis                                                    | 20.44<br>(15.38 to<br>27.27)                   | 32.27<br>(21.86 to<br>46.19)                 | 43.88<br>(30.61 to<br>61.12)             | 29.80<br>(20.08 to<br>43.44)                 | 1.20<br>(0.89 to<br>1.61)             | 2.48<br>(1.58 to<br>3.88)              | 3.62<br>(2.36 to<br>5.36)             | 2.22<br>(1.38 to<br>3.58)              |
| Coal workers pneumoconiosis                                   | 1.80<br>(0.90 to<br>3.05)                      | 2.88<br>(1.25 to<br>5.62)                    | 3.22<br>(1.25 to<br>6.77)                | 2.79<br>(1.24 to<br>5.24)                    | 0.11<br>(0.06 to<br>0.19)             | 0.24<br>(0.10 to<br>0.54)              | 0.30<br>(0.11 to<br>0.69)             | 0.22<br>(0.09 to<br>0.48)              |
| Other pneumoconiosis                                          | 4.54<br>(2.85 to<br>6.57)                      | 7.04<br>(3.59 to<br>13.06)                   | 8.69<br>(3.90 to<br>16.18)               | 6.77<br>(3.47 to<br>12.41)                   | 0.29<br>(0.17 to<br>0.43)             | 0.66<br>(0.29 to<br>1.29)              | 0.89<br>(0.36 to<br>1.73)             | 0.61<br>(0.28 to<br>1.21)              |
| Asthma                                                        | 52.93<br>(42.02 to<br>72.26)                   | 28.95<br>(14.28 to<br>57.15)                 | 14.05<br>(6.99 to<br>26.16)              | 35.46<br>(16.12 to<br>66.81)                 | 2.97<br>(2.30 to<br>4.12)             | 2.16<br>(1.04 to<br>4.02)              | 1.17<br>(0.58 to<br>2.17)             | 2.51<br>(1.13 to<br>4.63)              |
| Interstitial lung disease and pulmonary sarcoidosis           | 43.13<br>(31.91 to<br>56.39)                   | 63.98<br>(45.12 to<br>88.02)                 | 102.34<br>(74.47 to<br>136.12)           | 58.72<br>(40.96 to<br>80.29)                 | 2.21<br>(1.63 to<br>3.05)             | 4.12<br>(2.83 to<br>6.11)              | 7.11<br>(5.17 to<br>10.02)            | 3.66<br>(2.48 to<br>5.43)              |
| Other chronic respiratory diseases                            | 32.38<br>(23.97 to<br>45.77)                   | 38.49<br>(24.61 to<br>59.54)                 | 36.68<br>(24.08 to<br>54.71)             | 37.76<br>(24.30 to<br>58.98)                 | 1.45<br>(1.03 to<br>2.06)             | 2.27<br>(1.43 to<br>3.55)              | 2.39<br>(1.55 to<br>3.51)             | 2.12<br>(1.33 to<br>3.35)              |
| <b>Cirrhosis and other chronic liver diseases</b>             | <b>1,215.89<br/>(1,055.02 to<br/>1,450.17)</b> | <b>1,095.94<br/>(870.65 to<br/>1,363.08)</b> | <b>737.22<br/>(583.49 to<br/>921.29)</b> | <b>1,167.33<br/>(940.35 to<br/>1,444.42)</b> | <b>45.78<br/>(39.56 to<br/>53.86)</b> | <b>48.64<br/>(40.66 to<br/>58.64)</b>  | <b>34.86<br/>(28.66 to<br/>41.97)</b> | <b>50.52<br/>(42.41 to<br/>60.18)</b>  |
| Cirrhosis and other chronic liver diseases due to hepatitis B | 221.61<br>(171.53 to<br>299.92)                | 184.06<br>(136.44 to<br>259.56)              | 143.96<br>(106.67 to<br>201.97)          | 183.65<br>(137.18 to<br>252.55)              | 8.20<br>(6.38 to<br>11.02)            | 7.99<br>(6.08 to<br>11.02)             | 6.58<br>(4.97 to<br>9.05)             | 7.78<br>(5.94 to<br>10.41)             |
| Cirrhosis and other chronic liver diseases due to hepatitis C | 318.82<br>(220.02 to<br>441.99)                | 277.46<br>(184.39 to<br>399.94)              | 212.14<br>(144.17 to<br>302.24)          | 277.96<br>(187.91 to<br>394.71)              | 11.77<br>(8.29 to<br>16.28)           | 11.87<br>(8.13 to<br>16.37)            | 9.53<br>(6.71 to<br>13.19)            | 11.63<br>(8.07 to<br>16.09)            |

|                                                                |                                                            |                                                            |                                                            |                                                            |                                                    |                                                      |                                                     |                                                      |
|----------------------------------------------------------------|------------------------------------------------------------|------------------------------------------------------------|------------------------------------------------------------|------------------------------------------------------------|----------------------------------------------------|------------------------------------------------------|-----------------------------------------------------|------------------------------------------------------|
|                                                                | 446.55<br>(342.83 to<br>562.83)                            | 446.08<br>(331.13 to<br>583.47)                            | 233.47<br>(170.40 to<br>313.38)                            | 517.74<br>(390.91 to<br>670.56)                            | 17.09<br>(13.26 to<br>21.42)                       | 19.87<br>(15.23 to<br>25.22)                         | 11.32<br>(8.46 to<br>14.42)                         | 22.46<br>(17.36 to<br>28.35)                         |
| Cirrhosis and other chronic liver diseases due to alcohol use  |                                                            |                                                            |                                                            |                                                            |                                                    |                                                      |                                                     |                                                      |
|                                                                | 228.92<br>(184.55 to<br>283.83)                            | 188.34<br>(144.49 to<br>243.84)                            | 147.65<br>(113.26 to<br>191.59)                            | 187.98<br>(143.90 to<br>247.88)                            | 8.72<br>(7.09 to<br>10.73)                         | 8.91<br>(7.01 to<br>11.33)                           | 7.44<br>(5.91 to<br>9.34)                           | 8.64<br>(6.76 to<br>11.05)                           |
| Cirrhosis and other chronic liver diseases due to other causes |                                                            |                                                            |                                                            |                                                            |                                                    |                                                      |                                                     |                                                      |
| <b>Digestive diseases</b>                                      | <b>1,746.76</b><br><b>(1,475.29 to</b><br><b>2,015.24)</b> | <b>1,965.57</b><br><b>(1,486.07 to</b><br><b>2,558.85)</b> | <b>1,597.86</b><br><b>(1,232.72 to</b><br><b>2,024.64)</b> | <b>1,982.18</b><br><b>(1,486.42 to</b><br><b>2,613.48)</b> | <b>90.80</b><br><b>(75.19 to</b><br><b>104.49)</b> | <b>136.42</b><br><b>(105.53 to</b><br><b>171.22)</b> | <b>123.97</b><br><b>(97.14 to</b><br><b>152.36)</b> | <b>132.05</b><br><b>(101.56 to</b><br><b>166.30)</b> |
| Peptic ulcer disease                                           | 301.59<br>(236.49 to<br>359.44)                            | 206.54<br>(137.43 to<br>296.44)                            | 109.88<br>(73.93 to<br>155.09)                             | 209.47<br>(139.79 to<br>310.02)                            | 15.14<br>(11.83 to<br>17.87)                       | 14.06<br>(9.45 to<br>19.94)                          | 8.20<br>(5.76 to<br>11.25)                          | 13.74<br>(9.26 to<br>19.75)                          |

| Montenegro                                 |                                    |                                    |                                    |                                    |                              |                              |                              |                              |
|--------------------------------------------|------------------------------------|------------------------------------|------------------------------------|------------------------------------|------------------------------|------------------------------|------------------------------|------------------------------|
| Cause                                      | YLLs (actual counts)               |                                    |                                    |                                    | Deaths (actual counts)       |                              |                              |                              |
|                                            | 2016                               | 2040 Forecast                      | 2040 Better Scenario               | 2040 Worse Scenario                | 2016                         | 2040 Forecast                | 2040 Better Scenario         | 2040 Worse Scenario          |
| Gastritis and duodenitis                   | 4.34<br>(3.34 to 5.35)             | 4.83<br>(3.54 to 6.40)             | 3.63<br>(2.60 to 4.78)             | 4.73<br>(3.45 to 6.24)             | 0.22<br>(0.17 to 0.27)       | 0.35<br>(0.25 to 0.46)       | 0.29<br>(0.21 to 0.38)       | 0.33<br>(0.24 to 0.43)       |
| Appendicitis                               | 22.49<br>(17.01 to 28.05)          | 18.62<br>(12.75 to 25.68)          | 11.67<br>(7.99 to 15.75)           | 18.65<br>(12.84 to 25.58)          | 0.97<br>(0.73 to 1.22)       | 1.09<br>(0.74 to 1.47)       | 0.74<br>(0.52 to 1.00)       | 1.05<br>(0.72 to 1.44)       |
| Paralytic ileus and intestinal obstruction | 309.10<br>(247.29 to 397.90)       | 371.55<br>(288.93 to 486.39)       | 394.51<br>(302.71 to 514.67)       | 351.11<br>(275.63 to 466.26)       | 16.03<br>(12.59 to 21.54)    | 27.38<br>(21.00 to 37.19)    | 31.69<br>(24.22 to 42.13)    | 24.90<br>(18.94 to 34.16)    |
| Inguinal, femoral, and abdominal hernia    | 22.27<br>(16.14 to 31.78)          | 17.60<br>(12.21 to 25.90)          | 15.01<br>(10.19 to 22.29)          | 16.87<br>(11.97 to 24.46)          | 1.32<br>(0.93 to 1.92)       | 1.41<br>(0.94 to 2.09)       | 1.32<br>(0.87 to 1.98)       | 1.30<br>(0.86 to 1.95)       |
| Inflammatory bowel disease                 | 53.47<br>(40.96 to 67.99)          | 49.49<br>(36.90 to 63.39)          | 49.90<br>(36.72 to 63.76)          | 47.75<br>(35.71 to 61.51)          | 2.22<br>(1.76 to 2.76)       | 2.92<br>(2.23 to 3.70)       | 3.22<br>(2.43 to 4.15)       | 2.71<br>(2.07 to 3.44)       |
| Vascular intestinal disorders              | 557.16<br>(464.61 to 687.35)       | 706.56<br>(576.39 to 866.51)       | 648.97<br>(520.36 to 798.82)       | 673.27<br>(549.65 to 832.09)       | 32.82<br>(27.33 to 40.77)    | 53.40<br>(42.98 to 66.87)    | 53.17<br>(42.37 to 66.29)    | 49.27<br>(39.57 to 61.65)    |
| Gallbladder and biliary diseases           | 141.83<br>(112.42 to 170.16)       | 180.73<br>(97.44 to 327.89)        | 121.59<br>(67.88 to 213.92)        | 217.56<br>(113.57 to 394.96)       | 8.71<br>(6.89 to 10.43)      | 14.56<br>(7.94 to 25.87)     | 10.83<br>(6.04 to 18.83)     | 16.66<br>(8.63 to 29.26)     |
| Pancreatitis                               | 281.79<br>(227.51 to 344.30)       | 343.96<br>(142.32 to 776.61)       | 181.38<br>(78.74 to 403.52)        | 380.23<br>(150.22 to 882.16)       | 10.37<br>(8.27 to 13.12)     | 16.04<br>(6.78 to 35.72)     | 9.09<br>(4.12 to 19.63)      | 17.32<br>(7.00 to 38.60)     |
| Other digestive diseases                   | 52.71<br>(39.60 to 65.05)          | 65.71<br>(46.08 to 82.31)          | 61.31<br>(42.55 to 78.66)          | 62.54<br>(44.91 to 79.66)          | 3.00<br>(2.17 to 3.70)       | 5.23<br>(3.50 to 6.70)       | 5.41<br>(3.60 to 7.62)       | 4.77<br>(3.21 to 6.13)       |
| Neurological disorders                     | 3,296.47<br>(2,797.68 to 3,834.85) | 5,843.51<br>(4,615.14 to 7,607.11) | 6,458.94<br>(5,227.33 to 8,026.51) | 5,853.27<br>(4,410.41 to 7,922.79) | 306.44<br>(249.42 to 354.87) | 306.44<br>(479.90 to 847.53) | 641.51<br>(610.33 to 960.46) | 625.21<br>(488.54 to 872.99) |
| Alzheimer's disease and other dementias    | 2,379.10<br>(1,913.63 to 2,912.58) | 4,556.23<br>(3,380.97 to 6,223.19) | 5,012.17<br>(3,817.93 to 6,529.01) | 4,633.11<br>(3,259.03 to 6,705.33) | 248.21<br>(200.28 to 302.16) | 545.79<br>(393.15 to 746.96) | 643.85<br>(489.33 to 842.52) | 538.50<br>(357.43 to 779.77) |
| Parkinson's disease                        | 463.60<br>(341.20 to 605.34)       | 825.59<br>(612.21 to 1,086.55)     | 1,032.85<br>(768.95 to 1,339.55)   | 748.89<br>(547.54 to 985.58)       | 38.97<br>(28.88 to 50.91)    | 79.15<br>(57.71 to 104.67)   | 104.27<br>(77.67 to 135.70)  | 70.29<br>(49.66 to 94.06)    |
| Epilepsy                                   | 179.37<br>(157.56 to 206.45)       | 187.18<br>(116.83 to 283.98)       | 141.44<br>(90.48 to 207.38)        | 200.80<br>(124.27 to 309.92)       | 4.51<br>(4.00 to 5.13)       | 5.97<br>(3.95 to 9.02)       | 4.85<br>(3.32 to 7.12)       | 6.24<br>(4.05 to 9.53)       |
| Multiple sclerosis                         | 162.51<br>(136.50 to 197.09)       | 159.43<br>(114.38 to 219.68)       | 154.73<br>(112.34 to 207.61)       | 157.59<br>(111.79 to 217.15)       | 5.27<br>(4.41 to 6.46)       | 6.08<br>(4.37 to 8.30)       | 6.23<br>(4.56 to 8.35)       | 5.89<br>(4.23 to 8.02)       |
| Motor neuron disease                       | 34.36<br>(29.40 to 39.19)          | 40.10<br>(32.18 to 47.90)          | 40.06<br>(31.93 to 48.02)          | 39.24<br>(31.71 to 46.56)          | 1.26<br>(1.07 to 1.44)       | 1.71<br>(1.40 to 2.00)       | 1.78<br>(1.43 to 2.11)       | 1.64<br>(1.36 to 1.92)       |
| Other neurological disorders               | 77.53<br>(67.42 to 88.94)          | 74.98<br>(62.32 to 89.29)          | 77.70<br>(63.72 to 93.07)          | 73.65<br>(61.48 to 87.75)          | 2.22<br>(1.98 to 2.49)       | 2.80<br>(2.45 to 3.17)       | 3.12<br>(2.71 to 3.57)       | 2.66<br>(2.34 to 3.01)       |
| Mental disorders                           | 1,125.33<br>(929.76 to 1,408.67)   | 1,454.08<br>(1,133.61 to 1,862.25) | 1,805.33<br>(1,397.51 to 2,272.05) | 1,427.43<br>(1,108.90 to 1,854.05) | 30.34<br>(25.04 to 36.85)    | 46.57<br>(36.87 to 57.73)    | 62.82<br>(49.96 to 76.25)    | 44.50<br>(35.65 to 55.78)    |
| Alcohol use disorders                      | 408.43<br>(286.81 to 564.67)       | 363.37<br>(233.46 to 546.19)       | 365.50<br>(229.84 to 556.00)       | 372.87<br>(239.32 to 555.14)       | 11.95<br>(8.41 to 16.58)     | 11.69<br>(7.55 to 17.51)     | 12.10<br>(7.69 to 18.39)     | 11.85<br>(7.71 to 17.61)     |
| Drug use disorders                         | 716.56<br>(568.87 to 948.77)       | 1,090.35<br>(835.19 to 1,433.76)   | 1,439.43<br>(1,092.04 to 1,823.25) | 1,054.20<br>(797.22 to 1,385.35)   | 18.37<br>(14.92 to 22.99)    | 34.87<br>(27.32 to 43.93)    | 50.72<br>(40.21 to 61.84)    | 32.64<br>(25.70 to 41.30)    |
| Opioid use disorders                       | 545.14<br>(427.39 to 754.57)       | 674.89<br>(501.49 to 919.76)       | 749.79<br>(555.12 to 1,010.69)     | 663.72<br>(486.68 to 918.44)       | 13.09<br>(10.50 to 17.12)    | 19.01<br>(14.49 to 24.81)    | 22.39<br>(16.93 to 28.68)    | 18.28<br>(13.82 to 24.07)    |

|                           |                                 |                                 |                                 |                                 |                           |                              |                              |                             |
|---------------------------|---------------------------------|---------------------------------|---------------------------------|---------------------------------|---------------------------|------------------------------|------------------------------|-----------------------------|
| Cocaine use disorders     | 1.83<br>(1.18 to<br>3.32)       | 4.62<br>(2.75 to<br>8.59)       | 6.68<br>(3.99 to<br>12.18)      | 4.43<br>(2.64 to<br>7.99)       | 0.05<br>(0.03 to<br>0.08) | 0.13<br>(0.08 to<br>0.22)    | 0.20<br>(0.12 to<br>0.32)    | 0.12<br>(0.08 to<br>0.21)   |
| Amphetamine use disorders | 5.32<br>(3.62 to<br>8.35)       | 22.60<br>(12.95 to<br>37.50)    | 39.17<br>(23.66 to<br>61.79)    | 21.47<br>(12.55 to<br>34.66)    | 0.10<br>(0.07 to<br>0.16) | 0.46<br>(0.28 to<br>0.72)    | 0.81<br>(0.52 to<br>1.23)    | 0.44<br>(0.27 to<br>0.67)   |
| Other drug use disorders  | 164.26<br>(121.70 to<br>229.96) | 388.24<br>(266.24 to<br>530.19) | 643.79<br>(470.17 to<br>860.44) | 364.58<br>(259.49 to<br>523.71) | 5.13<br>(3.91 to<br>6.55) | 15.27<br>(10.86 to<br>20.13) | 27.32<br>(20.52 to<br>34.64) | 13.80<br>(9.83 to<br>18.58) |
| Eating disorders          | 0.35<br>(0.25 to<br>0.45)       | 0.36<br>(0.24 to<br>0.52)       | 0.41<br>(0.25 to<br>0.60)       | 0.36<br>(0.24 to<br>0.51)       | 0.01<br>(0.01 to<br>0.01) | 0.01<br>(0.00 to<br>0.01)    | 0.01<br>(0.01 to<br>0.01)    | 0.01<br>(0.00 to<br>0.01)   |



| Montenegro                                                 |                                           |                                           |                                           |                                           |                                     |                                     |                                     |                                     |
|------------------------------------------------------------|-------------------------------------------|-------------------------------------------|-------------------------------------------|-------------------------------------------|-------------------------------------|-------------------------------------|-------------------------------------|-------------------------------------|
| Cause                                                      | YLLs (actual counts)                      |                                           |                                           |                                           | Deaths (actual counts)              |                                     |                                     |                                     |
|                                                            | 2016                                      | 2040 Forecast                             | 2040 Better Scenario                      | 2040 Worse Scenario                       | 2016                                | 2040 Forecast                       | 2040 Better Scenario                | 2040 Worse Scenario                 |
| <b>Diabetes, urogenital, blood, and endocrine diseases</b> | <b>5,199.45</b><br>(4,662.22 to 5,816.57) | <b>6,468.19</b><br>(4,654.89 to 8,730.52) | <b>4,460.08</b><br>(3,242.71 to 6,023.09) | <b>7,232.16</b><br>(5,170.10 to 9,798.51) | <b>286.78</b><br>(256.72 to 320.81) | <b>472.97</b><br>(352.30 to 624.89) | <b>355.08</b><br>(260.38 to 471.17) | <b>509.68</b><br>(374.95 to 683.29) |
| Diabetes mellitus                                          | 2,783.98<br>(2,439.98 to 3,164.40)        | 3,173.75<br>(1,921.88 to 5,134.20)        | 1,961.65<br>(1,214.69 to 3,108.27)        | 3,498.48<br>(2,078.24 to 5,645.94)        | 156.21<br>(135.00 to 178.23)        | 227.50<br>(143.12 to 352.31)        | 153.23<br>(98.49 to 233.22)         | 239.99<br>(150.21 to 372.33)        |
| Acute glomerulonephritis                                   | 5.06<br>(4.19 to 6.09)                    | 5.36<br>(3.66 to 8.17)                    | 4.22<br>(2.82 to 6.35)                    | 5.38<br>(3.74 to 7.94)                    | 0.16<br>(0.12 to 0.20)              | 0.24<br>(0.14 to 0.40)              | 0.20<br>(0.12 to 0.35)              | 0.23<br>(0.14 to 0.38)              |
| Chronic kidney disease                                     | 2,129.44<br>(1,888.26 to 2,433.66)        | 2,945.05<br>(1,743.08 to 4,698.28)        | 2,173.66<br>(1,323.28 to 3,520.83)        | 3,596.60<br>(1,923.57 to 5,598.43)        | 117.52<br>(102.39 to 135.36)        | 222.00<br>(129.95 to 363.70)        | 178.97<br>(110.45 to 291.37)        | 248.01<br>(145.33 to 415.02)        |
| Chronic kidney disease due to diabetes mellitus            | 795.76<br>(691.77 to 929.22)              | 1,128.79<br>(647.26 to 1,822.18)          | 821.73<br>(486.38 to 1,327.45)            | 1,324.20<br>(721.47 to 2,227.90)          | 39.76<br>(34.27 to 46.72)           | 73.32<br>(42.10 to 119.53)          | 57.31<br>(34.08 to 94.62)           | 83.64<br>(45.78 to 142.57)          |
| Chronic kidney disease due to hypertension                 | 374.42<br>(311.00 to 449.72)              | 634.06<br>(360.48 to 1,063.81)            | 530.36<br>(314.53 to 873.67)              | 708.81<br>(391.90 to 1,192.19)            | 30.34<br>(25.20 to 36.63)           | 66.07<br>(38.61 to 109.68)          | 59.64<br>(35.73 to 97.23)           | 71.49<br>(39.82 to 121.33)          |
| Chronic kidney disease due to glomerulonephritis           | 533.20<br>(464.79 to 611.14)              | 583.15<br>(347.77 to 920.10)              | 391.26<br>(244.11 to 613.29)              | 673.51<br>(390.03 to 1,112.67)            | 24.63<br>(20.84 to 29.16)           | 38.39<br>(22.26 to 62.82)           | 27.67<br>(16.41 to 45.12)           | 43.39<br>(24.05 to 74.28)           |
| Chronic kidney disease due to other and unspecified causes | 426.06<br>(366.73 to 500.92)              | 599.05<br>(355.34 to 980.09)              | 430.32<br>(261.75 to 687.47)              | 690.09<br>(391.71 to 1,164.54)            | 22.80<br>(19.11 to 27.41)           | 44.22<br>(25.78 to 74.12)           | 34.35<br>(20.48 to 56.42)           | 49.50<br>(27.48 to 85.08)           |
| Urinary diseases and male infertility                      | 66.66<br>(58.34 to 74.78)                 | 117.53<br>(96.61 to 142.96)               | 98.90<br>(80.62 to 119.74)                | 110.93<br>(90.99 to 133.74)               | 5.03<br>(4.36 to 5.67)              | 11.79<br>(9.23 to 14.89)            | 10.81<br>(8.63 to 13.37)            | 10.75<br>(8.19 to 13.98)            |
| Urinary tract infections                                   | 54.23<br>(46.91 to 61.26)                 | 102.91<br>(83.38 to 126.08)               | 88.25<br>(71.15 to 108.96)                | 96.99<br>(77.54 to 118.85)                | 4.18<br>(3.55 to 4.80)              | 10.40<br>(8.08 to 13.18)            | 9.69<br>(7.60 to 12.09)             | 9.47<br>(7.20 to 12.29)             |
| Urolithiasis                                               | 2.82<br>(2.22 to 3.37)                    | 3.21<br>(2.32 to 4.33)                    | 2.18<br>(1.56 to 2.96)                    | 3.16<br>(2.30 to 4.24)                    | 0.14<br>(0.11 to 0.18)              | 0.22<br>(0.15 to 0.33)              | 0.17<br>(0.11 to 0.25)              | 0.21<br>(0.14 to 0.31)              |
| Other urinary diseases                                     | 9.61<br>(7.25 to 13.06)                   | 11.42<br>(7.34 to 18.60)                  | 8.47<br>(5.29 to 13.43)                   | 10.78<br>(7.13 to 16.69)                  | 0.71<br>(0.50 to 1.05)              | 1.17<br>(0.65 to 2.06)              | 0.95<br>(0.53 to 1.69)              | 1.06<br>(0.59 to 1.87)              |
| Gynecological diseases                                     | 0.54<br>(0.39 to 0.70)                    | 0.28<br>(0.17 to 0.44)                    | 0.12<br>(0.08 to 0.18)                    | 0.29<br>(0.17 to 0.46)                    | 0.02<br>(0.02 to 0.03)              | 0.02<br>(0.01 to 0.02)              | 0.01<br>(0.01 to 0.01)              | 0.02<br>(0.01 to 0.02)              |
| Uterine fibroids                                           | 0.03<br>(0.01 to 0.05)                    | 0.02<br>(0.01 to 0.04)                    | 0.01<br>(0.01 to 0.02)                    | 0.02<br>(0.01 to 0.05)                    | 0.00<br>(0.00 to 0.00)              | 0.00<br>(0.00 to 0.00)              | 0.00<br>(0.00 to 0.00)              | 0.00<br>(0.00 to 0.00)              |
| Polycystic ovarian syndrome                                | 0.24<br>(0.14 to 0.35)                    | 0.07<br>(0.02 to 0.15)                    | 0.02<br>(0.01 to 0.04)                    | 0.07<br>(0.02 to 0.16)                    | 0.01<br>(0.00 to 0.01)              | 0.00<br>(0.00 to 0.00)              | 0.00<br>(0.00 to 0.00)              | 0.00<br>(0.00 to 0.00)              |
| Endometriosis                                              | 0.01<br>(0.00 to 0.02)                    | 0.01<br>(0.00 to 0.01)                    | 0.00<br>(0.00 to 0.01)                    | 0.01<br>(0.00 to 0.02)                    | 0.00<br>(0.00 to 0.00)              | 0.00<br>(0.00 to 0.00)              | 0.00<br>(0.00 to 0.00)              | 0.00<br>(0.00 to 0.00)              |
| Genital prolapse                                           | 0.14<br>(0.09 to 0.22)                    | 0.08<br>(0.04 to 0.16)                    | 0.04<br>(0.02 to 0.08)                    | 0.08<br>(0.04 to 0.16)                    | 0.01<br>(0.00 to 0.01)              | 0.01<br>(0.00 to 0.01)              | 0.00<br>(0.00 to 0.01)              | 0.01<br>(0.00 to 0.01)              |
| Other gynecological diseases                               | 0.12<br>(0.05 to 0.20)                    | 0.10<br>(0.04 to 0.17)                    | 0.05<br>(0.02 to 0.08)                    | 0.10<br>(0.04 to 0.17)                    | 0.01<br>(0.00 to 0.01)              | 0.01<br>(0.00 to 0.01)              | 0.00<br>(0.00 to 0.01)              | 0.01<br>(0.00 to 0.01)              |
| Hemoglobinopathies and hemolytic anemias                   | 64.22<br>(49.38 to 76.26)                 | 56.26<br>(41.70 to 71.01)                 | 39.31<br>(28.84 to 49.92)                 | 55.34<br>(40.53 to 69.88)                 | 3.08<br>(2.37 to 3.71)              | 4.01<br>(2.96 to 5.05)              | 3.14<br>(2.33 to 3.94)              | 3.77<br>(2.75 to 4.79)              |
| Thalassemias                                               | 3.40<br>(2.32 to 4.98)                    | 0.96<br>(0.54 to 1.86)                    | 0.88<br>(0.50 to 1.66)                    | 0.99<br>(0.56 to 1.90)                    | 0.04<br>(0.03 to 0.06)              | 0.01<br>(0.01 to 0.02)              | 0.01<br>(0.01 to 0.02)              | 0.01<br>(0.01 to 0.02)              |

|                                                   |                                 |                                 |                                 |                                 |                           |                           |                            |                           |
|---------------------------------------------------|---------------------------------|---------------------------------|---------------------------------|---------------------------------|---------------------------|---------------------------|----------------------------|---------------------------|
|                                                   | 6.94<br>(5.33 to<br>8.56)       | 4.59<br>(3.21 to<br>6.23)       | 2.87<br>(1.96 to<br>3.88)       | 4.78<br>(3.32 to<br>6.53)       | 0.14<br>(0.11 to<br>0.18) | 0.11<br>(0.08 to<br>0.15) | 0.07<br>(0.05 to<br>0.10)  | 0.12<br>(0.08 to<br>0.16) |
| Sickle cell disorders                             |                                 |                                 |                                 |                                 |                           |                           |                            |                           |
|                                                   | 17.04<br>(11.92 to<br>21.54)    | 16.27<br>(10.63 to<br>22.63)    | 9.57<br>(6.24 to<br>13.28)      | 16.69<br>(10.98 to<br>22.70)    | 0.48<br>(0.34 to<br>0.63) | 0.64<br>(0.41 to<br>0.90) | 0.40<br>(0.26 to<br>0.55)  | 0.64<br>(0.42 to<br>0.89) |
| G6PD deficiency                                   |                                 |                                 |                                 |                                 |                           |                           |                            |                           |
|                                                   | 36.84<br>(27.73 to<br>44.55)    | 34.43<br>(25.68 to<br>43.33)    | 26.00<br>(19.36 to<br>32.91)    | 32.88<br>(24.44 to<br>41.63)    | 2.41<br>(1.83 to<br>2.92) | 3.24<br>(2.34 to<br>4.15) | 2.66<br>(1.96 to<br>3.33)  | 2.99<br>(2.19 to<br>3.85) |
| Other hemoglobinopathies and hemolytic anemias    |                                 |                                 |                                 |                                 |                           |                           |                            |                           |
|                                                   | 149.57<br>(119.71 to<br>178.66) | 169.96<br>(130.18 to<br>208.72) | 182.20<br>(141.14 to<br>221.83) | 165.14<br>(126.96 to<br>202.01) | 4.75<br>(3.75 to<br>5.53) | 7.42<br>(5.68 to<br>8.92) | 8.73<br>(6.64 to<br>10.47) | 6.92<br>(5.37 to<br>8.28) |
| Endocrine, metabolic, blood, and immune disorders |                                 |                                 |                                 |                                 |                           |                           |                            |                           |

| Montenegro                                    |                                     |                                     |                                     |                                     |                                |                               |                               |                               |
|-----------------------------------------------|-------------------------------------|-------------------------------------|-------------------------------------|-------------------------------------|--------------------------------|-------------------------------|-------------------------------|-------------------------------|
| Cause                                         | YLLs (actual counts)                |                                     |                                     |                                     | Deaths (actual counts)         |                               |                               |                               |
|                                               | 2016                                | 2040 Forecast                       | 2040 Better Scenario                | 2040 Worse Scenario                 | 2016                           | 2040 Forecast                 | 2040 Better Scenario          | 2040 Worse Scenario           |
| <b>Musculoskeletal disorders</b>              | <b>66.71</b><br>(54.44 to 77.23)    | <b>83.74</b><br>(62.35 to 108.12)   | <b>62.49</b><br>(46.09 to 78.93)    | <b>83.32</b><br>(62.59 to 106.03)   | <b>2.87</b><br>(2.26 to 3.31)  | <b>4.76</b><br>(3.49 to 6.01) | <b>3.74</b><br>(2.74 to 4.63) | <b>4.59</b><br>(3.34 to 5.87) |
| Rheumatoid arthritis                          | 25.58<br>(19.76 to 31.21)           | 38.59<br>(24.07 to 57.46)           | 21.05<br>(12.82 to 31.46)           | 39.07<br>(24.00 to 58.08)           | 1.26<br>(0.96 to 1.53)         | 2.38<br>(1.56 to 3.43)        | 1.39<br>(0.86 to 2.02)        | 2.35<br>(1.50 to 3.42)        |
| Other musculoskeletal disorders               | 41.13<br>(33.18 to 48.46)           | 45.16<br>(33.04 to 55.53)           | 41.44<br>(30.65 to 50.50)           | 44.25<br>(32.16 to 54.22)           | 1.61<br>(1.20 to 1.89)         | 2.38<br>(1.62 to 2.91)        | 2.35<br>(1.62 to 2.86)        | 2.25<br>(1.55 to 2.75)        |
| <b>Other non-communicable diseases</b>        | <b>636.87</b><br>(463.34 to 913.79) | <b>342.14</b><br>(219.44 to 582.41) | <b>227.53</b><br>(152.67 to 363.68) | <b>361.35</b><br>(227.73 to 615.96) | <b>8.77</b><br>(6.68 to 11.86) | <b>6.48</b><br>(4.64 to 9.40) | <b>5.03</b><br>(3.67 to 6.91) | <b>6.58</b><br>(4.65 to 9.89) |
| Congenital birth defects                      | 517.60<br>(360.47 to 780.39)        | 272.28<br>(167.16 to 469.91)        | 177.94<br>(114.84 to 293.19)        | 289.49<br>(174.55 to 503.41)        | 6.76<br>(4.92 to 9.80)         | 3.91<br>(2.60 to 6.24)        | 2.70<br>(1.90 to 4.05)        | 4.12<br>(2.70 to 6.63)        |
| Neural tube defects                           | 7.01<br>(4.08 to 11.89)             | 1.93<br>(0.99 to 3.82)              | 0.78<br>(0.43 to 1.61)              | 2.13<br>(1.04 to 4.63)              | 0.10<br>(0.06 to 0.15)         | 0.03<br>(0.02 to 0.05)        | 0.01<br>(0.01 to 0.02)        | 0.03<br>(0.02 to 0.06)        |
| Congenital heart anomalies                    | 217.59<br>(146.54 to 339.74)        | 85.55<br>(44.51 to 165.26)          | 34.98<br>(18.43 to 65.46)           | 94.13<br>(48.65 to 179.44)          | 2.78<br>(1.94 to 4.24)         | 1.16<br>(0.65 to 2.11)        | 0.48<br>(0.27 to 0.85)        | 1.27<br>(0.70 to 2.31)        |
| Orofacial clefts                              | 15.78<br>(6.75 to 31.28)            | 6.19<br>(1.63 to 16.85)             | 2.17<br>(0.57 to 5.87)              | 6.88<br>(1.94 to 17.87)             | 0.18<br>(0.08 to 0.36)         | 0.07<br>(0.02 to 0.20)        | 0.03<br>(0.01 to 0.07)        | 0.08<br>(0.02 to 0.21)        |
| Down syndrome                                 | 105.48<br>(71.74 to 156.18)         | 91.17<br>(58.96 to 148.08)          | 92.58<br>(61.59 to 147.16)          | 92.21<br>(59.64 to 149.83)          | 1.55<br>(1.11 to 2.19)         | 1.49<br>(1.05 to 2.19)        | 1.55<br>(1.12 to 2.18)        | 1.50<br>(1.05 to 2.23)        |
| Other chromosomal abnormalities               | 20.29<br>(11.20 to 34.91)           | 17.27<br>(7.66 to 36.15)            | 12.40<br>(5.63 to 25.97)            | 18.14<br>(8.01 to 37.45)            | 0.24<br>(0.14 to 0.42)         | 0.21<br>(0.10 to 0.43)        | 0.16<br>(0.07 to 0.31)        | 0.22<br>(0.11 to 0.45)        |
| Congenital musculoskeletal and limb anomalies | 14.48<br>(6.97 to 39.61)            | 7.40<br>(2.79 to 20.39)             | 3.60<br>(1.43 to 9.60)              | 8.02<br>(3.03 to 20.43)             | 0.18<br>(0.09 to 0.47)         | 0.09<br>(0.04 to 0.25)        | 0.05<br>(0.02 to 0.11)        | 0.10<br>(0.04 to 0.25)        |
| Urogenital congenital anomalies               | 6.79<br>(4.44 to 10.71)             | 3.10<br>(1.79 to 5.80)              | 1.74<br>(1.05 to 3.17)              | 3.31<br>(1.90 to 6.07)              | 0.09<br>(0.07 to 0.14)         | 0.05<br>(0.03 to 0.08)        | 0.03<br>(0.02 to 0.05)        | 0.05<br>(0.03 to 0.08)        |
| Digestive congenital anomalies                | 30.86<br>(13.21 to 62.17)           | 13.37<br>(4.48 to 33.68)            | 6.09<br>(1.96 to 14.31)             | 14.65<br>(4.78 to 36.17)            | 0.36<br>(0.16 to 0.72)         | 0.16<br>(0.05 to 0.39)        | 0.07<br>(0.02 to 0.17)        | 0.17<br>(0.06 to 0.42)        |
| Other congenital birth defects                | 99.31<br>(54.08 to 180.80)          | 46.31<br>(21.51 to 100.22)          | 23.60<br>(11.12 to 49.02)           | 50.02<br>(22.91 to 102.32)          | 1.28<br>(0.75 to 2.23)         | 0.64<br>(0.35 to 1.25)        | 0.33<br>(0.18 to 0.61)        | 0.69<br>(0.36 to 1.28)        |
| Skin and subcutaneous diseases                | 17.80<br>(10.95 to 26.08)           | 32.66<br>(19.42 to 46.55)           | 28.84<br>(16.86 to 40.51)           | 31.66<br>(18.84 to 44.67)           | 0.83<br>(0.48 to 1.17)         | 2.15<br>(1.18 to 2.94)        | 2.09<br>(1.13 to 2.84)        | 1.99<br>(1.11 to 2.73)        |
| Cellulitis                                    | 2.70<br>(1.80 to 4.77)              | 5.37<br>(3.30 to 9.59)              | 5.24<br>(3.16 to 9.28)              | 5.22<br>(3.23 to 9.38)              | 0.11<br>(0.06 to 0.19)         | 0.29<br>(0.16 to 0.51)        | 0.31<br>(0.17 to 0.53)        | 0.27<br>(0.15 to 0.48)        |
| Pyoderma                                      | 8.74<br>(5.02 to 12.74)             | 19.59<br>(11.09 to 27.29)           | 17.19<br>(9.50 to 23.73)            | 18.97<br>(10.69 to 26.64)           | 0.41<br>(0.23 to 0.56)         | 1.31<br>(0.69 to 1.82)        | 1.29<br>(0.65 to 1.82)        | 1.22<br>(0.65 to 1.70)        |
| Decubitus ulcer                               | 2.80<br>(1.68 to 3.81)              | 3.56<br>(1.91 to 5.22)              | 2.75<br>(1.43 to 4.02)              | 3.45<br>(1.90 to 4.99)              | 0.16<br>(0.08 to 0.23)         | 0.30<br>(0.13 to 0.47)        | 0.26<br>(0.11 to 0.40)        | 0.28<br>(0.13 to 0.44)        |
| Other skin and subcutaneous diseases          | 3.56<br>(2.12 to 5.34)              | 4.14<br>(2.37 to 6.29)              | 3.66<br>(2.00 to 5.59)              | 4.03<br>(2.27 to 6.07)              | 0.16<br>(0.09 to 0.24)         | 0.25<br>(0.13 to 0.37)        | 0.24<br>(0.13 to 0.37)        | 0.23<br>(0.12 to 0.34)        |
| Sudden infant death syndrome                  | 101.47<br>(50.78 to 178.00)         | 37.21<br>(12.21 to 94.53)           | 20.76<br>(6.67 to 53.54)            | 40.20<br>(12.92 to 101.80)          | 1.18<br>(0.59 to 2.07)         | 0.43<br>(0.14 to 1.10)        | 0.24<br>(0.08 to 0.62)        | 0.47<br>(0.15 to 1.18)        |

|                          |                                         |                                        |                                       |                                        |                                 |                                 |                                 |                                 |
|--------------------------|-----------------------------------------|----------------------------------------|---------------------------------------|----------------------------------------|---------------------------------|---------------------------------|---------------------------------|---------------------------------|
| Injuries                 | 10,180.48<br>(9,314.91 to<br>11,093.74) | 7,323.88<br>(5,530.26 to<br>10,090.85) | 4,120.91<br>(3,197.36 to<br>5,514.65) | 7,817.37<br>(5,834.88 to<br>10,823.07) | 279.50<br>(256.16 to<br>305.85) | 254.66<br>(205.23 to<br>324.72) | 168.96<br>(138.20 to<br>212.70) | 260.37<br>(207.21 to<br>334.26) |
| Transport injuries       | 2,731.30<br>(2,402.19 to<br>3,113.20)   | 2,134.67<br>(1,343.06 to<br>3,463.51)  | 542.48<br>(345.18 to<br>881.04)       | 2,404.22<br>(1,482.78 to<br>3,938.43)  | 66.52<br>(58.42 to<br>75.22)    | 59.63<br>(40.04 to<br>93.98)    | 17.80<br>(12.15 to<br>27.89)    | 65.38<br>(42.00 to<br>106.15)   |
| Road injuries            | 2,540.40<br>(2,223.90 to<br>2,902.73)   | 1,961.17<br>(1,249.04 to<br>3,174.24)  | 453.04<br>(292.31 to<br>735.91)       | 2,217.04<br>(1,369.76 to<br>3,609.07)  | 61.79<br>(54.09 to<br>69.91)    | 54.56<br>(36.86 to<br>85.40)    | 15.06<br>(10.37 to<br>23.39)    | 60.03<br>(39.04 to<br>96.95)    |
| Pedestrian road injuries | 866.79<br>(692.63 to<br>1,017.52)       | 524.62<br>(320.35 to<br>860.69)        | 99.82<br>(65.50 to<br>157.63)         | 598.77<br>(356.82 to<br>1,011.61)      | 24.94<br>(20.15 to<br>29.21)    | 19.40<br>(12.40 to<br>30.95)    | 4.56<br>(3.08 to<br>6.83)       | 21.33<br>(13.15 to<br>33.98)    |

| Montenegro                                      |                                                            |                                                            |                                                            |                                                            |                                                     |                                                    |                                                   |                                                    |
|-------------------------------------------------|------------------------------------------------------------|------------------------------------------------------------|------------------------------------------------------------|------------------------------------------------------------|-----------------------------------------------------|----------------------------------------------------|---------------------------------------------------|----------------------------------------------------|
| Cause                                           | YLLs (actual counts)                                       |                                                            |                                                            |                                                            | Deaths (actual counts)                              |                                                    |                                                   |                                                    |
|                                                 | 2016                                                       | 2040 Forecast                                              | 2040 Better Scenario                                       | 2040 Worse Scenario                                        | 2016                                                | 2040 Forecast                                      | 2040 Better Scenario                              | 2040 Worse Scenario                                |
| Cyclist road injuries                           | 98.82<br>(80.01 to<br>123.25)                              | 97.67<br>(55.38 to<br>172.43)                              | 33.34<br>(19.73 to<br>58.04)                               | 106.67<br>(60.11 to<br>189.93)                             | 2.79<br>(2.26 to<br>3.51)                           | 3.21<br>(1.85 to<br>5.65)                          | 1.44<br>(0.87 to<br>2.46)                         | 3.38<br>(1.93 to<br>5.94)                          |
| Motorcyclist road injuries                      | 354.03<br>(278.67 to<br>440.50)                            | 336.07<br>(183.59 to<br>598.61)                            | 126.31<br>(72.06 to<br>219.62)                             | 369.49<br>(199.52 to<br>662.04)                            | 6.92<br>(5.51 to<br>8.48)                           | 6.95<br>(4.01 to<br>11.98)                         | 2.98<br>(1.77 to<br>5.21)                         | 7.54<br>(4.29 to<br>13.22)                         |
| Motor vehicle road injuries                     | 1,188.71<br>(1,012.22 to<br>1,402.54)                      | 969.34<br>(610.32 to<br>1,523.79)                          | 185.38<br>(120.47 to<br>286.97)                            | 1,104.72<br>(683.28 to<br>1,752.47)                        | 26.30<br>(22.27 to<br>30.68)                        | 23.93<br>(15.65 to<br>37.50)                       | 5.72<br>(3.88 to<br>8.58)                         | 26.64<br>(17.27 to<br>41.95)                       |
| Other road injuries                             | 32.05<br>(24.99 to<br>42.56)                               | 33.47<br>(17.64 to<br>63.26)                               | 8.19<br>(4.59 to<br>15.21)                                 | 37.39<br>(19.55 to<br>70.53)                               | 0.84<br>(0.67 to<br>1.09)                           | 1.06<br>(0.56 to<br>2.05)                          | 0.36<br>(0.20 to<br>0.66)                         | 1.14<br>(0.60 to<br>2.15)                          |
| Other transport injuries                        | 190.90<br>(152.84 to<br>232.48)                            | 173.50<br>(99.39 to<br>304.65)                             | 89.44<br>(52.50 to<br>153.94)                              | 187.17<br>(102.08 to<br>331.00)                            | 4.73<br>(3.85 to<br>5.70)                           | 5.07<br>(3.00 to<br>8.57)                          | 2.74<br>(1.65 to<br>4.55)                         | 5.35<br>(2.96 to<br>9.34)                          |
| <b>Unintentional injuries</b>                   | <b>3,418.77</b><br><b>(3,094.15 to</b><br><b>3,772.69)</b> | <b>2,268.33</b><br><b>(1,858.31 to</b><br><b>2,762.42)</b> | <b>1,674.48</b><br><b>(1,403.54 to</b><br><b>1,971.36)</b> | <b>2,295.99</b><br><b>(1,876.52 to</b><br><b>2,806.61)</b> | <b>103.92</b><br><b>(93.50 to</b><br><b>116.56)</b> | <b>99.62</b><br><b>(84.61 to</b><br><b>118.28)</b> | <b>84.69</b><br><b>(73.29 to</b><br><b>97.95)</b> | <b>95.88</b><br><b>(81.25 to</b><br><b>113.15)</b> |
| Falls                                           | 565.59<br>(480.78 to<br>675.53)                            | 557.20<br>(460.73 to<br>673.56)                            | 481.89<br>(394.51 to<br>581.72)                            | 539.86<br>(448.88 to<br>647.84)                            | 25.55<br>(21.68 to<br>30.45)                        | 36.73<br>(29.94 to<br>44.23)                       | 35.14<br>(29.30 to<br>41.67)                      | 33.93<br>(27.46 to<br>41.30)                       |
| Drowning                                        | 279.76<br>(243.00 to<br>324.03)                            | 162.12<br>(100.67 to<br>256.74)                            | 109.71<br>(70.29 to<br>168.28)                             | 169.43<br>(103.58 to<br>268.80)                            | 6.39<br>(5.58 to<br>7.25)                           | 4.50<br>(2.85 to<br>6.97)                          | 3.22<br>(2.14 to<br>4.75)                         | 4.60<br>(2.92 to<br>7.11)                          |
| Fire, heat, and hot substances                  | 228.91<br>(193.74 to<br>278.69)                            | 140.68<br>(90.65 to<br>219.74)                             | 87.06<br>(59.72 to<br>127.78)                              | 145.43<br>(94.02 to<br>220.82)                             | 8.02<br>(6.68 to<br>10.13)                          | 7.09<br>(4.57 to<br>11.20)                         | 4.96<br>(3.26 to<br>7.70)                         | 7.00<br>(4.33 to<br>11.02)                         |
| Poisonings                                      | 150.54<br>(116.37 to<br>208.05)                            | 67.01<br>(38.72 to<br>117.13)                              | 35.35<br>(22.03 to<br>59.68)                               | 71.21<br>(40.31 to<br>125.68)                              | 4.09<br>(3.24 to<br>5.65)                           | 2.48<br>(1.48 to<br>4.31)                          | 1.46<br>(0.91 to<br>2.40)                         | 2.53<br>(1.49 to<br>4.48)                          |
| Exposure to mechanical forces                   | 668.51<br>(546.85 to<br>784.93)                            | 402.03<br>(308.92 to<br>505.80)                            | 274.94<br>(215.62 to<br>340.51)                            | 411.70<br>(320.45 to<br>540.36)                            | 17.34<br>(14.24 to<br>20.02)                        | 13.50<br>(10.83 to<br>16.30)                       | 10.31<br>(8.38 to<br>12.32)                       | 13.32<br>(10.71 to<br>16.40)                       |
| Unintentional firearm injuries                  | 270.58<br>(211.39 to<br>338.60)                            | 162.31<br>(122.69 to<br>212.72)                            | 121.36<br>(91.95 to<br>156.62)                             | 164.74<br>(122.53 to<br>220.22)                            | 7.17<br>(5.79 to<br>8.63)                           | 5.93<br>(4.72 to<br>7.23)                          | 5.07<br>(4.06 to<br>6.23)                         | 5.76<br>(4.57 to<br>7.31)                          |
| Unintentional suffocation                       | 24.38<br>(16.90 to<br>35.55)                               | 13.74<br>(9.25 to<br>21.79)                                | 9.68<br>(6.68 to<br>14.58)                                 | 14.23<br>(9.39 to<br>22.11)                                | 0.44<br>(0.33 to<br>0.58)                           | 0.29<br>(0.22 to<br>0.40)                          | 0.22<br>(0.16 to<br>0.29)                         | 0.30<br>(0.22 to<br>0.41)                          |
| Other exposure to mechanical forces             | 373.56<br>(265.28 to<br>456.06)                            | 225.98<br>(154.59 to<br>299.28)                            | 143.90<br>(98.92 to<br>186.22)                             | 232.73<br>(158.12 to<br>312.33)                            | 9.73<br>(6.84 to<br>11.60)                          | 7.27<br>(5.16 to<br>9.21)                          | 5.03<br>(3.61 to<br>6.23)                         | 7.27<br>(5.14 to<br>9.25)                          |
| Adverse effects of medical treatment            | 262.26<br>(216.49 to<br>320.58)                            | 221.79<br>(177.47 to<br>279.83)                            | 190.71<br>(150.22 to<br>239.83)                            | 218.77<br>(174.42 to<br>273.59)                            | 9.15<br>(7.52 to<br>11.80)                          | 10.29<br>(8.30 to<br>13.77)                        | 9.77<br>(7.78 to<br>12.76)                        | 9.72<br>(7.79 to<br>12.82)                         |
| Animal contact                                  | 75.41<br>(50.84 to<br>98.52)                               | 75.71<br>(50.46 to<br>103.95)                              | 59.06<br>(39.65 to<br>80.65)                               | 76.20<br>(50.77 to<br>103.83)                              | 2.33<br>(1.59 to<br>3.11)                           | 2.99<br>(2.07 to<br>4.08)                          | 2.52<br>(1.71 to<br>3.46)                         | 2.91<br>(1.99 to<br>3.94)                          |
| Venomous animal contact                         | 57.16<br>(37.75 to<br>76.87)                               | 55.44<br>(35.50 to<br>77.31)                               | 44.39<br>(28.20 to<br>61.40)                               | 55.72<br>(35.69 to<br>77.98)                               | 1.72<br>(1.16 to<br>2.33)                           | 2.10<br>(1.40 to<br>2.97)                          | 1.81<br>(1.19 to<br>2.52)                         | 2.04<br>(1.38 to<br>2.88)                          |
| Non-venomous animal contact                     | 18.25<br>(10.34 to<br>26.64)                               | 20.28<br>(11.51 to<br>30.54)                               | 14.67<br>(7.95 to<br>21.98)                                | 20.48<br>(11.10 to<br>31.10)                               | 0.61<br>(0.35 to<br>0.91)                           | 0.90<br>(0.50 to<br>1.35)                          | 0.71<br>(0.39 to<br>1.08)                         | 0.87<br>(0.49 to<br>1.31)                          |
| Foreign body                                    | 338.41<br>(281.90 to<br>462.98)                            | 266.59<br>(213.57 to<br>362.32)                            | 278.35<br>(224.53 to<br>377.75)                            | 261.86<br>(211.68 to<br>355.25)                            | 9.59<br>(8.14 to<br>13.32)                          | 10.38<br>(8.57 to<br>14.39)                        | 12.01<br>(9.90 to<br>16.40)                       | 9.76<br>(8.02 to<br>13.45)                         |
| Pulmonary aspiration and foreign body in airway | 129.34<br>(101.91 to<br>171.59)                            | 90.30<br>(69.34 to<br>122.88)                              | 81.49<br>(62.85 to<br>109.74)                              | 90.12<br>(68.60 to<br>125.13)                              | 3.53<br>(2.91 to<br>4.43)                           | 3.44<br>(2.80 to<br>4.33)                          | 3.47<br>(2.75 to<br>4.40)                         | 3.29<br>(2.68 to<br>4.13)                          |

|                                             |                                                            |                                                            |                                                            |                                                            |                                                     |                                                    |                                                   |                                                    |
|---------------------------------------------|------------------------------------------------------------|------------------------------------------------------------|------------------------------------------------------------|------------------------------------------------------------|-----------------------------------------------------|----------------------------------------------------|---------------------------------------------------|----------------------------------------------------|
|                                             | 209.07<br>(164.46 to<br>318.57)                            | 176.30<br>(135.19 to<br>263.39)                            | 196.86<br>(151.39 to<br>282.22)                            | 171.73<br>(130.41 to<br>260.34)                            | 6.06<br>(4.83 to<br>9.55)                           | 6.94<br>(5.30 to<br>10.89)                         | 8.54<br>(6.60 to<br>12.88)                        | 6.48<br>(4.90 to<br>10.00)                         |
| Foreign body in other body part             |                                                            |                                                            |                                                            |                                                            |                                                     |                                                    |                                                   |                                                    |
|                                             | 16.84<br>(13.01 to<br>22.97)                               | 12.80<br>(9.18 to<br>18.17)                                | 8.00<br>(5.74 to<br>11.12)                                 | 13.03<br>(9.51 to<br>18.49)                                | 0.61<br>(0.47 to<br>0.84)                           | 0.61<br>(0.44 to<br>0.86)                          | 0.42<br>(0.30 to<br>0.58)                         | 0.60<br>(0.43 to<br>0.83)                          |
| Environmental heat and cold exposure        |                                                            |                                                            |                                                            |                                                            |                                                     |                                                    |                                                   |                                                    |
|                                             | 832.52<br>(654.91 to<br>1,067.83)                          | 362.40<br>(231.32 to<br>565.25)                            | 149.42<br>(97.21 to<br>221.18)                             | 388.52<br>(253.52 to<br>600.26)                            | 20.84<br>(16.42 to<br>26.53)                        | 11.05<br>(7.39 to<br>16.49)                        | 4.88<br>(3.36 to<br>6.93)                         | 11.50<br>(7.75 to<br>17.14)                        |
| Other unintentional injuries                |                                                            |                                                            |                                                            |                                                            |                                                     |                                                    |                                                   |                                                    |
| <b>Self-harm and interpersonal violence</b> | <b>4,027.26</b><br><b>(3,531.67 to</b><br><b>4,607.72)</b> | <b>2,872.42</b><br><b>(1,909.78 to</b><br><b>4,393.84)</b> | <b>1,855.12</b><br><b>(1,279.14 to</b><br><b>2,735.27)</b> | <b>3,068.95</b><br><b>(2,001.06 to</b><br><b>4,700.24)</b> | <b>108.99</b><br><b>(95.21 to</b><br><b>125.08)</b> | <b>94.11</b><br><b>(63.22 to</b><br><b>138.01)</b> | <b>65.11</b><br><b>(45.08 to</b><br><b>91.77)</b> | <b>97.84</b><br><b>(63.96 to</b><br><b>145.26)</b> |

| Montenegro                                                                          |                                      |                                         |                                         |                                         |                                      |                                      |                                      |                                      |
|-------------------------------------------------------------------------------------|--------------------------------------|-----------------------------------------|-----------------------------------------|-----------------------------------------|--------------------------------------|--------------------------------------|--------------------------------------|--------------------------------------|
| Cause                                                                               | YLLs (actual counts)                 |                                         |                                         |                                         | Deaths (actual counts)               |                                      |                                      |                                      |
|                                                                                     | 2016                                 | 2040 Forecast                           | 2040 Better Scenario                    | 2040 Worse Scenario                     | 2016                                 | 2040 Forecast                        | 2040 Better Scenario                 | 2040 Worse Scenario                  |
| Self-harm                                                                           | 2,925.33<br>(2,517.81 to 3,372.74)   | 2,291.75<br>(1,359.57 to 3,680.80)      | 1,471.73<br>(943.59 to 2,273.12)        | 2,464.35<br>(1,446.31 to 4,087.25)      | 82.21<br>(70.27 to 95.97)            | 77.19<br>(47.09 to 119.53)           | 53.23<br>(34.51 to 79.46)            | 80.57<br>(48.07 to 126.15)           |
| Self-harm by firearm                                                                | 674.98<br>(459.96 to 994.83)         | 432.98<br>(209.54 to 841.98)            | 243.49<br>(126.99 to 449.44)            | 469.89<br>(223.43 to 903.46)            | 17.62<br>(11.90 to 26.22)            | 13.73<br>(6.72 to 25.78)             | 8.26<br>(4.35 to 15.02)              | 14.44<br>(7.05 to 26.84)             |
| Self-harm by other specified means                                                  | 2,250.35<br>(1,828.41 to 2,663.73)   | 1,858.77<br>(1,106.66 to 2,995.40)      | 1,228.23<br>(783.99 to 1,878.45)        | 1,994.47<br>(1,197.39 to 3,235.77)      | 64.59<br>(52.21 to 76.60)            | 63.46<br>(39.24 to 98.55)            | 44.96<br>(29.31 to 66.38)            | 66.13<br>(40.18 to 103.84)           |
| Interpersonal violence                                                              | 1,101.93<br>(900.16 to 1,391.60)     | 580.67<br>(403.05 to 840.32)            | 383.40<br>(271.28 to 552.62)            | 604.59<br>(413.61 to 894.11)            | 26.78<br>(21.95 to 33.71)            | 16.92<br>(11.79 to 24.13)            | 11.88<br>(8.50 to 17.05)             | 17.28<br>(11.95 to 24.73)            |
| Physical violence by firearm                                                        | 487.81<br>(359.35 to 699.92)         | 219.59<br>(146.16 to 331.54)            | 134.42<br>(92.07 to 199.08)             | 229.13<br>(152.60 to 347.26)            | 10.78<br>(7.97 to 15.54)             | 5.40<br>(3.66 to 7.99)               | 3.44<br>(2.39 to 5.05)               | 5.58<br>(3.76 to 8.61)               |
| Physical violence by sharp object                                                   | 242.61<br>(160.40 to 342.58)         | 130.13<br>(84.85 to 191.73)             | 87.23<br>(58.26 to 122.86)              | 134.03<br>(86.66 to 195.38)             | 6.04<br>(4.11 to 8.38)               | 3.88<br>(2.67 to 5.52)               | 2.78<br>(1.93 to 3.83)               | 3.91<br>(2.65 to 5.51)               |
| Physical violence by other means                                                    | 371.51<br>(254.63 to 500.67)         | 230.95<br>(123.87 to 416.02)            | 161.74<br>(92.50 to 277.79)             | 241.43<br>(129.02 to 433.14)            | 9.95<br>(7.05 to 13.06)              | 7.63<br>(4.29 to 12.94)              | 5.67<br>(3.29 to 9.23)               | 7.79<br>(4.32 to 13.55)              |
| <b>Forces of nature, conflict and terrorism, and executions and police conflict</b> | <b>3.15</b><br><b>(2.81 to 3.53)</b> | <b>48.46</b><br><b>(0.00 to 114.26)</b> | <b>48.82</b><br><b>(0.00 to 114.68)</b> | <b>48.22</b><br><b>(0.00 to 113.41)</b> | <b>0.06</b><br><b>(0.06 to 0.07)</b> | <b>1.30</b><br><b>(0.00 to 2.73)</b> | <b>1.37</b><br><b>(0.00 to 2.88)</b> | <b>1.26</b><br><b>(0.00 to 2.58)</b> |
| Exposure to forces of nature                                                        | 0.00<br>(0.00 to 0.00)               | 46.85<br>(0.00 to 23.16)                | 47.21<br>(0.00 to 23.39)                | 46.61<br>(0.00 to 23.02)                | 0.00<br>(0.00 to 0.00)               | 1.26<br>(0.00 to 0.61)               | 1.33<br>(0.00 to 0.65)               | 1.23<br>(0.00 to 0.59)               |
| Conflict and terrorism                                                              | 0.00<br>(0.00 to 0.00)               | 1.61<br>(0.00 to 11.72)                 | 1.62<br>(0.00 to 11.72)                 | 1.61<br>(0.00 to 11.71)                 | 0.00<br>(0.00 to 0.00)               | 0.04<br>(0.00 to 0.28)               | 0.04<br>(0.00 to 0.29)               | 0.04<br>(0.00 to 0.27)               |
| Executions and police conflict                                                      | 3.15<br>(2.81 to 3.53)               | 0.00<br>(0.00 to 0.00)                  | 0.00<br>(0.00 to 0.00)                  | 0.00<br>(0.00 to 0.00)                  | 0.06<br>(0.06 to 0.07)               | 0.00<br>(0.00 to 0.00)               | 0.00<br>(0.00 to 0.00)               | 0.00<br>(0.00 to 0.00)               |

| Poland                                                            |                                    |                                    |                                    |                                    |                              |                              |                              |                              |
|-------------------------------------------------------------------|------------------------------------|------------------------------------|------------------------------------|------------------------------------|------------------------------|------------------------------|------------------------------|------------------------------|
| Cause                                                             | YLLs (in 1000s)                    |                                    |                                    |                                    | Deaths (in 1000s)            |                              |                              |                              |
|                                                                   | 2016                               | 2040 Forecast                      | 2040 Better Scenario               | 2040 Worse Scenario                | 2016                         | 2040 Forecast                | 2040 Better Scenario         | 2040 Worse Scenario          |
| All causes                                                        | 6,781.38<br>(6,254.81 to 7,367.43) | 5,547.43<br>(4,712.97 to 6,556.30) | 4,702.91<br>(4,067.46 to 5,487.96) | 7,336.51<br>(6,204.01 to 8,739.47) | 389.71<br>(362.34 to 419.26) | 431.10<br>(369.69 to 500.45) | 379.89<br>(329.49 to 440.13) | 529.48<br>(455.07 to 614.87) |
| Communicable, maternal, neonatal, and nutritional diseases        | 269.17<br>(231.54 to 322.16)       | 177.04<br>(140.06 to 228.91)       | 146.17<br>(118.90 to 182.98)       | 236.69<br>(177.93 to 323.37)       | 12.51<br>(11.12 to 14.07)    | 13.49<br>(10.79 to 16.89)    | 12.10<br>(9.98 to 14.61)     | 16.09<br>(12.46 to 21.03)    |
| HIV/AIDS and tuberculosis                                         | 21.12<br>(18.94 to 24.31)          | 7.59<br>(4.74 to 11.71)            | 4.70<br>(3.01 to 6.90)             | 12.03<br>(7.34 to 19.28)           | 0.73<br>(0.64 to 0.84)       | 0.32<br>(0.19 to 0.51)       | 0.20<br>(0.13 to 0.30)       | 0.50<br>(0.30 to 0.81)       |
| Tuberculosis                                                      | 14.90<br>(12.70 to 18.03)          | 4.87<br>(2.55 to 8.67)             | 2.89<br>(1.66 to 4.93)             | 8.27<br>(4.32 to 15.41)            | 0.59<br>(0.51 to 0.70)       | 0.27<br>(0.15 to 0.45)       | 0.16<br>(0.10 to 0.26)       | 0.42<br>(0.23 to 0.73)       |
| HIV/AIDS                                                          | 6.23<br>(5.64 to 6.91)             | 2.72<br>(1.25 to 4.04)             | 1.80<br>(0.71 to 2.93)             | 3.76<br>(1.99 to 5.34)             | 0.13<br>(0.12 to 0.15)       | 0.05<br>(0.02 to 0.09)       | 0.04<br>(0.01 to 0.06)       | 0.08<br>(0.03 to 0.12)       |
| Diarrhea, lower respiratory, and other common infectious diseases | 176.70<br>(157.48 to 198.17)       | 142.75<br>(110.47 to 191.18)       | 119.27<br>(95.72 to 153.06)        | 192.63<br>(140.52 to 269.93)       | 10.73<br>(9.49 to 12.13)     | 12.53<br>(9.88 to 15.93)     | 11.30<br>(9.22 to 13.90)     | 14.92<br>(11.35 to 19.68)    |
| Diarrheal diseases                                                | 3.00<br>(2.60 to 3.45)             | 11.27<br>(3.46 to 28.90)           | 11.99<br>(4.60 to 28.18)           | 8.42<br>(2.37 to 23.73)            | 0.17<br>(0.15 to 0.20)       | 1.02<br>(0.32 to 2.57)       | 1.13<br>(0.45 to 2.55)       | 0.72<br>(0.21 to 1.99)       |
| Intestinal infectious diseases                                    | 0.01<br>(0.00 to 0.02)             | 0.01<br>(0.00 to 0.01)             | 0.01<br>(0.00 to 0.02)             | 0.01<br>(0.00 to 0.01)             | 0.00<br>(0.00 to 0.00)       | 0.00<br>(0.00 to 0.00)       | 0.00<br>(0.00 to 0.00)       | 0.00<br>(0.00 to 0.00)       |
| Typhoid fever                                                     | 0.00<br>(0.00 to 0.01)             | 0.00<br>(0.00 to 0.01)             | 0.00<br>(0.00 to 0.01)             | 0.00<br>(0.00 to 0.01)             | 0.00<br>(0.00 to 0.00)       | 0.00<br>(0.00 to 0.00)       | 0.00<br>(0.00 to 0.00)       | 0.00<br>(0.00 to 0.00)       |
| Paratyphoid fever                                                 | 0.00<br>(0.00 to 0.01)             | 0.00<br>(0.00 to 0.01)             | 0.00<br>(0.00 to 0.01)             | 0.00<br>(0.00 to 0.01)             | 0.00<br>(0.00 to 0.00)       | 0.00<br>(0.00 to 0.00)       | 0.00<br>(0.00 to 0.00)       | 0.00<br>(0.00 to 0.00)       |
| Other intestinal infectious diseases                              | 0.00<br>(0.00 to 0.01)             | 0.00<br>(0.00 to 0.01)             | 0.00<br>(0.00 to 0.01)             | 0.00<br>(0.00 to 0.01)             | 0.00<br>(0.00 to 0.00)       | 0.00<br>(0.00 to 0.00)       | 0.00<br>(0.00 to 0.00)       | 0.00<br>(0.00 to 0.00)       |
| Lower respiratory infections                                      | 162.36<br>(144.70 to 182.54)       | 123.86<br>(90.62 to 173.45)        | 100.11<br>(76.29 to 132.86)        | 176.02<br>(123.23 to 256.41)       | 10.25<br>(9.08 to 11.58)     | 11.26<br>(8.47 to 14.85)     | 9.91<br>(7.58 to 12.68)      | 13.93<br>(10.22 to 18.85)    |
| Upper respiratory infections                                      | 0.10<br>(0.05 to 0.19)             | 0.06<br>(0.02 to 0.14)             | 0.05<br>(0.02 to 0.10)             | 0.08<br>(0.03 to 0.19)             | 0.00<br>(0.00 to 0.01)       | 0.00<br>(0.00 to 0.01)       | 0.00<br>(0.00 to 0.01)       | 0.00<br>(0.00 to 0.01)       |
| Otitis media                                                      | 0.00<br>(0.00 to 0.01)             | 0.00<br>(0.00 to 0.01)             | 0.00<br>(0.00 to 0.01)             | 0.00<br>(0.00 to 0.01)             | 0.00<br>(0.00 to 0.00)       | 0.00<br>(0.00 to 0.00)       | 0.00<br>(0.00 to 0.00)       | 0.00<br>(0.00 to 0.00)       |
| Meningitis                                                        | 5.56<br>(4.58 to 6.73)             | 2.01<br>(1.52 to 2.59)             | 1.82<br>(1.38 to 2.30)             | 2.26<br>(1.69 to 2.94)             | 0.16<br>(0.13 to 0.19)       | 0.07<br>(0.06 to 0.09)       | 0.07<br>(0.05 to 0.08)       | 0.08<br>(0.06 to 0.10)       |
| Pneumococcal meningitis                                           | 0.84<br>(0.69 to 1.04)             | 0.44<br>(0.32 to 0.60)             | 0.45<br>(0.33 to 0.60)             | 0.43<br>(0.32 to 0.59)             | 0.03<br>(0.02 to 0.03)       | 0.02<br>(0.01 to 0.02)       | 0.02<br>(0.01 to 0.02)       | 0.02<br>(0.01 to 0.02)       |
| H influenzae type B meningitis                                    | 0.68<br>(0.55 to 0.83)             | 0.46<br>(0.32 to 0.65)             | 0.45<br>(0.32 to 0.62)             | 0.47<br>(0.32 to 0.69)             | 0.02<br>(0.02 to 0.02)       | 0.01<br>(0.01 to 0.02)       | 0.02<br>(0.01 to 0.02)       | 0.01<br>(0.01 to 0.02)       |
| Meningococcal meningitis                                          | 2.20<br>(1.79 to 2.70)             | 0.56<br>(0.40 to 0.77)             | 0.47<br>(0.34 to 0.62)             | 0.69<br>(0.48 to 0.96)             | 0.06<br>(0.05 to 0.07)       | 0.02<br>(0.01 to 0.03)       | 0.02<br>(0.01 to 0.02)       | 0.02<br>(0.01 to 0.03)       |
| Other meningitis                                                  | 1.84<br>(1.51 to 2.21)             | 0.54<br>(0.38 to 0.75)             | 0.44<br>(0.32 to 0.58)             | 0.67<br>(0.48 to 0.92)             | 0.06<br>(0.05 to 0.07)       | 0.02<br>(0.02 to 0.03)       | 0.02<br>(0.01 to 0.02)       | 0.03<br>(0.02 to 0.04)       |
| Encephalitis                                                      | 5.44<br>(3.93 to 9.08)             | 5.00<br>(3.62 to 7.98)             | 4.87<br>(3.52 to 7.69)             | 5.10<br>(3.73 to 8.19)             | 0.14<br>(0.10 to 0.22)       | 0.16<br>(0.12 to 0.27)       | 0.16<br>(0.12 to 0.27)       | 0.16<br>(0.12 to 0.27)       |



|                |                           |                           |                           |                           |                           |                           |                           |                           |
|----------------|---------------------------|---------------------------|---------------------------|---------------------------|---------------------------|---------------------------|---------------------------|---------------------------|
| Diphtheria     | 0.01<br>(0.01 to<br>0.02) | 0.00<br>(0.00 to<br>0.00) | 0.00<br>(0.00 to<br>0.00) | 0.00<br>(0.00 to<br>0.01) | 0.00<br>(0.00 to<br>0.00) | 0.00<br>(0.00 to<br>0.00) | 0.00<br>(0.00 to<br>0.00) | 0.00<br>(0.00 to<br>0.00) |
| Whooping cough | 0.06<br>(0.02 to<br>0.16) | 0.02<br>(0.00 to<br>0.06) | 0.01<br>(0.00 to<br>0.02) | 0.04<br>(0.01 to<br>0.15) | 0.00<br>(0.00 to<br>0.00) | 0.00<br>(0.00 to<br>0.00) | 0.00<br>(0.00 to<br>0.00) | 0.00<br>(0.00 to<br>0.00) |
| Tetanus        | 0.05<br>(0.04 to<br>0.07) | 0.01<br>(0.00 to<br>0.01) | 0.01<br>(0.00 to<br>0.01) | 0.01<br>(0.00 to<br>0.01) | 0.00<br>(0.00 to<br>0.00) | 0.00<br>(0.00 to<br>0.00) | 0.00<br>(0.00 to<br>0.00) | 0.00<br>(0.00 to<br>0.00) |
| Measles        | 0.01<br>(0.01 to<br>0.01) | 0.46<br>(0.00 to<br>2.72) | 0.36<br>(0.00 to<br>1.95) | 0.64<br>(0.00 to<br>3.83) | 0.00<br>(0.00 to<br>0.00) | 0.01<br>(0.00 to<br>0.05) | 0.01<br>(0.00 to<br>0.04) | 0.01<br>(0.00 to<br>0.07) |

| Poland                                                |                                  |                                  |                                  |                                  |                                  |                                  |                                  |                                  |
|-------------------------------------------------------|----------------------------------|----------------------------------|----------------------------------|----------------------------------|----------------------------------|----------------------------------|----------------------------------|----------------------------------|
| Cause                                                 | YLLs (in 1000s)                  |                                  |                                  |                                  | Deaths (in 1000s)                |                                  |                                  |                                  |
|                                                       | 2016                             | 2040 Forecast                    | 2040 Better Scenario             | 2040 Worse Scenario              | 2016                             | 2040 Forecast                    | 2040 Better Scenario             | 2040 Worse Scenario              |
| Varicella and herpes zoster                           | 0.09<br>(0.05 to<br>0.18)        | 0.05<br>(0.03 to<br>0.12)        | 0.05<br>(0.03 to<br>0.10)        | 0.06<br>(0.03 to<br>0.12)        | 0.00<br>(0.00 to<br>0.01)        | 0.00<br>(0.00 to<br>0.01)        | 0.00<br>(0.00 to<br>0.01)        | 0.00<br>(0.00 to<br>0.01)        |
| Neglected tropical diseases and malaria               | <b>0.37</b><br>(0.32 to<br>0.47) | <b>0.32</b><br>(0.27 to<br>0.41) | <b>0.32</b><br>(0.27 to<br>0.41) | <b>0.31</b><br>(0.27 to<br>0.40) | <b>0.01</b><br>(0.01 to<br>0.02) | <b>0.01</b><br>(0.01 to<br>0.02) | <b>0.01</b><br>(0.01 to<br>0.02) | <b>0.01</b><br>(0.01 to<br>0.02) |
| Malaria                                               | 0.00<br>(0.00 to<br>0.00)        | 0.00<br>(0.00 to<br>0.00)        | 0.00<br>(0.00 to<br>0.00)        | 0.00<br>(0.00 to<br>0.00)        | 0.00<br>(0.00 to<br>0.00)        | 0.00<br>(0.00 to<br>0.00)        | 0.00<br>(0.00 to<br>0.00)        | 0.00<br>(0.00 to<br>0.00)        |
| Chagas disease                                        | 0.00<br>(0.00 to<br>0.00)        | 0.00<br>(0.00 to<br>0.00)        | 0.00<br>(0.00 to<br>0.00)        | 0.00<br>(0.00 to<br>0.00)        | 0.00<br>(0.00 to<br>0.00)        | 0.00<br>(0.00 to<br>0.00)        | 0.00<br>(0.00 to<br>0.00)        | 0.00<br>(0.00 to<br>0.00)        |
| Leishmaniasis                                         | 0.00<br>(0.00 to<br>0.00)        | 0.00<br>(0.00 to<br>0.00)        | 0.00<br>(0.00 to<br>0.00)        | 0.00<br>(0.00 to<br>0.00)        | 0.00<br>(0.00 to<br>0.00)        | 0.00<br>(0.00 to<br>0.00)        | 0.00<br>(0.00 to<br>0.00)        | 0.00<br>(0.00 to<br>0.00)        |
| African trypanosomiasis                               | 0.00<br>(0.00 to<br>0.00)        | 0.00<br>(0.00 to<br>0.00)        | 0.00<br>(0.00 to<br>0.00)        | 0.00<br>(0.00 to<br>0.00)        | 0.00<br>(0.00 to<br>0.00)        | 0.00<br>(0.00 to<br>0.00)        | 0.00<br>(0.00 to<br>0.00)        | 0.00<br>(0.00 to<br>0.00)        |
| Schistosomiasis                                       | 0.00<br>(0.00 to<br>0.00)        | 0.00<br>(0.00 to<br>0.00)        | 0.00<br>(0.00 to<br>0.00)        | 0.00<br>(0.00 to<br>0.00)        | 0.00<br>(0.00 to<br>0.00)        | 0.00<br>(0.00 to<br>0.00)        | 0.00<br>(0.00 to<br>0.00)        | 0.00<br>(0.00 to<br>0.00)        |
| Cysticercosis                                         | 0.02<br>(0.02 to<br>0.02)        | 0.01<br>(0.01 to<br>0.01)        | 0.01<br>(0.01 to<br>0.01)        | 0.01<br>(0.01 to<br>0.01)        | 0.00<br>(0.00 to<br>0.00)        | 0.00<br>(0.00 to<br>0.00)        | 0.00<br>(0.00 to<br>0.00)        | 0.00<br>(0.00 to<br>0.00)        |
| Cystic echinococcosis                                 | 0.11<br>(0.09 to<br>0.13)        | 0.07<br>(0.05 to<br>0.09)        | 0.06<br>(0.05 to<br>0.07)        | 0.07<br>(0.06 to<br>0.09)        | 0.00<br>(0.00 to<br>0.01)        | 0.00<br>(0.00 to<br>0.01)        | 0.00<br>(0.00 to<br>0.01)        | 0.00<br>(0.00 to<br>0.01)        |
| Dengue                                                | 0.00<br>(0.00 to<br>0.00)        | 0.00<br>(0.00 to<br>0.00)        | 0.00<br>(0.00 to<br>0.00)        | 0.00<br>(0.00 to<br>0.00)        | 0.00<br>(0.00 to<br>0.00)        | 0.00<br>(0.00 to<br>0.00)        | 0.00<br>(0.00 to<br>0.00)        | 0.00<br>(0.00 to<br>0.00)        |
| Yellow fever                                          | 0.00<br>(0.00 to<br>0.00)        | 0.00<br>(0.00 to<br>0.00)        | 0.00<br>(0.00 to<br>0.00)        | 0.00<br>(0.00 to<br>0.00)        | 0.00<br>(0.00 to<br>0.00)        | 0.00<br>(0.00 to<br>0.00)        | 0.00<br>(0.00 to<br>0.00)        | 0.00<br>(0.00 to<br>0.00)        |
| Rabies                                                | 0.00<br>(0.00 to<br>0.00)        | 0.00<br>(0.00 to<br>0.00)        | 0.00<br>(0.00 to<br>0.00)        | 0.00<br>(0.00 to<br>0.00)        | 0.00<br>(0.00 to<br>0.00)        | 0.00<br>(0.00 to<br>0.00)        | 0.00<br>(0.00 to<br>0.00)        | 0.00<br>(0.00 to<br>0.00)        |
| Intestinal nematode infections                        | 0.00<br>(0.00 to<br>0.00)        | 0.00<br>(0.00 to<br>0.00)        | 0.00<br>(0.00 to<br>0.00)        | 0.00<br>(0.00 to<br>0.00)        | 0.00<br>(0.00 to<br>0.00)        | 0.00<br>(0.00 to<br>0.00)        | 0.00<br>(0.00 to<br>0.00)        | 0.00<br>(0.00 to<br>0.00)        |
| Other neglected tropical diseases                     | 0.24<br>(0.20 to<br>0.32)        | 0.24<br>(0.20 to<br>0.33)        | 0.25<br>(0.21 to<br>0.34)        | 0.23<br>(0.19 to<br>0.31)        | 0.01<br>(0.01 to<br>0.01)        | 0.01<br>(0.01 to<br>0.01)        | 0.01<br>(0.01 to<br>0.02)        | 0.01<br>(0.01 to<br>0.01)        |
| Maternal disorders                                    | <b>0.84</b><br>(0.69 to<br>1.00) | <b>0.58</b><br>(0.41 to<br>0.79) | <b>0.51</b><br>(0.38 to<br>0.66) | <b>0.67</b><br>(0.48 to<br>0.92) | <b>0.02</b><br>(0.01 to<br>0.02) | <b>0.01</b><br>(0.01 to<br>0.02) | <b>0.01</b><br>(0.01 to<br>0.01) | <b>0.01</b><br>(0.01 to<br>0.02) |
| Maternal hemorrhage                                   | 0.22<br>(0.16 to<br>0.29)        | 0.14<br>(0.09 to<br>0.22)        | 0.13<br>(0.08 to<br>0.19)        | 0.16<br>(0.10 to<br>0.25)        | 0.00<br>(0.00 to<br>0.01)        | 0.00<br>(0.00 to<br>0.00)        | 0.00<br>(0.00 to<br>0.00)        | 0.00<br>(0.00 to<br>0.01)        |
| Maternal sepsis and other maternal infections         | 0.17<br>(0.13 to<br>0.24)        | 0.10<br>(0.06 to<br>0.16)        | 0.09<br>(0.05 to<br>0.13)        | 0.12<br>(0.07 to<br>0.18)        | 0.00<br>(0.00 to<br>0.00)        | 0.00<br>(0.00 to<br>0.00)        | 0.00<br>(0.00 to<br>0.00)        | 0.00<br>(0.00 to<br>0.00)        |
| Maternal hypertensive disorders                       | 0.08<br>(0.05 to<br>0.11)        | 0.05<br>(0.03 to<br>0.08)        | 0.04<br>(0.03 to<br>0.07)        | 0.06<br>(0.03 to<br>0.09)        | 0.00<br>(0.00 to<br>0.00)        | 0.00<br>(0.00 to<br>0.00)        | 0.00<br>(0.00 to<br>0.00)        | 0.00<br>(0.00 to<br>0.00)        |
| Maternal obstructed labor and uterine rupture         | 0.03<br>(0.02 to<br>0.05)        | 0.02<br>(0.01 to<br>0.04)        | 0.02<br>(0.01 to<br>0.04)        | 0.03<br>(0.01 to<br>0.05)        | 0.00<br>(0.00 to<br>0.00)        | 0.00<br>(0.00 to<br>0.00)        | 0.00<br>(0.00 to<br>0.00)        | 0.00<br>(0.00 to<br>0.00)        |
| Maternal abortion, miscarriage, and ectopic pregnancy | 0.12<br>(0.09 to<br>0.17)        | 0.13<br>(0.07 to<br>0.20)        | 0.11<br>(0.06 to<br>0.17)        | 0.15<br>(0.08 to<br>0.24)        | 0.00<br>(0.00 to<br>0.00)        | 0.00<br>(0.00 to<br>0.00)        | 0.00<br>(0.00 to<br>0.00)        | 0.00<br>(0.00 to<br>0.01)        |

|                                        |                           |                           |                           |                           |                           |                           |                           |                           |
|----------------------------------------|---------------------------|---------------------------|---------------------------|---------------------------|---------------------------|---------------------------|---------------------------|---------------------------|
| Indirect maternal deaths               | 0.04<br>(0.02 to<br>0.05) | 0.03<br>(0.01 to<br>0.04) | 0.02<br>(0.01 to<br>0.04) | 0.03<br>(0.02 to<br>0.05) | 0.00<br>(0.00 to<br>0.00) | 0.00<br>(0.00 to<br>0.00) | 0.00<br>(0.00 to<br>0.00) | 0.00<br>(0.00 to<br>0.00) |
| Late maternal deaths                   | 0.02<br>(0.01 to<br>0.03) | 0.01<br>(0.01 to<br>0.02) | 0.01<br>(0.00 to<br>0.02) | 0.01<br>(0.01 to<br>0.02) | 0.00<br>(0.00 to<br>0.00) | 0.00<br>(0.00 to<br>0.00) | 0.00<br>(0.00 to<br>0.00) | 0.00<br>(0.00 to<br>0.00) |
| Maternal deaths aggravated by HIV/AIDS | 0.00<br>(0.00 to<br>0.00) | 0.00<br>(0.00 to<br>0.00) | 0.00<br>(0.00 to<br>0.00) | 0.00<br>(0.00 to<br>0.00) | 0.00<br>(0.00 to<br>0.00) | 0.00<br>(0.00 to<br>0.00) | 0.00<br>(0.00 to<br>0.00) | 0.00<br>(0.00 to<br>0.00) |
| Other maternal disorders               | 0.16<br>(0.12 to<br>0.22) | 0.10<br>(0.06 to<br>0.17) | 0.09<br>(0.06 to<br>0.15) | 0.12<br>(0.07 to<br>0.19) | 0.00<br>(0.00 to<br>0.00) | 0.00<br>(0.00 to<br>0.00) | 0.00<br>(0.00 to<br>0.00) | 0.00<br>(0.00 to<br>0.00) |

| Poland                                                                  |                                   |                                 |                                 |                                  |                               |                               |                               |                               |
|-------------------------------------------------------------------------|-----------------------------------|---------------------------------|---------------------------------|----------------------------------|-------------------------------|-------------------------------|-------------------------------|-------------------------------|
| Cause                                                                   | YLLs (in 1000s)                   |                                 |                                 |                                  | Deaths (in 1000s)             |                               |                               |                               |
|                                                                         | 2016                              | 2040 Forecast                   | 2040 Better Scenario            | 2040 Worse Scenario              | 2016                          | 2040 Forecast                 | 2040 Better Scenario          | 2040 Worse Scenario           |
| <b>Neonatal disorders</b>                                               | <b>63.34</b><br>(37.08 to 103.66) | <b>19.33</b><br>(9.18 to 35.54) | <b>14.88</b><br>(7.19 to 26.88) | <b>24.63</b><br>(11.56 to 46.85) | <b>0.73</b><br>(0.43 to 1.20) | <b>0.22</b><br>(0.11 to 0.41) | <b>0.17</b><br>(0.08 to 0.31) | <b>0.28</b><br>(0.13 to 0.54) |
| Neonatal preterm birth                                                  | 45.85<br>(26.70 to 75.64)         | 10.05<br>(4.64 to 19.49)        | 7.18<br>(3.38 to 13.61)         | 14.06<br>(6.39 to 26.65)         | 0.53<br>(0.31 to 0.87)        | 0.12<br>(0.05 to 0.23)        | 0.08<br>(0.04 to 0.16)        | 0.16<br>(0.07 to 0.31)        |
| Neonatal encephalopathy due to birth asphyxia and trauma                | 7.87<br>(4.39 to 12.83)           | 2.35<br>(0.96 to 4.99)          | 1.80<br>(0.75 to 3.73)          | 2.92<br>(1.18 to 6.06)           | 0.09<br>(0.05 to 0.15)        | 0.03<br>(0.01 to 0.06)        | 0.02<br>(0.01 to 0.04)        | 0.03<br>(0.01 to 0.07)        |
| Neonatal sepsis and other neonatal infections                           | 4.56<br>(2.27 to 9.66)            | 3.15<br>(1.27 to 7.54)          | 2.53<br>(1.02 to 5.80)          | 3.70<br>(1.47 to 8.81)           | 0.05<br>(0.03 to 0.11)        | 0.04<br>(0.01 to 0.08)        | 0.03<br>(0.01 to 0.07)        | 0.04<br>(0.02 to 0.10)        |
| Hemolytic disease and other neonatal jaundice                           | 0.25<br>(0.13 to 0.47)            | 0.09<br>(0.03 to 0.24)          | 0.07<br>(0.02 to 0.18)          | 0.10<br>(0.03 to 0.28)           | 0.00<br>(0.00 to 0.01)        | 0.00<br>(0.00 to 0.00)        | 0.00<br>(0.00 to 0.00)        | 0.00<br>(0.00 to 0.00)        |
| Other neonatal disorders                                                | 4.81<br>(2.64 to 8.10)            | 3.70<br>(1.48 to 8.33)          | 3.29<br>(1.32 to 7.27)          | 3.84<br>(1.53 to 8.73)           | 0.06<br>(0.03 to 0.09)        | 0.04<br>(0.02 to 0.10)        | 0.04<br>(0.02 to 0.08)        | 0.04<br>(0.02 to 0.10)        |
| <b>Nutritional deficiencies</b>                                         | <b>2.79</b><br>(2.47 to 3.14)     | <b>2.57</b><br>(2.06 to 3.16)   | <b>2.72</b><br>(2.18 to 3.36)   | <b>2.37</b><br>(1.90 to 2.90)    | <b>0.15</b><br>(0.14 to 0.17) | <b>0.20</b><br>(0.15 to 0.27) | <b>0.23</b><br>(0.17 to 0.29) | <b>0.18</b><br>(0.13 to 0.24) |
| Protein-energy malnutrition                                             | 2.06<br>(1.27 to 2.47)            | 1.75<br>(0.92 to 2.35)          | 1.92<br>(1.03 to 2.54)          | 1.55<br>(0.79 to 2.12)           | 0.11<br>(0.07 to 0.13)        | 0.14<br>(0.07 to 0.20)        | 0.16<br>(0.09 to 0.22)        | 0.12<br>(0.06 to 0.17)        |
| Iodine deficiency                                                       | 0.11<br>(0.01 to 0.31)            | 0.16<br>(0.01 to 0.48)          | 0.16<br>(0.01 to 0.50)          | 0.16<br>(0.01 to 0.45)           | 0.01<br>(0.00 to 0.02)        | 0.01<br>(0.00 to 0.05)        | 0.01<br>(0.00 to 0.05)        | 0.01<br>(0.00 to 0.04)        |
| Dietary iron deficiency                                                 | 0.16<br>(0.12 to 0.28)            | 0.13<br>(0.09 to 0.20)          | 0.14<br>(0.09 to 0.21)          | 0.12<br>(0.08 to 0.18)           | 0.01<br>(0.00 to 0.01)        | 0.01<br>(0.00 to 0.01)        | 0.01<br>(0.00 to 0.01)        | 0.01<br>(0.00 to 0.01)        |
| Other nutritional deficiencies                                          | 0.46<br>(0.32 to 1.09)            | 0.52<br>(0.30 to 1.18)          | 0.50<br>(0.29 to 1.20)          | 0.53<br>(0.31 to 1.15)           | 0.03<br>(0.02 to 0.07)        | 0.05<br>(0.03 to 0.10)        | 0.05<br>(0.02 to 0.11)        | 0.05<br>(0.03 to 0.10)        |
| <b>Other communicable, maternal, neonatal, and nutritional diseases</b> | <b>4.00</b><br>(3.50 to 4.70)     | <b>3.90</b><br>(3.30 to 4.71)   | <b>3.76</b><br>(3.18 to 4.54)   | <b>4.05</b><br>(3.44 to 4.87)    | <b>0.14</b><br>(0.12 to 0.16) | <b>0.18</b><br>(0.15 to 0.22) | <b>0.18</b><br>(0.15 to 0.22) | <b>0.18</b><br>(0.15 to 0.22) |
| Sexually transmitted infections excluding HIV                           | 0.22<br>(0.18 to 0.28)            | 0.13<br>(0.10 to 0.19)          | 0.13<br>(0.09 to 0.19)          | 0.14<br>(0.10 to 0.20)           | 0.01<br>(0.01 to 0.01)        | 0.01<br>(0.00 to 0.01)        | 0.01<br>(0.01 to 0.01)        | 0.01<br>(0.00 to 0.01)        |
| Syphilis                                                                | 0.08<br>(0.06 to 0.10)            | 0.03<br>(0.02 to 0.05)          | 0.03<br>(0.02 to 0.04)          | 0.04<br>(0.02 to 0.05)           | 0.00<br>(0.00 to 0.00)        | 0.00<br>(0.00 to 0.00)        | 0.00<br>(0.00 to 0.00)        | 0.00<br>(0.00 to 0.00)        |
| Chlamydial infection                                                    | 0.03<br>(0.02 to 0.04)            | 0.02<br>(0.01 to 0.03)          | 0.02<br>(0.01 to 0.03)          | 0.02<br>(0.01 to 0.03)           | 0.00<br>(0.00 to 0.00)        | 0.00<br>(0.00 to 0.00)        | 0.00<br>(0.00 to 0.00)        | 0.00<br>(0.00 to 0.00)        |
| Gonococcal infection                                                    | 0.08<br>(0.07 to 0.10)            | 0.06<br>(0.04 to 0.09)          | 0.05<br>(0.04 to 0.09)          | 0.06<br>(0.04 to 0.09)           | 0.00<br>(0.00 to 0.00)        | 0.00<br>(0.00 to 0.00)        | 0.00<br>(0.00 to 0.00)        | 0.00<br>(0.00 to 0.00)        |
| Other sexually transmitted infections                                   | 0.04<br>(0.03 to 0.05)            | 0.02<br>(0.02 to 0.04)          | 0.02<br>(0.02 to 0.04)          | 0.03<br>(0.02 to 0.04)           | 0.00<br>(0.00 to 0.00)        | 0.00<br>(0.00 to 0.00)        | 0.00<br>(0.00 to 0.00)        | 0.00<br>(0.00 to 0.00)        |
| Acute hepatitis                                                         | 1.16<br>(1.01 to 1.38)            | 0.81<br>(0.58 to 1.11)          | 0.69<br>(0.51 to 0.94)          | 0.95<br>(0.69 to 1.33)           | 0.05<br>(0.04 to 0.06)        | 0.04<br>(0.03 to 0.06)        | 0.04<br>(0.03 to 0.05)        | 0.05<br>(0.04 to 0.07)        |
| Acute hepatitis A                                                       | 0.05<br>(0.03 to 0.07)            | 0.03<br>(0.02 to 0.05)          | 0.03<br>(0.02 to 0.05)          | 0.04<br>(0.02 to 0.06)           | 0.00<br>(0.00 to 0.00)        | 0.00<br>(0.00 to 0.00)        | 0.00<br>(0.00 to 0.00)        | 0.00<br>(0.00 to 0.00)        |
| Acute hepatitis B                                                       | 0.88<br>(0.73 to 1.06)            | 0.59<br>(0.40 to 0.85)          | 0.50<br>(0.34 to 0.71)          | 0.70<br>(0.47 to 1.02)           | 0.03<br>(0.03 to 0.04)        | 0.03<br>(0.02 to 0.04)        | 0.03<br>(0.02 to 0.04)        | 0.03<br>(0.02 to 0.05)        |



| Poland                               |                                       |                                       |                                       |                                       |                                |                                 |                                |                                 |
|--------------------------------------|---------------------------------------|---------------------------------------|---------------------------------------|---------------------------------------|--------------------------------|---------------------------------|--------------------------------|---------------------------------|
| Cause                                | YLLs (in 1000s)                       |                                       |                                       |                                       | Deaths (in 1000s)              |                                 |                                |                                 |
|                                      | 2016                                  | 2040 Forecast                         | 2040 Better Scenario                  | 2040 Worse Scenario                   | 2016                           | 2040 Forecast                   | 2040 Better Scenario           | 2040 Worse Scenario             |
| Neoplasms                            | 2,076.55<br>(1,908.85 to<br>2,258.72) | 1,937.02<br>(1,662.24 to<br>2,260.11) | 1,679.58<br>(1,453.11 to<br>1,955.90) | 2,517.89<br>(2,122.58 to<br>3,006.99) | 102.04<br>(94.06 to<br>110.50) | 120.38<br>(105.83 to<br>136.45) | 107.49<br>(95.47 to<br>121.44) | 147.03<br>(127.27 to<br>170.43) |
| Lip and oral cavity cancer           | 37.29<br>(32.82 to<br>42.48)          | 28.58<br>(15.72 to<br>47.87)          | 19.26<br>(10.94 to<br>32.54)          | 48.04<br>(26.67 to<br>77.08)          | 1.58<br>(1.40 to<br>1.78)      | 1.51<br>(0.87 to<br>2.45)       | 1.03<br>(0.62 to<br>1.65)      | 2.41<br>(1.36 to<br>3.81)       |
| Nasopharynx cancer                   | 5.55<br>(4.86 to<br>6.39)             | 3.56<br>(2.03 to<br>5.98)             | 2.26<br>(1.29 to<br>3.85)             | 6.53<br>(3.66 to<br>10.86)            | 0.20<br>(0.18 to<br>0.23)      | 0.15<br>(0.09 to<br>0.25)       | 0.10<br>(0.06 to<br>0.16)      | 0.27<br>(0.15 to<br>0.43)       |
| Other pharynx cancer                 | 25.09<br>(21.91 to<br>29.74)          | 27.39<br>(14.90 to<br>46.74)          | 22.65<br>(12.31 to<br>39.29)          | 30.20<br>(16.17 to<br>51.62)          | 0.98<br>(0.84 to<br>1.12)      | 1.17<br>(0.66 to<br>1.95)       | 0.98<br>(0.56 to<br>1.64)      | 1.26<br>(0.70 to<br>2.11)       |
| Esophageal cancer                    | 44.17<br>(37.75 to<br>50.89)          | 44.14<br>(23.54 to<br>77.57)          | 34.15<br>(18.65 to<br>60.18)          | 71.05<br>(35.32 to<br>129.18)         | 1.99<br>(1.73 to<br>2.27)      | 2.41<br>(1.35 to<br>3.96)       | 1.86<br>(1.08 to<br>3.08)      | 3.70<br>(1.92 to<br>6.41)       |
| Stomach cancer                       | 115.48<br>(104.07 to<br>128.62)       | 66.51<br>(48.50 to<br>88.04)          | 56.53<br>(42.89 to<br>73.87)          | 82.85<br>(58.26 to<br>112.32)         | 5.95<br>(5.40 to<br>6.58)      | 4.44<br>(3.33 to<br>5.85)       | 3.88<br>(3.04 to<br>4.92)      | 5.25<br>(3.77 to<br>6.99)       |
| Colon and rectum cancer              | 255.73<br>(228.48 to<br>287.36)       | 266.47<br>(184.58 to<br>390.02)       | 215.74<br>(154.63 to<br>306.64)       | 324.40<br>(220.10 to<br>468.64)       | 14.46<br>(13.01 to<br>16.16)   | 19.28<br>(13.69 to<br>27.47)    | 16.19<br>(11.93 to<br>22.64)   | 22.35<br>(15.55 to<br>32.18)    |
| Liver cancer                         | 43.81<br>(38.78 to<br>49.30)          | 67.44<br>(44.21 to<br>100.42)         | 58.46<br>(40.09 to<br>84.60)          | 87.26<br>(52.11 to<br>138.30)         | 2.26<br>(2.01 to<br>2.54)      | 4.43<br>(3.00 to<br>6.52)       | 4.00<br>(2.83 to<br>5.74)      | 5.34<br>(3.37 to<br>8.26)       |
| Liver cancer due to hepatitis B      | 12.50<br>(9.23 to<br>15.97)           | 17.36<br>(10.68 to<br>28.87)          | 16.38<br>(10.55 to<br>26.55)          | 21.20<br>(12.17 to<br>36.84)          | 0.59<br>(0.43 to<br>0.76)      | 1.05<br>(0.66 to<br>1.67)       | 1.02<br>(0.66 to<br>1.58)      | 1.20<br>(0.70 to<br>2.03)       |
| Liver cancer due to hepatitis C      | 9.67<br>(6.74 to<br>12.88)            | 15.56<br>(9.17 to<br>24.32)           | 14.87<br>(9.15 to<br>22.63)           | 18.36<br>(10.22 to<br>30.06)          | 0.56<br>(0.40 to<br>0.73)      | 1.14<br>(0.70 to<br>1.78)       | 1.12<br>(0.70 to<br>1.68)      | 1.26<br>(0.72 to<br>2.00)       |
| Liver cancer due to alcohol use      | 14.38<br>(11.92 to<br>17.14)          | 23.55<br>(15.23 to<br>35.78)          | 16.87<br>(11.19 to<br>25.15)          | 34.18<br>(20.70 to<br>55.56)          | 0.76<br>(0.63 to<br>0.91)      | 1.54<br>(0.99 to<br>2.32)       | 1.18<br>(0.78 to<br>1.75)      | 2.07<br>(1.28 to<br>3.25)       |
| Liver cancer due to other causes     | 7.26<br>(6.00 to<br>8.78)             | 10.97<br>(6.47 to<br>17.74)           | 10.34<br>(6.45 to<br>16.19)           | 13.51<br>(7.23 to<br>23.45)           | 0.36<br>(0.29 to<br>0.43)      | 0.70<br>(0.43 to<br>1.09)       | 0.68<br>(0.43 to<br>1.01)      | 0.81<br>(0.45 to<br>1.36)       |
| Gallbladder and biliary tract cancer | 43.01<br>(38.50 to<br>48.32)          | 36.65<br>(32.17 to<br>41.46)          | 36.95<br>(32.32 to<br>42.13)          | 35.84<br>(31.56 to<br>40.56)          | 2.50<br>(2.24 to<br>2.79)      | 2.71<br>(2.41 to<br>3.07)       | 2.81<br>(2.48 to<br>3.18)      | 2.56<br>(2.27 to<br>2.92)       |
| Pancreatic cancer                    | 111.33<br>(100.20 to<br>123.19)       | 133.14<br>(108.06 to<br>164.97)       | 128.65<br>(105.66 to<br>157.94)       | 150.26<br>(118.81 to<br>191.14)       | 5.72<br>(5.12 to<br>6.32)      | 8.50<br>(6.99 to<br>10.47)      | 8.39<br>(7.00 to<br>10.16)     | 9.09<br>(7.33 to<br>11.38)      |
| Larynx cancer                        | 37.88<br>(33.16 to<br>43.33)          | 24.85<br>(11.81 to<br>46.07)          | 16.79<br>(8.00 to<br>30.89)           | 44.59<br>(20.28 to<br>80.29)          | 1.60<br>(1.41 to<br>1.82)      | 1.19<br>(0.58 to<br>2.20)       | 0.79<br>(0.39 to<br>1.42)      | 2.09<br>(0.99 to<br>3.81)       |
| Tracheal, bronchus, and lung cancer  | 511.99<br>(459.72 to<br>572.15)       | 403.55<br>(293.92 to<br>549.35)       | 294.71<br>(215.59 to<br>401.16)       | 733.68<br>(523.15 to<br>1,006.40)     | 23.92<br>(21.61 to<br>26.58)   | 27.25<br>(16.72 to<br>29.33)    | 16.26<br>(12.19 to<br>21.39)   | 38.50<br>(28.63 to<br>51.25)    |
| Malignant skin melanoma              | 31.20<br>(25.52 to<br>36.46)          | 42.21<br>(32.79 to<br>51.64)          | 46.84<br>(37.00 to<br>56.85)          | 36.85<br>(29.45 to<br>44.54)          | 1.34<br>(1.06 to<br>1.55)      | 2.34<br>(1.82 to<br>2.80)       | 2.67<br>(2.08 to<br>3.18)      | 1.96<br>(1.53 to<br>2.34)       |
| Non-melanoma skin cancer             | 9.48<br>(8.39 to<br>10.77)            | 13.18<br>(10.83 to<br>15.92)          | 12.49<br>(10.40 to<br>14.89)          | 13.78<br>(11.33 to<br>16.48)          | 0.64<br>(0.57 to<br>0.71)      | 1.21<br>(0.99 to<br>1.47)       | 1.19<br>(0.99 to<br>1.44)      | 1.21<br>(0.99 to<br>1.47)       |
| Breast cancer                        | 126.88<br>(108.63 to<br>147.91)       | 109.49<br>(80.28 to<br>145.30)        | 89.25<br>(67.79 to<br>115.83)         | 131.77<br>(92.65 to<br>178.39)        | 5.85<br>(5.07 to<br>6.74)      | 6.54<br>(4.92 to<br>8.47)       | 5.55<br>(4.29 to<br>7.12)      | 7.52<br>(5.59 to<br>9.92)       |
| Cervical cancer                      | 52.33<br>(44.38 to<br>61.05)          | 30.03<br>(21.52 to<br>40.27)          | 25.88<br>(19.43 to<br>33.42)          | 36.96<br>(25.12 to<br>52.36)          | 2.19<br>(1.87 to<br>2.55)      | 1.55<br>(1.16 to<br>2.01)       | 1.37<br>(1.07 to<br>1.73)      | 1.83<br>(1.31 to<br>2.50)       |

|                   |                              |                                |                                |                                |                           |                            |                            |                            |
|-------------------|------------------------------|--------------------------------|--------------------------------|--------------------------------|---------------------------|----------------------------|----------------------------|----------------------------|
|                   | 23.11<br>(18.94 to<br>27.74) | 22.33<br>(17.81 to<br>27.41)   | 21.09<br>(16.91 to<br>25.73)   | 22.74<br>(18.99 to<br>29.22)   | 1.23<br>(1.02 to<br>1.46) | 1.44<br>(1.17 to<br>1.73)  | 1.39<br>(1.12 to<br>1.67)  | 1.49<br>(1.20 to<br>1.80)  |
| Uterine cancer    |                              |                                |                                |                                |                           |                            |                            |                            |
| Ovarian cancer    | 69.86<br>(57.98 to<br>83.51) | 57.84<br>(42.70 to<br>75.38)   | 53.15<br>(40.07 to<br>68.36)   | 62.85<br>(45.15 to<br>83.50)   | 3.06<br>(2.55 to<br>3.63) | 2.98<br>(2.22 to<br>3.85)  | 2.78<br>(2.11 to<br>3.51)  | 3.17<br>(2.31 to<br>4.15)  |
| Prostate cancer   | 77.76<br>(61.77 to<br>92.67) | 101.52<br>(82.72 to<br>124.26) | 100.54<br>(82.68 to<br>121.50) | 102.37<br>(82.70 to<br>125.00) | 5.32<br>(4.28 to<br>6.32) | 8.77<br>(7.21 to<br>10.56) | 8.94<br>(7.38 to<br>10.73) | 8.44<br>(6.56 to<br>10.31) |
| Testicular cancer | 4.83<br>(3.99 to<br>5.87)    | 2.14<br>(1.64 to<br>2.80)      | 1.98<br>(1.53 to<br>2.55)      | 2.34<br>(1.79 to<br>3.05)      | 0.12<br>(0.10 to<br>0.14) | 0.08<br>(0.06 to<br>0.09)  | 0.07<br>(0.06 to<br>0.09)  | 0.08<br>(0.06 to<br>0.10)  |

| Poland                          |                                                  |                                                  |                                                |                                                  |                                            |                                            |                                  |                                            |
|---------------------------------|--------------------------------------------------|--------------------------------------------------|------------------------------------------------|--------------------------------------------------|--------------------------------------------|--------------------------------------------|----------------------------------|--------------------------------------------|
| Cause                           | YLLs (in 1000s)                                  |                                                  |                                                |                                                  | Deaths (in 1000s)                          |                                            |                                  |                                            |
|                                 | 2016                                             | 2040 Forecast                                    | 2040 Better Scenario                           | 2040 Worse Scenario                              | 2016                                       | 2040 Forecast                              | 2040 Better Scenario             | 2040 Worse Scenario                        |
| Kidney cancer                   | 65.69<br>(58.79 to 73.75)                        | 80.20<br>(58.01 to 108.68)                       | 79.80<br>(58.52 to 106.16)                     | 87.63<br>(59.71 to 123.19)                       | 3.21<br>(2.89 to 3.59)                     | 4.76<br>(3.58 to 6.22)                     | 4.86<br>(3.70 to 6.29)           | 4.93<br>(3.53 to 6.71)                     |
| Bladder cancer                  | 61.59<br>(55.11 to 69.04)                        | 58.37<br>(43.94 to 80.00)                        | 53.91<br>(41.53 to 72.42)                      | 71.89<br>(51.02 to 103.00)                       | 3.68<br>(3.31 to 4.09)                     | 4.56<br>(3.50 to 5.97)                     | 4.30<br>(3.38 to 5.56)           | 5.25<br>(3.79 to 7.24)                     |
| Brain and nervous system cancer | 83.09<br>(66.63 to 94.43)                        | 81.03<br>(62.58 to 94.36)                        | 78.97<br>(61.38 to 92.70)                      | 82.67<br>(64.05 to 95.95)                        | 3.11<br>(2.26 to 3.57)                     | 3.71<br>(2.51 to 4.37)                     | 3.69<br>(2.53 to 4.37)           | 3.69<br>(2.50 to 4.32)                     |
| Thyroid cancer                  | 5.50<br>(4.79 to 6.24)                           | 6.03<br>(4.19 to 8.86)                           | 5.52<br>(3.93 to 7.89)                         | 6.88<br>(4.66 to 10.30)                          | 0.29<br>(0.25 to 0.33)                     | 0.39<br>(0.28 to 0.56)                     | 0.37<br>(0.27 to 0.52)           | 0.43<br>(0.30 to 0.62)                     |
| Mesothelioma                    | 5.96<br>(5.09 to 6.79)                           | 5.60<br>(4.55 to 6.68)                           | 5.76<br>(4.67 to 6.91)                         | 5.35<br>(4.37 to 6.29)                           | 0.25<br>(0.21 to 0.28)                     | 0.28<br>(0.24 to 0.33)                     | 0.30<br>(0.25 to 0.34)           | 0.26<br>(0.22 to 0.30)                     |
| Hodgkin lymphoma                | 7.47<br>(6.65 to 8.45)                           | 4.38<br>(3.51 to 5.59)                           | 3.84<br>(3.18 to 4.70)                         | 5.06<br>(4.01 to 6.45)                           | 0.25<br>(0.22 to 0.28)                     | 0.18<br>(0.15 to 0.22)                     | 0.16<br>(0.13 to 0.19)           | 0.20<br>(0.16 to 0.25)                     |
| Non-Hodgkin lymphoma            | 44.31<br>(37.62 to 50.16)                        | 40.07<br>(30.65 to 50.97)                        | 37.72<br>(29.42 to 47.45)                      | 43.41<br>(32.60 to 56.59)                        | 1.99<br>(1.64 to 2.25)                     | 2.27<br>(1.74 to 2.85)                     | 2.19<br>(1.73 to 2.71)           | 2.37<br>(1.80 to 3.02)                     |
| Multiple myeloma                | 25.73<br>(17.76 to 30.17)                        | 28.35<br>(18.30 to 37.41)                        | 27.41<br>(17.80 to 35.86)                      | 29.82<br>(19.28 to 40.27)                        | 1.31<br>(0.86 to 1.54)                     | 1.70<br>(1.07 to 2.25)                     | 1.68<br>(1.06 to 2.19)           | 1.73<br>(1.08 to 2.31)                     |
| Leukemia                        | 69.19<br>(62.13 to 76.58)                        | 65.05<br>(50.80 to 83.69)                        | 61.07<br>(48.10 to 77.17)                      | 75.55<br>(55.93 to 102.57)                       | 3.29<br>(2.97 to 3.63)                     | 4.12<br>(3.22 to 5.25)                     | 3.97<br>(3.18 to 4.96)           | 4.56<br>(3.39 to 6.11)                     |
| Acute lymphoid leukemia         | 9.10<br>(7.70 to 10.45)                          | 5.30<br>(4.13 to 6.91)                           | 4.77<br>(3.76 to 6.15)                         | 6.44<br>(4.85 to 8.66)                           | 0.26<br>(0.23 to 0.31)                     | 0.20<br>(0.15 to 0.27)                     | 0.18<br>(0.14 to 0.24)           | 0.24<br>(0.18 to 0.33)                     |
| Chronic lymphoid leukemia       | 16.51<br>(14.00 to 19.51)                        | 16.29<br>(11.77 to 22.41)                        | 15.62<br>(11.39 to 20.96)                      | 18.46<br>(12.46 to 26.67)                        | 0.99<br>(0.84 to 1.16)                     | 1.24<br>(0.92 to 1.64)                     | 1.22<br>(0.93 to 1.58)           | 1.33<br>(0.94 to 1.85)                     |
| Acute myeloid leukemia          | 26.72<br>(22.90 to 29.93)                        | 27.62<br>(21.22 to 35.20)                        | 26.46<br>(20.61 to 33.21)                      | 31.36<br>(23.07 to 41.98)                        | 1.13<br>(0.96 to 1.28)                     | 1.49<br>(1.14 to 1.92)                     | 1.46<br>(1.14 to 1.85)           | 1.63<br>(1.20 to 2.19)                     |
| Chronic myeloid leukemia        | 4.56<br>(3.98 to 5.24)                           | 2.19<br>(1.54 to 3.09)                           | 1.83<br>(1.32 to 2.50)                         | 2.94<br>(1.93 to 4.35)                           | 0.24<br>(0.21 to 0.28)                     | 0.16<br>(0.11 to 0.22)                     | 0.13<br>(0.10 to 0.18)           | 0.20<br>(0.13 to 0.29)                     |
| Other leukemia                  | 12.30<br>(10.67 to 14.27)                        | 13.65<br>(10.22 to 18.22)                        | 12.39<br>(9.56 to 16.41)                       | 16.35<br>(11.67 to 22.85)                        | 0.65<br>(0.57 to 0.75)                     | 1.03<br>(0.79 to 1.36)                     | 0.97<br>(0.76 to 1.25)           | 1.17<br>(0.85 to 1.59)                     |
| Other neoplasms                 | 80.63<br>(71.54 to 90.06)                        | 86.90<br>(75.85 to 97.09)                        | 88.21<br>(76.58 to 99.48)                      | 84.28<br>(74.13 to 93.71)                        | 3.79<br>(3.33 to 4.22)                     | 5.47<br>(4.78 to 6.11)                     | 5.73<br>(4.97 to 6.40)           | 5.08<br>(4.42 to 5.67)                     |
| <b>Cardiovascular diseases</b>  | <b>2,405.89</b><br><b>(2,213.12 to 2,613.89)</b> | <b>1,628.38</b><br><b>(1,153.39 to 2,284.42)</b> | <b>1,226.25</b><br><b>(904.84 to 1,673.31)</b> | <b>2,454.63</b><br><b>(1,687.80 to 3,499.21)</b> | <b>179.89</b><br><b>(166.97 to 193.85)</b> | <b>164.94</b><br><b>(118.13 to 229.96)</b> | <b>133.12</b><br><b>(183.38)</b> | <b>221.79</b><br><b>(156.73 to 300.44)</b> |
| Rheumatic heart disease         | 22.40<br>(19.53 to 25.56)                        | 13.05<br>(9.40 to 18.39)                         | 11.47<br>(8.61 to 15.55)                       | 14.87<br>(10.70 to 21.21)                        | 1.14<br>(1.00 to 1.31)                     | 0.85<br>(0.62 to 1.20)                     | 0.77<br>(0.59 to 1.06)           | 0.93<br>(0.69 to 1.31)                     |
| Ischemic heart disease          | 1,422.12<br>(1,301.44 to 1,556.59)               | 860.65<br>(529.26 to 1,335.41)                   | 608.16<br>(383.28 to 916.49)                   | 1,410.47<br>(834.74 to 2,182.82)                 | 111.90<br>(103.49 to 121.36)               | 91.12<br>(55.84 to 138.14)                 | 69.70<br>(43.24 to 104.80)       | 130.98<br>(79.45 to 193.99)                |
| Stroke                          | 517.56<br>(465.65 to 575.18)                     | 249.01<br>(157.57 to 393.98)                     | 174.22<br>(112.68 to 272.93)                   | 429.19<br>(260.35 to 674.96)                     | 35.81<br>(31.97 to 40.06)                  | 24.42<br>(15.22 to 41.69)                  | 18.79<br>(11.81 to 31.05)        | 36.02<br>(21.93 to 59.71)                  |
| Ischemic stroke                 | 287.72<br>(257.05 to 321.77)                     | 150.94<br>(89.36 to 264.72)                      | 114.09<br>(67.87 to 194.60)                    | 234.31<br>(132.00 to 420.65)                     | 23.87<br>(21.20 to 26.81)                  | 17.15<br>(9.89 to 32.84)                   | 13.84<br>(8.00 to 25.30)         | 23.77<br>(13.16 to 44.71)                  |



|                                |                                 |                                |                                |                                 |                              |                             |                             |                             |
|--------------------------------|---------------------------------|--------------------------------|--------------------------------|---------------------------------|------------------------------|-----------------------------|-----------------------------|-----------------------------|
| Intracerebral hemorrhage       | 229.84<br>(205.28 to<br>257.66) | 98.07<br>(55.88 to<br>167.09)  | 60.13<br>(36.85 to<br>97.15)   | 194.88<br>(106.43 to<br>325.33) | 11.94<br>(10.72 to<br>13.34) | 7.26<br>(4.35 to<br>11.90)  | 4.94<br>(3.15 to<br>7.82)   | 12.25<br>(7.12 to<br>19.96) |
| Hypertensive heart disease     | 64.92<br>(50.22 to<br>111.83)   | 119.60<br>(61.22 to<br>267.49) | 91.33<br>(49.32 to<br>194.47)  | 156.11<br>(76.19 to<br>366.88)  | 4.89<br>(3.76 to<br>8.74)    | 12.25<br>(6.03 to<br>29.11) | 9.93<br>(5.17 to<br>23.04)  | 15.03<br>(7.08 to<br>36.12) |
| Cardiomyopathy and myocarditis | 177.77<br>(134.35 to<br>206.07) | 144.47<br>(91.54 to<br>216.93) | 123.95<br>(79.53 to<br>182.88) | 166.16<br>(107.10 to<br>247.08) | 12.73<br>(9.01 to<br>15.02)  | 14.09<br>(7.98 to<br>23.33) | 12.78<br>(7.29 to<br>20.48) | 15.42<br>(8.57 to<br>25.13) |
| Myocarditis                    | 6.99<br>(4.31 to<br>13.63)      | 13.40<br>(7.56 to<br>26.92)    | 14.08<br>(8.07 to<br>27.30)    | 12.55<br>(7.03 to<br>25.97)     | 0.45<br>(0.25 to<br>1.05)    | 1.46<br>(0.75 to<br>3.18)   | 1.59<br>(0.83 to<br>3.34)   | 1.30<br>(0.64 to<br>2.94)   |

| Poland                                                        |                                                      |                                                      |                                                      |                                                      |                                                   |                                                   |                                                  |                                                   |
|---------------------------------------------------------------|------------------------------------------------------|------------------------------------------------------|------------------------------------------------------|------------------------------------------------------|---------------------------------------------------|---------------------------------------------------|--------------------------------------------------|---------------------------------------------------|
| Cause                                                         | YLLs (in 1000s)                                      |                                                      |                                                      |                                                      | Deaths (in 1000s)                                 |                                                   |                                                  |                                                   |
|                                                               | 2016                                                 | 2040 Forecast                                        | 2040 Better Scenario                                 | 2040 Worse Scenario                                  | 2016                                              | 2040 Forecast                                     | 2040 Better Scenario                             | 2040 Worse Scenario                               |
| Alcoholic cardiomyopathy                                      | 48.75<br>(21.02 to<br>64.38)                         | 31.67<br>(14.52 to<br>43.78)                         | 23.92<br>(10.63 to<br>33.16)                         | 38.72<br>(17.74 to<br>53.28)                         | 1.74<br>(0.77 to<br>2.31)                         | 1.27<br>(0.60 to<br>1.73)                         | 0.98<br>(0.46 to<br>1.35)                        | 1.52<br>(0.72 to<br>2.05)                         |
| Other cardiomyopathy                                          | 122.03<br>(97.75 to<br>141.15)                       | 99.39<br>(52.48 to<br>168.54)                        | 85.95<br>(45.33 to<br>143.18)                        | 114.88<br>(61.73 to<br>192.20)                       | 10.53<br>(7.38 to<br>12.67)                       | 11.37<br>(4.76 to<br>21.15)                       | 10.21<br>(4.23 to<br>18.37)                      | 12.60<br>(5.48 to<br>22.42)                       |
| Atrial fibrillation and flutter                               | 25.65<br>(19.76 to<br>32.36)                         | 43.66<br>(32.41 to<br>58.32)                         | 40.90<br>(30.46 to<br>54.19)                         | 45.21<br>(33.55 to<br>60.22)                         | 2.80<br>(2.12 to<br>3.59)                         | 5.64<br>(4.14 to<br>7.56)                         | 5.46<br>(4.02 to<br>7.35)                        | 5.58<br>(4.08 to<br>7.54)                         |
| Aortic aneurysm                                               | 41.45<br>(36.69 to<br>46.91)                         | 33.53<br>(25.30 to<br>44.22)                         | 30.44<br>(23.78 to<br>39.82)                         | 38.30<br>(28.25 to<br>50.82)                         | 2.24<br>(2.00 to<br>2.51)                         | 2.38<br>(1.89 to<br>3.01)                         | 2.27<br>(1.83 to<br>2.86)                        | 2.50<br>(1.98 to<br>3.16)                         |
| Peripheral artery disease                                     | 30.48<br>(21.10 to<br>43.01)                         | 58.03<br>(35.89 to<br>86.87)                         | 56.64<br>(35.37 to<br>84.12)                         | 61.69<br>(38.39 to<br>91.05)                         | 2.48<br>(1.67 to<br>3.63)                         | 6.14<br>(3.77 to<br>9.15)                         | 6.28<br>(3.88 to<br>9.48)                        | 6.01<br>(3.60 to<br>8.98)                         |
| Endocarditis                                                  | 10.69<br>(8.55 to<br>15.32)                          | 12.58<br>(8.31 to<br>19.70)                          | 11.86<br>(7.95 to<br>18.82)                          | 12.91<br>(8.52 to<br>20.47)                          | 0.48<br>(0.38 to<br>0.72)                         | 0.75<br>(0.48 to<br>1.28)                         | 0.73<br>(0.48 to<br>1.26)                        | 0.73<br>(0.48 to<br>1.24)                         |
| Other cardiovascular and circulatory diseases                 | 92.85<br>(82.46 to<br>104.32)                        | 93.81<br>(66.73 to<br>130.34)                        | 77.29<br>(56.71 to<br>104.18)                        | 119.72<br>(82.65 to<br>167.25)                       | 5.42<br>(4.87 to<br>6.10)                         | 19.72<br>(5.39 to<br>10.00)                       | 6.39<br>(4.86 to<br>8.65)                        | 8.57<br>(6.18 to<br>11.62)                        |
| <b>Chronic respiratory diseases</b>                           | <b>177.29</b><br><b>(161.12 to</b><br><b>194.48)</b> | <b>162.03</b><br><b>(120.77 to</b><br><b>214.44)</b> | <b>131.54</b><br><b>(100.56 to</b><br><b>170.04)</b> | <b>260.51</b><br><b>(185.02 to</b><br><b>350.84)</b> | <b>11.71</b><br><b>(10.78 to</b><br><b>12.78)</b> | <b>13.77</b><br><b>(10.44 to</b><br><b>17.72)</b> | <b>11.13</b><br><b>(8.73 to</b><br><b>14.07)</b> | <b>20.64</b><br><b>(15.12 to</b><br><b>27.39)</b> |
| Chronic obstructive pulmonary disease                         | 156.52<br>(142.01 to<br>172.35)                      | 138.33<br>(96.41 to<br>190.18)                       | 105.49<br>(74.90 to<br>144.10)                       | 238.17<br>(159.85 to<br>329.99)                      | 10.64<br>(9.76 to<br>11.62)                       | 12.21<br>(8.81 to<br>16.09)                       | 9.38<br>(6.86 to<br>12.36)                       | 19.21<br>(13.56 to<br>25.99)                      |
| Pneumoconiosis                                                | 1.03<br>(0.87 to<br>1.21)                            | 1.24<br>(0.93 to<br>1.64)                            | 1.31<br>(0.97 to<br>1.75)                            | 1.25<br>(0.94 to<br>1.65)                            | 0.06<br>(0.05 to<br>0.07)                         | 0.11<br>(0.08 to<br>0.16)                         | 0.13<br>(0.09 to<br>0.18)                        | 0.11<br>(0.08 to<br>0.16)                         |
| Silicosis                                                     | 0.20<br>(0.14 to<br>0.45)                            | 0.09<br>(0.05 to<br>0.20)                            | 0.08<br>(0.04 to<br>0.17)                            | 0.11<br>(0.06 to<br>0.21)                            | 0.01<br>(0.01 to<br>0.03)                         | 0.01<br>(0.00 to<br>0.02)                         | 0.01<br>(0.00 to<br>0.02)                        | 0.01<br>(0.00 to<br>0.02)                         |
| Asbestosis                                                    | 0.24<br>(0.15 to<br>0.35)                            | 0.37<br>(0.26 to<br>0.51)                            | 0.41<br>(0.30 to<br>0.56)                            | 0.31<br>(0.22 to<br>0.45)                            | 0.01<br>(0.01 to<br>0.02)                         | 0.03<br>(0.02 to<br>0.04)                         | 0.03<br>(0.02 to<br>0.04)                        | 0.02<br>(0.01 to<br>0.03)                         |
| Coal workers pneumoconiosis                                   | 0.35<br>(0.18 to<br>0.46)                            | 0.21<br>(0.09 to<br>0.36)                            | 0.18<br>(0.08 to<br>0.31)                            | 0.26<br>(0.12 to<br>0.44)                            | 0.02<br>(0.01 to<br>0.03)                         | 0.02<br>(0.01 to<br>0.03)                         | 0.01<br>(0.01 to<br>0.03)                        | 0.02<br>(0.01 to<br>0.03)                         |
| Other pneumoconiosis                                          | 0.24<br>(0.18 to<br>0.29)                            | 0.57<br>(0.34 to<br>0.93)                            | 0.64<br>(0.37 to<br>1.05)                            | 0.57<br>(0.35 to<br>0.90)                            | 0.02<br>(0.01 to<br>0.02)                         | 0.06<br>(0.04 to<br>0.11)                         | 0.07<br>(0.04 to<br>0.13)                        | 0.06<br>(0.03 to<br>0.10)                         |
| Asthma                                                        | 9.45<br>(7.99 to<br>11.82)                           | 3.72<br>(1.78 to<br>7.22)                            | 2.84<br>(1.41 to<br>5.40)                            | 5.64<br>(2.52 to<br>10.86)                           | 0.52<br>(0.44 to<br>0.64)                         | 0.28<br>(0.14 to<br>0.56)                         | 0.23<br>(0.11 to<br>0.44)                        | 0.40<br>(0.18 to<br>0.77)                         |
| Interstitial lung disease and pulmonary sarcoidosis           | 9.01<br>(6.43 to<br>11.25)                           | 17.37<br>(12.16 to<br>23.05)                         | 20.52<br>(15.03 to<br>26.34)                         | 13.99<br>(9.71 to<br>19.09)                          | 0.44<br>(0.33 to<br>0.57)                         | 1.08<br>(0.77 to<br>1.54)                         | 1.31<br>(0.99 to<br>1.79)                        | 0.84<br>(0.58 to<br>1.22)                         |
| Other chronic respiratory diseases                            | 1.28<br>(0.95 to<br>2.19)                            | 1.37<br>(0.89 to<br>2.46)                            | 1.38<br>(0.89 to<br>2.50)                            | 1.45<br>(0.91 to<br>2.66)                            | 0.05<br>(0.04 to<br>0.09)                         | 0.08<br>(0.06 to<br>0.15)                         | 0.09<br>(0.06 to<br>0.15)                        | 0.08<br>(0.05 to<br>0.15)                         |
| <b>Cirrhosis and other chronic liver diseases</b>             | <b>234.98</b><br><b>(207.60 to</b><br><b>267.00)</b> | <b>156.09</b><br><b>(130.44 to</b><br><b>186.12)</b> | <b>128.77</b><br><b>(108.70 to</b><br><b>150.71)</b> | <b>186.53</b><br><b>(156.48 to</b><br><b>222.28)</b> | <b>8.27</b><br><b>(7.36 to</b><br><b>9.28)</b>    | <b>6.76</b><br><b>(5.83 to</b><br><b>7.86)</b>    | <b>5.73</b><br><b>(4.99 to</b><br><b>6.54)</b>   | <b>7.82</b><br><b>(6.74 to</b><br><b>9.08)</b>    |
| Cirrhosis and other chronic liver diseases due to hepatitis B | 40.49<br>(32.13 to<br>50.68)                         | 25.58<br>(19.49 to<br>33.77)                         | 23.73<br>(18.18 to<br>30.93)                         | 27.70<br>(20.53 to<br>36.64)                         | 1.39<br>(1.12 to<br>1.75)                         | 1.07<br>(0.85 to<br>1.36)                         | 1.02<br>(0.80 to<br>1.28)                        | 1.13<br>(0.89 to<br>1.44)                         |
| Cirrhosis and other chronic liver diseases due to hepatitis C | 60.18<br>(42.68 to<br>81.38)                         | 39.53<br>(27.50 to<br>54.85)                         | 36.34<br>(25.78 to<br>49.25)                         | 43.25<br>(29.61 to<br>60.36)                         | 2.08<br>(1.49 to<br>2.80)                         | 1.64<br>(1.14 to<br>2.20)                         | 1.53<br>(1.11 to<br>2.02)                        | 1.74<br>(1.22 to<br>2.37)                         |

|                                                                |                                                      |                                                      |                                                      |                                                      |                                                 |                                                  |                                                  |                                                  |
|----------------------------------------------------------------|------------------------------------------------------|------------------------------------------------------|------------------------------------------------------|------------------------------------------------------|-------------------------------------------------|--------------------------------------------------|--------------------------------------------------|--------------------------------------------------|
|                                                                | 88.06<br>(67.37 to<br>109.32)                        | 61.73<br>(46.52 to<br>79.78)                         | 41.56<br>(30.93 to<br>53.23)                         | 83.82<br>(63.49 to<br>105.35)                        | 3.14<br>(2.42 to<br>3.86)                       | 2.69<br>(2.06 to<br>3.36)                        | 1.89<br>(1.46 to<br>2.36)                        | 3.51<br>(2.75 to<br>4.33)                        |
| Cirrhosis and other chronic liver diseases due to alcohol use  |                                                      |                                                      |                                                      |                                                      |                                                 |                                                  |                                                  |                                                  |
|                                                                | 46.24<br>(38.32 to<br>55.49)                         | 29.26<br>(22.96 to<br>36.92)                         | 27.14<br>(21.57 to<br>33.69)                         | 31.77<br>(24.67 to<br>40.69)                         | 1.66<br>(1.38 to<br>1.97)                       | 1.36<br>(1.09 to<br>1.66)                        | 1.29<br>(1.06 to<br>1.55)                        | 1.43<br>(1.14 to<br>1.76)                        |
| Cirrhosis and other chronic liver diseases due to other causes |                                                      |                                                      |                                                      |                                                      |                                                 |                                                  |                                                  |                                                  |
| <b>Digestive diseases</b>                                      | <b>163.43</b><br><b>(139.36 to</b><br><b>206.00)</b> | <b>148.03</b><br><b>(116.19 to</b><br><b>197.62)</b> | <b>134.98</b><br><b>(108.40 to</b><br><b>176.59)</b> | <b>162.96</b><br><b>(125.45 to</b><br><b>226.81)</b> | <b>9.17</b><br><b>(7.91 to</b><br><b>11.04)</b> | <b>11.73</b><br><b>(9.58 to</b><br><b>15.00)</b> | <b>11.28</b><br><b>(9.35 to</b><br><b>14.07)</b> | <b>12.18</b><br><b>(9.67 to</b><br><b>15.73)</b> |
| Peptic ulcer disease                                           | 37.61<br>(31.54 to<br>47.47)                         | 14.32<br>(10.53 to<br>19.55)                         | 12.20<br>(9.26 to<br>16.05)                          | 17.88<br>(13.02 to<br>24.47)                         | 2.11<br>(1.80 to<br>2.60)                       | 1.19<br>(0.90 to<br>1.58)                        | 1.05<br>(0.82 to<br>1.32)                        | 1.39<br>(1.04 to<br>1.86)                        |

| Poland                                     |                              |                              |                              |                              |                           |                           |                           |                           |
|--------------------------------------------|------------------------------|------------------------------|------------------------------|------------------------------|---------------------------|---------------------------|---------------------------|---------------------------|
| Cause                                      | YLLs (in 1000s)              |                              |                              |                              | Deaths (in 1000s)         |                           |                           |                           |
|                                            | 2016                         | 2040 Forecast                | 2040 Better Scenario         | 2040 Worse Scenario          | 2016                      | 2040 Forecast             | 2040 Better Scenario      | 2040 Worse Scenario       |
| Gastritis and duodenitis                   | 3.37<br>(2.64 to 5.00)       | 2.66<br>(1.90 to 4.11)       | 2.45<br>(1.80 to 3.83)       | 2.88<br>(2.10 to 4.47)       | 0.17<br>(0.14 to 0.28)    | 0.20<br>(0.14 to 0.34)    | 0.19<br>(0.14 to 0.32)    | 0.21<br>(0.15 to 0.34)    |
| Appendicitis                               | 2.25<br>(1.63 to 4.53)       | 1.64<br>(1.08 to 3.27)       | 1.44<br>(0.97 to 2.96)       | 1.88<br>(1.24 to 3.90)       | 0.12<br>(0.09 to 0.23)    | 0.12<br>(0.08 to 0.24)    | 0.11<br>(0.08 to 0.22)    | 0.13<br>(0.09 to 0.27)    |
| Paralytic ileus and intestinal obstruction | 21.29<br>(17.66 to 29.74)    | 28.65<br>(23.55 to 38.35)    | 29.82<br>(24.51 to 39.95)    | 26.86<br>(21.89 to 36.21)    | 1.36<br>(1.12 to 1.76)    | 2.50<br>(2.01 to 3.21)    | 2.69<br>(2.19 to 3.42)    | 2.25<br>(1.80 to 2.93)    |
| Inguinal, femoral, and abdominal hernia    | 4.65<br>(3.40 to 8.66)       | 4.00<br>(2.91 to 6.93)       | 3.89<br>(2.88 to 6.64)       | 4.06<br>(2.94 to 7.24)       | 0.34<br>(0.27 to 0.58)    | 0.39<br>(0.29 to 0.63)    | 0.39<br>(0.29 to 0.63)    | 0.38<br>(0.28 to 0.63)    |
| Inflammatory bowel disease                 | 6.35<br>(4.35 to 7.79)       | 6.49<br>(4.22 to 8.19)       | 6.61<br>(4.22 to 8.39)       | 6.27<br>(4.17 to 7.82)       | 0.34<br>(0.21 to 0.42)    | 0.46<br>(0.28 to 0.59)    | 0.49<br>(0.32 to 0.62)    | 0.43<br>(0.27 to 0.54)    |
| Vascular intestinal disorders              | 20.79<br>(16.77 to 26.48)    | 27.79<br>(22.15 to 35.01)    | 27.68<br>(22.06 to 34.93)    | 27.48<br>(22.00 to 35.18)    | 1.46<br>(1.20 to 1.81)    | 2.51<br>(1.99 to 3.14)    | 2.58<br>(2.07 to 3.21)    | 2.39<br>(1.89 to 2.99)    |
| Gallbladder and biliary diseases           | 10.12<br>(8.55 to 12.54)     | 13.60<br>(6.76 to 25.71)     | 11.49<br>(6.02 to 21.36)     | 17.68<br>(8.69 to 32.97)     | 0.81<br>(0.69 to 0.96)    | 1.40<br>(0.70 to 2.71)    | 1.23<br>(0.64 to 2.43)    | 1.73<br>(0.85 to 3.30)    |
| Pancreatitis                               | 47.73<br>(36.07 to 58.47)    | 38.54<br>(19.69 to 72.52)    | 29.13<br>(15.64 to 54.16)    | 47.67<br>(23.98 to 88.83)    | 1.90<br>(1.45 to 2.28)    | 2.07<br>(1.14 to 3.71)    | 1.64<br>(0.96 to 2.83)    | 2.45<br>(1.32 to 4.39)    |
| Other digestive diseases                   | 9.27<br>(7.03 to 11.40)      | 10.35<br>(7.85 to 12.86)     | 10.27<br>(7.80 to 12.58)     | 10.31<br>(7.82 to 12.72)     | 0.57<br>(0.44 to 0.69)    | 0.88<br>(0.67 to 1.07)    | 0.90<br>(0.70 to 1.10)    | 0.83<br>(0.63 to 1.03)    |
| Neurological disorders                     | 265.41<br>(231.41 to 304.68) | 468.49<br>(371.20 to 599.15) | 475.96<br>(380.73 to 592.55) | 467.85<br>(356.61 to 618.71) | 24.24<br>(20.64 to 28.54) | 54.41<br>(41.82 to 71.11) | 57.84<br>(44.66 to 72.64) | 53.33<br>(38.48 to 71.87) |
| Alzheimer's disease and other dementias    | 175.46<br>(145.38 to 212.86) | 349.79<br>(253.67 to 475.23) | 354.72<br>(263.09 to 467.46) | 353.99<br>(244.09 to 502.91) | 19.49<br>(15.94 to 23.77) | 45.74<br>(33.02 to 61.89) | 47.69<br>(35.57 to 62.57) | 44.56<br>(30.76 to 63.13) |
| Parkinson's disease                        | 33.47<br>(25.17 to 43.47)    | 64.29<br>(48.44 to 83.62)    | 70.23<br>(52.99 to 90.66)    | 56.48<br>(41.40 to 73.59)    | 2.94<br>(2.20 to 3.90)    | 6.56<br>(4.82 to 8.62)    | 7.32<br>(5.49 to 9.55)    | 5.62<br>(4.06 to 7.43)    |
| Epilepsy                                   | 23.75<br>(20.45 to 27.41)    | 19.67<br>(12.66 to 30.51)    | 16.16<br>(10.65 to 24.73)    | 22.76<br>(14.27 to 35.64)    | 0.69<br>(0.60 to 0.79)    | 0.71<br>(0.48 to 1.07)    | 0.60<br>(0.42 to 0.89)    | 0.79<br>(0.52 to 1.20)    |
| Multiple sclerosis                         | 12.57<br>(9.90 to 16.58)     | 12.77<br>(9.12 to 17.20)     | 12.64<br>(9.21 to 16.91)     | 13.16<br>(9.29 to 18.02)     | 0.42<br>(0.33 to 0.55)    | 0.47<br>(0.34 to 0.65)    | 0.48<br>(0.35 to 0.65)    | 0.48<br>(0.34 to 0.66)    |
| Motor neuron disease                       | 8.77<br>(7.75 to 9.86)       | 10.32<br>(8.77 to 12.07)     | 10.38<br>(8.79 to 12.17)     | 10.15<br>(8.67 to 11.84)     | 0.35<br>(0.31 to 0.39)    | 0.45<br>(0.39 to 0.53)    | 0.46<br>(0.39 to 0.54)    | 0.44<br>(0.38 to 0.51)    |
| Other neurological disorders               | 11.39<br>(10.11 to 12.80)    | 11.64<br>(10.23 to 13.31)    | 11.83<br>(10.35 to 13.58)    | 11.30<br>(9.92 to 12.90)     | 0.36<br>(0.32 to 0.40)    | 0.46<br>(0.41 to 0.52)    | 0.48<br>(0.43 to 0.54)    | 0.43<br>(0.39 to 0.49)    |
| Mental disorders                           | 161.23<br>(140.40 to 185.83) | 174.19<br>(143.08 to 209.25) | 174.80<br>(145.45 to 210.12) | 168.36<br>(138.42 to 203.34) | 4.54<br>(3.97 to 5.22)    | 5.57<br>(4.65 to 6.60)    | 5.70<br>(4.81 to 6.76)    | 5.27<br>(4.39 to 6.33)    |
| Alcohol use disorders                      | 142.56<br>(123.65 to 164.88) | 122.43<br>(95.89 to 154.38)  | 115.45<br>(89.86 to 144.94)  | 124.52<br>(97.92 to 155.39)  | 4.04<br>(3.51 to 4.68)    | 3.75<br>(2.98 to 4.68)    | 3.55<br>(2.78 to 4.41)    | 3.79<br>(3.00 to 4.68)    |
| Drug use disorders                         | 18.41<br>(15.27 to 21.64)    | 51.51<br>(41.23 to 63.26)    | 59.08<br>(48.89 to 71.42)    | 43.62<br>(34.35 to 53.77)    | 0.50<br>(0.42 to 0.58)    | 1.82<br>(1.48 to 2.21)    | 2.14<br>(1.81 to 2.53)    | 1.48<br>(1.19 to 1.80)    |
| Opioid use disorders                       | 10.25<br>(8.31 to 14.01)     | 14.14<br>(10.40 to 22.47)    | 14.76<br>(10.74 to 23.86)    | 13.39<br>(9.85 to 21.37)     | 0.25<br>(0.20 to 0.34)    | 0.41<br>(0.31 to 0.67)    | 0.44<br>(0.33 to 0.72)    | 0.38<br>(0.29 to 0.61)    |

|                           |                           |                              |                              |                              |                           |                           |                           |                           |
|---------------------------|---------------------------|------------------------------|------------------------------|------------------------------|---------------------------|---------------------------|---------------------------|---------------------------|
|                           | 0.30<br>(0.19 to<br>0.39) | 1.16<br>(0.80 to<br>1.59)    | 1.32<br>(0.92 to<br>1.77)    | 1.00<br>(0.66 to<br>1.37)    | 0.01<br>(0.01 to<br>0.01) | 0.04<br>(0.03 to<br>0.05) | 0.04<br>(0.03 to<br>0.06) | 0.03<br>(0.02 to<br>0.04) |
| Cocaine use disorders     |                           |                              |                              |                              |                           |                           |                           |                           |
|                           | 0.95<br>(0.64 to<br>1.35) | 6.70<br>(4.61 to<br>10.01)   | 7.98<br>(5.55 to<br>11.41)   | 5.40<br>(3.48 to<br>7.96)    | 0.02<br>(0.01 to<br>0.03) | 0.15<br>(0.10 to<br>0.22) | 0.18<br>(0.13 to<br>0.26) | 0.12<br>(0.08 to<br>0.17) |
| Amphetamine use disorders |                           |                              |                              |                              |                           |                           |                           |                           |
|                           | 6.91<br>(4.67 to<br>8.72) | 29.50<br>(21.27 to<br>38.99) | 35.02<br>(26.61 to<br>44.20) | 23.82<br>(17.10 to<br>31.58) | 0.22<br>(0.16 to<br>0.27) | 1.22<br>(0.92 to<br>1.55) | 1.48<br>(1.17 to<br>1.79) | 0.95<br>(0.69 to<br>1.21) |
| Other drug use disorders  |                           |                              |                              |                              |                           |                           |                           |                           |
|                           | 0.26<br>(0.19 to<br>0.36) | 0.24<br>(0.15 to<br>0.37)    | 0.26<br>(0.16 to<br>0.40)    | 0.22<br>(0.14 to<br>0.33)    | 0.00<br>(0.00 to<br>0.01) | 0.00<br>(0.00 to<br>0.01) | 0.00<br>(0.00 to<br>0.01) | 0.00<br>(0.00 to<br>0.01) |
| Eating disorders          |                           |                              |                              |                              |                           |                           |                           |                           |

| Poland                                                     |                                     |                                     |                                     |                                     |                                  |                                  |                                  |                                  |
|------------------------------------------------------------|-------------------------------------|-------------------------------------|-------------------------------------|-------------------------------------|----------------------------------|----------------------------------|----------------------------------|----------------------------------|
| Cause                                                      | YLLs (in 1000s)                     |                                     |                                     |                                     | Deaths (in 1000s)                |                                  |                                  |                                  |
|                                                            | 2016                                | 2040 Forecast                       | 2040 Better Scenario                | 2040 Worse Scenario                 | 2016                             | 2040 Forecast                    | 2040 Better Scenario             | 2040 Worse Scenario              |
| <b>Diabetes, urogenital, blood, and endocrine diseases</b> | <b>224.25</b><br>(202.98 to 246.07) | <b>249.11</b><br>(188.44 to 334.20) | <b>213.21</b><br>(163.96 to 282.41) | <b>299.89</b><br>(220.59 to 406.47) | <b>13.77</b><br>(12.56 to 14.98) | <b>20.18</b><br>(15.46 to 26.91) | <b>17.87</b><br>(13.85 to 23.26) | <b>23.20</b><br>(17.42 to 31.21) |
| Diabetes mellitus                                          | 113.47<br>(101.44 to 126.06)        | 91.83<br>(55.39 to 143.85)          | 74.96<br>(47.58 to 111.21)          | 117.41<br>(70.01 to 183.74)         | 6.98<br>(6.29 to 7.69)           | 7.25<br>(4.67 to 10.86)          | 6.19<br>(4.15 to 9.10)           | 8.72<br>(5.54 to 13.09)          |
| Acute glomerulonephritis                                   | 0.33<br>(0.29 to 0.38)              | 0.21<br>(0.15 to 0.29)              | 0.20<br>(0.14 to 0.27)              | 0.23<br>(0.17 to 0.31)              | 0.01<br>(0.01 to 0.01)           | 0.01<br>(0.01 to 0.01)           | 0.01<br>(0.01 to 0.01)           | 0.01<br>(0.01 to 0.01)           |
| Chronic kidney disease                                     | 73.52<br>(66.49 to 81.42)           | 112.58<br>(66.12 to 186.80)         | 94.45<br>(56.97 to 152.81)          | 137.24<br>(77.11 to 231.61)         | 4.73<br>(4.30 to 5.20)           | 9.57<br>(5.44 to 15.69)          | 8.30<br>(4.95 to 13.68)          | 11.19<br>(6.19 to 19.05)         |
| Chronic kidney disease due to diabetes mellitus            | 33.63<br>(30.20 to 37.41)           | 51.10<br>(29.43 to 86.65)           | 42.56<br>(25.38 to 70.18)           | 62.74<br>(34.50 to 107.74)          | 1.93<br>(1.74 to 2.14)           | 3.80<br>(2.16 to 6.44)           | 3.26<br>(1.93 to 5.45)           | 4.48<br>(2.45 to 7.67)           |
| Chronic kidney disease due to hypertension                 | 9.21<br>(7.98 to 10.68)             | 17.96<br>(10.12 to 30.79)           | 15.78<br>(9.21 to 26.48)            | 20.67<br>(11.12 to 36.75)           | 0.88<br>(0.76 to 1.04)           | 2.13<br>(1.17 to 3.63)           | 1.93<br>(1.11 to 3.24)           | 2.36<br>(1.24 to 4.11)           |
| Chronic kidney disease due to glomerulonephritis           | 11.91<br>(10.65 to 13.41)           | 16.10<br>(9.67 to 27.18)            | 13.20<br>(8.16 to 21.83)            | 20.23<br>(11.37 to 34.13)           | 0.69<br>(0.62 to 0.79)           | 1.27<br>(0.73 to 2.16)           | 1.07<br>(0.63 to 1.81)           | 1.55<br>(0.84 to 2.74)           |
| Chronic kidney disease due to other and unspecified causes | 18.77<br>(16.79 to 20.95)           | 27.42<br>(15.83 to 45.41)           | 22.90<br>(13.65 to 37.31)           | 33.61<br>(18.32 to 56.92)           | 1.22<br>(1.08 to 1.37)           | 2.37<br>(1.33 to 4.00)           | 2.04<br>(1.17 to 3.39)           | 2.80<br>(1.49 to 4.85)           |
| Urinary diseases and male infertility                      | 15.08<br>(13.61 to 16.85)           | 19.96<br>(16.55 to 24.04)           | 19.10<br>(15.98 to 22.95)           | 20.69<br>(17.15 to 24.89)           | 1.09<br>(0.97 to 1.21)           | 1.91<br>(1.55 to 2.36)           | 1.90<br>(1.55 to 2.32)           | 1.90<br>(1.53 to 2.32)           |
| Urinary tract infections                                   | 13.95<br>(12.65 to 15.38)           | 18.68<br>(15.44 to 22.42)           | 17.94<br>(14.96 to 21.58)           | 19.28<br>(16.05 to 23.14)           | 1.02<br>(0.91 to 1.13)           | 1.81<br>(1.45 to 2.24)           | 1.80<br>(1.45 to 2.22)           | 1.79<br>(1.42 to 2.20)           |
| Urolithiasis                                               | 0.69<br>(0.30 to 1.70)              | 0.85<br>(0.33 to 2.33)              | 0.77<br>(0.30 to 2.21)              | 0.95<br>(0.38 to 2.50)              | 0.04<br>(0.02 to 0.12)           | 0.07<br>(0.02 to 0.22)           | 0.06<br>(0.02 to 0.21)           | 0.07<br>(0.03 to 0.22)           |
| Other urinary diseases                                     | 0.44<br>(0.27 to 0.59)              | 0.43<br>(0.26 to 0.63)              | 0.39<br>(0.24 to 0.57)              | 0.46<br>(0.28 to 0.68)              | 0.03<br>(0.02 to 0.04)           | 0.04<br>(0.03 to 0.06)           | 0.04<br>(0.02 to 0.06)           | 0.04<br>(0.03 to 0.06)           |
| Gynecological diseases                                     | 0.11<br>(0.08 to 0.22)              | 0.06<br>(0.04 to 0.12)              | 0.05<br>(0.03 to 0.10)              | 0.08<br>(0.05 to 0.15)              | 0.00<br>(0.00 to 0.01)           | 0.00<br>(0.00 to 0.01)           | 0.00<br>(0.00 to 0.01)           | 0.00<br>(0.00 to 0.01)           |
| Uterine fibroids                                           | 0.05<br>(0.04 to 0.10)              | 0.02<br>(0.01 to 0.04)              | 0.02<br>(0.01 to 0.03)              | 0.03<br>(0.02 to 0.05)              | 0.00<br>(0.00 to 0.00)           | 0.00<br>(0.00 to 0.00)           | 0.00<br>(0.00 to 0.00)           | 0.00<br>(0.00 to 0.00)           |
| Polycystic ovarian syndrome                                | 0.02<br>(0.01 to 0.04)              | 0.00<br>(0.00 to 0.01)              | 0.00<br>(0.00 to 0.01)              | 0.01<br>(0.00 to 0.01)              | 0.00<br>(0.00 to 0.00)           | 0.00<br>(0.00 to 0.00)           | 0.00<br>(0.00 to 0.00)           | 0.00<br>(0.00 to 0.00)           |
| Endometriosis                                              | 0.00<br>(0.00 to 0.00)              | 0.00<br>(0.00 to 0.00)              | 0.00<br>(0.00 to 0.00)              | 0.00<br>(0.00 to 0.00)              | 0.00<br>(0.00 to 0.00)           | 0.00<br>(0.00 to 0.00)           | 0.00<br>(0.00 to 0.00)           | 0.00<br>(0.00 to 0.00)           |
| Genital prolapse                                           | 0.00<br>(0.00 to 0.00)              | 0.00<br>(0.00 to 0.00)              | 0.00<br>(0.00 to 0.00)              | 0.00<br>(0.00 to 0.00)              | 0.00<br>(0.00 to 0.00)           | 0.00<br>(0.00 to 0.00)           | 0.00<br>(0.00 to 0.00)           | 0.00<br>(0.00 to 0.00)           |
| Other gynecological diseases                               | 0.04<br>(0.02 to 0.08)              | 0.03<br>(0.02 to 0.07)              | 0.03<br>(0.01 to 0.05)              | 0.04<br>(0.02 to 0.09)              | 0.00<br>(0.00 to 0.00)           | 0.00<br>(0.00 to 0.01)           | 0.00<br>(0.00 to 0.00)           | 0.00<br>(0.00 to 0.01)           |
| Hemoglobinopathies and hemolytic anemias                   | 9.34<br>(7.58 to 11.14)             | 6.18<br>(4.64 to 7.63)              | 5.66<br>(4.40 to 6.83)              | 6.77<br>(5.25 to 8.29)              | 0.52<br>(0.40 to 0.62)           | 0.53<br>(0.39 to 0.65)           | 0.51<br>(0.37 to 0.62)           | 0.55<br>(0.41 to 0.68)           |
| Thalassemias                                               | 0.26<br>(0.19 to 0.36)              | 0.07<br>(0.04 to 0.10)              | 0.06<br>(0.04 to 0.09)              | 0.07<br>(0.04 to 0.10)              | 0.00<br>(0.00 to 0.00)           | 0.00<br>(0.00 to 0.00)           | 0.00<br>(0.00 to 0.00)           | 0.00<br>(0.00 to 0.00)           |

|                                                   |                              |                              |                              |                              |                           |                           |                           |                           |
|---------------------------------------------------|------------------------------|------------------------------|------------------------------|------------------------------|---------------------------|---------------------------|---------------------------|---------------------------|
|                                                   | 0.84<br>(0.68 to<br>1.11)    | 0.39<br>(0.28 to<br>0.55)    | 0.34<br>(0.25 to<br>0.48)    | 0.45<br>(0.33 to<br>0.63)    | 0.02<br>(0.02 to<br>0.03) | 0.01<br>(0.01 to<br>0.02) | 0.01<br>(0.01 to<br>0.01) | 0.01<br>(0.01 to<br>0.02) |
| Sickle cell disorders                             |                              |                              |                              |                              |                           |                           |                           |                           |
|                                                   | 2.02<br>(1.55 to<br>2.53)    | 1.23<br>(0.86 to<br>1.65)    | 1.05<br>(0.77 to<br>1.40)    | 1.47<br>(1.05 to<br>2.00)    | 0.06<br>(0.05 to<br>0.08) | 0.05<br>(0.04 to<br>0.07) | 0.05<br>(0.03 to<br>0.06) | 0.06<br>(0.04 to<br>0.08) |
| G6PD deficiency                                   |                              |                              |                              |                              |                           |                           |                           |                           |
|                                                   | 6.22<br>(4.86 to<br>7.46)    | 4.49<br>(3.28 to<br>5.51)    | 4.21<br>(3.11 to<br>5.15)    | 4.78<br>(3.55 to<br>5.81)    | 0.44<br>(0.33 to<br>0.52) | 0.47<br>(0.34 to<br>0.58) | 0.45<br>(0.33 to<br>0.55) | 0.48<br>(0.35 to<br>0.59) |
| Other hemoglobinopathies and hemolytic anemias    |                              |                              |                              |                              |                           |                           |                           |                           |
|                                                   | 12.38<br>(10.45 to<br>16.72) | 18.28<br>(15.45 to<br>23.56) | 18.79<br>(15.85 to<br>24.01) | 17.47<br>(14.79 to<br>22.77) | 0.44<br>(0.38 to<br>0.58) | 0.90<br>(0.76 to<br>1.13) | 0.96<br>(0.80 to<br>1.20) | 0.83<br>(0.69 to<br>1.05) |
| Endocrine, metabolic, blood, and immune disorders |                              |                              |                              |                              |                           |                           |                           |                           |

| Poland                                        |                                   |                                  |                                  |                                  |                               |                               |                               |                               |
|-----------------------------------------------|-----------------------------------|----------------------------------|----------------------------------|----------------------------------|-------------------------------|-------------------------------|-------------------------------|-------------------------------|
| Cause                                         | YLLs (in 1000s)                   |                                  |                                  |                                  | Deaths (in 1000s)             |                               |                               |                               |
|                                               | 2016                              | 2040 Forecast                    | 2040 Better Scenario             | 2040 Worse Scenario              | 2016                          | 2040 Forecast                 | 2040 Better Scenario          | 2040 Worse Scenario           |
| <b>Musculoskeletal disorders</b>              | <b>12.18</b><br>(9.24 to 14.12)   | <b>10.47</b><br>(7.90 to 13.25)  | <b>9.34</b><br>(7.25 to 11.57)   | <b>12.08</b><br>(8.85 to 15.69)  | <b>0.56</b><br>(0.42 to 0.65) | <b>0.61</b><br>(0.47 to 0.76) | <b>0.55</b><br>(0.44 to 0.67) | <b>0.68</b><br>(0.50 to 0.88) |
| Rheumatoid arthritis                          | 5.84<br>(4.53 to 8.49)            | 5.23<br>(3.38 to 7.82)           | 4.27<br>(2.96 to 6.37)           | 6.67<br>(4.23 to 9.92)           | 0.31<br>(0.24 to 0.42)        | 0.34<br>(0.23 to 0.49)        | 0.28<br>(0.20 to 0.41)        | 0.42<br>(0.27 to 0.60)        |
| Other musculoskeletal disorders               | 6.35<br>(3.55 to 7.67)            | 5.24<br>(2.95 to 6.56)           | 5.07<br>(2.94 to 6.30)           | 5.41<br>(2.88 to 6.87)           | 0.25<br>(0.13 to 0.31)        | 0.27<br>(0.15 to 0.35)        | 0.27<br>(0.16 to 0.33)        | 0.27<br>(0.14 to 0.34)        |
| <b>Other non-communicable diseases</b>        | <b>68.38</b><br>(45.03 to 100.43) | <b>25.78</b><br>(17.49 to 37.81) | <b>22.03</b><br>(15.27 to 31.95) | <b>30.44</b><br>(20.01 to 45.08) | <b>1.03</b><br>(0.74 to 1.42) | <b>0.77</b><br>(0.55 to 1.18) | <b>0.73</b><br>(0.52 to 1.14) | <b>0.81</b><br>(0.59 to 1.23) |
| Congenital birth defects                      | 61.80<br>(39.21 to 92.18)         | 18.21<br>(10.79 to 28.96)        | 14.75<br>(9.01 to 22.88)         | 22.62<br>(13.05 to 36.80)        | 0.81<br>(0.54 to 1.16)        | 0.27<br>(0.17 to 0.40)        | 0.22<br>(0.15 to 0.32)        | 0.32<br>(0.20 to 0.50)        |
| Neural tube defects                           | 1.66<br>(0.93 to 2.75)            | 0.26<br>(0.10 to 0.56)           | 0.19<br>(0.08 to 0.42)           | 0.35<br>(0.14 to 0.76)           | 0.02<br>(0.01 to 0.03)        | 0.00<br>(0.00 to 0.01)        | 0.00<br>(0.00 to 0.01)        | 0.00<br>(0.00 to 0.01)        |
| Congenital heart anomalies                    | 27.85<br>(18.25 to 41.20)         | 5.45<br>(2.88 to 9.22)           | 3.98<br>(2.24 to 6.44)           | 7.56<br>(4.13 to 12.74)          | 0.37<br>(0.25 to 0.53)        | 0.08<br>(0.04 to 0.13)        | 0.06<br>(0.04 to 0.09)        | 0.11<br>(0.06 to 0.17)        |
| Orofacial clefts                              | 0.01<br>(0.01 to 0.03)            | 0.00<br>(0.00 to 0.01)           | 0.00<br>(0.00 to 0.00)           | 0.00<br>(0.00 to 0.01)           | 0.00<br>(0.00 to 0.00)        | 0.00<br>(0.00 to 0.00)        | 0.00<br>(0.00 to 0.00)        | 0.00<br>(0.00 to 0.00)        |
| Down syndrome                                 | 1.83<br>(1.52 to 2.54)            | 2.09<br>(1.56 to 2.84)           | 2.12<br>(1.58 to 2.89)           | 2.03<br>(1.50 to 2.74)           | 0.03<br>(0.02 to 0.05)        | 0.05<br>(0.03 to 0.06)        | 0.05<br>(0.04 to 0.06)        | 0.04<br>(0.03 to 0.06)        |
| Other chromosomal abnormalities               | 8.93<br>(4.87 to 14.52)           | 4.86<br>(2.57 to 8.50)           | 4.17<br>(2.22 to 7.17)           | 5.53<br>(2.90 to 9.90)           | 0.11<br>(0.06 to 0.17)        | 0.06<br>(0.03 to 0.11)        | 0.05<br>(0.03 to 0.09)        | 0.07<br>(0.04 to 0.12)        |
| Congenital musculoskeletal and limb anomalies | 1.17<br>(0.70 to 1.91)            | 0.29<br>(0.15 to 0.54)           | 0.22<br>(0.11 to 0.43)           | 0.38<br>(0.20 to 0.73)           | 0.01<br>(0.01 to 0.02)        | 0.00<br>(0.00 to 0.01)        | 0.00<br>(0.00 to 0.01)        | 0.00<br>(0.00 to 0.01)        |
| Urogenital congenital anomalies               | 1.59<br>(0.55 to 3.04)            | 0.44<br>(0.16 to 0.93)           | 0.35<br>(0.13 to 0.76)           | 0.54<br>(0.18 to 1.15)           | 0.02<br>(0.01 to 0.04)        | 0.01<br>(0.00 to 0.01)        | 0.01<br>(0.00 to 0.01)        | 0.01<br>(0.00 to 0.02)        |
| Digestive congenital anomalies                | 3.87<br>(1.90 to 7.21)            | 0.96<br>(0.36 to 2.10)           | 0.71<br>(0.28 to 1.58)           | 1.29<br>(0.48 to 2.76)           | 0.05<br>(0.02 to 0.09)        | 0.01<br>(0.00 to 0.03)        | 0.01<br>(0.02 to 0.02)        | 0.02<br>(0.01 to 0.03)        |
| Other congenital birth defects                | 14.89<br>(8.97 to 23.16)          | 3.86<br>(1.95 to 6.74)           | 2.99<br>(1.57 to 5.06)           | 4.94<br>(2.60 to 8.58)           | 0.19<br>(0.12 to 0.28)        | 0.05<br>(0.03 to 0.09)        | 0.04<br>(0.02 to 0.07)        | 0.07<br>(0.04 to 0.11)        |
| Skin and subcutaneous diseases                | 3.64<br>(2.26 to 6.26)            | 6.92<br>(4.28 to 11.99)          | 6.74<br>(4.28 to 11.79)          | 7.05<br>(4.44 to 12.15)          | 0.19<br>(0.11 to 0.34)        | 0.49<br>(0.30 to 0.92)        | 0.50<br>(0.31 to 0.94)        | 0.48<br>(0.30 to 0.88)        |
| Cellulitis                                    | 0.41<br>(0.23 to 0.87)            | 0.80<br>(0.44 to 1.71)           | 0.80<br>(0.44 to 1.72)           | 0.79<br>(0.43 to 1.67)           | 0.02<br>(0.01 to 0.04)        | 0.05<br>(0.03 to 0.12)        | 0.05<br>(0.03 to 0.12)        | 0.05<br>(0.03 to 0.11)        |
| Pyoderma                                      | 2.80<br>(1.70 to 4.82)            | 5.68<br>(3.47 to 9.97)           | 5.53<br>(3.41 to 9.66)           | 5.80<br>(3.63 to 10.13)          | 0.15<br>(0.09 to 0.27)        | 0.41<br>(0.24 to 0.74)        | 0.41<br>(0.25 to 0.76)        | 0.40<br>(0.24 to 0.72)        |
| Decubitus ulcer                               | 0.20<br>(0.11 to 0.38)            | 0.21<br>(0.10 to 0.39)           | 0.19<br>(0.10 to 0.37)           | 0.22<br>(0.11 to 0.43)           | 0.01<br>(0.01 to 0.02)        | 0.02<br>(0.01 to 0.04)        | 0.02<br>(0.01 to 0.04)        | 0.02<br>(0.01 to 0.04)        |
| Other skin and subcutaneous diseases          | 0.22<br>(0.12 to 0.39)            | 0.23<br>(0.12 to 0.42)           | 0.22<br>(0.12 to 0.40)           | 0.24<br>(0.13 to 0.44)           | 0.01<br>(0.01 to 0.02)        | 0.02<br>(0.01 to 0.03)        | 0.02<br>(0.01 to 0.03)        | 0.01<br>(0.01 to 0.03)        |
| Sudden infant death syndrome                  | 2.94<br>(1.55 to 4.95)            | 0.65<br>(0.28 to 1.25)           | 0.55<br>(0.23 to 1.02)           | 0.77<br>(0.33 to 1.46)           | 0.03<br>(0.02 to 0.06)        | 0.01<br>(0.00 to 0.01)        | 0.01<br>(0.00 to 0.01)        | 0.01<br>(0.00 to 0.02)        |



|                          |                                 |                                 |                                 |                                 |                              |                              |                              |                              |
|--------------------------|---------------------------------|---------------------------------|---------------------------------|---------------------------------|------------------------------|------------------------------|------------------------------|------------------------------|
| Injuries                 | 722.64<br>(633.27 to<br>810.08) | 410.81<br>(319.51 to<br>542.31) | 360.27<br>(283.31 to<br>455.16) | 538.68<br>(408.70 to<br>713.06) | 21.97<br>(19.21 to<br>24.52) | 18.50<br>(15.30 to<br>22.57) | 17.16<br>(14.41 to<br>20.23) | 21.63<br>(17.45 to<br>26.72) |
| Transport injuries       | 193.62<br>(171.07 to<br>222.08) | 65.61<br>(42.29 to<br>101.45)   | 57.45<br>(38.93 to<br>86.34)    | 145.51<br>(93.59 to<br>222.20)  | 4.85<br>(4.32 to<br>5.50)    | 2.19<br>(1.47 to<br>3.22)    | 1.95<br>(1.37 to<br>2.78)    | 4.31<br>(2.88 to<br>6.40)    |
| Road injuries            | 173.83<br>(154.01 to<br>199.16) | 54.24<br>(35.21 to<br>82.47)    | 48.66<br>(33.30 to<br>72.21)    | 130.79<br>(85.09 to<br>198.43)  | 4.36<br>(3.89 to<br>4.94)    | 1.85<br>(1.26 to<br>2.68)    | 1.68<br>(1.20 to<br>2.37)    | 3.88<br>(2.61 to<br>5.75)    |
| Pedestrian road injuries | 48.17<br>(39.30 to<br>57.88)    | 10.57<br>(6.85 to<br>16.48)     | 8.27<br>(5.84 to<br>11.83)      | 25.57<br>(16.31 to<br>40.03)    | 1.48<br>(1.24 to<br>1.75)    | 0.47<br>(0.32 to<br>0.70)    | 0.38<br>(0.28 to<br>0.54)    | 1.02<br>(0.67 to<br>1.48)    |

| Poland                                          |                                                      |                                                      |                                                      |                                                      |                                                 |                                                  |                                                  |                                                  |
|-------------------------------------------------|------------------------------------------------------|------------------------------------------------------|------------------------------------------------------|------------------------------------------------------|-------------------------------------------------|--------------------------------------------------|--------------------------------------------------|--------------------------------------------------|
| Cause                                           | YLLs (in 1000s)                                      |                                                      |                                                      |                                                      | Deaths (in 1000s)                               |                                                  |                                                  |                                                  |
|                                                 | 2016                                                 | 2040 Forecast                                        | 2040 Better Scenario                                 | 2040 Worse Scenario                                  | 2016                                            | 2040 Forecast                                    | 2040 Better Scenario                             | 2040 Worse Scenario                              |
| Cyclist road injuries                           | 13.15<br>(10.79 to<br>16.54)                         | 8.36<br>(5.11 to<br>13.77)                           | 7.83<br>(4.97 to<br>12.45)                           | 15.39<br>(9.13 to<br>25.74)                          | 0.40<br>(0.33 to<br>0.49)                       | 0.37<br>(0.23 to<br>0.59)                        | 0.36<br>(0.23 to<br>0.55)                        | 0.58<br>(0.35 to<br>0.93)                        |
| Motorcyclist road injuries                      | 17.48<br>(13.86 to<br>21.97)                         | 8.30<br>(4.92 to<br>14.01)                           | 7.62<br>(4.70 to<br>12.47)                           | 14.37<br>(8.25 to<br>24.41)                          | 0.34<br>(0.27 to<br>0.42)                       | 0.20<br>(0.12 to<br>0.33)                        | 0.18<br>(0.12 to<br>0.29)                        | 0.31<br>(0.19 to<br>0.51)                        |
| Motor vehicle road injuries                     | 94.04<br>(80.84 to<br>115.32)                        | 26.59<br>(17.77 to<br>39.91)                         | 24.54<br>(16.85 to<br>36.31)                         | 74.46<br>(48.98 to<br>112.16)                        | 2.12<br>(1.84 to<br>2.55)                       | 0.79<br>(0.55 to<br>1.17)                        | 0.74<br>(0.54 to<br>1.07)                        | 1.94<br>(1.32 to<br>2.88)                        |
| Other road injuries                             | 0.99<br>(0.65 to<br>1.25)                            | 0.42<br>(0.22 to<br>0.76)                            | 0.39<br>(0.21 to<br>0.70)                            | 0.99<br>(0.51 to<br>1.84)                            | 0.03<br>(0.02 to<br>0.04)                       | 0.02<br>(0.01 to<br>0.05)                        | 0.02<br>(0.01 to<br>0.03)                        | 0.03<br>(0.02 to<br>0.06)                        |
| Other transport injuries                        | 19.79<br>(16.66 to<br>23.89)                         | 11.38<br>(6.54 to<br>19.20)                          | 8.79<br>(5.45 to<br>14.26)                           | 14.72<br>(8.55 to<br>24.94)                          | 0.49<br>(0.41 to<br>0.59)                       | 0.34<br>(0.20 to<br>0.57)                        | 0.27<br>(0.17 to<br>0.43)                        | 0.43<br>(0.25 to<br>0.71)                        |
| <b>Unintentional injuries</b>                   | <b>237.35</b><br><b>(210.66 to</b><br><b>265.15)</b> | <b>165.55</b><br><b>(141.16 to</b><br><b>196.33)</b> | <b>155.13</b><br><b>(134.11 to</b><br><b>178.87)</b> | <b>177.35</b><br><b>(149.18 to</b><br><b>212.94)</b> | <b>9.55</b><br><b>(8.34 to</b><br><b>10.65)</b> | <b>10.74</b><br><b>(8.92 to</b><br><b>12.43)</b> | <b>10.56</b><br><b>(8.99 to</b><br><b>11.96)</b> | <b>10.81</b><br><b>(8.83 to</b><br><b>12.73)</b> |
| Falls                                           | 98.35<br>(80.03 to<br>113.85)                        | 92.90<br>(76.03 to<br>108.23)                        | 89.95<br>(75.02 to<br>103.21)                        | 95.47<br>(76.88 to<br>113.45)                        | 5.36<br>(4.37 to<br>6.09)                       | 7.82<br>(6.20 to<br>9.20)                        | 7.82<br>(6.24 to<br>9.10)                        | 7.66<br>(5.91 to<br>9.22)                        |
| Drowning                                        | 36.83<br>(32.39 to<br>42.25)                         | 17.70<br>(11.08 to<br>27.60)                         | 15.23<br>(10.00 to<br>23.33)                         | 20.61<br>(12.87 to<br>32.94)                         | 0.92<br>(0.82 to<br>1.04)                       | 0.54<br>(0.35 to<br>0.83)                        | 0.47<br>(0.32 to<br>0.71)                        | 0.61<br>(0.39 to<br>0.97)                        |
| Fire, heat, and hot substances                  | 18.46<br>(13.59 to<br>21.81)                         | 7.88<br>(5.19 to<br>12.10)                           | 6.55<br>(4.44 to<br>9.87)                            | 9.52<br>(6.11 to<br>15.41)                           | 0.63<br>(0.52 to<br>0.74)                       | 0.37<br>(0.26 to<br>0.56)                        | 0.32<br>(0.23 to<br>0.47)                        | 0.43<br>(0.29 to<br>0.67)                        |
| Poisonings                                      | 2.92<br>(2.43 to<br>3.72)                            | 0.85<br>(0.52 to<br>1.38)                            | 0.68<br>(0.43 to<br>1.05)                            | 1.08<br>(0.65 to<br>1.80)                            | 0.09<br>(0.07 to<br>0.11)                       | 0.04<br>(0.02 to<br>0.06)                        | 0.03<br>(0.02 to<br>0.05)                        | 0.04<br>(0.03 to<br>0.07)                        |
| Exposure to mechanical forces                   | 18.90<br>(15.55 to<br>22.84)                         | 9.01<br>(6.99 to<br>11.47)                           | 7.99<br>(6.36 to<br>9.89)                            | 10.36<br>(7.79 to<br>13.21)                          | 0.53<br>(0.42 to<br>0.62)                       | 0.35<br>(0.27 to<br>0.42)                        | 0.32<br>(0.25 to<br>0.38)                        | 0.38<br>(0.28 to<br>0.47)                        |
| Unintentional firearm injuries                  | 2.82<br>(2.43 to<br>3.55)                            | 1.50<br>(1.20 to<br>1.89)                            | 1.38<br>(1.12 to<br>1.72)                            | 1.65<br>(1.32 to<br>2.09)                            | 0.09<br>(0.08 to<br>0.11)                       | 0.07<br>(0.06 to<br>0.08)                        | 0.07<br>(0.06 to<br>0.08)                        | 0.07<br>(0.06 to<br>0.09)                        |
| Unintentional suffocation                       | 2.54<br>(1.84 to<br>3.19)                            | 1.11<br>(0.72 to<br>1.49)                            | 1.00<br>(0.66 to<br>1.33)                            | 1.25<br>(0.81 to<br>1.70)                            | 0.05<br>(0.04 to<br>0.07)                       | 0.03<br>(0.02 to<br>0.04)                        | 0.03<br>(0.03 to<br>0.03)                        | 0.03<br>(0.02 to<br>0.04)                        |
| Other exposure to mechanical forces             | 13.54<br>(10.51 to<br>16.75)                         | 6.40<br>(4.67 to<br>8.40)                            | 5.61<br>(4.21 to<br>7.25)                            | 7.45<br>(5.26 to<br>9.86)                            | 0.39<br>(0.29 to<br>0.47)                       | 0.25<br>(0.18 to<br>0.31)                        | 0.22<br>(0.17 to<br>0.27)                        | 0.28<br>(0.19 to<br>0.35)                        |
| Adverse effects of medical treatment            | 13.84<br>(9.06 to<br>16.88)                          | 10.62<br>(6.89 to<br>13.09)                          | 10.25<br>(6.60 to<br>12.64)                          | 10.97<br>(7.00 to<br>13.73)                          | 0.61<br>(0.38 to<br>0.75)                       | 0.63<br>(0.41 to<br>0.78)                        | 0.63<br>(0.40 to<br>0.77)                        | 0.62<br>(0.39 to<br>0.77)                        |
| Animal contact                                  | 1.73<br>(1.36 to<br>2.95)                            | 1.41<br>(1.04 to<br>2.43)                            | 1.29<br>(0.97 to<br>2.21)                            | 1.54<br>(1.12 to<br>2.64)                            | 0.06<br>(0.04 to<br>0.09)                       | 0.06<br>(0.05 to<br>0.10)                        | 0.06<br>(0.04 to<br>0.09)                        | 0.06<br>(0.05 to<br>0.11)                        |
| Venomous animal contact                         | 0.74<br>(0.54 to<br>1.48)                            | 0.65<br>(0.44 to<br>1.24)                            | 0.62<br>(0.42 to<br>1.17)                            | 0.70<br>(0.47 to<br>1.36)                            | 0.02<br>(0.02 to<br>0.04)                       | 0.03<br>(0.02 to<br>0.05)                        | 0.02<br>(0.02 to<br>0.04)                        | 0.03<br>(0.02 to<br>0.05)                        |
| Non-venomous animal contact                     | 0.99<br>(0.65 to<br>1.72)                            | 0.75<br>(0.50 to<br>1.27)                            | 0.68<br>(0.45 to<br>1.18)                            | 0.85<br>(0.57 to<br>1.48)                            | 0.03<br>(0.02 to<br>0.06)                       | 0.04<br>(0.03 to<br>0.06)                        | 0.03<br>(0.02 to<br>0.06)                        | 0.04<br>(0.03 to<br>0.07)                        |
| Foreign body                                    | 23.63<br>(18.96 to<br>27.99)                         | 15.90<br>(12.74 to<br>19.14)                         | 15.42<br>(12.44 to<br>18.62)                         | 16.40<br>(12.99 to<br>20.00)                         | 0.69<br>(0.55 to<br>0.80)                       | 0.61<br>(0.52 to<br>0.72)                        | 0.61<br>(0.52 to<br>0.73)                        | 0.60<br>(0.51 to<br>0.71)                        |
| Pulmonary aspiration and foreign body in airway | 22.24<br>(17.49 to<br>26.39)                         | 14.20<br>(10.92 to<br>17.34)                         | 13.63<br>(10.52 to<br>16.70)                         | 14.81<br>(11.54 to<br>18.31)                         | 0.64<br>(0.51 to<br>0.75)                       | 0.53<br>(0.44 to<br>0.64)                        | 0.52<br>(0.43 to<br>0.63)                        | 0.53<br>(0.43 to<br>0.64)                        |

|                                             |                                                      |                                                      |                                                     |                                                      |                                                |                                                |                                                |                                                 |
|---------------------------------------------|------------------------------------------------------|------------------------------------------------------|-----------------------------------------------------|------------------------------------------------------|------------------------------------------------|------------------------------------------------|------------------------------------------------|-------------------------------------------------|
|                                             | 1.39<br>(1.12 to<br>2.10)                            | 1.70<br>(1.36 to<br>2.45)                            | 1.79<br>(1.44 to<br>2.56)                           | 1.58<br>(1.25 to<br>2.26)                            | 0.05<br>(0.04 to<br>0.07)                      | 0.08<br>(0.07 to<br>0.12)                      | 0.09<br>(0.07 to<br>0.13)                      | 0.07<br>(0.06 to<br>0.10)                       |
| Foreign body in other body part             |                                                      |                                                      |                                                     |                                                      |                                                |                                                |                                                |                                                 |
|                                             | 12.28<br>(6.41 to<br>17.81)                          | 6.83<br>(3.54 to<br>10.74)                           | 5.91<br>(3.14 to<br>8.94)                           | 8.05<br>(4.21 to<br>12.45)                           | 0.39<br>(0.22 to<br>0.59)                      | 0.26<br>(0.15 to<br>0.42)                      | 0.23<br>(0.14 to<br>0.37)                      | 0.30<br>(0.17 to<br>0.47)                       |
| Environmental heat and cold exposure        |                                                      |                                                      |                                                     |                                                      |                                                |                                                |                                                |                                                 |
|                                             | 10.41<br>(8.74 to<br>12.41)                          | 2.44<br>(1.63 to<br>3.59)                            | 1.85<br>(1.29 to<br>2.53)                           | 3.35<br>(2.17 to<br>5.13)                            | 0.28<br>(0.23 to<br>0.33)                      | 0.08<br>(0.06 to<br>0.12)                      | 0.06<br>(0.05 to<br>0.09)                      | 0.11<br>(0.07 to<br>0.16)                       |
| Other unintentional injuries                |                                                      |                                                      |                                                     |                                                      |                                                |                                                |                                                |                                                 |
| <b>Self-harm and interpersonal violence</b> | <b>291.49</b><br><b>(208.32 to</b><br><b>346.16)</b> | <b>179.57</b><br><b>(108.50 to</b><br><b>277.34)</b> | <b>147.63</b><br><b>(90.88 to</b><br><b>222.86)</b> | <b>215.75</b><br><b>(120.41 to</b><br><b>343.17)</b> | <b>7.57</b><br><b>(5.58 to</b><br><b>8.98)</b> | <b>5.56</b><br><b>(3.47 to</b><br><b>8.50)</b> | <b>4.65</b><br><b>(3.03 to</b><br><b>6.95)</b> | <b>6.50</b><br><b>(3.88 to</b><br><b>10.12)</b> |



| Romania                                                           |                                                |                                                |                                                |                                                |                                          |                                          |                                          |                                          |
|-------------------------------------------------------------------|------------------------------------------------|------------------------------------------------|------------------------------------------------|------------------------------------------------|------------------------------------------|------------------------------------------|------------------------------------------|------------------------------------------|
| Cause                                                             | YLLs (actual counts)                           |                                                |                                                |                                                | Deaths (actual counts)                   |                                          |                                          |                                          |
|                                                                   | 2016                                           | 2040 Forecast                                  | 2040 Better Scenario                           | 2040 Worse Scenario                            | 2016                                     | 2040 Forecast                            | 2040 Better Scenario                     | 2040 Worse Scenario                      |
| All causes                                                        | 4,450,322.44<br>(4,105,279.75 to 4,836,457.65) | 2,978,338.37<br>(2,299,578.57 to 3,904,933.99) | 2,362,757.86<br>(1,833,326.02 to 3,026,140.75) | 3,977,573.09<br>(2,987,163.01 to 5,235,699.17) | 254,452.02<br>(235,955.16 to 274,490.83) | 210,969.69<br>(164,808.31 to 276,922.77) | 178,007.51<br>(139,692.37 to 235,809.15) | 261,948.93<br>(204,210.90 to 336,654.75) |
| Communicable, maternal, neonatal, and nutritional diseases        | 250,598.53<br>(224,479.06 to 278,700.79)       | 112,412.69<br>(77,449.26 to 160,751.35)        | 80,831.13<br>(59,200.81 to 111,779.64)         | 162,398.28<br>(105,516.64 to 253,577.36)       | 7,584.61<br>(6,862.20 to 8,371.51)       | 4,665.12<br>(3,348.83 to 6,627.49)       | 3,607.56<br>(2,671.03 to 5,006.06)       | 6,347.71<br>(4,278.40 to 9,312.35)       |
| HIV/AIDS and tuberculosis                                         | 38,944.59<br>(34,570.87 to 44,493.20)          | 13,035.51<br>(8,033.86 to 24,520.47)           | 8,441.07<br>(5,754.07 to 14,241.45)            | 20,399.77<br>(10,277.88 to 45,983.45)          | 1,132.19<br>(1,003.25 to 1,291.02)       | 349.63<br>(195.13 to 690.78)             | 218.16<br>(136.84 to 396.73)             | 573.37<br>(259.08 to 1,320.77)           |
| Tuberculosis                                                      | 52,586.51<br>(28,116.13 to 38,053.83)          | 6,691.97<br>(1,984.30 to 17,998.85)            | 3,477.85<br>(1,106.46 to 9,325.44)             | 13,299.01<br>(3,306.85 to 39,218.55)           | 1,004.05<br>(875.40 to 1,164.06)         | 225.95<br>(73.26 to 373.25)              | 120.60<br>(42.69 to 306.34)              | 435.74<br>(121.92 to 1,191.76)           |
| HIV/AIDS                                                          | 6,358.08<br>(5,816.56 to 6,925.09)             | 6,343.54<br>(4,872.88 to 7,719.12)             | 4,943.22<br>(3,999.95 to 5,830.14)             | 7,100.75<br>(5,583.04 to 8,590.11)             | 128.14<br>(117.88 to 138.48)             | 123.67<br>(96.71 to 149.57)              | 97.57<br>(79.41 to 114.70)               | 137.62<br>(107.27 to 164.86)             |
| Diarrhea, lower respiratory, and other common infectious diseases | 158,114.14<br>(141,433.80 to 175,557.84)       | 74,169.67<br>(49,406.69 to 109,706.69)         | 52,185.33<br>(36,303.41 to 75,161.31)          | 112,479.63<br>(69,719.78 to 180,720.48)        | 5,652.28<br>(5,055.60 to 6,299.44)       | 3,889.13<br>(2,732.13 to 5,563.69)       | 3,011.65<br>(2,165.85 to 4,292.19)       | 5,306.42<br>(3,560.05 to 7,867.20)       |
| Diarrheal diseases                                                | 3,727.03<br>(2,828.18 to 4,896.35)             | 3,063.36<br>(755.86 to 9,145.63)               | 3,831.66<br>(1,199.58 to 10,095.63)            | 3,493.50<br>(658.26 to 11,238.63)              | 75.34<br>(63.52 to 90.33)                | 153.78<br>(39.37 to 425.63)              | 222.09<br>(71.92 to 574.94)              | 148.82<br>(29.21 to 489.73)              |
| Intestinal infectious diseases                                    | 51.63<br>(27.57 to 88.94)                      | 28.59<br>(14.85 to 50.40)                      | 26.23<br>(13.76 to 45.30)                      | 31.83<br>(16.54 to 57.48)                      | 1.57<br>(0.87 to 2.62)                   | 1.15<br>(0.61 to 2.01)                   | 1.11<br>(0.58 to 1.90)                   | 1.20<br>(0.64 to 2.09)                   |
| Typhoid fever                                                     | 19.86<br>(9.06 to 36.15)                       | 9.23<br>(4.25 to 17.21)                        | 10.89<br>(5.31 to 20.09)                       | 7.62<br>(3.40 to 14.13)                        | 0.53<br>(0.25 to 1.01)                   | 0.37<br>(0.14 to 0.59)                   | 0.37<br>(0.18 to 0.70)                   | 0.24<br>(0.11 to 0.47)                   |
| Paratyphoid fever                                                 | 20.47<br>(7.98 to 43.52)                       | 13.82<br>(4.98 to 29.20)                       | 10.29<br>(3.78 to 21.86)                       | 18.29<br>(7.08 to 38.15)                       | 0.54<br>(0.21 to 1.16)                   | 0.45<br>(0.16 to 0.91)                   | 0.33<br>(0.13 to 0.71)                   | 0.55<br>(0.22 to 1.16)                   |
| Other intestinal infectious diseases                              | 11.30<br>(4.45 to 22.58)                       | 5.53<br>(1.96 to 12.10)                        | 5.05<br>(1.72 to 11.21)                        | 5.93<br>(2.07 to 12.96)                        | 0.50<br>(0.19 to 1.05)                   | 0.42<br>(0.13 to 0.97)                   | 0.41<br>(0.13 to 0.96)                   | 0.42<br>(0.13 to 0.95)                   |
| Lower respiratory infections                                      | 146,021.91<br>(130,220.69 to 162,868.67)       | 65,577.84<br>(41,905.57 to 101,771.15)         | 43,709.31<br>(28,192.22 to 66,083.91)          | 102,543.34<br>(60,373.35 to 167,469.01)        | 5,387.61<br>(4,787.28 to 6,020.55)       | 3,593.12<br>(2,432.63 to 5,222.88)       | 2,660.12<br>(1,797.81 to 3,899.82)       | 5,003.51<br>(3,215.65 to 7,580.08)       |
| Upper respiratory infections                                      | 83.78<br>(44.01 to 141.12)                     | 33.60<br>(11.75 to 72.77)                      | 22.43<br>(8.12 to 47.40)                       | 49.52<br>(16.48 to 111.10)                     | 3.42<br>(1.70 to 5.99)                   | 1.91<br>(0.63 to 4.37)                   | 1.34<br>(0.46 to 3.07)                   | 2.65<br>(0.87 to 6.40)                   |
| Otitis media                                                      | 8.72<br>(6.50 to 11.89)                        | 2.83<br>(1.25 to 6.08)                         | 2.88<br>(1.26 to 6.27)                         | 2.72<br>(1.18 to 5.88)                         | 0.32<br>(0.24 to 0.43)                   | 0.12<br>(0.06 to 0.26)                   | 0.13<br>(0.06 to 0.27)                   | 0.11<br>(0.05 to 0.24)                   |
| Meningitis                                                        | 3,501.68<br>(3,028.64 to 4,304.38)             | 1,054.60<br>(714.31 to 1,464.96)               | 831.39<br>(581.21 to 1,189.80)                 | 1,233.72<br>(844.46 to 1,777.30)               | 78.36<br>(67.44 to 104.14)               | 29.01<br>(21.35 to 41.43)                | 24.79<br>(18.05 to 36.68)                | 33.31<br>(23.93 to 48.09)                |
| Pneumococcal meningitis                                           | 537.95<br>(453.08 to 696.95)                   | 215.52<br>(157.07 to 307.41)                   | 211.70<br>(151.06 to 312.03)                   | 211.81<br>(155.06 to 298.24)                   | 14.22<br>(11.89 to 19.70)                | 7.38<br>(5.45 to 11.05)                  | 7.47<br>(5.40 to 11.47)                  | 7.01<br>(5.17 to 10.18)                  |
| H influenzae type B meningitis                                    | 432.27<br>(358.16 to 532.33)                   | 284.64<br>(161.51 to 501.03)                   | 231.14<br>(138.88 to 368.43)                   | 295.08<br>(161.26 to 533.46)                   | 9.22<br>(7.70 to 12.14)                  | 6.16<br>(4.25 to 9.17)                   | 5.67<br>(4.01 to 8.33)                   | 6.08<br>(4.07 to 9.18)                   |
| Meningococcal meningitis                                          | 1,571.10<br>(1,341.36 to 1,892.29)             | 316.95<br>(192.42 to 482.97)                   | 232.17<br>(147.89 to 343.43)                   | 427.85<br>(249.98 to 660.24)                   | 31.51<br>(27.16 to 40.62)                | 8.55<br>(5.58 to 12.82)                  | 6.51<br>(4.35 to 9.89)                   | 11.07<br>(7.12 to 16.75)                 |
| Other meningitis                                                  | 960.26<br>(819.35 to 1,196.82)                 | 217.48<br>(133.85 to 335.06)                   | 156.39<br>(99.98 to 237.27)                    | 298.98<br>(183.13 to 464.76)                   | 23.40<br>(19.84 to 31.62)                | 6.92<br>(4.42 to 10.44)                  | 5.14<br>(3.41 to 8.03)                   | 9.16<br>(5.84 to 14.39)                  |
| Encephalitis                                                      | 4,534.87<br>(3,504.43 to 6,104.83)             | 3,287.43<br>(2,373.30 to 4,892.02)             | 3,108.79<br>(2,245.62 to 4,761.41)             | 3,412.69<br>(2,489.70 to 5,069.82)             | 101.10<br>(80.65 to 151.62)              | 94.02<br>(66.59 to 156.34)               | 92.13<br>(62.78 to 154.85)               | 93.75<br>(67.49 to 152.79)               |

|                |                               |                                   |                                 |                                    |                           |                             |                            |                              |
|----------------|-------------------------------|-----------------------------------|---------------------------------|------------------------------------|---------------------------|-----------------------------|----------------------------|------------------------------|
| Diphtheria     | 10.63<br>(6.78 to<br>15.80)   | 1.80<br>(0.96 to<br>3.14)         | 1.42<br>(0.76 to<br>2.55)       | 1.81<br>(0.98 to<br>3.15)          | 0.21<br>(0.13 to<br>0.33) | 0.04<br>(0.02 to<br>0.07)   | 0.03<br>(0.02 to<br>0.06)  | 0.04<br>(0.02 to<br>0.07)    |
| Whooping cough | 61.46<br>(25.78 to<br>130.33) | 21.48<br>(3.34 to<br>65.22)       | 3.25<br>(1.17 to<br>7.81)       | 22.24<br>(3.71 to<br>66.71)        | 0.75<br>(0.31 to<br>1.56) | 0.26<br>(0.05 to<br>0.78)   | 0.05<br>(0.02 to<br>0.10)  | 0.27<br>(0.05 to<br>0.79)    |
| Tetanus        | 43.20<br>(23.57 to<br>58.51)  | 4.64<br>(1.97 to<br>7.46)         | 4.34<br>(1.85 to<br>6.88)       | 4.55<br>(1.88 to<br>7.33)          | 1.53<br>(0.98 to<br>2.05) | 0.16<br>(0.09 to<br>0.24)   | 0.16<br>(0.09 to<br>0.24)  | 0.15<br>(0.08 to<br>0.23)    |
| Measles        | 16.98<br>(11.09 to<br>25.42)  | 1,093.95<br>(1.59 to<br>8,264.51) | 627.25<br>(1.17 to<br>4,668.34) | 1,660.93<br>(1.57 to<br>14,302.09) | 0.21<br>(0.14 to<br>0.31) | 14.33<br>(0.03 to<br>99.26) | 8.55<br>(0.02 to<br>59.12) | 21.38<br>(0.03 to<br>169.42) |

| Romania                                               |                                                            |                                                        |                                                      |                                                        |                                                   |                                                  |                                                  |                                                   |
|-------------------------------------------------------|------------------------------------------------------------|--------------------------------------------------------|------------------------------------------------------|--------------------------------------------------------|---------------------------------------------------|--------------------------------------------------|--------------------------------------------------|---------------------------------------------------|
| Cause                                                 | YLLs (actual counts)                                       |                                                        |                                                      |                                                        | Deaths (actual counts)                            |                                                  |                                                  |                                                   |
|                                                       | 2016                                                       | 2040 Forecast                                          | 2040 Better Scenario                                 | 2040 Worse Scenario                                    | 2016                                              | 2040 Forecast                                    | 2040 Better Scenario                             | 2040 Worse Scenario                               |
| Varicella and herpes zoster                           | 52.24<br>(26.12 to<br>79.04)                               | 19.56<br>(9.58 to<br>35.60)                            | 16.39<br>(8.41 to<br>29.14)                          | 22.79<br>(10.66 to<br>39.31)                           | 1.86<br>(1.08 to<br>3.39)                         | 1.21<br>(0.63 to<br>2.42)                        | 1.15<br>(0.61 to<br>2.42)                        | 1.23<br>(0.64 to<br>2.35)                         |
| <b>Neglected tropical diseases and malaria</b>        | <b>320.87</b><br><b>(280.00 to</b><br><b>362.86)</b>       | <b>184.77</b><br><b>(155.82 to</b><br><b>218.29)</b>   | <b>173.00</b><br><b>(146.73 to</b><br><b>201.39)</b> | <b>197.81</b><br><b>(164.45 to</b><br><b>236.76)</b>   | <b>11.28</b><br><b>(9.77 to</b><br><b>13.11)</b>  | <b>7.97</b><br><b>(6.60 to</b><br><b>9.57)</b>   | <b>7.53</b><br><b>(6.37 to</b><br><b>8.92)</b>   | <b>8.38</b><br><b>(6.91 to</b><br><b>10.22)</b>   |
| Malaria                                               | 0.00<br>(0.00 to<br>0.00)                                  | 0.00<br>(0.00 to<br>0.00)                              | 0.00<br>(0.00 to<br>0.00)                            | 0.00<br>(0.00 to<br>0.00)                              | 0.00<br>(0.00 to<br>0.00)                         | 0.00<br>(0.00 to<br>0.00)                        | 0.00<br>(0.00 to<br>0.00)                        | 0.00<br>(0.00 to<br>0.00)                         |
| Chagas disease                                        | 0.00<br>(0.00 to<br>0.00)                                  | 0.00<br>(0.00 to<br>0.00)                              | 0.00<br>(0.00 to<br>0.00)                            | 0.00<br>(0.00 to<br>0.00)                              | 0.00<br>(0.00 to<br>0.00)                         | 0.00<br>(0.00 to<br>0.00)                        | 0.00<br>(0.00 to<br>0.00)                        | 0.00<br>(0.00 to<br>0.00)                         |
| Leishmaniasis                                         | 5.20<br>(2.54 to<br>8.35)                                  | 1.96<br>(0.97 to<br>3.46)                              | 1.71<br>(0.84 to<br>2.90)                            | 2.22<br>(1.09 to<br>3.80)                              | 0.20<br>(0.10 to<br>0.33)                         | 0.09<br>(0.04 to<br>0.15)                        | 0.08<br>(0.04 to<br>0.13)                        | 0.10<br>(0.04 to<br>0.16)                         |
| African trypanosomiasis                               | 0.00<br>(0.00 to<br>0.00)                                  | 0.00<br>(0.00 to<br>0.00)                              | 0.00<br>(0.00 to<br>0.00)                            | 0.00<br>(0.00 to<br>0.00)                              | 0.00<br>(0.00 to<br>0.00)                         | 0.00<br>(0.00 to<br>0.00)                        | 0.00<br>(0.00 to<br>0.00)                        | 0.00<br>(0.00 to<br>0.00)                         |
| Schistosomiasis                                       | 0.00<br>(0.00 to<br>0.00)                                  | 0.00<br>(0.00 to<br>0.00)                              | 0.00<br>(0.00 to<br>0.00)                            | 0.00<br>(0.00 to<br>0.00)                              | 0.00<br>(0.00 to<br>0.00)                         | 0.00<br>(0.00 to<br>0.00)                        | 0.00<br>(0.00 to<br>0.00)                        | 0.00<br>(0.00 to<br>0.00)                         |
| Cysticercosis                                         | 12.60<br>(10.19 to<br>15.28)                               | 3.56<br>(2.77 to<br>4.53)                              | 3.52<br>(2.70 to<br>4.46)                            | 3.58<br>(2.79 to<br>4.50)                              | 0.42<br>(0.34 to<br>0.52)                         | 0.15<br>(0.12 to<br>0.18)                        | 0.15<br>(0.12 to<br>0.19)                        | 0.14<br>(0.11 to<br>0.18)                         |
| Cystic echinococcosis                                 | 175.67<br>(147.34 to<br>208.07)                            | 82.28<br>(62.22 to<br>107.25)                          | 69.41<br>(54.80 to<br>86.75)                         | 96.55<br>(74.06 to<br>127.04)                          | 7.55<br>(6.39 to<br>8.98)                         | 4.86<br>(3.68 to<br>6.31)                        | 4.30<br>(3.39 to<br>5.36)                        | 5.40<br>(4.09 to<br>6.94)                         |
| Dengue                                                | 0.00<br>(0.00 to<br>0.00)                                  | 0.00<br>(0.00 to<br>0.00)                              | 0.00<br>(0.00 to<br>0.00)                            | 0.00<br>(0.00 to<br>0.00)                              | 0.00<br>(0.00 to<br>0.00)                         | 0.00<br>(0.00 to<br>0.00)                        | 0.00<br>(0.00 to<br>0.00)                        | 0.00<br>(0.00 to<br>0.00)                         |
| Yellow fever                                          | 0.00<br>(0.00 to<br>0.00)                                  | 0.00<br>(0.00 to<br>0.00)                              | 0.00<br>(0.00 to<br>0.00)                            | 0.00<br>(0.00 to<br>0.00)                              | 0.00<br>(0.00 to<br>0.00)                         | 0.00<br>(0.00 to<br>0.00)                        | 0.00<br>(0.00 to<br>0.00)                        | 0.00<br>(0.00 to<br>0.00)                         |
| Rabies                                                | 1.09<br>(0.80 to<br>1.51)                                  | 0.56<br>(0.39 to<br>0.80)                              | 0.49<br>(0.35 to<br>0.68)                            | 0.63<br>(0.45 to<br>0.89)                              | 0.03<br>(0.03 to<br>0.04)                         | 0.02<br>(0.02 to<br>0.03)                        | 0.02<br>(0.01 to<br>0.03)                        | 0.02<br>(0.02 to<br>0.03)                         |
| Intestinal nematode infections                        | 2.90<br>(1.27 to<br>5.15)                                  | 2.25<br>(1.03 to<br>3.90)                              | 2.27<br>(1.05 to<br>3.86)                            | 2.20<br>(0.98 to<br>3.84)                              | 0.09<br>(0.04 to<br>0.14)                         | 0.09<br>(0.04 to<br>0.16)                        | 0.10<br>(0.05 to<br>0.18)                        | 0.09<br>(0.04 to<br>0.15)                         |
| Other neglected tropical diseases                     | 123.41<br>(98.03 to<br>144.93)                             | 94.16<br>(77.89 to<br>117.22)                          | 95.61<br>(79.40 to<br>123.20)                        | 92.63<br>(75.61 to<br>110.66)                          | 2.98<br>(2.30 to<br>3.92)                         | 2.76<br>(2.23 to<br>4.22)                        | 2.89<br>(2.34 to<br>4.48)                        | 2.64<br>(2.09 to<br>3.80)                         |
| <b>Maternal disorders</b>                             | <b>1,837.24</b><br><b>(1,462.87 to</b><br><b>2,254.03)</b> | <b>811.50</b><br><b>(528.33 to</b><br><b>1,203.34)</b> | <b>672.49</b><br><b>(450.54 to</b><br><b>967.41)</b> | <b>986.60</b><br><b>(615.14 to</b><br><b>1,506.33)</b> | <b>34.10</b><br><b>(27.32 to</b><br><b>41.49)</b> | <b>15.10</b><br><b>(9.87 to</b><br><b>22.34)</b> | <b>12.52</b><br><b>(8.33 to</b><br><b>17.88)</b> | <b>18.36</b><br><b>(11.62 to</b><br><b>27.72)</b> |
| Maternal hemorrhage                                   | 255.50<br>(173.80 to<br>352.18)                            | 117.81<br>(66.24 to<br>193.48)                         | 98.95<br>(55.82 to<br>160.31)                        | 141.25<br>(78.17 to<br>236.06)                         | 4.78<br>(3.27 to<br>6.59)                         | 2.21<br>(1.24 to<br>3.62)                        | 1.86<br>(1.05 to<br>2.98)                        | 2.65<br>(1.46 to<br>4.40)                         |
| Maternal sepsis and other maternal infections         | 153.45<br>(101.59 to<br>222.39)                            | 71.21<br>(37.38 to<br>125.03)                          | 59.00<br>(31.74 to<br>101.42)                        | 86.30<br>(45.18 to<br>151.29)                          | 2.78<br>(1.88 to<br>4.05)                         | 1.29<br>(0.70 to<br>2.26)                        | 1.07<br>(0.58 to<br>1.83)                        | 1.56<br>(0.84 to<br>2.68)                         |
| Maternal hypertensive disorders                       | 128.92<br>(81.92 to<br>191.06)                             | 47.29<br>(24.46 to<br>82.24)                           | 38.94<br>(20.36 to<br>67.12)                         | 57.66<br>(29.85 to<br>100.42)                          | 2.27<br>(1.45 to<br>3.37)                         | 0.83<br>(0.43 to<br>1.44)                        | 0.69<br>(0.36 to<br>1.17)                        | 1.02<br>(0.53 to<br>1.74)                         |
| Maternal obstructed labor and uterine rupture         | 46.08<br>(25.56 to<br>72.21)                               | 20.36<br>(9.54 to<br>36.83)                            | 16.30<br>(7.71 to<br>29.10)                          | 25.51<br>(11.44 to<br>45.83)                           | 0.92<br>(0.52 to<br>1.42)                         | 0.41<br>(0.20 to<br>0.74)                        | 0.33<br>(0.16 to<br>0.59)                        | 0.51<br>(0.23 to<br>0.92)                         |
| Maternal abortion, miscarriage, and ectopic pregnancy | 707.00<br>(535.09 to<br>916.79)                            | 366.77<br>(208.00 to<br>598.10)                        | 301.81<br>(165.62 to<br>489.28)                      | 449.97<br>(246.16 to<br>755.78)                        | 13.37<br>(10.21 to<br>17.37)                      | 6.91<br>(3.96 to<br>11.15)                       | 5.68<br>(3.19 to<br>9.08)                        | 8.47<br>(4.73 to<br>14.19)                        |





| Romania                                                                 |                                              |                                              |                                             |                                              |                                     |                                     |                                    |                                     |
|-------------------------------------------------------------------------|----------------------------------------------|----------------------------------------------|---------------------------------------------|----------------------------------------------|-------------------------------------|-------------------------------------|------------------------------------|-------------------------------------|
| Cause                                                                   | YLLs (actual counts)                         |                                              |                                             |                                              | Deaths (actual counts)              |                                     |                                    |                                     |
|                                                                         | 2016                                         | 2040 Forecast                                | 2040 Better Scenario                        | 2040 Worse Scenario                          | 2016                                | 2040 Forecast                       | 2040 Better Scenario               | 2040 Worse Scenario                 |
| <b>Neonatal disorders</b>                                               | <b>42,652.50</b><br>(33,584.08 to 54,430.56) | <b>20,290.76</b><br>(10,946.65 to 34,081.80) | <b>15,587.96</b><br>(8,529.40 to 26,392.45) | <b>24,245.46</b><br>(13,013.81 to 40,851.27) | <b>492.67</b><br>(387.91 to 628.74) | <b>234.39</b><br>(126.45 to 393.67) | <b>180.07</b><br>(98.53 to 304.86) | <b>280.07</b><br>(150.34 to 471.88) |
| Neonatal preterm birth                                                  | 22,566.52<br>(17,463.48 to 29,384.43)        | 5,808.55<br>(3,245.80 to 9,505.92)           | 3,460.60<br>(1,953.31 to 5,408.28)          | 8,215.88<br>(4,474.04 to 13,329.86)          | 260.65<br>(201.71 to 339.39)        | 67.10<br>(37.50 to 109.80)          | 39.98<br>(22.57 to 62.47)          | 94.90<br>(51.69 to 153.97)          |
| Neonatal encephalopathy due to birth asphyxia and trauma                | 4,973.61<br>(3,710.29 to 6,616.28)           | 1,789.39<br>(875.98 to 3,372.68)             | 1,241.83<br>(638.49 to 2,233.47)            | 2,379.74<br>(1,120.31 to 4,339.96)           | 57.46<br>(42.87 to 76.44)           | 20.68<br>(10.12 to 38.96)           | 14.35<br>(7.38 to 25.80)           | 27.50<br>(12.95 to 50.14)           |
| Neonatal sepsis and other neonatal infections                           | 869.42<br>(547.38 to 1,602.14)               | 515.84<br>(246.38 to 1,039.74)               | 386.65<br>(189.43 to 779.80)                | 638.99<br>(317.56 to 1,307.39)               | 10.05<br>(6.33 to 18.51)            | 5.96<br>(2.85 to 12.01)             | 4.47<br>(9.01)                     | 7.38<br>(3.67 to 15.11)             |
| Hemolytic disease and other neonatal jaundice                           | 439.60<br>(280.83 to 678.40)                 | 159.59<br>(65.38 to 351.24)                  | 116.22<br>(48.10 to 247.30)                 | 201.96<br>(78.91 to 432.07)                  | 5.08<br>(3.25 to 7.84)              | 1.84<br>(0.76 to 4.06)              | 1.34<br>(0.56 to 2.86)             | 2.33<br>(0.91 to 4.99)              |
| Other neonatal disorders                                                | 13,803.35<br>(10,067.33 to 18,465.10)        | 12,017.38<br>(5,510.85 to 23,266.43)         | 10,382.64<br>(4,925.49 to 19,749.34)        | 12,808.89<br>(5,555.39 to 25,404.21)         | 159.43<br>(116.28 to 213.27)        | 138.81<br>(63.66 to 268.74)         | 119.93<br>(56.90 to 228.12)        | 147.96<br>(64.18 to 293.43)         |
| <b>Nutritional deficiencies</b>                                         | <b>2,901.26</b><br>(2,555.36 to 3,256.01)    | <b>1,317.31</b><br>(1,080.36 to 1,599.04)    | <b>1,370.89</b><br>(1,122.41 to 1,675.23)   | <b>1,266.50</b><br>(1,033.60 to 1,533.66)    | <b>97.70</b><br>(87.19 to 108.03)   | <b>73.45</b><br>(56.49 to 94.73)    | <b>84.03</b><br>(65.14 to 109.09)  | <b>63.59</b><br>(48.25 to 81.84)    |
| Protein-energy malnutrition                                             | 1,616.26<br>(1,021.92 to 1,921.34)           | 818.57<br>(524.95 to 1,085.19)               | 918.76<br>(628.24 to 1,213.83)              | 718.23<br>(453.85 to 959.85)                 | 65.23<br>(45.18 to 76.19)           | 53.69<br>(34.14 to 74.87)           | 64.68<br>(43.63 to 89.25)          | 43.60<br>(26.84 to 61.50)           |
| Iodine deficiency                                                       | 64.96<br>(6.35 to 175.48)                    | 69.70<br>(2.86 to 197.38)                    | 69.75<br>(2.55 to 204.52)                   | 69.29<br>(3.11 to 190.52)                    | 2.67<br>(0.19 to 8.12)              | 4.42<br>(0.08 to 15.48)             | 4.74<br>(0.07 to 17.85)            | 6.05<br>(0.10 to 13.44)             |
| Dietary iron deficiency                                                 | 90.89<br>(67.46 to 211.96)                   | 47.02<br>(31.42 to 103.69)                   | 48.27<br>(31.74 to 105.39)                  | 45.26<br>(30.54 to 100.84)                   | 2.13<br>(1.59 to 4.06)              | 1.37<br>(0.90 to 2.44)              | 1.47<br>(0.93 to 2.61)             | 1.26<br>(0.83 to 2.26)              |
| Other nutritional deficiencies                                          | 1,129.15<br>(879.46 to 1,643.01)             | 382.02<br>(261.20 to 576.33)                 | 334.11<br>(221.44 to 527.30)                | 433.72<br>(289.05 to 638.39)                 | 27.67<br>(21.67 to 43.67)           | 13.96<br>(8.81 to 23.59)            | 13.14<br>(8.01 to 23.63)           | 14.68<br>(9.49 to 23.35)            |
| <b>Other communicable, maternal, neonatal, and nutritional diseases</b> | <b>5,827.94</b><br>(5,076.91 to 6,701.76)    | <b>2,603.18</b><br>(2,050.38 to 3,220.96)    | <b>2,400.39</b><br>(1,896.45 to 2,951.49)   | <b>2,822.51</b><br>(2,216.96 to 3,534.04)    | <b>164.39</b><br>(143.80 to 191.84) | <b>95.46</b><br>(77.31 to 118.70)   | <b>93.60</b><br>(75.03 to 118.32)  | <b>97.51</b><br>(78.26 to 121.74)   |
| Sexually transmitted infections excluding HIV                           | 444.88<br>(201.46 to 848.87)                 | 101.41<br>(49.91 to 190.65)                  | 85.39<br>(44.07 to 152.39)                  | 119.80<br>(56.19 to 233.94)                  | 7.10<br>(4.15 to 11.76)             | 2.52<br>(1.56 to 3.96)              | 2.33<br>(1.46 to 3.60)             | 2.73<br>(1.67 to 4.31)              |
| Syphilis                                                                | 380.66<br>(138.19 to 789.73)                 | 65.03<br>(20.36 to 153.35)                   | 50.34<br>(16.63 to 116.31)                  | 82.14<br>(24.64 to 195.54)                   | 5.15<br>(2.31 to 9.93)              | 1.11<br>(0.51 to 2.19)              | 0.91<br>(0.44 to 1.77)             | 1.34<br>(0.59 to 2.71)              |
| Chlamydial infection                                                    | 12.39<br>(10.14 to 15.44)                    | 7.07<br>(4.56 to 10.53)                      | 6.83<br>(4.20 to 10.26)                     | 7.29<br>(4.73 to 10.81)                      | 0.38<br>(0.31 to 0.46)              | 0.28<br>(0.18 to 0.43)              | 0.29<br>(0.18 to 0.44)             | 0.28<br>(0.18 to 0.41)              |
| Gonococcal infection                                                    | 34.27<br>(28.18 to 42.33)                    | 19.92<br>(12.35 to 30.45)                    | 19.26<br>(11.61 to 29.82)                   | 20.55<br>(12.63 to 31.57)                    | 1.08<br>(0.90 to 1.33)              | 0.81<br>(0.50 to 1.28)              | 0.82<br>(0.50 to 1.33)             | 0.80<br>(0.50 to 1.22)              |
| Other sexually transmitted infections                                   | 17.57<br>(14.44 to 21.70)                    | 9.39<br>(6.03 to 14.63)                      | 8.97<br>(5.63 to 14.03)                     | 9.81<br>(6.31 to 15.23)                      | 0.49<br>(0.40 to 0.60)              | 0.31<br>(0.20 to 0.48)              | 0.31<br>(0.19 to 0.47)             | 0.32<br>(0.21 to 0.47)              |
| Acute hepatitis                                                         | 3,686.33<br>(3,180.27 to 4,231.87)           | 828.65<br>(555.76 to 1,177.98)               | 655.11<br>(448.41 to 883.96)                | 1,040.38<br>(678.31 to 1,484.12)             | 112.01<br>(96.08 to 129.62)         | 29.91<br>(19.96 to 41.87)           | 24.33<br>(16.79 to 33.13)          | 36.37<br>(24.14 to 51.86)           |
| Acute hepatitis A                                                       | 315.97<br>(232.55 to 419.24)                 | 63.01<br>(36.47 to 100.55)                   | 51.43<br>(29.81 to 81.05)                   | 75.46<br>(41.83 to 120.09)                   | 5.72<br>(4.40 to 7.40)              | 1.52<br>(0.92 to 2.28)              | 1.30<br>(0.78 to 1.95)             | 1.74<br>(1.02 to 2.63)              |
| Acute hepatitis B                                                       | 2,693.44<br>(2,254.58 to 3,155.06)           | 610.38<br>(391.17 to 897.63)                 | 480.06<br>(316.61 to 677.86)                | 771.57<br>(484.99 to 1,150.67)               | 86.79<br>(72.93 to 102.37)          | 22.35<br>(14.38 to 32.55)           | 17.96<br>(11.76 to 25.27)          | 27.51<br>(17.82 to 40.74)           |

|                                       |                                                                        |                                                                        |                                                                        |                                                                        |                                                                  |                                                                  |                                                                  |                                                                  |
|---------------------------------------|------------------------------------------------------------------------|------------------------------------------------------------------------|------------------------------------------------------------------------|------------------------------------------------------------------------|------------------------------------------------------------------|------------------------------------------------------------------|------------------------------------------------------------------|------------------------------------------------------------------|
|                                       | 148.96<br>(106.21 to<br>207.99)                                        | 36.34<br>(21.06 to<br>57.60)                                           | 29.09<br>(17.30 to<br>45.24)                                           | 45.28<br>(25.98 to<br>72.60)                                           | 5.05<br>(3.50 to<br>7.08)                                        | 1.39<br>(0.80 to<br>2.21)                                        | 1.13<br>(0.66 to<br>1.74)                                        | 1.69<br>(0.95 to<br>2.73)                                        |
| Acute hepatitis C                     |                                                                        |                                                                        |                                                                        |                                                                        |                                                                  |                                                                  |                                                                  |                                                                  |
|                                       | 527.96<br>(396.06 to<br>693.24)                                        | 118.92<br>(70.96 to<br>183.72)                                         | 94.54<br>(57.46 to<br>144.77)                                          | 148.08<br>(87.69 to<br>236.57)                                         | 14.46<br>(9.85 to<br>20.29)                                      | 4.66<br>(2.78 to<br>7.32)                                        | 3.94<br>(2.34 to<br>6.19)                                        | 5.43<br>(3.12 to<br>8.86)                                        |
| Acute hepatitis E                     |                                                                        |                                                                        |                                                                        |                                                                        |                                                                  |                                                                  |                                                                  |                                                                  |
|                                       | 1,696.72<br>(1,421.65 to<br>2,251.34)                                  | 1,673.12<br>(1,365.82 to<br>2,116.26)                                  | 1,659.88<br>(1,344.81 to<br>2,111.31)                                  | 1,662.33<br>(1,354.25 to<br>2,107.84)                                  | 45.27<br>(37.93 to<br>66.94)                                     | 63.03<br>(51.55 to<br>87.04)                                     | 66.94<br>(54.44 to<br>92.98)                                     | 58.41<br>(47.94 to<br>80.01)                                     |
| Other unspecified infectious diseases |                                                                        |                                                                        |                                                                        |                                                                        |                                                                  |                                                                  |                                                                  |                                                                  |
| <b>Non-communicable diseases</b>      | <b>3,849,499.83</b><br><b>(3,544,486.50 to</b><br><b>4,177,392.85)</b> | <b>2,702,313.67</b><br><b>(2,093,810.24 to</b><br><b>3,542,612.14)</b> | <b>2,152,355.18</b><br><b>(1,676,970.79 to</b><br><b>2,780,384.58)</b> | <b>3,581,728.72</b><br><b>(2,709,522.90 to</b><br><b>4,715,090.59)</b> | <b>236,837.84</b><br><b>(219,395.32 to</b><br><b>255,725.50)</b> | <b>200,280.28</b><br><b>(155,708.40 to</b><br><b>265,215.40)</b> | <b>169,332.56</b><br><b>(133,030.13 to</b><br><b>225,139.56)</b> | <b>247,735.62</b><br><b>(193,810.37 to</b><br><b>317,165.19)</b> |

| Romania                              |                                                     |                                                   |                                                 |                                                     |                                              |                                              |                                              |                                              |
|--------------------------------------|-----------------------------------------------------|---------------------------------------------------|-------------------------------------------------|-----------------------------------------------------|----------------------------------------------|----------------------------------------------|----------------------------------------------|----------------------------------------------|
| Cause                                | YLLs (actual counts)                                |                                                   |                                                 |                                                     | Deaths (actual counts)                       |                                              |                                              |                                              |
|                                      | 2016                                                | 2040 Forecast                                     | 2040 Better Scenario                            | 2040 Worse Scenario                                 | 2016                                         | 2040 Forecast                                | 2040 Better Scenario                         | 2040 Worse Scenario                          |
| <b>Neoplasms</b>                     | <b>1,042,245.35</b><br>(953,326.21 to 1,145,166.74) | <b>846,640.35</b><br>(675,275.84 to 1,054,801.21) | <b>695,228.71</b><br>(552,244.37 to 858,528.56) | <b>1,021,776.14</b><br>(805,081.74 to 1,256,835.07) | <b>46,932.70</b><br>(43,135.04 to 51,265.59) | <b>44,560.54</b><br>(37,095.71 to 52,660.53) | <b>38,255.32</b><br>(31,732.32 to 45,503.65) | <b>51,400.30</b><br>(43,011.56 to 60,225.02) |
| Lip and oral cavity cancer           | 27,426.47<br>(23,617.24 to 32,242.86)               | 19,105.97<br>(8,637.02 to 33,635.04)              | 12,859.35<br>(5,727.04 to 24,484.93)            | 26,715.24<br>(12,881.90 to 41,165.05)               | 1,045.66<br>(910.82 to 1,205.19)             | 829.42<br>(406.28 to 1,410.45)               | 567.05<br>(279.23 to 1,018.88)               | 1,152.90<br>(588.62 to 1,766.58)             |
| Nasopharynx cancer                   | 5,983.13<br>(5,223.76 to 6,852.53)                  | 3,347.58<br>(1,465.69 to 6,601.65)                | 2,057.73<br>(900.37 to 4,311.11)                | 5,182.51<br>(2,291.22 to 9,032.39)                  | 201.00<br>(176.43 to 228.15)                 | 125.89<br>(57.44 to 242.86)                  | 77.68<br>(36.08 to 154.66)                   | 194.75<br>(88.38 to 342.31)                  |
| Other pharynx cancer                 | 23,868.05<br>(20,400.89 to 27,966.28)               | 16,295.30<br>(7,041.73 to 32,510.34)              | 15,237.39<br>(6,603.14 to 30,360.91)            | 18,786.02<br>(7,886.60 to 36,608.39)                | 842.46<br>(726.30 to 979.14)                 | 643.09<br>(290.36 to 1,248.07)               | 605.77<br>(277.16 to 1,197.49)               | 729.40<br>(322.09 to 1,403.29)               |
| Esophageal cancer                    | 18,455.77<br>(15,830.12 to 21,380.81)               | 16,491.07<br>(7,539.63 to 32,231.70)              | 12,256.20<br>(5,792.30 to 23,949.24)            | 22,246.43<br>(9,769.82 to 44,602.10)                | 752.96<br>(653.88 to 863.08)                 | 759.13<br>(376.44 to 1,412.13)               | 581.01<br>(302.54 to 1,063.39)               | 997.80<br>(479.36 to 1,878.24)               |
| Stomach cancer                       | 68,229.24<br>(61,489.78 to 76,024.96)               | 34,803.99<br>(24,579.58 to 47,347.04)             | 27,772.92<br>(20,439.20 to 37,477.88)           | 42,988.54<br>(29,246.77 to 60,913.80)               | 3,356.72<br>(3,041.36 to 3,725.66)           | 1,985.35<br>(1,462.87 to 2,642.83)           | 1,655.81<br>(1,265.50 to 2,214.71)           | 2,346.47<br>(1,686.79 to 3,233.40)           |
| Colon and rectum cancer              | 112,911.73<br>(101,391.82 to 126,067.13)            | 94,644.59<br>(58,984.58 to 155,729.93)            | 73,612.54<br>(46,612.05 to 117,962.91)          | 115,308.34<br>(68,824.47 to 189,808.47)             | 5,874.21<br>(5,290.12 to 6,521.20)           | 5,676.46<br>(3,658.88 to 8,977.21)           | 4,592.36<br>(2,968.63 to 7,110.41)           | 6,618.99<br>(4,132.24 to 10,197.81)          |
| Liver cancer                         | 60,565.61<br>(53,488.63 to 68,359.84)               | 74,219.31<br>(47,010.39 to 113,715.33)            | 61,006.30<br>(40,691.89 to 88,328.76)           | 87,068.69<br>(52,981.84 to 140,306.43)              | 2,856.72<br>(2,531.45 to 3,210.21)           | 3,958.07<br>(2,606.20 to 5,867.48)           | 3,400.06<br>(2,361.94 to 4,761.97)           | 4,446.30<br>(2,800.56 to 6,833.50)           |
| Liver cancer due to hepatitis B      | 17,617.14<br>(13,074.57 to 22,708.70)               | 21,107.01<br>(11,980.85 to 36,674.84)             | 18,584.87<br>(11,329.21 to 29,760.81)           | 22,270.69<br>(12,257.92 to 39,686.58)               | 767.93<br>(557.83 to 1,003.41)               | 1,045.90<br>(602.20 to 1,776.53)             | 960.71<br>(590.95 to 1,514.57)               | 1,062.35<br>(602.51 to 1,835.20)             |
| Liver cancer due to hepatitis C      | 13,467.11<br>(9,504.43 to 17,891.07)                | 17,477.84<br>(9,943.08 to 28,479.71)              | 15,754.69<br>(9,607.52 to 24,313.47)            | 18,136.13<br>(9,754.05 to 30,597.81)                | 693.06<br>(500.96 to 924.83)                 | 1,008.06<br>(594.98 to 1,591.84)             | 954.88<br>(601.35 to 1,439.03)               | 1,000.89<br>(568.29 to 1,647.90)             |
| Liver cancer due to alcohol use      | 20,142.91<br>(16,691.11 to 24,197.46)               | 23,758.11<br>(14,768.27 to 37,233.45)             | 16,241.93<br>(10,559.53 to 24,514.55)           | 34,156.29<br>(20,147.61 to 54,493.40)               | 971.44<br>(801.07 to 1,157.94)               | 1,287.90<br>(817.79 to 1,984.07)             | 919.16<br>(612.64 to 1,356.96)               | 1,759.91<br>(1,096.94 to 2,720.47)           |
| Liver cancer due to other causes     | 9,338.45<br>(7,680.04 to 11,216.92)                 | 11,876.35<br>(6,605.41 to 20,387.75)              | 10,424.82<br>(6,169.33 to 16,448.51)            | 12,505.57<br>(6,665.83 to 22,110.79)                | 424.29<br>(346.95 to 510.82)                 | 561.21<br>(348.82 to 1,005.98)               | 616.21<br>(346.07 to 868.56)                 | 623.15<br>(345.80 to 1,065.77)               |
| Gallbladder and biliary tract cancer | 11,334.74<br>(10,140.97 to 12,740.92)               | 7,550.60<br>(6,448.76 to 8,840.95)                | 7,614.27<br>(6,433.19 to 9,112.74)              | 7,385.55<br>(6,382.82 to 8,518.89)                  | 586.27<br>(527.28 to 662.40)                 | 452.00<br>(391.08 to 512.50)                 | 470.68<br>(401.62 to 550.87)                 | 426.15<br>(372.04 to 481.56)                 |
| Pancreatic cancer                    | 59,201.98<br>(53,720.20 to 65,709.92)               | 64,601.41<br>(50,811.81 to 81,240.07)             | 61,233.76<br>(48,435.26 to 77,003.37)           | 66,193.76<br>(52,060.45 to 84,008.85)               | 2,861.60<br>(2,603.89 to 3,157.61)           | 3,522.05<br>(2,839.77 to 4,313.59)           | 3,480.91<br>(2,858.74 to 4,228.53)           | 3,468.21<br>(2,811.34 to 4,299.16)           |
| Larynx cancer                        | 23,787.68<br>(20,502.60 to 27,528.22)               | 14,867.13<br>(5,853.71 to 31,381.72)              | 8,957.88<br>(2,503.78 to 20,365.42)             | 23,067.81<br>(9,054.89 to 44,283.99)                | 940.00<br>(818.33 to 1,086.96)               | 647.05<br>(268.53 to 1,313.08)               | 388.39<br>(166.02 to 823.18)                 | 1,006.77<br>(419.55 to 1,893.29)             |
| Tracheal, bronchus, and lung cancer  | 219,069.57<br>(195,272.07 to 249,251.21)            | 172,746.88<br>(121,965.05 to 245,615.14)          | 110,876.78<br>(78,541.06 to 154,761.06)         | 256,013.01<br>(180,387.83 to 364,919.39)            | 9,402.18<br>(8,418.08 to 10,600.26)          | 8,220.03<br>(6,024.40 to 11,397.25)          | 5,412.56<br>(3,992.04 to 7,293.42)           | 11,885.36<br>(8,691.57 to 16,632.96)         |
| Malignant skin melanoma              | 9,952.39<br>(7,947.64 to 11,553.32)                 | 10,537.99<br>(8,332.21 to 13,353.63)              | 12,266.40<br>(9,667.47 to 15,103.04)            | 8,925.93<br>(6,889.10 to 10,905.96)                 | 395.86<br>(316.09 to 457.42)                 | 524.44<br>(444.56 to 660.18)                 | 632.89<br>(504.77 to 780.85)                 | 425.87<br>(330.10 to 521.42)                 |
| Non-melanoma skin cancer             | 8,186.36<br>(7,313.77 to 9,176.29)                  | 7,309.72<br>(5,751.16 to 8,924.28)                | 6,645.61<br>(5,297.23 to 7,974.34)              | 7,925.46<br>(6,227.72 to 9,816.18)                  | 492.33<br>(444.56 to 546.96)                 | 563.63<br>(443.02 to 698.81)                 | 540.26<br>(422.95 to 667.33)                 | 575.95<br>(434.23 to 727.49)                 |
| Breast cancer                        | 70,084.42<br>(59,723.86 to 81,636.71)               | 50,847.77<br>(34,456.25 to 71,430.04)             | 40,473.99<br>(28,589.70 to 55,702.52)           | 60,454.92<br>(40,596.60 to 87,306.80)               | 3,110.62<br>(2,663.51 to 3,595.61)           | 2,718.73<br>(1,917.30 to 3,754.47)           | 2,263.29<br>(1,648.23 to 3,070.75)           | 3,095.70<br>(2,179.11 to 4,315.52)           |
| Cervical cancer                      | 46,849.53<br>(40,141.57 to 55,243.50)               | 20,265.74<br>(14,198.55 to 28,682.29)             | 16,448.84<br>(11,896.49 to 21,742.08)           | 24,954.11<br>(17,111.11 to 36,144.52)               | 1,742.14<br>(1,495.69 to 2,045.97)           | 882.13<br>(656.18 to 1,195.42)               | 740.84<br>(563.40 to 941.63)                 | 1,048.87<br>(758.49 to 1,441.78)             |

|                   |                                          |                                          |                                          |                                          |                                       |                                       |                                       |                                       |
|-------------------|------------------------------------------|------------------------------------------|------------------------------------------|------------------------------------------|---------------------------------------|---------------------------------------|---------------------------------------|---------------------------------------|
|                   | 9,961.87<br>(8,347.24 to<br>11,867.86)   | 8,404.19<br>(6,453.25 to<br>10,569.54)   | 7,701.23<br>(5,915.51 to<br>9,762.48)    | 9,140.18<br>(6,962.64 to<br>11,439.50)   | 469.84<br>(394.98 to<br>559.11)       | 465.99<br>(369.06 to<br>571.13)       | 438.77<br>(349.70 to<br>533.16)       | 491.82<br>(389.76 to<br>601.64)       |
| Uterine cancer    |                                          |                                          |                                          |                                          |                                       |                                       |                                       |                                       |
|                   | 25,387.01<br>(20,825.32 to<br>30,129.48) | 17,949.40<br>(13,328.27 to<br>23,724.37) | 16,293.07<br>(12,061.20 to<br>21,148.76) | 19,597.95<br>(14,033.05 to<br>26,484.32) | 1,059.23<br>(871.52 to<br>1,250.43)   | 857.76<br>(647.04 to<br>1,119.05)     | 792.74<br>(604.84 to<br>1,017.04)     | 915.61<br>(674.61 to<br>1,206.18)     |
| Ovarian cancer    |                                          |                                          |                                          |                                          |                                       |                                       |                                       |                                       |
|                   | 31,831.06<br>(26,804.05 to<br>38,335.91) | 35,239.63<br>(28,132.38 to<br>43,418.63) | 34,359.66<br>(27,734.07 to<br>43,055.98) | 35,025.47<br>(27,464.40 to<br>42,909.86) | 2,180.88<br>(1,837.84 to<br>2,704.89) | 2,757.68<br>(2,207.81 to<br>3,424.93) | 2,818.89<br>(2,281.31 to<br>3,607.66) | 2,600.28<br>(1,959.58 to<br>3,202.13) |
| Prostate cancer   |                                          |                                          |                                          |                                          |                                       |                                       |                                       |                                       |
|                   | 2,201.05<br>(1,800.87 to<br>2,670.34)    | 1,021.72<br>(738.06 to<br>1,440.89)      | 910.08<br>(634.76 to<br>1,302.74)        | 1,144.10<br>(797.78 to<br>1,620.65)      | 58.46<br>(48.64 to<br>69.50)          | 34.44<br>(26.28 to<br>44.10)          | 31.99<br>(23.94 to<br>41.33)          | 36.64<br>(27.75 to<br>47.00)          |
| Testicular cancer |                                          |                                          |                                          |                                          |                                       |                                       |                                       |                                       |

| Romania                         |                                                                 |                                                             |                                                          |                                                              |                                          |                                          |                                         |                                          |
|---------------------------------|-----------------------------------------------------------------|-------------------------------------------------------------|----------------------------------------------------------|--------------------------------------------------------------|------------------------------------------|------------------------------------------|-----------------------------------------|------------------------------------------|
| Cause                           | YLLs (actual counts)                                            |                                                             |                                                          |                                                              | Deaths (actual counts)                   |                                          |                                         |                                          |
|                                 | 2016                                                            | 2040 Forecast                                               | 2040 Better Scenario                                     | 2040 Worse Scenario                                          | 2016                                     | 2040 Forecast                            | 2040 Better Scenario                    | 2040 Worse Scenario                      |
| Kidney cancer                   | 19,007.46<br>(17,010.53 to 21,244.13)                           | 19,822.54<br>(13,976.17 to 27,588.82)                       | 19,237.92<br>(14,118.45 to 26,098.80)                    | 19,846.59<br>(13,712.63 to 28,058.53)                        | 843.26<br>(761.29 to 937.54)             | 1,023.15<br>(758.22 to 1,361.09)         | 1,037.27<br>(793.82 to 1,348.07)        | 981.59<br>(705.11 to 1,354.68)           |
| Bladder cancer                  | 24,855.61<br>(21,847.46 to 28,007.14)                           | 22,895.16<br>(17,001.60 to 30,806.10)                       | 19,909.76<br>(15,045.39 to 25,936.30)                    | 25,284.36<br>(18,087.51 to 34,881.37)                        | 1,422.67<br>(1,266.19 to 1,602.04)       | 1,488.47<br>(1,135.96 to 1,920.85)       | 1,375.54<br>(1,078.84 to 1,736.10)      | 1,555.76<br>(1,154.88 to 2,056.54)       |
| Brain and nervous system cancer | 41,841.85<br>(26,798.89 to 48,918.05)                           | 31,938.73<br>(21,503.06 to 38,486.18)                       | 30,654.09<br>(21,112.76 to 37,109.50)                    | 32,992.50<br>(21,698.71 to 39,678.98)                        | 1,472.59<br>(913.15 to 1,729.96)         | 1,309.79<br>(831.61 to 1,576.40)         | 1,287.90<br>(841.98 to 1,539.53)        | 1,315.51<br>(803.17 to 1,571.14)         |
| Thyroid cancer                  | 3,148.59<br>(2,770.96 to 3,562.69)                              | 2,692.18<br>(1,876.34 to 3,867.74)                          | 2,350.48<br>(1,666.52 to 3,228.90)                       | 3,029.03<br>(2,096.08 to 4,372.35)                           | 149.55<br>(132.12 to 169.76)             | 145.60<br>(104.22 to 203.27)             | 130.26<br>(95.90 to 176.98)             | 158.23<br>(111.63 to 223.12)             |
| Mesothelioma                    | 1,781.98<br>(1,572.98 to 2,043.27)                              | 1,636.77<br>(1,339.88 to 2,003.45)                          | 1,702.82<br>(1,380.77 to 2,117.37)                       | 1,553.98<br>(1,286.43 to 1,881.44)                           | 70.91<br>(63.10 to 82.07)                | 78.01<br>(65.27 to 94.39)                | 83.35<br>(69.17 to 102.60)              | 71.78<br>(60.85 to 85.75)                |
| Hodgkin lymphoma                | 3,630.86<br>(2,892.58 to 4,135.44)                              | 1,679.35<br>(1,234.62 to 2,216.91)                          | 1,382.77<br>(1,021.18 to 1,759.38)                       | 2,034.98<br>(1,438.87 to 2,745.78)                           | 115.02<br>(96.88 to 130.17)              | 63.40<br>(48.52 to 81.24)                | 53.43<br>(40.72 to 66.69)               | 74.64<br>(55.58 to 97.51)                |
| Non-Hodgkin lymphoma            | 19,840.89<br>(17,603.12 to 22,459.59)                           | 13,911.84<br>(11,092.06 to 18,064.32)                       | 12,603.39<br>(10,039.18 to 16,195.95)                    | 15,109.79<br>(11,705.74 to 19,851.20)                        | 775.39<br>(686.25 to 897.58)             | 667.63<br>(539.68 to 864.95)             | 626.57<br>(506.79 to 810.69)            | 696.93<br>(555.49 to 909.40)             |
| Multiple myeloma                | 7,883.25<br>(6,557.06 to 9,478.19)                              | 7,411.30<br>(5,745.66 to 9,783.71)                          | 6,997.11<br>(5,466.60 to 9,276.59)                       | 7,698.55<br>(5,908.67 to 10,216.13)                          | 366.28<br>(317.09 to 470.80)             | 394.04<br>(307.41 to 548.02)             | 383.89<br>(301.20 to 547.05)            | 395.25<br>(311.16 to 536.99)             |
| Leukemia                        | 33,491.64<br>(30,351.12 to 37,237.23)                           | 26,331.76<br>(19,845.20 to 34,378.83)                       | 23,154.80<br>(17,558.73 to 29,609.28)                    | 29,191.24<br>(21,218.13 to 39,274.54)                        | 1,337.71<br>(1,206.68 to 1,489.05)       | 1,291.17<br>(991.51 to 1,647.93)         | 1,180.54<br>(920.94 to 1,477.44)        | 1,373.12<br>(1,023.03 to 1,833.60)       |
| Acute lymphoid leukemia         | 5,763.16<br>(5,117.19 to 6,453.11)                              | 3,282.14<br>(2,398.88 to 4,303.27)                          | 2,767.64<br>(2,098.11 to 3,601.90)                       | 3,792.65<br>(2,719.63 to 5,095.10)                           | 164.29<br>(143.49 to 185.50)             | 120.87<br>(92.41 to 158.61)              | 104.62<br>(80.95 to 132.45)             | 135.65<br>(100.06 to 181.13)             |
| Chronic lymphoid leukemia       | 4,587.84<br>(4,139.66 to 6,078.24)                              | 4,383.82<br>(3,073.66 to 6,149.18)                          | 3,995.70<br>(2,880.56 to 5,561.06)                       | 4,641.95<br>(3,151.00 to 6,647.43)                           | 266.86<br>(220.73 to 325.92)             | 263.52<br>(191.55 to 353.10)             | 251.08<br>(187.79 to 331.72)            | 266.76<br>(190.81 to 364.84)             |
| Acute myeloid leukemia          | 11,322.80<br>(9,755.81 to 12,797.44)                            | 10,691.79<br>(8,091.45 to 13,958.32)                        | 9,809.15<br>(7,560.03 to 12,468.33)                      | 11,338.95<br>(8,410.47 to 14,990.64)                         | 419.09<br>(362.22 to 476.73)             | 478.10<br>(365.64 to 615.61)             | 453.21<br>(352.85 to 566.85)            | 489.24<br>(364.28 to 645.56)             |
| Chronic myeloid leukemia        | 1,690.75<br>(1,473.61 to 1,976.68)                              | 602.25<br>(394.63 to 884.33)                                | 440.70<br>(305.72 to 635.84)                             | 802.53<br>(1,221.01)                                         | 72.10<br>(63.19 to 83.27)                | 31.15<br>(21.57 to 43.69)                | 23.97<br>(17.60 to 32.39)               | 39.40<br>(26.17 to 58.38)                |
| Other leukemia                  | 9,727.10<br>(8,613.70 to 11,127.96)                             | 7,371.76<br>(5,236.56 to 10,144.30)                         | 6,141.62<br>(4,498.99 to 8,176.66)                       | 8,615.16<br>(5,897.75 to 12,221.05)                          | 415.38<br>(362.59 to 473.72)             | 397.53<br>(293.76 to 530.77)             | 347.66<br>(265.19 to 444.66)            | 442.07<br>(314.24 to 608.88)             |
| Other neoplasms                 | 51,475.53<br>(45,956.17 to 57,531.37)                           | 48,070.73<br>(41,659.20 to 54,937.78)                       | 48,671.59<br>(41,496.86 to 56,678.21)                    | 46,911.12<br>(40,879.17 to 53,335.46)                        | 2,150.18<br>(1,934.58 to 2,408.70)       | 2,475.94<br>(2,202.33 to 2,787.41)       | 2,604.61<br>(2,284.00 to 2,988.64)      | 2,313.65<br>(2,062.55 to 2,583.82)       |
| <b>Cardiovascular diseases</b>  | <b>20,037,646.54</b><br><b>(18,747,666.64 to 22,114,766.52)</b> | <b>11,407,787.43</b><br><b>(748,178.85 to 1,745,128.65)</b> | <b>804,285.24</b><br><b>(536,970.89 to 1,224,702.15)</b> | <b>1,748,525.28</b><br><b>(1,116,182.53 to 2,583,472.23)</b> | <b>148,490.17</b><br><b>(160,097.97)</b> | <b>103,562.99</b><br><b>(158,365.83)</b> | <b>79,961.90</b><br><b>(125,575.80)</b> | <b>142,133.98</b><br><b>(207,271.91)</b> |
| Rheumatic heart disease         | 9,958.40<br>(8,800.86 to 11,186.74)                             | 5,168.49<br>(3,690.52 to 7,412.33)                          | 4,438.27<br>(3,163.01 to 6,343.95)                       | 6,038.73<br>(4,222.14 to 8,572.65)                           | 542.68<br>(478.00 to 605.98)             | 358.23<br>(257.34 to 512.03)             | 324.21<br>(231.03 to 462.19)            | 394.78<br>(282.47 to 561.54)             |
| Ischemic heart disease          | 986,592.60<br>(898,122.73 to 1,082,870.51)                      | 488,979.77<br>(278,467.67 to 833,511.21)                    | 316,704.60<br>(186,179.92 to 522,086.88)                 | 803,588.32<br>(447,505.04 to 1,303,126.04)                   | 73,392.26<br>(67,170.79 to 80,231.38)    | 45,245.75<br>(25,711.40 to 77,126.60)    | 32,574.69<br>(19,095.40 to 55,040.96)   | 65,519.78<br>(38,658.39 to 104,832.28)   |
| Stroke                          | 679,095.31<br>(614,412.48 to 749,888.79)                        | 286,048.47<br>(157,541.69 to 491,902.83)                    | 177,976.80<br>(101,743.62 to 295,620.55)                 | 491,197.23<br>(264,760.07 to 856,458.12)                     | 49,041.81<br>(44,527.01 to 54,189.50)    | 24,981.20<br>(13,943.53 to 42,202.48)    | 17,240.67<br>(9,968.84 to 28,936.62)    | 37,894.77<br>(21,003.95 to 62,980.33)    |
| Ischemic stroke                 | 327,374.92<br>(294,694.46 to 364,107.50)                        | 140,029.25<br>(76,968.84 to 246,225.10)                     | 96,102.30<br>(52,203.13 to 167,978.73)                   | 216,626.85<br>(116,462.92 to 380,800.17)                     | 26,801.35<br>(24,183.97 to 29,754.59)    | 13,847.31<br>(7,592.42 to 24,680.02)     | 10,311.52<br>(5,582.47 to 18,779.30)    | 19,349.58<br>(10,298.73 to 34,533.31)    |

|                                |                                             |                                            |                                            |                                             |                                          |                                         |                                         |                                         |
|--------------------------------|---------------------------------------------|--------------------------------------------|--------------------------------------------|---------------------------------------------|------------------------------------------|-----------------------------------------|-----------------------------------------|-----------------------------------------|
|                                | 351,720.40<br>(317,163.83 to<br>389,236.92) | 146,019.22<br>(72,491.58 to<br>272,457.96) | 81,874.49<br>(44,801.97 to<br>144,706.24)  | 274,570.37<br>(135,533.95 to<br>514,952.52) | 22,240.46<br>(20,059.87 to<br>24,668.21) | 11,133.89<br>(5,833.69 to<br>19,583.55) | 6,929.15<br>(3,928.40 to<br>12,134.89)  | 18,545.19<br>(9,761.07 to<br>31,944.94) |
| Intracerebral hemorrhage       |                                             |                                            |                                            |                                             |                                          |                                         |                                         |                                         |
|                                | 133,446.54<br>(60,752.10 to<br>174,344.61)  | 169,920.88<br>(76,331.23 to<br>424,070.51) | 139,376.00<br>(64,089.19 to<br>339,696.09) | 224,131.92<br>(100,423.13 to<br>586,592.83) | 10,675.07<br>(4,452.34 to<br>14,137.51)  | 16,737.06<br>(6,993.76 to<br>42,522.03) | 14,646.52<br>(6,134.28 to<br>37,301.12) | 20,785.13<br>(8,611.72 to<br>55,372.39) |
| Hypertensive heart disease     |                                             |                                            |                                            |                                             |                                          |                                         |                                         |                                         |
|                                | 128,940.77<br>(96,005.54 to<br>149,271.72)  | 91,692.94<br>(63,263.50 to<br>131,255.76)  | 81,783.87<br>(57,177.86 to<br>117,459.37)  | 108,654.06<br>(71,982.36 to<br>153,943.45)  | 8,215.79<br>(6,148.20 to<br>9,467.82)    | 7,866.81<br>(4,866.68 to<br>12,433.01)  | 7,443.91<br>(4,740.09 to<br>11,569.33)  | 8,608.88<br>(5,219.93 to<br>13,669.71)  |
| Cardiomyopathy and myocarditis |                                             |                                            |                                            |                                             |                                          |                                         |                                         |                                         |
|                                | 20,781.65<br>(12,230.24 to<br>26,854.45)    | 25,037.71<br>(16,994.42 to<br>31,497.11)   | 26,319.38<br>(18,497.68 to<br>32,954.91)   | 23,514.68<br>(14,866.99 to<br>30,125.69)    | 1,312.89<br>(858.03 to<br>1,618.36)      | 2,230.77<br>(1,557.01 to<br>2,827.48)   | 2,514.07<br>(1,831.33 to<br>3,200.09)   | 1,933.90<br>(1,256.61 to<br>2,478.35)   |
| Myocarditis                    |                                             |                                            |                                            |                                             |                                          |                                         |                                         |                                         |

| Romania                                                       |                                                  |                                                  |                                                  |                                                  |                                              |                                             |                                             |                                              |
|---------------------------------------------------------------|--------------------------------------------------|--------------------------------------------------|--------------------------------------------------|--------------------------------------------------|----------------------------------------------|---------------------------------------------|---------------------------------------------|----------------------------------------------|
| Cause                                                         | YLLs (actual counts)                             |                                                  |                                                  |                                                  | Deaths (actual counts)                       |                                             |                                             |                                              |
|                                                               | 2016                                             | 2040 Forecast                                    | 2040 Better Scenario                             | 2040 Worse Scenario                              | 2016                                         | 2040 Forecast                               | 2040 Better Scenario                        | 2040 Worse Scenario                          |
| Alcoholic cardiomyopathy                                      | 23,317.49<br>(16,373.22 to 29,890.21)            | 16,979.91<br>(12,042.14 to 23,698.53)            | 14,229.68<br>(9,738.45 to 20,303.39)             | 23,508.56<br>(16,938.56 to 31,605.94)            | 919.56<br>(626.12 to 1,169.84)               | 749.91<br>(537.07 to 1,027.46)              | 641.71<br>(444.19 to 905.12)                | 1,006.45<br>(711.88 to 1,319.31)             |
| Other cardiomyopathy                                          | 84,841.64<br>(61,040.26 to 99,613.36)            | 49,675.32<br>(26,590.54 to 86,292.68)            | 41,234.81<br>(22,336.97 to 73,333.76)            | 61,630.82<br>(32,072.31 to 101,552.86)           | 5,983.34<br>(4,412.60 to 6,996.95)           | 4,886.13<br>(2,413.66 to 9,504.47)          | 4,288.13<br>(2,105.99 to 8,155.27)          | 5,668.54<br>(2,720.86 to 10,645.12)          |
| Atrial fibrillation and flutter                               | 13,933.22<br>(10,762.19 to 17,790.69)            | 18,961.38<br>(12,342.92 to 28,259.80)            | 17,799.34<br>(11,698.38 to 26,827.15)            | 19,701.11<br>(13,168.01 to 28,276.85)            | 1,475.54<br>(1,118.16 to 1,920.79)           | 2,289.22<br>(1,463.50 to 3,470.77)          | 2,260.15<br>(1,443.72 to 3,494.71)          | 2,251.06<br>(1,446.88 to 3,368.96)           |
| Aortic aneurysm                                               | 14,987.43<br>(13,395.29 to 16,718.97)            | 10,353.16<br>(7,819.80 to 14,081.67)             | 9,354.70<br>(6,992.93 to 12,876.94)              | 11,156.41<br>(8,426.22 to 14,789.08)             | 839.76<br>(757.98 to 932.06)                 | 733.56<br>(568.26 to 964.44)                | 725.53<br>(548.67 to 987.94)                | 727.36<br>(571.68 to 938.32)                 |
| Peripheral artery disease                                     | 8,369.13<br>(6,128.17 to 11,762.23)              | 13,421.26<br>(8,591.32 to 21,842.59)             | 12,910.31<br>(8,234.31 to 22,150.36)             | 13,744.91<br>(8,497.42 to 21,242.31)             | 574.35<br>(443.28 to 912.19)                 | 1,127.39<br>(701.36 to 2,031.75)            | 1,172.50<br>(705.17 to 2,226.68)            | 1,066.44<br>(675.25 to 1,804.94)             |
| Endocarditis                                                  | 3,563.60<br>(2,824.50 to 4,980.62)               | 3,355.68<br>(2,221.91 to 5,474.14)               | 3,344.10<br>(2,193.06 to 5,533.86)               | 3,485.40<br>(2,313.70 to 5,542.84)               | 166.42<br>(133.86 to 242.48)                 | 210.41<br>(136.85 to 339.31)                | 221.76<br>(142.81 to 362.94)                | 203.86<br>(131.75 to 327.89)                 |
| Other cardiovascular and circulatory diseases                 | 58,959.55<br>(51,873.92 to 66,440.24)            | 52,885.41<br>(35,453.41 to 77,959.34)            | 40,597.26<br>(27,585.36 to 59,185.49)            | 66,827.20<br>(44,113.24 to 99,148.53)            | 3,566.49<br>(3,155.80 to 4,018.33)           | 4,013.36<br>(2,787.19 to 5,829.85)          | 3,351.96<br>(2,321.58 to 4,857.75)          | 4,681.91<br>(3,265.46 to 6,589.48)           |
| <b>Chronic respiratory diseases</b>                           | <b>113,376.93<br/>(102,792.58 to 126,313.40)</b> | <b>115,879.34<br/>(87,031.67 to 156,127.54)</b>  | <b>94,532.20<br/>(73,546.19 to 121,489.20)</b>   | <b>156,903.14<br/>(110,181.03 to 223,886.63)</b> | <b>7,298.32<br/>(6,690.67 to 8,040.39)</b>   | <b>9,067.66<br/>(7,029.85 to 11,719.21)</b> | <b>8,082.94<br/>(6,405.72 to 10,190.47)</b> | <b>11,186.44<br/>(8,125.25 to 15,073.72)</b> |
| Chronic obstructive pulmonary disease                         | 100,267.29<br>(87,287.38 to 113,044.24)          | 95,424.31<br>(64,019.68 to 134,708.23)           | 69,449.83<br>(45,490.24 to 95,947.16)            | 140,158.34<br>(91,633.77 to 205,171.99)          | 6,523.01<br>(5,786.50 to 7,246.77)           | 7,583.33<br>(5,270.73 to 10,414.37)         | 6,179.38<br>(4,252.75 to 8,264.44)          | 10,031.00<br>(6,774.17 to 14,056.24)         |
| Pneumoconiosis                                                | 383.07<br>(487.09 to 692.48)                     | 455.26<br>(315.62 to 641.08)                     | 483.83<br>(318.73 to 705.43)                     | 472.98<br>(334.97 to 642.63)                     | 32.46<br>(27.48 to 37.92)                    | 36.85<br>(24.57 to 54.94)                   | 41.61<br>(26.93 to 63.00)                   | 35.64<br>(23.93 to 50.81)                    |
| Silicosis                                                     | 417.85<br>(325.27 to 511.07)                     | 142.88<br>(66.74 to 244.72)                      | 120.98<br>(51.03 to 208.78)                      | 179.45<br>(85.56 to 308.66)                      | 22.35<br>(17.45 to 27.10)                    | 9.19<br>(4.46 to 15.93)                     | 8.08<br>(3.53 to 14.47)                     | 10.99<br>(5.35 to 18.89)                     |
| Asbestosis                                                    | 47.69<br>(36.31 to 84.76)                        | 87.31<br>(58.86 to 134.76)                       | 102.78<br>(71.28 to 153.43)                      | 74.10<br>(48.58 to 124.34)                       | 2.28<br>(1.68 to 4.51)                       | 6.15<br>(3.74 to 10.51)                     | 7.62<br>(4.82 to 12.39)                     | 4.92<br>(2.94 to 8.83)                       |
| Coal workers pneumoconiosis                                   | 16.87<br>(11.73 to 24.38)                        | 34.38<br>(15.68 to 62.49)                        | 39.52<br>(16.44 to 73.49)                        | 32.16<br>(15.95 to 57.28)                        | 1.06<br>(0.73 to 1.58)                       | 2.99<br>(1.23 to 5.80)                      | 3.57<br>(1.42 to 7.28)                      | 2.65<br>(1.16 to 5.04)                       |
| Other pneumoconiosis                                          | 100.66<br>(78.64 to 126.07)                      | 190.69<br>(106.73 to 315.43)                     | 220.56<br>(114.08 to 372.22)                     | 187.28<br>(111.18 to 305.60)                     | 6.77<br>(5.09 to 8.39)                       | 18.52<br>(9.62 to 33.70)                    | 22.35<br>(11.34 to 39.43)                   | 17.08<br>(9.20 to 29.37)                     |
| Asthma                                                        | 3,883.29<br>(3,209.93 to 4,689.16)               | 1,590.01<br>(781.09 to 2,968.33)                 | 1,076.61<br>(525.76 to 1,984.11)                 | 2,236.11<br>(1,045.56 to 4,370.59)               | 248.17<br>(205.29 to 293.91)                 | 129.54<br>(61.38 to 247.96)                 | 94.04<br>(46.48 to 179.13)                  | 169.80<br>(78.41 to 330.78)                  |
| Interstitial lung disease and pulmonary sarcoidosis           | 8,330.83<br>(5,791.61 to 16,066.35)              | 18,014.18<br>(11,138.31 to 34,314.72)            | 23,116.30<br>(15,926.25 to 39,162.27)            | 13,654.97<br>(8,053.00 to 26,883.93)             | 478.46<br>(335.32 to 912.18)                 | 1,290.35<br>(804.22 to 2,316.26)            | 1,737.30<br>(1,225.40 to 2,831.78)          | 925.56<br>(543.30 to 1,697.31)               |
| Other chronic respiratory diseases                            | 312.45<br>(236.92 to 526.93)                     | 395.59<br>(262.92 to 670.29)                     | 405.63<br>(256.66 to 652.70)                     | 380.75<br>(250.97 to 670.04)                     | 16.22<br>(10.79 to 25.22)                    | 27.59<br>(15.87 to 39.89)                   | 30.60<br>(16.80 to 44.39)                   | 24.44<br>(14.40 to 35.75)                    |
| <b>Cirrhosis and other chronic liver diseases</b>             | <b>258,333.30<br/>(231,436.09 to 286,338.52)</b> | <b>164,445.91<br/>(131,287.55 to 203,708.15)</b> | <b>134,582.51<br/>(107,906.73 to 164,807.96)</b> | <b>208,428.63<br/>(165,368.28 to 258,987.38)</b> | <b>10,131.69<br/>(9,159.11 to 11,184.33)</b> | <b>7,400.90<br/>(6,119.42 to 8,819.04)</b>  | <b>6,165.40<br/>(5,083.91 to 7,244.80)</b>  | <b>9,129.21<br/>(7,500.71 to 10,899.68)</b>  |
| Cirrhosis and other chronic liver diseases due to hepatitis B | 43,109.51<br>(34,761.71 to 52,937.28)            | 27,993.94<br>(20,146.62 to 38,237.98)            | 25,262.86<br>(18,003.29 to 33,767.10)            | 30,804.77<br>(21,951.26 to 41,003.28)            | 1,661.88<br>(1,335.53 to 2,044.64)           | 1,225.58<br>(909.36 to 1,622.17)            | 1,128.71<br>(833.60 to 1,462.83)            | 1,314.77<br>(976.33 to 1,718.32)             |
| Cirrhosis and other chronic liver diseases due to hepatitis C | 62,474.31<br>(44,065.70 to 84,989.43)            | 41,467.56<br>(28,529.04 to 57,967.17)            | 36,984.16<br>(25,572.94 to 51,815.57)            | 46,315.59<br>(30,836.80 to 66,381.71)            | 2,395.28<br>(1,672.65 to 3,239.21)           | 1,790.56<br>(1,212.11 to 2,473.40)          | 1,626.15<br>(1,137.17 to 2,189.08)          | 1,954.38<br>(1,316.22 to 2,767.60)           |

|                                                                |                                                  |                                                  |                                                 |                                                  |                                              |                                              |                                              |                                              |
|----------------------------------------------------------------|--------------------------------------------------|--------------------------------------------------|-------------------------------------------------|--------------------------------------------------|----------------------------------------------|----------------------------------------------|----------------------------------------------|----------------------------------------------|
|                                                                | 99,720.46<br>(78,697.37 to<br>122,048.52)        | 60,787.92<br>(43,864.41 to<br>79,684.37)         | 41,645.72<br>(29,711.40 to<br>54,686.13)        | 93,394.48<br>(68,523.77 to<br>120,947.94)        | 3,960.98<br>(3,125.60 to<br>4,865.47)        | 2,795.70<br>(2,082.87 to<br>3,567.62)        | 1,950.58<br>(1,422.50 to<br>2,517.68)        | 4,146.14<br>(3,152.42 to<br>5,221.56)        |
| Cirrhosis and other chronic liver diseases due to alcohol use  |                                                  |                                                  |                                                 |                                                  |                                              |                                              |                                              |                                              |
|                                                                | 53,029.01<br>(43,797.67 to<br>64,014.60)         | 34,196.49<br>(24,866.97 to<br>44,087.46)         | 30,689.77<br>(22,934.03 to<br>39,409.69)        | 37,913.79<br>(27,656.15 to<br>50,137.46)         | 2,113.56<br>(1,739.26 to<br>2,542.15)        | 1,589.06<br>(1,192.64 to<br>2,003.38)        | 1,459.96<br>(1,108.62 to<br>1,839.48)        | 1,713.92<br>(1,290.60 to<br>2,213.40)        |
| Cirrhosis and other chronic liver diseases due to other causes |                                                  |                                                  |                                                 |                                                  |                                              |                                              |                                              |                                              |
| <b>Digestive diseases</b>                                      | <b>82,416.55</b><br>(71,193.19 to<br>105,166.33) | <b>58,370.04</b><br>(41,326.41 to<br>106,810.32) | <b>51,712.65</b><br>(37,238.77 to<br>91,892.56) | <b>67,376.76</b><br>(44,942.16 to<br>128,167.85) | <b>4,017.97</b><br>(3,508.25 to<br>5,347.18) | <b>3,669.41</b><br>(2,799.09 to<br>6,254.90) | <b>3,479.62</b><br>(2,686.91 to<br>5,966.41) | <b>3,897.70</b><br>(2,885.58 to<br>6,791.65) |
| Peptic ulcer disease                                           | 11,148.48<br>(8,829.73 to<br>13,440.23)          | 3,950.94<br>(2,705.52 to<br>5,678.39)            | 2,959.67<br>(2,140.76 to<br>4,072.16)           | 5,089.75<br>(3,390.84 to<br>7,623.67)            | 531.07<br>(416.45 to<br>642.46)              | 236.52<br>(163.29 to<br>333.20)              | 188.33<br>(135.24 to<br>254.31)              | 287.88<br>(197.09 to<br>416.59)              |



| Romania                                    |                                             |                                             |                                             |                                             |                                          |                                          |                                          |                                          |
|--------------------------------------------|---------------------------------------------|---------------------------------------------|---------------------------------------------|---------------------------------------------|------------------------------------------|------------------------------------------|------------------------------------------|------------------------------------------|
| Cause                                      | YLLs (actual counts)                        |                                             |                                             |                                             | Deaths (actual counts)                   |                                          |                                          |                                          |
|                                            | 2016                                        | 2040 Forecast                               | 2040 Better Scenario                        | 2040 Worse Scenario                         | 2016                                     | 2040 Forecast                            | 2040 Better Scenario                     | 2040 Worse Scenario                      |
| Gastritis and duodenitis                   | 2,342.18<br>(1,690.70 to<br>3,052.23)       | 1,206.21<br>(825.68 to<br>1,698.65)         | 1,061.96<br>(741.86 to<br>1,585.03)         | 1,356.70<br>(912.46 to<br>1,939.66)         | 119.52<br>(85.77 to<br>166.32)           | 79.43<br>(51.56 to<br>121.25)            | 73.93<br>(48.51 to<br>121.27)            | 83.99<br>(53.55 to<br>127.01)            |
| Appendicitis                               | 1,400.22<br>(1,102.89 to<br>2,232.62)       | 660.57<br>(407.76 to<br>1,266.42)           | 535.55<br>(338.04 to<br>1,088.35)           | 811.09<br>(490.73 to<br>1,515.40)           | 58.68<br>(43.49 to<br>113.42)            | 36.70<br>(21.95 to<br>81.40)             | 31.28<br>(18.83 to<br>74.25)             | 42.67<br>(25.35 to<br>92.61)             |
| Paralytic ileus and intestinal obstruction | 13,600.73<br>(10,567.07 to<br>17,383.82)    | 12,961.00<br>(10,368.26 to<br>17,660.07)    | 13,588.60<br>(10,754.57 to<br>18,900.09)    | 12,144.68<br>(9,654.00 to<br>16,070.27)     | 762.72<br>(608.92 to<br>1,038.00)        | 950.12<br>(752.64 to<br>1,365.28)        | 1,048.42<br>(812.24 to<br>1,566.45)      | 840.42<br>(663.37 to<br>1,172.66)        |
| Inguinal, femoral, and abdominal hernia    | 2,267.18<br>(1,572.43 to<br>4,753.96)       | 1,318.32<br>(783.89 to<br>2,980.61)         | 1,240.96<br>(720.51 to<br>2,890.52)         | 1,387.04<br>(833.06 to<br>3,082.77)         | 137.86<br>(89.94 to<br>307.17)           | 99.62<br>(56.47 to<br>235.70)            | 99.00<br>(53.90 to<br>243.35)            | 98.48<br>(56.98 to<br>233.72)            |
| Inflammatory bowel disease                 | 1,672.39<br>(1,289.93 to<br>2,016.88)       | 1,165.70<br>(920.58 to<br>1,574.70)         | 1,178.85<br>(924.29 to<br>1,627.82)         | 1,139.74<br>(895.69 to<br>1,479.06)         | 70.50<br>(55.45 to<br>89.44)             | 70.50<br>(50.74 to<br>94.63)             | 71.51<br>(53.04 to<br>105.09)            | 61.47<br>(47.41 to<br>84.63)             |
| Vascular intestinal disorders              | 14,463.35<br>(11,569.05 to<br>19,714.67)    | 12,541.93<br>(9,763.54 to<br>17,700.44)     | 12,238.96<br>(9,410.43 to<br>17,932.89)     | 12,652.56<br>(9,817.80 to<br>17,810.62)     | 873.04<br>(686.12 to<br>1,216.19)        | 904.85<br>(682.82 to<br>1,289.58)        | 920.88<br>(673.40 to<br>1,373.02)        | 870.21<br>(651.84 to<br>1,201.30)        |
| Gallbladder and biliary diseases           | 3,750.98<br>(3,041.19 to<br>4,769.00)       | 3,555.63<br>(1,944.78 to<br>6,324.37)       | 2,548.71<br>(1,424.78 to<br>4,510.34)       | 4,618.89<br>(2,466.75 to<br>8,062.39)       | 238.44<br>(177.65 to<br>299.29)          | 260.80<br>(133.40 to<br>462.19)          | 200.10<br>(105.45 to<br>354.46)          | 316.37<br>(161.83 to<br>559.11)          |
| Pancreatitis                               | 27,224.76<br>(22,580.61 to<br>36,784.66)    | 17,821.43<br>(5,509.81 to<br>55,957.97)     | 13,258.29<br>(4,046.24 to<br>41,396.34)     | 24,934.52<br>(7,460.72 to<br>77,151.04)     | 1,011.16<br>(827.62 to<br>1,464.47)      | 812.39<br>(256.99 to<br>2,558.09)        | 616.17<br>(204.74 to<br>2,040.74)        | 1,085.60<br>(205.69 to<br>3,297.30)      |
| Other digestive diseases                   | 4,546.27<br>(3,129.48 to<br>5,574.04)       | 3,188.32<br>(2,355.25 to<br>4,131.46)       | 3,101.09<br>(2,326.63 to<br>4,116.29)       | 3,241.79<br>(2,579.87 to<br>4,157.00)       | 224.99<br>(158.63 to<br>282.91)          | 222.10<br>(159.62 to<br>290.67)          | 230.01<br>(167.15 to<br>312.80)          | 210.62<br>(149.79 to<br>299.45)          |
| Neurological disorders                     | 132,894.60<br>(113,571.80 to<br>156,575.63) | 203,888.70<br>(157,620.11 to<br>265,199.74) | 209,472.49<br>(165,003.77 to<br>266,660.21) | 189,744.29<br>(145,575.04 to<br>254,970.90) | 12,392.33<br>(10,482.99 to<br>14,759.50) | 22,624.37<br>(16,594.56 to<br>30,896.62) | 24,473.36<br>(18,384.90 to<br>32,202.90) | 20,009.27<br>(13,781.69 to<br>28,112.52) |
| Alzheimer's disease and other dementias    | 95,701.90<br>(78,893.10 to<br>117,326.93)   | 157,708.11<br>(114,392.14 to<br>217,780.15) | 161,123.60<br>(118,920.44 to<br>217,039.57) | 147,380.68<br>(103,196.03 to<br>212,747.67) | 10,269.32<br>(8,496.89 to<br>12,552.83)  | 19,233.65<br>(13,383.44 to<br>27,383.58) | 20,592.72<br>(14,865.51 to<br>28,333.41) | 17,111.83<br>(11,128.55 to<br>25,174.75) |
| Parkinson's disease                        | 18,544.37<br>(13,865.56 to<br>24,441.60)    | 29,649.25<br>(21,990.82 to<br>38,550.40)    | 33,841.64<br>(25,711.41 to<br>44,695.95)    | 25,179.73<br>(18,054.15 to<br>33,449.64)    | 1,604.56<br>(1,200.91 to<br>2,110.09)    | 2,855.96<br>(2,097.29 to<br>3,813.77)    | 3,370.32<br>(2,538.51 to<br>4,468.56)    | 2,336.08<br>(1,620.84 to<br>3,193.07)    |
| Epilepsy                                   | 10,132.13<br>(8,921.39 to<br>11,606.67)     | 7,967.95<br>(3,817.76 to<br>15,844.62)      | 6,714.88<br>(3,374.20 to<br>13,370.21)      | 9,594.44<br>(4,410.90 to<br>19,878.61)      | 266.15<br>(235.20 to<br>304.03)          | 254.80<br>(129.99 to<br>482.95)          | 220.21<br>(416.37 to<br>416.37)          | 296.50<br>(139.09 to<br>584.36)          |
| Multiple sclerosis                         | 2,993.72<br>(2,384.30 to<br>4,298.36)       | 2,853.75<br>(1,963.23 to<br>4,606.31)       | 2,815.66<br>(1,946.29 to<br>4,535.36)       | 2,798.49<br>(1,919.31 to<br>4,457.63)       | 94.69<br>(74.76 to<br>142.76)            | 104.14<br>(72.13 to<br>174.02)           | 105.50<br>(72.91 to<br>180.03)           | 99.56<br>(69.07 to<br>164.67)            |
| Motor neuron disease                       | 1,689.72<br>(1,489.74 to<br>1,909.47)       | 1,532.91<br>(1,244.40 to<br>1,838.37)       | 1,551.41<br>(1,248.92 to<br>1,879.10)       | 1,499.28<br>(1,235.90 to<br>1,772.77)       | 60.97<br>(53.90 to<br>68.30)             | 66.68<br>(55.65 to<br>77.77)             | 69.07<br>(57.16 to<br>82.01)             | 63.46<br>(53.75 to<br>73.27)             |
| Other neurological disorders               | 3,832.75<br>(3,409.12 to<br>4,236.57)       | 3,376.74<br>(2,798.00 to<br>3,942.02)       | 3,425.31<br>(2,806.61 to<br>4,021.81)       | 3,291.67<br>(2,758.03 to<br>3,836.05)       | 96.65<br>(86.38 to<br>107.40)            | 109.13<br>(93.87 to<br>124.30)           | 115.53<br>(98.82 to<br>132.66)           | 101.83<br>(89.48 to<br>115.21)           |
| Mental disorders                           | 37,569.09<br>(33,019.08 to<br>42,848.09)    | 66,625.59<br>(50,223.18 to<br>84,527.63)    | 77,026.52<br>(60,273.69 to<br>95,549.63)    | 58,371.42<br>(45,424.85 to<br>73,702.91)    | 1,189.41<br>(1,046.85 to<br>1,344.74)    | 2,573.29<br>(2,018.75 to<br>3,162.81)    | 3,095.96<br>(2,519.40 to<br>3,691.53)    | 2,156.56<br>(1,712.87 to<br>2,615.48)    |
| Alcohol use disorders                      | 20,495.75<br>(17,563.24 to<br>23,528.12)    | 21,029.69<br>(15,628.58 to<br>27,520.40)    | 20,903.84<br>(15,596.56 to<br>27,209.96)    | 21,636.86<br>(16,577.45 to<br>27,918.86)    | 628.92<br>(542.85 to<br>721.93)          | 737.39<br>(569.76 to<br>936.07)          | 741.98<br>(569.09 to<br>947.76)          | 745.32<br>(585.07 to<br>938.36)          |
| Drug use disorders                         | 17,063.91<br>(14,833.56 to<br>19,545.72)    | 45,587.44<br>(33,468.52 to<br>59,378.11)    | 56,113.69<br>(43,723.51 to<br>69,939.86)    | 36,726.53<br>(27,705.81 to<br>47,320.10)    | 560.29<br>(489.90 to<br>634.54)          | 1,835.72<br>(1,391.61 to<br>2,322.56)    | 2,353.79<br>(1,894.78 to<br>2,839.90)    | 1,411.08<br>(1,068.82 to<br>1,763.74)    |
| Opioid use disorders                       | 8,800.89<br>(7,299.57 to<br>12,264.22)      | 12,435.69<br>(8,879.82 to<br>22,042.61)     | 13,390.89<br>(9,518.86 to<br>24,780.21)     | 11,456.90<br>(8,316.09 to<br>19,906.25)     | 259.95<br>(217.28 to<br>346.18)          | 426.36<br>(321.20 to<br>673.31)          | 471.84<br>(353.44 to<br>772.46)          | 380.69<br>(293.09 to<br>593.11)          |

|                           |                                       |                                          |                                          |                                          |                                 |                                     |                                       |                                   |
|---------------------------|---------------------------------------|------------------------------------------|------------------------------------------|------------------------------------------|---------------------------------|-------------------------------------|---------------------------------------|-----------------------------------|
|                           | 141.12<br>(66.45 to<br>185.09)        | 500.18<br>(298.56 to<br>714.38)          | 594.68<br>(364.38 to<br>831.69)          | 416.60<br>(229.26 to<br>586.31)          | 3.56<br>(1.79 to<br>4.67)       | 12.94<br>(7.92 to<br>18.49)         | 15.55<br>(9.85 to<br>22.05)           | 10.64<br>(6.32 to<br>15.35)       |
| Cocaine use disorders     |                                       |                                          |                                          |                                          |                                 |                                     |                                       |                                   |
|                           | 684.33<br>(326.51 to<br>903.74)       | 4,549.27<br>(2,756.78 to<br>6,731.00)    | 5,887.64<br>(3,879.55 to<br>8,505.16)    | 3,467.27<br>(1,956.78 to<br>5,349.57)    | 14.50<br>(7.56 to<br>18.86)     | 95.74<br>(59.50 to<br>139.81)       | 124.60<br>(83.72 to<br>178.26)        | 72.56<br>(42.70 to<br>110.51)     |
| Amphetamine use disorders |                                       |                                          |                                          |                                          |                                 |                                     |                                       |                                   |
|                           | 7,437.57<br>(4,891.35 to<br>8,958.86) | 28,102.30<br>(19,810.82 to<br>37,969.08) | 36,240.48<br>(27,198.83 to<br>46,498.89) | 21,385.76<br>(14,820.91 to<br>28,436.07) | 282.27<br>(209.45 to<br>333.26) | 1,300.68<br>(933.34 to<br>1,720.07) | 1,741.80<br>(1,361.83 to<br>2,160.08) | 947.18<br>(659.07 to<br>1,240.99) |
| Other drug use disorders  |                                       |                                          |                                          |                                          |                                 |                                     |                                       |                                   |
|                           | 9.43<br>(7.74 to<br>11.53)            | 8.46<br>(5.68 to<br>12.63)               | 8.99<br>(5.91 to<br>13.58)               | 8.03<br>(5.49 to<br>11.84)               | 0.20<br>(0.16 to<br>0.24)       | 0.18<br>(0.12 to<br>0.27)           | 0.19<br>(0.12 to<br>0.29)             | 0.17<br>(0.11 to<br>0.25)         |
| Eating disorders          |                                       |                                          |                                          |                                          |                                 |                                     |                                       |                                   |

| Romania                                                    |                                                |                                               |                                               |                                                |                                           |                                           |                                           |                                           |
|------------------------------------------------------------|------------------------------------------------|-----------------------------------------------|-----------------------------------------------|------------------------------------------------|-------------------------------------------|-------------------------------------------|-------------------------------------------|-------------------------------------------|
| Cause                                                      | YLLs (actual counts)                           |                                               |                                               |                                                | Deaths (actual counts)                    |                                           |                                           |                                           |
|                                                            | 2016                                           | 2040 Forecast                                 | 2040 Better Scenario                          | 2040 Worse Scenario                            | 2016                                      | 2040 Forecast                             | 2040 Better Scenario                      | 2040 Worse Scenario                       |
| <b>Diabetes, urogenital, blood, and endocrine diseases</b> | <b>100,978.69</b><br>(91,949.70 to 110,297.80) | <b>91,629.41</b><br>(64,622.22 to 128,570.83) | <b>73,805.60</b><br>(52,891.45 to 102,846.64) | <b>111,571.95</b><br>(77,386.32 to 154,848.34) | <b>5,667.35</b><br>(5,176.31 to 6,197.38) | <b>6,343.93</b><br>(4,493.50 to 8,672.28) | <b>5,374.60</b><br>(3,855.44 to 7,419.85) | <b>7,301.08</b><br>(5,219.25 to 9,869.58) |
| Diabetes mellitus                                          | 40,227.25<br>(35,924.65 to 44,731.09)          | 28,779.74<br>(15,958.22 to 50,417.08)         | 21,249.30<br>(12,575.71 to 35,132.25)         | 38,190.55<br>(21,016.25 to 68,218.55)          | 2,197.19<br>(1,975.01 to 2,442.70)        | 1,817.28<br>(1,078.38 to 2,957.76)        | 1,421.42<br>(892.70 to 2,250.13)          | 2,276.19<br>(1,341.67 to 3,828.12)        |
| Acute glomerulonephritis                                   | 126.29<br>(112.06 to 142.54)                   | 80.92<br>(55.37 to 115.61)                    | 71.59<br>(48.57 to 101.08)                    | 91.03<br>(60.66 to 128.24)                     | 3.74<br>(3.23 to 4.27)                    | 2.91<br>(1.91 to 4.27)                    | 2.68<br>(1.77 to 3.86)                    | 3.13<br>(2.09 to 4.55)                    |
| Chronic kidney disease                                     | 49,417.08<br>(44,755.12 to 54,415.63)          | 49,877.03<br>(29,491.29 to 80,471.42)         | 40,211.20<br>(24,824.79 to 65,330.00)         | 59,876.58<br>(34,715.03 to 96,831.04)          | 2,872.44<br>(2,617.82 to 3,153.72)        | 3,651.33<br>(2,140.64 to 5,933.36)        | 3,081.07<br>(1,856.82 to 4,993.05)        | 4,160.19<br>(2,441.02 to 6,689.32)        |
| Chronic kidney disease due to diabetes mellitus            | 14,688.16<br>(13,061.16 to 16,491.28)          | 15,812.91<br>(9,104.04 to 26,420.90)          | 12,719.03<br>(7,674.75 to 20,611.09)          | 18,969.04<br>(10,776.63 to 31,511.46)          | 789.42<br>(704.27 to 882.78)              | 1,028.84<br>(588.53 to 1,713.41)          | 860.81<br>(505.63 to 1,400.08)            | 1,179.58<br>(670.75 to 1,966.46)          |
| Chronic kidney disease due to hypertension                 | 3,893.84<br>(3,338.08 to 4,529.17)             | 5,563.16<br>(3,161.54 to 9,203.86)            | 4,830.05<br>(2,876.60 to 8,058.76)            | 6,143.57<br>(3,504.41 to 10,120.95)            | 326.61<br>(279.25 to 384.41)              | 570.39<br>(320.90 to 971.63)              | 519.00<br>(299.74 to 882.78)              | 598.07<br>(331.75 to 1,008.98)            |
| Chronic kidney disease due to glomerulonephritis           | 13,614.28<br>(12,253.46 to 15,146.93)          | 12,843.05<br>(7,700.71 to 21,135.28)          | 10,043.94<br>(6,214.60 to 16,399.59)          | 15,973.84<br>(9,117.94 to 25,855.55)           | 732.27<br>(655.09 to 824.67)              | 874.84<br>(494.16 to 1,436.22)            | 710.57<br>(423.07 to 1,176.32)            | 1,039.27<br>(596.23 to 1,701.91)          |
| Chronic kidney disease due to other and unspecified causes | 17,220.80<br>(15,436.28 to 19,262.03)          | 15,657.91<br>(9,251.62 to 26,057.04)          | 12,618.18<br>(7,740.83 to 20,733.89)          | 18,790.12<br>(10,926.06 to 31,217.51)          | 1,024.14<br>(917.20 to 1,148.13)          | 1,177.25<br>(676.74 to 1,965.60)          | 990.69<br>(597.34 to 1,625.75)            | 1,343.27<br>(767.29 to 2,253.95)          |
| Urinary diseases and male infertility                      | 7,437.79<br>(6,696.82 to 8,223.88)             | 8,989.74<br>(7,314.90 to 10,946.69)           | 8,271.57<br>(6,721.65 to 9,918.17)            | 9,638.68<br>(7,805.68 to 11,833.87)            | 441.74<br>(398.53 to 488.90)              | 661.47<br>(531.99 to 810.09)              | 640.77<br>(513.98 to 775.95)              | 668.98<br>(525.50 to 818.66)              |
| Urinary tract infections                                   | 7,042.94<br>(6,309.03 to 7,789.86)             | 8,679.87<br>(7,040.59 to 10,556.59)           | 8,905.25<br>(6,535.06 to 9,590.98)            | 9,281.20<br>(7,504.23 to 11,411.35)            | 421.40<br>(378.69 to 467.53)              | 638.99<br>(510.30 to 785.07)              | 620.06<br>(496.12 to 752.50)              | 645.07<br>(503.44 to 785.69)              |
| Urolithiasis                                               | 99.10<br>(66.44 to 136.79)                     | 69.38<br>(39.78 to 102.62)                    | 57.53<br>(32.96 to 85.23)                     | 83.63<br>(46.20 to 128.22)                     | 3.82<br>(2.16 to 4.98)                    | 3.88<br>(1.86 to 5.89)                    | 3.42<br>(1.68 to 5.09)                    | 4.34<br>(2.06 to 6.64)                    |
| Other urinary diseases                                     | 295.75<br>(152.67 to 413.95)                   | 240.50<br>(111.85 to 369.13)                  | 208.80<br>(98.09 to 324.12)                   | 273.86<br>(123.64 to 430.06)                   | 16.51<br>(7.44 to 23.69)                  | 18.60<br>(7.75 to 29.22)                  | 17.29<br>(7.27 to 28.25)                  | 19.57<br>(8.19 to 31.01)                  |
| Gynecological diseases                                     | 46.86<br>(33.04 to 95.94)                      | 18.35<br>(9.34 to 45.98)                      | 13.37<br>(7.15 to 33.22)                      | 25.59<br>(12.14 to 59.06)                      | 1.75<br>(1.23 to 4.03)                    | 0.97<br>(0.50 to 2.60)                    | 0.75<br>(0.39 to 2.12)                    | 1.27<br>(0.62 to 3.32)                    |
| Uterine fibroids                                           | 15.56<br>(10.85 to 33.70)                      | 6.01<br>(3.13 to 14.09)                       | 4.71<br>(2.51 to 11.02)                       | 7.70<br>(3.82 to 17.75)                        | 0.55<br>(0.38 to 1.29)                    | 0.28<br>(0.14 to 0.69)                    | 0.23<br>(0.12 to 0.59)                    | 0.34<br>(0.17 to 0.85)                    |
| Polycystic ovarian syndrome                                | 8.14<br>(3.95 to 17.11)                        | 1.19<br>(0.30 to 3.29)                        | 0.65<br>(0.17 to 1.78)                        | 2.19<br>(0.50 to 6.55)                         | 0.20<br>(0.10 to 0.43)                    | 0.03<br>(0.01 to 0.08)                    | 0.02<br>(0.00 to 0.05)                    | 0.06<br>(0.01 to 0.16)                    |
| Endometriosis                                              | 0.56<br>(0.21 to 1.57)                         | 0.47<br>(0.12 to 1.43)                        | 0.33<br>(0.09 to 1.03)                        | 0.66<br>(0.17 to 2.13)                         | 0.01<br>(0.00 to 0.04)                    | 0.01<br>(0.00 to 0.04)                    | 0.01<br>(0.00 to 0.03)                    | 0.02<br>(0.00 to 0.05)                    |
| Genital prolapse                                           | 1.38<br>(0.78 to 4.21)                         | 0.90<br>(0.36 to 2.65)                        | 0.68<br>(0.29 to 2.15)                        | 1.19<br>(0.50 to 3.61)                         | 0.11<br>(0.06 to 0.35)                    | 0.08<br>(0.03 to 0.24)                    | 0.06<br>(0.02 to 0.22)                    | 0.10<br>(0.04 to 0.31)                    |
| Other gynecological diseases                               | 21.23<br>(14.55 to 43.40)                      | 9.78<br>(4.68 to 24.97)                       | 7.00<br>(3.43 to 16.83)                       | 13.85<br>(6.21 to 32.21)                       | 0.87<br>(0.59 to 2.06)                    | 0.57<br>(0.28 to 1.67)                    | 0.43<br>(0.22 to 1.29)                    | 0.76<br>(0.36 to 2.01)                    |
| Hemoglobinopathies and hemolytic anemias                   | 909.75<br>(775.93 to 1,170.65)                 | 516.83<br>(396.95 to 720.16)                  | 451.81<br>(350.15 to 639.22)                  | 587.06<br>(446.26 to 826.58)                   | 47.12<br>(39.93 to 63.56)                 | 38.24<br>(29.63 to 56.09)                 | 35.61<br>(27.52 to 52.34)                 | 40.49<br>(30.93 to 59.35)                 |
| Thalassemias                                               | 33.34<br>(27.62 to 39.84)                      | 8.12<br>(4.91 to 11.88)                       | 7.52<br>(4.47 to 11.10)                       | 8.48<br>(5.09 to 12.49)                        | 0.42<br>(0.35 to 0.50)                    | 0.10<br>(0.06 to 0.15)                    | 0.10<br>(0.06 to 0.14)                    | 0.11<br>(0.07 to 0.16)                    |

|                                                   |                                       |                                       |                                       |                                       |                                |                                 |                                 |                                 |
|---------------------------------------------------|---------------------------------------|---------------------------------------|---------------------------------------|---------------------------------------|--------------------------------|---------------------------------|---------------------------------|---------------------------------|
|                                                   | 114.47<br>(95.32 to<br>139.41)        | 45.36<br>(30.35 to<br>65.57)          | 36.68<br>(24.58 to<br>52.33)          | 56.29<br>(37.24 to<br>84.03)          | 2.34<br>(1.94 to<br>2.92)      | 1.12<br>(0.77 to<br>1.61)       | 0.92<br>(0.63 to<br>1.33)       | 1.38<br>(0.92 to<br>2.09)       |
| Sickle cell disorders                             |                                       |                                       |                                       |                                       |                                |                                 |                                 |                                 |
|                                                   | 154.55<br>(129.34 to<br>188.38)       | 97.19<br>(66.31 to<br>139.99)         | 77.46<br>(55.26 to<br>107.19)         | 121.55<br>(83.16 to<br>179.04)        | 4.41<br>(3.64 to<br>5.47)      | 3.86<br>(2.73 to<br>5.45)       | 3.16<br>(2.34 to<br>4.32)       | 4.68<br>(3.33 to<br>6.74)       |
| G6PD deficiency                                   |                                       |                                       |                                       |                                       |                                |                                 |                                 |                                 |
|                                                   | 607.39<br>(512.09 to<br>808.71)       | 366.16<br>(283.26 to<br>519.53)       | 330.16<br>(257.05 to<br>479.57)       | 400.74<br>(308.13 to<br>572.25)       | 39.96<br>(33.73 to<br>55.09)   | 33.15<br>(25.71 to<br>48.99)    | 31.44<br>(23.92 to<br>46.54)    | 34.33<br>(25.87 to<br>50.23)    |
| Other hemoglobinopathies and hemolytic anemias    |                                       |                                       |                                       |                                       |                                |                                 |                                 |                                 |
|                                                   | 2,813.67<br>(2,314.14 to<br>4,664.45) | 3,366.80<br>(2,713.36 to<br>5,649.60) | 3,536.75<br>(2,837.63 to<br>6,017.00) | 3,162.46<br>(2,566.54 to<br>5,316.66) | 103.37<br>(88.14 to<br>155.41) | 171.75<br>(141.50 to<br>246.92) | 192.31<br>(157.58 to<br>271.93) | 150.82<br>(124.43 to<br>219.39) |
| Endocrine, metabolic, blood, and immune disorders |                                       |                                       |                                       |                                       |                                |                                 |                                 |                                 |

| Romania                                       |                                              |                                             |                                            |                                              |                                     |                                     |                                     |                                     |
|-----------------------------------------------|----------------------------------------------|---------------------------------------------|--------------------------------------------|----------------------------------------------|-------------------------------------|-------------------------------------|-------------------------------------|-------------------------------------|
| Cause                                         | YLLs (actual counts)                         |                                             |                                            |                                              | Deaths (actual counts)              |                                     |                                     |                                     |
|                                               | 2016                                         | 2040 Forecast                               | 2040 Better Scenario                       | 2040 Worse Scenario                          | 2016                                | 2040 Forecast                       | 2040 Better Scenario                | 2040 Worse Scenario                 |
| <b>Musculoskeletal disorders</b>              | <b>2,225.22</b><br>(1,882.62 to 2,598.18)    | <b>1,852.02</b><br>(1,463.32 to 2,315.59)   | <b>1,743.71</b><br>(1,388.84 to 2,157.09)  | <b>1,971.35</b><br>(1,544.61 to 2,470.91)    | <b>108.44</b><br>(90.62 to 126.27)  | <b>110.15</b><br>(86.23 to 134.25)  | <b>108.04</b><br>(83.39 to 132.29)  | <b>112.33</b><br>(85.55 to 137.64)  |
| Rheumatoid arthritis                          | 527.47<br>(411.76 to 827.42)                 | 313.43<br>(192.69 to 513.74)                | 242.16<br>(152.88 to 451.98)               | 401.45<br>(239.02 to 681.20)                 | 32.66<br>(25.21 to 51.18)           | 23.75<br>(14.28 to 40.91)           | 19.35<br>(11.82 to 36.15)           | 28.81<br>(17.41 to 47.64)           |
| Other musculoskeletal disorders               | 1,697.75<br>(1,298.50 to 1,988.13)           | 1,538.59<br>(1,194.18 to 1,912.85)          | 1,501.55<br>(1,177.70 to 1,879.47)         | 1,569.89<br>(1,197.30 to 1,942.33)           | 75.77<br>(52.27 to 89.47)           | 86.41<br>(60.07 to 106.51)          | 88.70<br>(63.52 to 108.13)          | 83.52<br>(56.32 to 102.46)          |
| <b>Other non-communicable diseases</b>        | <b>41,813.55</b><br>(33,646.13 to 52,256.16) | <b>12,994.89</b><br>(7,917.91 to 19,837.94) | <b>9,965.55</b><br>(6,332.30 to 14,761.80) | <b>17,059.77</b><br>(10,210.57 to 26,392.55) | <b>609.47</b><br>(496.84 to 784.37) | <b>367.03</b><br>(236.33 to 692.73) | <b>335.42</b><br>(214.35 to 673.47) | <b>408.76</b><br>(262.94 to 711.47) |
| Congenital birth defects                      | 38,505.49<br>(29,920.77 to 48,496.15)        | 8,991.86<br>(4,719.55 to 14,587.76)         | 6,136.45<br>(3,389.98 to 9,198.45)         | 12,907.94<br>(6,877.70 to 21,152.43)         | 477.33<br>(376.27 to 601.92)        | 118.45<br>(64.92 to 188.57)         | 82.74<br>(48.00 to 123.84)          | 167.62<br>(92.42 to 270.22)         |
| Neural tube defects                           | 970.69<br>(684.46 to 1,432.05)               | 155.10<br>(61.48 to 307.87)                 | 98.21<br>(40.31 to 188.07)                 | 238.84<br>(97.67 to 493.35)                  | 116.63<br>(8.29 to 17.27)           | 1.91<br>(0.79 to 3.77)              | 1.22<br>(0.52 to 2.28)              | 2.93<br>(1.23 to 5.99)              |
| Congenital heart anomalies                    | 18,956.01<br>(14,285.58 to 23,782.45)        | 3,530.35<br>(1,738.68 to 6,162.81)          | 2,188.90<br>(1,116.17 to 3,390.81)         | 5,501.39<br>(2,767.40 to 9,643.58)           | 235.85<br>(180.49 to 299.22)        | 45.97<br>(23.39 to 78.75)           | 28.79<br>(15.19 to 44.43)           | 71.28<br>(36.04 to 123.95)          |
| Orofacial clefts                              | 48.09<br>(23.39 to 88.60)                    | 7.15<br>(2.19 to 18.26)                     | 3.86<br>(1.32 to 8.34)                     | 12.66<br>(3.76 to 31.89)                     | 0.56<br>(0.27 to 1.03)              | 0.08<br>(0.03 to 0.21)              | 0.04<br>(0.02 to 0.10)              | 0.15<br>(0.04 to 0.37)              |
| Down syndrome                                 | 744.50<br>(544.14 to 1,227.74)               | 566.23<br>(381.45 to 990.77)                | 562.67<br>(381.30 to 974.49)               | 556.72<br>(373.94 to 981.45)                 | 12.34<br>(9.44 to 18.81)            | 10.46<br>(7.37 to 17.49)            | 10.60<br>(7.44 to 17.85)            | 10.15<br>(7.20 to 16.97)            |
| Other chromosomal abnormalities               | 1,052.87<br>(689.13 to 1,786.13)             | 588.72<br>(312.74 to 1,120.69)              | 476.28<br>(262.12 to 896.45)               | 700.25<br>(377.14 to 1,291.56)               | 12.83<br>(8.52 to 21.74)            | 7.50<br>(4.13 to 14.24)             | 6.12<br>(3.51 to 11.19)             | 8.88<br>(4.95 to 16.10)             |
| Congenital musculoskeletal and limb anomalies | 470.49<br>(322.81 to 652.52)                 | 113.48<br>(53.01 to 210.57)                 | 76.72<br>(37.16 to 138.85)                 | 162.01<br>(75.24 to 302.30)                  | 5.73<br>(3.99 to 7.88)              | 1.42<br>(0.68 to 2.58)              | 0.96<br>(0.49 to 1.71)              | 2.01<br>(0.96 to 3.69)              |
| Urogenital congenital anomalies               | 746.06<br>(451.43 to 1,448.06)               | 211.28<br>(95.55 to 440.86)                 | 154.55<br>(75.40 to 327.39)                | 281.33<br>(132.52 to 609.03)                 | 10.93<br>(7.28 to 19.80)            | 3.62<br>(1.89 to 6.66)              | 2.93<br>(1.49 to 5.02)              | 4.72<br>(2.52 to 9.17)              |
| Digestive congenital anomalies                | 4,646.99<br>(3,053.71 to 6,616.84)           | 1,149.42<br>(446.83 to 2,345.52)            | 741.47<br>(296.71 to 1,393.25)             | 1,706.80<br>(673.67 to 3,378.58)             | 54.63<br>(36.06 to 77.49)           | 13.62<br>(5.38 to 27.55)            | 8.81<br>(3.60 to 16.36)             | 20.19<br>(8.14 to 39.86)            |
| Other congenital birth defects                | 10,869.78<br>(7,979.22 to 14,388.97)         | 2,670.14<br>(1,333.60 to 4,340.68)          | 1,833.80<br>(944.68 to 2,854.14)           | 3,747.92<br>(1,925.44 to 6,221.18)           | 132.85<br>(99.07 to 173.80)         | 33.87<br>(17.70 to 54.25)           | 23.46<br>(12.84 to 35.78)           | 47.30<br>(25.21 to 77.86)           |
| Skin and subcutaneous diseases                | 2,623.83<br>(1,703.07 to 5,056.01)           | 3,877.48<br>(2,516.73 to 8,069.12)          | 3,728.13<br>(2,375.88 to 7,775.21)         | 3,998.19<br>(2,631.58 to 8,135.04)           | 124.19<br>(84.33 to 272.22)         | 247.12<br>(155.04 to 564.10)        | 251.51<br>(152.81 to 577.82)        | 299.36<br>(150.60 to 549.74)        |
| Cellulitis                                    | 463.17<br>(245.32 to 926.64)                 | 811.46<br>(412.04 to 1,623.45)              | 807.97<br>(409.90 to 1,603.73)             | 806.73<br>(408.16 to 1,567.77)               | 21.41<br>(12.25 to 48.96)           | 46.97<br>(24.45 to 104.68)          | 48.88<br>(25.66 to 110.49)          | 41.47<br>(22.62 to 98.42)           |
| Pyoderma                                      | 1,385.88<br>(951.47 to 3,122.46)             | 2,601.28<br>(1,576.05 to 5,975.81)          | 2,500.22<br>(1,450.23 to 5,835.86)         | 2,682.05<br>(1,650.78 to 6,144.08)           | 63.82<br>(36.98 to 172.39)          | 168.51<br>(94.49 to 422.10)         | 172.42<br>(92.22 to 438.08)         | 162.24<br>(91.35 to 409.50)         |
| Decubitus ulcer                               | 624.78<br>(302.33 to 1,015.49)               | 318.73<br>(141.06 to 517.39)                | 283.49<br>(129.45 to 469.06)               | 354.43<br>(159.17 to 586.52)                 | 33.32<br>(16.39 to 59.03)           | 23.80<br>(9.82 to 42.13)            | 22.31<br>(9.19 to 40.24)            | 24.99<br>(10.23 to 44.38)           |
| Other skin and subcutaneous diseases          | 149.99<br>(75.95 to 246.34)                  | 136.45<br>(72.93 to 251.37)                 | 136.45<br>(68.64 to 255.96)                | 154.98<br>(78.61 to 255.52)                  | 5.64<br>(2.81 to 11.07)             | 7.83<br>(3.33 to 16.68)             | 7.90<br>(3.31 to 17.66)             | 7.66<br>(3.42 to 15.04)             |
| Sudden infant death syndrome                  | 684.22<br>(466.29 to 959.29)                 | 125.55<br>(61.19 to 219.72)                 | 100.97<br>(48.99 to 181.37)                | 153.65<br>(74.70 to 268.50)                  | 7.94<br>(5.41 to 11.13)             | 1.46<br>(0.71 to 2.55)              | 1.17<br>(0.57 to 2.10)              | 1.78<br>(0.87 to 3.12)              |

|                          |                                             |                                            |                                            |                                             |                                         |                                        |                                       |                                        |
|--------------------------|---------------------------------------------|--------------------------------------------|--------------------------------------------|---------------------------------------------|-----------------------------------------|----------------------------------------|---------------------------------------|----------------------------------------|
| Injuries                 | 350,224.09<br>(311,797.10 to<br>394,211.64) | 163,612.01<br>(99,866.97 to<br>275,887.78) | 129,571.54<br>(79,923.14 to<br>215,421.48) | 233,446.09<br>(132,959.01 to<br>412,399.16) | 10,029.57<br>(8,858.79 to<br>11,625.78) | 6,024.29<br>(3,819.48 to<br>10,507.89) | 5,067.39<br>(3,216.94 to<br>8,894.02) | 7,865.60<br>(4,707.10 to<br>14,112.49) |
| Transport injuries       | 102,334.14<br>(91,010.97 to<br>115,159.49)  | 33,003.25<br>(16,222.33 to<br>65,615.79)   | 17,491.79<br>(8,883.34 to<br>34,019.08)    | 76,468.53<br>(35,031.14 to<br>156,789.93)   | 2,643.23<br>(2,363.35 to<br>2,963.44)   | 1,062.18<br>(550.82 to<br>1,964.42)    | 604.52<br>(322.62 to<br>1,091.61)     | 2,230.71<br>(1,076.81 to<br>4,366.50)  |
| Road injuries            | 87,165.42<br>(77,466.56 to<br>98,090.30)    | 25,726.40<br>(13,070.22 to<br>51,151.81)   | 12,186.72<br>(6,390.41 to<br>23,916.86)    | 66,037.78<br>(30,762.03 to<br>135,174.51)   | 2,230.21<br>(1,995.64 to<br>2,509.85)   | 825.81<br>(441.36 to<br>1,528.55)      | 428.02<br>(239.72 to<br>777.16)       | 1,903.38<br>(936.66 to<br>3,733.75)    |
| Pedestrian road injuries | 26,782.50<br>(22,120.33 to<br>31,372.86)    | 5,513.87<br>(2,835.88 to<br>11,045.94)     | 2,334.94<br>(1,268.45 to<br>4,366.88)      | 14,788.26<br>(6,717.80 to<br>30,371.59)     | 794.90<br>(678.80 to<br>948.02)         | 223.37<br>(119.55 to<br>435.54)        | 104.28<br>(59.41 to<br>192.12)        | 538.31<br>(259.15 to<br>1,112.13)      |

| Romania                                         |                                             |                                           |                                          |                                           |                                       |                                       |                                       |                                       |
|-------------------------------------------------|---------------------------------------------|-------------------------------------------|------------------------------------------|-------------------------------------------|---------------------------------------|---------------------------------------|---------------------------------------|---------------------------------------|
| Cause                                           | YLLs (actual counts)                        |                                           |                                          |                                           | Deaths (actual counts)                |                                       |                                       |                                       |
|                                                 | 2016                                        | 2040 Forecast                             | 2040 Better Scenario                     | 2040 Worse Scenario                       | 2016                                  | 2040 Forecast                         | 2040 Better Scenario                  | 2040 Worse Scenario                   |
| Cyclist road injuries                           | 5,401.43<br>(4,366.13 to<br>6,812.87)       | 2,250.01<br>(936.21 to<br>5,108.66)       | 1,287.12<br>(552.64 to<br>2,900.77)      | 4,784.65<br>(1,907.08 to<br>11,080.79)    | 140.50<br>(114.86 to<br>180.92)       | 75.74<br>(32.23 to<br>173.97)         | 48.62<br>(21.87 to<br>110.78)         | 140.39<br>(56.08 to<br>326.61)        |
| Motorcyclist road injuries                      | 8,701.58<br>(6,934.52 to<br>11,083.55)      | 4,223.08<br>(1,694.62 to<br>10,386.08)    | 2,734.07<br>(1,101.25 to<br>6,733.19)    | 7,684.84<br>(3,074.63 to<br>19,075.25)    | 173.54<br>(139.39 to<br>226.42)       | 95.79<br>(38.12 to<br>236.19)         | 65.95<br>(26.95 to<br>160.54)         | 162.15<br>(63.44 to<br>411.44)        |
| Motor vehicle road injuries                     | 44,282.67<br>(38,276.24 to<br>52,919.10)    | 12,788.88<br>(6,847.52 to<br>24,603.46)   | 5,352.69<br>(3,089.37 to<br>9,918.26)    | 36,566.46<br>(18,275.50 to<br>75,648.41)  | 1,054.07<br>(904.40 to<br>1,258.57)   | 390.04<br>(222.94 to<br>697.80)       | 186.16<br>(113.90 to<br>312.55)       | 978.46<br>(506.84 to<br>1,855.40)     |
| Other road injuries                             | 1,997.23<br>(1,216.53 to<br>2,577.13)       | 950.57<br>(498.75 to<br>1,754.40)         | 477.89<br>(232.63 to<br>848.62)          | 2,213.56<br>(919.22 to<br>4,355.29)       | 67.20<br>(33.55 to<br>87.02)          | 40.86<br>(19.53 to<br>69.71)          | 23.01<br>(11.62 to<br>38.14)          | 84.06<br>(37.53 to<br>146.09)         |
| Other transport injuries                        | 15,168.73<br>(12,806.79 to<br>17,515.99)    | 7,276.85<br>(3,247.18 to<br>14,965.86)    | 5,305.08<br>(2,406.17 to<br>10,729.27)   | 10,430.75<br>(4,102.08 to<br>21,875.50)   | 413.02<br>(351.30 to<br>475.37)       | 236.37<br>(112.56 to<br>461.60)       | 176.50<br>(85.37 to<br>336.37)        | 327.34<br>(156.76 to<br>651.36)       |
| Unintentional injuries                          | 142,930.74<br>(127,695.73 to<br>162,439.83) | 74,445.20<br>(52,712.73 to<br>113,381.39) | 65,665.71<br>(46,066.66 to<br>99,755.46) | 84,881.42<br>(58,377.39 to<br>128,135.83) | 4,504.35<br>(3,889.05 to<br>5,837.49) | 3,343.74<br>(2,184.28 to<br>5,617.43) | 2,920.41<br>(1,999.47 to<br>5,397.65) | 3,378.67<br>(2,338.21 to<br>5,930.00) |
| Falls                                           | 43,960.18<br>(37,752.42 to<br>57,740.37)    | 30,678.22<br>(22,752.36 to<br>50,505.67)  | 28,443.46<br>(20,912.11 to<br>48,230.55) | 32,808.41<br>(24,552.44 to<br>53,373.24)  | 1,731.97<br>(1,377.85 to<br>2,948.84) | 1,589.79<br>(1,092.59 to<br>3,426.48) | 1,544.32<br>(1,048.46 to<br>3,348.70) | 1,612.71<br>(1,124.94 to<br>3,397.90) |
| Drowning                                        | 29,991.97<br>(26,673.61 to<br>33,834.68)    | 13,389.13<br>(6,610.88 to<br>26,691.32)   | 11,171.18<br>(5,645.69 to<br>22,303.97)  | 16,392.63<br>(7,772.10 to<br>34,468.22)   | 734.73<br>(652.87 to<br>824.37)       | 399.85<br>(208.82 to<br>776.19)       | 342.48<br>(182.44 to<br>648.57)       | 474.66<br>(232.75 to<br>980.54)       |
| Fire, heat, and hot substances                  | 11,491.54<br>(9,941.89 to<br>13,306.91)     | 4,546.95<br>(2,375.71 to<br>8,747.31)     | 3,615.05<br>(1,960.96 to<br>6,840.07)    | 5,784.43<br>(2,812.83 to<br>11,054.34)    | 413.31<br>(360.41 to<br>520.08)       | 413.31<br>(121.50 to<br>449.40)       | 224.67<br>(106.31 to<br>373.00)       | 266.53<br>(136.86 to<br>548.12)       |
| Poisonings                                      | 2,806.75<br>(2,300.88 to<br>4,210.41)       | 752.04<br>(362.77 to<br>2,069.82)         | 555.56<br>(273.13 to<br>1,513.67)        | 1,032.53<br>(471.31 to<br>2,848.39)       | 78.36<br>(64.91 to<br>124.99)         | 29.44<br>(14.18 to<br>78.38)          | 22.99<br>(11.28 to<br>61.40)          | 37.92<br>(17.19 to<br>106.59)         |
| Exposure to mechanical forces                   | 11,455.15<br>(7,750.25 to<br>13,723.39)     | 4,456.30<br>(3,050.33 to<br>5,943.52)     | 3,641.12<br>(2,558.63 to<br>4,681.19)    | 5,444.57<br>(3,628.88 to<br>7,552.86)     | 300.58<br>(213.99 to<br>354.97)       | 143.51<br>(103.21 to<br>190.96)       | 121.98<br>(90.76 to<br>160.11)        | 168.29<br>(117.85 to<br>230.13)       |
| Unintentional firearm injuries                  | 1,096.44<br>(752.49 to<br>1,292.55)         | 369.50<br>(260.86 to<br>511.59)           | 315.74<br>(228.23 to<br>423.35)          | 433.28<br>(298.64 to<br>592.04)           | 26.43<br>(20.34 to<br>30.75)          | 11.79<br>(8.93 to<br>16.44)           | 10.82<br>(8.16 to<br>15.25)           | 12.89<br>(9.53 to<br>17.14)           |
| Unintentional suffocation                       | 346.63<br>(277.17 to<br>439.20)             | 140.54<br>(96.50 to<br>198.43)            | 117.94<br>(81.20 to<br>164.74)           | 165.40<br>(110.70 to<br>239.15)           | 6.02<br>(4.96 to<br>7.43)             | 2.94<br>(2.13 to<br>4.04)             | 2.56<br>(1.88 to<br>3.56)             | 3.35<br>(2.41 to<br>4.66)             |
| Other exposure to mechanical forces             | 10,012.09<br>(6,447.25 to<br>12,193.57)     | 3,946.27<br>(2,625.35 to<br>5,342.40)     | 3,207.43<br>(2,216.94 to<br>4,130.94)    | 4,845.90<br>(3,173.14 to<br>6,759.17)     | 268.12<br>(180.75 to<br>320.63)       | 128.77<br>(90.06 to<br>173.74)        | 108.60<br>(78.35 to<br>145.32)        | 152.04<br>(104.38 to<br>208.57)       |
| Adverse effects of medical treatment            | 4,537.99<br>(3,579.85 to<br>6,018.62)       | 2,842.21<br>(2,082.27 to<br>4,263.63)     | 2,668.45<br>(1,929.83 to<br>4,078.89)    | 3,000.74<br>(2,302.17 to<br>4,460.74)     | 173.82<br>(138.37 to<br>253.70)       | 144.59<br>(100.19 to<br>236.50)       | 143.05<br>(96.90 to<br>237.30)        | 143.96<br>(101.07 to<br>237.19)       |
| Animal contact                                  | 1,636.57<br>(977.49 to<br>2,072.01)         | 909.25<br>(606.17 to<br>1,293.01)         | 774.29<br>(518.28 to<br>1,089.59)        | 1,065.27<br>(674.11 to<br>1,568.87)       | 50.18<br>(31.79 to<br>63.56)          | 34.53<br>(24.08 to<br>49.75)          | 30.45<br>(21.20 to<br>43.65)          | 38.87<br>(25.95 to<br>57.31)          |
| Venomous animal contact                         | 361.51<br>(147.82 to<br>525.18)             | 198.73<br>(97.32 to<br>320.75)            | 179.24<br>(89.42 to<br>278.41)           | 219.96<br>(101.73 to<br>346.46)           | 9.75<br>(4.06 to<br>14.16)            | 6.33<br>(3.28 to<br>10.19)            | 5.88<br>(3.16 to<br>9.46)             | 6.79<br>(3.39 to<br>10.79)            |
| Non-venomous animal contact                     | 1,275.06<br>(764.98 to<br>1,677.85)         | 710.52<br>(468.85 to<br>1,044.97)         | 595.05<br>(403.08 to<br>897.79)          | 845.31<br>(532.59 to<br>1,286.95)         | 40.43<br>(25.85 to<br>54.26)          | 28.20<br>(19.56 to<br>41.51)          | 24.58<br>(17.24 to<br>37.03)          | 32.08<br>(21.57 to<br>47.59)          |
| Foreign body                                    | 20,447.48<br>(15,853.64 to<br>24,146.67)    | 10,944.12<br>(8,437.02 to<br>13,834.42)   | 10,223.88<br>(7,720.86 to<br>13,108.47)  | 11,620.07<br>(8,854.12 to<br>14,805.98)   | 546.98<br>(449.83 to<br>645.63)       | 367.52<br>(281.44 to<br>510.03)       | 357.38<br>(265.83 to<br>508.44)       | 374.32<br>(290.73 to<br>497.58)       |
| Pulmonary aspiration and foreign body in airway | 20,048.98<br>(15,468.87 to<br>23,719.89)    | 10,685.18<br>(8,161.91 to<br>13,561.51)   | 9,950.82<br>(7,491.50 to<br>12,832.36)   | 11,376.54<br>(8,600.29 to<br>14,526.14)   | 535.92<br>(437.03 to<br>634.73)       | 357.66<br>(274.04 to<br>496.85)       | 346.41<br>(258.12 to<br>495.12)       | 365.57<br>(283.56 to<br>486.41)       |

|                                             |                                                                 |                                                                |                                                               |                                                                |                                                            |                                                          |                                                          |                                                            |
|---------------------------------------------|-----------------------------------------------------------------|----------------------------------------------------------------|---------------------------------------------------------------|----------------------------------------------------------------|------------------------------------------------------------|----------------------------------------------------------|----------------------------------------------------------|------------------------------------------------------------|
|                                             | 398.51<br>(265.35 to<br>495.71)                                 | 258.95<br>(189.78 to<br>371.08)                                | 273.05<br>(199.75 to<br>397.17)                               | 243.53<br>(180.41 to<br>341.08)                                | 11.06<br>(8.31 to<br>15.64)                                | 9.86<br>(7.28 to<br>16.54)                               | 10.97<br>(7.92 to<br>18.62)                              | 8.75<br>(6.45 to<br>14.90)                                 |
| Foreign body in other body part             |                                                                 |                                                                |                                                               |                                                                |                                                            |                                                          |                                                          |                                                            |
|                                             | 9,509.99<br>(5,332.46 to<br>14,298.87)                          | 4,640.32<br>(2,669.20 to<br>8,138.16)                          | 3,735.97<br>(2,188.55 to<br>6,776.47)                         | 5,746.75<br>(3,342.76 to<br>10,172.68)                         | 308.37<br>(183.86 to<br>467.20)                            | 177.17<br>(105.12 to<br>299.76)                          | 146.94<br>(90.73 to<br>265.80)                           | 212.00<br>(127.55 to<br>359.61)                            |
| Environmental heat and cold exposure        |                                                                 |                                                                |                                                               |                                                                |                                                            |                                                          |                                                          |                                                            |
|                                             | 7,293.10<br>(6,219.56 to<br>8,528.36)                           | 1,286.68<br>(721.53 to<br>2,140.27)                            | 836.77<br>(501.50 to<br>1,267.93)                             | 1,986.03<br>(1,074.28 to<br>3,455.81)                          | 166.05<br>(141.49 to<br>194.91)                            | 32.69<br>(19.39 to<br>53.16)                             | 21.66<br>(13.67 to<br>31.52)                             | 49.42<br>(26.90 to<br>84.22)                               |
| Other unintentional injuries                |                                                                 |                                                                |                                                               |                                                                |                                                            |                                                          |                                                          |                                                            |
| <b>Self-harm and interpersonal violence</b> | <b>104,870.32</b><br><b>(81,206.75 to</b><br><b>124,014.42)</b> | <b>55,766.47</b><br><b>(28,798.17 to</b><br><b>101,637.94)</b> | <b>46,015.32</b><br><b>(24,636.00 to</b><br><b>83,234.45)</b> | <b>71,704.82</b><br><b>(35,385.47 to</b><br><b>131,263.03)</b> | <b>2,880.05</b><br><b>(2,268.68 to</b><br><b>3,371.67)</b> | <b>1,807.27</b><br><b>(982.94 to</b><br><b>3,282.88)</b> | <b>1,530.95</b><br><b>(858.75 to</b><br><b>2,755.81)</b> | <b>2,245.67</b><br><b>(1,154.66 to</b><br><b>4,123.44)</b> |



| Romania                                                                             |                                                   |                                                      |                                                      |                                                      |                                                |                                                  |                                                  |                                                  |
|-------------------------------------------------------------------------------------|---------------------------------------------------|------------------------------------------------------|------------------------------------------------------|------------------------------------------------------|------------------------------------------------|--------------------------------------------------|--------------------------------------------------|--------------------------------------------------|
| Cause                                                                               | YLLs (actual counts)                              |                                                      |                                                      |                                                      | Deaths (actual counts)                         |                                                  |                                                  |                                                  |
|                                                                                     | 2016                                              | 2040 Forecast                                        | 2040 Better Scenario                                 | 2040 Worse Scenario                                  | 2016                                           | 2040 Forecast                                    | 2040 Better Scenario                             | 2040 Worse Scenario                              |
| Self-harm                                                                           | 87,409.84<br>(61,825.22 to<br>104,039.95)         | 48,917.59<br>(25,133.18 to<br>89,639.89)             | 40,293.48<br>(21,542.42 to<br>71,771.14)             | 63,322.45<br>(31,456.21 to<br>118,916.77)            | 2,423.49<br>(1,761.68 to<br>2,854.07)          | 1,589.55<br>(868.61 to<br>2,815.80)              | 1,343.83<br>(747.61 to<br>2,382.53)              | 1,988.14<br>(1,008.46 to<br>3,608.33)            |
| Self-harm by firearm                                                                | 677.85<br>(399.69 to<br>1,013.57)                 | 263.85<br>(123.66 to<br>642.20)                      | 202.46<br>(98.30 to<br>492.50)                       | 372.52<br>(164.62 to<br>917.34)                      | 17.60<br>(10.99 to<br>25.77)                   | 8.23<br>(4.15 to<br>19.43)                       | 6.56<br>(3.41 to<br>15.08)                       | 11.08<br>(5.32 to<br>27.43)                      |
| Self-harm by other specified means                                                  | 86,731.99<br>(60,777.38 to<br>103,133.98)         | 48,653.74<br>(24,991.40 to<br>89,382.90)             | 40,091.02<br>(21,418.63 to<br>71,372.84)             | 62,949.93<br>(31,271.69 to<br>118,353.83)            | 2,405.88<br>(1,740.81 to<br>2,833.28)          | 1,581.32<br>(864.74 to<br>2,807.06)              | 1,337.27<br>(744.29 to<br>2,376.99)              | 1,977.06<br>(1,003.54 to<br>3,586.65)            |
| Interpersonal violence                                                              | 17,460.48<br>(12,699.65 to<br>30,728.03)          | 6,848.88<br>(3,475.41 to<br>15,981.58)               | 5,721.84<br>(3,020.50 to<br>13,075.20)               | 8,382.37<br>(4,136.09 to<br>20,374.95)               | 456.57<br>(328.34 to<br>765.81)                | 217.72<br>(121.66 to<br>471.03)                  | 187.12<br>(106.79 to<br>408.78)                  | 257.52<br>(136.56 to<br>584.20)                  |
| Physical violence by firearm                                                        | 760.35<br>(445.75 to<br>1,985.97)                 | 214.12<br>(112.20 to<br>621.59)                      | 171.41<br>(93.26 to<br>476.94)                       | 272.70<br>(134.65 to<br>806.49)                      | 17.00<br>(10.21 to<br>43.19)                   | 5.47<br>(3.07 to<br>14.38)                       | 4.48<br>(2.58 to<br>11.44)                       | 6.79<br>(3.62 to<br>18.53)                       |
| Physical violence by sharp object                                                   | 7,157.57<br>(4,725.35 to<br>13,253.82)            | 2,375.05<br>(1,515.33 to<br>4,648.15)                | 1,962.60<br>(1,258.00 to<br>3,956.44)                | 2,910.03<br>(1,762.62 to<br>6,047.23)                | 179.13<br>(119.49 to<br>324.39)                | 70.24<br>(46.32 to<br>127.65)                    | 59.70<br>(40.21 to<br>109.95)                    | 83.37<br>(53.33 to<br>158.86)                    |
| Physical violence by other means                                                    | 9,542.56<br>(6,660.61 to<br>17,837.11)            | 4,259.70<br>(1,716.50 to<br>11,443.47)               | 3,587.83<br>(1,531.68 to<br>9,539.15)                | 5,199.65<br>(1,932.57 to<br>14,344.63)               | 260.44<br>(176.90 to<br>464.25)                | 142.01<br>(63.32 to<br>349.46)                   | 122.94<br>(58.08 to<br>295.71)                   | 167.37<br>(69.51 to<br>433.05)                   |
| <b>Forces of nature, conflict and terrorism, and executions and police conflict</b> | <b>88.89</b><br><b>(81.81 to</b><br><b>97.70)</b> | <b>397.08</b><br><b>(0.00 to</b><br><b>1,848.35)</b> | <b>398.72</b><br><b>(0.00 to</b><br><b>1,845.05)</b> | <b>391.31</b><br><b>(0.00 to</b><br><b>1,833.90)</b> | <b>1.94</b><br><b>(1.78 to</b><br><b>2.12)</b> | <b>11.10</b><br><b>(0.00 to</b><br><b>52.19)</b> | <b>11.51</b><br><b>(0.00 to</b><br><b>53.78)</b> | <b>10.55</b><br><b>(0.00 to</b><br><b>50.83)</b> |
| Exposure to forces of nature                                                        | 0.00<br>(0.00 to<br>0.00)                         | 377.94<br>(0.00 to<br>1,845.35)                      | 379.56<br>(0.00 to<br>1,845.05)                      | 372.38<br>(0.00 to<br>1,833.90)                      | 0.00<br>(0.00 to<br>0.00)                      | 10.60<br>(0.00 to<br>52.19)                      | 11.00<br>(0.00 to<br>53.78)                      | 10.08<br>(0.00 to<br>50.83)                      |
| Conflict and terrorism                                                              | 0.00<br>(0.00 to<br>0.00)                         | 19.15<br>(0.00 to<br>10.63)                          | 19.16<br>(0.00 to<br>10.89)                          | 18.93<br>(0.00 to<br>10.20)                          | 0.00<br>(0.00 to<br>0.00)                      | 0.50<br>(0.28 to<br>0.00)                        | 0.52<br>(0.29 to<br>0.00)                        | 0.47<br>(0.26 to<br>0.00)                        |
| Executions and police conflict                                                      | 88.89<br>(81.81 to<br>97.70)                      | 0.00<br>(0.00 to<br>0.00)                            | 0.00<br>(0.00 to<br>0.00)                            | 0.00<br>(0.00 to<br>0.00)                            | 1.94<br>(1.78 to<br>2.12)                      | 0.00<br>(0.00 to<br>0.00)                        | 0.00<br>(0.00 to<br>0.00)                        | 0.00<br>(0.00 to<br>0.00)                        |

| Serbia                                                            |                                                   |                                                   |                                                 |                                                   |                                             |                                            |                                          |                                             |
|-------------------------------------------------------------------|---------------------------------------------------|---------------------------------------------------|-------------------------------------------------|---------------------------------------------------|---------------------------------------------|--------------------------------------------|------------------------------------------|---------------------------------------------|
| Cause                                                             | YLLs (actual counts)                              |                                                   |                                                 |                                                   | Deaths (actual counts)                      |                                            |                                          |                                             |
|                                                                   | 2016                                              | 2040 Forecast                                     | 2040 Better Scenario                            | 2040 Worse Scenario                               | 2016                                        | 2040 Forecast                              | 2040 Better Scenario                     | 2040 Worse Scenario                         |
| All causes                                                        | 1,837,901.31<br>(1,745,304.40 to<br>1,931,873.85) | 1,566,274.37<br>(1,249,097.79 to<br>1,949,964.93) | 1,026,008.60<br>(836,952.83 to<br>1,247,465.41) | 1,835,542.54<br>(1,456,607.28 to<br>2,263,000.43) | 106,773.58<br>(102,231.68 to<br>111,187.43) | 108,762.79<br>(93,032.95 to<br>125,111.10) | 79,176.12<br>(67,859.86 to<br>91,086.51) | 121,816.76<br>(104,166.59 to<br>140,788.57) |
| Communicable, maternal, neonatal, and nutritional diseases        | 63,530.77<br>(54,700.60 to<br>71,545.12)          | 34,237.07<br>(26,519.59 to<br>45,512.51)          | 19,454.91<br>(15,756.54 to<br>24,596.85)        | 40,706.66<br>(30,573.11 to<br>55,480.34)          | 1,913.27<br>(1,631.11 to<br>2,130.42)       | 1,572.13<br>(1,214.47 to<br>2,142.23)      | 1,015.75<br>(812.75 to<br>1,305.88)      | 1,744.48<br>(1,323.71 to<br>2,432.04)       |
| HIV/AIDS and tuberculosis                                         | 3,492.02<br>(3,128.61 to<br>4,036.68)             | 2,291.54<br>(1,083.00 to<br>4,985.51)             | 750.67<br>(404.85 to<br>1,466.20)               | 2,974.54<br>(1,455.65 to<br>5,972.89)             | 144.12<br>(130.31 to<br>163.87)             | 109.38<br>(53.07 to<br>231.06)             | 36.87<br>(19.59 to<br>70.74)             | 131.62<br>(63.65 to<br>262.11)              |
| Tuberculosis                                                      | 3,109.45<br>(2,798.29 to<br>3,530.89)             | 2,004.10<br>(809.08 to<br>4,787.05)               | 559.75<br>(255.70 to<br>1,219.58)               | 2,414.35<br>(942.87 to<br>5,503.51)               | 135.44<br>(122.83 to<br>152.21)             | 102.94<br>(46.53 to<br>225.45)             | 52.52<br>(16.07 to<br>64.90)             | 119.73<br>(50.55 to<br>254.22)              |
| HIV/AIDS                                                          | 382.57<br>(237.58 to<br>754.32)                   | 287.44<br>(144.78 to<br>629.28)                   | 190.93<br>(71.94 to<br>523.12)                  | 560.19<br>(347.79 to<br>959.04)                   | 8.68<br>(5.02 to<br>18.97)                  | 6.44<br>(2.65 to<br>15.49)                 | 4.55<br>(1.35 to<br>13.68)               | 11.89<br>(6.88 to<br>22.18)                 |
| Diarrhea, lower respiratory, and other common infectious diseases | 28,660.74<br>(22,451.07 to<br>32,437.44)          | 20,420.55<br>(14,820.72 to<br>28,759.25)          | 11,804.71<br>(9,150.23 to<br>15,685.51)         | 24,247.08<br>(17,301.76 to<br>35,041.82)          | 1,358.97<br>(1,092.96 to<br>1,560.11)       | 1,288.46<br>(953.72 to<br>1,776.98)        | 855.37<br>(664.79 to<br>1,135.45)        | 1,418.62<br>(1,023.12 to<br>2,002.64)       |
| Diarrheal diseases                                                | 926.81<br>(558.96 to<br>1,425.23)                 | 688.55<br>(118.78 to<br>2,595.93)                 | 1,401.31<br>(301.71 to<br>4,263.63)             | 794.46<br>(124.66 to<br>2,920.51)                 | 35.50<br>(15.04 to<br>69.80)                | 47.72<br>(6.99 to<br>185.44)               | 110.71<br>(21.84 to<br>340.87)           | 51.98<br>(7.00 to<br>201.64)                |
| Intestinal infectious diseases                                    | 16.26<br>(8.42 to<br>29.31)                       | 11.04<br>(5.51 to<br>20.02)                       | 9.20<br>(4.55 to<br>16.95)                      | 11.28<br>(5.54 to<br>20.66)                       | 0.49<br>(0.26 to<br>0.84)                   | 0.39<br>(0.21 to<br>0.69)                  | 0.35<br>(0.17 to<br>0.62)                | 0.39<br>(0.20 to<br>0.68)                   |
| Typhoid fever                                                     | 4.61<br>(2.00 to<br>8.74)                         | 2.71<br>(1.17 to<br>5.24)                         | 3.93<br>(1.78 to<br>7.53)                       | 2.58<br>(1.13 to<br>4.97)                         | 0.12<br>(0.05 to<br>0.23)                   | 0.08<br>(0.05 to<br>0.15)                  | 0.12<br>(0.05 to<br>0.23)                | 0.07<br>(0.03 to<br>0.14)                   |
| Paratyphoid fever                                                 | 8.73<br>(3.49 to<br>18.25)                        | 6.68<br>(2.60 to<br>13.75)                        | 3.93<br>(1.47 to<br>8.49)                       | 7.08<br>(2.86 to<br>14.60)                        | 0.23<br>(0.09 to<br>0.49)                   | 0.20<br>(0.08 to<br>0.42)                  | 0.12<br>(0.05 to<br>0.27)                | 0.20<br>(0.08 to<br>0.43)                   |
| Other intestinal infectious diseases                              | 2.92<br>(1.12 to<br>6.06)                         | 1.65<br>(0.58 to<br>3.59)                         | 1.33<br>(0.45 to<br>3.01)                       | 1.62<br>(0.56 to<br>3.56)                         | 0.14<br>(0.05 to<br>0.29)                   | 0.12<br>(0.04 to<br>0.28)                  | 0.11<br>(0.03 to<br>0.26)                | 0.11<br>(0.04 to<br>0.26)                   |
| Lower respiratory infections                                      | 23,149.25<br>(17,680.18 to<br>26,305.47)          | 16,921.42<br>(11,301.04 to<br>25,588.46)          | 8,302.68<br>(5,047.63 to<br>12,405.23)          | 20,279.04<br>(13,190.19 to<br>31,063.71)          | 1,208.10<br>(967.80 to<br>1,390.52)         | 1,153.00<br>(816.89 to<br>1,678.46)        | 670.84<br>(419.06 to<br>994.36)          | 1,276.48<br>(866.21 to<br>1,899.59)         |
| Upper respiratory infections                                      | 39.35<br>(21.21 to<br>66.63)                      | 29.70<br>(12.25 to<br>60.47)                      | 12.23<br>(4.84 to<br>24.39)                     | 31.87<br>(13.00 to<br>65.28)                      | 1.65<br>(0.80 to<br>2.90)                   | 1.61<br>(0.62 to<br>3.43)                  | 0.73<br>(0.27 to<br>1.60)                | 1.65<br>(0.64 to<br>3.49)                   |
| Otitis media                                                      | 0.62<br>(0.35 to<br>0.89)                         | 0.07<br>(0.03 to<br>0.14)                         | 0.07<br>(0.03 to<br>0.14)                       | 0.07<br>(0.03 to<br>0.14)                         | 0.01<br>(0.01 to<br>0.02)                   | 0.00<br>(0.00 to<br>0.01)                  | 0.00<br>(0.00 to<br>0.01)                | 0.00<br>(0.00 to<br>0.00)                   |
| Meningitis                                                        | 1,499.00<br>(1,188.73 to<br>1,928.45)             | 522.03<br>(359.50 to<br>768.05)                   | 322.33<br>(218.79 to<br>477.46)                 | 577.72<br>(388.19 to<br>865.98)                   | 34.67<br>(26.77 to<br>46.81)                | 15.23<br>(10.76 to<br>22.07)               | 10.17<br>(6.91 to<br>15.49)              | 15.87<br>(11.13 to<br>22.40)                |
| Pneumococcal meningitis                                           | 118.99<br>(86.55 to<br>172.14)                    | 40.09<br>(25.84 to<br>63.71)                      | 39.32<br>(24.95 to<br>65.01)                    | 40.21<br>(25.87 to<br>63.92)                      | 3.23<br>(2.21 to<br>4.83)                   | 1.42<br>(0.88 to<br>2.23)                  | 1.47<br>(0.92 to<br>2.47)                | 1.38<br>(0.86 to<br>2.19)                   |
| H influenzae type B meningitis                                    | 267.41<br>(208.53 to<br>345.06)                   | 147.17<br>(75.14 to<br>274.43)                    | 114.21<br>(68.66 to<br>187.18)                  | 177.54<br>(80.68 to<br>363.47)                    | 5.87<br>(4.45 to<br>7.81)                   | 3.24<br>(2.11 to<br>4.94)                  | 2.98<br>(2.03 to<br>4.46)                | 3.50<br>(2.14 to<br>5.75)                   |
| Meningococcal meningitis                                          | 558.99<br>(443.36 to<br>709.12)                   | 147.54<br>(95.55 to<br>222.45)                    | 76.16<br>(49.29 to<br>117.99)                   | 159.03<br>(105.41 to<br>234.99)                   | 11.44<br>(8.88 to<br>15.08)                 | 4.23<br>(2.91 to<br>6.24)                  | 2.36<br>(1.54 to<br>3.60)                | 4.39<br>(3.01 to<br>6.29)                   |
| Other meningitis                                                  | 553.61<br>(436.72 to<br>725.16)                   | 187.22<br>(125.88 to<br>288.31)                   | 92.64<br>(61.18 to<br>142.17)                   | 200.94<br>(137.06 to<br>299.14)                   | 14.13<br>(10.80 to<br>19.25)                | 6.35<br>(4.26 to<br>9.50)                  | 3.36<br>(2.20 to<br>5.17)                | 6.60<br>(4.40 to<br>9.69)                   |
| Encephalitis                                                      | 2,299.54<br>(1,683.13 to<br>2,704.07)             | 1,800.46<br>(1,278.71 to<br>2,214.45)             | 1,610.23<br>(1,171.63 to<br>1,972.84)           | 1,804.68<br>(1,281.91 to<br>2,218.77)             | 65.17<br>(42.52 to<br>81.82)                | 60.84<br>(39.38 to<br>78.52)               | 57.07<br>(38.22 to<br>72.67)             | 59.39<br>(37.97 to<br>77.37)                |

|                |                                  |                                  |                              |                                  |                            |                            |                           |                            |
|----------------|----------------------------------|----------------------------------|------------------------------|----------------------------------|----------------------------|----------------------------|---------------------------|----------------------------|
| Diphtheria     | 3.82<br>(2.49 to<br>5.59)        | 0.73<br>(0.40 to<br>1.27)        | 0.62<br>(0.34 to<br>1.12)    | 0.85<br>(0.45 to<br>1.55)        | 0.08<br>(0.05 to<br>0.12)  | 0.02<br>(0.01 to<br>0.03)  | 0.01<br>(0.01 to<br>0.03) | 0.02<br>(0.01 to<br>0.03)  |
| Whooping cough | 576.46<br>(50.33 to<br>1,770.00) | 300.28<br>(20.31 to<br>1,030.93) | 60.63<br>(4.30 to<br>231.73) | 566.54<br>(44.50 to<br>1,795.85) | 6.90<br>(0.60 to<br>21.21) | 3.60<br>(0.25 to<br>12.32) | 0.77<br>(0.06 to<br>2.96) | 6.74<br>(0.53 to<br>21.26) |
| Tetanus        | 50.25<br>(44.32 to<br>56.88)     | 3.74<br>(2.74 to<br>5.00)        | 3.53<br>(2.45 to<br>4.83)    | 3.96<br>(2.88 to<br>5.46)        | 1.43<br>(0.99 to<br>1.86)  | 0.15<br>(0.08 to<br>0.24)  | 0.16<br>(0.09 to<br>0.26) | 0.15<br>(0.08 to<br>0.23)  |
| Measles        | 3.51<br>(2.00 to<br>5.76)        | 83.61<br>(0.04 to<br>737.13)     | 40.28<br>(0.04 to<br>303.29) | 117.73<br>(0.04 to<br>1,008.11)  | 0.04<br>(0.02 to<br>0.07)  | 1.10<br>(0.00 to<br>8.97)  | 0.56<br>(0.00 to<br>4.06) | 1.52<br>(0.00 to<br>12.06) |

| Serbia                                                |                                                      |                                                      |                                                      |                                                      |                                                   |                                                |                                                |                                                |
|-------------------------------------------------------|------------------------------------------------------|------------------------------------------------------|------------------------------------------------------|------------------------------------------------------|---------------------------------------------------|------------------------------------------------|------------------------------------------------|------------------------------------------------|
| Cause                                                 | YLLs (actual counts)                                 |                                                      |                                                      |                                                      | Deaths (actual counts)                            |                                                |                                                |                                                |
|                                                       | 2016                                                 | 2040 Forecast                                        | 2040 Better Scenario                                 | 2040 Worse Scenario                                  | 2016                                              | 2040 Forecast                                  | 2040 Better Scenario                           | 2040 Worse Scenario                            |
| Varicella and herpes zoster                           | 95.87<br>(65.64 to<br>134.28)                        | 58.94<br>(37.20 to<br>89.91)                         | 41.61<br>(23.80 to<br>64.40)                         | 58.89<br>(36.69 to<br>88.95)                         | 4.92<br>(3.11 to<br>7.37)                         | 4.79<br>(2.42 to<br>8.50)                      | 3.97<br>(1.97 to<br>6.94)                      | 4.43<br>(2.24 to<br>7.80)                      |
| <b>Neglected tropical diseases and malaria</b>        | <b>143.21</b><br><b>(115.36 to</b><br><b>159.70)</b> | <b>93.11</b><br><b>(75.42 to</b><br><b>107.14)</b>   | <b>93.25</b><br><b>(74.60 to</b><br><b>108.68)</b>   | <b>91.54</b><br><b>(73.93 to</b><br><b>105.19)</b>   | <b>5.38</b><br><b>(3.95 to</b><br><b>6.11)</b>    | <b>4.35</b><br><b>(2.92 to</b><br><b>5.25)</b> | <b>4.69</b><br><b>(3.02 to</b><br><b>5.62)</b> | <b>4.11</b><br><b>(2.73 to</b><br><b>4.95)</b> |
| Malaria                                               | 0.00<br>(0.00 to<br>0.00)                            | 0.00<br>(0.00 to<br>0.00)                            | 0.00<br>(0.00 to<br>0.00)                            | 0.00<br>(0.00 to<br>0.00)                            | 0.00<br>(0.00 to<br>0.00)                         | 0.00<br>(0.00 to<br>0.00)                      | 0.00<br>(0.00 to<br>0.00)                      | 0.00<br>(0.00 to<br>0.00)                      |
| Chagas disease                                        | 0.00<br>(0.00 to<br>0.00)                            | 0.00<br>(0.00 to<br>0.00)                            | 0.00<br>(0.00 to<br>0.00)                            | 0.00<br>(0.00 to<br>0.00)                            | 0.00<br>(0.00 to<br>0.00)                         | 0.00<br>(0.00 to<br>0.00)                      | 0.00<br>(0.00 to<br>0.00)                      | 0.00<br>(0.00 to<br>0.00)                      |
| Leishmaniasis                                         | 2.61<br>(1.29 to<br>4.19)                            | 0.99<br>(0.51 to<br>1.62)                            | 0.70<br>(0.36 to<br>1.18)                            | 1.02<br>(0.51 to<br>1.65)                            | 0.10<br>(0.05 to<br>0.17)                         | 0.04<br>(0.02 to<br>0.07)                      | 0.03<br>(0.02 to<br>0.05)                      | 0.04<br>(0.02 to<br>0.07)                      |
| African trypanosomiasis                               | 0.00<br>(0.00 to<br>0.00)                            | 0.00<br>(0.00 to<br>0.00)                            | 0.00<br>(0.00 to<br>0.00)                            | 0.00<br>(0.00 to<br>0.00)                            | 0.00<br>(0.00 to<br>0.00)                         | 0.00<br>(0.00 to<br>0.00)                      | 0.00<br>(0.00 to<br>0.00)                      | 0.00<br>(0.00 to<br>0.00)                      |
| Schistosomiasis                                       | 0.00<br>(0.00 to<br>0.00)                            | 0.00<br>(0.00 to<br>0.00)                            | 0.00<br>(0.00 to<br>0.00)                            | 0.00<br>(0.00 to<br>0.00)                            | 0.00<br>(0.00 to<br>0.00)                         | 0.00<br>(0.00 to<br>0.00)                      | 0.00<br>(0.00 to<br>0.00)                      | 0.00<br>(0.00 to<br>0.00)                      |
| Cysticercosis                                         | 4.51<br>(3.73 to<br>5.43)                            | 1.22<br>(0.97 to<br>1.52)                            | 1.12<br>(0.87 to<br>1.49)                            | 1.22<br>(0.97 to<br>1.52)                            | 0.15<br>(0.13 to<br>0.18)                         | 0.05<br>(0.04 to<br>0.06)                      | 0.05<br>(0.04 to<br>0.06)                      | 0.05<br>(0.04 to<br>0.06)                      |
| Cystic echinococcosis                                 | 53.82<br>(46.34 to<br>62.25)                         | 26.93<br>(20.75 to<br>34.73)                         | 17.27<br>(13.21 to<br>22.63)                         | 27.51<br>(21.54 to<br>35.15)                         | 2.29<br>(1.99 to<br>2.62)                         | 1.51<br>(1.15 to<br>1.96)                      | 1.06<br>(0.82 to<br>1.38)                      | 1.48<br>(1.16 to<br>1.91)                      |
| Dengue                                                | 0.00<br>(0.00 to<br>0.00)                            | 0.00<br>(0.00 to<br>0.00)                            | 0.00<br>(0.00 to<br>0.00)                            | 0.00<br>(0.00 to<br>0.00)                            | 0.00<br>(0.00 to<br>0.00)                         | 0.00<br>(0.00 to<br>0.00)                      | 0.00<br>(0.00 to<br>0.00)                      | 0.00<br>(0.00 to<br>0.00)                      |
| Yellow fever                                          | 0.00<br>(0.00 to<br>0.00)                            | 0.00<br>(0.00 to<br>0.00)                            | 0.00<br>(0.00 to<br>0.00)                            | 0.00<br>(0.00 to<br>0.00)                            | 0.00<br>(0.00 to<br>0.00)                         | 0.00<br>(0.00 to<br>0.00)                      | 0.00<br>(0.00 to<br>0.00)                      | 0.00<br>(0.00 to<br>0.00)                      |
| Rabies                                                | 0.30<br>(0.16 to<br>0.41)                            | 0.16<br>(0.09 to<br>0.22)                            | 0.12<br>(0.07 to<br>0.16)                            | 0.16<br>(0.08 to<br>0.22)                            | 0.01<br>(0.01 to<br>0.01)                         | 0.01<br>(0.00 to<br>0.01)                      | 0.01<br>(0.00 to<br>0.01)                      | 0.01<br>(0.00 to<br>0.01)                      |
| Intestinal nematode infections                        | 1.24<br>(0.61 to<br>2.17)                            | 0.93<br>(0.49 to<br>1.54)                            | 0.93<br>(0.49 to<br>1.53)                            | 0.92<br>(0.48 to<br>1.54)                            | 0.04<br>(0.02 to<br>0.06)                         | 0.04<br>(0.02 to<br>0.06)                      | 0.04<br>(0.02 to<br>0.07)                      | 0.04<br>(0.02 to<br>0.06)                      |
| Other neglected tropical diseases                     | 80.73<br>(51.12 to<br>95.25)                         | 62.88<br>(42.30 to<br>74.25)                         | 73.12<br>(49.86 to<br>87.15)                         | 60.72<br>(41.91 to<br>71.94)                         | 2.79<br>(1.27 to<br>3.41)                         | 2.71<br>(1.15 to<br>3.45)                      | 3.51<br>(1.56 to<br>4.41)                      | 2.50<br>(1.10 to<br>3.17)                      |
| <b>Maternal disorders</b>                             | <b>769.26</b><br><b>(624.90 to</b><br><b>958.11)</b> | <b>302.08</b><br><b>(201.17 to</b><br><b>458.53)</b> | <b>205.32</b><br><b>(136.69 to</b><br><b>307.10)</b> | <b>318.21</b><br><b>(209.41 to</b><br><b>469.74)</b> | <b>14.13</b><br><b>(11.59 to</b><br><b>17.28)</b> | <b>5.58</b><br><b>(3.78 to</b><br><b>8.28)</b> | <b>3.80</b><br><b>(2.57 to</b><br><b>5.67)</b> | <b>5.88</b><br><b>(3.93 to</b><br><b>8.68)</b> |
| Maternal hemorrhage                                   | 98.88<br>(67.02 to<br>140.09)                        | 43.11<br>(24.02 to<br>72.43)                         | 29.56<br>(16.47 to<br>50.16)                         | 45.11<br>(25.05 to<br>75.42)                         | 1.85<br>(1.28 to<br>2.61)                         | 0.81<br>(0.46 to<br>1.35)                      | 0.56<br>(0.31 to<br>0.92)                      | 0.85<br>(0.47 to<br>1.40)                      |
| Maternal sepsis and other maternal infections         | 43.09<br>(27.52 to<br>64.23)                         | 13.42<br>(6.96 to<br>23.52)                          | 8.97<br>(4.68 to<br>15.88)                           | 14.11<br>(7.26 to<br>24.67)                          | 0.78<br>(0.51 to<br>1.16)                         | 0.25<br>(0.13 to<br>0.42)                      | 0.16<br>(0.09 to<br>0.28)                      | 0.26<br>(0.13 to<br>0.45)                      |
| Maternal hypertensive disorders                       | 121.05<br>(83.74 to<br>168.51)                       | 50.52<br>(26.75 to<br>83.75)                         | 33.25<br>(17.78 to<br>56.47)                         | 53.25<br>(27.38 to<br>90.60)                         | 2.13<br>(1.48 to<br>2.93)                         | 0.89<br>(0.49 to<br>1.47)                      | 0.59<br>(0.32 to<br>0.98)                      | 0.94<br>(0.49 to<br>1.57)                      |
| Maternal obstructed labor and uterine rupture         | 8.45<br>(3.63 to<br>15.79)                           | 4.39<br>(1.71 to<br>9.41)                            | 2.73<br>(1.06 to<br>5.73)                            | 4.65<br>(1.80 to<br>9.77)                            | 0.16<br>(0.07 to<br>0.29)                         | 0.08<br>(0.03 to<br>0.18)                      | 0.05<br>(0.02 to<br>0.11)                      | 0.09<br>(0.03 to<br>0.18)                      |
| Maternal abortion, miscarriage, and ectopic pregnancy | 122.66<br>(87.46 to<br>167.57)                       | 46.11<br>(25.15 to<br>80.26)                         | 30.50<br>(16.70 to<br>51.66)                         | 48.71<br>(26.34 to<br>85.48)                         | 2.35<br>(1.69 to<br>3.19)                         | 0.89<br>(0.50 to<br>1.55)                      | 0.59<br>(0.33 to<br>0.99)                      | 0.94<br>(0.52 to<br>1.65)                      |

|                                        |                                 |                               |                               |                                |                           |                           |                           |                           |
|----------------------------------------|---------------------------------|-------------------------------|-------------------------------|--------------------------------|---------------------------|---------------------------|---------------------------|---------------------------|
| Indirect maternal deaths               | 121.10<br>(76.60 to<br>212.84)  | 41.54<br>(20.40 to<br>83.68)  | 27.01<br>(13.36 to<br>56.19)  | 44.23<br>(21.41 to<br>89.74)   | 2.14<br>(1.36 to<br>3.76) | 0.74<br>(0.37 to<br>1.47) | 0.48<br>(0.24 to<br>1.00) | 0.78<br>(0.38 to<br>1.60) |
| Late maternal deaths                   | 16.77<br>(8.74 to<br>28.58)     | 6.18<br>(2.97 to<br>12.65)    | 4.02<br>(1.86 to<br>8.02)     | 6.55<br>(2.93 to<br>13.52)     | 0.31<br>(0.16 to<br>0.52) | 0.11<br>(0.05 to<br>0.22) | 0.07<br>(0.03 to<br>0.15) | 0.12<br>(0.06 to<br>0.24) |
| Maternal deaths aggravated by HIV/AIDS | 0.02<br>(0.01 to<br>0.04)       | 0.44<br>(0.03 to<br>2.80)     | 0.28<br>(0.01 to<br>1.75)     | 0.50<br>(0.05 to<br>3.03)      | 0.00<br>(0.00 to<br>0.00) | 0.01<br>(0.00 to<br>0.04) | 0.00<br>(0.00 to<br>0.03) | 0.01<br>(0.00 to<br>0.04) |
| Other maternal disorders               | 237.23<br>(172.65 to<br>311.08) | 96.37<br>(57.84 to<br>159.39) | 69.00<br>(40.79 to<br>114.30) | 101.09<br>(59.44 to<br>169.23) | 4.41<br>(3.22 to<br>5.76) | 1.80<br>(1.09 to<br>2.92) | 1.29<br>(0.78 to<br>2.12) | 1.89<br>(1.12 to<br>3.07) |

| Serbia                                                                  |                                              |                                             |                                           |                                             |                                     |                                    |                                  |                                    |
|-------------------------------------------------------------------------|----------------------------------------------|---------------------------------------------|-------------------------------------------|---------------------------------------------|-------------------------------------|------------------------------------|----------------------------------|------------------------------------|
| Cause                                                                   | YLLs (actual counts)                         |                                             |                                           |                                             | Deaths (actual counts)              |                                    |                                  |                                    |
|                                                                         | 2016                                         | 2040 Forecast                               | 2040 Better Scenario                      | 2040 Worse Scenario                         | 2016                                | 2040 Forecast                      | 2040 Better Scenario             | 2040 Worse Scenario                |
| <b>Neonatal disorders</b>                                               | <b>28,883.35</b><br>(23,440.83 to 34,452.68) | <b>10,195.29</b><br>(6,731.14 to 15,363.02) | <b>5,749.72</b><br>(3,888.67 to 8,557.80) | <b>12,148.19</b><br>(8,110.57 to 18,128.63) | <b>333.87</b><br>(270.95 to 398.27) | <b>117.87</b><br>(77.82 to 177.56) | <b>66.48</b><br>(44.97 to 98.90) | <b>140.44</b><br>(93.74 to 209.52) |
| Neonatal preterm birth                                                  | 17,850.46<br>(13,858.75 to 21,857.57)        | 5,164.79<br>(3,181.61 to 7,925.48)          | 2,467.07<br>(1,496.01 to 3,738.68)        | 6,580.47<br>(4,109.99 to 9,770.38)          | 206.28<br>(160.12 to 252.57)        | 59.69<br>(36.78 to 91.60)          | 28.52<br>(17.30 to 43.22)        | 76.05<br>(47.52 to 112.89)         |
| Neonatal encephalopathy due to birth asphyxia and trauma                | 6,010.07<br>(4,596.50 to 7,753.12)           | 2,121.70<br>(1,161.66 to 3,689.31)          | 1,071.72<br>(605.09 to 1,809.61)          | 2,412.24<br>(1,338.07 to 4,135.77)          | 69.49<br>(53.16 to 89.65)           | 24.54<br>(13.43 to 42.63)          | 12.39<br>(7.00 to 20.91)         | 27.90<br>(15.47 to 47.80)          |
| Neonatal sepsis and other neonatal infections                           | 1,111.52<br>(638.50 to 2,899.37)             | 918.52<br>(461.03 to 2,216.12)              | 555.63<br>(274.29 to 1,310.38)            | 1,020.00<br>(506.02 to 2,459.97)            | 12.85<br>(7.38 to 33.51)            | 10.62<br>(5.34 to 25.62)           | 6.43<br>(3.17 to 15.15)          | 11.80<br>(5.85 to 28.45)           |
| Hemolytic disease and other neonatal jaundice                           | 62.22<br>(40.31 to 91.68)                    | 17.94<br>(7.88 to 37.05)                    | 10.22<br>(4.79 to 20.50)                  | 20.15<br>(9.08 to 43.26)                    | 0.72<br>(0.47 to 1.06)              | 0.21<br>(0.09 to 0.43)             | 0.12<br>(0.06 to 0.24)           | 0.23<br>(0.11 to 0.50)             |
| Other neonatal disorders                                                | 3,849.09<br>(2,868.88 to 5,047.16)           | 1,972.53<br>(1,068.92 to 3,489.56)          | 1,645.07<br>(943.12 to 2,775.93)          | 2,115.33<br>(1,141.49 to 3,723.48)          | 44.52<br>(33.19 to 58.36)           | 22.82<br>(12.37 to 40.35)          | 19.03<br>(10.91 to 32.08)        | 24.47<br>(13.21 to 43.04)          |
| <b>Nutritional deficiencies</b>                                         | <b>543.24</b><br>(484.44 to 615.37)          | <b>263.93</b><br>(211.71 to 327.78)         | <b>264.77</b><br>(213.96 to 326.68)       | <b>255.05</b><br>(203.47 to 317.15)         | <b>23.66</b><br>(21.39 to 26.13)    | <b>18.25</b><br>(13.12 to 24.96)   | <b>20.77</b><br>(15.22 to 28.27) | <b>16.69</b><br>(11.90 to 23.24)   |
| Protein-energy malnutrition                                             | 288.70<br>(240.53 to 354.86)                 | 97.83<br>(72.41 to 131.21)                  | 121.69<br>(91.16 to 160.12)               | 92.53<br>(67.75 to 125.03)                  | 10.75<br>(9.27 to 12.62)            | 6.75<br>(4.33 to 10.05)            | 9.97<br>(6.39 to 14.68)          | 5.95<br>(3.73 to 9.00)             |
| Iodine deficiency                                                       | 23.34<br>(3.12 to 56.84)                     | 19.63<br>(2.09 to 54.15)                    | 17.75<br>(1.59 to 49.13)                  | 19.07<br>(2.15 to 51.79)                    | 1.03<br>(0.10 to 2.65)              | 1.40<br>(0.09 to 4.57)             | 1.41<br>(0.06 to 5.27)           | 1.29<br>(0.09 to 4.09)             |
| Dietary iron deficiency                                                 | 41.56<br>(35.47 to 49.14)                    | 21.67<br>(16.57 to 28.59)                   | 22.87<br>(17.48 to 30.39)                 | 21.53<br>(16.41 to 28.48)                   | 1.01<br>(0.84 to 1.26)              | 0.58<br>(0.44 to 0.82)             | 0.64<br>(0.48 to 0.92)           | 0.56<br>(0.42 to 0.79)             |
| Other nutritional deficiencies                                          | 189.64<br>(149.79 to 221.17)                 | 124.80<br>(87.53 to 171.77)                 | 102.45<br>(71.06 to 141.71)               | 121.91<br>(85.35 to 166.49)                 | 10.88<br>(8.99 to 12.63)            | 9.52<br>(5.95 to 14.26)            | 8.74<br>(5.63 to 13.11)          | 8.88<br>(5.44 to 13.31)            |
| <b>Other communicable, maternal, neonatal, and nutritional diseases</b> | <b>1,038.96</b><br>(860.15 to 1,175.59)      | <b>670.57</b><br>(541.90 to 800.04)         | <b>586.47</b><br>(479.98 to 690.99)       | <b>672.05</b><br>(539.38 to 801.19)         | <b>33.15</b><br>(27.23 to 36.88)    | <b>28.24</b><br>(21.54 to 33.62)   | <b>27.77</b><br>(22.29 to 32.83) | <b>27.13</b><br>(20.51 to 32.64)   |
| Sexually transmitted infections excluding HIV                           | 90.54<br>(66.30 to 107.40)                   | 35.68<br>(25.46 to 48.12)                   | 28.97<br>(20.34 to 38.99)                 | 36.27<br>(25.47 to 48.49)                   | 2.57<br>(2.13 to 3.04)              | 1.24<br>(0.91 to 1.66)             | 1.09<br>(0.80 to 1.49)           | 1.22<br>(0.89 to 1.61)             |
| Syphilis                                                                | 30.89<br>(26.86 to 34.77)                    | 9.93<br>(6.74 to 14.68)                     | 6.51<br>(4.45 to 9.06)                    | 10.36<br>(6.87 to 14.92)                    | 0.83<br>(0.73 to 0.95)              | 0.34<br>(0.24 to 0.48)             | 0.25<br>(0.17 to 0.36)           | 0.34<br>(0.24 to 0.49)             |
| Chlamydial infection                                                    | 11.12<br>(7.40 to 13.88)                     | 4.86<br>(3.07 to 7.15)                      | 4.28<br>(2.78 to 6.31)                    | 4.89<br>(3.08 to 7.22)                      | 0.33<br>(0.26 to 0.40)              | 0.18<br>(0.12 to 0.25)             | 0.17<br>(0.11 to 0.24)           | 0.17<br>(0.12 to 0.24)             |
| Gonococcal infection                                                    | 32.11<br>(21.78 to 39.40)                    | 14.10<br>(8.83 to 20.74)                    | 12.34<br>(7.81 to 18.09)                  | 14.16<br>(8.97 to 21.17)                    | 0.97<br>(0.78 to 1.18)              | 0.52<br>(0.35 to 0.75)             | 0.49<br>(0.33 to 0.71)           | 0.50<br>(0.33 to 0.73)             |
| Other sexually transmitted infections                                   | 16.43<br>(10.68 to 20.51)                    | 6.79<br>(4.32 to 9.94)                      | 5.83<br>(3.80 to 8.50)                    | 6.87<br>(4.39 to 10.19)                     | 0.44<br>(0.33 to 0.53)              | 0.21<br>(0.15 to 0.29)             | 0.19<br>(0.13 to 0.27)           | 0.21<br>(0.14 to 0.29)             |
| Acute hepatitis                                                         | 215.65<br>(188.67 to 247.30)                 | 126.04<br>(94.70 to 164.68)                 | 71.06<br>(52.46 to 92.98)                 | 132.53<br>(97.99 to 170.88)                 | 6.62<br>(5.81 to 7.53)              | 4.69<br>(3.53 to 6.06)             | 2.80<br>(2.08 to 3.64)           | 4.80<br>(3.57 to 6.20)             |
| Acute hepatitis A                                                       | 11.92<br>(7.83 to 16.21)                     | 4.97<br>(2.99 to 7.85)                      | 3.22<br>(1.95 to 5.13)                    | 5.21<br>(3.08 to 8.13)                      | 0.24<br>(0.17 to 0.32)              | 0.14<br>(0.08 to 0.21)             | 0.10<br>(0.06 to 0.15)           | 0.14<br>(0.09 to 0.21)             |
| Acute hepatitis B                                                       | 167.88<br>(143.77 to 196.15)                 | 100.20<br>(72.20 to 134.71)                 | 55.50<br>(39.54 to 74.89)                 | 105.52<br>(75.14 to 137.88)                 | 5.26<br>(4.46 to 6.15)              | 3.64<br>(2.57 to 4.89)             | 2.11<br>(1.49 to 2.81)           | 3.76<br>(2.70 to 4.91)             |



| Serbia                               |                                                 |                                                 |                                                 |                                                 |                                              |                                              |                                              |                                              |
|--------------------------------------|-------------------------------------------------|-------------------------------------------------|-------------------------------------------------|-------------------------------------------------|----------------------------------------------|----------------------------------------------|----------------------------------------------|----------------------------------------------|
| Cause                                | YLLs (actual counts)                            |                                                 |                                                 |                                                 | Deaths (actual counts)                       |                                              |                                              |                                              |
|                                      | 2016                                            | 2040 Forecast                                   | 2040 Better Scenario                            | 2040 Worse Scenario                             | 2016                                         | 2040 Forecast                                | 2040 Better Scenario                         | 2040 Worse Scenario                          |
| <b>Neoplasms</b>                     | <b>523,732.63</b><br>(491,946.29 to 555,403.82) | <b>495,052.08</b><br>(401,061.66 to 602,016.34) | <b>361,177.39</b><br>(295,399.39 to 434,233.79) | <b>543,292.91</b><br>(437,078.33 to 650,569.08) | <b>24,058.94</b><br>(22,681.90 to 25,485.40) | <b>25,881.90</b><br>(22,028.04 to 30,156.87) | <b>20,252.23</b><br>(17,449.89 to 23,339.07) | <b>27,549.79</b><br>(23,075.33 to 32,009.25) |
| Lip and oral cavity cancer           | 8,091.59<br>(7,238.61 to 9,047.99)              | 9,657.43<br>(4,730.42 to 15,866.51)             | 4,930.65<br>(2,433.14 to 8,960.05)              | 10,887.45<br>(5,318.59 to 17,113.80)            | 344.94<br>(310.74 to 382.11)                 | 344.94<br>(235.19 to 724.02)                 | 240.81<br>(131.38 to 399.80)                 | 504.04<br>(264.36 to 791.84)                 |
| Nasopharynx cancer                   | 1,344.65<br>(1,179.42 to 1,523.39)              | 1,583.03<br>(749.55 to 2,948.14)                | 675.83<br>(318.46 to 1,383.04)                  | 1,860.18<br>(883.62 to 3,270.43)                | 46.25<br>(40.74 to 52.23)                    | 57.99<br>(28.53 to 103.57)                   | 24.86<br>(12.48 to 47.58)                    | 67.73<br>(33.57 to 115.32)                   |
| Other pharynx cancer                 | 6,218.29<br>(5,327.02 to 7,116.12)              | 5,961.71<br>(2,953.37 to 11,467.21)             | 4,847.31<br>(2,489.88 to 9,564.57)              | 6,303.51<br>(3,100.13 to 11,960.78)             | 235.40<br>(202.81 to 269.42)                 | 241.38<br>(124.48 to 440.31)                 | 202.79<br>(108.32 to 370.60)                 | 251.75<br>(129.46 to 467.10)                 |
| Esophageal cancer                    | 8,549.85<br>(7,590.08 to 9,563.92)              | 9,212.71<br>(4,400.39 to 17,625.16)             | 5,993.12<br>(2,999.97 to 11,479.06)             | 10,537.95<br>(4,956.54 to 20,031.67)            | 367.30<br>(326.55 to 409.04)                 | 420.57<br>(214.14 to 763.50)                 | 278.78<br>(151.53 to 487.77)                 | 476.07<br>(236.46 to 870.34)                 |
| Stomach cancer                       | 25,364.05<br>(23,234.91 to 27,732.48)           | 16,588.08<br>(11,787.71 to 22,448.65)           | 10,547.03<br>(7,826.72 to 14,144.57)            | 17,565.25<br>(12,493.34 to 24,080.38)           | 1,227.91<br>(1,128.35 to 1,332.00)           | 913.72<br>(677.53 to 1,209.43)               | 624.40<br>(478.17 to 805.38)                 | 942.96<br>(693.48 to 1,238.88)               |
| Colon and rectum cancer              | 64,529.14<br>(59,198.80 to 70,694.70)           | 70,281.71<br>(44,180.74 to 108,974.28)          | 46,565.60<br>(30,375.98 to 70,773.44)           | 75,852.24<br>(47,268.03 to 118,230.83)          | 3,348.48<br>(3,075.40 to 3,683.18)           | 4,213.62<br>(2,823.36 to 6,263.69)           | 3,036.52<br>(2,075.76 to 4,412.05)           | 4,406.09<br>(2,858.97 to 6,530.12)           |
| Liver cancer                         | 18,043.41<br>(16,034.10 to 20,163.88)           | 21,778.09<br>(13,369.45 to 32,824.95)           | 19,737.03<br>(12,697.40 to 29,236.99)           | 26,781.71<br>(15,284.16 to 42,254.90)           | 891.62<br>(790.73 to 997.64)                 | 1,187.89<br>(756.29 to 1,750.71)             | 1,151.66<br>(778.24 to 1,664.94)             | 1,407.45<br>(847.00 to 2,172.06)             |
| Liver cancer due to hepatitis B      | 4,649.33<br>(3,418.10 to 6,083.24)              | 5,106.95<br>(2,962.42 to 8,658.41)              | 5,121.59<br>(3,087.55 to 8,409.99)              | 6,012.17<br>(3,263.19 to 10,369.79)             | 211.67<br>(151.76 to 275.66)                 | 258.21<br>(154.32 to 417.70)                 | 273.37<br>(169.92 to 429.03)                 | 294.02<br>(166.11 to 488.28)                 |
| Liver cancer due to hepatitis C      | 5,495.69<br>(4,227.45 to 6,746.66)              | 6,425.43<br>(3,842.98 to 9,991.72)              | 6,553.91<br>(4,108.97 to 9,926.67)              | 7,439.56<br>(4,197.89 to 12,158.42)             | 290.61<br>(226.62 to 354.88)                 | 378.23<br>(234.41 to 572.42)                 | 411.17<br>(269.10 to 608.82)                 | 421.71<br>(244.54 to 665.23)                 |
| Liver cancer due to alcohol use      | 5,043.26<br>(4,173.74 to 6,028.41)              | 6,836.61<br>(4,176.11 to 10,434.06)             | 4,627.91<br>(2,911.11 to 7,040.62)              | 9,285.38<br>(5,414.80 to 14,862.30)             | 252.32<br>(207.66 to 299.41)                 | 369.40<br>(233.34 to 552.83)                 | 273.14<br>(179.18 to 408.18)                 | 482.65<br>(288.88 to 755.76)                 |
| Liver cancer due to other causes     | 2,855.14<br>(2,397.99 to 3,421.71)              | 3,409.12<br>(1,861.80 to 5,613.89)              | 3,433.62<br>(1,990.65 to 5,518.94)              | 4,044.60<br>(2,053.19 to 7,111.05)              | 137.03<br>(113.92 to 163.33)                 | 182.05<br>(104.29 to 293.26)                 | 193.98<br>(118.04 to 307.35)                 | 209.07<br>(111.33 to 358.51)                 |
| Gallbladder and biliary tract cancer | 8,495.02<br>(7,358.66 to 9,903.46)              | 5,526.30<br>(4,593.98 to 6,782.04)              | 5,445.63<br>(4,448.19 to 6,772.04)              | 5,329.03<br>(4,450.46 to 6,440.70)              | 456.04<br>(395.72 to 540.03)                 | 341.01<br>(287.81 to 420.93)                 | 356.62<br>(444.30 to 390.45)                 | 320.54<br>(270.07 to 390.45)                 |
| Pancreatic cancer                    | 27,350.73<br>(25,069.26 to 29,780.90)           | 28,988.61<br>(22,572.39 to 37,021.77)           | 26,576.97<br>(20,876.45 to 33,829.86)           | 29,265.65<br>(22,697.77 to 37,828.91)           | 1,358.89<br>(1,244.42 to 1,479.06)           | 1,591.40<br>(1,274.13 to 1,991.42)           | 1,579.20<br>(1,276.23 to 1,910.97)           | 1,567.08<br>(1,247.99 to 1,984.30)           |
| Larynx cancer                        | 9,312.56<br>(8,235.64 to 10,338.65)             | 9,261.90<br>(4,013.37 to 18,427.22)             | 4,164.73<br>(1,841.74 to 8,777.78)              | 10,337.01<br>(4,466.14 to 19,824.54)            | 398.50<br>(352.42 to 448.05)                 | 422.33<br>(378.23 to 483.09)                 | 384.53<br>(368.76 to 411.17)                 | 471.65<br>(219.26 to 902.32)                 |
| Tracheal, bronchus, and lung cancer  | 132,948.23<br>(120,992.42 to 144,947.37)        | 120,498.95<br>(84,123.79 to 164,201.02)         | 65,784.29<br>(46,889.25 to 88,944.58)           | 148,450.01<br>(104,028.52 to 198,976.98)        | 5,716.74<br>(5,197.18 to 6,232.59)           | 5,534.62<br>(3,995.14 to 7,463.78)           | 3,020.39<br>(2,260.16 to 3,995.03)           | 6,751.78<br>(4,824.97 to 9,018.13)           |
| Malignant skin melanoma              | 7,487.33<br>(5,813.95 to 8,496.69)              | 6,467.38<br>(5,172.10 to 7,923.80)              | 8,687.34<br>(6,979.56 to 10,605.43)             | 6,091.37<br>(4,852.84 to 7,323.03)              | 298.23<br>(246.34 to 339.86)                 | 304.16<br>(247.92 to 366.73)                 | 439.70<br>(365.35 to 534.13)                 | 277.33<br>(224.57 to 337.51)                 |
| Non-melanoma skin cancer             | 3,496.02<br>(3,181.71 to 3,865.51)              | 3,969.49<br>(3,303.40 to 4,746.00)              | 3,161.15<br>(2,688.42 to 3,680.82)              | 3,835.58<br>(3,231.88 to 4,566.13)              | 238.42<br>(216.31 to 263.91)                 | 337.31<br>(260.09 to 418.79)                 | 296.82<br>(242.53 to 356.59)                 | 313.29<br>(240.89 to 395.39)                 |
| Breast cancer                        | 42,857.28<br>(37,577.66 to 49,746.15)           | 40,710.00<br>(27,551.36 to 59,978.06)           | 27,712.57<br>(19,064.49 to 39,527.42)           | 44,115.58<br>(29,340.80 to 65,742.18)           | 1,898.15<br>(1,671.44 to 2,207.38)           | 2,126.46<br>(1,543.58 to 3,024.43)           | 1,574.62<br>(1,166.22 to 2,156.60)           | 2,227.45<br>(1,571.04 to 3,238.95)           |
| Cervical cancer                      | 16,503.84<br>(13,296.57 to 19,128.06)           | 10,922.27<br>(7,461.89 to 15,664.43)            | 6,865.26<br>(4,892.59 to 9,342.92)              | 11,667.81<br>(7,525.80 to 17,117.63)            | 634.01<br>(527.09 to 740.55)                 | 484.08<br>(352.77 to 659.87)                 | 327.16<br>(245.82 to 424.51)                 | 502.12<br>(351.86 to 698.67)                 |



|                   |                                          |                                          |                                          |                                          |                                       |                                       |                                       |                                       |
|-------------------|------------------------------------------|------------------------------------------|------------------------------------------|------------------------------------------|---------------------------------------|---------------------------------------|---------------------------------------|---------------------------------------|
|                   | 5,908.58<br>(5,100.47 to<br>6,839.94)    | 5,159.70<br>(4,131.71 to<br>6,321.30)    | 4,204.16<br>(3,285.12 to<br>5,211.16)    | 5,137.71<br>(4,142.43 to<br>6,275.02)    | 286.80<br>(248.63 to<br>330.64)       | 294.08<br>(243.20 to<br>352.80)       | 251.96<br>(204.61 to<br>306.21)       | 286.29<br>(235.17 to<br>342.75)       |
| Uterine cancer    |                                          |                                          |                                          |                                          |                                       |                                       |                                       |                                       |
|                   | 13,028.28<br>(11,075.88 to<br>15,114.47) | 10,348.91<br>(7,724.28 to<br>13,794.57)  | 8,761.17<br>(6,437.76 to<br>11,591.66)   | 10,897.73<br>(7,837.95 to<br>14,854.34)  | 540.93<br>(465.98 to<br>624.17)       | 478.90<br>(365.64 to<br>632.00)       | 420.36<br>(317.41 to<br>549.53)       | 495.52<br>(364.50 to<br>664.96)       |
| Ovarian cancer    |                                          |                                          |                                          |                                          |                                       |                                       |                                       |                                       |
|                   | 18,539.69<br>(15,160.82 to<br>24,606.94) | 21,537.26<br>(16,995.09 to<br>28,066.61) | 19,589.52<br>(15,751.42 to<br>25,863.74) | 20,394.64<br>(15,871.51 to<br>26,617.55) | 1,278.12<br>(1,048.60 to<br>1,708.81) | 1,684.31<br>(1,282.52 to<br>2,240.66) | 1,661.08<br>(1,331.41 to<br>2,190.88) | 1,548.51<br>(1,160.00 to<br>2,047.70) |
| Prostate cancer   |                                          |                                          |                                          |                                          |                                       |                                       |                                       |                                       |
|                   | 1,769.64<br>(1,416.15 to<br>2,176.19)    | 877.74<br>(606.96 to<br>1,372.08)        | 658.15<br>(447.36 to<br>1,046.54)        | 898.12<br>(611.80 to<br>1,376.85)        | 41.23<br>(33.88 to<br>50.04)          | 25.24<br>(19.26 to<br>33.25)          | 20.64<br>(15.72 to<br>27.75)          | 24.95<br>(18.92 to<br>33.27)          |
| Testicular cancer |                                          |                                          |                                          |                                          |                                       |                                       |                                       |                                       |

| Serbia                          |                                          |                                          |                                          |                                            |                                       |                                       |                                       |                                       |
|---------------------------------|------------------------------------------|------------------------------------------|------------------------------------------|--------------------------------------------|---------------------------------------|---------------------------------------|---------------------------------------|---------------------------------------|
| Cause                           | YLLs (actual counts)                     |                                          |                                          |                                            | Deaths (actual counts)                |                                       |                                       |                                       |
|                                 | 2016                                     | 2040 Forecast                            | 2040 Better Scenario                     | 2040 Worse Scenario                        | 2016                                  | 2040 Forecast                         | 2040 Better Scenario                  | 2040 Worse Scenario                   |
| Kidney cancer                   | 10,581.56<br>(9,327.06 to 11,742.93)     | 11,291.71<br>(7,732.92 to 16,290.36)     | 10,895.28<br>(7,864.95 to 15,045.89)     | 11,086.17<br>(7,559.46 to 16,041.98)       | 489.76<br>(436.02 to 541.39)          | 581.07<br>(422.31 to 812.91)          | 601.22<br>(458.17 to 781.53)          | 556.61<br>(396.48 to 791.62)          |
| Bladder cancer                  | 12,207.54<br>(11,012.29 to 13,450.12)    | 11,616.67<br>(8,338.84 to 16,002.56)     | 9,093.98<br>(6,847.86 to 11,913.10)      | 11,745.50<br>(8,331.96 to 16,358.52)       | 717.35<br>(651.22 to 791.29)          | 781.90<br>(572.82 to 1,044.23)        | 671.97<br>(529.80 to 850.47)          | 767.00<br>(546.16 to 1,041.57)        |
| Brain and nervous system cancer | 22,370.24<br>(18,921.02 to 25,012.26)    | 20,888.49<br>(17,199.38 to 24,352.78)    | 18,676.48<br>(15,248.10 to 21,712.03)    | 20,757.90<br>(17,183.81 to 23,891.07)      | 791.63<br>(647.89 to 896.78)          | 839.74<br>(685.14 to 972.52)          | 786.38<br>(637.73 to 915.59)          | 816.91<br>(665.05 to 941.96)          |
| Thyroid cancer                  | 1,425.18<br>(1,201.46 to 1,604.95)       | 1,182.31<br>(821.07 to 1,710.87)         | 982.27<br>(683.42 to 1,426.96)           | 1,340.21<br>(880.23 to 2,037.58)           | 67.25<br>(59.16 to 75.90)             | 64.00<br>(45.86 to 90.95)             | 55.79<br>(39.88 to 80.52)             | 70.07<br>(48.09 to 103.71)            |
| Mesothelioma                    | 919.90<br>(795.39 to 1,043.00)           | 767.63<br>(620.55 to 926.43)             | 807.89<br>(651.26 to 995.90)             | 745.19<br>(608.37 to 895.85)               | 35.51<br>(30.95 to 40.18)             | 32.53<br>(26.78 to 39.02)             | 35.73<br>(29.14 to 43.46)             | 30.97<br>(25.74 to 36.76)             |
| Hodgkin lymphoma                | 2,553.58<br>(1,491.84 to 3,157.76)       | 1,461.46<br>(902.78 to 1,975.36)         | 932.82<br>(591.20 to 1,234.34)           | 1,512.80<br>(945.23 to 2,039.53)           | 78.94<br>(49.75 to 94.37)             | 52.79<br>(34.37 to 68.09)             | 35.31<br>(24.39 to 44.66)             | 53.46<br>(35.42 to 69.88)             |
| Non-Hodgkin lymphoma            | 9,968.36<br>(8,183.60 to 11,180.09)      | 7,966.73<br>(6,322.06 to 9,946.65)       | 6,724.64<br>(5,269.48 to 8,510.54)       | 8,450.59<br>(6,550.65 to 10,935.13)        | 402.78<br>(341.62 to 449.67)          | 375.42<br>(302.66 to 464.15)          | 335.59<br>(272.43 to 417.52)          | 387.26<br>(305.24 to 492.90)          |
| Multiple myeloma                | 4,392.35<br>(3,204.68 to 5,071.44)       | 4,118.95<br>(3,007.33 to 5,329.53)       | 3,833.71<br>(2,868.91 to 4,900.48)       | 4,351.01<br>(3,104.47 to 5,821.61)         | 205.04<br>(159.20 to 233.42)          | 212.93<br>(164.66 to 271.50)          | 208.08<br>(165.93 to 262.92)          | 219.21<br>(163.92 to 288.93)          |
| Leukemia                        | 17,380.56<br>(13,988.79 to 19,194.07)    | 16,408.72<br>(11,952.43 to 22,607.89)    | 14,265.87<br>(10,768.54 to 19,003.94)    | 17,660.59<br>(12,731.36 to 24,816.74)      | 715.08<br>(581.14 to 790.12)          | 799.26<br>(597.12 to 1,074.42)        | 736.48<br>(566.55 to 941.49)          | 835.32<br>(613.13 to 1,148.22)        |
| Acute lymphoid leukemia         | 2,714.09<br>(2,014.61 to 3,220.13)       | 1,950.56<br>(1,378.19 to 2,756.32)       | 1,473.63<br>(1,034.35 to 2,092.89)       | 2,140.79<br>(1,490.76 to 3,072.02)         | 76.34<br>(55.90 to 89.40)             | 66.16<br>(46.09 to 93.04)             | 50.99<br>(36.24 to 71.73)             | 72.16<br>(49.17 to 104.97)            |
| Chronic lymphoid leukemia       | 3,305.64<br>(2,790.85 to 3,905.62)       | 3,018.69<br>(2,075.65 to 4,242.17)       | 2,748.78<br>(1,941.21 to 3,879.10)       | 3,167.94<br>(2,125.21 to 4,699.30)         | 178.67<br>(149.87 to 209.55)          | 187.09<br>(131.89 to 263.49)          | 182.82<br>(134.63 to 244.03)          | 190.28<br>(130.78 to 275.13)          |
| Acute myeloid leukemia          | 8,228.92<br>(6,122.18 to 9,413.34)       | 8,718.30<br>(6,407.31 to 11,866.79)      | 8,053.93<br>(6,073.91 to 10,603.05)      | 9,404.01<br>(6,779.75 to 13,182.16)        | 309.04<br>(240.47 to 350.20)          | 379.06<br>(282.73 to 507.85)          | 367.82<br>(283.75 to 472.65)          | 399.30<br>(292.51 to 552.52)          |
| Chronic myeloid leukemia        | 974.85<br>(771.32 to 1,219.19)           | 548.78<br>(355.65 to 845.52)             | 323.03<br>(213.78 to 478.60)             | 608.83<br>(380.03 to 939.17)               | 44.65<br>(34.85 to 54.31)             | 31.02<br>(20.38 to 44.95)             | 20.02<br>(13.43 to 28.07)             | 32.95<br>(21.48 to 47.99)             |
| Other leukemia                  | 2,157.06<br>(1,832.52 to 2,559.49)       | 2,172.38<br>(1,524.07 to 3,109.73)       | 1,666.50<br>(1,207.70 to 2,313.80)       | 2,339.03<br>(1,601.07 to 3,393.58)         | 106.38<br>(85.84 to 125.27)           | 135.94<br>(95.26 to 185.66)           | 114.82<br>(84.53 to 152.01)           | 140.62<br>(97.74 to 194.73)           |
| Other neoplasms                 | 22,095.17<br>(18,682.01 to 24,157.27)    | 20,021.17<br>(17,211.75 to 22,600.89)    | 20,056.92<br>(17,045.68 to 22,830.36)    | 19,434.40<br>(16,837.99 to 21,856.06)      | 947.66<br>(803.46 to 1,041.01)        | 1,031.72<br>(894.32 to 1,161.22)      | 1,112.79<br>(974.90 to 1,256.12)      | 970.36<br>(822.13 to 1,093.17)        |
| Cardiovascular diseases         | 779,892.97<br>(737,710.10 to 821,753.47) | 617,137.91<br>(446,445.20 to 840,843.61) | 336,704.63<br>(245,234.83 to 457,082.29) | 793,381.03<br>(559,660.46 to 1,078,346.96) | 57,445.14<br>(54,783.77 to 60,114.81) | 54,940.31<br>(42,317.84 to 69,998.57) | 34,814.18<br>(26,842.51 to 46,160.31) | 64,856.07<br>(49,898.69 to 82,383.78) |
| Rheumatic heart disease         | 2,505.09<br>(2,237.45 to 2,867.55)       | 1,486.76<br>(1,065.66 to 2,139.18)       | 1,047.04<br>(720.24 to 1,551.35)         | 1,516.25<br>(1,093.88 to 2,136.70)         | 135.44<br>(119.56 to 161.96)          | 100.50<br>(72.74 to 145.77)           | 77.18<br>(54.18 to 113.65)            | 98.96<br>(72.72 to 141.41)            |
| Ischemic heart disease          | 328,588.51<br>(296,049.60 to 384,949.70) | 222,455.23<br>(124,005.46 to 363,873.34) | 104,363.03<br>(58,811.90 to 176,158.99)  | 317,257.00<br>(177,630.42 to 515,671.58)   | 23,356.54<br>(20,765.11 to 28,419.19) | 19,064.76<br>(11,243.80 to 30,459.02) | 10,659.15<br>(6,218.80 to 17,809.34)  | 24,701.42<br>(14,517.54 to 38,411.81) |
| Stroke                          | 240,855.99<br>(214,820.02 to 285,340.29) | 160,398.78<br>(85,626.54 to 283,491.66)  | 69,669.95<br>(37,991.41 to 125,639.22)   | 226,715.23<br>(121,367.65 to 389,759.87)   | 17,092.42<br>(14,971.63 to 20,988.50) | 13,091.07<br>(7,113.94 to 23,067.42)  | 6,711.71<br>(3,630.72 to 11,793.98)   | 16,835.69<br>(9,405.69 to 28,716.17)  |
| Ischemic stroke                 | 151,509.68<br>(133,621.87 to 182,831.82) | 90,754.47<br>(47,475.14 to 167,820.08)   | 44,897.93<br>(23,230.55 to 85,133.96)    | 121,250.70<br>(61,899.49 to 227,552.36)    | 11,864.86<br>(10,300.33 to 14,724.13) | 8,275.77<br>(4,275.30 to 15,952.40)   | 4,664.57<br>(2,383.13 to 9,007.43)    | 10,216.58<br>(5,277.06 to 19,509.70)  |

|                                |                                            |                                            |                                            |                                            |                                         |                                         |                                         |                                         |
|--------------------------------|--------------------------------------------|--------------------------------------------|--------------------------------------------|--------------------------------------------|-----------------------------------------|-----------------------------------------|-----------------------------------------|-----------------------------------------|
| Intracerebral hemorrhage       | 89,346.31<br>(79,847.90 to<br>102,859.30)  | 69,644.30<br>(33,532.90 to<br>125,128.06)  | 24,772.02<br>(12,961.74 to<br>44,830.09)   | 105,464.53<br>(52,338.67 to<br>190,493.34) | 5,227.56<br>(4,578.54 to<br>6,333.96)   | 4,815.30<br>(2,519.33 to<br>8,610.59)   | 2,047.13<br>(1,093.77 to<br>3,745.93)   | 6,619.11<br>(3,463.63 to<br>11,599.85)  |
| Hypertensive heart disease     | 21,174.02<br>(18,292.19 to<br>25,212.88)   | 32,233.35<br>(15,687.77 to<br>75,439.82)   | 23,835.49<br>(12,360.43 to<br>52,520.86)   | 38,370.64<br>(17,798.41 to<br>93,492.96)   | 1,734.18<br>(1,458.17 to<br>2,022.68)   | 3,127.03<br>(1,599.58 to<br>7,719.67)   | 2,601.19<br>(1,399.12 to<br>6,215.36)   | 3,596.18<br>(1,771.01 to<br>9,164.92)   |
| Cardiomyopathy and myocarditis | 138,185.19<br>(63,540.73 to<br>171,620.80) | 149,384.52<br>(53,848.40 to<br>239,957.78) | 102,693.03<br>(38,962.75 to<br>163,112.74) | 155,953.75<br>(54,894.29 to<br>250,819.82) | 11,979.06<br>(4,470.45 to<br>15,230.89) | 15,598.32<br>(4,497.82 to<br>26,478.03) | 11,619.20<br>(3,572.99 to<br>19,246.51) | 15,685.41<br>(4,347.18 to<br>27,429.03) |
| Myocarditis                    | 5,740.60<br>(4,539.89 to<br>9,460.33)      | 7,295.10<br>(5,184.45 to<br>12,347.85)     | 7,891.16<br>(5,659.71 to<br>13,749.64)     | 6,833.64<br>(4,848.70 to<br>11,086.54)     | 402.13<br>(284.78 to<br>868.88)         | 663.83<br>(395.06 to<br>1,301.75)       | 803.05<br>(496.34 to<br>1,636.57)       | 594.12<br>(348.59 to<br>1,122.60)       |

| Serbia                                                        |                                                     |                                                     |                                                     |                                                     |                                                  |                                                  |                                                  |                                                  |
|---------------------------------------------------------------|-----------------------------------------------------|-----------------------------------------------------|-----------------------------------------------------|-----------------------------------------------------|--------------------------------------------------|--------------------------------------------------|--------------------------------------------------|--------------------------------------------------|
| Cause                                                         | YLLs (actual counts)                                |                                                     |                                                     |                                                     | Deaths (actual counts)                           |                                                  |                                                  |                                                  |
|                                                               | 2016                                                | 2040 Forecast                                       | 2040 Better Scenario                                | 2040 Worse Scenario                                 | 2016                                             | 2040 Forecast                                    | 2040 Better Scenario                             | 2040 Worse Scenario                              |
| Alcoholic cardiomyopathy                                      | 12,078.28<br>(8,216.25 to 19,977.57)                | 14,480.68<br>(9,356.88 to 22,283.99)                | 10,232.06<br>(6,170.32 to 14,955.85)                | 16,045.07<br>(10,668.51 to 25,616.47)               | 811.06<br>(544.63 to 1,420.65)                   | 1,189.69<br>(701.56 to 2,082.32)                 | 910.56<br>(492.01 to 1,435.43)                   | 1,287.32<br>(775.66 to 2,327.05)                 |
| Other cardiomyopathy                                          | 120,366.31<br>(43,805.97 to 153,870.18)             | 127,608.74<br>(31,934.92 to 220,150.90)             | 84,569.81<br>(21,097.60 to 146,758.77)              | 133,075.04<br>(32,936.12 to 233,559.94)             | 10,765.87<br>(3,244.83 to 14,041.23)             | 13,744.80<br>(2,715.04 to 24,699.79)             | 9,905.59<br>(1,922.22 to 18,050.60)              | 13,803.97<br>(2,647.32 to 25,746.61)             |
| Atrial fibrillation and flutter                               | 6,277.98<br>(4,672.56 to 8,621.53)                  | 8,778.49<br>(5,566.87 to 13,868.77)                 | 7,995.72<br>(5,046.96 to 12,876.94)                 | 8,698.87<br>(5,618.39 to 13,294.42)                 | 660.99<br>(481.05 to 933.79)                     | 1,025.03<br>(635.18 to 1,660.88)                 | 1,017.99<br>(640.04 to 1,664.78)                 | 980.91<br>(598.49 to 1,529.11)                   |
| Aortic aneurysm                                               | 9,624.63<br>(8,512.48 to 10,919.19)                 | 7,245.85<br>(5,008.15 to 10,186.06)                 | 5,545.89<br>(3,919.75 to 7,711.22)                  | 7,516.31<br>(5,218.13 to 10,367.23)                 | 507.64<br>(443.48 to 592.65)                     | 434.67<br>(319.78 to 586.00)                     | 381.57<br>(278.28 to 530.77)                     | 431.68<br>(318.84 to 569.53)                     |
| Peripheral artery disease                                     | 879.10<br>(568.61 to 1,104.48)                      | 1,053.12<br>(659.05 to 1,520.36)                    | 1,027.34<br>(678.55 to 1,490.18)                    | 1,078.19<br>(643.14 to 1,583.49)                    | 96.57<br>(48.13 to 80.69)                        | 96.29<br>(63.51 to 139.95)                       | 107.06<br>(72.68 to 162.44)                      | 93.42<br>(59.09 to 135.01)                       |
| Endocarditis                                                  | 1,707.59<br>(1,376.76 to 2,047.39)                  | 1,560.33<br>(1,079.06 to 2,213.15)                  | 1,509.49<br>(1,027.54 to 2,177.81)                  | 1,629.97<br>(1,114.59 to 2,305.08)                  | 76.83<br>(64.97 to 99.65)                        | 86.29<br>(60.62 to 131.14)                       | 92.24<br>(63.38 to 151.04)                       | 85.75<br>(59.99 to 126.04)                       |
| Other cardiovascular and circulatory diseases                 | 30,094.86<br>(24,573.98 to 40,486.22)               | 32,541.47<br>(21,343.88 to 49,631.16)               | 19,017.66<br>(12,673.88 to 29,295.79)               | 34,644.81<br>(22,518.30 to 50,928.27)               | 1,836.48<br>(1,534.97 to 2,658.64)               | 2,316.35<br>(1,578.71 to 3,638.66)               | 1,546.90<br>(1,028.10 to 2,570.49)               | 2,346.65<br>(1,579.08 to 3,533.03)               |
| <b>Chronic respiratory diseases</b>                           | <b>54,746.22</b><br><b>(50,321.47 to 60,032.96)</b> | <b>47,284.24</b><br><b>(34,384.04 to 65,039.06)</b> | <b>26,991.06</b><br><b>(20,774.08 to 34,859.93)</b> | <b>58,087.45</b><br><b>(40,894.92 to 82,042.67)</b> | <b>3,575.54</b><br><b>(3,293.38 to 3,919.28)</b> | <b>3,574.00</b><br><b>(2,602.51 to 4,778.66)</b> | <b>2,271.70</b><br><b>(1,789.82 to 2,859.78)</b> | <b>4,164.90</b><br><b>(2,958.34 to 5,691.32)</b> |
| Chronic obstructive pulmonary disease                         | 47,682.59<br>(43,622.07 to 52,322.21)               | 42,793.01<br>(29,574.89 to 60,862.08)               | 22,605.53<br>(16,396.88 to 30,579.87)               | 53,032.88<br>(36,222.67 to 77,448.88)               | 3,167.75<br>(2,916.13 to 3,486.66)               | 3,267.51<br>(2,320.68 to 4,516.29)               | 1,961.68<br>(1,477.60 to 2,555.03)               | 3,830.10<br>(2,662.82 to 5,398.51)               |
| Pneumoconiosis                                                | 166.61<br>(141.88 to 195.33)                        | 96.51<br>(73.05 to 126.60)                          | 91.27<br>(67.42 to 123.90)                          | 97.51<br>(74.58 to 126.37)                          | 9.57<br>(8.19 to 11.19)                          | 9.57<br>(5.14 to 9.54)                           | 7.33<br>(5.15 to 10.58)                          | 6.87<br>(4.97 to 9.42)                           |
| Silicosis                                                     | 47.05<br>(36.19 to 67.58)                           | 21.56<br>(11.89 to 37.11)                           | 10.46<br>(5.83 to 18.16)                            | 22.38<br>(12.42 to 38.46)                           | 2.73<br>(2.12 to 3.85)                           | 1.48<br>(0.82 to 2.51)                           | 0.79<br>(0.44 to 1.30)                           | 1.49<br>(0.86 to 2.52)                           |
| Asbestosis                                                    | 24.91<br>(19.91 to 33.21)                           | 19.50<br>(13.81 to 28.17)                           | 25.41<br>(18.34 to 36.46)                           | 18.33<br>(13.11 to 26.09)                           | 1.15<br>(0.88 to 1.64)                           | 1.11<br>(0.75 to 1.71)                           | 1.58<br>(1.11 to 2.35)                           | 1.00<br>(0.68 to 1.52)                           |
| Coal workers pneumoconiosis                                   | 16.18<br>(7.76 to 21.58)                            | 6.03<br>(2.71 to 10.25)                             | 5.86<br>(2.33 to 11.03)                             | 6.13<br>(2.68 to 10.24)                             | 0.91<br>(0.46 to 1.22)                           | 0.49<br>(0.20 to 0.87)                           | 0.55<br>(0.10 to 1.06)                           | 0.48<br>(0.20 to 0.84)                           |
| Other pneumoconiosis                                          | 78.46<br>(64.43 to 94.87)                           | 49.41<br>(34.59 to 69.52)                           | 49.55<br>(31.90 to 76.20)                           | 50.67<br>(35.57 to 70.70)                           | 4.78<br>(3.85 to 5.72)                           | 3.94<br>(2.65 to 5.86)                           | 4.41<br>(2.73 to 7.08)                           | 3.89<br>(2.60 to 5.71)                           |
| Asthma                                                        | 4,939.21<br>(4,278.60 to 6,013.25)                  | 2,314.44<br>(1,114.67 to 4,618.70)                  | 1,170.94<br>(573.12 to 2,223.94)                    | 3,035.12<br>(1,388.46 to 5,792.17)                  | 301.22<br>(257.87 to 359.97)                     | 175.59<br>(86.94 to 340.43)                      | 99.38<br>(185.92 to 407.70)                      | 217.47<br>(99.56 to 407.70)                      |
| Interstitial lung disease and pulmonary sarcoidosis           | 1,505.53<br>(1,238.28 to 1,975.42)                  | 1,716.57<br>(1,274.87 to 2,315.06)                  | 2,775.55<br>(2,116.16 to 3,810.99)                  | 1,562.64<br>(1,179.83 to 2,112.15)                  | 77.14<br>(63.58 to 104.07)                       | 104.00<br>(76.49 to 141.74)                      | 181.89<br>(136.42 to 251.51)                     | 91.69<br>(66.96 to 128.14)                       |
| Other chronic respiratory diseases                            | 452.29<br>(249.65 to 590.60)                        | 363.72<br>(190.38 to 536.99)                        | 347.76<br>(185.23 to 502.71)                        | 359.28<br>(187.36 to 534.88)                        | 19.87<br>(10.72 to 26.44)                        | 19.87<br>(9.78 to 30.05)                         | 21.42<br>(10.74 to 31.51)                        | 18.77<br>(9.15 to 28.75)                         |
| <b>Cirrhosis and other chronic liver diseases</b>             | <b>31,064.21</b><br><b>(27,605.29 to 35,370.31)</b> | <b>27,087.20</b><br><b>(21,872.14 to 34,138.26)</b> | <b>17,924.17</b><br><b>(14,208.09 to 22,228.44)</b> | <b>28,853.58</b><br><b>(23,213.06 to 35,707.02)</b> | <b>1,209.24</b><br><b>(1,081.32 to 1,365.81)</b> | <b>1,146.46</b><br><b>(965.12 to 1,387.47)</b>   | <b>798.89</b><br><b>(666.24 to 960.70)</b>       | <b>1,197.22</b><br><b>(1,012.72 to 1,421.55)</b> |
| Cirrhosis and other chronic liver diseases due to hepatitis B | 5,213.38<br>(4,132.90 to 6,798.54)                  | 4,165.44<br>(3,086.67 to 5,761.37)                  | 3,245.14<br>(2,378.23 to 4,501.62)                  | 4,187.54<br>(3,118.50 to 5,793.75)                  | 200.16<br>(157.82 to 261.80)                     | 173.52<br>(131.21 to 233.28)                     | 141.34<br>(106.47 to 193.64)                     | 170.98<br>(131.10 to 227.88)                     |
| Cirrhosis and other chronic liver diseases due to hepatitis C | 8,861.94<br>(6,329.30 to 11,815.03)                 | 7,409.96<br>(5,047.73 to 10,534.83)                 | 5,645.50<br>(3,882.82 to 7,837.35)                  | 7,481.79<br>(5,020.54 to 10,493.01)                 | 339.60<br>(243.78 to 449.09)                     | 306.08<br>(214.09 to 419.80)                     | 242.83<br>(171.85 to 332.07)                     | 303.47<br>(208.84 to 417.41)                     |

|                                                                |                                                               |                                                               |                                                               |                                                               |                                                            |                                                            |                                                            |                                                            |
|----------------------------------------------------------------|---------------------------------------------------------------|---------------------------------------------------------------|---------------------------------------------------------------|---------------------------------------------------------------|------------------------------------------------------------|------------------------------------------------------------|------------------------------------------------------------|------------------------------------------------------------|
|                                                                | 11,439.26<br>(8,827.47 to<br>14,436.04)                       | 11,300.39<br>(8,491.68 to<br>15,253.86)                       | 5,757.11<br>(4,150.08 to<br>7,875.44)                         | 12,945.38<br>(9,878.47 to<br>16,807.67)                       | 452.73<br>(350.04 to<br>567.59)                            | 479.87<br>(368.22 to<br>617.15)                            | 261.38<br>(193.25 to<br>342.71)                            | 538.92<br>(412.55 to<br>689.19)                            |
| Cirrhosis and other chronic liver diseases due to alcohol use  |                                                               |                                                               |                                                               |                                                               |                                                            |                                                            |                                                            |                                                            |
|                                                                | 5,549.63<br>(4,616.15 to<br>6,780.08)                         | 4,211.42<br>(3,180.41 to<br>5,586.29)                         | 3,276.42<br>(2,475.89 to<br>4,252.34)                         | 4,238.87<br>(3,218.90 to<br>5,512.66)                         | 216.75<br>(180.53 to<br>267.51)                            | 216.75<br>(146.26 to<br>236.51)                            | 186.99<br>(119.70 to<br>193.88)                            | 153.34<br>(145.25 to<br>230.91)                            |
| Cirrhosis and other chronic liver diseases due to other causes |                                                               |                                                               |                                                               |                                                               |                                                            |                                                            |                                                            |                                                            |
|                                                                | <b>40,457.95</b><br><b>(30,562.77 to</b><br><b>45,464.82)</b> | <b>34,978.17</b><br><b>(26,785.76 to</b><br><b>46,199.05)</b> | <b>27,168.57</b><br><b>(21,062.27 to</b><br><b>34,243.24)</b> | <b>35,912.52</b><br><b>(26,831.67 to</b><br><b>48,122.48)</b> | <b>2,359.87</b><br><b>(1,700.03 to</b><br><b>2,672.63)</b> | <b>2,377.99</b><br><b>(1,815.15 to</b><br><b>2,933.19)</b> | <b>2,060.92</b><br><b>(1,543.31 to</b><br><b>2,495.35)</b> | <b>2,351.44</b><br><b>(1,756.32 to</b><br><b>2,933.92)</b> |
| Digestive diseases                                             |                                                               |                                                               |                                                               |                                                               |                                                            |                                                            |                                                            |                                                            |
|                                                                | 10,058.75<br>(8,519.20 to<br>11,558.43)                       | 5,615.93<br>(4,091.93 to<br>7,812.35)                         | 3,160.12<br>(2,285.79 to<br>4,459.52)                         | 5,775.54<br>(4,190.11 to<br>8,057.78)                         | 614.72<br>(502.91 to<br>712.99)                            | 415.32<br>(299.85 to<br>567.22)                            | 256.80<br>(193.57 to<br>344.62)                            | 412.14<br>(294.11 to<br>560.78)                            |
| Peptic ulcer disease                                           |                                                               |                                                               |                                                               |                                                               |                                                            |                                                            |                                                            |                                                            |

| Serbia                                     |                                       |                                       |                                        |                                        |                                    |                                     |                                     |                                     |
|--------------------------------------------|---------------------------------------|---------------------------------------|----------------------------------------|----------------------------------------|------------------------------------|-------------------------------------|-------------------------------------|-------------------------------------|
| Cause                                      | YLLs (actual counts)                  |                                       |                                        |                                        | Deaths (actual counts)             |                                     |                                     |                                     |
|                                            | 2016                                  | 2040 Forecast                         | 2040 Better Scenario                   | 2040 Worse Scenario                    | 2016                               | 2040 Forecast                       | 2040 Better Scenario                | 2040 Worse Scenario                 |
| Gastritis and duodenitis                   | 597.99<br>(453.58 to 703.96)          | 397.83<br>(302.95 to 505.86)          | 305.23<br>(233.37 to 391.05)           | 387.96<br>(290.75 to 485.18)           | 38.89<br>(28.18 to 47.12)          | 32.03<br>(22.31 to 41.75)           | 27.17<br>(19.73 to 35.23)           | 30.04<br>(20.65 to 39.46)           |
| Appendicitis                               | 695.14<br>(562.33 to 811.28)          | 356.97<br>(421.24 to 722.04)          | 348.53<br>(255.10 to 464.71)           | 564.71<br>(424.91 to 728.20)           | 34.19<br>(27.11 to 40.51)          | 33.75<br>(25.36 to 43.27)           | 22.97<br>(17.22 to 29.97)           | 33.03<br>(24.86 to 42.87)           |
| Paralytic ileus and intestinal obstruction | 7,614.85<br>(4,385.25 to 9,157.05)    | 7,244.04<br>(4,274.37 to 8,921.70)    | 7,780.08<br>(4,682.78 to 9,657.81)     | 6,814.98<br>(3,968.80 to 8,401.49)     | 476.79<br>(255.04 to 582.71)       | 549.80<br>(298.44 to 687.27)        | 638.63<br>(370.16 to 791.49)        | 500.42<br>(268.29 to 635.03)        |
| Inguinal, femoral, and abdominal hernia    | 1,199.09<br>(744.46 to 1,494.16)      | 811.86<br>(490.33 to 1,064.06)        | 686.12<br>(427.60 to 905.57)           | 779.84<br>(471.70 to 1,025.26)         | 82.92<br>(47.75 to 102.46)         | 66.99<br>(37.77 to 89.07)           | 61.59<br>(36.36 to 79.90)           | 62.24<br>(34.65 to 83.08)           |
| Inflammatory bowel disease                 | 2,073.58<br>(1,288.72 to 2,472.80)    | 1,425.02<br>(942.28 to 1,754.88)      | 1,432.75<br>(958.61 to 1,795.35)       | 1,371.62<br>(899.70 to 1,685.91)       | 101.89<br>(58.08 to 124.04)        | 85.75<br>(50.54 to 106.86)          | 94.08<br>(58.33 to 117.88)          | 79.62<br>(46.78 to 99.63)           |
| Vascular intestinal disorders              | 5,579.41<br>(3,629.20 to 6,617.76)    | 6,026.45<br>(4,113.15 to 7,496.11)    | 5,530.65<br>(3,924.29 to 7,068.34)     | 5,777.64<br>(3,888.30 to 7,159.66)     | 357.96<br>(231.42 to 430.18)       | 440.78<br>(290.13 to 543.80)        | 433.77<br>(302.11 to 547.77)        | 411.13<br>(261.11 to 507.23)        |
| Gallbladder and biliary diseases           | 2,842.06<br>(2,363.36 to 3,356.97)    | 2,539.17<br>(1,345.47 to 4,664.83)    | 1,812.03<br>(961.22 to 3,396.01)       | 3,307.07<br>(1,666.97 to 6,230.89)     | 191.72<br>(154.39 to 224.64)       | 203.58<br>(109.20 to 376.40)        | 158.60<br>(84.14 to 291.89)         | 252.45<br>(127.74 to 463.64)        |
| Pancreatitis                               | 7,503.18<br>(5,150.23 to 8,788.50)    | 8,658.69<br>(3,297.09 to 19,833.50)   | 4,542.65<br>(1,901.52 to 9,817.36)     | 9,496.33<br>(3,692.92 to 21,166.94)    | 330.60<br>(210.38 to 395.56)       | 425.25<br>(178.08 to 889.73)        | 240.10<br>(109.51 to 485.16)        | 455.07<br>(181.03 to 962.42)        |
| Other digestive diseases                   | 2,293.90<br>(1,781.34 to 2,658.62)    | 1,702.20<br>(1,364.43 to 2,092.75)    | 1,570.40<br>(1,265.06 to 1,978.17)     | 1,636.83<br>(1,293.32 to 1,991.31)     | 130.20<br>(96.83 to 154.15)        | 124.75<br>(91.97 to 153.26)         | 127.20<br>(97.61 to 158.47)         | 115.32<br>(82.84 to 142.48)         |
| Neurological disorders                     | 62,479.00<br>(54,733.39 to 72,712.81) | 75,663.19<br>(59,785.31 to 97,253.27) | 85,119.38<br>(67,803.73 to 107,652.44) | 77,408.13<br>(58,490.82 to 103,280.50) | 5,369.92<br>(4,587.72 to 6,343.48) | 7,990.16<br>(5,737.31 to 10,683.60) | 9,623.60<br>(7,411.39 to 12,379.44) | 7,744.58<br>(5,422.07 to 11,114.23) |
| Alzheimer's disease and other dementias    | 40,910.47<br>(34,106.61 to 50,108.73) | 53,844.25<br>(38,889.43 to 74,854.09) | 61,991.37<br>(46,241.78 to 82,678.80)  | 56,310.72<br>(38,454.66 to 82,451.97)  | 4,305.10<br>(3,581.91 to 5,282.55) | 6,422.93<br>(4,460.47 to 9,214.02)  | 7,957.68<br>(5,848.80 to 10,744.42) | 6,490.52<br>(4,222.97 to 9,780.52)  |
| Parkinson's disease                        | 7,648.15<br>(5,653.92 to 9,865.98)    | 10,044.45<br>(7,530.55 to 13,241.90)  | 12,707.08<br>(9,617.89 to 16,454.35)   | 9,081.34<br>(6,708.75 to 11,859.20)    | 945.27<br>(481.50 to 831.52)       | 945.27<br>(686.51 to 1,257.92)      | 1,267.46<br>(947.09 to 1,646.89)    | 835.22<br>(600.28 to 1,123.39)      |
| Epilepsy                                   | 5,611.39<br>(5,089.35 to 6,433.82)    | 5,192.47<br>(2,650.91 to 10,283.70)   | 3,755.75<br>(2,079.39 to 7,378.30)     | 5,497.75<br>(2,764.45 to 11,074.27)    | 160.17<br>(146.38 to 177.41)       | 188.23<br>(109.62 to 319.93)        | 149.16<br>(94.01 to 243.68)         | 192.56<br>(109.01 to 330.78)        |
| Multiple sclerosis                         | 2,922.82<br>(2,218.19 to 3,392.12)    | 2,286.00<br>(1,655.51 to 2,991.05)    | 2,258.35<br>(1,708.00 to 2,924.76)     | 2,290.19<br>(1,644.92 to 3,013.83)     | 92.37<br>(75.29 to 104.56)         | 80.35<br>(60.85 to 102.95)          | 83.63<br>(64.17 to 106.64)          | 78.94<br>(58.72 to 102.02)          |
| Motor neuron disease                       | 600.52<br>(337.43 to 662.09)          | 571.47<br>(462.42 to 677.56)          | 570.60<br>(455.77 to 687.78)           | 559.66<br>(458.01 to 657.07)           | 22.59<br>(20.13 to 24.90)          | 23.79<br>(19.65 to 27.71)           | 24.75<br>(20.19 to 29.51)           | 22.88<br>(19.08 to 26.56)           |
| Other neurological disorders               | 4,785.66<br>(4,326.01 to 5,333.53)    | 3,721.54<br>(3,134.21 to 4,477.23)    | 3,836.24<br>(3,172.91 to 4,812.26)     | 3,668.46<br>(3,098.17 to 4,377.97)     | 140.06<br>(127.56 to 153.46)       | 129.60<br>(112.25 to 146.27)        | 140.92<br>(119.97 to 163.03)        | 124.46<br>(109.00 to 140.33)        |
| Mental disorders                           | 14,679.30<br>(11,350.99 to 17,952.96) | 13,822.18<br>(10,464.24 to 18,614.82) | 15,829.49<br>(12,052.79 to 21,659.37)  | 13,647.32<br>(10,410.63 to 18,169.18)  | 454.12<br>(335.44 to 547.48)       | 461.30<br>(348.56 to 586.07)        | 546.69<br>(419.57 to 678.91)        | 447.81<br>(345.69 to 564.96)        |
| Alcohol use disorders                      | 10,575.29<br>(8,078.80 to 14,436.05)  | 9,050.50<br>(6,512.56 to 13,387.03)   | 9,117.39<br>(6,418.92 to 13,621.75)    | 9,074.37<br>(6,436.62 to 13,274.02)    | 357.80<br>(263.26 to 445.50)       | 330.81<br>(237.24 to 446.83)        | 346.62<br>(243.42 to 467.46)        | 326.56<br>(236.97 to 435.68)        |
| Drug use disorders                         | 4,088.43<br>(2,541.71 to 5,138.81)    | 4,759.45<br>(3,497.15 to 6,746.64)    | 6,697.34<br>(4,974.20 to 9,448.52)     | 4,560.97<br>(3,324.07 to 6,303.16)     | 96.00<br>(66.44 to 115.60)         | 130.23<br>(100.51 to 168.05)        | 199.77<br>(157.22 to 254.74)        | 121.00<br>(94.91 to 152.86)         |
| Opioid use disorders                       | 2,342.82<br>(1,437.86 to 3,011.94)    | 2,168.23<br>(1,518.59 to 3,276.48)    | 2,365.23<br>(1,635.01 to 3,658.19)     | 2,142.30<br>(1,500.30 to 3,252.43)     | 49.80<br>(33.60 to 61.38)          | 51.20<br>(38.26 to 72.12)           | 58.72<br>(43.69 to 84.88)           | 49.69<br>(37.38 to 69.89)           |

|                           |                                     |                                       |                                       |                                       |                              |                              |                                |                              |
|---------------------------|-------------------------------------|---------------------------------------|---------------------------------------|---------------------------------------|------------------------------|------------------------------|--------------------------------|------------------------------|
|                           | 43.15<br>(19.56 to<br>65.29)        | 61.25<br>(31.92 to<br>99.26)          | 87.43<br>(47.26 to<br>136.85)         | 58.49<br>(31.09 to<br>92.89)          | 0.97<br>(0.48 to<br>1.37)    | 1.52<br>(0.83 to<br>2.28)    | 2.24<br>(1.25 to<br>3.26)      | 1.43<br>(0.78 to<br>2.14)    |
| Cocaine use disorders     | 144.78<br>(61.67 to<br>239.73)      | 304.35<br>(156.24 to<br>530.86)       | 527.03<br>(278.33 to<br>870.12)       | 285.62<br>(142.06 to<br>486.29)       | 2.71<br>(1.24 to<br>4.30)    | 5.95<br>(3.19 to<br>9.81)    | 10.46<br>(5.86 to<br>16.51)    | 5.55<br>(2.88 to<br>9.10)    |
| Amphetamine use disorders | 1,557.68<br>(872.51 to<br>2,038.70) | 2,225.62<br>(1,404.51 to<br>3,426.73) | 3,717.66<br>(2,541.22 to<br>5,456.34) | 2,074.56<br>(1,352.31 to<br>3,102.05) | 42.53<br>(26.24 to<br>51.99) | 71.56<br>(49.21 to<br>96.89) | 128.35<br>(92.61 to<br>166.15) | 64.33<br>(45.22 to<br>87.11) |
| Other drug use disorders  | 15.58<br>(10.75 to<br>21.38)        | 12.23<br>(8.14 to<br>19.49)           | 14.76<br>(9.40 to<br>23.81)           | 11.99<br>(8.05 to<br>19.14)           | 0.32<br>(0.22 to<br>0.43)    | 0.25<br>(0.17 to<br>0.39)    | 0.30<br>(0.19 to<br>0.49)      | 0.25<br>(0.16 to<br>0.38)    |
| Eating disorders          |                                     |                                       |                                       |                                       |                              |                              |                                |                              |

| Serbia                                                     |                                               |                                               |                                              |                                                |                                           |                                           |                                           |                                            |
|------------------------------------------------------------|-----------------------------------------------|-----------------------------------------------|----------------------------------------------|------------------------------------------------|-------------------------------------------|-------------------------------------------|-------------------------------------------|--------------------------------------------|
| Cause                                                      | YLLs (actual counts)                          |                                               |                                              |                                                | Deaths (actual counts)                    |                                           |                                           |                                            |
|                                                            | 2016                                          | 2040 Forecast                                 | 2040 Better Scenario                         | 2040 Worse Scenario                            | 2016                                      | 2040 Forecast                             | 2040 Better Scenario                      | 2040 Worse Scenario                        |
| <b>Diabetes, urogenital, blood, and endocrine diseases</b> | <b>93,930.48</b><br>(86,991.87 to 100,941.98) | <b>96,331.41</b><br>(67,916.59 to 142,554.97) | <b>65,278.85</b><br>(45,863.30 to 99,464.12) | <b>108,252.53</b><br>(76,218.38 to 169,204.75) | <b>5,532.15</b><br>(5,077.11 to 5,926.17) | <b>6,722.41</b><br>(4,923.68 to 9,626.47) | <b>4,918.98</b><br>(3,625.13 to 7,127.47) | <b>7,299.09</b><br>(5,343.91 to 10,815.75) |
| Diabetes mellitus                                          | 51,917.44<br>(47,556.01 to 56,596.44)         | 49,287.11<br>(29,092.67 to 81,430.00)         | 29,726.18<br>(18,205.67 to 48,981.20)        | 54,640.87<br>(31,989.36 to 92,327.76)          | 3,094.99<br>(2,836.34 to 3,381.94)        | 3,381.19<br>(2,099.65 to 5,261.71)        | 2,214.37<br>(1,425.25 to 3,392.98)        | 3,592.74<br>(2,170.70 to 5,723.66)         |
| Acute glomerulonephritis                                   | 47.18<br>(43.24 to 52.23)                     | 39.30<br>(28.90 to 55.39)                     | 29.12<br>(20.82 to 41.38)                    | 40.36<br>(29.71 to 55.82)                      | 1.15<br>(1.03 to 1.30)                    | 1.17<br>(0.82 to 1.64)                    | 0.92<br>(0.63 to 1.31)                    | 1.17<br>(0.83 to 1.67)                     |
| Chronic kidney disease                                     | 33,161.19<br>(26,931.76 to 36,556.58)         | 38,297.02<br>(19,747.81 to 86,151.29)         | 27,707.47<br>(14,644.66 to 62,298.23)        | 45,069.98<br>(22,320.47 to 103,000.33)         | 2,027.38<br>(1,541.94 to 2,234.38)        | 2,804.95<br>(1,411.31 to 6,162.12)        | 2,199.43<br>(1,163.47 to 4,674.41)        | 3,202.10<br>(1,554.54 to 7,230.43)         |
| Chronic kidney disease due to diabetes mellitus            | 10,567.58<br>(8,332.46 to 11,914.40)          | 13,470.94<br>(6,644.11 to 31,403.37)          | 9,597.35<br>(4,834.96 to 22,003.74)          | 16,105.30<br>(7,493.27 to 39,710.32)           | 570.93<br>(442.18 to 644.67)              | 850.19<br>(408.03 to 2,041.73)            | 645.40<br>(322.24 to 1,520.58)            | 991.07<br>(462.04 to 2,473.03)             |
| Chronic kidney disease due to hypertension                 | 6,543.53<br>(4,888.62 to 7,649.57)            | 8,264.28<br>(4,043.01 to 18,630.96)           | 6,758.60<br>(3,419.00 to 14,479.82)          | 9,410.06<br>(4,408.48 to 21,665.87)            | 543.21<br>(393.56 to 635.40)              | 800.69<br>(396.44 to 1,552.70)            | 705.97<br>(369.98 to 1,310.58)            | 883.55<br>(423.29 to 1,776.42)             |
| Chronic kidney disease due to glomerulonephritis           | 6,483.82<br>(5,485.28 to 7,230.73)            | 6,274.35<br>(3,364.27 to 13,053.52)           | 4,122.50<br>(2,210.21 to 8,527.36)           | 7,432.91<br>(3,866.59 to 15,783.49)            | 348.70<br>(278.25 to 393.45)              | 416.58<br>(213.96 to 902.76)              | 291.86<br>(152.67 to 595.02)              | 482.22<br>(232.73 to 1,015.31)             |
| Chronic kidney disease due to other and unspecified causes | 9,566.26<br>(7,892.07 to 10,684.94)           | 10,287.44<br>(5,304.28 to 22,418.09)          | 7,229.03<br>(3,776.31 to 16,251.38)          | 12,121.72<br>(5,985.35 to 27,758.43)           | 564.53<br>(440.69 to 639.43)              | 737.49<br>(374.07 to 1,596.32)            | 556.22<br>(290.60 to 1,185.30)            | 845.27<br>(405.26 to 1,940.83)             |
| Urinary diseases and male infertility                      | 2,898.07<br>(2,645.06 to 3,162.43)            | 3,776.85<br>(3,113.07 to 4,534.90)            | 2,965.79<br>(2,465.05 to 3,550.62)           | 3,682.01<br>(3,054.15 to 4,395.34)             | 177.62<br>(160.84 to 194.20)              | 283.37<br>(227.42 to 342.94)              | 243.17<br>(200.43 to 292.41)              | 266.28<br>(212.04 to 324.99)               |
| Urinary tract infections                                   | 1,938.59<br>(1,637.86 to 2,395.96)            | 2,945.79<br>(2,320.88 to 3,709.48)            | 2,380.28<br>(1,876.88 to 2,996.21)           | 2,866.46<br>(2,261.68 to 3,625.93)             | 117.26<br>(97.71 to 146.86)               | 218.93<br>(170.53 to 276.79)              | 193.19<br>(151.37 to 240.70)              | 205.49<br>(157.39 to 258.88)               |
| Urolithiasis                                               | 162.40<br>(114.04 to 197.75)                  | 176.94<br>(114.50 to 245.70)                  | 117.97<br>(75.87 to 162.99)                  | 177.89<br>(113.11 to 247.80)                   | 8.61<br>(5.92 to 10.71)                   | 11.07<br>(6.70 to 15.94)                  | 8.01<br>(4.85 to 11.40)                   | 10.75<br>(6.48 to 15.55)                   |
| Other urinary diseases                                     | 797.08<br>(469.73 to 1,040.23)                | 654.12<br>(341.19 to 969.81)                  | 467.55<br>(242.91 to 700.39)                 | 637.66<br>(330.25 to 948.94)                   | 51.76<br>(30.56 to 68.07)                 | 53.36<br>(26.02 to 84.52)                 | 41.97<br>(20.56 to 65.29)                 | 50.05<br>(23.93 to 78.07)                  |
| Gynecological diseases                                     | 66.56<br>(53.18 to 81.04)                     | 33.60<br>(21.85 to 49.29)                     | 16.62<br>(11.07 to 24.32)                    | 35.49<br>(22.25 to 52.40)                      | 2.99<br>(2.38 to 3.60)                    | 2.05<br>(1.33 to 3.01)                    | 1.14<br>(0.77 to 1.64)                    | 2.06<br>(1.26 to 3.05)                     |
| Uterine fibroids                                           | 15.86<br>(10.09 to 24.64)                     | 9.38<br>(4.61 to 17.38)                       | 5.49<br>(2.91 to 9.79)                       | 9.71<br>(4.73 to 17.99)                        | 0.69<br>(0.45 to 1.01)                    | 0.50<br>(0.26 to 0.84)                    | 0.32<br>(0.17 to 0.54)                    | 0.50<br>(0.25 to 0.85)                     |
| Polycystic ovarian syndrome                                | 8.77<br>(4.64 to 14.77)                       | 2.61<br>(0.87 to 5.96)                        | 0.74<br>(0.22 to 1.76)                       | 3.01<br>(0.96 to 7.02)                         | 0.22<br>(0.11 to 0.37)                    | 0.06<br>(0.02 to 0.15)                    | 0.02<br>(0.01 to 0.04)                    | 0.07<br>(0.02 to 0.18)                     |
| Endometriosis                                              | 0.29<br>(0.15 to 0.55)                        | 0.18<br>(0.07 to 0.43)                        | 0.09<br>(0.03 to 0.21)                       | 0.20<br>(0.08 to 0.47)                         | 0.01<br>(0.00 to 0.01)                    | 0.00<br>(0.00 to 0.01)                    | 0.00<br>(0.00 to 0.01)                    | 0.00<br>(0.00 to 0.01)                     |
| Genital prolapse                                           | 2.40<br>(1.32 to 3.93)                        | 0.83<br>(0.37 to 1.54)                        | 0.44<br>(0.20 to 0.82)                       | 0.85<br>(0.40 to 1.55)                         | 0.18<br>(0.07 to 0.28)                    | 0.07<br>(0.03 to 0.15)                    | 0.04<br>(0.01 to 0.09)                    | 0.07<br>(0.02 to 0.15)                     |
| Other gynecological diseases                               | 39.24<br>(26.90 to 50.03)                     | 20.60<br>(12.44 to 30.93)                     | 9.86<br>(6.03 to 14.92)                      | 21.72<br>(12.96 to 34.40)                      | 1.88<br>(1.43 to 2.33)                    | 1.41<br>(0.85 to 2.18)                    | 0.77<br>(0.47 to 1.15)                    | 1.41<br>(0.82 to 2.23)                     |
| Hemoglobinopathies and hemolytic anemias                   | 1,335.17<br>(1,033.29 to 1,527.41)            | 1,096.17<br>(792.97 to 1,352.94)              | 783.77<br>(572.60 to 952.44)                 | 1,083.52<br>(775.94 to 1,341.25)               | 75.57<br>(53.85 to 87.23)                 | 83.87<br>(54.55 to 105.87)                | 67.31<br>(44.22 to 83.95)                 | 79.30<br>(49.86 to 103.55)                 |
| Thalassemias                                               | 45.47<br>(33.55 to 64.56)                     | 12.25<br>(7.40 to 20.04)                      | 11.01<br>(6.69 to 19.02)                     | 12.68<br>(7.67 to 20.72)                       | 0.58<br>(0.43 to 0.83)                    | 0.16<br>(0.10 to 0.27)                    | 0.15<br>(0.09 to 0.25)                    | 0.17<br>(0.10 to 0.28)                     |



|                                                   |                                       |                                       |                                       |                                       |                                 |                                 |                                 |                                 |
|---------------------------------------------------|---------------------------------------|---------------------------------------|---------------------------------------|---------------------------------------|---------------------------------|---------------------------------|---------------------------------|---------------------------------|
|                                                   | 120.27<br>(98.81 to<br>157.84)        | 81.44<br>(60.46 to<br>116.94)         | 51.21<br>(37.49 to<br>75.08)          | 85.55<br>(63.07 to<br>123.42)         | 2.63<br>(2.16 to<br>3.26)       | 2.18<br>(1.62 to<br>2.97)       | 1.40<br>(1.02 to<br>1.91)       | 2.27<br>(1.67 to<br>3.06)       |
| Sickle cell disorders                             |                                       |                                       |                                       |                                       |                                 |                                 |                                 |                                 |
|                                                   | 282.15<br>(215.83 to<br>363.01)       | 273.01<br>(191.81 to<br>373.86)       | 161.47<br>(115.31 to<br>220.61)       | 282.85<br>(200.18 to<br>384.24)       | 8.68<br>(6.35 to<br>11.09)      | 11.42<br>(7.91 to<br>15.42)     | 7.13<br>(4.95 to<br>9.48)       | 11.55<br>(7.87 to<br>15.35)     |
| G6PD deficiency                                   |                                       |                                       |                                       |                                       |                                 |                                 |                                 |                                 |
|                                                   | 887.28<br>(644.20 to<br>1,024.87)     | 729.47<br>(483.13 to<br>914.20)       | 560.08<br>(378.52 to<br>691.95)       | 702.44<br>(456.20 to<br>895.42)       | 63.68<br>(44.20 to<br>74.27)    | 70.10<br>(42.90 to<br>90.71)    | 58.63<br>(36.99 to<br>74.77)    | 65.31<br>(38.93 to<br>88.30)    |
| Other hemoglobinopathies and hemolytic anemias    |                                       |                                       |                                       |                                       |                                 |                                 |                                 |                                 |
|                                                   | 4,504.87<br>(3,499.01 to<br>5,041.57) | 3,801.36<br>(3,049.14 to<br>4,542.99) | 4,049.90<br>(3,309.27 to<br>4,895.90) | 3,700.29<br>(2,955.28 to<br>4,401.67) | 152.45<br>(120.93 to<br>170.31) | 165.82<br>(132.89 to<br>193.72) | 192.64<br>(156.50 to<br>225.49) | 155.43<br>(123.63 to<br>181.50) |
| Endocrine, metabolic, blood, and immune disorders |                                       |                                       |                                       |                                       |                                 |                                 |                                 |                                 |

| Serbia                                        |                                              |                                            |                                           |                                             |                                     |                                     |                                     |                                     |
|-----------------------------------------------|----------------------------------------------|--------------------------------------------|-------------------------------------------|---------------------------------------------|-------------------------------------|-------------------------------------|-------------------------------------|-------------------------------------|
| Cause                                         | YLLs (actual counts)                         |                                            |                                           |                                             | Deaths (actual counts)              |                                     |                                     |                                     |
|                                               | 2016                                         | 2040 Forecast                              | 2040 Better Scenario                      | 2040 Worse Scenario                         | 2016                                | 2040 Forecast                       | 2040 Better Scenario                | 2040 Worse Scenario                 |
| <b>Musculoskeletal disorders</b>              | <b>3,182.62</b><br>(2,659.80 to 4,118.61)    | <b>3,310.53</b><br>(2,645.12 to 4,543.57)  | <b>2,699.70</b><br>(2,141.49 to 3,650.46) | <b>3,308.54</b><br>(2,647.81 to 4,523.87)   | <b>140.90</b><br>(119.05 to 184.33) | <b>187.31</b><br>(144.34 to 244.20) | <b>164.20</b><br>(127.37 to 205.85) | <b>180.65</b><br>(141.48 to 234.58) |
| Rheumatoid arthritis                          | 642.99<br>(466.39 to 914.14)                 | 728.31<br>(456.82 to 1,151.60)             | 391.44<br>(252.49 to 619.62)              | 758.91<br>(459.03 to 1,190.49)              | 35.22<br>(26.03 to 51.89)           | 49.31<br>(31.02 to 76.12)           | 28.79<br>(18.53 to 44.21)           | 49.70<br>(30.40 to 75.54)           |
| Other musculoskeletal disorders               | 2,539.63<br>(2,092.83 to 3,241.68)           | 2,582.22<br>(2,059.25 to 3,569.49)         | 2,308.26<br>(1,852.68 to 3,168.54)        | 2,549.63<br>(2,035.48 to 3,539.67)          | 105.68<br>(86.49 to 136.15)         | 138.01<br>(106.55 to 182.79)        | 135.40<br>(103.74 to 171.94)        | 130.95<br>(100.36 to 173.28)        |
| <b>Other non-communicable diseases</b>        | <b>18,777.51</b><br>(15,474.58 to 21,571.26) | <b>9,599.20</b><br>(7,292.18 to 12,636.25) | <b>5,882.53</b><br>(4,641.45 to 7,617.16) | <b>10,347.41</b><br>(7,797.49 to 13,597.28) | <b>294.59</b><br>(251.99 to 347.31) | <b>252.81</b><br>(185.59 to 335.45) | <b>203.78</b><br>(143.02 to 274.00) | <b>253.62</b><br>(189.88 to 324.13) |
| Congenital birth defects                      | 15,910.68<br>(13,213.93 to 19,246.69)        | 6,947.41<br>(4,875.68 to 9,877.82)         | 3,568.29<br>(2,554.72 to 4,937.60)        | 7,730.69<br>(5,398.13 to 10,943.78)         | 203.67<br>(171.64 to 244.95)        | 96.07<br>(69.46 to 135.89)          | 51.49<br>(37.94 to 71.10)           | 106.05<br>(76.00 to 147.25)         |
| Neural tube defects                           | 274.68<br>(198.02 to 380.68)                 | 56.82<br>(32.20 to 95.70)                  | 22.18<br>(13.22 to 37.27)                 | 64.88<br>(36.66 to 107.63)                  | 3.48<br>(2.59 to 4.72)              | 0.79<br>(0.47 to 1.27)              | 0.32<br>(0.20 to 0.50)              | 0.89<br>(0.55 to 1.43)              |
| Congenital heart anomalies                    | 8,746.22<br>(7,179.99 to 10,708.59)          | 3,423.09<br>(2,256.48 to 5,315.54)         | 1,336.13<br>(870.34 to 1,995.67)          | 3,900.94<br>(2,546.39 to 5,789.33)          | 111.70<br>(93.12 to 134.99)         | 46.80<br>(31.67 to 71.32)           | 18.55<br>(12.45 to 26.98)           | 53.05<br>(35.04 to 77.25)           |
| Orofacial clefts                              | 4.37<br>(2.92 to 6.53)                       | 1.65<br>(0.68 to 3.46)                     | 0.52<br>(0.22 to 1.10)                    | 1.94<br>(0.81 to 4.00)                      | 0.05<br>(0.03 to 0.08)              | 0.02<br>(0.01 to 0.04)              | 0.01<br>(0.00 to 0.01)              | 0.02<br>(0.01 to 0.05)              |
| Down syndrome                                 | 1,038.21<br>(789.62 to 1,407.32)             | 813.92<br>(563.99 to 1,238.69)             | 825.95<br>(585.29 to 1,225.35)            | 825.50<br>(568.83 to 1,263.07)              | 15.44<br>(12.02 to 21.42)           | 13.58<br>(9.64 to 21.10)            | 14.08<br>(10.22 to 21.21)           | 13.65<br>(9.63 to 21.06)            |
| Other chromosomal abnormalities               | 906.49<br>(630.24 to 1,628.87)               | 594.82<br>(367.23 to 1,124.62)             | 406.82<br>(257.87 to 717.71)              | 636.75<br>(390.57 to 1,171.17)              | 11.28<br>(8.07 to 19.72)            | 7.80<br>(5.00 to 13.88)             | 5.41<br>(3.54 to 9.11)              | 8.32<br>(5.33 to 14.42)             |
| Congenital musculoskeletal and limb anomalies | 508.69<br>(231.60 to 724.78)                 | 192.32<br>(80.17 to 323.28)                | 89.14<br>(35.39 to 149.26)                | 216.50<br>(86.72 to 366.40)                 | 5.99<br>(2.76 to 8.49)              | 2.29<br>(0.99 to 3.82)              | 1.06<br>(0.44 to 1.76)              | 2.57<br>(1.06 to 4.30)              |
| Urogenital congenital anomalies               | 188.74<br>(140.88 to 323.47)                 | 83.54<br>(57.68 to 139.27)                 | 46.05<br>(32.81 to 71.35)                 | 90.73<br>(62.38 to 148.52)                  | 3.05<br>(2.42 to 4.53)              | 1.61<br>(1.15 to 2.29)              | 0.93<br>(0.65 to 1.29)              | 1.72<br>(1.24 to 2.40)              |
| Digestive congenital anomalies                | 1,117.72<br>(485.03 to 1,574.43)             | 430.44<br>(172.51 to 809.74)               | 184.45<br>(67.70 to 335.51)               | 488.37<br>(188.32 to 867.06)                | 13.03<br>(5.68 to 18.34)            | 5.04<br>(2.03 to 9.44)              | 2.16<br>(0.81 to 3.91)              | 5.72<br>(2.27 to 10.11)             |
| Other congenital birth defects                | 3,125.56<br>(2,357.93 to 4,300.08)           | 1,350.80<br>(868.90 to 2,088.33)           | 657.04<br>(432.15 to 992.04)              | 1,505.09<br>(984.99 to 2,310.23)            | 39.65<br>(30.73 to 53.76)           | 18.14<br>(12.11 to 27.09)           | 8.97<br>(6.20 to 13.13)             | 20.10<br>(13.60 to 29.98)           |
| Skin and subcutaneous diseases                | 1,546.75<br>(877.59 to 2,191.63)             | 2,419.57<br>(1,424.51 to 3,468.73)         | 2,188.24<br>(1,294.42 to 3,096.75)        | 2,356.73<br>(1,381.61 to 3,377.30)          | 81.41<br>(45.59 to 117.92)          | 154.05<br>(86.85 to 220.68)         | 190.83<br>(85.65 to 217.14)         | 144.55<br>(81.92 to 207.16)         |
| Cellulitis                                    | 612.01<br>(305.35 to 893.48)                 | 1,159.86<br>(614.28 to 1,678.47)           | 1,138.04<br>(614.27 to 1,658.63)          | 1,122.06<br>(589.96 to 1,625.85)            | 29.58<br>(14.97 to 44.22)           | 66.11<br>(34.46 to 98.28)           | 70.48<br>(37.99 to 103.61)          | 61.84<br>(32.00 to 92.49)           |
| Pyoderma                                      | 396.15<br>(212.17 to 578.99)                 | 729.03<br>(370.72 to 1,112.93)             | 643.79<br>(328.61 to 1,000.20)            | 712.35<br>(367.47 to 1,080.31)              | 18.96<br>(8.47 to 28.05)            | 46.71<br>(20.53 to 70.73)           | 46.10<br>(20.30 to 70.57)           | 43.72<br>(19.30 to 65.76)           |
| Decubitus ulcer                               | 424.09<br>(231.72 to 678.19)                 | 397.13<br>(191.41 to 715.55)               | 295.73<br>(148.32 to 564.16)              | 389.70<br>(193.63 to 688.05)                | 27.76<br>(14.72 to 46.30)           | 33.42<br>(14.89 to 63.05)           | 26.92<br>(12.38 to 55.18)           | 31.65<br>(14.60 to 59.66)           |
| Other skin and subcutaneous diseases          | 114.50<br>(65.97 to 173.04)                  | 133.55<br>(76.16 to 215.05)                | 110.68<br>(62.81 to 179.15)               | 132.62<br>(72.46 to 217.85)                 | 5.11<br>(2.64 to 7.66)              | 7.80<br>(3.83 to 12.48)             | 7.33<br>(3.67 to 11.49)             | 7.35<br>(3.60 to 11.89)             |
| Sudden infant death syndrome                  | 819.89<br>(565.57 to 1,173.84)               | 232.22<br>(112.39 to 439.94)               | 126.01<br>(65.49 to 226.01)               | 259.99<br>(131.38 to 484.67)                | 9.51<br>(6.56 to 13.62)             | 2.69<br>(1.30 to 5.11)              | 1.46<br>(0.76 to 2.62)              | 3.02<br>(1.52 to 5.62)              |

|                          |                                             |                                            |                                           |                                            |                                       |                                       |                                       |                                       |
|--------------------------|---------------------------------------------|--------------------------------------------|-------------------------------------------|--------------------------------------------|---------------------------------------|---------------------------------------|---------------------------------------|---------------------------------------|
| Injuries                 | 151,927.84<br>(139,338.40 to<br>165,959.73) | 111,771.18<br>(65,791.42 to<br>209,202.85) | 61,777.91<br>(39,330.39 to<br>112,611.55) | 122,344.47<br>(69,931.28 to<br>227,962.22) | 4,419.88<br>(4,084.10 to<br>4,788.51) | 3,856.01<br>(2,510.23 to<br>6,371.44) | 2,505.21<br>(1,780.78 to<br>3,945.16) | 4,027.11<br>(2,552.86 to<br>6,671.86) |
| Transport injuries       | 45,680.64<br>(40,895.86 to<br>51,028.88)    | 32,040.45<br>(16,437.43 to<br>66,351.10)   | 8,062.71<br>(4,548.65 to<br>15,922.68)    | 38,569.97<br>(19,437.00 to<br>79,119.01)   | 1,098.98<br>(993.17 to<br>1,212.00)   | 862.95<br>(465.03 to<br>1,659.89)     | 257.44<br>(152.61 to<br>451.60)       | 1,004.04<br>(529.96 to<br>1,957.14)   |
| Road injuries            | 40,658.80<br>(36,385.20 to<br>45,480.87)    | 27,587.74<br>(14,344.58 to<br>56,329.79)   | 5,816.16<br>(3,290.41 to<br>10,986.91)    | 33,710.11<br>(17,194.48 to<br>68,971.87)   | 965.75<br>(873.17 to<br>1,068.86)     | 730.46<br>(397.92 to<br>1,384.94)     | 186.48<br>(112.68 to<br>318.71)       | 862.98<br>(458.65 to<br>1,660.85)     |
| Pedestrian road injuries | 8,605.35<br>(7,421.84 to<br>10,263.79)      | 5,082.27<br>(2,561.71 to<br>10,878.64)     | 860.26<br>(488.39 to<br>1,628.77)         | 6,253.65<br>(3,059.04 to<br>13,040.83)     | 260.87<br>(229.54 to<br>305.88)       | 187.33<br>(100.77 to<br>364.81)       | 39.98<br>(24.47 to<br>68.47)          | 220.06<br>(115.65 to<br>411.23)       |

| Serbia                                          |                                                               |                                                               |                                                               |                                                               |                                                            |                                                          |                                                        |                                                          |
|-------------------------------------------------|---------------------------------------------------------------|---------------------------------------------------------------|---------------------------------------------------------------|---------------------------------------------------------------|------------------------------------------------------------|----------------------------------------------------------|--------------------------------------------------------|----------------------------------------------------------|
| Cause                                           | YLLs (actual counts)                                          |                                                               |                                                               |                                                               | Deaths (actual counts)                                     |                                                          |                                                        |                                                          |
|                                                 | 2016                                                          | 2040 Forecast                                                 | 2040 Better Scenario                                          | 2040 Worse Scenario                                           | 2016                                                       | 2040 Forecast                                            | 2040 Better Scenario                                   | 2040 Worse Scenario                                      |
| Cyclist road injuries                           | 3,845.25<br>(3,113.12 to<br>4,563.81)                         | 2,736.65<br>(1,269.23 to<br>5,445.99)                         | 765.87<br>(391.81 to<br>1,438.64)                             | 3,233.41<br>(1,475.58 to<br>6,497.53)                         | 101.13<br>(83.93 to<br>118.97)                             | 79.33<br>(37.46 to<br>154.17)                            | 29.25<br>(15.37 to<br>53.03)                           | 89.85<br>(41.59 to<br>173.36)                            |
| Motorcyclist road injuries                      | 6,290.66<br>(4,902.80 to<br>7,750.59)                         | 4,852.39<br>(2,279.24 to<br>10,804.93)                        | 1,782.99<br>(920.84 to<br>3,699.66)                           | 5,572.17<br>(2,578.14 to<br>12,639.16)                        | 119.31<br>(94.22 to<br>146.00)                             | 98.20<br>(46.49 to<br>210.68)                            | 40.91<br>(21.70 to<br>79.92)                           | 110.83<br>(51.05 to<br>239.65)                           |
| Motor vehicle road injuries                     | 21,606.70<br>(18,552.98 to<br>24,930.23)                      | 14,650.14<br>(8,045.15 to<br>29,782.66)                       | 2,349.52<br>(1,436.73 to<br>4,369.70)                         | 18,328.04<br>(9,796.18 to<br>37,492.93)                       | 475.92<br>(412.23 to<br>546.56)                            | 357.03<br>(206.79 to<br>668.40)                          | 73.58<br>(48.37 to<br>121.69)                          | 432.50<br>(243.04 to<br>827.92)                          |
| Other road injuries                             | 310.84<br>(254.32 to<br>380.27)                               | 266.29<br>(116.99 to<br>578.61)                               | 57.52<br>(28.95 to<br>106.10)                                 | 322.84<br>(139.35 to<br>716.61)                               | 8.52<br>(6.79 to<br>10.23)                                 | 8.57<br>(3.98 to<br>16.36)                               | 2.76<br>(1.49 to<br>4.63)                              | 9.74<br>(4.41 to<br>19.25)                               |
| Other transport injuries                        | 5,021.84<br>(4,245.18 to<br>5,961.56)                         | 4,452.71<br>(2,039.43 to<br>9,724.78)                         | 2,246.55<br>(1,133.84 to<br>4,622.12)                         | 4,859.86<br>(2,165.29 to<br>10,715.77)                        | 133.23<br>(114.06 to<br>154.14)                            | 132.50<br>(66.33 to<br>269.92)                           | 70.96<br>(38.61 to<br>133.46)                          | 141.06<br>(68.32 to<br>279.85)                           |
| <b>Unintentional injuries</b>                   | <b>37,818.37</b><br><b>(34,765.22 to</b><br><b>41,061.95)</b> | <b>23,468.26</b><br><b>(18,024.32 to</b><br><b>32,398.83)</b> | <b>17,375.93</b><br><b>(13,566.66 to</b><br><b>23,145.11)</b> | <b>23,868.81</b><br><b>(18,115.90 to</b><br><b>32,093.55)</b> | <b>1,336.01</b><br><b>(1,234.48 to</b><br><b>1,441.88)</b> | <b>1,100.40</b><br><b>(909.15 to</b><br><b>1,358.46)</b> | <b>924.41</b><br><b>(772.47 to</b><br><b>1,137.24)</b> | <b>1,065.88</b><br><b>(875.41 to</b><br><b>1,315.65)</b> |
| Falls                                           | 10,178.97<br>(8,368.04 to<br>11,454.02)                       | 7,865.37<br>(6,525.44 to<br>9,359.03)                         | 6,666.37<br>(5,540.81 to<br>7,897.65)                         | 7,687.90<br>(6,489.67 to<br>9,083.26)                         | 512.18<br>(433.16 to<br>568.82)                            | 517.54<br>(429.64 to<br>616.84)                          | 478.94<br>(405.24 to<br>564.62)                        | 485.04<br>(396.26 to<br>576.72)                          |
| Drowning                                        | 6,131.66<br>(5,420.43 to<br>6,957.94)                         | 3,147.18<br>(1,593.35 to<br>6,839.07)                         | 2,093.15<br>(1,077.22 to<br>4,339.43)                         | 3,317.93<br>(1,638.54 to<br>6,896.47)                         | 140.51<br>(126.55 to<br>157.16)                            | 87.05<br>(46.43 to<br>179.45)                            | 61.47<br>(34.24 to<br>119.28)                          | 89.60<br>(47.01 to<br>178.92)                            |
| Fire, heat, and hot substances                  | 2,874.46<br>(2,506.16 to<br>3,375.22)                         | 1,587.06<br>(808.24 to<br>3,027.94)                           | 965.85<br>(558.30 to<br>1,771.41)                             | 1,656.94<br>(883.65 to<br>3,160.90)                           | 111.39<br>(95.41 to<br>126.51)                             | 79.60<br>(49.30 to<br>138.49)                            | 55.24<br>(36.12 to<br>90.65)                           | 79.13<br>(47.18 to<br>136.95)                            |
| Poisonings                                      | 1,151.80<br>(971.44 to<br>1,543.26)                           | 515.79<br>(246.94 to<br>1,164.36)                             | 267.84<br>(134.96 to<br>575.87)                               | 554.65<br>(260.28 to<br>1,237.18)                             | 34.85<br>(29.78 to<br>45.68)                               | 19.91<br>(10.60 to<br>40.60)                             | 11.69<br>(6.75 to<br>23.12)                            | 20.47<br>(10.65 to<br>42.09)                             |
| Exposure to mechanical forces                   | 5,316.62<br>(4,678.38 to<br>6,004.80)                         | 2,745.25<br>(2,077.44 to<br>3,673.64)                         | 1,818.29<br>(1,373.10 to<br>2,490.63)                         | 2,847.34<br>(2,115.61 to<br>3,767.17)                         | 148.47<br>(132.62 to<br>164.53)                            | 94.71<br>(77.37 to<br>116.25)                            | 69.21<br>(55.67 to<br>86.36)                           | 94.81<br>(75.24 to<br>116.05)                            |
| Unintentional firearm injuries                  | 1,462.91<br>(1,228.90 to<br>2,060.18)                         | 749.16<br>(540.78 to<br>1,189.95)                             | 538.72<br>(394.82 to<br>849.71)                               | 769.69<br>(549.26 to<br>1,242.42)                             | 41.17<br>(35.99 to<br>51.55)                               | 26.34<br>(21.00 to<br>35.94)                             | 21.29<br>(16.96 to<br>28.23)                           | 26.01<br>(20.34 to<br>35.18)                             |
| Unintentional suffocation                       | 257.07<br>(142.31 to<br>344.24)                               | 107.44<br>(66.76 to<br>153.76)                                | 72.58<br>(46.84 to<br>100.99)                                 | 114.22<br>(69.66 to<br>165.12)                                | 4.15<br>(2.54 to<br>5.29)                                  | 2.03<br>(1.40 to<br>2.70)                                | 1.48<br>(1.06 to<br>1.94)                              | 2.09<br>(1.43 to<br>2.84)                                |
| Other exposure to mechanical forces             | 3,596.65<br>(3,078.04 to<br>4,104.65)                         | 1,888.65<br>(1,419.38 to<br>2,517.47)                         | 1,207.00<br>(890.38 to<br>1,642.84)                           | 1,963.42<br>(1,438.79 to<br>2,574.42)                         | 103.16<br>(87.47 to<br>115.69)                             | 66.34<br>(53.33 to<br>82.43)                             | 46.44<br>(36.47 to<br>58.45)                           | 66.70<br>(52.24 to<br>82.19)                             |
| Adverse effects of medical treatment            | 2,655.57<br>(2,247.68 to<br>3,113.53)                         | 2,066.36<br>(1,672.64 to<br>2,761.48)                         | 1,763.43<br>(1,394.80 to<br>2,436.36)                         | 2,046.93<br>(1,634.69 to<br>2,695.36)                         | 112.32<br>(97.29 to<br>132.49)                             | 106.19<br>(89.02 to<br>137.05)                           | 99.40<br>(81.73 to<br>132.46)                          | 101.06<br>(83.87 to<br>128.76)                           |
| Animal contact                                  | 554.60<br>(484.64 to<br>639.10)                               | 424.10<br>(335.62 to<br>562.56)                               | 319.07<br>(250.10 to<br>442.04)                               | 431.27<br>(332.83 to<br>573.34)                               | 18.50<br>(15.98 to<br>20.92)                               | 17.05<br>(14.04 to<br>21.16)                             | 14.00<br>(11.42 to<br>17.87)                           | 16.69<br>(13.58 to<br>20.70)                             |
| Venomous animal contact                         | 271.53<br>(230.56 to<br>321.74)                               | 214.79<br>(162.06 to<br>296.59)                               | 173.43<br>(131.79 to<br>247.23)                               | 217.10<br>(162.88 to<br>299.88)                               | 8.49<br>(6.91 to<br>10.01)                                 | 7.94<br>(6.21 to<br>10.36)                               | 6.92<br>(5.36 to<br>9.40)                              | 7.76<br>(6.01 to<br>10.23)                               |
| Non-venomous animal contact                     | 283.07<br>(236.83 to<br>335.49)                               | 209.31<br>(158.89 to<br>284.40)                               | 145.64<br>(110.49 to<br>203.03)                               | 214.16<br>(160.26 to<br>291.78)                               | 10.01<br>(8.20 to<br>11.74)                                | 9.12<br>(7.05 to<br>11.81)                               | 7.08<br>(5.47 to<br>9.33)                              | 8.92<br>(6.96 to<br>11.57)                               |
| Foreign body                                    | 3,751.76<br>(3,153.80 to<br>4,354.16)                         | 2,376.57<br>(1,959.36 to<br>3,059.06)                         | 2,158.04<br>(1,747.06 to<br>2,832.20)                         | 2,380.47<br>(1,954.66 to<br>3,043.02)                         | 108.74<br>(93.09 to<br>127.57)                             | 83.55<br>(70.46 to<br>108.09)                            | 83.73<br>(69.05 to<br>109.98)                          | 80.62<br>(68.32 to<br>103.64)                            |
| Pulmonary aspiration and foreign body in airway | 3,197.53<br>(2,575.11 to<br>3,720.66)                         | 1,938.59<br>(1,574.90 to<br>2,455.24)                         | 1,663.91<br>(1,333.99 to<br>2,132.57)                         | 1,954.75<br>(1,573.87 to<br>2,462.94)                         | 91.48<br>(75.24 to<br>107.64)                              | 66.81<br>(55.76 to<br>84.71)                             | 63.00<br>(51.44 to<br>80.82)                           | 64.98<br>(53.85 to<br>82.36)                             |

|                                             |                                                               |                                                                |                                                               |                                                                |                                                            |                                                            |                                                          |                                                            |
|---------------------------------------------|---------------------------------------------------------------|----------------------------------------------------------------|---------------------------------------------------------------|----------------------------------------------------------------|------------------------------------------------------------|------------------------------------------------------------|----------------------------------------------------------|------------------------------------------------------------|
|                                             | 554.23<br>(456.86 to<br>829.86)                               | 437.97<br>(329.79 to<br>723.27)                                | 494.13<br>(367.16 to<br>825.22)                               | 425.72<br>(322.26 to<br>712.76)                                | 17.26<br>(14.33 to<br>26.37)                               | 16.74<br>(12.89 to<br>27.23)                               | 20.73<br>(15.78 to<br>33.57)                             | 15.64<br>(12.22 to<br>25.66)                               |
| Foreign body in other body part             |                                                               |                                                                |                                                               |                                                                |                                                            |                                                            |                                                          |                                                            |
|                                             | 1,435.33<br>(1,084.54 to<br>1,905.62)                         | 1,016.41<br>(731.86 to<br>1,568.11)                            | 627.28<br>(449.90 to<br>968.52)                               | 1,055.52<br>(740.79 to<br>1,603.74)                            | 51.22<br>(37.29 to<br>64.45)                               | 40.94<br>(30.70 to<br>56.22)                               | 27.22<br>(20.46 to<br>37.93)                             | 41.22<br>(29.79 to<br>57.59)                               |
| Environmental heat and cold exposure        |                                                               |                                                                |                                                               |                                                                |                                                            |                                                            |                                                          |                                                            |
|                                             | 3,767.61<br>(3,223.99 to<br>4,446.01)                         | 1,724.18<br>(1,115.66 to<br>2,730.54)                          | 696.60<br>(453.89 to<br>1,066.82)                             | 1,889.87<br>(1,197.64 to<br>2,807.02)                          | 97.84<br>(85.39 to<br>113.25)                              | 53.87<br>(37.09 to<br>79.51)                               | 23.50<br>(16.45 to<br>33.17)                             | 57.24<br>(38.51 to<br>80.79)                               |
| Other unintentional injuries                |                                                               |                                                                |                                                               |                                                                |                                                            |                                                            |                                                          |                                                            |
| <b>Self-harm and interpersonal violence</b> | <b>68,386.54</b><br><b>(61,739.45 to</b><br><b>78,674.87)</b> | <b>55,519.99</b><br><b>(30,422.15 to</b><br><b>112,062.58)</b> | <b>35,588.56</b><br><b>(21,002.19 to</b><br><b>66,039.06)</b> | <b>59,165.52</b><br><b>(32,042.00 to</b><br><b>115,494.04)</b> | <b>1,984.00</b><br><b>(1,790.62 to</b><br><b>2,250.88)</b> | <b>1,873.28</b><br><b>(1,071.44 to</b><br><b>3,348.42)</b> | <b>1,302.03</b><br><b>(817.86 to</b><br><b>2,202.89)</b> | <b>1,938.48</b><br><b>(1,102.24 to</b><br><b>3,528.92)</b> |

| Serbia                                                                              |                                         |                                          |                                          |                                          |                                      |                                        |                                        |                                        |
|-------------------------------------------------------------------------------------|-----------------------------------------|------------------------------------------|------------------------------------------|------------------------------------------|--------------------------------------|----------------------------------------|----------------------------------------|----------------------------------------|
| Cause                                                                               | YLLs (actual counts)                    |                                          |                                          |                                          | Deaths (actual counts)               |                                        |                                        |                                        |
|                                                                                     | 2016                                    | 2040 Forecast                            | 2040 Better Scenario                     | 2040 Worse Scenario                      | 2016                                 | 2040 Forecast                          | 2040 Better Scenario                   | 2040 Worse Scenario                    |
| Self-harm                                                                           | 57,327.01<br>(51,315.33 to 68,441.94)   | 49,875.59<br>(26,394.20 to 101,692.83)   | 31,996.58<br>(18,672.67 to 60,563.79)    | 53,202.49<br>(28,331.91 to 106,581.94)   | 1,721.69<br>(1,546.90 to 1,986.36)   | 1,721.81<br>(969.15 to 3,138.32)       | 1,200.10<br>(743.12 to 2,048.77)       | 1,781.13<br>(1,002.96 to 3,283.92)     |
| Self-harm by firearm                                                                | 9,301.98<br>(7,029.73 to 13,944.19)     | 5,927.82<br>(2,879.89 to 15,722.67)      | 3,237.08<br>(1,717.13 to 8,023.67)       | 6,434.81<br>(3,045.60 to 17,084.31)      | 248.98<br>(179.62 to 371.36)         | 178.27<br>(93.56 to 423.78)            | 103.56<br>(59.79 to 231.66)            | 188.50<br>(98.46 to 451.15)            |
| Self-harm by other specified means                                                  | 48,025.03<br>(42,275.47 to 56,778.12)   | 43,947.76<br>(23,448.18 to 88,849.01)    | 28,759.50<br>(16,946.10 to 54,436.97)    | 46,767.67<br>(25,102.57 to 93,869.24)    | 1,472.70<br>(1,310.62 to 1,698.05)   | 1,543.54<br>(881.04 to 2,771.62)       | 1,096.54<br>(683.55 to 1,862.65)       | 1,592.63<br>(900.24 to 2,914.91)       |
| Interpersonal violence                                                              | 11,059.53<br>(8,725.51 to 13,228.72)    | 5,644.40<br>(3,720.48 to 9,419.45)       | 3,591.98<br>(2,380.24 to 5,899.68)       | 5,963.04<br>(3,828.05 to 9,695.75)       | 262.31<br>(214.74 to 315.67)         | 151.47<br>(102.82 to 251.53)           | 101.93<br>(69.29 to 168.49)            | 157.34<br>(105.09 to 250.18)           |
| Physical violence by firearm                                                        | 4,989.37<br>(3,163.28 to 6,262.94)      | 2,245.26<br>(1,508.47 to 3,576.34)       | 1,310.98<br>(899.90 to 2,152.45)         | 2,389.51<br>(1,554.30 to 3,843.69)       | 106.40<br>(67.71 to 136.56)          | 51.28<br>(36.22 to 81.66)              | 30.87<br>(21.98 to 49.53)              | 54.10<br>(36.37 to 84.16)              |
| Physical violence by sharp object                                                   | 2,527.70<br>(1,956.68 to 3,718.70)      | 1,346.15<br>(938.47 to 2,453.01)         | 870.55<br>(616.97 to 1,547.90)           | 1,408.96<br>(960.45 to 2,507.86)         | 62.14<br>(48.97 to 91.81)            | 37.48<br>(27.71 to 65.16)              | 25.83<br>(19.34 to 43.32)              | 38.44<br>(27.91 to 65.65)              |
| Physical violence by other means                                                    | 3,542.46<br>(2,531.45 to 4,630.62)      | 2,053.00<br>(1,025.75 to 4,352.24)       | 1,410.45<br>(750.89 to 2,753.58)         | 2,164.57<br>(1,053.71 to 4,522.03)       | 93.76<br>(69.25 to 120.29)           | 62.71<br>(31.87 to 128.49)             | 45.23<br>(24.81 to 84.36)              | 64.80<br>(32.57 to 135.42)             |
| <b>Forces of nature, conflict and terrorism, and executions and police conflict</b> | <b>42.29</b><br><b>(39.33 to 45.83)</b> | <b>742.48</b><br><b>(0.00 to 613.30)</b> | <b>750.72</b><br><b>(0.00 to 619.87)</b> | <b>740.16</b><br><b>(0.00 to 612.81)</b> | <b>0.90</b><br><b>(0.84 to 0.97)</b> | <b>19.37</b><br><b>(0.00 to 17.19)</b> | <b>21.34</b><br><b>(0.00 to 18.20)</b> | <b>18.71</b><br><b>(0.00 to 16.87)</b> |
| Exposure to forces of nature                                                        | 0.00<br>(0.00 to 0.00)                  | 16.89<br>(0.00 to 127.59)                | 17.19<br>(0.00 to 128.96)                | 16.77<br>(0.00 to 126.22)                | 0.00<br>(0.00 to 0.00)               | 0.49<br>(0.00 to 3.41)                 | 0.53<br>(0.00 to 3.71)                 | 0.48<br>(0.00 to 3.24)                 |
| Conflict and terrorism                                                              | 0.00<br>(0.00 to 0.00)                  | 725.59<br>(0.00 to 476.09)               | 733.53<br>(0.00 to 480.97)               | 723.39<br>(0.00 to 470.64)               | 0.00<br>(0.00 to 0.00)               | 18.87<br>(12.20 to 0.00)               | 20.81<br>(13.42 to 0.00)               | 18.23<br>(11.57 to 0.00)               |
| Executions and police conflict                                                      | 42.29<br>(39.33 to 45.83)               | 0.00<br>(0.00 to 0.00)                   | 0.00<br>(0.00 to 0.00)                   | 0.00<br>(0.00 to 0.00)                   | 0.90<br>(0.84 to 0.97)               | 0.00<br>(0.00 to 0.00)                 | 0.00<br>(0.00 to 0.00)                 | 0.00<br>(0.00 to 0.00)                 |

| Slovakia                                                          |                                            |                                            |                                          |                                              |                                       |                                       |                                       |                                       |
|-------------------------------------------------------------------|--------------------------------------------|--------------------------------------------|------------------------------------------|----------------------------------------------|---------------------------------------|---------------------------------------|---------------------------------------|---------------------------------------|
| Cause                                                             | YLLs (actual counts)                       |                                            |                                          |                                              | Deaths (actual counts)                |                                       |                                       |                                       |
|                                                                   | 2016                                       | 2040 Forecast                              | 2040 Better Scenario                     | 2040 Worse Scenario                          | 2016                                  | 2040 Forecast                         | 2040 Better Scenario                  | 2040 Worse Scenario                   |
| All causes                                                        | 964,466.85<br>(865,224.51 to 1,067,327.66) | 901,943.00<br>(730,332.68 to 1,101,948.73) | 752,366.57<br>(613,144.36 to 901,991.08) | 1,184,017.53<br>(953,771.41 to 1,458,978.49) | 54,007.34<br>(49,089.00 to 59,407.46) | 65,892.76<br>(54,964.06 to 77,782.70) | 58,013.51<br>(48,015.35 to 68,395.83) | 80,176.68<br>(67,140.06 to 95,257.43) |
| Communicable, maternal, neonatal, and nutritional diseases        | 45,861.49<br>(38,758.39 to 53,874.68)      | 43,081.92<br>(32,125.07 to 57,297.09)      | 35,394.46<br>(26,958.25 to 45,900.30)    | 56,099.69<br>(40,523.06 to 77,269.86)        | 2,008.38<br>(1,651.55 to 2,341.35)    | 3,232.19<br>(2,403.10 to 4,277.30)    | 2,911.30<br>(2,192.56 to 3,791.92)    | 3,716.55<br>(2,641.99 to 4,972.78)    |
| HIV/AIDS and tuberculosis                                         | 824.23<br>(704.81 to 999.82)               | 407.60<br>(251.75 to 658.91)               | 253.85<br>(161.47 to 380.50)             | 632.48<br>(380.86 to 1,030.54)               | 33.79<br>(29.16 to 41.03)             | 23.25<br>(13.50 to 38.12)             | 15.24<br>(9.75 to 22.89)              | 34.03<br>(19.69 to 56.01)             |
| Tuberculosis                                                      | 674.89<br>(566.41 to 842.22)               | 324.65<br>(182.83 to 556.05)               | 199.23<br>(119.72 to 319.21)             | 521.41<br>(283.33 to 899.13)                 | 30.09<br>(25.61 to 37.26)             | 21.17<br>(11.87 to 35.54)             | 13.78<br>(8.29 to 20.98)              | 31.30<br>(16.65 to 52.96)             |
| HIV/AIDS                                                          | 149.34<br>(113.11 to 190.97)               | 82.95<br>(33.62 to 133.74)                 | 54.61<br>(15.32 to 104.36)               | 111.07<br>(53.62 to 171.08)                  | 3.70<br>(2.71 to 4.83)                | 2.09<br>(0.65 to 3.62)                | 1.46<br>(0.29 to 3.02)                | 2.72<br>(1.12 to 4.36)                |
| Diarrhea, lower respiratory, and other common infectious diseases | 32,771.44<br>(27,268.45 to 38,687.47)      | 37,818.41<br>(27,246.68 to 51,361.68)      | 31,355.19<br>(23,014.98 to 41,789.64)    | 49,611.14<br>(34,528.47 to 69,373.31)        | 1,806.20<br>(1,450.38 to 2,133.17)    | 3,113.05<br>(2,271.33 to 4,155.13)    | 2,808.94<br>(2,097.81 to 3,686.87)    | 3,579.43<br>(2,518.83 to 4,839.31)    |
| Diarrheal diseases                                                | 624.97<br>(411.02 to 860.92)               | 1,640.57<br>(392.49 to 4,719.79)           | 1,830.78<br>(542.33 to 4,655.38)         | 1,276.77<br>(291.25 to 4,215.23)             | 21.60<br>(11.83 to 32.47)             | 115.29<br>(26.66 to 344.02)           | 139.56<br>(41.06 to 354.08)           | 81.43<br>(17.71 to 259.84)            |
| Intestinal infectious diseases                                    | 6.25<br>(2.37 to 14.63)                    | 4.39<br>(1.60 to 9.93)                     | 4.35<br>(1.60 to 9.90)                   | 4.42<br>(1.63 to 10.23)                      | 0.17<br>(0.07 to 0.40)                | 0.17<br>(0.07 to 0.35)                | 0.17<br>(0.07 to 0.36)                | 0.16<br>(0.06 to 0.34)                |
| Typhoid fever                                                     | 1.94<br>(0.60 to 4.78)                     | 1.82<br>(0.59 to 4.20)                     | 2.18<br>(0.73 to 5.09)                   | 1.60<br>(0.52 to 3.81)                       | 0.05<br>(0.02 to 0.12)                | 0.06<br>(0.02 to 0.14)                | 0.07<br>(0.02 to 0.17)                | 0.05<br>(0.02 to 0.12)                |
| Paratyphoid fever                                                 | 2.73<br>(1.12 to 9.80)                     | 2.13<br>(0.61 to 5.90)                     | 1.75<br>(0.49 to 4.75)                   | 2.39<br>(0.67 to 6.47)                       | 0.10<br>(0.03 to 0.26)                | 0.07<br>(0.02 to 0.19)                | 0.06<br>(0.02 to 0.16)                | 0.08<br>(0.02 to 0.20)                |
| Other intestinal infectious diseases                              | 0.58<br>(0.23 to 1.20)                     | 0.44<br>(0.17 to 0.96)                     | 0.43<br>(0.16 to 0.94)                   | 0.44<br>(0.17 to 0.95)                       | 0.03<br>(0.01 to 0.06)                | 0.04<br>(0.01 to 0.08)                | 0.04<br>(0.01 to 0.09)                | 0.03<br>(0.01 to 0.08)                |
| Lower respiratory infections                                      | 30,368.73<br>(25,032.36 to 35,873.84)      | 35,010.50<br>(24,544.64 to 49,041.45)      | 28,565.46<br>(20,553.45 to 39,065.07)    | 47,009.97<br>(32,381.97 to 66,916.85)        | 1,743.82<br>(1,394.46 to 2,081.37)    | 2,963.94<br>(2,134.10 to 4,017.90)    | 2,638.51<br>(1,931.42 to 3,491.09)    | 3,462.81<br>(2,417.07 to 4,724.00)    |
| Upper respiratory infections                                      | 14.88<br>(7.39 to 24.24)                   | 11.54<br>(4.27 to 25.98)                   | 8.19<br>(3.05 to 17.89)                  | 13.96<br>(5.05 to 31.05)                     | 0.61<br>(0.29 to 1.03)                | 0.69<br>(0.22 to 1.52)                | 0.52<br>(0.17 to 1.18)                | 0.79<br>(0.26 to 1.84)                |
| Otitis media                                                      | 0.54<br>(0.35 to 0.84)                     | 0.09<br>(0.04 to 0.21)                     | 0.09<br>(0.04 to 0.21)                   | 0.09<br>(0.04 to 0.20)                       | 0.01<br>(0.01 to 0.02)                | 0.00<br>(0.00 to 0.01)                | 0.00<br>(0.00 to 0.01)                | 0.00<br>(0.00 to 0.01)                |
| Meningitis                                                        | 1,196.83<br>(839.87 to 1,586.98)           | 455.33<br>(277.03 to 672.73)               | 390.59<br>(240.61 to 563.29)             | 493.88<br>(292.17 to 736.76)                 | 26.68<br>(18.97 to 35.20)             | 13.30<br>(8.87 to 19.05)              | 12.04<br>(8.15 to 17.25)              | 13.80<br>(9.16 to 19.68)              |
| Pneumococcal meningitis                                           | 156.59<br>(107.41 to 211.29)               | 78.97<br>(49.65 to 113.03)                 | 80.10<br>(50.99 to 116.64)               | 76.59<br>(48.11 to 109.24)                   | 4.18<br>(2.95 to 5.70)                | 2.94<br>(1.92 to 4.28)                | 3.08<br>(2.03 to 4.51)                | 2.74<br>(1.82 to 3.94)                |
| H influenzae type B meningitis                                    | 234.36<br>(164.00 to 323.36)               | 184.58<br>(81.51 to 332.45)                | 164.29<br>(79.05 to 278.03)              | 193.36<br>(79.97 to 361.06)                  | 4.97<br>(3.52 to 6.77)                | 3.99<br>(2.41 to 6.02)                | 3.89<br>(2.41 to 5.72)                | 3.93<br>(2.27 to 6.06)                |
| Meningococcal meningitis                                          | 455.65<br>(318.32 to 621.04)               | 96.36<br>(56.76 to 154.19)                 | 73.83<br>(43.99 to 113.94)               | 112.22<br>(65.13 to 183.23)                  | 8.99<br>(6.46 to 11.88)               | 2.95<br>(1.86 to 4.49)                | 2.38<br>(1.51 to 3.64)                | 3.28<br>(2.07 to 5.15)                |
| Other meningitis                                                  | 350.24<br>(249.93 to 465.37)               | 95.41<br>(56.06 to 152.47)                 | 72.37<br>(44.73 to 112.77)               | 111.71<br>(66.22 to 176.97)                  | 8.54<br>(6.03 to 11.45)               | 3.42<br>(2.11 to 5.34)                | 2.70<br>(1.72 to 4.13)                | 3.85<br>(2.39 to 6.03)                |
| Encephalitis                                                      | 389.26<br>(295.01 to 480.51)               | 362.27<br>(276.94 to 455.36)               | 351.86<br>(270.71 to 441.97)             | 362.65<br>(275.45 to 453.75)                 | 9.53<br>(7.51 to 11.45)               | 12.58<br>(9.99 to 15.28)              | 12.72<br>(10.07 to 15.54)             | 12.04<br>(9.47 to 14.76)              |

|                |                              |                                 |                               |                                 |                           |                            |                            |                            |
|----------------|------------------------------|---------------------------------|-------------------------------|---------------------------------|---------------------------|----------------------------|----------------------------|----------------------------|
| Diphtheria     | 1.93<br>(1.15 to<br>2.99)    | 0.43<br>(0.21 to<br>0.74)       | 0.38<br>(0.19 to<br>0.68)     | 0.45<br>(0.22 to<br>0.80)       | 0.04<br>(0.02 to<br>0.06) | 0.01<br>(0.00 to<br>0.02)  | 0.01<br>(0.00 to<br>0.02)  | 0.01<br>(0.00 to<br>0.02)  |
| Whooping cough | 99.77<br>(9.99 to<br>315.64) | 68.84<br>(3.65 to<br>258.48)    | 18.07<br>(1.22 to<br>68.08)   | 96.05<br>(4.56 to<br>352.58)    | 1.19<br>(0.12 to<br>3.78) | 0.82<br>(0.04 to<br>3.08)  | 0.22<br>(0.02 to<br>0.82)  | 1.14<br>(0.06 to<br>4.19)  |
| Tetanus        | 26.69<br>(23.69 to<br>29.79) | 1.58<br>(1.13 to<br>2.14)       | 1.44<br>(1.04 to<br>1.92)     | 1.64<br>(1.15 to<br>2.25)       | 0.56<br>(0.50 to<br>0.63) | 0.04<br>(0.03 to<br>0.05)  | 0.03<br>(0.03 to<br>0.04)  | 0.04<br>(0.03 to<br>0.05)  |
| Measles        | 0.01<br>(0.00 to<br>0.02)    | 229.41<br>(0.00 to<br>1,467.25) | 154.21<br>(0.00 to<br>963.63) | 316.91<br>(0.00 to<br>2,044.20) | 0.00<br>(0.00 to<br>0.00) | 3.26<br>(0.00 to<br>20.22) | 2.29<br>(0.00 to<br>13.75) | 4.45<br>(0.00 to<br>29.12) |



| Slovakia                                              |                                                      |                                                     |                                                     |                                                     |                                                |                                                |                                                |                                                |
|-------------------------------------------------------|------------------------------------------------------|-----------------------------------------------------|-----------------------------------------------------|-----------------------------------------------------|------------------------------------------------|------------------------------------------------|------------------------------------------------|------------------------------------------------|
| Cause                                                 | YLLs (actual counts)                                 |                                                     |                                                     |                                                     | Deaths (actual counts)                         |                                                |                                                |                                                |
|                                                       | 2016                                                 | 2040 Forecast                                       | 2040 Better Scenario                                | 2040 Worse Scenario                                 | 2016                                           | 2040 Forecast                                  | 2040 Better Scenario                           | 2040 Worse Scenario                            |
| Varicella and herpes zoster                           | 41.57<br>(29.28 to<br>59.09)                         | 33.47<br>(20.93 to<br>51.80)                        | 29.76<br>(18.56 to<br>45.04)                        | 34.34<br>(20.54 to<br>52.99)                        | 1.97<br>(1.25 to<br>2.92)                      | 2.96<br>(1.54 to<br>5.03)                      | 2.87<br>(1.50 to<br>4.90)                      | 2.76<br>(1.43 to<br>4.63)                      |
| <b>Neglected tropical diseases and malaria</b>        | <b>45.15</b><br><b>(39.02 to</b><br><b>52.62)</b>    | <b>40.50</b><br><b>(34.03 to</b><br><b>48.27)</b>   | <b>40.87</b><br><b>(34.33 to</b><br><b>48.91)</b>   | <b>39.72</b><br><b>(33.51 to</b><br><b>47.26)</b>   | <b>1.19</b><br><b>(1.03 to</b><br><b>1.41)</b> | <b>1.36</b><br><b>(1.15 to</b><br><b>1.66)</b> | <b>1.40</b><br><b>(1.18 to</b><br><b>1.73)</b> | <b>1.30</b><br><b>(1.09 to</b><br><b>1.56)</b> |
| Malaria                                               | 0.00<br>(0.00 to<br>0.00)                            | 0.00<br>(0.00 to<br>0.00)                           | 0.00<br>(0.00 to<br>0.00)                           | 0.00<br>(0.00 to<br>0.00)                           | 0.00<br>(0.00 to<br>0.00)                      | 0.00<br>(0.00 to<br>0.00)                      | 0.00<br>(0.00 to<br>0.00)                      | 0.00<br>(0.00 to<br>0.00)                      |
| Chagas disease                                        | 0.00<br>(0.00 to<br>0.00)                            | 0.00<br>(0.00 to<br>0.00)                           | 0.00<br>(0.00 to<br>0.00)                           | 0.00<br>(0.00 to<br>0.00)                           | 0.00<br>(0.00 to<br>0.00)                      | 0.00<br>(0.00 to<br>0.00)                      | 0.00<br>(0.00 to<br>0.00)                      | 0.00<br>(0.00 to<br>0.00)                      |
| Leishmaniasis                                         | 0.00<br>(0.00 to<br>0.00)                            | 0.00<br>(0.00 to<br>0.00)                           | 0.00<br>(0.00 to<br>0.00)                           | 0.00<br>(0.00 to<br>0.00)                           | 0.00<br>(0.00 to<br>0.00)                      | 0.00<br>(0.00 to<br>0.00)                      | 0.00<br>(0.00 to<br>0.00)                      | 0.00<br>(0.00 to<br>0.00)                      |
| African trypanosomiasis                               | 0.00<br>(0.00 to<br>0.00)                            | 0.00<br>(0.00 to<br>0.00)                           | 0.00<br>(0.00 to<br>0.00)                           | 0.00<br>(0.00 to<br>0.00)                           | 0.00<br>(0.00 to<br>0.00)                      | 0.00<br>(0.00 to<br>0.00)                      | 0.00<br>(0.00 to<br>0.00)                      | 0.00<br>(0.00 to<br>0.00)                      |
| Schistosomiasis                                       | 0.00<br>(0.00 to<br>0.00)                            | 0.00<br>(0.00 to<br>0.00)                           | 0.00<br>(0.00 to<br>0.00)                           | 0.00<br>(0.00 to<br>0.00)                           | 0.00<br>(0.00 to<br>0.00)                      | 0.00<br>(0.00 to<br>0.00)                      | 0.00<br>(0.00 to<br>0.00)                      | 0.00<br>(0.00 to<br>0.00)                      |
| Cysticercosis                                         | 2.54<br>(2.02 to<br>3.12)                            | 0.92<br>(0.71 to<br>1.17)                           | 0.91<br>(0.69 to<br>1.16)                           | 0.91<br>(0.71 to<br>1.15)                           | 0.08<br>(0.07 to<br>0.10)                      | 0.04<br>(0.03 to<br>0.05)                      | 0.04<br>(0.03 to<br>0.05)                      | 0.04<br>(0.03 to<br>0.05)                      |
| Cystic echinococcosis                                 | 6.58<br>(5.35 to<br>7.92)                            | 4.71<br>(3.57 to<br>6.25)                           | 4.00<br>(3.14 to<br>5.07)                           | 5.06<br>(3.91 to<br>6.66)                           | 0.26<br>(0.21 to<br>0.31)                      | 0.27<br>(0.20 to<br>0.35)                      | 0.24<br>(0.19 to<br>0.30)                      | 0.27<br>(0.21 to<br>0.35)                      |
| Dengue                                                | 0.00<br>(0.00 to<br>0.00)                            | 0.00<br>(0.00 to<br>0.00)                           | 0.00<br>(0.00 to<br>0.00)                           | 0.00<br>(0.00 to<br>0.00)                           | 0.00<br>(0.00 to<br>0.00)                      | 0.00<br>(0.00 to<br>0.00)                      | 0.00<br>(0.00 to<br>0.00)                      | 0.00<br>(0.00 to<br>0.00)                      |
| Yellow fever                                          | 0.00<br>(0.00 to<br>0.00)                            | 0.00<br>(0.00 to<br>0.00)                           | 0.00<br>(0.00 to<br>0.00)                           | 0.00<br>(0.00 to<br>0.00)                           | 0.00<br>(0.00 to<br>0.00)                      | 0.00<br>(0.00 to<br>0.00)                      | 0.00<br>(0.00 to<br>0.00)                      | 0.00<br>(0.00 to<br>0.00)                      |
| Rabies                                                | 0.25<br>(0.13 to<br>0.36)                            | 0.19<br>(0.11 to<br>0.28)                           | 0.16<br>(0.10 to<br>0.26)                           | 0.20<br>(0.11 to<br>0.30)                           | 0.01<br>(0.00 to<br>0.01)                      | 0.01<br>(0.00 to<br>0.02)                      | 0.01<br>(0.00 to<br>0.02)                      | 0.01<br>(0.00 to<br>0.02)                      |
| Intestinal nematode infections                        | 0.48<br>(0.20 to<br>0.89)                            | 0.49<br>(0.22 to<br>0.81)                           | 0.49<br>(0.22 to<br>0.79)                           | 0.47<br>(0.21 to<br>0.80)                           | 0.01<br>(0.01 to<br>0.02)                      | 0.02<br>(0.01 to<br>0.04)                      | 0.02<br>(0.01 to<br>0.04)                      | 0.02<br>(0.01 to<br>0.03)                      |
| Other neglected tropical diseases                     | 35.30<br>(29.61 to<br>42.10)                         | 34.19<br>(28.29 to<br>41.01)                        | 35.31<br>(29.27 to<br>42.90)                        | 33.08<br>(27.49 to<br>39.52)                        | 0.83<br>(0.70 to<br>1.00)                      | 1.03<br>(0.84 to<br>1.32)                      | 1.09<br>(0.90 to<br>1.42)                      | 0.96<br>(0.79 to<br>1.20)                      |
| <b>Maternal disorders</b>                             | <b>203.92</b><br><b>(156.97 to</b><br><b>262.48)</b> | <b>118.21</b><br><b>(80.89 to</b><br><b>167.01)</b> | <b>100.28</b><br><b>(70.83 to</b><br><b>138.67)</b> | <b>131.78</b><br><b>(90.38 to</b><br><b>186.88)</b> | <b>3.99</b><br><b>(3.08 to</b><br><b>5.15)</b> | <b>2.37</b><br><b>(1.64 to</b><br><b>3.31)</b> | <b>2.02</b><br><b>(1.41 to</b><br><b>2.79)</b> | <b>2.64</b><br><b>(1.78 to</b><br><b>3.73)</b> |
| Maternal hemorrhage                                   | 35.31<br>(23.66 to<br>52.07)                         | 18.51<br>(10.60 to<br>30.26)                        | 15.76<br>(9.16 to<br>25.47)                         | 20.57<br>(11.91 to<br>33.84)                        | 0.69<br>(0.46 to<br>1.01)                      | 0.37<br>(0.21 to<br>0.59)                      | 0.31<br>(0.18 to<br>0.51)                      | 0.41<br>(0.24 to<br>0.67)                      |
| Maternal sepsis and other maternal infections         | 3.46<br>(1.65 to<br>6.01)                            | 1.78<br>(0.79 to<br>3.39)                           | 1.50<br>(0.69 to<br>2.85)                           | 1.99<br>(0.90 to<br>3.79)                           | 0.07<br>(0.03 to<br>0.12)                      | 0.04<br>(0.02 to<br>0.07)                      | 0.03<br>(0.01 to<br>0.06)                      | 0.04<br>(0.02 to<br>0.07)                      |
| Maternal hypertensive disorders                       | 9.95<br>(6.04 to<br>15.21)                           | 5.57<br>(3.02 to<br>9.51)                           | 4.65<br>(2.62 to<br>7.81)                           | 6.26<br>(3.42 to<br>10.78)                          | 0.18<br>(0.11 to<br>0.28)                      | 0.10<br>(0.06 to<br>0.18)                      | 0.09<br>(0.05 to<br>0.15)                      | 0.12<br>(0.06 to<br>0.20)                      |
| Maternal obstructed labor and uterine rupture         | 2.31<br>(0.97 to<br>4.52)                            | 1.51<br>(0.58 to<br>2.92)                           | 1.23<br>(0.47 to<br>2.36)                           | 1.71<br>(0.64 to<br>3.33)                           | 0.05<br>(0.02 to<br>0.09)                      | 0.03<br>(0.01 to<br>0.06)                      | 0.03<br>(0.01 to<br>0.05)                      | 0.04<br>(0.01 to<br>0.07)                      |
| Maternal abortion, miscarriage, and ectopic pregnancy | 67.47<br>(47.27 to<br>92.30)                         | 38.67<br>(21.80 to<br>62.19)                        | 32.25<br>(18.53 to<br>51.97)                        | 43.59<br>(24.72 to<br>70.10)                        | 1.34<br>(0.93 to<br>1.83)                      | 0.80<br>(0.45 to<br>1.30)                      | 0.66<br>(0.39 to<br>1.05)                      | 0.90<br>(0.50 to<br>1.47)                      |



| Slovakia                                                                |                                             |                                           |                                           |                                           |                                    |                                  |                                  |                                  |
|-------------------------------------------------------------------------|---------------------------------------------|-------------------------------------------|-------------------------------------------|-------------------------------------------|------------------------------------|----------------------------------|----------------------------------|----------------------------------|
| Cause                                                                   | YLLs (actual counts)                        |                                           |                                           |                                           | Deaths (actual counts)             |                                  |                                  |                                  |
|                                                                         | 2016                                        | 2040 Forecast                             | 2040 Better Scenario                      | 2040 Worse Scenario                       | 2016                               | 2040 Forecast                    | 2040 Better Scenario             | 2040 Worse Scenario              |
| <b>Neonatal disorders</b>                                               | <b>11,071.57</b><br>(7,443.80 to 15,744.80) | <b>3,856.56</b><br>(2,271.50 to 6,121.86) | <b>2,806.74</b><br>(1,681.33 to 4,364.48) | <b>4,864.96</b><br>(2,884.83 to 7,730.87) | <b>127.99</b><br>(86.04 to 182.02) | <b>44.59</b><br>(26.28 to 70.76) | <b>32.46</b><br>(19.45 to 50.48) | <b>56.25</b><br>(33.36 to 89.37) |
| Neonatal preterm birth                                                  | 8,169.67<br>(5,423.00 to 11,633.55)         | 2,351.34<br>(1,336.78 to 3,753.97)        | 1,590.48<br>(896.58 to 2,474.92)          | 3,191.65<br>(1,808.20 to 5,059.07)        | 94.42<br>(62.68 to 134.45)         | 27.18<br>(15.45 to 43.39)        | 18.39<br>(10.37 to 28.61)        | 36.89<br>(20.90 to 58.47)        |
| Neonatal encephalopathy due to birth asphyxia and trauma                | 1,666.41<br>(1,060.70 to 2,481.93)          | 521.52<br>(266.12 to 935.31)              | 371.82<br>(195.67 to 643.41)              | 625.06<br>(306.76 to 1,118.94)            | 19.28<br>(12.28 to 28.72)          | 6.04<br>(3.08 to 10.81)          | 4.30<br>(2.27 to 7.44)           | 7.24<br>(3.55 to 12.95)          |
| Neonatal sepsis and other neonatal infections                           | 225.65<br>(123.28 to 421.63)                | 122.96<br>(57.60 to 246.97)               | 94.09<br>(44.76 to 184.26)                | 140.92<br>(66.14 to 278.40)               | 2.61<br>(1.43 to 4.87)             | 1.42<br>(0.67 to 2.86)           | 1.09<br>(0.52 to 2.13)           | 1.63<br>(0.77 to 3.22)           |
| Hemolytic disease and other neonatal jaundice                           | 30.83<br>(16.87 to 53.75)                   | 10.81<br>(4.69 to 24.70)                  | 8.09<br>(3.57 to 17.92)                   | 12.56<br>(5.22 to 27.46)                  | 0.36<br>(0.20 to 0.62)             | 0.13<br>(0.05 to 0.29)           | 0.09<br>(0.04 to 0.21)           | 0.15<br>(0.06 to 0.32)           |
| Other neonatal disorders                                                | 979.00<br>(596.33 to 1,499.02)              | 849.93<br>(430.61 to 1,579.77)            | 742.26<br>(381.23 to 1,353.74)            | 894.76<br>(445.90 to 1,699.26)            | 11.32<br>(6.90 to 17.33)           | 9.83<br>(4.98 to 18.26)          | 8.58<br>(4.41 to 15.65)          | 10.35<br>(5.16 to 19.64)         |
| <b>Nutritional deficiencies</b>                                         | <b>221.83</b><br>(191.10 to 255.03)         | <b>219.64</b><br>(174.49 to 276.62)       | <b>242.92</b><br>(193.42 to 305.00)       | <b>195.30</b><br>(155.31 to 243.17)       | <b>11.57</b><br>(10.17 to 13.22)   | <b>19.06</b><br>(13.70 to 26.26) | <b>22.51</b><br>(16.38 to 30.32) | <b>15.73</b><br>(11.05 to 21.72) |
| Protein-energy malnutrition                                             | 152.77<br>(128.04 to 179.72)                | 151.29<br>(108.32 to 205.77)              | 175.54<br>(126.60 to 237.01)              | 129.16<br>(88.96 to 173.86)               | 8.46<br>(7.23 to 9.92)             | 14.02<br>(8.92 to 20.34)         | 17.28<br>(11.69 to 24.76)        | 11.16<br>(6.73 to 16.29)         |
| Iodine deficiency                                                       | 8.48<br>(0.98 to 21.26)                     | 14.80<br>(0.67 to 42.34)                  | 15.40<br>(0.59 to 45.67)                  | 13.67<br>(0.67 to 37.37)                  | 0.40<br>(0.03 to 1.11)             | 1.25<br>(0.02 to 4.69)           | 1.38<br>(0.02 to 5.45)           | 1.09<br>(0.02 to 3.81)           |
| Dietary iron deficiency                                                 | 18.46<br>(15.26 to 22.19)                   | 14.61<br>(11.17 to 19.08)                 | 15.99<br>(11.49 to 19.76)                 | 14.06<br>(10.72 to 18.36)                 | 0.47<br>(0.39 to 0.59)             | 0.47<br>(0.35 to 0.67)           | 0.51<br>(0.37 to 0.72)           | 0.44<br>(0.32 to 0.61)           |
| Other nutritional deficiencies                                          | 42.12<br>(32.00 to 49.56)                   | 38.94<br>(25.43 to 53.67)                 | 36.90<br>(24.18 to 51.56)                 | 38.41<br>(25.60 to 53.11)                 | 2.24<br>(1.55 to 2.75)             | 3.31<br>(2.00 to 5.02)           | 3.34<br>(1.98 to 5.07)           | 3.04<br>(1.81 to 4.65)           |
| <b>Other communicable, maternal, neonatal, and nutritional diseases</b> | <b>723.35</b><br>(529.32 to 861.95)         | <b>621.01</b><br>(435.73 to 771.18)       | <b>594.61</b><br>(418.72 to 738.23)       | <b>624.31</b><br>(436.80 to 777.86)       | <b>23.66</b><br>(17.16 to 27.84)   | <b>28.50</b><br>(20.65 to 34.79) | <b>28.73</b><br>(20.82 to 34.95) | <b>27.18</b><br>(19.60 to 33.20) |
| Sexually transmitted infections excluding HIV                           | 75.61<br>(50.06 to 95.98)                   | 31.30<br>(19.43 to 44.09)                 | 29.17<br>(18.47 to 41.45)                 | 32.47<br>(19.83 to 46.29)                 | 2.24<br>(1.57 to 2.78)             | 1.34<br>(0.90 to 1.86)           | 1.31<br>(0.88 to 1.85)           | 1.33<br>(0.89 to 1.86)           |
| Syphilis                                                                | 25.71<br>(20.50 to 31.88)                   | 7.85<br>(5.01 to 12.03)                   | 6.73<br>(4.25 to 10.32)                   | 8.59<br>(5.35 to 13.10)                   | 0.70<br>(0.56 to 0.84)             | 0.33<br>(0.20 to 0.51)           | 0.30<br>(0.18 to 0.46)           | 0.34<br>(0.21 to 0.51)           |
| Chlamydial infection                                                    | 9.31<br>(5.25 to 12.38)                     | 4.43<br>(2.58 to 6.43)                    | 4.26<br>(2.51 to 6.15)                    | 4.50<br>(2.59 to 6.66)                    | 0.29<br>(0.19 to 0.38)             | 0.20<br>(0.12 to 0.29)           | 0.20<br>(0.12 to 0.29)           | 0.19<br>(0.12 to 0.28)           |
| Gonococcal infection                                                    | 26.85<br>(15.67 to 35.50)                   | 13.09<br>(7.41 to 20.14)                  | 12.56<br>(7.23 to 19.37)                  | 13.30<br>(7.52 to 20.65)                  | 0.85<br>(0.57 to 1.09)             | 0.59<br>(0.37 to 0.90)           | 0.59<br>(0.37 to 0.90)           | 0.58<br>(0.36 to 0.86)           |
| Other sexually transmitted infections                                   | 13.73<br>(7.72 to 18.21)                    | 5.92<br>(3.27 to 9.05)                    | 5.63<br>(3.18 to 8.63)                    | 6.08<br>(3.36 to 9.35)                    | 0.39<br>(0.24 to 0.51)             | 0.22<br>(0.14 to 0.33)           | 0.22<br>(0.14 to 0.33)           | 0.22<br>(0.14 to 0.33)           |
| Acute hepatitis                                                         | 167.58<br>(137.87 to 200.94)                | 94.80<br>(62.55 to 139.42)                | 75.86<br>(51.87 to 110.07)                | 106.55<br>(70.03 to 159.92)               | 5.70<br>(4.70 to 6.88)             | 4.21<br>(2.84 to 6.04)           | 3.47<br>(2.38 to 4.92)           | 4.56<br>(3.04 to 6.53)           |
| Acute hepatitis A                                                       | 15.77<br>(10.31 to 23.86)                   | 5.43<br>(3.05 to 9.40)                    | 4.46<br>(2.60 to 7.79)                    | 6.01<br>(3.28 to 10.20)                   | 0.29<br>(0.21 to 0.40)             | 0.16<br>(0.10 to 0.27)           | 0.14<br>(0.09 to 0.23)           | 0.17<br>(0.10 to 0.28)           |
| Acute hepatitis B                                                       | 126.65<br>(102.48 to 154.75)                | 73.93<br>(46.58 to 112.07)                | 58.72<br>(37.95 to 88.64)                 | 83.65<br>(52.05 to 129.03)                | 4.45<br>(3.58 to 5.46)             | 3.18<br>(2.05 to 4.74)           | 2.58<br>(1.68 to 3.80)           | 3.49<br>(2.23 to 5.27)           |



| Slovakia                             |                                             |                                             |                                             |                                             |                                          |                                          |                                          |                                          |
|--------------------------------------|---------------------------------------------|---------------------------------------------|---------------------------------------------|---------------------------------------------|------------------------------------------|------------------------------------------|------------------------------------------|------------------------------------------|
| Cause                                | YLLs (actual counts)                        |                                             |                                             |                                             | Deaths (actual counts)                   |                                          |                                          |                                          |
|                                      | 2016                                        | 2040 Forecast                               | 2040 Better Scenario                        | 2040 Worse Scenario                         | 2016                                     | 2040 Forecast                            | 2040 Better Scenario                     | 2040 Worse Scenario                      |
| Neoplasms                            | 277,157.25<br>(247,157.81 to<br>313,415.60) | 301,633.96<br>(244,659.06 to<br>367,375.17) | 264,940.48<br>(215,857.18 to<br>319,724.25) | 378,266.90<br>(305,356.14 to<br>468,383.05) | 13,065.67<br>(11,688.45 to<br>14,779.98) | 17,647.25<br>(15,093.86 to<br>20,536.93) | 16,294.72<br>(13,811.69 to<br>18,974.45) | 20,931.46<br>(17,689.89 to<br>24,472.65) |
| Lip and oral cavity cancer           | 8,247.10<br>(6,702.88 to<br>9,961.74)       | 7,134.66<br>(3,458.74 to<br>12,920.25)      | 4,883.69<br>(2,438.59 to<br>8,712.60)       | 12,523.48<br>(6,038.99 to<br>21,638.20)     | 314.97<br>(259.04 to<br>375.00)          | 313.17<br>(167.80 to<br>537.57)          | 227.79<br>(127.70 to<br>379.50)          | 537.70<br>(285.58 to<br>900.81)          |
| Nasopharynx cancer                   | 875.32<br>(698.28 to<br>1,114.90)           | 719.64<br>(376.85 to<br>1,277.51)           | 461.36<br>(245.77 to<br>810.96)             | 1,333.67<br>(674.34 to<br>2,379.32)         | 31.86<br>(25.61 to<br>40.07)             | 29.62<br>(16.43 to<br>51.35)             | 19.92<br>(11.20 to<br>34.22)             | 54.23<br>(29.01 to<br>95.90)             |
| Other pharynx cancer                 | 8,546.63<br>(6,744.83 to<br>10,542.66)      | 8,631.36<br>(4,563.73 to<br>14,839.42)      | 8,103.79<br>(4,267.38 to<br>13,868.42)      | 10,514.61<br>(5,519.23 to<br>17,783.29)     | 310.41<br>(245.76 to<br>383.09)          | 347.79<br>(189.91 to<br>572.94)          | 331.30<br>(180.99 to<br>552.29)          | 415.91<br>(224.79 to<br>722.02)          |
| Esophageal cancer                    | 7,395.40<br>(6,082.60 to<br>8,988.89)       | 7,497.75<br>(3,731.47 to<br>13,434.42)      | 5,862.90<br>(3,101.64 to<br>10,266.76)      | 12,457.11<br>(5,808.03 to<br>24,205.80)     | 300.35<br>(250.85 to<br>361.05)          | 342.70<br>(180.16 to<br>590.97)          | 281.73<br>(155.45 to<br>477.97)          | 560.30<br>(274.52 to<br>1,032.19)        |
| Stomach cancer                       | 14,535.90<br>(12,648.49 to<br>16,528.20)    | 10,635.15<br>(7,681.14 to<br>14,436.87)     | 8,880.36<br>(6,537.90 to<br>12,132.15)      | 12,399.56<br>(8,877.79 to<br>17,267.37)     | 743.82<br>(655.58 to<br>843.55)          | 696.61<br>(517.09 to<br>942.56)          | 609.03<br>(459.02 to<br>815.81)          | 772.28<br>(574.44 to<br>1,050.43)        |
| Colon and rectum cancer              | 40,591.40<br>(35,386.70 to<br>46,796.00)    | 47,416.06<br>(32,331.72 to<br>68,858.71)    | 39,460.19<br>(27,132.45 to<br>56,474.98)    | 56,845.65<br>(38,324.15 to<br>83,398.74)    | 2,170.31<br>(1,895.48 to<br>2,495.39)    | 3,172.92<br>(2,234.22 to<br>4,535.94)    | 2,760.38<br>(1,958.78 to<br>3,858.42)    | 3,609.24<br>(2,465.55 to<br>5,200.79)    |
| Liver cancer                         | 8,961.36<br>(7,590.60 to<br>10,524.59)      | 13,972.82<br>(8,921.03 to<br>21,349.90)     | 13,135.47<br>(8,728.06 to<br>19,880.87)     | 18,672.40<br>(10,696.99 to<br>30,217.84)    | 430.86<br>(365.98 to<br>504.49)          | 817.00<br>(539.18 to<br>1,200.19)        | 806.36<br>(545.88 to<br>1,157.70)        | 1,030.07<br>(611.07 to<br>1,574.89)      |
| Liver cancer due to hepatitis B      | 2,645.55<br>(1,898.23 to<br>3,456.67)       | 4,034.12<br>(2,343.40 to<br>6,627.25)       | 3,897.94<br>(2,394.33 to<br>6,305.52)       | 4,919.20<br>(2,692.02 to<br>8,647.50)       | 117.67<br>(83.19 to<br>155.17)           | 217.94<br>(133.64 to<br>302.53)          | 220.59<br>(139.05 to<br>352.87)          | 252.95<br>(142.19 to<br>428.31)          |
| Liver cancer due to hepatitis C      | 1,959.53<br>(1,351.66 to<br>2,637.37)       | 3,382.74<br>(1,973.06 to<br>5,454.28)       | 3,345.81<br>(1,999.95 to<br>5,216.47)       | 4,013.86<br>(2,158.91 to<br>6,838.95)       | 103.00<br>(73.95 to<br>138.27)           | 103.00<br>(129.80 to<br>332.28)          | 223.71<br>(138.08 to<br>337.26)          | 241.85<br>(135.95 to<br>391.58)          |
| Liver cancer due to alcohol use      | 2,815.49<br>(2,256.08 to<br>3,493.43)       | 4,082.37<br>(2,573.12 to<br>6,308.51)       | 3,492.49<br>(2,260.03 to<br>5,319.39)       | 6,888.20<br>(3,881.81 to<br>10,875.84)      | 138.83<br>(111.73 to<br>171.09)          | 243.25<br>(154.38 to<br>366.77)          | 219.31<br>(140.41 to<br>328.79)          | 370.66<br>(223.40 to<br>584.46)          |
| Liver cancer due to other causes     | 1,540.79<br>(1,213.84 to<br>1,928.63)       | 2,473.58<br>(1,410.32 to<br>4,013.43)       | 2,399.23<br>(1,426.53 to<br>3,754.26)       | 3,051.14<br>(1,554.11 to<br>5,258.67)       | 71.36<br>(56.52 to<br>88.32)             | 140.18<br>(82.01 to<br>223.11)           | 142.75<br>(88.60 to<br>223.77)           | 164.61<br>(87.44 to<br>279.60)           |
| Gallbladder and biliary tract cancer | 6,292.14<br>(4,929.70 to<br>7,455.74)       | 5,537.55<br>(4,271.89 to<br>6,750.52)       | 5,586.31<br>(4,304.75 to<br>6,836.34)       | 5,283.84<br>(4,107.59 to<br>6,371.29)       | 350.34<br>(276.03 to<br>415.51)          | 378.05<br>(294.00 to<br>452.72)          | 394.09<br>(307.90 to<br>473.69)          | 347.05<br>(265.34 to<br>413.70)          |
| Pancreatic cancer                    | 17,267.12<br>(15,247.17 to<br>19,670.32)    | 22,549.54<br>(17,927.96 to<br>28,189.87)    | 21,932.71<br>(17,389.99 to<br>27,500.50)    | 24,496.66<br>(19,120.96 to<br>31,318.68)    | 848.05<br>(754.55 to<br>965.88)          | 1,318.16<br>(1,083.76 to<br>1,612.52)    | 1,336.75<br>(1,087.47 to<br>1,629.93)    | 1,371.41<br>(1,108.61 to<br>1,716.13)    |
| Larynx cancer                        | 4,401.52<br>(3,597.23 to<br>5,359.15)       | 3,439.86<br>(1,428.80 to<br>7,492.97)       | 2,148.34<br>(937.94 to<br>4,457.99)         | 6,376.28<br>(2,595.77 to<br>13,289.08)      | 174.93<br>(144.46 to<br>210.46)          | 149.48<br>(64.40 to<br>306.32)           | 97.99<br>(64.79 to<br>197.96)            | 278.65<br>(116.85 to<br>563.79)          |
| Tracheal, bronchus, and lung cancer  | 49,258.20<br>(42,260.15 to<br>57,465.44)    | 48,869.77<br>(33,292.36 to<br>71,340.36)    | 34,994.46<br>(24,205.19 to<br>50,155.46)    | 86,079.40<br>(58,211.34 to<br>126,660.70)   | 2,773.12<br>(1,960.83 to<br>2,634.87)    | 2,563.64<br>(1,811.88 to<br>3,592.12)    | 1,965.42<br>(1,404.39 to<br>2,777.57)    | 4,435.35<br>(3,068.09 to<br>6,287.18)    |
| Malignant skin melanoma              | 4,805.99<br>(3,481.43 to<br>5,715.39)       | 6,533.31<br>(4,545.99 to<br>8,128.03)       | 7,505.89<br>(5,264.04 to<br>9,286.91)       | 5,750.78<br>(3,940.56 to<br>7,183.04)       | 198.91<br>(138.95 to<br>236.97)          | 352.10<br>(241.59 to<br>429.93)          | 418.96<br>(290.14 to<br>505.54)          | 295.94<br>(201.80 to<br>364.69)          |
| Non-melanoma skin cancer             | 1,132.70<br>(986.51 to<br>1,301.12)         | 1,655.94<br>(1,337.95 to<br>2,067.30)       | 1,542.34<br>(1,244.53 to<br>1,904.57)       | 1,613.59<br>(1,312.96 to<br>2,041.66)       | 75.93<br>(66.82 to<br>85.69)             | 149.27<br>(118.30 to<br>189.34)          | 146.36<br>(116.56 to<br>183.15)          | 137.17<br>(104.13 to<br>175.75)          |
| Breast cancer                        | 18,988.70<br>(15,324.07 to<br>23,508.34)    | 18,005.33<br>(12,791.81 to<br>24,695.48)    | 15,118.87<br>(10,931.87 to<br>20,294.46)    | 21,560.24<br>(14,959.99 to<br>29,851.46)    | 876.39<br>(700.13 to<br>1,066.87)        | 1,064.55<br>(763.23 to<br>1,433.50)      | 933.88<br>(677.89 to<br>1,223.29)        | 1,213.74<br>(849.78 to<br>1,642.27)      |
| Cervical cancer                      | 6,549.61<br>(4,456.42 to<br>8,153.56)       | 3,641.16<br>(2,267.38 to<br>5,038.63)       | 3,061.95<br>(2,025.96 to<br>4,140.56)       | 4,191.41<br>(2,540.82 to<br>5,928.92)       | 247.79<br>(172.25 to<br>311.20)          | 174.84<br>(114.71 to<br>232.52)          | 152.20<br>(104.38 to<br>200.12)          | 193.13<br>(124.51 to<br>262.69)          |



| Slovakia                        |                                             |                                             |                                             |                                             |                                          |                                          |                                          |                                          |
|---------------------------------|---------------------------------------------|---------------------------------------------|---------------------------------------------|---------------------------------------------|------------------------------------------|------------------------------------------|------------------------------------------|------------------------------------------|
| Cause                           | YLLs (actual counts)                        |                                             |                                             |                                             | Deaths (actual counts)                   |                                          |                                          |                                          |
|                                 | 2016                                        | 2040 Forecast                               | 2040 Better Scenario                        | 2040 Worse Scenario                         | 2016                                     | 2040 Forecast                            | 2040 Better Scenario                     | 2040 Worse Scenario                      |
| Kidney cancer                   | 8,400.09<br>(6,439.97 to<br>9,754.22)       | 11,328.24<br>(7,770.72 to<br>15,876.44)     | 11,239.68<br>(7,880.36 to<br>15,418.79)     | 11,917.62<br>(7,863.96 to<br>17,734.38)     | 401.11<br>(309.15 to<br>461.32)          | 650.95<br>(456.56 to<br>876.48)          | 677.00<br>(486.11 to<br>886.21)          | 654.37<br>(443.03 to<br>941.88)          |
| Bladder cancer                  | 5,502.86<br>(4,706.43 to<br>6,353.25)       | 6,764.85<br>(5,093.77 to<br>9,061.39)       | 6,313.13<br>(4,802.15 to<br>8,358.36)       | 7,855.29<br>(5,581.63 to<br>10,953.16)      | 334.07<br>(286.34 to<br>383.54)          | 512.02<br>(395.84 to<br>660.05)          | 505.41<br>(397.12 to<br>647.55)          | 563.19<br>(410.33 to<br>772.37)          |
| Brain and nervous system cancer | 11,037.60<br>(9,153.58 to<br>12,857.45)     | 11,509.37<br>(9,078.86 to<br>13,936.64)     | 11,065.57<br>(8,729.93 to<br>13,451.36)     | 11,496.60<br>(9,082.14 to<br>13,749.61)     | 383.36<br>(307.47 to<br>450.12)          | 496.89<br>(377.32 to<br>596.08)          | 489.83<br>(367.56 to<br>596.25)          | 481.17<br>(361.30 to<br>572.48)          |
| Thyroid cancer                  | 697.35<br>(583.02 to<br>821.37)             | 860.03<br>(591.89 to<br>1,238.61)           | 792.53<br>(552.14 to<br>1,127.53)           | 955.04<br>(649.66 to<br>1,419.83)           | 36.31<br>(30.65 to<br>42.79)             | 35.97<br>(39.41 to<br>79.52)             | 53.22<br>(37.75 to<br>75.86)             | 59.32<br>(40.94 to<br>86.49)             |
| Mesothelioma                    | 415.71<br>(346.57 to<br>499.18)             | 525.36<br>(419.04 to<br>650.67)             | 543.65<br>(428.39 to<br>680.50)             | 496.56<br>(402.53 to<br>611.48)             | 16.20<br>(13.64 to<br>19.27)             | 24.78<br>(20.17 to<br>30.24)             | 26.30<br>(21.14 to<br>31.81)             | 22.64<br>(18.65 to<br>27.11)             |
| Hodgkin lymphoma                | 1,047.27<br>(809.45 to<br>1,290.64)         | 663.84<br>(480.91 to<br>892.89)             | 557.70<br>(412.28 to<br>738.89)             | 722.10<br>(515.92 to<br>984.80)             | 34.44<br>(26.36 to<br>42.11)             | 28.87<br>(20.65 to<br>37.67)             | 24.97<br>(18.42 to<br>32.19)             | 30.23<br>(21.65 to<br>40.09)             |
| Non-Hodgkin lymphoma            | 6,484.18<br>(5,291.10 to<br>7,500.45)       | 6,374.80<br>(4,791.07 to<br>8,270.54)       | 5,977.21<br>(4,464.99 to<br>7,731.51)       | 6,693.63<br>(4,970.27 to<br>8,860.75)       | 284.94<br>(219.07 to<br>331.55)          | 361.94<br>(259.70 to<br>467.83)          | 350.97<br>(253.18 to<br>451.48)          | 363.61<br>(259.56 to<br>478.38)          |
| Multiple myeloma                | 3,223.75<br>(2,146.60 to<br>3,939.16)       | 4,290.06<br>(2,602.71 to<br>5,721.74)       | 4,188.01<br>(2,557.51 to<br>5,545.43)       | 4,412.91<br>(2,690.14 to<br>6,023.78)       | 164.34<br>(101.57 to<br>203.08)          | 263.01<br>(150.15 to<br>349.89)          | 264.75<br>(151.65 to<br>350.23)          | 259.59<br>(148.32 to<br>354.99)          |
| Leukemia                        | 9,048.84<br>(7,605.09 to<br>10,490.41)      | 10,373.54<br>(7,678.71 to<br>13,704.88)     | 9,812.82<br>(7,315.06 to<br>12,813.32)      | 11,616.83<br>(8,555.55 to<br>16,016.24)     | 381.82<br>(307.40 to<br>445.93)          | 580.26<br>(425.15 to<br>760.85)          | 571.96<br>(423.56 to<br>737.52)          | 621.59<br>(448.92 to<br>853.58)          |
| Acute lymphoid leukemia         | 1,477.18<br>(1,212.77 to<br>1,776.27)       | 1,006.72<br>(749.60 to<br>1,256.12)         | 874.20<br>(652.33 to<br>1,165.77)           | 1,179.92<br>(861.39 to<br>1,616.30)         | 39.27<br>(32.45 to<br>47.94)             | 35.42<br>(25.87 to<br>48.83)             | 31.48<br>(23.36 to<br>42.65)             | 41.12<br>(28.99 to<br>57.13)             |
| Chronic lymphoid leukemia       | 2,041.70<br>(1,687.58 to<br>2,449.80)       | 2,688.45<br>(1,871.11 to<br>3,772.21)       | 2,618.28<br>(1,836.27 to<br>3,609.23)       | 2,932.98<br>(1,985.67 to<br>4,331.36)       | 115.73<br>(96.12 to<br>135.84)           | 189.05<br>(138.23 to<br>252.85)          | 191.85<br>(141.40 to<br>255.18)          | 196.39<br>(136.41 to<br>277.64)          |
| Acute myeloid leukemia          | 4,078.69<br>(3,266.61 to<br>4,848.93)       | 5,365.10<br>(3,901.09 to<br>7,157.61)       | 5,156.77<br>(3,792.91 to<br>6,808.12)       | 5,983.58<br>(4,200.67 to<br>8,309.45)       | 158.23<br>(121.42 to<br>189.73)          | 264.48<br>(187.64 to<br>350.53)          | 262.89<br>(188.37 to<br>347.00)          | 284.96<br>(197.58 to<br>393.06)          |
| Chronic myeloid leukemia        | 363.45<br>(288.61 to<br>458.67)             | 204.28<br>(136.84 to<br>306.84)             | 162.37<br>(112.45 to<br>230.80)             | 254.83<br>(161.83 to<br>393.38)             | 16.22<br>(12.74 to<br>19.83)             | 12.83<br>(8.55 to<br>19.04)              | 10.81<br>(7.32 to<br>15.23)              | 14.98<br>(9.62 to<br>22.26)              |
| Other leukemia                  | 1,087.81<br>(737.54 to<br>1,341.78)         | 1,109.00<br>(618.11 to<br>1,573.03)         | 1,001.20<br>(569.89 to<br>1,389.76)         | 1,265.52<br>(713.66 to<br>1,823.28)         | 52.37<br>(30.23 to<br>65.34)             | 78.48<br>(39.26 to<br>108.54)            | 74.93<br>(37.01 to<br>102.05)            | 84.14<br>(41.85 to<br>120.84)            |
| Other neoplasms                 | 11,114.22<br>(9,617.31 to<br>12,684.70)     | 14,511.63<br>(12,442.96 to<br>16,839.90)    | 14,720.34<br>(12,499.82 to<br>17,202.61)    | 13,859.86<br>(12,004.33 to<br>15,994.28)    | 478.86<br>(415.11 to<br>546.57)          | 838.96<br>(733.69 to<br>957.87)          | 885.34<br>(762.84 to<br>1,014.26)        | 765.03<br>(667.96 to<br>872.26)          |
| Cardiovascular diseases         | 375,094.54<br>(336,419.29 to<br>417,013.09) | 289,363.19<br>(194,492.09 to<br>419,154.03) | 210,763.34<br>(144,004.96 to<br>301,691.86) | 441,031.96<br>(291,244.78 to<br>642,741.85) | 27,110.05<br>(24,610.87 to<br>29,795.77) | 26,937.72<br>(18,830.01 to<br>37,463.31) | 21,160.93<br>(14,753.07 to<br>29,428.75) | 36,322.91<br>(25,558.25 to<br>50,707.63) |
| Rheumatic heart disease         | 2,037.81<br>(1,749.62 to<br>2,370.87)       | 1,277.07<br>(904.49 to<br>1,819.19)         | 1,091.38<br>(788.86 to<br>1,525.29)         | 1,381.76<br>(975.46 to<br>1,993.98)         | 100.20<br>(87.09 to<br>115.98)           | 81.78<br>(59.44 to<br>111.08)            | 72.93<br>(53.69 to<br>99.01)             | 84.41<br>(61.24 to<br>116.26)            |
| Ischemic heart disease          | 247,433.65<br>(220,291.37 to<br>277,586.72) | 177,513.76<br>(105,385.50 to<br>277,955.12) | 121,285.76<br>(72,270.45 to<br>187,039.01)  | 286,903.99<br>(168,511.49 to<br>458,873.57) | 18,855.38<br>(17,047.14 to<br>20,733.89) | 17,149.34<br>(10,546.28 to<br>25,944.82) | 12,783.23<br>(7,781.61 to<br>19,368.39)  | 24,212.57<br>(15,461.48 to<br>36,028.48) |
| Stroke                          | 75,051.56<br>(65,676.34 to<br>84,831.16)    | 44,299.60<br>(27,905.48 to<br>69,845.15)    | 30,818.92<br>(19,790.58 to<br>46,743.70)    | 73,162.16<br>(45,366.85 to<br>116,392.76)   | 5,056.11<br>(4,455.90 to<br>5,672.64)    | 4,042.99<br>(2,528.85 to<br>6,554.62)    | 3,064.26<br>(1,982.18 to<br>4,785.67)    | 5,730.13<br>(3,564.60 to<br>8,739.73)    |
| Ischemic stroke                 | 44,753.39<br>(39,073.76 to<br>50,483.35)    | 26,192.99<br>(15,144.85 to<br>45,536.03)    | 19,314.10<br>(11,626.62 to<br>32,730.19)    | 39,412.01<br>(22,353.18 to<br>65,465.08)    | 3,377.90<br>(2,971.94 to<br>3,793.37)    | 2,635.87<br>(1,514.64 to<br>4,739.05)    | 2,084.09<br>(1,250.10 to<br>3,612.20)    | 3,500.60<br>(2,037.63 to<br>6,100.23)    |

|                                |                                          |                                          |                                         |                                          |                                       |                                     |                                     |                                       |
|--------------------------------|------------------------------------------|------------------------------------------|-----------------------------------------|------------------------------------------|---------------------------------------|-------------------------------------|-------------------------------------|---------------------------------------|
| Intracerebral hemorrhage       | 30,298.17<br>(26,191.92 to<br>34,957.95) | 18,106.61<br>(10,410.06 to<br>30,156.48) | 11,504.82<br>(7,075.64 to<br>18,271.43) | 33,750.15<br>(18,526.45 to<br>56,323.69) | 1,678.22<br>(1,459.74 to<br>1,911.04) | 1,407.12<br>(849.56 to<br>2,225.57) | 980.17<br>(615.37 to<br>1,465.71)   | 2,229.53<br>(1,270.90 to<br>3,535.07) |
| Hypertensive heart disease     | 12,658.12<br>(9,889.77 to<br>15,682.09)  | 19,496.46<br>(10,223.10 to<br>44,567.76) | 16,815.03<br>(9,251.91 to<br>37,805.53) | 26,534.68<br>(13,386.36 to<br>66,296.81) | 899.32<br>(712.82 to<br>1,112.72)     | 1,854.05<br>(969.62 to<br>4,619.28) | 1,696.09<br>(929.18 to<br>4,005.02) | 2,349.15<br>(1,169.78 to<br>5,994.69) |
| Cardiomyopathy and myocarditis | 10,599.77<br>(8,776.79 to<br>12,666.73)  | 8,011.85<br>(5,470.27 to<br>11,927.57)   | 7,222.64<br>(5,022.32 to<br>11,293.01)  | 8,761.03<br>(6,166.14 to<br>12,618.14)   | 491.55<br>(390.17 to<br>722.02)       | 572.45<br>(355.56 to<br>1,069.79)   | 560.40<br>(345.76 to<br>1,086.79)   | 567.65<br>(354.41 to<br>1,027.19)     |
| Myocarditis                    | 1,651.04<br>(1,140.35 to<br>2,604.24)    | 2,724.67<br>(1,791.82 to<br>4,695.91)    | 2,877.39<br>(1,881.32 to<br>5,129.41)   | 2,456.82<br>(1,614.03 to<br>4,149.65)    | 106.01<br>(69.22 to<br>187.53)        | 245.94<br>(147.54 to<br>471.90)     | 276.53<br>(167.90 to<br>531.88)     | 207.80<br>(122.26 to<br>398.62)       |



| Slovakia                                                      |                                                               |                                                               |                                                               |                                                               |                                                            |                                                            |                                                            |                                                            |
|---------------------------------------------------------------|---------------------------------------------------------------|---------------------------------------------------------------|---------------------------------------------------------------|---------------------------------------------------------------|------------------------------------------------------------|------------------------------------------------------------|------------------------------------------------------------|------------------------------------------------------------|
| Cause                                                         | YLLs (actual counts)                                          |                                                               |                                                               |                                                               | Deaths (actual counts)                                     |                                                            |                                                            |                                                            |
|                                                               | 2016                                                          | 2040 Forecast                                                 | 2040 Better Scenario                                          | 2040 Worse Scenario                                           | 2016                                                       | 2040 Forecast                                              | 2040 Better Scenario                                       | 2040 Worse Scenario                                        |
| Alcoholic cardiomyopathy                                      | 2,414.70<br>(629.12 to<br>3,621.23)                           | 1,330.10<br>(324.22 to<br>2,126.30)                           | 1,149.07<br>(282.51 to<br>1,847.74)                           | 1,772.79<br>(461.00 to<br>2,830.96)                           | 86.51<br>(24.75 to<br>128.28)                              | 57.24<br>(16.48 to<br>90.28)                               | 50.88<br>(14.60 to<br>80.03)                               | 73.47<br>(21.58 to<br>114.09)                              |
| Other cardiomyopathy                                          | 6,534.03<br>(5,074.65 to<br>8,739.05)                         | 3,957.08<br>(1,982.66 to<br>7,330.05)                         | 3,196.18<br>(1,643.22 to<br>6,275.68)                         | 4,531.43<br>(2,271.39 to<br>8,160.81)                         | 299.02<br>(204.62 to<br>531.42)                            | 269.28<br>(112.10 to<br>646.53)                            | 232.99<br>(92.80 to<br>586.01)                             | 286.39<br>(123.26 to<br>667.05)                            |
| Atrial fibrillation and flutter                               | 2,919.81<br>(2,245.74 to<br>3,689.68)                         | 5,605.91<br>(4,074.33 to<br>7,250.87)                         | 5,552.53<br>(4,036.37 to<br>7,249.88)                         | 5,717.81<br>(4,172.19 to<br>7,438.75)                         | 302.82<br>(232.79 to<br>387.02)                            | 672.47<br>(486.18 to<br>888.49)                            | 692.21<br>(507.88 to<br>911.14)                            | 649.94<br>(470.45 to<br>869.88)                            |
| Aortic aneurysm                                               | 5,585.36<br>(3,045.61 to<br>4,194.87)                         | 3,076.65<br>(2,263.49 to<br>4,117.94)                         | 2,855.73<br>(2,128.18 to<br>3,782.54)                         | 3,419.81<br>(2,489.83 to<br>4,637.22)                         | 176.01<br>(151.91 to<br>204.09)                            | 208.71<br>(162.85 to<br>264.82)                            | 206.25<br>(159.51 to<br>263.27)                            | 210.86<br>(162.81 to<br>265.86)                            |
| Peripheral artery disease                                     | 784.05<br>(273.50 to<br>1,094.10)                             | 1,181.24<br>(380.29 to<br>1,894.63)                           | 1,187.91<br>(390.93 to<br>1,898.15)                           | 1,247.22<br>(390.34 to<br>2,004.06)                           | 56.16<br>(21.24 to<br>76.80)                               | 108.83<br>(38.00 to<br>170.12)                             | 115.74<br>(41.64 to<br>181.56)                             | 104.68<br>(35.81 to<br>164.68)                             |
| Endocarditis                                                  | 1,214.69<br>(940.83 to<br>1,502.60)                           | 1,640.97<br>(1,089.51 to<br>2,310.70)                         | 1,603.89<br>(1,075.04 to<br>2,272.25)                         | 1,688.00<br>(1,107.06 to<br>2,361.97)                         | 54.27<br>(43.03 to<br>65.72)                               | 98.98<br>(66.53 to<br>139.98)                              | 101.44<br>(68.31 to<br>142.73)                             | 95.77<br>(64.46 to<br>135.85)                              |
| Other cardiovascular and circulatory diseases                 | 18,809.72<br>(15,010.37 to<br>28,599.10)                      | 27,259.68<br>(17,656.94 to<br>43,541.36)                      | 22,329.54<br>(14,978.48 to<br>36,157.06)                      | 32,215.51<br>(20,662.90 to<br>51,248.85)                      | 1,118.24<br>(889.40 to<br>1,672.73)                        | 2,148.11<br>(1,451.20 to<br>3,285.20)                      | 1,868.37<br>(1,273.30 to<br>2,923.39)                      | 2,317.75<br>(1,568.91 to<br>3,643.39)                      |
| <b>Chronic respiratory diseases</b>                           | <b>17,807.52</b><br><b>(15,586.80 to</b><br><b>20,191.19)</b> | <b>19,127.29</b><br><b>(13,768.73 to</b><br><b>26,235.76)</b> | <b>15,876.25</b><br><b>(11,800.37 to</b><br><b>21,120.17)</b> | <b>29,685.35</b><br><b>(20,413.11 to</b><br><b>42,693.27)</b> | <b>1,093.65</b><br><b>(968.12 to</b><br><b>1,260.74)</b>   | <b>1,479.44</b><br><b>(1,100.86 to</b><br><b>1,960.59)</b> | <b>1,304.93</b><br><b>(1,003.14 to</b><br><b>1,683.39)</b> | <b>2,177.08</b><br><b>(1,551.68 to</b><br><b>3,051.88)</b> |
| Chronic obstructive pulmonary disease                         | 15,162.14<br>(13,257.64 to<br>17,298.52)                      | 15,873.30<br>(10,618.26 to<br>23,001.15)                      | 12,163.53<br>(8,310.07 to<br>17,429.99)                       | 26,624.06<br>(17,122.17 to<br>39,648.88)                      | 961.37<br>(845.23 to<br>1,107.10)                          | 1,272.30<br>(900.87 to<br>1,763.28)                        | 1,062.40<br>(764.18 to<br>1,463.12)                        | 1,988.85<br>(1,364.74 to<br>2,852.20)                      |
| Pneumoconiosis                                                | 125.27<br>(98.80 to<br>156.94)                                | 107.02<br>(79.56 to<br>142.75)                                | 103.65<br>(75.27 to<br>143.20)                                | 110.23<br>(81.43 to<br>148.77)                                | 7.28<br>(5.81 to<br>8.95)                                  | 8.39<br>(6.01 to<br>12.11)                                 | 8.51<br>(5.91 to<br>12.73)                                 | 8.22<br>(5.80 to<br>11.62)                                 |
| Silicosis                                                     | 69.91<br>(51.67 to<br>91.52)                                  | 31.13<br>(16.54 to<br>53.55)                                  | 23.21<br>(12.87 to<br>39.88)                                  | 35.13<br>(18.48 to<br>59.74)                                  | 4.33<br>(3.20 to<br>5.52)                                  | 2.42<br>(1.26 to<br>4.20)                                  | 1.87<br>(1.00 to<br>3.20)                                  | 2.61<br>(1.37 to<br>4.44)                                  |
| Asbestosis                                                    | 10.84<br>(8.42 to<br>14.80)                                   | 18.79<br>(12.56 to<br>31.22)                                  | 21.44<br>(14.38 to<br>36.96)                                  | 16.70<br>(11.22 to<br>28.15)                                  | 0.45<br>(0.33 to<br>0.73)                                  | 1.13<br>(0.64 to<br>2.52)                                  | 1.34<br>(0.75 to<br>3.00)                                  | 0.96<br>(0.54 to<br>2.14)                                  |
| Coal workers pneumoconiosis                                   | 13.52<br>(4.78 to<br>20.76)                                   | 10.34<br>(5.32 to<br>16.85)                                   | 9.03<br>(4.80 to<br>15.15)                                    | 11.49<br>(5.89 to<br>19.52)                                   | 0.68<br>(0.25 to<br>1.03)                                  | 0.73<br>(0.38 to<br>1.26)                                  | 0.68<br>(0.35 to<br>1.32)                                  | 0.76<br>(0.40 to<br>1.32)                                  |
| Other pneumoconiosis                                          | 31.01<br>(24.50 to<br>39.91)                                  | 46.76<br>(30.74 to<br>73.59)                                  | 49.96<br>(31.39 to<br>78.58)                                  | 46.90<br>(31.80 to<br>72.30)                                  | 1.83<br>(1.43 to<br>2.32)                                  | 4.11<br>(2.50 to<br>6.85)                                  | 4.61<br>(2.66 to<br>7.99)                                  | 3.89<br>(2.42 to<br>6.47)                                  |
| Asthma                                                        | 932.88<br>(768.60 to<br>1,187.37)                             | 444.61<br>(223.13 to<br>901.21)                               | 335.29<br>(169.96 to<br>637.70)                               | 636.20<br>(293.61 to<br>1,274.27)                             | 51.42<br>(42.43 to<br>66.10)                               | 35.01<br>(17.48 to<br>68.94)                               | 28.02<br>(13.78 to<br>53.75)                               | 45.87<br>(20.78 to<br>90.92)                               |
| Interstitial lung disease and pulmonary sarcoidosis           | 1,380.63<br>(966.27 to<br>1,717.74)                           | 2,465.05<br>(1,767.92 to<br>3,171.73)                         | 3,036.88<br>(2,362.19 to<br>3,804.36)                         | 2,069.25<br>(1,445.96 to<br>2,794.62)                         | 65.32<br>(50.16 to<br>82.96)                               | 150.49<br>(108.84 to<br>211.77)                            | 191.73<br>(146.44 to<br>263.63)                            | 121.00<br>(86.61 to<br>173.40)                             |
| Other chronic respiratory diseases                            | 206.60<br>(146.35 to<br>346.31)                               | 237.32<br>(148.48 to<br>421.53)                               | 236.90<br>(147.75 to<br>417.51)                               | 245.61<br>(152.07 to<br>442.69)                               | 8.25<br>(5.73 to<br>13.94)                                 | 13.48<br>(8.56 to<br>23.65)                                | 14.27<br>(9.00 to<br>24.42)                                | 13.13<br>(8.22 to<br>23.18)                                |
| <b>Cirrhosis and other chronic liver diseases</b>             | <b>46,272.47</b><br><b>(36,845.99 to</b><br><b>54,819.64)</b> | <b>37,049.07</b><br><b>(28,724.37 to</b><br><b>46,858.48)</b> | <b>31,728.48</b><br><b>(24,563.00 to</b><br><b>40,168.71)</b> | <b>44,514.41</b><br><b>(34,157.07 to</b><br><b>57,220.76)</b> | <b>1,600.99</b><br><b>(1,295.20 to</b><br><b>1,877.95)</b> | <b>1,477.59</b><br><b>(1,186.79 to</b><br><b>1,818.09)</b> | <b>1,289.94</b><br><b>(1,037.95 to</b><br><b>1,595.47)</b> | <b>1,728.41</b><br><b>(1,362.39 to</b><br><b>2,148.78)</b> |
| Cirrhosis and other chronic liver diseases due to hepatitis B | 8,380.52<br>(6,121.99 to<br>10,699.55)                        | 7,133.41<br>(4,951.74 to<br>9,752.70)                         | 6,431.35<br>(4,607.53 to<br>8,750.43)                         | 7,457.05<br>(5,150.97 to<br>10,149.37)                        | 285.72<br>(213.39 to<br>366.17)                            | 279.22<br>(202.93 to<br>373.08)                            | 256.15<br>(190.53 to<br>345.03)                            | 284.94<br>(206.50 to<br>381.72)                            |
| Cirrhosis and other chronic liver diseases due to hepatitis C | 12,249.80<br>(8,000.38 to<br>17,191.83)                       | 10,693.82<br>(6,753.32 to<br>15,562.32)                       | 9,542.90<br>(6,200.09 to<br>13,626.78)                        | 11,288.61<br>(7,128.38 to<br>16,595.21)                       | 419.01<br>(281.38 to<br>584.89)                            | 413.98<br>(271.71 to<br>585.97)                            | 375.25<br>(250.31 to<br>523.61)                            | 427.62<br>(279.34 to<br>620.10)                            |

|                                                                |                                                               |                                                               |                                                               |                                                               |                                                            |                                                            |                                                            |                                                            |
|----------------------------------------------------------------|---------------------------------------------------------------|---------------------------------------------------------------|---------------------------------------------------------------|---------------------------------------------------------------|------------------------------------------------------------|------------------------------------------------------------|------------------------------------------------------------|------------------------------------------------------------|
|                                                                | 16,883.49<br>(12,405.45 to<br>21,403.72)                      | 11,913.23<br>(8,272.38 to<br>16,454.61)                       | 9,184.92<br>(6,498.42 to<br>12,841.41)                        | 18,085.83<br>(12,873.73 to<br>24,299.47)                      | 591.62<br>(443.23 to<br>747.10)                            | 484.82<br>(347.23 to<br>647.92)                            | 383.75<br>(273.76 to<br>515.32)                            | 708.85<br>(518.08 to<br>924.71)                            |
| Cirrhosis and other chronic liver diseases due to alcohol use  |                                                               |                                                               |                                                               |                                                               |                                                            |                                                            |                                                            |                                                            |
|                                                                | 8,758.65<br>(6,931.79 to<br>10,781.08)                        | 7,308.62<br>(5,412.36 to<br>9,543.19)                         | 6,569.32<br>(4,923.53 to<br>8,653.44)                         | 7,682.92<br>(5,580.01 to<br>10,038.37)                        | 304.65<br>(242.39 to<br>375.31)                            | 299.56<br>(229.59 to<br>385.86)                            | 274.80<br>(208.26 to<br>354.11)                            | 307.01<br>(230.22 to<br>394.25)                            |
| Cirrhosis and other chronic liver diseases due to other causes |                                                               |                                                               |                                                               |                                                               |                                                            |                                                            |                                                            |                                                            |
|                                                                | <b>21,996.03</b><br><b>(18,840.39 to</b><br><b>25,559.50)</b> | <b>22,624.20</b><br><b>(17,726.72 to</b><br><b>29,678.22)</b> | <b>20,724.79</b><br><b>(16,333.07 to</b><br><b>26,226.86)</b> | <b>24,674.38</b><br><b>(18,723.41 to</b><br><b>32,478.02)</b> | <b>1,191.12</b><br><b>(1,020.03 to</b><br><b>1,363.66)</b> | <b>1,672.56</b><br><b>(1,339.67 to</b><br><b>2,060.69)</b> | <b>1,618.13</b><br><b>(1,304.21 to</b><br><b>1,972.92)</b> | <b>1,703.60</b><br><b>(1,330.20 to</b><br><b>2,151.27)</b> |
| Digestive diseases                                             |                                                               |                                                               |                                                               |                                                               |                                                            |                                                            |                                                            |                                                            |
|                                                                | 4,846.29<br>(3,934.63 to<br>5,764.00)                         | 2,809.81<br>(2,014.41 to<br>3,835.59)                         | 2,293.72<br>(1,721.07 to<br>3,045.81)                         | 3,247.35<br>(2,320.47 to<br>4,475.51)                         | 264.96<br>(215.66 to<br>309.42)                            | 212.21<br>(156.39 to<br>285.29)                            | 181.16<br>(136.58 to<br>238.37)                            | 227.93<br>(165.74 to<br>306.59)                            |
| Peptic ulcer disease                                           |                                                               |                                                               |                                                               |                                                               |                                                            |                                                            |                                                            |                                                            |

| Slovakia                                   |                                       |                                       |                                       |                                       |                                    |                                    |                                    |                                    |
|--------------------------------------------|---------------------------------------|---------------------------------------|---------------------------------------|---------------------------------------|------------------------------------|------------------------------------|------------------------------------|------------------------------------|
| Cause                                      | YLLs (actual counts)                  |                                       |                                       |                                       | Deaths (actual counts)             |                                    |                                    |                                    |
|                                            | 2016                                  | 2040 Forecast                         | 2040 Better Scenario                  | 2040 Worse Scenario                   | 2016                               | 2040 Forecast                      | 2040 Better Scenario               | 2040 Worse Scenario                |
| Gastritis and duodenitis                   | 416.20<br>(335.72 to 511.92)          | 381.22<br>(285.81 to 494.94)          | 341.70<br>(260.26 to 435.02)          | 389.41<br>(296.45 to 498.83)          | 22.69<br>(18.64 to 27.24)          | 28.51<br>(21.34 to 36.75)          | 26.92<br>(20.42 to 34.79)          | 27.46<br>(20.88 to 35.12)          |
| Appendicitis                               | 263.66<br>(205.40 to 316.96)          | 244.56<br>(168.29 to 328.87)          | 205.03<br>(146.03 to 269.71)          | 261.08<br>(180.22 to 358.21)          | 14.44<br>(10.75 to 17.42)          | 18.02<br>(11.94 to 24.55)          | 15.78<br>(10.82 to 21.04)          | 18.28<br>(12.30 to 25.23)          |
| Paralytic ileus and intestinal obstruction | 3,608.04<br>(2,502.85 to 4,403.37)    | 5,165.44<br>(3,471.17 to 6,373.45)    | 5,416.89<br>(3,616.89 to 6,753.05)    | 4,732.83<br>(3,137.87 to 5,803.10)    | 220.69<br>(147.05 to 271.35)       | 422.92<br>(271.75 to 523.16)       | 462.63<br>(299.65 to 576.36)       | 368.79<br>(235.49 to 463.53)       |
| Inguinal, femoral, and abdominal hernia    | 619.46<br>(452.16 to 1,008.38)        | 570.54<br>(406.63 to 939.36)          | 542.74<br>(381.42 to 906.67)          | 556.46<br>(397.58 to 922.12)          | 40.67<br>(29.75 to 66.11)          | 48.95<br>(34.48 to 79.53)          | 48.89<br>(34.66 to 80.71)          | 45.20<br>(31.06 to 73.77)          |
| Inflammatory bowel disease                 | 1,325.39<br>(945.11 to 1,650.34)      | 1,329.64<br>(949.24 to 1,668.23)      | 1,348.87<br>(974.58 to 1,698.39)      | 1,265.71<br>(898.18 to 1,584.92)      | 63.11<br>(44.13 to 77.44)          | 86.87<br>(61.50 to 107.83)         | 92.33<br>(65.88 to 115.41)         | 78.41<br>(54.18 to 97.10)          |
| Vascular intestinal disorders              | 1,499.24<br>(1,129.69 to 1,784.51)    | 2,109.52<br>(1,517.50 to 2,613.74)    | 2,086.27<br>(1,518.07 to 2,591.26)    | 2,009.87<br>(1,456.07 to 2,454.56)    | 102.38<br>(73.16 to 122.94)        | 179.06<br>(124.44 to 223.17)       | 184.31<br>(128.68 to 233.07)       | 163.42<br>(114.88 to 204.05)       |
| Gallbladder and biliary diseases           | 2,079.02<br>(1,729.07 to 2,610.07)    | 2,815.18<br>(1,447.67 to 5,075.50)    | 2,383.53<br>(1,242.90 to 4,404.49)    | 3,619.18<br>(1,800.37 to 6,633.36)    | 145.60<br>(122.06 to 175.99)       | 253.67<br>(131.62 to 459.45)       | 225.95<br>(116.77 to 412.75)       | 306.70<br>(152.66 to 563.60)       |
| Pancreatitis                               | 5,489.12<br>(4,365.76 to 6,612.96)    | 5,096.19<br>(2,697.84 to 10,119.42)   | 4,062.88<br>(2,156.25 to 7,807.48)    | 6,545.15<br>(3,242.08 to 13,185.66)   | 219.30<br>(175.71 to 263.56)       | 272.27<br>(154.26 to 498.13)       | 227.04<br>(130.53 to 407.24)       | 328.94<br>(175.69 to 605.25)       |
| Other digestive diseases                   | 1,849.61<br>(1,490.27 to 2,206.08)    | 2,102.10<br>(1,662.99 to 2,584.97)    | 2,043.17<br>(1,630.01 to 2,538.41)    | 2,047.36<br>(1,653.30 to 2,498.12)    | 97.29<br>(80.12 to 115.66)         | 150.08<br>(121.02 to 184.61)       | 153.11<br>(123.00 to 192.09)       | 138.46<br>(111.25 to 169.43)       |
| Neurological disorders                     | 34,152.36<br>(29,267.21 to 40,130.84) | 63,403.21<br>(50,172.44 to 81,639.88) | 67,006.30<br>(54,054.91 to 85,237.70) | 62,745.31<br>(48,044.63 to 83,990.56) | 2,857.96<br>(2,400.32 to 3,439.02) | 6,760.58<br>(5,185.03 to 8,842.95) | 7,475.62<br>(5,799.00 to 9,634.21) | 6,354.47<br>(4,562.81 to 8,856.30) |
| Alzheimer's disease and other dementias    | 21,396.94<br>(17,348.24 to 26,842.08) | 46,222.60<br>(33,766.30 to 64,255.77) | 49,213.10<br>(36,909.68 to 67,390.61) | 46,064.51<br>(32,151.86 to 67,010.95) | 2,358.76<br>(1,825.82 to 2,804.26) | 5,574.37<br>(4,051.74 to 7,650.61) | 6,160.24<br>(4,508.75 to 8,312.95) | 5,304.89<br>(3,583.13 to 7,741.92) |
| Parkinson's disease                        | 4,282.90<br>(3,124.65 to 5,562.48)    | 9,540.19<br>(7,040.47 to 12,499.63)   | 10,703.30<br>(7,936.55 to 13,810.24)  | 8,174.15<br>(5,981.32 to 10,657.07)   | 358.06<br>(264.32 to 466.29)       | 909.94<br>(671.31 to 1,202.83)     | 1,049.62<br>(787.56 to 1,358.58)   | 754.62<br>(547.34 to 1,000.09)     |
| Epilepsy                                   | 4,704.00<br>(3,972.30 to 5,610.45)    | 4,318.40<br>(2,760.79 to 6,591.45)    | 3,733.92<br>(2,422.96 to 5,783.82)    | 5,223.70<br>(3,231.15 to 8,159.65)    | 126.45<br>(107.44 to 150.14)       | 147.23<br>(98.37 to 218.66)        | 131.60<br>(89.79 to 197.78)        | 171.79<br>(110.85 to 261.98)       |
| Multiple sclerosis                         | 1,174.05<br>(785.84 to 1,439.83)      | 1,091.95<br>(697.07 to 1,453.25)      | 1,108.33<br>(709.71 to 1,463.32)      | 1,111.30<br>(699.02 to 1,481.88)      | 38.76<br>(26.04 to 47.61)          | 43.14<br>(29.05 to 55.83)          | 44.85<br>(30.11 to 58.01)          | 42.48<br>(27.82 to 55.30)          |
| Motor neuron disease                       | 570.32<br>(469.42 to 662.02)          | 570.95<br>(456.91 to 703.41)          | 573.26<br>(458.75 to 709.57)          | 555.87<br>(450.74 to 675.62)          | 21.02<br>(17.42 to 24.34)          | 24.75<br>(20.15 to 29.87)          | 25.34<br>(20.49 to 30.73)          | 23.50<br>(19.36 to 28.10)          |
| Other neurological disorders               | 2,024.15<br>(1,747.20 to 2,333.71)    | 1,659.12<br>(1,402.19 to 1,948.25)    | 1,674.39<br>(1,412.67 to 1,967.51)    | 1,615.78<br>(1,374.73 to 1,888.88)    | 54.91<br>(47.91 to 62.54)          | 61.14<br>(52.53 to 70.50)          | 63.97<br>(54.45 to 74.44)          | 57.18<br>(49.59 to 65.30)          |
| Mental disorders                           | 8,472.02<br>(6,040.46 to 10,688.13)   | 11,191.84<br>(8,121.68 to 14,670.25)  | 12,389.76<br>(9,122.89 to 15,810.49)  | 10,862.20<br>(7,832.28 to 14,090.69)  | 234.96<br>(170.30 to 296.53)       | 367.05<br>(279.51 to 473.43)       | 416.74<br>(322.10 to 524.25)       | 346.05<br>(258.66 to 447.81)       |
| Alcohol use disorders                      | 6,130.01<br>(3,863.64 to 8,154.26)    | 5,413.38<br>(3,170.67 to 7,849.59)    | 5,489.35<br>(3,212.71 to 7,992.67)    | 5,785.87<br>(3,434.94 to 8,269.51)    | 173.30<br>(112.94 to 232.50)       | 174.10<br>(104.07 to 250.30)       | 178.37<br>(108.14 to 254.80)       | 183.32<br>(111.44 to 260.82)       |
| Drug use disorders                         | 2,337.67<br>(1,816.57 to 2,937.99)    | 5,773.53<br>(4,342.72 to 7,504.24)    | 6,895.19<br>(5,356.37 to 8,722.31)    | 5,071.59<br>(3,766.45 to 6,465.17)    | 59.57<br>(47.19 to 72.71)          | 192.85<br>(146.75 to 245.61)       | 238.25<br>(189.03 to 297.54)       | 162.64<br>(123.99 to 208.50)       |
| Opioid use disorders                       | 1,364.85<br>(924.82 to 1,777.37)      | 1,761.00<br>(1,031.36 to 2,397.76)    | 1,862.10<br>(1,092.71 to 2,518.51)    | 1,679.83<br>(977.55 to 2,281.29)      | 31.20<br>(21.83 to 39.73)          | 49.32<br>(34.05 to 64.74)          | 53.33<br>(36.79 to 69.99)          | 45.77<br>(31.06 to 60.13)          |

|                           |                                   |                                       |                                       |                                       |                              |                                |                                 |                               |
|---------------------------|-----------------------------------|---------------------------------------|---------------------------------------|---------------------------------------|------------------------------|--------------------------------|---------------------------------|-------------------------------|
|                           | 59.71<br>(41.45 to<br>101.36)     | 248.26<br>(158.53 to<br>371.85)       | 293.30<br>(190.62 to<br>424.40)       | 218.09<br>(139.19 to<br>324.44)       | 1.76<br>(1.24 to<br>2.52)    | 8.76<br>(5.12 to<br>12.78)     | 10.54<br>(6.11 to<br>15.19)     | 7.50<br>(4.40 to<br>10.95)    |
| Cocaine use disorders     |                                   |                                       |                                       |                                       |                              |                                |                                 |                               |
|                           | 135.15<br>(79.85 to<br>300.76)    | 901.07<br>(548.89 to<br>1,518.61)     | 1,143.55<br>(745.70 to<br>1,845.96)   | 760.46<br>(447.34 to<br>1,332.30)     | 3.15<br>(2.08 to<br>6.16)    | 34.43<br>(16.01 to<br>36.96)   | 31.58<br>(21.68 to<br>45.44)    | 20.15<br>(12.59 to<br>30.75)  |
| Amphetamine use disorders |                                   |                                       |                                       |                                       |                              |                                |                                 |                               |
|                           | 777.97<br>(569.27 to<br>1,085.55) | 2,863.20<br>(1,943.94 to<br>3,931.07) | 3,596.24<br>(2,553.17 to<br>4,803.84) | 2,413.22<br>(1,617.93 to<br>3,312.18) | 23.46<br>(18.20 to<br>30.47) | 110.34<br>(76.77 to<br>148.95) | 142.81<br>(108.46 to<br>187.85) | 89.21<br>(64.63 to<br>120.84) |
| Other drug use disorders  |                                   |                                       |                                       |                                       |                              |                                |                                 |                               |
|                           | 4.34<br>(3.19 to<br>7.64)         | 4.93<br>(3.22 to<br>9.02)             | 5.22<br>(3.41 to<br>9.81)             | 4.73<br>(3.16 to<br>8.55)             | 0.09<br>(0.07 to<br>0.15)    | 0.10<br>(0.07 to<br>0.19)      | 0.11<br>(0.07 to<br>0.20)       | 0.10<br>(0.06 to<br>0.18)     |
| Eating disorders          |                                   |                                       |                                       |                                       |                              |                                |                                 |                               |

| Slovakia                                                   |                                              |                                              |                                              |                                              |                                           |                                           |                                           |                                           |
|------------------------------------------------------------|----------------------------------------------|----------------------------------------------|----------------------------------------------|----------------------------------------------|-------------------------------------------|-------------------------------------------|-------------------------------------------|-------------------------------------------|
| Cause                                                      | YLLs (actual counts)                         |                                              |                                              |                                              | Deaths (actual counts)                    |                                           |                                           |                                           |
|                                                            | 2016                                         | 2040 Forecast                                | 2040 Better Scenario                         | 2040 Worse Scenario                          | 2016                                      | 2040 Forecast                             | 2040 Better Scenario                      | 2040 Worse Scenario                       |
| <b>Diabetes, urogenital, blood, and endocrine diseases</b> | <b>32,406.00</b><br>(28,761.22 to 36,503.10) | <b>45,923.83</b><br>(33,967.04 to 61,676.62) | <b>38,441.88</b><br>(28,499.38 to 51,651.14) | <b>52,465.12</b><br>(38,173.87 to 70,625.71) | <b>1,851.15</b><br>(1,647.47 to 2,074.04) | <b>3,447.68</b><br>(2,584.96 to 4,583.47) | <b>3,017.39</b><br>(2,250.36 to 3,962.71) | <b>3,729.07</b><br>(2,765.96 to 4,905.74) |
| Diabetes mellitus                                          | 13,988.20<br>(12,182.26 to 16,046.50)        | 15,215.06<br>(9,217.86 to 24,485.57)         | 11,918.84<br>(7,325.65 to 18,752.38)         | 18,688.59<br>(10,750.58 to 30,208.80)        | 793.11<br>(693.05 to 900.53)              | 1,086.71<br>(684.66 to 1,664.91)          | 896.44<br>(570.89 to 1,360.33)            | 1,254.54<br>(769.67 to 1,932.54)          |
| Acute glomerulonephritis                                   | 30.40<br>(26.74 to 34.36)                    | 24.10<br>(17.33 to 33.26)                    | 21.22<br>(15.41 to 28.57)                    | 25.63<br>(18.57 to 34.91)                    | 0.76<br>(0.66 to 0.88)                    | 0.76<br>(0.54 to 1.09)                    | 0.70<br>(0.49 to 1.01)                    | 0.78<br>(0.55 to 1.11)                    |
| Chronic kidney disease                                     | 12,175.66<br>(10,528.36 to 13,890.26)        | 21,718.66<br>(12,585.84 to 36,127.67)        | 17,932.20<br>(10,635.61 to 28,847.21)        | 24,949.63<br>(14,167.69 to 41,155.42)        | 725.39<br>(632.22 to 822.20)              | 1,700.12<br>(978.34 to 2,352.13)          | 1,466.15<br>(854.96 to 2,355.98)          | 1,856.39<br>(1,029.41 to 2,994.86)        |
| Chronic kidney disease due to diabetes mellitus            | 6,230.02<br>(5,360.48 to 7,279.60)           | 11,625.24<br>(6,507.84 to 19,605.90)         | 9,540.07<br>(5,608.55 to 15,642.74)          | 13,475.97<br>(7,439.04 to 22,716.92)         | 344.37<br>(297.10 to 395.31)              | 818.17<br>(453.91 to 1,350.72)            | 698.49<br>(405.13 to 1,149.42)            | 904.13<br>(496.14 to 1,527.94)            |
| Chronic kidney disease due to hypertension                 | 1,048.09<br>(864.25 to 1,267.45)             | 2,585.40<br>(1,447.80 to 4,247.12)           | 2,274.75<br>(1,294.40 to 3,731.81)           | 2,790.77<br>(1,539.72 to 4,598.53)           | 92.64<br>(74.33 to 113.40)                | 281.51<br>(154.38 to 465.50)              | 258.25<br>(143.15 to 423.99)              | 290.11<br>(156.73 to 480.07)              |
| Chronic kidney disease due to glomerulonephritis           | 1,621.09<br>(1,324.08 to 1,975.62)           | 2,312.11<br>(1,314.89 to 3,894.19)           | 1,847.07<br>(1,095.01 to 3,055.87)           | 2,716.86<br>(1,515.53 to 4,608.31)           | 89.30<br>(72.21 to 109.36)                | 175.14<br>(96.12 to 300.83)               | 145.29<br>(83.00 to 245.47)               | 196.81<br>(107.13 to 338.20)              |
| Chronic kidney disease due to other and unspecified causes | 3,276.46<br>(2,810.27 to 3,797.89)           | 5,195.91<br>(3,019.05 to 8,577.54)           | 4,270.31<br>(2,491.94 to 6,874.24)           | 5,966.03<br>(3,402.48 to 9,783.61)           | 199.09<br>(170.02 to 231.95)              | 425.30<br>(237.86 to 702.00)              | 364.12<br>(209.36 to 589.39)              | 465.34<br>(258.49 to 778.74)              |
| Urinary diseases and male infertility                      | 3,818.38<br>(3,330.09 to 4,370.06)           | 6,090.52<br>(4,866.04 to 7,501.98)           | 5,648.77<br>(4,559.79 to 6,931.35)           | 6,046.48<br>(4,865.61 to 7,488.54)           | 243.05<br>(213.15 to 278.97)              | 505.73<br>(401.44 to 625.36)              | 490.63<br>(395.52 to 602.45)              | 476.89<br>(378.42 to 591.31)              |
| Urinary tract infections                                   | 3,414.02<br>(2,986.07 to 3,911.28)           | 5,694.43<br>(4,472.63 to 6,927.92)           | 5,220.12<br>(4,222.07 to 6,467.24)           | 5,549.56<br>(4,498.59 to 6,882.51)           | 218.04<br>(190.63 to 250.64)              | 465.69<br>(367.48 to 577.91)              | 453.51<br>(365.51 to 561.22)              | 438.33<br>(342.80 to 547.16)              |
| Urolithiasis                                               | 146.61<br>(96.84 to 291.66)                  | 204.79<br>(115.44 to 433.32)                 | 179.81<br>(102.11 to 383.38)                 | 213.60<br>(120.77 to 446.74)                 | 8.99<br>(5.80 to 18.28)                   | 15.90<br>(8.56 to 33.93)                  | 14.62<br>(8.02 to 31.16)                  | 15.77<br>(8.59 to 33.04)                  |
| Other urinary diseases                                     | 257.75<br>(190.95 to 360.78)                 | 281.31<br>(186.89 to 431.03)                 | 248.84<br>(167.50 to 375.98)                 | 283.32<br>(188.97 to 428.70)                 | 16.02<br>(11.47 to 23.38)                 | 24.13<br>(15.26 to 37.54)                 | 22.50<br>(14.44 to 35.51)                 | 22.79<br>(14.29 to 35.57)                 |
| Gynecological diseases                                     | 8.08<br>(6.11 to 10.53)                      | 3.91<br>(2.35 to 6.42)                       | 2.89<br>(1.79 to 4.42)                       | 4.64<br>(2.69 to 7.33)                       | 0.34<br>(0.27 to 0.44)                    | 0.26<br>(0.16 to 0.40)                    | 0.20<br>(0.13 to 0.30)                    | 0.29<br>(0.17 to 0.44)                    |
| Uterine fibroids                                           | 0.70<br>(0.42 to 1.10)                       | 0.52<br>(0.24 to 1.06)                       | 0.41<br>(0.20 to 0.85)                       | 0.59<br>(0.28 to 1.23)                       | 0.02<br>(0.01 to 0.03)                    | 0.02<br>(0.01 to 0.04)                    | 0.02<br>(0.01 to 0.03)                    | 0.02<br>(0.01 to 0.05)                    |
| Polycystic ovarian syndrome                                | 1.09<br>(0.56 to 1.91)                       | 0.24<br>(0.07 to 0.63)                       | 0.14<br>(0.04 to 0.33)                       | 0.34<br>(0.10 to 0.87)                       | 0.03<br>(0.01 to 0.05)                    | 0.01<br>(0.00 to 0.02)                    | 0.00<br>(0.00 to 0.01)                    | 0.01<br>(0.00 to 0.02)                    |
| Endometriosis                                              | 0.36<br>(0.18 to 0.68)                       | 0.14<br>(0.05 to 0.34)                       | 0.10<br>(0.03 to 0.25)                       | 0.17<br>(0.05 to 0.40)                       | 0.01<br>(0.00 to 0.02)                    | 0.00<br>(0.00 to 0.01)                    | 0.00<br>(0.00 to 0.01)                    | 0.00<br>(0.00 to 0.01)                    |
| Genital prolapse                                           | 0.60<br>(0.37 to 1.18)                       | 0.26<br>(0.12 to 0.58)                       | 0.19<br>(0.10 to 0.42)                       | 0.31<br>(0.15 to 0.65)                       | 0.03<br>(0.02 to 0.06)                    | 0.02<br>(0.01 to 0.04)                    | 0.01<br>(0.01 to 0.03)                    | 0.02<br>(0.01 to 0.04)                    |
| Other gynecological diseases                               | 5.34<br>(3.91 to 6.93)                       | 2.75<br>(1.55 to 4.57)                       | 2.04<br>(1.21 to 3.25)                       | 3.23<br>(1.76 to 5.16)                       | 0.26<br>(0.19 to 0.33)                    | 0.21<br>(0.12 to 0.34)                    | 0.17<br>(0.10 to 0.25)                    | 0.23<br>(0.13 to 0.36)                    |
| Hemoglobinopathies and hemolytic anemias                   | 467.84<br>(341.96 to 556.37)                 | 378.33<br>(267.78 to 487.07)                 | 331.45<br>(243.56 to 407.38)                 | 392.71<br>(281.06 to 500.74)                 | 22.81<br>(16.78 to 26.90)                 | 29.04<br>(20.92 to 35.91)                 | 27.05<br>(20.44 to 33.12)                 | 28.22<br>(20.57 to 35.17)                 |
| Thalassemias                                               | 26.31<br>(18.38 to 36.82)                    | 6.27<br>(3.90 to 9.57)                       | 5.77<br>(3.66 to 8.76)                       | 6.48<br>(4.00 to 9.92)                       | 0.33<br>(0.23 to 0.46)                    | 0.08<br>(0.05 to 0.12)                    | 0.08<br>(0.05 to 0.11)                    | 0.08<br>(0.05 to 0.13)                    |

|                                                   |                                       |                                       |                                       |                                       |                              |                                |                                |                                |
|---------------------------------------------------|---------------------------------------|---------------------------------------|---------------------------------------|---------------------------------------|------------------------------|--------------------------------|--------------------------------|--------------------------------|
|                                                   | 48.15<br>(33.45 to<br>60.56)          | 26.92<br>(17.57 to<br>38.49)          | 22.07<br>(14.69 to<br>30.05)          | 30.31<br>(19.85 to<br>42.58)          | 1.05<br>(0.74 to<br>1.32)    | 0.75<br>(0.49 to<br>1.06)      | 0.62<br>(0.42 to<br>0.84)      | 0.83<br>(0.55 to<br>1.18)      |
| Sickle cell disorders                             |                                       |                                       |                                       |                                       |                              |                                |                                |                                |
|                                                   | 116.57<br>(76.14 to<br>150.57)        | 90.19<br>(55.62 to<br>130.02)         | 72.22<br>(45.76 to<br>99.22)          | 101.09<br>(62.28 to<br>145.58)        | 3.27<br>(2.11 to<br>4.29)    | 3.63<br>(2.29 to<br>5.13)      | 2.98<br>(1.97 to<br>4.06)      | 3.93<br>(2.52 to<br>5.50)      |
| G6PD deficiency                                   |                                       |                                       |                                       |                                       |                              |                                |                                |                                |
|                                                   | 276.82<br>(201.95 to<br>330.74)       | 254.96<br>(184.68 to<br>318.84)       | 231.39<br>(173.14 to<br>282.58)       | 254.83<br>(186.75 to<br>318.73)       | 18.15<br>(13.51 to<br>21.67) | 24.59<br>(17.71 to<br>30.56)   | 23.38<br>(17.51 to<br>28.74)   | 23.37<br>(16.81 to<br>29.55)   |
| Other hemoglobinopathies and hemolytic anemias    |                                       |                                       |                                       |                                       |                              |                                |                                |                                |
|                                                   | 1,917.43<br>(1,365.04 to<br>2,270.52) | 2,493.25<br>(1,793.05 to<br>2,996.36) | 2,586.51<br>(1,854.87 to<br>3,126.77) | 2,357.45<br>(1,689.34 to<br>2,829.13) | 65.69<br>(46.33 to<br>76.95) | 125.06<br>(88.50 to<br>149.50) | 136.21<br>(95.69 to<br>163.53) | 111.97<br>(78.06 to<br>134.29) |
| Endocrine, metabolic, blood, and immune disorders |                                       |                                       |                                       |                                       |                              |                                |                                |                                |

| Slovakia                                      |                                             |                                           |                                           |                                           |                                     |                                    |                                    |                                    |
|-----------------------------------------------|---------------------------------------------|-------------------------------------------|-------------------------------------------|-------------------------------------------|-------------------------------------|------------------------------------|------------------------------------|------------------------------------|
| Cause                                         | YLLs (actual counts)                        |                                           |                                           |                                           | Deaths (actual counts)              |                                    |                                    |                                    |
|                                               | 2016                                        | 2040 Forecast                             | 2040 Better Scenario                      | 2040 Worse Scenario                       | 2016                                | 2040 Forecast                      | 2040 Better Scenario               | 2040 Worse Scenario                |
| <b>Musculoskeletal disorders</b>              | <b>1,052.04</b><br>(616.54 to 1,295.30)     | <b>948.54</b><br>(562.50 to 1,217.49)     | <b>874.30</b><br>(528.35 to 1,101.41)     | <b>982.26</b><br>(574.34 to 1,264.48)     | <b>44.26</b><br>(27.15 to 54.31)    | <b>54.20</b><br>(33.23 to 68.76)   | <b>51.35</b><br>(32.52 to 64.26)   | <b>54.09</b><br>(32.78 to 68.69)   |
| Rheumatoid arthritis                          | 280.68<br>(184.80 to 388.03)                | 240.27<br>(153.65 to 356.55)              | 188.00<br>(123.72 to 277.40)              | 276.33<br>(176.83 to 415.48)              | 14.98<br>(9.59 to 20.16)            | 16.51<br>(10.17 to 24.22)          | 13.37<br>(8.46 to 19.69)           | 18.20<br>(11.26 to 26.87)          |
| Other musculoskeletal disorders               | 771.35<br>(407.14 to 964.65)                | 708.27<br>(389.60 to 908.93)              | 686.30<br>(394.30 to 884.13)              | 705.93<br>(380.86 to 919.04)              | 29.28<br>(16.24 to 36.30)           | 37.69<br>(21.66 to 47.35)          | 37.98<br>(22.77 to 48.17)          | 35.89<br>(20.16 to 45.59)          |
| <b>Other non-communicable diseases</b>        | <b>11,913.15</b><br>(8,687.52 to 16,174.03) | <b>4,973.68</b><br>(3,229.52 to 7,344.48) | <b>3,940.76</b><br>(2,636.43 to 5,607.28) | <b>5,705.16</b><br>(3,722.59 to 8,662.33) | <b>172.90</b><br>(125.68 to 230.43) | <b>127.04</b><br>(66.73 to 189.33) | <b>115.00</b><br>(57.45 to 170.93) | <b>131.12</b><br>(73.34 to 194.19) |
| Congenital birth defects                      | 10,219.46<br>(7,354.02 to 14,038.31)        | 3,737.41<br>(2,354.75 to 5,721.00)        | 2,795.18<br>(1,863.80 to 4,190.39)        | 4,456.20<br>(2,783.41 to 6,987.99)        | 131.63<br>(97.46 to 176.64)         | 53.20<br>(35.22 to 77.47)          | 41.10<br>(29.18 to 58.52)          | 62.44<br>(41.34 to 93.98)          |
| Neural tube defects                           | 159.13<br>(101.14 to 250.44)                | 25.96<br>(12.59 to 55.20)                 | 17.41<br>(8.93 to 35.32)                  | 33.03<br>(15.84 to 69.45)                 | 2.02<br>(1.33 to 3.09)              | 0.37<br>(0.20 to 0.72)             | 0.25<br>(0.14 to 0.47)             | 0.47<br>(0.25 to 0.91)             |
| Congenital heart anomalies                    | 4,481.14<br>(3,202.62 to 6,281.15)          | 1,202.86<br>(692.52 to 2,037.38)          | 783.83<br>(460.79 to 1,297.76)            | 1,550.29<br>(833.14 to 2,656.00)          | 16.93<br>(43.44 to 80.70)           | 16.93<br>(10.07 to 27.47)          | 11.19<br>(6.87 to 17.85)           | 21.67<br>(12.15 to 35.97)          |
| Orofacial clefts                              | 7.32<br>(3.82 to 15.41)                     | 1.93<br>(0.63 to 4.96)                    | 1.11<br>(0.39 to 2.63)                    | 2.71<br>(0.86 to 6.81)                    | 0.08<br>(0.04 to 0.18)              | 0.02<br>(0.01 to 0.06)             | 0.01<br>(0.00 to 0.03)             | 0.03<br>(0.01 to 0.08)             |
| Down syndrome                                 | 608.54<br>(418.17 to 868.11)                | 523.90<br>(372.89 to 734.80)              | 523.29<br>(378.06 to 722.75)              | 517.68<br>(364.85 to 727.86)              | 10.07<br>(7.27 to 13.82)            | 10.59<br>(7.70 to 14.61)           | 10.77<br>(8.03 to 14.65)           | 10.36<br>(7.54 to 14.31)           |
| Other chromosomal abnormalities               | 1,031.02<br>(460.71 to 1,664.13)            | 694.07<br>(327.12 to 1,166.48)            | 563.22<br>(274.98 to 925.01)              | 775.47<br>(363.66 to 1,303.46)            | 12.25<br>(5.53 to 19.67)            | 8.38<br>(4.02 to 13.97)            | 6.83<br>(3.41 to 11.07)            | 9.35<br>(4.49 to 15.53)            |
| Congenital musculoskeletal and limb anomalies | 426.88<br>(262.80 to 659.85)                | 153.92<br>(77.91 to 274.07)               | 107.36<br>(56.15 to 187.20)               | 189.41<br>(92.47 to 339.70)               | 5.14<br>(3.22 to 7.88)              | 1.93<br>(1.00 to 3.39)             | 1.35<br>(0.75 to 2.29)             | 2.36<br>(1.20 to 4.16)             |
| Urogenital congenital anomalies               | 289.34<br>(125.24 to 483.08)                | 104.57<br>(48.52 to 196.32)               | 77.21<br>(37.75 to 140.99)                | 124.08<br>(55.93 to 232.23)               | 3.74<br>(1.83 to 5.99)              | 1.56<br>(0.84 to 2.75)             | 1.18<br>(0.67 to 1.98)             | 1.83<br>(1.00 to 3.16)             |
| Digestive congenital anomalies                | 727.68<br>(438.70 to 1,147.05)              | 231.16<br>(105.54 to 447.07)              | 154.76<br>(73.88 to 293.43)               | 291.09<br>(133.49 to 580.57)              | 8.57<br>(5.18 to 13.45)             | 2.77<br>(1.30 to 5.33)             | 1.86<br>(0.92 to 3.50)             | 3.49<br>(1.63 to 6.86)             |
| Other congenital birth defects                | 2,488.41<br>(1,673.22 to 3,569.52)          | 799.03<br>(458.43 to 1,284.24)            | 566.99<br>(337.77 to 890.52)              | 972.44<br>(555.37 to 1,614.40)            | 30.94<br>(21.27 to 43.68)           | 10.64<br>(6.36 to 16.68)           | 7.65<br>(4.83 to 11.75)            | 12.87<br>(7.84 to 20.74)           |
| Skin and subcutaneous diseases                | 479.72<br>(161.68 to 708.55)                | 935.12<br>(278.47 to 1,502.09)            | 905.24<br>(272.38 to 1,466.15)            | 905.51<br>(273.16 to 1,454.90)            | 27.18<br>(7.69 to 42.29)            | 70.34<br>(18.61 to 116.18)         | 71.11<br>(18.75 to 117.67)         | 64.70<br>(17.16 to 106.66)         |
| Cellulitis                                    | 46.96<br>(17.41 to 68.00)                   | 136.50<br>(39.91 to 213.22)               | 139.46<br>(39.42 to 220.30)               | 127.65<br>(38.63 to 194.99)               | 2.32<br>(0.66 to 3.57)              | 9.59<br>(2.30 to 15.60)            | 10.23<br>(6.81 to 16.81)           | 8.49<br>(2.09 to 13.70)            |
| Pyoderma                                      | 275.71<br>(85.87 to 413.64)                 | 642.21<br>(174.58 to 1,047.97)            | 620.23<br>(165.22 to 1,021.05)            | 623.71<br>(168.74 to 1,013.18)            | 14.07<br>(3.75 to 22.14)            | 46.33<br>(11.23 to 77.29)          | 46.92<br>(11.26 to 78.71)          | 42.64<br>(10.40 to 71.80)          |
| Decubitus ulcer                               | 128.31<br>(33.26 to 207.33)                 | 120.71<br>(26.12 to 227.02)               | 111.38<br>(24.50 to 210.88)               | 119.09<br>(25.16 to 223.51)               | 9.65<br>(1.99 to 16.48)             | 12.05<br>(2.19 to 23.65)           | 11.55<br>(2.10 to 22.50)           | 11.39<br>(2.04 to 22.83)           |
| Other skin and subcutaneous diseases          | 28.74<br>(12.63 to 40.32)                   | 35.70<br>(13.47 to 54.86)                 | 34.17<br>(12.54 to 53.38)                 | 35.07<br>(13.19 to 53.85)                 | 1.14<br>(0.41 to 1.72)              | 2.38<br>(0.76 to 3.95)             | 2.41<br>(0.76 to 3.99)             | 2.18<br>(0.70 to 3.63)             |
| Sudden infant death syndrome                  | 1,213.97<br>(745.83 to 1,923.15)            | 301.15<br>(154.28 to 537.60)              | 240.35<br>(123.87 to 436.24)              | 343.45<br>(176.80 to 636.68)              | 14.09<br>(8.65 to 22.32)            | 3.49<br>(1.79 to 6.24)             | 2.79<br>(1.44 to 5.06)             | 3.98<br>(2.05 to 7.39)             |

|                          |                                           |                                          |                                          |                                           |                                       |                                       |                                       |                                       |
|--------------------------|-------------------------------------------|------------------------------------------|------------------------------------------|-------------------------------------------|---------------------------------------|---------------------------------------|---------------------------------------|---------------------------------------|
| Injuries                 | 92,281.98<br>(80,963.82 to<br>104,812.41) | 62,622.27<br>(49,132.90 to<br>79,343.86) | 50,285.76<br>(39,788.35 to<br>62,091.76) | 76,984.79<br>(59,208.17 to<br>100,176.58) | 2,776.24<br>(2,454.54 to<br>3,125.23) | 2,689.46<br>(2,224.45 to<br>3,237.03) | 2,357.45<br>(1,954.16 to<br>2,802.40) | 2,981.86<br>(2,419.99 to<br>3,646.06) |
| Transport injuries       | 23,077.74<br>(19,661.84 to<br>26,853.46)  | 12,561.13<br>(7,992.91 to<br>19,464.76)  | 6,444.12<br>(4,101.35 to<br>9,864.76)    | 20,991.27<br>(13,068.98 to<br>33,076.29)  | 575.33<br>(492.39 to<br>669.55)       | 402.36<br>(268.42 to<br>606.29)       | 229.50<br>(152.24 to<br>342.54)       | 617.57<br>(399.66 to<br>943.28)       |
| Road injuries            | 19,572.96<br>(16,567.37 to<br>23,168.21)  | 10,323.32<br>(6,640.68 to<br>15,640.61)  | 4,774.52<br>(3,091.05 to<br>7,234.73)    | 18,114.80<br>(11,314.62 to<br>27,992.19)  | 486.63<br>(414.85 to<br>575.10)       | 330.65<br>(224.03 to<br>492.88)       | 174.18<br>(119.58 to<br>253.87)       | 529.02<br>(346.64 to<br>794.77)       |
| Pedestrian road injuries | 4,734.53<br>(3,829.93 to<br>5,841.66)     | 1,874.60<br>(1,204.89 to<br>2,883.98)    | 814.85<br>(550.63 to<br>1,221.34)        | 3,310.42<br>(2,038.54 to<br>5,265.13)     | 145.31<br>(119.64 to<br>176.22)       | 82.11<br>(54.97 to<br>122.71)         | 40.09<br>(27.82 to<br>56.94)          | 132.52<br>(85.33 to<br>202.46)        |



| Slovakia                                        |                                                               |                                                               |                                                               |                                                               |                                                            |                                                            |                                                            |                                                            |
|-------------------------------------------------|---------------------------------------------------------------|---------------------------------------------------------------|---------------------------------------------------------------|---------------------------------------------------------------|------------------------------------------------------------|------------------------------------------------------------|------------------------------------------------------------|------------------------------------------------------------|
| Cause                                           | YLLs (actual counts)                                          |                                                               |                                                               |                                                               | Deaths (actual counts)                                     |                                                            |                                                            |                                                            |
|                                                 | 2016                                                          | 2040 Forecast                                                 | 2040 Better Scenario                                          | 2040 Worse Scenario                                           | 2016                                                       | 2040 Forecast                                              | 2040 Better Scenario                                       | 2040 Worse Scenario                                        |
| Cyclist road injuries                           | 1,793.07<br>(1,406.35 to<br>2,312.80)                         | 1,528.60<br>(892.44 to<br>2,659.83)                           | 883.28<br>(518.38 to<br>1,502.24)                             | 2,339.37<br>(1,323.48 to<br>4,131.83)                         | 51.08<br>(40.64 to<br>65.31)                               | 57.25<br>(34.04 to<br>96.02)                               | 37.63<br>(23.06 to<br>62.40)                               | 79.36<br>(45.88 to<br>137.30)                              |
| Motorcyclist road injuries                      | 1,938.06<br>(1,474.89 to<br>2,561.22)                         | 1,386.68<br>(726.07 to<br>2,521.06)                           | 858.21<br>(461.94 to<br>1,541.38)                             | 2,056.63<br>(1,054.57 to<br>3,707.06)                         | 38.94<br>(29.81 to<br>50.84)                               | 31.90<br>(17.74 to<br>56.40)                               | 21.45<br>(12.17 to<br>36.85)                               | 44.75<br>(23.89 to<br>79.25)                               |
| Motor vehicle road injuries                     | 10,994.93<br>(9,183.41 to<br>13,197.47)                       | 5,471.20<br>(3,524.43 to<br>8,161.10)                         | 2,190.55<br>(1,437.75 to<br>3,268.44)                         | 10,297.26<br>(6,555.32 to<br>15,725.55)                       | 248.70<br>(208.07 to<br>303.06)                            | 157.32<br>(106.37 to<br>228.15)                            | 73.84<br>(51.51 to<br>104.44)                              | 269.22<br>(176.76 to<br>398.39)                            |
| Other road injuries                             | 112.38<br>(85.99 to<br>139.72)                                | 62.24<br>(33.94 to<br>112.75)                                 | 27.65<br>(15.23 to<br>48.84)                                  | 111.13<br>(58.29 to<br>207.62)                                | 2.60<br>(2.11 to<br>3.28)                                  | 2.06<br>(1.14 to<br>3.75)                                  | 1.16<br>(0.65 to<br>2.00)                                  | 3.17<br>(1.69 to<br>5.95)                                  |
| Other transport injuries                        | 3,504.78<br>(2,798.71 to<br>4,197.57)                         | 2,237.81<br>(1,234.74 to<br>3,781.36)                         | 1,669.60<br>(975.11 to<br>2,701.69)                           | 2,876.46<br>(1,604.72 to<br>4,929.88)                         | 88.70<br>(71.44 to<br>105.35)                              | 71.71<br>(42.16 to<br>119.30)                              | 55.32<br>(34.00 to<br>88.71)                               | 88.55<br>(51.90 to<br>148.25)                              |
| <b>Unintentional injuries</b>                   | <b>36,968.22</b><br><b>(32,042.40 to</b><br><b>42,202.33)</b> | <b>28,168.37</b><br><b>(23,051.84 to</b><br><b>34,385.65)</b> | <b>25,533.17</b><br><b>(21,232.62 to</b><br><b>30,631.05)</b> | <b>29,286.06</b><br><b>(23,884.78 to</b><br><b>35,644.16)</b> | <b>1,343.38</b><br><b>(1,183.66 to</b><br><b>1,517.28)</b> | <b>1,564.92</b><br><b>(1,329.97 to</b><br><b>1,835.53)</b> | <b>1,504.76</b><br><b>(1,290.63 to</b><br><b>1,745.48)</b> | <b>1,516.34</b><br><b>(1,270.67 to</b><br><b>1,787.13)</b> |
| Falls                                           | 14,396.36<br>(12,052.45 to<br>16,740.84)                      | 15,285.52<br>(12,521.74 to<br>18,197.93)                      | 14,433.97<br>(12,067.88 to<br>17,226.38)                      | 15,167.34<br>(12,540.75 to<br>17,991.89)                      | 687.59<br>(590.21 to<br>783.19)                            | 1,052.53<br>(870.02 to<br>1,252.44)                        | 1,040.85<br>(875.75 to<br>1,231.83)                        | 984.49<br>(801.33 to<br>1,182.16)                          |
| Drowning                                        | 5,035.91<br>(4,345.28 to<br>5,881.95)                         | 2,648.42<br>(1,656.47 to<br>4,100.42)                         | 2,242.00<br>(1,432.82 to<br>3,412.08)                         | 3,031.83<br>(1,868.01 to<br>4,790.38)                         | 125.92<br>(108.93 to<br>145.28)                            | 86.37<br>(57.26 to<br>129.78)                              | 75.58<br>(50.83 to<br>111.12)                              | 95.26<br>(61.16 to<br>146.79)                              |
| Fire, heat, and hot substances                  | 1,575.93<br>(1,252.83 to<br>1,846.75)                         | 862.61<br>(565.79 to<br>1,239.27)                             | 703.77<br>(471.79 to<br>979.05)                               | 992.38<br>(636.67 to<br>1,476.00)                             | 56.64<br>(45.50 to<br>65.73)                               | 46.15<br>(31.61 to<br>63.77)                               | 40.04<br>(28.77 to<br>53.65)                               | 49.56<br>(33.88 to<br>70.25)                               |
| Poisonings                                      | 756.72<br>(599.39 to<br>1,102.12)                             | 295.76<br>(175.31 to<br>514.06)                               | 223.86<br>(140.08 to<br>382.22)                               | 362.02<br>(204.32 to<br>627.36)                               | 20.78<br>(16.39 to<br>31.02)                               | 11.58<br>(7.03 to<br>20.77)                                | 9.28<br>(5.89 to<br>16.04)                                 | 13.35<br>(7.73 to<br>23.22)                                |
| Exposure to mechanical forces                   | 4,168.19<br>(3,487.67 to<br>4,918.60)                         | 2,120.78<br>(1,627.18 to<br>2,797.77)                         | 1,785.16<br>(1,408.09 to<br>2,298.07)                         | 2,327.77<br>(1,786.51 to<br>3,076.08)                         | 112.97<br>(94.08 to<br>133.32)                             | 79.11<br>(61.30 to<br>100.55)                              | 70.22<br>(55.81 to<br>86.11)                               | 82.13<br>(63.63 to<br>103.34)                              |
| Unintentional firearm injuries                  | 1,138.36<br>(784.75 to<br>1,418.85)                           | 535.16<br>(334.43 to<br>722.61)                               | 469.44<br>(300.82 to<br>623.51)                               | 570.83<br>(353.05 to<br>774.18)                               | 33.73<br>(21.93 to<br>41.65)                               | 23.07<br>(12.79 to<br>30.07)                               | 21.61<br>(12.07 to<br>27.80)                               | 23.00<br>(13.00 to<br>29.78)                               |
| Unintentional suffocation                       | 350.61<br>(278.11 to<br>486.03)                               | 176.22<br>(131.37 to<br>241.38)                               | 149.59<br>(113.15 to<br>202.59)                               | 193.47<br>(141.69 to<br>269.13)                               | 6.68<br>(5.43 to<br>8.23)                                  | 4.18<br>(3.13 to<br>5.41)                                  | 3.70<br>(2.82 to<br>4.78)                                  | 4.41<br>(3.33 to<br>5.72)                                  |
| Other exposure to mechanical forces             | 2,679.22<br>(2,209.69 to<br>3,251.27)                         | 1,409.40<br>(1,045.67 to<br>1,898.50)                         | 1,166.12<br>(895.71 to<br>1,511.34)                           | 1,563.47<br>(1,175.52 to<br>2,079.41)                         | 72.56<br>(60.57 to<br>87.09)                               | 51.86<br>(39.87 to<br>67.07)                               | 44.91<br>(35.88 to<br>55.29)                               | 54.72<br>(42.05 to<br>70.19)                               |
| Adverse effects of medical treatment            | 1,618.66<br>(1,213.53 to<br>1,934.17)                         | 1,434.61<br>(1,071.28 to<br>1,768.44)                         | 1,352.96<br>(1,017.52 to<br>1,661.72)                         | 1,441.08<br>(1,078.25 to<br>1,767.03)                         | 63.66<br>(48.17 to<br>74.82)                               | 78.44<br>(60.89 to<br>95.13)                               | 77.52<br>(59.96 to<br>94.11)                               | 74.51<br>(57.07 to<br>89.94)                               |
| Animal contact                                  | 345.08<br>(286.74 to<br>412.40)                               | 304.17<br>(233.12 to<br>389.61)                               | 268.71<br>(207.96 to<br>344.38)                               | 322.99<br>(247.09 to<br>418.27)                               | 10.49<br>(8.77 to<br>12.45)                                | 12.43<br>(9.78 to<br>15.37)                                | 11.53<br>(9.25 to<br>14.51)                                | 12.49<br>(9.92 to<br>15.81)                                |
| Venomous animal contact                         | 197.76<br>(158.03 to<br>238.82)                               | 164.05<br>(123.00 to<br>211.54)                               | 150.29<br>(114.08 to<br>194.55)                               | 170.03<br>(125.79 to<br>221.47)                               | 6.07<br>(4.90 to<br>7.28)                                  | 6.98<br>(5.30 to<br>8.91)                                  | 6.72<br>(5.21 to<br>8.52)                                  | 6.82<br>(5.17 to<br>8.67)                                  |
| Non-venomous animal contact                     | 147.32<br>(116.47 to<br>183.13)                               | 140.12<br>(99.55 to<br>192.97)                                | 118.43<br>(86.46 to<br>163.26)                                | 152.97<br>(105.39 to<br>216.19)                               | 4.43<br>(3.53 to<br>5.52)                                  | 5.45<br>(4.01 to<br>7.56)                                  | 4.81<br>(3.59 to<br>6.63)                                  | 5.67<br>(4.15 to<br>7.78)                                  |
| Foreign body                                    | 3,797.78<br>(3,105.79 to<br>4,565.24)                         | 2,719.47<br>(2,209.51 to<br>3,254.95)                         | 2,579.51<br>(2,099.11 to<br>3,157.29)                         | 2,761.27<br>(2,211.86 to<br>3,379.00)                         | 107.21<br>(88.69 to<br>129.90)                             | 104.63<br>(87.62 to<br>126.86)                             | 104.53<br>(87.91 to<br>126.81)                             | 100.69<br>(84.05 to<br>120.97)                             |
| Pulmonary aspiration and foreign body in airway | 3,528.40<br>(2,924.06 to<br>4,359.94)                         | 2,504.65<br>(2,030.54 to<br>3,159.32)                         | 2,352.96<br>(1,934.21 to<br>2,945.65)                         | 2,557.70<br>(2,054.44 to<br>3,185.43)                         | 98.91<br>(83.17 to<br>121.11)                              | 94.85<br>(79.46 to<br>119.47)                              | 93.66<br>(78.48 to<br>119.66)                              | 91.94<br>(77.13 to<br>115.36)                              |

|                                             |                                                               |                                                               |                                                               |                                                               |                                                        |                                                        |                                                      |                                                        |
|---------------------------------------------|---------------------------------------------------------------|---------------------------------------------------------------|---------------------------------------------------------------|---------------------------------------------------------------|--------------------------------------------------------|--------------------------------------------------------|------------------------------------------------------|--------------------------------------------------------|
|                                             | 269.38<br>(112.30 to<br>361.07)                               | 214.82<br>(92.52 to<br>292.79)                                | 226.55<br>(98.89 to<br>307.38)                                | 203.57<br>(86.13 to<br>274.34)                                | 8.30<br>(3.52 to<br>11.05)                             | 9.79<br>(4.36 to<br>12.94)                             | 10.87<br>(4.83 to<br>14.30)                          | 8.74<br>(3.73 to<br>11.56)                             |
| Foreign body in other body part             |                                                               |                                                               |                                                               |                                                               |                                                        |                                                        |                                                      |                                                        |
|                                             | 2,775.94<br>(1,331.40 to<br>3,678.00)                         | 1,797.73<br>(831.24 to<br>2,643.03)                           | 1,465.03<br>(698.90 to<br>2,057.45)                           | 2,007.83<br>(901.40 to<br>2,968.26)                           | 88.67<br>(44.11 to<br>116.19)                          | 67.66<br>(33.77 to<br>96.56)                           | 56.60<br>(29.99 to<br>76.83)                         | 73.18<br>(36.06 to<br>103.35)                          |
| Environmental heat and cold exposure        |                                                               |                                                               |                                                               |                                                               |                                                        |                                                        |                                                      |                                                        |
|                                             | 2,497.65<br>(2,041.31 to<br>3,027.07)                         | 699.31<br>(432.96 to<br>1,135.83)                             | 478.19<br>(326.38 to<br>711.93)                               | 871.55<br>(538.44 to<br>1,363.11)                             | 69.45<br>(54.51 to<br>83.65)                           | 26.01<br>(16.29 to<br>40.63)                           | 18.62<br>(12.59 to<br>26.85)                         | 30.69<br>(19.15 to<br>47.30)                           |
| Other unintentional injuries                |                                                               |                                                               |                                                               |                                                               |                                                        |                                                        |                                                      |                                                        |
| <b>Self-harm and interpersonal violence</b> | <b>32,209.67</b><br><b>(26,854.06 to</b><br><b>38,531.74)</b> | <b>21,877.42</b><br><b>(14,030.11 to</b><br><b>32,600.33)</b> | <b>18,293.06</b><br><b>(11,801.06 to</b><br><b>26,548.06)</b> | <b>26,692.30</b><br><b>(16,514.66 to</b><br><b>40,167.40)</b> | <b>856.97</b><br><b>(714.98 to</b><br><b>1,022.52)</b> | <b>721.78</b><br><b>(473.23 to</b><br><b>1,063.30)</b> | <b>622.77</b><br><b>(412.34 to</b><br><b>906.47)</b> | <b>847.56</b><br><b>(538.36 to</b><br><b>1,252.38)</b> |

| Slovakia                                                                            |                                         |                                        |                                        |                                        |                                      |                                      |                                      |                                      |
|-------------------------------------------------------------------------------------|-----------------------------------------|----------------------------------------|----------------------------------------|----------------------------------------|--------------------------------------|--------------------------------------|--------------------------------------|--------------------------------------|
| Cause                                                                               | YLLs (actual counts)                    |                                        |                                        |                                        | Deaths (actual counts)               |                                      |                                      |                                      |
|                                                                                     | 2016                                    | 2040 Forecast                          | 2040 Better Scenario                   | 2040 Worse Scenario                    | 2016                                 | 2040 Forecast                        | 2040 Better Scenario                 | 2040 Worse Scenario                  |
| Self-harm                                                                           | 26,507.51<br>(21,176.77 to 31,906.91)   | 19,080.12<br>(11,409.06 to 29,465.97)  | 15,925.50<br>(9,807.08 to 24,146.44)   | 23,476.84<br>(13,581.14 to 36,849.69)  | 713.89<br>(585.93 to 860.76)         | 632.96<br>(392.43 to 977.06)         | 545.54<br>(341.73 to 823.62)         | 748.24<br>(444.19 to 1,153.35)       |
| Self-harm by firearm                                                                | 1,924.33<br>(1,194.31 to 2,730.37)      | 963.60<br>(472.19 to 1,733.06)         | 751.05<br>(380.21 to 1,304.85)         | 1,243.93<br>(586.80 to 2,231.25)       | 49.89<br>(31.28 to 71.37)            | 30.69<br>(15.71 to 54.22)            | 24.67<br>(13.03 to 42.64)            | 38.09<br>(19.02 to 70.22)            |
| Self-harm by other specified means                                                  | 24,583.18<br>(19,779.60 to 29,619.19)   | 18,116.52<br>(10,879.50 to 27,822.63)  | 15,174.46<br>(9,273.23 to 23,060.71)   | 22,232.91<br>(12,936.77 to 34,741.94)  | 664.00<br>(541.87 to 798.31)         | 602.27<br>(376.64 to 933.77)         | 520.87<br>(328.14 to 790.36)         | 710.15<br>(422.57 to 1,096.62)       |
| Interpersonal violence                                                              | 5,702.16<br>(4,655.68 to 7,477.09)      | 2,797.30<br>(1,850.33 to 4,217.60)     | 2,367.55<br>(1,621.67 to 3,533.50)     | 3,215.47<br>(2,130.24 to 4,831.46)     | 143.08<br>(117.61 to 186.34)         | 88.82<br>(60.56 to 130.77)           | 77.22<br>(53.99 to 111.97)           | 99.32<br>(66.87 to 146.62)           |
| Physical violence by firearm                                                        | 1,068.48<br>(730.67 to 1,823.04)        | 392.34<br>(246.69 to 680.21)           | 318.55<br>(209.48 to 535.31)           | 447.81<br>(279.39 to 780.74)           | 23.56<br>(16.47 to 39.88)            | 10.13<br>(6.36 to 17.02)             | 8.38<br>(5.65 to 13.99)              | 11.36<br>(7.14 to 18.64)             |
| Physical violence by sharp object                                                   | 1,512.65<br>(1,172.37 to 2,205.03)      | 688.06<br>(482.79 to 985.20)           | 576.13<br>(412.24 to 848.90)           | 766.69<br>(523.86 to 1,142.62)         | 37.86<br>(29.09 to 52.77)            | 21.48<br>(15.15 to 30.49)            | 18.51<br>(13.45 to 26.75)            | 23.24<br>(16.19 to 33.79)            |
| Physical violence by other means                                                    | 3,121.03<br>(2,425.88 to 4,077.66)      | 1,716.90<br>(1,019.64 to 2,814.36)     | 1,472.88<br>(893.40 to 2,382.87)       | 2,000.97<br>(1,173.99 to 3,336.75)     | 81.65<br>(64.73 to 104.71)           | 57.21<br>(34.66 to 91.18)            | 50.34<br>(31.42 to 80.12)            | 64.73<br>(38.83 to 106.15)           |
| <b>Forces of nature, conflict and terrorism, and executions and police conflict</b> | <b>26.35</b><br><b>(23.41 to 29.28)</b> | <b>15.35</b><br><b>(0.00 to 79.39)</b> | <b>15.42</b><br><b>(0.00 to 80.70)</b> | <b>15.16</b><br><b>(0.00 to 76.85)</b> | <b>0.56</b><br><b>(0.49 to 0.62)</b> | <b>0.41</b><br><b>(0.00 to 2.36)</b> | <b>0.42</b><br><b>(0.00 to 2.49)</b> | <b>0.40</b><br><b>(0.00 to 2.14)</b> |
| Exposure to forces of nature                                                        | 0.00<br>(0.00 to 0.00)                  | 14.87<br>(0.00 to 79.39)               | 14.94<br>(0.00 to 80.70)               | 14.68<br>(0.00 to 76.85)               | 0.00<br>(0.00 to 0.00)               | 0.40<br>(0.00 to 2.36)               | 0.41<br>(0.00 to 2.49)               | 0.39<br>(0.00 to 2.14)               |
| Conflict and terrorism                                                              | 0.00<br>(0.00 to 0.00)                  | 0.48<br>(0.00 to 8.74)                 | 0.48<br>(0.00 to 8.73)                 | 0.47<br>(0.00 to 8.68)                 | 0.00<br>(0.00 to 0.00)               | 0.00<br>(0.00 to 0.23)               | 0.01<br>(0.00 to 0.23)               | 0.01<br>(0.00 to 0.21)               |
| Executions and police conflict                                                      | 26.35<br>(23.41 to 29.28)               | 0.00<br>(0.00 to 0.00)                 | 0.00<br>(0.00 to 0.00)                 | 0.00<br>(0.00 to 0.00)                 | 0.56<br>(0.49 to 0.62)               | 0.00<br>(0.00 to 0.00)               | 0.00<br>(0.00 to 0.00)               | 0.00<br>(0.00 to 0.00)               |

| Slovenia                                                          |                                             |                                             |                                             |                                             |                                          |                                          |                                          |                                          |
|-------------------------------------------------------------------|---------------------------------------------|---------------------------------------------|---------------------------------------------|---------------------------------------------|------------------------------------------|------------------------------------------|------------------------------------------|------------------------------------------|
| Cause                                                             | YLLs (actual counts)                        |                                             |                                             |                                             | Deaths (actual counts)                   |                                          |                                          |                                          |
|                                                                   | 2016                                        | 2040 Forecast                               | 2040 Better Scenario                        | 2040 Worse Scenario                         | 2016                                     | 2040 Forecast                            | 2040 Better Scenario                     | 2040 Worse Scenario                      |
| All causes                                                        | 298,696.78<br>(261,059.69 to<br>334,061.52) | 280,901.35<br>(236,612.86 to<br>332,244.36) | 242,322.85<br>(204,419.30 to<br>283,312.67) | 354,727.93<br>(290,048.72 to<br>422,615.91) | 20,640.19<br>(18,501.25 to<br>22,662.87) | 24,601.91<br>(21,854.88 to<br>28,008.42) | 22,031.45<br>(19,646.26 to<br>24,942.75) | 29,187.46<br>(25,549.83 to<br>33,495.36) |
| Communicable, maternal, neonatal, and nutritional diseases        | 8,951.38<br>(7,847.51 to<br>10,102.63)      | 10,058.98<br>(7,327.64 to<br>13,914.44)     | 8,720.73<br>(6,449.62 to<br>11,830.56)      | 12,378.05<br>(8,494.41 to<br>17,889.21)     | 695.89<br>(596.60 to<br>804.19)          | 1,130.42<br>(831.78 to<br>1,554.72)      | 1,044.57<br>(780.35 to<br>1,396.08)      | 1,288.74<br>(900.89 to<br>1,832.22)      |
| HIV/AIDS and tuberculosis                                         | 323.83<br>(278.29 to<br>380.84)             | 150.87<br>(91.56 to<br>242.35)              | 100.47<br>(65.02 to<br>155.28)              | 250.12<br>(157.00 to<br>408.16)             | 16.02<br>(13.49 to<br>18.86)             | 10.30<br>(6.15 to<br>16.75)              | 7.30<br>(4.69 to<br>11.14)               | 15.81<br>(9.23 to<br>26.42)              |
| Tuberculosis                                                      | 253.50<br>(209.95 to<br>312.08)             | 120.59<br>(65.89 to<br>208.04)              | 81.32<br>(47.87 to<br>136.05)               | 193.77<br>(101.95 to<br>355.00)             | 14.40<br>(11.93 to<br>17.18)             | 9.69<br>(5.80 to<br>16.25)               | 6.90<br>(4.26 to<br>10.77)               | 14.67<br>(8.10 to<br>25.28)              |
| HIV/AIDS                                                          | 70.33<br>(62.74 to<br>78.98)                | 30.28<br>(17.15 to<br>44.64)                | 19.15<br>(10.86 to<br>29.92)                | 56.34<br>(35.35 to<br>78.13)                | 1.62<br>(1.45 to<br>1.81)                | 0.61<br>(0.32 to<br>0.95)                | 0.39<br>(0.21 to<br>0.65)                | 1.14<br>(0.66 to<br>1.67)                |
| Diarrhea, lower respiratory, and other common infectious diseases | 6,527.80<br>(5,554.52 to<br>7,550.44)       | 8,810.59<br>(6,222.14 to<br>12,477.70)      | 7,722.01<br>(5,536.87 to<br>10,783.30)      | 10,908.53<br>(7,115.57 to<br>16,397.90)     | 645.27<br>(549.35 to<br>749.90)          | 1,089.66<br>(793.33 to<br>1,513.59)      | 1,008.35<br>(745.09 to<br>1,356.62)      | 1,242.23<br>(856.28 to<br>1,780.89)      |
| Diarrheal diseases                                                | 93.04<br>(80.54 to<br>106.10)               | 295.64<br>(86.06 to<br>780.51)              | 318.39<br>(118.97 to<br>752.43)             | 234.87<br>(67.43 to<br>622.73)              | 6.55<br>(5.62 to<br>7.55)                | 33.31<br>(9.98 to<br>89.84)              | 37.73<br>(14.41 to<br>88.40)             | 25.11<br>(7.41 to<br>68.20)              |
| Intestinal infectious diseases                                    | 4.03<br>(1.34 to<br>9.42)                   | 2.26<br>(0.73 to<br>5.40)                   | 2.27<br>(0.73 to<br>5.47)                   | 2.27<br>(0.73 to<br>5.44)                   | 0.12<br>(0.04 to<br>0.28)                | 0.09<br>(0.03 to<br>0.21)                | 0.09<br>(0.03 to<br>0.21)                | 0.09<br>(0.03 to<br>0.20)                |
| Typhoid fever                                                     | 1.43<br>(0.46 to<br>3.40)                   | 1.03<br>(0.32 to<br>2.45)                   | 1.20<br>(0.39 to<br>2.85)                   | 0.94<br>(0.29 to<br>2.19)                   | 0.04<br>(0.01 to<br>0.10)                | 0.04<br>(0.01 to<br>0.09)                | 0.05<br>(0.02 to<br>0.11)                | 0.03<br>(0.01 to<br>0.08)                |
| Paratyphoid fever                                                 | 2.53<br>(0.75 to<br>6.46)                   | 1.18<br>(0.33 to<br>3.00)                   | 1.02<br>(0.28 to<br>2.69)                   | 1.28<br>(0.36 to<br>3.32)                   | 0.08<br>(0.02 to<br>0.19)                | 0.04<br>(0.01 to<br>0.11)                | 0.04<br>(0.01 to<br>0.10)                | 0.05<br>(0.01 to<br>0.12)                |
| Other intestinal infectious diseases                              | 0.06<br>(0.02 to<br>0.13)                   | 0.05<br>(0.02 to<br>0.11)                   | 0.05<br>(0.02 to<br>0.11)                   | 0.05<br>(0.02 to<br>0.10)                   | 0.00<br>(0.00 to<br>0.01)                | 0.01<br>(0.00 to<br>0.01)                | 0.01<br>(0.00 to<br>0.01)                | 0.00<br>(0.00 to<br>0.01)                |
| Lower respiratory infections                                      | 6,101.10<br>(5,160.13 to<br>7,090.14)       | 8,285.15<br>(5,652.07 to<br>11,937.21)      | 7,191.65<br>(5,089.09 to<br>10,159.52)      | 10,427.53<br>(6,694.99 to<br>15,889.33)     | 626.70<br>(532.63 to<br>730.80)          | 1,046.05<br>(751.25 to<br>1,470.98)      | 960.72<br>(699.81 to<br>1,302.76)        | 1,206.74<br>(829.81 to<br>1,745.85)      |
| Upper respiratory infections                                      | 3.74<br>(1.94 to<br>6.40)                   | 2.60<br>(1.03 to<br>5.30)                   | 1.96<br>(0.79 to<br>4.06)                   | 2.99<br>(1.23 to<br>5.95)                   | 0.19<br>(0.09 to<br>0.34)                | 0.20<br>(0.07 to<br>0.45)                | 0.16<br>(0.05 to<br>0.36)                | 0.22<br>(0.08 to<br>0.50)                |
| Otitis media                                                      | 0.26<br>(0.16 to<br>0.43)                   | 0.04<br>(0.01 to<br>0.10)                   | 0.04<br>(0.01 to<br>0.10)                   | 0.04<br>(0.01 to<br>0.10)                   | 0.01<br>(0.01 to<br>0.01)                | 0.00<br>(0.00 to<br>0.01)                | 0.00<br>(0.00 to<br>0.01)                | 0.00<br>(0.00 to<br>0.01)                |
| Meningitis                                                        | 183.83<br>(156.08 to<br>221.29)             | 86.70<br>(63.44 to<br>116.03)               | 75.13<br>(56.34 to<br>99.72)                | 98.02<br>(69.47 to<br>136.84)               | 6.78<br>(5.71 to<br>8.04)                | 4.00<br>(3.19 to<br>4.98)                | 3.66<br>(2.87 to<br>4.54)                | 4.17<br>(3.31 to<br>5.26)                |
| Pneumococcal meningitis                                           | 27.48<br>(20.68 to<br>36.40)                | 15.88<br>(10.79 to<br>22.14)                | 16.15<br>(10.86 to<br>22.42)                | 15.68<br>(10.74 to<br>21.63)                | 1.03<br>(0.76 to<br>1.35)                | 0.80<br>(0.55 to<br>1.09)                | 0.84<br>(0.57 to<br>1.14)                | 0.76<br>(0.53 to<br>1.05)                |
| H influenzae type B meningitis                                    | 26.94<br>(22.65 to<br>31.66)                | 25.93<br>(15.77 to<br>46.11)                | 22.45<br>(14.85 to<br>35.42)                | 32.35<br>(17.02 to<br>62.85)                | 0.98<br>(0.82 to<br>1.17)                | 0.84<br>(0.65 to<br>1.12)                | 0.84<br>(0.66 to<br>1.07)                | 0.88<br>(0.65 to<br>1.26)                |
| Meningococcal meningitis                                          | 51.17<br>(43.63 to<br>61.60)                | 16.80<br>(12.16 to<br>23.13)                | 13.82<br>(10.01 to<br>18.99)                | 18.60<br>(13.10 to<br>25.52)                | 1.74<br>(1.46 to<br>2.08)                | 0.85<br>(0.64 to<br>1.11)                | 0.72<br>(0.56 to<br>0.94)                | 0.90<br>(0.68 to<br>1.19)                |
| Other meningitis                                                  | 78.24<br>(65.52 to<br>93.53)                | 28.10<br>(19.91 to<br>39.00)                | 22.71<br>(16.18 to<br>30.50)                | 31.38<br>(21.95 to<br>44.18)                | 3.03<br>(2.51 to<br>3.61)                | 1.51<br>(1.12 to<br>2.02)                | 1.26<br>(1.64 to<br>1.64)                | 1.63<br>(1.20 to<br>2.21)                |
| Encephalitis                                                      | 134.26<br>(99.38 to<br>178.62)              | 122.51<br>(75.78 to<br>163.14)              | 120.40<br>(74.31 to<br>162.08)              | 122.37<br>(76.29 to<br>163.01)              | 4.35<br>(2.68 to<br>5.54)                | 5.32<br>(2.86 to<br>7.39)                | 5.36<br>(2.87 to<br>7.46)                | 5.17<br>(2.78 to<br>7.12)                |

|                |                           |                             |                            |                             |                           |                           |                           |                           |
|----------------|---------------------------|-----------------------------|----------------------------|-----------------------------|---------------------------|---------------------------|---------------------------|---------------------------|
| Diphtheria     | 0.43<br>(0.27 to<br>0.67) | 0.08<br>(0.04 to<br>0.14)   | 0.07<br>(0.04 to<br>0.13)  | 0.09<br>(0.05 to<br>0.17)   | 0.01<br>(0.01 to<br>0.02) | 0.00<br>(0.00 to<br>0.00) | 0.00<br>(0.00 to<br>0.00) | 0.00<br>(0.00 to<br>0.00) |
| Whooping cough | 0.77<br>(0.21 to<br>1.42) | 0.24<br>(0.04 to<br>0.75)   | 0.07<br>(0.02 to<br>0.16)  | 0.55<br>(0.05 to<br>1.85)   | 0.01<br>(0.00 to<br>0.02) | 0.00<br>(0.00 to<br>0.01) | 0.00<br>(0.00 to<br>0.00) | 0.01<br>(0.00 to<br>0.02) |
| Tetanus        | 2.21<br>(1.49 to<br>2.90) | 0.15<br>(0.09 to<br>0.22)   | 0.15<br>(0.08 to<br>0.22)  | 0.18<br>(0.10 to<br>0.26)   | 0.11<br>(0.08 to<br>0.16) | 0.01<br>(0.00 to<br>0.01) | 0.01<br>(0.00 to<br>0.01) | 0.01<br>(0.00 to<br>0.01) |
| Measles        | 0.14<br>(0.11 to<br>0.17) | 11.72<br>(0.05 to<br>63.18) | 8.63<br>(0.04 to<br>42.97) | 16.15<br>(0.06 to<br>87.76) | 0.00<br>(0.00 to<br>0.00) | 0.20<br>(0.00 to<br>1.18) | 0.15<br>(0.00 to<br>0.88) | 0.26<br>(0.00 to<br>1.65) |

| Slovenia                                              |                                  |                                  |                                  |                                  |                               |                               |                               |                               |
|-------------------------------------------------------|----------------------------------|----------------------------------|----------------------------------|----------------------------------|-------------------------------|-------------------------------|-------------------------------|-------------------------------|
| Cause                                                 | YLLs (actual counts)             |                                  |                                  |                                  | Deaths (actual counts)        |                               |                               |                               |
|                                                       | 2016                             | 2040 Forecast                    | 2040 Better Scenario             | 2040 Worse Scenario              | 2016                          | 2040 Forecast                 | 2040 Better Scenario          | 2040 Worse Scenario           |
| Varicella and herpes zoster                           | 4.00<br>(1.60 to 5.78)           | 3.50<br>(1.32 to 5.31)           | 3.26<br>(1.22 to 4.93)           | 3.48<br>(1.32 to 5.36)           | 0.43<br>(0.13 to 0.65)        | 0.48<br>(0.15 to 0.79)        | 0.47<br>(0.15 to 0.74)        | 0.46<br>(0.15 to 0.75)        |
| <b>Neglected tropical diseases and malaria</b>        | <b>13.36</b><br>(11.72 to 15.17) | <b>10.02</b><br>(7.93 to 12.34)  | <b>9.75</b><br>(7.70 to 12.22)   | <b>10.14</b><br>(8.09 to 12.46)  | <b>0.42</b><br>(0.36 to 0.48) | <b>0.41</b><br>(0.35 to 0.47) | <b>0.40</b><br>(0.34 to 0.47) | <b>0.40</b><br>(0.34 to 0.46) |
| Malaria                                               | 0.00<br>(0.00 to 0.00)           | 0.00<br>(0.00 to 0.00)           | 0.00<br>(0.00 to 0.00)           | 0.00<br>(0.00 to 0.00)           | 0.00<br>(0.00 to 0.00)        | 0.00<br>(0.00 to 0.00)        | 0.00<br>(0.00 to 0.00)        | 0.00<br>(0.00 to 0.00)        |
| Chagas disease                                        | 0.00<br>(0.00 to 0.00)           | 0.00<br>(0.00 to 0.00)           | 0.00<br>(0.00 to 0.00)           | 0.00<br>(0.00 to 0.00)           | 0.00<br>(0.00 to 0.00)        | 0.00<br>(0.00 to 0.00)        | 0.00<br>(0.00 to 0.00)        | 0.00<br>(0.00 to 0.00)        |
| Leishmaniasis                                         | 0.00<br>(0.00 to 0.00)           | 0.00<br>(0.00 to 0.00)           | 0.00<br>(0.00 to 0.00)           | 0.00<br>(0.00 to 0.00)           | 0.00<br>(0.00 to 0.00)        | 0.00<br>(0.00 to 0.00)        | 0.00<br>(0.00 to 0.00)        | 0.00<br>(0.00 to 0.00)        |
| African trypanosomiasis                               | 0.00<br>(0.00 to 0.00)           | 0.00<br>(0.00 to 0.00)           | 0.00<br>(0.00 to 0.00)           | 0.00<br>(0.00 to 0.00)           | 0.00<br>(0.00 to 0.00)        | 0.00<br>(0.00 to 0.00)        | 0.00<br>(0.00 to 0.00)        | 0.00<br>(0.00 to 0.00)        |
| Schistosomiasis                                       | 0.00<br>(0.00 to 0.00)           | 0.00<br>(0.00 to 0.00)           | 0.00<br>(0.00 to 0.00)           | 0.00<br>(0.00 to 0.00)           | 0.00<br>(0.00 to 0.00)        | 0.00<br>(0.00 to 0.00)        | 0.00<br>(0.00 to 0.00)        | 0.00<br>(0.00 to 0.00)        |
| Cysticercosis                                         | 0.68<br>(0.53 to 0.85)           | 0.20<br>(0.15 to 0.26)           | 0.20<br>(0.15 to 0.26)           | 0.20<br>(0.15 to 0.26)           | 0.02<br>(0.02 to 0.03)        | 0.01<br>(0.01 to 0.01)        | 0.01<br>(0.01 to 0.01)        | 0.01<br>(0.01 to 0.01)        |
| Cystic echinococcosis                                 | 3.74<br>(3.05 to 4.58)           | 2.46<br>(1.88 to 3.18)           | 2.14<br>(1.66 to 2.68)           | 2.61<br>(2.02 to 3.31)           | 0.18<br>(0.15 to 0.21)        | 0.17<br>(0.14 to 0.21)        | 0.16<br>(0.13 to 0.19)        | 0.17<br>(0.14 to 0.22)        |
| Dengue                                                | 0.00<br>(0.00 to 0.00)           | 0.00<br>(0.00 to 0.00)           | 0.00<br>(0.00 to 0.00)           | 0.00<br>(0.00 to 0.00)           | 0.00<br>(0.00 to 0.00)        | 0.00<br>(0.00 to 0.00)        | 0.00<br>(0.00 to 0.00)        | 0.00<br>(0.00 to 0.00)        |
| Yellow fever                                          | 0.00<br>(0.00 to 0.00)           | 0.00<br>(0.00 to 0.00)           | 0.00<br>(0.00 to 0.00)           | 0.00<br>(0.00 to 0.00)           | 0.00<br>(0.00 to 0.00)        | 0.00<br>(0.00 to 0.00)        | 0.00<br>(0.00 to 0.00)        | 0.00<br>(0.00 to 0.00)        |
| Rabies                                                | 0.06<br>(0.05 to 0.08)           | 0.04<br>(0.03 to 0.06)           | 0.04<br>(0.03 to 0.05)           | 0.05<br>(0.04 to 0.06)           | 0.00<br>(0.00 to 0.00)        | 0.00<br>(0.00 to 0.00)        | 0.00<br>(0.00 to 0.00)        | 0.00<br>(0.00 to 0.00)        |
| Intestinal nematode infections                        | 0.00<br>(0.00 to 0.00)           | 0.00<br>(0.00 to 0.00)           | 0.00<br>(0.00 to 0.00)           | 0.00<br>(0.00 to 0.00)           | 0.00<br>(0.00 to 0.00)        | 0.00<br>(0.00 to 0.00)        | 0.00<br>(0.00 to 0.00)        | 0.00<br>(0.00 to 0.00)        |
| Other neglected tropical diseases                     | 8.88<br>(7.80 to 9.99)           | 7.32<br>(5.64 to 9.25)           | 7.37<br>(5.70 to 9.35)           | 7.29<br>(5.68 to 9.12)           | 0.21<br>(0.18 to 0.24)        | 0.22<br>(0.19 to 0.26)        | 0.23<br>(0.19 to 0.28)        | 0.21<br>(0.18 to 0.25)        |
| <b>Maternal disorders</b>                             | <b>68.06</b><br>(53.09 to 85.50) | <b>29.75</b><br>(18.04 to 43.82) | <b>25.91</b><br>(15.66 to 38.05) | <b>32.61</b><br>(20.11 to 48.50) | <b>1.27</b><br>(0.99 to 1.59) | <b>0.55</b><br>(0.34 to 0.80) | <b>0.48</b><br>(0.30 to 0.69) | <b>0.60</b><br>(0.37 to 0.88) |
| Maternal hemorrhage                                   | 16.19<br>(11.01 to 22.28)        | 6.23<br>(3.34 to 10.49)          | 5.45<br>(2.87 to 9.24)           | 6.81<br>(3.65 to 11.40)          | 0.30<br>(0.20 to 0.41)        | 0.12<br>(0.06 to 0.19)        | 0.10<br>(0.06 to 0.17)        | 0.13<br>(0.07 to 0.21)        |
| Maternal sepsis and other maternal infections         | 0.77<br>(0.36 to 1.37)           | 0.30<br>(0.12 to 0.62)           | 0.26<br>(0.11 to 0.53)           | 0.33<br>(0.14 to 0.67)           | 0.01<br>(0.01 to 0.03)        | 0.01<br>(0.00 to 0.01)        | 0.00<br>(0.00 to 0.01)        | 0.01<br>(0.00 to 0.01)        |
| Maternal hypertensive disorders                       | 7.56<br>(5.11 to 10.91)          | 3.12<br>(1.56 to 5.38)           | 2.69<br>(1.36 to 4.65)           | 3.45<br>(1.78 to 5.80)           | 0.13<br>(0.09 to 0.19)        | 0.05<br>(0.03 to 0.09)        | 0.05<br>(0.02 to 0.08)        | 0.06<br>(0.03 to 0.10)        |
| Maternal obstructed labor and uterine rupture         | 1.11<br>(0.60 to 1.87)           | 0.48<br>(0.21 to 0.90)           | 0.40<br>(0.18 to 0.74)           | 0.53<br>(0.24 to 0.98)           | 0.02<br>(0.01 to 0.04)        | 0.01<br>(0.00 to 0.02)        | 0.01<br>(0.00 to 0.01)        | 0.01<br>(0.00 to 0.02)        |
| Maternal abortion, miscarriage, and ectopic pregnancy | 18.45<br>(12.94 to 25.51)        | 8.51<br>(4.39 to 14.94)          | 7.34<br>(3.83 to 12.80)          | 9.38<br>(4.79 to 16.63)          | 0.35<br>(0.25 to 0.48)        | 0.16<br>(0.08 to 0.28)        | 0.14<br>(0.07 to 0.24)        | 0.18<br>(0.09 to 0.31)        |

|                                        |                              |                             |                            |                             |                           |                           |                           |                           |
|----------------------------------------|------------------------------|-----------------------------|----------------------------|-----------------------------|---------------------------|---------------------------|---------------------------|---------------------------|
|                                        | 1.77<br>(1.00 to<br>2.97)    | 0.89<br>(0.37 to<br>1.79)   | 0.75<br>(0.32 to<br>1.51)  | 0.99<br>(0.42 to<br>1.96)   | 0.03<br>(0.02 to<br>0.05) | 0.02<br>(0.01 to<br>0.03) | 0.01<br>(0.01 to<br>0.03) | 0.02<br>(0.01 to<br>0.03) |
| Indirect maternal deaths               |                              |                             |                            |                             |                           |                           |                           |                           |
|                                        | 0.52<br>(0.22 to<br>1.02)    | 0.20<br>(0.07 to<br>0.44)   | 0.17<br>(0.06 to<br>0.39)  | 0.22<br>(0.08 to<br>0.52)   | 0.01<br>(0.00 to<br>0.02) | 0.00<br>(0.00 to<br>0.01) | 0.00<br>(0.00 to<br>0.01) | 0.00<br>(0.00 to<br>0.01) |
| Late maternal deaths                   |                              |                             |                            |                             |                           |                           |                           |                           |
|                                        | 0.00<br>(0.00 to<br>0.00)    | 0.02<br>(0.00 to<br>0.18)   | 0.02<br>(0.00 to<br>0.16)  | 0.02<br>(0.00 to<br>0.18)   | 0.00<br>(0.00 to<br>0.00) | 0.00<br>(0.00 to<br>0.00) | 0.00<br>(0.00 to<br>0.00) | 0.00<br>(0.00 to<br>0.00) |
| Maternal deaths aggravated by HIV/AIDS |                              |                             |                            |                             |                           |                           |                           |                           |
|                                        | 21.68<br>(15.71 to<br>29.08) | 10.00<br>(5.74 to<br>16.20) | 8.83<br>(5.14 to<br>14.35) | 10.89<br>(6.25 to<br>17.46) | 0.40<br>(0.29 to<br>0.54) | 0.18<br>(0.11 to<br>0.29) | 0.16<br>(0.10 to<br>0.26) | 0.20<br>(0.12 to<br>0.32) |
| Other maternal disorders               |                              |                             |                            |                             |                           |                           |                           |                           |

| Slovenia                                                                |                                           |                                       |                                     |                                       |                                  |                                  |                                  |                                  |
|-------------------------------------------------------------------------|-------------------------------------------|---------------------------------------|-------------------------------------|---------------------------------------|----------------------------------|----------------------------------|----------------------------------|----------------------------------|
| Cause                                                                   | YLLs (actual counts)                      |                                       |                                     |                                       | Deaths (actual counts)           |                                  |                                  |                                  |
|                                                                         | 2016                                      | 2040 Forecast                         | 2040 Better Scenario                | 2040 Worse Scenario                   | 2016                             | 2040 Forecast                    | 2040 Better Scenario             | 2040 Worse Scenario              |
| <b>Neonatal disorders</b>                                               | <b>1,757.50</b><br>(1,325.29 to 2,178.13) | <b>753.91</b><br>(420.29 to 1,282.30) | <b>560.67</b><br>(311.24 to 963.72) | <b>877.53</b><br>(484.97 to 1,473.13) | <b>20.31</b><br>(15.32 to 25.18) | <b>8.71</b><br>(4.86 to 14.81)   | <b>6.48</b><br>(3.60 to 11.14)   | <b>10.14</b><br>(5.60 to 17.02)  |
| Neonatal preterm birth                                                  | 1,057.39<br>(793.99 to 1,328.30)          | 367.74<br>(208.30 to 622.11)          | 236.07<br>(132.65 to 402.93)        | 449.60<br>(248.76 to 752.18)          | 12.22<br>(9.17 to 15.35)         | 4.25<br>(2.41 to 7.19)           | 2.73<br>(1.53 to 4.66)           | 5.19<br>(2.87 to 8.70)           |
| Neonatal encephalopathy due to birth asphyxia and trauma                | 213.32<br>(154.95 to 286.07)              | 79.88<br>(37.45 to 156.58)            | 59.86<br>(27.87 to 113.43)          | 94.47<br>(42.43 to 184.03)            | 2.47<br>(1.79 to 3.31)           | 0.92<br>(0.43 to 1.81)           | 0.69<br>(0.32 to 1.31)           | 1.09<br>(0.49 to 2.13)           |
| Neonatal sepsis and other neonatal infections                           | 185.24<br>(118.50 to 267.68)              | 91.02<br>(41.91 to 175.61)            | 72.72<br>(34.29 to 137.57)          | 103.75<br>(46.81 to 198.43)           | 2.14<br>(1.37 to 3.09)           | 1.05<br>(0.48 to 2.03)           | 0.84<br>(0.40 to 1.59)           | 1.20<br>(0.54 to 2.29)           |
| Hemolytic disease and other neonatal jaundice                           | 5.66<br>(3.46 to 8.89)                    | 1.75<br>(0.73 to 4.27)                | 1.38<br>(0.58 to 3.35)              | 2.02<br>(0.83 to 5.12)                | 0.07<br>(0.04 to 0.10)           | 0.02<br>(0.01 to 0.05)           | 0.02<br>(0.01 to 0.04)           | 0.02<br>(0.01 to 0.06)           |
| Other neonatal disorders                                                | 295.90<br>(208.30 to 385.89)              | 213.52<br>(91.81 to 438.16)           | 190.64<br>(84.84 to 378.23)         | 227.70<br>(96.09 to 468.73)           | 3.42<br>(2.41 to 4.46)           | 2.47<br>(1.06 to 5.06)           | 2.20<br>(0.98 to 4.37)           | 2.63<br>(1.11 to 5.42)           |
| <b>Nutritional deficiencies</b>                                         | <b>29.92</b><br>(26.37 to 33.99)          | <b>45.45</b><br>(36.47 to 56.79)      | <b>46.65</b><br>(37.29 to 58.50)    | <b>43.13</b><br>(34.62 to 53.65)      | <b>2.30</b><br>(1.99 to 2.62)    | <b>5.17</b><br>(3.79 to 7.01)    | <b>5.55</b><br>(4.08 to 7.46)    | <b>4.69</b><br>(3.42 to 6.38)    |
| Protein-energy malnutrition                                             | 10.18<br>(6.58 to 14.04)                  | 15.64<br>(8.16 to 22.49)              | 17.62<br>(9.09 to 25.39)            | 13.97<br>(7.22 to 20.14)              | 0.87<br>(0.41 to 1.17)           | 2.03<br>(0.85 to 3.12)           | 2.39<br>(1.02 to 3.57)           | 1.74<br>(0.73 to 2.70)           |
| Iodine deficiency                                                       | 1.57<br>(0.17 to 3.96)                    | 3.19<br>(0.15 to 10.03)               | 3.14<br>(0.14 to 10.21)             | 3.11<br>(0.16 to 9.65)                | 0.11<br>(0.01 to 0.34)           | 0.34<br>(0.01 to 1.39)           | 0.34<br>(0.00 to 1.40)           | 0.32<br>(0.01 to 1.25)           |
| Dietary iron deficiency                                                 | 4.83<br>(3.71 to 5.80)                    | 3.88<br>(2.68 to 5.23)                | 3.99<br>(2.79 to 5.36)              | 3.79<br>(2.63 to 5.05)                | 0.16<br>(0.11 to 0.20)           | 0.15<br>(0.10 to 0.22)           | 0.16<br>(0.11 to 0.23)           | 0.14<br>(0.10 to 0.21)           |
| Other nutritional deficiencies                                          | 13.33<br>(10.47 to 16.70)                 | 22.74<br>(15.06 to 33.41)             | 21.91<br>(14.41 to 32.96)           | 22.26<br>(14.77 to 32.57)             | 1.16<br>(0.87 to 1.64)           | 2.65<br>(1.63 to 4.32)           | 2.66<br>(1.63 to 4.47)           | 2.49<br>(1.55 to 4.00)           |
| <b>Other communicable, maternal, neonatal, and nutritional diseases</b> | <b>230.90</b><br>(175.62 to 270.82)       | <b>258.39</b><br>(188.41 to 323.57)   | <b>255.27</b><br>(185.38 to 318.82) | <b>255.98</b><br>(186.97 to 316.82)   | <b>10.31</b><br>(7.37 to 12.26)  | <b>15.62</b><br>(11.35 to 18.71) | <b>16.02</b><br>(11.64 to 19.23) | <b>14.87</b><br>(10.80 to 17.84) |
| Sexually transmitted infections excluding HIV                           | 5.43<br>(4.48 to 6.64)                    | 3.77<br>(2.67 to 5.21)                | 3.61<br>(2.55 to 4.99)              | 3.83<br>(2.74 to 5.23)                | 0.23<br>(0.19 to 0.29)           | 0.26<br>(0.19 to 0.37)           | 0.26<br>(0.18 to 0.38)           | 0.25<br>(0.18 to 0.36)           |
| Syphilis                                                                | 1.70<br>(1.39 to 2.11)                    | 1.00<br>(0.67 to 1.49)                | 0.90<br>(0.59 to 1.35)              | 1.05<br>(0.68 to 1.57)                | 0.07<br>(0.06 to 0.08)           | 0.06<br>(0.04 to 0.10)           | 0.06<br>(0.04 to 0.09)           | 0.06<br>(0.04 to 0.10)           |
| Chlamydial infection                                                    | 0.75<br>(0.60 to 0.92)                    | 0.57<br>(0.39 to 0.82)                | 0.56<br>(0.38 to 0.82)              | 0.57<br>(0.39 to 0.82)                | 0.03<br>(0.03 to 0.04)           | 0.04<br>(0.03 to 0.07)           | 0.04<br>(0.03 to 0.07)           | 0.04<br>(0.03 to 0.06)           |
| Gonococcal infection                                                    | 2.02<br>(1.63 to 2.48)                    | 1.58<br>(1.07 to 2.32)                | 1.54<br>(1.04 to 2.27)              | 1.58<br>(1.08 to 2.30)                | 0.10<br>(0.08 to 0.12)           | 0.12<br>(0.08 to 0.18)           | 0.12<br>(0.08 to 0.19)           | 0.11<br>(0.07 to 0.18)           |
| Other sexually transmitted infections                                   | 0.96<br>(0.77 to 1.19)                    | 0.63<br>(0.42 to 0.90)                | 0.61<br>(0.40 to 0.88)              | 0.64<br>(0.43 to 0.91)                | 0.04<br>(0.03 to 0.04)           | 0.04<br>(0.02 to 0.06)           | 0.04<br>(0.02 to 0.06)           | 0.04<br>(0.02 to 0.05)           |
| Acute hepatitis                                                         | 28.09<br>(23.48 to 33.14)                 | 15.22<br>(10.66 to 20.69)             | 12.58<br>(9.03 to 17.13)            | 16.80<br>(11.71 to 22.89)             | 1.07<br>(0.90 to 1.25)           | 0.81<br>(0.59 to 1.06)           | 0.69<br>(0.53 to 0.91)           | 0.86<br>(0.63 to 1.13)           |
| Acute hepatitis A                                                       | 1.44<br>(1.08 to 1.87)                    | 0.60<br>(0.38 to 0.94)                | 0.53<br>(0.33 to 0.83)              | 0.65<br>(0.41 to 1.02)                | 0.04<br>(0.03 to 0.05)           | 0.03<br>(0.02 to 0.04)           | 0.02<br>(0.01 to 0.04)           | 0.03<br>(0.02 to 0.04)           |
| Acute hepatitis B                                                       | 21.40<br>(17.55 to 25.58)                 | 11.64<br>(7.80 to 16.29)              | 9.53<br>(6.55 to 13.42)             | 12.95<br>(8.76 to 17.93)              | 0.80<br>(0.64 to 0.96)           | 0.56<br>(0.39 to 0.76)           | 0.47<br>(0.33 to 0.64)           | 0.61<br>(0.41 to 0.83)           |



|                                       |                                             |                                             |                                             |                                             |                                          |                                          |                                          |                                          |
|---------------------------------------|---------------------------------------------|---------------------------------------------|---------------------------------------------|---------------------------------------------|------------------------------------------|------------------------------------------|------------------------------------------|------------------------------------------|
|                                       | 1.03<br>(0.73 to<br>1.44)                   | 0.60<br>(0.36 to<br>0.96)                   | 0.50<br>(0.31 to<br>0.77)                   | 0.66<br>(0.40 to<br>1.02)                   | 0.04<br>(0.03 to<br>0.06)                | 0.03<br>(0.02 to<br>0.05)                | 0.03<br>(0.02 to<br>0.04)                | 0.03<br>(0.02 to<br>0.05)                |
| Acute hepatitis C                     | 4.21<br>(3.15 to<br>5.54)                   | 2.37<br>(1.46 to<br>3.54)                   | 2.03<br>(1.24 to<br>3.00)                   | 2.54<br>(1.56 to<br>3.92)                   | 0.19<br>(0.13 to<br>0.27)                | 0.19<br>(0.11 to<br>0.30)                | 0.17<br>(0.10 to<br>0.27)                | 0.19<br>(0.11 to<br>0.30)                |
| Acute hepatitis E                     | 197.38<br>(142.25 to<br>234.76)             | 239.40<br>(170.97 to<br>299.72)             | 239.07<br>(170.49 to<br>300.15)             | 235.36<br>(167.81 to<br>293.85)             | 9.01<br>(6.07 to<br>10.82)               | 14.55<br>(10.25 to<br>17.61)             | 15.06<br>(10.66 to<br>18.14)             | 13.76<br>(9.66 to<br>16.66)              |
| Other unspecified infectious diseases | 257,024.62<br>(225,431.37 to<br>286,446.77) | 247,217.26<br>(206,513.33 to<br>294,689.98) | 212,037.09<br>(178,179.06 to<br>250,718.32) | 313,181.73<br>(255,613.11 to<br>377,034.33) | 18,585.29<br>(16,652.38 to<br>20,432.31) | 21,977.70<br>(19,291.34 to<br>25,392.29) | 19,553.56<br>(17,310.43 to<br>22,418.35) | 26,281.35<br>(22,806.39 to<br>30,244.14) |
| Non-communicable diseases             |                                             |                                             |                                             |                                             |                                          |                                          |                                          |                                          |

| Slovenia                             |                                            |                                           |                                           |                                             |                                       |                                       |                                       |                                       |
|--------------------------------------|--------------------------------------------|-------------------------------------------|-------------------------------------------|---------------------------------------------|---------------------------------------|---------------------------------------|---------------------------------------|---------------------------------------|
| Cause                                | YLLs (actual counts)                       |                                           |                                           |                                             | Deaths (actual counts)                |                                       |                                       |                                       |
|                                      | 2016                                       | 2040 Forecast                             | 2040 Better Scenario                      | 2040 Worse Scenario                         | 2016                                  | 2040 Forecast                         | 2040 Better Scenario                  | 2040 Worse Scenario                   |
| Neoplasms                            | 103,746.14<br>(89,654.43 to<br>117,704.92) | 99,277.44<br>(81,033.82 to<br>119,482.98) | 86,314.05<br>(71,643.47 to<br>102,200.06) | 124,707.78<br>(100,261.21 to<br>153,698.69) | 5,801.91<br>(5,088.49 to<br>6,501.77) | 6,981.18<br>(6,040.06 to<br>7,993.65) | 6,309.64<br>(5,494.27 to<br>7,170.97) | 8,263.47<br>(7,030.54 to<br>9,669.45) |
| Lip and oral cavity cancer           | 1,326.79<br>(1,095.11 to<br>1,597.98)      | 962.18<br>(522.04 to<br>1,665.80)         | 672.24<br>(377.99 to<br>1,114.60)         | 1,818.64<br>(922.26 to<br>3,237.94)         | 60.04<br>(50.60 to<br>70.42)          | 53.12<br>(30.62 to<br>87.85)          | 38.57<br>(23.27 to<br>61.58)          | 95.75<br>(52.77 to<br>162.90)         |
| Nasopharynx cancer                   | 141.08<br>(116.09 to<br>172.67)            | 98.16<br>(50.80 to<br>174.10)             | 64.22<br>(34.23 to<br>110.40)             | 194.31<br>(96.35 to<br>354.09)              | 5.50<br>(4.60 to<br>6.71)             | 4.41<br>(2.43 to<br>7.70)             | 2.95<br>(1.70 to<br>5.03)             | 8.48<br>(4.56 to<br>15.16)            |
| Other pharynx cancer                 | 2,544.90<br>(2,070.41 to<br>3,115.16)      | 1,951.96<br>(1,041.83 to<br>3,206.92)     | 1,805.94<br>(987.17 to<br>2,982.55)       | 2,497.10<br>(1,320.61 to<br>4,195.41)       | 98.18<br>(81.02 to<br>118.53)         | 86.27<br>(47.12 to<br>141.92)         | 80.89<br>(45.16 to<br>132.86)         | 108.84<br>(58.90 to<br>181.51)        |
| Esophageal cancer                    | 2,158.50<br>(1,700.83 to<br>2,652.36)      | 2,026.23<br>(1,054.38 to<br>3,752.81)     | 1,519.11<br>(848.39 to<br>2,656.24)       | 3,354.73<br>(1,589.70 to<br>6,530.14)       | 103.55<br>(83.85 to<br>124.44)        | 117.51<br>(65.79 to<br>207.74)        | 90.65<br>(54.52 to<br>147.88)         | 186.90<br>(96.13 to<br>349.83)        |
| Stomach cancer                       | 6,000.87<br>(5,078.69 to<br>6,910.97)      | 4,246.74<br>(3,043.30 to<br>5,784.09)     | 3,576.76<br>(2,643.17 to<br>4,763.98)     | 4,923.89<br>(3,463.87 to<br>6,724.46)       | 364.15<br>(312.92 to<br>414.98)       | 323.86<br>(241.08 to<br>433.50)       | 281.56<br>(215.46 to<br>367.32)       | 360.66<br>(261.64 to<br>481.47)       |
| Colon and rectum cancer              | 13,666.50<br>(11,528.73 to<br>15,986.99)   | 14,079.99<br>(9,738.90 to<br>20,046.86)   | 11,802.11<br>(8,267.02 to<br>16,475.92)   | 17,537.17<br>(11,694.22 to<br>25,139.26)    | 864.12<br>(740.17 to<br>999.62)       | 1,108.50<br>(788.12 to<br>1,550.05)   | 960.76<br>(690.83 to<br>1,338.76)     | 1,326.05<br>(923.08 to<br>1,858.19)   |
| Liver cancer                         | 3,949.81<br>(3,282.20 to<br>4,650.54)      | 4,690.91<br>(2,870.76 to<br>7,458.72)     | 4,161.06<br>(2,757.35 to<br>6,329.07)     | 6,273.19<br>(3,613.80 to<br>10,647.05)      | 212.74<br>(179.93 to<br>247.18)       | 302.51<br>(196.52 to<br>452.73)       | 278.15<br>(191.82 to<br>397.10)       | 384.74<br>(232.50 to<br>610.84)       |
| Liver cancer due to hepatitis B      | 1,154.22<br>(823.54 to<br>1,529.59)        | 1,376.84<br>(794.33 to<br>2,327.98)       | 1,243.22<br>(746.10 to<br>2,003.74)       | 1,655.08<br>(896.59 to<br>2,999.10)         | 57.72<br>(41.65 to<br>76.78)          | 82.76<br>(49.17 to<br>133.02)         | 77.24<br>(48.00 to<br>120.23)         | 95.17<br>(52.51 to<br>164.22)         |
| Liver cancer due to hepatitis C      | 917.29<br>(631.02 to<br>1,250.36)          | 1,215.63<br>(690.89 to<br>1,988.03)       | 1,117.04<br>(671.56 to<br>1,756.52)       | 1,425.66<br>(762.17 to<br>2,449.18)         | 54.03<br>(37.90 to<br>73.07)          | 85.32<br>(50.06 to<br>134.23)         | 81.14<br>(52.59 to<br>123.08)         | 95.50<br>(53.95 to<br>154.25)         |
| Liver cancer due to alcohol use      | 1,158.13<br>(917.21 to<br>1,417.58)        | 1,213.32<br>(746.72 to<br>1,943.20)       | 1,000.76<br>(644.16 to<br>1,558.81)       | 2,107.79<br>(1,223.65 to<br>3,532.70)       | 63.49<br>(50.37 to<br>77.48)          | 78.96<br>(50.25 to<br>120.26)         | 67.94<br>(44.77 to<br>101.25)         | 128.91<br>(77.68 to<br>208.40)        |
| Liver cancer due to other causes     | 720.17<br>(556.18 to<br>908.28)            | 885.13<br>(487.36 to<br>1,516.31)         | 800.04<br>(468.27 to<br>1,306.21)         | 1,084.66<br>(552.31 to<br>1,969.40)         | 37.50<br>(29.30 to<br>46.75)          | 55.48<br>(32.10 to<br>90.71)          | 51.83<br>(31.36 to<br>80.50)          | 65.16<br>(34.67 to<br>112.09)         |
| Gallbladder and biliary tract cancer | 2,070.56<br>(1,748.61 to<br>2,392.41)      | 1,749.36<br>(1,460.27 to<br>2,021.83)     | 1,763.48<br>(1,476.92 to<br>2,042.17)     | 1,688.29<br>(1,418.07 to<br>1,958.13)       | 138.16<br>(117.35 to<br>157.75)       | 140.58<br>(121.65 to<br>159.86)       | 145.63<br>(125.21 to<br>166.01)       | 131.83<br>(113.28 to<br>150.98)       |
| Pancreatic cancer                    | 6,688.31<br>(5,695.89 to<br>7,658.11)      | 7,378.41<br>(5,666.92 to<br>9,371.59)     | 7,123.78<br>(5,492.50 to<br>8,992.43)     | 8,197.74<br>(6,095.23 to<br>10,715.40)      | 387.16<br>(333.23 to<br>440.64)       | 515.40<br>(412.84 to<br>633.90)       | 511.77<br>(411.11 to<br>627.20)       | 550.56<br>(428.47 to<br>699.77)       |
| Larynx cancer                        | 1,101.92<br>(921.49 to<br>1,315.19)        | 716.23<br>(317.80 to<br>1,441.92)         | 441.87<br>(209.32 to<br>866.64)           | 1,364.33<br>(569.21 to<br>2,817.79)         | 50.85<br>(42.60 to<br>60.03)          | 40.00<br>(18.57 to<br>71.92)          | 24.99<br>(12.40 to<br>45.78)          | 74.06<br>(32.74 to<br>148.35)         |
| Tracheal, bronchus, and lung cancer  | 21,012.80<br>(17,876.38 to<br>24,412.17)   | 16,776.95<br>(11,095.18 to<br>24,131.30)  | 10,712.08<br>(7,261.50 to<br>15,135.64)   | 29,954.45<br>(19,371.06 to<br>43,634.60)    | 1,039.30<br>(889.23 to<br>1,200.86)   | 995.76<br>(678.27 to<br>1,393.41)     | 650.05<br>(456.78 to<br>890.89)       | 1,696.88<br>(1,131.45 to<br>2,398.56) |
| Malignant skin melanoma              | 2,429.86<br>(1,695.87 to<br>2,919.14)      | 2,656.89<br>(1,856.25 to<br>3,218.68)     | 2,974.86<br>(2,109.59 to<br>3,622.49)     | 2,427.18<br>(1,689.72 to<br>2,941.57)       | 111.52<br>(79.02 to<br>132.09)        | 158.36<br>(112.60 to<br>188.40)       | 182.35<br>(130.83 to<br>216.27)       | 140.17<br>(98.52 to<br>166.46)        |
| Non-melanoma skin cancer             | 517.67<br>(436.58 to<br>603.85)            | 631.08<br>(517.66 to<br>759.32)           | 590.49<br>(492.72 to<br>702.90)           | 626.93<br>(518.95 to<br>752.45)             | 43.64<br>(38.01 to<br>49.80)          | 66.19<br>(53.74 to<br>79.49)          | 64.26<br>(52.99 to<br>77.03)          | 63.41<br>(50.76 to<br>76.74)          |
| Breast cancer                        | 7,096.17<br>(5,711.21 to<br>8,537.29)      | 5,902.48<br>(4,171.29 to<br>8,183.25)     | 5,275.57<br>(3,724.45 to<br>7,274.91)     | 7,165.36<br>(4,870.06 to<br>10,417.80)      | 394.52<br>(321.68 to<br>473.50)       | 419.16<br>(314.06 to<br>556.84)       | 386.95<br>(293.97 to<br>508.98)       | 487.77<br>(358.61 to<br>673.56)       |
| Cervical cancer                      | 1,488.17<br>(1,181.25 to<br>1,829.16)      | 913.90<br>(636.22 to<br>1,295.09)         | 786.49<br>(561.24 to<br>1,098.10)         | 1,033.85<br>(704.52 to<br>1,501.67)         | 73.97<br>(59.36 to<br>90.64)          | 58.09<br>(43.54 to<br>77.38)          | 51.52<br>(38.73 to<br>67.41)          | 63.14<br>(45.71 to<br>86.98)          |

|                   |                                       |                                        |                                        |                                        |                                 |                                 |                                 |                                 |
|-------------------|---------------------------------------|----------------------------------------|----------------------------------------|----------------------------------------|---------------------------------|---------------------------------|---------------------------------|---------------------------------|
|                   | 1,066.15<br>(836.50 to<br>1,338.31)   | 1,223.31<br>(936.59 to<br>1,577.50)    | 1,144.00<br>(868.93 to<br>1,462.34)    | 1,249.62<br>(961.28 to<br>1,593.92)    | 68.75<br>(54.59 to<br>85.58)    | 92.60<br>(73.29 to<br>115.14)   | 88.52<br>(70.23 to<br>110.03)   | 92.39<br>(73.49 to<br>114.96)   |
| Uterine cancer    |                                       |                                        |                                        |                                        |                                 |                                 |                                 |                                 |
|                   | 2,904.96<br>(2,311.27 to<br>3,603.27) | 2,352.44<br>(1,660.25 to<br>3,266.11)  | 2,138.26<br>(1,503.54 to<br>2,915.91)  | 2,547.71<br>(1,745.34 to<br>3,634.34)  | 141.43<br>(113.61 to<br>173.11) | 136.73<br>(100.81 to<br>182.60) | 125.67<br>(93.59 to<br>166.44)  | 145.96<br>(104.51 to<br>204.48) |
| Ovarian cancer    |                                       |                                        |                                        |                                        |                                 |                                 |                                 |                                 |
|                   | 5,661.19<br>(3,793.17 to<br>6,920.77) | 8,552.82<br>(5,549.07 to<br>10,257.68) | 8,383.69<br>(5,615.98 to<br>10,009.17) | 8,372.07<br>(5,417.24 to<br>10,100.50) | 448.99<br>(275.99 to<br>548.32) | 822.43<br>(505.74 to<br>977.64) | 832.20<br>(514.14 to<br>975.91) | 777.56<br>(473.97 to<br>937.48) |
| Prostate cancer   |                                       |                                        |                                        |                                        |                                 |                                 |                                 |                                 |
|                   | 214.21<br>(162.30 to<br>283.83)       | 92.66<br>(62.65 to<br>134.06)          | 83.84<br>(56.37 to<br>119.84)          | 97.51<br>(64.64 to<br>140.18)          | 5.41<br>(4.22 to<br>7.00)       | 3.22<br>(2.44 to<br>4.32)       | 3.05<br>(2.30 to<br>4.00)       | 3.23<br>(2.40 to<br>4.23)       |
| Testicular cancer |                                       |                                        |                                        |                                        |                                 |                                 |                                 |                                 |

| Slovenia                        |                                               |                                                |                                               |                                                 |                                            |                                             |                                            |                                              |
|---------------------------------|-----------------------------------------------|------------------------------------------------|-----------------------------------------------|-------------------------------------------------|--------------------------------------------|---------------------------------------------|--------------------------------------------|----------------------------------------------|
| Cause                           | YLLs (actual counts)                          |                                                |                                               |                                                 | Deaths (actual counts)                     |                                             |                                            |                                              |
|                                 | 2016                                          | 2040 Forecast                                  | 2040 Better Scenario                          | 2040 Worse Scenario                             | 2016                                       | 2040 Forecast                               | 2040 Better Scenario                       | 2040 Worse Scenario                          |
| Kidney cancer                   | 2,859.86<br>(2,350.31 to 3,397.13)            | 3,210.65<br>(2,207.14 to 4,522.80)             | 3,145.33<br>(2,196.71 to 4,308.29)            | 3,430.18<br>(2,271.37 to 5,029.91)              | 158.25<br>(132.60 to 183.96)               | 219.09<br>(156.06 to 297.06)                | 221.87<br>(161.65 to 293.32)               | 224.25<br>(152.74 to 317.81)                 |
| Bladder cancer                  | 2,602.69<br>(2,230.20 to 3,035.53)            | 2,831.73<br>(2,096.68 to 3,795.66)             | 2,571.93<br>(1,954.59 to 3,396.41)            | 3,316.85<br>(2,331.40 to 4,717.03)              | 188.10<br>(162.73 to 218.04)               | 252.50<br>(194.00 to 334.17)                | 237.30<br>(186.48 to 307.19)               | 282.44<br>(208.08 to 381.53)                 |
| Brain and nervous system cancer | 3,543.56<br>(2,241.14 to 4,527.32)            | 3,182.16<br>(1,944.58 to 4,008.90)             | 3,065.75<br>(1,879.14 to 3,830.74)            | 3,199.30<br>(1,965.01 to 4,009.78)              | 135.75<br>(82.15 to 165.97)                | 147.97<br>(87.99 to 183.96)                 | 145.24<br>(87.40 to 179.33)                | 145.67<br>(85.37 to 178.29)                  |
| Thyroid cancer                  | 241.54<br>(202.51 to 287.33)                  | 302.03<br>(204.37 to 458.99)                   | 271.89<br>(189.08 to 399.44)                  | 325.00<br>(215.04 to 508.13)                    | 15.01<br>(12.55 to 17.61)                  | 22.61<br>(15.64 to 32.94)                   | 20.96<br>(14.85 to 30.31)                  | 23.52<br>(16.05 to 34.72)                    |
| Mesothelioma                    | 650.80<br>(494.92 to 783.25)                  | 655.61<br>(465.92 to 805.21)                   | 674.58<br>(482.92 to 835.16)                  | 628.37<br>(441.51 to 763.09)                    | 30.40<br>(22.23 to 36.12)                  | 36.78<br>(24.66 to 43.67)                   | 38.58<br>(25.94 to 46.04)                  | 34.49<br>(22.72 to 40.85)                    |
| Hodgkin lymphoma                | 261.59<br>(221.92 to 306.14)                  | 189.55<br>(146.86 to 237.72)                   | 164.00<br>(129.96 to 199.12)                  | 202.16<br>(156.51 to 251.64)                    | 11.15<br>(9.08 to 12.93)                   | 10.25<br>(7.74 to 12.67)                    | 9.10<br>(6.97 to 10.86)                    | 10.63<br>(7.92 to 12.99)                     |
| Non-Hodgkin lymphoma            | 3,002.67<br>(2,015.94 to 3,557.49)            | 2,769.53<br>(1,679.95 to 3,682.50)             | 2,589.51<br>(1,573.11 to 3,350.71)            | 2,857.51<br>(1,694.67 to 3,815.97)              | 174.97<br>(100.39 to 209.28)               | 204.67<br>(110.61 to 266.18)                | 197.35<br>(105.43 to 251.75)               | 204.08<br>(109.90 to 265.51)                 |
| Multiple myeloma                | 1,590.21<br>(955.80 to 1,969.97)              | 1,816.14<br>(999.49 to 2,463.76)               | 1,736.87<br>(961.03 to 2,340.52)              | 1,857.95<br>(1,014.20 to 2,557.39)              | 93.16<br>(50.91 to 115.38)                 | 126.93<br>(64.26 to 170.93)                 | 124.79<br>(63.33 to 167.43)                | 125.94<br>(63.54 to 171.94)                  |
| Leukemia                        | 3,478.02<br>(3,002.92 to 4,024.82)            | 3,413.17<br>(2,588.27 to 4,461.81)             | 3,124.66<br>(2,426.56 to 3,976.88)            | 3,788.71<br>(2,749.81 to 5,107.39)              | 192.12<br>(166.74 to 219.58)               | 241.16<br>(188.52 to 304.52)                | 227.46<br>(181.99 to 281.09)               | 257.02<br>(194.04 to 337.00)                 |
| Acute lymphoid leukemia         | 525.44<br>(435.28 to 663.02)                  | 351.19<br>(250.00 to 497.28)                   | 308.93<br>(221.19 to 427.60)                  | 398.73<br>(279.46 to 572.70)                    | 23.06<br>(19.08 to 28.11)                  | 19.60<br>(14.13 to 26.58)                   | 17.74<br>(12.99 to 23.59)                  | 21.45<br>(15.23 to 29.45)                    |
| Chronic lymphoid leukemia       | 917.17<br>(678.64 to 1,145.70)                | 1,023.82<br>(713.29 to 1,431.64)               | 962.91<br>(686.13 to 1,310.14)                | 1,110.41<br>(742.13 to 1,628.70)                | 64.27<br>(48.26 to 79.01)                  | 86.13<br>(62.40 to 114.99)                  | 83.63<br>(61.53 to 109.58)                 | 89.62<br>(63.00 to 125.51)                   |
| Acute myeloid leukemia          | 1,111.07<br>(846.16 to 1,361.98)              | 1,200.92<br>(892.32 to 1,629.74)               | 1,123.35<br>(848.66 to 1,492.28)              | 1,330.68<br>(954.74 to 1,858.67)                | 48.75<br>(38.57 to 58.79)                  | 66.20<br>(49.02 to 87.91)                   | 63.38<br>(47.74 to 83.38)                  | 71.13<br>(51.56 to 97.17)                    |
| Chronic myeloid leukemia        | 294.68<br>(235.36 to 411.96)                  | 147.02<br>(96.53 to 238.40)                    | 117.51<br>(79.45 to 193.74)                   | 176.69<br>(112.14 to 292.56)                    | 16.13<br>(12.56 to 24.14)                  | 10.86<br>(7.02 to 18.77)                    | 9.02<br>(6.00 to 15.80)                    | 12.42<br>(7.93 to 21.07)                     |
| Other leukemia                  | 629.67<br>(513.96 to 826.40)                  | 690.23<br>(486.20 to 1,021.32)                 | 611.95<br>(444.17 to 890.54)                  | 772.19<br>(531.59 to 1,161.62)                  | 39.91<br>(33.16 to 51.00)                  | 58.37<br>(43.02 to 83.28)                   | 53.68<br>(40.17 to 76.05)                  | 62.40<br>(44.52 to 91.57)                    |
| Other neoplasms                 | 3,474.78<br>(2,931.79 to 4,028.26)            | 3,904.14<br>(3,293.34 to 4,515.28)             | 3,949.69<br>(3,327.75 to 4,580.73)            | 3,777.67<br>(3,179.95 to 4,364.35)              | 191.01<br>(164.06 to 220.21)               | 274.53<br>(237.80 to 313.53)                | 286.49<br>(246.65 to 327.61)               | 257.06<br>(221.00 to 293.45)                 |
| <b>Cardiovascular diseases</b>  | <b>89,195.40<br/>(78,485.19 to 99,699.11)</b> | <b>73,817.76<br/>(54,438.90 to 102,911.75)</b> | <b>56,782.42<br/>(42,840.89 to 77,173.20)</b> | <b>104,112.90<br/>(72,450.83 to 147,160.03)</b> | <b>8,252.84<br/>(7,379.26 to 9,111.25)</b> | <b>8,187.44<br/>(6,198.90 to 11,078.59)</b> | <b>6,701.87<br/>(5,231.54 to 9,034.91)</b> | <b>10,599.95<br/>(7,791.30 to 14,330.02)</b> |
| Rheumatic heart disease         | 1,260.15<br>(1,066.52 to 1,452.87)            | 884.83<br>(652.76 to 1,191.01)                 | 786.72<br>(586.50 to 1,062.03)                | 928.86<br>(690.05 to 1,256.90)                  | 95.51<br>(80.61 to 110.35)                 | 82.51<br>(61.47 to 112.26)                  | 75.84<br>(56.49 to 102.85)                 | 83.74<br>(63.11 to 114.34)                   |
| Ischemic heart disease          | 44,500.51<br>(38,419.15 to 50,982.97)         | 29,204.45<br>(18,203.00 to 44,338.11)          | 19,590.69<br>(12,460.15 to 29,241.08)         | 45,845.30<br>(26,879.51 to 71,316.70)           | 4,132.03<br>(3,589.81 to 4,814.88)         | 3,240.98<br>(2,028.75 to 4,868.68)          | 2,354.06<br>(1,458.41 to 3,516.92)         | 4,565.59<br>(2,773.78 to 6,998.74)           |
| Stroke                          | 19,846.01<br>(16,962.38 to 22,922.06)         | 12,973.58<br>(8,073.59 to 20,125.40)           | 9,282.36<br>(5,960.62 to 14,329.53)           | 20,532.47<br>(12,366.23 to 31,509.40)           | 1,767.34<br>(1,497.34 to 2,078.76)         | 1,391.27<br>(862.02 to 2,217.80)            | 1,078.60<br>(677.80 to 1,703.59)           | 1,958.32<br>(1,163.34 to 3,069.53)           |
| Ischemic stroke                 | 10,807.18<br>(9,139.95 to 12,644.64)          | 7,250.22<br>(4,253.44 to 12,569.81)            | 5,501.83<br>(3,227.04 to 9,223.61)            | 10,454.85<br>(5,982.66 to 18,499.15)            | 1,090.87<br>(918.39 to 1,294.61)           | 853.93<br>(480.64 to 1,510.90)              | 688.42<br>(392.27 to 1,193.55)             | 1,128.86<br>(629.59 to 2,043.78)             |

|                                |                                        |                                        |                                        |                                         |                                 |                                     |                                     |                                     |
|--------------------------------|----------------------------------------|----------------------------------------|----------------------------------------|-----------------------------------------|---------------------------------|-------------------------------------|-------------------------------------|-------------------------------------|
|                                | 9,038.83<br>(7,741.91 to<br>10,399.73) | 5,723.35<br>(3,401.87 to<br>9,114.11)  | 3,780.54<br>(2,333.68 to<br>5,720.73)  | 10,077.62<br>(5,383.89 to<br>16,721.57) | 676.47<br>(574.31 to<br>791.09) | 537.34<br>(329.91 to<br>851.50)     | 390.18<br>(243.57 to<br>608.85)     | 829.46<br>(465.38 to<br>1,364.56)   |
| Intracerebral hemorrhage       |                                        |                                        |                                        |                                         |                                 |                                     |                                     |                                     |
|                                | 5,629.45<br>(2,941.96 to<br>7,341.95)  | 9,939.29<br>(3,748.97 to<br>23,930.49) | 8,755.90<br>(3,390.50 to<br>19,318.44) | 13,753.58<br>(4,990.88 to<br>32,425.36) | 596.39<br>(258.72 to<br>824.21) | 1,201.33<br>(391.14 to<br>2,814.15) | 1,105.20<br>(379.72 to<br>2,403.37) | 1,595.93<br>(504.89 to<br>4,224.35) |
| Hypertensive heart disease     |                                        |                                        |                                        |                                         |                                 |                                     |                                     |                                     |
|                                | 7,322.64<br>(5,937.38 to<br>8,529.42)  | 8,507.71<br>(5,577.80 to<br>12,759.99) | 7,454.17<br>(4,990.25 to<br>10,995.22) | 9,453.81<br>(6,165.81 to<br>14,311.39)  | 718.13<br>(515.13 to<br>856.57) | 992.66<br>(603.74 to<br>1,553.97)   | 902.63<br>(552.02 to<br>1,405.50)   | 1,055.52<br>(624.18 to<br>1,681.75) |
| Cardiomyopathy and myocarditis |                                        |                                        |                                        |                                         |                                 |                                     |                                     |                                     |
|                                | 966.16<br>(370.99 to<br>1,397.01)      | 956.93<br>(362.47 to<br>1,441.98)      | 996.28<br>(373.52 to<br>1,486.59)      | 894.54<br>(337.43 to<br>1,360.77)       | 111.74<br>(29.25 to<br>174.98)  | 129.70<br>(35.59 to<br>208.72)      | 139.69<br>(39.12 to<br>220.95)      | 116.87<br>(31.84 to<br>193.52)      |
| Myocarditis                    |                                        |                                        |                                        |                                         |                                 |                                     |                                     |                                     |

| Slovenia                                                      |                                                     |                                                    |                                                   |                                                     |                                            |                                              |                                              |                                                |
|---------------------------------------------------------------|-----------------------------------------------------|----------------------------------------------------|---------------------------------------------------|-----------------------------------------------------|--------------------------------------------|----------------------------------------------|----------------------------------------------|------------------------------------------------|
| Cause                                                         | YLLs (actual counts)                                |                                                    |                                                   |                                                     | Deaths (actual counts)                     |                                              |                                              |                                                |
|                                                               | 2016                                                | 2040 Forecast                                      | 2040 Better Scenario                              | 2040 Worse Scenario                                 | 2016                                       | 2040 Forecast                                | 2040 Better Scenario                         | 2040 Worse Scenario                            |
| Alcoholic cardiomyopathy                                      | 589.98<br>(421.26 to 1,073.69)                      | 597.28<br>(421.15 to 915.35)                       | 550.78<br>(390.82 to 831.45)                      | 851.99<br>(603.12 to 1,293.52)                      | 45.85<br>(31.76 to 62.88)                  | 58.15<br>(32.97 to 85.12)                    | 55.71<br>(31.43 to 80.53)                    | 80.00<br>(46.43 to 115.99)                     |
| Other cardiomyopathy                                          | 5,766.49<br>(4,727.39 to 7,022.58)                  | 6,953.50<br>(4,204.02 to 11,024.62)                | 5,907.11<br>(3,642.27 to 9,507.23)                | 7,707.28<br>(4,595.82 to 12,415.98)                 | 560.54<br>(431.63 to 689.52)               | 804.81<br>(456.76 to 1,330.41)               | 707.22<br>(408.15 to 1,212.83)               | 858.65<br>(478.20 to 1,487.85)                 |
| Atrial fibrillation and flutter                               | 1,753.28<br>(1,312.17 to 2,260.43)                  | 2,428.28<br>(1,717.67 to 3,348.12)                 | 2,352.42<br>(1,673.01 to 3,282.54)                | 2,666.38<br>(1,867.58 to 3,683.44)                  | 202.05<br>(150.58 to 266.77)               | 310.15<br>(218.15 to 435.94)                 | 310.14<br>(217.52 to 435.47)                 | 326.77<br>(224.83 to 461.58)                   |
| Aortic aneurysm                                               | 1,917.69<br>(1,636.91 to 2,234.13)                  | 1,590.48<br>(1,205.70 to 2,084.53)                 | 1,461.30<br>(1,112.74 to 1,880.88)                | 1,728.25<br>(1,271.61 to 2,290.76)                  | 118.09<br>(101.24 to 137.35)               | 123.12<br>(96.10 to 158.53)                  | 118.98<br>(92.69 to 154.40)                  | 125.55<br>(96.07 to 162.48)                    |
| Peripheral artery disease                                     | 49.64<br>(29.80 to 64.36)                           | 103.11<br>(56.21 to 152.27)                        | 105.23<br>(57.99 to 154.86)                       | 108.57<br>(59.80 to 159.78)                         | 5.10<br>(2.72 to 6.81)                     | 12.28<br>(6.09 to 18.43)                     | 13.03<br>(6.44 to 19.22)                     | 12.25<br>(6.20 to 18.39)                       |
| Endocarditis                                                  | 300.00<br>(232.33 to 468.59)                        | 398.06<br>(268.19 to 641.80)                       | 390.13<br>(265.42 to 628.46)                      | 413.56<br>(274.89 to 660.28)                        | 16.89<br>(13.01 to 25.27)                  | 28.07<br>(18.58 to 45.01)                    | 28.44<br>(18.97 to 45.88)                    | 28.00<br>(18.49 to 45.06)                      |
| Other cardiovascular and circulatory diseases                 | 6,616.03<br>(5,697.76 to 7,562.80)                  | 7,787.97<br>(5,716.67 to 10,649.24)                | 6,603.49<br>(4,940.60 to 8,986.98)                | 8,682.11<br>(6,161.06 to 11,983.85)                 | 601.31<br>(518.59 to 689.37)               | 805.08<br>(594.20 to 1,095.36)               | 714.94<br>(537.20 to 984.58)                 | 848.29<br>(622.38 to 1,157.67)                 |
| <b>Chronic respiratory diseases</b>                           | <b>7,824.55</b><br><b>(6,827.52 to 8,903.16)</b>    | <b>9,235.31</b><br><b>(6,596.05 to 12,700.92)</b>  | <b>7,225.12</b><br><b>(5,372.10 to 9,665.73)</b>  | <b>13,985.53</b><br><b>(9,574.41 to 19,942.13)</b>  | <b>687.43</b><br><b>(608.23 to 773.03)</b> | <b>957.88</b><br><b>(703.21 to 1,285.19)</b> | <b>764.33</b><br><b>(582.19 to 1,002.75)</b> | <b>1,370.50</b><br><b>(961.28 to 1,893.47)</b> |
| Chronic obstructive pulmonary disease                         | 6,741.05<br>(5,839.05 to 7,359.91)                  | 7,791.87<br>(5,150.10 to 11,534.47)                | 5,615.44<br>(3,720.92 to 8,340.91)                | 12,625.10<br>(8,186.35 to 18,490.29)                | 612.38<br>(537.52 to 697.40)               | 833.91<br>(573.15 to 1,205.39)               | 622.09<br>(433.80 to 914.85)                 | 1,257.66<br>(851.27 to 1,800.59)               |
| Pneumoconiosis                                                | 93.32<br>(75.39 to 113.95)                          | 117.07<br>(86.54 to 154.18)                        | 127.16<br>(92.11 to 170.95)                       | 109.24<br>(81.54 to 143.16)                         | 6.38<br>(5.24 to 7.71)                     | 10.03<br>(7.53 to 13.09)                     | 11.19<br>(8.19 to 14.74)                     | 9.11<br>(6.79 to 11.89)                        |
| Silicosis                                                     | 3.35<br>(1.72 to 26.20)                             | 4.54<br>(0.85 to 23.68)                            | 3.89<br>(0.67 to 22.69)                           | 4.76<br>(0.97 to 24.95)                             | 0.39<br>(0.13 to 1.82)                     | 0.41<br>(0.08 to 2.19)                       | 0.36<br>(0.07 to 2.01)                       | 0.41<br>(0.09 to 2.18)                         |
| Asbestosis                                                    | 73.54<br>(30.02 to 99.87)                           | 96.24<br>(54.33 to 134.86)                         | 106.96<br>(66.96 to 147.47)                       | 87.57<br>(43.69 to 125.07)                          | 4.83<br>(1.74 to 6.55)                     | 7.85<br>(4.12 to 11.19)                      | 8.98<br>(5.50 to 12.48)                      | 6.93<br>(3.25 to 10.01)                        |
| Coal workers pneumoconiosis                                   | 0.91<br>(0.38 to 3.39)                              | 1.01<br>(0.35 to 3.71)                             | 0.97<br>(0.33 to 3.68)                            | 1.06<br>(0.38 to 3.87)                              | 0.06<br>(0.03 to 0.22)                     | 0.10<br>(0.04 to 0.36)                       | 0.10<br>(0.04 to 0.37)                       | 0.10<br>(0.04 to 0.34)                         |
| Other pneumoconiosis                                          | 13.52<br>(6.40 to 43.66)                            | 15.28<br>(6.57 to 46.17)                           | 15.35<br>(6.40 to 45.91)                          | 15.84<br>(7.16 to 45.56)                            | 1.11<br>(0.55 to 3.42)                     | 1.66<br>(0.72 to 4.61)                       | 1.75<br>(0.73 to 4.90)                       | 1.66<br>(0.76 to 4.37)                         |
| Asthma                                                        | 315.78<br>(255.96 to 468.58)                        | 161.83<br>(75.70 to 323.15)                        | 116.99<br>(56.41 to 230.22)                       | 213.68<br>(98.39 to 443.01)                         | 22.44<br>(18.19 to 31.94)                  | 15.17<br>(7.21 to 29.83)                     | 11.59<br>(5.70 to 22.58)                     | 18.74<br>(8.79 to 37.21)                       |
| Interstitial lung disease and pulmonary sarcoidosis           | 638.81<br>(262.29 to 864.21)                        | 1,127.05<br>(448.38 to 1,569.32)                   | 1,329.09<br>(554.65 to 1,818.86)                  | 997.33<br>(378.29 to 1,421.33)                      | 44.51<br>(15.85 to 61.18)                  | 96.32<br>(33.52 to 137.56)                   | 117.01<br>(43.44 to 163.76)                  | 82.48<br>(27.64 to 120.88)                     |
| Other chronic respiratory diseases                            | 35.59<br>(26.39 to 57.79)                           | 37.49<br>(24.27 to 64.82)                          | 36.45<br>(23.28 to 63.74)                         | 40.18<br>(25.77 to 68.32)                           | 1.71<br>(1.25 to 2.87)                     | 2.45<br>(1.56 to 4.39)                       | 2.46<br>(1.58 to 4.50)                       | 2.51<br>(1.57 to 4.44)                         |
| <b>Cirrhosis and other chronic liver diseases</b>             | <b>13,639.86</b><br><b>(11,555.45 to 16,064.94)</b> | <b>10,811.23</b><br><b>(8,678.79 to 13,383.51)</b> | <b>9,545.69</b><br><b>(7,702.76 to 11,793.73)</b> | <b>13,054.69</b><br><b>(10,416.53 to 15,943.99)</b> | <b>540.37</b><br><b>(460.41 to 628.59)</b> | <b>487.16</b><br><b>(404.70 to 582.94)</b>   | <b>436.78</b><br><b>(365.51 to 524.80)</b>   | <b>577.73</b><br><b>(480.16 to 685.66)</b>     |
| Cirrhosis and other chronic liver diseases due to hepatitis B | 2,470.69<br>(1,851.08 to 3,223.95)                  | 2,125.58<br>(1,548.50 to 2,866.10)                 | 1,948.12<br>(1,426.42 to 2,625.87)                | 2,198.44<br>(1,612.13 to 2,961.78)                  | 96.72<br>(73.82 to 124.86)                 | 94.69<br>(70.84 to 124.68)                   | 88.09<br>(66.03 to 114.42)                   | 96.22<br>(72.36 to 126.81)                     |
| Cirrhosis and other chronic liver diseases due to hepatitis C | 3,621.24<br>(2,552.57 to 4,909.62)                  | 3,165.01<br>(2,118.38 to 4,368.87)                 | 2,877.08<br>(1,952.47 to 3,960.04)                | 3,301.55<br>(2,165.20 to 4,611.69)                  | 140.41<br>(99.22 to 190.08)                | 137.96<br>(95.58 to 187.88)                  | 127.10<br>(89.13 to 171.68)                  | 141.61<br>(96.29 to 195.62)                    |

|                                                                |                                                            |                                                            |                                                            |                                                             |                                                      |                                                      |                                                      |                                                      |
|----------------------------------------------------------------|------------------------------------------------------------|------------------------------------------------------------|------------------------------------------------------------|-------------------------------------------------------------|------------------------------------------------------|------------------------------------------------------|------------------------------------------------------|------------------------------------------------------|
| Cirrhosis and other chronic liver diseases due to alcohol use  | 5,061.37<br>(3,852.73 to<br>6,566.72)                      | 3,376.35<br>(2,426.30 to<br>4,516.59)                      | 2,759.64<br>(1,992.14 to<br>3,733.91)                      | 5,328.10<br>(3,962.86 to<br>7,000.54)                       | 202.53<br>(157.18 to<br>260.22)                      | 155.13<br>(114.10 to<br>203.56)                      | 129.23<br>(95.93 to<br>169.32)                       | 238.58<br>(182.68 to<br>305.99)                      |
| Cirrhosis and other chronic liver diseases due to other causes | 2,486.56<br>(1,955.65 to<br>3,073.92)                      | 2,144.29<br>(1,596.69 to<br>2,791.25)                      | 1,960.84<br>(1,472.85 to<br>2,538.10)                      | 2,226.59<br>(1,677.88 to<br>2,906.94)                       | 100.72<br>(79.97 to<br>122.58)                       | 99.39<br>(76.31 to<br>125.38)                        | 92.35<br>(71.26 to<br>115.51)                        | 101.33<br>(77.81 to<br>128.19)                       |
| <b>Digestive diseases</b>                                      | <b>6,632.48</b><br><b>(5,451.24 to</b><br><b>8,089.42)</b> | <b>7,865.26</b><br><b>(6,057.89 to</b><br><b>9,843.81)</b> | <b>7,319.80</b><br><b>(5,535.58 to</b><br><b>9,045.81)</b> | <b>8,326.52</b><br><b>(6,396.37 to</b><br><b>10,639.32)</b> | <b>542.28</b><br><b>(408.50 to</b><br><b>630.62)</b> | <b>786.77</b><br><b>(537.09 to</b><br><b>968.98)</b> | <b>758.30</b><br><b>(516.76 to</b><br><b>923.65)</b> | <b>796.92</b><br><b>(543.44 to</b><br><b>999.61)</b> |
| Peptic ulcer disease                                           | 1,029.72<br>(864.26 to<br>1,349.43)                        | 840.34<br>(633.67 to<br>1,103.31)                          | 703.22<br>(542.22 to<br>926.36)                            | 929.83<br>(691.97 to<br>1,245.97)                           | 84.71<br>(69.12 to<br>105.18)                        | 84.90<br>(62.61 to<br>114.73)                        | 73.67<br>(55.51 to<br>97.18)                         | 89.55<br>(65.14 to<br>119.40)                        |

| Slovenia                                   |                                       |                                       |                                       |                                       |                                    |                                    |                                    |                                    |
|--------------------------------------------|---------------------------------------|---------------------------------------|---------------------------------------|---------------------------------------|------------------------------------|------------------------------------|------------------------------------|------------------------------------|
| Cause                                      | YLLs (actual counts)                  |                                       |                                       |                                       | Deaths (actual counts)             |                                    |                                    |                                    |
|                                            | 2016                                  | 2040 Forecast                         | 2040 Better Scenario                  | 2040 Worse Scenario                   | 2016                               | 2040 Forecast                      | 2040 Better Scenario               | 2040 Worse Scenario                |
| Gastritis and duodenitis                   | 104.23<br>(60.25 to 131.24)           | 124.58<br>(65.17 to 167.16)           | 114.50<br>(61.35 to 150.55)           | 125.82<br>(67.79 to 167.28)           | 8.74<br>(3.72 to 11.12)            | 12.56<br>(5.41 to 17.05)           | 11.99<br>(5.21 to 16.44)           | 12.21<br>(5.23 to 16.27)           |
| Appendicitis                               | 68.82<br>(52.73 to 99.05)             | 72.35<br>(51.01 to 98.92)             | 62.39<br>(46.07 to 84.25)             | 76.06<br>(54.99 to 104.65)            | 4.61<br>(3.37 to 5.68)             | 6.09<br>(4.00 to 8.12)             | 5.41<br>(3.72 to 7.23)             | 6.21<br>(4.11 to 8.36)             |
| Paralytic ileus and intestinal obstruction | 977.72<br>(545.02 to 1,342.38)        | 1,333.37<br>(685.87 to 1,884.76)      | 1,390.85<br>(713.56 to 1,969.97)      | 1,247.63<br>(644.48 to 1,766.35)      | 82.05<br>(37.57 to 122.39)         | 137.78<br>(59.50 to 209.52)        | 148.12<br>(63.49 to 222.22)        | 124.91<br>(53.17 to 191.37)        |
| Inguinal, femoral, and abdominal hernia    | 251.69<br>(156.23 to 312.01)          | 210.71<br>(131.16 to 271.58)          | 200.02<br>(123.82 to 254.93)          | 208.39<br>(125.35 to 268.29)          | 20.78<br>(12.24 to 26.04)          | 21.39<br>(12.72 to 28.06)          | 21.05<br>(12.48 to 28.01)          | 20.42<br>(11.67 to 26.83)          |
| Inflammatory bowel disease                 | 248.52<br>(164.73 to 307.17)          | 319.57<br>(189.79 to 397.35)          | 326.92<br>(193.59 to 408.81)          | 304.94<br>(181.68 to 378.11)          | 17.62<br>(9.25 to 22.04)           | 28.95<br>(14.00 to 37.43)          | 30.71<br>(14.82 to 40.37)          | 26.60<br>(12.79 to 34.42)          |
| Vascular intestinal disorders              | 1,426.39<br>(1,107.13 to 1,727.96)    | 2,002.58<br>(1,471.98 to 2,419.70)    | 1,978.88<br>(1,460.04 to 2,399.70)    | 1,938.33<br>(1,453.83 to 2,341.47)    | 126.68<br>(96.85 to 151.18)        | 206.28<br>(148.95 to 250.27)       | 209.96<br>(151.59 to 256.43)       | 193.95<br>(141.73 to 233.96)       |
| Gallbladder and biliary diseases           | 927.60<br>(755.73 to 1,148.10)        | 1,264.53<br>(633.30 to 2,304.17)      | 1,020.47<br>(523.05 to 1,878.31)      | 1,486.71<br>(760.27 to 2,670.81)      | 93.35<br>(69.58 to 117.65)         | 145.82<br>(69.13 to 270.22)        | 122.17<br>(60.58 to 228.73)        | 165.06<br>(81.12 to 307.42)        |
| Pancreatitis                               | 1,032.98<br>(797.35 to 1,661.25)      | 979.35<br>(475.38 to 2,002.92)        | 812.57<br>(397.88 to 1,606.49)        | 1,312.92<br>(585.37 to 2,748.70)      | 55.32<br>(44.87 to 71.71)          | 68.71<br>(36.05 to 134.12)         | 59.10<br>(31.85 to 112.06)         | 88.43<br>(42.71 to 176.13)         |
| Other digestive diseases                   | 564.80<br>(410.13 to 688.16)          | 717.89<br>(520.35 to 885.44)          | 709.99<br>(525.36 to 876.05)          | 695.88<br>(502.48 to 854.55)          | 48.41<br>(36.19 to 58.10)          | 74.29<br>(54.78 to 92.93)          | 76.11<br>(56.18 to 94.72)          | 69.57<br>(50.21 to 86.07)          |
| Neurological disorders                     | 16,917.23<br>(14,143.44 to 19,866.27) | 25,547.36<br>(20,104.83 to 33,382.73) | 25,792.69<br>(20,668.95 to 32,756.25) | 25,884.38<br>(19,942.29 to 34,875.30) | 1,675.22<br>(1,385.07 to 2,002.71) | 2,966.80<br>(2,319.56 to 3,891.36) | 3,083.17<br>(2,444.20 to 3,937.75) | 2,911.30<br>(2,175.96 to 4,006.21) |
| Alzheimer's disease and other dementias    | 11,636.96<br>(9,290.07 to 14,398.58)  | 19,189.04<br>(14,116.81 to 26,856.87) | 19,177.62<br>(14,328.44 to 25,990.28) | 19,701.56<br>(13,778.51 to 28,677.90) | 1,359.27<br>(1,094.68 to 1,660.74) | 2,471.45<br>(1,813.46 to 3,377.10) | 2,547.14<br>(1,929.28 to 3,376.60) | 2,453.29<br>(1,720.63 to 3,527.37) |
| Parkinson's disease                        | 2,218.69<br>(1,651.82 to 2,933.60)    | 3,671.69<br>(2,718.55 to 4,868.48)    | 3,979.45<br>(2,963.39 to 5,239.13)    | 3,348.27<br>(2,466.53 to 4,418.54)    | 200.27<br>(149.77 to 264.33)       | 367.44<br>(273.35 to 490.82)       | 406.75<br>(303.06 to 539.09)       | 327.65<br>(239.23 to 434.37)       |
| Epilepsy                                   | 686.32<br>(572.19 to 828.91)          | 721.06<br>(448.95 to 1,137.47)        | 648.51<br>(407.84 to 1,030.36)        | 889.53<br>(536.40 to 1,438.58)        | 23.19<br>(19.61 to 27.49)          | 32.99<br>(22.09 to 49.47)          | 30.85<br>(21.23 to 45.59)          | 39.15<br>(25.39 to 59.66)          |
| Multiple sclerosis                         | 665.29<br>(450.33 to 835.35)          | 569.91<br>(349.44 to 751.85)          | 570.42<br>(348.31 to 745.58)          | 581.94<br>(352.91 to 775.45)          | 25.14<br>(15.88 to 30.74)          | 26.46<br>(15.44 to 34.55)          | 27.14<br>(15.72 to 35.18)          | 26.21<br>(15.12 to 34.24)          |
| Motor neuron disease                       | 107.21<br>(90.00 to 125.53)           | 155.85<br>(126.29 to 190.70)          | 155.62<br>(124.57 to 191.10)          | 153.76<br>(125.16 to 186.57)          | 4.14<br>(3.51 to 4.82)             | 7.15<br>(5.93 to 8.59)             | 7.25<br>(6.00 to 8.72)             | 6.93<br>(5.76 to 8.29)             |
| Other neurological disorders               | 1,602.76<br>(1,324.02 to 1,853.40)    | 1,239.80<br>(1,023.25 to 1,468.61)    | 1,261.08<br>(1,029.84 to 1,500.51)    | 1,209.34<br>(993.40 to 1,423.35)      | 63.21<br>(53.38 to 72.97)          | 61.31<br>(52.07 to 71.21)          | 64.03<br>(54.21 to 74.39)          | 58.07<br>(49.31 to 67.27)          |
| Mental disorders                           | 6,244.07<br>(5,103.53 to 7,417.71)    | 5,155.80<br>(3,968.10 to 6,443.93)    | 5,382.38<br>(4,155.96 to 6,700.29)    | 5,448.74<br>(4,253.94 to 6,792.80)    | 212.37<br>(176.73 to 251.70)       | 202.18<br>(162.89 to 245.95)       | 213.16<br>(172.04 to 260.52)       | 211.74<br>(171.16 to 255.48)       |
| Alcohol use disorders                      | 5,051.51<br>(4,127.61 to 6,090.33)    | 3,880.37<br>(2,910.09 to 4,953.36)    | 3,942.83<br>(2,963.12 to 5,060.71)    | 4,254.83<br>(3,210.68 to 5,387.19)    | 185.02<br>(153.46 to 220.45)       | 167.68<br>(132.21 to 208.96)       | 173.26<br>(136.75 to 215.28)       | 180.34<br>(143.14 to 222.28)       |
| Drug use disorders                         | 1,186.67<br>(911.06 to 1,479.31)      | 1,272.48<br>(884.00 to 1,713.10)      | 1,436.41<br>(999.67 to 1,909.40)      | 1,191.05<br>(832.02 to 1,589.67)      | 27.23<br>(21.55 to 33.30)          | 34.44<br>(26.29 to 43.26)          | 39.84<br>(30.98 to 49.73)          | 31.34<br>(23.90 to 39.36)          |
| Opioid use disorders                       | 590.53<br>(305.61 to 774.31)          | 449.12<br>(248.10 to 657.38)          | 460.82<br>(254.46 to 680.40)          | 444.09<br>(242.17 to 645.57)          | 13.05<br>(7.69 to 16.57)           | 11.62<br>(7.83 to 15.77)           | 12.20<br>(8.30 to 16.41)           | 11.21<br>(7.48 to 14.96)           |



|                           |                                 |                                 |                                   |                                 |                             |                              |                              |                              |
|---------------------------|---------------------------------|---------------------------------|-----------------------------------|---------------------------------|-----------------------------|------------------------------|------------------------------|------------------------------|
|                           | 16.74<br>(11.09 to<br>23.48)    | 32.69<br>(19.37 to<br>47.57)    | 37.29<br>(21.30 to<br>54.81)      | 30.13<br>(17.92 to<br>44.28)    | 0.47<br>(0.26 to<br>0.63)   | 1.22<br>(0.51 to<br>1.68)    | 1.46<br>(0.58 to<br>2.04)    | 1.06<br>(0.48 to<br>1.49)    |
| Cocaine use disorders     | 69.64<br>(21.67 to<br>105.18)   | 140.57<br>(49.27 to<br>226.15)  | 168.57<br>(60.46 to<br>268.50)    | 127.24<br>(45.71 to<br>204.56)  | 1.30<br>(0.43 to<br>1.95)   | 2.69<br>(1.00 to<br>4.26)    | 3.24<br>(1.21 to<br>5.04)    | 2.42<br>(0.92 to<br>3.77)    |
| Amphetamine use disorders | 509.76<br>(364.54 to<br>734.59) | 650.10<br>(423.52 to<br>931.21) | 769.73<br>(504.81 to<br>1,093.48) | 589.59<br>(385.89 to<br>858.57) | 12.41<br>(9.45 to<br>17.04) | 18.91<br>(13.55 to<br>24.99) | 22.94<br>(17.14 to<br>29.40) | 16.64<br>(12.05 to<br>22.15) |
| Other drug use disorders  | 5.89<br>(4.17 to<br>7.80)       | 2.96<br>(1.81 to<br>4.54)       | 3.14<br>(1.87 to<br>4.90)         | 2.87<br>(1.75 to<br>4.31)       | 0.12<br>(0.09 to<br>0.16)   | 0.06<br>(0.04 to<br>0.09)    | 0.06<br>(0.04 to<br>0.10)    | 0.06<br>(0.03 to<br>0.09)    |
| Eating disorders          |                                 |                                 |                                   |                                 |                             |                              |                              |                              |

| Slovenia                                                   |                                     |                                      |                                      |                                       |                              |                                  |                                  |                                    |
|------------------------------------------------------------|-------------------------------------|--------------------------------------|--------------------------------------|---------------------------------------|------------------------------|----------------------------------|----------------------------------|------------------------------------|
| Cause                                                      | YLLs (actual counts)                |                                      |                                      |                                       | Deaths (actual counts)       |                                  |                                  |                                    |
|                                                            | 2016                                | 2040 Forecast                        | 2040 Better Scenario                 | 2040 Worse Scenario                   | 2016                         | 2040 Forecast                    | 2040 Better Scenario             | 2040 Worse Scenario                |
|                                                            | 9,614.20<br>(8,442.59 to 10,814.88) | 12,858.46<br>(9,845.31 to 16,455.26) | 11,288.85<br>(8,621.87 to 14,393.60) | 14,870.03<br>(11,201.43 to 19,247.34) | 764.40<br>(676.25 to 853.35) | 1,258.03<br>(991.18 to 1,578.86) | 1,142.80<br>(890.61 to 1,439.58) | 1,400.22<br>(1,082.26 to 1,773.85) |
| Diabetes, urogenital, blood, and endocrine diseases        |                                     |                                      |                                      |                                       |                              |                                  |                                  |                                    |
| Diabetes mellitus                                          | 4,468.05<br>(3,816.06 to 5,196.98)  | 5,728.88<br>(3,579.63 to 8,637.18)   | 4,701.47<br>(2,948.21 to 6,999.25)   | 6,915.34<br>(4,238.68 to 10,759.59)   | 337.16<br>(290.28 to 387.41) | 522.69<br>(339.58 to 756.66)     | 447.11<br>(293.03 to 639.53)     | 599.62<br>(377.77 to 906.99)       |
| Acute glomerulonephritis                                   | 8.81<br>(7.71 to 9.92)              | 6.02<br>(4.22 to 8.44)               | 5.36<br>(3.72 to 7.50)               | 6.44<br>(4.47 to 9.00)                | 0.20<br>(0.18 to 0.23)       | 0.16<br>(0.11 to 0.21)           | 0.14<br>(0.10 to 0.20)           | 0.16<br>(0.12 to 0.23)             |
| Chronic kidney disease                                     | 2,510.95<br>(2,196.65 to 2,846.79)  | 3,939.87<br>(2,366.14 to 6,299.71)   | 3,483.51<br>(2,086.29 to 5,570.16)   | 4,811.70<br>(2,782.88 to 7,990.78)    | 232.13<br>(203.00 to 260.36) | 439.88<br>(269.75 to 714.23)     | 402.61<br>(252.75 to 639.51)     | 517.96<br>(302.35 to 869.34)       |
| Chronic kidney disease due to diabetes mellitus            | 791.53<br>(686.47 to 902.90)        | 1,334.83<br>(784.52 to 2,204.02)     | 1,174.96<br>(702.02 to 1,898.92)     | 1,646.57<br>(921.18 to 2,822.93)      | 62.93<br>(54.57 to 71.71)    | 130.85<br>(79.00 to 212.54)      | 119.30<br>(73.49 to 186.42)      | 155.38<br>(88.27 to 266.90)        |
| Chronic kidney disease due to hypertension                 | 405.24<br>(340.09 to 476.35)        | 742.66<br>(435.09 to 1,237.26)       | 688.09<br>(410.52 to 1,121.84)       | 872.07<br>(487.40 to 1,510.78)        | 50.90<br>(42.94 to 59.80)    | 105.12<br>(61.68 to 174.52)      | 100.24<br>(60.47 to 165.45)      | 119.63<br>(67.34 to 207.87)        |
| Chronic kidney disease due to glomerulonephritis           | 511.43<br>(441.94 to 583.70)        | 688.66<br>(408.64 to 1,134.82)       | 589.53<br>(351.19 to 949.03)         | 856.25<br>(476.74 to 1,438.49)        | 43.80<br>(37.74 to 50.42)    | 43.80<br>(43.18 to 119.78)       | 63.67<br>(38.53 to 105.54)       | 87.05<br>(49.44 to 147.74)         |
| Chronic kidney disease due to other and unspecified causes | 802.75<br>(695.92 to 918.03)        | 1,173.73<br>(697.21 to 1,992.27)     | 1,030.93<br>(611.97 to 1,699.50)     | 1,436.80<br>(799.03 to 2,442.81)      | 74.49<br>(64.32 to 85.26)    | 131.71<br>(80.04 to 217.66)      | 119.39<br>(73.14 to 192.30)      | 155.91<br>(89.47 to 266.39)        |
| Urinary diseases and male infertility                      | 1,223.91<br>(1,052.15 to 1,415.94)  | 1,628.10<br>(1,310.85 to 1,957.94)   | 1,525.37<br>(1,247.05 to 1,808.13)   | 1,624.37<br>(1,324.29 to 1,993.19)    | 124.72<br>(107.00 to 144.11) | 191.54<br>(151.69 to 235.73)     | 185.12<br>(151.26 to 227.34)     | 185.07<br>(146.33 to 231.06)       |
| Urinary tract infections                                   | 600.63<br>(357.87 to 1,131.85)      | 1,045.67<br>(693.67 to 1,682.83)     | 986.53<br>(653.45 to 1,586.54)       | 1,044.12<br>(687.95 to 1,654.11)      | 55.42<br>(28.44 to 118.70)   | 115.20<br>(70.52 to 198.82)      | 112.23<br>(68.84 to 195.68)      | 111.36<br>(66.89 to 195.59)        |
| Urolithiasis                                               | 30.44<br>(18.55 to 64.34)           | 38.12<br>(23.38 to 74.72)            | 33.88<br>(20.37 to 68.13)            | 39.61<br>(24.16 to 75.64)             | 2.33<br>(1.18 to 6.08)       | 3.50<br>(1.95 to 7.83)           | 3.21<br>(1.75 to 7.32)           | 3.51<br>(1.94 to 7.85)             |
| Other urinary diseases                                     | 592.83<br>(139.44 to 864.82)        | 544.31<br>(93.55 to 855.15)          | 504.96<br>(87.12 to 783.92)          | 540.63<br>(94.09 to 860.17)           | 66.97<br>(12.74 to 98.89)    | 72.84<br>(10.98 to 115.14)       | 69.68<br>(10.66 to 109.82)       | 70.20<br>(10.51 to 114.14)         |
| Gynecological diseases                                     | 1.98<br>(1.41 to 3.26)              | 1.35<br>(0.82 to 2.09)               | 1.09<br>(0.68 to 1.68)               | 1.50<br>(0.88 to 2.35)                | 0.12<br>(0.08 to 0.16)       | 0.12<br>(0.06 to 0.19)           | 0.10<br>(0.05 to 0.15)           | 0.13<br>(0.07 to 0.20)             |
| Uterine fibroids                                           | 1.33<br>(0.94 to 2.35)              | 0.75<br>(0.42 to 1.29)               | 0.62<br>(0.35 to 1.10)               | 0.83<br>(0.45 to 1.47)                | 0.06<br>(0.04 to 0.09)       | 0.05<br>(0.03 to 0.07)           | 0.04<br>(0.02 to 0.06)           | 0.05<br>(0.03 to 0.08)             |
| Polycystic ovarian syndrome                                | 0.11<br>(0.06 to 0.27)              | 0.04<br>(0.01 to 0.11)               | 0.02<br>(0.01 to 0.07)               | 0.05<br>(0.01 to 0.15)                | 0.00<br>(0.00 to 0.01)       | 0.00<br>(0.00 to 0.00)           | 0.00<br>(0.00 to 0.00)           | 0.00<br>(0.00 to 0.00)             |
| Endometriosis                                              | 0.02<br>(0.01 to 0.04)              | 0.01<br>(0.00 to 0.03)               | 0.01<br>(0.00 to 0.02)               | 0.01<br>(0.00 to 0.03)                | 0.00<br>(0.00 to 0.00)       | 0.00<br>(0.00 to 0.00)           | 0.00<br>(0.00 to 0.00)           | 0.00<br>(0.00 to 0.00)             |
| Genital prolapse                                           | 0.06<br>(0.03 to 0.09)              | 0.04<br>(0.02 to 0.07)               | 0.03<br>(0.01 to 0.06)               | 0.04<br>(0.02 to 0.08)                | 0.00<br>(0.00 to 0.01)       | 0.00<br>(0.00 to 0.01)           | 0.00<br>(0.00 to 0.00)           | 0.00<br>(0.00 to 0.01)             |
| Other gynecological diseases                               | 0.47<br>(0.28 to 0.66)              | 0.52<br>(0.26 to 0.86)               | 0.41<br>(0.21 to 0.67)               | 0.57<br>(0.28 to 0.91)                | 0.06<br>(0.03 to 0.08)       | 0.07<br>(0.03 to 0.12)           | 0.06<br>(0.02 to 0.10)           | 0.08<br>(0.03 to 0.13)             |
| Hemoglobinopathies and hemolytic anemias                   | 231.98<br>(167.81 to 281.30)        | 207.91<br>(138.73 to 262.99)         | 188.97<br>(127.73 to 232.93)         | 211.35<br>(144.10 to 263.77)          | 18.86<br>(11.31 to 23.13)    | 23.21<br>(12.91 to 29.80)        | 21.95<br>(12.18 to 27.75)        | 22.64<br>(12.86 to 29.52)          |
| Thalassemias                                               | 6.20<br>(4.58 to 8.36)              | 1.76<br>(0.94 to 3.18)               | 1.68<br>(0.90 to 3.05)               | 1.81<br>(0.97 to 3.23)                | 0.08<br>(0.06 to 0.11)       | 0.02<br>(0.01 to 0.04)           | 0.02<br>(0.01 to 0.04)           | 0.02<br>(0.01 to 0.04)             |

|                                                   |                                     |                                     |                                     |                                     |                              |                              |                               |                              |
|---------------------------------------------------|-------------------------------------|-------------------------------------|-------------------------------------|-------------------------------------|------------------------------|------------------------------|-------------------------------|------------------------------|
|                                                   | 15.09<br>(11.45 to<br>23.02)        | 8.72<br>(5.87 to<br>13.23)          | 7.47<br>(5.03 to<br>11.37)          | 9.54<br>(6.42 to<br>14.40)          | 0.37<br>(0.28 to<br>0.56)    | 0.27<br>(0.18 to<br>0.39)    | 0.23<br>(0.16 to<br>0.34)     | 0.29<br>(0.20 to<br>0.43)    |
| Sickle cell disorders                             |                                     |                                     |                                     |                                     |                              |                              |                               |                              |
|                                                   | 31.75<br>(23.25 to<br>45.66)        | 29.26<br>(20.26 to<br>42.75)        | 24.54<br>(17.43 to<br>34.83)        | 31.80<br>(22.11 to<br>46.41)        | 1.08<br>(0.78 to<br>1.51)    | 1.52<br>(1.05 to<br>2.18)    | 1.31<br>(0.93 to<br>1.88)     | 1.60<br>(1.10 to<br>2.32)    |
| G6PD deficiency                                   |                                     |                                     |                                     |                                     |                              |                              |                               |                              |
|                                                   | 178.94<br>(122.22 to<br>216.31)     | 168.16<br>(103.70 to<br>212.44)     | 155.28<br>(96.40 to<br>192.70)      | 168.20<br>(105.26 to<br>213.34)     | 17.34<br>(9.99 to<br>21.32)  | 21.39<br>(11.23 to<br>27.84) | 20.39<br>(10.73 to<br>26.05)  | 20.73<br>(10.92 to<br>27.37) |
| Other hemoglobinopathies and hemolytic anemias    |                                     |                                     |                                     |                                     |                              |                              |                               |                              |
|                                                   | 1,168.53<br>(769.15 to<br>1,391.22) | 1,346.32<br>(831.42 to<br>1,651.23) | 1,383.07<br>(865.34 to<br>1,701.43) | 1,299.33<br>(811.81 to<br>1,598.03) | 51.20<br>(29.88 to<br>61.38) | 80.43<br>(44.86 to<br>97.45) | 85.77<br>(47.33 to<br>104.91) | 74.63<br>(41.33 to<br>90.79) |
| Endocrine, metabolic, blood, and immune disorders |                                     |                                     |                                     |                                     |                              |                              |                               |                              |

| Slovenia                                      |                                           |                                           |                                         |                                           |                                  |                                   |                                   |                                   |
|-----------------------------------------------|-------------------------------------------|-------------------------------------------|-----------------------------------------|-------------------------------------------|----------------------------------|-----------------------------------|-----------------------------------|-----------------------------------|
| Cause                                         | YLLs (actual counts)                      |                                           |                                         |                                           | Deaths (actual counts)           |                                   |                                   |                                   |
|                                               | 2016                                      | 2040 Forecast                             | 2040 Better Scenario                    | 2040 Worse Scenario                       | 2016                             | 2040 Forecast                     | 2040 Better Scenario              | 2040 Worse Scenario               |
| <b>Musculoskeletal disorders</b>              | <b>948.33</b><br>(656.95 to 1,152.03)     | <b>1,001.22</b><br>(667.39 to 1,271.68)   | <b>918.51</b><br>(623.52 to 1,145.66)   | <b>1,039.28</b><br>(686.17 to 1,315.19)   | <b>55.80</b><br>(34.76 to 67.98) | <b>72.97</b><br>(43.30 to 90.59)  | <b>68.16</b><br>(41.44 to 83.57)  | <b>73.95</b><br>(44.55 to 92.54)  |
| Rheumatoid arthritis                          | 373.92<br>(250.40 to 506.26)              | 369.00<br>(234.26 to 538.35)              | 301.56<br>(195.88 to 434.63)            | 409.99<br>(257.00 to 592.30)              | 26.04<br>(16.87 to 34.84)        | 30.80<br>(19.29 to 43.64)         | 25.81<br>(15.84 to 36.32)         | 33.25<br>(20.05 to 47.40)         |
| Other musculoskeletal disorders               | 574.41<br>(389.67 to 703.59)              | 632.23<br>(390.43 to 801.39)              | 616.95<br>(388.64 to 777.89)            | 629.29<br>(387.59 to 788.94)              | 29.76<br>(16.60 to 37.07)        | 42.18<br>(22.19 to 52.97)         | 42.35<br>(23.44 to 52.83)         | 40.70<br>(21.17 to 51.39)         |
| <b>Other non-communicable diseases</b>        | <b>2,262.37</b><br>(1,848.30 to 2,833.88) | <b>1,647.41</b><br>(1,123.60 to 2,131.72) | <b>1,467.57</b><br>(999.74 to 1,904.57) | <b>1,751.87</b><br>(1,217.85 to 2,326.79) | <b>52.66</b><br>(34.50 to 65.94) | <b>77.29</b><br>(32.26 to 112.26) | <b>75.37</b><br>(30.38 to 110.58) | <b>75.58</b><br>(33.30 to 108.87) |
| Congenital birth defects                      | 1,906.77<br>(1,561.17 to 2,577.49)        | 1,042.32<br>(742.25 to 1,491.43)          | 880.88<br>(636.92 to 1,205.03)          | 1,157.89<br>(800.56 to 1,632.50)          | 27.98<br>(23.48 to 35.36)        | 27.98<br>(13.03 to 23.23)         | 15.62<br>(11.43 to 20.12)         | 19.34<br>(13.95 to 25.43)         |
| Neural tube defects                           | 22.60<br>(13.11 to 33.01)                 | 5.14<br>(2.55 to 9.67)                    | 3.71<br>(1.95 to 6.78)                  | 6.20<br>(3.11 to 11.38)                   | 0.29<br>(0.18 to 0.41)           | 0.08<br>(0.04 to 0.13)            | 0.06<br>(0.03 to 0.10)            | 0.09<br>(0.05 to 0.16)            |
| Congenital heart anomalies                    | 695.20<br>(513.32 to 1,218.17)            | 260.60<br>(152.95 to 503.20)              | 186.16<br>(111.79 to 359.11)            | 317.61<br>(178.05 to 604.35)              | 9.99<br>(7.70 to 16.28)          | 9.99<br>(2.56 to 6.98)            | 2.94<br>(1.91 to 5.12)            | 4.92<br>(2.99 to 8.35)            |
| Orofacial clefts                              | 1.09<br>(0.24 to 2.34)                    | 0.36<br>(0.07 to 1.04)                    | 0.23<br>(0.05 to 0.63)                  | 0.48<br>(0.09 to 1.38)                    | 0.01<br>(0.00 to 0.03)           | 0.00<br>(0.00 to 0.01)            | 0.00<br>(0.00 to 0.01)            | 0.01<br>(0.00 to 0.02)            |
| Down syndrome                                 | 290.21<br>(215.50 to 388.37)              | 316.16<br>(225.33 to 422.64)              | 319.43<br>(230.04 to 422.17)            | 312.99<br>(223.32 to 418.96)              | 5.85<br>(3.92 to 7.49)           | 7.20<br>(4.54 to 9.42)            | 7.36<br>(4.67 to 9.55)            | 7.07<br>(4.50 to 9.17)            |
| Other chromosomal abnormalities               | 302.84<br>(155.43 to 413.31)              | 219.06<br>(115.03 to 337.04)              | 187.82<br>(101.44 to 287.68)            | 238.85<br>(124.40 to 370.57)              | 3.94<br>(2.03 to 5.29)           | 3.02<br>(1.51 to 4.52)            | 2.61<br>(1.34 to 3.87)            | 3.27<br>(1.62 to 4.95)            |
| Congenital musculoskeletal and limb anomalies | 72.48<br>(18.65 to 109.88)                | 24.10<br>(5.69 to 50.68)                  | 17.91<br>(4.45 to 36.10)                | 28.41<br>(6.79 to 58.79)                  | 0.87<br>(0.23 to 1.30)           | 0.29<br>(0.07 to 0.60)            | 0.22<br>(0.06 to 0.43)            | 0.34<br>(0.09 to 0.70)            |
| Urogenital congenital anomalies               | 22.20<br>(10.59 to 32.71)                 | 10.00<br>(4.90 to 16.80)                  | 7.94<br>(4.04 to 13.19)                 | 11.40<br>(5.59 to 19.05)                  | 0.33<br>(0.18 to 0.47)           | 0.17<br>(0.09 to 0.27)            | 0.14<br>(0.07 to 0.21)            | 0.19<br>(0.10 to 0.30)            |
| Digestive congenital anomalies                | 63.38<br>(32.22 to 142.14)                | 28.24<br>(12.78 to 66.45)                 | 20.53<br>(9.28 to 48.79)                | 33.93<br>(15.03 to 83.46)                 | 0.80<br>(0.44 to 1.69)           | 0.37<br>(0.18 to 0.81)            | 0.27<br>(0.14 to 0.60)            | 0.44<br>(0.22 to 1.00)            |
| Other congenital birth defects                | 436.76<br>(318.54 to 631.77)              | 178.65<br>(111.45 to 292.45)              | 137.16<br>(86.34 to 224.00)             | 208.01<br>(129.27 to 336.32)              | 5.90<br>(4.53 to 8.01)           | 2.60<br>(1.71 to 3.95)            | 2.02<br>(1.36 to 3.07)            | 3.01<br>(1.94 to 4.59)            |
| Skin and subcutaneous diseases                | 285.13<br>(123.75 to 384.41)              | 584.44<br>(209.02 to 847.42)              | 569.39<br>(199.19 to 825.97)            | 571.02<br>(209.75 to 825.91)              | 23.86<br>(7.16 to 35.32)         | 59.25<br>(15.69 to 92.15)         | 59.55<br>(15.35 to 93.02)         | 55.98<br>(14.89 to 88.40)         |
| Cellulitis                                    | 36.53<br>(13.87 to 54.55)                 | 89.49<br>(29.25 to 135.81)                | 89.92<br>(29.43 to 136.68)              | 86.53<br>(29.11 to 130.98)                | 2.45<br>(0.62 to 3.96)           | 7.59<br>(1.78 to 12.22)           | 7.87<br>(1.82 to 12.63)           | 7.09<br>(1.67 to 11.52)           |
| Pyoderma                                      | 114.10<br>(52.81 to 157.26)               | 346.81<br>(113.35 to 525.54)              | 339.47<br>(112.35 to 518.28)            | 337.98<br>(115.52 to 503.84)              | 8.18<br>(2.43 to 12.36)          | 33.69<br>(7.57 to 55.05)          | 34.20<br>(7.54 to 56.48)          | 31.66<br>(7.26 to 51.92)          |
| Decubitus ulcer                               | 116.64<br>(37.99 to 168.25)               | 123.25<br>(35.34 to 192.68)               | 115.78<br>(33.96 to 180.29)             | 122.07<br>(36.23 to 192.58)               | 12.16<br>(3.02 to 18.59)         | 15.81<br>(3.89 to 25.65)          | 15.29<br>(3.75 to 24.53)          | 15.19<br>(3.79 to 25.17)          |
| Other skin and subcutaneous diseases          | 17.87<br>(8.64 to 25.62)                  | 24.89<br>(9.25 to 35.74)                  | 24.22<br>(8.89 to 34.64)                | 24.43<br>(9.65 to 34.39)                  | 1.07<br>(0.37 to 1.52)           | 2.16<br>(0.59 to 3.29)            | 2.19<br>(0.58 to 3.33)            | 2.02<br>(0.58 to 3.05)            |
| Sudden infant death syndrome                  | 70.47<br>(39.36 to 107.89)                | 20.65<br>(7.95 to 49.50)                  | 17.30<br>(6.69 to 40.66)                | 22.97<br>(8.57 to 54.75)                  | 0.82<br>(0.46 to 1.25)           | 0.24<br>(0.09 to 0.57)            | 0.20<br>(0.08 to 0.47)            | 0.27<br>(0.10 to 0.64)            |

|                          |                                          |                                          |                                          |                                          |                                       |                                       |                                     |                                       |
|--------------------------|------------------------------------------|------------------------------------------|------------------------------------------|------------------------------------------|---------------------------------------|---------------------------------------|-------------------------------------|---------------------------------------|
| Injuries                 | 32,720.77<br>(27,423.08 to<br>38,927.92) | 23,625.11<br>(16,550.43 to<br>34,400.31) | 21,565.04<br>(15,225.07 to<br>29,982.36) | 29,168.16<br>(19,488.02 to<br>43,124.93) | 1,359.01<br>(1,063.12 to<br>1,588.20) | 1,493.79<br>(1,008.83 to<br>1,892.46) | 1,433.32<br>(966.99 to<br>1,794.47) | 1,617.38<br>(1,102.95 to<br>2,130.21) |
| Transport injuries       | 6,231.59<br>(5,180.88 to<br>7,366.42)    | 2,643.67<br>(1,463.29 to<br>4,519.08)    | 2,456.78<br>(1,380.33 to<br>4,150.12)    | 5,688.98<br>(2,975.66 to<br>10,084.72)   | 169.28<br>(143.32 to<br>197.41)       | 99.43<br>(63.28 to<br>148.69)         | 94.29<br>(61.50 to<br>139.89)       | 183.37<br>(109.55 to<br>289.05)       |
| Road injuries            | 5,328.91<br>(4,457.16 to<br>6,295.00)    | 2,128.32<br>(1,176.88 to<br>3,611.35)    | 2,042.14<br>(1,143.14 to<br>3,454.80)    | 5,034.08<br>(2,600.41 to<br>8,901.83)    | 142.41<br>(120.69 to<br>166.89)       | 79.54<br>(51.22 to<br>118.26)         | 77.87<br>(50.89 to<br>114.61)       | 158.92<br>(94.08 to<br>250.03)        |
| Pedestrian road injuries | 732.47<br>(528.81 to<br>1,089.16)        | 245.96<br>(151.39 to<br>409.36)          | 200.48<br>(125.46 to<br>339.40)          | 530.13<br>(307.44 to<br>908.02)          | 27.70<br>(21.83 to<br>38.95)          | 14.30<br>(9.58 to<br>22.99)           | 12.06<br>(8.31 to<br>19.34)         | 27.34<br>(17.33 to<br>43.53)          |

| Slovenia                                        |                                              |                                              |                                              |                                              |                                      |                                        |                                        |                                        |
|-------------------------------------------------|----------------------------------------------|----------------------------------------------|----------------------------------------------|----------------------------------------------|--------------------------------------|----------------------------------------|----------------------------------------|----------------------------------------|
| Cause                                           | YLLs (actual counts)                         |                                              |                                              |                                              | Deaths (actual counts)               |                                        |                                        |                                        |
|                                                 | 2016                                         | 2040 Forecast                                | 2040 Better Scenario                         | 2040 Worse Scenario                          | 2016                                 | 2040 Forecast                          | 2040 Better Scenario                   | 2040 Worse Scenario                    |
| Cyclist road injuries                           | 429.56<br>(280.41 to 540.39)                 | 254.85<br>(141.26 to 433.32)                 | 253.49<br>(144.14 to 421.29)                 | 477.67<br>(245.05 to 833.30)                 | 14.89<br>(10.35 to 18.59)            | 13.26<br>(7.88 to 21.89)               | 13.55<br>(8.26 to 22.26)               | 20.88<br>(11.71 to 35.44)              |
| Motorcyclist road injuries                      | 970.10<br>(536.98 to 1,253.82)               | 526.77<br>(227.72 to 1,036.17)               | 511.39<br>(227.52 to 993.19)                 | 946.27<br>(380.09 to 1,949.73)               | 21.60<br>(12.48 to 27.64)            | 14.90<br>(7.67 to 26.38)               | 14.81<br>(7.80 to 25.70)               | 23.37<br>(10.98 to 43.91)              |
| Motor vehicle road injuries                     | 3,177.31<br>(2,572.86 to 3,970.45)           | 1,092.88<br>(576.29 to 1,869.55)             | 1,068.93<br>(575.18 to 1,808.40)             | 3,061.77<br>(1,521.19 to 5,473.48)           | 77.58<br>(63.43 to 97.55)            | 36.65<br>(23.20 to 55.74)              | 37.00<br>(23.78 to 55.09)              | 86.51<br>(49.37 to 136.28)             |
| Other road injuries                             | 19.48<br>(12.93 to 25.87)                    | 7.87<br>(3.98 to 14.65)                      | 7.85<br>(4.03 to 14.46)                      | 18.23<br>(8.69 to 34.50)                     | 0.64<br>(0.40 to 0.85)               | 0.43<br>(0.21 to 0.80)                 | 0.45<br>(0.22 to 0.82)                 | 0.81<br>(0.38 to 1.59)                 |
| Other transport injuries                        | 902.68<br>(733.26 to 1,109.48)               | 515.35<br>(275.91 to 888.79)                 | 414.63<br>(227.13 to 701.47)                 | 654.90<br>(335.99 to 1,173.46)               | 26.87<br>(21.99 to 32.43)            | 19.89<br>(11.84 to 32.10)              | 16.42<br>(10.03 to 26.54)              | 24.46<br>(13.65 to 41.80)              |
| <b>Unintentional injuries</b>                   | <b>11,209.02<br/>(7,921.34 to 13,387.44)</b> | <b>10,878.36<br/>(6,976.25 to 13,582.53)</b> | <b>10,329.27<br/>(6,634.33 to 12,739.50)</b> | <b>10,945.57<br/>(6,964.53 to 13,672.15)</b> | <b>713.61<br/>(436.59 to 856.71)</b> | <b>997.01<br/>(568.15 to 1,224.89)</b> | <b>984.05<br/>(556.83 to 1,186.57)</b> | <b>958.19<br/>(537.98 to 1,198.34)</b> |
| Falls                                           | 6,328.86<br>(4,129.56 to 7,562.82)           | 7,553.34<br>(4,576.50 to 9,298.38)           | 7,283.39<br>(4,353.95 to 8,857.28)           | 7,447.24<br>(4,414.90 to 9,196.20)           | 513.16<br>(284.16 to 616.88)         | 801.20<br>(426.44 to 993.98)           | 796.42<br>(416.07 to 971.22)           | 762.23<br>(395.22 to 964.65)           |
| Drowning                                        | 707.78<br>(607.42 to 830.30)                 | 391.21<br>(248.46 to 625.04)                 | 345.13<br>(217.46 to 543.50)                 | 442.97<br>(266.92 to 742.55)                 | 21.69<br>(18.72 to 25.24)            | 15.99<br>(10.94 to 23.86)              | 14.54<br>(11.44 to 21.44)              | 17.47<br>(11.50 to 27.49)              |
| Fire, heat, and hot substances                  | 262.54<br>(206.09 to 323.70)                 | 154.52<br>(102.59 to 234.99)                 | 132.17<br>(92.33 to 197.11)                  | 175.15<br>(113.54 to 274.55)                 | 12.20<br>(9.73 to 14.50)             | 10.66<br>(7.65 to 14.89)               | 9.56<br>(6.95 to 13.38)                | 11.45<br>(7.85 to 16.58)               |
| Poisonings                                      | 195.40<br>(151.88 to 288.23)                 | 72.43<br>(43.09 to 126.75)                   | 58.15<br>(35.55 to 99.58)                    | 96.54<br>(48.38 to 153.98)                   | 6.75<br>(5.41 to 9.80)               | 3.47<br>(2.26 to 5.73)                 | 2.90<br>(1.93 to 4.75)                 | 3.97<br>(2.43 to 6.74)                 |
| Exposure to mechanical forces                   | 886.79<br>(572.06 to 1,129.58)               | 447.59<br>(287.29 to 628.46)                 | 386.47<br>(254.18 to 530.50)                 | 486.12<br>(309.62 to 683.95)                 | 27.24<br>(18.30 to 33.97)            | 19.16<br>(13.84 to 24.52)              | 17.29<br>(12.69 to 21.59)              | 19.87<br>(13.89 to 25.51)              |
| Unintentional firearm injuries                  | 46.35<br>(37.47 to 65.88)                    | 35.86<br>(27.05 to 46.23)                    | 33.45<br>(25.33 to 42.14)                    | 36.79<br>(27.88 to 47.73)                    | 2.25<br>(1.56 to 2.67)               | 2.79<br>(1.61 to 3.47)                 | 2.78<br>(1.56 to 3.45)                 | 2.69<br>(1.56 to 3.35)                 |
| Unintentional suffocation                       | 16.36<br>(12.27 to 23.12)                    | 8.60<br>(5.80 to 13.14)                      | 7.59<br>(5.22 to 11.47)                      | 9.32<br>(6.27 to 14.12)                      | 0.34<br>(0.28 to 0.48)               | 0.24<br>(0.18 to 0.34)                 | 0.22<br>(0.16 to 0.31)                 | 0.24<br>(0.18 to 0.36)                 |
| Other exposure to mechanical forces             | 824.08<br>(510.34 to 1,050.70)               | 403.14<br>(249.91 to 571.46)                 | 345.43<br>(216.57 to 482.39)                 | 440.01<br>(271.09 to 627.26)                 | 24.65<br>(16.20 to 31.10)            | 16.13<br>(11.61 to 21.15)              | 14.30<br>(10.58 to 18.27)              | 16.94<br>(11.82 to 22.31)              |
| Adverse effects of medical treatment            | 1,473.53<br>(733.78 to 2,056.21)             | 1,329.65<br>(614.53 to 1,940.13)             | 1,274.63<br>(601.43 to 1,854.05)             | 1,334.57<br>(620.95 to 1,941.97)             | 82.18<br>(39.89 to 115.84)           | 96.55<br>(45.82 to 135.93)             | 95.46<br>(45.90 to 134.41)             | 93.50<br>(43.80 to 132.17)             |
| Animal contact                                  | 69.92<br>(49.68 to 99.37)                    | 62.75<br>(42.34 to 86.71)                    | 57.09<br>(38.44 to 77.19)                    | 65.45<br>(43.53 to 90.71)                    | 2.93<br>(2.02 to 3.80)               | 3.69<br>(2.37 to 4.71)                 | 3.48<br>(2.27 to 4.39)                 | 3.69<br>(2.36 to 4.72)                 |
| Venomous animal contact                         | 32.58<br>(18.85 to 46.72)                    | 24.51<br>(13.89 to 36.23)                    | 22.85<br>(12.69 to 32.99)                    | 25.39<br>(14.08 to 37.11)                    | 1.13<br>(0.59 to 1.52)               | 1.19<br>(0.60 to 1.64)                 | 1.15<br>(0.57 to 1.58)                 | 1.18<br>(0.58 to 1.62)                 |
| Non-venomous animal contact                     | 37.34<br>(26.09 to 58.76)                    | 38.24<br>(24.79 to 53.61)                    | 34.24<br>(23.04 to 47.10)                    | 40.05<br>(26.67 to 55.98)                    | 1.80<br>(1.26 to 2.50)               | 2.51<br>(1.61 to 3.22)                 | 2.34<br>(1.55 to 3.00)                 | 2.51<br>(1.63 to 3.28)                 |
| Foreign body                                    | 732.97<br>(588.60 to 1,025.81)               | 494.83<br>(357.46 to 653.13)                 | 481.17<br>(343.40 to 631.47)                 | 498.65<br>(361.13 to 665.01)                 | 27.18<br>(19.74 to 34.03)            | 27.33<br>(17.54 to 34.96)              | 27.95<br>(17.60 to 35.73)              | 26.10<br>(16.53 to 33.17)              |
| Pulmonary aspiration and foreign body in airway | 705.04<br>(560.69 to 1,000.50)               | 463.66<br>(330.35 to 619.02)                 | 447.45<br>(315.28 to 594.34)                 | 468.99<br>(333.33 to 634.95)                 | 25.93<br>(18.77 to 32.80)            | 25.11<br>(15.61 to 32.35)              | 25.46<br>(15.63 to 32.73)              | 24.12<br>(15.09 to 30.91)              |

|                                             |                                                               |                                                              |                                                             |                                                              |                                                      |                                                      |                                                      |                                                      |
|---------------------------------------------|---------------------------------------------------------------|--------------------------------------------------------------|-------------------------------------------------------------|--------------------------------------------------------------|------------------------------------------------------|------------------------------------------------------|------------------------------------------------------|------------------------------------------------------|
|                                             | 27.93<br>(21.27 to<br>38.36)                                  | 31.46<br>(21.68 to<br>41.03)                                 | 33.71<br>(23.23 to<br>43.99)                                | 29.66<br>(20.35 to<br>38.72)                                 | 1.25<br>(0.82 to<br>1.55)                            | 2.21<br>(1.29 to<br>2.89)                            | 2.48<br>(1.43 to<br>3.19)                            | 1.98<br>(1.13 to<br>2.61)                            |
| Foreign body in other body part             |                                                               |                                                              |                                                             |                                                              |                                                      |                                                      |                                                      |                                                      |
| Environmental heat and cold exposure        | 382.02<br>(231.62 to<br>627.67)                               | 314.04<br>(172.87 to<br>485.40)                              | 268.20<br>(151.11 to<br>415.29)                             | 340.06<br>(190.34 to<br>529.57)                              | 14.84<br>(8.90 to<br>22.84)                          | 16.12<br>(8.91 to<br>22.52)                          | 14.24<br>(7.87 to<br>19.96)                          | 16.76<br>(9.40 to<br>24.02)                          |
| Other unintentional injuries                | 169.21<br>(136.07 to<br>210.61)                               | 58.00<br>(37.21 to<br>90.00)                                 | 42.88<br>(29.11 to<br>62.48)                                | 68.81<br>(44.09 to<br>106.83)                                | 5.43<br>(4.49 to<br>6.61)                            | 2.82<br>(1.98 to<br>3.96)                            | 2.19<br>(1.67 to<br>2.90)                            | 3.14<br>(2.19 to<br>4.45)                            |
| <b>Self-harm and interpersonal violence</b> | <b>15,271.44</b><br><b>(12,295.24 to</b><br><b>20,692.76)</b> | <b>10,088.81</b><br><b>(5,487.73 to</b><br><b>17,420.41)</b> | <b>8,764.71</b><br><b>(4,828.86 to</b><br><b>14,689.53)</b> | <b>12,519.40</b><br><b>(6,343.81 to</b><br><b>21,930.53)</b> | <b>475.92</b><br><b>(386.10 to</b><br><b>633.38)</b> | <b>397.00</b><br><b>(232.69 to</b><br><b>631.91)</b> | <b>354.63</b><br><b>(211.32 to</b><br><b>552.93)</b> | <b>475.48</b><br><b>(261.36 to</b><br><b>766.11)</b> |

| Slovenia                                                                            |                                                |                                                   |                                                   |                                                   |                                                |                                                |                                                |                                                |
|-------------------------------------------------------------------------------------|------------------------------------------------|---------------------------------------------------|---------------------------------------------------|---------------------------------------------------|------------------------------------------------|------------------------------------------------|------------------------------------------------|------------------------------------------------|
| Cause                                                                               | YLLs (actual counts)                           |                                                   |                                                   |                                                   | Deaths (actual counts)                         |                                                |                                                |                                                |
|                                                                                     | 2016                                           | 2040 Forecast                                     | 2040 Better Scenario                              | 2040 Worse Scenario                               | 2016                                           | 2040 Forecast                                  | 2040 Better Scenario                           | 2040 Worse Scenario                            |
| Self-harm                                                                           | 14,422.00<br>(11,541.05 to<br>19,843.44)       | 9,726.63<br>(5,170.49 to<br>16,977.81)            | 8,445.67<br>(4,568.08 to<br>14,393.62)            | 12,106.95<br>(5,991.72 to<br>21,427.53)           | 452.99<br>(365.14 to<br>608.02)                | 384.42<br>(222.59 to<br>612.13)                | 343.29<br>(202.91 to<br>540.13)                | 461.50<br>(250.68 to<br>749.69)                |
| Self-harm by firearm                                                                | 1,376.40<br>(873.95 to<br>2,052.10)            | 644.09<br>(285.42 to<br>1,232.52)                 | 529.70<br>(238.62 to<br>1,005.42)                 | 825.21<br>(350.98 to<br>1,664.03)                 | 44.65<br>(26.46 to<br>64.17)                   | 27.35<br>(13.13 to<br>48.48)                   | 23.23<br>(11.52 to<br>41.48)                   | 33.66<br>(15.39 to<br>61.43)                   |
| Self-harm by other specified means                                                  | 13,045.60<br>(10,410.72 to<br>18,178.15)       | 9,082.54<br>(4,862.43 to<br>15,869.99)            | 7,915.97<br>(4,289.06 to<br>13,383.23)            | 11,281.74<br>(5,599.83 to<br>19,921.00)           | 408.34<br>(329.23 to<br>553.59)                | 357.07<br>(207.93 to<br>574.58)                | 320.06<br>(188.04 to<br>503.40)                | 427.84<br>(231.53 to<br>701.96)                |
| Interpersonal violence                                                              | 849.43<br>(637.78 to<br>1,359.16)              | 362.17<br>(224.29 to<br>634.25)                   | 319.04<br>(199.28 to<br>543.41)                   | 412.45<br>(247.64 to<br>716.60)                   | 22.93<br>(17.25 to<br>36.99)                   | 12.58<br>(8.21 to<br>22.02)                    | 11.34<br>(7.55 to<br>19.39)                    | 13.98<br>(8.93 to<br>23.87)                    |
| Physical violence by firearm                                                        | 189.68<br>(112.37 to<br>335.02)                | 67.36<br>(37.58 to<br>117.11)                     | 57.62<br>(32.85 to<br>103.16)                     | 75.09<br>(41.62 to<br>129.78)                     | 4.45<br>(2.65 to<br>7.51)                      | 1.82<br>(1.07 to<br>3.18)                      | 1.58<br>(0.94 to<br>2.67)                      | 1.99<br>(1.16 to<br>3.30)                      |
| Physical violence by sharp object                                                   | 236.12<br>(161.38 to<br>398.60)                | 101.76<br>(63.38 to<br>167.98)                    | 89.80<br>(56.50 to<br>147.88)                     | 110.67<br>(68.53 to<br>183.03)                    | 6.47<br>(4.48 to<br>10.66)                     | 3.58<br>(2.35 to<br>5.66)                      | 3.23<br>(2.19 to<br>5.01)                      | 3.78<br>(2.51 to<br>5.96)                      |
| Physical violence by other means                                                    | 423.63<br>(301.90 to<br>798.80)                | 193.05<br>(104.27 to<br>395.17)                   | 171.63<br>(94.79 to<br>345.76)                    | 226.69<br>(120.75 to<br>455.23)                   | 12.00<br>(8.55 to<br>22.44)                    | 7.19<br>(4.14 to<br>14.83)                     | 6.54<br>(3.78 to<br>13.33)                     | 8.21<br>(4.61 to<br>16.35)                     |
| <b>Forces of nature, conflict and terrorism, and executions and police conflict</b> | <b>8.73</b><br><b>(7.66 to</b><br><b>9.83)</b> | <b>14.27</b><br><b>(0.00 to</b><br><b>110.63)</b> | <b>14.28</b><br><b>(0.00 to</b><br><b>110.50)</b> | <b>14.21</b><br><b>(0.00 to</b><br><b>110.46)</b> | <b>0.20</b><br><b>(0.17 to</b><br><b>0.22)</b> | <b>0.34</b><br><b>(0.00 to</b><br><b>2.45)</b> | <b>0.35</b><br><b>(0.00 to</b><br><b>2.48)</b> | <b>0.34</b><br><b>(0.00 to</b><br><b>2.41)</b> |
| Exposure to forces of nature                                                        | 0.00<br>(0.00 to<br>0.00)                      | 9.80<br>(0.00 to<br>60.17)                        | 9.80<br>(0.00 to<br>60.39)                        | 9.77<br>(0.00 to<br>59.84)                        | 0.00<br>(0.00 to<br>0.00)                      | 0.22<br>(0.00 to<br>1.44)                      | 0.22<br>(0.00 to<br>1.45)                      | 0.22<br>(0.00 to<br>1.43)                      |
| Conflict and terrorism                                                              | 0.00<br>(0.00 to<br>0.00)                      | 4.47<br>(0.00 to<br>5.35)                         | 4.47<br>(0.00 to<br>5.34)                         | 4.45<br>(0.00 to<br>5.32)                         | 0.00<br>(0.00 to<br>0.00)                      | 0.12<br>(0.00 to<br>0.15)                      | 0.13<br>(0.00 to<br>0.15)                      | 0.12<br>(0.00 to<br>0.15)                      |
| Executions and police conflict                                                      | 8.73<br>(7.66 to<br>9.83)                      | 0.00<br>(0.00 to<br>0.00)                         | 0.00<br>(0.00 to<br>0.00)                         | 0.00<br>(0.00 to<br>0.00)                         | 0.20<br>(0.17 to<br>0.22)                      | 0.00<br>(0.00 to<br>0.00)                      | 0.00<br>(0.00 to<br>0.00)                      | 0.00<br>(0.00 to<br>0.00)                      |



| Eastern Europe                                                    |                                       |                                       |                                       |                                       |                                    |                                    |                                    |                                    |
|-------------------------------------------------------------------|---------------------------------------|---------------------------------------|---------------------------------------|---------------------------------------|------------------------------------|------------------------------------|------------------------------------|------------------------------------|
| Cause                                                             | YLLs (in 1000s)                       |                                       |                                       |                                       | Deaths (in 1000s)                  |                                    |                                    |                                    |
|                                                                   | 2016                                  | 2040 Forecast                         | 2040 Better Scenario                  | 2040 Worse Scenario                   | 2016                               | 2040 Forecast                      | 2040 Better Scenario               | 2040 Worse Scenario                |
| All causes                                                        | 61,475.42<br>(50,461.88 to 75,337.01) | 47,895.23<br>(31,800.66 to 70,165.72) | 32,970.99<br>(21,419.90 to 49,509.63) | 59,163.07<br>(39,272.15 to 85,951.42) | 2,908.88<br>(2,435.95 to 3,495.72) | 2,735.10<br>(2,111.77 to 3,487.60) | 1,989.95<br>(1,514.33 to 2,598.58) | 3,183.65<br>(2,471.21 to 4,004.66) |
| Communicable, maternal, neonatal, and nutritional diseases        | 4,450.91<br>(3,895.08 to 5,150.40)    | 2,509.43<br>(1,783.51 to 3,734.39)    | 1,394.32<br>(987.04 to 2,025.05)      | 3,544.53<br>(2,522.51 to 5,157.39)    | 104.66<br>(88.87 to 123.98)        | 72.21<br>(52.87 to 105.39)         | 43.88<br>(32.59 to 62.40)          | 97.12<br>(70.62 to 144.34)         |
| HIV/AIDS and tuberculosis                                         | 1,920.18<br>(1,727.44 to 2,154.57)    | 1,022.10<br>(805.22 to 1,510.54)      | 469.54<br>(365.15 to 592.64)          | 1,650.63<br>(1,212.39 to 2,297.92)    | 42.70<br>(37.92 to 48.52)          | 22.59<br>(17.29 to 34.59)          | 9.82<br>(7.27 to 13.08)            | 36.89<br>(25.92 to 53.59)          |
| Tuberculosis                                                      | 659.52<br>(487.88 to 884.40)          | 264.47<br>(107.55 to 610.45)          | 81.06<br>(32.77 to 186.63)            | 342.45<br>(152.88 to 771.60)          | 17.52<br>(13.14 to 23.09)          | 7.84<br>(3.54 to 17.14)            | 2.47<br>(1.12 to 5.35)             | 10.00<br>(4.40 to 21.14)           |
| HIV/AIDS                                                          | 1,260.66<br>(1,175.66 to 1,357.72)    | 757.63<br>(624.37 to 1,035.62)        | 388.48<br>(306.67 to 473.70)          | 1,308.18<br>(970.48 to 1,858.04)      | 25.18<br>(23.54 to 27.04)          | 14.75<br>(12.00 to 21.24)          | 7.35<br>(5.55 to 9.16)             | 26.89<br>(19.03 to 41.43)          |
| Diarrhea, lower respiratory, and other common infectious diseases | 1,703.38<br>(1,343.41 to 2,160.54)    | 1,179.71<br>(646.40 to 2,110.89)      | 719.51<br>(413.89 to 1,240.85)        | 1,553.33<br>(842.61 to 2,800.44)      | 50.85<br>(39.85 to 64.26)          | 44.88<br>(29.63 to 71.09)          | 30.55<br>(21.13 to 46.06)          | 55.18<br>(35.02 to 90.28)          |
| Diarrheal diseases                                                | 25.11<br>(20.39 to 31.05)             | 24.96<br>(5.61 to 83.00)              | 36.71<br>(10.53 to 105.07)            | 28.32<br>(5.75 to 96.99)              | 0.55<br>(0.46 to 0.65)             | 1.11<br>(0.29 to 3.40)             | 1.88<br>(0.63 to 4.90)             | 1.12<br>(0.26 to 3.54)             |
| Intestinal infectious diseases                                    | 0.46<br>(0.19 to 1.01)                | 0.37<br>(0.13 to 0.87)                | 0.45<br>(0.15 to 1.08)                | 0.35<br>(0.13 to 0.81)                | 0.01<br>(0.00 to 0.02)             | 0.01<br>(0.00 to 0.02)             | 0.01<br>(0.00 to 0.03)             | 0.01<br>(0.00 to 0.02)             |
| Typhoid fever                                                     | 0.24<br>(0.09 to 0.53)                | 0.24<br>(0.08 to 0.57)                | 0.36<br>(0.12 to 0.85)                | 0.23<br>(0.07 to 0.53)                | 0.01<br>(0.00 to 0.01)             | 0.01<br>(0.00 to 0.01)             | 0.01<br>(0.00 to 0.01)             | 0.01<br>(0.00 to 0.01)             |
| Paratyphoid fever                                                 | 0.21<br>(0.07 to 0.50)                | 0.12<br>(0.04 to 0.30)                | 0.08<br>(0.02 to 0.24)                | 0.12<br>(0.04 to 0.30)                | 0.01<br>(0.00 to 0.01)             | 0.01<br>(0.00 to 0.01)             | 0.00<br>(0.00 to 0.01)             | 0.00<br>(0.00 to 0.01)             |
| Other intestinal infectious diseases                              | 0.01<br>(0.01 to 0.03)                | 0.01<br>(0.00 to 0.02)                | 0.01<br>(0.00 to 0.01)                | 0.01<br>(0.00 to 0.01)                | 0.00<br>(0.00 to 0.00)             | 0.00<br>(0.00 to 0.00)             | 0.00<br>(0.00 to 0.00)             | 0.00<br>(0.00 to 0.00)             |
| Lower respiratory infections                                      | 1,497.87<br>(1,165.65 to 1,909.68)    | 1,048.59<br>(560.60 to 1,920.75)      | 597.83<br>(325.59 to 1,102.70)        | 1,413.10<br>(722.77 to 2,642.67)      | 46.13<br>(36.06 to 58.69)          | 40.78<br>(26.16 to 65.95)          | 26.09<br>(17.22 to 40.38)          | 51.08<br>(30.82 to 85.89)          |
| Upper respiratory infections                                      | 1.26<br>(0.78 to 1.94)                | 0.93<br>(0.49 to 1.60)                | 0.38<br>(0.20 to 0.69)                | 0.95<br>(0.50 to 1.68)                | 0.04<br>(0.03 to 0.07)             | 0.04<br>(0.02 to 0.07)             | 0.02<br>(0.03 to 0.03)             | 0.04<br>(0.01 to 0.07)             |
| Otitis media                                                      | 0.14<br>(0.10 to 0.19)                | 0.03<br>(0.02 to 0.07)                | 0.04<br>(0.02 to 0.08)                | 0.03<br>(0.02 to 0.07)                | 0.00<br>(0.00 to 0.01)             | 0.00<br>(0.00 to 0.00)             | 0.00<br>(0.00 to 0.00)             | 0.00<br>(0.00 to 0.00)             |
| Meningitis                                                        | 93.47<br>(76.82 to 114.79)            | 33.61<br>(22.87 to 48.04)             | 19.72<br>(13.20 to 28.84)             | 36.13<br>(24.28 to 52.14)             | 2.08<br>(1.68 to 2.61)             | 0.91<br>(0.65 to 1.25)             | 0.58<br>(0.40 to 0.83)             | 0.93<br>(0.67 to 1.26)             |
| Pneumococcal meningitis                                           | 6.19<br>(4.76 to 7.95)                | 2.77<br>(1.72 to 4.25)                | 2.67<br>(1.62 to 4.24)                | 2.82<br>(1.78 to 4.29)                | 0.16<br>(0.12 to 0.21)             | 0.09<br>(0.06 to 0.13)             | 0.09<br>(0.06 to 0.13)             | 0.09<br>(0.06 to 0.13)             |
| H influenzae type B meningitis                                    | 7.18<br>(5.87 to 8.84)                | 5.34<br>(2.37 to 12.34)               | 3.20<br>(1.91 to 5.22)                | 6.98<br>(2.63 to 16.98)               | 0.15<br>(0.12 to 0.19)             | 0.10<br>(0.06 to 0.18)             | 0.08<br>(0.06 to 0.12)             | 0.12<br>(0.06 to 0.23)             |
| Meningococcal meningitis                                          | 50.41<br>(41.48 to 61.50)             | 14.33<br>(9.73 to 20.66)              | 7.92<br>(5.22 to 11.74)               | 14.88<br>(10.15 to 21.36)             | 1.00<br>(0.81 to 1.24)             | 0.37<br>(0.26 to 0.51)             | 0.22<br>(0.15 to 0.31)             | 0.38<br>(0.27 to 0.52)             |
| Other meningitis                                                  | 29.69<br>(23.25 to 37.64)             | 11.17<br>(7.13 to 16.84)              | 5.92<br>(3.70 to 9.32)                | 11.46<br>(7.52 to 17.04)              | 0.77<br>(0.60 to 0.99)             | 0.35<br>(0.24 to 0.50)             | 0.19<br>(0.13 to 0.29)             | 0.35<br>(0.24 to 0.50)             |
| Encephalitis                                                      | 81.33<br>(61.60 to 117.83)            | 61.54<br>(41.10 to 95.41)             | 58.23<br>(37.19 to 92.19)             | 60.70<br>(40.89 to 93.72)             | 1.95<br>(1.44 to 2.85)             | 1.85<br>(1.26 to 2.81)             | 1.85<br>(1.23 to 2.77)             | 1.77<br>(1.22 to 2.67)             |

|                |                           |                            |                            |                             |                           |                           |                           |                           |
|----------------|---------------------------|----------------------------|----------------------------|-----------------------------|---------------------------|---------------------------|---------------------------|---------------------------|
| Diphtheria     | 0.50<br>(0.35 to<br>0.69) | 0.09<br>(0.05 to<br>0.15)  | 0.07<br>(0.04 to<br>0.14)  | 0.10<br>(0.05 to<br>0.17)   | 0.01<br>(0.01 to<br>0.01) | 0.00<br>(0.00 to<br>0.00) | 0.00<br>(0.00 to<br>0.00) | 0.00<br>(0.00 to<br>0.00) |
| Whooping cough | 0.92<br>(0.42 to<br>2.57) | 0.63<br>(0.12 to<br>1.86)  | 0.08<br>(0.02 to<br>0.26)  | 0.67<br>(0.11 to<br>2.02)   | 0.01<br>(0.01 to<br>0.03) | 0.01<br>(0.00 to<br>0.02) | 0.00<br>(0.00 to<br>0.00) | 0.01<br>(0.00 to<br>0.02) |
| Tetanus        | 0.34<br>(0.25 to<br>0.58) | 0.03<br>(0.02 to<br>0.04)  | 0.03<br>(0.02 to<br>0.05)  | 0.03<br>(0.02 to<br>0.04)   | 0.01<br>(0.01 to<br>0.03) | 0.00<br>(0.00 to<br>0.00) | 0.00<br>(0.00 to<br>0.00) | 0.00<br>(0.00 to<br>0.00) |
| Measles        | 0.28<br>(0.20 to<br>0.39) | 8.39<br>(0.17 to<br>42.13) | 5.58<br>(0.16 to<br>26.79) | 12.39<br>(0.21 to<br>63.62) | 0.00<br>(0.00 to<br>0.01) | 0.14<br>(0.00 to<br>0.76) | 0.10<br>(0.00 to<br>0.50) | 0.20<br>(0.00 to<br>1.03) |

| Eastern Europe                                        |                                         |                                        |                                        |                                        |                                      |                                      |                                      |                                      |
|-------------------------------------------------------|-----------------------------------------|----------------------------------------|----------------------------------------|----------------------------------------|--------------------------------------|--------------------------------------|--------------------------------------|--------------------------------------|
| Cause                                                 | YLLs (in 1000s)                         |                                        |                                        |                                        | Deaths (in 1000s)                    |                                      |                                      |                                      |
|                                                       | 2016                                    | 2040 Forecast                          | 2040 Better Scenario                   | 2040 Worse Scenario                    | 2016                                 | 2040 Forecast                        | 2040 Better Scenario                 | 2040 Worse Scenario                  |
| Varicella and herpes zoster                           | 1.71<br>(0.51 to 2.47)                  | 0.56<br>(0.20 to 0.95)                 | 0.38<br>(0.14 to 0.64)                 | 0.58<br>(0.19 to 0.98)                 | 0.04<br>(0.02 to 0.06)               | 0.02<br>(0.01 to 0.05)               | 0.02<br>(0.01 to 0.04)               | 0.02<br>(0.01 to 0.04)               |
| <b>Neglected tropical diseases and malaria</b>        | <b>5.97</b><br><b>(3.44 to 7.67)</b>    | <b>3.83</b><br><b>(2.22 to 5.55)</b>   | <b>3.73</b><br><b>(2.08 to 5.60)</b>   | <b>3.78</b><br><b>(2.19 to 5.45)</b>   | <b>0.15</b><br><b>(0.10 to 0.19)</b> | <b>0.12</b><br><b>(0.08 to 0.15)</b> | <b>0.11</b><br><b>(0.07 to 0.16)</b> | <b>0.11</b><br><b>(0.07 to 0.15)</b> |
| Malaria                                               | 0.00<br>(0.00 to 0.00)                  | 0.00<br>(0.00 to 0.00)                 | 0.00<br>(0.00 to 0.00)                 | 0.00<br>(0.00 to 0.00)                 | 0.00<br>(0.00 to 0.00)               | 0.00<br>(0.00 to 0.00)               | 0.00<br>(0.00 to 0.00)               | 0.00<br>(0.00 to 0.00)               |
| Chagas disease                                        | 0.00<br>(0.00 to 0.00)                  | 0.00<br>(0.00 to 0.00)                 | 0.00<br>(0.00 to 0.00)                 | 0.00<br>(0.00 to 0.00)                 | 0.00<br>(0.00 to 0.00)               | 0.00<br>(0.00 to 0.00)               | 0.00<br>(0.00 to 0.00)               | 0.00<br>(0.00 to 0.00)               |
| Leishmaniasis                                         | 0.00<br>(0.00 to 0.00)                  | 0.00<br>(0.00 to 0.00)                 | 0.00<br>(0.00 to 0.00)                 | 0.00<br>(0.00 to 0.00)                 | 0.00<br>(0.00 to 0.00)               | 0.00<br>(0.00 to 0.00)               | 0.00<br>(0.00 to 0.00)               | 0.00<br>(0.00 to 0.00)               |
| African trypanosomiasis                               | 0.00<br>(0.00 to 0.00)                  | 0.00<br>(0.00 to 0.00)                 | 0.00<br>(0.00 to 0.00)                 | 0.00<br>(0.00 to 0.00)                 | 0.00<br>(0.00 to 0.00)               | 0.00<br>(0.00 to 0.00)               | 0.00<br>(0.00 to 0.00)               | 0.00<br>(0.00 to 0.00)               |
| Schistosomiasis                                       | 0.00<br>(0.00 to 0.00)                  | 0.00<br>(0.00 to 0.00)                 | 0.00<br>(0.00 to 0.00)                 | 0.00<br>(0.00 to 0.00)                 | 0.00<br>(0.00 to 0.00)               | 0.00<br>(0.00 to 0.00)               | 0.00<br>(0.00 to 0.00)               | 0.00<br>(0.00 to 0.00)               |
| Cysticercosis                                         | 0.21<br>(0.16 to 0.28)                  | 0.06<br>(0.04 to 0.08)                 | 0.05<br>(0.04 to 0.08)                 | 0.06<br>(0.04 to 0.08)                 | 0.01<br>(0.00 to 0.01)               | 0.00<br>(0.00 to 0.00)               | 0.00<br>(0.00 to 0.00)               | 0.00<br>(0.00 to 0.00)               |
| Cystic echinococcosis                                 | 1.58<br>(1.22 to 2.03)                  | 0.83<br>(0.57 to 1.17)                 | 0.52<br>(0.36 to 0.76)                 | 0.83<br>(0.59 to 1.14)                 | 0.05<br>(0.04 to 0.07)               | 0.04<br>(0.03 to 0.05)               | 0.03<br>(0.02 to 0.05)               | 0.04<br>(0.03 to 0.05)               |
| Dengue                                                | 0.00<br>(0.00 to 0.00)                  | 0.00<br>(0.00 to 0.00)                 | 0.00<br>(0.00 to 0.00)                 | 0.00<br>(0.00 to 0.00)                 | 0.00<br>(0.00 to 0.00)               | 0.00<br>(0.00 to 0.00)               | 0.00<br>(0.00 to 0.00)               | 0.00<br>(0.00 to 0.00)               |
| Yellow fever                                          | 0.00<br>(0.00 to 0.00)                  | 0.00<br>(0.00 to 0.00)                 | 0.00<br>(0.00 to 0.00)                 | 0.00<br>(0.00 to 0.00)                 | 0.00<br>(0.00 to 0.00)               | 0.00<br>(0.00 to 0.00)               | 0.00<br>(0.00 to 0.00)               | 0.00<br>(0.00 to 0.00)               |
| Rabies                                                | 0.18<br>(0.13 to 0.23)                  | 0.09<br>(0.06 to 0.14)                 | 0.07<br>(0.04 to 0.11)                 | 0.10<br>(0.06 to 0.15)                 | 0.00<br>(0.00 to 0.01)               | 0.00<br>(0.00 to 0.00)               | 0.00<br>(0.00 to 0.00)               | 0.00<br>(0.00 to 0.00)               |
| Intestinal nematode infections                        | 0.00<br>(0.00 to 0.00)                  | 0.00<br>(0.00 to 0.00)                 | 0.00<br>(0.00 to 0.00)                 | 0.00<br>(0.00 to 0.00)                 | 0.00<br>(0.00 to 0.00)               | 0.00<br>(0.00 to 0.00)               | 0.00<br>(0.00 to 0.00)               | 0.00<br>(0.00 to 0.00)               |
| Other neglected tropical diseases                     | 4.00<br>(1.58 to 5.42)                  | 2.85<br>(1.25 to 4.30)                 | 3.09<br>(1.36 to 4.74)                 | 2.80<br>(1.22 to 4.14)                 | 0.08<br>(0.03 to 0.11)               | 0.07<br>(0.04 to 0.11)               | 0.08<br>(0.04 to 0.12)               | 0.07<br>(0.03 to 0.10)               |
| <b>Maternal disorders</b>                             | <b>25.44</b><br><b>(16.21 to 39.50)</b> | <b>16.07</b><br><b>(7.49 to 31.81)</b> | <b>16.94</b><br><b>(4.93 to 22.41)</b> | <b>16.93</b><br><b>(7.81 to 33.88)</b> | <b>0.47</b><br><b>(0.30 to 0.73)</b> | <b>0.29</b><br><b>(0.14 to 0.58)</b> | <b>0.20</b><br><b>(0.09 to 0.41)</b> | <b>0.31</b><br><b>(0.14 to 0.62)</b> |
| Maternal hemorrhage                                   | 4.35<br>(2.51 to 7.15)                  | 2.44<br>(1.03 to 5.20)                 | 1.70<br>(0.69 to 3.67)                 | 2.55<br>(1.09 to 5.46)                 | 0.08<br>(0.05 to 0.13)               | 0.04<br>(0.02 to 0.10)               | 0.03<br>(0.01 to 0.07)               | 0.05<br>(0.02 to 0.10)               |
| Maternal sepsis and other maternal infections         | 1.50<br>(0.80 to 2.58)                  | 0.74<br>(0.27 to 1.61)                 | 0.51<br>(0.19 to 1.16)                 | 0.77<br>(0.28 to 1.70)                 | 0.03<br>(0.01 to 0.05)               | 0.01<br>(0.00 to 0.03)               | 0.01<br>(0.00 to 0.02)               | 0.01<br>(0.01 to 0.03)               |
| Maternal hypertensive disorders                       | 2.68<br>(1.55 to 4.43)                  | 1.61<br>(0.64 to 3.44)                 | 1.10<br>(0.42 to 2.45)                 | 1.69<br>(0.66 to 3.66)                 | 0.05<br>(0.03 to 0.08)               | 0.03<br>(0.01 to 0.06)               | 0.02<br>(0.01 to 0.04)               | 0.03<br>(0.01 to 0.06)               |
| Maternal obstructed labor and uterine rupture         | 0.33<br>(0.15 to 0.61)                  | 0.15<br>(0.06 to 0.34)                 | 0.10<br>(0.04 to 0.22)                 | 0.16<br>(0.06 to 0.36)                 | 0.01<br>(0.00 to 0.01)               | 0.00<br>(0.00 to 0.01)               | 0.00<br>(0.00 to 0.00)               | 0.00<br>(0.00 to 0.01)               |
| Maternal abortion, miscarriage, and ectopic pregnancy | 5.36<br>(3.30 to 8.46)                  | 4.14<br>(1.75 to 9.04)                 | 2.78<br>(1.15 to 6.14)                 | 4.39<br>(1.86 to 9.59)                 | 0.10<br>(0.06 to 0.16)               | 0.08<br>(0.05 to 0.17)               | 0.05<br>(0.03 to 0.11)               | 0.08<br>(0.04 to 0.18)               |



| Eastern Europe                                                          |                                     |                                     |                                    |                                     |                               |                               |                               |                               |
|-------------------------------------------------------------------------|-------------------------------------|-------------------------------------|------------------------------------|-------------------------------------|-------------------------------|-------------------------------|-------------------------------|-------------------------------|
| Cause                                                                   | YLLs (in 1000s)                     |                                     |                                    |                                     | Deaths (in 1000s)             |                               |                               |                               |
|                                                                         | 2016                                | 2040 Forecast                       | 2040 Better Scenario               | 2040 Worse Scenario                 | 2016                          | 2040 Forecast                 | 2040 Better Scenario          | 2040 Worse Scenario           |
| <b>Neonatal disorders</b>                                               | <b>690.69</b><br>(583.98 to 807.83) | <b>237.55</b><br>(116.44 to 480.34) | <b>146.05</b><br>(74.35 to 287.93) | <b>269.67</b><br>(135.25 to 539.08) | <b>7.98</b><br>(6.75 to 9.34) | <b>2.75</b><br>(1.35 to 5.55) | <b>1.69</b><br>(0.86 to 3.33) | <b>3.12</b><br>(1.56 to 6.23) |
| Neonatal preterm birth                                                  | 245.16<br>(197.14 to 289.39)        | 61.40<br>(36.06 to 97.42)           | 29.19<br>(18.01 to 45.08)          | 74.88<br>(44.02 to 119.89)          | 2.83<br>(2.28 to 3.34)        | 0.71<br>(0.42 to 1.13)        | 0.34<br>(0.21 to 0.52)        | 0.87<br>(0.51 to 1.39)        |
| Neonatal encephalopathy due to birth asphyxia and trauma                | 197.88<br>(157.33 to 244.13)        | 60.06<br>(24.97 to 144.80)          | 30.36<br>(13.52 to 67.50)          | 67.50<br>(28.34 to 160.41)          | 2.29<br>(1.82 to 2.82)        | 0.69<br>(0.29 to 1.67)        | 0.35<br>(0.16 to 0.78)        | 0.78<br>(0.33 to 1.85)        |
| Neonatal sepsis and other neonatal infections                           | 104.95<br>(79.59 to 154.01)         | 43.76<br>(20.50 to 91.73)           | 26.76<br>(13.23 to 55.80)          | 48.80<br>(23.15 to 103.60)          | 1.21<br>(0.92 to 1.78)        | 0.51<br>(0.24 to 1.06)        | 0.31<br>(0.15 to 0.64)        | 0.56<br>(0.27 to 1.20)        |
| Hemolytic disease and other neonatal jaundice                           | 7.00<br>(4.88 to 10.02)             | 2.32<br>(0.82 to 6.22)              | 1.35<br>(0.50 to 3.54)             | 2.60<br>(0.92 to 6.87)              | 0.08<br>(0.06 to 0.12)        | 0.03<br>(0.01 to 0.07)        | 0.02<br>(0.01 to 0.04)        | 0.03<br>(0.01 to 0.08)        |
| Other neonatal disorders                                                | 135.70<br>(105.26 to 166.32)        | 70.01<br>(27.82 to 166.59)          | 58.39<br>(24.36 to 134.18)         | 75.88<br>(29.72 to 183.55)          | 1.57<br>(1.22 to 1.92)        | 0.81<br>(0.32 to 1.92)        | 0.67<br>(0.28 to 1.55)        | 0.88<br>(0.34 to 2.12)        |
| <b>Nutritional deficiencies</b>                                         | <b>25.40</b><br>(20.06 to 31.90)    | <b>14.30</b><br>(9.64 to 19.65)     | <b>14.47</b><br>(9.55 to 20.38)    | <b>13.89</b><br>(9.49 to 18.84)     | <b>0.89</b><br>(0.70 to 1.13) | <b>0.57</b><br>(0.43 to 0.73) | <b>0.61</b><br>(0.44 to 0.80) | <b>0.53</b><br>(0.41 to 0.67) |
| Protein-energy malnutrition                                             | 9.93<br>(6.58 to 14.20)             | 6.01<br>(3.55 to 9.16)              | 7.16<br>(4.31 to 10.76)            | 5.79<br>(3.51 to 8.83)              | 0.28<br>(0.18 to 0.46)        | 0.21<br>(0.13 to 0.33)        | 0.27<br>(0.17 to 0.40)        | 0.20<br>(0.12 to 0.30)        |
| Iodine deficiency                                                       | 1.02<br>(0.26 to 2.36)              | 0.92<br>(0.21 to 2.23)              | 0.84<br>(0.17 to 2.12)             | 0.90<br>(0.21 to 2.11)              | 0.03<br>(0.01 to 0.09)        | 0.04<br>(0.01 to 0.10)        | 0.04<br>(0.01 to 0.10)        | 0.04<br>(0.01 to 0.10)        |
| Dietary iron deficiency                                                 | 1.60<br>(1.16 to 2.67)              | 1.42<br>(0.91 to 2.47)              | 1.59<br>(0.99 to 2.92)             | 1.39<br>(0.90 to 2.39)              | 0.04<br>(0.03 to 0.09)        | 0.04<br>(0.03 to 0.09)        | 0.05<br>(0.03 to 0.11)        | 0.04<br>(0.02 to 0.08)        |
| Other nutritional deficiencies                                          | 12.86<br>(8.14 to 17.36)            | 5.95<br>(3.20 to 8.81)              | 4.89<br>(2.38 to 7.34)             | 5.81<br>(3.15 to 8.40)              | 0.53<br>(0.34 to 0.70)        | 0.28<br>(0.15 to 0.38)        | 0.25<br>(0.12 to 0.35)        | 0.26<br>(0.14 to 0.35)        |
| <b>Other communicable, maternal, neonatal, and nutritional diseases</b> | <b>79.85</b><br>(61.09 to 95.26)    | <b>35.87</b><br>(26.83 to 47.30)    | <b>30.08</b><br>(22.58 to 40.31)   | <b>36.30</b><br>(27.41 to 47.51)    | <b>1.62</b><br>(1.34 to 1.91) | <b>1.01</b><br>(0.81 to 1.25) | <b>0.91</b><br>(0.72 to 1.15) | <b>0.98</b><br>(0.79 to 1.19) |
| Sexually transmitted infections excluding HIV                           | 10.83<br>(6.74 to 16.56)            | 2.66<br>(1.55 to 4.49)              | 2.11<br>(1.20 to 3.66)             | 2.72<br>(1.56 to 4.60)              | 0.23<br>(0.16 to 0.35)        | 0.08<br>(0.05 to 0.13)        | 0.07<br>(0.05 to 0.11)        | 0.08<br>(0.05 to 0.13)        |
| Syphilis                                                                | 6.07<br>(3.05 to 10.88)             | 1.15<br>(0.59 to 2.17)              | 0.75<br>(0.38 to 1.46)             | 1.21<br>(0.60 to 2.38)              | 0.10<br>(0.06 to 0.16)        | 0.03<br>(0.02 to 0.05)        | 0.02<br>(0.01 to 0.03)        | 0.03<br>(0.02 to 0.05)        |
| Chlamydial infection                                                    | 0.90<br>(0.51 to 1.47)              | 0.28<br>(0.15 to 0.53)              | 0.26<br>(0.13 to 0.50)             | 0.28<br>(0.15 to 0.53)              | 0.03<br>(0.02 to 0.04)        | 0.01<br>(0.01 to 0.02)        | 0.01<br>(0.01 to 0.02)        | 0.01<br>(0.01 to 0.02)        |
| Gonococcal infection                                                    | 2.55<br>(1.44 to 4.15)              | 0.83<br>(0.43 to 1.53)              | 0.75<br>(0.38 to 1.39)             | 0.82<br>(0.43 to 1.53)              | 0.07<br>(0.04 to 0.12)        | 0.03<br>(0.02 to 0.05)        | 0.03<br>(0.02 to 0.05)        | 0.03<br>(0.02 to 0.05)        |
| Other sexually transmitted infections                                   | 1.32<br>(0.73 to 2.16)              | 0.40<br>(0.20 to 0.78)              | 0.36<br>(0.17 to 0.71)             | 0.40<br>(0.20 to 0.79)              | 0.03<br>(0.02 to 0.06)        | 0.01<br>(0.01 to 0.02)        | 0.01<br>(0.01 to 0.02)        | 0.01<br>(0.01 to 0.02)        |
| Acute hepatitis                                                         | 18.69<br>(15.42 to 22.84)           | 6.96<br>(4.83 to 9.84)              | 3.96<br>(2.69 to 5.81)             | 7.13<br>(4.93 to 10.08)             | 0.46<br>(0.38 to 0.56)        | 0.21<br>(0.16 to 0.28)        | 0.13<br>(0.09 to 0.18)        | 0.21<br>(0.16 to 0.28)        |
| Acute hepatitis A                                                       | 2.19<br>(1.67 to 2.83)              | 0.50<br>(0.30 to 0.84)              | 0.32<br>(0.19 to 0.54)             | 0.53<br>(0.31 to 0.87)              | 0.03<br>(0.02 to 0.04)        | 0.01<br>(0.01 to 0.01)        | 0.01<br>(0.00 to 0.01)        | 0.01<br>(0.01 to 0.01)        |
| Acute hepatitis B                                                       | 14.27<br>(11.47 to 17.86)           | 5.59<br>(3.71 to 8.23)              | 3.14<br>(2.03 to 4.79)             | 5.70<br>(3.75 to 8.36)              | 0.38<br>(0.30 to 0.47)        | 0.17<br>(0.12 to 0.24)        | 0.10<br>(0.07 to 0.15)        | 0.17<br>(0.12 to 0.24)        |

|                                       |                                                               |                                                               |                                                               |                                                               |                                                            |                                                            |                                                            |                                                            |
|---------------------------------------|---------------------------------------------------------------|---------------------------------------------------------------|---------------------------------------------------------------|---------------------------------------------------------------|------------------------------------------------------------|------------------------------------------------------------|------------------------------------------------------------|------------------------------------------------------------|
|                                       | 0.49<br>(0.35 to<br>0.69)                                     | 0.22<br>(0.14 to<br>0.35)                                     | 0.13<br>(0.08 to<br>0.21)                                     | 0.23<br>(0.14 to<br>0.35)                                     | 0.01<br>(0.01 to<br>0.02)                                  | 0.01<br>(0.00 to<br>0.01)                                  | 0.00<br>(0.00 to<br>0.01)                                  | 0.01<br>(0.00 to<br>0.01)                                  |
| Acute hepatitis C                     |                                                               |                                                               |                                                               |                                                               |                                                            |                                                            |                                                            |                                                            |
|                                       | 1.75<br>(1.33 to<br>2.28)                                     | 0.65<br>(0.43 to<br>0.94)                                     | 0.38<br>(0.25 to<br>0.55)                                     | 0.67<br>(0.45 to<br>0.97)                                     | 0.04<br>(0.03 to<br>0.06)                                  | 0.02<br>(0.01 to<br>0.03)                                  | 0.01<br>(0.01 to<br>0.02)                                  | 0.02<br>(0.01 to<br>0.03)                                  |
| Acute hepatitis E                     |                                                               |                                                               |                                                               |                                                               |                                                            |                                                            |                                                            |                                                            |
|                                       | 50.32<br>(34.71 to<br>62.33)                                  | 26.25<br>(18.83 to<br>34.86)                                  | 24.01<br>(17.45 to<br>31.99)                                  | 26.46<br>(18.94 to<br>35.28)                                  | 0.92<br>(0.71 to<br>1.10)                                  | 0.72<br>(0.57 to<br>0.89)                                  | 0.71<br>(0.57 to<br>0.90)                                  | 0.69<br>(0.55 to<br>0.85)                                  |
| Other unspecified infectious diseases |                                                               |                                                               |                                                               |                                                               |                                                            |                                                            |                                                            |                                                            |
| <b>Non-communicable diseases</b>      | <b>47,753.84</b><br><b>(39,191.14 to</b><br><b>58,518.22)</b> | <b>39,268.36</b><br><b>(26,037.19 to</b><br><b>57,883.97)</b> | <b>27,397.56</b><br><b>(18,013.66 to</b><br><b>40,878.35)</b> | <b>48,298.72</b><br><b>(31,765.06 to</b><br><b>71,927.51)</b> | <b>2,573.24</b><br><b>(2,152.98 to</b><br><b>3,074.17)</b> | <b>2,486.70</b><br><b>(1,930.64 to</b><br><b>3,179.03)</b> | <b>1,819.44</b><br><b>(1,393.43 to</b><br><b>2,375.73)</b> | <b>2,885.98</b><br><b>(2,248.38 to</b><br><b>3,646.34)</b> |

| Eastern Europe                       |                                            |                                            |                                            |                                             |                                     |                                     |                                     |                                     |
|--------------------------------------|--------------------------------------------|--------------------------------------------|--------------------------------------------|---------------------------------------------|-------------------------------------|-------------------------------------|-------------------------------------|-------------------------------------|
| Cause                                | YLLs (in 1000s)                            |                                            |                                            |                                             | Deaths (in 1000s)                   |                                     |                                     |                                     |
|                                      | 2016                                       | 2040 Forecast                              | 2040 Better Scenario                       | 2040 Worse Scenario                         | 2016                                | 2040 Forecast                       | 2040 Better Scenario                | 2040 Worse Scenario                 |
| <b>Neoplasms</b>                     | <b>9,941.52</b><br>(8,057.47 to 12,359.52) | <b>9,813.84</b><br>(6,476.59 to 13,879.91) | <b>7,863.21</b><br>(5,035.50 to 11,431.16) | <b>11,134.66</b><br>(7,276.09 to 15,760.49) | <b>433.68</b><br>(356.98 to 532.95) | <b>492.17</b><br>(371.51 to 628.49) | <b>417.54</b><br>(307.33 to 548.88) | <b>537.07</b><br>(412.29 to 681.64) |
| Lip and oral cavity cancer           | 224.56<br>(173.94 to 282.36)               | 218.03<br>(97.48 to 427.35)                | 129.34<br>(55.37 to 253.92)                | 298.74<br>(135.53 to 536.79)                | 8.79<br>(6.98 to 10.93)             | 9.34<br>(4.86 to 16.84)             | 5.92<br>(3.14 to 10.50)             | 12.47<br>(6.41 to 21.37)            |
| Nasopharynx cancer                   | 33.00<br>(26.32 to 40.85)                  | 32.76<br>(15.43 to 61.94)                  | 16.14<br>(7.35 to 31.26)                   | 45.97<br>(21.90 to 83.02)                   | 1.14<br>(0.92 to 1.40)              | 1.21<br>(0.62 to 2.17)              | 0.62<br>(0.32 to 1.12)              | 1.68<br>(0.87 to 2.89)              |
| Other pharynx cancer                 | 159.15<br>(123.88 to 201.49)               | 156.69<br>(73.43 to 284.33)                | 146.89<br>(67.30 to 281.10)                | 173.39<br>(84.36 to 310.69)                 | 5.83<br>(4.60 to 7.33)              | 6.19<br>(3.19 to 10.73)             | 5.92<br>(2.94 to 10.51)             | 6.75<br>(3.51 to 11.38)             |
| Esophageal cancer                    | 253.12<br>(193.45 to 318.23)               | 274.70<br>(121.23 to 574.17)               | 205.13<br>(93.36 to 418.39)                | 371.88<br>(159.72 to 782.29)                | 10.71<br>(8.33 to 13.33)            | 12.77<br>(6.47 to 24.16)            | 10.05<br>(5.20 to 18.61)            | 16.73<br>(8.16 to 32.28)            |
| Stomach cancer                       | 1,065.54<br>(856.64 to 1,315.78)           | 779.79<br>(488.82 to 1,179.69)             | 530.24<br>(329.71 to 815.01)               | 820.66<br>(518.13 to 1,237.46)              | 49.20<br>(40.09 to 60.33)           | 41.05<br>(29.40 to 56.60)           | 29.60<br>(20.83 to 41.29)           | 41.71<br>(29.58 to 57.41)           |
| Colon and rectum cancer              | 1,160.33<br>(932.78 to 1,438.45)           | 1,326.09<br>(831.28 to 2,003.48)           | 969.35<br>(593.52 to 1,450.61)             | 1,443.05<br>(897.77 to 2,151.66)            | 77.76<br>(47.77 to 110.58)          | 58.78<br>(53.29 to 110.58)          | 60.61<br>(41.17 to 87.26)           | 81.49<br>(55.95 to 119.30)          |
| Liver cancer                         | 311.32<br>(245.21 to 392.99)               | 392.93<br>(222.04 to 684.40)               | 380.43<br>(215.21 to 665.24)               | 497.61<br>(266.87 to 909.71)                | 14.07<br>(11.28 to 17.48)           | 20.25<br>(12.65 to 31.58)           | 20.90<br>(13.38 to 32.73)           | 24.28<br>(14.58 to 40.19)           |
| Liver cancer due to hepatitis B      | 119.18<br>(87.62 to 154.69)                | 143.47<br>(78.73 to 264.41)                | 148.42<br>(80.87 to 271.59)                | 169.14<br>(87.32 to 317.88)                 | 5.07<br>(3.83 to 6.56)              | 7.00<br>(4.24 to 11.44)             | 7.65<br>(4.74 to 12.40)             | 7.88<br>(4.60 to 13.26)             |
| Liver cancer due to hepatitis C      | 33.24<br>(25.97 to 41.95)                  | 43.79<br>(24.97 to 72.43)                  | 46.50<br>(26.81 to 77.39)                  | 50.05<br>(27.98 to 85.19)                   | 1.72<br>(1.38 to 2.20)              | 2.60<br>(1.68 to 3.89)              | 2.93<br>(1.87 to 4.34)              | 2.83<br>(1.73 to 4.42)              |
| Liver cancer due to alcohol use      | 105.71<br>(82.78 to 134.98)                | 134.03<br>(75.69 to 227.27)                | 111.09<br>(62.81 to 188.97)                | 193.63<br>(103.94 to 337.62)                | 4.93<br>(3.91 to 6.24)              | 6.98<br>(4.32 to 10.83)             | 6.29<br>(3.93 to 9.63)              | 9.44<br>(5.63 to 15.10)             |
| Liver cancer due to other causes     | 53.19<br>(41.27 to 67.45)                  | 71.65<br>(37.79 to 130.16)                 | 74.42<br>(39.83 to 134.64)                 | 84.80<br>(41.72 to 161.50)                  | 2.34<br>(1.84 to 2.94)              | 3.67<br>(2.14 to 6.06)              | 4.04<br>(2.45 to 6.49)              | 4.13<br>(2.27 to 7.25)              |
| Gallbladder and biliary tract cancer | 112.52<br>(91.53 to 140.30)                | 92.03<br>(67.52 to 118.89)                 | 91.71<br>(64.67 to 124.63)                 | 86.20<br>(65.38 to 108.27)                  | 5.72<br>(4.69 to 7.09)              | 5.38<br>(4.41 to 6.36)              | 5.61<br>(4.37 to 6.94)              | 4.91<br>(4.16 to 5.71)              |
| Pancreatic cancer                    | 543.80<br>(431.45 to 680.89)               | 600.31<br>(393.72 to 878.53)               | 593.77<br>(378.96 to 887.73)               | 616.65<br>(408.25 to 896.32)                | 24.94<br>(20.04 to 30.87)           | 30.97<br>(23.05 to 41.34)           | 32.21<br>(23.64 to 43.49)           | 30.67<br>(22.73 to 40.50)           |
| Larynx cancer                        | 186.20<br>(143.30 to 237.00)               | 168.30<br>(60.37 to 403.77)                | 83.22<br>(30.41 to 201.18)                 | 241.09<br>(85.74 to 549.03)                 | 7.39<br>(5.75 to 9.31)              | 6.96<br>(2.79 to 16.32)             | 3.57<br>(1.52 to 7.91)              | 9.91<br>(3.99 to 20.66)             |
| Tracheal, bronchus, and lung cancer  | 1,703.11<br>(1,336.94 to 2,116.35)         | 1,649.53<br>(864.77 to 2,746.98)           | 1,095.59<br>(586.26 to 1,909.60)           | 2,369.56<br>(1,282.10 to 3,898.95)          | 73.61<br>(58.34 to 90.06)           | 77.44<br>(46.92 to 117.82)          | 54.25<br>(33.57 to 83.38)           | 108.15<br>(65.72 to 164.01)         |
| Malignant skin melanoma              | 165.73<br>(120.96 to 213.19)               | 165.44<br>(106.52 to 240.76)               | 216.14<br>(137.42 to 316.52)               | 153.24<br>(99.82 to 218.97)                 | 6.48<br>(4.81 to 8.31)              | 7.72<br>(5.68 to 9.99)              | 10.54<br>(7.64 to 14.24)            | 6.94<br>(5.11 to 8.81)              |
| Non-melanoma skin cancer             | 57.26<br>(46.10 to 71.21)                  | 65.13<br>(50.45 to 80.82)                  | 50.62<br>(37.23 to 66.71)                  | 61.38<br>(48.52 to 74.62)                   | 3.03<br>(2.50 to 3.66)              | 4.28<br>(3.64 to 5.00)              | 3.62<br>(2.99 to 4.28)              | 3.90<br>(3.27 to 4.58)              |
| Breast cancer                        | 815.30<br>(587.03 to 1,153.49)             | 812.58<br>(464.91 to 1,407.51)             | 579.70<br>(324.64 to 1,017.53)             | 877.55<br>(512.88 to 1,518.98)              | 33.92<br>(24.81 to 46.73)           | 38.83<br>(25.86 to 59.32)           | 29.40<br>(19.44 to 45.26)           | 40.66<br>(27.13 to 62.34)           |
| Cervical cancer                      | 293.76<br>(204.23 to 417.93)               | 189.55<br>(111.50 to 335.50)               | 130.67<br>(73.94 to 232.74)                | 195.60<br>(115.90 to 346.49)                | 10.53<br>(7.57 to 14.45)            | 8.27<br>(5.67 to 12.65)             | 5.97<br>(3.98 to 9.17)              | 8.29<br>(5.75 to 12.74)             |

|                   |                                 |                                 |                                 |                                 |                              |                              |                              |                              |
|-------------------|---------------------------------|---------------------------------|---------------------------------|---------------------------------|------------------------------|------------------------------|------------------------------|------------------------------|
|                   | 177.63<br>(120.13 to<br>258.43) | 175.89<br>(105.92 to<br>268.05) | 145.64<br>(83.77 to<br>230.54)  | 173.17<br>(107.66 to<br>256.52) | 8.32<br>(5.79 to<br>11.88)   | 9.57<br>(6.62 to<br>13.21)   | 8.26<br>(5.49 to<br>11.90)   | 9.24<br>(6.57 to<br>12.33)   |
| Uterine cancer    |                                 |                                 |                                 |                                 |                              |                              |                              |                              |
|                   | 316.74<br>(221.91 to<br>447.09) | 290.04<br>(163.71 to<br>483.20) | 245.88<br>(137.02 to<br>427.41) | 302.67<br>(173.41 to<br>507.99) | 12.78<br>(9.12 to<br>17.74)  | 13.26<br>(8.45 to<br>20.44)  | 11.55<br>(7.16 to<br>18.18)  | 13.65<br>(8.68 to<br>20.78)  |
| Ovarian cancer    |                                 |                                 |                                 |                                 |                              |                              |                              |                              |
|                   | 305.48<br>(228.89 to<br>387.65) | 369.87<br>(278.82 to<br>456.15) | 340.18<br>(244.35 to<br>438.84) | 337.36<br>(260.69 to<br>408.02) | 17.85<br>(13.64 to<br>22.23) | 25.08<br>(20.47 to<br>29.76) | 24.50<br>(19.77 to<br>29.27) | 22.05<br>(16.58 to<br>26.52) |
| Prostate cancer   |                                 |                                 |                                 |                                 |                              |                              |                              |                              |
|                   | 19.78<br>(14.05 to<br>26.14)    | 13.21<br>(7.81 to<br>20.75)     | 10.13<br>(5.72 to<br>16.23)     | 13.06<br>(7.65 to<br>20.18)     | 0.48<br>(0.35 to<br>0.63)    | 0.39<br>(0.27 to<br>0.54)    | 0.32<br>(0.22 to<br>0.45)    | 0.37<br>(0.26 to<br>0.51)    |
| Testicular cancer |                                 |                                 |                                 |                                 |                              |                              |                              |                              |



| Eastern Europe                  |                                                     |                                                     |                                                    |                                                     |                                                  |                                                  |                                              |                                                  |
|---------------------------------|-----------------------------------------------------|-----------------------------------------------------|----------------------------------------------------|-----------------------------------------------------|--------------------------------------------------|--------------------------------------------------|----------------------------------------------|--------------------------------------------------|
| Cause                           | YLLs (in 1000s)                                     |                                                     |                                                    |                                                     | Deaths (in 1000s)                                |                                                  |                                              |                                                  |
|                                 | 2016                                                | 2040 Forecast                                       | 2040 Better Scenario                               | 2040 Worse Scenario                                 | 2016                                             | 2040 Forecast                                    | 2040 Better Scenario                         | 2040 Worse Scenario                              |
| Kidney cancer                   | 290.32<br>(229.77 to 362.40)                        | 318.40<br>(187.81 to 493.87)                        | 325.56<br>(191.90 to 517.97)                       | 322.82<br>(189.09 to 497.25)                        | 12.63<br>(10.11 to 15.50)                        | 15.68<br>(10.62 to 22.16)                        | 17.04<br>(11.56 to 23.79)                    | 15.31<br>(10.28 to 21.83)                        |
| Bladder cancer                  | 204.67<br>(164.82 to 251.30)                        | 222.82<br>(152.90 to 317.31)                        | 192.66<br>(132.50 to 273.53)                       | 234.68<br>(157.76 to 344.00)                        | 11.17<br>(9.21 to 13.42)                         | 14.16<br>(10.77 to 18.55)                        | 13.19<br>(10.16 to 16.90)                    | 14.24<br>(10.46 to 19.39)                        |
| Brain and nervous system cancer | 345.63<br>(275.20 to 436.54)                        | 341.62<br>(220.58 to 498.47)                        | 310.46<br>(194.92 to 473.99)                       | 332.16<br>(221.82 to 470.02)                        | 10.72<br>(8.46 to 13.56)                         | 12.21<br>(8.54 to 16.62)                         | 11.50<br>(7.78 to 16.32)                     | 11.60<br>(8.38 to 15.45)                         |
| Thyroid cancer                  | 35.89<br>(28.03 to 45.85)                           | 37.25<br>(22.91 to 58.60)                           | 31.31<br>(18.69 to 50.92)                          | 39.98<br>(24.18 to 63.77)                           | 1.72<br>(1.36 to 2.23)                           | 2.03<br>(1.35 to 2.99)                           | 1.77<br>(1.17 to 2.64)                       | 2.10<br>(1.39 to 3.13)                           |
| Mesothelioma                    | 25.44<br>(20.16 to 31.65)                           | 26.52<br>(18.43 to 36.59)                           | 28.42<br>(19.14 to 41.08)                          | 24.94<br>(17.60 to 33.43)                           | 1.09<br>(0.88 to 1.34)                           | 1.31<br>(1.03 to 1.66)                           | 1.47<br>(1.11 to 1.93)                       | 1.20<br>(0.96 to 1.48)                           |
| Hodgkin lymphoma                | 50.67<br>(39.29 to 65.97)                           | 33.35<br>(21.58 to 49.76)                           | 22.08<br>(13.49 to 34.41)                          | 33.50<br>(21.86 to 49.23)                           | 1.43<br>(1.13 to 1.84)                           | 1.10<br>(0.78 to 1.52)                           | 0.75<br>(0.51 to 1.10)                       | 1.07<br>(0.77 to 1.47)                           |
| Non-Hodgkin lymphoma            | 184.94<br>(144.79 to 229.87)                        | 165.08<br>(110.93 to 235.16)                        | 141.50<br>(92.43 to 207.72)                        | 167.78<br>(113.05 to 241.06)                        | 7.00<br>(5.60 to 8.66)                           | 7.50<br>(5.60 to 10.13)                          | 6.76<br>(4.93 to 9.30)                       | 7.39<br>(5.53 to 9.79)                           |
| Multiple myeloma                | 88.19<br>(66.60 to 113.63)                          | 93.52<br>(59.65 to 137.63)                          | 87.78<br>(54.53 to 133.49)                         | 95.23<br>(61.06 to 139.07)                          | 3.89<br>(3.01 to 5.03)                           | 4.63<br>(3.28 to 6.34)                           | 4.52<br>(3.08 to 6.39)                       | 4.60<br>(3.26 to 6.37)                           |
| Leukemia                        | 346.04<br>(284.92 to 423.02)                        | 315.67<br>(210.13 to 449.00)                        | 271.40<br>(178.69 to 396.46)                       | 342.50<br>(225.92 to 493.28)                        | 12.65<br>(10.38 to 15.39)                        | 13.95<br>(10.08 to 18.80)                        | 12.65<br>(9.01 to 17.26)                     | 14.61<br>(10.37 to 19.94)                        |
| Acute lymphoid leukemia         | 71.88<br>(58.95 to 87.70)                           | 52.25<br>(35.28 to 75.74)                           | 41.11<br>(27.61 to 61.17)                          | 57.40<br>(38.78 to 82.61)                           | 1.88<br>(1.53 to 2.33)                           | 1.71<br>(1.19 to 2.36)                           | 1.40<br>(0.96 to 2.00)                       | 1.84<br>(1.28 to 2.58)                           |
| Chronic lymphoid leukemia       | 56.97<br>(45.24 to 72.01)                           | 58.44<br>(38.46 to 85.62)                           | 54.74<br>(35.88 to 80.41)                          | 61.65<br>(39.57 to 93.36)                           | 2.94<br>(2.39 to 3.63)                           | 3.41<br>(2.46 to 4.54)                           | 3.36<br>(2.44 to 4.49)                       | 3.46<br>(2.43 to 4.78)                           |
| Acute myeloid leukemia          | 110.73<br>(87.25 to 139.08)                         | 118.17<br>(74.97 to 174.26)                         | 112.13<br>(71.13 to 168.05)                        | 128.17<br>(81.16 to 189.67)                         | 3.75<br>(2.97 to 4.68)                           | 4.69<br>(3.24 to 6.57)                           | 4.64<br>(3.17 to 6.56)                       | 4.94<br>(3.39 to 6.96)                           |
| Chronic myeloid leukemia        | 25.28<br>(20.08 to 32.38)                           | 14.44<br>(9.03 to 21.96)                            | 8.32<br>(5.18 to 12.72)                            | 16.24<br>(10.02 to 24.67)                           | 1.03<br>(0.82 to 1.30)                           | 0.68<br>(0.47 to 0.97)                           | 0.42<br>(0.29 to 0.59)                       | 0.74<br>(0.50 to 1.06)                           |
| Other leukemia                  | 81.17<br>(64.53 to 100.56)                          | 72.37<br>(46.97 to 105.28)                          | 55.10<br>(35.49 to 81.12)                          | 79.03<br>(50.56 to 116.59)                          | 3.06<br>(2.45 to 3.78)                           | 3.46<br>(2.50 to 4.69)                           | 2.84<br>(2.04 to 3.85)                       | 3.63<br>(2.53 to 5.02)                           |
| Other neoplasms                 | 465.40<br>(369.98 to 585.02)                        | 486.75<br>(338.16 to 666.67)                        | 491.25<br>(329.74 to 711.12)                       | 462.25<br>(330.31 to 621.52)                        | 17.82<br>(14.28 to 22.39)                        | 22.90<br>(18.01 to 28.34)                        | 24.48<br>(18.46 to 31.71)                    | 21.08<br>(17.14 to 25.28)                        |
| <b>Cardiovascular diseases</b>  | <b>27,646.25</b><br><b>(22,845.05 to 33,686.72)</b> | <b>19,908.41</b><br><b>(12,189.92 to 32,164.06)</b> | <b>10,740.39</b><br><b>(6,650.42 to 17,856.48)</b> | <b>26,976.30</b><br><b>(15,972.60 to 43,807.62)</b> | <b>1,730.02</b><br><b>(1,460.17 to 2,070.66)</b> | <b>1,490.76</b><br><b>(1,085.61 to 2,019.28)</b> | <b>899.22</b><br><b>(640.97 to 1,259.58)</b> | <b>1,830.81</b><br><b>(1,323.38 to 2,520.39)</b> |
| Rheumatic heart disease         | 167.06<br>(132.51 to 209.01)                        | 100.13<br>(54.77 to 173.52)                         | 66.92<br>(35.12 to 120.95)                         | 101.58<br>(55.78 to 172.18)                         | 4.29<br>(5.07 to 8.12)                           | 4.29<br>(2.61 to 7.01)                           | 3.02<br>(1.81 to 5.10)                       | 4.25<br>(2.63 to 6.74)                           |
| Ischemic heart disease          | 16,760.89<br>(13,976.34 to 20,119.41)               | 11,330.04<br>(6,442.40 to 19,911.95)                | 5,682.12<br>(3,264.26 to 10,054.38)                | 16,162.37<br>(8,621.68 to 27,692.08)                | 1,102.74<br>(939.25 to 1,296.48)                 | 885.37<br>(584.50 to 1,286.86)                   | 505.75<br>(322.04 to 758.10)                 | 1,128.92<br>(732.18 to 1,653.24)                 |
| Stroke                          | 7,034.81<br>(5,733.11 to 8,648.22)                  | 5,222.23<br>(3,017.49 to 8,753.27)                  | 2,489.31<br>(1,435.63 to 4,241.10)                 | 6,954.91<br>(3,999.76 to 11,687.75)                 | 461.42<br>(377.59 to 561.77)                     | 415.07<br>(266.07 to 656.24)                     | 230.34<br>(142.89 to 381.02)                 | 497.25<br>(314.28 to 773.69)                     |
| Ischemic stroke                 | 4,631.95<br>(3,786.68 to 5,665.59)                  | 3,386.95<br>(1,958.09 to 5,750.29)                  | 1,782.29<br>(992.65 to 3,090.39)                   | 4,250.81<br>(2,336.35 to 7,420.99)                  | 342.17<br>(281.42 to 415.79)                     | 303.50<br>(184.17 to 521.94)                     | 179.92<br>(105.19 to 318.55)                 | 349.05<br>(207.54 to 590.52)                     |

|                                |                                       |                                     |                                     |                                       |                                |                                |                              |                                |
|--------------------------------|---------------------------------------|-------------------------------------|-------------------------------------|---------------------------------------|--------------------------------|--------------------------------|------------------------------|--------------------------------|
| Intracerebral hemorrhage       | 2,402.86<br>(1,937.31 to<br>3,006.05) | 1,835.28<br>(901.41 to<br>3,613.63) | 707.02<br>(373.43 to<br>1,316.32)   | 2,704.09<br>(1,289.35 to<br>5,286.97) | 119.25<br>(96.70 to<br>146.69) | 111.57<br>(64.81 to<br>186.83) | 50.42<br>(31.30 to<br>82.09) | 148.20<br>(84.11 to<br>252.00) |
| Hypertensive heart disease     | 569.30<br>(380.28 to<br>839.93)       | 734.43<br>(371.03 to<br>1,504.25)   | 533.36<br>(288.37 to<br>1,012.74)   | 905.96<br>(431.24 to<br>1,919.95)     | 34.61<br>(22.51 to<br>50.74)   | 53.20<br>(29.01 to<br>105.54)  | 43.06<br>(24.67 to<br>77.58) | 62.41<br>(32.77 to<br>125.41)  |
| Cardiomyopathy and myocarditis | 2,174.22<br>(1,555.20 to<br>2,936.96) | 1,527.04<br>(746.34 to<br>2,645.27) | 1,135.28<br>(523.16 to<br>2,050.98) | 1,838.40<br>(902.18 to<br>3,141.27)   | 71.56<br>(51.76 to<br>95.41)   | 57.67<br>(32.98 to<br>87.67)   | 45.88<br>(24.63 to<br>71.69) | 65.68<br>(38.22 to<br>98.12)   |
| Myocarditis                    | 36.48<br>(25.25 to<br>50.53)          | 34.51<br>(18.82 to<br>50.44)        | 35.44<br>(17.99 to<br>52.87)        | 32.87<br>(18.43 to<br>47.33)          | 1.51<br>(0.80 to<br>2.07)      | 2.22<br>(0.89 to<br>3.34)      | 2.64<br>(0.96 to<br>3.98)    | 2.00<br>(0.83 to<br>3.05)      |

| Eastern Europe                                                |                                                |                                              |                                              |                                                |                                       |                                       |                                       |                                        |
|---------------------------------------------------------------|------------------------------------------------|----------------------------------------------|----------------------------------------------|------------------------------------------------|---------------------------------------|---------------------------------------|---------------------------------------|----------------------------------------|
| Cause                                                         | YLLs (in 1000s)                                |                                              |                                              |                                                | Deaths (in 1000s)                     |                                       |                                       |                                        |
|                                                               | 2016                                           | 2040 Forecast                                | 2040 Better Scenario                         | 2040 Worse Scenario                            | 2016                                  | 2040 Forecast                         | 2040 Better Scenario                  | 2040 Worse Scenario                    |
| Alcoholic cardiomyopathy                                      | 1,645.44<br>(1,147.26 to<br>2,279.27)          | 1,225.69<br>(569.42 to<br>2,134.40)          | 941.46<br>(410.79 to<br>1,753.08)            | 1,521.32<br>(715.41 to<br>2,634.57)            | 50.80<br>(36.32 to<br>68.90)          | 42.28<br>(23.83 to<br>66.81)          | 34.48<br>(18.58 to<br>56.14)          | 50.36<br>(28.65 to<br>78.59)           |
| Other cardiomyopathy                                          | 492.30<br>(299.53 to<br>666.94)                | 266.84<br>(123.06 to<br>494.54)              | 158.38<br>(69.19 to<br>302.19)               | 284.21<br>(131.28 to<br>532.18)                | 19.26<br>(10.56 to<br>26.24)          | 13.17<br>(5.51 to<br>22.64)           | 8.77<br>(3.30 to<br>15.68)            | 13.33<br>(5.68 to<br>22.77)            |
| Atrial fibrillation and flutter                               | 121.96<br>(90.49 to<br>163.55)                 | 185.62<br>(139.59 to<br>245.74)              | 177.61<br>(131.46 to<br>234.72)              | 180.73<br>(134.54 to<br>238.43)                | 12.50<br>(9.27 to<br>16.46)           | 21.21<br>(15.66 to<br>28.04)          | 21.64<br>(16.04 to<br>28.45)          | 19.95<br>(14.20 to<br>26.84)           |
| Aortic aneurysm                                               | 209.45<br>(165.05 to<br>263.26)                | 131.91<br>(84.61 to<br>203.20)               | 110.51<br>(71.41 to<br>170.49)               | 134.43<br>(85.56 to<br>206.34)                 | 10.25<br>(8.28 to<br>12.59)           | 8.16<br>(6.17 to<br>10.92)            | 7.64<br>(5.72 to<br>10.36)            | 7.86<br>(5.89 to<br>10.52)             |
| Peripheral artery disease                                     | 142.97<br>(95.12 to<br>214.50)                 | 276.25<br>(163.86 to<br>447.24)              | 271.65<br>(162.51 to<br>449.83)              | 272.27<br>(160.47 to<br>438.88)                | 10.36<br>(7.03 to<br>16.87)           | 24.29<br>(15.14 to<br>41.90)          | 26.02<br>(16.28 to<br>44.97)          | 22.87<br>(14.40 to<br>39.12)           |
| Endocarditis                                                  | 89.93<br>(64.55 to<br>133.78)                  | 89.69<br>(46.68 to<br>162.64)                | 84.04<br>(43.24 to<br>155.54)                | 91.40<br>(47.40 to<br>163.37)                  | 2.97<br>(2.16 to<br>4.60)             | 3.75<br>(2.25 to<br>6.50)             | 3.75<br>(2.20 to<br>6.45)             | 3.68<br>(2.20 to<br>6.32)              |
| Other cardiovascular and circulatory diseases                 | 375.65<br>(287.10 to<br>484.09)                | 311.05<br>(171.59 to<br>539.58)              | 189.59<br>(107.33 to<br>330.90)              | 334.25<br>(185.62 to<br>599.01)                | 17.21<br>(13.54 to<br>21.81)          | 17.75<br>(12.14 to<br>26.51)          | 12.12<br>(8.30 to<br>18.15)           | 17.95<br>(12.30 to<br>27.02)           |
| <b>Chronic respiratory diseases</b>                           | <b>1,011.04<br/>(818.31 to<br/>1,219.53)</b>   | <b>1,014.73<br/>(585.99 to<br/>1,631.61)</b> | <b>712.35<br/>(430.58 to<br/>1,140.17)</b>   | <b>1,381.85<br/>(749.79 to<br/>2,246.68)</b>   | <b>56.50<br/>(46.69 to<br/>67.25)</b> | <b>65.28<br/>(42.75 to<br/>94.26)</b> | <b>50.65<br/>(34.82 to<br/>69.81)</b> | <b>82.70<br/>(51.26 to<br/>123.05)</b> |
| Chronic obstructive pulmonary disease                         | 871.18<br>(705.18 to<br>1,051.15)              | 909.66<br>(498.55 to<br>1,474.05)            | 605.06<br>(349.54 to<br>982.85)              | 1,269.33<br>(662.57 to<br>2,117.83)            | 50.23<br>(41.34 to<br>59.51)          | 59.74<br>(37.72 to<br>88.62)          | 44.66<br>(29.83 to<br>63.59)          | 77.02<br>(46.40 to<br>116.74)          |
| Pneumoconiosis                                                | 4.80<br>(3.66 to<br>6.15)                      | 4.52<br>(3.21 to<br>6.04)                    | 4.96<br>(3.24 to<br>7.29)                    | 4.46<br>(3.25 to<br>6.02)                      | 0.27<br>(0.21 to<br>0.34)             | 0.27<br>(0.25 to<br>0.34)             | 0.41<br>(0.28 to<br>0.59)             | 0.33<br>(0.24 to<br>0.45)              |
| Silicosis                                                     | 0.62<br>(0.41 to<br>0.95)                      | 0.31<br>(0.19 to<br>0.52)                    | 0.19<br>(0.10 to<br>0.35)                    | 0.30<br>(0.18 to<br>0.49)                      | 0.03<br>(0.02 to<br>0.05)             | 0.02<br>(0.01 to<br>0.04)             | 0.02<br>(0.01 to<br>0.03)             | 0.02<br>(0.01 to<br>0.03)              |
| Asbestosis                                                    | 0.93<br>(0.65 to<br>1.32)                      | 1.18<br>(0.70 to<br>1.80)                    | 1.51<br>(0.88 to<br>2.45)                    | 1.09<br>(0.66 to<br>1.63)                      | 0.04<br>(0.02 to<br>0.05)             | 0.06<br>(0.03 to<br>0.08)             | 0.08<br>(0.05 to<br>0.12)             | 0.05<br>(0.03 to<br>0.08)              |
| Coal workers pneumoconiosis                                   | 0.53<br>(0.13 to<br>0.84)                      | 0.24<br>(0.09 to<br>0.40)                    | 0.18<br>(0.08 to<br>0.32)                    | 0.25<br>(0.09 to<br>0.41)                      | 0.03<br>(0.01 to<br>0.04)             | 0.02<br>(0.01 to<br>0.03)             | 0.01<br>(0.01 to<br>0.03)             | 0.02<br>(0.01 to<br>0.03)              |
| Other pneumoconiosis                                          | 2.72<br>(2.02 to<br>3.57)                      | 2.79<br>(1.86 to<br>4.06)                    | 3.08<br>(1.86 to<br>4.86)                    | 2.82<br>(1.92 to<br>4.04)                      | 0.17<br>(0.13 to<br>0.22)             | 0.24<br>(0.16 to<br>0.36)             | 0.30<br>(0.19 to<br>0.47)             | 0.24<br>(0.15 to<br>0.36)              |
| Asthma                                                        | 84.30<br>(64.25 to<br>121.12)                  | 39.05<br>(17.13 to<br>78.23)                 | 18.71<br>(7.96 to<br>38.37)                  | 49.85<br>(20.64 to<br>104.42)                  | 3.95<br>(3.05 to<br>5.68)             | 2.17<br>(1.02 to<br>4.33)             | 1.15<br>(0.54 to<br>2.29)             | 2.63<br>(1.18 to<br>5.26)              |
| Interstitial lung disease and pulmonary sarcoidosis           | 28.75<br>(18.53 to<br>37.93)                   | 37.41<br>(23.15 to<br>53.49)                 | 59.64<br>(37.24 to<br>86.82)                 | 33.54<br>(20.88 to<br>47.74)                   | 1.21<br>(0.82 to<br>1.57)             | 1.89<br>(1.32 to<br>2.54)             | 3.21<br>(2.19 to<br>4.31)             | 1.64<br>(1.13 to<br>2.17)              |
| Other chronic respiratory diseases                            | 22.01<br>(14.76 to<br>37.66)                   | 24.08<br>(12.87 to<br>47.63)                 | 23.98<br>(12.69 to<br>46.64)                 | 24.68<br>(12.95 to<br>49.81)                   | 0.84<br>(0.58 to<br>1.42)             | 1.13<br>(0.69 to<br>2.00)             | 1.23<br>(0.76 to<br>2.13)             | 1.09<br>(0.66 to<br>1.95)              |
| <b>Cirrhosis and other chronic liver diseases</b>             | <b>2,450.53<br/>(1,937.32 to<br/>3,061.05)</b> | <b>1,510.57<br/>(985.89 to<br/>2,202.22)</b> | <b>1,065.33<br/>(651.23 to<br/>1,669.89)</b> | <b>1,665.24<br/>(1,088.74 to<br/>2,362.04)</b> | <b>75.14<br/>(59.93 to<br/>93.63)</b> | <b>54.25<br/>(38.87 to<br/>74.22)</b> | <b>39.69<br/>(27.18 to<br/>56.79)</b> | <b>58.38<br/>(42.67 to<br/>78.36)</b>  |
| Cirrhosis and other chronic liver diseases due to hepatitis B | 483.87<br>(369.02 to<br>618.32)                | 289.79<br>(180.50 to<br>429.90)              | 226.39<br>(133.72 to<br>355.17)              | 283.76<br>(180.10 to<br>411.56)                | 14.59<br>(11.31 to<br>18.39)          | 10.29<br>(7.14 to<br>14.25)           | 8.28<br>(5.43 to<br>12.12)            | 9.88<br>(6.92 to<br>13.25)             |
| Cirrhosis and other chronic liver diseases due to hepatitis C | 599.99<br>(460.76 to<br>762.02)                | 374.46<br>(233.53 to<br>560.29)              | 286.94<br>(170.85 to<br>446.02)              | 368.00<br>(233.35 to<br>533.62)                | 18.12<br>(14.23 to<br>22.86)          | 13.08<br>(8.99 to<br>18.00)           | 10.29<br>(6.79 to<br>15.07)           | 12.64<br>(8.80 to<br>17.18)            |

|                                                                |                                                          |                                                          |                                                        |                                                          |                                                   |                                                   |                                                   |                                                   |
|----------------------------------------------------------------|----------------------------------------------------------|----------------------------------------------------------|--------------------------------------------------------|----------------------------------------------------------|---------------------------------------------------|---------------------------------------------------|---------------------------------------------------|---------------------------------------------------|
| Cirrhosis and other chronic liver diseases due to alcohol use  | 863.95<br>(683.48 to<br>1,095.38)                        | 562.43<br>(360.57 to<br>850.85)                          | 332.40<br>(200.14 to<br>524.83)                        | 732.00<br>(480.12 to<br>1,058.00)                        | 27.29<br>(21.87 to<br>34.42)                      | 20.53<br>(14.31 to<br>28.98)                      | 12.83<br>(8.66 to<br>18.85)                       | 25.81<br>(18.42 to<br>35.29)                      |
| Cirrhosis and other chronic liver diseases due to other causes | 502.72<br>(392.38 to<br>652.09)                          | 283.89<br>(184.44 to<br>423.27)                          | 219.60<br>(141.10 to<br>342.45)                        | 281.47<br>(187.72 to<br>417.23)                          | 15.14<br>(11.82 to<br>19.53)                      | 10.35<br>(7.33 to<br>14.36)                       | 8.28<br>(5.80 to<br>11.99)                        | 10.05<br>(7.28 to<br>13.86)                       |
| <b>Digestive diseases</b>                                      | <b>1,272.89</b><br><b>(966.80 to</b><br><b>1,666.80)</b> | <b>1,032.22</b><br><b>(664.65 to</b><br><b>1,636.81)</b> | <b>778.27</b><br><b>(499.76 to</b><br><b>1,232.66)</b> | <b>1,082.95</b><br><b>(691.06 to</b><br><b>1,722.77)</b> | <b>52.70</b><br><b>(41.17 to</b><br><b>66.61)</b> | <b>53.19</b><br><b>(40.96 to</b><br><b>70.51)</b> | <b>44.91</b><br><b>(34.55 to</b><br><b>58.99)</b> | <b>52.99</b><br><b>(40.70 to</b><br><b>71.67)</b> |
| Peptic ulcer disease                                           | 251.72<br>(188.11 to<br>324.23)                          | 109.54<br>(68.37 to<br>165.60)                           | 63.81<br>(38.46 to<br>99.45)                           | 114.40<br>(72.73 to<br>166.30)                           | 10.30<br>(7.79 to<br>13.25)                       | 5.46<br>(3.83 to<br>7.28)                         | 3.40<br>(2.36 to<br>4.62)                         | 5.49<br>(3.94 to<br>7.28)                         |

| Eastern Europe                             |                                                  |                                                  |                                                  |                                                  |                                           |                                            |                                            |                                            |
|--------------------------------------------|--------------------------------------------------|--------------------------------------------------|--------------------------------------------------|--------------------------------------------------|-------------------------------------------|--------------------------------------------|--------------------------------------------|--------------------------------------------|
| Cause                                      | YLLs (in 1000s)                                  |                                                  |                                                  |                                                  | Deaths (in 1000s)                         |                                            |                                            |                                            |
|                                            | 2016                                             | 2040 Forecast                                    | 2040 Better Scenario                             | 2040 Worse Scenario                              | 2016                                      | 2040 Forecast                              | 2040 Better Scenario                       | 2040 Worse Scenario                        |
| Gastritis and duodenitis                   | 14.50<br>(10.09 to 20.33)                        | 11.63<br>(7.13 to 17.75)                         | 8.46<br>(4.94 to 13.58)                          | 11.33<br>(7.06 to 17.39)                         | 0.56<br>(0.41 to 0.82)                    | 0.56<br>(0.41 to 0.84)                     | 0.44<br>(0.31 to 0.67)                     | 0.53<br>(0.39 to 0.79)                     |
| Appendicitis                               | 20.20<br>(14.87 to 32.17)                        | 13.67<br>(9.10 to 22.95)                         | 8.48<br>(5.44 to 14.45)                          | 13.59<br>(9.16 to 22.92)                         | 0.71<br>(0.52 to 1.15)                    | 0.62<br>(0.44 to 1.01)                     | 0.41<br>(0.29 to 0.68)                     | 0.59<br>(0.43 to 0.99)                     |
| Paralytic ileus and intestinal obstruction | 99.43<br>(74.04 to 132.04)                       | 96.04<br>(67.17 to 135.32)                       | 100.26<br>(67.77 to 142.89)                      | 89.75<br>(64.15 to 123.66)                       | 4.31<br>(3.22 to 5.60)                    | 5.53<br>(4.34 to 7.26)                     | 6.22<br>(4.81 to 8.17)                     | 4.96<br>(3.92 to 6.58)                     |
| Inguinal, femoral, and abdominal hernia    | 26.64<br>(18.97 to 43.98)                        | 18.61<br>(13.05 to 30.74)                        | 16.01<br>(10.58 to 27.11)                        | 17.61<br>(12.55 to 28.90)                        | 1.52<br>(1.07 to 2.59)                    | 1.32<br>(0.98 to 2.17)                     | 1.23<br>(0.87 to 2.06)                     | 1.21<br>(0.90 to 2.02)                     |
| Inflammatory bowel disease                 | 36.23<br>(24.66 to 48.77)                        | 32.28<br>(20.04 to 46.47)                        | 32.15<br>(19.20 to 48.49)                        | 30.59<br>(19.45 to 42.92)                        | 1.43<br>(0.94 to 1.89)                    | 1.55<br>(0.98 to 2.01)                     | 1.64<br>(1.00 to 2.18)                     | 1.42<br>(0.92 to 1.80)                     |
| Vascular intestinal disorders              | 206.98<br>(160.26 to 268.50)                     | 226.54<br>(177.07 to 282.91)                     | 210.65<br>(155.99 to 275.14)                     | 210.18<br>(168.01 to 259.43)                     | 12.59<br>(9.82 to 15.95)                  | 16.26<br>(13.46 to 19.41)                  | 16.10<br>(12.90 to 19.76)                  | 14.71<br>(12.16 to 17.62)                  |
| Gallbladder and biliary diseases           | 67.49<br>(50.99 to 89.01)                        | 74.54<br>(36.75 to 138.90)                       | 52.44<br>(26.07 to 100.90)                       | 91.53<br>(44.52 to 167.69)                       | 3.93<br>(2.99 to 5.09)                    | 5.37<br>(2.78 to 9.90)                     | 4.09<br>(2.13 to 7.50)                     | 6.26<br>(3.16 to 11.70)                    |
| Pancreatitis                               | 477.16<br>(335.17 to 649.80)                     | 396.17<br>(166.25 to 918.13)                     | 238.61<br>(99.52 to 552.67)                      | 453.06<br>(192.55 to 1,033.83)                   | 14.44<br>(10.26 to 19.36)                 | 13.66<br>(6.90 to 27.21)                   | 8.62<br>(4.47 to 17.02)                    | 15.19<br>(7.54 to 31.05)                   |
| Other digestive diseases                   | 72.55<br>(45.22 to 99.95)                        | 53.21<br>(33.27 to 78.40)                        | 47.39<br>(29.29 to 72.08)                        | 50.92<br>(32.27 to 74.45)                        | 2.91<br>(1.95 to 3.88)                    | 2.86<br>(2.05 to 3.64)                     | 2.77<br>(1.98 to 3.53)                     | 2.63<br>(1.88 to 3.31)                     |
| Neurological disorders                     | <b>1,189.07</b><br><b>(942.24 to 1,487.95)</b>   | <b>1,779.03</b><br><b>(1,399.21 to 2,303.89)</b> | <b>1,984.41</b><br><b>(1,553.95 to 2,528.10)</b> | <b>1,762.88</b><br><b>(1,348.18 to 2,386.71)</b> | <b>103.09</b><br><b>(81.38 to 131.02)</b> | <b>182.67</b><br><b>(135.66 to 247.25)</b> | <b>218.51</b><br><b>(172.80 to 282.24)</b> | <b>176.06</b><br><b>(121.86 to 249.30)</b> |
| Alzheimer's disease and other dementias    | 812.03<br>(620.29 to 1,062.02)                   | 1,314.60<br>(965.11 to 1,832.89)                 | 1,478.21<br>(1,107.18 to 2,005.55)               | 1,321.22<br>(915.30 to 1,968.75)                 | 84.37<br>(65.16 to 109.66)                | 153.34<br>(106.99 to 216.44)               | 182.64<br>(136.24 to 245.24)               | 149.83<br>(96.11 to 221.52)                |
| Parkinson's disease                        | 155.88<br>(111.50 to 209.71)                     | 248.65<br>(184.56 to 324.29)                     | 308.75<br>(226.05 to 404.58)                     | 218.91<br>(163.86 to 290.56)                     | 12.87<br>(9.22 to 17.12)                  | 22.72<br>(16.92 to 30.13)                  | 29.44<br>(22.13 to 38.55)                  | 19.63<br>(14.12 to 26.38)                  |
| Epilepsy                                   | 81.68<br>(65.73 to 103.87)                       | 88.88<br>(41.19 to 174.06)                       | 66.43<br>(31.71 to 127.89)                       | 98.71<br>(45.48 to 195.52)                       | 1.87<br>(1.51 to 2.35)                    | 2.32<br>(1.21 to 4.29)                     | 1.81<br>(0.96 to 3.26)                     | 2.52<br>(1.28 to 4.60)                     |
| Multiple sclerosis                         | 46.48<br>(32.57 to 69.35)                        | 42.17<br>(22.38 to 75.53)                        | 43.35<br>(22.58 to 76.77)                        | 42.27<br>(22.75 to 75.16)                        | 1.28<br>(0.91 to 1.91)                    | 1.30<br>(0.76 to 2.18)                     | 1.39<br>(0.81 to 2.31)                     | 1.28<br>(0.76 to 2.16)                     |
| Motor neuron disease                       | 20.39<br>(16.39 to 25.71)                        | 22.55<br>(14.41 to 33.76)                        | 22.92<br>(14.18 to 35.04)                        | 21.50<br>(14.08 to 31.25)                        | 0.73<br>(0.58 to 0.91)                    | 0.90<br>(0.63 to 1.24)                     | 0.94<br>(0.65 to 1.34)                     | 0.84<br>(0.62 to 1.11)                     |
| Other neurological disorders               | 72.40<br>(59.08 to 88.77)                        | 62.19<br>(42.45 to 89.32)                        | 64.75<br>(43.36 to 95.84)                        | 60.27<br>(42.10 to 84.78)                        | 1.98<br>(1.61 to 2.44)                    | 2.09<br>(1.58 to 2.75)                     | 2.29<br>(1.68 to 3.08)                     | 1.96<br>(1.50 to 2.53)                     |
| Mental disorders                           | <b>2,539.66</b><br><b>(1,883.97 to 3,325.42)</b> | <b>2,774.44</b><br><b>(1,501.11 to 4,485.66)</b> | <b>3,248.85</b><br><b>(1,770.16 to 5,394.73)</b> | <b>2,778.08</b><br><b>(1,556.77 to 4,498.79)</b> | <b>65.95</b><br><b>(49.91 to 85.13)</b>   | <b>79.17</b><br><b>(46.27 to 121.44)</b>   | <b>95.73</b><br><b>(56.70 to 149.64)</b>   | <b>77.94</b><br><b>(46.71 to 116.63)</b>   |
| Alcohol use disorders                      | 1,625.04<br>(1,205.61 to 2,115.83)               | 1,426.39<br>(731.01 to 2,341.84)                 | 1,495.21<br>(755.48 to 2,603.05)                 | 1,497.39<br>(803.45 to 2,428.37)                 | 43.45<br>(32.41 to 56.27)                 | 40.77<br>(22.07 to 65.08)                  | 43.47<br>(22.98 to 71.87)                  | 42.32<br>(23.49 to 65.32)                  |
| Drug use disorders                         | 914.17<br>(659.75 to 1,236.34)                   | 1,347.74<br>(731.31 to 2,197.63)                 | 1,753.27<br>(955.33 to 2,889.79)                 | 1,280.38<br>(717.89 to 2,068.95)                 | 22.50<br>(16.47 to 29.81)                 | 38.40<br>(24.00 to 56.99)                  | 52.25<br>(32.73 to 78.54)                  | 35.62<br>(22.48 to 51.79)                  |
| Opioid use disorders                       | 630.12<br>(447.13 to 870.21)                     | 797.68<br>(435.53 to 1,345.29)                   | 881.75<br>(476.51 to 1,549.35)                   | 770.47<br>(431.45 to 1,285.34)                   | 15.04<br>(10.84 to 20.45)                 | 21.74<br>(13.02 to 34.86)                  | 24.84<br>(14.55 to 41.28)                  | 20.59<br>(12.69 to 32.21)                  |

|                           |                                 |                                 |                                   |                                 |                           |                             |                              |                             |
|---------------------------|---------------------------------|---------------------------------|-----------------------------------|---------------------------------|---------------------------|-----------------------------|------------------------------|-----------------------------|
|                           | 55.97<br>(23.56 to<br>79.96)    | 97.08<br>(36.83 to<br>171.62)   | 136.95<br>(55.37 to<br>245.09)    | 91.24<br>(35.21 to<br>161.20)   | 1.37<br>(0.58 to<br>1.91) | 2.60<br>(1.04 to<br>4.43)   | 3.74<br>(1.61 to<br>6.43)    | 2.41<br>(0.98 to<br>4.06)   |
| Cocaine use disorders     |                                 |                                 |                                   |                                 |                           |                             |                              |                             |
|                           | 31.23<br>(12.78 to<br>46.97)    | 75.35<br>(28.91 to<br>132.18)   | 127.68<br>(53.26 to<br>222.02)    | 69.68<br>(27.71 to<br>118.57)   | 0.74<br>(0.30 to<br>1.10) | 1.91<br>(0.76 to<br>3.17)   | 3.30<br>(1.42 to<br>5.59)    | 1.75<br>(0.71 to<br>2.86)   |
| Amphetamine use disorders |                                 |                                 |                                   |                                 |                           |                             |                              |                             |
|                           | 196.84<br>(102.70 to<br>277.49) | 377.63<br>(183.56 to<br>630.97) | 606.88<br>(306.16 to<br>1,026.21) | 349.00<br>(169.32 to<br>574.39) | 5.35<br>(2.90 to<br>7.32) | 12.15<br>(6.66 to<br>17.85) | 20.37<br>(11.99 to<br>30.56) | 10.88<br>(6.09 to<br>15.84) |
| Other drug use disorders  |                                 |                                 |                                   |                                 |                           |                             |                              |                             |
|                           | 0.46<br>(0.29 to<br>0.69)       | 0.31<br>(0.15 to<br>0.60)       | 0.37<br>(0.17 to<br>0.75)         | 0.31<br>(0.15 to<br>0.59)       | 0.01<br>(0.01 to<br>0.01) | 0.01<br>(0.00 to<br>0.01)   | 0.01<br>(0.00 to<br>0.01)    | 0.01<br>(0.00 to<br>0.01)   |
| Eating disorders          |                                 |                                 |                                   |                                 |                           |                             |                              |                             |

| Eastern Europe                                             |                                       |                                         |                                       |                                         |                                  |                                  |                                  |                                  |
|------------------------------------------------------------|---------------------------------------|-----------------------------------------|---------------------------------------|-----------------------------------------|----------------------------------|----------------------------------|----------------------------------|----------------------------------|
| Cause                                                      | YLLs (in 1000s)                       |                                         |                                       |                                         | Deaths (in 1000s)                |                                  |                                  |                                  |
|                                                            | 2016                                  | 2040 Forecast                           | 2040 Better Scenario                  | 2040 Worse Scenario                     | 2016                             | 2040 Forecast                    | 2040 Better Scenario             | 2040 Worse Scenario              |
| <b>Diabetes, urogenital, blood, and endocrine diseases</b> | <b>970.93</b><br>(780.33 to 1,208.93) | <b>1,064.01</b><br>(642.46 to 1,727.04) | <b>761.06</b><br>(447.66 to 1,271.10) | <b>1,128.93</b><br>(671.96 to 1,825.18) | <b>43.90</b><br>(35.71 to 54.15) | <b>59.00</b><br>(41.22 to 84.98) | <b>45.10</b><br>(30.64 to 66.73) | <b>59.94</b><br>(41.60 to 85.74) |
| Diabetes mellitus                                          | 329.13<br>(260.99 to 416.90)          | 302.57<br>(154.95 to 581.82)            | 187.07<br>(96.01 to 356.49)           | 350.54<br>(175.07 to 675.87)            | 15.86<br>(12.57 to 20.13)        | 16.95<br>(10.05 to 28.12)        | 11.38<br>(6.75 to 18.92)         | 18.50<br>(10.60 to 31.25)        |
| Acute glomerulonephritis                                   | 7.27<br>(5.67 to 9.32)                | 10.83<br>(5.88 to 18.85)                | 8.44<br>(4.34 to 15.44)               | 10.70<br>(5.88 to 18.57)                | 0.22<br>(0.18 to 0.28)           | 0.37<br>(0.22 to 0.59)           | 0.30<br>(0.17 to 0.49)           | 0.35<br>(0.21 to 0.56)           |
| Chronic kidney disease                                     | 320.40<br>(256.05 to 405.56)          | 373.75<br>(177.39 to 743.78)            | 253.75<br>(120.82 to 504.16)          | 406.09<br>(181.54 to 844.24)            | 14.34<br>(11.71 to 17.68)        | 21.54<br>(11.36 to 40.71)        | 15.84<br>(8.34 to 30.89)         | 22.46<br>(11.75 to 42.90)        |
| Chronic kidney disease due to diabetes mellitus            | 81.02<br>(64.63 to 101.36)            | 107.39<br>(47.85 to 223.84)             | 75.04<br>(34.19 to 151.17)            | 117.12<br>(50.68 to 244.47)             | 3.62<br>(2.94 to 4.44)           | 5.80<br>(2.90 to 11.54)          | 4.34<br>(2.19 to 8.90)           | 6.10<br>(3.02 to 12.00)          |
| Chronic kidney disease due to hypertension                 | 13.54<br>(10.81 to 17.10)             | 21.20<br>(10.97 to 40.87)               | 16.95<br>(8.93 to 33.12)              | 21.89<br>(11.05 to 41.80)               | 1.01<br>(0.82 to 1.26)           | 2.06<br>(1.09 to 3.67)           | 1.78<br>(0.99 to 3.13)           | 2.04<br>(1.08 to 3.67)           |
| Chronic kidney disease due to glomerulonephritis           | 136.96<br>(108.91 to 172.24)          | 151.91<br>(71.68 to 302.85)             | 97.50<br>(45.90 to 193.76)            | 166.16<br>(75.80 to 341.87)             | 5.63<br>(4.51 to 6.97)           | 8.03<br>(4.15 to 15.30)          | 5.52<br>(2.86 to 10.28)          | 8.46<br>(4.35 to 16.26)          |
| Chronic kidney disease due to other and unspecified causes | 88.89<br>(68.90 to 112.80)            | 93.25<br>(44.07 to 186.82)              | 64.25<br>(30.30 to 129.53)            | 100.92<br>(46.89 to 202.38)             | 4.08<br>(3.23 to 5.13)           | 5.65<br>(2.97 to 11.21)          | 4.20<br>(2.23 to 8.42)           | 5.86<br>(3.04 to 11.26)          |
| Urinary diseases and male infertility                      | 219.61<br>(173.92 to 275.66)          | 296.66<br>(209.75 to 408.69)            | 233.20<br>(156.63 to 334.11)          | 283.92<br>(206.45 to 386.23)            | 10.63<br>(8.48 to 13.12)         | 16.96<br>(13.72 to 20.55)        | 14.28<br>(10.92 to 18.22)        | 15.66<br>(12.80 to 18.57)        |
| Urinary tract infections                                   | 176.61<br>(140.09 to 224.37)          | 251.17<br>(174.34 to 351.86)            | 201.13<br>(133.69 to 293.96)          | 240.26<br>(172.86 to 329.44)            | 8.29<br>(6.62 to 10.55)          | 14.13<br>(11.20 to 17.58)        | 12.14<br>(9.30 to 15.64)         | 13.04<br>(10.51 to 15.87)        |
| Urolithiasis                                               | 30.64<br>(19.57 to 42.30)             | 35.70<br>(21.32 to 54.28)               | 25.27<br>(14.12 to 40.57)             | 34.46<br>(20.30 to 50.85)               | 1.69<br>(1.12 to 2.31)           | 2.19<br>(1.37 to 3.01)           | 1.65<br>(0.99 to 2.40)           | 2.05<br>(1.27 to 2.83)           |
| Other urinary diseases                                     | 12.36<br>(5.57 to 18.08)              | 9.79<br>(4.46 to 14.88)                 | 6.81<br>(3.04 to 10.95)               | 9.19<br>(4.19 to 14.02)                 | 0.65<br>(0.30 to 0.91)           | 0.64<br>(0.31 to 0.89)           | 0.48<br>(0.23 to 0.69)           | 0.57<br>(0.27 to 0.81)           |
| Gynecological diseases                                     | 3.78<br>(0.95 to 6.47)                | 1.71<br>(0.37 to 3.82)                  | 0.98<br>(0.22 to 2.25)                | 1.78<br>(0.40 to 3.95)                  | 0.11<br>(0.03 to 0.18)           | 0.06<br>(0.02 to 0.11)           | 0.03<br>(0.01 to 0.07)           | 0.06<br>(0.02 to 0.12)           |
| Uterine fibroids                                           | 2.23<br>(0.56 to 3.86)                | 0.98<br>(0.20 to 2.35)                  | 0.60<br>(0.12 to 1.53)                | 1.01<br>(0.21 to 2.38)                  | 0.06<br>(0.02 to 0.10)           | 0.03<br>(0.01 to 0.07)           | 0.02<br>(0.00 to 0.04)           | 0.03<br>(0.01 to 0.07)           |
| Polycystic ovarian syndrome                                | 0.06<br>(0.02 to 0.11)                | 0.02<br>(0.00 to 0.04)                  | 0.00<br>(0.00 to 0.01)                | 0.02<br>(0.00 to 0.04)                  | 0.00<br>(0.00 to 0.00)           | 0.00<br>(0.00 to 0.00)           | 0.00<br>(0.00 to 0.00)           | 0.00<br>(0.00 to 0.00)           |
| Endometriosis                                              | 0.19<br>(0.03 to 0.41)                | 0.15<br>(0.02 to 0.45)                  | 0.08<br>(0.01 to 0.24)                | 0.16<br>(0.02 to 0.45)                  | 0.00<br>(0.00 to 0.01)           | 0.00<br>(0.00 to 0.01)           | 0.00<br>(0.00 to 0.01)           | 0.00<br>(0.00 to 0.01)           |
| Genital prolapse                                           | 0.16<br>(0.05 to 0.29)                | 0.09<br>(0.02 to 0.19)                  | 0.05<br>(0.01 to 0.11)                | 0.09<br>(0.02 to 0.20)                  | 0.01<br>(0.00 to 0.01)           | 0.00<br>(0.00 to 0.01)           | 0.00<br>(0.00 to 0.00)           | 0.00<br>(0.00 to 0.01)           |
| Other gynecological diseases                               | 1.13<br>(0.28 to 1.99)                | 0.48<br>(0.12 to 1.01)                  | 0.24<br>(0.06 to 0.52)                | 0.50<br>(0.13 to 1.06)                  | 0.03<br>(0.01 to 0.06)           | 0.02<br>(0.01 to 0.03)           | 0.01<br>(0.00 to 0.02)           | 0.02<br>(0.01 to 0.03)           |
| Hemoglobinopathies and hemolytic anemias                   | 27.16<br>(19.78 to 34.03)             | 14.86<br>(10.01 to 21.52)               | 9.89<br>(6.59 to 15.06)               | 14.59<br>(10.06 to 20.77)               | 0.94<br>(0.72 to 1.18)           | 0.74<br>(0.58 to 0.96)           | 0.55<br>(0.41 to 0.75)           | 0.70<br>(0.54 to 0.89)           |
| Thalassemias                                               | 2.47<br>(2.06 to 2.93)                | 0.40<br>(0.29 to 0.57)                  | 0.37<br>(0.26 to 0.52)                | 0.42<br>(0.30 to 0.59)                  | 0.03<br>(0.03 to 0.04)           | 0.01<br>(0.00 to 0.01)           | 0.00<br>(0.00 to 0.01)           | 0.01<br>(0.00 to 0.01)           |

|                                                   |                              |                              |                               |                              |                           |                           |                           |                           |
|---------------------------------------------------|------------------------------|------------------------------|-------------------------------|------------------------------|---------------------------|---------------------------|---------------------------|---------------------------|
|                                                   | 5.23<br>(3.45 to<br>6.90)    | 2.52<br>(1.37 to<br>4.20)    | 1.52<br>(0.80 to<br>2.62)     | 2.59<br>(1.42 to<br>4.30)    | 0.10<br>(0.07 to<br>0.13) | 0.05<br>(0.03 to<br>0.09) | 0.03<br>(0.02 to<br>0.06) | 0.06<br>(0.03 to<br>0.09) |
| Sickle cell disorders                             |                              |                              |                               |                              |                           |                           |                           |                           |
|                                                   | 5.66<br>(3.49 to<br>7.37)    | 3.86<br>(2.07 to<br>6.22)    | 2.16<br>(1.16 to<br>3.65)     | 3.88<br>(2.18 to<br>6.11)    | 0.14<br>(0.09 to<br>0.18) | 0.12<br>(0.07 to<br>0.18) | 0.07<br>(0.04 to<br>0.11) | 0.12<br>(0.07 to<br>0.18) |
| G6PD deficiency                                   |                              |                              |                               |                              |                           |                           |                           |                           |
|                                                   | 13.81<br>(10.17 to<br>17.91) | 8.08<br>(5.91 to<br>11.08)   | 5.84<br>(4.04 to<br>8.35)     | 7.70<br>(5.68 to<br>10.10)   | 0.66<br>(0.51 to<br>0.87) | 0.56<br>(0.45 to<br>0.76) | 0.44<br>(0.34 to<br>0.59) | 0.52<br>(0.42 to<br>0.70) |
| Other hemoglobinopathies and hemolytic anemias    |                              |                              |                               |                              |                           |                           |                           |                           |
|                                                   | 63.59<br>(48.19 to<br>78.34) | 63.63<br>(39.07 to<br>97.65) | 67.73<br>(40.51 to<br>106.23) | 61.30<br>(38.37 to<br>92.94) | 1.80<br>(1.38 to<br>2.33) | 2.38<br>(1.67 to<br>3.34) | 2.71<br>(1.85 to<br>3.95) | 2.20<br>(1.57 to<br>3.01) |
| Endocrine, metabolic, blood, and immune disorders |                              |                              |                               |                              |                           |                           |                           |                           |



| Eastern Europe                                |                                     |                                     |                                     |                                     |                                 |                                |                               |                                |
|-----------------------------------------------|-------------------------------------|-------------------------------------|-------------------------------------|-------------------------------------|---------------------------------|--------------------------------|-------------------------------|--------------------------------|
| Cause                                         | YLLs (in 1000s)                     |                                     |                                     |                                     | Deaths (in 1000s)               |                                |                               |                                |
|                                               | 2016                                | 2040 Forecast                       | 2040 Better Scenario                | 2040 Worse Scenario                 | 2016                            | 2040 Forecast                  | 2040 Better Scenario          | 2040 Worse Scenario            |
| <b>Musculoskeletal disorders</b>              | <b>57.91</b><br>(41.50 to 79.70)    | <b>58.85</b><br>(36.77 to 88.90)    | <b>46.81</b><br>(28.58 to 73.28)    | <b>58.37</b><br>(37.43 to 86.28)    | <b>2.20</b><br>(1.60 to 2.98)   | <b>2.75</b><br>(2.01 to 3.65)  | <b>2.23</b><br>(1.59 to 3.08) | <b>2.65</b><br>(1.97 to 3.50)  |
| Rheumatoid arthritis                          | 21.55<br>(15.00 to 33.56)           | 20.71<br>(12.88 to 33.99)           | 11.60<br>(7.02 to 20.60)            | 21.18<br>(13.45 to 34.70)           | 0.94<br>(0.67 to 1.45)          | 1.12<br>(0.77 to 1.68)         | 0.64<br>(0.43 to 1.07)        | 1.11<br>(0.76 to 1.72)         |
| Other musculoskeletal disorders               | 36.37<br>(23.40 to 51.51)           | 38.14<br>(22.27 to 58.99)           | 35.21<br>(20.24 to 55.40)           | 37.19<br>(21.79 to 57.51)           | 1.26<br>(0.78 to 1.74)          | 1.63<br>(0.97 to 2.25)         | 1.59<br>(1.01 to 2.21)        | 1.54<br>(0.92 to 2.08)         |
| <b>Other non-communicable diseases</b>        | <b>674.03</b><br>(558.38 to 819.37) | <b>312.25</b><br>(213.37 to 426.91) | <b>196.89</b><br>(125.17 to 284.23) | <b>329.47</b><br>(222.84 to 448.58) | <b>10.06</b><br>(7.86 to 12.18) | <b>7.46</b><br>(4.40 to 10.38) | <b>5.85</b><br>(2.96 to 8.67) | <b>7.44</b><br>(4.45 to 10.18) |
| Congenital birth defects                      | 569.92<br>(473.87 to 753.69)        | 206.09<br>(140.36 to 301.42)        | 101.46<br>(68.08 to 150.38)         | 225.44<br>(152.56 to 326.60)        | 7.45<br>(6.19 to 9.76)          | 3.06<br>(2.15 to 4.38)         | 1.57<br>(1.05 to 2.35)        | 3.30<br>(2.27 to 4.73)         |
| Neural tube defects                           | 18.19<br>(12.19 to 29.03)           | 4.89<br>(2.82 to 8.58)              | 1.78<br>(1.03 to 2.96)              | 5.41<br>(3.06 to 9.24)              | 0.23<br>(0.15 to 0.36)          | 0.07<br>(0.04 to 0.11)         | 0.02<br>(0.01 to 0.04)        | 0.07<br>(0.04 to 0.12)         |
| Congenital heart anomalies                    | 285.27<br>(230.32 to 397.96)        | 100.79<br>(67.16 to 154.42)         | 39.83<br>(25.42 to 65.83)           | 111.25<br>(72.01 to 170.56)         | 3.81<br>(3.08 to 5.38)          | 1.52<br>(1.03 to 2.28)         | 0.61<br>(0.39 to 1.00)        | 1.66<br>(1.10 to 2.55)         |
| Orofacial clefts                              | 0.65<br>(0.38 to 1.30)              | 0.18<br>(0.07 to 0.37)              | 0.06<br>(0.02 to 0.13)              | 0.21<br>(0.08 to 0.45)              | 0.01<br>(0.00 to 0.02)          | 0.00<br>(0.00 to 0.00)         | 0.00<br>(0.00 to 0.00)        | 0.00<br>(0.00 to 0.01)         |
| Down syndrome                                 | 20.80<br>(15.25 to 26.09)           | 14.85<br>(10.02 to 21.79)           | 15.52<br>(10.43 to 24.14)           | 14.89<br>(10.25 to 21.32)           | 0.35<br>(0.26 to 0.45)          | 0.30<br>(0.20 to 0.47)         | 0.32<br>(0.21 to 0.54)        | 0.30<br>(0.20 to 0.45)         |
| Other chromosomal abnormalities               | 24.65<br>(16.95 to 33.54)           | 12.85<br>(7.56 to 19.71)            | 8.89<br>(5.31 to 13.48)             | 13.76<br>(8.10 to 21.35)            | 0.31<br>(0.21 to 0.41)          | 0.17<br>(0.10 to 0.26)         | 0.12<br>(0.07 to 0.18)        | 0.18<br>(0.11 to 0.28)         |
| Congenital musculoskeletal and limb anomalies | 9.27<br>(6.45 to 21.90)             | 3.54<br>(2.06 to 7.47)              | 1.70<br>(0.99 to 3.85)              | 3.90<br>(2.26 to 8.45)              | 0.12<br>(0.08 to 0.26)          | 0.05<br>(0.03 to 0.09)         | 0.02<br>(0.01 to 0.05)        | 0.05<br>(0.03 to 0.11)         |
| Urogenital congenital anomalies               | 7.25<br>(4.93 to 12.75)             | 2.71<br>(1.60 to 4.92)              | 1.54<br>(0.87 to 2.86)              | 2.90<br>(1.68 to 5.13)              | 0.10<br>(0.07 to 0.18)          | 0.05<br>(0.03 to 0.09)         | 0.03<br>(0.02 to 0.05)        | 0.05<br>(0.03 to 0.09)         |
| Digestive congenital anomalies                | 45.53<br>(33.09 to 73.15)           | 15.82<br>(8.59 to 27.62)            | 7.23<br>(3.76 to 12.76)             | 17.72<br>(9.29 to 31.69)            | 0.55<br>(0.41 to 0.88)          | 0.20<br>(0.12 to 0.36)         | 0.09<br>(0.05 to 0.17)        | 0.23<br>(0.12 to 0.40)         |
| Other congenital birth defects                | 158.31<br>(127.10 to 193.93)        | 50.46<br>(33.91 to 73.40)           | 24.90<br>(16.33 to 35.86)           | 55.40<br>(36.81 to 81.11)           | 1.98<br>(1.59 to 2.41)          | 0.69<br>(0.48 to 0.98)         | 0.35<br>(0.23 to 0.49)        | 0.75<br>(0.51 to 1.08)         |
| Skin and subcutaneous diseases                | 56.17<br>(11.59 to 93.86)           | 91.80<br>(23.68 to 162.54)          | 86.03<br>(23.65 to 154.67)          | 88.38<br>(22.50 to 155.39)          | 2.06<br>(0.47 to 3.42)          | 4.24<br>(1.23 to 6.76)         | 4.17<br>(1.29 to 6.80)        | 3.96<br>(1.12 to 6.16)         |
| Cellulitis                                    | 39.06<br>(8.15 to 65.33)            | 64.24<br>(16.64 to 115.41)          | 61.70<br>(17.01 to 112.45)          | 61.72<br>(15.83 to 108.97)          | 1.37<br>(0.31 to 2.26)          | 2.76<br>(0.80 to 4.48)         | 2.77<br>(0.85 to 4.59)        | 2.59<br>(0.75 to 4.10)         |
| Pyoderma                                      | 13.84<br>(2.47 to 24.52)            | 24.83<br>(5.28 to 45.14)            | 22.13<br>(5.00 to 41.53)            | 23.99<br>(5.12 to 43.17)            | 0.55<br>(0.11 to 0.97)          | 1.31<br>(0.32 to 2.11)         | 1.26<br>(0.32 to 2.11)        | 1.22<br>(0.29 to 1.96)         |
| Decubitus ulcer                               | 2.04<br>(0.50 to 3.25)              | 1.65<br>(0.47 to 2.68)              | 1.27<br>(0.37 to 2.09)              | 1.61<br>(0.44 to 2.60)              | 0.09<br>(0.02 to 0.15)          | 0.11<br>(0.04 to 0.17)         | 0.09<br>(0.03 to 0.14)        | 0.10<br>(0.03 to 0.16)         |
| Other skin and subcutaneous diseases          | 1.24<br>(0.29 to 2.09)              | 1.09<br>(0.30 to 1.87)              | 0.93<br>(0.27 to 1.61)              | 1.06<br>(0.29 to 1.82)              | 0.04<br>(0.01 to 0.07)          | 0.05<br>(0.02 to 0.08)         | 0.05<br>(0.02 to 0.08)        | 0.05<br>(0.01 to 0.08)         |
| Sudden infant death syndrome                  | 47.93<br>(35.40 to 62.63)           | 14.35<br>(7.51 to 24.23)            | 9.40<br>(4.73 to 16.39)             | 15.66<br>(8.09 to 26.39)            | 0.56<br>(0.41 to 0.73)          | 0.17<br>(0.09 to 0.28)         | 0.11<br>(0.05 to 0.19)        | 0.18<br>(0.09 to 0.31)         |

|                          |                                        |                                        |                                       |                                        |                                 |                                |                                |                                 |
|--------------------------|----------------------------------------|----------------------------------------|---------------------------------------|----------------------------------------|---------------------------------|--------------------------------|--------------------------------|---------------------------------|
| Injuries                 | 9,270.67<br>(6,994.46 to<br>11,922.79) | 6,117.44<br>(3,045.08 to<br>11,788.97) | 4,179.11<br>(2,036.22 to<br>8,010.48) | 7,319.82<br>(3,603.80 to<br>14,010.44) | 230.97<br>(176.02 to<br>297.47) | 176.19<br>(98.08 to<br>299.69) | 126.63<br>(70.94 to<br>219.01) | 200.55<br>(110.75 to<br>360.11) |
| Transport injuries       | 1,847.93<br>(1,403.85 to<br>2,378.35)  | 789.44<br>(322.03 to<br>1,733.25)      | 385.66<br>(159.31 to<br>851.19)       | 1,617.54<br>(653.39 to<br>3,539.14)    | 41.93<br>(32.40 to<br>53.63)    | 20.74<br>(9.60 to<br>42.82)    | 10.67<br>(5.08 to<br>21.46)    | 39.25<br>(17.61 to<br>81.53)    |
| Road injuries            | 1,667.75<br>(1,271.74 to<br>2,144.16)  | 619.25<br>(257.45 to<br>1,387.17)      | 291.43<br>(123.75 to<br>628.04)       | 1,433.54<br>(584.15 to<br>3,123.32)    | 37.66<br>(29.20 to<br>48.08)    | 16.22<br>(7.68 to<br>33.12)    | 8.09<br>(3.97 to<br>16.51)     | 34.45<br>(15.58 to<br>71.35)    |
| Pedestrian road injuries | 504.08<br>(376.59 to<br>664.05)        | 180.64<br>(81.04 to<br>377.06)         | 61.85<br>(28.40 to<br>131.96)         | 354.67<br>(152.82 to<br>783.27)        | 13.04<br>(9.92 to<br>17.01)     | 5.69<br>(2.96 to<br>10.78)     | 2.13<br>(1.16 to<br>3.89)      | 10.40<br>(5.12 to<br>20.79)     |

| Eastern Europe                                  |                                                            |                                                            |                                                          |                                                            |                                                    |                                                    |                                                   |                                                    |
|-------------------------------------------------|------------------------------------------------------------|------------------------------------------------------------|----------------------------------------------------------|------------------------------------------------------------|----------------------------------------------------|----------------------------------------------------|---------------------------------------------------|----------------------------------------------------|
| Cause                                           | YLLs (in 1000s)                                            |                                                            |                                                          |                                                            | Deaths (in 1000s)                                  |                                                    |                                                   |                                                    |
|                                                 | 2016                                                       | 2040 Forecast                                              | 2040 Better Scenario                                     | 2040 Worse Scenario                                        | 2016                                               | 2040 Forecast                                      | 2040 Better Scenario                              | 2040 Worse Scenario                                |
| Cyclist road injuries                           | 53.10<br>(40.36 to<br>67.62)                               | 32.72<br>(12.42 to<br>76.48)                               | 19.01<br>(7.81 to<br>44.23)                              | 58.70<br>(22.92 to<br>139.82)                              | 1.36<br>(1.04 to<br>1.72)                          | 1.00<br>(0.43 to<br>2.18)                          | 0.66<br>(0.30 to<br>1.39)                         | 1.63<br>(0.69 to<br>3.55)                          |
| Motorcyclist road injuries                      | 121.87<br>(86.16 to<br>163.65)                             | 75.43<br>(24.11 to<br>195.48)                              | 52.03<br>(16.85 to<br>135.29)                            | 130.79<br>(43.39 to<br>328.16)                             | 2.38<br>(1.68 to<br>3.20)                          | 1.63<br>(0.58 to<br>4.07)                          | 1.19<br>(0.43 to<br>2.88)                         | 2.66<br>(0.94 to<br>6.56)                          |
| Motor vehicle road injuries                     | 978.91<br>(727.07 to<br>1,293.10)                          | 324.74<br>(128.03 to<br>713.27)                            | 155.70<br>(65.67 to<br>332.48)                           | 877.43<br>(349.47 to<br>1,895.82)                          | 20.63<br>(15.30 to<br>27.10)                       | 7.72<br>(3.42 to<br>16.36)                         | 4.02<br>(1.94 to<br>8.13)                         | 19.44<br>(8.25 to<br>40.12)                        |
| Other road injuries                             | 9.79<br>(7.11 to<br>14.55)                                 | 5.72<br>(2.05 to<br>14.07)                                 | 2.84<br>(1.09 to<br>6.95)                                | 11.95<br>(4.35 to<br>31.24)                                | 0.24<br>(0.18 to<br>0.36)                          | 0.17<br>(0.07 to<br>0.40)                          | 0.10<br>(0.04 to<br>0.22)                         | 0.32<br>(0.13 to<br>0.78)                          |
| Other transport injuries                        | 180.17<br>(133.56 to<br>240.93)                            | 170.20<br>(63.40 to<br>384.22)                             | 94.23<br>(35.86 to<br>219.15)                            | 184.01<br>(70.27 to<br>432.80)                             | 4.27<br>(3.21 to<br>5.70)                          | 4.52<br>(1.92 to<br>9.66)                          | 2.58<br>(1.12 to<br>5.58)                         | 4.80<br>(2.06 to<br>10.61)                         |
| <b>Unintentional injuries</b>                   | <b>3,360.70</b><br><b>(2,581.16 to</b><br><b>4,388.72)</b> | <b>2,223.81</b><br><b>(1,306.25 to</b><br><b>3,507.10)</b> | <b>1,611.55</b><br><b>(942.31 to</b><br><b>2,537.78)</b> | <b>2,254.12</b><br><b>(1,333.73 to</b><br><b>3,534.07)</b> | <b>96.57</b><br><b>(70.21 to</b><br><b>117.96)</b> | <b>71.00</b><br><b>(46.44 to</b><br><b>102.67)</b> | <b>54.13</b><br><b>(35.48 to</b><br><b>78.73)</b> | <b>69.94</b><br><b>(46.71 to</b><br><b>101.62)</b> |
| Falls                                           | 635.95<br>(491.04 to<br>816.52)                            | 485.05<br>(309.07 to<br>720.03)                            | 399.24<br>(246.16 to<br>617.12)                          | 473.43<br>(310.29 to<br>691.44)                            | 19.89<br>(15.80 to<br>25.03)                       | 19.00<br>(14.31 to<br>25.12)                       | 16.50<br>(12.09 to<br>22.44)                      | 17.91<br>(13.65 to<br>23.48)                       |
| Drowning                                        | 658.11<br>(520.47 to<br>830.94)                            | 414.29<br>(188.59 to<br>817.08)                            | 288.41<br>(132.65 to<br>566.65)                          | 436.34<br>(194.12 to<br>874.63)                            | 14.81<br>(11.65 to<br>18.57)                       | 10.61<br>(5.27 to<br>20.13)                        | 7.61<br>(3.86 to<br>14.10)                        | 10.96<br>(5.27 to<br>21.23)                        |
| Fire, heat, and hot substances                  | 398.47<br>(304.55 to<br>514.66)                            | 233.92<br>(119.38 to<br>432.17)                            | 143.55<br>(73.99 to<br>262.33)                           | 245.45<br>(122.87 to<br>449.21)                            | 11.57<br>(8.93 to<br>14.71)                        | 8.12<br>(4.83 to<br>13.49)                         | 5.30<br>(3.20 to<br>8.82)                         | 8.25<br>(4.76 to<br>13.75)                         |
| Poisonings                                      | 160.76<br>(124.02 to<br>218.94)                            | 55.56<br>(27.19 to<br>104.85)                              | 28.55<br>(14.40 to<br>53.17)                             | 59.74<br>(28.43 to<br>111.29)                              | 3.76<br>(2.89 to<br>5.27)                          | 1.58<br>(0.86 to<br>2.82)                          | 0.86<br>(0.48 to<br>1.49)                         | 1.65<br>(0.86 to<br>2.92)                          |
| Exposure to mechanical forces                   | 270.66<br>(201.85 to<br>363.43)                            | 157.90<br>(92.29 to<br>255.72)                             | 107.04<br>(61.37 to<br>174.12)                           | 160.42<br>(95.14 to<br>256.70)                             | 6.29<br>(4.70 to<br>8.37)                          | 4.25<br>(2.66 to<br>6.58)                          | 2.99<br>(1.83 to<br>4.62)                         | 4.23<br>(2.66 to<br>6.39)                          |
| Unintentional firearm injuries                  | 40.11<br>(29.53 to<br>54.57)                               | 19.96<br>(11.38 to<br>31.45)                               | 14.64<br>(8.17 to<br>23.18)                              | 20.07<br>(11.64 to<br>31.46)                               | 1.00<br>(0.74 to<br>1.33)                          | 0.59<br>(0.38 to<br>0.85)                          | 0.47<br>(0.29 to<br>0.67)                         | 0.58<br>(0.37 to<br>0.84)                          |
| Unintentional suffocation                       | 50.65<br>(36.59 to<br>82.77)                               | 24.44<br>(14.28 to<br>40.15)                               | 17.93<br>(10.38 to<br>29.81)                             | 25.22<br>(14.73 to<br>42.02)                               | 0.88<br>(0.64 to<br>1.35)                          | 0.48<br>(0.29 to<br>0.76)                          | 0.37<br>(0.21 to<br>0.59)                         | 0.49<br>(0.30 to<br>0.76)                          |
| Other exposure to mechanical forces             | 179.90<br>(131.04 to<br>252.82)                            | 113.50<br>(62.24 to<br>189.23)                             | 74.46<br>(40.55 to<br>124.30)                            | 115.13<br>(65.01 to<br>191.37)                             | 4.42<br>(3.24 to<br>6.11)                          | 3.18<br>(1.94 to<br>5.01)                          | 2.16<br>(1.27 to<br>3.44)                         | 3.16<br>(1.91 to<br>4.86)                          |
| Adverse effects of medical treatment            | 111.58<br>(80.01 to<br>146.21)                             | 82.32<br>(52.33 to<br>122.67)                              | 68.84<br>(43.48 to<br>103.43)                            | 80.50<br>(51.70 to<br>118.49)                              | 3.61<br>(2.62 to<br>4.74)                          | 3.15<br>(2.21 to<br>4.37)                          | 2.77<br>(1.93 to<br>3.89)                         | 2.99<br>(2.08 to<br>4.14)                          |
| Animal contact                                  | 24.14<br>(17.50 to<br>36.56)                               | 20.76<br>(12.79 to<br>33.76)                               | 15.45<br>(9.12 to<br>25.75)                              | 20.65<br>(12.91 to<br>32.80)                               | 0.67<br>(0.49 to<br>1.05)                          | 0.66<br>(0.43 to<br>1.07)                          | 0.51<br>(0.33 to<br>0.84)                         | 0.64<br>(0.43 to<br>0.99)                          |
| Venomous animal contact                         | 13.34<br>(8.84 to<br>20.96)                                | 10.75<br>(5.84 to<br>18.40)                                | 8.70<br>(4.68 to<br>15.28)                               | 10.64<br>(5.78 to<br>18.24)                                | 0.36<br>(0.24 to<br>0.59)                          | 0.33<br>(0.19 to<br>0.58)                          | 0.27<br>(0.15 to<br>0.49)                         | 0.32<br>(0.18 to<br>0.55)                          |
| Non-venomous animal contact                     | 10.80<br>(6.95 to<br>16.57)                                | 10.01<br>(5.81 to<br>16.36)                                | 6.76<br>(3.88 to<br>11.27)                               | 10.01<br>(5.83 to<br>16.29)                                | 0.31<br>(0.20 to<br>0.52)                          | 0.34<br>(0.21 to<br>0.55)                          | 0.24<br>(0.14 to<br>0.39)                         | 0.33<br>(0.20 to<br>0.54)                          |
| Foreign body                                    | 411.88<br>(315.86 to<br>595.61)                            | 284.29<br>(175.39 to<br>444.04)                            | 252.53<br>(152.60 to<br>406.95)                          | 278.68<br>(172.91 to<br>436.91)                            | 10.75<br>(8.27 to<br>15.37)                        | 8.52<br>(5.59 to<br>12.67)                         | 7.83<br>(4.99 to<br>11.82)                        | 8.18<br>(5.45 to<br>12.12)                         |
| Pulmonary aspiration and foreign body in airway | 392.30<br>(301.03 to<br>565.92)                            | 267.43<br>(164.83 to<br>416.15)                            | 233.63<br>(139.72 to<br>375.42)                          | 262.47<br>(162.96 to<br>409.92)                            | 10.25<br>(7.87 to<br>14.63)                        | 8.02<br>(5.23 to<br>11.83)                         | 7.24<br>(4.63 to<br>11.15)                        | 7.71<br>(5.10 to<br>11.49)                         |

|                                             |                                                            |                                                            |                                                          |                                                            |                                                    |                                                    |                                                    |                                                    |
|---------------------------------------------|------------------------------------------------------------|------------------------------------------------------------|----------------------------------------------------------|------------------------------------------------------------|----------------------------------------------------|----------------------------------------------------|----------------------------------------------------|----------------------------------------------------|
|                                             | 19.57<br>(14.09 to<br>32.11)                               | 16.87<br>(9.11 to<br>28.83)                                | 18.90<br>(10.31 to<br>32.87)                             | 16.21<br>(9.08 to<br>28.01)                                | 0.51<br>(0.37 to<br>0.83)                          | 0.50<br>(0.31 to<br>0.83)                          | 0.59<br>(0.36 to<br>0.96)                          | 0.47<br>(0.30 to<br>0.76)                          |
| Foreign body in other body part             |                                                            |                                                            |                                                          |                                                            |                                                    |                                                    |                                                    |                                                    |
|                                             | 517.26<br>(325.80 to<br>985.23)                            | 422.75<br>(191.86 to<br>853.18)                            | 279.50<br>(123.91 to<br>603.66)                          | 428.36<br>(197.52 to<br>868.25)                            | 15.04<br>(9.51 to<br>28.37)                        | 13.26<br>(6.63 to<br>26.06)                        | 8.95<br>(4.32 to<br>18.74)                         | 13.24<br>(6.75 to<br>26.18)                        |
| Environmental heat and cold exposure        |                                                            |                                                            |                                                          |                                                            |                                                    |                                                    |                                                    |                                                    |
|                                             | 171.89<br>(128.64 to<br>222.59)                            | 66.96<br>(36.93 to<br>110.24)                              | 28.44<br>(15.37 to<br>46.96)                             | 70.54<br>(39.15 to<br>113.39)                              | 4.16<br>(3.13 to<br>5.38)                          | 1.84<br>(1.11 to<br>2.89)                          | 0.81<br>(0.48 to<br>1.29)                          | 1.90<br>(1.14 to<br>2.92)                          |
| Other unintentional injuries                |                                                            |                                                            |                                                          |                                                            |                                                    |                                                    |                                                    |                                                    |
| <b>Self-harm and interpersonal violence</b> | <b>4,054.05</b><br><b>(2,955.69 to</b><br><b>5,515.51)</b> | <b>3,095.35</b><br><b>(1,151.25 to</b><br><b>6,993.58)</b> | <b>2,172.90</b><br><b>(829.71 to</b><br><b>4,858.94)</b> | <b>3,439.43</b><br><b>(1,241.14 to</b><br><b>7,771.59)</b> | <b>98.31</b><br><b>(72.34 to</b><br><b>133.73)</b> | <b>84.22</b><br><b>(35.18 to</b><br><b>173.50)</b> | <b>61.59</b><br><b>(27.08 to</b><br><b>123.53)</b> | <b>91.14</b><br><b>(37.29 to</b><br><b>190.46)</b> |

| Eastern Europe                                                                      |                                                 |                                                 |                                                 |                                                 |                                                |                                                |                                                |                                                |
|-------------------------------------------------------------------------------------|-------------------------------------------------|-------------------------------------------------|-------------------------------------------------|-------------------------------------------------|------------------------------------------------|------------------------------------------------|------------------------------------------------|------------------------------------------------|
| Cause                                                                               | YLLs (in 1000s)                                 |                                                 |                                                 |                                                 | Deaths (in 1000s)                              |                                                |                                                |                                                |
|                                                                                     | 2016                                            | 2040 Forecast                                   | 2040 Better Scenario                            | 2040 Worse Scenario                             | 2016                                           | 2040 Forecast                                  | 2040 Better Scenario                           | 2040 Worse Scenario                            |
| Self-harm                                                                           | 2,769.17<br>(2,000.23 to<br>3,767.46)           | 2,449.71<br>(764.47 to<br>5,846.81)             | 1,715.88<br>(563.06 to<br>4,070.03)             | 2,758.89<br>(832.98 to<br>6,620.43)             | 68.45<br>(50.22 to<br>94.18)                   | 67.41<br>(25.06 to<br>146.85)                  | 49.29<br>(19.45 to<br>103.83)                  | 73.69<br>(26.59 to<br>161.41)                  |
| Self-harm by firearm                                                                | 98.46<br>(61.87 to<br>154.31)                   | 67.16<br>(18.82 to<br>172.45)                   | 40.58<br>(12.03 to<br>110.92)                   | 76.86<br>(21.20 to<br>204.53)                   | 2.46<br>(1.54 to<br>3.87)                      | 1.84<br>(0.62 to<br>4.48)                      | 1.15<br>(0.40 to<br>2.78)                      | 2.05<br>(0.67 to<br>4.94)                      |
| Self-harm by other specified means                                                  | 2,670.71<br>(1,932.81 to<br>3,633.11)           | 2,382.55<br>(745.32 to<br>5,677.45)             | 1,675.31<br>(550.98 to<br>3,957.96)             | 2,682.03<br>(809.33 to<br>6,431.96)             | 65.99<br>(48.54 to<br>90.55)                   | 65.57<br>(24.43 to<br>142.89)                  | 48.14<br>(19.08 to<br>101.24)                  | 71.64<br>(25.86 to<br>156.62)                  |
| Interpersonal violence                                                              | 1,284.88<br>(760.54 to<br>2,076.19)             | 645.64<br>(270.67 to<br>1,335.02)               | 457.02<br>(193.56 to<br>921.39)                 | 680.53<br>(287.51 to<br>1,412.72)               | 29.86<br>(17.68 to<br>48.06)                   | 16.81<br>(7.55 to<br>32.40)                    | 12.30<br>(5.62 to<br>23.15)                    | 17.45<br>(7.84 to<br>34.21)                    |
| Physical violence by firearm                                                        | 102.78<br>(45.72 to<br>279.73)                  | 39.27<br>(14.95 to<br>112.00)                   | 23.52<br>(9.10 to<br>63.32)                     | 40.83<br>(15.27 to<br>113.83)                   | 2.10<br>(0.95 to<br>5.76)                      | 0.85<br>(0.34 to<br>2.26)                      | 0.52<br>(0.21 to<br>1.34)                      | 0.88<br>(0.34 to<br>2.34)                      |
| Physical violence by sharp object                                                   | 458.80<br>(253.94 to<br>782.15)                 | 207.10<br>(89.49 to<br>413.61)                  | 138.26<br>(60.81 to<br>269.83)                  | 212.68<br>(92.38 to<br>433.23)                  | 10.25<br>(5.72 to<br>17.80)                    | 5.08<br>(2.31 to<br>9.68)                      | 3.49<br>(1.62 to<br>6.50)                      | 5.15<br>(2.36 to<br>10.06)                     |
| Physical violence by other means                                                    | 723.30<br>(430.09 to<br>1,155.50)               | 399.27<br>(148.29 to<br>891.50)                 | 295.24<br>(111.81 to<br>645.47)                 | 427.03<br>(155.56 to<br>963.92)                 | 17.51<br>(10.38 to<br>27.63)                   | 10.88<br>(4.46 to<br>22.45)                    | 8.29<br>(3.41 to<br>16.98)                     | 11.43<br>(4.61 to<br>23.92)                    |
| <b>Forces of nature, conflict and terrorism, and executions and police conflict</b> | <b>7.99</b><br><b>(2.87 to</b><br><b>11.03)</b> | <b>8.84</b><br><b>(0.00 to</b><br><b>68.08)</b> | <b>8.99</b><br><b>(0.00 to</b><br><b>68.59)</b> | <b>8.73</b><br><b>(0.00 to</b><br><b>67.62)</b> | <b>0.17</b><br><b>(0.07 to</b><br><b>0.22)</b> | <b>0.23</b><br><b>(0.00 to</b><br><b>1.87)</b> | <b>0.25</b><br><b>(0.00 to</b><br><b>2.02)</b> | <b>0.22</b><br><b>(0.00 to</b><br><b>1.79)</b> |
| Exposure to forces of nature                                                        | 0.00<br>(0.00 to<br>0.00)                       | 1.52<br>(0.00 to<br>7.90)                       | 1.55<br>(0.00 to<br>8.07)                       | 1.49<br>(0.00 to<br>7.79)                       | 0.00<br>(0.00 to<br>0.00)                      | 0.05<br>(0.00 to<br>0.22)                      | 0.05<br>(0.00 to<br>0.24)                      | 0.04<br>(0.00 to<br>0.21)                      |
| Conflict and terrorism                                                              | 0.00<br>(0.00 to<br>0.00)                       | 7.32<br>(0.00 to<br>67.24)                      | 7.44<br>(0.00 to<br>67.78)                      | 7.24<br>(0.00 to<br>66.80)                      | 0.00<br>(0.00 to<br>0.00)                      | 0.18<br>(0.00 to<br>1.68)                      | 0.20<br>(0.00 to<br>1.77)                      | 0.18<br>(0.00 to<br>1.61)                      |
| Executions and police conflict                                                      | 7.99<br>(2.87 to<br>11.03)                      | 0.00<br>(0.00 to<br>0.00)                       | 0.00<br>(0.00 to<br>0.00)                       | 0.00<br>(0.00 to<br>0.00)                       | 0.17<br>(0.07 to<br>0.22)                      | 0.00<br>(0.00 to<br>0.00)                      | 0.00<br>(0.00 to<br>0.00)                      | 0.00<br>(0.00 to<br>0.00)                      |

| Belarus                                                           |                                                   |                                                   |                                                 |                                                   |                                             |                                            |                                           |                                             |
|-------------------------------------------------------------------|---------------------------------------------------|---------------------------------------------------|-------------------------------------------------|---------------------------------------------------|---------------------------------------------|--------------------------------------------|-------------------------------------------|---------------------------------------------|
| Cause                                                             | YLLs (actual counts)                              |                                                   |                                                 |                                                   | Deaths (actual counts)                      |                                            |                                           |                                             |
|                                                                   | 2016                                              | 2040 Forecast                                     | 2040 Better Scenario                            | 2040 Worse Scenario                               | 2016                                        | 2040 Forecast                              | 2040 Better Scenario                      | 2040 Worse Scenario                         |
| All causes                                                        | 2,367,305.81<br>(2,010,739.10 to<br>2,721,141.58) | 1,843,487.28<br>(1,347,531.20 to<br>2,483,741.35) | 1,283,667.67<br>(948,738.86 to<br>1,719,690.39) | 2,356,901.51<br>(1,700,750.52 to<br>3,184,863.97) | 121,036.57<br>(103,617.70 to<br>137,849.02) | 115,108.27<br>(91,924.73 to<br>144,567.12) | 84,693.67<br>(68,417.74 to<br>107,628.60) | 137,866.14<br>(111,482.56 to<br>172,693.46) |
| Communicable, maternal, neonatal, and nutritional diseases        | 89,148.34<br>(77,485.81 to<br>102,319.64)         | 48,648.35<br>(35,911.71 to<br>66,487.52)          | 28,970.78<br>(21,795.06 to<br>37,771.73)        | 72,323.85<br>(52,181.44 to<br>97,179.20)          | 2,166.14<br>(1,884.57 to<br>2,482.99)       | 1,670.92<br>(1,275.31 to<br>2,250.56)      | 1,112.31<br>(870.51 to<br>1,404.04)       | 2,256.50<br>(1,679.55 to<br>2,980.66)       |
| HIV/AIDS and tuberculosis                                         | 32,569.84<br>(28,619.09 to<br>37,392.85)          | 15,370.56<br>(10,969.83 to<br>22,664.28)          | 7,256.11<br>(5,247.87 to<br>9,799.53)           | 29,952.57<br>(19,387.40 to<br>45,207.47)          | 805.35<br>(703.56 to<br>935.55)             | 386.19<br>(269.74 to<br>585.71)            | 173.37<br>(126.35 to<br>237.82)           | 734.43<br>(464.03 to<br>1,138.99)           |
| Tuberculosis                                                      | 15,171.89<br>(11,714.96 to<br>19,599.80)          | 4,882.73<br>(2,057.73 to<br>10,694.39)            | 1,510.35<br>(655.43 to<br>3,279.20)             | 6,587.89<br>(2,762.47 to<br>14,132.33)            | 441.69<br>(347.82 to<br>563.77)             | 169.66<br>(81.27 to<br>346.32)             | 55.42<br>(28.01 to<br>109.00)             | 222.78<br>(105.05 to<br>452.23)             |
| HIV/AIDS                                                          | 17,397.95<br>(15,698.69 to<br>19,279.31)          | 10,487.83<br>(7,463.86 to<br>15,138.38)           | 5,745.76<br>(4,152.71 to<br>7,513.43)           | 23,364.68<br>(14,353.84 to<br>38,253.06)          | 363.66<br>(331.06 to<br>400.90)             | 216.52<br>(151.28 to<br>326.26)            | 117.95<br>(84.02 to<br>154.73)            | 511.65<br>(291.85 to<br>886.59)             |
| Diarrhea, lower respiratory, and other common infectious diseases | 33,203.80<br>(27,182.39 to<br>40,216.92)          | 26,018.95<br>(16,324.67 to<br>40,353.25)          | 16,383.53<br>(10,850.18 to<br>23,894.20)        | 34,349.23<br>(20,198.70 to<br>53,302.94)          | 1,038.24<br>(850.09 to<br>1,243.03)         | 1,148.02<br>(803.13 to<br>1,598.92)        | 826.05<br>(616.99 to<br>1,093.48)         | 1,379.11<br>(910.59 to<br>1,998.09)         |
| Diarrheal diseases                                                | 424.19<br>(334.47 to<br>549.26)                   | 596.34<br>(161.91 to<br>1,762.93)                 | 1,027.61<br>(345.86 to<br>2,566.34)             | 565.02<br>(139.23 to<br>1,816.48)                 | 13.99<br>(11.79 to<br>16.64)                | 39.30<br>(11.56 to<br>110.36)              | 75.81<br>(28.02 to<br>179.01)             | 34.20<br>(8.95 to<br>104.56)                |
| Intestinal infectious diseases                                    | 9.53<br>(4.26 to<br>18.41)                        | 5.46<br>(2.38 to<br>10.80)                        | 5.67<br>(2.48 to<br>11.20)                      | 5.49<br>(2.40 to<br>10.91)                        | 0.23<br>(0.11 to<br>0.46)                   | 0.17<br>(0.08 to<br>0.33)                  | 0.18<br>(0.09 to<br>0.34)                 | 0.16<br>(0.08 to<br>0.32)                   |
| Typhoid fever                                                     | 3.31<br>(1.36 to<br>6.35)                         | 2.38<br>(0.99 to<br>4.62)                         | 3.52<br>(1.50 to<br>6.89)                       | 2.21<br>(0.93 to<br>4.34)                         | 0.07<br>(0.03 to<br>0.13)                   | 0.06<br>(0.03 to<br>0.12)                  | 0.10<br>(0.04 to<br>0.19)                 | 0.06<br>(0.02 to<br>0.11)                   |
| Paratyphoid fever                                                 | 5.68<br>(2.16 to<br>12.11)                        | 2.78<br>(0.96 to<br>6.34)                         | 1.89<br>(0.60 to<br>4.39)                       | 2.98<br>(1.06 to<br>6.51)                         | 0.14<br>(0.05 to<br>0.31)                   | 0.09<br>(0.03 to<br>0.19)                  | 0.06<br>(0.02 to<br>0.14)                 | 0.09<br>(0.03 to<br>0.19)                   |
| Other intestinal infectious diseases                              | 0.54<br>(0.21 to<br>1.11)                         | 0.30<br>(0.11 to<br>0.69)                         | 0.26<br>(0.09 to<br>0.61)                       | 0.30<br>(0.11 to<br>0.65)                         | 0.02<br>(0.01 to<br>0.05)                   | 0.02<br>(0.01 to<br>0.05)                  | 0.02<br>(0.01 to<br>0.05)                 | 0.02<br>(0.01 to<br>0.05)                   |
| Lower respiratory infections                                      | 27,028.34<br>(21,514.75 to<br>33,324.62)          | 22,345.05<br>(12,529.35 to<br>36,350.93)          | 12,762.73<br>(7,485.91 to<br>19,670.76)         | 30,532.97<br>(16,293.78 to<br>49,400.83)          | 895.42<br>(720.43 to<br>1,087.65)           | 1,014.16<br>(660.62 to<br>1,479.36)        | 667.12<br>(455.29 to<br>938.96)           | 1,250.30<br>(775.70 to<br>1,869.19)         |
| Upper respiratory infections                                      | 46.14<br>(24.83 to<br>79.59)                      | 32.83<br>(13.43 to<br>68.38)                      | 14.92<br>(5.94 to<br>31.09)                     | 36.65<br>(14.66 to<br>76.45)                      | 1.75<br>(0.87 to<br>3.08)                   | 1.70<br>(0.62 to<br>3.50)                  | 0.82<br>(0.30 to<br>1.74)                 | 1.81<br>(0.67 to<br>3.86)                   |
| Otitis media                                                      | 1.94<br>(1.49 to<br>2.51)                         | 0.91<br>(0.46 to<br>1.84)                         | 1.03<br>(0.52 to<br>2.08)                       | 0.81<br>(0.41 to<br>1.66)                         | 0.10<br>(0.07 to<br>0.12)                   | 0.06<br>(0.03 to<br>0.11)                  | 0.07<br>(0.04 to<br>0.13)                 | 0.05<br>(0.03 to<br>0.10)                   |
| Meningitis                                                        | 2,375.49<br>(1,886.31 to<br>3,172.37)             | 876.64<br>(614.55 to<br>1,225.87)                 | 572.32<br>(395.35 to<br>878.98)                 | 961.73<br>(664.33 to<br>1,428.04)                 | 53.92<br>(44.01 to<br>73.95)                | 27.25<br>(20.02 to<br>40.41)               | 18.49<br>(13.38 to<br>27.21)              | 28.51<br>(21.04 to<br>41.66)                |
| Pneumococcal meningitis                                           | 164.72<br>(117.08 to<br>239.91)                   | 90.57<br>(56.90 to<br>149.78)                     | 92.45<br>(57.09 to<br>152.08)                   | 88.85<br>(56.35 to<br>146.90)                     | 4.51<br>(3.17 to<br>6.77)                   | 3.22<br>(2.08 to<br>5.19)                  | 3.42<br>(2.22 to<br>5.45)                 | 3.06<br>(2.00 to<br>4.91)                   |
| H influenzae type B meningitis                                    | 168.60<br>(128.33 to<br>228.44)                   | 106.06<br>(64.52 to<br>183.34)                    | 101.70<br>(62.75 to<br>172.63)                  | 124.25<br>(69.38 to<br>226.52)                    | 3.56<br>(2.73 to<br>4.87)                   | 2.52<br>(1.78 to<br>3.76)                  | 2.59<br>(1.81 to<br>3.84)                 | 2.63<br>(1.79 to<br>4.11)                   |
| Meningococcal meningitis                                          | 1,317.44<br>(1,022.83 to<br>1,793.71)             | 382.70<br>(256.27 to<br>574.47)                   | 216.23<br>(143.81 to<br>328.85)                 | 422.42<br>(280.54 to<br>643.76)                   | 26.43<br>(21.43 to<br>35.14)                | 11.14<br>(8.05 to<br>16.92)                | 6.62<br>(4.68 to<br>9.74)                 | 11.81<br>(8.47 to<br>17.93)                 |
| Other meningitis                                                  | 724.73<br>(573.63 to<br>1,002.83)                 | 297.31<br>(198.73 to<br>465.81)                   | 161.94<br>(108.93 to<br>253.24)                 | 326.20<br>(217.68 to<br>493.32)                   | 19.41<br>(15.38 to<br>27.05)                | 10.37<br>(7.34 to<br>15.61)                | 5.88<br>(4.09 to<br>8.96)                 | 11.01<br>(7.78 to<br>16.42)                 |
| Encephalitis                                                      | 3,278.35<br>(2,472.14 to<br>4,529.79)             | 2,038.55<br>(1,398.47 to<br>3,123.92)             | 1,909.75<br>(1,284.65 to<br>2,950.21)           | 2,045.35<br>(1,398.45 to<br>3,123.91)             | 71.71<br>(54.59 to<br>108.73)               | 62.55<br>(43.74 to<br>98.38)               | 61.42<br>(42.37 to<br>95.34)              | 60.24<br>(42.10 to<br>95.79)                |

|                |                            |                               |                              |                                 |                           |                            |                           |                            |
|----------------|----------------------------|-------------------------------|------------------------------|---------------------------------|---------------------------|----------------------------|---------------------------|----------------------------|
| Diphtheria     | 4.79<br>(2.98 to<br>7.10)  | 0.99<br>(0.51 to<br>1.79)     | 1.00<br>(0.50 to<br>1.84)    | 1.26<br>(0.61 to<br>2.29)       | 0.10<br>(0.06 to<br>0.16) | 0.02<br>(0.01 to<br>0.04)  | 0.02<br>(0.01 to<br>0.05) | 0.03<br>(0.01 to<br>0.05)  |
| Whooping cough | 7.75<br>(1.87 to<br>15.37) | 1.55<br>(0.27 to<br>4.10)     | 1.37<br>(0.25 to<br>3.56)    | 8.33<br>(1.01 to<br>26.83)      | 0.11<br>(0.03 to<br>0.22) | 0.03<br>(0.00 to<br>0.07)  | 0.02<br>(0.00 to<br>0.06) | 0.10<br>(0.01 to<br>0.32)  |
| Tetanus        | 4.28<br>(2.95 to<br>5.59)  | 0.57<br>(0.33 to<br>0.88)     | 0.60<br>(0.34 to<br>0.94)    | 0.67<br>(0.42 to<br>1.00)       | 0.13<br>(0.09 to<br>0.18) | 0.02<br>(0.01 to<br>0.03)  | 0.02<br>(0.01 to<br>0.04) | 0.02<br>(0.01 to<br>0.03)  |
| Measles        | 0.58<br>(0.46 to<br>0.73)  | 110.68<br>(0.14 to<br>815.66) | 79.79<br>(0.13 to<br>541.69) | 181.38<br>(0.23 to<br>1,346.49) | 0.01<br>(0.01 to<br>0.01) | 2.10<br>(0.00 to<br>13.80) | 1.53<br>(0.00 to<br>9.59) | 3.08<br>(0.00 to<br>20.73) |

| Belarus                                               |                                                      |                                                      |                                                     |                                                      |                                                |                                                |                                                |                                                |
|-------------------------------------------------------|------------------------------------------------------|------------------------------------------------------|-----------------------------------------------------|------------------------------------------------------|------------------------------------------------|------------------------------------------------|------------------------------------------------|------------------------------------------------|
| Cause                                                 | YLLs (actual counts)                                 |                                                      |                                                     |                                                      | Deaths (actual counts)                         |                                                |                                                |                                                |
|                                                       | 2016                                                 | 2040 Forecast                                        | 2040 Better Scenario                                | 2040 Worse Scenario                                  | 2016                                           | 2040 Forecast                                  | 2040 Better Scenario                           | 2040 Worse Scenario                            |
| Varicella and herpes zoster                           | 22.42<br>(12.34 to<br>39.81)                         | 9.38<br>(5.06 to<br>16.69)                           | 6.74<br>(3.74 to<br>11.86)                          | 9.57<br>(5.13 to<br>17.60)                           | 0.77<br>(0.42 to<br>1.36)                      | 0.65<br>(0.35 to<br>1.20)                      | 0.53<br>(0.30 to<br>0.98)                      | 0.60<br>(0.31 to<br>1.15)                      |
| <b>Neglected tropical diseases and malaria</b>        | <b>121.38</b><br><b>(100.71 to</b><br><b>145.37)</b> | <b>70.36</b><br><b>(54.78 to</b><br><b>87.37)</b>    | <b>62.74</b><br><b>(48.42 to</b><br><b>79.01)</b>   | <b>70.55</b><br><b>(55.69 to</b><br><b>86.69)</b>    | <b>3.62</b><br><b>(3.01 to</b><br><b>4.35)</b> | <b>2.83</b><br><b>(2.33 to</b><br><b>3.39)</b> | <b>2.52</b><br><b>(2.07 to</b><br><b>3.06)</b> | <b>2.71</b><br><b>(2.26 to</b><br><b>3.23)</b> |
| Malaria                                               | 0.00<br>(0.00 to<br>0.00)                            | 0.00<br>(0.00 to<br>0.00)                            | 0.00<br>(0.00 to<br>0.00)                           | 0.00<br>(0.00 to<br>0.00)                            | 0.00<br>(0.00 to<br>0.00)                      | 0.00<br>(0.00 to<br>0.00)                      | 0.00<br>(0.00 to<br>0.00)                      | 0.00<br>(0.00 to<br>0.00)                      |
| Chagas disease                                        | 0.00<br>(0.00 to<br>0.00)                            | 0.00<br>(0.00 to<br>0.00)                            | 0.00<br>(0.00 to<br>0.00)                           | 0.00<br>(0.00 to<br>0.00)                            | 0.00<br>(0.00 to<br>0.00)                      | 0.00<br>(0.00 to<br>0.00)                      | 0.00<br>(0.00 to<br>0.00)                      | 0.00<br>(0.00 to<br>0.00)                      |
| Leishmaniasis                                         | 0.00<br>(0.00 to<br>0.00)                            | 0.00<br>(0.00 to<br>0.00)                            | 0.00<br>(0.00 to<br>0.00)                           | 0.00<br>(0.00 to<br>0.00)                            | 0.00<br>(0.00 to<br>0.00)                      | 0.00<br>(0.00 to<br>0.00)                      | 0.00<br>(0.00 to<br>0.00)                      | 0.00<br>(0.00 to<br>0.00)                      |
| African trypanosomiasis                               | 0.00<br>(0.00 to<br>0.00)                            | 0.00<br>(0.00 to<br>0.00)                            | 0.00<br>(0.00 to<br>0.00)                           | 0.00<br>(0.00 to<br>0.00)                            | 0.00<br>(0.00 to<br>0.00)                      | 0.00<br>(0.00 to<br>0.00)                      | 0.00<br>(0.00 to<br>0.00)                      | 0.00<br>(0.00 to<br>0.00)                      |
| Schistosomiasis                                       | 0.00<br>(0.00 to<br>0.00)                            | 0.00<br>(0.00 to<br>0.00)                            | 0.00<br>(0.00 to<br>0.00)                           | 0.00<br>(0.00 to<br>0.00)                            | 0.00<br>(0.00 to<br>0.00)                      | 0.00<br>(0.00 to<br>0.00)                      | 0.00<br>(0.00 to<br>0.00)                      | 0.00<br>(0.00 to<br>0.00)                      |
| Cysticercosis                                         | 8.59<br>(6.62 to<br>10.88)                           | 2.41<br>(1.71 to<br>3.22)                            | 2.24<br>(1.55 to<br>3.05)                           | 2.37<br>(1.70 to<br>3.12)                            | 0.26<br>(0.20 to<br>0.33)                      | 0.09<br>(0.07 to<br>0.12)                      | 0.09<br>(0.07 to<br>0.11)                      | 0.09<br>(0.07 to<br>0.11)                      |
| Cystic echinococcosis                                 | 56.42<br>(44.32 to<br>69.80)                         | 30.03<br>(22.03 to<br>38.95)                         | 19.99<br>(14.73 to<br>26.75)                        | 30.88<br>(23.29 to<br>39.88)                         | 2.11<br>(1.68 to<br>2.59)                      | 1.60<br>(1.26 to<br>1.97)                      | 1.13<br>(0.87 to<br>1.44)                      | 1.56<br>(1.23 to<br>1.92)                      |
| Dengue                                                | 0.00<br>(0.00 to<br>0.00)                            | 0.00<br>(0.00 to<br>0.00)                            | 0.00<br>(0.00 to<br>0.00)                           | 0.00<br>(0.00 to<br>0.00)                            | 0.00<br>(0.00 to<br>0.00)                      | 0.00<br>(0.00 to<br>0.00)                      | 0.00<br>(0.00 to<br>0.00)                      | 0.00<br>(0.00 to<br>0.00)                      |
| Yellow fever                                          | 0.00<br>(0.00 to<br>0.00)                            | 0.00<br>(0.00 to<br>0.00)                            | 0.00<br>(0.00 to<br>0.00)                           | 0.00<br>(0.00 to<br>0.00)                            | 0.00<br>(0.00 to<br>0.00)                      | 0.00<br>(0.00 to<br>0.00)                      | 0.00<br>(0.00 to<br>0.00)                      | 0.00<br>(0.00 to<br>0.00)                      |
| Rabies                                                | 0.34<br>(0.26 to<br>0.46)                            | 0.19<br>(0.13 to<br>0.27)                            | 0.14<br>(0.10 to<br>0.20)                           | 0.20<br>(0.14 to<br>0.28)                            | 0.01<br>(0.01 to<br>0.01)                      | 0.01<br>(0.01 to<br>0.01)                      | 0.01<br>(0.00 to<br>0.01)                      | 0.01<br>(0.01 to<br>0.01)                      |
| Intestinal nematode infections                        | 0.00<br>(0.00 to<br>0.00)                            | 0.00<br>(0.00 to<br>0.00)                            | 0.00<br>(0.00 to<br>0.00)                           | 0.00<br>(0.00 to<br>0.00)                            | 0.00<br>(0.00 to<br>0.00)                      | 0.00<br>(0.00 to<br>0.00)                      | 0.00<br>(0.00 to<br>0.00)                      | 0.00<br>(0.00 to<br>0.00)                      |
| Other neglected tropical diseases                     | 56.03<br>(45.93 to<br>70.97)                         | 37.73<br>(29.48 to<br>48.97)                         | 40.37<br>(30.91 to<br>52.35)                        | 37.10<br>(29.14 to<br>48.14)                         | 1.23<br>(1.00 to<br>1.54)                      | 1.13<br>(0.90 to<br>1.46)                      | 1.30<br>(1.03 to<br>1.68)                      | 1.05<br>(0.85 to<br>1.35)                      |
| <b>Maternal disorders</b>                             | <b>346.45</b><br><b>(247.45 to</b><br><b>475.49)</b> | <b>266.50</b><br><b>(143.72 to</b><br><b>438.41)</b> | <b>187.71</b><br><b>(99.42 to</b><br><b>314.32)</b> | <b>289.07</b><br><b>(154.47 to</b><br><b>489.26)</b> | <b>6.64</b><br><b>(4.76 to</b><br><b>9.09)</b> | <b>5.12</b><br><b>(2.76 to</b><br><b>8.48)</b> | <b>3.61</b><br><b>(1.92 to</b><br><b>5.97)</b> | <b>5.55</b><br><b>(2.93 to</b><br><b>9.15)</b> |
| Maternal hemorrhage                                   | 48.23<br>(29.41 to<br>74.77)                         | 34.70<br>(16.41 to<br>63.49)                         | 24.58<br>(11.29 to<br>46.25)                        | 37.51<br>(17.23 to<br>68.06)                         | 0.93<br>(0.56 to<br>1.43)                      | 0.67<br>(0.32 to<br>1.20)                      | 0.48<br>(0.22 to<br>0.90)                      | 0.72<br>(0.34 to<br>1.32)                      |
| Maternal sepsis and other maternal infections         | 8.94<br>(4.12 to<br>15.13)                           | 5.66<br>(2.16 to<br>11.75)                           | 3.93<br>(1.49 to<br>8.42)                           | 6.12<br>(2.31 to<br>12.77)                           | 0.17<br>(0.08 to<br>0.29)                      | 0.11<br>(0.04 to<br>0.22)                      | 0.07<br>(0.03 to<br>0.16)                      | 0.12<br>(0.05 to<br>0.24)                      |
| Maternal hypertensive disorders                       | 20.70<br>(12.13 to<br>33.04)                         | 15.69<br>(7.22 to<br>30.35)                          | 10.73<br>(4.80 to<br>21.20)                         | 17.02<br>(7.59 to<br>34.04)                          | 0.37<br>(0.22 to<br>0.59)                      | 0.28<br>(0.13 to<br>0.53)                      | 0.19<br>(0.09 to<br>0.38)                      | 0.30<br>(0.14 to<br>0.60)                      |
| Maternal obstructed labor and uterine rupture         | 3.64<br>(1.51 to<br>7.20)                            | 2.68<br>(0.97 to<br>5.80)                            | 1.73<br>(0.60 to<br>3.91)                           | 2.93<br>(1.01 to<br>6.78)                            | 0.07<br>(0.03 to<br>0.14)                      | 0.05<br>(0.02 to<br>0.12)                      | 0.03<br>(0.01 to<br>0.08)                      | 0.06<br>(0.02 to<br>0.13)                      |
| Maternal abortion, miscarriage, and ectopic pregnancy | 140.49<br>(88.99 to<br>207.68)                       | 104.51<br>(47.55 to<br>198.17)                       | 72.26<br>(32.42 to<br>135.74)                       | 114.41<br>(50.78 to<br>215.86)                       | 2.74<br>(1.73 to<br>4.05)                      | 2.05<br>(0.92 to<br>3.89)                      | 1.42<br>(0.63 to<br>2.65)                      | 2.24<br>(0.99 to<br>4.22)                      |



|                                        |                               |                               |                               |                               |                           |                           |                           |                           |
|----------------------------------------|-------------------------------|-------------------------------|-------------------------------|-------------------------------|---------------------------|---------------------------|---------------------------|---------------------------|
| Indirect maternal deaths               | 33.74<br>(18.93 to<br>55.44)  | 30.15<br>(12.38 to<br>60.62)  | 20.45<br>(7.91 to<br>42.50)   | 32.94<br>(13.07 to<br>67.49)  | 0.60<br>(0.34 to<br>1.00) | 0.53<br>(0.22 to<br>1.06) | 0.36<br>(0.14 to<br>0.73) | 0.58<br>(0.23 to<br>1.20) |
| Late maternal deaths                   | 3.92<br>(1.78 to<br>7.21)     | 2.38<br>(0.87 to<br>5.22)     | 1.62<br>(0.57 to<br>3.64)     | 2.59<br>(0.92 to<br>5.84)     | 0.07<br>(0.03 to<br>0.13) | 0.04<br>(0.02 to<br>0.10) | 0.03<br>(0.01 to<br>0.07) | 0.05<br>(0.02 to<br>0.11) |
| Maternal deaths aggravated by HIV/AIDS | 0.60<br>(0.23 to<br>1.15)     | 1.65<br>(0.30 to<br>5.52)     | 1.28<br>(0.23 to<br>4.20)     | 1.81<br>(0.32 to<br>5.90)     | 0.01<br>(0.00 to<br>0.02) | 0.03<br>(0.01 to<br>0.11) | 0.02<br>(0.00 to<br>0.08) | 0.04<br>(0.01 to<br>0.12) |
| Other maternal disorders               | 86.19<br>(33.82 to<br>165.63) | 69.09<br>(25.41 to<br>147.13) | 51.13<br>(18.45 to<br>109.02) | 73.93<br>(27.29 to<br>156.63) | 1.68<br>(0.68 to<br>3.25) | 1.35<br>(0.50 to<br>2.77) | 1.00<br>(0.37 to<br>2.10) | 1.44<br>(0.53 to<br>2.98) |

| Belarus                                                                 |                                              |                                           |                                           |                                            |                                     |                                   |                                  |                                   |
|-------------------------------------------------------------------------|----------------------------------------------|-------------------------------------------|-------------------------------------------|--------------------------------------------|-------------------------------------|-----------------------------------|----------------------------------|-----------------------------------|
| Cause                                                                   | YLLs (actual counts)                         |                                           |                                           |                                            | Deaths (actual counts)              |                                   |                                  |                                   |
|                                                                         | 2016                                         | 2040 Forecast                             | 2040 Better Scenario                      | 2040 Worse Scenario                        | 2016                                | 2040 Forecast                     | 2040 Better Scenario             | 2040 Worse Scenario               |
| <b>Neonatal disorders</b>                                               | <b>18,374.62</b><br>(12,854.39 to 24,653.08) | <b>4,288.09</b><br>(1,772.43 to 9,212.07) | <b>2,704.70</b><br>(1,119.45 to 5,806.42) | <b>4,973.11</b><br>(2,052.61 to 10,997.86) | <b>212.36</b><br>(148.54 to 284.96) | <b>49.57</b><br>(20.49 to 106.44) | <b>31.27</b><br>(12.95 to 67.09) | <b>57.49</b><br>(23.73 to 127.09) |
| Neonatal preterm birth                                                  | 6,355.13<br>(4,123.38 to 8,946.06)           | 1,127.02<br>(566.49 to 2,046.40)          | 547.83<br>(273.28 to 988.52)              | 1,375.13<br>(647.73 to 2,547.21)           | 73.45<br>(47.66 to 103.38)          | 13.03<br>(6.55 to 23.65)          | 6.33<br>(3.16 to 11.43)          | 15.89<br>(7.49 to 29.44)          |
| Neonatal encephalopathy due to birth asphyxia and trauma                | 6,167.19<br>(4,121.89 to 8,469.30)           | 1,204.94<br>(387.46 to 2,889.37)          | 663.13<br>(225.59 to 1,573.60)            | 1,424.97<br>(459.58 to 3,459.73)           | 71.28<br>(47.64 to 97.89)           | 13.93<br>(4.48 to 33.39)          | 7.67<br>(2.61 to 18.19)          | 16.47<br>(5.32 to 39.98)          |
| Neonatal sepsis and other neonatal infections                           | 2,602.93<br>(1,557.40 to 4,394.13)           | 798.11<br>(283.67 to 2,026.84)            | 505.16<br>(182.54 to 1,245.90)            | 916.85<br>(314.66 to 2,340.72)             | 30.07<br>(18.00 to 50.77)           | 9.22<br>(3.28 to 23.43)           | 5.84<br>(2.11 to 14.39)          | 10.60<br>(3.64 to 27.04)          |
| Hemolytic disease and other neonatal jaundice                           | 75.78<br>(45.31 to 136.63)                   | 19.06<br>(5.03 to 58.61)                  | 11.50<br>(3.24 to 34.16)                  | 22.11<br>(5.87 to 67.59)                   | 0.88<br>(0.52 to 1.58)              | 0.22<br>(0.06 to 0.68)            | 0.13<br>(0.04 to 0.39)           | 0.26<br>(0.07 to 0.78)            |
| Other neonatal disorders                                                | 3,173.59<br>(1,896.78 to 4,604.06)           | 1,138.96<br>(356.24 to 2,900.08)          | 977.07<br>(324.32 to 2,423.98)            | 1,234.04<br>(379.26 to 3,197.53)           | 36.68<br>(21.92 to 53.21)           | 13.17<br>(4.12 to 33.51)          | 11.30<br>(3.75 to 28.01)         | 14.27<br>(4.39 to 36.94)          |
| <b>Nutritional deficiencies</b>                                         | <b>644.43</b><br>(525.43 to 781.01)          | <b>530.31</b><br>(375.86 to 720.69)       | <b>530.47</b><br>(372.23 to 729.94)       | <b>521.93</b><br>(373.29 to 705.92)        | <b>17.99</b><br>(14.69 to 21.64)    | <b>18.91</b><br>(13.88 to 24.65)  | <b>19.42</b><br>(14.00 to 25.47) | <b>17.92</b><br>(13.28 to 23.32)  |
| Protein-energy malnutrition                                             | 332.47<br>(245.57 to 441.28)                 | 234.12<br>(144.32 to 362.81)              | 272.41<br>(168.67 to 405.27)              | 224.09<br>(137.35 to 343.85)               | 8.36<br>(5.88 to 11.64)             | 7.85<br>(4.88 to 12.19)           | 9.62<br>(6.05 to 14.11)          | 7.20<br>(4.51 to 11.08)           |
| Iodine deficiency                                                       | 30.07<br>(3.48 to 78.02)                     | 33.46<br>(2.27 to 105.13)                 | 30.01<br>(1.49 to 96.93)                  | 33.32<br>(2.34 to 101.78)                  | 0.91<br>(0.09 to 2.39)              | 1.34<br>(0.08 to 3.86)            | 1.24<br>(0.06 to 3.67)           | 1.28<br>(0.08 to 3.68)            |
| Dietary iron deficiency                                                 | 76.88<br>(59.12 to 98.63)                    | 68.14<br>(46.79 to 93.25)                 | 73.47<br>(49.93 to 100.83)                | 67.68<br>(46.43 to 92.35)                  | 1.65<br>(1.22 to 2.18)              | 1.57<br>(1.02 to 2.19)            | 1.74<br>(1.13 to 2.43)           | 1.53<br>(1.00 to 2.08)            |
| Other nutritional deficiencies                                          | 205.00<br>(133.93 to 268.55)                 | 194.59<br>(113.65 to 287.84)              | 154.58<br>(87.67 to 238.01)               | 196.84<br>(115.58 to 292.98)               | 7.07<br>(4.36 to 9.31)              | 8.15<br>(4.89 to 11.43)           | 6.82<br>(3.92 to 9.90)           | 7.91<br>(4.87 to 11.26)           |
| <b>Other communicable, maternal, neonatal, and nutritional diseases</b> | <b>3,887.82</b><br>(2,812.19 to 5,784.72)    | <b>2,103.57</b><br>(1,512.57 to 2,892.32) | <b>1,845.53</b><br>(1,347.08 to 2,509.45) | <b>2,167.40</b><br>(1,557.20 to 3,011.87)  | <b>81.95</b><br>(65.02 to 107.11)   | <b>60.30</b><br>(46.13 to 80.56)  | <b>56.07</b><br>(42.62 to 76.98) | <b>59.29</b><br>(45.63 to 78.05)  |
| Sexually transmitted infections excluding HIV                           | 89.51<br>(61.34 to 138.13)                   | 43.01<br>(28.15 to 71.23)                 | 35.46<br>(22.74 to 57.92)                 | 44.37<br>(28.78 to 72.43)                  | 2.46<br>(1.82 to 3.71)              | 1.69<br>(1.17 to 2.70)            | 1.49<br>(1.02 to 2.32)           | 1.67<br>(1.15 to 2.66)            |
| Syphilis                                                                | 45.28<br>(22.74 to 83.94)                    | 15.01<br>(8.62 to 29.84)                  | 10.27<br>(6.02 to 18.41)                  | 16.25<br>(9.26 to 32.16)                   | 0.95<br>(0.61 to 1.62)              | 0.51<br>(0.33 to 0.95)            | 0.38<br>(0.24 to 0.68)           | 0.52<br>(0.33 to 0.98)            |
| Chlamydial infection                                                    | 8.48<br>(6.35 to 11.60)                      | 5.24<br>(3.18 to 8.62)                    | 4.75<br>(2.89 to 7.81)                    | 5.25<br>(3.13 to 8.62)                     | 0.29<br>(0.22 to 0.39)              | 0.23<br>(0.15 to 0.36)            | 0.22<br>(0.14 to 0.35)           | 0.22<br>(0.14 to 0.34)            |
| Gonococcal infection                                                    | 23.91<br>(17.86 to 32.87)                    | 15.62<br>(9.37 to 27.25)                  | 14.11<br>(8.48 to 25.02)                  | 15.65<br>(9.34 to 27.35)                   | 0.85<br>(0.64 to 1.15)              | 0.69<br>(0.45 to 1.13)            | 0.65<br>(0.41 to 1.06)           | 0.66<br>(0.43 to 1.10)            |
| Other sexually transmitted infections                                   | 11.83<br>(8.81 to 16.36)                     | 7.14<br>(4.24 to 11.74)                   | 6.34<br>(3.71 to 10.57)                   | 7.21<br>(4.30 to 11.89)                    | 0.38<br>(0.28 to 0.51)              | 0.27<br>(0.17 to 0.43)            | 0.25<br>(0.15 to 0.39)           | 0.26<br>(0.17 to 0.42)            |
| Acute hepatitis                                                         | 992.15<br>(805.59 to 1,209.76)               | 349.13<br>(249.64 to 496.49)              | 209.48<br>(145.80 to 305.87)              | 379.53<br>(265.74 to 536.75)               | 24.01<br>(19.64 to 29.11)           | 10.90<br>(8.08 to 14.98)          | 6.80<br>(4.96 to 9.40)           | 11.46<br>(8.29 to 15.51)          |
| Acute hepatitis A                                                       | 107.63<br>(53.48 to 176.69)                  | 22.40<br>(10.73 to 44.94)                 | 14.93<br>(7.08 to 29.99)                  | 24.94<br>(11.50 to 50.56)                  | 1.47<br>(0.83 to 2.30)              | 0.42<br>(0.23 to 0.70)            | 0.29<br>(0.16 to 0.49)           | 0.44<br>(0.25 to 0.78)            |
| Acute hepatitis B                                                       | 733.25<br>(583.21 to 924.41)                 | 273.83<br>(185.91 to 407.70)              | 161.94<br>(108.52 to 245.26)              | 297.26<br>(200.55 to 439.20)               | 19.02<br>(15.33 to 23.43)           | 8.58<br>(6.02 to 12.20)           | 5.22<br>(3.57 to 7.56)           | 9.08<br>(6.31 to 13.05)           |

|                                       |                                                                        |                                                                        |                                                                      |                                                                        |                                                                 |                                                                 |                                                               |                                                                  |
|---------------------------------------|------------------------------------------------------------------------|------------------------------------------------------------------------|----------------------------------------------------------------------|------------------------------------------------------------------------|-----------------------------------------------------------------|-----------------------------------------------------------------|---------------------------------------------------------------|------------------------------------------------------------------|
|                                       | 24.87<br>(16.92 to<br>35.92)                                           | 11.27<br>(6.89 to<br>18.33)                                            | 6.89<br>(4.21 to<br>11.46)                                           | 12.10<br>(7.46 to<br>19.68)                                            | 0.73<br>(0.49 to<br>1.05)                                       | 0.39<br>(0.24 to<br>0.63)                                       | 0.25<br>(0.15 to<br>0.40)                                     | 0.41<br>(0.25 to<br>0.65)                                        |
| Acute hepatitis C                     |                                                                        |                                                                        |                                                                      |                                                                        |                                                                 |                                                                 |                                                               |                                                                  |
|                                       | 126.40<br>(90.41 to<br>171.12)                                         | 41.63<br>(26.29 to<br>64.91)                                           | 25.72<br>(16.08 to<br>39.74)                                         | 45.23<br>(28.53 to<br>68.34)                                           | 2.80<br>(2.00 to<br>3.89)                                       | 1.52<br>(0.93 to<br>2.31)                                       | 1.04<br>(0.64 to<br>1.57)                                     | 1.53<br>(0.95 to<br>2.25)                                        |
| Acute hepatitis E                     |                                                                        |                                                                        |                                                                      |                                                                        |                                                                 |                                                                 |                                                               |                                                                  |
|                                       | 2,806.16<br>(1,759.64 to<br>4,571.80)                                  | 1,711.42<br>(1,194.24 to<br>2,418.48)                                  | 1,600.59<br>(1,143.53 to<br>2,207.07)                                | 1,743.50<br>(1,196.58 to<br>2,518.49)                                  | 55.48<br>(40.52 to<br>79.24)                                    | 47.71<br>(35.50 to<br>67.37)                                    | 47.78<br>(36.04 to<br>67.78)                                  | 46.17<br>(34.37 to<br>63.95)                                     |
| Other unspecified infectious diseases |                                                                        |                                                                        |                                                                      |                                                                        |                                                                 |                                                                 |                                                               |                                                                  |
| <b>Non-communicable diseases</b>      | <b>1,930,451.28</b><br><b>(1,641,317.43 to</b><br><b>2,222,475.99)</b> | <b>1,567,512.92</b><br><b>(1,123,756.35 to</b><br><b>2,145,067.39)</b> | <b>1,094,687.43</b><br><b>(810,996.81 to</b><br><b>1,463,185.62)</b> | <b>2,006,111.64</b><br><b>(1,438,125.21 to</b><br><b>2,750,476.07)</b> | <b>109,681.84</b><br><b>(94,015.66 to</b><br><b>125,022.05)</b> | <b>106,224.92</b><br><b>(85,232.75 to</b><br><b>134,490.55)</b> | <b>78,258.54</b><br><b>(62,565.27 to</b><br><b>99,694.44)</b> | <b>127,254.36</b><br><b>(102,480.15 to</b><br><b>160,080.03)</b> |

| Belarus                              |                                                 |                                                 |                                                 |                                                 |                                              |                                              |                                              |                                              |
|--------------------------------------|-------------------------------------------------|-------------------------------------------------|-------------------------------------------------|-------------------------------------------------|----------------------------------------------|----------------------------------------------|----------------------------------------------|----------------------------------------------|
| Cause                                | YLLs (actual counts)                            |                                                 |                                                 |                                                 | Deaths (actual counts)                       |                                              |                                              |                                              |
|                                      | 2016                                            | 2040 Forecast                                   | 2040 Better Scenario                            | 2040 Worse Scenario                             | 2016                                         | 2040 Forecast                                | 2040 Better Scenario                         | 2040 Worse Scenario                          |
| <b>Neoplasms</b>                     | <b>423,240.02</b><br>(353,161.35 to 495,091.11) | <b>454,548.84</b><br>(332,554.19 to 603,540.71) | <b>355,431.46</b><br>(257,964.71 to 478,778.80) | <b>514,542.21</b><br>(378,070.17 to 671,821.92) | <b>18,517.06</b><br>(15,619.53 to 21,495.71) | <b>23,831.83</b><br>(19,237.58 to 29,111.64) | <b>19,685.18</b><br>(15,617.88 to 24,486.70) | <b>25,852.41</b><br>(20,988.52 to 31,397.60) |
| Lip and oral cavity cancer           | 10,786.79<br>(8,516.58 to 13,702.88)            | 10,663.17<br>(4,876.75 to 20,161.72)            | 5,933.49<br>(2,720.66 to 11,494.87)             | 13,519.44<br>(6,426.33 to 23,140.16)            | 407.43<br>(329.24 to 504.69)                 | 452.51<br>(223.44 to 789.50)                 | 265.39<br>(140.32 to 469.22)                 | 564.28<br>(284.19 to 930.23)                 |
| Nasopharynx cancer                   | 2,213.71<br>(1,711.84 to 2,847.01)              | 2,160.22<br>(937.70 to 4,293.39)                | 1,023.29<br>(441.81 to 2,096.35)                | 2,864.81<br>(1,290.85 to 5,213.36)              | 75.35<br>(58.84 to 96.49)                    | 79.20<br>(35.89 to 151.62)                   | 38.25<br>(17.51 to 74.11)                    | 104.11<br>(48.76 to 187.90)                  |
| Other pharynx cancer                 | 9,364.51<br>(7,210.31 to 11,888.25)             | 9,371.38<br>(4,620.33 to 16,964.47)             | 8,251.92<br>(3,910.00 to 15,074.91)             | 9,882.06<br>(4,975.46 to 17,451.16)             | 332.29<br>(258.80 to 417.65)                 | 366.91<br>(187.68 to 642.71)                 | 328.61<br>(165.90 to 593.76)                 | 381.31<br>(200.46 to 663.18)                 |
| Esophageal cancer                    | 11,284.14<br>(8,778.70 to 14,263.95)            | 12,110.77<br>(5,314.30 to 24,520.59)            | 8,541.69<br>(3,878.51 to 16,627.92)             | 15,458.76<br>(6,634.04 to 31,627.81)            | 449.47<br>(357.82 to 558.90)                 | 541.04<br>(262.58 to 1,020.90)               | 397.88<br>(207.46 to 730.06)                 | 673.78<br>(312.47 to 1,269.65)               |
| Stomach cancer                       | 48,818.71<br>(41,154.54 to 57,096.15)           | 39,380.56<br>(26,701.00 to 57,125.90)           | 26,698.62<br>(18,414.51 to 38,571.07)           | 42,548.26<br>(28,969.30 to 62,195.59)           | 2,265.53<br>(1,921.27 to 2,623.05)           | 2,171.84<br>(1,609.86 to 2,949.89)           | 1,555.66<br>(1,154.12 to 2,118.79)           | 2,253.83<br>(1,655.70 to 3,071.61)           |
| Colon and rectum cancer              | 45,990.45<br>(37,863.76 to 55,513.65)           | 61,390.10<br>(40,270.56 to 90,672.10)           | 44,295.32<br>(29,391.28 to 65,058.19)           | 68,871.79<br>(44,980.11 to 103,273.96)          | 2,380.55<br>(1,979.48 to 2,838.78)           | 3,818.11<br>(2,640.47 to 5,516.66)           | 2,924.71<br>(2,056.66 to 4,185.07)           | 4,112.54<br>(2,778.70 to 6,029.12)           |
| Liver cancer                         | 9,913.90<br>(8,063.24 to 11,969.66)             | 13,590.15<br>(8,092.42 to 22,317.88)            | 12,158.75<br>(7,603.08 to 19,168.16)            | 16,701.66<br>(9,496.38 to 28,279.39)            | 448.93<br>(370.56 to 536.48)                 | 724.75<br>(463.52 to 1,119.07)               | 693.98<br>(464.27 to 1,020.69)               | 845.57<br>(507.59 to 1,355.32)               |
| Liver cancer due to hepatitis B      | 3,724.12<br>(2,906.77 to 4,707.46)              | 4,696.43<br>(2,769.16 to 7,969.62)              | 4,695.67<br>(2,837.44 to 7,686.63)              | 5,287.55<br>(2,887.99 to 9,316.65)              | 158.16<br>(124.98 to 197.97)                 | 236.92<br>(147.99 to 371.57)                 | 250.53<br>(161.48 to 380.53)                 | 254.04<br>(150.35 to 419.20)                 |
| Liver cancer due to hepatitis C      | 988.80<br>(770.72 to 1,228.01)                  | 1,411.41<br>(851.00 to 2,223.59)                | 1,454.24<br>(907.03 to 2,228.41)                | 1,540.87<br>(896.55 to 2,503.40)                | 51.92<br>(41.43 to 63.64)                    | 87.53<br>(56.44 to 129.01)                   | 95.57<br>(62.66 to 139.97)                   | 90.72<br>(56.26 to 139.39)                   |
| Liver cancer due to alcohol use      | 3,690.65<br>(2,928.20 to 4,551.21)              | 5,384.68<br>(3,186.32 to 8,817.78)              | 3,903.84<br>(2,426.30 to 6,113.96)              | 7,506.80<br>(4,278.14 to 12,600.17)             | 173.02<br>(139.59 to 212.82)                 | 290.32<br>(183.06 to 452.64)                 | 230.46<br>(151.49 to 343.49)                 | 382.86<br>(232.17 to 606.40)                 |
| Liver cancer due to other causes     | 1,510.34<br>(1,163.02 to 1,887.77)              | 2,097.62<br>(1,168.42 to 3,611.09)              | 2,105.01<br>(1,229.52 to 3,520.73)              | 2,366.45<br>(1,245.74 to 4,286.44)              | 65.84<br>(52.13 to 81.03)                    | 109.99<br>(66.39 to 176.75)                  | 117.41<br>(74.26 to 180.02)                  | 117.96<br>(66.74 to 197.61)                  |
| Gallbladder and biliary tract cancer | 6,757.46<br>(5,434.59 to 8,089.99)              | 5,398.43<br>(4,193.07 to 6,504.25)              | 5,329.57<br>(4,063.60 to 6,652.04)              | 5,075.81<br>(4,038.36 to 6,014.28)              | 353.33<br>(291.72 to 419.06)                 | 335.79<br>(279.76 to 385.39)                 | 345.93<br>(279.76 to 409.78)                 | 305.83<br>(258.36 to 347.59)                 |
| Pancreatic cancer                    | 21,195.60<br>(17,047.13 to 25,451.98)           | 25,841.61<br>(18,356.73 to 35,172.42)           | 25,056.56<br>(17,765.45 to 34,028.97)           | 26,016.44<br>(18,435.36 to 35,796.51)           | 981.04<br>(800.62 to 1,176.89)               | 1,396.77<br>(1,077.78 to 1,791.01)           | 1,420.84<br>(1,097.72 to 1,843.01)           | 1,353.40<br>(1,042.22 to 1,751.39)           |
| Larynx cancer                        | 9,503.32<br>(7,452.43 to 11,947.46)             | 9,501.32<br>(3,172.89 to 20,872.44)             | 4,407.66<br>(1,563.04 to 9,515.98)              | 12,758.70<br>(4,382.06 to 26,323.47)            | 363.45<br>(289.42 to 455.58)                 | 391.54<br>(144.06 to 819.21)                 | 186.17<br>(89.02 to 389.30)                  | 522.09<br>(399.02 to 1,062.17)               |
| Tracheal, bronchus, and lung cancer  | 76,541.87<br>(61,526.72 to 93,801.11)           | 82,853.46<br>(48,228.27 to 130,441.44)          | 53,650.55<br>(31,678.76 to 85,214.39)           | 114,746.62<br>(67,452.89 to 177,919.26)         | 3,276.52<br>(2,676.39 to 3,953.39)           | 4,008.34<br>(2,592.49 to 5,817.05)           | 2,718.94<br>(1,801.20 to 4,019.00)           | 5,379.93<br>(3,462.44 to 7,706.65)           |
| Malignant skin melanoma              | 7,801.79<br>(5,759.42 to 9,648.35)              | 8,448.54<br>(6,025.93 to 10,708.09)             | 10,762.90<br>(7,548.30 to 14,189.98)            | 7,698.41<br>(5,460.02 to 9,704.47)              | 315.53<br>(227.94 to 388.58)                 | 432.78<br>(315.99 to 524.67)                 | 571.59<br>(424.17 to 712.24)                 | 380.78<br>(277.54 to 462.26)                 |
| Non-melanoma skin cancer             | 2,370.08<br>(1,918.66 to 2,897.62)              | 2,807.73<br>(2,250.19 to 3,478.20)              | 2,153.27<br>(1,657.46 to 2,717.44)              | 2,733.24<br>(2,249.84 to 3,310.52)              | 115.78<br>(96.55 to 137.58)                  | 172.90<br>(147.28 to 203.99)                 | 141.65<br>(118.17 to 167.39)                 | 160.69<br>(135.68 to 190.20)                 |
| Breast cancer                        | 28,581.74<br>(21,804.50 to 37,013.48)           | 30,942.85<br>(19,047.54 to 50,706.40)           | 22,298.29<br>(13,712.29 to 35,487.03)           | 34,760.14<br>(20,743.56 to 58,295.19)           | 1,171.60<br>(901.07 to 1,495.15)             | 1,545.62<br>(1,036.43 to 2,342.33)           | 1,169.68<br>(791.28 to 1,692.91)             | 1,674.60<br>(1,100.75 to 2,579.89)           |
| Cervical cancer                      | 13,254.80<br>(10,031.42 to 17,401.27)           | 8,586.55<br>(5,856.46 to 12,207.16)             | 6,058.65<br>(4,196.81 to 8,655.79)              | 9,018.54<br>(6,295.45 to 12,669.47)             | 509.62<br>(392.60 to 666.00)                 | 417.83<br>(316.22 to 550.90)                 | 307.76<br>(231.01 to 411.20)                 | 424.15<br>(324.02 to 554.83)                 |

|                   |                                          |                                          |                                          |                                          |                                   |                                       |                                       |                                     |
|-------------------|------------------------------------------|------------------------------------------|------------------------------------------|------------------------------------------|-----------------------------------|---------------------------------------|---------------------------------------|-------------------------------------|
|                   | 3,609.18<br>(2,696.26 to<br>4,718.20)    | 4,468.42<br>(3,197.32 to<br>5,969.10)    | 3,651.28<br>(2,576.27 to<br>4,983.05)    | 4,482.95<br>(3,287.60 to<br>5,922.43)    | 181.65<br>(139.60 to<br>232.48)   | 263.12<br>(204.39 to<br>332.90)       | 223.95<br>(169.42 to<br>291.75)       | 256.45<br>(202.20 to<br>319.56)     |
| Uterine cancer    |                                          |                                          |                                          |                                          |                                   |                                       |                                       |                                     |
|                   | 13,021.23<br>(9,534.27 to<br>17,208.02)  | 13,212.54<br>(8,742.79 to<br>19,573.81)  | 11,179.44<br>(7,260.64 to<br>16,682.13)  | 14,001.86<br>(9,057.93 to<br>20,522.22)  | 538.27<br>(397.32 to<br>704.86)   | 661.72<br>(463.00 to<br>908.17)       | 577.04<br>(404.03 to<br>795.52)       | 684.67<br>(472.09 to<br>964.87)     |
| Ovarian cancer    |                                          |                                          |                                          |                                          |                                   |                                       |                                       |                                     |
|                   | 14,955.72<br>(10,929.53 to<br>18,902.93) | 20,862.86<br>(16,003.22 to<br>25,942.17) | 18,906.98<br>(14,217.90 to<br>24,220.23) | 19,284.02<br>(14,271.10 to<br>23,852.84) | 868.85<br>(664.34 to<br>1,086.02) | 1,428.42<br>(1,131.87 to<br>1,728.43) | 1,369.32<br>(1,097.36 to<br>1,646.42) | 1,267.26<br>(949.68 to<br>1,585.38) |
| Prostate cancer   |                                          |                                          |                                          |                                          |                                   |                                       |                                       |                                     |
|                   | 757.66<br>(566.90 to<br>1,002.40)        | 503.87<br>(309.91 to<br>765.95)          | 382.33<br>(229.51 to<br>587.48)          | 522.98<br>(325.12 to<br>788.89)          | 16.99<br>(12.88 to<br>22.21)      | 13.09<br>(9.08 to<br>18.43)           | 10.35<br>(7.04 to<br>14.67)           | 13.13<br>(9.38 to<br>18.68)         |
| Testicular cancer |                                          |                                          |                                          |                                          |                                   |                                       |                                       |                                     |

| Belarus                         |                                                                      |                                                                    |                                                                  |                                                                      |                                                               |                                                               |                                                               |                                                                |
|---------------------------------|----------------------------------------------------------------------|--------------------------------------------------------------------|------------------------------------------------------------------|----------------------------------------------------------------------|---------------------------------------------------------------|---------------------------------------------------------------|---------------------------------------------------------------|----------------------------------------------------------------|
| Cause                           | YLLs (actual counts)                                                 |                                                                    |                                                                  |                                                                      | Deaths (actual counts)                                        |                                                               |                                                               |                                                                |
|                                 | 2016                                                                 | 2040 Forecast                                                      | 2040 Better Scenario                                             | 2040 Worse Scenario                                                  | 2016                                                          | 2040 Forecast                                                 | 2040 Better Scenario                                          | 2040 Worse Scenario                                            |
| Kidney cancer                   | 9,708.38<br>(7,775.20 to<br>11,900.09)                               | 12,462.57<br>(8,023.41 to<br>19,735.03)                            | 12,323.68<br>(8,165.02 to<br>18,859.51)                          | 12,429.80<br>(7,846.58 to<br>19,842.98)                              | 419.90<br>(344.88 to<br>503.11)                               | 631.45<br>(450.28 to<br>906.56)                               | 665.33<br>(483.97 to<br>932.44)                               | 603.78<br>(424.77 to<br>889.91)                                |
| Bladder cancer                  | 7,570.10<br>(5,959.62 to<br>9,304.57)                                | 10,071.52<br>(7,007.51 to<br>14,328.49)                            | 8,536.57<br>(6,069.86 to<br>11,837.80)                           | 10,381.32<br>(7,090.73 to<br>15,305.63)                              | 427.06<br>(346.91 to<br>514.92)                               | 688.88<br>(517.13 to<br>919.44)                               | 629.10<br>(489.01 to<br>804.02)                               | 676.15<br>(483.34 to<br>936.47)                                |
| Brain and nervous system cancer | 14,631.09<br>(11,490.05 to<br>17,612.06)                             | 14,176.38<br>(10,287.72 to<br>18,300.77)                           | 12,761.82<br>(9,161.46 to<br>16,958.50)                          | 14,055.28<br>(10,385.70 to<br>17,770.46)                             | 450.44<br>(358.57 to<br>545.12)                               | 527.23<br>(403.82 to<br>658.45)                               | 489.99<br>(367.14 to<br>634.87)                               | 508.45<br>(396.38 to<br>615.20)                                |
| Thyroid cancer                  | 1,466.95<br>(1,198.58 to<br>1,801.85)                                | 1,540.89<br>(1,009.41 to<br>2,352.60)                              | 1,285.25<br>(842.76 to<br>1,955.69)                              | 1,663.44<br>(1,057.08 to<br>2,581.47)                                | 68.20<br>(56.12 to<br>83.26)                                  | 84.96<br>(58.72 to<br>125.94)                                 | 73.35<br>(50.27 to<br>107.45)                                 | 88.24<br>(59.18 to<br>134.67)                                  |
| Mesothelioma                    | 875.28<br>(724.35 to<br>1,051.18)                                    | 941.19<br>(728.78 to<br>1,212.01)                                  | 992.05<br>(743.86 to<br>1,325.21)                                | 886.18<br>(697.58 to<br>1,111.80)                                    | 36.50<br>(30.46 to<br>43.19)                                  | 47.22<br>(38.63 to<br>58.78)                                  | 51.66<br>(41.38 to<br>65.64)                                  | 43.15<br>(35.47 to<br>53.06)                                   |
| Hodgkin lymphoma                | 1,492.74<br>(1,211.56 to<br>1,933.21)                                | 946.31<br>(687.17 to<br>1,289.99)                                  | 633.74<br>(446.93 to<br>881.54)                                  | 983.85<br>(720.33 to<br>1,317.56)                                    | 47.64<br>(38.82 to<br>60.42)                                  | 37.02<br>(28.58 to<br>48.06)                                  | 25.76<br>(19.53 to<br>35.00)                                  | 37.23<br>(29.17 to<br>47.62)                                   |
| Non-Hodgkin lymphoma            | 8,975.74<br>(7,024.04 to<br>10,937.41)                               | 8,321.26<br>(6,058.93 to<br>11,119.37)                             | 7,091.16<br>(5,130.88 to<br>9,564.22)                            | 8,553.38<br>(6,204.38 to<br>11,499.31)                               | 363.71<br>(287.59 to<br>440.63)                               | 425.66<br>(327.31 to<br>548.77)                               | 378.39<br>(290.58 to<br>488.18)                               | 422.15<br>(318.51 to<br>553.63)                                |
| Multiple myeloma                | 5,017.45<br>(3,627.25 to<br>6,214.58)                                | 5,843.56<br>(3,927.18 to<br>7,907.13)                              | 5,410.02<br>(3,647.83 to<br>7,387.93)                            | 5,971.81<br>(4,026.53 to<br>8,231.39)                                | 232.89<br>(167.70 to<br>286.53)                               | 313.88<br>(218.19 to<br>412.19)                               | 301.53<br>(209.62 to<br>396.33)                               | 311.19<br>(216.00 to<br>417.51)                                |
| Leukemia                        | 18,686.77<br>(15,271.50 to<br>22,379.70)                             | 18,528.69<br>(13,297.38 to<br>25,276.54)                           | 16,130.27<br>(11,445.14 to<br>22,057.67)                         | 19,937.49<br>(13,924.62 to<br>27,925.13)                             | 729.99<br>(604.52 to<br>870.20)                               | 893.64<br>(674.99 to<br>1,181.45)                             | 816.60<br>(616.01 to<br>1,075.05)                             | 922.89<br>(669.66 to<br>1,251.17)                              |
| Acute lymphoid leukemia         | 4,130.15<br>(3,297.72 to<br>4,953.71)                                | 2,902.42<br>(2,029.21 to<br>4,042.74)                              | 2,253.12<br>(1,582.17 to<br>3,140.16)                            | 3,235.31<br>(2,219.62 to<br>4,543.41)                                | 110.31<br>(89.88 to<br>132.74)                                | 96.57<br>(68.64 to<br>133.75)                                 | 71.03<br>(55.30 to<br>106.89)                                 | 105.18<br>(73.97 to<br>148.31)                                 |
| Chronic lymphoid leukemia       | 3,761.95<br>(2,938.33 to<br>4,650.43)                                | 4,359.62<br>(2,929.02 to<br>6,342.00)                              | 3,995.58<br>(2,692.75 to<br>5,686.23)                            | 4,524.96<br>(2,962.79 to<br>6,736.55)                                | 204.37<br>(163.42 to<br>247.34)                               | 269.44<br>(195.14 to<br>367.69)                               | 259.58<br>(191.74 to<br>350.52)                               | 268.77<br>(187.88 to<br>376.66)                                |
| Acute myeloid leukemia          | 7,389.31<br>(5,822.08 to<br>8,849.57)                                | 8,583.90<br>(6,088.37 to<br>11,887.78)                             | 8,001.76<br>(5,698.68 to<br>10,940.80)                           | 9,192.23<br>(6,450.99 to<br>12,775.35)                               | 267.85<br>(212.90 to<br>322.85)                               | 376.64<br>(277.85 to<br>504.36)                               | 365.47<br>(273.26 to<br>489.04)                               | 389.82<br>(284.91 to<br>527.57)                                |
| Chronic myeloid leukemia        | 1,853.33<br>(1,474.51 to<br>2,297.96)                                | 1,046.54<br>(678.19 to<br>1,587.43)                                | 610.82<br>(400.23 to<br>898.76)                                  | 1,217.56<br>(776.45 to<br>1,850.30)                                  | 75.99<br>(60.94 to<br>93.10)                                  | 52.47<br>(36.00 to<br>75.32)                                  | 32.29<br>(22.51 to<br>45.76)                                  | 58.39<br>(39.37 to<br>86.19)                                   |
| Other leukemia                  | 1,562.03<br>(1,150.26 to<br>2,204.13)                                | 1,636.21<br>(1,096.49 to<br>2,437.53)                              | 1,268.99<br>(857.15 to<br>1,861.94)                              | 1,767.43<br>(1,154.07 to<br>2,722.80)                                | 71.47<br>(54.16 to<br>97.99)                                  | 98.51<br>(70.96 to<br>139.75)                                 | 82.24<br>(60.75 to<br>112.94)                                 | 100.72<br>(69.16 to<br>148.16)                                 |
| Other neoplasms                 | 18,092.86<br>(14,665.39 to<br>21,536.29)                             | 19,621.93<br>(15,225.03 to<br>24,067.25)                           | 19,526.36<br>(14,889.15 to<br>24,938.73)                         | 18,733.17<br>(14,786.22 to<br>22,591.72)                             | 688.55<br>(568.27 to<br>817.05)                               | 959.63<br>(803.95 to<br>1,110.59)                             | 1,005.78<br>(826.75 to<br>1,196.74)                           | 880.78<br>(748.99 to<br>1,012.10)                              |
| Cardiovascular diseases         | <b>1,155,687.69</b><br><b>(985,602.27 to</b><br><b>1,324,689.40)</b> | <b>755,685.05</b><br><b>(474,824.55 to</b><br><b>1,198,628.86)</b> | <b>414,989.22</b><br><b>(269,124.42 to</b><br><b>640,489.69)</b> | <b>1,109,806.24</b><br><b>(689,689.99 to</b><br><b>1,723,054.11)</b> | <b>75,648.88</b><br><b>(65,025.26 to</b><br><b>86,313.73)</b> | <b>60,382.81</b><br><b>(42,505.34 to</b><br><b>86,547.96)</b> | <b>36,933.88</b><br><b>(26,300.54 to</b><br><b>53,747.56)</b> | <b>79,090.88</b><br><b>(55,948.55 to</b><br><b>110,666.33)</b> |
| Rheumatic heart disease         | 9,146.26<br>(7,503.51 to<br>11,069.45)                               | 4,848.44<br>(2,831.03 to<br>8,024.12)                              | 3,260.25<br>(1,903.85 to<br>5,424.89)                            | 5,171.75<br>(3,067.15 to<br>8,592.64)                                | 323.17<br>(265.43 to<br>389.95)                               | 196.73<br>(125.55 to<br>312.65)                               | 136.92<br>(87.85 to<br>222.07)                                | 204.88<br>(132.08 to<br>321.39)                                |
| Ischemic heart disease          | 849,402.87<br>(724,419.57 to<br>974,314.19)                          | 527,725.69<br>(309,443.44 to<br>906,103.59)                        | 286,000.40<br>(173,898.54 to<br>477,273.16)                      | 795,476.94<br>(446,364.59 to<br>1,303,899.18)                        | 57,564.53<br>(49,512.35 to<br>65,529.52)                      | 43,667.88<br>(28,151.70 to<br>66,161.93)                      | 26,371.76<br>(17,420.27 to<br>40,990.45)                      | 58,246.28<br>(37,795.23 to<br>87,196.62)                       |
| Stroke                          | 234,926.42<br>(197,436.10 to<br>273,563.10)                          | 154,445.82<br>(91,044.26 to<br>254,221.17)                         | 74,065.32<br>(45,822.06 to<br>123,075.69)                        | 230,098.08<br>(132,478.11 to<br>375,001.09)                          | 14,436.80<br>(12,228.13 to<br>16,699.94)                      | 11,646.16<br>(7,433.46 to<br>18,156.55)                       | 6,338.24<br>(4,105.84 to<br>9,878.14)                         | 15,349.08<br>(9,675.00 to<br>23,536.37)                        |
| Ischemic stroke                 | 147,068.37<br>(125,915.89 to<br>170,613.27)                          | 97,794.99<br>(58,823.96 to<br>165,904.68)                          | 51,780.07<br>(31,557.27 to<br>85,237.67)                         | 135,149.18<br>(77,970.53 to<br>224,047.05)                           | 10,348.58<br>(8,750.57 to<br>11,971.42)                       | 8,378.30<br>(5,112.14 to<br>13,997.18)                        | 4,882.72<br>(3,017.28 to<br>8,169.16)                         | 10,459.04<br>(6,284.44 to<br>17,616.73)                        |

|                                |                                           |                                           |                                          |                                           |                                       |                                       |                                     |                                       |
|--------------------------------|-------------------------------------------|-------------------------------------------|------------------------------------------|-------------------------------------------|---------------------------------------|---------------------------------------|-------------------------------------|---------------------------------------|
| Intracerebral hemorrhage       | 87,858.05<br>(73,135.39 to<br>104,042.19) | 56,650.84<br>(27,460.91 to<br>105,159.83) | 22,285.25<br>(12,044.49 to<br>39,656.41) | 94,948.89<br>(45,197.82 to<br>174,597.25) | 4,088.23<br>(3,424.87 to<br>4,781.96) | 3,267.86<br>(1,862.66 to<br>5,478.68) | 1,455.52<br>(891.82 to<br>2,371.35) | 4,890.04<br>(2,649.98 to<br>8,390.12) |
| Hypertensive heart disease     | 22,325.13<br>(13,826.54 to<br>28,977.91)  | 28,705.76<br>(13,258.46 to<br>58,105.18)  | 20,439.75<br>(10,192.49 to<br>38,767.98) | 36,054.50<br>(15,793.17 to<br>76,491.49)  | 1,371.50<br>(818.44 to<br>1,775.24)   | 2,172.73<br>(1,089.80 to<br>4,426.73) | 1,708.05<br>(890.75 to<br>3,245.97) | 2,603.07<br>(1,222.45 to<br>5,521.79) |
| Cardiomyopathy and myocarditis | 16,929.93<br>(12,336.01 to<br>25,814.62)  | 12,674.09<br>(6,992.05 to<br>23,311.80)   | 8,349.54<br>(4,573.71 to<br>15,054.37)   | 14,942.04<br>(8,406.03 to<br>27,043.17)   | 508.88<br>(365.17 to<br>808.76)       | 453.51<br>(268.72 to<br>812.27)       | 313.00<br>(186.23 to<br>554.65)     | 517.31<br>(311.38 to<br>916.91)       |
| Myocarditis                    | 1,140.21<br>(804.00 to<br>1,676.59)       | 903.23<br>(565.37 to<br>1,510.33)         | 846.66<br>(526.33 to<br>1,425.39)        | 895.07<br>(572.73 to<br>1,464.56)         | 33.63<br>(23.76 to<br>52.36)          | 35.94<br>(23.10 to<br>63.68)          | 36.60<br>(23.43 to<br>64.92)        | 33.70<br>(21.84 to<br>59.81)          |

| Belarus                                                       |                                                     |                                                     |                                                     |                                                      |                                                  |                                                  |                                                  |                                                  |
|---------------------------------------------------------------|-----------------------------------------------------|-----------------------------------------------------|-----------------------------------------------------|------------------------------------------------------|--------------------------------------------------|--------------------------------------------------|--------------------------------------------------|--------------------------------------------------|
| Cause                                                         | YLLs (actual counts)                                |                                                     |                                                     |                                                      | Deaths (actual counts)                           |                                                  |                                                  |                                                  |
|                                                               | 2016                                                | 2040 Forecast                                       | 2040 Better Scenario                                | 2040 Worse Scenario                                  | 2016                                             | 2040 Forecast                                    | 2040 Better Scenario                             | 2040 Worse Scenario                              |
| Alcoholic cardiomyopathy                                      | 8,150.70<br>(5,438.74 to 14,874.41)                 | 6,601.99<br>(3,644.11 to 13,473.62)                 | 4,552.32<br>(2,431.79 to 9,299.10)                  | 8,081.67<br>(4,653.73 to 16,050.56)                  | 243.14<br>(162.24 to 455.72)                     | 226.77<br>(135.38 to 445.36)                     | 161.92<br>(93.62 to 319.17)                      | 271.72<br>(169.66 to 520.19)                     |
| Other cardiomyopathy                                          | 7,639.03<br>(5,536.22 to 11,427.42)                 | 5,168.87<br>(2,425.53 to 10,074.35)                 | 2,950.55<br>(1,402.72 to 5,861.81)                  | 5,965.30<br>(2,848.51 to 11,863.25)                  | 232.11<br>(169.65 to 370.29)                     | 190.80<br>(99.40 to 365.55)                      | 114.48<br>(59.38 to 213.82)                      | 211.88<br>(109.00 to 414.01)                     |
| Atrial fibrillation and flutter                               | 5,553.98<br>(4,185.32 to 7,322.13)                  | 9,342.83<br>(6,712.00 to 12,779.99)                 | 8,467.96<br>(6,112.01 to 11,520.16)                 | 9,221.86<br>(6,463.17 to 12,958.08)                  | 580.05<br>(429.34 to 771.92)                     | 1,076.05<br>(768.77 to 1,482.56)                 | 1,031.20<br>(745.85 to 1,403.82)                 | 1,021.94<br>(699.45 to 1,436.24)                 |
| Aortic aneurysm                                               | 7,304.34<br>(5,716.96 to 8,854.20)                  | 6,556.01<br>(4,221.99 to 9,325.32)                  | 5,239.35<br>(3,558.75 to 7,802.40)                  | 6,600.63<br>(4,371.65 to 9,632.89)                   | 357.97<br>(283.81 to 427.84)                     | 387.66<br>(286.57 to 521.62)                     | 352.66<br>(261.61 to 478.77)                     | 377.79<br>(273.93 to 508.51)                     |
| Peripheral artery disease                                     | 1,588.67<br>(997.71 to 2,149.52)                    | 2,856.19<br>(1,578.80 to 4,474.36)                  | 2,840.70<br>(1,590.83 to 4,508.33)                  | 2,809.33<br>(1,570.67 to 4,312.53)                   | 122.26<br>(74.51 to 167.21)                      | 268.39<br>(151.60 to 415.81)                     | 288.49<br>(164.85 to 453.29)                     | 249.81<br>(141.26 to 382.49)                     |
| Endocarditis                                                  | 3,174.95<br>(2,339.31 to 4,337.01)                  | 3,059.54<br>(1,826.83 to 4,902.27)                  | 2,831.55<br>(1,697.05 to 4,509.06)                  | 3,158.47<br>(1,862.48 to 5,091.51)                   | 110.41<br>(81.93 to 149.22)                      | 135.23<br>(89.00 to 207.06)                      | 132.54<br>(86.32 to 200.13)                      | 133.16<br>(86.63 to 203.88)                      |
| Other cardiovascular and circulatory diseases                 | 5,335.13<br>(4,142.45 to 7,014.50)                  | 5,670.69<br>(3,528.60 to 9,001.75)                  | 3,494.39<br>(2,259.81 to 5,502.92)                  | 6,272.64<br>(3,907.58 to 10,067.79)                  | 273.30<br>(215.45 to 355.81)                     | 378.47<br>(260.51 to 556.85)                     | 261.02<br>(184.35 to 382.71)                     | 387.55<br>(264.41 to 564.83)                     |
| <b>Chronic respiratory diseases</b>                           | <b>38,838.30</b><br><b>(31,921.80 to 46,561.12)</b> | <b>47,338.01</b><br><b>(27,999.84 to 77,812.84)</b> | <b>33,016.94</b><br><b>(20,687.36 to 52,217.64)</b> | <b>62,514.20</b><br><b>(35,061.76 to 107,614.66)</b> | <b>2,216.84</b><br><b>(1,878.20 to 2,587.54)</b> | <b>3,225.04</b><br><b>(2,118.38 to 4,772.64)</b> | <b>2,460.50</b><br><b>(1,707.15 to 3,469.36)</b> | <b>3,944.05</b><br><b>(2,421.22 to 6,110.44)</b> |
| Chronic obstructive pulmonary disease                         | 33,402.97<br>(27,409.13 to 40,450.49)               | 43,099.28<br>(24,678.03 to 73,292.31)               | 28,551.90<br>(17,043.18 to 47,133.43)               | 58,015.91<br>(31,070.46 to 102,988.44)               | 1,965.02<br>(1,658.81 to 2,305.20)               | 2,991.12<br>(1,901.63 to 4,525.23)               | 2,203.64<br>(1,482.14 to 3,179.40)               | 3,706.00<br>(2,233.94 to 5,853.55)               |
| Pneumoconiosis                                                | 110.36<br>(77.24 to 149.15)                         | 108.47<br>(75.26 to 152.64)                         | 105.66<br>(71.54 to 158.71)                         | 107.97<br>(75.98 to 150.30)                          | 6.08<br>(4.40 to 7.92)                           | 8.08<br>(5.58 to 11.89)                          | 8.54<br>(5.59 to 13.63)                          | 7.78<br>(5.21 to 11.47)                          |
| Silicosis                                                     | 17.76<br>(8.81 to 33.51)                            | 7.69<br>(3.14 to 18.11)                             | 3.48<br>(1.46 to 8.20)                              | 8.18<br>(3.26 to 18.61)                              | 0.92<br>(0.48 to 1.68)                           | 0.48<br>(0.21 to 1.03)                           | 0.24<br>(0.11 to 0.50)                           | 0.49<br>(0.20 to 1.03)                           |
| Asbestosis                                                    | 23.40<br>(16.31 to 32.25)                           | 33.26<br>(20.75 to 50.06)                           | 41.94<br>(26.06 to 63.60)                           | 30.41<br>(19.20 to 45.94)                            | 0.83<br>(0.58 to 1.13)                           | 1.51<br>(0.97 to 2.24)                           | 1.99<br>(1.28 to 2.97)                           | 1.33<br>(0.86 to 1.96)                           |
| Coal workers pneumoconiosis                                   | 1.18<br>(0.65 to 2.22)                              | 1.28<br>(0.65 to 2.45)                              | 1.05<br>(0.51 to 2.08)                              | 1.37<br>(0.69 to 2.69)                               | 0.06<br>(0.03 to 0.10)                           | 0.10<br>(0.05 to 0.19)                           | 0.09<br>(0.04 to 0.19)                           | 0.09<br>(0.05 to 0.19)                           |
| Other pneumoconiosis                                          | 68.03<br>(47.36 to 93.81)                           | 66.23<br>(44.18 to 98.52)                           | 59.20<br>(36.55 to 97.38)                           | 68.02<br>(44.83 to 100.38)                           | 4.26<br>(3.12 to 5.59)                           | 5.99<br>(3.84 to 9.18)                           | 6.22<br>(3.68 to 10.74)                          | 5.86<br>(3.65 to 9.03)                           |
| Asthma                                                        | 3,584.23<br>(2,732.21 to 5,115.80)                  | 1,635.41<br>(711.96 to 3,257.83)                    | 812.77<br>(378.42 to 1,633.09)                      | 2,152.03<br>(935.53 to 4,553.14)                     | 174.30<br>(134.81 to 238.14)                     | 98.70<br>(44.81 to 193.83)                       | 53.76<br>(25.39 to 110.11)                       | 122.26<br>(53.59 to 251.37)                      |
| Interstitial lung disease and pulmonary sarcoidosis           | 1,211.76<br>(869.72 to 1,671.37)                    | 1,891.06<br>(1,264.79 to 2,710.82)                  | 2,958.50<br>(1,974.88 to 4,342.57)                  | 1,623.85<br>(1,101.44 to 2,405.93)                   | 52.84<br>(39.20 to 71.58)                        | 100.32<br>(72.52 to 140.55)                      | 166.02<br>(119.07 to 232.63)                     | 82.50<br>(59.32 to 116.47)                       |
| Other chronic respiratory diseases                            | 528.99<br>(330.39 to 808.59)                        | 603.80<br>(308.66 to 1,068.61)                      | 588.12<br>(304.64 to 1,060.59)                      | 614.43<br>(314.15 to 1,089.88)                       | 18.60<br>(12.01 to 28.43)                        | 26.82<br>(15.19 to 44.55)                        | 28.55<br>(16.49 to 46.98)                        | 25.51<br>(14.17 to 42.98)                        |
| <b>Cirrhosis and other chronic liver diseases</b>             | <b>79,249.81</b><br><b>(64,796.41 to 94,144.35)</b> | <b>46,035.49</b><br><b>(32,872.15 to 60,861.10)</b> | <b>31,331.43</b><br><b>(22,003.23 to 42,808.62)</b> | <b>52,356.39</b><br><b>(38,628.16 to 68,117.39)</b>  | <b>2,545.84</b><br><b>(2,093.82 to 3,016.24)</b> | <b>1,757.53</b><br><b>(1,357.05 to 2,206.87)</b> | <b>1,241.07</b><br><b>(939.43 to 1,602.10)</b>   | <b>1,946.88</b><br><b>(1,546.42 to 2,413.42)</b> |
| Cirrhosis and other chronic liver diseases due to hepatitis B | 15,211.47<br>(12,060.30 to 18,936.67)               | 8,530.29<br>(6,022.19 to 11,593.25)                 | 6,724.50<br>(4,643.75 to 9,345.78)                  | 8,612.18<br>(6,237.56 to 11,320.07)                  | 480.28<br>(385.48 to 589.70)                     | 320.71<br>(240.07 to 410.88)                     | 260.38<br>(189.52 to 342.12)                     | 315.85<br>(243.91 to 397.77)                     |
| Cirrhosis and other chronic liver diseases due to hepatitis C | 18,171.11<br>(14,337.47 to 22,342.57)               | 10,395.47<br>(7,162.96 to 14,041.65)                | 8,035.20<br>(5,420.15 to 11,205.79)                 | 10,558.16<br>(7,434.82 to 13,910.62)                 | 572.95<br>(455.32 to 698.49)                     | 382.70<br>(281.53 to 497.77)                     | 303.44<br>(217.37 to 402.89)                     | 380.33<br>(287.94 to 481.59)                     |



|                                                                |                                                               |                                                               |                                                               |                                                               |                                                            |                                                            |                                                            |                                                            |
|----------------------------------------------------------------|---------------------------------------------------------------|---------------------------------------------------------------|---------------------------------------------------------------|---------------------------------------------------------------|------------------------------------------------------------|------------------------------------------------------------|------------------------------------------------------------|------------------------------------------------------------|
|                                                                | 29,926.03<br>(23,886.38 to<br>36,486.01)                      | 18,675.62<br>(13,094.11 to<br>24,933.67)                      | 9,995.21<br>(6,805.68 to<br>13,856.85)                        | 24,574.80<br>(17,810.25 to<br>32,448.91)                      | 983.69<br>(796.76 to<br>1,196.22)                          | 721.75<br>(547.54 to<br>928.96)                            | 409.19<br>(305.47 to<br>542.97)                            | 920.36<br>(717.32 to<br>1,162.81)                          |
| Cirrhosis and other chronic liver diseases due to alcohol use  |                                                               |                                                               |                                                               |                                                               |                                                            |                                                            |                                                            |                                                            |
|                                                                | 15,941.20<br>(12,799.35 to<br>19,388.07)                      | 8,434.12<br>(6,069.01 to<br>11,166.39)                        | 6,576.53<br>(4,647.95 to<br>8,811.15)                         | 8,611.25<br>(6,347.14 to<br>11,334.84)                        | 508.93<br>(411.40 to<br>618.94)                            | 332.38<br>(257.03 to<br>420.41)                            | 268.06<br>(203.31 to<br>344.67)                            | 330.34<br>(255.26 to<br>412.98)                            |
| Cirrhosis and other chronic liver diseases due to other causes |                                                               |                                                               |                                                               |                                                               |                                                            |                                                            |                                                            |                                                            |
|                                                                | <b>37,045.83</b><br><b>(30,095.82 to</b><br><b>48,792.68)</b> | <b>35,863.62</b><br><b>(24,341.01 to</b><br><b>56,696.09)</b> | <b>27,205.60</b><br><b>(19,246.76 to</b><br><b>40,846.63)</b> | <b>37,644.86</b><br><b>(25,327.22 to</b><br><b>61,402.02)</b> | <b>1,713.61</b><br><b>(1,396.08 to</b><br><b>2,145.38)</b> | <b>2,107.22</b><br><b>(1,620.74 to</b><br><b>2,987.67)</b> | <b>1,800.56</b><br><b>(1,401.64 to</b><br><b>2,383.85)</b> | <b>2,078.97</b><br><b>(1,543.26 to</b><br><b>3,011.82)</b> |
| Digestive diseases                                             |                                                               |                                                               |                                                               |                                                               |                                                            |                                                            |                                                            |                                                            |
|                                                                | 5,214.78<br>(3,998.72 to<br>7,587.78)                         | 2,611.01<br>(1,762.68 to<br>3,867.60)                         | 1,522.77<br>(1,022.67 to<br>2,304.28)                         | 2,837.28<br>(1,929.93 to<br>4,282.50)                         | 222.10<br>(176.48 to<br>306.42)                            | 144.02<br>(107.25 to<br>194.44)                            | 89.27<br>(66.05 to<br>121.30)                              | 148.60<br>(107.95 to<br>211.75)                            |
| Peptic ulcer disease                                           |                                                               |                                                               |                                                               |                                                               |                                                            |                                                            |                                                            |                                                            |

| Belarus                                    |                                        |                                        |                                         |                                        |                                    |                                     |                                      |                                     |
|--------------------------------------------|----------------------------------------|----------------------------------------|-----------------------------------------|----------------------------------------|------------------------------------|-------------------------------------|--------------------------------------|-------------------------------------|
| Cause                                      | YLLs (actual counts)                   |                                        |                                         |                                        | Deaths (actual counts)             |                                     |                                      |                                     |
|                                            | 2016                                   | 2040 Forecast                          | 2040 Better Scenario                    | 2040 Worse Scenario                    | 2016                               | 2040 Forecast                       | 2040 Better Scenario                 | 2040 Worse Scenario                 |
| Gastritis and duodenitis                   | 391.05<br>(269.04 to 549.69)           | 336.41<br>(226.87 to 492.50)           | 245.59<br>(159.05 to 351.40)            | 336.26<br>(225.87 to 489.77)           | 17.04<br>(12.18 to 23.67)          | 18.91<br>(13.50 to 26.35)           | 14.91<br>(10.44 to 20.99)            | 17.95<br>(12.77 to 25.00)           |
| Appendicitis                               | 793.24<br>(614.48 to 1,180.50)         | 465.89<br>(328.46 to 780.82)           | 293.57<br>(202.80 to 497.22)            | 485.06<br>(343.52 to 807.71)           | 27.96<br>(21.74 to 42.39)          | 22.83<br>(17.23 to 37.02)           | 15.34<br>(11.44 to 24.89)            | 22.61<br>(16.62 to 36.91)           |
| Paralytic ileus and intestinal obstruction | 4,437.02<br>(2,949.71 to 5,642.20)     | 4,368.29<br>(2,816.47 to 5,673.22)     | 4,558.52<br>(2,945.96 to 6,112.83)      | 4,040.08<br>(2,638.04 to 5,171.66)     | 219.07<br>(139.13 to 283.90)       | 302.61<br>(194.86 to 397.52)        | 338.08<br>(214.92 to 454.78)         | 265.77<br>(167.65 to 351.85)        |
| Inguinal, femoral, and abdominal hernia    | 674.07<br>(497.32 to 1,033.26)         | 523.75<br>(384.91 to 813.90)           | 445.14<br>(320.39 to 684.76)            | 499.96<br>(365.88 to 774.50)           | 42.56<br>(31.29 to 64.62)          | 41.35<br>(30.59 to 62.32)           | 37.94<br>(27.62 to 56.99)            | 37.74<br>(27.38 to 57.16)           |
| Inflammatory bowel disease                 | 1,060.94<br>(832.76 to 1,422.64)       | 1,012.37<br>(748.46 to 1,424.78)       | 993.94<br>(717.76 to 1,407.13)          | 963.99<br>(726.05 to 1,319.24)         | 42.65<br>(34.06 to 54.96)          | 52.02<br>(41.83 to 68.31)           | 54.16<br>(43.02 to 72.05)            | 47.50<br>(38.35 to 62.86)           |
| Vascular intestinal disorders              | 6,816.26<br>(5,603.23 to 8,819.21)     | 8,972.16<br>(7,353.31 to 11,282.55)    | 8,294.23<br>(6,692.49 to 10,593.67)     | 8,353.33<br>(6,852.48 to 10,554.49)    | 460.51<br>(381.79 to 570.06)       | 711.80<br>(591.43 to 865.09)        | 696.70<br>(567.33 to 863.75)         | 640.83<br>(517.96 to 785.97)        |
| Gallbladder and biliary diseases           | 2,347.67<br>(1,895.17 to 3,180.16)     | 2,659.07<br>(1,362.15 to 4,914.27)     | 1,807.17<br>(935.85 to 3,353.96)        | 3,271.70<br>(1,571.72 to 5,977.29)     | 140.08<br>(116.20 to 182.27)       | 199.16<br>(103.45 to 367.61)        | 147.20<br>(76.27 to 277.76)          | 231.14<br>(114.89 to 425.62)        |
| Pancreatitis                               | 14,242.13<br>(10,298.02 to 19,255.90)  | 13,097.99<br>(5,261.50 to 30,359.15)   | 7,420.66<br>(2,972.29 to 17,609.94)     | 15,113.43<br>(6,076.20 to 35,252.25)   | 448.02<br>(331.84 to 596.64)       | 498.03<br>(206.13 to 1,138.21)      | 293.70<br>(127.37 to 670.29)         | 560.73<br>(228.37 to 1,255.34)      |
| Other digestive diseases                   | 1,968.66<br>(1,512.38 to 2,786.52)     | 1,816.69<br>(1,371.27 to 2,581.78)     | 1,624.00<br>(1,210.64 to 2,347.56)      | 1,743.76<br>(1,341.23 to 2,533.60)     | 93.64<br>(74.87 to 124.85)         | 116.48<br>(94.22 to 155.89)         | 113.26<br>(90.26 to 151.48)          | 106.10<br>(84.74 to 144.10)         |
| Neurological disorders                     | 57,087.77<br>(46,481.36 to 68,803.98)  | 93,556.30<br>(73,529.51 to 119,936.90) | 100,793.51<br>(80,442.44 to 126,487.25) | 91,270.66<br>(69,291.94 to 122,581.57) | 4,974.95<br>(4,025.59 to 6,032.38) | 9,729.53<br>(7,441.09 to 12,979.30) | 11,162.43<br>(8,840.64 to 14,272.81) | 9,151.97<br>(6,496.93 to 12,777.11) |
| Alzheimer's disease and other dementias    | 38,106.76<br>(29,969.53 to 47,837.21)  | 68,806.65<br>(50,579.26 to 94,488.29)  | 74,745.53<br>(56,553.14 to 100,643.64)  | 67,775.65<br>(47,214.84 to 98,552.14)  | 4,059.94<br>(3,179.22 to 5,017.92) | 8,139.52<br>(5,880.83 to 11,466.74) | 9,295.34<br>(7,085.50 to 12,367.45)  | 7,746.14<br>(5,173.28 to 11,420.30) |
| Parkinson's disease                        | 7,108.91<br>(5,089.76 to 9,687.67)     | 13,213.05<br>(9,675.53 to 17,404.78)   | 15,885.36<br>(11,621.27 to 20,915.26)   | 11,483.05<br>(8,240.19 to 15,164.54)   | 599.20<br>(430.81 to 819.61)       | 1,218.40<br>(881.91 to 1,595.47)    | 1,518.37<br>(1,134.00 to 1,985.79)   | 1,033.69<br>(735.48 to 1,392.95)    |
| Epilepsy                                   | 6,047.73<br>(4,666.86 to 8,209.67)     | 5,809.52<br>(2,598.04 to 11,385.44)    | 4,271.86<br>(1,936.54 to 8,387.83)      | 6,447.86<br>(2,872.34 to 12,342.50)    | 140.70<br>(109.59 to 187.54)       | 154.51<br>(75.77 to 289.48)         | 116.56<br>(58.61 to 216.92)          | 168.23<br>(81.00 to 316.15)         |
| Multiple sclerosis                         | 1,675.75<br>(884.36 to 3,319.70)       | 1,497.22<br>(754.56 to 3,068.80)       | 1,527.46<br>(766.26 to 3,095.19)        | 1,488.36<br>(759.58 to 3,028.46)       | 48.95<br>(26.72 to 92.74)          | 52.69<br>(30.04 to 96.62)           | 56.31<br>(32.57 to 98.95)            | 50.68<br>(28.29 to 93.20)           |
| Motor neuron disease                       | 872.83<br>(699.42 to 1,055.11)         | 1,108.83<br>(820.23 to 1,429.16)       | 1,118.48<br>(802.28 to 1,486.32)        | 1,088.61<br>(798.04 to 1,327.01)       | 32.75<br>(26.31 to 39.28)          | 48.33<br>(37.61 to 59.42)           | 50.14<br>(37.79 to 63.78)            | 45.08<br>(35.83 to 54.08)           |
| Other neurological disorders               | 3,275.78<br>(2,735.93 to 3,838.84)     | 3,121.02<br>(2,384.82 to 3,909.41)     | 3,244.82<br>(2,414.50 to 4,174.67)      | 3,017.13<br>(2,331.08 to 3,710.46)     | 93.41<br>(77.44 to 110.10)         | 116.09<br>(93.43 to 139.95)         | 125.71<br>(99.44 to 155.00)          | 108.15<br>(88.47 to 126.67)         |
| Mental disorders                           | 81,844.49<br>(56,290.84 to 111,604.64) | 84,792.34<br>(52,318.93 to 126,030.26) | 97,275.51<br>(62,137.34 to 144,800.19)  | 84,150.14<br>(53,430.29 to 124,924.21) | 2,204.53<br>(1,504.75 to 2,993.39) | 2,518.98<br>(1,610.02 to 3,620.48)  | 2,954.55<br>(1,933.98 to 4,232.53)   | 2,461.22<br>(1,599.27 to 3,500.70)  |
| Alcohol use disorders                      | 55,818.54<br>(31,494.83 to 81,874.94)  | 47,794.01<br>(23,809.76 to 80,133.28)  | 47,732.70<br>(22,960.28 to 80,138.80)   | 49,682.49<br>(25,128.72 to 80,835.35)  | 1,555.38<br>(889.78 to 2,268.58)   | 1,446.28<br>(730.39 to 2,376.17)    | 1,468.95<br>(721.28 to 2,425.44)     | 1,486.01<br>(776.31 to 2,352.13)    |
| Drug use disorders                         | 26,017.32<br>(19,902.73 to 32,636.62)  | 36,991.29<br>(25,682.61 to 50,057.14)  | 49,534.65<br>(34,120.62 to 68,365.12)   | 34,460.80<br>(24,254.64 to 46,759.25)  | 648.98<br>(501.36 to 807.44)       | 1,072.56<br>(785.27 to 1,415.95)    | 1,485.43<br>(1,093.16 to 1,954.85)   | 975.07<br>(726.99 to 1,257.76)      |
| Opioid use disorders                       | 17,443.20<br>(12,826.26 to 22,736.91)  | 18,546.11<br>(12,044.08 to 26,582.42)  | 20,385.73<br>(12,834.85 to 30,127.35)   | 17,896.07<br>(11,757.43 to 25,410.78)  | 425.13<br>(314.32 to 549.85)       | 516.59<br>(347.16 to 725.07)        | 581.83<br>(383.06 to 837.22)         | 489.03<br>(332.44 to 676.12)        |

|                           |                                       |                                         |                                          |                                         |                                 |                                 |                                 |                                 |
|---------------------------|---------------------------------------|-----------------------------------------|------------------------------------------|-----------------------------------------|---------------------------------|---------------------------------|---------------------------------|---------------------------------|
|                           | 1,570.00<br>(1,001.41 to<br>2,211.39) | 3,477.54<br>(2,132.58 to<br>5,241.59)   | 4,905.02<br>(2,922.56 to<br>7,298.87)    | 3,185.54<br>(1,949.15 to<br>4,833.94)   | 40.04<br>(26.24 to<br>55.54)    | 98.05<br>(60.98 to<br>146.03)   | 140.50<br>(84.84 to<br>208.78)  | 88.44<br>(54.99 to<br>131.71)   |
| Cocaine use disorders     |                                       |                                         |                                          |                                         |                                 |                                 |                                 |                                 |
|                           | 990.24<br>(609.46 to<br>1,488.56)     | 2,919.02<br>(1,762.94 to<br>4,428.97)   | 4,969.39<br>(3,023.08 to<br>7,684.11)    | 2,589.20<br>(1,528.73 to<br>4,020.68)   | 24.54<br>(15.20 to<br>36.48)    | 78.22<br>(47.84 to<br>120.70)   | 134.98<br>(81.53 to<br>208.60)  | 68.47<br>(41.02 to<br>104.71)   |
| Amphetamine use disorders |                                       |                                         |                                          |                                         |                                 |                                 |                                 |                                 |
|                           | 6,013.87<br>(4,203.18 to<br>8,384.43) | 12,048.62<br>(7,811.69 to<br>17,006.17) | 19,274.52<br>(12,870.19 to<br>27,116.35) | 10,790.00<br>(7,087.57 to<br>15,435.71) | 159.27<br>(115.65 to<br>212.92) | 379.70<br>(272.80 to<br>507.71) | 628.11<br>(463.06 to<br>832.84) | 329.13<br>(236.68 to<br>442.29) |
| Other drug use disorders  |                                       |                                         |                                          |                                         |                                 |                                 |                                 |                                 |
|                           | 8.63<br>(6.07 to<br>12.00)            | 7.04<br>(4.15 to<br>10.97)              | 8.15<br>(4.54 to<br>12.98)               | 6.85<br>(4.07 to<br>10.72)              | 0.18<br>(0.12 to<br>0.24)       | 0.14<br>(0.08 to<br>0.23)       | 0.17<br>(0.09 to<br>0.27)       | 0.14<br>(0.08 to<br>0.22)       |
| Eating disorders          |                                       |                                         |                                          |                                         |                                 |                                 |                                 |                                 |

| Belarus                                                    |                                              |                                              |                                              |                                              |                                           |                                           |                                           |                                           |
|------------------------------------------------------------|----------------------------------------------|----------------------------------------------|----------------------------------------------|----------------------------------------------|-------------------------------------------|-------------------------------------------|-------------------------------------------|-------------------------------------------|
| Cause                                                      | YLLs (actual counts)                         |                                              |                                              |                                              | Deaths (actual counts)                    |                                           |                                           |                                           |
|                                                            | 2016                                         | 2040 Forecast                                | 2040 Better Scenario                         | 2040 Worse Scenario                          | 2016                                      | 2040 Forecast                             | 2040 Better Scenario                      | 2040 Worse Scenario                       |
| <b>Diabetes, urogenital, blood, and endocrine diseases</b> | <b>32,043.10</b><br>(26,785.68 to 37,497.05) | <b>41,181.30</b><br>(27,076.11 to 59,821.45) | <b>29,525.90</b><br>(19,531.20 to 43,719.89) | <b>44,111.63</b><br>(29,427.64 to 63,972.90) | <b>1,486.03</b><br>(1,262.63 to 1,723.71) | <b>2,466.28</b><br>(1,830.36 to 3,279.93) | <b>1,874.12</b><br>(1,377.08 to 2,526.68) | <b>2,510.04</b><br>(1,875.12 to 3,367.81) |
| Diabetes mellitus                                          | 8,220.70<br>(6,884.19 to 9,745.12)           | 10,454.21<br>(5,639.25 to 19,076.43)         | 6,574.78<br>(3,620.21 to 11,786.59)          | 12,516.43<br>(6,438.97 to 22,782.02)         | 420.05<br>(354.80 to 493.92)              | 637.70<br>(385.28 to 1,031.79)            | 433.66<br>(266.50 to 698.20)              | 710.64<br>(411.70 to 1,183.87)            |
| Acute glomerulonephritis                                   | 277.81<br>(212.43 to 349.93)                 | 416.28<br>(252.78 to 664.91)                 | 330.22<br>(195.73 to 528.30)                 | 411.64<br>(253.63 to 644.05)                 | 10.76<br>(8.22 to 13.65)                  | 19.64<br>(12.38 to 31.01)                 | 16.45<br>(10.21 to 26.14)                 | 18.63<br>(12.15 to 28.79)                 |
| Chronic kidney disease                                     | 12,189.01<br>(10,095.84 to 14,279.66)        | 15,230.03<br>(8,183.00 to 27,228.04)         | 10,381.12<br>(5,830.04 to 18,051.16)         | 16,341.92<br>(8,817.51 to 29,302.13)         | 578.77<br>(491.16 to 669.89)              | 967.31<br>(551.50 to 1,647.01)            | 707.22<br>(419.68 to 1,168.18)            | 988.16<br>(561.31 to 1,664.33)            |
| Chronic kidney disease due to diabetes mellitus            | 3,393.40<br>(2,662.35 to 4,254.93)           | 5,113.17<br>(2,593.69 to 9,874.69)           | 3,549.98<br>(1,865.92 to 6,535.92)           | 5,488.95<br>(2,759.57 to 10,664.03)          | 157.46<br>(126.22 to 194.09)              | 295.46<br>(159.49 to 522.07)              | 217.68<br>(121.20 to 383.56)              | 303.77<br>(160.85 to 546.68)              |
| Chronic kidney disease due to hypertension                 | 646.99<br>(500.72 to 824.13)                 | 1,186.25<br>(629.50 to 2,072.19)             | 930.11<br>(520.58 to 1,599.58)               | 1,196.00<br>(643.82 to 2,149.93)             | 50.68<br>(38.63 to 64.59)                 | 117.84<br>(64.70 to 204.63)               | 99.12<br>(56.67 to 169.32)                | 113.31<br>(62.06 to 198.48)               |
| Chronic kidney disease due to glomerulonephritis           | 5,207.13<br>(4,149.58 to 6,335.16)           | 5,333.20<br>(2,811.84 to 9,626.80)           | 3,439.42<br>(1,882.97 to 6,071.64)           | 5,810.64<br>(3,094.49 to 10,785.86)          | 226.82<br>(182.76 to 272.63)              | 316.78<br>(173.44 to 551.79)              | 216.87<br>(122.06 to 374.13)              | 329.63<br>(181.21 to 579.11)              |
| Chronic kidney disease due to other and unspecified causes | 2,941.48<br>(2,282.31 to 3,747.89)           | 3,597.42<br>(1,876.40 to 6,590.98)           | 2,461.61<br>(1,338.11 to 4,331.84)           | 3,846.32<br>(1,995.67 to 6,938.11)           | 143.82<br>(111.69 to 178.57)              | 237.24<br>(129.01 to 406.46)              | 173.55<br>(98.97 to 293.77)               | 241.45<br>(131.97 to 414.52)              |
| Urinary diseases and male infertility                      | 7,502.39<br>(6,220.82 to 8,941.83)           | 12,159.17<br>(9,280.68 to 15,743.57)         | 9,381.19<br>(6,967.10 to 12,497.94)          | 12,001.73<br>(9,286.41 to 15,279.93)         | 357.83<br>(300.71 to 421.03)              | 710.91<br>(580.12 to 853.55)              | 581.82<br>(470.93 to 722.25)              | 671.61<br>(558.13 to 801.79)              |
| Urinary tract infections                                   | 6,103.83<br>(4,997.90 to 7,397.38)           | 10,215.82<br>(7,587.77 to 13,714.41)         | 8,092.29<br>(5,905.60 to 11,076.11)          | 10,178.48<br>(7,698.98 to 13,515.89)         | 276.78<br>(226.43 to 338.52)              | 585.13<br>(463.71 to 729.22)              | 487.98<br>(383.75 to 622.43)              | 552.46<br>(442.44 to 688.23)              |
| Urolithiasis                                               | 867.72<br>(529.35 to 1,191.74)               | 1,298.74<br>(717.50 to 1,959.10)             | 900.56<br>(502.78 to 1,359.35)               | 1,295.54<br>(736.33 to 1,910.28)             | 50.88<br>(31.39 to 69.59)                 | 86.93<br>(49.71 to 127.67)                | 64.01<br>(35.76 to 93.17)                 | 83.42<br>(49.23 to 118.18)                |
| Other urinary diseases                                     | 530.85<br>(278.79 to 784.89)                 | 544.61<br>(262.02 to 858.30)                 | 388.34<br>(186.41 to 625.04)                 | 527.71<br>(260.50 to 823.47)                 | 30.17<br>(15.44 to 45.12)                 | 38.86<br>(18.09 to 60.25)                 | 29.84<br>(13.84 to 46.36)                 | 35.73<br>(17.43 to 55.89)                 |
| Gynecological diseases                                     | 60.84<br>(14.55 to 91.91)                    | 19.24<br>(5.35 to 36.73)                     | 10.40<br>(2.99 to 20.56)                     | 21.22<br>(5.98 to 40.18)                     | 1.85<br>(0.51 to 2.73)                    | 0.77<br>(0.28 to 1.29)                    | 0.42<br>(0.16 to 0.73)                    | 0.83<br>(0.30 to 1.39)                    |
| Uterine fibroids                                           | 33.73<br>(7.73 to 51.30)                     | 10.43<br>(2.32 to 22.40)                     | 6.17<br>(1.50 to 13.47)                      | 11.35<br>(2.69 to 25.05)                     | 0.97<br>(0.25 to 1.46)                    | 0.35<br>(0.10 to 0.69)                    | 0.21<br>(0.06 to 0.42)                    | 0.37<br>(0.10 to 0.76)                    |
| Polycystic ovarian syndrome                                | 3.90<br>(0.78 to 7.37)                       | 0.49<br>(0.10 to 1.22)                       | 0.15<br>(0.03 to 0.38)                       | 0.61<br>(0.12 to 1.55)                       | 0.09<br>(0.02 to 0.18)                    | 0.01<br>(0.00 to 0.05)                    | 0.00<br>(0.00 to 0.01)                    | 0.01<br>(0.00 to 0.04)                    |
| Endometriosis                                              | 0.44<br>(0.08 to 1.04)                       | 0.18<br>(0.03 to 0.52)                       | 0.09<br>(0.01 to 0.27)                       | 0.21<br>(0.03 to 0.59)                       | 0.01<br>(0.00 to 0.03)                    | 0.00<br>(0.00 to 0.01)                    | 0.00<br>(0.00 to 0.01)                    | 0.01<br>(0.00 to 0.01)                    |
| Genital prolapse                                           | 1.48<br>(0.40 to 2.51)                       | 0.51<br>(0.14 to 1.08)                       | 0.26<br>(0.08 to 0.57)                       | 0.55<br>(0.15 to 1.21)                       | 0.07<br>(0.02 to 0.12)                    | 0.03<br>(0.01 to 0.06)                    | 0.02<br>(0.00 to 0.03)                    | 0.03<br>(0.01 to 0.07)                    |
| Other gynecological diseases                               | 21.29<br>(5.50 to 33.88)                     | 7.63<br>(2.34 to 14.24)                      | 3.72<br>(1.19 to 7.14)                       | 8.50<br>(2.65 to 16.06)                      | 0.70<br>(0.22 to 1.07)                    | 0.38<br>(0.15 to 0.61)                    | 0.19<br>(0.08 to 0.31)                    | 0.41<br>(0.17 to 0.68)                    |
| Hemoglobinopathies and hemolytic anemias                   | 1,035.98<br>(791.49 to 1,254.46)             | 663.29<br>(482.42 to 887.19)                 | 460.19<br>(325.12 to 642.70)                 | 682.25<br>(498.86 to 894.68)                 | 35.07<br>(27.89 to 44.96)                 | 34.07<br>(25.95 to 48.03)                 | 25.63<br>(19.16 to 36.59)                 | 33.03<br>(25.31 to 45.25)                 |
| Thalassemias                                               | 133.99<br>(96.17 to 196.99)                  | 29.13<br>(18.13 to 47.22)                    | 26.73<br>(16.58 to 44.26)                    | 31.12<br>(19.33 to 50.96)                    | 1.65<br>(1.19 to 2.40)                    | 0.37<br>(0.24 to 0.59)                    | 0.34<br>(0.22 to 0.55)                    | 0.40<br>(0.25 to 0.63)                    |

|                                                   |                                       |                                       |                                       |                                       |                              |                               |                                |                               |
|---------------------------------------------------|---------------------------------------|---------------------------------------|---------------------------------------|---------------------------------------|------------------------------|-------------------------------|--------------------------------|-------------------------------|
| Sickle cell disorders                             | 184.17<br>(125.94 to<br>239.18)       | 108.78<br>(62.98 to<br>167.25)        | 68.94<br>(39.96 to<br>107.00)         | 118.92<br>(69.63 to<br>176.59)        | 3.56<br>(2.34 to<br>4.64)    | 2.38<br>(1.36 to<br>3.69)     | 1.53<br>(0.87 to<br>2.38)      | 2.58<br>(1.51 to<br>3.86)     |
| G6PD deficiency                                   | 224.03<br>(148.80 to<br>295.67)       | 165.96<br>(101.28 to<br>251.08)       | 100.69<br>(61.53 to<br>152.70)        | 178.32<br>(110.01 to<br>261.52)       | 5.52<br>(3.71 to<br>7.20)    | 5.22<br>(3.48 to<br>7.61)     | 3.27<br>(2.13 to<br>4.83)      | 5.46<br>(3.67 to<br>7.74)     |
| Other hemoglobinopathies and hemolytic anemias    | 493.80<br>(380.40 to<br>624.12)       | 359.43<br>(263.13 to<br>504.58)       | 263.84<br>(189.13 to<br>383.20)       | 353.90<br>(259.58 to<br>489.69)       | 24.34<br>(19.01 to<br>33.53) | 26.10<br>(19.38 to<br>38.59)  | 20.49<br>(15.09 to<br>30.77)   | 24.59<br>(18.38 to<br>36.00)  |
| Endocrine, metabolic, blood, and immune disorders | 2,756.37<br>(1,705.10 to<br>3,392.56) | 2,239.08<br>(1,343.39 to<br>3,038.00) | 2,387.99<br>(1,462.22 to<br>3,310.15) | 2,136.43<br>(1,299.36 to<br>2,888.55) | 81.71<br>(52.52 to<br>99.83) | 95.88<br>(63.09 to<br>121.98) | 108.91<br>(71.77 to<br>140.70) | 87.14<br>(58.07 to<br>109.82) |

| Belarus                                       |                                       |                                     |                                    |                                     |                              |                              |                             |                              |
|-----------------------------------------------|---------------------------------------|-------------------------------------|------------------------------------|-------------------------------------|------------------------------|------------------------------|-----------------------------|------------------------------|
| Cause                                         | YLLs (actual counts)                  |                                     |                                    |                                     | Deaths (actual counts)       |                              |                             |                              |
|                                               | 2016                                  | 2040 Forecast                       | 2040 Better Scenario               | 2040 Worse Scenario                 | 2016                         | 2040 Forecast                | 2040 Better Scenario        | 2040 Worse Scenario          |
|                                               | 822.09<br>(581.27 to 1,035.21)        | 835.21<br>(538.00 to 1,091.95)      | 646.29<br>(423.17 to 839.53)       | 843.23<br>(516.31 to 1,073.31)      | 41.88<br>(22.40 to 52.79)    | 53.68<br>(26.11 to 66.80)    | 43.26<br>(20.45 to 54.14)   | 52.16<br>(25.32 to 64.94)    |
| Musculoskeletal disorders                     |                                       |                                     |                                    |                                     |                              |                              |                             |                              |
| Rheumatoid arthritis                          | 348.56<br>(196.85 to 470.03)          | 343.42<br>(182.70 to 501.82)        | 194.39<br>(98.89 to 293.03)        | 365.78<br>(188.96 to 525.75)        | 19.57<br>(8.85 to 26.64)     | 23.43<br>(10.18 to 33.22)    | 13.88<br>(5.79 to 20.11)    | 24.09<br>(10.36 to 33.87)    |
| Other musculoskeletal disorders               | 473.53<br>(357.94 to 593.39)          | 491.78<br>(327.47 to 630.56)        | 451.90<br>(308.62 to 581.77)       | 477.45<br>(314.21 to 604.26)        | 22.31<br>(12.70 to 27.96)    | 30.25<br>(14.67 to 37.68)    | 29.38<br>(14.24 to 36.75)   | 28.06<br>(13.81 to 35.06)    |
| Other non-communicable diseases               | 23,692.18<br>(17,862.57 to 33,028.91) | 7,676.75<br>(5,427.54 to 11,128.85) | 4,471.57<br>(3,185.79 to 6,174.46) | 8,872.08<br>(6,030.21 to 12,885.20) | 332.23<br>(258.18 to 442.37) | 152.01<br>(109.51 to 199.32) | 102.98<br>(72.08 to 132.76) | 165.77<br>(113.17 to 219.84) |
| Congenital birth defects                      | 21,836.73<br>(16,379.18 to 31,201.45) | 6,816.61<br>(4,692.65 to 10,146.93) | 3,761.53<br>(2,609.87 to 5,524.05) | 7,982.27<br>(5,326.56 to 11,908.61) | 300.62<br>(232.22 to 411.91) | 113.36<br>(79.98 to 158.69)  | 65.85<br>(47.25 to 90.79)   | 129.83<br>(89.24 to 183.81)  |
| Neural tube defects                           | 1,022.75<br>(541.57 to 1,976.63)      | 171.46<br>(84.17 to 358.94)         | 73.68<br>(36.95 to 151.95)         | 211.15<br>(101.07 to 444.29)        | 12.98<br>(7.08 to 24.39)     | 2.46<br>(1.28 to 4.79)       | 1.07<br>(0.58 to 2.05)      | 3.00<br>(1.53 to 5.96)       |
| Congenital heart anomalies                    | 13,062.38<br>(9,465.29 to 18,082.47)  | 3,621.33<br>(2,362.41 to 5,444.26)  | 1,598.90<br>(1,011.86 to 2,463.70) | 4,377.73<br>(2,751.41 to 6,664.37)  | 181.30<br>(135.55 to 241.96) | 59.45<br>(39.45 to 86.75)    | 26.64<br>(17.69 to 39.81)   | 70.72<br>(46.40 to 102.87)   |
| Orofacial clefts                              | 18.70<br>(4.82 to 72.34)              | 3.99<br>(0.81 to 16.93)             | 1.35<br>(0.29 to 5.61)             | 5.27<br>(1.05 to 21.92)             | 0.22<br>(0.06 to 0.84)       | 0.05<br>(0.01 to 0.20)       | 0.02<br>(0.00 to 0.07)      | 0.06<br>(0.01 to 0.25)       |
| Down syndrome                                 | 866.34<br>(583.52 to 1,360.45)        | 789.83<br>(505.59 to 1,171.14)      | 835.48<br>(546.79 to 1,237.55)     | 783.32<br>(506.57 to 1,155.73)      | 16.66<br>(11.39 to 23.48)    | 17.76<br>(11.34 to 26.29)    | 18.98<br>(12.10 to 27.79)   | 17.40<br>(11.13 to 25.83)    |
| Other chromosomal abnormalities               | 660.65<br>(406.26 to 1,060.16)        | 344.29<br>(188.91 to 582.57)        | 250.98<br>(140.15 to 426.28)       | 383.24<br>(207.62 to 649.81)        | 8.20<br>(5.23 to 12.73)      | 4.80<br>(2.72 to 8.06)       | 3.56<br>(2.03 to 5.93)      | 5.27<br>(2.97 to 8.66)       |
| Congenital musculoskeletal and limb anomalies | 320.27<br>(181.65 to 570.16)          | 91.49<br>(47.16 to 179.20)          | 47.24<br>(23.80 to 92.89)          | 109.11<br>(55.17 to 218.31)         | 3.92<br>(2.25 to 6.84)       | 1.21<br>(0.66 to 2.24)       | 0.63<br>(0.34 to 1.19)      | 1.44<br>(0.77 to 2.74)       |
| Urogenital congenital anomalies               | 153.88<br>(88.42 to 277.86)           | 58.35<br>(35.15 to 97.35)           | 35.12<br>(21.29 to 58.01)          | 65.07<br>(38.82 to 112.10)          | 2.55<br>(1.62 to 4.26)       | 1.30<br>(0.79 to 2.07)       | 0.80<br>(0.49 to 1.29)      | 1.41<br>(0.87 to 2.30)       |
| Digestive congenital anomalies                | 669.88<br>(345.98 to 1,370.24)        | 200.22<br>(92.25 to 435.44)         | 96.07<br>(45.04 to 201.31)         | 241.88<br>(111.97 to 521.56)        | 8.51<br>(4.67 to 16.66)      | 2.90<br>(1.56 to 5.75)       | 1.41<br>(0.76 to 2.76)      | 3.44<br>(1.80 to 6.70)       |
| Other congenital birth defects                | 5,061.88<br>(3,435.49 to 8,648.06)    | 1,535.64<br>(969.86 to 2,583.25)    | 822.72<br>(520.37 to 1,406.29)     | 1,805.51<br>(1,125.59 to 3,053.14)  | 66.27<br>(46.19 to 107.22)   | 23.42<br>(15.60 to 37.10)    | 12.74<br>(8.59 to 19.75)    | 27.08<br>(17.52 to 41.68)    |
| Skin and subcutaneous diseases                | 258.06<br>(133.97 to 355.10)          | 524.83<br>(248.86 to 705.10)        | 489.25<br>(224.91 to 675.87)       | 499.40<br>(240.83 to 659.55)        | 13.07<br>(5.43 to 18.51)     | 34.76<br>(12.53 to 48.41)    | 34.57<br>(48.58 to 44.23)   | 31.42<br>(11.59 to 44.23)    |
| Cellulitis                                    | 120.72<br>(61.52 to 181.77)           | 252.10<br>(117.21 to 357.34)        | 245.10<br>(113.04 to 352.16)       | 239.21<br>(113.98 to 333.43)        | 5.45<br>(2.34 to 7.74)       | 14.21<br>(5.59 to 19.78)     | 14.58<br>(5.52 to 20.29)    | 12.93<br>(5.22 to 18.06)     |
| Pyoderma                                      | 110.90<br>(46.62 to 162.72)           | 239.42<br>(89.73 to 345.84)         | 217.30<br>(79.44 to 325.59)        | 227.96<br>(86.77 to 320.23)         | 5.98<br>(2.00 to 8.96)       | 17.56<br>(5.14 to 26.58)     | 17.39<br>(4.92 to 26.87)    | 15.78<br>(4.71 to 24.19)     |
| Decubitus ulcer                               | 17.68<br>(7.88 to 25.38)              | 23.17<br>(8.14 to 36.11)            | 18.08<br>(6.22 to 28.69)           | 22.29<br>(8.11 to 35.48)            | 1.26<br>(0.36 to 2.00)       | 2.30<br>(0.57 to 3.85)       | 1.93<br>(0.48 to 3.30)      | 2.09<br>(0.52 to 3.65)       |
| Other skin and subcutaneous diseases          | 8.76<br>(5.11 to 11.85)               | 10.14<br>(4.74 to 14.44)            | 8.78<br>(3.96 to 12.67)            | 9.93<br>(4.87 to 14.07)             | 0.38<br>(0.14 to 0.57)       | 0.69<br>(0.20 to 1.11)       | 0.67<br>(0.18 to 1.07)      | 0.62<br>(0.19 to 1.00)       |
| Sudden infant death syndrome                  | 1,597.38<br>(842.63 to 2,685.31)      | 335.31<br>(128.58 to 656.01)        | 220.79<br>(88.08 to 425.78)        | 390.42<br>(147.42 to 765.93)        | 18.54<br>(9.78 to 31.17)     | 3.89<br>(1.49 to 7.61)       | 2.56<br>(1.02 to 4.94)      | 4.53<br>(1.71 to 8.89)       |

|                          |                                             |                                             |                                            |                                             |                                        |                                        |                                       |                                        |
|--------------------------|---------------------------------------------|---------------------------------------------|--------------------------------------------|---------------------------------------------|----------------------------------------|----------------------------------------|---------------------------------------|----------------------------------------|
| Injuries                 | 347,706.19<br>(285,457.02 to<br>422,627.12) | 227,326.01<br>(137,340.50 to<br>354,062.95) | 160,009.46<br>(96,125.22 to<br>242,705.09) | 278,466.02<br>(165,763.23 to<br>434,133.42) | 9,188.59<br>(7,610.91 to<br>11,148.99) | 7,212.43<br>(4,781.48 to<br>10,452.08) | 5,322.82<br>(3,597.69 to<br>7,529.66) | 8,355.28<br>(5,501.12 to<br>12,216.89) |
| Transport injuries       | 65,400.90<br>(53,579.55 to<br>80,138.46)    | 21,111.97<br>(9,150.46 to<br>46,459.50)     | 14,307.71<br>(6,515.92 to<br>30,432.63)    | 57,180.61<br>(25,587.16 to<br>123,097.53)   | 1,600.64<br>(1,326.62 to<br>1,942.78)  | 641.92<br>(321.71 to<br>1,288.42)      | 446.91<br>(233.86 to<br>852.69)       | 1,547.19<br>(761.39 to<br>3,121.52)    |
| Road injuries            | 60,457.12<br>(49,432.76 to<br>73,766.02)    | 16,645.69<br>(7,466.24 to<br>36,175.98)     | 11,899.69<br>(5,524.95 to<br>25,434.17)    | 52,169.63<br>(23,549.68 to<br>112,620.15)   | 1,476.71<br>(1,220.48 to<br>1,787.11)  | 510.62<br>(263.61 to<br>1,010.10)      | 373.71<br>(199.48 to<br>711.54)       | 1,403.17<br>(695.99 to<br>2,811.84)    |
| Pedestrian road injuries | 19,834.01<br>(15,023.49 to<br>25,827.62)    | 4,995.71<br>(2,389.24 to<br>10,020.72)      | 2,484.26<br>(1,258.98 to<br>4,674.21)      | 13,780.36<br>(6,343.82 to<br>28,216.29)     | 559.81<br>(436.82 to<br>715.84)        | 185.24<br>(105.79 to<br>337.81)        | 97.33<br>(56.27 to<br>170.99)         | 457.97<br>(242.79 to<br>858.32)        |

| Belarus                                         |                                                      |                                                    |                                                    |                                                    |                                                |                                                |                                                |                                                |
|-------------------------------------------------|------------------------------------------------------|----------------------------------------------------|----------------------------------------------------|----------------------------------------------------|------------------------------------------------|------------------------------------------------|------------------------------------------------|------------------------------------------------|
| Cause                                           | YLLs (actual counts)                                 |                                                    |                                                    |                                                    | Deaths (actual counts)                         |                                                |                                                |                                                |
|                                                 | 2016                                                 | 2040 Forecast                                      | 2040 Better Scenario                               | 2040 Worse Scenario                                | 2016                                           | 2040 Forecast                                  | 2040 Better Scenario                           | 2040 Worse Scenario                            |
| Cyclist road injuries                           | 3,617.26<br>(2,560.18 to<br>4,830.15)                | 1,784.83<br>(724.10 to<br>4,156.77)                | 1,526.09<br>(649.83 to<br>3,526.67)                | 4,276.05<br>(1,727.06 to<br>9,886.83)              | 99.10<br>(70.67 to<br>130.15)                  | 63.17<br>(28.55 to<br>135.89)                  | 56.53<br>(27.13 to<br>118.75)                  | 130.46<br>(56.41 to<br>277.47)                 |
| Motorcyclist road injuries                      | 4,317.21<br>(2,883.18 to<br>6,067.62)                | 2,464.19<br>(796.93 to<br>6,591.77)                | 2,061.07<br>(700.59 to<br>5,295.31)                | 4,873.15<br>(1,628.29 to<br>12,831.85)             | 87.55<br>(59.45 to<br>120.78)                  | 57.26<br>(20.88 to<br>144.76)                  | 49.35<br>(18.92 to<br>117.01)                  | 103.64<br>(37.68 to<br>257.92)                 |
| Motor vehicle road injuries                     | 32,164.82<br>(25,526.55 to<br>40,541.27)             | 7,195.38<br>(3,194.62 to<br>15,704.71)             | 5,657.40<br>(2,710.05 to<br>12,046.51)             | 28,597.13<br>(12,557.79 to<br>63,457.73)           | 716.22<br>(571.84 to<br>901.07)                | 197.50<br>(99.58 to<br>398.22)                 | 163.86<br>(88.04 to<br>319.77)                 | 691.35<br>(328.38 to<br>1,417.09)              |
| Other road injuries                             | 523.82<br>(349.17 to<br>906.53)                      | 205.58<br>(75.74 to<br>478.27)                     | 170.86<br>(67.40 to<br>390.10)                     | 642.93<br>(227.69 to<br>1,561.81)                  | 14.03<br>(9.46 to<br>23.84)                    | 7.45<br>(3.02 to<br>16.84)                     | 6.64<br>(2.88 to<br>14.48)                     | 19.75<br>(7.57 to<br>45.15)                    |
| Other transport injuries                        | 4,943.78<br>(3,815.82 to<br>6,553.77)                | 4,466.28<br>(1,748.53 to<br>10,486.94)             | 2,408.02<br>(974.16 to<br>5,415.78)                | 5,010.98<br>(1,942.16 to<br>11,224.44)             | 123.93<br>(96.72 to<br>160.75)                 | 131.30<br>(59.31 to<br>280.50)                 | 73.20<br>(34.44 to<br>151.34)                  | 144.02<br>(64.26 to<br>297.45)                 |
| <b>Unintentional injuries</b>                   | <b>149,663.68<br/>(121,107.17 to<br/>179,996.31)</b> | <b>95,755.61<br/>(64,740.36 to<br/>145,941.00)</b> | <b>71,281.31<br/>(48,050.10 to<br/>104,425.57)</b> | <b>99,387.37<br/>(65,585.32 to<br/>145,713.58)</b> | <b>4,206.56<br/>(3,410.33 to<br/>5,038.84)</b> | <b>3,304.81<br/>(2,445.78 to<br/>4,544.92)</b> | <b>2,582.08<br/>(1,918.91 to<br/>3,478.76)</b> | <b>3,307.61<br/>(2,408.70 to<br/>4,528.33)</b> |
| Falls                                           | 38,257.41<br>(27,534.35 to<br>48,115.17)             | 28,621.33<br>(19,405.58 to<br>39,225.85)           | 23,510.76<br>(15,713.71 to<br>32,194.30)           | 28,580.22<br>(19,591.59 to<br>38,472.24)           | 1,211.65<br>(906.46 to<br>1,495.52)            | 1,151.39<br>(864.01 to<br>1,435.65)            | 987.07<br>(734.08 to<br>1,245.41)              | 1,104.38<br>(836.83 to<br>1,371.47)            |
| Drowning                                        | 34,521.16<br>(28,217.28 to<br>41,937.55)             | 21,830.37<br>(10,990.35 to<br>41,842.26)           | 15,180.74<br>(7,983.18 to<br>29,469.20)            | 23,499.83<br>(11,440.86 to<br>46,582.39)           | 810.86<br>(660.16 to<br>977.36)                | 601.64<br>(328.87 to<br>1,112.75)              | 432.60<br>(244.31 to<br>796.11)                | 630.92<br>(335.57 to<br>1,189.46)              |
| Fire, heat, and hot substances                  | 21,403.70<br>(15,656.56 to<br>26,367.65)             | 11,555.81<br>(6,101.29 to<br>20,863.05)            | 7,070.55<br>(3,882.23 to<br>12,229.46)             | 12,512.78<br>(6,482.52 to<br>22,851.20)            | 655.11<br>(468.74 to<br>799.91)                | 437.86<br>(256.77 to<br>718.27)                | 285.50<br>(178.64 to<br>452.98)                | 455.61<br>(262.93 to<br>771.02)                |
| Poisonings                                      | 7,966.84<br>(5,596.55 to<br>10,723.41)               | 2,552.83<br>(1,183.03 to<br>5,093.20)              | 1,373.54<br>(683.70 to<br>2,621.81)                | 2,873.19<br>(1,330.07 to<br>5,875.00)              | 207.29<br>(139.67 to<br>280.85)                | 82.89<br>(40.54 to<br>154.77)                  | 47.07<br>(24.45 to<br>83.62)                   | 90.09<br>(43.84 to<br>169.24)                  |
| Exposure to mechanical forces                   | 8,001.98<br>(6,064.00 to<br>10,310.12)               | 4,554.90<br>(3,045.23 to<br>6,555.16)              | 3,057.27<br>(2,076.71 to<br>4,453.36)              | 4,817.48<br>(3,188.13 to<br>6,941.40)              | 194.39<br>(147.52 to<br>249.83)                | 131.90<br>(92.96 to<br>184.51)                 | 91.89<br>(65.65 to<br>127.69)                  | 135.72<br>(95.15 to<br>186.57)                 |
| Unintentional firearm injuries                  | 1,192.32<br>(922.61 to<br>1,540.14)                  | 605.59<br>(411.65 to<br>849.47)                    | 444.17<br>(307.00 to<br>622.69)                    | 628.53<br>(434.67 to<br>873.78)                    | 30.76<br>(23.99 to<br>38.94)                   | 19.75<br>(14.61 to<br>26.38)                   | 15.54<br>(11.44 to<br>20.87)                   | 19.70<br>(14.56 to<br>25.96)                   |
| Unintentional suffocation                       | 868.32<br>(647.86 to<br>1,288.90)                    | 379.64<br>(254.46 to<br>568.06)                    | 277.44<br>(183.09 to<br>428.95)                    | 408.29<br>(264.74 to<br>628.70)                    | 14.69<br>(11.33 to<br>20.71)                   | 7.65<br>(5.27 to<br>11.18)                     | 5.73<br>(3.92 to<br>8.58)                      | 8.04<br>(5.37 to<br>12.02)                     |
| Other exposure to mechanical forces             | 5,941.35<br>(4,203.13 to<br>8,080.30)                | 3,569.67<br>(2,235.70 to<br>5,362.01)              | 2,335.66<br>(1,499.83 to<br>3,503.85)              | 3,780.66<br>(2,368.47 to<br>5,602.87)              | 148.94<br>(106.17 to<br>201.56)                | 104.50<br>(69.88 to<br>152.04)                 | 70.62<br>(48.32 to<br>101.54)                  | 107.98<br>(71.96 to<br>155.17)                 |
| Adverse effects of medical treatment            | 7,791.08<br>(5,339.20 to<br>9,959.64)                | 6,243.99<br>(3,967.29 to<br>8,616.93)              | 5,310.24<br>(3,340.86 to<br>7,379.86)              | 6,173.69<br>(3,966.60 to<br>8,305.34)              | 269.25<br>(182.32 to<br>341.28)                | 262.56<br>(178.92 to<br>339.15)                | 232.95<br>(159.36 to<br>305.30)                | 250.90<br>(170.66 to<br>319.46)                |
| Animal contact                                  | 1,818.39<br>(1,231.95 to<br>2,438.78)                | 1,450.90<br>(910.29 to<br>2,130.64)                | 1,084.15<br>(671.48 to<br>1,643.19)                | 1,488.05<br>(956.31 to<br>2,235.17)                | 52.01<br>(36.38 to<br>71.69)                   | 47.61<br>(31.33 to<br>71.04)                   | 36.27<br>(23.53 to<br>54.93)                   | 47.81<br>(31.77 to<br>70.68)                   |
| Venomous animal contact                         | 855.90<br>(490.04 to<br>1,254.42)                    | 629.16<br>(314.06 to<br>1,039.31)                  | 512.62<br>(259.60 to<br>856.89)                    | 636.59<br>(319.18 to<br>1,034.38)                  | 23.08<br>(12.72 to<br>33.93)                   | 19.02<br>(9.91 to<br>31.59)                    | 15.78<br>(8.26 to<br>26.39)                    | 18.94<br>(9.90 to<br>31.57)                    |
| Non-venomous animal contact                     | 962.49<br>(620.64 to<br>1,395.35)                    | 821.74<br>(491.93 to<br>1,299.68)                  | 571.54<br>(342.22 to<br>942.46)                    | 851.46<br>(510.60 to<br>1,376.95)                  | 28.93<br>(19.02 to<br>43.04)                   | 28.59<br>(17.73 to<br>46.80)                   | 20.49<br>(12.86 to<br>33.63)                   | 28.88<br>(18.21 to<br>46.57)                   |
| Foreign body                                    | 18,674.25<br>(14,339.23 to<br>23,298.12)             | 12,789.75<br>(8,700.70 to<br>17,660.97)            | 11,207.48<br>(7,572.53 to<br>15,532.95)            | 12,757.51<br>(8,798.57 to<br>17,284.18)            | 494.18<br>(380.48 to<br>615.85)                | 394.76<br>(277.40 to<br>529.90)                | 354.75<br>(250.20 to<br>484.41)                | 385.58<br>(275.71 to<br>509.49)                |
| Pulmonary aspiration and foreign body in airway | 18,005.21<br>(13,619.45 to<br>22,534.04)             | 12,274.63<br>(8,240.01 to<br>16,961.52)            | 10,631.15<br>(7,142.08 to<br>14,835.90)            | 12,266.46<br>(8,366.06 to<br>16,734.65)            | 476.20<br>(362.12 to<br>594.67)                | 378.19<br>(263.88 to<br>509.80)                | 335.55<br>(232.76 to<br>461.38)                | 370.24<br>(259.33 to<br>492.86)                |



|                                             |                                                                  |                                                                 |                                                                |                                                                 |                                                            |                                                            |                                                            |                                                            |
|---------------------------------------------|------------------------------------------------------------------|-----------------------------------------------------------------|----------------------------------------------------------------|-----------------------------------------------------------------|------------------------------------------------------------|------------------------------------------------------------|------------------------------------------------------------|------------------------------------------------------------|
|                                             | 669.04<br>(511.15 to<br>1,011.39)                                | 515.12<br>(346.87 to<br>779.15)                                 | 576.33<br>(386.56 to<br>859.10)                                | 491.05<br>(333.07 to<br>739.79)                                 | 17.99<br>(13.62 to<br>27.23)                               | 16.57<br>(11.86 to<br>24.73)                               | 19.20<br>(13.74 to<br>28.56)                               | 15.34<br>(11.10 to<br>22.70)                               |
| Foreign body in other body part             |                                                                  |                                                                 |                                                                |                                                                 |                                                            |                                                            |                                                            |                                                            |
|                                             | 5,455.72<br>(3,540.96 to<br>10,149.68)                           | 4,005.55<br>(2,354.93 to<br>7,250.32)                           | 2,557.56<br>(1,493.12 to<br>4,619.85)                          | 4,215.41<br>(2,479.51 to<br>7,726.27)                           | 168.35<br>(109.00 to<br>308.63)                            | 134.82<br>(82.19 to<br>241.57)                             | 87.88<br>(52.84 to<br>158.99)                              | 139.44<br>(87.51 to<br>248.17)                             |
| Environmental heat and cold exposure        |                                                                  |                                                                 |                                                                |                                                                 |                                                            |                                                            |                                                            |                                                            |
|                                             | 5,773.15<br>(4,538.30 to<br>7,202.60)                            | 2,149.68<br>(1,343.40 to<br>3,269.55)                           | 929.02<br>(587.05 to<br>1,412.70)                              | 2,469.21<br>(1,564.39 to<br>3,732.83)                           | 143.48<br>(113.18 to<br>179.16)                            | 59.38<br>(38.58 to<br>89.36)                               | 26.11<br>(16.91 to<br>39.79)                               | 67.15<br>(43.58 to<br>100.79)                              |
| Other unintentional injuries                |                                                                  |                                                                 |                                                                |                                                                 |                                                            |                                                            |                                                            |                                                            |
| <b>Self-harm and interpersonal violence</b> | <b>131,697.76</b><br><b>(102,178.40 to</b><br><b>171,111.15)</b> | <b>110,440.65</b><br><b>(48,053.28 to</b><br><b>208,083.30)</b> | <b>74,402.45</b><br><b>(32,854.22 to</b><br><b>135,932.23)</b> | <b>121,880.38</b><br><b>(51,394.94 to</b><br><b>231,540.14)</b> | <b>3,361.66</b><br><b>(2,642.56 to</b><br><b>4,385.80)</b> | <b>3,265.28</b><br><b>(1,550.34 to</b><br><b>5,773.53)</b> | <b>2,293.39</b><br><b>(1,142.20 to</b><br><b>3,929.10)</b> | <b>3,500.07</b><br><b>(1,657.70 to</b><br><b>6,307.12)</b> |

| Belarus                                                                             |                                                        |                                                   |                                                   |                                                   |                                                  |                                                |                                                |                                                |
|-------------------------------------------------------------------------------------|--------------------------------------------------------|---------------------------------------------------|---------------------------------------------------|---------------------------------------------------|--------------------------------------------------|------------------------------------------------|------------------------------------------------|------------------------------------------------|
| Cause                                                                               | YLLs (actual counts)                                   |                                                   |                                                   |                                                   | Deaths (actual counts)                           |                                                |                                                |                                                |
|                                                                                     | 2016                                                   | 2040 Forecast                                     | 2040 Better Scenario                              | 2040 Worse Scenario                               | 2016                                             | 2040 Forecast                                  | 2040 Better Scenario                           | 2040 Worse Scenario                            |
| Self-harm                                                                           | 102,600.70<br>(79,043.57 to<br>137,891.91)             | 95,560.26<br>(38,514.68 to<br>187,850.37)         | 64,052.13<br>(26,510.18 to<br>122,720.29)         | 105,858.11<br>(41,020.49 to<br>211,203.69)        | 2,659.90<br>(2,065.14 to<br>3,540.95)            | 2,842.45<br>(1,262.95 to<br>5,243.28)          | 1,988.93<br>(944.29 to<br>3,583.69)            | 3,054.67<br>(1,310.97 to<br>5,756.48)          |
| Self-harm by firearm                                                                | 3,444.51<br>(2,007.04 to<br>5,452.56)                  | 2,556.22<br>(864.89 to<br>5,751.77)               | 1,472.59<br>(514.71 to<br>3,236.75)               | 2,903.15<br>(935.29 to<br>6,508.39)               | 87.22<br>(51.36 to<br>137.82)                    | 74.16<br>(27.46 to<br>159.73)                  | 44.50<br>(17.45 to<br>95.08)                   | 81.79<br>(28.69 to<br>178.51)                  |
| Self-harm by other specified means                                                  | 99,156.19<br>(76,411.94 to<br>133,177.09)              | 93,004.04<br>(37,476.84 to<br>182,090.28)         | 62,579.53<br>(26,045.99 to<br>119,864.88)         | 102,954.96<br>(39,891.55 to<br>204,949.96)        | 2,572.67<br>(1,990.85 to<br>3,424.57)            | 2,768.29<br>(1,234.74 to<br>5,092.03)          | 1,944.43<br>(929.24 to<br>3,504.15)            | 2,972.87<br>(1,278.55 to<br>5,574.57)          |
| Interpersonal violence                                                              | 29,097.06<br>(19,848.97 to<br>46,498.43)               | 14,880.39<br>(7,438.73 to<br>28,839.78)           | 10,350.32<br>(5,294.14 to<br>19,568.55)           | 16,022.27<br>(7,746.43 to<br>30,971.50)           | 701.76<br>(482.87 to<br>1,109.54)                | 422.82<br>(224.07 to<br>789.42)                | 304.47<br>(167.89 to<br>559.67)                | 445.41<br>(233.10 to<br>819.68)                |
| Physical violence by firearm                                                        | 2,488.67<br>(1,176.25 to<br>5,116.34)                  | 920.14<br>(401.53 to<br>1,931.43)                 | 562.76<br>(257.18 to<br>1,158.01)                 | 1,009.84<br>(431.98 to<br>2,106.40)               | 51.39<br>(24.54 to<br>104.21)                    | 20.77<br>(9.43 to<br>42.43)                    | 12.96<br>(6.27 to<br>26.12)                    | 22.55<br>(9.94 to<br>46.89)                    |
| Physical violence by sharp object                                                   | 9,710.52<br>(5,902.69 to<br>17,104.26)                 | 4,431.90<br>(2,463.80 to<br>7,977.76)             | 2,945.30<br>(1,633.97 to<br>5,242.42)             | 4,733.80<br>(2,547.07 to<br>8,839.00)             | 226.17<br>(138.63 to<br>399.42)                  | 119.07<br>(69.39 to<br>206.03)                 | 81.63<br>(48.71 to<br>141.28)                  | 124.70<br>(69.90 to<br>224.43)                 |
| Physical violence by other means                                                    | 16,897.87<br>(11,322.73 to<br>29,551.76)               | 9,528.36<br>(4,041.71 to<br>20,567.28)            | 6,842.26<br>(3,050.53 to<br>14,445.20)            | 10,278.63<br>(4,262.60 to<br>22,582.61)           | 424.21<br>(285.81 to<br>718.77)                  | 282.98<br>(132.07 to<br>576.67)                | 209.87<br>(101.63 to<br>411.76)                | 298.16<br>(137.21 to<br>606.55)                |
| <b>Forces of nature, conflict and terrorism, and executions and police conflict</b> | <b>943.85</b><br><b>(175.67 to</b><br><b>1,430.75)</b> | <b>17.78</b><br><b>(0.00 to</b><br><b>131.70)</b> | <b>17.99</b><br><b>(0.00 to</b><br><b>133.20)</b> | <b>17.65</b><br><b>(0.00 to</b><br><b>130.74)</b> | <b>19.73</b><br><b>(4.19 to</b><br><b>29.46)</b> | <b>0.42</b><br><b>(0.00 to</b><br><b>3.20)</b> | <b>0.44</b><br><b>(0.00 to</b><br><b>3.29)</b> | <b>0.41</b><br><b>(0.00 to</b><br><b>3.14)</b> |
| Exposure to forces of nature                                                        | 0.00<br>(0.00 to<br>0.00)                              | 7.30<br>(0.00 to<br>60.76)                        | 7.49<br>(0.00 to<br>61.85)                        | 7.13<br>(0.00 to<br>59.63)                        | 0.00<br>(0.00 to<br>0.00)                        | 0.22<br>(0.00 to<br>1.84)                      | 0.23<br>(0.00 to<br>1.52)                      | 0.21<br>(0.00 to<br>1.75)                      |
| Conflict and terrorism                                                              | 0.00<br>(0.00 to<br>0.00)                              | 10.49<br>(0.00 to<br>71.02)                       | 10.50<br>(0.00 to<br>71.10)                       | 10.52<br>(0.00 to<br>71.24)                       | 0.00<br>(0.00 to<br>0.00)                        | 0.20<br>(0.00 to<br>1.35)                      | 0.21<br>(0.00 to<br>1.36)                      | 0.20<br>(0.00 to<br>1.35)                      |
| Executions and police conflict                                                      | 943.85<br>(175.67 to<br>1,430.75)                      | 0.00<br>(0.00 to<br>0.00)                         | 0.00<br>(0.00 to<br>0.00)                         | 0.00<br>(0.00 to<br>0.00)                         | 19.73<br>(4.19 to<br>29.46)                      | 0.00<br>(0.00 to<br>0.00)                      | 0.00<br>(0.00 to<br>0.00)                      | 0.00<br>(0.00 to<br>0.00)                      |

| Estonia                                                           |                                             |                                             |                                             |                                             |                                          |                                          |                                          |                                          |
|-------------------------------------------------------------------|---------------------------------------------|---------------------------------------------|---------------------------------------------|---------------------------------------------|------------------------------------------|------------------------------------------|------------------------------------------|------------------------------------------|
| Cause                                                             | YLLs (actual counts)                        |                                             |                                             |                                             | Deaths (actual counts)                   |                                          |                                          |                                          |
|                                                                   | 2016                                        | 2040 Forecast                               | 2040 Better Scenario                        | 2040 Worse Scenario                         | 2016                                     | 2040 Forecast                            | 2040 Better Scenario                     | 2040 Worse Scenario                      |
| All causes                                                        | 260,762.17<br>(234,601.55 to<br>286,439.54) | 208,931.00<br>(154,587.40 to<br>277,354.00) | 167,018.39<br>(126,260.94 to<br>216,417.39) | 253,868.69<br>(183,743.44 to<br>336,689.16) | 15,872.58<br>(14,319.71 to<br>17,089.82) | 15,241.75<br>(12,337.73 to<br>18,537.39) | 12,754.37<br>(10,586.64 to<br>15,325.68) | 17,654.64<br>(14,342.60 to<br>21,393.80) |
| Communicable, maternal, neonatal, and nutritional diseases        | 8,383.65<br>(7,383.01 to<br>9,434.32)       | 6,168.54<br>(4,022.05 to<br>9,865.18)       | 4,640.53<br>(3,209.85 to<br>7,045.37)       | 7,580.11<br>(4,751.71 to<br>13,000.75)      | 260.00<br>(231.06 to<br>290.23)          | 238.90<br>(168.47 to<br>348.72)          | 189.05<br>(141.01 to<br>261.63)          | 282.42<br>(187.94 to<br>440.39)          |
| HIV/AIDS and tuberculosis                                         | 2,548.71<br>(2,265.93 to<br>2,850.74)       | 1,572.21<br>(1,264.80 to<br>2,216.45)       | 1,214.12<br>(987.01 to<br>1,542.50)         | 1,855.13<br>(1,450.06 to<br>2,809.87)       | 64.06<br>(56.29 to<br>72.59)             | 40.09<br>(30.47 to<br>59.34)             | 28.90<br>(22.90 to<br>39.01)             | 47.96<br>(35.30 to<br>77.38)             |
| Tuberculosis                                                      | 832.07<br>(651.83 to<br>1,055.44)           | 410.29<br>(165.11 to<br>1,018.16)           | 206.55<br>(87.56 to<br>511.27)              | 543.60<br>(208.84 to<br>1,478.54)           | 29.21<br>(23.20 to<br>36.84)             | 16.75<br>(7.97 to<br>35.30)              | 8.78<br>(4.37 to<br>18.88)               | 21.46<br>(9.53 to<br>50.27)              |
| HIV/AIDS                                                          | 1,716.64<br>(1,526.59 to<br>1,940.72)       | 1,161.92<br>(993.86 to<br>1,331.45)         | 1,007.57<br>(833.43 to<br>1,170.25)         | 1,311.53<br>(1,154.01 to<br>1,499.32)       | 34.84<br>(31.00 to<br>39.26)             | 23.34<br>(19.82 to<br>26.91)             | 20.12<br>(16.22 to<br>23.40)             | 26.51<br>(23.18 to<br>30.55)             |
| Diarrhea, lower respiratory, and other common infectious diseases | 4,469.76<br>(3,831.22 to<br>5,269.65)       | 3,607.87<br>(1,961.25 to<br>6,570.86)       | 2,583.54<br>(1,493.91 to<br>4,418.24)       | 4,668.46<br>(2,351.07 to<br>8,870.02)       | 174.47<br>(151.35 to<br>204.31)          | 179.53<br>(116.13 to<br>279.09)          | 142.00<br>(98.42 to<br>209.54)           | 214.93<br>(131.17 to<br>355.23)          |
| Diarrheal diseases                                                | 52.27<br>(42.60 to<br>64.34)                | 114.02<br>(27.55 to<br>391.30)              | 116.80<br>(37.08 to<br>325.89)              | 108.41<br>(23.08 to<br>377.47)              | 2.24<br>(1.90 to<br>2.57)                | 8.20<br>(2.22 to<br>24.88)               | 9.38<br>(3.33 to<br>23.37)               | 7.21<br>(1.75 to<br>22.06)               |
| Intestinal infectious diseases                                    | 2.06<br>(0.68 to<br>4.79)                   | 1.26<br>(0.38 to<br>3.25)                   | 1.30<br>(0.40 to<br>3.41)                   | 1.24<br>(0.38 to<br>3.18)                   | 0.06<br>(0.02 to<br>0.13)                | 0.04<br>(0.01 to<br>0.10)                | 0.04<br>(0.01 to<br>0.11)                | 0.04<br>(0.01 to<br>0.10)                |
| Typhoid fever                                                     | 0.77<br>(0.24 to<br>1.88)                   | 0.63<br>(0.18 to<br>1.59)                   | 0.77<br>(0.23 to<br>1.92)                   | 0.59<br>(0.17 to<br>1.59)                   | 0.02<br>(0.01 to<br>0.05)                | 0.02<br>(0.01 to<br>0.05)                | 0.02<br>(0.01 to<br>0.05)                | 0.02<br>(0.01 to<br>0.04)                |
| Paratyphoid fever                                                 | 1.24<br>(0.37 to<br>3.16)                   | 0.60<br>(0.14 to<br>1.70)                   | 0.50<br>(0.12 to<br>1.44)                   | 0.62<br>(0.16 to<br>1.77)                   | 0.04<br>(0.01 to<br>0.09)                | 0.02<br>(0.01 to<br>0.05)                | 0.02<br>(0.01 to<br>0.05)                | 0.02<br>(0.01 to<br>0.05)                |
| Other intestinal infectious diseases                              | 0.04<br>(0.02 to<br>0.08)                   | 0.03<br>(0.01 to<br>0.06)                   | 0.03<br>(0.01 to<br>0.06)                   | 0.03<br>(0.01 to<br>0.06)                   | 0.00<br>(0.00 to<br>0.01)                | 0.00<br>(0.00 to<br>0.01)                | 0.00<br>(0.00 to<br>0.01)                | 0.00<br>(0.00 to<br>0.01)                |
| Lower respiratory infections                                      | 3,967.65<br>(3,350.98 to<br>4,745.98)       | 3,183.18<br>(1,633.69 to<br>5,977.67)       | 2,183.42<br>(1,199.05 to<br>3,875.97)       | 4,235.91<br>(2,012.94 to<br>8,424.54)       | 158.63<br>(136.05 to<br>188.04)          | 159.83<br>(100.93 to<br>257.50)          | 121.60<br>(80.84 to<br>185.50)           | 196.38<br>(114.24 to<br>338.19)          |
| Upper respiratory infections                                      | 3.69<br>(1.91 to<br>6.56)                   | 2.70<br>(0.99 to<br>5.95)                   | 1.85<br>(0.69 to<br>3.90)                   | 2.86<br>(1.04 to<br>6.18)                   | 0.16<br>(0.08 to<br>0.30)                | 0.16<br>(0.06 to<br>0.36)                | 0.12<br>(0.04 to<br>0.26)                | 0.17<br>(0.06 to<br>0.34)                |
| Otitis media                                                      | 0.40<br>(0.19 to<br>0.75)                   | 0.07<br>(0.02 to<br>0.24)                   | 0.08<br>(0.02 to<br>0.26)                   | 0.07<br>(0.02 to<br>0.23)                   | 0.04<br>(0.01 to<br>0.09)                | 0.01<br>(0.00 to<br>0.02)                | 0.01<br>(0.00 to<br>0.02)                | 0.00<br>(0.00 to<br>0.02)                |
| Meningitis                                                        | 220.04<br>(184.08 to<br>269.00)             | 92.09<br>(57.13 to<br>149.48)               | 72.80<br>(44.97 to<br>117.56)               | 102.32<br>(60.42 to<br>173.73)              | 6.72<br>(5.68 to<br>8.32)                | 3.32<br>(2.42 to<br>4.59)                | 2.77<br>(2.04 to<br>3.81)                | 3.43<br>(2.41 to<br>4.84)                |
| Pneumococcal meningitis                                           | 8.40<br>(6.67 to<br>10.34)                  | 3.66<br>(2.52 to<br>5.19)                   | 3.76<br>(2.58 to<br>5.33)                   | 3.68<br>(2.56 to<br>5.17)                   | 0.33<br>(0.25 to<br>0.41)                | 0.18<br>(0.13 to<br>0.23)                | 0.19<br>(0.13 to<br>0.25)                | 0.17<br>(0.13 to<br>0.23)                |
| H influenzae type B meningitis                                    | 18.74<br>(15.02 to<br>23.84)                | 20.55<br>(8.80 to<br>46.63)                 | 17.12<br>(8.51 to<br>34.59)                 | 27.32<br>(9.74 to<br>69.27)                 | 0.51<br>(0.42 to<br>0.65)                | 0.48<br>(0.30 to<br>0.78)                | 0.46<br>(0.31 to<br>0.69)                | 0.54<br>(0.30 to<br>1.02)                |
| Meningococcal meningitis                                          | 86.08<br>(69.91 to<br>106.86)               | 27.03<br>(15.98 to<br>45.52)                | 20.91<br>(12.12 to<br>35.10)                | 28.44<br>(15.99 to<br>48.22)                | 2.25<br>(1.90 to<br>2.74)                | 0.95<br>(0.67 to<br>1.37)                | 0.77<br>(0.56 to<br>1.11)                | 0.97<br>(0.66 to<br>1.39)                |
| Other meningitis                                                  | 106.83<br>(89.47 to<br>135.69)              | 40.86<br>(24.83 to<br>64.88)                | 31.01<br>(19.28 to<br>48.80)                | 42.88<br>(26.15 to<br>68.20)                | 3.64<br>(3.04 to<br>4.57)                | 1.71<br>(1.20 to<br>2.42)                | 1.35<br>(0.97 to<br>1.90)                | 1.75<br>(1.20 to<br>2.54)                |
| Encephalitis                                                      | 219.36<br>(168.46 to<br>336.58)             | 196.81<br>(129.67 to<br>315.62)             | 194.96<br>(127.53 to<br>314.09)             | 193.53<br>(128.22 to<br>312.58)             | 6.45<br>(4.78 to<br>8.91)                | 7.57<br>(4.80 to<br>10.24)               | 7.77<br>(4.89 to<br>10.56)               | 7.23<br>(4.67 to<br>9.81)                |

|                |                           |                              |                             |                              |                           |                           |                           |                           |
|----------------|---------------------------|------------------------------|-----------------------------|------------------------------|---------------------------|---------------------------|---------------------------|---------------------------|
| Diphtheria     | 0.50<br>(0.32 to<br>0.78) | 0.13<br>(0.06 to<br>0.27)    | 0.12<br>(0.05 to<br>0.25)   | 0.16<br>(0.06 to<br>0.32)    | 0.01<br>(0.01 to<br>0.02) | 0.00<br>(0.00 to<br>0.01) | 0.00<br>(0.00 to<br>0.01) | 0.00<br>(0.00 to<br>0.01) |
| Whooping cough | 1.62<br>(0.53 to<br>3.94) | 0.84<br>(0.08 to<br>3.62)    | 0.16<br>(0.03 to<br>0.60)   | 2.16<br>(0.15 to<br>8.99)    | 0.02<br>(0.01 to<br>0.05) | 0.01<br>(0.00 to<br>0.04) | 0.00<br>(0.00 to<br>0.01) | 0.03<br>(0.00 to<br>0.11) |
| Tetanus        | 0.56<br>(0.31 to<br>0.83) | 0.07<br>(0.03 to<br>0.13)    | 0.07<br>(0.03 to<br>0.13)   | 0.08<br>(0.04 to<br>0.15)    | 0.02<br>(0.01 to<br>0.03) | 0.00<br>(0.00 to<br>0.00) | 0.00<br>(0.00 to<br>0.01) | 0.00<br>(0.00 to<br>0.00) |
| Measles        | 0.11<br>(0.08 to<br>0.15) | 15.67<br>(0.03 to<br>122.88) | 11.02<br>(0.02 to<br>80.24) | 20.71<br>(0.03 to<br>167.11) | 0.00<br>(0.00 to<br>0.00) | 0.27<br>(0.00 to<br>2.07) | 0.20<br>(0.00 to<br>1.45) | 0.33<br>(0.00 to<br>2.67) |

| Estonia                                               |                                  |                                  |                                  |                                  |                               |                               |                               |                               |
|-------------------------------------------------------|----------------------------------|----------------------------------|----------------------------------|----------------------------------|-------------------------------|-------------------------------|-------------------------------|-------------------------------|
| Cause                                                 | YLLs (actual counts)             |                                  |                                  |                                  | Deaths (actual counts)        |                               |                               |                               |
|                                                       | 2016                             | 2040 Forecast                    | 2040 Better Scenario             | 2040 Worse Scenario              | 2016                          | 2040 Forecast                 | 2040 Better Scenario          | 2040 Worse Scenario           |
| Varicella and herpes zoster                           | 1.50<br>(0.61 to 2.13)           | 1.05<br>(0.37 to 1.67)           | 0.95<br>(0.34 to 1.51)           | 1.02<br>(0.36 to 1.67)           | 0.12<br>(0.03 to 0.19)        | 0.12<br>(0.03 to 0.21)        | 0.12<br>(0.03 to 0.21)        | 0.11<br>(0.03 to 0.20)        |
| <b>Neglected tropical diseases and malaria</b>        | <b>8.93</b><br>(7.42 to 10.26)   | <b>5.99</b><br>(4.10 to 8.43)    | <b>6.00</b><br>(4.10 to 8.54)    | <b>5.93</b><br>(4.08 to 8.33)    | <b>0.24</b><br>(0.20 to 0.28) | <b>0.22</b><br>(0.16 to 0.27) | <b>0.23</b><br>(0.16 to 0.29) | <b>0.21</b><br>(0.16 to 0.26) |
| Malaria                                               | 0.00<br>(0.00 to 0.00)           | 0.00<br>(0.00 to 0.00)           | 0.00<br>(0.00 to 0.00)           | 0.00<br>(0.00 to 0.00)           | 0.00<br>(0.00 to 0.00)        | 0.00<br>(0.00 to 0.00)        | 0.00<br>(0.00 to 0.00)        | 0.00<br>(0.00 to 0.00)        |
| Chagas disease                                        | 0.00<br>(0.00 to 0.00)           | 0.00<br>(0.00 to 0.00)           | 0.00<br>(0.00 to 0.00)           | 0.00<br>(0.00 to 0.00)           | 0.00<br>(0.00 to 0.00)        | 0.00<br>(0.00 to 0.00)        | 0.00<br>(0.00 to 0.00)        | 0.00<br>(0.00 to 0.00)        |
| Leishmaniasis                                         | 0.00<br>(0.00 to 0.00)           | 0.00<br>(0.00 to 0.00)           | 0.00<br>(0.00 to 0.00)           | 0.00<br>(0.00 to 0.00)           | 0.00<br>(0.00 to 0.00)        | 0.00<br>(0.00 to 0.00)        | 0.00<br>(0.00 to 0.00)        | 0.00<br>(0.00 to 0.00)        |
| African trypanosomiasis                               | 0.00<br>(0.00 to 0.00)           | 0.00<br>(0.00 to 0.00)           | 0.00<br>(0.00 to 0.00)           | 0.00<br>(0.00 to 0.00)           | 0.00<br>(0.00 to 0.00)        | 0.00<br>(0.00 to 0.00)        | 0.00<br>(0.00 to 0.00)        | 0.00<br>(0.00 to 0.00)        |
| Schistosomiasis                                       | 0.00<br>(0.00 to 0.00)           | 0.00<br>(0.00 to 0.00)           | 0.00<br>(0.00 to 0.00)           | 0.00<br>(0.00 to 0.00)           | 0.00<br>(0.00 to 0.00)        | 0.00<br>(0.00 to 0.00)        | 0.00<br>(0.00 to 0.00)        | 0.00<br>(0.00 to 0.00)        |
| Cysticercosis                                         | 0.59<br>(0.47 to 0.73)           | 0.16<br>(0.11 to 0.22)           | 0.15<br>(0.10 to 0.22)           | 0.16<br>(0.11 to 0.22)           | 0.02<br>(0.02 to 0.02)        | 0.01<br>(0.01 to 0.01)        | 0.01<br>(0.01 to 0.01)        | 0.01<br>(0.01 to 0.01)        |
| Cystic echinococcosis                                 | 1.53<br>(1.23 to 1.85)           | 0.86<br>(0.60 to 1.21)           | 0.71<br>(0.50 to 0.98)           | 0.87<br>(0.61 to 1.21)           | 0.06<br>(0.05 to 0.07)        | 0.05<br>(0.04 to 0.06)        | 0.04<br>(0.03 to 0.05)        | 0.05<br>(0.04 to 0.06)        |
| Dengue                                                | 0.00<br>(0.00 to 0.00)           | 0.00<br>(0.00 to 0.00)           | 0.00<br>(0.00 to 0.00)           | 0.00<br>(0.00 to 0.00)           | 0.00<br>(0.00 to 0.00)        | 0.00<br>(0.00 to 0.00)        | 0.00<br>(0.00 to 0.00)        | 0.00<br>(0.00 to 0.00)        |
| Yellow fever                                          | 0.00<br>(0.00 to 0.00)           | 0.00<br>(0.00 to 0.00)           | 0.00<br>(0.00 to 0.00)           | 0.00<br>(0.00 to 0.00)           | 0.00<br>(0.00 to 0.00)        | 0.00<br>(0.00 to 0.00)        | 0.00<br>(0.00 to 0.00)        | 0.00<br>(0.00 to 0.00)        |
| Rabies                                                | 0.04<br>(0.03 to 0.05)           | 0.03<br>(0.02 to 0.04)           | 0.02<br>(0.02 to 0.03)           | 0.03<br>(0.02 to 0.04)           | 0.00<br>(0.00 to 0.00)        | 0.00<br>(0.00 to 0.00)        | 0.00<br>(0.00 to 0.00)        | 0.00<br>(0.00 to 0.00)        |
| Intestinal nematode infections                        | 0.03<br>(0.01 to 0.05)           | 0.02<br>(0.01 to 0.04)           | 0.03<br>(0.01 to 0.04)           | 0.02<br>(0.01 to 0.04)           | 0.00<br>(0.00 to 0.00)        | 0.00<br>(0.00 to 0.00)        | 0.00<br>(0.00 to 0.00)        | 0.00<br>(0.00 to 0.00)        |
| Other neglected tropical diseases                     | 6.74<br>(5.41 to 7.87)           | 4.93<br>(3.25 to 7.29)           | 5.09<br>(3.35 to 7.52)           | 4.86<br>(3.20 to 7.05)           | 0.16<br>(0.12 to 0.19)        | 0.16<br>(0.10 to 0.21)        | 0.18<br>(0.11 to 0.23)        | 0.15<br>(0.10 to 0.20)        |
| <b>Maternal disorders</b>                             | <b>39.90</b><br>(36.14 to 50.02) | <b>32.40</b><br>(13.92 to 62.24) | <b>27.13</b><br>(10.97 to 52.03) | <b>34.13</b><br>(14.56 to 64.47) | <b>0.73</b><br>(0.55 to 0.91) | <b>0.58</b><br>(0.26 to 1.12) | <b>0.49</b><br>(0.21 to 0.93) | <b>0.61</b><br>(0.27 to 1.15) |
| Maternal hemorrhage                                   | 3.44<br>(5.28 to 12.98)          | 6.38<br>(2.53 to 13.66)          | 5.36<br>(2.10 to 11.74)          | 6.69<br>(2.56 to 14.08)          | 0.16<br>(0.10 to 0.24)        | 0.12<br>(0.05 to 0.25)        | 0.10<br>(0.04 to 0.21)        | 0.12<br>(0.05 to 0.26)        |
| Maternal sepsis and other maternal infections         | 0.31<br>(0.12 to 0.61)           | 0.26<br>(0.07 to 0.58)           | 0.22<br>(0.06 to 0.50)           | 0.27<br>(0.07 to 0.62)           | 0.01<br>(0.00 to 0.01)        | 0.00<br>(0.00 to 0.01)        | 0.00<br>(0.00 to 0.01)        | 0.00<br>(0.00 to 0.01)        |
| Maternal hypertensive disorders                       | 6.83<br>(4.42 to 10.31)          | 5.44<br>(1.82 to 11.75)          | 4.49<br>(1.50 to 9.93)           | 5.74<br>(1.91 to 12.89)          | 0.12<br>(0.08 to 0.18)        | 0.09<br>(0.03 to 0.20)        | 0.08<br>(0.03 to 0.17)        | 0.10<br>(0.03 to 0.21)        |
| Maternal obstructed labor and uterine rupture         | 0.26<br>(0.10 to 0.52)           | 0.22<br>(0.06 to 0.56)           | 0.18<br>(0.05 to 0.45)           | 0.24<br>(0.06 to 0.55)           | 0.00<br>(0.00 to 0.01)        | 0.00<br>(0.00 to 0.01)        | 0.00<br>(0.00 to 0.01)        | 0.00<br>(0.00 to 0.01)        |
| Maternal abortion, miscarriage, and ectopic pregnancy | 6.12<br>(3.80 to 9.20)           | 5.80<br>(2.17 to 12.09)          | 4.80<br>(1.76 to 10.10)          | 6.13<br>(2.25 to 13.03)          | 0.12<br>(0.07 to 0.17)        | 0.11<br>(0.04 to 0.22)        | 0.09<br>(0.03 to 0.19)        | 0.11<br>(0.04 to 0.24)        |

|                                        |                             |                             |                            |                             |                           |                           |                           |                           |
|----------------------------------------|-----------------------------|-----------------------------|----------------------------|-----------------------------|---------------------------|---------------------------|---------------------------|---------------------------|
|                                        | 4.18<br>(2.52 to<br>6.50)   | 4.02<br>(1.30 to<br>9.22)   | 3.29<br>(1.02 to<br>7.54)  | 4.27<br>(1.35 to<br>9.60)   | 0.07<br>(0.04 to<br>0.11) | 0.07<br>(0.02 to<br>0.16) | 0.06<br>(0.02 to<br>0.13) | 0.07<br>(0.02 to<br>0.16) |
| Indirect maternal deaths               |                             |                             |                            |                             |                           |                           |                           |                           |
|                                        | 0.29<br>(0.12 to<br>0.58)   | 0.21<br>(0.06 to<br>0.54)   | 0.17<br>(0.05 to<br>0.43)  | 0.22<br>(0.06 to<br>0.55)   | 0.01<br>(0.00 to<br>0.01) | 0.00<br>(0.00 to<br>0.01) | 0.00<br>(0.00 to<br>0.01) | 0.00<br>(0.00 to<br>0.01) |
| Late maternal deaths                   |                             |                             |                            |                             |                           |                           |                           |                           |
|                                        | 0.03<br>(0.01 to<br>0.05)   | 0.05<br>(0.01 to<br>0.17)   | 0.04<br>(0.01 to<br>0.15)  | 0.05<br>(0.01 to<br>0.18)   | 0.00<br>(0.00 to<br>0.00) | 0.00<br>(0.00 to<br>0.00) | 0.00<br>(0.00 to<br>0.00) | 0.00<br>(0.00 to<br>0.00) |
| Maternal deaths aggravated by HIV/AIDS |                             |                             |                            |                             |                           |                           |                           |                           |
|                                        | 13.43<br>(6.78 to<br>21.53) | 10.02<br>(3.19 to<br>22.19) | 8.58<br>(2.73 to<br>19.15) | 10.51<br>(3.40 to<br>23.39) | 0.25<br>(0.13 to<br>0.40) | 0.18<br>(0.06 to<br>0.39) | 0.16<br>(0.05 to<br>0.34) | 0.19<br>(0.06 to<br>0.42) |
| Other maternal disorders               |                             |                             |                            |                             |                           |                           |                           |                           |

| Estonia                                                                 |                                         |                                       |                                       |                                       |                                 |                                |                                |                                |
|-------------------------------------------------------------------------|-----------------------------------------|---------------------------------------|---------------------------------------|---------------------------------------|---------------------------------|--------------------------------|--------------------------------|--------------------------------|
| Cause                                                                   | YLLs (actual counts)                    |                                       |                                       |                                       | Deaths (actual counts)          |                                |                                |                                |
|                                                                         | 2016                                    | 2040 Forecast                         | 2040 Better Scenario                  | 2040 Worse Scenario                   | 2016                            | 2040 Forecast                  | 2040 Better Scenario           | 2040 Worse Scenario            |
| <b>Neonatal disorders</b>                                               | <b>1,096.97</b><br>(700.87 to 1,539.81) | <b>733.25</b><br>(176.49 to 2,001.85) | <b>591.84</b><br>(145.28 to 1,649.75) | <b>803.40</b><br>(191.45 to 2,230.09) | <b>12.68</b><br>(8.10 to 17.80) | <b>8.47</b><br>(2.04 to 23.13) | <b>6.84</b><br>(1.68 to 19.06) | <b>9.29</b><br>(2.21 to 25.76) |
| Neonatal preterm birth                                                  | 411.34<br>(256.52 to 594.07)            | 139.69<br>(40.72 to 303.27)           | 99.22<br>(29.44 to 216.34)            | 174.18<br>(50.35 to 396.30)           | 4.76<br>(2.97 to 6.87)          | 1.61<br>(0.47 to 3.50)         | 1.15<br>(0.34 to 2.50)         | 2.01<br>(0.58 to 4.58)         |
| Neonatal encephalopathy due to birth asphyxia and trauma                | 380.09<br>(237.19 to 539.22)            | 187.23<br>(32.29 to 533.55)           | 138.55<br>(25.46 to 398.94)           | 203.80<br>(37.65 to 614.96)           | 4.39<br>(2.74 to 6.23)          | 2.16<br>(0.37 to 6.16)         | 1.60<br>(0.29 to 4.61)         | 2.36<br>(0.44 to 7.10)         |
| Neonatal sepsis and other neonatal infections                           | 127.26<br>(67.16 to 292.27)             | 153.37<br>(32.97 to 462.49)           | 121.59<br>(25.97 to 373.97)           | 164.41<br>(34.79 to 499.87)           | 1.47<br>(0.78 to 3.38)          | 1.77<br>(0.38 to 5.34)         | 1.41<br>(0.30 to 4.32)         | 1.90<br>(0.40 to 5.78)         |
| Hemolytic disease and other neonatal jaundice                           | 3.41<br>(1.89 to 5.72)                  | 3.13<br>(0.46 to 12.46)               | 2.41<br>(0.38 to 9.77)                | 3.38<br>(0.49 to 14.19)               | 0.04<br>(0.02 to 0.07)          | 0.04<br>(0.01 to 0.14)         | 0.03<br>(0.00 to 0.11)         | 0.04<br>(0.01 to 0.16)         |
| Other neonatal disorders                                                | 174.86<br>(98.52 to 264.87)             | 249.82<br>(42.75 to 777.21)           | 230.07<br>(40.71 to 712.11)           | 257.64<br>(44.00 to 814.21)           | 2.02<br>(1.14 to 3.06)          | 2.89<br>(0.50 to 8.98)         | 2.66<br>(0.47 to 8.23)         | 2.98<br>(0.51 to 9.41)         |
| <b>Nutritional deficiencies</b>                                         | <b>59.58</b><br>(50.87 to 68.82)        | <b>73.03</b><br>(52.41 to 98.97)      | <b>77.04</b><br>(54.83 to 103.66)     | <b>70.53</b><br>(51.06 to 94.87)      | <b>2.55</b><br>(2.19 to 2.90)   | <b>3.74</b><br>(2.99 to 4.67)  | <b>4.11</b><br>(3.29 to 5.11)  | <b>3.47</b><br>(2.78 to 4.34)  |
| Protein-energy malnutrition                                             | 30.30<br>(23.12 to 42.16)               | 43.19<br>(27.82 to 63.50)             | 48.08<br>(31.58 to 69.81)             | 41.16<br>(26.64 to 61.36)             | 1.22<br>(0.86 to 1.76)          | 2.12<br>(1.40 to 3.02)         | 2.49<br>(1.69 to 3.48)         | 1.94<br>(1.30 to 2.78)         |
| Iodine deficiency                                                       | 2.99<br>(0.35 to 8.02)                  | 4.73<br>(0.18 to 14.16)               | 4.70<br>(0.16 to 14.42)               | 4.61<br>(0.17 to 13.61)               | 0.13<br>(0.01 to 0.36)          | 0.26<br>(0.01 to 0.72)         | 0.27<br>(0.01 to 0.78)         | 0.24<br>(0.01 to 0.68)         |
| Dietary iron deficiency                                                 | 7.32<br>(4.19 to 9.16)                  | 7.57<br>(3.77 to 11.78)               | 8.01<br>(3.93 to 12.47)               | 7.44<br>(3.74 to 11.75)               | 0.20<br>(0.11 to 0.26)          | 0.20<br>(0.10 to 0.35)         | 0.23<br>(0.11 to 0.35)         | 0.21<br>(0.10 to 0.31)         |
| Other nutritional deficiencies                                          | 18.96<br>(10.89 to 23.83)               | 17.54<br>(9.40 to 25.66)              | 16.25<br>(8.58 to 24.00)              | 17.32<br>(8.78 to 25.19)              | 1.00<br>(0.57 to 1.29)          | 1.14<br>(0.65 to 1.62)         | 1.13<br>(0.65 to 1.62)         | 1.08<br>(0.63 to 1.52)         |
| <b>Other communicable, maternal, neonatal, and nutritional diseases</b> | <b>159.81</b><br>(114.72 to 195.46)     | <b>143.78</b><br>(95.89 to 198.92)    | <b>140.87</b><br>(93.98 to 194.30)    | <b>142.53</b><br>(94.03 to 198.85)    | <b>5.27</b><br>(3.77 to 6.25)   | <b>6.26</b><br>(4.55 to 7.77)  | <b>6.48</b><br>(4.73 to 8.04)  | <b>5.95</b><br>(4.31 to 7.39)  |
| Sexually transmitted infections excluding HIV                           | 6.71<br>(4.87 to 10.39)                 | 4.65<br>(3.05 to 7.42)                | 4.34<br>(2.82 to 6.92)                | 4.67<br>(3.05 to 7.63)                | 0.26<br>(0.20 to 0.38)          | 0.25<br>(0.17 to 0.36)         | 0.24<br>(0.17 to 0.36)         | 0.24<br>(0.17 to 0.36)         |
| Syphilis                                                                | 3.05<br>(1.64 to 5.29)                  | 1.39<br>(0.80 to 2.62)                | 1.19<br>(0.68 to 2.21)                | 1.43<br>(0.80 to 2.66)                | 0.09<br>(0.07 to 0.14)          | 0.06<br>(0.04 to 0.10)         | 0.06<br>(0.04 to 0.09)         | 0.06<br>(0.04 to 0.10)         |
| Chlamydial infection                                                    | 0.71<br>(0.55 to 0.87)                  | 0.62<br>(0.38 to 1.07)                | 0.60<br>(0.37 to 1.06)                | 0.61<br>(0.38 to 1.06)                | 0.03<br>(0.03 to 0.04)          | 0.04<br>(0.02 to 0.06)         | 0.04<br>(0.02 to 0.06)         | 0.03<br>(0.02 to 0.06)         |
| Gonococcal infection                                                    | 2.03<br>(1.56 to 2.51)                  | 1.87<br>(1.15 to 3.17)                | 1.81<br>(1.10 to 3.00)                | 1.85<br>(1.14 to 3.17)                | 0.10<br>(0.08 to 0.13)          | 0.11<br>(0.07 to 0.18)         | 0.11<br>(0.07 to 0.18)         | 0.11<br>(0.07 to 0.17)         |
| Other sexually transmitted infections                                   | 0.91<br>(0.70 to 1.12)                  | 0.78<br>(0.46 to 1.33)                | 0.74<br>(0.44 to 1.29)                | 0.78<br>(0.46 to 1.35)                | 0.04<br>(0.03 to 0.04)          | 0.04<br>(0.02 to 0.06)         | 0.04<br>(0.02 to 0.06)         | 0.04<br>(0.02 to 0.06)         |
| Acute hepatitis                                                         | 28.88<br>(24.40 to 34.03)               | 13.74<br>(8.22 to 22.17)              | 10.69<br>(6.45 to 17.04)              | 14.39<br>(8.54 to 22.77)              | 0.87<br>(0.74 to 1.02)          | 0.52<br>(0.35 to 0.77)         | 0.42<br>(0.28 to 0.60)         | 0.53<br>(0.35 to 0.77)         |
| Acute hepatitis A                                                       | 1.59<br>(0.95 to 2.38)                  | 0.70<br>(0.31 to 1.39)                | 0.57<br>(0.25 to 1.13)                | 0.73<br>(0.32 to 1.48)                | 0.03<br>(0.02 to 0.04)          | 0.02<br>(0.01 to 0.03)         | 0.01<br>(0.01 to 0.02)         | 0.02<br>(0.01 to 0.03)         |
| Acute hepatitis B                                                       | 22.63<br>(18.57 to 27.33)               | 10.84<br>(6.10 to 18.07)              | 8.36<br>(4.74 to 13.66)               | 11.37<br>(6.45 to 18.54)              | 0.69<br>(0.57 to 0.83)          | 0.39<br>(0.25 to 0.62)         | 0.31<br>(0.19 to 0.47)         | 0.40<br>(0.25 to 0.62)         |

|                                       |                                                                  |                                                                  |                                                                  |                                                                  |                                                               |                                                               |                                                              |                                                               |
|---------------------------------------|------------------------------------------------------------------|------------------------------------------------------------------|------------------------------------------------------------------|------------------------------------------------------------------|---------------------------------------------------------------|---------------------------------------------------------------|--------------------------------------------------------------|---------------------------------------------------------------|
| Acute hepatitis C                     | 0.91<br>(0.65 to<br>1.26)                                        | 0.48<br>(0.26 to<br>0.83)                                        | 0.38<br>(0.20 to<br>0.65)                                        | 0.50<br>(0.26 to<br>0.84)                                        | 0.03<br>(0.02 to<br>0.04)                                     | 0.02<br>(0.01 to<br>0.03)                                     | 0.02<br>(0.01 to<br>0.02)                                    | 0.02<br>(0.01 to<br>0.03)                                     |
| Acute hepatitis E                     | 3.75<br>(2.70 to<br>5.15)                                        | 1.73<br>(0.98 to<br>2.87)                                        | 1.38<br>(0.79 to<br>2.28)                                        | 1.79<br>(1.01 to<br>2.95)                                        | 0.12<br>(0.08 to<br>0.17)                                     | 0.09<br>(0.05 to<br>0.14)                                     | 0.08<br>(0.05 to<br>0.12)                                    | 0.09<br>(0.05 to<br>0.13)                                     |
| Other unspecified infectious diseases | 124.22<br>(78.82 to<br>157.76)                                   | 125.39<br>(79.29 to<br>178.12)                                   | 125.84<br>(80.39 to<br>177.67)                                   | 123.47<br>(76.91 to<br>176.37)                                   | 4.14<br>(2.64 to<br>5.06)                                     | 5.50<br>(3.75 to<br>6.95)                                     | 5.81<br>(4.05 to<br>7.31)                                    | 5.18<br>(3.52 to<br>6.56)                                     |
| <b>Non-communicable diseases</b>      | <b>223,257.54</b><br><b>(199,633.64 to</b><br><b>244,372.31)</b> | <b>182,634.92</b><br><b>(135,801.48 to</b><br><b>245,376.29)</b> | <b>146,104.56</b><br><b>(111,595.13 to</b><br><b>191,661.68)</b> | <b>222,562.53</b><br><b>(164,492.22 to</b><br><b>299,577.79)</b> | <b>14,756.30</b><br><b>(13,236.06 to</b><br><b>15,863.04)</b> | <b>14,271.35</b><br><b>(11,565.96 to</b><br><b>17,261.45)</b> | <b>11,943.12</b><br><b>(9,874.63 to</b><br><b>14,369.09)</b> | <b>16,564.45</b><br><b>(13,408.34 to</b><br><b>20,193.52)</b> |



| Estonia                              |                                              |                                              |                                              |                                              |                                           |                                           |                                           |                                           |
|--------------------------------------|----------------------------------------------|----------------------------------------------|----------------------------------------------|----------------------------------------------|-------------------------------------------|-------------------------------------------|-------------------------------------------|-------------------------------------------|
| Cause                                | YLLs (actual counts)                         |                                              |                                              |                                              | Deaths (actual counts)                    |                                           |                                           |                                           |
|                                      | 2016                                         | 2040 Forecast                                | 2040 Better Scenario                         | 2040 Worse Scenario                          | 2016                                      | 2040 Forecast                             | 2040 Better Scenario                      | 2040 Worse Scenario                       |
| <b>Neoplasms</b>                     | <b>63,068.67</b><br>(54,934.29 to 70,210.64) | <b>59,652.31</b><br>(46,139.42 to 74,981.25) | <b>49,332.84</b><br>(38,293.90 to 61,771.19) | <b>68,502.28</b><br>(52,783.31 to 87,425.81) | <b>3,380.69</b><br>(2,965.57 to 3,717.12) | <b>3,777.22</b><br>(3,146.99 to 4,464.26) | <b>3,280.20</b><br>(2,742.67 to 3,857.81) | <b>4,158.15</b><br>(3,453.65 to 4,964.58) |
| Lip and oral cavity cancer           | 1,225.96<br>(1,002.77 to 1,472.59)           | 1,284.13<br>(650.96 to 2,410.74)             | 728.72<br>(393.36 to 1,307.18)               | 1,777.33<br>(901.34 to 3,129.68)             | 56.14<br>(47.55 to 66.05)                 | 68.43<br>(37.67 to 118.27)                | 40.63<br>(23.75 to 65.96)                 | 91.40<br>(49.90 to 153.15)                |
| Nasopharynx cancer                   | 129.26<br>(106.97 to 161.00)                 | 120.93<br>(56.74 to 226.75)                  | 62.98<br>(31.68 to 115.80)                   | 173.71<br>(82.43 to 321.86)                  | 4.94<br>(4.14 to 6.01)                    | 5.18<br>(2.70 to 9.07)                    | 2.76<br>(1.52 to 4.76)                    | 7.28<br>(3.70 to 13.01)                   |
| Other pharynx cancer                 | 961.31<br>(775.74 to 1,158.13)               | 1,046.02<br>(497.11 to 1,864.88)             | 893.15<br>(433.49 to 1,620.50)               | 1,134.06<br>(551.22 to 2,027.66)             | 37.32<br>(30.45 to 44.64)                 | 44.03<br>(22.47 to 76.10)                 | 37.91<br>(19.96 to 65.31)                 | 47.32<br>(24.41 to 80.10)                 |
| Esophageal cancer                    | 1,402.59<br>(1,131.03 to 1,699.92)           | 1,567.68<br>(747.28 to 3,194.68)             | 1,026.61<br>(540.85 to 1,959.36)             | 2,146.86<br>(1,002.35 to 4,412.18)           | 65.16<br>(54.01 to 77.27)                 | 82.68<br>(44.49 to 150.71)                | 55.86<br>(32.22 to 95.43)                 | 109.54<br>(56.33 to 208.27)               |
| Stomach cancer                       | 5,488.85<br>(4,802.53 to 6,156.64)           | 3,347.91<br>(2,253.68 to 4,801.88)           | 2,678.22<br>(1,918.37 to 3,746.10)           | 3,656.69<br>(2,449.37 to 5,137.45)           | 295.12<br>(260.17 to 329.08)              | 212.57<br>(155.02 to 291.10)              | 177.19<br>(133.82 to 235.33)              | 224.23<br>(160.08 to 303.59)              |
| Colon and rectum cancer              | 6,650.21<br>(5,694.51 to 7,760.07)           | 7,088.90<br>(4,569.06 to 10,312.83)          | 5,626.73<br>(3,819.77 to 8,107.30)           | 8,103.07<br>(5,339.05 to 11,953.00)          | 416.79<br>(361.61 to 476.39)              | 521.40<br>(369.53 to 742.54)              | 434.50<br>(306.12 to 610.39)              | 575.15<br>(400.21 to 823.43)              |
| Liver cancer                         | 1,800.82<br>(1,511.91 to 2,077.94)           | 2,575.57<br>(1,583.39 to 4,009.80)           | 2,037.65<br>(1,333.62 to 3,061.97)           | 3,135.57<br>(1,861.48 to 5,095.86)           | 96.83<br>(82.82 to 110.38)                | 156.61<br>(101.97 to 236.55)              | 131.62<br>(91.93 to 188.17)               | 181.91<br>(112.80 to 285.98)              |
| Liver cancer due to hepatitis B      | 621.74<br>(496.10 to 754.89)                 | 824.90<br>(480.93 to 1,341.09)               | 732.78<br>(469.39 to 1,157.13)               | 928.15<br>(526.47 to 1,591.89)               | 31.62<br>(25.33 to 38.05)                 | 48.24<br>(30.37 to 75.33)                 | 44.96<br>(30.45 to 66.29)                 | 52.11<br>(31.04 to 83.59)                 |
| Liver cancer due to hepatitis C      | 191.55<br>(155.48 to 228.54)                 | 271.33<br>(169.50 to 420.65)                 | 248.03<br>(163.04 to 371.19)                 | 298.69<br>(180.17 to 470.95)                 | 11.79<br>(9.64 to 14.06)                  | 19.09<br>(12.32 to 28.33)                 | 18.38<br>(12.57 to 26.23)                 | 20.11<br>(12.67 to 30.70)                 |
| Liver cancer due to alcohol use      | 737.83<br>(612.21 to 870.06)                 | 1,083.36<br>(659.12 to 1,700.33)             | 707.04<br>(457.63 to 1,062.83)               | 1,456.54<br>(850.49 to 2,336.20)             | 40.23<br>(33.71 to 46.93)                 | 65.07<br>(41.84 to 98.11)                 | 45.86<br>(31.27 to 66.01)                 | 83.14<br>(51.29 to 128.40)                |
| Liver cancer due to other causes     | 249.69<br>(201.45 to 300.67)                 | 395.97<br>(226.58 to 675.01)                 | 349.80<br>(216.31 to 565.60)                 | 452.19<br>(247.11 to 798.46)                 | 13.18<br>(10.74 to 15.65)                 | 24.21<br>(14.75 to 33.99)                 | 22.43<br>(14.75 to 33.99)                 | 26.54<br>(15.29 to 44.89)                 |
| Gallbladder and biliary tract cancer | 721.18<br>(616.53 to 819.06)                 | 491.30<br>(389.08 to 594.16)                 | 497.71<br>(391.26 to 612.62)                 | 469.72<br>(377.47 to 559.99)                 | 44.44<br>(38.35 to 49.79)                 | 34.85<br>(29.67 to 39.83)                 | 36.57<br>(30.68 to 42.38)                 | 32.47<br>(27.82 to 36.88)                 |
| Pancreatic cancer                    | 4,323.35<br>(3,618.21 to 4,948.47)           | 4,644.06<br>(3,403.19 to 6,076.79)           | 4,430.98<br>(3,287.47 to 5,742.28)           | 4,928.98<br>(3,561.42 to 6,518.28)           | 242.48<br>(206.19 to 274.36)              | 295.45<br>(228.14 to 368.25)              | 293.20<br>(232.64 to 363.95)              | 303.10<br>(230.62 to 388.34)              |
| Larynx cancer                        | 838.21<br>(678.09 to 996.89)                 | 697.98<br>(270.99 to 1,537.66)               | 354.09<br>(145.66 to 748.74)                 | 1,023.14<br>(383.69 to 2,340.30)             | 36.91<br>(30.51 to 43.28)                 | 34.76<br>(14.84 to 72.07)                 | 17.89<br>(8.35 to 35.82)                  | 49.90<br>(20.96 to 103.28)                |
| Tracheal, bronchus, and lung cancer  | 11,754.35<br>(10,085.09 to 13,375.48)        | 10,642.96<br>(7,011.35 to 15,771.05)         | 6,669.00<br>(4,486.76 to 9,752.08)           | 15,461.04<br>(10,144.34 to 22,863.98)        | 602.51<br>(525.49 to 684.19)              | 615.73<br>(425.65 to 849.89)              | 395.76<br>(279.42 to 544.72)              | 866.57<br>(593.06 to 1,195.01)            |
| Malignant skin melanoma              | 1,192.44<br>(812.45 to 1,422.13)             | 1,243.63<br>(805.62 to 1,662.36)             | 1,442.83<br>(949.62 to 1,915.34)             | 1,156.05<br>(759.07 to 1,485.30)             | 57.40<br>(38.06 to 68.34)                 | 72.84<br>(47.80 to 90.36)                 | 87.75<br>(59.11 to 108.37)                | 65.67<br>(43.74 to 80.17)                 |
| Non-melanoma skin cancer             | 369.14<br>(315.82 to 431.73)                 | 424.93<br>(340.83 to 526.25)                 | 391.36<br>(315.87 to 483.28)                 | 406.56<br>(324.58 to 501.30)                 | 27.05<br>(23.61 to 31.18)                 | 40.79<br>(32.41 to 49.88)                 | 39.78<br>(32.34 to 48.11)                 | 37.48<br>(28.94 to 46.18)                 |
| Breast cancer                        | 4,418.27<br>(3,572.68 to 5,262.43)           | 3,824.85<br>(2,413.26 to 5,718.08)           | 2,994.36<br>(1,905.23 to 4,490.71)           | 4,140.87<br>(2,535.94 to 6,259.87)           | 216.67<br>(178.89 to 254.12)              | 222.25<br>(156.65 to 306.82)              | 183.66<br>(132.24 to 254.58)              | 233.65<br>(161.66 to 329.35)              |
| Cervical cancer                      | 1,444.89<br>(1,134.47 to 1,741.82)           | 806.32<br>(516.93 to 1,170.25)               | 671.05<br>(439.81 to 954.53)                 | 852.23<br>(547.60 to 1,257.94)               | 65.49<br>(51.69 to 77.68)                 | 43.98<br>(31.83 to 59.35)                 | 37.94<br>(28.24 to 50.29)                 | 45.23<br>(32.80 to 61.76)                 |

|                   |                                       |                                       |                                       |                                       |                                |                                 |                                 |                                 |
|-------------------|---------------------------------------|---------------------------------------|---------------------------------------|---------------------------------------|--------------------------------|---------------------------------|---------------------------------|---------------------------------|
|                   | 770.41<br>(595.13 to<br>947.52)       | 714.04<br>(518.98 to<br>945.13)       | 656.97<br>(476.58 to<br>867.12)       | 710.42<br>(526.55 to<br>927.53)       | 46.33<br>(36.54 to<br>56.53)   | 50.21<br>(39.45 to<br>62.45)    | 47.80<br>(37.59 to<br>60.29)    | 48.75<br>(38.42 to<br>60.73)    |
| Uterine cancer    |                                       |                                       |                                       |                                       |                                |                                 |                                 |                                 |
|                   | 2,077.87<br>(1,545.30 to<br>2,632.37) | 1,645.86<br>(1,031.62 to<br>2,386.71) | 1,505.18<br>(947.01 to<br>2,150.03)   | 1,719.23<br>(1,063.19 to<br>2,543.30) | 107.49<br>(80.31 to<br>134.84) | 97.95<br>(66.31 to<br>134.39)   | 91.60<br>(62.17 to<br>124.53)   | 100.51<br>(66.73 to<br>143.67)  |
| Ovarian cancer    |                                       |                                       |                                       |                                       |                                |                                 |                                 |                                 |
|                   | 3,418.07<br>(1,467.18 to<br>4,283.44) | 4,020.29<br>(1,746.86 to<br>5,044.99) | 3,906.64<br>(1,775.95 to<br>4,892.67) | 3,809.83<br>(1,616.54 to<br>4,774.26) | 240.92<br>(98.97 to<br>299.49) | 342.49<br>(143.31 to<br>420.77) | 347.17<br>(145.47 to<br>423.20) | 313.61<br>(125.69 to<br>390.98) |
| Prostate cancer   |                                       |                                       |                                       |                                       |                                |                                 |                                 |                                 |
|                   | 64.78<br>(49.40 to<br>82.18)          | 41.11<br>(26.55 to<br>60.81)          | 37.10<br>(24.10 to<br>54.73)          | 40.95<br>(26.46 to<br>59.45)          | 1.89<br>(1.49 to<br>2.36)      | 1.88<br>(1.41 to<br>2.44)       | 1.84<br>(1.39 to<br>2.36)       | 1.76<br>(1.32 to<br>2.26)       |
| Testicular cancer |                                       |                                       |                                       |                                       |                                |                                 |                                 |                                 |

| Estonia                         |                                                     |                                                    |                                                   |                                                    |                                                |                                                |                                                |                                                 |
|---------------------------------|-----------------------------------------------------|----------------------------------------------------|---------------------------------------------------|----------------------------------------------------|------------------------------------------------|------------------------------------------------|------------------------------------------------|-------------------------------------------------|
| Cause                           | YLLs (actual counts)                                |                                                    |                                                   |                                                    | Deaths (actual counts)                         |                                                |                                                |                                                 |
|                                 | 2016                                                | 2040 Forecast                                      | 2040 Better Scenario                              | 2040 Worse Scenario                                | 2016                                           | 2040 Forecast                                  | 2040 Better Scenario                           | 2040 Worse Scenario                             |
| Kidney cancer                   | 2,348.68<br>(1,935.79 to<br>2,706.58)               | 2,467.53<br>(1,681.64 to<br>3,463.24)              | 2,407.31<br>(1,680.78 to<br>3,318.65)             | 2,529.45<br>(1,708.04 to<br>3,618.31)              | 128.58<br>(108.01 to<br>146.55)                | 156.99<br>(114.16 to<br>209.37)                | 160.08<br>(120.19 to<br>206.67)                | 154.96<br>(109.10 to<br>211.21)                 |
| Bladder cancer                  | 1,515.19<br>(1,310.83 to<br>1,731.60)               | 1,554.27<br>(1,129.58 to<br>2,130.37)              | 1,357.63<br>(1,016.52 to<br>1,797.57)             | 1,682.58<br>(1,192.92 to<br>2,353.14)              | 105.66<br>(92.19 to<br>119.54)                 | 132.44<br>(99.06 to<br>174.29)                 | 121.58<br>(94.59 to<br>156.46)                 | 137.18<br>(98.24 to<br>188.31)                  |
| Brain and nervous system cancer | 2,231.08<br>(1,457.64 to<br>2,678.64)               | 1,948.41<br>(1,174.38 to<br>2,647.77)              | 1,872.06<br>(1,137.81 to<br>2,572.93)             | 1,922.27<br>(1,162.07 to<br>2,586.73)              | 82.28<br>(49.83 to<br>99.21)                   | 82.34<br>(47.55 to<br>106.83)                  | 81.02<br>(46.84 to<br>105.94)                  | 79.62<br>(45.72 to<br>102.23)                   |
| Thyroid cancer                  | 195.89<br>(163.22 to<br>232.71)                     | 193.16<br>(128.46 to<br>295.50)                    | 170.57<br>(116.13 to<br>258.04)                   | 200.21<br>(131.22 to<br>311.04)                    | 12.06<br>(10.03 to<br>14.30)                   | 13.73<br>(9.56 to<br>20.11)                    | 12.56<br>(8.84 to<br>18.08)                    | 13.83<br>(9.40 to<br>20.65)                     |
| Mesothelioma                    | 105.26<br>(86.98 to<br>120.56)                      | 105.71<br>(82.42 to<br>133.68)                     | 111.75<br>(84.98 to<br>143.38)                    | 100.00<br>(78.02 to<br>124.89)                     | 5.23<br>(4.37 to<br>5.91)                      | 6.39<br>(5.21 to<br>7.58)                      | 6.99<br>(5.70 to<br>8.42)                      | 5.87<br>(4.69 to<br>6.89)                       |
| Hodgkin lymphoma                | 164.46<br>(140.57 to<br>187.68)                     | 103.66<br>(73.63 to<br>137.77)                     | 86.06<br>(61.76 to<br>113.93)                     | 105.54<br>(74.48 to<br>142.57)                     | 6.11<br>(5.13 to<br>6.88)                      | 4.91<br>(3.68 to<br>6.18)                      | 4.22<br>(3.14 to<br>5.25)                      | 4.85<br>(3.60 to<br>6.05)                       |
| Non-Hodgkin lymphoma            | 1,491.71<br>(1,124.32 to<br>1,749.70)               | 1,263.21<br>(855.26 to<br>1,724.21)                | 1,161.40<br>(808.21 to<br>1,577.12)               | 1,270.68<br>(865.86 to<br>1,751.51)                | 77.30<br>(52.01 to<br>90.39)                   | 78.36<br>(52.57 to<br>102.53)                  | 74.71<br>(50.68 to<br>96.80)                   | 76.56<br>(50.78 to<br>99.77)                    |
| Multiple myeloma                | 903.55<br>(541.88 to<br>1,114.78)                   | 875.73<br>(485.31 to<br>1,219.59)                  | 831.20<br>(473.54 to<br>1,153.72)                 | 882.60<br>(487.52 to<br>1,242.60)                  | 49.19<br>(27.27 to<br>61.31)                   | 53.15<br>(28.22 to<br>72.38)                   | 52.01<br>(28.23 to<br>70.63)                   | 52.31<br>(27.63 to<br>72.36)                    |
| Leukemia                        | 2,569.76<br>(2,143.10 to<br>2,949.45)               | 2,466.81<br>(1,810.04 to<br>3,331.87)              | 2,224.87<br>(1,641.20 to<br>2,936.17)             | 2,616.42<br>(1,860.25 to<br>3,609.71)              | 127.10<br>(109.51 to<br>144.47)                | 152.48<br>(116.36 to<br>197.40)                | 143.16<br>(111.83 to<br>180.41)                | 155.82<br>(115.99 to<br>206.76)                 |
| Acute lymphoid leukemia         | 371.80<br>(281.17 to<br>441.09)                     | 308.87<br>(136.76 to<br>303.48)                    | 175.64<br>(115.35 to<br>253.77)                   | 229.04<br>(145.84 to<br>339.33)                    | 10.06<br>(8.11 to<br>11.96)                    | 7.14<br>(5.13 to<br>9.99)                      | 6.11<br>(4.47 to<br>8.72)                      | 7.71<br>(5.30 to<br>10.97)                      |
| Chronic lymphoid leukemia       | 613.30<br>(420.71 to<br>734.50)                     | 621.13<br>(390.19 to<br>892.58)                    | 572.44<br>(373.08 to<br>802.72)                   | 646.57<br>(401.59 to<br>953.57)                    | 40.69<br>(28.17 to<br>48.35)                   | 47.40<br>(31.41 to<br>65.36)                   | 45.58<br>(31.40 to<br>60.52)                   | 47.56<br>(30.38 to<br>67.33)                    |
| Acute myeloid leukemia          | 1,051.91<br>(882.61 to<br>1,219.15)                 | 1,199.51<br>(864.74 to<br>1,619.61)                | 1,114.58<br>(814.81 to<br>1,508.09)               | 1,270.81<br>(895.55 to<br>1,726.98)                | 48.46<br>(40.28 to<br>56.75)                   | 67.41<br>(50.13 to<br>88.15)                   | 64.84<br>(48.91 to<br>84.14)                   | 69.19<br>(50.35 to<br>92.32)                    |
| Chronic myeloid leukemia        | 158.63<br>(130.45 to<br>194.98)                     | 84.21<br>(55.66 to<br>132.08)                      | 62.16<br>(41.84 to<br>96.36)                      | 93.46<br>(58.12 to<br>144.62)                      | 8.40<br>(6.85 to<br>11.28)                     | 5.56<br>(3.65 to<br>9.22)                      | 4.29<br>(2.92 to<br>7.11)                      | 5.93<br>(3.84 to<br>9.66)                       |
| Other leukemia                  | 374.11<br>(292.60 to<br>471.35)                     | 353.09<br>(239.60 to<br>504.41)                    | 300.06<br>(210.32 to<br>416.88)                   | 376.52<br>(253.58 to<br>553.11)                    | 19.49<br>(15.59 to<br>23.98)                   | 24.97<br>(17.92 to<br>34.16)                   | 22.34<br>(16.35 to<br>29.86)                   | 25.43<br>(17.55 to<br>35.76)                    |
| Other neoplasms                 | 2,491.12<br>(1,989.14 to<br>2,870.01)               | 2,445.36<br>(1,876.37 to<br>3,056.24)              | 2,498.66<br>(1,907.27 to<br>3,175.87)             | 2,346.21<br>(1,813.29 to<br>2,888.81)              | 125.33<br>(101.89 to<br>142.90)                | 152.36<br>(125.65 to<br>178.01)                | 162.41<br>(133.82 to<br>192.18)                | 141.61<br>(116.42 to<br>163.43)                 |
| <b>Cardiovascular diseases</b>  | <b>108,924.15<br/>(97,360.24 to<br/>119,327.57)</b> | <b>71,218.21<br/>(45,509.81 to<br/>109,100.54)</b> | <b>48,791.45<br/>(32,545.54 to<br/>73,437.01)</b> | <b>99,467.61<br/>(60,674.35 to<br/>158,237.94)</b> | <b>8,662.08<br/>(7,803.28 to<br/>9,332.96)</b> | <b>6,858.22<br/>(4,757.71 to<br/>9,536.04)</b> | <b>5,099.86<br/>(3,632.94 to<br/>7,053.16)</b> | <b>8,709.51<br/>(5,920.55 to<br/>12,412.10)</b> |
| Rheumatic heart disease         | 733.01<br>(572.61 to<br>868.92)                     | 367.40<br>(204.91 to<br>599.32)                    | 302.99<br>(177.01 to<br>494.55)                   | 384.61<br>(220.17 to<br>634.77)                    | 33.46<br>(26.04 to<br>40.16)                   | 19.32<br>(12.21 to<br>29.50)                   | 16.50<br>(10.51 to<br>25.18)                   | 19.70<br>(12.68 to<br>29.63)                    |
| Ischemic heart disease          | 64,048.09<br>(54,266.16 to<br>76,946.22)            | 38,734.98<br>(21,050.29 to<br>64,873.06)           | 24,891.62<br>(13,888.21 to<br>41,833.77)          | 57,271.85<br>(29,141.11 to<br>100,090.67)          | 5,567.55<br>(4,735.74 to<br>6,621.95)          | 4,055.37<br>(2,351.33 to<br>6,422.31)          | 2,858.29<br>(1,683.40 to<br>4,542.29)          | 5,325.06<br>(3,026.00 to<br>8,490.06)           |
| Stroke                          | 16,622.39<br>(13,673.71 to<br>20,451.22)            | 10,742.34<br>(5,942.80 to<br>18,641.04)            | 6,722.46<br>(3,886.24 to<br>11,419.07)            | 15,760.07<br>(8,683.11 to<br>28,001.67)            | 1,999.64<br>(977.88 to<br>1,470.93)            | 969.92<br>(541.50 to<br>1,651.63)              | 676.97<br>(386.29 to<br>1,151.86)              | 1,255.62<br>(725.91 to<br>2,126.72)             |
| Ischemic stroke                 | 11,560.16<br>(9,519.12 to<br>14,284.86)             | 7,633.97<br>(4,112.71 to<br>13,854.06)             | 5,106.31<br>(2,815.07 to<br>8,921.01)             | 10,604.79<br>(5,690.59 to<br>19,709.40)            | 928.05<br>(756.07 to<br>1,143.65)              | 767.29<br>(404.36 to<br>1,403.67)              | 558.20<br>(304.45 to<br>995.24)                | 960.39<br>(519.37 to<br>1,787.28)               |

|                                |                                         |                                         |                                        |                                         |                                     |                                     |                                   |                                     |
|--------------------------------|-----------------------------------------|-----------------------------------------|----------------------------------------|-----------------------------------------|-------------------------------------|-------------------------------------|-----------------------------------|-------------------------------------|
| Intracerebral hemorrhage       | 5,062.23<br>(4,105.82 to<br>6,204.64)   | 3,108.37<br>(1,439.15 to<br>6,043.80)   | 1,616.15<br>(854.50 to<br>2,968.63)    | 5,155.28<br>(2,265.21 to<br>10,046.38)  | 271.59<br>(220.91 to<br>336.68)     | 202.62<br>(108.07 to<br>351.20)     | 118.77<br>(69.31 to<br>197.71)    | 295.22<br>(152.52 to<br>532.49)     |
| Hypertensive heart disease     | 14,397.54<br>(3,491.01 to<br>21,576.95) | 12,459.28<br>(2,239.30 to<br>29,985.97) | 9,607.57<br>(1,933.55 to<br>21,665.14) | 16,197.20<br>(2,798.76 to<br>41,176.02) | 1,139.76<br>(231.78 to<br>1,744.01) | 1,191.82<br>(199.47 to<br>2,856.60) | 994.74<br>(183.93 to<br>2,241.35) | 1,467.28<br>(234.30 to<br>3,767.61) |
| Cardiomyopathy and myocarditis | 6,185.07<br>(4,552.00 to<br>7,647.72)   | 3,514.00<br>(1,837.95 to<br>6,116.68)   | 2,597.06<br>(1,412.40 to<br>4,483.73)  | 4,057.42<br>(2,088.91 to<br>7,009.62)   | 229.67<br>(169.62 to<br>281.52)     | 142.40<br>(84.08 to<br>231.47)      | 108.77<br>(66.15 to<br>173.37)    | 160.16<br>(94.75 to<br>251.94)      |
| Myocarditis                    | 83.85<br>(47.68 to<br>112.15)           | 55.62<br>(33.62 to<br>81.92)            | 55.71<br>(34.93 to<br>83.87)           | 54.15<br>(32.32 to<br>79.90)            | 3.30<br>(2.26 to<br>4.38)           | 3.13<br>(2.14 to<br>4.93)           | 3.39<br>(2.25 to<br>5.57)         | 2.88<br>(1.98 to<br>4.35)           |

| Estonia                                                       |                                                            |                                                            |                                                            |                                                            |                                                      |                                                      |                                                      |                                                      |
|---------------------------------------------------------------|------------------------------------------------------------|------------------------------------------------------------|------------------------------------------------------------|------------------------------------------------------------|------------------------------------------------------|------------------------------------------------------|------------------------------------------------------|------------------------------------------------------|
| Cause                                                         | YLLs (actual counts)                                       |                                                            |                                                            |                                                            | Deaths (actual counts)                               |                                                      |                                                      |                                                      |
|                                                               | 2016                                                       | 2040 Forecast                                              | 2040 Better Scenario                                       | 2040 Worse Scenario                                        | 2016                                                 | 2040 Forecast                                        | 2040 Better Scenario                                 | 2040 Worse Scenario                                  |
| Alcoholic cardiomyopathy                                      | 2,839.53<br>(1,341.64 to<br>3,818.54)                      | 1,548.45<br>(669.32 to<br>2,462.64)                        | 1,109.37<br>(471.63 to<br>1,819.52)                        | 1,853.96<br>(783.24 to<br>2,890.86)                        | 100.65<br>(45.18 to<br>136.26)                       | 59.18<br>(25.10 to<br>90.87)                         | 43.34<br>(18.26 to<br>68.61)                         | 69.85<br>(29.60 to<br>105.79)                        |
| Other cardiomyopathy                                          | 3,261.70<br>(2,581.97 to<br>4,408.11)                      | 1,909.93<br>(853.06 to<br>3,917.52)                        | 1,431.98<br>(678.58 to<br>2,697.34)                        | 2,149.31<br>(915.95 to<br>4,207.17)                        | 125.72<br>(100.67 to<br>165.09)                      | 80.09<br>(40.23 to<br>145.11)                        | 62.03<br>(32.10 to<br>106.21)                        | 87.43<br>(42.58 to<br>157.82)                        |
| Atrial fibrillation and flutter                               | 1,264.28<br>(919.81 to<br>1,726.44)                        | 1,519.07<br>(1,044.33 to<br>2,180.85)                      | 1,411.40<br>(958.68 to<br>2,045.60)                        | 1,534.29<br>(1,057.71 to<br>2,205.92)                      | 139.76<br>(101.01 to<br>187.87)                      | 194.44<br>(133.87 to<br>280.70)                      | 189.02<br>(128.71 to<br>275.25)                      | 188.53<br>(128.08 to<br>272.88)                      |
| Aortic aneurysm                                               | 1,507.97<br>(1,258.89 to<br>1,786.99)                      | 1,061.87<br>(706.23 to<br>1,612.83)                        | 949.65<br>(637.71 to<br>1,453.78)                          | 1,148.46<br>(762.39 to<br>1,728.72)                        | 88.75<br>(75.33 to<br>105.00)                        | 74.40<br>(53.99 to<br>105.00)                        | 71.33<br>(50.97 to<br>99.01)                         | 75.46<br>(53.83 to<br>105.02)                        |
| Peripheral artery disease                                     | 216.11<br>(63.29 to<br>323.82)                             | 193.94<br>(50.86 to<br>341.92)                             | 193.51<br>(51.08 to<br>343.22)                             | 202.61<br>(52.54 to<br>358.47)                             | 20.05<br>(5.27 to<br>31.01)                          | 22.24<br>(5.65 to<br>39.82)                          | 23.58<br>(6.14 to<br>41.75)                          | 21.92<br>(5.48 to<br>39.04)                          |
| Endocarditis                                                  | 520.07<br>(395.56 to<br>710.81)                            | 475.13<br>(276.60 to<br>804.41)                            | 454.86<br>(265.54 to<br>779.45)                            | 501.63<br>(287.84 to<br>863.65)                            | 21.37<br>(16.11 to<br>29.29)                         | 22.76<br>(14.65 to<br>35.97)                         | 22.69<br>(14.34 to<br>37.08)                         | 23.15<br>(14.80 to<br>37.08)                         |
| Other cardiovascular and circulatory diseases                 | 3,429.62<br>(2,882.44 to<br>4,060.21)                      | 2,150.19<br>(1,316.14 to<br>3,468.00)                      | 1,660.34<br>(1,048.83 to<br>2,697.51)                      | 2,409.49<br>(1,455.29 to<br>4,018.02)                      | 222.06<br>(185.13 to<br>264.11)                      | 165.55<br>(110.17 to<br>250.06)                      | 137.97<br>(93.87 to<br>207.17)                       | 172.64<br>(113.56 to<br>258.68)                      |
| <b>Chronic respiratory diseases</b>                           | <b>4,077.50</b><br><b>(3,575.65 to</b><br><b>4,577.50)</b> | <b>3,809.83</b><br><b>(2,451.95 to</b><br><b>5,787.39)</b> | <b>2,866.65</b><br><b>(1,920.72 to</b><br><b>4,281.37)</b> | <b>5,016.34</b><br><b>(3,105.61 to</b><br><b>7,919.88)</b> | <b>264.67</b><br><b>(234.73 to</b><br><b>293.69)</b> | <b>296.80</b><br><b>(201.93 to</b><br><b>428.74)</b> | <b>228.11</b><br><b>(164.15 to</b><br><b>319.41)</b> | <b>375.55</b><br><b>(247.97 to</b><br><b>558.38)</b> |
| Chronic obstructive pulmonary disease                         | 3,185.01<br>(2,761.13 to<br>3,603.07)                      | 3,096.80<br>(1,857.92 to<br>4,956.58)                      | 2,112.99<br>(1,285.21 to<br>3,327.52)                      | 4,290.67<br>(2,456.16 to<br>7,065.23)                      | 216.04<br>(190.79 to<br>241.17)                      | 251.38<br>(159.66 to<br>379.27)                      | 179.55<br>(118.22 to<br>270.80)                      | 330.45<br>(203.43 to<br>511.97)                      |
| Pneumoconiosis                                                | 9.27<br>(7.71 to<br>11.08)                                 | 8.92<br>(6.65 to<br>11.77)                                 | 9.64<br>(6.92 to<br>13.19)                                 | 8.70<br>(6.58 to<br>11.41)                                 | 0.63<br>(0.53 to<br>0.74)                            | 0.78<br>(0.57 to<br>1.23)                            | 0.87<br>(0.63 to<br>1.23)                            | 0.75<br>(0.54 to<br>1.03)                            |
| Silicosis                                                     | 0.78<br>(0.51 to<br>1.16)                                  | 0.37<br>(0.16 to<br>0.78)                                  | 0.27<br>(0.12 to<br>0.56)                                  | 0.37<br>(0.15 to<br>0.80)                                  | 0.05<br>(0.03 to<br>0.07)                            | 0.03<br>(0.01 to<br>0.05)                            | 0.02<br>(0.01 to<br>0.04)                            | 0.03<br>(0.01 to<br>0.06)                            |
| Asbestosis                                                    | 2.46<br>(1.98 to<br>3.01)                                  | 3.60<br>(2.44 to<br>5.17)                                  | 4.36<br>(2.89 to<br>6.37)                                  | 3.28<br>(2.25 to<br>4.57)                                  | 0.11<br>(0.09 to<br>0.13)                            | 0.19<br>(0.14 to<br>0.27)                            | 0.23<br>(0.16 to<br>0.33)                            | 0.17<br>(0.12 to<br>0.24)                            |
| Coal workers pneumoconiosis                                   | 0.08<br>(0.05 to<br>0.12)                                  | 0.07<br>(0.04 to<br>0.13)                                  | 0.07<br>(0.04 to<br>0.13)                                  | 0.07<br>(0.04 to<br>0.14)                                  | 0.00<br>(0.00 to<br>0.01)                            | 0.01<br>(0.00 to<br>0.01)                            | 0.01<br>(0.00 to<br>0.01)                            | 0.01<br>(0.00 to<br>0.01)                            |
| Other pneumoconiosis                                          | 5.95<br>(4.89 to<br>7.36)                                  | 4.88<br>(3.26 to<br>7.06)                                  | 4.94<br>(3.26 to<br>7.37)                                  | 4.98<br>(3.40 to<br>7.20)                                  | 0.47<br>(0.40 to<br>0.56)                            | 0.56<br>(0.37 to<br>0.82)                            | 0.60<br>(0.39 to<br>0.90)                            | 0.55<br>(0.36 to<br>0.81)                            |
| Asthma                                                        | 548.73<br>(457.59 to<br>655.31)                            | 251.93<br>(109.44 to<br>512.06)                            | 169.54<br>(78.05 to<br>339.84)                             | 306.24<br>(131.46 to<br>611.71)                            | 32.22<br>(26.70 to<br>37.97)                         | 18.35<br>(8.42 to<br>35.44)                          | 13.14<br>(6.42 to<br>24.75)                          | 21.18<br>(9.48 to<br>41.95)                          |
| Interstitial lung disease and pulmonary sarcoidosis           | 270.95<br>(193.14 to<br>360.10)                            | 392.76<br>(260.87 to<br>573.62)                            | 514.54<br>(352.28 to<br>720.62)                            | 350.68<br>(233.02 to<br>501.32)                            | 13.06<br>(9.57 to<br>17.65)                          | 22.88<br>(16.08 to<br>32.42)                         | 30.94<br>(22.67 to<br>42.26)                         | 19.90<br>(13.89 to<br>27.91)                         |
| Other chronic respiratory diseases                            | 63.52<br>(28.56 to<br>92.96)                               | 59.42<br>(20.93 to<br>109.52)                              | 60.05<br>(20.90 to<br>110.81)                              | 60.05<br>(20.75 to<br>110.76)                              | 2.72<br>(1.05 to<br>4.14)                            | 3.40<br>(1.10 to<br>6.23)                            | 3.61<br>(1.16 to<br>6.55)                            | 3.26<br>(1.03 to<br>6.01)                            |
| <b>Cirrhosis and other chronic liver diseases</b>             | <b>7,735.58</b><br><b>(6,607.29 to</b><br><b>8,943.09)</b> | <b>4,981.71</b><br><b>(3,348.58 to</b><br><b>6,757.47)</b> | <b>3,798.22</b><br><b>(2,540.41 to</b><br><b>5,306.21)</b> | <b>5,541.74</b><br><b>(3,747.18 to</b><br><b>7,494.72)</b> | <b>261.80</b><br><b>(226.51 to</b><br><b>298.69)</b> | <b>192.87</b><br><b>(142.46 to</b><br><b>247.24)</b> | <b>151.12</b><br><b>(110.60 to</b><br><b>197.12)</b> | <b>210.48</b><br><b>(156.24 to</b><br><b>268.49)</b> |
| Cirrhosis and other chronic liver diseases due to hepatitis B | 1,507.07<br>(1,232.89 to<br>1,821.80)                      | 869.54<br>(568.28 to<br>1,228.34)                          | 776.64<br>(509.72 to<br>1,104.67)                          | 873.24<br>(575.06 to<br>1,228.04)                          | 50.26<br>(41.52 to<br>60.48)                         | 33.53<br>(23.87 to<br>45.33)                         | 30.54<br>(21.59 to<br>41.16)                         | 33.11<br>(23.83 to<br>44.15)                         |
| Cirrhosis and other chronic liver diseases due to hepatitis C | 1,793.88<br>(1,480.20 to<br>2,143.47)                      | 1,088.21<br>(716.22 to<br>1,546.27)                        | 962.17<br>(627.33 to<br>1,392.94)                          | 1,097.21<br>(719.52 to<br>1,567.49)                        | 59.28<br>(49.49 to<br>70.32)                         | 40.82<br>(28.87 to<br>55.03)                         | 36.70<br>(25.88 to<br>50.43)                         | 40.57<br>(28.91 to<br>54.84)                         |

|                                                                |                                                            |                                                            |                                                            |                                                            |                                                      |                                                      |                                                      |                                                      |
|----------------------------------------------------------------|------------------------------------------------------------|------------------------------------------------------------|------------------------------------------------------------|------------------------------------------------------------|------------------------------------------------------|------------------------------------------------------|------------------------------------------------------|------------------------------------------------------|
| Cirrhosis and other chronic liver diseases due to alcohol use  | 2,991.27<br>(2,487.59 to<br>3,506.16)                      | 2,220.73<br>(1,461.50 to<br>3,079.25)                      | 1,346.15<br>(872.35 to<br>1,898.48)                        | 2,759.49<br>(1,822.04 to<br>3,776.40)                      | 102.97<br>(86.76 to<br>119.05)                       | 86.03<br>(62.62 to<br>113.21)                        | 54.32<br>(38.94 to<br>71.75)                         | 104.54<br>(76.17 to<br>136.33)                       |
| Cirrhosis and other chronic liver diseases due to other causes | 1,443.36<br>(1,198.89 to<br>1,698.20)                      | 803.23<br>(548.28 to<br>1,109.07)                          | 713.26<br>(480.53 to<br>985.90)                            | 811.80<br>(543.48 to<br>1,120.74)                          | 49.28<br>(41.06 to<br>57.68)                         | 32.51<br>(24.08 to<br>42.44)                         | 29.56<br>(21.70 to<br>38.39)                         | 32.25<br>(23.65 to<br>42.26)                         |
| <b>Digestive diseases</b>                                      | <b>5,355.01</b><br><b>(4,304.77 to</b><br><b>6,472.79)</b> | <b>5,122.22</b><br><b>(3,596.66 to</b><br><b>7,251.20)</b> | <b>4,496.09</b><br><b>(3,220.89 to</b><br><b>6,291.80)</b> | <b>5,232.89</b><br><b>(3,598.68 to</b><br><b>7,521.42)</b> | <b>309.85</b><br><b>(239.77 to</b><br><b>365.00)</b> | <b>376.96</b><br><b>(268.13 to</b><br><b>484.02)</b> | <b>357.42</b><br><b>(264.59 to</b><br><b>448.45)</b> | <b>366.68</b><br><b>(261.36 to</b><br><b>471.78)</b> |
| Peptic ulcer disease                                           | 1,138.02<br>(948.04 to<br>1,503.10)                        | 526.29<br>(364.11 to<br>768.99)                            | 404.99<br>(288.10 to<br>574.13)                            | 571.24<br>(392.03 to<br>846.03)                            | 59.58<br>(50.23 to<br>72.50)                         | 35.89<br>(26.25 to<br>48.23)                         | 29.15<br>(22.16 to<br>37.68)                         | 36.94<br>(27.09 to<br>50.22)                         |

| Estonia                                    |                                       |                                       |                                       |                                       |                                |                                    |                                    |                                    |
|--------------------------------------------|---------------------------------------|---------------------------------------|---------------------------------------|---------------------------------------|--------------------------------|------------------------------------|------------------------------------|------------------------------------|
| Cause                                      | YLLs (actual counts)                  |                                       |                                       |                                       | Deaths (actual counts)         |                                    |                                    |                                    |
|                                            | 2016                                  | 2040 Forecast                         | 2040 Better Scenario                  | 2040 Worse Scenario                   | 2016                           | 2040 Forecast                      | 2040 Better Scenario               | 2040 Worse Scenario                |
| Gastritis and duodenitis                   | 54.18<br>(38.08 to 71.11)             | 40.10<br>(26.15 to 58.13)             | 35.08<br>(22.66 to 50.84)             | 39.61<br>(24.50 to 57.98)             | 2.79<br>(1.80 to 3.54)         | 2.68<br>(1.68 to 3.63)             | 2.48<br>(1.59 to 3.31)             | 2.53<br>(1.60 to 3.45)             |
| Appendicitis                               | 46.63<br>(33.30 to 91.28)             | 34.52<br>(22.05 to 68.22)             | 27.92<br>(18.38 to 54.14)             | 35.06<br>(22.33 to 66.66)             | 2.16<br>(1.64 to 3.71)         | 2.06<br>(1.46 to 3.50)             | 1.75<br>(1.27 to 2.94)             | 2.02<br>(1.43 to 3.48)             |
| Paralytic ileus and intestinal obstruction | 411.44<br>(292.06 to 532.52)          | 421.77<br>(283.36 to 562.56)          | 440.30<br>(294.97 to 593.68)          | 398.45<br>(271.97 to 523.64)          | 23.15<br>(15.34 to 29.23)      | 31.72<br>(20.45 to 41.38)          | 34.88<br>(22.54 to 45.70)          | 28.81<br>(18.59 to 37.44)          |
| Inguinal, femoral, and abdominal hernia    | 77.85<br>(45.37 to 98.85)             | 53.62<br>(30.77 to 71.93)             | 50.32<br>(28.73 to 67.14)             | 51.73<br>(29.01 to 69.30)             | 5.30<br>(3.05 to 6.72)         | 4.64<br>(2.60 to 6.19)             | 4.59<br>(2.59 to 6.21)             | 4.31<br>(2.40 to 5.74)             |
| Inflammatory bowel disease                 | 186.92<br>(139.64 to 272.77)          | 183.76<br>(126.63 to 286.85)          | 185.22<br>(127.70 to 286.22)          | 177.25<br>(123.50 to 276.06)          | 8.97<br>(6.84 to 12.36)        | 10.92<br>(8.21 to 15.20)           | 11.52<br>(8.58 to 15.76)           | 10.20<br>(7.73 to 14.21)           |
| Vascular intestinal disorders              | 1,530.78<br>(1,078.08 to 1,862.88)    | 1,876.64<br>(1,295.66 to 2,335.33)    | 1,854.63<br>(1,284.10 to 2,312.27)    | 1,780.55<br>(1,237.84 to 2,196.54)    | 118.63<br>(81.82 to 143.12)    | 172.79<br>(111.87 to 209.79)       | 178.34<br>(117.24 to 217.83)       | 159.48<br>(101.81 to 194.78)       |
| Gallbladder and biliary diseases           | 284.07<br>(239.36 to 357.76)          | 383.75<br>(197.22 to 709.56)          | 287.48<br>(154.39 to 531.03)          | 437.70<br>(217.36 to 820.62)          | 20.50<br>(17.27 to 24.79)      | 34.52<br>(17.73 to 64.12)          | 27.68<br>(14.57 to 52.41)          | 37.64<br>(18.94 to 72.09)          |
| Pancreatitis                               | 1,213.94<br>(827.60 to 1,571.88)      | 1,238.72<br>(465.31 to 2,879.46)      | 859.46<br>(343.52 to 2,009.00)        | 1,390.41<br>(527.97 to 3,221.92)      | 46.06<br>(29.64 to 57.94)      | 55.21<br>(23.01 to 116.79)         | 39.83<br>(18.00 to 80.72)          | 60.08<br>(25.24 to 125.15)         |
| Other digestive diseases                   | 411.19<br>(279.27 to 517.93)          | 363.05<br>(247.81 to 475.27)          | 350.68<br>(242.50 to 464.45)          | 350.89<br>(241.03 to 461.87)          | 22.71<br>(16.62 to 27.70)      | 26.53<br>(19.16 to 32.56)          | 27.18<br>(20.05 to 33.55)          | 24.66<br>(17.74 to 30.31)          |
| Neurological disorders                     | 10,876.10<br>(9,131.71 to 12,812.01)  | 15,141.36<br>(12,004.26 to 19,652.14) | 15,372.98<br>(12,406.91 to 19,530.71) | 15,138.41<br>(11,736.39 to 20,119.74) | 996.22<br>(821.75 to 1,199.84) | 1,697.14<br>(1,304.70 to 2,245.80) | 1,819.28<br>(1,445.87 to 2,337.87) | 1,642.01<br>(1,201.17 to 2,263.43) |
| Alzheimer's disease and other dementias    | 7,149.41<br>(5,702.61 to 8,897.27)    | 10,849.02<br>(7,964.23 to 15,241.89)  | 11,107.02<br>(8,426.54 to 14,915.64)  | 10,917.42<br>(7,683.50 to 15,785.26)  | 804.53<br>(637.88 to 994.67)   | 1,424.75<br>(1,039.80 to 1,982.64) | 1,523.20<br>(1,153.15 to 2,025.86) | 1,388.90<br>(965.16 to 2,038.76)   |
| Parkinson's disease                        | 1,371.46<br>(986.85 to 1,795.12)      | 1,945.20<br>(1,432.40 to 2,524.88)    | 2,186.26<br>(1,592.59 to 2,839.59)    | 1,770.93<br>(1,277.67 to 2,333.95)    | 120.52<br>(88.22 to 158.37)    | 190.84<br>(140.49 to 251.21)       | 220.77<br>(164.04 to 289.51)       | 170.19<br>(121.76 to 225.94)       |
| Epilepsy                                   | 1,250.41<br>(1,026.84 to 1,545.24)    | 1,355.18<br>(606.72 to 2,638.09)      | 1,068.39<br>(497.70 to 2,069.37)      | 1,471.75<br>(652.61 to 2,858.76)      | 33.47<br>(27.75 to 40.93)      | 41.88<br>(21.18 to 76.39)          | 33.83<br>(17.95 to 60.19)          | 44.69<br>(22.48 to 81.45)          |
| Multiple sclerosis                         | 338.16<br>(225.17 to 436.46)          | 288.87<br>(158.41 to 439.14)          | 289.44<br>(159.19 to 440.28)          | 295.79<br>(161.74 to 458.32)          | 10.16<br>(6.97 to 12.86)       | 9.66<br>(5.80 to 14.05)            | 9.85<br>(5.95 to 14.11)            | 9.76<br>(5.82 to 14.32)            |
| Motor neuron disease                       | 146.09<br>(123.66 to 167.89)          | 146.83<br>(109.42 to 193.51)          | 148.90<br>(108.77 to 199.41)          | 142.23<br>(106.85 to 184.33)          | 6.16<br>(5.21 to 7.02)         | 6.85<br>(5.44 to 8.56)             | 7.08<br>(5.51 to 9.07)             | 6.53<br>(5.26 to 8.01)             |
| Other neurological disorders               | 620.57<br>(492.20 to 722.40)          | 556.26<br>(407.46 to 734.48)          | 572.97<br>(413.49 to 764.34)          | 540.29<br>(398.34 to 705.41)          | 21.39<br>(17.71 to 24.61)      | 23.16<br>(18.42 to 28.32)          | 24.56<br>(19.35 to 30.67)          | 21.93<br>(17.60 to 26.57)          |
| Mental disorders                           | 13,073.59<br>(10,641.70 to 15,844.06) | 12,899.60<br>(8,365.04 to 18,862.96)  | 13,068.02<br>(8,459.37 to 19,181.48)  | 13,072.72<br>(8,539.76 to 18,981.24)  | 338.83<br>(277.42 to 404.39)   | 367.07<br>(249.22 to 519.60)       | 371.44<br>(249.84 to 527.89)       | 370.28<br>(252.11 to 524.77)       |
| Alcohol use disorders                      | 8,502.64<br>(6,681.86 to 10,547.00)   | 8,209.06<br>(5,019.37 to 12,552.11)   | 7,714.72<br>(4,696.23 to 11,779.49)   | 8,544.08<br>(5,345.02 to 12,928.67)   | 244.36<br>(193.99 to 297.91)   | 253.18<br>(162.82 to 374.33)       | 240.05<br>(154.38 to 356.79)       | 261.63<br>(170.64 to 385.73)       |
| Drug use disorders                         | 4,568.32<br>(3,558.50 to 5,660.71)    | 4,689.34<br>(2,894.64 to 7,042.12)    | 5,351.97<br>(3,274.65 to 8,094.94)    | 4,527.47<br>(2,842.25 to 6,777.38)    | 94.42<br>(75.68 to 115.53)     | 113.86<br>(75.94 to 163.25)        | 131.36<br>(86.84 to 191.03)        | 108.63<br>(73.99 to 156.54)        |
| Opioid use disorders                       | 2,888.80<br>(1,157.43 to 3,849.86)    | 2,321.79<br>(1,036.47 to 3,788.64)    | 2,412.59<br>(1,064.06 to 3,995.33)    | 2,289.38<br>(1,018.37 to 3,748.01)    | 59.74<br>(29.24 to 77.40)      | 57.44<br>(31.82 to 86.88)          | 60.55<br>(33.44 to 92.28)          | 55.92<br>(30.49 to 84.25)          |

|                           |                                     |                                     |                                       |                                     |                              |                              |                              |                              |
|---------------------------|-------------------------------------|-------------------------------------|---------------------------------------|-------------------------------------|------------------------------|------------------------------|------------------------------|------------------------------|
|                           | 331.17<br>(131.35 to<br>551.72)     | -427.46<br>(202.95 to<br>698.47)    | 501.54<br>(240.65 to<br>838.60)       | 409.34<br>(200.31 to<br>688.29)     | 6.83<br>(3.06 to<br>10.76)   | 10.02<br>(5.21 to<br>15.70)  | 11.85<br>(6.25 to<br>18.36)  | 9.53<br>(5.05 to<br>15.03)   |
| Cocaine use disorders     |                                     |                                     |                                       |                                     |                              |                              |                              |                              |
|                           | 198.88<br>(98.16 to<br>401.03)      | 484.35<br>(223.84 to<br>849.41)     | 622.87<br>(289.59 to<br>1,066.46)     | 453.67<br>(217.73 to<br>787.48)     | 4.02<br>(2.19 to<br>7.59)    | 10.96<br>(5.50 to<br>18.68)  | 14.20<br>(7.35 to<br>23.75)  | 10.19<br>(5.22 to<br>16.76)  |
| Amphetamine use disorders |                                     |                                     |                                       |                                     |                              |                              |                              |                              |
|                           | 1,149.48<br>(748.67 to<br>2,286.64) | 1,455.73<br>(787.17 to<br>2,538.61) | 1,814.97<br>(1,028.00 to<br>3,023.85) | 1,375.08<br>(769.48 to<br>2,396.43) | 23.83<br>(16.44 to<br>43.25) | 35.44<br>(22.22 to<br>55.24) | 44.77<br>(28.88 to<br>68.54) | 33.00<br>(20.67 to<br>52.37) |
| Other drug use disorders  |                                     |                                     |                                       |                                     |                              |                              |                              |                              |
|                           | 2.63<br>(1.71 to<br>3.68)           | 1.20<br>(0.57 to<br>2.13)           | 1.33<br>(0.61 to<br>2.36)             | 1.18<br>(0.56 to<br>2.08)           | 0.05<br>(0.03 to<br>0.07)    | 0.02<br>(0.01 to<br>0.04)    | 0.03<br>(0.01 to<br>0.05)    | 0.02<br>(0.01 to<br>0.04)    |
| Eating disorders          |                                     |                                     |                                       |                                     |                              |                              |                              |                              |



| Estonia                                                    |                                           |                                            |                                           |                                            |                                     |                                     |                                     |                                     |
|------------------------------------------------------------|-------------------------------------------|--------------------------------------------|-------------------------------------------|--------------------------------------------|-------------------------------------|-------------------------------------|-------------------------------------|-------------------------------------|
| Cause                                                      | YLLs (actual counts)                      |                                            |                                           |                                            | Deaths (actual counts)              |                                     |                                     |                                     |
|                                                            | 2016                                      | 2040 Forecast                              | 2040 Better Scenario                      | 2040 Worse Scenario                        | 2016                                | 2040 Forecast                       | 2040 Better Scenario                | 2040 Worse Scenario                 |
| <b>Diabetes, urogenital, blood, and endocrine diseases</b> | <b>7,698.77</b><br>(6,814.66 to 8,493.00) | <b>7,930.86</b><br>(5,460.34 to 11,215.92) | <b>6,739.11</b><br>(4,764.04 to 9,496.94) | <b>8,652.75</b><br>(6,044.12 to 12,383.14) | <b>478.44</b><br>(423.79 to 521.75) | <b>629.12</b><br>(470.53 to 844.33) | <b>564.81</b><br>(425.55 to 751.24) | <b>657.03</b><br>(493.27 to 903.24) |
| Diabetes mellitus                                          | 2,536.06<br>(2,218.20 to 2,860.81)        | 2,027.49<br>(1,072.01 to 3,619.19)         | 1,482.10<br>(822.36 to 2,589.28)          | 2,360.67<br>(1,218.24 to 4,329.23)         | 135.00<br>(117.88 to 151.75)        | 130.75<br>(79.43 to 209.70)         | 102.71<br>(65.06 to 160.69)         | 142.68<br>(83.94 to 233.18)         |
| Acute glomerulonephritis                                   | 5.75<br>(5.05 to 6.48)                    | 4.39<br>(2.65 to 6.64)                     | 3.85<br>(2.32 to 5.79)                    | 4.49<br>(2.68 to 6.80)                     | 0.13<br>(0.11 to 0.14)              | 0.12<br>(0.08 to 0.18)              | 0.11<br>(0.07 to 0.17)              | 0.12<br>(0.08 to 0.18)              |
| Chronic kidney disease                                     | 3,231.22<br>(2,833.99 to 3,588.33)        | 3,198.49<br>(1,748.80 to 5,566.29)         | 2,672.42<br>(1,506.72 to 4,536.71)        | 3,694.94<br>(1,926.53 to 6,474.01)         | 226.36<br>(200.14 to 249.25)        | 286.09<br>(158.59 to 492.96)        | 251.16<br>(146.55 to 420.86)        | 318.31<br>(170.52 to 554.60)        |
| Chronic kidney disease due to diabetes mellitus            | 1,176.28<br>(1,017.61 to 1,317.61)        | 1,277.69<br>(672.20 to 2,281.45)           | 1,062.97<br>(583.52 to 1,906.03)          | 1,495.20<br>(745.36 to 2,770.96)           | 73.14<br>(63.95 to 82.46)           | 97.74<br>(53.74 to 176.81)          | 84.97<br>(48.15 to 148.36)          | 110.36<br>(57.73 to 198.70)         |
| Chronic kidney disease due to hypertension                 | 418.56<br>(346.37 to 490.60)              | 516.92<br>(282.27 to 871.28)               | 462.19<br>(259.43 to 778.36)              | 575.06<br>(299.47 to 1,003.54)             | 42.27<br>(34.77 to 50.34)           | 65.45<br>(35.66 to 111.33)          | 61.19<br>(34.39 to 102.03)          | 70.36<br>(36.32 to 123.35)          |
| Chronic kidney disease due to glomerulonephritis           | 897.48<br>(777.26 to 1,021.08)            | 695.02<br>(377.24 to 1,239.65)             | 558.41<br>(314.85 to 970.05)              | 807.49<br>(421.55 to 1,464.02)             | 57.38<br>(49.02 to 66.59)           | 57.74<br>(32.03 to 101.45)          | 48.35<br>(27.64 to 81.25)           | 67.07<br>(35.19 to 115.58)          |
| Chronic kidney disease due to other and unspecified causes | 738.91<br>(627.02 to 855.82)              | 708.85<br>(389.13 to 1,265.14)             | 588.85<br>(330.88 to 1,027.81)            | 817.19<br>(425.73 to 1,490.11)             | 53.58<br>(44.69 to 63.15)           | 65.16<br>(34.90 to 114.71)          | 56.65<br>(32.08 to 96.71)           | 72.52<br>(38.24 to 132.58)          |
| Urinary diseases and male infertility                      | 1,253.84<br>(1,098.64 to 1,399.79)        | 1,941.76<br>(1,537.10 to 2,399.26)         | 1,797.23<br>(1,428.34 to 2,246.47)        | 1,861.92<br>(1,472.47 to 2,292.62)         | 88.72<br>(77.75 to 99.05)           | 173.29<br>(142.28 to 207.48)        | 169.16<br>(139.56 to 201.89)        | 159.75<br>(129.43 to 190.91)        |
| Urinary tract infections                                   | 1,084.03<br>(945.38 to 1,219.86)          | 1,738.47<br>(1,361.81 to 2,171.51)         | 1,617.73<br>(1,284.34 to 2,034.15)        | 1,667.94<br>(1,313.11 to 2,077.75)         | 74.86<br>(65.11 to 84.36)           | 152.93<br>(123.63 to 185.73)        | 150.19<br>(121.71 to 181.55)        | 141.09<br>(113.78 to 171.10)        |
| Urolithiasis                                               | 69.89<br>(50.88 to 118.55)                | 103.24<br>(64.72 to 177.64)                | 89.78<br>(56.85 to 156.03)                | 99.85<br>(74.68 to 174.68)                 | 5.71<br>(4.00 to 10.08)             | 9.85<br>(5.95 to 17.39)             | 9.01<br>(5.50 to 16.44)             | 9.18<br>(5.61 to 16.90)             |
| Other urinary diseases                                     | 99.93<br>(50.38 to 134.57)                | 100.05<br>(47.39 to 154.17)                | 89.72<br>(43.59 to 135.87)                | 94.13<br>(45.76 to 141.02)                 | 8.15<br>(4.05 to 11.49)             | 10.51<br>(4.77 to 16.84)            | 9.97<br>(4.54 to 15.69)             | 9.47<br>(4.38 to 15.03)             |
| Gynecological diseases                                     | 2.77<br>(1.50 to 3.83)                    | 1.32<br>(0.60 to 2.37)                     | 1.02<br>(0.48 to 1.79)                    | 1.37<br>(0.64 to 2.48)                     | 0.13<br>(0.06 to 0.18)              | 0.08<br>(0.03 to 0.13)              | 0.07<br>(0.03 to 0.10)              | 0.08<br>(0.03 to 0.13)              |
| Uterine fibroids                                           | 2.14<br>(1.14 to 2.98)                    | 0.96<br>(0.41 to 1.82)                     | 0.75<br>(0.33 to 1.36)                    | 0.99<br>(0.42 to 1.86)                     | 0.09<br>(0.04 to 0.13)              | 0.05<br>(0.02 to 0.08)              | 0.04<br>(0.02 to 0.07)              | 0.05<br>(0.02 to 0.08)              |
| Polycystic ovarian syndrome                                | 0.20<br>(0.09 to 0.42)                    | 0.05<br>(0.01 to 0.14)                     | 0.03<br>(0.01 to 0.08)                    | 0.05<br>(0.01 to 0.16)                     | 0.01<br>(0.00 to 0.01)              | 0.00<br>(0.00 to 0.00)              | 0.00<br>(0.00 to 0.00)              | 0.00<br>(0.00 to 0.00)              |
| Endometriosis                                              | 0.02<br>(0.01 to 0.05)                    | 0.02<br>(0.00 to 0.05)                     | 0.01<br>(0.00 to 0.03)                    | 0.02<br>(0.00 to 0.05)                     | 0.00<br>(0.00 to 0.00)              | 0.00<br>(0.00 to 0.00)              | 0.00<br>(0.00 to 0.00)              | 0.00<br>(0.00 to 0.00)              |
| Genital prolapse                                           | 0.10<br>(0.03 to 0.17)                    | 0.04<br>(0.01 to 0.09)                     | 0.03<br>(0.01 to 0.07)                    | 0.04<br>(0.01 to 0.09)                     | 0.01<br>(0.00 to 0.01)              | 0.00<br>(0.00 to 0.01)              | 0.00<br>(0.00 to 0.00)              | 0.00<br>(0.00 to 0.01)              |
| Other gynecological diseases                               | 0.30<br>(0.16 to 0.44)                    | 0.26<br>(0.12 to 0.45)                     | 0.19<br>(0.09 to 0.32)                    | 0.27<br>(0.12 to 0.45)                     | 0.02<br>(0.01 to 0.04)              | 0.03<br>(0.01 to 0.05)              | 0.02<br>(0.01 to 0.04)              | 0.03<br>(0.01 to 0.05)              |
| Hemoglobinopathies and hemolytic anemias                   | 120.35<br>(95.35 to 154.96)               | 71.97<br>(52.03 to 96.16)                  | 63.05<br>(45.29 to 83.31)                 | 71.14<br>(51.21 to 94.08)                  | 6.22<br>(4.62 to 7.60)              | 5.47<br>(3.81 to 6.76)              | 5.09<br>(3.56 to 6.26)              | 5.16<br>(3.54 to 6.48)              |
| Thalassemias                                               | 7.67<br>(5.63 to 9.81)                    | 2.50<br>(1.18 to 4.45)                     | 2.40<br>(1.15 to 4.27)                    | 2.57<br>(1.21 to 4.58)                     | 0.10<br>(0.07 to 0.12)              | 0.03<br>(0.02 to 0.06)              | 0.03<br>(0.02 to 0.05)              | 0.03<br>(0.02 to 0.06)              |

|                                                   |                                 |                                 |                                   |                                 |                              |                              |                              |                              |
|---------------------------------------------------|---------------------------------|---------------------------------|-----------------------------------|---------------------------------|------------------------------|------------------------------|------------------------------|------------------------------|
|                                                   | 14.89<br>(11.71 to<br>22.22)    | 7.22<br>(3.94 to<br>12.67)      | 5.91<br>(3.22 to<br>10.57)        | 7.57<br>(4.16 to<br>13.09)      | 0.30<br>(0.24 to<br>0.45)    | 0.17<br>(0.10 to<br>0.30)    | 0.14<br>(0.08 to<br>0.25)    | 0.18<br>(0.10 to<br>0.30)    |
| Sickle cell disorders                             |                                 |                                 |                                   |                                 |                              |                              |                              |                              |
|                                                   | 17.07<br>(13.65 to<br>22.14)    | 10.82<br>(6.78 to<br>16.42)     | 8.68<br>(5.44 to<br>13.17)        | 11.16<br>(6.89 to<br>16.97)     | 0.48<br>(0.39 to<br>0.61)    | 0.41<br>(0.27 to<br>0.58)    | 0.33<br>(0.22 to<br>0.48)    | 0.41<br>(0.27 to<br>0.59)    |
| G6PD deficiency                                   |                                 |                                 |                                   |                                 |                              |                              |                              |                              |
|                                                   | 80.73<br>(61.06 to<br>103.18)   | 51.43<br>(36.61 to<br>65.69)    | 46.07<br>(32.94 to<br>59.08)      | 49.83<br>(35.63 to<br>63.55)    | 5.33<br>(3.86 to<br>6.46)    | 4.86<br>(3.31 to<br>6.03)    | 4.58<br>(3.13 to<br>5.66)    | 4.54<br>(3.07 to<br>5.65)    |
| Other hemoglobinopathies and hemolytic anemias    |                                 |                                 |                                   |                                 |                              |                              |                              |                              |
|                                                   | 548.77<br>(367.71 to<br>648.81) | 685.44<br>(403.84 to<br>943.94) | 719.44<br>(421.10 to<br>1,007.52) | 658.21<br>(389.80 to<br>897.70) | 21.88<br>(13.69 to<br>25.87) | 33.31<br>(20.31 to<br>42.45) | 36.51<br>(22.53 to<br>46.86) | 30.92<br>(18.55 to<br>38.99) |
| Endocrine, metabolic, blood, and immune disorders |                                 |                                 |                                   |                                 |                              |                              |                              |                              |

| Estonia                                       |                                           |                                         |                                         |                                         |                                  |                                  |                                  |                                  |
|-----------------------------------------------|-------------------------------------------|-----------------------------------------|-----------------------------------------|-----------------------------------------|----------------------------------|----------------------------------|----------------------------------|----------------------------------|
| Cause                                         | YLLs (actual counts)                      |                                         |                                         |                                         | Deaths (actual counts)           |                                  |                                  |                                  |
|                                               | 2016                                      | 2040 Forecast                           | 2040 Better Scenario                    | 2040 Worse Scenario                     | 2016                             | 2040 Forecast                    | 2040 Better Scenario             | 2040 Worse Scenario              |
| <b>Musculoskeletal disorders</b>              | <b>589.15</b><br>(475.57 to 717.89)       | <b>579.44</b><br>(406.60 to 788.28)     | <b>505.88</b><br>(358.31 to 682.75)     | <b>590.23</b><br>(415.38 to 812.98)     | <b>27.86</b><br>(22.35 to 33.16) | <b>33.14</b><br>(25.60 to 42.58) | <b>29.71</b><br>(23.23 to 37.02) | <b>32.90</b><br>(25.31 to 42.56) |
| Rheumatoid arthritis                          | 241.74<br>(180.01 to 312.58)              | 239.85<br>(151.14 to 361.15)            | 178.76<br>(116.44 to 262.40)            | 255.69<br>(162.46 to 384.78)            | 12.79<br>(9.63 to 16.27)         | 14.77<br>(9.97 to 21.31)         | 11.34<br>(7.87 to 15.89)         | 15.33<br>(10.44 to 22.32)        |
| Other musculoskeletal disorders               | 347.41<br>(278.35 to 438.50)              | 339.59<br>(237.30 to 455.10)            | 327.12<br>(230.22 to 440.68)            | 334.54<br>(235.25 to 445.37)            | 15.06<br>(11.69 to 17.98)        | 18.37<br>(13.84 to 22.76)        | 18.37<br>(13.97 to 23.01)        | 17.57<br>(13.18 to 21.80)        |
| <b>Other non-communicable diseases</b>        | <b>1,859.01</b><br>(1,404.31 to 2,423.55) | <b>1,299.37</b><br>(774.94 to 1,942.52) | <b>1,133.33</b><br>(668.85 to 1,662.16) | <b>1,347.56</b><br>(807.29 to 2,038.88) | <b>35.87</b><br>(24.98 to 44.31) | <b>42.81</b><br>(22.78 to 60.07) | <b>41.17</b><br>(21.11 to 58.10) | <b>41.87</b><br>(22.33 to 58.32) |
| Congenital birth defects                      | 1,531.61<br>(1,148.97 to 2,157.73)        | 786.46<br>(436.50 to 1,324.58)          | 637.78<br>(355.77 to 1,039.75)          | 845.72<br>(455.77 to 1,423.24)          | 22.32<br>(17.60 to 29.83)        | 12.99<br>(7.79 to 20.01)         | 10.91<br>(6.71 to 16.55)         | 13.74<br>(8.11 to 21.26)         |
| Neural tube defects                           | 11.61<br>(6.61 to 18.29)                  | 3.12<br>(1.34 to 6.58)                  | 2.13<br>(0.92 to 4.54)                  | 3.49<br>(1.47 to 7.58)                  | 0.16<br>(0.10 to 0.24)           | 0.05<br>(0.02 to 0.09)           | 0.03<br>(0.02 to 0.07)           | 0.05<br>(0.03 to 0.11)           |
| Congenital heart anomalies                    | 642.42<br>(456.97 to 1,102.14)            | 223.32<br>(104.37 to 480.93)            | 147.72<br>(68.77 to 325.09)             | 252.03<br>(113.19 to 516.35)            | 9.44<br>(7.13 to 15.08)          | 3.66<br>(1.95 to 6.98)           | 2.45<br>(1.30 to 4.65)           | 4.08<br>(2.14 to 7.67)           |
| Orofacial clefts                              | 0.85<br>(0.31 to 1.82)                    | 0.26<br>(0.06 to 0.74)                  | 0.15<br>(0.03 to 0.44)                  | 0.30<br>(0.07 to 0.88)                  | 0.01<br>(0.00 to 0.02)           | 0.00<br>(0.00 to 0.01)           | 0.00<br>(0.00 to 0.01)           | 0.00<br>(0.00 to 0.01)           |
| Down syndrome                                 | 217.93<br>(148.31 to 277.90)              | 209.41<br>(128.33 to 311.62)            | 215.91<br>(131.30 to 325.59)            | 207.69<br>(129.57 to 305.61)            | 4.25<br>(2.77 to 5.12)           | 4.62<br>(2.71 to 6.71)           | 4.81<br>(2.88 to 7.06)           | 4.54<br>(2.72 to 6.49)           |
| Other chromosomal abnormalities               | 304.88<br>(49.17 to 339.81)               | 159.73<br>(39.22 to 339.69)             | 133.56<br>(33.13 to 284.61)             | 171.25<br>(42.11 to 362.30)             | 2.46<br>(0.61 to 4.04)           | 1.93<br>(0.51 to 4.05)           | 1.62<br>(0.43 to 3.38)           | 2.07<br>(0.53 to 4.30)           |
| Congenital musculoskeletal and limb anomalies | 34.63<br>(13.62 to 55.97)                 | 13.33<br>(4.64 to 30.60)                | 9.42<br>(3.35 to 20.95)                 | 14.90<br>(5.07 to 35.60)                | 0.41<br>(0.17 to 0.66)           | 0.16<br>(0.06 to 0.37)           | 0.12<br>(0.04 to 0.25)           | 0.18<br>(0.06 to 0.43)           |
| Urogenital congenital anomalies               | 10.95<br>(5.59 to 17.29)                  | 4.74<br>(2.40 to 8.56)                  | 3.64<br>(1.84 to 6.64)                  | 5.12<br>(2.58 to 9.35)                  | 0.17<br>(0.10 to 0.25)           | 0.09<br>(0.05 to 0.15)           | 0.07<br>(0.04 to 0.12)           | 0.09<br>(0.05 to 0.16)           |
| Digestive congenital anomalies                | 29.01<br>(13.42 to 48.52)                 | 13.50<br>(4.95 to 30.49)                | 9.27<br>(3.29 to 21.22)                 | 15.18<br>(5.38 to 35.40)                | 0.38<br>(0.20 to 0.61)           | 0.18<br>(0.08 to 0.38)           | 0.13<br>(0.05 to 0.26)           | 0.20<br>(0.08 to 0.44)           |
| Other congenital birth defects                | 379.33<br>(261.42 to 621.14)              | 159.05<br>(71.79 to 315.63)             | 115.98<br>(51.23 to 243.80)             | 175.77<br>(76.52 to 360.01)             | 5.04<br>(3.67 to 7.84)           | 2.30<br>(1.18 to 4.22)           | 1.69<br>(0.86 to 3.25)           | 2.52<br>(1.26 to 4.72)           |
| Skin and subcutaneous diseases                | 255.81<br>(87.10 to 354.51)               | 484.76<br>(172.95 to 718.87)            | 472.88<br>(167.86 to 705.87)            | 471.21<br>(165.61 to 684.61)            | 12.72<br>(4.13 to 17.92)         | 29.50<br>(10.19 to 41.82)        | 30.00<br>(10.20 to 43.17)        | 27.77<br>(9.41 to 39.45)         |
| Cellulitis                                    | 116.93<br>(39.03 to 160.61)               | 248.51<br>(87.78 to 366.99)             | 246.61<br>(88.04 to 368.49)             | 241.39<br>(85.25 to 354.48)             | 5.06<br>(1.73 to 6.95)           | 12.42<br>(4.63 to 17.43)         | 12.67<br>(4.84 to 17.92)         | 11.79<br>(4.35 to 16.45)         |
| Pyoderma                                      | 118.37<br>(35.09 to 172.98)               | 217.25<br>(63.49 to 336.68)             | 209.03<br>(60.50 to 330.88)             | 211.18<br>(61.52 to 325.91)             | 6.49<br>(1.71 to 9.80)           | 15.45<br>(4.12 to 23.93)         | 15.76<br>(4.17 to 24.69)         | 14.46<br>(3.89 to 22.31)         |
| Decubitus ulcer                               | 13.67<br>(4.71 to 19.40)                  | 12.94<br>(4.42 to 19.97)                | 11.56<br>(3.99 to 17.53)                | 12.64<br>(4.29 to 19.87)                | 0.87<br>(0.28 to 1.26)           | 1.24<br>(0.41 to 1.97)           | 1.18<br>(0.38 to 1.81)           | 1.16<br>(0.37 to 1.85)           |
| Other skin and subcutaneous diseases          | 6.84<br>(2.66 to 9.68)                    | 6.07<br>(2.29 to 9.27)                  | 5.67<br>(2.13 to 8.65)                  | 5.99<br>(2.21 to 9.21)                  | 0.29<br>(0.11 to 0.41)           | 0.38<br>(0.14 to 0.57)           | 0.38<br>(0.13 to 0.57)           | 0.36<br>(0.13 to 0.54)           |
| Sudden infant death syndrome                  | 71.59<br>(39.36 to 118.14)                | 28.15<br>(5.12 to 73.41)                | 22.68<br>(4.05 to 61.20)                | 30.63<br>(5.63 to 78.84)                | 0.83<br>(0.46 to 1.37)           | 0.33<br>(0.06 to 0.85)           | 0.26<br>(0.05 to 0.71)           | 0.36<br>(0.07 to 0.91)           |

|                          |                                          |                                         |                                         |                                          |                                   |                                   |                                 |                                   |
|--------------------------|------------------------------------------|-----------------------------------------|-----------------------------------------|------------------------------------------|-----------------------------------|-----------------------------------|---------------------------------|-----------------------------------|
| Injuries                 | 29,120.97<br>(24,320.63 to<br>36,726.91) | 20,127.54<br>(9,386.58 to<br>38,079.35) | 16,273.30<br>(7,924.30 to<br>29,546.89) | 23,726.04<br>(10,813.89 to<br>45,243.08) | 856.27<br>(722.99 to<br>1,075.44) | 731.50<br>(423.49 to<br>1,190.39) | 622.21<br>(378.28 to<br>958.12) | 807.77<br>(452.45 to<br>1,325.55) |
| Transport injuries       | 4,357.06<br>(3,646.63 to<br>5,185.04)    | 1,912.96<br>(674.80 to<br>4,595.65)     | 1,520.13<br>(563.71 to<br>3,599.36)     | 4,262.72<br>(1,456.18 to<br>10,562.82)   | 111.64<br>(94.96 to<br>130.26)    | 60.14<br>(26.85 to<br>127.63)     | 49.39<br>(23.43 to<br>100.32)   | 118.46<br>(49.25 to<br>259.57)    |
| Road injuries            | 3,800.62<br>(3,178.65 to<br>4,529.48)    | 1,510.28<br>(540.15 to<br>3,539.88)     | 1,239.81<br>(466.91 to<br>2,897.46)     | 3,807.57<br>(1,319.86 to<br>9,364.53)    | 98.12<br>(83.38 to<br>114.19)     | 48.57<br>(22.00 to<br>100.81)     | 41.11<br>(19.92 to<br>82.97)    | 105.72<br>(44.58 to<br>232.77)    |
| Pedestrian road injuries | 1,032.92<br>(737.76 to<br>1,324.32)      | 303.11<br>(130.13 to<br>661.99)         | 205.20<br>(95.71 to<br>423.08)          | 651.82<br>(260.81 to<br>1,428.39)        | 33.01<br>(25.71 to<br>41.66)      | 12.71<br>(6.82 to<br>24.01)       | 9.02<br>(5.10 to<br>16.21)      | 24.43<br>(11.74 to<br>46.36)      |

| Estonia                                         |                                                     |                                                   |                                                   |                                                   |                                            |                                            |                                            |                                            |
|-------------------------------------------------|-----------------------------------------------------|---------------------------------------------------|---------------------------------------------------|---------------------------------------------------|--------------------------------------------|--------------------------------------------|--------------------------------------------|--------------------------------------------|
| Cause                                           | YLLs (actual counts)                                |                                                   |                                                   |                                                   | Deaths (actual counts)                     |                                            |                                            |                                            |
|                                                 | 2016                                                | 2040 Forecast                                     | 2040 Better Scenario                              | 2040 Worse Scenario                               | 2016                                       | 2040 Forecast                              | 2040 Better Scenario                       | 2040 Worse Scenario                        |
| Cyclist road injuries                           | 290.17<br>(182.58 to 376.31)                        | 197.48<br>(74.55 to 491.08)                       | 176.85<br>(69.52 to 430.88)                       | 377.15<br>(133.23 to 959.81)                      | 9.04<br>(6.14 to 11.52)                    | 8.04<br>(3.53 to 17.42)                    | 7.47<br>(3.42 to 15.78)                    | 13.28<br>(5.54 to 30.86)                   |
| Motorcyclist road injuries                      | 219.66<br>(119.33 to 303.96)                        | 168.49<br>(39.86 to 499.02)                       | 146.92<br>(36.59 to 433.84)                       | 303.65<br>(71.32 to 892.87)                       | 4.40<br>(2.49 to 6.05)                     | 3.94<br>(1.21 to 10.94)                    | 3.55<br>(1.15 to 9.76)                     | 6.42<br>(1.81 to 18.16)                    |
| Motor vehicle road injuries                     | 2,237.70<br>(1,802.79 to 2,776.51)                  | 831.90<br>(278.37 to 2,000.99)                    | 702.83<br>(249.63 to 1,649.03)                    | 2,449.50<br>(786.58 to 5,975.32)                  | 51.19<br>(41.88 to 63.36)                  | 23.56<br>(10.12 to 48.55)                  | 20.77<br>(9.61 to 42.04)                   | 60.89<br>(24.08 to 133.43)                 |
| Other road injuries                             | 20.17<br>(11.91 to 29.59)                           | 9.30<br>(2.88 to 24.56)                           | 8.01<br>(2.64 to 20.34)                           | 25.45<br>(7.40 to 69.18)                          | 0.48<br>(0.35 to 0.73)                     | 0.52<br>(0.12 to 0.80)                     | 0.30<br>(0.12 to 0.72)                     | 0.70<br>(0.24 to 1.80)                     |
| Other transport injuries                        | 556.44<br>(442.29 to 688.22)                        | 402.68<br>(125.98 to 1,047.24)                    | 280.32<br>(90.78 to 700.50)                       | 455.15<br>(134.77 to 1,162.29)                    | 13.52<br>(10.94 to 16.55)                  | 11.56<br>(4.24 to 27.57)                   | 8.27<br>(3.26 to 18.22)                    | 12.73<br>(4.67 to 29.10)                   |
| <b>Unintentional injuries</b>                   | <b>12,871.41</b><br><b>(10,731.84 to 16,475.06)</b> | <b>8,924.54</b><br><b>(5,271.73 to 14,059.71)</b> | <b>7,665.67</b><br><b>(4,643.75 to 11,772.81)</b> | <b>9,186.16</b><br><b>(5,333.40 to 14,633.45)</b> | <b>417.37</b><br><b>(353.45 to 527.24)</b> | <b>370.90</b><br><b>(262.97 to 521.26)</b> | <b>334.11</b><br><b>(243.38 to 454.76)</b> | <b>367.19</b><br><b>(255.76 to 525.06)</b> |
| Falls                                           | 3,258.57<br>(2,610.66 to 4,717.12)                  | 2,631.41<br>(1,701.15 to 3,814.96)                | 2,438.37<br>(1,597.46 to 3,493.11)                | 2,607.15<br>(1,719.09 to 3,856.18)                | 130.69<br>(109.87 to 173.84)               | 146.64<br>(114.32 to 188.97)               | 142.53<br>(112.50 to 178.65)               | 139.01<br>(107.81 to 180.02)               |
| Drowning                                        | 2,093.33<br>(1,753.97 to 2,443.39)                  | 1,308.77<br>(584.54 to 2,744.88)                  | 1,068.54<br>(491.13 to 2,195.22)                  | 1,399.73<br>(608.99 to 2,966.29)                  | 54.46<br>(46.23 to 62.87)                  | 40.75<br>(20.95 to 75.70)                  | 34.23<br>(18.47 to 61.65)                  | 42.39<br>(21.60 to 81.05)                  |
| Fire, heat, and hot substances                  | 1,848.14<br>(1,529.65 to 2,510.18)                  | 1,164.96<br>(561.80 to 2,289.41)                  | 892.22<br>(449.91 to 1,686.60)                    | 1,246.23<br>(597.40 to 2,454.74)                  | 62.16<br>(51.84 to 85.63)                  | 48.63<br>(27.59 to 85.50)                  | 39.03<br>(23.26 to 64.69)                  | 50.15<br>(27.92 to 87.09)                  |
| Poisonings                                      | 273.13<br>(200.39 to 544.52)                        | 118.87<br>(46.46 to 278.95)                       | 84.38<br>(35.17 to 192.33)                        | 131.15<br>(51.19 to 311.65)                       | 7.50<br>(5.67 to 8.40)                     | 3.93<br>(1.86 to 8.40)                     | 2.90<br>(1.45 to 6.24)                     | 4.20<br>(1.93 to 9.33)                     |
| Exposure to mechanical forces                   | 754.89<br>(556.29 to 995.61)                        | 382.13<br>(212.52 to 641.36)                      | 314.17<br>(175.60 to 519.83)                      | 400.13<br>(218.39 to 660.37)                      | 19.34<br>(14.76 to 25.47)                  | 11.61<br>(7.35 to 17.75)                   | 9.86<br>(6.31 to 14.88)                    | 11.80<br>(7.28 to 18.05)                   |
| Unintentional firearm injuries                  | 96.40<br>(77.65 to 122.71)                          | 49.20<br>(27.65 to 82.27)                         | 42.60<br>(24.50 to 69.93)                         | 50.79<br>(28.28 to 82.93)                         | 2.70<br>(2.24 to 3.38)                     | 1.81<br>(1.24 to 2.61)                     | 1.67<br>(1.18 to 2.35)                     | 1.79<br>(1.23 to 2.55)                     |
| Unintentional suffocation                       | 63.59<br>(37.85 to 96.70)                           | 37.06<br>(16.18 to 78.14)                         | 31.33<br>(13.70 to 65.90)                         | 39.39<br>(16.94 to 85.01)                         | 1.02<br>(0.69 to 1.48)                     | 0.65<br>(0.33 to 1.20)                     | 0.56<br>(0.30 to 1.06)                     | 0.68<br>(0.35 to 1.26)                     |
| Other exposure to mechanical forces             | 594.89<br>(413.08 to 833.71)                        | 295.87<br>(157.11 to 505.77)                      | 240.24<br>(126.76 to 408.58)                      | 309.95<br>(159.76 to 529.77)                      | 15.61<br>(11.16 to 21.47)                  | 9.14<br>(5.47 to 14.23)                    | 7.64<br>(4.59 to 11.91)                    | 9.33<br>(5.47 to 14.82)                    |
| Adverse effects of medical treatment            | 380.92<br>(263.98 to 490.08)                        | 311.83<br>(182.95 to 453.10)                      | 292.20<br>(168.21 to 424.00)                      | 309.01<br>(187.53 to 445.64)                      | 16.60<br>(10.98 to 20.22)                  | 16.74<br>(10.31 to 22.03)                  | 16.34<br>(9.89 to 21.59)                   | 16.02<br>(9.94 to 21.20)                   |
| Animal contact                                  | 57.20<br>(37.35 to 74.55)                           | 44.93<br>(24.90 to 69.01)                         | 39.95<br>(22.03 to 62.14)                         | 45.43<br>(25.02 to 69.74)                         | 1.97<br>(1.30 to 2.51)                     | 1.86<br>(1.17 to 2.67)                     | 1.69<br>(1.06 to 2.43)                     | 1.83<br>(1.15 to 2.63)                     |
| Venomous animal contact                         | 30.92<br>(16.65 to 42.69)                           | 24.52<br>(11.83 to 40.86)                         | 22.44<br>(10.63 to 37.54)                         | 24.65<br>(12.02 to 40.43)                         | 0.97<br>(0.50 to 1.31)                     | 0.91<br>(0.45 to 1.43)                     | 0.85<br>(0.44 to 1.33)                     | 0.90<br>(0.46 to 1.41)                     |
| Non-venomous animal contact                     | 26.29<br>(17.01 to 38.19)                           | 20.41<br>(11.90 to 31.49)                         | 17.51<br>(10.09 to 26.78)                         | 20.78<br>(11.83 to 32.63)                         | 1.00<br>(0.69 to 1.40)                     | 0.95<br>(0.62 to 1.34)                     | 0.85<br>(0.56 to 1.19)                     | 0.94<br>(0.61 to 1.34)                     |
| Foreign body                                    | 1,900.66<br>(1,438.38 to 3,129.63)                  | 1,242.62<br>(694.10 to 2,156.41)                  | 1,164.59<br>(643.06 to 2,007.29)                  | 1,256.22<br>(695.44 to 2,242.77)                  | 50.74<br>(38.04 to 84.68)                  | 38.15<br>(22.51 to 68.13)                  | 36.46<br>(21.50 to 63.15)                  | 37.85<br>(22.21 to 67.65)                  |
| Pulmonary aspiration and foreign body in airway | 1,855.67<br>(1,401.63 to 3,077.69)                  | 1,199.39<br>(665.42 to 2,104.01)                  | 1,118.30<br>(614.10 to 1,944.06)                  | 1,214.18<br>(669.56 to 2,196.90)                  | 49.41<br>(36.82 to 83.40)                  | 36.61<br>(21.40 to 66.64)                  | 34.76<br>(20.29 to 61.54)                  | 36.40<br>(21.21 to 65.94)                  |

|                                             |                                                              |                                                             |                                                             |                                                              |                                                      |                                                      |                                                     |                                                      |
|---------------------------------------------|--------------------------------------------------------------|-------------------------------------------------------------|-------------------------------------------------------------|--------------------------------------------------------------|------------------------------------------------------|------------------------------------------------------|-----------------------------------------------------|------------------------------------------------------|
|                                             | 44.99<br>(34.53 to<br>69.73)                                 | 43.22<br>(24.51 to<br>71.44)                                | 46.29<br>(26.36 to<br>76.67)                                | 42.04<br>(23.73 to<br>70.31)                                 | 1.33<br>(1.04 to<br>1.98)                            | 1.54<br>(1.01 to<br>2.29)                            | 1.70<br>(1.12 to<br>2.52)                           | 1.45<br>(0.95 to<br>2.19)                            |
| Foreign body in other body part             |                                                              |                                                             |                                                             |                                                              |                                                      |                                                      |                                                     |                                                      |
|                                             | 2,075.25<br>(1,439.04 to<br>3,987.76)                        | 1,637.33<br>(855.16 to<br>3,301.87)                         | 1,317.66<br>(684.79 to<br>2,665.99)                         | 1,701.07<br>(886.96 to<br>3,531.05)                          | 67.97<br>(48.32 to<br>127.62)                        | 60.15<br>(34.12 to<br>113.67)                        | 49.43<br>(28.37 to<br>93.43)                        | 61.30<br>(34.58 to<br>118.63)                        |
| Environmental heat and cold exposure        |                                                              |                                                             |                                                             |                                                              |                                                      |                                                      |                                                     |                                                      |
|                                             | 229.32<br>(187.20 to<br>281.33)                              | 81.69<br>(40.84 to<br>153.43)                               | 53.59<br>(26.87 to<br>95.24)                                | 90.04<br>(44.05 to<br>163.15)                                | 5.92<br>(4.86 to<br>7.21)                            | 2.45<br>(1.35 to<br>4.26)                            | 1.65<br>(0.96 to<br>2.71)                           | 2.64<br>(1.42 to<br>4.50)                            |
| Other unintentional injuries                |                                                              |                                                             |                                                             |                                                              |                                                      |                                                      |                                                     |                                                      |
| <b>Self-harm and interpersonal violence</b> | <b>11,886.80</b><br><b>(9,428.67 to</b><br><b>17,866.16)</b> | <b>9,287.64</b><br><b>(2,887.87 to</b><br><b>21,271.77)</b> | <b>7,085.07</b><br><b>(2,368.89 to</b><br><b>15,666.46)</b> | <b>10,274.77</b><br><b>(3,203.58 to</b><br><b>24,602.67)</b> | <b>327.14</b><br><b>(259.33 to</b><br><b>484.99)</b> | <b>300.41</b><br><b>(116.87 to</b><br><b>611.97)</b> | <b>238.66</b><br><b>(98.28 to</b><br><b>485.36)</b> | <b>322.07</b><br><b>(121.80 to</b><br><b>683.23)</b> |

| Estonia                                                                             |                                                |                                                 |                                                 |                                                 |                                                |                                                |                                                |                                                |
|-------------------------------------------------------------------------------------|------------------------------------------------|-------------------------------------------------|-------------------------------------------------|-------------------------------------------------|------------------------------------------------|------------------------------------------------|------------------------------------------------|------------------------------------------------|
| Cause                                                                               | YLLs (actual counts)                           |                                                 |                                                 |                                                 | Deaths (actual counts)                         |                                                |                                                |                                                |
|                                                                                     | 2016                                           | 2040 Forecast                                   | 2040 Better Scenario                            | 2040 Worse Scenario                             | 2016                                           | 2040 Forecast                                  | 2040 Better Scenario                           | 2040 Worse Scenario                            |
| Self-harm                                                                           | 9,024.24<br>(6,991.81 to<br>13,851.09)         | 8,055.30<br>(2,326.21 to<br>18,878.69)          | 6,085.56<br>(1,882.33 to<br>13,990.83)          | 8,951.26<br>(2,580.06 to<br>21,717.64)          | 255.58<br>(200.19 to<br>381.84)                | 263.31<br>(95.88 to<br>559.40)                 | 207.71<br>(82.78 to<br>431.43)                 | 283.18<br>(102.81 to<br>621.57)                |
| Self-harm by firearm                                                                | 763.54<br>(433.43 to<br>1,274.59)              | 464.38<br>(116.63 to<br>1,219.49)               | 325.50<br>(88.19 to<br>833.02)                  | 526.70<br>(129.36 to<br>1,371.22)               | 20.78<br>(12.44 to<br>33.22)                   | 14.43<br>(4.50 to<br>33.70)                    | 10.48<br>(3.46 to<br>24.36)                    | 15.92<br>(4.76 to<br>37.45)                    |
| Self-harm by other specified means                                                  | 8,260.70<br>(6,417.83 to<br>12,683.78)         | 7,590.93<br>(2,214.23 to<br>18,099.74)          | 5,760.05<br>(1,786.18 to<br>13,382.72)          | 8,424.57<br>(2,435.17 to<br>20,347.37)          | 234.79<br>(184.46 to<br>350.50)                | 248.88<br>(91.76 to<br>522.21)                 | 197.23<br>(79.41 to<br>409.56)                 | 267.26<br>(97.64 to<br>585.95)                 |
| Interpersonal violence                                                              | 2,862.56<br>(2,006.03 to<br>5,016.06)          | 1,232.34<br>(508.01 to<br>2,827.56)             | 999.51<br>(410.96 to<br>2,329.31)               | 1,323.50<br>(542.38 to<br>3,093.65)             | 71.56<br>(50.27 to<br>127.01)                  | 37.10<br>(17.27 to<br>80.68)                   | 30.95<br>(15.06 to<br>66.66)                   | 38.89<br>(18.37 to<br>86.68)                   |
| Physical violence by firearm                                                        | 285.78<br>(136.18 to<br>825.94)                | 90.30<br>(28.20 to<br>287.53)                   | 70.59<br>(23.28 to<br>210.13)                   | 97.57<br>(31.44 to<br>304.26)                   | 5.98<br>(2.84 to<br>16.81)                     | 2.06<br>(0.73 to<br>6.51)                      | 1.63<br>(0.64 to<br>4.78)                      | 2.20<br>(0.79 to<br>6.67)                      |
| Physical violence by sharp object                                                   | 1,105.62<br>(629.44 to<br>1,853.16)            | 425.88<br>(163.81 to<br>929.67)                 | 348.12<br>(134.53 to<br>752.56)                 | 451.04<br>(178.00 to<br>1,008.99)               | 26.97<br>(15.42 to<br>45.54)                   | 12.20<br>(5.47 to<br>25.15)                    | 10.24<br>(4.73 to<br>20.94)                    | 12.64<br>(5.61 to<br>26.55)                    |
| Physical violence by other means                                                    | 1,471.17<br>(971.98 to<br>2,976.52)            | 716.16<br>(271.45 to<br>1,870.44)               | 580.81<br>(223.12 to<br>1,476.98)               | 774.89<br>(288.75 to<br>2,006.88)               | 38.62<br>(26.47 to<br>78.68)                   | 22.83<br>(10.00 to<br>55.66)                   | 19.07<br>(8.72 to<br>45.66)                    | 24.04<br>(10.59 to<br>60.76)                   |
| <b>Forces of nature, conflict and terrorism, and executions and police conflict</b> | <b>5.70</b><br><b>(5.00 to</b><br><b>6.41)</b> | <b>2.41</b><br><b>(0.00 to</b><br><b>21.76)</b> | <b>2.42</b><br><b>(0.00 to</b><br><b>21.79)</b> | <b>2.39</b><br><b>(0.00 to</b><br><b>21.73)</b> | <b>0.13</b><br><b>(0.11 to</b><br><b>0.14)</b> | <b>0.05</b><br><b>(0.00 to</b><br><b>0.51)</b> | <b>0.05</b><br><b>(0.00 to</b><br><b>0.54)</b> | <b>0.05</b><br><b>(0.00 to</b><br><b>0.48)</b> |
| Exposure to forces of nature                                                        | 0.00<br>(0.00 to<br>0.00)                      | 1.39<br>(0.00 to<br>21.52)                      | 1.41<br>(0.00 to<br>21.69)                      | 1.37<br>(0.00 to<br>21.61)                      | 0.00<br>(0.00 to<br>0.00)                      | 0.03<br>(0.00 to<br>0.44)                      | 0.03<br>(0.00 to<br>0.45)                      | 0.03<br>(0.00 to<br>0.44)                      |
| Conflict and terrorism                                                              | 0.00<br>(0.00 to<br>0.00)                      | 1.02<br>(0.00 to<br>11.66)                      | 1.02<br>(0.00 to<br>11.69)                      | 1.02<br>(0.00 to<br>11.62)                      | 0.00<br>(0.00 to<br>0.00)                      | 0.02<br>(0.00 to<br>0.24)                      | 0.02<br>(0.00 to<br>0.25)                      | 0.02<br>(0.00 to<br>0.24)                      |
| Executions and police conflict                                                      | 5.70<br>(5.00 to<br>6.41)                      | 0.00<br>(0.00 to<br>0.00)                       | 0.00<br>(0.00 to<br>0.00)                       | 0.00<br>(0.00 to<br>0.00)                       | 0.13<br>(0.11 to<br>0.14)                      | 0.00<br>(0.00 to<br>0.00)                      | 0.00<br>(0.00 to<br>0.00)                      | 0.00<br>(0.00 to<br>0.00)                      |

| Latvia                                                            |                                          |                                          |                                          |                                          |                                       |                                       |                                       |                                       |
|-------------------------------------------------------------------|------------------------------------------|------------------------------------------|------------------------------------------|------------------------------------------|---------------------------------------|---------------------------------------|---------------------------------------|---------------------------------------|
| Cause                                                             | YLLs (actual counts)                     |                                          |                                          |                                          | Deaths (actual counts)                |                                       |                                       |                                       |
|                                                                   | 2016                                     | 2040 Forecast                            | 2040 Better Scenario                     | 2040 Worse Scenario                      | 2016                                  | 2040 Forecast                         | 2040 Better Scenario                  | 2040 Worse Scenario                   |
| All causes                                                        | 493,620.39<br>(440,747.43 to 543,824.64) | 326,925.06<br>(232,163.93 to 467,658.79) | 246,296.60<br>(178,470.62 to 350,359.27) | 393,659.96<br>(277,636.27 to 569,214.02) | 28,427.74<br>(25,653.56 to 31,112.65) | 22,495.89<br>(18,165.95 to 28,766.99) | 17,957.14<br>(14,573.02 to 22,873.86) | 25,750.91<br>(20,717.04 to 32,659.52) |
| Communicable, maternal, neonatal, and nutritional diseases        | 20,971.16<br>(18,579.84 to 23,525.14)    | 11,373.71<br>(7,784.77 to 16,913.17)     | 8,041.78<br>(5,789.35 to 11,927.06)      | 14,507.16<br>(9,900.28 to 22,031.68)     | 606.51<br>(546.43 to 668.28)          | 443.47<br>(328.43 to 611.15)          | 335.78<br>(263.20 to 449.25)          | 525.71<br>(385.42 to 750.93)          |
| HIV/AIDS and tuberculosis                                         | 6,696.52<br>(6,136.24 to 7,365.84)       | 2,571.97<br>(1,872.79 to 3,456.20)       | 1,830.75<br>(1,273.53 to 2,435.85)       | 3,990.90<br>(3,153.86 to 5,043.70)       | 169.26<br>(154.81 to 186.89)          | 67.12<br>(46.59 to 93.73)             | 44.22<br>(30.34 to 59.78)             | 100.96<br>(77.75 to 131.33)           |
| Tuberculosis                                                      | 1,713.37<br>(1,400.37 to 2,128.79)       | 694.13<br>(299.63 to 1,452.56)           | 288.93<br>(139.57 to 581.59)             | 863.55<br>(378.49 to 1,816.71)           | 60.42<br>(50.01 to 74.14)             | 28.27<br>(14.43 to 53.26)             | 12.53<br>(7.06 to 21.86)              | 34.19<br>(17.09 to 65.20)             |
| HIV/AIDS                                                          | 4,983.15<br>(4,529.61 to 5,493.47)       | 1,877.85<br>(1,336.39 to 2,469.74)       | 1,541.82<br>(1,020.10 to 2,111.47)       | 3,127.35<br>(2,445.79 to 3,709.22)       | 108.83<br>(99.49 to 119.34)           | 38.85<br>(25.83 to 53.21)             | 31.69<br>(19.27 to 45.26)             | 66.76<br>(50.26 to 80.25)             |
| Diarrhea, lower respiratory, and other common infectious diseases | 9,811.76<br>(8,400.16 to 11,362.56)      | 7,014.12<br>(4,067.45 to 11,648.64)      | 4,752.90<br>(2,983.33 to 7,588.55)       | 8,641.33<br>(4,826.61 to 15,232.39)      | 366.78<br>(317.14 to 417.83)          | 339.82<br>(237.35 to 494.70)          | 258.52<br>(191.34 to 359.56)          | 388.85<br>(260.29 to 597.18)          |
| Diarrheal diseases                                                | 118.01<br>(93.99 to 151.90)              | 243.53<br>(54.21 to 770.55)              | 281.79<br>(87.43 to 755.25)              | 236.67<br>(50.41 to 808.11)              | 4.15<br>(3.58 to 4.83)                | 15.74<br>(4.05 to 44.68)              | 20.56<br>(7.08 to 51.50)              | 14.26<br>(3.39 to 48.23)              |
| Intestinal infectious diseases                                    | 1.70<br>(0.58 to 3.93)                   | 0.91<br>(0.28 to 2.29)                   | 0.94<br>(0.29 to 2.38)                   | 0.90<br>(0.28 to 2.28)                   | 0.05<br>(0.02 to 0.10)                | 0.03<br>(0.01 to 0.07)                | 0.03<br>(0.01 to 0.07)                | 0.03<br>(0.01 to 0.07)                |
| Typhoid fever                                                     | 0.47<br>(0.15 to 1.19)                   | 0.40<br>(0.11 to 1.02)                   | 0.53<br>(0.16 to 1.31)                   | 0.39<br>(0.12 to 0.93)                   | 0.01<br>(0.00 to 0.03)                | 0.01<br>(0.00 to 0.03)                | 0.02<br>(0.01 to 0.04)                | 0.01<br>(0.00 to 0.02)                |
| Paratyphoid fever                                                 | 1.14<br>(0.33 to 2.88)                   | 0.46<br>(0.12 to 1.28)                   | 0.36<br>(0.09 to 1.01)                   | 0.47<br>(0.12 to 1.29)                   | 0.03<br>(0.01 to 0.08)                | 0.02<br>(0.00 to 0.04)                | 0.01<br>(0.00 to 0.04)                | 0.02<br>(0.00 to 0.04)                |
| Other intestinal infectious diseases                              | 0.08<br>(0.03 to 0.17)                   | 0.05<br>(0.02 to 0.10)                   | 0.04<br>(0.01 to 0.10)                   | 0.04<br>(0.02 to 0.10)                   | 0.00<br>(0.00 to 0.01)                | 0.00<br>(0.00 to 0.01)                | 0.00<br>(0.00 to 0.01)                | 0.00<br>(0.00 to 0.01)                |
| Lower respiratory infections                                      | 8,484.68<br>(7,192.60 to 9,974.28)       | 5,918.69<br>(3,249.78 to 10,432.94)      | 3,686.20<br>(2,156.35 to 6,354.69)       | 7,537.07<br>(3,968.84 to 13,811.68)      | 327.99<br>(281.95 to 376.79)          | 294.13<br>(197.91 to 445.94)          | 208.96<br>(146.78 to 306.21)          | 344.48<br>(221.02 to 551.23)          |
| Upper respiratory infections                                      | 7.87<br>(3.85 to 13.46)                  | 4.32<br>(1.55 to 9.44)                   | 2.59<br>(0.95 to 5.86)                   | 4.48<br>(1.61 to 10.49)                  | 0.33<br>(0.16 to 0.60)                | 0.25<br>(0.08 to 0.55)                | 0.16<br>(0.05 to 0.37)                | 0.25<br>(0.08 to 0.58)                |
| Otitis media                                                      | 8.72<br>(5.49 to 14.17)                  | 1.05<br>(0.33 to 2.86)                   | 1.18<br>(0.36 to 3.35)                   | 0.96<br>(0.31 to 2.67)                   | 0.59<br>(0.36 to 0.99)                | 0.07<br>(0.02 to 0.21)                | 0.08<br>(0.03 to 0.24)                | 0.07<br>(0.02 to 0.19)                |
| Meningitis                                                        | 373.10<br>(301.51 to 529.69)             | 141.68<br>(86.64 to 233.67)              | 105.99<br>(64.77 to 174.82)              | 152.44<br>(89.13 to 256.35)              | 10.42<br>(8.68 to 14.95)              | 4.69<br>(3.22 to 7.12)                | 3.73<br>(2.63 to 5.88)                | 4.75<br>(3.31 to 7.28)                |
| Pneumococcal meningitis                                           | 27.03<br>(21.51 to 37.12)                | 13.86<br>(9.20 to 22.73)                 | 14.25<br>(9.36 to 23.89)                 | 13.74<br>(9.15 to 22.71)                 | 0.89<br>(0.71 to 1.20)                | 0.56<br>(0.41 to 0.84)                | 0.60<br>(0.44 to 0.91)                | 0.54<br>(0.40 to 0.82)                |
| H influenzae type B meningitis                                    | 28.95<br>(22.05 to 41.20)                | 33.70<br>(13.72 to 79.57)                | 27.00<br>(12.71 to 57.25)                | 41.75<br>(14.75 to 103.39)               | 0.73<br>(0.58 to 1.08)                | 0.70<br>(0.41 to 1.26)                | 0.65<br>(0.42 to 1.08)                | 0.77<br>(0.42 to 1.51)                |
| Meningococcal meningitis                                          | 144.89<br>(111.47 to 206.04)             | 37.66<br>(22.09 to 64.08)                | 26.33<br>(15.57 to 44.16)                | 38.85<br>(22.76 to 66.57)                | 3.46<br>(2.83 to 4.88)                | 1.26<br>(0.85 to 1.98)                | 0.93<br>(0.62 to 1.42)                | 1.26<br>(0.85 to 1.98)                |
| Other meningitis                                                  | 172.23<br>(139.47 to 254.47)             | 56.46<br>(33.01 to 96.99)                | 38.41<br>(22.57 to 67.03)                | 58.09<br>(34.19 to 101.19)               | 5.34<br>(4.36 to 7.82)                | 2.17<br>(1.41 to 3.45)                | 1.54<br>(1.03 to 2.45)                | 2.18<br>(1.42 to 3.49)                |
| Encephalitis                                                      | 794.76<br>(616.08 to 1,192.32)           | 637.32<br>(420.70 to 953.09)             | 624.69<br>(412.75 to 942.20)             | 627.09<br>(423.99 to 929.54)             | 22.66<br>(17.04 to 31.23)             | 23.38<br>(15.78 to 32.21)             | 23.77<br>(15.88 to 33.15)             | 22.46<br>(15.13 to 30.29)             |



|                |                           |                              |                              |                              |                           |                           |                           |                           |
|----------------|---------------------------|------------------------------|------------------------------|------------------------------|---------------------------|---------------------------|---------------------------|---------------------------|
| Diphtheria     | 1.03<br>(0.64 to<br>1.60) | 0.21<br>(0.09 to<br>0.44)    | 0.19<br>(0.08 to<br>0.43)    | 0.23<br>(0.10 to<br>0.48)    | 0.02<br>(0.01 to<br>0.04) | 0.00<br>(0.00 to<br>0.01) | 0.00<br>(0.00 to<br>0.01) | 0.01<br>(0.00 to<br>0.01) |
| Whooping cough | 1.75<br>(0.32 to<br>3.92) | 0.41<br>(0.04 to<br>1.57)    | 0.08<br>(0.02 to<br>0.22)    | 0.84<br>(0.05 to<br>3.32)    | 0.02<br>(0.00 to<br>0.05) | 0.01<br>(0.00 to<br>0.02) | 0.00<br>(0.00 to<br>0.00) | 0.01<br>(0.00 to<br>0.04) |
| Tetanus        | 0.85<br>(0.57 to<br>1.17) | 0.10<br>(0.06 to<br>0.18)    | 0.10<br>(0.05 to<br>0.19)    | 0.11<br>(0.06 to<br>0.18)    | 0.03<br>(0.02 to<br>0.04) | 0.00<br>(0.00 to<br>0.01) | 0.00<br>(0.00 to<br>0.01) | 0.00<br>(0.00 to<br>0.01) |
| Measles        | 5.66<br>(3.81 to<br>8.24) | 60.88<br>(0.45 to<br>393.78) | 45.05<br>(0.43 to<br>286.58) | 75.54<br>(0.49 to<br>477.29) | 0.08<br>(0.06 to<br>0.12) | 1.22<br>(0.01 to<br>8.97) | 0.93<br>(0.01 to<br>6.60) | 1.46<br>(0.01 to<br>9.74) |

| Latvia                                                |                                       |                                      |                                     |                                      |                                  |                                  |                                  |                                  |
|-------------------------------------------------------|---------------------------------------|--------------------------------------|-------------------------------------|--------------------------------------|----------------------------------|----------------------------------|----------------------------------|----------------------------------|
| Cause                                                 | YLLs (actual counts)                  |                                      |                                     |                                      | Deaths (actual counts)           |                                  |                                  |                                  |
|                                                       | 2016                                  | 2040 Forecast                        | 2040 Better Scenario                | 2040 Worse Scenario                  | 2016                             | 2040 Forecast                    | 2040 Better Scenario             | 2040 Worse Scenario              |
| Varicella and herpes zoster                           | 13.63<br>(5.21 to<br>21.45)           | 5.03<br>(2.15 to<br>9.22)            | 4.09<br>(1.83 to<br>7.45)           | 5.02<br>(2.07 to<br>9.48)            | 0.43<br>(0.24 to<br>0.75)        | 0.30<br>(0.17 to<br>0.68)        | 0.28<br>(0.16 to<br>0.64)        | 0.28<br>(0.16 to<br>0.62)        |
| <b>Neglected tropical diseases and malaria</b>        | <b>58.96</b><br>(25.14 to<br>84.21)   | <b>34.14</b><br>(17.01 to<br>51.82)  | <b>36.52</b><br>(18.43 to<br>55.70) | <b>33.60</b><br>(16.44 to<br>51.28)  | <b>1.36</b><br>(0.74 to<br>1.72) | <b>1.26</b><br>(0.75 to<br>1.62) | <b>1.47</b><br>(0.84 to<br>1.89) | <b>1.17</b><br>(0.69 to<br>1.50) |
| Malaria                                               | 0.00<br>(0.00 to<br>0.00)             | 0.00<br>(0.00 to<br>0.00)            | 0.00<br>(0.00 to<br>0.00)           | 0.00<br>(0.00 to<br>0.00)            | 0.00<br>(0.00 to<br>0.00)        | 0.00<br>(0.00 to<br>0.00)        | 0.00<br>(0.00 to<br>0.00)        | 0.00<br>(0.00 to<br>0.00)        |
| Chagas disease                                        | 0.00<br>(0.00 to<br>0.00)             | 0.00<br>(0.00 to<br>0.00)            | 0.00<br>(0.00 to<br>0.00)           | 0.00<br>(0.00 to<br>0.00)            | 0.00<br>(0.00 to<br>0.00)        | 0.00<br>(0.00 to<br>0.00)        | 0.00<br>(0.00 to<br>0.00)        | 0.00<br>(0.00 to<br>0.00)        |
| Leishmaniasis                                         | 0.00<br>(0.00 to<br>0.00)             | 0.00<br>(0.00 to<br>0.00)            | 0.00<br>(0.00 to<br>0.00)           | 0.00<br>(0.00 to<br>0.00)            | 0.00<br>(0.00 to<br>0.00)        | 0.00<br>(0.00 to<br>0.00)        | 0.00<br>(0.00 to<br>0.00)        | 0.00<br>(0.00 to<br>0.00)        |
| African trypanosomiasis                               | 0.00<br>(0.00 to<br>0.00)             | 0.00<br>(0.00 to<br>0.00)            | 0.00<br>(0.00 to<br>0.00)           | 0.00<br>(0.00 to<br>0.00)            | 0.00<br>(0.00 to<br>0.00)        | 0.00<br>(0.00 to<br>0.00)        | 0.00<br>(0.00 to<br>0.00)        | 0.00<br>(0.00 to<br>0.00)        |
| Schistosomiasis                                       | 0.00<br>(0.00 to<br>0.00)             | 0.00<br>(0.00 to<br>0.00)            | 0.00<br>(0.00 to<br>0.00)           | 0.00<br>(0.00 to<br>0.00)            | 0.00<br>(0.00 to<br>0.00)        | 0.00<br>(0.00 to<br>0.00)        | 0.00<br>(0.00 to<br>0.00)        | 0.00<br>(0.00 to<br>0.00)        |
| Cysticercosis                                         | 1.56<br>(1.23 to<br>1.93)             | 0.40<br>(0.28 to<br>0.58)            | 0.40<br>(0.26 to<br>0.58)           | 0.40<br>(0.27 to<br>0.56)            | 0.05<br>(0.04 to<br>0.06)        | 0.02<br>(0.01 to<br>0.02)        | 0.02<br>(0.01 to<br>0.02)        | 0.02<br>(0.01 to<br>0.02)        |
| Cystic echinococcosis                                 | 3.60<br>(2.94 to<br>4.25)             | 1.77<br>(1.27 to<br>2.46)            | 1.38<br>(0.98 to<br>1.91)           | 1.76<br>(1.28 to<br>2.42)            | 0.14<br>(0.12 to<br>0.17)        | 0.10<br>(0.08 to<br>0.13)        | 0.08<br>(0.06 to<br>0.10)        | 0.09<br>(0.07 to<br>0.12)        |
| Dengue                                                | 0.00<br>(0.00 to<br>0.00)             | 0.00<br>(0.00 to<br>0.00)            | 0.00<br>(0.00 to<br>0.00)           | 0.00<br>(0.00 to<br>0.00)            | 0.00<br>(0.00 to<br>0.00)        | 0.00<br>(0.00 to<br>0.00)        | 0.00<br>(0.00 to<br>0.00)        | 0.00<br>(0.00 to<br>0.00)        |
| Yellow fever                                          | 0.00<br>(0.00 to<br>0.00)             | 0.00<br>(0.00 to<br>0.00)            | 0.00<br>(0.00 to<br>0.00)           | 0.00<br>(0.00 to<br>0.00)            | 0.00<br>(0.00 to<br>0.00)        | 0.00<br>(0.00 to<br>0.00)        | 0.00<br>(0.00 to<br>0.00)        | 0.00<br>(0.00 to<br>0.00)        |
| Rabies                                                | 1.93<br>(1.37 to<br>2.71)             | 0.87<br>(0.60 to<br>1.26)            | 0.74<br>(0.52 to<br>1.07)           | 0.87<br>(0.60 to<br>1.26)            | 0.05<br>(0.04 to<br>0.07)        | 0.04<br>(0.03 to<br>0.05)        | 0.04<br>(0.03 to<br>0.05)        | 0.04<br>(0.03 to<br>0.05)        |
| Intestinal nematode infections                        | 0.11<br>(0.06 to<br>0.20)             | 0.08<br>(0.04 to<br>0.13)            | 0.08<br>(0.04 to<br>0.14)           | 0.08<br>(0.04 to<br>0.13)            | 0.00<br>(0.00 to<br>0.01)        | 0.00<br>(0.00 to<br>0.01)        | 0.00<br>(0.00 to<br>0.01)        | 0.00<br>(0.00 to<br>0.01)        |
| Other neglected tropical diseases                     | 51.74<br>(17.72 to<br>76.85)          | 31.01<br>(13.92 to<br>48.51)         | 33.92<br>(15.56 to<br>52.11)        | 30.49<br>(13.31 to<br>48.03)         | 1.10<br>(0.51 to<br>1.47)        | 1.10<br>(0.59 to<br>1.46)        | 1.33<br>(0.73 to<br>1.73)        | 1.02<br>(0.54 to<br>1.34)        |
| <b>Maternal disorders</b>                             | <b>123.71</b><br>(91.90 to<br>164.94) | <b>63.25</b><br>(30.62 to<br>108.67) | <b>49.23</b><br>(23.41 to<br>86.30) | <b>66.71</b><br>(31.72 to<br>115.25) | <b>2.37</b><br>(1.77 to<br>3.16) | <b>1.20</b><br>(0.59 to<br>2.06) | <b>0.94</b><br>(0.45 to<br>1.66) | <b>1.26</b><br>(0.61 to<br>2.18) |
| Maternal hemorrhage                                   | 23.07<br>(13.55 to<br>36.00)          | 12.82<br>(5.14 to<br>23.74)          | 10.07<br>(4.01 to<br>18.51)         | 13.59<br>(5.37 to<br>24.65)          | 0.45<br>(0.26 to<br>0.70)        | 0.25<br>(0.10 to<br>0.46)        | 0.20<br>(0.08 to<br>0.36)        | 0.26<br>(0.10 to<br>0.47)        |
| Maternal sepsis and other maternal infections         | 1.09<br>(0.47 to<br>2.08)             | 0.62<br>(0.22 to<br>1.37)            | 0.48<br>(0.16 to<br>1.06)           | 0.65<br>(0.23 to<br>1.41)            | 0.02<br>(0.01 to<br>0.04)        | 0.01<br>(0.00 to<br>0.03)        | 0.01<br>(0.00 to<br>0.02)        | 0.01<br>(0.00 to<br>0.03)        |
| Maternal hypertensive disorders                       | 8.33<br>(4.89 to<br>13.13)            | 4.72<br>(1.89 to<br>9.33)            | 3.61<br>(1.45 to<br>6.91)           | 4.99<br>(2.02 to<br>9.38)            | 0.15<br>(0.09 to<br>0.24)        | 0.08<br>(0.03 to<br>0.16)        | 0.06<br>(0.03 to<br>0.12)        | 0.09<br>(0.04 to<br>0.17)        |
| Maternal obstructed labor and uterine rupture         | 0.89<br>(0.33 to<br>1.81)             | 0.56<br>(0.16 to<br>1.33)            | 0.41<br>(0.12 to<br>0.98)           | 0.59<br>(0.17 to<br>1.40)            | 0.02<br>(0.01 to<br>0.04)        | 0.01<br>(0.00 to<br>0.03)        | 0.01<br>(0.00 to<br>0.02)        | 0.01<br>(0.00 to<br>0.03)        |
| Maternal abortion, miscarriage, and ectopic pregnancy | 24.08<br>(14.25 to<br>36.25)          | 15.52<br>(6.00 to<br>30.00)          | 11.90<br>(4.60 to<br>22.95)         | 16.38<br>(6.37 to<br>31.65)          | 0.48<br>(0.28 to<br>0.72)        | 0.31<br>(0.12 to<br>0.60)        | 0.23<br>(0.09 to<br>0.46)        | 0.32<br>(0.12 to<br>0.63)        |

|                                        |                              |                             |                             |                             |                           |                           |                           |                           |
|----------------------------------------|------------------------------|-----------------------------|-----------------------------|-----------------------------|---------------------------|---------------------------|---------------------------|---------------------------|
| Indirect maternal deaths               | 20.96<br>(12.57 to<br>32.17) | 13.40<br>(5.31 to<br>24.96) | 10.17<br>(3.95 to<br>19.57) | 14.27<br>(5.60 to<br>27.44) | 0.37<br>(0.22 to<br>0.58) | 0.24<br>(0.09 to<br>0.44) | 0.18<br>(0.07 to<br>0.35) | 0.25<br>(0.10 to<br>0.48) |
| Late maternal deaths                   | 1.22<br>(0.54 to<br>2.36)    | 0.65<br>(0.22 to<br>1.48)   | 0.49<br>(0.16 to<br>1.12)   | 0.68<br>(0.23 to<br>1.54)   | 0.02<br>(0.01 to<br>0.04) | 0.01<br>(0.00 to<br>0.03) | 0.01<br>(0.00 to<br>0.02) | 0.01<br>(0.00 to<br>0.03) |
| Maternal deaths aggravated by HIV/AIDS | 0.09<br>(0.04 to<br>0.18)    | 0.34<br>(0.06 to<br>1.08)   | 0.26<br>(0.04 to<br>0.88)   | 0.41<br>(0.08 to<br>1.23)   | 0.00<br>(0.00 to<br>0.00) | 0.01<br>(0.00 to<br>0.02) | 0.01<br>(0.00 to<br>0.02) | 0.01<br>(0.00 to<br>0.02) |
| Other maternal disorders               | 43.97<br>(21.55 to<br>70.23) | 14.64<br>(5.10 to<br>30.82) | 11.84<br>(4.16 to<br>25.38) | 15.34<br>(5.35 to<br>32.85) | 0.86<br>(0.43 to<br>1.37) | 0.28<br>(0.10 to<br>0.58) | 0.23<br>(0.08 to<br>0.48) | 0.30<br>(0.11 to<br>0.62) |

| Latvia                                                                  |                                           |                                         |                                       |                                         |                                  |                                  |                                  |                                  |
|-------------------------------------------------------------------------|-------------------------------------------|-----------------------------------------|---------------------------------------|-----------------------------------------|----------------------------------|----------------------------------|----------------------------------|----------------------------------|
| Cause                                                                   | YLLs (actual counts)                      |                                         |                                       |                                         | Deaths (actual counts)           |                                  |                                  |                                  |
|                                                                         | 2016                                      | 2040 Forecast                           | 2040 Better Scenario                  | 2040 Worse Scenario                     | 2016                             | 2040 Forecast                    | 2040 Better Scenario             | 2040 Worse Scenario              |
| <b>Neonatal disorders</b>                                               | <b>3,318.96</b><br>(1,990.16 to 4,825.79) | <b>1,159.37</b><br>(350.92 to 3,243.30) | <b>879.48</b><br>(267.00 to 2,466.67) | <b>1,245.72</b><br>(367.64 to 3,537.47) | <b>38.36</b><br>(23.00 to 55.77) | <b>13.40</b><br>(4.06 to 37.47)  | <b>10.16</b><br>(3.09 to 28.49)  | <b>14.40</b><br>(4.25 to 40.88)  |
| Neonatal preterm birth                                                  | 624.18<br>(336.64 to 943.81)              | 136.77<br>(51.24 to 294.81)             | 81.46<br>(30.99 to 172.07)            | 157.94<br>(58.46 to 343.06)             | 7.21<br>(3.89 to 10.91)          | 1.58<br>(0.59 to 3.41)           | 0.94<br>(0.36 to 1.99)           | 1.83<br>(0.68 to 3.96)           |
| Neonatal encephalopathy due to birth asphyxia and trauma                | 1,703.24<br>(1,017.71 to 2,487.34)        | 426.77<br>(112.54 to 1,258.68)          | 283.64<br>(77.65 to 779.57)           | 463.63<br>(119.33 to 1,412.36)          | 19.68<br>(11.76 to 28.74)        | 4.93<br>(1.30 to 14.54)          | 3.28<br>(0.90 to 9.01)           | 5.36<br>(1.38 to 16.32)          |
| Neonatal sepsis and other neonatal infections                           | 296.43<br>(150.42 to 566.52)              | 121.71<br>(35.95 to 331.19)             | 89.24<br>(27.61 to 239.18)            | 130.42<br>(38.09 to 357.24)             | 3.43<br>(1.74 to 6.55)           | 1.41<br>(0.42 to 3.83)           | 1.03<br>(0.32 to 2.76)           | 1.51<br>(0.44 to 4.13)           |
| Hemolytic disease and other neonatal jaundice                           | 10.55<br>(5.17 to 18.70)                  | 3.57<br>(0.69 to 13.06)                 | 2.52<br>(0.51 to 9.02)                | 3.86<br>(0.73 to 14.44)                 | 0.12<br>(0.06 to 0.22)           | 0.04<br>(0.01 to 0.15)           | 0.03<br>(0.01 to 0.10)           | 0.04<br>(0.01 to 0.17)           |
| Other neonatal disorders                                                | 684.55<br>(362.93 to 1,075.59)            | 470.54<br>(114.28 to 1,498.33)          | 422.62<br>(107.21 to 1,291.63)        | 489.88<br>(117.57 to 1,559.66)          | 7.91<br>(4.19 to 12.43)          | 5.44<br>(1.32 to 17.31)          | 4.88<br>(1.24 to 14.92)          | 5.66<br>(1.36 to 18.02)          |
| <b>Nutritional deficiencies</b>                                         | <b>273.21</b><br>(230.70 to 319.53)       | <b>135.42</b><br>(93.37 to 185.26)      | <b>128.92</b><br>(87.87 to 176.82)    | <b>133.72</b><br>(92.62 to 181.49)      | <b>9.23</b><br>(7.95 to 10.60)   | <b>5.69</b><br>(4.31 to 7.31)    | <b>5.67</b><br>(4.29 to 7.35)    | <b>5.45</b><br>(4.16 to 6.95)    |
| Protein-energy malnutrition                                             | 68.49<br>(42.68 to 104.20)                | 37.41<br>(21.19 to 62.45)               | 41.86<br>(24.16 to 67.88)             | 36.29<br>(20.53 to 60.50)               | 1.73<br>(1.03 to 2.98)           | 1.51<br>(0.89 to 2.34)           | 1.84<br>(1.12 to 2.77)           | 1.40<br>(0.81 to 2.21)           |
| Iodine deficiency                                                       | 8.42<br>(0.83 to 22.70)                   | 7.61<br>(0.48 to 23.40)                 | 6.85<br>(0.39 to 21.69)               | 7.53<br>(0.48 to 23.85)                 | 0.31<br>(0.02 to 0.87)           | 0.36<br>(0.02 to 1.05)           | 0.34<br>(0.01 to 0.99)           | 0.34<br>(0.01 to 1.02)           |
| Dietary iron deficiency                                                 | 13.59<br>(10.79 to 17.68)                 | 9.62<br>(6.26 to 14.30)                 | 10.21<br>(6.63 to 15.29)              | 9.56<br>(6.30 to 14.47)                 | 0.31<br>(0.25 to 0.40)           | 0.25<br>(0.16 to 0.36)           | 0.27<br>(0.18 to 0.40)           | 0.24<br>(0.16 to 0.35)           |
| Other nutritional deficiencies                                          | 182.71<br>(141.07 to 216.94)              | 80.78<br>(49.10 to 120.24)              | 69.99<br>(40.48 to 105.87)            | 80.34<br>(48.86 to 118.40)              | 6.88<br>(5.46 to 8.18)           | 3.57<br>(2.36 to 5.09)           | 3.23<br>(2.08 to 4.64)           | 3.47<br>(2.28 to 4.86)           |
| <b>Other communicable, maternal, neonatal, and nutritional diseases</b> | <b>688.05</b><br>(582.49 to 830.42)       | <b>395.44</b><br>(288.75 to 546.20)     | <b>363.99</b><br>(265.15 to 509.48)   | <b>395.18</b><br>(286.80 to 545.85)     | <b>19.15</b><br>(16.67 to 22.37) | <b>14.98</b><br>(11.82 to 19.26) | <b>14.80</b><br>(11.68 to 19.08) | <b>14.42</b><br>(11.45 to 18.40) |
| Sexually transmitted infections excluding HIV                           | 45.80<br>(35.12 to 61.33)                 | 23.45<br>(14.36 to 37.23)               | 21.74<br>(13.12 to 34.63)             | 23.39<br>(14.26 to 36.55)               | 1.68<br>(1.33 to 2.15)           | 1.13<br>(0.76 to 1.65)           | 1.10<br>(0.72 to 1.62)           | 1.09<br>(0.72 to 1.61)           |
| Syphilis                                                                | 14.43<br>(8.84 to 24.96)                  | 5.76<br>(3.20 to 9.71)                  | 4.84<br>(2.69 to 8.13)                | 5.83<br>(3.27 to 9.77)                  | 0.45<br>(0.34 to 0.66)           | 0.27<br>(0.16 to 0.43)           | 0.24<br>(0.14 to 0.38)           | 0.26<br>(0.16 to 0.42)           |
| Chlamydial infection                                                    | 6.01<br>(4.67 to 7.85)                    | 3.32<br>(1.96 to 5.31)                  | 3.18<br>(1.87 to 5.09)                | 3.29<br>(1.93 to 5.28)                  | 0.24<br>(0.19 to 0.30)           | 0.17<br>(0.11 to 0.24)           | 0.17<br>(0.11 to 0.25)           | 0.16<br>(0.10 to 0.23)           |
| Gonococcal infection                                                    | 17.27<br>(13.52 to 22.36)                 | 10.02<br>(5.69 to 16.27)                | 9.60<br>(5.42 to 15.60)               | 9.92<br>(5.66 to 16.19)                 | 0.70<br>(0.56 to 0.90)           | 0.50<br>(0.32 to 0.76)           | 0.51<br>(0.31 to 0.77)           | 0.49<br>(0.31 to 0.73)           |
| Other sexually transmitted infections                                   | 8.08<br>(6.23 to 10.60)                   | 4.36<br>(2.44 to 7.57)                  | 4.12<br>(2.25 to 7.21)                | 4.34<br>(2.43 to 7.46)                  | 0.29<br>(0.23 to 0.37)           | 0.19<br>(0.12 to 0.29)           | 0.18<br>(0.11 to 0.29)           | 0.18<br>(0.11 to 0.28)           |
| Acute hepatitis                                                         | 355.89<br>(293.63 to 428.94)              | 99.99<br>(63.11 to 155.36)              | 73.00<br>(44.42 to 115.80)            | 102.80<br>(64.09 to 159.95)             | 9.71<br>(8.19 to 11.35)          | 3.60<br>(2.46 to 5.19)           | 2.76<br>(1.84 to 4.03)           | 3.58<br>(2.38 to 5.22)           |
| Acute hepatitis A                                                       | 62.57<br>(35.76 to 102.61)                | 13.01<br>(4.62 to 34.53)                | 9.96<br>(3.52 to 26.17)               | 13.71<br>(4.87 to 35.38)                | 0.86<br>(0.53 to 1.33)           | 0.22<br>(0.10 to 0.45)           | 0.17<br>(0.09 to 0.37)           | 0.22<br>(0.11 to 0.48)           |
| Acute hepatitis B                                                       | 237.57<br>(197.16 to 281.64)              | 71.13<br>(42.85 to 114.55)              | 51.19<br>(29.74 to 82.46)             | 72.91<br>(41.74 to 115.90)              | 7.24<br>(6.07 to 8.65)           | 2.64<br>(1.69 to 3.99)           | 1.97<br>(1.24 to 3.01)           | 2.64<br>(1.66 to 4.03)           |



| Latvia                               |                                                |                                               |                                               |                                                |                                           |                                           |                                           |                                           |
|--------------------------------------|------------------------------------------------|-----------------------------------------------|-----------------------------------------------|------------------------------------------------|-------------------------------------------|-------------------------------------------|-------------------------------------------|-------------------------------------------|
| Cause                                | YLLs (actual counts)                           |                                               |                                               |                                                | Deaths (actual counts)                    |                                           |                                           |                                           |
|                                      | 2016                                           | 2040 Forecast                                 | 2040 Better Scenario                          | 2040 Worse Scenario                            | 2016                                      | 2040 Forecast                             | 2040 Better Scenario                      | 2040 Worse Scenario                       |
| <b>Neoplasms</b>                     | <b>106,398.34</b><br>(93,320.73 to 118,698.93) | <b>91,731.19</b><br>(66,678.92 to 121,214.23) | <b>73,749.70</b><br>(53,477.69 to 100,403.18) | <b>101,476.05</b><br>(75,155.07 to 133,299.60) | <b>5,437.05</b><br>(4,793.94 to 6,025.44) | <b>5,468.38</b><br>(4,399.05 to 6,696.81) | <b>4,665.48</b><br>(3,776.27 to 5,827.49) | <b>5,826.85</b><br>(4,707.79 to 7,105.22) |
| Lip and oral cavity cancer           | 2,332.93<br>(1,907.70 to 2,806.73)             | 2,075.19<br>(934.93 to 4,019.04)              | 1,146.18<br>(545.10 to 2,251.98)              | 2,704.53<br>(1,223.78 to 5,026.51)             | 99.85<br>(83.72 to 117.68)                | 99.58<br>(53.06 to 180.03)                | 58.80<br>(32.92 to 101.60)                | 126.88<br>(65.70 to 224.60)               |
| Nasopharynx cancer                   | 224.62<br>(188.63 to 269.21)                   | 193.13<br>(85.65 to 403.56)                   | 94.86<br>(43.60 to 192.69)                    | 259.21<br>(115.90 to 519.43)                   | 8.49<br>(7.19 to 10.03)                   | 7.90<br>(3.77 to 15.24)                   | 4.00<br>(2.03 to 7.59)                    | 10.48<br>(5.14 to 19.45)                  |
| Other pharynx cancer                 | 1,513.47<br>(1,237.27 to 1,811.71)             | 1,216.87<br>(553.16 to 2,282.10)              | 1,094.73<br>(507.29 to 2,053.26)              | 1,385.44<br>(631.60 to 2,524.55)               | 58.33<br>(48.10 to 69.19)                 | 51.83<br>(26.20 to 88.74)                 | 47.60<br>(24.29 to 84.08)                 | 58.34<br>(29.00 to 99.82)                 |
| Esophageal cancer                    | 2,777.69<br>(2,287.70 to 3,354.82)             | 2,737.76<br>(1,213.42 to 5,707.02)            | 1,826.73<br>(851.12 to 3,722.10)              | 3,579.18<br>(1,539.99 to 7,289.46)             | 121.70<br>(102.17 to 144.68)              | 131.96<br>(64.92 to 245.07)               | 92.25<br>(48.10 to 169.25)                | 169.00<br>(81.44 to 323.74)               |
| Stomach cancer                       | 9,267.12<br>(8,057.44 to 10,477.11)            | 5,089.53<br>(3,341.45 to 7,410.93)            | 3,815.08<br>(2,609.85 to 5,592.94)            | 5,348.28<br>(3,544.47 to 7,846.39)             | 483.81<br>(424.53 to 542.10)              | 308.65<br>(220.69 to 418.79)              | 244.26<br>(182.56 to 332.35)              | 315.43<br>(229.03 to 429.93)              |
| Colon and rectum cancer              | 11,451.11<br>(9,958.91 to 13,222.02)           | 10,723.89<br>(6,997.80 to 15,889.14)          | 8,289.88<br>(5,483.30 to 12,194.84)           | 11,762.23<br>(7,707.76 to 17,040.06)           | 680.48<br>(597.05 to 779.23)              | 743.77<br>(515.67 to 1,057.12)            | 607.76<br>(426.54 to 857.88)              | 790.34<br>(541.37 to 1,127.23)            |
| Liver cancer                         | 2,885.05<br>(2,463.07 to 3,339.65)             | 3,530.48<br>(2,129.06 to 5,832.73)            | 3,104.72<br>(1,936.10 to 4,990.10)            | 4,282.09<br>(2,431.56 to 7,401.85)             | 146.80<br>(125.89 to 168.75)              | 206.89<br>(132.97 to 316.25)              | 193.48<br>(127.46 to 287.61)              | 240.18<br>(144.77 to 376.16)              |
| Liver cancer due to hepatitis B      | 1,055.97<br>(851.68 to 1,284.69)               | 1,235.81<br>(721.21 to 2,155.30)              | 1,162.34<br>(721.03 to 1,954.50)              | 1,401.86<br>(758.82 to 2,499.37)               | 50.46<br>(40.98 to 61.54)                 | 68.89<br>(42.27 to 111.12)                | 68.41<br>(44.27 to 109.03)                | 75.32<br>(45.18 to 123.39)                |
| Liver cancer due to hepatitis C      | 311.77<br>(256.00 to 372.22)                   | 399.65<br>(238.53 to 628.23)                  | 386.99<br>(241.29 to 594.09)                  | 443.52<br>(253.60 to 718.75)                   | 18.20<br>(15.00 to 21.91)                 | 26.73<br>(17.10 to 40.08)                 | 27.40<br>(17.94 to 39.94)                 | 28.57<br>(17.39 to 43.78)                 |
| Liver cancer due to alcohol use      | 1,052.18<br>(884.46 to 1,237.46)               | 1,260.89<br>(745.51 to 2,024.60)              | 968.25<br>(596.84 to 1,538.40)                | 1,719.71<br>(973.24 to 2,856.55)               | 54.84<br>(45.86 to 63.91)                 | 74.07<br>(46.82 to 113.18)                | 61.23<br>(39.80 to 91.85)                 | 95.76<br>(57.39 to 152.67)                |
| Liver cancer due to other causes     | 465.13<br>(383.06 to 565.91)                   | 634.12<br>(351.97 to 1,095.44)                | 583.86<br>(344.44 to 969.96)                  | 716.99<br>(370.43 to 1,264.59)                 | 23.29<br>(19.30 to 27.90)                 | 37.20<br>(22.06 to 59.66)                 | 36.43<br>(22.61 to 55.60)                 | 40.53<br>(22.94 to 67.67)                 |
| Gallbladder and biliary tract cancer | 874.22<br>(762.52 to 1,003.79)                 | 574.05<br>(457.08 to 727.86)                  | 583.86<br>(453.76 to 774.05)                  | 546.42<br>(441.57 to 673.69)                   | 50.27<br>(44.35 to 57.58)                 | 38.26<br>(32.92 to 44.72)                 | 40.51<br>(34.04 to 49.28)                 | 35.63<br>(30.89 to 41.22)                 |
| Pancreatic cancer                    | 6,984.58<br>(5,931.83 to 8,032.86)             | 7,636.00<br>(5,496.96 to 10,679.86)           | 7,103.89<br>(5,134.60 to 10,041.16)           | 7,648.17<br>(5,475.82 to 10,754.76)            | 373.75<br>(319.43 to 427.38)              | 459.84<br>(353.05 to 603.12)              | 449.00<br>(347.88 to 590.02)              | 448.41<br>(347.40 to 587.33)              |
| Larynx cancer                        | 1,882.69<br>(1,537.57 to 2,233.44)             | 1,413.90<br>(536.06 to 3,334.55)              | 666.71<br>(266.23 to 1,536.87)                | 1,861.66<br>(695.02 to 4,214.94)               | 80.32<br>(66.49 to 94.90)                 | 66.00<br>(27.50 to 142.95)                | 31.98<br>(14.42 to 67.40)                 | 85.88<br>(35.55 to 175.36)                |
| Tracheal, bronchus, and lung cancer  | 18,930.22<br>(16,004.49 to 21,973.78)          | 17,374.83<br>(10,743.03 to 27,073.19)         | 10,239.85<br>(6,364.04 to 16,376.59)          | 22,852.67<br>(13,976.00 to 35,223.32)          | 919.98<br>(791.77 to 1,053.11)            | 939.63<br>(623.96 to 1,369.19)            | 575.20<br>(392.49 to 850.22)              | 1,201.45<br>(797.45 to 1,746.55)          |
| Malignant skin melanoma              | 1,553.09<br>(1,084.65 to 1,861.26)             | 1,482.62<br>(956.36 to 1,993.57)              | 1,805.38<br>(1,169.42 to 2,509.75)            | 1,383.88<br>(905.12 to 1,832.61)               | 74.82<br>(48.94 to 89.84)                 | 88.29<br>(57.32 to 111.17)                | 112.21<br>(73.57 to 142.17)               | 80.26<br>(51.88 to 98.88)                 |
| Non-melanoma skin cancer             | 814.84<br>(698.99 to 942.17)                   | 710.84<br>(558.48 to 879.82)                  | 632.70<br>(498.65 to 802.20)                  | 675.12<br>(530.28 to 841.16)                   | 58.24<br>(51.12 to 66.43)                 | 65.58<br>(52.20 to 81.59)                 | 62.56<br>(50.42 to 77.28)                 | 60.28<br>(47.26 to 75.76)                 |
| Breast cancer                        | 7,747.07<br>(6,293.78 to 9,522.94)             | 5,988.24<br>(3,673.70 to 9,181.43)            | 4,547.80<br>(2,826.27 to 7,044.79)            | 6,427.43<br>(3,917.68 to 10,048.64)            | 364.68<br>(298.37 to 442.99)              | 334.51<br>(229.52 to 481.57)              | 267.68<br>(183.20 to 385.83)              | 348.56<br>(238.48 to 511.52)              |
| Cervical cancer                      | 2,031.65<br>(1,657.13 to 2,504.62)             | 1,069.10<br>(699.25 to 1,590.57)              | 843.34<br>(553.28 to 1,243.78)                | 1,096.79<br>(702.43 to 1,612.47)               | 93.37<br>(76.86 to 115.19)                | 58.37<br>(43.18 to 79.60)                 | 48.07<br>(35.97 to 64.86)                 | 58.40<br>(42.69 to 78.98)                 |

|                   |                                       |                                       |                                       |                                       |                                 |                                 |                                 |                                 |
|-------------------|---------------------------------------|---------------------------------------|---------------------------------------|---------------------------------------|---------------------------------|---------------------------------|---------------------------------|---------------------------------|
|                   | 1,819.32<br>(1,464.06 to<br>2,306.49) | 1,387.62<br>(1,000.15 to<br>1,887.42) | 1,234.44<br>(876.69 to<br>1,708.80)   | 1,373.25<br>(998.54 to<br>1,868.87)   | 103.34<br>(83.29 to<br>130.91)  | 91.61<br>(71.02 to<br>116.95)   | 84.72<br>(64.93 to<br>109.21)   | 88.89<br>(68.97 to<br>112.34)   |
| Uterine cancer    |                                       |                                       |                                       |                                       |                                 |                                 |                                 |                                 |
|                   | 4,100.87<br>(2,950.62 to<br>5,318.42) | 3,043.06<br>(1,757.80 to<br>4,848.46) | 2,685.79<br>(1,576.96 to<br>4,194.31) | 3,136.58<br>(1,802.97 to<br>4,909.44) | 194.98<br>(141.74 to<br>250.95) | 166.83<br>(106.00 to<br>244.11) | 151.06<br>(97.55 to<br>224.29)  | 168.98<br>(105.80 to<br>251.99) |
| Ovarian cancer    |                                       |                                       |                                       |                                       |                                 |                                 |                                 |                                 |
|                   | 5,391.56<br>(2,698.86 to<br>6,648.56) | 5,498.50<br>(2,746.10 to<br>6,832.27) | 5,297.53<br>(2,727.31 to<br>6,863.23) | 5,122.41<br>(2,532.26 to<br>6,367.26) | 367.41<br>(180.39 to<br>450.11) | 437.75<br>(216.60 to<br>529.71) | 443.99<br>(224.03 to<br>542.74) | 396.96<br>(190.83 to<br>486.46) |
| Prostate cancer   |                                       |                                       |                                       |                                       |                                 |                                 |                                 |                                 |
|                   | 191.61<br>(140.21 to<br>249.47)       | 92.10<br>(56.40 to<br>145.65)         | 80.43<br>(48.34 to<br>132.34)         | 90.62<br>(54.60 to<br>143.86)         | 5.60<br>(4.18 to<br>7.10)       | 3.84<br>(2.75 to<br>5.25)       | 3.60<br>(2.54 to<br>4.94)       | 3.61<br>(2.55 to<br>4.88)       |
| Testicular cancer |                                       |                                       |                                       |                                       |                                 |                                 |                                 |                                 |

| Latvia                          |                                                                  |                                                                 |                                                                |                                                                 |                                                               |                                                              |                                                             |                                                              |
|---------------------------------|------------------------------------------------------------------|-----------------------------------------------------------------|----------------------------------------------------------------|-----------------------------------------------------------------|---------------------------------------------------------------|--------------------------------------------------------------|-------------------------------------------------------------|--------------------------------------------------------------|
| Cause                           | YLLs (actual counts)                                             |                                                                 |                                                                |                                                                 | Deaths (actual counts)                                        |                                                              |                                                             |                                                              |
|                                 | 2016                                                             | 2040 Forecast                                                   | 2040 Better Scenario                                           | 2040 Worse Scenario                                             | 2016                                                          | 2040 Forecast                                                | 2040 Better Scenario                                        | 2040 Worse Scenario                                          |
| Kidney cancer                   | 3,685.56<br>(3,030.35 to<br>4,190.12)                            | 3,655.95<br>(2,424.79 to<br>5,359.34)                           | 3,561.36<br>(2,467.21 to<br>5,142.67)                          | 3,614.73<br>(2,358.11 to<br>5,414.47)                           | 194.74<br>(163.14 to<br>219.39)                               | 222.54<br>(158.50 to<br>304.51)                              | 230.08<br>(171.05 to<br>305.89)                             | 213.82<br>(152.61 to<br>295.62)                              |
| Bladder cancer                  | 3,080.93<br>(2,608.88 to<br>3,528.84)                            | 2,822.34<br>(1,971.49 to<br>3,948.93)                           | 2,340.47<br>(1,691.98 to<br>3,206.29)                          | 2,857.33<br>(1,987.37 to<br>4,043.40)                           | 198.15<br>(170.76 to<br>225.32)                               | 214.50<br>(156.09 to<br>288.10)                              | 191.43<br>(147.51 to<br>246.96)                             | 210.16<br>(151.32 to<br>285.67)                              |
| Brain and nervous system cancer | 3,887.81<br>(2,762.15 to<br>4,607.66)                            | 3,038.74<br>(1,934.92 to<br>4,249.55)                           | 2,892.44<br>(1,837.22 to<br>4,169.82)                          | 2,977.79<br>(1,885.66 to<br>4,102.60)                           | 141.90<br>(94.73 to<br>169.58)                                | 129.71<br>(80.16 to<br>173.12)                               | 127.28<br>(79.20 to<br>175.11)                              | 124.53<br>(76.69 to<br>161.71)                               |
| Thyroid cancer                  | 399.74<br>(334.35 to<br>470.71)                                  | 315.40<br>(206.49 to<br>470.62)                                 | 280.43<br>(185.39 to<br>413.75)                                | 336.77<br>(217.77 to<br>510.31)                                 | 22.73<br>(19.10 to<br>26.65)                                  | 21.32<br>(14.56 to<br>30.65)                                 | 19.59<br>(13.63 to<br>28.31)                                | 22.10<br>(14.87 to<br>32.32)                                 |
| Mesothelioma                    | 210.08<br>(178.86 to<br>244.31)                                  | 204.22<br>(148.42 to<br>281.33)                                 | 218.49<br>(156.36 to<br>316.81)                                | 193.85<br>(143.28 to<br>263.32)                                 | 9.49<br>(8.19 to<br>10.95)                                    | 10.88<br>(8.83 to<br>13.84)                                  | 12.06<br>(9.59 to<br>15.84)                                 | 10.09<br>(8.33 to<br>12.58)                                  |
| Hodgkin lymphoma                | 389.16<br>(279.49 to<br>455.72)                                  | 184.82<br>(119.00 to<br>274.93)                                 | 142.67<br>(90.57 to<br>215.00)                                 | 186.72<br>(119.47 to<br>270.91)                                 | 12.40<br>(9.59 to<br>14.32)                                   | 7.11<br>(5.18 to<br>9.80)                                    | 5.65<br>(4.05 to<br>8.02)                                   | 7.03<br>(5.11 to<br>9.48)                                    |
| Non-Hodgkin lymphoma            | 2,264.10<br>(1,707.80 to<br>2,660.52)                            | 1,576.81<br>(1,069.88 to<br>2,168.31)                           | 1,437.59<br>(964.75 to<br>2,003.90)                            | 1,610.74<br>(1,078.74 to<br>2,236.56)                           | 105.06<br>(78.80 to<br>123.09)                                | 87.65<br>(61.18 to<br>115.01)                                | 83.04<br>(58.47 to<br>110.01)                               | 87.27<br>(61.03 to<br>115.72)                                |
| Multiple myeloma                | 1,319.70<br>(927.24 to<br>1,591.25)                              | 1,161.92<br>(733.22 to<br>1,615.29)                             | 1,117.47<br>(700.03 to<br>1,584.28)                            | 1,187.91<br>(744.16 to<br>1,655.85)                             | 68.00<br>(45.87 to<br>82.17)                                  | 67.69<br>(42.89 to<br>90.14)                                 | 67.27<br>(43.05 to<br>90.68)                                | 67.72<br>(42.90 to<br>92.16)                                 |
| Leukemia                        | 3,957.16<br>(3,370.70 to<br>4,593.79)                            | 3,236.40<br>(2,220.00 to<br>4,524.92)                           | 2,858.10<br>(1,992.15 to<br>3,993.41)                          | 3,437.04<br>(2,524.76 to<br>4,894.67)                           | 182.13<br>(157.59 to<br>209.40)                               | 181.45<br>(133.11 to<br>239.57)                              | 167.62<br>(124.84 to<br>218.30)                             | 187.13<br>(135.15 to<br>251.85)                              |
| Acute lymphoid leukemia         | 555.85<br>(447.48 to<br>657.68)                                  | 309.94<br>(200.60 to<br>450.66)                                 | 252.52<br>(166.51 to<br>368.43)                                | 336.37<br>(216.56 to<br>492.37)                                 | 15.85<br>(13.45 to<br>18.41)                                  | 11.12<br>(7.48 to<br>15.89)                                  | 9.18<br>(6.18 to<br>12.99)                                  | 11.93<br>(8.02 to<br>16.98)                                  |
| Chronic lymphoid leukemia       | 997.71<br>(812.89 to<br>1,183.36)                                | 965.55<br>(659.65 to<br>1,365.62)                               | 891.68<br>(620.35 to<br>1,249.00)                              | 1,001.52<br>(674.45 to<br>1,427.71)                             | 62.05<br>(50.11 to<br>73.49)                                  | 67.11<br>(47.55 to<br>89.87)                                 | 64.77<br>(47.27 to<br>86.39)                                | 67.83<br>(47.97 to<br>93.31)                                 |
| Acute myeloid leukemia          | 1,288.77<br>(995.03 to<br>1,528.90)                              | 1,196.97<br>(772.45 to<br>1,735.28)                             | 1,106.97<br>(708.76 to<br>1,594.24)                            | 1,276.68<br>(823.32 to<br>1,855.25)                             | 51.49<br>(40.42 to<br>60.78)                                  | 56.48<br>(38.86 to<br>77.59)                                 | 53.92<br>(37.17 to<br>74.21)                                | 58.91<br>(40.45 to<br>81.78)                                 |
| Chronic myeloid leukemia        | 319.77<br>(263.09 to<br>396.52)                                  | 134.92<br>(82.32 to<br>205.26)                                  | 91.79<br>(58.58 to<br>139.34)                                  | 148.42<br>(89.63 to<br>233.34)                                  | 16.22<br>(13.28 to<br>20.46)                                  | 8.15<br>(5.32 to<br>12.07)                                   | 5.82<br>(4.00 to<br>8.58)                                   | 8.70<br>(5.63 to<br>13.06)                                   |
| Other leukemia                  | 795.05<br>(654.75 to<br>971.39)                                  | 629.02<br>(425.06 to<br>908.50)                                 | 515.13<br>(356.66 to<br>733.48)                                | 674.06<br>(447.80 to<br>994.63)                                 | 36.52<br>(30.31 to<br>44.08)                                  | 38.59<br>(28.02 to<br>53.11)                                 | 33.92<br>(25.37 to<br>46.57)                                | 39.77<br>(28.47 to<br>55.87)                                 |
| Other neoplasms                 | 4,430.39<br>(3,583.23 to<br>5,136.39)                            | 3,696.88<br>(2,772.79 to<br>4,693.51)                           | 3,806.78<br>(2,787.05 to<br>4,962.17)                          | 3,537.20<br>(2,680.69 to<br>4,435.62)                           | 216.24<br>(177.60 to<br>249.04)                               | 224.47<br>(184.74 to<br>263.17)                              | 242.73<br>(197.18 to<br>293.52)                             | 209.02<br>(172.36 to<br>243.52)                              |
| <b>Cardiovascular diseases</b>  | <b>230,830.93</b><br><b>(207,008.02 to</b><br><b>255,533.31)</b> | <b>118,459.42</b><br><b>(73,846.40 to</b><br><b>196,273.67)</b> | <b>71,531.06</b><br><b>(47,245.39 to</b><br><b>114,802.42)</b> | <b>162,366.59</b><br><b>(99,552.11 to</b><br><b>266,979.21)</b> | <b>16,562.54</b><br><b>(14,914.62 to</b><br><b>18,185.12)</b> | <b>10,385.43</b><br><b>(7,299.03 to</b><br><b>15,214.35)</b> | <b>6,969.57</b><br><b>(4,926.75 to</b><br><b>10,172.08)</b> | <b>13,029.18</b><br><b>(9,151.03 to</b><br><b>18,872.09)</b> |
| Rheumatic heart disease         | 1,316.56<br>(1,087.03 to<br>1,541.34)                            | 609.50<br>(348.14 to<br>1,051.67)                               | 473.62<br>(267.35 to<br>813.81)                                | 630.26<br>(360.58 to<br>1,078.23)                               | 54.36<br>(45.45 to<br>63.72)                                  | 29.30<br>(18.81 to<br>45.40)                                 | 23.65<br>(15.35 to<br>37.32)                                | 29.67<br>(18.85 to<br>46.82)                                 |
| Ischemic heart disease          | 133,798.80<br>(118,864.38 to<br>150,173.58)                      | 66,654.49<br>(37,808.30 to<br>121,193.51)                       | 37,462.13<br>(22,074.64 to<br>66,681.28)                       | 97,031.10<br>(53,052.97 to<br>172,621.92)                       | 10,220.32<br>(9,205.27 to<br>11,282.90)                       | 6,151.11<br>(3,851.74 to<br>9,777.59)                        | 3,910.18<br>(2,447.89 to<br>6,145.94)                       | 8,056.49<br>(5,052.06 to<br>12,685.83)                       |
| Stroke                          | 59,295.89<br>(51,777.33 to<br>67,693.89)                         | 30,188.07<br>(17,474.50 to<br>50,957.84)                        | 17,507.54<br>(10,649.99 to<br>29,547.95)                       | 40,706.61<br>(23,322.39 to<br>68,808.57)                        | 4,512.47<br>(3,961.54 to<br>5,102.07)                         | 2,798.72<br>(1,732.09 to<br>4,544.42)                        | 1,831.18<br>(1,136.23 to<br>3,020.65)                       | 3,394.47<br>(2,087.25 to<br>5,519.67)                        |
| Ischemic stroke                 | 43,795.98<br>(38,354.70 to<br>49,770.83)                         | 20,871.80<br>(11,819.91 to<br>37,019.80)                        | 12,944.18<br>(7,466.17 to<br>22,500.88)                        | 26,803.01<br>(14,715.45 to<br>47,812.00)                        | 3,625.85<br>(3,171.48 to<br>4,093.27)                         | 2,121.41<br>(1,235.31 to<br>3,697.58)                        | 1,450.47<br>(835.91 to<br>2,571.41)                         | 2,494.76<br>(1,445.77 to<br>4,458.44)                        |



|                                |                                          |                                        |                                        |                                         |                                   |                                   |                                 |                                   |
|--------------------------------|------------------------------------------|----------------------------------------|----------------------------------------|-----------------------------------------|-----------------------------------|-----------------------------------|---------------------------------|-----------------------------------|
| Intracerebral hemorrhage       | 15,499.92<br>(13,409.52 to<br>17,988.87) | 9,316.27<br>(4,599.57 to<br>18,139.49) | 4,563.36<br>(2,491.42 to<br>8,643.33)  | 13,903.61<br>(6,578.97 to<br>27,152.59) | 886.62<br>(771.29 to<br>1,016.55) | 677.31<br>(395.97 to<br>1,133.28) | 380.71<br>(233.90 to<br>611.34) | 899.70<br>(494.93 to<br>1,562.22) |
| Hypertensive heart disease     | 6,807.23<br>(2,294.88 to<br>9,860.11)    | 5,570.46<br>(1,388.01 to<br>13,530.60) | 4,270.32<br>(1,154.71 to<br>9,674.69)  | 7,079.69<br>(1,652.07 to<br>18,224.35)  | 488.85<br>(152.06 to<br>727.81)   | 501.43<br>(123.19 to<br>1,186.78) | 427.92<br>(110.73 to<br>944.75) | 617.21<br>(140.80 to<br>1,542.60) |
| Cardiomyopathy and myocarditis | 21,103.84<br>(14,839.34 to<br>25,570.19) | 8,575.51<br>(4,204.72 to<br>16,183.28) | 6,102.63<br>(3,091.94 to<br>11,492.92) | 9,875.85<br>(4,900.09 to<br>18,718.25)  | 713.04<br>(510.93 to<br>860.52)   | 323.64<br>(185.29 to<br>552.51)   | 238.96<br>(139.48 to<br>405.43) | 361.42<br>(201.47 to<br>611.80)   |
| Myocarditis                    | 90.30<br>(66.47 to<br>131.16)            | 63.29<br>(40.53 to<br>102.49)          | 62.86<br>(39.60 to<br>102.96)          | 60.82<br>(39.46 to<br>96.84)            | 3.40<br>(2.46 to<br>5.17)         | 3.56<br>(2.38 to<br>5.71)         | 3.94<br>(2.60 to<br>6.57)       | 3.25<br>(2.20 to<br>5.22)         |

| Latvia                                                        |                                                               |                                                            |                                                            |                                                             |                                                      |                                                      |                                                      |                                                      |
|---------------------------------------------------------------|---------------------------------------------------------------|------------------------------------------------------------|------------------------------------------------------------|-------------------------------------------------------------|------------------------------------------------------|------------------------------------------------------|------------------------------------------------------|------------------------------------------------------|
| Cause                                                         | YLLs (actual counts)                                          |                                                            |                                                            |                                                             | Deaths (actual counts)                               |                                                      |                                                      |                                                      |
|                                                               | 2016                                                          | 2040 Forecast                                              | 2040 Better Scenario                                       | 2040 Worse Scenario                                         | 2016                                                 | 2040 Forecast                                        | 2040 Better Scenario                                 | 2040 Worse Scenario                                  |
| Alcoholic cardiomyopathy                                      | 11,798.21<br>(4,706.97 to<br>15,694.61)                       | 4,161.87<br>(1,369.18 to<br>7,779.82)                      | 3,086.05<br>(1,051.14 to<br>5,877.73)                      | 5,073.99<br>(1,681.94 to<br>9,312.00)                       | 356.05<br>(147.63 to<br>472.85)                      | 139.70<br>(51.82 to<br>244.52)                       | 106.46<br>(41.17 to<br>188.65)                       | 167.27<br>(62.82 to<br>289.21)                       |
| Other cardiomyopathy                                          | 9,215.32<br>(7,181.91 to<br>13,315.26)                        | 4,350.35<br>(1,960.34 to<br>9,127.54)                      | 2,953.72<br>(1,348.11 to<br>6,028.22)                      | 4,741.04<br>(2,053.63 to<br>9,718.96)                       | 353.59<br>(285.35 to<br>468.69)                      | 180.38<br>(94.18 to<br>323.33)                       | 128.55<br>(71.03 to<br>226.08)                       | 190.90<br>(100.41 to<br>339.80)                      |
| Atrial fibrillation and flutter                               | 1,714.26<br>(1,302.34 to<br>2,178.34)                         | 2,015.63<br>(1,466.26 to<br>2,666.37)                      | 1,908.88<br>(1,389.39 to<br>2,552.26)                      | 2,009.89<br>(1,437.90 to<br>2,668.62)                       | 185.65<br>(139.69 to<br>239.69)                      | 248.03<br>(179.98 to<br>333.19)                      | 248.46<br>(182.87 to<br>332.44)                      | 240.12<br>(169.22 to<br>327.11)                      |
| Aortic aneurysm                                               | 1,688.70<br>(1,456.84 to<br>1,940.31)                         | 1,320.00<br>(862.54 to<br>2,068.98)                        | 1,111.82<br>(751.93 to<br>1,718.94)                        | 1,342.92<br>(876.56 to<br>2,046.75)                         | 96.17<br>(83.95 to<br>108.86)                        | 88.40<br>(65.38 to<br>121.26)                        | 81.81<br>(61.14 to<br>112.82)                        | 86.32<br>(63.51 to<br>117.40)                        |
| Peripheral artery disease                                     | 704.08<br>(136.25 to<br>1,118.88)                             | 627.15<br>(110.25 to<br>1,204.87)                          | 583.21<br>(103.28 to<br>1,115.67)                          | 607.31<br>(103.97 to<br>1,164.99)                           | 58.85<br>(11.32 to<br>94.32)                         | 63.02<br>(11.96 to<br>117.94)                        | 63.86<br>(12.26 to<br>118.62)                        | 58.87<br>(10.83 to<br>109.10)                        |
| Endocarditis                                                  | 605.29<br>(468.61 to<br>867.90)                               | 511.93<br>(284.19 to<br>932.66)                            | 489.17<br>(274.87 to<br>893.05)                            | 536.94<br>(293.84 to<br>999.00)                             | 23.90<br>(18.89 to<br>34.40)                         | 24.16<br>(15.16 to<br>38.81)                         | 24.41<br>(15.55 to<br>39.37)                         | 24.41<br>(15.35 to<br>39.14)                         |
| Other cardiovascular and circulatory diseases                 | 3,796.28<br>(3,223.88 to<br>4,363.73)                         | 2,386.67<br>(1,389.33 to<br>4,024.00)                      | 1,621.74<br>(1,019.94 to<br>2,571.62)                      | 2,546.01<br>(1,474.06 to<br>4,319.51)                       | 208.92<br>(181.67 to<br>237.62)                      | 174.19<br>(106.61 to<br>234.35)                      | 157.61<br>(84.03 to<br>175.47)                       | 160.22<br>(106.57 to<br>237.30)                      |
| <b>Chronic respiratory diseases</b>                           | <b>6,007.33</b><br><b>(5,226.09 to</b><br><b>6,825.63)</b>    | <b>5,520.72</b><br><b>(3,311.57 to</b><br><b>8,527.56)</b> | <b>4,061.94</b><br><b>(2,552.69 to</b><br><b>6,050.90)</b> | <b>6,819.23</b><br><b>(3,957.87 to</b><br><b>10,993.54)</b> | <b>363.87</b><br><b>(322.12 to</b><br><b>407.39)</b> | <b>394.09</b><br><b>(262.41 to</b><br><b>562.15)</b> | <b>306.18</b><br><b>(215.74 to</b><br><b>420.71)</b> | <b>462.09</b><br><b>(298.11 to</b><br><b>676.88)</b> |
| Chronic obstructive pulmonary disease                         | 4,821.04<br>(4,142.40 to<br>5,497.44)                         | 4,580.26<br>(2,557.24 to<br>7,469.59)                      | 2,969.63<br>(1,717.86 to<br>4,700.76)                      | 5,882.44<br>(3,210.60 to<br>9,929.82)                       | 301.35<br>(266.09 to<br>337.91)                      | 335.87<br>(210.20 to<br>496.99)                      | 235.85<br>(153.52 to<br>342.35)                      | 405.72<br>(244.79 to<br>614.21)                      |
| Pneumoconiosis                                                | 21.08<br>(17.37 to<br>25.31)                                  | 12.77<br>(9.25 to<br>17.73)                                | 13.07<br>(9.07 to<br>19.24)                                | 12.36<br>(8.94 to<br>16.77)                                 | 1.41<br>(1.18 to<br>1.68)                            | 1.07<br>(0.78 to<br>1.46)                            | 1.15<br>(0.81 to<br>1.66)                            | 1.02<br>(0.74 to<br>1.42)                            |
| Silicosis                                                     | 7.52<br>(4.82 to<br>9.90)                                     | 2.30<br>(0.95 to<br>4.62)                                  | 1.43<br>(0.57 to<br>2.91)                                  | 2.24<br>(0.93 to<br>4.33)                                   | 0.50<br>(0.32 to<br>0.66)                            | 0.18<br>(0.08 to<br>0.35)                            | 0.12<br>(0.05 to<br>0.23)                            | 0.17<br>(0.08 to<br>0.34)                            |
| Asbestosis                                                    | 3.97<br>(3.17 to<br>4.87)                                     | 4.29<br>(2.77 to<br>6.66)                                  | 5.40<br>(3.33 to<br>8.64)                                  | 3.97<br>(2.60 to<br>6.08)                                   | 0.16<br>(0.13 to<br>0.20)                            | 0.22<br>(0.15 to<br>0.34)                            | 0.29<br>(0.19 to<br>0.45)                            | 0.20<br>(0.14 to<br>0.30)                            |
| Coal workers pneumoconiosis                                   | 0.08<br>(0.05 to<br>0.14)                                     | 0.07<br>(0.04 to<br>0.12)                                  | 0.07<br>(0.04 to<br>0.13)                                  | 0.07<br>(0.04 to<br>0.12)                                   | 0.00<br>(0.00 to<br>0.01)                            | 0.01<br>(0.00 to<br>0.01)                            | 0.01<br>(0.01 to<br>0.01)                            | 0.01<br>(0.00 to<br>0.01)                            |
| Other pneumoconiosis                                          | 9.46<br>(7.53 to<br>12.64)                                    | 6.11<br>(4.14 to<br>8.74)                                  | 6.18<br>(3.98 to<br>9.34)                                  | 6.08<br>(4.16 to<br>8.69)                                   | 0.74<br>(0.60 to<br>0.96)                            | 0.66<br>(0.44 to<br>0.97)                            | 0.73<br>(0.47 to<br>1.13)                            | 0.64<br>(0.41 to<br>0.94)                            |
| Asthma                                                        | 685.04<br>(564.77 to<br>1,011.22)                             | 250.83<br>(103.21 to<br>544.16)                            | 159.67<br>(67.89 to<br>327.94)                             | 305.75<br>(121.37 to<br>652.94)                             | 37.67<br>(31.13 to<br>54.17)                         | 16.78<br>(7.43 to<br>34.40)                          | 11.45<br>(5.05 to<br>23.20)                          | 19.38<br>(8.37 to<br>40.22)                          |
| Interstitial lung disease and pulmonary sarcoidosis           | 320.60<br>(243.87 to<br>452.97)                               | 322.63<br>(350.11 to<br>756.69)                            | 763.08<br>(521.47 to<br>1,121.40)                          | 467.18<br>(320.51 to<br>691.26)                             | 16.46<br>(12.58 to<br>22.73)                         | 31.84<br>(22.86 to<br>44.58)                         | 48.40<br>(35.46 to<br>66.83)                         | 27.76<br>(19.57 to<br>39.55)                         |
| Other chronic respiratory diseases                            | 159.62<br>(84.06 to<br>212.17)                                | 154.22<br>(66.52 to<br>269.52)                             | 156.49<br>(66.69 to<br>273.15)                             | 151.50<br>(64.68 to<br>270.66)                              | 6.99<br>(3.45 to<br>9.43)                            | 8.52<br>(3.76 to<br>13.81)                           | 9.33<br>(4.02 to<br>15.36)                           | 8.00<br>(3.49 to<br>13.35)                           |
| <b>Cirrhosis and other chronic liver diseases</b>             | <b>11,897.42</b><br><b>(10,256.58 to</b><br><b>13,593.57)</b> | <b>6,233.69</b><br><b>(4,091.88 to</b><br><b>9,155.64)</b> | <b>4,879.55</b><br><b>(3,105.34 to</b><br><b>7,357.08)</b> | <b>6,824.18</b><br><b>(4,520.47 to</b><br><b>9,940.01)</b>  | <b>404.81</b><br><b>(353.81 to</b><br><b>458.81)</b> | <b>248.23</b><br><b>(179.93 to</b><br><b>338.27)</b> | <b>201.11</b><br><b>(144.32 to</b><br><b>278.59)</b> | <b>265.32</b><br><b>(198.38 to</b><br><b>350.82)</b> |
| Cirrhosis and other chronic liver diseases due to hepatitis B | 2,334.07<br>(1,938.59 to<br>2,788.64)                         | 1,194.54<br>(740.00 to<br>1,807.72)                        | 1,035.01<br>(645.82 to<br>1,614.46)                        | 1,185.05<br>(770.06 to<br>1,759.97)                         | 78.23<br>(65.75 to<br>92.50)                         | 47.03<br>(33.11 to<br>65.95)                         | 41.87<br>(29.61 to<br>59.18)                         | 45.81<br>(33.73 to<br>62.93)                         |
| Cirrhosis and other chronic liver diseases due to hepatitis C | 2,898.02<br>(2,415.81 to<br>3,448.41)                         | 1,521.55<br>(939.22 to<br>2,410.34)                        | 1,299.93<br>(778.85 to<br>2,063.82)                        | 1,515.35<br>(957.40 to<br>2,316.41)                         | 96.06<br>(80.89 to<br>113.94)                        | 58.15<br>(40.62 to<br>83.02)                         | 50.86<br>(34.84 to<br>74.17)                         | 56.99<br>(39.83 to<br>80.31)                         |

|                                                                |                                                              |                                                             |                                                            |                                                             |                                                      |                                                      |                                                      |                                                      |
|----------------------------------------------------------------|--------------------------------------------------------------|-------------------------------------------------------------|------------------------------------------------------------|-------------------------------------------------------------|------------------------------------------------------|------------------------------------------------------|------------------------------------------------------|------------------------------------------------------|
|                                                                | 4,401.38<br>(3,707.49 to<br>5,155.90)                        | 2,386.45<br>(1,556.09 to<br>3,533.35)                       | 1,573.94<br>(1,007.48 to<br>2,379.25)                      | 2,993.44<br>(1,980.04 to<br>4,379.68)                       | 152.40<br>(130.04 to<br>176.97)                      | 96.13<br>(68.75 to<br>131.20)                        | 66.88<br>(47.41 to<br>92.68)                         | 116.50<br>(84.68 to<br>157.42)                       |
| Cirrhosis and other chronic liver diseases due to alcohol use  |                                                              |                                                             |                                                            |                                                             |                                                      |                                                      |                                                      |                                                      |
|                                                                | 2,263.95<br>(1,913.28 to<br>2,661.74)                        | 1,131.15<br>(760.30 to<br>1,655.06)                         | 970.66<br>(640.47 to<br>1,423.82)                          | 1,130.35<br>(761.07 to<br>1,620.24)                         | 78.13<br>(66.65 to<br>91.07)                         | 46.92<br>(33.89 to<br>63.42)                         | 41.50<br>(29.67 to<br>56.24)                         | 46.02<br>(33.71 to<br>60.73)                         |
| Cirrhosis and other chronic liver diseases due to other causes |                                                              |                                                             |                                                            |                                                             |                                                      |                                                      |                                                      |                                                      |
| <b>Digestive diseases</b>                                      | <b>10,171.82</b><br><b>(8,139.18 to</b><br><b>11,936.11)</b> | <b>7,907.54</b><br><b>(5,420.08 to</b><br><b>12,076.56)</b> | <b>6,754.85</b><br><b>(4,699.10 to</b><br><b>9,972.49)</b> | <b>8,108.89</b><br><b>(5,516.75 to</b><br><b>12,484.47)</b> | <b>548.70</b><br><b>(422.19 to</b><br><b>636.14)</b> | <b>548.24</b><br><b>(407.33 to</b><br><b>708.61)</b> | <b>515.06</b><br><b>(373.65 to</b><br><b>660.37)</b> | <b>535.90</b><br><b>(394.65 to</b><br><b>694.45)</b> |
| Peptic ulcer disease                                           | 2,256.23<br>(1,812.00 to<br>2,698.41)                        | 893.25<br>(593.28 to<br>1,295.77)                           | 609.73<br>(416.11 to<br>890.92)                            | 909.55<br>(612.06 to<br>1,314.14)                           | 118.58<br>(95.47 to<br>138.23)                       | 58.65<br>(41.78 to<br>79.81)                         | 42.74<br>(31.83 to<br>56.43)                         | 57.84<br>(41.96 to<br>77.41)                         |

| Latvia                                     |                                                     |                                                     |                                                     |                                                     |                                                  |                                                  |                                                  |                                                  |
|--------------------------------------------|-----------------------------------------------------|-----------------------------------------------------|-----------------------------------------------------|-----------------------------------------------------|--------------------------------------------------|--------------------------------------------------|--------------------------------------------------|--------------------------------------------------|
| Cause                                      | YLLs (actual counts)                                |                                                     |                                                     |                                                     | Deaths (actual counts)                           |                                                  |                                                  |                                                  |
|                                            | 2016                                                | 2040 Forecast                                       | 2040 Better Scenario                                | 2040 Worse Scenario                                 | 2016                                             | 2040 Forecast                                    | 2040 Better Scenario                             | 2040 Worse Scenario                              |
| Gastritis and duodenitis                   | 151.10<br>(114.13 to 192.22)                        | 130.12<br>(81.84 to 197.72)                         | 108.33<br>(68.13 to 167.07)                         | 127.85<br>(81.99 to 190.88)                         | 7.20<br>(5.43 to 9.32)                           | 7.91<br>(5.44 to 10.90)                          | 7.04<br>(4.83 to 9.84)                           | 7.51<br>(5.23 to 10.46)                          |
| Appendicitis                               | 94.05<br>(68.81 to 186.91)                          | 61.22<br>(38.66 to 117.70)                          | 46.09<br>(29.08 to 89.64)                           | 61.16<br>(38.64 to 119.51)                          | 4.28<br>(3.23 to 7.53)                           | 3.52<br>(2.40 to 6.26)                           | 2.79<br>(1.91 to 4.90)                           | 3.41<br>(2.32 to 5.93)                           |
| Paralytic ileus and intestinal obstruction | 601.38<br>(454.02 to 760.93)                        | 571.49<br>(404.91 to 770.02)                        | 607.00<br>(425.67 to 845.12)                        | 538.21<br>(383.80 to 707.95)                        | 33.06<br>(23.81 to 40.00)                        | 41.92<br>(29.31 to 51.68)                        | 47.38<br>(33.00 to 59.01)                        | 38.17<br>(27.13 to 46.79)                        |
| Inguinal, femoral, and abdominal hernia    | 131.41<br>(95.11 to 180.03)                         | 85.33<br>(59.68 to 118.08)                          | 78.85<br>(53.82 to 110.72)                          | 81.44<br>(56.39 to 112.39)                          | 9.06<br>(6.24 to 11.84)                          | 7.25<br>(4.86 to 9.67)                           | 7.14<br>(4.67 to 9.73)                           | 6.73<br>(4.46 to 9.20)                           |
| Inflammatory bowel disease                 | 295.25<br>(216.44 to 367.21)                        | 231.97<br>(155.58 to 324.70)                        | 234.85<br>(154.96 to 337.81)                        | 222.97<br>(149.36 to 306.57)                        | 13.27<br>(9.50 to 16.30)                         | 12.70<br>(9.19 to 16.37)                         | 13.53<br>(9.71 to 17.56)                         | 11.88<br>(8.54 to 15.19)                         |
| Vascular intestinal disorders              | 2,529.96<br>(1,830.51 to 3,043.54)                  | 2,795.73<br>(1,987.39 to 3,467.73)                  | 2,759.32<br>(1,948.26 to 3,494.15)                  | 2,633.50<br>(1,862.05 to 3,220.04)                  | 191.26<br>(133.89 to 226.97)                     | 252.10<br>(173.79 to 303.50)                     | 262.32<br>(177.53 to 317.55)                     | 232.27<br>(162.13 to 281.95)                     |
| Gallbladder and biliary diseases           | 573.01<br>(474.78 to 676.80)                        | 426.65<br>(278.09 to 1,048.63)                      | 426.65<br>(214.20 to 809.38)                        | 669.56<br>(325.03 to 1,278.64)                      | 39.35<br>(31.81 to 46.60)                        | 47.00<br>(23.78 to 89.48)                        | 38.45<br>(19.42 to 72.18)                        | 53.99<br>(26.37 to 102.23)                       |
| Pancreatitis                               | 2,960.52<br>(2,235.66 to 3,683.83)                  | 2,137.85<br>(808.69 to 5,102.34)                    | 1,461.84<br>(568.54 to 3,635.01)                    | 2,439.30<br>(912.21 to 5,926.49)                    | 103.03<br>(76.47 to 125.16)                      | 86.94<br>(41.05 to 178.06)                       | 62.69<br>(31.24 to 127.03)                       | 95.98<br>(43.91 to 201.49)                       |
| Other digestive diseases                   | 578.92<br>(383.83 to 709.43)                        | 442.16<br>(290.83 to 599.93)                        | 422.19<br>(281.34 to 585.69)                        | 425.35<br>(280.11 to 569.44)                        | 29.61<br>(20.94 to 35.71)                        | 30.24<br>(21.70 to 37.51)                        | 30.97<br>(22.03 to 39.04)                        | 28.13<br>(20.28 to 34.57)                        |
| Neurological disorders                     | <b>15,998.06</b><br><b>(13,445.75 to 18,934.13)</b> | <b>20,983.78</b><br><b>(16,337.80 to 27,655.24)</b> | <b>21,963.60</b><br><b>(17,053.69 to 28,129.59)</b> | <b>21,072.37</b><br><b>(16,102.21 to 28,445.78)</b> | <b>1,467.19</b><br><b>(1,228.59 to 1,750.99)</b> | <b>2,313.50</b><br><b>(1,756.49 to 3,138.95)</b> | <b>2,573.89</b><br><b>(2,024.32 to 3,358.11)</b> | <b>2,362.07</b><br><b>(1,658.48 to 3,139.86)</b> |
| Alzheimer's disease and other dementias    | 10,946.00<br>(8,861.28 to 13,594.92)                | 15,493.55<br>(11,304.23 to 21,782.51)               | 16,283.06<br>(12,054.22 to 22,162.97)               | 15,700.18<br>(11,120.00 to 22,719.27)               | 1,202.43<br>(976.15 to 1,472.43)                 | 1,956.28<br>(1,419.25 to 2,751.62)               | 2,165.92<br>(1,619.33 to 2,917.57)               | 1,930.50<br>(1,344.93 to 2,822.70)               |
| Parkinson's disease                        | 2,062.43<br>(1,452.98 to 2,708.40)                  | 2,805.19<br>(2,043.65 to 3,673.85)                  | 3,269.91<br>(2,395.46 to 4,337.40)                  | 2,558.46<br>(1,860.03 to 3,340.62)                  | 178.28<br>(127.49 to 237.45)                     | 268.03<br>(195.04 to 351.72)                     | 323.18<br>(242.03 to 423.50)                     | 240.44<br>(173.69 to 320.19)                     |
| Epilepsy                                   | 1,562.63<br>(1,298.49 to 1,871.32)                  | 1,393.25<br>(620.83 to 3,000.56)                    | 1,096.94<br>(500.80 to 2,319.58)                    | 1,546.50<br>(680.61 to 3,310.55)                    | 39.93<br>(33.35 to 47.52)                        | 40.12<br>(19.92 to 81.89)                        | 32.41<br>(16.54 to 63.46)                        | 43.90<br>(21.60 to 87.28)                        |
| Multiple sclerosis                         | 668.16<br>(458.39 to 824.69)                        | 530.99<br>(269.61 to 853.06)                        | 523.77<br>(271.03 to 847.46)                        | 529.86<br>(270.87 to 845.42)                        | 17.14<br>(13.72 to 23.87)                        | 17.14<br>(9.57 to 25.98)                         | 17.24<br>(9.70 to 26.12)                         | 16.91<br>(9.51 to 25.44)                         |
| Motor neuron disease                       | 259.09<br>(215.78 to 298.55)                        | 194.70<br>(136.49 to 267.72)                        | 199.17<br>(137.15 to 284.18)                        | 187.84<br>(134.80 to 253.23)                        | 10.39<br>(8.76 to 11.89)                         | 8.76<br>(6.66 to 11.17)                          | 9.16<br>(6.83 to 12.10)                          | 8.33<br>(6.47 to 10.43)                          |
| Other neurological disorders               | 499.75<br>(416.50 to 577.99)                        | 566.10<br>(417.76 to 753.24)                        | 590.74<br>(428.14 to 819.88)                        | 549.52<br>(408.25 to 722.37)                        | 16.63<br>(14.42 to 18.96)                        | 23.18<br>(18.66 to 29.02)                        | 24.98<br>(19.58 to 32.62)                        | 22.00<br>(17.85 to 27.26)                        |
| Mental disorders                           | <b>11,880.66</b><br><b>(9,670.45 to 14,100.15)</b>  | <b>14,295.10</b><br><b>(8,598.23 to 21,920.03)</b>  | <b>15,912.79</b><br><b>(9,356.71 to 25,201.06)</b>  | <b>14,439.31</b><br><b>(8,597.39 to 21,836.62)</b>  | <b>341.89</b><br><b>(281.23 to 403.67)</b>       | <b>444.54</b><br><b>(287.24 to 653.56)</b>       | <b>503.95</b><br><b>(323.94 to 764.70)</b>       | <b>443.62</b><br><b>(285.60 to 639.02)</b>       |
| Alcohol use disorders                      | 9,609.40<br>(7,761.98 to 11,550.37)                 | 8,657.42<br>(4,930.93 to 13,956.77)                 | 8,781.56<br>(4,937.53 to 14,440.70)                 | 9,071.28<br>(5,183.15 to 14,245.52)                 | 282.04<br>(229.88 to 337.27)                     | 275.84<br>(170.33 to 426.37)                     | 284.77<br>(172.63 to 455.58)                     | 285.54<br>(178.76 to 433.51)                     |
| Drug use disorders                         | 2,269.51<br>(1,798.82 to 2,789.37)                  | 5,636.48<br>(3,323.65 to 8,770.05)                  | 7,129.86<br>(4,156.98 to 11,127.79)                 | 5,366.85<br>(3,229.40 to 8,279.89)                  | 59.81<br>(47.98 to 72.41)                        | 168.68<br>(109.40 to 247.01)                     | 219.15<br>(144.38 to 331.93)                     | 158.06<br>(104.75 to 231.67)                     |
| Opioid use disorders                       | 1,509.79<br>(1,159.48 to 1,934.84)                  | 2,451.05<br>(1,325.44 to 4,086.93)                  | 2,678.89<br>(1,403.58 to 4,453.10)                  | 2,382.72<br>(1,296.06 to 3,901.05)                  | 38.44<br>(29.82 to 49.45)                        | 69.86<br>(41.08 to 109.96)                       | 77.62<br>(44.31 to 126.13)                       | 67.12<br>(40.02 to 104.27)                       |

|                           |                                 |                                     |                                       |                                     |                             |                              |                               |                              |
|---------------------------|---------------------------------|-------------------------------------|---------------------------------------|-------------------------------------|-----------------------------|------------------------------|-------------------------------|------------------------------|
|                           | 148.61<br>(82.81 to<br>213.33)  | 637.77<br>(334.41 to<br>1,083.10)   | 824.43<br>(434.67 to<br>1,418.69)     | 602.96<br>(316.53 to<br>1,007.48)   | 3.98<br>(2.29 to<br>5.63)   | 18.72<br>(10.38 to<br>30.80) | 24.49<br>(13.79 to<br>40.71)  | 17.53<br>(9.66 to<br>28.07)  |
| Cocaine use disorders     |                                 |                                     |                                       |                                     |                             |                              |                               |                              |
|                           | 86.41<br>(51.32 to<br>129.42)   | 713.78<br>(356.82 to<br>1,289.55)   | 1,042.61<br>(547.19 to<br>1,840.28)   | 665.76<br>(343.63 to<br>1,213.14)   | 2.24<br>(1.33 to<br>3.30)   | 19.59<br>(10.06 to<br>34.65) | 28.92<br>(15.87 to<br>50.50)  | 18.11<br>(9.57 to<br>31.64)  |
| Amphetamine use disorders |                                 |                                     |                                       |                                     |                             |                              |                               |                              |
|                           | 524.70<br>(301.84 to<br>682.37) | 1,833.88<br>(965.10 to<br>2,989.03) | 2,583.93<br>(1,385.69 to<br>4,095.44) | 1,715.41<br>(932.48 to<br>2,780.56) | 15.15<br>(8.88 to<br>19.31) | 60.50<br>(35.90 to<br>90.82) | 88.12<br>(55.48 to<br>130.16) | 55.29<br>(32.92 to<br>81.88) |
| Other drug use disorders  |                                 |                                     |                                       |                                     |                             |                              |                               |                              |
|                           | 1.75<br>(1.23 to<br>2.32)       | 1.20<br>(0.58 to<br>2.18)           | 1.37<br>(0.65 to<br>2.55)             | 1.18<br>(0.59 to<br>2.11)           | 0.04<br>(0.03 to<br>0.05)   | 0.03<br>(0.01 to<br>0.05)    | 0.03<br>(0.01 to<br>0.06)     | 0.03<br>(0.01 to<br>0.05)    |
| Eating disorders          |                                 |                                     |                                       |                                     |                             |                              |                               |                              |

| Latvia                                                     |                                              |                                             |                                            |                                             |                                     |                                       |                                     |                                       |
|------------------------------------------------------------|----------------------------------------------|---------------------------------------------|--------------------------------------------|---------------------------------------------|-------------------------------------|---------------------------------------|-------------------------------------|---------------------------------------|
| Cause                                                      | YLLs (actual counts)                         |                                             |                                            |                                             | Deaths (actual counts)              |                                       |                                     |                                       |
|                                                            | 2016                                         | 2040 Forecast                               | 2040 Better Scenario                       | 2040 Worse Scenario                         | 2016                                | 2040 Forecast                         | 2040 Better Scenario                | 2040 Worse Scenario                   |
| <b>Diabetes, urogenital, blood, and endocrine diseases</b> | <b>14,033.94</b><br>(12,398.23 to 15,720.44) | <b>11,500.42</b><br>(7,714.27 to 16,852.79) | <b>9,239.03</b><br>(6,212.32 to 13,358.50) | <b>12,055.31</b><br>(8,139.98 to 17,853.37) | <b>827.28</b><br>(737.07 to 921.93) | <b>848.44</b><br>(634.89 to 1,114.75) | <b>724.48</b><br>(546.84 to 900.91) | <b>850.41</b><br>(645.43 to 1,120.78) |
| Diabetes mellitus                                          | 6,043.55<br>(5,285.20 to 6,873.84)           | 3,751.57<br>(1,961.85 to 6,794.26)          | 2,675.33<br>(1,430.78 to 4,872.12)         | 4,318.76<br>(2,219.12 to 8,060.16)          | 345.49<br>(303.07 to 394.84)        | 254.42<br>(149.02 to 420.05)          | 195.10<br>(119.81 to 316.39)        | 275.75<br>(160.26 to 467.41)          |
| Acute glomerulonephritis                                   | 10.10<br>(8.62 to 11.62)                     | 9.89<br>(5.29 to 17.69)                     | 8.35<br>(4.44 to 14.90)                    | 9.95<br>(5.39 to 17.46)                     | 0.25<br>(0.21 to 0.29)              | 0.30<br>(0.16 to 0.53)                | 0.26<br>(0.14 to 0.48)              | 0.30<br>(0.16 to 0.53)                |
| Chronic kidney disease                                     | 3,770.30<br>(3,327.29 to 4,225.56)           | 3,239.79<br>(1,731.70 to 5,966.64)          | 2,428.45<br>(1,332.17 to 4,423.96)         | 3,420.26<br>(1,787.71 to 6,285.22)          | 224.78<br>(198.19 to 250.31)        | 254.88<br>(144.42 to 440.12)          | 204.07<br>(120.84 to 345.91)        | 260.06<br>(145.97 to 453.83)          |
| Chronic kidney disease due to diabetes mellitus            | 878.08<br>(759.73 to 1,000.44)               | 953.58<br>(492.58 to 1,826.37)              | 716.63<br>(377.11 to 1,364.58)             | 1,013.34<br>(507.21 to 1,940.11)            | 47.94<br>(41.68 to 54.39)           | 64.66<br>(35.85 to 116.61)            | 51.49<br>(29.25 to 91.24)           | 66.59<br>(35.55 to 120.21)            |
| Chronic kidney disease due to hypertension                 | 315.12<br>(263.91 to 371.26)                 | 361.08<br>(200.88 to 631.34)                | 299.77<br>(174.01 to 511.68)               | 367.70<br>(200.68 to 655.14)                | 28.51<br>(23.80 to 33.75)           | 42.18<br>(23.63 to 73.15)             | 37.33<br>(21.79 to 63.87)           | 41.63<br>(22.84 to 71.79)             |
| Chronic kidney disease due to glomerulonephritis           | 1,303.57<br>(1,131.20 to 1,480.39)           | 970.54<br>(504.76 to 1,822.03)              | 696.42<br>(377.10 to 1,261.12)             | 1,033.58<br>(532.72 to 1,948.66)            | 70.94<br>(61.14 to 81.34)           | 70.44<br>(38.70 to 127.12)            | 53.36<br>(30.49 to 92.21)           | 72.74<br>(39.58 to 130.60)            |
| Chronic kidney disease due to other and unspecified causes | 1,273.53<br>(1,106.45 to 1,437.18)           | 954.59<br>(514.51 to 1,749.42)              | 715.63<br>(402.19 to 1,290.42)             | 1,005.65<br>(534.58 to 1,847.11)            | 77.40<br>(67.24 to 87.84)           | 77.61<br>(43.54 to 132.94)            | 61.89<br>(36.44 to 105.16)          | 79.10<br>(43.37 to 137.00)            |
| Urinary diseases and male infertility                      | 3,140.11<br>(2,744.27 to 3,602.86)           | 3,543.16<br>(2,722.00 to 4,542.20)          | 3,131.84<br>(2,340.69 to 4,003.21)         | 3,386.14<br>(2,610.11 to 4,235.30)          | 212.73<br>(186.52 to 243.13)        | 290.10<br>(236.72 to 351.65)          | 272.07<br>(216.89 to 333.98)        | 268.75<br>(218.94 to 328.17)          |
| Urinary tract infections                                   | 2,176.69<br>(1,828.93 to 2,662.61)           | 2,709.67<br>(1,982.11 to 3,605.13)          | 2,431.30<br>(1,751.38 to 3,250.73)         | 2,596.92<br>(1,937.73 to 3,417.80)          | 137.55<br>(115.28 to 171.33)        | 137.55<br>(164.58 to 276.98)          | 203.32<br>(155.47 to 264.82)        | 197.94<br>(153.29 to 253.47)          |
| Urolithiasis                                               | 333.33<br>(233.29 to 447.81)                 | 335.43<br>(213.21 to 495.48)                | 273.63<br>(173.70 to 406.72)               | 323.22<br>(202.26 to 472.39)                | 26.02<br>(18.15 to 34.90)           | 27.88<br>(18.05 to 43.08)             | 24.06<br>(15.63 to 37.11)           | 26.16<br>(16.52 to 39.99)             |
| Other urinary diseases                                     | 610.08<br>(282.54 to 791.78)                 | 498.06<br>(219.31 to 712.50)                | 426.91<br>(183.83 to 611.43)               | 465.99<br>(203.38 to 666.50)                | 49.15<br>(21.33 to 63.49)           | 49.11<br>(20.56 to 71.40)             | 44.69<br>(18.39 to 64.19)           | 44.65<br>(18.30 to 65.94)             |
| Gynecological diseases                                     | 23.97<br>(5.11 to 35.70)                     | 6.60<br>(1.43 to 13.37)                     | 4.49<br>(0.96 to 9.04)                     | 6.83<br>(1.41 to 14.24)                     | 0.80<br>(0.19 to 1.15)              | 0.31<br>(0.07 to 0.55)                | 0.22<br>(0.05 to 0.39)              | 0.31<br>(0.07 to 0.55)                |
| Uterine fibroids                                           | 11.32<br>(2.79 to 17.28)                     | 3.65<br>(0.81 to 8.05)                      | 2.63<br>(0.59 to 5.97)                     | 3.76<br>(0.83 to 8.85)                      | 0.36<br>(0.10 to 0.53)              | 0.14<br>(0.04 to 0.27)                | 0.11<br>(0.03 to 0.20)              | 0.14<br>(0.04 to 0.28)                |
| Polycystic ovarian syndrome                                | 1.64<br>(0.37 to 3.42)                       | 0.14<br>(0.02 to 0.41)                      | 0.07<br>(0.01 to 0.19)                     | 0.16<br>(0.03 to 0.47)                      | 0.04<br>(0.01 to 0.08)              | 0.00<br>(0.00 to 0.01)                | 0.00<br>(0.00 to 0.01)              | 0.00<br>(0.00 to 0.01)                |
| Endometriosis                                              | 0.14<br>(0.02 to 0.28)                       | 0.04<br>(0.00 to 0.13)                      | 0.03<br>(0.00 to 0.08)                     | 0.04<br>(0.00 to 0.13)                      | 0.00<br>(0.00 to 0.01)              | 0.00<br>(0.00 to 0.01)                | 0.00<br>(0.00 to 0.00)              | 0.00<br>(0.00 to 0.00)                |
| Genital prolapse                                           | 0.84<br>(0.15 to 1.36)                       | 0.14<br>(0.03 to 0.30)                      | 0.09<br>(0.02 to 0.19)                     | 0.14<br>(0.03 to 0.30)                      | 0.05<br>(0.01 to 0.08)              | 0.01<br>(0.00 to 0.02)                | 0.01<br>(0.00 to 0.01)              | 0.01<br>(0.00 to 0.02)                |
| Other gynecological diseases                               | 10.03<br>(1.72 to 15.43)                     | 2.62<br>(0.49 to 5.52)                      | 1.68<br>(0.29 to 3.43)                     | 2.72<br>(0.45 to 5.63)                      | 0.35<br>(0.07 to 0.52)              | 0.16<br>(0.03 to 0.29)                | 0.11<br>(0.02 to 0.20)              | 0.15<br>(0.03 to 0.27)                |
| Hemoglobinopathies and hemolytic anemias                   | 241.22<br>(180.78 to 290.98)                 | 112.68<br>(78.95 to 151.83)                 | 93.17<br>(65.81 to 125.51)                 | 110.90<br>(78.53 to 149.91)                 | 11.62<br>(8.46 to 13.93)            | 7.88<br>(5.70 to 9.84)                | 7.02<br>(5.15 to 8.85)              | 7.47<br>(5.40 to 9.29)                |
| Thalassemias                                               | 11.64<br>(8.69 to 14.98)                     | 2.48<br>(1.28 to 4.32)                      | 2.32<br>(1.17 to 4.07)                     | 2.57<br>(1.35 to 4.47)                      | 0.15<br>(0.11 to 0.19)              | 0.03<br>(0.02 to 0.06)                | 0.03<br>(0.02 to 0.05)              | 0.03<br>(0.02 to 0.06)                |

|                                                   |                                 |                                   |                                   |                                   |                              |                              |                              |                              |
|---------------------------------------------------|---------------------------------|-----------------------------------|-----------------------------------|-----------------------------------|------------------------------|------------------------------|------------------------------|------------------------------|
|                                                   | 32.33<br>(24.91 to<br>41.11)    | 11.81<br>(6.52 to<br>19.08)       | 8.97<br>(4.83 to<br>15.02)        | 12.26<br>(6.79 to<br>19.91)       | 0.66<br>(0.50 to<br>0.84)    | 0.28<br>(0.15 to<br>0.46)    | 0.22<br>(0.12 to<br>0.36)    | 0.29<br>(0.16 to<br>0.47)    |
| Sickle cell disorders                             |                                 |                                   |                                   |                                   |                              |                              |                              |                              |
|                                                   | 38.26<br>(29.70 to<br>46.91)    | 18.93<br>(11.23 to<br>29.77)      | 14.07<br>(8.31 to<br>22.55)       | 19.24<br>(11.53 to<br>30.61)      | 1.07<br>(0.82 to<br>1.31)    | 0.69<br>(0.44 to<br>1.04)    | 0.53<br>(0.34 to<br>0.80)    | 0.69<br>(0.45 to<br>1.03)    |
| G6PD deficiency                                   |                                 |                                   |                                   |                                   |                              |                              |                              |                              |
|                                                   | 158.99<br>(115.54 to<br>192.51) | 79.47<br>(56.45 to<br>103.12)     | 67.80<br>(48.54 to<br>89.73)      | 76.82<br>(54.87 to<br>98.75)      | 9.74<br>(6.95 to<br>11.80)   | 6.87<br>(4.93 to<br>8.53)    | 6.24<br>(4.52 to<br>7.84)    | 6.46<br>(4.65 to<br>7.98)    |
| Other hemoglobinopathies and hemolytic anemias    |                                 |                                   |                                   |                                   |                              |                              |                              |                              |
|                                                   | 804.69<br>(472.87 to<br>962.68) | 836.74<br>(456.76 to<br>1,212.06) | 897.39<br>(488.19 to<br>1,324.91) | 802.48<br>(427.01 to<br>1,138.26) | 31.62<br>(16.94 to<br>38.43) | 40.55<br>(20.79 to<br>54.23) | 45.74<br>(23.88 to<br>61.67) | 37.77<br>(19.04 to<br>49.07) |
| Endocrine, metabolic, blood, and immune disorders |                                 |                                   |                                   |                                   |                              |                              |                              |                              |

| Latvia                                        |                                           |                                           |                                           |                                           |                                    |                                    |                                    |                                    |
|-----------------------------------------------|-------------------------------------------|-------------------------------------------|-------------------------------------------|-------------------------------------------|------------------------------------|------------------------------------|------------------------------------|------------------------------------|
| Cause                                         | YLLs (actual counts)                      |                                           |                                           |                                           | Deaths (actual counts)             |                                    |                                    |                                    |
|                                               | 2016                                      | 2040 Forecast                             | 2040 Better Scenario                      | 2040 Worse Scenario                       | 2016                               | 2040 Forecast                      | 2040 Better Scenario               | 2040 Worse Scenario                |
| <b>Musculoskeletal disorders</b>              | <b>798.43</b><br>(642.44 to 969.05)       | <b>688.84</b><br>(469.97 to 976.04)       | <b>567.17</b><br>(388.97 to 830.51)       | <b>693.57</b><br>(480.92 to 973.68)       | <b>34.64</b><br>(28.18 to 41.86)   | <b>35.14</b><br>(26.16 to 47.01)   | <b>29.67</b><br>(22.32 to 40.04)   | <b>34.68</b><br>(25.77 to 46.63)   |
| Rheumatoid arthritis                          | 345.82<br>(249.57 to 450.94)              | 285.93<br>(168.93 to 447.98)              | 190.08<br>(115.51 to 292.80)              | 295.48<br>(177.46 to 457.16)              | 16.98<br>(12.24 to 21.91)          | 15.89<br>(10.09 to 23.38)          | 10.90<br>(7.04 to 15.77)           | 16.14<br>(10.23 to 24.29)          |
| Other musculoskeletal disorders               | 452.62<br>(359.69 to 557.91)              | 402.90<br>(275.17 to 572.25)              | 377.09<br>(254.03 to 541.83)              | 398.08<br>(271.60 to 565.08)              | 17.66<br>(13.89 to 21.97)          | 19.25<br>(14.11 to 25.36)          | 18.77<br>(14.03 to 25.31)          | 18.54<br>(13.80 to 24.18)          |
| <b>Other non-communicable diseases</b>        | <b>5,086.25</b><br>(3,522.04 to 7,218.98) | <b>3,045.17</b><br>(1,852.30 to 4,518.23) | <b>2,653.75</b><br>(1,597.06 to 3,919.11) | <b>3,083.22</b><br>(1,870.59 to 4,531.68) | <b>106.49</b><br>(70.71 to 136.50) | <b>126.92</b><br>(66.54 to 173.45) | <b>123.15</b><br>(62.41 to 171.65) | <b>122.85</b><br>(64.77 to 165.02) |
| Congenital birth defects                      | 3,274.13<br>(2,270.26 to 5,753.56)        | 1,255.40<br>(657.03 to 2,377.73)          | 955.80<br>(513.40 to 1,796.51)            | 1,335.43<br>(692.96 to 2,559.58)          | 48.00<br>(34.52 to 78.82)          | 21.29<br>(12.24 to 37.27)          | 16.89<br>(9.86 to 30.31)           | 22.30<br>(12.75 to 41.59)          |
| Neural tube defects                           | 20.16<br>(11.70 to 33.75)                 | 5.62<br>(2.30 to 11.73)                   | 3.36<br>(1.39 to 7.01)                    | 6.21<br>(2.42 to 13.03)                   | 0.28<br>(0.17 to 0.44)             | 0.09<br>(0.04 to 0.17)             | 0.05<br>(0.03 to 0.11)             | 0.10<br>(0.04 to 0.19)             |
| Congenital heart anomalies                    | 1,350.18<br>(827.13 to 2,915.91)          | 359.15<br>(158.23 to 882.65)              | 206.90<br>(90.71 to 513.97)               | 394.87<br>(167.89 to 981.31)              | 19.70<br>(13.34 to 39.22)          | 6.18<br>(3.10 to 13.02)            | 3.61<br>(1.75 to 7.85)             | 6.71<br>(3.19 to 14.20)            |
| Orofacial clefts                              | 2.98<br>(1.15 to 5.83)                    | 0.46<br>(0.10 to 1.25)                    | 0.22<br>(0.06 to 0.60)                    | 0.52<br>(0.13 to 1.42)                    | 0.03<br>(0.01 to 0.07)             | 0.01<br>(0.00 to 0.01)             | 0.00<br>(0.00 to 0.01)             | 0.01<br>(0.00 to 0.02)             |
| Down syndrome                                 | 491.75<br>(354.99 to 657.00)              | 391.90<br>(235.93 to 650.32)              | 404.18<br>(242.28 to 684.13)              | 392.81<br>(241.59 to 637.50)              | 8.57<br>(6.52 to 12.00)            | 8.02<br>(4.82 to 13.48)            | 8.39<br>(5.00 to 14.44)            | 7.95<br>(4.87 to 13.14)            |
| Other chromosomal abnormalities               | 215.93<br>(101.25 to 360.60)              | 127.66<br>(52.66 to 257.45)               | 101.26<br>(41.89 to 207.45)               | 135.77<br>(55.64 to 276.75)               | 2.64<br>(1.28 to 4.36)             | 1.65<br>(0.71 to 3.28)             | 1.32<br>(0.57 to 2.65)             | 1.75<br>(0.75 to 3.49)             |
| Congenital musculoskeletal and limb anomalies | 78.17<br>(36.43 to 132.46)                | 23.28<br>(8.10 to 54.72)                  | 14.70<br>(5.09 to 33.76)                  | 25.75<br>(8.87 to 59.97)                  | 0.94<br>(0.45 to 1.56)             | 0.29<br>(0.11 to 0.66)             | 0.18<br>(0.07 to 0.41)             | 0.32<br>(0.12 to 0.72)             |
| Urogenital congenital anomalies               | 21.27<br>(12.34 to 34.57)                 | 7.50<br>(3.70 to 14.02)                   | 5.28<br>(2.60 to 10.14)                   | 7.98<br>(3.93 to 15.69)                   | 0.34<br>(0.22 to 0.51)             | 0.15<br>(0.08 to 0.26)             | 0.11<br>(0.06 to 0.20)             | 0.16<br>(0.08 to 0.28)             |
| Digestive congenital anomalies                | 67.26<br>(32.62 to 129.78)                | 19.31<br>(7.45 to 44.29)                  | 11.72<br>(4.28 to 27.18)                  | 21.24<br>(7.95 to 49.33)                  | 0.91<br>(0.48 to 1.61)             | 0.31<br>(0.14 to 0.61)             | 0.19<br>(0.08 to 0.39)             | 0.33<br>(0.15 to 0.68)             |
| Other congenital birth defects                | 1,126.43<br>(678.37 to 1,891.25)          | 320.52<br>(140.41 to 661.06)              | 208.18<br>(88.63 to 434.21)               | 350.29<br>(147.74 to 728.90)              | 14.58<br>(9.29 to 23.55)           | 4.60<br>(2.17 to 8.88)             | 3.02<br>(1.44 to 6.05)             | 4.98<br>(2.32 to 9.87)             |
| Skin and subcutaneous diseases                | 963.70<br>(451.18 to 1,266.40)            | 1,626.17<br>(739.04 to 2,365.95)          | 1,570.10<br>(718.37 to 2,351.23)          | 1,572.40<br>(723.05 to 2,260.78)          | 49.80<br>(21.99 to 67.78)          | 103.73<br>(44.30 to 143.42)        | 104.77<br>(64.67 to 149.46)        | 97.72<br>(41.72 to 131.87)         |
| Cellulitis                                    | 321.63<br>(135.30 to 455.08)              | 608.55<br>(274.89 to 955.75)              | 606.01<br>(276.23 to 995.30)              | 586.97<br>(271.84 to 898.06)              | 13.71<br>(5.64 to 19.13)           | 30.70<br>(14.23 to 44.14)          | 31.60<br>(14.50 to 47.26)          | 28.98<br>(13.25 to 41.04)          |
| Pyoderma                                      | 453.00<br>(176.95 to 635.71)              | 905.48<br>(340.22 to 1,365.77)            | 867.86<br>(323.07 to 1,335.46)            | 876.31<br>(328.61 to 1,305.72)            | 24.35<br>(8.15 to 35.59)           | 63.42<br>(21.37 to 91.35)          | 64.52<br>(21.92 to 94.76)          | 59.66<br>(20.29 to 85.41)          |
| Decubitus ulcer                               | 167.59<br>(69.91 to 242.12)               | 95.12<br>(37.69 to 154.67)                | 80.77<br>(34.05 to 132.10)                | 92.42<br>(37.24 to 147.61)                | 10.62<br>(4.23 to 16.02)           | 8.45<br>(3.42 to 14.73)            | 7.53<br>(3.16 to 13.57)            | 7.99<br>(3.15 to 13.98)            |
| Other skin and subcutaneous diseases          | 21.48<br>(10.15 to 37.91)                 | 17.03<br>(7.61 to 29.53)                  | 15.47<br>(6.98 to 27.00)                  | 16.70<br>(7.79 to 29.75)                  | 1.13<br>(0.44 to 1.88)             | 1.16<br>(0.44 to 2.00)             | 1.13<br>(0.44 to 1.98)             | 1.10<br>(0.42 to 1.94)             |
| Sudden infant death syndrome                  | 748.43<br>(370.94 to 1,255.15)            | 163.60<br>(42.08 to 428.52)               | 127.86<br>(32.41 to 348.32)               | 175.39<br>(44.92 to 449.72)               | 8.69<br>(4.31 to 14.57)            | 1.90<br>(0.49 to 4.97)             | 1.48<br>(0.38 to 4.04)             | 2.04<br>(0.52 to 5.22)             |



|                          |                                          |                                          |                                          |                                          |                                       |                                     |                                     |                                     |
|--------------------------|------------------------------------------|------------------------------------------|------------------------------------------|------------------------------------------|---------------------------------------|-------------------------------------|-------------------------------------|-------------------------------------|
| Injuries                 | 59,546.04<br>(50,946.73 to<br>69,171.12) | 35,185.49<br>(17,079.04 to<br>66,282.23) | 26,941.39<br>(13,323.20 to<br>49,950.51) | 42,214.07<br>(20,343.44 to<br>80,876.91) | 1,726.77<br>(1,486.05 to<br>1,986.99) | 1,239.52<br>(728.13 to<br>2,057.21) | 1,009.82<br>(610.67 to<br>1,646.11) | 1,393.02<br>(789.03 to<br>2,421.63) |
| Transport injuries       | 10,216.11<br>(8,458.24 to<br>11,877.83)  | 4,317.46<br>(1,617.83 to<br>10,877.54)   | 2,550.21<br>(992.33 to<br>6,278.12)      | 9,088.16<br>(3,273.03 to<br>22,975.65)   | 263.66<br>(223.85 to<br>302.88)       | 131.49<br>(62.11 to<br>285.61)      | 83.07<br>(41.09 to<br>173.46)       | 249.23<br>(108.92 to<br>554.13)     |
| Road injuries            | 9,058.95<br>(7,494.77 to<br>10,561.14)   | 3,495.60<br>(1,333.43 to<br>8,785.55)    | 2,012.98<br>(797.22 to<br>4,921.82)      | 8,176.03<br>(2,959.97 to<br>20,790.21)   | 232.82<br>(198.19 to<br>268.57)       | 106.26<br>(50.52 to<br>229.24)      | 66.02<br>(33.20 to<br>134.90)       | 221.85<br>(97.47 to<br>493.77)      |
| Pedestrian road injuries | 2,900.66<br>(2,224.23 to<br>3,651.10)    | 842.41<br>(370.69 to<br>1,869.32)        | 397.88<br>(178.64 to<br>837.31)          | 1,730.06<br>(709.99 to<br>3,953.36)      | 89.66<br>(71.80 to<br>108.66)         | 32.62<br>(17.40 to<br>61.24)        | 16.81<br>(9.36 to<br>29.81)         | 61.27<br>(29.85 to<br>124.05)       |

| Latvia                                          |                                                     |                                                    |                                                    |                                                    |                                            |                                            |                                            |                                            |
|-------------------------------------------------|-----------------------------------------------------|----------------------------------------------------|----------------------------------------------------|----------------------------------------------------|--------------------------------------------|--------------------------------------------|--------------------------------------------|--------------------------------------------|
| Cause                                           | YLLs (actual counts)                                |                                                    |                                                    |                                                    | Deaths (actual counts)                     |                                            |                                            |                                            |
|                                                 | 2016                                                | 2040 Forecast                                      | 2040 Better Scenario                               | 2040 Worse Scenario                                | 2016                                       | 2040 Forecast                              | 2040 Better Scenario                       | 2040 Worse Scenario                        |
| Cyclist road injuries                           | 653.12<br>(465.42 to 821.34)                        | 403.76<br>(156.14 to 1,034.86)                     | 289.21<br>(123.35 to 692.97)                       | 754.63<br>(276.49 to 1,926.24)                     | 19.51<br>(14.32 to 24.28)                  | 15.05<br>(6.94 to 34.05)                   | 11.81<br>(5.87 to 24.56)                   | 24.84<br>(10.71 to 59.60)                  |
| Motorcyclist road injuries                      | 662.48<br>(431.52 to 866.41)                        | 485.70<br>(131.48 to 1,554.41)                     | 354.94<br>(101.57 to 1,091.80)                     | 822.47<br>(211.84 to 2,674.62)                     | 13.83<br>(9.36 to 17.83)                   | 11.67<br>(3.91 to 32.64)                   | 9.09<br>(3.37 to 25.11)                    | 18.17<br>(5.66 to 52.67)                   |
| Motor vehicle road injuries                     | 4,814.61<br>(3,768.56 to 5,833.25)                  | 1,747.73<br>(604.20 to 4,651.85)                   | 960.57<br>(366.66 to 2,385.47)                     | 4,833.84<br>(1,612.07 to 13,250.00)                | 108.93<br>(87.49 to 132.89)                | 46.24<br>(19.83 to 103.56)                 | 27.82<br>(13.11 to 37.67)                  | 116.27<br>(46.67 to 282.29)                |
| Other road injuries                             | 28.08<br>(19.03 to 47.83)                           | 16.01<br>(5.98 to 40.40)                           | 10.38<br>(4.04 to 24.71)                           | 35.02<br>(12.46 to 90.74)                          | 0.89<br>(0.57 to 1.37)                     | 0.67<br>(0.29 to 1.45)                     | 0.49<br>(0.22 to 0.99)                     | 1.29<br>(0.52 to 2.94)                     |
| Other transport injuries                        | 1,157.16<br>(937.82 to 1,411.75)                    | 821.86<br>(289.74 to 2,135.71)                     | 537.23<br>(193.69 to 1,356.16)                     | 912.14<br>(314.76 to 2,295.57)                     | 30.84<br>(25.52 to 36.85)                  | 25.22<br>(10.99 to 58.05)                  | 17.05<br>(7.68 to 37.40)                   | 27.39<br>(11.52 to 61.74)                  |
| <b>Unintentional injuries</b>                   | <b>26,347.71</b><br><b>(22,590.28 to 30,324.58)</b> | <b>15,429.59</b><br><b>(8,736.58 to 26,540.76)</b> | <b>12,645.91</b><br><b>(7,209.98 to 21,447.47)</b> | <b>15,780.28</b><br><b>(9,022.81 to 27,674.61)</b> | <b>834.35</b><br><b>(715.68 to 952.73)</b> | <b>617.26</b><br><b>(416.12 to 901.45)</b> | <b>536.25</b><br><b>(368.29 to 787.33)</b> | <b>609.29</b><br><b>(413.32 to 916.35)</b> |
| Falls                                           | 6,529.20<br>(5,320.36 to 8,858.82)                  | 5,115.13<br>(3,237.73 to 7,873.18)                 | 4,604.82<br>(2,948.28 to 7,179.38)                 | 5,038.33<br>(3,224.56 to 7,694.24)                 | 258.27<br>(218.80 to 320.23)               | 265.55<br>(202.23 to 354.58)               | 251.97<br>(190.97 to 337.89)               | 252.02<br>(192.74 to 335.48)               |
| Drowning                                        | 6,121.19<br>(5,084.70 to 7,168.94)                  | 3,096.68<br>(1,376.69 to 6,565.10)                 | 2,420.86<br>(1,101.39 to 5,002.62)                 | 3,307.21<br>(1,425.12 to 6,983.17)                 | 153.89<br>(129.89 to 178.71)               | 90.96<br>(46.27 to 172.80)                 | 73.44<br>(38.35 to 139.62)                 | 94.87<br>(46.84 to 187.20)                 |
| Fire, heat, and hot substances                  | 3,869.51<br>(3,172.34 to 4,705.88)                  | 1,875.39<br>(958.79 to 3,508.77)                   | 1,353.09<br>(705.08 to 2,520.64)                   | 1,989.06<br>(982.14 to 3,859.09)                   | 128.35<br>(106.19 to 154.40)               | 75.53<br>(45.15 to 125.09)                 | 57.68<br>(35.70 to 92.59)                  | 77.51<br>(45.03 to 131.65)                 |
| Poisonings                                      | 743.96<br>(558.12 to 1,154.95)                      | 355.88<br>(107.83 to 560.62)                       | 166.44<br>(71.52 to 355.57)                        | 278.50<br>(108.43 to 610.11)                       | 20.24<br>(15.41 to 30.19)                  | 8.24<br>(3.95 to 16.92)                    | 5.58<br>(2.84 to 10.94)                    | 8.75<br>(4.03 to 17.89)                    |
| Exposure to mechanical forces                   | 1,696.06<br>(1,112.06 to 2,121.27)                  | 748.79<br>(370.38 to 1,296.06)                     | 575.09<br>(284.85 to 1,002.68)                     | 773.20<br>(378.95 to 1,298.82)                     | 43.65<br>(29.10 to 54.37)                  | 22.65<br>(12.77 to 37.38)                  | 18.08<br>(10.40 to 28.84)                  | 22.86<br>(12.90 to 36.28)                  |
| Unintentional firearm injuries                  | 187.45<br>(151.15 to 229.81)                        | 82.52<br>(46.22 to 134.27)                         | 68.67<br>(38.42 to 112.47)                         | 83.89<br>(48.24 to 134.55)                         | 5.55<br>(4.49 to 6.65)                     | 3.22<br>(2.07 to 4.70)                     | 2.91<br>(1.89 to 4.21)                     | 3.15<br>(2.05 to 4.60)                     |
| Unintentional suffocation                       | 100.44<br>(68.39 to 140.09)                         | 41.66<br>(20.50 to 71.78)                          | 33.74<br>(16.41 to 57.56)                          | 43.70<br>(21.90 to 76.42)                          | 1.86<br>(1.28 to 2.57)                     | 0.88<br>(0.46 to 1.48)                     | 0.73<br>(0.37 to 1.24)                     | 0.91<br>(0.46 to 1.52)                     |
| Other exposure to mechanical forces             | 1,408.17<br>(847.93 to 1,800.70)                    | 624.60<br>(298.09 to 1,101.92)                     | 472.68<br>(225.01 to 840.69)                       | 645.61<br>(305.63 to 1,108.10)                     | 36.24<br>(22.65 to 45.92)                  | 18.55<br>(10.07 to 31.28)                  | 14.45<br>(7.93 to 24.21)                   | 18.79<br>(10.12 to 30.89)                  |
| Adverse effects of medical treatment            | 815.18<br>(532.36 to 1,010.28)                      | 533.39<br>(299.97 to 838.62)                       | 487.42<br>(270.16 to 779.66)                       | 526.78<br>(296.27 to 801.69)                       | 32.04<br>(20.57 to 39.06)                  | 25.40<br>(15.40 to 35.69)                  | 24.36<br>(14.65 to 34.80)                  | 24.31<br>(14.86 to 33.38)                  |
| Animal contact                                  | 108.16<br>(84.70 to 176.14)                         | 89.60<br>(52.51 to 157.66)                         | 75.75<br>(43.45 to 131.75)                         | 90.01<br>(52.24 to 154.28)                         | 3.74<br>(3.00 to 5.78)                     | 3.68<br>(2.43 to 5.89)                     | 3.23<br>(2.13 to 5.04)                     | 3.61<br>(2.40 to 5.58)                     |
| Venomous animal contact                         | 55.10<br>(39.02 to 93.81)                           | 39.93<br>(20.41 to 76.53)                          | 35.01<br>(18.06 to 66.76)                          | 40.14<br>(20.57 to 76.90)                          | 1.59<br>(1.14 to 2.71)                     | 1.31<br>(0.73 to 2.53)                     | 1.18<br>(0.66 to 2.22)                     | 1.29<br>(0.72 to 2.46)                     |
| Non-venomous animal contact                     | 53.05<br>(39.58 to 92.97)                           | 49.67<br>(29.43 to 87.53)                          | 40.71<br>(23.59 to 69.96)                          | 49.88<br>(29.31 to 87.76)                          | 2.15<br>(1.67 to 3.46)                     | 2.37<br>(1.54 to 3.60)                     | 2.05<br>(1.31 to 3.16)                     | 2.32<br>(1.51 to 3.58)                     |
| Foreign body                                    | 1,921.46<br>(1,563.19 to 2,575.08)                  | 1,156.91<br>(659.64 to 1,885.01)                   | 1,077.35<br>(619.99 to 1,804.08)                   | 1,155.14<br>(664.80 to 1,859.66)                   | 52.82<br>(43.39 to 69.27)                  | 37.15<br>(23.20 to 58.22)                  | 35.55<br>(22.60 to 56.05)                  | 36.44<br>(23.08 to 56.82)                  |
| Pulmonary aspiration and foreign body in airway | 1,817.29<br>(1,470.12 to 2,462.01)                  | 1,070.41<br>(597.72 to 1,776.27)                   | 983.40<br>(556.87 to 1,642.35)                     | 1,070.31<br>(609.96 to 1,760.66)                   | 49.87<br>(40.68 to 66.50)                  | 34.24<br>(21.19 to 54.20)                  | 32.26<br>(20.05 to 51.38)                  | 33.65<br>(21.15 to 52.95)                  |

|                                             |                                                               |                                                              |                                                              |                                                              |                                                      |                                                        |                                                      |                                                        |
|---------------------------------------------|---------------------------------------------------------------|--------------------------------------------------------------|--------------------------------------------------------------|--------------------------------------------------------------|------------------------------------------------------|--------------------------------------------------------|------------------------------------------------------|--------------------------------------------------------|
|                                             | 104.18<br>(78.49 to<br>154.80)                                | 86.49<br>(49.96 to<br>146.63)                                | 93.95<br>(53.50 to<br>160.44)                                | 84.83<br>(49.72 to<br>144.32)                                | 2.95<br>(2.26 to<br>4.43)                            | 2.92<br>(1.88 to<br>4.80)                              | 3.29<br>(2.10 to<br>5.43)                            | 2.79<br>(1.81 to<br>4.64)                              |
| Foreign body in other body part             |                                                               |                                                              |                                                              |                                                              |                                                      |                                                        |                                                      |                                                        |
|                                             | 3,859.46<br>(1,851.62 to<br>5,018.98)                         | 2,408.87<br>(894.61 to<br>4,409.65)                          | 1,800.37<br>(667.25 to<br>3,282.82)                          | 2,461.66<br>(957.92 to<br>4,434.94)                          | 124.11<br>(59.95 to<br>160.79)                       | 83.59<br>(33.61 to<br>146.65)                          | 63.71<br>(25.93 to<br>111.60)                        | 84.22<br>(34.56 to<br>144.75)                          |
| Environmental heat and cold exposure        |                                                               |                                                              |                                                              |                                                              |                                                      |                                                        |                                                      |                                                        |
|                                             | 683.52<br>(571.28 to<br>809.72)                               | 148.95<br>(71.34 to<br>275.63)                               | 84.74<br>(41.35 to<br>153.72)                                | 160.38<br>(76.72 to<br>300.70)                               | 17.26<br>(14.48 to<br>20.38)                         | 4.50<br>(2.46 to<br>7.65)                              | 2.65<br>(1.49 to<br>4.45)                            | 4.72<br>(2.51 to<br>8.31)                              |
| Other unintentional injuries                |                                                               |                                                              |                                                              |                                                              |                                                      |                                                        |                                                      |                                                        |
| <b>Self-harm and interpersonal violence</b> | <b>22,973.49</b><br><b>(18,754.91 to</b><br><b>30,374.66)</b> | <b>15,436.46</b><br><b>(5,208.13 to</b><br><b>33,893.86)</b> | <b>11,743.25</b><br><b>(4,090.52 to</b><br><b>25,068.77)</b> | <b>17,343.66</b><br><b>(5,645.52 to</b><br><b>37,917.50)</b> | <b>628.58</b><br><b>(516.25 to</b><br><b>827.03)</b> | <b>490.73</b><br><b>(204.01 to</b><br><b>1,009.59)</b> | <b>390.45</b><br><b>(173.23 to</b><br><b>780.04)</b> | <b>534.44</b><br><b>(215.25 to</b><br><b>1,091.57)</b> |

| Latvia                                                                              |                                                |                                                 |                                                 |                                                 |                                                |                                                |                                                |                                                |
|-------------------------------------------------------------------------------------|------------------------------------------------|-------------------------------------------------|-------------------------------------------------|-------------------------------------------------|------------------------------------------------|------------------------------------------------|------------------------------------------------|------------------------------------------------|
| Cause                                                                               | YLLs (actual counts)                           |                                                 |                                                 |                                                 | Deaths (actual counts)                         |                                                |                                                |                                                |
|                                                                                     | 2016                                           | 2040 Forecast                                   | 2040 Better Scenario                            | 2040 Worse Scenario                             | 2016                                           | 2040 Forecast                                  | 2040 Better Scenario                           | 2040 Worse Scenario                            |
| Self-harm                                                                           | 17,237.74<br>(13,618.62 to<br>23,738.16)       | 13,096.39<br>(4,097.10 to<br>30,355.55)         | 9,919.23<br>(3,202.81 to<br>21,869.36)          | 14,836.86<br>(4,416.76 to<br>33,886.55)         | 482.29<br>(387.76 to<br>654.05)                | 420.65<br>(164.69 to<br>892.98)                | 333.97<br>(140.96 to<br>685.74)                | 460.91<br>(175.61 to<br>967.21)                |
| Self-harm by firearm                                                                | 961.05<br>(594.52 to<br>1,563.64)              | 506.17<br>(135.90 to<br>1,325.99)               | 346.83<br>(98.25 to<br>914.32)                  | 581.76<br>(151.92 to<br>1,549.63)               | 26.52<br>(16.98 to<br>41.96)                   | 16.10<br>(5.50 to<br>38.09)                    | 11.58<br>(4.28 to<br>26.66)                    | 17.91<br>(5.95 to<br>44.12)                    |
| Self-harm by other specified means                                                  | 16,276.69<br>(12,876.65 to<br>22,487.67)       | 12,590.23<br>(3,896.65 to<br>29,377.50)         | 9,572.41<br>(3,072.85 to<br>21,148.78)          | 14,255.10<br>(4,212.21 to<br>32,627.30)         | 455.78<br>(368.89 to<br>621.66)                | 404.55<br>(158.60 to<br>849.54)                | 322.39<br>(136.06 to<br>657.30)                | 443.00<br>(168.28 to<br>924.54)                |
| Interpersonal violence                                                              | 5,735.75<br>(3,943.56 to<br>8,492.76)          | 2,340.07<br>(904.83 to<br>5,257.87)             | 1,824.02<br>(718.99 to<br>3,949.06)             | 2,506.80<br>(975.94 to<br>5,512.46)             | 146.29<br>(101.04 to<br>215.58)                | 70.08<br>(31.87 to<br>147.38)                  | 56.48<br>(25.82 to<br>115.49)                  | 73.53<br>(31.96 to<br>153.36)                  |
| Physical violence by firearm                                                        | 397.08<br>(176.11 to<br>734.63)                | 113.45<br>(38.07 to<br>263.87)                  | 82.02<br>(27.38 to<br>188.05)                   | 120.26<br>(39.73 to<br>277.74)                  | 8.58<br>(4.00 to<br>14.92)                     | 2.70<br>(0.97 to<br>5.96)                      | 1.99<br>(0.71 to<br>4.44)                      | 2.83<br>(0.99 to<br>6.41)                      |
| Physical violence by sharp object                                                   | 2,093.41<br>(1,202.89 to<br>3,188.16)          | 743.06<br>(294.99 to<br>1,505.33)               | 568.68<br>(228.95 to<br>1,149.22)               | 774.05<br>(307.17 to<br>1,572.94)               | 52.73<br>(30.63 to<br>78.47)                   | 21.73<br>(9.58 to<br>41.08)                    | 17.14<br>(7.73 to<br>32.76)                    | 22.21<br>(9.53 to<br>42.39)                    |
| Physical violence by other means                                                    | 3,245.27<br>(2,171.55 to<br>5,516.27)          | 1,483.55<br>(526.36 to<br>3,669.02)             | 1,173.32<br>(429.61 to<br>2,876.59)             | 1,612.50<br>(586.85 to<br>3,995.36)             | 84.98<br>(57.36 to<br>142.18)                  | 45.65<br>(18.87 to<br>104.72)                  | 37.34<br>(15.91 to<br>82.00)                   | 48.49<br>(20.21 to<br>113.21)                  |
| <b>Forces of nature, conflict and terrorism, and executions and police conflict</b> | <b>8.73</b><br><b>(7.55 to</b><br><b>9.95)</b> | <b>1.99</b><br><b>(0.00 to</b><br><b>16.90)</b> | <b>2.01</b><br><b>(0.00 to</b><br><b>16.99)</b> | <b>1.97</b><br><b>(0.00 to</b><br><b>16.80)</b> | <b>0.19</b><br><b>(0.17 to</b><br><b>0.22)</b> | <b>0.05</b><br><b>(0.00 to</b><br><b>0.43)</b> | <b>0.05</b><br><b>(0.00 to</b><br><b>0.46)</b> | <b>0.05</b><br><b>(0.00 to</b><br><b>0.42)</b> |
| Exposure to forces of nature                                                        | 0.00<br>(0.00 to<br>0.00)                      | 1.11<br>(0.00 to<br>10.13)                      | 1.13<br>(0.00 to<br>10.45)                      | 1.09<br>(0.00 to<br>9.86)                       | 0.00<br>(0.00 to<br>0.00)                      | 0.03<br>(0.00 to<br>0.37)                      | 0.04<br>(0.00 to<br>0.42)                      | 0.03<br>(0.00 to<br>0.35)                      |
| Conflict and terrorism                                                              | 0.00<br>(0.00 to<br>0.00)                      | 0.88<br>(0.00 to<br>12.91)                      | 0.88<br>(0.00 to<br>12.90)                      | 0.88<br>(0.00 to<br>12.92)                      | 0.00<br>(0.00 to<br>0.00)                      | 0.02<br>(0.00 to<br>0.21)                      | 0.02<br>(0.00 to<br>0.21)                      | 0.02<br>(0.00 to<br>0.21)                      |
| Executions and police conflict                                                      | 8.73<br>(7.55 to<br>9.95)                      | 0.00<br>(0.00 to<br>0.00)                       | 0.00<br>(0.00 to<br>0.00)                       | 0.00<br>(0.00 to<br>0.00)                       | 0.19<br>(0.17 to<br>0.22)                      | 0.00<br>(0.00 to<br>0.00)                      | 0.00<br>(0.00 to<br>0.00)                      | 0.00<br>(0.00 to<br>0.00)                      |

| Lithuania                                                         |                                          |                                          |                                          |                                          |                                       |                                       |                                       |                                       |
|-------------------------------------------------------------------|------------------------------------------|------------------------------------------|------------------------------------------|------------------------------------------|---------------------------------------|---------------------------------------|---------------------------------------|---------------------------------------|
| Cause                                                             | YLLs (actual counts)                     |                                          |                                          |                                          | Deaths (actual counts)                |                                       |                                       |                                       |
|                                                                   | 2016                                     | 2040 Forecast                            | 2040 Better Scenario                     | 2040 Worse Scenario                      | 2016                                  | 2040 Forecast                         | 2040 Better Scenario                  | 2040 Worse Scenario                   |
| All causes                                                        | 706,297.00<br>(661,473.88 to 753,603.20) | 525,276.28<br>(360,911.35 to 785,992.49) | 422,472.13<br>(293,964.61 to 636,572.53) | 638,215.43<br>(437,635.19 to 929,301.13) | 39,951.17<br>(37,652.99 to 42,094.74) | 35,543.21<br>(24,839.26 to 53,451.90) | 29,871.97<br>(20,864.66 to 45,936.38) | 41,137.59<br>(29,338.97 to 60,174.70) |
| Communicable, maternal, neonatal, and nutritional diseases        | 27,586.20<br>(25,345.70 to 29,933.11)    | 14,011.30<br>(9,372.46 to 20,322.24)     | 10,226.54<br>(7,186.02 to 14,290.13)     | 18,634.38<br>(12,797.10 to 26,707.24)    | 915.14<br>(844.90 to 990.64)          | 657.62<br>(459.07 to 946.29)          | 526.48<br>(377.99 to 739.82)          | 790.88<br>(549.94 to 1,139.63)        |
| HIV/AIDS and tuberculosis                                         | 8,212.56<br>(7,368.46 to 9,214.73)       | 2,392.66<br>(1,298.55 to 4,826.78)       | 1,374.11<br>(833.71 to 2,562.52)         | 4,270.60<br>(2,276.43 to 7,631.92)       | 245.26<br>(220.23 to 276.88)          | 81.38<br>(44.82 to 164.48)            | 45.13<br>(27.56 to 82.21)             | 129.62<br>(72.62 to 225.81)           |
| Tuberculosis                                                      | 5,756.01<br>(4,999.85 to 6,750.00)       | 1,807.46<br>(794.45 to 4,233.25)         | 885.61<br>(410.56 to 1,980.00)           | 2,358.90<br>(1,017.60 to 5,541.89)       | 188.33<br>(164.28 to 218.61)          | 70.04<br>(34.69 to 150.68)            | 55.69<br>(18.73 to 71.04)             | 88.41<br>(41.92 to 185.76)            |
| HIV/AIDS                                                          | 2,456.54<br>(2,208.18 to 2,731.67)       | 585.20<br>(359.32 to 839.34)             | 488.50<br>(299.65 to 721.19)             | 1,911.71<br>(678.58 to 2,734.25)         | 56.92<br>(51.04 to 63.38)             | 11.34<br>(6.18 to 17.26)              | 9.45<br>(5.29 to 15.37)               | 41.21<br>(13.64 to 60.53)             |
| Diarrhea, lower respiratory, and other common infectious diseases | 14,841.58<br>(13,360.54 to 16,541.94)    | 9,472.84<br>(6,028.01 to 14,592.62)      | 7,141.12<br>(4,767.96 to 10,704.37)      | 11,999.66<br>(7,415.48 to 19,160.44)     | 596.64<br>(536.52 to 664.03)          | 531.83<br>(360.31 to 783.33)          | 441.51<br>(308.03 to 636.10)          | 615.42<br>(404.39 to 914.53)          |
| Diarrheal diseases                                                | 255.04<br>(223.17 to 292.22)             | 543.23<br>(123.06 to 1,770.65)           | 579.29<br>(177.22 to 1,614.67)           | 524.88<br>(107.90 to 1,646.59)           | 9.15<br>(8.19 to 10.27)               | 33.65<br>(8.11 to 107.44)             | 39.25<br>(12.43 to 104.18)            | 30.41<br>(6.83 to 92.93)              |
| Intestinal infectious diseases                                    | 3.28<br>(1.21 to 7.46)                   | 2.25<br>(0.78 to 5.24)                   | 2.39<br>(0.83 to 5.64)                   | 2.22<br>(0.78 to 5.13)                   | 0.09<br>(0.03 to 0.19)                | 0.07<br>(0.03 to 0.16)                | 0.08<br>(0.03 to 0.17)                | 0.07<br>(0.02 to 0.15)                |
| Typhoid fever                                                     | 1.49<br>(0.49 to 3.56)                   | 1.26<br>(0.40 to 2.92)                   | 1.57<br>(0.51 to 3.68)                   | 1.18<br>(0.36 to 2.79)                   | 0.03<br>(0.01 to 0.08)                | 0.03<br>(0.01 to 0.08)                | 0.05<br>(0.02 to 0.10)                | 0.03<br>(0.01 to 0.07)                |
| Paratyphoid fever                                                 | 1.63<br>(0.49 to 4.05)                   | 0.89<br>(0.25 to 2.37)                   | 0.72<br>(0.20 to 1.95)                   | 0.93<br>(0.27 to 2.47)                   | 0.04<br>(0.01 to 0.11)                | 0.04<br>(0.01 to 0.11)                | 0.02<br>(0.01 to 0.06)                | 0.03<br>(0.01 to 0.07)                |
| Other intestinal infectious diseases                              | 0.16<br>(0.07 to 0.34)                   | 0.10<br>(0.04 to 0.23)                   | 0.10<br>(0.03 to 0.22)                   | 0.10<br>(0.04 to 0.22)                   | 0.01<br>(0.00 to 0.02)                | 0.01<br>(0.00 to 0.02)                | 0.01<br>(0.00 to 0.02)                | 0.01<br>(0.00 to 0.02)                |
| Lower respiratory infections                                      | 13,095.91<br>(11,679.19 to 14,791.90)    | 7,895.68<br>(4,723.30 to 12,582.76)      | 5,602.53<br>(3,472.29 to 8,820.00)       | 10,417.09<br>(6,013.60 to 17,318.37)     | 545.27<br>(487.13 to 610.87)          | 462.44<br>(298.80 to 701.52)          | 367.48<br>(246.79 to 548.92)          | 549.95<br>(350.43 to 834.61)          |
| Upper respiratory infections                                      | 10.80<br>(5.45 to 18.69)                 | 6.77<br>(2.46 to 15.25)                  | 4.59<br>(1.72 to 9.50)                   | 7.24<br>(2.65 to 15.61)                  | 0.44<br>(0.21 to 0.76)                | 0.38<br>(0.12 to 0.88)                | 0.27<br>(0.09 to 0.61)                | 0.39<br>(0.13 to 0.83)                |
| Otitis media                                                      | 0.32<br>(0.23 to 0.45)                   | 0.05<br>(0.02 to 0.10)                   | 0.05<br>(0.02 to 0.10)                   | 0.05<br>(0.02 to 0.10)                   | 0.01<br>(0.00 to 0.01)                | 0.00<br>(0.00 to 0.00)                | 0.00<br>(0.00 to 0.00)                | 0.00<br>(0.00 to 0.00)                |
| Meningitis                                                        | 707.68<br>(614.16 to 887.46)             | 251.95<br>(170.77 to 357.85)             | 209.35<br>(147.23 to 299.43)             | 264.77<br>(180.48 to 380.50)             | 19.61<br>(17.30 to 24.34)             | 8.86<br>(6.58 to 12.10)               | 7.82<br>(5.85 to 10.90)               | 8.89<br>(6.53 to 12.13)               |
| Pneumococcal meningitis                                           | 107.57<br>(91.56 to 144.70)              | 56.65<br>(39.54 to 81.20)                | 58.35<br>(40.25 to 84.90)                | 55.29<br>(39.04 to 79.89)                | 3.39<br>(2.88 to 4.42)                | 2.21<br>(1.60 to 3.01)                | 2.36<br>(1.69 to 3.26)                | 2.09<br>(1.54 to 2.81)                |
| H influenzae type B meningitis                                    | 54.70<br>(45.39 to 68.36)                | 39.99<br>(21.57 to 74.48)                | 33.76<br>(20.95 to 54.10)                | 44.80<br>(22.04 to 89.11)                | 1.40<br>(1.18 to 1.74)                | 1.03<br>(0.71 to 1.48)                | 1.01<br>(0.74 to 1.41)                | 1.04<br>(0.70 to 1.58)                |
| Meningococcal meningitis                                          | 309.71<br>(264.86 to 379.23)             | 79.88<br>(49.87 to 122.91)               | 60.70<br>(39.83 to 91.06)                | 85.04<br>(54.31 to 130.82)               | 7.45<br>(6.52 to 9.17)                | 2.65<br>(1.85 to 3.83)                | 2.12<br>(1.49 to 3.05)                | 2.71<br>(1.85 to 3.91)                |
| Other meningitis                                                  | 235.71<br>(204.87 to 303.13)             | 75.44<br>(47.79 to 115.14)               | 56.54<br>(37.01 to 86.49)                | 79.64<br>(51.05 to 125.11)               | 7.38<br>(6.45 to 9.28)                | 2.98<br>(2.01 to 4.37)                | 2.32<br>(1.59 to 3.38)                | 3.05<br>(2.08 to 4.53)                |
| Encephalitis                                                      | 749.59<br>(591.76 to 1,047.98)           | 688.58<br>(473.88 to 944.08)             | 681.21<br>(466.71 to 938.69)             | 679.14<br>(476.40 to 931.41)             | 21.48<br>(15.57 to 27.17)             | 24.63<br>(16.21 to 33.81)             | 25.18<br>(16.42 to 35.32)             | 23.61<br>(15.68 to 31.48)             |

|                |                           |                              |                              |                              |                           |                           |                           |                            |
|----------------|---------------------------|------------------------------|------------------------------|------------------------------|---------------------------|---------------------------|---------------------------|----------------------------|
| Diphtheria     | 1.72<br>(1.08 to<br>2.55) | 0.37<br>(0.19 to<br>0.68)    | 0.34<br>(0.17 to<br>0.67)    | 0.39<br>(0.21 to<br>0.70)    | 0.04<br>(0.02 to<br>0.06) | 0.01<br>(0.00 to<br>0.02) | 0.01<br>(0.00 to<br>0.02) | 0.01<br>(0.00 to<br>0.02)  |
| Whooping cough | 3.74<br>(1.24 to<br>6.42) | 1.11<br>(0.19 to<br>3.57)    | 0.22<br>(0.08 to<br>0.49)    | 1.80<br>(0.24 to<br>5.74)    | 0.05<br>(0.02 to<br>0.08) | 0.01<br>(0.00 to<br>0.04) | 0.00<br>(0.00 to<br>0.01) | 0.02<br>(0.00 to<br>0.07)  |
| Tetanus        | 3.62<br>(2.59 to<br>4.57) | 0.35<br>(0.21 to<br>0.56)    | 0.36<br>(0.21 to<br>0.57)    | 0.35<br>(0.21 to<br>0.55)    | 0.16<br>(0.11 to<br>0.21) | 0.02<br>(0.01 to<br>0.03) | 0.02<br>(0.01 to<br>0.03) | 0.02<br>(0.01 to<br>0.03)  |
| Measles        | 2.91<br>(2.33 to<br>3.63) | 78.70<br>(0.40 to<br>444.74) | 57.53<br>(0.38 to<br>302.06) | 97.91<br>(0.41 to<br>562.15) | 0.05<br>(0.04 to<br>0.06) | 1.46<br>(0.01 to<br>9.52) | 1.11<br>(0.01 to<br>6.85) | 1.78<br>(0.01 to<br>11.61) |

| Lithuania                                             |                                                      |                                                    |                                                    |                                                    |                                                |                                                |                                                |                                                |
|-------------------------------------------------------|------------------------------------------------------|----------------------------------------------------|----------------------------------------------------|----------------------------------------------------|------------------------------------------------|------------------------------------------------|------------------------------------------------|------------------------------------------------|
| Cause                                                 | YLLs (actual counts)                                 |                                                    |                                                    |                                                    | Deaths (actual counts)                         |                                                |                                                |                                                |
|                                                       | 2016                                                 | 2040 Forecast                                      | 2040 Better Scenario                               | 2040 Worse Scenario                                | 2016                                           | 2040 Forecast                                  | 2040 Better Scenario                           | 2040 Worse Scenario                            |
| Varicella and herpes zoster                           | 6.97<br>(3.59 to<br>11.80)                           | 3.79<br>(1.85 to<br>6.55)                          | 3.28<br>(1.60 to<br>5.63)                          | 3.83<br>(1.84 to<br>6.41)                          | 0.31<br>(0.16 to<br>0.57)                      | 0.30<br>(0.14 to<br>0.56)                      | 0.29<br>(0.14 to<br>0.56)                      | 0.28<br>(0.14 to<br>0.53)                      |
| <b>Neglected tropical diseases and malaria</b>        | <b>41.08</b><br><b>(22.84 to</b><br><b>50.60)</b>    | <b>35.28</b><br><b>(17.83 to</b><br><b>47.14)</b>  | <b>36.48</b><br><b>(18.15 to</b><br><b>49.34)</b>  | <b>34.37</b><br><b>(17.46 to</b><br><b>45.25)</b>  | <b>1.26</b><br><b>(0.63 to</b><br><b>1.85)</b> | <b>1.43</b><br><b>(0.63 to</b><br><b>1.91)</b> | <b>1.55</b><br><b>(0.66 to</b><br><b>2.14)</b> | <b>1.33</b><br><b>(0.60 to</b><br><b>1.74)</b> |
| Malaria                                               | 0.00<br>(0.00 to<br>0.00)                            | 0.00<br>(0.00 to<br>0.00)                          | 0.00<br>(0.00 to<br>0.00)                          | 0.00<br>(0.00 to<br>0.00)                          | 0.00<br>(0.00 to<br>0.00)                      | 0.00<br>(0.00 to<br>0.00)                      | 0.00<br>(0.00 to<br>0.00)                      | 0.00<br>(0.00 to<br>0.00)                      |
| Chagas disease                                        | 0.00<br>(0.00 to<br>0.00)                            | 0.00<br>(0.00 to<br>0.00)                          | 0.00<br>(0.00 to<br>0.00)                          | 0.00<br>(0.00 to<br>0.00)                          | 0.00<br>(0.00 to<br>0.00)                      | 0.00<br>(0.00 to<br>0.00)                      | 0.00<br>(0.00 to<br>0.00)                      | 0.00<br>(0.00 to<br>0.00)                      |
| Leishmaniasis                                         | 0.00<br>(0.00 to<br>0.00)                            | 0.00<br>(0.00 to<br>0.00)                          | 0.00<br>(0.00 to<br>0.00)                          | 0.00<br>(0.00 to<br>0.00)                          | 0.00<br>(0.00 to<br>0.00)                      | 0.00<br>(0.00 to<br>0.00)                      | 0.00<br>(0.00 to<br>0.00)                      | 0.00<br>(0.00 to<br>0.00)                      |
| African trypanosomiasis                               | 0.00<br>(0.00 to<br>0.00)                            | 0.00<br>(0.00 to<br>0.00)                          | 0.00<br>(0.00 to<br>0.00)                          | 0.00<br>(0.00 to<br>0.00)                          | 0.00<br>(0.00 to<br>0.00)                      | 0.00<br>(0.00 to<br>0.00)                      | 0.00<br>(0.00 to<br>0.00)                      | 0.00<br>(0.00 to<br>0.00)                      |
| Schistosomiasis                                       | 0.00<br>(0.00 to<br>0.00)                            | 0.00<br>(0.00 to<br>0.00)                          | 0.00<br>(0.00 to<br>0.00)                          | 0.00<br>(0.00 to<br>0.00)                          | 0.00<br>(0.00 to<br>0.00)                      | 0.00<br>(0.00 to<br>0.00)                      | 0.00<br>(0.00 to<br>0.00)                      | 0.00<br>(0.00 to<br>0.00)                      |
| Cysticercosis                                         | 2.50<br>(2.02 to<br>3.05)                            | 0.73<br>(0.51 to<br>1.01)                          | 0.71<br>(0.48 to<br>1.02)                          | 0.71<br>(0.51 to<br>0.99)                          | 0.08<br>(0.06 to<br>0.10)                      | 0.03<br>(0.02 to<br>0.04)                      | 0.03<br>(0.02 to<br>0.04)                      | 0.03<br>(0.02 to<br>0.04)                      |
| Cystic echinococcosis                                 | 4.57<br>(3.82 to<br>5.44)                            | 2.66<br>(1.91 to<br>3.64)                          | 2.19<br>(1.58 to<br>3.04)                          | 2.70<br>(1.97 to<br>3.70)                          | 0.18<br>(0.15 to<br>0.21)                      | 0.15<br>(0.11 to<br>0.19)                      | 0.13<br>(0.09 to<br>0.17)                      | 0.14<br>(0.11 to<br>0.19)                      |
| Dengue                                                | 0.00<br>(0.00 to<br>0.00)                            | 0.00<br>(0.00 to<br>0.00)                          | 0.00<br>(0.00 to<br>0.00)                          | 0.00<br>(0.00 to<br>0.00)                          | 0.00<br>(0.00 to<br>0.00)                      | 0.00<br>(0.00 to<br>0.00)                      | 0.00<br>(0.00 to<br>0.00)                      | 0.00<br>(0.00 to<br>0.00)                      |
| Yellow fever                                          | 0.00<br>(0.00 to<br>0.00)                            | 0.00<br>(0.00 to<br>0.00)                          | 0.00<br>(0.00 to<br>0.00)                          | 0.00<br>(0.00 to<br>0.00)                          | 0.00<br>(0.00 to<br>0.00)                      | 0.00<br>(0.00 to<br>0.00)                      | 0.00<br>(0.00 to<br>0.00)                      | 0.00<br>(0.00 to<br>0.00)                      |
| Rabies                                                | 0.15<br>(0.12 to<br>0.19)                            | 0.10<br>(0.07 to<br>0.14)                          | 0.09<br>(0.06 to<br>0.12)                          | 0.10<br>(0.07 to<br>0.14)                          | 0.00<br>(0.00 to<br>0.00)                      | 0.00<br>(0.00 to<br>0.00)                      | 0.00<br>(0.00 to<br>0.00)                      | 0.00<br>(0.00 to<br>0.00)                      |
| Intestinal nematode infections                        | 0.23<br>(0.12 to<br>0.38)                            | 0.20<br>(0.10 to<br>0.33)                          | 0.20<br>(0.10 to<br>0.34)                          | 0.20<br>(0.10 to<br>0.33)                          | 0.01<br>(0.00 to<br>0.01)                      | 0.01<br>(0.00 to<br>0.02)                      | 0.01<br>(0.00 to<br>0.02)                      | 0.01<br>(0.00 to<br>0.01)                      |
| Other neglected tropical diseases                     | 33.63<br>(15.34 to<br>42.84)                         | 31.60<br>(13.95 to<br>43.03)                       | 33.29<br>(14.56 to<br>45.74)                       | 30.65<br>(13.69 to<br>41.25)                       | 0.99<br>(0.35 to<br>1.28)                      | 1.24<br>(0.42 to<br>1.70)                      | 1.38<br>(0.48 to<br>1.95)                      | 1.15<br>(0.40 to<br>1.54)                      |
| <b>Maternal disorders</b>                             | <b>164.67</b><br><b>(137.38 to</b><br><b>194.24)</b> | <b>83.28</b><br><b>(45.05 to</b><br><b>141.02)</b> | <b>68.97</b><br><b>(37.76 to</b><br><b>115.78)</b> | <b>88.49</b><br><b>(47.46 to</b><br><b>152.07)</b> | <b>3.13</b><br><b>(2.62 to</b><br><b>3.69)</b> | <b>1.60</b><br><b>(0.87 to</b><br><b>2.69)</b> | <b>1.33</b><br><b>(0.74 to</b><br><b>2.20)</b> | <b>1.70</b><br><b>(0.93 to</b><br><b>2.84)</b> |
| Maternal hemorrhage                                   | 21.89<br>(14.41 to<br>31.52)                         | 11.51<br>(5.58 to<br>20.64)                        | 9.60<br>(4.68 to<br>17.31)                         | 12.10<br>(5.96 to<br>21.22)                        | 0.42<br>(0.28 to<br>0.60)                      | 0.22<br>(0.11 to<br>0.40)                      | 0.19<br>(0.09 to<br>0.34)                      | 0.24<br>(0.12 to<br>0.42)                      |
| Maternal sepsis and other maternal infections         | 5.72<br>(3.44 to<br>8.66)                            | 2.30<br>(1.01 to<br>4.34)                          | 1.90<br>(0.84 to<br>3.56)                          | 2.43<br>(1.07 to<br>4.73)                          | 0.11<br>(0.07 to<br>0.16)                      | 0.04<br>(0.02 to<br>0.08)                      | 0.04<br>(0.02 to<br>0.07)                      | 0.05<br>(0.02 to<br>0.09)                      |
| Maternal hypertensive disorders                       | 19.37<br>(13.36 to<br>26.90)                         | 9.55<br>(4.35 to<br>17.62)                         | 7.79<br>(3.58 to<br>14.33)                         | 10.13<br>(4.78 to<br>18.48)                        | 0.34<br>(0.24 to<br>0.48)                      | 0.17<br>(0.08 to<br>0.31)                      | 0.14<br>(0.07 to<br>0.25)                      | 0.18<br>(0.09 to<br>0.33)                      |
| Maternal obstructed labor and uterine rupture         | 1.90<br>(0.89 to<br>3.51)                            | 1.09<br>(0.38 to<br>2.35)                          | 0.87<br>(0.30 to<br>1.83)                          | 1.16<br>(0.39 to<br>2.53)                          | 0.04<br>(0.02 to<br>0.07)                      | 0.02<br>(0.01 to<br>0.05)                      | 0.02<br>(0.01 to<br>0.04)                      | 0.02<br>(0.01 to<br>0.05)                      |
| Maternal abortion, miscarriage, and ectopic pregnancy | 41.78<br>(29.15 to<br>55.80)                         | 24.84<br>(11.20 to<br>48.63)                       | 20.35<br>(9.34 to<br>39.17)                        | 26.45<br>(12.16 to<br>52.27)                       | 0.82<br>(0.57 to<br>1.10)                      | 0.49<br>(0.25 to<br>0.96)                      | 0.40<br>(0.19 to<br>0.79)                      | 0.52<br>(0.24 to<br>1.05)                      |





| Lithuania                                                               |                                           |                                         |                                         |                                         |                                  |                                  |                                  |                                  |
|-------------------------------------------------------------------------|-------------------------------------------|-----------------------------------------|-----------------------------------------|-----------------------------------------|----------------------------------|----------------------------------|----------------------------------|----------------------------------|
| Cause                                                                   | YLLs (actual counts)                      |                                         |                                         |                                         | Deaths (actual counts)           |                                  |                                  |                                  |
|                                                                         | 2016                                      | 2040 Forecast                           | 2040 Better Scenario                    | 2040 Worse Scenario                     | 2016                             | 2040 Forecast                    | 2040 Better Scenario             | 2040 Worse Scenario              |
| <b>Neonatal disorders</b>                                               | <b>3,442.82</b><br>(2,539.46 to 4,335.81) | <b>1,459.20</b><br>(605.00 to 2,745.43) | <b>1,064.36</b><br>(462.31 to 1,943.17) | <b>1,676.12</b><br>(696.07 to 3,029.76) | <b>39.80</b><br>(29.35 to 50.11) | <b>16.87</b><br>(7.00 to 31.72)  | <b>12.30</b><br>(5.35 to 22.46)  | <b>19.38</b><br>(8.04 to 35.02)  |
| Neonatal preterm birth                                                  | 1,344.77<br>(970.49 to 1,739.42)          | 433.84<br>(181.91 to 793.85)            | 270.99<br>(118.28 to 470.30)            | 541.73<br>(227.77 to 954.94)            | 15.54<br>(11.21 to 20.10)        | 5.01<br>(2.10 to 9.17)           | 3.13<br>(1.37 to 5.43)           | 6.26<br>(2.63 to 11.03)          |
| Neonatal encephalopathy due to birth asphyxia and trauma                | 1,034.78<br>(744.29 to 1,330.82)          | 373.41<br>(133.64 to 779.85)            | 257.16<br>(98.19 to 543.18)             | 425.34<br>(153.09 to 901.00)            | 11.96<br>(8.61 to 15.39)         | 4.32<br>(1.55 to 9.01)           | 2.97<br>(1.14 to 6.28)           | 4.92<br>(1.77 to 10.41)          |
| Neonatal sepsis and other neonatal infections                           | 613.28<br>(385.74 to 872.10)              | 263.54<br>(98.88 to 534.71)             | 196.24<br>(75.58 to 377.99)             | 293.62<br>(108.58 to 591.29)            | 7.09<br>(4.46 to 10.08)          | 3.04<br>(1.14 to 6.18)           | 2.27<br>(0.87 to 4.37)           | 3.39<br>(1.26 to 6.83)           |
| Hemolytic disease and other neonatal jaundice                           | 16.29<br>(9.58 to 26.88)                  | 6.45<br>(1.80 to 17.70)                 | 4.66<br>(1.37 to 12.33)                 | 7.24<br>(1.98 to 19.42)                 | 0.19<br>(0.11 to 0.31)           | 0.07<br>(0.02 to 0.20)           | 0.05<br>(0.02 to 0.14)           | 0.08<br>(0.02 to 0.22)           |
| Other neonatal disorders                                                | 433.70<br>(289.38 to 578.29)              | 382.16<br>(143.77 to 818.47)            | 335.31<br>(130.11 to 705.91)            | 408.19<br>(153.64 to 871.92)            | 5.02<br>(3.35 to 6.68)           | 4.42<br>(1.66 to 9.46)           | 3.88<br>(1.51 to 8.16)           | 4.72<br>(1.78 to 10.08)          |
| <b>Nutritional deficiencies</b>                                         | <b>165.90</b><br>(147.42 to 185.78)       | <b>109.56</b><br>(81.80 to 146.75)      | <b>110.75</b><br>(81.89 to 151.05)      | <b>106.93</b><br>(80.85 to 141.73)      | <b>5.77</b><br>(5.18 to 6.38)    | <b>4.94</b><br>(3.86 to 6.43)    | <b>5.22</b><br>(4.07 to 6.97)    | <b>4.64</b><br>(3.66 to 5.94)    |
| Protein-energy malnutrition                                             | 64.66<br>(39.56 to 80.55)                 | 44.14<br>(23.63 to 67.50)               | 48.84<br>(26.01 to 74.20)               | 42.05<br>(22.53 to 63.29)               | 2.05<br>(1.04 to 2.56)           | 1.99<br>(0.92 to 2.89)           | 2.35<br>(1.11 to 3.37)           | 1.81<br>(0.82 to 2.58)           |
| Iodine deficiency                                                       | 8.66<br>(1.11 to 23.62)                   | 8.19<br>(0.93 to 22.22)                 | 7.89<br>(0.84 to 21.41)                 | 8.06<br>(0.87 to 21.55)                 | 0.32<br>(0.03 to 0.83)           | 0.41<br>(0.03 to 1.08)           | 0.41<br>(0.03 to 1.12)           | 0.39<br>(0.03 to 1.03)           |
| Dietary iron deficiency                                                 | 18.23<br>(15.16 to 21.58)                 | 14.88<br>(10.27 to 20.93)               | 15.64<br>(10.73 to 22.15)               | 14.66<br>(10.02 to 20.50)               | 0.47<br>(0.39 to 0.57)           | 0.42<br>(0.29 to 0.59)           | 0.45<br>(0.30 to 0.63)           | 0.40<br>(0.28 to 0.56)           |
| Other nutritional deficiencies                                          | 74.36<br>(56.80 to 93.23)                 | 42.34<br>(27.22 to 63.41)               | 38.39<br>(24.08 to 59.20)               | 42.17<br>(27.72 to 61.94)               | 2.93<br>(2.35 to 3.84)           | 2.12<br>(1.38 to 3.14)           | 2.01<br>(1.27 to 3.14)           | 2.05<br>(1.38 to 2.98)           |
| <b>Other communicable, maternal, neonatal, and nutritional diseases</b> | <b>717.58</b><br>(642.80 to 796.76)       | <b>458.47</b><br>(347.30 to 597.32)     | <b>430.74</b><br>(328.08 to 573.06)     | <b>458.20</b><br>(351.88 to 594.58)     | <b>23.28</b><br>(20.72 to 25.63) | <b>19.58</b><br>(15.34 to 25.11) | <b>19.44</b><br>(15.10 to 25.77) | <b>18.79</b><br>(14.96 to 23.48) |
| Sexually transmitted infections excluding HIV                           | 66.97<br>(55.25 to 79.33)                 | 31.13<br>(19.85 to 46.77)               | 29.51<br>(18.56 to 44.27)               | 31.21<br>(20.20 to 45.95)               | 2.54<br>(2.15 to 2.98)           | 1.63<br>(1.08 to 2.36)           | 1.64<br>(1.06 to 2.47)           | 1.58<br>(1.05 to 2.24)           |
| Syphilis                                                                | 19.42<br>(14.33 to 25.84)                 | 7.33<br>(4.41 to 11.41)                 | 6.39<br>(3.88 to 10.04)                 | 7.53<br>(4.49 to 11.40)                 | 0.67<br>(0.55 to 0.79)           | 0.38<br>(0.23 to 0.59)           | 0.35<br>(0.21 to 0.57)           | 0.37<br>(0.23 to 0.56)           |
| Chlamydial infection                                                    | 9.17<br>(7.52 to 10.94)                   | 4.55<br>(2.80 to 7.08)                  | 4.44<br>(2.71 to 6.95)                  | 4.52<br>(2.78 to 7.03)                  | 0.37<br>(0.31 to 0.44)           | 0.25<br>(0.16 to 0.38)           | 0.26<br>(0.16 to 0.40)           | 0.24<br>(0.16 to 0.36)           |
| Gonococcal infection                                                    | 25.93<br>(21.46 to 30.84)                 | 13.47<br>(7.95 to 21.45)                | 13.12<br>(7.77 to 20.95)                | 13.37<br>(7.84 to 21.26)                | 1.06<br>(0.89 to 1.26)           | 0.74<br>(0.45 to 1.13)           | 0.76<br>(0.46 to 1.21)           | 0.71<br>(0.44 to 1.06)           |
| Other sexually transmitted infections                                   | 12.45<br>(10.21 to 14.84)                 | 5.79<br>(3.49 to 9.35)                  | 5.56<br>(3.33 to 8.81)                  | 5.80<br>(3.53 to 9.14)                  | 0.43<br>(0.36 to 0.51)           | 0.26<br>(0.16 to 0.39)           | 0.26<br>(0.16 to 0.40)           | 0.25<br>(0.16 to 0.37)           |
| Acute hepatitis                                                         | 344.16<br>(297.17 to 398.79)              | 121.40<br>(77.17 to 183.53)             | 95.17<br>(60.27 to 143.11)              | 126.25<br>(81.78 to 188.66)             | 11.01<br>(9.50 to 12.64)         | 4.91<br>(3.24 to 7.10)           | 4.00<br>(2.68 to 5.71)           | 4.94<br>(3.27 to 7.12)           |
| Acute hepatitis A                                                       | 28.06<br>(18.32 to 39.39)                 | 7.24<br>(3.53 to 13.37)                 | 5.83<br>(2.96 to 10.62)                 | 7.72<br>(3.85 to 13.88)                 | 0.49<br>(0.35 to 0.64)           | 0.18<br>(0.10 to 0.28)           | 0.15<br>(0.09 to 0.24)           | 0.18<br>(0.10 to 0.29)           |
| Acute hepatitis B                                                       | 272.00<br>(231.00 to 320.41)              | 96.25<br>(58.97 to 147.75)              | 74.85<br>(45.31 to 115.85)              | 100.26<br>(62.26 to 152.01)             | 8.85<br>(7.50 to 10.35)          | 3.74<br>(2.35 to 5.47)           | 2.99<br>(1.90 to 4.51)           | 3.80<br>(2.39 to 5.62)           |

|                                       |                                                                  |                                                                  |                                                                  |                                                                  |                                                               |                                                               |                                                               |                                                               |
|---------------------------------------|------------------------------------------------------------------|------------------------------------------------------------------|------------------------------------------------------------------|------------------------------------------------------------------|---------------------------------------------------------------|---------------------------------------------------------------|---------------------------------------------------------------|---------------------------------------------------------------|
|                                       | 10.49<br>(7.19 to<br>15.05)                                      | 4.06<br>(2.25 to<br>6.97)                                        | 3.22<br>(1.79 to<br>5.51)                                        | 4.19<br>(2.34 to<br>7.29)                                        | 0.37<br>(0.26 to<br>0.54)                                     | 0.17<br>(0.10 to<br>0.28)                                     | 0.14<br>(0.08 to<br>0.22)                                     | 0.17<br>(0.10 to<br>0.28)                                     |
| Acute hepatitis C                     |                                                                  |                                                                  |                                                                  |                                                                  |                                                               |                                                               |                                                               |                                                               |
|                                       | 33.61<br>(22.57 to<br>49.53)                                     | 13.86<br>(7.58 to<br>24.43)                                      | 11.27<br>(6.17 to<br>19.15)                                      | 14.08<br>(7.82 to<br>23.43)                                      | 1.31<br>(0.81 to<br>1.96)                                     | 0.82<br>(0.43 to<br>1.35)                                     | 0.71<br>(0.38 to<br>1.16)                                     | 0.79<br>(0.43 to<br>1.29)                                     |
| Acute hepatitis E                     |                                                                  |                                                                  |                                                                  |                                                                  |                                                               |                                                               |                                                               |                                                               |
|                                       | 306.45<br>(257.18 to<br>359.96)                                  | 305.94<br>(236.47 to<br>397.37)                                  | 306.06<br>(235.15 to<br>406.54)                                  | 300.74<br>(234.06 to<br>383.24)                                  | 9.74<br>(7.89 to<br>11.14)                                    | 13.04<br>(10.11 to<br>16.61)                                  | 13.81<br>(10.61 to<br>18.15)                                  | 12.27<br>(9.69 to<br>15.38)                                   |
| Other unspecified infectious diseases |                                                                  |                                                                  |                                                                  |                                                                  |                                                               |                                                               |                                                               |                                                               |
| <b>Non-communicable diseases</b>      | <b>571,834.05</b><br><b>(535,298.61 to</b><br><b>610,159.72)</b> | <b>440,038.07</b><br><b>(297,578.28 to</b><br><b>674,593.76)</b> | <b>354,774.64</b><br><b>(243,799.66 to</b><br><b>542,131.93)</b> | <b>535,938.09</b><br><b>(359,723.60 to</b><br><b>797,652.75)</b> | <b>36,020.05</b><br><b>(33,955.65 to</b><br><b>38,036.52)</b> | <b>32,522.12</b><br><b>(22,294.09 to</b><br><b>49,952.91)</b> | <b>27,354.15</b><br><b>(18,778.87 to</b><br><b>42,968.87)</b> | <b>37,714.05</b><br><b>(26,344.31 to</b><br><b>56,027.89)</b> |

| Lithuania                            |                                                 |                                                 |                                                |                                                 |                                           |                                            |                                            |                                            |
|--------------------------------------|-------------------------------------------------|-------------------------------------------------|------------------------------------------------|-------------------------------------------------|-------------------------------------------|--------------------------------------------|--------------------------------------------|--------------------------------------------|
| Cause                                | YLLs (actual counts)                            |                                                 |                                                |                                                 | Deaths (actual counts)                    |                                            |                                            |                                            |
|                                      | 2016                                            | 2040 Forecast                                   | 2040 Better Scenario                           | 2040 Worse Scenario                             | 2016                                      | 2040 Forecast                              | 2040 Better Scenario                       | 2040 Worse Scenario                        |
| <b>Neoplasms</b>                     | <b>151,111.29</b><br>(139,314.81 to 161,949.07) | <b>143,592.65</b><br>(103,374.12 to 198,111.25) | <b>123,019.70</b><br>(87,330.03 to 176,616.39) | <b>165,193.66</b><br>(120,666.01 to 220,653.89) | <b>7,569.77</b><br>(7,018.94 to 8,092.95) | <b>8,548.82</b><br>(6,456.64 to 11,497.19) | <b>7,676.52</b><br>(5,625.57 to 10,916.86) | <b>9,418.55</b><br>(7,242.69 to 12,139.39) |
| Lip and oral cavity cancer           | 3,564.52<br>(3,108.26 to 4,098.30)              | 3,397.65<br>(1,604.33 to 6,510.68)              | 2,101.41<br>(990.06 to 4,115.22)               | 4,735.88<br>(2,295.74 to 8,347.09)              | 144.44<br>(128.23 to 163.46)              | 144.44<br>(81.99 to 287.54)                | 103.43<br>(53.36 to 186.60)                | 217.95<br>(112.26 to 366.14)               |
| Nasopharynx cancer                   | 264.71<br>(231.14 to 309.05)                    | 265.68<br>(131.58 to 491.48)                    | 151.75<br>(73.99 to 296.38)                    | 384.81<br>(191.99 to 698.73)                    | 9.95<br>(8.76 to 11.44)                   | 11.27<br>(5.74 to 20.41)                   | 6.57<br>(3.32 to 12.07)                    | 16.01<br>(8.36 to 28.15)                   |
| Other pharynx cancer                 | 2,468.57<br>(2,097.51 to 2,863.95)              | 2,415.37<br>(1,199.48 to 4,452.21)              | 2,094.73<br>(1,032.58 to 3,895.41)             | 2,607.63<br>(1,317.53 to 4,633.76)              | 90.55<br>(78.18 to 104.36)                | 99.16<br>(51.94 to 176.96)                 | 86.67<br>(44.62 to 158.20)                 | 105.84<br>(56.10 to 186.46)                |
| Esophageal cancer                    | 4,447.09<br>(3,848.39 to 5,111.57)              | 4,307.66<br>(2,036.72 to 8,795.07)              | 3,166.01<br>(1,562.72 to 6,309.10)             | 6,149.89<br>(2,805.22 to 12,500.65)             | 190.00<br>(167.11 to 215.35)              | 209.57<br>(106.11 to 402.47)               | 158.92<br>(83.60 to 297.56)                | 289.93<br>(140.82 to 551.03)               |
| Stomach cancer                       | 13,499.24<br>(12,347.81 to 14,747.04)           | 8,169.05<br>(5,238.86 to 12,577.08)             | 6,677.70<br>(4,377.95 to 10,394.54)            | 8,904.89<br>(5,720.15 to 13,363.82)             | 700.53<br>(641.93 to 762.84)              | 506.76<br>(339.17 to 757.46)               | 432.53<br>(292.11 to 669.41)               | 532.64<br>(362.87 to 780.67)               |
| Colon and rectum cancer              | 15,781.90<br>(14,362.69 to 17,431.40)           | 17,805.39<br>(10,949.26 to 27,603.27)           | 13,772.16<br>(8,480.26 to 21,782.10)           | 19,311.46<br>(11,943.08 to 29,085.16)           | 921.16<br>(834.34 to 1,015.25)            | 1,221.45<br>(788.43 to 1,808.89)           | 989.20<br>(626.90 to 1,504.08)             | 1,281.84<br>(848.46 to 1,922.01)           |
| Liver cancer                         | 3,689.99<br>(3,286.65 to 4,131.08)              | 5,393.71<br>(3,110.54 to 9,201.79)              | 4,513.52<br>(2,716.53 to 7,642.89)             | 6,503.66<br>(3,557.76 to 11,332.92)             | 187.24<br>(167.87 to 207.69)              | 321.18<br>(195.18 to 529.94)               | 283.80<br>(162.49 to 462.49)               | 370.29<br>(176.90 to 606.09)               |
| Liver cancer due to hepatitis B      | 1,335.69<br>(1,103.73 to 1,593.55)              | 1,782.66<br>(998.33 to 3,038.92)                | 1,668.09<br>(979.22 to 2,907.67)               | 2,010.21<br>(1,088.30 to 3,536.82)              | 63.89<br>(53.39 to 75.93)                 | 101.47<br>(59.49 to 168.29)                | 99.46<br>(60.27 to 166.30)                 | 109.81<br>(61.88 to 186.12)                |
| Liver cancer due to hepatitis C      | 376.50<br>(316.59 to 438.94)                    | 560.48<br>(323.56 to 928.79)                    | 539.11<br>(315.91 to 910.53)                   | 616.19<br>(345.56 to 1,042.75)                  | 21.96<br>(18.57 to 25.75)                 | 38.13<br>(22.96 to 61.27)                  | 38.49<br>(23.04 to 63.62)                  | 40.24<br>(23.47 to 65.47)                  |
| Liver cancer due to alcohol use      | 1,423.51<br>(1,226.23 to 1,639.24)              | 2,187.80<br>(1,248.56 to 3,704.81)              | 1,498.88<br>(892.87 to 2,531.90)               | 2,896.25<br>(1,591.54 to 5,037.22)              | 73.71<br>(64.19 to 85.07)                 | 130.31<br>(77.57 to 216.05)                | 95.55<br>(57.49 to 157.93)                 | 164.27<br>(94.47 to 273.13)                |
| Liver cancer due to other causes     | 554.29<br>(473.95 to 646.79)                    | 862.76<br>(470.89 to 1,539.28)                  | 807.43<br>(465.09 to 1,396.35)                 | 981.00<br>(512.62 to 1,747.04)                  | 27.67<br>(23.72 to 32.09)                 | 51.26<br>(29.27 to 88.06)                  | 50.30<br>(29.51 to 86.47)                  | 55.97<br>(30.60 to 96.66)                  |
| Gallbladder and biliary tract cancer | 1,674.41<br>(1,513.58 to 1,849.59)              | 1,270.92<br>(942.31 to 1,740.84)                | 1,297.99<br>(942.12 to 1,871.41)               | 1,207.01<br>(919.18 to 1,582.53)                | 97.54<br>(88.29 to 107.28)                | 87.44<br>(66.93 to 119.13)                 | 92.26<br>(68.07 to 131.55)                 | 81.18<br>(64.40 to 105.57)                 |
| Pancreatic cancer                    | 8,932.15<br>(8,108.16 to 9,811.81)              | 10,654.96<br>(7,537.27 to 15,339.75)            | 10,536.31<br>(7,345.30 to 15,887.40)           | 11,139.46<br>(7,910.28 to 15,614.15)            | 469.41<br>(428.12 to 515.77)              | 648.16<br>(480.83 to 905.26)               | 666.05<br>(477.87 to 967.92)               | 653.26<br>(490.37 to 878.93)               |
| Larynx cancer                        | 3,150.47<br>(2,750.00 to 3,613.59)              | 2,225.02<br>(830.14 to 4,832.94)                | 1,263.04<br>(883.64 to 2,708.61)               | 3,380.61<br>(1,361.11 to 6,957.89)              | 129.27<br>(113.94 to 146.93)              | 100.90<br>(40.29 to 208.11)                | 58.35<br>(24.72 to 119.15)                 | 151.86<br>(59.55 to 304.19)                |
| Tracheal, bronchus, and lung cancer  | 26,481.27<br>(23,762.50 to 29,562.07)           | 23,264.49<br>(14,754.64 to 36,184.37)           | 16,784.27<br>(10,424.30 to 26,800.71)          | 35,732.17<br>(22,856.87 to 54,584.66)           | 1,270.50<br>(1,136.38 to 1,407.53)        | 1,259.79<br>(819.24 to 1,874.79)           | 945.44<br>(607.76 to 1,446.95)             | 1,878.30<br>(1,232.97 to 2,747.89)         |
| Malignant skin melanoma              | 2,310.14<br>(1,638.55 to 2,671.57)              | 2,407.39<br>(1,546.70 to 3,477.23)              | 2,801.25<br>(1,791.25 to 4,119.90)             | 2,225.55<br>(1,437.78 to 3,131.99)              | 104.93<br>(73.52 to 121.80)               | 135.11<br>(88.14 to 190.45)                | 162.62<br>(106.20 to 238.41)               | 121.58<br>(79.27 to 165.89)                |
| Non-melanoma skin cancer             | 864.87<br>(776.54 to 962.87)                    | 866.83<br>(634.68 to 1,167.74)                  | 792.34<br>(566.65 to 1,131.30)                 | 831.32<br>(626.67 to 1,101.70)                  | 55.29<br>(50.40 to 60.72)                 | 70.64<br>(52.06 to 95.18)                  | 67.85<br>(48.79 to 97.80)                  | 65.69<br>(50.17 to 87.64)                  |
| Breast cancer                        | 11,169.27<br>(9,624.89 to 12,905.56)            | 9,689.75<br>(6,200.96 to 15,331.97)             | 7,630.28<br>(4,810.34 to 12,061.70)            | 10,367.84<br>(6,595.66 to 15,940.66)            | 509.00<br>(441.54 to 579.83)              | 535.80<br>(352.65 to 823.11)               | 441.77<br>(290.56 to 693.80)               | 558.12<br>(368.36 to 839.73)               |
| Cervical cancer                      | 3,840.69<br>(3,344.17 to 4,371.21)              | 2,292.36<br>(1,533.52 to 3,362.73)              | 1,920.16<br>(1,300.94 to 2,935.90)             | 2,397.08<br>(1,612.83 to 3,510.83)              | 166.98<br>(146.31 to 190.46)              | 120.71<br>(83.96 to 173.73)                | 104.69<br>(72.24 to 158.71)                | 122.97<br>(85.51 to 173.13)                |



| Lithuania                       |                                                      |                                                     |                                                     |                                                      |                                                   |                                                  |                                                  |                                                   |
|---------------------------------|------------------------------------------------------|-----------------------------------------------------|-----------------------------------------------------|------------------------------------------------------|---------------------------------------------------|--------------------------------------------------|--------------------------------------------------|---------------------------------------------------|
| Cause                           | YLLs (actual counts)                                 |                                                     |                                                     |                                                      | Deaths (actual counts)                            |                                                  |                                                  |                                                   |
|                                 | 2016                                                 | 2040 Forecast                                       | 2040 Better Scenario                                | 2040 Worse Scenario                                  | 2016                                              | 2040 Forecast                                    | 2040 Better Scenario                             | 2040 Worse Scenario                               |
| Kidney cancer                   | 5,598.83<br>(4,927.43 to<br>6,219.64)                | 6,198.91<br>(4,011.17 to<br>9,308.11)               | 6,243.30<br>(4,036.38 to<br>9,405.62)               | 6,362.76<br>(4,035.30 to<br>9,510.11)                | 283.53<br>(251.97 to<br>313.50)                   | 364.97<br>(248.29 to<br>514.00)                  | 384.17<br>(260.18 to<br>554.73)                  | 360.85<br>(245.16 to<br>509.91)                   |
| Bladder cancer                  | 3,642.22<br>(3,277.74 to<br>4,037.48)                | 3,885.70<br>(2,706.83 to<br>5,739.37)               | 3,565.52<br>(2,450.81 to<br>5,280.12)               | 4,216.76<br>(2,929.43 to<br>6,175.21)                | 235.82<br>(213.74 to<br>260.37)                   | 293.76<br>(215.88 to<br>415.04)                  | 284.57<br>(204.55 to<br>407.89)                  | 305.77<br>(223.12 to<br>431.46)                   |
| Brain and nervous system cancer | 5,728.89<br>(4,225.15 to<br>6,576.19)                | 5,149.60<br>(3,300.76 to<br>7,314.46)               | 4,982.19<br>(3,094.04 to<br>7,338.54)               | 5,049.71<br>(3,247.20 to<br>7,037.94)                | 205.97<br>(140.45 to<br>239.30)                   | 218.51<br>(128.35 to<br>312.23)                  | 217.08<br>(124.46 to<br>320.35)                  | 209.44<br>(123.77 to<br>287.84)                   |
| Thyroid cancer                  | 465.75<br>(407.01 to<br>524.10)                      | 465.43<br>(291.53 to<br>736.79)                     | 414.05<br>(261.37 to<br>653.18)                     | 487.54<br>(310.32 to<br>759.91)                      | 24.92<br>(21.90 to<br>27.96)                      | 29.52<br>(18.93 to<br>46.25)                     | 27.19<br>(17.24 to<br>43.47)                     | 30.07<br>(19.41 to<br>45.91)                      |
| Mesothelioma                    | 249.73<br>(223.22 to<br>282.09)                      | 317.87<br>(235.16 to<br>451.84)                     | 337.10<br>(241.14 to<br>499.77)                     | 299.54<br>(227.09 to<br>406.85)                      | 11.49<br>(10.37 to<br>12.75)                      | 17.57<br>(13.31 to<br>23.93)                     | 19.22<br>(13.98 to<br>27.18)                     | 16.15<br>(12.64 to<br>21.13)                      |
| Hodgkin lymphoma                | 448.28<br>(398.82 to<br>602.18)                      | 294.94<br>(204.34 to<br>428.79)                     | 243.73<br>(172.21 to<br>365.69)                     | 300.37<br>(210.91 to<br>431.18)                      | 15.29<br>(13.72 to<br>19.56)                      | 12.64<br>(9.08 to<br>17.63)                      | 10.81<br>(7.74 to<br>15.46)                      | 12.50<br>(9.13 to<br>17.04)                       |
| Non-Hodgkin lymphoma            | 3,024.33<br>(2,351.71 to<br>3,402.73)                | 2,569.54<br>(1,671.36 to<br>3,667.32)               | 2,381.50<br>(1,587.28 to<br>3,560.79)               | 2,585.73<br>(1,722.67 to<br>3,647.46)                | 146.78<br>(109.37 to<br>166.44)                   | 151.56<br>(99.02 to<br>214.98)                   | 145.50<br>(93.55 to<br>215.86)                   | 148.48<br>(96.68 to<br>208.07)                    |
| Multiple myeloma                | 1,906.61<br>(1,481.84 to<br>2,199.92)                | 2,088.79<br>(1,336.11 to<br>3,107.94)               | 2,016.93<br>(1,272.37 to<br>3,057.46)               | 2,099.81<br>(1,331.49 to<br>3,047.67)                | 100.75<br>(73.22 to<br>116.50)                    | 126.52<br>(78.25 to<br>183.91)                   | 125.87<br>(77.20 to<br>186.82)                   | 124.26<br>(76.95 to<br>176.33)                    |
| Leukemia                        | 5,517.34<br>(5,003.51 to<br>6,085.53)                | 5,470.85<br>(3,792.04 to<br>7,876.45)               | 5,025.43<br>(3,495.93 to<br>7,420.95)               | 5,854.91<br>(4,071.89 to<br>8,266.97)                | 257.30<br>(235.06 to<br>281.70)                   | 315.64<br>(223.34 to<br>438.58)                  | 301.39<br>(210.67 to<br>440.11)                  | 326.60<br>(229.54 to<br>456.84)                   |
| Acute lymphoid leukemia         | 742.98<br>(656.92 to<br>837.40)                      | 508.85<br>(355.14 to<br>724.54)                     | 435.71<br>(307.16 to<br>624.67)                     | 560.01<br>(390.96 to<br>779.55)                      | 21.72<br>(19.14 to<br>24.71)                      | 19.02<br>(13.09 to<br>27.08)                     | 16.70<br>(11.46 to<br>24.54)                     | 20.54<br>(14.22 to<br>29.10)                      |
| Chronic lymphoid leukemia       | 1,320.86<br>(1,134.28 to<br>1,556.72)                | 1,561.88<br>(1,003.18 to<br>2,381.80)               | 1,476.03<br>(942.08 to<br>2,283.38)                 | 1,639.56<br>(1,058.62 to<br>2,477.24)                | 80.22<br>(68.76 to<br>94.05)                      | 107.29<br>(71.26 to<br>157.24)                   | 105.54<br>(69.15 to<br>159.65)                   | 108.87<br>(73.51 to<br>158.04)                    |
| Acute myeloid leukemia          | 2,246.64<br>(1,840.18 to<br>2,554.00)                | 2,354.92<br>(1,606.37 to<br>3,408.34)               | 2,235.41<br>(1,517.81 to<br>3,269.27)               | 2,515.20<br>(1,716.40 to<br>3,620.38)                | 95.09<br>(77.19 to<br>108.43)                     | 120.95<br>(82.76 to<br>175.12)                   | 118.50<br>(80.04 to<br>175.51)                   | 125.62<br>(85.64 to<br>182.09)                    |
| Chronic myeloid leukemia        | 419.05<br>(371.62 to<br>479.74)                      | 218.66<br>(137.51 to<br>338.32)                     | 162.30<br>(104.78 to<br>253.13)                     | 248.56<br>(155.99 to<br>379.75)                      | 19.65<br>(17.26 to<br>23.37)                      | 12.81<br>(8.33 to<br>19.26)                      | 9.95<br>(6.62 to<br>15.58)                       | 13.99<br>(9.08 to<br>20.54)                       |
| Other leukemia                  | 787.81<br>(679.59 to<br>915.00)                      | 826.55<br>(551.86 to<br>1,205.22)                   | 715.99<br>(472.68 to<br>1,059.86)                   | 891.57<br>(581.11 to<br>1,293.55)                    | 40.62<br>(34.71 to<br>46.71)                      | 55.57<br>(37.88 to<br>79.80)                     | 50.69<br>(34.51 to<br>75.51)                     | 57.59<br>(39.34 to<br>81.49)                      |
| Other neoplasms                 | 6,121.93<br>(5,275.62 to<br>6,785.40)                | 6,572.90<br>(4,930.20 to<br>8,850.31)               | 6,759.77<br>(5,006.11 to<br>9,471.14)               | 6,271.26<br>(4,790.40 to<br>8,182.82)                | 285.27<br>(249.22 to<br>315.86)                   | 384.65<br>(300.09 to<br>514.12)                  | 411.63<br>(310.28 to<br>574.41)                  | 356.67<br>(283.81 to<br>461.22)                   |
| <b>Cardiovascular diseases</b>  | <b>295,163.40<br/>(275,356.07 to<br/>314,320.16)</b> | <b>169,902.85<br/>(93,081.85 to<br/>307,893.17)</b> | <b>112,998.47<br/>(63,947.71 to<br/>207,979.76)</b> | <b>236,756.71<br/>(127,398.17 to<br/>422,146.69)</b> | <b>22,105.62<br/>(20,817.72 to<br/>23,375.24)</b> | <b>15,559.72<br/>(8,762.30 to<br/>27,956.45)</b> | <b>11,291.66<br/>(6,474.64 to<br/>20,887.75)</b> | <b>19,687.61<br/>(11,304.16 to<br/>34,254.50)</b> |
| Rheumatic heart disease         | 2,263.90<br>(2,010.30 to<br>2,516.76)                | 1,248.33<br>(713.90 to<br>2,089.68)                 | 1,033.70<br>(601.07 to<br>1,833.24)                 | 1,302.08<br>(748.72 to<br>2,260.62)                  | 97.23<br>(86.75 to<br>107.83)                     | 63.83<br>(38.25 to<br>109.22)                    | 54.57<br>(33.15 to<br>96.19)                     | 65.13<br>(39.76 to<br>110.34)                     |
| Ischemic heart disease          | 195,419.35<br>(182,000.03 to<br>209,990.10)          | 108,497.71<br>(53,399.55 to<br>211,797.90)          | 69,162.69<br>(35,139.32 to<br>134,137.60)           | 158,859.82<br>(77,444.68 to<br>294,832.08)           | 15,685.92<br>(14,753.98 to<br>16,695.56)          | 10,764.70<br>(5,479.38 to<br>20,621.35)          | 7,579.42<br>(3,845.56 to<br>15,010.24)           | 14,039.12<br>(7,284.35 to<br>26,142.33)           |
| Stroke                          | 60,696.93<br>(55,285.11 to<br>66,508.77)             | 29,789.27<br>(14,410.81 to<br>55,435.36)            | 18,786.17<br>(9,509.26 to<br>35,931.09)             | 41,932.24<br>(20,942.12 to<br>76,453.75)             | 4,435.33<br>(4,017.63 to<br>4,858.51)             | 2,681.21<br>(1,345.85 to<br>4,826.04)            | 1,878.87<br>(943.89 to<br>3,570.63)              | 3,369.80<br>(1,713.33 to<br>6,132.97)             |
| Ischemic stroke                 | 43,121.73<br>(39,168.47 to<br>47,562.06)             | 21,144.14<br>(9,837.51 to<br>41,918.80)             | 14,263.69<br>(6,925.61 to<br>28,389.73)             | 28,103.16<br>(13,811.27 to<br>56,683.65)             | 3,518.96<br>(3,173.58 to<br>3,872.11)             | 2,107.77<br>(1,010.54 to<br>3,985.56)            | 1,540.56<br>(752.28 to<br>3,085.74)              | 2,558.48<br>(1,270.77 to<br>4,815.81)             |

|                                |                                          |                                        |                                        |                                         |                                   |                                   |                                 |                                   |
|--------------------------------|------------------------------------------|----------------------------------------|----------------------------------------|-----------------------------------------|-----------------------------------|-----------------------------------|---------------------------------|-----------------------------------|
| Intracerebral hemorrhage       | 17,575.20<br>(15,784.95 to<br>19,437.39) | 8,645.13<br>(3,780.67 to<br>17,335.34) | 4,522.49<br>(2,121.46 to<br>8,910.19)  | 13,829.08<br>(5,836.55 to<br>27,922.01) | 916.37<br>(826.69 to<br>1,005.03) | 573.45<br>(270.80 to<br>1,071.71) | 338.31<br>(174.36 to<br>624.19) | 811.33<br>(390.87 to<br>1,534.72) |
| Hypertensive heart disease     | 6,572.23<br>(3,536.37 to<br>8,348.38)    | 7,438.42<br>(3,027.81 to<br>16,939.12) | 5,462.60<br>(2,425.32 to<br>12,135.34) | 9,424.73<br>(3,627.73 to<br>22,572.43)  | 404.42<br>(231.05 to<br>523.46)   | 585.12<br>(260.68 to<br>1,329.95) | 468.19<br>(218.51 to<br>984.02) | 702.33<br>(298.81 to<br>1,662.21) |
| Cardiomyopathy and myocarditis | 14,228.66<br>(10,805.75 to<br>16,399.11) | 8,856.35<br>(5,042.23 to<br>14,796.66) | 6,349.75<br>(3,563.23 to<br>11,149.85) | 10,259.07<br>(5,927.45 to<br>16,733.05) | 478.83<br>(364.75 to<br>550.18)   | 326.31<br>(195.50 to<br>525.42)   | 241.97<br>(143.76 to<br>399.36) | 368.39<br>(221.52 to<br>573.62)   |
| Myocarditis                    | 151.91<br>(119.19 to<br>202.70)          | 122.82<br>(84.40 to<br>188.76)         | 123.00<br>(83.26 to<br>196.30)         | 119.82<br>(83.20 to<br>179.57)          | 5.43<br>(4.21 to<br>7.85)         | 7.02<br>(4.66 to<br>12.10)        | 7.82<br>(4.99 to<br>14.15)      | 6.41<br>(4.32 to<br>10.50)        |

| Lithuania                                                     |                                                               |                                                               |                                                              |                                                               |                                                        |                                                        |                                                        |                                                          |
|---------------------------------------------------------------|---------------------------------------------------------------|---------------------------------------------------------------|--------------------------------------------------------------|---------------------------------------------------------------|--------------------------------------------------------|--------------------------------------------------------|--------------------------------------------------------|----------------------------------------------------------|
| Cause                                                         | YLLs (actual counts)                                          |                                                               |                                                              |                                                               | Deaths (actual counts)                                 |                                                        |                                                        |                                                          |
|                                                               | 2016                                                          | 2040 Forecast                                                 | 2040 Better Scenario                                         | 2040 Worse Scenario                                           | 2016                                                   | 2040 Forecast                                          | 2040 Better Scenario                                   | 2040 Worse Scenario                                      |
| Alcoholic cardiomyopathy                                      | 7,969.11<br>(5,850.25 to<br>9,498.42)                         | 5,728.80<br>(3,289.10 to<br>9,560.91)                         | 4,029.27<br>(2,224.18 to<br>6,985.12)                        | 6,816.12<br>(4,002.85 to<br>11,041.43)                        | 245.17<br>(174.12 to<br>290.06)                        | 189.90<br>(111.41 to<br>305.51)                        | 135.56<br>(76.48 to<br>226.56)                         | 223.34<br>(132.77 to<br>348.16)                          |
| Other cardiomyopathy                                          | 6,107.65<br>(4,608.93 to<br>7,418.27)                         | 3,004.73<br>(1,383.94 to<br>5,727.82)                         | 2,197.47<br>(1,047.90 to<br>4,255.44)                        | 3,323.12<br>(1,512.28 to<br>6,248.11)                         | 228.23<br>(173.23 to<br>271.10)                        | 129.39<br>(64.48 to<br>238.26)                         | 98.59<br>(51.44 to<br>180.88)                          | 138.64<br>(67.86 to<br>245.87)                           |
| Atrial fibrillation and flutter                               | 2,357.15<br>(1,810.21 to<br>3,001.42)                         | 3,354.86<br>(2,165.08 to<br>5,169.97)                         | 3,147.81<br>(2,032.35 to<br>5,031.03)                        | 3,356.74<br>(2,185.85 to<br>5,040.19)                         | 257.69<br>(197.50 to<br>329.93)                        | 408.64<br>(268.54 to<br>627.09)                        | 401.99<br>(255.21 to<br>648.68)                        | 395.04<br>(258.26 to<br>598.41)                          |
| Aortic aneurysm                                               | 2,919.32<br>(2,619.01 to<br>3,249.85)                         | 2,094.29<br>(1,299.80 to<br>3,590.00)                         | 1,872.44<br>(1,157.17 to<br>3,224.71)                        | 2,230.40<br>(1,375.77 to<br>3,736.60)                         | 151.58<br>(136.70 to<br>167.46)                        | 131.92<br>(87.03 to<br>206.83)                         | 126.63<br>(82.58 to<br>205.31)                         | 132.90<br>(88.14 to<br>201.36)                           |
| Peripheral artery disease                                     | 1,324.98<br>(653.34 to<br>1,724.67)                           | 1,779.15<br>(742.04 to<br>3,272.92)                           | 1,783.59<br>(738.33 to<br>3,378.56)                          | 1,843.11<br>(767.61 to<br>3,368.21)                           | 103.29<br>(52.97 to<br>132.04)                         | 167.73<br>(76.97 to<br>294.86)                         | 179.16<br>(79.47 to<br>329.76)                         | 164.63<br>(75.20 to<br>289.55)                           |
| Endocarditis                                                  | 1,052.64<br>(818.87 to<br>1,384.35)                           | 1,014.72<br>(579.69 to<br>1,782.05)                           | 966.30<br>(555.69 to<br>1,704.99)                            | 1,041.23<br>(595.75 to<br>1,814.45)                           | 42.42<br>(31.70 to<br>54.09)                           | 49.59<br>(29.52 to<br>80.13)                           | 49.65<br>(29.36 to<br>82.00)                           | 49.00<br>(28.92 to<br>78.60)                             |
| Other cardiovascular and circulatory diseases                 | 8,328.23<br>(7,500.73 to<br>9,239.57)                         | 5,829.75<br>(3,245.98 to<br>10,277.56)                        | 4,433.42<br>(2,579.66 to<br>8,128.55)                        | 6,507.29<br>(3,648.24 to<br>11,804.32)                        | 448.32<br>(404.03 to<br>498.46)                        | 380.68<br>(227.88 to<br>626.45)                        | 311.22<br>(187.92 to<br>530.86)                        | 401.27<br>(244.03 to<br>661.35)                          |
| <b>Chronic respiratory diseases</b>                           | <b>11,925.64</b><br><b>(10,982.15 to</b><br><b>13,079.61)</b> | <b>12,428.64</b><br><b>(7,422.20 to</b><br><b>19,922.54)</b>  | <b>9,543.55</b><br><b>(5,775.59 to</b><br><b>15,291.85)</b>  | <b>17,594.94</b><br><b>(10,365.58 to</b><br><b>28,307.62)</b> | <b>780.21</b><br><b>(719.06 to</b><br><b>847.60)</b>   | <b>941.39</b><br><b>(604.12 to</b><br><b>1,399.96)</b> | <b>775.73</b><br><b>(502.82 to</b><br><b>1,190.99)</b> | <b>1,246.66</b><br><b>(778.51 to</b><br><b>1,873.54)</b> |
| Chronic obstructive pulmonary disease                         | 10,641.13<br>(9,791.11 to<br>11,498.78)                       | 11,352.31<br>(6,505.72 to<br>18,502.85)                       | 8,412.00<br>(4,864.14 to<br>13,845.82)                       | 16,495.19<br>(9,396.40 to<br>27,143.78)                       | 714.99<br>(658.64 to<br>778.38)                        | 877.83<br>(543.70 to<br>1,347.60)                      | 706.56<br>(441.85 to<br>1,100.72)                      | 1,183.76<br>(724.08 to<br>1,821.06)                      |
| Pneumoconiosis                                                | 23.81<br>(20.42 to<br>27.69)                                  | 21.65<br>(14.67 to<br>31.89)                                  | 22.95<br>(14.92 to<br>36.35)                                 | 21.34<br>(14.85 to<br>30.47)                                  | 1.59<br>(1.37 to<br>1.83)                              | 1.83<br>(1.22 to<br>2.78)                              | 2.02<br>(1.30 to<br>3.25)                              | 1.77<br>(1.21 to<br>2.68)                                |
| Silicosis                                                     | 3.03<br>(2.15 to<br>4.19)                                     | 1.04<br>(0.42 to<br>2.29)                                     | 0.73<br>(0.31 to<br>1.60)                                    | 1.07<br>(0.45 to<br>2.20)                                     | 0.16<br>(0.11 to<br>0.23)                              | 0.07<br>(0.03 to<br>0.14)                              | 0.05<br>(0.02 to<br>0.10)                              | 0.07<br>(0.03 to<br>0.13)                                |
| Asbestosis                                                    | 6.07<br>(5.22 to<br>7.08)                                     | 7.39<br>(4.87 to<br>10.69)                                    | 8.61<br>(5.59 to<br>12.86)                                   | 6.88<br>(4.62 to<br>10.02)                                    | 0.23<br>(0.20 to<br>0.28)                              | 0.37<br>(0.25 to<br>0.56)                              | 0.45<br>(0.30 to<br>0.70)                              | 0.33<br>(0.23 to<br>0.51)                                |
| Coal workers pneumoconiosis                                   | 0.24<br>(0.17 to<br>0.38)                                     | 0.25<br>(0.13 to<br>0.47)                                     | 0.25<br>(0.12 to<br>0.50)                                    | 0.25<br>(0.13 to<br>0.48)                                     | 0.01<br>(0.01 to<br>0.02)                              | 0.02<br>(0.01 to<br>0.04)                              | 0.02<br>(0.01 to<br>0.05)                              | 0.02<br>(0.01 to<br>0.04)                                |
| Other pneumoconiosis                                          | 14.47<br>(12.07 to<br>17.23)                                  | 12.97<br>(8.05 to<br>21.10)                                   | 13.35<br>(7.77 to<br>23.76)                                  | 13.14<br>(8.21 to<br>20.70)                                   | 1.18<br>(1.00 to<br>1.38)                              | 1.37<br>(0.84 to<br>2.25)                              | 1.50<br>(0.87 to<br>2.58)                              | 1.35<br>(0.85 to<br>2.16)                                |
| Asthma                                                        | 731.14<br>(632.18 to<br>912.78)                               | 300.69<br>(130.09 to<br>628.51)                               | 195.51<br>(90.02 to<br>393.84)                               | 375.12<br>(160.64 to<br>778.91)                               | 39.40<br>(33.90 to<br>49.35)                           | 19.73<br>(8.73 to<br>40.62)                            | 13.68<br>(6.15 to<br>27.94)                            | 25.54<br>(10.49 to<br>46.65)                             |
| Interstitial lung disease and pulmonary sarcoidosis           | 357.21<br>(256.09 to<br>473.48)                               | 556.41<br>(355.48 to<br>858.26)                               | 716.82<br>(461.39 to<br>1,105.46)                            | 496.67<br>(322.90 to<br>756.48)                               | 16.89<br>(12.78 to<br>23.01)                           | 31.60<br>(21.24 to<br>48.11)                           | 42.39<br>(28.88 to<br>63.94)                           | 27.32<br>(18.32 to<br>41.67)                             |
| Other chronic respiratory diseases                            | 172.35<br>(127.78 to<br>288.86)                               | 197.57<br>(110.52 to<br>359.33)                               | 196.27<br>(111.03 to<br>361.97)                              | 206.63<br>(115.10 to<br>372.14)                               | 7.35<br>(5.47 to<br>12.28)                             | 10.41<br>(6.30 to<br>18.66)                            | 11.09<br>(6.56 to<br>20.31)                            | 10.25<br>(6.16 to<br>18.32)                              |
| <b>Cirrhosis and other chronic liver diseases</b>             | <b>28,901.21</b><br><b>(26,031.29 to</b><br><b>32,129.59)</b> | <b>15,172.76</b><br><b>(10,223.20 to</b><br><b>21,690.84)</b> | <b>11,588.73</b><br><b>(7,767.77 to</b><br><b>17,139.94)</b> | <b>16,679.00</b><br><b>(11,584.26 to</b><br><b>23,852.54)</b> | <b>918.12</b><br><b>(828.88 to</b><br><b>1,013.07)</b> | <b>553.60</b><br><b>(392.21 to</b><br><b>784.41)</b>   | <b>433.46</b><br><b>(306.90 to</b><br><b>627.55)</b>   | <b>597.35</b><br><b>(430.36 to</b><br><b>825.89)</b>     |
| Cirrhosis and other chronic liver diseases due to hepatitis B | 5,692.43<br>(4,870.66 to<br>6,614.33)                         | 2,754.68<br>(1,789.63 to<br>4,176.08)                         | 2,460.92<br>(1,598.70 to<br>3,764.77)                        | 2,765.11<br>(1,842.34 to<br>4,051.35)                         | 177.67<br>(153.78 to<br>204.96)                        | 98.90<br>(67.52 to<br>144.18)                          | 90.08<br>(61.38 to<br>134.05)                          | 97.55<br>(68.23 to<br>137.59)                            |
| Cirrhosis and other chronic liver diseases due to hepatitis C | 6,691.61<br>(5,700.16 to<br>7,755.22)                         | 3,340.37<br>(2,151.44 to<br>4,965.98)                         | 2,952.48<br>(1,901.03 to<br>4,448.39)                        | 3,366.00<br>(2,249.96 to<br>4,881.13)                         | 208.06<br>(179.56 to<br>238.79)                        | 117.72<br>(80.10 to<br>171.09)                         | 105.80<br>(72.02 to<br>154.67)                         | 116.83<br>(82.31 to<br>165.31)                           |

|                                                                |                                                               |                                                              |                                                              |                                                              |                                                        |                                                        |                                                        |                                                        |
|----------------------------------------------------------------|---------------------------------------------------------------|--------------------------------------------------------------|--------------------------------------------------------------|--------------------------------------------------------------|--------------------------------------------------------|--------------------------------------------------------|--------------------------------------------------------|--------------------------------------------------------|
|                                                                | 11,141.81<br>(9,753.57 to<br>12,775.23)                       | 6,591.25<br>(4,374.64 to<br>9,666.36)                        | 3,968.84<br>(2,601.03 to<br>5,985.84)                        | 8,034.39<br>(5,504.85 to<br>11,662.33)                       | 359.44<br>(316.41 to<br>410.77)                        | 241.97<br>(167.44 to<br>346.83)                        | 151.40<br>(104.23 to<br>226.36)                        | 288.57<br>(207.04 to<br>405.97)                        |
| Cirrhosis and other chronic liver diseases due to alcohol use  |                                                               |                                                              |                                                              |                                                              |                                                        |                                                        |                                                        |                                                        |
|                                                                | 5,375.37<br>(4,600.94 to<br>6,175.32)                         | 2,486.46<br>(1,667.65 to<br>3,653.37)                        | 2,206.50<br>(1,462.90 to<br>3,319.57)                        | 2,513.50<br>(1,703.21 to<br>3,651.71)                        | 172.94<br>(149.40 to<br>198.48)                        | 95.01<br>(66.31 to<br>135.40)                          | 86.18<br>(59.70 to<br>125.37)                          | 94.41<br>(67.31 to<br>132.07)                          |
| Cirrhosis and other chronic liver diseases due to other causes |                                                               |                                                              |                                                              |                                                              |                                                        |                                                        |                                                        |                                                        |
| <b>Digestive diseases</b>                                      | <b>17,806.86</b><br><b>(13,117.85 to</b><br><b>20,350.06)</b> | <b>12,911.15</b><br><b>(7,969.07 to</b><br><b>19,568.41)</b> | <b>11,213.60</b><br><b>(6,894.79 to</b><br><b>16,903.13)</b> | <b>13,243.02</b><br><b>(8,022.70 to</b><br><b>19,931.06)</b> | <b>976.98</b><br><b>(641.56 to</b><br><b>1,101.30)</b> | <b>925.32</b><br><b>(567.06 to</b><br><b>1,322.97)</b> | <b>866.19</b><br><b>(523.98 to</b><br><b>1,291.41)</b> | <b>909.65</b><br><b>(553.58 to</b><br><b>1,278.39)</b> |
| Peptic ulcer disease                                           | 4,524.96<br>(3,691.20 to<br>5,235.42)                         | 1,442.73<br>(948.14 to<br>2,115.63)                          | 1,112.07<br>(715.57 to<br>1,689.34)                          | 1,530.89<br>(1,009.96 to<br>2,227.21)                        | 241.35<br>(185.24 to<br>275.53)                        | 105.22<br>(68.04 to<br>152.84)                         | 85.47<br>(55.19 to<br>131.74)                          | 106.85<br>(71.56 to<br>152.94)                         |



| Lithuania                                  |                                       |                                       |                                       |                                       |                                    |                                    |                                    |                                    |
|--------------------------------------------|---------------------------------------|---------------------------------------|---------------------------------------|---------------------------------------|------------------------------------|------------------------------------|------------------------------------|------------------------------------|
| Cause                                      | YLLs (actual counts)                  |                                       |                                       |                                       | Deaths (actual counts)             |                                    |                                    |                                    |
|                                            | 2016                                  | 2040 Forecast                         | 2040 Better Scenario                  | 2040 Worse Scenario                   | 2016                               | 2040 Forecast                      | 2040 Better Scenario               | 2040 Worse Scenario                |
| Gastritis and duodenitis                   | 219.13<br>(137.83 to 267.68)          | 116.71<br>(64.57 to 168.26)           | 103.58<br>(56.15 to 156.79)           | 114.20<br>(63.28 to 158.47)           | 11.35<br>(6.19 to 13.67)           | 8.34<br>(4.20 to 11.68)            | 7.86<br>(3.86 to 11.70)            | 7.85<br>(4.00 to 10.85)            |
| Appendicitis                               | 266.44<br>(219.77 to 337.26)          | 144.82<br>(96.43 to 218.69)           | 117.41<br>(76.87 to 180.06)           | 146.50<br>(97.10 to 209.35)           | 12.13<br>(9.15 to 14.70)           | 8.78<br>(5.52 to 12.61)            | 7.49<br>(4.53 to 11.13)            | 8.56<br>(5.30 to 11.98)            |
| Paralytic ileus and intestinal obstruction | 1,141.98<br>(803.18 to 1,378.82)      | 1,105.34<br>(697.71 to 1,546.65)      | 1,169.40<br>(717.07 to 1,715.16)      | 1,033.03<br>(662.08 to 1,387.18)      | 61.69<br>(39.52 to 76.05)          | 81.10<br>(48.11 to 116.57)         | 90.62<br>(52.53 to 137.64)         | 72.95<br>(44.07 to 101.64)         |
| Inguinal, femoral, and abdominal hernia    | 330.56<br>(93.01 to 398.64)           | 226.61<br>(120.05 to 340.77)          | 216.19<br>(113.77 to 343.62)          | 216.94<br>(119.61 to 311.14)          | 22.94<br>(12.41 to 28.23)          | 20.03<br>(9.92 to 31.02)           | 20.24<br>(9.72 to 33.09)           | 18.57<br>(9.24 to 27.43)           |
| Inflammatory bowel disease                 | 435.36<br>(247.31 to 539.15)          | 345.41<br>(182.04 to 510.44)          | 352.32<br>(180.26 to 540.89)          | 329.68<br>(176.10 to 473.08)          | 20.37<br>(10.23 to 25.30)          | 20.06<br>(9.70 to 28.92)           | 21.31<br>(10.07 to 32.06)          | 18.61<br>(9.30 to 25.93)           |
| Vascular intestinal disorders              | 3,503.40<br>(2,457.51 to 4,099.85)    | 3,806.70<br>(2,530.65 to 5,224.67)    | 3,803.58<br>(2,477.62 to 5,613.77)    | 3,590.30<br>(2,331.56 to 4,730.43)    | 268.38<br>(169.37 to 311.57)       | 340.84<br>(207.00 to 475.35)       | 354.53<br>(216.19 to 523.84)       | 314.62<br>(186.19 to 420.14)       |
| Gallbladder and biliary diseases           | 1,291.09<br>(974.01 to 1,486.74)      | 1,272.15<br>(595.31 to 2,464.30)      | 984.33<br>(466.85 to 1,900.12)        | 1,470.95<br>(685.61 to 2,817.04)      | 91.41<br>(61.89 to 105.36)         | 113.24<br>(52.40 to 222.63)        | 93.27<br>(42.98 to 185.85)         | 126.28<br>(56.79 to 241.60)        |
| Pancreatitis                               | 4,785.95<br>(3,024.60 to 5,886.46)    | 3,509.11<br>(1,373.67 to 8,551.26)    | 2,435.50<br>(941.70 to 5,963.61)      | 3,903.11<br>(1,512.00 to 9,669.91)    | 176.69<br>(98.48 to 214.51)        | 159.83<br>(62.48 to 337.94)        | 115.36<br>(45.50 to 242.36)        | 172.09<br>(67.12 to 363.92)        |
| Other digestive diseases                   | 1,307.98<br>(907.40 to 1,559.07)      | 941.57<br>(608.93 to 1,325.85)        | 919.22<br>(579.20 to 1,354.17)        | 907.43<br>(579.61 to 1,229.05)        | 70.70<br>(47.67 to 83.53)          | 67.87<br>(43.80 to 93.79)          | 70.04<br>(45.09 to 103.85)         | 63.27<br>(41.24 to 84.34)          |
| Neurological disorders                     | 23,962.67<br>(20,791.64 to 28,046.32) | 36,134.42<br>(25,669.43 to 52,262.02) | 37,396.55<br>(25,829.50 to 55,924.83) | 35,918.07<br>(25,683.93 to 51,892.13) | 2,186.57<br>(1,840.85 to 2,609.92) | 3,923.12<br>(2,732.21 to 5,927.82) | 4,287.94<br>(2,912.01 to 6,619.83) | 3,794.52<br>(2,573.00 to 5,732.37) |
| Alzheimer's disease and other dementias    | 15,850.80<br>(13,029.58 to 19,737.86) | 26,075.14<br>(17,254.86 to 40,548.73) | 27,210.97<br>(17,694.13 to 42,807.28) | 26,157.17<br>(16,999.55 to 40,565.02) | 1,769.46<br>(1,440.23 to 2,169.57) | 3,286.66<br>(2,174.21 to 5,186.40) | 3,582.95<br>(2,354.16 to 5,794.84) | 3,210.05<br>(2,069.47 to 5,127.69) |
| Parkinson's disease                        | 3,028.64<br>(2,225.37 to 3,934.03)    | 4,866.88<br>(3,361.18 to 6,970.71)    | 5,548.26<br>(3,740.94 to 8,437.40)    | 4,383.49<br>(3,082.03 to 6,221.45)    | 266.20<br>(196.34 to 348.68)       | 463.44<br>(327.12 to 662.71)       | 543.54<br>(374.09 to 835.65)       | 410.03<br>(294.26 to 588.68)       |
| Epilepsy                                   | 2,468.85<br>(2,175.10 to 2,808.38)    | 2,805.52<br>(1,288.87 to 5,967.95)    | 2,208.08<br>(1,035.63 to 4,677.27)    | 3,031.77<br>(1,394.39 to 6,446.56)    | 63.48<br>(56.22 to 71.68)          | 79.80<br>(39.27 to 160.94)         | 63.98<br>(32.20 to 124.83)         | 83.03<br>(41.95 to 168.16)         |
| Multiple sclerosis                         | 958.57<br>(718.91 to 1,125.32)        | 841.91<br>(516.91 to 1,293.38)        | 843.53<br>(518.40 to 1,304.34)        | 849.32<br>(527.36 to 1,291.65)        | 28.67<br>(20.82 to 33.51)          | 27.80<br>(17.26 to 41.83)          | 28.41<br>(17.93 to 43.05)          | 27.63<br>(17.53 to 41.51)          |
| Motor neuron disease                       | 717.69<br>(633.04 to 799.49)          | 651.51<br>(472.58 to 908.62)          | 666.86<br>(473.08 to 979.53)          | 625.82<br>(465.63 to 848.35)          | 29.91<br>(26.24 to 33.12)          | 31.06<br>(23.26 to 42.71)          | 32.41<br>(23.57 to 47.27)          | 29.35<br>(22.59 to 39.12)          |
| Other neurological disorders               | 938.13<br>(823.27 to 1,047.95)        | 893.47<br>(668.23 to 1,199.82)        | 918.86<br>(674.81 to 1,268.86)        | 870.50<br>(658.22 to 1,145.94)        | 28.84<br>(25.97 to 31.53)          | 34.36<br>(26.40 to 45.43)          | 36.66<br>(27.42 to 50.79)          | 32.43<br>(25.47 to 41.30)          |
| Mental disorders                           | 21,793.33<br>(19,129.21 to 24,939.44) | 30,830.08<br>(20,645.02 to 47,076.77) | 33,130.68<br>(22,318.24 to 50,859.86) | 30,309.88<br>(20,458.33 to 44,714.11) | 592.25<br>(523.66 to 671.60)       | 930.12<br>(636.98 to 1,369.45)     | 1,020.16<br>(701.90 to 1,504.40)   | 900.48<br>(632.17 to 1,284.38)     |
| Alcohol use disorders                      | 13,450.81<br>(11,422.80 to 15,701.58) | 15,605.75<br>(9,890.50 to 23,883.91)  | 14,750.55<br>(9,148.63 to 23,389.89)  | 16,062.16<br>(10,390.56 to 24,271.75) | 374.78<br>(321.52 to 436.23)       | 467.67<br>(306.79 to 715.99)       | 446.77<br>(285.70 to 695.41)       | 476.78<br>(316.10 to 718.44)       |
| Drug use disorders                         | 8,339.39<br>(7,091.83 to 9,666.09)    | 15,221.60<br>(10,284.83 to 22,623.25) | 18,377.15<br>(12,217.85 to 27,619.95) | 14,245.05<br>(9,523.78 to 20,843.48)  | 217.41<br>(187.76 to 250.31)       | 462.39<br>(318.92 to 672.97)       | 573.33<br>(395.28 to 841.25)       | 423.65<br>(295.58 to 596.87)       |
| Opioid use disorders                       | 5,120.68<br>(3,601.31 to 6,114.06)    | 5,601.35<br>(3,130.40 to 8,811.22)    | 5,946.50<br>(3,299.74 to 9,397.93)    | 5,427.24<br>(3,057.71 to 8,433.43)    | 127.56<br>(92.54 to 151.02)        | 158.04<br>(93.81 to 244.81)        | 170.43<br>(98.75 to 267.74)        | 151.02<br>(90.32 to 230.55)        |

|                           |                                       |                                       |                                        |                                       |                              |                                 |                                 |                                 |
|---------------------------|---------------------------------------|---------------------------------------|----------------------------------------|---------------------------------------|------------------------------|---------------------------------|---------------------------------|---------------------------------|
|                           | 656.39<br>(482.84 to<br>897.20)       | 1,743.19<br>(1,031.46 to<br>2,715.84) | 2,115.33<br>(1,248.91 to<br>3,292.47)  | 1,624.18<br>(987.28 to<br>2,508.37)   | 17.46<br>(12.83 to<br>23.94) | 51.13<br>(30.20 to<br>79.20)    | 62.77<br>(37.70 to<br>99.40)    | 47.04<br>(28.51 to<br>71.68)    |
| Cocaine use disorders     | 399.30<br>(291.91 to<br>619.34)       | 2,028.21<br>(1,196.19 to<br>3,297.98) | 2,701.85<br>(1,618.48 to<br>4,436.51)  | 1,847.84<br>(1,052.49 to<br>3,006.32) | 10.31<br>(7.57 to<br>15.57)  | 56.02<br>(33.33 to<br>89.67)    | 75.37<br>(45.16 to<br>119.67)   | 50.47<br>(29.66 to<br>80.79)    |
| Amphetamine use disorders | 2,163.03<br>(1,686.71 to<br>3,043.86) | 5,848.84<br>(3,603.21 to<br>8,962.20) | 7,613.48<br>(4,903.02 to<br>11,348.79) | 5,345.79<br>(3,287.53 to<br>8,087.83) | 62.08<br>(49.56 to<br>83.82) | 197.20<br>(131.11 to<br>287.86) | 264.76<br>(180.01 to<br>382.95) | 175.12<br>(117.04 to<br>251.46) |
| Other drug use disorders  | 3.12<br>(2.48 to<br>3.92)             | 2.73<br>(1.71 to<br>4.38)             | 2.98<br>(1.85 to<br>4.79)              | 2.67<br>(1.70 to<br>4.21)             | 0.06<br>(0.05 to<br>0.08)    | 0.06<br>(0.03 to<br>0.09)       | 0.06<br>(0.04 to<br>0.10)       | 0.06<br>(0.03 to<br>0.09)       |
| Eating disorders          |                                       |                                       |                                        |                                       |                              |                                 |                                 |                                 |

| Lithuania                                                  |                                              |                                             |                                             |                                             |                                     |                                       |                                       |                                       |
|------------------------------------------------------------|----------------------------------------------|---------------------------------------------|---------------------------------------------|---------------------------------------------|-------------------------------------|---------------------------------------|---------------------------------------|---------------------------------------|
| Cause                                                      | YLLs (actual counts)                         |                                             |                                             |                                             | Deaths (actual counts)              |                                       |                                       |                                       |
|                                                            | 2016                                         | 2040 Forecast                               | 2040 Better Scenario                        | 2040 Worse Scenario                         | 2016                                | 2040 Forecast                         | 2040 Better Scenario                  | 2040 Worse Scenario                   |
| <b>Diabetes, urogenital, blood, and endocrine diseases</b> | <b>13,052.18</b><br>(12,072.56 to 14,030.72) | <b>13,716.14</b><br>(8,292.27 to 21,782.86) | <b>11,364.50</b><br>(6,895.38 to 18,667.89) | <b>14,641.10</b><br>(9,084.88 to 23,324.37) | <b>708.30</b><br>(658.48 to 760.58) | <b>942.27</b><br>(599.63 to 1,464.68) | <b>820.32</b><br>(514.26 to 1,324.42) | <b>963.34</b><br>(632.10 to 1,462.70) |
| Diabetes mellitus                                          | 4,618.09<br>(4,189.63 to 5,071.59)           | 3,631.69<br>(1,742.37 to 6,877.83)          | 2,704.47<br>(1,337.64 to 5,045.11)          | 4,303.48<br>(2,081.72 to 8,328.07)          | 234.47<br>(211.72 to 257.73)        | 227.31<br>(122.46 to 393.03)          | 180.82<br>(100.41 to 316.47)          | 253.27<br>(136.90 to 434.57)          |
| Acute glomerulonephritis                                   | 25.33<br>(21.96 to 29.06)                    | 32.46<br>(19.14 to 54.41)                   | 28.99<br>(16.84 to 48.93)                   | 32.60<br>(53.10)                            | 0.82<br>(0.70 to 0.96)              | 1.32<br>(0.73 to 2.25)                | 1.21<br>(0.65 to 2.12)                | 1.30<br>(0.73 to 2.20)                |
| Chronic kidney disease                                     | 4,117.75<br>(3,781.44 to 4,459.12)           | 5,151.21<br>(2,426.32 to 10,370.65)         | 4,025.68<br>(1,964.41 to 8,096.61)          | 5,552.36<br>(2,572.11 to 11,117.50)         | 237.38<br>(219.05 to 257.94)        | 379.70<br>(185.31 to 755.53)          | 313.67<br>(155.60 to 623.28)          | 395.09<br>(189.28 to 764.53)          |
| Chronic kidney disease due to diabetes mellitus            | 1,161.91<br>(966.80 to 1,372.04)             | 1,757.07<br>(794.30 to 3,688.85)            | 1,377.05<br>(645.00 to 2,886.11)            | 1,894.76<br>(849.73 to 3,980.06)            | 63.39<br>(52.07 to 76.40)           | 116.12<br>(54.74 to 231.70)           | 95.62<br>(45.54 to 191.72)            | 121.20<br>(55.24 to 240.68)           |
| Chronic kidney disease due to hypertension                 | 271.99<br>(215.36 to 337.37)                 | 481.09<br>(218.91 to 960.75)                | 409.46<br>(191.13 to 808.89)                | 497.98<br>(222.58 to 993.72)                | 24.25<br>(19.22 to 30.83)           | 52.72<br>(24.39 to 104.16)            | 47.48<br>(22.28 to 93.76)             | 52.69<br>(24.09 to 104.64)            |
| Chronic kidney disease due to glomerulonephritis           | 1,686.53<br>(1,445.07 to 1,948.05)           | 1,694.29<br>(782.01 to 3,621.91)            | 1,284.36<br>(621.10 to 2,637.54)            | 1,848.61<br>(843.07 to 3,929.16)            | 90.28<br>(75.11 to 106.18)          | 117.85<br>(55.25 to 236.64)           | 93.73<br>(44.39 to 190.79)            | 124.56<br>(57.74 to 256.07)           |
| Chronic kidney disease due to other and unspecified causes | 997.32<br>(826.90 to 1,195.05)               | 1,218.76<br>(567.71 to 2,437.91)            | 954.81<br>(464.09 to 1,938.23)              | 1,311.01<br>(595.22 to 2,650.94)            | 59.45<br>(47.64 to 72.32)           | 93.01<br>(44.69 to 182.46)            | 76.85<br>(37.30 to 153.14)            | 96.64<br>(45.80 to 190.16)            |
| Urinary diseases and male infertility                      | 2,983.02<br>(2,705.83 to 3,276.09)           | 3,570.34<br>(2,481.18 to 5,041.43)          | 3,249.74<br>(2,200.83 to 4,852.94)          | 3,459.98<br>(2,525.09 to 4,688.84)          | 188.53<br>(171.06 to 208.17)        | 272.07<br>(197.30 to 375.95)          | 258.99<br>(182.96 to 380.63)          | 255.70<br>(193.23 to 342.43)          |
| Urinary tract infections                                   | 2,275.40<br>(2,049.76 to 2,534.36)           | 2,881.45<br>(1,977.96 to 4,091.14)          | 2,653.01<br>(1,786.37 to 3,984.25)          | 2,787.34<br>(1,991.07 to 3,837.95)          | 139.10<br>(123.38 to 154.43)        | 216.63<br>(156.72 to 302.63)          | 208.75<br>(142.83 to 304.88)          | 203.13<br>(150.86 to 272.22)          |
| Urolithiasis                                               | 420.93<br>(311.75 to 676.44)                 | 484.55<br>(272.49 to 865.14)                | 416.43<br>(232.96 to 789.61)                | 478.50<br>(284.85 to 843.67)                | 29.03<br>(21.40 to 49.22)           | 37.55<br>(21.17 to 68.73)             | 33.66<br>(18.81 to 63.76)             | 36.18<br>(21.37 to 66.31)             |
| Other urinary diseases                                     | 286.69<br>(165.93 to 361.80)                 | 204.34<br>(114.96 to 318.22)                | 180.30<br>(97.97 to 289.37)                 | 194.14<br>(108.29 to 287.90)                | 20.40<br>(11.93 to 26.03)           | 17.89<br>(9.81 to 27.64)              | 16.59<br>(9.01 to 26.27)              | 16.39<br>(9.15 to 25.01)              |
| Gynecological diseases                                     | 44.29<br>(11.98 to 59.17)                    | 14.30<br>(4.05 to 27.16)                    | 10.53<br>(3.00 to 20.24)                    | 15.37<br>(4.22 to 29.25)                    | 1.34<br>(0.43 to 1.76)              | 0.51<br>(0.21 to 0.94)                | 0.38<br>(0.16 to 0.69)                | 0.54<br>(0.20 to 0.97)                |
| Uterine fibroids                                           | 20.73<br>(5.85 to 28.83)                     | 8.10<br>(2.10 to 17.06)                     | 6.26<br>(1.63 to 13.36)                     | 8.60<br>(2.25 to 17.72)                     | 0.60<br>(0.20 to 0.82)              | 0.25<br>(0.08 to 0.50)                | 0.19<br>(0.07 to 0.40)                | 0.26<br>(0.08 to 0.53)                |
| Polycystic ovarian syndrome                                | 2.61<br>(0.64 to 4.33)                       | 0.26<br>(0.05 to 0.69)                      | 0.14<br>(0.03 to 0.36)                      | 0.31<br>(0.06 to 0.83)                      | 0.07<br>(0.02 to 0.11)              | 0.01<br>(0.00 to 0.02)                | 0.00<br>(0.00 to 0.01)                | 0.01<br>(0.00 to 0.02)                |
| Endometriosis                                              | 0.38<br>(0.08 to 0.75)                       | 0.12<br>(0.02 to 0.35)                      | 0.09<br>(0.01 to 0.26)                      | 0.13<br>(0.02 to 0.39)                      | 0.01<br>(0.00 to 0.02)              | 0.00<br>(0.00 to 0.01)                | 0.00<br>(0.00 to 0.01)                | 0.00<br>(0.00 to 0.01)                |
| Genital prolapse                                           | 0.99<br>(0.37 to 1.46)                       | 0.35<br>(0.12 to 0.73)                      | 0.25<br>(0.09 to 0.51)                      | 0.37<br>(0.13 to 0.74)                      | 0.05<br>(0.02 to 0.07)              | 0.02<br>(0.01 to 0.04)                | 0.02<br>(0.01 to 0.03)                | 0.02<br>(0.01 to 0.04)                |
| Other gynecological diseases                               | 19.58<br>(4.70 to 27.16)                     | 5.47<br>(1.41 to 10.69)                     | 3.80<br>(0.98 to 7.75)                      | 5.96<br>(1.51 to 12.20)                     | 0.62<br>(0.20 to 0.83)              | 0.23<br>(0.10 to 0.44)                | 0.16<br>(0.07 to 0.31)                | 0.24<br>(0.10 to 0.46)                |
| Hemoglobinopathies and hemolytic anemias                   | 277.02<br>(239.27 to 365.88)                 | 175.27<br>(120.25 to 250.72)                | 151.03<br>(104.32 to 227.69)                | 175.51<br>(125.34 to 254.30)                | 12.73<br>(10.70 to 16.95)           | 11.75<br>(8.21 to 17.11)              | 10.73<br>(7.42 to 16.40)              | 11.29<br>(8.21 to 15.64)              |
| Thalassemias                                               | 21.39<br>(17.70 to 25.70)                    | 6.71<br>(4.26 to 10.23)                     | 6.27<br>(3.94 to 9.59)                      | 7.05<br>(4.47 to 10.70)                     | 0.27<br>(0.23 to 0.33)              | 0.09<br>(0.06 to 0.13)                | 0.08<br>(0.05 to 0.12)                | 0.09<br>(0.06 to 0.14)                |

|                                                   |                                   |                                     |                                     |                                     |                              |                              |                              |                              |
|---------------------------------------------------|-----------------------------------|-------------------------------------|-------------------------------------|-------------------------------------|------------------------------|------------------------------|------------------------------|------------------------------|
|                                                   | 42.61<br>(35.58 to<br>57.58)      | 20.24<br>(12.54 to<br>32.72)        | 16.07<br>(10.03 to<br>26.09)        | 21.52<br>(13.45 to<br>34.01)        | 0.81<br>(0.68 to<br>1.14)    | 0.44<br>(0.27 to<br>0.74)    | 0.36<br>(0.22 to<br>0.59)    | 0.47<br>(0.29 to<br>0.74)    |
| Sickle cell disorders                             |                                   |                                     |                                     |                                     |                              |                              |                              |                              |
|                                                   | 46.64<br>(38.97 to<br>62.33)      | 30.33<br>(19.14 to<br>47.79)        | 23.93<br>(15.20 to<br>37.75)        | 31.55<br>(20.34 to<br>48.35)        | 1.21<br>(1.02 to<br>1.61)    | 1.08<br>(0.70 to<br>1.67)    | 0.88<br>(0.56 to<br>1.38)    | 1.10<br>(0.73 to<br>1.66)    |
| G6PD deficiency                                   |                                   |                                     |                                     |                                     |                              |                              |                              |                              |
|                                                   | 166.38<br>(140.85 to<br>227.64)   | 118.00<br>(79.60 to<br>175.96)      | 104.77<br>(70.35 to<br>160.82)      | 115.39<br>(82.13 to<br>163.84)      | 10.43<br>(8.59 to<br>13.88)  | 10.14<br>(7.06 to<br>14.99)  | 9.42<br>(6.44 to<br>14.59)   | 9.64<br>(7.00 to<br>13.38)   |
| Other hemoglobinopathies and hemolytic anemias    |                                   |                                     |                                     |                                     |                              |                              |                              |                              |
|                                                   | 986.68<br>(699.93 to<br>1,134.14) | 1,140.87<br>(765.95 to<br>1,607.85) | 1,194.06<br>(783.56 to<br>1,729.91) | 1,101.80<br>(742.72 to<br>1,512.74) | 33.03<br>(24.34 to<br>37.63) | 49.61<br>(33.57 to<br>69.03) | 54.51<br>(36.00 to<br>79.03) | 46.15<br>(31.52 to<br>62.68) |
| Endocrine, metabolic, blood, and immune disorders |                                   |                                     |                                     |                                     |                              |                              |                              |                              |

| Lithuania                                     |                                           |                                           |                                           |                                           |                                     |                                    |                                    |                                    |
|-----------------------------------------------|-------------------------------------------|-------------------------------------------|-------------------------------------------|-------------------------------------------|-------------------------------------|------------------------------------|------------------------------------|------------------------------------|
| Cause                                         | YLLs (actual counts)                      |                                           |                                           |                                           | Deaths (actual counts)              |                                    |                                    |                                    |
|                                               | 2016                                      | 2040 Forecast                             | 2040 Better Scenario                      | 2040 Worse Scenario                       | 2016                                | 2040 Forecast                      | 2040 Better Scenario               | 2040 Worse Scenario                |
| <b>Musculoskeletal disorders</b>              | <b>1,228.87</b><br>(1,012.14 to 1,403.78) | <b>1,115.95</b><br>(752.44 to 1,632.75)   | <b>951.63</b><br>(641.11 to 1,422.98)     | <b>1,142.44</b><br>(778.38 to 1,659.77)   | <b>53.91</b><br>(43.06 to 61.13)    | <b>58.93</b><br>(39.35 to 84.52)   | <b>51.01</b><br>(34.52 to 75.48)   | <b>59.23</b><br>(40.55 to 84.70)   |
| Rheumatoid arthritis                          | 540.64<br>(436.67 to 709.82)              | 513.46<br>(302.08 to 846.87)              | 375.22<br>(226.86 to 608.93)              | 546.76<br>(325.07 to 871.67)              | 26.92<br>(21.78 to 35.11)           | 29.87<br>(17.78 to 47.76)          | 22.41<br>(13.75 to 36.17)          | 31.18<br>(19.33 to 48.51)          |
| Other musculoskeletal disorders               | 688.23<br>(522.86 to 805.17)              | 602.49<br>(399.77 to 878.80)              | 576.40<br>(380.04 to 859.48)              | 595.67<br>(387.02 to 852.74)              | 27.00<br>(18.96 to 31.66)           | 29.05<br>(42.24)                   | 28.60<br>(18.55 to 42.29)          | 28.04<br>(17.91 to 39.78)          |
| <b>Other non-communicable diseases</b>        | <b>6,888.60</b><br>(5,579.68 to 8,515.90) | <b>4,333.43</b><br>(2,890.82 to 6,026.55) | <b>3,567.22</b><br>(2,445.61 to 5,008.52) | <b>4,459.27</b><br>(3,020.08 to 6,341.68) | <b>128.92</b><br>(100.17 to 154.71) | <b>138.85</b><br>(85.71 to 193.64) | <b>131.16</b><br>(80.48 to 189.75) | <b>136.67</b><br>(87.18 to 185.90) |
| Congenital birth defects                      | 5,470.21<br>(4,458.09 to 7,170.50)        | 2,434.33<br>(1,465.14 to 3,758.96)        | 1,849.07<br>(1,139.83 to 2,823.74)        | 2,696.51<br>(1,611.61 to 4,230.71)        | 75.66<br>(63.01 to 96.77)           | 37.52<br>(23.84 to 56.40)          | 29.50<br>(19.37 to 42.94)          | 40.86<br>(26.23 to 61.15)          |
| Neural tube defects                           | 76.82<br>(47.21 to 108.23)                | 18.17<br>(8.33 to 34.49)                  | 11.74<br>(5.54 to 21.94)                  | 21.11<br>(9.11 to 39.94)                  | 0.97<br>(0.62 to 1.34)              | 0.25<br>(0.13 to 0.45)             | 0.16<br>(0.09 to 0.29)             | 0.29<br>(0.14 to 0.51)             |
| Congenital heart anomalies                    | 2,414.16<br>(1,855.51 to 3,848.36)        | 760.19<br>(385.20 to 1,461.17)            | 483.94<br>(255.37 to 911.57)              | 874.13<br>(463.27 to 1,595.90)            | 35.08<br>(28.22 to 52.38)           | 12.18<br>(6.59 to 22.31)           | 7.91<br>(4.52 to 13.65)            | 13.80<br>(7.62 to 23.66)           |
| Orofacial clefts                              | 4.26<br>(1.69 to 7.96)                    | 0.96<br>(0.26 to 2.31)                    | 0.52<br>(0.15 to 1.14)                    | 1.18<br>(0.29 to 2.83)                    | 0.05<br>(0.02 to 0.09)              | 0.01<br>(0.00 to 0.03)             | 0.01<br>(0.00 to 0.01)             | 0.01<br>(0.00 to 0.03)             |
| Down syndrome                                 | 331.59<br>(246.60 to 411.99)              | 424.48<br>(290.22 to 594.80)              | 439.22<br>(300.58 to 625.47)              | 422.98<br>(291.33 to 588.88)              | 6.13<br>(4.78 to 7.47)              | 8.63<br>(5.88 to 12.39)            | 9.06<br>(6.10 to 13.11)            | 8.50<br>(5.87 to 12.00)            |
| Other chromosomal abnormalities               | 537.21<br>(336.25 to 814.24)              | 486.04<br>(274.37 to 793.07)              | 399.42<br>(225.25 to 647.26)              | 528.60<br>(289.32 to 867.06)              | 6.67<br>(4.26 to 10.01)             | 6.40<br>(3.74 to 10.32)            | 5.31<br>(3.10 to 8.55)             | 6.91<br>(3.98 to 11.38)            |
| Congenital musculoskeletal and limb anomalies | 102.22<br>(59.44 to 145.00)               | 42.27<br>(18.59 to 82.74)                 | 28.75<br>(12.90 to 54.56)                 | 48.56<br>(20.50 to 94.16)                 | 1.25<br>(0.75 to 1.75)              | 0.55<br>(0.26 to 1.02)             | 0.38<br>(0.18 to 0.68)             | 0.62<br>(0.28 to 1.15)             |
| Urogenital congenital anomalies               | 68.74<br>(31.00 to 113.68)                | 27.47<br>(13.09 to 52.65)                 | 20.40<br>(9.91 to 38.77)                  | 30.44<br>(13.33 to 58.89)                 | 0.99<br>(0.54 to 1.56)              | 0.46<br>(0.25 to 0.83)             | 0.35<br>(0.20 to 0.63)             | 0.50<br>(0.26 to 0.90)             |
| Digestive congenital anomalies                | 272.98<br>(112.84 to 419.24)              | 99.93<br>(35.92 to 199.75)                | 65.15<br>(24.66 to 135.41)                | 116.06<br>(41.01 to 238.51)               | 3.41<br>(1.46 to 5.13)              | 1.31<br>(0.53 to 2.50)             | 0.87<br>(0.36 to 1.72)             | 1.51<br>(0.59 to 3.02)             |
| Other congenital birth defects                | 1,662.24<br>(1,085.18 to 2,198.81)        | 574.82<br>(295.43 to 979.20)              | 399.92<br>(213.47 to 667.09)              | 653.44<br>(335.33 to 1,101.08)            | 21.12<br>(14.40 to 27.47)           | 7.74<br>(4.31 to 12.63)            | 5.45<br>(3.11 to 8.75)             | 8.72<br>(4.81 to 14.21)            |
| Skin and subcutaneous diseases                | 1,037.65<br>(513.04 to 1,413.85)          | 1,699.65<br>(864.94 to 2,558.39)          | 1,639.93<br>(827.46 to 2,570.24)          | 1,652.07<br>(830.14 to 2,419.62)          | 48.84<br>(23.64 to 67.93)           | 100.17<br>(50.70 to 148.29)        | 100.76<br>(50.43 to 156.20)        | 94.53<br>(46.99 to 136.72)         |
| Cellulitis                                    | 322.58<br>(155.26 to 527.45)              | 548.66<br>(259.07 to 928.99)              | 546.49<br>(251.73 to 906.52)              | 529.56<br>(245.23 to 867.07)              | 13.89<br>(6.45 to 21.84)            | 28.54<br>(13.13 to 46.62)          | 29.30<br>(13.28 to 49.58)          | 26.87<br>(12.39 to 43.13)          |
| Pyoderma                                      | 608.38<br>(274.52 to 826.78)              | 1,063.21<br>(474.81 to 1,630.55)          | 1,014.71<br>(450.27 to 1,623.34)          | 1,035.87<br>(467.47 to 1,549.17)          | 29.07<br>(12.65 to 39.48)           | 64.95<br>(29.68 to 97.15)          | 65.17<br>(29.57 to 103.60)         | 61.31<br>(28.21 to 88.62)          |
| Decubitus ulcer                               | 87.21<br>(42.12 to 136.81)                | 62.70<br>(30.22 to 113.81)                | 55.37<br>(27.03 to 103.70)                | 61.84<br>(29.57 to 109.34)                | 5.04<br>(2.48 to 8.78)              | 5.01<br>(2.38 to 9.42)             | 4.64<br>(2.24 to 9.06)             | 4.78<br>(2.28 to 8.90)             |
| Other skin and subcutaneous diseases          | 19.48<br>(10.93 to 33.53)                 | 25.08<br>(13.46 to 46.74)                 | 23.36<br>(12.67 to 43.64)                 | 24.79<br>(13.34 to 45.98)                 | 0.84<br>(0.44 to 1.55)              | 1.66<br>(0.82 to 3.37)             | 1.64<br>(0.83 to 3.35)             | 1.57<br>(0.77 to 3.14)             |
| Sudden infant death syndrome                  | 380.74<br>(256.16 to 519.29)              | 99.46<br>(43.78 to 182.89)                | 78.22<br>(33.46 to 144.41)                | 110.69<br>(48.61 to 206.94)               | 4.42<br>(2.97 to 6.03)              | 1.15<br>(0.51 to 2.12)             | 0.91<br>(0.39 to 1.68)             | 1.28<br>(0.56 to 2.40)             |

|                          |                                            |                                           |                                          |                                           |                                       |                                       |                                       |                                       |
|--------------------------|--------------------------------------------|-------------------------------------------|------------------------------------------|-------------------------------------------|---------------------------------------|---------------------------------------|---------------------------------------|---------------------------------------|
| Injuries                 | 106,876.75<br>(97,496.80 to<br>118,022.67) | 71,226.91<br>(43,128.41 to<br>115,917.48) | 57,470.96<br>(35,447.33 to<br>91,667.64) | 83,642.97<br>(49,704.85 to<br>135,991.14) | 3,015.98<br>(2,744.36 to<br>3,323.29) | 2,363.47<br>(1,592.25 to<br>3,519.96) | 1,991.33<br>(1,388.48 to<br>2,931.93) | 2,632.66<br>(1,769.28 to<br>3,914.30) |
| Transport injuries       | 16,289.64<br>(14,479.17 to<br>18,244.35)   | 6,675.00<br>(3,201.48 to<br>13,516.36)    | 5,630.29<br>(2,814.71 to<br>11,055.67)   | 14,793.70<br>(7,146.78 to<br>29,109.70)   | 413.87<br>(373.40 to<br>457.51)       | 210.53<br>(113.06 to<br>385.52)       | 181.48<br>(100.43 to<br>323.54)       | 411.40<br>(217.80 to<br>754.58)       |
| Road injuries            | 15,054.41<br>(13,362.89 to<br>16,809.42)   | 5,699.53<br>(2,742.64 to<br>11,597.72)    | 4,954.80<br>(2,492.64 to<br>9,727.21)    | 13,710.86<br>(6,606.48 to<br>27,044.05)   | 381.04<br>(343.95 to<br>420.54)       | 179.81<br>(98.16 to<br>329.88)        | 159.53<br>(88.97 to<br>280.24)        | 378.18<br>(199.50 to<br>701.72)       |
| Pedestrian road injuries | 4,576.74<br>(3,524.95 to<br>5,532.72)      | 1,260.04<br>(635.64 to<br>2,455.68)       | 887.81<br>(465.07 to<br>1,662.09)        | 2,668.31<br>(1,299.90 to<br>5,063.94)     | 142.51<br>(115.27 to<br>165.51)       | 50.87<br>(29.37 to<br>88.19)          | 37.20<br>(21.94 to<br>61.89)          | 97.41<br>(54.29 to<br>170.01)         |

| Lithuania                                       |                                                               |                                                               |                                                               |                                                               |                                                            |                                                          |                                                        |                                                        |
|-------------------------------------------------|---------------------------------------------------------------|---------------------------------------------------------------|---------------------------------------------------------------|---------------------------------------------------------------|------------------------------------------------------------|----------------------------------------------------------|--------------------------------------------------------|--------------------------------------------------------|
| Cause                                           | YLLs (actual counts)                                          |                                                               |                                                               |                                                               | Deaths (actual counts)                                     |                                                          |                                                        |                                                        |
|                                                 | 2016                                                          | 2040 Forecast                                                 | 2040 Better Scenario                                          | 2040 Worse Scenario                                           | 2016                                                       | 2040 Forecast                                            | 2040 Better Scenario                                   | 2040 Worse Scenario                                    |
| Cyclist road injuries                           | 1,220.02<br>(909.82 to<br>1,516.59)                           | 874.95<br>(402.41 to<br>1,859.29)                             | 823.34<br>(396.76 to<br>1,696.85)                             | 1,656.00<br>(758.32 to<br>3,565.34)                           | 36.29<br>(27.77 to<br>45.27)                               | 33.85<br>(17.05 to<br>67.87)                             | 32.77<br>(16.97 to<br>63.21)                           | 55.83<br>(27.30 to<br>112.61)                          |
| Motorcyclist road injuries                      | 1,091.19<br>(775.53 to<br>1,387.65)                           | 720.23<br>(255.76 to<br>1,795.09)                             | 649.59<br>(241.25 to<br>1,579.44)                             | 1,307.01<br>(495.32 to<br>3,073.09)                           | 20.53<br>(14.86 to<br>25.82)                               | 15.53<br>(5.99 to<br>36.76)                              | 14.28<br>(5.89 to<br>32.60)                            | 25.96<br>(10.05 to<br>59.85)                           |
| Motor vehicle road injuries                     | 7,997.12<br>(6,901.66 to<br>9,585.04)                         | 2,743.79<br>(1,318.98 to<br>5,415.99)                         | 2,499.96<br>(1,241.63 to<br>4,771.95)                         | 7,832.24<br>(3,692.29 to<br>15,269.58)                        | 176.98<br>(153.65 to<br>214.10)                            | 75.63<br>(40.53 to<br>137.63)                            | 71.41<br>(39.82 to<br>123.42)                          | 190.91<br>(97.21 to<br>352.18)                         |
| Other road injuries                             | 169.33<br>(122.53 to<br>262.42)                               | 100.51<br>(38.79 to<br>236.20)                                | 94.10<br>(38.22 to<br>214.22)                                 | 247.30<br>(93.95 to<br>580.93)                                | 4.73<br>(3.47 to<br>7.58)                                  | 3.92<br>(1.65 to<br>8.80)                                | 3.87<br>(1.68 to<br>8.64)                              | 8.07<br>(3.30 to<br>18.11)                             |
| Other transport injuries                        | 1,235.23<br>(1,044.31 to<br>1,551.37)                         | 975.48<br>(425.52 to<br>2,097.36)                             | 675.49<br>(302.04 to<br>1,403.82)                             | 1,082.85<br>(472.15 to<br>2,245.37)                           | 32.83<br>(28.29 to<br>39.63)                               | 30.72<br>(15.03 to<br>59.67)                             | 21.95<br>(11.35 to<br>41.15)                           | 33.22<br>(16.54 to<br>64.28)                           |
| <b>Unintentional injuries</b>                   | <b>41,190.66</b><br><b>(37,185.58 to</b><br><b>46,196.56)</b> | <b>26,032.01</b><br><b>(18,060.94 to</b><br><b>37,313.65)</b> | <b>22,401.89</b><br><b>(15,936.86 to</b><br><b>32,038.39)</b> | <b>26,649.63</b><br><b>(18,396.87 to</b><br><b>38,464.10)</b> | <b>1,303.56</b><br><b>(1,139.87 to</b><br><b>1,452.15)</b> | <b>1,003.28</b><br><b>(749.69 to</b><br><b>1,324.01)</b> | <b>903.33</b><br><b>(679.47 to</b><br><b>1,206.07)</b> | <b>992.88</b><br><b>(739.47 to</b><br><b>1,331.58)</b> |
| Falls                                           | 11,136.16<br>(9,010.51 to<br>12,972.29)                       | 8,705.41<br>(6,239.63 to<br>11,917.83)                        | 8,027.43<br>(5,730.87 to<br>11,184.04)                        | 8,604.96<br>(6,197.87 to<br>11,602.28)                        | 437.52<br>(320.22 to<br>499.98)                            | 427.29<br>(290.10 to<br>554.61)                          | 410.67<br>(274.98 to<br>552.39)                        | 408.19<br>(273.54 to<br>521.25)                        |
| Drowning                                        | 8,882.09<br>(7,963.11 to<br>9,909.37)                         | 5,346.69<br>(2,753.02 to<br>9,789.31)                         | 4,325.70<br>(2,352.26 to<br>7,885.95)                         | 5,695.30<br>(2,878.31 to<br>11,071.93)                        | 227.25<br>(205.87 to<br>251.36)                            | 158.92<br>(89.93 to<br>273.32)                           | 132.47<br>(78.69 to<br>224.21)                         | 164.92<br>(92.87 to<br>292.18)                         |
| Fire, heat, and hot substances                  | 2,697.27<br>(2,352.37 to<br>3,505.77)                         | 1,480.29<br>(822.82 to<br>2,593.74)                           | 1,120.97<br>(655.58 to<br>1,879.48)                           | 1,580.62<br>(853.20 to<br>2,826.85)                           | 87.19<br>(76.72 to<br>94.24)                               | 57.85<br>(36.05 to<br>94.24)                             | 46.01<br>(29.90 to<br>71.01)                           | 59.65<br>(36.00 to<br>96.43)                           |
| Poisonings                                      | 813.77<br>(645.06 to<br>1,554.95)                             | 347.03<br>(164.09 to<br>741.28)                               | 242.85<br>(124.42 to<br>485.58)                               | 381.32<br>(176.12 to<br>812.91)                               | 21.94<br>(17.54 to<br>41.15)                               | 11.26<br>(5.79 to<br>22.16)                              | 8.22<br>(4.62 to<br>16.01)                             | 12.00<br>(6.27 to<br>24.51)                            |
| Exposure to mechanical forces                   | 2,305.45<br>(1,922.83 to<br>2,791.91)                         | 1,070.23<br>(733.93 to<br>1,534.89)                           | 872.81<br>(606.97 to<br>1,217.39)                             | 1,117.28<br>(764.97 to<br>1,591.41)                           | 57.68<br>(46.72 to<br>69.08)                               | 31.64<br>(22.49 to<br>43.84)                             | 26.77<br>(19.64 to<br>36.35)                           | 32.15<br>(22.69 to<br>43.67)                           |
| Unintentional firearm injuries                  | 307.86<br>(267.43 to<br>374.04)                               | 144.68<br>(104.80 to<br>197.80)                               | 124.10<br>(91.37 to<br>166.67)                                | 149.04<br>(106.18 to<br>204.96)                               | 8.17<br>(7.19 to<br>9.69)                                  | 5.08<br>(3.91 to<br>6.60)                                | 4.66<br>(3.56 to<br>6.21)                              | 5.03<br>(3.87 to<br>6.53)                              |
| Unintentional suffocation                       | 317.94<br>(253.86 to<br>504.17)                               | 145.63<br>(92.58 to<br>238.53)                                | 121.02<br>(78.90 to<br>189.67)                                | 154.68<br>(100.01 to<br>251.98)                               | 5.63<br>(4.67 to<br>8.33)                                  | 2.90<br>(1.97 to<br>4.27)                                | 2.48<br>(1.73 to<br>3.69)                              | 3.00<br>(2.03 to<br>4.56)                              |
| Other exposure to mechanical forces             | 1,679.65<br>(1,283.18 to<br>2,107.80)                         | 779.92<br>(508.27 to<br>1,145.57)                             | 627.69<br>(415.13 to<br>910.26)                               | 813.56<br>(527.95 to<br>1,188.52)                             | 43.89<br>(33.16 to<br>54.05)                               | 23.67<br>(16.13 to<br>33.68)                             | 19.63<br>(13.57 to<br>27.82)                           | 24.11<br>(16.20 to<br>34.15)                           |
| Adverse effects of medical treatment            | 1,079.25<br>(702.05 to<br>1,307.94)                           | 730.97<br>(442.26 to<br>1,002.86)                             | 682.97<br>(403.91 to<br>979.91)                               | 723.82<br>(438.07 to<br>979.91)                               | 41.87<br>(26.33 to<br>51.01)                               | 35.87<br>(21.11 to<br>49.49)                             | 35.05<br>(20.65 to<br>49.54)                           | 34.30<br>(20.03 to<br>46.38)                           |
| Animal contact                                  | 277.05<br>(215.17 to<br>395.77)                               | 232.56<br>(152.95 to<br>348.47)                               | 200.32<br>(133.21 to<br>300.78)                               | 235.50<br>(156.17 to<br>359.55)                               | 9.55<br>(7.12 to<br>12.63)                                 | 9.48<br>(6.58 to<br>13.26)                               | 8.42<br>(5.75 to<br>11.83)                             | 9.36<br>(6.43 to<br>12.92)                             |
| Venomous animal contact                         | 104.96<br>(59.13 to<br>158.76)                                | 66.89<br>(34.60 to<br>105.96)                                 | 60.26<br>(30.57 to<br>95.93)                                  | 67.61<br>(34.25 to<br>106.89)                                 | 3.00<br>(1.62 to<br>4.40)                                  | 2.16<br>(1.05 to<br>3.27)                                | 1.99<br>(0.97 to<br>3.06)                              | 2.14<br>(1.05 to<br>3.26)                              |
| Non-venomous animal contact                     | 172.09<br>(131.14 to<br>286.12)                               | 165.66<br>(107.54 to<br>259.80)                               | 140.06<br>(92.54 to<br>222.91)                                | 167.89<br>(109.03 to<br>266.11)                               | 6.55<br>(4.86 to<br>9.53)                                  | 7.32<br>(5.09 to<br>10.25)                               | 6.43<br>(4.48 to<br>9.25)                              | 7.22<br>(4.98 to<br>10.17)                             |
| Foreign body                                    | 5,564.74<br>(4,758.33 to<br>6,687.82)                         | 3,604.05<br>(2,636.50 to<br>4,996.87)                         | 3,384.09<br>(2,462.27 to<br>4,795.31)                         | 3,600.71<br>(2,625.74 to<br>4,981.77)                         | 156.53<br>(130.58 to<br>182.32)                            | 114.15<br>(83.21 to<br>155.60)                           | 109.66<br>(81.07 to<br>153.75)                         | 111.83<br>(83.62 to<br>149.90)                         |
| Pulmonary aspiration and foreign body in airway | 5,435.19<br>(4,628.07 to<br>6,565.74)                         | 3,486.97<br>(2,537.37 to<br>4,853.11)                         | 3,258.18<br>(2,362.29 to<br>4,640.47)                         | 3,487.85<br>(2,540.76 to<br>4,821.69)                         | 152.79<br>(127.11 to<br>179.27)                            | 110.05<br>(80.38 to<br>150.52)                           | 105.09<br>(76.73 to<br>148.54)                         | 108.00<br>(80.46 to<br>145.15)                         |

|                                      |                                                               |                                                               |                                                               |                                                               |                                                            |                                                          |                                                        |                                                          |
|--------------------------------------|---------------------------------------------------------------|---------------------------------------------------------------|---------------------------------------------------------------|---------------------------------------------------------------|------------------------------------------------------------|----------------------------------------------------------|--------------------------------------------------------|----------------------------------------------------------|
|                                      | 129.55<br>(102.86 to<br>168.92)                               | 117.08<br>(80.92 to<br>166.90)                                | 125.91<br>(86.15 to<br>179.71)                                | 112.86<br>(78.20 to<br>159.08)                                | 3.74<br>(2.91 to<br>4.71)                                  | 4.10<br>(2.87 to<br>5.60)                                | 4.57<br>(3.17 to<br>6.26)                              | 3.83<br>(2.69 to<br>5.16)                                |
| Foreign body in other body part      |                                                               |                                                               |                                                               |                                                               |                                                            |                                                          |                                                        |                                                          |
|                                      | 7,097.51<br>(4,174.80 to<br>10,244.73)                        | 4,148.84<br>(2,254.13 to<br>6,593.44)                         | 3,309.33<br>(1,831.39 to<br>5,505.63)                         | 4,305.42<br>(2,311.09 to<br>7,174.02)                         | 229.09<br>(133.87 to<br>323.26)                            | 145.95<br>(82.11 to<br>224.49)                           | 118.88<br>(65.09 to<br>188.23)                         | 148.76<br>(78.30 to<br>235.90)                           |
| Environmental heat and cold exposure |                                                               |                                                               |                                                               |                                                               |                                                            |                                                          |                                                        |                                                          |
|                                      | 1,337.38<br>(1,152.06 to<br>1,556.10)                         | 365.95<br>(218.54 to<br>591.20)                               | 235.43<br>(151.78 to<br>352.45)                               | 404.70<br>(241.76 to<br>649.32)                               | 34.93<br>(30.19 to<br>40.70)                               | 10.87<br>(6.72 to<br>16.89)                              | 7.19<br>(4.82 to<br>10.44)                             | 11.73<br>(7.31 to<br>18.23)                              |
| Other unintentional injuries         |                                                               |                                                               |                                                               |                                                               |                                                            |                                                          |                                                        |                                                          |
|                                      | <b>49,383.45</b><br><b>(42,802.44 to</b><br><b>57,828.35)</b> | <b>38,514.97</b><br><b>(16,908.50 to</b><br><b>75,924.40)</b> | <b>29,433.80</b><br><b>(13,333.70 to</b><br><b>55,974.81)</b> | <b>42,194.77</b><br><b>(17,850.12 to</b><br><b>84,558.62)</b> | <b>1,298.26</b><br><b>(1,133.46 to</b><br><b>1,524.26)</b> | <b>1,149.52</b><br><b>(555.31 to</b><br><b>2,094.37)</b> | <b>906.38</b><br><b>(460.42 to</b><br><b>1,617.12)</b> | <b>1,228.26</b><br><b>(577.00 to</b><br><b>2,291.19)</b> |
| Self-harm and interpersonal violence |                                                               |                                                               |                                                               |                                                               |                                                            |                                                          |                                                        |                                                          |



| Lithuania                                                                           |                                         |                                       |                                       |                                       |                                      |                                      |                                      |                                      |
|-------------------------------------------------------------------------------------|-----------------------------------------|---------------------------------------|---------------------------------------|---------------------------------------|--------------------------------------|--------------------------------------|--------------------------------------|--------------------------------------|
| Cause                                                                               | YLLs (actual counts)                    |                                       |                                       |                                       | Deaths (actual counts)               |                                      |                                      |                                      |
|                                                                                     | 2016                                    | 2040 Forecast                         | 2040 Better Scenario                  | 2040 Worse Scenario                   | 2016                                 | 2040 Forecast                        | 2040 Better Scenario                 | 2040 Worse Scenario                  |
| Self-harm                                                                           | 41,058.35<br>(33,576.38 to 48,127.06)   | 34,407.97<br>(13,898.78 to 71,215.15) | 26,129.18<br>(10,996.37 to 51,937.38) | 37,815.81<br>(14,712.42 to 79,203.27) | 1,091.71<br>(909.73 to 1,276.28)     | 1,030.35<br>(470.73 to 1,956.36)     | 807.98<br>(395.90 to 1,490.65)       | 1,103.74<br>(488.38 to 2,141.28)     |
| Self-harm by firearm                                                                | 1,087.21<br>(652.66 to 1,570.70)        | 607.74<br>(212.17 to 1,346.25)        | 427.17<br>(153.18 to 936.81)          | 681.39<br>(225.41 to 1,475.78)        | 28.89<br>(17.92 to 40.45)            | 18.26<br>(7.46 to 38.31)             | 13.28<br>(5.59 to 26.47)             | 19.94<br>(7.64 to 41.70)             |
| Self-harm by other specified means                                                  | 39,971.13<br>(32,359.26 to 46,943.24)   | 33,800.23<br>(13,685.75 to 70,049.15) | 25,702.01<br>(10,805.80 to 51,176.58) | 37,134.42<br>(14,421.49 to 77,850.55) | 1,062.82<br>(882.28 to 1,241.33)     | 1,012.09<br>(462.03 to 1,925.42)     | 794.69<br>(389.27 to 1,468.02)       | 1,083.81<br>(478.98 to 2,101.16)     |
| Interpersonal violence                                                              | 8,325.10<br>(6,115.55 to 14,370.39)     | 4,107.01<br>(2,131.41 to 8,188.56)    | 3,304.62<br>(1,793.05 to 6,597.33)    | 4,578.95<br>(2,380.51 to 8,953.68)    | 206.55<br>(151.28 to 346.86)         | 119.17<br>(64.89 to 230.62)          | 98.40<br>(55.60 to 186.77)           | 124.51<br>(67.50 to 241.67)          |
| Physical violence by firearm                                                        | 662.30<br>(382.27 to 1,557.12)          | 230.61<br>(111.57 to 573.15)          | 178.50<br>(91.38 to 431.73)           | 247.48<br>(120.79 to 590.08)          | 13.69<br>(7.94 to 31.21)             | 5.22<br>(2.65 to 12.55)              | 4.12<br>(2.15 to 9.54)               | 5.54<br>(2.80 to 12.89)              |
| Physical violence by sharp object                                                   | 2,606.15<br>(1,655.72 to 4,870.00)      | 1,079.54<br>(589.95 to 2,154.15)      | 868.84<br>(484.99 to 1,689.54)        | 1,136.45<br>(620.06 to 2,226.55)      | 61.30<br>(38.73 to 111.81)           | 28.99<br>(16.91 to 55.47)            | 23.93<br>(14.21 to 45.38)            | 29.97<br>(17.21 to 56.56)            |
| Physical violence by other means                                                    | 5,056.65<br>(3,650.35 to 9,107.32)      | 2,796.85<br>(1,261.12 to 6,234.22)    | 2,357.28<br>(1,074.84 to 4,968.00)    | 2,995.03<br>(1,331.50 to 6,941.07)    | 131.56<br>(94.22 to 233.04)          | 84.96<br>(42.44 to 174.70)           | 70.36<br>(36.45 to 145.38)           | 89.00<br>(43.57 to 191.34)           |
| <b>Forces of nature, conflict and terrorism, and executions and police conflict</b> | <b>13.00</b><br><b>(11.92 to 14.01)</b> | <b>4.93</b><br><b>(0.00 to 47.07)</b> | <b>4.98</b><br><b>(0.00 to 46.93)</b> | <b>4.87</b><br><b>(0.00 to 47.25)</b> | <b>0.29</b><br><b>(0.26 to 0.31)</b> | <b>0.13</b><br><b>(0.00 to 1.31)</b> | <b>0.14</b><br><b>(0.00 to 1.34)</b> | <b>0.13</b><br><b>(0.00 to 1.28)</b> |
| Exposure to forces of nature                                                        | 0.00<br>(0.00 to 0.00)                  | 3.15<br>(0.00 to 45.75)               | 3.18<br>(0.00 to 45.82)               | 3.11<br>(0.00 to 45.75)               | 0.00<br>(0.00 to 0.00)               | 0.09<br>(0.00 to 1.25)               | 0.09<br>(0.00 to 1.28)               | 0.09<br>(0.00 to 1.20)               |
| Conflict and terrorism                                                              | 0.00<br>(0.00 to 0.00)                  | 1.78<br>(0.00 to 12.63)               | 1.79<br>(0.00 to 13.00)               | 1.76<br>(0.00 to 12.25)               | 0.00<br>(0.00 to 0.00)               | 0.05<br>(0.00 to 0.42)               | 0.05<br>(0.00 to 0.43)               | 0.04<br>(0.00 to 0.40)               |
| Executions and police conflict                                                      | 13.00<br>(11.92 to 14.01)               | 0.00<br>(0.00 to 0.00)                | 0.00<br>(0.00 to 0.00)                | 0.00<br>(0.00 to 0.00)                | 0.29<br>(0.26 to 0.31)               | 0.00<br>(0.00 to 0.00)               | 0.00<br>(0.00 to 0.00)               | 0.00<br>(0.00 to 0.00)               |

| Moldova                                                           |                                            |                                            |                                            |                                              |                                       |                                       |                                       |                                       |
|-------------------------------------------------------------------|--------------------------------------------|--------------------------------------------|--------------------------------------------|----------------------------------------------|---------------------------------------|---------------------------------------|---------------------------------------|---------------------------------------|
| Cause                                                             | YLLs (actual counts)                       |                                            |                                            |                                              | Deaths (actual counts)                |                                       |                                       |                                       |
|                                                                   | 2016                                       | 2040 Forecast                              | 2040 Better Scenario                       | 2040 Worse Scenario                          | 2016                                  | 2040 Forecast                         | 2040 Better Scenario                  | 2040 Worse Scenario                   |
| All causes                                                        | 957,796.15<br>(860,672.72 to 1,063,758.30) | 947,465.25<br>(655,753.29 to 1,473,375.12) | 652,504.63<br>(435,406.04 to 1,022,311.00) | 1,176,076.23<br>(786,698.97 to 1,799,212.29) | 43,153.52<br>(39,241.56 to 47,482.01) | 50,450.91<br>(38,073.26 to 67,883.90) | 35,971.08<br>(26,236.49 to 50,076.46) | 59,340.69<br>(44,763.07 to 79,652.73) |
| Communicable, maternal, neonatal, and nutritional diseases        | 72,015.42<br>(61,089.59 to 84,717.33)      | 40,323.08<br>(23,285.04 to 69,242.24)      | 24,759.34<br>(14,442.62 to 43,435.85)      | 58,028.60<br>(33,257.99 to 103,762.56)       | 1,586.49<br>(1,392.24 to 1,809.89)    | 1,141.01<br>(691.46 to 1,964.44)      | 736.01<br>(454.90 to 1,235.00)        | 1,586.14<br>(936.97 to 2,741.34)      |
| HIV/AIDS and tuberculosis                                         | 18,539.75<br>(16,304.81 to 21,496.99)      | 8,969.44<br>(5,243.18 to 17,013.06)        | 4,168.12<br>(2,459.39 to 7,463.18)         | 13,921.05<br>(9,022.29 to 24,830.30)         | 432.73<br>(380.01 to 507.22)          | 227.97<br>(125.85 to 456.59)          | 102.17<br>(57.97 to 191.02)           | 345.02<br>(212.31 to 644.61)          |
| Tuberculosis                                                      | 9,687.39<br>(7,864.58 to 12,402.41)        | 5,082.86<br>(1,671.83 to 13,435.18)        | 1,795.10<br>(579.13 to 4,940.67)           | 6,880.45<br>(2,336.48 to 17,746.68)          | 252.59<br>(206.39 to 325.09)          | 146.50<br>(52.00 to 373.38)           | 52.44<br>(18.15 to 140.54)            | 195.90<br>(70.82 to 493.44)           |
| HIV/AIDS                                                          | 8,852.36<br>(7,839.12 to 9,929.84)         | 3,886.58<br>(2,667.53 to 5,373.54)         | 2,373.01<br>(1,375.13 to 3,819.28)         | 7,040.61<br>(5,462.09 to 8,708.48)           | 180.14<br>(160.70 to 201.12)          | 81.47<br>(53.65 to 116.23)            | 49.73<br>(28.52 to 83.36)             | 149.12<br>(111.46 to 188.89)          |
| Diarrhea, lower respiratory, and other common infectious diseases | 35,596.30<br>(30,108.45 to 41,949.50)      | 24,421.72<br>(12,170.43 to 46,597.16)      | 16,169.27<br>(8,362.62 to 30,614.90)       | 35,796.47<br>(16,631.22 to 71,207.90)        | 931.30<br>(806.41 to 1,072.51)        | 817.83<br>(469.13 to 1,469.55)        | 570.06<br>(341.82 to 995.61)          | 1,130.58<br>(602.17 to 2,133.10)      |
| Diarrheal diseases                                                | 558.66<br>(352.16 to 861.24)               | 126.93<br>(17.18 to 497.13)                | 146.36<br>(21.93 to 543.42)                | 258.76<br>(27.94 to 949.04)                  | 9.06<br>(6.46 to 12.67)               | 3.89<br>(0.71 to 13.65)               | 5.32<br>(1.06 to 18.14)               | 6.87<br>(0.95 to 24.98)               |
| Intestinal infectious diseases                                    | 1.94<br>(1.07 to 3.25)                     | 0.83<br>(0.41 to 1.51)                     | 0.64<br>(0.32 to 1.17)                     | 0.82<br>(0.41 to 1.47)                       | 0.06<br>(0.03 to 0.10)                | 0.03<br>(0.02 to 0.07)                | 0.03<br>(0.01 to 0.05)                | 0.03<br>(0.01 to 0.06)                |
| Typhoid fever                                                     | 0.21<br>(0.10 to 0.41)                     | 0.08<br>(0.04 to 0.16)                     | 0.10<br>(0.05 to 0.20)                     | 0.09<br>(0.04 to 0.17)                       | 0.00<br>(0.00 to 0.01)                | 0.00<br>(0.00 to 0.00)                | 0.00<br>(0.00 to 0.00)                | 0.00<br>(0.00 to 0.00)                |
| Paratyphoid fever                                                 | 0.59<br>(0.24 to 1.21)                     | 0.26<br>(0.11 to 0.54)                     | 0.18<br>(0.07 to 0.39)                     | 0.26<br>(0.11 to 0.55)                       | 0.01<br>(0.01 to 0.03)                | 0.01<br>(0.00 to 0.01)                | 0.01<br>(0.01 to 0.01)                | 0.01<br>(0.00 to 0.01)                |
| Other intestinal infectious diseases                              | 1.13<br>(0.44 to 2.29)                     | 0.48<br>(0.16 to 1.07)                     | 0.36<br>(0.12 to 0.78)                     | 0.47<br>(0.16 to 0.99)                       | 0.04<br>(0.02 to 0.08)                | 0.03<br>(0.01 to 0.05)                | 0.02<br>(0.01 to 0.05)                | 0.02<br>(0.01 to 0.05)                |
| Lower respiratory infections                                      | 32,152.66<br>(27,148.32 to 37,973.55)      | 22,390.64<br>(10,761.94 to 44,178.59)      | 14,523.80<br>(7,149.54 to 28,292.85)       | 33,544.04<br>(15,046.75 to 67,799.62)        | 857.76<br>(738.65 to 989.62)          | 760.76<br>(424.17 to 1,392.65)        | 521.59<br>(304.70 to 934.02)          | 1,070.83<br>(550.56 to 2,058.98)      |
| Upper respiratory infections                                      | 40.92<br>(20.92 to 72.90)                  | 42.17<br>(15.63 to 92.62)                  | 19.69<br>(6.97 to 43.77)                   | 42.07<br>(15.53 to 96.02)                    | 1.40<br>(0.67 to 2.53)                | 1.84<br>(0.68 to 3.65)                | 0.90<br>(0.31 to 1.89)                | 1.76<br>(0.65 to 3.59)                |
| Otitis media                                                      | 4.32<br>(2.20 to 9.02)                     | 1.49<br>(0.36 to 4.99)                     | 1.58<br>(0.38 to 5.23)                     | 1.39<br>(0.34 to 4.69)                       | 0.15<br>(0.08 to 0.33)                | 0.06<br>(0.01 to 0.18)                | 0.06<br>(0.02 to 0.19)                | 0.05<br>(0.01 to 0.16)                |
| Meningitis                                                        | 1,391.87<br>(1,066.53 to 1,740.90)         | 740.79<br>(474.55 to 1,183.02)             | 503.28<br>(313.76 to 835.22)               | 766.58<br>(493.71 to 1,214.08)               | 29.98<br>(23.53 to 37.19)             | 20.31<br>(13.88 to 30.80)             | 14.32<br>(9.21 to 22.80)              | 20.00<br>(13.79 to 29.74)             |
| Pneumococcal meningitis                                           | 108.94<br>(76.58 to 147.52)                | 59.84<br>(32.81 to 103.33)                 | 59.55<br>(31.82 to 102.48)                 | 60.53<br>(33.60 to 101.13)                   | 2.77<br>(1.93 to 3.93)                | 1.85<br>(1.06 to 3.13)                | 1.89<br>(1.08 to 3.22)                | 1.82<br>(1.05 to 3.05)                |
| H influenzae type B meningitis                                    | 120.01<br>(88.50 to 156.88)                | 81.27<br>(38.63 to 193.08)                 | 65.46<br>(35.16 to 131.18)                 | 110.52<br>(44.11 to 289.65)                  | 2.42<br>(1.83 to 3.07)                | 1.71<br>(1.01 to 3.05)                | 1.58<br>(0.97 to 2.61)                | 2.00<br>(1.08 to 4.14)                |
| Meningococcal meningitis                                          | 712.58<br>(535.84 to 914.85)               | 305.98<br>(190.30 to 499.18)               | 194.31<br>(114.73 to 331.74)               | 307.32<br>(190.83 to 496.12)                 | 13.60<br>(10.62 to 16.92)             | 7.81<br>(5.20 to 11.77)               | 5.12<br>(3.23 to 8.23)                | 7.61<br>(5.11 to 11.48)               |
| Other meningitis                                                  | 450.34<br>(345.26 to 559.80)               | 293.70<br>(189.57 to 473.68)               | 183.96<br>(108.15 to 325.33)               | 288.21<br>(185.40 to 458.23)                 | 11.19<br>(8.56 to 14.17)              | 8.94<br>(5.89 to 14.11)               | 5.73<br>(3.57 to 9.76)                | 8.57<br>(5.71 to 13.17)               |
| Encephalitis                                                      | 1,432.06<br>(953.50 to 1,772.68)           | 1,008.49<br>(613.85 to 1,491.85)           | 892.78<br>(547.41 to 1,345.07)             | 1,010.37<br>(611.68 to 1,468.41)             | 32.59<br>(22.01 to 39.96)             | 28.89<br>(19.00 to 41.64)             | 26.27<br>(17.19 to 38.61)             | 28.17<br>(18.33 to 39.85)             |

|                |                           |                               |                              |                                 |                           |                            |                            |                            |
|----------------|---------------------------|-------------------------------|------------------------------|---------------------------------|---------------------------|----------------------------|----------------------------|----------------------------|
| Diphtheria     | 3.18<br>(1.98 to<br>4.69) | 0.75<br>(0.34 to<br>1.46)     | 0.67<br>(0.29 to<br>1.36)    | 0.93<br>(0.40 to<br>2.01)       | 0.06<br>(0.04 to<br>0.10) | 0.02<br>(0.01 to<br>0.04)  | 0.02<br>(0.01 to<br>0.04)  | 0.02<br>(0.01 to<br>0.04)  |
| Whooping cough | 3.21<br>(1.40 to<br>7.79) | 1.20<br>(0.17 to<br>4.68)     | 0.26<br>(0.09 to<br>0.81)    | 2.74<br>(0.32 to<br>10.54)      | 0.04<br>(0.02 to<br>0.10) | 0.02<br>(0.00 to<br>0.06)  | 0.00<br>(0.00 to<br>0.01)  | 0.03<br>(0.00 to<br>0.13)  |
| Tetanus        | 1.38<br>(0.88 to<br>2.03) | 0.22<br>(0.11 to<br>0.39)     | 0.21<br>(0.09 to<br>0.39)    | 0.25<br>(0.13 to<br>0.43)       | 0.04<br>(0.02 to<br>0.06) | 0.01<br>(0.00 to<br>0.01)  | 0.01<br>(0.00 to<br>0.01)  | 0.01<br>(0.00 to<br>0.01)  |
| Measles        | 0.76<br>(0.50 to<br>1.16) | 105.82<br>(0.14 to<br>746.08) | 78.40<br>(0.14 to<br>615.96) | 166.11<br>(0.16 to<br>1,212.82) | 0.01<br>(0.01 to<br>0.01) | 1.88<br>(0.00 to<br>14.06) | 1.45<br>(0.00 to<br>10.56) | 2.70<br>(0.00 to<br>20.74) |

| Moldova                                               |                                                      |                                                     |                                                     |                                                      |                                                 |                                                |                                                |                                                |
|-------------------------------------------------------|------------------------------------------------------|-----------------------------------------------------|-----------------------------------------------------|------------------------------------------------------|-------------------------------------------------|------------------------------------------------|------------------------------------------------|------------------------------------------------|
| Cause                                                 | YLLs (actual counts)                                 |                                                     |                                                     |                                                      | Deaths (actual counts)                          |                                                |                                                |                                                |
|                                                       | 2016                                                 | 2040 Forecast                                       | 2040 Better Scenario                                | 2040 Worse Scenario                                  | 2016                                            | 2040 Forecast                                  | 2040 Better Scenario                           | 2040 Worse Scenario                            |
| Varicella and herpes zoster                           | 5.34<br>(2.60 to<br>8.44)                            | 2.41<br>(0.91 to<br>4.73)                           | 1.59<br>(0.59 to<br>3.10)                           | 2.40<br>(0.94 to<br>4.68)                            | 0.16<br>(0.06 to<br>0.22)                       | 0.12<br>(0.04 to<br>0.20)                      | 0.09<br>(0.03 to<br>0.15)                      | 0.11<br>(0.04 to<br>0.18)                      |
| <b>Neglected tropical diseases and malaria</b>        | <b>89.72</b><br><b>(76.24 to</b><br><b>104.39)</b>   | <b>51.11</b><br><b>(36.47 to</b><br><b>71.92)</b>   | <b>34.18</b><br><b>(24.65 to</b><br><b>49.76)</b>   | <b>51.87</b><br><b>(37.56 to</b><br><b>72.72)</b>    | <b>2.73</b><br><b>(2.31 to</b><br><b>3.21)</b>  | <b>2.00</b><br><b>(1.52 to</b><br><b>2.59)</b> | <b>1.33</b><br><b>(1.03 to</b><br><b>1.77)</b> | <b>1.95</b><br><b>(1.53 to</b><br><b>2.49)</b> |
| Malaria                                               | 0.00<br>(0.00 to<br>0.00)                            | 0.00<br>(0.00 to<br>0.00)                           | 0.00<br>(0.00 to<br>0.00)                           | 0.00<br>(0.00 to<br>0.00)                            | 0.00<br>(0.00 to<br>0.00)                       | 0.00<br>(0.00 to<br>0.00)                      | 0.00<br>(0.00 to<br>0.00)                      | 0.00<br>(0.00 to<br>0.00)                      |
| Chagas disease                                        | 0.00<br>(0.00 to<br>0.00)                            | 0.00<br>(0.00 to<br>0.00)                           | 0.00<br>(0.00 to<br>0.00)                           | 0.00<br>(0.00 to<br>0.00)                            | 0.00<br>(0.00 to<br>0.00)                       | 0.00<br>(0.00 to<br>0.00)                      | 0.00<br>(0.00 to<br>0.00)                      | 0.00<br>(0.00 to<br>0.00)                      |
| Leishmaniasis                                         | 0.00<br>(0.00 to<br>0.00)                            | 0.00<br>(0.00 to<br>0.00)                           | 0.00<br>(0.00 to<br>0.00)                           | 0.00<br>(0.00 to<br>0.00)                            | 0.00<br>(0.00 to<br>0.00)                       | 0.00<br>(0.00 to<br>0.00)                      | 0.00<br>(0.00 to<br>0.00)                      | 0.00<br>(0.00 to<br>0.00)                      |
| African trypanosomiasis                               | 0.00<br>(0.00 to<br>0.00)                            | 0.00<br>(0.00 to<br>0.00)                           | 0.00<br>(0.00 to<br>0.00)                           | 0.00<br>(0.00 to<br>0.00)                            | 0.00<br>(0.00 to<br>0.00)                       | 0.00<br>(0.00 to<br>0.00)                      | 0.00<br>(0.00 to<br>0.00)                      | 0.00<br>(0.00 to<br>0.00)                      |
| Schistosomiasis                                       | 0.00<br>(0.00 to<br>0.00)                            | 0.00<br>(0.00 to<br>0.00)                           | 0.00<br>(0.00 to<br>0.00)                           | 0.00<br>(0.00 to<br>0.00)                            | 0.00<br>(0.00 to<br>0.00)                       | 0.00<br>(0.00 to<br>0.00)                      | 0.00<br>(0.00 to<br>0.00)                      | 0.00<br>(0.00 to<br>0.00)                      |
| Cysticercosis                                         | 4.92<br>(3.76 to<br>6.28)                            | 1.70<br>(1.15 to<br>2.59)                           | 1.58<br>(1.04 to<br>2.45)                           | 1.66<br>(1.12 to<br>2.46)                            | 0.15<br>(0.11 to<br>0.19)                       | 0.06<br>(0.04 to<br>0.09)                      | 0.06<br>(0.04 to<br>0.09)                      | 0.06<br>(0.04 to<br>0.08)                      |
| Cystic echinococcosis                                 | 60.94<br>(50.00 to<br>72.91)                         | 36.16<br>(25.29 to<br>51.93)                        | 20.81<br>(14.36 to<br>30.79)                        | 36.51<br>(26.30 to<br>51.19)                         | 2.10<br>(1.72 to<br>2.52)                       | 1.60<br>(1.20 to<br>2.12)                      | 0.96<br>(0.72 to<br>1.29)                      | 1.55<br>(1.19 to<br>2.00)                      |
| Dengue                                                | 0.00<br>(0.00 to<br>0.00)                            | 0.00<br>(0.00 to<br>0.00)                           | 0.00<br>(0.00 to<br>0.00)                           | 0.00<br>(0.00 to<br>0.00)                            | 0.00<br>(0.00 to<br>0.00)                       | 0.00<br>(0.00 to<br>0.00)                      | 0.00<br>(0.00 to<br>0.00)                      | 0.00<br>(0.00 to<br>0.00)                      |
| Yellow fever                                          | 0.00<br>(0.00 to<br>0.00)                            | 0.00<br>(0.00 to<br>0.00)                           | 0.00<br>(0.00 to<br>0.00)                           | 0.00<br>(0.00 to<br>0.00)                            | 0.00<br>(0.00 to<br>0.00)                       | 0.00<br>(0.00 to<br>0.00)                      | 0.00<br>(0.00 to<br>0.00)                      | 0.00<br>(0.00 to<br>0.00)                      |
| Rabies                                                | 1.44<br>(1.06 to<br>1.90)                            | 0.55<br>(0.35 to<br>0.86)                           | 0.32<br>(0.21 to<br>0.51)                           | 0.59<br>(0.37 to<br>0.93)                            | 0.03<br>(0.02 to<br>0.04)                       | 0.01<br>(0.01 to<br>0.02)                      | 0.01<br>(0.01 to<br>0.01)                      | 0.01<br>(0.01 to<br>0.02)                      |
| Intestinal nematode infections                        | 0.52<br>(0.22 to<br>1.01)                            | 0.44<br>(0.19 to<br>0.86)                           | 0.44<br>(0.20 to<br>0.86)                           | 0.43<br>(0.19 to<br>0.83)                            | 0.01<br>(0.01 to<br>0.02)                       | 0.02<br>(0.01 to<br>0.03)                      | 0.02<br>(0.03 to<br>0.03)                      | 0.01<br>(0.01 to<br>0.02)                      |
| Other neglected tropical diseases                     | 21.91<br>(19.01 to<br>24.74)                         | 12.27<br>(8.79 to<br>16.67)                         | 11.03<br>(8.01 to<br>15.26)                         | 12.69<br>(9.23 to<br>17.13)                          | 0.44<br>(0.39 to<br>0.50)                       | 0.31<br>(0.23 to<br>0.41)                      | 0.29<br>(0.21 to<br>0.39)                      | 0.31<br>(0.23 to<br>0.41)                      |
| <b>Maternal disorders</b>                             | <b>511.16</b><br><b>(402.25 to</b><br><b>642.33)</b> | <b>195.59</b><br><b>(99.11 to</b><br><b>327.42)</b> | <b>118.35</b><br><b>(58.89 to</b><br><b>202.95)</b> | <b>210.62</b><br><b>(105.29 to</b><br><b>360.67)</b> | <b>9.14</b><br><b>(7.23 to</b><br><b>11.49)</b> | <b>3.57</b><br><b>(1.86 to</b><br><b>5.99)</b> | <b>2.16</b><br><b>(1.06 to</b><br><b>3.76)</b> | <b>3.84</b><br><b>(1.91 to</b><br><b>6.59)</b> |
| Maternal hemorrhage                                   | 73.28<br>(47.79 to<br>104.57)                        | 25.03<br>(10.98 to<br>46.20)                        | 15.28<br>(6.53 to<br>29.24)                         | 26.76<br>(11.35 to<br>51.50)                         | 1.35<br>(0.88 to<br>1.92)                       | 0.47<br>(0.20 to<br>0.86)                      | 0.29<br>(0.12 to<br>0.56)                      | 0.50<br>(0.21 to<br>0.95)                      |
| Maternal sepsis and other maternal infections         | 54.06<br>(35.53 to<br>77.89)                         | 18.62<br>(8.13 to<br>33.70)                         | 11.19<br>(4.80 to<br>20.52)                         | 20.05<br>(8.43 to<br>36.99)                          | 0.96<br>(0.64 to<br>1.37)                       | 0.34<br>(0.15 to<br>0.60)                      | 0.20<br>(0.09 to<br>0.37)                      | 0.36<br>(0.15 to<br>0.66)                      |
| Maternal hypertensive disorders                       | 51.80<br>(34.98 to<br>73.52)                         | 18.40<br>(8.35 to<br>34.32)                         | 10.93<br>(4.46 to<br>21.15)                         | 19.88<br>(8.39 to<br>38.36)                          | 0.89<br>(0.60 to<br>1.25)                       | 0.32<br>(0.15 to<br>0.59)                      | 0.19<br>(0.08 to<br>0.36)                      | 0.34<br>(0.15 to<br>0.65)                      |
| Maternal obstructed labor and uterine rupture         | 10.10<br>(5.10 to<br>17.43)                          | 4.58<br>(1.70 to<br>9.52)                           | 2.58<br>(0.92 to<br>5.45)                           | 4.92<br>(1.86 to<br>10.34)                           | 0.19<br>(0.10 to<br>0.32)                       | 0.09<br>(0.03 to<br>0.18)                      | 0.05<br>(0.02 to<br>0.11)                      | 0.10<br>(0.04 to<br>0.20)                      |
| Maternal abortion, miscarriage, and ectopic pregnancy | 94.25<br>(62.87 to<br>132.53)                        | 42.67<br>(18.74 to<br>84.37)                        | 25.47<br>(11.43 to<br>49.59)                        | 45.95<br>(19.74 to<br>90.57)                         | 1.75<br>(1.17 to<br>2.44)                       | 0.81<br>(0.37 to<br>1.59)                      | 0.49<br>(0.22 to<br>0.92)                      | 0.87<br>(0.39 to<br>1.72)                      |

|                                        |                                 |                               |                              |                               |                           |                           |                           |                           |
|----------------------------------------|---------------------------------|-------------------------------|------------------------------|-------------------------------|---------------------------|---------------------------|---------------------------|---------------------------|
|                                        | 151.43<br>(102.08 to<br>212.18) | 54.43<br>(22.13 to<br>106.00) | 32.51<br>(12.84 to<br>65.81) | 58.99<br>(23.00 to<br>118.45) | 2.60<br>(1.76 to<br>3.64) | 0.93<br>(0.39 to<br>1.78) | 0.56<br>(0.23 to<br>1.10) | 1.01<br>(0.41 to<br>2.01) |
| Indirect maternal deaths               |                                 |                               |                              |                               |                           |                           |                           |                           |
|                                        | 10.90<br>(5.80 to<br>18.78)     | 3.56<br>(1.53 to<br>7.21)     | 2.11<br>(0.85 to<br>4.43)    | 3.84<br>(1.59 to<br>8.22)     | 0.19<br>(0.10 to<br>0.33) | 0.06<br>(0.03 to<br>0.13) | 0.04<br>(0.02 to<br>0.08) | 0.07<br>(0.03 to<br>0.14) |
| Late maternal deaths                   |                                 |                               |                              |                               |                           |                           |                           |                           |
|                                        | 0.40<br>(0.17 to<br>0.74)       | 0.77<br>(0.14 to<br>2.48)     | 0.52<br>(0.10 to<br>1.65)    | 0.83<br>(0.15 to<br>2.77)     | 0.01<br>(0.00 to<br>0.01) | 0.01<br>(0.00 to<br>0.05) | 0.01<br>(0.00 to<br>0.03) | 0.02<br>(0.00 to<br>0.05) |
| Maternal deaths aggravated by HIV/AIDS |                                 |                               |                              |                               |                           |                           |                           |                           |
|                                        | 64.95<br>(38.91 to<br>95.27)    | 27.54<br>(13.37 to<br>49.94)  | 17.75<br>(8.35 to<br>31.82)  | 29.40<br>(13.91 to<br>54.00)  | 1.20<br>(0.72 to<br>1.77) | 0.53<br>(0.26 to<br>0.96) | 0.34<br>(0.16 to<br>0.61) | 0.56<br>(0.27 to<br>1.01) |
| Other maternal disorders               |                                 |                               |                              |                               |                           |                           |                           |                           |

| Moldova                                                                 |                                              |                                            |                                           |                                            |                                     |                                   |                                   |                                   |
|-------------------------------------------------------------------------|----------------------------------------------|--------------------------------------------|-------------------------------------------|--------------------------------------------|-------------------------------------|-----------------------------------|-----------------------------------|-----------------------------------|
| Cause                                                                   | YLLs (actual counts)                         |                                            |                                           |                                            | Deaths (actual counts)              |                                   |                                   |                                   |
|                                                                         | 2016                                         | 2040 Forecast                              | 2040 Better Scenario                      | 2040 Worse Scenario                        | 2016                                | 2040 Forecast                     | 2040 Better Scenario              | 2040 Worse Scenario               |
| <b>Neonatal disorders</b>                                               | <b>16,280.94</b><br>(10,495.92 to 23,462.00) | <b>6,026.54</b><br>(2,195.14 to 14,132.52) | <b>3,744.41</b><br>(1,352.50 to 8,928.77) | <b>7,380.99</b><br>(2,748.93 to 17,233.13) | <b>188.07</b><br>(121.24 to 271.02) | <b>69.64</b><br>(25.37 to 163.26) | <b>43.27</b><br>(15.63 to 103.16) | <b>85.28</b><br>(31.77 to 199.06) |
| Neonatal preterm birth                                                  | 4,776.33<br>(2,934.48 to 7,110.49)           | 1,358.76<br>(570.18 to 2,679.60)           | 736.50<br>(306.68 to 1,452.88)            | 1,777.80<br>(757.29 to 3,487.33)           | 55.18<br>(33.90 to 82.14)           | 15.70<br>(6.59 to 30.96)          | 8.51<br>(3.55 to 16.78)           | 20.54<br>(8.75 to 40.31)          |
| Neonatal encephalopathy due to birth asphyxia and trauma                | 4,581.11<br>(2,814.93 to 6,962.37)           | 1,744.75<br>(489.39 to 4,708.56)           | 1,024.08<br>(294.30 to 2,773.36)          | 2,091.79<br>(587.16 to 5,692.94)           | 52.92<br>(32.52 to 80.43)           | 20.16<br>(5.66 to 54.39)          | 11.83<br>(3.40 to 32.04)          | 24.17<br>(6.79 to 65.76)          |
| Neonatal sepsis and other neonatal infections                           | 4,199.51<br>(2,137.71 to 6,464.74)           | 2,002.96<br>(655.58 to 5,082.01)           | 1,287.36<br>(439.67 to 3,124.20)          | 2,402.55<br>(768.22 to 5,996.78)           | 48.50<br>(25.57 to 74.67)           | 23.14<br>(7.57 to 58.70)          | 14.87<br>(5.08 to 36.09)          | 27.75<br>(8.88 to 69.27)          |
| Hemolytic disease and other neonatal jaundice                           | 128.20<br>(63.01 to 229.85)                  | 40.05<br>(9.63 to 130.03)                  | 24.06<br>(5.74 to 76.93)                  | 48.33<br>(10.93 to 161.88)                 | 1.48<br>(0.73 to 2.66)              | 0.46<br>(0.11 to 1.50)            | 0.28<br>(0.07 to 0.89)            | 0.56<br>(0.13 to 1.87)            |
| Other neonatal disorders                                                | 2,595.80<br>(1,533.81 to 4,041.07)           | 880.01<br>(247.10 to 2,489.55)             | 672.42<br>(198.07 to 1,851.28)            | 1,060.52<br>(289.53 to 3,027.22)           | 29.99<br>(17.72 to 46.69)           | 10.17<br>(2.86 to 28.76)          | 7.77<br>(2.29 to 21.39)           | 12.26<br>(3.35 to 34.97)          |
| <b>Nutritional deficiencies</b>                                         | <b>80.37</b><br>(68.76 to 93.61)             | <b>85.47</b><br>(57.00 to 126.82)          | <b>78.99</b><br>(52.58 to 119.49)         | <b>84.58</b><br>(57.46 to 126.16)          | <b>2.54</b><br>(2.21 to 2.94)       | <b>3.16</b><br>(2.33 to 4.36)     | <b>3.05</b><br>(2.22 to 4.27)     | <b>3.00</b><br>(2.22 to 4.11)     |
| Protein-energy malnutrition                                             | 33.43<br>(24.99 to 56.77)                    | 37.37<br>(20.07 to 68.82)                  | 38.46<br>(20.96 to 69.31)                 | 37.00<br>(68.91)                           | 1.14<br>(0.85 to 1.89)              | 1.44<br>(0.87 to 2.53)            | 1.56<br>(0.99 to 2.60)            | 1.37<br>(0.84 to 2.42)            |
| Iodine deficiency                                                       | 5.64<br>(0.77 to 13.17)                      | 6.91<br>(0.46 to 20.45)                    | 5.82<br>(0.33 to 18.18)                   | 6.82<br>(0.53 to 20.47)                    | 0.19<br>(0.02 to 0.44)              | 0.28<br>(0.02 to 0.78)            | 0.25<br>(0.02 to 0.73)            | 0.27<br>(0.02 to 0.76)            |
| Dietary iron deficiency                                                 | 14.39<br>(8.65 to 17.86)                     | 12.17<br>(6.08 to 18.74)                   | 12.09<br>(5.91 to 18.71)                  | 12.32<br>(6.15 to 18.78)                   | 0.34<br>(0.18 to 0.43)              | 0.32<br>(0.14 to 0.49)            | 0.33<br>(0.14 to 0.50)            | 0.32<br>(0.15 to 0.48)            |
| Other nutritional deficiencies                                          | 26.91<br>(13.19 to 34.83)                    | 29.02<br>(11.03 to 47.91)                  | 22.63<br>(8.34 to 38.95)                  | 28.44<br>(11.05 to 46.40)                  | 0.88<br>(0.41 to 1.14)              | 1.12<br>(0.46 to 1.68)            | 0.91<br>(0.38 to 1.42)            | 1.05<br>(0.43 to 1.58)            |
| <b>Other communicable, maternal, neonatal, and nutritional diseases</b> | <b>917.18</b><br>(761.08 to 1,110.59)        | <b>573.21</b><br>(405.69 to 782.87)        | <b>446.03</b><br>(312.60 to 629.76)       | <b>583.01</b><br>(412.19 to 806.91)        | <b>19.97</b><br>(16.97 to 23.06)    | <b>16.85</b><br>(12.72 to 22.17)  | <b>13.98</b><br>(10.52 to 18.64)  | <b>16.46</b><br>(12.61 to 21.65)  |
| Sexually transmitted infections excluding HIV                           | 176.95<br>(114.21 to 280.68)                 | 79.25<br>(46.75 to 127.17)                 | 61.28<br>(36.05 to 99.39)                 | 81.18<br>(48.36 to 129.89)                 | 3.60<br>(2.67 to 5.14)              | 2.13<br>(1.37 to 3.29)            | 1.75<br>(1.11 to 2.81)            | 2.12<br>(1.38 to 3.33)            |
| Syphilis                                                                | 99.00<br>(41.89 to 202.48)                   | 31.31<br>(14.36 to 65.28)                  | 20.68<br>(9.39 to 42.78)                  | 32.91<br>(14.77 to 68.23)                  | 1.53<br>(0.83 to 2.85)              | 0.67<br>(0.38 to 1.20)            | 0.47<br>(0.26 to 0.86)            | 0.68<br>(0.38 to 1.26)            |
| Chlamydial infection                                                    | 15.03<br>(11.79 to 18.82)                    | 9.17<br>(5.12 to 15.94)                    | 7.78<br>(4.24 to 13.55)                   | 9.23<br>(5.08 to 16.04)                    | 0.40<br>(0.32 to 0.53)              | 0.28<br>(0.17 to 0.46)            | 0.25<br>(0.15 to 0.41)            | 0.28<br>(0.17 to 0.46)            |
| Gonococcal infection                                                    | 41.26<br>(32.14 to 52.46)                    | 25.89<br>(13.74 to 43.64)                  | 22.00<br>(11.40 to 37.36)                 | 26.01<br>(13.65 to 43.67)                  | 1.12<br>(0.89 to 1.50)              | 0.82<br>(0.48 to 1.35)            | 0.72<br>(0.42 to 1.17)            | 0.80<br>(0.47 to 1.34)            |
| Other sexually transmitted infections                                   | 21.65<br>(16.92 to 27.58)                    | 12.89<br>(7.09 to 21.99)                   | 10.83<br>(5.98 to 18.84)                  | 13.02<br>(7.10 to 22.18)                   | 0.55<br>(0.43 to 0.72)              | 0.37<br>(0.21 to 0.63)            | 0.31<br>(0.18 to 0.54)            | 0.36<br>(0.21 to 0.63)            |
| Acute hepatitis                                                         | 240.65<br>(203.60 to 280.69)                 | 156.52<br>(105.62 to 224.35)               | 96.93<br>(61.67 to 149.51)                | 159.32<br>(109.05 to 229.29)               | 4.79<br>(4.11 to 5.55)              | 3.98<br>(2.80 to 5.57)            | 2.52<br>(1.66 to 3.79)            | 3.93<br>(2.80 to 5.49)            |
| Acute hepatitis A                                                       | 26.96<br>(16.41 to 41.76)                    | 11.15<br>(3.44 to 30.58)                   | 7.41<br>(2.32 to 21.18)                   | 11.71<br>(3.64 to 30.83)                   | 0.36<br>(0.23 to 0.53)              | 0.17<br>(0.07 to 0.40)            | 0.11<br>(0.05 to 0.28)            | 0.17<br>(0.07 to 0.40)            |
| Acute hepatitis B                                                       | 147.99<br>(120.72 to 179.23)                 | 107.42<br>(69.18 to 158.03)                | 65.48<br>(39.25 to 103.48)                | 108.02<br>(71.27 to 159.68)                | 3.32<br>(2.77 to 3.97)              | 2.98<br>(2.04 to 4.29)            | 1.86<br>(1.15 to 2.87)            | 2.93<br>(1.98 to 4.25)            |



| Moldova                              |                                                 |                                                 |                                                 |                                                 |                                           |                                            |                                           |                                            |
|--------------------------------------|-------------------------------------------------|-------------------------------------------------|-------------------------------------------------|-------------------------------------------------|-------------------------------------------|--------------------------------------------|-------------------------------------------|--------------------------------------------|
| Cause                                | YLLs (actual counts)                            |                                                 |                                                 |                                                 | Deaths (actual counts)                    |                                            |                                           |                                            |
|                                      | 2016                                            | 2040 Forecast                                   | 2040 Better Scenario                            | 2040 Worse Scenario                             | 2016                                      | 2040 Forecast                              | 2040 Better Scenario                      | 2040 Worse Scenario                        |
| <b>Neoplasms</b>                     | <b>159,692.40</b><br>(143,053.46 to 177,519.21) | <b>188,641.42</b><br>(127,874.11 to 278,790.46) | <b>156,527.01</b><br>(106,333.10 to 239,104.49) | <b>217,476.44</b><br>(146,510.47 to 313,943.15) | <b>6,191.92</b><br>(5,566.18 to 6,886.85) | <b>8,278.78</b><br>(6,235.09 to 11,317.81) | <b>7,170.88</b><br>(5,352.25 to 9,993.87) | <b>9,171.16</b><br>(6,891.63 to 12,084.98) |
| Lip and oral cavity cancer           | 3,515.18<br>(2,955.57 to 4,120.22)              | 4,281.03<br>(1,628.86 to 9,463.47)              | 2,659.71<br>(1,075.99 to 6,003.32)              | 6,459.06<br>(2,529.26 to 13,754.39)             | 129.78<br>(110.84 to 150.58)              | 166.57<br>(72.60 to 337.75)                | 109.33<br>(50.48 to 223.50)               | 244.56<br>(105.59 to 493.48)               |
| Nasopharynx cancer                   | 1,115.61<br>(960.30 to 1,294.90)                | 1,200.09<br>(451.42 to 2,807.35)                | 658.02<br>(250.62 to 1,525.96)                  | 1,836.47<br>(704.06 to 3,911.37)                | 34.70<br>(29.91 to 40.22)                 | 39.66<br>(15.76 to 86.99)                  | 22.15<br>(9.18 to 49.27)                  | 60.42<br>(23.92 to 124.13)                 |
| Other pharynx cancer                 | 4,158.40<br>(3,421.14 to 4,966.34)              | 3,919.15<br>(1,564.83 to 8,355.84)              | 3,635.05<br>(1,418.37 to 8,078.31)              | 4,639.77<br>(1,859.87 to 9,592.79)              | 143.22<br>(118.42 to 170.14)              | 139.35<br>(59.63 to 282.66)                | 130.90<br>(54.55 to 275.79)               | 163.16<br>(69.44 to 324.12)                |
| Esophageal cancer                    | 2,384.56<br>(1,997.57 to 2,824.48)              | 2,750.80<br>(1,203.38 to 5,748.57)              | 2,032.53<br>(932.40 to 4,178.01)                | 4,060.94<br>(1,697.37 to 8,568.51)              | 91.62<br>(77.54 to 107.62)                | 112.24<br>(54.29 to 220.31)                | 86.94<br>(44.33 to 163.10)                | 159.95<br>(74.15 to 313.33)                |
| Stomach cancer                       | 13,246.76<br>(11,546.62 to 15,072.30)           | 12,683.47<br>(8,187.16 to 20,156.27)            | 9,041.76<br>(5,705.30 to 14,830.41)             | 13,253.23<br>(8,541.41 to 20,957.10)            | 530.69<br>(465.71 to 603.76)              | 566.40<br>(394.86 to 830.38)               | 419.45<br>(288.46 to 615.99)              | 571.65<br>(394.01 to 818.76)               |
| Colon and rectum cancer              | 19,781.54<br>(17,398.84 to 22,465.24)           | 28,162.79<br>(16,947.57 to 44,280.86)           | 22,741.39<br>(13,413.34 to 37,069.10)           | 30,530.88<br>(18,156.44 to 47,728.47)           | 869.45<br>(768.96 to 978.52)              | 1,390.22<br>(904.46 to 2,036.27)           | 1,168.27<br>(756.61 to 1,736.15)          | 1,451.74<br>(939.19 to 2,153.21)           |
| Liver cancer                         | 11,932.00<br>(10,379.90 to 13,621.54)           | 12,130.29<br>(6,980.75 to 21,435.46)            | 11,150.98<br>(6,516.60 to 19,130.70)            | 15,626.01<br>(8,496.86 to 28,411.37)            | 482.71<br>(420.77 to 550.02)              | 546.45<br>(346.92 to 871.44)               | 525.64<br>(340.57 to 824.49)              | 669.62<br>(395.82 to 1,104.90)             |
| Liver cancer due to hepatitis B      | 4,849.73<br>(3,992.40 to 5,706.44)              | 4,933.83<br>(2,747.34 to 8,956.57)              | 4,719.62<br>(2,707.30 to 8,279.42)              | 5,855.43<br>(3,133.57 to 11,069.38)             | 187.76<br>(154.84 to 232.75)              | 212.16<br>(130.03 to 332.05)               | 211.02<br>(130.43 to 345.25)              | 241.39<br>(139.26 to 429.57)               |
| Liver cancer due to hepatitis C      | 1,282.65<br>(1,050.26 to 1,530.70)              | 1,412.69<br>(821.48 to 2,373.56)                | 1,380.14<br>(817.40 to 2,258.51)                | 1,620.16<br>(893.85 to 2,824.50)                | 57.63<br>(47.67 to 68.30)                 | 70.99<br>(44.75 to 108.07)                 | 72.44<br>(46.32 to 109.30)                | 77.47<br>(47.00 to 124.25)                 |
| Liver cancer due to alcohol use      | 3,345.48<br>(2,819.00 to 3,962.18)              | 3,224.31<br>(1,816.69 to 5,550.46)              | 2,608.34<br>(1,531.32 to 4,393.90)              | 5,068.44<br>(2,677.26 to 9,041.99)              | 139.93<br>(118.07 to 163.51)              | 149.08<br>(92.17 to 235.10)                | 128.27<br>(81.46 to 199.77)               | 219.43<br>(126.40 to 360.54)               |
| Liver cancer due to other causes     | 2,454.14<br>(2,032.46 to 2,931.86)              | 2,559.45<br>(1,392.20 to 4,655.68)              | 2,442.88<br>(1,360.01 to 4,236.71)              | 3,081.99<br>(1,572.91 to 5,688.89)              | 97.39<br>(81.13 to 116.22)                | 114.22<br>(67.82 to 186.10)                | 113.91<br>(68.72 to 180.36)               | 131.33<br>(73.05 to 225.91)                |
| Gallbladder and biliary tract cancer | 1,027.83<br>(895.76 to 1,239.47)                | 1,063.24<br>(793.25 to 1,466.55)                | 1,062.36<br>(758.36 to 1,540.52)                | 987.04<br>(758.71 to 1,313.98)                  | 46.16<br>(40.26 to 56.44)                 | 53.62<br>(42.87 to 69.65)                  | 55.45<br>(43.03 to 75.21)                 | 48.46<br>(40.37 to 61.60)                  |
| Pancreatic cancer                    | 9,196.29<br>(8,094.65 to 10,493.11)             | 12,460.56<br>(8,730.26 to 18,218.45)            | 12,338.77<br>(8,583.53 to 18,658.89)            | 12,935.55<br>(9,145.40 to 18,534.51)            | 378.03<br>(333.57 to 429.39)              | 569.06<br>(432.16 to 765.45)               | 586.42<br>(440.08 to 817.72)              | 568.35<br>(437.14 to 761.36)               |
| Larynx cancer                        | 4,472.23<br>(3,742.89 to 5,328.94)              | 4,303.11<br>(1,522.93 to 11,081.84)             | 2,386.84<br>(807.78 to 5,875.72)                | 6,929.23<br>(2,342.62 to 16,430.36)             | 160.41<br>(133.79 to 190.25)              | 165.17<br>(61.36 to 376.55)                | 90.21<br>(53.33 to 207.70)                | 251.94<br>(88.28 to 560.65)                |
| Tracheal, bronchus, and lung cancer  | 25,034.72<br>(21,396.78 to 29,008.21)           | 28,940.59<br>(16,349.58 to 49,036.02)           | 20,602.37<br>(11,767.93 to 36,527.35)           | 43,214.40<br>(24,984.99 to 69,501.05)           | 982.82<br>(848.12 to 1,134.96)            | 1,212.95<br>(745.37 to 1,873.21)           | 908.23<br>(576.11 to 1,413.93)            | 1,758.29<br>(1,076.44 to 2,689.95)         |
| Malignant skin melanoma              | 1,972.46<br>(1,613.56 to 2,366.75)              | 2,103.33<br>(1,469.06 to 3,054.34)              | 2,632.48<br>(1,786.49 to 3,859.90)              | 1,963.26<br>(1,399.33 to 2,783.06)              | 72.17<br>(59.72 to 86.82)                 | 92.21<br>(70.97 to 122.00)                 | 119.46<br>(89.14 to 162.57)               | 83.36<br>(65.53 to 106.58)                 |
| Non-melanoma skin cancer             | 914.96<br>(797.96 to 1,046.56)                  | 1,540.52<br>(1,202.38 to 2,015.32)              | 1,234.56<br>(910.54 to 1,748.94)                | 1,412.04<br>(1,133.28 to 1,754.19)              | 44.08<br>(39.02 to 49.83)                 | 87.80<br>(74.40 to 103.23)                 | 74.14<br>(58.76 to 91.34)                 | 77.43<br>(66.16 to 90.23)                  |
| Breast cancer                        | 13,587.88<br>(11,212.62 to 16,126.22)           | 16,365.17<br>(9,450.31 to 27,280.95)            | 12,982.83<br>(7,453.36 to 21,947.17)            | 17,826.57<br>(10,315.30 to 29,585.49)           | 520.76<br>(433.56 to 614.95)              | 703.90<br>(454.74 to 1,080.20)             | 578.43<br>(365.94 to 892.02)              | 744.80<br>(479.71 to 1,145.11)             |
| Cervical cancer                      | 5,410.08<br>(4,396.50 to 6,502.04)              | 4,723.50<br>(2,981.32 to 7,105.69)              | 3,471.10<br>(2,106.77 to 5,404.11)              | 4,770.81<br>(2,998.82 to 7,133.20)              | 181.58<br>(148.36 to 218.58)              | 185.05<br>(128.85 to 261.39)               | 139.97<br>(92.01 to 206.60)               | 182.43<br>(126.54 to 255.99)               |



|                   |                                       |                                       |                                       |                                       |                                 |                                 |                                 |                                 |
|-------------------|---------------------------------------|---------------------------------------|---------------------------------------|---------------------------------------|---------------------------------|---------------------------------|---------------------------------|---------------------------------|
|                   | 2,221.23<br>(1,833.12 to<br>2,668.42) | 2,786.12<br>(1,874.98 to<br>3,884.14) | 2,270.45<br>(1,478.80 to<br>3,281.25) | 2,709.86<br>(1,861.73 to<br>3,668.05) | 93.54<br>(77.30 to<br>111.70)   | 132.87<br>(98.58 to<br>174.09)  | 111.26<br>(78.98 to<br>151.98)  | 126.80<br>(95.76 to<br>160.67)  |
| Uterine cancer    |                                       |                                       |                                       |                                       |                                 |                                 |                                 |                                 |
|                   | 3,532.56<br>(2,875.05 to<br>4,230.07) | 4,548.55<br>(2,703.86 to<br>7,032.58) | 4,165.08<br>(2,468.64 to<br>6,611.65) | 4,549.59<br>(2,727.21 to<br>7,089.72) | 128.73<br>(105.40 to<br>153.35) | 185.22<br>(118.39 to<br>274.82) | 173.30<br>(110.13 to<br>262.32) | 182.32<br>(118.03 to<br>268.73) |
| Ovarian cancer    |                                       |                                       |                                       |                                       |                                 |                                 |                                 |                                 |
|                   | 4,037.31<br>(3,248.95 to<br>4,796.76) | 6,460.97<br>(5,083.27 to<br>8,101.79) | 6,108.23<br>(4,578.07 to<br>8,291.68) | 5,784.58<br>(4,659.27 to<br>7,078.59) | 214.14<br>(177.44 to<br>260.45) | 384.71<br>(323.08 to<br>479.63) | 380.24<br>(308.87 to<br>500.32) | 330.48<br>(269.44 to<br>410.25) |
| Prostate cancer   |                                       |                                       |                                       |                                       |                                 |                                 |                                 |                                 |
|                   | 336.88<br>(264.16 to<br>424.06)       | 232.11<br>(148.56 to<br>362.08)       | 186.57<br>(115.33 to<br>297.98)       | 224.26<br>(145.53 to<br>348.63)       | 8.09<br>(6.44 to<br>10.02)      | 7.19<br>(5.16 to<br>10.29)      | 6.02<br>(4.19 to<br>8.97)       | 6.66<br>(4.82 to<br>9.29)       |
| Testicular cancer |                                       |                                       |                                       |                                       |                                 |                                 |                                 |                                 |

| Moldova                         |                                                      |                                                      |                                                      |                                                      |                                                   |                                                   |                                                  |                                                   |
|---------------------------------|------------------------------------------------------|------------------------------------------------------|------------------------------------------------------|------------------------------------------------------|---------------------------------------------------|---------------------------------------------------|--------------------------------------------------|---------------------------------------------------|
| Cause                           | YLLs (actual counts)                                 |                                                      |                                                      |                                                      | Deaths (actual counts)                            |                                                   |                                                  |                                                   |
|                                 | 2016                                                 | 2040 Forecast                                        | 2040 Better Scenario                                 | 2040 Worse Scenario                                  | 2016                                              | 2040 Forecast                                     | 2040 Better Scenario                             | 2040 Worse Scenario                               |
| Kidney cancer                   | 3,282.70<br>(2,867.87 to<br>3,803.04)                | 4,349.39<br>(2,784.78 to<br>6,876.70)                | 4,441.21<br>(2,855.13 to<br>6,945.05)                | 4,468.87<br>(2,784.67 to<br>7,171.74)                | 122.36<br>(107.12 to<br>141.63)                   | 179.30<br>(123.06 to<br>262.47)                   | 190.41<br>(132.03 to<br>280.96)                  | 178.13<br>(118.49 to<br>263.09)                   |
| Bladder cancer                  | 2,918.70<br>(2,501.64 to<br>3,387.53)                | 4,101.45<br>(2,885.34 to<br>5,950.54)                | 3,548.82<br>(2,513.17 to<br>5,184.75)                | 4,347.20<br>(3,034.01 to<br>6,447.24)                | 142.31<br>(122.93 to<br>163.72)                   | 222.32<br>(170.90 to<br>292.95)                   | 204.06<br>(157.86 to<br>272.01)                  | 223.14<br>(164.51 to<br>305.56)                   |
| Brain and nervous system cancer | 6,013.95<br>(4,816.76 to<br>6,935.43)                | 6,723.18<br>(4,514.55 to<br>10,012.12)               | 6,338.41<br>(4,197.09 to<br>9,766.61)                | 6,460.82<br>(4,399.18 to<br>9,370.04)                | 172.79<br>(143.39 to<br>200.58)                   | 227.72<br>(162.81 to<br>325.71)                   | 220.02<br>(153.19 to<br>323.97)                  | 213.50<br>(156.59 to<br>291.17)                   |
| Thyroid cancer                  | 602.69<br>(511.16 to<br>697.53)                      | 711.24<br>(489.72 to<br>1,124.22)                    | 577.19<br>(360.01 to<br>930.70)                      | 750.19<br>(466.76 to<br>1,199.67)                    | 23.26<br>(19.87 to<br>26.73)                      | 30.78<br>(20.73 to<br>46.72)                      | 25.60<br>(17.00 to<br>38.82)                     | 31.51<br>(20.62 to<br>48.75)                      |
| Mesothelioma                    | 178.15<br>(154.75 to<br>207.88)                      | 200.27<br>(138.18 to<br>305.37)                      | 201.68<br>(135.75 to<br>321.52)                      | 191.73<br>(135.53 to<br>280.76)                      | 5.86<br>(5.11 to<br>6.82)                         | 7.49<br>(5.53 to<br>10.78)                        | 7.74<br>(5.56 to<br>11.53)                       | 7.00<br>(5.32 to<br>9.71)                         |
| Hodgkin lymphoma                | 1,098.46<br>(919.81 to<br>1,289.36)                  | 904.64<br>(620.39 to<br>1,334.91)                    | 616.03<br>(392.41 to<br>976.39)                      | 888.07<br>(612.29 to<br>1,303.06)                    | 30.05<br>(24.81 to<br>36.35)                      | 30.65<br>(22.15 to<br>44.19)                      | 21.48<br>(14.47 to<br>32.77)                     | 29.23<br>(21.32 to<br>41.09)                      |
| Non-Hodgkin lymphoma            | 3,815.54<br>(3,230.70 to<br>4,342.25)                | 4,227.32<br>(2,969.25 to<br>6,101.25)                | 3,786.45<br>(2,569.41 to<br>5,745.53)                | 4,188.38<br>(2,989.48 to<br>5,971.59)                | 124.28<br>(108.48 to<br>141.72)                   | 169.34<br>(126.34 to<br>236.62)                   | 156.74<br>(112.77 to<br>226.64)                  | 162.62<br>(122.75 to<br>220.86)                   |
| Multiple myeloma                | 1,096.54<br>(928.20 to<br>1,408.17)                  | 1,614.32<br>(1,073.89 to<br>2,464.54)                | 1,546.07<br>(998.51 to<br>2,395.90)                  | 1,595.08<br>(1,071.63 to<br>2,405.49)                | 43.62<br>(36.46 to<br>60.49)                      | 71.71<br>(49.69 to<br>110.06)                     | 70.81<br>(48.18 to<br>112.83)                    | 69.01<br>(48.45 to<br>106.83)                     |
| Leukemia                        | 5,095.32<br>(4,486.09 to<br>5,708.26)                | 5,553.68<br>(3,749.34 to<br>8,002.04)                | 4,774.25<br>(3,209.84 to<br>7,050.16)                | 5,945.87<br>(3,972.20 to<br>8,599.13)                | 153.71<br>(136.82 to<br>173.16)                   | 215.69<br>(154.42 to<br>295.53)                   | 192.59<br>(136.99 to<br>268.58)                  | 222.42<br>(155.98 to<br>307.46)                   |
| Acute lymphoid leukemia         | 1,306.33<br>(1,122.80 to<br>1,528.09)                | 1,367.21<br>(917.62 to<br>1,974.89)                  | 1,153.22<br>(759.29 to<br>1,698.23)                  | 1,468.50<br>(974.02 to<br>2,086.97)                  | 33.89<br>(29.60 to<br>38.87)                      | 47.25<br>(33.13 to<br>66.20)                      | 40.90<br>(27.77 to<br>59.69)                     | 49.49<br>(34.69 to<br>68.43)                      |
| Chronic lymphoid leukemia       | 286.42<br>(231.38 to<br>384.81)                      | 383.88<br>(252.47 to<br>601.77)                      | 357.03<br>(232.02 to<br>558.14)                      | 397.49<br>(255.82 to<br>645.01)                      | 12.84<br>(10.36 to<br>18.00)                      | 19.93<br>(13.80 to<br>30.06)                      | 19.39<br>(13.57 to<br>28.96)                     | 19.72<br>(13.41 to<br>30.14)                      |
| Acute myeloid leukemia          | 1,376.05<br>(1,144.37 to<br>1,575.40)                | 1,803.27<br>(1,198.77 to<br>2,643.16)                | 1,748.24<br>(1,165.13 to<br>2,646.01)                | 1,923.73<br>(1,278.11 to<br>2,796.77)                | 41.06<br>(35.06 to<br>47.41)                      | 67.05<br>(47.12 to<br>94.17)                      | 67.20<br>(46.69 to<br>97.20)                     | 69.35<br>(48.02 to<br>96.29)                      |
| Chronic myeloid leukemia        | 146.06<br>(118.63 to<br>180.73)                      | 133.62<br>(83.41 to<br>205.12)                       | 89.19<br>(53.18 to<br>139.51)                        | 142.75<br>(86.78 to<br>223.26)                       | 4.93<br>(4.04 to<br>6.00)                         | 5.53<br>(3.66 to<br>8.06)                         | 3.85<br>(2.43 to<br>5.75)                        | 5.68<br>(3.69 to<br>8.40)                         |
| Other leukemia                  | 1,980.45<br>(1,665.90 to<br>2,292.74)                | 1,865.69<br>(1,220.97 to<br>2,748.62)                | 1,426.56<br>(916.17 to<br>2,176.98)                  | 2,013.40<br>(1,294.69 to<br>3,019.50)                | 75.92<br>(53.03 to<br>69.39)                      | 75.92<br>(53.68 to<br>105.49)                     | 61.26<br>(43.64 to<br>86.44)                     | 78.18<br>(54.12 to<br>111.54)                     |
| Other neoplasms                 | 7,711.87<br>(6,750.67 to<br>8,769.96)                | 9,400.51<br>(6,701.15 to<br>13,400.15)               | 9,335.81<br>(6,494.18 to<br>13,808.54)               | 8,926.68<br>(6,571.19 to<br>12,216.60)               | 261.02<br>(230.01 to<br>293.90)                   | 383.13<br>(299.44 to<br>505.60)                   | 395.60<br>(299.89 to<br>541.28)                  | 352.18<br>(283.19 to<br>446.82)                   |
| <b>Cardiovascular diseases</b>  | <b>405,019.51<br/>(364,388.62 to<br/>447,162.38)</b> | <b>373,095.14<br/>(227,688.20 to<br/>628,948.49)</b> | <b>303,556.85<br/>(120,147.29 to<br/>352,131.69)</b> | <b>522,297.45<br/>(307,904.96 to<br/>884,374.36)</b> | <b>24,278.32<br/>(22,074.65 to<br/>26,645.61)</b> | <b>26,287.18<br/>(18,044.74 to<br/>36,683.89)</b> | <b>15,616.94<br/>(9,993.93 to<br/>22,958.71)</b> | <b>33,137.40<br/>(22,895.22 to<br/>46,584.08)</b> |
| Rheumatic heart disease         | 3,493.97<br>(2,903.26 to<br>4,263.43)                | 2,414.46<br>(1,268.33 to<br>4,588.46)                | 1,587.28<br>(787.47 to<br>3,125.87)                  | 2,463.28<br>(1,313.69 to<br>4,592.08)                | 111.44<br>(92.56 to<br>135.62)                    | 85.15<br>(47.97 to<br>156.65)                     | 57.19<br>(30.60 to<br>105.84)                    | 85.41<br>(49.34 to<br>154.20)                     |
| Ischemic heart disease          | 262,078.16<br>(235,864.83 to<br>290,138.91)          | 242,864.97<br>(140,132.48 to<br>423,876.43)          | 131,908.32<br>(72,605.14 to<br>234,759.62)           | 340,827.43<br>(186,928.43 to<br>592,576.57)          | 16,885.19<br>(15,301.82 to<br>18,553.07)          | 18,443.63<br>(11,791.32 to<br>27,004.45)          | 10,867.77<br>(6,553.74 to<br>16,977.14)          | 23,187.21<br>(15,036.05 to<br>33,632.34)          |
| Stroke                          | 105,862.59<br>(94,513.10 to<br>118,631.04)           | 92,290.33<br>(50,098.36 to<br>169,277.59)            | 43,568.74<br>(23,583.46 to<br>80,980.72)             | 138,160.62<br>(69,680.00 to<br>262,047.02)           | 5,590.36<br>(4,994.71 to<br>6,235.31)             | 5,636.82<br>(3,452.94 to<br>8,945.58)             | 2,962.35<br>(1,775.43 to<br>4,806.10)            | 7,533.20<br>(4,424.10 to<br>12,276.27)            |
| Ischemic stroke                 | 54,523.83<br>(48,306.73 to<br>61,225.72)             | 43,930.08<br>(24,975.90 to<br>74,662.84)             | 23,555.07<br>(12,977.58 to<br>41,404.45)             | 59,399.97<br>(31,973.34 to<br>103,217.55)            | 3,274.53<br>(2,898.02 to<br>3,666.32)             | 3,132.21<br>(1,844.33 to<br>5,189.94)             | 1,827.60<br>(1,057.15 to<br>3,073.95)            | 3,839.32<br>(2,166.26 to<br>6,399.77)             |

|                                |                                          |                                           |                                         |                                           |                                       |                                       |                                     |                                       |
|--------------------------------|------------------------------------------|-------------------------------------------|-----------------------------------------|-------------------------------------------|---------------------------------------|---------------------------------------|-------------------------------------|---------------------------------------|
| Intracerebral hemorrhage       | 51,338.75<br>(45,242.42 to<br>57,924.89) | 48,360.25<br>(21,258.36 to<br>105,679.01) | 20,013.67<br>(9,037.09 to<br>43,322.18) | 78,760.65<br>(33,191.37 to<br>172,261.60) | 2,315.83<br>(2,047.75 to<br>2,596.55) | 2,504.62<br>(1,319.47 to<br>4,749.16) | 1,134.75<br>(597.98 to<br>2,112.73) | 3,693.88<br>(1,810.60 to<br>7,006.69) |
| Hypertensive heart disease     | 13,388.81<br>(5,335.86 to<br>18,631.41)  | 14,538.80<br>(3,940.50 to<br>33,733.50)   | 10,570.17<br>(2,938.08 to<br>23,216.23) | 18,789.21<br>(4,927.09 to<br>45,469.17)   | 827.66<br>(290.09 to<br>1,189.39)     | 1,003.09<br>(251.05 to<br>2,387.54)   | 779.75<br>(202.77 to<br>1,708.25)   | 1,227.88<br>(299.19 to<br>3,047.30)   |
| Cardiomyopathy and myocarditis | 10,048.39<br>(8,439.77 to<br>12,666.50)  | 8,602.42<br>(4,819.72 to<br>16,267.53)    | 5,974.45<br>(3,159.95 to<br>11,182.01)  | 9,139.77<br>(5,161.78 to<br>17,052.26)    | 321.76<br>(272.99 to<br>392.55)       | 311.74<br>(189.95 to<br>524.21)       | 223.84<br>(133.18 to<br>388.71)     | 321.04<br>(196.96 to<br>526.83)       |
| Myocarditis                    | 226.02<br>(159.16 to<br>376.28)          | 204.16<br>(123.90 to<br>351.91)           | 184.51<br>(109.68 to<br>327.50)         | 189.60<br>(116.57 to<br>321.48)           | 6.87<br>(5.00 to<br>11.04)            | 8.13<br>(5.62 to<br>12.26)            | 7.89<br>(5.40 to<br>12.27)          | 7.24<br>(5.05 to<br>11.08)            |

| Moldova                                                       |                                                                |                                                                 |                                                                |                                                                 |                                                            |                                                            |                                                            |                                                            |
|---------------------------------------------------------------|----------------------------------------------------------------|-----------------------------------------------------------------|----------------------------------------------------------------|-----------------------------------------------------------------|------------------------------------------------------------|------------------------------------------------------------|------------------------------------------------------------|------------------------------------------------------------|
| Cause                                                         | YLLs (actual counts)                                           |                                                                 |                                                                |                                                                 | Deaths (actual counts)                                     |                                                            |                                                            |                                                            |
|                                                               | 2016                                                           | 2040 Forecast                                                   | 2040 Better Scenario                                           | 2040 Worse Scenario                                             | 2016                                                       | 2040 Forecast                                              | 2040 Better Scenario                                       | 2040 Worse Scenario                                        |
| Alcoholic cardiomyopathy                                      | 4,950.87<br>(1,673.04 to<br>6,863.87)                          | 2,787.97<br>(631.96 to<br>5,202.75)                             | 2,210.37<br>(513.35 to<br>4,274.18)                            | 3,455.25<br>(881.03 to<br>6,268.30)                             | 154.83<br>(53.33 to<br>213.88)                             | 96.11<br>(22.72 to<br>174.45)                              | 77.80<br>(19.02 to<br>143.70)                              | 116.23<br>(31.37 to<br>200.51)                             |
| Other cardiomyopathy                                          | 4,871.50<br>(3,416.48 to<br>9,145.50)                          | 5,610.29<br>(2,569.12 to<br>11,639.57)                          | 3,579.57<br>(1,550.04 to<br>7,914.21)                          | 5,494.91<br>(2,437.53 to<br>11,904.33)                          | 160.05<br>(116.86 to<br>288.91)                            | 207.50<br>(108.74 to<br>392.28)                            | 138.15<br>(66.13 to<br>270.61)                             | 197.57<br>(99.76 to<br>391.56)                             |
| Atrial fibrillation and flutter                               | 1,838.67<br>(1,435.42 to<br>2,313.15)                          | 3,211.26<br>(2,368.54 to<br>4,198.28)                           | 3,124.23<br>(2,303.36 to<br>4,117.45)                          | 3,121.03<br>(2,298.87 to<br>4,109.52)                           | 179.53<br>(139.59 to<br>227.69)                            | 328.59<br>(235.62 to<br>434.68)                            | 337.09<br>(248.41 to<br>444.93)                            | 306.00<br>(212.48 to<br>413.22)                            |
| Aortic aneurysm                                               | 1,892.03<br>(1,633.52 to<br>2,176.31)                          | 1,666.65<br>(1,002.31 to<br>2,830.64)                           | 1,419.34<br>(852.36 to<br>2,414.84)                            | 1,770.46<br>(1,047.78 to<br>2,993.42)                           | 77.87<br>(68.17 to<br>88.48)                               | 82.63<br>(58.39 to<br>120.89)                              | 76.25<br>(53.98 to<br>112.86)                              | 82.08<br>(56.87 to<br>119.57)                              |
| Peripheral artery disease                                     | 869.50<br>(216.26 to<br>1,346.13)                              | 990.63<br>(237.10 to<br>1,930.33)                               | 1,017.41<br>(257.56 to<br>1,976.96)                            | 1,015.11<br>(234.46 to<br>2,014.94)                             | 51.37<br>(14.53 to<br>76.32)                               | 72.36<br>(20.99 to<br>127.64)                              | 79.81<br>(24.74 to<br>137.80)                              | 69.45<br>(19.47 to<br>123.70)                              |
| Endocarditis                                                  | 1,015.52<br>(746.43 to<br>1,394.50)                            | 962.76<br>(517.98 to<br>1,751.27)                               | 863.66<br>(469.87 to<br>1,560.38)                              | 976.94<br>(532.96 to<br>1,748.79)                               | 32.76<br>(24.56 to<br>45.08)                               | 38.56<br>(23.64 to<br>63.48)                               | 36.33<br>(22.08 to<br>60.59)                               | 37.68<br>(22.72 to<br>60.98)                               |
| Other cardiovascular and circulatory diseases                 | 4,531.87<br>(3,900.67 to<br>5,226.39)                          | 5,552.84<br>(3,142.36 to<br>9,639.81)                           | 3,523.25<br>(1,975.17 to<br>6,101.54)                          | 6,033.59<br>(3,365.45 to<br>10,675.53)                          | 200.37<br>(174.66 to<br>228.58)                            | 284.60<br>(188.15 to<br>435.31)                            | 287.44<br>(126.94 to<br>304.13)                            | 287.44<br>(187.02 to<br>439.36)                            |
| <b>Chronic respiratory diseases</b>                           | <b>18,347.77</b><br><b>(16,076.28 to</b><br><b>20,738.10)</b>  | <b>22,805.08</b><br><b>(14,341.89 to</b><br><b>36,850.01)</b>   | <b>16,106.60</b><br><b>(10,652.50 to</b><br><b>24,991.82)</b>  | <b>32,258.95</b><br><b>(18,853.78 to</b><br><b>55,034.17)</b>   | <b>1,062.78</b><br><b>(944.14 to</b><br><b>1,193.83)</b>   | <b>1,461.06</b><br><b>(1,017.18 to</b><br><b>2,106.06)</b> | <b>1,151.13</b><br><b>(834.64 to</b><br><b>1,588.23)</b>   | <b>1,869.19</b><br><b>(1,173.09 to</b><br><b>2,891.10)</b> |
| Chronic obstructive pulmonary disease                         | 17,133.98<br>(14,959.12 to<br>19,407.09)                       | 21,683.70<br>(13,301.43 to<br>35,441.06)                        | 15,124.90<br>(9,735.16 to<br>23,830.24)                        | 31,044.21<br>(17,679.76 to<br>53,628.25)                        | 1,008.96<br>(896.62 to<br>1,139.35)                        | 1,403.15<br>(955.06 to<br>2,048.64)                        | 1,098.65<br>(788.85 to<br>1,528.82)                        | 1,809.24<br>(1,122.13 to<br>2,826.92)                      |
| Pneumoconiosis                                                | 15.93<br>(13.24 to<br>19.12)                                   | 18.76<br>(14.32 to<br>24.83)                                    | 16.80<br>(12.30 to<br>23.26)                                   | 17.59<br>(13.58 to<br>22.69)                                    | 0.93<br>(0.78 to<br>1.10)                                  | 1.22<br>(0.95 to<br>1.55)                                  | 1.11<br>(0.85 to<br>1.44)                                  | 1.11<br>(0.82 to<br>1.43)                                  |
| Silicosis                                                     | 0.43<br>(0.26 to<br>1.14)                                      | 0.54<br>(0.23 to<br>1.32)                                       | 0.29<br>(0.11 to<br>0.80)                                      | 0.48<br>(0.21 to<br>1.15)                                       | 0.02<br>(0.01 to<br>0.07)                                  | 0.03<br>(0.02 to<br>0.08)                                  | 0.02<br>(0.01 to<br>0.05)                                  | 0.03<br>(0.01 to<br>0.07)                                  |
| Asbestosis                                                    | 5.84<br>(4.62 to<br>7.15)                                      | 6.99<br>(4.56 to<br>10.74)                                      | 7.96<br>(5.10 to<br>12.56)                                     | 6.61<br>(4.42 to<br>9.88)                                       | 0.22<br>(0.17 to<br>0.27)                                  | 0.30<br>(0.21 to<br>0.42)                                  | 0.35<br>(0.25 to<br>0.50)                                  | 0.28<br>(0.19 to<br>0.38)                                  |
| Coal workers pneumoconiosis                                   | 0.09<br>(0.06 to<br>0.17)                                      | 0.09<br>(0.05 to<br>0.21)                                       | 0.06<br>(0.03 to<br>0.13)                                      | 0.10<br>(0.05 to<br>0.21)                                       | 0.00<br>(0.00 to<br>0.01)                                  | 0.01<br>(0.00 to<br>0.01)                                  | 0.00<br>(0.01 to<br>0.01)                                  | 0.01<br>(0.00 to<br>0.01)                                  |
| Other pneumoconiosis                                          | 9.57<br>(7.82 to<br>11.64)                                     | 11.14<br>(8.04 to<br>15.24)                                     | 8.49<br>(5.83 to<br>11.91)                                     | 10.41<br>(7.40 to<br>14.02)                                     | 0.68<br>(0.57 to<br>0.82)                                  | 0.88<br>(0.63 to<br>1.19)                                  | 0.73<br>(0.51 to<br>1.04)                                  | 0.80<br>(0.54 to<br>1.11)                                  |
| Asthma                                                        | 822.32<br>(677.57 to<br>1,143.08)                              | 644.33<br>(295.07 to<br>1,271.11)                               | 343.26<br>(158.00 to<br>677.82)                                | 766.67<br>(337.95 to<br>1,575.14)                               | 38.27<br>(31.92 to<br>53.24)                               | 34.98<br>(16.86 to<br>67.36)                               | 20.03<br>(8.69 to<br>38.69)                                | 39.33<br>(18.16 to<br>78.29)                               |
| Interstitial lung disease and pulmonary sarcoidosis           | 295.05<br>(228.08 to<br>416.03)                                | 383.68<br>(265.16 to<br>603.24)                                 | 553.09<br>(366.03 to<br>914.35)                                | 351.61<br>(246.53 to<br>558.47)                                 | 12.26<br>(9.59 to<br>17.77)                                | 18.97<br>(13.84 to<br>29.28)                               | 28.64<br>(20.08 to<br>43.61)                               | 16.76<br>(12.46 to<br>25.52)                               |
| Other chronic respiratory diseases                            | 80.49<br>(51.78 to<br>109.36)                                  | 74.62<br>(41.88 to<br>139.53)                                   | 68.55<br>(38.78 to<br>128.78)                                  | 78.87<br>(43.33 to<br>146.35)                                   | 2.37<br>(1.67 to<br>3.71)                                  | 2.74<br>(1.61 to<br>4.86)                                  | 2.70<br>(1.59 to<br>4.95)                                  | 2.75<br>(1.61 to<br>4.89)                                  |
| <b>Cirrhosis and other chronic liver diseases</b>             | <b>92,618.34</b><br><b>(81,233.93 to</b><br><b>104,678.98)</b> | <b>106,393.63</b><br><b>(75,885.36 to</b><br><b>153,015.42)</b> | <b>80,862.16</b><br><b>(54,124.32 to</b><br><b>124,864.16)</b> | <b>115,395.60</b><br><b>(82,793.77 to</b><br><b>162,622.34)</b> | <b>3,308.96</b><br><b>(2,915.10 to</b><br><b>3,729.67)</b> | <b>4,237.30</b><br><b>(3,223.05 to</b><br><b>5,763.23)</b> | <b>3,301.90</b><br><b>(2,363.37 to</b><br><b>4,723.50)</b> | <b>4,480.81</b><br><b>(3,484.97 to</b><br><b>5,937.41)</b> |
| Cirrhosis and other chronic liver diseases due to hepatitis B | 18,003.52<br>(15,187.85 to<br>21,319.89)                       | 21,853.55<br>(15,056.23 to<br>33,026.95)                        | 17,746.04<br>(11,756.74 to<br>28,090.76)                       | 20,982.73<br>(14,680.01 to<br>30,784.03)                        | 633.79<br>(535.96 to<br>744.74)                            | 855.66<br>(631.94 to<br>1,202.23)                          | 709.36<br>(496.70 to<br>1,032.89)                          | 804.95<br>(612.16 to<br>1,087.00)                          |
| Cirrhosis and other chronic liver diseases due to hepatitis C | 24,295.88<br>(20,638.75 to<br>28,374.61)                       | 29,818.00<br>(20,235.40 to<br>44,493.18)                        | 23,803.11<br>(15,468.73 to<br>37,820.47)                       | 28,745.40<br>(19,990.23 to<br>42,008.99)                        | 846.19<br>(718.27 to<br>985.92)                            | 1,141.00<br>(834.42 to<br>1,608.07)                        | 927.77<br>(644.25 to<br>1,360.47)                          | 1,080.25<br>(809.16 to<br>1,468.84)                        |

|                                                                |                                                               |                                                               |                                                              |                                                               |                                                      |                                                          |                                                        |                                                          |
|----------------------------------------------------------------|---------------------------------------------------------------|---------------------------------------------------------------|--------------------------------------------------------------|---------------------------------------------------------------|------------------------------------------------------|----------------------------------------------------------|--------------------------------------------------------|----------------------------------------------------------|
|                                                                | 31,699.89<br>(26,652.02 to<br>36,772.78)                      | 32,569.69<br>(23,089.10 to<br>47,728.00)                      | 21,549.23<br>(14,641.10 to<br>32,883.24)                     | 44,173.42<br>(31,469.39 to<br>61,526.95)                      | 1,149.97<br>(980.89 to<br>1,320.85)                  | 1,327.12<br>(996.97 to<br>1,812.87)                      | 915.46<br>(660.15 to<br>1,306.35)                      | 1,726.01<br>(1,307.09 to<br>2,253.02)                    |
| Cirrhosis and other chronic liver diseases due to alcohol use  |                                                               |                                                               |                                                              |                                                               |                                                      |                                                          |                                                        |                                                          |
|                                                                | 18,619.04<br>(15,794.20 to<br>21,841.62)                      | 22,152.39<br>(15,160.14 to<br>32,136.05)                      | 17,763.78<br>(11,562.82 to<br>27,152.71)                     | 21,494.05<br>(15,053.57 to<br>30,809.11)                      | 679.01<br>(573.82 to<br>795.18)                      | 913.51<br>(672.63 to<br>1,250.43)                        | 749.31<br>(531.10 to<br>1,085.34)                      | 869.60<br>(654.37 to<br>1,155.87)                        |
| Cirrhosis and other chronic liver diseases due to other causes |                                                               |                                                               |                                                              |                                                               |                                                      |                                                          |                                                        |                                                          |
| <b>Digestive diseases</b>                                      | <b>21,647.20</b><br><b>(17,737.67 to</b><br><b>25,140.91)</b> | <b>25,512.66</b><br><b>(12,644.13 to</b><br><b>58,541.33)</b> | <b>18,155.62</b><br><b>(9,450.65 to</b><br><b>40,673.07)</b> | <b>28,117.85</b><br><b>(13,577.23 to</b><br><b>63,602.67)</b> | <b>786.37</b><br><b>(679.71 to</b><br><b>899.82)</b> | <b>1,028.00</b><br><b>(642.65 to</b><br><b>1,968.97)</b> | <b>783.96</b><br><b>(500.55 to</b><br><b>1,444.37)</b> | <b>1,075.05</b><br><b>(643.89 to</b><br><b>2,125.05)</b> |
| Peptic ulcer disease                                           | 4,928.47<br>(3,655.90 to<br>5,905.83)                         | 3,226.46<br>(2,011.81 to<br>5,228.52)                         | 1,948.63<br>(1,136.66 to<br>3,387.24)                        | 3,423.25<br>(2,154.08 to<br>5,527.71)                         | 174.54<br>(133.32 to<br>206.99)                      | 130.30<br>(87.51 to<br>187.66)                           | 80.96<br>(51.42 to<br>125.46)                          | 133.22<br>(92.32 to<br>194.09)                           |

| Moldova                                    |                                       |                                       |                                       |                                       |                                    |                                    |                                    |                                    |
|--------------------------------------------|---------------------------------------|---------------------------------------|---------------------------------------|---------------------------------------|------------------------------------|------------------------------------|------------------------------------|------------------------------------|
| Cause                                      | YLLs (actual counts)                  |                                       |                                       |                                       | Deaths (actual counts)             |                                    |                                    |                                    |
|                                            | 2016                                  | 2040 Forecast                         | 2040 Better Scenario                  | 2040 Worse Scenario                   | 2016                               | 2040 Forecast                      | 2040 Better Scenario               | 2040 Worse Scenario                |
| Gastritis and duodenitis                   | 87.03<br>(54.49 to 110.07)            | 88.03<br>(50.67 to 137.83)            | 65.39<br>(36.70 to 111.00)            | 84.40<br>(47.53 to 131.13)            | 3.29<br>(2.11 to 4.17)             | 3.94<br>(2.56 to 5.78)             | 3.08<br>(1.93 to 4.71)             | 3.64<br>(2.33 to 5.26)             |
| Appendicitis                               | 297.75<br>(230.12 to 448.02)          | 311.87<br>(201.38 to 495.51)          | 202.94<br>(125.90 to 349.73)          | 303.29<br>(201.50 to 468.65)          | 10.03<br>(7.70 to 15.54)           | 13.09<br>(9.13 to 20.66)           | 8.86<br>(5.80 to 14.75)            | 12.29<br>(8.68 to 19.12)           |
| Paralytic ileus and intestinal obstruction | 1,353.65<br>(1,051.78 to 1,934.44)    | 1,474.43<br>(1,028.30 to 2,316.30)    | 1,449.72<br>(988.61 to 2,295.22)      | 1,390.37<br>(986.85 to 2,147.15)      | 54.39<br>(43.15 to 76.45)          | 76.69<br>(58.48 to 111.62)         | 80.16<br>(59.97 to 116.20)         | 68.85<br>(52.36 to 99.28)          |
| Inguinal, femoral, and abdominal hernia    | 441.71<br>(331.25 to 691.11)          | 405.17<br>(274.50 to 652.98)          | 335.78<br>(214.07 to 554.13)          | 380.87<br>(262.79 to 597.88)          | 21.91<br>(16.10 to 37.84)          | 22.92<br>(15.83 to 39.29)          | 20.16<br>(13.20 to 35.81)          | 20.80<br>(14.56 to 35.36)          |
| Inflammatory bowel disease                 | 532.83<br>(378.89 to 656.50)          | 579.19<br>(377.21 to 882.47)          | 553.81<br>(354.78 to 879.51)          | 552.30<br>(361.79 to 810.04)          | 17.95<br>(14.28 to 22.04)          | 22.89<br>(16.59 to 31.50)          | 22.71<br>(15.89 to 32.97)          | 21.16<br>(15.54 to 28.42)          |
| Vascular intestinal disorders              | 3,197.77<br>(2,563.71 to 3,737.50)    | 4,062.39<br>(3,031.43 to 5,539.70)    | 3,591.67<br>(2,603.83 to 5,213.94)    | 3,762.06<br>(2,886.86 to 4,925.56)    | 161.74<br>(135.56 to 189.02)       | 229.56<br>(184.17 to 288.84)       | 211.73<br>(164.56 to 277.93)       | 206.51<br>(168.64 to 256.47)       |
| Gallbladder and biliary diseases           | 871.54<br>(712.71 to 1,021.54)        | 1,278.86<br>(626.53 to 2,456.52)      | 807.06<br>(409.93 to 1,526.47)        | 1,509.94<br>(731.15 to 2,902.22)      | 40.73<br>(33.59 to 47.55)          | 68.42<br>(35.11 to 123.91)         | 45.76<br>(24.27 to 84.10)          | 76.81<br>(38.14 to 140.91)         |
| Pancreatitis                               | 9,240.09<br>(7,274.03 to 11,097.97)   | 13,381.60<br>(3,577.13 to 40,741.12)  | 8,608.05<br>(2,299.26 to 27,983.08)   | 16,041.51<br>(4,054.67 to 47,867.20)  | 272.73<br>(225.30 to 326.71)       | 423.54<br>(129.18 to 1,221.69)     | 277.57<br>(85.25 to 825.25)        | 498.39<br>(144.47 to 1,424.85)     |
| Other digestive diseases                   | 696.35<br>(508.52 to 890.65)          | 704.67<br>(477.60 to 1,038.91)        | 592.56<br>(394.55 to 895.73)          | 669.85<br>(462.70 to 963.85)          | 29.05<br>(22.11 to 35.58)          | 36.65<br>(26.99 to 47.24)          | 33.37<br>(24.04 to 43.47)          | 33.37<br>(24.80 to 43.15)          |
| Neurological disorders                     | 17,669.07<br>(15,284.83 to 20,695.02) | 30,164.04<br>(23,743.91 to 38,972.05) | 31,889.38<br>(25,422.08 to 40,853.10) | 29,306.94<br>(22,692.67 to 38,988.66) | 1,376.87<br>(1,167.17 to 1,653.74) | 2,616.99<br>(1,995.39 to 3,442.69) | 2,962.16<br>(2,262.39 to 3,812.81) | 2,430.26<br>(1,674.65 to 3,375.10) |
| Alzheimer's disease and other dementias    | 10,789.28<br>(8,923.43 to 13,439.07)  | 20,824.91<br>(15,446.58 to 28,867.77) | 22,295.84<br>(16,808.88 to 29,980.55) | 20,085.61<br>(13,976.18 to 29,516.95) | 1,099.67<br>(905.03 to 1,384.91)   | 2,117.40<br>(1,473.64 to 2,947.53) | 2,379.56<br>(1,792.91 to 3,227.14) | 1,977.57<br>(1,256.06 to 2,919.17) |
| Parkinson's disease                        | 2,016.27<br>(1,504.18 to 2,644.99)    | 4,186.31<br>(3,119.17 to 5,469.77)    | 5,174.93<br>(3,875.53 to 6,801.46)    | 3,606.86<br>(2,652.61 to 4,808.38)    | 160.51<br>(120.14 to 212.44)       | 352.28<br>(258.91 to 465.01)       | 451.21<br>(339.04 to 587.16)       | 296.65<br>(206.60 to 409.13)       |
| Epilepsy                                   | 3,020.41<br>(2,593.36 to 3,511.59)    | 3,130.23<br>(1,218.44 to 7,008.18)    | 2,305.09<br>(905.00 to 5,244.59)      | 3,644.01<br>(1,395.37 to 8,086.97)    | 68.34<br>(58.89 to 79.16)          | 82.52<br>(34.28 to 177.11)         | 61.83<br>(26.23 to 132.74)         | 94.61<br>(38.79 to 202.39)         |
| Multiple sclerosis                         | 374.11<br>(304.10 to 476.28)          | 318.70<br>(191.18 to 528.24)          | 332.41<br>(193.89 to 566.23)          | 320.51<br>(194.51 to 519.16)          | 10.00<br>(8.17 to 12.81)           | 10.08<br>(6.56 to 15.44)           | 10.83<br>(6.91 to 17.18)           | 9.89<br>(6.50 to 14.99)            |
| Motor neuron disease                       | 275.54<br>(234.36 to 321.51)          | 372.23<br>(254.85 to 576.78)          | 384.15<br>(254.20 to 620.78)          | 352.88<br>(245.37 to 521.82)          | 9.07<br>(7.77 to 10.57)            | 14.16<br>(10.56 to 20.01)          | 14.98<br>(10.89 to 21.99)          | 13.14<br>(9.88 to 17.89)           |
| Other neurological disorders               | 1,193.46<br>(1,026.27 to 1,362.33)    | 1,331.65<br>(905.20 to 1,967.68)      | 1,396.96<br>(918.56 to 2,147.11)      | 1,297.07<br>(894.59 to 1,867.15)      | 29.27<br>(25.50 to 33.11)          | 40.56<br>(29.44 to 57.57)          | 43.75<br>(30.91 to 64.07)          | 38.39<br>(28.48 to 52.67)          |
| Mental disorders                           | 24,734.93<br>(21,125.76 to 29,164.24) | 21,901.63<br>(14,147.29 to 34,536.11) | 23,902.58<br>(15,322.97 to 38,561.84) | 22,853.27<br>(15,224.37 to 35,442.15) | 712.72<br>(613.37 to 834.56)       | 699.93<br>(484.86 to 1,037.99)     | 788.41<br>(544.73 to 1,192.46)     | 714.85<br>(506.44 to 1,037.59)     |
| Alcohol use disorders                      | 17,866.14<br>(15,159.96 to 21,169.38) | 13,326.70<br>(8,053.06 to 21,801.84)  | 13,420.47<br>(7,999.89 to 22,681.20)  | 14,609.17<br>(9,131.29 to 22,951.38)  | 506.98<br>(430.56 to 598.31)       | 406.28<br>(255.73 to 637.75)       | 414.75<br>(257.98 to 673.58)       | 439.96<br>(285.94 to 674.93)       |
| Drug use disorders                         | 6,866.70<br>(5,669.76 to 8,168.07)    | 8,572.80<br>(5,780.76 to 13,645.77)   | 10,479.81<br>(6,918.92 to 16,904.82)  | 8,241.98<br>(5,696.13 to 12,737.99)   | 205.69<br>(172.52 to 241.62)       | 293.61<br>(215.86 to 428.07)       | 373.62<br>(267.58 to 551.63)       | 274.95<br>(205.96 to 388.38)       |
| Opioid use disorders                       | 4,346.04<br>(3,496.36 to 5,318.23)    | 4,793.57<br>(2,915.78 to 8,052.58)    | 5,146.76<br>(3,029.09 to 8,650.27)    | 4,630.14<br>(2,850.25 to 7,563.34)    | 123.35<br>(98.73 to 149.39)        | 152.11<br>(97.92 to 235.51)        | 167.12<br>(102.75 to 262.23)       | 144.09<br>(94.56 to 218.83)        |

|                           |                                       |                                       |                                       |                                       |                              |                               |                                 |                               |
|---------------------------|---------------------------------------|---------------------------------------|---------------------------------------|---------------------------------------|------------------------------|-------------------------------|---------------------------------|-------------------------------|
|                           | 500.14<br>(317.17 to<br>665.93)       | 764.61<br>(438.34 to<br>1,321.14)     | 957.51<br>(515.43 to<br>1,667.03)     | 738.40<br>(429.42 to<br>1,249.68)     | 14.98<br>(8.83 to<br>20.16)  | 25.69<br>(14.44 to<br>42.25)  | 32.72<br>(18.04 to<br>53.69)    | 24.39<br>(13.92 to<br>38.76)  |
| Cocaine use disorders     |                                       |                                       |                                       |                                       |                              |                               |                                 |                               |
|                           | 305.33<br>(193.04 to<br>434.66)       | 551.33<br>(295.05 to<br>942.54)       | 782.44<br>(400.48 to<br>1,374.97)     | 537.47<br>(295.19 to<br>892.37)       | 8.72<br>(5.54 to<br>12.38)   | 17.24<br>(9.60 to<br>28.30)   | 24.82<br>(13.12 to<br>42.69)    | 16.56<br>(9.34 to<br>26.51)   |
| Amphetamine use disorders |                                       |                                       |                                       |                                       |                              |                               |                                 |                               |
|                           | 1,715.19<br>(1,236.69 to<br>2,132.55) | 2,463.29<br>(1,621.43 to<br>3,796.51) | 3,593.09<br>(2,266.80 to<br>5,879.50) | 2,335.97<br>(1,540.94 to<br>3,524.56) | 58.65<br>(46.09 to<br>72.69) | 98.56<br>(72.99 to<br>139.79) | 148.95<br>(103.77 to<br>217.22) | 89.91<br>(67.51 to<br>123.75) |
| Other drug use disorders  |                                       |                                       |                                       |                                       |                              |                               |                                 |                               |
|                           | 2.09<br>(1.67 to<br>2.61)             | 2.13<br>(1.21 to<br>3.49)             | 2.30<br>(1.31 to<br>3.89)             | 2.12<br>(1.23 to<br>3.45)             | 0.04<br>(0.03 to<br>0.05)    | 0.05<br>(0.03 to<br>0.08)     | 0.05<br>(0.03 to<br>0.08)       | 0.05<br>(0.03 to<br>0.08)     |
| Eating disorders          |                                       |                                       |                                       |                                       |                              |                               |                                 |                               |

| Moldova                                                    |                                              |                                              |                                              |                                              |                                     |                                           |                                         |                                           |
|------------------------------------------------------------|----------------------------------------------|----------------------------------------------|----------------------------------------------|----------------------------------------------|-------------------------------------|-------------------------------------------|-----------------------------------------|-------------------------------------------|
| Cause                                                      | YLLs (actual counts)                         |                                              |                                              |                                              | Deaths (actual counts)              |                                           |                                         |                                           |
|                                                            | 2016                                         | 2040 Forecast                                | 2040 Better Scenario                         | 2040 Worse Scenario                          | 2016                                | 2040 Forecast                             | 2040 Better Scenario                    | 2040 Worse Scenario                       |
| <b>Diabetes, urogenital, blood, and endocrine diseases</b> | <b>19,541.10</b><br>(17,363.74 to 21,887.99) | <b>28,540.90</b><br>(17,727.67 to 45,736.90) | <b>20,833.54</b><br>(12,774.74 to 34,274.24) | <b>29,384.90</b><br>(18,384.73 to 47,133.07) | <b>815.70</b><br>(727.87 to 905.11) | <b>1,435.45</b><br>(1,030.47 to 2,034.27) | <b>1,097.25</b><br>(762.79 to 1,584.57) | <b>1,416.55</b><br>(1,001.40 to 2,016.88) |
| Diabetes mellitus                                          | 6,779.30<br>(5,937.72 to 7,664.02)           | 10,393.87<br>(4,873.55 to 21,266.07)         | 6,626.79<br>(3,129.48 to 13,600.53)          | 11,524.71<br>(5,223.70 to 23,189.32)         | 298.36<br>(262.00 to 335.78)        | 507.51<br>(270.93 to 914.63)              | 337.94<br>(177.56 to 622.14)            | 538.51<br>(285.55 to 992.67)              |
| Acute glomerulonephritis                                   | 21.91<br>(19.16 to 25.05)                    | 23.25<br>(13.49 to 39.20)                    | 18.00<br>(10.09 to 31.45)                    | 23.37<br>(8.51 to 38.51)                     | 0.46<br>(0.40 to 0.52)              | 0.62<br>(0.36 to 1.05)                    | 0.49<br>(0.27 to 0.86)                  | 0.61<br>(0.36 to 0.99)                    |
| Chronic kidney disease                                     | 5,143.78<br>(4,521.46 to 5,827.55)           | 5,936.53<br>(3,012.57 to 10,825.47)          | 3,967.24<br>(1,977.09 to 7,083.92)           | 6,430.28<br>(3,254.32 to 11,897.53)          | 208.12<br>(185.24 to 232.59)        | 314.79<br>(176.79 to 538.69)              | 222.52<br>(122.29 to 373.12)            | 326.96<br>(180.00 to 558.88)              |
| Chronic kidney disease due to diabetes mellitus            | 1,258.63<br>(1,096.52 to 1,649.85)           | 1,911.01<br>(903.80 to 3,785.20)             | 1,303.62<br>(619.12 to 2,623.71)             | 2,089.06<br>(983.60 to 4,172.86)             | 56.64<br>(46.29 to 67.79)           | 94.55<br>(49.89 to 175.75)                | 67.48<br>(35.42 to 122.00)              | 99.63<br>(51.40 to 180.86)                |
| Chronic kidney disease due to hypertension                 | 263.45<br>(212.02 to 321.98)                 | 424.14<br>(227.05 to 735.17)                 | 317.40<br>(167.11 to 540.55)                 | 439.63<br>(231.00 to 767.67)                 | 17.63<br>(14.20 to 21.83)           | 35.02<br>(18.96 to 59.77)                 | 27.92<br>(15.13 to 46.74)               | 34.71<br>(18.56 to 58.67)                 |
| Chronic kidney disease due to glomerulonephritis           | 2,292.52<br>(1,911.79 to 2,709.10)           | 2,237.12<br>(1,126.42 to 4,064.09)           | 1,433.21<br>(715.75 to 2,617.93)             | 2,427.85<br>(1,225.97 to 4,439.11)           | 83.43<br>(69.51 to 97.97)           | 110.44<br>(59.71 to 191.19)               | 74.24<br>(38.81 to 129.29)              | 115.28<br>(62.19 to 206.89)               |
| Chronic kidney disease due to other and unspecified causes | 1,229.18<br>(1,001.45 to 1,517.30)           | 1,364.27<br>(676.07 to 2,458.38)             | 913.01<br>(457.93 to 1,665.73)               | 1,473.74<br>(718.11 to 2,623.11)             | 50.42<br>(40.98 to 61.66)           | 74.78<br>(40.56 to 128.01)                | 52.88<br>(27.93 to 89.59)               | 77.35<br>(41.14 to 133.56)                |
| Urinary diseases and male infertility                      | 5,784.39<br>(5,122.07 to 6,527.09)           | 10,368.69<br>(7,478.21 to 14,404.81)         | 8,486.55<br>(5,798.43 to 12,486.20)          | 9,640.54<br>(7,137.01 to 13,085.41)          | 253.79<br>(225.79 to 285.11)        | 540.19<br>(434.16 to 666.74)              | 463.98<br>(351.09 to 606.26)            | 483.19<br>(399.36 to 583.18)              |
| Urinary tract infections                                   | 4,609.00<br>(3,977.06 to 5,412.86)           | 8,721.78<br>(6,164.72 to 12,230.25)          | 7,271.98<br>(4,871.76 to 10,810.84)          | 8,104.34<br>(5,855.97 to 11,026.73)          | 201.75<br>(175.51 to 232.91)        | 455.60<br>(360.01 to 567.87)              | 398.30<br>(298.81 to 524.87)            | 407.28<br>(328.73 to 500.49)              |
| Urolithiasis                                               | 542.70<br>(370.82 to 672.59)                 | 954.12<br>(585.52 to 1,464.08)               | 730.43<br>(416.13 to 1,168.23)               | 885.39<br>(546.38 to 1,329.28)               | 25.88<br>(17.96 to 32.92)           | 50.36<br>(31.29 to 70.78)                 | 40.49<br>(23.71 to 61.48)               | 45.23<br>(28.95 to 62.08)                 |
| Other urinary diseases                                     | 632.69<br>(250.64 to 914.84)                 | 692.79<br>(283.61 to 1,217.66)               | 484.15<br>(192.06 to 897.42)                 | 650.81<br>(261.49 to 1,143.52)               | 26.16<br>(12.73 to 36.62)           | 34.23<br>(17.31 to 53.32)                 | 25.19<br>(12.75 to 40.91)               | 30.68<br>(15.17 to 47.48)                 |
| Gynecological diseases                                     | 86.94<br>(22.11 to 129.84)                   | 77.43<br>(21.14 to 156.75)                   | 45.16<br>(11.44 to 97.85)                    | 77.72<br>(21.10 to 154.68)                   | 2.47<br>(0.71 to 3.59)              | 2.51<br>(0.82 to 4.74)                    | 1.47<br>(0.47 to 3.02)                  | 2.48<br>(0.79 to 4.66)                    |
| Uterine fibroids                                           | 43.45<br>(11.67 to 66.96)                    | 40.74<br>(9.62 to 95.32)                     | 24.95<br>(5.69 to 58.85)                     | 41.31<br>(9.67 to 98.19)                     | 1.11<br>(0.33 to 1.71)              | 1.11<br>(0.30 to 2.55)                    | 0.69<br>(0.17 to 1.62)                  | 1.12<br>(0.30 to 2.60)                    |
| Polycystic ovarian syndrome                                | 1.52<br>(0.33 to 3.14)                       | 0.97<br>(0.19 to 2.86)                       | 0.35<br>(0.06 to 1.07)                       | 1.00<br>(0.20 to 3.04)                       | 0.04<br>(0.01 to 0.07)              | 0.02<br>(0.00 to 0.07)                    | 0.01<br>(0.00 to 0.03)                  | 0.02<br>(0.00 to 0.07)                    |
| Endometriosis                                              | 0.11<br>(0.02 to 0.21)                       | 0.11<br>(0.02 to 0.31)                       | 0.06<br>(0.01 to 0.18)                       | 0.12<br>(0.02 to 0.32)                       | 0.00<br>(0.00 to 0.01)              | 0.00<br>(0.00 to 0.01)                    | 0.00<br>(0.00 to 0.00)                  | 0.00<br>(0.00 to 0.01)                    |
| Genital prolapse                                           | 0.37<br>(0.10 to 0.72)                       | 0.30<br>(0.09 to 0.70)                       | 0.17<br>(0.04 to 0.41)                       | 0.30<br>(0.09 to 0.70)                       | 0.01<br>(0.00 to 0.03)              | 0.01<br>(0.00 to 0.04)                    | 0.01<br>(0.00 to 0.02)                  | 0.01<br>(0.00 to 0.03)                    |
| Other gynecological diseases                               | 41.49<br>(10.25 to 65.72)                    | 35.30<br>(9.36 to 67.69)                     | 19.63<br>(4.88 to 39.69)                     | 34.99<br>(9.32 to 66.55)                     | 1.31<br>(0.40 to 2.00)              | 1.35<br>(0.50 to 2.42)                    | 0.77<br>(0.28 to 1.47)                  | 1.32<br>(0.46 to 2.35)                    |
| Hemoglobinopathies and hemolytic anemias                   | 297.80<br>(251.71 to 368.50)                 | 215.52<br>(153.12 to 317.89)                 | 152.99<br>(101.16 to 233.41)                 | 208.39<br>(149.99 to 297.74)                 | 9.29<br>(7.92 to 12.72)             | 10.04<br>(7.84 to 14.56)                  | 7.58<br>(5.49 to 11.25)                 | 9.20<br>(7.23 to 13.35)                   |
| Thalassemias                                               | 24.14<br>(17.91 to 31.13)                    | 5.94<br>(3.45 to 9.88)                       | 5.98<br>(3.50 to 9.91)                       | 6.33<br>(3.69 to 10.49)                      | 0.31<br>(0.23 to 0.39)              | 0.08<br>(0.05 to 0.13)                    | 0.08<br>(0.05 to 0.13)                  | 0.08<br>(0.05 to 0.13)                    |



|                                                   |                                       |                                     |                                     |                                     |                              |                              |                              |                              |
|---------------------------------------------------|---------------------------------------|-------------------------------------|-------------------------------------|-------------------------------------|------------------------------|------------------------------|------------------------------|------------------------------|
|                                                   | 73.43<br>(52.95 to<br>89.81)          | 40.80<br>(23.78 to<br>65.31)        | 27.72<br>(15.48 to<br>45.45)        | 41.96<br>(24.98 to<br>66.01)        | 1.28<br>(0.96 to<br>1.57)    | 0.81<br>(0.48 to<br>1.31)    | 0.56<br>(0.31 to<br>0.91)    | 0.82<br>(0.49 to<br>1.32)    |
| Sickle cell disorders                             |                                       |                                     |                                     |                                     |                              |                              |                              |                              |
|                                                   | 68.21<br>(54.40 to<br>83.70)          | 58.83<br>(36.97 to<br>95.28)        | 37.48<br>(21.24 to<br>62.98)        | 58.40<br>(36.68 to<br>91.57)        | 1.56<br>(1.30 to<br>1.95)    | 1.83<br>(1.21 to<br>2.86)    | 1.20<br>(0.72 to<br>1.98)    | 1.76<br>(1.17 to<br>2.68)    |
| G6PD deficiency                                   |                                       |                                     |                                     |                                     |                              |                              |                              |                              |
|                                                   | 132.03<br>(110.80 to<br>188.46)       | 109.95<br>(81.41 to<br>169.30)      | 81.82<br>(56.75 to<br>130.02)       | 101.71<br>(77.37 to<br>156.10)      | 6.15<br>(5.16 to<br>9.00)    | 7.32<br>(5.85 to<br>10.96)   | 5.75<br>(4.31 to<br>8.61)    | 6.53<br>(5.14 to<br>9.80)    |
| Other hemoglobinopathies and hemolytic anemias    |                                       |                                     |                                     |                                     |                              |                              |                              |                              |
|                                                   | 1,426.98<br>(1,188.40 to<br>1,787.65) | 1,525.60<br>(950.09 to<br>2,434.19) | 1,536.80<br>(945.47 to<br>2,539.55) | 1,479.89<br>(938.78 to<br>2,293.83) | 43.20<br>(33.76 to<br>52.26) | 59.80<br>(40.82 to<br>85.45) | 63.27<br>(42.03 to<br>92.96) | 55.59<br>(38.16 to<br>77.28) |
| Endocrine, metabolic, blood, and immune disorders |                                       |                                     |                                     |                                     |                              |                              |                              |                              |

| Moldova                                       |                                              |                                            |                                            |                                            |                                     |                                     |                                     |                                     |
|-----------------------------------------------|----------------------------------------------|--------------------------------------------|--------------------------------------------|--------------------------------------------|-------------------------------------|-------------------------------------|-------------------------------------|-------------------------------------|
| Cause                                         | YLLs (actual counts)                         |                                            |                                            |                                            | Deaths (actual counts)              |                                     |                                     |                                     |
|                                               | 2016                                         | 2040 Forecast                              | 2040 Better Scenario                       | 2040 Worse Scenario                        | 2016                                | 2040 Forecast                       | 2040 Better Scenario                | 2040 Worse Scenario                 |
| <b>Musculoskeletal disorders</b>              | <b>813.85</b><br>(681.48 to 1,021.00)        | <b>1,137.27</b><br>(796.77 to 1,679.98)    | <b>950.19</b><br>(643.68 to 1,464.02)      | <b>1,102.73</b><br>(784.80 to 1,603.37)    | <b>27.54</b><br>(23.29 to 36.96)    | <b>46.85</b><br>(35.18 to 68.05)    | <b>39.43</b><br>(28.38 to 57.94)    | <b>44.15</b><br>(34.04 to 62.83)    |
| Rheumatoid arthritis                          | 201.54<br>(155.27 to 301.03)                 | 376.64<br>(239.41 to 592.42)               | 231.18<br>(134.23 to 398.62)               | 370.34<br>(237.49 to 572.67)               | 8.47<br>(6.65 to 12.65)             | 18.15<br>(12.42 to 26.79)           | 11.50<br>(7.32 to 18.94)            | 17.31<br>(12.12 to 25.22)           |
| Other musculoskeletal disorders               | 612.31<br>(508.14 to 762.93)                 | 760.64<br>(521.89 to 1,165.64)             | 719.01<br>(480.19 to 1,108.91)             | 732.39<br>(512.23 to 1,119.73)             | 19.07<br>(15.65 to 24.36)           | 28.70<br>(20.89 to 43.36)           | 27.93<br>(20.16 to 41.88)           | 26.84<br>(19.88 to 39.69)           |
| <b>Other non-communicable diseases</b>        | <b>16,207.54</b><br>(10,837.04 to 22,760.42) | <b>9,358.36</b><br>(5,861.79 to 15,350.33) | <b>6,326.91</b><br>(4,014.41 to 10,210.81) | <b>9,987.12</b><br>(6,228.62 to 16,604.95) | <b>221.83</b><br>(154.69 to 299.97) | <b>197.95</b><br>(134.34 to 283.30) | <b>156.50</b><br>(104.04 to 226.20) | <b>198.58</b><br>(136.48 to 289.15) |
| Congenital birth defects                      | 14,474.38<br>(9,504.30 to 20,827.77)         | 6,641.07<br>(3,653.11 to 11,909.04)        | 3,812.44<br>(2,058.20 to 6,864.44)         | 7,367.20<br>(4,034.02 to 13,343.66)        | 180.44<br>(122.02 to 253.49)        | 91.98<br>(55.75 to 153.93)          | 53.81<br>(31.40 to 90.99)           | 100.29<br>(59.74 to 169.75)         |
| Neural tube defects                           | 167.62<br>(103.21 to 259.49)                 | 58.90<br>(27.23 to 124.61)                 | 28.53<br>(12.25 to 61.03)                  | 67.18<br>(30.22 to 144.78)                 | 2.03<br>(1.28 to 3.12)              | 0.76<br>(0.38 to 1.53)              | 0.37<br>(0.18 to 0.75)              | 0.86<br>(0.42 to 1.78)              |
| Congenital heart anomalies                    | 6,022.47<br>(4,055.77 to 8,741.42)           | 2,798.99<br>(1,591.24 to 4,931.14)         | 1,458.43<br>(751.96 to 2,768.71)           | 3,076.39<br>(1,718.90 to 5,517.85)         | 77.15<br>(53.76 to 108.71)          | 40.84<br>(25.19 to 66.94)           | 21.59<br>(12.03 to 38.31)           | 44.01<br>(26.94 to 73.20)           |
| Orofacial clefts                              | 2.47<br>(1.13 to 5.52)                       | 1.44<br>(0.41 to 3.95)                     | 0.62<br>(0.16 to 1.77)                     | 1.66<br>(0.46 to 4.51)                     | 0.03<br>(0.01 to 0.06)              | 0.02<br>(0.00 to 0.05)              | 0.01<br>(0.00 to 0.02)              | 0.02<br>(0.01 to 0.05)              |
| Down syndrome                                 | 243.28<br>(177.50 to 357.36)                 | 207.73<br>(125.26 to 339.06)               | 200.70<br>(117.62 to 339.37)               | 215.71<br>(131.36 to 352.24)               | 4.17<br>(3.19 to 5.84)              | 4.35<br>(2.65 to 7.11)              | 4.24<br>(2.50 to 7.30)              | 4.44<br>(2.73 to 7.11)              |
| Other chromosomal abnormalities               | 335.61<br>(165.27 to 540.00)                 | 214.20<br>(96.47 to 439.36)                | 160.30<br>(71.32 to 332.77)                | 238.88<br>(105.74 to 493.93)               | 4.07<br>(2.01 to 6.43)              | 2.73<br>(1.26 to 5.53)              | 2.05<br>(0.96 to 4.06)              | 3.01<br>(1.43 to 5.96)              |
| Congenital musculoskeletal and limb anomalies | 223.76<br>(130.86 to 368.09)                 | 146.23<br>(61.90 to 309.43)                | 86.62<br>(36.74 to 183.52)                 | 165.00<br>(69.61 to 348.41)                | 2.64<br>(1.57 to 4.34)              | 1.77<br>(0.80 to 3.66)              | 1.05<br>(0.46 to 2.17)              | 1.99<br>(0.89 to 4.11)              |
| Urogenital congenital anomalies               | 144.10<br>(80.98 to 266.72)                  | 74.36<br>(38.63 to 153.02)                 | 48.65<br>(23.57 to 101.83)                 | 80.45<br>(41.02 to 169.35)                 | 1.96<br>(1.18 to 3.43)              | 1.28<br>(0.71 to 2.40)              | 0.85<br>(0.46 to 1.65)              | 1.34<br>(0.74 to 2.56)              |
| Digestive congenital anomalies                | 2,016.98<br>(1,186.96 to 3,161.98)           | 931.53<br>(409.97 to 1,853.04)             | 508.85<br>(214.76 to 1,068.83)             | 1,053.61<br>(457.67 to 2,143.30)           | 24.16<br>(14.50 to 37.40)           | 11.89<br>(5.90 to 22.91)            | 6.56<br>(3.03 to 13.23)             | 13.28<br>(6.29 to 26.11)            |
| Other congenital birth defects                | 5,318.09<br>(2,832.72 to 8,076.12)           | 2,207.69<br>(1,015.25 to 4,303.72)         | 1,319.76<br>(576.33 to 2,559.79)           | 2,468.31<br>(1,108.64 to 4,759.02)         | 64.21<br>(35.10 to 96.43)           | 28.34<br>(14.61 to 53.07)           | 17.09<br>(8.49 to 31.93)            | 31.34<br>(15.85 to 57.78)           |
| Skin and subcutaneous diseases                | 963.85<br>(413.02 to 1,259.74)               | 2,506.18<br>(1,215.80 to 3,914.53)         | 2,367.34<br>(1,207.44 to 3,825.51)         | 2,383.74<br>(1,141.15 to 3,594.94)         | 32.47<br>(15.60 to 43.23)           | 103.52<br>(56.96 to 155.23)         | 100.98<br>(57.63 to 156.79)         | 95.56<br>(51.76 to 139.25)          |
| Cellulitis                                    | 621.64<br>(213.82 to 850.15)                 | 1,564.25<br>(634.08 to 2,569.47)           | 1,550.87<br>(652.12 to 2,611.67)           | 1,480.82<br>(585.95 to 2,373.92)           | 20.41<br>(8.08 to 27.70)            | 61.33<br>(27.66 to 95.01)           | 62.22<br>(29.89 to 100.05)          | 56.65<br>(24.87 to 85.57)           |
| Pyoderma                                      | 294.92<br>(142.43 to 477.69)                 | 882.77<br>(451.83 to 1,472.20)             | 765.69<br>(409.60 to 1,352.66)             | 846.92<br>(439.18 to 1,363.88)             | 10.52<br>(5.54 to 19.22)            | 38.94<br>(22.59 to 69.25)           | 35.75<br>(21.23 to 65.57)           | 36.03<br>(20.62 to 63.55)           |
| Decubitus ulcer                               | 23.71<br>(8.22 to 32.68)                     | 29.71<br>(10.35 to 45.05)                  | 24.16<br>(8.72 to 38.18)                   | 27.88<br>(9.61 to 42.11)                   | 0.85<br>(0.30 to 1.21)              | 1.87<br>(0.61 to 2.98)              | 1.66<br>(0.56 to 2.76)              | 1.64<br>(0.52 to 2.64)              |
| Other skin and subcutaneous diseases          | 23.59<br>(8.61 to 32.69)                     | 29.45<br>(10.50 to 46.42)                  | 26.63<br>(9.96 to 43.00)                   | 28.12<br>(9.93 to 43.12)                   | 0.69<br>(0.26 to 0.95)              | 1.38<br>(0.48 to 2.05)              | 1.35<br>(0.49 to 2.05)              | 1.23<br>(0.42 to 1.81)              |
| Sudden infant death syndrome                  | 769.31<br>(448.11 to 1,211.29)               | 211.11<br>(56.18 to 537.52)                | 147.12<br>(37.83 to 397.52)                | 236.18<br>(63.78 to 607.30)                | 8.92<br>(5.20 to 14.05)             | 2.45<br>(0.65 to 6.24)              | 1.71<br>(0.44 to 4.61)              | 2.74<br>(0.74 to 7.05)              |

|                          |                                            |                                           |                                           |                                            |                                       |                                       |                                       |                                       |
|--------------------------|--------------------------------------------|-------------------------------------------|-------------------------------------------|--------------------------------------------|---------------------------------------|---------------------------------------|---------------------------------------|---------------------------------------|
| Injuries                 | 109,489.01<br>(93,636.17 to<br>126,109.67) | 99,592.05<br>(56,595.11 to<br>175,371.64) | 68,634.45<br>(38,728.16 to<br>124,278.18) | 109,866.39<br>(61,211.45 to<br>193,516.48) | 2,784.03<br>(2,400.59 to<br>3,185.07) | 3,020.41<br>(1,890.58 to<br>5,076.79) | 2,166.51<br>(1,373.48 to<br>3,643.35) | 3,216.46<br>(1,974.65 to<br>5,401.99) |
| Transport injuries       | 23,640.68<br>(19,966.25 to<br>27,544.91)   | 19,159.89<br>(7,743.39 to<br>43,004.13)   | 7,845.59<br>(3,225.22 to<br>18,004.32)    | 25,446.02<br>(10,012.15 to<br>56,558.91)   | 537.79<br>(459.08 to<br>625.64)       | 529.01<br>(238.90 to<br>1,112.92)     | 229.78<br>(107.29 to<br>480.42)       | 675.28<br>(298.90 to<br>1,433.50)     |
| Road injuries            | 21,905.15<br>(18,486.18 to<br>25,469.09)   | 16,935.87<br>(6,874.60 to<br>38,091.69)   | 6,452.20<br>(2,700.70 to<br>14,769.02)    | 23,018.52<br>(9,080.55 to<br>50,907.59)    | 496.89<br>(425.13 to<br>576.51)       | 466.38<br>(213.63 to<br>977.76)       | 189.80<br>(90.85 to<br>395.86)        | 608.45<br>(270.21 to<br>1,280.92)     |
| Pedestrian road injuries | 6,472.03<br>(4,943.78 to<br>8,488.42)      | 5,624.20<br>(2,458.40 to<br>11,988.32)    | 1,867.86<br>(850.85 to<br>4,114.78)       | 7,277.98<br>(3,096.15 to<br>15,728.76)     | 163.74<br>(127.24 to<br>214.14)       | 179.00<br>(89.90 to<br>350.12)        | 64.06<br>(33.27 to<br>126.87)         | 222.25<br>(107.28 to<br>449.74)       |

| Moldova                                         |                                                   |                                                   |                                                   |                                                   |                                                |                                              |                                              |                                              |
|-------------------------------------------------|---------------------------------------------------|---------------------------------------------------|---------------------------------------------------|---------------------------------------------------|------------------------------------------------|----------------------------------------------|----------------------------------------------|----------------------------------------------|
| Cause                                           | YLLs (actual counts)                              |                                                   |                                                   |                                                   | Deaths (actual counts)                         |                                              |                                              |                                              |
|                                                 | 2016                                              | 2040 Forecast                                     | 2040 Better Scenario                              | 2040 Worse Scenario                               | 2016                                           | 2040 Forecast                                | 2040 Better Scenario                         | 2040 Worse Scenario                          |
| Cyclist road injuries                           | 855.10<br>(627.46 to<br>1,076.03)                 | 852.64<br>(305.04 to<br>2,167.02)                 | 430.37<br>(158.13 to<br>1,104.96)                 | 1,105.69<br>(383.36 to<br>2,820.76)               | 21.29<br>(16.18 to<br>26.77)                   | 24.39<br>(9.42 to<br>60.01)                  | 13.46<br>(5.54 to<br>32.41)                  | 30.44<br>(11.27 to<br>75.54)                 |
| Motorcyclist road injuries                      | 2,144.63<br>(1,445.13 to<br>2,722.87)             | 1,748.99<br>(602.49 to<br>4,344.84)               | 1,029.04<br>(344.53 to<br>2,615.86)               | 2,217.44<br>(752.74 to<br>5,355.75)               | 41.11<br>(28.89 to<br>51.81)                   | 37.81<br>(13.78 to<br>92.36)                 | 23.78<br>(8.55 to<br>59.38)                  | 46.64<br>(16.77 to<br>111.24)                |
| Motor vehicle road injuries                     | 11,859.92<br>(9,442.92 to<br>14,228.80)           | 8,026.24<br>(3,216.84 to<br>17,782.36)            | 2,831.57<br>(1,159.32 to<br>6,163.35)             | 11,509.41<br>(4,434.85 to<br>25,321.76)           | 253.74<br>(202.93 to<br>304.24)                | 201.95<br>(89.68 to<br>423.94)               | 77.72<br>(36.52 to<br>158.47)                | 279.48<br>(117.27 to<br>589.63)              |
| Other road injuries                             | 573.47<br>(306.33 to<br>753.82)                   | 683.80<br>(214.50 to<br>1,779.40)                 | 293.35<br>(91.26 to<br>772.54)                    | 907.99<br>(276.48 to<br>2,375.73)                 | 17.01<br>(7.97 to<br>22.85)                    | 23.22<br>(7.30 to<br>57.57)                  | 10.78<br>(3.55 to<br>26.79)                  | 29.63<br>(9.24 to<br>73.69)                  |
| Other transport injuries                        | 1,735.52<br>(1,411.08 to<br>2,153.97)             | 2,224.02<br>(820.50 to<br>5,433.46)               | 1,393.39<br>(514.68 to<br>3,330.52)               | 2,427.50<br>(877.45 to<br>5,782.60)               | 40.90<br>(33.43 to<br>50.09)                   | 62.63<br>(26.36 to<br>142.76)                | 39.97<br>(17.01 to<br>88.01)                 | 66.83<br>(27.33 to<br>154.99)                |
| <b>Unintentional injuries</b>                   | <b>46,020.53<br/>(39,070.40 to<br/>53,151.37)</b> | <b>40,865.38<br/>(27,417.49 to<br/>63,492.68)</b> | <b>31,114.50<br/>(20,587.12 to<br/>50,760.38)</b> | <b>40,794.77<br/>(27,664.98 to<br/>62,270.70)</b> | <b>1,248.37<br/>(1,059.51 to<br/>1,435.06)</b> | <b>1,344.31<br/>(980.89 to<br/>1,929.70)</b> | <b>1,054.44<br/>(748.86 to<br/>1,588.24)</b> | <b>1,303.10<br/>(952.83 to<br/>1,881.52)</b> |
| Falls                                           | 8,293.33<br>(6,925.65 to<br>10,800.81)            | 9,237.22<br>(6,729.52 to<br>13,295.58)            | 7,792.89<br>(5,444.76 to<br>11,786.89)            | 8,872.33<br>(6,533.71 to<br>12,761.43)            | 261.52<br>(222.29 to<br>328.01)                | 355.63<br>(282.09 to<br>472.56)              | 308.69<br>(235.57 to<br>427.67)              | 330.42<br>(264.63 to<br>428.39)              |
| Drowning                                        | 10,006.03<br>(8,499.55 to<br>11,583.76)           | 6,917.92<br>(3,517.93 to<br>13,912.25)            | 5,059.49<br>(2,555.65 to<br>10,301.95)            | 7,296.68<br>(3,590.94 to<br>14,965.37)            | 228.30<br>(196.10 to<br>262.47)                | 192.67<br>(104.12 to<br>365.24)              | 144.66<br>(78.98 to<br>276.39)               | 198.01<br>(105.24 to<br>381.35)              |
| Fire, heat, and hot substances                  | 4,146.76<br>(3,336.75 to<br>5,055.74)             | 3,374.49<br>(1,917.27 to<br>6,032.79)             | 2,234.79<br>(1,250.52 to<br>4,093.15)             | 3,473.28<br>(1,884.59 to<br>6,299.10)             | 126.64<br>(101.30 to<br>150.31)                | 129.44<br>(80.14 to<br>211.72)               | 90.14<br>(55.57 to<br>147.77)                | 127.98<br>(77.63 to<br>215.64)               |
| Poisonings                                      | 1,868.84<br>(1,328.03 to<br>5,068.23)             | 1,638.90<br>(781.25 to<br>4,129.19)               | 949.56<br>(438.70 to<br>2,340.49)                 | 1,721.63<br>(799.67 to<br>4,365.28)               | 49.10<br>(35.78 to<br>121.49)                  | 56.46<br>(31.14 to<br>121.34)                | 34.35<br>(18.61 to<br>73.49)                 | 57.14<br>(30.15 to<br>127.53)                |
| Exposure to mechanical forces                   | 2,433.54<br>(2,010.03 to<br>3,207.89)             | 1,881.33<br>(1,242.69 to<br>2,921.98)             | 1,301.01<br>(836.36 to<br>2,103.00)               | 1,887.96<br>(1,249.61 to<br>2,839.03)             | 55.66<br>(46.11 to<br>76.25)                   | 52.57<br>(36.00 to<br>79.59)                 | 37.26<br>(24.95 to<br>58.40)                 | 51.43<br>(36.03 to<br>75.13)                 |
| Unintentional firearm injuries                  | 407.72<br>(322.13 to<br>529.90)                   | 281.41<br>(179.23 to<br>434.84)                   | 204.02<br>(125.52 to<br>324.97)                   | 282.89<br>(182.20 to<br>431.44)                   | 9.65<br>(7.61 to<br>12.94)                     | 8.30<br>(5.61 to<br>12.68)                   | 6.26<br>(4.10 to<br>9.90)                    | 8.10<br>(5.51 to<br>12.26)                   |
| Unintentional suffocation                       | 320.47<br>(237.08 to<br>442.70)                   | 177.01<br>(110.18 to<br>290.00)                   | 128.68<br>(77.92 to<br>215.86)                    | 187.39<br>(114.95 to<br>312.39)                   | 5.09<br>(3.95 to<br>6.95)                      | 3.48<br>(2.21 to<br>5.28)                    | 2.58<br>(1.60 to<br>4.02)                    | 3.59<br>(2.26 to<br>5.52)                    |
| Other exposure to mechanical forces             | 1,705.36<br>(1,362.23 to<br>2,417.57)             | 1,422.91<br>(906.63 to<br>2,274.39)               | 968.31<br>(606.15 to<br>1,624.38)                 | 1,417.68<br>(914.65 to<br>2,215.35)               | 40.92<br>(32.86 to<br>58.82)                   | 40.79<br>(27.28 to<br>62.42)                 | 28.42<br>(18.64 to<br>45.44)                 | 39.74<br>(27.16 to<br>60.59)                 |
| Adverse effects of medical treatment            | 1,276.90<br>(991.98 to<br>1,902.07)               | 1,235.90<br>(796.17 to<br>2,043.31)               | 1,024.06<br>(638.93 to<br>1,709.55)               | 1,209.16<br>(776.55 to<br>1,966.61)               | 38.38<br>(29.02 to<br>59.08)                   | 45.95<br>(30.69 to<br>75.96)                 | 39.41<br>(25.64 to<br>65.39)                 | 43.45<br>(29.75 to<br>69.97)                 |
| Animal contact                                  | 417.58<br>(315.31 to<br>698.82)                   | 494.22<br>(305.54 to<br>860.99)                   | 353.41<br>(210.87 to<br>619.26)                   | 488.23<br>(302.47 to<br>847.14)                   | 11.91<br>(8.97 to<br>19.97)                    | 16.29<br>(10.52 to<br>27.95)                 | 11.88<br>(7.45 to<br>20.81)                  | 15.70<br>(10.39 to<br>26.59)                 |
| Venomous animal contact                         | 176.85<br>(106.78 to<br>316.16)                   | 156.98<br>(82.76 to<br>305.72)                    | 121.05<br>(62.92 to<br>238.06)                    | 156.36<br>(84.30 to<br>303.26)                    | 4.78<br>(2.87 to<br>8.48)                      | 4.82<br>(2.67 to<br>9.37)                    | 3.78<br>(2.06 to<br>7.27)                    | 4.71<br>(2.61 to<br>9.16)                    |
| Non-venomous animal contact                     | 240.74<br>(172.40 to<br>430.77)                   | 337.25<br>(203.62 to<br>627.49)                   | 232.36<br>(135.10 to<br>428.97)                   | 331.87<br>(201.79 to<br>602.91)                   | 7.13<br>(5.13 to<br>12.71)                     | 11.48<br>(7.36 to<br>20.48)                  | 8.10<br>(4.99 to<br>14.64)                   | 10.99<br>(7.14 to<br>19.73)                  |
| Foreign body                                    | 9,650.20<br>(7,551.16 to<br>12,132.64)            | 8,689.19<br>(5,702.36 to<br>12,993.16)            | 7,855.68<br>(4,986.82 to<br>12,156.10)            | 8,466.09<br>(5,626.23 to<br>12,293.64)            | 250.70<br>(193.79 to<br>310.74)                | 263.32<br>(178.76 to<br>381.26)              | 242.53<br>(159.05 to<br>362.95)              | 251.30<br>(172.59 to<br>355.08)              |
| Pulmonary aspiration and foreign body in airway | 9,342.10<br>(7,255.33 to<br>11,829.88)            | 8,421.42<br>(5,485.83 to<br>12,662.37)            | 7,586.24<br>(4,805.17 to<br>11,875.88)            | 8,199.58<br>(5,432.76 to<br>12,008.04)            | 242.92<br>(185.16 to<br>301.61)                | 255.25<br>(171.89 to<br>372.32)              | 234.20<br>(152.91 to<br>352.23)              | 243.45<br>(165.11 to<br>346.69)              |

|                                             |                                                               |                                                               |                                                               |                                                               |                                                        |                                                          |                                                        |                                                          |
|---------------------------------------------|---------------------------------------------------------------|---------------------------------------------------------------|---------------------------------------------------------------|---------------------------------------------------------------|--------------------------------------------------------|----------------------------------------------------------|--------------------------------------------------------|----------------------------------------------------------|
|                                             | 308.10<br>(232.18 to<br>512.35)                               | 267.77<br>(167.07 to<br>466.71)                               | 269.44<br>(163.16 to<br>475.78)                               | 266.52<br>(164.99 to<br>455.95)                               | 7.78<br>(5.96 to<br>13.13)                             | 8.07<br>(5.28 to<br>14.13)                               | 8.33<br>(5.38 to<br>14.62)                             | 7.84<br>(5.07 to<br>13.71)                               |
| Foreign body in other body part             |                                                               |                                                               |                                                               |                                                               |                                                        |                                                          |                                                        |                                                          |
|                                             | 6,338.24<br>(2,881.84 to<br>8,671.64)                         | 6,039.74<br>(2,412.97 to<br>10,419.26)                        | 3,843.73<br>(1,501.56 to<br>7,358.25)                         | 6,019.77<br>(2,535.21 to<br>10,669.31)                        | 191.18<br>(87.27 to<br>258.73)                         | 196.60<br>(82.39 to<br>323.21)                           | 126.95<br>(51.30 to<br>230.34)                         | 192.94<br>(82.00 to<br>322.95)                           |
| Environmental heat and cold exposure        |                                                               |                                                               |                                                               |                                                               |                                                        |                                                          |                                                        |                                                          |
|                                             | 1,589.10<br>(1,311.38 to<br>1,968.90)                         | 1,356.47<br>(857.21 to<br>2,111.34)                           | 699.89<br>(395.86 to<br>1,180.09)                             | 1,359.64<br>(847.14 to<br>2,047.13)                           | 34.98<br>(28.97 to<br>43.48)                           | 35.37<br>(23.42 to<br>53.53)                             | 18.57<br>(10.96 to<br>30.56)                           | 34.72<br>(22.91 to<br>51.59)                             |
| Other unintentional injuries                |                                                               |                                                               |                                                               |                                                               |                                                        |                                                          |                                                        |                                                          |
| <b>Self-harm and interpersonal violence</b> | <b>39,807.23</b><br><b>(32,604.28 to</b><br><b>51,446.88)</b> | <b>39,480.39</b><br><b>(15,928.60 to</b><br><b>87,557.90)</b> | <b>29,587.33</b><br><b>(12,065.99 to</b><br><b>65,638.14)</b> | <b>43,538.78</b><br><b>(16,985.42 to</b><br><b>94,737.60)</b> | <b>997.46</b><br><b>(825.02 to</b><br><b>1,264.28)</b> | <b>1,145.02</b><br><b>(506.35 to</b><br><b>2,409.41)</b> | <b>880.13</b><br><b>(391.70 to</b><br><b>1,863.08)</b> | <b>1,236.06</b><br><b>(525.78 to</b><br><b>2,619.49)</b> |

| Moldova                                                                             |                                                   |                                                   |                                                   |                                                   |                                                |                                                 |                                                 |                                                 |
|-------------------------------------------------------------------------------------|---------------------------------------------------|---------------------------------------------------|---------------------------------------------------|---------------------------------------------------|------------------------------------------------|-------------------------------------------------|-------------------------------------------------|-------------------------------------------------|
| Cause                                                                               | YLLs (actual counts)                              |                                                   |                                                   |                                                   | Deaths (actual counts)                         |                                                 |                                                 |                                                 |
|                                                                                     | 2016                                              | 2040 Forecast                                     | 2040 Better Scenario                              | 2040 Worse Scenario                               | 2016                                           | 2040 Forecast                                   | 2040 Better Scenario                            | 2040 Worse Scenario                             |
| Self-harm                                                                           | 28,654.10<br>(22,692.95 to<br>35,980.33)          | 31,623.19<br>(11,140.62 to<br>73,985.88)          | 23,573.57<br>(8,717.55 to<br>56,917.09)           | 35,310.58<br>(12,417.22 to<br>80,180.11)          | 728.33<br>(580.55 to<br>895.30)                | 916.90<br>(366.06 to<br>1,986.96)               | 700.44<br>(290.15 to<br>1,562.72)               | 1,001.85<br>(385.54 to<br>2,225.20)             |
| Self-harm by firearm                                                                | 637.84<br>(386.90 to<br>935.90)                   | 522.63<br>(173.62 to<br>1,300.90)                 | 344.39<br>(119.21 to<br>870.43)                   | 588.23<br>(190.67 to<br>1,428.81)                 | 15.41<br>(9.66 to<br>21.97)                    | 14.55<br>(5.37 to<br>34.15)                     | 9.84<br>(3.77 to<br>23.81)                      | 16.02<br>(5.66 to<br>37.44)                     |
| Self-harm by other specified means                                                  | 28,016.26<br>(22,199.72 to<br>35,072.55)          | 31,100.56<br>(10,954.35 to<br>72,859.82)          | 23,229.18<br>(8,602.36 to<br>56,072.07)           | 34,722.36<br>(12,240.67 to<br>78,754.22)          | 712.92<br>(567.54 to<br>880.11)                | 902.35<br>(361.04 to<br>1,958.10)               | 690.61<br>(286.69 to<br>1,536.72)               | 985.83<br>(378.87 to<br>2,192.03)               |
| Interpersonal violence                                                              | 11,153.13<br>(7,683.17 to<br>19,436.07)           | 7,857.20<br>(3,511.56 to<br>17,547.25)            | 6,013.77<br>(2,639.27 to<br>13,714.21)            | 8,228.20<br>(3,623.77 to<br>18,366.95)            | 269.14<br>(188.27 to<br>466.32)                | 228.12<br>(110.32 to<br>481.15)                 | 179.68<br>(86.31 to<br>383.69)                  | 234.21<br>(113.29 to<br>494.70)                 |
| Physical violence by firearm                                                        | 741.83<br>(367.72 to<br>1,704.51)                 | 428.68<br>(181.33 to<br>1,016.98)                 | 296.01<br>(127.40 to<br>714.28)                   | 428.64<br>(182.42 to<br>1,009.72)                 | 15.18<br>(7.90 to<br>35.78)                    | 15.18<br>(4.25 to<br>24.09)                     | 9.95<br>(3.06 to<br>16.61)                      | 9.86<br>(4.25 to<br>24.00)                      |
| Physical violence by sharp object                                                   | 3,030.59<br>(1,851.70 to<br>5,289.25)             | 2,100.31<br>(1,027.57 to<br>4,423.62)             | 1,559.96<br>(743.08 to<br>3,235.65)               | 2,073.55<br>(1,013.39 to<br>4,375.06)             | 69.44<br>(43.11 to<br>119.29)                  | 57.06<br>(29.15 to<br>116.15)                   | 43.45<br>(22.31 to<br>86.31)                    | 55.39<br>(28.27 to<br>114.10)                   |
| Physical violence by other means                                                    | 7,380.71<br>(5,003.66 to<br>14,634.11)            | 5,328.20<br>(2,082.02 to<br>13,674.38)            | 4,157.80<br>(1,678.56 to<br>10,531.84)            | 5,726.01<br>(2,186.22 to<br>14,577.72)            | 184.51<br>(128.71 to<br>357.56)                | 161.11<br>(70.02 to<br>387.81)                  | 129.27<br>(58.62 to<br>305.32)                  | 168.96<br>(71.23 to<br>406.26)                  |
| <b>Forces of nature, conflict and terrorism, and executions and police conflict</b> | <b>20.58</b><br><b>(18.16 to</b><br><b>23.13)</b> | <b>86.39</b><br><b>(0.00 to</b><br><b>698.61)</b> | <b>87.02</b><br><b>(0.00 to</b><br><b>711.59)</b> | <b>86.81</b><br><b>(0.00 to</b><br><b>697.76)</b> | <b>0.41</b><br><b>(0.37 to</b><br><b>0.46)</b> | <b>2.08</b><br><b>(0.00 to</b><br><b>19.23)</b> | <b>2.16</b><br><b>(0.00 to</b><br><b>20.46)</b> | <b>2.02</b><br><b>(0.00 to</b><br><b>18.21)</b> |
| Exposure to forces of nature                                                        | 0.00<br>(0.00 to<br>0.00)                         | 17.25<br>(0.00 to<br>128.44)                      | 17.51<br>(0.00 to<br>130.02)                      | 17.24<br>(0.00 to<br>128.48)                      | 0.00<br>(0.00 to<br>0.00)                      | 0.47<br>(0.00 to<br>3.62)                       | 0.50<br>(0.00 to<br>3.79)                       | 0.45<br>(0.00 to<br>3.49)                       |
| Conflict and terrorism                                                              | 0.00<br>(0.00 to<br>0.00)                         | 69.14<br>(0.00 to<br>19.69)                       | 69.51<br>(0.00 to<br>19.89)                       | 69.58<br>(0.00 to<br>19.79)                       | 0.00<br>(0.00 to<br>0.00)                      | 1.61<br>(0.45 to<br>0.00)                       | 1.66<br>(0.46 to<br>0.00)                       | 1.56<br>(0.43 to<br>0.00)                       |
| Executions and police conflict                                                      | 20.58<br>(18.16 to<br>23.13)                      | 0.00<br>(0.00 to<br>0.00)                         | 0.00<br>(0.00 to<br>0.00)                         | 0.00<br>(0.00 to<br>0.00)                         | 0.41<br>(0.37 to<br>0.46)                      | 0.00<br>(0.00 to<br>0.00)                       | 0.00<br>(0.00 to<br>0.00)                       | 0.00<br>(0.00 to<br>0.00)                       |

| Russia                                                            |                                          |                                          |                                          |                                          |                                       |                                       |                                       |                                       |
|-------------------------------------------------------------------|------------------------------------------|------------------------------------------|------------------------------------------|------------------------------------------|---------------------------------------|---------------------------------------|---------------------------------------|---------------------------------------|
| Cause                                                             | YLLs (in 1000s)                          |                                          |                                          |                                          | Deaths (in 1000s)                     |                                       |                                       |                                       |
|                                                                   | 2016                                     | 2040 Forecast                            | 2040 Better Scenario                     | 2040 Worse Scenario                      | 2016                                  | 2040 Forecast                         | 2040 Better Scenario                  | 2040 Worse Scenario                   |
| All causes                                                        | 43,616.04<br>(32,832.92 to<br>57,305.69) | 33,286.92<br>(19,693.25 to<br>51,615.83) | 23,769.86<br>(13,842.55 to<br>37,610.27) | 41,164.19<br>(24,413.73 to<br>62,866.07) | 1,997.04<br>(1,541.91 to<br>2,591.65) | 1,864.40<br>(1,363.53 to<br>2,439.54) | 1,405.24<br>(1,018.66 to<br>1,909.98) | 2,172.58<br>(1,593.40 to<br>2,825.60) |
| Communicable, maternal, neonatal, and nutritional diseases        | 3,364.23<br>(2,827.84 to<br>4,060.96)    | 1,863.18<br>(1,235.50 to<br>2,909.32)    | 1,034.82<br>(679.23 to<br>1,587.86)      | 2,706.38<br>(1,803.71 to<br>4,129.84)    | 79.80<br>(64.62 to<br>98.97)          | 54.41<br>(37.79 to<br>83.65)          | 33.42<br>(23.39 to<br>49.47)          | 74.64<br>(50.86 to<br>113.61)         |
| HIV/AIDS and tuberculosis                                         | 1,409.31<br>(1,228.50 to<br>1,629.08)    | 724.15<br>(532.89 to<br>1,120.07)        | 309.60<br>(230.83 to<br>429.71)          | 1,259.49<br>(860.25 to<br>1,801.96)      | 30.87<br>(26.44 to<br>36.29)          | 15.62<br>(11.01 to<br>25.60)          | 6.32<br>(4.52 to<br>9.10)             | 27.73<br>(18.04 to<br>42.13)          |
| Tuberculosis                                                      | 504.14<br>(346.93 to<br>714.20)          | 179.64<br>(60.84 to<br>459.22)           | 60.75<br>(21.00 to<br>153.04)            | 252.30<br>(76.32 to<br>570.16)           | 13.12<br>(9.08 to<br>18.41)           | 5.20<br>(2.07 to<br>12.40)            | 1.81<br>(0.72 to<br>4.20)             | 6.62<br>(2.54 to<br>15.02)            |
| HIV/AIDS                                                          | 905.16<br>(825.91 to<br>999.23)          | 544.51<br>(410.50 to<br>846.75)          | 248.85<br>(186.29 to<br>318.22)          | 1,027.18<br>(697.28 to<br>1,563.98)      | 17.75<br>(16.23 to<br>19.58)          | 10.42<br>(7.62 to<br>17.55)           | 4.51<br>(3.29 to<br>5.83)             | 21.11<br>(13.42 to<br>35.06)          |
| Diarrhea, lower respiratory, and other common infectious diseases | 1,374.55<br>(1,025.10 to<br>1,819.45)    | 934.47<br>(470.39 to<br>1,745.52)        | 582.66<br>(305.31 to<br>1,039.76)        | 1,219.59<br>(586.12 to<br>2,310.08)      | 41.16<br>(30.30 to<br>54.59)          | 35.69<br>(21.87 to<br>58.47)          | 24.71<br>(16.45 to<br>38.32)          | 43.59<br>(25.89 to<br>73.57)          |
| Diarrheal diseases                                                | 20.86<br>(16.33 to<br>26.95)             | 22.01<br>(4.68 to<br>75.01)              | 31.82<br>(8.86 to<br>92.56)              | 24.96<br>(4.92 to<br>88.32)              | 0.44<br>(0.35 to<br>0.54)             | 0.95<br>(0.22 to<br>3.00)             | 1.56<br>(0.51 to<br>4.21)             | 0.96<br>(0.21 to<br>3.20)             |
| Intestinal infectious diseases                                    | 0.37<br>(0.12 to<br>0.87)                | 0.32<br>(0.10 to<br>0.78)                | 0.41<br>(0.12 to<br>1.00)                | 0.30<br>(0.10 to<br>0.72)                | 0.01<br>(0.00 to<br>0.02)             | 0.01<br>(0.00 to<br>0.02)             | 0.01<br>(0.00 to<br>0.03)             | 0.01<br>(0.00 to<br>0.02)             |
| Typhoid fever                                                     | 0.21<br>(0.07 to<br>0.49)                | 0.23<br>(0.07 to<br>0.55)                | 0.34<br>(0.10 to<br>0.80)                | 0.21<br>(0.06 to<br>0.51)                | 0.00<br>(0.00 to<br>0.01)             | 0.01<br>(0.00 to<br>0.01)             | 0.01<br>(0.00 to<br>0.02)             | 0.01<br>(0.00 to<br>0.01)             |
| Paratyphoid fever                                                 | 0.15<br>(0.04 to<br>0.39)                | 0.09<br>(0.02 to<br>0.24)                | 0.07<br>(0.02 to<br>0.20)                | 0.09<br>(0.02 to<br>0.25)                | 0.00<br>(0.00 to<br>0.01)             | 0.00<br>(0.00 to<br>0.01)             | 0.00<br>(0.00 to<br>0.01)             | 0.00<br>(0.00 to<br>0.01)             |
| Other intestinal infectious diseases                              | 0.01<br>(0.00 to<br>0.02)                | 0.00<br>(0.00 to<br>0.01)                | 0.00<br>(0.00 to<br>0.01)                | 0.00<br>(0.00 to<br>0.01)                | 0.00<br>(0.00 to<br>0.00)             | 0.00<br>(0.00 to<br>0.00)             | 0.00<br>(0.00 to<br>0.00)             | 0.00<br>(0.00 to<br>0.00)             |
| Lower respiratory infections                                      | 1,221.48<br>(890.90 to<br>1,624.71)      | 834.61<br>(403.97 to<br>1,594.29)        | 485.89<br>(247.41 to<br>923.90)          | 1,111.72<br>(514.28 to<br>2,170.84)      | 37.61<br>(27.72 to<br>50.03)          | 32.52<br>(19.57 to<br>53.84)          | 21.16<br>(13.36 to<br>33.69)          | 40.42<br>(23.15 to<br>70.57)          |
| Upper respiratory infections                                      | 0.79<br>(0.39 to<br>1.44)                | 0.48<br>(0.17 to<br>1.01)                | 0.23<br>(0.09 to<br>0.50)                | 0.50<br>(0.17 to<br>1.08)                | 0.03<br>(0.01 to<br>0.05)             | 0.02<br>(0.01 to<br>0.05)             | 0.01<br>(0.00 to<br>0.02)             | 0.02<br>(0.01 to<br>0.05)             |
| Otitis media                                                      | 0.11<br>(0.07 to<br>0.16)                | 0.03<br>(0.01 to<br>0.06)                | 0.03<br>(0.01 to<br>0.07)                | 0.03<br>(0.01 to<br>0.06)                | 0.00<br>(0.00 to<br>0.00)             | 0.00<br>(0.00 to<br>0.00)             | 0.00<br>(0.00 to<br>0.00)             | 0.00<br>(0.00 to<br>0.00)             |
| Meningitis                                                        | 67.68<br>(52.46 to<br>84.97)             | 22.20<br>(13.39 to<br>34.13)             | 14.09<br>(8.17 to<br>22.02)              | 24.48<br>(14.75 to<br>37.13)             | 1.53<br>(1.16 to<br>2.02)             | 0.61<br>(0.39 to<br>0.90)             | 0.42<br>(0.26 to<br>0.62)             | 0.63<br>(0.40 to<br>0.91)             |
| Pneumococcal meningitis                                           | 4.38<br>(3.19 to<br>5.89)                | 1.96<br>(1.10 to<br>3.20)                | 1.94<br>(1.05 to<br>3.24)                | 2.03<br>(1.16 to<br>3.30)                | 0.12<br>(0.08 to<br>0.16)             | 0.06<br>(0.04 to<br>0.09)             | 0.06<br>(0.04 to<br>0.10)             | 0.06<br>(0.04 to<br>0.09)             |
| H influenzae type B meningitis                                    | 5.29<br>(4.15 to<br>6.67)                | 3.57<br>(1.62 to<br>7.47)                | 2.40<br>(1.34 to<br>4.10)                | 5.08<br>(1.84 to<br>11.67)               | 0.11<br>(0.09 to<br>0.15)             | 0.07<br>(0.04 to<br>0.12)             | 0.06<br>(0.04 to<br>0.09)             | 0.09<br>(0.05 to<br>0.17)             |
| Meningococcal meningitis                                          | 36.30<br>(28.76 to<br>45.10)             | 9.49<br>(5.56 to<br>15.01)               | 5.62<br>(3.23 to<br>8.80)                | 9.92<br>(5.70 to<br>15.42)               | 0.73<br>(0.56 to<br>0.94)             | 0.25<br>(0.16 to<br>0.37)             | 0.16<br>(0.10 to<br>0.23)             | 0.25<br>(0.15 to<br>0.38)             |
| Other meningitis                                                  | 21.70<br>(15.72 to<br>28.98)             | 7.19<br>(3.94 to<br>12.02)               | 4.12<br>(2.11 to<br>7.03)                | 7.46<br>(4.02 to<br>12.46)               | 0.57<br>(0.41 to<br>0.77)             | 0.23<br>(0.13 to<br>0.35)             | 0.14<br>(0.08 to<br>0.21)             | 0.23<br>(0.14 to<br>0.35)             |
| Encephalitis                                                      | 60.36<br>(43.74 to<br>92.96)             | 47.00<br>(28.70 to<br>78.05)             | 44.97<br>(26.19 to<br>75.59)             | 46.19<br>(28.43 to<br>76.21)             | 1.49<br>(1.05 to<br>2.25)             | 1.44<br>(0.93 to<br>2.22)             | 1.45<br>(0.91 to<br>2.21)             | 1.37<br>(0.90 to<br>2.07)             |

|                |                           |                            |                            |                             |                           |                           |                           |                           |
|----------------|---------------------------|----------------------------|----------------------------|-----------------------------|---------------------------|---------------------------|---------------------------|---------------------------|
| Diphtheria     | 0.23<br>(0.14 to<br>0.36) | 0.06<br>(0.03 to<br>0.12)  | 0.05<br>(0.02 to<br>0.12)  | 0.07<br>(0.03 to<br>0.13)   | 0.00<br>(0.00 to<br>0.01) | 0.00<br>(0.00 to<br>0.00) | 0.00<br>(0.00 to<br>0.00) | 0.00<br>(0.00 to<br>0.00) |
| Whooping cough | 0.76<br>(0.28 to<br>2.41) | 0.53<br>(0.06 to<br>1.75)  | 0.07<br>(0.02 to<br>0.25)  | 0.56<br>(0.06 to<br>1.97)   | 0.01<br>(0.00 to<br>0.03) | 0.01<br>(0.00 to<br>0.02) | 0.00<br>(0.00 to<br>0.00) | 0.01<br>(0.00 to<br>0.02) |
| Tetanus        | 0.12<br>(0.08 to<br>0.19) | 0.01<br>(0.01 to<br>0.02)  | 0.01<br>(0.01 to<br>0.02)  | 0.01<br>(0.01 to<br>0.02)   | 0.00<br>(0.00 to<br>0.01) | 0.00<br>(0.00 to<br>0.00) | 0.00<br>(0.00 to<br>0.00) | 0.00<br>(0.00 to<br>0.00) |
| Measles        | 0.27<br>(0.18 to<br>0.37) | 6.73<br>(0.02 to<br>36.41) | 4.76<br>(0.02 to<br>24.97) | 10.27<br>(0.03 to<br>57.85) | 0.00<br>(0.00 to<br>0.00) | 0.11<br>(0.00 to<br>0.70) | 0.08<br>(0.00 to<br>0.46) | 0.16<br>(0.00 to<br>0.90) |



| Russia                                                |                                        |                                        |                                       |                                        |                                      |                                      |                                      |                                      |
|-------------------------------------------------------|----------------------------------------|----------------------------------------|---------------------------------------|----------------------------------------|--------------------------------------|--------------------------------------|--------------------------------------|--------------------------------------|
| Cause                                                 | YLLs (in 1000s)                        |                                        |                                       |                                        | Deaths (in 1000s)                    |                                      |                                      |                                      |
|                                                       | 2016                                   | 2040 Forecast                          | 2040 Better Scenario                  | 2040 Worse Scenario                    | 2016                                 | 2040 Forecast                        | 2040 Better Scenario                 | 2040 Worse Scenario                  |
| Varicella and herpes zoster                           | 1.52<br>(0.42 to 2.26)                 | 0.48<br>(0.16 to 0.86)                 | 0.33<br>(0.12 to 0.58)                | 0.50<br>(0.15 to 0.89)                 | 0.03<br>(0.01 to 0.05)               | 0.02<br>(0.01 to 0.04)               | 0.01<br>(0.01 to 0.03)               | 0.02<br>(0.01 to 0.03)               |
| <b>Neglected tropical diseases and malaria</b>        | <b>4.86</b><br><b>(2.41 to 6.58)</b>   | <b>3.21</b><br><b>(1.66 to 4.89)</b>   | <b>3.25</b><br><b>(1.65 to 5.13)</b>  | <b>3.16</b><br><b>(1.64 to 4.79)</b>   | <b>0.12</b><br><b>(0.07 to 0.15)</b> | <b>0.09</b><br><b>(0.06 to 0.13)</b> | <b>0.09</b><br><b>(0.05 to 0.14)</b> | <b>0.09</b><br><b>(0.05 to 0.12)</b> |
| Malaria                                               | 0.00<br>(0.00 to 0.00)                 | 0.00<br>(0.00 to 0.00)                 | 0.00<br>(0.00 to 0.00)                | 0.00<br>(0.00 to 0.00)                 | 0.00<br>(0.00 to 0.00)               | 0.00<br>(0.00 to 0.00)               | 0.00<br>(0.00 to 0.00)               | 0.00<br>(0.00 to 0.00)               |
| Chagas disease                                        | 0.00<br>(0.00 to 0.00)                 | 0.00<br>(0.00 to 0.00)                 | 0.00<br>(0.00 to 0.00)                | 0.00<br>(0.00 to 0.00)                 | 0.00<br>(0.00 to 0.00)               | 0.00<br>(0.00 to 0.00)               | 0.00<br>(0.00 to 0.00)               | 0.00<br>(0.00 to 0.00)               |
| Leishmaniasis                                         | 0.00<br>(0.00 to 0.00)                 | 0.00<br>(0.00 to 0.00)                 | 0.00<br>(0.00 to 0.00)                | 0.00<br>(0.00 to 0.00)                 | 0.00<br>(0.00 to 0.00)               | 0.00<br>(0.00 to 0.00)               | 0.00<br>(0.00 to 0.00)               | 0.00<br>(0.00 to 0.00)               |
| African trypanosomiasis                               | 0.00<br>(0.00 to 0.00)                 | 0.00<br>(0.00 to 0.00)                 | 0.00<br>(0.00 to 0.00)                | 0.00<br>(0.00 to 0.00)                 | 0.00<br>(0.00 to 0.00)               | 0.00<br>(0.00 to 0.00)               | 0.00<br>(0.00 to 0.00)               | 0.00<br>(0.00 to 0.00)               |
| Schistosomiasis                                       | 0.00<br>(0.00 to 0.00)                 | 0.00<br>(0.00 to 0.00)                 | 0.00<br>(0.00 to 0.00)                | 0.00<br>(0.00 to 0.00)                 | 0.00<br>(0.00 to 0.00)               | 0.00<br>(0.00 to 0.00)               | 0.00<br>(0.00 to 0.00)               | 0.00<br>(0.00 to 0.00)               |
| Cysticercosis                                         | 0.13<br>(0.09 to 0.18)                 | 0.03<br>(0.02 to 0.05)                 | 0.03<br>(0.02 to 0.05)                | 0.03<br>(0.02 to 0.05)                 | 0.00<br>(0.00 to 0.01)               | 0.00<br>(0.00 to 0.00)               | 0.00<br>(0.00 to 0.00)               | 0.00<br>(0.00 to 0.00)               |
| Cystic echinococcosis                                 | 1.05<br>(0.73 to 1.44)                 | 0.53<br>(0.33 to 0.81)                 | 0.36<br>(0.21 to 0.57)                | 0.53<br>(0.32 to 0.80)                 | 0.04<br>(0.03 to 0.05)               | 0.02<br>(0.02 to 0.02)               | 0.02<br>(0.01 to 0.02)               | 0.02<br>(0.02 to 0.03)               |
| Dengue                                                | 0.00<br>(0.00 to 0.00)                 | 0.00<br>(0.00 to 0.00)                 | 0.00<br>(0.00 to 0.00)                | 0.00<br>(0.00 to 0.00)                 | 0.00<br>(0.00 to 0.00)               | 0.00<br>(0.00 to 0.00)               | 0.00<br>(0.00 to 0.00)               | 0.00<br>(0.00 to 0.00)               |
| Yellow fever                                          | 0.00<br>(0.00 to 0.00)                 | 0.00<br>(0.00 to 0.00)                 | 0.00<br>(0.00 to 0.00)                | 0.00<br>(0.00 to 0.00)                 | 0.00<br>(0.00 to 0.00)               | 0.00<br>(0.00 to 0.00)               | 0.00<br>(0.00 to 0.00)               | 0.00<br>(0.00 to 0.00)               |
| Rabies                                                | 0.12<br>(0.09 to 0.17)                 | 0.07<br>(0.04 to 0.11)                 | 0.05<br>(0.03 to 0.09)                | 0.07<br>(0.04 to 0.11)                 | 0.00<br>(0.00 to 0.00)               | 0.00<br>(0.00 to 0.00)               | 0.00<br>(0.00 to 0.00)               | 0.00<br>(0.00 to 0.00)               |
| Intestinal nematode infections                        | 0.00<br>(0.00 to 0.00)                 | 0.00<br>(0.00 to 0.00)                 | 0.00<br>(0.00 to 0.00)                | 0.00<br>(0.00 to 0.00)                 | 0.00<br>(0.00 to 0.00)               | 0.00<br>(0.00 to 0.00)               | 0.00<br>(0.00 to 0.00)               | 0.00<br>(0.00 to 0.00)               |
| Other neglected tropical diseases                     | 3.56<br>(1.21 to 4.96)                 | 2.58<br>(1.02 to 3.96)                 | 2.80<br>(1.14 to 4.46)                | 2.53<br>(1.00 to 3.83)                 | 0.07<br>(0.03 to 0.10)               | 0.07<br>(0.03 to 0.10)               | 0.07<br>(0.04 to 0.11)               | 0.06<br>(0.03 to 0.09)               |
| <b>Maternal disorders</b>                             | <b>18.33</b><br><b>(9.72 to 31.96)</b> | <b>11.99</b><br><b>(4.13 to 26.91)</b> | <b>8.55</b><br><b>(2.86 to 20.00)</b> | <b>12.61</b><br><b>(4.25 to 28.83)</b> | <b>0.34</b><br><b>(0.18 to 0.59)</b> | <b>0.22</b><br><b>(0.08 to 0.49)</b> | <b>0.15</b><br><b>(0.05 to 0.36)</b> | <b>0.23</b><br><b>(0.08 to 0.52)</b> |
| Maternal hemorrhage                                   | 3.39<br>(1.67 to 6.05)                 | 1.90<br>(0.63 to 4.58)                 | 1.38<br>(0.44 to 3.24)                | 1.98<br>(0.62 to 4.79)                 | 0.06<br>(0.03 to 0.11)               | 0.03<br>(0.01 to 0.08)               | 0.03<br>(0.01 to 0.06)               | 0.04<br>(0.01 to 0.09)               |
| Maternal sepsis and other maternal infections         | 1.32<br>(0.65 to 2.39)                 | 0.65<br>(0.21 to 1.52)                 | 0.46<br>(0.15 to 1.09)                | 0.68<br>(0.21 to 1.61)                 | 0.02<br>(0.01 to 0.04)               | 0.01<br>(0.00 to 0.03)               | 0.01<br>(0.00 to 0.02)               | 0.01<br>(0.00 to 0.03)               |
| Maternal hypertensive disorders                       | 2.27<br>(1.16 to 3.98)                 | 1.37<br>(0.45 to 3.17)                 | 0.96<br>(0.31 to 2.29)                | 1.44<br>(0.46 to 3.35)                 | 0.04<br>(0.02 to 0.07)               | 0.02<br>(0.01 to 0.05)               | 0.02<br>(0.01 to 0.04)               | 0.02<br>(0.01 to 0.06)               |
| Maternal obstructed labor and uterine rupture         | 0.27<br>(0.11 to 0.52)                 | 0.11<br>(0.04 to 0.29)                 | 0.08<br>(0.02 to 0.20)                | 0.12<br>(0.04 to 0.32)                 | 0.01<br>(0.00 to 0.01)               | 0.00<br>(0.00 to 0.01)               | 0.00<br>(0.00 to 0.00)               | 0.00<br>(0.00 to 0.01)               |
| Maternal abortion, miscarriage, and ectopic pregnancy | 3.34<br>(1.74 to 6.02)                 | 3.06<br>(0.96 to 7.60)                 | 2.15<br>(0.66 to 5.44)                | 3.23<br>(1.00 to 8.18)                 | 0.06<br>(0.03 to 0.11)               | 0.06<br>(0.02 to 0.14)               | 0.04<br>(0.01 to 0.10)               | 0.06<br>(0.02 to 0.15)               |



| Russia                                                                  |                                     |                                    |                                    |                                    |                               |                               |                               |                               |
|-------------------------------------------------------------------------|-------------------------------------|------------------------------------|------------------------------------|------------------------------------|-------------------------------|-------------------------------|-------------------------------|-------------------------------|
| Cause                                                                   | YLLs (in 1000s)                     |                                    |                                    |                                    | Deaths (in 1000s)             |                               |                               |                               |
|                                                                         | 2016                                | 2040 Forecast                      | 2040 Better Scenario               | 2040 Worse Scenario                | 2016                          | 2040 Forecast                 | 2040 Better Scenario          | 2040 Worse Scenario           |
| <b>Neonatal disorders</b>                                               | <b>484.49</b><br>(414.68 to 546.72) | <b>160.12</b><br>(76.48 to 327.17) | <b>104.12</b><br>(51.29 to 212.18) | <b>182.22</b><br>(87.04 to 377.21) | <b>5.60</b><br>(4.79 to 6.32) | <b>1.85</b><br>(0.89 to 3.78) | <b>1.20</b><br>(0.59 to 2.45) | <b>2.11</b><br>(1.01 to 4.36) |
| Neonatal preterm birth                                                  | 178.29<br>(143.12 to 213.04)        | 41.80<br>(22.91 to 69.21)          | 21.10<br>(11.94 to 33.95)          | 51.39<br>(27.59 to 85.89)          | 2.06<br>(1.65 to 2.46)        | 0.48<br>(0.27 to 0.80)        | 0.24<br>(0.14 to 0.39)        | 0.59<br>(0.32 to 0.99)        |
| Neonatal encephalopathy due to birth asphyxia and trauma                | 125.61<br>(98.30 to 152.68)         | 34.38<br>(13.92 to 78.30)          | 19.01<br>(8.10 to 40.94)           | 39.00<br>(15.86 to 88.90)          | 1.45<br>(1.14 to 1.76)        | 0.40<br>(0.16 to 0.90)        | 0.22<br>(0.09 to 0.47)        | 0.45<br>(0.18 to 1.03)        |
| Neonatal sepsis and other neonatal infections                           | 77.02<br>(56.48 to 122.41)          | 30.38<br>(13.66 to 64.23)          | 19.33<br>(8.96 to 39.24)           | 33.90<br>(14.77 to 72.47)          | 0.89<br>(0.65 to 1.41)        | 0.35<br>(0.16 to 0.74)        | 0.22<br>(0.10 to 0.45)        | 0.39<br>(0.17 to 0.84)        |
| Hemolytic disease and other neonatal jaundice                           | 5.48<br>(3.65 to 8.21)              | 1.77<br>(0.60 to 4.80)             | 1.08<br>(0.38 to 2.92)             | 1.99<br>(0.66 to 5.32)             | 0.06<br>(0.04 to 0.09)        | 0.02<br>(0.01 to 0.06)        | 0.01<br>(0.00 to 0.03)        | 0.02<br>(0.01 to 0.06)        |
| Other neonatal disorders                                                | 98.08<br>(76.70 to 121.82)          | 51.80<br>(19.42 to 127.60)         | 43.61<br>(17.33 to 105.43)         | 55.93<br>(20.69 to 138.55)         | 1.13<br>(0.89 to 1.41)        | 0.60<br>(0.22 to 1.47)        | 0.50<br>(0.20 to 1.22)        | 0.65<br>(0.24 to 1.60)        |
| <b>Nutritional deficiencies</b>                                         | <b>20.04</b><br>(14.90 to 26.37)    | <b>10.58</b><br>(6.44 to 15.61)    | <b>10.78</b><br>(6.38 to 16.26)    | <b>10.20</b><br>(6.37 to 14.84)    | <b>0.75</b><br>(0.56 to 0.99) | <b>0.45</b><br>(0.33 to 0.60) | <b>0.48</b><br>(0.34 to 0.65) | <b>0.42</b><br>(0.31 to 0.55) |
| Protein-energy malnutrition                                             | 6.71<br>(3.86 to 10.52)             | 4.18<br>(2.19 to 6.96)             | 5.01<br>(2.60 to 8.33)             | 3.97<br>(2.11 to 6.58)             | 0.21<br>(0.12 to 0.37)        | 0.16<br>(0.09 to 0.26)        | 0.20<br>(0.12 to 0.32)        | 0.14<br>(0.08 to 0.23)        |
| Iodine deficiency                                                       | 0.75<br>(0.06 to 2.02)              | 0.67<br>(0.05 to 1.95)             | 0.62<br>(0.04 to 1.92)             | 0.64<br>(0.05 to 1.85)             | 0.03<br>(0.00 to 0.08)        | 0.03<br>(0.00 to 0.09)        | 0.03<br>(0.00 to 0.09)        | 0.03<br>(0.00 to 0.09)        |
| Dietary iron deficiency                                                 | 1.16<br>(0.76 to 2.14)              | 1.08<br>(0.62 to 2.05)             | 1.21<br>(0.68 to 2.43)             | 1.05<br>(0.61 to 1.98)             | 0.03<br>(0.02 to 0.07)        | 0.03<br>(0.02 to 0.08)        | 0.04<br>(0.02 to 0.10)        | 0.03<br>(0.02 to 0.07)        |
| Other nutritional deficiencies                                          | 11.41<br>(7.29 to 15.64)            | 4.66<br>(2.36 to 7.26)             | 3.93<br>(1.86 to 6.27)             | 4.54<br>(2.34 to 6.91)             | 0.48<br>(0.31 to 0.65)        | 0.23<br>(0.12 to 0.32)        | 0.21<br>(0.10 to 0.30)        | 0.21<br>(0.12 to 0.30)        |
| <b>Other communicable, maternal, neonatal, and nutritional diseases</b> | <b>52.67</b><br>(36.41 to 66.26)    | <b>18.66</b><br>(12.05 to 27.40)   | <b>15.86</b><br>(10.20 to 23.11)   | <b>19.09</b><br>(12.36 to 27.57)   | <b>0.96</b><br>(0.72 to 1.21) | <b>0.49</b><br>(0.36 to 0.65) | <b>0.46</b><br>(0.33 to 0.62) | <b>0.48</b><br>(0.35 to 0.63) |
| Sexually transmitted infections excluding HIV                           | 9.89<br>(5.68 to 15.51)             | 2.15<br>(1.04 to 3.90)             | 1.74<br>(0.82 to 3.26)             | 2.21<br>(1.07 to 4.08)             | 0.21<br>(0.13 to 0.32)        | 0.06<br>(0.03 to 0.11)        | 0.06<br>(0.03 to 0.10)        | 0.06<br>(0.03 to 0.11)        |
| Syphilis                                                                | 5.48<br>(2.61 to 10.13)             | 0.91<br>(0.40 to 1.80)             | 0.61<br>(0.27 to 1.24)             | 0.96<br>(0.42 to 1.89)             | 0.09<br>(0.05 to 0.15)        | 0.02<br>(0.01 to 0.05)        | 0.01<br>(0.01 to 0.02)        | 0.02<br>(0.01 to 0.03)        |
| Chlamydial infection                                                    | 0.83<br>(0.42 to 1.41)              | 0.23<br>(0.09 to 0.47)             | 0.21<br>(0.08 to 0.45)             | 0.23<br>(0.09 to 0.47)             | 0.02<br>(0.01 to 0.04)        | 0.01<br>(0.01 to 0.04)        | 0.01<br>(0.00 to 0.01)        | 0.01<br>(0.00 to 0.01)        |
| Gonococcal infection                                                    | 2.36<br>(1.20 to 3.97)              | 0.68<br>(0.27 to 1.40)             | 0.62<br>(0.24 to 1.27)             | 0.68<br>(0.27 to 1.37)             | 0.07<br>(0.04 to 0.11)        | 0.02<br>(0.01 to 0.04)        | 0.02<br>(0.01 to 0.04)        | 0.02<br>(0.01 to 0.04)        |
| Other sexually transmitted infections                                   | 1.22<br>(0.62 to 2.07)              | 0.33<br>(0.12 to 0.70)             | 0.30<br>(0.11 to 0.64)             | 0.33<br>(0.12 to 0.71)             | 0.03<br>(0.02 to 0.05)        | 0.03<br>(0.00 to 0.02)        | 0.01<br>(0.00 to 0.02)        | 0.01<br>(0.00 to 0.02)        |
| Acute hepatitis                                                         | 10.06<br>(7.58 to 13.32)            | 3.62<br>(2.10 to 5.98)             | 2.26<br>(1.26 to 3.81)             | 3.74<br>(2.09 to 5.99)             | 0.25<br>(0.18 to 0.33)        | 0.11<br>(0.07 to 0.17)        | 0.07<br>(0.04 to 0.11)        | 0.11<br>(0.07 to 0.17)        |
| Acute hepatitis A                                                       | 1.47<br>(1.04 to 1.98)              | 0.30<br>(0.16 to 0.56)             | 0.20<br>(0.11 to 0.37)             | 0.32<br>(0.16 to 0.58)             | 0.02<br>(0.01 to 0.03)        | 0.01<br>(0.00 to 0.01)        | 0.00<br>(0.00 to 0.01)        | 0.01<br>(0.00 to 0.01)        |
| Acute hepatitis B                                                       | 7.62<br>(5.36 to 10.52)             | 2.93<br>(1.57 to 5.03)             | 1.81<br>(0.93 to 3.14)             | 3.02<br>(1.59 to 5.10)             | 0.20<br>(0.14 to 0.27)        | 0.09<br>(0.05 to 0.14)        | 0.06<br>(0.03 to 0.10)        | 0.09<br>(0.05 to 0.14)        |

|                                       |                                                               |                                                               |                                                               |                                                               |                                                            |                                                            |                                                          |                                                            |
|---------------------------------------|---------------------------------------------------------------|---------------------------------------------------------------|---------------------------------------------------------------|---------------------------------------------------------------|------------------------------------------------------------|------------------------------------------------------------|----------------------------------------------------------|------------------------------------------------------------|
|                                       | 0.27<br>(0.18 to<br>0.40)                                     | 0.12<br>(0.06 to<br>0.20)                                     | 0.07<br>(0.04 to<br>0.13)                                     | 0.12<br>(0.06 to<br>0.20)                                     | 0.01<br>(0.01 to<br>0.01)                                  | 0.00<br>(0.00 to<br>0.01)                                  | 0.00<br>(0.00 to<br>0.00)                                | 0.00<br>(0.00 to<br>0.01)                                  |
| Acute hepatitis C                     |                                                               |                                                               |                                                               |                                                               |                                                            |                                                            |                                                          |                                                            |
|                                       | 0.71<br>(0.51 to<br>0.97)                                     | 0.27<br>(0.16 to<br>0.43)                                     | 0.17<br>(0.10 to<br>0.27)                                     | 0.28<br>(0.16 to<br>0.45)                                     | 0.02<br>(0.01 to<br>0.02)                                  | 0.01<br>(0.01 to<br>0.01)                                  | 0.01<br>(0.00 to<br>0.01)                                | 0.01<br>(0.01 to<br>0.01)                                  |
| Acute hepatitis E                     |                                                               |                                                               |                                                               |                                                               |                                                            |                                                            |                                                          |                                                            |
|                                       | 32.72<br>(19.65 to<br>43.91)                                  | 12.89<br>(7.69 to<br>19.06)                                   | 11.86<br>(7.14 to<br>17.21)                                   | 13.14<br>(7.71 to<br>19.53)                                   | 0.50<br>(0.33 to<br>0.64)                                  | 0.32<br>(0.23 to<br>0.41)                                  | 0.33<br>(0.24 to<br>0.43)                                | 0.31<br>(0.22 to<br>0.39)                                  |
| Other unspecified infectious diseases |                                                               |                                                               |                                                               |                                                               |                                                            |                                                            |                                                          |                                                            |
| <b>Non-communicable diseases</b>      | <b>33,145.74</b><br><b>(24,800.89 to</b><br><b>43,683.94)</b> | <b>26,917.20</b><br><b>(15,994.80 to</b><br><b>42,041.46)</b> | <b>19,526.21</b><br><b>(11,587.46 to</b><br><b>30,812.68)</b> | <b>32,930.26</b><br><b>(19,366.99 to</b><br><b>50,855.65)</b> | <b>1,742.52</b><br><b>(1,339.35 to</b><br><b>2,250.68)</b> | <b>1,682.18</b><br><b>(1,247.46 to</b><br><b>2,233.39)</b> | <b>1,276.51</b><br><b>(926.46 to</b><br><b>1,718.55)</b> | <b>1,949.22</b><br><b>(1,432.59 to</b><br><b>2,527.78)</b> |

| Russia                               |                                           |                                            |                                           |                                            |                                     |                                     |                                     |                                     |
|--------------------------------------|-------------------------------------------|--------------------------------------------|-------------------------------------------|--------------------------------------------|-------------------------------------|-------------------------------------|-------------------------------------|-------------------------------------|
| Cause                                | YLLs (in 1000s)                           |                                            |                                           |                                            | Deaths (in 1000s)                   |                                     |                                     |                                     |
|                                      | 2016                                      | 2040 Forecast                              | 2040 Better Scenario                      | 2040 Worse Scenario                        | 2016                                | 2040 Forecast                       | 2040 Better Scenario                | 2040 Worse Scenario                 |
| <b>Neoplasms</b>                     | <b>6,964.94</b><br>(5,182.54 to 9,346.83) | <b>6,735.03</b><br>(3,868.65 to 10,431.51) | <b>5,507.77</b><br>(3,103.01 to 8,643.86) | <b>7,661.51</b><br>(4,370.86 to 11,700.08) | <b>305.54</b><br>(231.76 to 403.97) | <b>342.08</b><br>(237.22 to 466.25) | <b>295.58</b><br>(202.25 to 407.53) | <b>374.32</b><br>(260.12 to 508.22) |
| Lip and oral cavity cancer           | 151.64<br>(104.41 to 205.40)              | 145.87<br>(50.10 to 314.01)                | 88.07<br>(31.66 to 190.29)                | 200.52<br>(70.25 to 403.88)                | 6.01<br>(4.27 to 8.05)              | 6.38<br>(2.84 to 12.48)             | 4.13<br>(1.95 to 7.75)              | 8.51<br>(3.76 to 15.94)             |
| Nasopharynx cancer                   | 18.12<br>(12.77 to 24.61)                 | 16.79<br>(5.70 to 37.60)                   | 8.67<br>(2.88 to 19.60)                   | 23.70<br>(7.91 to 49.30)                   | 0.64<br>(0.46 to 0.86)              | 0.64<br>(0.26 to 1.30)              | 0.35<br>(0.15 to 0.69)              | 0.89<br>(0.35 to 1.74)              |
| Other pharynx cancer                 | 99.61<br>(67.35 to 137.92)                | 101.53<br>(55.18 to 202.43)                | 94.10<br>(31.70 to 200.76)                | 111.73<br>(40.89 to 213.42)                | 3.69<br>(2.54 to 5.05)              | 4.07<br>(1.71 to 7.48)              | 3.86<br>(1.60 to 7.34)              | 4.42<br>(1.87 to 7.96)              |
| Esophageal cancer                    | 183.35<br>(127.37 to 246.80)              | 203.59<br>(78.76 to 441.01)                | 151.91<br>(60.89 to 318.78)               | 275.89<br>(105.49 to 614.97)               | 7.92<br>(5.67 to 10.46)             | 9.71<br>(4.64 to 19.40)             | 7.65<br>(3.83 to 14.18)             | 12.70<br>(5.82 to 26.03)            |
| Stomach cancer                       | 760.56<br>(564.48 to 1,018.21)            | 530.63<br>(290.99 to 853.21)               | 376.98<br>(209.39 to 611.64)              | 559.95<br>(306.68 to 892.03)               | 35.53<br>(26.85 to 46.38)           | 28.57<br>(18.98 to 40.78)           | 21.41<br>(13.98 to 30.92)           | 29.11<br>(19.53 to 41.78)           |
| Colon and rectum cancer              | 808.93<br>(594.83 to 1,072.63)            | 876.60<br>(509.70 to 1,374.50)             | 659.75<br>(377.24 to 1,045.46)            | 957.91<br>(568.30 to 1,496.89)             | 41.39<br>(30.94 to 54.14)           | 52.53<br>(34.80 to 77.32)           | 42.01<br>(27.15 to 63.08)           | 55.25<br>(36.56 to 82.03)           |
| Liver cancer                         | 234.35<br>(172.76 to 313.44)              | 307.01<br>(161.01 to 557.37)               | 298.28<br>(156.63 to 548.67)              | 387.04<br>(192.78 to 753.61)               | 10.64<br>(8.00 to 13.98)            | 15.89<br>(9.52 to 25.43)            | 16.45<br>(10.07 to 26.78)           | 18.98<br>(10.83 to 32.66)           |
| Liver cancer due to hepatitis B      | 89.63<br>(61.40 to 124.65)                | 112.12<br>(55.84 to 218.48)                | 115.91<br>(58.54 to 229.14)               | 132.64<br>(63.42 to 264.80)                | 3.84<br>(2.69 to 5.23)              | 5.50<br>(3.21 to 9.35)              | 6.00<br>(3.49 to 10.16)             | 6.21<br>(3.44 to 11.09)             |
| Liver cancer due to hepatitis C      | 25.31<br>(18.56 to 34.29)                 | 34.52<br>(18.62 to 59.12)                  | 36.64<br>(20.05 to 62.93)                 | 39.61<br>(20.76 to 71.70)                  | 1.32<br>(1.00 to 1.77)              | 2.06<br>(1.29 to 3.13)              | 2.32<br>(1.44 to 3.48)              | 2.25<br>(1.35 to 3.58)              |
| Liver cancer due to alcohol use      | 78.96<br>(56.87 to 107.60)                | 103.42<br>(53.76 to 185.87)                | 86.72<br>(45.37 to 152.62)                | 147.25<br>(72.36 to 278.40)                | 3.69<br>(2.71 to 4.97)              | 3.40<br>(3.16 to 8.59)              | 4.92<br>(2.90 to 7.79)              | 7.20<br>(4.10 to 11.91)             |
| Liver cancer due to other causes     | 40.46<br>(28.95 to 54.56)                 | 56.95<br>(28.23 to 109.83)                 | 59.02<br>(29.78 to 113.20)                | 67.54<br>(31.02 to 138.52)                 | 1.79<br>(1.31 to 2.36)              | 2.93<br>(1.62 to 5.04)              | 3.22<br>(1.87 to 5.39)              | 3.31<br>(1.74 to 6.09)              |
| Gallbladder and biliary tract cancer | 68.39<br>(49.90 to 93.88)                 | 59.86<br>(39.77 to 83.49)                  | 60.48<br>(38.51 to 87.67)                 | 56.21<br>(38.34 to 75.75)                  | 3.55<br>(2.61 to 4.81)              | 3.59<br>(2.74 to 4.47)              | 3.80<br>(2.76 to 4.91)              | 3.29<br>(2.59 to 4.03)              |
| Pancreatic cancer                    | 382.41<br>(283.75 to 518.02)              | 419.42<br>(247.24 to 653.99)               | 415.11<br>(241.50 to 670.39)              | 430.83<br>(254.66 to 678.78)               | 17.64<br>(13.26 to 25.58)           | 21.90<br>(15.29 to 30.96)           | 22.78<br>(15.50 to 32.28)           | 21.68<br>(15.13 to 30.59)           |
| Larynx cancer                        | 123.76<br>(83.68 to 173.19)               | 106.07<br>(51.50 to 279.94)                | 54.76<br>(16.30 to 148.60)                | 152.96<br>(46.69 to 372.67)                | 4.96<br>(3.44 to 6.83)              | 4.48<br>(1.64 to 10.56)             | 2.39<br>(0.90 to 5.81)              | 6.42<br>(2.34 to 14.31)             |
| Tracheal, bronchus, and lung cancer  | 1,203.92<br>(844.53 to 1,616.70)          | 1,142.88<br>(505.92 to 2,141.58)           | 765.10<br>(339.69 to 1,440.02)            | 1,644.79<br>(736.54 to 2,950.86)           | 52.15<br>(37.27 to 67.76)           | 54.16<br>(28.55 to 90.49)           | 38.19<br>(20.79 to 63.25)           | 75.87<br>(39.30 to 125.12)          |
| Malignant skin melanoma              | 112.27<br>(76.46 to 155.81)               | 116.47<br>(67.16 to 182.97)                | 149.80<br>(84.52 to 237.84)               | 107.66<br>(64.56 to 163.59)                | 4.39<br>(3.00 to 6.04)              | 5.44<br>(3.73 to 7.42)              | 7.34<br>(4.97 to 10.09)             | 4.88<br>(3.43 to 6.51)              |
| Non-melanoma skin cancer             | 40.45<br>(30.35 to 54.03)                 | 44.16<br>(31.48 to 57.44)                  | 35.97<br>(24.67 to 49.32)                 | 41.74<br>(30.39 to 52.85)                  | 2.23<br>(1.72 to 2.87)              | 3.11<br>(2.52 to 3.79)              | 2.73<br>(2.13 to 3.38)              | 2.84<br>(2.27 to 3.48)              |
| Breast cancer                        | 567.53<br>(351.77 to 898.63)              | 539.23<br>(259.90 to 1,044.35)             | 395.06<br>(189.52 to 747.26)              | 581.09<br>(285.91 to 1,107.04)             | 23.79<br>(15.14 to 36.68)           | 26.15<br>(15.72 to 42.99)           | 20.29<br>(11.99 to 33.16)           | 27.31<br>(16.12 to 44.85)           |
| Cervical cancer                      | 201.24<br>(117.61 to 327.51)              | 118.92<br>(53.20 to 249.14)                | 85.97<br>(36.98 to 173.47)                | 124.00<br>(55.23 to 260.57)                | 6.92<br>(4.21 to 10.89)             | 5.07<br>(2.85 to 8.96)              | 3.83<br>(2.11 to 6.61)              | 5.13<br>(2.89 to 9.09)              |

|                   |                                 |                                 |                                 |                                 |                             |                              |                              |                              |
|-------------------|---------------------------------|---------------------------------|---------------------------------|---------------------------------|-----------------------------|------------------------------|------------------------------|------------------------------|
|                   | 143.26<br>(88.15 to<br>221.11)  | 135.74<br>(70.05 to<br>224.05)  | 114.81<br>(57.44 to<br>194.52)  | 133.90<br>(71.35 to<br>214.23)  | 6.66<br>(4.20 to<br>10.17)  | 7.39<br>(4.65 to<br>10.88)   | 6.50<br>(3.92 to<br>9.89)    | 7.15<br>(4.62 to<br>10.11)   |
| Uterine cancer    |                                 |                                 |                                 |                                 |                             |                              |                              |                              |
| Ovarian cancer    | 217.84<br>(130.26 to<br>340.79) | 195.88<br>(92.08 to<br>368.76)  | 169.49<br>(78.19 to<br>327.09)  | 204.94<br>(97.67 to<br>385.38)  | 8.82<br>(5.32 to<br>13.61)  | 8.99<br>(4.98 to<br>15.01)   | 7.98<br>(4.30 to<br>13.79)   | 9.28<br>(5.12 to<br>15.68)   |
| Prostate cancer   | 204.08<br>(135.90 to<br>280.55) | 239.86<br>(165.43 to<br>308.89) | 225.66<br>(147.57 to<br>307.55) | 219.82<br>(157.63 to<br>277.80) | 11.84<br>(8.06 to<br>16.09) | 16.43<br>(12.66 to<br>19.88) | 16.35<br>(12.32 to<br>20.24) | 14.52<br>(10.54 to<br>17.90) |
| Testicular cancer | 13.61<br>(8.33 to<br>19.82)     | 8.97<br>(4.34 to<br>15.91)      | 7.20<br>(3.39 to<br>12.84)      | 8.85<br>(4.26 to<br>15.58)      | 0.34<br>(0.22 to<br>0.48)   | 8.28<br>(0.18 to<br>0.41)    | 0.24<br>(0.15 to<br>0.36)    | 0.26<br>(0.17 to<br>0.39)    |

| Russia                          |                                                     |                                                    |                                                   |                                                    |                                                |                                              |                                            |                                                |
|---------------------------------|-----------------------------------------------------|----------------------------------------------------|---------------------------------------------------|----------------------------------------------------|------------------------------------------------|----------------------------------------------|--------------------------------------------|------------------------------------------------|
| Cause                           | YLLs (in 1000s)                                     |                                                    |                                                   |                                                    | Deaths (in 1000s)                              |                                              |                                            |                                                |
|                                 | 2016                                                | 2040 Forecast                                      | 2040 Better Scenario                              | 2040 Worse Scenario                                | 2016                                           | 2040 Forecast                                | 2040 Better Scenario                       | 2040 Worse Scenario                            |
| Kidney cancer                   | 220.19<br>(160.30 to 293.70)                        | 236.63<br>(124.68 to 401.10)                       | 243.12<br>(129.60 to 421.89)                      | 240.08<br>(125.26 to 403.00)                       | 9.62<br>(7.13 to 12.56)                        | 11.81<br>(7.46 to 17.27)                     | 12.89<br>(8.18 to 19.22)                   | 11.53<br>(7.31 to 17.12)                       |
| Bladder cancer                  | 138.64<br>(101.99 to 184.07)                        | 150.70<br>(95.37 to 229.95)                        | 132.22<br>(83.20 to 201.13)                       | 159.32<br>(100.23 to 250.40)                       | 7.56<br>(5.71 to 9.83)                         | 9.70<br>(7.03 to 13.11)                      | 9.14<br>(6.65 to 12.07)                    | 9.80<br>(6.93 to 13.81)                        |
| Brain and nervous system cancer | 239.96<br>(177.32 to 321.53)                        | 235.00<br>(135.90 to 371.73)                       | 217.03<br>(120.24 to 360.25)                      | 229.08<br>(137.40 to 354.28)                       | 7.47<br>(5.42 to 10.13)                        | 8.40<br>(5.33 to 12.39)                      | 8.02<br>(4.92 to 12.26)                    | 8.00<br>(5.22 to 11.45)                        |
| Thyroid cancer                  | 25.61<br>(18.21 to 35.17)                           | 26.64<br>(15.42 to 42.31)                          | 22.90<br>(12.68 to 37.71)                         | 28.70<br>(16.32 to 47.25)                          | 1.26<br>(0.90 to 1.73)                         | 1.50<br>(0.97 to 2.23)                       | 1.34<br>(0.85 to 2.01)                     | 1.56<br>(0.99 to 2.36)                         |
| Mesothelioma                    | 16.64<br>(11.93 to 22.55)                           | 18.39<br>(11.52 to 27.40)                          | 19.84<br>(11.87 to 30.37)                         | 17.25<br>(11.11 to 25.15)                          | 0.69<br>(0.51 to 0.92)                         | 0.89<br>(0.65 to 1.20)                       | 1.01<br>(0.71 to 1.38)                     | 0.82<br>(0.60 to 1.07)                         |
| Hodgkin lymphoma                | 38.59<br>(27.34 to 53.76)                           | 24.33<br>(13.55 to 39.09)                          | 16.80<br>(8.84 to 27.90)                          | 24.61<br>(13.51 to 40.34)                          | 1.07<br>(0.77 to 1.47)                         | 0.78<br>(0.49 to 1.16)                       | 0.56<br>(0.33 to 0.87)                     | 0.77<br>(0.48 to 1.13)                         |
| Non-Hodgkin lymphoma            | 125.90<br>(90.81 to 169.14)                         | 110.07<br>(66.22 to 166.21)                        | 96.40<br>(57.12 to 149.19)                        | 112.58<br>(68.22 to 168.78)                        | 4.75<br>(3.48 to 6.41)                         | 5.00<br>(3.47 to 7.02)                       | 4.59<br>(3.09 to 6.65)                     | 4.96<br>(3.49 to 6.81)                         |
| Multiple myeloma                | 60.96<br>(43.24 to 84.00)                           | 63.32<br>(35.89 to 98.36)                          | 60.17<br>(33.28 to 96.08)                         | 64.82<br>(37.50 to 99.40)                          | 2.66<br>(1.92 to 3.65)                         | 3.12<br>(2.05 to 4.59)                       | 3.08<br>(1.94 to 4.68)                     | 3.12<br>(2.07 to 4.47)                         |
| Leukemia                        | 227.49<br>(172.09 to 298.91)                        | 204.88<br>(121.39 to 316.92)                       | 179.68<br>(104.75 to 283.45)                      | 223.79<br>(133.76 to 351.78)                       | 8.32<br>(6.25 to 10.94)                        | 9.08<br>(6.15 to 12.93)                      | 8.38<br>(5.54 to 11.87)                    | 9.58<br>(6.41 to 13.82)                        |
| Acute lymphoid leukemia         | 51.19<br>(39.41 to 66.32)                           | 36.23<br>(21.79 to 56.03)                          | 29.08<br>(17.27 to 45.61)                         | 40.04<br>(24.06 to 62.05)                          | 1.35<br>(1.01 to 1.77)                         | 1.20<br>(0.77 to 1.80)                       | 1.01<br>(1.50 to 1.50)                     | 1.30<br>(0.82 to 1.97)                         |
| Chronic lymphoid leukemia       | 38.61<br>(27.91 to 52.22)                           | 38.22<br>(22.93 to 60.63)                          | 36.17<br>(21.65 to 57.73)                         | 40.62<br>(24.31 to 65.53)                          | 1.96<br>(1.45 to 2.62)                         | 2.22<br>(1.53 to 3.15)                       | 2.21<br>(1.50 to 3.12)                     | 2.27<br>(1.53 to 3.28)                         |
| Acute myeloid leukemia          | 74.92<br>(54.40 to 100.58)                          | 77.21<br>(43.63 to 123.23)                         | 73.49<br>(40.93 to 118.19)                        | 84.38<br>(47.15 to 134.40)                         | 2.48<br>(1.82 to 3.35)                         | 2.99<br>(1.89 to 4.50)                       | 2.97<br>(1.83 to 4.53)                     | 3.18<br>(1.98 to 4.89)                         |
| Chronic myeloid leukemia        | 16.97<br>(12.07 to 23.50)                           | 8.51<br>(4.62 to 14.34)                            | 5.24<br>(2.81 to 8.92)                            | 9.74<br>(5.20 to 16.45)                            | 0.69<br>(0.50 to 0.94)                         | 0.40<br>(0.25 to 0.62)                       | 0.26<br>(0.16 to 0.40)                     | 0.44<br>(0.28 to 0.69)                         |
| Other leukemia                  | 45.80<br>(33.86 to 60.71)                           | 44.71<br>(26.48 to 70.35)                          | 35.69<br>(21.14 to 56.14)                         | 49.01<br>(28.59 to 78.18)                          | 1.84<br>(1.36 to 2.43)                         | 2.27<br>(1.58 to 3.25)                       | 1.93<br>(1.32 to 2.74)                     | 2.38<br>(1.58 to 3.45)                         |
| Other neoplasms                 | 335.64<br>(244.85 to 451.52)                        | 355.59<br>(226.20 to 507.90)                       | 362.44<br>(223.07 to 543.36)                      | 337.74<br>(218.44 to 478.16)                       | 13.04<br>(9.76 to 17.58)                       | 17.01<br>(12.63 to 22.01)                    | 18.31<br>(12.98 to 24.71)                  | 15.67<br>(12.03 to 19.62)                      |
| <b>Cardiovascular diseases</b>  | <b>18,947.92</b><br><b>(14,275.58 to 24,864.35)</b> | <b>13,404.08</b><br><b>(7,636.09 to 22,764.24)</b> | <b>7,598.56</b><br><b>(4,381.19 to 13,052.85)</b> | <b>18,094.76</b><br><b>(9,968.52 to 30,867.21)</b> | <b>1,150.43</b><br><b>(892.13 to 1,479.67)</b> | <b>985.81</b><br><b>(680.27 to 1,386.60)</b> | <b>622.63</b><br><b>(424.71 to 906.71)</b> | <b>1,211.43</b><br><b>(832.04 to 1,718.46)</b> |
| Rheumatic heart disease         | 106.36<br>(75.40 to 147.16)                         | 62.94<br>(31.43 to 117.89)                         | 45.10<br>(21.51 to 84.46)                         | 63.70<br>(31.11 to 115.32)                         | 4.30<br>(3.08 to 5.89)                         | 2.87<br>(1.65 to 4.95)                       | 2.14<br>(1.21 to 3.76)                     | 2.84<br>(1.65 to 4.75)                         |
| Ischemic heart disease          | 10,513.06<br>(7,932.13 to 13,767.31)                | 6,849.25<br>(3,536.18 to 12,596.88)                | 3,576.92<br>(1,871.77 to 6,556.73)                | 9,959.77<br>(4,979.27 to 18,111.40)                | 670.80<br>(521.60 to 857.94)                   | 525.61<br>(320.13 to 811.31)                 | 313.17<br>(191.79 to 476.51)               | 684.38<br>(418.04 to 1,050.37)                 |
| Stroke                          | 5,221.54<br>(3,918.19 to 6,787.42)                  | 3,808.39<br>(2,042.28 to 6,579.69)                 | 1,888.02<br>(1,046.66 to 3,313.33)                | 4,977.90<br>(2,679.21 to 8,630.65)                 | 345.86<br>(267.31 to 444.86)                   | 308.43<br>(192.45 to 496.66)                 | 177.84<br>(109.27 to 293.11)               | 364.49<br>(225.88 to 586.45)                   |
| Ischemic stroke                 | 3,466.53<br>(2,635.50 to 4,488.07)                  | 2,511.24<br>(1,399.75 to 4,438.13)                 | 1,365.47<br>(736.27 to 2,424.98)                  | 3,112.01<br>(1,685.25 to 5,524.79)                 | 258.00<br>(199.82 to 330.60)                   | 228.07<br>(134.81 to 407.30)                 | 139.66<br>(80.42 to 251.76)                | 259.95<br>(152.61 to 453.13)                   |

|                                |                                       |                                     |                                     |                                     |                               |                               |                              |                                |
|--------------------------------|---------------------------------------|-------------------------------------|-------------------------------------|-------------------------------------|-------------------------------|-------------------------------|------------------------------|--------------------------------|
|                                | 1,755.01<br>(1,291.78 to<br>2,348.31) | 1,297.15<br>(583.11 to<br>2,666.72) | 522.55<br>(262.79 to<br>1,004.29)   | 1,865.89<br>(783.08 to<br>3,894.80) | 87.86<br>(66.27 to<br>115.44) | 80.36<br>(44.20 to<br>138.87) | 38.19<br>(22.95 to<br>63.27) | 104.54<br>(55.95 to<br>184.81) |
| Intracerebral hemorrhage       | 384.68<br>(260.76 to<br>630.85)       | 522.87<br>(252.26 to<br>1,086.09)   | 382.30<br>(196.27 to<br>756.92)     | 635.60<br>(296.46 to<br>1,395.64)   | 22.89<br>(15.47 to<br>38.51)  | 37.45<br>(20.86 to<br>73.58)  | 30.51<br>(17.84 to<br>57.24) | 43.36<br>(22.98 to<br>88.71)   |
| Hypertensive heart disease     | 1,965.51<br>(1,365.66 to<br>2,716.14) | 1,364.80<br>(614.81 to<br>2,397.22) | 1,032.40<br>(447.70 to<br>1,898.50) | 1,649.83<br>(751.87 to<br>2,873.75) | 64.72<br>(44.33 to<br>88.10)  | 51.58<br>(27.61 to<br>79.16)  | 41.77<br>(20.83 to<br>66.00) | 58.89<br>(32.24 to<br>89.96)   |
| Cardiomyopathy and myocarditis | 25.13<br>(16.48 to<br>36.42)          | 25.38<br>(11.79 to<br>38.78)        | 27.01<br>(11.66 to<br>41.98)        | 23.96<br>(11.81 to<br>36.19)        | 1.14<br>(0.51 to<br>1.70)     | 1.85<br>(0.58 to<br>2.96)     | 2.24<br>(0.63 to<br>3.54)    | 1.65<br>(0.53 to<br>2.69)      |
| Myocarditis                    |                                       |                                     |                                     |                                     |                               |                               |                              |                                |



| Russia                                                        |                                                            |                                                        |                                                        |                                                        |                                                   |                                                   |                                                   |                                                   |
|---------------------------------------------------------------|------------------------------------------------------------|--------------------------------------------------------|--------------------------------------------------------|--------------------------------------------------------|---------------------------------------------------|---------------------------------------------------|---------------------------------------------------|---------------------------------------------------|
| Cause                                                         | YLLs (in 1000s)                                            |                                                        |                                                        |                                                        | Deaths (in 1000s)                                 |                                                   |                                                   |                                                   |
|                                                               | 2016                                                       | 2040 Forecast                                          | 2040 Better Scenario                                   | 2040 Worse Scenario                                    | 2016                                              | 2040 Forecast                                     | 2040 Better Scenario                              | 2040 Worse Scenario                               |
| Alcoholic cardiomyopathy                                      | 1,543.51<br>(1,049.07 to<br>2,177.67)                      | 1,155.59<br>(512.60 to<br>2,055.11)                    | 889.13<br>(374.64 to<br>1,662.44)                      | 1,429.52<br>(646.12 to<br>2,521.43)                    | 47.55<br>(33.11 to<br>65.69)                      | 39.75<br>(21.48 to<br>63.77)                      | 32.51<br>(16.90 to<br>53.07)                      | 47.17<br>(25.75 to<br>74.71)                      |
| Other cardiomyopathy                                          | 396.86<br>(211.56 to<br>579.41)                            | 183.83<br>(64.48 to<br>365.57)                         | 116.26<br>(40.18 to<br>235.63)                         | 196.35<br>(69.30 to<br>392.68)                         | 16.03<br>(7.36 to<br>23.17)                       | 9.98<br>(3.01 to<br>18.21)                        | 7.02<br>(1.94 to<br>13.41)                        | 10.08<br>(3.08 to<br>18.19)                       |
| Atrial fibrillation and flutter                               | 79.61<br>(55.14 to<br>114.83)                              | 125.30<br>(91.50 to<br>169.17)                         | 121.35<br>(88.04 to<br>164.23)                         | 121.00<br>(86.95 to<br>163.12)                         | 8.15<br>(5.61 to<br>11.46)                        | 14.41<br>(10.31 to<br>19.41)                      | 14.84<br>(10.68 to<br>19.72)                      | 13.48<br>(9.34 to<br>18.31)                       |
| Aortic aneurysm                                               | 158.08<br>(116.49 to<br>209.25)                            | 89.40<br>(53.41 to<br>140.71)                          | 76.39<br>(45.64 to<br>121.86)                          | 90.26<br>(53.97 to<br>140.40)                          | 7.68<br>(5.79 to<br>9.97)                         | 5.66<br>(4.19 to<br>7.80)                         | 5.39<br>(3.91 to<br>7.49)                         | 5.42<br>(4.00 to<br>7.27)                         |
| Peripheral artery disease                                     | 131.86<br>(87.19 to<br>201.36)                             | 259.97<br>(152.01 to<br>424.78)                        | 254.69<br>(151.12 to<br>424.49)                        | 256.01<br>(148.39 to<br>418.85)                        | 9.50<br>(6.39 to<br>15.83)                        | 22.79<br>(14.36 to<br>39.98)                      | 24.30<br>(14.91 to<br>42.80)                      | 21.45<br>(13.40 to<br>37.32)                      |
| Endocarditis                                                  | 68.67<br>(46.00 to<br>107.93)                              | 69.63<br>(33.35 to<br>132.69)                          | 65.78<br>(31.66 to<br>128.10)                          | 70.91<br>(34.13 to<br>131.41)                          | 2.21<br>(1.48 to<br>3.62)                         | 2.89<br>(1.61 to<br>5.08)                         | 2.90<br>(1.57 to<br>5.20)                         | 2.82<br>(1.58 to<br>5.01)                         |
| Other cardiovascular and circulatory diseases                 | 318.56<br>(233.65 to<br>428.71)                            | 251.53<br>(132.64 to<br>453.20)                        | 155.63<br>(83.57 to<br>276.31)                         | 269.77<br>(141.73 to<br>499.34)                        | 14.31<br>(10.80 to<br>18.83)                      | 9.76<br>(9.36 to<br>21.66)                        | 14.11<br>(6.49 to<br>14.95)                       | 14.30<br>(9.41 to<br>22.11)                       |
| <b>Chronic respiratory diseases</b>                           | <b>679.98</b><br><b>(502.16 to</b><br><b>885.31)</b>       | <b>662.78</b><br><b>(329.93 to</b><br><b>1,186.00)</b> | <b>473.80</b><br><b>(249.04 to</b><br><b>820.30)</b>   | <b>905.07</b><br><b>(435.71 to</b><br><b>1,660.26)</b> | <b>37.62</b><br><b>(28.68 to</b><br><b>47.65)</b> | <b>42.72</b><br><b>(25.75 to</b><br><b>67.15)</b> | <b>33.34</b><br><b>(21.17 to</b><br><b>50.53)</b> | <b>54.83</b><br><b>(31.31 to</b><br><b>88.61)</b> |
| Chronic obstructive pulmonary disease                         | 588.91<br>(433.15 to<br>770.29)                            | 593.35<br>(286.49 to<br>1,081.74)                      | 400.15<br>(201.64 to<br>721.72)                        | 831.68<br>(379.02 to<br>1,570.49)                      | 33.57<br>(25.64 to<br>42.47)                      | 39.05<br>(22.30 to<br>62.91)                      | 29.19<br>(17.85 to<br>45.36)                      | 51.10<br>(28.28 to<br>82.48)                      |
| Pneumoconiosis                                                | 3.88<br>(2.80 to<br>5.15)                                  | 3.61<br>(2.35 to<br>5.17)                              | 4.17<br>(2.55 to<br>6.47)                              | 3.59<br>(2.42 to<br>5.15)                              | 0.22<br>(0.16 to<br>0.29)                         | 0.28<br>(0.19 to<br>0.40)                         | 0.35<br>(0.22 to<br>0.53)                         | 0.27<br>(0.19 to<br>0.39)                         |
| Silicosis                                                     | 0.50<br>(0.31 to<br>0.80)                                  | 0.23<br>(0.11 to<br>0.42)                              | 0.16<br>(0.07 to<br>0.31)                              | 0.22<br>(0.11 to<br>0.41)                              | 0.03<br>(0.02 to<br>0.04)                         | 0.02<br>(0.01 to<br>0.05)                         | 0.01<br>(0.01 to<br>0.03)                         | 0.02<br>(0.01 to<br>0.03)                         |
| Asbestosis                                                    | 0.70<br>(0.42 to<br>1.07)                                  | 0.92<br>(0.47 to<br>1.51)                              | 1.18<br>(0.58 to<br>1.99)                              | 0.85<br>(0.44 to<br>1.37)                              | 0.03<br>(0.01 to<br>0.04)                         | 0.03<br>(0.02 to<br>0.07)                         | 0.07<br>(0.03 to<br>0.10)                         | 0.04<br>(0.02 to<br>0.06)                         |
| Coal workers pneumoconiosis                                   | 0.52<br>(0.12 to<br>0.83)                                  | 0.23<br>(0.08 to<br>0.39)                              | 0.17<br>(0.07 to<br>0.31)                              | 0.24<br>(0.08 to<br>0.39)                              | 0.03<br>(0.01 to<br>0.04)                         | 0.02<br>(0.01 to<br>0.02)                         | 0.01<br>(0.01 to<br>0.02)                         | 0.02<br>(0.01 to<br>0.02)                         |
| Other pneumoconiosis                                          | 2.17<br>(1.56 to<br>2.99)                                  | 2.23<br>(1.35 to<br>3.46)                              | 2.66<br>(1.51 to<br>4.47)                              | 2.29<br>(1.43 to<br>3.49)                              | 0.14<br>(0.10 to<br>0.19)                         | 0.20<br>(0.12 to<br>0.31)                         | 0.26<br>(0.15 to<br>0.43)                         | 0.20<br>(0.12 to<br>0.31)                         |
| Asthma                                                        | 51.49<br>(35.69 to<br>82.02)                               | 20.82<br>(8.13 to<br>45.63)                            | 11.11<br>(4.33 to<br>24.33)                            | 27.09<br>(10.07 to<br>60.78)                           | 2.38<br>(1.68 to<br>3.82)                         | 1.16<br>(0.50 to<br>2.41)                         | 0.67<br>(0.28 to<br>1.39)                         | 1.43<br>(0.58 to<br>3.11)                         |
| Interstitial lung disease and pulmonary sarcoidosis           | 18.45<br>(10.59 to<br>26.03)                               | 25.61<br>(14.18 to<br>39.48)                           | 38.98<br>(21.17 to<br>61.48)                           | 22.90<br>(12.68 to<br>34.37)                           | 0.77<br>(0.47 to<br>1.08)                         | 1.31<br>(0.83 to<br>1.85)                         | 2.11<br>(1.32 to<br>3.02)                         | 1.13<br>(0.72 to<br>1.59)                         |
| Other chronic respiratory diseases                            | 17.24<br>(10.68 to<br>31.36)                               | 19.39<br>(9.23 to<br>40.96)                            | 19.39<br>(9.22 to<br>41.02)                            | 19.82<br>(9.31 to<br>42.81)                            | 0.68<br>(0.44 to<br>1.19)                         | 0.93<br>(0.54 to<br>1.73)                         | 1.02<br>(0.60 to<br>1.87)                         | 0.90<br>(0.52 to<br>1.70)                         |
| <b>Cirrhosis and other chronic liver diseases</b>             | <b>1,637.54</b><br><b>(1,170.46 to</b><br><b>2,242.39)</b> | <b>913.69</b><br><b>(472.58 to</b><br><b>1,455.15)</b> | <b>673.74</b><br><b>(343.18 to</b><br><b>1,139.84)</b> | <b>992.75</b><br><b>(525.73 to</b><br><b>1,587.48)</b> | <b>49.99</b><br><b>(36.35 to</b><br><b>67.36)</b> | <b>33.01</b><br><b>(20.04 to</b><br><b>48.52)</b> | <b>25.23</b><br><b>(14.86 to</b><br><b>38.91)</b> | <b>34.99</b><br><b>(21.76 to</b><br><b>51.20)</b> |
| Cirrhosis and other chronic liver diseases due to hepatitis B | 323.49<br>(222.14 to<br>451.68)                            | 173.54<br>(86.94 to<br>289.86)                         | 141.35<br>(67.26 to<br>243.73)                         | 170.86<br>(85.71 to<br>277.19)                         | 9.71<br>(6.83 to<br>13.33)                        | 6.20<br>(3.66 to<br>9.28)                         | 5.20<br>(2.96 to<br>8.18)                         | 5.98<br>(3.57 to<br>8.72)                         |
| Cirrhosis and other chronic liver diseases due to hepatitis C | 405.56<br>(280.18 to<br>561.04)                            | 225.55<br>(112.59 to<br>375.50)                        | 180.35<br>(87.14 to<br>314.66)                         | 222.98<br>(117.00 to<br>366.64)                        | 12.19<br>(8.67 to<br>16.67)                       | 7.92<br>(4.75 to<br>12.26)                        | 6.49<br>(3.72 to<br>10.47)                        | 7.69<br>(4.63 to<br>11.59)                        |

|                                                                |                                                        |                                                        |                                                      |                                                        |                                                   |                                                   |                                                   |                                                   |
|----------------------------------------------------------------|--------------------------------------------------------|--------------------------------------------------------|------------------------------------------------------|--------------------------------------------------------|---------------------------------------------------|---------------------------------------------------|---------------------------------------------------|---------------------------------------------------|
|                                                                | 566.15<br>(401.36 to<br>784.06)                        | 338.81<br>(170.38 to<br>558.98)                        | 210.76<br>(104.28 to<br>356.48)                      | 423.60<br>(218.12 to<br>678.00)                        | 17.85<br>(12.80 to<br>24.32)                      | 12.48<br>(7.42 to<br>18.62)                       | 8.22<br>(4.76 to<br>12.68)                        | 15.05<br>(8.93 to<br>21.88)                       |
| Cirrhosis and other chronic liver diseases due to alcohol use  |                                                        |                                                        |                                                      |                                                        |                                                   |                                                   |                                                   |                                                   |
|                                                                | 342.34<br>(237.55 to<br>483.54)                        | 175.80<br>(93.94 to<br>291.14)                         | 141.28<br>(74.38 to<br>242.09)                       | 175.30<br>(96.44 to<br>287.86)                         | 10.25<br>(7.17 to<br>14.43)                       | 6.41<br>(3.93 to<br>9.68)                         | 5.32<br>(3.21 to<br>8.21)                         | 6.26<br>(3.98 to<br>9.33)                         |
| Cirrhosis and other chronic liver diseases due to other causes |                                                        |                                                        |                                                      |                                                        |                                                   |                                                   |                                                   |                                                   |
| <b>Digestive diseases</b>                                      | <b>980.25</b><br><b>(684.49 to</b><br><b>1,350.38)</b> | <b>748.36</b><br><b>(435.01 to</b><br><b>1,281.09)</b> | <b>581.12</b><br><b>(340.22 to</b><br><b>974.90)</b> | <b>783.63</b><br><b>(451.32 to</b><br><b>1,382.49)</b> | <b>40.47</b><br><b>(29.24 to</b><br><b>53.72)</b> | <b>38.94</b><br><b>(27.95 to</b><br><b>54.11)</b> | <b>33.60</b><br><b>(24.33 to</b><br><b>46.05)</b> | <b>38.80</b><br><b>(27.91 to</b><br><b>55.00)</b> |
| Peptic ulcer disease                                           | 196.29<br>(133.90 to<br>270.56)                        | 79.68<br>(43.98 to<br>125.67)                          | 48.56<br>(26.71 to<br>80.01)                         | 82.93<br>(47.89 to<br>129.69)                          | 8.13<br>(5.61 to<br>10.86)                        | 4.06<br>(2.66 to<br>5.57)                         | 2.62<br>(1.71 to<br>3.73)                         | 4.07<br>(2.68 to<br>5.58)                         |

| Russia                                     |                                                   |                                                   |                                                   |                                                   |                                          |                                            |                                             |                                            |
|--------------------------------------------|---------------------------------------------------|---------------------------------------------------|---------------------------------------------------|---------------------------------------------------|------------------------------------------|--------------------------------------------|---------------------------------------------|--------------------------------------------|
| Cause                                      | YLLs (in 1000s)                                   |                                                   |                                                   |                                                   | Deaths (in 1000s)                        |                                            |                                             |                                            |
|                                            | 2016                                              | 2040 Forecast                                     | 2040 Better Scenario                              | 2040 Worse Scenario                               | 2016                                     | 2040 Forecast                              | 2040 Better Scenario                        | 2040 Worse Scenario                        |
| Gastritis and duodenitis                   | 11.55<br>(7.43 to 17.23)                          | 8.72<br>(4.92 to 13.91)                           | 6.57<br>(3.55 to 10.85)                           | 8.54<br>(4.79 to 13.64)                           | 0.44<br>(0.29 to 0.67)                   | 0.42<br>(0.28 to 0.66)                     | 0.33<br>(0.21 to 0.54)                      | 0.39<br>(0.26 to 0.59)                     |
| Appendicitis                               | 14.10<br>(9.69 to 23.93)                          | 9.39<br>(5.58 to 16.36)                           | 6.21<br>(3.63 to 11.06)                           | 9.37<br>(5.77 to 15.93)                           | 0.51<br>(0.36 to 0.85)                   | 0.44<br>(0.30 to 0.69)                     | 0.31<br>(0.20 to 0.50)                      | 0.43<br>(0.29 to 0.70)                     |
| Paralytic ileus and intestinal obstruction | 69.85<br>(48.75 to 97.36)                         | 68.57<br>(43.91 to 99.39)                         | 72.34<br>(44.90 to 109.22)                        | 63.99<br>(42.06 to 92.24)                         | 3.06<br>(2.15 to 4.20)                   | 4.00<br>(2.98 to 5.42)                     | 4.52<br>(3.28 to 6.15)                      | 3.59<br>(2.69 to 4.92)                     |
| Inguinal, femoral, and abdominal hernia    | 21.46<br>(14.32 to 37.00)                         | 14.59<br>(9.53 to 25.50)                          | 12.84<br>(7.85 to 23.00)                          | 13.86<br>(9.12 to 23.40)                          | 1.22<br>(0.80 to 2.16)                   | 1.05<br>(0.73 to 1.78)                     | 0.99<br>(0.66 to 1.74)                      | 0.96<br>(0.68 to 1.69)                     |
| Inflammatory bowel disease                 | 28.31<br>(17.21 to 39.85)                         | 24.99<br>(13.31 to 38.19)                         | 25.13<br>(13.01 to 39.84)                         | 23.67<br>(13.08 to 35.03)                         | 1.12<br>(0.65 to 1.56)                   | 1.21<br>(0.65 to 1.63)                     | 1.29<br>(0.68 to 1.80)                      | 1.11<br>(0.61 to 1.47)                     |
| Vascular intestinal disorders              | 157.48<br>(114.51 to 214.50)                      | 165.23<br>(119.78 to 214.81)                      | 156.19<br>(107.91 to 213.36)                      | 153.81<br>(114.76 to 196.20)                      | 9.42<br>(6.93 to 12.46)                  | 11.80<br>(9.18 to 14.42)                   | 11.82<br>(8.82 to 14.91)                    | 10.72<br>(8.31 to 13.16)                   |
| Gallbladder and biliary diseases           | 54.29<br>(38.59 to 75.35)                         | 58.80<br>(27.00 to 112.54)                        | 42.62<br>(20.07 to 84.19)                         | 72.44<br>(33.35 to 135.16)                        | 3.20<br>(2.27 to 4.36)                   | 4.33<br>(2.10 to 8.16)                     | 3.37<br>(1.67 to 6.42)                      | 5.07<br>(2.44 to 9.58)                     |
| Pancreatitis                               | 369.39<br>(237.43 to 527.13)                      | 278.69<br>(91.74 to 715.21)                       | 174.68<br>(56.94 to 450.94)                       | 316.96<br>(97.49 to 813.99)                       | 11.13<br>(7.33 to 15.65)                 | 9.56<br>(4.08 to 21.03)                    | 6.30<br>(2.84 to 13.66)                     | 10.53<br>(4.44 to 23.21)                   |
| Other digestive diseases                   | 57.52<br>(31.58 to 84.73)                         | 39.69<br>(21.00 to 62.66)                         | 36.00<br>(19.14 to 57.95)                         | 38.06<br>(20.75 to 59.64)                         | 2.23<br>(1.31 to 3.17)                   | 2.09<br>(1.34 to 2.82)                     | 2.05<br>(1.29 to 2.57)                      | 1.93<br>(1.25 to 2.58)                     |
| Neurological disorders                     | <b>771.00</b><br>(565.98 to <b>1,035.43</b> )     | <b>1,217.92</b><br>(938.26 to <b>1,695.44</b> )   | <b>1,357.81</b><br>(1,037.24 to <b>1,763.14</b> ) | <b>1,209.74</b><br>(903.88 to <b>1,651.28</b> )   | <b>67.56</b><br>(49.36 to <b>90.38</b> ) | <b>127.07</b><br>(92.43 to <b>174.64</b> ) | <b>150.84</b><br>(117.89 to <b>197.55</b> ) | <b>123.08</b><br>(83.21 to <b>173.95</b> ) |
| Alzheimer's disease and other dementias    | 536.77<br>(381.27 to 740.85)                      | 914.66<br>(662.02 to 1,283.48)                    | 1,023.13<br>(743.78 to 1,410.85)                  | 923.56<br>(628.08 to 1,377.95)                    | 55.56<br>(39.77 to 75.90)                | 107.26<br>(72.82 to 153.79)                | 126.63<br>(93.60 to 173.86)                 | 105.41<br>(66.38 to 156.55)                |
| Parkinson's disease                        | 103.71<br>(71.01 to 147.98)                       | 171.63<br>(125.06 to 225.47)                      | 211.17<br>(153.66 to 279.77)                      | 151.66<br>(111.08 to 203.13)                      | 8.52<br>(5.84 to 12.06)                  | 15.78<br>(11.61 to 21.07)                  | 20.21<br>(14.96 to 26.97)                   | 13.69<br>(9.78 to 18.59)                   |
| Epilepsy                                   | 37.94<br>(27.33 to 51.69)                         | 46.92<br>(18.50 to 102.36)                        | 36.38<br>(14.68 to 80.16)                         | 51.71<br>(20.46 to 113.64)                        | 0.88<br>(0.64 to 1.21)                   | 1.24<br>(0.59 to 2.51)                     | 1.02<br>(0.50 to 1.96)                      | 1.33<br>(0.62 to 2.70)                     |
| Multiple sclerosis                         | 27.32<br>(17.12 to 45.92)                         | 27.36<br>(12.43 to 54.06)                         | 27.86<br>(12.57 to 55.20)                         | 27.28<br>(12.36 to 53.76)                         | 0.75<br>(0.48 to 1.26)                   | 0.83<br>(0.42 to 1.58)                     | 0.87<br>(0.44 to 1.67)                      | 0.82<br>(0.42 to 1.55)                     |
| Motor neuron disease                       | 14.24<br>(10.55 to 19.17)                         | 15.06<br>(8.34 to 24.15)                          | 15.34<br>(8.18 to 25.37)                          | 14.41<br>(8.23 to 22.65)                          | 0.49<br>(0.36 to 0.65)                   | 0.58<br>(0.36 to 0.86)                     | 0.61<br>(0.36 to 0.93)                      | 0.55<br>(0.35 to 0.79)                     |
| Other neurological disorders               | 51.01<br>(38.80 to 66.25)                         | 42.30<br>(25.69 to 65.46)                         | 43.92<br>(25.68 to 71.85)                         | 41.12<br>(25.33 to 62.26)                         | 1.36<br>(1.01 to 1.79)                   | 1.37<br>(0.93 to 1.92)                     | 1.50<br>(0.98 to 2.17)                      | 1.29<br>(0.90 to 1.77)                     |
| Mental disorders                           | <b>1,934.23</b><br>(1,323.57 to <b>2,699.17</b> ) | <b>2,227.67</b><br>(1,037.28 to <b>3,846.11</b> ) | <b>2,592.85</b><br>(1,200.51 to <b>4,620.31</b> ) | <b>2,216.32</b><br>(1,072.11 to <b>3,789.91</b> ) | <b>49.72</b><br>(34.64 to <b>69.03</b> ) | <b>63.17</b><br>(33.01 to <b>101.18</b> )  | <b>76.10</b><br>(40.13 to <b>127.20</b> )   | <b>61.71</b><br>(33.09 to <b>97.90</b> )   |
| Alcohol use disorders                      | 1,202.57<br>(815.46 to 1,694.41)                  | 1,104.68<br>(489.50 to 1,956.31)                  | 1,154.25<br>(498.39 to 2,131.60)                  | 1,151.40<br>(538.17 to 2,002.25)                  | 31.85<br>(21.70 to 44.51)                | 31.19<br>(14.72 to 53.37)                  | 33.14<br>(15.20 to 58.65)                   | 32.13<br>(15.54 to 53.59)                  |
| Drug use disorders                         | 731.26<br>(493.93 to 1,017.58)                    | 1,122.72<br>(554.92 to 1,932.59)                  | 1,438.28<br>(702.87 to 2,513.15)                  | 1,064.66<br>(536.07 to 1,815.04)                  | 17.86<br>(12.34 to 24.47)                | 31.98<br>(18.30 to 49.45)                  | 42.95<br>(24.83 to 67.21)                   | 29.58<br>(17.65 to 45.05)                  |
| Opioid use disorders                       | 507.84<br>(334.63 to 735.03)                      | 672.76<br>(333.73 to 1,214.71)                    | 741.45<br>(368.22 to 1,381.18)                    | 649.28<br>(329.85 to 1,148.75)                    | 12.01<br>(8.17 to 17.34)                 | 18.29<br>(10.14 to 30.60)                  | 20.88<br>(11.39 to 36.17)                   | 17.30<br>(9.78 to 28.26)                   |

|                           |                                |                                 |                                 |                                 |                           |                             |                             |                            |
|---------------------------|--------------------------------|---------------------------------|---------------------------------|---------------------------------|---------------------------|-----------------------------|-----------------------------|----------------------------|
|                           | 45.19<br>(15.32 to<br>69.24)   | 77.91<br>(25.38 to<br>148.23)   | 107.98<br>(35.05 to<br>209.71)  | 72.97<br>(23.82 to<br>138.23)   | 1.09<br>(0.37 to<br>1.63) | 2.06<br>(0.71 to<br>3.74)   | 2.91<br>(1.04 to<br>5.38)   | 1.90<br>(0.65 to<br>3.40)  |
| Cocaine use disorders     |                                |                                 |                                 |                                 |                           |                             |                             |                            |
|                           | 25.08<br>(7.82 to<br>40.89)    | 60.06<br>(17.32 to<br>114.81)   | 99.13<br>(32.49 to<br>188.58)   | 55.26<br>(16.28 to<br>102.94)   | 0.59<br>(0.19 to<br>0.94) | 1.50<br>(0.48 to<br>2.72)   | 2.52<br>(0.84 to<br>4.68)   | 1.36<br>(0.42 to<br>2.45)  |
| Amphetamine use disorders |                                |                                 |                                 |                                 |                           |                             |                             |                            |
|                           | 153.15<br>(66.10 to<br>231.38) | 312.00<br>(132.76 to<br>555.22) | 489.73<br>(216.07 to<br>879.65) | 287.16<br>(121.25 to<br>500.89) | 4.17<br>(1.92 to<br>6.06) | 10.12<br>(5.12 to<br>15.69) | 16.63<br>(8.99 to<br>25.98) | 9.02<br>(4.50 to<br>13.90) |
| Other drug use disorders  |                                |                                 |                                 |                                 |                           |                             |                             |                            |
|                           | 0.40<br>(0.23 to<br>0.64)      | 0.27<br>(0.12 to<br>0.55)       | 0.32<br>(0.13 to<br>0.69)       | 0.26<br>(0.11 to<br>0.54)       | 0.01<br>(0.00 to<br>0.01) | 0.01<br>(0.00 to<br>0.01)   | 0.01<br>(0.00 to<br>0.01)   | 0.00<br>(0.00 to<br>0.01)  |
| Eating disorders          |                                |                                 |                                 |                                 |                           |                             |                             |                            |

| Russia                                                     |                                     |                                       |                                     |                                       |                                  |                                  |                                  |                                  |
|------------------------------------------------------------|-------------------------------------|---------------------------------------|-------------------------------------|---------------------------------------|----------------------------------|----------------------------------|----------------------------------|----------------------------------|
| Cause                                                      | YLLs (in 1000s)                     |                                       |                                     |                                       | Deaths (in 1000s)                |                                  |                                  |                                  |
|                                                            | 2016                                | 2040 Forecast                         | 2040 Better Scenario                | 2040 Worse Scenario                   | 2016                             | 2040 Forecast                    | 2040 Better Scenario             | 2040 Worse Scenario              |
| <b>Diabetes, urogenital, blood, and endocrine diseases</b> | <b>712.86</b><br>(528.25 to 955.17) | <b>753.30</b><br>(417.44 to 1,264.13) | <b>556.65</b><br>(299.27 to 963.63) | <b>801.03</b><br>(435.32 to 1,363.95) | <b>32.31</b><br>(24.36 to 43.00) | <b>41.92</b><br>(27.32 to 63.15) | <b>32.86</b><br>(21.17 to 51.38) | <b>42.70</b><br>(28.30 to 63.93) |
| Diabetes mellitus                                          | 236.28<br>(171.41 to 321.72)        | 196.11<br>(94.55 to 386.82)           | 127.49<br>(62.14 to 251.89)         | 229.99<br>(109.41 to 460.31)          | 11.61<br>(8.46 to 15.92)         | 11.29<br>(6.47 to 19.34)         | 7.91<br>(4.55 to 13.71)          | 12.47<br>(6.97 to 21.90)         |
| Acute glomerulonephritis                                   | 5.28<br>(3.79 to 7.32)              | 8.33<br>(3.85 to 15.68)               | 6.68<br>(3.00 to 12.76)             | 8.28<br>(3.88 to 15.28)               | 0.15<br>(0.11 to 0.21)           | 0.27<br>(0.14 to 0.47)           | 0.22<br>(0.11 to 0.40)           | 0.26<br>(0.14 to 0.46)           |
| Chronic kidney disease                                     | 237.89<br>(175.04 to 319.20)        | 189.24<br>(115.37 to 580.48)          | 275.23<br>(80.62 to 393.39)         | 299.76<br>(122.13 to 642.59)          | 10.37<br>(7.83 to 13.59)         | 15.48<br>(7.51 to 31.86)         | 11.46<br>(5.63 to 24.07)         | 16.18<br>(7.88 to 32.64)         |
| Chronic kidney disease due to diabetes mellitus            | 58.67<br>(43.28 to 78.71)           | 75.24<br>(29.68 to 166.63)            | 53.19<br>(21.08 to 115.58)          | 82.22<br>(31.63 to 189.33)            | 2.56<br>(1.92 to 3.38)           | 3.97<br>(1.81 to 8.57)           | 2.98<br>(1.39 to 6.57)           | 4.18<br>(1.92 to 8.87)           |
| Chronic kidney disease due to hypertension                 | 9.75<br>(7.29 to 13.15)             | 15.13<br>(7.25 to 30.93)              | 12.10<br>(5.86 to 25.17)            | 15.62<br>(7.47 to 30.82)              | 0.70<br>(0.53 to 0.93)           | 1.44<br>(0.74 to 2.69)           | 1.24<br>(0.65 to 2.36)           | 1.43<br>(0.71 to 2.71)           |
| Chronic kidney disease due to glomerulonephritis           | 98.02<br>(70.96 to 134.24)          | 111.73<br>(46.60 to 238.28)           | 73.13<br>(31.09 to 153.37)          | 122.63<br>(49.11 to 269.96)           | 3.92<br>(2.90 to 5.24)           | 5.74<br>(2.79 to 11.48)          | 3.99<br>(1.96 to 8.36)           | 6.07<br>(2.91 to 12.41)          |
| Chronic kidney disease due to other and unspecified causes | 71.45<br>(52.43 to 95.01)           | 73.13<br>(32.03 to 152.86)            | 50.82<br>(22.07 to 106.17)          | 79.29<br>(33.74 to 166.88)            | 3.19<br>(2.41 to 4.18)           | 4.34<br>(2.17 to 8.99)           | 3.24<br>(1.61 to 6.82)           | 4.51<br>(2.20 to 9.04)           |
| Urinary diseases and male infertility                      | 167.68<br>(122.23 to 222.52)        | 215.66<br>(140.43 to 313.00)          | 174.75<br>(110.79 to 263.14)        | 206.81<br>(139.58 to 299.43)          | 8.23<br>(6.15 to 10.70)          | 12.66<br>(9.80 to 15.85)         | 10.91<br>(8.07 to 14.35)         | 11.71<br>(9.03 to 14.38)         |
| Urinary tract infections                                   | 135.09<br>(98.35 to 183.28)         | 183.92<br>(117.73 to 271.12)          | 151.55<br>(94.58 to 227.72)         | 176.04<br>(118.33 to 256.81)          | 6.49<br>(4.83 to 8.61)           | 10.71<br>(8.11 to 13.58)         | 9.40<br>(6.86 to 12.51)          | 9.88<br>(7.56 to 12.41)          |
| Urolithiasis                                               | 25.12<br>(15.57 to 35.62)           | 27.04<br>(15.22 to 43.04)             | 19.73<br>(10.52 to 32.98)           | 26.30<br>(14.66 to 40.17)             | 1.38<br>(0.88 to 1.96)           | 1.65<br>(1.03 to 2.46)           | 1.28<br>(0.75 to 1.96)           | 1.56<br>(0.96 to 2.29)           |
| Other urinary diseases                                     | 7.47<br>(3.00 to 11.74)             | 4.70<br>(1.88 to 7.79)                | 3.47<br>(1.40 to 6.04)              | 4.47<br>(1.83 to 7.60)                | 0.37<br>(0.15 to 0.56)           | 0.47<br>(0.14 to 0.44)           | 0.23<br>(0.11 to 0.36)           | 0.27<br>(0.12 to 0.40)           |
| Gynecological diseases                                     | 3.31<br>(0.82 to 5.96)              | 1.48<br>(0.29 to 3.48)                | 0.86<br>(0.17 to 2.08)              | 1.55<br>(0.33 to 3.62)                | 0.10<br>(0.03 to 0.17)           | 0.05<br>(0.01 to 0.10)           | 0.03<br>(0.01 to 0.06)           | 0.05<br>(0.01 to 0.10)           |
| Uterine fibroids                                           | 1.98<br>(0.50 to 3.61)              | 0.85<br>(0.16 to 2.21)                | 0.53<br>(0.10 to 1.41)              | 0.89<br>(0.17 to 2.20)                | 0.06<br>(0.02 to 0.10)           | 0.03<br>(0.01 to 0.06)           | 0.02<br>(0.00 to 0.04)           | 0.03<br>(0.01 to 0.06)           |
| Polycystic ovarian syndrome                                | 0.04<br>(0.01 to 0.08)              | 0.01<br>(0.00 to 0.03)                | 0.00<br>(0.00 to 0.01)              | 0.01<br>(0.00 to 0.03)                | 0.00<br>(0.00 to 0.00)           | 0.00<br>(0.00 to 0.00)           | 0.00<br>(0.00 to 0.00)           | 0.00<br>(0.00 to 0.00)           |
| Endometriosis                                              | 0.18<br>(0.03 to 0.41)              | 0.15<br>(0.02 to 0.45)                | 0.08<br>(0.01 to 0.24)              | 0.16<br>(0.02 to 0.45)                | 0.00<br>(0.00 to 0.01)           | 0.00<br>(0.00 to 0.01)           | 0.00<br>(0.00 to 0.01)           | 0.00<br>(0.00 to 0.01)           |
| Genital prolapse                                           | 0.15<br>(0.05 to 0.28)              | 0.09<br>(0.02 to 0.19)                | 0.05<br>(0.01 to 0.11)              | 0.09<br>(0.02 to 0.20)                | 0.01<br>(0.00 to 0.01)           | 0.00<br>(0.00 to 0.01)           | 0.00<br>(0.00 to 0.00)           | 0.00<br>(0.00 to 0.01)           |
| Other gynecological diseases                               | 0.95<br>(0.23 to 1.78)              | 0.38<br>(0.09 to 0.88)                | 0.20<br>(0.05 to 0.46)              | 0.40<br>(0.10 to 0.94)                | 0.03<br>(0.01 to 0.05)           | 0.02<br>(0.01 to 0.03)           | 0.01<br>(0.00 to 0.02)           | 0.02<br>(0.01 to 0.03)           |
| Hemoglobinopathies and hemolytic anemias                   | 16.26<br>(10.64 to 22.26)           | 7.74<br>(4.51 to 11.92)               | 5.72<br>(3.24 to 8.91)              | 7.64<br>(4.52 to 11.73)               | 0.57<br>(0.37 to 0.78)           | 0.41<br>(0.28 to 0.55)           | 0.33<br>(0.22 to 0.45)           | 0.39<br>(0.26 to 0.51)           |
| Thalassemias                                               | 1.63<br>(1.34 to 1.90)              | 0.23<br>(0.16 to 0.33)                | 0.21<br>(0.14 to 0.30)              | 0.24<br>(0.16 to 0.35)                | 0.02<br>(0.02 to 0.02)           | 0.00<br>(0.00 to 0.00)           | 0.00<br>(0.00 to 0.00)           | 0.00<br>(0.00 to 0.00)           |

|                                                   |                              |                              |                              |                              |                           |                           |                           |                           |
|---------------------------------------------------|------------------------------|------------------------------|------------------------------|------------------------------|---------------------------|---------------------------|---------------------------|---------------------------|
|                                                   | 3.11<br>(1.89 to<br>4.49)    | 1.26<br>(0.55 to<br>2.43)    | 0.85<br>(0.36 to<br>1.67)    | 1.31<br>(0.60 to<br>2.56)    | 0.06<br>(0.03 to<br>0.09) | 0.03<br>(0.01 to<br>0.05) | 0.02<br>(0.01 to<br>0.04) | 0.03<br>(0.01 to<br>0.05) |
| Sickle cell disorders                             |                              |                              |                              |                              |                           |                           |                           |                           |
|                                                   | 2.95<br>(1.72 to<br>4.13)    | 1.62<br>(0.72 to<br>2.95)    | 1.06<br>(0.47 to<br>1.94)    | 1.65<br>(0.77 to<br>2.98)    | 0.07<br>(0.04 to<br>0.11) | 0.05<br>(0.03 to<br>0.09) | 0.04<br>(0.02 to<br>0.06) | 0.05<br>(0.03 to<br>0.09) |
| G6PD deficiency                                   |                              |                              |                              |                              |                           |                           |                           |                           |
|                                                   | 8.57<br>(5.17 to<br>12.40)   | 4.63<br>(2.81 to<br>6.72)    | 3.60<br>(2.16 to<br>5.33)    | 4.44<br>(2.74 to<br>6.34)    | 0.41<br>(0.27 to<br>0.58) | 0.33<br>(0.24 to<br>0.43) | 0.28<br>(0.19 to<br>0.37) | 0.31<br>(0.21 to<br>0.39) |
| Other hemoglobinopathies and hemolytic anemias    |                              |                              |                              |                              |                           |                           |                           |                           |
|                                                   | 46.17<br>(34.00 to<br>60.30) | 48.76<br>(27.88 to<br>77.66) | 51.91<br>(28.84 to<br>85.77) | 46.99<br>(27.65 to<br>74.31) | 1.28<br>(0.93 to<br>1.78) | 1.76<br>(1.17 to<br>2.59) | 2.00<br>(1.29 to<br>3.04) | 1.64<br>(1.09 to<br>2.39) |
| Endocrine, metabolic, blood, and immune disorders |                              |                              |                              |                              |                           |                           |                           |                           |

| Russia                                        |                                     |                                     |                                    |                                     |                               |                               |                               |                               |
|-----------------------------------------------|-------------------------------------|-------------------------------------|------------------------------------|-------------------------------------|-------------------------------|-------------------------------|-------------------------------|-------------------------------|
| Cause                                         | YLLs (in 1000s)                     |                                     |                                    |                                     | Deaths (in 1000s)             |                               |                               |                               |
|                                               | 2016                                | 2040 Forecast                       | 2040 Better Scenario               | 2040 Worse Scenario                 | 2016                          | 2040 Forecast                 | 2040 Better Scenario          | 2040 Worse Scenario           |
| <b>Musculoskeletal disorders</b>              | <b>47.90</b><br>(32.10 to 69.98)    | <b>45.84</b><br>(26.41 to 74.45)    | <b>37.68</b><br>(21.17 to 62.42)   | <b>45.73</b><br>(26.48 to 72.50)    | <b>1.71</b><br>(1.15 to 2.47) | <b>1.97</b><br>(1.31 to 2.86) | <b>1.67</b><br>(1.10 to 2.45) | <b>1.92</b><br>(1.30 to 2.76) |
| Rheumatoid arthritis                          | 17.17<br>(10.72 to 28.77)           | 14.27<br>(7.31 to 26.41)            | 8.38<br>(4.13 to 16.82)            | 14.81<br>(7.52 to 28.14)            | 0.70<br>(0.44 to 1.18)        | 0.70<br>(0.39 to 1.22)        | 0.43<br>(0.23 to 0.85)        | 0.71<br>(0.40 to 1.28)        |
| Other musculoskeletal disorders               | 30.73<br>(18.78 to 46.02)           | 31.57<br>(16.83 to 51.67)           | 29.29<br>(15.75 to 48.95)          | 30.92<br>(16.61 to 50.39)           | 1.01<br>(0.59 to 1.49)        | 1.27<br>(0.72 to 1.85)        | 1.24<br>(0.76 to 1.84)        | 1.21<br>(0.66 to 1.72)        |
| <b>Other non-communicable diseases</b>        | <b>469.13</b><br>(384.10 to 557.77) | <b>208.52</b><br>(121.67 to 302.99) | <b>146.23</b><br>(80.23 to 221.29) | <b>219.73</b><br>(126.80 to 319.33) | <b>7.17</b><br>(5.37 to 8.88) | <b>5.50</b><br>(2.73 to 8.14) | <b>4.66</b><br>(2.06 to 7.25) | <b>5.45</b><br>(2.79 to 8.01) |
| Congenital birth defects                      | 382.39<br>(323.07 to 491.02)        | 116.39<br>(67.22 to 177.60)         | 62.41<br>(35.65 to 98.85)          | 129.57<br>(72.32 to 203.71)         | 4.93<br>(4.17 to 6.44)        | 1.69<br>(0.99 to 2.63)        | 0.94<br>(0.53 to 1.58)        | 1.86<br>(1.05 to 2.96)        |
| Neural tube defects                           | 6.48<br>(4.95 to 8.68)              | 1.86<br>(0.93 to 3.09)              | 0.85<br>(0.40 to 1.44)             | 2.11<br>(1.02 to 3.49)              | 0.08<br>(0.06 to 0.11)        | 0.02<br>(0.01 to 0.04)        | 0.01<br>(0.01 to 0.02)        | 0.03<br>(0.01 to 0.05)        |
| Congenital heart anomalies                    | 185.67<br>(149.91 to 268.26)        | 54.27<br>(29.08 to 91.90)           | 24.37<br>(12.23 to 44.20)          | 61.36<br>(30.66 to 107.67)          | 2.46<br>(1.99 to 3.58)        | 0.37<br>(0.44 to 1.39)        | 0.91<br>(0.19 to 0.70)        | 0.37<br>(0.48 to 1.62)        |
| Orofacial clefts                              | 0.55<br>(0.31 to 1.08)              | 0.14<br>(0.05 to 0.31)              | 0.05<br>(0.02 to 0.11)             | 0.16<br>(0.06 to 0.39)              | 0.01<br>(0.00 to 0.01)        | 0.00<br>(0.00 to 0.00)        | 0.00<br>(0.00 to 0.00)        | 0.00<br>(0.00 to 0.00)        |
| Down syndrome                                 | 12.48<br>(8.06 to 16.14)            | 8.31<br>(5.02 to 13.11)             | 8.61<br>(5.04 to 14.42)            | 8.33<br>(5.10 to 12.86)             | 0.19<br>(0.14 to 0.25)        | 0.16<br>(0.09 to 0.28)        | 0.17<br>(0.09 to 0.32)        | 0.16<br>(0.09 to 0.27)        |
| Other chromosomal abnormalities               | 11.37<br>(10.04 to 23.39)           | 7.73<br>(3.61 to 12.46)             | 5.53<br>(2.56 to 8.85)             | 8.29<br>(3.86 to 13.40)             | 0.22<br>(0.12 to 0.29)        | 0.10<br>(0.05 to 0.16)        | 0.08<br>(0.04 to 0.12)        | 0.11<br>(0.05 to 0.18)        |
| Congenital musculoskeletal and limb anomalies | 6.39<br>(4.25 to 16.74)             | 2.04<br>(1.02 to 5.12)              | 1.07<br>(0.51 to 2.73)             | 2.28<br>(1.13 to 5.68)              | 0.08<br>(0.05 to 0.20)        | 0.03<br>(0.01 to 0.06)        | 0.01<br>(0.01 to 0.04)        | 0.03<br>(0.02 to 0.07)        |
| Urogenital congenital anomalies               | 5.71<br>(3.77 to 10.28)             | 1.92<br>(1.02 to 3.74)              | 1.14<br>(0.58 to 2.28)             | 2.08<br>(1.07 to 3.98)              | 0.08<br>(0.05 to 0.14)        | 0.03<br>(0.02 to 0.06)        | 0.02<br>(0.01 to 0.04)        | 0.04<br>(0.02 to 0.07)        |
| Digestive congenital anomalies                | 36.64<br>(25.53 to 58.41)           | 11.11<br>(4.96 to 21.00)            | 5.36<br>(2.25 to 10.51)            | 12.59<br>(5.43 to 24.32)            | 0.44<br>(0.31 to 0.71)        | 0.14<br>(0.06 to 0.26)        | 0.07<br>(0.03 to 0.13)        | 0.16<br>(0.07 to 0.30)        |
| Other congenital birth defects                | 111.09<br>(79.11 to 135.07)         | 29.02<br>(16.07 to 42.45)           | 15.44<br>(8.46 to 22.80)           | 32.37<br>(18.22 to 49.02)           | 1.37<br>(0.99 to 1.65)        | 0.39<br>(0.23 to 0.56)        | 0.21<br>(0.12 to 0.31)        | 0.43<br>(0.25 to 0.64)        |
| Skin and subcutaneous diseases                | 51.09<br>(9.24 to 88.26)            | 81.88<br>(18.66 to 149.46)          | 76.80<br>(19.22 to 143.83)         | 78.93<br>(17.79 to 143.83)          | 1.83<br>(0.36 to 3.16)        | 3.69<br>(0.98 to 6.09)        | 3.64<br>(1.01 to 6.14)        | 3.46<br>(0.90 to 5.58)        |
| Cellulitis                                    | 36.84<br>(6.91 to 62.74)            | 59.60<br>(14.48 to 110.22)          | 57.18<br>(14.60 to 106.48)         | 57.32<br>(13.79 to 103.79)          | 1.29<br>(0.27 to 2.16)        | 2.55<br>(0.70 to 4.20)        | 2.55<br>(0.75 to 4.33)        | 2.39<br>(0.66 to 3.85)        |
| Pyoderma                                      | 11.53<br>(1.43 to 21.89)            | 20.07<br>(3.12 to 39.42)            | 17.85<br>(2.97 to 35.80)           | 19.43<br>(3.00 to 37.57)            | 0.44<br>(0.06 to 0.84)        | 1.02<br>(0.19 to 1.76)        | 0.98<br>(0.20 to 1.74)        | 0.95<br>(0.18 to 1.65)        |
| Decubitus ulcer                               | 1.62<br>(0.30 to 2.78)              | 1.27<br>(0.29 to 2.24)              | 0.97<br>(0.23 to 1.72)             | 1.25<br>(0.28 to 2.18)              | 0.07<br>(0.01 to 0.12)        | 0.08<br>(0.02 to 0.13)        | 0.07<br>(0.02 to 0.11)        | 0.07<br>(0.02 to 0.12)        |
| Other skin and subcutaneous diseases          | 1.10<br>(0.22 to 1.94)              | 0.94<br>(0.22 to 1.69)              | 0.80<br>(0.20 to 1.45)             | 0.92<br>(0.22 to 1.65)              | 0.04<br>(0.01 to 0.07)        | 0.04<br>(0.01 to 0.07)        | 0.04<br>(0.01 to 0.07)        | 0.04<br>(0.01 to 0.07)        |
| Sudden infant death syndrome                  | 35.65<br>(25.61 to 48.71)           | 10.25<br>(4.56 to 18.02)            | 7.02<br>(3.10 to 12.19)            | 11.23<br>(4.97 to 20.02)            | 0.41<br>(0.30 to 0.57)        | 0.12<br>(0.05 to 0.21)        | 0.08<br>(0.04 to 0.14)        | 0.13<br>(0.06 to 0.23)        |

|                          |                                       |                                       |                                       |                                        |                                 |                                |                               |                                |
|--------------------------|---------------------------------------|---------------------------------------|---------------------------------------|----------------------------------------|---------------------------------|--------------------------------|-------------------------------|--------------------------------|
| Injuries                 | 7,106.07<br>(4,956.20 to<br>9,687.36) | 4,506.54<br>(1,857.98 to<br>9,234.74) | 3,208.82<br>(1,319.76 to<br>6,606.53) | 5,527.55<br>(2,266.41 to<br>11,440.59) | 174.72<br>(123.20 to<br>237.98) | 127.81<br>(62.86 to<br>233.21) | 95.31<br>(47.38 to<br>171.92) | 148.72<br>(71.77 to<br>286.07) |
| Transport injuries       | 1,409.93<br>(988.25 to<br>1,928.03)   | 491.79<br>(179.35 to<br>1,125.81)     | 287.53<br>(105.80 to<br>672.41)       | 1,210.55<br>(443.64 to<br>2,725.18)    | 31.58<br>(22.35 to<br>43.04)    | 12.80<br>(5.43 to<br>27.62)    | 7.78<br>(3.37 to<br>16.42)    | 28.77<br>(11.58 to<br>63.50)   |
| Road injuries            | 1,266.26<br>(893.56 to<br>1,730.76)   | 358.01<br>(133.29 to<br>818.70)       | 210.82<br>(79.00 to<br>476.13)        | 1,066.34<br>(394.49 to<br>2,365.32)    | 28.20<br>(19.95 to<br>38.15)    | 9.30<br>(4.03 to<br>19.44)     | 5.71<br>(2.51 to<br>11.82)    | 25.06<br>(10.16 to<br>54.63)   |
| Pedestrian road injuries | 378.68<br>(264.53 to<br>537.58)       | 101.51<br>(40.70 to<br>220.82)        | 44.31<br>(18.33 to<br>95.77)          | 249.71<br>(94.27 to<br>568.37)         | 9.63<br>(6.84 to<br>13.30)      | 3.18<br>(1.56 to<br>6.15)      | 1.49<br>(0.75 to<br>2.88)     | 7.17<br>(3.19 to<br>14.93)     |



| Russia                                          |                                                            |                                                          |                                                          |                                                          |                                                   |                                                   |                                                   |                                                   |
|-------------------------------------------------|------------------------------------------------------------|----------------------------------------------------------|----------------------------------------------------------|----------------------------------------------------------|---------------------------------------------------|---------------------------------------------------|---------------------------------------------------|---------------------------------------------------|
| Cause                                           | YLLs (in 1000s)                                            |                                                          |                                                          |                                                          | Deaths (in 1000s)                                 |                                                   |                                                   |                                                   |
|                                                 | 2016                                                       | 2040 Forecast                                            | 2040 Better Scenario                                     | 2040 Worse Scenario                                      | 2016                                              | 2040 Forecast                                     | 2040 Better Scenario                              | 2040 Worse Scenario                               |
| Cyclist road injuries                           | 29.80<br>(20.43 to<br>42.10)                               | 13.27<br>(4.63 to<br>34.60)                              | 9.71<br>(3.39 to<br>24.43)                               | 32.41<br>(11.39 to<br>81.73)                             | 0.73<br>(0.50 to<br>1.03)                         | 0.41<br>(0.16 to<br>0.99)                         | 0.33<br>(0.13 to<br>0.76)                         | 0.86<br>(0.34 to<br>2.07)                         |
| Motorcyclist road injuries                      | 91.48<br>(59.75 to<br>129.63)                              | 50.84<br>(14.57 to<br>134.07)                            | 38.68<br>(10.94 to<br>102.32)                            | 98.89<br>(30.40 to<br>255.26)                            | 1.79<br>(1.18 to<br>2.52)                         | 1.11<br>(0.35 to<br>2.80)                         | 0.88<br>(0.28 to<br>2.27)                         | 2.00<br>(0.67 to<br>4.98)                         |
| Motor vehicle road injuries                     | 760.23<br>(522.48 to<br>1,059.08)                          | 190.02<br>(70.53 to<br>426.29)                           | 116.54<br>(43.22 to<br>254.87)                           | 678.07<br>(247.23 to<br>1,518.52)                        | 15.91<br>(10.88 to<br>22.04)                      | 4.54<br>(1.85 to<br>9.56)                         | 2.96<br>(1.27 to<br>6.08)                         | 14.85<br>(5.83 to<br>31.92)                       |
| Other road injuries                             | 6.08<br>(4.02 to<br>9.26)                                  | 2.38<br>(0.76 to<br>6.31)                                | 1.58<br>(0.52 to<br>4.14)                                | 7.26<br>(2.33 to<br>18.91)                               | 0.14<br>(0.10 to<br>0.22)                         | 0.07<br>(0.03 to<br>0.18)                         | 0.05<br>(0.02 to<br>0.12)                         | 0.19<br>(0.06 to<br>0.48)                         |
| Other transport injuries                        | 143.67<br>(98.08 to<br>204.62)                             | 133.78<br>(45.35 to<br>317.24)                           | 76.71<br>(26.39 to<br>181.46)                            | 144.22<br>(48.49 to<br>348.94)                           | 3.38<br>(2.34 to<br>4.77)                         | 3.50<br>(1.37 to<br>7.75)                         | 2.07<br>(0.85 to<br>4.57)                         | 3.71<br>(1.44 to<br>8.62)                         |
| <b>Unintentional injuries</b>                   | <b>2,492.91</b><br><b>(1,787.00 to</b><br><b>3,481.34)</b> | <b>1,614.94</b><br><b>(821.69 to</b><br><b>2,710.37)</b> | <b>1,197.59</b><br><b>(602.18 to</b><br><b>2,005.76)</b> | <b>1,640.36</b><br><b>(824.78 to</b><br><b>2,747.88)</b> | <b>66.48</b><br><b>(47.72 to</b><br><b>93.40)</b> | <b>50.95</b><br><b>(29.46 to</b><br><b>77.54)</b> | <b>39.64</b><br><b>(23.20 to</b><br><b>61.79)</b> | <b>50.36</b><br><b>(29.36 to</b><br><b>78.01)</b> |
| Falls                                           | 440.54<br>(304.45 to<br>603.88)                            | 326.03<br>(178.13 to<br>526.41)                          | 275.12<br>(145.57 to<br>445.58)                          | 318.87<br>(173.69 to<br>498.82)                          | 13.62<br>(9.80 to<br>18.23)                       | 12.77<br>(8.62 to<br>17.62)                       | 11.35<br>(7.46 to<br>16.21)                       | 12.06<br>(8.28 to<br>16.60)                       |
| Drowning                                        | 455.06<br>(322.36 to<br>607.46)                            | 275.51<br>(109.53 to<br>578.16)                          | 199.43<br>(78.58 to<br>404.55)                           | 290.48<br>(114.35 to<br>627.67)                          | 10.08<br>(7.06 to<br>13.61)                       | 6.87<br>(3.00 to<br>13.65)                        | 5.12<br>(2.26 to<br>9.90)                         | 7.11<br>(3.02 to<br>14.23)                        |
| Fire, heat, and hot substances                  | 296.04<br>(209.83 to<br>404.02)                            | 163.21<br>(72.04 to<br>309.29)                           | 105.23<br>(48.14 to<br>202.71)                           | 171.90<br>(77.55 to<br>328.04)                           | 8.43<br>(5.97 to<br>11.39)                        | 5.58<br>(3.07 to<br>9.69)                         | 3.82<br>(2.15 to<br>6.51)                         | 5.70<br>(3.07 to<br>10.00)                        |
| Poisonings                                      | 106.55<br>(75.52 to<br>153.62)                             | 32.45<br>(14.39 to<br>65.69)                             | 18.30<br>(8.49 to<br>36.56)                              | 35.25<br>(15.47 to<br>71.33)                             | 2.35<br>(1.64 to<br>3.59)                         | 0.88<br>(0.43 to<br>1.68)                         | 0.52<br>(0.26 to<br>0.97)                         | 0.93<br>(0.45 to<br>1.77)                         |
| Exposure to mechanical forces                   | 211.99<br>(147.39 to<br>302.84)                            | 123.03<br>(62.97 to<br>212.45)                           | 86.51<br>(44.25 to<br>151.09)                            | 125.34<br>(64.83 to<br>213.90)                           | 4.87<br>(3.37 to<br>6.90)                         | 3.27<br>(1.83 to<br>5.39)                         | 2.39<br>(1.30 to<br>3.92)                         | 3.26<br>(1.78 to<br>5.26)                         |
| Unintentional firearm injuries                  | 31.81<br>(21.42 to<br>45.66)                               | 15.67<br>(7.63 to<br>26.47)                              | 11.81<br>(5.83 to<br>19.99)                              | 15.76<br>(7.83 to<br>26.38)                              | 0.79<br>(0.54 to<br>1.11)                         | 0.46<br>(0.26 to<br>0.70)                         | 0.37<br>(0.21 to<br>0.57)                         | 0.45<br>(0.26 to<br>0.70)                         |
| Unintentional suffocation                       | 44.50<br>(30.84 to<br>74.96)                               | 21.39<br>(11.66 to<br>36.92)                             | 15.94<br>(8.53 to<br>27.65)                              | 22.05<br>(12.02 to<br>38.14)                             | 0.77<br>(0.55 to<br>1.21)                         | 0.42<br>(0.24 to<br>0.70)                         | 0.33<br>(0.18 to<br>0.55)                         | 0.43<br>(0.24 to<br>0.70)                         |
| Other exposure to mechanical forces             | 135.68<br>(90.54 to<br>209.13)                             | 85.97<br>(41.33 to<br>155.52)                            | 58.76<br>(27.79 to<br>106.13)                            | 87.53<br>(43.04 to<br>155.09)                            | 3.32<br>(2.22 to<br>4.91)                         | 2.39<br>(1.29 to<br>4.05)                         | 1.69<br>(0.89 to<br>2.86)                         | 2.39<br>(1.25 to<br>3.97)                         |
| Adverse effects of medical treatment            | 69.73<br>(46.89 to<br>98.67)                               | 49.29<br>(27.88 to<br>82.59)                             | 42.51<br>(23.58 to<br>71.28)                             | 48.40<br>(27.74 to<br>79.19)                             | 2.19<br>(1.51 to<br>3.11)                         | 1.83<br>(1.20 to<br>2.72)                         | 1.66<br>(1.07 to<br>2.52)                         | 1.75<br>(1.15 to<br>2.59)                         |
| Animal contact                                  | 14.63<br>(9.87 to<br>24.41)                                | 12.53<br>(6.47 to<br>22.17)                              | 9.95<br>(4.97 to<br>17.84)                               | 12.47<br>(6.50 to<br>21.64)                              | 0.41<br>(0.27 to<br>0.70)                         | 0.40<br>(0.23 to<br>0.68)                         | 0.33<br>(0.19 to<br>0.56)                         | 0.39<br>(0.23 to<br>0.65)                         |
| Venomous animal contact                         | 8.82<br>(5.51 to<br>15.33)                                 | 7.32<br>(3.37 to<br>13.70)                               | 6.13<br>(2.81 to<br>11.57)                               | 7.23<br>(3.38 to<br>13.22)                               | 0.24<br>(0.15 to<br>0.43)                         | 0.23<br>(0.12 to<br>0.41)                         | 0.20<br>(0.10 to<br>0.36)                         | 0.22<br>(0.11 to<br>0.40)                         |
| Non-venomous animal contact                     | 5.81<br>(3.37 to<br>9.52)                                  | 5.22<br>(2.53 to<br>9.84)                                | 3.82<br>(1.82 to<br>7.15)                                | 5.24<br>(2.58 to<br>9.61)                                | 0.17<br>(0.10 to<br>0.29)                         | 0.17<br>(0.09 to<br>0.31)                         | 0.13<br>(0.07 to<br>0.24)                         | 0.17<br>(0.09 to<br>0.30)                         |
| Foreign body                                    | 289.49<br>(202.05 to<br>452.25)                            | 200.81<br>(106.29 to<br>343.75)                          | 181.99<br>(93.78 to<br>317.64)                           | 197.04<br>(105.12 to<br>329.67)                          | 7.53<br>(5.22 to<br>11.80)                        | 6.02<br>(3.41 to<br>9.66)                         | 5.64<br>(3.12 to<br>9.17)                         | 5.79<br>(3.34 to<br>9.34)                         |
| Pulmonary aspiration and foreign body in airway | 274.11<br>(190.40 to<br>434.37)                            | 186.82<br>(97.80 to<br>320.59)                           | 166.31<br>(85.79 to<br>293.22)                           | 183.62<br>(98.84 to<br>315.44)                           | 7.14<br>(4.94 to<br>11.26)                        | 5.61<br>(3.18 to<br>9.18)                         | 5.16<br>(2.86 to<br>8.53)                         | 5.40<br>(3.07 to<br>8.78)                         |

|                                             |                                                            |                                                          |                                                          |                                                          |                                                    |                                                    |                                                    |                                                    |
|---------------------------------------------|------------------------------------------------------------|----------------------------------------------------------|----------------------------------------------------------|----------------------------------------------------------|----------------------------------------------------|----------------------------------------------------|----------------------------------------------------|----------------------------------------------------|
|                                             | 15.39<br>(10.38 to<br>25.95)                               | 14.00<br>(6.94 to<br>25.20)                              | 15.68<br>(7.61 to<br>28.37)                              | 13.42<br>(6.75 to<br>23.93)                              | 0.39<br>(0.27 to<br>0.67)                          | 0.41<br>(0.23 to<br>0.69)                          | 0.48<br>(0.27 to<br>0.81)                          | 0.39<br>(0.22 to<br>0.65)                          |
| Foreign body in other body part             |                                                            |                                                          |                                                          |                                                          |                                                    |                                                    |                                                    |                                                    |
|                                             | 472.01<br>(291.99 to<br>918.45)                            | 384.73<br>(163.95 to<br>794.66)                          | 256.66<br>(106.60 to<br>568.61)                          | 390.12<br>(170.49 to<br>814.84)                          | 13.65<br>(8.57 to<br>26.34)                        | 12.00<br>(5.58 to<br>24.30)                        | 8.17<br>(3.72 to<br>17.59)                         | 11.99<br>(5.85 to<br>24.51)                        |
| Environmental heat and cold exposure        |                                                            |                                                          |                                                          |                                                          |                                                    |                                                    |                                                    |                                                    |
|                                             | 136.85<br>(95.71 to<br>185.25)                             | 47.33<br>(22.17 to<br>88.71)                             | 21.89<br>(10.00 to<br>38.52)                             | 50.47<br>(22.86 to<br>90.23)                             | 3.34<br>(2.34 to<br>4.52)                          | 1.33<br>(0.70 to<br>2.26)                          | 0.64<br>(0.33 to<br>1.06)                          | 1.38<br>(0.71 to<br>2.27)                          |
| Other unintentional injuries                |                                                            |                                                          |                                                          |                                                          |                                                    |                                                    |                                                    |                                                    |
| <b>Self-harm and interpersonal violence</b> | <b>3,200.27</b><br><b>(2,173.67 to</b><br><b>4,605.78)</b> | <b>2,392.60</b><br><b>(740.19 to</b><br><b>5,904.77)</b> | <b>1,716.36</b><br><b>(559.55 to</b><br><b>4,121.13)</b> | <b>2,669.53</b><br><b>(803.82 to</b><br><b>6,383.39)</b> | <b>76.60</b><br><b>(52.51 to</b><br><b>108.52)</b> | <b>63.87</b><br><b>(24.01 to</b><br><b>141.75)</b> | <b>47.69</b><br><b>(18.83 to</b><br><b>101.01)</b> | <b>69.41</b><br><b>(24.89 to</b><br><b>154.47)</b> |

| Russia                                                                              |                                      |                                       |                                       |                                       |                                      |                                      |                                      |                                      |
|-------------------------------------------------------------------------------------|--------------------------------------|---------------------------------------|---------------------------------------|---------------------------------------|--------------------------------------|--------------------------------------|--------------------------------------|--------------------------------------|
| Cause                                                                               | YLLs (in 1000s)                      |                                       |                                       |                                       | Deaths (in 1000s)                    |                                      |                                      |                                      |
|                                                                                     | 2016                                 | 2040 Forecast                         | 2040 Better Scenario                  | 2040 Worse Scenario                   | 2016                                 | 2040 Forecast                        | 2040 Better Scenario                 | 2040 Worse Scenario                  |
| Self-harm                                                                           | 2,135.08<br>(1,419.32 to 3,055.98)   | 1,863.28<br>(491.56 to 4,798.69)      | 1,333.42<br>(383.86 to 3,362.51)      | 2,110.24<br>(542.84 to 5,532.87)      | 52.00<br>(35.19 to 75.09)            | 50.25<br>(16.59 to 119.57)           | 37.53<br>(13.17 to 83.27)            | 55.23<br>(17.24 to 131.79)           |
| Self-harm by firearm                                                                | 77.17<br>(43.60 to 123.12)           | 51.15<br>(12.27 to 143.69)            | 31.94<br>(7.91 to 92.86)              | 58.95<br>(13.63 to 166.66)            | 1.92<br>(1.10 to 3.11)               | 1.38<br>(0.40 to 3.60)               | 0.90<br>(0.27 to 2.36)               | 1.55<br>(0.44 to 4.10)               |
| Self-harm by other specified means                                                  | 2,057.91<br>(1,368.78 to 2,975.95)   | 1,812.13<br>(480.49 to 4,661.97)      | 1,301.47<br>(375.29 to 3,275.91)      | 2,051.29<br>(529.36 to 5,382.59)      | 50.08<br>(33.91 to 72.35)            | 48.87<br>(16.17 to 116.29)           | 36.64<br>(12.92 to 81.39)            | 53.67<br>(16.69 to 128.21)           |
| Interpersonal violence                                                              | 1,065.19<br>(605.77 to 1,718.33)     | 529.32<br>(192.82 to 1,133.53)        | 382.94<br>(143.48 to 814.78)          | 559.28<br>(206.79 to 1,224.46)        | 24.60<br>(14.02 to 39.66)            | 13.62<br>(5.41 to 27.53)             | 10.16<br>(4.14 to 20.20)             | 14.18<br>(5.75 to 29.54)             |
| Physical violence by firearm                                                        | 81.96<br>(33.86 to 240.74)           | 30.15<br>(9.45 to 91.80)              | 18.86<br>(6.13 to 54.04)              | 31.55<br>(9.97 to 94.24)              | 1.67<br>(0.71 to 4.76)               | 0.65<br>(0.22 to 1.76)               | 0.41<br>(0.15 to 1.12)               | 0.67<br>(0.23 to 1.90)               |
| Physical violence by sharp object                                                   | 381.34<br>(201.71 to 660.29)         | 167.73<br>(64.55 to 354.00)           | 115.50<br>(45.65 to 230.77)           | 173.15<br>(65.48 to 372.87)           | 8.46<br>(4.52 to 14.45)              | 4.06<br>(1.72 to 8.05)               | 2.88<br>(1.22 to 5.51)               | 4.14<br>(1.71 to 8.48)               |
| Physical violence by other means                                                    | 601.89<br>(334.01 to 963.74)         | 331.44<br>(113.11 to 783.11)          | 248.59<br>(83.64 to 569.91)           | 354.58<br>(119.04 to 825.17)          | 14.46<br>(8.12 to 22.97)             | 8.91<br>(3.33 to 19.51)              | 6.87<br>(2.57 to 14.61)              | 9.36<br>(3.49 to 20.82)              |
| <b>Forces of nature, conflict and terrorism, and executions and police conflict</b> | <b>2.96</b><br><b>(1.73 to 4.64)</b> | <b>7.21</b><br><b>(0.00 to 63.05)</b> | <b>7.34</b><br><b>(0.00 to 64.25)</b> | <b>7.11</b><br><b>(0.00 to 62.63)</b> | <b>0.06</b><br><b>(0.04 to 0.10)</b> | <b>0.19</b><br><b>(0.00 to 1.86)</b> | <b>0.20</b><br><b>(0.00 to 2.02)</b> | <b>0.18</b><br><b>(0.00 to 1.79)</b> |
| Exposure to forces of nature                                                        | 0.00<br>(0.00 to 0.00)               | 1.46<br>(0.00 to 7.74)                | 1.49<br>(0.00 to 7.90)                | 1.43<br>(0.00 to 7.62)                | 0.00<br>(0.00 to 0.00)               | 0.04<br>(0.00 to 0.21)               | 0.05<br>(0.00 to 0.23)               | 0.04<br>(0.00 to 0.21)               |
| Conflict and terrorism                                                              | 0.00<br>(0.00 to 0.00)               | 5.75<br>(0.00 to 38.70)               | 5.85<br>(0.00 to 39.13)               | 5.68<br>(0.00 to 38.09)               | 0.00<br>(0.00 to 0.00)               | 0.15<br>(0.00 to 1.04)               | 0.16<br>(0.00 to 1.13)               | 0.14<br>(0.00 to 1.00)               |
| Executions and police conflict                                                      | 2.96<br>(1.73 to 4.64)               | 0.00<br>(0.00 to 0.00)                | 0.00<br>(0.00 to 0.00)                | 0.00<br>(0.00 to 0.00)                | 0.06<br>(0.04 to 0.10)               | 0.00<br>(0.00 to 0.00)               | 0.00<br>(0.00 to 0.00)               | 0.00<br>(0.00 to 0.00)               |

| Ukraine                                                           |                                       |                                      |                                    |                                      |                              |                              |                              |                              |
|-------------------------------------------------------------------|---------------------------------------|--------------------------------------|------------------------------------|--------------------------------------|------------------------------|------------------------------|------------------------------|------------------------------|
| Cause                                                             | YLLs (in 1000s)                       |                                      |                                    |                                      | Deaths (in 1000s)            |                              |                              |                              |
|                                                                   | 2016                                  | 2040 Forecast                        | 2040 Better Scenario               | 2040 Worse Scenario                  | 2016                         | 2040 Forecast                | 2040 Better Scenario         | 2040 Worse Scenario          |
| All causes                                                        | 13,073.59<br>(10,547.66 to 16,168.26) | 10,756.22<br>(7,516.96 to 15,239.59) | 6,429.18<br>(4,431.09 to 9,182.24) | 13,180.16<br>(9,048.10 to 18,552.22) | 663.40<br>(547.83 to 813.24) | 631.86<br>(520.47 to 768.85) | 403.46<br>(321.89 to 505.90) | 729.32<br>(592.60 to 879.03) |
| Communicable, maternal, neonatal, and nutritional diseases        | 868.57<br>(733.33 to 1,016.47)        | 525.72<br>(370.59 to 748.90)         | 282.86<br>(198.35 to 383.19)       | 667.08<br>(454.42 to 942.80)         | 19.33<br>(16.48 to 22.60)    | 13.65<br>(9.75 to 19.44)     | 7.56<br>(5.46 to 10.21)      | 17.04<br>(11.76 to 24.47)    |
| HIV/AIDS and tuberculosis                                         | 442.31<br>(399.44 to 491.31)          | 267.08<br>(198.96 to 391.91)         | 144.09<br>(95.70 to 193.93)        | 337.15<br>(255.57 to 483.38)         | 10.11<br>(9.04 to 11.37)     | 6.17<br>(4.32 to 9.51)       | 3.11<br>(1.88 to 4.38)       | 7.80<br>(5.65 to 11.95)      |
| Tuberculosis                                                      | 122.22<br>(87.75 to 164.92)           | 71.96<br>(26.10 to 177.47)           | 15.62<br>(5.49 to 40.12)           | 92.91<br>(33.96 to 229.35)           | 3.43<br>(2.50 to 4.59)       | 2.21<br>(0.91 to 5.11)       | 0.49<br>(0.19 to 1.18)       | 2.82<br>(1.14 to 6.59)       |
| HIV/AIDS                                                          | 320.09<br>(294.87 to 351.82)          | 195.12<br>(151.58 to 234.58)         | 128.47<br>(83.28 to 171.10)        | 244.24<br>(200.23 to 295.69)         | 6.68<br>(6.16 to 7.33)       | 3.96<br>(2.88 to 4.94)       | 2.61<br>(1.49 to 3.68)       | 4.99<br>(3.93 to 6.18)       |
| Diarrhea, lower respiratory, and other common infectious diseases | 230.90<br>(173.77 to 302.79)          | 174.71<br>(89.09 to 302.88)          | 89.82<br>(48.85 to 152.92)         | 238.28<br>(117.86 to 416.39)         | 6.58<br>(5.09 to 8.52)       | 6.18<br>(3.81 to 9.70)       | 3.60<br>(2.34 to 5.52)       | 7.86<br>(4.54 to 12.97)      |
| Diarrheal diseases                                                | 2.84<br>(1.80 to 4.63)                | 1.33<br>(0.27 to 4.40)               | 2.74<br>(0.67 to 7.70)             | 1.66<br>(0.31 to 5.39)               | 0.07<br>(0.06 to 0.10)       | 0.66<br>(0.01 to 0.20)       | 0.17<br>(0.03 to 0.43)       | 0.07<br>(0.02 to 0.23)       |
| Intestinal infectious diseases                                    | 0.07<br>(0.03 to 0.14)                | 0.04<br>(0.02 to 0.07)               | 0.04<br>(0.02 to 0.07)             | 0.04<br>(0.02 to 0.07)               | 0.00<br>(0.00 to 0.00)       | 0.00<br>(0.00 to 0.00)       | 0.00<br>(0.00 to 0.00)       | 0.00<br>(0.00 to 0.00)       |
| Typhoid fever                                                     | 0.02<br>(0.01 to 0.05)                | 0.01<br>(0.00 to 0.02)               | 0.02<br>(0.01 to 0.04)             | 0.01<br>(0.00 to 0.02)               | 0.00<br>(0.00 to 0.00)       | 0.00<br>(0.00 to 0.00)       | 0.00<br>(0.00 to 0.00)       | 0.00<br>(0.00 to 0.00)       |
| Paratyphoid fever                                                 | 0.04<br>(0.02 to 0.09)                | 0.02<br>(0.01 to 0.05)               | 0.01<br>(0.00 to 0.03)             | 0.02<br>(0.01 to 0.05)               | 0.00<br>(0.00 to 0.00)       | 0.00<br>(0.00 to 0.00)       | 0.00<br>(0.00 to 0.00)       | 0.00<br>(0.00 to 0.00)       |
| Other intestinal infectious diseases                              | 0.00<br>(0.00 to 0.01)                | 0.00<br>(0.00 to 0.01)               | 0.00<br>(0.00 to 0.00)             | 0.00<br>(0.01 to 0.01)               | 0.00<br>(0.00 to 0.00)       | 0.00<br>(0.00 to 0.00)       | 0.00<br>(0.00 to 0.00)       | 0.00<br>(0.00 to 0.00)       |
| Lower respiratory infections                                      | 191.66<br>(143.94 to 255.69)          | 152.24<br>(73.43 to 272.64)          | 73.18<br>(35.91 to 131.72)         | 215.10<br>(100.80 to 388.74)         | 5.73<br>(4.39 to 7.42)       | 5.56<br>(3.27 to 8.96)       | 3.04<br>(1.86 to 4.82)       | 7.25<br>(3.98 to 12.23)      |
| Upper respiratory infections                                      | 0.35<br>(0.18 to 0.65)                | 0.35<br>(0.14 to 0.77)               | 0.11<br>(0.04 to 0.23)             | 0.35<br>(0.15 to 0.77)               | 0.01<br>(0.01 to 0.02)       | 0.02<br>(0.01 to 0.04)       | 0.01<br>(0.01 to 0.01)       | 0.02<br>(0.01 to 0.03)       |
| Otitis media                                                      | 0.01<br>(0.01 to 0.01)                | 0.00<br>(0.00 to 0.01)               | 0.00<br>(0.00 to 0.01)             | 0.00<br>(0.00 to 0.01)               | 0.00<br>(0.00 to 0.00)       | 0.00<br>(0.00 to 0.00)       | 0.00<br>(0.00 to 0.00)       | 0.00<br>(0.00 to 0.00)       |
| Meningitis                                                        | 20.72<br>(14.65 to 28.87)             | 9.30<br>(5.76 to 14.90)              | 4.17<br>(2.59 to 6.45)             | 9.40<br>(5.89 to 14.93)              | 0.43<br>(0.32 to 0.57)       | 0.24<br>(0.16 to 0.34)       | 0.12<br>(0.08 to 0.17)       | 0.23<br>(0.16 to 0.34)       |
| Pneumococcal meningitis                                           | 1.39<br>(0.93 to 2.02)                | 0.59<br>(0.33 to 1.00)               | 0.51<br>(0.28 to 0.85)             | 0.57<br>(0.32 to 0.96)               | 0.03<br>(0.02 to 0.05)       | 0.02<br>(0.01 to 0.03)       | 0.02<br>(0.01 to 0.03)       | 0.02<br>(0.01 to 0.03)       |
| H influenzae type B meningitis                                    | 1.50<br>(1.01 to 2.23)                | 1.49<br>(0.45 to 4.53)               | 0.55<br>(0.30 to 1.08)             | 1.55<br>(0.45 to 4.85)               | 0.03<br>(0.02 to 0.04)       | 0.02<br>(0.01 to 0.06)       | 0.01<br>(0.01 to 0.02)       | 0.02<br>(0.01 to 0.06)       |
| Meningococcal meningitis                                          | 11.53<br>(8.01 to 16.71)              | 4.01<br>(2.47 to 6.17)               | 1.78<br>(1.07 to 2.80)             | 4.08<br>(2.53 to 6.11)               | 0.22<br>(0.16 to 0.29)       | 0.10<br>(0.07 to 0.14)       | 0.05<br>(0.03 to 0.07)       | 0.10<br>(0.07 to 0.14)       |
| Other meningitis                                                  | 6.30<br>(4.50 to 8.43)                | 3.21<br>(2.01 to 4.84)               | 1.33<br>(0.80 to 2.10)             | 3.20<br>(2.04 to 4.77)               | 0.15<br>(0.11 to 0.20)       | 0.09<br>(0.06 to 0.14)       | 0.04<br>(0.02 to 0.06)       | 0.09<br>(0.06 to 0.13)       |
| Encephalitis                                                      | 14.49<br>(9.28 to 19.70)              | 9.97<br>(6.15 to 15.04)              | 8.96<br>(5.41 to 14.12)            | 9.96<br>(6.17 to 15.05)              | 0.31<br>(0.22 to 0.45)       | 0.27<br>(0.17 to 0.44)       | 0.25<br>(0.15 to 0.41)       | 0.26<br>(0.17 to 0.42)       |

|                |                           |                           |                           |                           |                           |                           |                           |                           |
|----------------|---------------------------|---------------------------|---------------------------|---------------------------|---------------------------|---------------------------|---------------------------|---------------------------|
| Diphtheria     | 0.26<br>(0.16 to<br>0.39) | 0.02<br>(0.01 to<br>0.05) | 0.02<br>(0.01 to<br>0.04) | 0.02<br>(0.01 to<br>0.05) | 0.01<br>(0.00 to<br>0.01) | 0.00<br>(0.00 to<br>0.00) | 0.00<br>(0.00 to<br>0.00) | 0.00<br>(0.00 to<br>0.00) |
| Whooping cough | 0.14<br>(0.02 to<br>0.37) | 0.09<br>(0.01 to<br>0.35) | 0.00<br>(0.00 to<br>0.01) | 0.10<br>(0.01 to<br>0.37) | 0.00<br>(0.00 to<br>0.00) | 0.00<br>(0.00 to<br>0.00) | 0.00<br>(0.00 to<br>0.00) | 0.00<br>(0.00 to<br>0.00) |
| Tetanus        | 0.21<br>(0.14 to<br>0.40) | 0.01<br>(0.01 to<br>0.03) | 0.01<br>(0.01 to<br>0.03) | 0.01<br>(0.01 to<br>0.02) | 0.01<br>(0.01 to<br>0.02) | 0.00<br>(0.00 to<br>0.00) | 0.00<br>(0.00 to<br>0.00) | 0.00<br>(0.00 to<br>0.00) |
| Measles        | 0.01<br>(0.00 to<br>0.02) | 1.28<br>(0.00 to<br>7.71) | 0.55<br>(0.00 to<br>3.56) | 1.58<br>(0.00 to<br>9.65) | 0.00<br>(0.00 to<br>0.00) | 0.02<br>(0.00 to<br>0.14) | 0.01<br>(0.00 to<br>0.07) | 0.02<br>(0.00 to<br>0.17) |

| Ukraine                                               |                                                |                                                |                                                |                                                |                                                |                                                |                                                |                                                |
|-------------------------------------------------------|------------------------------------------------|------------------------------------------------|------------------------------------------------|------------------------------------------------|------------------------------------------------|------------------------------------------------|------------------------------------------------|------------------------------------------------|
| Cause                                                 | YLLs (in 1000s)                                |                                                |                                                |                                                | Deaths (in 1000s)                              |                                                |                                                |                                                |
|                                                       | 2016                                           | 2040 Forecast                                  | 2040 Better Scenario                           | 2040 Worse Scenario                            | 2016                                           | 2040 Forecast                                  | 2040 Better Scenario                           | 2040 Worse Scenario                            |
| Varicella and herpes zoster                           | 0.13<br>(0.07 to<br>0.25)                      | 0.06<br>(0.03 to<br>0.11)                      | 0.03<br>(0.02 to<br>0.06)                      | 0.06<br>(0.03 to<br>0.11)                      | 0.00<br>(0.00 to<br>0.01)                      | 0.00<br>(0.00 to<br>0.01)                      | 0.00<br>(0.00 to<br>0.00)                      | 0.00<br>(0.00 to<br>0.01)                      |
| <b>Neglected tropical diseases and malaria</b>        | <b>0.79</b><br><b>(0.62 to</b><br><b>1.02)</b> | <b>0.42</b><br><b>(0.30 to</b><br><b>0.58)</b> | <b>0.31</b><br><b>(0.22 to</b><br><b>0.43)</b> | <b>0.42</b><br><b>(0.30 to</b><br><b>0.57)</b> | <b>0.02</b><br><b>(0.02 to</b><br><b>0.03)</b> | <b>0.02</b><br><b>(0.01 to</b><br><b>0.02)</b> | <b>0.01</b><br><b>(0.01 to</b><br><b>0.01)</b> | <b>0.02</b><br><b>(0.01 to</b><br><b>0.02)</b> |
| Malaria                                               | 0.00<br>(0.00 to<br>0.00)                      | 0.00<br>(0.00 to<br>0.00)                      | 0.00<br>(0.00 to<br>0.00)                      | 0.00<br>(0.00 to<br>0.00)                      | 0.00<br>(0.00 to<br>0.00)                      | 0.00<br>(0.00 to<br>0.00)                      | 0.00<br>(0.00 to<br>0.00)                      | 0.00<br>(0.00 to<br>0.00)                      |
| Chagas disease                                        | 0.00<br>(0.00 to<br>0.00)                      | 0.00<br>(0.00 to<br>0.00)                      | 0.00<br>(0.00 to<br>0.00)                      | 0.00<br>(0.00 to<br>0.00)                      | 0.00<br>(0.00 to<br>0.00)                      | 0.00<br>(0.00 to<br>0.00)                      | 0.00<br>(0.00 to<br>0.00)                      | 0.00<br>(0.00 to<br>0.00)                      |
| Leishmaniasis                                         | 0.00<br>(0.00 to<br>0.00)                      | 0.00<br>(0.00 to<br>0.00)                      | 0.00<br>(0.00 to<br>0.00)                      | 0.00<br>(0.00 to<br>0.00)                      | 0.00<br>(0.00 to<br>0.00)                      | 0.00<br>(0.00 to<br>0.00)                      | 0.00<br>(0.00 to<br>0.00)                      | 0.00<br>(0.00 to<br>0.00)                      |
| African trypanosomiasis                               | 0.00<br>(0.00 to<br>0.00)                      | 0.00<br>(0.00 to<br>0.00)                      | 0.00<br>(0.00 to<br>0.00)                      | 0.00<br>(0.00 to<br>0.00)                      | 0.00<br>(0.00 to<br>0.00)                      | 0.00<br>(0.00 to<br>0.00)                      | 0.00<br>(0.00 to<br>0.00)                      | 0.00<br>(0.00 to<br>0.00)                      |
| Schistosomiasis                                       | 0.00<br>(0.00 to<br>0.00)                      | 0.00<br>(0.00 to<br>0.00)                      | 0.00<br>(0.00 to<br>0.00)                      | 0.00<br>(0.00 to<br>0.00)                      | 0.00<br>(0.00 to<br>0.00)                      | 0.00<br>(0.00 to<br>0.00)                      | 0.00<br>(0.00 to<br>0.00)                      | 0.00<br>(0.00 to<br>0.00)                      |
| Cysticercosis                                         | 0.07<br>(0.05 to<br>0.09)                      | 0.02<br>(0.01 to<br>0.03)                      | 0.02<br>(0.01 to<br>0.02)                      | 0.02<br>(0.01 to<br>0.03)                      | 0.00<br>(0.00 to<br>0.00)                      | 0.00<br>(0.00 to<br>0.00)                      | 0.00<br>(0.00 to<br>0.00)                      | 0.00<br>(0.00 to<br>0.00)                      |
| Cystic echinococcosis                                 | 0.41<br>(0.30 to<br>0.53)                      | 0.23<br>(0.16 to<br>0.31)                      | 0.12<br>(0.08 to<br>0.17)                      | 0.23<br>(0.16 to<br>0.30)                      | 0.02<br>(0.01 to<br>0.02)                      | 0.01<br>(0.01 to<br>0.01)                      | 0.01<br>(0.00 to<br>0.01)                      | 0.01<br>(0.01 to<br>0.01)                      |
| Dengue                                                | 0.00<br>(0.00 to<br>0.00)                      | 0.00<br>(0.00 to<br>0.00)                      | 0.00<br>(0.00 to<br>0.00)                      | 0.00<br>(0.00 to<br>0.00)                      | 0.00<br>(0.00 to<br>0.00)                      | 0.00<br>(0.00 to<br>0.00)                      | 0.00<br>(0.00 to<br>0.00)                      | 0.00<br>(0.00 to<br>0.00)                      |
| Yellow fever                                          | 0.00<br>(0.00 to<br>0.00)                      | 0.00<br>(0.00 to<br>0.00)                      | 0.00<br>(0.00 to<br>0.00)                      | 0.00<br>(0.00 to<br>0.00)                      | 0.00<br>(0.00 to<br>0.00)                      | 0.00<br>(0.00 to<br>0.00)                      | 0.00<br>(0.00 to<br>0.00)                      | 0.00<br>(0.00 to<br>0.00)                      |
| Rabies                                                | 0.05<br>(0.03 to<br>0.07)                      | 0.02<br>(0.01 to<br>0.04)                      | 0.01<br>(0.01 to<br>0.02)                      | 0.02<br>(0.01 to<br>0.04)                      | 0.00<br>(0.00 to<br>0.00)                      | 0.00<br>(0.00 to<br>0.00)                      | 0.00<br>(0.00 to<br>0.00)                      | 0.00<br>(0.00 to<br>0.00)                      |
| Intestinal nematode infections                        | 0.00<br>(0.00 to<br>0.00)                      | 0.00<br>(0.00 to<br>0.00)                      | 0.00<br>(0.00 to<br>0.00)                      | 0.00<br>(0.00 to<br>0.00)                      | 0.00<br>(0.00 to<br>0.00)                      | 0.00<br>(0.00 to<br>0.00)                      | 0.00<br>(0.00 to<br>0.00)                      | 0.00<br>(0.00 to<br>0.00)                      |
| Other neglected tropical diseases                     | 0.27<br>(0.21 to<br>0.36)                      | 0.15<br>(0.11 to<br>0.21)                      | 0.16<br>(0.11 to<br>0.23)                      | 0.16<br>(0.11 to<br>0.22)                      | 0.01<br>(0.00 to<br>0.01)                      | 0.00<br>(0.00 to<br>0.01)                      | 0.00<br>(0.00 to<br>0.01)                      | 0.00<br>(0.00 to<br>0.01)                      |
| <b>Maternal disorders</b>                             | <b>5.93</b><br><b>(3.44 to</b><br><b>9.06)</b> | <b>3.44</b><br><b>(1.46 to</b><br><b>6.88)</b> | <b>1.94</b><br><b>(0.78 to</b><br><b>3.87)</b> | <b>3.63</b><br><b>(1.49 to</b><br><b>7.26)</b> | <b>0.11</b><br><b>(0.06 to</b><br><b>0.17)</b> | <b>0.06</b><br><b>(0.03 to</b><br><b>0.13)</b> | <b>0.04</b><br><b>(0.01 to</b><br><b>0.07)</b> | <b>0.07</b><br><b>(0.03 to</b><br><b>0.13)</b> |
| Maternal hemorrhage                                   | 0.79<br>(0.39 to<br>1.36)                      | 0.45<br>(0.16 to<br>0.89)                      | 0.26<br>(0.09 to<br>0.55)                      | 0.47<br>(0.17 to<br>1.00)                      | 0.01<br>(0.01 to<br>0.03)                      | 0.01<br>(0.00 to<br>0.02)                      | 0.00<br>(0.00 to<br>0.01)                      | 0.01<br>(0.00 to<br>0.02)                      |
| Maternal sepsis and other maternal infections         | 0.11<br>(0.04 to<br>0.22)                      | 0.06<br>(0.02 to<br>0.14)                      | 0.03<br>(0.01 to<br>0.08)                      | 0.06<br>(0.02 to<br>0.15)                      | 0.00<br>(0.00 to<br>0.00)                      | 0.00<br>(0.00 to<br>0.00)                      | 0.00<br>(0.00 to<br>0.00)                      | 0.00<br>(0.00 to<br>0.00)                      |
| Maternal hypertensive disorders                       | 0.30<br>(0.15 to<br>0.54)                      | 0.19<br>(0.07 to<br>0.41)                      | 0.10<br>(0.04 to<br>0.22)                      | 0.20<br>(0.07 to<br>0.45)                      | 0.01<br>(0.00 to<br>0.01)                      | 0.00<br>(0.00 to<br>0.01)                      | 0.00<br>(0.00 to<br>0.00)                      | 0.00<br>(0.00 to<br>0.01)                      |
| Maternal obstructed labor and uterine rupture         | 0.04<br>(0.02 to<br>0.09)                      | 0.03<br>(0.01 to<br>0.07)                      | 0.01<br>(0.00 to<br>0.03)                      | 0.03<br>(0.01 to<br>0.07)                      | 0.00<br>(0.00 to<br>0.00)                      | 0.00<br>(0.00 to<br>0.00)                      | 0.00<br>(0.00 to<br>0.00)                      | 0.00<br>(0.00 to<br>0.00)                      |
| Maternal abortion, miscarriage, and ectopic pregnancy | 1.72<br>(0.92 to<br>2.90)                      | 0.89<br>(0.33 to<br>2.13)                      | 0.49<br>(0.17 to<br>1.15)                      | 0.95<br>(0.33 to<br>2.24)                      | 0.03<br>(0.02 to<br>0.06)                      | 0.02<br>(0.01 to<br>0.04)                      | 0.01<br>(0.00 to<br>0.02)                      | 0.02<br>(0.01 to<br>0.04)                      |

|                                        |                           |                           |                           |                           |                           |                           |                           |                           |
|----------------------------------------|---------------------------|---------------------------|---------------------------|---------------------------|---------------------------|---------------------------|---------------------------|---------------------------|
|                                        | 1.87<br>(0.99 to<br>3.29) | 1.07<br>(0.37 to<br>2.38) | 0.58<br>(0.19 to<br>1.27) | 1.14<br>(0.39 to<br>2.58) | 0.03<br>(0.02 to<br>0.06) | 0.02<br>(0.01 to<br>0.04) | 0.01<br>(0.00 to<br>0.02) | 0.02<br>(0.01 to<br>0.04) |
| Indirect maternal deaths               |                           |                           |                           |                           |                           |                           |                           |                           |
|                                        | 0.05<br>(0.02 to<br>0.11) | 0.03<br>(0.01 to<br>0.07) | 0.01<br>(0.00 to<br>0.04) | 0.03<br>(0.01 to<br>0.07) | 0.00<br>(0.00 to<br>0.00) | 0.00<br>(0.00 to<br>0.00) | 0.00<br>(0.00 to<br>0.00) | 0.00<br>(0.00 to<br>0.00) |
| Late maternal deaths                   |                           |                           |                           |                           |                           |                           |                           |                           |
|                                        | 0.02<br>(0.01 to<br>0.03) | 0.04<br>(0.01 to<br>0.14) | 0.03<br>(0.01 to<br>0.09) | 0.05<br>(0.01 to<br>0.15) | 0.00<br>(0.00 to<br>0.00) | 0.00<br>(0.00 to<br>0.00) | 0.00<br>(0.00 to<br>0.00) | 0.00<br>(0.00 to<br>0.00) |
| Maternal deaths aggravated by HIV/AIDS |                           |                           |                           |                           |                           |                           |                           |                           |
|                                        | 1.03<br>(0.37 to<br>2.25) | 0.68<br>(0.21 to<br>1.60) | 0.42<br>(0.13 to<br>0.99) | 0.71<br>(0.22 to<br>1.71) | 0.02<br>(0.01 to<br>0.04) | 0.01<br>(0.00 to<br>0.03) | 0.01<br>(0.00 to<br>0.02) | 0.01<br>(0.00 to<br>0.03) |
| Other maternal disorders               |                           |                           |                           |                           |                           |                           |                           |                           |

| Ukraine                                                                 |                                    |                                   |                                  |                                   |                               |                               |                               |                               |
|-------------------------------------------------------------------------|------------------------------------|-----------------------------------|----------------------------------|-----------------------------------|-------------------------------|-------------------------------|-------------------------------|-------------------------------|
| Cause                                                                   | YLLs (in 1000s)                    |                                   |                                  |                                   | Deaths (in 1000s)             |                               |                               |                               |
|                                                                         | 2016                               | 2040 Forecast                     | 2040 Better Scenario             | 2040 Worse Scenario               | 2016                          | 2040 Forecast                 | 2040 Better Scenario          | 2040 Worse Scenario           |
| <b>Neonatal disorders</b>                                               | <b>163.69</b><br>(95.72 to 261.59) | <b>63.76</b><br>(21.68 to 162.77) | <b>32.94</b><br>(11.80 to 82.89) | <b>71.37</b><br>(25.52 to 182.98) | <b>1.89</b><br>(1.11 to 3.02) | <b>0.74</b><br>(0.25 to 1.88) | <b>0.38</b><br>(0.14 to 0.96) | <b>0.82</b><br>(0.29 to 2.11) |
| Neonatal preterm birth                                                  | 53.35<br>(29.84 to 86.18)          | 16.40<br>(6.67 to 34.28)          | 6.35<br>(2.71 to 13.22)          | 19.46<br>(8.17 to 40.92)          | 0.62<br>(0.34 to 1.00)        | 0.19<br>(0.08 to 0.40)        | 0.07<br>(0.03 to 0.15)        | 0.22<br>(0.09 to 0.47)        |
| Neonatal encephalopathy due to birth asphyxia and trauma                | 58.41<br>(33.29 to 96.93)          | 21.75<br>(5.85 to 62.48)          | 8.98<br>(2.68 to 25.57)          | 23.89<br>(6.59 to 67.36)          | 0.67<br>(0.38 to 1.12)        | 0.25<br>(0.07 to 0.72)        | 0.10<br>(0.03 to 0.30)        | 0.28<br>(0.08 to 0.78)        |
| Neonatal sepsis and other neonatal infections                           | 20.08<br>(10.61 to 32.95)          | 10.04<br>(3.42 to 26.54)          | 5.23<br>(1.93 to 13.13)          | 10.99<br>(3.67 to 29.10)          | 0.23<br>(0.12 to 0.38)        | 0.12<br>(0.04 to 0.31)        | 0.06<br>(0.02 to 0.15)        | 0.13<br>(0.04 to 0.34)        |
| Hemolytic disease and other neonatal jaundice                           | 1.28<br>(0.67 to 2.21)             | 0.48<br>(0.09 to 1.53)            | 0.23<br>(0.05 to 0.73)           | 0.53<br>(0.10 to 1.71)            | 0.01<br>(0.01 to 0.03)        | 0.01<br>(0.00 to 0.02)        | 0.00<br>(0.00 to 0.01)        | 0.01<br>(0.00 to 0.02)        |
| Other neonatal disorders                                                | 30.56<br>(16.59 to 50.61)          | 15.09<br>(3.93 to 44.18)          | 12.15<br>(3.33 to 33.32)         | 16.50<br>(4.32 to 49.14)          | 0.35<br>(0.19 to 0.58)        | 0.17<br>(0.05 to 0.51)        | 0.14<br>(0.04 to 0.38)        | 0.19<br>(0.05 to 0.57)        |
| <b>Nutritional deficiencies</b>                                         | <b>4.14</b><br>(3.09 to 5.44)      | <b>2.78</b><br>(1.85 to 4.01)     | <b>2.77</b><br>(1.77 to 4.09)    | <b>2.77</b><br>(1.82 to 3.99)     | <b>0.10</b><br>(0.08 to 0.13) | <b>0.09</b><br>(0.06 to 0.12) | <b>0.09</b><br>(0.06 to 0.12) | <b>0.08</b><br>(0.06 to 0.11) |
| Protein-energy malnutrition                                             | 2.69<br>(1.82 to 3.77)             | 1.43<br>(0.83 to 2.26)            | 1.70<br>(1.01 to 2.68)           | 1.44<br>(0.83 to 2.27)            | 0.06<br>(0.04 to 0.08)        | 0.04<br>(0.02 to 0.06)        | 0.05<br>(0.03 to 0.08)        | 0.04<br>(0.02 to 0.06)        |
| Iodine deficiency                                                       | 0.21<br>(0.02 to 0.53)             | 0.19<br>(0.02 to 0.57)            | 0.16<br>(0.01 to 0.53)           | 0.19<br>(0.02 to 0.58)            | 0.01<br>(0.00 to 0.01)        | 0.01<br>(0.00 to 0.02)        | 0.01<br>(0.00 to 0.02)        | 0.01<br>(0.00 to 0.02)        |
| Dietary iron deficiency                                                 | 0.31<br>(0.21 to 0.48)             | 0.23<br>(0.14 to 0.37)            | 0.26<br>(0.15 to 0.44)           | 0.23<br>(0.14 to 0.37)            | 0.01<br>(0.00 to 0.01)        | 0.01<br>(0.00 to 0.01)        | 0.01<br>(0.00 to 0.01)        | 0.01<br>(0.00 to 0.01)        |
| Other nutritional deficiencies                                          | 0.94<br>(0.51 to 1.32)             | 0.93<br>(0.45 to 1.39)            | 0.65<br>(0.30 to 1.03)           | 0.91<br>(0.47 to 1.36)            | 0.03<br>(0.02 to 0.05)        | 0.04<br>(0.02 to 0.05)        | 0.03<br>(0.01 to 0.04)        | 0.03<br>(0.02 to 0.05)        |
| <b>Other communicable, maternal, neonatal, and nutritional diseases</b> | <b>20.81</b><br>(16.16 to 26.83)   | <b>13.53</b><br>(8.93 to 19.77)   | <b>11.00</b><br>(7.17 to 16.25)  | <b>13.46</b><br>(8.91 to 19.38)   | <b>0.51</b><br>(0.40 to 0.66) | <b>0.40</b><br>(0.28 to 0.56) | <b>0.34</b><br>(0.24 to 0.49) | <b>0.39</b><br>(0.27 to 0.53) |
| Sexually transmitted infections excluding HIV                           | 0.56<br>(0.25 to 1.34)             | 0.33<br>(0.17 to 1.04)            | 0.22<br>(0.11 to 0.56)           | 0.33<br>(0.17 to 1.02)            | 0.01<br>(0.01 to 0.03)        | 0.01<br>(0.01 to 0.03)        | 0.01<br>(0.01 to 0.02)        | 0.01<br>(0.01 to 0.03)        |
| Syphilis                                                                | 0.42<br>(0.13 to 1.08)             | 0.18<br>(0.07 to 0.61)            | 0.09<br>(0.04 to 0.30)           | 0.18<br>(0.07 to 0.64)            | 0.01<br>(0.00 to 0.02)        | 0.00<br>(0.00 to 0.02)        | 0.00<br>(0.00 to 0.01)        | 0.00<br>(0.00 to 0.02)        |
| Chlamydial infection                                                    | 0.03<br>(0.02 to 0.05)             | 0.03<br>(0.01 to 0.06)            | 0.02<br>(0.01 to 0.05)           | 0.03<br>(0.01 to 0.06)            | 0.00<br>(0.00 to 0.00)        | 0.00<br>(0.00 to 0.00)        | 0.00<br>(0.00 to 0.00)        | 0.00<br>(0.00 to 0.00)        |
| Gonococcal infection                                                    | 0.08<br>(0.05 to 0.15)             | 0.08<br>(0.04 to 0.18)            | 0.07<br>(0.04 to 0.14)           | 0.08<br>(0.04 to 0.17)            | 0.00<br>(0.00 to 0.01)        | 0.00<br>(0.00 to 0.01)        | 0.00<br>(0.00 to 0.01)        | 0.00<br>(0.00 to 0.01)        |
| Other sexually transmitted infections                                   | 0.04<br>(0.02 to 0.08)             | 0.04<br>(0.02 to 0.10)            | 0.03<br>(0.01 to 0.07)           | 0.04<br>(0.02 to 0.10)            | 0.00<br>(0.00 to 0.00)        | 0.00<br>(0.00 to 0.00)        | 0.00<br>(0.00 to 0.00)        | 0.00<br>(0.00 to 0.00)        |
| Acute hepatitis                                                         | 6.67<br>(4.90 to 8.91)             | 2.61<br>(1.59 to 3.99)            | 1.22<br>(0.69 to 2.02)           | 2.60<br>(1.62 to 4.08)            | 0.17<br>(0.12 to 0.23)        | 0.08<br>(0.05 to 0.12)        | 0.04<br>(0.02 to 0.06)        | 0.08<br>(0.05 to 0.11)        |
| Acute hepatitis A                                                       | 0.49<br>(0.29 to 0.87)             | 0.14<br>(0.07 to 0.31)            | 0.08<br>(0.04 to 0.17)           | 0.15<br>(0.07 to 0.31)            | 0.01<br>(0.00 to 0.01)        | 0.00<br>(0.00 to 0.00)        | 0.00<br>(0.00 to 0.00)        | 0.00<br>(0.00 to 0.00)        |
| Acute hepatitis B                                                       | 5.23<br>(3.74 to 7.16)             | 2.10<br>(1.23 to 3.35)            | 0.96<br>(0.52 to 1.63)           | 2.09<br>(1.24 to 3.39)            | 0.14<br>(0.10 to 0.19)        | 0.06<br>(0.04 to 0.10)        | 0.03<br>(0.02 to 0.05)        | 0.06<br>(0.04 to 0.09)        |



|                                       |                                                              |                                                             |                                                            |                                                              |                                                      |                                                      |                                                      |                                                      |
|---------------------------------------|--------------------------------------------------------------|-------------------------------------------------------------|------------------------------------------------------------|--------------------------------------------------------------|------------------------------------------------------|------------------------------------------------------|------------------------------------------------------|------------------------------------------------------|
|                                       | 0.18<br>(0.12 to<br>0.27)                                    | 0.09<br>(0.05 to<br>0.15)                                   | 0.04<br>(0.02 to<br>0.07)                                  | 0.08<br>(0.05 to<br>0.15)                                    | 0.01<br>(0.00 to<br>0.01)                            | 0.00<br>(0.00 to<br>0.00)                            | 0.00<br>(0.00 to<br>0.00)                            | 0.00<br>(0.00 to<br>0.00)                            |
| Acute hepatitis C                     |                                                              |                                                             |                                                            |                                                              |                                                      |                                                      |                                                      |                                                      |
|                                       | 0.77<br>(0.52 to<br>1.13)                                    | 0.28<br>(0.16 to<br>0.46)                                   | 0.14<br>(0.08 to<br>0.23)                                  | 0.28<br>(0.17 to<br>0.46)                                    | 0.02<br>(0.01 to<br>0.03)                            | 0.01<br>(0.01 to<br>0.01)                            | 0.00<br>(0.00 to<br>0.01)                            | 0.01<br>(0.00 to<br>0.01)                            |
| Acute hepatitis E                     |                                                              |                                                             |                                                            |                                                              |                                                      |                                                      |                                                      |                                                      |
|                                       | 13.58<br>(10.20 to<br>17.42)                                 | 10.60<br>(6.79 to<br>15.19)                                 | 9.56<br>(6.19 to<br>14.17)                                 | 10.53<br>(6.88 to<br>14.97)                                  | 0.33<br>(0.25 to<br>0.42)                            | 0.31<br>(0.22 to<br>0.43)                            | 0.30<br>(0.20 to<br>0.42)                            | 0.30<br>(0.21 to<br>0.41)                            |
| Other unspecified infectious diseases |                                                              |                                                             |                                                            |                                                              |                                                      |                                                      |                                                      |                                                      |
| <b>Non-communicable diseases</b>      | <b>10,693.16</b><br><b>(8,683.23 to</b><br><b>13,404.96)</b> | <b>9,073.06</b><br><b>(6,421.15 to</b><br><b>12,860.27)</b> | <b>5,505.36</b><br><b>(3,851.64 to</b><br><b>7,845.80)</b> | <b>11,258.72</b><br><b>(7,740.67 to</b><br><b>15,804.85)</b> | <b>605.39</b><br><b>(500.74 to</b><br><b>738.97)</b> | <b>584.40</b><br><b>(482.62 to</b><br><b>709.51)</b> | <b>375.69</b><br><b>(301.51 to</b><br><b>470.33)</b> | <b>676.85</b><br><b>(552.71 to</b><br><b>814.06)</b> |

| Ukraine                              |                                           |                                           |                                           |                                           |                                   |                                    |                                   |                                    |
|--------------------------------------|-------------------------------------------|-------------------------------------------|-------------------------------------------|-------------------------------------------|-----------------------------------|------------------------------------|-----------------------------------|------------------------------------|
| Cause                                | YLLs (in 1000s)                           |                                           |                                           |                                           | Deaths (in 1000s)                 |                                    |                                   |                                    |
|                                      | 2016                                      | 2040 Forecast                             | 2040 Better Scenario                      | 2040 Worse Scenario                       | 2016                              | 2040 Forecast                      | 2040 Better Scenario              | 2040 Worse Scenario                |
| <b>Neoplasms</b>                     | <b>2,073.07</b><br>(1,656.70 to 2,618.02) | <b>2,140.65</b><br>(1,452.87 to 3,032.65) | <b>1,597.38</b><br>(1,079.61 to 2,317.77) | <b>2,405.96</b><br>(1,611.18 to 3,408.41) | <b>87.04</b><br>(70.30 to 108.44) | <b>100.19</b><br>(77.07 to 128.28) | <b>79.48</b><br>(60.71 to 103.20) | <b>108.32</b><br>(82.15 to 140.25) |
| Lip and oral cavity cancer           | 51.49<br>(37.55 to 67.86)                 | 50.47<br>(19.49 to 106.17)                | 28.71<br>(11.49 to 60.31)                 | 69.02<br>(28.03 to 130.13)                | 1.95<br>(1.45 to 2.51)            | 2.01<br>(0.91 to 3.99)             | 1.21<br>(0.57 to 2.40)            | 2.71<br>(1.26 to 4.96)             |
| Nasopharynx cancer                   | 10.93<br>(7.84 to 14.38)                  | 12.03<br>(4.38 to 24.51)                  | 5.48<br>(2.01 to 11.64)                   | 16.74<br>(6.48 to 32.73)                  | 0.37<br>(0.27 to 0.48)            | 0.42<br>(0.17 to 0.85)             | 0.20<br>(0.08 to 0.40)            | 0.58<br>(0.25 to 1.09)             |
| Other pharynx cancer                 | 41.07<br>(28.87 to 55.68)                 | 37.19<br>(15.57 to 67.89)                 | 36.81<br>(15.67 to 69.55)                 | 42.01<br>(17.96 to 76.81)                 | 1.48<br>(1.06 to 1.97)            | 1.41<br>(0.66 to 2.53)             | 1.43<br>(0.64 to 2.62)            | 1.58<br>(0.77 to 2.80)             |
| Esophageal cancer                    | 47.48<br>(33.59 to 63.72)                 | 47.63<br>(17.84 to 109.42)                | 36.62<br>(13.87 to 78.65)                 | 64.59<br>(24.06 to 148.77)                | 1.88<br>(1.37 to 2.48)            | 1.99<br>(0.85 to 3.97)             | 1.61<br>(0.72 to 3.10)            | 2.62<br>(1.11 to 5.44)             |
| Stomach cancer                       | 214.66<br>(168.54 to 271.82)              | 180.49<br>(116.85 to 278.06)              | 104.35<br>(65.91 to 162.73)               | 186.99<br>(117.50 to 293.25)              | 9.39<br>(7.50 to 11.73)           | 8.71<br>(6.24 to 12.14)            | 5.36<br>(3.74 to 7.57)            | 8.70<br>(6.09 to 12.39)            |
| Colon and rectum cancer              | 251.75<br>(199.46 to 323.53)              | 324.32<br>(202.27 to 483.38)              | 214.88<br>(134.43 to 320.49)              | 346.56<br>(213.30 to 518.01)              | 12.12<br>(9.71 to 15.49)          | 17.54<br>(11.82 to 25.11)          | 12.47<br>(8.31 to 17.74)          | 18.03<br>(12.06 to 26.48)          |
| Liver cancer                         | 46.74<br>(36.60 to 60.31)                 | 48.71<br>(28.19 to 81.45)                 | 49.18<br>(29.28 to 80.78)                 | 64.33<br>(35.49 to 111.94)                | 2.07<br>(1.64 to 2.63)            | 2.40<br>(1.53 to 3.67)             | 2.62<br>(1.72 to 3.90)            | 2.99<br>(1.81 to 4.76)             |
| Liver cancer due to hepatitis B      | 17.97<br>(13.37 to 23.91)                 | 17.87<br>(10.13 to 31.45)                 | 19.54<br>(11.18 to 33.64)                 | 21.01<br>(11.21 to 39.07)                 | 0.75<br>(0.56 to 0.98)            | 0.83<br>(0.52 to 1.31)             | 0.97<br>(0.62 to 1.51)            | 0.93<br>(0.55 to 1.55)             |
| Liver cancer due to hepatitis C      | 4.78<br>(3.60 to 6.38)                    | 5.21<br>(3.15 to 8.36)                    | 5.86<br>(3.54 to 9.24)                    | 5.92<br>(3.35 to 9.97)                    | 0.24<br>(0.19 to 0.32)            | 0.30<br>(0.20 to 0.43)             | 0.36<br>(0.24 to 0.51)            | 0.32<br>(0.20 to 0.49)             |
| Liver cancer due to alcohol use      | 16.50<br>(12.69 to 21.75)                 | 17.47<br>(10.20 to 28.92)                 | 14.69<br>(8.69 to 23.96)                  | 27.73<br>(15.58 to 47.78)                 | 0.76<br>(0.59 to 0.99)            | 0.87<br>(0.56 to 1.33)             | 0.81<br>(0.54 to 1.21)            | 1.29<br>(0.77 to 2.05)             |
| Liver cancer due to other causes     | 7.49<br>(5.58 to 9.98)                    | 8.15<br>(4.48 to 14.22)                   | 9.10<br>(5.10 to 15.39)                   | 9.66<br>(5.03 to 18.09)                   | 0.32<br>(0.25 to 0.42)            | 0.48<br>(0.25 to 0.63)             | 0.48<br>(0.30 to 0.72)            | 0.45<br>(0.26 to 0.76)             |
| Gallbladder and biliary tract cancer | 33.07<br>(25.68 to 42.37)                 | 23.37<br>(17.37 to 30.10)                 | 22.46<br>(16.04 to 30.29)                 | 21.71<br>(16.58 to 27.23)                 | 1.58<br>(1.24 to 2.01)            | 1.23<br>(1.02 to 1.48)             | 1.25<br>(0.99 to 1.55)            | 1.12<br>(0.94 to 1.32)             |
| Pancreatic cancer                    | 110.76<br>(86.14 to 140.90)               | 119.66<br>(78.73 to 174.04)               | 119.20<br>(77.68 to 179.13)               | 123.15<br>(80.62 to 181.95)               | 4.85<br>(3.84 to 6.12)            | 5.71<br>(4.21 to 7.54)             | 6.01<br>(4.41 to 8.10)            | 5.65<br>(4.14 to 7.54)             |
| Larynx cancer                        | 42.59<br>(29.93 to 57.00)                 | 43.89<br>(12.71 to 109.24)                | 19.38<br>(5.98 to 47.75)                  | 62.18<br>(18.45 to 140.26)                | 1.66<br>(1.19 to 2.19)            | 1.72<br>(0.58 to 3.87)             | 0.79<br>(0.29 to 1.74)            | 2.43<br>(0.82 to 5.08)             |
| Tracheal, bronchus, and lung cancer  | 340.45<br>(252.77 to 442.32)              | 343.57<br>(167.36 to 608.97)              | 222.54<br>(112.66 to 403.16)              | 492.76<br>(242.16 to 858.92)              | 14.40<br>(10.88 to 18.51)         | 15.24<br>(8.56 to 24.24)           | 10.52<br>(6.17 to 16.75)          | 21.20<br>(11.96 to 33.29)          |
| Malignant skin melanoma              | 38.63<br>(27.69 to 51.42)                 | 33.28<br>(22.56 to 46.72)                 | 46.89<br>(30.83 to 67.66)                 | 31.15<br>(21.31 to 42.62)                 | 1.46<br>(1.10 to 1.96)            | 1.46<br>(1.11 to 1.94)             | 2.15<br>(1.59 to 2.91)            | 1.33<br>(1.02 to 1.72)             |
| Non-melanoma skin cancer             | 11.48<br>(8.60 to 14.54)                  | 14.62<br>(10.88 to 18.88)                 | 9.45<br>(6.52 to 13.16)                   | 13.59<br>(10.30 to 16.99)                 | 0.51<br>(0.39 to 0.63)            | 0.73<br>(0.60 to 0.86)             | 0.51<br>(0.40 to 0.63)            | 0.65<br>(0.55 to 0.77)             |
| Breast cancer                        | 182.27<br>(122.53 to 258.62)              | 206.54<br>(110.81 to 380.31)              | 134.19<br>(72.84 to 248.19)               | 222.94<br>(116.31 to 421.94)              | 7.35<br>(5.01 to 10.32)           | 9.34<br>(5.89 to 15.22)            | 6.47<br>(4.09 to 10.32)           | 9.79<br>(5.95 to 15.97)            |
| Cervical cancer                      | 66.54<br>(44.06 to 99.62)                 | 53.15<br>(31.86 to 86.74)                 | 31.74<br>(18.63 to 51.86)                 | 53.46<br>(31.02 to 88.31)                 | 2.60<br>(1.75 to 3.84)            | 2.37<br>(1.63 to 3.55)             | 1.50<br>(0.99 to 2.24)            | 2.32<br>(1.60 to 3.48)             |

|                   |                               |                               |                               |                               |                           |                           |                           |                           |
|-------------------|-------------------------------|-------------------------------|-------------------------------|-------------------------------|---------------------------|---------------------------|---------------------------|---------------------------|
|                   | 23.71<br>(15.72 to<br>34.25)  | 28.73<br>(18.78 to<br>41.53)  | 21.12<br>(13.29 to<br>31.06)  | 27.93<br>(18.65 to<br>39.90)  | 1.12<br>(0.76 to<br>1.61) | 1.50<br>(1.10 to<br>2.01) | 1.17<br>(0.83 to<br>1.57) | 1.43<br>(1.07 to<br>1.89) |
| Uterine cancer    |                               |                               |                               |                               |                           |                           |                           |                           |
|                   | 69.90<br>(46.47 to<br>102.53) | 66.54<br>(39.00 to<br>104.91) | 52.08<br>(30.36 to<br>83.26)  | 68.90<br>(39.79 to<br>110.65) | 2.69<br>(1.82 to<br>3.87) | 2.86<br>(1.86 to<br>4.31) | 2.30<br>(1.48 to<br>3.48) | 2.93<br>(1.87 to<br>4.40) |
| Ovarian cancer    |                               |                               |                               |                               |                           |                           |                           |                           |
|                   | 66.05<br>(46.03 to<br>92.27)  | 84.36<br>(62.77 to<br>112.41) | 71.53<br>(51.19 to<br>100.99) | 75.36<br>(57.19 to<br>98.63)  | 3.79<br>(2.74 to<br>5.30) | 5.34<br>(4.33 to<br>7.18) | 4.86<br>(3.88 to<br>6.58) | 4.58<br>(3.44 to<br>6.32) |
| Prostate cancer   |                               |                               |                               |                               |                           |                           |                           |                           |
|                   | 4.61<br>(2.95 to<br>6.62)     | 3.26<br>(1.59 to<br>5.28)     | 2.15<br>(0.95 to<br>3.69)     | 3.21<br>(1.59 to<br>5.20)     | 0.10<br>(0.07 to<br>0.14) | 0.08<br>(0.04 to<br>0.12) | 0.05<br>(0.03 to<br>0.09) | 0.08<br>(0.04 to<br>0.12) |
| Testicular cancer |                               |                               |                               |                               |                           |                           |                           |                           |

| Ukraine                         |                                                  |                                                  |                                                  |                                                   |                                            |                                            |                                            |                                            |
|---------------------------------|--------------------------------------------------|--------------------------------------------------|--------------------------------------------------|---------------------------------------------------|--------------------------------------------|--------------------------------------------|--------------------------------------------|--------------------------------------------|
| Cause                           | YLLs (in 1000s)                                  |                                                  |                                                  |                                                   | Deaths (in 1000s)                          |                                            |                                            |                                            |
|                                 | 2016                                             | 2040 Forecast                                    | 2040 Better Scenario                             | 2040 Worse Scenario                               | 2016                                       | 2040 Forecast                              | 2040 Better Scenario                       | 2040 Worse Scenario                        |
| Kidney cancer                   | 45.51<br>(35.22 to 57.92)                        | 52.63<br>(30.46 to 85.20)                        | 53.46<br>(31.69 to 88.42)                        | 53.33<br>(30.67 to 86.51)                         | 1.86<br>(1.46 to 2.34)                     | 2.32<br>(1.52 to 3.46)                     | 2.52<br>(1.70 to 3.73)                     | 2.27<br>(1.47 to 3.45)                     |
| Bladder cancer                  | 47.30<br>(35.66 to 60.91)                        | 49.68<br>(32.13 to 73.25)                        | 41.08<br>(26.93 to 59.27)                        | 51.87<br>(33.16 to 78.66)                         | 2.50<br>(1.92 to 3.14)                     | 2.90<br>(2.13 to 3.90)                     | 2.62<br>(1.96 to 3.44)                     | 2.88<br>(2.03 to 4.05)                     |
| Brain and nervous system cancer | 73.17<br>(56.41 to 96.89)                        | 75.58<br>(51.20 to 108.18)                       | 64.59<br>(42.16 to 96.24)                        | 72.61<br>(50.39 to 101.53)                        | 2.20<br>(1.69 to 2.97)                     | 2.63<br>(1.91 to 3.61)                     | 2.34<br>(1.63 to 3.43)                     | 2.47<br>(1.81 to 3.31)                     |
| Thyroid cancer                  | 7.15<br>(5.57 to 9.34)                           | 7.38<br>(4.53 to 11.20)                          | 5.68<br>(3.33 to 8.85)                           | 7.84<br>(4.80 to 12.12)                           | 0.31<br>(0.24 to 0.39)                     | 0.35<br>(0.24 to 0.51)                     | 0.28<br>(0.18 to 0.41)                     | 0.36<br>(0.24 to 0.54)                     |
| Mesothelioma                    | 7.18<br>(5.43 to 9.50)                           | 6.36<br>(4.64 to 8.49)                           | 6.72<br>(4.76 to 9.37)                           | 6.02<br>(4.46 to 7.86)                            | 0.33<br>(0.25 to 0.43)                     | 0.33<br>(0.25 to 0.42)                     | 0.36<br>(0.28 to 0.47)                     | 0.30<br>(0.24 to 0.38)                     |
| Hodgkin lymphoma                | 8.49<br>(6.43 to 11.13)                          | 6.58<br>(4.37 to 9.57)                           | 3.56<br>(2.18 to 5.50)                           | 6.43<br>(4.27 to 9.05)                            | 0.25<br>(0.19 to 0.33)                     | 0.23<br>(0.16 to 0.31)                     | 0.13<br>(0.09 to 0.19)                     | 0.22<br>(0.16 to 0.29)                     |
| Non-Hodgkin lymphoma            | 39.47<br>(30.25 to 50.36)                        | 37.05<br>(25.08 to 52.19)                        | 29.25<br>(19.32 to 43.50)                        | 36.99<br>(25.44 to 52.01)                         | 1.43<br>(1.12 to 1.84)                     | 1.59<br>(1.18 to 2.08)                     | 1.32<br>(0.96 to 1.81)                     | 1.54<br>(1.15 to 2.03)                     |
| Multiple myeloma                | 16.98<br>(12.40 to 22.59)                        | 18.62<br>(12.51 to 26.53)                        | 16.69<br>(10.94 to 24.31)                        | 18.68<br>(12.62 to 26.70)                         | 0.73<br>(0.55 to 0.98)                     | 0.88<br>(0.63 to 1.18)                     | 0.82<br>(0.58 to 1.15)                     | 0.86<br>(0.62 to 1.17)                     |
| Leukemia                        | 82.73<br>(65.73 to 104.50)                       | 75.53<br>(50.57 to 109.36)                       | 60.71<br>(40.28 to 88.41)                        | 80.92<br>(53.38 to 118.53)                        | 2.88<br>(2.30 to 3.60)                     | 3.10<br>(2.25 to 4.25)                     | 2.65<br>(1.92 to 3.57)                     | 3.21<br>(2.26 to 4.42)                     |
| Acute lymphoid leukemia         | 13.60<br>(10.55 to 17.29)                        | 10.72<br>(7.34 to 15.70)                         | 7.75<br>(5.11 to 11.48)                          | 11.53<br>(7.80 to 17.00)                          | 0.34<br>(0.26 to 0.43)                     | 0.32<br>(0.22 to 0.46)                     | 0.24<br>(0.16 to 0.35)                     | 0.34<br>(0.23 to 0.49)                     |
| Chronic lymphoid leukemia       | 11.37<br>(8.67 to 14.70)                         | 12.33<br>(8.32 to 18.36)                         | 11.28<br>(7.58 to 16.52)                         | 12.82<br>(8.47 to 19.33)                          | 0.58<br>(0.46 to 0.73)                     | 0.68<br>(0.49 to 0.93)                     | 0.66<br>(0.49 to 0.89)                     | 0.68<br>(0.48 to 0.95)                     |
| Acute myeloid leukemia          | 22.46<br>(17.46 to 28.44)                        | 25.83<br>(16.70 to 37.52)                        | 24.44<br>(15.54 to 36.04)                        | 27.62<br>(17.83 to 40.38)                         | 0.76<br>(0.60 to 0.97)                     | 1.01<br>(0.70 to 1.36)                     | 1.00<br>(0.69 to 1.35)                     | 1.05<br>(0.72 to 1.43)                     |
| Chronic myeloid leukemia        | 5.42<br>(4.02 to 7.27)                           | 4.31<br>(2.69 to 6.54)                           | 2.06<br>(1.26 to 3.20)                           | 4.65<br>(2.87 to 7.21)                            | 0.21<br>(0.16 to 0.28)                     | 0.20<br>(0.13 to 0.28)                     | 0.10<br>(0.07 to 0.14)                     | 0.20<br>(0.14 to 0.29)                     |
| Other leukemia                  | 29.87<br>(22.04 to 40.99)                        | 22.35<br>(14.14 to 34.99)                        | 15.18<br>(9.49 to 24.00)                         | 24.30<br>(15.17 to 39.08)                         | 0.99<br>(0.75 to 1.35)                     | 0.90<br>(0.62 to 1.32)                     | 0.66<br>(0.45 to 0.97)                     | 0.94<br>(0.62 to 1.43)                     |
| Other neoplasms                 | 90.92<br>(70.94 to 115.61)                       | 89.42<br>(65.15 to 120.46)                       | 86.88<br>(61.02 to 119.85)                       | 84.69<br>(62.38 to 110.99)                        | 3.21<br>(2.53 to 4.05)                     | 3.79<br>(3.06 to 4.63)                     | 3.96<br>(3.08 to 4.99)                     | 3.47<br>(2.86 to 4.16)                     |
| <b>Cardiovascular diseases</b>  | <b>6,502.70</b><br><b>(5,306.46 to 8,057.40)</b> | <b>5,015.96</b><br><b>(3,348.41 to 7,650.29)</b> | <b>2,289.96</b><br><b>(1,510.42 to 3,539.17)</b> | <b>6,750.84</b><br><b>(4,275.60 to 10,248.31)</b> | <b>432.33</b><br><b>(356.90 to 524.42)</b> | <b>385.48</b><br><b>(299.81 to 496.88)</b> | <b>200.68</b><br><b>(147.70 to 268.78)</b> | <b>465.73</b><br><b>(350.08 to 598.94)</b> |
| Rheumatic heart disease         | 43.75<br>(33.26 to 57.27)                        | 27.70<br>(14.56 to 48.56)                        | 15.17<br>(7.69 to 27.14)                         | 27.93<br>(15.13 to 48.13)                         | 1.48<br>(1.14 to 1.93)                     | 1.02<br>(0.61 to 1.68)                     | 0.59<br>(0.34 to 0.97)                     | 1.01<br>(0.61 to 1.66)                     |
| Ischemic heart disease          | 4,743.09<br>(3,889.03 to 5,872.87)               | 3,496.31<br>(2,149.65 to 5,579.25)               | 1,555.77<br>(945.12 to 2,549.62)                 | 4,753.13<br>(2,746.54 to 7,526.23)                | 326.02<br>(270.80 to 395.31)               | 276.67<br>(199.45 to 378.37)               | 141.00<br>(96.83 to 201.70)                | 335.68<br>(235.46 to 452.84)               |
| Stroke                          | 1,335.87<br>(1,075.29 to 1,662.45)               | 1,096.39<br>(651.00 to 1,788.47)                 | 440.64<br>(265.84 to 720.26)                     | 1,510.35<br>(867.48 to 2,455.91)                  | 85.38<br>(69.61 to 105.35)                 | 82.90<br>(54.76 to 123.98)                 | 38.81<br>(24.51 to 60.44)                  | 101.86<br>(66.29 to 154.88)                |
| Ischemic stroke                 | 865.35<br>(697.49 to 1,080.50)                   | 684.33<br>(405.55 to 1,115.94)                   | 309.17<br>(181.08 to 511.58)                     | 878.75<br>(505.76 to 1,433.57)                    | 62.47<br>(50.73 to 76.77)                  | 58.92<br>(36.39 to 95.74)                  | 30.00<br>(18.05 to 49.43)                  | 68.79<br>(41.62 to 112.92)                 |

|                                |                                 |                                 |                                |                                   |                              |                              |                            |                              |
|--------------------------------|---------------------------------|---------------------------------|--------------------------------|-----------------------------------|------------------------------|------------------------------|----------------------------|------------------------------|
| Intracerebral hemorrhage       | 470.52<br>(375.10 to<br>592.44) | 412.05<br>(209.87 to<br>764.38) | 131.47<br>(67.32 to<br>247.69) | 631.60<br>(314.52 to<br>1,194.69) | 22.91<br>(18.57 to<br>28.50) | 23.98<br>(14.07 to<br>39.60) | 8.81<br>(5.32 to<br>14.64) | 33.07<br>(19.27 to<br>55.62) |
| Hypertensive heart disease     | 121.13<br>(72.04 to<br>168.70)  | 142.85<br>(67.44 to<br>287.82)  | 100.71<br>(49.82 to<br>195.13) | 182.82<br>(83.76 to<br>388.77)    | 7.49<br>(4.34 to<br>10.11)   | 10.30<br>(5.18 to<br>20.38)  | 8.17<br>(4.23 to<br>15.27) | 12.43<br>(5.96 to<br>25.73)  |
| Cardiomyopathy and myocarditis | 140.21<br>(95.16 to<br>219.27)  | 120.02<br>(62.17 to<br>215.23)  | 73.51<br>(37.93 to<br>135.37)  | 140.29<br>(73.61 to<br>246.51)    | 4.59<br>(3.33 to<br>6.87)    | 4.53<br>(2.95 to<br>7.23)    | 2.99<br>(1.97 to<br>4.78)  | 5.06<br>(3.33 to<br>8.07)    |
| Myocarditis                    | 9.65<br>(6.47 to<br>14.00)      | 7.78<br>(4.53 to<br>12.38)      | 7.15<br>(4.16 to<br>11.72)     | 7.59<br>(4.50 to<br>12.01)        | 0.32<br>(0.22 to<br>0.44)    | 0.32<br>(0.22 to<br>0.44)    | 0.34<br>(0.23 to<br>0.46)  | 0.30<br>(0.21 to<br>0.41)    |

| Ukraine                                                       |                                                      |                                                      |                                                      |                                                      |                                                   |                                                   |                                                  |                                                   |
|---------------------------------------------------------------|------------------------------------------------------|------------------------------------------------------|------------------------------------------------------|------------------------------------------------------|---------------------------------------------------|---------------------------------------------------|--------------------------------------------------|---------------------------------------------------|
| Cause                                                         | YLLs (in 1000s)                                      |                                                      |                                                      |                                                      | Deaths (in 1000s)                                 |                                                   |                                                  |                                                   |
|                                                               | 2016                                                 | 2040 Forecast                                        | 2040 Better Scenario                                 | 2040 Worse Scenario                                  | 2016                                              | 2040 Forecast                                     | 2040 Better Scenario                             | 2040 Worse Scenario                               |
| Alcoholic cardiomyopathy                                      | 66.22<br>(41.82 to<br>119.75)                        | 49.28<br>(26.60 to<br>96.12)                         | 37.35<br>(18.88 to<br>72.33)                         | 66.52<br>(36.83 to<br>125.63)                        | 2.15<br>(1.46 to<br>3.71)                         | 1.81<br>(1.22 to<br>3.11)                         | 1.44<br>(0.96 to<br>2.41)                        | 2.34<br>(1.60 to<br>3.98)                         |
| Other cardiomyopathy                                          | 64.35<br>(44.95 to<br>98.24)                         | 62.96<br>(28.98 to<br>122.35)                        | 29.01<br>(12.99 to<br>59.74)                         | 66.19<br>(29.32 to<br>133.56)                        | 2.13<br>(1.57 to<br>3.14)                         | 2.40<br>(1.34 to<br>4.14)                         | 1.21<br>(0.65 to<br>2.12)                        | 2.42<br>(1.33 to<br>4.40)                         |
| Atrial fibrillation and flutter                               | 29.62<br>(21.58 to<br>39.34)                         | 40.87<br>(30.45 to<br>55.17)                         | 38.20<br>(28.47 to<br>51.15)                         | 40.48<br>(29.01 to<br>55.71)                         | 3.01<br>(2.19 to<br>3.99)                         | 4.54<br>(3.09 to<br>6.31)                         | 4.59<br>(3.39 to<br>6.22)                        | 4.32<br>(2.80 to<br>6.17)                         |
| Aortic aneurysm                                               | 36.06<br>(27.75 to<br>45.97)                         | 30.02<br>(19.45 to<br>46.16)                         | 23.52<br>(15.40 to<br>35.99)                         | 31.07<br>(19.87 to<br>47.23)                         | 1.79<br>(1.44 to<br>2.22)                         | 1.73<br>(1.30 to<br>2.33)                         | 1.53<br>(1.16 to<br>2.06)                        | 1.68<br>(1.24 to<br>2.28)                         |
| Peripheral artery disease                                     | 6.41<br>(3.91 to<br>8.71)                            | 9.84<br>(5.43 to<br>14.80)                           | 10.54<br>(5.68 to<br>16.05)                          | 9.78<br>(5.45 to<br>14.69)                           | 0.50<br>(0.30 to<br>0.71)                         | 0.91<br>(0.51 to<br>1.38)                         | 1.08<br>(0.61 to<br>1.62)                        | 0.86<br>(0.46 to<br>1.31)                         |
| Endocarditis                                                  | 14.90<br>(10.46 to<br>20.48)                         | 14.04<br>(7.60 to<br>23.30)                          | 12.66<br>(6.89 to<br>20.95)                          | 14.28<br>(7.68 to<br>23.88)                          | 0.53<br>(0.38 to<br>0.73)                         | 0.60<br>(0.38 to<br>0.92)                         | 0.58<br>(0.37 to<br>0.91)                        | 0.58<br>(0.36 to<br>0.89)                         |
| Other cardiovascular and circulatory diseases                 | 31.67<br>(23.39 to<br>43.80)                         | 37.93<br>(22.55 to<br>62.26)                         | 19.23<br>(11.75 to<br>31.76)                         | 40.71<br>(23.35 to<br>67.40)                         | 1.54<br>(1.18 to<br>2.09)                         | 2.28<br>(1.62 to<br>3.27)                         | 1.34<br>(0.95 to<br>1.93)                        | 2.25<br>(1.56 to<br>3.23)                         |
| <b>Chronic respiratory diseases</b>                           | <b>251.86</b><br><b>(197.18 to</b><br><b>312.80)</b> | <b>260.06</b><br><b>(142.77 to</b><br><b>445.89)</b> | <b>172.95</b><br><b>(102.05 to</b><br><b>289.66)</b> | <b>352.58</b><br><b>(177.77 to</b><br><b>622.42)</b> | <b>14.19</b><br><b>(11.43 to</b><br><b>17.29)</b> | <b>16.24</b><br><b>(10.44 to</b><br><b>24.42)</b> | <b>12.39</b><br><b>(8.54 to</b><br><b>17.31)</b> | <b>19.98</b><br><b>(11.83 to</b><br><b>31.78)</b> |
| Chronic obstructive pulmonary disease                         | 213.09<br>(167.19 to<br>265.60)                      | 232.50<br>(120.99 to<br>413.25)                      | 147.74<br>(83.24 to<br>254.65)                       | 321.93<br>(152.49 to<br>589.26)                      | 12.45<br>(10.04 to<br>15.23)                      | 14.84<br>(9.30 to<br>22.89)                       | 11.04<br>(7.44 to<br>16.00)                      | 18.48<br>(10.60 to<br>29.95)                      |
| Pneumoconiosis                                                | 0.74<br>(0.54 to<br>0.99)                            | 0.74<br>(0.54 to<br>0.99)                            | 0.62<br>(0.42 to<br>0.90)                            | 0.70<br>(0.51 to<br>0.93)                            | 0.04<br>(0.03 to<br>0.05)                         | 0.04<br>(0.04 to<br>0.07)                         | 0.05<br>(0.03 to<br>0.07)                        | 0.05<br>(0.03 to<br>0.06)                         |
| Silicosis                                                     | 0.09<br>(0.05 to<br>0.14)                            | 0.07<br>(0.03 to<br>0.13)                            | 0.02<br>(0.01 to<br>0.04)                            | 0.06<br>(0.03 to<br>0.12)                            | 0.01<br>(0.00 to<br>0.01)                         | 0.00<br>(0.00 to<br>0.01)                         | 0.00<br>(0.00 to<br>0.00)                        | 0.00<br>(0.00 to<br>0.01)                         |
| Asbestosis                                                    | 0.20<br>(0.14 to<br>0.27)                            | 0.20<br>(0.12 to<br>0.33)                            | 0.27<br>(0.15 to<br>0.45)                            | 0.19<br>(0.11 to<br>0.30)                            | 0.01<br>(0.00 to<br>0.01)                         | 0.01<br>(0.01 to<br>0.01)                         | 0.01<br>(0.01 to<br>0.02)                        | 0.01<br>(0.00 to<br>0.01)                         |
| Coal workers pneumoconiosis                                   | 0.01<br>(0.01 to<br>0.02)                            | 0.01<br>(0.01 to<br>0.03)                            | 0.01<br>(0.00 to<br>0.01)                            | 0.01<br>(0.01 to<br>0.03)                            | 0.00<br>(0.00 to<br>0.00)                         | 0.00<br>(0.00 to<br>0.00)                         | 0.00<br>(0.00 to<br>0.00)                        | 0.00<br>(0.00 to<br>0.00)                         |
| Other pneumoconiosis                                          | 0.44<br>(0.31 to<br>0.60)                            | 0.46<br>(0.32 to<br>0.64)                            | 0.32<br>(0.21 to<br>0.50)                            | 0.43<br>(0.29 to<br>0.59)                            | 0.03<br>(0.02 to<br>0.04)                         | 0.04<br>(0.02 to<br>0.05)                         | 0.03<br>(0.02 to<br>0.05)                        | 0.03<br>(0.02 to<br>0.05)                         |
| Asthma                                                        | 26.44<br>(19.10 to<br>36.42)                         | 15.15<br>(6.84 to<br>31.51)                          | 5.91<br>(2.62 to<br>12.08)                           | 18.86<br>(7.99 to<br>38.75)                          | 1.25<br>(0.91 to<br>1.69)                         | 0.83<br>(0.40 to<br>1.63)                         | 0.36<br>(0.17 to<br>0.70)                        | 0.97<br>(0.45 to<br>1.88)                         |
| Interstitial lung disease and pulmonary sarcoidosis           | 7.84<br>(5.53 to<br>10.82)                           | 8.06<br>(5.28 to<br>12.05)                           | 15.15<br>(9.89 to<br>23.40)                          | 7.35<br>(4.89 to<br>10.67)                           | 0.33<br>(0.23 to<br>0.45)                         | 0.38<br>(0.28 to<br>0.53)                         | 0.78<br>(0.55 to<br>1.09)                        | 0.34<br>(0.24 to<br>0.46)                         |
| Other chronic respiratory diseases                            | 3.76<br>(2.30 to<br>5.80)                            | 3.61<br>(1.71 to<br>6.92)                            | 3.52<br>(1.72 to<br>6.73)                            | 3.75<br>(1.75 to<br>7.27)                            | 0.13<br>(0.08 to<br>0.19)                         | 0.14<br>(0.08 to<br>0.24)                         | 0.15<br>(0.09 to<br>0.25)                        | 0.14<br>(0.08 to<br>0.24)                         |
| <b>Cirrhosis and other chronic liver diseases</b>             | <b>592.59</b><br><b>(447.92 to</b><br><b>772.51)</b> | <b>418.06</b><br><b>(272.69 to</b><br><b>599.62)</b> | <b>259.13</b><br><b>(158.82 to</b><br><b>399.75)</b> | <b>475.69</b><br><b>(319.51 to</b><br><b>680.59)</b> | <b>17.70</b><br><b>(13.63 to</b><br><b>22.78)</b> | <b>14.26</b><br><b>(10.10 to</b><br><b>19.23)</b> | <b>9.13</b><br><b>(6.21 to</b><br><b>12.89)</b>  | <b>15.89</b><br><b>(11.54 to</b><br><b>21.30)</b> |
| Cirrhosis and other chronic liver diseases due to hepatitis B | 117.63<br>(86.33 to<br>156.14)                       | 81.05<br>(50.77 to<br>120.16)                        | 56.30<br>(33.38 to<br>87.67)                         | 78.48<br>(50.00 to<br>116.23)                        | 3.46<br>(2.57 to<br>4.55)                         | 2.73<br>(1.89 to<br>3.82)                         | 1.95<br>(1.27 to<br>2.85)                        | 2.60<br>(1.84 to<br>3.65)                         |
| Cirrhosis and other chronic liver diseases due to hepatitis C | 140.58<br>(101.67 to<br>182.67)                      | 102.75<br>(61.97 to<br>153.62)                       | 69.54<br>(39.67 to<br>107.24)                        | 99.73<br>(61.66 to<br>147.30)                        | 4.15<br>(3.06 to<br>5.34)                         | 3.42<br>(2.25 to<br>4.77)                         | 2.37<br>(1.51 to<br>3.46)                        | 3.27<br>(2.21 to<br>4.45)                         |

|                                                                |                                                      |                                                      |                                                     |                                                      |                                                 |                                                 |                                                 |                                                 |
|----------------------------------------------------------------|------------------------------------------------------|------------------------------------------------------|-----------------------------------------------------|------------------------------------------------------|-------------------------------------------------|-------------------------------------------------|-------------------------------------------------|-------------------------------------------------|
|                                                                | 217.64<br>(163.13 to<br>293.34)                      | 161.18<br>(103.92 to<br>236.53)                      | 83.21<br>(50.06 to<br>129.95)                       | 225.87<br>(149.53 to<br>327.18)                      | 6.69<br>(5.08 to<br>8.89)                       | 5.58<br>(3.90 to<br>7.77)                       | 3.02<br>(2.02 to<br>4.37)                       | 7.69<br>(5.44 to<br>10.43)                      |
| Cirrhosis and other chronic liver diseases due to alcohol use  |                                                      |                                                      |                                                     |                                                      |                                                 |                                                 |                                                 |                                                 |
|                                                                | 116.74<br>(88.40 to<br>154.01)                       | 73.09<br>(47.81 to<br>103.80)                        | 50.09<br>(32.25 to<br>73.24)                        | 71.61<br>(47.94 to<br>100.75)                        | 3.40<br>(2.61 to<br>4.48)                       | 2.52<br>(1.79 to<br>3.40)                       | 1.79<br>(1.25 to<br>2.49)                       | 2.42<br>(1.77 to<br>3.26)                       |
| Cirrhosis and other chronic liver diseases due to other causes |                                                      |                                                      |                                                     |                                                      |                                                 |                                                 |                                                 |                                                 |
| <b>Digestive diseases</b>                                      | <b>199.72</b><br><b>(146.17 to</b><br><b>273.11)</b> | <b>196.55</b><br><b>(111.77 to</b><br><b>348.86)</b> | <b>129.32</b><br><b>(77.18 to</b><br><b>223.45)</b> | <b>206.98</b><br><b>(114.90 to</b><br><b>369.49)</b> | <b>7.90</b><br><b>(5.96 to</b><br><b>10.82)</b> | <b>9.26</b><br><b>(6.36 to</b><br><b>14.43)</b> | <b>6.99</b><br><b>(5.01 to</b><br><b>10.73)</b> | <b>9.22</b><br><b>(6.27 to</b><br><b>14.88)</b> |
| Peptic ulcer disease                                           | 37.37<br>(27.31 to<br>54.02)                         | 21.15<br>(13.11 to<br>33.61)                         | 9.65<br>(5.70 to<br>16.15)                          | 22.20<br>(13.89 to<br>35.24)                         | 1.35<br>(1.02 to<br>1.96)                       | 0.93<br>(0.65 to<br>1.40)                       | 0.45<br>(0.31 to<br>0.70)                       | 0.93<br>(0.65 to<br>1.40)                       |

| Ukraine                                    |                              |                              |                              |                              |                           |                           |                           |                           |
|--------------------------------------------|------------------------------|------------------------------|------------------------------|------------------------------|---------------------------|---------------------------|---------------------------|---------------------------|
| Cause                                      | YLLs (in 1000s)              |                              |                              |                              | Deaths (in 1000s)         |                           |                           |                           |
|                                            | 2016                         | 2040 Forecast                | 2040 Better Scenario         | 2040 Worse Scenario          | 2016                      | 2040 Forecast             | 2040 Better Scenario      | 2040 Worse Scenario       |
| Gastritis and duodenitis                   | 2.04<br>(1.38 to 3.08)       | 2.19<br>(1.36 to 3.48)       | 1.34<br>(0.78 to 2.26)       | 2.08<br>(1.32 to 3.24)       | 0.08<br>(0.06 to 0.13)    | 0.11<br>(0.08 to 0.17)    | 0.07<br>(0.05 to 0.11)    | 0.10<br>(0.07 to 0.15)    |
| Appendicitis                               | 4.60<br>(3.28 to 6.60)       | 3.26<br>(2.05 to 5.74)       | 1.58<br>(0.93 to 3.01)       | 3.19<br>(2.00 to 5.46)       | 0.13<br>(0.09 to 0.24)    | 0.13<br>(0.08 to 0.26)    | 0.07<br>(0.04 to 0.14)    | 0.12<br>(0.08 to 0.24)    |
| Paralytic ileus and intestinal obstruction | 21.64<br>(14.38 to 30.50)    | 19.53<br>(13.20 to 29.94)    | 19.70<br>(13.13 to 31.95)    | 18.36<br>(12.55 to 27.46)    | 0.86<br>(0.61 to 1.27)    | 1.00<br>(0.75 to 1.56)    | 1.11<br>(0.82 to 1.76)    | 0.89<br>(0.68 to 1.39)    |
| Inguinal, femoral, and abdominal hernia    | 3.53<br>(2.47 to 5.83)       | 2.72<br>(1.90 to 4.47)       | 2.04<br>(1.39 to 3.28)       | 2.52<br>(1.81 to 4.11)       | 0.20<br>(0.14 to 0.33)    | 0.18<br>(0.13 to 0.30)    | 0.15<br>(0.11 to 0.24)    | 0.16<br>(0.11 to 0.28)    |
| Inflammatory bowel disease                 | 5.40<br>(3.98 to 7.32)       | 4.94<br>(3.31 to 7.34)       | 4.70<br>(3.08 to 7.24)       | 4.67<br>(3.22 to 6.81)       | 0.20<br>(0.15 to 0.28)    | 0.22<br>(0.17 to 0.31)    | 0.23<br>(0.17 to 0.32)    | 0.20<br>(0.15 to 0.28)    |
| Vascular intestinal disorders              | 31.92<br>(23.94 to 46.07)    | 39.79<br>(31.05 to 60.65)    | 34.16<br>(25.39 to 49.81)    | 36.25<br>(28.73 to 53.86)    | 1.97<br>(1.49 to 2.87)    | 2.75<br>(2.17 to 4.04)    | 2.57<br>(2.02 to 3.65)    | 2.44<br>(1.86 to 3.62)    |
| Gallbladder and biliary diseases           | 7.83<br>(5.85 to 11.35)      | 9.59<br>(4.79 to 17.17)      | 5.51<br>(2.73 to 10.24)      | 11.73<br>(5.57 to 21.69)     | 0.40<br>(0.30 to 0.60)    | 0.58<br>(0.31 to 1.06)    | 0.36<br>(0.19 to 0.66)    | 0.67<br>(0.34 to 1.24)    |
| Pancreatitis                               | 75.32<br>(50.54 to 108.15)   | 84.11<br>(26.05 to 215.99)   | 43.15<br>(12.84 to 113.09)   | 97.22<br>(31.00 to 255.57)   | 2.26<br>(1.53 to 3.19)    | 2.88<br>(1.01 to 6.81)    | 1.53<br>(0.55 to 3.41)    | 3.27<br>(1.14 to 7.76)    |
| Other digestive diseases                   | 10.06<br>(7.10 to 14.23)     | 9.25<br>(6.29 to 13.41)      | 7.48<br>(4.90 to 11.10)      | 8.76<br>(6.02 to 12.73)      | 0.43<br>(0.31 to 0.62)    | 0.49<br>(0.37 to 0.70)    | 0.45<br>(0.33 to 0.62)    | 0.45<br>(0.34 to 0.64)    |
| Neurological disorders                     | 292.48<br>(228.43 to 382.29) | 365.13<br>(292.33 to 469.03) | 419.18<br>(340.68 to 522.03) | 360.44<br>(271.88 to 486.58) | 24.54<br>(19.05 to 31.80) | 35.33<br>(25.23 to 47.81) | 44.87<br>(34.74 to 57.37) | 33.69<br>(22.35 to 48.65) |
| Alzheimer's disease and other dementias    | 192.42<br>(145.83 to 258.05) | 257.89<br>(187.39 to 357.84) | 303.43<br>(231.68 to 398.91) | 257.02<br>(173.46 to 377.29) | 19.87<br>(15.17 to 26.62) | 29.16<br>(19.28 to 41.32) | 37.06<br>(27.22 to 49.60) | 28.17<br>(17.36 to 42.99) |
| Parkinson's disease                        | 36.58<br>(25.35 to 50.20)    | 50.01<br>(36.36 to 65.34)    | 65.51<br>(48.35 to 85.23)    | 43.45<br>(30.75 to 59.44)    | 3.02<br>(2.09 to 4.19)    | 4.45<br>(3.15 to 5.95)    | 6.17<br>(4.56 to 7.93)    | 3.78<br>(2.53 to 5.30)    |
| Epilepsy                                   | 29.39<br>(21.15 to 41.14)    | 27.46<br>(9.80 to 62.55)     | 19.10<br>(6.99 to 43.85)     | 30.86<br>(10.94 to 71.00)    | 0.64<br>(0.46 to 0.89)    | 0.68<br>(0.27 to 1.48)    | 0.49<br>(0.24 to 1.04)    | 0.75<br>(0.30 to 1.64)    |
| Multiple sclerosis                         | 15.15<br>(9.84 to 22.03)     | 11.33<br>(6.29 to 18.64)     | 11.97<br>(6.49 to 19.84)     | 11.51<br>(6.45 to 18.64)     | 0.41<br>(0.27 to 0.59)    | 0.36<br>(0.22 to 0.56)    | 0.39<br>(0.24 to 0.62)    | 0.35<br>(0.22 to 0.54)    |
| Motor neuron disease                       | 4.08<br>(3.12 to 5.25)       | 5.01<br>(3.49 to 6.99)       | 5.06<br>(3.39 to 7.38)       | 4.72<br>(3.37 to 6.37)       | 0.15<br>(0.12 to 0.20)    | 0.21<br>(0.16 to 0.27)    | 0.22<br>(0.16 to 0.30)    | 0.19<br>(0.15 to 0.24)    |
| Other neurological disorders               | 14.87<br>(10.93 to 19.19)    | 13.43<br>(9.28 to 18.43)     | 14.11<br>(9.42 to 20.13)     | 12.88<br>(8.92 to 17.47)     | 0.43<br>(0.33 to 0.55)    | 0.48<br>(0.36 to 0.61)    | 0.53<br>(0.39 to 0.70)    | 0.45<br>(0.34 to 0.56)    |
| Mental disorders                           | 452.11<br>(297.39 to 670.15) | 382.06<br>(204.89 to 623.16) | 472.71<br>(247.98 to 757.61) | 396.93<br>(216.59 to 637.77) | 12.04<br>(7.99 to 17.76)  | 11.04<br>(6.35 to 17.17)  | 13.99<br>(7.98 to 21.79)  | 11.34<br>(6.67 to 17.56)  |
| Alcohol use disorders                      | 317.22<br>(193.07 to 509.40) | 228.12<br>(112.70 to 410.84) | 248.56<br>(118.31 to 445.41) | 248.02<br>(124.80 to 436.23) | 8.63<br>(5.29 to 13.80)   | 6.73<br>(3.50 to 11.92)   | 7.47<br>(3.76 to 13.14)   | 7.24<br>(3.83 to 12.50)   |
| Drug use disorders                         | 134.85<br>(92.79 to 185.73)  | 153.91<br>(88.85 to 246.50)  | 224.12<br>(128.25 to 360.98) | 148.88<br>(87.15 to 232.25)  | 3.41<br>(2.41 to 4.62)    | 4.31<br>(2.76 to 6.54)    | 6.52<br>(4.14 to 10.01)   | 4.10<br>(2.65 to 6.11)    |
| Opioid use disorders                       | 90.97<br>(62.04 to 126.54)   | 91.21<br>(50.25 to 148.68)   | 103.74<br>(54.46 to 172.64)  | 88.57<br>(48.95 to 141.47)   | 2.25<br>(1.55 to 3.11)    | 2.49<br>(1.44 to 3.92)    | 2.90<br>(1.61 to 4.63)    | 2.38<br>(1.40 to 3.63)    |





| Ukraine                                                    |                              |                              |                             |                              |                        |                          |                        |                          |
|------------------------------------------------------------|------------------------------|------------------------------|-----------------------------|------------------------------|------------------------|--------------------------|------------------------|--------------------------|
| Cause                                                      | YLLs (in 1000s)              |                              |                             |                              | Deaths (in 1000s)      |                          |                        |                          |
|                                                            | 2016                         | 2040 Forecast                | 2040 Better Scenario        | 2040 Worse Scenario          | 2016                   | 2040 Forecast            | 2040 Better Scenario   | 2040 Worse Scenario      |
|                                                            | 171.70<br>(136.60 to 219.14) | 207.84<br>(129.21 to 323.17) | 126.71<br>(77.47 to 204.91) | 219.05<br>(134.85 to 342.82) | 7.28<br>(5.89 to 9.09) | 10.75<br>(7.88 to 14.76) | 7.15<br>(5.17 to 9.87) | 10.84<br>(7.66 to 15.00) |
| Diabetes, urogenital, blood, and endocrine diseases        |                              |                              |                             |                              |                        |                          |                        |                          |
| Diabetes mellitus                                          | 64.65<br>(51.04 to 83.09)    | 76.20<br>(36.11 to 148.75)   | 39.51<br>(19.11 to 78.53)   | 85.52<br>(39.56 to 169.88)   | 2.82<br>(2.27 to 3.55) | 3.91<br>(2.18 to 6.60)   | 2.23<br>(1.27 to 3.71) | 4.11<br>(2.28 to 7.20)   |
| Acute glomerulonephritis                                   | 1.66<br>(1.24 to 2.20)       | 2.01<br>(1.15 to 3.55)       | 1.37<br>(0.77 to 2.32)      | 1.94<br>(1.14 to 3.14)       | 0.05<br>(0.04 to 0.07) | 0.07<br>(0.05 to 0.12)   | 0.05<br>(0.03 to 0.09) | 0.07<br>(0.04 to 0.11)   |
| Chronic kidney disease                                     | 54.06<br>(42.80 to 68.22)    | 65.77<br>(35.80 to 112.25)   | 41.04<br>(22.63 to 71.71)   | 70.89<br>(37.53 to 123.42)   | 2.50<br>(2.03 to 3.08) | 3.86<br>(2.37 to 6.05)   | 2.69<br>(1.64 to 4.25) | 3.99<br>(2.34 to 6.49)   |
| Chronic kidney disease due to diabetes mellitus            | 14.38<br>(11.04 to 18.54)    | 21.14<br>(11.14 to 37.87)    | 13.84<br>(7.24 to 25.06)    | 22.92<br>(11.70 to 41.63)    | 0.67<br>(0.53 to 0.84) | 1.17<br>(0.67 to 1.93)   | 0.84<br>(0.49 to 1.39) | 1.22<br>(0.69 to 2.02)   |
| Chronic kidney disease due to hypertension                 | 1.87<br>(1.44 to 2.40)       | 3.10<br>(1.79 to 4.97)       | 2.43<br>(1.43 to 3.93)      | 3.20<br>(1.79 to 5.24)       | 0.15<br>(0.12 to 0.20) | 0.31<br>(0.18 to 0.50)   | 0.27<br>(0.16 to 0.43) | 0.30<br>(0.17 to 0.51)   |
| Chronic kidney disease due to glomerulonephritis           | 27.55<br>(21.53 to 35.07)    | 29.25<br>(15.82 to 50.57)    | 16.96<br>(9.13 to 29.29)    | 31.60<br>(16.59 to 54.45)    | 1.18<br>(0.95 to 1.47) | 1.62<br>(0.98 to 2.61)   | 1.04<br>(0.63 to 1.69) | 1.69<br>(0.99 to 2.80)   |
| Chronic kidney disease due to other and unspecified causes | 10.26<br>(7.93 to 13.30)     | 12.28<br>(6.66 to 20.64)     | 7.80<br>(4.26 to 13.31)     | 13.18<br>(7.01 to 22.45)     | 0.50<br>(0.39 to 0.64) | 0.77<br>(0.46 to 1.23)   | 0.54<br>(0.33 to 0.87) | 0.79<br>(0.46 to 1.30)   |
| Urinary diseases and male infertility                      | 31.26<br>(24.66 to 40.10)    | 49.41<br>(34.17 to 69.78)    | 32.41<br>(20.93 to 48.49)   | 46.76<br>(33.26 to 64.74)    | 1.30<br>(1.04 to 1.64) | 2.31<br>(1.84 to 2.91)   | 1.62<br>(1.24 to 2.14) | 2.11<br>(1.70 to 2.62)   |
| Urinary tract infections                                   | 25.26<br>(19.04 to 33.70)    | 40.88<br>(26.97 to 59.77)    | 27.51<br>(17.17 to 42.33)   | 38.88<br>(26.34 to 56.05)    | 0.97<br>(0.72 to 1.30) | 1.80<br>(1.31 to 2.40)   | 1.30<br>(0.92 to 1.79) | 1.66<br>(1.23 to 2.17)   |
| Urolithiasis                                               | 3.27<br>(1.75 to 4.61)       | 5.49<br>(2.80 to 8.38)       | 3.12<br>(1.46 to 5.14)      | 5.08<br>(2.62 to 7.53)       | 0.18<br>(0.09 to 0.26) | 0.32<br>(0.16 to 0.48)   | 0.20<br>(0.09 to 0.32) | 0.29<br>(0.14 to 0.43)   |
| Other urinary diseases                                     | 2.73<br>(1.26 to 4.19)       | 3.04<br>(1.28 to 4.80)       | 1.77<br>(0.70 to 3.02)      | 2.79<br>(1.21 to 4.37)       | 0.15<br>(0.06 to 0.23) | 0.19<br>(0.07 to 0.30)   | 0.12<br>(0.05 to 0.20) | 0.17<br>(0.07 to 0.27)   |
| Gynecological diseases                                     | 0.25<br>(0.06 to 0.44)       | 0.11<br>(0.03 to 0.23)       | 0.04<br>(0.01 to 0.09)      | 0.11<br>(0.03 to 0.23)       | 0.01<br>(0.00 to 0.01) | 0.00<br>(0.00 to 0.01)   | 0.00<br>(0.00 to 0.00) | 0.00<br>(0.00 to 0.01)   |
| Uterine fibroids                                           | 0.14<br>(0.03 to 0.25)       | 0.06<br>(0.01 to 0.13)       | 0.03<br>(0.01 to 0.06)      | 0.06<br>(0.01 to 0.13)       | 0.00<br>(0.00 to 0.01) | 0.00<br>(0.00 to 0.00)   | 0.00<br>(0.00 to 0.00) | 0.00<br>(0.00 to 0.00)   |
| Polycystic ovarian syndrome                                | 0.02<br>(0.00 to 0.04)       | 0.00<br>(0.00 to 0.01)       | 0.00<br>(0.00 to 0.00)      | 0.01<br>(0.00 to 0.01)       | 0.00<br>(0.00 to 0.00) | 0.00<br>(0.00 to 0.00)   | 0.00<br>(0.00 to 0.00) | 0.00<br>(0.00 to 0.00)   |
| Endometriosis                                              | 0.00<br>(0.00 to 0.01)       | 0.00<br>(0.00 to 0.00)       | 0.00<br>(0.00 to 0.00)      | 0.00<br>(0.00 to 0.00)       | 0.00<br>(0.00 to 0.00) | 0.00<br>(0.00 to 0.00)   | 0.00<br>(0.00 to 0.00) | 0.00<br>(0.00 to 0.00)   |
| Genital prolapse                                           | 0.01<br>(0.00 to 0.01)       | 0.00<br>(0.00 to 0.01)       | 0.00<br>(0.00 to 0.00)      | 0.00<br>(0.00 to 0.01)       | 0.00<br>(0.00 to 0.00) | 0.00<br>(0.00 to 0.00)   | 0.00<br>(0.00 to 0.00) | 0.00<br>(0.00 to 0.00)   |
| Other gynecological diseases                               | 0.09<br>(0.02 to 0.15)       | 0.05<br>(0.02 to 0.09)       | 0.02<br>(0.01 to 0.03)      | 0.05<br>(0.02 to 0.09)       | 0.00<br>(0.00 to 0.00) | 0.00<br>(0.00 to 0.00)   | 0.00<br>(0.00 to 0.00) | 0.00<br>(0.00 to 0.00)   |
| Hemoglobinopathies and hemolytic anemias                   | 8.93<br>(6.35 to 12.17)      | 5.88<br>(3.76 to 9.10)       | 3.25<br>(2.00 to 5.14)      | 5.70<br>(3.62 to 8.75)       | 0.29<br>(0.21 to 0.41) | 0.26<br>(0.19 to 0.39)   | 0.16<br>(0.11 to 0.26) | 0.24<br>(0.17 to 0.36)   |
| Thalassemias                                               | 0.64<br>(0.40 to 1.01)       | 0.12<br>(0.07 to 0.22)       | 0.11<br>(0.06 to 0.20)      | 0.13<br>(0.07 to 0.23)       | 0.01<br>(0.01 to 0.01) | 0.00<br>(0.00 to 0.00)   | 0.00<br>(0.00 to 0.00) | 0.00<br>(0.00 to 0.00)   |

|                                                   |                             |                            |                            |                            |                           |                           |                           |                           |
|---------------------------------------------------|-----------------------------|----------------------------|----------------------------|----------------------------|---------------------------|---------------------------|---------------------------|---------------------------|
|                                                   | 1.77<br>(1.12 to<br>2.53)   | 1.07<br>(0.53 to<br>1.87)  | 0.55<br>(0.26 to<br>0.99)  | 1.08<br>(0.54 to<br>1.86)  | 0.03<br>(0.02 to<br>0.05) | 0.02<br>(0.01 to<br>0.04) | 0.01<br>(0.01 to<br>0.02) | 0.02<br>(0.01 to<br>0.04) |
| Sickle cell disorders                             |                             |                            |                            |                            |                           |                           |                           |                           |
|                                                   | 2.31<br>(1.29 to<br>3.48)   | 1.95<br>(0.96 to<br>3.46)  | 0.92<br>(0.44 to<br>1.68)  | 1.93<br>(0.96 to<br>3.41)  | 0.06<br>(0.03 to<br>0.08) | 0.06<br>(0.03 to<br>0.10) | 0.03<br>(0.01 to<br>0.05) | 0.06<br>(0.03 to<br>0.09) |
| G6PD deficiency                                   |                             |                            |                            |                            |                           |                           |                           |                           |
|                                                   | 4.20<br>(2.98 to<br>5.92)   | 2.73<br>(1.88 to<br>4.27)  | 1.67<br>(1.10 to<br>2.77)  | 2.56<br>(1.77 to<br>3.95)  | 0.19<br>(0.14 to<br>0.30) | 0.18<br>(0.13 to<br>0.30) | 0.12<br>(0.09 to<br>0.21) | 0.16<br>(0.12 to<br>0.27) |
| Other hemoglobinopathies and hemolytic anemias    |                             |                            |                            |                            |                           |                           |                           |                           |
|                                                   | 10.90<br>(7.28 to<br>14.26) | 8.45<br>(5.54 to<br>11.90) | 9.09<br>(5.89 to<br>13.51) | 8.14<br>(5.26 to<br>11.49) | 0.31<br>(0.23 to<br>0.39) | 0.34<br>(0.25 to<br>0.44) | 0.40<br>(0.30 to<br>0.52) | 0.31<br>(0.23 to<br>0.40) |
| Endocrine, metabolic, blood, and immune disorders |                             |                            |                            |                            |                           |                           |                           |                           |

| Ukraine                                       |                             |                            |                           |                            |                        |                        |                        |                        |
|-----------------------------------------------|-----------------------------|----------------------------|---------------------------|----------------------------|------------------------|------------------------|------------------------|------------------------|
| Cause                                         | YLLs (in 1000s)             |                            |                           |                            | Deaths (in 1000s)      |                        |                        |                        |
|                                               | 2016                        | 2040 Forecast              | 2040 Better Scenario      | 2040 Worse Scenario        | 2016                   | 2040 Forecast          | 2040 Better Scenario   | 2040 Worse Scenario    |
| Musculoskeletal disorders                     | 5.76<br>(4.11 to 7.91)      | 8.65<br>(5.23 to 11.21)    | 5.51<br>(3.52 to 7.51)    | 8.27<br>(5.13 to 10.60)    | 0.30<br>(0.17 to 0.42) | 0.55<br>(0.26 to 0.70) | 0.37<br>(0.18 to 0.47) | 0.51<br>(0.25 to 0.64) |
| Rheumatoid arthritis                          | 2.70<br>(1.52 to 3.83)      | 4.68<br>(2.47 to 6.52)     | 2.04<br>(1.01 to 3.09)    | 4.54<br>(2.46 to 6.14)     | 0.15<br>(0.07 to 0.22) | 0.32<br>(0.14 to 0.45) | 0.15<br>(0.06 to 0.21) | 0.30<br>(0.13 to 0.40) |
| Other musculoskeletal disorders               | 3.07<br>(2.21 to 4.13)      | 3.97<br>(2.57 to 5.44)     | 3.47<br>(2.34 to 4.73)    | 3.73<br>(2.44 to 5.06)     | 0.15<br>(0.09 to 0.21) | 0.24<br>(0.11 to 0.31) | 0.22<br>(0.11 to 0.28) | 0.22<br>(0.11 to 0.28) |
| Other non-communicable diseases               | 151.17<br>(92.87 to 258.03) | 78.11<br>(46.30 to 130.65) | 32.51<br>(20.05 to 51.94) | 81.99<br>(48.12 to 137.12) | 2.07<br>(1.36 to 3.26) | 1.30<br>(0.88 to 1.93) | 0.64<br>(0.45 to 0.91) | 1.33<br>(0.88 to 2.00) |
| Congenital birth defects                      | 140.84<br>(86.57 to 239.27) | 71.77<br>(41.59 to 120.51) | 28.03<br>(16.62 to 47.26) | 75.63<br>(43.34 to 128.22) | 1.89<br>(1.23 to 3.01) | 1.09<br>(0.70 to 1.69) | 0.45<br>(0.29 to 0.71) | 1.13<br>(0.71 to 1.77) |
| Neural tube defects                           | 10.41<br>(5.10 to 19.37)    | 2.78<br>(1.27 to 5.83)     | 0.82<br>(0.36 to 1.71)    | 2.99<br>(1.32 to 6.14)     | 0.13<br>(0.07 to 0.24) | 0.04<br>(0.02 to 0.08) | 0.01<br>(0.01 to 0.02) | 0.04<br>(0.02 to 0.08) |
| Congenital heart anomalies                    | 76.10<br>(46.66 to 123.10)  | 38.76<br>(22.35 to 65.85)  | 11.57<br>(6.41 to 20.14)  | 40.91<br>(24.03 to 69.76)  | 1.03<br>(0.67 to 1.60) | 0.59<br>(0.35 to 0.92) | 1.03<br>(0.10 to 0.29) | 0.61<br>(0.37 to 0.95) |
| Orofacial clefts                              | 0.07<br>(0.03 to 0.16)      | 0.04<br>(0.01 to 0.09)     | 0.01<br>(0.00 to 0.02)    | 0.04<br>(0.01 to 0.10)     | 0.00<br>(0.00 to 0.00) | 0.00<br>(0.00 to 0.00) | 0.00<br>(0.00 to 0.00) | 0.00<br>(0.00 to 0.00) |
| Down syndrome                                 | 6.17<br>(4.07 to 9.39)      | 4.52<br>(2.73 to 7.10)     | 4.82<br>(2.86 to 7.69)    | 4.54<br>(2.75 to 7.02)     | 0.12<br>(0.08 to 0.17) | 0.10<br>(0.06 to 0.16) | 0.11<br>(0.06 to 0.18) | 0.10<br>(0.06 to 0.15) |
| Other chromosomal abnormalities               | 5.33<br>(2.34 to 11.52)     | 3.79<br>(1.42 to 8.93)     | 2.32<br>(0.92 to 5.19)    | 4.01<br>(1.50 to 9.22)     | 0.06<br>(0.03 to 0.14) | 0.05<br>(0.02 to 0.11) | 0.03<br>(0.01 to 0.06) | 0.05<br>(0.02 to 0.11) |
| Congenital musculoskeletal and limb anomalies | 2.13<br>(0.97 to 4.78)      | 1.18<br>(0.45 to 3.02)     | 0.45<br>(0.18 to 1.11)    | 1.26<br>(0.49 to 3.22)     | 0.03<br>(0.01 to 0.06) | 0.02<br>(0.01 to 0.04) | 0.01<br>(0.00 to 0.01) | 0.02<br>(0.01 to 0.04) |
| Urogenital congenital anomalies               | 1.13<br>(0.63 to 2.39)      | 0.61<br>(0.34 to 1.14)     | 0.28<br>(0.16 to 0.52)    | 0.63<br>(0.35 to 1.19)     | 0.02<br>(0.01 to 0.03) | 0.01<br>(0.01 to 0.02) | 0.01<br>(0.00 to 0.01) | 0.01<br>(0.01 to 0.02) |
| Digestive congenital anomalies                | 5.83<br>(2.92 to 12.04)     | 3.45<br>(1.42 to 8.04)     | 1.18<br>(0.51 to 2.71)    | 3.68<br>(1.51 to 8.49)     | 0.07<br>(0.04 to 0.14) | 0.05<br>(0.02 to 0.10) | 0.02<br>(0.01 to 0.03) | 0.05<br>(0.02 to 0.10) |
| Other congenital birth defects                | 33.67<br>(18.69 to 62.87)   | 16.65<br>(8.87 to 31.18)   | 6.59<br>(3.59 to 12.43)   | 17.58<br>(9.42 to 32.89)   | 0.44<br>(0.26 to 0.77) | 0.24<br>(0.14 to 0.40) | 0.10<br>(0.06 to 0.17) | 0.25<br>(0.15 to 0.44) |
| Skin and subcutaneous diseases                | 1.61<br>(0.81 to 2.37)      | 3.08<br>(1.53 to 4.42)     | 2.69<br>(1.34 to 3.87)    | 2.88<br>(1.46 to 4.01)     | 0.07<br>(0.03 to 0.11) | 0.17<br>(0.08 to 0.25) | 0.17<br>(0.07 to 0.22) | 0.16<br>(0.07 to 0.21) |
| Cellulitis                                    | 0.72<br>(0.35 to 1.13)      | 1.41<br>(0.68 to 2.26)     | 1.33<br>(0.65 to 2.14)    | 1.32<br>(0.64 to 2.09)     | 0.03<br>(0.01 to 0.04) | 0.07<br>(0.03 to 0.10) | 0.07<br>(0.03 to 0.10) | 0.06<br>(0.03 to 0.09) |
| Pyoderma                                      | 0.72<br>(0.31 to 1.12)      | 1.45<br>(0.60 to 2.11)     | 1.21<br>(0.50 to 1.81)    | 1.36<br>(0.57 to 1.98)     | 0.04<br>(0.01 to 0.05) | 0.09<br>(0.03 to 0.13) | 0.08<br>(0.03 to 0.12) | 0.08<br>(0.03 to 0.12) |
| Decubitus ulcer                               | 0.11<br>(0.05 to 0.16)      | 0.16<br>(0.06 to 0.24)     | 0.11<br>(0.04 to 0.16)    | 0.14<br>(0.06 to 0.22)     | 0.01<br>(0.00 to 0.01) | 0.01<br>(0.00 to 0.02) | 0.01<br>(0.00 to 0.02) | 0.01<br>(0.00 to 0.02) |
| Other skin and subcutaneous diseases          | 0.06<br>(0.03 to 0.08)      | 0.06<br>(0.03 to 0.09)     | 0.05<br>(0.02 to 0.07)    | 0.06<br>(0.03 to 0.09)     | 0.00<br>(0.00 to 0.00) | 0.00<br>(0.00 to 0.01) | 0.00<br>(0.00 to 0.01) | 0.00<br>(0.00 to 0.00) |
| Sudden infant death syndrome                  | 8.72<br>(3.79 to 17.45)     | 3.26<br>(1.11 to 7.58)     | 1.79<br>(0.53 to 4.63)    | 3.48<br>(1.18 to 8.10)     | 0.10<br>(0.04 to 0.20) | 0.04<br>(0.01 to 0.09) | 0.02<br>(0.01 to 0.05) | 0.04<br>(0.01 to 0.09) |

|                          |                                       |                                     |                                   |                                     |                              |                              |                              |                              |
|--------------------------|---------------------------------------|-------------------------------------|-----------------------------------|-------------------------------------|------------------------------|------------------------------|------------------------------|------------------------------|
| Injuries                 | 1,511.86<br>(1,099.38 to<br>1,976.03) | 1,157.44<br>(490.38 to<br>2,238.76) | 640.96<br>(278.48 to<br>1,231.19) | 1,254.35<br>(523.31 to<br>2,463.68) | 38.68<br>(28.46 to<br>50.53) | 33.81<br>(16.91 to<br>59.95) | 20.21<br>(10.11 to<br>35.07) | 35.42<br>(17.40 to<br>64.06) |
| Transport injuries       | 318.09<br>(234.98 to<br>415.59)       | 244.47<br>(79.39 to<br>647.40)      | 66.27<br>(21.30 to<br>183.81)     | 296.22<br>(92.90 to<br>807.85)      | 7.43<br>(5.53 to<br>9.66)    | 6.36<br>(2.46 to<br>15.27)   | 1.90<br>(0.76 to<br>4.48)    | 7.47<br>(2.78 to<br>18.30)   |
| Road injuries            | 291.21<br>(215.03 to<br>381.82)       | 216.95<br>(70.37 to<br>566.69)      | 54.05<br>(17.39 to<br>150.46)     | 266.32<br>(83.30 to<br>719.47)      | 6.77<br>(5.05 to<br>8.84)    | 5.60<br>(2.18 to<br>13.35)   | 1.55<br>(0.63 to<br>3.66)    | 6.67<br>(2.50 to<br>16.35)   |
| Pedestrian road injuries | 90.58<br>(64.89 to<br>122.76)         | 66.11<br>(23.56 to<br>162.21)       | 11.69<br>(4.44 to<br>28.37)       | 78.85<br>(28.09 to<br>196.57)       | 2.42<br>(1.78 to<br>3.21)    | 2.06<br>(0.88 to<br>4.55)    | 0.41<br>(0.20 to<br>0.87)    | 2.37<br>(1.02 to<br>5.39)    |

| Ukraine                                         |                                                      |                                                      |                                                      |                                                      |                                                   |                                                  |                                                 |                                                  |
|-------------------------------------------------|------------------------------------------------------|------------------------------------------------------|------------------------------------------------------|------------------------------------------------------|---------------------------------------------------|--------------------------------------------------|-------------------------------------------------|--------------------------------------------------|
| Cause                                           | YLLs (in 1000s)                                      |                                                      |                                                      |                                                      | Deaths (in 1000s)                                 |                                                  |                                                 |                                                  |
|                                                 | 2016                                                 | 2040 Forecast                                        | 2040 Better Scenario                                 | 2040 Worse Scenario                                  | 2016                                              | 2040 Forecast                                    | 2040 Better Scenario                            | 2040 Worse Scenario                              |
| Cyclist road injuries                           | 16.67<br>(11.75 to<br>23.42)                         | 15.34<br>(4.79 to<br>41.72)                          | 6.06<br>(1.95 to<br>15.59)                           | 18.12<br>(5.40 to<br>49.50)                          | 0.44<br>(0.31 to<br>0.61)                         | 0.45<br>(0.16 to<br>1.13)                        | 0.21<br>(0.08 to<br>0.50)                       | 0.51<br>(0.17 to<br>1.27)                        |
| Motorcyclist road injuries                      | 21.96<br>(14.32 to<br>31.78)                         | 19.00<br>(4.39 to<br>60.24)                          | 9.11<br>(1.97 to<br>28.61)                           | 22.38<br>(5.08 to<br>70.79)                          | 0.43<br>(0.29 to<br>0.62)                         | 0.39<br>(0.10 to<br>1.17)                        | 0.21<br>(0.05 to<br>0.60)                       | 0.45<br>(0.12 to<br>1.38)                        |
| Motor vehicle road injuries                     | 159.61<br>(113.45 to<br>212.44)                      | 114.17<br>(34.85 to<br>308.05)                       | 26.51<br>(8.39 to<br>73.03)                          | 144.14<br>(42.57 to<br>400.28)                       | 3.42<br>(2.44 to<br>4.53)                         | 2.64<br>(0.93 to<br>6.51)                        | 0.70<br>(0.28 to<br>1.67)                       | 3.25<br>(1.10 to<br>8.34)                        |
| Other road injuries                             | 2.39<br>(1.61 to<br>3.95)                            | 2.32<br>(0.61 to<br>6.94)                            | 0.68<br>(0.19 to<br>2.02)                            | 2.83<br>(0.72 to<br>8.48)                            | 0.06<br>(0.04 to<br>0.10)                         | 0.07<br>(0.02 to<br>0.20)                        | 0.02<br>(0.01 to<br>0.07)                       | 0.08<br>(0.02 to<br>0.23)                        |
| Other transport injuries                        | 26.88<br>(18.83 to<br>36.72)                         | 27.52<br>(8.32 to<br>78.53)                          | 12.22<br>(3.57 to<br>35.21)                          | 29.90<br>(8.73 to<br>83.47)                          | 0.65<br>(0.47 to<br>0.88)                         | 0.76<br>(0.28 to<br>1.92)                        | 0.35<br>(0.13 to<br>0.91)                       | 0.80<br>(0.28 to<br>2.03)                        |
| <b>Unintentional injuries</b>                   | <b>591.69</b><br><b>(442.38 to</b><br><b>766.78)</b> | <b>421.87</b><br><b>(219.12 to</b><br><b>743.32)</b> | <b>268.85</b><br><b>(140.48 to</b><br><b>477.57)</b> | <b>421.97</b><br><b>(220.46 to</b><br><b>750.93)</b> | <b>16.07</b><br><b>(12.01 to</b><br><b>20.69)</b> | <b>13.41</b><br><b>(8.17 to</b><br><b>21.36)</b> | <b>9.09</b><br><b>(5.52 to</b><br><b>14.36)</b> | <b>13.00</b><br><b>(7.87 to</b><br><b>20.97)</b> |
| Falls                                           | 127.93<br>(91.94 to<br>178.07)                       | 104.71<br>(60.10 to<br>165.87)                       | 77.74<br>(42.82 to<br>129.20)                        | 100.86<br>(58.79 to<br>158.14)                       | 3.97<br>(2.91 to<br>5.62)                         | 3.89<br>(1.14 to<br>5.85)                        | 3.05<br>(1.97 to<br>4.61)                       | 3.61<br>(2.43 to<br>5.30)                        |
| Drowning                                        | 141.42<br>(103.55 to<br>187.93)                      | 100.28<br>(37.87 to<br>232.14)                       | 60.92<br>(22.74 to<br>142.59)                        | 104.65<br>(38.95 to<br>246.50)                       | 3.25<br>(2.39 to<br>4.26)                         | 2.65<br>(1.14 to<br>5.84)                        | 1.68<br>(0.73 to<br>3.62)                       | 2.71<br>(1.13 to<br>5.94)                        |
| Fire, heat, and hot substances                  | 68.47<br>(50.82 to<br>89.76)                         | 51.26<br>(23.15 to<br>107.96)                        | 25.65<br>(11.64 to<br>53.10)                         | 52.75<br>(23.66 to<br>111.56)                        | 2.08<br>(1.59 to<br>2.68)                         | 1.79<br>(0.98 to<br>3.38)                        | 0.97<br>(0.54 to<br>1.75)                       | 1.78<br>(0.93 to<br>3.37)                        |
| Poisonings                                      | 42.54<br>(29.68 to<br>58.12)                         | 18.19<br>(7.17 to<br>41.05)                          | 7.44<br>(2.92 to<br>16.82)                           | 19.11<br>(7.31 to<br>43.97)                          | 1.11<br>(0.76 to<br>1.50)                         | 0.54<br>(0.24 to<br>1.15)                        | 0.24<br>(0.11 to<br>0.48)                       | 0.56<br>(0.24 to<br>1.19)                        |
| Exposure to mechanical forces                   | 43.47<br>(31.07 to<br>58.47)                         | 26.23<br>(13.80 to<br>43.00)                         | 14.41<br>(7.62 to<br>24.62)                          | 26.08<br>(13.44 to<br>42.55)                         | 1.05<br>(0.74 to<br>1.39)                         | 0.73<br>(0.42 to<br>1.14)                        | 0.42<br>(0.24 to<br>0.68)                       | 0.71<br>(0.40 to<br>1.10)                        |
| Unintentional firearm injuries                  | 6.11<br>(4.29 to<br>8.41)                            | 3.13<br>(1.70 to<br>5.20)                            | 1.95<br>(1.07 to<br>3.27)                            | 3.11<br>(1.71 to<br>5.17)                            | 0.15<br>(0.11 to<br>0.21)                         | 0.10<br>(0.06 to<br>0.15)                        | 0.07<br>(0.04 to<br>0.10)                       | 0.09<br>(0.06 to<br>0.14)                        |
| Unintentional suffocation                       | 4.48<br>(3.02 to<br>7.04)                            | 2.27<br>(1.25 to<br>3.62)                            | 1.40<br>(0.77 to<br>2.28)                            | 2.34<br>(1.30 to<br>3.77)                            | 0.07<br>(0.05 to<br>0.11)                         | 0.04<br>(0.02 to<br>0.07)                        | 0.03<br>(0.02 to<br>0.04)                       | 0.04<br>(0.02 to<br>0.07)                        |
| Other exposure to mechanical forces             | 32.89<br>(22.40 to<br>45.52)                         | 20.83<br>(10.12 to<br>35.19)                         | 11.05<br>(5.35 to<br>19.59)                          | 20.63<br>(10.23 to<br>34.15)                         | 0.82<br>(0.56 to<br>1.11)                         | 0.59<br>(0.32 to<br>0.94)                        | 0.33<br>(0.18 to<br>0.54)                       | 0.57<br>(0.32 to<br>0.90)                        |
| Adverse effects of medical treatment            | 30.51<br>(21.23 to<br>40.94)                         | 23.98<br>(13.94 to<br>36.29)                         | 18.53<br>(10.61 to<br>28.86)                         | 23.16<br>(13.76 to<br>34.65)                         | 1.02<br>(0.73 to<br>1.37)                         | 0.93<br>(0.63 to<br>1.30)                        | 0.76<br>(0.50 to<br>1.10)                       | 0.87<br>(0.60 to<br>1.22)                        |
| Animal contact                                  | 6.83<br>(4.51 to<br>9.82)                            | 5.92<br>(3.13 to<br>9.65)                            | 3.75<br>(1.92 to<br>6.29)                            | 5.83<br>(3.15 to<br>9.40)                            | 0.19<br>(0.12 to<br>0.28)                         | 0.18<br>(0.10 to<br>0.30)                        | 0.12<br>(0.07 to<br>0.20)                       | 0.18<br>(0.10 to<br>0.28)                        |
| Venomous animal contact                         | 3.29<br>(2.00 to<br>5.12)                            | 2.51<br>(1.15 to<br>4.47)                            | 1.81<br>(0.81 to<br>3.26)                            | 2.49<br>(1.14 to<br>4.46)                            | 0.08<br>(0.05 to<br>0.14)                         | 0.07<br>(0.03 to<br>0.13)                        | 0.05<br>(0.02 to<br>0.10)                       | 0.07<br>(0.03 to<br>0.13)                        |
| Non-venomous animal contact                     | 3.54<br>(2.25 to<br>5.48)                            | 3.40<br>(1.83 to<br>5.65)                            | 1.94<br>(1.02 to<br>3.38)                            | 3.35<br>(1.84 to<br>5.71)                            | 0.10<br>(0.07 to<br>0.17)                         | 0.11<br>(0.06 to<br>0.19)                        | 0.07<br>(0.04 to<br>0.12)                       | 0.11<br>(0.06 to<br>0.18)                        |
| Foreign body                                    | 84.67<br>(61.22 to<br>111.39)                        | 56.00<br>(32.50 to<br>84.85)                         | 45.86<br>(25.92 to<br>72.25)                         | 54.41<br>(31.92 to<br>82.57)                         | 2.21<br>(1.62 to<br>2.91)                         | 1.65<br>(1.00 to<br>2.46)                        | 1.40<br>(0.83 to<br>2.13)                       | 1.57<br>(0.97 to<br>2.32)                        |
| Pulmonary aspiration and foreign body in airway | 81.74<br>(59.08 to<br>108.46)                        | 54.16<br>(31.32 to<br>82.30)                         | 43.75<br>(24.37 to<br>69.28)                         | 52.61<br>(30.54 to<br>79.88)                         | 2.13<br>(1.55 to<br>2.81)                         | 1.60<br>(0.95 to<br>2.39)                        | 1.33<br>(0.78 to<br>2.02)                       | 1.52<br>(0.93 to<br>2.23)                        |

|                                             |                                                      |                                                        |                                                     |                                                        |                                                   |                                                  |                                                 |                                                  |
|---------------------------------------------|------------------------------------------------------|--------------------------------------------------------|-----------------------------------------------------|--------------------------------------------------------|---------------------------------------------------|--------------------------------------------------|-------------------------------------------------|--------------------------------------------------|
|                                             | 2.93<br>(2.07 to<br>4.46)                            | 1.84<br>(1.04 to<br>3.05)                              | 2.11<br>(1.17 to<br>3.66)                           | 1.80<br>(1.02 to<br>2.97)                              | 0.08<br>(0.06 to<br>0.12)                         | 0.06<br>(0.04 to<br>0.09)                        | 0.07<br>(0.04 to<br>0.11)                       | 0.05<br>(0.03 to<br>0.09)                        |
| Foreign body in other body part             |                                                      |                                                        |                                                     |                                                        |                                                   |                                                  |                                                 |                                                  |
| Environmental heat and cold exposure        | 20.42<br>(12.64 to<br>41.10)                         | 19.77<br>(9.71 to<br>39.83)                            | 10.01<br>(4.58 to<br>20.62)                         | 19.54<br>(9.67 to<br>39.37)                            | 0.61<br>(0.38 to<br>1.24)                         | 0.64<br>(0.34 to<br>1.30)                        | 0.33<br>(0.16 to<br>0.68)                       | 0.62<br>(0.32 to<br>1.26)                        |
| Other unintentional injuries                | 25.43<br>(18.12 to<br>34.35)                         | 15.53<br>(7.37 to<br>27.05)                            | 4.55<br>(2.04 to<br>8.39)                           | 15.58<br>(7.51 to<br>27.02)                            | 0.58<br>(0.42 to<br>0.79)                         | 0.40<br>(0.20 to<br>0.69)                        | 0.12<br>(0.06 to<br>0.21)                       | 0.39<br>(0.20 to<br>0.66)                        |
| <b>Self-harm and interpersonal violence</b> | <b>598.03</b><br><b>(419.06 to</b><br><b>837.39)</b> | <b>489.59</b><br><b>(157.18 to</b><br><b>1,133.50)</b> | <b>304.29</b><br><b>(97.67 to</b><br><b>699.13)</b> | <b>534.67</b><br><b>(163.78 to</b><br><b>1,231.23)</b> | <b>15.10</b><br><b>(10.70 to</b><br><b>21.29)</b> | <b>14.00</b><br><b>(5.21 to</b><br><b>29.78)</b> | <b>9.18</b><br><b>(3.50 to</b><br><b>19.64)</b> | <b>14.91</b><br><b>(5.38 to</b><br><b>31.90)</b> |

| Ukraine                                                                             |                                      |                                       |                                       |                                       |                                      |                                      |                                      |                                      |
|-------------------------------------------------------------------------------------|--------------------------------------|---------------------------------------|---------------------------------------|---------------------------------------|--------------------------------------|--------------------------------------|--------------------------------------|--------------------------------------|
| Cause                                                                               | YLLs (in 1000s)                      |                                       |                                       |                                       | Deaths (in 1000s)                    |                                      |                                      |                                      |
|                                                                                     | 2016                                 | 2040 Forecast                         | 2040 Better Scenario                  | 2040 Worse Scenario                   | 2016                                 | 2040 Forecast                        | 2040 Better Scenario                 | 2040 Worse Scenario                  |
| Self-harm                                                                           | 435.52<br>(298.69 to 632.03)         | 403.68<br>(116.58 to 971.99)          | 252.71<br>(75.53 to 603.04)           | 445.88<br>(122.50 to 1,100.40)        | 11.23<br>(7.87 to 16.27)             | 11.69<br>(3.95 to 25.79)             | 7.72<br>(2.71 to 16.91)              | 12.56<br>(4.06 to 28.07)             |
| Self-harm by firearm                                                                | 14.40<br>(8.61 to 23.81)             | 11.35<br>(2.75 to 29.72)              | 5.72<br>(1.47 to 15.09)               | 12.63<br>(3.00 to 33.99)              | 0.36<br>(0.22 to 0.59)               | 0.32<br>(0.09 to 0.78)               | 0.17<br>(0.05 to 0.40)               | 0.34<br>(0.09 to 0.86)               |
| Self-harm by other specified means                                                  | 421.12<br>(288.06 to 610.43)         | 392.33<br>(114.00 to 942.37)          | 246.99<br>(74.04 to 590.50)           | 433.25<br>(119.43 to 1,072.16)        | 10.87<br>(7.63 to 15.83)             | 11.37<br>(3.85 to 25.09)             | 7.55<br>(2.67 to 16.52)              | 12.21<br>(3.95 to 27.28)             |
| Interpersonal violence                                                              | 162.51<br>(101.06 to 261.21)         | 85.91<br>(31.62 to 190.47)            | 51.58<br>(18.98 to 116.89)            | 88.79<br>(32.57 to 196.32)            | 3.87<br>(2.39 to 6.20)               | 3.87<br>(0.98 to 4.97)               | 2.32<br>(0.62 to 3.13)               | 2.36<br>(0.99 to 4.94)               |
| Physical violence by firearm                                                        | 16.25<br>(7.11 to 34.64)             | 7.34<br>(2.31 to 16.88)               | 3.47<br>(1.17 to 8.53)                | 7.38<br>(2.39 to 16.94)               | 0.33<br>(0.15 to 0.68)               | 0.16<br>(0.05 to 0.37)               | 0.08<br>(0.03 to 0.18)               | 0.16<br>(0.06 to 0.37)               |
| Physical violence by sharp object                                                   | 58.90<br>(33.48 to 103.63)           | 30.58<br>(12.34 to 64.08)             | 16.47<br>(6.56 to 34.67)              | 30.36<br>(12.24 to 61.95)             | 1.35<br>(0.77 to 2.36)               | 0.78<br>(0.35 to 1.56)               | 0.44<br>(0.20 to 0.88)               | 0.76<br>(0.34 to 1.52)               |
| Physical violence by other means                                                    | 87.36<br>(53.71 to 144.30)           | 47.98<br>(16.20 to 116.82)            | 31.64<br>(10.88 to 77.33)             | 51.05<br>(16.98 to 125.07)            | 2.19<br>(1.37 to 3.56)               | 1.38<br>(0.53 to 3.12)               | 0.95<br>(0.38 to 2.11)               | 1.43<br>(0.54 to 3.31)               |
| <b>Forces of nature, conflict and terrorism, and executions and police conflict</b> | <b>4.05</b><br><b>(0.71 to 6.57)</b> | <b>1.52</b><br><b>(0.00 to 25.03)</b> | <b>1.54</b><br><b>(0.00 to 25.28)</b> | <b>1.50</b><br><b>(0.00 to 24.90)</b> | <b>0.08</b><br><b>(0.02 to 0.13)</b> | <b>0.04</b><br><b>(0.00 to 0.61)</b> | <b>0.04</b><br><b>(0.00 to 0.66)</b> | <b>0.03</b><br><b>(0.00 to 0.59)</b> |
| Exposure to forces of nature                                                        | 0.00<br>(0.00 to 0.00)               | 0.03<br>(0.00 to 0.47)                | 0.03<br>(0.00 to 0.49)                | 0.03<br>(0.00 to 0.46)                | 0.00<br>(0.00 to 0.00)               | 0.00<br>(0.00 to 0.01)               | 0.00<br>(0.00 to 0.01)               | 0.00<br>(0.00 to 0.01)               |
| Conflict and terrorism                                                              | 0.00<br>(0.00 to 0.00)               | 1.49<br>(0.00 to 24.90)               | 1.51<br>(0.00 to 25.13)               | 1.47<br>(0.00 to 24.77)               | 0.00<br>(0.00 to 0.00)               | 0.04<br>(0.00 to 0.60)               | 0.04<br>(0.00 to 0.66)               | 0.03<br>(0.00 to 0.59)               |
| Executions and police conflict                                                      | 4.05<br>(0.71 to 6.57)               | 0.00<br>(0.00 to 0.00)                | 0.00<br>(0.00 to 0.00)                | 0.00<br>(0.00 to 0.00)                | 0.08<br>(0.02 to 0.13)               | 0.00<br>(0.00 to 0.00)               | 0.00<br>(0.00 to 0.00)               | 0.00<br>(0.00 to 0.00)               |



| High-income                                                       |                                             |                                             |                                             |                                             |                                       |                                          |                                         |                                          |
|-------------------------------------------------------------------|---------------------------------------------|---------------------------------------------|---------------------------------------------|---------------------------------------------|---------------------------------------|------------------------------------------|-----------------------------------------|------------------------------------------|
| Cause                                                             | YLLs (in 1000s)                             |                                             |                                             |                                             | Deaths (in 1000s)                     |                                          |                                         |                                          |
|                                                                   | 2016                                        | 2040 Forecast                               | 2040 Better Scenario                        | 2040 Worse Scenario                         | 2016                                  | 2040 Forecast                            | 2040 Better Scenario                    | 2040 Worse Scenario                      |
| All causes                                                        | 146,123.70<br>(143,914.36 to<br>148,341.94) | 157,825.47<br>(133,503.65 to<br>184,620.93) | 134,226.38<br>(114,309.38 to<br>156,218.64) | 193,343.15<br>(162,373.90 to<br>228,635.95) | 9,611.50<br>(9,491.07 to<br>9,727.54) | 12,510.61<br>(10,941.26 to<br>14,270.77) | 11,095.30<br>(9,742.53 to<br>12,626.91) | 14,495.77<br>(12,622.26 to<br>16,542.40) |
| Communicable, maternal, neonatal, and nutritional diseases        | 8,822.87<br>(8,480.87 to<br>9,125.78)       | 9,392.32<br>(7,999.51 to<br>11,180.42)      | 8,184.72<br>(7,087.33 to<br>9,566.19)       | 10,936.44<br>(9,153.55 to<br>13,409.98)     | 521.78<br>(489.47 to<br>554.52)       | 808.86<br>(689.43 to<br>953.03)          | 775.21<br>(670.93 to<br>895.98)         | 867.04<br>(713.42 to<br>1,056.53)        |
| HIV/AIDS and tuberculosis                                         | 726.81<br>(707.72 to<br>746.95)             | 297.42<br>(244.30 to<br>366.74)             | 195.10<br>(155.33 to<br>243.13)             | 516.23<br>(419.27 to<br>629.94)             | 26.53<br>(25.35 to<br>27.73)          | 14.45<br>(10.97 to<br>19.35)             | 10.21<br>(7.67 to<br>13.56)             | 21.32<br>(15.86 to<br>28.53)             |
| Tuberculosis                                                      | 204.58<br>(186.58 to<br>224.55)             | 136.02<br>(93.20 to<br>190.58)              | 88.62<br>(62.74 to<br>124.79)               | 190.86<br>(124.56 to<br>280.69)             | 13.37<br>(12.20 to<br>14.59)          | 11.30<br>(7.80 to<br>16.33)              | 8.07<br>(5.77 to<br>11.28)              | 15.06<br>(9.70 to<br>22.28)              |
| HIV/AIDS                                                          | 522.23<br>(516.48 to<br>529.50)             | 161.40<br>(129.32 to<br>199.46)             | 106.48<br>(76.26 to<br>137.60)              | 325.36<br>(246.12 to<br>409.94)             | 13.16<br>(13.02 to<br>13.37)          | 3.15<br>(2.53 to<br>3.86)                | 2.14<br>(1.52 to<br>2.86)               | 6.26<br>(4.79 to<br>7.90)                |
| Diarrhea, lower respiratory, and other common infectious diseases | 5,122.33<br>(4,856.72 to<br>5,395.23)       | 6,820.89<br>(5,572.68 to<br>8,526.20)       | 6,150.45<br>(5,112.51 to<br>7,470.47)       | 7,922.89<br>(6,225.97 to<br>10,371.03)      | 433.46<br>(402.22 to<br>465.47)       | 722.75<br>(601.84 to<br>869.04)          | 694.24<br>(587.99 to<br>814.03)         | 775.53<br>(620.60 to<br>963.64)          |
| Diarrheal diseases                                                | 392.93<br>(379.07 to<br>410.09)             | 1,016.99<br>(732.81 to<br>1,555.40)         | 1,314.94<br>(1,002.08 to<br>1,873.87)       | 882.39<br>(613.06 to<br>1,369.30)           | 31.27<br>(29.97 to<br>32.74)          | 110.10<br>(77.84 to<br>171.87)           | 147.20<br>(110.60 to<br>212.94)         | 91.29<br>(62.83 to<br>145.66)            |
| Intestinal infectious diseases                                    | 1.85<br>(0.91 to<br>3.34)                   | 1.83<br>(0.89 to<br>3.23)                   | 1.89<br>(0.92 to<br>3.32)                   | 1.81<br>(0.89 to<br>3.17)                   | 0.07<br>(0.03 to<br>0.12)             | 0.08<br>(0.04 to<br>0.14)                | 0.08<br>(0.04 to<br>0.14)               | 0.07<br>(0.04 to<br>0.13)                |
| Typhoid fever                                                     | 0.77<br>(0.28 to<br>1.69)                   | 0.89<br>(0.34 to<br>1.89)                   | 1.04<br>(0.41 to<br>2.18)                   | 0.85<br>(0.33 to<br>1.81)                   | 0.02<br>(0.01 to<br>0.04)             | 0.02<br>(0.01 to<br>0.05)                | 0.03<br>(0.01 to<br>0.05)               | 0.02<br>(0.01 to<br>0.05)                |
| Paratyphoid fever                                                 | 0.39<br>(0.12 to<br>0.97)                   | 0.35<br>(0.11 to<br>0.86)                   | 0.29<br>(0.09 to<br>0.73)                   | 0.37<br>(0.12 to<br>0.88)                   | 0.01<br>(0.00 to<br>0.05)             | 0.01<br>(0.00 to<br>0.02)                | 0.01<br>(0.00 to<br>0.02)               | 0.01<br>(0.00 to<br>0.02)                |
| Other intestinal infectious diseases                              | 0.69<br>(0.28 to<br>1.42)                   | 0.59<br>(0.22 to<br>1.28)                   | 0.56<br>(0.20 to<br>1.21)                   | 0.59<br>(0.22 to<br>1.26)                   | 0.04<br>(0.01 to<br>0.08)             | 0.04<br>(0.02 to<br>0.10)                | 0.04<br>(0.02 to<br>0.10)               | 0.04<br>(0.02 to<br>0.09)                |
| Lower respiratory infections                                      | 4,449.99<br>(4,192.40 to<br>4,720.67)       | 5,566.48<br>(4,416.59 to<br>7,241.82)       | 4,627.37<br>(3,716.30 to<br>5,890.93)       | 6,778.62<br>(5,138.90 to<br>9,273.47)       | 392.94<br>(362.37 to<br>425.10)       | 602.59<br>(492.47 to<br>759.93)          | 537.45<br>(441.02 to<br>665.31)         | 674.24<br>(529.65 to<br>870.04)          |
| Upper respiratory infections                                      | 1.77<br>(1.60 to<br>1.98)                   | 1.45<br>(1.16 to<br>1.80)                   | 1.04<br>(0.82 to<br>1.30)                   | 1.56<br>(1.26 to<br>1.98)                   | 0.08<br>(0.07 to<br>0.09)             | 0.08<br>(0.07 to<br>0.11)                | 0.06<br>(0.05 to<br>0.08)               | 0.09<br>(0.07 to<br>0.11)                |
| Otitis media                                                      | 1.33<br>(1.21 to<br>1.49)                   | 0.35<br>(0.25 to<br>0.49)                   | 0.36<br>(0.26 to<br>0.51)                   | 0.33<br>(0.24 to<br>0.46)                   | 0.05<br>(0.04 to<br>0.05)             | 0.02<br>(0.02 to<br>0.05)                | 0.02<br>(0.02 to<br>0.03)               | 0.02<br>(0.01 to<br>0.03)                |
| Meningitis                                                        | 155.33<br>(142.92 to<br>180.04)             | 95.59<br>(77.81 to<br>117.61)               | 77.08<br>(64.08 to<br>92.84)                | 107.52<br>(84.61 to<br>135.92)              | 4.51<br>(4.13 to<br>5.28)             | 3.37<br>(2.91 to<br>3.99)                | 2.97<br>(2.56 to<br>3.56)               | 3.45<br>(2.96 to<br>4.08)                |
| Pneumococcal meningitis                                           | 36.30<br>(32.96 to<br>41.95)                | 23.49<br>(19.74 to<br>28.37)                | 23.10<br>(19.29 to<br>27.97)                | 23.86<br>(20.10 to<br>28.76)                | 1.18<br>(1.05 to<br>1.37)             | 1.00<br>(0.86 to<br>1.20)                | 1.03<br>(0.88 to<br>1.23)               | 0.97<br>(0.83 to<br>1.15)                |
| H influenzae type B meningitis                                    | 13.97<br>(12.64 to<br>16.01)                | 24.07<br>(12.11 to<br>43.30)                | 17.46<br>(10.78 to<br>27.15)                | 32.72<br>(14.37 to<br>62.13)                | 0.38<br>(0.34 to<br>0.44)             | 0.49<br>(0.34 to<br>0.73)                | 0.42<br>(0.33 to<br>0.55)               | 0.57<br>(0.35 to<br>0.92)                |
| Meningococcal meningitis                                          | 51.65<br>(47.22 to<br>58.59)                | 21.95<br>(17.94 to<br>26.99)                | 16.27<br>(13.20 to<br>20.18)                | 23.40<br>(18.96 to<br>28.64)                | 1.21<br>(1.10 to<br>1.39)             | 0.70<br>(0.60 to<br>0.83)                | 0.55<br>(0.46 to<br>0.66)               | 0.72<br>(0.61 to<br>0.85)                |
| Other meningitis                                                  | 53.41<br>(48.51 to<br>62.82)                | 26.08<br>(21.64 to<br>32.19)                | 20.24<br>(16.34 to<br>25.41)                | 27.55<br>(22.56 to<br>33.86)                | 1.75<br>(1.58 to<br>2.09)             | 1.18<br>(1.01 to<br>1.44)                | 0.96<br>(0.81 to<br>1.19)               | 1.19<br>(1.02 to<br>1.44)                |
| Encephalitis                                                      | 93.44<br>(74.83 to<br>123.98)               | 112.63<br>(88.09 to<br>150.99)              | 109.64<br>(85.50 to<br>145.76)              | 111.71<br>(87.08 to<br>152.07)              | 3.28<br>(2.56 to<br>4.26)             | 5.15<br>(3.95 to<br>6.76)                | 5.21<br>(4.00 to<br>6.91)               | 4.91<br>(3.80 to<br>6.47)                |

|                |                            |                            |                            |                             |                           |                           |                           |                           |
|----------------|----------------------------|----------------------------|----------------------------|-----------------------------|---------------------------|---------------------------|---------------------------|---------------------------|
| Diphtheria     | 0.35<br>(0.32 to<br>0.39)  | 0.09<br>(0.07 to<br>0.12)  | 0.07<br>(0.06 to<br>0.08)  | 0.12<br>(0.08 to<br>0.18)   | 0.01<br>(0.01 to<br>0.01) | 0.00<br>(0.00 to<br>0.00) | 0.00<br>(0.00 to<br>0.00) | 0.00<br>(0.00 to<br>0.00) |
| Whooping cough | 7.74<br>(3.10 to<br>12.73) | 4.20<br>(1.20 to<br>9.64)  | 1.24<br>(0.43 to<br>2.63)  | 12.01<br>(4.11 to<br>23.98) | 0.09<br>(0.04 to<br>0.15) | 0.05<br>(0.01 to<br>0.11) | 0.02<br>(0.01 to<br>0.03) | 0.14<br>(0.05 to<br>0.28) |
| Tetanus        | 1.34<br>(1.08 to<br>1.61)  | 0.15<br>(0.12 to<br>0.20)  | 0.14<br>(0.11 to<br>0.18)  | 0.21<br>(0.15 to<br>0.30)   | 0.06<br>(0.04 to<br>0.07) | 0.01<br>(0.00 to<br>0.01) | 0.01<br>(0.00 to<br>0.01) | 0.01<br>(0.01 to<br>0.01) |
| Measles        | 0.87<br>(0.76 to<br>1.00)  | 8.34<br>(1.02 to<br>53.37) | 5.37<br>(0.90 to<br>29.49) | 13.68<br>(1.17 to<br>90.61) | 0.01<br>(0.01 to<br>0.01) | 0.11<br>(0.02 to<br>0.63) | 0.08<br>(0.02 to<br>0.37) | 0.18<br>(0.02 to<br>1.07) |

| High-income                                           |                                            |                                          |                                         |                                          |                                      |                                      |                                      |                                      |
|-------------------------------------------------------|--------------------------------------------|------------------------------------------|-----------------------------------------|------------------------------------------|--------------------------------------|--------------------------------------|--------------------------------------|--------------------------------------|
| Cause                                                 | YLLs (in 1000s)                            |                                          |                                         |                                          | Deaths (in 1000s)                    |                                      |                                      |                                      |
|                                                       | 2016                                       | 2040 Forecast                            | 2040 Better Scenario                    | 2040 Worse Scenario                      | 2016                                 | 2040 Forecast                        | 2040 Better Scenario                 | 2040 Worse Scenario                  |
| Varicella and herpes zoster                           | 15.38<br>(8.46 to 25.33)                   | 12.80<br>(6.72 to 20.72)                 | 11.33<br>(5.95 to 18.11)                | 12.93<br>(6.87 to 20.99)                 | 1.10<br>(0.53 to 1.86)               | 1.18<br>(0.57 to 1.90)               | 1.13<br>(0.55 to 1.83)               | 1.12<br>(0.54 to 1.83)               |
| <b>Neglected tropical diseases and malaria</b>        | <b>27.03</b><br><b>(21.85 to 34.09)</b>    | <b>24.70</b><br><b>(17.81 to 29.24)</b>  | <b>26.38</b><br><b>(19.25 to 30.89)</b> | <b>23.89</b><br><b>(17.32 to 28.64)</b>  | <b>1.01</b><br><b>(0.80 to 1.16)</b> | <b>1.16</b><br><b>(0.78 to 1.33)</b> | <b>1.31</b><br><b>(0.89 to 1.49)</b> | <b>1.07</b><br><b>(0.72 to 1.22)</b> |
| Malaria                                               | 0.15<br>(0.12 to 0.18)                     | 0.09<br>(0.07 to 0.12)                   | 0.09<br>(0.07 to 0.11)                  | 0.09<br>(0.07 to 0.11)                   | 0.00<br>(0.00 to 0.01)               | 0.00<br>(0.00 to 0.00)               | 0.00<br>(0.00 to 0.00)               | 0.00<br>(0.00 to 0.00)               |
| Chagas disease                                        | 10.85<br>(9.56 to 12.31)                   | 7.42<br>(6.42 to 8.57)                   | 8.99<br>(7.81 to 10.35)                 | 6.96<br>(6.03 to 7.97)                   | 0.48<br>(0.43 to 0.55)               | 0.36<br>(0.32 to 0.41)               | 0.45<br>(0.40 to 0.52)               | 0.33<br>(0.29 to 0.38)               |
| Leishmaniasis                                         | 0.87<br>(0.52 to 1.38)                     | 0.23<br>(0.14 to 0.52)                   | 0.20<br>(0.12 to 0.44)                  | 0.24<br>(0.14 to 0.53)                   | 0.03<br>(0.02 to 0.06)               | 0.01<br>(0.01 to 0.02)               | 0.01<br>(0.01 to 0.02)               | 0.01<br>(0.01 to 0.02)               |
| African trypanosomiasis                               | 0.00<br>(0.00 to 0.00)                     | 0.00<br>(0.00 to 0.00)                   | 0.00<br>(0.00 to 0.00)                  | 0.00<br>(0.00 to 0.00)                   | 0.00<br>(0.00 to 0.00)               | 0.00<br>(0.00 to 0.00)               | 0.00<br>(0.00 to 0.00)               | 0.00<br>(0.00 to 0.00)               |
| Schistosomiasis                                       | 0.00<br>(0.00 to 0.00)                     | 0.00<br>(0.00 to 0.00)                   | 0.00<br>(0.00 to 0.00)                  | 0.00<br>(0.00 to 0.00)                   | 0.00<br>(0.00 to 0.00)               | 0.00<br>(0.00 to 0.00)               | 0.00<br>(0.00 to 0.00)               | 0.00<br>(0.00 to 0.00)               |
| Cysticercosis                                         | 0.61<br>(0.57 to 0.66)                     | 0.24<br>(0.20 to 0.27)                   | 0.23<br>(0.20 to 0.27)                  | 0.23<br>(0.20 to 0.27)                   | 0.02<br>(0.02 to 0.02)               | 0.01<br>(0.01 to 0.01)               | 0.01<br>(0.01 to 0.01)               | 0.01<br>(0.01 to 0.01)               |
| Cystic echinococcosis                                 | 0.50<br>(0.44 to 0.57)                     | 0.32<br>(0.26 to 0.40)                   | 0.26<br>(0.22 to 0.33)                  | 0.33<br>(0.27 to 0.41)                   | 0.03<br>(0.02 to 0.03)               | 0.02<br>(0.02 to 0.02)               | 0.02<br>(0.02 to 0.02)               | 0.02<br>(0.02 to 0.03)               |
| Dengue                                                | 0.14<br>(0.11 to 0.21)                     | 0.67<br>(0.51 to 0.89)                   | 0.67<br>(0.50 to 0.89)                  | 0.66<br>(0.49 to 0.88)                   | 0.00<br>(0.00 to 0.01)               | 0.03<br>(0.02 to 0.05)               | 0.03<br>(0.02 to 0.04)               | 0.03<br>(0.02 to 0.05)               |
| Yellow fever                                          | 2.90<br>(0.49 to 9.43)                     | 1.19<br>(0.18 to 4.49)                   | 0.88<br>(0.12 to 3.41)                  | 1.26<br>(0.19 to 4.56)                   | 0.05<br>(0.01 to 0.17)               | 0.02<br>(0.00 to 0.08)               | 0.02<br>(0.00 to 0.06)               | 0.02<br>(0.00 to 0.08)               |
| Rabies                                                | 0.26<br>(0.24 to 0.28)                     | 0.29<br>(0.24 to 0.34)                   | 0.25<br>(0.21 to 0.30)                  | 0.30<br>(0.25 to 0.36)                   | 0.01<br>(0.01 to 0.01)               | 0.01<br>(0.01 to 0.01)               | 0.01<br>(0.01 to 0.01)               | 0.01<br>(0.01 to 0.01)               |
| Intestinal nematode infections                        | 0.08<br>(0.03 to 0.14)                     | 0.07<br>(0.04 to 0.13)                   | 0.07<br>(0.04 to 0.12)                  | 0.08<br>(0.04 to 0.14)                   | 0.00<br>(0.00 to 0.00)               | 0.00<br>(0.00 to 0.00)               | 0.00<br>(0.00 to 0.00)               | 0.00<br>(0.00 to 0.00)               |
| Other neglected tropical diseases                     | 10.65<br>(6.60 to 11.82)                   | 14.18<br>(7.79 to 16.52)                 | 14.74<br>(8.00 to 17.23)                | 13.74<br>(7.70 to 15.93)                 | 0.38<br>(0.19 to 0.43)               | 0.69<br>(0.33 to 0.82)               | 0.76<br>(0.36 to 0.90)               | 0.63<br>(0.30 to 0.74)               |
| <b>Maternal disorders</b>                             | <b>108.77</b><br><b>(102.10 to 115.77)</b> | <b>84.59</b><br><b>(61.64 to 113.82)</b> | <b>70.71</b><br><b>(51.03 to 96.42)</b> | <b>89.00</b><br><b>(64.87 to 118.52)</b> | <b>2.05</b><br><b>(1.92 to 2.18)</b> | <b>1.61</b><br><b>(1.18 to 2.15)</b> | <b>1.35</b><br><b>(0.98 to 1.83)</b> | <b>1.69</b><br><b>(1.24 to 2.26)</b> |
| Maternal hemorrhage                                   | 10.30<br>(8.26 to 12.44)                   | 7.61<br>(5.26 to 10.44)                  | 6.30<br>(4.32 to 8.79)                  | 8.00<br>(5.58 to 11.03)                  | 0.19<br>(0.16 to 0.23)               | 0.14<br>(0.10 to 0.20)               | 0.12<br>(0.08 to 0.17)               | 0.15<br>(0.11 to 0.21)               |
| Maternal sepsis and other maternal infections         | 9.53<br>(7.56 to 11.68)                    | 5.58<br>(3.90 to 7.71)                   | 4.23<br>(2.99 to 5.87)                  | 5.93<br>(4.18 to 8.39)                   | 0.18<br>(0.14 to 0.22)               | 0.11<br>(0.08 to 0.15)               | 0.08<br>(0.06 to 0.11)               | 0.11<br>(0.08 to 0.16)               |
| Maternal hypertensive disorders                       | 12.35<br>(10.05 to 14.96)                  | 9.21<br>(6.24 to 13.19)                  | 7.48<br>(4.90 to 10.82)                 | 9.70<br>(6.48 to 13.88)                  | 0.22<br>(0.18 to 0.27)               | 0.17<br>(0.11 to 0.24)               | 0.14<br>(0.09 to 0.20)               | 0.18<br>(0.12 to 0.25)               |
| Maternal obstructed labor and uterine rupture         | 1.65<br>(1.11 to 2.26)                     | 1.15<br>(0.72 to 1.71)                   | 0.93<br>(0.58 to 1.39)                  | 1.22<br>(0.76 to 1.81)                   | 0.03<br>(0.02 to 0.04)               | 0.02<br>(0.01 to 0.05)               | 0.02<br>(0.01 to 0.03)               | 0.02<br>(0.01 to 0.04)               |
| Maternal abortion, miscarriage, and ectopic pregnancy | 15.04<br>(12.88 to 17.52)                  | 15.88<br>(10.73 to 24.07)                | 12.88<br>(8.49 to 19.88)                | 16.71<br>(11.30 to 25.34)                | 0.30<br>(0.26 to 0.34)               | 0.32<br>(0.21 to 0.48)               | 0.26<br>(0.17 to 0.40)               | 0.33<br>(0.23 to 0.50)               |

|                                        |                              |                              |                              |                              |                           |                           |                           |                           |
|----------------------------------------|------------------------------|------------------------------|------------------------------|------------------------------|---------------------------|---------------------------|---------------------------|---------------------------|
|                                        | 17.36<br>(13.75 to<br>21.68) | 11.67<br>(7.49 to<br>17.66)  | 9.59<br>(6.09 to<br>14.62)   | 12.39<br>(8.04 to<br>18.67)  | 0.32<br>(0.26 to<br>0.40) | 0.22<br>(0.14 to<br>0.32) | 0.18<br>(0.11 to<br>0.27) | 0.23<br>(0.15 to<br>0.34) |
| Indirect maternal deaths               |                              |                              |                              |                              |                           |                           |                           |                           |
|                                        | 11.73<br>(9.77 to<br>13.85)  | 6.14<br>(3.66 to<br>10.01)   | 5.17<br>(3.03 to<br>8.52)    | 6.44<br>(3.81 to<br>10.51)   | 0.22<br>(0.18 to<br>0.25) | 0.11<br>(0.07 to<br>0.19) | 0.10<br>(0.06 to<br>0.16) | 0.12<br>(0.07 to<br>0.19) |
| Late maternal deaths                   |                              |                              |                              |                              |                           |                           |                           |                           |
|                                        | 0.10<br>(0.05 to<br>0.15)    | 0.55<br>(0.23 to<br>1.07)    | 0.46<br>(0.19 to<br>0.92)    | 0.62<br>(0.27 to<br>1.17)    | 0.00<br>(0.00 to<br>0.00) | 0.01<br>(0.00 to<br>0.02) | 0.01<br>(0.00 to<br>0.02) | 0.01<br>(0.01 to<br>0.02) |
| Maternal deaths aggravated by HIV/AIDS |                              |                              |                              |                              |                           |                           |                           |                           |
|                                        | 30.71<br>(26.63 to<br>35.26) | 26.80<br>(17.42 to<br>39.64) | 23.68<br>(15.24 to<br>35.35) | 27.99<br>(18.02 to<br>41.26) | 0.58<br>(0.51 to<br>0.66) | 0.51<br>(0.33 to<br>0.74) | 0.45<br>(0.29 to<br>0.66) | 0.53<br>(0.34 to<br>0.78) |
| Other maternal disorders               |                              |                              |                              |                              |                           |                           |                           |                           |

| High-income                                                             |                                           |                                           |                                         |                                           |                                  |                                  |                                  |                                  |
|-------------------------------------------------------------------------|-------------------------------------------|-------------------------------------------|-----------------------------------------|-------------------------------------------|----------------------------------|----------------------------------|----------------------------------|----------------------------------|
| Cause                                                                   | YLLs (in 1000s)                           |                                           |                                         |                                           | Deaths (in 1000s)                |                                  |                                  |                                  |
|                                                                         | 2016                                      | 2040 Forecast                             | 2040 Better Scenario                    | 2040 Worse Scenario                       | 2016                             | 2040 Forecast                    | 2040 Better Scenario             | 2040 Worse Scenario              |
| <b>Neonatal disorders</b>                                               | <b>2,300.42</b><br>(2,172.02 to 2,413.37) | <b>1,513.19</b><br>(1,175.39 to 1,949.25) | <b>1,084.73</b><br>(844.25 to 1,407.61) | <b>1,754.25</b><br>(1,359.89 to 2,269.92) | <b>26.59</b><br>(25.10 to 27.89) | <b>17.49</b><br>(13.59 to 22.53) | <b>12.54</b><br>(9.76 to 16.27)  | <b>20.28</b><br>(15.72 to 26.23) |
| Neonatal preterm birth                                                  | 1,282.34<br>(1,191.99 to 1,349.81)        | 720.52<br>(552.29 to 905.72)              | 425.50<br>(324.46 to 533.58)            | 854.29<br>(653.81 to 1,072.64)            | 14.82<br>(13.77 to 15.60)        | 8.33<br>(6.38 to 10.47)          | 4.92<br>(3.75 to 6.17)           | 9.87<br>(7.56 to 12.40)          |
| Neonatal encephalopathy due to birth asphyxia and trauma                | 389.64<br>(351.39 to 417.76)              | 196.50<br>(141.67 to 273.04)              | 145.73<br>(105.90 to 201.83)            | 229.71<br>(163.94 to 319.31)              | 4.50<br>(4.06 to 4.83)           | 2.27<br>(1.64 to 3.16)           | 1.69<br>(1.23 to 2.33)           | 2.66<br>(1.90 to 3.69)           |
| Neonatal sepsis and other neonatal infections                           | 177.08<br>(151.65 to 209.30)              | 157.50<br>(107.90 to 272.20)              | 119.62<br>(82.22 to 205.95)             | 181.11<br>(124.39 to 314.81)              | 2.05<br>(1.75 to 3.34)           | 1.82<br>(1.25 to 3.15)           | 1.38<br>(0.95 to 2.38)           | 2.09<br>(1.44 to 3.64)           |
| Hemolytic disease and other neonatal jaundice                           | 6.91<br>(5.63 to 8.17)                    | 3.06<br>(2.05 to 4.66)                    | 2.31<br>(1.56 to 3.40)                  | 3.52<br>(2.37 to 5.37)                    | 0.08<br>(0.07 to 0.09)           | 0.04<br>(0.02 to 0.05)           | 0.03<br>(0.02 to 0.04)           | 0.04<br>(0.03 to 0.06)           |
| Other neonatal disorders                                                | 444.46<br>(393.12 to 480.47)              | 435.61<br>(301.58 to 629.03)              | 391.58<br>(272.51 to 559.97)            | 485.62<br>(334.58 to 705.10)              | 5.14<br>(4.54 to 5.55)           | 5.04<br>(3.49 to 7.27)           | 4.53<br>(3.15 to 6.47)           | 5.61<br>(3.87 to 8.15)           |
| <b>Nutritional deficiencies</b>                                         | <b>187.56</b><br>(181.23 to 194.27)       | <b>239.97</b><br>(221.30 to 259.37)       | <b>265.03</b><br>(243.13 to 287.66)     | <b>221.06</b><br>(204.68 to 239.23)       | <b>17.77</b><br>(17.03 to 18.51) | <b>30.00</b><br>(27.06 to 33.28) | <b>34.32</b><br>(31.05 to 37.97) | <b>26.70</b><br>(23.68 to 29.83) |
| Protein-energy malnutrition                                             | 147.91<br>(119.84 to 158.79)              | 190.80<br>(155.71 to 213.76)              | 217.12<br>(179.55 to 242.81)            | 173.75<br>(141.18 to 194.81)              | 14.39<br>(11.37 to 15.50)        | 24.56<br>(19.78 to 28.31)        | 28.80<br>(23.55 to 32.81)        | 21.65<br>(17.09 to 25.13)        |
| Iodine deficiency                                                       | 2.92<br>(1.92 to 4.47)                    | 9.97<br>(4.00 to 20.51)                   | 9.99<br>(3.84 to 21.20)                 | 9.44<br>(3.84 to 19.99)                   | 0.17<br>(0.10 to 0.29)           | 1.10<br>(0.36 to 2.60)           | 1.14<br>(0.35 to 2.75)           | 1.01<br>(0.32 to 2.31)           |
| Dietary iron deficiency                                                 | 5.03<br>(2.74 to 5.78)                    | 4.68<br>(2.45 to 5.63)                    | 4.93<br>(2.45 to 5.99)                  | 4.54<br>(2.46 to 5.40)                    | 0.30<br>(0.08 to 0.41)           | 0.32<br>(0.08 to 0.46)           | 0.36<br>(0.09 to 0.52)           | 0.29<br>(0.08 to 0.42)           |
| Other nutritional deficiencies                                          | 31.70<br>(23.72 to 38.54)                 | 34.51<br>(26.16 to 63.52)                 | 33.00<br>(24.95 to 62.36)               | 33.33<br>(25.17 to 60.38)                 | 2.90<br>(2.34 to 3.56)           | 4.02<br>(3.04 to 8.17)           | 4.02<br>(3.00 to 8.40)           | 3.74<br>(2.80 to 7.57)           |
| <b>Other communicable, maternal, neonatal, and nutritional diseases</b> | <b>349.95</b><br>(314.34 to 390.35)       | <b>411.57</b><br>(362.02 to 463.30)       | <b>392.32</b><br>(344.78 to 442.80)     | <b>409.13</b><br>(362.00 to 459.29)       | <b>14.38</b><br>(12.80 to 15.14) | <b>21.39</b><br>(18.72 to 23.40) | <b>21.25</b><br>(18.52 to 23.42) | <b>20.46</b><br>(18.01 to 22.38) |
| Sexually transmitted infections excluding HIV                           | 34.73<br>(15.56 to 65.86)                 | 13.74<br>(7.96 to 25.82)                  | 11.10<br>(7.23 to 19.06)                | 14.44<br>(8.07 to 27.96)                  | 0.88<br>(0.64 to 1.28)           | 0.52<br>(0.43 to 0.67)           | 0.49<br>(0.41 to 0.60)           | 0.51<br>(0.42 to 0.68)           |
| Syphilis                                                                | 25.54<br>(6.43 to 56.58)                  | 7.82<br>(2.35 to 19.60)                   | 5.43<br>(1.93 to 13.10)                 | 8.56<br>(2.45 to 22.03)                   | 0.44<br>(0.22 to 0.83)           | 0.18<br>(0.11 to 0.32)           | 0.15<br>(0.10 to 0.24)           | 0.19<br>(0.11 to 0.34)           |
| Chlamydial infection                                                    | 1.77<br>(1.69 to 1.90)                    | 1.17<br>(0.99 to 1.38)                    | 1.12<br>(0.94 to 1.32)                  | 1.15<br>(0.98 to 1.36)                    | 0.09<br>(0.08 to 0.09)           | 0.07<br>(0.06 to 0.08)           | 0.07<br>(0.06 to 0.08)           | 0.07<br>(0.06 to 0.08)           |
| Gonococcal infection                                                    | 5.07<br>(4.83 to 5.42)                    | 3.31<br>(2.79 to 3.92)                    | 3.18<br>(2.68 to 3.76)                  | 3.28<br>(2.79 to 3.86)                    | 0.25<br>(0.24 to 0.27)           | 0.20<br>(0.18 to 0.23)           | 0.20<br>(0.17 to 0.23)           | 0.19<br>(0.17 to 0.22)           |
| Other sexually transmitted infections                                   | 2.35<br>(2.24 to 2.51)                    | 1.45<br>(1.20 to 1.75)                    | 1.37<br>(1.13 to 1.67)                  | 1.45<br>(1.20 to 1.74)                    | 0.09<br>(0.09 to 0.10)           | 0.07<br>(0.06 to 0.08)           | 0.07<br>(0.06 to 0.08)           | 0.07<br>(0.06 to 0.08)           |
| Acute hepatitis                                                         | 85.80<br>(81.89 to 89.71)                 | 73.54<br>(60.79 to 89.65)                 | 60.13<br>(49.05 to 73.44)               | 76.14<br>(63.20 to 92.82)                 | 3.56<br>(3.40 to 3.73)           | 3.55<br>(3.06 to 4.19)           | 2.98<br>(2.55 to 3.51)           | 3.59<br>(3.10 to 4.20)           |
| Acute hepatitis A                                                       | 5.33<br>(4.47 to 6.35)                    | 3.72<br>(2.80 to 4.85)                    | 3.20<br>(2.37 to 4.21)                  | 3.81<br>(2.89 to 5.02)                    | 0.18<br>(0.14 to 0.22)           | 0.16<br>(0.12 to 0.21)           | 0.14<br>(0.11 to 0.19)           | 0.16<br>(0.12 to 0.21)           |
| Acute hepatitis B                                                       | 67.71<br>(62.68 to 72.15)                 | 58.00<br>(46.58 to 72.46)                 | 47.04<br>(37.47 to 59.50)               | 60.29<br>(48.70 to 75.51)                 | 2.69<br>(2.45 to 2.91)           | 2.59<br>(2.11 to 3.14)           | 2.14<br>(1.71 to 2.62)           | 2.64<br>(2.18 to 3.20)           |

|                                       |                                                                  |                                                                  |                                                                 |                                                                  |                                                            |                                                              |                                                             |                                                               |
|---------------------------------------|------------------------------------------------------------------|------------------------------------------------------------------|-----------------------------------------------------------------|------------------------------------------------------------------|------------------------------------------------------------|--------------------------------------------------------------|-------------------------------------------------------------|---------------------------------------------------------------|
| Acute hepatitis C                     | 3.87<br>(2.88 to<br>5.05)                                        | 3.40<br>(2.41 to<br>4.58)                                        | 2.78<br>(1.96 to<br>3.76)                                       | 3.50<br>(2.44 to<br>4.79)                                        | 0.17<br>(0.13 to<br>0.23)                                  | 0.17<br>(0.13 to<br>0.23)                                    | 0.14<br>(0.10 to<br>0.19)                                   | 0.17<br>(0.12 to<br>0.23)                                     |
| Acute hepatitis E                     | 8.90<br>(6.73 to<br>11.54)                                       | 8.42<br>(5.94 to<br>11.33)                                       | 7.12<br>(5.05 to<br>9.64)                                       | 8.54<br>(6.05 to<br>11.60)                                       | 0.52<br>(0.37 to<br>0.69)                                  | 0.63<br>(0.45 to<br>0.86)                                    | 0.56<br>(0.40 to<br>0.76)                                   | 0.62<br>(0.44 to<br>0.84)                                     |
| Other unspecified infectious diseases | 229.42<br>(198.11 to<br>249.65)                                  | 324.28<br>(280.77 to<br>364.74)                                  | 321.09<br>(276.84 to<br>362.12)                                 | 318.55<br>(276.85 to<br>357.51)                                  | 9.95<br>(8.30 to<br>10.49)                                 | 17.32<br>(14.74 to<br>19.04)                                 | 17.78<br>(15.06 to<br>19.69)                                | 16.35<br>(14.02 to<br>17.84)                                  |
| <b>Non-communicable diseases</b>      | <b>121,535.50</b><br><b>(119,640.24 to</b><br><b>123,448.47)</b> | <b>135,036.30</b><br><b>(112,366.54 to</b><br><b>161,098.46)</b> | <b>114,997.91</b><br><b>(96,829.96 to</b><br><b>135,397.06)</b> | <b>166,947.44</b><br><b>(137,532.17 to</b><br><b>199,949.29)</b> | <b>8,556.78</b><br><b>(8,439.82 to</b><br><b>8,681.03)</b> | <b>11,117.84</b><br><b>(9,586.82 to</b><br><b>12,852.15)</b> | <b>9,795.75</b><br><b>(8,500.58 to</b><br><b>11,282.24)</b> | <b>13,007.77</b><br><b>(11,160.38 to</b><br><b>15,094.24)</b> |

| High-income                          |                                       |                                       |                                       |                                       |                                    |                                    |                                    |                                    |
|--------------------------------------|---------------------------------------|---------------------------------------|---------------------------------------|---------------------------------------|------------------------------------|------------------------------------|------------------------------------|------------------------------------|
| Cause                                | YLLs (in 1000s)                       |                                       |                                       |                                       | Deaths (in 1000s)                  |                                    |                                    |                                    |
|                                      | 2016                                  | 2040 Forecast                         | 2040 Better Scenario                  | 2040 Worse Scenario                   | 2016                               | 2040 Forecast                      | 2040 Better Scenario               | 2040 Worse Scenario                |
| Neoplasms                            | 45,525.91<br>(44,579.03 to 46,434.49) | 50,184.44<br>(42,615.40 to 58,792.41) | 43,392.67<br>(36,844.17 to 50,657.18) | 62,967.76<br>(52,458.49 to 74,950.74) | 2,591.00<br>(2,535.23 to 2,644.28) | 3,351.60<br>(2,923.12 to 3,867.93) | 2,973.97<br>(2,598.08 to 3,421.51) | 4,025.70<br>(3,454.18 to 4,718.80) |
| Lip and oral cavity cancer           | 545.61<br>(521.33 to 568.18)          | 497.95<br>(335.64 to 728.95)          | 341.56<br>(237.01 to 481.79)          | 851.23<br>(531.40 to 1,301.11)        | 27.73<br>(26.60 to 28.76)          | 27.73<br>(19.85 to 41.14)          | 28.98<br>(14.56 to 27.93)          | 47.50<br>(30.47 to 70.35)          |
| Nasopharynx cancer                   | 148.98<br>(141.62 to 159.24)          | 139.15<br>(97.59 to 196.61)           | 89.12<br>(64.91 to 122.96)            | 239.34<br>(160.50 to 357.86)          | 6.76<br>(6.43 to 7.22)             | 7.25<br>(4.91 to 10.48)            | 4.63<br>(3.32 to 6.46)             | 12.02<br>(7.82 to 17.91)           |
| Other pharynx cancer                 | 383.81<br>(366.46 to 398.27)          | 396.50<br>(256.09 to 581.88)          | 351.26<br>(234.30 to 501.19)          | 481.94<br>(302.74 to 717.21)          | 16.95<br>(16.21 to 17.52)          | 20.01<br>(13.44 to 28.82)          | 18.06<br>(12.44 to 25.42)          | 23.70<br>(15.08 to 35.12)          |
| Esophageal cancer                    | 1,380.83<br>(1,271.47 to 1,417.16)    | 1,449.23<br>(914.45 to 2,234.33)      | 1,052.38<br>(714.36 to 1,557.63)      | 2,262.99<br>(1,321.29 to 3,703.19)    | 71.35<br>(67.39 to 74.71)          | 85.72<br>(54.55 to 129.18)         | 62.85<br>(43.15 to 89.68)          | 129.29<br>(77.18 to 206.57)        |
| Stomach cancer                       | 2,686.41<br>(2,568.52 to 2,811.78)    | 1,969.81<br>(1,546.05 to 2,556.42)    | 1,637.03<br>(1,308.83 to 2,082.34)    | 2,185.71<br>(1,670.15 to 2,875.79)    | 167.50<br>(160.50 to 174.47)       | 146.60<br>(115.78 to 192.21)       | 124.78<br>(100.55 to 159.72)       | 158.18<br>(121.12 to 210.39)       |
| Colon and rectum cancer              | 5,022.92<br>(4,848.68 to 5,256.85)    | 5,774.88<br>(4,109.09 to 8,054.85)    | 4,801.22<br>(3,447.90 to 6,697.25)    | 6,958.63<br>(4,832.78 to 10,064.62)   | 313.54<br>(302.02 to 328.16)       | 431.44<br>(309.87 to 600.35)       | 369.85<br>(271.09 to 514.14)       | 503.21<br>(353.26 to 718.42)       |
| Liver cancer                         | 2,412.04<br>(2,260.10 to 2,564.50)    | 3,323.20<br>(2,303.09 to 4,903.22)    | 3,076.93<br>(2,223.77 to 4,387.52)    | 4,236.24<br>(2,691.62 to 6,618.13)    | 131.91<br>(125.08 to 138.16)       | 205.58<br>(147.80 to 289.13)       | 194.72<br>(145.97 to 266.56)       | 252.35<br>(168.19 to 372.57)       |
| Liver cancer due to hepatitis B      | 515.13<br>(407.24 to 646.43)          | 737.09<br>(478.21 to 1,188.79)        | 700.82<br>(462.87 to 1,079.28)        | 859.04<br>(515.52 to 1,448.84)        | 22.93<br>(18.13 to 28.74)          | 38.12<br>(25.88 to 57.62)          | 36.87<br>(25.63 to 53.96)          | 43.33<br>(27.52 to 69.12)          |
| Liver cancer due to hepatitis C      | 972.54<br>(886.53 to 1,056.87)        | 1,338.32<br>(942.85 to 1,921.19)      | 1,279.69<br>(930.72 to 1,775.15)      | 1,572.22<br>(1,041.19 to 2,409.68)    | 59.50<br>(54.91 to 64.35)          | 92.08<br>(66.72 to 126.93)         | 89.76<br>(67.42 to 120.00)         | 104.37<br>(71.11 to 151.70)        |
| Liver cancer due to alcohol use      | 539.61<br>(453.76 to 621.44)          | 684.19<br>(439.86 to 1,027.45)        | 565.81<br>(378.60 to 819.34)          | 1,107.28<br>(671.61 to 1,766.73)      | 28.62<br>(24.12 to 33.31)          | 40.52<br>(26.78 to 59.70)          | 34.57<br>(23.83 to 49.39)          | 62.98<br>(39.34 to 97.55)          |
| Liver cancer due to other causes     | 384.76<br>(342.83 to 431.16)          | 563.60<br>(352.64 to 888.87)          | 530.61<br>(347.87 to 801.50)          | 697.71<br>(400.23 to 1,150.75)        | 20.86<br>(18.53 to 23.39)          | 34.86<br>(22.88 to 52.89)          | 33.52<br>(22.73 to 49.57)          | 41.67<br>(24.98 to 66.93)          |
| Gallbladder and biliary tract cancer | 836.73<br>(791.30 to 889.28)          | 714.51<br>(641.35 to 788.47)          | 714.50<br>(635.02 to 798.84)          | 689.17<br>(623.62 to 751.27)          | 56.56<br>(53.55 to 59.78)          | 55.36<br>(50.84 to 59.77)          | 56.84<br>(51.64 to 62.00)          | 52.17<br>(48.45 to 55.70)          |
| Pancreatic cancer                    | 2,976.52<br>(2,847.49 to 3,078.08)    | 3,614.04<br>(2,907.86 to 4,554.69)    | 3,490.14<br>(2,821.62 to 4,407.01)    | 4,068.95<br>(3,206.29 to 5,242.24)    | 175.11<br>(167.21 to 181.16)       | 240.57<br>(195.74 to 299.18)       | 236.16<br>(193.63 to 294.73)       | 263.89<br>(211.59 to 334.72)       |
| Larynx cancer                        | 353.99<br>(343.36 to 365.52)          | 276.33<br>(154.08 to 449.48)          | 176.95<br>(101.38 to 280.75)          | 488.22<br>(253.79 to 836.66)          | 17.81<br>(17.27 to 18.42)          | 15.82<br>(8.77 to 25.71)           | 10.21<br>(6.21 to 16.21)           | 26.96<br>(14.27 to 45.72)          |
| Tracheal, bronchus, and lung cancer  | 10,247.38<br>(9,988.48 to 10,499.94)  | 9,687.71<br>(7,281.25 to 12,525.09)   | 6,632.60<br>(5,086.30 to 8,501.00)    | 17,046.98<br>(12,511.44 to 22,674.07) | 567.35<br>(552.21 to 584.72)       | 615.50<br>(461.67 to 799.67)       | 424.49<br>(324.07 to 550.00)       | 1,032.98<br>(756.69 to 1,368.69)   |
| Malignant skin melanoma              | 657.77<br>(562.34 to 737.77)          | 905.49<br>(758.46 to 1,057.44)        | 1,011.86<br>(843.44 to 1,193.14)      | 842.58<br>(709.28 to 978.47)          | 31.28<br>(26.07 to 34.19)          | 50.58<br>(41.55 to 56.73)          | 57.91<br>(47.84 to 65.86)          | 45.66<br>(37.65 to 50.78)          |
| Non-melanoma skin cancer             | 199.66<br>(192.26 to 207.70)          | 260.17<br>(237.94 to 283.51)          | 238.05<br>(214.91 to 262.47)          | 255.63<br>(235.63 to 276.04)          | 14.50<br>(13.97 to 15.11)          | 22.45<br>(21.10 to 23.91)          | 21.35<br>(19.94 to 22.87)          | 21.34<br>(19.88 to 22.78)          |
| Breast cancer                        | 3,429.61<br>(3,310.78 to 3,570.14)    | 3,531.50<br>(2,630.33 to 4,698.63)    | 2,982.69<br>(2,241.63 to 3,929.02)    | 4,200.78<br>(3,030.38 to 5,796.27)    | 169.64<br>(163.27 to 176.47)       | 206.33<br>(156.88 to 271.83)       | 179.86<br>(138.28 to 234.56)       | 238.38<br>(176.60 to 324.03)       |
| Cervical cancer                      | 649.18<br>(620.62 to 684.92)          | 490.69<br>(389.64 to 610.31)          | 406.43<br>(325.57 to 503.42)          | 542.50<br>(415.12 to 706.83)          | 28.17<br>(26.89 to 29.88)          | 24.97<br>(20.23 to 30.88)          | 21.28<br>(17.45 to 25.94)          | 26.97<br>(21.20 to 34.70)          |

|                   |                                       |                                       |                                       |                                       |                                 |                                 |                                 |                                 |
|-------------------|---------------------------------------|---------------------------------------|---------------------------------------|---------------------------------------|---------------------------------|---------------------------------|---------------------------------|---------------------------------|
|                   | 420.42<br>(402.04 to<br>443.74)       | 513.31<br>(446.98 to<br>586.57)       | 478.12<br>(413.34 to<br>549.81)       | 512.44<br>(450.91 to<br>582.54)       | 24.42<br>(23.37 to<br>25.82)    | 34.92<br>(31.27 to<br>39.09)    | 33.20<br>(29.48 to<br>37.51)    | 34.18<br>(30.88 to<br>37.97)    |
| Uterine cancer    |                                       |                                       |                                       |                                       |                                 |                                 |                                 |                                 |
|                   | 1,101.12<br>(1,040.20 to<br>1,152.96) | 1,174.06<br>(885.76 to<br>1,577.84)   | 1,067.20<br>(810.18 to<br>1,410.67)   | 1,237.48<br>(908.90 to<br>1,710.75)   | 56.49<br>(53.33 to<br>59.21)    | 68.94<br>(52.42 to<br>92.60)    | 62.96<br>(48.61 to<br>83.49)    | 71.82<br>(52.73 to<br>99.17)    |
| Ovarian cancer    |                                       |                                       |                                       |                                       |                                 |                                 |                                 |                                 |
|                   | 1,829.17<br>(1,692.95 to<br>2,279.74) | 2,787.90<br>(2,406.19 to<br>3,557.47) | 2,704.71<br>(2,340.08 to<br>3,489.75) | 2,705.20<br>(2,333.55 to<br>3,442.91) | 150.03<br>(139.49 to<br>181.68) | 266.25<br>(234.50 to<br>330.14) | 266.05<br>(234.64 to<br>330.43) | 250.65<br>(216.05 to<br>308.84) |
| Prostate cancer   |                                       |                                       |                                       |                                       |                                 |                                 |                                 |                                 |
|                   | 61.37<br>(56.45 to<br>66.01)          | 45.69<br>(37.42 to<br>54.07)          | 39.66<br>(32.18 to<br>47.48)          | 46.25<br>(38.15 to<br>54.59)          | 1.54<br>(1.43 to<br>1.64)       | 1.37<br>(1.20 to<br>1.54)       | 1.24<br>(1.08 to<br>1.41)       | 1.35<br>(1.18 to<br>1.51)       |
| Testicular cancer |                                       |                                       |                                       |                                       |                                 |                                 |                                 |                                 |



| High-income                     |                                                               |                                                               |                                                               |                                                               |                                                            |                                                            |                                                            |                                                            |
|---------------------------------|---------------------------------------------------------------|---------------------------------------------------------------|---------------------------------------------------------------|---------------------------------------------------------------|------------------------------------------------------------|------------------------------------------------------------|------------------------------------------------------------|------------------------------------------------------------|
| Cause                           | YLLs (in 1000s)                                               |                                                               |                                                               |                                                               | Deaths (in 1000s)                                          |                                                            |                                                            |                                                            |
|                                 | 2016                                                          | 2040 Forecast                                                 | 2040 Better Scenario                                          | 2040 Worse Scenario                                           | 2016                                                       | 2040 Forecast                                              | 2040 Better Scenario                                       | 2040 Worse Scenario                                        |
| Kidney cancer                   | 1,092.54<br>(1,050.45 to<br>1,131.44)                         | 1,443.66<br>(1,199.43 to<br>1,704.05)                         | 1,426.53<br>(1,203.34 to<br>1,671.50)                         | 1,552.42<br>(1,240.70 to<br>1,896.35)                         | 61.46<br>(58.90 to<br>63.44)                               | 92.81<br>(78.52 to<br>108.13)                              | 93.72<br>(80.07 to<br>107.61)                              | 96.64<br>(79.24 to<br>117.31)                              |
| Bladder cancer                  | 1,036.22<br>(999.35 to<br>1,069.84)                           | 1,175.87<br>(921.50 to<br>1,535.94)                           | 1,053.81<br>(838.18 to<br>1,357.61)                           | 1,386.90<br>(1,035.50 to<br>1,884.25)                         | 77.97<br>(75.09 to<br>80.74)                               | 104.30<br>(81.78 to<br>133.53)                             | 95.52<br>(77.20 to<br>120.68)                              | 118.69<br>(88.51 to<br>157.94)                             |
| Brain and nervous system cancer | 1,420.99<br>(1,201.18 to<br>1,557.75)                         | 1,704.82<br>(1,400.56 to<br>1,934.66)                         | 1,645.45<br>(1,349.22 to<br>1,880.57)                         | 1,685.71<br>(1,400.53 to<br>1,893.97)                         | 54.86<br>(43.98 to<br>58.28)                               | 77.60<br>(60.65 to<br>86.51)                               | 76.42<br>(59.49 to<br>86.13)                               | 74.98<br>(59.12 to<br>82.65)                               |
| Thyroid cancer                  | 151.19<br>(143.28 to<br>160.06)                               | 168.86<br>(129.01 to<br>227.07)                               | 153.33<br>(119.17 to<br>202.73)                               | 180.48<br>(133.50 to<br>249.87)                               | 9.03<br>(8.59 to<br>9.58)                                  | 11.74<br>(9.23 to<br>15.38)                                | 10.97<br>(8.76 to<br>14.19)                                | 12.13<br>(9.31 to<br>16.53)                                |
| Mesothelioma                    | 296.56<br>(274.57 to<br>315.96)                               | 397.83<br>(354.55 to<br>456.76)                               | 414.00<br>(365.42 to<br>476.58)                               | 376.49<br>(339.17 to<br>418.62)                               | 17.26<br>(16.05 to<br>18.48)                               | 26.75<br>(24.28 to<br>29.62)                               | 28.44<br>(25.68 to<br>32.38)                               | 24.72<br>(22.63 to<br>26.61)                               |
| Hodgkin lymphoma                | 117.91<br>(113.02 to<br>135.56)                               | 98.43<br>(85.81 to<br>116.33)                                 | 83.18<br>(71.50 to<br>99.14)                                  | 100.70<br>(88.25 to<br>119.54)                                | 4.53<br>(4.37 to<br>4.93)                                  | 4.52<br>(4.12 to<br>5.01)                                  | 3.93<br>(3.54 to<br>4.43)                                  | 4.50<br>(4.13 to<br>5.00)                                  |
| Non-Hodgkin lymphoma            | 1,485.09<br>(1,393.59 to<br>1,695.09)                         | 1,798.80<br>(1,477.76 to<br>2,234.25)                         | 1,679.68<br>(1,386.49 to<br>2,069.78)                         | 1,832.14<br>(1,475.93 to<br>2,316.21)                         | 84.53<br>(79.48 to<br>91.80)                               | 119.69<br>(101.10 to<br>143.86)                            | 114.97<br>(97.39 to<br>136.98)                             | 118.15<br>(99.13 to<br>143.66)                             |
| Multiple myeloma                | 749.24<br>(645.69 to<br>901.36)                               | 1,019.93<br>(812.88 to<br>1,233.97)                           | 982.33<br>(780.66 to<br>1,264.49)                             | 1,031.25<br>(812.84 to<br>1,353.03)                           | 46.33<br>(38.61 to<br>54.38)                               | 71.10<br>(57.35 to<br>89.62)                               | 70.21<br>(56.71 to<br>87.83)                               | 69.91<br>(55.89 to<br>89.56)                               |
| Leukemia                        | 1,843.32<br>(1,773.23 to<br>1,897.23)                         | 2,213.65<br>(1,774.15 to<br>2,755.85)                         | 2,033.91<br>(1,659.03 to<br>2,490.48)                         | 2,451.43<br>(1,902.56 to<br>3,140.51)                         | 97.68<br>(94.52 to<br>100.41)                              | 143.55<br>(115.36 to<br>175.96)                            | 135.30<br>(110.39 to<br>163.58)                            | 153.98<br>(118.87 to<br>196.56)                            |
| Acute lymphoid leukemia         | 237.73<br>(213.87 to<br>251.48)                               | 189.00<br>(154.85 to<br>231.13)                               | 165.08<br>(135.73 to<br>200.81)                               | 211.19<br>(169.55 to<br>264.54)                               | 6.95<br>(6.35 to<br>7.41)                                  | 6.82<br>(5.57 to<br>8.44)                                  | 6.09<br>(5.00 to<br>7.46)                                  | 7.52<br>(5.95 to<br>9.54)                                  |
| Chronic lymphoid leukemia       | 243.13<br>(222.28 to<br>291.41)                               | 307.57<br>(231.13 to<br>406.07)                               | 291.20<br>(225.04 to<br>376.86)                               | 336.97<br>(243.14 to<br>462.28)                               | 18.14<br>(16.83 to<br>21.26)                               | 26.06<br>(20.03 to<br>33.39)                               | 25.33<br>(19.90 to<br>32.01)                               | 27.49<br>(20.38 to<br>36.40)                               |
| Acute myeloid leukemia          | 777.36<br>(689.11 to<br>809.27)                               | 1,036.48<br>(826.57 to<br>1,277.67)                           | 985.77<br>(798.42 to<br>1,200.12)                             | 1,141.12<br>(884.59 to<br>1,451.62)                           | 38.08<br>(33.69 to<br>39.63)                               | 60.05<br>(48.45 to<br>73.74)                               | 58.39<br>(47.47 to<br>70.55)                               | 64.32<br>(50.26 to<br>81.13)                               |
| Chronic myeloid leukemia        | 121.50<br>(112.40 to<br>129.09)                               | 77.56<br>(58.97 to<br>101.06)                                 | 61.34<br>(47.37 to<br>78.49)                                  | 90.28<br>(65.72 to<br>121.77)                                 | 7.18<br>(6.74 to<br>7.65)                                  | 5.33<br>(4.13 to<br>6.76)                                  | 4.35<br>(3.41 to<br>5.42)                                  | 5.97<br>(4.39 to<br>7.87)                                  |
| Other leukemia                  | 463.60<br>(429.94 to<br>493.47)                               | 603.02<br>(470.54 to<br>769.60)                               | 530.52<br>(424.72 to<br>667.85)                               | 671.87<br>(511.88 to<br>880.59)                               | 27.32<br>(25.59 to<br>29.09)                               | 45.29<br>(35.71 to<br>56.89)                               | 41.14<br>(33.38 to<br>50.85)                               | 48.67<br>(36.74 to<br>62.93)                               |
| Other neoplasms                 | 2,019.35<br>(1,916.61 to<br>2,088.03)                         | 2,610.49<br>(2,362.79 to<br>2,859.67)                         | 2,628.05<br>(2,360.32 to<br>2,913.70)                         | 2,517.97<br>(2,295.83 to<br>2,737.62)                         | 108.74<br>(103.36 to<br>112.47)                            | 170.89<br>(157.06 to<br>182.87)                            | 177.74<br>(162.50 to<br>192.70)                            | 159.38<br>(147.53 to<br>169.00)                            |
| <b>Cardiovascular diseases</b>  | <b>37,159.13</b><br><b>(36,409.43 to</b><br><b>37,928.31)</b> | <b>33,924.25</b><br><b>(22,291.77 to</b><br><b>48,754.53)</b> | <b>31,137.48</b><br><b>(16,333.34 to</b><br><b>32,879.80)</b> | <b>45,927.41</b><br><b>(29,746.71 to</b><br><b>70,116.17)</b> | <b>3,078.97</b><br><b>(3,006.34 to</b><br><b>3,153.95)</b> | <b>3,220.49</b><br><b>(2,313.30 to</b><br><b>4,501.13)</b> | <b>2,457.79</b><br><b>(1,813.34 to</b><br><b>3,393.81)</b> | <b>4,063.13</b><br><b>(2,797.52 to</b><br><b>5,780.45)</b> |
| Rheumatic heart disease         | 515.56<br>(492.95 to<br>544.71)                               | 414.12<br>(331.81 to<br>541.44)                               | 357.92<br>(284.68 to<br>463.34)                               | 413.68<br>(333.63 to<br>540.74)                               | 41.59<br>(39.75 to<br>43.90)                               | 40.45<br>(33.55 to<br>52.53)                               | 36.44<br>(30.03 to<br>46.89)                               | 39.11<br>(32.41 to<br>51.77)                               |
| Ischemic heart disease          | 20,145.50<br>(19,658.10 to<br>20,768.19)                      | 15,553.96<br>(9,002.01 to<br>26,084.97)                       | 9,526.65<br>(5,676.87 to<br>15,173.69)                        | 24,391.09<br>(13,410.55 to<br>41,968.83)                      | 1,648.90<br>(1,604.48 to<br>1,708.28)                      | 1,501.19<br>(894.21 to<br>2,398.44)                        | 1,015.93<br>(610.40 to<br>1,585.96)                        | 2,084.98<br>(1,203.04 to<br>3,394.74)                      |
| Stroke                          | 8,333.46<br>(7,898.74 to<br>8,757.92)                         | 6,052.88<br>(3,862.11 to<br>9,848.82)                         | 3,914.73<br>(2,543.50 to<br>6,354.37)                         | 8,841.17<br>(5,429.12 to<br>14,537.25)                        | 717.71<br>(670.70 to<br>766.50)                            | 612.47<br>(394.55 to<br>1,009.73)                          | 442.58<br>(287.04 to<br>715.16)                            | 795.36<br>(496.13 to<br>1,310.74)                          |
| Ischemic stroke                 | 3,955.95<br>(3,712.21 to<br>4,189.72)                         | 2,999.26<br>(1,704.28 to<br>5,937.11)                         | 2,130.96<br>(1,242.67 to<br>4,067.57)                         | 3,977.18<br>(2,192.18 to<br>8,257.42)                         | 418.24<br>(387.97 to<br>449.11)                            | 361.60<br>(205.75 to<br>666.25)                            | 275.75<br>(159.62 to<br>506.40)                            | 443.21<br>(243.44 to<br>864.47)                            |

|                                |                                       |                                       |                                       |                                       |                                 |                                 |                                 |                                 |
|--------------------------------|---------------------------------------|---------------------------------------|---------------------------------------|---------------------------------------|---------------------------------|---------------------------------|---------------------------------|---------------------------------|
| Intracerebral hemorrhage       | 4,377.50<br>(4,177.51 to<br>4,575.54) | 3,053.62<br>(1,848.27 to<br>4,963.10) | 1,783.77<br>(1,165.74 to<br>2,721.46) | 4,863.99<br>(2,805.92 to<br>8,152.53) | 299.47<br>(281.47 to<br>318.60) | 250.87<br>(166.03 to<br>381.64) | 166.83<br>(116.54 to<br>239.63) | 352.15<br>(220.52 to<br>560.80) |
| Hypertensive heart disease     | 1,634.53<br>(1,102.33 to<br>2,027.62) | 2,588.06<br>(1,297.31 to<br>5,465.36) | 2,016.81<br>(1,112.29 to<br>3,796.82) | 3,413.42<br>(1,680.15 to<br>7,440.63) | 141.29<br>(89.03 to<br>168.69)  | 266.49<br>(131.30 to<br>576.02) | 220.94<br>(117.83 to<br>418.39) | 335.20<br>(160.51 to<br>758.08) |
| Cardiomyopathy and myocarditis | 1,519.39<br>(1,372.87 to<br>1,709.85) | 1,509.04<br>(1,122.37 to<br>2,041.85) | 1,265.87<br>(941.07 to<br>1,685.48)   | 1,628.96<br>(1,215.87 to<br>2,185.21) | 96.17<br>(80.30 to<br>102.35)   | 116.02<br>(82.52 to<br>162.72)  | 102.61<br>(73.21 to<br>140.82)  | 118.14<br>(84.53 to<br>165.14)  |
| Myocarditis                    | 171.66<br>(133.21 to<br>203.44)       | 198.74<br>(152.95 to<br>234.60)       | 202.20<br>(154.98 to<br>241.35)       | 190.83<br>(147.20 to<br>223.97)       | 12.56<br>(8.73 to<br>14.37)     | 19.83<br>(14.02 to<br>23.57)    | 21.32<br>(15.21 to<br>24.98)    | 18.08<br>(12.75 to<br>21.69)    |

| High-income                                                   |                                                  |                                                  |                                                  |                                                    |                                            |                                            |                                            |                                              |
|---------------------------------------------------------------|--------------------------------------------------|--------------------------------------------------|--------------------------------------------------|----------------------------------------------------|--------------------------------------------|--------------------------------------------|--------------------------------------------|----------------------------------------------|
| Cause                                                         | YLLs (in 1000s)                                  |                                                  |                                                  |                                                    | Deaths (in 1000s)                          |                                            |                                            |                                              |
|                                                               | 2016                                             | 2040 Forecast                                    | 2040 Better Scenario                             | 2040 Worse Scenario                                | 2016                                       | 2040 Forecast                              | 2040 Better Scenario                       | 2040 Worse Scenario                          |
| Alcoholic cardiomyopathy                                      | 307.17<br>(217.57 to 372.40)                     | 301.97<br>(217.16 to 389.46)                     | 264.66<br>(189.30 to 344.25)                     | 377.14<br>(271.79 to 465.91)                       | 13.23<br>(8.96 to 15.51)                   | 14.62<br>(10.33 to 18.00)                  | 13.28<br>(9.29 to 16.57)                   | 17.71<br>(12.60 to 21.15)                    |
| Other cardiomyopathy                                          | 1,040.56<br>(942.26 to 1,209.10)                 | 1,008.34<br>(678.21 to 1,450.91)                 | 799.01<br>(537.50 to 1,142.25)                   | 1,060.99<br>(713.99 to 1,531.97)                   | 70.38<br>(59.09 to 75.55)                  | 81.57<br>(53.06 to 127.36)                 | 68.02<br>(44.00 to 104.64)                 | 82.35<br>(53.48 to 126.57)                   |
| Atrial fibrillation and flutter                               | 895.00<br>(726.47 to 1,078.56)                   | 1,319.95<br>(990.71 to 1,730.45)                 | 1,242.04<br>(938.16 to 1,614.68)                 | 1,396.97<br>(1,036.53 to 1,840.37)                 | 104.92<br>(83.69 to 129.16)                | 165.52<br>(125.08 to 216.55)               | 160.86<br>(122.85 to 208.73)               | 168.78<br>(125.51 to 219.58)                 |
| Aortic aneurysm                                               | 1,024.96<br>(984.48 to 1,057.88)                 | 1,100.10<br>(850.45 to 1,453.18)                 | 1,013.85<br>(801.16 to 1,329.74)                 | 1,154.26<br>(877.87 to 1,542.74)                   | 77.09<br>(74.83 to 79.42)                  | 96.58<br>(78.14 to 124.47)                 | 93.53<br>(75.93 to 118.74)                 | 96.03<br>(77.05 to 122.98)                   |
| Peripheral artery disease                                     | 348.67<br>(255.66 to 520.26)                     | 683.28<br>(456.16 to 1,070.82)                   | 668.90<br>(449.18 to 1,044.64)                   | 729.35<br>(484.84 to 1,153.66)                     | 34.11<br>(23.87 to 52.18)                  | 76.08<br>(51.45 to 118.70)                 | 77.82<br>(52.60 to 120.94)                 | 76.54<br>(50.87 to 119.16)                   |
| Endocarditis                                                  | 460.61<br>(352.59 to 606.03)                     | 671.35<br>(445.47 to 984.34)                     | 645.78<br>(435.23 to 929.95)                     | 675.72<br>(445.63 to 985.22)                       | 33.15<br>(24.09 to 42.70)                  | 55.79<br>(35.82 to 84.22)                  | 55.72<br>(36.10 to 82.62)                  | 54.13<br>(34.33 to 82.69)                    |
| Other cardiovascular and circulatory diseases                 | 2,281.47<br>(2,194.93 to 2,371.74)               | 3,031.49<br>(2,359.15 to 3,982.33)               | 2,484.94<br>(1,959.28 to 3,217.78)               | 3,282.79<br>(2,516.73 to 4,354.76)                 | 184.05<br>(177.02 to 191.24)               | 289.90<br>(238.16 to 362.54)               | 251.35<br>(206.29 to 312.50)               | 294.87<br>(240.18 to 373.48)                 |
| <b>Chronic respiratory diseases</b>                           | <b>6,926.75</b><br><b>(6,777.17 to 7,089.73)</b> | <b>7,363.78</b><br><b>(5,980.67 to 9,014.65)</b> | <b>6,171.48</b><br><b>(5,097.03 to 7,429.26)</b> | <b>10,732.23</b><br><b>(8,376.41 to 13,723.32)</b> | <b>543.78</b><br><b>(531.36 to 556.69)</b> | <b>669.41</b><br><b>(548.60 to 817.63)</b> | <b>562.49</b><br><b>(466.51 to 676.77)</b> | <b>928.50</b><br><b>(734.15 to 1,170.97)</b> |
| Chronic obstructive pulmonary disease                         | 5,581.63<br>(5,397.72 to 5,902.50)               | 5,444.35<br>(4,134.08 to 7,111.13)               | 3,988.98<br>(3,026.14 to 5,219.30)               | 8,906.90<br>(6,613.08 to 11,905.51)                | 454.94<br>(439.58 to 480.78)               | 520.22<br>(400.00 to 673.77)               | 387.96<br>(299.69 to 503.22)               | 791.12<br>(601.54 to 1,030.27)               |
| Pneumoconiosis                                                | 72.72<br>(67.60 to 82.19)                        | 72.28<br>(63.28 to 84.43)                        | 73.96<br>(62.90 to 90.18)                        | 69.73<br>(62.12 to 78.76)                          | 5.86<br>(5.45 to 6.57)                     | 6.57<br>(5.77 to 7.60)                     | 6.87<br>(5.88 to 8.23)                     | 6.17<br>(5.46 to 6.97)                       |
| Silicosis                                                     | 24.90<br>(21.76 to 33.35)                        | 11.48<br>(8.85 to 18.25)                         | 8.55<br>(6.36 to 14.81)                          | 11.84<br>(9.33 to 18.09)                           | 2.14<br>(1.85 to 2.84)                     | 1.09<br>(0.84 to 1.72)                     | 0.84<br>(0.63 to 1.46)                     | 1.09<br>(0.85 to 1.68)                       |
| Asbestosis                                                    | 26.35<br>(17.60 to 31.22)                        | 44.57<br>(35.08 to 53.27)                        | 50.61<br>(40.46 to 61.85)                        | 40.13<br>(30.01 to 47.20)                          | 2.08<br>(1.33 to 2.46)                     | 3.94<br>(2.94 to 4.74)                     | 4.58<br>(3.63 to 5.51)                     | 3.46<br>(2.54 to 4.11)                       |
| Coal workers pneumoconiosis                                   | 11.90<br>(7.22 to 15.43)                         | 9.66<br>(6.25 to 15.55)                          | 8.49<br>(5.38 to 14.32)                          | 10.73<br>(7.02 to 15.77)                           | 0.91<br>(0.60 to 1.24)                     | 0.90<br>(0.57 to 1.51)                     | 0.81<br>(0.51 to 1.42)                     | 0.96<br>(0.62 to 1.51)                       |
| Other pneumoconiosis                                          | 9.58<br>(7.69 to 15.06)                          | 6.57<br>(5.16 to 10.21)                          | 6.30<br>(4.84 to 10.16)                          | 7.03<br>(5.57 to 10.89)                            | 0.73<br>(0.59 to 1.13)                     | 0.64<br>(0.51 to 0.99)                     | 0.64<br>(0.50 to 1.01)                     | 0.66<br>(0.53 to 0.99)                       |
| Asthma                                                        | 305.81<br>(284.40 to 369.35)                     | 159.58<br>(100.14 to 255.78)                     | 117.57<br>(75.17 to 184.74)                      | 204.55<br>(121.65 to 339.29)                       | 17.50<br>(16.22 to 21.57)                  | 12.05<br>(7.88 to 18.79)                   | 9.50<br>(6.35 to 14.50)                    | 14.59<br>(9.11 to 23.28)                     |
| Interstitial lung disease and pulmonary sarcoidosis           | 845.88<br>(541.57 to 946.65)                     | 1,541.14<br>(1,011.90 to 1,787.28)               | 1,846.30<br>(1,265.02 to 2,167.66)               | 1,393.75<br>(894.56 to 1,608.22)                   | 59.39<br>(36.86 to 66.45)                  | 121.54<br>(77.97 to 139.65)                | 148.89<br>(100.24 to 171.85)               | 107.22<br>(66.80 to 133.28)                  |
| Other chronic respiratory diseases                            | 120.70<br>(81.85 to 166.46)                      | 146.42<br>(95.59 to 201.13)                      | 144.68<br>(93.28 to 201.42)                      | 157.30<br>(102.10 to 216.80)                       | 6.10<br>(3.99 to 8.54)                     | 9.03<br>(5.87 to 12.89)                    | 9.27<br>(5.98 to 13.29)                    | 9.40<br>(5.92 to 13.32)                      |
| <b>Cirrhosis and other chronic liver diseases</b>             | <b>4,479.14</b><br><b>(4,284.39 to 4,663.90)</b> | <b>4,355.79</b><br><b>(3,763.10 to 4,974.45)</b> | <b>3,751.20</b><br><b>(3,199.41 to 4,329.89)</b> | <b>4,924.14</b><br><b>(4,290.49 to 5,563.96)</b>   | <b>191.45</b><br><b>(183.64 to 198.82)</b> | <b>212.14</b><br><b>(191.40 to 233.97)</b> | <b>187.88</b><br><b>(167.27 to 209.94)</b> | <b>233.37</b><br><b>(212.23 to 255.24)</b>   |
| Cirrhosis and other chronic liver diseases due to hepatitis B | 631.57<br>(546.39 to 729.04)                     | 635.30<br>(525.23 to 762.41)                     | 584.01<br>(480.09 to 710.83)                     | 642.91<br>(536.25 to 771.85)                       | 27.69<br>(24.35 to 31.78)                  | 32.31<br>(27.50 to 38.18)                  | 30.33<br>(25.73 to 36.17)                  | 31.93<br>(27.45 to 37.68)                    |
| Cirrhosis and other chronic liver diseases due to hepatitis C | 1,449.59<br>(1,328.71 to 1,592.49)               | 1,455.30<br>(1,224.97 to 1,691.38)               | 1,310.96<br>(1,093.40 to 1,544.20)               | 1,463.42<br>(1,231.69 to 1,700.27)                 | 61.15<br>(56.19 to 66.80)                  | 68.49<br>(59.53 to 77.56)                  | 62.92<br>(54.25 to 71.94)                  | 67.47<br>(59.07 to 76.20)                    |

|                                                                |                                                            |                                                            |                                                            |                                                            |                                                      |                                                      |                                                      |                                                      |
|----------------------------------------------------------------|------------------------------------------------------------|------------------------------------------------------------|------------------------------------------------------------|------------------------------------------------------------|------------------------------------------------------|------------------------------------------------------|------------------------------------------------------|------------------------------------------------------|
|                                                                | 1,792.80<br>(1,636.95 to<br>1,948.43)                      | 1,622.57<br>(1,368.05 to<br>1,903.46)                      | 1,270.33<br>(1,059.61 to<br>1,508.41)                      | 2,174.98<br>(1,865.08 to<br>2,501.16)                      | 75.72<br>(69.37 to<br>82.19)                         | 78.23<br>(68.78 to<br>88.44)                         | 63.70<br>(55.29 to<br>72.93)                         | 101.71<br>(90.36 to<br>113.24)                       |
| Cirrhosis and other chronic liver diseases due to alcohol use  |                                                            |                                                            |                                                            |                                                            |                                                      |                                                      |                                                      |                                                      |
|                                                                | 605.18<br>(524.20 to<br>701.11)                            | 642.63<br>(516.30 to<br>791.53)                            | 585.90<br>(465.56 to<br>732.71)                            | 642.83<br>(521.88 to<br>793.49)                            | 26.89<br>(23.52 to<br>30.87)                         | 33.11<br>(28.01 to<br>39.38)                         | 30.93<br>(25.95 to<br>36.60)                         | 32.26<br>(27.43 to<br>38.15)                         |
| Cirrhosis and other chronic liver diseases due to other causes |                                                            |                                                            |                                                            |                                                            |                                                      |                                                      |                                                      |                                                      |
| <b>Digestive diseases</b>                                      | <b>2,814.08</b><br><b>(2,628.72 to</b><br><b>3,340.15)</b> | <b>3,487.16</b><br><b>(2,966.48 to</b><br><b>4,244.63)</b> | <b>3,273.37</b><br><b>(2,791.80 to</b><br><b>3,969.57)</b> | <b>3,541.78</b><br><b>(2,997.52 to</b><br><b>4,332.62)</b> | <b>216.03</b><br><b>(200.31 to</b><br><b>249.43)</b> | <b>321.91</b><br><b>(277.95 to</b><br><b>386.04)</b> | <b>314.43</b><br><b>(271.77 to</b><br><b>373.93)</b> | <b>314.92</b><br><b>(269.57 to</b><br><b>380.03)</b> |
| Peptic ulcer disease                                           | 344.38<br>(310.68 to<br>419.30)                            | 256.65<br>(213.74 to<br>313.75)                            | 213.54<br>(176.00 to<br>261.23)                            | 274.85<br>(224.48 to<br>337.98)                            | 26.16<br>(23.97 to<br>31.19)                         | 24.77<br>(21.06 to<br>29.51)                         | 21.44<br>(18.16 to<br>25.50)                         | 25.37<br>(21.13 to<br>30.55)                         |

| High-income                                |                                                    |                                                     |                                                     |                                                     |                                                  |                                                  |                                                  |                                                  |
|--------------------------------------------|----------------------------------------------------|-----------------------------------------------------|-----------------------------------------------------|-----------------------------------------------------|--------------------------------------------------|--------------------------------------------------|--------------------------------------------------|--------------------------------------------------|
| Cause                                      | YLLs (in 1000s)                                    |                                                     |                                                     |                                                     | Deaths (in 1000s)                                |                                                  |                                                  |                                                  |
|                                            | 2016                                               | 2040 Forecast                                       | 2040 Better Scenario                                | 2040 Worse Scenario                                 | 2016                                             | 2040 Forecast                                    | 2040 Better Scenario                             | 2040 Worse Scenario                              |
| Gastritis and duodenitis                   | 32.41<br>(27.72 to 49.11)                          | 43.25<br>(35.36 to 70.89)                           | 39.15<br>(31.88 to 64.78)                           | 42.83<br>(35.08 to 68.30)                           | 2.28<br>(1.98 to 3.63)                           | 3.90<br>(3.20 to 6.63)                           | 3.70<br>(3.04 to 6.28)                           | 3.72<br>(3.07 to 6.23)                           |
| Appendicitis                               | 51.24<br>(43.58 to 72.59)                          | 47.00<br>(38.30 to 68.33)                           | 39.04<br>(31.64 to 57.01)                           | 47.87<br>(39.26 to 68.77)                           | 2.85<br>(2.43 to 4.11)                           | 3.35<br>(2.77 to 4.87)                           | 2.92<br>(2.43 to 4.27)                           | 3.30<br>(2.75 to 4.72)                           |
| Paralytic ileus and intestinal obstruction | 569.32<br>(450.00 to 681.45)                       | 794.27<br>(629.36 to 971.37)                        | 819.65<br>(648.98 to 999.90)                        | 748.59<br>(591.28 to 916.57)                        | 47.02<br>(36.86 to 54.66)                        | 78.49<br>(61.29 to 92.95)                        | 83.61<br>(65.40 to 99.26)                        | 71.68<br>(55.88 to 85.44)                        |
| Inguinal, femoral, and abdominal hernia    | 91.66<br>(73.02 to 131.31)                         | 76.73<br>(60.59 to 108.00)                          | 72.00<br>(56.72 to 101.66)                          | 74.57<br>(58.95 to 104.79)                          | 7.84<br>(6.24 to 11.31)                          | 7.69<br>(6.05 to 11.01)                          | 7.50<br>(5.89 to 10.78)                          | 7.24<br>(5.67 to 10.31)                          |
| Inflammatory bowel disease                 | 204.91<br>(141.09 to 229.28)                       | 250.35<br>(174.44 to 296.88)                        | 254.89<br>(178.05 to 304.70)                        | 238.17<br>(166.62 to 279.90)                        | 14.47<br>(9.75 to 16.22)                         | 21.39<br>(14.63 to 25.01)                        | 22.50<br>(15.61 to 26.42)                        | 19.66<br>(13.53 to 22.95)                        |
| Vascular intestinal disorders              | 452.30<br>(399.79 to 532.04)                       | 638.89<br>(537.81 to 764.36)                        | 624.05<br>(520.83 to 751.36)                        | 614.46<br>(518.74 to 733.76)                        | 35.63<br>(31.36 to 41.39)                        | 58.41<br>(50.28 to 69.33)                        | 58.77<br>(50.18 to 69.60)                        | 54.66<br>(46.71 to 64.41)                        |
| Gallbladder and biliary diseases           | 318.17<br>(289.99 to 386.00)                       | 422.78<br>(254.80 to 710.13)                        | 340.77<br>(212.37 to 551.70)                        | 499.26<br>(289.01 to 841.68)                        | 29.27<br>(26.96 to 34.79)                        | 44.84<br>(27.60 to 74.10)                        | 37.98<br>(23.99 to 61.25)                        | 50.84<br>(30.35 to 85.36)                        |
| Pancreatitis                               | 339.16<br>(299.65 to 440.96)                       | 376.49<br>(262.03 to 562.27)                        | 300.78<br>(214.07 to 441.68)                        | 444.57<br>(300.02 to 689.38)                        | 17.78<br>(15.81 to 22.78)                        | 23.68<br>(17.07 to 34.38)                        | 19.77<br>(14.54 to 28.05)                        | 27.11<br>(18.75 to 41.95)                        |
| Other digestive diseases                   | 410.53<br>(337.84 to 493.27)                       | 580.76<br>(472.80 to 704.89)                        | 569.50<br>(466.81 to 690.81)                        | 556.60<br>(456.15 to 671.34)                        | 32.72<br>(28.14 to 38.85)                        | 55.38<br>(46.00 to 65.06)                        | 56.21<br>(47.23 to 66.03)                        | 51.34<br>(42.44 to 60.74)                        |
| Neurological disorders                     | <b>10,408.94</b><br><b>(9,411.75 to 11,621.18)</b> | <b>15,969.75</b><br><b>(12,778.95 to 20,786.51)</b> | <b>16,096.30</b><br><b>(13,034.92 to 20,408.18)</b> | <b>16,361.38</b><br><b>(12,679.53 to 22,339.38)</b> | <b>1,169.31</b><br><b>(1,041.79 to 1,310.08)</b> | <b>1,947.77</b><br><b>(1,549.04 to 2,564.43)</b> | <b>2,015.14</b><br><b>(1,625.52 to 2,563.61)</b> | <b>1,946.49</b><br><b>(1,497.09 to 2,686.96)</b> |
| Alzheimer's disease and other dementias    | 7,907.23<br>(6,936.59 to 9,109.38)                 | 12,487.29<br>(9,389.16 to 17,056.97)                | 12,515.44<br>(9,598.23 to 16,725.92)                | 12,973.66<br>(9,455.70 to 18,849.96)                | 1,016.37<br>(885.16 to 1,158.33)                 | 1,693.77<br>(1,304.80 to 2,295.39)               | 1,743.15<br>(1,367.57 to 2,283.95)               | 1,709.98<br>(1,261.14 to 2,440.80)               |
| Parkinson's disease                        | 919.14<br>(753.87 to 1,115.83)                     | 1,584.81<br>(1,312.78 to 1,903.87)                  | 1,715.61<br>(1,422.28 to 2,062.01)                  | 1,452.87<br>(1,203.30 to 1,754.16)                  | 88.00<br>(71.99 to 107.79)                       | 161.95<br>(134.87 to 195.36)                     | 178.90<br>(148.55 to 216.80)                     | 145.40<br>(119.11 to 176.62)                     |
| Epilepsy                                   | 359.40<br>(343.04 to 382.24)                       | 407.81<br>(303.53 to 532.19)                        | 356.86<br>(271.69 to 460.62)                        | 472.26<br>(341.21 to 630.07)                        | 12.41<br>(11.87 to 13.19)                        | 17.41<br>(13.24 to 22.49)                        | 15.99<br>(12.40 to 20.47)                        | 19.69<br>(14.33 to 26.23)                        |
| Multiple sclerosis                         | 253.34<br>(197.41 to 284.23)                       | 266.32<br>(193.38 to 323.58)                        | 269.22<br>(193.07 to 327.17)                        | 272.15<br>(198.35 to 334.26)                        | 9.74<br>(7.18 to 10.57)                          | 11.11<br>(7.65 to 13.23)                         | 11.38<br>(7.79 to 13.71)                         | 11.13<br>(7.68 to 13.34)                         |
| Motor neuron disease                       | 467.22<br>(443.36 to 481.50)                       | 622.07<br>(550.32 to 697.48)                        | 626.39<br>(549.74 to 711.87)                        | 604.63<br>(500.74 to 670.15)                        | 22.20<br>(21.06 to 22.89)                        | 33.60<br>(30.57 to 36.94)                        | 34.32<br>(30.82 to 38.36)                        | 32.08<br>(29.45 to 34.69)                        |
| Other neurological disorders               | 502.61<br>(468.26 to 522.68)                       | 601.44<br>(532.19 to 670.34)                        | 612.79<br>(538.96 to 689.18)                        | 585.81<br>(521.00 to 647.70)                        | 20.38<br>(19.40 to 21.38)                        | 29.94<br>(27.44 to 32.23)                        | 31.40<br>(28.48 to 34.13)                        | 28.21<br>(26.03 to 30.17)                        |
| Mental disorders                           | <b>3,035.67</b><br><b>(2,905.60 to 3,138.81)</b>   | <b>5,271.85</b><br><b>(4,068.07 to 6,452.64)</b>    | <b>5,837.83</b><br><b>(4,466.00 to 7,205.62)</b>    | <b>5,152.33</b><br><b>(4,020.41 to 6,242.35)</b>    | <b>80.70</b><br><b>(77.52 to 83.23)</b>          | <b>143.41</b><br><b>(115.95 to 169.63)</b>       | <b>160.23</b><br><b>(128.38 to 192.00)</b>       | <b>139.39</b><br><b>(113.87 to 163.18)</b>       |
| Alcohol use disorders                      | 971.26<br>(928.67 to 1,011.75)                     | 1,013.03<br>(846.02 to 1,192.61)                    | 1,009.80<br>(836.30 to 1,212.03)                    | 1,088.86<br>(920.58 to 1,264.69)                    | 31.52<br>(30.18 to 32.78)                        | 35.83<br>(30.77 to 41.13)                        | 36.29<br>(30.91 to 42.32)                        | 37.97<br>(33.10 to 42.74)                        |
| Drug use disorders                         | 2,051.64<br>(1,943.80 to 2,132.87)                 | 4,246.25<br>(3,182.42 to 5,282.25)                  | 4,814.59<br>(3,559.68 to 5,994.30)                  | 4,051.19<br>(3,045.16 to 5,014.32)                  | 48.94<br>(46.59 to 50.76)                        | 107.34<br>(84.58 to 129.34)                      | 123.68<br>(96.52 to 150.96)                      | 101.18<br>(79.64 to 120.99)                      |
| Opioid use disorders                       | 1,118.86<br>(632.48 to 1,214.47)                   | 1,539.22<br>(728.29 to 2,072.15)                    | 1,605.52<br>(759.47 to 2,169.91)                    | 1,506.96<br>(720.64 to 2,013.52)                    | 25.15<br>(14.41 to 27.28)                        | 36.01<br>(17.38 to 47.40)                        | 37.86<br>(17.85 to 50.11)                        | 35.00<br>(17.01 to 45.25)                        |

|                           |                                   |                                       |                                       |                                       |                              |                              |                              |                              |
|---------------------------|-----------------------------------|---------------------------------------|---------------------------------------|---------------------------------------|------------------------------|------------------------------|------------------------------|------------------------------|
|                           | 147.18<br>(109.22 to<br>236.64)   | -462.72<br>(291.35 to<br>664.43)      | 527.77<br>(329.70 to<br>763.37)       | 441.80<br>(279.43 to<br>645.47)       | 3.52<br>(2.52 to<br>5.59)    | 10.95<br>(6.97 to<br>15.52)  | 12.54<br>(7.87 to<br>17.87)  | 10.43<br>(6.62 to<br>14.96)  |
| Cocaine use disorders     |                                   |                                       |                                       |                                       |                              |                              |                              |                              |
|                           | 98.33<br>(76.41 to<br>151.72)     | 451.19<br>(300.81 to<br>642.10)       | 551.76<br>(361.57 to<br>773.93)       | 421.19<br>(280.93 to<br>588.63)       | 2.22<br>(1.70 to<br>3.43)    | 10.23<br>(6.84 to<br>14.28)  | 12.57<br>(8.34 to<br>17.40)  | 9.52<br>(6.45 to<br>13.21)   |
| Amphetamine use disorders |                                   |                                       |                                       |                                       |                              |                              |                              |                              |
|                           | 687.28<br>(611.05 to<br>1,015.65) | 1,793.12<br>(1,317.88 to<br>2,484.17) | 2,129.54<br>(1,568.51 to<br>2,899.53) | 1,681.24<br>(1,237.96 to<br>2,314.28) | 18.05<br>(16.11 to<br>25.65) | 50.15<br>(39.77 to<br>65.74) | 60.70<br>(48.25 to<br>78.52) | 46.23<br>(36.74 to<br>61.05) |
| Other drug use disorders  |                                   |                                       |                                       |                                       |                              |                              |                              |                              |
|                           | 12.77<br>(11.77 to<br>13.71)      | 12.57<br>(9.94 to<br>15.44)           | 13.45<br>(10.58 to<br>16.67)          | 12.28<br>(9.71 to<br>14.91)           | 0.25<br>(0.23 to<br>0.26)    | 0.24<br>(0.19 to<br>0.30)    | 0.26<br>(0.21 to<br>0.33)    | 0.24<br>(0.19 to<br>0.29)    |
| Eating disorders          |                                   |                                       |                                       |                                       |                              |                              |                              |                              |

| High-income                                                |                                           |                                             |                                             |                                              |                                     |                                         |                                       |                                         |
|------------------------------------------------------------|-------------------------------------------|---------------------------------------------|---------------------------------------------|----------------------------------------------|-------------------------------------|-----------------------------------------|---------------------------------------|-----------------------------------------|
| Cause                                                      | YLLs (in 1000s)                           |                                             |                                             |                                              | Deaths (in 1000s)                   |                                         |                                       |                                         |
|                                                            | 2016                                      | 2040 Forecast                               | 2040 Better Scenario                        | 2040 Worse Scenario                          | 2016                                | 2040 Forecast                           | 2040 Better Scenario                  | 2040 Worse Scenario                     |
| <b>Diabetes, urogenital, blood, and endocrine diseases</b> | <b>8,289.33</b><br>(8,051.50 to 8,492.30) | <b>12,434.98</b><br>(8,944.36 to 17,396.04) | <b>10,694.82</b><br>(7,787.13 to 14,743.68) | <b>14,162.64</b><br>(10,043.16 to 19,815.02) | <b>598.92</b><br>(582.21 to 614.86) | <b>1,102.48</b><br>(809.05 to 1,527.27) | <b>981.70</b><br>(725.95 to 1,357.58) | <b>1,211.91</b><br>(874.37 to 1,692.80) |
| Diabetes mellitus                                          | 3,166.82<br>(3,069.26 to 3,263.87)        | 3,722.47<br>(2,494.00 to 5,381.86)          | 2,954.35<br>(2,035.10 to 4,230.92)          | 4,429.60<br>(2,886.35 to 6,556.04)           | 213.30<br>(206.29 to 220.11)        | 303.13<br>(221.01 to 411.35)            | 253.64<br>(188.03 to 337.59)          | 338.37<br>(237.20 to 471.39)            |
| Acute glomerulonephritis                                   | 8.30<br>(8.02 to 8.58)                    | 7.78<br>(6.61 to 9.11)                      | 7.12<br>(5.94 to 8.48)                      | 7.84<br>(6.73 to 9.15)                       | 0.42<br>(0.41 to 0.45)              | 0.45<br>(0.35 to 0.57)                  | 0.43<br>(0.34 to 0.56)                | 0.43<br>(0.34 to 0.55)                  |
| Chronic kidney disease                                     | 2,971.99<br>(2,894.88 to 3,049.34)        | 5,383.47<br>(2,712.51 to 9,866.85)          | 4,456.51<br>(2,344.75 to 8,240.45)          | 6,523.26<br>(3,195.08 to 11,852.83)          | 243.88<br>(236.85 to 250.63)        | 526.35<br>(268.37 to 963.37)            | 453.02<br>(240.72 to 822.23)          | 619.14<br>(303.77 to 1,113.60)          |
| Chronic kidney disease due to diabetes mellitus            | 1,431.92<br>(1,328.72 to 1,530.09)        | 2,711.41<br>(1,338.54 to 5,094.96)          | 2,229.64<br>(1,130.73 to 4,257.71)          | 3,332.55<br>(1,575.51 to 6,207.55)           | 101.36<br>(92.53 to 110.79)         | 232.23<br>(113.79 to 431.77)            | 197.87<br>(100.21 to 367.61)          | 277.73<br>(131.23 to 513.60)            |
| Chronic kidney disease due to hypertension                 | 567.69<br>(502.75 to 642.71)              | 1,225.67<br>(589.31 to 2,332.04)            | 1,050.34<br>(525.00 to 1,936.60)            | 1,442.10<br>(674.87 to 2,661.02)             | 63.56<br>(55.38 to 73.16)           | 153.29<br>(77.09 to 273.40)             | 135.99<br>(70.46 to 239.77)           | 175.21<br>(85.28 to 312.30)             |
| Chronic kidney disease due to glomerulonephritis           | 335.03<br>(299.42 to 373.39)              | 482.71<br>(249.12 to 917.68)                | 387.97<br>(206.77 to 736.54)                | 585.13<br>(291.09 to 1,115.36)               | 25.43<br>(22.22 to 28.90)           | 44.35<br>(22.83 to 83.99)               | 36.93<br>(19.75 to 70.65)             | 52.57<br>(26.05 to 98.74)               |
| Chronic kidney disease due to other and unspecified causes | 637.35<br>(561.42 to 713.30)              | 963.68<br>(520.85 to 1,705.90)              | 788.57<br>(436.25 to 1,395.44)              | 1,163.48<br>(604.19 to 2,108.63)             | 53.52<br>(45.95 to 61.44)           | 96.48<br>(50.98 to 175.72)              | 82.23<br>(45.05 to 149.31)            | 113.63<br>(58.20 to 205.70)             |
| Urinary diseases and male infertility                      | 711.54<br>(692.39 to 733.68)              | 1,236.34<br>(1,095.15 to 1,409.24)          | 1,157.12<br>(1,005.96 to 1,336.85)          | 1,189.04<br>(1,062.96 to 1,334.33)           | 67.99<br>(65.88 to 70.33)           | 141.59<br>(125.89 to 159.49)            | 137.31<br>(120.72 to 157.62)          | 132.22<br>(119.01 to 147.87)            |
| Urinary tract infections                                   | 632.18<br>(605.98 to 654.28)              | 1,151.89<br>(1,014.97 to 1,312.88)          | 1,081.54<br>(933.70 to 1,259.78)            | 1,105.08<br>(985.89 to 1,246.18)             | 61.81<br>(59.42 to 64.09)           | 133.29<br>(118.05 to 151.10)            | 129.55<br>(113.46 to 149.38)          | 124.25<br>(111.01 to 139.27)            |
| Urolithiasis                                               | 30.22<br>(25.14 to 46.90)                 | 31.58<br>(24.39 to 50.49)                   | 28.07<br>(21.35 to 44.73)                   | 31.70<br>(24.83 to 50.63)                    | 2.40<br>(1.97 to 3.83)              | 2.91<br>(2.27 to 4.65)                  | 2.68<br>(2.06 to 4.31)                | 2.83<br>(2.22 to 4.51)                  |
| Other urinary diseases                                     | 49.14<br>(36.89 to 66.79)                 | 52.86<br>(38.06 to 71.58)                   | 47.52<br>(33.92 to 64.45)                   | 52.26<br>(38.03 to 69.97)                    | 3.79<br>(2.73 to 5.15)              | 5.39<br>(3.85 to 7.16)                  | 5.08<br>(3.61 to 6.81)                | 5.14<br>(3.64 to 6.83)                  |
| Gynecological diseases                                     | 9.10<br>(5.85 to 10.14)                   | 6.20<br>(4.13 to 7.94)                      | 4.67<br>(3.09 to 6.08)                      | 6.56<br>(4.43 to 8.31)                       | 0.44<br>(0.29 to 0.50)              | 0.35<br>(0.24 to 0.43)                  | 0.28<br>(0.19 to 0.34)                | 0.36<br>(0.24 to 0.44)                  |
| Uterine fibroids                                           | 2.51<br>(1.62 to 2.84)                    | 1.59<br>(1.06 to 2.11)                      | 1.28<br>(0.86 to 1.73)                      | 1.66<br>(1.13 to 2.19)                       | 0.09<br>(0.06 to 0.10)              | 0.07<br>(0.05 to 0.08)                  | 0.05<br>(0.04 to 0.07)                | 0.07<br>(0.05 to 0.08)                  |
| Polycystic ovarian syndrome                                | 0.34<br>(0.27 to 0.46)                    | 0.11<br>(0.08 to 0.16)                      | 0.07<br>(0.05 to 0.10)                      | 0.13<br>(0.10 to 0.19)                       | 0.01<br>(0.01 to 0.01)              | 0.00<br>(0.00 to 0.00)                  | 0.00<br>(0.00 to 0.00)                | 0.00<br>(0.00 to 0.00)                  |
| Endometriosis                                              | 0.25<br>(0.06 to 0.31)                    | 0.21<br>(0.05 to 0.39)                      | 0.16<br>(0.04 to 0.32)                      | 0.22<br>(0.05 to 0.41)                       | 0.01<br>(0.01 to 0.01)              | 0.00<br>(0.00 to 0.00)                  | 0.00<br>(0.00 to 0.01)                | 0.00<br>(0.00 to 0.01)                  |
| Genital prolapse                                           | 0.65<br>(0.33 to 0.80)                    | 0.41<br>(0.21 to 0.56)                      | 0.33<br>(0.17 to 0.45)                      | 0.43<br>(0.22 to 0.58)                       | 0.06<br>(0.03 to 0.07)              | 0.03<br>(0.02 to 0.05)                  | 0.03<br>(0.01 to 0.04)                | 0.04<br>(0.02 to 0.05)                  |
| Other gynecological diseases                               | 5.35<br>(3.45 to 5.97)                    | 3.88<br>(2.70 to 4.91)                      | 2.83<br>(1.91 to 3.70)                      | 4.11<br>(2.81 to 5.22)                       | 0.28<br>(0.19 to 0.32)              | 0.25<br>(0.17 to 0.31)                  | 0.19<br>(0.13 to 0.24)                | 0.25<br>(0.17 to 0.31)                  |
| Hemoglobinopathies and hemolytic anemias                   | 229.20<br>(204.58 to 313.49)              | 249.11<br>(206.85 to 336.99)                | 220.55<br>(180.67 to 301.01)                | 247.71<br>(206.84 to 336.55)                 | 15.69<br>(13.59 to 21.37)           | 21.47<br>(18.12 to 29.06)               | 19.84<br>(16.66 to 26.68)             | 20.62<br>(17.17 to 28.35)               |
| Thalassemias                                               | 23.55<br>(21.07 to 31.77)                 | 12.64<br>(9.85 to 18.92)                    | 12.37<br>(9.50 to 18.69)                    | 12.73<br>(9.99 to 18.96)                     | 0.42<br>(0.37 to 0.59)              | 0.27<br>(0.21 to 0.43)                  | 0.27<br>(0.20 to 0.43)                | 0.27<br>(0.21 to 0.43)                  |

|                                                   |                                     |                                       |                                       |                                       |                              |                                |                                |                                |
|---------------------------------------------------|-------------------------------------|---------------------------------------|---------------------------------------|---------------------------------------|------------------------------|--------------------------------|--------------------------------|--------------------------------|
|                                                   | 40.04<br>(35.79 to<br>52.24)        | 54.18<br>(38.89 to<br>77.28)          | 46.53<br>(32.69 to<br>67.97)          | 55.34<br>(40.41 to<br>78.98)          | 1.03<br>(0.91 to<br>1.40)    | 1.94<br>(1.42 to<br>2.82)      | 1.69<br>(1.22 to<br>2.52)      | 1.96<br>(1.44 to<br>2.88)      |
| Sickle cell disorders                             |                                     |                                       |                                       |                                       |                              |                                |                                |                                |
|                                                   | 26.33<br>(23.15 to<br>33.25)        | 33.73<br>(26.86 to<br>44.90)          | 27.41<br>(21.35 to<br>36.58)          | 34.61<br>(27.76 to<br>45.60)          | 0.86<br>(0.75 to<br>1.09)    | 1.50<br>(1.22 to<br>2.02)      | 1.25<br>(1.00 to<br>1.70)      | 1.51<br>(1.23 to<br>2.00)      |
| G6PD deficiency                                   |                                     |                                       |                                       |                                       |                              |                                |                                |                                |
|                                                   | 139.28<br>(123.06 to<br>195.16)     | 148.56<br>(125.98 to<br>203.45)       | 134.24<br>(112.16 to<br>183.77)       | 145.03<br>(123.17 to<br>200.88)       | 13.38<br>(11.51 to<br>18.44) | 17.76<br>(14.86 to<br>23.78)   | 16.63<br>(13.86 to<br>22.20)   | 16.88<br>(13.99 to<br>23.08)   |
| Other hemoglobinopathies and hemolytic anemias    |                                     |                                       |                                       |                                       |                              |                                |                                |                                |
|                                                   | 1,192.37<br>(882.46 to<br>1,258.73) | 1,829.60<br>(1,287.10 to<br>2,162.47) | 1,894.49<br>(1,333.19 to<br>2,266.50) | 1,758.63<br>(1,230.93 to<br>2,047.35) | 57.19<br>(39.67 to<br>60.60) | 109.13<br>(74.71 to<br>125.46) | 117.18<br>(79.65 to<br>136.72) | 100.77<br>(69.05 to<br>114.19) |
| Endocrine, metabolic, blood, and immune disorders |                                     |                                       |                                       |                                       |                              |                                |                                |                                |



| High-income                                   |                                           |                                           |                                           |                                           |                                  |                                   |                                   |                                   |
|-----------------------------------------------|-------------------------------------------|-------------------------------------------|-------------------------------------------|-------------------------------------------|----------------------------------|-----------------------------------|-----------------------------------|-----------------------------------|
| Cause                                         | YLLs (in 1000s)                           |                                           |                                           |                                           | Deaths (in 1000s)                |                                   |                                   |                                   |
|                                               | 2016                                      | 2040 Forecast                             | 2040 Better Scenario                      | 2040 Worse Scenario                       | 2016                             | 2040 Forecast                     | 2040 Better Scenario              | 2040 Worse Scenario               |
| <b>Musculoskeletal disorders</b>              | <b>520.76</b><br>(490.97 to 603.38)       | <b>761.72</b><br>(661.62 to 898.40)       | <b>713.30</b><br>(612.86 to 838.12)       | <b>758.21</b><br>(665.50 to 891.26)       | <b>32.85</b><br>(30.52 to 36.60) | <b>57.86</b><br>(51.23 to 65.47)  | <b>55.83</b><br>(49.10 to 63.53)  | <b>55.92</b><br>(49.31 to 63.04)  |
| Rheumatoid arthritis                          | 135.50<br>(111.01 to 172.80)              | 197.23<br>(157.09 to 247.17)              | 161.65<br>(127.62 to 205.51)              | 207.79<br>(166.73 to 264.47)              | 9.47<br>(7.79 to 12.17)          | 16.23<br>(13.33 to 20.55)         | 13.66<br>(11.15 to 17.50)         | 16.66<br>(13.54 to 21.24)         |
| Other musculoskeletal disorders               | 385.26<br>(338.83 to 450.86)              | 564.49<br>(477.46 to 652.78)              | 551.65<br>(465.29 to 641.54)              | 550.42<br>(467.08 to 627.80)              | 23.39<br>(19.67 to 25.93)        | 41.63<br>(34.42 to 46.49)         | 42.17<br>(34.99 to 47.00)         | 39.26<br>(32.63 to 43.81)         |
| <b>Other non-communicable diseases</b>        | <b>2,375.78</b><br>(2,187.44 to 2,637.60) | <b>2,382.59</b><br>(1,893.04 to 2,743.39) | <b>1,929.46</b><br>(1,572.54 to 2,357.41) | <b>2,419.59</b><br>(2,016.98 to 2,899.74) | <b>53.77</b><br>(42.52 to 68.61) | <b>90.77</b><br>(62.12 to 127.87) | <b>86.29</b><br>(58.13 to 125.07) | <b>88.46</b><br>(61.68 to 122.79) |
| Congenital birth defects                      | 1,785.66<br>(1,614.31 to 2,022.88)        | 1,361.87<br>(1,144.37 to 1,624.69)        | 1,070.74<br>(899.36 to 1,274.54)          | 1,500.28<br>(1,269.22 to 1,790.16)        | 25.20<br>(22.48 to 28.34)        | 21.11<br>(17.81 to 24.96)         | 17.31<br>(14.47 to 20.64)         | 22.80<br>(19.22 to 26.96)         |
| Neural tube defects                           | 72.90<br>(56.84 to 82.45)                 | 22.85<br>(16.58 to 30.50)                 | 15.13<br>(10.84 to 20.68)                 | 26.23<br>(19.02 to 35.28)                 | 0.93<br>(0.73 to 1.04)           | 0.32<br>(0.23 to 0.42)            | 0.21<br>(0.16 to 0.29)            | 0.36<br>(0.26 to 0.48)            |
| Congenital heart anomalies                    | 658.66<br>(601.66 to 808.51)              | 377.94<br>(306.23 to 508.36)              | 252.41<br>(200.63 to 346.40)              | 430.28<br>(344.72 to 576.38)              | 9.25<br>(8.51 to 11.46)          | 5.66<br>(4.55 to 7.76)            | 3.87<br>(3.06 to 5.45)            | 6.37<br>(5.13 to 8.71)            |
| Orofacial clefts                              | 0.97<br>(0.55 to 1.68)                    | 0.44<br>(0.24 to 0.80)                    | 0.28<br>(0.15 to 0.51)                    | 0.53<br>(0.28 to 0.97)                    | 0.01<br>(0.01 to 0.02)           | 0.01<br>(0.00 to 0.01)            | 0.00<br>(0.00 to 0.01)            | 0.01<br>(0.00 to 0.01)            |
| Down syndrome                                 | 157.98<br>(112.67 to 177.85)              | 215.21<br>(154.34 to 251.42)              | 219.23<br>(158.27 to 259.74)              | 214.83<br>(154.77 to 248.57)              | 3.53<br>(2.41 to 3.79)           | 5.26<br>(3.58 to 6.18)            | 5.42<br>(3.75 to 6.41)            | 5.19<br>(3.50 to 6.04)            |
| Other chromosomal abnormalities               | 270.88<br>(207.78 to 347.81)              | 245.94<br>(260.04 to 442.07)              | 295.25<br>(224.34 to 377.45)              | 377.54<br>(282.42 to 482.41)              | 3.41<br>(2.58 to 4.27)           | 4.46<br>(3.39 to 5.56)            | 3.84<br>(2.92 to 4.75)            | 4.84<br>(3.66 to 6.00)            |
| Congenital musculoskeletal and limb anomalies | 53.85<br>(41.87 to 61.28)                 | 33.57<br>(24.56 to 41.97)                 | 24.91<br>(18.46 to 31.32)                 | 37.92<br>(27.88 to 47.61)                 | 0.72<br>(0.56 to 0.82)           | 0.48<br>(0.35 to 0.61)            | 0.37<br>(0.27 to 0.46)            | 0.54<br>(0.40 to 0.67)            |
| Urogenital congenital anomalies               | 62.42<br>(38.39 to 82.28)                 | 43.31<br>(25.32 to 62.77)                 | 32.68<br>(18.96 to 47.13)                 | 48.23<br>(27.81 to 70.25)                 | 0.86<br>(0.53 to 1.13)           | 0.64<br>(0.39 to 0.91)            | 0.49<br>(0.30 to 0.70)            | 0.70<br>(0.42 to 0.99)            |
| Digestive congenital anomalies                | 119.99<br>(86.77 to 140.71)               | 75.52<br>(53.77 to 97.94)                 | 50.42<br>(35.27 to 65.57)                 | 86.56<br>(60.81 to 112.46)                | 1.48<br>(1.06 to 1.72)           | 0.95<br>(0.68 to 1.22)            | 0.64<br>(0.46 to 0.82)            | 1.08<br>(0.77 to 1.38)            |
| Other congenital birth defects                | 388.02<br>(339.69 to 472.53)              | 247.09<br>(200.43 to 322.92)              | 180.45<br>(145.70 to 235.48)              | 278.16<br>(224.96 to 359.18)              | 5.02<br>(4.41 to 6.04)           | 3.32<br>(2.72 to 4.28)            | 2.46<br>(2.01 to 3.19)            | 3.71<br>(3.05 to 4.74)            |
| Skin and subcutaneous diseases                | 308.64<br>(178.08 to 464.92)              | 735.24<br>(435.67 to 1,090.15)            | 710.85<br>(422.85 to 1,072.35)            | 710.29<br>(410.64 to 1,052.68)            | 25.30<br>(13.97 to 39.81)        | 67.51<br>(38.59 to 103.56)        | 67.27<br>(39.10 to 103.27)        | 63.25<br>(36.34 to 96.39)         |
| Cellulitis                                    | 97.41<br>(51.04 to 161.68)                | 248.97<br>(136.49 to 423.74)              | 248.18<br>(137.09 to 421.93)              | 239.60<br>(130.57 to 404.73)              | 6.75<br>(3.68 to 11.89)          | 19.42<br>(10.89 to 34.79)         | 19.99<br>(11.13 to 35.47)         | 18.08<br>(10.10 to 32.49)         |
| Pyoderma                                      | 124.62<br>(65.10 to 190.76)               | 355.37<br>(188.81 to 538.59)              | 343.67<br>(184.01 to 524.68)              | 342.94<br>(180.82 to 517.76)              | 9.75<br>(4.85 to 15.57)          | 33.02<br>(17.24 to 50.18)         | 33.17<br>(17.38 to 51.03)         | 30.81<br>(16.40 to 47.52)         |
| Decubitus ulcer                               | 68.89<br>(36.09 to 109.62)                | 105.10<br>(54.74 to 167.74)               | 94.48<br>(50.47 to 153.15)                | 102.61<br>(54.09 to 165.39)               | 7.33<br>(3.72 to 11.52)          | 12.65<br>(6.49 to 20.79)          | 11.71<br>(6.03 to 19.12)          | 12.07<br>(6.02 to 19.89)          |
| Other skin and subcutaneous diseases          | 17.71<br>(10.32 to 31.05)                 | 25.80<br>(15.20 to 45.96)                 | 24.53<br>(14.48 to 43.60)                 | 25.14<br>(14.78 to 45.11)                 | 1.48<br>(0.85 to 2.70)           | 2.42<br>(1.40 to 4.58)            | 2.39<br>(1.41 to 4.49)            | 2.28<br>(1.32 to 4.27)            |
| Sudden infant death syndrome                  | 281.49<br>(258.96 to 304.78)              | 185.48<br>(126.38 to 265.93)              | 147.86<br>(102.04 to 208.18)              | 209.01<br>(143.44 to 307.24)              | 3.27<br>(3.01 to 3.54)           | 2.15<br>(1.47 to 3.09)            | 1.72<br>(1.18 to 2.42)            | 2.43<br>(1.66 to 3.57)            |

|                          |                                          |                                          |                                         |                                          |                                 |                                 |                                 |                                 |
|--------------------------|------------------------------------------|------------------------------------------|-----------------------------------------|------------------------------------------|---------------------------------|---------------------------------|---------------------------------|---------------------------------|
| Injuries                 | 15,765.32<br>(14,933.01 to<br>16,535.16) | 13,396.85<br>(10,188.22 to<br>17,250.91) | 11,043.75<br>(8,496.03 to<br>14,164.68) | 15,459.26<br>(11,504.83 to<br>20,380.43) | 532.94<br>(489.36 to<br>555.98) | 583.90<br>(489.99 to<br>688.19) | 524.34<br>(442.35 to<br>611.75) | 620.96<br>(512.63 to<br>752.45) |
| Transport injuries       | 4,298.64<br>(4,098.75 to<br>4,482.12)    | 3,677.83<br>(2,289.21 to<br>5,827.07)    | 2,694.67<br>(1,698.98 to<br>4,265.12)   | 4,914.41<br>(2,985.59 to<br>7,955.15)    | 112.29<br>(107.94 to<br>116.69) | 107.76<br>(70.48 to<br>162.21)  | 83.37<br>(55.91 to<br>123.31)   | 139.12<br>(88.85 to<br>215.11)  |
| Road injuries            | 3,975.73<br>(3,785.50 to<br>4,145.64)    | 3,353.75<br>(2,086.32 to<br>5,336.02)    | 2,450.34<br>(1,541.39 to<br>3,892.47)   | 4,538.84<br>(2,751.47 to<br>7,342.01)    | 103.79<br>(99.78 to<br>107.93)  | 98.13<br>(64.30 to<br>147.70)   | 75.88<br>(50.95 to<br>112.11)   | 128.17<br>(81.74 to<br>198.28)  |
| Pedestrian road injuries | 798.97<br>(653.71 to<br>901.07)          | 420.11<br>(282.34 to<br>613.87)          | 253.00<br>(172.54 to<br>367.64)         | 613.70<br>(409.12 to<br>914.60)          | 26.81<br>(22.92 to<br>30.25)    | 17.93<br>(12.79 to<br>25.32)    | 11.81<br>(8.59 to<br>16.30)     | 25.22<br>(17.38 to<br>36.03)    |

| High-income                                     |                                                  |                                                  |                                                  |                                                  |                                            |                                            |                                            |                                            |
|-------------------------------------------------|--------------------------------------------------|--------------------------------------------------|--------------------------------------------------|--------------------------------------------------|--------------------------------------------|--------------------------------------------|--------------------------------------------|--------------------------------------------|
| Cause                                           | YLLs (in 1000s)                                  |                                                  |                                                  |                                                  | Deaths (in 1000s)                          |                                            |                                            |                                            |
|                                                 | 2016                                             | 2040 Forecast                                    | 2040 Better Scenario                             | 2040 Worse Scenario                              | 2016                                       | 2040 Forecast                              | 2040 Better Scenario                       | 2040 Worse Scenario                        |
| Cyclist road injuries                           | 156.18<br>(123.66 to 170.71)                     | 146.11<br>(96.68 to 222.15)                      | 113.34<br>(76.46 to 168.80)                      | 200.02<br>(127.29 to 311.07)                     | 5.00<br>(4.03 to 5.48)                     | 5.64<br>(3.89 to 8.06)                     | 4.84<br>(3.40 to 6.70)                     | 7.17<br>(4.70 to 10.50)                    |
| Motorcyclist road injuries                      | 577.77<br>(428.24 to 627.74)                     | 524.93<br>(295.98 to 896.17)                     | 419.36<br>(239.82 to 718.78)                     | 676.71<br>(372.27 to 1,188.60)                   | 12.62<br>(9.61 to 13.67)                   | 12.28<br>(7.37 to 20.01)                   | 10.24<br>(6.29 to 16.23)                   | 15.38<br>(8.98 to 25.92)                   |
| Motor vehicle road injuries                     | 2,414.84<br>(2,263.22 to 2,700.38)               | 2,237.59<br>(1,341.17 to 3,689.88)               | 1,647.78<br>(1,001.75 to 2,687.85)               | 3,012.35<br>(1,771.62 to 4,894.40)               | 58.63<br>(54.75 to 65.69)                  | 61.51<br>(39.16 to 94.67)                  | 48.39<br>(31.53 to 72.97)                  | 79.35<br>(48.98 to 124.66)                 |
| Other road injuries                             | 27.98<br>(21.53 to 40.49)                        | 25.01<br>(15.24 to 41.54)                        | 16.86<br>(10.37 to 27.89)                        | 36.06<br>(21.49 to 60.05)                        | 0.73<br>(0.54 to 1.00)                     | 0.78<br>(0.48 to 1.28)                     | 0.59<br>(0.37 to 0.94)                     | 1.05<br>(0.64 to 1.75)                     |
| Other transport injuries                        | 322.91<br>(303.60 to 347.15)                     | 324.09<br>(204.38 to 507.39)                     | 244.33<br>(157.63 to 382.35)                     | 375.56<br>(234.12 to 606.02)                     | 8.50<br>(8.03 to 9.07)                     | 9.63<br>(6.32 to 14.86)                    | 7.50<br>(4.98 to 11.23)                    | 10.94<br>(6.92 to 17.04)                   |
| <b>Unintentional injuries</b>                   | <b>4,226.45</b><br><b>(3,896.03 to 4,463.16)</b> | <b>4,060.00</b><br><b>(3,526.63 to 4,546.52)</b> | <b>3,712.15</b><br><b>(3,241.45 to 4,159.26)</b> | <b>4,078.17</b><br><b>(3,551.86 to 4,592.68)</b> | <b>230.94</b><br><b>(199.95 to 244.30)</b> | <b>307.22</b><br><b>(258.18 to 335.46)</b> | <b>297.58</b><br><b>(248.93 to 323.70)</b> | <b>292.71</b><br><b>(244.06 to 322.12)</b> |
| Falls                                           | 1,558.54<br>(1,279.96 to 1,657.80)               | 1,887.89<br>(1,486.93 to 2,078.35)               | 1,797.71<br>(1,417.52 to 1,996.67)               | 1,837.94<br>(1,438.69 to 2,019.65)               | 121.61<br>(95.10 to 128.98)                | 185.68<br>(141.47 to 203.36)               | 182.78<br>(138.34 to 200.53)               | 174.10<br>(130.53 to 192.57)               |
| Drowning                                        | 575.45<br>(552.28 to 597.19)                     | 370.22<br>(280.17 to 484.79)                     | 312.32<br>(240.13 to 404.16)                     | 401.49<br>(297.23 to 543.66)                     | 17.61<br>(17.06 to 18.24)                  | 13.60<br>(10.74 to 17.36)                  | 12.02<br>(9.60 to 15.12)                   | 14.26<br>(10.97 to 19.13)                  |
| Fire, heat, and hot substances                  | 337.17<br>(314.44 to 399.09)                     | 253.42<br>(196.09 to 343.90)                     | 207.56<br>(161.80 to 280.39)                     | 271.56<br>(205.16 to 369.29)                     | 15.64<br>(13.68 to 17.24)                  | 16.03<br>(12.71 to 20.68)                  | 14.01<br>(11.28 to 17.87)                  | 16.27<br>(12.70 to 21.49)                  |
| Poisonings                                      | 143.45<br>(129.58 to 192.87)                     | 63.34<br>(42.80 to 98.45)                        | 48.17<br>(33.13 to 74.57)                        | 70.87<br>(47.39 to 110.94)                       | 3.85<br>(3.45 to 5.09)                     | 2.15<br>(1.56 to 3.13)                     | 1.70<br>(1.26 to 2.44)                     | 2.31<br>(1.64 to 3.48)                     |
| Exposure to mechanical forces                   | 471.28<br>(400.70 to 519.93)                     | 351.42<br>(288.62 to 414.70)                     | 298.55<br>(242.35 to 353.79)                     | 364.75<br>(299.14 to 434.85)                     | 14.67<br>(12.28 to 15.97)                  | 14.88<br>(12.39 to 16.82)                  | 13.51<br>(11.13 to 15.29)                  | 14.55<br>(12.10 to 16.63)                  |
| Unintentional firearm injuries                  | 90.82<br>(83.73 to 106.68)                       | 64.32<br>(52.82 to 78.96)                        | 53.85<br>(44.00 to 66.56)                        | 66.39<br>(54.80 to 81.72)                        | 2.48<br>(2.16 to 2.71)                     | 2.18<br>(1.81 to 2.48)                     | 1.95<br>(1.63 to 2.24)                     | 2.16<br>(1.80 to 2.47)                     |
| Unintentional suffocation                       | 118.95<br>(72.35 to 137.24)                      | 82.81<br>(50.01 to 112.96)                       | 72.08<br>(43.96 to 98.00)                        | 86.27<br>(51.24 to 119.20)                       | 3.22<br>(2.14 to 3.62)                     | 3.63<br>(2.30 to 4.62)                     | 3.47<br>(2.19 to 4.42)                     | 3.38<br>(2.11 to 4.39)                     |
| Other exposure to mechanical forces             | 261.52<br>(231.63 to 333.32)                     | 204.28<br>(169.26 to 262.83)                     | 172.62<br>(143.05 to 224.28)                     | 212.09<br>(176.92 to 277.40)                     | 8.97<br>(7.60 to 10.48)                    | 9.07<br>(7.50 to 10.57)                    | 8.08<br>(6.73 to 9.46)                     | 9.01<br>(7.42 to 10.43)                    |
| Adverse effects of medical treatment            | 351.12<br>(283.55 to 455.50)                     | 402.90<br>(332.40 to 537.86)                     | 378.04<br>(314.50 to 504.54)                     | 397.68<br>(327.89 to 534.66)                     | 20.56<br>(16.97 to 26.99)                  | 29.21<br>(24.57 to 39.15)                  | 28.60<br>(24.15 to 38.41)                  | 27.74<br>(23.14 to 37.30)                  |
| Animal contact                                  | 29.03<br>(22.65 to 37.53)                        | 31.05<br>(23.81 to 40.52)                        | 27.36<br>(20.98 to 35.71)                        | 32.08<br>(24.65 to 42.07)                        | 0.99<br>(0.78 to 1.27)                     | 1.30<br>(1.04 to 1.69)                     | 1.21<br>(0.96 to 1.54)                     | 1.29<br>(1.02 to 1.65)                     |
| Venomous animal contact                         | 11.87<br>(8.50 to 16.01)                         | 12.84<br>(8.75 to 17.19)                         | 11.77<br>(8.07 to 15.74)                         | 13.12<br>(8.95 to 17.60)                         | 0.40<br>(0.28 to 0.53)                     | 0.53<br>(0.37 to 0.69)                     | 0.50<br>(0.35 to 0.66)                     | 0.52<br>(0.36 to 0.69)                     |
| Non-venomous animal contact                     | 17.16<br>(12.83 to 23.22)                        | 18.21<br>(13.45 to 24.30)                        | 15.60<br>(11.62 to 20.85)                        | 18.97<br>(14.03 to 25.34)                        | 0.59<br>(0.45 to 0.80)                     | 0.78<br>(0.60 to 1.03)                     | 0.70<br>(0.55 to 0.93)                     | 0.77<br>(0.59 to 1.04)                     |
| Foreign body                                    | 537.99<br>(478.25 to 662.12)                     | 529.88<br>(449.46 to 630.03)                     | 508.80<br>(431.10 to 599.75)                     | 524.36<br>(448.55 to 625.98)                     | 26.95<br>(21.46 to 30.17)                  | 35.08<br>(27.35 to 39.97)                  | 35.76<br>(27.87 to 40.79)                  | 32.94<br>(25.64 to 37.51)                  |
| Pulmonary aspiration and foreign body in airway | 520.66<br>(460.36 to 644.67)                     | 511.71<br>(434.16 to 613.19)                     | 489.88<br>(414.63 to 583.21)                     | 506.61<br>(433.31 to 610.34)                     | 26.29<br>(20.86 to 29.59)                  | 34.12<br>(26.63 to 39.05)                  | 34.72<br>(26.94 to 39.72)                  | 32.06<br>(24.86 to 36.55)                  |

|                                             |                                                            |                                                            |                                                            |                                                            |                                                      |                                                      |                                                     |                                                      |
|---------------------------------------------|------------------------------------------------------------|------------------------------------------------------------|------------------------------------------------------------|------------------------------------------------------------|------------------------------------------------------|------------------------------------------------------|-----------------------------------------------------|------------------------------------------------------|
|                                             | 17.33<br>(13.60 to<br>21.74)                               | 18.16<br>(13.51 to<br>21.82)                               | 18.92<br>(14.08 to<br>22.67)                               | 17.74<br>(13.18 to<br>21.53)                               | 0.65<br>(0.44 to<br>0.74)                            | 0.96<br>(0.61 to<br>1.12)                            | 1.04<br>(0.66 to<br>1.22)                           | 0.89<br>(0.56 to<br>1.03)                            |
| Foreign body in other body part             |                                                            |                                                            |                                                            |                                                            |                                                      |                                                      |                                                     |                                                      |
|                                             | 128.94<br>(84.99 to<br>196.81)                             | 122.15<br>(81.03 to<br>198.85)                             | 104.38<br>(68.86 to<br>171.26)                             | 125.62<br>(82.01 to<br>202.47)                             | 6.64<br>(4.52 to<br>10.24)                           | 7.84<br>(5.58 to<br>12.94)                           | 7.02<br>(5.00 to<br>11.62)                          | 7.71<br>(5.34 to<br>12.61)                           |
| Environmental heat and cold exposure        |                                                            |                                                            |                                                            |                                                            |                                                      |                                                      |                                                     |                                                      |
|                                             | 93.49<br>(87.99 to<br>99.28)                               | 47.73<br>(40.28 to<br>55.83)                               | 29.25<br>(24.22 to<br>35.00)                               | 51.81<br>(44.09 to<br>60.96)                               | 2.43<br>(2.30 to<br>2.56)                            | 1.46<br>(1.29 to<br>1.65)                            | 0.97<br>(0.85 to<br>1.12)                           | 1.55<br>(1.36 to<br>1.75)                            |
| Other unintentional injuries                |                                                            |                                                            |                                                            |                                                            |                                                      |                                                      |                                                     |                                                      |
| <b>Self-harm and interpersonal violence</b> | <b>7,197.73</b><br><b>(6,446.94 to</b><br><b>8,043.30)</b> | <b>5,496.12</b><br><b>(3,629.93 to</b><br><b>8,100.30)</b> | <b>4,474.90</b><br><b>(3,047.13 to</b><br><b>6,414.42)</b> | <b>6,303.95</b><br><b>(3,996.49 to</b><br><b>9,514.23)</b> | <b>188.77</b><br><b>(164.46 to</b><br><b>211.85)</b> | <b>164.84</b><br><b>(113.34 to</b><br><b>234.76)</b> | <b>139.24</b><br><b>(98.41 to</b><br><b>192.84)</b> | <b>185.14</b><br><b>(122.00 to</b><br><b>272.55)</b> |

| High-income                                                                         |                                         |                                             |                                             |                                             |                                      |                                       |                                       |                                       |
|-------------------------------------------------------------------------------------|-----------------------------------------|---------------------------------------------|---------------------------------------------|---------------------------------------------|--------------------------------------|---------------------------------------|---------------------------------------|---------------------------------------|
| Cause                                                                               | YLLs (in 1000s)                         |                                             |                                             |                                             | Deaths (in 1000s)                    |                                       |                                       |                                       |
|                                                                                     | 2016                                    | 2040 Forecast                               | 2040 Better Scenario                        | 2040 Worse Scenario                         | 2016                                 | 2040 Forecast                         | 2040 Better Scenario                  | 2040 Worse Scenario                   |
| Self-harm                                                                           | 5,806.87<br>(5,112.22 to 6,673.15)      | 4,599.16<br>(2,930.06 to 6,970.97)          | 3,752.95<br>(2,486.84 to 5,503.51)          | 5,349.17<br>(3,244.82 to 8,341.65)          | 160.56<br>(139.96 to 183.55)         | 144.84<br>(97.13 to 212.08)           | 122.84<br>(85.14 to 174.55)           | 164.02<br>(104.50 to 248.29)          |
| Self-harm by firearm                                                                | 1,160.79<br>(908.05 to 1,474.48)        | 883.44<br>(458.29 to 1,507.98)              | 665.77<br>(359.09 to 1,105.28)              | 1,019.26<br>(508.17 to 1,790.85)            | 32.24<br>(24.77 to 39.91)            | 28.05<br>(15.50 to 45.87)             | 22.08<br>(12.70 to 34.71)             | 31.30<br>(16.74 to 52.37)             |
| Self-harm by other specified means                                                  | 4,646.08<br>(3,981.69 to 5,434.26)      | 3,715.72<br>(2,458.84 to 5,501.34)          | 3,087.18<br>(2,105.29 to 4,462.65)          | 4,329.91<br>(2,710.53 to 6,589.48)          | 128.31<br>(108.75 to 148.03)         | 116.79<br>(80.66 to 168.97)           | 100.76<br>(71.50 to 141.06)           | 132.72<br>(87.16 to 197.95)           |
| Interpersonal violence                                                              | 1,390.86<br>(929.97 to 1,799.95)        | 896.97<br>(563.03 to 1,243.11)              | 721.95<br>(458.95 to 991.49)                | 954.79<br>(596.83 to 1,337.78)              | 28.21<br>(19.16 to 36.49)            | 20.00<br>(12.94 to 27.74)             | 16.40<br>(10.78 to 22.73)             | 21.12<br>(13.54 to 29.43)             |
| Physical violence by firearm                                                        | 816.69<br>(444.22 to 1,016.80)          | 503.31<br>(266.92 to 728.97)                | 397.11<br>(210.95 to 574.95)                | 528.87<br>(273.24 to 773.06)                | 15.59<br>(8.63 to 19.47)             | 10.19<br>(5.45 to 14.58)              | 8.11<br>(4.39 to 11.68)               | 10.63<br>(5.59 to 15.42)              |
| Physical violence by sharp object                                                   | 255.10<br>(160.34 to 409.79)            | 176.85<br>(109.71 to 283.99)                | 141.28<br>(89.80 to 223.38)                 | 184.30<br>(113.70 to 301.31)                | 5.60<br>(3.58 to 8.74)               | 4.26<br>(2.74 to 6.78)                | 3.49<br>(2.33 to 5.28)                | 4.39<br>(2.81 to 6.84)                |
| Physical violence by other means                                                    | 319.07<br>(227.67 to 517.92)            | 216.81<br>(135.77 to 364.23)                | 183.56<br>(118.24 to 303.59)                | 241.62<br>(149.47 to 402.02)                | 7.02<br>(4.99 to 11.36)              | 5.55<br>(3.57 to 9.06)                | 4.80<br>(3.16 to 7.71)                | 6.09<br>(3.82 to 9.89)                |
| <b>Forces of nature, conflict and terrorism, and executions and police conflict</b> | <b>42.51</b><br><b>(30.77 to 51.89)</b> | <b>162.89</b><br><b>(14.00 to 1,207.27)</b> | <b>162.03</b><br><b>(13.97 to 1,197.15)</b> | <b>162.73</b><br><b>(14.00 to 1,212.99)</b> | <b>0.94</b><br><b>(0.68 to 1.19)</b> | <b>4.09</b><br><b>(0.36 to 27.99)</b> | <b>4.15</b><br><b>(0.37 to 28.71)</b> | <b>4.00</b><br><b>(0.35 to 27.03)</b> |
| Exposure to forces of nature                                                        | 10.33<br>(3.06 to 18.25)                | 43.73<br>(8.97 to 269.14)                   | 43.73<br>(8.89 to 269.66)                   | 43.68<br>(8.98 to 288.02)                   | 0.30<br>(0.09 to 0.52)               | 1.35<br>(0.22 to 8.57)                | 1.38<br>(0.22 to 8.80)                | 1.32<br>(0.22 to 8.38)                |
| Conflict and terrorism                                                              | 2.31<br>(1.04 to 3.60)                  | 78.50<br>(1.27 to 1,111.56)                 | 78.19<br>(1.29 to 1,114.50)                 | 78.55<br>(1.24 to 1,103.27)                 | 0.05<br>(0.02 to 0.08)               | 1.87<br>(0.05 to 26.74)               | 1.90<br>(0.06 to 27.43)               | 1.82<br>(0.05 to 25.68)               |
| Executions and police conflict                                                      | 29.87<br>(19.65 to 34.54)               | 40.66<br>(0.00 to 362.96)                   | 40.10<br>(0.00 to 356.48)                   | 40.70<br>(0.00 to 362.62)                   | 0.60<br>(0.39 to 0.68)               | 0.86<br>(0.00 to 7.56)                | 0.86<br>(0.00 to 7.54)                | 0.86<br>(0.00 to 7.50)                |

| High-income Asia Pacific                                          |                                          |                                          |                                          |                                          |                                       |                                       |                                       |                                       |
|-------------------------------------------------------------------|------------------------------------------|------------------------------------------|------------------------------------------|------------------------------------------|---------------------------------------|---------------------------------------|---------------------------------------|---------------------------------------|
| Cause                                                             | YLLS (in 1000s)                          |                                          |                                          |                                          | Deaths (in 1000s)                     |                                       |                                       |                                       |
|                                                                   | 2016                                     | 2040 Forecast                            | 2040 Better Scenario                     | 2040 Worse Scenario                      | 2016                                  | 2040 Forecast                         | 2040 Better Scenario                  | 2040 Worse Scenario                   |
| All causes                                                        | 22,778.77<br>(21,207.39 to<br>24,493.59) | 22,054.93<br>(17,860.53 to<br>26,723.58) | 19,307.52<br>(15,747.77 to<br>23,290.20) | 26,308.91<br>(21,084.83 to<br>32,122.89) | 1,701.75<br>(1,621.95 to<br>1,787.94) | 2,094.21<br>(1,783.60 to<br>2,430.90) | 1,897.90<br>(1,611.97 to<br>2,211.55) | 2,390.98<br>(2,025.27 to<br>2,792.22) |
| Communicable, maternal, neonatal, and nutritional diseases        | 1,428.38<br>(1,321.72 to<br>1,537.72)    | 1,672.43<br>(1,322.04 to<br>2,161.26)    | 1,495.78<br>(1,207.65 to<br>1,867.04)    | 1,949.20<br>(1,485.58 to<br>2,633.05)    | 130.21<br>(118.31 to<br>142.61)       | 204.25<br>(162.08 to<br>258.51)       | 192.05<br>(155.29 to<br>235.91)       | 225.22<br>(174.94 to<br>297.33)       |
| HIV/AIDS and tuberculosis                                         | 107.46<br>(91.67 to<br>124.57)           | 68.90<br>(44.84 to<br>107.49)            | 52.88<br>(35.20 to<br>79.43)             | 97.56<br>(58.36 to<br>158.60)            | 7.66<br>(6.72 to<br>8.64)             | 6.54<br>(4.25 to<br>9.96)             | 5.18<br>(3.52 to<br>7.68)             | 8.62<br>(5.14 to<br>14.01)            |
| Tuberculosis                                                      | 97.65<br>(82.71 to<br>114.50)            | 64.78<br>(41.06 to<br>103.54)            | 50.08<br>(32.14 to<br>76.55)             | 91.17<br>(52.03 to<br>151.74)            | 7.38<br>(6.47 to<br>8.33)             | 6.44<br>(4.16 to<br>9.88)             | 5.10<br>(3.42 to<br>7.63)             | 8.47<br>(4.97 to<br>13.83)            |
| HIV/AIDS                                                          | 9.81<br>(8.47 to<br>14.94)               | 4.11<br>(2.37 to<br>9.37)                | 2.80<br>(1.58 to<br>7.77)                | 6.39<br>(3.61 to<br>11.80)               | 0.28<br>(0.24 to<br>0.45)             | 0.11<br>(0.06 to<br>0.33)             | 0.08<br>(0.04 to<br>0.30)             | 0.15<br>(0.08 to<br>0.37)             |
| Diarrhea, lower respiratory, and other common infectious diseases | 1,126.84<br>(1,026.40 to<br>1,233.46)    | 1,459.39<br>(1,124.02 to<br>1,948.88)    | 1,306.61<br>(1,030.07 to<br>1,664.85)    | 1,703.88<br>(1,249.57 to<br>2,370.46)    | 115.24<br>(104.08 to<br>127.52)       | 188.43<br>(147.31 to<br>241.45)       | 177.16<br>(140.45 to<br>220.97)       | 207.86<br>(157.81 to<br>277.49)       |
| Diarrheal diseases                                                | 47.09<br>(40.44 to<br>58.84)             | 168.95<br>(86.02 to<br>348.62)           | 193.66<br>(109.92 to<br>343.71)          | 140.93<br>(68.24 to<br>285.88)           | 4.13<br>(3.57 to<br>5.14)             | 21.04<br>(10.63 to<br>43.35)          | 25.01<br>(14.29 to<br>43.76)          | 17.19<br>(8.40 to<br>34.72)           |
| Intestinal infectious diseases                                    | 0.18<br>(0.08 to<br>0.34)                | 0.14<br>(0.06 to<br>0.26)                | 0.14<br>(0.07 to<br>0.27)                | 0.13<br>(0.06 to<br>0.25)                | 0.01<br>(0.00 to<br>0.01)             | 0.01<br>(0.00 to<br>0.01)             | 0.01<br>(0.00 to<br>0.01)             | 0.01<br>(0.00 to<br>0.01)             |
| Typhoid fever                                                     | 0.07<br>(0.02 to<br>0.17)                | 0.07<br>(0.03 to<br>0.15)                | 0.08<br>(0.03 to<br>0.17)                | 0.07<br>(0.02 to<br>0.15)                | 0.00<br>(0.00 to<br>0.01)             | 0.00<br>(0.00 to<br>0.01)             | 0.00<br>(0.00 to<br>0.01)             | 0.00<br>(0.00 to<br>0.01)             |
| Paratyphoid fever                                                 | 0.05<br>(0.02 to<br>0.13)                | 0.03<br>(0.01 to<br>0.08)                | 0.03<br>(0.01 to<br>0.07)                | 0.03<br>(0.01 to<br>0.08)                | 0.00<br>(0.00 to<br>0.00)             | 0.00<br>(0.00 to<br>0.00)             | 0.00<br>(0.00 to<br>0.00)             | 0.00<br>(0.00 to<br>0.00)             |
| Other intestinal infectious diseases                              | 0.05<br>(0.02 to<br>0.10)                | 0.03<br>(0.01 to<br>0.07)                | 0.03<br>(0.01 to<br>0.07)                | 0.03<br>(0.01 to<br>0.07)                | 0.00<br>(0.00 to<br>0.01)             | 0.00<br>(0.00 to<br>0.01)             | 0.00<br>(0.00 to<br>0.01)             | 0.00<br>(0.00 to<br>0.01)             |
| Lower respiratory infections                                      | 1,045.16<br>(949.41 to<br>1,150.50)      | 1,262.49<br>(943.22 to<br>1,709.77)      | 1,085.85<br>(821.45 to<br>1,413.45)      | 1,529.72<br>(1,093.54 to<br>2,195.74)    | 109.68<br>(98.79 to<br>121.62)        | 165.87<br>(126.90 to<br>219.58)       | 150.63<br>(115.56 to<br>192.67)       | 189.13<br>(139.03 to<br>260.53)       |
| Upper respiratory infections                                      | 0.25<br>(0.21 to<br>0.31)                | 0.16<br>(0.11 to<br>0.25)                | 0.13<br>(0.08 to<br>0.21)                | 0.18<br>(0.11 to<br>0.28)                | 0.01<br>(0.01 to<br>0.02)             | 0.01<br>(0.01 to<br>0.02)             | 0.01<br>(0.01 to<br>0.02)             | 0.01<br>(0.01 to<br>0.02)             |
| Otitis media                                                      | 0.01<br>(0.01 to<br>0.01)                | 0.00<br>(0.00 to<br>0.01)                | 0.00<br>(0.00 to<br>0.01)                | 0.00<br>(0.00 to<br>0.01)                | 0.00<br>(0.00 to<br>0.00)             | 0.00<br>(0.00 to<br>0.00)             | 0.00<br>(0.00 to<br>0.00)             | 0.00<br>(0.00 to<br>0.00)             |
| Meningitis                                                        | 14.55<br>(12.03 to<br>20.11)             | 7.19<br>(5.35 to<br>11.00)               | 6.71<br>(4.06 to<br>10.52)               | 7.93<br>(5.77 to<br>11.99)               | 0.64<br>(0.55 to<br>0.85)             | 0.44<br>(0.34 to<br>0.65)             | 0.42<br>(0.33 to<br>0.63)             | 0.45<br>(0.35 to<br>0.64)             |
| Pneumococcal meningitis                                           | 2.48<br>(2.21 to<br>3.15)                | 1.39<br>(1.12 to<br>1.88)                | 1.43<br>(1.16 to<br>1.94)                | 1.41<br>(1.15 to<br>1.89)                | 0.12<br>(0.11 to<br>0.16)             | 0.09<br>(0.08 to<br>0.12)             | 0.10<br>(0.08 to<br>0.13)             | 0.09<br>(0.07 to<br>0.12)             |
| H influenzae type B meningitis                                    | 2.07<br>(1.73 to<br>2.74)                | 1.29<br>(0.93 to<br>1.96)                | 1.31<br>(0.95 to<br>1.99)                | 1.72<br>(1.05 to<br>2.90)                | 0.09<br>(0.07 to<br>0.11)             | 0.07<br>(0.05 to<br>0.10)             | 0.08<br>(0.06 to<br>0.11)             | 0.07<br>(0.05 to<br>0.10)             |
| Meningococcal meningitis                                          | 2.52<br>(2.01 to<br>3.60)                | 1.01<br>(0.71 to<br>1.66)                | 0.90<br>(0.62 to<br>1.50)                | 1.08<br>(0.76 to<br>1.75)                | 0.09<br>(0.08 to<br>0.13)             | 0.06<br>(0.04 to<br>0.09)             | 0.05<br>(0.04 to<br>0.08)             | 0.06<br>(0.04 to<br>0.09)             |
| Other meningitis                                                  | 7.49<br>(5.98 to<br>10.91)               | 3.50<br>(2.40 to<br>5.72)                | 3.07<br>(2.09 to<br>5.23)                | 3.72<br>(2.54 to<br>6.17)                | 0.34<br>(0.28 to<br>0.47)             | 0.22<br>(0.16 to<br>0.35)             | 0.20<br>(0.15 to<br>0.32)             | 0.23<br>(0.17 to<br>0.35)             |
| Encephalitis                                                      | 17.47<br>(14.52 to<br>22.95)             | 18.09<br>(14.45 to<br>23.41)             | 18.09<br>(14.28 to<br>23.32)             | 17.80<br>(14.13 to<br>23.06)             | 0.67<br>(0.56 to<br>0.88)             | 0.94<br>(0.76 to<br>1.20)             | 0.97<br>(0.77 to<br>1.23)             | 0.90<br>(0.72 to<br>1.14)             |

|                |                           |                           |                           |                            |                           |                           |                           |                           |
|----------------|---------------------------|---------------------------|---------------------------|----------------------------|---------------------------|---------------------------|---------------------------|---------------------------|
| Diphtheria     | 0.03<br>(0.03 to<br>0.04) | 0.01<br>(0.00 to<br>0.01) | 0.01<br>(0.00 to<br>0.01) | 0.01<br>(0.01 to<br>0.03)  | 0.00<br>(0.00 to<br>0.00) | 0.00<br>(0.00 to<br>0.00) | 0.00<br>(0.00 to<br>0.00) | 0.00<br>(0.00 to<br>0.00) |
| Whooping cough | 0.64<br>(0.19 to<br>1.66) | 0.50<br>(0.08 to<br>1.61) | 0.46<br>(0.07 to<br>1.50) | 4.47<br>(0.92 to<br>11.36) | 0.01<br>(0.00 to<br>0.02) | 0.01<br>(0.00 to<br>0.02) | 0.01<br>(0.00 to<br>0.02) | 0.05<br>(0.01 to<br>0.13) |
| Tetanus        | 0.39<br>(0.32 to<br>0.48) | 0.03<br>(0.02 to<br>0.04) | 0.03<br>(0.02 to<br>0.05) | 0.07<br>(0.04 to<br>0.12)  | 0.01<br>(0.01 to<br>0.02) | 0.00<br>(0.00 to<br>0.00) | 0.00<br>(0.00 to<br>0.00) | 0.00<br>(0.00 to<br>0.00) |
| Measles        | 0.18<br>(0.15 to<br>0.22) | 1.07<br>(0.02 to<br>6.10) | 0.80<br>(0.02 to<br>4.33) | 1.87<br>(0.03 to<br>11.63) | 0.00<br>(0.00 to<br>0.00) | 0.01<br>(0.00 to<br>0.08) | 0.01<br>(0.00 to<br>0.06) | 0.02<br>(0.00 to<br>0.14) |

| High-income Asia Pacific                              |                                      |                                      |                                      |                                      |                                      |                                      |                                      |                                      |
|-------------------------------------------------------|--------------------------------------|--------------------------------------|--------------------------------------|--------------------------------------|--------------------------------------|--------------------------------------|--------------------------------------|--------------------------------------|
| Cause                                                 | YLLs (in 1000s)                      |                                      |                                      |                                      | Deaths (in 1000s)                    |                                      |                                      |                                      |
|                                                       | 2016                                 | 2040 Forecast                        | 2040 Better Scenario                 | 2040 Worse Scenario                  | 2016                                 | 2040 Forecast                        | 2040 Better Scenario                 | 2040 Worse Scenario                  |
| Varicella and herpes zoster                           | 0.88<br>(0.62 to 1.62)               | 0.76<br>(0.52 to 1.41)               | 0.72<br>(0.49 to 1.31)               | 0.76<br>(0.52 to 1.40)               | 0.08<br>(0.05 to 0.17)               | 0.10<br>(0.06 to 0.20)               | 0.10<br>(0.06 to 0.19)               | 0.10<br>(0.06 to 0.19)               |
| <b>Neglected tropical diseases and malaria</b>        | <b>2.07</b><br><b>(1.22 to 2.67)</b> | <b>3.24</b><br><b>(1.59 to 4.22)</b> | <b>3.39</b><br><b>(1.66 to 4.44)</b> | <b>3.03</b><br><b>(1.51 to 3.91)</b> | <b>0.10</b><br><b>(0.05 to 0.13)</b> | <b>0.24</b><br><b>(0.11 to 0.31)</b> | <b>0.26</b><br><b>(0.12 to 0.34)</b> | <b>0.21</b><br><b>(0.10 to 0.27)</b> |
| Malaria                                               | 0.06<br>(0.05 to 0.09)               | 0.04<br>(0.02 to 0.05)               | 0.04<br>(0.02 to 0.05)               | 0.03<br>(0.02 to 0.05)               | 0.00<br>(0.00 to 0.00)               | 0.00<br>(0.00 to 0.00)               | 0.00<br>(0.00 to 0.00)               | 0.00<br>(0.00 to 0.00)               |
| Chagas disease                                        | 0.00<br>(0.00 to 0.00)               | 0.00<br>(0.00 to 0.00)               | 0.00<br>(0.00 to 0.00)               | 0.00<br>(0.00 to 0.00)               | 0.00<br>(0.00 to 0.00)               | 0.00<br>(0.00 to 0.00)               | 0.00<br>(0.00 to 0.00)               | 0.00<br>(0.00 to 0.00)               |
| Leishmaniasis                                         | 0.00<br>(0.00 to 0.00)               | 0.00<br>(0.00 to 0.00)               | 0.00<br>(0.00 to 0.00)               | 0.00<br>(0.00 to 0.00)               | 0.00<br>(0.00 to 0.00)               | 0.00<br>(0.00 to 0.00)               | 0.00<br>(0.00 to 0.00)               | 0.00<br>(0.00 to 0.00)               |
| African trypanosomiasis                               | 0.00<br>(0.00 to 0.00)               | 0.00<br>(0.00 to 0.00)               | 0.00<br>(0.00 to 0.00)               | 0.00<br>(0.00 to 0.00)               | 0.00<br>(0.00 to 0.00)               | 0.00<br>(0.00 to 0.00)               | 0.00<br>(0.00 to 0.00)               | 0.00<br>(0.00 to 0.00)               |
| Schistosomiasis                                       | 0.00<br>(0.00 to 0.00)               | 0.00<br>(0.00 to 0.00)               | 0.00<br>(0.00 to 0.00)               | 0.00<br>(0.00 to 0.00)               | 0.00<br>(0.00 to 0.00)               | 0.00<br>(0.00 to 0.00)               | 0.00<br>(0.00 to 0.00)               | 0.00<br>(0.00 to 0.00)               |
| Cysticercosis                                         | 0.03<br>(0.02 to 0.04)               | 0.01<br>(0.01 to 0.01)               | 0.01<br>(0.01 to 0.01)               | 0.01<br>(0.01 to 0.01)               | 0.00<br>(0.00 to 0.00)               | 0.00<br>(0.00 to 0.00)               | 0.00<br>(0.00 to 0.00)               | 0.00<br>(0.00 to 0.00)               |
| Cystic echinococcosis                                 | 0.01<br>(0.01 to 0.01)               | 0.01<br>(0.01 to 0.01)               | 0.01<br>(0.01 to 0.01)               | 0.01<br>(0.01 to 0.01)               | 0.00<br>(0.00 to 0.00)               | 0.00<br>(0.00 to 0.00)               | 0.00<br>(0.00 to 0.00)               | 0.00<br>(0.00 to 0.00)               |
| Dengue                                                | 0.08<br>(0.05 to 0.13)               | 0.42<br>(0.26 to 0.62)               | 0.42<br>(0.27 to 0.63)               | 0.40<br>(0.25 to 0.61)               | 0.00<br>(0.00 to 0.00)               | 0.02<br>(0.01 to 0.02)               | 0.02<br>(0.01 to 0.03)               | 0.02<br>(0.01 to 0.02)               |
| Yellow fever                                          | 0.00<br>(0.00 to 0.00)               | 0.00<br>(0.00 to 0.00)               | 0.00<br>(0.00 to 0.00)               | 0.00<br>(0.00 to 0.00)               | 0.00<br>(0.00 to 0.00)               | 0.00<br>(0.00 to 0.00)               | 0.00<br>(0.00 to 0.00)               | 0.00<br>(0.00 to 0.00)               |
| Rabies                                                | 0.01<br>(0.01 to 0.01)               | 0.01<br>(0.01 to 0.01)               | 0.01<br>(0.01 to 0.01)               | 0.01<br>(0.01 to 0.01)               | 0.00<br>(0.00 to 0.00)               | 0.00<br>(0.00 to 0.00)               | 0.00<br>(0.00 to 0.00)               | 0.00<br>(0.00 to 0.00)               |
| Intestinal nematode infections                        | 0.00<br>(0.00 to 0.00)               | 0.00<br>(0.00 to 0.00)               | 0.00<br>(0.00 to 0.00)               | 0.00<br>(0.00 to 0.00)               | 0.00<br>(0.00 to 0.00)               | 0.00<br>(0.00 to 0.00)               | 0.00<br>(0.00 to 0.00)               | 0.00<br>(0.00 to 0.00)               |
| Other neglected tropical diseases                     | 1.87<br>(1.01 to 2.44)               | 2.76<br>(1.18 to 3.71)               | 2.91<br>(1.25 to 3.91)               | 2.56<br>(1.10 to 3.40)               | 0.09<br>(0.04 to 0.13)               | 0.21<br>(0.09 to 0.29)               | 0.23<br>(0.10 to 0.31)               | 0.19<br>(0.08 to 0.25)               |
| <b>Maternal disorders</b>                             | <b>5.38</b><br><b>(4.38 to 6.72)</b> | <b>3.49</b><br><b>(2.69 to 4.55)</b> | <b>3.14</b><br><b>(2.41 to 4.15)</b> | <b>3.70</b><br><b>(2.82 to 4.91)</b> | <b>0.10</b><br><b>(0.08 to 0.13)</b> | <b>0.07</b><br><b>(0.05 to 0.09)</b> | <b>0.06</b><br><b>(0.05 to 0.08)</b> | <b>0.07</b><br><b>(0.05 to 0.09)</b> |
| Maternal hemorrhage                                   | 1.11<br>(0.76 to 1.54)               | 0.69<br>(0.44 to 1.06)               | 0.63<br>(0.40 to 0.98)               | 0.73<br>(0.46 to 1.14)               | 0.02<br>(0.01 to 0.03)               | 0.01<br>(0.01 to 0.02)               | 0.01<br>(0.01 to 0.02)               | 0.01<br>(0.01 to 0.02)               |
| Maternal sepsis and other maternal infections         | 0.29<br>(0.19 to 0.44)               | 0.16<br>(0.10 to 0.26)               | 0.15<br>(0.09 to 0.24)               | 0.17<br>(0.10 to 0.28)               | 0.01<br>(0.00 to 0.01)               | 0.00<br>(0.00 to 0.01)               | 0.00<br>(0.00 to 0.00)               | 0.00<br>(0.00 to 0.01)               |
| Maternal hypertensive disorders                       | 0.56<br>(0.38 to 0.82)               | 0.35<br>(0.22 to 0.56)               | 0.31<br>(0.19 to 0.52)               | 0.37<br>(0.23 to 0.61)               | 0.01<br>(0.01 to 0.02)               | 0.01<br>(0.00 to 0.01)               | 0.01<br>(0.01 to 0.01)               | 0.01<br>(0.00 to 0.01)               |
| Maternal obstructed labor and uterine rupture         | 0.22<br>(0.15 to 0.32)               | 0.13<br>(0.08 to 0.20)               | 0.12<br>(0.07 to 0.18)               | 0.14<br>(0.09 to 0.23)               | 0.00<br>(0.00 to 0.01)               | 0.00<br>(0.00 to 0.00)               | 0.00<br>(0.00 to 0.00)               | 0.00<br>(0.00 to 0.00)               |
| Maternal abortion, miscarriage, and ectopic pregnancy | 0.66<br>(0.52 to 0.84)               | 0.44<br>(0.30 to 0.66)               | 0.40<br>(0.27 to 0.59)               | 0.47<br>(0.31 to 0.70)               | 0.01<br>(0.01 to 0.02)               | 0.01<br>(0.01 to 0.01)               | 0.01<br>(0.01 to 0.01)               | 0.01<br>(0.01 to 0.01)               |



|                                        |                           |                           |                           |                           |                           |                           |                           |                           |
|----------------------------------------|---------------------------|---------------------------|---------------------------|---------------------------|---------------------------|---------------------------|---------------------------|---------------------------|
|                                        | 0.66<br>(0.46 to<br>0.95) | 0.46<br>(0.27 to<br>0.71) | 0.40<br>(0.25 to<br>0.62) | 0.49<br>(0.29 to<br>0.76) | 0.01<br>(0.01 to<br>0.02) | 0.01<br>(0.00 to<br>0.01) | 0.01<br>(0.00 to<br>0.01) | 0.01<br>(0.01 to<br>0.01) |
| Indirect maternal deaths               | 0.13<br>(0.08 to<br>0.19) | 0.06<br>(0.04 to<br>0.10) | 0.06<br>(0.03 to<br>0.09) | 0.07<br>(0.04 to<br>0.11) | 0.00<br>(0.00 to<br>0.00) | 0.00<br>(0.00 to<br>0.00) | 0.00<br>(0.00 to<br>0.00) | 0.00<br>(0.00 to<br>0.00) |
| Late maternal deaths                   | 0.00<br>(0.00 to<br>0.00) | 0.00<br>(0.00 to<br>0.00) | 0.00<br>(0.00 to<br>0.00) | 0.00<br>(0.00 to<br>0.00) | 0.00<br>(0.00 to<br>0.00) | 0.00<br>(0.00 to<br>0.00) | 0.00<br>(0.00 to<br>0.00) | 0.00<br>(0.00 to<br>0.00) |
| Maternal deaths aggravated by HIV/AIDS | 1.75<br>(1.38 to<br>2.21) | 1.19<br>(0.82 to<br>1.66) | 1.07<br>(0.74 to<br>1.51) | 1.26<br>(0.85 to<br>1.78) | 0.03<br>(0.03 to<br>0.04) | 0.02<br>(0.02 to<br>0.03) | 0.02<br>(0.01 to<br>0.03) | 0.02<br>(0.02 to<br>0.03) |
| Other maternal disorders               |                           |                           |                           |                           |                           |                           |                           |                           |

| High-income Asia Pacific                                                |                                   |                                  |                                  |                                  |                               |                               |                               |                               |
|-------------------------------------------------------------------------|-----------------------------------|----------------------------------|----------------------------------|----------------------------------|-------------------------------|-------------------------------|-------------------------------|-------------------------------|
| Cause                                                                   | YLLs (in 1000s)                   |                                  |                                  |                                  | Deaths (in 1000s)             |                               |                               |                               |
|                                                                         | 2016                              | 2040 Forecast                    | 2040 Better Scenario             | 2040 Worse Scenario              | 2016                          | 2040 Forecast                 | 2040 Better Scenario          | 2040 Worse Scenario           |
| <b>Neonatal disorders</b>                                               | <b>99.30</b><br>(85.21 to 113.44) | <b>51.07</b><br>(32.91 to 79.33) | <b>42.43</b><br>(27.31 to 66.14) | <b>57.52</b><br>(36.80 to 90.01) | <b>1.15</b><br>(0.99 to 1.31) | <b>0.59</b><br>(0.38 to 0.92) | <b>0.49</b><br>(0.32 to 0.77) | <b>0.67</b><br>(0.43 to 1.04) |
| Neonatal preterm birth                                                  | 47.30<br>(38.22 to 55.87)         | 18.15<br>(11.68 to 27.75)        | 12.83<br>(8.26 to 19.58)         | 21.15<br>(13.15 to 31.70)        | 0.55<br>(0.44 to 0.65)        | 0.21<br>(0.14 to 0.32)        | 0.15<br>(0.10 to 0.23)        | 0.24<br>(0.15 to 0.37)        |
| Neonatal encephalopathy due to birth asphyxia and trauma                | 17.01<br>(14.03 to 19.84)         | 6.42<br>(3.98 to 10.59)          | 5.31<br>(3.32 to 8.68)           | 7.39<br>(4.53 to 12.16)          | 0.20<br>(0.16 to 0.25)        | 0.07<br>(0.05 to 0.12)        | 0.06<br>(0.04 to 0.10)        | 0.09<br>(0.05 to 0.14)        |
| Neonatal sepsis and other neonatal infections                           | 11.33<br>(8.00 to 22.39)          | 8.21<br>(4.20 to 17.88)          | 7.19<br>(3.64 to 15.27)          | 9.34<br>(4.66 to 20.36)          | 0.13<br>(0.09 to 0.26)        | 0.09<br>(0.05 to 0.21)        | 0.08<br>(0.04 to 0.18)        | 0.11<br>(0.05 to 0.24)        |
| Hemolytic disease and other neonatal jaundice                           | 0.45<br>(0.34 to 0.56)            | 0.17<br>(0.10 to 0.30)           | 0.15<br>(0.09 to 0.25)           | 0.19<br>(0.11 to 0.33)           | 0.01<br>(0.00 to 0.01)        | 0.00<br>(0.00 to 0.00)        | 0.00<br>(0.00 to 0.00)        | 0.00<br>(0.00 to 0.00)        |
| Other neonatal disorders                                                | 23.22<br>(18.35 to 27.33)         | 18.13<br>(10.39 to 31.09)        | 16.95<br>(9.79 to 28.69)         | 19.44<br>(11.15 to 33.71)        | 0.27<br>(0.21 to 0.32)        | 0.21<br>(0.12 to 0.36)        | 0.20<br>(0.11 to 0.33)        | 0.22<br>(0.13 to 0.39)        |
| <b>Nutritional deficiencies</b>                                         | <b>36.44</b><br>(34.14 to 38.60)  | <b>39.34</b><br>(34.43 to 44.74) | <b>42.15</b><br>(36.78 to 48.05) | <b>36.80</b><br>(32.44 to 41.93) | <b>3.24</b><br>(3.05 to 3.43) | <b>5.09</b><br>(4.28 to 6.10) | <b>5.62</b><br>(4.76 to 6.71) | <b>4.62</b><br>(3.88 to 5.58) |
| Protein-energy malnutrition                                             | 25.81<br>(17.52 to 28.41)         | 26.43<br>(19.20 to 32.36)        | 29.40<br>(21.75 to 35.66)        | 24.24<br>(17.35 to 29.44)        | 2.31<br>(1.53 to 2.55)        | 3.51<br>(2.54 to 4.55)        | 4.02<br>(2.92 to 5.14)        | 3.13<br>(2.20 to 4.04)        |
| Iodine deficiency                                                       | 0.54<br>(0.52 to 0.92)            | 1.86<br>(0.25 to 5.31)           | 1.86<br>(0.24 to 5.46)           | 1.79<br>(0.25 to 5.05)           | 0.04<br>(0.02 to 0.06)        | 0.24<br>(0.02 to 0.85)        | 0.25<br>(0.02 to 0.90)        | 0.23<br>(0.02 to 0.77)        |
| Dietary iron deficiency                                                 | 0.70<br>(0.58 to 1.13)            | 0.50<br>(0.39 to 0.78)           | 0.52<br>(0.40 to 0.82)           | 0.50<br>(0.39 to 0.76)           | 0.02<br>(0.02 to 0.03)        | 0.02<br>(0.01 to 0.03)        | 0.02<br>(0.01 to 0.03)        | 0.02<br>(0.01 to 0.03)        |
| Other nutritional deficiencies                                          | 9.38<br>(7.38 to 16.66)           | 10.55<br>(8.03 to 16.61)         | 10.37<br>(7.84 to 16.66)         | 10.28<br>(7.83 to 15.90)         | 0.87<br>(0.69 to 1.58)        | 1.32<br>(0.95 to 2.13)        | 1.33<br>(0.97 to 2.21)        | 1.25<br>(0.90 to 2.01)        |
| <b>Other communicable, maternal, neonatal, and nutritional diseases</b> | <b>50.89</b><br>(45.25 to 54.80)  | <b>46.99</b><br>(38.95 to 56.89) | <b>45.17</b><br>(37.07 to 54.39) | <b>46.71</b><br>(38.41 to 56.65) | <b>2.72</b><br>(2.39 to 2.89) | <b>3.30</b><br>(2.75 to 3.92) | <b>3.28</b><br>(2.71 to 3.86) | <b>3.18</b><br>(2.62 to 3.75) |
| Sexually transmitted infections excluding HIV                           | 2.32<br>(1.74 to 3.42)            | 0.93<br>(0.70 to 1.28)           | 0.90<br>(0.67 to 1.23)           | 0.94<br>(0.70 to 1.34)           | 0.14<br>(0.12 to 0.15)        | 0.08<br>(0.07 to 0.10)        | 0.08<br>(0.06 to 0.10)        | 0.08<br>(0.06 to 0.10)        |
| Syphilis                                                                | 1.11<br>(0.59 to 2.26)            | 0.31<br>(0.18 to 0.64)           | 0.29<br>(0.17 to 0.59)           | 0.34<br>(0.19 to 0.71)           | 0.04<br>(0.04 to 0.06)        | 0.02<br>(0.02 to 0.05)        | 0.02<br>(0.01 to 0.03)        | 0.02<br>(0.02 to 0.03)        |
| Chlamydial infection                                                    | 0.24<br>(0.21 to 0.27)            | 0.13<br>(0.10 to 0.16)           | 0.12<br>(0.10 to 0.16)           | 0.12<br>(0.10 to 0.16)           | 0.02<br>(0.02 to 0.02)        | 0.01<br>(0.01 to 0.02)        | 0.01<br>(0.01 to 0.02)        | 0.01<br>(0.01 to 0.02)        |
| Gonococcal infection                                                    | 0.70<br>(0.62 to 0.79)            | 0.36<br>(0.28 to 0.46)           | 0.35<br>(0.28 to 0.46)           | 0.36<br>(0.28 to 0.45)           | 0.06<br>(0.05 to 0.06)        | 0.04<br>(0.03 to 0.05)        | 0.04<br>(0.03 to 0.05)        | 0.04<br>(0.03 to 0.05)        |
| Other sexually transmitted infections                                   | 0.28<br>(0.24 to 0.31)            | 0.13<br>(0.10 to 0.16)           | 0.13<br>(0.10 to 0.16)           | 0.13<br>(0.10 to 0.16)           | 0.02<br>(0.02 to 0.02)        | 0.01<br>(0.01 to 0.01)        | 0.01<br>(0.01 to 0.01)        | 0.01<br>(0.01 to 0.01)        |
| Acute hepatitis                                                         | 15.34<br>(14.08 to 16.67)         | 11.81<br>(8.66 to 16.16)         | 10.05<br>(7.29 to 13.58)         | 12.31<br>(8.88 to 16.96)         | 0.72<br>(0.67 to 0.77)        | 0.72<br>(0.53 to 0.98)        | 0.63<br>(0.46 to 0.84)        | 0.74<br>(0.53 to 0.99)        |
| Acute hepatitis A                                                       | 0.65<br>(0.54 to 0.78)            | 0.35<br>(0.25 to 0.49)           | 0.32<br>(0.22 to 0.44)           | 0.36<br>(0.26 to 0.51)           | 0.02<br>(0.02 to 0.03)        | 0.02<br>(0.01 to 0.03)        | 0.02<br>(0.01 to 0.02)        | 0.02<br>(0.01 to 0.03)        |
| Acute hepatitis B                                                       | 12.61<br>(11.41 to 13.93)         | 9.46<br>(6.79 to 13.47)          | 7.98<br>(5.57 to 11.19)          | 9.91<br>(6.98 to 14.14)          | 0.56<br>(0.50 to 0.62)        | 0.52<br>(0.36 to 0.75)        | 0.44<br>(0.31 to 0.61)        | 0.53<br>(0.37 to 0.75)        |



| High-income Asia Pacific             |                                    |                                    |                                    |                                     |                              |                              |                              |                              |
|--------------------------------------|------------------------------------|------------------------------------|------------------------------------|-------------------------------------|------------------------------|------------------------------|------------------------------|------------------------------|
| Cause                                | YLLs (in 1000s)                    |                                    |                                    |                                     | Deaths (in 1000s)            |                              |                              |                              |
|                                      | 2016                               | 2040 Forecast                      | 2040 Better Scenario               | 2040 Worse Scenario                 | 2016                         | 2040 Forecast                | 2040 Better Scenario         | 2040 Worse Scenario          |
| Neoplasms                            | 7,971.79<br>(7,407.77 to 8,616.37) | 7,792.76<br>(6,261.19 to 9,719.11) | 6,732.27<br>(5,399.90 to 8,307.57) | 9,192.56<br>(7,260.73 to 11,710.55) | 490.25<br>(461.88 to 521.14) | 573.54<br>(482.47 to 676.93) | 498.20<br>(418.46 to 589.29) | 659.25<br>(546.10 to 798.71) |
| Lip and oral cavity cancer           | 80.97<br>(74.26 to 88.22)          | 72.02<br>(47.03 to 105.29)         | 51.22<br>(35.45 to 70.92)          | 100.70<br>(60.74 to 155.26)         | 4.87<br>(4.54 to 5.21)       | 5.23<br>(3.47 to 7.67)       | 3.64<br>(2.59 to 4.99)       | 7.07<br>(4.46 to 10.81)      |
| Nasopharynx cancer                   | 27.38<br>(24.31 to 30.95)          | 24.99<br>(17.59 to 36.98)          | 17.70<br>(12.92 to 25.37)          | 37.52<br>(24.54 to 59.96)           | 1.29<br>(1.17 to 1.43)       | 1.37<br>(0.95 to 1.98)       | 0.93<br>(0.68 to 1.32)       | 2.00<br>(1.30 to 3.10)       |
| Other pharynx cancer                 | 55.43<br>(50.94 to 60.32)          | 47.53<br>(29.76 to 73.10)          | 42.25<br>(28.04 to 61.89)          | 54.54<br>(32.23 to 86.52)           | 2.89<br>(2.66 to 3.11)       | 2.83<br>(1.85 to 4.20)       | 2.59<br>(1.79 to 3.69)       | 3.17<br>(1.97 to 4.92)       |
| Esophageal cancer                    | 264.68<br>(234.17 to 293.24)       | 304.38<br>(184.30 to 471.10)       | 223.15<br>(147.57 to 323.24)       | 406.72<br>(227.08 to 666.12)        | 15.01<br>(13.45 to 16.47)    | 19.34<br>(12.07 to 29.54)    | 14.04<br>(9.65 to 19.84)     | 25.42<br>(14.59 to 40.63)    |
| Stomach cancer                       | 1,103.91<br>(1,010.56 to 1,206.68) | 739.74<br>(537.64 to 1,015.45)     | 642.27<br>(473.92 to 868.37)       | 820.19<br>(588.68 to 1,130.54)      | 70.21<br>(65.52 to 75.40)    | 57.22<br>(42.89 to 77.77)    | 50.12<br>(38.26 to 67.93)    | 62.11<br>(45.38 to 85.41)    |
| Colon and rectum cancer              | 939.29<br>(868.84 to 1,023.54)     | 883.15<br>(595.23 to 1,271.03)     | 767.23<br>(541.78 to 1,099.20)     | 1,005.28<br>(678.78 to 1,484.68)    | 61.38<br>(57.45 to 66.21)    | 72.23<br>(50.95 to 103.17)   | 63.94<br>(46.01 to 90.26)    | 79.81<br>(55.35 to 116.66)   |
| Liver cancer                         | 939.67<br>(822.26 to 1,075.81)     | 1,342.90<br>(926.70 to 2,007.93)   | 1,288.49<br>(915.81 to 1,842.11)   | 1,503.77<br>(981.32 to 2,378.66)    | 52.41<br>(47.31 to 58.05)    | 84.24<br>(61.29 to 117.52)   | 81.83<br>(61.57 to 110.12)   | 92.51<br>(63.98 to 137.64)   |
| Liver cancer due to hepatitis B      | 300.45<br>(224.38 to 394.76)       | 453.67<br>(271.90 to 735.23)       | 437.01<br>(271.17 to 693.23)       | 499.14<br>(284.94 to 876.73)        | 13.08<br>(9.91 to 16.95)     | 23.42<br>(15.45 to 36.38)    | 22.84<br>(15.60 to 34.28)    | 25.38<br>(15.95 to 41.23)    |
| Liver cancer due to hepatitis C      | 424.44<br>(384.17 to 462.30)       | 569.88<br>(408.37 to 802.52)       | 554.65<br>(412.11 to 741.26)       | 623.36<br>(426.42 to 920.11)        | 27.37<br>(25.18 to 29.45)    | 40.93<br>(30.17 to 55.20)    | 40.21<br>(30.81 to 52.51)    | 43.95<br>(30.89 to 62.21)    |
| Liver cancer due to alcohol use      | 94.98<br>(77.44 to 117.57)         | 136.78<br>(88.11 to 218.02)        | 121.24<br>(79.88 to 185.33)        | 176.24<br>(105.98 to 302.77)        | 5.00<br>(4.19 to 6.00)       | 7.96<br>(5.33 to 12.33)      | 7.17<br>(4.97 to 10.60)      | 9.99<br>(6.25 to 16.02)      |
| Liver cancer due to other causes     | 119.80<br>(102.44 to 140.35)       | 182.56<br>(118.28 to 277.15)       | 175.59<br>(117.37 to 257.71)       | 205.03<br>(123.23 to 327.27)        | 6.96<br>(6.09 to 7.88)       | 11.93<br>(8.16 to 17.23)     | 11.61<br>(8.22 to 16.38)     | 13.19<br>(8.55 to 20.02)     |
| Gallbladder and biliary tract cancer | 338.51<br>(305.50 to 373.39)       | 263.76<br>(221.38 to 303.65)       | 267.11<br>(222.94 to 310.66)       | 255.01<br>(215.20 to 290.85)        | 25.15<br>(23.17 to 27.24)    | 23.01<br>(20.11 to 25.48)    | 23.78<br>(20.65 to 26.57)    | 21.77<br>(19.21 to 23.91)    |
| Pancreatic cancer                    | 584.20<br>(527.36 to 630.98)       | 616.87<br>(481.12 to 795.86)       | 601.75<br>(470.50 to 778.15)       | 648.02<br>(498.00 to 851.52)        | 36.50<br>(33.36 to 39.09)    | 44.50<br>(35.66 to 56.17)    | 43.55<br>(35.03 to 54.69)    | 46.19<br>(36.35 to 59.05)    |
| Larynx cancer                        | 27.55<br>(24.49 to 31.06)          | 27.76<br>(15.87 to 46.72)          | 17.90<br>(11.13 to 29.27)          | 45.12<br>(23.53 to 81.85)           | 1.72<br>(1.55 to 1.91)       | 2.08<br>(1.20 to 3.44)       | 1.31<br>(0.82 to 2.06)       | 3.24<br>(1.72 to 5.65)       |
| Tracheal, bronchus, and lung cancer  | 1,480.11<br>(1,331.26 to 1,586.05) | 1,479.21<br>(1,064.04 to 2,048.54) | 907.53<br>(666.36 to 1,227.55)     | 2,260.50<br>(1,547.39 to 3,289.37)  | 95.62<br>(89.05 to 102.89)   | 115.46<br>(84.00 to 155.70)  | 69.55<br>(52.39 to 91.93)    | 169.34<br>(118.93 to 235.61) |
| Malignant skin melanoma              | 17.73<br>(14.78 to 20.08)          | 19.27<br>(15.15 to 23.11)          | 21.10<br>(16.72 to 25.29)          | 18.00<br>(14.22 to 21.25)           | 0.94<br>(0.76 to 1.05)       | 1.35<br>(1.06 to 1.55)       | 1.51<br>(1.21 to 1.73)       | 1.23<br>(0.98 to 1.39)       |
| Non-melanoma skin cancer             | 18.95<br>(17.26 to 20.94)          | 25.49<br>(22.28 to 29.13)          | 24.35<br>(21.11 to 28.00)          | 25.32<br>(22.14 to 28.98)           | 1.62<br>(1.49 to 1.75)       | 2.86<br>(2.53 to 3.25)       | 2.81<br>(2.50 to 3.15)       | 2.75<br>(2.39 to 3.14)       |
| Breast cancer                        | 347.05<br>(312.17 to 391.02)       | 238.14<br>(172.16 to 322.19)       | 204.87<br>(148.57 to 278.49)       | 276.68<br>(195.32 to 383.44)        | 14.99<br>(13.62 to 16.62)    | 12.75<br>(9.29 to 17.35)     | 11.16<br>(8.18 to 15.26)     | 14.51<br>(10.22 to 20.24)    |
| Cervical cancer                      | 104.35<br>(90.71 to 121.80)        | 63.60<br>(49.06 to 83.42)          | 57.26<br>(43.62 to 75.75)          | 67.30<br>(50.49 to 90.17)           | 4.77<br>(4.18 to 5.51)       | 3.83<br>(2.99 to 4.84)       | 3.46<br>(2.68 to 4.42)       | 3.99<br>(3.07 to 5.12)       |

|                   |                                 |                                 |                                 |                                 |                              |                              |                              |                              |
|-------------------|---------------------------------|---------------------------------|---------------------------------|---------------------------------|------------------------------|------------------------------|------------------------------|------------------------------|
|                   | 57.05<br>(51.87 to<br>64.24)    | 54.08<br>(43.06 to<br>66.66)    | 50.83<br>(40.48 to<br>63.57)    | 54.90<br>(43.85 to<br>68.30)    | 3.20<br>(2.94 to<br>3.59)    | 3.82<br>(3.13 to<br>4.59)    | 3.64<br>(2.98 to<br>4.39)    | 3.81<br>(3.12 to<br>4.58)    |
| Uterine cancer    |                                 |                                 |                                 |                                 |                              |                              |                              |                              |
|                   | 133.17<br>(115.57 to<br>151.51) | 93.87<br>(70.45 to<br>125.51)   | 88.00<br>(65.18 to<br>118.16)   | 98.52<br>(72.35 to<br>134.35)   | 6.21<br>(5.46 to<br>6.94)    | 5.39<br>(4.06 to<br>7.24)    | 5.06<br>(3.80 to<br>6.73)    | 5.62<br>(4.15 to<br>7.64)    |
| Ovarian cancer    |                                 |                                 |                                 |                                 |                              |                              |                              |                              |
|                   | 180.25<br>(149.01 to<br>203.70) | 222.43<br>(165.41 to<br>261.84) | 219.49<br>(165.91 to<br>260.13) | 215.69<br>(162.17 to<br>253.77) | 15.44<br>(12.17 to<br>17.26) | 23.09<br>(16.75 to<br>26.73) | 23.36<br>(16.94 to<br>27.23) | 21.75<br>(15.71 to<br>25.34) |
| Prostate cancer   |                                 |                                 |                                 |                                 |                              |                              |                              |                              |
|                   | 4.17<br>(3.72 to<br>4.66)       | 2.30<br>(1.87 to<br>2.76)       | 2.13<br>(1.72 to<br>2.57)       | 2.32<br>(1.88 to<br>2.81)       | 0.11<br>(0.10 to<br>0.13)    | 0.09<br>(0.08 to<br>0.10)    | 0.09<br>(0.07 to<br>0.10)    | 0.09<br>(0.07 to<br>0.10)    |
| Testicular cancer |                                 |                                 |                                 |                                 |                              |                              |                              |                              |

| High-income Asia Pacific        |                                                  |                                                  |                                                  |                                                  |                                            |                                            |                                            |                                            |
|---------------------------------|--------------------------------------------------|--------------------------------------------------|--------------------------------------------------|--------------------------------------------------|--------------------------------------------|--------------------------------------------|--------------------------------------------|--------------------------------------------|
| Cause                           | YLLs (in 1000s)                                  |                                                  |                                                  |                                                  | Deaths (in 1000s)                          |                                            |                                            |                                            |
|                                 | 2016                                             | 2040 Forecast                                    | 2040 Better Scenario                             | 2040 Worse Scenario                              | 2016                                       | 2040 Forecast                              | 2040 Better Scenario                       | 2040 Worse Scenario                        |
| Kidney cancer                   | 133.37<br>(118.81 to 146.53)                     | 146.83<br>(119.40 to 181.77)                     | 145.53<br>(119.65 to 177.57)                     | 149.97<br>(120.37 to 187.51)                     | 8.27<br>(7.47 to 8.92)                     | 10.78<br>(9.03 to 12.86)                   | 10.82<br>(9.16 to 12.72)                   | 10.82<br>(8.88 to 13.14)                   |
| Bladder cancer                  | 120.20<br>(110.38 to 129.97)                     | 131.28<br>(103.45 to 169.70)                     | 119.66<br>(94.86 to 152.13)                      | 145.16<br>(110.70 to 193.99)                     | 10.07<br>(9.36 to 10.75)                   | 13.57<br>(10.88 to 17.20)                  | 12.40<br>(10.15 to 15.63)                  | 14.69<br>(11.31 to 19.30)                  |
| Brain and nervous system cancer | 106.50<br>(92.37 to 123.83)                      | 100.67<br>(81.68 to 120.66)                      | 98.52<br>(79.59 to 118.97)                       | 100.68<br>(82.50 to 120.99)                      | 4.03<br>(3.45 to 4.52)                     | 4.79<br>(3.81 to 5.62)                     | 4.76<br>(3.76 to 5.65)                     | 4.70<br>(3.74 to 5.48)                     |
| Thyroid cancer                  | 36.87<br>(31.62 to 41.98)                        | 33.59<br>(25.52 to 44.00)                        | 31.79<br>(24.29 to 41.12)                        | 35.19<br>(26.33 to 47.57)                        | 2.49<br>(2.23 to 2.77)                     | 3.19<br>(2.22 to 3.53)                     | 2.68<br>(2.16 to 3.36)                     | 2.83<br>(2.22 to 3.73)                     |
| Mesothelioma                    | 28.17<br>(24.76 to 30.94)                        | 26.02<br>(21.43 to 30.37)                        | 26.99<br>(21.96 to 31.94)                        | 25.00<br>(20.79 to 29.04)                        | 1.66<br>(1.47 to 1.82)                     | 1.88<br>(1.61 to 2.14)                     | 2.00<br>(1.69 to 2.29)                     | 1.76<br>(1.52 to 1.99)                     |
| Hodgkin lymphoma                | 6.23<br>(5.48 to 6.92)                           | 3.90<br>(3.14 to 4.71)                           | 3.50<br>(2.80 to 4.25)                           | 4.04<br>(3.24 to 4.92)                           | 0.26<br>(0.24 to 0.29)                     | 0.21<br>(0.17 to 0.25)                     | 0.19<br>(0.16 to 0.23)                     | 0.21<br>(0.17 to 0.25)                     |
| Non-Hodgkin lymphoma            | 218.97<br>(193.66 to 239.45)                     | 187.94<br>(153.27 to 227.92)                     | 180.37<br>(147.05 to 218.05)                     | 190.47<br>(154.65 to 234.82)                     | 13.32<br>(11.60 to 14.35)                  | 13.80<br>(11.40 to 16.19)                  | 13.54<br>(11.18 to 15.91)                  | 13.64<br>(11.13 to 16.30)                  |
| Multiple myeloma                | 87.53<br>(73.72 to 104.39)                       | 88.76<br>(70.25 to 112.45)                       | 87.28<br>(68.46 to 109.93)                       | 89.37<br>(69.73 to 113.88)                       | 5.73<br>(4.72 to 6.63)                     | 6.77<br>(5.43 to 8.33)                     | 6.80<br>(5.47 to 8.29)                     | 6.67<br>(5.37 to 8.33)                     |
| Leukemia                        | 235.96<br>(214.00 to 255.85)                     | 214.87<br>(172.60 to 263.89)                     | 202.74<br>(164.58 to 246.16)                     | 228.31<br>(180.19 to 290.97)                     | 11.48<br>(10.56 to 12.31)                  | 13.45<br>(11.07 to 16.39)                  | 12.84<br>(10.66 to 15.35)                  | 14.02<br>(11.37 to 17.51)                  |
| Acute lymphoid leukemia         | 40.34<br>(33.80 to 45.60)                        | 25.19<br>(19.53 to 31.83)                        | 23.05<br>(17.77 to 29.31)                        | 27.15<br>(20.29 to 34.81)                        | 1.41<br>(1.23 to 1.56)                     | 1.18<br>(0.94 to 1.48)                     | 1.09<br>(0.86 to 1.35)                     | 1.25<br>(0.97 to 1.60)                     |
| Chronic lymphoid leukemia       | 6.04<br>(5.08 to 7.34)                           | 5.92<br>(4.43 to 7.93)                           | 5.70<br>(4.34 to 7.65)                           | 6.21<br>(4.45 to 8.43)                           | 0.40<br>(0.35 to 0.49)                     | 0.48<br>(0.37 to 0.64)                     | 0.47<br>(0.37 to 0.63)                     | 0.49<br>(0.37 to 0.67)                     |
| Acute myeloid leukemia          | 115.37<br>(101.14 to 125.89)                     | 113.49<br>(90.81 to 140.01)                      | 109.94<br>(89.01 to 134.89)                      | 119.10<br>(94.45 to 149.82)                      | 5.54<br>(4.87 to 5.96)                     | 6.63<br>(5.35 to 8.06)                     | 6.51<br>(5.34 to 7.78)                     | 6.85<br>(5.47 to 8.53)                     |
| Chronic myeloid leukemia        | 11.88<br>(10.00 to 14.06)                        | 5.41<br>(4.01 to 7.20)                           | 4.57<br>(3.42 to 6.10)                           | 6.09<br>(4.29 to 8.54)                           | 0.59<br>(0.52 to 0.67)                     | 0.35<br>(0.27 to 0.45)                     | 0.29<br>(0.23 to 0.38)                     | 0.38<br>(0.28 to 0.51)                     |
| Other leukemia                  | 62.34<br>(55.45 to 70.57)                        | 64.87<br>(50.84 to 81.76)                        | 59.48<br>(47.16 to 75.17)                        | 69.77<br>(53.15 to 92.03)                        | 3.55<br>(3.20 to 3.97)                     | 4.81<br>(3.87 to 6.02)                     | 4.48<br>(3.65 to 5.54)                     | 5.05<br>(3.96 to 6.52)                     |
| Other neoplasms                 | 323.56<br>(292.69 to 349.76)                     | 337.43<br>(291.52 to 385.63)                     | 341.22<br>(291.48 to 393.42)                     | 328.27<br>(283.21 to 373.65)                     | 18.61<br>(16.88 to 19.88)                  | 24.83<br>(21.62 to 27.55)                  | 25.80<br>(22.39 to 28.84)                  | 23.52<br>(20.45 to 26.04)                  |
| <b>Cardiovascular diseases</b>  | <b>5,085.65</b><br><b>(4,766.36 to 5,425.08)</b> | <b>3,809.66</b><br><b>(2,428.77 to 5,867.67)</b> | <b>2,882.77</b><br><b>(1,912.23 to 4,416.27)</b> | <b>5,315.49</b><br><b>(3,286.99 to 8,190.49)</b> | <b>460.79</b><br><b>(436.96 to 485.53)</b> | <b>435.56</b><br><b>(291.25 to 657.23)</b> | <b>352.65</b><br><b>(240.17 to 532.31)</b> | <b>560.11</b><br><b>(361.61 to 833.62)</b> |
| Rheumatic heart disease         | 63.47<br>(59.49 to 68.73)                        | 47.18<br>(34.54 to 67.56)                        | 42.55<br>(30.93 to 61.36)                        | 48.29<br>(34.61 to 70.50)                        | 6.48<br>(6.04 to 7.05)                     | 6.18<br>(4.57 to 8.95)                     | 5.71<br>(4.20 to 8.18)                     | 6.16<br>(4.53 to 9.08)                     |
| Ischemic heart disease          | 2,176.19<br>(2,044.93 to 2,312.37)               | 1,398.35<br>(799.09 to 2,346.28)                 | 977.65<br>(558.53 to 1,617.51)                   | 2,156.64<br>(1,193.58 to 3,744.53)               | 199.16<br>(188.52 to 208.85)               | 158.83<br>(90.46 to 253.06)                | 119.35<br>(68.10 to 196.30)                | 224.04<br>(125.17 to 376.84)               |
| Stroke                          | 1,860.20<br>(1,697.80 to 2,029.89)               | 1,254.30<br>(736.11 to 2,197.04)                 | 864.46<br>(527.57 to 1,491.59)                   | 1,833.60<br>(1,053.44 to 3,200.39)               | 160.61<br>(146.87 to 174.16)               | 134.03<br>(80.91 to 229.33)                | 101.39<br>(61.43 to 172.54)                | 177.04<br>(106.18 to 307.34)               |
| Ischemic stroke                 | 889.22<br>(806.15 to 970.06)                     | 666.33<br>(356.17 to 1,395.04)                   | 495.48<br>(278.13 to 1,035.62)                   | 905.22<br>(479.10 to 1,949.89)                   | 97.51<br>(88.64 to 106.19)                 | 85.10<br>(46.91 to 169.14)                 | 67.06<br>(37.71 to 129.30)                 | 108.01<br>(56.56 to 218.99)                |

|                                |                                   |                                   |                                 |                                   |                              |                               |                              |                               |
|--------------------------------|-----------------------------------|-----------------------------------|---------------------------------|-----------------------------------|------------------------------|-------------------------------|------------------------------|-------------------------------|
|                                | 970.99<br>(887.38 to<br>1,064.30) | 587.97<br>(325.93 to<br>1,025.69) | 368.98<br>(219.83 to<br>613.76) | 928.37<br>(510.83 to<br>1,662.40) | 63.10<br>(57.89 to<br>68.36) | 48.92<br>(29.78 to<br>80.65)  | 34.32<br>(21.88 to<br>54.55) | 69.02<br>(41.01 to<br>114.98) |
| Intracerebral hemorrhage       |                                   |                                   |                                 |                                   |                              |                               |                              |                               |
|                                | 177.48<br>(140.78 to<br>285.14)   | 327.13<br>(165.43 to<br>751.13)   | 277.81<br>(153.81 to<br>595.38) | 434.98<br>(208.22 to<br>1,047.43) | 20.21<br>(16.06 to<br>34.07) | 45.99<br>(23.98 to<br>106.73) | 40.04<br>(22.47 to<br>87.40) | 59.51<br>(28.71 to<br>147.51) |
| Hypertensive heart disease     |                                   |                                   |                                 |                                   |                              |                               |                              |                               |
|                                | 145.65<br>(128.92 to<br>186.90)   | 107.47<br>(76.95 to<br>157.21)    | 97.14<br>(70.00 to<br>138.83)   | 114.26<br>(81.62 to<br>163.70)    | 10.36<br>(9.13 to<br>13.69)  | 10.43<br>(7.27 to<br>15.79)   | 9.81<br>(6.82 to<br>14.50)   | 10.63<br>(7.42 to<br>15.91)   |
| Cardiomyopathy and myocarditis |                                   |                                   |                                 |                                   |                              |                               |                              |                               |
|                                | 29.89<br>(21.79 to<br>53.47)      | 33.87<br>(24.21 to<br>58.24)      | 34.48<br>(24.79 to<br>57.70)    | 32.88<br>(23.45 to<br>56.52)      | 2.36<br>(1.69 to<br>4.47)    | 3.90<br>(2.70 to<br>6.82)     | 4.12<br>(2.87 to<br>6.98)    | 3.67<br>(2.52 to<br>6.49)     |
| Myocarditis                    |                                   |                                   |                                 |                                   |                              |                               |                              |                               |

| High-income Asia Pacific                                      |                                            |                                              |                                            |                                                |                                         |                                          |                                         |                                           |
|---------------------------------------------------------------|--------------------------------------------|----------------------------------------------|--------------------------------------------|------------------------------------------------|-----------------------------------------|------------------------------------------|-----------------------------------------|-------------------------------------------|
| Cause                                                         | YLLs (in 1000s)                            |                                              |                                            |                                                | Deaths (in 1000s)                       |                                          |                                         |                                           |
|                                                               | 2016                                       | 2040 Forecast                                | 2040 Better Scenario                       | 2040 Worse Scenario                            | 2016                                    | 2040 Forecast                            | 2040 Better Scenario                    | 2040 Worse Scenario                       |
| Alcoholic cardiomyopathy                                      | 8.64<br>(6.90 to 12.13)                    | 7.05<br>(5.19 to 9.38)                       | 6.57<br>(4.78 to 8.58)                     | 7.91<br>(5.97 to 10.51)                        | 0.38<br>(0.30 to 0.50)                  | 0.38<br>(0.28 to 0.48)                   | 0.37<br>(0.27 to 0.46)                  | 0.42<br>(0.31 to 0.52)                    |
| Other cardiomyopathy                                          | 107.13<br>(89.89 to 124.84)                | 66.54<br>(41.05 to 105.52)                   | 56.09<br>(34.03 to 88.29)                  | 73.48<br>(44.95 to 112.91)                     | 7.62<br>(6.24 to 8.93)                  | 6.15<br>(3.58 to 10.12)                  | 5.32<br>(3.03 to 8.72)                  | 6.54<br>(3.76 to 10.73)                   |
| Atrial fibrillation and flutter                               | 130.63<br>(103.56 to 163.27)               | 160.52<br>(112.17 to 228.43)                 | 152.70<br>(107.37 to 216.46)               | 172.31<br>(120.77 to 243.99)                   | 15.29<br>(11.93 to 19.43)               | 21.63<br>(15.07 to 30.37)                | 21.09<br>(14.85 to 29.30)               | 22.43<br>(15.91 to 31.32)                 |
| Aortic aneurysm                                               | 249.17<br>(235.30 to 262.84)               | 189.56<br>(134.88 to 267.71)                 | 178.91<br>(127.92 to 254.10)               | 203.16<br>(144.40 to 283.12)                   | 21.62<br>(20.39 to 22.70)               | 20.26<br>(15.80 to 27.69)                | 19.88<br>(14.64 to 27.35)               | 20.72<br>(15.41 to 28.21)                 |
| Peripheral artery disease                                     | 13.55<br>(8.94 to 16.17)                   | 22.86<br>(13.55 to 33.79)                    | 22.69<br>(13.62 to 34.03)                  | 25.01<br>(15.01 to 36.62)                      | 1.57<br>(0.96 to 1.91)                  | 3.08<br>(1.76 to 4.64)                   | 3.16<br>(1.81 to 4.76)                  | 3.22<br>(1.84 to 4.83)                    |
| Endocarditis                                                  | 62.08<br>(50.19 to 91.79)                  | 82.84<br>(53.27 to 131.52)                   | 81.49<br>(52.90 to 128.53)                 | 85.56<br>(55.39 to 134.37)                     | 5.55<br>(4.63 to 8.03)                  | 9.07<br>(5.88 to 14.55)                  | 9.18<br>(5.99 to 14.60)                 | 9.08<br>(5.81 to 14.59)                   |
| Other cardiovascular and circulatory diseases                 | 207.20<br>(187.38 to 224.98)               | 219.44<br>(151.18 to 308.81)                 | 187.37<br>(131.51 to 264.67)               | 193.68<br>(168.51 to 341.83)                   | 19.93<br>(18.17 to 21.40)               | 26.66<br>(18.47 to 35.59)                | 23.05<br>(16.53 to 31.51)               | 27.30<br>(19.97 to 37.20)                 |
| <b>Chronic respiratory diseases</b>                           | <b>711.40</b><br><b>(665.46 to 760.82)</b> | <b>917.73</b><br><b>(704.59 to 1,159.17)</b> | <b>766.77</b><br><b>(608.46 to 937.54)</b> | <b>1,156.23</b><br><b>(847.61 to 1,526.60)</b> | <b>64.58</b><br><b>(60.94 to 68.22)</b> | <b>99.18</b><br><b>(76.54 to 126.12)</b> | <b>81.07</b><br><b>(64.55 to 99.67)</b> | <b>122.01</b><br><b>(90.52 to 158.54)</b> |
| Chronic obstructive pulmonary disease                         | 433.66<br>(394.38 to 493.74)               | 583.79<br>(394.75 to 809.04)                 | 394.72<br>(273.01 to 547.51)               | 832.81<br>(546.63 to 1,202.39)                 | 42.83<br>(39.51 to 47.92)               | 68.45<br>(47.32 to 95.37)                | 46.13<br>(32.21 to 64.07)               | 92.76<br>(62.33 to 131.49)                |
| Pneumoconiosis                                                | 20.78<br>(17.39 to 26.46)                  | 13.54<br>(10.46 to 17.84)                    | 13.31<br>(10.05 to 18.41)                  | 14.36<br>(11.17 to 18.81)                      | 1.59<br>(1.37 to 1.98)                  | 1.27<br>(1.04 to 1.62)                   | 1.29<br>(1.02 to 1.73)                  | 1.29<br>(1.06 to 1.64)                    |
| Silicosis                                                     | 5.70<br>(4.60 to 9.73)                     | 2.16<br>(1.24 to 4.33)                       | 1.76<br>(0.96 to 3.75)                     | 2.23<br>(1.29 to 4.34)                         | 0.49<br>(0.40 to 0.75)                  | 0.22<br>(0.13 to 0.42)                   | 0.18<br>(0.11 to 0.37)                  | 0.22<br>(0.13 to 0.40)                    |
| Asbestosis                                                    | 4.25<br>(2.45 to 5.34)                     | 4.93<br>(3.45 to 6.66)                       | 5.49<br>(4.01 to 7.72)                     | 4.59<br>(3.17 to 6.13)                         | 0.34<br>(0.18 to 0.43)                  | 0.46<br>(0.31 to 0.62)                   | 0.53<br>(0.38 to 0.72)                  | 0.42<br>(0.28 to 0.56)                    |
| Coal workers pneumoconiosis                                   | 4.52<br>(2.67 to 6.59)                     | 2.92<br>(1.60 to 4.77)                       | 2.70<br>(1.45 to 4.45)                     | 3.59<br>(1.90 to 5.84)                         | 0.28<br>(0.18 to 0.39)                  | 0.24<br>(0.15 to 0.35)                   | 0.23<br>(0.15 to 0.35)                  | 0.28<br>(0.17 to 0.42)                    |
| Other pneumoconiosis                                          | 6.30<br>(4.73 to 9.83)                     | 3.53<br>(2.51 to 5.47)                       | 3.36<br>(2.30 to 5.40)                     | 3.95<br>(2.82 to 6.06)                         | 0.48<br>(0.37 to 0.70)                  | 0.36<br>(0.26 to 0.53)                   | 0.35<br>(0.25 to 0.55)                  | 0.38<br>(0.28 to 0.55)                    |
| Asthma                                                        | 59.62<br>(49.43 to 89.36)                  | 38.14<br>(25.17 to 58.87)                    | 32.13<br>(21.58 to 50.13)                  | 47.74<br>(29.69 to 76.52)                      | 5.10<br>(4.26 to 7.35)                  | 4.24<br>(2.81 to 6.50)                   | 3.66<br>(2.48 to 5.52)                  | 5.10<br>(3.19 to 8.20)                    |
| Interstitial lung disease and pulmonary sarcoidosis           | 188.46<br>(126.37 to 214.46)               | 274.57<br>(188.13 to 332.39)                 | 319.12<br>(233.25 to 378.78)               | 253.42<br>(169.29 to 306.95)                   | 14.64<br>(9.42 to 16.69)                | 24.74<br>(16.27 to 29.96)                | 29.51<br>(20.64 to 34.60)               | 23.39<br>(14.30 to 27.03)                 |
| Other chronic respiratory diseases                            | 8.89<br>(6.84 to 12.61)                    | 7.70<br>(5.71 to 10.93)                      | 7.48<br>(5.49 to 10.93)                    | 7.89<br>(5.84 to 11.07)                        | 0.42<br>(0.30 to 0.60)                  | 0.48<br>(0.33 to 0.66)                   | 0.47<br>(0.33 to 0.69)                  | 0.48<br>(0.33 to 0.66)                    |
| <b>Cirrhosis and other chronic liver diseases</b>             | <b>695.13</b><br><b>(603.96 to 818.89)</b> | <b>626.78</b><br><b>(495.04 to 794.99)</b>   | <b>580.78</b><br><b>(458.72 to 747.54)</b> | <b>673.09</b><br><b>(534.36 to 857.66)</b>     | <b>33.67</b><br><b>(30.27 to 38.38)</b> | <b>37.03</b><br><b>(31.31 to 44.07)</b>  | <b>34.92</b><br><b>(29.19 to 42.20)</b> | <b>38.44</b><br><b>(32.39 to 46.55)</b>   |
| Cirrhosis and other chronic liver diseases due to hepatitis B | 217.45<br>(174.11 to 277.37)               | 215.97<br>(157.64 to 300.52)                 | 207.26<br>(149.96 to 290.18)               | 221.96<br>(161.08 to 306.11)                   | 9.91<br>(8.36 to 12.19)                 | 11.92<br>(9.51 to 15.37)                 | 11.59<br>(9.06 to 15.23)                | 11.92<br>(9.48 to 15.52)                  |
| Cirrhosis and other chronic liver diseases due to hepatitis C | 233.96<br>(214.68 to 255.21)               | 191.99<br>(158.61 to 229.46)                 | 177.89<br>(146.95 to 214.26)               | 193.22<br>(158.87 to 230.88)                   | 11.81<br>(10.98 to 12.69)               | 11.61<br>(9.80 to 13.72)                 | 10.97<br>(9.29 to 13.01)                | 11.42<br>(9.55 to 13.40)                  |



|                                                                |                                                      |                                                      |                                                      |                                                      |                                                   |                                                   |                                                   |                                                   |
|----------------------------------------------------------------|------------------------------------------------------|------------------------------------------------------|------------------------------------------------------|------------------------------------------------------|---------------------------------------------------|---------------------------------------------------|---------------------------------------------------|---------------------------------------------------|
|                                                                | 181.57<br>(145.20 to<br>228.98)                      | 161.04<br>(117.43 to<br>216.14)                      | 140.92<br>(102.47 to<br>191.58)                      | 199.28<br>(147.29 to<br>269.64)                      | 8.28<br>(7.00 to<br>9.98)                         | 9.15<br>(7.35 to<br>11.63)                        | 8.17<br>(6.51 to<br>10.43)                        | 10.82<br>(8.73 to<br>13.65)                       |
| Cirrhosis and other chronic liver diseases due to alcohol use  |                                                      |                                                      |                                                      |                                                      |                                                   |                                                   |                                                   |                                                   |
|                                                                | 62.15<br>(52.10 to<br>73.62)                         | 57.78<br>(45.72 to<br>72.11)                         | 54.71<br>(42.98 to<br>69.59)                         | 58.63<br>(46.27 to<br>73.92)                         | 3.66<br>(3.10 to<br>4.31)                         | 4.35<br>(3.43 to<br>5.48)                         | 4.19<br>(3.31 to<br>5.30)                         | 4.29<br>(3.44 to<br>5.41)                         |
| Cirrhosis and other chronic liver diseases due to other causes |                                                      |                                                      |                                                      |                                                      |                                                   |                                                   |                                                   |                                                   |
|                                                                | <b>375.55</b><br><b>(334.41 to</b><br><b>474.42)</b> | <b>415.65</b><br><b>(341.47 to</b><br><b>515.39)</b> | <b>397.94</b><br><b>(328.15 to</b><br><b>493.90)</b> | <b>427.35</b><br><b>(346.52 to</b><br><b>538.39)</b> | <b>32.31</b><br><b>(29.41 to</b><br><b>38.75)</b> | <b>44.77</b><br><b>(37.84 to</b><br><b>54.94)</b> | <b>43.85</b><br><b>(37.23 to</b><br><b>52.70)</b> | <b>44.79</b><br><b>(37.00 to</b><br><b>55.47)</b> |
| Digestive diseases                                             |                                                      |                                                      |                                                      |                                                      |                                                   |                                                   |                                                   |                                                   |
|                                                                | 61.73<br>(53.29 to<br>76.32)                         | 43.28<br>(33.63 to<br>55.64)                         | 37.58<br>(29.32 to<br>48.17)                         | 47.34<br>(36.38 to<br>62.32)                         | 5.18<br>(4.62 to<br>6.33)                         | 4.82<br>(3.81 to<br>6.11)                         | 4.26<br>(3.40 to<br>5.36)                         | 5.06<br>(3.94 to<br>6.55)                         |
| Peptic ulcer disease                                           |                                                      |                                                      |                                                      |                                                      |                                                   |                                                   |                                                   |                                                   |

| High-income Asia Pacific                   |                                                   |                                                   |                                                   |                                                   |                                             |                                             |                                             |                                             |
|--------------------------------------------|---------------------------------------------------|---------------------------------------------------|---------------------------------------------------|---------------------------------------------------|---------------------------------------------|---------------------------------------------|---------------------------------------------|---------------------------------------------|
| Cause                                      | YLLs (in 1000s)                                   |                                                   |                                                   |                                                   | Deaths (in 1000s)                           |                                             |                                             |                                             |
|                                            | 2016                                              | 2040 Forecast                                     | 2040 Better Scenario                              | 2040 Worse Scenario                               | 2016                                        | 2040 Forecast                               | 2040 Better Scenario                        | 2040 Worse Scenario                         |
| Gastritis and duodenitis                   | 2.97<br>(2.24 to 7.46)                            | 7.05<br>(5.13 to 14.20)                           | 6.84<br>(4.98 to 13.88)                           | 7.00<br>(5.10 to 14.00)                           | 0.33<br>(0.24 to 0.96)                      | 0.97<br>(0.69 to 2.23)                      | 0.95<br>(0.68 to 2.16)                      | 0.93<br>(0.65 to 2.17)                      |
| Appendicitis                               | 7.08<br>(5.77 to 10.15)                           | 6.22<br>(4.94 to 8.60)                            | 5.68<br>(4.48 to 7.62)                            | 6.50<br>(5.19 to 8.87)                            | 0.47<br>(0.39 to 0.64)                      | 0.57<br>(0.47 to 0.75)                      | 0.53<br>(0.43 to 0.69)                      | 0.58<br>(0.47 to 0.75)                      |
| Paralytic ileus and intestinal obstruction | 107.45<br>(89.09 to 138.25)                       | 131.98<br>(109.50 to 166.84)                      | 136.16<br>(112.96 to 172.20)                      | 125.68<br>(104.57 to 159.42)                      | 9.34<br>(7.68 to 11.20)                     | 14.12<br>(11.60 to 16.98)                   | 14.91<br>(12.23 to 17.91)                   | 13.13<br>(10.79 to 15.64)                   |
| Inguinal, femoral, and abdominal hernia    | 7.67<br>(6.26 to 11.09)                           | 6.44<br>(5.14 to 9.58)                            | 6.22<br>(4.94 to 9.05)                            | 6.31<br>(4.94 to 9.26)                            | 0.77<br>(0.63 to 1.10)                      | 0.78<br>(0.64 to 1.12)                      | 0.77<br>(0.63 to 1.11)                      | 0.74<br>(0.61 to 1.05)                      |
| Inflammatory bowel disease                 | 11.30<br>(8.58 to 17.76)                          | 17.06<br>(13.19 to 24.87)                         | 17.46<br>(13.36 to 25.17)                         | 16.30<br>(12.64 to 23.83)                         | 0.80<br>(0.62 to 1.20)                      | 1.63<br>(1.30 to 2.27)                      | 1.71<br>(1.37 to 2.40)                      | 1.51<br>(1.21 to 2.13)                      |
| Vascular intestinal disorders              | 37.37<br>(30.43 to 43.89)                         | 42.52<br>(33.48 to 50.96)                         | 41.78<br>(32.61 to 50.27)                         | 41.53<br>(33.12 to 49.34)                         | 3.08<br>(2.50 to 3.54)                      | 4.23<br>(3.40 to 5.01)                      | 4.25<br>(3.41 to 5.00)                      | 4.03<br>(3.27 to 4.77)                      |
| Gallbladder and biliary diseases           | 64.83<br>(56.89 to 81.07)                         | 80.32<br>(54.05 to 122.76)                        | 71.33<br>(49.41 to 106.34)                        | 91.67<br>(58.21 to 146.85)                        | 6.95<br>(6.28 to 8.27)                      | 10.14<br>(6.85 to 15.61)                    | 9.24<br>(6.39 to 13.81)                     | 11.23<br>(7.07 to 17.85)                    |
| Pancreatitis                               | 35.91<br>(28.90 to 49.22)                         | 36.37<br>(22.80 to 67.43)                         | 31.18<br>(20.64 to 53.37)                         | 41.74<br>(25.23 to 93.42)                         | 2.06<br>(1.72 to 2.67)                      | 2.76<br>(1.84 to 5.41)                      | 2.41<br>(1.69 to 4.19)                      | 3.06<br>(1.88 to 6.92)                      |
| Other digestive diseases                   | 39.25<br>(29.88 to 45.70)                         | 44.43<br>(34.43 to 53.20)                         | 43.72<br>(33.92 to 52.38)                         | 47.28<br>(33.85 to 51.14)                         | 3.32<br>(2.63 to 3.79)                      | 4.76<br>(3.88 to 5.59)                      | 4.81<br>(3.92 to 5.67)                      | 4.52<br>(3.67 to 5.33)                      |
| Neurological disorders                     | <b>2,318.84</b><br>(2,033.06 to <b>2,682.85</b> ) | <b>2,964.78</b><br>(2,341.66 to <b>3,803.57</b> ) | <b>3,020.06</b><br>(2,391.14 to <b>3,816.10</b> ) | <b>3,052.71</b><br>(2,333.73 to <b>4,068.52</b> ) | <b>281.62</b><br>(244.07 to <b>322.80</b> ) | <b>499.68</b><br>(326.42 to <b>520.80</b> ) | <b>426.35</b><br>(342.31 to <b>532.34</b> ) | <b>413.73</b><br>(319.29 to <b>552.58</b> ) |
| Alzheimer's disease and other dementias    | 2,033.67<br>(1,753.56 to 2,398.15)                | 2,642.36<br>(2,023.16 to 3,464.69)                | 2,687.72<br>(2,084.90 to 3,481.75)                | 2,738.77<br>(2,041.46 to 3,750.51)                | 262.38<br>(225.69 to 303.51)                | 382.95<br>(300.03 to 495.37)                | 397.82<br>(315.62 to 501.04)                | 388.69<br>(293.48 to 527.69)                |
| Parkinson's disease                        | 137.59<br>(104.63 to 179.67)                      | 185.11<br>(140.65 to 240.36)                      | 197.51<br>(148.89 to 255.90)                      | 172.78<br>(130.05 to 224.88)                      | 13.18<br>(10.07 to 17.17)                   | 19.95<br>(15.27 to 25.91)                   | 21.72<br>(16.52 to 28.44)                   | 18.27<br>(13.93 to 23.85)                   |
| Epilepsy                                   | 39.62<br>(33.77 to 46.21)                         | 38.66<br>(27.25 to 54.01)                         | 35.11<br>(25.15 to 48.11)                         | 44.00<br>(29.66 to 63.64)                         | 1.24<br>(1.08 to 1.43)                      | 1.65<br>(1.16 to 2.24)                      | 1.55<br>(1.12 to 2.07)                      | 1.80<br>(1.22 to 2.56)                      |
| Multiple sclerosis                         | 6.18<br>(5.18 to 8.22)                            | 5.22<br>(3.98 to 7.06)                            | 5.22<br>(3.99 to 7.04)                            | 5.34<br>(4.08 to 7.24)                            | 0.23<br>(0.19 to 0.30)                      | 0.22<br>(0.17 to 0.30)                      | 0.23<br>(0.17 to 0.30)                      | 0.23<br>(0.17 to 0.30)                      |
| Motor neuron disease                       | 36.56<br>(33.82 to 39.08)                         | 38.48<br>(32.79 to 44.91)                         | 38.56<br>(32.62 to 45.20)                         | 37.87<br>(32.48 to 43.86)                         | 1.92<br>(1.78 to 2.06)                      | 2.15<br>(1.84 to 2.50)                      | 2.18<br>(1.85 to 2.55)                      | 2.09<br>(1.81 to 2.42)                      |
| Other neurological disorders               | 65.22<br>(56.98 to 72.41)                         | 55.05<br>(46.12 to 65.10)                         | 55.95<br>(46.80 to 66.44)                         | 53.95<br>(45.55 to 63.12)                         | 2.77<br>(2.45 to 3.03)                      | 2.76<br>(2.36 to 3.19)                      | 2.86<br>(2.43 to 3.32)                      | 2.65<br>(2.28 to 3.04)                      |
| Mental disorders                           | <b>80.07</b><br>(64.86 to <b>106.08</b> )         | <b>91.09</b><br>(70.69 to <b>122.02</b> )         | <b>96.53</b><br>(75.71 to <b>128.03</b> )         | <b>88.79</b><br>(69.04 to <b>119.38</b> )         | <b>2.79</b><br>(2.33 to <b>3.56</b> )       | <b>4.42</b><br>(3.59 to <b>5.48</b> )       | <b>4.92</b><br>(4.03 to <b>6.07</b> )       | <b>4.13</b><br>(3.40 to <b>5.16</b> )       |
| Alcohol use disorders                      | 53.09<br>(39.21 to 77.60)                         | 47.11<br>(31.13 to 71.88)                         | 47.36<br>(31.08 to 72.48)                         | 47.85<br>(32.07 to 72.96)                         | 1.75<br>(1.32 to 2.48)                      | 1.83<br>(1.25 to 2.63)                      | 1.86<br>(1.26 to 2.71)                      | 1.82<br>(1.27 to 2.62)                      |
| Drug use disorders                         | 23.19<br>(19.74 to 30.47)                         | 41.37<br>(33.72 to 51.96)                         | 46.40<br>(38.10 to 57.58)                         | 38.37<br>(31.37 to 48.11)                         | 0.97<br>(0.83 to 1.14)                      | 2.54<br>(2.06 to 3.04)                      | 3.00<br>(2.45 to 3.54)                      | 2.27<br>(1.86 to 2.73)                      |
| Opioid use disorders                       | 13.19<br>(11.39 to 18.07)                         | 13.93<br>(11.05 to 18.37)                         | 14.55<br>(11.52 to 19.26)                         | 13.49<br>(10.77 to 18.11)                         | 0.44<br>(0.38 to 0.58)                      | 0.60<br>(0.49 to 0.78)                      | 0.65<br>(0.53 to 0.85)                      | 0.56<br>(0.47 to 0.74)                      |

|                           |                           |                              |                              |                              |                           |                           |                           |                           |
|---------------------------|---------------------------|------------------------------|------------------------------|------------------------------|---------------------------|---------------------------|---------------------------|---------------------------|
|                           | 1.62<br>(1.32 to<br>2.51) | 3.92<br>(2.91 to<br>5.78)    | 4.33<br>(3.24 to<br>6.30)    | 3.68<br>(2.79 to<br>5.52)    | 0.05<br>(0.04 to<br>0.06) | 0.14<br>(0.11 to<br>0.18) | 0.15<br>(0.12 to<br>0.20) | 0.13<br>(0.10 to<br>0.17) |
| Cocaine use disorders     | 0.93<br>(0.76 to<br>1.59) | 3.97<br>(2.88 to<br>6.10)    | 4.65<br>(3.43 to<br>6.95)    | 3.63<br>(2.60 to<br>5.69)    | 0.03<br>(0.02 to<br>0.04) | 0.13<br>(0.10 to<br>0.17) | 0.16<br>(0.12 to<br>0.21) | 0.12<br>(0.09 to<br>0.16) |
| Amphetamine use disorders | 7.45<br>(6.13 to<br>9.53) | 19.55<br>(15.48 to<br>24.06) | 22.86<br>(18.21 to<br>28.00) | 17.58<br>(13.91 to<br>21.75) | 0.46<br>(0.37 to<br>0.52) | 1.68<br>(1.29 to<br>2.05) | 2.04<br>(1.58 to<br>2.47) | 1.46<br>(1.13 to<br>1.80) |
| Other drug use disorders  | 3.79<br>(3.32 to<br>4.33) | 2.60<br>(1.91 to<br>3.38)    | 2.77<br>(2.01 to<br>3.61)    | 2.56<br>(1.87 to<br>3.33)    | 0.07<br>(0.07 to<br>0.08) | 0.05<br>(0.04 to<br>0.06) | 0.05<br>(0.04 to<br>0.07) | 0.05<br>(0.04 to<br>0.06) |
| Eating disorders          |                           |                              |                              |                              |                           |                           |                           |                           |

| High-income Asia Pacific                                   |                                     |                                       |                                     |                                       |                              |                                 |                                 |                                 |
|------------------------------------------------------------|-------------------------------------|---------------------------------------|-------------------------------------|---------------------------------------|------------------------------|---------------------------------|---------------------------------|---------------------------------|
| Cause                                                      | YLLs (in 1000s)                     |                                       |                                     |                                       | Deaths (in 1000s)            |                                 |                                 |                                 |
|                                                            | 2016                                | 2040 Forecast                         | 2040 Better Scenario                | 2040 Worse Scenario                   | 2016                         | 2040 Forecast                   | 2040 Better Scenario            | 2040 Worse Scenario             |
|                                                            | 1,076.56<br>(976.61 to<br>1,189.42) | 1,657.10<br>(1,084.81 to<br>2,690.81) | 1,466.35<br>(970.97 to<br>2,412.15) | 1,981.97<br>(1,272.03 to<br>3,173.18) | 89.37<br>(82.65 to<br>96.51) | 172.75<br>(120.95 to<br>264.11) | 158.15<br>(111.35 to<br>241.13) | 200.75<br>(136.26 to<br>303.35) |
| Diabetes, urogenital, blood, and endocrine diseases        |                                     |                                       |                                     |                                       |                              |                                 |                                 |                                 |
| Diabetes mellitus                                          | 366.82<br>(304.35 to<br>437.25)     | 433.26<br>(294.45 to<br>632.11)       | 371.88<br>(255.63 to<br>528.29)     | 520.78<br>(342.83 to<br>768.79)       | 25.26<br>(21.55 to<br>29.43) | 38.11<br>(27.21 to<br>51.96)    | 33.86<br>(24.99 to<br>45.14)    | 43.37<br>(30.32 to<br>60.02)    |
| Acute glomerulonephritis                                   | 1.99<br>(1.88 to<br>2.12)           | 1.86<br>(1.40 to<br>2.48)             | 1.75<br>(1.30 to<br>2.33)           | 1.85<br>(1.40 to<br>2.50)             | 0.14<br>(0.13 to<br>0.15)    | 0.17<br>(0.11 to<br>0.26)       | 0.16<br>(0.11 to<br>0.25)       | 0.16<br>(0.11 to<br>0.25)       |
| Chronic kidney disease                                     | 507.92<br>(475.57 to<br>541.19)     | 944.98<br>(439.20 to<br>2,013.59)     | 818.98<br>(395.83 to<br>1,787.13)   | 1,189.35<br>(531.59 to<br>2,393.95)   | 46.10<br>(43.62 to<br>48.48) | 101.54<br>(51.20 to<br>191.88)  | 90.97<br>(47.75 to<br>171.82)   | 125.85<br>(62.56 to<br>233.78)  |
| Chronic kidney disease due to diabetes mellitus            | 298.10<br>(268.24 to<br>329.24)     | 597.39<br>(267.60 to<br>1,337.49)     | 512.53<br>(234.91 to<br>1,171.30)   | 753.42<br>(328.98 to<br>1,611.36)     | 24.29<br>(21.40 to<br>27.38) | 57.75<br>(27.33 to<br>113.79)   | 51.22<br>(25.00 to<br>100.00)   | 71.72<br>(33.20 to<br>136.72)   |
| Chronic kidney disease due to hypertension                 | 70.74<br>(58.91 to<br>84.91)        | 164.07<br>(73.50 to<br>362.75)        | 147.01<br>(67.09 to<br>320.71)      | 201.99<br>(89.44 to<br>425.68)        | 8.97<br>(7.29 to<br>11.09)   | 22.72<br>(11.26 to<br>45.68)    | 20.94<br>(10.52 to<br>42.02)    | 27.64<br>(13.28 to<br>53.90)    |
| Chronic kidney disease due to glomerulonephritis           | 27.89<br>(23.08 to<br>33.44)        | 46.98<br>(20.70 to<br>107.09)         | 39.90<br>(18.13 to<br>93.95)        | 59.80<br>(25.48 to<br>129.43)         | 2.36<br>(1.83 to<br>3.00)    | 4.78<br>(2.23 to<br>10.00)      | 4.16<br>(1.99 to<br>8.67)       | 6.02<br>(2.73 to<br>12.36)      |
| Chronic kidney disease due to other and unspecified causes | 111.19<br>(92.47 to<br>131.69)      | 136.54<br>(70.19 to<br>256.64)        | 119.53<br>(63.40 to<br>222.90)      | 174.14<br>(87.39 to<br>319.67)        | 10.47<br>(8.26 to<br>12.78)  | 16.29<br>(8.54 to<br>28.87)     | 14.65<br>(7.84 to<br>26.21)     | 20.48<br>(10.21 to<br>36.46)    |
| Urinary diseases and male infertility                      | 89.56<br>(84.22 to<br>95.46)        | 130.11<br>(110.87 to<br>152.19)       | 124.13<br>(103.38 to<br>144.65)     | 127.87<br>(108.67 to<br>149.57)       | 9.88<br>(9.30 to<br>10.49)   | 18.06<br>(15.38 to<br>21.12)    | 17.59<br>(14.81 to<br>20.56)    | 17.36<br>(14.67 to<br>20.49)    |
| Urinary tract infections                                   | 71.73<br>(66.51 to<br>79.15)        | 112.93<br>(94.29 to<br>135.80)        | 107.90<br>(88.17 to<br>128.73)      | 110.61<br>(91.04 to<br>131.65)        | 8.13<br>(7.52 to<br>8.99)    | 15.94<br>(13.07 to<br>19.13)    | 15.54<br>(12.68 to<br>18.61)    | 15.30<br>(12.48 to<br>18.54)    |
| Urolithiasis                                               | 7.33<br>(5.89 to<br>10.44)          | 5.75<br>(4.15 to<br>8.44)             | 5.20<br>(3.75 to<br>7.64)           | 5.77<br>(4.20 to<br>8.37)             | 0.74<br>(0.57 to<br>1.09)    | 0.69<br>(0.49 to<br>1.03)       | 0.64<br>(0.45 to<br>0.94)       | 0.68<br>(0.48 to<br>0.98)       |
| Other urinary diseases                                     | 10.51<br>(6.12 to<br>14.51)         | 11.42<br>(5.76 to<br>16.50)           | 11.03<br>(5.40 to<br>16.05)         | 11.49<br>(5.73 to<br>16.55)           | 1.01<br>(0.52 to<br>1.41)    | 1.43<br>(0.68 to<br>2.09)       | 1.41<br>(0.66 to<br>2.08)       | 1.39<br>(0.66 to<br>2.08)       |
| Gynecological diseases                                     | 0.79<br>(0.64 to<br>0.94)           | 0.42<br>(0.33 to<br>0.56)             | 0.36<br>(0.27 to<br>0.47)           | 0.46<br>(0.35 to<br>0.61)             | 0.04<br>(0.04 to<br>0.05)    | 0.04<br>(0.03 to<br>0.05)       | 0.03<br>(0.04 to<br>0.04)       | 0.04<br>(0.03 to<br>0.05)       |
| Uterine fibroids                                           | 0.41<br>(0.30 to<br>0.47)           | 0.21<br>(0.16 to<br>0.28)             | 0.18<br>(0.13 to<br>0.24)           | 0.22<br>(0.16 to<br>0.30)             | 0.02<br>(0.01 to<br>0.02)    | 0.02<br>(0.01 to<br>0.02)       | 0.01<br>(0.01 to<br>0.02)       | 0.02<br>(0.01 to<br>0.02)       |
| Polycystic ovarian syndrome                                | 0.04<br>(0.03 to<br>0.07)           | 0.01<br>(0.01 to<br>0.02)             | 0.01<br>(0.00 to<br>0.01)           | 0.01<br>(0.01 to<br>0.02)             | 0.00<br>(0.00 to<br>0.00)    | 0.00<br>(0.00 to<br>0.00)       | 0.00<br>(0.00 to<br>0.00)       | 0.00<br>(0.00 to<br>0.00)       |
| Endometriosis                                              | 0.03<br>(0.01 to<br>0.05)           | 0.01<br>(0.00 to<br>0.02)             | 0.01<br>(0.00 to<br>0.01)           | 0.01<br>(0.00 to<br>0.02)             | 0.00<br>(0.00 to<br>0.00)    | 0.00<br>(0.00 to<br>0.00)       | 0.00<br>(0.00 to<br>0.00)       | 0.00<br>(0.00 to<br>0.00)       |
| Genital prolapse                                           | 0.05<br>(0.03 to<br>0.06)           | 0.03<br>(0.01 to<br>0.04)             | 0.02<br>(0.01 to<br>0.04)           | 0.03<br>(0.02 to<br>0.05)             | 0.01<br>(0.00 to<br>0.01)    | 0.00<br>(0.00 to<br>0.00)       | 0.00<br>(0.00 to<br>0.00)       | 0.00<br>(0.00 to<br>0.01)       |
| Other gynecological diseases                               | 0.26<br>(0.21 to<br>0.35)           | 0.17<br>(0.12 to<br>0.23)             | 0.14<br>(0.10 to<br>0.19)           | 0.18<br>(0.13 to<br>0.25)             | 0.02<br>(0.01 to<br>0.02)    | 0.02<br>(0.01 to<br>0.03)       | 0.01<br>(0.01 to<br>0.02)       | 0.02<br>(0.01 to<br>0.03)       |
| Hemoglobinopathies and hemolytic anemias                   | 38.72<br>(32.54 to<br>62.20)        | 32.45<br>(24.66 to<br>53.39)          | 29.94<br>(22.77 to<br>49.63)        | 32.60<br>(24.92 to<br>54.37)          | 2.99<br>(2.54 to<br>4.85)    | 3.57<br>(2.78 to<br>5.86)       | 3.35<br>(2.63 to<br>5.55)       | 3.49<br>(2.72 to<br>5.83)       |
| Thalassemias                                               | 5.36<br>(4.51 to<br>8.64)           | 2.61<br>(1.92 to<br>4.75)             | 2.58<br>(1.89 to<br>4.69)           | 2.62<br>(1.94 to<br>4.80)             | 0.11<br>(0.09 to<br>0.19)    | 0.06<br>(0.05 to<br>0.12)       | 0.06<br>(0.05 to<br>0.12)       | 0.06<br>(0.05 to<br>0.12)       |

|                                                   |                              |                                |                                |                                |                           |                             |                              |                             |
|---------------------------------------------------|------------------------------|--------------------------------|--------------------------------|--------------------------------|---------------------------|-----------------------------|------------------------------|-----------------------------|
|                                                   | 1.69<br>(1.36 to<br>2.52)    | 1.31<br>(0.94 to<br>2.09)      | 1.15<br>(0.82 to<br>1.82)      | 1.38<br>(1.00 to<br>2.20)      | 0.04<br>(0.04 to<br>0.07) | 0.05<br>(0.04 to<br>0.08)   | 0.04<br>(0.03 to<br>0.07)    | 0.05<br>(0.04 to<br>0.09)   |
| Sickle cell disorders                             |                              |                                |                                |                                |                           |                             |                              |                             |
|                                                   | 1.37<br>(1.07 to<br>2.03)    | 1.33<br>(0.95 to<br>2.13)      | 1.17<br>(0.84 to<br>1.89)      | 1.42<br>(1.01 to<br>2.26)      | 0.04<br>(0.03 to<br>0.07) | 0.06<br>(0.04 to<br>0.10)   | 0.05<br>(0.04 to<br>0.09)    | 0.06<br>(0.05 to<br>0.10)   |
| G6PD deficiency                                   |                              |                                |                                |                                |                           |                             |                              |                             |
|                                                   | 30.30<br>(25.35 to<br>49.29) | 27.21<br>(20.53 to<br>44.34)   | 25.04<br>(18.93 to<br>41.44)   | 27.18<br>(20.62 to<br>45.86)   | 2.79<br>(2.37 to<br>4.56) | 3.39<br>(2.64 to<br>5.58)   | 3.19<br>(2.50 to<br>5.23)    | 3.31<br>(2.57 to<br>5.50)   |
| Other hemoglobinopathies and hemolytic anemias    |                              |                                |                                |                                |                           |                             |                              |                             |
|                                                   | 70.74<br>(61.48 to<br>87.88) | 114.03<br>(94.25 to<br>140.59) | 119.31<br>(97.56 to<br>146.45) | 109.07<br>(90.65 to<br>136.54) | 4.96<br>(4.34 to<br>6.19) | 11.27<br>(9.41 to<br>13.98) | 12.19<br>(10.23 to<br>14.96) | 10.47<br>(8.78 to<br>13.01) |
| Endocrine, metabolic, blood, and immune disorders |                              |                                |                                |                                |                           |                             |                              |                             |

| High-income Asia Pacific                      |                                     |                                     |                                     |                                     |                               |                                |                                |                                |
|-----------------------------------------------|-------------------------------------|-------------------------------------|-------------------------------------|-------------------------------------|-------------------------------|--------------------------------|--------------------------------|--------------------------------|
| Cause                                         | YLLs (in 1000s)                     |                                     |                                     |                                     | Deaths (in 1000s)             |                                |                                |                                |
|                                               | 2016                                | 2040 Forecast                       | 2040 Better Scenario                | 2040 Worse Scenario                 | 2016                          | 2040 Forecast                  | 2040 Better Scenario           | 2040 Worse Scenario            |
| <b>Musculoskeletal disorders</b>              | <b>78.65</b><br>(68.63 to 94.78)    | <b>96.06</b><br>(72.90 to 116.43)   | <b>89.87</b><br>(67.57 to 109.47)   | <b>97.41</b><br>(74.83 to 119.66)   | <b>5.21</b><br>(4.35 to 5.93) | <b>8.05</b><br>(5.79 to 9.67)  | <b>7.67</b><br>(5.48 to 9.21)  | <b>7.98</b><br>(5.70 to 9.53)  |
| Rheumatoid arthritis                          | 25.76<br>(21.94 to 32.44)           | 33.36<br>(24.83 to 44.97)           | 27.90<br>(20.57 to 37.22)           | 35.51<br>(25.82 to 47.97)           | 1.90<br>(1.64 to 2.43)        | 2.92<br>(2.19 to 3.99)         | 2.47<br>(1.85 to 3.38)         | 3.03<br>(2.27 to 4.23)         |
| Other musculoskeletal disorders               | 52.89<br>(43.18 to 64.84)           | 62.70<br>(44.34 to 76.43)           | 61.98<br>(43.73 to 76.27)           | 61.90<br>(43.75 to 75.53)           | 3.32<br>(2.41 to 3.89)        | 5.14<br>(3.11 to 6.26)         | 5.20<br>(3.16 to 6.38)         | 4.95<br>(3.03 to 6.01)         |
| <b>Other non-communicable diseases</b>        | <b>190.11</b><br>(172.90 to 219.51) | <b>144.17</b><br>(117.39 to 185.45) | <b>130.66</b><br>(106.50 to 168.51) | <b>150.46</b><br>(121.19 to 192.98) | <b>5.16</b><br>(4.18 to 7.54) | <b>8.65</b><br>(6.15 to 14.26) | <b>8.48</b><br>(5.96 to 14.06) | <b>8.41</b><br>(5.99 to 13.73) |
| Congenital birth defects                      | 142.60<br>(129.33 to 166.37)        | 71.00<br>(55.59 to 92.40)           | 59.56<br>(46.77 to 79.39)           | 78.08<br>(59.70 to 104.82)          | 1.96<br>(1.80 to 2.33)        | 1.04<br>(0.83 to 1.35)         | 0.88<br>(0.70 to 1.15)         | 1.13<br>(0.88 to 1.50)         |
| Neural tube defects                           | 1.48<br>(1.14 to 1.77)              | 0.36<br>(0.26 to 0.50)              | 0.29<br>(0.20 to 0.39)              | 0.41<br>(0.29 to 0.57)              | 0.02<br>(0.02 to 0.02)        | 0.01<br>(0.00 to 0.01)         | 0.00<br>(0.00 to 0.01)         | 0.01<br>(0.00 to 0.01)         |
| Congenital heart anomalies                    | 61.77<br>(52.22 to 83.39)           | 24.20<br>(17.26 to 36.38)           | 18.51<br>(13.13 to 27.95)           | 27.62<br>(19.02 to 41.95)           | 0.87<br>(0.74 to 1.20)        | 0.37<br>(0.27 to 0.54)         | 0.28<br>(0.20 to 0.44)         | 0.41<br>(0.29 to 0.64)         |
| Orofacial clefts                              | 0.12<br>(0.08 to 0.20)              | 0.04<br>(0.02 to 0.07)              | 0.03<br>(0.02 to 0.05)              | 0.05<br>(0.03 to 0.09)              | 0.00<br>(0.00 to 0.00)        | 0.00<br>(0.00 to 0.00)         | 0.00<br>(0.00 to 0.00)         | 0.00<br>(0.00 to 0.00)         |
| Down syndrome                                 | 10.15<br>(7.49 to 16.55)            | 8.16<br>(5.76 to 13.54)             | 8.15<br>(5.78 to 13.61)             | 8.20<br>(5.78 to 13.74)             | 0.17<br>(0.13 to 0.24)        | 0.15<br>(0.11 to 0.24)         | 0.15<br>(0.11 to 0.24)         | 0.15<br>(0.11 to 0.24)         |
| Other chromosomal abnormalities               | 28.73<br>(19.58 to 36.50)           | 20.80<br>(14.03 to 29.03)           | 18.35<br>(12.64 to 25.57)           | 22.21<br>(14.92 to 31.45)           | 0.35<br>(0.24 to 0.45)        | 0.26<br>(0.17 to 0.37)         | 0.23<br>(0.16 to 0.32)         | 0.28<br>(0.19 to 0.39)         |
| Congenital musculoskeletal and limb anomalies | 4.20<br>(2.97 to 5.12)              | 1.71<br>(1.11 to 2.44)              | 1.40<br>(0.91 to 2.04)              | 1.95<br>(1.25 to 2.82)              | 0.05<br>(0.04 to 0.06)        | 0.02<br>(0.02 to 0.03)         | 0.02<br>(0.01 to 0.03)         | 0.03<br>(0.02 to 0.04)         |
| Urogenital congenital anomalies               | 3.64<br>(2.63 to 4.94)              | 1.58<br>(1.05 to 2.42)              | 1.30<br>(0.87 to 2.03)              | 1.72<br>(1.15 to 2.73)              | 0.05<br>(0.04 to 0.07)        | 0.03<br>(0.02 to 0.04)         | 0.02<br>(0.02 to 0.03)         | 0.03<br>(0.02 to 0.04)         |
| Digestive congenital anomalies                | 6.41<br>(4.73 to 8.02)              | 3.14<br>(2.04 to 4.67)              | 2.48<br>(1.60 to 3.69)              | 3.56<br>(2.26 to 5.37)              | 0.08<br>(0.06 to 0.10)        | 0.04<br>(0.03 to 0.06)         | 0.03<br>(0.02 to 0.05)         | 0.05<br>(0.03 to 0.07)         |
| Other congenital birth defects                | 26.11<br>(22.50 to 29.74)           | 11.02<br>(8.21 to 14.59)            | 9.05<br>(6.73 to 12.36)             | 12.35<br>(8.99 to 16.91)            | 0.36<br>(0.30 to 0.40)        | 0.16<br>(0.12 to 0.21)         | 0.13<br>(0.10 to 0.17)         | 0.18<br>(0.13 to 0.24)         |
| Skin and subcutaneous diseases                | 31.65<br>(20.29 to 50.48)           | 66.37<br>(44.09 to 105.38)          | 65.19<br>(42.96 to 103.01)          | 64.91<br>(42.19 to 102.58)          | 3.02<br>(1.95 to 5.30)        | 7.53<br>(4.88 to 13.09)        | 7.53<br>(4.94 to 13.12)        | 7.19<br>(4.61 to 12.45)        |
| Cellulitis                                    | 10.75<br>(5.62 to 17.09)            | 22.25<br>(10.79 to 32.99)           | 22.34<br>(10.89 to 33.38)           | 21.58<br>(10.57 to 32.01)           | 0.88<br>(0.44 to 1.49)        | 2.18<br>(1.01 to 3.43)         | 2.24<br>(1.05 to 3.55)         | 2.06<br>(0.97 to 3.31)         |
| Pyoderma                                      | 10.71<br>(7.17 to 20.58)            | 28.90<br>(19.57 to 52.37)           | 28.17<br>(19.16 to 51.26)           | 28.22<br>(19.01 to 51.24)           | 0.93<br>(0.61 to 2.00)        | 3.16<br>(2.15 to 6.32)         | 3.16<br>(2.15 to 6.18)         | 3.01<br>(2.07 to 6.00)         |
| Decubitus ulcer                               | 6.73<br>(3.99 to 9.91)              | 11.09<br>(6.63 to 16.81)            | 10.66<br>(6.39 to 15.77)            | 11.06<br>(6.50 to 17.07)            | 0.85<br>(0.52 to 1.45)        | 1.68<br>(0.99 to 3.02)         | 1.63<br>(0.97 to 2.83)         | 1.63<br>(0.94 to 2.91)         |
| Other skin and subcutaneous diseases          | 3.46<br>(2.16 to 6.24)              | 4.14<br>(2.55 to 8.09)              | 4.03<br>(2.49 to 7.86)              | 4.04<br>(2.49 to 7.86)              | 0.36<br>(0.21 to 0.76)        | 0.51<br>(0.31 to 1.11)         | 0.51<br>(0.31 to 1.10)         | 0.49<br>(0.30 to 1.09)         |
| Sudden infant death syndrome                  | 15.86<br>(12.78 to 19.51)           | 6.79<br>(4.40 to 11.16)             | 5.90<br>(3.77 to 9.80)              | 7.47<br>(4.77 to 12.52)             | 0.18<br>(0.15 to 0.23)        | 0.08<br>(0.05 to 0.13)         | 0.07<br>(0.04 to 0.11)         | 0.09<br>(0.06 to 0.15)         |

|                          |                                       |                                       |                                       |                                       |                                |                               |                               |                                |
|--------------------------|---------------------------------------|---------------------------------------|---------------------------------------|---------------------------------------|--------------------------------|-------------------------------|-------------------------------|--------------------------------|
| Injuries                 | 2,766.62<br>(2,411.33 to<br>3,118.58) | 1,866.73<br>(1,431.39 to<br>2,672.38) | 1,647.74<br>(1,274.33 to<br>2,378.49) | 2,223.65<br>(1,646.13 to<br>3,139.28) | 105.79<br>(93.22 to<br>117.34) | 96.32<br>(78.45 to<br>122.28) | 89.58<br>(73.47 to<br>112.81) | 106.15<br>(83.62 to<br>137.49) |
| Transport injuries       | 514.55<br>(433.89 to<br>607.42)       | 292.58<br>(185.68 to<br>434.42)       | 222.98<br>(146.41 to<br>326.76)       | 498.03<br>(297.01 to<br>781.60)       | 17.68<br>(15.31 to<br>20.56)   | 13.25<br>(9.13 to<br>18.53)   | 10.78<br>(7.58 to<br>14.87)   | 20.43<br>(13.23 to<br>29.73)   |
| Road injuries            | 468.57<br>(394.69 to<br>551.38)       | 250.52<br>(162.24 to<br>372.04)       | 187.24<br>(124.20 to<br>272.88)       | 447.67<br>(271.75 to<br>702.25)       | 16.04<br>(13.91 to<br>18.57)   | 11.36<br>(7.91 to<br>15.90)   | 9.13<br>(6.53 to<br>12.47)    | 18.25<br>(11.92 to<br>26.52)   |
| Pedestrian road injuries | 150.59<br>(122.72 to<br>181.00)       | 59.17<br>(40.91 to<br>81.75)          | 41.53<br>(29.29 to<br>57.39)          | 114.29<br>(73.11 to<br>168.89)        | 6.74<br>(5.69 to<br>7.98)      | 3.80<br>(2.75 to<br>5.10)     | 2.83<br>(2.09 to<br>3.78)     | 6.58<br>(4.44 to<br>9.43)      |

| High-income Asia Pacific                        |                                                      |                                                      |                                                      |                                                      |                                                   |                                                   |                                                   |                                                   |
|-------------------------------------------------|------------------------------------------------------|------------------------------------------------------|------------------------------------------------------|------------------------------------------------------|---------------------------------------------------|---------------------------------------------------|---------------------------------------------------|---------------------------------------------------|
| Cause                                           | YLLs (in 1000s)                                      |                                                      |                                                      |                                                      | Deaths (in 1000s)                                 |                                                   |                                                   |                                                   |
|                                                 | 2016                                                 | 2040 Forecast                                        | 2040 Better Scenario                                 | 2040 Worse Scenario                                  | 2016                                              | 2040 Forecast                                     | 2040 Better Scenario                              | 2040 Worse Scenario                               |
| Cyclist road injuries                           | 37.51<br>(30.55 to<br>43.18)                         | 34.33<br>(23.27 to<br>49.56)                         | 28.31<br>(19.68 to<br>39.89)                         | 49.17<br>(31.73 to<br>74.57)                         | 1.63<br>(1.36 to<br>1.87)                         | 2.00<br>(1.40 to<br>2.81)                         | 1.81<br>(1.29 to<br>2.49)                         | 2.53<br>(1.70 to<br>3.65)                         |
| Motorcyclist road injuries                      | 88.21<br>(65.17 to<br>113.43)                        | 68.92<br>(40.09 to<br>110.85)                        | 56.61<br>(33.74 to<br>88.40)                         | 102.06<br>(55.55 to<br>173.83)                       | 2.35<br>(1.84 to<br>2.93)                         | 2.38<br>(1.48 to<br>3.59)                         | 2.10<br>(1.33 to<br>3.10)                         | 3.20<br>(1.87 to<br>5.08)                         |
| Motor vehicle road injuries                     | 190.55<br>(157.29 to<br>239.50)                      | 86.74<br>(53.76 to<br>136.96)                        | 59.79<br>(37.94 to<br>92.64)                         | 179.30<br>(104.15 to<br>291.57)                      | 5.26<br>(4.42 to<br>6.34)                         | 3.10<br>(2.07 to<br>4.58)                         | 2.33<br>(1.60 to<br>3.38)                         | 5.81<br>(3.66 to<br>8.90)                         |
| Other road injuries                             | 1.72<br>(1.38 to<br>2.32)                            | 1.36<br>(0.84 to<br>2.17)                            | 1.01<br>(0.63 to<br>1.59)                            | 2.86<br>(1.57 to<br>4.88)                            | 0.06<br>(0.05 to<br>0.08)                         | 0.07<br>(0.05 to<br>0.12)                         | 0.06<br>(0.04 to<br>0.10)                         | 0.13<br>(0.08 to<br>0.21)                         |
| Other transport injuries                        | 45.98<br>(38.00 to<br>55.93)                         | 42.05<br>(25.29 to<br>65.11)                         | 35.74<br>(21.99 to<br>54.73)                         | 50.36<br>(28.85 to<br>79.52)                         | 1.65<br>(1.38 to<br>1.98)                         | 1.89<br>(1.19 to<br>2.81)                         | 1.64<br>(1.06 to<br>2.42)                         | 2.18<br>(1.31 to<br>3.33)                         |
| <b>Unintentional injuries</b>                   | <b>709.66</b><br><b>(641.80 to</b><br><b>785.09)</b> | <b>553.20</b><br><b>(472.12 to</b><br><b>640.67)</b> | <b>523.57</b><br><b>(449.61 to</b><br><b>607.86)</b> | <b>565.29</b><br><b>(477.00 to</b><br><b>662.14)</b> | <b>40.81</b><br><b>(36.18 to</b><br><b>44.31)</b> | <b>44.35</b><br><b>(38.51 to</b><br><b>49.95)</b> | <b>43.59</b><br><b>(37.62 to</b><br><b>48.94)</b> | <b>43.20</b><br><b>(37.07 to</b><br><b>49.11)</b> |
| Falls                                           | 232.99<br>(201.28 to<br>269.56)                      | 229.83<br>(195.00 to<br>270.50)                      | 222.89<br>(188.94 to<br>262.20)                      | 229.72<br>(192.22 to<br>271.03)                      | 15.70<br>(13.49 to<br>17.38)                      | 20.92<br>(17.92 to<br>23.68)                      | 20.82<br>(17.68 to<br>23.62)                      | 20.10<br>(17.00 to<br>22.88)                      |
| Drowning                                        | 146.18<br>(136.23 to<br>157.98)                      | 88.74<br>(69.03 to<br>117.50)                        | 79.77<br>(63.23 to<br>103.60)                        | 94.77<br>(71.90 to<br>130.73)                        | 7.50<br>(7.09 to<br>8.00)                         | 5.67<br>(4.49 to<br>7.46)                         | 5.24<br>(4.26 to<br>6.71)                         | 5.81<br>(4.50 to<br>7.80)                         |
| Fire, heat, and hot substances                  | 52.00<br>(46.59 to<br>58.84)                         | 30.75<br>(23.55 to<br>40.62)                         | 26.86<br>(20.91 to<br>34.96)                         | 33.63<br>(25.27 to<br>45.53)                         | 2.70<br>(2.43 to<br>3.01)                         | 2.20<br>(1.72 to<br>2.87)                         | 1.99<br>(1.61 to<br>2.52)                         | 2.29<br>(1.77 to<br>3.08)                         |
| Poisonings                                      | 22.41<br>(18.82 to<br>31.31)                         | 8.53<br>(5.92 to<br>13.23)                           | 7.20<br>(5.07 to<br>11.17)                           | 9.86<br>(6.50 to<br>15.66)                           | 0.78<br>(0.66 to<br>1.05)                         | 0.43<br>(0.32 to<br>0.64)                         | 0.38<br>(0.28 to<br>0.56)                         | 0.47<br>(0.34 to<br>0.72)                         |
| Exposure to mechanical forces                   | 53.72<br>(45.15 to<br>66.60)                         | 32.23<br>(26.03 to<br>40.35)                         | 29.07<br>(23.28 to<br>36.81)                         | 34.51<br>(27.56 to<br>44.08)                         | 1.81<br>(1.54 to<br>2.14)                         | 1.42<br>(1.18 to<br>1.67)                         | 1.33<br>(1.11 to<br>1.57)                         | 1.45<br>(1.19 to<br>1.75)                         |
| Unintentional firearm injuries                  | 4.65<br>(3.06 to<br>5.46)                            | 3.16<br>(1.97 to<br>3.85)                            | 3.04<br>(1.88 to<br>3.74)                            | 3.21<br>(1.97 to<br>3.94)                            | 0.30<br>(0.17 to<br>0.34)                         | 0.29<br>(0.16 to<br>0.35)                         | 0.29<br>(0.17 to<br>0.35)                         | 0.28<br>(0.16 to<br>0.34)                         |
| Unintentional suffocation                       | 6.72<br>(5.66 to<br>9.50)                            | 3.46<br>(2.57 to<br>5.10)                            | 3.09<br>(2.28 to<br>4.58)                            | 3.75<br>(2.75 to<br>5.63)                            | 0.11<br>(0.09 to<br>0.15)                         | 0.07<br>(0.05 to<br>0.09)                         | 0.06<br>(0.05 to<br>0.08)                         | 0.07<br>(0.05 to<br>0.10)                         |
| Other exposure to mechanical forces             | 42.35<br>(34.37 to<br>55.14)                         | 25.61<br>(20.05 to<br>33.44)                         | 22.94<br>(17.71 to<br>30.64)                         | 27.56<br>(21.24 to<br>36.56)                         | 1.41<br>(1.17 to<br>1.75)                         | 1.06<br>(0.88 to<br>1.35)                         | 0.97<br>(0.79 to<br>1.21)                         | 1.10<br>(0.89 to<br>1.39)                         |
| Adverse effects of medical treatment            | 30.00<br>(21.50 to<br>34.73)                         | 25.89<br>(19.07 to<br>31.27)                         | 25.16<br>(18.60 to<br>30.41)                         | 25.83<br>(19.07 to<br>30.97)                         | 1.83<br>(1.30 to<br>2.11)                         | 2.11<br>(1.56 to<br>2.51)                         | 2.12<br>(1.56 to<br>2.52)                         | 2.02<br>(1.48 to<br>2.40)                         |
| Animal contact                                  | 4.03<br>(3.30 to<br>5.23)                            | 4.24<br>(3.39 to<br>5.64)                            | 4.04<br>(3.20 to<br>5.33)                            | 4.38<br>(3.49 to<br>5.74)                            | 0.19<br>(0.16 to<br>0.25)                         | 0.27<br>(0.22 to<br>0.34)                         | 0.26<br>(0.22 to<br>0.33)                         | 0.26<br>(0.22 to<br>0.33)                         |
| Venomous animal contact                         | 2.55<br>(2.03 to<br>3.43)                            | 2.74<br>(2.10 to<br>3.73)                            | 2.65<br>(2.01 to<br>3.57)                            | 2.82<br>(2.15 to<br>3.80)                            | 0.12<br>(0.10 to<br>0.16)                         | 0.17<br>(0.13 to<br>0.22)                         | 0.16<br>(0.13 to<br>0.21)                         | 0.16<br>(0.13 to<br>0.21)                         |
| Non-venomous animal contact                     | 1.48<br>(1.16 to<br>2.01)                            | 1.50<br>(1.16 to<br>1.99)                            | 1.39<br>(1.06 to<br>1.86)                            | 1.56<br>(1.20 to<br>2.06)                            | 0.07<br>(0.05 to<br>0.10)                         | 0.10<br>(0.08 to<br>0.13)                         | 0.09<br>(0.07 to<br>0.13)                         | 0.10<br>(0.08 to<br>0.13)                         |
| Foreign body                                    | 119.27<br>(96.96 to<br>137.30)                       | 103.44<br>(83.23 to<br>120.89)                       | 102.70<br>(82.49 to<br>120.29)                       | 101.11<br>(80.65 to<br>117.57)                       | 8.01<br>(6.14 to<br>9.16)                         | 9.52<br>(7.20 to<br>11.29)                        | 9.83<br>(7.42 to<br>11.59)                        | 8.96<br>(6.73 to<br>10.62)                        |
| Pulmonary aspiration and foreign body in airway | 116.01<br>(94.31 to<br>134.36)                       | 99.76<br>(80.20 to<br>116.66)                        | 98.83<br>(79.21 to<br>115.52)                        | 97.63<br>(77.76 to<br>113.93)                        | 7.82<br>(6.01 to<br>8.95)                         | 9.21<br>(6.97 to<br>10.94)                        | 9.48<br>(7.15 to<br>11.20)                        | 8.67<br>(6.53 to<br>10.29)                        |



|                                             |                                                            |                                                        |                                                        |                                                          |                                                   |                                                   |                                                   |                                                   |
|---------------------------------------------|------------------------------------------------------------|--------------------------------------------------------|--------------------------------------------------------|----------------------------------------------------------|---------------------------------------------------|---------------------------------------------------|---------------------------------------------------|---------------------------------------------------|
|                                             | 3.26<br>(2.11 to<br>3.89)                                  | 3.67<br>(2.18 to<br>4.59)                              | 3.87<br>(2.29 to<br>4.86)                              | 3.48<br>(2.08 to<br>4.32)                                | 0.19<br>(0.11 to<br>0.23)                         | 0.32<br>(0.17 to<br>0.40)                         | 0.35<br>(0.19 to<br>0.44)                         | 0.29<br>(0.15 to<br>0.37)                         |
| Foreign body in other body part             |                                                            |                                                        |                                                        |                                                          |                                                   |                                                   |                                                   |                                                   |
|                                             | 37.06<br>(21.18 to<br>45.29)                               | 25.49<br>(14.64 to<br>33.19)                           | 22.58<br>(13.02 to<br>29.21)                           | 26.68<br>(15.12 to<br>35.01)                             | 1.92<br>(1.01 to<br>2.29)                         | 1.65<br>(0.89 to<br>2.09)                         | 1.50<br>(0.83 to<br>1.89)                         | 1.65<br>(0.90 to<br>2.13)                         |
| Environmental heat and cold exposure        |                                                            |                                                        |                                                        |                                                          |                                                   |                                                   |                                                   |                                                   |
|                                             | 11.98<br>(9.87 to<br>14.71)                                | 4.06<br>(3.08 to<br>5.38)                              | 3.31<br>(2.48 to<br>4.43)                              | 4.81<br>(3.54 to<br>6.62)                                | 0.37<br>(0.31 to<br>0.44)                         | 0.16<br>(0.13 to<br>0.20)                         | 0.13<br>(0.10 to<br>0.17)                         | 0.18<br>(0.14 to<br>0.23)                         |
| Other unintentional injuries                |                                                            |                                                        |                                                        |                                                          |                                                   |                                                   |                                                   |                                                   |
| <b>Self-harm and interpersonal violence</b> | <b>1,541.61</b><br><b>(1,276.56 to</b><br><b>1,780.60)</b> | <b>970.72</b><br><b>(649.07 to</b><br><b>1,451.30)</b> | <b>850.76</b><br><b>(577.92 to</b><br><b>1,238.20)</b> | <b>1,110.45</b><br><b>(696.04 to</b><br><b>1,744.54)</b> | <b>47.28</b><br><b>(39.20 to</b><br><b>54.63)</b> | <b>37.19</b><br><b>(25.29 to</b><br><b>53.90)</b> | <b>33.65</b><br><b>(23.09 to</b><br><b>48.19)</b> | <b>41.04</b><br><b>(26.09 to</b><br><b>62.99)</b> |

| High-income Asia Pacific                                                            |                                                |                                                   |                                                   |                                                   |                                                |                                                 |                                                 |                                                 |
|-------------------------------------------------------------------------------------|------------------------------------------------|---------------------------------------------------|---------------------------------------------------|---------------------------------------------------|------------------------------------------------|-------------------------------------------------|-------------------------------------------------|-------------------------------------------------|
| Cause                                                                               | YLLs (in 1000s)                                |                                                   |                                                   |                                                   | Deaths (in 1000s)                              |                                                 |                                                 |                                                 |
|                                                                                     | 2016                                           | 2040 Forecast                                     | 2040 Better Scenario                              | 2040 Worse Scenario                               | 2016                                           | 2040 Forecast                                   | 2040 Better Scenario                            | 2040 Worse Scenario                             |
| Self-harm                                                                           | 1,479.56<br>(1,228.20 to<br>1,707.73)          | 939.08<br>(620.84 to<br>1,410.13)                 | 822.25<br>(556.07 to<br>1,197.26)                 | 1,074.59<br>(670.00 to<br>1,692.15)               | 45.60<br>(37.97 to<br>53.11)                   | 36.12<br>(24.53 to<br>52.67)                    | 32.67<br>(22.39 to<br>46.78)                    | 39.85<br>(25.20 to<br>61.66)                    |
| Self-harm by firearm                                                                | 8.04<br>(5.79 to<br>10.60)                     | 4.56<br>(2.64 to<br>7.42)                         | 3.93<br>(2.27 to<br>6.21)                         | 5.26<br>(2.82 to<br>9.13)                         | 0.34<br>(0.23 to<br>0.42)                      | 0.25<br>(0.13 to<br>0.41)                       | 0.23<br>(0.12 to<br>0.35)                       | 0.28<br>(0.14 to<br>0.47)                       |
| Self-harm by other specified means                                                  | 1,471.52<br>(1,218.63 to<br>1,697.88)          | 934.52<br>(617.80 to<br>1,403.81)                 | 818.32<br>(553.57 to<br>1,191.20)                 | 1,069.33<br>(667.11 to<br>1,683.69)               | 45.26<br>(37.63 to<br>52.69)                   | 35.86<br>(24.41 to<br>52.39)                    | 32.44<br>(22.28 to<br>46.45)                    | 39.57<br>(25.04 to<br>61.29)                    |
| Interpersonal violence                                                              | 62.05<br>(44.85 to<br>78.79)                   | 31.64<br>(20.52 to<br>45.31)                      | 28.52<br>(18.25 to<br>40.96)                      | 35.87<br>(22.26 to<br>53.70)                      | 1.68<br>(1.14 to<br>2.10)                      | 1.07<br>(0.65 to<br>1.53)                       | 0.98<br>(0.60 to<br>1.40)                       | 1.19<br>(0.70 to<br>1.76)                       |
| Physical violence by firearm                                                        | 2.86<br>(1.82 to<br>4.47)                      | 1.25<br>(0.78 to<br>1.83)                         | 1.10<br>(0.68 to<br>1.58)                         | 1.35<br>(0.83 to<br>1.98)                         | 0.08<br>(0.05 to<br>0.11)                      | 0.04<br>(0.02 to<br>0.06)                       | 0.04<br>(0.02 to<br>0.05)                       | 0.04<br>(0.02 to<br>0.06)                       |
| Physical violence by sharp object                                                   | 15.01<br>(10.73 to<br>19.78)                   | 7.35<br>(4.98 to<br>10.29)                        | 6.71<br>(4.49 to<br>9.34)                         | 8.05<br>(5.42 to<br>11.27)                        | 0.41<br>(0.29 to<br>0.53)                      | 0.24<br>(0.17 to<br>0.33)                       | 0.22<br>(0.16 to<br>0.30)                       | 0.26<br>(0.17 to<br>0.35)                       |
| Physical violence by other means                                                    | 44.18<br>(30.45 to<br>56.47)                   | 23.04<br>(13.68 to<br>34.78)                      | 20.70<br>(12.24 to<br>30.92)                      | 26.47<br>(14.89 to<br>41.74)                      | 1.19<br>(0.76 to<br>1.50)                      | 0.79<br>(0.43 to<br>1.20)                       | 0.72<br>(0.39 to<br>1.09)                       | 0.89<br>(0.46 to<br>1.41)                       |
| <b>Forces of nature, conflict and terrorism, and executions and police conflict</b> | <b>0.81</b><br><b>(0.74 to</b><br><b>0.88)</b> | <b>50.24</b><br><b>(0.70 to</b><br><b>851.39)</b> | <b>50.44</b><br><b>(0.70 to</b><br><b>856.26)</b> | <b>49.87</b><br><b>(0.70 to</b><br><b>841.39)</b> | <b>0.02</b><br><b>(0.02 to</b><br><b>0.02)</b> | <b>1.53</b><br><b>(0.02 to</b><br><b>23.05)</b> | <b>1.57</b><br><b>(0.02 to</b><br><b>23.82)</b> | <b>1.48</b><br><b>(0.02 to</b><br><b>21.98)</b> |
| Exposure to forces of nature                                                        | 0.00<br>(0.00 to<br>0.00)                      | 16.88<br>(0.62 to<br>135.10)                      | 16.95<br>(0.63 to<br>135.34)                      | 16.82<br>(0.62 to<br>135.18)                      | 0.00<br>(0.00 to<br>0.00)                      | 0.59<br>(0.02 to<br>4.21)                       | 0.60<br>(0.02 to<br>4.29)                       | 0.58<br>(0.02 to<br>4.17)                       |
| Conflict and terrorism                                                              | 0.00<br>(0.00 to<br>0.00)                      | 33.36<br>(0.00 to<br>822.02)                      | 33.48<br>(0.00 to<br>827.01)                      | 33.05<br>(0.00 to<br>812.09)                      | 0.00<br>(0.00 to<br>0.00)                      | 0.94<br>(0.00 to<br>22.11)                      | 0.96<br>(0.00 to<br>22.84)                      | 0.90<br>(0.00 to<br>21.05)                      |
| Executions and police conflict                                                      | 0.81<br>(0.74 to<br>0.88)                      | 0.00<br>(0.00 to<br>0.00)                         | 0.00<br>(0.00 to<br>0.00)                         | 0.00<br>(0.00 to<br>0.00)                         | 0.02<br>(0.02 to<br>0.02)                      | 0.00<br>(0.00 to<br>0.00)                       | 0.00<br>(0.00 to<br>0.00)                       | 0.00<br>(0.00 to<br>0.00)                       |

| Brunei                                                            |                                       |                                        |                                       |                                         |                                    |                                    |                                    |                                    |
|-------------------------------------------------------------------|---------------------------------------|----------------------------------------|---------------------------------------|-----------------------------------------|------------------------------------|------------------------------------|------------------------------------|------------------------------------|
| Cause                                                             | YLLs (actual counts)                  |                                        |                                       |                                         | Deaths (actual counts)             |                                    |                                    |                                    |
|                                                                   | 2016                                  | 2040 Forecast                          | 2040 Better Scenario                  | 2040 Worse Scenario                     | 2016                               | 2040 Forecast                      | 2040 Better Scenario               | 2040 Worse Scenario                |
| All causes                                                        | 47,048.17<br>(39,008.82 to 55,907.08) | 84,307.71<br>(60,882.09 to 110,751.80) | 69,721.52<br>(49,971.50 to 91,976.48) | 107,045.84<br>(76,027.31 to 143,404.19) | 1,674.85<br>(1,412.16 to 1,914.24) | 4,612.48<br>(3,605.76 to 5,724.48) | 3,995.84<br>(3,077.56 to 4,927.46) | 5,584.01<br>(4,306.74 to 7,015.95) |
| Communicable, maternal, neonatal, and nutritional diseases        | 4,623.98<br>(4,101.72 to 5,175.26)    | 7,030.54<br>(4,993.17 to 9,520.79)     | 5,960.68<br>(4,227.83 to 8,217.52)    | 8,227.34<br>(5,713.88 to 11,733.64)     | 123.00<br>(105.89 to 141.18)       | 335.91<br>(260.23 to 436.42)       | 306.35<br>(236.73 to 396.43)       | 367.56<br>(275.84 to 502.82)       |
| HIV/AIDS and tuberculosis                                         | 600.58<br>(507.89 to 697.06)          | 626.89<br>(420.98 to 959.44)           | 429.43<br>(290.57 to 604.55)          | 825.36<br>(510.85 to 1,337.18)          | 19.82<br>(16.97 to 22.78)          | 33.33<br>(22.18 to 50.87)          | 23.92<br>(16.17 to 34.48)          | 41.64<br>(25.45 to 68.40)          |
| Tuberculosis                                                      | 435.27<br>(349.09 to 527.67)          | 532.28<br>(336.48 to 853.05)           | 372.48<br>(241.80 to 543.88)          | 688.53<br>(396.44 to 1,176.92)          | 16.14<br>(13.30 to 19.04)          | 31.47<br>(20.43 to 49.60)          | 22.80<br>(14.97 to 33.26)          | 38.76<br>(22.85 to 66.04)          |
| HIV/AIDS                                                          | 165.31<br>(141.11 to 189.48)          | 94.61<br>(42.82 to 165.09)             | 56.95<br>(26.85 to 99.02)             | 136.83<br>(63.23 to 220.53)             | 3.69<br>(3.15 to 4.20)             | 1.86<br>(0.74 to 3.52)             | 1.11<br>(0.47 to 2.20)             | 2.88<br>(1.14 to 5.10)             |
| Diarrhea, lower respiratory, and other common infectious diseases | 1,815.96<br>(1,528.76 to 2,123.17)    | 3,586.39<br>(2,639.16 to 4,834.39)     | 3,157.07<br>(2,360.14 to 4,111.32)    | 4,287.60<br>(3,085.54 to 6,224.76)      | 70.50<br>(58.29 to 86.49)          | 240.08<br>(181.94 to 328.41)       | 224.49<br>(171.18 to 303.41)       | 261.90<br>(192.91 to 365.96)       |
| Diarrheal diseases                                                | 82.00<br>(56.64 to 113.98)            | 324.34<br>(128.27 to 686.93)           | 404.88<br>(196.22 to 747.40)          | 258.48<br>(99.79 to 580.36)             | 2.51<br>(1.54 to 3.89)             | 23.35<br>(7.86 to 48.91)           | 29.73<br>(13.25 to 57.49)          | 16.45<br>(5.60 to 37.69)           |
| Intestinal infectious diseases                                    | 0.97<br>(0.42 to 1.97)                | 1.10<br>(0.46 to 2.30)                 | 1.11<br>(0.47 to 2.31)                | 1.10<br>(0.46 to 2.29)                  | 0.02<br>(0.01 to 0.04)             | 0.03<br>(0.01 to 0.06)             | 0.03<br>(0.01 to 0.06)             | 0.03<br>(0.01 to 0.06)             |
| Typhoid fever                                                     | 0.38<br>(0.12 to 0.93)                | 0.48<br>(0.15 to 1.17)                 | 0.56<br>(0.19 to 1.30)                | 0.43<br>(0.14 to 1.03)                  | 0.01<br>(0.00 to 0.02)             | 0.01<br>(0.00 to 0.03)             | 0.01<br>(0.00 to 0.03)             | 0.01<br>(0.00 to 0.02)             |
| Paratyphoid fever                                                 | 0.33<br>(0.10 to 0.86)                | 0.37<br>(0.09 to 0.98)                 | 0.32<br>(0.08 to 0.88)                | 0.41<br>(0.10 to 1.07)                  | 0.01<br>(0.00 to 0.02)             | 0.01<br>(0.00 to 0.02)             | 0.01<br>(0.00 to 0.02)             | 0.01<br>(0.00 to 0.03)             |
| Other intestinal infectious diseases                              | 0.26<br>(0.10 to 0.55)                | 0.25<br>(0.08 to 0.62)                 | 0.23<br>(0.07 to 0.61)                | 0.26<br>(0.08 to 0.67)                  | 0.01<br>(0.00 to 0.01)             | 0.01<br>(0.00 to 0.02)             | 0.01<br>(0.00 to 0.02)             | 0.01<br>(0.00 to 0.02)             |
| Lower respiratory infections                                      | 1,465.86<br>(1,206.23 to 1,738.63)    | 2,970.52<br>(2,106.54 to 4,160.74)     | 2,501.52<br>(1,764.20 to 3,400.62)    | 3,642.44<br>(2,539.78 to 5,434.56)      | 62.69<br>(51.53 to 78.27)          | 209.40<br>(150.78 to 295.45)       | 187.05<br>(132.74 to 263.56)       | 256.14<br>(168.75 to 337.45)       |
| Upper respiratory infections                                      | 0.70<br>(0.36 to 1.18)                | 0.99<br>(0.29 to 2.56)                 | 0.72<br>(0.20 to 1.96)                | 1.21<br>(0.34 to 3.39)                  | 0.02<br>(0.01 to 0.03)             | 0.04<br>(0.01 to 0.10)             | 0.03<br>(0.01 to 0.08)             | 0.05<br>(0.01 to 0.13)             |
| Otitis media                                                      | 0.30<br>(0.19 to 0.44)                | 0.10<br>(0.05 to 0.19)                 | 0.10<br>(0.05 to 0.21)                | 0.09<br>(0.04 to 0.18)                  | 0.01<br>(0.01 to 0.01)             | 0.00<br>(0.00 to 0.01)             | 0.01<br>(0.00 to 0.01)             | 0.00<br>(0.00 to 0.01)             |
| Meningitis                                                        | 155.29<br>(119.96 to 224.41)          | 111.38<br>(61.58 to 202.67)            | 92.48<br>(49.46 to 168.12)            | 144.28<br>(70.92 to 272.62)             | 3.06<br>(2.32 to 4.72)             | 3.30<br>(2.05 to 5.75)             | 2.87<br>(1.74 to 4.98)             | 3.73<br>(2.13 to 6.66)             |
| Pneumococcal meningitis                                           | 14.67<br>(9.73 to 22.58)              | 11.10<br>(6.54 to 18.91)               | 11.28<br>(6.65 to 19.18)              | 11.37<br>(6.67 to 19.65)                | 0.33<br>(0.22 to 0.53)             | 0.43<br>(0.26 to 0.77)             | 0.45<br>(0.27 to 0.80)             | 0.42<br>(0.25 to 0.73)             |
| H influenzae type B meningitis                                    | 18.13<br>(13.47 to 25.75)             | 29.24<br>(12.28 to 60.14)              | 24.84<br>(11.58 to 49.21)             | 50.62<br>(16.11 to 120.55)              | 0.33<br>(0.25 to 0.50)             | 0.59<br>(0.33 to 1.04)             | 0.55<br>(0.33 to 0.95)             | 0.81<br>(0.37 to 1.64)             |
| Meningococcal meningitis                                          | 55.64<br>(42.06 to 78.48)             | 29.13<br>(14.92 to 54.38)              | 23.31<br>(11.44 to 44.45)             | 33.78<br>(15.70 to 68.40)               | 1.01<br>(0.76 to 1.51)             | 0.83<br>(0.47 to 1.47)             | 0.69<br>(0.37 to 1.20)             | 0.91<br>(0.49 to 1.68)             |
| Other meningitis                                                  | 66.85<br>(50.33 to 99.03)             | 41.91<br>(21.94 to 79.64)              | 33.04<br>(16.36 to 62.14)             | 48.52<br>(23.13 to 99.02)               | 1.38<br>(1.02 to 2.19)             | 1.45<br>(0.84 to 2.75)             | 1.18<br>(0.67 to 2.21)             | 1.59<br>(0.85 to 3.11)             |
| Encephalitis                                                      | 85.46<br>(65.75 to 106.15)            | 136.44<br>(96.26 to 186.58)            | 133.61<br>(93.83 to 185.06)           | 136.19<br>(95.19 to 188.25)             | 1.74<br>(1.36 to 2.19)             | 4.16<br>(3.19 to 5.43)             | 4.20<br>(3.16 to 5.58)             | 3.99<br>(3.09 to 5.20)             |

|                |                            |                              |                            |                              |                           |                           |                           |                           |
|----------------|----------------------------|------------------------------|----------------------------|------------------------------|---------------------------|---------------------------|---------------------------|---------------------------|
| Diphtheria     | 0.26<br>(0.16 to<br>0.39)  | 0.08<br>(0.04 to<br>0.17)    | 0.06<br>(0.03 to<br>0.12)  | 0.19<br>(0.06 to<br>0.54)    | 0.00<br>(0.00 to<br>0.01) | 0.00<br>(0.00 to<br>0.00) | 0.00<br>(0.00 to<br>0.00) | 0.00<br>(0.00 to<br>0.01) |
| Whooping cough | 9.69<br>(0.86 to<br>32.13) | 15.39<br>(1.00 to<br>59.26)  | 4.29<br>(0.30 to<br>15.93) | 60.80<br>(3.99 to<br>226.80) | 0.12<br>(0.01 to<br>0.38) | 0.18<br>(0.01 to<br>0.70) | 0.05<br>(0.00 to<br>0.19) | 0.72<br>(0.05 to<br>2.66) |
| Tetanus        | 8.15<br>(5.83 to<br>13.48) | 1.77<br>(0.98 to<br>3.43)    | 1.38<br>(0.80 to<br>2.80)  | 3.83<br>(1.61 to<br>8.98)    | 0.18<br>(0.13 to<br>0.32) | 0.05<br>(0.03 to<br>0.09) | 0.05<br>(0.03 to<br>0.09) | 0.07<br>(0.04 to<br>0.14) |
| Measles        | 0.23<br>(0.00 to<br>0.54)  | 15.29<br>(0.00 to<br>129.45) | 9.15<br>(0.00 to<br>73.06) | 29.19<br>(0.00 to<br>245.85) | 0.00<br>(0.00 to<br>0.01) | 0.19<br>(0.00 to<br>1.52) | 0.11<br>(0.00 to<br>0.86) | 0.35<br>(0.00 to<br>2.87) |

| Brunei                                                |                                       |                                        |                                        |                                        |                                  |                                   |                                    |                                   |
|-------------------------------------------------------|---------------------------------------|----------------------------------------|----------------------------------------|----------------------------------------|----------------------------------|-----------------------------------|------------------------------------|-----------------------------------|
| Cause                                                 | YLLs (actual counts)                  |                                        |                                        |                                        | Deaths (actual counts)           |                                   |                                    |                                   |
|                                                       | 2016                                  | 2040 Forecast                          | 2040 Better Scenario                   | 2040 Worse Scenario                    | 2016                             | 2040 Forecast                     | 2040 Better Scenario               | 2040 Worse Scenario               |
| Varicella and herpes zoster                           | 7.04<br>(4.58 to<br>10.51)            | 8.99<br>(3.99 to<br>17.57)             | 7.76<br>(3.38 to<br>15.68)             | 9.80<br>(4.10 to<br>20.29)             | 0.15<br>(0.11 to<br>0.20)        | 0.38<br>(0.21 to<br>0.65)         | 0.35<br>(0.18 to<br>0.61)          | 0.37<br>(0.19 to<br>0.65)         |
| <b>Neglected tropical diseases and malaria</b>        | <b>61.20</b><br>(30.27 to<br>111.71)  | <b>294.15</b><br>(156.32 to<br>493.11) | <b>298.99</b><br>(161.35 to<br>493.89) | <b>285.97</b><br>(152.90 to<br>485.95) | <b>1.42</b><br>(0.74 to<br>2.42) | <b>9.58</b><br>(4.82 to<br>14.50) | <b>10.25</b><br>(5.32 to<br>15.36) | <b>8.73</b><br>(4.43 to<br>13.55) |
| Malaria                                               | 0.00<br>(0.00 to<br>0.00)             | 0.00<br>(0.00 to<br>0.00)              | 0.00<br>(0.00 to<br>0.00)              | 0.00<br>(0.00 to<br>0.00)              | 0.00<br>(0.00 to<br>0.00)        | 0.00<br>(0.00 to<br>0.00)         | 0.00<br>(0.00 to<br>0.00)          | 0.00<br>(0.00 to<br>0.00)         |
| Chagas disease                                        | 0.00<br>(0.00 to<br>0.00)             | 0.00<br>(0.00 to<br>0.00)              | 0.00<br>(0.00 to<br>0.00)              | 0.00<br>(0.00 to<br>0.00)              | 0.00<br>(0.00 to<br>0.00)        | 0.00<br>(0.00 to<br>0.00)         | 0.00<br>(0.00 to<br>0.00)          | 0.00<br>(0.00 to<br>0.00)         |
| Leishmaniasis                                         | 0.00<br>(0.00 to<br>0.00)             | 0.00<br>(0.00 to<br>0.00)              | 0.00<br>(0.00 to<br>0.00)              | 0.00<br>(0.00 to<br>0.00)              | 0.00<br>(0.00 to<br>0.00)        | 0.00<br>(0.00 to<br>0.00)         | 0.00<br>(0.00 to<br>0.00)          | 0.00<br>(0.00 to<br>0.00)         |
| African trypanosomiasis                               | 0.00<br>(0.00 to<br>0.00)             | 0.00<br>(0.00 to<br>0.00)              | 0.00<br>(0.00 to<br>0.00)              | 0.00<br>(0.00 to<br>0.00)              | 0.00<br>(0.00 to<br>0.00)        | 0.00<br>(0.00 to<br>0.00)         | 0.00<br>(0.00 to<br>0.00)          | 0.00<br>(0.00 to<br>0.00)         |
| Schistosomiasis                                       | 0.00<br>(0.00 to<br>0.00)             | 0.00<br>(0.00 to<br>0.00)              | 0.00<br>(0.00 to<br>0.00)              | 0.00<br>(0.00 to<br>0.00)              | 0.00<br>(0.00 to<br>0.00)        | 0.00<br>(0.00 to<br>0.00)         | 0.00<br>(0.00 to<br>0.00)          | 0.00<br>(0.00 to<br>0.00)         |
| Cysticercosis                                         | 0.00<br>(0.00 to<br>0.00)             | 0.00<br>(0.00 to<br>0.00)              | 0.00<br>(0.00 to<br>0.00)              | 0.00<br>(0.00 to<br>0.00)              | 0.00<br>(0.00 to<br>0.00)        | 0.00<br>(0.00 to<br>0.00)         | 0.00<br>(0.00 to<br>0.00)          | 0.00<br>(0.00 to<br>0.00)         |
| Cystic echinococcosis                                 | 0.09<br>(0.07 to<br>0.12)             | 0.14<br>(0.10 to<br>0.21)              | 0.12<br>(0.09 to<br>0.16)              | 0.15<br>(0.11 to<br>0.22)              | 0.00<br>(0.00 to<br>0.00)        | 0.01<br>(0.00 to<br>0.01)         | 0.01<br>(0.00 to<br>0.01)          | 0.01<br>(0.00 to<br>0.01)         |
| Dengue                                                | 50.89<br>(21.47 to<br>101.14)         | 266.74<br>(130.14 to<br>463.41)        | 269.45<br>(133.70 to<br>460.68)        | 260.60<br>(124.93 to<br>456.74)        | 1.10<br>(0.45 to<br>2.07)        | 8.19<br>(3.58 to<br>13.12)        | 8.68<br>(3.95 to<br>13.75)         | 7.54<br>(3.28 to<br>12.17)        |
| Yellow fever                                          | 0.00<br>(0.00 to<br>0.00)             | 0.00<br>(0.00 to<br>0.00)              | 0.00<br>(0.00 to<br>0.00)              | 0.00<br>(0.00 to<br>0.00)              | 0.00<br>(0.00 to<br>0.00)        | 0.00<br>(0.00 to<br>0.00)         | 0.00<br>(0.00 to<br>0.00)          | 0.00<br>(0.00 to<br>0.00)         |
| Rabies                                                | 0.53<br>(0.29 to<br>1.47)             | 1.06<br>(0.49 to<br>3.43)              | 0.97<br>(0.45 to<br>3.27)              | 1.12<br>(0.51 to<br>3.73)              | 0.01<br>(0.01 to<br>0.03)        | 0.05<br>(0.02 to<br>0.10)         | 0.05<br>(0.02 to<br>0.10)          | 0.04<br>(0.02 to<br>0.09)         |
| Intestinal nematode infections                        | 0.35<br>(0.13 to<br>0.68)             | 0.63<br>(0.25 to<br>1.31)              | 0.61<br>(0.25 to<br>1.28)              | 0.63<br>(0.24 to<br>1.33)              | 0.01<br>(0.00 to<br>0.01)        | 0.01<br>(0.01 to<br>0.03)         | 0.01<br>(0.01 to<br>0.03)          | 0.01<br>(0.01 to<br>0.02)         |
| Other neglected tropical diseases                     | 9.33<br>(6.90 to<br>12.77)            | 25.57<br>(16.50 to<br>35.96)           | 27.83<br>(17.18 to<br>39.21)           | 23.46<br>(15.36 to<br>32.76)           | 0.30<br>(0.19 to<br>0.39)        | 1.32<br>(0.55 to<br>1.84)         | 1.51<br>(0.62 to<br>2.11)          | 1.13<br>(0.49 to<br>1.59)         |
| <b>Maternal disorders</b>                             | <b>127.35</b><br>(89.05 to<br>185.75) | <b>107.40</b><br>(67.20 to<br>170.13)  | <b>91.85</b><br>(57.49 to<br>142.09)   | <b>118.97</b><br>(70.97 to<br>189.62)  | <b>2.34</b><br>(1.64 to<br>3.46) | <b>2.01</b><br>(1.24 to<br>3.17)  | <b>1.72</b><br>(1.07 to<br>2.68)   | <b>2.22</b><br>(1.32 to<br>3.55)  |
| Maternal hemorrhage                                   | 21.21<br>(14.06 to<br>39.92)          | 19.61<br>(10.04 to<br>36.63)           | 16.94<br>(9.03 to<br>31.59)            | 21.48<br>(10.97 to<br>40.35)           | 0.45<br>(0.26 to<br>0.74)        | 0.37<br>(0.19 to<br>0.68)         | 0.32<br>(0.17 to<br>0.60)          | 0.40<br>(0.21 to<br>0.76)         |
| Maternal sepsis and other maternal infections         | 3.81<br>(1.57 to<br>7.52)             | 2.87<br>(1.07 to<br>6.16)              | 2.45<br>(0.93 to<br>5.45)              | 3.16<br>(1.16 to<br>7.02)              | 0.07<br>(0.03 to<br>0.14)        | 0.06<br>(0.02 to<br>0.12)         | 0.05<br>(0.02 to<br>0.10)          | 0.06<br>(0.02 to<br>0.13)         |
| Maternal hypertensive disorders                       | 13.32<br>(7.32 to<br>22.59)           | 10.51<br>(5.27 to<br>19.93)            | 8.93<br>(4.36 to<br>16.82)             | 11.63<br>(5.44 to<br>22.49)            | 0.24<br>(0.13 to<br>0.41)        | 0.19<br>(0.09 to<br>0.37)         | 0.17<br>(0.08 to<br>0.31)          | 0.21<br>(0.10 to<br>0.42)         |
| Maternal obstructed labor and uterine rupture         | 3.80<br>(1.52 to<br>8.30)             | 3.42<br>(1.23 to<br>8.05)              | 2.84<br>(1.04 to<br>6.75)              | 3.84<br>(1.36 to<br>9.43)              | 0.07<br>(0.03 to<br>0.15)        | 0.07<br>(0.02 to<br>0.15)         | 0.05<br>(0.02 to<br>0.13)          | 0.07<br>(0.03 to<br>0.18)         |
| Maternal abortion, miscarriage, and ectopic pregnancy | 4.29<br>(1.64 to<br>8.16)             | 4.24<br>(1.53 to<br>9.32)              | 3.59<br>(1.27 to<br>7.78)              | 4.68<br>(1.61 to<br>10.47)             | 0.08<br>(0.03 to<br>0.15)        | 0.08<br>(0.03 to<br>0.18)         | 0.07<br>(0.03 to<br>0.15)          | 0.09<br>(0.03 to<br>0.20)         |



| Brunei                                                                  |                                           |                                         |                                         |                                         |                                  |                                  |                                  |                                  |
|-------------------------------------------------------------------------|-------------------------------------------|-----------------------------------------|-----------------------------------------|-----------------------------------------|----------------------------------|----------------------------------|----------------------------------|----------------------------------|
| Cause                                                                   | YLLs (actual counts)                      |                                         |                                         |                                         | Deaths (actual counts)           |                                  |                                  |                                  |
|                                                                         | 2016                                      | 2040 Forecast                           | 2040 Better Scenario                    | 2040 Worse Scenario                     | 2016                             | 2040 Forecast                    | 2040 Better Scenario             | 2040 Worse Scenario              |
| <b>Neonatal disorders</b>                                               | <b>1,659.54</b><br>(1,434.72 to 1,925.89) | <b>1,677.88</b><br>(772.00 to 2,979.86) | <b>1,280.46</b><br>(571.18 to 2,331.15) | <b>1,963.56</b><br>(867.47 to 3,578.75) | <b>19.19</b><br>(16.59 to 22.27) | <b>19.41</b><br>(8.93 to 34.46)  | <b>14.81</b><br>(6.61 to 26.96)  | <b>22.71</b><br>(10.03 to 41.39) |
| Neonatal preterm birth                                                  | 701.28<br>(561.73 to 865.04)              | 658.54<br>(276.38 to 1,244.99)          | 401.13<br>(154.04 to 787.28)            | 781.64<br>(303.54 to 1,584.51)          | 8.11<br>(6.49 to 10.00)          | 7.61<br>(3.19 to 14.39)          | 4.64<br>(1.78 to 9.10)           | 9.04<br>(3.51 to 18.31)          |
| Neonatal encephalopathy due to birth asphyxia and trauma                | 323.64<br>(230.60 to 436.60)              | 211.71<br>(88.34 to 411.41)             | 163.86<br>(64.46 to 329.41)             | 263.43<br>(525.52)                      | 3.74<br>(2.67 to 5.05)           | 2.45<br>(1.02 to 4.76)           | 1.90<br>(0.75 to 3.81)           | 3.05<br>(1.15 to 6.08)           |
| Neonatal sepsis and other neonatal infections                           | 256.68<br>(182.52 to 404.77)              | 322.26<br>(128.18 to 610.24)            | 266.20<br>(101.49 to 537.80)            | 383.93<br>(143.37 to 780.29)            | 2.97<br>(2.11 to 4.68)           | 3.73<br>(1.48 to 7.05)           | 3.08<br>(1.17 to 6.22)           | 4.44<br>(1.66 to 9.02)           |
| Hemolytic disease and other neonatal jaundice                           | 6.16<br>(3.74 to 10.01)                   | 3.07<br>(1.02 to 7.62)                  | 2.49<br>(0.76 to 6.32)                  | 3.67<br>(1.12 to 9.20)                  | 0.07<br>(0.04 to 0.12)           | 0.07<br>(0.01 to 0.09)           | 0.03<br>(0.01 to 0.07)           | 0.04<br>(0.01 to 0.11)           |
| Other neonatal disorders                                                | 371.78<br>(262.17 to 491.27)              | 482.31<br>(217.86 to 893.72)            | 446.78<br>(199.23 to 809.26)            | 530.90<br>(237.47 to 975.62)            | 4.30<br>(3.03 to 5.68)           | 5.58<br>(2.52 to 10.33)          | 5.17<br>(2.30 to 9.37)           | 6.14<br>(2.75 to 11.28)          |
| <b>Nutritional deficiencies</b>                                         | <b>24.39</b><br>(19.73 to 29.45)          | <b>58.33</b><br>(46.49 to 72.05)        | <b>58.83</b><br>(46.03 to 72.81)        | <b>55.88</b><br>(43.90 to 69.47)        | <b>0.97</b><br>(0.82 to 1.13)    | <b>4.04</b><br>(3.11 to 5.20)    | <b>4.23</b><br>(3.24 to 5.45)    | <b>3.68</b><br>(2.83 to 4.83)    |
| Protein-energy malnutrition                                             | 8.20<br>(6.34 to 10.18)                   | 20.98<br>(15.87 to 26.41)               | 23.42<br>(17.88 to 29.38)               | 18.72<br>(14.06 to 23.94)               | 0.32<br>(0.26 to 0.38)           | 1.44<br>(1.05 to 1.89)           | 1.67<br>(1.24 to 2.18)           | 1.22<br>(0.86 to 1.62)           |
| Iodine deficiency                                                       | 0.88<br>(0.09 to 2.26)                    | 3.27<br>(0.22 to 9.26)                  | 3.17<br>(0.19 to 9.34)                  | 3.22<br>(0.22 to 9.18)                  | 0.03<br>(0.00 to 0.08)           | 0.20<br>(0.01 to 0.80)           | 0.20<br>(0.01 to 0.79)           | 0.19<br>(0.01 to 0.73)           |
| Dietary iron deficiency                                                 | 2.32<br>(1.77 to 3.05)                    | 3.24<br>(2.28 to 4.54)                  | 3.32<br>(2.31 to 4.65)                  | 3.14<br>(2.22 to 4.33)                  | 0.05<br>(0.04 to 0.06)           | 0.09<br>(0.06 to 0.12)           | 0.09<br>(0.06 to 0.12)           | 0.08<br>(0.06 to 0.11)           |
| Other nutritional deficiencies                                          | 12.99<br>(10.14 to 16.10)                 | 30.84<br>(21.46 to 43.04)               | 28.93<br>(19.43 to 40.89)               | 30.80<br>(21.32 to 43.16)               | 0.58<br>(0.47 to 0.69)           | 2.31<br>(1.50 to 3.34)           | 2.26<br>(1.42 to 3.42)           | 2.19<br>(1.42 to 3.29)           |
| <b>Other communicable, maternal, neonatal, and nutritional diseases</b> | <b>334.97</b><br>(260.75 to 405.63)       | <b>679.50</b><br>(431.13 to 1,004.90)   | <b>644.05</b><br>(400.06 to 980.10)     | <b>689.99</b><br>(419.46 to 1,063.80)   | <b>8.75</b><br>(6.97 to 10.58)   | <b>27.47</b><br>(18.91 to 39.33) | <b>26.64</b><br>(17.92 to 38.86) | <b>26.68</b><br>(17.57 to 38.86) |
| Sexually transmitted infections excluding HIV                           | 12.54<br>(7.96 to 19.74)                  | 10.35<br>(5.94 to 17.44)                | 9.62<br>(5.55 to 16.14)                 | 10.73<br>(5.95 to 18.55)                | 0.32<br>(0.23 to 0.43)           | 0.48<br>(0.30 to 0.74)           | 0.47<br>(0.29 to 0.74)           | 0.47<br>(0.29 to 0.73)           |
| Syphilis                                                                | 5.76<br>(2.45 to 11.87)                   | 3.58<br>(1.53 to 7.69)                  | 3.07<br>(1.33 to 6.58)                  | 3.97<br>(1.53 to 9.44)                  | 0.11<br>(0.07 to 0.19)           | 0.13<br>(0.07 to 0.25)           | 0.12<br>(0.07 to 0.21)           | 0.14<br>(0.07 to 0.25)           |
| Chlamydial infection                                                    | 1.30<br>(0.86 to 1.82)                    | 1.30<br>(0.81 to 1.99)                  | 1.26<br>(0.77 to 1.95)                  | 1.29<br>(0.80 to 2.02)                  | 0.04<br>(0.03 to 0.05)           | 0.07<br>(0.05 to 0.10)           | 0.07<br>(0.04 to 0.11)           | 0.07<br>(0.04 to 0.10)           |
| Gonococcal infection                                                    | 3.64<br>(2.50 to 5.01)                    | 3.83<br>(2.35 to 5.85)                  | 3.71<br>(2.21 to 5.73)                  | 3.81<br>(2.35 to 5.86)                  | 0.11<br>(0.08 to 0.15)           | 0.21<br>(0.13 to 0.31)           | 0.21<br>(0.13 to 0.32)           | 0.20<br>(0.12 to 0.30)           |
| Other sexually transmitted infections                                   | 1.85<br>(1.24 to 2.58)                    | 1.64<br>(0.98 to 2.54)                  | 1.57<br>(0.93 to 2.51)                  | 1.65<br>(0.98 to 2.58)                  | 0.05<br>(0.04 to 0.07)           | 0.07<br>(0.05 to 0.11)           | 0.07<br>(0.04 to 0.11)           | 0.07<br>(0.04 to 0.11)           |
| Acute hepatitis                                                         | 56.19<br>(42.06 to 73.89)                 | 117.61<br>(51.38 to 238.44)             | 96.50<br>(39.27 to 208.40)              | 132.22<br>(52.71 to 281.96)             | 1.55<br>(1.18 to 2.03)           | 4.56<br>(2.11 to 9.20)           | 3.81<br>(1.58 to 8.24)           | 5.00<br>(2.04 to 10.67)          |
| Acute hepatitis A                                                       | 5.62<br>(3.76 to 8.24)                    | 7.43<br>(2.66 to 15.63)                 | 6.24<br>(2.16 to 13.68)                 | 8.40<br>(2.84 to 19.20)                 | 0.09<br>(0.06 to 0.12)           | 0.17<br>(0.07 to 0.35)           | 0.14<br>(0.06 to 0.30)           | 0.18<br>(0.07 to 0.37)           |
| Acute hepatitis B                                                       | 44.15<br>(32.05 to 61.06)                 | 94.57<br>(41.39 to 196.78)              | 77.24<br>(29.99 to 170.72)              | 106.63<br>(41.23 to 229.07)             | 1.27<br>(0.94 to 1.73)           | 3.65<br>(1.64 to 7.56)           | 3.02<br>(1.24 to 6.56)           | 4.03<br>(1.60 to 8.71)           |





| Brunei                               |                                             |                                              |                                              |                                              |                                     |                                         |                                         |                                           |
|--------------------------------------|---------------------------------------------|----------------------------------------------|----------------------------------------------|----------------------------------------------|-------------------------------------|-----------------------------------------|-----------------------------------------|-------------------------------------------|
| Cause                                | YLLs (actual counts)                        |                                              |                                              |                                              | Deaths (actual counts)              |                                         |                                         |                                           |
|                                      | 2016                                        | 2040 Forecast                                | 2040 Better Scenario                         | 2040 Worse Scenario                          | 2016                                | 2040 Forecast                           | 2040 Better Scenario                    | 2040 Worse Scenario                       |
| <b>Neoplasms</b>                     | <b>11,516.23</b><br>(9,367.70 to 13,761.29) | <b>23,322.08</b><br>(16,942.15 to 30,798.89) | <b>20,885.45</b><br>(15,363.72 to 27,444.66) | <b>28,630.19</b><br>(20,586.01 to 39,279.31) | <b>411.94</b><br>(344.40 to 479.73) | <b>1,134.65</b><br>(883.13 to 1,428.25) | <b>1,031.89</b><br>(796.73 to 1,287.43) | <b>1,372.65</b><br>(1,052.06 to 1,774.60) |
| Lip and oral cavity cancer           | 277.18<br>(216.74 to 346.83)                | 557.72<br>(368.22 to 860.96)                 | 478.63<br>(317.36 to 717.83)                 | 763.77<br>(458.70 to 1,242.13)               | 9.75<br>(7.90 to 11.72)             | 25.18<br>(17.66 to 35.84)               | 21.88<br>(15.49 to 30.36)               | 33.84<br>(21.87 to 50.64)                 |
| Nasopharynx cancer                   | 237.16<br>(180.62 to 303.63)                | 442.05<br>(251.82 to 758.38)                 | 358.34<br>(211.81 to 585.52)                 | 635.80<br>(339.92 to 1,166.87)               | 7.30<br>(5.67 to 9.06)              | 16.92<br>(10.32 to 26.51)               | 13.88<br>(8.73 to 20.96)                | 24.04<br>(13.89 to 39.38)                 |
| Other pharynx cancer                 | 153.78<br>(117.81 to 195.74)                | 352.94<br>(236.27 to 502.74)                 | 358.78<br>(242.32 to 500.53)                 | 352.83<br>(226.79 to 476.34)                 | 5.70<br>(4.44 to 7.08)              | 16.02<br>(11.20 to 22.34)               | 16.53<br>(11.87 to 22.57)               | 14.80<br>(10.43 to 20.55)                 |
| Esophageal cancer                    | 143.74<br>(112.90 to 174.97)                | 402.45<br>(237.84 to 621.87)                 | 353.34<br>(215.33 to 537.75)                 | 513.45<br>(290.22 to 840.20)                 | 5.79<br>(4.71 to 6.87)              | 19.26<br>(12.11 to 28.73)               | 17.03<br>(11.17 to 24.61)               | 24.33<br>(14.47 to 38.15)                 |
| Stomach cancer                       | 801.19<br>(633.14 to 968.12)                | 1,186.42<br>(805.89 to 1,714.72)             | 1,000.08<br>(676.44 to 1,416.42)             | 1,363.31<br>(901.90 to 1,978.03)             | 30.44<br>(24.81 to 35.70)           | 60.14<br>(43.13 to 84.22)               | 51.66<br>(36.80 to 70.66)               | 67.36<br>(47.62 to 93.53)                 |
| Colon and rectum cancer              | 1,385.89<br>(1,113.26 to 1,686.00)          | 2,999.15<br>(1,883.15 to 4,723.83)           | 2,626.32<br>(1,663.42 to 4,077.18)           | 3,324.32<br>(2,073.20 to 5,267.58)           | 53.67<br>(44.09 to 63.19)           | 155.99<br>(101.55 to 233.65)            | 139.52<br>(90.51 to 211.85)             | 168.08<br>(107.50 to 257.89)              |
| Liver cancer                         | 825.86<br>(641.63 to 1,020.99)              | 2,721.94<br>(1,727.47 to 4,237.60)           | 2,641.31<br>(1,737.59 to 3,901.12)           | 2,960.80<br>(1,799.36 to 4,771.51)           | 31.27<br>(24.95 to 38.01)           | 127.66<br>(86.16 to 186.51)             | 126.07<br>(88.64 to 176.15)             | 136.01<br>(87.33 to 207.85)               |
| Liver cancer due to hepatitis B      | 412.58<br>(305.85 to 535.29)                | 1,177.91<br>(705.35 to 1,925.78)             | 1,136.70<br>(705.10 to 1,807.95)             | 1,284.86<br>(734.11 to 2,161.89)             | 13.87<br>(10.41 to 17.66)           | 48.80<br>(30.72 to 75.16)               | 47.83<br>(31.05 to 70.85)               | 52.24<br>(30.70 to 83.89)                 |
| Liver cancer due to hepatitis C      | 260.24<br>(191.57 to 337.47)                | 985.16<br>(629.09 to 1,532.11)               | 962.12<br>(636.38 to 1,426.46)               | 1,054.81<br>(642.48 to 1,706.09)             | 11.28<br>(8.65 to 14.31)            | 51.53<br>(34.26 to 76.40)               | 51.22<br>(35.11 to 73.12)               | 53.99<br>(34.56 to 84.48)                 |
| Liver cancer due to alcohol use      | 41.75<br>(29.11 to 56.86)                   | 151.24<br>(85.42 to 247.93)                  | 145.91<br>(86.06 to 232.77)                  | 164.72<br>(90.17 to 287.13)                  | 1.65<br>(1.17 to 2.24)              | 7.12<br>(4.26 to 11.45)                 | 6.99<br>(4.35 to 10.67)                 | 7.60<br>(4.33 to 12.77)                   |
| Liver cancer due to other causes     | 111.30<br>(82.83 to 143.72)                 | 407.63<br>(228.38 to 695.69)                 | 396.59<br>(233.33 to 652.95)                 | 456.41<br>(247.97 to 806.63)                 | 4.47<br>(3.37 to 5.61)              | 20.21<br>(11.86 to 33.57)               | 20.03<br>(12.17 to 31.88)               | 22.18<br>(12.55 to 37.93)                 |
| Gallbladder and biliary tract cancer | 168.08<br>(132.99 to 206.82)                | 328.73<br>(249.97 to 418.64)                 | 329.24<br>(247.59 to 420.28)                 | 316.47<br>(243.72 to 402.52)                 | 7.50<br>(6.07 to 9.05)              | 18.85<br>(15.04 to 23.59)               | 19.28<br>(15.26 to 24.02)               | 17.62<br>(14.14 to 21.96)                 |
| Pancreatic cancer                    | 329.73<br>(268.56 to 394.08)                | 891.90<br>(620.31 to 1,252.82)               | 896.61<br>(620.24 to 1,269.26)               | 970.20<br>(662.70 to 1,414.01)               | 13.44<br>(11.17 to 15.73)           | 45.02<br>(32.85 to 61.47)               | 45.88<br>(33.16 to 62.59)               | 48.12<br>(34.60 to 68.30)                 |
| Larynx cancer                        | 59.46<br>(47.21 to 72.11)                   | 142.87<br>(76.55 to 255.26)                  | 109.20<br>(62.05 to 194.37)                  | 236.11<br>(118.20 to 408.98)                 | 2.63<br>(2.13 to 3.10)              | 7.68<br>(4.29 to 13.44)                 | 5.95<br>(3.44 to 10.55)                 | 12.44<br>(6.60 to 20.50)                  |
| Tracheal, bronchus, and lung cancer  | 1,852.61<br>(1,497.22 to 2,216.03)          | 4,186.01<br>(2,663.98 to 6,190.90)           | 3,180.58<br>(2,062.27 to 4,611.36)           | 7,669.82<br>(4,673.47 to 11,741.02)          | 79.50<br>(65.81 to 92.62)           | 225.92<br>(152.25 to 320.41)            | 173.79<br>(119.60 to 245.65)            | 403.70<br>(263.78 to 605.33)              |
| Malignant skin melanoma              | 63.30<br>(46.00 to 84.56)                   | 124.88<br>(84.32 to 171.02)                  | 141.83<br>(97.62 to 192.96)                  | 112.34<br>(75.26 to 152.98)                  | 1.90<br>(1.40 to 2.45)              | 5.19<br>(3.68 to 6.72)                  | 6.03<br>(4.42 to 7.77)                  | 4.53<br>(3.12 to 5.81)                    |
| Non-melanoma skin cancer             | 34.10<br>(26.91 to 42.45)                   | 87.86<br>(64.54 to 116.06)                   | 79.09<br>(56.59 to 105.33)                   | 89.83<br>(63.05 to 121.65)                   | 1.46<br>(1.21 to 1.71)              | 5.32<br>(4.25 to 6.66)                  | 4.95<br>(3.87 to 6.24)                  | 5.20<br>(3.97 to 6.92)                    |
| Breast cancer                        | 1,079.89<br>(760.87 to 1,464.94)            | 1,412.16<br>(850.01 to 2,258.97)             | 1,249.30<br>(755.38 to 1,938.31)             | 1,597.21<br>(911.38 to 2,607.03)             | 31.96<br>(22.58 to 42.52)           | 54.81<br>(34.83 to 84.02)               | 49.11<br>(31.30 to 74.55)               | 61.08<br>(36.18 to 98.91)                 |
| Cervical cancer                      | 449.89<br>(268.84 to 641.56)                | 501.26<br>(264.73 to 790.08)                 | 424.71<br>(235.30 to 650.63)                 | 575.26<br>(298.06 to 953.14)                 | 13.42<br>(8.35 to 18.43)            | 19.63<br>(11.55 to 29.17)               | 16.84<br>(10.04 to 24.31)               | 22.12<br>(12.24 to 34.22)                 |

|                   |                                 |                                   |                                   |                                   |                             |                              |                              |                              |
|-------------------|---------------------------------|-----------------------------------|-----------------------------------|-----------------------------------|-----------------------------|------------------------------|------------------------------|------------------------------|
|                   | 75.94<br>(53.50 to<br>100.79)   | 175.50<br>(121.03 to<br>237.76)   | 161.97<br>(110.53 to<br>216.82)   | 181.46<br>(123.12 to<br>250.86)   | 2.81<br>(2.05 to<br>3.57)   | 8.79<br>(6.50 to<br>11.30)   | 8.27<br>(6.03 to<br>10.65)   | 8.88<br>(6.47 to<br>11.74)   |
| Uterine cancer    |                                 |                                   |                                   |                                   |                             |                              |                              |                              |
|                   | 352.14<br>(243.12 to<br>477.63) | 512.42<br>(325.70 to<br>789.30)   | 470.45<br>(302.75 to<br>715.19)   | 552.84<br>(344.20 to<br>872.74)   | 11.03<br>(7.77 to<br>14.32) | 22.37<br>(15.03 to<br>32.95) | 20.72<br>(14.01 to<br>30.87) | 23.81<br>(15.81 to<br>36.64) |
| Ovarian cancer    |                                 |                                   |                                   |                                   |                             |                              |                              |                              |
|                   | 201.01<br>(147.41 to<br>266.88) | 834.28<br>(601.66 to<br>1,103.22) | 812.35<br>(568.65 to<br>1,103.28) | 809.04<br>(580.62 to<br>1,095.00) | 12.33<br>(9.20 to<br>16.01) | 59.15<br>(43.61 to<br>76.90) | 59.02<br>(42.95 to<br>77.28) | 55.37<br>(40.38 to<br>73.62) |
| Prostate cancer   |                                 |                                   |                                   |                                   |                             |                              |                              |                              |
|                   | 33.90<br>(22.14 to<br>51.89)    | 27.08<br>(14.63 to<br>48.34)      | 23.99<br>(12.79 to<br>42.43)      | 28.87<br>(14.61 to<br>52.47)      | 0.66<br>(0.44 to<br>0.98)   | 0.62<br>(0.37 to<br>1.04)    | 0.56<br>(0.33 to<br>0.92)    | 0.65<br>(0.37 to<br>1.10)    |
| Testicular cancer |                                 |                                   |                                   |                                   |                             |                              |                              |                              |

| Brunei                          |                                                    |                                                    |                                                    |                                                     |                                            |                                                |                                              |                                                |
|---------------------------------|----------------------------------------------------|----------------------------------------------------|----------------------------------------------------|-----------------------------------------------------|--------------------------------------------|------------------------------------------------|----------------------------------------------|------------------------------------------------|
| Cause                           | YLLs (actual counts)                               |                                                    |                                                    |                                                     | Deaths (actual counts)                     |                                                |                                              |                                                |
|                                 | 2016                                               | 2040 Forecast                                      | 2040 Better Scenario                               | 2040 Worse Scenario                                 | 2016                                       | 2040 Forecast                                  | 2040 Better Scenario                         | 2040 Worse Scenario                            |
| Kidney cancer                   | 201.12<br>(159.13 to 246.77)                       | 490.83<br>(363.07 to 642.63)                       | 501.90<br>(367.49 to 657.15)                       | 500.68<br>(366.41 to 668.79)                        | 7.49<br>(6.02 to 8.96)                     | 24.10<br>(18.84 to 29.90)                      | 25.15<br>(19.57 to 31.18)                    | 23.99<br>(18.66 to 30.41)                      |
| Bladder cancer                  | 117.02<br>(93.91 to 139.31)                        | 323.86<br>(229.90 to 459.76)                       | 310.06<br>(217.18 to 432.28)                       | 373.50<br>(256.00 to 543.12)                        | 6.10<br>(5.04 to 7.01)                     | 21.31<br>(15.76 to 29.35)                      | 20.88<br>(15.18 to 28.38)                    | 23.93<br>(16.96 to 34.13)                      |
| Brain and nervous system cancer | 496.13<br>(388.91 to 643.81)                       | 778.96<br>(552.24 to 1,054.51)                     | 741.21<br>(513.79 to 1,003.41)                     | 790.62<br>(551.05 to 1,078.92)                      | 12.23<br>(9.56 to 15.89)                   | 26.32<br>(19.58 to 33.94)                      | 25.54<br>(18.65 to 33.27)                    | 26.07<br>(19.11 to 33.80)                      |
| Thyroid cancer                  | 41.64<br>(32.73 to 50.53)                          | 100.19<br>(71.60 to 139.67)                        | 89.18<br>(63.95 to 118.77)                         | 105.31<br>(74.10 to 147.18)                         | 1.75<br>(1.42 to 2.08)                     | 5.58<br>(4.21 to 7.47)                         | 5.08<br>(3.81 to 6.53)                       | 5.69<br>(4.16 to 7.76)                         |
| Mesothelioma                    | 30.45<br>(23.76 to 37.99)                          | 77.56<br>(58.67 to 96.99)                          | 79.94<br>(59.96 to 101.84)                         | 73.72<br>(56.39 to 91.86)                           | 1.13<br>(0.90 to 1.37)                     | 3.81<br>(2.98 to 4.57)                         | 4.00<br>(3.13 to 4.86)                       | 3.52<br>(2.82 to 4.18)                         |
| Hodgkin lymphoma                | 49.88<br>(36.60 to 72.63)                          | 53.44<br>(34.29 to 79.82)                          | 45.18<br>(28.92 to 67.28)                          | 58.22<br>(35.85 to 94.90)                           | 1.31<br>(0.98 to 1.88)                     | 2.04<br>(1.39 to 2.95)                         | 1.76<br>(1.17 to 2.47)                       | 2.16<br>(1.41 to 3.32)                         |
| Non-Hodgkin lymphoma            | 552.18<br>(437.11 to 686.18)                       | 1,015.04<br>(727.28 to 1,333.24)                   | 934.26<br>(662.60 to 1,228.58)                     | 1,043.53<br>(739.06 to 1,420.68)                    | 17.57<br>(14.20 to 21.20)                  | 46.76<br>(36.11 to 58.47)                      | 44.08<br>(33.30 to 55.47)                    | 46.55<br>(35.25 to 60.82)                      |
| Multiple myeloma                | 162.31<br>(127.39 to 205.01)                       | 456.64<br>(337.75 to 598.72)                       | 436.57<br>(320.69 to 572.63)                       | 455.59<br>(335.60 to 607.04)                        | 6.81<br>(5.46 to 8.56)                     | 24.27<br>(18.86 to 31.01)                      | 23.66<br>(18.11 to 30.21)                    | 23.58<br>(18.14 to 30.54)                      |
| Leukemia                        | 699.51<br>(551.73 to 863.00)                       | 1,001.32<br>(700.04 to 1,374.03)                   | 923.68<br>(645.93 to 1,262.50)                     | 1,080.00<br>(738.61 to 1,526.39)                    | 17.07<br>(13.51 to 20.98)                  | 37.68<br>(28.04 to 49.47)                      | 35.48<br>(26.40 to 46.78)                    | 39.62<br>(28.96 to 52.26)                      |
| Acute lymphoid leukemia         | 189.24<br>(136.60 to 259.89)                       | 186.80<br>(116.60 to 298.07)                       | 163.91<br>(99.63 to 266.51)                        | 207.27<br>(121.01 to 342.42)                        | 3.71<br>(2.66 to 5.13)                     | 5.25<br>(3.37 to 8.34)                         | 4.65<br>(2.93 to 7.42)                       | 5.74<br>(3.48 to 9.46)                         |
| Chronic lymphoid leukemia       | 10.26<br>(7.10 to 15.98)                           | 23.21<br>(14.53 to 39.19)                          | 21.91<br>(13.76 to 36.78)                          | 24.44<br>(14.93 to 42.38)                           | 0.39<br>(0.27 to 0.62)                     | 1.23<br>(0.79 to 2.06)                         | 1.19<br>(0.77 to 1.99)                       | 1.26<br>(0.79 to 2.13)                         |
| Acute myeloid leukemia          | 335.62<br>(246.96 to 427.99)                       | 584.93<br>(405.83 to 796.67)                       | 560.46<br>(389.65 to 756.36)                       | 616.04<br>(422.35 to 859.14)                        | 8.60<br>(6.46 to 11.00)                    | 22.35<br>(16.48 to 29.33)                      | 21.82<br>(15.96 to 28.40)                    | 22.99<br>(16.62 to 30.82)                      |
| Chronic myeloid leukemia        | 58.46<br>(36.99 to 86.51)                          | 46.54<br>(24.36 to 81.21)                          | 36.63<br>(19.05 to 64.10)                          | 56.24<br>(27.04 to 109.35)                          | 1.53<br>(1.00 to 2.19)                     | 1.73<br>(0.97 to 2.80)                         | 1.38<br>(0.79 to 2.28)                       | 2.03<br>(1.06 to 3.62)                         |
| Other leukemia                  | 105.83<br>(67.23 to 139.34)                        | 159.84<br>(101.35 to 234.39)                       | 140.77<br>(88.60 to 204.51)                        | 176.00<br>(106.62 to 266.47)                        | 2.84<br>(1.90 to 3.71)                     | 7.12<br>(4.88 to 10.15)                        | 6.43<br>(4.38 to 9.26)                       | 7.60<br>(5.01 to 11.13)                        |
| Other neoplasms                 | 641.13<br>(509.76 to 783.19)                       | 1,136.61<br>(859.78 to 1,435.07)                   | 1,127.31<br>(840.94 to 1,432.89)                   | 1,115.28<br>(847.07 to 1,416.20)                    | 17.92<br>(14.43 to 21.40)                  | 48.26<br>(38.78 to 57.96)                      | 49.31<br>(39.30 to 59.70)                    | 45.56<br>(36.63 to 54.97)                      |
| <b>Cardiovascular diseases</b>  | <b>11,120.55</b><br><b>(8,876.08 to 13,388.21)</b> | <b>16,199.01</b><br><b>(9,152.59 to 28,360.24)</b> | <b>11,646.73</b><br><b>(6,527.63 to 19,047.69)</b> | <b>25,229.58</b><br><b>(13,561.10 to 44,055.37)</b> | <b>481.33</b><br><b>(403.86 to 549.13)</b> | <b>1,021.19</b><br><b>(610.58 to 1,883.02)</b> | <b>753.35</b><br><b>(458.67 to 1,371.12)</b> | <b>1,431.85</b><br><b>(823.23 to 2,457.18)</b> |
| Rheumatic heart disease         | 184.93<br>(147.33 to 227.84)                       | 228.28<br>(153.30 to 330.71)                       | 196.50<br>(130.29 to 283.56)                       | 244.20<br>(160.07 to 361.97)                        | 7.19<br>(5.95 to 8.46)                     | 14.44<br>(10.39 to 20.35)                      | 12.90<br>(9.09 to 17.72)                     | 14.70<br>(10.19 to 20.95)                      |
| Ischemic heart disease          | 5,948.00<br>(4,643.03 to 7,343.17)                 | 7,709.08<br>(3,434.18 to 15,758.45)                | 4,685.45<br>(2,173.55 to 9,408.06)                 | 13,509.89<br>(5,878.98 to 27,520.08)                | 262.07<br>(215.88 to 305.74)               | 483.18<br>(231.17 to 1,084.85)                 | 322.21<br>(156.12 to 735.79)                 | 753.54<br>(348.45 to 1,521.07)                 |
| Stroke                          | 2,888.22<br>(2,349.03 to 3,448.49)                 | 4,093.11<br>(1,959.97 to 9,009.70)                 | 2,498.07<br>(1,252.16 to 5,724.16)                 | 6,784.81<br>(3,209.09 to 14,130.25)                 | 130.67<br>(109.54 to 150.08)               | 260.37<br>(134.01 to 590.83)                   | 177.78<br>(91.78 to 428.05)                  | 382.78<br>(190.59 to 846.34)                   |
| Ischemic stroke                 | 803.79<br>(672.86 to 928.87)                       | 1,469.36<br>(616.40 to 4,627.84)                   | 1,017.77<br>(438.45 to 3,528.86)                   | 2,153.30<br>(876.92 to 6,938.31)                    | 53.02<br>(45.70 to 59.40)                  | 124.15<br>(53.71 to 411.16)                    | 92.99<br>(40.29 to 324.88)                   | 164.66<br>(69.28 to 527.33)                    |

|                                |                                       |                                       |                                     |                                       |                              |                                |                               |                                 |
|--------------------------------|---------------------------------------|---------------------------------------|-------------------------------------|---------------------------------------|------------------------------|--------------------------------|-------------------------------|---------------------------------|
| Intracerebral hemorrhage       | 2,084.44<br>(1,671.99 to<br>2,538.23) | 2,623.75<br>(1,177.30 to<br>5,803.44) | 1,480.30<br>(718.17 to<br>2,891.55) | 4,631.51<br>(2,005.64 to<br>9,959.10) | 77.65<br>(64.07 to<br>91.54) | 136.22<br>(67.30 to<br>283.57) | 84.79<br>(43.34 to<br>162.47) | 218.12<br>(102.08 to<br>475.60) |
| Hypertensive heart disease     | 288.61<br>(215.52 to<br>355.74)       | 915.40<br>(459.20 to<br>2,131.28)     | 778.32<br>(407.24 to<br>1,738.76)   | 1,118.19<br>(538.06 to<br>2,653.13)   | 15.43<br>(11.87 to<br>18.11) | 72.02<br>(37.03 to<br>176.48)  | 63.81<br>(34.68 to<br>152.05) | 82.94<br>(40.17 to<br>208.89)   |
| Cardiomyopathy and myocarditis | 877.07<br>(675.89 to<br>1,168.37)     | 1,095.50<br>(715.41 to<br>1,620.61)   | 981.44<br>(637.67 to<br>1,431.09)   | 1,176.82<br>(741.09 to<br>1,806.92)   | 25.53<br>(20.15 to<br>33.29) | 49.66<br>(34.69 to<br>71.82)   | 45.52<br>(31.51 to<br>65.15)  | 51.27<br>(34.37 to<br>76.37)    |
| Myocarditis                    | 138.77<br>(98.50 to<br>208.28)        | 189.29<br>(125.54 to<br>294.50)       | 186.99<br>(122.87 to<br>287.26)     | 186.89<br>(121.59 to<br>291.20)       | 3.49<br>(2.54 to<br>5.17)    | 8.39<br>(5.93 to<br>12.42)     | 8.79<br>(6.25 to<br>12.92)    | 7.73<br>(5.48 to<br>11.57)      |

| Brunei                                                        |                                                  |                                                  |                                                  |                                                   |                                          |                                            |                                            |                                            |
|---------------------------------------------------------------|--------------------------------------------------|--------------------------------------------------|--------------------------------------------------|---------------------------------------------------|------------------------------------------|--------------------------------------------|--------------------------------------------|--------------------------------------------|
| Cause                                                         | YLLs (actual counts)                             |                                                  |                                                  |                                                   | Deaths (actual counts)                   |                                            |                                            |                                            |
|                                                               | 2016                                             | 2040 Forecast                                    | 2040 Better Scenario                             | 2040 Worse Scenario                               | 2016                                     | 2040 Forecast                              | 2040 Better Scenario                       | 2040 Worse Scenario                        |
| Alcoholic cardiomyopathy                                      | 265.82<br>(191.62 to 394.73)                     | 373.30<br>(240.65 to 567.72)                     | 371.00<br>(237.81 to 564.06)                     | 366.41<br>(240.21 to 566.70)                      | 7.81<br>(5.81 to 11.39)                  | 15.01<br>(10.44 to 21.87)                  | 15.13<br>(10.16 to 21.98)                  | 14.37<br>(9.94 to 21.18)                   |
| Other cardiomyopathy                                          | 472.48<br>(371.51 to 616.80)                     | 532.91<br>(311.90 to 875.24)                     | 423.45<br>(241.94 to 695.67)                     | 623.53<br>(347.31 to 1,076.07)                    | 14.22<br>(11.34 to 18.21)                | 26.26<br>(15.74 to 43.27)                  | 21.61<br>(12.80 to 33.79)                  | 29.17<br>(16.81 to 47.87)                  |
| Atrial fibrillation and flutter                               | 63.27<br>(49.43 to 79.24)                        | 263.53<br>(183.30 to 359.84)                     | 255.37<br>(177.63 to 348.54)                     | 265.87<br>(185.68 to 364.63)                      | 5.00<br>(3.90 to 6.26)                   | 24.69<br>(17.45 to 33.60)                  | 24.81<br>(17.58 to 33.88)                  | 23.52<br>(16.49 to 32.10)                  |
| Aortic aneurysm                                               | 267.17<br>(210.78 to 325.81)                     | 568.57<br>(379.42 to 813.36)                     | 522.27<br>(347.83 to 741.28)                     | 618.43<br>(407.57 to 887.92)                      | 12.34<br>(10.14 to 14.43)                | 36.51<br>(26.14 to 49.42)                  | 34.96<br>(24.71 to 47.17)                  | 37.30<br>(26.41 to 50.79)                  |
| Peripheral artery disease                                     | 7.43<br>(5.12 to 9.83)                           | 30.93<br>(17.92 to 46.96)                        | 30.18<br>(17.33 to 45.24)                        | 34.77<br>(20.12 to 52.91)                         | 0.48<br>(0.33 to 0.62)                   | 2.44<br>(1.45 to 3.67)                     | 2.47<br>(1.49 to 3.73)                     | 2.56<br>(1.52 to 3.91)                     |
| Endocarditis                                                  | 153.66<br>(112.69 to 216.11)                     | 366.45<br>(232.32 to 554.41)                     | 354.96<br>(227.99 to 531.83)                     | 377.93<br>(239.94 to 569.02)                      | 5.62<br>(4.31 to 7.76)                   | 20.44<br>(13.66 to 30.34)                  | 20.56<br>(13.61 to 30.38)                  | 19.95<br>(13.15 to 29.76)                  |
| Other cardiovascular and circulatory diseases                 | 442.18<br>(336.61 to 581.68)                     | 928.16<br>(587.01 to 1,416.11)                   | 744.19<br>(475.86 to 1,089.58)                   | 1,098.65<br>(674.63 to 1,720.64)                  | 17.01<br>(13.37 to 22.16)                | 57.44<br>(38.72 to 85.51)                  | 48.33<br>(32.95 to 67.62)                  | 63.28<br>(41.19 to 94.48)                  |
| <b>Chronic respiratory diseases</b>                           | <b>1,932.31</b><br><b>(1,602.45 to 2,286.22)</b> | <b>4,857.72</b><br><b>(3,487.09 to 6,402.10)</b> | <b>4,144.09</b><br><b>(3,018.89 to 5,388.06)</b> | <b>7,325.26</b><br><b>(4,990.23 to 10,522.43)</b> | <b>99.85</b><br><b>(85.30 to 112.92)</b> | <b>335.42</b><br><b>(251.16 to 428.94)</b> | <b>292.38</b><br><b>(223.16 to 369.26)</b> | <b>490.55</b><br><b>(346.40 to 653.18)</b> |
| Chronic obstructive pulmonary disease                         | 1,295.50<br>(1,075.79 to 1,518.27)               | 3,749.57<br>(2,562.77 to 5,267.58)               | 3,005.82<br>(2,078.81 to 4,143.61)               | 6,208.56<br>(4,002.98 to 9,179.49)                | 74.15<br>(63.31 to 83.48)                | 268.99<br>(191.70 to 359.10)               | 222.29<br>(161.27 to 294.41)               | 426.42<br>(288.90 to 591.26)               |
| Pneumoconiosis                                                | 2.46<br>(1.90 to 3.09)                           | 8.29<br>(5.89 to 11.42)                          | 8.61<br>(6.00 to 11.96)                          | 7.98<br>(5.75 to 10.79)                           | 0.13<br>(0.10 to 0.16)                   | 0.59<br>(0.41 to 0.83)                     | 0.62<br>(0.43 to 0.89)                     | 0.55<br>(0.39 to 0.76)                     |
| Silicosis                                                     | 0.19<br>(0.11 to 0.29)                           | 0.91<br>(0.36 to 1.76)                           | 0.88<br>(0.33 to 1.72)                           | 0.89<br>(0.35 to 1.67)                            | 0.01<br>(0.01 to 0.02)                   | 0.07<br>(0.03 to 0.14)                     | 0.07<br>(0.03 to 0.14)                     | 0.07<br>(0.03 to 0.13)                     |
| Asbestosis                                                    | 0.52<br>(0.37 to 0.69)                           | 1.66<br>(1.06 to 2.35)                           | 1.86<br>(1.19 to 2.63)                           | 1.50<br>(0.92 to 2.14)                            | 0.02<br>(0.01 to 0.03)                   | 0.09<br>(0.05 to 0.13)                     | 0.10<br>(0.06 to 0.15)                     | 0.08<br>(0.04 to 0.11)                     |
| Coal workers pneumoconiosis                                   | 0.44<br>(0.25 to 1.12)                           | 1.66<br>(0.71 to 4.72)                           | 1.68<br>(0.68 to 4.81)                           | 1.66<br>(0.72 to 4.51)                            | 0.02<br>(0.01 to 0.06)                   | 0.11<br>(0.04 to 0.35)                     | 0.12<br>(0.04 to 0.37)                     | 0.11<br>(0.04 to 0.32)                     |
| Other pneumoconiosis                                          | 1.31<br>(0.77 to 1.70)                           | 4.06<br>(1.85 to 6.38)                           | 4.20<br>(1.96 to 6.69)                           | 3.93<br>(1.76 to 6.08)                            | 0.07<br>(0.04 to 0.10)                   | 0.32<br>(0.13 to 0.51)                     | 0.34<br>(0.16 to 0.56)                     | 0.30<br>(0.12 to 0.48)                     |
| Asthma                                                        | 435.73<br>(337.90 to 545.34)                     | 373.99<br>(210.43 to 633.05)                     | 260.78<br>(152.34 to 426.83)                     | 478.85<br>(254.30 to 832.23)                      | 17.02<br>(13.34 to 20.67)                | 22.87<br>(13.49 to 37.82)                  | 16.69<br>(10.06 to 26.19)                  | 27.60<br>(14.89 to 47.74)                  |
| Interstitial lung disease and pulmonary sarcoidosis           | 171.51<br>(130.69 to 214.69)                     | 690.68<br>(500.89 to 907.51)                     | 834.86<br>(616.93 to 1,071.50)                   | 592.65<br>(395.77 to 798.17)                      | 7.95<br>(6.15 to 9.88)                   | 41.78<br>(29.80 to 54.25)                  | 51.60<br>(39.29 to 65.10)                  | 34.75<br>(23.17 to 46.34)                  |
| Other chronic respiratory diseases                            | 27.11<br>(17.46 to 40.52)                        | 35.19<br>(20.56 to 54.82)                        | 34.02<br>(19.93 to 52.20)                        | 37.22<br>(21.59 to 57.66)                         | 0.61<br>(0.38 to 0.89)                   | 37.22<br>(21.59 to 57.66)                  | 1.19<br>(0.69 to 1.79)                     | 1.23<br>(0.72 to 1.91)                     |
| <b>Cirrhosis and other chronic liver diseases</b>             | <b>673.71</b><br><b>(519.51 to 874.16)</b>       | <b>1,157.88</b><br><b>(787.18 to 1,636.26)</b>   | <b>1,052.83</b><br><b>(687.59 to 1,473.61)</b>   | <b>1,200.42</b><br><b>(794.16 to 1,728.78)</b>    | <b>22.13</b><br><b>(17.42 to 27.53)</b>  | <b>49.77</b><br><b>(35.65 to 67.11)</b>    | <b>46.06</b><br><b>(32.13 to 61.95)</b>    | <b>50.34</b><br><b>(34.82 to 68.07)</b>    |
| Cirrhosis and other chronic liver diseases due to hepatitis B | 283.16<br>(208.28 to 385.99)                     | 446.65<br>(318.76 to 716.49)                     | 446.65<br>(281.97 to 634.68)                     | 506.68<br>(326.51 to 754.19)                      | 9.31<br>(7.08 to 12.42)                  | 21.09<br>(14.65 to 29.29)                  | 19.55<br>(12.98 to 27.14)                  | 21.27<br>(14.43 to 29.90)                  |
| Cirrhosis and other chronic liver diseases due to hepatitis C | 179.00<br>(118.89 to 258.39)                     | 313.95<br>(187.56 to 479.25)                     | 283.42<br>(169.94 to 439.67)                     | 327.45<br>(198.66 to 521.27)                      | 5.78<br>(3.99 to 8.03)                   | 12.87<br>(8.14 to 18.91)                   | 11.79<br>(7.34 to 17.57)                   | 13.14<br>(8.36 to 20.02)                   |

|                                                                |                                                |                                                      |                                                    |                                                      |                                             |                                              |                                              |                                              |
|----------------------------------------------------------------|------------------------------------------------|------------------------------------------------------|----------------------------------------------------|------------------------------------------------------|---------------------------------------------|----------------------------------------------|----------------------------------------------|----------------------------------------------|
|                                                                | 132.57<br>(89.45 to<br>192.17)                 | 221.48<br>(138.73 to<br>330.67)                      | 202.45<br>(121.97 to<br>305.49)                    | 229.02<br>(140.98 to<br>358.99)                      | 4.46<br>(3.16 to<br>6.26)                   | 9.64<br>(6.46 to<br>13.76)                   | 8.96<br>(5.79 to<br>12.86)                   | 9.72<br>(6.37 to<br>14.46)                   |
| Cirrhosis and other chronic liver diseases due to alcohol use  |                                                |                                                      |                                                    |                                                      |                                             |                                              |                                              |                                              |
|                                                                | 78.97<br>(58.98 to<br>105.00)                  | 132.24<br>(89.00 to<br>184.69)                       | 120.32<br>(78.77 to<br>169.68)                     | 137.27<br>(87.62 to<br>197.74)                       | 2.58<br>(1.97 to<br>3.36)                   | 6.18<br>(4.35 to<br>8.38)                    | 5.75<br>(3.86 to<br>7.95)                    | 6.22<br>(4.17 to<br>8.69)                    |
| Cirrhosis and other chronic liver diseases due to other causes |                                                |                                                      |                                                    |                                                      |                                             |                                              |                                              |                                              |
|                                                                | <b>716.25</b><br>(577.19 to<br><b>877.99</b> ) | <b>1,439.07</b><br>(1,085.94 to<br><b>1,838.96</b> ) | <b>1,315.22</b><br>(980.44 to<br><b>1,697.90</b> ) | <b>1,480.34</b><br>(1,095.94 to<br><b>1,960.94</b> ) | <b>29.64</b><br>(24.69 to<br><b>34.54</b> ) | <b>92.07</b><br>(73.97 to<br><b>113.73</b> ) | <b>86.69</b><br>(68.84 to<br><b>106.97</b> ) | <b>90.59</b><br>(70.42 to<br><b>116.40</b> ) |
| Digestive diseases                                             |                                                |                                                      |                                                    |                                                      |                                             |                                              |                                              |                                              |
|                                                                | 140.89<br>(103.49 to<br>182.62)                | 193.98<br>(129.37 to<br>270.78)                      | 158.86<br>(104.44 to<br>224.29)                    | 220.85<br>(137.92 to<br>343.61)                      | 6.16<br>(4.74 to<br>7.51)                   | 12.66<br>(8.80 to<br>17.02)                  | 10.69<br>(7.34 to<br>14.74)                  | 13.70<br>(8.96 to<br>20.92)                  |
| Peptic ulcer disease                                           |                                                |                                                      |                                                    |                                                      |                                             |                                              |                                              |                                              |

| Brunei                                     |                                           |                                           |                                           |                                           |                                  |                                     |                                     |                                     |
|--------------------------------------------|-------------------------------------------|-------------------------------------------|-------------------------------------------|-------------------------------------------|----------------------------------|-------------------------------------|-------------------------------------|-------------------------------------|
| Cause                                      | YLLs (actual counts)                      |                                           |                                           |                                           | Deaths (actual counts)           |                                     |                                     |                                     |
|                                            | 2016                                      | 2040 Forecast                             | 2040 Better Scenario                      | 2040 Worse Scenario                       | 2016                             | 2040 Forecast                       | 2040 Better Scenario                | 2040 Worse Scenario                 |
| Gastritis and duodenitis                   | 3.25<br>(2.52 to 4.05)                    | 11.30<br>(7.25 to 17.00)                  | 10.42<br>(6.56 to 16.18)                  | 11.37<br>(7.10 to 17.52)                  | 0.18<br>(0.14 to 0.22)           | 1.00<br>(0.64 to 1.52)              | 0.95<br>(0.59 to 1.49)              | 0.95<br>(0.60 to 1.51)              |
| Appendicitis                               | 54.93<br>(41.49 to 71.29)                 | 63.74<br>(40.92 to 92.93)                 | 52.92<br>(33.69 to 76.81)                 | 69.37<br>(43.43 to 106.44)                | 1.71<br>(1.32 to 2.16)           | 3.21<br>(2.21 to 4.45)              | 2.76<br>(1.88 to 3.77)              | 3.32<br>(2.20 to 4.89)              |
| Paralytic ileus and intestinal obstruction | 121.14<br>(96.00 to 164.26)               | 277.14<br>(208.28 to 391.47)              | 283.47<br>(211.81 to 402.22)              | 261.35<br>(198.67 to 365.56)              | 4.62<br>(3.67 to 6.52)           | 17.50<br>(14.00 to 24.86)           | 18.52<br>(14.69 to 26.30)           | 15.74<br>(12.55 to 22.30)           |
| Inguinal, femoral, and abdominal hernia    | 5.66<br>(3.86 to 7.35)                    | 8.23<br>(4.87 to 11.55)                   | 7.51<br>(4.38 to 10.68)                   | 8.31<br>(4.89 to 12.04)                   | 0.24<br>(0.15 to 0.30)           | 0.52<br>(0.32 to 0.70)              | 0.50<br>(0.29 to 0.68)              | 0.50<br>(0.29 to 0.70)              |
| Inflammatory bowel disease                 | 90.00<br>(68.37 to 115.57)                | 162.64<br>(121.70 to 208.14)              | 163.74<br>(120.47 to 213.06)              | 155.85<br>(116.48 to 201.10)              | 3.21<br>(2.53 to 3.89)           | 9.44<br>(7.36 to 11.84)             | 9.86<br>(7.63 to 12.47)             | 8.62<br>(6.76 to 10.70)             |
| Vascular intestinal disorders              | 38.17<br>(30.06 to 46.11)                 | 104.14<br>(76.59 to 134.43)               | 101.37<br>(73.97 to 132.46)               | 101.36<br>(75.54 to 130.43)               | 1.85<br>(1.49 to 2.20)           | 7.02<br>(5.45 to 8.82)              | 7.01<br>(5.33 to 8.93)              | 6.60<br>(5.12 to 8.36)              |
| Gallbladder and biliary diseases           | 104.53<br>(81.84 to 128.82)               | 278.34<br>(173.61 to 449.57)              | 217.53<br>(140.93 to 329.72)              | 312.06<br>(181.76 to 514.72)              | 5.65<br>(4.65 to 6.76)           | 20.93<br>(13.27 to 32.90)           | 17.09<br>(11.36 to 25.95)           | 22.21<br>(13.27 to 36.43)           |
| Pancreatitis                               | 52.68<br>(37.01 to 70.61)                 | 80.04<br>(50.29 to 127.02)                | 69.24<br>(43.09 to 104.53)                | 84.91<br>(51.38 to 136.75)                | 1.68<br>(1.22 to 2.16)           | 3.79<br>(2.55 to 5.68)              | 3.37<br>(2.24 to 4.89)              | 3.88<br>(2.53 to 5.90)              |
| Other digestive diseases                   | 104.99<br>(80.97 to 131.78)               | 259.53<br>(189.98 to 332.48)              | 250.17<br>(182.01 to 320.80)              | 254.91<br>(190.28 to 324.32)              | 4.33<br>(3.44 to 5.22)           | 16.00<br>(12.47 to 19.77)           | 15.94<br>(12.17 to 19.88)           | 15.06<br>(11.59 to 18.68)           |
| Neurological disorders                     | <b>1,383.08</b><br>(1,150.15 to 1,638.22) | <b>4,519.74</b><br>(3,445.99 to 6,042.92) | <b>4,515.08</b><br>(3,475.16 to 5,959.25) | <b>4,463.58</b><br>(3,372.44 to 6,137.10) | <b>79.46</b><br>(66.76 to 93.11) | <b>381.64</b><br>(282.43 to 515.58) | <b>394.73</b><br>(304.09 to 519.31) | <b>366.99</b><br>(251.92 to 506.97) |
| Alzheimer's disease and other dementias    | 689.25<br>(560.76 to 845.25)              | 3,304.58<br>(2,337.53 to 4,749.08)        | 3,304.81<br>(2,397.35 to 4,650.06)        | 3,273.88<br>(2,227.11 to 4,945.02)        | 61.10<br>(50.11 to 74.51)        | 327.94<br>(229.51 to 460.52)        | 338.13<br>(252.24 to 463.46)        | 311.69<br>(204.20 to 457.79)        |
| Parkinson's disease                        | 73.47<br>(55.01 to 94.90)                 | 355.35<br>(263.53 to 464.27)              | 386.89<br>(285.10 to 510.98)              | 315.44<br>(235.19 to 415.07)              | 5.26<br>(3.98 to 6.99)           | 28.92<br>(21.64 to 38.21)           | 32.17<br>(24.15 to 43.09)           | 24.91<br>(18.34 to 33.20)           |
| Epilepsy                                   | 416.00<br>(327.53 to 525.02)              | 523.41<br>(363.13 to 748.82)              | 485.95<br>(328.83 to 689.73)              | 543.70<br>(364.76 to 790.48)              | 7.99<br>(6.28 to 10.13)          | 13.22<br>(9.75 to 17.84)            | 12.59<br>(9.17 to 16.92)            | 13.34<br>(9.57 to 18.41)            |
| Multiple sclerosis                         | 10.50<br>(5.90 to 18.09)                  | 15.19<br>(8.48 to 25.89)                  | 15.36<br>(8.62 to 26.32)                  | 15.27<br>(8.51 to 26.14)                  | 0.28<br>(0.16 to 0.47)           | 0.51<br>(0.30 to 0.85)              | 0.52<br>(0.30 to 0.87)              | 0.51<br>(0.29 to 0.85)              |
| Motor neuron disease                       | 18.99<br>(14.69 to 23.96)                 | 39.30<br>(28.35 to 51.43)                 | 39.26<br>(28.15 to 51.97)                 | 38.50<br>(28.24 to 50.55)                 | 0.58<br>(0.46 to 0.72)           | 1.49<br>(1.13 to 1.88)              | 1.51<br>(1.11 to 1.91)              | 1.44<br>(1.11 to 1.80)              |
| Other neurological disorders               | 174.86<br>(110.23 to 279.20)              | 281.92<br>(177.01 to 452.34)              | 282.82<br>(177.57 to 451.71)              | 276.79<br>(173.51 to 442.17)              | 4.24<br>(2.75 to 6.45)           | 9.55<br>(6.29 to 14.34)             | 9.81<br>(6.50 to 14.69)             | 9.10<br>(5.99 to 13.57)             |
| Mental disorders                           | <b>76.80</b><br>(54.83 to 111.00)         | <b>152.57</b><br>(106.14 to 222.72)       | <b>169.50</b><br>(115.48 to 247.44)       | <b>141.41</b><br>(95.80 to 208.11)        | <b>1.86</b><br>(1.34 to 2.63)    | <b>4.74</b><br>(3.47 to 6.46)       | <b>5.40</b><br>(3.85 to 7.40)       | <b>4.27</b><br>(2.96 to 5.97)       |
| Alcohol use disorders                      | 34.27<br>(21.60 to 57.27)                 | 48.73<br>(28.53 to 86.23)                 | 51.71<br>(30.15 to 95.37)                 | 46.11<br>(26.55 to 84.30)                 | 0.90<br>(0.58 to 1.48)           | 1.61<br>(0.99 to 2.74)              | 1.73<br>(1.06 to 3.03)              | 1.49<br>(0.91 to 2.54)              |
| Drug use disorders                         | 41.73<br>(30.03 to 57.30)                 | 102.53<br>(70.96 to 146.14)               | 116.54<br>(79.63 to 164.69)               | 93.96<br>(63.45 to 136.26)                | 0.94<br>(0.69 to 1.26)           | 3.11<br>(2.23 to 4.18)              | 3.65<br>(2.60 to 4.85)              | 2.75<br>(1.90 to 3.82)              |
| Opioid use disorders                       | 29.22<br>(20.83 to 40.53)                 | 48.99<br>(34.28 to 70.53)                 | 51.36<br>(35.67 to 73.56)                 | 46.98<br>(32.99 to 66.54)                 | 0.64<br>(0.46 to 0.86)           | 1.37<br>(1.00 to 1.84)              | 1.47<br>(1.06 to 1.96)              | 1.28<br>(0.94 to 1.74)              |

|                           |                            |                              |                              |                              |                           |                           |                           |                           |
|---------------------------|----------------------------|------------------------------|------------------------------|------------------------------|---------------------------|---------------------------|---------------------------|---------------------------|
|                           | 2.79<br>(1.63 to<br>4.79)  | 10.85<br>(5.97 to<br>17.81)  | 12.48<br>(6.76 to<br>20.87)  | 9.88<br>(5.16 to<br>16.63)   | 0.06<br>(0.04 to<br>0.10) | 0.29<br>(0.17 to<br>0.46) | 0.34<br>(0.19 to<br>0.54) | 0.26<br>(0.14 to<br>0.42) |
| Cocaine use disorders     |                            |                              |                              |                              |                           |                           |                           |                           |
|                           | 2.16<br>(1.24 to<br>4.42)  | 13.81<br>(7.16 to<br>23.87)  | 17.18<br>(8.99 to<br>28.51)  | 12.06<br>(5.93 to<br>21.12)  | 0.05<br>(0.03 to<br>0.09) | 0.35<br>(0.20 to<br>0.55) | 0.45<br>(0.24 to<br>0.70) | 0.30<br>(0.15 to<br>0.51) |
| Amphetamine use disorders |                            |                              |                              |                              |                           |                           |                           |                           |
|                           | 7.56<br>(4.69 to<br>11.04) | 28.88<br>(17.19 to<br>44.67) | 35.51<br>(21.59 to<br>54.17) | 25.04<br>(14.23 to<br>40.01) | 0.19<br>(0.13 to<br>0.27) | 1.10<br>(0.70 to<br>1.59) | 1.40<br>(0.90 to<br>2.00) | 0.90<br>(0.52 to<br>1.37) |
| Other drug use disorders  |                            |                              |                              |                              |                           |                           |                           |                           |
|                           | 0.79<br>(0.55 to<br>1.14)  | 1.31<br>(0.73 to<br>2.24)    | 1.26<br>(0.71 to<br>2.15)    | 1.34<br>(0.74 to<br>2.29)    | 0.02<br>(0.01 to<br>0.02) | 0.03<br>(0.01 to<br>0.04) | 0.02<br>(0.01 to<br>0.04) | 0.03<br>(0.01 to<br>0.04) |
| Eating disorders          |                            |                              |                              |                              |                           |                           |                           |                           |



| Brunei                                                     |                                           |                                             |                                             |                                              |                                     |                                       |                                       |                                         |
|------------------------------------------------------------|-------------------------------------------|---------------------------------------------|---------------------------------------------|----------------------------------------------|-------------------------------------|---------------------------------------|---------------------------------------|-----------------------------------------|
| Cause                                                      | YLLs (actual counts)                      |                                             |                                             |                                              | Deaths (actual counts)              |                                       |                                       |                                         |
|                                                            | 2016                                      | 2040 Forecast                               | 2040 Better Scenario                        | 2040 Worse Scenario                          | 2016                                | 2040 Forecast                         | 2040 Better Scenario                  | 2040 Worse Scenario                     |
| <b>Diabetes, urogenital, blood, and endocrine diseases</b> | <b>5,837.21</b><br>(4,789.17 to 6,990.70) | <b>15,696.98</b><br>(9,368.56 to 27,365.95) | <b>13,247.26</b><br>(7,896.71 to 23,473.58) | <b>18,793.03</b><br>(11,060.59 to 30,711.08) | <b>241.78</b><br>(204.66 to 279.09) | <b>966.27</b><br>(592.27 to 1,659.85) | <b>846.64</b><br>(520.31 to 1,519.15) | <b>1,097.41</b><br>(657.91 to 1,782.34) |
| Diabetes mellitus                                          | 3,306.78<br>(2,681.56 to 4,001.67)        | 7,735.43<br>(4,995.03 to 11,752.15)         | 6,133.42<br>(3,923.10 to 9,045.45)          | 9,172.01<br>(5,731.56 to 14,141.40)          | 142.20<br>(119.23 to 166.09)        | 457.78<br>(314.51 to 647.28)          | 377.80<br>(265.68 to 514.19)          | 512.31<br>(347.24 to 745.51)            |
| Acute glomerulonephritis                                   | 15.00<br>(10.88 to 20.08)                 | 38.96<br>(24.53 to 60.57)                   | 35.82<br>(21.50 to 57.32)                   | 39.59<br>(23.98 to 62.18)                    | 0.56<br>(0.42 to 0.72)              | 2.16<br>(1.31 to 3.46)                | 2.06<br>(1.21 to 3.43)                | 2.10<br>(1.24 to 3.44)                  |
| Chronic kidney disease                                     | 1,358.56<br>(1,093.54 to 1,699.61)        | 5,454.38<br>(1,028.72 to 16,230.77)         | 4,691.59<br>(882.61 to 14,738.13)           | 7,143.26<br>(1,399.77 to 17,415.81)          | 57.76<br>(48.08 to 70.87)           | 361.66<br>(61.16 to 1,070.75)         | 323.16<br>(53.84 to 1,007.17)         | 446.68<br>(78.26 to 1,098.72)           |
| Chronic kidney disease due to diabetes mellitus            | 833.53<br>(655.33 to 1,042.89)            | 3,728.30<br>(657.17 to 11,214.00)           | 3,194.08<br>(561.62 to 10,268.99)           | 4,931.49<br>(905.27 to 12,319.18)            | 36.10<br>(29.48 to 44.73)           | 233.39<br>(38.61 to 689.83)           | 206.87<br>(33.63 to 652.47)           | 291.83<br>(50.51 to 712.07)             |
| Chronic kidney disease due to hypertension                 | 100.40<br>(78.46 to 128.67)               | 619.99<br>(98.56 to 1,914.91)               | 564.36<br>(92.00 to 1,806.28)               | 758.50<br>(130.02 to 1,892.70)               | 6.83<br>(5.38 to 8.71)              | 58.51<br>(9.51 to 177.06)             | 55.24<br>(9.07 to 174.90)             | 67.65<br>(11.86 to 175.11)              |
| Chronic kidney disease due to glomerulonephritis           | 233.72<br>(177.14 to 304.48)              | 540.59<br>(132.78 to 1,649.07)              | 450.04<br>(108.12 to 1,399.09)              | 715.50<br>(173.34 to 1,822.91)               | 7.62<br>(5.98 to 9.69)              | 32.30<br>(5.65 to 102.52)             | 27.83<br>(5.03 to 89.21)              | 40.85<br>(7.54 to 105.28)               |
| Chronic kidney disease due to other and unspecified causes | 190.91<br>(146.94 to 247.64)              | 565.49<br>(128.23 to 1,681.38)              | 483.12<br>(107.75 to 1,473.51)              | 737.77<br>(165.57 to 1,842.43)               | 7.20<br>(5.60 to 9.41)              | 37.46<br>(6.57 to 114.00)             | 33.22<br>(5.90 to 105.93)             | 46.35<br>(8.75 to 118.11)               |
| Urinary diseases and male infertility                      | 427.03<br>(358.30 to 494.27)              | 1,013.84<br>(739.20 to 1,354.52)            | 929.60<br>(662.85 to 1,257.78)              | 1,018.92<br>(712.72 to 1,446.84)             | 21.53<br>(18.55 to 24.29)           | 77.82<br>(58.92 to 99.59)             | 73.95<br>(55.51 to 96.57)             | 74.48<br>(54.53 to 99.63)               |
| Urinary tract infections                                   | 291.07<br>(240.60 to 345.00)              | 783.19<br>(575.96 to 1,025.42)              | 726.53<br>(516.56 to 974.26)                | 781.25<br>(550.00 to 1,075.73)               | 14.83<br>(12.31 to 17.90)           | 60.08<br>(45.43 to 77.73)             | 57.69<br>(42.54 to 77.58)             | 57.18<br>(41.65 to 78.04)               |
| Urolithiasis                                               | 5.60<br>(4.04 to 7.96)                    | 12.14<br>(7.09 to 19.97)                    | 9.88<br>(5.73 to 16.21)                     | 13.26<br>(7.47 to 23.94)                     | 0.20<br>(0.14 to 0.29)              | 0.63<br>(0.37 to 1.06)                | 0.53<br>(0.31 to 0.86)                | 0.66<br>(0.37 to 1.15)                  |
| Other urinary diseases                                     | 130.36<br>(95.06 to 157.99)               | 218.51<br>(110.64 to 344.39)                | 193.18<br>(93.20 to 312.16)                 | 224.41<br>(111.42 to 367.67)                 | 6.51<br>(3.84 to 8.37)              | 17.11<br>(7.69 to 27.28)              | 15.73<br>(6.80 to 26.12)              | 16.64<br>(7.16 to 27.96)                |
| Gynecological diseases                                     | 7.59<br>(4.93 to 10.90)                   | 6.82<br>(3.53 to 11.05)                     | 5.20<br>(2.76 to 8.31)                      | 8.01<br>(4.05 to 14.72)                      | 0.22<br>(0.15 to 0.31)              | 0.25<br>(0.14 to 0.41)                | 0.20<br>(0.11 to 0.31)                | 0.29<br>(0.15 to 0.52)                  |
| Uterine fibroids                                           | 4.29<br>(2.64 to 6.67)                    | 2.97<br>(1.52 to 5.05)                      | 2.37<br>(1.26 to 3.96)                      | 3.38<br>(1.72 to 6.21)                       | 0.12<br>(0.07 to 0.18)              | 0.10<br>(0.05 to 0.15)                | 0.08<br>(0.04 to 0.12)                | 0.11<br>(0.06 to 0.19)                  |
| Polycystic ovarian syndrome                                | 0.31<br>(0.15 to 0.61)                    | 0.20<br>(0.06 to 0.52)                      | 0.12<br>(0.04 to 0.27)                      | 0.27<br>(0.08 to 0.76)                       | 0.01<br>(0.00 to 0.02)              | 0.01<br>(0.00 to 0.01)                | 0.00<br>(0.00 to 0.01)                | 0.01<br>(0.00 to 0.02)                  |
| Endometriosis                                              | 0.15<br>(0.06 to 0.35)                    | 0.20<br>(0.06 to 0.53)                      | 0.15<br>(0.04 to 0.41)                      | 0.24<br>(0.06 to 0.68)                       | 0.00<br>(0.00 to 0.01)              | 0.00<br>(0.00 to 0.01)                | 0.00<br>(0.00 to 0.01)                | 0.00<br>(0.00 to 0.02)                  |
| Genital prolapse                                           | 0.42<br>(0.20 to 0.94)                    | 0.46<br>(0.18 to 1.40)                      | 0.35<br>(0.13 to 1.08)                      | 0.54<br>(0.20 to 1.63)                       | 0.01<br>(0.01 to 0.04)              | 0.02<br>(0.01 to 0.07)                | 0.01<br>(0.01 to 0.05)                | 0.02<br>(0.01 to 0.08)                  |
| Other gynecological diseases                               | 2.41<br>(1.43 to 3.56)                    | 2.99<br>(1.19 to 5.30)                      | 2.22<br>(0.85 to 3.91)                      | 3.58<br>(1.37 to 7.11)                       | 0.08<br>(0.05 to 0.12)              | 0.13<br>(0.05 to 0.23)                | 0.10<br>(0.03 to 0.17)                | 0.15<br>(0.05 to 0.30)                  |
| Hemoglobinopathies and hemolytic anemias                   | 162.48<br>(123.26 to 205.33)              | 202.29<br>(136.59 to 291.47)                | 175.17<br>(117.60 to 249.69)                | 214.91<br>(140.14 to 319.01)                 | 4.74<br>(3.74 to 6.00)              | 10.67<br>(7.78 to 15.01)              | 9.57<br>(6.86 to 13.46)               | 10.30<br>(7.53 to 15.69)                |
| Thalassemias                                               | 28.95<br>(22.38 to 36.03)                 | 13.35<br>(8.17 to 20.17)                    | 12.69<br>(7.69 to 19.22)                    | 13.78<br>(8.44 to 21.00)                     | 0.39<br>(0.29 to 0.49)              | 0.18<br>(0.11 to 0.27)                | 0.17<br>(0.11 to 0.26)                | 0.19<br>(0.12 to 0.28)                  |

|                                                   |                                 |                                     |                                     |                                     |                              |                              |                              |                              |
|---------------------------------------------------|---------------------------------|-------------------------------------|-------------------------------------|-------------------------------------|------------------------------|------------------------------|------------------------------|------------------------------|
|                                                   | 35.82<br>(24.61 to<br>50.32)    | 29.97<br>(17.32 to<br>50.86)        | 24.70<br>(13.54 to<br>41.99)        | 33.65<br>(18.07 to<br>58.57)        | 0.71<br>(0.50 to<br>0.98)    | 0.81<br>(0.47 to<br>1.31)    | 0.68<br>(0.38 to<br>1.13)    | 0.90<br>(0.49 to<br>1.53)    |
| Sickle cell disorders                             |                                 |                                     |                                     |                                     |                              |                              |                              |                              |
|                                                   | 23.17<br>(16.55 to<br>32.30)    | 40.69<br>(24.29 to<br>65.25)        | 32.95<br>(19.68 to<br>50.73)        | 45.68<br>(26.02 to<br>74.88)        | 0.53<br>(0.38 to<br>0.73)    | 1.29<br>(0.80 to<br>1.95)    | 1.06<br>(0.65 to<br>1.59)    | 1.42<br>(0.84 to<br>2.29)    |
| G6PD deficiency                                   |                                 |                                     |                                     |                                     |                              |                              |                              |                              |
|                                                   | 74.54<br>(57.60 to<br>96.69)    | 118.29<br>(82.99 to<br>168.44)      | 104.83<br>(72.82 to<br>148.70)      | 121.79<br>(82.79 to<br>179.05)      | 3.12<br>(2.49 to<br>4.03)    | 8.39<br>(6.17 to<br>11.89)   | 7.66<br>(5.59 to<br>10.79)   | 8.29<br>(5.98 to<br>11.73)   |
| Other hemoglobinopathies and hemolytic anemias    |                                 |                                     |                                     |                                     |                              |                              |                              |                              |
|                                                   | 559.78<br>(453.90 to<br>686.00) | 1,245.26<br>(937.87 to<br>1,600.25) | 1,276.46<br>(960.50 to<br>1,638.18) | 1,196.33<br>(905.62 to<br>1,532.75) | 14.76<br>(12.00 to<br>18.23) | 55.91<br>(45.53 to<br>69.52) | 59.90<br>(48.21 to<br>74.57) | 50.75<br>(40.95 to<br>62.83) |
| Endocrine, metabolic, blood, and immune disorders |                                 |                                     |                                     |                                     |                              |                              |                              |                              |

| Brunei                                        |                                           |                                           |                                           |                                           |                                  |                                  |                                  |                                  |
|-----------------------------------------------|-------------------------------------------|-------------------------------------------|-------------------------------------------|-------------------------------------------|----------------------------------|----------------------------------|----------------------------------|----------------------------------|
| Cause                                         | YLLs (actual counts)                      |                                           |                                           |                                           | Deaths (actual counts)           |                                  |                                  |                                  |
|                                               | 2016                                      | 2040 Forecast                             | 2040 Better Scenario                      | 2040 Worse Scenario                       | 2016                             | 2040 Forecast                    | 2040 Better Scenario             | 2040 Worse Scenario              |
| <b>Musculoskeletal disorders</b>              | <b>101.47</b><br>(74.71 to 133.29)        | <b>234.07</b><br>(153.48 to 337.23)       | <b>217.40</b><br>(138.97 to 316.21)       | <b>240.66</b><br>(153.70 to 357.66)       | <b>3.41</b><br>(2.56 to 4.30)    | <b>11.70</b><br>(8.00 to 16.05)  | <b>11.00</b><br>(7.22 to 15.47)  | <b>11.75</b><br>(7.71 to 17.35)  |
| Rheumatoid arthritis                          | 12.34<br>(8.75 to 17.06)                  | 50.39<br>(29.41 to 82.74)                 | 40.41<br>(22.93 to 67.66)                 | 56.92<br>(31.20 to 102.55)                | 0.59<br>(0.44 to 0.84)           | 3.08<br>(1.85 to 5.02)           | 2.51<br>(1.45 to 4.18)           | 3.38<br>(1.87 to 6.03)           |
| Other musculoskeletal disorders               | 89.14<br>(64.68 to 118.81)                | 183.68<br>(120.35 to 262.94)              | 177.00<br>(115.05 to 254.46)              | 183.74<br>(117.99 to 263.71)              | 2.82<br>(2.06 to 3.59)           | 8.62<br>(5.79 to 11.73)          | 8.49<br>(5.63 to 11.66)          | 8.37<br>(5.47 to 11.56)          |
| <b>Other non-communicable diseases</b>        | <b>2,093.30</b><br>(1,800.98 to 2,428.06) | <b>2,678.64</b><br>(1,429.05 to 4,588.50) | <b>2,260.47</b><br>(1,147.93 to 3,742.88) | <b>3,033.11</b><br>(1,470.14 to 5,359.68) | <b>28.37</b><br>(24.16 to 32.64) | <b>51.84</b><br>(31.69 to 78.68) | <b>46.48</b><br>(28.30 to 70.65) | <b>54.99</b><br>(31.80 to 87.20) |
| Congenital birth defects                      | 1,913.42<br>(1,625.48 to 2,224.01)        | 2,233.21<br>(1,101.09 to 3,951.81)        | 1,854.18<br>(853.50 to 3,230.71)          | 2,567.35<br>(1,161.17 to 4,742.29)        | 23.70<br>(20.18 to 27.48)        | 28.33<br>(14.64 to 49.45)        | 23.62<br>(11.65 to 40.30)        | 32.42<br>(15.29 to 58.18)        |
| Neural tube defects                           | 78.59<br>(52.57 to 114.14)                | 27.28<br>(9.43 to 63.63)                  | 19.53<br>(5.79 to 45.80)                  | 35.17<br>(10.10 to 93.65)                 | 0.93<br>(0.63 to 1.34)           | 0.34<br>(0.12 to 0.77)           | 0.24<br>(0.08 to 0.56)           | 0.43<br>(0.13 to 1.13)           |
| Congenital heart anomalies                    | 680.98<br>(531.95 to 840.94)              | 489.56<br>(212.80 to 958.12)              | 346.83<br>(138.32 to 676.94)              | 624.43<br>(230.41 to 1,358.63)            | 8.69<br>(6.86 to 10.59)          | 6.54<br>(3.03 to 12.40)          | 4.66<br>(1.97 to 8.88)           | 8.27<br>(3.31 to 17.30)          |
| Orofacial clefts                              | 0.99<br>(0.35 to 2.56)                    | 0.82<br>(0.15 to 2.77)                    | 0.53<br>(0.09 to 1.78)                    | 1.11<br>(0.18 to 3.96)                    | 0.01<br>(0.00 to 0.03)           | 0.01<br>(0.00 to 0.03)           | 0.01<br>(0.00 to 0.02)           | 0.01<br>(0.00 to 0.05)           |
| Down syndrome                                 | 168.53<br>(95.70 to 241.92)               | 339.20<br>(166.41 to 560.90)              | 337.99<br>(169.45 to 546.02)              | 339.67<br>(169.20 to 556.74)              | 2.17<br>(1.31 to 3.02)           | 4.65<br>(2.66 to 7.48)           | 4.68<br>(2.68 to 7.16)           | 4.63<br>(2.62 to 7.17)           |
| Other chromosomal abnormalities               | 413.70<br>(305.34 to 644.14)              | 883.70<br>(377.97 to 1,679.76)            | 770.52<br>(321.15 to 1,480.37)            | 973.00<br>(411.39 to 1,848.78)            | 4.91<br>(3.66 to 7.59)           | 10.57<br>(4.59 to 19.95)         | 9.23<br>(3.91 to 17.58)          | 11.62<br>(5.05 to 21.82)         |
| Congenital musculoskeletal and limb anomalies | 156.94<br>(117.35 to 205.87)              | 140.40<br>(57.18 to 280.08)               | 106.92<br>(40.10 to 221.17)               | 170.98<br>(62.09 to 354.11)               | 1.90<br>(1.44 to 2.46)           | 1.73<br>(0.74 to 3.40)           | 1.32<br>(0.51 to 2.70)           | 2.10<br>(0.78 to 4.29)           |
| Urogenital congenital anomalies               | 47.84<br>(32.94 to 66.35)                 | 47.67<br>(18.65 to 102.78)                | 37.88<br>(13.08 to 82.78)                 | 56.36<br>(18.67 to 128.55)                | 0.59<br>(0.42 to 0.80)           | 0.62<br>(0.26 to 1.28)           | 0.50<br>(0.19 to 1.05)           | 0.73<br>(0.27 to 1.58)           |
| Digestive congenital anomalies                | 10.77<br>(6.18 to 14.87)                  | 10.14<br>(3.25 to 23.50)                  | 7.50<br>(2.15 to 17.41)                   | 12.63<br>(3.82 to 31.05)                  | 0.13<br>(0.07 to 0.18)           | 0.12<br>(0.04 to 0.28)           | 0.09<br>(0.03 to 0.21)           | 0.15<br>(0.05 to 0.37)           |
| Other congenital birth defects                | 355.08<br>(262.87 to 448.95)              | 294.44<br>(134.80 to 552.27)              | 226.48<br>(95.93 to 439.96)               | 354.00<br>(144.97 to 696.88)              | 4.36<br>(3.28 to 5.45)           | 3.75<br>(1.82 to 6.86)           | 2.90<br>(1.29 to 5.43)           | 4.49<br>(1.93 to 8.62)           |
| Skin and subcutaneous diseases                | 76.76<br>(43.96 to 105.19)                | 347.14<br>(194.08 to 486.01)              | 332.01<br>(183.84 to 465.14)              | 342.78<br>(192.05 to 487.41)              | 3.47<br>(1.99 to 4.88)           | 22.37<br>(12.92 to 31.59)        | 22.00<br>(12.50 to 31.39)        | 21.14<br>(12.23 to 30.27)        |
| Cellulitis                                    | 26.72<br>(13.09 to 40.95)                 | 122.84<br>(56.38 to 178.73)               | 121.08<br>(55.47 to 176.51)               | 119.66<br>(54.30 to 175.01)               | 1.06<br>(0.48 to 1.55)           | 6.98<br>(3.14 to 9.94)           | 7.07<br>(3.18 to 10.05)          | 6.55<br>(2.92 to 9.40)           |
| Pyoderma                                      | 30.44<br>(15.86 to 43.66)                 | 160.82<br>(83.54 to 231.50)               | 152.58<br>(76.96 to 219.53)               | 159.68<br>(80.83 to 230.73)               | 1.12<br>(0.56 to 1.56)           | 9.47<br>(4.98 to 13.53)          | 9.32<br>(4.85 to 13.29)          | 8.94<br>(4.67 to 12.75)          |
| Decubitus ulcer                               | 13.48<br>(6.95 to 20.20)                  | 49.68<br>(23.23 to 89.33)                 | 45.38<br>(20.50 to 82.41)                 | 49.56<br>(22.70 to 90.55)                 | 1.07<br>(0.58 to 1.74)           | 5.13<br>(2.57 to 9.67)           | 4.83<br>(2.37 to 9.05)           | 4.90<br>(2.37 to 9.18)           |
| Other skin and subcutaneous diseases          | 6.11<br>(3.39 to 9.21)                    | 13.81<br>(7.57 to 21.60)                  | 12.97<br>(6.80 to 20.76)                  | 13.89<br>(7.24 to 22.27)                  | 0.22<br>(0.12 to 0.31)           | 0.79<br>(0.41 to 1.19)           | 0.77<br>(0.40 to 1.17)           | 0.74<br>(0.39 to 1.14)           |
| Sudden infant death syndrome                  | 103.13<br>(64.84 to 154.13)               | 98.28<br>(32.10 to 208.82)                | 74.27<br>(22.71 to 162.28)                | 122.98<br>(34.79 to 299.62)               | 1.20<br>(0.75 to 1.79)           | 1.14<br>(0.37 to 2.42)           | 0.86<br>(0.26 to 1.88)           | 1.43<br>(0.40 to 3.48)           |

|                          |                                       |                                       |                                       |                                        |                                 |                                 |                                 |                                 |
|--------------------------|---------------------------------------|---------------------------------------|---------------------------------------|----------------------------------------|---------------------------------|---------------------------------|---------------------------------|---------------------------------|
| Injuries                 | 6,973.28<br>(5,366.55 to<br>9,029.18) | 7,019.42<br>(4,979.89 to<br>9,861.31) | 4,906.80<br>(3,388.17 to<br>6,864.45) | 8,280.92<br>(5,605.18 to<br>11,770.25) | 152.08<br>(118.53 to<br>192.18) | 227.29<br>(173.89 to<br>292.12) | 174.86<br>(132.03 to<br>223.55) | 251.06<br>(183.86 to<br>331.18) |
| Transport injuries       | 3,251.91<br>(2,412.26 to<br>4,239.38) | 3,247.83<br>(2,235.23 to<br>4,701.50) | 1,601.29<br>(1,086.08 to<br>2,339.56) | 4,261.62<br>(2,885.83 to<br>6,293.14)  | 67.18<br>(51.07 to<br>85.74)    | 92.60<br>(67.17 to<br>124.86)   | 51.36<br>(36.66 to<br>69.33)    | 114.67<br>(80.96 to<br>160.53)  |
| Road injuries            | 2,814.04<br>(2,088.36 to<br>3,682.81) | 2,664.26<br>(1,851.64 to<br>3,884.98) | 1,149.81<br>(797.26 to<br>1,691.25)   | 3,592.17<br>(2,460.04 to<br>5,307.24)  | 57.35<br>(43.55 to<br>73.62)    | 74.11<br>(54.49 to<br>100.41)   | 36.61<br>(27.10 to<br>49.41)    | 94.09<br>(68.48 to<br>128.13)   |
| Pedestrian road injuries | 612.53<br>(457.70 to<br>793.19)       | 414.64<br>(258.76 to<br>636.82)       | 172.39<br>(106.52 to<br>257.40)       | 580.99<br>(337.41 to<br>953.44)        | 14.79<br>(11.44 to<br>18.76)    | 15.92<br>(10.75 to<br>23.02)    | 7.39<br>(5.00 to<br>10.61)      | 20.93<br>(13.06 to<br>31.65)    |

| Brunei                                          |                                                            |                                                            |                                                            |                                                            |                                                   |                                                     |                                                    |                                                     |
|-------------------------------------------------|------------------------------------------------------------|------------------------------------------------------------|------------------------------------------------------------|------------------------------------------------------------|---------------------------------------------------|-----------------------------------------------------|----------------------------------------------------|-----------------------------------------------------|
| Cause                                           | YLLs (actual counts)                                       |                                                            |                                                            |                                                            | Deaths (actual counts)                            |                                                     |                                                    |                                                     |
|                                                 | 2016                                                       | 2040 Forecast                                              | 2040 Better Scenario                                       | 2040 Worse Scenario                                        | 2016                                              | 2040 Forecast                                       | 2040 Better Scenario                               | 2040 Worse Scenario                                 |
| Cyclist road injuries                           | 141.91<br>(100.50 to<br>187.04)                            | 165.07<br>(112.79 to<br>233.06)                            | 83.97<br>(57.65 to<br>116.20)                              | 208.72<br>(141.86 to<br>294.17)                            | 3.46<br>(2.52 to<br>4.41)                         | 5.98<br>(4.36 to<br>7.95)                           | 3.75<br>(2.67 to<br>5.03)                          | 6.80<br>(4.92 to<br>9.03)                           |
| Motorcyclist road injuries                      | 798.15<br>(532.86 to<br>1,137.83)                          | 792.76<br>(499.39 to<br>1,222.73)                          | 430.37<br>(270.05 to<br>663.80)                            | 984.59<br>(621.64 to<br>1,513.91)                          | 14.46<br>(9.83 to<br>20.24)                       | 19.06<br>(12.87 to<br>27.55)                        | 11.85<br>(8.04 to<br>16.93)                        | 22.33<br>(15.06 to<br>32.13)                        |
| Motor vehicle road injuries                     | 1,220.29<br>(873.71 to<br>1,688.48)                        | 1,239.88<br>(834.51 to<br>1,853.89)                        | 442.65<br>(299.71 to<br>660.64)                            | 1,747.07<br>(1,178.87 to<br>2,621.78)                      | 23.81<br>(17.41 to<br>32.31)                      | 31.60<br>(22.90 to<br>44.25)                        | 12.87<br>(9.39 to<br>17.53)                        | 42.09<br>(30.21 to<br>59.06)                        |
| Other road injuries                             | 41.16<br>(27.51 to<br>58.13)                               | 51.91<br>(34.32 to<br>78.21)                               | 20.44<br>(14.31 to<br>29.58)                               | 70.80<br>(46.31 to<br>108.72)                              | 0.83<br>(0.58 to<br>1.14)                         | 1.55<br>(1.09 to<br>2.18)                           | 0.75<br>(0.54 to<br>1.03)                          | 1.93<br>(1.36 to<br>2.73)                           |
| Other transport injuries                        | 437.87<br>(316.98 to<br>593.03)                            | 583.57<br>(350.25 to<br>930.34)                            | 451.48<br>(263.59 to<br>713.43)                            | 669.45<br>(373.25 to<br>1,162.40)                          | 9.84<br>(7.29 to<br>13.08)                        | 18.49<br>(11.77 to<br>27.66)                        | 14.75<br>(9.34 to<br>22.08)                        | 20.58<br>(12.30 to<br>33.64)                        |
| <b>Unintentional injuries</b>                   | <b>2,510.13</b><br><b>(1,974.85 to</b><br><b>3,179.22)</b> | <b>2,635.78</b><br><b>(1,918.39 to</b><br><b>3,582.68)</b> | <b>2,318.36</b><br><b>(1,649.74 to</b><br><b>3,118.87)</b> | <b>2,793.88</b><br><b>(1,956.77 to</b><br><b>3,920.80)</b> | <b>58.91</b><br><b>(46.73 to</b><br><b>73.40)</b> | <b>104.17</b><br><b>(83.55 to</b><br><b>129.05)</b> | <b>96.45</b><br><b>(75.47 to</b><br><b>119.40)</b> | <b>104.16</b><br><b>(80.14 to</b><br><b>134.51)</b> |
| Falls                                           | 598.75<br>(451.80 to<br>802.21)                            | 865.38<br>(643.52 to<br>1,143.88)                          | 792.06<br>(578.60 to<br>1,047.22)                          | 884.39<br>(649.01 to<br>1,187.84)                          | 17.17<br>(13.40 to<br>22.05)                      | 42.26<br>(33.95 to<br>52.75)                        | 40.26<br>(31.60 to<br>50.34)                       | 40.98<br>(31.95 to<br>51.92)                        |
| Drowning                                        | 801.95<br>(614.32 to<br>1,032.97)                          | 648.23<br>(434.11 to<br>921.25)                            | 557.77<br>(375.31 to<br>780.10)                            | 699.29<br>(461.05 to<br>1,031.72)                          | 16.16<br>(12.47 to<br>20.89)                      | 21.00<br>(15.68 to<br>27.20)                        | 18.87<br>(13.80 to<br>24.64)                       | 21.53<br>(15.63 to<br>29.59)                        |
| Fire, heat, and hot substances                  | 231.15<br>(178.61 to<br>289.78)                            | 199.10<br>(139.35 to<br>277.45)                            | 163.09<br>(112.12 to<br>226.16)                            | 220.18<br>(146.33 to<br>327.22)                            | 5.50<br>(4.35 to<br>6.84)                         | 7.81<br>(5.91 to<br>10.56)                          | 6.70<br>(4.98 to<br>8.84)                          | 8.19<br>(5.90 to<br>11.39)                          |
| Poisonings                                      | 72.87<br>(51.82 to<br>104.64)                              | 38.40<br>(23.93 to<br>60.23)                               | 29.49<br>(18.10 to<br>44.90)                               | 44.57<br>(26.33 to<br>75.49)                               | 1.58<br>(1.14 to<br>2.25)                         | 1.16<br>(0.77 to<br>1.72)                           | 0.92<br>(0.62 to<br>1.31)                          | 1.29<br>(0.82 to<br>2.04)                           |
| Exposure to mechanical forces                   | 394.79<br>(293.19 to<br>532.50)                            | 367.66<br>(245.91 to<br>537.29)                            | 303.82<br>(197.75 to<br>444.79)                            | 407.58<br>(256.56 to<br>629.75)                            | 8.64<br>(6.42 to<br>11.79)                        | 10.85<br>(7.83 to<br>14.87)                         | 9.25<br>(6.61 to<br>12.60)                         | 11.63<br>(8.00 to<br>16.79)                         |
| Unintentional firearm injuries                  | 25.70<br>(20.00 to<br>33.57)                               | 32.69<br>(24.23 to<br>42.61)                               | 29.20<br>(21.48 to<br>38.22)                               | 34.27<br>(24.41 to<br>46.39)                               | 0.63<br>(0.50 to<br>0.79)                         | 1.47<br>(1.16 to<br>1.81)                           | 1.40<br>(1.11 to<br>1.73)                          | 1.44<br>(1.11 to<br>1.81)                           |
| Unintentional suffocation                       | 28.06<br>(15.46 to<br>48.93)                               | 25.31<br>(8.00 to<br>58.75)                                | 20.72<br>(6.64 to<br>48.23)                                | 29.10<br>(8.72 to<br>69.15)                                | 0.35<br>(0.20 to<br>0.59)                         | 0.33<br>(0.12 to<br>0.73)                           | 0.27<br>(0.10 to<br>0.59)                          | 0.37<br>(0.13 to<br>0.84)                           |
| Other exposure to mechanical forces             | 341.03<br>(248.03 to<br>475.91)                            | 309.67<br>(204.36 to<br>430.48)                            | 253.90<br>(166.99 to<br>374.58)                            | 344.20<br>(217.65 to<br>539.75)                            | 7.66<br>(5.57 to<br>10.60)                        | 9.05<br>(6.36 to<br>12.61)                          | 7.58<br>(5.21 to<br>10.62)                         | 9.82<br>(6.55 to<br>14.49)                          |
| Adverse effects of medical treatment            | 103.90<br>(79.07 to<br>130.56)                             | 139.66<br>(99.67 to<br>186.48)                             | 127.76<br>(89.04 to<br>169.07)                             | 143.93<br>(98.28 to<br>194.58)                             | 2.67<br>(2.11 to<br>3.23)                         | 6.06<br>(4.68 to<br>7.56)                           | 5.81<br>(4.39 to<br>7.27)                          | 5.90<br>(4.46 to<br>7.46)                           |
| Animal contact                                  | 16.41<br>(12.38 to<br>21.21)                               | 30.59<br>(20.76 to<br>43.76)                               | 26.35<br>(17.20 to<br>37.64)                               | 32.95<br>(21.41 to<br>49.89)                               | 0.41<br>(0.31 to<br>0.53)                         | 1.13<br>(0.83 to<br>1.52)                           | 1.01<br>(0.73 to<br>1.37)                          | 1.16<br>(0.82 to<br>1.65)                           |
| Venomous animal contact                         | 5.20<br>(3.61 to<br>6.94)                                  | 11.64<br>(7.83 to<br>16.01)                                | 10.50<br>(7.12 to<br>14.83)                                | 12.14<br>(8.19 to<br>16.93)                                | 0.14<br>(0.10 to<br>0.19)                         | 0.47<br>(0.33 to<br>0.65)                           | 0.44<br>(0.30 to<br>0.62)                          | 0.47<br>(0.33 to<br>0.67)                           |
| Non-venomous animal contact                     | 11.21<br>(8.21 to<br>14.74)                                | 18.95<br>(12.09 to<br>28.71)                               | 15.85<br>(9.81 to<br>24.22)                                | 20.81<br>(12.57 to<br>33.70)                               | 0.27<br>(0.20 to<br>0.35)                         | 0.66<br>(0.46 to<br>0.94)                           | 0.57<br>(0.39 to<br>0.82)                          | 0.69<br>(0.46 to<br>1.03)                           |
| Foreign body                                    | 191.03<br>(144.82 to<br>240.37)                            | 282.14<br>(203.28 to<br>387.16)                            | 269.59<br>(193.42 to<br>367.01)                            | 284.64<br>(199.36 to<br>402.24)                            | 4.56<br>(3.78 to<br>5.44)                         | 11.76<br>(9.45 to<br>14.70)                         | 11.95<br>(9.54 to<br>15.06)                        | 11.05<br>(8.80 to<br>14.00)                         |
| Pulmonary aspiration and foreign body in airway | 159.47<br>(114.32 to<br>207.21)                            | 225.24<br>(153.68 to<br>329.58)                            | 210.92<br>(141.89 to<br>305.98)                            | 230.22<br>(151.33 to<br>349.74)                            | 3.77<br>(3.04 to<br>4.51)                         | 9.29<br>(7.11 to<br>12.06)                          | 9.26<br>(6.99 to<br>12.36)                         | 8.84<br>(6.67 to<br>11.54)                          |

|                                             |                                                          |                                                          |                                                        |                                                          |                                                   |                                                   |                                                   |                                                   |
|---------------------------------------------|----------------------------------------------------------|----------------------------------------------------------|--------------------------------------------------------|----------------------------------------------------------|---------------------------------------------------|---------------------------------------------------|---------------------------------------------------|---------------------------------------------------|
|                                             | 31.56<br>(23.82 to<br>46.69)                             | 56.90<br>(43.11 to<br>79.99)                             | 58.67<br>(44.47 to<br>81.85)                           | 54.42<br>(41.45 to<br>76.35)                             | 0.78<br>(0.61 to<br>1.09)                         | 2.47<br>(1.89 to<br>3.29)                         | 2.69<br>(2.09 to<br>3.51)                         | 2.21<br>(1.68 to<br>2.94)                         |
| Foreign body in other body part             |                                                          |                                                          |                                                        |                                                          |                                                   |                                                   |                                                   |                                                   |
|                                             | 25.64<br>(18.03 to<br>35.15)                             | 32.56<br>(20.17 to<br>49.00)                             | 26.57<br>(16.79 to<br>39.23)                           | 36.11<br>(21.46 to<br>57.24)                             | 0.69<br>(0.50 to<br>0.91)                         | 1.29<br>(0.85 to<br>1.86)                         | 1.09<br>(0.71 to<br>1.54)                         | 1.37<br>(0.86 to<br>2.11)                         |
| Environmental heat and cold exposure        |                                                          |                                                          |                                                        |                                                          |                                                   |                                                   |                                                   |                                                   |
|                                             | 73.66<br>(52.99 to<br>100.77)                            | 32.05<br>(17.85 to<br>53.69)                             | 21.86<br>(12.57 to<br>35.93)                           | 40.24<br>(21.13 to<br>76.21)                             | 1.53<br>(1.11 to<br>2.08)                         | 0.85<br>(0.51 to<br>1.37)                         | 0.59<br>(0.36 to<br>0.93)                         | 1.05<br>(0.60 to<br>1.92)                         |
| Other unintentional injuries                |                                                          |                                                          |                                                        |                                                          |                                                   |                                                   |                                                   |                                                   |
| <b>Self-harm and interpersonal violence</b> | <b>1,206.65</b><br><b>(889.94 to</b><br><b>1,625.56)</b> | <b>1,109.04</b><br><b>(726.22 to</b><br><b>1,632.76)</b> | <b>960.46</b><br><b>(614.97 to</b><br><b>1,385.79)</b> | <b>1,198.62</b><br><b>(771.05 to</b><br><b>1,773.13)</b> | <b>25.90</b><br><b>(19.16 to</b><br><b>34.35)</b> | <b>29.96</b><br><b>(20.35 to</b><br><b>41.86)</b> | <b>26.49</b><br><b>(17.65 to</b><br><b>36.74)</b> | <b>31.68</b><br><b>(20.93 to</b><br><b>45.15)</b> |

| Brunei                                                                              |                                                |                                                  |                                                  |                                                  |                                                |                                                |                                                |                                                |
|-------------------------------------------------------------------------------------|------------------------------------------------|--------------------------------------------------|--------------------------------------------------|--------------------------------------------------|------------------------------------------------|------------------------------------------------|------------------------------------------------|------------------------------------------------|
| Cause                                                                               | YLLs (actual counts)                           |                                                  |                                                  |                                                  | Deaths (actual counts)                         |                                                |                                                |                                                |
|                                                                                     | 2016                                           | 2040 Forecast                                    | 2040 Better Scenario                             | 2040 Worse Scenario                              | 2016                                           | 2040 Forecast                                  | 2040 Better Scenario                           | 2040 Worse Scenario                            |
| Self-harm                                                                           | 935.79<br>(670.93 to<br>1,296.91)              | 902.17<br>(579.20 to<br>1,334.64)                | 785.55<br>(496.22 to<br>1,150.50)                | 971.10<br>(608.67 to<br>1,449.38)                | 20.64<br>(15.04 to<br>27.84)                   | 24.93<br>(16.77 to<br>35.22)                   | 22.15<br>(14.61 to<br>31.00)                   | 26.27<br>(17.20 to<br>37.68)                   |
| Self-harm by firearm                                                                | 49.52<br>(31.18 to<br>88.30)                   | 41.81<br>(23.86 to<br>72.02)                     | 34.75<br>(19.27 to<br>59.13)                     | 46.35<br>(25.31 to<br>86.29)                     | 1.15<br>(0.76 to<br>1.88)                      | 1.34<br>(0.76 to<br>2.05)                      | 1.15<br>(0.66 to<br>1.78)                      | 1.43<br>(0.81 to<br>2.39)                      |
| Self-harm by other specified means                                                  | 886.27<br>(629.84 to<br>1,218.87)              | 860.35<br>(547.87 to<br>1,264.45)                | 750.79<br>(475.24 to<br>1,099.13)                | 924.75<br>(579.61 to<br>1,368.96)                | 19.49<br>(14.13 to<br>26.07)                   | 23.59<br>(15.88 to<br>33.33)                   | 20.99<br>(13.88 to<br>29.41)                   | 24.84<br>(16.36 to<br>35.65)                   |
| Interpersonal violence                                                              | 270.86<br>(204.09 to<br>339.45)                | 206.87<br>(133.03 to<br>303.67)                  | 174.91<br>(113.05 to<br>254.69)                  | 227.52<br>(141.51 to<br>340.20)                  | 5.26<br>(3.83 to<br>7.01)                      | 5.03<br>(3.30 to<br>7.20)                      | 4.34<br>(2.84 to<br>6.14)                      | 5.41<br>(3.48 to<br>7.90)                      |
| Physical violence by firearm                                                        | 36.52<br>(19.98 to<br>55.34)                   | 25.90<br>(13.58 to<br>41.39)                     | 21.03<br>(11.25 to<br>33.28)                     | 29.18<br>(14.77 to<br>47.83)                     | 0.74<br>(0.40 to<br>1.11)                      | 0.65<br>(0.34 to<br>1.01)                      | 0.54<br>(0.29 to<br>0.82)                      | 0.72<br>(0.37 to<br>1.13)                      |
| Physical violence by sharp object                                                   | 66.47<br>(43.48 to<br>100.02)                  | 47.02<br>(26.65 to<br>76.81)                     | 37.62<br>(21.78 to<br>60.58)                     | 53.36<br>(29.25 to<br>87.31)                     | 1.35<br>(0.90 to<br>2.01)                      | 1.15<br>(0.69 to<br>1.80)                      | 0.94<br>(0.57 to<br>1.46)                      | 1.28<br>(0.74 to<br>2.06)                      |
| Physical violence by other means                                                    | 167.87<br>(128.04 to<br>220.35)                | 133.96<br>(85.83 to<br>191.22)                   | 116.27<br>(74.17 to<br>168.40)                   | 144.97<br>(90.59 to<br>216.75)                   | 3.18<br>(2.32 to<br>4.15)                      | 3.23<br>(2.07 to<br>4.53)                      | 2.87<br>(1.83 to<br>3.98)                      | 3.41<br>(2.17 to<br>4.82)                      |
| <b>Forces of nature, conflict and terrorism, and executions and police conflict</b> | <b>4.58</b><br><b>(2.87 to</b><br><b>6.84)</b> | <b>26.77</b><br><b>(0.00 to</b><br><b>76.63)</b> | <b>26.69</b><br><b>(0.00 to</b><br><b>77.20)</b> | <b>26.81</b><br><b>(0.00 to</b><br><b>76.20)</b> | <b>0.09</b><br><b>(0.05 to</b><br><b>0.13)</b> | <b>0.55</b><br><b>(0.00 to</b><br><b>1.68)</b> | <b>0.56</b><br><b>(0.00 to</b><br><b>1.69)</b> | <b>0.55</b><br><b>(0.00 to</b><br><b>1.67)</b> |
| Exposure to forces of nature                                                        | 0.00<br>(0.00 to<br>0.00)                      | 1.24<br>(0.00 to<br>0.00)                        | 1.25<br>(0.00 to<br>0.00)                        | 1.23<br>(0.00 to<br>0.00)                        | 0.00<br>(0.00 to<br>0.00)                      | 0.03<br>(0.00 to<br>0.00)                      | 0.03<br>(0.00 to<br>0.00)                      | 0.03<br>(0.00 to<br>0.00)                      |
| Conflict and terrorism                                                              | 0.00<br>(0.00 to<br>0.00)                      | 25.53<br>(0.00 to<br>1.10)                       | 25.44<br>(0.00 to<br>1.11)                       | 25.57<br>(0.00 to<br>1.09)                       | 0.00<br>(0.00 to<br>0.00)                      | 0.53<br>(0.00 to<br>0.02)                      | 0.53<br>(0.00 to<br>0.02)                      | 0.52<br>(0.00 to<br>0.02)                      |
| Executions and police conflict                                                      | 4.58<br>(2.87 to<br>6.84)                      | 0.00<br>(0.00 to<br>0.00)                        | 0.00<br>(0.00 to<br>0.00)                        | 0.00<br>(0.00 to<br>0.00)                        | 0.09<br>(0.05 to<br>0.13)                      | 0.00<br>(0.00 to<br>0.00)                      | 0.00<br>(0.00 to<br>0.00)                      | 0.00<br>(0.00 to<br>0.00)                      |

| Japan                                                             |                                       |                                       |                                       |                                       |                                    |                                    |                                    |                                    |
|-------------------------------------------------------------------|---------------------------------------|---------------------------------------|---------------------------------------|---------------------------------------|------------------------------------|------------------------------------|------------------------------------|------------------------------------|
| Cause                                                             | YLLs (in 1000s)                       |                                       |                                       |                                       | Deaths (in 1000s)                  |                                    |                                    |                                    |
|                                                                   | 2016                                  | 2040 Forecast                         | 2040 Better Scenario                  | 2040 Worse Scenario                   | 2016                               | 2040 Forecast                      | 2040 Better Scenario               | 2040 Worse Scenario                |
| All causes                                                        | 16,471.49<br>(16,155.13 to 16,790.79) | 14,183.12<br>(11,653.53 to 16,868.02) | 12,263.06<br>(10,173.69 to 14,626.82) | 16,396.41<br>(13,333.45 to 19,888.36) | 1,344.35<br>(1,322.19 to 1,367.14) | 1,477.39<br>(1,244.80 to 1,728.29) | 1,330.60<br>(1,118.39 to 1,553.19) | 1,652.13<br>(1,386.38 to 1,929.41) |
| Communicable, maternal, neonatal, and nutritional diseases        | 1,113.82<br>(1,028.66 to 1,215.82)    | 1,216.95<br>(938.26 to 1,595.26)      | 1,074.70<br>(848.88 to 1,346.12)      | 1,407.88<br>(1,045.12 to 1,929.72)    | 110.34<br>(100.49 to 121.27)       | 160.00<br>(125.88 to 207.41)       | 149.09<br>(119.88 to 183.80)       | 176.33<br>(135.19 to 235.89)       |
| HIV/AIDS and tuberculosis                                         | 47.10<br>(43.98 to 49.96)             | 24.62<br>(15.40 to 40.11)             | 16.76<br>(11.54 to 25.15)             | 29.70<br>(17.77 to 49.75)             | 4.09<br>(3.81 to 4.36)             | 2.76<br>(1.75 to 4.34)             | 1.96<br>(1.35 to 2.88)             | 3.18<br>(1.92 to 5.39)             |
| Tuberculosis                                                      | 42.14<br>(39.06 to 45.01)             | 23.41<br>(14.26 to 38.95)             | 15.93<br>(10.77 to 24.43)             | 28.09<br>(16.19 to 48.55)             | 3.94<br>(3.66 to 4.21)             | 2.72<br>(1.71 to 4.30)             | 1.93<br>(1.33 to 2.85)             | 3.14<br>(1.87 to 5.33)             |
| HIV/AIDS                                                          | 4.96<br>(4.91 to 5.00)                | 1.21<br>(0.92 to 1.61)                | 0.83<br>(0.67 to 1.00)                | 1.60<br>(1.12 to 2.14)                | 0.14<br>(0.14 to 0.15)             | 0.03<br>(0.03 to 0.04)             | 0.03<br>(0.02 to 0.03)             | 0.04<br>(0.03 to 0.06)             |
| Diarrhea, lower respiratory, and other common infectious diseases | 942.71<br>(861.59 to 1,046.21)        | 1,104.69<br>(838.01 to 1,484.31)      | 974.20<br>(753.86 to 1,246.81)        | 1,290.36<br>(929.67 to 1,817.08)      | 100.41<br>(90.88 to 111.32)        | 150.79<br>(117.38 to 198.17)       | 140.36<br>(111.23 to 174.93)       | 167.85<br>(125.68 to 227.03)       |
| Diarrheal diseases                                                | 33.28<br>(31.54 to 34.92)             | 88.79<br>(42.87 to 184.05)            | 109.54<br>(64.12 to 195.40)           | 80.88<br>(39.62 to 169.88)            | 3.08<br>(2.92 to 3.25)             | 12.05<br>(5.66 to 25.04)           | 15.35<br>(8.92 to 27.87)           | 10.70<br>(5.06 to 22.12)           |
| Intestinal infectious diseases                                    | 0.12<br>(0.05 to 0.22)                | 0.08<br>(0.04 to 0.15)                | 0.09<br>(0.04 to 0.16)                | 0.08<br>(0.04 to 0.15)                | 0.01<br>(0.00 to 0.01)             | 0.00<br>(0.00 to 0.01)             | 0.00<br>(0.00 to 0.01)             | 0.00<br>(0.00 to 0.01)             |
| Typhoid fever                                                     | 0.06<br>(0.02 to 0.13)                | 0.05<br>(0.02 to 0.09)                | 0.05<br>(0.02 to 0.11)                | 0.04<br>(0.02 to 0.10)                | 0.00<br>(0.00 to 0.00)             | 0.00<br>(0.00 to 0.00)             | 0.00<br>(0.00 to 0.00)             | 0.00<br>(0.00 to 0.00)             |
| Paratyphoid fever                                                 | 0.03<br>(0.01 to 0.07)                | 0.02<br>(0.00 to 0.04)                | 0.01<br>(0.00 to 0.03)                | 0.02<br>(0.01 to 0.04)                | 0.00<br>(0.00 to 0.00)             | 0.00<br>(0.00 to 0.00)             | 0.00<br>(0.00 to 0.00)             | 0.00<br>(0.00 to 0.00)             |
| Other intestinal infectious diseases                              | 0.03<br>(0.01 to 0.07)                | 0.02<br>(0.01 to 0.05)                | 0.02<br>(0.01 to 0.05)                | 0.02<br>(0.01 to 0.05)                | 0.00<br>(0.00 to 0.01)             | 0.00<br>(0.00 to 0.01)             | 0.00<br>(0.00 to 0.01)             | 0.00<br>(0.00 to 0.01)             |
| Lower respiratory infections                                      | 886.61<br>(804.57 to 989.08)          | 998.33<br>(727.97 to 1,373.60)        | 847.81<br>(638.51 to 1,122.24)        | 1,191.13<br>(842.60 to 1,731.32)      | 96.26<br>(86.78 to 107.15)         | 137.72<br>(104.09 to 185.38)       | 123.99<br>(94.74 to 159.53)        | 155.34<br>(113.02 to 217.01)       |
| Upper respiratory infections                                      | 0.17<br>(0.15 to 0.19)                | 0.09<br>(0.06 to 0.14)                | 0.07<br>(0.05 to 0.11)                | 0.10<br>(0.06 to 0.16)                | 0.01<br>(0.01 to 0.01)             | 0.01<br>(0.01 to 0.01)             | 0.01<br>(0.01 to 0.01)             | 0.01<br>(0.00 to 0.01)             |
| Otitis media                                                      | 0.01<br>(0.01 to 0.01)                | 0.00<br>(0.00 to 0.01)                | 0.00<br>(0.00 to 0.01)                | 0.00<br>(0.00 to 0.00)                | 0.00<br>(0.00 to 0.00)             | 0.00<br>(0.00 to 0.00)             | 0.00<br>(0.00 to 0.00)             | 0.00<br>(0.00 to 0.00)             |
| Meningitis                                                        | 9.75<br>(8.77 to 11.80)               | 4.23<br>(3.37 to 5.44)                | 3.87<br>(3.06 to 4.98)                | 4.47<br>(3.51 to 5.81)                | 0.48<br>(0.43 to 0.57)             | 0.28<br>(0.23 to 0.35)             | 0.26<br>(0.21 to 0.33)             | 0.28<br>(0.22 to 0.35)             |
| Pneumococcal meningitis                                           | 2.25<br>(2.01 to 2.78)                | 1.18<br>(0.95 to 1.53)                | 1.22<br>(0.98 to 1.59)                | 1.20<br>(0.96 to 1.56)                | 0.12<br>(0.10 to 0.14)             | 0.08<br>(0.06 to 0.10)             | 0.08<br>(0.07 to 0.11)             | 0.08<br>(0.06 to 0.10)             |
| H influenzae type B meningitis                                    | 1.50<br>(1.34 to 1.78)                | 0.79<br>(0.60 to 1.01)                | 0.80<br>(0.61 to 1.02)                | 0.97<br>(0.65 to 1.38)                | 0.07<br>(0.06 to 0.08)             | 0.05<br>(0.04 to 0.06)             | 0.05<br>(0.04 to 0.06)             | 0.05<br>(0.04 to 0.06)             |
| Meningococcal meningitis                                          | 1.48<br>(1.32 to 1.75)                | 0.51<br>(0.38 to 0.68)                | 0.42<br>(0.32 to 0.55)                | 0.52<br>(0.39 to 0.71)                | 0.06<br>(0.05 to 0.07)             | 0.03<br>(0.02 to 0.04)             | 0.03<br>(0.02 to 0.03)             | 0.03<br>(0.02 to 0.04)             |
| Other meningitis                                                  | 4.51<br>(4.05 to 5.48)                | 1.75<br>(1.31 to 2.40)                | 1.43<br>(1.08 to 1.91)                | 1.79<br>(1.33 to 2.48)                | 0.23<br>(0.20 to 0.28)             | 0.12<br>(0.09 to 0.16)             | 0.10<br>(0.08 to 0.14)             | 0.12<br>(0.09 to 0.17)             |
| Encephalitis                                                      | 11.61<br>(9.52 to 17.72)              | 11.76<br>(9.29 to 17.80)              | 11.67<br>(9.12 to 17.58)              | 11.60<br>(9.14 to 17.49)              | 0.49<br>(0.41 to 0.73)             | 0.65<br>(0.51 to 0.95)             | 0.66<br>(0.52 to 0.95)             | 0.62<br>(0.49 to 0.92)             |



|                |                           |                           |                           |                           |                           |                           |                           |                           |
|----------------|---------------------------|---------------------------|---------------------------|---------------------------|---------------------------|---------------------------|---------------------------|---------------------------|
| Diphtheria     | 0.02<br>(0.02 to<br>0.02) | 0.00<br>(0.00 to<br>0.00) | 0.00<br>(0.00 to<br>0.00) | 0.01<br>(0.00 to<br>0.01) | 0.00<br>(0.00 to<br>0.00) | 0.00<br>(0.00 to<br>0.00) | 0.00<br>(0.00 to<br>0.00) | 0.00<br>(0.00 to<br>0.00) |
| Whooping cough | 0.16<br>(0.05 to<br>0.23) | 0.04<br>(0.01 to<br>0.10) | 0.03<br>(0.01 to<br>0.07) | 0.42<br>(0.06 to<br>1.08) | 0.00<br>(0.00 to<br>0.00) | 0.00<br>(0.00 to<br>0.00) | 0.00<br>(0.00 to<br>0.00) | 0.00<br>(0.00 to<br>0.01) |
| Tetanus        | 0.11<br>(0.07 to<br>0.14) | 0.01<br>(0.00 to<br>0.01) | 0.01<br>(0.00 to<br>0.01) | 0.01<br>(0.01 to<br>0.02) | 0.01<br>(0.00 to<br>0.01) | 0.00<br>(0.00 to<br>0.00) | 0.00<br>(0.00 to<br>0.00) | 0.00<br>(0.00 to<br>0.00) |
| Measles        | 0.18<br>(0.15 to<br>0.21) | 0.83<br>(0.01 to<br>4.43) | 0.64<br>(0.01 to<br>3.22) | 1.15<br>(0.01 to<br>6.37) | 0.00<br>(0.00 to<br>0.00) | 0.01<br>(0.00 to<br>0.06) | 0.01<br>(0.00 to<br>0.05) | 0.02<br>(0.00 to<br>0.08) |

| Japan                                                 |                               |                               |                               |                               |                               |                               |                               |                               |
|-------------------------------------------------------|-------------------------------|-------------------------------|-------------------------------|-------------------------------|-------------------------------|-------------------------------|-------------------------------|-------------------------------|
| Cause                                                 | YLLs (in 1000s)               |                               |                               |                               | Deaths (in 1000s)             |                               |                               |                               |
|                                                       | 2016                          | 2040 Forecast                 | 2040 Better Scenario          | 2040 Worse Scenario           | 2016                          | 2040 Forecast                 | 2040 Better Scenario          | 2040 Worse Scenario           |
| Varicella and herpes zoster                           | 0.68<br>(0.41 to 1.42)        | 0.52<br>(0.31 to 1.15)        | 0.47<br>(0.29 to 1.03)        | 0.50<br>(0.30 to 1.11)        | 0.07<br>(0.04 to 0.16)        | 0.08<br>(0.04 to 0.18)        | 0.07<br>(0.04 to 0.17)        | 0.07<br>(0.04 to 0.17)        |
| <b>Neglected tropical diseases and malaria</b>        | <b>0.55</b><br>(0.51 to 0.67) | <b>0.50</b><br>(0.44 to 0.67) | <b>0.52</b><br>(0.45 to 0.71) | <b>0.49</b><br>(0.43 to 0.64) | <b>0.02</b><br>(0.02 to 0.04) | <b>0.03</b><br>(0.02 to 0.06) | <b>0.03</b><br>(0.03 to 0.07) | <b>0.03</b><br>(0.02 to 0.05) |
| Malaria                                               | 0.00<br>(0.00 to 0.00)        | 0.00<br>(0.00 to 0.00)        | 0.00<br>(0.00 to 0.00)        | 0.00<br>(0.00 to 0.00)        | 0.00<br>(0.00 to 0.00)        | 0.00<br>(0.00 to 0.00)        | 0.00<br>(0.00 to 0.00)        | 0.00<br>(0.00 to 0.00)        |
| Chagas disease                                        | 0.00<br>(0.00 to 0.00)        | 0.00<br>(0.00 to 0.00)        | 0.00<br>(0.00 to 0.00)        | 0.00<br>(0.00 to 0.00)        | 0.00<br>(0.00 to 0.00)        | 0.00<br>(0.00 to 0.00)        | 0.00<br>(0.00 to 0.00)        | 0.00<br>(0.00 to 0.00)        |
| Leishmaniasis                                         | 0.00<br>(0.00 to 0.00)        | 0.00<br>(0.00 to 0.00)        | 0.00<br>(0.00 to 0.00)        | 0.00<br>(0.00 to 0.00)        | 0.00<br>(0.00 to 0.00)        | 0.00<br>(0.00 to 0.00)        | 0.00<br>(0.00 to 0.00)        | 0.00<br>(0.00 to 0.00)        |
| African trypanosomiasis                               | 0.00<br>(0.00 to 0.00)        | 0.00<br>(0.00 to 0.00)        | 0.00<br>(0.00 to 0.00)        | 0.00<br>(0.00 to 0.00)        | 0.00<br>(0.00 to 0.00)        | 0.00<br>(0.00 to 0.00)        | 0.00<br>(0.00 to 0.00)        | 0.00<br>(0.00 to 0.00)        |
| Schistosomiasis                                       | 0.00<br>(0.00 to 0.00)        | 0.00<br>(0.00 to 0.00)        | 0.00<br>(0.00 to 0.00)        | 0.00<br>(0.00 to 0.00)        | 0.00<br>(0.00 to 0.00)        | 0.00<br>(0.00 to 0.00)        | 0.00<br>(0.00 to 0.00)        | 0.00<br>(0.00 to 0.00)        |
| Cysticercosis                                         | 0.00<br>(0.00 to 0.00)        | 0.00<br>(0.00 to 0.00)        | 0.00<br>(0.00 to 0.00)        | 0.00<br>(0.00 to 0.00)        | 0.00<br>(0.00 to 0.00)        | 0.00<br>(0.00 to 0.00)        | 0.00<br>(0.00 to 0.00)        | 0.00<br>(0.00 to 0.00)        |
| Cystic echinococcosis                                 | 0.00<br>(0.00 to 0.00)        | 0.00<br>(0.00 to 0.00)        | 0.00<br>(0.00 to 0.00)        | 0.00<br>(0.00 to 0.00)        | 0.00<br>(0.00 to 0.00)        | 0.00<br>(0.00 to 0.00)        | 0.00<br>(0.00 to 0.00)        | 0.00<br>(0.00 to 0.00)        |
| Dengue                                                | 0.00<br>(0.00 to 0.00)        | 0.00<br>(0.00 to 0.00)        | 0.00<br>(0.00 to 0.00)        | 0.00<br>(0.00 to 0.00)        | 0.00<br>(0.00 to 0.00)        | 0.00<br>(0.00 to 0.00)        | 0.00<br>(0.00 to 0.00)        | 0.00<br>(0.00 to 0.00)        |
| Yellow fever                                          | 0.00<br>(0.00 to 0.00)        | 0.00<br>(0.00 to 0.00)        | 0.00<br>(0.00 to 0.00)        | 0.00<br>(0.00 to 0.00)        | 0.00<br>(0.00 to 0.00)        | 0.00<br>(0.00 to 0.00)        | 0.00<br>(0.00 to 0.00)        | 0.00<br>(0.00 to 0.00)        |
| Rabies                                                | 0.01<br>(0.01 to 0.01)        | 0.01<br>(0.01 to 0.01)        | 0.01<br>(0.01 to 0.01)        | 0.01<br>(0.01 to 0.01)        | 0.00<br>(0.00 to 0.00)        | 0.00<br>(0.00 to 0.00)        | 0.00<br>(0.00 to 0.00)        | 0.00<br>(0.00 to 0.00)        |
| Intestinal nematode infections                        | 0.00<br>(0.00 to 0.00)        | 0.00<br>(0.00 to 0.00)        | 0.00<br>(0.00 to 0.00)        | 0.00<br>(0.00 to 0.00)        | 0.00<br>(0.00 to 0.00)        | 0.00<br>(0.00 to 0.00)        | 0.00<br>(0.00 to 0.00)        | 0.00<br>(0.00 to 0.00)        |
| Other neglected tropical diseases                     | 0.55<br>(0.50 to 0.66)        | 0.49<br>(0.43 to 0.66)        | 0.51<br>(0.45 to 0.70)        | 0.49<br>(0.42 to 0.64)        | 0.02<br>(0.02 to 0.03)        | 0.03<br>(0.02 to 0.06)        | 0.03<br>(0.02 to 0.07)        | 0.02<br>(0.02 to 0.05)        |
| <b>Maternal disorders</b>                             | <b>2.82</b><br>(2.56 to 3.06) | <b>2.01</b><br>(1.56 to 2.60) | <b>1.75</b><br>(1.37 to 2.28) | <b>2.08</b><br>(1.61 to 2.78) | <b>0.05</b><br>(0.05 to 0.06) | <b>0.04</b><br>(0.03 to 0.05) | <b>0.03</b><br>(0.03 to 0.04) | <b>0.04</b><br>(0.03 to 0.05) |
| Maternal hemorrhage                                   | 0.47<br>(0.36 to 0.58)        | 0.34<br>(0.21 to 0.51)        | 0.30<br>(0.19 to 0.46)        | 0.35<br>(0.22 to 0.55)        | 0.01<br>(0.01 to 0.01)        | 0.01<br>(0.00 to 0.01)        | 0.01<br>(0.00 to 0.01)        | 0.01<br>(0.00 to 0.01)        |
| Maternal sepsis and other maternal infections         | 0.11<br>(0.08 to 0.15)        | 0.06<br>(0.04 to 0.09)        | 0.05<br>(0.03 to 0.08)        | 0.06<br>(0.04 to 0.10)        | 0.00<br>(0.00 to 0.00)        | 0.00<br>(0.00 to 0.00)        | 0.00<br>(0.00 to 0.00)        | 0.00<br>(0.00 to 0.00)        |
| Maternal hypertensive disorders                       | 0.24<br>(0.18 to 0.32)        | 0.16<br>(0.10 to 0.25)        | 0.14<br>(0.08 to 0.21)        | 0.16<br>(0.10 to 0.25)        | 0.00<br>(0.00 to 0.01)        | 0.00<br>(0.00 to 0.00)        | 0.00<br>(0.00 to 0.00)        | 0.00<br>(0.00 to 0.00)        |
| Maternal obstructed labor and uterine rupture         | 0.12<br>(0.10 to 0.15)        | 0.08<br>(0.05 to 0.13)        | 0.07<br>(0.05 to 0.11)        | 0.09<br>(0.05 to 0.13)        | 0.00<br>(0.00 to 0.00)        | 0.00<br>(0.00 to 0.00)        | 0.00<br>(0.00 to 0.00)        | 0.00<br>(0.00 to 0.00)        |
| Maternal abortion, miscarriage, and ectopic pregnancy | 0.41<br>(0.35 to 0.49)        | 0.28<br>(0.18 to 0.42)        | 0.24<br>(0.16 to 0.36)        | 0.29<br>(0.18 to 0.44)        | 0.01<br>(0.01 to 0.01)        | 0.01<br>(0.00 to 0.01)        | 0.00<br>(0.00 to 0.01)        | 0.01<br>(0.00 to 0.01)        |

|                                        |                           |                           |                           |                           |                           |                           |                           |                           |
|----------------------------------------|---------------------------|---------------------------|---------------------------|---------------------------|---------------------------|---------------------------|---------------------------|---------------------------|
|                                        | 0.34<br>(0.26 to<br>0.43) | 0.29<br>(0.16 to<br>0.48) | 0.25<br>(0.14 to<br>0.40) | 0.30<br>(0.17 to<br>0.52) | 0.01<br>(0.00 to<br>0.01) | 0.01<br>(0.00 to<br>0.01) | 0.00<br>(0.00 to<br>0.01) | 0.01<br>(0.00 to<br>0.01) |
| Indirect maternal deaths               | 0.04<br>(0.03 to<br>0.06) | 0.03<br>(0.02 to<br>0.05) | 0.02<br>(0.01 to<br>0.04) | 0.03<br>(0.02 to<br>0.05) | 0.00<br>(0.00 to<br>0.00) | 0.00<br>(0.00 to<br>0.00) | 0.00<br>(0.00 to<br>0.00) | 0.00<br>(0.00 to<br>0.00) |
| Late maternal deaths                   | 0.00<br>(0.00 to<br>0.00) | 0.00<br>(0.00 to<br>0.00) | 0.00<br>(0.00 to<br>0.00) | 0.00<br>(0.00 to<br>0.00) | 0.00<br>(0.00 to<br>0.00) | 0.00<br>(0.00 to<br>0.00) | 0.00<br>(0.00 to<br>0.00) | 0.00<br>(0.00 to<br>0.00) |
| Maternal deaths aggravated by HIV/AIDS | 1.09<br>(0.92 to<br>1.28) | 0.77<br>(0.52 to<br>1.14) | 0.68<br>(0.46 to<br>1.00) | 0.80<br>(0.53 to<br>1.17) | 0.02<br>(0.02 to<br>0.02) | 0.01<br>(0.01 to<br>0.02) | 0.01<br>(0.01 to<br>0.02) | 0.02<br>(0.01 to<br>0.02) |
| Other maternal disorders               |                           |                           |                           |                           |                           |                           |                           |                           |

| Japan                                                                   |                                  |                                  |                                  |                                  |                               |                               |                               |                               |
|-------------------------------------------------------------------------|----------------------------------|----------------------------------|----------------------------------|----------------------------------|-------------------------------|-------------------------------|-------------------------------|-------------------------------|
| Cause                                                                   | YLLs (in 1000s)                  |                                  |                                  |                                  | Deaths (in 1000s)             |                               |                               |                               |
|                                                                         | 2016                             | 2040 Forecast                    | 2040 Better Scenario             | 2040 Worse Scenario              | 2016                          | 2040 Forecast                 | 2040 Better Scenario          | 2040 Worse Scenario           |
| <b>Neonatal disorders</b>                                               | <b>47.31</b><br>(41.30 to 51.83) | <b>21.56</b><br>(13.81 to 33.42) | <b>17.50</b><br>(11.32 to 27.25) | <b>23.57</b><br>(14.94 to 36.97) | <b>0.55</b><br>(0.48 to 0.60) | <b>0.25</b><br>(0.16 to 0.39) | <b>0.20</b><br>(0.13 to 0.32) | <b>0.27</b><br>(0.17 to 0.43) |
| Neonatal preterm birth                                                  | 19.06<br>(16.62 to 21.44)        | 6.41<br>(4.13 to 9.62)           | 4.15<br>(2.72 to 6.15)           | 6.98<br>(4.39 to 10.77)          | 0.22<br>(0.19 to 0.25)        | 0.07<br>(0.05 to 0.11)        | 0.05<br>(0.03 to 0.07)        | 0.08<br>(0.05 to 0.12)        |
| Neonatal encephalopathy due to birth asphyxia and trauma                | 10.60<br>(8.92 to 11.90)         | 3.60<br>(2.22 to 5.96)           | 2.85<br>(1.77 to 4.63)           | 4.02<br>(2.40 to 6.56)           | 0.12<br>(0.10 to 0.14)        | 0.04<br>(0.03 to 0.07)        | 0.03<br>(0.02 to 0.05)        | 0.05<br>(0.03 to 0.08)        |
| Neonatal sepsis and other neonatal infections                           | 4.17<br>(3.41 to 7.37)           | 2.47<br>(1.32 to 4.65)           | 2.06<br>(1.11 to 3.89)           | 2.73<br>(1.47 to 5.37)           | 0.05<br>(0.04 to 0.09)        | 0.03<br>(0.02 to 0.05)        | 0.02<br>(0.01 to 0.05)        | 0.03<br>(0.02 to 0.06)        |
| Hemolytic disease and other neonatal jaundice                           | 0.25<br>(0.20 to 0.31)           | 0.09<br>(0.05 to 0.14)           | 0.07<br>(0.04 to 0.12)           | 0.09<br>(0.06 to 0.15)           | 0.00<br>(0.00 to 0.00)        | 0.00<br>(0.00 to 0.00)        | 0.00<br>(0.00 to 0.00)        | 0.00<br>(0.00 to 0.00)        |
| Other neonatal disorders                                                | 13.22<br>(10.72 to 14.95)        | 8.98<br>(5.09 to 15.60)          | 8.37<br>(4.76 to 14.17)          | 9.75<br>(5.49 to 17.11)          | 0.15<br>(0.12 to 0.17)        | 0.10<br>(0.06 to 0.18)        | 0.10<br>(0.06 to 0.16)        | 0.11<br>(0.06 to 0.20)        |
| <b>Nutritional deficiencies</b>                                         | <b>32.40</b><br>(30.47 to 34.13) | <b>26.95</b><br>(22.51 to 31.51) | <b>29.06</b><br>(24.03 to 33.91) | <b>25.51</b><br>(21.48 to 29.68) | <b>2.87</b><br>(2.72 to 3.03) | <b>3.44</b><br>(2.76 to 4.29) | <b>3.84</b><br>(3.10 to 4.76) | <b>3.17</b><br>(2.54 to 3.95) |
| Protein-energy malnutrition                                             | 24.36<br>(16.01 to 26.96)        | 19.51<br>(12.14 to 24.64)        | 21.85<br>(13.85 to 27.27)        | 18.29<br>(11.24 to 23.12)        | 2.16<br>(1.38 to 2.40)        | 2.53<br>(1.57 to 3.44)        | 2.92<br>(1.90 to 3.93)        | 2.31<br>(1.42 to 3.14)        |
| Iodine deficiency                                                       | 0.46<br>(0.28 to 0.83)           | 1.42<br>(0.12 to 4.39)           | 1.41<br>(0.11 to 4.72)           | 1.36<br>(0.12 to 4.23)           | 0.03<br>(0.02 to 0.06)        | 0.19<br>(0.01 to 0.75)        | 0.20<br>(0.01 to 0.81)        | 0.18<br>(0.01 to 0.70)        |
| Dietary iron deficiency                                                 | 0.54<br>(0.43 to 0.97)           | 0.36<br>(0.26 to 0.62)           | 0.37<br>(0.27 to 0.65)           | 0.36<br>(0.26 to 0.61)           | 0.02<br>(0.01 to 0.03)        | 0.01<br>(0.01 to 0.02)        | 0.01<br>(0.01 to 0.02)        | 0.01<br>(0.01 to 0.02)        |
| Other nutritional deficiencies                                          | 7.04<br>(5.36 to 14.55)          | 5.67<br>(3.78 to 11.78)          | 5.42<br>(3.57 to 11.79)          | 5.50<br>(3.66 to 11.27)          | 0.67<br>(0.51 to 1.39)        | 0.71<br>(0.44 to 1.53)        | 0.71<br>(0.42 to 1.56)        | 0.67<br>(0.41 to 1.43)        |
| <b>Other communicable, maternal, neonatal, and nutritional diseases</b> | <b>40.93</b><br>(35.75 to 43.29) | <b>36.63</b><br>(29.18 to 45.77) | <b>34.92</b><br>(27.63 to 43.80) | <b>36.18</b><br>(28.53 to 45.69) | <b>2.35</b><br>(2.01 to 2.49) | <b>2.69</b><br>(2.16 to 3.30) | <b>2.66</b><br>(2.12 to 3.25) | <b>2.59</b><br>(2.04 to 3.18) |
| Sexually transmitted infections excluding HIV                           | 1.36<br>(1.24 to 1.49)           | 0.54<br>(0.41 to 0.70)           | 0.52<br>(0.39 to 0.68)           | 0.53<br>(0.41 to 0.69)           | 0.11<br>(0.10 to 0.12)        | 0.06<br>(0.04 to 0.08)        | 0.06<br>(0.04 to 0.08)        | 0.06<br>(0.04 to 0.08)        |
| Syphilis                                                                | 0.43<br>(0.36 to 0.48)           | 0.14<br>(0.10 to 0.18)           | 0.12<br>(0.09 to 0.17)           | 0.14<br>(0.10 to 0.18)           | 0.03<br>(0.03 to 0.03)        | 0.01<br>(0.01 to 0.02)        | 0.01<br>(0.01 to 0.02)        | 0.01<br>(0.01 to 0.02)        |
| Chlamydial infection                                                    | 0.19<br>(0.17 to 0.20)           | 0.08<br>(0.06 to 0.11)           | 0.08<br>(0.06 to 0.11)           | 0.08<br>(0.06 to 0.11)           | 0.02<br>(0.02 to 0.02)        | 0.01<br>(0.01 to 0.01)        | 0.01<br>(0.01 to 0.01)        | 0.01<br>(0.01 to 0.01)        |
| Gonococcal infection                                                    | 0.54<br>(0.50 to 0.60)           | 0.24<br>(0.18 to 0.32)           | 0.23<br>(0.17 to 0.31)           | 0.23<br>(0.17 to 0.31)           | 0.05<br>(0.04 to 0.05)        | 0.03<br>(0.02 to 0.04)        | 0.03<br>(0.02 to 0.04)        | 0.03<br>(0.02 to 0.04)        |
| Other sexually transmitted infections                                   | 0.21<br>(0.19 to 0.23)           | 0.08<br>(0.06 to 0.11)           | 0.08<br>(0.06 to 0.10)           | 0.08<br>(0.06 to 0.10)           | 0.01<br>(0.01 to 0.02)        | 0.01<br>(0.01 to 0.01)        | 0.01<br>(0.01 to 0.01)        | 0.01<br>(0.01 to 0.01)        |
| Acute hepatitis                                                         | 11.50<br>(10.82 to 12.24)        | 9.15<br>(6.14 to 13.43)          | 7.56<br>(5.05 to 10.83)          | 9.34<br>(6.20 to 13.72)          | 0.58<br>(0.55 to 0.61)        | 0.57<br>(0.39 to 0.82)        | 0.49<br>(0.33 to 0.70)        | 0.58<br>(0.38 to 0.84)        |
| Acute hepatitis A                                                       | 0.41<br>(0.34 to 0.50)           | 0.23<br>(0.16 to 0.34)           | 0.20<br>(0.14 to 0.29)           | 0.24<br>(0.16 to 0.34)           | 0.02<br>(0.01 to 0.02)        | 0.01<br>(0.01 to 0.02)        | 0.01<br>(0.01 to 0.02)        | 0.01<br>(0.01 to 0.02)        |
| Acute hepatitis B                                                       | 9.51<br>(8.73 to 10.30)          | 7.37<br>(4.66 to 11.21)          | 6.03<br>(3.85 to 8.98)           | 7.55<br>(4.83 to 11.49)          | 0.45<br>(0.40 to 0.49)        | 0.41<br>(0.27 to 0.62)        | 0.35<br>(0.22 to 0.51)        | 0.42<br>(0.27 to 0.63)        |

|                                       |                                                               |                                                              |                                                              |                                                               |                                                            |                                                            |                                                          |                                                            |
|---------------------------------------|---------------------------------------------------------------|--------------------------------------------------------------|--------------------------------------------------------------|---------------------------------------------------------------|------------------------------------------------------------|------------------------------------------------------------|----------------------------------------------------------|------------------------------------------------------------|
|                                       | 0.37<br>(0.27 to<br>0.51)                                     | 0.32<br>(0.19 to<br>0.51)                                    | 0.26<br>(0.16 to<br>0.42)                                    | 0.32<br>(0.19 to<br>0.53)                                     | 0.02<br>(0.01 to<br>0.03)                                  | 0.02<br>(0.01 to<br>0.03)                                  | 0.02<br>(0.01 to<br>0.03)                                | 0.02<br>(0.01 to<br>0.03)                                  |
| Acute hepatitis C                     |                                                               |                                                              |                                                              |                                                               |                                                            |                                                            |                                                          |                                                            |
|                                       | 1.22<br>(0.91 to<br>1.63)                                     | 1.23<br>(0.77 to<br>1.91)                                    | 1.05<br>(0.66 to<br>1.64)                                    | 1.23<br>(0.76 to<br>1.93)                                     | 0.09<br>(0.07 to<br>0.13)                                  | 0.13<br>(0.08 to<br>0.21)                                  | 0.11<br>(0.07 to<br>0.19)                                | 0.12<br>(0.08 to<br>0.20)                                  |
| Acute hepatitis E                     |                                                               |                                                              |                                                              |                                                               |                                                            |                                                            |                                                          |                                                            |
|                                       | 28.06<br>(22.76 to<br>30.26)                                  | 26.94<br>(21.05 to<br>32.85)                                 | 26.84<br>(20.88 to<br>32.78)                                 | 26.30<br>(20.37 to<br>32.12)                                  | 1.66<br>(1.32 to<br>1.79)                                  | 2.06<br>(1.62 to<br>2.48)                                  | 2.12<br>(1.65 to<br>2.57)                                | 1.95<br>(1.52 to<br>2.35)                                  |
| Other unspecified infectious diseases |                                                               |                                                              |                                                              |                                                               |                                                            |                                                            |                                                          |                                                            |
| <b>Non-communicable diseases</b>      | <b>13,681.76</b><br><b>(13,372.89 to</b><br><b>13,994.60)</b> | <b>11,841.62</b><br><b>(9,483.81 to</b><br><b>14,425.27)</b> | <b>10,216.31</b><br><b>(8,301.21 to</b><br><b>12,429.60)</b> | <b>13,757.17</b><br><b>(10,837.98 to</b><br><b>17,027.25)</b> | <b>1,164.08</b><br><b>(1,140.56 to</b><br><b>1,186.73)</b> | <b>1,256.40</b><br><b>(1,031.43 to</b><br><b>1,495.99)</b> | <b>1,125.30</b><br><b>(922.86 to</b><br><b>1,348.28)</b> | <b>1,413.13</b><br><b>(1,151.12 to</b><br><b>1,696.64)</b> |

| Japan                                |                                       |                                       |                                       |                                       |                                 |                                 |                                 |                                 |
|--------------------------------------|---------------------------------------|---------------------------------------|---------------------------------------|---------------------------------------|---------------------------------|---------------------------------|---------------------------------|---------------------------------|
| Cause                                | YLLs (in 1000s)                       |                                       |                                       |                                       | Deaths (in 1000s)               |                                 |                                 |                                 |
|                                      | 2016                                  | 2040 Forecast                         | 2040 Better Scenario                  | 2040 Worse Scenario                   | 2016                            | 2040 Forecast                   | 2040 Better Scenario            | 2040 Worse Scenario             |
| Neoplasms                            | 5,795.00<br>(5,607.19 to<br>5,967.39) | 5,045.00<br>(4,111.29 to<br>6,056.33) | 4,221.00<br>(3,481.56 to<br>5,072.49) | 5,760.36<br>(4,633.90 to<br>7,019.09) | 382.17<br>(369.20 to<br>394.44) | 400.44<br>(335.16 to<br>472.08) | 338.21<br>(283.91 to<br>394.73) | 446.66<br>(372.52 to<br>533.56) |
| Lip and oral cavity cancer           | 64.31<br>(59.83 to<br>68.60)          | 54.21<br>(35.62 to<br>82.24)          | 36.55<br>(25.25 to<br>51.90)          | 71.27<br>(44.30 to<br>112.11)         | 4.09<br>(3.84 to<br>4.34)       | 4.16<br>(2.73 to<br>6.29)       | 2.76<br>(1.98 to<br>3.86)       | 5.33<br>(3.31 to<br>8.26)       |
| Nasopharynx cancer                   | 15.94<br>(14.72 to<br>17.61)          | 13.65<br>(9.03 to<br>20.28)           | 8.46<br>(5.98 to<br>11.75)            | 18.86<br>(11.83 to<br>29.43)          | 0.87<br>(0.81 to<br>0.96)       | 0.88<br>(0.58 to<br>1.31)       | 0.54<br>(0.38 to<br>0.75)       | 1.20<br>(0.75 to<br>1.87)       |
| Other pharynx cancer                 | 44.29<br>(40.85 to<br>46.73)          | 53.17<br>(21.25 to<br>50.49)          | 29.20<br>(9.87 to<br>43.10)           | 37.88<br>(22.90 to<br>60.80)          | 2.38<br>(2.20 to<br>2.50)       | 2.02<br>(1.34 to<br>3.05)       | 1.83<br>(1.28 to<br>2.67)       | 2.25<br>(1.40 to<br>3.53)       |
| Esophageal cancer                    | 216.82<br>(193.12 to<br>238.85)       | 226.67<br>(135.65 to<br>355.97)       | 158.82<br>(105.77 to<br>231.77)       | 288.46<br>(162.55 to<br>474.02)       | 12.60<br>(11.33 to<br>13.80)    | 14.76<br>(8.94 to<br>22.56)     | 10.20<br>(7.01 to<br>14.52)     | 18.53<br>(10.76 to<br>29.89)    |
| Stomach cancer                       | 792.80<br>(750.70 to<br>831.71)       | 464.21<br>(342.05 to<br>649.25)       | 390.19<br>(292.67 to<br>538.34)       | 502.61<br>(365.47 to<br>698.33)       | 54.75<br>(52.00 to<br>57.32)    | 39.41<br>(29.32 to<br>55.82)    | 33.62<br>(25.67 to<br>46.24)    | 41.96<br>(30.65 to<br>59.41)    |
| Colon and rectum cancer              | 718.02<br>(675.80 to<br>778.32)       | 618.32<br>(418.41 to<br>894.64)       | 523.86<br>(364.60 to<br>745.00)       | 691.83<br>(469.34 to<br>1,019.57)     | 49.58<br>(46.84 to<br>53.42)    | 53.56<br>(37.12 to<br>76.06)    | 46.46<br>(33.15 to<br>65.34)    | 58.37<br>(40.35 to<br>84.83)    |
| Liver cancer                         | 555.69<br>(505.41 to<br>582.41)       | 675.04<br>(490.41 to<br>945.63)       | 651.23<br>(488.88 to<br>870.99)       | 752.88<br>(518.85 to<br>1,108.84)     | 35.53<br>(32.46 to<br>37.18)    | 47.82<br>(35.44 to<br>64.99)    | 46.54<br>(35.80 to<br>61.01)    | 52.26<br>(37.12 to<br>74.37)    |
| Liver cancer due to hepatitis B      | 72.77<br>(52.25 to<br>99.59)          | 85.96<br>(54.33 to<br>135.06)         | 83.60<br>(54.17 to<br>127.01)         | 95.12<br>(57.06 to<br>159.44)         | 3.88<br>(2.65 to<br>5.47)       | 5.08<br>(3.18 to<br>7.89)       | 4.97<br>(3.20 to<br>7.53)       | 5.53<br>(3.32 to<br>9.09)       |
| Liver cancer due to hepatitis C      | 355.77<br>(322.25 to<br>379.90)       | 434.75<br>(312.60 to<br>603.09)       | 423.76<br>(315.87 to<br>569.15)       | 476.49<br>(329.40 to<br>691.14)       | 23.80<br>(21.73 to<br>25.28)    | 32.27<br>(23.74 to<br>43.35)    | 31.70<br>(24.22 to<br>41.07)    | 34.71<br>(24.57 to<br>48.89)    |
| Liver cancer due to alcohol use      | 52.68<br>(45.85 to<br>58.81)          | 60.49<br>(41.37 to<br>87.69)          | 53.01<br>(38.01 to<br>73.27)          | 75.49<br>(48.80 to<br>115.85)         | 3.09<br>(2.72 to<br>3.43)       | 3.83<br>(2.71 to<br>5.41)       | 3.41<br>(2.52 to<br>4.63)       | 4.67<br>(3.12 to<br>6.97)       |
| Liver cancer due to other causes     | 74.47<br>(66.15 to<br>82.39)          | 93.83<br>(64.35 to<br>136.30)         | 90.86<br>(64.96 to<br>129.48)         | 105.77<br>(69.83 to<br>163.54)        | 4.77<br>(4.25 to<br>5.25)       | 6.63<br>(4.68 to<br>9.29)       | 6.47<br>(4.73 to<br>9.00)       | 7.35<br>(4.99 to<br>10.96)      |
| Gallbladder and biliary tract cancer | 247.68<br>(234.25 to<br>268.54)       | 165.97<br>(142.77 to<br>189.37)       | 167.53<br>(141.81 to<br>193.48)       | 160.58<br>(138.08 to<br>182.79)       | 19.74<br>(18.65 to<br>21.07)    | 15.82<br>(13.85 to<br>17.60)    | 16.35<br>(14.06 to<br>18.39)    | 15.00<br>(13.22 to<br>16.56)    |
| Pancreatic cancer                    | 461.22<br>(417.83 to<br>492.14)       | 428.27<br>(334.20 to<br>546.03)       | 414.97<br>(325.85 to<br>524.94)       | 446.06<br>(344.90 to<br>581.51)       | 30.07<br>(27.40 to<br>31.99)    | 32.57<br>(26.04 to<br>41.13)    | 31.64<br>(25.16 to<br>39.63)    | 33.56<br>(26.38 to<br>43.09)    |
| Larynx cancer                        | 17.46<br>(16.45 to<br>18.62)          | 15.05<br>(8.66 to<br>24.79)           | 8.15<br>(5.39 to<br>11.89)            | 21.07<br>(11.30 to<br>35.44)          | 1.16<br>(1.09 to<br>1.23)       | 1.22<br>(0.70 to<br>2.05)       | 0.65<br>(0.42 to<br>0.97)       | 1.67<br>(0.89 to<br>2.84)       |
| Tracheal, bronchus, and lung cancer  | 1,039.30<br>(994.49 to<br>1,086.91)   | 991.44<br>(711.40 to<br>1,344.91)     | 547.25<br>(413.86 to<br>708.16)       | 1,380.41<br>(954.04 to<br>1,930.79)   | 72.49<br>(69.36 to<br>75.83)    | 82.07<br>(58.84 to<br>110.71)   | 44.65<br>(34.00 to<br>58.09)    | 110.86<br>(77.89 to<br>152.26)  |
| Malignant skin melanoma              | 12.56<br>(10.24 to<br>14.75)          | 11.91<br>(9.44 to<br>14.27)           | 13.28<br>(10.70 to<br>15.91)          | 11.38<br>(9.08 to<br>13.52)           | 0.71<br>(0.56 to<br>0.81)       | 0.89<br>(0.70 to<br>1.04)       | 1.02<br>(0.83 to<br>1.18)       | 0.83<br>(0.66 to<br>0.96)       |
| Non-melanoma skin cancer             | 13.51<br>(12.67 to<br>14.52)          | 13.87<br>(11.76 to<br>16.23)          | 12.82<br>(10.89 to<br>14.81)          | 13.52<br>(11.56 to<br>15.88)          | 1.18<br>(1.11 to<br>1.25)       | 1.62<br>(1.40 to<br>1.90)       | 1.55<br>(1.35 to<br>1.77)       | 1.54<br>(1.31 to<br>1.81)       |
| Breast cancer                        | 256.68<br>(242.44 to<br>273.18)       | 167.00<br>(123.10 to<br>223.27)       | 139.22<br>(105.00 to<br>183.43)       | 188.44<br>(136.58 to<br>253.08)       | 11.65<br>(10.99 to<br>12.40)    | 9.17<br>(6.82 to<br>12.43)      | 7.81<br>(5.82 to<br>10.53)      | 10.17<br>(7.43 to<br>14.00)     |
| Cervical cancer                      | 71.59<br>(66.90 to<br>77.76)          | 37.48<br>(30.58 to<br>45.87)          | 32.63<br>(26.94 to<br>39.72)          | 38.30<br>(31.17 to<br>46.99)          | 3.34<br>(3.11 to<br>3.64)       | 2.33<br>(1.85 to<br>2.92)       | 2.04<br>(1.62 to<br>2.51)       | 2.35<br>(1.87 to<br>2.93)       |

|                   |                                 |                                 |                                 |                                 |                              |                              |                              |                              |
|-------------------|---------------------------------|---------------------------------|---------------------------------|---------------------------------|------------------------------|------------------------------|------------------------------|------------------------------|
|                   | 46.81<br>(43.55 to<br>51.99)    | 39.88<br>(32.34 to<br>49.00)    | 36.98<br>(29.92 to<br>45.50)    | 40.09<br>(32.48 to<br>49.54)    | 2.72<br>(2.52 to<br>3.01)    | 2.95<br>(2.40 to<br>3.59)    | 2.78<br>(2.21 to<br>3.38)    | 2.92<br>(2.37 to<br>3.54)    |
| Uterine cancer    |                                 |                                 |                                 |                                 |                              |                              |                              |                              |
| Ovarian cancer    | 101.04<br>(91.00 to<br>108.89)  | 66.96<br>(51.78 to<br>87.52)    | 62.09<br>(48.05 to<br>80.37)    | 69.86<br>(52.84 to<br>93.73)    | 4.91<br>(4.44 to<br>5.29)    | 3.95<br>(2.96 to<br>5.22)    | 3.66<br>(2.77 to<br>4.85)    | 4.10<br>(3.02 to<br>5.57)    |
| Prostate cancer   | 146.88<br>(123.51 to<br>162.11) | 155.71<br>(123.62 to<br>184.54) | 151.69<br>(121.02 to<br>177.39) | 149.98<br>(118.43 to<br>176.74) | 12.99<br>(10.45 to<br>14.20) | 17.15<br>(12.98 to<br>20.11) | 17.21<br>(13.11 to<br>19.90) | 16.09<br>(12.00 to<br>18.81) |
| Testicular cancer | 3.53<br>(3.15 to<br>3.99)       | 1.82<br>(1.45 to<br>2.26)       | 1.66<br>(1.33 to<br>2.04)       | 1.83<br>(1.47 to<br>2.28)       | 0.10<br>(0.09 to<br>0.11)    | 0.07<br>(0.06 to<br>0.08)    | 0.06<br>(0.05 to<br>0.07)    | 0.06<br>(0.05 to<br>0.08)    |

| Japan                           |                                                            |                                                            |                                                            |                                                            |                                                      |                                                      |                                                      |                                                      |
|---------------------------------|------------------------------------------------------------|------------------------------------------------------------|------------------------------------------------------------|------------------------------------------------------------|------------------------------------------------------|------------------------------------------------------|------------------------------------------------------|------------------------------------------------------|
| Cause                           | YLLs (in 1000s)                                            |                                                            |                                                            |                                                            | Deaths (in 1000s)                                    |                                                      |                                                      |                                                      |
|                                 | 2016                                                       | 2040 Forecast                                              | 2040 Better Scenario                                       | 2040 Worse Scenario                                        | 2016                                                 | 2040 Forecast                                        | 2040 Better Scenario                                 | 2040 Worse Scenario                                  |
| Kidney cancer                   | 100.19<br>(90.40 to<br>106.63)                             | 100.78<br>(82.56 to<br>120.92)                             | 98.98<br>(81.90 to<br>117.42)                              | 102.28<br>(83.17 to<br>124.93)                             | 6.65<br>(6.05 to<br>7.05)                            | 7.92<br>(6.58 to<br>9.37)                            | 7.89<br>(6.65 to<br>9.16)                            | 7.91<br>(6.41 to<br>9.51)                            |
| Bladder cancer                  | 94.86<br>(88.42 to<br>100.76)                              | 90.27<br>(71.52 to<br>115.34)                              | 79.79<br>(63.90 to<br>99.88)                               | 97.18<br>(74.26 to<br>129.72)                              | 8.30<br>(7.80 to<br>8.77)                            | 10.02<br>(7.92 to<br>12.69)                          | 8.90<br>(7.25 to<br>10.89)                           | 10.62<br>(8.14 to<br>13.86)                          |
| Brain and nervous system cancer | 64.95<br>(54.42 to<br>73.86)                               | 52.44<br>(41.79 to<br>61.83)                               | 50.53<br>(40.35 to<br>59.74)                               | 52.24<br>(41.95 to<br>61.63)                               | 2.62<br>(2.06 to<br>2.84)                            | 2.49<br>(1.91 to<br>2.90)                            | 2.44<br>(1.90 to<br>2.89)                            | 2.44<br>(1.88 to<br>2.84)                            |
| Thyroid cancer                  | 23.41<br>(21.85 to<br>25.58)                               | 20.29<br>(15.97 to<br>26.72)                               | 19.05<br>(15.14 to<br>24.54)                               | 21.02<br>(16.07 to<br>28.03)                               | 1.78<br>(1.66 to<br>1.95)                            | 1.88<br>(1.50 to<br>2.39)                            | 1.80<br>(1.44 to<br>2.28)                            | 1.90<br>(1.47 to<br>2.50)                            |
| Mesothelioma                    | 24.83<br>(21.57 to<br>27.49)                               | 21.23<br>(17.10 to<br>25.00)                               | 22.06<br>(17.68 to<br>26.25)                               | 20.47<br>(16.65 to<br>23.87)                               | 1.51<br>(1.32 to<br>1.66)                            | 1.58<br>(1.32 to<br>1.82)                            | 1.68<br>(1.40 to<br>1.96)                            | 1.49<br>(1.26 to<br>1.70)                            |
| Hodgkin lymphoma                | 4.41<br>(4.15 to<br>4.67)                                  | 2.54<br>(2.10 to<br>3.06)                                  | 2.21<br>(1.84 to<br>2.61)                                  | 2.57<br>(2.11 to<br>3.17)                                  | 0.20<br>(0.19 to<br>0.21)                            | 0.14<br>(0.12 to<br>0.17)                            | 0.13<br>(0.11 to<br>0.15)                            | 0.14<br>(0.12 to<br>0.17)                            |
| Non-Hodgkin lymphoma            | 169.66<br>(152.08 to<br>183.04)                            | 133.77<br>(109.01 to<br>161.28)                            | 127.49<br>(103.12 to<br>153.44)                            | 134.71<br>(108.86 to<br>166.55)                            | 11.14<br>(9.34 to<br>11.88)                          | 10.60<br>(8.42 to<br>12.52)                          | 10.36<br>(8.19 to<br>12.27)                          | 10.43<br>(8.17 to<br>12.59)                          |
| Multiple myeloma                | 68.07<br>(57.99 to<br>85.97)                               | 62.39<br>(48.65 to<br>80.67)                               | 61.24<br>(47.28 to<br>78.57)                               | 62.69<br>(48.62 to<br>83.21)                               | 4.73<br>(3.83 to<br>5.70)                            | 5.12<br>(3.97 to<br>6.34)                            | 5.14<br>(3.96 to<br>6.36)                            | 5.03<br>(3.88 to<br>6.36)                            |
| Leukemia                        | 169.95<br>(157.42 to<br>179.31)                            | 146.98<br>(118.24 to<br>180.56)                            | 137.20<br>(112.18 to<br>164.82)                            | 154.37<br>(121.82 to<br>193.67)                            | 9.09<br>(8.49 to<br>9.66)                            | 9.86<br>(8.07 to<br>11.97)                           | 9.32<br>(7.68 to<br>11.13)                           | 10.17<br>(8.15 to<br>12.61)                          |
| Acute lymphoid leukemia         | 26.85<br>(23.64 to<br>29.69)                               | 16.58<br>(13.27 to<br>20.63)                               | 14.88<br>(12.00 to<br>18.45)                               | 17.60<br>(13.67 to<br>22.30)                               | 1.03<br>(0.94 to<br>1.14)                            | 0.83<br>(0.66 to<br>1.06)                            | 0.75<br>(0.59 to<br>0.95)                            | 0.87<br>(0.67 to<br>1.11)                            |
| Chronic lymphoid leukemia       | 4.12<br>(3.65 to<br>5.66)                                  | 3.68<br>(2.78 to<br>5.60)                                  | 3.51<br>(2.69 to<br>5.34)                                  | 3.82<br>(2.83 to<br>5.77)                                  | 0.30<br>(0.27 to<br>0.41)                            | 0.33<br>(0.26 to<br>0.49)                            | 0.32<br>(0.26 to<br>0.49)                            | 0.34<br>(0.26 to<br>0.49)                            |
| Acute myeloid leukemia          | 86.64<br>(74.77 to<br>92.13)                               | 82.15<br>(64.86 to<br>100.55)                              | 79.25<br>(63.33 to<br>95.93)                               | 85.90<br>(66.75 to<br>108.42)                              | 4.57<br>(3.90 to<br>4.89)                            | 5.14<br>(4.07 to<br>6.29)                            | 5.03<br>(4.01 to<br>6.08)                            | 5.29<br>(4.09 to<br>6.58)                            |
| Chronic myeloid leukemia        | 7.41<br>(6.57 to<br>8.54)                                  | 3.46<br>(2.52 to<br>4.63)                                  | 2.80<br>(2.10 to<br>3.66)                                  | 3.74<br>(2.65 to<br>5.27)                                  | 0.43<br>(0.39 to<br>0.50)                            | 0.25<br>(0.19 to<br>0.33)                            | 0.21<br>(0.16 to<br>0.27)                            | 0.27<br>(0.20 to<br>0.37)                            |
| Other leukemia                  | 44.92<br>(40.43 to<br>50.17)                               | 41.10<br>(32.31 to<br>52.13)                               | 36.75<br>(29.34 to<br>45.84)                               | 43.31<br>(33.43 to<br>56.41)                               | 2.76<br>(2.50 to<br>3.07)                            | 3.31<br>(2.65 to<br>4.14)                            | 3.01<br>(2.45 to<br>3.73)                            | 3.41<br>(2.68 to<br>4.40)                            |
| Other neoplasms                 | 248.54<br>(226.69 to<br>262.74)                            | 233.68<br>(199.12 to<br>264.90)                            | 235.87<br>(201.42 to<br>269.92)                            | 227.52<br>(195.59 to<br>255.88)                            | 15.30<br>(14.03 to<br>16.15)                         | 18.44<br>(15.92 to<br>20.54)                         | 19.19<br>(16.55 to<br>21.57)                         | 17.50<br>(15.27 to<br>19.39)                         |
| <b>Cardiovascular diseases</b>  | <b>3,869.18</b><br><b>(3,724.45 to</b><br><b>4,006.45)</b> | <b>2,460.87</b><br><b>(1,570.02 to</b><br><b>3,826.54)</b> | <b>1,857.15</b><br><b>(1,220.31 to</b><br><b>2,824.80)</b> | <b>3,311.71</b><br><b>(2,068.25 to</b><br><b>5,099.01)</b> | <b>370.86</b><br><b>(357.05 to</b><br><b>384.41)</b> | <b>306.32</b><br><b>(201.74 to</b><br><b>460.93)</b> | <b>247.38</b><br><b>(165.03 to</b><br><b>370.94)</b> | <b>383.98</b><br><b>(248.37 to</b><br><b>577.46)</b> |
| Rheumatic heart disease         | 54.36<br>(51.10 to<br>59.10)                               | 39.09<br>(27.95 to<br>57.15)                               | 34.89<br>(24.71 to<br>50.87)                               | 39.63<br>(27.97 to<br>59.06)                               | 5.89<br>(5.48 to<br>6.45)                            | 5.45<br>(3.92 to<br>7.98)                            | 5.00<br>(3.61 to<br>7.36)                            | 5.40<br>(3.86 to<br>8.09)                            |
| Ischemic heart disease          | 1,690.50<br>(1,617.43 to<br>1,751.95)                      | 926.84<br>(523.88 to<br>1,532.00)                          | 636.09<br>(356.53 to<br>1,065.66)                          | 1,386.94<br>(753.28 to<br>2,352.01)                        | 162.42<br>(155.42 to<br>167.82)                      | 113.51<br>(65.05 to<br>181.70)                       | 84.05<br>(47.58 to<br>138.14)                        | 156.84<br>(86.88 to<br>261.80)                       |
| Stroke                          | 1,314.17<br>(1,229.31 to<br>1,393.04)                      | 713.11<br>(409.71 to<br>1,089.38)                          | 487.07<br>(279.83 to<br>826.15)                            | 1,001.91<br>(550.31 to<br>1,712.15)                        | 122.03<br>(112.57 to<br>131.18)                      | 85.93<br>(50.26 to<br>147.39)                        | 64.75<br>(37.49 to<br>113.14)                        | 109.86<br>(61.60 to<br>194.29)                       |
| Ischemic stroke                 | 623.18<br>(576.08 to<br>666.62)                            | 375.95<br>(199.24 to<br>720.34)                            | 281.20<br>(149.21 to<br>537.78)                            | 491.03<br>(255.10 to<br>996.28)                            | 74.50<br>(68.31 to<br>80.64)                         | 55.99<br>(29.74 to<br>107.85)                        | 44.09<br>(23.83 to<br>86.58)                         | 69.28<br>(35.64 to<br>140.44)                        |



|                                |                                 |                                 |                                 |                                 |                              |                              |                              |                              |
|--------------------------------|---------------------------------|---------------------------------|---------------------------------|---------------------------------|------------------------------|------------------------------|------------------------------|------------------------------|
|                                | 690.99<br>(650.86 to<br>731.08) | 337.16<br>(177.96 to<br>594.72) | 205.87<br>(120.63 to<br>353.79) | 510.87<br>(271.59 to<br>903.31) | 47.53<br>(44.15 to<br>50.75) | 29.94<br>(17.44 to<br>51.03) | 20.66<br>(12.57 to<br>34.09) | 40.58<br>(22.90 to<br>68.02) |
| Intracerebral hemorrhage       |                                 |                                 |                                 |                                 |                              |                              |                              |                              |
|                                | 120.03<br>(89.97 to<br>224.21)  | 179.93<br>(77.27 to<br>468.09)  | 151.21<br>(69.15 to<br>369.74)  | 238.51<br>(95.84 to<br>636.64)  | 14.56<br>(11.11 to<br>27.84) | 28.06<br>(12.58 to<br>70.42) | 24.24<br>(11.64 to<br>57.96) | 36.35<br>(14.99 to<br>96.16) |
| Hypertensive heart disease     |                                 |                                 |                                 |                                 |                              |                              |                              |                              |
|                                | 119.17<br>(105.45 to<br>157.53) | 82.35<br>(57.15 to<br>125.28)   | 73.32<br>(51.40 to<br>109.09)   | 86.62<br>(59.34 to<br>128.03)   | 9.01<br>(7.88 to<br>12.18)   | 8.53<br>(5.73 to<br>13.17)   | 7.95<br>(5.38 to<br>12.18)   | 8.63<br>(5.83 to<br>13.45)   |
| Cardiomyopathy and myocarditis |                                 |                                 |                                 |                                 |                              |                              |                              |                              |
|                                | 24.61<br>(17.35 to<br>47.00)    | 26.34<br>(18.43 to<br>47.91)    | 26.77<br>(18.73 to<br>48.09)    | 25.61<br>(17.79 to<br>48.01)    | 2.08<br>(1.46 to<br>4.11)    | 3.24<br>(2.11 to<br>6.01)    | 3.42<br>(2.26 to<br>6.13)    | 3.06<br>(1.99 to<br>5.72)    |
| Myocarditis                    |                                 |                                 |                                 |                                 |                              |                              |                              |                              |

| Japan                                                         |                                            |                                            |                                            |                                            |                                         |                                         |                                         |                                          |
|---------------------------------------------------------------|--------------------------------------------|--------------------------------------------|--------------------------------------------|--------------------------------------------|-----------------------------------------|-----------------------------------------|-----------------------------------------|------------------------------------------|
| Cause                                                         | YLLs (in 1000s)                            |                                            |                                            |                                            | Deaths (in 1000s)                       |                                         |                                         |                                          |
|                                                               | 2016                                       | 2040 Forecast                              | 2040 Better Scenario                       | 2040 Worse Scenario                        | 2016                                    | 2040 Forecast                           | 2040 Better Scenario                    | 2040 Worse Scenario                      |
| Alcoholic cardiomyopathy                                      | 6.62<br>(4.96 to 9.79)                     | 4.77<br>(3.27 to 6.92)                     | 4.37<br>(2.94 to 6.29)                     | 5.31<br>(3.72 to 7.76)                     | 0.28<br>(0.21 to 0.42)                  | 0.25<br>(0.17 to 0.35)                  | 0.24<br>(0.16 to 0.33)                  | 0.27<br>(0.19 to 0.38)                   |
| Other cardiomyopathy                                          | 87.93<br>(72.34 to 104.08)                 | 51.25<br>(30.64 to 83.26)                  | 42.17<br>(24.49 to 67.24)                  | 55.70<br>(32.66 to 88.24)                  | 6.65<br>(5.36 to 7.83)                  | 5.04<br>(2.76 to 8.63)                  | 4.29<br>(2.27 to 7.35)                  | 5.30<br>(2.85 to 8.94)                   |
| Atrial fibrillation and flutter                               | 109.37<br>(85.92 to 136.14)                | 116.18<br>(78.75 to 168.49)                | 109.85<br>(74.68 to 159.74)                | 124.74<br>(85.88 to 178.11)                | 13.14<br>(10.25 to 16.79)               | 16.45<br>(11.24 to 23.43)               | 15.97<br>(10.93 to 22.80)               | 17.09<br>(11.81 to 24.14)                |
| Aortic aneurysm                                               | 224.91<br>(213.00 to 236.89)               | 156.73<br>(109.94 to 223.26)               | 147.27<br>(103.36 to 209.66)               | 167.98<br>(117.75 to 238.16)               | 19.93<br>(18.80 to 20.87)               | 17.35<br>(12.70 to 24.07)               | 16.99<br>(12.22 to 23.79)               | 17.75<br>(12.88 to 24.52)                |
| Peripheral artery disease                                     | 10.64<br>(6.25 to 13.14)                   | 14.52<br>(7.24 to 22.42)                   | 14.58<br>(7.39 to 22.73)                   | 15.93<br>(8.27 to 24.37)                   | 1.31<br>(0.73 to 1.65)                  | 2.20<br>(1.04 to 3.40)                  | 2.27<br>(1.08 to 3.59)                  | 2.31<br>(1.13 to 3.62)                   |
| Endocarditis                                                  | 49.09<br>(39.54 to 77.08)                  | 55.09<br>(34.08 to 92.98)                  | 54.20<br>(33.99 to 90.31)                  | 57.22<br>(35.43 to 97.69)                  | 4.74<br>(3.81 to 7.13)                  | 6.66<br>(4.09 to 11.02)                 | 6.75<br>(4.18 to 11.08)                 | 6.72<br>(4.08 to 11.17)                  |
| Other cardiovascular and circulatory diseases                 | 176.94<br>(162.01 to 190.96)               | 177.04<br>(120.33 to 254.27)               | 148.69<br>(102.45 to 212.12)               | 192.23<br>(133.85 to 276.32)               | 17.84<br>(16.37 to 19.11)               | 22.19<br>(15.39 to 30.85)               | 19.41<br>(13.78 to 26.81)               | 23.02<br>(16.54 to 31.80)                |
| <b>Chronic respiratory diseases</b>                           | <b>528.15</b><br><b>(506.71 to 551.96)</b> | <b>627.36</b><br><b>(487.92 to 798.33)</b> | <b>516.97</b><br><b>(416.01 to 626.54)</b> | <b>728.10</b><br><b>(549.26 to 951.57)</b> | <b>50.05</b><br><b>(48.12 to 52.17)</b> | <b>72.02</b><br><b>(55.33 to 93.00)</b> | <b>57.40</b><br><b>(46.05 to 71.31)</b> | <b>82.49</b><br><b>(61.93 to 109.63)</b> |
| Chronic obstructive pulmonary disease                         | 313.78<br>(288.71 to 369.01)               | 379.72<br>(252.04 to 554.88)               | 232.71<br>(157.99 to 353.21)               | 491.66<br>(323.72 to 724.50)               | 32.80<br>(30.42 to 37.85)               | 48.47<br>(32.82 to 70.47)               | 29.78<br>(20.29 to 44.28)               | 60.46<br>(40.13 to 88.86)                |
| Pneumoconiosis                                                | 12.79<br>(11.37 to 15.76)                  | 8.39<br>(6.52 to 11.34)                    | 8.40<br>(6.32 to 12.08)                    | 8.27<br>(6.56 to 10.80)                    | 1.11<br>(1.00 to 1.34)                  | 0.89<br>(0.70 to 1.18)                  | 0.91<br>(0.70 to 1.29)                  | 0.86<br>(0.68 to 1.11)                   |
| Silicosis                                                     | 4.90<br>(4.01 to 7.32)                     | 1.80<br>(0.98 to 3.78)                     | 1.43<br>(0.74 to 3.19)                     | 1.80<br>(0.98 to 3.45)                     | 0.44<br>(0.37 to 0.63)                  | 0.19<br>(0.11 to 0.38)                  | 0.16<br>(0.08 to 0.33)                  | 0.19<br>(0.10 to 0.34)                   |
| Asbestosis                                                    | 3.87<br>(1.82 to 4.76)                     | 4.15<br>(2.61 to 5.64)                     | 4.66<br>(3.20 to 6.51)                     | 3.90<br>(2.39 to 5.23)                     | 0.32<br>(0.15 to 0.39)                  | 0.40<br>(0.24 to 0.54)                  | 0.46<br>(0.31 to 0.64)                  | 0.37<br>(0.22 to 0.49)                   |
| Coal workers pneumoconiosis                                   | 0.68<br>(0.52 to 1.22)                     | 0.62<br>(0.35 to 1.22)                     | 0.58<br>(0.31 to 1.21)                     | 0.65<br>(0.37 to 1.19)                     | 0.06<br>(0.05 to 0.11)                  | 0.08<br>(0.04 to 0.15)                  | 0.08<br>(0.05 to 0.15)                  | 0.08<br>(0.05 to 0.15)                   |
| Other pneumoconiosis                                          | 3.34<br>(2.78 to 4.88)                     | 1.82<br>(1.25 to 2.94)                     | 1.73<br>(1.14 to 3.08)                     | 1.92<br>(1.34 to 3.00)                     | 0.30<br>(0.25 to 0.43)                  | 0.22<br>(0.15 to 0.34)                  | 0.22<br>(0.15 to 0.37)                  | 0.23<br>(0.16 to 0.34)                   |
| Asthma                                                        | 29.62<br>(23.76 to 60.13)                  | 13.28<br>(8.07 to 26.92)                   | 10.37<br>(6.30 to 20.95)                   | 15.60<br>(8.95 to 31.01)                   | 2.58<br>(2.12 to 4.99)                  | 1.58<br>(0.98 to 3.10)                  | 1.28<br>(0.80 to 2.50)                  | 1.78<br>(1.05 to 3.35)                   |
| Interstitial lung disease and pulmonary sarcoidosis           | 164.19<br>(105.84 to 186.54)               | 219.67<br>(141.79 to 269.76)               | 259.41<br>(181.88 to 307.44)               | 206.14<br>(128.92 to 252.46)               | 13.17<br>(8.08 to 15.10)                | 20.69<br>(12.47 to 25.38)               | 25.03<br>(16.85 to 29.55)               | 18.99<br>(11.28 to 23.34)                |
| Other chronic respiratory diseases                            | 7.76<br>(5.59 to 11.32)                    | 6.30<br>(4.42 to 9.36)                     | 6.08<br>(4.25 to 9.50)                     | 6.44<br>(4.49 to 9.42)                     | 0.38<br>(0.26 to 0.56)                  | 0.40<br>(0.26 to 0.60)                  | 0.39<br>(0.26 to 0.61)                  | 0.40<br>(0.26 to 0.58)                   |
| <b>Cirrhosis and other chronic liver diseases</b>             | <b>410.36</b><br><b>(384.60 to 431.56)</b> | <b>320.99</b><br><b>(271.02 to 377.49)</b> | <b>290.14</b><br><b>(244.55 to 342.73)</b> | <b>328.55</b><br><b>(277.69 to 387.04)</b> | <b>23.15</b><br><b>(21.91 to 24.23)</b> | <b>22.40</b><br><b>(19.26 to 26.35)</b> | <b>20.78</b><br><b>(17.66 to 24.38)</b> | <b>22.43</b><br><b>(19.23 to 26.37)</b>  |
| Cirrhosis and other chronic liver diseases due to hepatitis B | 87.56<br>(79.99 to 94.53)                  | 69.03<br>(56.82 to 82.30)                  | 63.84<br>(52.09 to 76.71)                  | 68.58<br>(56.23 to 82.67)                  | 5.10<br>(4.68 to 5.51)                  | 4.95<br>(4.13 to 5.88)                  | 4.69<br>(3.89 to 5.64)                  | 4.81<br>(4.02 to 5.75)                   |
| Cirrhosis and other chronic liver diseases due to hepatitis C | 203.52<br>(189.61 to 217.17)               | 158.99<br>(132.10 to 189.13)               | 145.83<br>(121.23 to 174.52)               | 158.52<br>(130.58 to 188.94)               | 10.74<br>(10.02 to 11.45)               | 10.14<br>(8.59 to 11.97)                | 9.53<br>(7.99 to 11.26)                 | 9.91<br>(8.29 to 11.81)                  |

|                                                                |                                                      |                                                      |                                                      |                                                      |                                                   |                                                   |                                                   |                                                   |
|----------------------------------------------------------------|------------------------------------------------------|------------------------------------------------------|------------------------------------------------------|------------------------------------------------------|---------------------------------------------------|---------------------------------------------------|---------------------------------------------------|---------------------------------------------------|
| Cirrhosis and other chronic liver diseases due to alcohol use  | 78.63<br>(71.33 to<br>85.40)                         | 59.24<br>(49.53 to<br>70.62)                         | 49.23<br>(41.22 to<br>58.85)                         | 67.93<br>(57.03 to<br>81.84)                         | 4.52<br>(4.13 to<br>4.91)                         | 4.30<br>(3.64 to<br>5.14)                         | 3.71<br>(3.12 to<br>4.42)                         | 4.78<br>(4.03 to<br>5.75)                         |
| Cirrhosis and other chronic liver diseases due to other causes | 40.65<br>(34.76 to<br>47.91)                         | 33.73<br>(26.19 to<br>42.65)                         | 31.24<br>(24.53 to<br>39.57)                         | 33.53<br>(26.51 to<br>42.22)                         | 2.79<br>(2.35 to<br>3.29)                         | 3.01<br>(2.28 to<br>3.88)                         | 2.86<br>(2.18 to<br>3.76)                         | 2.92<br>(2.24 to<br>3.83)                         |
| <b>Digestive diseases</b>                                      | <b>288.44</b><br><b>(259.36 to</b><br><b>360.40)</b> | <b>272.09</b><br><b>(220.27 to</b><br><b>350.62)</b> | <b>258.10</b><br><b>(210.89 to</b><br><b>322.32)</b> | <b>275.13</b><br><b>(218.60 to</b><br><b>359.18)</b> | <b>26.11</b><br><b>(23.73 to</b><br><b>31.45)</b> | <b>31.41</b><br><b>(26.00 to</b><br><b>39.13)</b> | <b>30.57</b><br><b>(25.25 to</b><br><b>37.45)</b> | <b>31.10</b><br><b>(25.10 to</b><br><b>39.27)</b> |
| Peptic ulcer disease                                           | 48.99<br>(41.00 to<br>62.67)                         | 28.81<br>(21.18 to<br>38.52)                         | 23.94<br>(17.83 to<br>31.34)                         | 30.50<br>(21.66 to<br>40.87)                         | 4.24<br>(3.69 to<br>5.19)                         | 3.42<br>(2.57 to<br>4.56)                         | 2.92<br>(2.24 to<br>3.74)                         | 3.49<br>(2.55 to<br>4.65)                         |

| Japan                                      |                                           |                                           |                                           |                                           |                                     |                                     |                                     |                                     |
|--------------------------------------------|-------------------------------------------|-------------------------------------------|-------------------------------------------|-------------------------------------------|-------------------------------------|-------------------------------------|-------------------------------------|-------------------------------------|
| Cause                                      | YLLs (in 1000s)                           |                                           |                                           |                                           | Deaths (in 1000s)                   |                                     |                                     |                                     |
|                                            | 2016                                      | 2040 Forecast                             | 2040 Better Scenario                      | 2040 Worse Scenario                       | 2016                                | 2040 Forecast                       | 2040 Better Scenario                | 2040 Worse Scenario                 |
| Gastritis and duodenitis                   | 1.83<br>(1.26 to 6.10)                    | 2.86<br>(1.72 to 9.71)                    | 2.66<br>(1.58 to 8.96)                    | 2.77<br>(1.65 to 9.28)                    | 0.21<br>(0.14 to 0.83)              | 0.44<br>(0.25 to 1.65)              | 0.42<br>(0.24 to 1.61)              | 0.42<br>(0.24 to 1.58)              |
| Appendicitis                               | 3.76<br>(2.91 to 5.68)                    | 2.64<br>(1.89 to 4.18)                    | 2.26<br>(1.65 to 3.49)                    | 2.64<br>(1.89 to 4.06)                    | 0.26<br>(0.21 to 0.41)              | 0.26<br>(0.19 to 0.42)              | 0.23<br>(0.17 to 0.37)              | 0.25<br>(0.19 to 0.40)              |
| Paralytic ileus and intestinal obstruction | 88.87<br>(71.08 to 111.49)                | 97.17<br>(76.04 to 120.19)                | 100.16<br>(78.65 to 124.98)               | 92.84<br>(73.02 to 113.92)                | 8.00<br>(6.28 to 9.46)              | 10.90<br>(8.37 to 13.20)            | 11.52<br>(8.92 to 14.05)            | 10.19<br>(7.85 to 12.31)            |
| Inguinal, femoral, and abdominal hernia    | 6.02<br>(4.77 to 8.67)                    | 4.21<br>(3.14 to 6.16)                    | 4.01<br>(2.98 to 5.83)                    | 4.07<br>(3.08 to 5.97)                    | 0.65<br>(0.50 to 0.91)              | 0.56<br>(0.42 to 0.80)              | 0.55<br>(0.41 to 0.79)              | 0.53<br>(0.40 to 0.76)              |
| Inflammatory bowel disease                 | 6.32<br>(4.75 to 9.79)                    | 6.01<br>(4.29 to 9.71)                    | 6.07<br>(4.29 to 9.91)                    | 5.80<br>(4.20 to 9.30)                    | 0.46<br>(0.34 to 0.76)              | 0.58<br>(0.41 to 1.04)              | 0.60<br>(0.43 to 1.09)              | 0.55<br>(0.39 to 0.97)              |
| Vascular intestinal disorders              | 28.94<br>(22.91 to 34.07)                 | 28.36<br>(21.27 to 35.38)                 | 27.53<br>(20.55 to 34.57)                 | 27.52<br>(20.84 to 34.48)                 | 2.49<br>(2.01 to 2.88)              | 3.01<br>(2.33 to 3.65)              | 3.00<br>(2.30 to 3.66)              | 2.86<br>(2.24 to 3.45)              |
| Gallbladder and biliary diseases           | 47.34<br>(41.02 to 58.99)                 | 47.95<br>(31.41 to 75.12)                 | 42.06<br>(28.23 to 64.68)                 | 53.69<br>(32.91 to 87.98)                 | 5.42<br>(4.81 to 6.48)              | 6.73<br>(4.50 to 10.44)             | 6.09<br>(4.13 to 9.30)              | 7.36<br>(4.57 to 11.79)             |
| Pancreatitis                               | 24.10<br>(18.77 to 35.36)                 | 21.95<br>(13.24 to 44.58)                 | 18.08<br>(11.42 to 33.00)                 | 24.15<br>(13.72 to 53.44)                 | 1.53<br>(1.25 to 2.11)              | 1.85<br>(1.16 to 3.79)              | 1.56<br>(1.03 to 2.85)              | 1.98<br>(1.16 to 4.76)              |
| Other digestive diseases                   | 32.27<br>(22.91 to 37.83)                 | 32.13<br>(22.84 to 39.70)                 | 31.32<br>(22.40 to 38.41)                 | 31.15<br>(22.24 to 37.98)                 | 2.85<br>(2.18 to 3.25)              | 3.66<br>(2.81 to 4.39)              | 3.67<br>(2.82 to 4.44)              | 3.46<br>(2.67 to 4.20)              |
| Neurological disorders                     | <b>1,894.53</b><br>(1,670.53 to 2,174.15) | <b>2,064.15</b><br>(1,625.77 to 2,696.73) | <b>2,119.32</b><br>(1,673.32 to 2,661.24) | <b>2,139.63</b><br>(1,632.30 to 2,814.14) | <b>239.75</b><br>(209.77 to 274.09) | <b>304.24</b><br>(241.59 to 386.19) | <b>319.11</b><br>(255.27 to 399.13) | <b>309.81</b><br>(238.12 to 412.45) |
| Alzheimer's disease and other dementias    | 1,683.21<br>(1,457.31 to 1,974.39)        | 1,852.23<br>(1,419.75 to 2,390.34)        | 1,899.94<br>(1,467.58 to 2,437.23)        | 1,933.59<br>(1,446.81 to 2,613.42)        | 224.14<br>(194.70 to 258.85)        | 285.65<br>(223.14 to 367.25)        | 299.14<br>(236.24 to 377.61)        | 292.28<br>(221.47 to 394.48)        |
| Parkinson's disease                        | 111.55<br>(84.76 to 144.86)               | 122.51<br>(93.63 to 159.38)               | 131.44<br>(99.88 to 171.57)               | 115.93<br>(88.10 to 151.31)               | 10.94<br>(8.27 to 14.26)            | 13.85<br>(10.60 to 18.11)           | 15.19<br>(11.71 to 19.95)           | 12.86<br>(9.91 to 16.85)            |
| Epilepsy                                   | 19.04<br>(17.83 to 21.10)                 | 17.29<br>(12.25 to 23.67)                 | 15.18<br>(11.18 to 20.22)                 | 19.02<br>(12.99 to 26.73)                 | 0.68<br>(0.64 to 0.75)              | 0.79<br>(0.56 to 1.07)              | 0.73<br>(0.54 to 0.96)              | 0.84<br>(0.58 to 1.19)              |
| Multiple sclerosis                         | 4.38<br>(3.68 to 6.08)                    | 3.39<br>(2.61 to 4.75)                    | 3.38<br>(2.61 to 4.75)                    | 3.49<br>(2.68 to 4.88)                    | 0.17<br>(0.14 to 0.23)              | 0.15<br>(0.11 to 0.20)              | 0.15<br>(0.12 to 0.21)              | 0.15<br>(0.12 to 0.21)              |
| Motor neuron disease                       | 33.15<br>(30.65 to 35.48)                 | 33.62<br>(28.65 to 39.17)                 | 33.66<br>(28.56 to 39.59)                 | 33.07<br>(28.43 to 38.53)                 | 1.80<br>(1.66 to 1.93)              | 1.93<br>(1.65 to 2.26)              | 1.95<br>(1.65 to 2.30)              | 1.88<br>(1.62 to 2.18)              |
| Other neurological disorders               | 43.20<br>(38.13 to 46.41)                 | 35.11<br>(29.47 to 40.30)                 | 35.73<br>(29.80 to 41.19)                 | 34.53<br>(29.12 to 39.37)                 | 2.03<br>(1.81 to 2.17)              | 1.88<br>(1.59 to 2.15)              | 1.95<br>(1.65 to 2.24)              | 1.81<br>(1.54 to 2.06)              |
| Mental disorders                           | <b>35.72</b><br>(32.70 to 38.01)          | <b>38.84</b><br>(32.86 to 44.79)          | <b>42.98</b><br>(36.68 to 49.63)          | <b>38.01</b><br>(32.32 to 43.88)          | <b>1.38</b><br>(1.25 to 1.46)       | <b>2.18</b><br>(1.79 to 2.59)       | <b>2.56</b><br>(2.12 to 3.04)       | <b>2.04</b><br>(1.68 to 2.45)       |
| Alcohol use disorders                      | 15.28<br>(13.87 to 16.93)                 | 11.40<br>(9.26 to 13.81)                  | 11.54<br>(9.40 to 14.08)                  | 11.71<br>(9.63 to 14.17)                  | 0.56<br>(0.51 to 0.62)              | 0.48<br>(0.39 to 0.58)              | 0.50<br>(0.41 to 0.60)              | 0.48<br>(0.40 to 0.58)              |
| Drug use disorders                         | 16.94<br>(14.88 to 18.27)                 | 25.08<br>(20.46 to 29.49)                 | 28.91<br>(24.16 to 33.91)                 | 23.97<br>(19.75 to 28.24)                 | 0.75<br>(0.64 to 0.81)              | 23.97<br>(19.75 to 28.24)           | 2.02<br>(1.60 to 2.45)              | 1.52<br>(1.17 to 1.90)              |
| Opioid use disorders                       | 9.50<br>(8.05 to 10.76)                   | 8.70<br>(6.85 to 10.69)                   | 9.17<br>(7.17 to 11.43)                   | 8.51<br>(6.78 to 10.38)                   | 0.33<br>(0.29 to 0.41)              | 0.39<br>(0.32 to 0.52)              | 0.43<br>(0.34 to 0.58)              | 0.37<br>(0.30 to 0.50)              |

|                           |                           |                             |                              |                             |                           |                           |                           |                           |
|---------------------------|---------------------------|-----------------------------|------------------------------|-----------------------------|---------------------------|---------------------------|---------------------------|---------------------------|
|                           | 1.18<br>(0.78 to<br>1.51) | 2.28<br>(1.50 to<br>2.95)   | 2.59<br>(1.73 to<br>3.32)    | 2.21<br>(1.43 to<br>2.89)   | 0.03<br>(0.02 to<br>0.04) | 0.08<br>(0.05 to<br>0.10) | 0.09<br>(0.06 to<br>0.11) | 0.07<br>(0.05 to<br>0.09) |
| Cocaine use disorders     | 0.69<br>(0.53 to<br>0.89) | 2.37<br>(1.58 to<br>3.22)   | 2.89<br>(2.01 to<br>3.85)    | 2.26<br>(1.49 to<br>3.10)   | 0.02<br>(0.01 to<br>0.02) | 0.08<br>(0.05 to<br>0.10) | 0.10<br>(0.07 to<br>0.12) | 0.07<br>(0.05 to<br>0.10) |
| Amphetamine use disorders | 5.56<br>(4.41 to<br>6.82) | 11.74<br>(8.77 to<br>14.60) | 14.26<br>(10.77 to<br>17.55) | 10.99<br>(8.20 to<br>13.83) | 0.36<br>(0.29 to<br>0.41) | 1.11<br>(0.79 to<br>1.43) | 1.40<br>(1.03 to<br>1.80) | 1.00<br>(0.72 to<br>1.32) |
| Other drug use disorders  | 3.51<br>(3.06 to<br>4.00) | 2.36<br>(1.70 to<br>3.11)   | 2.53<br>(1.82 to<br>3.34)    | 2.33<br>(1.68 to<br>3.10)   | 0.07<br>(0.06 to<br>0.08) | 0.04<br>(0.03 to<br>0.06) | 0.05<br>(0.03 to<br>0.06) | 0.04<br>(0.03 to<br>0.06) |
| Eating disorders          |                           |                             |                              |                             |                           |                           |                           |                           |

| Japan                                                      |                                     |                                       |                                       |                                         |                                  |                                    |                                   |                                    |
|------------------------------------------------------------|-------------------------------------|---------------------------------------|---------------------------------------|-----------------------------------------|----------------------------------|------------------------------------|-----------------------------------|------------------------------------|
| Cause                                                      | YLLs (in 1000s)                     |                                       |                                       |                                         | Deaths (in 1000s)                |                                    |                                   |                                    |
|                                                            | 2016                                | 2040 Forecast                         | 2040 Better Scenario                  | 2040 Worse Scenario                     | 2016                             | 2040 Forecast                      | 2040 Better Scenario              | 2040 Worse Scenario                |
| <b>Diabetes, urogenital, blood, and endocrine diseases</b> | <b>667.44</b><br>(640.56 to 709.86) | <b>851.02</b><br>(578.78 to 1,259.87) | <b>766.55</b><br>(522.56 to 1,132.19) | <b>1,011.48</b><br>(665.73 to 1,537.25) | <b>62.87</b><br>(60.27 to 66.27) | <b>105.94</b><br>(75.15 to 149.36) | <b>98.43</b><br>(69.24 to 139.96) | <b>123.44</b><br>(82.79 to 180.76) |
| Diabetes mellitus                                          | 114.27<br>(108.72 to 119.59)        | 111.50<br>(72.97 to 169.59)           | 87.71<br>(59.65 to 127.80)            | 125.36<br>(80.40 to 189.95)             | 9.14<br>(8.72 to 9.58)           | 11.69<br>(8.22 to 16.42)           | 9.72<br>(7.09 to 13.24)           | 12.56<br>(8.72 to 18.05)           |
| Acute glomerulonephritis                                   | 1.62<br>(1.54 to 1.71)              | 1.55<br>(1.10 to 2.15)                | 1.45<br>(1.02 to 2.01)                | 1.53<br>(1.11 to 2.16)                  | 0.12<br>(0.11 to 0.13)           | 0.15<br>(0.10 to 0.24)             | 0.15<br>(0.09 to 0.24)            | 0.15<br>(0.09 to 0.23)             |
| Chronic kidney disease                                     | 395.25<br>(378.55 to 411.52)        | 534.51<br>(296.22 to 896.83)          | 477.72<br>(270.67 to 802.24)          | 687.22<br>(368.25 to 1,175.06)          | 38.69<br>(37.04 to 40.33)        | 68.05<br>(38.68 to 109.94)         | 62.47<br>(35.51 to 100.97)        | 85.98<br>(46.52 to 141.87)         |
| Chronic kidney disease due to diabetes mellitus            | 216.85<br>(193.45 to 240.88)        | 307.80<br>(168.05 to 538.44)          | 273.82<br>(150.03 to 470.19)          | 397.36<br>(207.42 to 689.01)            | 19.39<br>(16.57 to 22.20)        | 35.97<br>(19.77 to 60.34)          | 32.87<br>(17.91 to 55.43)         | 45.61<br>(24.07 to 77.77)          |
| Chronic kidney disease due to hypertension                 | 55.31<br>(44.57 to 68.22)           | 93.04<br>(49.40 to 163.43)            | 86.15<br>(45.93 to 150.76)            | 117.96<br>(59.60 to 210.32)             | 7.45<br>(5.89 to 9.42)           | 15.14<br>(8.14 to 26.13)           | 14.31<br>(7.60 to 24.46)          | 18.90<br>(9.55 to 33.42)           |
| Chronic kidney disease due to glomerulonephritis           | 20.07<br>(15.65 to 25.25)           | 22.55<br>(11.28 to 42.50)             | 19.47<br>(9.95 to 37.51)              | 29.11<br>(14.35 to 55.83)               | 1.91<br>(1.39 to 2.52)           | 2.80<br>(1.38 to 5.25)             | 2.48<br>(1.24 to 4.64)            | 3.58<br>(1.74 to 6.79)             |
| Chronic kidney disease due to other and unspecified causes | 103.02<br>(84.26 to 123.01)         | 111.12<br>(60.82 to 195.89)           | 98.29<br>(54.74 to 167.01)            | 142.79<br>(74.51 to 254.29)             | 9.94<br>(7.74 to 12.26)          | 14.13<br>(7.78 to 24.00)           | 12.82<br>(6.96 to 21.97)          | 17.89<br>(9.22 to 31.68)           |
| Urinary diseases and male infertility                      | 71.00<br>(67.57 to 74.99)           | 96.01<br>(78.68 to 115.10)            | 90.29<br>(73.10 to 107.56)            | 93.40<br>(76.31 to 112.78)              | 8.17<br>(7.77 to 8.63)           | 14.21<br>(11.60 to 17.12)          | 13.70<br>(11.07 to 16.44)         | 13.59<br>(11.04 to 16.59)          |
| Urinary tract infections                                   | 60.93<br>(57.44 to 64.62)           | 88.32<br>(72.32 to 106.58)            | 83.42<br>(67.17 to 100.51)            | 85.85<br>(69.80 to 104.24)              | 7.15<br>(6.72 to 7.59)           | 13.24<br>(10.74 to 16.07)          | 12.79<br>(10.32 to 15.54)         | 12.65<br>(10.14 to 15.63)          |
| Urolithiasis                                               | 6.39<br>(4.77 to 9.15)              | 4.61<br>(3.01 to 7.06)                | 4.09<br>(2.73 to 6.28)                | 4.57<br>(3.07 to 6.93)                  | 0.67<br>(0.48 to 0.96)           | 0.58<br>(0.37 to 0.90)             | 0.53<br>(0.34 to 0.79)            | 0.56<br>(0.37 to 0.86)             |
| Other urinary diseases                                     | 3.68<br>(2.78 to 5.69)              | 3.08<br>(2.09 to 4.95)                | 2.78<br>(1.84 to 4.46)                | 2.98<br>(2.01 to 4.81)                  | 0.35<br>(0.25 to 0.54)           | 0.40<br>(0.26 to 0.65)             | 0.37<br>(0.25 to 0.61)            | 0.38<br>(0.25 to 0.62)             |
| Gynecological diseases                                     | 0.60<br>(0.39 to 0.68)              | 0.28<br>(0.19 to 0.38)                | 0.22<br>(0.15 to 0.29)                | 0.28<br>(0.19 to 0.40)                  | 0.03<br>(0.02 to 0.04)           | 0.02<br>(0.02 to 0.04)             | 0.02<br>(0.03 to 0.03)            | 0.02<br>(0.02 to 0.04)             |
| Uterine fibroids                                           | 0.36<br>(0.23 to 0.41)              | 0.15<br>(0.10 to 0.22)                | 0.13<br>(0.08 to 0.17)                | 0.16<br>(0.10 to 0.23)                  | 0.02<br>(0.01 to 0.02)           | 0.01<br>(0.01 to 0.02)             | 0.01<br>(0.01 to 0.01)            | 0.01<br>(0.01 to 0.02)             |
| Polycystic ovarian syndrome                                | 0.02<br>(0.02 to 0.03)              | 0.00<br>(0.00 to 0.01)                | 0.00<br>(0.00 to 0.01)                | 0.01<br>(0.00 to 0.01)                  | 0.00<br>(0.00 to 0.00)           | 0.00<br>(0.00 to 0.00)             | 0.00<br>(0.00 to 0.00)            | 0.00<br>(0.00 to 0.00)             |
| Endometriosis                                              | 0.02<br>(0.00 to 0.03)              | 0.01<br>(0.00 to 0.01)                | 0.00<br>(0.00 to 0.01)                | 0.01<br>(0.00 to 0.01)                  | 0.00<br>(0.00 to 0.00)           | 0.00<br>(0.00 to 0.00)             | 0.00<br>(0.00 to 0.00)            | 0.00<br>(0.00 to 0.00)             |
| Genital prolapse                                           | 0.03<br>(0.02 to 0.04)              | 0.01<br>(0.01 to 0.02)                | 0.01<br>(0.00 to 0.01)                | 0.01<br>(0.01 to 0.02)                  | 0.00<br>(0.00 to 0.00)           | 0.00<br>(0.00 to 0.00)             | 0.00<br>(0.00 to 0.00)            | 0.00<br>(0.00 to 0.00)             |
| Other gynecological diseases                               | 0.17<br>(0.12 to 0.22)              | 0.10<br>(0.06 to 0.15)                | 0.08<br>(0.05 to 0.11)                | 0.10<br>(0.06 to 0.16)                  | 0.01<br>(0.01 to 0.02)           | 0.01<br>(0.01 to 0.02)             | 0.01<br>(0.01 to 0.01)            | 0.01<br>(0.01 to 0.02)             |
| Hemoglobinopathies and hemolytic anemias                   | 30.22<br>(25.45 to 50.72)           | 25.21<br>(18.49 to 43.24)             | 22.92<br>(17.00 to 39.55)             | 24.95<br>(18.50 to 43.42)               | 2.55<br>(2.17 to 4.24)           | 2.95<br>(2.22 to 4.88)             | 2.74<br>(2.09 to 4.56)            | 2.86<br>(2.15 to 4.87)             |
| Thalassemias                                               | 4.45<br>(3.69 to 7.71)              | 2.32<br>(1.64 to 4.41)                | 2.30<br>(1.63 to 4.38)                | 2.32<br>(1.65 to 4.44)                  | 0.10<br>(0.08 to 0.17)           | 0.06<br>(0.04 to 0.12)             | 0.06<br>(0.04 to 0.12)            | 0.06<br>(0.04 to 0.12)             |

|                                                   |                              |                               |                               |                               |                           |                            |                            |                            |
|---------------------------------------------------|------------------------------|-------------------------------|-------------------------------|-------------------------------|---------------------------|----------------------------|----------------------------|----------------------------|
|                                                   | 0.85<br>(0.71 to<br>1.53)    | 0.83<br>(0.57 to<br>1.53)     | 0.71<br>(0.48 to<br>1.28)     | 0.85<br>(0.57 to<br>1.53)     | 0.03<br>(0.02 to<br>0.04) | 0.03<br>(0.02 to<br>0.06)  | 0.03<br>(0.02 to<br>0.05)  | 0.04<br>(0.02 to<br>0.06)  |
| Sickle cell disorders                             |                              |                               |                               |                               |                           |                            |                            |                            |
|                                                   | 0.63<br>(0.50 to<br>1.09)    | 0.73<br>(0.50 to<br>1.38)     | 0.62<br>(0.42 to<br>1.17)     | 0.75<br>(0.50 to<br>1.37)     | 0.02<br>(0.02 to<br>0.04) | 0.04<br>(0.03 to<br>0.07)  | 0.03<br>(0.02 to<br>0.06)  | 0.04<br>(0.03 to<br>0.07)  |
| G6PD deficiency                                   |                              |                               |                               |                               |                           |                            |                            |                            |
|                                                   | 24.29<br>(20.46 to<br>41.14) | 21.32<br>(15.55 to<br>36.04)  | 19.30<br>(14.21 to<br>32.65)  | 21.02<br>(15.48 to<br>35.67)  | 2.40<br>(2.05 to<br>4.00) | 2.82<br>(2.12 to<br>4.66)  | 2.62<br>(2.00 to<br>4.35)  | 2.73<br>(2.05 to<br>4.62)  |
| Other hemoglobinopathies and hemolytic anemias    |                              |                               |                               |                               |                           |                            |                            |                            |
|                                                   | 54.49<br>(46.30 to<br>71.33) | 81.96<br>(64.71 to<br>106.13) | 86.24<br>(68.37 to<br>110.58) | 78.72<br>(63.10 to<br>102.74) | 4.16<br>(3.54 to<br>5.35) | 8.86<br>(7.01 to<br>11.08) | 9.65<br>(7.65 to<br>12.08) | 8.28<br>(6.65 to<br>10.54) |
| Endocrine, metabolic, blood, and immune disorders |                              |                               |                               |                               |                           |                            |                            |                            |

| Japan                                         |                                     |                                    |                                   |                                    |                               |                                |                                |                                |
|-----------------------------------------------|-------------------------------------|------------------------------------|-----------------------------------|------------------------------------|-------------------------------|--------------------------------|--------------------------------|--------------------------------|
| Cause                                         | YLLs (in 1000s)                     |                                    |                                   |                                    | Deaths (in 1000s)             |                                |                                |                                |
|                                               | 2016                                | 2040 Forecast                      | 2040 Better Scenario              | 2040 Worse Scenario                | 2016                          | 2040 Forecast                  | 2040 Better Scenario           | 2040 Worse Scenario            |
| <b>Musculoskeletal disorders</b>              | <b>57.53</b><br>(51.66 to 75.81)    | <b>59.87</b><br>(46.71 to 78.45)   | <b>53.91</b><br>(42.25 to 70.85)  | <b>60.44</b><br>(46.29 to 80.37)   | <b>3.85</b><br>(3.46 to 4.87) | <b>4.90</b><br>(3.90 to 6.40)  | <b>4.47</b><br>(3.53 to 5.77)  | <b>4.86</b><br>(3.74 to 6.38)  |
| Rheumatoid arthritis                          | 21.60<br>(16.72 to 26.99)           | 25.78<br>(18.22 to 35.85)          | 20.84<br>(14.59 to 28.41)         | 26.76<br>(18.23 to 37.69)          | 1.64<br>(1.29 to 2.09)        | 2.34<br>(1.67 to 3.24)         | 1.93<br>(1.40 to 2.62)         | 2.38<br>(1.67 to 3.36)         |
| Other musculoskeletal disorders               | 35.93<br>(30.08 to 50.09)           | 34.08<br>(26.53 to 48.43)          | 33.07<br>(25.84 to 47.66)         | 33.67<br>(26.11 to 48.62)          | 2.20<br>(1.82 to 2.93)        | 2.56<br>(1.98 to 3.54)         | 2.54<br>(1.97 to 3.48)         | 2.48<br>(1.92 to 3.39)         |
| <b>Other non-communicable diseases</b>        | <b>135.42</b><br>(123.75 to 164.16) | <b>101.44</b><br>(80.86 to 147.70) | <b>90.18</b><br>(72.34 to 128.51) | <b>103.77</b><br>(82.03 to 146.67) | <b>3.90</b><br>(3.14 to 6.51) | <b>6.56</b><br>(4.76 to 12.60) | <b>6.39</b><br>(4.61 to 12.45) | <b>6.32</b><br>(4.59 to 12.11) |
| Congenital birth defects                      | 102.05<br>(93.48 to 122.66)         | 49.30<br>(37.11 to 66.64)          | 39.94<br>(30.53 to 53.14)         | 52.74<br>(39.39 to 72.28)          | 1.42<br>(1.30 to 1.74)        | 0.73<br>(0.56 to 0.99)         | 0.60<br>(0.46 to 0.81)         | 0.78<br>(0.59 to 1.07)         |
| Neural tube defects                           | 0.90<br>(0.67 to 1.15)              | 0.21<br>(0.13 to 0.32)             | 0.16<br>(0.10 to 0.24)            | 0.22<br>(0.14 to 0.35)             | 0.01<br>(0.01 to 0.02)        | 0.00<br>(0.00 to 0.01)         | 0.00<br>(0.00 to 0.00)         | 0.00<br>(0.00 to 0.01)         |
| Congenital heart anomalies                    | 44.63<br>(36.71 to 63.62)           | 16.96<br>(11.21 to 27.04)          | 12.26<br>(8.00 to 20.20)          | 18.49<br>(11.97 to 30.55)          | 0.64<br>(0.53 to 0.92)        | 0.27<br>(0.18 to 0.43)         | 0.19<br>(0.13 to 0.31)         | 0.29<br>(0.19 to 0.47)         |
| Orofacial clefts                              | 0.08<br>(0.04 to 0.16)              | 0.02<br>(0.01 to 0.05)             | 0.02<br>(0.01 to 0.04)            | 0.03<br>(0.01 to 0.06)             | 0.00<br>(0.00 to 0.00)        | 0.00<br>(0.00 to 0.00)         | 0.00<br>(0.00 to 0.00)         | 0.00<br>(0.00 to 0.00)         |
| Down syndrome                                 | 6.24<br>(4.25 to 11.49)             | 4.65<br>(3.02 to 8.95)             | 4.66<br>(3.05 to 9.04)            | 4.71<br>(3.05 to 9.06)             | 0.11<br>(0.08 to 0.19)        | 0.09<br>(0.06 to 0.16)         | 0.09<br>(0.06 to 0.16)         | 0.09<br>(0.06 to 0.17)         |
| Other chromosomal abnormalities               | 23.33<br>(13.08 to 31.32)           | 16.26<br>(8.96 to 23.82)           | 14.16<br>(7.98 to 20.44)          | 17.22<br>(9.49 to 25.11)           | 0.29<br>(0.16 to 0.39)        | 0.21<br>(0.11 to 0.30)         | 0.18<br>(0.10 to 0.26)         | 0.22<br>(0.12 to 0.32)         |
| Congenital musculoskeletal and limb anomalies | 2.50<br>(1.69 to 3.00)              | 0.93<br>(0.55 to 1.36)             | 0.72<br>(0.43 to 1.03)            | 1.00<br>(0.58 to 1.51)             | 0.03<br>(0.02 to 0.04)        | 0.01<br>(0.01 to 0.02)         | 0.01<br>(0.01 to 0.01)         | 0.01<br>(0.01 to 0.02)         |
| Urogenital congenital anomalies               | 3.01<br>(1.81 to 4.23)              | 1.22<br>(0.67 to 1.95)             | 0.98<br>(0.55 to 1.61)            | 1.30<br>(0.71 to 2.15)             | 0.04<br>(0.03 to 0.06)        | 0.02<br>(0.01 to 0.03)         | 0.02<br>(0.01 to 0.03)         | 0.02<br>(0.01 to 0.03)         |
| Digestive congenital anomalies                | 4.60<br>(3.10 to 6.04)              | 2.17<br>(1.24 to 3.38)             | 1.63<br>(0.97 to 2.48)            | 2.37<br>(1.33 to 3.75)             | 0.06<br>(0.04 to 0.08)        | 0.03<br>(0.02 to 0.05)         | 0.02<br>(0.01 to 0.03)         | 0.03<br>(0.02 to 0.05)         |
| Other congenital birth defects                | 16.56<br>(13.74 to 19.51)           | 6.88<br>(4.74 to 9.69)             | 5.37<br>(3.68 to 7.45)            | 7.40<br>(4.97 to 10.59)            | 0.23<br>(0.19 to 0.26)        | 0.10<br>(0.07 to 0.14)         | 0.08<br>(0.06 to 0.11)         | 0.11<br>(0.07 to 0.15)         |
| Skin and subcutaneous diseases                | 23.53<br>(15.42 to 44.23)           | 47.95<br>(32.87 to 90.69)          | 46.74<br>(31.99 to 88.66)         | 46.53<br>(32.08 to 87.75)          | 2.37<br>(1.60 to 4.78)        | 5.78<br>(3.93 to 11.79)        | 5.75<br>(3.92 to 11.78)        | 5.49<br>(3.74 to 11.18)        |
| Cellulitis                                    | 8.76<br>(4.67 to 15.85)             | 16.41<br>(8.42 to 29.91)           | 16.42<br>(8.37 to 29.84)          | 15.90<br>(8.12 to 28.45)           | 0.75<br>(0.39 to 1.42)        | 1.70<br>(0.83 to 3.20)         | 1.74<br>(0.86 to 3.32)         | 1.61<br>(0.78 to 3.05)         |
| Pyoderma                                      | 9.07<br>(5.87 to 19.01)             | 23.39<br>(15.94 to 46.58)          | 22.65<br>(15.26 to 44.61)         | 22.74<br>(15.60 to 45.36)          | 0.83<br>(0.55 to 1.87)        | 2.69<br>(1.80 to 5.86)         | 2.68<br>(1.77 to 5.75)         | 2.56<br>(1.69 to 5.60)         |
| Decubitus ulcer                               | 3.04<br>(1.93 to 6.85)              | 4.85<br>(2.65 to 11.66)            | 4.48<br>(2.47 to 10.49)           | 4.70<br>(2.53 to 11.23)            | 0.48<br>(0.30 to 1.16)        | 0.95<br>(0.47 to 2.29)         | 0.89<br>(0.45 to 2.13)         | 0.90<br>(0.46 to 2.21)         |
| Other skin and subcutaneous diseases          | 2.67<br>(1.69 to 5.77)              | 3.30<br>(2.00 to 7.38)             | 3.19<br>(1.95 to 7.16)            | 3.19<br>(1.95 to 7.24)             | 0.31<br>(0.19 to 0.72)        | 0.45<br>(0.27 to 1.07)         | 0.44<br>(0.27 to 1.05)         | 0.42<br>(0.25 to 1.03)         |
| Sudden infant death syndrome                  | 9.83<br>(8.02 to 11.48)             | 4.18<br>(2.62 to 6.36)             | 3.50<br>(2.21 to 5.39)            | 4.50<br>(2.82 to 7.00)             | 0.11<br>(0.09 to 0.13)        | 0.05<br>(0.05 to 0.07)         | 0.04<br>(0.03 to 0.06)         | 0.05<br>(0.03 to 0.08)         |



|                          |                                       |                                     |                                   |                                     |                              |                              |                              |                              |
|--------------------------|---------------------------------------|-------------------------------------|-----------------------------------|-------------------------------------|------------------------------|------------------------------|------------------------------|------------------------------|
| Injuries                 | 1,675.90<br>(1,524.57 to<br>1,790.03) | 1,124.55<br>(893.00 to<br>1,456.36) | 972.05<br>(784.19 to<br>1,229.74) | 1,231.36<br>(943.85 to<br>1,675.24) | 69.94<br>(63.22 to<br>74.77) | 60.98<br>(50.52 to<br>74.22) | 56.21<br>(47.14 to<br>66.76) | 62.67<br>(50.76 to<br>79.01) |
| Transport injuries       | 230.69<br>(216.63 to<br>248.88)       | 150.48<br>(98.65 to<br>220.16)      | 112.59<br>(76.00 to<br>160.67)    | 194.52<br>(122.37 to<br>291.61)     | 8.36<br>(7.97 to<br>8.85)    | 6.59<br>(4.60 to<br>9.21)    | 5.31<br>(3.83 to<br>7.18)    | 7.88<br>(5.25 to<br>11.19)   |
| Road injuries            | 209.63<br>(196.74 to<br>226.25)       | 133.92<br>(87.59 to<br>197.07)      | 99.57<br>(67.46 to<br>142.94)     | 176.26<br>(110.68 to<br>265.71)     | 7.56<br>(7.20 to<br>8.01)    | 5.81<br>(4.08 to<br>8.14)    | 4.67<br>(3.38 to<br>6.29)    | 7.06<br>(4.73 to<br>9.94)    |
| Pedestrian road injuries | 57.41<br>(48.13 to<br>68.27)          | 25.42<br>(17.78 to<br>37.10)        | 16.88<br>(12.07 to<br>24.13)      | 32.57<br>(21.89 to<br>48.60)        | 2.83<br>(2.53 to<br>3.33)    | 1.63<br>(1.17 to<br>2.32)    | 1.15<br>(0.85 to<br>1.58)    | 1.98<br>(1.36 to<br>2.82)    |

| Japan                                           |                                      |                                      |                                      |                                      |                                   |                                   |                                   |                                   |
|-------------------------------------------------|--------------------------------------|--------------------------------------|--------------------------------------|--------------------------------------|-----------------------------------|-----------------------------------|-----------------------------------|-----------------------------------|
| Cause                                           | YLLs (in 1000s)                      |                                      |                                      |                                      | Deaths (in 1000s)                 |                                   |                                   |                                   |
|                                                 | 2016                                 | 2040 Forecast                        | 2040 Better Scenario                 | 2040 Worse Scenario                  | 2016                              | 2040 Forecast                     | 2040 Better Scenario              | 2040 Worse Scenario               |
| Cyclist road injuries                           | 25.22<br>(19.79 to 28.49)            | 23.11<br>(15.59 to 32.84)            | 19.09<br>(13.39 to 26.41)            | 28.52<br>(18.54 to 41.83)            | 1.15<br>(0.93 to 1.29)            | 1.37<br>(0.95 to 1.94)            | 1.25<br>(0.90 to 1.72)            | 1.54<br>(1.04 to 2.23)            |
| Motorcyclist road injuries                      | 38.60<br>(27.34 to 43.47)            | 31.51<br>(18.21 to 50.50)            | 25.63<br>(15.50 to 39.70)            | 39.23<br>(21.67 to 64.54)            | 1.00<br>(0.75 to 1.11)            | 0.98<br>(0.63 to 1.46)            | 0.87<br>(0.58 to 1.25)            | 1.14<br>(0.70 to 1.76)            |
| Motor vehicle road injuries                     | 87.62<br>(79.41 to 113.31)           | 53.33<br>(33.45 to 85.17)            | 37.54<br>(24.17 to 59.34)            | 75.20<br>(45.64 to 123.03)           | 2.55<br>(2.24 to 3.17)            | 1.80<br>(1.18 to 2.70)            | 1.38<br>(0.94 to 2.02)            | 2.36<br>(1.51 to 3.69)            |
| Other road injuries                             | 0.78<br>(0.60 to 1.10)               | 0.55<br>(0.35 to 0.89)               | 0.42<br>(0.27 to 0.66)               | 0.73<br>(0.45 to 1.21)               | 0.03<br>(0.02 to 0.04)            | 0.03<br>(0.02 to 0.05)            | 0.03<br>(0.02 to 0.04)            | 0.04<br>(0.02 to 0.06)            |
| Other transport injuries                        | 21.07<br>(18.92 to 26.98)            | 16.56<br>(10.50 to 25.25)            | 13.02<br>(8.53 to 19.54)             | 18.26<br>(11.14 to 29.08)            | 0.80<br>(0.72 to 0.94)            | 0.78<br>(0.51 to 1.16)            | 0.63<br>(0.43 to 0.92)            | 0.83<br>(0.52 to 1.27)            |
| <b>Unintentional injuries</b>                   | <b>490.06<br/>(441.90 to 522.04)</b> | <b>354.11<br/>(296.58 to 411.96)</b> | <b>330.01<br/>(275.30 to 376.58)</b> | <b>353.05<br/>(289.18 to 415.38)</b> | <b>31.72<br/>(27.31 to 34.15)</b> | <b>31.54<br/>(25.69 to 36.16)</b> | <b>30.74<br/>(24.91 to 35.00)</b> | <b>30.29<br/>(24.35 to 35.17)</b> |
| Falls                                           | 143.07<br>(122.12 to 166.48)         | 128.31<br>(102.15 to 150.44)         | 122.54<br>(98.16 to 143.16)          | 125.23<br>(99.32 to 149.31)          | 11.20<br>(9.03 to 12.30)          | 13.43<br>(10.37 to 15.74)         | 13.23<br>(10.20 to 15.31)         | 12.71<br>(9.66 to 15.02)          |
| Drowning                                        | 113.65<br>(108.28 to 118.96)         | 65.65<br>(50.64 to 87.81)            | 58.17<br>(45.94 to 75.32)            | 68.23<br>(51.17 to 94.18)            | 6.56<br>(6.28 to 6.85)            | 4.71<br>(3.70 to 6.22)            | 4.32<br>(3.48 to 5.51)            | 4.75<br>(3.59 to 6.38)            |
| Fire, heat, and hot substances                  | 35.48<br>(31.76 to 39.43)            | 19.13<br>(14.42 to 26.24)            | 16.08<br>(12.67 to 21.00)            | 20.01<br>(14.82 to 27.89)            | 2.04<br>(1.79 to 2.24)            | 1.49<br>(1.14 to 2.05)            | 1.31<br>(1.04 to 1.69)            | 1.50<br>(1.12 to 2.06)            |
| Poisonings                                      | 13.53<br>(11.79 to 18.30)            | 4.27<br>(2.84 to 6.75)               | 3.35<br>(2.31 to 5.09)               | 4.61<br>(2.89 to 7.37)               | 0.48<br>(0.42 to 0.71)            | 0.22<br>(0.16 to 0.36)            | 0.18<br>(0.13 to 0.31)            | 0.23<br>(0.16 to 0.39)            |
| Exposure to mechanical forces                   | 28.15<br>(25.29 to 41.24)            | 17.00<br>(13.81 to 24.13)            | 14.72<br>(12.02 to 20.47)            | 17.40<br>(13.88 to 25.40)            | 1.07<br>(0.97 to 1.38)            | 0.82<br>(0.68 to 1.04)            | 0.74<br>(0.62 to 0.90)            | 0.81<br>(0.66 to 1.03)            |
| Unintentional firearm injuries                  | 2.62<br>(1.58 to 2.88)               | 1.49<br>(0.82 to 1.81)               | 1.40<br>(0.76 to 1.69)               | 1.48<br>(0.81 to 1.82)               | 0.19<br>(0.10 to 0.22)            | 0.16<br>(0.07 to 0.20)            | 0.16<br>(0.07 to 0.19)            | 0.15<br>(0.07 to 0.19)            |
| Unintentional suffocation                       | 4.72<br>(3.95 to 7.07)               | 2.25<br>(1.60 to 3.28)               | 1.95<br>(1.41 to 2.90)               | 2.37<br>(1.67 to 3.57)               | 0.08<br>(0.07 to 0.11)            | 0.05<br>(0.04 to 0.06)            | 0.04<br>(0.03 to 0.06)            | 0.05<br>(0.04 to 0.06)            |
| Other exposure to mechanical forces             | 20.81<br>(18.18 to 33.77)            | 13.25<br>(10.52 to 20.68)            | 11.37<br>(9.10 to 17.62)             | 13.54<br>(10.57 to 21.26)            | 0.79<br>(0.71 to 1.14)            | 0.61<br>(0.51 to 0.85)            | 0.55<br>(0.46 to 0.73)            | 0.61<br>(0.50 to 0.84)            |
| Adverse effects of medical treatment            | 21.49<br>(13.55 to 25.35)            | 16.09<br>(10.17 to 20.13)            | 15.42<br>(9.76 to 19.10)             | 15.83<br>(9.86 to 19.84)             | 1.42<br>(0.93 to 1.65)            | 1.41<br>(0.93 to 1.72)            | 1.40<br>(0.92 to 1.72)            | 1.34<br>(0.87 to 1.64)            |
| Animal contact                                  | 2.05<br>(1.71 to 3.13)               | 1.85<br>(1.45 to 2.88)               | 1.71<br>(1.34 to 2.65)               | 1.85<br>(1.45 to 2.82)               | 0.11<br>(0.09 to 0.17)            | 0.11<br>(0.11 to 0.19)            | 0.13<br>(0.11 to 0.19)            | 0.13<br>(0.10 to 0.18)            |
| Venomous animal contact                         | 1.15<br>(0.91 to 1.90)               | 1.10<br>(0.81 to 1.90)               | 1.04<br>(0.77 to 1.77)               | 1.10<br>(0.81 to 1.85)               | 0.07<br>(0.05 to 0.10)            | 0.08<br>(0.06 to 0.13)            | 0.08<br>(0.06 to 0.12)            | 0.08<br>(0.06 to 0.12)            |
| Non-venomous animal contact                     | 0.90<br>(0.61 to 1.36)               | 0.75<br>(0.48 to 1.09)               | 0.67<br>(0.43 to 0.98)               | 0.75<br>(0.48 to 1.13)               | 0.05<br>(0.03 to 0.07)            | 0.06<br>(0.04 to 0.08)            | 0.05<br>(0.03 to 0.08)            | 0.05<br>(0.03 to 0.08)            |
| Foreign body                                    | 100.46<br>(78.62 to 115.19)          | 82.92<br>(61.21 to 98.37)            | 82.04<br>(60.63 to 97.96)            | 80.71<br>(59.76 to 95.71)            | 7.14<br>(5.20 to 8.27)            | 8.05<br>(5.63 to 9.68)            | 8.30<br>(5.80 to 9.96)            | 7.57<br>(5.29 to 9.15)            |
| Pulmonary aspiration and foreign body in airway | 98.65<br>(76.92 to 113.78)           | 81.35<br>(60.16 to 96.79)            | 80.37<br>(59.44 to 96.19)            | 79.19<br>(58.68 to 94.27)            | 7.02<br>(5.12 to 8.13)            | 7.90<br>(5.52 to 9.52)            | 8.13<br>(5.67 to 9.77)            | 7.43<br>(5.17 to 9.01)            |

|                                             |                                                        |                                                      |                                                      |                                                        |                                                   |                                                   |                                                   |                                                   |
|---------------------------------------------|--------------------------------------------------------|------------------------------------------------------|------------------------------------------------------|--------------------------------------------------------|---------------------------------------------------|---------------------------------------------------|---------------------------------------------------|---------------------------------------------------|
|                                             | 1.81<br>(1.11 to<br>2.09)                              | 1.57<br>(0.87 to<br>1.94)                            | 1.67<br>(0.93 to<br>2.07)                            | 1.51<br>(0.84 to<br>1.87)                              | 0.12<br>(0.06 to<br>0.14)                         | 0.15<br>(0.07 to<br>0.20)                         | 0.17<br>(0.08 to<br>0.21)                         | 0.14<br>(0.07 to<br>0.18)                         |
| Foreign body in other body part             |                                                        |                                                      |                                                      |                                                        |                                                   |                                                   |                                                   |                                                   |
|                                             | 27.02<br>(13.07 to<br>32.24)                           | 17.20<br>(7.89 to<br>23.64)                          | 14.74<br>(6.95 to<br>19.17)                          | 17.38<br>(8.17 to<br>24.33)                            | 1.53<br>(0.70 to<br>1.82)                         | 1.20<br>(0.54 to<br>1.62)                         | 1.06<br>(0.49 to<br>1.40)                         | 1.17<br>(0.54 to<br>1.61)                         |
| Environmental heat and cold exposure        |                                                        |                                                      |                                                      |                                                        |                                                   |                                                   |                                                   |                                                   |
|                                             | 5.16<br>(4.84 to<br>5.59)                              | 1.70<br>(1.28 to<br>2.32)                            | 1.24<br>(1.00 to<br>1.52)                            | 1.80<br>(1.33 to<br>2.54)                              | 0.18<br>(0.17 to<br>0.19)                         | 0.07<br>(0.06 to<br>0.10)                         | 0.05<br>(0.04 to<br>0.07)                         | 0.07<br>(0.06 to<br>0.10)                         |
| Other unintentional injuries                |                                                        |                                                      |                                                      |                                                        |                                                   |                                                   |                                                   |                                                   |
| <b>Self-harm and interpersonal violence</b> | <b>954.60</b><br><b>(812.92 to</b><br><b>1,050.13)</b> | <b>604.70</b><br><b>(412.74 to</b><br><b>859.19)</b> | <b>514.12</b><br><b>(369.81 to</b><br><b>718.00)</b> | <b>668.57</b><br><b>(432.08 to</b><br><b>1,038.02)</b> | <b>29.85</b><br><b>(26.02 to</b><br><b>33.58)</b> | <b>22.32</b><br><b>(15.46 to</b><br><b>31.71)</b> | <b>19.60</b><br><b>(14.20 to</b><br><b>27.54)</b> | <b>23.97</b><br><b>(15.77 to</b><br><b>36.86)</b> |

| Japan                                                                               |                                                |                                                   |                                                   |                                                   |                                                |                                                |                                                |                                                |
|-------------------------------------------------------------------------------------|------------------------------------------------|---------------------------------------------------|---------------------------------------------------|---------------------------------------------------|------------------------------------------------|------------------------------------------------|------------------------------------------------|------------------------------------------------|
| Cause                                                                               | YLLs (in 1000s)                                |                                                   |                                                   |                                                   | Deaths (in 1000s)                              |                                                |                                                |                                                |
|                                                                                     | 2016                                           | 2040 Forecast                                     | 2040 Better Scenario                              | 2040 Worse Scenario                               | 2016                                           | 2040 Forecast                                  | 2040 Better Scenario                           | 2040 Worse Scenario                            |
| Self-harm                                                                           | 926.00<br>(787.66 to<br>1,022.61)              | 591.51<br>(400.45 to<br>845.18)                   | 502.75<br>(358.04 to<br>706.23)                   | 654.41<br>(418.37 to<br>1,023.23)                 | 29.05<br>(25.35 to<br>32.91)                   | 21.87<br>(15.07 to<br>31.27)                   | 19.21<br>(13.86 to<br>27.09)                   | 23.49<br>(15.38 to<br>36.31)                   |
| Self-harm by firearm                                                                | 4.51<br>(2.93 to<br>6.14)                      | 2.43<br>(1.37 to<br>4.02)                         | 2.00<br>(1.20 to<br>3.27)                         | 2.67<br>(1.41 to<br>4.68)                         | 0.21<br>(0.15 to<br>0.28)                      | 0.14<br>(0.08 to<br>0.22)                      | 0.12<br>(0.08 to<br>0.19)                      | 0.15<br>(0.08 to<br>0.25)                      |
| Self-harm by other specified means                                                  | 921.49<br>(782.09 to<br>1,017.25)              | 589.08<br>(398.83 to<br>841.96)                   | 500.76<br>(356.74 to<br>703.32)                   | 651.74<br>(416.81 to<br>1,018.79)                 | 28.84<br>(24.95 to<br>32.65)                   | 21.73<br>(14.98 to<br>31.07)                   | 19.09<br>(13.77 to<br>26.90)                   | 23.35<br>(15.28 to<br>36.05)                   |
| Interpersonal violence                                                              | 28.60<br>(22.05 to<br>42.30)                   | 13.19<br>(9.40 to<br>20.61)                       | 11.37<br>(8.26 to<br>17.56)                       | 14.16<br>(9.75 to<br>23.14)                       | 0.80<br>(0.60 to<br>1.14)                      | 0.45<br>(0.31 to<br>0.65)                      | 0.40<br>(0.28 to<br>0.57)                      | 0.47<br>(0.32 to<br>0.73)                      |
| Physical violence by firearm                                                        | 1.71<br>(0.96 to<br>3.17)                      | 0.70<br>(0.38 to<br>1.28)                         | 0.60<br>(0.34 to<br>1.07)                         | 0.73<br>(0.40 to<br>1.38)                         | 0.05<br>(0.03 to<br>0.08)                      | 0.02<br>(0.01 to<br>0.04)                      | 0.02<br>(0.01 to<br>0.03)                      | 0.02<br>(0.01 to<br>0.04)                      |
| Physical violence by sharp object                                                   | 5.94<br>(4.23 to<br>10.58)                     | 2.84<br>(2.02 to<br>4.85)                         | 2.47<br>(1.77 to<br>4.19)                         | 2.92<br>(2.07 to<br>4.95)                         | 0.18<br>(0.13 to<br>0.31)                      | 0.11<br>(0.07 to<br>0.17)                      | 0.10<br>(0.07 to<br>0.15)                      | 0.11<br>(0.07 to<br>0.17)                      |
| Physical violence by other means                                                    | 20.95<br>(15.59 to<br>31.20)                   | 9.66<br>(6.33 to<br>15.45)                        | 8.30<br>(5.63 to<br>13.15)                        | 10.52<br>(6.81 to<br>17.66)                       | 0.57<br>(0.41 to<br>0.81)                      | 0.32<br>(0.20 to<br>0.49)                      | 0.28<br>(0.18 to<br>0.42)                      | 0.34<br>(0.22 to<br>0.54)                      |
| <b>Forces of nature, conflict and terrorism, and executions and police conflict</b> | <b>0.55</b><br><b>(0.51 to</b><br><b>0.58)</b> | <b>15.26</b><br><b>(0.36 to</b><br><b>124.96)</b> | <b>15.33</b><br><b>(0.36 to</b><br><b>125.17)</b> | <b>15.22</b><br><b>(0.36 to</b><br><b>125.13)</b> | <b>0.01</b><br><b>(0.01 to</b><br><b>0.01)</b> | <b>0.54</b><br><b>(0.01 to</b><br><b>3.91)</b> | <b>0.56</b><br><b>(0.01 to</b><br><b>4.00)</b> | <b>0.53</b><br><b>(0.01 to</b><br><b>3.88)</b> |
| Exposure to forces of nature                                                        | 0.00<br>(0.00 to<br>0.00)                      | 15.24<br>(0.35 to<br>124.96)                      | 15.31<br>(0.35 to<br>125.17)                      | 15.20<br>(0.35 to<br>125.13)                      | 0.00<br>(0.00 to<br>0.00)                      | 0.54<br>(0.01 to<br>3.91)                      | 0.55<br>(0.01 to<br>4.00)                      | 0.53<br>(0.01 to<br>3.88)                      |
| Conflict and terrorism                                                              | 0.00<br>(0.00 to<br>0.00)                      | 0.02<br>(0.00 to<br>0.14)                         | 0.02<br>(0.00 to<br>0.14)                         | 0.02<br>(0.00 to<br>0.14)                         | 0.00<br>(0.00 to<br>0.00)                      | 0.00<br>(0.00 to<br>0.01)                      | 0.00<br>(0.00 to<br>0.01)                      | 0.00<br>(0.00 to<br>0.01)                      |
| Executions and police conflict                                                      | 0.55<br>(0.51 to<br>0.58)                      | 0.00<br>(0.00 to<br>0.00)                         | 0.00<br>(0.00 to<br>0.00)                         | 0.00<br>(0.00 to<br>0.00)                         | 0.01<br>(0.01 to<br>0.01)                      | 0.00<br>(0.00 to<br>0.00)                      | 0.00<br>(0.00 to<br>0.00)                      | 0.00<br>(0.00 to<br>0.00)                      |

| South Korea                                                       |                                    |                                    |                                    |                                     |                              |                              |                              |                              |
|-------------------------------------------------------------------|------------------------------------|------------------------------------|------------------------------------|-------------------------------------|------------------------------|------------------------------|------------------------------|------------------------------|
| Cause                                                             | YLLs (in 1000s)                    |                                    |                                    |                                     | Deaths (in 1000s)            |                              |                              |                              |
|                                                                   | 2016                               | 2040 Forecast                      | 2040 Better Scenario               | 2040 Worse Scenario                 | 2016                         | 2040 Forecast                | 2040 Better Scenario         | 2040 Worse Scenario          |
| All causes                                                        | 5,928.92<br>(4,425.26 to 7,610.12) | 7,251.22<br>(5,071.24 to 9,735.81) | 6,503.42<br>(4,617.50 to 8,669.68) | 9,134.06<br>(6,279.52 to 12,414.41) | 336.37<br>(257.47 to 424.83) | 571.87<br>(461.35 to 688.91) | 526.71<br>(424.87 to 630.76) | 684.96<br>(551.88 to 820.04) |
| Communicable, maternal, neonatal, and nutritional diseases        | 273.26<br>(214.12 to 342.99)       | 376.33<br>(280.60 to 493.44)       | 353.10<br>(265.65 to 454.65)       | 447.17<br>(329.26 to 605.18)        | 17.26<br>(13.00 to 21.98)    | 37.59<br>(26.62 to 50.01)    | 36.94<br>(26.57 to 48.00)    | 41.42<br>(28.43 to 56.98)    |
| HIV/AIDS and tuberculosis                                         | 57.51<br>(43.17 to 74.70)          | 41.47<br>(24.33 to 69.71)          | 34.08<br>(20.37 to 55.13)          | 63.84<br>(35.29 to 113.48)          | 3.46<br>(2.69 to 4.40)       | 3.66<br>(2.19 to 5.99)       | 3.12<br>(1.94 to 4.94)       | 5.27<br>(2.87 to 9.13)       |
| Tuberculosis                                                      | 54.11<br>(39.65 to 70.53)          | 39.83<br>(22.88 to 68.95)          | 32.88<br>(19.30 to 54.06)          | 61.11<br>(33.09 to 109.85)          | 3.57<br>(2.56 to 4.25)       | 3.61<br>(2.14 to 5.88)       | 3.08<br>(1.91 to 4.92)       | 5.20<br>(2.83 to 9.07)       |
| HIV/AIDS                                                          | 3.40<br>(2.08 to 8.55)             | 1.64<br>(0.43 to 6.98)             | 1.21<br>(0.26 to 6.25)             | 2.73<br>(0.73 to 8.17)              | 0.10<br>(0.05 to 0.27)       | 0.05<br>(0.01 to 0.27)       | 0.04<br>(0.00 to 0.27)       | 0.07<br>(0.01 to 0.28)       |
| Diarrhea, lower respiratory, and other common infectious diseases | 150.56<br>(106.76 to 199.63)       | 283.51<br>(195.68 to 391.83)       | 270.98<br>(191.49 to 365.83)       | 329.02<br>(223.95 to 466.72)        | 12.41<br>(8.61 to 16.50)     | 31.23<br>(20.85 to 42.69)    | 31.01<br>(21.25 to 41.57)    | 33.63<br>(21.64 to 47.56)    |
| Diarrheal diseases                                                | 13.23<br>(7.16 to 24.60)           | 77.19<br>(33.74 to 158.63)         | 81.12<br>(38.68 to 149.92)         | 57.55<br>(22.47 to 124.13)          | 1.02<br>(0.52 to 2.00)       | 8.73<br>(3.55 to 17.61)      | 9.39<br>(4.32 to 17.47)      | 6.27<br>(2.26 to 13.48)      |
| Intestinal infectious diseases                                    | 0.05<br>(0.02 to 0.11)             | 0.05<br>(0.02 to 0.10)             | 0.05<br>(0.02 to 0.10)             | 0.04<br>(0.02 to 0.09)              | 0.00<br>(0.00 to 0.00)       | 0.00<br>(0.00 to 0.00)       | 0.00<br>(0.00 to 0.00)       | 0.00<br>(0.00 to 0.00)       |
| Typhoid fever                                                     | 0.01<br>(0.00 to 0.03)             | 0.02<br>(0.01 to 0.05)             | 0.02<br>(0.01 to 0.06)             | 0.02<br>(0.01 to 0.05)              | 0.00<br>(0.00 to 0.00)       | 0.00<br>(0.00 to 0.00)       | 0.00<br>(0.00 to 0.00)       | 0.00<br>(0.00 to 0.00)       |
| Paratyphoid fever                                                 | 0.02<br>(0.01 to 0.06)             | 0.01<br>(0.00 to 0.03)             | 0.01<br>(0.00 to 0.03)             | 0.01<br>(0.00 to 0.03)              | 0.00<br>(0.00 to 0.00)       | 0.00<br>(0.00 to 0.00)       | 0.00<br>(0.00 to 0.00)       | 0.00<br>(0.00 to 0.00)       |
| Other intestinal infectious diseases                              | 0.01<br>(0.01 to 0.03)             | 0.01<br>(0.00 to 0.03)             | 0.01<br>(0.00 to 0.03)             | 0.01<br>(0.00 to 0.02)              | 0.00<br>(0.00 to 0.00)       | 0.00<br>(0.00 to 0.00)       | 0.00<br>(0.00 to 0.00)       | 0.00<br>(0.00 to 0.00)       |
| Lower respiratory infections                                      | 126.30<br>(88.89 to 166.73)        | 196.82<br>(125.49 to 286.50)       | 180.44<br>(115.39 to 259.18)       | 257.60<br>(167.34 to 390.75)        | 11.04<br>(7.71 to 14.50)     | 22.04<br>(13.86 to 31.80)    | 21.15<br>(13.19 to 30.32)    | 26.86<br>(16.56 to 40.05)    |
| Upper respiratory infections                                      | 0.08<br>(0.04 to 0.14)             | 0.07<br>(0.03 to 0.14)             | 0.06<br>(0.02 to 0.12)             | 0.08<br>(0.03 to 0.16)              | 0.00<br>(0.00 to 0.01)       | 0.00<br>(0.00 to 0.01)       | 0.00<br>(0.00 to 0.01)       | 0.00<br>(0.00 to 0.01)       |
| Otitis media                                                      | 0.00<br>(0.00 to 0.00)             | 0.00<br>(0.00 to 0.00)             | 0.00<br>(0.00 to 0.00)             | 0.00<br>(0.00 to 0.00)              | 0.00<br>(0.00 to 0.00)       | 0.00<br>(0.00 to 0.00)       | 0.00<br>(0.00 to 0.00)       | 0.00<br>(0.00 to 0.00)       |
| Meningitis                                                        | 4.44<br>(2.35 to 9.41)             | 2.65<br>(1.32 to 5.97)             | 2.55<br>(1.24 to 5.94)             | 3.09<br>(1.51 to 6.84)              | 0.15<br>(0.08 to 0.33)       | 0.15<br>(0.08 to 0.32)       | 0.15<br>(0.08 to 0.32)       | 0.16<br>(0.09 to 0.32)       |
| Pneumococcal meningitis                                           | 0.20<br>(0.11 to 0.39)             | 0.17<br>(0.09 to 0.36)             | 0.18<br>(0.09 to 0.38)             | 0.18<br>(0.10 to 0.37)              | 0.01<br>(0.00 to 0.02)       | 0.01<br>(0.00 to 0.02)       | 0.01<br>(0.00 to 0.02)       | 0.01<br>(0.01 to 0.02)       |
| H influenzae type B meningitis                                    | 0.52<br>(0.27 to 1.12)             | 0.45<br>(0.21 to 1.05)             | 0.46<br>(0.22 to 1.07)             | 0.66<br>(0.26 to 1.56)              | 0.02<br>(0.01 to 0.04)       | 0.02<br>(0.01 to 0.05)       | 0.02<br>(0.01 to 0.05)       | 0.02<br>(0.01 to 0.05)       |
| Meningococcal meningitis                                          | 0.93<br>(0.51 to 1.99)             | 0.44<br>(0.21 to 1.04)             | 0.42<br>(0.20 to 1.00)             | 0.49<br>(0.23 to 1.13)              | 0.03<br>(0.01 to 0.06)       | 0.02<br>(0.01 to 0.05)       | 0.02<br>(0.01 to 0.05)       | 0.02<br>(0.01 to 0.05)       |
| Other meningitis                                                  | 2.78<br>(1.43 to 6.08)             | 1.59<br>(0.77 to 3.66)             | 1.50<br>(0.70 to 3.54)             | 1.76<br>(0.83 to 4.02)              | 0.10<br>(0.05 to 0.22)       | 0.09<br>(0.05 to 0.20)       | 0.09<br>(0.05 to 0.19)       | 0.10<br>(0.05 to 0.21)       |
| Encephalitis                                                      | 5.53<br>(2.65 to 7.83)             | 5.84<br>(3.04 to 8.79)             | 5.93<br>(3.12 to 8.97)             | 5.71<br>(2.89 to 8.58)              | 0.17<br>(0.09 to 0.24)       | 0.27<br>(0.15 to 0.39)       | 0.28<br>(0.16 to 0.41)       | 0.26<br>(0.14 to 0.35)       |

|                |                           |                           |                           |                            |                           |                           |                           |                           |
|----------------|---------------------------|---------------------------|---------------------------|----------------------------|---------------------------|---------------------------|---------------------------|---------------------------|
| Diphtheria     | 0.01<br>(0.01 to<br>0.02) | 0.00<br>(0.00 to<br>0.01) | 0.00<br>(0.00 to<br>0.01) | 0.01<br>(0.00 to<br>0.02)  | 0.00<br>(0.00 to<br>0.00) | 0.00<br>(0.00 to<br>0.00) | 0.00<br>(0.00 to<br>0.00) | 0.00<br>(0.00 to<br>0.00) |
| Whooping cough | 0.47<br>(0.05 to<br>1.47) | 0.44<br>(0.04 to<br>1.54) | 0.42<br>(0.04 to<br>1.45) | 3.99<br>(0.64 to<br>10.63) | 0.01<br>(0.00 to<br>0.02) | 0.01<br>(0.00 to<br>0.02) | 0.01<br>(0.00 to<br>0.02) | 0.05<br>(0.01 to<br>0.13) |
| Tetanus        | 0.27<br>(0.21 to<br>0.35) | 0.02<br>(0.01 to<br>0.03) | 0.02<br>(0.02 to<br>0.03) | 0.05<br>(0.03 to<br>0.09)  | 0.01<br>(0.01 to<br>0.01) | 0.00<br>(0.00 to<br>0.00) | 0.00<br>(0.00 to<br>0.00) | 0.00<br>(0.00 to<br>0.00) |
| Measles        | 0.00<br>(0.00 to<br>0.00) | 0.21<br>(0.00 to<br>1.89) | 0.15<br>(0.00 to<br>1.29) | 0.66<br>(0.00 to<br>6.44)  | 0.00<br>(0.00 to<br>0.00) | 0.00<br>(0.00 to<br>0.02) | 0.00<br>(0.00 to<br>0.02) | 0.01<br>(0.00 to<br>0.08) |

| South Korea                                           |                                                |                                                |                                                |                                                |                                                |                                                |                                                |                                                |
|-------------------------------------------------------|------------------------------------------------|------------------------------------------------|------------------------------------------------|------------------------------------------------|------------------------------------------------|------------------------------------------------|------------------------------------------------|------------------------------------------------|
| Cause                                                 | YLLs (in 1000s)                                |                                                |                                                |                                                | Deaths (in 1000s)                              |                                                |                                                |                                                |
|                                                       | 2016                                           | 2040 Forecast                                  | 2040 Better Scenario                           | 2040 Worse Scenario                            | 2016                                           | 2040 Forecast                                  | 2040 Better Scenario                           | 2040 Worse Scenario                            |
| Varicella and herpes zoster                           | 0.19<br>(0.13 to<br>0.26)                      | 0.23<br>(0.14 to<br>0.35)                      | 0.23<br>(0.13 to<br>0.35)                      | 0.23<br>(0.14 to<br>0.37)                      | 0.01<br>(0.01 to<br>0.01)                      | 0.02<br>(0.01 to<br>0.04)                      | 0.02<br>(0.01 to<br>0.04)                      | 0.02<br>(0.01 to<br>0.04)                      |
| <b>Neglected tropical diseases and malaria</b>        | <b>1.40</b><br><b>(0.49 to</b><br><b>2.02)</b> | <b>2.29</b><br><b>(0.59 to</b><br><b>3.26)</b> | <b>2.41</b><br><b>(0.62 to</b><br><b>3.44)</b> | <b>2.09</b><br><b>(0.55 to</b><br><b>2.96)</b> | <b>0.08</b><br><b>(0.02 to</b><br><b>0.11)</b> | <b>0.19</b><br><b>(0.05 to</b><br><b>0.26)</b> | <b>0.20</b><br><b>(0.05 to</b><br><b>0.28)</b> | <b>0.16</b><br><b>(0.04 to</b><br><b>0.23)</b> |
| Malaria                                               | 0.06<br>(0.05 to<br>0.09)                      | 0.04<br>(0.02 to<br>0.05)                      | 0.04<br>(0.02 to<br>0.05)                      | 0.03<br>(0.02 to<br>0.05)                      | 0.00<br>(0.00 to<br>0.00)                      | 0.00<br>(0.00 to<br>0.00)                      | 0.00<br>(0.00 to<br>0.00)                      | 0.00<br>(0.00 to<br>0.00)                      |
| Chagas disease                                        | 0.00<br>(0.00 to<br>0.00)                      | 0.00<br>(0.00 to<br>0.00)                      | 0.00<br>(0.00 to<br>0.00)                      | 0.00<br>(0.00 to<br>0.00)                      | 0.00<br>(0.00 to<br>0.00)                      | 0.00<br>(0.00 to<br>0.00)                      | 0.00<br>(0.00 to<br>0.00)                      | 0.00<br>(0.00 to<br>0.00)                      |
| Leishmaniasis                                         | 0.00<br>(0.00 to<br>0.00)                      | 0.00<br>(0.00 to<br>0.00)                      | 0.00<br>(0.00 to<br>0.00)                      | 0.00<br>(0.00 to<br>0.00)                      | 0.00<br>(0.00 to<br>0.00)                      | 0.00<br>(0.00 to<br>0.00)                      | 0.00<br>(0.00 to<br>0.00)                      | 0.00<br>(0.00 to<br>0.00)                      |
| African trypanosomiasis                               | 0.00<br>(0.00 to<br>0.00)                      | 0.00<br>(0.00 to<br>0.00)                      | 0.00<br>(0.00 to<br>0.00)                      | 0.00<br>(0.00 to<br>0.00)                      | 0.00<br>(0.00 to<br>0.00)                      | 0.00<br>(0.00 to<br>0.00)                      | 0.00<br>(0.00 to<br>0.00)                      | 0.00<br>(0.00 to<br>0.00)                      |
| Schistosomiasis                                       | 0.00<br>(0.00 to<br>0.00)                      | 0.00<br>(0.00 to<br>0.00)                      | 0.00<br>(0.00 to<br>0.00)                      | 0.00<br>(0.00 to<br>0.00)                      | 0.00<br>(0.00 to<br>0.00)                      | 0.00<br>(0.00 to<br>0.00)                      | 0.00<br>(0.00 to<br>0.00)                      | 0.00<br>(0.00 to<br>0.00)                      |
| Cysticercosis                                         | 0.03<br>(0.02 to<br>0.04)                      | 0.01<br>(0.01 to<br>0.01)                      | 0.01<br>(0.01 to<br>0.01)                      | 0.01<br>(0.01 to<br>0.01)                      | 0.00<br>(0.00 to<br>0.00)                      | 0.00<br>(0.00 to<br>0.00)                      | 0.00<br>(0.00 to<br>0.00)                      | 0.00<br>(0.00 to<br>0.00)                      |
| Cystic echinococcosis                                 | 0.01<br>(0.01 to<br>0.01)                      | 0.01<br>(0.01 to<br>0.01)                      | 0.01<br>(0.01 to<br>0.01)                      | 0.01<br>(0.01 to<br>0.01)                      | 0.00<br>(0.00 to<br>0.00)                      | 0.00<br>(0.00 to<br>0.00)                      | 0.00<br>(0.00 to<br>0.00)                      | 0.00<br>(0.00 to<br>0.00)                      |
| Dengue                                                | 0.00<br>(0.00 to<br>0.00)                      | 0.00<br>(0.00 to<br>0.00)                      | 0.00<br>(0.00 to<br>0.00)                      | 0.00<br>(0.00 to<br>0.00)                      | 0.00<br>(0.00 to<br>0.00)                      | 0.00<br>(0.00 to<br>0.00)                      | 0.00<br>(0.00 to<br>0.00)                      | 0.00<br>(0.00 to<br>0.00)                      |
| Yellow fever                                          | 0.00<br>(0.00 to<br>0.00)                      | 0.00<br>(0.00 to<br>0.00)                      | 0.00<br>(0.00 to<br>0.00)                      | 0.00<br>(0.00 to<br>0.00)                      | 0.00<br>(0.00 to<br>0.00)                      | 0.00<br>(0.00 to<br>0.00)                      | 0.00<br>(0.00 to<br>0.00)                      | 0.00<br>(0.00 to<br>0.00)                      |
| Rabies                                                | 0.00<br>(0.00 to<br>0.00)                      | 0.00<br>(0.00 to<br>0.00)                      | 0.00<br>(0.00 to<br>0.00)                      | 0.00<br>(0.00 to<br>0.00)                      | 0.00<br>(0.00 to<br>0.00)                      | 0.00<br>(0.00 to<br>0.00)                      | 0.00<br>(0.00 to<br>0.00)                      | 0.00<br>(0.00 to<br>0.00)                      |
| Intestinal nematode infections                        | 0.00<br>(0.00 to<br>0.00)                      | 0.00<br>(0.00 to<br>0.00)                      | 0.00<br>(0.00 to<br>0.00)                      | 0.00<br>(0.00 to<br>0.00)                      | 0.00<br>(0.00 to<br>0.00)                      | 0.00<br>(0.00 to<br>0.00)                      | 0.00<br>(0.00 to<br>0.00)                      | 0.00<br>(0.00 to<br>0.00)                      |
| Other neglected tropical diseases                     | 1.30<br>(0.37 to<br>1.88)                      | 2.23<br>(0.53 to<br>3.20)                      | 2.35<br>(0.57 to<br>3.37)                      | 2.03<br>(0.48 to<br>2.90)                      | 0.07<br>(0.02 to<br>0.11)                      | 0.18<br>(0.04 to<br>0.26)                      | 0.20<br>(0.05 to<br>0.28)                      | 0.16<br>(0.04 to<br>0.23)                      |
| <b>Maternal disorders</b>                             | <b>2.33</b><br><b>(1.39 to</b><br><b>3.64)</b> | <b>1.29</b><br><b>(0.72 to</b><br><b>2.16)</b> | <b>1.22</b><br><b>(0.69 to</b><br><b>2.04)</b> | <b>1.41</b><br><b>(0.77 to</b><br><b>2.39)</b> | <b>0.04</b><br><b>(0.03 to</b><br><b>0.07)</b> | <b>0.02</b><br><b>(0.01 to</b><br><b>0.04)</b> | <b>0.02</b><br><b>(0.01 to</b><br><b>0.04)</b> | <b>0.03</b><br><b>(0.01 to</b><br><b>0.05)</b> |
| Maternal hemorrhage                                   | 0.61<br>(0.32 to<br>1.00)                      | 0.52<br>(0.15 to<br>0.61)                      | 0.31<br>(0.15 to<br>0.58)                      | 0.35<br>(0.17 to<br>0.65)                      | 0.01<br>(0.01 to<br>0.02)                      | 0.01<br>(0.00 to<br>0.01)                      | 0.01<br>(0.00 to<br>0.01)                      | 0.01<br>(0.00 to<br>0.01)                      |
| Maternal sepsis and other maternal infections         | 0.17<br>(0.09 to<br>0.30)                      | 0.09<br>(0.04 to<br>0.18)                      | 0.09<br>(0.04 to<br>0.17)                      | 0.10<br>(0.05 to<br>0.20)                      | 0.00<br>(0.00 to<br>0.01)                      | 0.00<br>(0.00 to<br>0.00)                      | 0.00<br>(0.00 to<br>0.00)                      | 0.00<br>(0.00 to<br>0.00)                      |
| Maternal hypertensive disorders                       | 0.30<br>(0.16 to<br>0.52)                      | 0.18<br>(0.08 to<br>0.36)                      | 0.17<br>(0.08 to<br>0.33)                      | 0.19<br>(0.09 to<br>0.38)                      | 0.01<br>(0.00 to<br>0.01)                      | 0.00<br>(0.00 to<br>0.01)                      | 0.00<br>(0.00 to<br>0.01)                      | 0.00<br>(0.00 to<br>0.01)                      |
| Maternal obstructed labor and uterine rupture         | 0.10<br>(0.04 to<br>0.18)                      | 0.05<br>(0.02 to<br>0.09)                      | 0.04<br>(0.02 to<br>0.09)                      | 0.05<br>(0.02 to<br>0.11)                      | 0.00<br>(0.00 to<br>0.00)                      | 0.00<br>(0.00 to<br>0.00)                      | 0.00<br>(0.00 to<br>0.00)                      | 0.00<br>(0.00 to<br>0.00)                      |
| Maternal abortion, miscarriage, and ectopic pregnancy | 0.21<br>(0.11 to<br>0.35)                      | 0.13<br>(0.06 to<br>0.26)                      | 0.12<br>(0.06 to<br>0.24)                      | 0.14<br>(0.07 to<br>0.28)                      | 0.00<br>(0.00 to<br>0.01)                      | 0.00<br>(0.00 to<br>0.01)                      | 0.00<br>(0.00 to<br>0.00)                      | 0.00<br>(0.00 to<br>0.01)                      |

|                                        |                           |                           |                           |                           |                           |                           |                           |                           |
|----------------------------------------|---------------------------|---------------------------|---------------------------|---------------------------|---------------------------|---------------------------|---------------------------|---------------------------|
| Indirect maternal deaths               | 0.29<br>(0.15 to<br>0.52) | 0.14<br>(0.06 to<br>0.28) | 0.13<br>(0.06 to<br>0.26) | 0.16<br>(0.07 to<br>0.32) | 0.01<br>(0.00 to<br>0.01) | 0.00<br>(0.00 to<br>0.01) | 0.00<br>(0.00 to<br>0.00) | 0.00<br>(0.00 to<br>0.01) |
| Late maternal deaths                   | 0.08<br>(0.04 to<br>0.14) | 0.03<br>(0.01 to<br>0.06) | 0.03<br>(0.01 to<br>0.06) | 0.04<br>(0.01 to<br>0.07) | 0.00<br>(0.00 to<br>0.00) | 0.00<br>(0.00 to<br>0.00) | 0.00<br>(0.00 to<br>0.00) | 0.00<br>(0.00 to<br>0.00) |
| Maternal deaths aggravated by HIV/AIDS | 0.00<br>(0.00 to<br>0.00) | 0.00<br>(0.00 to<br>0.00) | 0.00<br>(0.00 to<br>0.00) | 0.00<br>(0.00 to<br>0.00) | 0.00<br>(0.00 to<br>0.00) | 0.00<br>(0.00 to<br>0.00) | 0.00<br>(0.00 to<br>0.00) | 0.00<br>(0.00 to<br>0.00) |
| Other maternal disorders               | 0.58<br>(0.31 to<br>0.92) | 0.35<br>(0.17 to<br>0.64) | 0.33<br>(0.16 to<br>0.62) | 0.38<br>(0.18 to<br>0.70) | 0.01<br>(0.01 to<br>0.02) | 0.01<br>(0.00 to<br>0.01) | 0.01<br>(0.00 to<br>0.01) | 0.01<br>(0.00 to<br>0.01) |



| South Korea                                                             |                                  |                                  |                                  |                                  |                               |                               |                               |                               |
|-------------------------------------------------------------------------|----------------------------------|----------------------------------|----------------------------------|----------------------------------|-------------------------------|-------------------------------|-------------------------------|-------------------------------|
| Cause                                                                   | YLLs (in 1000s)                  |                                  |                                  |                                  | Deaths (in 1000s)             |                               |                               |                               |
|                                                                         | 2016                             | 2040 Forecast                    | 2040 Better Scenario             | 2040 Worse Scenario              | 2016                          | 2040 Forecast                 | 2040 Better Scenario          | 2040 Worse Scenario           |
| <b>Neonatal disorders</b>                                               | <b>48.32</b><br>(36.24 to 62.29) | <b>26.56</b><br>(13.94 to 47.18) | <b>22.56</b><br>(11.99 to 39.88) | <b>30.51</b><br>(16.28 to 54.06) | <b>0.56</b><br>(0.42 to 0.72) | <b>0.31</b><br>(0.16 to 0.55) | <b>0.26</b><br>(0.14 to 0.46) | <b>0.35</b><br>(0.19 to 0.63) |
| Neonatal preterm birth                                                  | 26.61<br>(18.43 to 35.25)        | 10.53<br>(5.24 to 18.03)         | 7.87<br>(3.89 to 13.94)          | 12.74<br>(6.25 to 22.46)         | 0.31<br>(0.21 to 0.41)        | 0.12<br>(0.06 to 0.21)        | 0.09<br>(0.04 to 0.16)        | 0.15<br>(0.07 to 0.26)        |
| Neonatal encephalopathy due to birth asphyxia and trauma                | 5.82<br>(3.99 to 8.14)           | 2.44<br>(1.18 to 4.69)           | 2.15<br>(1.05 to 4.13)           | 2.92<br>(1.39 to 5.67)           | 0.07<br>(0.05 to 0.09)        | 0.03<br>(0.01 to 0.05)        | 0.02<br>(0.01 to 0.05)        | 0.03<br>(0.02 to 0.07)        |
| Neonatal sepsis and other neonatal infections                           | 6.75<br>(3.74 to 15.42)          | 5.31<br>(2.20 to 13.29)          | 4.77<br>(2.00 to 11.67)          | 6.10<br>(2.53 to 15.29)          | 0.08<br>(0.04 to 0.18)        | 0.06<br>(0.03 to 0.15)        | 0.06<br>(0.02 to 0.13)        | 0.07<br>(0.03 to 0.18)        |
| Hemolytic disease and other neonatal jaundice                           | 0.18<br>(0.11 to 0.28)           | 0.08<br>(0.03 to 0.17)           | 0.07<br>(0.03 to 0.15)           | 0.09<br>(0.04 to 0.20)           | 0.00<br>(0.00 to 0.00)        | 0.00<br>(0.00 to 0.00)        | 0.00<br>(0.00 to 0.00)        | 0.00<br>(0.00 to 0.00)        |
| Other neonatal disorders                                                | 8.96<br>(5.91 to 12.61)          | 8.20<br>(3.73 to 15.94)          | 7.70<br>(3.56 to 15.00)          | 8.66<br>(3.93 to 17.03)          | 0.10<br>(0.07 to 0.15)        | 0.09<br>(0.04 to 0.18)        | 0.09<br>(0.04 to 0.17)        | 0.10<br>(0.05 to 0.20)        |
| <b>Nutritional deficiencies</b>                                         | <b>3.99</b><br>(2.99 to 5.14)    | <b>12.28</b><br>(9.61 to 15.24)  | <b>12.99</b><br>(10.15 to 16.23) | <b>11.20</b><br>(8.78 to 13.92)  | <b>0.36</b><br>(0.28 to 0.45) | <b>1.64</b><br>(1.19 to 2.14) | <b>1.77</b><br>(1.32 to 2.29) | <b>1.44</b><br>(1.03 to 1.91) |
| Protein-energy malnutrition                                             | 1.43<br>(1.07 to 1.91)           | 6.88<br>(4.91 to 9.36)           | 7.50<br>(5.41 to 10.17)          | 5.91<br>(4.14 to 8.13)           | 0.15<br>(0.11 to 0.20)        | 0.98<br>(0.66 to 1.43)        | 1.09<br>(0.74 to 1.55)        | 0.82<br>(0.53 to 1.24)        |
| Iodine deficiency                                                       | 0.08<br>(0.01 to 0.27)           | 0.43<br>(0.01 to 1.98)           | 0.45<br>(0.00 to 2.08)           | 0.42<br>(0.01 to 1.85)           | 0.00<br>(0.00 to 0.02)        | 0.05<br>(0.00 to 0.29)        | 0.05<br>(0.00 to 0.31)        | 0.05<br>(0.00 to 0.27)        |
| Dietary iron deficiency                                                 | 0.15<br>(0.11 to 0.20)           | 0.13<br>(0.09 to 0.19)           | 0.14<br>(0.09 to 0.19)           | 0.13<br>(0.09 to 0.18)           | 0.00<br>(0.00 to 0.01)        | 0.00<br>(0.00 to 0.01)        | 0.00<br>(0.00 to 0.01)        | 0.00<br>(0.00 to 0.01)        |
| Other nutritional deficiencies                                          | 2.32<br>(1.67 to 3.04)           | 4.84<br>(3.33 to 6.36)           | 4.90<br>(3.37 to 6.47)           | 4.74<br>(3.33 to 6.21)           | 0.21<br>(0.15 to 0.26)        | 0.60<br>(0.38 to 0.85)        | 0.62<br>(0.39 to 0.87)        | 0.57<br>(0.36 to 0.80)        |
| <b>Other communicable, maternal, neonatal, and nutritional diseases</b> | <b>9.14</b><br>(6.79 to 11.82)   | <b>8.94</b><br>(6.37 to 12.01)   | <b>8.87</b><br>(6.27 to 12.08)   | <b>9.09</b><br>(6.48 to 12.13)   | <b>0.35</b><br>(0.27 to 0.45) | <b>0.54</b><br>(0.41 to 0.70) | <b>0.55</b><br>(0.41 to 0.72) | <b>0.53</b><br>(0.40 to 0.68) |
| Sexually transmitted infections excluding HIV                           | 0.91<br>(0.36 to 2.02)           | 0.35<br>(0.19 to 0.67)           | 0.34<br>(0.19 to 0.65)           | 0.37<br>(0.20 to 0.74)           | 0.03<br>(0.02 to 0.04)        | 0.02<br>(0.01 to 0.03)        | 0.02<br>(0.01 to 0.03)        | 0.02<br>(0.01 to 0.03)        |
| Syphilis                                                                | 0.65<br>(0.15 to 1.80)           | 0.16<br>(0.05 to 0.48)           | 0.15<br>(0.05 to 0.44)           | 0.18<br>(0.05 to 0.55)           | 0.01<br>(0.01 to 0.03)        | 0.01<br>(0.00 to 0.01)        | 0.01<br>(0.00 to 0.01)        | 0.01<br>(0.00 to 0.01)        |
| Chlamydial infection                                                    | 0.05<br>(0.03 to 0.07)           | 0.04<br>(0.02 to 0.06)           | 0.04<br>(0.02 to 0.06)           | 0.04<br>(0.02 to 0.06)           | 0.00<br>(0.00 to 0.00)        | 0.00<br>(0.00 to 0.00)        | 0.00<br>(0.00 to 0.00)        | 0.00<br>(0.00 to 0.00)        |
| Gonococcal infection                                                    | 0.15<br>(0.09 to 0.22)           | 0.11<br>(0.07 to 0.17)           | 0.11<br>(0.07 to 0.18)           | 0.11<br>(0.07 to 0.17)           | 0.01<br>(0.01 to 0.01)        | 0.01<br>(0.01 to 0.01)        | 0.01<br>(0.01 to 0.01)        | 0.01<br>(0.01 to 0.01)        |
| Other sexually transmitted infections                                   | 0.07<br>(0.04 to 0.10)           | 0.04<br>(0.03 to 0.06)           | 0.04<br>(0.03 to 0.06)           | 0.04<br>(0.03 to 0.06)           | 0.00<br>(0.00 to 0.00)        | 0.00<br>(0.00 to 0.00)        | 0.00<br>(0.00 to 0.00)        | 0.00<br>(0.00 to 0.00)        |
| Acute hepatitis                                                         | 3.66<br>(2.65 to 4.87)           | 2.41<br>(1.54 to 3.60)           | 2.26<br>(1.39 to 3.45)           | 2.70<br>(1.69 to 4.11)           | 0.14<br>(0.10 to 0.18)        | 0.14<br>(0.09 to 0.20)        | 0.13<br>(0.09 to 0.19)        | 0.15<br>(0.10 to 0.22)        |
| Acute hepatitis A                                                       | 0.24<br>(0.17 to 0.33)           | 0.11<br>(0.06 to 0.17)           | 0.10<br>(0.06 to 0.16)           | 0.12<br>(0.07 to 0.19)           | 0.01<br>(0.00 to 0.01)        | 0.01<br>(0.00 to 0.01)        | 0.00<br>(0.00 to 0.01)        | 0.01<br>(0.00 to 0.01)        |
| Acute hepatitis B                                                       | 2.96<br>(2.08 to 3.99)           | 1.89<br>(1.14 to 2.91)           | 1.77<br>(1.05 to 2.76)           | 2.14<br>(1.26 to 3.35)           | 0.10<br>(0.07 to 0.14)        | 0.10<br>(0.06 to 0.14)        | 0.09<br>(0.06 to 0.14)        | 0.10<br>(0.07 to 0.16)        |

|                                       |                                                            |                                                            |                                                            |                                                             |                                                      |                                                      |                                                      |                                                      |
|---------------------------------------|------------------------------------------------------------|------------------------------------------------------------|------------------------------------------------------------|-------------------------------------------------------------|------------------------------------------------------|------------------------------------------------------|------------------------------------------------------|------------------------------------------------------|
|                                       | 0.11<br>(0.07 to<br>0.17)                                  | 0.09<br>(0.05 to<br>0.15)                                  | 0.08<br>(0.04 to<br>0.14)                                  | 0.10<br>(0.05 to<br>0.16)                                   | 0.00<br>(0.00 to<br>0.01)                            | 0.01<br>(0.00 to<br>0.01)                            | 0.01<br>(0.00 to<br>0.01)                            | 0.01<br>(0.00 to<br>0.01)                            |
| Acute hepatitis C                     |                                                            |                                                            |                                                            |                                                             |                                                      |                                                      |                                                      |                                                      |
|                                       | 0.35<br>(0.24 to<br>0.50)                                  | 0.32<br>(0.18 to<br>0.54)                                  | 0.31<br>(0.17 to<br>0.53)                                  | 0.35<br>(0.19 to<br>0.58)                                   | 0.02<br>(0.01 to<br>0.03)                            | 0.03<br>(0.02 to<br>0.06)                            | 0.03<br>(0.02 to<br>0.06)                            | 0.03<br>(0.02 to<br>0.06)                            |
| Acute hepatitis E                     |                                                            |                                                            |                                                            |                                                             |                                                      |                                                      |                                                      |                                                      |
|                                       | 4.57<br>(3.39 to<br>5.85)                                  | 6.18<br>(4.45 to<br>8.16)                                  | 6.26<br>(4.47 to<br>8.32)                                  | 6.02<br>(4.36 to<br>7.87)                                   | 0.19<br>(0.14 to<br>0.24)                            | 0.38<br>(0.29 to<br>0.49)                            | 0.39<br>(0.30 to<br>0.51)                            | 0.36<br>(0.27 to<br>0.45)                            |
| Other unspecified infectious diseases |                                                            |                                                            |                                                            |                                                             |                                                      |                                                      |                                                      |                                                      |
| <b>Non-communicable diseases</b>      | <b>4,598.40</b><br><b>(3,456.02 to</b><br><b>5,910.07)</b> | <b>6,169.04</b><br><b>(4,204.07 to</b><br><b>8,328.86)</b> | <b>5,503.40</b><br><b>(3,805.78 to</b><br><b>7,412.41)</b> | <b>7,735.02</b><br><b>(5,181.95 to</b><br><b>10,572.84)</b> | <b>284.21</b><br><b>(217.85 to</b><br><b>357.93)</b> | <b>500.43</b><br><b>(395.86 to</b><br><b>612.81)</b> | <b>457.67</b><br><b>(363.64 to</b><br><b>560.27)</b> | <b>601.63</b><br><b>(473.96 to</b><br><b>738.27)</b> |

| South Korea                          |                                           |                                           |                                           |                                           |                                    |                                     |                                     |                                     |
|--------------------------------------|-------------------------------------------|-------------------------------------------|-------------------------------------------|-------------------------------------------|------------------------------------|-------------------------------------|-------------------------------------|-------------------------------------|
| Cause                                | YLLs (in 1000s)                           |                                           |                                           |                                           | Deaths (in 1000s)                  |                                     |                                     |                                     |
|                                      | 2016                                      | 2040 Forecast                             | 2040 Better Scenario                      | 2040 Worse Scenario                       | 2016                               | 2040 Forecast                       | 2040 Better Scenario                | 2040 Worse Scenario                 |
| <b>Neoplasms</b>                     | <b>2,052.94</b><br>(1,505.91 to 2,654.02) | <b>2,538.89</b><br>(1,586.85 to 3,669.45) | <b>2,321.39</b><br>(1,465.20 to 3,342.51) | <b>3,175.37</b><br>(1,924.16 to 4,741.44) | <b>102.15</b><br>(76.25 to 129.73) | <b>160.63</b><br>(113.74 to 213.23) | <b>148.48</b><br>(105.18 to 196.26) | <b>197.47</b><br>(136.11 to 268.47) |
| Lip and oral cavity cancer           | 15.19<br>(10.91 to 20.08)                 | 15.57<br>(7.94 to 27.92)                  | 12.72<br>(6.75 to 22.06)                  | 26.36<br>(11.77 to 51.22)                 | 0.71<br>(0.52 to 0.93)             | 0.95<br>(0.53 to 1.55)              | 0.78<br>(0.45 to 1.24)              | 1.57<br>(0.79 to 2.77)              |
| Nasopharynx cancer                   | 6.98<br>(4.84 to 9.45)                    | 5.65<br>(2.75 to 11.48)                   | 4.48<br>(2.20 to 8.65)                    | 10.34<br>(4.57 to 23.87)                  | 0.26<br>(0.19 to 0.36)             | 0.26<br>(0.13 to 0.50)              | 0.21<br>(0.11 to 0.39)              | 0.48<br>(0.22 to 0.98)              |
| Other pharynx cancer                 | 10.32<br>(6.91 to 14.55)                  | 12.76<br>(6.45 to 21.84)                  | 11.50<br>(6.07 to 19.17)                  | 14.98<br>(7.24 to 26.09)                  | 0.47<br>(0.32 to 0.66)             | 0.73<br>(0.40 to 1.21)              | 0.67<br>(0.39 to 1.08)              | 0.83<br>(0.44 to 1.42)              |
| Esophageal cancer                    | 45.53<br>(31.28 to 62.88)                 | 72.86<br>(35.42 to 134.26)                | 60.09<br>(30.38 to 106.82)                | 111.80<br>(48.10 to 226.84)               | 2.29<br>(1.60 to 3.10)             | 4.29<br>(2.23 to 7.58)              | 3.57<br>(1.96 to 6.06)              | 6.51<br>(2.98 to 12.37)             |
| Stomach cancer                       | 303.41<br>(221.19 to 396.59)              | 265.26<br>(166.72 to 392.23)              | 242.63<br>(151.80 to 354.47)              | 306.08<br>(190.35 to 452.09)              | 15.05<br>(11.14 to 19.29)          | 17.14<br>(11.73 to 23.77)           | 15.87<br>(11.02 to 21.75)           | 19.41<br>(13.22 to 26.93)           |
| Colon and rectum cancer              | 204.20<br>(149.83 to 266.97)              | 234.26<br>(139.56 to 359.62)              | 214.92<br>(129.00 to 328.01)              | 278.86<br>(166.29 to 432.51)              | 10.89<br>(8.12 to 14.04)           | 16.67<br>(10.92 to 24.82)           | 15.59<br>(10.24 to 23.24)           | 19.22<br>(12.46 to 28.94)           |
| Liver cancer                         | 372.17<br>(262.20 to 509.36)              | 636.82<br>(355.61 to 1,066.13)            | 608.63<br>(353.38 to 990.04)              | 717.28<br>(378.00 to 1,265.79)            | 16.29<br>(11.74 to 21.69)          | 34.59<br>(21.57 to 52.93)           | 33.56<br>(21.42 to 50.30)           | 38.29<br>(22.77 to 62.63)           |
| Liver cancer due to hepatitis B      | 221.01<br>(151.95 to 306.02)              | 351.49<br>(191.60 to 605.94)              | 338.52<br>(187.97 to 562.73)              | 386.51<br>(198.80 to 706.61)              | 8.90<br>(6.26 to 12.35)            | 17.45<br>(10.56 to 28.04)           | 17.03<br>(10.50 to 26.35)           | 18.90<br>(10.79 to 31.88)           |
| Liver cancer due to hepatitis C      | 65.56<br>(44.64 to 91.15)                 | 126.14<br>(73.46 to 205.14)               | 122.53<br>(71.31 to 197.51)               | 137.25<br>(76.19 to 235.95)               | 3.39<br>(2.39 to 4.72)             | 8.07<br>(5.14 to 12.27)             | 7.96<br>(5.16 to 11.93)             | 8.62<br>(5.18 to 13.77)             |
| Liver cancer due to alcohol use      | 41.88<br>(27.11 to 60.97)                 | 75.12<br>(38.87 to 133.53)                | 67.18<br>(35.85 to 114.90)                | 99.42<br>(49.10 to 190.96)                | 1.89<br>(1.25 to 2.70)             | 4.06<br>(2.22 to 6.88)              | 3.70<br>(2.09 to 6.02)              | 5.25<br>(2.78 to 9.45)              |
| Liver cancer due to other causes     | 43.72<br>(29.35 to 62.45)                 | 84.07<br>(44.02 to 143.00)                | 80.41<br>(43.36 to 132.50)                | 94.10<br>(46.24 to 165.71)                | 2.11<br>(1.44 to 2.93)             | 5.01<br>(2.82 to 7.97)              | 4.87<br>(2.80 to 7.60)              | 5.52<br>(2.99 to 9.02)              |
| Gallbladder and biliary tract cancer | 88.87<br>(61.91 to 119.33)                | 94.93<br>(66.78 to 125.84)                | 96.70<br>(67.78 to 130.11)                | 91.65<br>(65.61 to 119.99)                | 5.31<br>(3.83 to 7.00)             | 7.00<br>(5.32 to 8.68)              | 7.24<br>(5.52 to 9.04)              | 6.59<br>(5.06 to 8.01)              |
| Pancreatic cancer                    | 116.51<br>(84.93 to 150.91)               | 176.71<br>(109.44 to 256.63)              | 174.95<br>(108.46 to 254.69)              | 189.29<br>(115.12 to 279.88)              | 6.10<br>(4.54 to 7.78)             | 11.22<br>(7.63 to 15.29)            | 11.20<br>(7.64 to 15.25)            | 11.88<br>(7.99 to 16.44)            |
| Larynx cancer                        | 9.51<br>(6.60 to 12.84)                   | 11.76<br>(5.28 to 23.71)                  | 8.99<br>(4.25 to 17.76)                   | 22.46<br>(9.01 to 48.11)                  | 0.53<br>(0.37 to 0.69)             | 0.80<br>(0.38 to 1.52)              | 0.61<br>(0.31 to 1.16)              | 1.48<br>(0.65 to 2.91)              |
| Tracheal, bronchus, and lung cancer  | 386.87<br>(285.51 to 511.55)              | 449.75<br>(238.82 to 760.00)              | 331.82<br>(183.37 to 545.48)              | 811.61<br>(398.54 to 1,413.06)            | 21.85<br>(16.52 to 28.47)          | 31.02<br>(18.20 to 48.00)           | 23.09<br>(13.93 to 35.26)           | 54.27<br>(30.28 to 86.79)           |
| Malignant skin melanoma              | 4.77<br>(3.09 to 6.46)                    | 6.66<br>(4.09 to 9.30)                    | 7.07<br>(4.31 to 9.90)                    | 5.97<br>(3.67 to 8.15)                    | 0.22<br>(0.13 to 0.28)             | 0.42<br>(0.25 to 0.53)              | 0.45<br>(0.27 to 0.58)              | 0.36<br>(0.22 to 0.45)              |
| Non-melanoma skin cancer             | 5.14<br>(3.77 to 6.70)                    | 10.97<br>(8.69 to 13.46)                  | 10.89<br>(8.53 to 13.54)                  | 11.14<br>(8.95 to 13.68)                  | 0.42<br>(0.32 to 0.52)             | 1.18<br>(0.94 to 1.42)              | 1.20<br>(0.96 to 1.44)              | 1.16<br>(0.91 to 1.41)              |
| Breast cancer                        | 79.07<br>(48.70 to 119.02)                | 57.97<br>(30.40 to 99.95)                 | 53.29<br>(28.18 to 91.95)                 | 73.31<br>(37.35 to 129.86)                | 2.92<br>(1.83 to 4.33)             | 2.96<br>(1.67 to 4.68)              | 2.76<br>(1.56 to 4.34)              | 3.64<br>(1.98 to 5.88)              |
| Cervical cancer                      | 30.30<br>(18.29 to 46.36)                 | 23.24<br>(13.05 to 39.44)                 | 21.94<br>(12.18 to 37.27)                 | 25.85<br>(14.14 to 45.62)                 | 1.33<br>(0.81 to 2.01)             | 1.35<br>(0.82 to 2.14)              | 1.29<br>(0.78 to 2.02)              | 1.49<br>(0.89 to 2.34)              |

|                   |                              |                              |                              |                              |                           |                           |                           |                           |
|-------------------|------------------------------|------------------------------|------------------------------|------------------------------|---------------------------|---------------------------|---------------------------|---------------------------|
|                   | 8.78<br>(5.55 to<br>13.20)   | 11.96<br>(7.32 to<br>18.86)  | 11.66<br>(7.12 to<br>18.32)  | 12.50<br>(7.72 to<br>19.57)  | 0.42<br>(0.27 to<br>0.61) | 0.75<br>(0.51 to<br>1.07) | 0.74<br>(0.51 to<br>1.06) | 0.77<br>(0.53 to<br>1.09) |
| Uterine cancer    |                              |                              |                              |                              |                           |                           |                           |                           |
| Ovarian cancer    | 28.59<br>(17.73 to<br>42.47) | 22.68<br>(12.71 to<br>37.27) | 21.85<br>(12.28 to<br>36.01) | 24.16<br>(13.28 to<br>40.30) | 1.16<br>(0.75 to<br>1.70) | 1.24<br>(0.77 to<br>1.89) | 1.20<br>(0.75 to<br>1.81) | 1.30<br>(0.80 to<br>2.02) |
| Prostate cancer   | 30.91<br>(17.39 to<br>44.65) | 60.08<br>(32.22 to<br>84.43) | 61.14<br>(32.90 to<br>87.42) | 59.20<br>(32.93 to<br>80.25) | 2.26<br>(1.22 to<br>3.23) | 5.38<br>(3.03 to<br>7.09) | 5.59<br>(3.11 to<br>7.43) | 5.14<br>(2.91 to<br>6.68) |
| Testicular cancer | 0.57<br>(0.37 to<br>0.82)    | 0.40<br>(0.26 to<br>0.59)    | 0.39<br>(0.25 to<br>0.59)    | 0.41<br>(0.27 to<br>0.60)    | 0.02<br>(0.01 to<br>0.02) | 0.02<br>(0.01 to<br>0.03) | 0.02<br>(0.01 to<br>0.03) | 0.02<br>(0.01 to<br>0.02) |

| South Korea                     |                                                |                                                |                                              |                                                  |                                          |                                           |                                          |                                            |
|---------------------------------|------------------------------------------------|------------------------------------------------|----------------------------------------------|--------------------------------------------------|------------------------------------------|-------------------------------------------|------------------------------------------|--------------------------------------------|
| Cause                           | YLLs (in 1000s)                                |                                                |                                              |                                                  | Deaths (in 1000s)                        |                                           |                                          |                                            |
|                                 | 2016                                           | 2040 Forecast                                  | 2040 Better Scenario                         | 2040 Worse Scenario                              | 2016                                     | 2040 Forecast                             | 2040 Better Scenario                     | 2040 Worse Scenario                        |
| Kidney cancer                   | 30.64<br>(22.05 to 40.97)                      | 41.43<br>(26.28 to 59.95)                      | 41.90<br>(26.48 to 60.42)                    | 42.98<br>(26.78 to 63.48)                        | 1.50<br>(1.11 to 1.96)                   | 2.59<br>(1.83 to 3.42)                    | 2.65<br>(1.88 to 3.52)                   | 2.63<br>(1.85 to 3.59)                     |
| Bladder cancer                  | 24.09<br>(17.23 to 31.80)                      | 38.43<br>(25.31 to 54.99)                      | 37.34<br>(24.41 to 53.09)                    | 45.07<br>(28.76 to 66.34)                        | 1.68<br>(1.25 to 2.15)                   | 3.34<br>(2.44 to 4.51)                    | 3.30<br>(2.41 to 4.41)                   | 3.85<br>(2.71 to 5.44)                     |
| Brain and nervous system cancer | 38.73<br>(27.48 to 55.39)                      | 44.34<br>(30.14 to 61.52)                      | 44.16<br>(29.70 to 61.39)                    | 44.52<br>(30.55 to 60.93)                        | 1.32<br>(0.95 to 1.79)                   | 2.14<br>(1.54 to 2.75)                    | 2.16<br>(1.54 to 2.80)                   | 2.10<br>(1.53 to 2.66)                     |
| Thyroid cancer                  | 13.02<br>(8.63 to 17.27)                       | 12.38<br>(7.93 to 18.11)                       | 11.89<br>(7.63 to 17.03)                     | 13.20<br>(8.39 to 19.85)                         | 0.69<br>(0.48 to 0.90)                   | 0.84<br>(0.60 to 1.15)                    | 0.82<br>(0.59 to 1.12)                   | 0.88<br>(0.62 to 1.23)                     |
| Mesothelioma                    | 2.97<br>(2.09 to 4.00)                         | 3.88<br>(2.65 to 5.27)                         | 4.01<br>(2.71 to 5.52)                       | 3.67<br>(2.55 to 4.89)                           | 0.14<br>(0.10 to 0.18)                   | 0.24<br>(0.18 to 0.31)                    | 0.26<br>(0.19 to 0.32)                   | 0.22<br>(0.17 to 0.28)                     |
| Hodgkin lymphoma                | 1.62<br>(0.93 to 2.30)                         | 1.15<br>(0.64 to 1.70)                         | 1.10<br>(0.60 to 1.64)                       | 1.25<br>(0.70 to 1.88)                           | 0.06<br>(0.03 to 0.08)                   | 0.06<br>(0.03 to 0.08)                    | 0.05<br>(0.03 to 0.08)                   | 0.06<br>(0.03 to 0.08)                     |
| Non-Hodgkin lymphoma            | 45.19<br>(32.77 to 59.78)                      | 47.62<br>(33.39 to 65.63)                      | 46.61<br>(32.40 to 64.41)                    | 49.08<br>(34.70 to 67.92)                        | 2.01<br>(1.49 to 2.61)                   | 2.82<br>(2.15 to 3.64)                    | 2.82<br>(2.13 to 3.64)                   | 2.84<br>(2.20 to 3.63)                     |
| Multiple myeloma                | 18.22<br>(12.03 to 24.49)                      | 23.74<br>(15.60 to 32.81)                      | 23.50<br>(15.33 to 32.41)                    | 24.04<br>(15.86 to 33.26)                        | 0.94<br>(0.65 to 1.23)                   | 1.49<br>(1.08 to 1.94)                    | 1.50<br>(1.08 to 1.96)                   | 1.48<br>(1.08 to 1.92)                     |
| Leukemia                        | 61.02<br>(44.05 to 80.25)                      | 60.38<br>(40.03 to 86.96)                      | 58.43<br>(38.72 to 83.80)                    | 65.95<br>(43.70 to 96.07)                        | 2.20<br>(1.59 to 2.97)                   | 3.20<br>(2.29 to 4.42)                    | 3.14<br>(2.24 to 4.28)                   | 3.44<br>(2.46 to 4.84)                     |
| Acute lymphoid leukemia         | 12.48<br>(7.82 to 17.18)                       | 7.61<br>(4.22 to 11.58)                        | 7.25<br>(4.05 to 11.09)                      | 8.47<br>(4.66 to 12.93)                          | 0.35<br>(0.21 to 0.48)                   | 0.31<br>(0.18 to 0.47)                    | 0.30<br>(0.17 to 0.45)                   | 0.35<br>(0.20 to 0.52)                     |
| Chronic lymphoid leukemia       | 1.80<br>(1.00 to 2.60)                         | 2.00<br>(0.99 to 3.22)                         | 1.97<br>(0.98 to 3.17)                       | 2.14<br>(1.06 to 3.50)                           | 0.09<br>(0.05 to 0.13)                   | 0.13<br>(0.07 to 0.20)                    | 0.13<br>(0.07 to 0.20)                   | 0.14<br>(0.07 to 0.21)                     |
| Acute myeloid leukemia          | 26.47<br>(18.43 to 37.25)                      | 27.18<br>(17.61 to 40.99)                      | 26.70<br>(17.22 to 39.77)                    | 28.85<br>(18.48 to 44.41)                        | 0.88<br>(0.61 to 1.31)                   | 1.27<br>(0.85 to 1.94)                    | 1.27<br>(0.84 to 1.93)                   | 1.33<br>(0.88 to 2.06)                     |
| Chronic myeloid leukemia        | 4.21<br>(2.47 to 6.28)                         | 1.75<br>(0.93 to 2.92)                         | 1.60<br>(0.86 to 2.69)                       | 2.12<br>(1.13 to 3.65)                           | 0.14<br>(0.09 to 0.21)                   | 0.08<br>(0.05 to 0.13)                    | 0.08<br>(0.05 to 0.12)                   | 0.10<br>(0.06 to 0.16)                     |
| Other leukemia                  | 16.05<br>(11.52 to 22.72)                      | 21.83<br>(14.14 to 32.10)                      | 20.92<br>(13.58 to 31.11)                    | 24.37<br>(15.58 to 36.46)                        | 0.74<br>(0.52 to 1.01)                   | 1.40<br>(0.96 to 1.91)                    | 1.36<br>(0.93 to 1.87)                   | 1.52<br>(1.03 to 2.14)                     |
| Other neoplasms                 | 69.79<br>(51.56 to 90.35)                      | 95.24<br>(67.81 to 126.05)                     | 96.78<br>(68.28 to 128.68)                   | 92.38<br>(66.77 to 120.27)                       | 3.11<br>(2.28 to 3.99)                   | 5.92<br>(4.57 to 7.32)                    | 6.13<br>(4.77 to 7.63)                   | 5.57<br>(4.35 to 6.81)                     |
| <b>Cardiovascular diseases</b>  | <b>1,112.64</b><br><b>(842.80 to 1,428.88)</b> | <b>1,222.19</b><br><b>(753.92 to 2,090.11)</b> | <b>927.84</b><br><b>(597.83 to 1,536.91)</b> | <b>1,811.08</b><br><b>(1,061.15 to 3,070.02)</b> | <b>83.75</b><br><b>(64.77 to 103.81)</b> | <b>119.59</b><br><b>(80.48 to 191.17)</b> | <b>97.38</b><br><b>(66.75 to 152.76)</b> | <b>162.58</b><br><b>(105.36 to 258.49)</b> |
| Rheumatic heart disease         | 8.31<br>(6.09 to 10.87)                        | 7.26<br>(5.11 to 10.32)                        | 6.89<br>(4.87 to 9.76)                       | 7.76<br>(5.50 to 11.02)                          | 0.56<br>(0.42 to 0.74)                   | 0.68<br>(0.52 to 0.94)                    | 0.66<br>(0.50 to 0.90)                   | 0.70<br>(0.52 to 0.97)                     |
| Ischemic heart disease          | 424.14<br>(317.73 to 540.78)                   | 409.51<br>(211.04 to 772.68)                   | 297.46<br>(159.80 to 525.12)                 | 661.96<br>(328.18 to 1,293.52)                   | 33.13<br>(25.48 to 41.10)                | 40.76<br>(22.41 to 73.62)                 | 31.83<br>(17.85 to 55.60)                | 59.93<br>(31.50 to 113.28)                 |
| Stroke                          | 524.59<br>(391.70 to 675.41)                   | 516.50<br>(283.12 to 1,017.33)                 | 359.58<br>(207.18 to 677.39)                 | 793.62<br>(420.81 to 1,500.70)                   | 37.29<br>(28.77 to 46.66)                | 46.22<br>(28.04 to 87.41)                 | 35.17<br>(21.81 to 65.41)                | 64.55<br>(37.72 to 120.39)                 |
| Ischemic stroke                 | 257.53<br>(193.65 to 329.04)                   | 279.22<br>(140.46 to 674.40)                   | 205.68<br>(107.28 to 465.39)                 | 398.09<br>(192.09 to 998.38)                     | 22.34<br>(17.36 to 27.79)                | 28.09<br>(15.02 to 62.53)                 | 22.14<br>(12.19 to 49.06)                | 37.36<br>(19.12 to 88.07)                  |

|                                |                                 |                                 |                                |                                 |                              |                              |                             |                              |
|--------------------------------|---------------------------------|---------------------------------|--------------------------------|---------------------------------|------------------------------|------------------------------|-----------------------------|------------------------------|
|                                | 267.06<br>(196.23 to<br>349.20) | 237.28<br>(126.11 to<br>423.50) | 153.90<br>(88.94 to<br>256.91) | 395.53<br>(199.22 to<br>747.38) | 14.95<br>(11.32 to<br>19.00) | 18.13<br>(10.79 to<br>29.37) | 13.04<br>(8.27 to<br>20.24) | 27.18<br>(15.33 to<br>45.84) |
| Intracerebral hemorrhage       |                                 |                                 |                                |                                 |                              |                              |                             |                              |
|                                | 49.39<br>(35.45 to<br>67.18)    | 128.71<br>(68.06 to<br>278.38)  | 110.84<br>(64.95 to<br>215.14) | 172.79<br>(84.80 to<br>394.23)  | 5.14<br>(3.57 to<br>6.89)    | 16.40<br>(8.55 to<br>37.27)  | 14.47<br>(8.37 to<br>28.91) | 21.26<br>(10.40 to<br>50.19) |
| Hypertensive heart disease     |                                 |                                 |                                |                                 |                              |                              |                             |                              |
|                                | 22.51<br>(16.58 to<br>29.72)    | 20.51<br>(14.18 to<br>29.74)    | 19.50<br>(13.59 to<br>28.13)   | 22.62<br>(15.49 to<br>32.81)    | 1.20<br>(0.89 to<br>1.55)    | 1.65<br>(1.20 to<br>2.25)    | 1.62<br>(1.18 to<br>2.21)   | 1.73<br>(1.25 to<br>2.38)    |
| Cardiomyopathy and myocarditis |                                 |                                 |                                |                                 |                              |                              |                             |                              |
|                                | 4.18<br>(2.90 to<br>6.15)       | 6.11<br>(4.36 to<br>8.57)       | 6.28<br>(4.46 to<br>8.77)      | 5.85<br>(4.15 to<br>8.29)       | 0.24<br>(0.17 to<br>0.36)    | 0.57<br>(0.40 to<br>0.85)    | 0.61<br>(0.43 to<br>0.90)   | 0.52<br>(0.36 to<br>0.79)    |
| Myocarditis                    |                                 |                                 |                                |                                 |                              |                              |                             |                              |

| South Korea                                                   |                                            |                                            |                                            |                                            |                                         |                                         |                                         |                                         |
|---------------------------------------------------------------|--------------------------------------------|--------------------------------------------|--------------------------------------------|--------------------------------------------|-----------------------------------------|-----------------------------------------|-----------------------------------------|-----------------------------------------|
| Cause                                                         | YLLs (in 1000s)                            |                                            |                                            |                                            | Deaths (in 1000s)                       |                                         |                                         |                                         |
|                                                               | 2016                                       | 2040 Forecast                              | 2040 Better Scenario                       | 2040 Worse Scenario                        | 2016                                    | 2040 Forecast                           | 2040 Better Scenario                    | 2040 Worse Scenario                     |
| Alcoholic cardiomyopathy                                      | 1.53<br>(1.01 to 2.32)                     | 1.64<br>(1.00 to 2.40)                     | 1.56<br>(0.93 to 2.29)                     | 1.95<br>(1.25 to 2.77)                     | 0.08<br>(0.05 to 0.11)                  | 0.11<br>(0.06 to 0.16)                  | 0.11<br>(0.06 to 0.15)                  | 0.12<br>(0.08 to 0.17)                  |
| Other cardiomyopathy                                          | 16.80<br>(12.20 to 22.08)                  | 12.76<br>(7.59 to 20.11)                   | 11.65<br>(7.01 to 18.19)                   | 14.83<br>(8.88 to 23.30)                   | 0.88<br>(0.65 to 1.15)                  | 0.96<br>(0.60 to 1.51)                  | 0.90<br>(0.57 to 1.41)                  | 1.08<br>(0.67 to 1.66)                  |
| Atrial fibrillation and flutter                               | 19.53<br>(13.77 to 26.77)                  | 40.02<br>(28.45 to 56.54)                  | 38.67<br>(27.74 to 54.18)                  | 43.11<br>(30.46 to 60.83)                  | 1.96<br>(1.39 to 2.72)                  | 4.69<br>(3.32 to 6.48)                  | 4.64<br>(3.32 to 6.42)                  | 4.84<br>(3.45 to 6.74)                  |
| Aortic aneurysm                                               | 22.38<br>(16.62 to 28.81)                  | 29.40<br>(20.54 to 41.35)                  | 28.41<br>(20.21 to 39.94)                  | 31.49<br>(21.96 to 44.48)                  | 1.58<br>(1.20 to 1.99)                  | 2.66<br>(2.00 to 3.55)                  | 2.64<br>(2.00 to 3.51)                  | 2.70<br>(2.01 to 3.56)                  |
| Peripheral artery disease                                     | 2.37<br>(1.62 to 3.82)                     | 7.08<br>(4.44 to 11.30)                    | 6.89<br>(4.35 to 11.12)                    | 7.69<br>(4.82 to 12.39)                    | 0.21<br>(0.15 to 0.33)                  | 0.76<br>(0.50 to 1.21)                  | 0.76<br>(0.50 to 1.22)                  | 0.78<br>(0.50 to 1.25)                  |
| Endocarditis                                                  | 11.83<br>(8.18 to 18.15)                   | 25.73<br>(16.50 to 42.09)                  | 25.33<br>(16.48 to 41.12)                  | 26.19<br>(16.88 to 42.68)                  | 0.76<br>(0.53 to 1.16)                  | 2.27<br>(1.48 to 3.79)                  | 2.29<br>(1.50 to 3.83)                  | 2.22<br>(1.45 to 3.73)                  |
| Other cardiovascular and circulatory diseases                 | 27.59<br>(16.89 to 37.46)                  | 37.48<br>(21.94 to 54.75)                  | 34.29<br>(20.35 to 49.59)                  | 43.86<br>(26.38 to 63.10)                  | 1.93<br>(1.19 to 2.58)                  | 3.50<br>(2.09 to 4.82)                  | 3.29<br>(2.00 to 4.57)                  | 3.86<br>(2.33 to 5.42)                  |
| <b>Chronic respiratory diseases</b>                           | <b>172.71</b><br><b>(126.78 to 218.16)</b> | <b>266.44</b><br><b>(166.46 to 387.67)</b> | <b>230.05</b><br><b>(148.89 to 327.88)</b> | <b>391.98</b><br><b>(231.73 to 595.13)</b> | <b>13.84</b><br><b>(10.44 to 17.31)</b> | <b>25.29</b><br><b>(16.79 to 35.31)</b> | <b>22.08</b><br><b>(15.08 to 30.34)</b> | <b>36.76</b><br><b>(23.57 to 52.86)</b> |
| Chronic obstructive pulmonary disease                         | 112.04<br>(83.59 to 142.44)                | 184.56<br>(103.21 to 288.59)               | 146.69<br>(84.17 to 228.57)                | 309.41<br>(165.18 to 505.80)               | 9.46<br>(7.13 to 11.84)                 | 18.39<br>(11.28 to 27.32)               | 15.06<br>(9.29 to 22.14)                | 29.81<br>(17.42 to 45.32)               |
| Pneumoconiosis                                                | 7.96<br>(5.29 to 12.05)                    | 5.11<br>(3.21 to 7.54)                     | 4.88<br>(3.03 to 7.22)                     | 6.96<br>(3.85 to 9.22)                     | 0.47<br>(0.32 to 0.72)                  | 0.38<br>(0.26 to 0.55)                  | 0.37<br>(0.25 to 0.52)                  | 0.43<br>(0.29 to 0.61)                  |
| Silicosis                                                     | 0.80<br>(0.40 to 2.75)                     | 0.36<br>(0.17 to 1.15)                     | 0.32<br>(0.15 to 1.02)                     | 0.43<br>(0.20 to 1.53)                     | 0.05<br>(0.03 to 0.18)                  | 0.03<br>(0.01 to 0.09)                  | 0.03<br>(0.01 to 0.08)                  | 0.03<br>(0.02 to 0.11)                  |
| Asbestosis                                                    | 0.37<br>(0.17 to 0.88)                     | 0.77<br>(0.36 to 1.70)                     | 0.82<br>(0.39 to 1.77)                     | 0.69<br>(0.31 to 1.56)                     | 0.02<br>(0.01 to 0.05)                  | 0.06<br>(0.03 to 0.12)                  | 0.07<br>(0.03 to 0.13)                  | 0.05<br>(0.03 to 0.10)                  |
| Coal workers pneumoconiosis                                   | 3.84<br>(1.94 to 5.86)                     | 2.30<br>(0.98 to 4.08)                     | 2.12<br>(0.88 to 3.89)                     | 2.94<br>(1.30 to 5.16)                     | 0.22<br>(0.12 to 0.33)                  | 0.16<br>(0.07 to 0.27)                  | 0.15<br>(0.07 to 0.26)                  | 0.20<br>(0.10 to 0.33)                  |
| Other pneumoconiosis                                          | 2.95<br>(1.71 to 5.25)                     | 1.69<br>(0.98 to 2.89)                     | 1.61<br>(0.92 to 2.70)                     | 2.01<br>(1.15 to 3.47)                     | 0.18<br>(0.10 to 0.31)                  | 0.13<br>(0.08 to 0.21)                  | 0.13<br>(0.08 to 0.20)                  | 0.15<br>(0.09 to 0.24)                  |
| Asthma                                                        | 28.71<br>(19.85 to 37.45)                  | 23.72<br>(13.90 to 37.84)                  | 20.89<br>(12.12 to 32.57)                  | 30.73<br>(17.77 to 49.87)                  | 2.46<br>(1.51 to 3.24)                  | 2.59<br>(1.42 to 4.15)                  | 2.32<br>(1.22 to 3.63)                  | 3.23<br>(1.62 to 5.32)                  |
| Interstitial lung disease and pulmonary sarcoidosis           | 22.99<br>(14.62 to 31.45)                  | 51.79<br>(33.46 to 70.41)                  | 56.34<br>(36.43 to 77.41)                  | 44.47<br>(27.78 to 60.88)                  | 1.41<br>(0.90 to 1.94)                  | 3.85<br>(2.57 to 5.12)                  | 4.25<br>(2.87 to 5.65)                  | 3.22<br>(2.07 to 4.30)                  |
| Other chronic respiratory diseases                            | 1.01<br>(0.67 to 1.72)                     | 1.25<br>(0.74 to 1.98)                     | 1.26<br>(0.73 to 1.99)                     | 1.31<br>(0.78 to 2.08)                     | 0.04<br>(0.03 to 0.06)                  | 0.07<br>(0.04 to 0.11)                  | 0.08<br>(0.04 to 0.11)                  | 0.08<br>(0.04 to 0.11)                  |
| <b>Cirrhosis and other chronic liver diseases</b>             | <b>279.96</b><br><b>(189.95 to 402.62)</b> | <b>298.28</b><br><b>(190.60 to 450.73)</b> | <b>283.35</b><br><b>(179.90 to 431.43)</b> | <b>336.81</b><br><b>(215.89 to 507.21)</b> | <b>10.32</b><br><b>(7.17 to 14.66)</b>  | <b>14.23</b><br><b>(10.06 to 20.61)</b> | <b>13.75</b><br><b>(9.59 to 20.10)</b>  | <b>15.61</b><br><b>(11.06 to 22.07)</b> |
| Cirrhosis and other chronic liver diseases due to hepatitis B | 127.12<br>(84.61 to 185.59)                | 142.53<br>(88.09 to 221.44)                | 139.11<br>(85.59 to 218.04)                | 148.87<br>(94.02 to 228.26)                | 4.69<br>(3.21 to 6.85)                  | 6.73<br>(4.66 to 9.95)                  | 6.66<br>(4.49 to 9.93)                  | 6.87<br>(4.77 to 10.04)                 |
| Cirrhosis and other chronic liver diseases due to hepatitis C | 29.58<br>(19.36 to 43.70)                  | 31.66<br>(19.11 to 49.38)                  | 30.76<br>(18.43 to 47.76)                  | 33.32<br>(20.38 to 51.59)                  | 1.05<br>(0.70 to 1.51)                  | 1.40<br>(0.93 to 2.10)                  | 1.38<br>(0.89 to 2.05)                  | 1.45<br>(0.96 to 2.16)                  |

|                                                                |                                                    |                                                      |                                                     |                                                      |                                                |                                                   |                                                   |                                                  |
|----------------------------------------------------------------|----------------------------------------------------|------------------------------------------------------|-----------------------------------------------------|------------------------------------------------------|------------------------------------------------|---------------------------------------------------|---------------------------------------------------|--------------------------------------------------|
|                                                                | 102.40<br>(68.28 to<br>149.52)                     | 101.01<br>(61.82 to<br>153.33)                       | 90.94<br>(55.35 to<br>138.10)                       | 130.50<br>(81.45 to<br>199.10)                       | 3.74<br>(2.58 to<br>5.38)                      | 4.80<br>(3.28 to<br>7.20)                         | 4.43<br>(2.99 to<br>6.53)                         | 5.99<br>(4.15 to<br>8.65)                        |
| Cirrhosis and other chronic liver diseases due to alcohol use  |                                                    |                                                      |                                                     |                                                      |                                                |                                                   |                                                   |                                                  |
|                                                                | 20.87<br>(14.61 to<br>29.39)                       | 23.09<br>(15.32 to<br>33.60)                         | 22.54<br>(14.77 to<br>33.01)                        | 24.12<br>(16.26 to<br>35.32)                         | 0.85<br>(0.59 to<br>1.17)                      | 1.29<br>(0.93 to<br>1.78)                         | 1.28<br>(0.91 to<br>1.79)                         | 1.31<br>(0.95 to<br>1.81)                        |
| Cirrhosis and other chronic liver diseases due to other causes |                                                    |                                                      |                                                     |                                                      |                                                |                                                   |                                                   |                                                  |
| <b>Digestive diseases</b>                                      | <b>82.35</b><br><b>(59.49 to</b><br><b>116.56)</b> | <b>134.20</b><br><b>(100.87 to</b><br><b>184.02)</b> | <b>130.95</b><br><b>(98.67 to</b><br><b>180.97)</b> | <b>142.47</b><br><b>(107.48 to</b><br><b>197.39)</b> | <b>5.90</b><br><b>(4.44 to</b><br><b>7.76)</b> | <b>12.62</b><br><b>(10.04 to</b><br><b>16.09)</b> | <b>12.57</b><br><b>(10.10 to</b><br><b>15.92)</b> | <b>12.94</b><br><b>(9.94 to</b><br><b>16.96)</b> |
| Peptic ulcer disease                                           | 11.84<br>(8.42 to<br>16.47)                        | 13.19<br>(9.61 to<br>17.91)                          | 12.45<br>(9.09 to<br>17.28)                         | 15.43<br>(10.99 to<br>21.44)                         | 0.89<br>(0.65 to<br>1.19)                      | 1.30<br>(0.97 to<br>1.74)                         | 1.25<br>(0.92 to<br>1.65)                         | 1.47<br>(1.05 to<br>1.98)                        |



| South Korea                                |                              |                                |                                |                                |                           |                            |                             |                            |
|--------------------------------------------|------------------------------|--------------------------------|--------------------------------|--------------------------------|---------------------------|----------------------------|-----------------------------|----------------------------|
| Cause                                      | YLLs (in 1000s)              |                                |                                |                                | Deaths (in 1000s)         |                            |                             |                            |
|                                            | 2016                         | 2040 Forecast                  | 2040 Better Scenario           | 2040 Worse Scenario            | 2016                      | 2040 Forecast              | 2040 Better Scenario        | 2040 Worse Scenario        |
| Gastritis and duodenitis                   | 1.11<br>(0.80 to 1.52)       | 4.11<br>(2.97 to 5.55)         | 4.11<br>(2.86 to 5.59)         | 4.15<br>(3.02 to 5.67)         | 0.11<br>(0.08 to 0.16)    | 0.52<br>(0.36 to 0.73)     | 0.53<br>(0.36 to 0.75)      | 0.50<br>(0.34 to 0.73)     |
| Appendicitis                               | 3.18<br>(2.30 to 4.43)       | 3.38<br>(2.45 to 4.46)         | 3.24<br>(2.30 to 4.35)         | 3.66<br>(2.67 to 4.91)         | 0.20<br>(0.15 to 0.27)    | 0.30<br>(0.20 to 0.38)     | 0.29<br>(0.20 to 0.37)      | 0.31<br>(0.21 to 0.40)     |
| Paralytic ileus and intestinal obstruction | 17.66<br>(12.33 to 27.58)    | 32.78<br>(24.52 to 49.32)      | 33.92<br>(25.07 to 51.22)      | 30.89<br>(23.33 to 47.08)      | 1.28<br>(0.92 to 1.91)    | 3.05<br>(2.35 to 4.29)     | 3.21<br>(2.50 to 4.54)      | 2.78<br>(2.14 to 3.94)     |
| Inguinal, femoral, and abdominal hernia    | 1.53<br>(1.00 to 2.82)       | 2.03<br>(1.38 to 3.70)         | 2.02<br>(1.37 to 3.73)         | 2.04<br>(1.40 to 3.66)         | 0.12<br>(0.08 to 0.21)    | 0.20<br>(0.14 to 0.36)     | 0.21<br>(0.14 to 0.37)      | 0.19<br>(0.13 to 0.36)     |
| Inflammatory bowel disease                 | 4.79<br>(3.22 to 8.59)       | 10.70<br>(8.05 to 15.94)       | 11.03<br>(8.20 to 16.34)       | 10.16<br>(7.69 to 15.26)       | 0.33<br>(0.24 to 0.49)    | 1.03<br>(0.80 to 1.35)     | 1.09<br>(0.84 to 1.42)      | 0.94<br>(0.73 to 1.25)     |
| Vascular intestinal disorders              | 7.77<br>(5.53 to 10.28)      | 12.86<br>(9.40 to 16.59)       | 12.95<br>(9.33 to 16.81)       | 12.72<br>(9.51 to 16.20)       | 0.54<br>(0.39 to 0.71)    | 1.11<br>(0.87 to 1.36)     | 1.14<br>(0.88 to 1.41)      | 1.07<br>(0.84 to 1.31)     |
| Gallbladder and biliary diseases           | 16.73<br>(11.86 to 24.08)    | 30.54<br>(19.01 to 50.24)      | 27.77<br>(17.85 to 44.15)      | 35.92<br>(21.54 to 60.77)      | 1.48<br>(1.08 to 2.00)    | 3.25<br>(2.01 to 5.19)     | 3.02<br>(1.96 to 4.70)      | 3.70<br>(2.17 to 6.15)     |
| Pancreatitis                               | 11.34<br>(7.52 to 16.71)     | 13.63<br>(7.48 to 26.85)       | 12.38<br>(7.07 to 23.47)       | 16.67<br>(8.46 to 35.79)       | 0.51<br>(0.36 to 0.70)    | 0.86<br>(0.52 to 1.80)     | 0.80<br>(0.50 to 1.58)      | 1.02<br>(0.56 to 2.41)     |
| Other digestive diseases                   | 6.42<br>(4.56 to 8.88)       | 10.99<br>(8.33 to 14.42)       | 11.09<br>(8.35 to 14.65)       | 10.83<br>(8.38 to 14.10)       | 0.44<br>(0.33 to 0.59)    | 1.01<br>(0.79 to 1.27)     | 1.04<br>(0.82 to 1.31)      | 0.96<br>(0.75 to 1.20)     |
| Neurological disorders                     | 400.14<br>(297.66 to 521.16) | 841.32<br>(637.22 to 1,115.47) | 843.00<br>(645.90 to 1,096.33) | 853.29<br>(631.45 to 1,170.68) | 39.30<br>(29.56 to 50.92) | 98.73<br>(76.09 to 128.61) | 100.64<br>(78.56 to 128.29) | 97.27<br>(71.30 to 132.60) |
| Alzheimer's disease and other dementias    | 330.84<br>(242.85 to 436.89) | 739.62<br>(542.30 to 996.25)   | 739.13<br>(552.33 to 983.23)   | 753.97<br>(534.74 to 1,063.83) | 35.81<br>(26.74 to 46.76) | 91.24<br>(68.14 to 120.52) | 92.75<br>(70.68 to 119.70)  | 90.37<br>(64.76 to 125.26) |
| Parkinson's disease                        | 24.18<br>(16.65 to 33.58)    | 57.23<br>(41.11 to 77.12)      | 60.46<br>(43.41 to 82.26)      | 51.86<br>(37.09 to 69.05)      | 2.08<br>(1.46 to 2.87)    | 5.59<br>(4.11 to 7.51)     | 5.99<br>(4.43 to 7.98)      | 4.94<br>(3.58 to 6.63)     |
| Epilepsy                                   | 19.55<br>(14.27 to 26.06)    | 20.11<br>(12.23 to 31.62)      | 18.74<br>(11.57 to 28.83)      | 23.64<br>(13.69 to 37.66)      | 0.53<br>(0.39 to 0.70)    | 0.81<br>(0.53 to 1.19)     | 0.78<br>(0.51 to 1.12)      | 0.92<br>(0.57 to 1.39)     |
| Multiple sclerosis                         | 1.67<br>(1.16 to 2.29)       | 1.65<br>(1.06 to 2.38)         | 1.67<br>(1.07 to 2.40)         | 1.68<br>(1.08 to 2.43)         | 0.05<br>(0.04 to 0.07)    | 0.07<br>(0.05 to 0.09)     | 0.07<br>(0.05 to 0.10)      | 0.07<br>(0.05 to 0.09)     |
| Motor neuron disease                       | 2.73<br>(1.96 to 3.57)       | 3.87<br>(2.61 to 5.51)         | 3.90<br>(2.60 to 5.56)         | 3.82<br>(2.60 to 5.34)         | 0.10<br>(0.07 to 0.13)    | 0.17<br>(0.12 to 0.24)     | 0.18<br>(0.12 to 0.24)      | 0.17<br>(0.12 to 0.22)     |
| Other neurological disorders               | 21.17<br>(15.68 to 27.22)    | 18.84<br>(12.94 to 25.30)      | 19.11<br>(13.05 to 26.02)      | 18.53<br>(12.82 to 24.42)      | 0.72<br>(0.53 to 0.94)    | 0.84<br>(0.61 to 1.09)     | 0.87<br>(0.62 to 1.13)      | 0.80<br>(0.59 to 1.03)     |
| Mental disorders                           | 43.47<br>(28.17 to 71.57)    | 50.99<br>(31.84 to 81.45)      | 52.24<br>(32.57 to 83.04)      | 49.58<br>(30.94 to 78.99)      | 1.39<br>(0.93 to 2.15)    | 2.20<br>(1.52 to 3.17)     | 2.31<br>(1.59 to 3.33)      | 2.05<br>(1.42 to 3.00)     |
| Alcohol use disorders                      | 37.50<br>(23.51 to 62.23)    | 35.31<br>(19.91 to 59.87)      | 35.40<br>(19.75 to 59.81)      | 35.75<br>(20.48 to 60.29)      | 1.18<br>(0.74 to 1.90)    | 1.33<br>(0.77 to 2.14)     | 1.35<br>(0.77 to 2.18)      | 1.32<br>(0.77 to 2.09)     |
| Drug use disorders                         | 5.69<br>(3.56 to 12.03)      | 15.44<br>(10.54 to 24.08)      | 16.60<br>(11.26 to 25.66)      | 13.60<br>(9.24 to 21.72)       | 0.20<br>(0.14 to 0.33)    | 0.86<br>(0.64 to 1.14)     | 0.96<br>(0.71 to 1.28)      | 0.72<br>(0.53 to 0.97)     |
| Opioid use disorders                       | 3.29<br>(1.94 to 7.46)       | 4.76<br>(2.85 to 8.01)         | 4.90<br>(2.94 to 8.15)         | 4.52<br>(2.69 to 7.67)         | 0.10<br>(0.06 to 0.18)    | 0.19<br>(0.13 to 0.29)     | 0.20<br>(0.13 to 0.30)      | 0.18<br>(0.12 to 0.26)     |

|                           |                           |                            |                            |                           |                           |                           |                           |                           |
|---------------------------|---------------------------|----------------------------|----------------------------|---------------------------|---------------------------|---------------------------|---------------------------|---------------------------|
| Cocaine use disorders     | 0.40<br>(0.20 to<br>1.21) | 1.58<br>(0.85 to<br>3.50)  | 1.68<br>(0.91 to<br>3.64)  | 1.42<br>(0.76 to<br>3.19) | 0.01<br>(0.01 to<br>0.03) | 0.06<br>(0.03 to<br>0.10) | 0.06<br>(0.04 to<br>0.11) | 0.05<br>(0.03 to<br>0.09) |
| Amphetamine use disorders | 0.22<br>(0.11 to<br>0.73) | 1.55<br>(0.85 to<br>3.62)  | 1.70<br>(0.92 to<br>3.83)  | 1.32<br>(0.71 to<br>3.18) | 0.01<br>(0.00 to<br>0.02) | 0.05<br>(0.03 to<br>0.09) | 0.06<br>(0.04 to<br>0.10) | 0.04<br>(0.03 to<br>0.08) |
| Other drug use disorders  | 1.77<br>(1.13 to<br>3.33) | 7.54<br>(5.06 to<br>10.82) | 8.31<br>(5.57 to<br>12.07) | 6.35<br>(4.25 to<br>9.23) | 0.09<br>(0.06 to<br>0.13) | 0.56<br>(0.38 to<br>0.74) | 0.63<br>(0.44 to<br>0.85) | 0.45<br>(0.31 to<br>0.61) |
| Eating disorders          | 0.29<br>(0.18 to<br>0.40) | 0.23<br>(0.12 to<br>0.38)  | 0.24<br>(0.12 to<br>0.38)  | 0.23<br>(0.12 to<br>0.36) | 0.01<br>(0.00 to<br>0.01) | 0.00<br>(0.00 to<br>0.01) | 0.00<br>(0.00 to<br>0.01) | 0.00<br>(0.00 to<br>0.01) |

| South Korea                                                |                                     |                                       |                                       |                                       |                                  |                                   |                                   |                                   |
|------------------------------------------------------------|-------------------------------------|---------------------------------------|---------------------------------------|---------------------------------------|----------------------------------|-----------------------------------|-----------------------------------|-----------------------------------|
| Cause                                                      | YLLs (in 1000s)                     |                                       |                                       |                                       | Deaths (in 1000s)                |                                   |                                   |                                   |
|                                                            | 2016                                | 2040 Forecast                         | 2040 Better Scenario                  | 2040 Worse Scenario                   | 2016                             | 2040 Forecast                     | 2040 Better Scenario              | 2040 Worse Scenario               |
| <b>Diabetes, urogenital, blood, and endocrine diseases</b> | <b>385.27</b><br>(287.13 to 492.75) | <b>747.64</b><br>(409.77 to 1,593.13) | <b>647.37</b><br>(363.00 to 1,411.76) | <b>901.23</b><br>(494.59 to 1,822.81) | <b>25.11</b><br>(19.49 to 31.70) | <b>62.38</b><br>(38.59 to 124.28) | <b>55.65</b><br>(35.14 to 112.42) | <b>72.22</b><br>(44.88 to 140.24) |
| Diabetes mellitus                                          | 246.21<br>(183.32 to 313.94)        | 306.40<br>(201.01 to 454.57)          | 271.19<br>(182.00 to 392.09)          | 377.35<br>(238.77 to 562.09)          | 15.79<br>(12.11 to 20.05)        | 25.38<br>(17.93 to 34.24)         | 23.23<br>(16.73 to 31.22)         | 29.64<br>(20.34 to 41.22)         |
| Acute glomerulonephritis                                   | 0.34<br>(0.25 to 0.43)              | 0.25<br>(0.18 to 0.35)                | 0.25<br>(0.17 to 0.35)                | 0.26<br>(0.19 to 0.37)                | 0.01<br>(0.01 to 0.02)           | 0.01<br>(0.01 to 0.02)            | 0.01<br>(0.01 to 0.02)            | 0.01<br>(0.01 to 0.02)            |
| Chronic kidney disease                                     | 100.23<br>(73.86 to 128.76)         | 380.72<br>(97.33 to 1,232.26)         | 315.03<br>(85.51 to 1,112.01)         | 464.24<br>(118.84 to 1,416.16)        | 6.66<br>(5.09 to 8.39)           | 31.22<br>(9.43 to 96.85)          | 26.47<br>(8.46 to 86.00)          | 37.04<br>(10.97 to 108.05)        |
| Chronic kidney disease due to diabetes mellitus            | 72.30<br>(53.05 to 93.72)           | 268.01<br>(65.81 to 894.95)           | 219.70<br>(57.06 to 784.32)           | 328.48<br>(81.19 to 991.15)           | 4.38<br>(3.32 to 5.58)           | 20.22<br>(5.61 to 63.70)          | 16.95<br>(4.91 to 55.93)          | 24.14<br>(6.59 to 70.89)          |
| Chronic kidney disease due to hypertension                 | 14.46<br>(10.69 to 18.58)           | 68.15<br>(19.61 to 226.29)            | 58.28<br>(17.45 to 198.00)            | 80.47<br>(23.00 to 252.36)            | 1.44<br>(1.08 to 1.87)           | 7.27<br>(2.52 to 22.91)           | 6.36<br>(2.32 to 20.79)           | 8.37<br>(2.77 to 25.18)           |
| Chronic kidney disease due to glomerulonephritis           | 6.08<br>(4.58 to 7.80)              | 21.03<br>(5.83 to 71.62)              | 17.47<br>(5.04 to 58.53)              | 26.34<br>(7.13 to 80.62)              | 0.36<br>(0.27 to 0.46)           | 1.73<br>(0.49 to 5.65)            | 1.46<br>(0.43 to 4.97)            | 2.12<br>(0.59 to 6.55)            |
| Chronic kidney disease due to other and unspecified causes | 7.38<br>(5.56 to 9.41)              | 23.53<br>(6.41 to 74.84)              | 19.59<br>(5.67 to 67.03)              | 28.94<br>(7.74 to 85.99)              | 0.49<br>(0.37 to 0.62)           | 2.00<br>(0.61 to 6.37)            | 1.70<br>(0.54 to 5.61)            | 2.41<br>(0.71 to 7.15)            |
| Urinary diseases and male infertility                      | 15.59<br>(11.71 to 20.49)           | 25.08<br>(19.70 to 31.07)             | 24.97<br>(19.50 to 31.21)             | 25.38<br>(19.86 to 31.31)             | 1.46<br>(1.11 to 1.87)           | 2.96<br>(2.36 to 3.61)            | 3.00<br>(2.41 to 3.67)            | 2.90<br>(2.26 to 3.59)            |
| Urinary tract infections                                   | 8.09<br>(4.69 to 13.81)             | 16.07<br>(10.54 to 24.17)             | 16.05<br>(10.37 to 24.08)             | 16.16<br>(10.42 to 24.07)             | 0.74<br>(0.40 to 1.35)           | 1.86<br>(1.18 to 2.90)            | 1.89<br>(1.21 to 2.93)            | 1.81<br>(1.14 to 2.86)            |
| Urolithiasis                                               | 0.89<br>(0.54 to 1.76)              | 1.02<br>(0.62 to 1.77)                | 0.99<br>(0.59 to 1.71)                | 1.07<br>(0.65 to 1.85)                | 0.07<br>(0.04 to 0.14)           | 0.10<br>(0.06 to 0.18)            | 0.10<br>(0.06 to 0.17)            | 0.10<br>(0.06 to 0.18)            |
| Other urinary diseases                                     | 6.62<br>(2.44 to 10.67)             | 7.99<br>(2.35 to 13.05)               | 7.93<br>(2.33 to 12.98)               | 8.15<br>(2.47 to 13.40)               | 0.65<br>(0.21 to 1.05)           | 1.00<br>(0.26 to 1.68)            | 1.01<br>(0.27 to 1.68)            | 0.98<br>(0.27 to 1.69)            |
| Gynecological diseases                                     | 0.18<br>(0.11 to 0.29)              | 0.14<br>(0.09 to 0.21)                | 0.13<br>(0.08 to 0.20)                | 0.16<br>(0.10 to 0.24)                | 0.01<br>(0.01 to 0.01)           | 0.01<br>(0.01 to 0.02)            | 0.01<br>(0.01 to 0.02)            | 0.01<br>(0.01 to 0.02)            |
| Uterine fibroids                                           | 0.05<br>(0.03 to 0.08)              | 0.05<br>(0.03 to 0.09)                | 0.05<br>(0.03 to 0.08)                | 0.06<br>(0.03 to 0.10)                | 0.00<br>(0.00 to 0.00)           | 0.00<br>(0.00 to 0.01)            | 0.00<br>(0.00 to 0.01)            | 0.00<br>(0.00 to 0.01)            |
| Polycystic ovarian syndrome                                | 0.02<br>(0.01 to 0.04)              | 0.00<br>(0.00 to 0.01)                | 0.00<br>(0.00 to 0.01)                | 0.01<br>(0.00 to 0.01)                | 0.00<br>(0.00 to 0.00)           | 0.00<br>(0.00 to 0.00)            | 0.00<br>(0.00 to 0.00)            | 0.00<br>(0.00 to 0.00)            |
| Endometriosis                                              | 0.01<br>(0.00 to 0.02)              | 0.00<br>(0.00 to 0.01)                | 0.00<br>(0.00 to 0.01)                | 0.00<br>(0.00 to 0.01)                | 0.00<br>(0.00 to 0.00)           | 0.00<br>(0.00 to 0.00)            | 0.00<br>(0.00 to 0.00)            | 0.00<br>(0.00 to 0.00)            |
| Genital prolapse                                           | 0.02<br>(0.01 to 0.03)              | 0.02<br>(0.00 to 0.03)                | 0.01<br>(0.00 to 0.03)                | 0.02<br>(0.01 to 0.03)                | 0.00<br>(0.00 to 0.00)           | 0.00<br>(0.00 to 0.00)            | 0.00<br>(0.00 to 0.00)            | 0.00<br>(0.00 to 0.00)            |
| Other gynecological diseases                               | 0.09<br>(0.05 to 0.14)              | 0.06<br>(0.04 to 0.10)                | 0.06<br>(0.04 to 0.09)                | 0.07<br>(0.05 to 0.12)                | 0.00<br>(0.00 to 0.01)           | 0.01<br>(0.00 to 0.01)            | 0.01<br>(0.01 to 0.01)            | 0.01<br>(0.00 to 0.01)            |
| Hemoglobinopathies and hemolytic anemias                   | 8.09<br>(5.78 to 11.19)             | 6.70<br>(4.89 to 9.89)                | 6.51<br>(4.69 to 9.62)                | 7.08<br>(5.18 to 10.39)               | 0.42<br>(0.30 to 0.63)           | 0.58<br>(0.45 to 0.88)            | 0.58<br>(0.44 to 0.86)            | 0.59<br>(0.45 to 0.89)            |
| Thalassemias                                               | 0.84<br>(0.59 to 1.09)              | 0.25<br>(0.15 to 0.38)                | 0.25<br>(0.15 to 0.38)                | 0.25<br>(0.16 to 0.39)                | 0.01<br>(0.01 to 0.02)           | 0.00<br>(0.00 to 0.01)            | 0.00<br>(0.00 to 0.01)            | 0.00<br>(0.00 to 0.01)            |

|                                                   |                              |                              |                              |                              |                           |                           |                           |                           |
|---------------------------------------------------|------------------------------|------------------------------|------------------------------|------------------------------|---------------------------|---------------------------|---------------------------|---------------------------|
|                                                   | 0.79<br>(0.53 to<br>1.09)    | 0.42<br>(0.26 to<br>0.63)    | 0.40<br>(0.24 to<br>0.59)    | 0.47<br>(0.29 to<br>0.71)    | 0.02<br>(0.01 to<br>0.02) | 0.01<br>(0.01 to<br>0.02) | 0.01<br>(0.01 to<br>0.02) | 0.01<br>(0.01 to<br>0.02) |
| Sickle cell disorders                             |                              |                              |                              |                              |                           |                           |                           |                           |
|                                                   | 0.68<br>(0.46 to<br>0.94)    | 0.50<br>(0.31 to<br>0.75)    | 0.47<br>(0.29 to<br>0.70)    | 0.57<br>(0.35 to<br>0.84)    | 0.02<br>(0.01 to<br>0.03) | 0.02<br>(0.01 to<br>0.03) | 0.02<br>(0.01 to<br>0.03) | 0.02<br>(0.01 to<br>0.03) |
| G6PD deficiency                                   |                              |                              |                              |                              |                           |                           |                           |                           |
|                                                   | 5.79<br>(4.02 to<br>8.46)    | 5.53<br>(4.05 to<br>8.27)    | 5.40<br>(3.91 to<br>8.17)    | 5.79<br>(4.28 to<br>8.65)    | 0.38<br>(0.26 to<br>0.57) | 0.55<br>(0.42 to<br>0.83) | 0.54<br>(0.41 to<br>0.83) | 0.55<br>(0.42 to<br>0.84) |
| Other hemoglobinopathies and hemolytic anemias    |                              |                              |                              |                              |                           |                           |                           |                           |
|                                                   | 14.63<br>(10.69 to<br>19.22) | 28.35<br>(21.21 to<br>36.99) | 29.30<br>(21.85 to<br>38.45) | 26.76<br>(20.24 to<br>34.81) | 0.74<br>(0.54 to<br>0.99) | 2.22<br>(1.72 to<br>2.83) | 2.35<br>(1.83 to<br>3.00) | 2.01<br>(1.56 to<br>2.58) |
| Endocrine, metabolic, blood, and immune disorders |                              |                              |                              |                              |                           |                           |                           |                           |

| South Korea                                   |                                  |                                  |                                  |                                  |                               |                               |                               |                               |
|-----------------------------------------------|----------------------------------|----------------------------------|----------------------------------|----------------------------------|-------------------------------|-------------------------------|-------------------------------|-------------------------------|
| Cause                                         | YLLs (in 1000s)                  |                                  |                                  |                                  | Deaths (in 1000s)             |                               |                               |                               |
|                                               | 2016                             | 2040 Forecast                    | 2040 Better Scenario             | 2040 Worse Scenario              | 2016                          | 2040 Forecast                 | 2040 Better Scenario          | 2040 Worse Scenario           |
| <b>Musculoskeletal disorders</b>              | <b>20.41</b><br>(12.89 to 28.07) | <b>34.77</b><br>(18.46 to 46.73) | <b>34.57</b><br>(18.46 to 47.12) | <b>35.52</b><br>(19.26 to 47.86) | <b>1.34</b><br>(0.65 to 1.89) | <b>3.07</b><br>(1.30 to 4.09) | <b>3.12</b><br>(1.31 to 4.17) | <b>3.04</b><br>(1.31 to 4.11) |
| Rheumatoid arthritis                          | 4.07<br>(2.69 to 6.54)           | 7.39<br>(4.52 to 12.94)          | 6.89<br>(4.15 to 12.09)          | 8.54<br>(5.25 to 14.46)          | 0.25<br>(0.16 to 0.49)        | 0.57<br>(0.35 to 1.24)        | 0.53<br>(0.32 to 1.17)        | 0.64<br>(0.39 to 1.32)        |
| Other musculoskeletal disorders               | 16.34<br>(9.80 to 22.61)         | 27.38<br>(12.27 to 37.83)        | 27.68<br>(12.40 to 38.41)        | 26.98<br>(12.14 to 37.67)        | 1.09<br>(0.45 to 1.58)        | 2.51<br>(0.80 to 3.50)        | 2.58<br>(0.83 to 3.60)        | 2.40<br>(0.76 to 3.40)        |
| <b>Other non-communicable diseases</b>        | <b>48.50</b><br>(37.76 to 61.00) | <b>34.32</b><br>(21.94 to 51.18) | <b>32.63</b><br>(20.43 to 48.30) | <b>37.68</b><br>(23.62 to 58.04) | <b>1.11</b><br>(0.72 to 1.47) | <b>1.69</b><br>(0.82 to 2.38) | <b>1.69</b><br>(0.81 to 2.41) | <b>1.69</b><br>(0.83 to 2.42) |
| Congenital birth defects                      | 35.69<br>(27.24 to 45.70)        | 17.39<br>(10.50 to 29.37)        | 15.85<br>(9.52 to 26.61)         | 20.40<br>(12.07 to 35.62)        | 0.48<br>(0.37 to 0.60)        | 0.25<br>(0.16 to 0.40)        | 0.23<br>(0.14 to 0.37)        | 0.29<br>(0.18 to 0.48)        |
| Neural tube defects                           | 0.45<br>(0.31 to 0.63)           | 0.10<br>(0.06 to 0.18)           | 0.09<br>(0.05 to 0.15)           | 0.13<br>(0.07 to 0.22)           | 0.01<br>(0.00 to 0.01)        | 0.00<br>(0.00 to 0.00)        | 0.00<br>(0.00 to 0.00)        | 0.00<br>(0.00 to 0.00)        |
| Congenital heart anomalies                    | 14.96<br>(10.88 to 20.32)        | 5.89<br>(3.08 to 10.81)          | 5.13<br>(2.61 to 9.63)           | 7.50<br>(3.82 to 13.89)          | 0.20<br>(0.15 to 0.27)        | 0.08<br>(0.05 to 0.15)        | 0.07<br>(0.04 to 0.13)        | 0.10<br>(0.05 to 0.19)        |
| Orofacial clefts                              | 0.03<br>(0.02 to 0.06)           | 0.01<br>(0.01 to 0.03)           | 0.01<br>(0.00 to 0.03)           | 0.02<br>(0.01 to 0.05)           | 0.00<br>(0.00 to 0.00)        | 0.00<br>(0.00 to 0.00)        | 0.00<br>(0.00 to 0.00)        | 0.00<br>(0.00 to 0.00)        |
| Down syndrome                                 | 3.60<br>(1.92 to 6.31)           | 2.95<br>(1.52 to 5.42)           | 2.93<br>(1.54 to 5.35)           | 2.93<br>(1.50 to 5.49)           | 0.06<br>(0.03 to 0.10)        | 0.05<br>(0.03 to 0.09)        | 0.05<br>(0.03 to 0.09)        | 0.05<br>(0.03 to 0.09)        |
| Other chromosomal abnormalities               | 4.59<br>(2.46 to 8.24)           | 3.31<br>(1.45 to 6.79)           | 3.11<br>(1.36 to 6.39)           | 3.65<br>(1.60 to 7.65)           | 0.06<br>(0.03 to 0.10)        | 0.04<br>(0.02 to 0.08)        | 0.04<br>(0.02 to 0.08)        | 0.05<br>(0.02 to 0.09)        |
| Congenital musculoskeletal and limb anomalies | 1.45<br>(0.85 to 2.12)           | 0.59<br>(0.27 to 1.12)           | 0.53<br>(0.24 to 1.02)           | 0.72<br>(0.33 to 1.40)           | 0.02<br>(0.01 to 0.03)        | 0.01<br>(0.00 to 0.01)        | 0.01<br>(0.00 to 0.01)        | 0.01<br>(0.00 to 0.02)        |
| Urogenital congenital anomalies               | 0.53<br>(0.34 to 1.14)           | 0.27<br>(0.14 to 0.62)           | 0.25<br>(0.13 to 0.56)           | 0.32<br>(0.17 to 0.75)           | 0.01<br>(0.01 to 0.02)        | 0.00<br>(0.00 to 0.01)        | 0.00<br>(0.00 to 0.01)        | 0.01<br>(0.00 to 0.01)        |
| Digestive congenital anomalies                | 1.68<br>(1.07 to 2.44)           | 0.87<br>(0.43 to 1.69)           | 0.77<br>(0.37 to 1.53)           | 1.08<br>(0.52 to 2.17)           | 0.02<br>(0.01 to 0.03)        | 0.01<br>(0.01 to 0.02)        | 0.01<br>(0.01 to 0.02)        | 0.01<br>(0.01 to 0.03)        |
| Other congenital birth defects                | 8.39<br>(6.06 to 11.13)          | 3.38<br>(1.92 to 5.75)           | 3.04<br>(1.71 to 5.25)           | 4.06<br>(2.30 to 7.16)           | 0.11<br>(0.08 to 0.15)        | 0.05<br>(0.03 to 0.08)        | 0.04<br>(0.03 to 0.07)        | 0.06<br>(0.03 to 0.10)        |
| Skin and subcutaneous diseases                | 7.00<br>(2.82 to 10.54)          | 14.47<br>(5.87 to 21.21)         | 14.50<br>(5.89 to 21.50)         | 14.48<br>(5.93 to 21.21)         | 0.56<br>(0.22 to 0.87)        | 1.41<br>(0.56 to 2.05)        | 1.44<br>(0.57 to 2.10)        | 1.37<br>(0.54 to 2.03)        |
| Cellulitis                                    | 1.50<br>(0.49 to 2.41)           | 3.93<br>(1.05 to 6.39)           | 4.00<br>(1.07 to 6.53)           | 3.82<br>(1.03 to 6.22)           | 0.09<br>(0.02 to 0.16)        | 0.33<br>(0.07 to 0.54)        | 0.34<br>(0.07 to 0.56)        | 0.31<br>(0.06 to 0.51)        |
| Pyoderma                                      | 1.41<br>(0.58 to 2.12)           | 4.18<br>(1.66 to 6.12)           | 4.19<br>(1.64 to 6.16)           | 4.17<br>(1.65 to 6.01)           | 0.09<br>(0.03 to 0.13)        | 0.36<br>(0.13 to 0.52)        | 0.36<br>(0.13 to 0.54)        | 0.34<br>(0.12 to 0.50)        |
| Decubitus ulcer                               | 3.36<br>(1.32 to 5.19)           | 5.67<br>(2.28 to 8.80)           | 5.63<br>(2.27 to 8.81)           | 5.80<br>(2.37 to 9.06)           | 0.34<br>(0.13 to 0.53)        | 0.68<br>(0.28 to 1.03)        | 0.68<br>(0.28 to 1.05)        | 0.67<br>(0.28 to 1.04)        |
| Other skin and subcutaneous diseases          | 0.72<br>(0.28 to 1.11)           | 0.69<br>(0.27 to 1.07)           | 0.69<br>(0.26 to 1.08)           | 0.70<br>(0.27 to 1.08)           | 0.04<br>(0.01 to 0.07)        | 0.05<br>(0.02 to 0.08)        | 0.05<br>(0.02 to 0.08)        | 0.05<br>(0.02 to 0.08)        |
| Sudden infant death syndrome                  | 5.81<br>(3.74 to 8.70)           | 2.47<br>(1.01 to 6.25)           | 2.29<br>(0.95 to 5.77)           | 2.80<br>(1.14 to 7.08)           | 0.07<br>(0.04 to 0.10)        | 0.03<br>(0.01 to 0.07)        | 0.03<br>(0.01 to 0.07)        | 0.03<br>(0.01 to 0.08)        |

|                          |                                     |                                   |                                   |                                   |                              |                              |                              |                              |
|--------------------------|-------------------------------------|-----------------------------------|-----------------------------------|-----------------------------------|------------------------------|------------------------------|------------------------------|------------------------------|
| Injuries                 | 1,057.26<br>(753.17 to<br>1,404.98) | 705.85<br>(433.15 to<br>1,434.14) | 646.93<br>(398.14 to<br>1,386.78) | 951.87<br>(582.94 to<br>1,779.33) | 34.90<br>(25.43 to<br>45.73) | 33.86<br>(23.92 to<br>54.10) | 32.11<br>(22.87 to<br>52.02) | 41.91<br>(29.07 to<br>65.51) |
| Transport injuries       | 274.21<br>(198.87 to<br>363.91)     | 132.10<br>(74.12 to<br>216.87)    | 106.27<br>(60.39 to<br>171.63)    | 291.28<br>(157.14 to<br>495.24)   | 9.09<br>(6.76 to<br>11.79)   | 6.33<br>(3.91 to<br>9.54)    | 5.32<br>(3.34 to<br>7.95)    | 12.16<br>(7.30 to<br>19.06)  |
| Road injuries            | 250.14<br>(182.16 to<br>331.74)     | 107.50<br>(61.19 to<br>175.02)    | 84.28<br>(48.64 to<br>135.06)     | 260.21<br>(142.27 to<br>442.76)   | 8.26<br>(6.14 to<br>10.75)   | 5.25<br>(3.29 to<br>7.79)    | 4.33<br>(2.76 to<br>6.33)    | 10.84<br>(6.53 to<br>16.84)  |
| Pedestrian road injuries | 91.41<br>(64.96 to<br>120.04)       | 32.21<br>(20.46 to<br>48.98)      | 24.09<br>(15.36 to<br>35.99)      | 79.75<br>(47.36 to<br>126.26)     | 3.84<br>(2.86 to<br>4.96)    | 2.09<br>(1.42 to<br>2.95)    | 1.64<br>(1.14 to<br>2.30)    | 4.51<br>(2.88 to<br>6.71)    |

| South Korea                                     |                                                      |                                                      |                                                      |                                                      |                                                 |                                                  |                                                  |                                                   |
|-------------------------------------------------|------------------------------------------------------|------------------------------------------------------|------------------------------------------------------|------------------------------------------------------|-------------------------------------------------|--------------------------------------------------|--------------------------------------------------|---------------------------------------------------|
| Cause                                           | YLLs (in 1000s)                                      |                                                      |                                                      |                                                      | Deaths (in 1000s)                               |                                                  |                                                  |                                                   |
|                                                 | 2016                                                 | 2040 Forecast                                        | 2040 Better Scenario                                 | 2040 Worse Scenario                                  | 2016                                            | 2040 Forecast                                    | 2040 Better Scenario                             | 2040 Worse Scenario                               |
| Cyclist road injuries                           | 11.76<br>(7.95 to<br>16.22)                          | 10.35<br>(5.67 to<br>16.74)                          | 8.80<br>(4.95 to<br>13.86)                           | 19.65<br>(10.58 to<br>32.94)                         | 0.46<br>(0.32 to<br>0.63)                       | 0.59<br>(0.35 to<br>0.91)                        | 0.53<br>(0.32 to<br>0.81)                        | 0.94<br>(0.53 to<br>1.49)                         |
| Motorcyclist road injuries                      | 46.62<br>(29.60 to<br>69.66)                         | 34.09<br>(16.40 to<br>60.49)                         | 29.41<br>(14.51 to<br>50.92)                         | 58.95<br>(27.69 to<br>110.88)                        | 1.29<br>(0.85 to<br>1.87)                       | 1.32<br>(0.69 to<br>2.15)                        | 1.19<br>(0.64 to<br>1.93)                        | 1.97<br>(1.01 to<br>3.31)                         |
| Motor vehicle road injuries                     | 99.47<br>(69.78 to<br>141.34)                        | 30.12<br>(16.09 to<br>54.41)                         | 21.42<br>(11.71 to<br>38.14)                         | 99.83<br>(51.92 to<br>183.53)                        | 2.63<br>(1.86 to<br>3.70)                       | 1.21<br>(0.72 to<br>1.95)                        | 0.93<br>(0.57 to<br>1.47)                        | 3.34<br>(1.87 to<br>5.62)                         |
| Other road injuries                             | 0.87<br>(0.57 to<br>1.47)                            | 0.74<br>(0.38 to<br>1.34)                            | 0.56<br>(0.29 to<br>1.02)                            | 2.03<br>(0.98 to<br>3.90)                            | 0.03<br>(0.02 to<br>0.04)                       | 0.04<br>(0.02 to<br>0.07)                        | 0.04<br>(0.02 to<br>0.06)                        | 0.09<br>(0.05 to<br>0.16)                         |
| Other transport injuries                        | 24.07<br>(16.10 to<br>34.17)                         | 24.60<br>(12.52 to<br>42.44)                         | 22.00<br>(11.46 to<br>37.38)                         | 31.07<br>(15.46 to<br>55.82)                         | 0.83<br>(0.56 to<br>1.18)                       | 1.08<br>(0.60 to<br>1.78)                        | 0.99<br>(0.55 to<br>1.60)                        | 1.32<br>(0.69 to<br>2.26)                         |
| <b>Unintentional injuries</b>                   | <b>211.97</b><br><b>(156.26 to</b><br><b>278.46)</b> | <b>189.71</b><br><b>(139.76 to</b><br><b>248.34)</b> | <b>184.65</b><br><b>(134.94 to</b><br><b>243.81)</b> | <b>202.57</b><br><b>(150.61 to</b><br><b>266.82)</b> | <b>8.82</b><br><b>(6.62 to</b><br><b>11.32)</b> | <b>12.29</b><br><b>(9.95 to</b><br><b>14.77)</b> | <b>12.33</b><br><b>(9.87 to</b><br><b>14.95)</b> | <b>12.39</b><br><b>(10.10 to</b><br><b>14.75)</b> |
| Falls                                           | 86.64<br>(62.56 to<br>116.06)                        | 96.48<br>(71.00 to<br>125.57)                        | 95.45<br>(69.95 to<br>125.68)                        | 99.40<br>(74.09 to<br>129.21)                        | 4.36<br>(3.27 to<br>5.62)                       | 7.17<br>(5.79 to<br>8.59)                        | 7.26<br>(5.86 to<br>8.77)                        | 7.07<br>(5.78 to<br>8.49)                         |
| Drowning                                        | 31.17<br>(22.32 to<br>41.74)                         | 22.01<br>(14.13 to<br>33.11)                         | 20.64<br>(13.16 to<br>31.08)                         | 25.37<br>(15.87 to<br>38.68)                         | 0.91<br>(0.65 to<br>1.28)                       | 0.93<br>(0.62 to<br>1.54)                        | 0.89<br>(0.59 to<br>1.47)                        | 1.02<br>(0.67 to<br>1.63)                         |
| Fire, heat, and hot substances                  | 16.04<br>(11.71 to<br>21.60)                         | 11.16<br>(7.45 to<br>16.20)                          | 10.37<br>(6.97 to<br>15.12)                          | 13.12<br>(8.68 to<br>19.54)                          | 0.65<br>(0.47 to<br>0.86)                       | 0.68<br>(0.49 to<br>0.94)                        | 0.65<br>(0.47 to<br>0.90)                        | 0.76<br>(0.53 to<br>1.07)                         |
| Poisonings                                      | 8.69<br>(5.83 to<br>15.09)                           | 4.16<br>(2.59 to<br>7.27)                            | 3.76<br>(2.36 to<br>6.35)                            | 5.13<br>(3.08 to<br>8.84)                            | 0.29<br>(0.20 to<br>0.44)                       | 0.21<br>(0.14 to<br>0.31)                        | 0.19<br>(0.13 to<br>0.28)                        | 0.24<br>(0.16 to<br>0.37)                         |
| Exposure to mechanical forces                   | 24.70<br>(16.91 to<br>33.71)                         | 14.45<br>(9.46 to<br>21.12)                          | 13.65<br>(8.91 to<br>19.96)                          | 16.27<br>(10.61 to<br>23.54)                         | 0.72<br>(0.49 to<br>0.98)                       | 0.58<br>(0.41 to<br>0.77)                        | 0.56<br>(0.39 to<br>0.75)                        | 0.62<br>(0.43 to<br>0.83)                         |
| Unintentional firearm injuries                  | 1.93<br>(1.24 to<br>2.61)                            | 1.56<br>(0.91 to<br>2.10)                            | 1.54<br>(0.89 to<br>2.08)                            | 1.62<br>(0.93 to<br>2.17)                            | 0.10<br>(0.06 to<br>0.13)                       | 0.13<br>(0.07 to<br>0.16)                        | 0.13<br>(0.07 to<br>0.17)                        | 0.12<br>(0.07 to<br>0.16)                         |
| Unintentional suffocation                       | 1.91<br>(1.30 to<br>2.95)                            | 1.14<br>(0.64 to<br>2.26)                            | 1.07<br>(0.59 to<br>2.12)                            | 1.29<br>(0.70 to<br>2.59)                            | 0.03<br>(0.02 to<br>0.04)                       | 0.02<br>(0.01 to<br>0.03)                        | 0.02<br>(0.01 to<br>0.03)                        | 0.02<br>(0.01 to<br>0.04)                         |
| Other exposure to mechanical forces             | 20.86<br>(13.79 to<br>29.21)                         | 11.75<br>(7.32 to<br>17.62)                          | 11.03<br>(6.85 to<br>16.62)                          | 13.35<br>(8.18 to<br>19.95)                          | 0.60<br>(0.39 to<br>0.84)                       | 0.43<br>(0.29 to<br>0.61)                        | 0.41<br>(0.27 to<br>0.58)                        | 0.47<br>(0.32 to<br>0.66)                         |
| Adverse effects of medical treatment            | 8.13<br>(5.98 to<br>10.59)                           | 9.24<br>(6.85 to<br>12.18)                           | 9.19<br>(6.81 to<br>12.11)                           | 9.43<br>(7.14 to<br>12.33)                           | 0.40<br>(0.29 to<br>0.51)                       | 0.67<br>(0.52 to<br>0.82)                        | 0.68<br>(0.53 to<br>0.85)                        | 0.65<br>(0.51 to<br>0.79)                         |
| Animal contact                                  | 1.92<br>(1.37 to<br>2.55)                            | 2.31<br>(1.61 to<br>3.19)                            | 2.25<br>(1.56 to<br>3.13)                            | 2.44<br>(1.72 to<br>3.35)                            | 0.07<br>(0.05 to<br>0.10)                       | 0.13<br>(0.10 to<br>0.16)                        | 0.13<br>(0.09 to<br>0.16)                        | 0.13<br>(0.10 to<br>0.16)                         |
| Venomous animal contact                         | 1.37<br>(0.94 to<br>1.85)                            | 1.60<br>(1.08 to<br>2.28)                            | 1.57<br>(1.04 to<br>2.25)                            | 1.68<br>(1.13 to<br>2.36)                            | 0.05<br>(0.04 to<br>0.07)                       | 0.08<br>(0.06 to<br>0.11)                        | 0.08<br>(0.06 to<br>0.12)                        | 0.09<br>(0.06 to<br>0.11)                         |
| Non-venomous animal contact                     | 0.55<br>(0.39 to<br>0.75)                            | 0.70<br>(0.49 to<br>1.01)                            | 0.68<br>(0.47 to<br>0.97)                            | 0.76<br>(0.54 to<br>1.08)                            | 0.02<br>(0.01 to<br>0.03)                       | 0.04<br>(0.03 to<br>0.06)                        | 0.04<br>(0.03 to<br>0.06)                        | 0.04<br>(0.03 to<br>0.06)                         |
| Foreign body                                    | 18.10<br>(13.67 to<br>23.97)                         | 19.46<br>(14.58 to<br>26.14)                         | 19.62<br>(14.50 to<br>26.59)                         | 19.35<br>(14.70 to<br>25.76)                         | 0.85<br>(0.62 to<br>1.15)                       | 1.41<br>(1.10 to<br>1.84)                        | 1.47<br>(1.14 to<br>1.91)                        | 1.33<br>(1.05 to<br>1.74)                         |
| Pulmonary aspiration and foreign body in airway | 16.71<br>(12.52 to<br>22.32)                         | 17.46<br>(12.79 to<br>24.17)                         | 17.52<br>(12.74 to<br>24.63)                         | 17.48<br>(13.10 to<br>23.83)                         | 0.78<br>(0.57 to<br>1.07)                       | 1.25<br>(0.95 to<br>1.72)                        | 1.29<br>(0.97 to<br>1.78)                        | 1.18<br>(0.92 to<br>1.62)                         |

|                                             |                                                      |                                                      |                                                      |                                                      |                                                   |                                                  |                                                  |                                                  |
|---------------------------------------------|------------------------------------------------------|------------------------------------------------------|------------------------------------------------------|------------------------------------------------------|---------------------------------------------------|--------------------------------------------------|--------------------------------------------------|--------------------------------------------------|
|                                             | 1.39<br>(0.85 to<br>1.89)                            | 2.01<br>(1.07 to<br>2.74)                            | 2.10<br>(1.11 to<br>2.88)                            | 1.88<br>(1.00 to<br>2.54)                            | 0.07<br>(0.04 to<br>0.10)                         | 0.16<br>(0.08 to<br>0.22)                        | 0.18<br>(0.08 to<br>0.24)                        | 0.15<br>(0.07 to<br>0.20)                        |
| Foreign body in other body part             |                                                      |                                                      |                                                      |                                                      |                                                   |                                                  |                                                  |                                                  |
|                                             | 9.96<br>(5.87 to<br>14.54)                           | 8.20<br>(4.68 to<br>12.07)                           | 7.75<br>(4.46 to<br>11.35)                           | 9.19<br>(5.17 to<br>13.55)                           | 0.39<br>(0.23 to<br>0.55)                         | 0.45<br>(0.27 to<br>0.60)                        | 0.43<br>(0.26 to<br>0.58)                        | 0.48<br>(0.28 to<br>0.64)                        |
| Environmental heat and cold exposure        |                                                      |                                                      |                                                      |                                                      |                                                   |                                                  |                                                  |                                                  |
|                                             | 6.62<br>(4.45 to<br>9.43)                            | 2.24<br>(1.41 to<br>3.49)                            | 1.98<br>(1.22 to<br>3.08)                            | 2.87<br>(1.76 to<br>4.56)                            | 0.18<br>(0.13 to<br>0.26)                         | 0.08<br>(0.06 to<br>0.12)                        | 0.07<br>(0.05 to<br>0.11)                        | 0.10<br>(0.07 to<br>0.15)                        |
| Other unintentional injuries                |                                                      |                                                      |                                                      |                                                      |                                                   |                                                  |                                                  |                                                  |
| <b>Self-harm and interpersonal violence</b> | <b>570.86</b><br><b>(380.95 to</b><br><b>774.46)</b> | <b>349.08</b><br><b>(185.30 to</b><br><b>573.85)</b> | <b>320.93</b><br><b>(175.33 to</b><br><b>517.66)</b> | <b>423.40</b><br><b>(213.55 to</b><br><b>734.28)</b> | <b>16.98</b><br><b>(10.89 to</b><br><b>23.01)</b> | <b>14.25</b><br><b>(7.24 to</b><br><b>22.66)</b> | <b>13.45</b><br><b>(6.95 to</b><br><b>21.10)</b> | <b>16.41</b><br><b>(8.21 to</b><br><b>27.76)</b> |



| South Korea                                                                         |                                      |                                         |                                         |                                         |                                      |                                       |                                       |                                       |
|-------------------------------------------------------------------------------------|--------------------------------------|-----------------------------------------|-----------------------------------------|-----------------------------------------|--------------------------------------|---------------------------------------|---------------------------------------|---------------------------------------|
| Cause                                                                               | YLLs (in 1000s)                      |                                         |                                         |                                         | Deaths (in 1000s)                    |                                       |                                       |                                       |
|                                                                                     | 2016                                 | 2040 Forecast                           | 2040 Better Scenario                    | 2040 Worse Scenario                     | 2016                                 | 2040 Forecast                         | 2040 Better Scenario                  | 2040 Worse Scenario                   |
| Self-harm                                                                           | 538.49<br>(363.55 to 728.44)         | 331.39<br>(176.47 to 550.94)            | 304.46<br>(164.69 to 493.92)            | 402.52<br>(201.73 to 707.53)            | 16.13<br>(10.44 to 21.79)            | 13.64<br>(6.97 to 21.80)              | 12.88<br>(6.68 to 20.28)              | 15.71<br>(7.72 to 26.77)              |
| Self-harm by firearm                                                                | 3.35<br>(1.76 to 5.06)               | 1.99<br>(0.74 to 3.68)                  | 1.80<br>(0.67 to 3.32)                  | 2.44<br>(0.87 to 4.84)                  | 0.13<br>(0.05 to 0.19)               | 0.11<br>(0.03 to 0.19)                | 0.10<br>(0.03 to 0.17)                | 0.12<br>(0.04 to 0.23)                |
| Self-harm by other specified means                                                  | 535.13<br>(361.38 to 724.62)         | 329.41<br>(175.53 to 547.98)            | 302.66<br>(163.95 to 491.29)            | 400.08<br>(201.02 to 703.77)            | 16.01<br>(10.39 to 21.63)            | 13.54<br>(6.94 to 21.62)              | 12.78<br>(6.66 to 20.12)              | 15.59<br>(7.69 to 26.54)              |
| Interpersonal violence                                                              | 32.38<br>(16.40 to 45.48)            | 17.69<br>(8.00 to 29.79)                | 16.46<br>(7.65 to 27.24)                | 20.89<br>(9.09 to 35.31)                | 0.85<br>(0.38 to 1.21)               | 0.60<br>(0.25 to 0.99)                | 0.57<br>(0.24 to 0.93)                | 0.69<br>(0.28 to 1.16)                |
| Physical violence by firearm                                                        | 1.07<br>(0.54 to 1.68)               | 0.49<br>(0.22 to 0.79)                  | 0.46<br>(0.21 to 0.75)                  | 0.56<br>(0.25 to 0.92)                  | 0.03<br>(0.01 to 0.04)               | 0.02<br>(0.01 to 0.03)                | 0.02<br>(0.01 to 0.03)                | 0.02<br>(0.01 to 0.03)                |
| Physical violence by sharp object                                                   | 8.75<br>(4.58 to 12.48)              | 4.30<br>(2.12 to 6.93)                  | 4.04<br>(1.99 to 6.46)                  | 4.90<br>(2.41 to 7.71)                  | 0.22<br>(0.11 to 0.31)               | 0.13<br>(0.07 to 0.20)                | 0.12<br>(0.06 to 0.19)                | 0.14<br>(0.07 to 0.22)                |
| Physical violence by other means                                                    | 22.56<br>(10.69 to 31.73)            | 12.90<br>(5.15 to 22.41)                | 11.96<br>(4.87 to 20.67)                | 15.43<br>(5.90 to 27.54)                | 0.61<br>(0.24 to 0.87)               | 0.46<br>(0.16 to 0.78)                | 0.43<br>(0.15 to 0.73)                | 0.53<br>(0.18 to 0.92)                |
| <b>Forces of nature, conflict and terrorism, and executions and police conflict</b> | <b>0.22</b><br><b>(0.17 to 0.28)</b> | <b>34.94</b><br><b>(0.00 to 822.02)</b> | <b>35.08</b><br><b>(0.00 to 827.01)</b> | <b>34.62</b><br><b>(0.00 to 812.09)</b> | <b>0.00</b><br><b>(0.00 to 0.01)</b> | <b>0.99</b><br><b>(0.00 to 22.11)</b> | <b>1.01</b><br><b>(0.00 to 22.84)</b> | <b>0.95</b><br><b>(0.00 to 21.05)</b> |
| Exposure to forces of nature                                                        | 0.00<br>(0.00 to 0.00)               | 1.63<br>(0.00 to 10.54)                 | 1.64<br>(0.00 to 10.66)                 | 1.62<br>(0.00 to 10.55)                 | 0.00<br>(0.00 to 0.00)               | 0.05<br>(0.00 to 0.31)                | 0.05<br>(0.00 to 0.31)                | 0.05<br>(0.00 to 0.30)                |
| Conflict and terrorism                                                              | 0.00<br>(0.00 to 0.00)               | 33.31<br>(0.00 to 822.02)               | 33.44<br>(0.00 to 827.01)               | 33.00<br>(0.00 to 812.09)               | 0.00<br>(0.00 to 0.00)               | 0.94<br>(0.00 to 22.11)               | 0.96<br>(0.00 to 22.84)               | 0.90<br>(0.00 to 21.05)               |
| Executions and police conflict                                                      | 0.22<br>(0.17 to 0.28)               | 0.00<br>(0.00 to 0.00)                  | 0.00<br>(0.00 to 0.00)                  | 0.00<br>(0.00 to 0.00)                  | 0.00<br>(0.00 to 0.01)               | 0.00<br>(0.00 to 0.00)                | 0.00<br>(0.00 to 0.00)                | 0.00<br>(0.00 to 0.00)                |

| Singapore                                                         |                                          |                                          |                                          |                                          |                                       |                                       |                                       |                                       |
|-------------------------------------------------------------------|------------------------------------------|------------------------------------------|------------------------------------------|------------------------------------------|---------------------------------------|---------------------------------------|---------------------------------------|---------------------------------------|
| Cause                                                             | YLLs (actual counts)                     |                                          |                                          |                                          | Deaths (actual counts)                |                                       |                                       |                                       |
|                                                                   | 2016                                     | 2040 Forecast                            | 2040 Better Scenario                     | 2040 Worse Scenario                      | 2016                                  | 2040 Forecast                         | 2040 Better Scenario                  | 2040 Worse Scenario                   |
| All causes                                                        | 331,311.54<br>(275,014.68 to 400,032.47) | 536,285.04<br>(383,651.62 to 720,327.07) | 471,318.00<br>(339,457.37 to 628,772.22) | 671,389.44<br>(475,599.82 to 897,330.59) | 19,354.93<br>(16,350.30 to 23,013.75) | 40,336.17<br>(28,858.03 to 53,839.89) | 36,589.21<br>(26,117.17 to 48,818.99) | 48,305.90<br>(34,777.67 to 63,782.29) |
| Communicable, maternal, neonatal, and nutritional diseases        | 36,676.63<br>(30,984.36 to 43,805.13)    | 72,112.52<br>(53,231.12 to 97,000.82)    | 62,017.08<br>(46,622.60 to 81,008.83)    | 85,924.11<br>(62,713.03 to 117,322.89)   | 2,490.18<br>(2,063.17 to 2,994.69)    | 6,329.07<br>(4,682.52 to 8,266.44)    | 5,720.64<br>(4,209.52 to 7,446.11)    | 7,109.95<br>(5,249.39 to 9,429.64)    |
| HIV/AIDS and tuberculosis                                         | 2,249.28<br>(2,037.56 to 2,494.08)       | 2,183.49<br>(1,431.11 to 3,087.54)       | 1,606.71<br>(1,088.70 to 2,240.69)       | 3,194.76<br>(2,064.42 to 4,599.10)       | 86.88<br>(76.40 to 98.95)             | 96.38<br>(66.73 to 136.65)            | 81.50<br>(56.85 to 113.43)            | 125.31<br>(87.19 to 179.80)           |
| Tuberculosis                                                      | 967.10<br>(774.27 to 1,202.79)           | 1,009.71<br>(646.17 to 1,516.12)         | 896.14<br>(601.33 to 1,330.12)           | 1,275.35<br>(813.50 to 2,023.01)         | 53.91<br>(43.50 to 66.48)             | 75.57<br>(49.22 to 112.00)            | 68.28<br>(46.07 to 99.19)             | 92.10<br>(59.54 to 140.77)            |
| HIV/AIDS                                                          | 1,282.18<br>(1,218.72 to 1,351.07)       | 1,173.78<br>(552.00 to 1,895.95)         | 710.56<br>(296.99 to 1,165.99)           | 1,919.41<br>(961.53 to 3,157.15)         | 32.97<br>(31.36 to 34.80)             | 32.97<br>(9.10 to 33.82)              | 13.22<br>(5.07 to 24.11)              | 33.21<br>(15.97 to 53.10)             |
| Diarrhea, lower respiratory, and other common infectious diseases | 31,755.97<br>(26,125.32 to 38,599.02)    | 67,607.82<br>(49,123.85 to 92,264.45)    | 58,281.61<br>(43,107.81 to 77,195.41)    | 80,213.70<br>(57,302.18 to 111,781.03)   | 2,357.21<br>(1,940.88 to 2,846.96)    | 6,163.63<br>(4,544.26 to 8,085.07)    | 5,571.55<br>(4,051.67 to 7,254.22)    | 6,914.69<br>(5,081.83 to 9,231.78)    |
| Diarrheal diseases                                                | 490.26<br>(404.52 to 588.73)             | 2,640.43<br>(1,339.74 to 5,719.24)       | 2,595.26<br>(1,414.66 to 5,046.23)       | 2,242.57<br>(1,108.19 to 4,878.62)       | 29.57<br>(24.19 to 35.55)             | 234.07<br>(118.65 to 507.42)          | 234.08<br>(126.54 to 452.23)          | 193.13<br>(92.87 to 419.08)           |
| Intestinal infectious diseases                                    | 9.52<br>(3.43 to 21.54)                  | 8.50<br>(3.06 to 19.52)                  | 8.51<br>(3.06 to 19.58)                  | 8.55<br>(3.11 to 19.42)                  | 0.25<br>(0.10 to 0.55)                | 0.28<br>(0.12 to 0.61)                | 0.29<br>(0.12 to 0.62)                | 0.28<br>(0.12 to 0.61)                |
| Typhoid fever                                                     | 4.66<br>(1.51 to 11.02)                  | 4.11<br>(1.33 to 9.59)                   | 4.27<br>(1.36 to 9.72)                   | 3.87<br>(1.20 to 8.94)                   | 0.11<br>(0.04 to 0.26)                | 0.11<br>(0.04 to 0.24)                | 0.11<br>(0.04 to 0.25)                | 0.10<br>(0.03 to 0.23)                |
| Paratyphoid fever                                                 | 4.08<br>(1.18 to 10.54)                  | 3.52<br>(0.95 to 9.42)                   | 3.38<br>(0.88 to 9.01)                   | 3.78<br>(1.05 to 9.79)                   | 0.10<br>(0.03 to 0.27)                | 0.11<br>(0.03 to 0.29)                | 0.11<br>(0.03 to 0.29)                | 0.12<br>(0.03 to 0.31)                |
| Other intestinal infectious diseases                              | 0.77<br>(0.31 to 1.60)                   | 0.88<br>(0.33 to 1.89)                   | 0.87<br>(0.32 to 1.89)                   | 0.90<br>(0.34 to 1.94)                   | 0.04<br>(0.01 to 0.08)                | 0.06<br>(0.02 to 0.14)                | 0.06<br>(0.02 to 0.14)                | 0.06<br>(0.02 to 0.14)                |
| Lower respiratory infections                                      | 30,790.05<br>(25,233.77 to 37,486.02)    | 64,366.49<br>(45,666.26 to 88,340.03)    | 55,099.65<br>(40,163.62 to 73,691.65)    | 77,342.53<br>(54,557.64 to 108,996.84)   | 2,312.85<br>(1,902.20 to 2,795.55)    | 5,902.08<br>(4,221.81 to 7,786.99)    | 5,310.09<br>(3,838.99 to 6,975.46)    | 6,693.94<br>(4,881.75 to 8,965.10)    |
| Upper respiratory infections                                      | 2.82<br>(1.42 to 4.69)                   | 3.52<br>(1.41 to 7.58)                   | 3.26<br>(1.29 to 6.92)                   | 3.97<br>(1.58 to 8.43)                   | 0.12<br>(0.06 to 0.20)                | 0.21<br>(0.08 to 0.49)                | 0.20<br>(0.07 to 0.46)                | 0.23<br>(0.09 to 0.54)                |
| Otitis media                                                      | 1.00<br>(0.71 to 1.41)                   | 0.32<br>(0.17 to 0.60)                   | 0.33<br>(0.17 to 0.61)                   | 0.31<br>(0.16 to 0.57)                   | 0.05<br>(0.03 to 0.07)                | 0.02<br>(0.01 to 0.05)                | 0.02<br>(0.01 to 0.05)                | 0.02<br>(0.01 to 0.04)                |
| Meningitis                                                        | 209.15<br>(162.01 to 332.52)             | 205.79<br>(138.66 to 370.16)             | 196.90<br>(133.45 to 354.14)             | 223.03<br>(151.91 to 395.69)             | 6.72<br>(4.97 to 11.67)               | 10.17<br>(6.80 to 18.90)              | 9.93<br>(6.63 to 18.43)               | 10.58<br>(7.24 to 19.50)              |
| Pneumococcal meningitis                                           | 16.73<br>(11.65 to 30.53)                | 24.34<br>(15.24 to 51.26)                | 24.63<br>(15.34 to 51.98)                | 24.03<br>(15.16 to 50.87)                | 0.59<br>(0.39 to 1.17)                | 1.27<br>(0.78 to 2.66)                | 1.30<br>(0.80 to 2.24)                | 1.22<br>(0.77 to 2.56)                |
| H influenzae type B meningitis                                    | 23.12<br>(18.02 to 34.22)                | 29.28<br>(19.31 to 47.99)                | 27.78<br>(18.75 to 46.08)                | 33.39<br>(20.74 to 55.53)                | 0.70<br>(0.53 to 1.16)                | 1.20<br>(0.84 to 2.05)                | 1.21<br>(0.84 to 2.08)                | 1.19<br>(0.83 to 2.01)                |
| Meningococcal meningitis                                          | 48.85<br>(37.50 to 74.20)                | 37.98<br>(24.16 to 67.56)                | 36.14<br>(23.41 to 65.27)                | 41.25<br>(26.49 to 73.60)                | 1.36<br>(1.02 to 2.28)                | 1.71<br>(1.10 to 3.16)                | 1.65<br>(1.06 to 3.08)                | 1.80<br>(1.17 to 3.36)                |
| Other meningitis                                                  | 120.45<br>(92.82 to 192.98)              | 114.19<br>(72.51 to 213.51)              | 108.35<br>(70.19 to 199.21)              | 124.36<br>(80.21 to 230.42)              | 4.07<br>(3.02 to 7.10)                | 6.00<br>(3.86 to 11.25)               | 5.77<br>(3.70 to 10.87)               | 6.36<br>(4.15 to 11.74)               |
| Encephalitis                                                      | 240.21<br>(177.54 to 327.84)             | 355.39<br>(257.31 to 503.97)             | 356.50<br>(258.41 to 506.19)             | 354.13<br>(257.48 to 503.09)             | 7.03<br>(5.37 to 10.01)               | 15.42<br>(11.26 to 22.93)             | 15.66<br>(11.35 to 23.35)             | 15.02<br>(11.02 to 22.25)             |

|                |                           |                              |                            |                              |                           |                           |                           |                           |
|----------------|---------------------------|------------------------------|----------------------------|------------------------------|---------------------------|---------------------------|---------------------------|---------------------------|
| Diphtheria     | 0.66<br>(0.43 to<br>1.00) | 0.19<br>(0.10 to<br>0.31)    | 0.16<br>(0.09 to<br>0.27)  | 0.26<br>(0.13 to<br>0.47)    | 0.01<br>(0.01 to<br>0.02) | 0.00<br>(0.00 to<br>0.01) | 0.00<br>(0.00 to<br>0.01) | 0.00<br>(0.00 to<br>0.01) |
| Whooping cough | 1.95<br>(0.40 to<br>3.86) | 1.21<br>(0.16 to<br>3.73)    | 0.28<br>(0.07 to<br>0.76)  | 3.49<br>(0.37 to<br>11.08)   | 0.02<br>(0.01 to<br>0.05) | 0.01<br>(0.00 to<br>0.04) | 0.00<br>(0.00 to<br>0.01) | 0.04<br>(0.00 to<br>0.13) |
| Tetanus        | 1.64<br>(0.64 to<br>2.27) | 0.24<br>(0.08 to<br>0.37)    | 0.22<br>(0.06 to<br>0.33)  | 0.31<br>(0.13 to<br>0.51)    | 0.05<br>(0.02 to<br>0.07) | 0.01<br>(0.00 to<br>0.01) | 0.01<br>(0.00 to<br>0.01) | 0.01<br>(0.00 to<br>0.01) |
| Measles        | 0.29<br>(0.23 to<br>0.36) | 13.30<br>(0.02 to<br>134.12) | 8.37<br>(0.02 to<br>76.75) | 21.68<br>(0.03 to<br>207.57) | 0.00<br>(0.00 to<br>0.01) | 0.20<br>(0.00 to<br>1.66) | 0.14<br>(0.00 to<br>1.11) | 0.30<br>(0.00 to<br>2.91) |

| Singapore                                             |                                       |                                        |                                        |                                        |                                  |                                    |                                    |                                   |
|-------------------------------------------------------|---------------------------------------|----------------------------------------|----------------------------------------|----------------------------------------|----------------------------------|------------------------------------|------------------------------------|-----------------------------------|
| Cause                                                 | YLLs (actual counts)                  |                                        |                                        |                                        | Deaths (actual counts)           |                                    |                                    |                                   |
|                                                       | 2016                                  | 2040 Forecast                          | 2040 Better Scenario                   | 2040 Worse Scenario                    | 2016                             | 2040 Forecast                      | 2040 Better Scenario               | 2040 Worse Scenario               |
| Varicella and herpes zoster                           | 8.43<br>(4.45 to<br>22.32)            | 12.43<br>(6.27 to<br>32.66)            | 12.18<br>(6.15 to<br>31.69)            | 12.85<br>(6.48 to<br>34.07)            | 0.53<br>(0.29 to<br>1.31)        | 1.15<br>(0.58 to<br>2.88)          | 1.15<br>(0.57 to<br>2.90)          | 1.14<br>(0.58 to<br>2.89)         |
| <b>Neglected tropical diseases and malaria</b>        | <b>48.28</b><br>(35.47 to<br>63.76)   | <b>165.06</b><br>(108.24 to<br>237.11) | <b>169.22</b><br>(110.82 to<br>243.90) | <b>157.77</b><br>(104.26 to<br>225.71) | <b>2.04</b><br>(1.38 to<br>2.78) | <b>10.62</b><br>(6.74 to<br>15.43) | <b>10.98</b><br>(6.96 to<br>16.01) | <b>9.99</b><br>(6.40 to<br>14.60) |
| Malaria                                               | 0.00<br>(0.00 to<br>0.00)             | 0.00<br>(0.00 to<br>0.00)              | 0.00<br>(0.00 to<br>0.00)              | 0.00<br>(0.00 to<br>0.00)              | 0.00<br>(0.00 to<br>0.00)        | 0.00<br>(0.00 to<br>0.00)          | 0.00<br>(0.00 to<br>0.00)          | 0.00<br>(0.00 to<br>0.00)         |
| Chagas disease                                        | 0.00<br>(0.00 to<br>0.00)             | 0.00<br>(0.00 to<br>0.00)              | 0.00<br>(0.00 to<br>0.00)              | 0.00<br>(0.00 to<br>0.00)              | 0.00<br>(0.00 to<br>0.00)        | 0.00<br>(0.00 to<br>0.00)          | 0.00<br>(0.00 to<br>0.00)          | 0.00<br>(0.00 to<br>0.00)         |
| Leishmaniasis                                         | 0.00<br>(0.00 to<br>0.00)             | 0.00<br>(0.00 to<br>0.00)              | 0.00<br>(0.00 to<br>0.00)              | 0.00<br>(0.00 to<br>0.00)              | 0.00<br>(0.00 to<br>0.00)        | 0.00<br>(0.00 to<br>0.00)          | 0.00<br>(0.00 to<br>0.00)          | 0.00<br>(0.00 to<br>0.00)         |
| African trypanosomiasis                               | 0.00<br>(0.00 to<br>0.00)             | 0.00<br>(0.00 to<br>0.00)              | 0.00<br>(0.00 to<br>0.00)              | 0.00<br>(0.00 to<br>0.00)              | 0.00<br>(0.00 to<br>0.00)        | 0.00<br>(0.00 to<br>0.00)          | 0.00<br>(0.00 to<br>0.00)          | 0.00<br>(0.00 to<br>0.00)         |
| Schistosomiasis                                       | 0.00<br>(0.00 to<br>0.00)             | 0.00<br>(0.00 to<br>0.00)              | 0.00<br>(0.00 to<br>0.00)              | 0.00<br>(0.00 to<br>0.00)              | 0.00<br>(0.00 to<br>0.00)        | 0.00<br>(0.00 to<br>0.00)          | 0.00<br>(0.00 to<br>0.00)          | 0.00<br>(0.00 to<br>0.00)         |
| Cysticercosis                                         | 0.00<br>(0.00 to<br>0.00)             | 0.00<br>(0.00 to<br>0.00)              | 0.00<br>(0.00 to<br>0.00)              | 0.00<br>(0.00 to<br>0.00)              | 0.00<br>(0.00 to<br>0.00)        | 0.00<br>(0.00 to<br>0.00)          | 0.00<br>(0.00 to<br>0.00)          | 0.00<br>(0.00 to<br>0.00)         |
| Cystic echinococcosis                                 | 0.00<br>(0.00 to<br>0.00)             | 0.00<br>(0.00 to<br>0.00)              | 0.00<br>(0.00 to<br>0.00)              | 0.00<br>(0.00 to<br>0.00)              | 0.00<br>(0.00 to<br>0.00)        | 0.00<br>(0.00 to<br>0.00)          | 0.00<br>(0.00 to<br>0.00)          | 0.00<br>(0.00 to<br>0.00)         |
| Dengue                                                | 30.07<br>(18.93 to<br>44.72)          | 149.60<br>(92.78 to<br>220.54)         | 153.70<br>(95.01 to<br>227.10)         | 142.36<br>(88.55 to<br>209.36)         | 1.64<br>(1.04 to<br>2.38)        | 10.24<br>(6.42 to<br>14.94)        | 10.59<br>(6.57 to<br>15.61)        | 9.62<br>(5.97 to<br>14.10)        |
| Yellow fever                                          | 0.00<br>(0.00 to<br>0.00)             | 0.00<br>(0.00 to<br>0.00)              | 0.00<br>(0.00 to<br>0.00)              | 0.00<br>(0.00 to<br>0.00)              | 0.00<br>(0.00 to<br>0.00)        | 0.00<br>(0.00 to<br>0.00)          | 0.00<br>(0.00 to<br>0.00)          | 0.00<br>(0.00 to<br>0.00)         |
| Rabies                                                | 0.11<br>(0.09 to<br>0.15)             | 0.10<br>(0.07 to<br>0.14)              | 0.10<br>(0.07 to<br>0.13)              | 0.10<br>(0.07 to<br>0.14)              | 0.00<br>(0.00 to<br>0.00)        | 0.00<br>(0.00 to<br>0.01)          | 0.00<br>(0.00 to<br>0.01)          | 0.00<br>(0.00 to<br>0.01)         |
| Intestinal nematode infections                        | 0.00<br>(0.00 to<br>0.00)             | 0.00<br>(0.00 to<br>0.00)              | 0.00<br>(0.00 to<br>0.00)              | 0.00<br>(0.00 to<br>0.00)              | 0.00<br>(0.00 to<br>0.00)        | 0.00<br>(0.00 to<br>0.00)          | 0.00<br>(0.00 to<br>0.00)          | 0.00<br>(0.00 to<br>0.00)         |
| Other neglected tropical diseases                     | 18.10<br>(15.28 to<br>21.64)          | 15.36<br>(11.08 to<br>20.11)           | 15.42<br>(11.09 to<br>20.26)           | 15.30<br>(10.99 to<br>20.04)           | 0.39<br>(0.32 to<br>0.47)        | 0.38<br>(0.27 to<br>0.57)          | 0.39<br>(0.28 to<br>0.58)          | 0.37<br>(0.27 to<br>0.54)         |
| <b>Maternal disorders</b>                             | <b>102.82</b><br>(70.19 to<br>141.82) | <b>86.04</b><br>(49.26 to<br>134.77)   | <b>82.18</b><br>(46.84 to<br>127.34)   | <b>92.33</b><br>(52.57 to<br>144.47)   | <b>2.08</b><br>(1.42 to<br>2.87) | <b>1.77</b><br>(1.03 to<br>2.74)   | <b>1.70</b><br>(0.99 to<br>2.61)   | <b>1.90</b><br>(1.10 to<br>2.99)  |
| Maternal hemorrhage                                   | 8.74<br>(5.01 to<br>13.97)            | 7.39<br>(3.43 to<br>13.33)             | 7.11<br>(3.26 to<br>12.69)             | 7.85<br>(3.55 to<br>14.29)             | 0.17<br>(0.10 to<br>0.27)        | 0.15<br>(0.07 to<br>0.26)          | 0.14<br>(0.07 to<br>0.25)          | 0.16<br>(0.07 to<br>0.28)         |
| Maternal sepsis and other maternal infections         | 1.08<br>(0.43 to<br>2.09)             | 1.07<br>(0.37 to<br>2.23)              | 1.03<br>(0.35 to<br>2.11)              | 1.15<br>(0.40 to<br>2.41)              | 0.02<br>(0.01 to<br>0.04)        | 0.02<br>(0.01 to<br>0.05)          | 0.02<br>(0.01 to<br>0.04)          | 0.02<br>(0.01 to<br>0.05)         |
| Maternal hypertensive disorders                       | 3.28<br>(1.69 to<br>5.50)             | 2.78<br>(1.17 to<br>5.17)              | 2.67<br>(1.12 to<br>5.01)              | 2.97<br>(1.25 to<br>5.49)              | 0.06<br>(0.03 to<br>0.11)        | 0.05<br>(0.02 to<br>0.10)          | 0.05<br>(0.02 to<br>0.10)          | 0.06<br>(0.02 to<br>0.11)         |
| Maternal obstructed labor and uterine rupture         | 1.22<br>(0.46 to<br>2.35)             | 1.03<br>(0.34 to<br>2.25)              | 0.98<br>(0.32 to<br>2.13)              | 1.11<br>(0.37 to<br>2.42)              | 0.02<br>(0.01 to<br>0.05)        | 0.02<br>(0.01 to<br>0.05)          | 0.02<br>(0.01 to<br>0.04)          | 0.02<br>(0.01 to<br>0.05)         |
| Maternal abortion, miscarriage, and ectopic pregnancy | 37.97<br>(24.93 to<br>54.88)          | 30.22<br>(15.70 to<br>50.28)           | 28.90<br>(14.88 to<br>48.10)           | 32.40<br>(16.68 to<br>54.14)           | 0.81<br>(0.53 to<br>1.16)        | 0.66<br>(0.35 to<br>1.11)          | 0.63<br>(0.33 to<br>1.07)          | 0.71<br>(0.37 to<br>1.19)         |

|                                        |                              |                              |                              |                              |                           |                           |                           |                           |
|----------------------------------------|------------------------------|------------------------------|------------------------------|------------------------------|---------------------------|---------------------------|---------------------------|---------------------------|
|                                        | 12.54<br>(7.61 to<br>19.39)  | 11.32<br>(4.89 to<br>21.41)  | 10.66<br>(4.68 to<br>20.16)  | 12.37<br>(5.33 to<br>23.77)  | 0.24<br>(0.14 to<br>0.36) | 0.22<br>(0.10 to<br>0.40) | 0.20<br>(0.09 to<br>0.38) | 0.24<br>(0.10 to<br>0.45) |
| Indirect maternal deaths               |                              |                              |                              |                              |                           |                           |                           |                           |
|                                        | 1.38<br>(0.57 to<br>2.56)    | 1.12<br>(0.41 to<br>2.38)    | 1.06<br>(0.39 to<br>2.28)    | 1.21<br>(0.45 to<br>2.57)    | 0.03<br>(0.01 to<br>0.05) | 0.02<br>(0.01 to<br>0.05) | 0.02<br>(0.01 to<br>0.05) | 0.03<br>(0.01 to<br>0.05) |
| Late maternal deaths                   |                              |                              |                              |                              |                           |                           |                           |                           |
|                                        | 0.01<br>(0.00 to<br>0.01)    | 0.02<br>(0.00 to<br>0.06)    | 0.01<br>(0.00 to<br>0.04)    | 0.03<br>(0.00 to<br>0.10)    | 0.00<br>(0.00 to<br>0.00) | 0.00<br>(0.00 to<br>0.00) | 0.00<br>(0.00 to<br>0.00) | 0.00<br>(0.00 to<br>0.00) |
| Maternal deaths aggravated by HIV/AIDS |                              |                              |                              |                              |                           |                           |                           |                           |
|                                        | 36.61<br>(24.22 to<br>52.58) | 31.10<br>(16.11 to<br>51.67) | 29.76<br>(15.56 to<br>49.47) | 33.24<br>(17.13 to<br>55.90) | 0.73<br>(0.47 to<br>1.04) | 0.63<br>(0.33 to<br>1.05) | 0.60<br>(0.32 to<br>1.01) | 0.67<br>(0.35 to<br>1.12) |
| Other maternal disorders               |                              |                              |                              |                              |                           |                           |                           |                           |

| Singapore                                                               |                                           |                                         |                                         |                                         |                                  |                                  |                                  |                                  |
|-------------------------------------------------------------------------|-------------------------------------------|-----------------------------------------|-----------------------------------------|-----------------------------------------|----------------------------------|----------------------------------|----------------------------------|----------------------------------|
| Cause                                                                   | YLLs (actual counts)                      |                                         |                                         |                                         | Deaths (actual counts)           |                                  |                                  |                                  |
|                                                                         | 2016                                      | 2040 Forecast                           | 2040 Better Scenario                    | 2040 Worse Scenario                     | 2016                             | 2040 Forecast                    | 2040 Better Scenario             | 2040 Worse Scenario              |
| <b>Neonatal disorders</b>                                               | <b>2,003.30</b><br>(1,476.26 to 2,648.32) | <b>1,278.94</b><br>(725.09 to 2,075.58) | <b>1,090.54</b><br>(619.01 to 1,767.49) | <b>1,467.99</b><br>(846.46 to 2,377.91) | <b>23.16</b><br>(17.07 to 30.62) | <b>14.80</b><br>(8.39 to 24.02)  | <b>12.62</b><br>(7.17 to 20.43)  | <b>16.98</b><br>(9.80 to 27.50)  |
| Neonatal preterm birth                                                  | 922.86<br>(656.59 to 1,211.42)            | 539.56<br>(297.41 to 859.17)            | 409.97<br>(228.31 to 653.01)            | 641.74<br>(359.75 to 1,035.54)          | 10.67<br>(7.59 to 14.00)         | 6.24<br>(3.44 to 9.95)           | 4.74<br>(2.64 to 7.55)           | 7.42<br>(4.16 to 11.97)          |
| Neonatal encephalopathy due to birth asphyxia and trauma                | 254.57<br>(179.14 to 349.68)              | 164.71<br>(87.42 to 289.59)             | 147.07<br>(77.70 to 259.23)             | 194.58<br>(101.03 to 341.77)            | 2.94<br>(2.07 to 4.04)           | 1.91<br>(1.01 to 3.35)           | 1.70<br>(0.90 to 3.00)           | 2.25<br>(1.17 to 3.95)           |
| Neonatal sepsis and other neonatal infections                           | 146.49<br>(91.31 to 221.61)               | 108.21<br>(52.75 to 200.17)             | 98.09<br>(47.96 to 179.12)              | 124.50<br>(60.44 to 226.32)             | 1.69<br>(1.06 to 2.56)           | 1.25<br>(0.51 to 2.31)           | 1.13<br>(0.55 to 2.07)           | 1.44<br>(0.70 to 2.62)           |
| Hemolytic disease and other neonatal jaundice                           | 8.41<br>(5.12 to 12.94)                   | 4.00<br>(1.94 to 7.47)                  | 3.63<br>(1.79 to 6.80)                  | 4.61<br>(2.26 to 8.83)                  | 0.10<br>(0.06 to 0.15)           | 0.05<br>(0.02 to 0.09)           | 0.04<br>(0.02 to 0.08)           | 0.05<br>(0.03 to 0.10)           |
| Other neonatal disorders                                                | 670.97<br>(481.26 to 913.04)              | 462.47<br>(237.81 to 805.32)            | 431.78<br>(221.77 to 765.03)            | 502.56<br>(257.36 to 871.68)            | 7.76<br>(5.57 to 10.56)          | 5.35<br>(2.75 to 9.32)           | 5.00<br>(2.57 to 8.85)           | 5.82<br>(2.98 to 10.09)          |
| <b>Nutritional deficiencies</b>                                         | <b>30.34</b><br>(25.44 to 35.90)          | <b>44.76</b><br>(34.95 to 54.42)        | <b>45.84</b><br>(35.60 to 56.02)        | <b>42.96</b><br>(34.02 to 51.68)        | <b>1.47</b><br>(1.22 to 1.75)    | <b>4.09</b><br>(3.00 to 5.32)    | <b>4.28</b><br>(3.11 to 5.64)    | <b>3.78</b><br>(2.82 to 4.85)    |
| Protein-energy malnutrition                                             | 12.11<br>(9.49 to 17.56)                  | 21.49<br>(15.10 to 31.65)               | 22.48<br>(15.70 to 32.85)               | 19.91<br>(14.13 to 29.55)               | 0.75<br>(0.57 to 1.07)           | 2.40<br>(1.53 to 3.50)           | 2.56<br>(1.62 to 3.72)           | 2.15<br>(1.39 to 3.18)           |
| Iodine deficiency                                                       | 1.63<br>(0.26 to 3.61)                    | 3.60<br>(0.30 to 9.37)                  | 3.65<br>(0.29 to 9.77)                  | 3.52<br>(0.32 to 8.95)                  | 0.08<br>(0.01 to 0.22)           | 0.31<br>(0.01 to 1.01)           | 0.32<br>(0.01 to 1.05)           | 0.30<br>(0.01 to 0.95)           |
| Dietary iron deficiency                                                 | 7.43<br>(5.45 to 9.24)                    | 7.73<br>(4.72 to 10.62)                 | 7.84<br>(4.75 to 10.83)                 | 7.54<br>(4.67 to 10.27)                 | 0.20<br>(0.12 to 0.25)           | 0.28<br>(0.13 to 0.41)           | 0.29<br>(0.13 to 0.42)           | 0.27<br>(0.12 to 0.39)           |
| Other nutritional deficiencies                                          | 9.17<br>(6.47 to 11.37)                   | 11.93<br>(5.93 to 16.60)                | 11.87<br>(5.87 to 16.68)                | 11.99<br>(6.13 to 16.50)                | 0.44<br>(0.24 to 0.57)           | 1.10<br>(0.51 to 1.65)           | 1.11<br>(0.51 to 1.71)           | 1.06<br>(0.51 to 1.57)           |
| <b>Other communicable, maternal, neonatal, and nutritional diseases</b> | <b>486.64</b><br>(384.74 to 648.56)       | <b>746.40</b><br>(512.65 to 1,103.16)   | <b>740.99</b><br>(507.34 to 1,086.05)   | <b>754.61</b><br>(517.71 to 1,114.35)   | <b>17.34</b><br>(13.46 to 25.19) | <b>37.78</b><br>(25.64 to 60.35) | <b>38.01</b><br>(25.81 to 60.62) | <b>37.29</b><br>(25.72 to 60.00) |
| Sexually transmitted infections excluding HIV                           | 32.21<br>(16.51 to 66.67)                 | 26.09<br>(15.18 to 46.36)               | 25.74<br>(15.02 to 44.94)               | 26.72<br>(15.60 to 47.52)               | 1.12<br>(0.78 to 1.82)           | 1.60<br>(1.00 to 2.51)           | 1.60<br>(0.99 to 2.52)           | 1.58<br>(0.99 to 2.50)           |
| Syphilis                                                                | 16.66<br>(4.09 to 51.17)                  | 8.88<br>(3.87 to 22.92)                 | 8.54<br>(3.80 to 21.85)                 | 9.47<br>(4.04 to 25.03)                 | 0.38<br>(0.20 to 0.78)           | 0.42<br>(0.24 to 0.75)           | 0.41<br>(0.24 to 0.71)           | 0.43<br>(0.25 to 0.76)           |
| Chlamydial infection                                                    | 3.10<br>(2.22 to 4.40)                    | 3.38<br>(2.13 to 5.16)                  | 3.38<br>(2.13 to 5.11)                  | 3.38<br>(2.15 to 5.12)                  | 0.15<br>(0.11 to 0.22)           | 0.24<br>(0.15 to 0.39)           | 0.25<br>(0.15 to 0.39)           | 0.24<br>(0.15 to 0.38)           |
| Gonococcal infection                                                    | 8.53<br>(6.05 to 12.44)                   | 9.98<br>(6.04 to 15.68)                 | 9.97<br>(6.04 to 15.70)                 | 9.98<br>(6.05 to 15.56)                 | 0.43<br>(0.31 to 0.63)           | 0.71<br>(0.42 to 1.11)           | 0.72<br>(0.42 to 1.11)           | 0.69<br>(0.42 to 1.11)           |
| Other sexually transmitted infections                                   | 3.92<br>(2.78 to 5.63)                    | 3.86<br>(2.37 to 6.18)                  | 3.84<br>(2.37 to 6.17)                  | 3.89<br>(2.42 to 6.19)                  | 0.16<br>(0.11 to 0.23)           | 0.23<br>(0.14 to 0.35)           | 0.23<br>(0.14 to 0.36)           | 0.22<br>(0.14 to 0.35)           |
| Acute hepatitis                                                         | 119.72<br>(95.58 to 150.82)               | 135.08<br>(77.03 to 216.42)             | 128.47<br>(73.37 to 202.72)             | 146.20<br>(84.15 to 230.40)             | 4.22<br>(3.35 to 5.25)           | 6.52<br>(3.73 to 10.17)          | 6.26<br>(3.59 to 9.68)           | 6.93<br>(4.10 to 10.65)          |
| Acute hepatitis A                                                       | 4.63<br>(3.36 to 6.00)                    | 3.60<br>(2.05 to 6.01)                  | 3.47<br>(1.93 to 5.65)                  | 3.82<br>(2.18 to 6.27)                  | 0.12<br>(0.08 to 0.16)           | 0.14<br>(0.08 to 0.25)           | 0.14<br>(0.07 to 0.24)           | 0.15<br>(0.08 to 0.25)           |
| Acute hepatitis B                                                       | 97.18<br>(75.62 to 123.63)                | 109.56<br>(60.31 to 179.58)             | 103.98<br>(56.79 to 167.51)             | 118.99<br>(65.99 to 190.86)             | 3.37<br>(2.63 to 4.28)           | 4.99<br>(2.74 to 8.10)           | 4.78<br>(2.60 to 7.70)           | 5.34<br>(2.99 to 8.52)           |

|                                       |                                                                  |                                                                  |                                                                  |                                                                  |                                                               |                                                               |                                                               |                                                               |
|---------------------------------------|------------------------------------------------------------------|------------------------------------------------------------------|------------------------------------------------------------------|------------------------------------------------------------------|---------------------------------------------------------------|---------------------------------------------------------------|---------------------------------------------------------------|---------------------------------------------------------------|
|                                       | 4.77<br>(3.10 to<br>7.07)                                        | 5.71<br>(2.90 to<br>9.70)                                        | 5.44<br>(2.70 to<br>9.26)                                        | 6.16<br>(3.13 to<br>10.48)                                       | 0.18<br>(0.12 to<br>0.27)                                     | 0.28<br>(0.14 to<br>0.47)                                     | 0.27<br>(0.13 to<br>0.45)                                     | 0.30<br>(0.15 to<br>0.50)                                     |
| Acute hepatitis C                     |                                                                  |                                                                  |                                                                  |                                                                  |                                                               |                                                               |                                                               |                                                               |
|                                       | 13.15<br>(9.20 to<br>18.41)                                      | 16.21<br>(8.01 to<br>27.26)                                      | 15.58<br>(7.72 to<br>26.37)                                      | 17.22<br>(8.57 to<br>28.77)                                      | 0.55<br>(0.35 to<br>0.80)                                     | 1.10<br>(0.54 to<br>1.90)                                     | 1.08<br>(0.52 to<br>1.85)                                     | 1.14<br>(0.55 to<br>1.95)                                     |
| Acute hepatitis E                     |                                                                  |                                                                  |                                                                  |                                                                  |                                                               |                                                               |                                                               |                                                               |
|                                       | 334.71<br>(259.95 to<br>484.15)                                  | 585.23<br>(407.15 to<br>918.37)                                  | 586.79<br>(407.22 to<br>926.39)                                  | 581.69<br>(406.15 to<br>920.42)                                  | 12.00<br>(8.94 to<br>19.58)                                   | 29.66<br>(20.34 to<br>51.18)                                  | 30.14<br>(20.58 to<br>51.99)                                  | 28.78<br>(19.84 to<br>49.65)                                  |
| Other unspecified infectious diseases |                                                                  |                                                                  |                                                                  |                                                                  |                                                               |                                                               |                                                               |                                                               |
| <b>Non-communicable diseases</b>      | <b>268,145.83</b><br><b>(223,123.34 to</b><br><b>323,870.87)</b> | <b>434,855.71</b><br><b>(301,684.55 to</b><br><b>590,527.84)</b> | <b>385,441.57</b><br><b>(272,857.74 to</b><br><b>523,351.24)</b> | <b>553,328.23</b><br><b>(378,443.39 to</b><br><b>763,237.63)</b> | <b>16,067.92</b><br><b>(13,571.27 to</b><br><b>19,091.30)</b> | <b>32,755.19</b><br><b>(22,837.80 to</b><br><b>45,158.63)</b> | <b>29,775.72</b><br><b>(20,925.54 to</b><br><b>40,921.12)</b> | <b>39,879.26</b><br><b>(27,830.86 to</b><br><b>54,649.56)</b> |

| Singapore                            |                                         |                                          |                                          |                                          |                                    |                                      |                                      |                                      |
|--------------------------------------|-----------------------------------------|------------------------------------------|------------------------------------------|------------------------------------------|------------------------------------|--------------------------------------|--------------------------------------|--------------------------------------|
| Cause                                | YLLs (actual counts)                    |                                          |                                          |                                          | Deaths (actual counts)             |                                      |                                      |                                      |
|                                      | 2016                                    | 2040 Forecast                            | 2040 Better Scenario                     | 2040 Worse Scenario                      | 2016                               | 2040 Forecast                        | 2040 Better Scenario                 | 2040 Worse Scenario                  |
| Neoplasms                            | 112,333.21<br>(93,382.49 to 135,913.47) | 185,553.50<br>(131,811.19 to 249,647.25) | 168,995.76<br>(121,911.51 to 225,775.60) | 228,194.79<br>(158,399.16 to 312,759.14) | 5,515.03<br>(4,608.40 to 6,614.44) | 11,345.04<br>(8,217.53 to 15,022.98) | 10,479.72<br>(7,657.61 to 13,782.87) | 13,746.80<br>(9,837.71 to 18,559.32) |
| Lip and oral cavity cancer           | 1,194.83<br>(963.01 to 1,490.73)        | 1,678.62<br>(1,054.81 to 2,603.02)       | 1,461.99<br>(956.18 to 2,203.30)         | 2,319.80<br>(1,374.39 to 3,917.24)       | 54.88<br>(45.13 to 67.51)          | 94.31<br>(61.34 to 141.28)           | 83.40<br>(55.36 to 121.63)           | 128.26<br>(78.19 to 210.44)          |
| Nasopharynx cancer                   | 4,227.43<br>(3,296.21 to 5,386.61)      | 5,241.52<br>(3,143.51 to 8,334.37)       | 4,405.12<br>(2,739.38 to 6,817.05)       | 7,681.10<br>(4,320.20 to 13,062.48)      | 144.53<br>(113.46 to 182.84)       | 206.63<br>(125.87 to 331.57)         | 174.95<br>(109.90 to 271.41)         | 301.56<br>(173.76 to 508.12)         |
| Other pharynx cancer                 | 668.52<br>(515.87 to 861.81)            | 1,246.99<br>(815.57 to 1,890.80)         | 1,190.55<br>(796.74 to 1,751.71)         | 1,334.80<br>(842.92 to 2,073.39)         | 30.14<br>(23.67 to 38.35)          | 70.08<br>(48.15 to 102.23)           | 67.99<br>(47.15 to 97.47)            | 72.91<br>(48.65 to 109.86)           |
| Esophageal cancer                    | 2,188.43<br>(1,708.93 to 2,805.27)      | 4,453.83<br>(2,653.41 to 7,438.80)       | 3,893.56<br>(2,410.98 to 6,237.90)       | 5,942.55<br>(3,257.33 to 10,961.41)      | 114.43<br>(92.00 to 143.60)        | 271.76<br>(168.22 to 439.57)         | 240.86<br>(155.48 to 366.43)         | 358.35<br>(205.98 to 641.46)         |
| Stomach cancer                       | 6,904.07<br>(5,591.32 to 8,427.89)      | 9,085.41<br>(6,017.89 to 13,234.07)      | 8,449.52<br>(5,710.23 to 12,234.07)      | 10,138.10<br>(6,825.72 to 14,382.36)     | 383.37<br>(314.33 to 462.12)       | 618.07<br>(409.56 to 892.94)         | 580.16<br>(391.61 to 835.15)         | 678.38<br>(461.23 to 957.09)         |
| Colon and rectum cancer              | 15,684.78<br>(12,869.95 to 18,820.88)   | 27,568.29<br>(17,774.03 to 39,782.78)    | 25,832.41<br>(16,672.38 to 37,403.00)    | 31,272.84<br>(20,100.87 to 45,327.72)    | 845.51<br>(698.60 to 1,003.70)     | 1,848.88<br>(1,215.09 to 2,715.91)   | 1,754.05<br>(1,154.15 to 2,551.84)   | 2,057.55<br>(1,347.91 to 3,037.03)   |
| Liver cancer                         | 10,979.37<br>(8,670.61 to 13,748.40)    | 28,321.00<br>(17,567.47 to 43,258.34)    | 25,978.88<br>(16,808.06 to 37,903.97)    | 30,647.13<br>(18,181.73 to 49,147.79)    | 555.82<br>(449.07 to 675.39)       | 1,711.08<br>(1,090.72 to 2,565.52)   | 1,597.70<br>(1,063.59 to 2,260.55)   | 1,818.86<br>(1,116.96 to 2,807.93)   |
| Liver cancer due to hepatitis B      | 6,249.83<br>(4,818.47 to 8,161.20)      | 15,041.01<br>(9,237.52 to 23,730.31)     | 13,751.25<br>(8,771.28 to 20,545.34)     | 16,228.00<br>(9,632.41 to 26,732.04)     | 290.11<br>(226.01 to 372.03)       | 844.79<br>(528.70 to 1,277.72)       | 785.89<br>(513.98 to 1,147.46)       | 896.14<br>(539.54 to 1,413.29)       |
| Liver cancer due to hepatitis C      | 2,859.58<br>(2,150.40 to 3,738.12)      | 8,008.18<br>(4,823.53 to 12,469.64)      | 7,404.88<br>(4,595.54 to 11,154.41)      | 8,559.00<br>(4,991.69 to 13,570.25)      | 165.75<br>(126.08 to 213.23)       | 536.01<br>(334.40 to 807.68)         | 504.27<br>(321.51 to 728.81)         | 562.19<br>(336.89 to 858.44)         |
| Liver cancer due to alcohol use      | 377.37<br>(272.95 to 521.86)            | 1,017.03<br>(592.74 to 1,739.47)         | 906.62<br>(541.76 to 1,501.72)           | 1,158.68<br>(645.76 to 2,046.21)         | 19.12<br>(13.98 to 26.32)          | 59.76<br>(35.38 to 100.79)           | 54.26<br>(33.34 to 87.32)            | 66.72<br>(37.90 to 113.32)           |
| Liver cancer due to other causes     | 1,492.60<br>(1,106.56 to 1,956.06)      | 4,254.78<br>(2,486.26 to 7,013.89)       | 3,916.13<br>(2,370.74 to 6,257.08)       | 4,701.46<br>(2,617.17 to 7,965.58)       | 80.83<br>(61.66 to 104.06)         | 270.52<br>(161.88 to 432.63)         | 253.28<br>(155.88 to 390.94)         | 293.81<br>(167.01 to 484.14)         |
| Gallbladder and biliary tract cancer | 1,793.72<br>(1,456.57 to 2,305.65)      | 2,527.04<br>(1,918.57 to 3,479.11)       | 2,554.89<br>(1,920.85 to 3,554.67)       | 2,467.29<br>(1,894.48 to 3,355.07)       | 98.70<br>(80.53 to 131.85)         | 169.57<br>(129.58 to 243.14)         | 173.10<br>(130.70 to 230.53)         | 162.69<br>(126.56 to 230.53)         |
| Pancreatic cancer                    | 6,150.46<br>(5,005.00 to 7,596.79)      | 10,993.63<br>(7,644.64 to 15,013.68)     | 10,939.98<br>(7,588.39 to 14,901.40)     | 11,704.48<br>(8,060.93 to 16,474.40)     | 313.17<br>(256.56 to 382.78)       | 666.43<br>(469.20 to 897.40)         | 668.45<br>(469.15 to 901.61)         | 702.20<br>(492.28 to 971.50)         |
| Larynx cancer                        | 517.91<br>(408.86 to 661.32)            | 812.06<br>(443.93 to 1,423.55)           | 652.17<br>(376.21 to 1,090.74)           | 1,356.43<br>(880.22 to 2,547.37)         | 28.93<br>(23.13 to 36.07)          | 53.33<br>(29.65 to 93.99)            | 43.59<br>(25.35 to 72.97)            | 88.31<br>(44.47 to 161.08)           |
| Tracheal, bronchus, and lung cancer  | 22,087.32<br>(17,871.01 to 27,256.03)   | 33,838.20<br>(21,332.13 to 51,100.25)    | 25,279.47<br>(16,378.90 to 37,248.27)    | 60,812.12<br>(35,734.74 to 95,498.04)    | 1,199.95<br>(981.70 to 1,462.92)   | 2,139.47<br>(1,369.34 to 3,145.43)   | 1,636.30<br>(1,070.89 to 2,369.96)   | 3,804.15<br>(2,286.71 to 5,783.68)   |
| Malignant skin melanoma              | 342.36<br>(263.46 to 445.45)            | 582.21<br>(428.14 to 767.04)             | 607.45<br>(446.77 to 810.83)             | 540.57<br>(405.73 to 701.03)             | 14.83<br>(11.35 to 18.87)          | 35.13<br>(26.39 to 44.66)            | 37.12<br>(27.72 to 47.68)            | 31.87<br>(24.25 to 39.70)            |
| Non-melanoma skin cancer             | 259.78<br>(205.64 to 324.37)            | 564.53<br>(420.60 to 714.01)             | 557.40<br>(412.09 to 712.77)             | 571.83<br>(438.33 to 714.76)             | 15.95<br>(13.11 to 19.42)          | 45.04<br>(34.22 to 57.25)            | 45.08<br>(33.84 to 57.60)            | 44.52<br>(34.57 to 54.94)            |
| Breast cancer                        | 10,221.44<br>(7,399.18 to 13,391.56)    | 11,754.11<br>(7,239.69 to 17,806.82)     | 11,119.29<br>(6,856.49 to 16,617.30)     | 13,330.23<br>(8,087.85 to 20,839.63)     | 391.61<br>(286.14 to 506.81)       | 570.02<br>(355.87 to 855.52)         | 544.81<br>(337.81 to 806.18)         | 636.73<br>(390.51 to 997.70)         |
| Cervical cancer                      | 2,011.89<br>(1,455.09 to 2,653.42)      | 2,376.84<br>(1,484.66 to 3,646.72)       | 2,273.43<br>(1,426.45 to 3,474.92)       | 2,578.44<br>(1,601.46 to 4,014.04)       | 84.68<br>(62.04 to 110.87)         | 125.45<br>(82.00 to 186.71)          | 120.73<br>(77.80 to 178.97)          | 134.74<br>(87.49 to 203.55)          |



|                   |                                       |                                       |                                       |                                       |                                 |                                 |                                 |                                 |
|-------------------|---------------------------------------|---------------------------------------|---------------------------------------|---------------------------------------|---------------------------------|---------------------------------|---------------------------------|---------------------------------|
|                   | 1,388.05<br>(1,021.23 to<br>1,849.54) | 2,071.32<br>(1,353.53 to<br>2,969.86) | 2,030.33<br>(1,332.03 to<br>2,895.32) | 2,136.19<br>(1,401.11 to<br>3,041.86) | 63.76<br>(47.28 to<br>84.63)    | 117.36<br>(79.58 to<br>163.76)  | 115.85<br>(77.59 to<br>163.50)  | 119.67<br>(81.30 to<br>165.50)  |
| Uterine cancer    |                                       |                                       |                                       |                                       |                                 |                                 |                                 |                                 |
| Ovarian cancer    | 3,186.68<br>(2,269.39 to<br>4,290.65) | 3,717.16<br>(2,296.27 to<br>5,518.52) | 3,591.68<br>(2,188.79 to<br>5,326.79) | 3,948.07<br>(2,411.68 to<br>5,989.69) | 127.06<br>(91.69 to<br>168.22)  | 184.86<br>(115.17 to<br>267.07) | 179.55<br>(112.97 to<br>257.85) | 195.15<br>(120.90 to<br>285.45) |
| Prostate cancer   | 2,262.76<br>(1,533.65 to<br>2,978.63) | 5,802.52<br>(3,723.59 to<br>7,901.07) | 5,857.15<br>(3,702.35 to<br>8,056.59) | 5,703.67<br>(3,708.40 to<br>7,587.93) | 173.08<br>(116.77 to<br>222.77) | 497.55<br>(306.94 to<br>661.43) | 508.23<br>(312.35 to<br>688.49) | 478.02<br>(303.79 to<br>620.82) |
| Testicular cancer | 45.10<br>(33.16 to<br>61.55)          | 50.16<br>(34.36 to<br>68.56)          | 49.29<br>(33.85 to<br>67.59)          | 51.27<br>(35.74 to<br>69.42)          | 1.34<br>(1.01 to<br>1.78)       | 2.35<br>(1.66 to<br>3.10)       | 2.35<br>(1.65 to<br>3.13)       | 2.31<br>(1.69 to<br>2.99)       |

| Singapore                       |                                                    |                                                     |                                                    |                                                     |                                                |                                                 |                                                 |                                                  |
|---------------------------------|----------------------------------------------------|-----------------------------------------------------|----------------------------------------------------|-----------------------------------------------------|------------------------------------------------|-------------------------------------------------|-------------------------------------------------|--------------------------------------------------|
| Cause                           | YLLs (actual counts)                               |                                                     |                                                    |                                                     | Deaths (actual counts)                         |                                                 |                                                 |                                                  |
|                                 | 2016                                               | 2040 Forecast                                       | 2040 Better Scenario                               | 2040 Worse Scenario                                 | 2016                                           | 2040 Forecast                                   | 2040 Better Scenario                            | 2040 Worse Scenario                              |
| Kidney cancer                   | 2,335.49<br>(1,866.51 to<br>2,958.04)              | 4,129.97<br>(2,981.26 to<br>5,689.40)               | 4,145.91<br>(2,974.76 to<br>5,679.42)              | 4,217.95<br>(3,022.25 to<br>5,866.61)               | 112.39<br>(91.70 to<br>139.47)                 | 249.98<br>(185.47 to<br>329.54)                 | 253.68<br>(186.60 to<br>333.99)                 | 251.12<br>(187.94 to<br>335.62)                  |
| Bladder cancer                  | 1,130.27<br>(916.20 to<br>1,395.08)                | 2,256.89<br>(1,563.79 to<br>3,117.18)               | 2,211.66<br>(1,533.94 to<br>3,043.90)              | 2,537.44<br>(1,709.15 to<br>3,619.39)               | 76.61<br>(62.96 to<br>93.73)                   | 180.65<br>(126.21 to<br>248.98)                 | 179.41<br>(123.71 to<br>245.48)                 | 199.11<br>(135.11 to<br>278.13)                  |
| Brain and nervous system cancer | 2,320.73<br>(1,802.57 to<br>3,015.10)              | 3,109.90<br>(2,285.19 to<br>4,050.60)               | 3,090.73<br>(2,269.31 to<br>4,076.31)              | 3,131.02<br>(2,314.68 to<br>4,060.67)               | 73.89<br>(57.23 to<br>94.29)                   | 135.44<br>(101.86 to<br>170.72)                 | 135.97<br>(101.51 to<br>172.87)                 | 133.96<br>(100.85 to<br>168.43)                  |
| Thyroid cancer                  | 400.22<br>(323.88 to<br>497.27)                    | 820.55<br>(577.19 to<br>1,154.65)                   | 764.49<br>(543.72 to<br>1,086.36)                  | 859.60<br>(594.99 to<br>1,225.49)                   | 21.44<br>(17.49 to<br>26.45)                   | 53.62<br>(35.17 to<br>73.84)                    | 50.66<br>(36.36 to<br>68.44)                    | 55.18<br>(39.49 to<br>76.23)                     |
| Mesothelioma                    | 349.35<br>(269.50 to<br>446.03)                    | 826.31<br>(558.57 to<br>1,067.52)                   | 848.18<br>(567.96 to<br>1,103.43)                  | 785.17<br>(535.74 to<br>987.62)                     | 18.31<br>(13.76 to<br>23.27)                   | 52.31<br>(35.44 to<br>66.40)                    | 54.13<br>(36.34 to<br>69.87)                    | 48.94<br>(33.14 to<br>60.65)                     |
| Hodgkin lymphoma                | 149.04<br>(110.86 to<br>189.47)                    | 152.28<br>(106.69 to<br>200.45)                     | 146.89<br>(104.36 to<br>193.14)                    | 160.76<br>(113.28 to<br>208.49)                     | 5.08<br>(3.96 to<br>6.39)                      | 7.14<br>(5.14 to<br>9.13)                       | 6.95<br>(5.09 to<br>9.00)                       | 7.40<br>(5.43 to<br>9.39)                        |
| Non-Hodgkin lymphoma            | 3,573.59<br>(2,838.66 to<br>4,443.35)              | 5,524.30<br>(3,964.99 to<br>7,324.07)               | 5,334.26<br>(3,855.39 to<br>7,006.61)              | 5,636.18<br>(4,059.98 to<br>7,432.08)               | 158.62<br>(127.03 to<br>195.21)                | 324.71<br>(239.81 to<br>422.73)                 | 317.46<br>(234.32 to<br>409.58)                 | 324.68<br>(242.50 to<br>413.62)                  |
| Multiple myeloma                | 1,075.63<br>(799.64 to<br>1,755.12)                | 2,163.66<br>(1,459.69 to<br>3,786.20)               | 2,102.95<br>(1,425.13 to<br>3,645.35)              | 2,178.56<br>(1,482.51 to<br>3,782.98)               | 56.91<br>(41.91 to<br>98.38)                   | 140.02<br>(94.29 to<br>254.54)                  | 137.72<br>(93.10 to<br>249.18)                  | 138.46<br>(94.43 to<br>249.79)                   |
| Leukemia                        | 4,295.80<br>(3,521.29 to<br>5,161.86)              | 6,503.88<br>(4,679.87 to<br>8,678.94)               | 6,181.47<br>(4,477.45 to<br>8,164.31)              | 6,906.49<br>(4,933.97 to<br>9,311.86)               | 162.68<br>(133.49 to<br>194.91)                | 356.50<br>(262.46 to<br>466.20)                 | 343.40<br>(254.31 to<br>449.61)                 | 370.91<br>(270.92 to<br>487.12)                  |
| Acute lymphoid leukemia         | 831.38<br>(658.24 to<br>996.85)                    | 804.98<br>(547.27 to<br>1,109.25)                   | 752.84<br>(506.68 to<br>1,035.64)                  | 876.05<br>(595.09 to<br>1,215.93)                   | 21.81<br>(17.46 to<br>26.94)                   | 33.21<br>(22.99 to<br>45.80)                    | 31.28<br>(21.86 to<br>42.93)                    | 35.55<br>(24.56 to<br>49.05)                     |
| Chronic lymphoid leukemia       | 104.89<br>(80.87 to<br>134.28)                     | 205.86<br>(137.01 to<br>300.93)                     | 199.07<br>(132.79 to<br>289.72)                    | 214.47<br>(142.02 to<br>315.50)                     | 6.03<br>(4.67 to<br>7.72)                      | 14.80<br>(10.10 to<br>21.14)                    | 14.54<br>(9.96 to<br>20.96)                     | 15.06<br>(10.28 to<br>21.54)                     |
| Acute myeloid leukemia          | 1,914.49<br>(1,568.03 to<br>2,336.89)              | 3,574.08<br>(2,575.92 to<br>4,775.31)               | 3,431.87<br>(2,475.90 to<br>4,540.70)              | 3,730.74<br>(2,692.64 to<br>5,009.17)               | 77.35<br>(62.18 to<br>94.36)                   | 196.29<br>(142.10 to<br>256.19)                 | 190.80<br>(139.39 to<br>249.24)                 | 201.22<br>(146.07 to<br>264.42)                  |
| Chronic myeloid leukemia        | 200.79<br>(155.04 to<br>253.29)                    | 148.73<br>(98.34 to<br>214.10)                      | 135.18<br>(90.94 to<br>192.94)                     | 170.51<br>(111.41 to<br>250.13)                     | 7.24<br>(5.73 to<br>8.99)                      | 7.59<br>(5.11 to<br>10.64)                      | 7.02<br>(4.75 to<br>9.81)                       | 8.49<br>(5.72 to<br>12.00)                       |
| Other leukemia                  | 1,254.26<br>(1,008.58 to<br>1,550.66)              | 1,770.23<br>(1,243.38 to<br>2,414.83)               | 1,662.52<br>(1,173.19 to<br>2,273.85)              | 1,914.72<br>(1,327.89 to<br>2,665.55)               | 50.26<br>(40.48 to<br>61.50)                   | 104.61<br>(74.40 to<br>143.06)                  | 99.76<br>(71.71 to<br>135.01)                   | 110.59<br>(77.62 to<br>151.46)                   |
| Other neoplasms                 | 4,588.20<br>(3,731.51 to<br>5,640.59)              | 7,380.32<br>(5,695.02 to<br>9,274.74)               | 7,444.64<br>(5,741.38 to<br>9,403.17)              | 7,244.70<br>(5,639.07 to<br>8,989.03)               | 187.37<br>(153.68 to<br>226.82)                | 417.29<br>(327.14 to<br>515.02)                 | 426.07<br>(328.54 to<br>529.72)                 | 400.79<br>(318.41 to<br>484.85)                  |
| <b>Cardiovascular diseases</b>  | <b>92,701.24<br/>(76,088.13 to<br/>111,735.19)</b> | <b>110,402.90<br/>(62,807.63 to<br/>188,524.35)</b> | <b>86,731.04<br/>(50,355.31 to<br/>146,218.46)</b> | <b>167,477.36<br/>(95,151.40 to<br/>282,000.12)</b> | <b>5,697.57<br/>(4,772.02 to<br/>6,740.33)</b> | <b>8,624.32<br/>(4,801.64 to<br/>14,543.25)</b> | <b>7,130.95<br/>(4,059.93 to<br/>12,060.27)</b> | <b>12,117.91<br/>(6,807.23 to<br/>20,686.52)</b> |
| Rheumatic heart disease         | 614.68<br>(490.27 to<br>761.57)                    | 609.60<br>(390.29 to<br>880.48)                     | 576.53<br>(372.07 to<br>840.01)                    | 657.77<br>(427.46 to<br>943.90)                     | 26.50<br>(21.44 to<br>32.67)                   | 37.37<br>(23.59 to<br>55.64)                    | 35.78<br>(22.70 to<br>53.25)                    | 39.46<br>(25.41 to<br>58.43)                     |
| Ischemic heart disease          | 55,611.18<br>(44,783.00 to<br>67,970.41)           | 54,296.33<br>(28,007.83 to<br>98,722.88)            | 39,417.61<br>(21,046.97 to<br>70,496.55)           | 94,236.79<br>(48,519.25 to<br>168,170.31)           | 3,354.40<br>(2,784.83 to<br>3,986.12)          | 4,080.01<br>(2,091.93 to<br>7,397.74)           | 3,143.82<br>(1,653.97 to<br>5,540.51)           | 6,506.27<br>(3,347.49 to<br>11,582.86)           |
| Stroke                          | 18,550.96<br>(15,060.17 to<br>22,370.61)           | 20,600.87<br>(11,296.80 to<br>34,877.06)            | 15,314.36<br>(8,624.10 to<br>25,138.86)            | 31,289.04<br>(17,098.18 to<br>52,639.09)            | 1,162.30<br>(951.26 to<br>1,399.83)            | 1,613.51<br>(870.33 to<br>2,747.09)             | 1,287.10<br>(702.31 to<br>2,205.60)             | 2,252.58<br>(1,196.58 to<br>3,781.99)            |
| Ischemic stroke                 | 7,706.99<br>(6,263.52 to<br>9,284.37)              | 9,695.77<br>(4,946.63 to<br>17,801.05)              | 7,584.47<br>(3,962.35 to<br>13,724.76)             | 13,950.72<br>(6,996.64 to<br>26,031.55)             | 617.25<br>(504.24 to<br>745.99)                | 899.19<br>(446.94 to<br>1,729.62)               | 743.31<br>(369.28 to<br>1,427.54)               | 1,207.73<br>(591.06 to<br>2,393.10)              |

|                                |                                         |                                         |                                         |                                         |                                 |                                     |                                     |                                     |
|--------------------------------|-----------------------------------------|-----------------------------------------|-----------------------------------------|-----------------------------------------|---------------------------------|-------------------------------------|-------------------------------------|-------------------------------------|
|                                | 10,843.98<br>(8,783.84 to<br>13,143.33) | 10,905.10<br>(5,810.07 to<br>19,007.95) | 7,729.90<br>(4,266.51 to<br>12,984.41)  | 17,338.32<br>(8,896.93 to<br>29,931.52) | 545.06<br>(443.73 to<br>657.04) | 714.32<br>(393.56 to<br>1,200.33)   | 543.79<br>(302.95 to<br>911.92)     | 1,044.85<br>(558.44 to<br>1,738.75) |
| Intracerebral hemorrhage       |                                         |                                         |                                         |                                         |                                 |                                     |                                     |                                     |
|                                | 7,774.18<br>(3,739.01 to<br>10,931.68)  | 17,570.67<br>(6,497.14 to<br>44,698.83) | 14,994.10<br>(6,035.77 to<br>35,373.37) | 22,567.15<br>(7,926.47 to<br>62,877.47) | 498.01<br>(311.42 to<br>760.18) | 1,447.38<br>(614.43 to<br>3,731.25) | 1,264.43<br>(571.25 to<br>3,084.48) | 1,811.61<br>(733.23 to<br>4,836.50) |
| Hypertensive heart disease     |                                         |                                         |                                         |                                         |                                 |                                     |                                     |                                     |
|                                | 3,097.95<br>(2,333.34 to<br>4,461.36)   | 3,511.14<br>(2,095.94 to<br>6,284.58)   | 3,343.20<br>(2,001.90 to<br>6,012.19)   | 3,843.39<br>(2,312.88 to<br>6,789.22)   | 124.47<br>(85.15 to<br>214.51)  | 202.55<br>(106.16 to<br>427.54)     | 195.59<br>(101.10 to<br>418.88)     | 216.25<br>(114.26 to<br>450.61)     |
| Cardiomyopathy and myocarditis |                                         |                                         |                                         |                                         |                                 |                                     |                                     |                                     |
|                                | 952.58<br>(706.58 to<br>1,497.09)       | 1,234.58<br>(702.91 to<br>2,600.25)     | 1,237.90<br>(695.63 to<br>2,617.37)     | 1,231.38<br>(712.62 to<br>2,530.71)     | 34.41<br>(18.74 to<br>85.53)    | 74.00<br>(30.58 to<br>218.59)       | 75.29<br>(30.76 to<br>223.48)       | 72.03<br>(30.49 to<br>214.73)       |
| Myocarditis                    |                                         |                                         |                                         |                                         |                                 |                                     |                                     |                                     |

| Singapore                                                     |                                             |                                               |                                               |                                               |                                      |                                          |                                          |                                            |
|---------------------------------------------------------------|---------------------------------------------|-----------------------------------------------|-----------------------------------------------|-----------------------------------------------|--------------------------------------|------------------------------------------|------------------------------------------|--------------------------------------------|
| Cause                                                         | YLLs (actual counts)                        |                                               |                                               |                                               | Deaths (actual counts)               |                                          |                                          |                                            |
|                                                               | 2016                                        | 2040 Forecast                                 | 2040 Better Scenario                          | 2040 Worse Scenario                           | 2016                                 | 2040 Forecast                            | 2040 Better Scenario                     | 2040 Worse Scenario                        |
| Alcoholic cardiomyopathy                                      | 222.03<br>(151.67 to 356.89)                | 271.90<br>(174.34 to 466.34)                  | 267.46<br>(169.25 to 461.11)                  | 282.42<br>(183.17 to 479.33)                  | 7.91<br>(5.39 to 13.13)              | 12.52<br>(8.08 to 22.32)                 | 12.44<br>(7.92 to 22.29)                 | 12.74<br>(8.46 to 22.43)                   |
| Other cardiomyopathy                                          | 1,923.34<br>(1,431.88 to 2,859.46)          | 2,004.66<br>(1,083.80 to 3,580.93)            | 1,837.84<br>(994.24 to 3,270.51)              | 2,329.59<br>(1,246.56 to 4,173.08)            | 82.15<br>(58.60 to 135.70)           | 116.04<br>(59.10 to 222.60)              | 107.86<br>(55.05 to 210.25)              | 131.48<br>(67.78 to 252.38)                |
| Atrial fibrillation and flutter                               | 1,666.73<br>(1,253.88 to 2,151.61)          | 4,059.02<br>(2,548.53 to 6,057.36)            | 3,922.30<br>(2,440.95 to 5,895.17)            | 4,192.54<br>(2,691.36 to 6,236.77)            | 182.15<br>(134.07 to 238.00)         | 468.55<br>(282.41 to 718.11)             | 460.36<br>(278.69 to 718.79)             | 471.27<br>(291.25 to 706.61)               |
| Aortic aneurysm                                               | 1,617.94<br>(1,319.94 to 1,992.57)          | 2,869.41<br>(1,812.13 to 4,312.37)            | 2,712.93<br>(1,733.37 to 4,094.71)            | 3,063.61<br>(1,959.56 to 4,456.40)            | 103.15<br>(85.43 to 125.30)          | 219.70<br>(140.70 to 333.22)             | 212.25<br>(136.31 to 321.49)             | 226.70<br>(149.14 to 331.63)               |
| Peripheral artery disease                                     | 537.01<br>(164.56 to 830.86)                | 1,233.64<br>(349.08 to 2,311.17)              | 1,194.84<br>(341.82 to 2,232.30)              | 1,352.71<br>(379.15 to 2,490.94)              | 47.10<br>(14.63 to 71.51)            | 123.15<br>(33.91 to 231.13)              | 121.85<br>(33.63 to 226.56)              | 130.17<br>(36.86 to 241.15)                |
| Endocarditis                                                  | 1,001.79<br>(527.26 to 1,421.95)            | 1,664.69<br>(807.30 to 2,767.20)              | 1,608.73<br>(805.72 to 2,663.49)              | 1,775.23<br>(851.15 to 2,933.39)              | 51.67<br>(32.42 to 68.15)            | 113.80<br>(62.64 to 190.93)              | 111.87<br>(62.59 to 187.29)              | 117.69<br>(64.99 to 191.57)                |
| Other cardiovascular and circulatory diseases                 | 2,228.82<br>(1,818.42 to 2,704.06)          | 3,987.54<br>(2,528.48 to 5,994.09)            | 3,646.43<br>(2,341.70 to 5,498.52)            | 4,499.13<br>(2,889.56 to 6,635.16)            | 147.82<br>(119.22 to 179.67)         | 318.30<br>(193.39 to 486.69)             | 297.90<br>(180.47 to 453.10)             | 345.91<br>(216.84 to 513.23)               |
| <b>Chronic respiratory diseases</b>                           | <b>8,611.57<br/>(6,977.82 to 10,523.05)</b> | <b>19,071.57<br/>(12,002.94 to 28,317.68)</b> | <b>15,604.82<br/>(10,244.90 to 22,701.18)</b> | <b>28,823.33<br/>(16,897.00 to 45,043.37)</b> | <b>593.74<br/>(489.60 to 710.51)</b> | <b>1,536.68<br/>(991.87 to 2,170.42)</b> | <b>1,296.17<br/>(855.60 to 1,819.69)</b> | <b>2,270.53<br/>(1,379.53 to 3,342.12)</b> |
| Chronic obstructive pulmonary disease                         | 6,541.28<br>(5,275.17 to 8,111.56)          | 15,759.28<br>(9,220.70 to 24,444.94)          | 12,316.83<br>(7,446.15 to 18,787.17)          | 25,539.31<br>(14,089.10 to 41,598.34)         | 489.77<br>(398.82 to 594.00)         | 1,318.09<br>(784.98 to 1,902.78)         | 1,075.86<br>(653.09 to 1,557.12)         | 2,059.08<br>(1,170.34 to 3,091.18)         |
| Pneumoconiosis                                                | 22.18<br>(16.73 to 28.75)                   | 26.84<br>(18.63 to 36.46)                     | 26.33<br>(18.04 to 36.27)                     | 27.67<br>(19.82 to 37.45)                     | 1.58<br>(1.22 to 1.99)               | 2.21<br>(1.54 to 2.99)                   | 2.18<br>(1.50 to 2.99)                   | 2.27<br>(1.62 to 3.05)                     |
| Silicosis                                                     | 2.19<br>(1.39 to 3.16)                      | 1.62<br>(0.77 to 2.88)                        | 1.51<br>(0.72 to 2.69)                        | 1.78<br>(0.88 to 3.21)                        | 0.16<br>(0.10 to 0.23)               | 0.14<br>(0.07 to 0.23)                   | 0.13<br>(0.07 to 0.22)                   | 0.15<br>(0.07 to 0.25)                     |
| Asbestosis                                                    | 5.98<br>(4.34 to 7.95)                      | 10.14<br>(6.98 to 14.01)                      | 10.45<br>(7.18 to 14.52)                      | 9.60<br>(6.68 to 13.04)                       | 0.29<br>(0.18 to 0.39)               | 0.61<br>(0.40 to 0.85)                   | 0.64<br>(0.41 to 0.89)                   | 0.57<br>(0.38 to 0.77)                     |
| Coal workers pneumoconiosis                                   | 0.21<br>(0.14 to 0.46)                      | 0.39<br>(0.18 to 0.78)                        | 0.37<br>(0.17 to 0.76)                        | 0.42<br>(0.19 to 0.86)                        | 0.02<br>(0.01 to 0.03)               | 0.04<br>(0.02 to 0.07)                   | 0.04<br>(0.02 to 0.07)                   | 0.04<br>(0.02 to 0.07)                     |
| Other pneumoconiosis                                          | 13.81<br>(10.17 to 18.09)                   | 14.70<br>(9.47 to 21.14)                      | 13.99<br>(8.92 to 20.31)                      | 16.06<br>(10.58 to 22.75)                     | 1.12<br>(0.84 to 1.42)               | 1.42<br>(0.94 to 2.07)                   | 1.38<br>(0.88 to 2.02)                   | 1.52<br>(1.02 to 2.15)                     |
| Asthma                                                        | 852.63<br>(657.98 to 1,374.03)              | 760.17<br>(418.37 to 1,407.60)                | 613.09<br>(350.23 to 1,145.80)                | 932.51<br>(512.95 to 1,735.61)                | 40.50<br>(30.76 to 74.59)            | 49.57<br>(26.99 to 100.63)               | 41.09<br>(23.64 to 87.11)                | 58.85<br>(31.65 to 126.39)                 |
| Interstitial lung disease and pulmonary sarcoidosis           | 1,103.42<br>(796.08 to 1,467.36)            | 2,418.66<br>(1,725.79 to 3,551.02)            | 2,544.07<br>(1,813.32 to 3,708.63)            | 2,210.60<br>(1,588.58 to 3,269.87)            | 58.87<br>(43.55 to 87.14)            | 161.99<br>(112.41 to 259.69)             | 172.24<br>(119.57 to 273.47)             | 145.33<br>(103.00 to 236.54)               |
| Other chronic respiratory diseases                            | 92.06<br>(49.39 to 127.79)                  | 104.50<br>(48.65 to 170.93)                   | 113.05<br>(49.30 to 166.36)                   | 3.02<br>(50.19 to 180.95)                     | 1.47<br>(1.47 to 4.27)               | 4.82<br>(2.14 to 7.71)                   | 4.79<br>(2.15 to 7.70)                   | 5.00<br>(2.20 to 8.04)                     |
| <b>Cirrhosis and other chronic liver diseases</b>             | <b>4,133.96<br/>(3,315.24 to 5,197.95)</b>  | <b>6,345.10<br/>(4,759.74 to 8,154.87)</b>    | <b>6,229.09<br/>(4,684.85 to 8,047.91)</b>    | <b>6,530.70<br/>(4,996.73 to 8,293.83)</b>    | <b>182.14<br/>(148.85 to 223.71)</b> | <b>349.37<br/>(267.77 to 435.75)</b>     | <b>346.16<br/>(262.12 to 437.17)</b>     | <b>353.67<br/>(276.05 to 436.62)</b>       |
| Cirrhosis and other chronic liver diseases due to hepatitis B | 2,492.35<br>(1,965.65 to 3,201.17)          | 3,918.17<br>(2,888.54 to 5,099.94)            | 3,859.57<br>(2,847.80 to 5,085.12)            | 4,003.79<br>(2,984.32 to 5,183.04)            | 110.76<br>(88.72 to 138.07)          | 216.50<br>(161.56 to 276.48)             | 215.13<br>(159.06 to 276.70)             | 217.77<br>(165.20 to 274.05)               |
| Cirrhosis and other chronic liver diseases due to hepatitis C | 683.64<br>(507.15 to 901.24)                | 1,023.76<br>(715.28 to 1,372.62)              | 1,004.92<br>(694.80 to 1,356.97)              | 1,052.67<br>(732.68 to 1,394.95)              | 27.86<br>(21.12 to 35.95)            | 51.67<br>(36.17 to 68.32)                | 51.12<br>(35.83 to 68.10)                | 52.37<br>(37.35 to 68.82)                  |

|                                                                |                                                            |                                                             |                                                             |                                                             |                                                      |                                                      |                                                      |                                                      |
|----------------------------------------------------------------|------------------------------------------------------------|-------------------------------------------------------------|-------------------------------------------------------------|-------------------------------------------------------------|------------------------------------------------------|------------------------------------------------------|------------------------------------------------------|------------------------------------------------------|
|                                                                | 402.19<br>(294.28 to<br>532.89)                            | 572.69<br>(407.18 to<br>780.03)                             | 548.32<br>(387.07 to<br>747.85)                             | 621.49<br>(448.43 to<br>843.00)                             | 17.40<br>(13.36 to<br>22.65)                         | 31.17<br>(22.86 to<br>41.20)                         | 30.24<br>(21.82 to<br>40.48)                         | 33.03<br>(24.35 to<br>43.58)                         |
| Cirrhosis and other chronic liver diseases due to alcohol use  |                                                            |                                                             |                                                             |                                                             |                                                      |                                                      |                                                      |                                                      |
|                                                                | 555.79<br>(428.43 to<br>729.12)                            | 830.48<br>(587.50 to<br>1,117.05)                           | 816.27<br>(582.74 to<br>1,107.32)                           | 852.75<br>(619.26 to<br>1,146.00)                           | 26.13<br>(20.17 to<br>33.85)                         | 50.04<br>(36.05 to<br>67.42)                         | 49.67<br>(35.64 to<br>66.45)                         | 50.51<br>(36.80 to<br>66.61)                         |
| Cirrhosis and other chronic liver diseases due to other causes |                                                            |                                                             |                                                             |                                                             |                                                      |                                                      |                                                      |                                                      |
|                                                                | <b>4,052.25</b><br><b>(3,203.53 to</b><br><b>6,144.84)</b> | <b>7,917.48</b><br><b>(5,708.25 to</b><br><b>11,723.73)</b> | <b>7,571.43</b><br><b>(5,504.28 to</b><br><b>11,175.93)</b> | <b>8,267.71</b><br><b>(5,988.51 to</b><br><b>12,242.01)</b> | <b>266.84</b><br><b>(212.88 to</b><br><b>398.40)</b> | <b>645.74</b><br><b>(463.05 to</b><br><b>968.25)</b> | <b>626.02</b><br><b>(444.65 to</b><br><b>943.22)</b> | <b>657.51</b><br><b>(472.47 to</b><br><b>992.12)</b> |
| Digestive diseases                                             |                                                            |                                                             |                                                             |                                                             |                                                      |                                                      |                                                      |                                                      |
|                                                                | 756.93<br>(567.99 to<br>1,150.31)                          | 1,086.06<br>(737.23 to<br>1,593.54)                         | 1,028.00<br>(686.74 to<br>1,535.49)                         | 1,184.84<br>(811.82 to<br>1,722.04)                         | 49.31<br>(37.01 to<br>73.66)                         | 86.96<br>(58.29 to<br>131.45)                        | 83.39<br>(54.53 to<br>126.21)                        | 92.72<br>(62.63 to<br>140.98)                        |
| Peptic ulcer disease                                           |                                                            |                                                             |                                                             |                                                             |                                                      |                                                      |                                                      |                                                      |

| Singapore                                  |                                                     |                                                     |                                                     |                                                     |                                                  |                                                  |                                                  |                                                  |
|--------------------------------------------|-----------------------------------------------------|-----------------------------------------------------|-----------------------------------------------------|-----------------------------------------------------|--------------------------------------------------|--------------------------------------------------|--------------------------------------------------|--------------------------------------------------|
| Cause                                      | YLLs (actual counts)                                |                                                     |                                                     |                                                     | Deaths (actual counts)                           |                                                  |                                                  |                                                  |
|                                            | 2016                                                | 2040 Forecast                                       | 2040 Better Scenario                                | 2040 Worse Scenario                                 | 2016                                             | 2040 Forecast                                    | 2040 Better Scenario                             | 2040 Worse Scenario                              |
| Gastritis and duodenitis                   | 30.59<br>(20.54 to 56.88)                           | 64.89<br>(38.70 to 136.21)                          | 63.92<br>(37.96 to 136.12)                          | 66.28<br>(40.63 to 137.65)                          | 2.02<br>(1.30 to 5.15)                           | 5.82<br>(3.26 to 15.67)                          | 5.81<br>(3.18 to 15.75)                          | 5.80<br>(3.30 to 15.39)                          |
| Appendicitis                               | 85.49<br>(56.42 to 187.28)                          | 131.14<br>(78.30 to 296.52)                         | 126.19<br>(74.98 to 288.64)                         | 139.37<br>(85.53 to 316.04)                         | 4.08<br>(2.61 to 9.80)                           | 8.91<br>(5.17 to 22.21)                          | 8.69<br>(5.02 to 22.31)                          | 9.24<br>(5.53 to 22.95)                          |
| Paralytic ileus and intestinal obstruction | 794.48<br>(550.81 to 1,389.54)                      | 1,753.08<br>(1,160.90 to 3,084.86)                  | 1,790.81<br>(1,178.82 to 3,145.96)                  | 1,687.17<br>(1,130.30 to 2,970.19)                  | 55.33<br>(37.20 to 100.08)                       | 152.93<br>(97.52 to 273.17)                      | 158.04<br>(100.18 to 284.75)                     | 144.13<br>(93.57 to 261.14)                      |
| Inguinal, femoral, and abdominal hernia    | 120.58<br>(79.97 to 188.24)                         | 187.98<br>(116.87 to 298.05)                        | 186.66<br>(115.21 to 293.62)                        | 189.33<br>(122.76 to 300.61)                        | 8.82<br>(6.17 to 13.94)                          | 16.30<br>(10.50 to 26.33)                        | 16.39<br>(10.42 to 27.11)                        | 16.03<br>(10.47 to 26.40)                        |
| Inflammatory bowel disease                 | 101.28<br>(71.74 to 160.14)                         | 185.53<br>(125.07 to 295.70)                        | 187.75<br>(124.88 to 301.60)                        | 181.62<br>(124.34 to 285.03)                        | 4.96<br>(3.36 to 8.77)                           | 12.32<br>(7.80 to 22.88)                         | 12.63<br>(7.89 to 23.33)                         | 11.79<br>(7.65 to 22.06)                         |
| Vascular intestinal disorders              | 625.19<br>(423.76 to 821.53)                        | 1,194.77<br>(751.68 to 1,605.43)                    | 1,200.16<br>(747.40 to 1,627.55)                    | 1,183.62<br>(763.29 to 1,567.06)                    | 42.86<br>(29.56 to 55.93)                        | 98.00<br>(61.39 to 133.07)                       | 99.43<br>(61.39 to 137.10)                       | 95.40<br>(61.44 to 126.45)                       |
| Gallbladder and biliary diseases           | 656.82<br>(496.71 to 934.15)                        | 1,545.23<br>(838.22 to 2,638.69)                    | 1,280.57<br>(723.78 to 2,104.87)                    | 1,743.97<br>(947.51 to 2,957.74)                    | 49.93<br>(36.99 to 71.29)                        | 136.46<br>(72.12 to 239.14)                      | 115.67<br>(63.67 to 196.56)                      | 150.00<br>(79.29 to 257.98)                      |
| Pancreatitis                               | 423.84<br>(304.63 to 609.56)                        | 713.13<br>(373.70 to 1,650.18)                      | 649.51<br>(352.31 to 1,291.10)                      | 841.50<br>(396.20 to 2,191.88)                      | 21.18<br>(15.13 to 28.63)                        | 46.13<br>(24.65 to 95.91)                        | 42.85<br>(23.84 to 82.32)                        | 52.72<br>(26.16 to 131.75)                       |
| Other digestive diseases                   | 457.07<br>(328.91 to 780.61)                        | 1,055.67<br>(724.05 to 1,707.40)                    | 1,057.87<br>(722.11 to 1,703.26)                    | 1,050.02<br>(735.40 to 1,679.06)                    | 28.33<br>(20.64 to 46.44)                        | 81.91<br>(55.82 to 131.99)                       | 83.12<br>(55.87 to 133.44)                       | 79.67<br>(55.34 to 128.47)                       |
| Neurological disorders                     | <b>22,788.45</b><br><b>(18,357.65 to 28,094.98)</b> | <b>54,788.39</b><br><b>(37,698.52 to 77,400.46)</b> | <b>53,228.31</b><br><b>(37,033.78 to 74,158.09)</b> | <b>55,315.34</b><br><b>(37,759.88 to 79,112.82)</b> | <b>2,492.37</b><br><b>(2,021.20 to 3,070.37)</b> | <b>6,328.19</b><br><b>(4,178.57 to 9,115.70)</b> | <b>6,209.18</b><br><b>(4,115.02 to 8,749.81)</b> | <b>6,285.75</b><br><b>(4,158.74 to 9,178.74)</b> |
| Alzheimer's disease and other dementias    | 18,921.82<br>(15,086.85 to 23,657.87)               | 47,093.81<br>(31,318.01 to 68,040.52)               | 45,349.97<br>(30,384.97 to 65,009.22)               | 47,932.83<br>(31,495.23 to 71,318.13)               | 2,264.79<br>(1,793.01 to 2,804.76)               | 5,733.30<br>(3,690.00 to 8,457.52)               | 5,590.17<br>(3,595.10 to 8,142.42)               | 5,731.88<br>(3,656.27 to 8,645.89)               |
| Parkinson's disease                        | 1,778.58<br>(1,299.08 to 2,350.18)                  | 5,024.62<br>(3,574.95 to 6,756.24)                  | 5,223.18<br>(3,678.97 to 7,065.41)                  | 4,683.11<br>(3,375.09 to 6,262.74)                  | 164.75<br>(118.55 to 220.37)                     | 483.01<br>(342.65 to 659.52)                     | 506.29<br>(356.35 to 692.45)                     | 443.31<br>(320.21 to 596.24)                     |
| Epilepsy                                   | 616.75<br>(502.17 to 765.91)                        | 735.35<br>(512.89 to 1,022.72)                      | 708.47<br>(497.34 to 972.67)                        | 787.89<br>(539.00 to 1,111.95)                      | 16.15<br>(13.11 to 19.97)                        | 26.87<br>(19.46 to 35.87)                        | 26.31<br>(19.15 to 34.78)                        | 28.02<br>(20.11 to 38.13)                        |
| Multiple sclerosis                         | 128.90<br>(89.17 to 176.56)                         | 161.92<br>(110.96 to 226.95)                        | 162.15<br>(110.15 to 227.88)                        | 161.45<br>(111.72 to 227.48)                        | 4.09<br>(2.89 to 5.60)                           | 6.47<br>(4.50 to 9.02)                           | 6.53<br>(4.52 to 9.14)                           | 6.37<br>(4.50 to 8.83)                           |
| Motor neuron disease                       | 665.87<br>(543.45 to 817.04)                        | 959.61<br>(733.34 to 1,238.54)                      | 966.18<br>(733.77 to 1,254.28)                      | 947.31<br>(728.44 to 1,213.24)                      | 23.33<br>(18.87 to 28.54)                        | 45.37<br>(34.98 to 57.76)                        | 46.04<br>(35.22 to 58.90)                        | 44.18<br>(34.67 to 55.33)                        |
| Other neurological disorders               | 676.53<br>(556.04 to 821.37)                        | 813.09<br>(614.74 to 1,044.38)                      | 818.36<br>(617.49 to 1,053.08)                      | 802.74<br>(610.60 to 1,026.81)                      | 19.25<br>(15.87 to 23.15)                        | 33.16<br>(25.56 to 41.11)                        | 33.84<br>(25.78 to 42.31)                        | 32.00<br>(24.96 to 39.05)                        |
| Mental disorders                           | <b>801.28</b><br><b>(597.47 to 1,046.05)</b>        | <b>1,112.13</b><br><b>(793.35 to 1,519.10)</b>      | <b>1,142.07</b><br><b>(807.07 to 1,561.30)</b>      | <b>1,064.70</b><br><b>(763.68 to 1,447.35)</b>      | <b>21.92</b><br><b>(16.61 to 28.43)</b>          | <b>39.73</b><br><b>(29.31 to 52.20)</b>          | <b>41.21</b><br><b>(30.22 to 55.39)</b>          | <b>37.38</b><br><b>(27.75 to 48.25)</b>          |
| Alcohol use disorders                      | 275.99<br>(206.11 to 364.45)                        | 354.93<br>(253.46 to 484.76)                        | 359.86<br>(255.56 to 493.80)                        | 347.69<br>(252.42 to 466.62)                        | 8.61<br>(6.57 to 11.28)                          | 14.49<br>(10.67 to 18.98)                        | 14.86<br>(10.81 to 19.49)                        | 13.91<br>(10.41 to 17.95)                        |
| Drug use disorders                         | 523.50<br>(359.68 to 708.58)                        | 753.83<br>(506.59 to 1,049.29)                      | 778.79<br>(525.66 to 1,083.60)                      | 713.71<br>(483.44 to 988.01)                        | 13.27<br>(9.27 to 17.83)                         | 25.17<br>(17.50 to 34.76)                        | 26.28<br>(18.02 to 36.11)                        | 23.40<br>(16.32 to 31.80)                        |
| Opioid use disorders                       | 368.22<br>(255.85 to 499.67)                        | 424.49<br>(279.60 to 615.26)                        | 431.43<br>(282.32 to 628.92)                        | 412.62<br>(273.30 to 596.57)                        | 9.25<br>(6.48 to 12.48)                          | 14.17<br>(9.72 to 19.50)                         | 14.57<br>(9.90 to 20.12)                         | 13.49<br>(9.34 to 18.53)                         |

|                           |                                |                                 |                                 |                                 |                           |                            |                            |                            |
|---------------------------|--------------------------------|---------------------------------|---------------------------------|---------------------------------|---------------------------|----------------------------|----------------------------|----------------------------|
|                           | 28.29<br>(7.04 to<br>43.46)    | 46.44<br>(16.41 to<br>73.66)    | 48.26<br>(17.06 to<br>76.71)    | 43.51<br>(14.93 to<br>70.18)    | 0.66<br>(0.19 to<br>1.02) | 1.20<br>(0.46 to<br>1.87)  | 1.25<br>(0.47 to<br>1.94)  | 1.12<br>(0.43 to<br>1.74)  |
| Cocaine use disorders     | 17.80<br>(7.34 to<br>27.11)    | 42.49<br>(19.49 to<br>68.75)    | 45.17<br>(20.54 to<br>73.52)    | 38.36<br>(17.22 to<br>62.47)    | 0.41<br>(0.17 to<br>0.62) | 1.17<br>(0.63 to<br>1.84)  | 1.25<br>(0.66 to<br>1.97)  | 1.04<br>(0.56 to<br>1.64)  |
| Amphetamine use disorders | 109.19<br>(59.23 to<br>158.86) | 240.41<br>(141.38 to<br>363.69) | 253.93<br>(150.62 to<br>379.13) | 219.21<br>(130.23 to<br>330.08) | 2.95<br>(1.88 to<br>4.18) | 8.64<br>(5.64 to<br>12.64) | 9.22<br>(6.03 to<br>13.72) | 7.74<br>(5.10 to<br>11.12) |
| Other drug use disorders  | 1.79<br>(1.32 to<br>2.36)      | 3.37<br>(2.20 to<br>5.17)       | 3.41<br>(2.22 to<br>5.19)       | 3.30<br>(2.16 to<br>4.99)       | 0.04<br>(0.03 to<br>0.05) | 0.07<br>(0.05 to<br>0.11)  | 0.07<br>(0.05 to<br>0.11)  | 0.07<br>(0.05 to<br>0.10)  |
| Eating disorders          |                                |                                 |                                 |                                 |                           |                            |                            |                            |

| Singapore                                                  |                                              |                                              |                                              |                                              |                                         |                                           |                                           |                                           |
|------------------------------------------------------------|----------------------------------------------|----------------------------------------------|----------------------------------------------|----------------------------------------------|-----------------------------------------|-------------------------------------------|-------------------------------------------|-------------------------------------------|
| Cause                                                      | YLLs (actual counts)                         |                                              |                                              |                                              | Deaths (actual counts)                  |                                           |                                           |                                           |
|                                                            | 2016                                         | 2040 Forecast                                | 2040 Better Scenario                         | 2040 Worse Scenario                          | 2016                                    | 2040 Forecast                             | 2040 Better Scenario                      | 2040 Worse Scenario                       |
| <b>Diabetes, urogenital, blood, and endocrine diseases</b> | <b>18,004.62</b><br>(14,959.17 to 21,720.39) | <b>42,742.15</b><br>(27,415.09 to 63,090.34) | <b>39,171.46</b><br>(25,513.94 to 57,621.60) | <b>50,470.63</b><br>(32,118.43 to 75,367.97) | <b>1,150.75</b><br>(962.53 to 1,375.15) | <b>3,463.01</b><br>(2,216.75 to 5,164.53) | <b>3,220.00</b><br>(2,074.99 to 4,765.10) | <b>3,993.05</b><br>(2,530.19 to 5,941.92) |
| Diabetes mellitus                                          | 3,036.80<br>(2,492.54 to 3,674.40)           | 7,624.36<br>(4,701.76 to 12,372.21)          | 6,850.28<br>(4,278.47 to 10,982.33)          | 8,890.72<br>(5,447.26 to 14,478.39)          | 186.17<br>(153.84 to 222.53)            | 586.24<br>(384.44 to 868.33)              | 540.13<br>(358.66 to 789.45)              | 657.85<br>(429.09 to 987.18)              |
| Acute glomerulonephritis                                   | 17.95<br>(15.13 to 21.50)                    | 14.95<br>(10.37 to 20.27)                    | 14.44<br>(9.92 to 19.53)                     | 15.78<br>(10.85 to 21.49)                    | 0.38<br>(0.31 to 0.45)                  | 0.37<br>(0.26 to 0.49)                    | 0.36<br>(0.26 to 0.47)                    | 0.38<br>(0.28 to 0.50)                    |
| Chronic kidney disease                                     | 11,085.64<br>(9,103.38 to 13,368.95)         | 24,287.51<br>(12,780.88 to 42,064.09)        | 21,531.82<br>(11,782.27 to 36,723.58)        | 30,747.02<br>(16,139.04 to 53,937.36)        | 686.50<br>(567.15 to 824.76)            | 1,905.12<br>(971.79 to 3,331.10)          | 1,701.95<br>(899.93 to 2,945.80)          | 2,379.73<br>(1,202.99 to 4,118.84)        |
| Chronic kidney disease due to diabetes mellitus            | 8,122.93<br>(6,613.69 to 9,795.80)           | 17,852.05<br>(9,489.32 to 31,271.22)         | 15,820.68<br>(8,613.46 to 27,888.54)         | 22,650.98<br>(11,944.83 to 39,489.46)        | 481.81<br>(397.19 to 575.38)            | 1,332.22<br>(690.71 to 2,351.11)          | 1,189.58<br>(633.08 to 2,050.38)          | 1,668.25<br>(861.21 to 2,940.56)          |
| Chronic kidney disease due to hypertension                 | 867.90<br>(697.38 to 1,086.59)               | 2,257.47<br>(1,129.99 to 4,117.32)           | 2,023.83<br>(1,034.43 to 3,606.16)           | 2,797.19<br>(1,358.82 to 5,075.39)           | 82.86<br>(66.71 to 103.31)              | 244.43<br>(116.52 to 452.86)              | 221.16<br>(108.00 to 407.81)              | 298.05<br>(140.25 to 552.96)              |
| Chronic kidney disease due to glomerulonephritis           | 1,505.10<br>(1,213.56 to 1,849.32)           | 2,852.95<br>(1,452.35 to 5,119.78)           | 2,514.15<br>(1,338.38 to 4,473.71)           | 3,623.99<br>(1,824.21 to 6,484.11)           | 83.98<br>(67.19 to 103.05)              | 218.92<br>(108.72 to 397.14)              | 193.59<br>(98.13 to 347.06)               | 276.49<br>(135.68 to 501.31)              |
| Chronic kidney disease due to other and unspecified causes | 589.72<br>(474.29 to 732.41)                 | 1,325.03<br>(705.64 to 2,319.29)             | 1,173.16<br>(642.79 to 2,021.31)             | 1,674.87<br>(870.09 to 2,872.43)             | 37.85<br>(29.94 to 47.48)               | 109.55<br>(55.68 to 195.50)               | 97.62<br>(51.11 to 170.62)                | 136.94<br>(68.63 to 244.52)               |
| Urinary diseases and male infertility                      | 2,545.63<br>(2,088.96 to 3,106.95)           | 8,003.56<br>(5,793.31 to 10,067.01)          | 7,937.96<br>(5,755.17 to 10,208.81)          | 8,061.94<br>(5,977.53 to 10,059.85)          | 226.34<br>(185.94 to 273.14)            | 811.47<br>(575.78 to 1,036.46)            | 814.13<br>(571.03 to 1,060.10)            | 802.01<br>(590.08 to 1,019.26)            |
| Urinary tract infections                                   | 2,411.80<br>(1,975.24 to 2,936.53)           | 7,761.61<br>(5,597.37 to 9,854.19)           | 7,702.36<br>(5,543.96 to 9,910.00)           | 7,811.68<br>(5,739.63 to 9,789.03)           | 217.82<br>(179.25 to 263.87)            | 791.50<br>(560.98 to 1,013.91)            | 794.41<br>(553.40 to 1,035.49)            | 781.85<br>(574.63 to 997.27)              |
| Urolithiasis                                               | 47.39<br>(25.18 to 119.68)                   | 113.25<br>(48.93 to 336.75)                  | 109.77<br>(46.83 to 323.48)                  | 118.55<br>(52.38 to 343.40)                  | 2.89<br>(1.34 to 8.69)                  | 8.86<br>(3.50 to 29.37)                   | 8.69<br>(3.37 to 28.80)                   | 9.09<br>(3.63 to 29.53)                   |
| Other urinary diseases                                     | 86.44<br>(51.91 to 141.24)                   | 128.70<br>(63.09 to 226.32)                  | 125.83<br>(61.54 to 222.24)                  | 131.71<br>(67.08 to 230.55)                  | 5.62<br>(3.21 to 9.45)                  | 11.11<br>(5.25 to 19.86)                  | 11.03<br>(5.29 to 19.69)                  | 11.07<br>(5.48 to 19.57)                  |
| Gynecological diseases                                     | 4.02<br>(2.67 to 5.92)                       | 3.49<br>(1.99 to 5.43)                       | 3.28<br>(1.86 to 5.04)                       | 3.87<br>(2.24 to 6.14)                       | 0.15<br>(0.10 to 0.23)                  | 0.20<br>(0.12 to 0.35)                    | 0.19<br>(0.11 to 0.33)                    | 0.22<br>(0.13 to 0.38)                    |
| Uterine fibroids                                           | 2.97<br>(1.93 to 4.31)                       | 2.24<br>(1.18 to 3.58)                       | 2.12<br>(1.12 to 3.37)                       | 2.45<br>(1.31 to 3.98)                       | 0.10<br>(0.07 to 0.15)                  | 0.10<br>(0.05 to 0.16)                    | 0.10<br>(0.05 to 0.16)                    | 0.11<br>(0.06 to 0.18)                    |
| Polycystic ovarian syndrome                                | 0.46<br>(0.27 to 0.76)                       | 0.18<br>(0.08 to 0.37)                       | 0.16<br>(0.07 to 0.33)                       | 0.23<br>(0.10 to 0.47)                       | 0.01<br>(0.01 to 0.02)                  | 0.00<br>(0.00 to 0.01)                    | 0.00<br>(0.00 to 0.01)                    | 0.01<br>(0.00 to 0.01)                    |
| Endometriosis                                              | 0.05<br>(0.02 to 0.10)                       | 0.05<br>(0.02 to 0.13)                       | 0.05<br>(0.01 to 0.12)                       | 0.06<br>(0.02 to 0.15)                       | 0.00<br>(0.00 to 0.00)                  | 0.00<br>(0.00 to 0.00)                    | 0.00<br>(0.00 to 0.00)                    | 0.00<br>(0.00 to 0.00)                    |
| Genital prolapse                                           | 0.09<br>(0.05 to 0.14)                       | 0.11<br>(0.05 to 0.21)                       | 0.11<br>(0.05 to 0.19)                       | 0.13<br>(0.06 to 0.23)                       | 0.01<br>(0.00 to 0.01)                  | 0.01<br>(0.00 to 0.02)                    | 0.01<br>(0.00 to 0.02)                    | 0.01<br>(0.00 to 0.02)                    |
| Other gynecological diseases                               | 0.45<br>(0.30 to 0.83)                       | 0.90<br>(0.46 to 1.73)                       | 0.84<br>(0.43 to 1.56)                       | 1.00<br>(0.54 to 1.84)                       | 0.03<br>(0.02 to 0.07)                  | 0.09<br>(0.04 to 0.20)                    | 0.08<br>(0.04 to 0.18)                    | 0.09<br>(0.05 to 0.22)                    |
| Hemoglobinopathies and hemolytic anemias                   | 252.08<br>(172.78 to 511.75)                 | 340.61<br>(196.92 to 784.05)                 | 331.38<br>(192.68 to 773.51)                 | 354.69<br>(207.18 to 825.05)                 | 11.39<br>(7.13 to 26.31)                | 23.62<br>(13.03 to 57.61)                 | 23.27<br>(12.78 to 56.92)                 | 24.08<br>(13.53 to 58.98)                 |
| Thalassemias                                               | 41.58<br>(32.29 to 61.36)                    | 24.70<br>(14.32 to 43.79)                    | 24.43<br>(14.19 to 43.23)                    | 25.10<br>(14.58 to 44.53)                    | 0.67<br>(0.50 to 1.09)                  | 0.44<br>(0.26 to 0.84)                    | 0.43<br>(0.25 to 0.83)                    | 0.44<br>(0.26 to 0.85)                    |



|                                                   |                                     |                                       |                                       |                                       |                              |                                |                                |                                |
|---------------------------------------------------|-------------------------------------|---------------------------------------|---------------------------------------|---------------------------------------|------------------------------|--------------------------------|--------------------------------|--------------------------------|
|                                                   | 17.00<br>(12.08 to<br>28.94)        | 22.32<br>(12.45 to<br>47.90)          | 21.30<br>(11.86 to<br>45.62)          | 23.98<br>(13.43 to<br>51.25)          | 0.40<br>(0.27 to<br>0.73)    | 0.78<br>(0.42 to<br>1.76)      | 0.75<br>(0.41 to<br>1.69)      | 0.83<br>(0.45 to<br>1.87)      |
| Sickle cell disorders                             |                                     |                                       |                                       |                                       |                              |                                |                                |                                |
|                                                   | 42.28<br>(30.81 to<br>70.05)        | 50.55<br>(30.48 to<br>95.69)          | 48.05<br>(29.06 to<br>90.75)          | 54.58<br>(33.43 to<br>103.49)         | 1.09<br>(0.77 to<br>1.91)    | 1.92<br>(1.15 to<br>3.81)      | 1.84<br>(1.09 to<br>3.65)      | 2.05<br>(1.22 to<br>4.07)      |
| G6PD deficiency                                   |                                     |                                       |                                       |                                       |                              |                                |                                |                                |
|                                                   | 151.22<br>(93.02 to<br>352.90)      | 243.04<br>(134.35 to<br>606.63)       | 237.60<br>(130.96 to<br>594.24)       | 251.03<br>(139.78 to<br>630.41)       | 9.24<br>(5.50 to<br>22.47)   | 20.48<br>(11.04 to<br>51.06)   | 20.24<br>(10.83 to<br>51.37)   | 20.76<br>(11.41 to<br>52.31)   |
| Other hemoglobinopathies and hemolytic anemias    |                                     |                                       |                                       |                                       |                              |                                |                                |                                |
|                                                   | 1,062.51<br>(832.71 to<br>1,394.54) | 2,467.66<br>(1,788.98 to<br>3,905.11) | 2,502.31<br>(1,798.84 to<br>3,980.71) | 2,396.60<br>(1,765.15 to<br>3,788.42) | 39.81<br>(30.25 to<br>71.40) | 135.99<br>(94.49 to<br>294.24) | 139.98<br>(96.38 to<br>301.41) | 128.77<br>(90.94 to<br>277.42) |
| Endocrine, metabolic, blood, and immune disorders |                                     |                                       |                                       |                                       |                              |                                |                                |                                |

| Singapore                                     |                                           |                                           |                                           |                                           |                                    |                                     |                                     |                                     |
|-----------------------------------------------|-------------------------------------------|-------------------------------------------|-------------------------------------------|-------------------------------------------|------------------------------------|-------------------------------------|-------------------------------------|-------------------------------------|
| Cause                                         | YLLs (actual counts)                      |                                           |                                           |                                           | Deaths (actual counts)             |                                     |                                     |                                     |
|                                               | 2016                                      | 2040 Forecast                             | 2040 Better Scenario                      | 2040 Worse Scenario                       | 2016                               | 2040 Forecast                       | 2040 Better Scenario                | 2040 Worse Scenario                 |
| <b>Musculoskeletal disorders</b>              | <b>617.52</b><br>(473.40 to 951.00)       | <b>1,194.68</b><br>(827.37 to 2,148.77)   | <b>1,185.02</b><br>(819.80 to 2,154.41)   | <b>1,209.52</b><br>(841.83 to 2,168.10)   | <b>26.41</b><br>(20.36 to 46.64)   | <b>71.55</b><br>(50.19 to 134.00)   | <b>71.66</b><br>(50.06 to 135.63)   | <b>71.26</b><br>(50.87 to 132.90)   |
| Rheumatoid arthritis                          | 81.16<br>(53.22 to 114.01)                | 135.76<br>(81.03 to 211.58)               | 128.38<br>(74.96 to 199.32)               | 148.38<br>(89.02 to 232.60)               | 4.73<br>(3.11 to 7.33)             | 10.19<br>(5.92 to 15.92)            | 9.73<br>(5.68 to 15.46)             | 10.96<br>(6.55 to 17.23)            |
| Other musculoskeletal disorders               | 536.36<br>(412.82 to 834.44)              | 1,058.91<br>(728.31 to 1,967.22)          | 1,056.64<br>(722.36 to 1,949.48)          | 1,061.15<br>(734.87 to 1,980.78)          | 21.68<br>(16.61 to 39.26)          | 61.36<br>(42.93 to 116.83)          | 61.93<br>(43.01 to 117.54)          | 60.30<br>(42.61 to 116.35)          |
| <b>Other non-communicable diseases</b>        | <b>4,101.71</b><br>(3,262.73 to 5,012.56) | <b>5,727.79</b><br>(3,637.68 to 7,638.55) | <b>5,582.56</b><br>(3,512.96 to 7,402.96) | <b>5,974.15</b><br>(3,858.13 to 7,911.06) | <b>121.15</b><br>(79.12 to 158.71) | <b>351.56</b><br>(193.62 to 498.90) | <b>354.65</b><br>(193.62 to 510.03) | <b>345.40</b><br>(192.18 to 474.80) |
| Congenital birth defects                      | 2,947.65<br>(2,364.99 to 3,732.30)        | 2,083.45<br>(1,338.01 to 3,049.72)        | 1,923.06<br>(1,242.80 to 2,791.90)        | 2,367.23<br>(1,521.79 to 3,446.56)        | 41.03<br>(33.35 to 52.08)          | 31.42<br>(20.99 to 45.06)           | 29.19<br>(19.82 to 40.87)           | 35.37<br>(23.80 to 51.14)           |
| Neural tube defects                           | 50.36<br>(29.90 to 75.17)                 | 20.97<br>(9.88 to 40.77)                  | 18.91<br>(8.93 to 36.33)                  | 24.69<br>(11.39 to 47.97)                 | 0.65<br>(0.40 to 0.94)             | 0.30<br>(0.15 to 0.54)              | 0.27<br>(0.14 to 0.48)              | 0.35<br>(0.18 to 0.63)              |
| Congenital heart anomalies                    | 1,499.10<br>(1,139.53 to 2,413.47)        | 861.29<br>(486.45 to 1,591.62)            | 776.20<br>(442.81 to 1,433.17)            | 1,015.23<br>(585.69 to 1,875.09)          | 21.75<br>(17.02 to 33.96)          | 13.71<br>(8.30 to 24.81)            | 12.43<br>(7.38 to 22.60)            | 16.01<br>(9.77 to 28.44)            |
| Orofacial clefts                              | 0.79<br>(0.11 to 1.76)                    | 0.39<br>(0.05 to 1.06)                    | 0.34<br>(0.04 to 0.92)                    | 0.48<br>(0.06 to 1.30)                    | 0.01<br>(0.00 to 0.02)             | 0.00<br>(0.00 to 0.01)              | 0.00<br>(0.00 to 0.01)              | 0.01<br>(0.00 to 0.02)              |
| Down syndrome                                 | 138.31<br>(102.03 to 212.31)              | 219.63<br>(153.74 to 337.67)              | 219.46<br>(152.83 to 336.86)              | 219.64<br>(154.71 to 338.34)              | 2.34<br>(1.76 to 3.40)             | 4.26<br>(3.10 to 6.29)              | 4.29<br>(3.10 to 6.24)              | 4.22<br>(3.08 to 6.22)              |
| Other chromosomal abnormalities               | 198.61<br>(65.15 to 298.74)               | 339.39<br>(131.04 to 566.64)              | 320.57<br>(125.00 to 535.43)              | 370.44<br>(140.44 to 617.88)              | 2.34<br>(0.77 to 3.49)             | 4.01<br>(1.54 to 6.67)              | 3.79<br>(1.48 to 6.28)              | 4.38<br>(1.67 to 7.24)              |
| Congenital musculoskeletal and limb anomalies | 85.52<br>(34.18 to 123.44)                | 53.93<br>(21.86 to 89.38)                 | 49.14<br>(20.50 to 81.95)                 | 62.35<br>(25.73 to 104.55)                | 1.04<br>(0.43 to 1.48)             | 0.67<br>(0.28 to 1.10)              | 0.61<br>(0.26 to 1.00)              | 0.78<br>(0.33 to 1.27)              |
| Urogenital congenital anomalies               | 52.83<br>(36.59 to 79.52)                 | 36.28<br>(19.98 to 64.48)                 | 33.68<br>(18.60 to 60.60)                 | 40.71<br>(22.36 to 72.87)                 | 0.76<br>(0.55 to 1.09)             | 0.58<br>(0.34 to 1.06)              | 0.55<br>(0.32 to 0.99)              | 0.65<br>(0.38 to 1.14)              |
| Digestive congenital anomalies                | 117.63<br>(63.84 to 169.66)               | 87.15<br>(42.55 to 143.07)                | 78.96<br>(39.44 to 129.26)                | 101.71<br>(49.69 to 168.85)               | 1.53<br>(0.87 to 2.15)             | 1.20<br>(0.64 to 1.90)              | 1.10<br>(0.60 to 1.73)              | 1.40<br>(0.74 to 2.21)              |
| Other congenital birth defects                | 804.50<br>(496.66 to 1,068.54)            | 464.43<br>(264.58 to 706.38)              | 425.80<br>(240.74 to 647.48)              | 531.97<br>(297.72 to 807.73)              | 10.60<br>(6.54 to 13.80)           | 6.67<br>(3.98 to 9.85)              | 6.15<br>(3.67 to 9.11)              | 7.58<br>(4.53 to 11.12)             |
| Skin and subcutaneous diseases                | 1,039.49<br>(462.25 to 1,456.30)          | 3,601.48<br>(1,685.90 to 5,119.99)        | 3,619.79<br>(1,720.74 to 5,209.48)        | 3,558.31<br>(1,659.39 to 4,940.64)        | 78.80<br>(37.80 to 113.75)         | 319.64<br>(161.39 to 463.59)        | 325.00<br>(164.67 to 476.48)        | 309.47<br>(156.10 to 475.54)        |
| Cellulitis                                    | 462.10<br>(110.82 to 763.29)              | 1,782.40<br>(392.76 to 3,003.35)          | 1,802.35<br>(398.35 to 3,065.49)          | 1,743.20<br>(382.73 to 2,906.36)          | 31.82<br>(7.25 to 52.48)           | 147.53<br>(33.06 to 245.93)         | 150.96<br>(33.62 to 255.07)         | 141.32<br>(31.74 to 233.17)         |
| Pyoderma                                      | 204.83<br>(127.93 to 403.57)              | 1,172.05<br>(704.82 to 2,298.52)          | 1,177.35<br>(699.81 to 2,333.19)          | 1,158.82<br>(699.32 to 2,257.00)          | 14.56<br>(9.05 to 30.31)           | 106.96<br>(62.50 to 220.44)         | 108.89<br>(63.32 to 226.23)         | 103.27<br>(61.12 to 210.72)         |
| Decubitus ulcer                               | 317.96<br>(154.15 to 545.36)              | 510.63<br>(237.61 to 947.46)              | 503.78<br>(237.10 to 948.44)              | 520.28<br>(241.66 to 944.46)              | 28.84<br>(15.49 to 54.73)          | 53.59<br>(26.50 to 106.87)          | 53.41<br>(26.71 to 106.50)          | 53.67<br>(26.15 to 106.70)          |
| Other skin and subcutaneous diseases          | 54.60<br>(23.38 to 85.84)                 | 136.40<br>(56.57 to 229.35)               | 136.32<br>(56.59 to 229.96)               | 136.01<br>(58.12 to 229.26)               | 3.57<br>(1.55 to 6.00)             | 11.56<br>(5.43 to 20.63)            | 11.73<br>(5.54 to 20.85)            | 11.21<br>(5.23 to 19.76)            |
| Sudden infant death syndrome                  | 114.58<br>(74.40 to 170.15)               | 42.87<br>(23.38 to 75.40)                 | 39.72<br>(21.32 to 69.90)                 | 48.61<br>(26.45 to 85.13)                 | 1.33<br>(0.86 to 1.97)             | 0.50<br>(0.27 to 0.87)              | 0.46<br>(0.25 to 0.81)              | 0.56<br>(0.31 to 0.99)              |

|                          |                                          |                                          |                                          |                                          |                                   |                                     |                                     |                                     |
|--------------------------|------------------------------------------|------------------------------------------|------------------------------------------|------------------------------------------|-----------------------------------|-------------------------------------|-------------------------------------|-------------------------------------|
| Injuries                 | 26,489.08<br>(20,907.52 to<br>34,612.91) | 29,316.81<br>(20,517.96 to<br>40,006.46) | 23,859.35<br>(16,843.37 to<br>32,201.21) | 32,137.10<br>(22,147.51 to<br>45,209.75) | 796.83<br>(629.35 to<br>1,037.30) | 1,251.90<br>(914.09 to<br>1,644.53) | 1,092.85<br>(803.96 to<br>1,414.25) | 1,316.69<br>(953.38 to<br>1,746.55) |
| Transport injuries       | 6,394.71<br>(5,015.71 to<br>8,043.83)    | 6,746.32<br>(4,095.89 to<br>10,583.22)   | 2,519.30<br>(1,551.88 to<br>3,936.23)    | 7,967.14<br>(4,675.16 to<br>12,823.48)   | 167.76<br>(133.97 to<br>210.63)   | 234.04<br>(155.17 to<br>341.53)     | 102.48<br>(69.47 to<br>148.63)      | 267.42<br>(173.54 to<br>406.23)     |
| Road injuries            | 5,987.83<br>(4,717.57 to<br>7,518.44)    | 6,433.81<br>(3,894.08 to<br>10,088.05)   | 2,245.19<br>(1,379.78 to<br>3,505.55)    | 7,606.28<br>(4,426.01 to<br>12,288.07)   | 157.69<br>(125.59 to<br>197.01)   | 223.67<br>(148.43 to<br>326.79)     | 93.10<br>(62.16 to<br>134.89)       | 255.75<br>(165.16 to<br>386.59)     |
| Pedestrian road injuries | 1,148.06<br>(905.65 to<br>1,460.28)      | 1,128.07<br>(735.18 to<br>1,630.43)      | 387.30<br>(255.59 to<br>551.37)          | 1,390.15<br>(902.38 to<br>2,074.34)      | 45.03<br>(35.89 to<br>56.21)      | 63.32<br>(42.26 to<br>88.67)        | 24.73<br>(16.53 to<br>34.93)        | 75.18<br>(50.19 to<br>108.38)       |

| Singapore                                       |                                                  |                                                  |                                                  |                                                  |                                            |                                            |                                            |                                            |
|-------------------------------------------------|--------------------------------------------------|--------------------------------------------------|--------------------------------------------------|--------------------------------------------------|--------------------------------------------|--------------------------------------------|--------------------------------------------|--------------------------------------------|
| Cause                                           | YLLs (actual counts)                             |                                                  |                                                  |                                                  | Deaths (actual counts)                     |                                            |                                            |                                            |
|                                                 | 2016                                             | 2040 Forecast                                    | 2040 Better Scenario                             | 2040 Worse Scenario                              | 2016                                       | 2040 Forecast                              | 2040 Better Scenario                       | 2040 Worse Scenario                        |
| Cyclist road injuries                           | 389.33<br>(288.35 to 514.10)                     | 710.77<br>(445.69 to 1,086.70)                   | 334.56<br>(212.30 to 497.62)                     | 783.21<br>(483.16 to 1,213.95)                   | 14.41<br>(10.68 to 19.10)                  | 35.99<br>(23.37 to 52.60)                  | 20.32<br>(13.34 to 29.51)                  | 37.92<br>(24.19 to 57.46)                  |
| Motorcyclist road injuries                      | 2,196.17<br>(1,589.21 to 2,910.81)               | 2,524.70<br>(1,333.86 to 4,210.55)               | 1,134.21<br>(622.04 to 1,905.03)                 | 2,884.95<br>(1,458.33 to 4,994.73)               | 46.86<br>(33.91 to 62.17)                  | 62.80<br>(35.72 to 102.56)                 | 32.90<br>(19.17 to 53.03)                  | 70.00<br>(38.02 to 115.76)                 |
| Motor vehicle road injuries                     | 2,229.90<br>(1,696.49 to 2,896.63)               | 2,047.67<br>(1,192.26 to 3,340.50)               | 383.24<br>(221.58 to 630.89)                     | 2,521.07<br>(1,402.42 to 4,253.27)               | 50.73<br>(39.17 to 65.92)                  | 60.67<br>(37.94 to 94.14)                  | 14.80<br>(9.52 to 22.85)                   | 71.67<br>(43.42 to 115.60)                 |
| Other road injuries                             | 24.36<br>(17.35 to 30.98)                        | 22.60<br>(12.15 to 36.43)                        | 5.88<br>(2.82 to 10.07)                          | 26.89<br>(14.36 to 43.73)                        | 0.65<br>(0.40 to 0.88)                     | 0.89<br>(0.41 to 1.51)                     | 0.35<br>(0.14 to 0.60)                     | 0.99<br>(0.45 to 1.70)                     |
| Other transport injuries                        | 406.88<br>(306.64 to 531.23)                     | 312.51<br>(186.11 to 488.63)                     | 274.11<br>(163.00 to 434.93)                     | 360.86<br>(208.37 to 595.45)                     | 10.08<br>(7.71 to 13.12)                   | 10.37<br>(6.55 to 15.75)                   | 9.38<br>(5.91 to 14.11)                    | 11.66<br>(7.33 to 18.23)                   |
| <b>Unintentional injuries</b>                   | <b>5,123.93</b><br><b>(4,127.85 to 6,582.27)</b> | <b>6,743.11</b><br><b>(5,026.44 to 9,205.52)</b> | <b>6,579.13</b><br><b>(4,931.61 to 8,771.39)</b> | <b>6,883.06</b><br><b>(5,174.01 to 9,334.78)</b> | <b>211.51</b><br><b>(167.52 to 284.67)</b> | <b>421.97</b><br><b>(320.01 to 596.43)</b> | <b>421.31</b><br><b>(317.73 to 586.83)</b> | <b>417.12</b><br><b>(320.11 to 589.01)</b> |
| Falls                                           | 2,682.23<br>(2,106.55 to 3,620.00)               | 4,169.39<br>(3,119.61 to 5,701.65)               | 4,100.81<br>(3,049.90 to 5,499.15)               | 4,198.32<br>(3,182.90 to 5,693.43)               | 129.25<br>(102.46 to 182.84)               | 287.03<br>(218.53 to 420.19)               | 287.70<br>(215.38 to 416.53)               | 281.62<br>(217.45 to 411.08)               |
| Drowning                                        | 560.67<br>(457.73 to 693.27)                     | 437.22<br>(306.97 to 604.07)                     | 409.33<br>(287.63 to 566.06)                     | 472.57<br>(326.90 to 658.29)                     | 13.38<br>(10.86 to 16.69)                  | 15.22<br>(11.28 to 19.86)                  | 14.60<br>(10.84 to 19.04)                  | 16.00<br>(11.78 to 21.27)                  |
| Fire, heat, and hot substances                  | 259.69<br>(210.56 to 345.15)                     | 256.53<br>(186.56 to 364.21)                     | 242.96<br>(177.01 to 343.86)                     | 277.03<br>(200.16 to 403.83)                     | 11.06<br>(8.97 to 14.66)                   | 16.37<br>(12.14 to 22.30)                  | 15.89<br>(11.68 to 21.81)                  | 17.05<br>(12.80 to 23.50)                  |
| Poisonings                                      | 115.08<br>(86.72 to 190.43)                      | 65.88<br>(42.45 to 115.16)                       | 60.46<br>(39.80 to 106.55)                       | 74.25<br>(48.30 to 131.99)                       | 3.43<br>(2.62 to 5.72)                     | 2.89<br>(1.98 to 4.92)                     | 2.73<br>(1.89 to 4.59)                     | 3.13<br>(2.17 to 5.38)                     |
| Exposure to mechanical forces                   | 476.33<br>(373.62 to 630.37)                     | 416.58<br>(290.38 to 572.63)                     | 393.24<br>(278.80 to 539.76)                     | 444.83<br>(315.36 to 615.59)                     | 12.89<br>(10.18 to 17.68)                  | 15.55<br>(11.53 to 22.06)                  | 15.02<br>(11.05 to 21.37)                  | 16.15<br>(11.95 to 22.89)                  |
| Unintentional firearm injuries                  | 67.36<br>(53.97 to 83.76)                        | 67.44<br>(49.13 to 92.99)                        | 65.26<br>(47.59 to 90.48)                        | 69.75<br>(51.66 to 95.96)                        | 2.29<br>(1.80 to 3.45)                     | 3.55<br>(2.52 to 6.17)                     | 3.52<br>(2.50 to 6.17)                     | 3.56<br>(2.57 to 6.16)                     |
| Unintentional suffocation                       | 64.76<br>(44.41 to 117.07)                       | 47.54<br>(28.95 to 85.91)                        | 44.22<br>(27.52 to 77.79)                        | 51.54<br>(31.04 to 94.65)                        | 1.03<br>(0.77 to 1.65)                     | 0.97<br>(0.68 to 1.55)                     | 0.93<br>(0.65 to 1.43)                     | 1.02<br>(0.71 to 1.63)                     |
| Other exposure to mechanical forces             | 344.22<br>(253.75 to 469.06)                     | 301.60<br>(206.82 to 429.61)                     | 283.77<br>(194.38 to 401.94)                     | 323.53<br>(220.75 to 460.92)                     | 9.57<br>(7.24 to 13.27)                    | 11.03<br>(7.84 to 15.47)                   | 10.58<br>(7.53 to 14.85)                   | 11.57<br>(8.29 to 16.40)                   |
| Adverse effects of medical treatment            | 277.11<br>(200.83 to 442.45)                     | 421.18<br>(287.11 to 683.53)                     | 415.22<br>(282.22 to 665.15)                     | 424.01<br>(289.53 to 683.86)                     | 12.60<br>(8.98 to 17.79)                   | 26.87<br>(17.79 to 43.95)                  | 27.02<br>(17.78 to 44.73)                  | 26.31<br>(17.81 to 43.04)                  |
| Animal contact                                  | 47.28<br>(37.27 to 65.07)                        | 54.28<br>(36.82 to 89.42)                        | 52.29<br>(35.36 to 86.77)                        | 56.51<br>(38.53 to 92.61)                        | 1.47<br>(1.11 to 2.51)                     | 2.56<br>(1.69 to 4.88)                     | 2.52<br>(1.65 to 4.86)                     | 2.58<br>(1.71 to 5.03)                     |
| Venomous animal contact                         | 21.73<br>(16.39 to 34.24)                        | 26.63<br>(16.60 to 53.61)                        | 25.79<br>(15.95 to 52.24)                        | 27.44<br>(17.20 to 54.66)                        | 0.61<br>(0.41 to 1.32)                     | 1.16<br>(0.64 to 3.01)                     | 1.15<br>(0.63 to 3.00)                     | 1.16<br>(0.65 to 3.01)                     |
| Non-venomous animal contact                     | 25.55<br>(19.13 to 34.46)                        | 27.65<br>(18.16 to 41.42)                        | 26.50<br>(17.32 to 39.49)                        | 29.07<br>(19.25 to 43.61)                        | 0.86<br>(0.64 to 1.32)                     | 1.40<br>(0.90 to 2.24)                     | 1.37<br>(0.87 to 2.15)                     | 1.41<br>(0.91 to 2.28)                     |
| Foreign body                                    | 525.68<br>(406.02 to 756.41)                     | 770.70<br>(538.47 to 1,219.56)                   | 765.73<br>(536.14 to 1,213.94)                   | 766.52<br>(541.75 to 1,216.20)                   | 22.16<br>(15.80 to 36.23)                  | 48.78<br>(31.61 to 86.31)                  | 49.50<br>(32.10 to 88.22)                  | 47.06<br>(31.37 to 82.50)                  |
| Pulmonary aspiration and foreign body in airway | 499.49<br>(383.91 to 728.18)                     | 730.18<br>(503.91 to 1,171.91)                   | 724.78<br>(501.94 to 1,166.51)                   | 727.33<br>(510.09 to 1,162.40)                   | 21.31<br>(15.13 to 35.17)                  | 46.68<br>(29.81 to 83.96)                  | 47.32<br>(29.98 to 85.38)                  | 45.08<br>(29.62 to 80.27)                  |

|                                             |                                                               |                                                               |                                                              |                                                               |                                                      |                                                      |                                                      |                                                      |
|---------------------------------------------|---------------------------------------------------------------|---------------------------------------------------------------|--------------------------------------------------------------|---------------------------------------------------------------|------------------------------------------------------|------------------------------------------------------|------------------------------------------------------|------------------------------------------------------|
|                                             | 26.18<br>(21.10 to<br>33.05)                                  | 40.53<br>(29.32 to<br>58.14)                                  | 40.94<br>(29.27 to<br>58.43)                                 | 39.19<br>(28.55 to<br>55.32)                                  | 0.85<br>(0.65 to<br>1.28)                            | 2.11<br>(1.49 to<br>3.55)                            | 2.18<br>(1.53 to<br>3.65)                            | 1.98<br>(1.41 to<br>3.31)                            |
| Foreign body in other body part             |                                                               |                                                               |                                                              |                                                               |                                                      |                                                      |                                                      |                                                      |
|                                             | 56.92<br>(39.53 to<br>107.94)                                 | 65.51<br>(40.38 to<br>132.99)                                 | 62.10<br>(38.60 to<br>128.57)                                | 69.85<br>(42.86 to<br>143.19)                                 | 2.07<br>(1.40 to<br>4.23)                            | 3.52<br>(2.21 to<br>7.22)                            | 3.42<br>(2.13 to<br>6.99)                            | 3.64<br>(2.29 to<br>7.45)                            |
| Environmental heat and cold exposure        |                                                               |                                                               |                                                              |                                                               |                                                      |                                                      |                                                      |                                                      |
|                                             | 122.94<br>(95.46 to<br>158.36)                                | 85.84<br>(56.64 to<br>121.85)                                 | 76.99<br>(51.27 to<br>110.29)                                | 99.16<br>(66.56 to<br>140.59)                                 | 3.22<br>(2.53 to<br>4.10)                            | 3.18<br>(2.20 to<br>4.37)                            | 2.91<br>(2.03 to<br>4.04)                            | 3.58<br>(2.51 to<br>4.95)                            |
| Other unintentional injuries                |                                                               |                                                               |                                                              |                                                               |                                                      |                                                      |                                                      |                                                      |
| <b>Self-harm and interpersonal violence</b> | <b>14,939.97</b><br><b>(11,386.78 to</b><br><b>21,543.94)</b> | <b>15,822.73</b><br><b>(10,325.00 to</b><br><b>23,394.09)</b> | <b>14,756.17</b><br><b>(9,904.85 to</b><br><b>21,244.90)</b> | <b>17,282.39</b><br><b>(10,961.25 to</b><br><b>26,971.70)</b> | <b>416.90</b><br><b>(321.30 to</b><br><b>587.84)</b> | <b>595.58</b><br><b>(406.99 to</b><br><b>844.81)</b> | <b>568.73</b><br><b>(394.96 to</b><br><b>786.22)</b> | <b>631.87</b><br><b>(425.67 to</b><br><b>931.32)</b> |

| Singapore                                                                           |                                                   |                                                 |                                                 |                                                 |                                                |                                                |                                                |                                                |
|-------------------------------------------------------------------------------------|---------------------------------------------------|-------------------------------------------------|-------------------------------------------------|-------------------------------------------------|------------------------------------------------|------------------------------------------------|------------------------------------------------|------------------------------------------------|
| Cause                                                                               | YLLs (actual counts)                              |                                                 |                                                 |                                                 | Deaths (actual counts)                         |                                                |                                                |                                                |
|                                                                                     | 2016                                              | 2040 Forecast                                   | 2040 Better Scenario                            | 2040 Worse Scenario                             | 2016                                           | 2040 Forecast                                  | 2040 Better Scenario                           | 2040 Worse Scenario                            |
| Self-harm                                                                           | 14,138.63<br>(10,720.45 to<br>20,591.32)          | 15,277.95<br>(9,975.75 to<br>22,638.96)         | 14,244.34<br>(9,551.96 to<br>20,536.95)         | 16,693.79<br>(10,567.25 to<br>26,205.21)        | 397.67<br>(305.71 to<br>565.27)                | 577.73<br>(390.62 to<br>827.25)                | 551.64<br>(381.13 to<br>767.97)                | 612.97<br>(411.70 to<br>909.25)                |
| Self-harm by firearm                                                                | 128.12<br>(79.00 to<br>226.94)                    | 102.26<br>(55.99 to<br>183.42)                  | 93.17<br>(51.04 to<br>156.20)                   | 115.19<br>(60.68 to<br>211.32)                  | 3.37<br>(2.12 to<br>5.88)                      | 3.68<br>(2.07 to<br>6.48)                      | 3.44<br>(1.99 to<br>5.74)                      | 4.01<br>(2.26 to<br>7.14)                      |
| Self-harm by other specified means                                                  | 14,010.51<br>(10,638.80 to<br>20,417.49)          | 15,175.69<br>(9,903.22 to<br>22,504.81)         | 14,151.17<br>(9,495.80 to<br>20,417.33)         | 16,578.60<br>(10,508.72 to<br>25,851.17)        | 394.30<br>(303.49 to<br>560.53)                | 574.05<br>(387.52 to<br>817.94)                | 548.20<br>(378.31 to<br>763.09)                | 608.96<br>(408.53 to<br>902.40)                |
| Interpersonal violence                                                              | 801.34<br>(567.37 to<br>1,426.96)                 | 544.78<br>(342.30 to<br>1,029.26)               | 511.83<br>(325.30 to<br>947.18)                 | 588.60<br>(363.83 to<br>1,110.22)               | 19.23<br>(13.60 to<br>34.17)                   | 17.85<br>(11.67 to<br>32.46)                   | 17.09<br>(11.17 to<br>30.84)                   | 18.90<br>(12.11 to<br>34.86)                   |
| Physical violence by firearm                                                        | 47.50<br>(26.25 to<br>95.10)                      | 27.89<br>(16.02 to<br>55.95)                    | 26.19<br>(14.94 to<br>53.02)                    | 30.12<br>(17.39 to<br>61.83)                    | 1.10<br>(0.65 to<br>2.24)                      | 0.85<br>(0.50 to<br>1.72)                      | 0.81<br>(0.48 to<br>1.62)                      | 0.91<br>(0.53 to<br>1.86)                      |
| Physical violence by sharp object                                                   | 254.40<br>(149.58 to<br>426.92)                   | 166.29<br>(99.94 to<br>296.80)                  | 156.92<br>(95.37 to<br>276.60)                  | 177.52<br>(106.35 to<br>321.50)                 | 6.25<br>(4.02 to<br>10.60)                     | 5.43<br>(3.50 to<br>9.52)                      | 5.22<br>(3.33 to<br>8.96)                      | 5.69<br>(3.66 to<br>10.03)                     |
| Physical violence by other means                                                    | 499.44<br>(330.19 to<br>998.32)                   | 350.60<br>(204.83 to<br>736.80)                 | 328.73<br>(193.85 to<br>679.03)                 | 380.96<br>(216.75 to<br>821.69)                 | 11.87<br>(7.98 to<br>23.71)                    | 11.57<br>(6.99 to<br>23.48)                    | 11.06<br>(6.83 to<br>22.20)                    | 12.30<br>(7.35 to<br>25.20)                    |
| <b>Forces of nature, conflict and terrorism, and executions and police conflict</b> | <b>30.48</b><br><b>(19.47 to</b><br><b>41.35)</b> | <b>4.66</b><br><b>(0.00 to</b><br><b>47.93)</b> | <b>4.73</b><br><b>(0.00 to</b><br><b>47.78)</b> | <b>4.51</b><br><b>(0.00 to</b><br><b>48.17)</b> | <b>0.65</b><br><b>(0.41 to</b><br><b>0.88)</b> | <b>0.32</b><br><b>(0.00 to</b><br><b>1.85)</b> | <b>0.33</b><br><b>(0.00 to</b><br><b>1.88)</b> | <b>0.29</b><br><b>(0.00 to</b><br><b>1.82)</b> |
| Exposure to forces of nature                                                        | 0.00<br>(0.00 to<br>0.00)                         | 0.87<br>(0.00 to<br>14.13)                      | 0.86<br>(0.00 to<br>13.72)                      | 0.89<br>(0.00 to<br>14.81)                      | 0.00<br>(0.00 to<br>0.00)                      | 0.03<br>(0.00 to<br>0.17)                      | 0.03<br>(0.00 to<br>0.16)                      | 0.03<br>(0.00 to<br>0.18)                      |
| Conflict and terrorism                                                              | 0.00<br>(0.00 to<br>0.00)                         | 3.79<br>(0.00 to<br>47.93)                      | 3.87<br>(0.00 to<br>47.78)                      | 3.62<br>(0.00 to<br>48.17)                      | 0.00<br>(0.00 to<br>0.00)                      | 0.29<br>(0.00 to<br>0.89)                      | 0.31<br>(0.00 to<br>0.89)                      | 0.26<br>(0.00 to<br>0.88)                      |
| Executions and police conflict                                                      | 30.48<br>(19.47 to<br>41.35)                      | 0.00<br>(0.00 to<br>0.00)                       | 0.00<br>(0.00 to<br>0.00)                       | 0.00<br>(0.00 to<br>0.00)                       | 0.65<br>(0.41 to<br>0.88)                      | 0.00<br>(0.00 to<br>0.00)                      | 0.00<br>(0.00 to<br>0.00)                      | 0.00<br>(0.00 to<br>0.00)                      |

| Australasia                                                       |                                    |                                    |                                    |                                    |                              |                              |                              |                              |
|-------------------------------------------------------------------|------------------------------------|------------------------------------|------------------------------------|------------------------------------|------------------------------|------------------------------|------------------------------|------------------------------|
| Cause                                                             | YLLs (in 1000s)                    |                                    |                                    |                                    | Deaths (in 1000s)            |                              |                              |                              |
|                                                                   | 2016                               | 2040 Forecast                      | 2040 Better Scenario               | 2040 Worse Scenario                | 2016                         | 2040 Forecast                | 2040 Better Scenario         | 2040 Worse Scenario          |
| All causes                                                        | 2,977.14<br>(2,840.25 to 3,124.97) | 3,864.42<br>(3,400.05 to 4,471.69) | 3,306.46<br>(2,932.28 to 3,795.84) | 4,692.30<br>(4,071.60 to 5,505.86) | 198.23<br>(189.99 to 207.02) | 316.37<br>(285.24 to 354.41) | 280.74<br>(253.79 to 313.68) | 367.96<br>(329.01 to 415.06) |
| Communicable, maternal, neonatal, and nutritional diseases        | 131.42<br>(120.42 to 142.14)       | 155.29<br>(129.64 to 186.45)       | 136.23<br>(114.84 to 162.24)       | 178.95<br>(146.22 to 217.11)       | 7.01<br>(6.31 to 7.73)       | 12.70<br>(10.33 to 15.71)    | 12.13<br>(10.04 to 14.73)    | 13.57<br>(10.79 to 17.21)    |
| HIV/AIDS and tuberculosis                                         | 4.73<br>(4.47 to 5.01)             | 2.16<br>(1.32 to 3.29)             | 1.09<br>(0.73 to 1.64)             | 4.74<br>(2.86 to 6.81)             | 0.17<br>(0.16 to 0.18)       | 0.11<br>(0.07 to 0.15)       | 0.07<br>(0.05 to 0.09)       | 0.18<br>(0.12 to 0.25)       |
| Tuberculosis                                                      | 1.39<br>(1.27 to 1.55)             | 1.02<br>(0.67 to 1.46)             | 0.66<br>(0.45 to 0.92)             | 1.48<br>(0.96 to 2.19)             | 0.09<br>(0.08 to 0.10)       | 0.08<br>(0.06 to 0.12)       | 0.06<br>(0.04 to 0.08)       | 0.12<br>(0.08 to 0.18)       |
| HIV/AIDS                                                          | 3.34<br>(3.13 to 3.58)             | 1.15<br>(0.45 to 2.14)             | 0.43<br>(0.16 to 0.92)             | 3.25<br>(1.46 to 5.14)             | 0.08<br>(0.08 to 0.09)       | 0.02<br>(0.01 to 0.04)       | 0.02<br>(0.00 to 0.02)       | 0.06<br>(0.02 to 0.10)       |
| Diarrhea, lower respiratory, and other common infectious diseases | 59.85<br>(54.51 to 65.28)          | 93.38<br>(75.42 to 115.19)         | 84.24<br>(69.36 to 101.90)         | 107.00<br>(83.88 to 136.96)        | 5.66<br>(5.01 to 6.34)       | 11.10<br>(8.75 to 14.20)     | 10.62<br>(8.57 to 13.11)     | 11.86<br>(9.14 to 15.47)     |
| Diarrheal diseases                                                | 4.24<br>(3.88 to 4.64)             | 12.30<br>(6.69 to 24.49)           | 14.41<br>(8.87 to 25.09)           | 9.66<br>(5.16 to 19.50)            | 0.32<br>(0.29 to 0.35)       | 1.35<br>(0.72 to 2.73)       | 1.66<br>(0.99 to 2.93)       | 1.02<br>(0.52 to 2.10)       |
| Intestinal infectious diseases                                    | 0.02<br>(0.01 to 0.04)             | 0.02<br>(0.01 to 0.03)             | 0.02<br>(0.01 to 0.03)             | 0.02<br>(0.01 to 0.03)             | 0.00<br>(0.00 to 0.00)       | 0.00<br>(0.00 to 0.00)       | 0.00<br>(0.00 to 0.00)       | 0.00<br>(0.00 to 0.00)       |
| Typhoid fever                                                     | 0.00<br>(0.00 to 0.01)             | 0.01<br>(0.00 to 0.01)             | 0.01<br>(0.00 to 0.01)             | 0.00<br>(0.00 to 0.01)             | 0.00<br>(0.00 to 0.00)       | 0.00<br>(0.00 to 0.00)       | 0.00<br>(0.00 to 0.00)       | 0.00<br>(0.00 to 0.00)       |
| Paratyphoid fever                                                 | 0.01<br>(0.00 to 0.02)             | 0.01<br>(0.00 to 0.02)             | 0.01<br>(0.00 to 0.02)             | 0.01<br>(0.00 to 0.02)             | 0.00<br>(0.00 to 0.00)       | 0.00<br>(0.00 to 0.00)       | 0.00<br>(0.00 to 0.00)       | 0.00<br>(0.00 to 0.00)       |
| Other intestinal infectious diseases                              | 0.00<br>(0.00 to 0.01)             | 0.00<br>(0.00 to 0.01)             | 0.00<br>(0.00 to 0.01)             | 0.00<br>(0.00 to 0.01)             | 0.00<br>(0.00 to 0.00)       | 0.00<br>(0.00 to 0.00)       | 0.00<br>(0.00 to 0.00)       | 0.00<br>(0.00 to 0.00)       |
| Lower respiratory infections                                      | 50.58<br>(45.55 to 55.97)          | 76.34<br>(58.88 to 98.88)          | 65.62<br>(51.52 to 82.69)          | 91.58<br>(69.17 to 120.90)         | 5.16<br>(4.53 to 5.85)       | 9.54<br>(7.31 to 12.52)      | 8.76<br>(6.75 to 11.17)      | 10.63<br>(8.14 to 14.24)     |
| Upper respiratory infections                                      | 0.04<br>(0.02 to 0.05)             | 0.03<br>(0.02 to 0.06)             | 0.03<br>(0.01 to 0.05)             | 0.04<br>(0.02 to 0.08)             | 0.00<br>(0.00 to 0.00)       | 0.00<br>(0.00 to 0.00)       | 0.00<br>(0.00 to 0.00)       | 0.00<br>(0.00 to 0.01)       |
| Otitis media                                                      | 0.01<br>(0.01 to 0.01)             | 0.01<br>(0.00 to 0.02)             | 0.01<br>(0.00 to 0.02)             | 0.01<br>(0.00 to 0.02)             | 0.00<br>(0.00 to 0.00)       | 0.00<br>(0.00 to 0.00)       | 0.00<br>(0.00 to 0.00)       | 0.00<br>(0.00 to 0.00)       |
| Meningitis                                                        | 2.85<br>(2.56 to 3.35)             | 2.10<br>(1.54 to 2.79)             | 1.71<br>(1.31 to 2.23)             | 2.83<br>(1.82 to 4.28)             | 0.07<br>(0.06 to 0.08)       | 0.06<br>(0.05 to 0.08)       | 0.05<br>(0.04 to 0.07)       | 0.07<br>(0.05 to 0.09)       |
| Pneumococcal meningitis                                           | 0.46<br>(0.41 to 0.56)             | 0.33<br>(0.26 to 0.43)             | 0.32<br>(0.26 to 0.42)             | 0.35<br>(0.27 to 0.46)             | 0.01<br>(0.01 to 0.02)       | 0.01<br>(0.01 to 0.02)       | 0.01<br>(0.01 to 0.02)       | 0.01<br>(0.01 to 0.02)       |
| H influenzae type B meningitis                                    | 0.35<br>(0.30 to 0.41)             | 0.89<br>(0.42 to 1.62)             | 0.65<br>(0.36 to 1.07)             | 1.46<br>(0.55 to 2.89)             | 0.01<br>(0.01 to 0.01)       | 0.01<br>(0.01 to 0.02)       | 0.01<br>(0.01 to 0.02)       | 0.02<br>(0.01 to 0.04)       |
| Meningococcal meningitis                                          | 1.16<br>(1.03 to 1.35)             | 0.47<br>(0.35 to 0.64)             | 0.39<br>(0.30 to 0.54)             | 0.55<br>(0.39 to 0.75)             | 0.02<br>(0.02 to 0.03)       | 0.01<br>(0.01 to 0.02)       | 0.01<br>(0.01 to 0.02)       | 0.02<br>(0.01 to 0.02)       |
| Other meningitis                                                  | 0.88<br>(0.78 to 1.05)             | 0.41<br>(0.31 to 0.54)             | 0.34<br>(0.26 to 0.46)             | 0.48<br>(0.36 to 0.65)             | 0.02<br>(0.02 to 0.03)       | 0.02<br>(0.01 to 0.02)       | 0.01<br>(0.01 to 0.02)       | 0.02<br>(0.02 to 0.03)       |
| Encephalitis                                                      | 1.50<br>(1.02 to 1.77)             | 1.86<br>(1.22 to 2.27)             | 1.84<br>(1.20 to 2.25)             | 1.86<br>(1.22 to 2.28)             | 0.05<br>(0.03 to 0.06)       | 0.09<br>(0.05 to 0.11)       | 0.09<br>(0.05 to 0.11)       | 0.08<br>(0.05 to 0.11)       |

|                |                           |                           |                           |                           |                           |                           |                           |                           |
|----------------|---------------------------|---------------------------|---------------------------|---------------------------|---------------------------|---------------------------|---------------------------|---------------------------|
| Diphtheria     | 0.01<br>(0.01 to<br>0.01) | 0.00<br>(0.00 to<br>0.00) | 0.00<br>(0.00 to<br>0.00) | 0.00<br>(0.00 to<br>0.01) | 0.00<br>(0.00 to<br>0.00) | 0.00<br>(0.00 to<br>0.00) | 0.00<br>(0.00 to<br>0.00) | 0.00<br>(0.00 to<br>0.00) |
| Whooping cough | 0.05<br>(0.01 to<br>0.09) | 0.03<br>(0.01 to<br>0.08) | 0.01<br>(0.00 to<br>0.01) | 0.08<br>(0.01 to<br>0.22) | 0.00<br>(0.00 to<br>0.00) | 0.00<br>(0.00 to<br>0.00) | 0.00<br>(0.00 to<br>0.00) | 0.00<br>(0.00 to<br>0.00) |
| Tetanus        | 0.02<br>(0.01 to<br>0.02) | 0.00<br>(0.00 to<br>0.00) | 0.00<br>(0.00 to<br>0.00) | 0.00<br>(0.00 to<br>0.01) | 0.00<br>(0.00 to<br>0.00) | 0.00<br>(0.00 to<br>0.00) | 0.00<br>(0.00 to<br>0.00) | 0.00<br>(0.00 to<br>0.00) |
| Measles        | 0.02<br>(0.02 to<br>0.03) | 0.20<br>(0.00 to<br>1.40) | 0.15<br>(0.00 to<br>0.91) | 0.39<br>(0.00 to<br>2.73) | 0.00<br>(0.00 to<br>0.00) | 0.00<br>(0.00 to<br>0.02) | 0.00<br>(0.00 to<br>0.01) | 0.01<br>(0.00 to<br>0.03) |



| Australasia                                           |                               |                               |                               |                               |                               |                               |                               |                               |
|-------------------------------------------------------|-------------------------------|-------------------------------|-------------------------------|-------------------------------|-------------------------------|-------------------------------|-------------------------------|-------------------------------|
| Cause                                                 | YLLs (in 1000s)               |                               |                               |                               | Deaths (in 1000s)             |                               |                               |                               |
|                                                       | 2016                          | 2040 Forecast                 | 2040 Better Scenario          | 2040 Worse Scenario           | 2016                          | 2040 Forecast                 | 2040 Better Scenario          | 2040 Worse Scenario           |
| Varicella and herpes zoster                           | 0.53<br>(0.23 to 0.72)        | 0.49<br>(0.22 to 0.71)        | 0.46<br>(0.20 to 0.67)        | 0.52<br>(0.23 to 0.74)        | 0.05<br>(0.02 to 0.07)        | 0.05<br>(0.02 to 0.08)        | 0.05<br>(0.02 to 0.08)        | 0.05<br>(0.02 to 0.08)        |
| <b>Neglected tropical diseases and malaria</b>        | <b>0.17</b><br>(0.16 to 0.19) | <b>0.22</b><br>(0.19 to 0.26) | <b>0.22</b><br>(0.20 to 0.26) | <b>0.22</b><br>(0.19 to 0.25) | <b>0.00</b><br>(0.00 to 0.00) | <b>0.01</b><br>(0.01 to 0.01) | <b>0.01</b><br>(0.01 to 0.01) | <b>0.01</b><br>(0.01 to 0.01) |
| Malaria                                               | 0.00<br>(0.00 to 0.00)        | 0.00<br>(0.00 to 0.00)        | 0.00<br>(0.00 to 0.00)        | 0.00<br>(0.00 to 0.00)        | 0.00<br>(0.00 to 0.00)        | 0.00<br>(0.00 to 0.00)        | 0.00<br>(0.00 to 0.00)        | 0.00<br>(0.00 to 0.00)        |
| Chagas disease                                        | 0.00<br>(0.00 to 0.00)        | 0.00<br>(0.00 to 0.00)        | 0.00<br>(0.00 to 0.00)        | 0.00<br>(0.00 to 0.00)        | 0.00<br>(0.00 to 0.00)        | 0.00<br>(0.00 to 0.00)        | 0.00<br>(0.00 to 0.00)        | 0.00<br>(0.00 to 0.00)        |
| Leishmaniasis                                         | 0.00<br>(0.00 to 0.00)        | 0.00<br>(0.00 to 0.00)        | 0.00<br>(0.00 to 0.00)        | 0.00<br>(0.00 to 0.00)        | 0.00<br>(0.00 to 0.00)        | 0.00<br>(0.00 to 0.00)        | 0.00<br>(0.00 to 0.00)        | 0.00<br>(0.00 to 0.00)        |
| African trypanosomiasis                               | 0.00<br>(0.00 to 0.00)        | 0.00<br>(0.00 to 0.00)        | 0.00<br>(0.00 to 0.00)        | 0.00<br>(0.00 to 0.00)        | 0.00<br>(0.00 to 0.00)        | 0.00<br>(0.00 to 0.00)        | 0.00<br>(0.00 to 0.00)        | 0.00<br>(0.00 to 0.00)        |
| Schistosomiasis                                       | 0.00<br>(0.00 to 0.00)        | 0.00<br>(0.00 to 0.00)        | 0.00<br>(0.00 to 0.00)        | 0.00<br>(0.00 to 0.00)        | 0.00<br>(0.00 to 0.00)        | 0.00<br>(0.00 to 0.00)        | 0.00<br>(0.00 to 0.00)        | 0.00<br>(0.00 to 0.00)        |
| Cysticercosis                                         | 0.01<br>(0.01 to 0.02)        | 0.01<br>(0.01 to 0.01)        | 0.01<br>(0.01 to 0.01)        | 0.01<br>(0.01 to 0.01)        | 0.00<br>(0.00 to 0.00)        | 0.00<br>(0.00 to 0.00)        | 0.00<br>(0.00 to 0.00)        | 0.00<br>(0.00 to 0.00)        |
| Cystic echinococcosis                                 | 0.00<br>(0.00 to 0.00)        | 0.00<br>(0.00 to 0.00)        | 0.00<br>(0.00 to 0.00)        | 0.00<br>(0.00 to 0.00)        | 0.00<br>(0.00 to 0.00)        | 0.00<br>(0.00 to 0.00)        | 0.00<br>(0.00 to 0.00)        | 0.00<br>(0.00 to 0.00)        |
| Dengue                                                | 0.00<br>(0.00 to 0.01)        | 0.02<br>(0.01 to 0.02)        | 0.02<br>(0.01 to 0.02)        | 0.02<br>(0.01 to 0.02)        | 0.00<br>(0.00 to 0.00)        | 0.00<br>(0.00 to 0.00)        | 0.00<br>(0.00 to 0.00)        | 0.00<br>(0.00 to 0.00)        |
| Yellow fever                                          | 0.00<br>(0.00 to 0.00)        | 0.00<br>(0.00 to 0.00)        | 0.00<br>(0.00 to 0.00)        | 0.00<br>(0.00 to 0.00)        | 0.00<br>(0.00 to 0.00)        | 0.00<br>(0.00 to 0.00)        | 0.00<br>(0.00 to 0.00)        | 0.00<br>(0.00 to 0.00)        |
| Rabies                                                | 0.00<br>(0.00 to 0.00)        | 0.00<br>(0.00 to 0.00)        | 0.00<br>(0.00 to 0.00)        | 0.00<br>(0.00 to 0.00)        | 0.00<br>(0.00 to 0.00)        | 0.00<br>(0.00 to 0.00)        | 0.00<br>(0.00 to 0.00)        | 0.00<br>(0.00 to 0.00)        |
| Intestinal nematode infections                        | 0.00<br>(0.00 to 0.00)        | 0.00<br>(0.00 to 0.00)        | 0.00<br>(0.00 to 0.00)        | 0.00<br>(0.00 to 0.00)        | 0.00<br>(0.00 to 0.00)        | 0.00<br>(0.00 to 0.00)        | 0.00<br>(0.00 to 0.00)        | 0.00<br>(0.00 to 0.00)        |
| Other neglected tropical diseases                     | 0.15<br>(0.14 to 0.17)        | 0.19<br>(0.17 to 0.23)        | 0.20<br>(0.17 to 0.23)        | 0.19<br>(0.17 to 0.22)        | 0.00<br>(0.00 to 0.00)        | 0.01<br>(0.01 to 0.01)        | 0.01<br>(0.01 to 0.01)        | 0.01<br>(0.01 to 0.01)        |
| <b>Maternal disorders</b>                             | <b>1.24</b><br>(1.09 to 1.41) | <b>0.99</b><br>(0.73 to 1.30) | <b>0.88</b><br>(0.65 to 1.17) | <b>1.09</b><br>(0.80 to 1.44) | <b>0.02</b><br>(0.02 to 0.03) | <b>0.02</b><br>(0.01 to 0.02) | <b>0.02</b><br>(0.01 to 0.02) | <b>0.02</b><br>(0.01 to 0.03) |
| Maternal hemorrhage                                   | 0.15<br>(0.11 to 0.21)        | 0.12<br>(0.07 to 0.18)        | 0.11<br>(0.06 to 0.16)        | 0.13<br>(0.08 to 0.20)        | 0.00<br>(0.00 to 0.00)        | 0.00<br>(0.00 to 0.00)        | 0.00<br>(0.00 to 0.00)        | 0.00<br>(0.00 to 0.00)        |
| Maternal sepsis and other maternal infections         | 0.09<br>(0.06 to 0.12)        | 0.05<br>(0.03 to 0.08)        | 0.05<br>(0.03 to 0.08)        | 0.06<br>(0.03 to 0.09)        | 0.00<br>(0.00 to 0.00)        | 0.00<br>(0.00 to 0.00)        | 0.00<br>(0.00 to 0.00)        | 0.00<br>(0.00 to 0.00)        |
| Maternal hypertensive disorders                       | 0.11<br>(0.08 to 0.15)        | 0.09<br>(0.05 to 0.14)        | 0.08<br>(0.05 to 0.13)        | 0.10<br>(0.06 to 0.16)        | 0.00<br>(0.00 to 0.00)        | 0.00<br>(0.00 to 0.00)        | 0.00<br>(0.00 to 0.00)        | 0.00<br>(0.00 to 0.00)        |
| Maternal obstructed labor and uterine rupture         | 0.03<br>(0.02 to 0.05)        | 0.02<br>(0.01 to 0.04)        | 0.02<br>(0.01 to 0.04)        | 0.03<br>(0.01 to 0.05)        | 0.00<br>(0.00 to 0.00)        | 0.00<br>(0.00 to 0.00)        | 0.00<br>(0.00 to 0.00)        | 0.00<br>(0.00 to 0.00)        |
| Maternal abortion, miscarriage, and ectopic pregnancy | 0.10<br>(0.07 to 0.14)        | 0.09<br>(0.05 to 0.14)        | 0.08<br>(0.05 to 0.13)        | 0.10<br>(0.06 to 0.16)        | 0.00<br>(0.00 to 0.00)        | 0.00<br>(0.00 to 0.00)        | 0.00<br>(0.00 to 0.00)        | 0.00<br>(0.00 to 0.00)        |

|                                        |                           |                           |                           |                           |                           |                           |                           |                           |
|----------------------------------------|---------------------------|---------------------------|---------------------------|---------------------------|---------------------------|---------------------------|---------------------------|---------------------------|
|                                        | 0.24<br>(0.18 to<br>0.31) | 0.22<br>(0.13 to<br>0.33) | 0.19<br>(0.11 to<br>0.29) | 0.25<br>(0.15 to<br>0.38) | 0.00<br>(0.00 to<br>0.01) | 0.00<br>(0.00 to<br>0.01) | 0.00<br>(0.00 to<br>0.01) | 0.00<br>(0.00 to<br>0.01) |
| Indirect maternal deaths               | 0.05<br>(0.03 to<br>0.07) | 0.04<br>(0.02 to<br>0.07) | 0.03<br>(0.02 to<br>0.06) | 0.04<br>(0.02 to<br>0.07) | 0.00<br>(0.00 to<br>0.00) | 0.00<br>(0.00 to<br>0.00) | 0.00<br>(0.00 to<br>0.00) | 0.00<br>(0.00 to<br>0.00) |
| Late maternal deaths                   | 0.00<br>(0.00 to<br>0.00) | 0.00<br>(0.00 to<br>0.00) | 0.00<br>(0.00 to<br>0.00) | 0.00<br>(0.00 to<br>0.00) | 0.00<br>(0.00 to<br>0.00) | 0.00<br>(0.00 to<br>0.00) | 0.00<br>(0.00 to<br>0.00) | 0.00<br>(0.00 to<br>0.00) |
| Maternal deaths aggravated by HIV/AIDS | 0.47<br>(0.37 to<br>0.58) | 0.36<br>(0.24 to<br>0.52) | 0.33<br>(0.22 to<br>0.47) | 0.40<br>(0.26 to<br>0.57) | 0.01<br>(0.01 to<br>0.01) | 0.01<br>(0.00 to<br>0.01) | 0.01<br>(0.00 to<br>0.01) | 0.01<br>(0.00 to<br>0.01) |
| Other maternal disorders               |                           |                           |                           |                           |                           |                           |                           |                           |

| Australasia                                                             |                                  |                                  |                                  |                                  |                               |                               |                               |                               |
|-------------------------------------------------------------------------|----------------------------------|----------------------------------|----------------------------------|----------------------------------|-------------------------------|-------------------------------|-------------------------------|-------------------------------|
| Cause                                                                   | YLLs (in 1000s)                  |                                  |                                  |                                  | Deaths (in 1000s)             |                               |                               |                               |
|                                                                         | 2016                             | 2040 Forecast                    | 2040 Better Scenario             | 2040 Worse Scenario              | 2016                          | 2040 Forecast                 | 2040 Better Scenario          | 2040 Worse Scenario           |
| <b>Neonatal disorders</b>                                               | <b>54.72</b><br>(47.08 to 62.32) | <b>44.37</b><br>(30.42 to 65.08) | <b>35.71</b><br>(24.51 to 52.60) | <b>51.62</b><br>(35.06 to 76.66) | <b>0.63</b><br>(0.54 to 0.72) | <b>0.51</b><br>(0.35 to 0.75) | <b>0.41</b><br>(0.28 to 0.61) | <b>0.60</b><br>(0.41 to 0.89) |
| Neonatal preterm birth                                                  | 24.46<br>(20.53 to 28.51)        | 15.99<br>(11.02 to 22.34)        | 11.00<br>(7.49 to 15.29)         | 20.07<br>(13.77 to 28.33)        | 0.28<br>(0.24 to 0.33)        | 0.18<br>(0.13 to 0.26)        | 0.13<br>(0.09 to 0.18)        | 0.23<br>(0.16 to 0.33)        |
| Neonatal encephalopathy due to birth asphyxia and trauma                | 15.69<br>(12.44 to 18.77)        | 9.64<br>(6.01 to 15.27)          | 7.77<br>(4.87 to 12.51)          | 11.47<br>(7.15 to 18.35)         | 0.18<br>(0.14 to 0.22)        | 0.11<br>(0.07 to 0.18)        | 0.09<br>(0.06 to 0.14)        | 0.13<br>(0.08 to 0.21)        |
| Neonatal sepsis and other neonatal infections                           | 2.46<br>(1.71 to 5.78)           | 3.13<br>(1.71 to 7.52)           | 2.62<br>(1.43 to 6.31)           | 3.60<br>(1.96 to 8.65)           | 0.03<br>(0.02 to 0.07)        | 0.04<br>(0.02 to 0.09)        | 0.03<br>(0.02 to 0.07)        | 0.04<br>(0.02 to 0.10)        |
| Hemolytic disease and other neonatal jaundice                           | 0.13<br>(0.10 to 0.19)           | 0.09<br>(0.05 to 0.17)           | 0.08<br>(0.04 to 0.14)           | 0.11<br>(0.06 to 0.20)           | 0.00<br>(0.00 to 0.00)        | 0.00<br>(0.00 to 0.00)        | 0.00<br>(0.00 to 0.00)        | 0.00<br>(0.00 to 0.00)        |
| Other neonatal disorders                                                | 11.98<br>(9.49 to 14.83)         | 15.51<br>(9.11 to 25.26)         | 14.24<br>(8.46 to 22.81)         | 16.38<br>(9.54 to 26.73)         | 0.14<br>(0.11 to 0.17)        | 0.18<br>(0.11 to 0.29)        | 0.16<br>(0.10 to 0.26)        | 0.19<br>(0.11 to 0.31)        |
| <b>Nutritional deficiencies</b>                                         | <b>1.76</b><br>(1.61 to 1.91)    | <b>3.29</b><br>(2.83 to 3.82)    | <b>3.56</b><br>(3.05 to 4.15)    | <b>3.03</b><br>(2.60 to 3.49)    | <b>0.18</b><br>(0.16 to 0.19) | <b>0.41</b><br>(0.34 to 0.49) | <b>0.46</b><br>(0.38 to 0.56) | <b>0.36</b><br>(0.30 to 0.44) |
| Protein-energy malnutrition                                             | 1.25<br>(1.05 to 1.50)           | 2.40<br>(1.79 to 3.00)           | 2.67<br>(2.04 to 3.32)           | 2.14<br>(1.56 to 2.70)           | 0.13<br>(0.11 to 0.16)        | 0.31<br>(0.23 to 0.40)        | 0.35<br>(0.26 to 0.45)        | 0.27<br>(0.19 to 0.34)        |
| Iodine deficiency                                                       | 0.04<br>(0.01 to 0.11)           | 0.15<br>(0.01 to 0.52)           | 0.16<br>(0.01 to 0.55)           | 0.15<br>(0.01 to 0.59)           | 0.00<br>(0.00 to 0.01)        | 0.02<br>(0.00 to 0.07)        | 0.02<br>(0.00 to 0.07)        | 0.02<br>(0.00 to 0.06)        |
| Dietary iron deficiency                                                 | 0.09<br>(0.06 to 0.10)           | 0.10<br>(0.06 to 0.13)           | 0.11<br>(0.07 to 0.14)           | 0.10<br>(0.06 to 0.13)           | 0.00<br>(0.00 to 0.00)        | 0.00<br>(0.00 to 0.01)        | 0.00<br>(0.00 to 0.01)        | 0.00<br>(0.00 to 0.01)        |
| Other nutritional deficiencies                                          | 0.38<br>(0.20 to 0.55)           | 0.64<br>(0.31 to 0.94)           | 0.63<br>(0.31 to 0.94)           | 0.64<br>(0.32 to 0.93)           | 0.04<br>(0.02 to 0.06)        | 0.08<br>(0.04 to 0.12)        | 0.08<br>(0.04 to 0.12)        | 0.08<br>(0.04 to 0.11)        |
| <b>Other communicable, maternal, neonatal, and nutritional diseases</b> | <b>8.95</b><br>(7.68 to 9.88)    | <b>10.88</b><br>(9.15 to 12.49)  | <b>10.52</b><br>(8.74 to 12.07)  | <b>11.26</b><br>(9.49 to 12.94)  | <b>0.35</b><br>(0.29 to 0.38) | <b>0.54</b><br>(0.45 to 0.62) | <b>0.55</b><br>(0.45 to 0.62) | <b>0.54</b><br>(0.44 to 0.61) |
| Sexually transmitted infections excluding HIV                           | 0.21<br>(0.17 to 0.26)           | 0.16<br>(0.13 to 0.21)           | 0.16<br>(0.13 to 0.20)           | 0.16<br>(0.14 to 0.21)           | 0.01<br>(0.01 to 0.01)        | 0.01<br>(0.01 to 0.02)        | 0.01<br>(0.01 to 0.02)        | 0.01<br>(0.01 to 0.01)        |
| Syphilis                                                                | 0.09<br>(0.07 to 0.13)           | 0.05<br>(0.04 to 0.07)           | 0.04<br>(0.03 to 0.06)           | 0.05<br>(0.04 to 0.07)           | 0.00<br>(0.00 to 0.00)        | 0.00<br>(0.00 to 0.00)        | 0.00<br>(0.00 to 0.00)        | 0.00<br>(0.00 to 0.00)        |
| Chlamydial infection                                                    | 0.02<br>(0.02 to 0.03)           | 0.02<br>(0.02 to 0.03)           | 0.02<br>(0.02 to 0.03)           | 0.02<br>(0.02 to 0.03)           | 0.00<br>(0.00 to 0.00)        | 0.00<br>(0.00 to 0.00)        | 0.00<br>(0.00 to 0.00)        | 0.00<br>(0.00 to 0.00)        |
| Gonococcal infection                                                    | 0.06<br>(0.06 to 0.08)           | 0.06<br>(0.05 to 0.08)           | 0.06<br>(0.05 to 0.09)           | 0.06<br>(0.05 to 0.08)           | 0.00<br>(0.00 to 0.00)        | 0.01<br>(0.00 to 0.01)        | 0.01<br>(0.00 to 0.01)        | 0.00<br>(0.00 to 0.01)        |
| Other sexually transmitted infections                                   | 0.03<br>(0.02 to 0.03)           | 0.03<br>(0.02 to 0.03)           | 0.02<br>(0.02 to 0.03)           | 0.03<br>(0.02 to 0.03)           | 0.00<br>(0.00 to 0.00)        | 0.00<br>(0.00 to 0.00)        | 0.00<br>(0.00 to 0.00)        | 0.00<br>(0.00 to 0.00)        |
| Acute hepatitis                                                         | 3.44<br>(2.93 to 4.07)           | 2.55<br>(1.85 to 3.51)           | 2.22<br>(1.58 to 3.04)           | 2.93<br>(2.09 to 4.06)           | 0.12<br>(0.10 to 0.14)        | 0.10<br>(0.08 to 0.13)        | 0.09<br>(0.07 to 0.12)        | 0.11<br>(0.08 to 0.15)        |
| Acute hepatitis A                                                       | 0.08<br>(0.05 to 0.13)           | 0.10<br>(0.05 to 0.18)           | 0.09<br>(0.05 to 0.16)           | 0.11<br>(0.06 to 0.20)           | 0.00<br>(0.00 to 0.00)        | 0.00<br>(0.00 to 0.01)        | 0.00<br>(0.00 to 0.01)        | 0.00<br>(0.00 to 0.01)        |
| Acute hepatitis B                                                       | 2.97<br>(2.51 to 3.51)           | 2.14<br>(1.51 to 3.04)           | 1.85<br>(1.27 to 2.61)           | 2.47<br>(1.70 to 3.49)           | 0.10<br>(0.08 to 0.12)        | 0.08<br>(0.06 to 0.11)        | 0.07<br>(0.05 to 0.10)        | 0.09<br>(0.06 to 0.13)        |



| Australasia                          |                                         |                                           |                                           |                                           |                                  |                                   |                                  |                                    |
|--------------------------------------|-----------------------------------------|-------------------------------------------|-------------------------------------------|-------------------------------------------|----------------------------------|-----------------------------------|----------------------------------|------------------------------------|
| Cause                                | YLLs (in 1000s)                         |                                           |                                           |                                           | Deaths (in 1000s)                |                                   |                                  |                                    |
|                                      | 2016                                    | 2040 Forecast                             | 2040 Better Scenario                      | 2040 Worse Scenario                       | 2016                             | 2040 Forecast                     | 2040 Better Scenario             | 2040 Worse Scenario                |
| <b>Neoplasms</b>                     | <b>1,029.26</b><br>(975.29 to 1,088.25) | <b>1,408.44</b><br>(1,213.15 to 1,640.56) | <b>1,191.69</b><br>(1,037.79 to 1,377.22) | <b>1,682.94</b><br>(1,426.22 to 1,993.15) | <b>58.41</b><br>(55.39 to 61.55) | <b>95.96</b><br>(85.36 to 109.50) | <b>83.72</b><br>(75.10 to 94.54) | <b>110.80</b><br>(97.46 to 127.41) |
| Lip and oral cavity cancer           | 12.14<br>(11.12 to 13.18)               | 16.52<br>(9.95 to 25.93)                  | 9.88<br>(6.36 to 15.23)                   | 25.46<br>(15.02 to 40.36)                 | 0.63<br>(0.58 to 0.68)           | 1.00<br>(0.61 to 1.51)            | 0.61<br>(0.41 to 0.89)           | 1.51<br>(0.89 to 2.30)             |
| Nasopharynx cancer                   | 5.07<br>(4.53 to 5.70)                  | 7.14<br>(4.22 to 11.79)                   | 4.02<br>(2.45 to 6.48)                    | 11.25<br>(6.46 to 18.38)                  | 0.25<br>(0.23 to 0.28)           | 0.42<br>(0.24 to 0.69)            | 0.24<br>(0.15 to 0.38)           | 0.64<br>(0.36 to 1.09)             |
| Other pharynx cancer                 | 8.30<br>(7.59 to 9.04)                  | 13.28<br>(7.58 to 21.28)                  | 10.65<br>(6.36 to 16.72)                  | 14.87<br>(8.20 to 23.63)                  | 0.40<br>(0.37 to 0.44)           | 0.77<br>(0.45 to 1.22)            | 0.63<br>(0.39 to 0.97)           | 0.84<br>(0.48 to 1.35)             |
| Esophageal cancer                    | 31.19<br>(28.15 to 34.35)               | 43.70<br>(26.55 to 71.83)                 | 27.38<br>(18.11 to 41.37)                 | 61.12<br>(36.07 to 100.88)                | 1.77<br>(1.62 to 1.93)           | 2.84<br>(1.77 to 4.47)            | 1.81<br>(1.22 to 2.64)           | 3.92<br>(2.34 to 6.22)             |
| Stomach cancer                       | 38.78<br>(36.25 to 41.77)               | 31.89<br>(25.61 to 39.53)                 | 27.62<br>(22.81 to 33.55)                 | 37.15<br>(29.11 to 47.92)                 | 2.38<br>(2.22 to 2.56)           | 2.41<br>(1.94 to 3.01)            | 2.13<br>(1.77 to 2.61)           | 2.73<br>(2.14 to 3.50)             |
| Colon and rectum cancer              | 122.43<br>(113.26 to 133.22)            | 168.43<br>(121.80 to 229.33)              | 138.15<br>(100.87 to 186.82)              | 205.48<br>(146.68 to 287.06)              | 7.49<br>(6.95 to 8.08)           | 12.47<br>(9.16 to 16.67)          | 10.55<br>(7.89 to 13.89)         | 14.80<br>(10.70 to 20.27)          |
| Liver cancer                         | 35.93<br>(32.56 to 39.29)               | 54.36<br>(36.30 to 82.71)                 | 43.50<br>(30.96 to 63.56)                 | 69.94<br>(43.95 to 112.19)                | 1.84<br>(1.67 to 2.00)           | 3.19<br>(2.21 to 4.67)            | 2.65<br>(1.93 to 3.75)           | 3.95<br>(2.60 to 6.04)             |
| Liver cancer due to hepatitis B      | 7.43<br>(5.96 to 9.17)                  | 10.29<br>(6.53 to 16.27)                  | 9.06<br>(6.15 to 13.55)                   | 12.14<br>(7.27 to 19.86)                  | 0.32<br>(0.26 to 0.40)           | 0.51<br>(0.33 to 0.76)            | 0.46<br>(0.31 to 0.60)           | 0.58<br>(0.36 to 0.91)             |
| Liver cancer due to hepatitis C      | 9.75<br>(8.10 to 11.43)                 | 15.37<br>(9.96 to 23.55)                  | 13.69<br>(9.34 to 20.04)                  | 17.75<br>(10.81 to 28.29)                 | 0.56<br>(0.47 to 0.66)           | 1.02<br>(0.69 to 1.53)            | 0.94<br>(0.66 to 1.34)           | 1.15<br>(0.72 to 1.75)             |
| Liver cancer due to alcohol use      | 14.58<br>(12.13 to 17.18)               | 22.09<br>(14.05 to 34.41)                 | 14.97<br>(9.95 to 22.37)                  | 32.27<br>(19.36 to 52.91)                 | 0.74<br>(0.60 to 0.88)           | 1.27<br>(0.81 to 1.94)            | 0.90<br>(0.60 to 1.32)           | 1.77<br>(1.07 to 2.80)             |
| Liver cancer due to other causes     | 4.16<br>(3.49 to 4.96)                  | 6.60<br>(4.15 to 10.70)                   | 5.79<br>(3.86 to 8.99)                    | 7.78<br>(4.56 to 13.02)                   | 0.21<br>(0.18 to 0.26)           | 0.39<br>(0.25 to 0.63)            | 0.35<br>(0.23 to 0.54)           | 0.45<br>(0.26 to 0.75)             |
| Gallbladder and biliary tract cancer | 11.83<br>(10.90 to 13.61)               | 12.77<br>(11.36 to 14.96)                 | 12.88<br>(11.39 to 15.30)                 | 12.58<br>(11.27 to 14.68)                 | 0.77<br>(0.71 to 0.87)           | 0.98<br>(0.88 to 1.12)            | 1.01<br>(0.91 to 1.16)           | 0.94<br>(0.85 to 1.06)             |
| Pancreatic cancer                    | 58.11<br>(53.90 to 62.55)               | 86.32<br>(71.43 to 105.46)                | 81.10<br>(68.00 to 98.15)                 | 94.62<br>(76.98 to 117.75)                | 3.39<br>(3.15 to 3.63)           | 5.81<br>(4.86 to 7.06)            | 5.55<br>(4.70 to 6.69)           | 6.26<br>(5.16 to 7.76)             |
| Larynx cancer                        | 5.62<br>(5.08 to 6.18)                  | 5.90<br>(3.09 to 10.34)                   | 3.21<br>(1.78 to 5.37)                    | 9.41<br>(4.69 to 17.01)                   | 0.30<br>(0.28 to 0.33)           | 0.37<br>(0.19 to 0.63)            | 0.20<br>(0.11 to 0.33)           | 0.56<br>(0.29 to 1.00)             |
| Tracheal, bronchus, and lung cancer  | 191.96<br>(178.38 to 205.96)            | 240.45<br>(177.79 to 326.13)              | 141.31<br>(107.08 to 185.83)              | 375.94<br>(273.64 to 507.99)              | 10.67<br>(9.94 to 11.42)         | 15.49<br>(11.25 to 21.05)         | 9.26<br>(6.85 to 12.25)          | 23.32<br>(16.82 to 31.66)          |
| Malignant skin melanoma              | 45.82<br>(38.76 to 51.44)               | 71.59<br>(59.41 to 84.71)                 | 79.00<br>(64.88 to 93.17)                 | 65.19<br>(53.08 to 75.77)                 | 2.31<br>(1.91 to 2.56)           | 4.36<br>(3.59 to 4.96)            | 4.95<br>(4.05 to 5.68)           | 3.86<br>(3.14 to 4.37)             |
| Non-melanoma skin cancer             | 10.88<br>(9.98 to 11.78)                | 15.71<br>(13.95 to 17.78)                 | 14.86<br>(13.03 to 16.95)                 | 16.40<br>(14.54 to 18.65)                 | 0.82<br>(0.76 to 0.88)           | 1.42<br>(1.27 to 1.60)            | 1.39<br>(1.23 to 1.57)           | 1.44<br>(1.28 to 1.61)             |
| Breast cancer                        | 85.36<br>(77.14 to 93.80)               | 102.93<br>(77.07 to 136.35)               | 83.37<br>(63.32 to 108.59)                | 122.33<br>(89.07 to 164.70)               | 3.99<br>(3.62 to 4.37)           | 5.92<br>(4.49 to 7.72)            | 4.96<br>(3.84 to 6.38)           | 6.85<br>(5.07 to 9.09)             |
| Cervical cancer                      | 11.35<br>(10.14 to 12.61)               | 9.79<br>(7.46 to 12.38)                   | 8.60<br>(6.66 to 10.81)                   | 11.44<br>(8.41 to 15.06)                  | 0.50<br>(0.45 to 0.56)           | 0.53<br>(0.41 to 0.67)            | 0.47<br>(0.37 to 0.59)           | 0.61<br>(0.45 to 0.81)             |

|                   |                              |                               |                               |                               |                           |                            |                            |                            |
|-------------------|------------------------------|-------------------------------|-------------------------------|-------------------------------|---------------------------|----------------------------|----------------------------|----------------------------|
| Uterine cancer    | 10.11<br>(8.92 to<br>11.52)  | 15.13<br>(12.93 to<br>17.77)  | 14.39<br>(12.18 to<br>16.92)  | 15.74<br>(13.43 to<br>18.37)  | 0.61<br>(0.54 to<br>0.69) | 1.10<br>(0.95 to<br>1.28)  | 1.07<br>(0.92 to<br>1.25)  | 1.12<br>(0.97 to<br>1.30)  |
| Ovarian cancer    | 25.38<br>(22.47 to<br>28.34) | 30.98<br>(23.61 to<br>40.07)  | 27.44<br>(21.39 to<br>34.82)  | 33.58<br>(24.99 to<br>44.53)  | 1.29<br>(1.14 to<br>1.43) | 1.85<br>(1.40 to<br>2.41)  | 1.63<br>(1.27 to<br>2.05)  | 1.98<br>(1.46 to<br>2.63)  |
| Prostate cancer   | 55.46<br>(47.77 to<br>69.80) | 97.81<br>(81.43 to<br>128.86) | 95.88<br>(79.45 to<br>126.03) | 98.77<br>(82.03 to<br>131.14) | 4.69<br>(4.07 to<br>5.72) | 9.72<br>(8.33 to<br>12.52) | 9.79<br>(8.35 to<br>12.38) | 9.56<br>(8.09 to<br>12.41) |
| Testicular cancer | 1.13<br>(0.96 to<br>1.31)    | 0.97<br>(0.74 to<br>1.27)     | 0.91<br>(0.69 to<br>1.21)     | 1.03<br>(0.79 to<br>1.35)     | 0.03<br>(0.02 to<br>0.03) | 0.03<br>(0.02 to<br>0.04)  | 0.03<br>(0.02 to<br>0.04)  | 0.03<br>(0.03 to<br>0.04)  |

| Australasia                     |                                      |                                      |                                      |                                          |                                   |                                    |                                   |                                     |
|---------------------------------|--------------------------------------|--------------------------------------|--------------------------------------|------------------------------------------|-----------------------------------|------------------------------------|-----------------------------------|-------------------------------------|
| Cause                           | YLLs (in 1000s)                      |                                      |                                      |                                          | Deaths (in 1000s)                 |                                    |                                   |                                     |
|                                 | 2016                                 | 2040 Forecast                        | 2040 Better Scenario                 | 2040 Worse Scenario                      | 2016                              | 2040 Forecast                      | 2040 Better Scenario              | 2040 Worse Scenario                 |
| Kidney cancer                   | 25.26<br>(23.40 to 27.33)            | 39.69<br>(33.08 to 47.98)            | 38.33<br>(32.77 to 45.41)            | 41.41<br>(33.77 to 51.08)                | 1.40<br>(1.30 to 1.50)            | 2.59<br>(2.17 to 3.07)             | 2.56<br>(2.16 to 2.98)            | 2.64<br>(2.15 to 3.20)              |
| Bladder cancer                  | 18.84<br>(17.29 to 20.54)            | 27.78<br>(22.17 to 35.31)            | 24.30<br>(19.93 to 30.19)            | 32.01<br>(24.74 to 42.06)                | 1.48<br>(1.36 to 1.62)            | 2.59<br>(2.06 to 3.25)             | 2.32<br>(1.91 to 2.83)            | 2.92<br>(2.23 to 3.76)              |
| Brain and nervous system cancer | 45.86<br>(37.44 to 52.66)            | 61.80<br>(50.65 to 71.68)            | 60.28<br>(49.34 to 70.60)            | 62.99<br>(51.84 to 73.08)                | 1.71<br>(1.34 to 1.90)            | 2.73<br>(2.15 to 3.15)             | 2.71<br>(2.16 to 3.12)            | 2.74<br>(2.13 to 3.10)              |
| Thyroid cancer                  | 2.82<br>(2.57 to 3.12)               | 3.55<br>(2.64 to 4.91)               | 3.23<br>(2.45 to 4.38)               | 3.95<br>(2.87 to 5.59)                   | 0.16<br>(0.14 to 0.17)            | 0.24<br>(0.18 to 0.33)             | 0.22<br>(0.17 to 0.30)            | 0.26<br>(0.19 to 0.36)              |
| Mesothelioma                    | 14.51<br>(13.01 to 16.31)            | 23.26<br>(20.18 to 27.41)            | 24.18<br>(20.82 to 28.61)            | 22.28<br>(19.46 to 25.98)                | 0.88<br>(0.79 to 0.98)            | 1.62<br>(1.42 to 1.84)             | 1.72<br>(1.50 to 1.96)            | 1.52<br>(1.35 to 1.73)              |
| Hodgkin lymphoma                | 2.52<br>(2.29 to 2.76)               | 2.17<br>(1.84 to 2.62)               | 1.95<br>(1.64 to 2.36)               | 2.39<br>(2.02 to 2.87)                   | 0.10<br>(0.09 to 0.11)            | 0.11<br>(0.09 to 0.12)             | 0.10<br>(0.08 to 0.11)            | 0.11<br>(0.10 to 0.13)              |
| Non-Hodgkin lymphoma            | 38.37<br>(34.83 to 45.72)            | 53.99<br>(44.55 to 67.53)            | 50.99<br>(42.32 to 63.52)            | 57.29<br>(46.60 to 72.33)                | 2.21<br>(1.99 to 2.47)            | 3.75<br>(3.13 to 4.54)             | 3.64<br>(3.07 to 4.34)            | 3.86<br>(3.21 to 4.75)              |
| Multiple myeloma                | 19.35<br>(14.91 to 22.00)            | 29.58<br>(21.99 to 37.57)            | 28.58<br>(21.30 to 35.77)            | 30.79<br>(22.77 to 39.79)                | 1.21<br>(0.91 to 1.35)            | 2.16<br>(1.62 to 2.69)             | 2.14<br>(1.61 to 2.64)            | 2.19<br>(1.61 to 2.75)              |
| Leukemia                        | 50.41<br>(46.96 to 54.06)            | 76.89<br>(61.17 to 95.65)            | 70.75<br>(57.99 to 86.09)            | 84.62<br>(65.99 to 107.02)               | 2.75<br>(2.56 to 2.95)            | 5.13<br>(4.10 to 6.38)             | 4.83<br>(3.97 to 5.90)            | 5.50<br>(4.27 to 6.97)              |
| Acute lymphoid leukemia         | 9.52<br>(8.36 to 10.59)              | 10.42<br>(8.19 to 13.31)             | 9.34<br>(7.41 to 11.75)              | 11.72<br>(9.07 to 15.22)                 | 0.37<br>(0.33 to 0.41)            | 0.48<br>(0.37 to 0.62)             | 0.44<br>(0.35 to 0.56)            | 0.53<br>(0.40 to 0.70)              |
| Chronic lymphoid leukemia       | 7.22<br>(6.37 to 8.99)               | 11.30<br>(8.41 to 15.43)             | 10.52<br>(8.05 to 14.16)             | 12.22<br>(8.82 to 17.04)                 | 0.54<br>(0.48 to 0.66)            | 0.99<br>(0.76 to 1.32)             | 0.95<br>(0.75 to 1.24)            | 1.04<br>(0.77 to 1.40)              |
| Acute myeloid leukemia          | 23.95<br>(20.98 to 25.97)            | 42.87<br>(34.18 to 53.69)            | 40.16<br>(32.81 to 49.52)            | 46.53<br>(36.36 to 59.35)                | 1.21<br>(1.05 to 1.32)            | 2.62<br>(2.09 to 3.27)             | 2.51<br>(2.05 to 3.06)            | 2.77<br>(2.15 to 3.52)              |
| Chronic myeloid leukemia        | 3.76<br>(3.30 to 4.36)               | 3.00<br>(2.19 to 4.16)               | 2.46<br>(1.85 to 3.35)               | 3.67<br>(2.58 to 5.15)                   | 0.23<br>(0.20 to 0.27)            | 0.22<br>(0.16 to 0.31)             | 0.19<br>(0.14 to 0.25)            | 0.26<br>(0.18 to 0.37)              |
| Other leukemia                  | 5.95<br>(5.38 to 6.61)               | 9.30<br>(7.18 to 11.83)              | 8.27<br>(6.59 to 10.28)              | 10.49<br>(7.84 to 13.63)                 | 0.40<br>(0.36 to 0.44)            | 0.81<br>(0.63 to 1.05)             | 0.75<br>(0.60 to 0.93)            | 0.89<br>(0.67 to 1.17)              |
| Other neoplasms                 | 44.45<br>(40.95 to 47.85)            | 64.07<br>(57.66 to 71.14)            | 64.95<br>(58.06 to 72.38)            | 62.90<br>(56.79 to 69.10)                | 2.39<br>(2.19 to 2.58)            | 4.35<br>(3.92 to 4.79)             | 4.55<br>(4.07 to 5.05)            | 4.14<br>(3.73 to 4.52)              |
| <b>Cardiovascular diseases</b>  | <b>708.11<br/>(673.94 to 747.47)</b> | <b>733.91<br/>(558.04 to 984.64)</b> | <b>550.30<br/>(436.32 to 703.70)</b> | <b>1,048.88<br/>(751.59 to 1,483.86)</b> | <b>63.98<br/>(61.01 to 67.16)</b> | <b>79.35<br/>(62.10 to 103.72)</b> | <b>63.41<br/>(50.79 to 81.51)</b> | <b>103.67<br/>(78.02 to 140.85)</b> |
| Rheumatic heart disease         | 9.42<br>(8.52 to 10.42)              | 7.56<br>(6.25 to 9.41)               | 6.91<br>(5.69 to 8.54)               | 8.21<br>(6.71 to 10.35)                  | 0.64<br>(0.58 to 0.71)            | 0.69<br>(0.58 to 0.88)             | 0.66<br>(0.54 to 0.81)            | 0.73<br>(0.60 to 0.93)              |
| Ischemic heart disease          | 400.21<br>(376.56 to 424.89)         | 360.21<br>(230.69 to 553.98)         | 241.47<br>(159.30 to 356.27)         | 579.74<br>(354.59 to 922.46)             | 35.56<br>(33.67 to 37.45)         | 38.30<br>(24.96 to 57.04)          | 27.75<br>(18.60 to 40.62)         | 55.32<br>(34.95 to 85.24)           |
| Stroke                          | 156.99<br>(144.38 to 170.19)         | 146.00<br>(99.29 to 216.73)          | 100.83<br>(71.09 to 147.79)          | 209.41<br>(134.42 to 323.54)             | 16.07<br>(14.60 to 17.49)         | 17.34<br>(11.85 to 25.92)          | 13.10<br>(9.21 to 19.42)          | 22.63<br>(14.98 to 34.83)           |
| Ischemic stroke                 | 64.39<br>(58.44 to 70.45)            | 59.71<br>(35.95 to 105.77)           | 44.92<br>(27.71 to 78.59)            | 79.00<br>(45.47 to 141.58)               | 7.83<br>(7.09 to 8.55)            | 8.11<br>(4.82 to 14.96)            | 6.47<br>(3.90 to 11.53)           | 10.07<br>(5.66 to 18.93)            |

|                                |                               |                               |                              |                                |                           |                            |                           |                             |
|--------------------------------|-------------------------------|-------------------------------|------------------------------|--------------------------------|---------------------------|----------------------------|---------------------------|-----------------------------|
| Intracerebral hemorrhage       | 92.60<br>(84.95 to<br>100.67) | 86.29<br>(55.95 to<br>129.11) | 55.91<br>(38.57 to<br>78.80) | 130.42<br>(78.84 to<br>204.88) | 8.24<br>(7.41 to<br>9.05) | 9.23<br>(6.35 to<br>13.29) | 6.63<br>(4.76 to<br>9.06) | 12.56<br>(8.15 to<br>18.56) |
| Hypertensive heart disease     | 13.53<br>(10.63 to<br>20.06)  | 26.93<br>(16.98 to<br>47.73)  | 22.26<br>(14.89 to<br>35.59) | 35.93<br>(20.61 to<br>72.13)   | 1.39<br>(1.02 to<br>1.99) | 3.41<br>(2.11 to<br>6.28)  | 2.93<br>(1.92 to<br>4.71) | 4.32<br>(2.43 to<br>9.08)   |
| Cardiomyopathy and myocarditis | 32.15<br>(28.12 to<br>43.73)  | 32.26<br>(25.08 to<br>46.50)  | 27.20<br>(21.19 to<br>38.06) | 38.22<br>(29.43 to<br>56.06)   | 1.62<br>(1.41 to<br>2.17) | 2.03<br>(1.52 to<br>2.93)  | 1.80<br>(1.35 to<br>2.58) | 2.31<br>(1.71 to<br>3.35)   |
| Myocarditis                    | 3.95<br>(3.14 to<br>6.02)     | 4.26<br>(3.28 to<br>6.29)     | 4.23<br>(3.25 to<br>6.18)    | 4.29<br>(3.29 to<br>6.42)      | 0.14<br>(0.11 to<br>0.20) | 0.21<br>(0.16 to<br>0.30)  | 0.22<br>(0.17 to<br>0.31) | 0.20<br>(0.16 to<br>0.29)   |



| Australasia                                                   |                                            |                                            |                                            |                                            |                                         |                                         |                                         |                                         |
|---------------------------------------------------------------|--------------------------------------------|--------------------------------------------|--------------------------------------------|--------------------------------------------|-----------------------------------------|-----------------------------------------|-----------------------------------------|-----------------------------------------|
| Cause                                                         | YLLs (in 1000s)                            |                                            |                                            |                                            | Deaths (in 1000s)                       |                                         |                                         |                                         |
|                                                               | 2016                                       | 2040 Forecast                              | 2040 Better Scenario                       | 2040 Worse Scenario                        | 2016                                    | 2040 Forecast                           | 2040 Better Scenario                    | 2040 Worse Scenario                     |
| Alcoholic cardiomyopathy                                      | 11.87<br>(9.58 to 17.85)                   | 12.94<br>(10.10 to 19.29)                  | 9.94<br>(7.68 to 14.57)                    | 16.17<br>(12.72 to 24.32)                  | 0.47<br>(0.38 to 0.71)                  | 0.59<br>(0.46 to 0.89)                  | 0.47<br>(0.37 to 0.70)                  | 0.72<br>(0.57 to 1.10)                  |
| Other cardiomyopathy                                          | 16.33<br>(13.75 to 23.28)                  | 15.06<br>(10.07 to 23.29)                  | 13.03<br>(8.84 to 19.87)                   | 17.76<br>(11.69 to 28.01)                  | 1.01<br>(0.85 to 1.38)                  | 1.23<br>(0.79 to 1.99)                  | 1.11<br>(0.74 to 1.75)                  | 1.39<br>(0.89 to 2.25)                  |
| Atrial fibrillation and flutter                               | 19.63<br>(15.35 to 24.42)                  | 37.17<br>(27.21 to 49.04)                  | 35.26<br>(26.36 to 45.95)                  | 39.90<br>(28.85 to 53.79)                  | 2.32<br>(1.76 to 2.97)                  | 4.75<br>(3.46 to 6.28)                  | 4.65<br>(3.43 to 6.11)                  | 4.91<br>(3.56 to 6.56)                  |
| Aortic aneurysm                                               | 23.17<br>(21.37 to 25.19)                  | 33.11<br>(27.43 to 41.28)                  | 32.04<br>(26.68 to 39.36)                  | 35.70<br>(28.97 to 45.54)                  | 1.82<br>(1.68 to 1.96)                  | 3.10<br>(2.63 to 3.80)                  | 3.11<br>(2.65 to 3.76)                  | 3.18<br>(2.65 to 3.91)                  |
| Peripheral artery disease                                     | 9.15<br>(6.81 to 16.64)                    | 24.20<br>(15.95 to 41.49)                  | 24.34<br>(16.04 to 41.63)                  | 25.19<br>(16.25 to 44.00)                  | 1.09<br>(0.80 to 2.00)                  | 1.09<br>(2.05 to 5.85)                  | 3.21<br>(2.14 to 6.02)                  | 3.33<br>(2.01 to 5.93)                  |
| Endocarditis                                                  | 6.92<br>(4.99 to 8.46)                     | 10.94<br>(7.03 to 15.18)                   | 10.85<br>(6.98 to 14.96)                   | 11.37<br>(7.22 to 16.16)                   | 0.46<br>(0.31 to 0.55)                  | 0.89<br>(0.55 to 1.33)                  | 0.91<br>(0.57 to 1.35)                  | 0.89<br>(0.55 to 1.34)                  |
| Other cardiovascular and circulatory diseases                 | 36.92<br>(33.93 to 40.19)                  | 55.53<br>(45.99 to 68.74)                  | 49.14<br>(41.47 to 60.01)                  | 65.21<br>(52.75 to 83.33)                  | 3.02<br>(2.78 to 3.27)                  | 5.62<br>(4.73 to 6.78)                  | 5.17<br>(4.39 to 6.19)                  | 6.21<br>(5.20 to 7.68)                  |
| <b>Chronic respiratory diseases</b>                           | <b>156.04</b><br><b>(146.34 to 166.22)</b> | <b>210.37</b><br><b>(174.72 to 255.97)</b> | <b>156.50</b><br><b>(133.28 to 183.78)</b> | <b>292.42</b><br><b>(236.42 to 367.02)</b> | <b>12.45</b><br><b>(11.72 to 13.27)</b> | <b>19.70</b><br><b>(16.39 to 24.07)</b> | <b>15.02</b><br><b>(12.74 to 17.86)</b> | <b>26.57</b><br><b>(21.72 to 32.91)</b> |
| Chronic obstructive pulmonary disease                         | 125.94<br>(116.49 to 139.34)               | 167.56<br>(130.94 to 216.67)               | 110.15<br>(87.01 to 144.99)                | 251.54<br>(195.34 to 324.03)               | 10.46<br>(9.70 to 11.55)                | 16.16<br>(12.74 to 21.47)               | 11.04<br>(8.71 to 14.71)                | 23.33<br>(18.26 to 30.46)               |
| Pneumoconiosis                                                | 1.28<br>(0.81 to 2.19)                     | 2.06<br>(1.21 to 3.72)                     | 2.24<br>(1.30 to 4.20)                     | 1.90<br>(1.13 to 3.37)                     | 0.11<br>(0.07 to 0.18)                  | 0.19<br>(0.11 to 0.35)                  | 0.21<br>(0.12 to 0.39)                  | 0.17<br>(0.10 to 0.30)                  |
| Silicosis                                                     | 0.15<br>(0.05 to 0.59)                     | 0.11<br>(0.03 to 0.56)                     | 0.10<br>(0.02 to 0.51)                     | 0.13<br>(0.03 to 0.61)                     | 0.01<br>(0.00 to 0.05)                  | 0.01<br>(0.00 to 0.05)                  | 0.01<br>(0.00 to 0.05)                  | 0.01<br>(0.00 to 0.06)                  |
| Asbestosis                                                    | 1.04<br>(0.68 to 1.80)                     | 1.81<br>(1.10 to 3.22)                     | 2.01<br>(1.20 to 3.66)                     | 1.63<br>(1.01 to 2.92)                     | 0.09<br>(0.06 to 0.15)                  | 0.17<br>(0.10 to 0.30)                  | 0.19<br>(0.11 to 0.34)                  | 0.15<br>(0.09 to 0.27)                  |
| Coal workers pneumoconiosis                                   | 0.02<br>(0.00 to 0.17)                     | 0.05<br>(0.01 to 0.38)                     | 0.04<br>(0.01 to 0.36)                     | 0.05<br>(0.01 to 0.45)                     | 0.00<br>(0.00 to 0.01)                  | 0.00<br>(0.00 to 0.04)                  | 0.00<br>(0.00 to 0.04)                  | 0.00<br>(0.00 to 0.04)                  |
| Other pneumoconiosis                                          | 0.07<br>(0.03 to 0.26)                     | 0.08<br>(0.04 to 0.29)                     | 0.08<br>(0.04 to 0.29)                     | 0.09<br>(0.05 to 0.31)                     | 0.01<br>(0.00 to 0.02)                  | 0.01<br>(0.00 to 0.05)                  | 0.01<br>(0.00 to 0.03)                  | 0.01<br>(0.00 to 0.03)                  |
| Asthma                                                        | 10.12<br>(9.10 to 13.57)                   | 5.46<br>(3.22 to 9.44)                     | 4.12<br>(2.48 to 7.10)                     | 7.71<br>(4.46 to 13.27)                    | 0.53<br>(0.47 to 0.70)                  | 0.39<br>(0.23 to 0.67)                  | 0.31<br>(0.19 to 0.53)                  | 0.51<br>(0.30 to 0.89)                  |
| Interstitial lung disease and pulmonary sarcoidosis           | 16.86<br>(7.61 to 20.95)                   | 33.02<br>(15.04 to 41.56)                  | 37.81<br>(18.46 to 47.26)                  | 28.87<br>(12.79 to 36.69)                  | 1.27<br>(0.55 to 1.60)                  | 2.83<br>(1.22 to 3.60)                  | 3.31<br>(1.56 to 4.16)                  | 2.41<br>(1.03 to 3.11)                  |
| Other chronic respiratory diseases                            | 1.85<br>(1.12 to 2.47)                     | 2.27<br>(1.42 to 3.11)                     | 2.18<br>(1.39 to 3.05)                     | 2.41<br>(1.47 to 3.31)                     | 0.09<br>(0.05 to 0.12)                  | 0.14<br>(0.09 to 0.20)                  | 0.14<br>(0.09 to 0.19)                  | 0.14<br>(0.09 to 0.20)                  |
| <b>Cirrhosis and other chronic liver diseases</b>             | <b>56.88</b><br><b>(52.05 to 62.66)</b>    | <b>59.62</b><br><b>(52.12 to 69.41)</b>    | <b>51.76</b><br><b>(44.95 to 60.58)</b>    | <b>67.85</b><br><b>(59.07 to 79.65)</b>    | <b>2.43</b><br><b>(2.24 to 2.64)</b>    | <b>2.98</b><br><b>(2.70 to 3.34)</b>    | <b>2.68</b><br><b>(2.41 to 3.03)</b>    | <b>3.29</b><br><b>(2.96 to 3.69)</b>    |
| Cirrhosis and other chronic liver diseases due to hepatitis B | 17.46<br>(15.18 to 20.10)                  | 18.21<br>(15.05 to 22.40)                  | 17.10<br>(14.24 to 21.08)                  | 19.25<br>(15.90 to 23.73)                  | 0.74<br>(0.65 to 0.84)                  | 0.89<br>(0.77 to 1.04)                  | 0.86<br>(0.74 to 1.00)                  | 0.92<br>(0.79 to 1.08)                  |
| Cirrhosis and other chronic liver diseases due to hepatitis C | 16.06<br>(14.02 to 18.22)                  | 16.97<br>(14.25 to 20.44)                  | 15.82<br>(13.14 to 19.17)                  | 18.07<br>(15.07 to 21.93)                  | 0.65<br>(0.58 to 0.72)                  | 0.78<br>(0.67 to 0.91)                  | 0.75<br>(0.64 to 0.87)                  | 0.82<br>(0.70 to 0.96)                  |

|                                                                |                                                   |                                                    |                                                   |                                                    |                                                |                                                 |                                                 |                                                 |
|----------------------------------------------------------------|---------------------------------------------------|----------------------------------------------------|---------------------------------------------------|----------------------------------------------------|------------------------------------------------|-------------------------------------------------|-------------------------------------------------|-------------------------------------------------|
|                                                                | 16.08<br>(14.21 to<br>18.19)                      | 16.85<br>(14.19 to<br>20.04)                       | 11.70<br>(9.83 to<br>13.95)                       | 22.53<br>(19.03 to<br>26.60)                       | 0.70<br>(0.62 to<br>0.78)                      | 0.86<br>(0.75 to<br>0.98)                       | 0.64<br>(0.55 to<br>0.74)                       | 1.10<br>(0.95 to<br>1.25)                       |
| Cirrhosis and other chronic liver diseases due to alcohol use  |                                                   |                                                    |                                                   |                                                    |                                                |                                                 |                                                 |                                                 |
|                                                                | 7.28<br>(6.31 to<br>8.25)                         | 7.59<br>(6.43 to<br>9.09)                          | 7.14<br>(6.07 to<br>8.55)                         | 8.00<br>(6.79 to<br>9.54)                          | 0.34<br>(0.30 to<br>0.39)                      | 0.45<br>(0.39 to<br>0.52)                       | 0.43<br>(0.38 to<br>0.51)                       | 0.45<br>(0.39 to<br>0.53)                       |
| Cirrhosis and other chronic liver diseases due to other causes |                                                   |                                                    |                                                   |                                                    |                                                |                                                 |                                                 |                                                 |
| <b>Digestive diseases</b>                                      | <b>51.46</b><br><b>(46.56 to</b><br><b>66.14)</b> | <b>81.87</b><br><b>(70.14 to</b><br><b>103.10)</b> | <b>78.54</b><br><b>(67.49 to</b><br><b>98.94)</b> | <b>85.34</b><br><b>(73.02 to</b><br><b>108.97)</b> | <b>4.53</b><br><b>(4.13 to</b><br><b>5.53)</b> | <b>8.66</b><br><b>(7.57 to</b><br><b>10.61)</b> | <b>8.62</b><br><b>(7.53 to</b><br><b>10.56)</b> | <b>8.69</b><br><b>(7.53 to</b><br><b>10.81)</b> |
| Peptic ulcer disease                                           | 5.79<br>(5.09 to<br>7.51)                         | 6.12<br>(5.01 to<br>7.79)                          | 5.41<br>(4.37 to<br>6.87)                         | 7.01<br>(5.67 to<br>8.95)                          | 0.52<br>(0.46 to<br>0.65)                      | 0.69<br>(0.56 to<br>0.86)                       | 0.62<br>(0.51 to<br>0.80)                       | 0.75<br>(0.61 to<br>0.95)                       |

| Australasia                                |                              |                              |                              |                              |                           |                           |                           |                           |
|--------------------------------------------|------------------------------|------------------------------|------------------------------|------------------------------|---------------------------|---------------------------|---------------------------|---------------------------|
| Cause                                      | YLLs (in 1000s)              |                              |                              |                              | Deaths (in 1000s)         |                           |                           |                           |
|                                            | 2016                         | 2040 Forecast                | 2040 Better Scenario         | 2040 Worse Scenario          | 2016                      | 2040 Forecast             | 2040 Better Scenario      | 2040 Worse Scenario       |
| Gastritis and duodenitis                   | 0.58<br>(0.47 to 1.02)       | 0.85<br>(0.65 to 1.62)       | 0.79<br>(0.60 to 1.50)       | 0.89<br>(0.68 to 1.68)       | 0.04<br>(0.03 to 0.08)    | 0.08<br>(0.06 to 0.15)    | 0.08<br>(0.06 to 0.15)    | 0.08<br>(0.06 to 0.15)    |
| Appendicitis                               | 0.77<br>(0.63 to 1.17)       | 0.81<br>(0.63 to 1.28)       | 0.72<br>(0.56 to 1.13)       | 0.89<br>(0.70 to 1.38)       | 0.05<br>(0.04 to 0.07)    | 0.07<br>(0.05 to 0.10)    | 0.06<br>(0.05 to 0.09)    | 0.07<br>(0.06 to 0.11)    |
| Paralytic ileus and intestinal obstruction | 9.59<br>(7.61 to 11.91)      | 17.70<br>(13.90 to 22.22)    | 18.50<br>(14.56 to 23.07)    | 16.81<br>(13.09 to 20.96)    | 0.92<br>(0.72 to 1.12)    | 2.01<br>(1.57 to 2.42)    | 2.16<br>(1.69 to 2.61)    | 1.86<br>(1.43 to 2.24)    |
| Inguinal, femoral, and abdominal hernia    | 2.16<br>(1.67 to 3.14)       | 2.07<br>(1.62 to 3.05)       | 2.01<br>(1.55 to 2.99)       | 2.11<br>(1.64 to 3.11)       | 0.20<br>(0.15 to 0.29)    | 0.23<br>(0.17 to 0.33)    | 0.23<br>(0.17 to 0.33)    | 0.22<br>(0.17 to 0.33)    |
| Inflammatory bowel disease                 | 3.67<br>(2.44 to 4.33)       | 5.32<br>(3.44 to 6.47)       | 5.47<br>(3.56 to 6.71)       | 5.13<br>(3.31 to 6.24)       | 0.30<br>(0.20 to 0.36)    | 0.53<br>(0.34 to 0.65)    | 0.56<br>(0.36 to 0.69)    | 0.49<br>(0.31 to 0.60)    |
| Vascular intestinal disorders              | 7.78<br>(6.60 to 10.71)      | 13.87<br>(11.57 to 18.88)    | 13.80<br>(11.42 to 18.79)    | 13.79<br>(11.52 to 18.92)    | 0.68<br>(0.59 to 0.89)    | 1.41<br>(1.19 to 1.86)    | 1.44<br>(1.21 to 1.90)    | 1.36<br>(1.16 to 1.80)    |
| Gallbladder and biliary diseases           | 5.83<br>(5.15 to 7.52)       | 9.48<br>(5.54 to 15.85)      | 7.75<br>(4.66 to 12.57)      | 11.82<br>(6.80 to 19.46)     | 0.55<br>(0.48 to 0.69)    | 1.06<br>(0.62 to 1.76)    | 0.90<br>(0.54 to 1.47)    | 1.26<br>(0.73 to 2.11)    |
| Pancreatitis                               | 5.26<br>(4.47 to 7.39)       | 7.55<br>(4.42 to 13.49)      | 5.94<br>(3.62 to 10.44)      | 9.02<br>(5.05 to 16.65)      | 0.31<br>(0.27 to 0.43)    | 0.56<br>(0.35 to 0.96)    | 0.46<br>(0.30 to 0.74)    | 0.64<br>(0.39 to 1.14)    |
| Other digestive diseases                   | 10.03<br>(8.28 to 12.87)     | 18.11<br>(15.13 to 23.05)    | 18.16<br>(15.21 to 23.17)    | 17.86<br>(14.87 to 22.84)    | 0.96<br>(0.83 to 1.19)    | 2.04<br>(1.75 to 2.55)    | 2.11<br>(1.79 to 2.54)    | 1.95<br>(1.68 to 2.46)    |
| Neurological disorders                     | 208.77<br>(187.86 to 232.60) | 400.19<br>(326.14 to 503.74) | 397.76<br>(330.01 to 490.24) | 411.38<br>(328.18 to 534.14) | 21.63<br>(18.99 to 24.45) | 46.97<br>(37.17 to 60.31) | 47.93<br>(38.74 to 60.43) | 47.06<br>(36.12 to 62.83) |
| Alzheimer's disease and other dementias    | 137.58<br>(118.51 to 160.45) | 287.76<br>(217.19 to 387.43) | 284.53<br>(219.95 to 372.81) | 300.16<br>(219.44 to 419.50) | 17.67<br>(15.11 to 20.46) | 39.28<br>(29.72 to 53.06) | 39.86<br>(30.72 to 51.81) | 39.78<br>(29.07 to 55.86) |
| Parkinson's disease                        | 21.60<br>(16.44 to 27.89)    | 43.20<br>(32.75 to 55.92)    | 46.08<br>(34.94 to 59.58)    | 40.27<br>(30.30 to 52.49)    | 1.98<br>(1.51 to 2.59)    | 4.30<br>(3.27 to 5.65)    | 4.69<br>(3.59 to 6.12)    | 3.93<br>(2.96 to 5.18)    |
| Epilepsy                                   | 12.34<br>(11.39 to 13.46)    | 17.82<br>(11.98 to 25.85)    | 15.09<br>(10.45 to 21.58)    | 20.15<br>(13.42 to 29.11)    | 0.35<br>(0.32 to 0.38)    | 0.64<br>(0.45 to 0.89)    | 0.56<br>(0.40 to 0.76)    | 0.71<br>(0.48 to 1.00)    |
| Multiple sclerosis                         | 5.05<br>(3.80 to 6.01)       | 5.93<br>(4.38 to 7.22)       | 6.00<br>(4.43 to 7.28)       | 6.05<br>(4.46 to 7.46)       | 0.19<br>(0.14 to 0.23)    | 0.26<br>(0.19 to 0.31)    | 0.26<br>(0.19 to 0.32)    | 0.26<br>(0.19 to 0.31)    |
| Motor neuron disease                       | 17.65<br>(16.17 to 19.16)    | 26.29<br>(23.21 to 29.97)    | 26.50<br>(23.25 to 30.38)    | 25.95<br>(22.99 to 29.41)    | 0.85<br>(0.78 to 0.92)    | 1.52<br>(1.34 to 1.71)    | 1.55<br>(1.37 to 1.77)    | 1.47<br>(1.31 to 1.64)    |
| Other neurological disorders               | 14.54<br>(13.38 to 15.72)    | 19.19<br>(16.94 to 21.74)    | 19.55<br>(17.21 to 22.23)    | 18.80<br>(16.65 to 21.22)    | 0.59<br>(0.54 to 0.64)    | 0.97<br>(0.87 to 1.08)    | 1.01<br>(0.91 to 1.13)    | 0.92<br>(0.83 to 1.02)    |
| Mental disorders                           | 64.88<br>(57.98 to 71.21)    | 125.70<br>(100.17 to 159.60) | 136.02<br>(109.08 to 173.43) | 116.68<br>(93.24 to 149.69)  | 1.66<br>(1.51 to 1.81)    | 3.36<br>(2.84 to 4.01)    | 3.63<br>(3.05 to 4.37)    | 3.12<br>(2.63 to 3.74)    |
| Alcohol use disorders                      | 14.73<br>(13.33 to 16.20)    | 17.66<br>(15.01 to 20.77)    | 16.69<br>(14.11 to 19.70)    | 18.28<br>(15.66 to 21.29)    | 0.52<br>(0.47 to 0.56)    | 0.75<br>(0.66 to 0.86)    | 0.74<br>(0.64 to 0.84)    | 0.76<br>(0.67 to 0.86)    |
| Drug use disorders                         | 49.85<br>(43.89 to 55.46)    | 107.65<br>(83.70 to 140.13)  | 118.91<br>(92.91 to 154.78)  | 98.04<br>(76.07 to 128.51)   | 1.14<br>(1.01 to 1.27)    | 2.60<br>(2.12 to 3.22)    | 2.89<br>(2.35 to 3.59)    | 2.35<br>(1.90 to 2.92)    |
| Opioid use disorders                       | 25.92<br>(20.88 to 30.71)    | 38.38<br>(27.83 to 53.63)    | 39.70<br>(28.65 to 55.96)    | 37.11<br>(26.95 to 51.58)    | 0.58<br>(0.47 to 0.68)    | 0.91<br>(0.67 to 1.22)    | 0.95<br>(0.70 to 1.28)    | 0.88<br>(0.65 to 1.17)    |

|                           |                              |                              |                              |                              |                           |                           |                           |                           |
|---------------------------|------------------------------|------------------------------|------------------------------|------------------------------|---------------------------|---------------------------|---------------------------|---------------------------|
|                           | 0.45<br>(0.14 to<br>0.58)    | 0.98<br>(0.32 to<br>1.44)    | 1.08<br>(0.35 to<br>1.60)    | 0.89<br>(0.30 to<br>1.31)    | 0.01<br>(0.00 to<br>0.01) | 0.02<br>(0.01 to<br>0.03) | 0.02<br>(0.01 to<br>0.03) | 0.02<br>(0.01 to<br>0.03) |
| Cocaine use disorders     | 2.74<br>(1.10 to<br>3.57)    | 11.43<br>(5.52 to<br>17.15)  | 13.31<br>(6.39 to<br>19.98)  | 9.88<br>(4.69 to<br>15.06)   | 0.05<br>(0.02 to<br>0.07) | 0.23<br>(0.11 to<br>0.34) | 0.27<br>(0.13 to<br>0.39) | 0.20<br>(0.10 to<br>0.29) |
| Amphetamine use disorders | 20.76<br>(16.22 to<br>25.09) | 56.85<br>(41.51 to<br>74.83) | 64.82<br>(47.41 to<br>85.81) | 50.16<br>(35.87 to<br>66.14) | 0.50<br>(0.40 to<br>0.60) | 1.44<br>(1.12 to<br>1.81) | 1.65<br>(1.27 to<br>2.08) | 1.26<br>(0.95 to<br>1.60) |
| Other drug use disorders  | 0.29<br>(0.23 to<br>0.36)    | 0.39<br>(0.27 to<br>0.58)    | 0.42<br>(0.28 to<br>0.63)    | 0.37<br>(0.25 to<br>0.54)    | 0.01<br>(0.00 to<br>0.01) | 0.01<br>(0.01 to<br>0.01) | 0.01<br>(0.01 to<br>0.01) | 0.01<br>(0.00 to<br>0.01) |
| Eating disorders          |                              |                              |                              |                              |                           |                           |                           |                           |

| Australasia                                                |                                 |                                 |                                 |                                 |                              |                              |                              |                              |
|------------------------------------------------------------|---------------------------------|---------------------------------|---------------------------------|---------------------------------|------------------------------|------------------------------|------------------------------|------------------------------|
| Cause                                                      | YLLs (in 1000s)                 |                                 |                                 |                                 | Deaths (in 1000s)            |                              |                              |                              |
|                                                            | 2016                            | 2040 Forecast                   | 2040 Better Scenario            | 2040 Worse Scenario             | 2016                         | 2040 Forecast                | 2040 Better Scenario         | 2040 Worse Scenario          |
|                                                            | 167.16<br>(157.10 to<br>177.95) | 280.32<br>(228.09 to<br>345.06) | 251.88<br>(208.35 to<br>307.44) | 318.60<br>(256.39 to<br>405.12) | 12.99<br>(12.20 to<br>13.77) | 27.39<br>(22.37 to<br>33.82) | 25.32<br>(20.92 to<br>30.68) | 30.39<br>(24.52 to<br>38.24) |
| Diabetes, urogenital, blood, and endocrine diseases        |                                 |                                 |                                 |                                 |                              |                              |                              |                              |
| Diabetes mellitus                                          | 63.69<br>(59.41 to<br>68.43)    | 87.21<br>(57.95 to<br>127.77)   | 70.37<br>(48.65 to<br>100.95)   | 103.68<br>(67.07 to<br>154.46)  | 4.78<br>(4.43 to<br>5.14)    | 8.01<br>(5.72 to<br>11.03)   | 6.84<br>(5.03 to<br>9.19)    | 9.08<br>(6.32 to<br>12.73)   |
| Acute glomerulonephritis                                   | 0.17<br>(0.16 to<br>0.19)       | 0.19<br>(0.16 to<br>0.23)       | 0.18<br>(0.14 to<br>0.22)       | 0.20<br>(0.17 to<br>0.24)       | 0.01<br>(0.01 to<br>0.01)    | 0.01<br>(0.01 to<br>0.01)    | 0.01<br>(0.01 to<br>0.01)    | 0.01<br>(0.01 to<br>0.01)    |
| Chronic kidney disease                                     | 53.06<br>(49.71 to<br>56.91)    | 104.09<br>(67.94 to<br>161.56)  | 91.45<br>(61.92 to<br>138.72)   | 127.40<br>(77.67 to<br>204.55)  | 4.98<br>(4.66 to<br>5.34)    | 12.09<br>(7.80 to<br>18.57)  | 10.94<br>(7.38 to<br>16.55)  | 14.32<br>(8.83 to<br>22.88)  |
| Chronic kidney disease due to diabetes mellitus            | 29.53<br>(27.60 to<br>31.79)    | 52.82<br>(34.44 to<br>81.73)    | 46.25<br>(31.29 to<br>69.84)    | 65.21<br>(40.10 to<br>106.73)   | 2.47<br>(2.30 to<br>2.66)    | 5.54<br>(3.59 to<br>8.50)    | 5.00<br>(3.37 to<br>7.48)    | 6.63<br>(4.09 to<br>10.59)   |
| Chronic kidney disease due to hypertension                 | 7.63<br>(6.95 to<br>8.41)       | 19.18<br>(12.01 to<br>29.82)    | 17.46<br>(11.41 to<br>26.32)    | 22.61<br>(13.56 to<br>37.04)    | 1.05<br>(0.95 to<br>1.16)    | 2.89<br>(1.83 to<br>4.53)    | 2.70<br>(1.77 to<br>4.04)    | 3.31<br>(2.00 to<br>5.37)    |
| Chronic kidney disease due to glomerulonephritis           | 7.77<br>(7.12 to<br>8.41)       | 14.71<br>(9.21 to<br>23.70)     | 12.57<br>(8.18 to<br>19.50)     | 18.27<br>(10.87 to<br>30.41)    | 0.67<br>(0.61 to<br>0.73)    | 1.60<br>(1.01 to<br>2.56)    | 1.40<br>(0.92 to<br>2.16)    | 1.94<br>(1.15 to<br>3.25)    |
| Chronic kidney disease due to other and unspecified causes | 8.13<br>(7.52 to<br>8.80)       | 17.38<br>(11.35 to<br>27.11)    | 15.18<br>(10.32 to<br>22.81)    | 21.31<br>(13.23 to<br>34.46)    | 0.79<br>(0.72 to<br>0.86)    | 2.05<br>(1.34 to<br>3.16)    | 1.84<br>(1.26 to<br>2.76)    | 2.45<br>(1.51 to<br>3.95)    |
| Urinary diseases and male infertility                      | 11.75<br>(10.86 to<br>12.70)    | 24.74<br>(21.15 to<br>28.38)    | 24.01<br>(20.40 to<br>27.87)    | 25.16<br>(21.40 to<br>28.76)    | 1.25<br>(1.14 to<br>1.36)    | 3.17<br>(2.68 to<br>3.69)    | 3.17<br>(2.68 to<br>3.72)    | 3.13<br>(2.62 to<br>3.69)    |
| Urinary tract infections                                   | 10.07<br>(9.20 to<br>10.99)     | 22.45<br>(19.06 to<br>25.85)    | 21.90<br>(18.46 to<br>25.58)    | 22.70<br>(19.12 to<br>26.34)    | 1.12<br>(1.02 to<br>1.23)    | 2.95<br>(2.47 to<br>3.46)    | 2.96<br>(2.48 to<br>3.51)    | 2.89<br>(2.41 to<br>3.44)    |
| Urolithiasis                                               | 0.74<br>(0.54 to<br>1.14)       | 1.00<br>(0.72 to<br>1.59)       | 0.91<br>(0.64 to<br>1.49)       | 1.08<br>(0.77 to<br>1.73)       | 0.05<br>(0.04 to<br>0.08)    | 0.08<br>(0.06 to<br>0.13)    | 0.08<br>(0.06 to<br>0.13)    | 0.09<br>(0.06 to<br>0.14)    |
| Other urinary diseases                                     | 0.95<br>(0.67 to<br>1.33)       | 1.30<br>(0.88 to<br>1.86)       | 1.21<br>(0.79 to<br>1.76)       | 1.38<br>(0.92 to<br>1.99)       | 0.08<br>(0.05 to<br>0.11)    | 0.14<br>(0.09 to<br>0.21)    | 0.14<br>(0.09 to<br>0.21)    | 0.14<br>(0.09 to<br>0.21)    |
| Gynecological diseases                                     | 0.17<br>(0.14 to<br>0.26)       | 0.10<br>(0.07 to<br>0.15)       | 0.08<br>(0.06 to<br>0.13)       | 0.12<br>(0.09 to<br>0.18)       | 0.01<br>(0.01 to<br>0.01)    | 0.01<br>(0.01 to<br>0.01)    | 0.01<br>(0.01 to<br>0.01)    | 0.01<br>(0.01 to<br>0.01)    |
| Uterine fibroids                                           | 0.01<br>(0.01 to<br>0.02)       | 0.01<br>(0.01 to<br>0.01)       | 0.01<br>(0.01 to<br>0.01)       | 0.01<br>(0.01 to<br>0.02)       | 0.00<br>(0.00 to<br>0.00)    | 0.00<br>(0.00 to<br>0.00)    | 0.00<br>(0.00 to<br>0.00)    | 0.00<br>(0.00 to<br>0.00)    |
| Polycystic ovarian syndrome                                | 0.08<br>(0.06 to<br>0.12)       | 0.02<br>(0.01 to<br>0.03)       | 0.02<br>(0.01 to<br>0.02)       | 0.03<br>(0.02 to<br>0.05)       | 0.00<br>(0.00 to<br>0.00)    | 0.00<br>(0.00 to<br>0.00)    | 0.00<br>(0.00 to<br>0.00)    | 0.00<br>(0.00 to<br>0.00)    |
| Endometriosis                                              | 0.00<br>(0.00 to<br>0.00)       | 0.00<br>(0.00 to<br>0.00)       | 0.00<br>(0.00 to<br>0.00)       | 0.00<br>(0.00 to<br>0.00)       | 0.00<br>(0.00 to<br>0.00)    | 0.00<br>(0.00 to<br>0.00)    | 0.00<br>(0.00 to<br>0.00)    | 0.00<br>(0.00 to<br>0.00)    |
| Genital prolapse                                           | 0.01<br>(0.01 to<br>0.02)       | 0.01<br>(0.01 to<br>0.02)       | 0.01<br>(0.01 to<br>0.02)       | 0.01<br>(0.01 to<br>0.03)       | 0.00<br>(0.00 to<br>0.00)    | 0.00<br>(0.00 to<br>0.00)    | 0.00<br>(0.00 to<br>0.00)    | 0.00<br>(0.00 to<br>0.00)    |
| Other gynecological diseases                               | 0.06<br>(0.05 to<br>0.10)       | 0.06<br>(0.04 to<br>0.09)       | 0.05<br>(0.03 to<br>0.08)       | 0.07<br>(0.05 to<br>0.11)       | 0.01<br>(0.00 to<br>0.01)    | 0.01<br>(0.00 to<br>0.01)    | 0.01<br>(0.00 to<br>0.01)    | 0.01<br>(0.00 to<br>0.01)    |
| Hemoglobinopathies and hemolytic anemias                   | 2.38<br>(2.04 to<br>3.64)       | 2.75<br>(2.22 to<br>4.37)       | 2.58<br>(2.06 to<br>4.15)       | 2.90<br>(2.33 to<br>4.50)       | 0.17<br>(0.14 to<br>0.26)    | 0.28<br>(0.22 to<br>0.45)    | 0.27<br>(0.21 to<br>0.43)    | 0.28<br>(0.22 to<br>0.44)    |
| Thalassemias                                               | 0.34<br>(0.29 to<br>0.48)       | 0.19<br>(0.14 to<br>0.29)       | 0.18<br>(0.14 to<br>0.29)       | 0.19<br>(0.14 to<br>0.29)       | 0.00<br>(0.00 to<br>0.01)    | 0.00<br>(0.00 to<br>0.00)    | 0.00<br>(0.00 to<br>0.00)    | 0.00<br>(0.00 to<br>0.00)    |

|                                                   |                              |                              |                              |                              |                           |                           |                           |                           |
|---------------------------------------------------|------------------------------|------------------------------|------------------------------|------------------------------|---------------------------|---------------------------|---------------------------|---------------------------|
|                                                   | 0.11<br>(0.09 to<br>0.16)    | 0.12<br>(0.09 to<br>0.18)    | 0.11<br>(0.08 to<br>0.16)    | 0.14<br>(0.10 to<br>0.20)    | 0.00<br>(0.00 to<br>0.00) | 0.00<br>(0.00 to<br>0.01) | 0.00<br>(0.00 to<br>0.01) | 0.00<br>(0.00 to<br>0.01) |
| Sickle cell disorders                             |                              |                              |                              |                              |                           |                           |                           |                           |
|                                                   | 0.24<br>(0.20 to<br>0.32)    | 0.30<br>(0.23 to<br>0.44)    | 0.27<br>(0.20 to<br>0.39)    | 0.34<br>(0.26 to<br>0.48)    | 0.01<br>(0.01 to<br>0.01) | 0.01<br>(0.01 to<br>0.02) | 0.01<br>(0.01 to<br>0.02) | 0.01<br>(0.01 to<br>0.02) |
| G6PD deficiency                                   |                              |                              |                              |                              |                           |                           |                           |                           |
|                                                   | 1.69<br>(1.42 to<br>2.68)    | 2.14<br>(1.72 to<br>3.45)    | 2.02<br>(1.59 to<br>3.29)    | 2.23<br>(1.78 to<br>3.58)    | 0.15<br>(0.13 to<br>0.24) | 0.26<br>(0.20 to<br>0.42) | 0.25<br>(0.20 to<br>0.40) | 0.26<br>(0.21 to<br>0.41) |
| Other hemoglobinopathies and hemolytic anemias    |                              |                              |                              |                              |                           |                           |                           |                           |
|                                                   | 35.93<br>(28.15 to<br>40.46) | 61.24<br>(46.82 to<br>70.35) | 63.22<br>(48.42 to<br>73.15) | 59.14<br>(45.43 to<br>67.73) | 1.81<br>(1.27 to<br>2.03) | 3.83<br>(2.58 to<br>4.39) | 4.09<br>(2.75 to<br>4.74) | 3.56<br>(2.42 to<br>4.07) |
| Endocrine, metabolic, blood, and immune disorders |                              |                              |                              |                              |                           |                           |                           |                           |

| Australasia                                   |                           |                           |                           |                           |                        |                        |                        |                        |
|-----------------------------------------------|---------------------------|---------------------------|---------------------------|---------------------------|------------------------|------------------------|------------------------|------------------------|
| Cause                                         | YLLs (in 1000s)           |                           |                           |                           | Deaths (in 1000s)      |                        |                        |                        |
|                                               | 2016                      | 2040 Forecast             | 2040 Better Scenario      | 2040 Worse Scenario       | 2016                   | 2040 Forecast          | 2040 Better Scenario   | 2040 Worse Scenario    |
| Musculoskeletal disorders                     | 14.23<br>(12.86 to 15.92) | 24.34<br>(21.22 to 28.40) | 23.29<br>(20.12 to 27.49) | 25.35<br>(21.91 to 29.75) | 1.04<br>(0.89 to 1.14) | 2.15<br>(1.80 to 2.44) | 2.12<br>(1.76 to 2.42) | 2.16<br>(1.82 to 2.46) |
| Rheumatoid arthritis                          | 3.74<br>(2.96 to 4.88)    | 6.78<br>(5.23 to 8.84)    | 5.83<br>(4.51 to 7.65)    | 7.82<br>(6.07 to 10.07)   | 0.28<br>(0.23 to 0.37) | 0.60<br>(0.46 to 0.81) | 0.52<br>(0.40 to 0.71) | 0.67<br>(0.52 to 0.88) |
| Other musculoskeletal disorders               | 10.49<br>(9.02 to 11.92)  | 17.56<br>(14.40 to 20.46) | 17.46<br>(14.53 to 20.36) | 17.53<br>(14.34 to 20.40) | 0.76<br>(0.62 to 0.85) | 1.55<br>(1.18 to 1.79) | 1.59<br>(1.23 to 1.85) | 1.49<br>(1.12 to 1.74) |
| Other non-communicable diseases               | 58.73<br>(51.27 to 69.55) | 69.15<br>(56.80 to 84.84) | 63.26<br>(51.48 to 78.32) | 75.54<br>(62.34 to 93.44) | 1.36<br>(1.07 to 1.71) | 3.14<br>(2.06 to 4.27) | 3.16<br>(2.04 to 4.29) | 3.11<br>(2.08 to 4.22) |
| Congenital birth defects                      | 43.76<br>(37.84 to 55.16) | 40.83<br>(32.86 to 53.12) | 35.66<br>(28.72 to 46.51) | 46.56<br>(37.49 to 60.63) | 0.63<br>(0.55 to 0.78) | 0.64<br>(0.53 to 0.81) | 0.57<br>(0.47 to 0.72) | 0.71<br>(0.58 to 0.91) |
| Neural tube defects                           | 1.92<br>(1.39 to 2.57)    | 0.72<br>(0.44 to 1.13)    | 0.56<br>(0.34 to 0.90)    | 0.90<br>(0.54 to 1.42)    | 0.02<br>(0.02 to 0.03) | 0.01<br>(0.01 to 0.01) | 0.01<br>(0.00 to 0.01) | 0.01<br>(0.01 to 0.02) |
| Congenital heart anomalies                    | 14.53<br>(12.05 to 19.96) | 8.80<br>(6.52 to 12.51)   | 6.85<br>(4.98 to 9.80)    | 11.06<br>(8.01 to 15.90)  | 0.21<br>(0.17 to 0.28) | 0.10<br>(0.10 to 0.19) | 0.10<br>(0.15 to 0.15) | 0.17<br>(0.12 to 0.23) |
| Orofacial clefts                              | 0.02<br>(0.01 to 0.04)    | 0.01<br>(0.00 to 0.02)    | 0.01<br>(0.00 to 0.02)    | 0.01<br>(0.01 to 0.03)    | 0.00<br>(0.00 to 0.00) | 0.00<br>(0.00 to 0.00) | 0.00<br>(0.00 to 0.00) | 0.00<br>(0.00 to 0.00) |
| Down syndrome                                 | 5.01<br>(3.63 to 6.13)    | 8.27<br>(6.25 to 10.24)   | 8.42<br>(6.41 to 10.36)   | 8.14<br>(6.06 to 10.04)   | 0.11<br>(0.08 to 0.13) | 0.19<br>(0.14 to 0.23) | 0.20<br>(0.15 to 0.24) | 0.19<br>(0.14 to 0.23) |
| Other chromosomal abnormalities               | 7.23<br>(5.28 to 11.34)   | 11.48<br>(8.10 to 18.04)  | 10.36<br>(7.30 to 16.00)  | 12.60<br>(8.86 to 19.66)  | 0.09<br>(0.07 to 0.15) | 0.15<br>(0.11 to 0.23) | 0.14<br>(0.10 to 0.21) | 0.17<br>(0.12 to 0.25) |
| Congenital musculoskeletal and limb anomalies | 1.56<br>(1.20 to 2.01)    | 1.29<br>(0.89 to 1.82)    | 1.05<br>(0.71 to 1.52)    | 1.55<br>(1.03 to 2.24)    | 0.02<br>(0.02 to 0.03) | 0.02<br>(0.01 to 0.03) | 0.01<br>(0.02 to 0.02) | 0.02<br>(0.02 to 0.03) |
| Urogenital congenital anomalies               | 1.29<br>(0.82 to 2.00)    | 1.00<br>(0.58 to 1.72)    | 0.84<br>(0.49 to 1.48)    | 1.17<br>(0.67 to 2.02)    | 0.02<br>(0.01 to 0.03) | 0.01<br>(0.01 to 0.02) | 0.01<br>(0.02 to 0.02) | 0.02<br>(0.01 to 0.03) |
| Digestive congenital anomalies                | 2.91<br>(2.10 to 4.43)    | 2.33<br>(1.44 to 3.72)    | 1.86<br>(1.12 to 2.97)    | 2.88<br>(1.74 to 4.49)    | 0.04<br>(0.03 to 0.05) | 0.03<br>(0.02 to 0.04) | 0.02<br>(0.01 to 0.04) | 0.04<br>(0.02 to 0.05) |
| Other congenital birth defects                | 9.28<br>(7.48 to 12.75)   | 6.93<br>(5.11 to 9.84)    | 5.71<br>(4.18 to 8.19)    | 8.27<br>(6.04 to 11.82)   | 0.12<br>(0.10 to 0.16) | 0.09<br>(0.07 to 0.15) | 0.08<br>(0.06 to 0.11) | 0.11<br>(0.08 to 0.15) |
| Skin and subcutaneous diseases                | 6.89<br>(3.76 to 10.20)   | 22.13<br>(11.87 to 31.77) | 22.29<br>(12.04 to 32.07) | 21.78<br>(11.93 to 31.41) | 0.64<br>(0.34 to 0.96) | 2.43<br>(1.30 to 3.55) | 2.52<br>(1.35 to 3.68) | 2.31<br>(1.24 to 3.40) |
| Cellulitis                                    | 3.62<br>(1.75 to 5.38)    | 11.22<br>(5.55 to 16.56)  | 11.42<br>(5.53 to 16.87)  | 10.94<br>(5.45 to 16.46)  | 0.32<br>(0.15 to 0.47) | 1.14<br>(0.54 to 1.69) | 1.20<br>(0.57 to 1.76) | 1.08<br>(0.51 to 1.59) |
| Pyoderma                                      | 2.53<br>(1.24 to 4.08)    | 9.43<br>(4.63 to 14.75)   | 9.43<br>(4.63 to 14.88)   | 9.33<br>(4.58 to 14.58)   | 0.25<br>(0.12 to 0.40) | 1.10<br>(0.53 to 1.72) | 1.14<br>(0.55 to 1.77) | 1.05<br>(0.51 to 1.65) |
| Decubitus ulcer                               | 0.45<br>(0.26 to 0.89)    | 0.93<br>(0.52 to 1.93)    | 0.89<br>(0.50 to 1.83)    | 0.96<br>(0.54 to 1.99)    | 0.05<br>(0.03 to 0.11) | 0.13<br>(0.07 to 0.27) | 0.13<br>(0.07 to 0.27) | 0.13<br>(0.07 to 0.27) |
| Other skin and subcutaneous diseases          | 0.28<br>(0.17 to 0.52)    | 0.55<br>(0.32 to 1.04)    | 0.54<br>(0.32 to 1.04)    | 0.55<br>(0.32 to 1.06)    | 0.02<br>(0.01 to 0.05) | 0.06<br>(0.03 to 0.11) | 0.06<br>(0.03 to 0.11) | 0.05<br>(0.03 to 0.11) |
| Sudden infant death syndrome                  | 8.09<br>(6.58 to 9.92)    | 6.19<br>(4.29 to 8.98)    | 5.31<br>(3.57 to 7.73)    | 7.19<br>(4.98 to 10.61)   | 0.09<br>(0.08 to 0.12) | 0.07<br>(0.05 to 0.10) | 0.06<br>(0.04 to 0.09) | 0.08<br>(0.06 to 0.12) |

|                          |                                 |                                 |                                 |                                 |                             |                              |                              |                              |
|--------------------------|---------------------------------|---------------------------------|---------------------------------|---------------------------------|-----------------------------|------------------------------|------------------------------|------------------------------|
| Injuries                 | 330.21<br>(302.80 to<br>355.51) | 315.21<br>(226.85 to<br>461.76) | 269.23<br>(197.44 to<br>381.32) | 388.35<br>(271.14 to<br>566.13) | 10.74<br>(9.48 to<br>11.52) | 14.00<br>(11.09 to<br>17.61) | 13.00<br>(10.39 to<br>16.10) | 15.52<br>(12.07 to<br>19.91) |
| Transport injuries       | 93.60<br>(85.64 to<br>102.14)   | 75.82<br>(47.30 to<br>124.92)   | 62.65<br>(40.59 to<br>100.93)   | 117.10<br>(71.17 to<br>194.57)  | 2.24<br>(2.06 to<br>2.43)   | 2.13<br>(1.43 to<br>3.28)    | 1.81<br>(1.26 to<br>2.70)    | 3.09<br>(2.00 to<br>4.85)    |
| Road injuries            | 84.16<br>(76.88 to<br>91.43)    | 65.67<br>(40.65 to<br>108.26)   | 54.67<br>(35.19 to<br>87.08)    | 104.50<br>(63.39 to<br>174.34)  | 2.01<br>(1.86 to<br>2.18)   | 1.87<br>(1.26 to<br>2.85)    | 1.60<br>(1.12 to<br>2.38)    | 2.77<br>(1.80 to<br>4.37)    |
| Pedestrian road injuries | 12.51<br>(9.23 to<br>15.04)     | 6.47<br>(4.41 to<br>9.68)       | 4.84<br>(3.36 to<br>7.15)       | 10.40<br>(6.80 to<br>16.09)     | 0.37<br>(0.29 to<br>0.46)   | 0.27<br>(0.20 to<br>0.40)    | 0.21<br>(0.16 to<br>0.31)    | 0.41<br>(0.29 to<br>0.60)    |



| Australasia                                     |                                         |                                         |                                         |                                          |                                      |                                      |                                      |                                      |
|-------------------------------------------------|-----------------------------------------|-----------------------------------------|-----------------------------------------|------------------------------------------|--------------------------------------|--------------------------------------|--------------------------------------|--------------------------------------|
| Cause                                           | YLLs (in 1000s)                         |                                         |                                         |                                          | Deaths (in 1000s)                    |                                      |                                      |                                      |
|                                                 | 2016                                    | 2040 Forecast                           | 2040 Better Scenario                    | 2040 Worse Scenario                      | 2016                                 | 2040 Forecast                        | 2040 Better Scenario                 | 2040 Worse Scenario                  |
| Cyclist road injuries                           | 2.65<br>(1.89 to 3.06)                  | 2.34<br>(1.44 to 3.68)                  | 2.00<br>(1.27 to 3.06)                  | 3.65<br>(2.23 to 5.84)                   | 0.06<br>(0.04 to 0.07)               | 0.06<br>(0.04 to 0.10)               | 0.06<br>(0.04 to 0.09)               | 0.09<br>(0.06 to 0.14)               |
| Motorcyclist road injuries                      | 12.46<br>(7.94 to 14.86)                | 12.36<br>(6.54 to 23.56)                | 10.73<br>(5.85 to 20.24)                | 16.87<br>(8.73 to 32.58)                 | 0.24<br>(0.16 to 0.29)               | 0.25<br>(0.14 to 0.47)               | 0.22<br>(0.13 to 0.40)               | 0.33<br>(0.18 to 0.62)               |
| Motor vehicle road injuries                     | 56.04<br>(50.55 to 65.32)               | 44.11<br>(26.94 to 71.65)               | 36.78<br>(23.50 to 57.72)               | 72.95<br>(43.96 to 119.26)               | 1.32<br>(1.20 to 1.52)               | 1.27<br>(0.85 to 1.95)               | 1.10<br>(0.76 to 1.62)               | 1.92<br>(1.24 to 3.01)               |
| Other road injuries                             | 0.50<br>(0.22 to 0.66)                  | 0.39<br>(0.16 to 0.65)                  | 0.33<br>(0.14 to 0.54)                  | 0.61<br>(0.24 to 1.02)                   | 0.01<br>(0.01 to 0.01)               | 0.01<br>(0.00 to 0.02)               | 0.01<br>(0.00 to 0.01)               | 0.01<br>(0.01 to 0.02)               |
| Other transport injuries                        | 9.44<br>(8.34 to 11.74)                 | 10.16<br>(6.21 to 16.91)                | 7.98<br>(4.97 to 13.02)                 | 12.60<br>(7.45 to 21.14)                 | 0.22<br>(0.20 to 0.27)               | 0.26<br>(0.17 to 0.42)               | 0.21<br>(0.14 to 0.33)               | 0.32<br>(0.20 to 0.52)               |
| <b>Unintentional injuries</b>                   | <b>78.21</b><br><b>(66.55 to 84.30)</b> | <b>86.91</b><br><b>(70.08 to 99.34)</b> | <b>82.65</b><br><b>(66.56 to 94.70)</b> | <b>90.85</b><br><b>(73.15 to 104.57)</b> | <b>4.77</b><br><b>(3.78 to 5.22)</b> | <b>7.89</b><br><b>(6.04 to 9.07)</b> | <b>7.89</b><br><b>(6.08 to 9.09)</b> | <b>7.81</b><br><b>(5.92 to 9.04)</b> |
| Falls                                           | 33.27<br>(24.06 to 37.05)               | 47.96<br>(34.21 to 55.72)               | 46.96<br>(33.46 to 54.67)               | 48.53<br>(34.06 to 56.69)                | 3.17<br>(2.28 to 3.56)               | 5.77<br>(4.09 to 6.83)               | 5.82<br>(4.12 to 6.85)               | 5.65<br>(3.95 to 6.75)               |
| Drowning                                        | 12.29<br>(11.16 to 13.47)               | 8.18<br>(5.96 to 11.29)                 | 7.14<br>(5.28 to 9.57)                  | 9.28<br>(6.66 to 13.08)                  | 0.26<br>(0.24 to 0.28)               | 0.21<br>(0.15 to 0.28)               | 0.18<br>(0.14 to 0.24)               | 0.23<br>(0.17 to 0.32)               |
| Fire, heat, and hot substances                  | 4.18<br>(3.78 to 5.35)                  | 3.61<br>(2.73 to 5.01)                  | 3.10<br>(2.43 to 4.25)                  | 4.11<br>(3.06 to 5.79)                   | 0.19<br>(0.17 to 0.23)               | 0.25<br>(0.20 to 0.35)               | 0.23<br>(0.18 to 0.30)               | 0.27<br>(0.21 to 0.37)               |
| Poisonings                                      | 2.19<br>(1.81 to 2.82)                  | 0.98<br>(0.66 to 1.51)                  | 0.80<br>(0.55 to 1.21)                  | 1.19<br>(0.79 to 1.84)                   | 0.05<br>(0.05 to 0.07)               | 0.05<br>(0.02 to 0.05)               | 0.03<br>(0.02 to 0.04)               | 0.04<br>(0.03 to 0.06)               |
| Exposure to mechanical forces                   | 9.89<br>(8.09 to 11.26)                 | 7.42<br>(5.89 to 9.34)                  | 6.58<br>(5.21 to 8.35)                  | 8.29<br>(6.54 to 10.46)                  | 0.23<br>(0.19 to 0.27)               | 0.23<br>(0.19 to 0.28)               | 0.21<br>(0.18 to 0.25)               | 0.25<br>(0.20 to 0.30)               |
| Unintentional firearm injuries                  | 0.77<br>(0.67 to 1.15)                  | 0.70<br>(0.54 to 1.06)                  | 0.65<br>(0.50 to 0.97)                  | 0.77<br>(0.59 to 1.15)                   | 0.02<br>(0.02 to 0.03)               | 0.03<br>(0.02 to 0.04)               | 0.03<br>(0.02 to 0.04)               | 0.03<br>(0.02 to 0.04)               |
| Unintentional suffocation                       | 3.20<br>(1.71 to 4.18)                  | 2.07<br>(1.16 to 2.99)                  | 1.83<br>(1.03 to 2.62)                  | 2.32<br>(1.27 to 3.40)                   | 0.05<br>(0.03 to 0.06)               | 0.03<br>(0.02 to 0.05)               | 0.03<br>(0.02 to 0.04)               | 0.04<br>(0.02 to 0.05)               |
| Other exposure to mechanical forces             | 5.92<br>(4.96 to 7.97)                  | 4.65<br>(3.70 to 6.30)                  | 4.11<br>(3.24 to 5.58)                  | 5.21<br>(4.12 to 7.06)                   | 0.16<br>(0.14 to 0.21)               | 0.17<br>(0.14 to 0.21)               | 0.16<br>(0.13 to 0.19)               | 0.18<br>(0.15 to 0.23)               |
| Adverse effects of medical treatment            | 6.49<br>(4.58 to 7.61)                  | 8.90<br>(6.23 to 10.59)                 | 8.71<br>(6.14 to 10.38)                 | 9.06<br>(6.33 to 10.72)                  | 0.44<br>(0.31 to 0.51)               | 0.79<br>(0.55 to 0.95)               | 0.80<br>(0.56 to 0.96)               | 0.78<br>(0.53 to 0.93)               |
| Animal contact                                  | 0.95<br>(0.64 to 1.19)                  | 0.96<br>(0.67 to 1.27)                  | 0.88<br>(0.60 to 1.14)                  | 1.05<br>(0.71 to 1.39)                   | 0.02<br>(0.02 to 0.03)               | 0.03<br>(0.02 to 0.04)               | 0.03<br>(0.02 to 0.04)               | 0.03<br>(0.02 to 0.04)               |
| Venomous animal contact                         | 0.29<br>(0.19 to 0.40)                  | 0.34<br>(0.23 to 0.48)                  | 0.32<br>(0.21 to 0.44)                  | 0.36<br>(0.24 to 0.50)                   | 0.01<br>(0.00 to 0.01)               | 0.01<br>(0.01 to 0.02)               | 0.01<br>(0.01 to 0.01)               | 0.01<br>(0.01 to 0.02)               |
| Non-venomous animal contact                     | 0.64<br>(0.42 to 0.85)                  | 0.62<br>(0.41 to 0.82)                  | 0.56<br>(0.36 to 0.74)                  | 0.68<br>(0.44 to 0.93)                   | 0.02<br>(0.01 to 0.02)               | 0.02<br>(0.01 to 0.03)               | 0.02<br>(0.01 to 0.03)               | 0.02<br>(0.01 to 0.03)               |
| Foreign body                                    | 6.10<br>(5.32 to 8.32)                  | 6.59<br>(5.60 to 8.44)                  | 6.48<br>(5.52 to 8.17)                  | 6.69<br>(5.67 to 8.63)                   | 0.27<br>(0.22 to 0.31)               | 0.42<br>(0.32 to 0.50)               | 0.44<br>(0.32 to 0.52)               | 0.40<br>(0.30 to 0.48)               |
| Pulmonary aspiration and foreign body in airway | 5.87<br>(5.09 to 8.10)                  | 6.32<br>(5.36 to 8.18)                  | 6.20<br>(5.24 to 7.92)                  | 6.43<br>(5.43 to 8.41)                   | 0.26<br>(0.21 to 0.30)               | 0.41<br>(0.30 to 0.48)               | 0.42<br>(0.31 to 0.50)               | 0.39<br>(0.29 to 0.46)               |

|                                             |                                                      |                                                     |                                                     |                                                      |                                                |                                                |                                                |                                                |
|---------------------------------------------|------------------------------------------------------|-----------------------------------------------------|-----------------------------------------------------|------------------------------------------------------|------------------------------------------------|------------------------------------------------|------------------------------------------------|------------------------------------------------|
|                                             | 0.23<br>(0.17 to<br>0.26)                            | 0.27<br>(0.19 to<br>0.33)                           | 0.28<br>(0.20 to<br>0.34)                           | 0.26<br>(0.19 to<br>0.32)                            | 0.01<br>(0.01 to<br>0.01)                      | 0.01<br>(0.01 to<br>0.02)                      | 0.02<br>(0.01 to<br>0.02)                      | 0.01<br>(0.01 to<br>0.02)                      |
| Foreign body in other body part             |                                                      |                                                     |                                                     |                                                      |                                                |                                                |                                                |                                                |
|                                             | 1.35<br>(0.89 to<br>2.10)                            | 1.60<br>(1.06 to<br>2.50)                           | 1.44<br>(0.98 to<br>2.26)                           | 1.75<br>(1.16 to<br>2.71)                            | 0.08<br>(0.05 to<br>0.13)                      | 0.13<br>(0.09 to<br>0.21)                      | 0.12<br>(0.08 to<br>0.19)                      | 0.14<br>(0.09 to<br>0.21)                      |
| Environmental heat and cold exposure        |                                                      |                                                     |                                                     |                                                      |                                                |                                                |                                                |                                                |
|                                             | 1.52<br>(1.35 to<br>1.72)                            | 0.72<br>(0.55 to<br>0.97)                           | 0.56<br>(0.42 to<br>0.78)                           | 0.90<br>(0.68 to<br>1.24)                            | 0.04<br>(0.03 to<br>0.04)                      | 0.02<br>(0.02 to<br>0.03)                      | 0.02<br>(0.02 to<br>0.02)                      | 0.03<br>(0.02 to<br>0.04)                      |
| Other unintentional injuries                |                                                      |                                                     |                                                     |                                                      |                                                |                                                |                                                |                                                |
| <b>Self-harm and interpersonal violence</b> | <b>158.11</b><br><b>(136.24 to</b><br><b>178.46)</b> | <b>149.57</b><br><b>(88.82 to</b><br><b>252.39)</b> | <b>120.96</b><br><b>(75.13 to</b><br><b>200.43)</b> | <b>177.54</b><br><b>(102.06 to</b><br><b>309.05)</b> | <b>3.73</b><br><b>(3.19 to</b><br><b>4.21)</b> | <b>3.84</b><br><b>(2.41 to</b><br><b>6.07)</b> | <b>3.16</b><br><b>(2.08 to</b><br><b>4.93)</b> | <b>4.49</b><br><b>(2.72 to</b><br><b>7.43)</b> |

| Australasia                                                                         |                                      |                                       |                                       |                                       |                                      |                                      |                                      |                                      |
|-------------------------------------------------------------------------------------|--------------------------------------|---------------------------------------|---------------------------------------|---------------------------------------|--------------------------------------|--------------------------------------|--------------------------------------|--------------------------------------|
| Cause                                                                               | YLLs (in 1000s)                      |                                       |                                       |                                       | Deaths (in 1000s)                    |                                      |                                      |                                      |
|                                                                                     | 2016                                 | 2040 Forecast                         | 2040 Better Scenario                  | 2040 Worse Scenario                   | 2016                                 | 2040 Forecast                        | 2040 Better Scenario                 | 2040 Worse Scenario                  |
| Self-harm                                                                           | 140.75<br>(119.48 to 158.98)         | 138.07<br>(78.87 to 238.31)           | 110.91<br>(66.70 to 188.32)           | 164.51<br>(91.84 to 295.37)           | 3.36<br>(2.83 to 3.83)               | 3.57<br>(2.16 to 5.77)               | 2.92<br>(1.85 to 4.63)               | 4.19<br>(2.45 to 7.10)               |
| Self-harm by firearm                                                                | 8.83<br>(6.60 to 16.17)              | 8.00<br>(3.90 to 17.90)               | 6.18<br>(3.21 to 13.16)               | 9.88<br>(4.69 to 22.83)               | 0.25<br>(0.19 to 0.42)               | 0.25<br>(0.14 to 0.49)               | 0.20<br>(0.11 to 0.39)               | 0.31<br>(0.16 to 0.61)               |
| Self-harm by other specified means                                                  | 131.92<br>(105.61 to 149.64)         | 130.07<br>(74.27 to 223.76)           | 104.73<br>(63.11 to 175.61)           | 154.63<br>(85.97 to 272.08)           | 3.11<br>(2.48 to 3.55)               | 3.32<br>(2.02 to 5.31)               | 2.72<br>(1.73 to 4.24)               | 3.88<br>(2.28 to 6.58)               |
| Interpersonal violence                                                              | 17.36<br>(12.28 to 23.52)            | 11.50<br>(7.72 to 16.91)              | 10.05<br>(6.83 to 14.72)              | 13.03<br>(8.75 to 19.40)              | 0.37<br>(0.26 to 0.49)               | 0.27<br>(0.18 to 0.39)               | 0.24<br>(0.16 to 0.34)               | 0.31<br>(0.20 to 0.44)               |
| Physical violence by firearm                                                        | 2.63<br>(1.67 to 5.35)               | 1.56<br>(0.99 to 3.39)                | 1.37<br>(0.86 to 2.96)                | 1.77<br>(1.11 to 3.78)                | 0.06<br>(0.04 to 0.11)               | 0.03<br>(0.02 to 0.08)               | 0.03<br>(0.02 to 0.07)               | 0.04<br>(0.02 to 0.08)               |
| Physical violence by sharp object                                                   | 6.19<br>(3.61 to 8.62)               | 4.04<br>(2.38 to 5.72)                | 3.61<br>(2.14 to 5.11)                | 4.51<br>(2.59 to 6.45)                | 0.13<br>(0.08 to 0.18)               | 0.10<br>(0.06 to 0.13)               | 0.09<br>(0.05 to 0.12)               | 0.11<br>(0.06 to 0.15)               |
| Physical violence by other means                                                    | 8.54<br>(5.52 to 12.51)              | 5.91<br>(3.45 to 9.19)                | 5.07<br>(2.99 to 7.84)                | 6.75<br>(3.92 to 10.64)               | 0.18<br>(0.12 to 0.25)               | 0.14<br>(0.08 to 0.22)               | 0.12<br>(0.07 to 0.19)               | 0.16<br>(0.09 to 0.25)               |
| <b>Forces of nature, conflict and terrorism, and executions and police conflict</b> | <b>0.29</b><br><b>(0.22 to 0.39)</b> | <b>2.91</b><br><b>(0.00 to 19.68)</b> | <b>2.96</b><br><b>(0.00 to 20.30)</b> | <b>2.86</b><br><b>(0.00 to 19.14)</b> | <b>0.01</b><br><b>(0.00 to 0.01)</b> | <b>0.13</b><br><b>(0.00 to 1.36)</b> | <b>0.14</b><br><b>(0.00 to 1.48)</b> | <b>0.12</b><br><b>(0.00 to 1.31)</b> |
| Exposure to forces of nature                                                        | 0.00<br>(0.00 to 0.00)               | 2.44<br>(0.00 to 15.81)               | 2.49<br>(0.00 to 16.37)               | 2.40<br>(0.00 to 15.31)               | 0.00<br>(0.00 to 0.00)               | 0.11<br>(0.00 to 1.32)               | 0.12<br>(0.00 to 1.48)               | 0.11<br>(0.00 to 1.20)               |
| Conflict and terrorism                                                              | 0.00<br>(0.00 to 0.00)               | 0.47<br>(0.00 to 3.48)                | 0.48<br>(0.00 to 3.60)                | 0.46<br>(0.00 to 3.37)                | 0.00<br>(0.00 to 0.00)               | 0.02<br>(0.00 to 0.21)               | 0.02<br>(0.00 to 0.23)               | 0.02<br>(0.00 to 0.19)               |
| Executions and police conflict                                                      | 0.29<br>(0.22 to 0.39)               | 0.00<br>(0.00 to 0.00)                | 0.00<br>(0.00 to 0.00)                | 0.00<br>(0.00 to 0.00)                | 0.01<br>(0.00 to 0.01)               | 0.00<br>(0.00 to 0.00)               | 0.00<br>(0.00 to 0.00)               | 0.00<br>(0.00 to 0.00)               |

| Australia                                                                |                                                       |                                                       |                                                       |                                                       |                                                 |                                                 |                                                 |                                                 |
|--------------------------------------------------------------------------|-------------------------------------------------------|-------------------------------------------------------|-------------------------------------------------------|-------------------------------------------------------|-------------------------------------------------|-------------------------------------------------|-------------------------------------------------|-------------------------------------------------|
| Cause                                                                    | YLLs (actual counts)                                  |                                                       |                                                       |                                                       | Deaths (actual counts)                          |                                                 |                                                 |                                                 |
|                                                                          | 2016                                                  | 2040 Forecast                                         | 2040 Better Scenario                                  | 2040 Worse Scenario                                   | 2016                                            | 2040 Forecast                                   | 2040 Better Scenario                            | 2040 Worse Scenario                             |
| <b>All causes</b>                                                        | <b>2,461,630.10</b><br>(2,330,956.76 to 2,608,153.83) | <b>3,245,599.26</b><br>(2,833,018.24 to 3,782,159.71) | <b>2,796,762.98</b><br>(2,462,656.48 to 3,237,574.81) | <b>3,939,574.10</b><br>(3,394,747.74 to 4,655,916.97) | <b>165,710.45</b><br>(157,786.50 to 174,390.89) | <b>265,203.56</b><br>(237,726.16 to 298,628.97) | <b>236,585.12</b><br>(212,752.92 to 265,917.95) | <b>308,735.35</b><br>(275,130.77 to 349,026.99) |
| <b>Communicable, maternal, neonatal, and nutritional diseases</b>        | <b>110,103.27</b><br>(99,912.27 to 119,825.33)        | <b>129,298.55</b><br>(107,988.94 to 155,305.51)       | <b>113,833.95</b><br>(96,161.58 to 134,917.22)        | <b>148,141.84</b><br>(122,408.37 to 180,800.02)       | <b>5,979.03</b><br>(5,335.44 to 6,647.22)       | <b>10,505.83</b><br>(8,500.64 to 13,033.08)     | <b>10,015.17</b><br>(8,252.11 to 12,194.53)     | <b>11,202.75</b><br>(8,882.46 to 14,061.57)     |
| <b>HIV/AIDS and tuberculosis</b>                                         | <b>4,040.95</b><br>(3,789.32 to 4,302.51)             | <b>1,780.52</b><br>(995.19 to 2,882.64)               | <b>893.74</b><br>(571.01 to 1,444.80)                 | <b>3,853.76</b><br>(2,113.64 to 5,759.75)             | <b>146.27</b><br>(136.62 to 156.84)             | <b>88.98</b><br>(57.85 to 130.53)               | <b>55.57</b><br>(38.44 to 79.42)                | <b>150.03</b><br>(97.89 to 215.82)              |
| <b>Tuberculosis</b>                                                      | <b>1,103.73</b><br>(994.84 to 1,237.70)               | <b>830.91</b><br>(530.75 to 1,250.25)                 | <b>551.58</b><br>(369.76 to 786.91)                   | <b>1,211.69</b><br>(750.96 to 1,840.66)               | <b>72.58</b><br>(65.04 to 82.28)                | <b>70.79</b><br>(45.30 to 108.21)               | <b>48.96</b><br>(33.01 to 70.86)                | <b>99.04</b><br>(60.59 to 152.88)               |
| <b>HIV/AIDS</b>                                                          | <b>2,937.21</b><br>(2,731.03 to 3,173.00)             | <b>949.61</b><br>(276.09 to 1,926.63)                 | <b>342.15</b><br>(99.51 to 842.78)                    | <b>2,642.07</b><br>(973.23 to 4,327.79)               | <b>73.69</b><br>(68.57 to 79.23)                | <b>18.18</b><br>(4.65 to 38.49)                 | <b>6.61</b><br>(1.71 to 17.32)                  | <b>50.98</b><br>(16.79 to 85.79)                |
| <b>Diarrhea, lower respiratory, and other common infectious diseases</b> | <b>51,998.99</b><br>(46,469.70 to 56,663.05)          | <b>78,546.08</b><br>(62,683.48 to 96,856.36)          | <b>70,546.68</b><br>(57,836.73 to 85,957.12)          | <b>90,025.40</b><br>(69,862.10 to 113,897.78)         | <b>4,824.34</b><br>(4,222.68 to 5,462.75)       | <b>9,117.61</b><br>(7,160.75 to 11,702.37)      | <b>8,690.81</b><br>(6,903.32 to 10,843.79)      | <b>9,737.85</b><br>(7,494.93 to 12,600.40)      |
| <b>Diarrheal diseases</b>                                                | <b>3,403.62</b><br>(3,053.66 to 3,799.81)             | <b>9,898.42</b><br>(5,316.69 to 19,854.57)            | <b>11,286.59</b><br>(6,730.18 to 20,077.75)           | <b>7,776.71</b><br>(4,019.64 to 16,276.07)            | <b>256.82</b><br>(227.97 to 285.82)             | <b>1,073.58</b><br>(560.38 to 2,194.59)         | <b>1,279.79</b><br>(738.84 to 2,332.35)         | <b>805.70</b><br>(401.58 to 1,704.60)           |
| <b>Intestinal infectious diseases</b>                                    | <b>8.80</b><br>(3.96 to 17.25)                        | <b>8.44</b><br>(3.78 to 16.24)                        | <b>8.42</b><br>(3.76 to 16.19)                        | <b>8.51</b><br>(3.81 to 16.35)                        | <b>0.31</b><br>(0.15 to 0.58)                   | <b>0.37</b><br>(0.17 to 0.70)                   | <b>0.38</b><br>(0.18 to 0.72)                   | <b>0.37</b><br>(0.17 to 0.69)                   |
| <b>Typhoid fever</b>                                                     | <b>2.88</b><br>(0.94 to 6.67)                         | <b>3.22</b><br>(1.12 to 7.14)                         | <b>3.55</b><br>(1.23 to 7.22)                         | <b>2.93</b><br>(0.99 to 6.39)                         | <b>0.07</b><br>(0.02 to 0.17)                   | <b>0.08</b><br>(0.03 to 0.18)                   | <b>0.09</b><br>(0.03 to 0.20)                   | <b>0.07</b><br>(0.03 to 0.16)                   |
| <b>Paratyphoid fever</b>                                                 | <b>3.44</b><br>(0.93 to 7.95)                         | <b>2.79</b><br>(0.86 to 7.01)                         | <b>2.51</b><br>(0.76 to 6.39)                         | <b>3.08</b><br>(0.96 to 7.86)                         | <b>0.09</b><br>(0.03 to 0.23)                   | <b>0.09</b><br>(0.03 to 0.22)                   | <b>0.08</b><br>(0.02 to 0.20)                   | <b>0.10</b><br>(0.03 to 0.23)                   |
| <b>Other intestinal infectious diseases</b>                              | <b>2.78</b><br>(1.12 to 5.63)                         | <b>2.43</b><br>(0.94 to 5.16)                         | <b>2.35</b><br>(0.89 to 5.14)                         | <b>2.50</b><br>(0.95 to 5.31)                         | <b>0.15</b><br>(0.06 to 0.31)                   | <b>0.20</b><br>(0.07 to 0.45)                   | <b>0.20</b><br>(0.07 to 0.46)                   | <b>0.20</b><br>(0.07 to 0.44)                   |
| <b>Lower respiratory infections</b>                                      | <b>44,023.86</b><br>(39,250.83 to 48,978.93)          | <b>64,757.96</b><br>(49,813.85 to 82,740.76)          | <b>55,732.38</b><br>(43,467.34 to 70,138.30)          | <b>77,655.43</b><br>(58,303.90 to 102,334.81)         | <b>4,423.88</b><br>(3,830.51 to 5,061.53)       | <b>7,866.02</b><br>(5,895.96 to 10,206.17)      | <b>7,236.64</b><br>(5,549.23 to 9,329.19)       | <b>8,747.21</b><br>(6,567.18 to 11,559.82)      |
| <b>Upper respiratory infections</b>                                      | <b>28.79</b><br>(15.62 to 45.40)                      | <b>28.61</b><br>(12.28 to 55.93)                      | <b>23.39</b><br>(9.85 to 47.01)                       | <b>34.95</b><br>(14.69 to 69.82)                      | <b>1.30</b><br>(0.63 to 2.21)                   | <b>1.82</b><br>(0.66 to 3.95)                   | <b>1.55</b><br>(0.56 to 3.44)                   | <b>2.13</b><br>(0.79 to 4.65)                   |
| <b>Otitis media</b>                                                      | <b>7.49</b><br>(5.64 to 10.35)                        | <b>7.71</b><br>(3.14 to 17.39)                        | <b>8.17</b><br>(3.27 to 18.73)                        | <b>7.23</b><br>(3.02 to 16.50)                        | <b>0.59</b><br>(0.39 to 0.90)                   | <b>0.73</b><br>(0.24 to 2.00)                   | <b>0.79</b><br>(0.26 to 2.18)                   | <b>0.66</b><br>(0.22 to 1.76)                   |
| <b>Meningitis</b>                                                        | <b>2,125.59</b><br>(1,874.02 to 2,520.52)             | <b>1,605.19</b><br>(1,179.53 to 2,161.59)             | <b>1,346.11</b><br>(1,022.37 to 1,784.73)             | <b>2,069.60</b><br>(1,342.66 to 3,049.51)             | <b>53.82</b><br>(48.18 to 65.70)                | <b>46.94</b><br>(38.03 to 60.78)                | <b>42.89</b><br>(34.81 to 56.01)                | <b>55.53</b><br>(41.24 to 70.74)                |
| <b>Pneumococcal meningitis</b>                                           | <b>340.76</b><br>(296.84 to 411.92)                   | <b>252.06</b><br>(201.06 to 336.61)                   | <b>249.94</b><br>(199.56 to 336.76)                   | <b>260.06</b><br>(203.27 to 348.30)                   | <b>9.97</b><br>(8.73 to 12.51)                  | <b>10.57</b><br>(8.72 to 14.10)                 | <b>10.93</b><br>(8.96 to 14.59)                 | <b>10.38</b><br>(8.55 to 13.84)                 |
| <b>H influenzae type B meningitis</b>                                    | <b>253.44</b><br>(212.03 to 303.29)                   | <b>661.18</b><br>(321.46 to 1,193.28)                 | <b>503.35</b><br>(276.74 to 827.40)                   | <b>1,007.17</b><br>(386.74 to 1,962.77)               | <b>5.70</b><br>(4.91 to 7.00)                   | <b>10.91</b><br>(6.65 to 17.27)                 | <b>9.29</b><br>(6.35 to 13.25)                  | <b>14.74</b><br>(7.35 to 26.18)                 |
| <b>Meningococcal meningitis</b>                                          | <b>851.10</b><br>(744.40 to 1,002.35)                 | <b>360.62</b><br>(263.39 to 507.61)                   | <b>310.07</b><br>(224.55 to 435.59)                   | <b>416.67</b><br>(292.05 to 590.70)                   | <b>18.42</b><br>(16.34 to 22.20)                | <b>11.11</b><br>(8.83 to 14.61)                 | <b>9.93</b><br>(7.71 to 13.21)                  | <b>12.36</b><br>(9.57 to 16.36)                 |
| <b>Other meningitis</b>                                                  | <b>680.29</b><br>(602.61 to 817.91)                   | <b>331.33</b><br>(250.29 to 452.79)                   | <b>282.75</b><br>(211.64 to 389.82)                   | <b>385.70</b><br>(282.19 to 533.13)                   | <b>19.73</b><br>(17.52 to 24.43)                | <b>14.36</b><br>(11.31 to 19.58)                | <b>12.75</b><br>(9.80 to 17.52)                 | <b>16.05</b><br>(12.40 to 21.77)                |
| <b>Encephalitis</b>                                                      | <b>1,230.11</b><br>(854.83 to 1,479.74)               | <b>1,578.43</b><br>(1,050.56 to 1,938.63)             | <b>1,570.15</b><br>(1,031.88 to 1,939.40)             | <b>1,579.37</b><br>(1,053.61 to 1,947.75)             | <b>43.22</b><br>(27.34 to 52.29)                | <b>75.89</b><br>(45.08 to 95.42)                | <b>78.00</b><br>(46.15 to 99.16)                | <b>73.40</b><br>(44.21 to 91.43)                |

|                |                              |                                 |                               |                                 |                           |                            |                            |                            |
|----------------|------------------------------|---------------------------------|-------------------------------|---------------------------------|---------------------------|----------------------------|----------------------------|----------------------------|
| Diphtheria     | 5.81<br>(3.85 to<br>8.11)    | 1.79<br>(1.05 to<br>2.80)       | 1.45<br>(0.88 to<br>2.21)     | 2.59<br>(1.28 to<br>4.80)       | 0.11<br>(0.07 to<br>0.16) | 0.03<br>(0.02 to<br>0.06)  | 0.03<br>(0.02 to<br>0.05)  | 0.04<br>(0.02 to<br>0.07)  |
| Whooping cough | 40.94<br>(11.68 to<br>79.38) | 24.91<br>(4.36 to<br>70.76)     | 4.74<br>(1.23 to<br>12.05)    | 70.45<br>(9.42 to<br>204.09)    | 0.49<br>(0.14 to<br>0.94) | 0.30<br>(0.05 to<br>0.84)  | 0.06<br>(0.02 to<br>0.15)  | 0.83<br>(0.11 to<br>2.38)  |
| Tetanus        | 13.97<br>(9.46 to<br>17.52)  | 1.98<br>(1.17 to<br>2.88)       | 1.67<br>(0.92 to<br>2.40)     | 2.76<br>(1.70 to<br>4.56)       | 0.51<br>(0.34 to<br>0.63) | 0.07<br>(0.04 to<br>0.10)  | 0.07<br>(0.04 to<br>0.10)  | 0.08<br>(0.05 to<br>0.11)  |
| Measles        | 21.02<br>(16.00 to<br>27.12) | 177.39<br>(1.69 to<br>1,149.37) | 134.34<br>(1.43 to<br>770.57) | 338.79<br>(2.36 to<br>2,288.99) | 0.30<br>(0.24 to<br>0.38) | 2.60<br>(0.03 to<br>15.98) | 2.05<br>(0.03 to<br>11.86) | 4.55<br>(0.04 to<br>28.13) |

| Australia                                             |                                                        |                                                      |                                                      |                                                        |                                                   |                                                  |                                                  |                                                   |
|-------------------------------------------------------|--------------------------------------------------------|------------------------------------------------------|------------------------------------------------------|--------------------------------------------------------|---------------------------------------------------|--------------------------------------------------|--------------------------------------------------|---------------------------------------------------|
| Cause                                                 | YLLs (actual counts)                                   |                                                      |                                                      |                                                        | Deaths (actual counts)                            |                                                  |                                                  |                                                   |
|                                                       | 2016                                                   | 2040 Forecast                                        | 2040 Better Scenario                                 | 2040 Worse Scenario                                    | 2016                                              | 2040 Forecast                                    | 2040 Better Scenario                             | 2040 Worse Scenario                               |
| Varicella and herpes zoster                           | 489.01<br>(209.77 to<br>660.73)                        | 455.26<br>(195.47 to<br>659.33)                      | 429.26<br>(182.84 to<br>621.60)                      | 479.01<br>(204.14 to<br>695.82)                        | 43.00<br>(17.23 to<br>61.13)                      | 49.26<br>(20.11 to<br>74.32)                     | 48.57<br>(19.81 to<br>74.20)                     | 49.34<br>(20.03 to<br>75.38)                      |
| <b>Neglected tropical diseases and malaria</b>        | <b>140.66</b><br><b>(130.49 to</b><br><b>159.84)</b>   | <b>190.80</b><br><b>(166.53 to</b><br><b>225.80)</b> | <b>193.73</b><br><b>(168.33 to</b><br><b>230.09)</b> | <b>188.48</b><br><b>(165.00 to</b><br><b>221.17)</b>   | <b>3.64</b><br><b>(3.30 to</b><br><b>4.29)</b>    | <b>6.43</b><br><b>(5.56 to</b><br><b>8.11)</b>   | <b>6.86</b><br><b>(5.85 to</b><br><b>8.73)</b>   | <b>6.05</b><br><b>(5.26 to</b><br><b>7.51)</b>    |
| Malaria                                               | 0.00<br>(0.00 to<br>0.00)                              | 0.00<br>(0.00 to<br>0.00)                            | 0.00<br>(0.00 to<br>0.00)                            | 0.00<br>(0.00 to<br>0.00)                              | 0.00<br>(0.00 to<br>0.00)                         | 0.00<br>(0.00 to<br>0.00)                        | 0.00<br>(0.00 to<br>0.00)                        | 0.00<br>(0.00 to<br>0.00)                         |
| Chagas disease                                        | 0.00<br>(0.00 to<br>0.00)                              | 0.00<br>(0.00 to<br>0.00)                            | 0.00<br>(0.00 to<br>0.00)                            | 0.00<br>(0.00 to<br>0.00)                              | 0.00<br>(0.00 to<br>0.00)                         | 0.00<br>(0.00 to<br>0.00)                        | 0.00<br>(0.00 to<br>0.00)                        | 0.00<br>(0.00 to<br>0.00)                         |
| Leishmaniasis                                         | 0.00<br>(0.00 to<br>0.00)                              | 0.00<br>(0.00 to<br>0.00)                            | 0.00<br>(0.00 to<br>0.00)                            | 0.00<br>(0.00 to<br>0.00)                              | 0.00<br>(0.00 to<br>0.00)                         | 0.00<br>(0.00 to<br>0.00)                        | 0.00<br>(0.00 to<br>0.00)                        | 0.00<br>(0.00 to<br>0.00)                         |
| African trypanosomiasis                               | 0.00<br>(0.00 to<br>0.00)                              | 0.00<br>(0.00 to<br>0.00)                            | 0.00<br>(0.00 to<br>0.00)                            | 0.00<br>(0.00 to<br>0.00)                              | 0.00<br>(0.00 to<br>0.00)                         | 0.00<br>(0.00 to<br>0.00)                        | 0.00<br>(0.00 to<br>0.00)                        | 0.00<br>(0.00 to<br>0.00)                         |
| Schistosomiasis                                       | 0.00<br>(0.00 to<br>0.00)                              | 0.00<br>(0.00 to<br>0.00)                            | 0.00<br>(0.00 to<br>0.00)                            | 0.00<br>(0.00 to<br>0.00)                              | 0.00<br>(0.00 to<br>0.00)                         | 0.00<br>(0.00 to<br>0.00)                        | 0.00<br>(0.00 to<br>0.00)                        | 0.00<br>(0.00 to<br>0.00)                         |
| Cysticercosis                                         | 11.34<br>(10.22 to<br>12.55)                           | 4.94<br>(4.27 to<br>5.74)                            | 4.90<br>(4.22 to<br>5.70)                            | 4.98<br>(4.32 to<br>5.76)                              | 0.37<br>(0.34 to<br>0.41)                         | 0.20<br>(0.18 to<br>0.22)                        | 0.20<br>(0.18 to<br>0.23)                        | 0.19<br>(0.17 to<br>0.22)                         |
| Cystic echinococcosis                                 | 0.00<br>(0.00 to<br>0.00)                              | 0.00<br>(0.00 to<br>0.00)                            | 0.00<br>(0.00 to<br>0.00)                            | 0.00<br>(0.00 to<br>0.00)                              | 0.00<br>(0.00 to<br>0.00)                         | 0.00<br>(0.00 to<br>0.00)                        | 0.00<br>(0.00 to<br>0.00)                        | 0.00<br>(0.00 to<br>0.00)                         |
| Dengue                                                | 4.07<br>(2.76 to<br>5.61)                              | 18.51<br>(13.37 to<br>24.51)                         | 18.49<br>(13.25 to<br>24.54)                         | 18.50<br>(13.29 to<br>24.46)                           | 0.13<br>(0.09 to<br>0.19)                         | 0.86<br>(0.62 to<br>1.19)                        | 0.89<br>(0.64 to<br>1.24)                        | 0.82<br>(0.59 to<br>1.14)                         |
| Yellow fever                                          | 0.00<br>(0.00 to<br>0.00)                              | 0.00<br>(0.00 to<br>0.00)                            | 0.00<br>(0.00 to<br>0.00)                            | 0.00<br>(0.00 to<br>0.00)                              | 0.00<br>(0.00 to<br>0.00)                         | 0.00<br>(0.00 to<br>0.00)                        | 0.00<br>(0.00 to<br>0.00)                        | 0.00<br>(0.00 to<br>0.00)                         |
| Rabies                                                | 2.14<br>(1.46 to<br>3.27)                              | 2.13<br>(1.51 to<br>3.23)                            | 1.98<br>(1.40 to<br>2.95)                            | 2.30<br>(1.61 to<br>3.44)                              | 0.04<br>(0.03 to<br>0.06)                         | 0.06<br>(0.05 to<br>0.08)                        | 0.06<br>(0.05 to<br>0.08)                        | 0.06<br>(0.05 to<br>0.08)                         |
| Intestinal nematode infections                        | 0.00<br>(0.00 to<br>0.00)                              | 0.00<br>(0.00 to<br>0.00)                            | 0.00<br>(0.00 to<br>0.00)                            | 0.00<br>(0.00 to<br>0.00)                              | 0.00<br>(0.00 to<br>0.00)                         | 0.00<br>(0.00 to<br>0.00)                        | 0.00<br>(0.00 to<br>0.00)                        | 0.00<br>(0.00 to<br>0.00)                         |
| Other neglected tropical diseases                     | 123.10<br>(114.06 to<br>141.77)                        | 165.21<br>(143.06 to<br>198.40)                      | 168.36<br>(144.80 to<br>203.85)                      | 162.69<br>(141.36 to<br>194.72)                        | 3.09<br>(2.77 to<br>3.75)                         | 5.31<br>(4.48 to<br>6.97)                        | 5.70<br>(4.73 to<br>7.48)                        | 4.97<br>(4.21 to<br>6.40)                         |
| <b>Maternal disorders</b>                             | <b>863.07</b><br><b>(735.63 to</b><br><b>1,010.03)</b> | <b>732.56</b><br><b>(530.49 to</b><br><b>996.22)</b> | <b>665.20</b><br><b>(477.28 to</b><br><b>915.87)</b> | <b>806.29</b><br><b>(567.19 to</b><br><b>1,098.50)</b> | <b>15.91</b><br><b>(13.58 to</b><br><b>18.64)</b> | <b>13.62</b><br><b>(9.79 to</b><br><b>18.51)</b> | <b>12.36</b><br><b>(8.90 to</b><br><b>16.88)</b> | <b>14.99</b><br><b>(10.61 to</b><br><b>20.52)</b> |
| Maternal hemorrhage                                   | 136.28<br>(97.87 to<br>186.11)                         | 108.71<br>(63.95 to<br>168.44)                       | 98.99<br>(58.67 to<br>153.51)                        | 119.24<br>(70.25 to<br>185.96)                         | 2.49<br>(1.78 to<br>3.42)                         | 2.01<br>(1.19 to<br>3.08)                        | 1.83<br>(1.07 to<br>2.84)                        | 2.20<br>(1.29 to<br>3.40)                         |
| Maternal sepsis and other maternal infections         | 82.74<br>(58.75 to<br>112.36)                          | 50.12<br>(29.90 to<br>80.64)                         | 45.39<br>(26.99 to<br>73.19)                         | 55.32<br>(32.81 to<br>89.93)                           | 1.55<br>(1.10 to<br>2.12)                         | 0.95<br>(0.57 to<br>1.55)                        | 0.86<br>(0.52 to<br>1.38)                        | 1.05<br>(0.63 to<br>1.70)                         |
| Maternal hypertensive disorders                       | 98.48<br>(69.33 to<br>132.96)                          | 79.92<br>(48.17 to<br>128.38)                        | 72.11<br>(42.95 to<br>118.30)                        | 88.50<br>(52.36 to<br>145.08)                          | 1.76<br>(1.25 to<br>2.39)                         | 1.44<br>(0.87 to<br>2.31)                        | 1.30<br>(0.77 to<br>2.11)                        | 1.59<br>(0.95 to<br>2.59)                         |
| Maternal obstructed labor and uterine rupture         | 27.99<br>(17.07 to<br>43.33)                           | 22.34<br>(12.01 to<br>37.87)                         | 19.85<br>(10.60 to<br>33.75)                         | 25.09<br>(13.39 to<br>42.70)                           | 0.52<br>(0.32 to<br>0.80)                         | 0.42<br>(0.22 to<br>0.72)                        | 0.37<br>(0.20 to<br>0.64)                        | 0.47<br>(0.25 to<br>0.81)                         |
| Maternal abortion, miscarriage, and ectopic pregnancy | 83.55<br>(58.30 to<br>117.17)                          | 74.55<br>(42.19 to<br>120.80)                        | 67.17<br>(37.69 to<br>110.92)                        | 82.53<br>(45.87 to<br>135.09)                          | 1.63<br>(1.14 to<br>2.25)                         | 1.49<br>(0.85 to<br>2.40)                        | 1.34<br>(0.77 to<br>2.18)                        | 1.64<br>(0.93 to<br>2.69)                         |

|                                        |                                 |                                 |                                 |                                 |                           |                           |                           |                           |
|----------------------------------------|---------------------------------|---------------------------------|---------------------------------|---------------------------------|---------------------------|---------------------------|---------------------------|---------------------------|
|                                        | 95.48<br>(64.72 to<br>136.01)   | 110.89<br>(59.26 to<br>189.38)  | 99.54<br>(52.66 to<br>169.63)   | 123.61<br>(64.68 to<br>210.91)  | 1.73<br>(1.17 to<br>2.45) | 2.01<br>(1.09 to<br>3.43) | 1.81<br>(0.97 to<br>3.10) | 2.24<br>(1.17 to<br>3.86) |
| Indirect maternal deaths               |                                 |                                 |                                 |                                 |                           |                           |                           |                           |
|                                        | 43.01<br>(27.56 to<br>62.51)    | 35.25<br>(18.59 to<br>60.97)    | 31.67<br>(16.29 to<br>54.99)    | 39.23<br>(20.28 to<br>68.97)    | 0.80<br>(0.51 to<br>1.16) | 0.66<br>(0.35 to<br>1.13) | 0.59<br>(0.31 to<br>1.02) | 0.73<br>(0.38 to<br>1.27) |
| Late maternal deaths                   |                                 |                                 |                                 |                                 |                           |                           |                           |                           |
|                                        | 0.07<br>(0.03 to<br>0.14)       | 0.27<br>(0.07 to<br>0.73)       | 0.21<br>(0.02 to<br>0.62)       | 0.32<br>(0.09 to<br>0.82)       | 0.00<br>(0.00 to<br>0.00) | 0.01<br>(0.00 to<br>0.01) | 0.00<br>(0.00 to<br>0.01) | 0.01<br>(0.00 to<br>0.02) |
| Maternal deaths aggravated by HIV/AIDS |                                 |                                 |                                 |                                 |                           |                           |                           |                           |
|                                        | 295.47<br>(222.84 to<br>372.74) | 250.50<br>(151.47 to<br>381.50) | 230.27<br>(139.99 to<br>351.23) | 272.46<br>(163.88 to<br>415.44) | 5.42<br>(4.11 to<br>6.84) | 4.64<br>(2.84 to<br>7.07) | 4.26<br>(2.59 to<br>6.53) | 5.05<br>(3.03 to<br>7.72) |
| Other maternal disorders               |                                 |                                 |                                 |                                 |                           |                           |                           |                           |

| Australia                                                               |                                              |                                              |                                              |                                              |                                     |                                     |                                     |                                     |
|-------------------------------------------------------------------------|----------------------------------------------|----------------------------------------------|----------------------------------------------|----------------------------------------------|-------------------------------------|-------------------------------------|-------------------------------------|-------------------------------------|
| Cause                                                                   | YLLs (actual counts)                         |                                              |                                              |                                              | Deaths (actual counts)              |                                     |                                     |                                     |
|                                                                         | 2016                                         | 2040 Forecast                                | 2040 Better Scenario                         | 2040 Worse Scenario                          | 2016                                | 2040 Forecast                       | 2040 Better Scenario                | 2040 Worse Scenario                 |
| <b>Neonatal disorders</b>                                               | <b>43,837.28</b><br>(36,893.63 to 51,290.44) | <b>35,082.37</b><br>(24,370.95 to 51,789.77) | <b>28,664.47</b><br>(19,710.42 to 42,315.05) | <b>40,183.78</b><br>(27,899.66 to 59,244.63) | <b>506.72</b><br>(426.43 to 592.88) | <b>405.61</b><br>(281.76 to 598.49) | <b>331.44</b><br>(227.95 to 489.10) | <b>464.58</b><br>(322.59 to 684.78) |
| Neonatal preterm birth                                                  | 17,646.45<br>(14,320.30 to 21,365.21)        | 11,304.35<br>(7,606.00 to 16,250.69)         | 7,897.05<br>(5,336.60 to 11,412.99)          | 13,902.47<br>(9,387.50 to 19,632.14)         | 203.96<br>(165.52 to 246.94)        | 130.67<br>(87.98 to 187.80)         | 91.30<br>(61.72 to 131.92)          | 160.69<br>(108.51 to 226.89)        |
| Neonatal encephalopathy due to birth asphyxia and trauma                | 14,127.09<br>(10,988.81 to 17,259.19)        | 8,300.21<br>(5,040.58 to 13,705.42)          | 6,749.41<br>(4,110.83 to 11,045.81)          | 9,813.62<br>(5,831.57 to 16,133.07)          | 163.32<br>(127.07 to 199.49)        | 96.01<br>(58.34 to 158.42)          | 78.08<br>(47.57 to 127.69)          | 113.51<br>(67.55 to 186.61)         |
| Neonatal sepsis and other neonatal infections                           | 1,813.30<br>(1,134.96 to 5,481.94)           | 2,443.71<br>(1,228.86 to 6,838.07)           | 2,067.14<br>(1,046.77 to 5,771.65)           | 2,780.98<br>(1,406.40 to 7,744.55)           | 20.95<br>(13.12 to 63.33)           | 28.24<br>(14.20 to 79.02)           | 23.89<br>(12.10 to 66.70)           | 32.14<br>(16.26 to 89.49)           |
| Hemolytic disease and other neonatal jaundice                           | 107.08<br>(73.78 to 161.10)                  | 76.47<br>(41.74 to 142.02)                   | 64.23<br>(34.98 to 116.23)                   | 87.92<br>(47.59 to 164.04)                   | 1.24<br>(0.86 to 1.86)              | 0.89<br>(0.49 to 1.64)              | 0.75<br>(0.41 to 1.35)              | 1.02<br>(0.55 to 1.90)              |
| Other neonatal disorders                                                | 10,143.36<br>(7,788.25 to 12,892.82)         | 12,957.62<br>(7,661.91 to 21,186.79)         | 11,886.65<br>(7,040.73 to 19,309.82)         | 13,598.80<br>(7,970.69 to 22,153.63)         | 117.24<br>(90.04 to 149.02)         | 149.80<br>(88.59 to 244.91)         | 137.43<br>(81.41 to 223.18)         | 157.21<br>(92.17 to 256.08)         |
| <b>Nutritional deficiencies</b>                                         | <b>1,614.45</b><br>(1,474.47 to 1,767.15)    | <b>3,030.45</b><br>(2,566.73 to 3,546.63)    | <b>3,273.20</b><br>(2,764.69 to 3,852.87)    | <b>2,789.88</b><br>(2,365.99 to 3,252.80)    | <b>160.95</b><br>(143.49 to 180.05) | <b>374.66</b><br>(304.61 to 454.52) | <b>417.89</b><br>(340.50 to 510.72) | <b>332.76</b><br>(269.92 to 404.67) |
| Protein-energy malnutrition                                             | 1,153.94<br>(971.06 to 1,393.37)             | 2,215.33<br>(1,626.18 to 2,804.31)           | 2,458.00<br>(1,833.65 to 3,083.36)           | 1,981.42<br>(1,424.72 to 2,518.73)           | 118.98<br>(98.24 to 146.99)         | 282.07<br>(202.57 to 364.77)        | 322.52<br>(234.47 to 416.98)        | 244.04<br>(171.82 to 320.78)        |
| Iodine deficiency                                                       | 38.06<br>(3.17 to 104.18)                    | 139.62<br>(4.11 to 512.78)                   | 143.06<br>(3.80 to 543.11)                   | 135.15<br>(4.27 to 485.79)                   | 2.27<br>(0.11 to 8.17)              | 14.97<br>(0.14 to 66.31)            | 15.79<br>(0.13 to 71.87)            | 14.02<br>(0.15 to 59.92)            |
| Dietary iron deficiency                                                 | 74.82<br>(47.28 to 90.04)                    | 91.29<br>(55.52 to 118.13)                   | 94.36<br>(56.60 to 123.58)                   | 88.29<br>(54.23 to 113.51)                   | 2.79<br>(1.10 to 4.00)              | 2.79<br>(1.32 to 6.46)              | 4.17<br>(1.37 to 7.09)              | 3.55<br>(1.27 to 5.86)              |
| Other nutritional deficiencies                                          | 347.63<br>(179.04 to 500.65)                 | 584.22<br>(283.58 to 860.33)                 | 577.78<br>(273.22 to 857.24)                 | 585.02<br>(289.53 to 842.52)                 | 36.91<br>(16.48 to 54.06)           | 73.76<br>(32.35 to 110.39)          | 75.41<br>(32.29 to 114.62)          | 71.15<br>(31.55 to 103.93)          |
| <b>Other communicable, maternal, neonatal, and nutritional diseases</b> | <b>8,207.87</b><br>(7,006.55 to 9,124.92)    | <b>9,935.77</b><br>(8,299.31 to 11,469.94)   | <b>9,596.93</b><br>(8,003.95 to 11,109.19)   | <b>10,294.25</b><br>(8,618.10 to 11,975.08)  | <b>321.20</b><br>(269.49 to 356.37) | <b>498.93</b><br>(411.41 to 567.94) | <b>500.23</b><br>(411.63 to 570.36) | <b>496.51</b><br>(408.09 to 566.54) |
| Sexually transmitted infections excluding HIV                           | 176.52<br>(144.09 to 226.32)                 | 139.80<br>(113.37 to 183.79)                 | 135.94<br>(109.12 to 182.94)                 | 143.31<br>(115.83 to 188.60)                 | 8.74<br>(7.37 to 10.61)             | 10.11<br>(7.81 to 13.77)            | 10.22<br>(7.77 to 13.96)            | 9.89<br>(7.73 to 13.38)             |
| Syphilis                                                                | 79.10<br>(55.40 to 113.97)                   | 41.33<br>(31.35 to 57.87)                    | 38.23<br>(29.10 to 53.85)                    | 44.60<br>(33.52 to 64.19)                    | 3.15<br>(2.52 to 3.97)              | 2.56<br>(1.94 to 3.49)              | 2.48<br>(1.86 to 3.40)              | 2.61<br>(1.98 to 3.58)              |
| Chlamydial infection                                                    | 18.99<br>(16.48 to 22.57)                    | 19.69<br>(15.57 to 26.64)                    | 19.60<br>(15.35 to 27.15)                    | 19.66<br>(15.66 to 26.21)                    | 1.15<br>(0.96 to 1.40)              | 1.62<br>(1.21 to 2.42)              | 1.67<br>(1.24 to 2.54)              | 1.55<br>(1.16 to 2.32)              |
| Gonococcal infection                                                    | 54.33<br>(46.77 to 65.95)                    | 56.62<br>(43.03 to 76.73)                    | 56.28<br>(42.52 to 78.05)                    | 56.63<br>(43.04 to 75.51)                    | 3.28<br>(2.76 to 3.96)              | 4.52<br>(3.33 to 6.42)              | 4.64<br>(3.40 to 6.68)              | 4.35<br>(3.22 to 6.03)              |
| Other sexually transmitted infections                                   | 24.11<br>(20.87 to 28.88)                    | 22.16<br>(17.45 to 30.07)                    | 21.82<br>(17.06 to 30.05)                    | 22.41<br>(17.67 to 30.07)                    | 1.16<br>(0.99 to 1.39)              | 1.41<br>(1.09 to 1.92)              | 1.44<br>(1.10 to 1.98)              | 1.38<br>(1.07 to 1.84)              |
| Acute hepatitis                                                         | 3,345.80<br>(2,828.55 to 3,973.60)           | 2,483.52<br>(1,775.31 to 3,434.55)           | 2,159.70<br>(1,515.36 to 2,977.68)           | 2,846.63<br>(2,004.25 to 3,968.05)           | 114.22<br>(97.99 to 132.60)         | 98.79<br>(73.26 to 130.52)          | 87.24<br>(63.24 to 118.01)          | 111.29<br>(80.72 to 148.98)         |
| Acute hepatitis A                                                       | 79.87<br>(49.75 to 123.69)                   | 96.11<br>(49.76 to 173.87)                   | 87.25<br>(44.33 to 159.64)                   | 105.59<br>(52.56 to 191.81)                  | 2.36<br>(1.38 to 3.69)              | 3.72<br>(1.88 to 6.38)              | 3.44<br>(1.73 to 5.92)              | 4.00<br>(1.98 to 6.88)              |
| Acute hepatitis B                                                       | 2,896.34<br>(2,424.53 to 3,431.17)           | 2,086.05<br>(1,449.19 to 2,968.74)           | 1,806.30<br>(1,225.61 to 2,569.55)           | 2,401.28<br>(1,633.20 to 3,403.59)           | 96.54<br>(81.18 to 114.12)          | 79.00<br>(55.95 to 107.85)          | 69.20<br>(47.94 to 96.59)           | 89.73<br>(62.13 to 124.51)          |



|                                       |                                                                        |                                                                        |                                                                        |                                                                        |                                                                  |                                                                  |                                                                  |                                                                  |
|---------------------------------------|------------------------------------------------------------------------|------------------------------------------------------------------------|------------------------------------------------------------------------|------------------------------------------------------------------------|------------------------------------------------------------------|------------------------------------------------------------------|------------------------------------------------------------------|------------------------------------------------------------------|
|                                       | 149.83<br>(102.13 to<br>214.39)                                        | 111.99<br>(68.12 to<br>178.29)                                         | 97.81<br>(58.30 to<br>154.92)                                          | 127.75<br>(75.53 to<br>205.08)                                         | 5.26<br>(3.57 to<br>7.34)                                        | 4.44<br>(2.83 to<br>6.67)                                        | 3.93<br>(2.46 to<br>5.94)                                        | 5.00<br>(3.13 to<br>7.63)                                        |
| Acute hepatitis C                     |                                                                        |                                                                        |                                                                        |                                                                        |                                                                  |                                                                  |                                                                  |                                                                  |
|                                       | 219.76<br>(140.38 to<br>319.16)                                        | 189.38<br>(107.53 to<br>297.95)                                        | 168.34<br>(95.90 to<br>263.41)                                         | 212.01<br>(119.56 to<br>336.51)                                        | 10.07<br>(6.08 to<br>14.84)                                      | 11.63<br>(6.80 to<br>18.33)                                      | 10.67<br>(6.19 to<br>16.65)                                      | 12.56<br>(7.25 to<br>19.78)                                      |
| Acute hepatitis E                     |                                                                        |                                                                        |                                                                        |                                                                        |                                                                  |                                                                  |                                                                  |                                                                  |
|                                       | 4,685.55<br>(3,619.25 to<br>5,250.12)                                  | 7,312.46<br>(5,761.19 to<br>8,381.16)                                  | 7,301.30<br>(5,755.51 to<br>8,374.69)                                  | 7,304.31<br>(5,747.99 to<br>8,369.17)                                  | 198.24<br>(147.60 to<br>223.83)                                  | 390.04<br>(299.10 to<br>449.06)                                  | 402.77<br>(308.91 to<br>464.34)                                  | 375.33<br>(287.55 to<br>430.18)                                  |
| Other unspecified infectious diseases |                                                                        |                                                                        |                                                                        |                                                                        |                                                                  |                                                                  |                                                                  |                                                                  |
| <b>Non-communicable diseases</b>      | <b>2,080,423.45</b><br><b>(1,968,235.95 to</b><br><b>2,209,122.32)</b> | <b>2,851,327.91</b><br><b>(2,483,407.83 to</b><br><b>3,331,733.11)</b> | <b>2,456,690.63</b><br><b>(2,162,592.84 to</b><br><b>2,836,140.21)</b> | <b>3,467,400.33</b><br><b>(2,979,099.07 to</b><br><b>4,076,834.70)</b> | <b>150,722.35</b><br><b>(143,294.84 to</b><br><b>158,701.06)</b> | <b>242,840.76</b><br><b>(216,406.86 to</b><br><b>274,929.57)</b> | <b>215,567.80</b><br><b>(193,436.78 to</b><br><b>243,597.93)</b> | <b>284,432.50</b><br><b>(251,851.07 to</b><br><b>324,339.51)</b> |

| Australia                            |                                                 |                                                       |                                                     |                                                       |                                              |                                              |                                              |                                               |
|--------------------------------------|-------------------------------------------------|-------------------------------------------------------|-----------------------------------------------------|-------------------------------------------------------|----------------------------------------------|----------------------------------------------|----------------------------------------------|-----------------------------------------------|
| Cause                                | YLLs (actual counts)                            |                                                       |                                                     |                                                       | Deaths (actual counts)                       |                                              |                                              |                                               |
|                                      | 2016                                            | 2040 Forecast                                         | 2040 Better Scenario                                | 2040 Worse Scenario                                   | 2016                                         | 2040 Forecast                                | 2040 Better Scenario                         | 2040 Worse Scenario                           |
| <b>Neoplasms</b>                     | <b>849,948.61</b><br>(798,026.97 to 908,780.30) | <b>1,178,810.41</b><br>(1,009,780.29 to 1,382,997.05) | <b>1,004,336.06</b><br>(868,230.30 to 1,168,631.23) | <b>1,414,745.09</b><br>(1,191,435.37 to 1,685,909.78) | <b>48,600.71</b><br>(45,839.38 to 51,620.43) | <b>79,939.94</b><br>(70,670.72 to 91,802.09) | <b>70,190.30</b><br>(62,668.60 to 79,827.15) | <b>92,714.53</b><br>(81,158.70 to 107,620.76) |
| Lip and oral cavity cancer           | 10,477.16<br>(9,515.01 to 11,511.56)            | 14,545.02<br>(8,453.42 to 23,834.93)                  | 8,772.12<br>(5,450.72 to 13,804.64)                 | 22,523.74<br>(12,860.44 to 36,691.77)                 | 547.41<br>(500.97 to 597.04)                 | 866.19<br>(519.11 to 1,345.14)               | 537.13<br>(345.18 to 798.26)                 | 1,318.50<br>(772.40 to 2,068.98)              |
| Nasopharynx cancer                   | 4,461.82<br>(3,955.03 to 5,036.03)              | 6,389.85<br>(3,575.23 to 10,825.63)                   | 3,631.14<br>(2,151.83 to 6,043.78)                  | 10,079.64<br>(5,646.32 to 17,077.73)                  | 223.34<br>(198.06 to 251.77)                 | 373.57<br>(208.18 to 633.54)                 | 214.27<br>(127.76 to 354.13)                 | 577.81<br>(318.23 to 992.56)                  |
| Other pharynx cancer                 | 7,300.93<br>(6,611.86 to 8,025.49)              | 11,932.26<br>(6,584.18 to 19,324.60)                  | 9,517.91<br>(5,490.81 to 15,121.30)                 | 13,326.83<br>(7,192.55 to 21,626.86)                  | 556.09<br>(324.94 to 387.69)                 | 683.75<br>(393.71 to 1,095.29)               | 554.88<br>(336.54 to 863.03)                 | 751.72<br>(421.77 to 1,207.86)                |
| Esophageal cancer                    | 26,764.95<br>(23,907.33 to 29,853.54)           | 37,503.89<br>(22,453.95 to 62,413.04)                 | 23,626.79<br>(15,390.54 to 36,469.73)               | 52,579.01<br>(30,716.12 to 88,991.05)                 | 1,509.21<br>(1,369.07 to 1,664.60)           | 2,401.10<br>(1,468.28 to 3,845.81)           | 1,538.36<br>(1,022.95 to 2,281.81)           | 3,326.96<br>(1,962.37 to 5,341.40)            |
| Stomach cancer                       | 32,414.77<br>(29,959.80 to 35,185.42)           | 26,821.26<br>(21,461.81 to 33,531.06)                 | 23,508.97<br>(19,303.35 to 28,745.83)               | 31,221.12<br>(24,377.06 to 40,391.91)                 | 2,017.60<br>(1,860.42 to 2,188.36)           | 2,024.02<br>(1,625.40 to 2,530.48)           | 1,813.26<br>(1,495.29 to 2,223.68)           | 2,297.86<br>(1,789.31 to 2,969.87)            |
| Colon and rectum cancer              | 97,597.35<br>(89,537.48 to 106,879.46)          | 136,296.03<br>(97,028.03 to 187,795.20)               | 113,095.34<br>(81,661.34 to 154,437.17)             | 167,192.92<br>(116,441.38 to 235,197.22)              | 5,957.44<br>(5,501.44 to 6,497.23)           | 9,962.07<br>(7,209.51 to 13,525.12)          | 8,526.49<br>(6,285.83 to 11,351.54)          | 11,902.81<br>(8,455.50 to 16,523.30)          |
| Liver cancer                         | 30,570.58<br>(27,141.51 to 33,827.85)           | 46,565.21<br>(31,288.14 to 71,938.66)                 | 37,185.87<br>(26,419.90 to 54,251.56)               | 59,965.90<br>(37,032.51 to 96,788.07)                 | 1,575.82<br>(1,412.50 to 1,739.62)           | 2,727.16<br>(1,874.41 to 4,048.26)           | 2,259.33<br>(1,636.51 to 3,230.76)           | 3,381.88<br>(2,215.84 to 5,170.25)            |
| Liver cancer due to hepatitis B      | 6,193.68<br>(4,918.74 to 7,825.13)              | 8,657.51<br>(5,499.96 to 13,627.71)                   | 7,627.74<br>(5,156.50 to 11,449.54)                 | 10,231.85<br>(6,084.11 to 16,882.45)                  | 268.99<br>(212.41 to 340.00)                 | 426.86<br>(276.37 to 638.93)                 | 384.43<br>(263.31 to 555.34)                 | 491.34<br>(300.36 to 739.02)                  |
| Liver cancer due to hepatitis C      | 8,437.74<br>(6,883.66 to 10,075.80)             | 13,324.94<br>(8,519.18 to 20,652.95)                  | 11,876.41<br>(8,111.54 to 17,539.33)                | 15,421.88<br>(9,261.78 to 24,648.69)                  | 488.22<br>(402.44 to 581.26)                 | 884.73<br>(590.11 to 1,343.43)               | 810.41<br>(570.38 to 1,169.87)               | 991.98<br>(625.48 to 1,536.83)                |
| Liver cancer due to alcohol use      | 12,432.53<br>(10,086.19 to 14,809.99)           | 18,997.35<br>(11,989.61 to 30,017.11)                 | 12,772.16<br>(8,450.72 to 19,387.69)                | 27,707.53<br>(16,423.38 to 45,488.69)                 | 637.58<br>(505.39 to 767.35)                 | 1,084.22<br>(690.14 to 1,674.27)             | 766.86<br>(504.48 to 1,127.22)               | 1,516.89<br>(919.89 to 2,427.14)              |
| Liver cancer due to other causes     | 3,506.63<br>(2,863.08 to 4,265.12)              | 5,585.41<br>(3,447.49 to 9,050.91)                    | 4,909.55<br>(3,248.03 to 7,592.60)                  | 6,604.64<br>(3,807.40 to 11,085.44)                   | 181.03<br>(147.94 to 221.49)                 | 331.36<br>(207.78 to 534.17)                 | 297.63<br>(199.35 to 457.03)                 | 381.67<br>(222.37 to 635.85)                  |
| Gallbladder and biliary tract cancer | 9,769.75<br>(8,918.28 to 11,519.99)             | 10,937.86<br>(9,687.68 to 13,093.16)                  | 11,041.88<br>(9,686.59 to 13,237.32)                | 10,778.68<br>(9,618.83 to 12,790.68)                  | 642.09<br>(589.18 to 735.65)                 | 836.38<br>(752.74 to 971.28)                 | 864.80<br>(771.81 to 1,007.20)               | 802.53<br>(724.32 to 923.48)                  |
| Pancreatic cancer                    | 49,051.78<br>(45,074.21 to 53,514.37)           | 73,495.11<br>(60,330.12 to 90,243.79)                 | 69,468.38<br>(57,799.71 to 84,823.07)               | 80,914.31<br>(65,187.24 to 101,523.60)                | 2,878.43<br>(2,651.47 to 3,113.50)           | 4,923.23<br>(4,084.05 to 5,992.50)           | 4,730.31<br>(3,966.25 to 5,711.54)           | 5,327.01<br>(4,338.00 to 6,609.92)            |
| Larynx cancer                        | 4,881.91<br>(4,368.54 to 5,443.00)              | 5,127.05<br>(2,649.82 to 9,248.38)                    | 2,831.19<br>(1,575.03 to 4,768.05)                  | 8,242.88<br>(4,052.94 to 15,212.05)                   | 261.59<br>(235.52 to 289.69)                 | 312.29<br>(157.64 to 545.48)                 | 176.11<br>(94.64 to 295.61)                  | 484.93<br>(242.25 to 870.82)                  |
| Tracheal, bronchus, and lung cancer  | 159,190.89<br>(146,094.35 to 172,654.52)        | 198,194.18<br>(143,857.23 to 271,792.83)              | 118,839.25<br>(88,518.66 to 158,624.32)             | 315,114.07<br>(227,333.56 to 433,657.62)              | 8,913.59<br>(8,187.28 to 9,660.14)           | 12,734.58<br>(9,236.79 to 17,345.02)         | 7,770.94<br>(5,719.71 to 10,473.88)          | 19,486.85<br>(13,992.41 to 26,886.58)         |
| Malignant skin melanoma              | 37,353.52<br>(31,717.79 to 42,119.33)           | 59,249.88<br>(48,991.62 to 70,365.30)                 | 64,874.83<br>(53,474.13 to 77,897.85)               | 54,009.50<br>(44,497.25 to 63,100.82)                 | 1,879.53<br>(1,564.86 to 2,106.97)           | 3,564.84<br>(2,957.35 to 4,126.11)           | 4,004.12<br>(3,303.74 to 4,656.47)           | 3,160.02<br>(2,576.80 to 3,618.34)            |
| Non-melanoma skin cancer             | 9,082.35<br>(8,252.33 to 9,961.95)              | 13,365.25<br>(11,768.69 to 15,336.31)                 | 12,706.72<br>(11,029.48 to 14,587.20)               | 13,945.38<br>(12,237.61 to 15,935.71)                 | 672.89<br>(615.55 to 729.65)                 | 1,189.66<br>(1,051.79 to 1,348.51)           | 1,166.37<br>(1,019.10 to 1,321.28)           | 1,200.39<br>(1,057.58 to 1,363.39)            |
| Breast cancer                        | 68,173.01<br>(60,657.85 to 76,134.61)           | 85,059.74<br>(62,513.15 to 113,826.95)                | 69,593.77<br>(52,236.15 to 91,172.88)               | 101,463.77<br>(72,125.73 to 137,585.62)               | 3,232.66<br>(2,900.94 to 3,594.45)           | 4,882.06<br>(3,653.08 to 6,417.45)           | 4,123.87<br>(3,162.24 to 5,339.77)           | 5,678.27<br>(4,110.37 to 7,510.96)            |
| Cervical cancer                      | 9,599.26<br>(8,418.49 to 10,819.68)             | 8,343.23<br>(6,323.51 to 10,771.10)                   | 7,415.57<br>(5,722.34 to 9,468.23)                  | 9,745.10<br>(7,140.58 to 13,127.33)                   | 428.92<br>(376.34 to 482.53)                 | 450.53<br>(349.83 to 579.37)                 | 407.57<br>(321.51 to 509.63)                 | 516.29<br>(381.27 to 691.61)                  |

|                   |                                          |                                           |                                           |                                           |                                       |                                        |                                        |                                        |
|-------------------|------------------------------------------|-------------------------------------------|-------------------------------------------|-------------------------------------------|---------------------------------------|----------------------------------------|----------------------------------------|----------------------------------------|
|                   | 7,959.07<br>(6,950.53 to<br>9,140.62)    | 12,352.15<br>(10,459.98 to<br>14,629.39)  | 11,821.27<br>(9,955.75 to<br>14,028.11)   | 12,839.08<br>(10,884.68 to<br>15,131.65)  | 491.58<br>(433.23 to<br>562.24)       | 908.23<br>(774.52 to<br>1,064.38)      | 887.16<br>(752.14 to<br>1,045.68)      | 922.10<br>(789.86 to<br>1,078.65)      |
| Uterine cancer    |                                          |                                           |                                           |                                           |                                       |                                        |                                        |                                        |
|                   | 20,926.89<br>(18,176.56 to<br>23,827.88) | 25,959.31<br>(19,543.67 to<br>34,028.39)  | 22,985.86<br>(17,823.23 to<br>29,486.41)  | 28,165.93<br>(20,752.53 to<br>37,591.87)  | 1,068.18<br>(928.06 to<br>1,205.15)   | 1,548.38<br>(1,153.10 to<br>2,028.98)  | 1,356.19<br>(1,049.93 to<br>1,727.44)  | 1,656.52<br>(1,200.50 to<br>2,219.34)  |
| Ovarian cancer    |                                          |                                           |                                           |                                           |                                       |                                        |                                        |                                        |
|                   | 46,737.40<br>(39,871.14 to<br>58,804.17) | 83,275.30<br>(68,744.48 to<br>110,455.49) | 81,924.76<br>(66,857.11 to<br>108,351.83) | 84,093.28<br>(68,733.80 to<br>112,044.53) | 3,986.93<br>(3,423.57 to<br>4,920.51) | 8,265.27<br>(6,967.73 to<br>10,598.44) | 8,341.03<br>(7,010.78 to<br>10,519.80) | 8,127.02<br>(6,807.74 to<br>10,595.02) |
| Prostate cancer   |                                          |                                           |                                           |                                           |                                       |                                        |                                        |                                        |
|                   | 850.79<br>(698.58 to<br>1,017.65)        | 756.75<br>(554.93 to<br>1,040.23)         | 714.74<br>(519.65 to<br>993.20)           | 799.11<br>(589.75 to<br>1,096.25)         | 22.07<br>(18.49 to<br>26.10)          | 23.89<br>(19.07 to<br>30.18)           | 23.04<br>(18.27 to<br>29.41)           | 24.67<br>(19.84 to<br>31.31)           |
| Testicular cancer |                                          |                                           |                                           |                                           |                                       |                                        |                                        |                                        |

| Australia                       |                                                  |                                                  |                                                  |                                                    |                                               |                                               |                                               |                                                |
|---------------------------------|--------------------------------------------------|--------------------------------------------------|--------------------------------------------------|----------------------------------------------------|-----------------------------------------------|-----------------------------------------------|-----------------------------------------------|------------------------------------------------|
| Cause                           | YLLs (actual counts)                             |                                                  |                                                  |                                                    | Deaths (actual counts)                        |                                               |                                               |                                                |
|                                 | 2016                                             | 2040 Forecast                                    | 2040 Better Scenario                             | 2040 Worse Scenario                                | 2016                                          | 2040 Forecast                                 | 2040 Better Scenario                          | 2040 Worse Scenario                            |
| Kidney cancer                   | 20,890.29<br>(19,044.68 to 22,842.52)            | 33,649.99<br>(27,829.29 to 41,037.61)            | 32,605.10<br>(27,562.50 to 38,931.92)            | 35,208.11<br>(28,531.36 to 43,885.17)              | 1,166.30<br>(1,067.21 to 1,272.46)            | 2,188.96<br>(1,827.44 to 2,619.49)            | 2,166.52<br>(1,848.88 to 2,539.22)            | 2,234.61<br>(1,817.00 to 2,739.04)             |
| Bladder cancer                  | 16,006.55<br>(14,477.94 to 17,674.43)            | 23,306.60<br>(18,378.46 to 30,347.45)            | 20,632.02<br>(16,778.56 to 25,842.59)            | 27,024.46<br>(20,641.77 to 35,941.15)              | 1,266.74<br>(1,148.35 to 1,401.89)            | 2,164.80<br>(1,709.60 to 2,744.67)            | 1,960.16<br>(1,601.37 to 2,417.97)            | 2,453.23<br>(1,864.41 to 3,200.22)             |
| Brain and nervous system cancer | 38,042.76<br>(30,759.07 to 43,436.23)            | 52,563.71<br>(43,226.62 to 61,897.83)            | 51,432.80<br>(41,694.35 to 60,700.64)            | 53,523.33<br>(43,808.44 to 63,025.40)              | 1,425.63<br>(1,110.72 to 1,594.81)            | 2,325.56<br>(1,840.22 to 2,673.60)            | 2,310.30<br>(1,817.48 to 2,681.58)            | 2,327.19<br>(1,825.00 to 2,673.93)             |
| Thyroid cancer                  | 2,346.38<br>(2,115.23 to 2,625.26)               | 3,001.75<br>(2,220.97 to 4,139.07)               | 2,734.85<br>(2,065.25 to 3,606.54)               | 3,334.07<br>(2,405.08 to 4,704.33)                 | 132.05<br>(118.73 to 146.92)                  | 201.79<br>(152.14 to 278.45)                  | 189.18<br>(145.71 to 252.88)                  | 216.79<br>(160.46 to 304.47)                   |
| Mesothelioma                    | 12,798.79<br>(11,314.53 to 14,633.86)            | 20,731.63<br>(17,755.56 to 24,836.69)            | 21,523.19<br>(18,364.95 to 25,998.19)            | 19,858.95<br>(16,988.83 to 23,657.51)              | 776.17<br>(687.39 to 876.69)                  | 1,440.63<br>(1,251.03 to 1,660.98)            | 1,525.93<br>(1,319.89 to 1,755.19)            | 1,349.87<br>(1,181.27 to 1,548.35)             |
| Hodgkin lymphoma                | 2,015.16<br>(1,813.07 to 2,233.32)               | 1,794.21<br>(1,490.87 to 2,204.63)               | 1,626.65<br>(1,328.80 to 2,019.83)               | 1,968.95<br>(1,623.61 to 2,417.26)                 | 77.54<br>(69.72 to 85.69)                     | 88.86<br>(73.36 to 100.10)                    | 79.27<br>(67.29 to 93.87)                     | 92.23<br>(78.85 to 108.84)                     |
| Non-Hodgkin lymphoma            | 31,601.45<br>(28,269.71 to 38,145.22)            | 45,687.26<br>(37,457.27 to 57,979.23)            | 43,289.43<br>(35,699.39 to 54,618.82)            | 48,403.02<br>(38,988.85 to 62,339.39)              | 1,843.77<br>(1,648.25 to 2,091.66)            | 3,175.14<br>(2,630.26 to 3,869.92)            | 3,086.68<br>(2,582.95 to 3,721.01)            | 3,265.39<br>(2,688.80 to 4,017.93)             |
| Multiple myeloma                | 15,661.72<br>(11,966.02 to 17,768.43)            | 24,467.49<br>(18,027.45 to 31,025.94)            | 23,654.19<br>(17,362.58 to 29,723.72)            | 25,444.59<br>(18,813.02 to 32,679.04)              | 984.31<br>(741.72 to 1,113.43)                | 1,780.62<br>(1,312.36 to 2,212.24)            | 1,764.16<br>(1,297.52 to 2,182.38)            | 1,799.77<br>(1,316.73 to 2,266.72)             |
| Leukemia                        | 41,412.49<br>(38,115.75 to 44,905.67)            | 64,657.07<br>(51,563.90 to 80,254.74)            | 59,760.87<br>(48,799.39 to 73,245.43)            | 71,185.78<br>(54,741.75 to 90,608.12)              | 2,303.00<br>(2,125.80 to 2,490.80)            | 4,320.76<br>(3,434.08 to 5,417.89)            | 4,078.44<br>(3,345.38 to 5,033.93)            | 4,630.19<br>(3,570.61 to 5,916.40)             |
| Acute lymphoid leukemia         | 7,812.39<br>(6,760.21 to 8,835.45)               | 8,691.08<br>(6,808.77 to 11,144.86)              | 7,844.92<br>(6,216.31 to 9,966.64)               | 9,777.12<br>(7,505.29 to 12,759.88)                | 313.17<br>(273.09 to 354.17)                  | 403.39<br>(308.25 to 523.72)                  | 369.68<br>(288.33 to 467.51)                  | 444.61<br>(330.71 to 596.94)                   |
| Chronic lymphoid leukemia       | 5,867.27<br>(5,112.95 to 7,511.25)               | 9,298.06<br>(6,871.37 to 12,990.64)              | 8,690.26<br>(6,573.17 to 11,924.83)              | 10,070.26<br>(7,254.29 to 14,322.36)               | 445.94<br>(393.24 to 556.77)                  | 813.89<br>(615.38 to 1,052.27)                | 780.70<br>(606.80 to 1,038.31)                | 855.23<br>(628.43 to 1,178.87)                 |
| Acute myeloid leukemia          | 19,700.17<br>(16,987.42 to 21,713.53)            | 36,359.17<br>(28,853.03 to 45,678.48)            | 34,150.15<br>(27,602.28 to 41,953.92)            | 39,475.26<br>(30,752.52 to 50,704.28)              | 1,013.58<br>(863.62 to 1,119.11)              | 2,231.13<br>(1,771.78 to 2,798.26)            | 2,137.61<br>(1,730.38 to 2,621.83)            | 2,359.97<br>(1,823.12 to 3,028.22)             |
| Chronic myeloid leukemia        | 3,251.53<br>(2,810.49 to 3,821.31)               | 2,632.39<br>(1,892.74 to 3,708.08)               | 2,183.12<br>(1,612.13 to 3,001.26)               | 3,215.26<br>(2,228.21 to 4,565.42)                 | 202.42<br>(173.37 to 241.59)                  | 195.65<br>(140.01 to 273.73)                  | 166.76<br>(123.81 to 229.16)                  | 230.93<br>(159.65 to 328.20)                   |
| Other leukemia                  | 4,781.12<br>(4,276.13 to 5,393.25)               | 7,676.37<br>(5,914.39 to 9,890.41)               | 6,892.43<br>(5,466.90 to 8,610.50)               | 8,647.88<br>(6,449.89 to 11,329.10)                | 327.89<br>(289.82 to 370.46)                  | 676.70<br>(519.40 to 877.53)                  | 623.69<br>(490.91 to 787.86)                  | 739.45<br>(552.87 to 987.51)                   |
| Other neoplasms                 | 36,008.83<br>(32,849.29 to 39,364.22)            | 52,781.38<br>(46,777.05 to 59,338.88)            | 53,520.61<br>(47,217.43 to 60,430.59)            | 51,793.55<br>(46,354.90 to 57,883.78)              | 1,959.84<br>(1,780.94 to 2,139.82)            | 3,578.64<br>(3,171.48 to 3,986.11)            | 3,734.45<br>(3,308.63 to 4,196.34)            | 3,401.12<br>(3,015.32 to 3,766.30)             |
| <b>Cardiovascular diseases</b>  | <b>575,185.17<br/>(542,450.32 to 613,029.13)</b> | <b>607,386.70<br/>(463,289.86 to 814,281.85)</b> | <b>459,310.23<br/>(362,894.91 to 587,839.71)</b> | <b>869,034.90<br/>(626,022.98 to 1,218,660.38)</b> | <b>52,789.58<br/>(49,941.31 to 55,906.92)</b> | <b>66,059.07<br/>(51,498.45 to 87,243.47)</b> | <b>53,121.87<br/>(42,219.06 to 67,838.45)</b> | <b>86,329.18<br/>(64,328.97 to 116,845.26)</b> |
| Rheumatic heart disease         | 6,732.08<br>(6,000.21 to 7,554.00)               | 5,746.81<br>(4,723.06 to 7,201.88)               | 5,325.43<br>(4,362.53 to 6,708.01)               | 6,201.91<br>(4,999.58 to 7,915.12)                 | 491.94<br>(440.63 to 554.36)                  | 544.17<br>(446.63 to 696.58)                  | 519.66<br>(427.62 to 655.61)                  | 567.11<br>(457.49 to 723.02)                   |
| Ischemic heart disease          | 323,150.34<br>(301,009.27 to 345,789.51)         | 296,039.54<br>(190,190.27 to 456,853.96)         | 200,352.34<br>(132,813.99 to 295,777.91)         | 478,785.31<br>(291,387.11 to 757,721.57)           | 29,128.39<br>(27,304.79 to 30,908.30)         | 31,695.11<br>(20,474.84 to 47,617.65)         | 23,119.86<br>(15,397.34 to 34,345.30)         | 45,910.15<br>(28,836.32 to 71,369.13)          |
| Stroke                          | 129,548.93<br>(118,360.82 to 141,967.48)         | 122,287.05<br>(82,138.63 to 184,564.02)          | 85,597.80<br>(59,857.61 to 126,512.20)           | 174,905.18<br>(110,574.72 to 271,888.34)           | 13,480.31<br>(12,092.13 to 14,832.42)         | 14,622.81<br>(9,837.00 to 22,003.13)          | 11,169.28<br>(7,795.54 to 16,494.94)          | 19,030.88<br>(12,575.95 to 29,953.42)          |
| Ischemic stroke                 | 53,256.25<br>(47,727.58 to 58,729.37)            | 50,090.76<br>(29,445.65 to 88,775.15)            | 38,135.42<br>(23,282.63 to 67,076.83)            | 66,111.63<br>(37,432.85 to 118,742.39)             | 6,574.25<br>(5,870.76 to 7,254.43)            | 6,852.50<br>(3,981.75 to 12,686.65)           | 5,518.64<br>(3,285.57 to 9,855.09)            | 8,485.46<br>(4,703.83 to 15,880.58)            |

|                                |                                          |                                           |                                          |                                            |                                       |                                        |                                       |                                         |
|--------------------------------|------------------------------------------|-------------------------------------------|------------------------------------------|--------------------------------------------|---------------------------------------|----------------------------------------|---------------------------------------|-----------------------------------------|
|                                | 76,292.68<br>(69,470.44 to<br>83,980.58) | 72,196.29<br>(46,293.04 to<br>110,276.09) | 47,462.37<br>(32,618.93 to<br>67,602.07) | 108,793.56<br>(65,340.68 to<br>172,089.54) | 6,906.07<br>(6,177.54 to<br>7,642.38) | 7,770.31<br>(5,237.19 to<br>11,197.62) | 5,650.64<br>(4,036.36 to<br>7,804.21) | 10,545.42<br>(6,763.48 to<br>15,717.76) |
| Intracerebral hemorrhage       |                                          |                                           |                                          |                                            |                                       |                                        |                                       |                                         |
|                                | 11,238.71<br>(8,723.80 to<br>16,552.40)  | 22,511.47<br>(14,129.77 to<br>39,340.55)  | 18,560.47<br>(12,317.80 to<br>29,749.03) | 29,983.97<br>(17,161.05 to<br>59,592.18)   | 1,175.33<br>(841.22 to<br>1,651.53)   | 2,857.80<br>(1,739.91 to<br>5,323.25)  | 2,442.34<br>(1,590.10 to<br>3,966.70) | 3,620.45<br>(1,998.92 to<br>7,552.26)   |
| Hypertensive heart disease     |                                          |                                           |                                          |                                            |                                       |                                        |                                       |                                         |
|                                | 26,018.37<br>(22,230.71 to<br>35,957.31) | 27,288.01<br>(20,958.33 to<br>39,814.05)  | 23,048.30<br>(17,658.40 to<br>32,313.50) | 32,127.64<br>(24,291.70 to<br>47,859.68)   | 1,350.89<br>(1,166.83 to<br>1,825.12) | 1,759.92<br>(1,311.15 to<br>2,503.83)  | 1,563.41<br>(1,157.41 to<br>2,209.99) | 1,984.62<br>(1,457.11 to<br>2,886.84)   |
| Cardiomyopathy and myocarditis |                                          |                                           |                                          |                                            |                                       |                                        |                                       |                                         |
|                                | 3,055.81<br>(2,404.73 to<br>4,946.02)    | 3,459.54<br>(2,623.85 to<br>5,337.09)     | 3,446.06<br>(2,614.16 to<br>5,235.40)    | 3,470.95<br>(2,611.95 to<br>5,430.34)      | 107.77<br>(86.71 to<br>159.72)        | 174.28<br>(135.05 to<br>242.95)        | 182.19<br>(139.65 to<br>251.05)       | 165.98<br>(128.17 to<br>234.35)         |
| Myocarditis                    |                                          |                                           |                                          |                                            |                                       |                                        |                                       |                                         |

| Australia                                                     |                                                        |                                                        |                                                        |                                                        |                                                    |                                                     |                                                     |                                                     |
|---------------------------------------------------------------|--------------------------------------------------------|--------------------------------------------------------|--------------------------------------------------------|--------------------------------------------------------|----------------------------------------------------|-----------------------------------------------------|-----------------------------------------------------|-----------------------------------------------------|
| Cause                                                         | YLLs (actual counts)                                   |                                                        |                                                        |                                                        | Deaths (actual counts)                             |                                                     |                                                     |                                                     |
|                                                               | 2016                                                   | 2040 Forecast                                          | 2040 Better Scenario                                   | 2040 Worse Scenario                                    | 2016                                               | 2040 Forecast                                       | 2040 Better Scenario                                | 2040 Worse Scenario                                 |
| Alcoholic cardiomyopathy                                      | 9,620.28<br>(7,753.55 to 14,881.51)                    | 10,844.34<br>(8,331.87 to 16,334.37)                   | 8,237.09<br>(6,248.80 to 12,189.92)                    | 13,426.07<br>(10,409.65 to 20,586.50)                  | 381.35<br>(307.15 to 588.73)                       | 492.25<br>(379.78 to 743.19)                        | 387.05<br>(295.41 to 572.49)                        | 594.77<br>(457.91 to 910.34)                        |
| Other cardiomyopathy                                          | 13,342.29<br>(10,992.45 to 19,411.01)                  | 12,984.14<br>(8,611.12 to 20,203.86)                   | 11,365.15<br>(7,694.67 to 17,663.74)                   | 15,230.62<br>(9,842.00 to 24,090.18)                   | 861.77<br>(728.04 to 1,166.29)                     | 1,093.39<br>(704.53 to 1,745.82)                    | 994.18<br>(657.22 to 1,539.74)                      | 1,223.87<br>(782.48 to 1,976.51)                    |
| Atrial fibrillation and flutter                               | 16,418.13<br>(12,787.01 to 20,507.23)                  | 31,230.44<br>(22,664.65 to 41,438.69)                  | 29,598.29<br>(21,861.77 to 38,771.64)                  | 33,469.42<br>(23,953.94 to 45,245.47)                  | 1,955.76<br>(1,470.96 to 2,511.26)                 | 4,001.42<br>(2,879.55 to 5,305.43)                  | 3,905.84<br>(2,860.07 to 5,150.49)                  | 4,124.11<br>(2,974.92 to 5,541.28)                  |
| Aortic aneurysm                                               | 17,651.08<br>(16,017.66 to 19,521.06)                  | 25,891.55<br>(21,209.44 to 32,353.32)                  | 25,164.27<br>(20,952.10 to 31,040.64)                  | 27,905.55<br>(22,396.34 to 35,678.19)                  | 1,403.13<br>(1,269.66 to 1,541.63)                 | 2,443.92<br>(2,052.08 to 3,001.82)                  | 2,456.32<br>(2,078.32 to 2,979.74)                  | 2,499.48<br>(2,058.99 to 3,097.15)                  |
| Peripheral artery disease                                     | 8,005.31<br>(5,883.54 to 14,569.33)                    | 21,117.59<br>(13,683.61 to 36,419.42)                  | 21,268.67<br>(13,836.29 to 36,509.02)                  | 22,041.92<br>(14,180.42 to 38,853.19)                  | 961.87<br>(694.88 to 1,283.61)                     | 2,803.61<br>(1,788.23 to 5,136.09)                  | 2,914.97<br>(1,851.95 to 5,308.20)                  | 2,795.10<br>(1,732.18 to 5,191.17)                  |
| Endocarditis                                                  | 6,190.77<br>(4,324.36 to 7,411.05)                     | 9,836.07<br>(6,193.61 to 13,871.24)                    | 9,761.31<br>(6,138.53 to 13,658.43)                    | 10,214.50<br>(6,337.12 to 14,784.86)                   | 411.24<br>(270.98 to 491.64)                       | 801.72<br>(478.29 to 1,195.21)                      | 820.59<br>(495.48 to 1,221.12)                      | 800.61<br>(474.56 to 1,207.02)                      |
| Other cardiovascular and circulatory diseases                 | 30,231.44<br>(27,574.74 to 33,244.58)                  | 45,438.16<br>(37,276.28 to 56,468.36)                  | 40,633.35<br>(33,957.41 to 50,046.74)                  | 53,399.49<br>(42,918.60 to 68,996.73)                  | 2,430.71<br>(2,216.27 to 2,666.18)                 | 4,528.60<br>(3,757.57 to 5,514.99)                  | 4,209.60<br>(3,527.22 to 5,103.48)                  | 4,996.67<br>(4,090.99 to 6,242.78)                  |
| <b>Chronic respiratory diseases</b>                           | <b>127,390.56</b><br><b>(118,328.19 to 137,524.99)</b> | <b>171,009.93</b><br><b>(139,626.07 to 208,312.55)</b> | <b>130,091.55</b><br><b>(108,903.57 to 154,095.08)</b> | <b>240,159.86</b><br><b>(191,615.82 to 302,722.41)</b> | <b>10,276.59</b><br><b>(9,571.62 to 11,101.98)</b> | <b>15,980.67</b><br><b>(13,116.69 to 19,635.55)</b> | <b>12,473.69</b><br><b>(10,558.20 to 14,925.31)</b> | <b>21,822.36</b><br><b>(17,546.55 to 27,276.39)</b> |
| Chronic obstructive pulmonary disease                         | 101,688.58<br>(92,811.85 to 113,704.96)                | 134,404.58<br>(102,673.85 to 175,306.23)               | 90,832.20<br>(71,149.63 to 121,185.07)                 | 205,124.51<br>(157,160.89 to 268,881.85)               | 8,547.20<br>(7,824.17 to 9,530.14)                 | 12,951.87<br>(9,995.03 to 17,304.57)                | 9,119.57<br>(7,069.19 to 12,274.39)                 | 19,046.02<br>(14,705.80 to 25,185.91)               |
| Pneumoconiosis                                                | 1,124.95<br>(689.46 to 1,985.03)                       | 1,785.06<br>(992.41 to 3,270.40)                       | 1,929.80<br>(1,053.11 to 3,735.90)                     | 1,654.93<br>(931.29 to 3,059.41)                       | 93.81<br>(56.83 to 167.11)                         | 166.04<br>(91.80 to 311.01)                         | 183.21<br>(99.53 to 353.69)                         | 150.45<br>(84.40 to 276.86)                         |
| Silicosis                                                     | 145.07<br>(49.94 to 586.30)                            | 110.73<br>(25.93 to 551.57)                            | 95.53<br>(20.76 to 509.22)                             | 126.94<br>(32.05 to 607.91)                            | 11.30<br>(3.55 to 47.66)                           | 10.60<br>(2.34 to 53.96)                            | 9.37<br>(1.96 to 50.91)                             | 11.82<br>(2.78 to 56.72)                            |
| Asbestosis                                                    | 907.12<br>(572.00 to 1,617.15)                         | 1,557.74<br>(898.92 to 2,893.56)                       | 1,720.92<br>(973.19 to 3,276.08)                       | 1,401.07<br>(825.84 to 2,625.96)                       | 76.52<br>(47.32 to 137.13)                         | 143.94<br>(83.05 to 267.51)                         | 162.30<br>(91.63 to 307.18)                         | 126.62<br>(73.79 to 240.86)                         |
| Coal workers pneumoconiosis                                   | 18.10<br>(2.45 to 172.44)                              | 45.16<br>(5.61 to 375.36)                              | 42.80<br>(5.26 to 351.46)                              | 51.23<br>(6.18 to 445.27)                              | 1.38<br>(0.14 to 13.83)                            | 4.17<br>(0.45 to 39.22)                             | 4.10<br>(0.44 to 39.41)                             | 4.51<br>(0.47 to 41.25)                             |
| Other pneumoconiosis                                          | 54.66<br>(24.45 to 208.36)                             | 71.42<br>(32.88 to 254.95)                             | 70.54<br>(31.45 to 258.64)                             | 75.68<br>(35.62 to 261.22)                             | 4.60<br>(1.91 to 18.78)                            | 7.33<br>(3.18 to 26.04)                             | 7.44<br>(3.11 to 27.16)                             | 7.49<br>(3.31 to 25.51)                             |
| Asthma                                                        | 8,391.43<br>(7,459.65 to 11,152.88)                    | 4,705.12<br>(2,763.65 to 8,110.73)                     | 3,591.38<br>(2,154.60 to 6,102.16)                     | 6,610.57<br>(3,796.80 to 11,334.08)                    | 453.34<br>(397.72 to 586.49)                       | 343.33<br>(208.35 to 588.27)                        | 275.73<br>(162.77 to 465.67)                        | 449.52<br>(259.29 to 779.61)                        |
| Interstitial lung disease and pulmonary sarcoidosis           | 14,617.08<br>(6,434.03 to 18,450.04)                   | 28,130.12<br>(12,366.22 to 36,038.27)                  | 31,828.71<br>(14,999.72 to 40,342.09)                  | 24,666.55<br>(10,551.50 to 31,948.96)                  | 1,103.38<br>(463.18 to 1,412.97)                   | 2,398.48<br>(1,018.63 to 3,120.39)                  | 2,776.36<br>(1,264.38 to 3,554.28)                  | 2,051.02<br>(855.64 to 2,709.40)                    |
| Other chronic respiratory diseases                            | 1,568.52<br>(980.58 to 2,129.20)                       | 1,985.05<br>(1,254.22 to 2,784.42)                     | 1,909.46<br>(1,214.51 to 2,731.45)                     | 2,103.31<br>(1,297.99 to 2,934.80)                     | 76.87<br>(46.60 to 103.92)                         | 120.94<br>(74.70 to 174.69)                         | 118.81<br>(74.58 to 171.06)                         | 125.35<br>(75.78 to 179.84)                         |
| <b>Cirrhosis and other chronic liver diseases</b>             | <b>51,435.20</b><br><b>(46,785.35 to 56,847.02)</b>    | <b>54,451.75</b><br><b>(47,138.84 to 63,788.85)</b>    | <b>47,325.01</b><br><b>(40,940.52 to 55,826.39)</b>    | <b>61,991.06</b><br><b>(53,470.51 to 72,956.52)</b>    | <b>2,163.74</b><br><b>(1,988.52 to 2,363.97)</b>   | <b>2,658.14</b><br><b>(2,390.96 to 2,997.97)</b>    | <b>2,382.63</b><br><b>(2,131.97 to 2,709.41)</b>    | <b>2,933.85</b><br><b>(2,613.71 to 3,329.15)</b>    |
| Cirrhosis and other chronic liver diseases due to hepatitis B | 15,709.19<br>(13,574.50 to 18,115.32)                  | 16,560.22<br>(13,640.04 to 20,580.58)                  | 15,594.67<br>(12,805.55 to 19,351.88)                  | 17,506.76<br>(14,340.57 to 21,830.68)                  | 657.12<br>(576.61 to 748.22)                       | 794.05<br>(675.41 to 930.09)                        | 764.53<br>(652.93 to 901.48)                        | 819.42<br>(698.49 to 966.42)                        |
| Cirrhosis and other chronic liver diseases due to hepatitis C | 14,662.43<br>(12,743.17 to 16,716.05)                  | 15,655.25<br>(12,942.84 to 19,044.79)                  | 14,636.92<br>(12,088.32 to 17,867.67)                  | 16,672.53<br>(13,733.20 to 20,422.33)                  | 584.54<br>(519.47 to 655.90)                       | 708.23<br>(604.68 to 827.47)                        | 675.36<br>(573.62 to 795.88)                        | 738.16<br>(628.12 to 872.65)                        |

|                                                                |                                                               |                                                               |                                                               |                                                               |                                                            |                                                            |                                                            |                                                            |
|----------------------------------------------------------------|---------------------------------------------------------------|---------------------------------------------------------------|---------------------------------------------------------------|---------------------------------------------------------------|------------------------------------------------------------|------------------------------------------------------------|------------------------------------------------------------|------------------------------------------------------------|
|                                                                | 14,554.05<br>(12,769.53 to<br>16,520.67)                      | 15,415.80<br>(12,930.95 to<br>18,500.32)                      | 10,658.63<br>(8,871.68 to<br>12,787.91)                       | 20,618.15<br>(17,236.50 to<br>24,629.15)                      | 620.42<br>(549.23 to<br>692.45)                            | 766.99<br>(662.83 to<br>884.78)                            | 565.02<br>(484.84 to<br>656.86)                            | 979.17<br>(842.87 to<br>1,133.32)                          |
| Cirrhosis and other chronic liver diseases due to alcohol use  |                                                               |                                                               |                                                               |                                                               |                                                            |                                                            |                                                            |                                                            |
|                                                                | 6,509.53<br>(5,637.00 to<br>7,386.70)                         | 6,820.48<br>(5,748.49 to<br>8,205.12)                         | 6,434.79<br>(5,412.64 to<br>7,717.37)                         | 7,193.62<br>(6,034.43 to<br>8,667.64)                         | 301.67<br>(265.25 to<br>341.01)                            | 388.88<br>(337.49 to<br>453.62)                            | 377.71<br>(326.16 to<br>445.06)                            | 397.10<br>(342.08 to<br>464.97)                            |
| Cirrhosis and other chronic liver diseases due to other causes |                                                               |                                                               |                                                               |                                                               |                                                            |                                                            |                                                            |                                                            |
| <b>Digestive diseases</b>                                      | <b>43,014.15</b><br><b>(38,707.07 to</b><br><b>55,678.43)</b> | <b>69,560.63</b><br><b>(59,362.68 to</b><br><b>88,371.47)</b> | <b>66,888.56</b><br><b>(57,418.88 to</b><br><b>85,072.45)</b> | <b>72,417.44</b><br><b>(61,407.00 to</b><br><b>93,636.69)</b> | <b>3,821.12</b><br><b>(3,445.73 to</b><br><b>4,730.99)</b> | <b>7,356.18</b><br><b>(6,380.09 to</b><br><b>9,120.14)</b> | <b>7,331.61</b><br><b>(6,361.83 to</b><br><b>9,054.66)</b> | <b>7,366.86</b><br><b>(6,314.67 to</b><br><b>9,281.37)</b> |
| Peptic ulcer disease                                           | 4,689.62<br>(4,091.08 to<br>6,112.37)                         | 5,055.68<br>(4,070.25 to<br>6,492.03)                         | 4,523.90<br>(3,629.22 to<br>5,914.40)                         | 5,778.98<br>(4,595.20 to<br>7,419.63)                         | 422.29<br>(370.08 to<br>530.43)                            | 566.01<br>(459.89 to<br>721.40)                            | 522.15<br>(416.07 to<br>680.37)                            | 620.54<br>(491.81 to<br>792.69)                            |

| Australia                                  |                                          |                                          |                                          |                                          |                                       |                                       |                                       |                                       |
|--------------------------------------------|------------------------------------------|------------------------------------------|------------------------------------------|------------------------------------------|---------------------------------------|---------------------------------------|---------------------------------------|---------------------------------------|
| Cause                                      | YLLs (actual counts)                     |                                          |                                          |                                          | Deaths (actual counts)                |                                       |                                       |                                       |
|                                            | 2016                                     | 2040 Forecast                            | 2040 Better Scenario                     | 2040 Worse Scenario                      | 2016                                  | 2040 Forecast                         | 2040 Better Scenario                  | 2040 Worse Scenario                   |
| Gastritis and duodenitis                   | 442.43<br>(349.80 to 832.42)             | 655.51<br>(482.07 to 1,338.85)           | 617.93<br>(448.79 to 1,265.08)           | 690.00<br>(501.50 to 1,396.15)           | 31.81<br>(25.15 to 66.78)             | 60.56<br>(42.84 to 126.80)            | 59.32<br>(41.30 to 125.78)            | 61.07<br>(43.54 to 128.00)            |
| Appendicitis                               | 633.37<br>(516.32 to 981.07)             | 693.68<br>(542.08 to 1,113.86)           | 625.00<br>(481.69 to 996.28)             | 763.64<br>(593.46 to 1,204.30)           | 39.26<br>(31.94 to 59.65)             | 55.98<br>(43.98 to 88.58)             | 52.04<br>(40.24 to 82.93)             | 59.52<br>(46.42 to 94.73)             |
| Paralytic ileus and intestinal obstruction | 7,956.99<br>(6,240.37 to 9,853.23)       | 14,803.84<br>(11,449.73 to 18,529.22)    | 15,449.68<br>(12,017.73 to 19,438.97)    | 14,056.98<br>(10,789.11 to 17,606.57)    | 771.90<br>(597.12 to 930.86)          | 1,683.58<br>(1,292.56 to 2,053.11)    | 1,804.64<br>(1,395.68 to 2,180.73)    | 1,551.76<br>(1,177.14 to 1,864.88)    |
| Inguinal, femoral, and abdominal hernia    | 1,808.16<br>(1,471.50 to 2,819.60)       | 1,769.63<br>(1,413.60 to 2,769.19)       | 1,725.29<br>(1,368.80 to 2,707.11)       | 1,798.75<br>(1,449.08 to 2,843.92)       | 166.79<br>(132.97 to 260.47)          | 192.44<br>(150.46 to 302.24)          | 193.45<br>(150.19 to 305.63)          | 189.08<br>(148.49 to 297.86)          |
| Inflammatory bowel disease                 | 3,321.49<br>(2,197.52 to 3,958.01)       | 4,750.55<br>(2,999.06 to 5,875.60)       | 4,884.31<br>(3,109.27 to 6,076.81)       | 4,584.51<br>(2,905.71 to 5,633.99)       | 279.80<br>(177.61 to 337.14)          | 476.69<br>(292.99 to 594.25)          | 505.61<br>(313.17 to 635.58)          | 444.37<br>(272.96 to 550.88)          |
| Vascular intestinal disorders              | 6,587.32<br>(5,539.51 to 9,168.13)       | 11,935.36<br>(9,825.96 to 16,638.79)     | 11,898.91<br>(9,721.29 to 16,564.46)     | 11,862.86<br>(9,755.69 to 16,702.23)     | 578.30<br>(495.36 to 783.29)          | 1,214.77<br>(1,008.63 to 1,637.97)    | 1,243.67<br>(1,030.55 to 1,669.13)    | 1,172.26<br>(982.46 to 1,582.19)      |
| Gallbladder and biliary diseases           | 4,816.19<br>(4,194.03 to 6,278.48)       | 8,113.04<br>(4,745.57 to 13,595.23)      | 6,660.24<br>(3,982.40 to 10,814.85)      | 10,087.59<br>(5,729.36 to 16,703.88)     | 458.83<br>(398.21 to 586.45)          | 908.03<br>(527.91 to 1,514.55)        | 773.70<br>(461.16 to 1,285.24)        | 1,080.66<br>(616.70 to 1,792.69)      |
| Pancreatitis                               | 4,390.56<br>(3,680.24 to 6,403.34)       | 6,467.38<br>(3,488.54 to 12,311.79)      | 5,117.46<br>(2,956.02 to 9,468.92)       | 7,690.06<br>(4,047.89 to 14,836.50)      | 262.22<br>(222.00 to 372.45)          | 470.89<br>(277.29 to 844.23)          | 389.68<br>(247.03 to 662.22)          | 539.52<br>(305.29 to 1,000.28)        |
| Other digestive diseases                   | 8,368.02<br>(6,958.99 to 10,951.63)      | 15,315.96<br>(12,739.79 to 19,788.39)    | 15,385.82<br>(12,715.90 to 19,981.48)    | 15,104.07<br>(12,577.37 to 19,599.66)    | 809.90<br>(699.04 to 1,018.00)        | 1,727.25<br>(1,446.45 to 2,199.13)    | 1,787.34<br>(1,493.12 to 2,277.83)    | 1,648.07<br>(1,385.37 to 2,110.00)    |
| Neurological disorders                     | 175,699.50<br>(157,737.87 to 195,845.57) | 337,336.88<br>(276,190.31 to 426,859.62) | 334,727.22<br>(278,346.93 to 414,059.87) | 346,729.99<br>(276,178.68 to 453,009.00) | 18,360.94<br>(16,083.00 to 20,778.25) | 39,574.83<br>(31,183.16 to 51,114.61) | 40,258.22<br>(32,408.35 to 50,840.81) | 39,659.37<br>(30,457.49 to 53,155.78) |
| Alzheimer's disease and other dementias    | 115,700.19<br>(99,825.70 to 134,326.67)  | 241,107.40<br>(181,613.63 to 328,169.51) | 237,888.69<br>(184,352.71 to 311,866.57) | 251,645.53<br>(183,537.17 to 352,086.51) | 14,977.37<br>(12,862.44 to 17,416.91) | 32,964.24<br>(24,904.27 to 44,367.44) | 33,332.02<br>(25,771.18 to 43,676.62) | 33,399.72<br>(24,311.13 to 47,082.24) |
| Parkinson's disease                        | 18,717.64<br>(14,119.62 to 24,194.67)    | 37,524.65<br>(28,353.78 to 48,457.33)    | 39,901.71<br>(30,299.49 to 51,576.33)    | 34,988.77<br>(26,253.33 to 45,862.94)    | 1,720.65<br>(1,314.15 to 2,260.13)    | 3,734.57<br>(2,823.64 to 4,885.10)    | 4,048.84<br>(3,090.04 to 5,286.55)    | 3,408.87<br>(2,551.87 to 4,508.91)    |
| Epilepsy                                   | 10,183.61<br>(9,276.07 to 11,228.05)     | 15,095.78<br>(9,773.36 to 22,603.31)     | 12,792.80<br>(8,517.44 to 18,825.25)     | 17,016.77<br>(10,758.46 to 25,492.45)    | 292.63<br>(267.97 to 319.53)          | 556.09<br>(379.01 to 796.15)          | 485.42<br>(342.43 to 677.15)          | 609.25<br>(402.86 to 877.56)          |
| Multiple sclerosis                         | 4,072.69<br>(3,098.34 to 4,948.93)       | 4,863.02<br>(3,668.73 to 5,992.10)       | 4,915.59<br>(3,705.81 to 6,027.63)       | 4,965.31<br>(3,744.73 to 6,136.34)       | 156.89<br>(115.50 to 186.61)          | 210.39<br>(153.57 to 255.06)          | 215.51<br>(156.58 to 259.70)          | 210.61<br>(155.23 to 256.30)          |
| Motor neuron disease                       | 14,729.01<br>(13,311.93 to 16,131.40)    | 22,302.50<br>(19,458.83 to 25,596.07)    | 22,480.83<br>(19,515.80 to 25,945.92)    | 22,018.56<br>(19,237.60 to 25,171.73)    | 711.13<br>(643.38 to 779.04)          | 1,282.72<br>(1,119.81 to 1,462.11)    | 1,313.93<br>(1,145.01 to 1,504.06)    | 1,243.31<br>(1,092.61 to 1,410.61)    |
| Other neurological disorders               | 12,296.35<br>(11,189.46 to 13,469.99)    | 16,443.53<br>(14,337.17 to 18,861.36)    | 16,747.60<br>(14,564.55 to 19,294.95)    | 16,095.05<br>(14,093.98 to 18,391.57)    | 502.27<br>(459.37 to 549.21)          | 826.83<br>(733.02 to 930.60)          | 862.49<br>(761.02 to 970.80)          | 787.62<br>(706.91 to 882.94)          |
| Mental disorders                           | 60,280.88<br>(53,636.33 to 66,599.22)    | 118,130.50<br>(93,176.23 to 151,665.31)  | 127,545.09<br>(101,328.63 to 165,356.32) | 109,595.02<br>(86,796.46 to 141,747.50)  | 1,539.49<br>(1,389.50 to 1,685.19)    | 3,339.00<br>(2,642.48 to 3,757.96)    | 3,382.74<br>(2,829.08 to 4,084.26)    | 2,911.03<br>(2,432.89 to 3,523.62)    |
| Alcohol use disorders                      | 13,168.04<br>(11,828.54 to 14,641.58)    | 16,042.53<br>(13,511.98 to 19,098.75)    | 15,088.44<br>(12,635.07 to 17,986.02)    | 16,604.89<br>(14,041.90 to 19,525.27)    | 460.61<br>(415.22 to 508.10)          | 680.89<br>(590.05 to 782.60)          | 659.13<br>(567.17 to 765.32)          | 686.90<br>(599.57 to 785.69)          |
| Drug use disorders                         | 46,860.44<br>(40,974.37 to 52,430.90)    | 101,729.87<br>(78,292.51 to 133,588.61)  | 112,074.10<br>(87,169.55 to 147,977.76)  | 92,654.65<br>(71,623.57 to 122,450.69)   | 1,074.20<br>(945.15 to 1,194.67)      | 2,451.35<br>(1,986.96 to 3,052.15)    | 2,716.39<br>(2,202.43 to 3,390.61)    | 2,217.79<br>(1,777.45 to 2,777.65)    |
| Opioid use disorders                       | 24,324.94<br>(19,610.00 to 29,011.93)    | 36,274.14<br>(25,917.54 to 51,413.15)    | 37,493.95<br>(26,848.58 to 53,386.23)    | 35,068.89<br>(25,216.85 to 49,308.40)    | 542.61<br>(437.00 to 639.38)          | 859.03<br>(630.26 to 1,160.88)        | 894.37<br>(650.43 to 1,217.37)        | 824.11<br>(604.33 to 1,115.22)        |



|                           |                                          |                                          |                                          |                                          |                                 |                                       |                                       |                                     |
|---------------------------|------------------------------------------|------------------------------------------|------------------------------------------|------------------------------------------|---------------------------------|---------------------------------------|---------------------------------------|-------------------------------------|
|                           | 417.69<br>(123.66 to<br>550.30)          | 927.72<br>(292.95 to<br>1,381.75)        | 1,020.40<br>(324.38 to<br>1,532.20)      | 844.18<br>(275.91 to<br>1,256.92)        | 8.32<br>(2.58 to<br>10.92)      | 19.13<br>(6.33 to<br>27.70)           | 21.05<br>(7.04 to<br>30.67)           | 17.40<br>(5.79 to<br>25.12)         |
| Cocaine use disorders     |                                          |                                          |                                          |                                          |                                 |                                       |                                       |                                     |
|                           | 2,573.68<br>(1,029.31 to<br>3,396.04)    | 10,948.46<br>(5,268.61 to<br>16,639.08)  | 12,703.42<br>(6,072.31 to<br>19,248.56)  | 9,459.97<br>(4,578.93 to<br>14,502.61)   | 50.40<br>(21.34 to<br>65.92)    | 218.48<br>(106.77 to<br>326.56)       | 253.42<br>(125.75 to<br>375.27)       | 188.80<br>(92.06 to<br>281.97)      |
| Amphetamine use disorders |                                          |                                          |                                          |                                          |                                 |                                       |                                       |                                     |
|                           | 19,544.13<br>(15,100.90 to<br>23,666.00) | 53,579.55<br>(38,362.52 to<br>70,933.06) | 60,856.34<br>(44,120.02 to<br>81,257.49) | 47,281.60<br>(33,252.78 to<br>62,930.18) | 472.87<br>(375.20 to<br>563.13) | 1,354.71<br>(1,042.23 to<br>1,712.95) | 1,547.55<br>(1,182.45 to<br>1,966.92) | 1,187.47<br>(888.63 to<br>1,520.00) |
| Other drug use disorders  |                                          |                                          |                                          |                                          |                                 |                                       |                                       |                                     |
|                           | 252.40<br>(196.51 to<br>319.54)          | 358.09<br>(237.22 to<br>537.88)          | 382.54<br>(250.81 to<br>583.30)          | 335.48<br>(221.69 to<br>509.18)          | 4.68<br>(3.66 to<br>5.86)       | 6.76<br>(4.52 to<br>9.86)             | 7.22<br>(4.77 to<br>10.78)            | 6.34<br>(4.25 to<br>9.33)           |
| Eating disorders          |                                          |                                          |                                          |                                          |                                 |                                       |                                       |                                     |

| Australia                                                  |                                                 |                                                 |                                                 |                                                 |                                              |                                              |                                              |                                              |
|------------------------------------------------------------|-------------------------------------------------|-------------------------------------------------|-------------------------------------------------|-------------------------------------------------|----------------------------------------------|----------------------------------------------|----------------------------------------------|----------------------------------------------|
| Cause                                                      | YLLs (actual counts)                            |                                                 |                                                 |                                                 | Deaths (actual counts)                       |                                              |                                              |                                              |
|                                                            | 2016                                            | 2040 Forecast                                   | 2040 Better Scenario                            | 2040 Worse Scenario                             | 2016                                         | 2040 Forecast                                | 2040 Better Scenario                         | 2040 Worse Scenario                          |
| <b>Diabetes, urogenital, blood, and endocrine diseases</b> | <b>139,820.04</b><br>(130,437.81 to 150,376.02) | <b>238,799.95</b><br>(194,060.44 to 296,517.83) | <b>215,508.73</b><br>(176,992.34 to 264,696.55) | <b>271,292.46</b><br>(217,171.82 to 346,808.86) | <b>11,200.76</b><br>(10,457.91 to 11,960.04) | <b>23,702.19</b><br>(19,311.84 to 29,186.92) | <b>21,988.18</b><br>(18,143.66 to 26,679.60) | <b>26,288.82</b><br>(21,172.73 to 33,231.12) |
| Diabetes mellitus                                          | 54,565.33<br>(50,314.27 to 59,291.65)           | 76,144.60<br>(50,259.66 to 112,155.12)          | 61,908.76<br>(42,353.62 to 88,993.26)           | 90,269.26<br>(57,268.19 to 136,016.65)          | 4,173.67<br>(3,854.06 to 4,539.02)           | 7,046.95<br>(4,994.43 to 9,795.62)           | 6,051.88<br>(4,397.40 to 8,207.21)           | 7,965.17<br>(5,458.47 to 11,302.45)          |
| Acute glomerulonephritis                                   | 147.92<br>(135.01 to 161.95)                    | 165.23<br>(136.03 to 202.88)                    | 155.00<br>(126.80 to 193.79)                    | 175.51<br>(144.71 to 215.81)                    | 5.10<br>(4.44 to 5.85)                       | 6.42<br>(4.78 to 8.78)                       | 6.20<br>(4.54 to 8.65)                       | 6.60<br>(4.92 to 9.02)                       |
| Chronic kidney disease                                     | 42,761.65<br>(39,760.90 to 46,242.05)           | 86,736.74<br>(55,920.93 to 136,519.97)          | 76,715.87<br>(51,383.09 to 119,133.51)          | 106,462.95<br>(64,479.79 to 172,737.36)         | 4,220.06<br>(3,919.31 to 4,568.88)           | 10,343.69<br>(6,644.88 to 16,018.29)         | 9,403.64<br>(6,249.42 to 14,243.21)          | 12,284.97<br>(7,435.94 to 19,885.56)         |
| Chronic kidney disease due to diabetes mellitus            | 22,739.79<br>(21,094.50 to 24,720.69)           | 41,707.32<br>(26,804.21 to 66,253.64)           | 36,831.50<br>(24,834.23 to 56,722.73)           | 51,739.00<br>(31,402.50 to 85,491.33)           | 2,003.74<br>(1,841.95 to 2,190.87)           | 4,508.46<br>(2,906.82 to 6,945.20)           | 4,091.35<br>(2,739.52 to 6,183.23)           | 5,416.58<br>(3,297.07 to 8,777.06)           |
| Chronic kidney disease due to hypertension                 | 6,772.61<br>(6,111.40 to 7,515.18)              | 17,001.91<br>(10,610.48 to 26,958.89)           | 15,508.13<br>(10,065.89 to 23,677.32)           | 20,082.20<br>(12,023.57 to 33,124.92)           | 950.17<br>(853.54 to 1,059.27)               | 2,584.81<br>(1,628.91 to 4,102.68)           | 2,415.50<br>(1,573.57 to 3,638.12)           | 2,961.77<br>(1,779.60 to 4,859.16)           |
| Chronic kidney disease due to glomerulonephritis           | 6,312.09<br>(5,768.59 to 6,876.15)              | 12,642.15<br>(7,815.21 to 20,667.77)            | 10,877.39<br>(7,009.69 to 17,143.18)            | 15,736.68<br>(9,296.14 to 26,919.22)            | 568.35<br>(513.47 to 626.57)                 | 1,404.87<br>(870.02 to 2,281.58)             | 1,236.11<br>(803.04 to 1,889.51)             | 1,705.10<br>(1,017.43 to 2,854.25)           |
| Chronic kidney disease due to other and unspecified causes | 6,937.16<br>(6,374.90 to 7,551.79)              | 15,385.37<br>(9,974.90 to 23,765.49)            | 13,498.85<br>(9,119.45 to 20,288.55)            | 18,905.06<br>(11,650.94 to 30,715.55)           | 697.80<br>(634.83 to 768.37)                 | 1,845.54<br>(1,188.82 to 2,870.45)           | 1,660.68<br>(1,126.92 to 2,511.40)           | 2,201.52<br>(1,351.37 to 3,578.76)           |
| Urinary diseases and male infertility                      | 10,010.82<br>(9,145.70 to 10,914.60)            | 21,259.07<br>(17,899.00 to 24,648.45)           | 20,717.69<br>(17,348.13 to 24,364.29)           | 21,586.95<br>(18,184.96 to 24,909.71)           | 1,072.03<br>(970.72 to 1,180.13)             | 2,727.45<br>(2,266.51 to 3,231.71)           | 2,735.94<br>(2,278.10 to 3,266.49)           | 2,682.19<br>(2,205.28 to 3,209.72)           |
| Urinary tract infections                                   | 8,653.20<br>(7,790.42 to 9,510.06)              | 19,328.85<br>(16,178.34 to 22,573.73)           | 18,924.26<br>(15,767.40 to 22,359.05)           | 19,524.72<br>(16,223.99 to 22,802.59)           | 967.63<br>(867.36 to 1,069.57)               | 2,536.43<br>(2,093.09 to 3,022.33)           | 2,552.70<br>(2,097.60 to 3,080.92)           | 2,485.54<br>(2,020.31 to 3,003.09)           |
| Urolithiasis                                               | 550.15<br>(401.80 to 925.47)                    | 798.55<br>(555.74 to 1,359.38)                  | 734.26<br>(503.43 to 1,261.09)                  | 861.77<br>(591.14 to 1,458.40)                  | 38.94<br>(28.70 to 64.13)                    | 68.38<br>(47.57 to 114.08)                   | 64.69<br>(44.58 to 109.43)                   | 71.44<br>(49.53 to 117.95)                   |
| Other urinary diseases                                     | 807.48<br>(571.48 to 1,157.70)                  | 1,133.67<br>(758.69 to 1,676.47)                | 1,059.17<br>(694.55 to 1,590.90)                | 1,200.46<br>(792.98 to 1,776.82)                | 122.64<br>(45.43 to 93.55)                   | 122.64<br>(78.91 to 186.78)                  | 118.55<br>(75.46 to 184.64)                  | 125.21<br>(80.04 to 189.20)                  |
| Gynecological diseases                                     | 154.43<br>(123.53 to 230.03)                    | 88.09<br>(64.95 to 134.59)                      | 72.83<br>(52.86 to 113.15)                      | 106.24<br>(76.57 to 161.79)                     | 8.28<br>(6.61 to 12.18)                      | 7.24<br>(5.18 to 11.29)                      | 6.26<br>(4.39 to 10.09)                      | 8.28<br>(5.98 to 13.22)                      |
| Uterine fibroids                                           | 10.67<br>(7.92 to 17.30)                        | 7.65<br>(5.00 to 11.90)                         | 6.72<br>(4.36 to 10.55)                         | 8.69<br>(5.68 to 13.52)                         | 0.43<br>(0.32 to 0.70)                       | 0.36<br>(0.24 to 0.61)                       | 0.32<br>(0.21 to 0.55)                       | 0.40<br>(0.26 to 0.67)                       |
| Polycystic ovarian syndrome                                | 72.98<br>(54.33 to 106.13)                      | 18.94<br>(11.55 to 30.03)                       | 13.85<br>(8.15 to 23.06)                        | 25.82<br>(15.65 to 42.70)                       | 1.69<br>(1.25 to 2.49)                       | 0.44<br>(0.27 to 0.71)                       | 0.32<br>(0.19 to 0.53)                       | 0.60<br>(0.36 to 1.00)                       |
| Endometriosis                                              | 0.04<br>(0.02 to 0.07)                          | 0.05<br>(0.02 to 0.10)                          | 0.04<br>(0.02 to 0.08)                          | 0.06<br>(0.03 to 0.12)                          | 0.00<br>(0.00 to 0.00)                       | 0.00<br>(0.00 to 0.00)                       | 0.00<br>(0.00 to 0.00)                       | 0.00<br>(0.00 to 0.00)                       |
| Genital prolapse                                           | 11.77<br>(7.74 to 20.12)                        | 10.87<br>(5.45 to 20.32)                        | 9.28<br>(4.61 to 17.62)                         | 12.64<br>(6.22 to 23.40)                        | 1.06<br>(0.68 to 1.76)                       | 1.01<br>(0.48 to 1.98)                       | 0.88<br>(0.41 to 1.74)                       | 1.15<br>(0.54 to 2.26)                       |
| Other gynecological diseases                               | 58.96<br>(45.76 to 92.23)                       | 50.58<br>(35.14 to 81.45)                       | 42.95<br>(29.41 to 69.57)                       | 59.03<br>(40.71 to 95.06)                       | 5.11<br>(3.98 to 7.53)                       | 5.42<br>(3.59 to 8.69)                       | 4.73<br>(3.08 to 7.61)                       | 6.12<br>(4.04 to 9.64)                       |
| Hemoglobinopathies and hemolytic anemias                   | 2,080.88<br>(1,765.12 to 3,175.40)              | 2,444.68<br>(1,954.06 to 3,887.17)              | 2,301.85<br>(1,807.39 to 3,704.22)              | 2,575.03<br>(2,037.66 to 4,070.66)              | 147.17<br>(123.38 to 232.41)                 | 243.47<br>(194.13 to 398.34)                 | 236.40<br>(185.77 to 387.39)                 | 247.56<br>(195.37 to 399.19)                 |
| Thalassemias                                               | 276.27<br>(231.57 to 391.67)                    | 151.30<br>(110.00 to 243.80)                    | 149.61<br>(107.96 to 243.15)                    | 153.08<br>(111.92 to 245.34)                    | 3.94<br>(3.29 to 5.72)                       | 2.27<br>(1.63 to 3.75)                       | 2.25<br>(1.61 to 3.75)                       | 2.29<br>(1.65 to 3.74)                       |

|                                                   |                                          |                                          |                                          |                                          |                                       |                                       |                                       |                                       |
|---------------------------------------------------|------------------------------------------|------------------------------------------|------------------------------------------|------------------------------------------|---------------------------------------|---------------------------------------|---------------------------------------|---------------------------------------|
|                                                   | 99.12<br>(81.95 to<br>139.62)            | 110.59<br>(79.40 to<br>165.79)           | 99.19<br>(70.29 to<br>146.66)            | 122.92<br>(87.83 to<br>184.00)           | 2.44<br>(2.01 to<br>3.53)             | 3.79<br>(2.73 to<br>5.90)             | 3.42<br>(2.42 to<br>5.31)             | 4.18<br>(2.99 to<br>6.40)             |
| Sickle cell disorders                             |                                          |                                          |                                          |                                          |                                       |                                       |                                       |                                       |
|                                                   | 231.20<br>(195.60 to<br>304.98)          | 292.84<br>(220.00 to<br>423.44)          | 259.40<br>(191.94 to<br>374.95)          | 328.93<br>(247.58 to<br>472.18)          | 6.97<br>(5.88 to<br>9.45)             | 12.21<br>(9.32 to<br>17.73)           | 10.97<br>(8.34 to<br>16.14)           | 13.49<br>(10.25 to<br>19.74)          |
| G6PD deficiency                                   |                                          |                                          |                                          |                                          |                                       |                                       |                                       |                                       |
|                                                   | 1,474.29<br>(1,232.82 to<br>2,351.08)    | 1,889.95<br>(1,497.56 to<br>3,096.33)    | 1,793.64<br>(1,409.68 to<br>2,956.23)    | 1,970.10<br>(1,553.87 to<br>3,173.34)    | 133.83<br>(111.62 to<br>215.72)       | 225.19<br>(177.44 to<br>372.83)       | 219.76<br>(171.72 to<br>365.16)       | 227.60<br>(178.24 to<br>369.82)       |
| Other hemoglobinopathies and hemolytic anemias    |                                          |                                          |                                          |                                          |                                       |                                       |                                       |                                       |
|                                                   | 30,099.00<br>(23,509.22 to<br>34,121.02) | 51,961.54<br>(39,607.04 to<br>60,033.55) | 53,636.74<br>(41,101.59 to<br>62,445.55) | 50,116.52<br>(38,187.66 to<br>57,656.30) | 1,574.45<br>(1,084.75 to<br>1,764.74) | 3,326.98<br>(2,163.41 to<br>3,881.97) | 3,547.86<br>(2,298.00 to<br>4,165.16) | 3,094.05<br>(2,016.55 to<br>3,597.11) |
| Endocrine, metabolic, blood, and immune disorders |                                          |                                          |                                          |                                          |                                       |                                       |                                       |                                       |

| Australia                                     |                                              |                                              |                                              |                                              |                                         |                                           |                                           |                                           |
|-----------------------------------------------|----------------------------------------------|----------------------------------------------|----------------------------------------------|----------------------------------------------|-----------------------------------------|-------------------------------------------|-------------------------------------------|-------------------------------------------|
| Cause                                         | YLLs (actual counts)                         |                                              |                                              |                                              | Deaths (actual counts)                  |                                           |                                           |                                           |
|                                               | 2016                                         | 2040 Forecast                                | 2040 Better Scenario                         | 2040 Worse Scenario                          | 2016                                    | 2040 Forecast                             | 2040 Better Scenario                      | 2040 Worse Scenario                       |
| <b>Musculoskeletal disorders</b>              | <b>11,541.52</b><br>(10,331.11 to 13,138.33) | <b>20,323.20</b><br>(17,539.31 to 24,194.14) | <b>19,573.51</b><br>(16,770.64 to 23,363.07) | <b>21,109.19</b><br>(18,128.47 to 25,098.65) | <b>865.76</b><br>(708.77 to 968.87)     | <b>1,811.56</b><br>(1,488.31 to 2,100.00) | <b>1,797.22</b><br>(1,467.50 to 2,093.12) | <b>1,819.42</b><br>(1,485.14 to 2,106.22) |
| Rheumatoid arthritis                          | 2,984.55<br>(2,352.08 to 3,950.03)           | 5,565.10<br>(4,246.67 to 7,418.04)           | 4,863.60<br>(3,712.65 to 6,560.35)           | 6,395.27<br>(4,845.02 to 8,471.52)           | 226.92<br>(182.00 to 312.09)            | 491.51<br>(374.02 to 677.26)              | 438.91<br>(332.15 to 607.88)              | 549.57<br>(417.44 to 736.91)              |
| Other musculoskeletal disorders               | 8,556.97<br>(7,335.01 to 9,732.01)           | 14,758.11<br>(12,032.62 to 17,518.00)        | 14,709.92<br>(12,120.60 to 17,503.38)        | 14,713.92<br>(11,831.90 to 17,326.59)        | 638.84<br>(510.22 to 725.08)            | 1,320.05<br>(967.59 to 1,558.11)          | 1,358.31<br>(1,011.87 to 1,601.47)        | 1,269.85<br>(911.07 to 1,507.43)          |
| <b>Other non-communicable diseases</b>        | <b>46,107.82</b><br>(39,771.93 to 54,167.75) | <b>55,517.97</b><br>(44,834.79 to 68,220.54) | <b>51,384.67</b><br>(40,951.60 to 63,123.48) | <b>60,325.31</b><br>(48,562.89 to 73,686.15) | <b>1,103.66</b><br>(846.43 to 1,385.32) | <b>2,619.19</b><br>(1,675.03 to 3,548.90) | <b>2,644.36</b><br>(1,659.92 to 3,630.78) | <b>2,587.08</b><br>(1,696.76 to 3,519.67) |
| Congenital birth defects                      | 34,320.19<br>(28,722.66 to 42,620.19)        | 32,207.57<br>(25,586.54 to 41,302.31)        | 28,517.10<br>(22,546.63 to 36,571.00)        | 36,592.46<br>(28,458.60 to 46,936.40)        | 491.71<br>(418.56 to 596.49)            | 508.20<br>(412.29 to 644.93)              | 459.72<br>(371.54 to 578.42)              | 565.84<br>(450.45 to 712.18)              |
| Neural tube defects                           | 1,352.78<br>(921.77 to 1,940.75)             | 538.35<br>(301.24 to 915.29)                 | 434.89<br>(239.01 to 761.54)                 | 666.80<br>(358.86 to 1,150.20)               | 17.05<br>(11.98 to 23.86)               | 7.28<br>(4.36 to 11.95)                   | 5.91<br>(3.45 to 9.78)                    | 8.98<br>(5.09 to 14.79)                   |
| Congenital heart anomalies                    | 11,641.12<br>(9,358.10 to 15,529.79)         | 7,152.83<br>(5,115.05 to 10,105.27)          | 5,714.05<br>(3,997.35 to 8,180.40)           | 8,934.71<br>(6,176.36 to 12,603.63)          | 166.07<br>(135.58 to 221.61)            | 109.01<br>(79.53 to 151.71)               | 87.62<br>(62.90 to 123.29)                | 135.30<br>(95.43 to 187.66)               |
| Orofacial clefts                              | 17.90<br>(7.53 to 30.44)                     | 8.87<br>(3.27 to 17.70)                      | 6.71<br>(2.46 to 13.53)                      | 11.75<br>(4.13 to 23.58)                     | 0.21<br>(0.09 to 0.35)                  | 0.10<br>(0.04 to 0.20)                    | 0.08<br>(0.03 to 0.16)                    | 0.14<br>(0.05 to 0.27)                    |
| Down syndrome                                 | 3,950.66<br>(2,806.32 to 4,834.59)           | 6,549.66<br>(4,809.65 to 8,203.86)           | 6,658.77<br>(4,940.76 to 8,322.53)           | 6,437.83<br>(4,714.86 to 8,061.35)           | 83.92<br>(59.75 to 99.28)               | 152.08<br>(113.05 to 185.95)              | 155.49<br>(116.36 to 189.98)              | 148.54<br>(109.77 to 181.40)              |
| Other chromosomal abnormalities               | 5,538.23<br>(3,872.23 to 9,437.45)           | 8,812.26<br>(5,981.92 to 14,125.70)          | 8,052.35<br>(5,461.15 to 12,726.02)          | 9,628.49<br>(6,487.00 to 15,458.69)          | 71.70<br>(51.15 to 120.38)              | 117.55<br>(81.54 to 185.55)               | 107.95<br>(74.85 to 170.17)               | 127.79<br>(87.91 to 203.54)               |
| Congenital musculoskeletal and limb anomalies | 1,123.71<br>(842.48 to 1,489.69)             | 966.60<br>(624.78 to 1,430.31)               | 807.77<br>(519.99 to 1,196.28)               | 1,154.67<br>(740.26 to 1,720.56)             | 15.24<br>(11.64 to 19.76)               | 13.69<br>(9.35 to 19.75)                  | 11.51<br>(7.75 to 16.68)                  | 16.25<br>(10.87 to 23.57)                 |
| Urogenital congenital anomalies               | 1,083.15<br>(690.11 to 1,774.72)             | 822.53<br>(463.13 to 1,489.52)               | 705.79<br>(393.03 to 1,306.41)               | 957.14<br>(530.46 to 1,756.71)               | 14.37<br>(9.39 to 23.15)                | 11.42<br>(6.82 to 20.10)                  | 9.85<br>(5.83 to 17.22)                   | 13.21<br>(7.82 to 23.13)                  |
| Digestive congenital anomalies                | 2,341.21<br>(1,589.26 to 3,749.30)           | 1,870.47<br>(1,109.98 to 3,108.50)           | 1,523.64<br>(890.58 to 2,500.40)             | 2,290.03<br>(1,348.97 to 3,785.08)           | 28.66<br>(19.84 to 45.02)               | 23.22<br>(14.25 to 38.13)                 | 18.96<br>(11.40 to 30.47)                 | 28.36<br>(17.22 to 45.63)                 |
| Other congenital birth defects                | 7,271.45<br>(5,598.95 to 9,610.04)           | 5,486.01<br>(3,884.05 to 7,799.75)           | 4,613.14<br>(3,193.31 to 6,640.40)           | 6,511.05<br>(4,476.06 to 9,247.19)           | 94.49<br>(74.07 to 123.65)              | 73.85<br>(53.54 to 102.73)                | 62.36<br>(44.57 to 87.80)                 | 87.27<br>(61.87 to 122.30)                |
| Skin and subcutaneous diseases                | 5,773.12<br>(3,092.54 to 8,523.01)           | 18,721.04<br>(9,926.57 to 26,855.49)         | 18,857.90<br>(9,935.42 to 27,120.06)         | 18,428.28<br>(9,822.15 to 26,541.73)         | 542.13<br>(282.79 to 810.93)            | 2,057.73<br>(1,079.70 to 2,997.22)        | 2,135.11<br>(1,115.85 to 3,088.88)        | 1,959.69<br>(1,029.91 to 2,896.21)        |
| Cellulitis                                    | 2,889.90<br>(1,354.92 to 4,291.23)           | 8,983.17<br>(4,312.90 to 13,434.42)          | 9,146.79<br>(4,407.07 to 13,422.44)          | 8,755.82<br>(4,205.01 to 13,102.24)          | 256.24<br>(119.53 to 378.01)            | 914.01<br>(419.23 to 1,377.28)            | 959.03<br>(441.48 to 1,405.41)            | 861.65<br>(394.80 to 1,273.65)            |
| Pyoderma                                      | 2,258.57<br>(1,104.27 to 3,629.26)           | 8,468.88<br>(4,137.71 to 13,478.66)          | 8,478.11<br>(4,205.97 to 13,501.71)          | 8,379.29<br>(4,130.66 to 13,128.19)          | 220.69<br>(106.55 to 356.79)            | 985.35<br>(479.23 to 1,549.42)            | 1,017.74<br>(500.32 to 1,608.04)          | 941.75<br>(463.86 to 1,477.29)            |
| Decubitus ulcer                               | 380.01<br>(212.91 to 759.20)                 | 800.00<br>(427.93 to 1,686.55)               | 769.27<br>(423.16 to 1,611.42)               | 822.60<br>(447.83 to 1,755.54)               | 43.92<br>(24.15 to 93.87)               | 109.79<br>(58.56 to 237.24)               | 108.63<br>(59.08 to 233.75)               | 109.36<br>(59.25 to 238.68)               |
| Other skin and subcutaneous diseases          | 244.64<br>(144.70 to 449.89)                 | 468.98<br>(274.69 to 891.89)                 | 463.73<br>(266.57 to 880.01)                 | 470.56<br>(275.01 to 898.58)                 | 21.28<br>(11.83 to 41.45)               | 48.59<br>(26.35 to 93.74)                 | 49.71<br>(26.84 to 95.54)                 | 46.93<br>(25.46 to 91.83)                 |
| Sudden infant death syndrome                  | 6,014.51<br>(4,644.57 to 7,622.10)           | 4,589.36<br>(2,879.15 to 7,035.18)           | 4,009.67<br>(2,505.80 to 6,106.96)           | 5,304.57<br>(3,323.99 to 8,272.89)           | 69.82<br>(53.91 to 88.49)               | 53.25<br>(33.39 to 81.64)                 | 46.53<br>(29.07 to 70.87)                 | 61.55<br>(38.56 to 96.00)                 |

|                          |                                             |                                             |                                             |                                             |                                       |                                         |                                         |                                          |
|--------------------------|---------------------------------------------|---------------------------------------------|---------------------------------------------|---------------------------------------------|---------------------------------------|-----------------------------------------|-----------------------------------------|------------------------------------------|
| Injuries                 | 271,103.38<br>(248,292.39 to<br>296,137.54) | 264,972.80<br>(185,118.17 to<br>396,525.36) | 226,238.39<br>(163,786.40 to<br>330,113.37) | 324,031.94<br>(220,873.89 to<br>495,927.15) | 9,009.07<br>(7,912.30 to<br>9,779.31) | 11,856.97<br>(9,362.91 to<br>15,089.49) | 11,002.15<br>(8,794.94 to<br>13,705.09) | 13,100.10<br>(10,195.10 to<br>17,134.13) |
| Transport injuries       | 75,246.87<br>(67,960.04 to<br>82,748.42)    | 62,367.47<br>(37,739.86 to<br>106,782.37)   | 51,312.59<br>(32,134.39 to<br>86,254.93)    | 95,245.77<br>(56,201.64 to<br>164,762.78)   | 1,826.86<br>(1,669.55 to<br>1,991.02) | 1,784.12<br>(1,175.00 to<br>2,837.58)   | 1,505.96<br>(1,033.17 to<br>2,325.49)   | 2,560.90<br>(1,631.89 to<br>4,105.72)    |
| Road injuries            | 68,119.83<br>(61,395.66 to<br>74,868.44)    | 54,332.18<br>(32,816.63 to<br>92,699.85)    | 44,913.47<br>(28,285.39 to<br>74,815.56)    | 85,361.24<br>(50,350.47 to<br>148,363.16)   | 1,656.29<br>(1,517.49 to<br>1,806.89) | 1,573.15<br>(1,044.94 to<br>2,490.47)   | 1,336.54<br>(919.71 to<br>2,042.28)     | 2,304.46<br>(1,474.49 to<br>3,676.97)    |
| Pedestrian road injuries | 10,494.90<br>(7,685.35 to<br>12,847.14)     | 5,643.90<br>(3,810.28 to<br>8,621.67)       | 4,248.28<br>(2,903.34 to<br>6,410.44)       | 9,011.31<br>(5,817.00 to<br>14,311.63)      | 320.44<br>(253.33 to<br>394.25)       | 243.61<br>(173.84 to<br>360.53)         | 190.76<br>(138.21 to<br>279.42)         | 360.13<br>(247.43 to<br>543.17)          |

| Australia                                       |                                                     |                                                     |                                                     |                                                     |                                                  |                                                  |                                                  |                                                  |
|-------------------------------------------------|-----------------------------------------------------|-----------------------------------------------------|-----------------------------------------------------|-----------------------------------------------------|--------------------------------------------------|--------------------------------------------------|--------------------------------------------------|--------------------------------------------------|
| Cause                                           | YLLs (actual counts)                                |                                                     |                                                     |                                                     | Deaths (actual counts)                           |                                                  |                                                  |                                                  |
|                                                 | 2016                                                | 2040 Forecast                                       | 2040 Better Scenario                                | 2040 Worse Scenario                                 | 2016                                             | 2040 Forecast                                    | 2040 Better Scenario                             | 2040 Worse Scenario                              |
| Cyclist road injuries                           | 2,061.52<br>(1,435.83 to 2,442.45)                  | 1,883.57<br>(1,132.11 to 3,039.16)                  | 1,592.96<br>(971.45 to 2,530.49)                    | 2,890.85<br>(1,690.26 to 4,732.14)                  | 48.72<br>(34.76 to 57.11)                        | 53.09<br>(32.87 to 83.49)                        | 46.41<br>(29.31 to 71.43)                        | 73.58<br>(44.85 to 117.65)                       |
| Motorcyclist road injuries                      | 10,688.27<br>(6,807.29 to 12,948.44)                | 10,611.49<br>(5,500.79 to 21,285.84)                | 9,161.12<br>(4,865.40 to 18,113.49)                 | 14,363.04<br>(7,224.96 to 28,760.46)                | 209.78<br>(137.72 to 252.67)                     | 215.67<br>(117.28 to 414.53)                     | 187.82<br>(104.91 to 350.83)                     | 284.01<br>(150.35 to 541.65)                     |
| Motor vehicle road injuries                     | 44,440.66<br>(39,361.65 to 52,320.41)               | 35,841.85<br>(21,469.05 to 60,123.55)               | 29,615.44<br>(18,409.42 to 49,181.37)               | 58,551.78<br>(34,316.33 to 98,772.99)               | 1,067.45<br>(955.42 to 1,240.70)                 | 1,051.71<br>(693.77 to 1,645.91)                 | 903.69<br>(621.31 to 1,353.81)                   | 1,573.59<br>(1,005.23 to 2,507.29)               |
| Other road injuries                             | 434.48<br>(190.86 to 579.92)                        | 351.36<br>(144.72 to 594.52)                        | 295.67<br>(123.77 to 482.46)                        | 544.26<br>(219.91 to 921.72)                        | 9.90<br>(4.59 to 12.80)                          | 9.07<br>(3.97 to 14.73)                          | 7.85<br>(3.50 to 12.47)                          | 13.15<br>(5.60 to 21.98)                         |
| Other transport injuries                        | 7,127.04<br>(6,132.57 to 9,159.65)                  | 8,035.30<br>(4,763.19 to 14,006.31)                 | 6,399.13<br>(3,917.87 to 10,954.87)                 | 9,884.53<br>(5,692.94 to 17,533.67)                 | 170.57<br>(149.02 to 211.17)                     | 210.98<br>(130.38 to 344.78)                     | 169.42<br>(108.98 to 276.15)                     | 256.44<br>(155.68 to 429.32)                     |
| <b>Unintentional injuries</b>                   | <b>64,042.46</b><br><b>(54,967.86 to 69,799.28)</b> | <b>73,571.46</b><br><b>(59,265.01 to 85,414.88)</b> | <b>70,392.60</b><br><b>(56,450.26 to 81,852.53)</b> | <b>76,677.07</b><br><b>(61,551.32 to 89,180.32)</b> | <b>4,038.90</b><br><b>(3,181.98 to 4,462.52)</b> | <b>6,722.32</b><br><b>(5,104.53 to 7,875.82)</b> | <b>6,735.23</b><br><b>(5,141.29 to 7,858.49)</b> | <b>6,645.82</b><br><b>(4,951.71 to 7,821.89)</b> |
| Falls                                           | 27,592.74<br>(19,717.73 to 31,149.30)               | 40,191.70<br>(28,064.95 to 47,185.54)               | 39,504.86<br>(27,583.45 to 46,713.13)               | 40,611.46<br>(28,403.63 to 48,174.89)               | 2,661.87<br>(1,888.03 to 3,019.16)               | 4,815.65<br>(3,355.11 to 5,787.84)               | 4,871.47<br>(3,406.08 to 5,841.68)               | 4,706.58<br>(3,205.58 to 5,716.20)               |
| Drowning                                        | 9,815.47<br>(8,760.33 to 10,901.50)                 | 6,747.12<br>(4,825.18 to 9,403.95)                  | 5,935.48<br>(4,279.69 to 8,063.45)                  | 7,615.59<br>(5,343.18 to 10,849.29)                 | 209.53<br>(189.43 to 229.83)                     | 174.90<br>(127.68 to 242.51)                     | 155.63<br>(116.38 to 209.36)                     | 194.40<br>(140.18 to 273.75)                     |
| Fire, heat, and hot substances                  | 3,479.44<br>(3,115.30 to 4,455.68)                  | 3,135.40<br>(2,374.72 to 4,419.86)                  | 2,725.84<br>(2,106.43 to 3,747.24)                  | 3,558.50<br>(2,623.30 to 5,042.85)                  | 169.29<br>(145.26 to 194.71)                     | 228.44<br>(174.59 to 302.68)                     | 208.66<br>(161.71 to 268.17)                     | 245.38<br>(184.23 to 330.72)                     |
| Poisonings                                      | 1,790.66<br>(1,463.21 to 2,317.13)                  | 836.64<br>(554.99 to 1,320.45)                      | 687.11<br>(461.43 to 1,061.04)                      | 1,009.31<br>(660.29 to 1,605.95)                    | 45.59<br>(37.95 to 58.94)                        | 28.96<br>(19.66 to 42.57)                        | 23.82<br>(17.12 to 35.69)                        | 32.61<br>(22.68 to 49.82)                        |
| Exposure to mechanical forces                   | 7,014.55<br>(6,171.12 to 9,175.61)                  | 5,782.01<br>(4,555.58 to 7,617.59)                  | 5,218.46<br>(4,090.29 to 7,013.97)                  | 6,422.27<br>(5,021.77 to 8,613.05)                  | 179.07<br>(158.64 to 221.01)                     | 193.54<br>(161.26 to 234.57)                     | 180.77<br>(150.52 to 219.70)                     | 206.87<br>(170.55 to 250.46)                     |
| Unintentional firearm injuries                  | 646.60<br>(552.15 to 964.26)                        | 616.56<br>(470.28 to 942.05)                        | 570.11<br>(437.02 to 866.99)                        | 669.57<br>(509.96 to 1,023.34)                      | 18.74<br>(16.41 to 26.31)                        | 23.84<br>(19.66 to 34.86)                        | 23.10<br>(18.91 to 33.84)                        | 24.56<br>(20.08 to 35.11)                        |
| Unintentional suffocation                       | 1,773.62<br>(1,356.87 to 2,582.59)                  | 1,323.62<br>(938.01 to 1,890.00)                    | 1,204.42<br>(847.78 to 1,727.75)                    | 1,462.85<br>(1,027.00 to 2,120.32)                  | 29.21<br>(21.70 to 38.10)                        | 24.35<br>(16.75 to 32.31)                        | 22.44<br>(15.36 to 29.97)                        | 26.54<br>(18.03 to 35.57)                        |
| Other exposure to mechanical forces             | 4,594.34<br>(3,939.34 to 6,562.14)                  | 3,841.83<br>(2,940.08 to 5,486.30)                  | 3,443.92<br>(2,650.92 to 4,880.01)                  | 4,289.85<br>(3,274.79 to 6,121.84)                  | 131.13<br>(111.55 to 173.84)                     | 145.35<br>(118.22 to 182.53)                     | 135.24<br>(109.62 to 170.33)                     | 155.77<br>(125.38 to 197.05)                     |
| Adverse effects of medical treatment            | 5,903.09<br>(4,078.74 to 6,857.45)                  | 8,215.29<br>(5,618.97 to 9,871.74)                  | 8,054.10<br>(5,554.86 to 9,743.76)                  | 8,347.40<br>(5,702.18 to 10,005.73)                 | 408.00<br>(279.86 to 471.75)                     | 736.21<br>(496.42 to 889.31)                     | 746.37<br>(507.37 to 905.70)                     | 719.55<br>(483.36 to 870.77)                     |
| Animal contact                                  | 829.05<br>(567.44 to 1,054.51)                      | 860.31<br>(590.53 to 1,148.31)                      | 790.66<br>(539.38 to 1,047.58)                      | 938.72<br>(635.01 to 1,243.92)                      | 21.92<br>(15.50 to 28.40)                        | 27.81<br>(20.29 to 37.09)                        | 26.23<br>(19.08 to 35.27)                        | 29.46<br>(20.95 to 38.91)                        |
| Venomous animal contact                         | 265.70<br>(168.24 to 369.40)                        | 315.81<br>(206.67 to 443.36)                        | 297.66<br>(193.76 to 413.19)                        | 335.78<br>(218.72 to 470.10)                        | 7.01<br>(4.43 to 10.46)                          | 9.72<br>(6.34 to 14.34)                          | 9.34<br>(6.13 to 13.78)                          | 10.11<br>(6.58 to 15.05)                         |
| Non-venomous animal contact                     | 563.36<br>(372.16 to 750.47)                        | 544.49<br>(360.99 to 732.64)                        | 493.00<br>(322.94 to 665.01)                        | 602.94<br>(388.74 to 822.86)                        | 14.91<br>(10.37 to 20.07)                        | 18.09<br>(12.83 to 24.54)                        | 16.89<br>(11.93 to 23.27)                        | 19.36<br>(13.64 to 26.33)                        |
| Foreign body                                    | 5,138.13<br>(4,433.86 to 7,057.22)                  | 5,726.41<br>(4,808.74 to 7,321.54)                  | 5,656.58<br>(4,729.79 to 7,171.19)                  | 5,799.82<br>(4,842.68 to 7,454.96)                  | 238.73<br>(187.13 to 274.09)                     | 378.20<br>(274.43 to 455.65)                     | 392.70<br>(282.27 to 477.02)                     | 361.72<br>(262.09 to 433.11)                     |
| Pulmonary aspiration and foreign body in airway | 4,944.39<br>(4,245.95 to 6,874.83)                  | 5,495.68<br>(4,608.25 to 7,113.54)                  | 5,417.48<br>(4,512.61 to 6,915.50)                  | 5,576.58<br>(4,640.63 to 7,269.27)                  | 231.66<br>(181.69 to 267.15)                     | 365.67<br>(264.77 to 442.41)                     | 379.18<br>(271.32 to 462.39)                     | 350.17<br>(252.91 to 421.16)                     |

|                                             |                                                                  |                                                                 |                                                                 |                                                                 |                                                            |                                                            |                                                            |                                                            |
|---------------------------------------------|------------------------------------------------------------------|-----------------------------------------------------------------|-----------------------------------------------------------------|-----------------------------------------------------------------|------------------------------------------------------------|------------------------------------------------------------|------------------------------------------------------------|------------------------------------------------------------|
|                                             | 193.74<br>(146.98 to<br>225.46)                                  | 230.74<br>(164.46 to<br>284.17)                                 | 239.10<br>(171.45 to<br>294.94)                                 | 223.24<br>(160.17 to<br>274.85)                                 | 7.07<br>(4.83 to<br>8.44)                                  | 12.53<br>(8.02 to<br>16.12)                                | 13.52<br>(8.67 to<br>17.30)                                | 11.56<br>(7.41 to<br>14.88)                                |
| Foreign body in other body part             |                                                                  |                                                                 |                                                                 |                                                                 |                                                            |                                                            |                                                            |                                                            |
|                                             | 1,191.93<br>(798.39 to<br>1,898.45)                              | 1,452.80<br>(974.93 to<br>2,294.65)                             | 1,320.72<br>(899.14 to<br>2,118.25)                             | 1,592.42<br>(1,069.63 to<br>2,472.70)                           | 72.04<br>(48.35 to<br>115.23)                              | 119.02<br>(78.67 to<br>190.12)                             | 112.69<br>(75.44 to<br>182.69)                             | 134.47<br>(82.44 to<br>196.38)                             |
| Environmental heat and cold exposure        |                                                                  |                                                                 |                                                                 |                                                                 |                                                            |                                                            |                                                            |                                                            |
|                                             | 1,287.40<br>(1,123.16 to<br>1,471.20)                            | 623.78<br>(455.20 to<br>877.88)                                 | 498.79<br>(361.56 to<br>706.43)                                 | 781.59<br>(563.05 to<br>1,109.36)                               | 32.86<br>(29.29 to<br>36.82)                               | 20.49<br>(16.15 to<br>26.14)                               | 16.89<br>(13.14 to<br>21.96)                               | 24.77<br>(19.07 to<br>32.91)                               |
| Other unintentional injuries                |                                                                  |                                                                 |                                                                 |                                                                 |                                                            |                                                            |                                                            |                                                            |
| <b>Self-harm and interpersonal violence</b> | <b>131,541.99</b><br><b>(113,409.24 to</b><br><b>150,416.53)</b> | <b>128,351.66</b><br><b>(73,444.22 to</b><br><b>229,040.48)</b> | <b>103,850.20</b><br><b>(62,718.86 to</b><br><b>176,789.67)</b> | <b>151,428.12</b><br><b>(84,779.44 to</b><br><b>274,808.51)</b> | <b>3,137.81</b><br><b>(2,656.78 to</b><br><b>3,581.23)</b> | <b>3,333.32</b><br><b>(2,034.71 to</b><br><b>5,487.54)</b> | <b>2,743.49</b><br><b>(1,763.07 to</b><br><b>4,378.14)</b> | <b>3,876.48</b><br><b>(2,293.93 to</b><br><b>6,469.64)</b> |

| Australia                                                                           |                                            |                                            |                                            |                                            |                                      |                                        |                                        |                                        |
|-------------------------------------------------------------------------------------|--------------------------------------------|--------------------------------------------|--------------------------------------------|--------------------------------------------|--------------------------------------|----------------------------------------|----------------------------------------|----------------------------------------|
| Cause                                                                               | YLLs (actual counts)                       |                                            |                                            |                                            | Deaths (actual counts)               |                                        |                                        |                                        |
|                                                                                     | 2016                                       | 2040 Forecast                              | 2040 Better Scenario                       | 2040 Worse Scenario                        | 2016                                 | 2040 Forecast                          | 2040 Better Scenario                   | 2040 Worse Scenario                    |
| Self-harm                                                                           | 116,974.54<br>(99,619.56 to 135,367.41)    | 118,472.64<br>(64,860.86 to 217,501.96)    | 95,164.05<br>(55,216.68 to 168,036.47)     | 140,265.26<br>(74,382.72 to 261,155.56)    | 2,828.05<br>(2,382.93 to 3,257.53)   | 3,097.43<br>(1,827.16 to 5,157.61)     | 2,534.64<br>(1,570.67 to 4,115.43)     | 3,612.51<br>(2,050.53 to 6,165.31)     |
| Self-harm by firearm                                                                | 7,130.21<br>(5,329.89 to 13,927.73)        | 6,888.65<br>(3,233.10 to 16,135.80)        | 5,339.25<br>(2,657.38 to 12,078.08)        | 8,438.00<br>(3,803.34 to 20,130.08)        | 207.30<br>(150.93 to 360.88)         | 221.66<br>(115.54 to 440.33)           | 176.54<br>(96.47 to 345.97)            | 265.61<br>(132.42 to 527.25)           |
| Self-harm by other specified means                                                  | 109,844.33<br>(88,176.16 to 127,502.47)    | 111,583.99<br>(61,644.45 to 198,079.47)    | 89,824.80<br>(51,735.90 to 155,952.43)     | 131,827.26<br>(70,254.68 to 244,644.33)    | 2,620.75<br>(2,085.52 to 3,032.26)   | 2,875.77<br>(1,704.26 to 4,761.09)     | 2,358.10<br>(1,466.30 to 3,779.26)     | 3,346.91<br>(1,909.40 to 5,739.66)     |
| Interpersonal violence                                                              | 14,567.44<br>(10,364.84 to 19,810.48)      | 9,879.01<br>(6,526.96 to 14,729.11)        | 8,686.14<br>(5,871.76 to 12,922.13)        | 11,162.87<br>(7,474.70 to 16,683.22)       | 309.75<br>(217.97 to 413.67)         | 235.89<br>(157.33 to 344.78)           | 208.85<br>(142.32 to 297.58)           | 263.97<br>(174.61 to 382.31)           |
| Physical violence by firearm                                                        | 2,301.50<br>(1,453.33 to 4,699.21)         | 1,385.32<br>(865.09 to 3,027.97)           | 1,225.19<br>(768.70 to 2,685.42)           | 1,574.24<br>(980.36 to 3,448.28)           | 48.27<br>(31.08 to 97.12)            | 31.02<br>(19.87 to 68.12)              | 27.56<br>(17.56 to 60.55)              | 35.04<br>(22.15 to 76.15)              |
| Physical violence by sharp object                                                   | 5,241.08<br>(3,024.05 to 7,207.06)         | 3,501.95<br>(2,004.75 to 5,034.24)         | 3,156.20<br>(1,806.01 to 4,463.28)         | 3,906.58<br>(2,232.12 to 5,661.13)         | 113.08<br>(64.83 to 154.83)          | 83.46<br>(48.92 to 115.67)             | 75.83<br>(44.74 to 103.21)             | 92.17<br>(53.42 to 130.20)             |
| Physical violence by other means                                                    | 7,024.87<br>(4,536.70 to 10,213.09)        | 4,991.74<br>(2,877.24 to 7,976.65)         | 4,304.76<br>(2,517.44 to 6,710.14)         | 5,682.05<br>(3,246.81 to 9,123.91)         | 148.45<br>(94.10 to 211.33)          | 121.42<br>(70.19 to 188.61)            | 105.45<br>(62.13 to 159.50)            | 136.76<br>(78.17 to 214.24)            |
| <b>Forces of nature, conflict and terrorism, and executions and police conflict</b> | <b>272.06</b><br><b>(195.37 to 363.93)</b> | <b>682.21</b><br><b>(0.00 to 3,851.73)</b> | <b>683.01</b><br><b>(0.00 to 3,851.69)</b> | <b>680.97</b><br><b>(0.00 to 3,849.88)</b> | <b>5.51</b><br><b>(4.03 to 7.17)</b> | <b>17.20</b><br><b>(0.00 to 96.40)</b> | <b>17.47</b><br><b>(0.00 to 97.47)</b> | <b>16.90</b><br><b>(0.00 to 94.97)</b> |
| Exposure to forces of nature                                                        | 0.00<br>(0.00 to 0.00)                     | 392.51<br>(0.00 to 3,851.73)               | 392.28<br>(0.00 to 3,851.69)               | 392.56<br>(0.00 to 3,849.88)               | 0.00<br>(0.00 to 0.00)               | 9.59<br>(0.00 to 96.40)                | 9.68<br>(0.00 to 97.47)                | 9.47<br>(0.00 to 94.97)                |
| Conflict and terrorism                                                              | 0.00<br>(0.00 to 0.00)                     | 289.70<br>(0.00 to 2,309.11)               | 290.73<br>(0.00 to 2,303.59)               | 288.42<br>(0.00 to 2,315.13)               | 0.00<br>(0.00 to 0.00)               | 7.62<br>(0.00 to 38.55)                | 7.79<br>(0.00 to 38.45)                | 7.43<br>(0.00 to 38.64)                |
| Executions and police conflict                                                      | 272.06<br>(195.37 to 363.93)               | 0.00<br>(0.00 to 0.00)                     | 0.00<br>(0.00 to 0.00)                     | 0.00<br>(0.00 to 0.00)                     | 5.51<br>(4.03 to 7.17)               | 0.00<br>(0.00 to 0.00)                 | 0.00<br>(0.00 to 0.00)                 | 0.00<br>(0.00 to 0.00)                 |



| New Zealand                                                              |                                                 |                                                 |                                                 |                                                 |                                              |                                              |                                              |                                              |
|--------------------------------------------------------------------------|-------------------------------------------------|-------------------------------------------------|-------------------------------------------------|-------------------------------------------------|----------------------------------------------|----------------------------------------------|----------------------------------------------|----------------------------------------------|
| Cause                                                                    | YLLs (actual counts)                            |                                                 |                                                 |                                                 | Deaths (actual counts)                       |                                              |                                              |                                              |
|                                                                          | 2016                                            | 2040 Forecast                                   | 2040 Better Scenario                            | 2040 Worse Scenario                             | 2016                                         | 2040 Forecast                                | 2040 Better Scenario                         | 2040 Worse Scenario                          |
| <b>All causes</b>                                                        | <b>515,509.73</b><br>(473,247.38 to 566,542.48) | <b>618,818.96</b><br>(517,288.56 to 737,571.63) | <b>509,692.35</b><br>(425,455.37 to 601,090.24) | <b>752,724.24</b><br>(618,473.44 to 906,673.80) | <b>32,515.18</b><br>(30,089.86 to 35,441.29) | <b>51,165.86</b><br>(45,265.31 to 58,122.10) | <b>44,155.22</b><br>(39,153.80 to 50,348.20) | <b>59,226.07</b><br>(51,803.38 to 67,656.94) |
| <b>Communicable, maternal, neonatal, and nutritional diseases</b>        | <b>21,315.17</b><br>(18,822.42 to 24,041.87)    | <b>25,990.64</b><br>(18,609.20 to 36,404.03)    | <b>22,393.03</b><br>(16,241.48 to 30,707.77)    | <b>30,811.25</b><br>(21,694.21 to 44,124.42)    | <b>1,032.09</b><br>(901.48 to 1,172.74)      | <b>2,193.54</b><br>(1,631.58 to 2,938.24)    | <b>2,116.69</b><br>(1,601.16 to 2,766.70)    | <b>2,370.71</b><br>(1,716.63 to 3,288.54)    |
| <b>HIV/AIDS and tuberculosis</b>                                         | <b>693.76</b><br>(649.49 to 745.55)             | <b>384.28</b><br>(238.77 to 571.72)             | <b>192.08</b><br>(130.57 to 284.81)             | <b>883.53</b><br>(536.08 to 1,295.16)           | <b>25.41</b><br>(23.31 to 27.80)             | <b>17.25</b><br>(11.87 to 24.84)             | <b>10.02</b><br>(7.07 to 14.17)              | <b>30.50</b><br>(20.61 to 44.20)             |
| <b>Tuberculosis</b>                                                      | <b>288.27</b><br>(251.80 to 329.38)             | <b>184.13</b><br>(118.12 to 290.49)             | <b>108.78</b><br>(71.06 to 165.27)              | <b>272.76</b><br>(161.53 to 435.96)             | <b>16.04</b><br>(13.96 to 18.30)             | <b>15.85</b><br>(9.19 to 21.26)              | <b>8.66</b><br>(6.00 to 12.78)               | <b>19.72</b><br>(12.39 to 31.38)             |
| <b>HIV/AIDS</b>                                                          | <b>405.49</b><br>(376.84 to 440.34)             | <b>200.16</b><br>(78.56 to 362.04)              | <b>83.30</b><br>(39.90 to 160.06)               | <b>610.77</b><br>(284.87 to 988.34)             | <b>9.37</b><br>(8.71 to 10.16)               | <b>3.40</b><br>(1.18 to 6.47)                | <b>1.36</b><br>(0.58 to 2.88)                | <b>10.77</b><br>(4.69 to 17.79)              |
| <b>Diarrhea, lower respiratory, and other common infectious diseases</b> | <b>8,450.31</b><br>(7,498.26 to 9,466.16)       | <b>14,832.89</b><br>(10,951.74 to 19,646.30)    | <b>13,698.27</b><br>(10,252.61 to 17,982.71)    | <b>16,970.98</b><br>(12,213.47 to 23,337.41)    | <b>833.00</b><br>(708.54 to 972.86)          | <b>1,982.58</b><br>(1,429.55 to 2,723.10)    | <b>1,932.28</b><br>(1,437.58 to 2,589.62)    | <b>2,126.20</b><br>(1,503.51 to 3,010.92)    |
| <b>Diarrheal diseases</b>                                                | <b>836.77</b><br>(739.52 to 963.57)             | <b>2,404.64</b><br>(1,277.03 to 4,742.76)       | <b>3,127.28</b><br>(1,872.03 to 5,617.16)       | <b>1,879.59</b><br>(955.96 to 3,861.17)         | <b>65.44</b><br>(57.03 to 75.17)             | <b>280.22</b><br>(146.45 to 561.13)          | <b>383.85</b><br>(222.54 to 689.41)          | <b>209.39</b><br>(102.79 to 431.23)          |
| <b>Intestinal infectious diseases</b>                                    | <b>8.97</b><br>(3.30 to 21.08)                  | <b>7.41</b><br>(2.61 to 17.04)                  | <b>6.98</b><br>(2.41 to 16.10)                  | <b>7.87</b><br>(2.80 to 18.31)                  | <b>0.28</b><br>(0.10 to 0.62)                | <b>0.26</b><br>(0.10 to 0.55)                | <b>0.25</b><br>(0.10 to 0.52)                | <b>0.27</b><br>(0.10 to 0.58)                |
| <b>Typhoid fever</b>                                                     | <b>1.95</b><br>(0.64 to 4.67)                   | <b>1.92</b><br>(0.62 to 4.65)                   | <b>2.28</b><br>(0.73 to 5.39)                   | <b>1.73</b><br>(0.55 to 4.12)                   | <b>0.05</b><br>(0.02 to 0.12)                | <b>0.06</b><br>(0.02 to 0.15)                | <b>0.07</b><br>(0.02 to 0.15)                | <b>0.05</b><br>(0.02 to 0.11)                |
| <b>Paratyphoid fever</b>                                                 | <b>6.33</b><br>(1.96 to 16.30)                  | <b>4.95</b><br>(1.42 to 12.48)                  | <b>4.20</b><br>(1.15 to 10.85)                  | <b>5.58</b><br>(1.65 to 13.88)                  | <b>0.19</b><br>(0.06 to 0.49)                | <b>0.16</b><br>(0.05 to 0.40)                | <b>0.14</b><br>(0.04 to 0.35)                | <b>0.18</b><br>(0.05 to 0.44)                |
| <b>Other intestinal infectious diseases</b>                              | <b>0.68</b><br>(0.27 to 1.41)                   | <b>0.54</b><br>(0.19 to 1.15)                   | <b>0.50</b><br>(0.18 to 1.12)                   | <b>0.57</b><br>(0.21 to 1.24)                   | <b>0.03</b><br>(0.01 to 0.07)                | <b>0.04</b><br>(0.01 to 0.09)                | <b>0.04</b><br>(0.01 to 0.10)                | <b>0.04</b><br>(0.01 to 0.09)                |
| <b>Lower respiratory infections</b>                                      | <b>6,554.11</b><br>(5,699.98 to 7,500.85)       | <b>11,583.46</b><br>(8,122.04 to 16,162.74)     | <b>9,884.86</b><br>(7,051.12 to 13,800.76)      | <b>13,928.12</b><br>(9,622.79 to 19,827.96)     | <b>740.06</b><br>(619.20 to 877.67)          | <b>1,674.32</b><br>(1,160.89 to 2,386.04)    | <b>1,522.77</b><br>(1,062.83 to 2,142.38)    | <b>1,884.69</b><br>(1,282.61 to 2,763.97)    |
| <b>Upper respiratory infections</b>                                      | <b>7.28</b><br>(3.84 to 11.88)                  | <b>5.53</b><br>(2.14 to 12.12)                  | <b>3.91</b><br>(1.45 to 8.58)                   | <b>7.02</b><br>(2.59 to 15.31)                  | <b>0.30</b><br>(0.16 to 0.52)                | <b>0.34</b><br>(0.12 to 0.79)                | <b>0.26</b><br>(0.08 to 0.61)                | <b>0.42</b><br>(0.14 to 0.97)                |
| <b>Otitis media</b>                                                      | <b>2.73</b><br>(1.63 to 4.54)                   | <b>0.73</b><br>(0.18 to 2.43)                   | <b>0.80</b><br>(0.18 to 2.63)                   | <b>0.68</b><br>(0.17 to 2.28)                   | <b>0.28</b><br>(0.14 to 0.52)                | <b>0.09</b><br>(0.01 to 0.31)                | <b>0.10</b><br>(0.02 to 0.34)                | <b>0.08</b><br>(0.01 to 0.28)                |
| <b>Meningitis</b>                                                        | <b>723.59</b><br>(625.04 to 865.90)             | <b>492.30</b><br>(311.05 to 767.80)             | <b>360.18</b><br>(234.52 to 539.90)             | <b>760.92</b><br>(419.44 to 1,331.40)           | <b>15.43</b><br>(13.54 to 18.65)             | <b>11.67</b><br>(8.40 to 16.12)              | <b>9.64</b><br>(6.85 to 13.25)               | <b>15.25</b><br>(10.08 to 23.15)             |
| <b>Pneumococcal meningitis</b>                                           | <b>122.94</b><br>(104.62 to 148.55)             | <b>76.32</b><br>(55.39 to 105.19)               | <b>72.58</b><br>(52.51 to 100.11)               | <b>85.80</b><br>(59.99 to 122.11)               | <b>3.06</b><br>(2.66 to 3.79)                | <b>2.74</b><br>(2.12 to 3.68)                | <b>2.76</b><br>(2.11 to 3.74)                | <b>2.87</b><br>(2.23 to 3.84)                |
| <b>H influenzae type B meningitis</b>                                    | <b>96.07</b><br>(79.32 to 117.60)               | <b>232.62</b><br>(89.59 to 482.78)              | <b>148.00</b><br>(68.80 to 285.39)              | <b>452.37</b><br>(141.42 to 989.60)             | <b>1.84</b><br>(1.57 to 2.23)                | <b>3.45</b><br>(1.72 to 6.44)                | <b>2.51</b><br>(1.46 to 4.15)                | <b>5.99</b><br>(2.31 to 12.35)               |
| <b>Meningococcal meningitis</b>                                          | <b>307.67</b><br>(262.32 to 369.41)             | <b>106.63</b><br>(65.31 to 168.18)              | <b>81.70</b><br>(48.54 to 130.75)               | <b>129.00</b><br>(75.57 to 205.65)              | <b>5.74</b><br>(4.99 to 6.85)                | <b>2.70</b><br>(1.81 to 3.95)                | <b>2.17</b><br>(1.40 to 3.19)                | <b>3.15</b><br>(2.12 to 4.55)                |
| <b>Other meningitis</b>                                                  | <b>196.92</b><br>(168.91 to 238.08)             | <b>76.73</b><br>(49.33 to 116.60)               | <b>57.89</b><br>(35.07 to 90.29)                | <b>93.75</b><br>(58.66 to 146.94)               | <b>4.79</b><br>(4.16 to 5.88)                | <b>2.78</b><br>(1.90 to 4.03)                | <b>2.20</b><br>(1.42 to 3.29)                | <b>3.24</b><br>(2.20 to 4.74)                |
| <b>Encephalitis</b>                                                      | <b>267.18</b><br>(156.15 to 339.72)             | <b>278.22</b><br>(159.64 to 373.46)             | <b>268.69</b><br>(155.30 to 368.66)             | <b>284.88</b><br>(162.91 to 380.59)             | <b>8.10</b><br>(4.83 to 10.21)               | <b>11.72</b><br>(7.06 to 15.26)              | <b>11.80</b><br>(7.06 to 15.69)              | <b>11.60</b><br>(6.95 to 14.90)              |

|                |                            |                              |                              |                              |                           |                           |                           |                           |
|----------------|----------------------------|------------------------------|------------------------------|------------------------------|---------------------------|---------------------------|---------------------------|---------------------------|
| Diphtheria     | 1.70<br>(1.08 to<br>2.52)  | 0.50<br>(0.28 to<br>0.86)    | 0.35<br>(0.22 to<br>0.55)    | 0.89<br>(0.41 to<br>1.89)    | 0.03<br>(0.02 to<br>0.04) | 0.01<br>(0.01 to<br>0.01) | 0.01<br>(0.00 to<br>0.01) | 0.01<br>(0.01 to<br>0.03) |
| Whooping cough | 5.17<br>(1.28 to<br>10.22) | 3.29<br>(0.46 to<br>9.90)    | 0.54<br>(0.12 to<br>1.46)    | 6.83<br>(0.99 to<br>17.96)   | 0.06<br>(0.02 to<br>0.12) | 0.04<br>(0.01 to<br>0.12) | 0.01<br>(0.00 to<br>0.02) | 0.08<br>(0.01 to<br>0.21) |
| Tetanus        | 2.59<br>(1.84 to<br>3.24)  | 0.34<br>(0.21 to<br>0.54)    | 0.25<br>(0.15 to<br>0.36)    | 0.56<br>(0.31 to<br>0.97)    | 0.09<br>(0.06 to<br>0.11) | 0.01<br>(0.01 to<br>0.01) | 0.01<br>(0.01 to<br>0.01) | 0.01<br>(0.01 to<br>0.02) |
| Measles        | 1.04<br>(0.74 to<br>1.52)  | 20.20<br>(0.04 to<br>197.16) | 12.58<br>(0.04 to<br>121.17) | 54.19<br>(0.05 to<br>523.55) | 0.01<br>(0.01 to<br>0.02) | 0.26<br>(0.00 to<br>2.35) | 0.17<br>(0.00 to<br>1.44) | 0.66<br>(0.00 to<br>6.15) |

| New Zealand                                           |                                     |                                     |                                     |                                     |                               |                               |                               |                               |
|-------------------------------------------------------|-------------------------------------|-------------------------------------|-------------------------------------|-------------------------------------|-------------------------------|-------------------------------|-------------------------------|-------------------------------|
| Cause                                                 | YLLs (actual counts)                |                                     |                                     |                                     | Deaths (actual counts)        |                               |                               |                               |
|                                                       | 2016                                | 2040 Forecast                       | 2040 Better Scenario                | 2040 Worse Scenario                 | 2016                          | 2040 Forecast                 | 2040 Better Scenario          | 2040 Worse Scenario           |
| Varicella and herpes zoster                           | 39.18<br>(19.63 to 60.34)           | 36.27<br>(17.08 to 60.32)           | 31.85<br>(14.36 to 53.83)           | 39.41<br>(18.55 to 66.18)           | 2.93<br>(1.39 to 4.78)        | 3.64<br>(1.65 to 5.98)        | 3.43<br>(1.56 to 5.64)        | 3.74<br>(1.70 to 6.15)        |
| <b>Neglected tropical diseases and malaria</b>        | <b>26.41</b><br>(24.10 to 29.01)    | <b>29.24</b><br>(23.89 to 34.88)    | <b>29.41</b><br>(24.21 to 35.01)    | <b>29.28</b><br>(23.86 to 34.67)    | <b>0.58</b><br>(0.52 to 0.64) | <b>0.70</b><br>(0.59 to 0.81) | <b>0.72</b><br>(0.62 to 0.85) | <b>0.68</b><br>(0.58 to 0.79) |
| Malaria                                               | 0.00<br>(0.00 to 0.00)              | 0.00<br>(0.00 to 0.00)              | 0.00<br>(0.00 to 0.00)              | 0.00<br>(0.00 to 0.00)              | 0.00<br>(0.00 to 0.00)        | 0.00<br>(0.00 to 0.00)        | 0.00<br>(0.00 to 0.00)        | 0.00<br>(0.00 to 0.00)        |
| Chagas disease                                        | 0.00<br>(0.00 to 0.00)              | 0.00<br>(0.00 to 0.00)              | 0.00<br>(0.00 to 0.00)              | 0.00<br>(0.00 to 0.00)              | 0.00<br>(0.00 to 0.00)        | 0.00<br>(0.00 to 0.00)        | 0.00<br>(0.00 to 0.00)        | 0.00<br>(0.00 to 0.00)        |
| Leishmaniasis                                         | 0.00<br>(0.00 to 0.00)              | 0.00<br>(0.00 to 0.00)              | 0.00<br>(0.00 to 0.00)              | 0.00<br>(0.00 to 0.00)              | 0.00<br>(0.00 to 0.00)        | 0.00<br>(0.00 to 0.00)        | 0.00<br>(0.00 to 0.00)        | 0.00<br>(0.00 to 0.00)        |
| African trypanosomiasis                               | 0.00<br>(0.00 to 0.00)              | 0.00<br>(0.00 to 0.00)              | 0.00<br>(0.00 to 0.00)              | 0.00<br>(0.00 to 0.00)              | 0.00<br>(0.00 to 0.00)        | 0.00<br>(0.00 to 0.00)        | 0.00<br>(0.00 to 0.00)        | 0.00<br>(0.00 to 0.00)        |
| Schistosomiasis                                       | 0.00<br>(0.00 to 0.00)              | 0.00<br>(0.00 to 0.00)              | 0.00<br>(0.00 to 0.00)              | 0.00<br>(0.00 to 0.00)              | 0.00<br>(0.00 to 0.00)        | 0.00<br>(0.00 to 0.00)        | 0.00<br>(0.00 to 0.00)        | 0.00<br>(0.00 to 0.00)        |
| Cysticercosis                                         | 2.59<br>(2.24 to 2.98)              | 0.96<br>(0.80 to 1.13)              | 0.94<br>(0.78 to 1.10)              | 0.97<br>(0.81 to 1.14)              | 0.08<br>(0.07 to 0.10)        | 0.04<br>(0.03 to 0.04)        | 0.04<br>(0.04 to 0.04)        | 0.04<br>(0.03 to 0.04)        |
| Cystic echinococcosis                                 | 0.00<br>(0.00 to 0.00)              | 0.00<br>(0.00 to 0.00)              | 0.00<br>(0.00 to 0.00)              | 0.00<br>(0.00 to 0.00)              | 0.00<br>(0.00 to 0.00)        | 0.00<br>(0.00 to 0.00)        | 0.00<br>(0.00 to 0.00)        | 0.00<br>(0.00 to 0.00)        |
| Dengue                                                | 0.00<br>(0.00 to 0.00)              | 0.00<br>(0.00 to 0.00)              | 0.00<br>(0.00 to 0.00)              | 0.00<br>(0.00 to 0.00)              | 0.00<br>(0.00 to 0.00)        | 0.00<br>(0.00 to 0.00)        | 0.00<br>(0.00 to 0.00)        | 0.00<br>(0.00 to 0.00)        |
| Yellow fever                                          | 0.00<br>(0.00 to 0.00)              | 0.00<br>(0.00 to 0.00)              | 0.00<br>(0.00 to 0.00)              | 0.00<br>(0.00 to 0.00)              | 0.00<br>(0.00 to 0.00)        | 0.00<br>(0.00 to 0.00)        | 0.00<br>(0.00 to 0.00)        | 0.00<br>(0.00 to 0.00)        |
| Rabies                                                | 0.17<br>(0.13 to 0.22)              | 0.17<br>(0.13 to 0.22)              | 0.15<br>(0.11 to 0.20)              | 0.18<br>(0.14 to 0.25)              | 0.00<br>(0.00 to 0.01)        | 0.01<br>(0.01 to 0.01)        | 0.01<br>(0.01 to 0.01)        | 0.01<br>(0.01 to 0.01)        |
| Intestinal nematode infections                        | 0.00<br>(0.00 to 0.00)              | 0.00<br>(0.00 to 0.00)              | 0.00<br>(0.00 to 0.00)              | 0.00<br>(0.00 to 0.00)              | 0.00<br>(0.00 to 0.00)        | 0.00<br>(0.00 to 0.00)        | 0.00<br>(0.00 to 0.00)        | 0.00<br>(0.00 to 0.00)        |
| Other neglected tropical diseases                     | 23.65<br>(21.58 to 26.01)           | 28.12<br>(22.90 to 33.48)           | 28.33<br>(23.19 to 33.86)           | 28.13<br>(22.80 to 33.37)           | 0.49<br>(0.44 to 0.54)        | 0.65<br>(0.55 to 0.76)        | 0.68<br>(0.58 to 0.80)        | 0.64<br>(0.54 to 0.74)        |
| <b>Maternal disorders</b>                             | <b>379.65</b><br>(307.75 to 463.98) | <b>256.17</b><br>(154.56 to 382.52) | <b>219.24</b><br>(129.84 to 331.18) | <b>286.29</b><br>(170.99 to 432.12) | <b>6.80</b><br>(5.50 to 8.25) | <b>4.63</b><br>(2.83 to 6.85) | <b>3.97</b><br>(2.39 to 5.90) | <b>5.18</b><br>(3.14 to 7.77) |
| Maternal hemorrhage                                   | 15.55<br>(9.57 to 24.28)            | 7.88<br>(3.86 to 13.99)             | 6.76<br>(3.28 to 12.17)             | 8.73<br>(4.28 to 15.48)             | 0.28<br>(0.17 to 0.43)        | 0.14<br>(0.07 to 0.25)        | 0.12<br>(0.06 to 0.22)        | 0.16<br>(0.08 to 0.28)        |
| Maternal sepsis and other maternal infections         | 3.75<br>(1.59 to 6.88)              | 1.91<br>(0.71 to 3.75)              | 1.63<br>(0.61 to 3.23)              | 2.14<br>(0.80 to 4.26)              | 0.07<br>(0.03 to 0.12)        | 0.04<br>(0.01 to 0.07)        | 0.03<br>(0.01 to 0.06)        | 0.04<br>(0.02 to 0.08)        |
| Maternal hypertensive disorders                       | 11.74<br>(7.34 to 17.43)            | 7.12<br>(3.35 to 12.70)             | 6.02<br>(2.87 to 10.89)             | 7.99<br>(3.76 to 14.07)             | 0.20<br>(0.13 to 0.31)        | 0.13<br>(0.06 to 0.22)        | 0.11<br>(0.05 to 0.19)        | 0.14<br>(0.07 to 0.25)        |
| Maternal obstructed labor and uterine rupture         | 2.75<br>(1.11 to 5.37)              | 1.76<br>(0.62 to 3.98)              | 1.45<br>(0.49 to 3.27)              | 2.00<br>(0.70 to 4.53)              | 0.05<br>(0.02 to 0.10)        | 0.03<br>(0.01 to 0.07)        | 0.03<br>(0.01 to 0.06)        | 0.04<br>(0.01 to 0.08)        |
| Maternal abortion, miscarriage, and ectopic pregnancy | 19.91<br>(12.68 to 29.21)           | 12.90<br>(6.82 to 25.13)            | 10.91<br>(5.77 to 20.82)            | 14.42<br>(7.59 to 27.89)            | 0.38<br>(0.24 to 0.56)        | 0.25<br>(0.13 to 0.48)        | 0.21<br>(0.11 to 0.40)        | 0.28<br>(0.15 to 0.53)        |

|                                        |                                 |                                |                               |                                |                           |                           |                           |                           |
|----------------------------------------|---------------------------------|--------------------------------|-------------------------------|--------------------------------|---------------------------|---------------------------|---------------------------|---------------------------|
|                                        | 143.75<br>(104.99 to<br>186.52) | 108.74<br>(55.41 to<br>187.12) | 91.50<br>(46.00 to<br>158.25) | 123.15<br>(61.13 to<br>215.58) | 2.55<br>(1.88 to<br>3.30) | 1.95<br>(1.00 to<br>3.29) | 1.64<br>(0.84 to<br>2.84) | 2.21<br>(1.11 to<br>3.79) |
| Indirect maternal deaths               |                                 |                                |                               |                                |                           |                           |                           |                           |
|                                        | 6.84<br>(3.72 to<br>11.51)      | 3.08<br>(1.33 to<br>6.34)      | 2.59<br>(1.08 to<br>5.38)     | 3.47<br>(1.48 to<br>7.27)      | 0.12<br>(0.07 to<br>0.21) | 0.06<br>(0.02 to<br>0.12) | 0.05<br>(0.02 to<br>0.10) | 0.06<br>(0.03 to<br>0.13) |
| Late maternal deaths                   |                                 |                                |                               |                                |                           |                           |                           |                           |
|                                        | 0.06<br>(0.02 to<br>0.13)       | 0.14<br>(0.02 to<br>0.40)      | 0.10<br>(0.01 to<br>0.28)     | 0.19<br>(0.04 to<br>0.51)      | 0.00<br>(0.00 to<br>0.00) | 0.00<br>(0.00 to<br>0.01) | 0.00<br>(0.00 to<br>0.01) | 0.00<br>(0.00 to<br>0.01) |
| Maternal deaths aggravated by HIV/AIDS |                                 |                                |                               |                                |                           |                           |                           |                           |
|                                        | 175.30<br>(131.38 to<br>230.95) | 112.64<br>(66.02 to<br>182.63) | 98.29<br>(57.28 to<br>159.82) | 124.19<br>(72.84 to<br>201.44) | 3.14<br>(2.35 to<br>4.12) | 2.04<br>(1.21 to<br>3.30) | 1.78<br>(1.07 to<br>2.88) | 2.25<br>(1.33 to<br>3.62) |
| Other maternal disorders               |                                 |                                |                               |                                |                           |                           |                           |                           |

| New Zealand                                                             |                                             |                                            |                                            |                                             |                                     |                                    |                                   |                                    |
|-------------------------------------------------------------------------|---------------------------------------------|--------------------------------------------|--------------------------------------------|---------------------------------------------|-------------------------------------|------------------------------------|-----------------------------------|------------------------------------|
| Cause                                                                   | YLLs (actual counts)                        |                                            |                                            |                                             | Deaths (actual counts)              |                                    |                                   |                                    |
|                                                                         | 2016                                        | 2040 Forecast                              | 2040 Better Scenario                       | 2040 Worse Scenario                         | 2016                                | 2040 Forecast                      | 2040 Better Scenario              | 2040 Worse Scenario                |
| <b>Neonatal disorders</b>                                               | <b>10,882.23</b><br>(8,917.69 to 12,991.63) | <b>9,282.92</b><br>(4,104.18 to 17,376.10) | <b>7,043.94</b><br>(3,097.09 to 13,579.02) | <b>11,438.78</b><br>(4,946.96 to 21,476.43) | <b>125.79</b><br>(103.07 to 150.19) | <b>107.31</b><br>(47.46 to 200.81) | <b>81.43</b><br>(35.83 to 156.94) | <b>132.22</b><br>(57.22 to 248.18) |
| Neonatal preterm birth                                                  | 6,815.04<br>(5,517.76 to 8,314.32)          | 4,689.65<br>(2,048.57 to 8,695.15)         | 3,099.04<br>(1,349.68 to 5,835.73)         | 6,167.94<br>(2,621.81 to 11,375.56)         | 78.77<br>(63.77 to 96.09)           | 54.20<br>(23.69 to 100.47)         | 35.82<br>(15.61 to 67.43)         | 71.28<br>(30.32 to 131.45)         |
| Neonatal encephalopathy due to birth asphyxia and trauma                | 1,563.63<br>(1,203.10 to 2,018.83)          | 1,339.46<br>(580.29 to 2,786.72)           | 1,024.92<br>(439.48 to 2,101.35)           | 1,656.03<br>(721.59 to 3,437.98)            | 18.08<br>(13.92 to 23.35)           | 15.50<br>(6.72 to 32.21)           | 11.86<br>(5.10 to 24.28)          | 19.16<br>(8.35 to 39.77)           |
| Neonatal sepsis and other neonatal infections                           | 642.86<br>(311.76 to 905.97)                | 685.05<br>(233.09 to 1,490.84)             | 554.18<br>(186.32 to 1,235.56)             | 816.43<br>(278.82 to 1,820.19)              | 7.43<br>(3.60 to 10.47)             | 7.91<br>(2.69 to 17.22)            | 6.40<br>(2.15 to 14.27)           | 9.43<br>(3.22 to 21.03)            |
| Hemolytic disease and other neonatal jaundice                           | 27.22<br>(16.62 to 39.76)                   | 16.46<br>(6.30 to 36.76)                   | 13.12<br>(4.96 to 29.06)                   | 19.72<br>(7.51 to 44.49)                    | 0.32<br>(0.19 to 0.46)              | 0.19<br>(0.07 to 0.43)             | 0.15<br>(0.06 to 0.34)            | 0.23<br>(0.09 to 0.51)             |
| Other neonatal disorders                                                | 1,833.48<br>(1,341.55 to 2,400.17)          | 2,552.29<br>(1,016.84 to 5,707.20)         | 2,352.70<br>(935.51 to 5,131.68)           | 2,778.67<br>(1,103.21 to 6,130.48)          | 21.20<br>(15.51 to 27.75)           | 29.51<br>(11.78 to 65.94)          | 27.20<br>(10.83 to 59.29)         | 32.13<br>(12.78 to 70.84)          |
| <b>Nutritional deficiencies</b>                                         | <b>142.10</b><br>(126.70 to 159.13)         | <b>257.58</b><br>(217.06 to 303.85)        | <b>288.88</b><br>(240.52 to 342.67)        | <b>235.97</b><br>(199.19 to 278.05)         | <b>14.29</b><br>(12.55 to 16.23)    | <b>35.07</b><br>(28.51 to 43.40)   | <b>41.13</b><br>(33.26 to 50.71)  | <b>30.96</b><br>(24.96 to 38.06)   |
| Protein-energy malnutrition                                             | 95.41<br>(68.67 to 114.46)                  | 182.79<br>(123.65 to 235.04)               | 214.66<br>(151.54 to 275.60)               | 161.58<br>(108.77 to 209.40)                | 10.61<br>(7.36 to 12.68)            | 26.43<br>(17.32 to 35.48)          | 32.23<br>(21.85 to 42.75)         | 22.67<br>(14.29 to 30.59)          |
| Iodine deficiency                                                       | 4.24<br>(0.40 to 11.40)                     | 12.18<br>(0.49 to 46.07)                   | 12.58<br>(0.42 to 50.27)                   | 11.79<br>(0.54 to 42.92)                    | 0.26<br>(0.01 to 0.94)              | 1.44<br>(0.02 to 7.02)             | 1.55<br>(0.01 to 7.88)            | 1.34<br>(0.02 to 6.10)             |
| Dietary iron deficiency                                                 | 10.75<br>(8.38 to 12.81)                    | 11.30<br>(8.35 to 14.43)                   | 11.74<br>(8.48 to 15.35)                   | 11.00<br>(8.16 to 14.02)                    | 0.32<br>(0.21 to 0.42)              | 0.41<br>(0.25 to 0.63)             | 0.45<br>(0.27 to 0.70)            | 0.39<br>(0.24 to 0.58)             |
| Other nutritional deficiencies                                          | 31.69<br>(22.39 to 53.93)                   | 51.32<br>(31.17 to 96.24)                  | 49.91<br>(29.36 to 98.03)                  | 51.60<br>(31.51 to 94.67)                   | 3.10<br>(2.11 to 5.93)              | 6.77<br>(3.87 to 13.64)            | 6.90<br>(3.91 to 14.37)           | 6.56<br>(3.71 to 13.10)            |
| <b>Other communicable, maternal, neonatal, and nutritional diseases</b> | <b>740.70</b><br>(595.26 to 849.53)         | <b>947.56</b><br>(736.37 to 1,163.89)      | <b>921.20</b><br>(712.37 to 1,134.47)      | <b>966.42</b><br>(750.80 to 1,186.62)       | <b>26.22</b><br>(21.02 to 29.90)    | <b>46.02</b><br>(36.43 to 53.86)   | <b>47.14</b><br>(36.95 to 55.43)  | <b>44.96</b><br>(35.51 to 52.58)   |
| Sexually transmitted infections excluding HIV                           | 31.64<br>(24.06 to 42.00)                   | 20.51<br>(14.69 to 28.14)                  | 19.29<br>(13.61 to 26.40)                  | 21.37<br>(15.13 to 29.59)                   | 1.26<br>(1.03 to 1.52)              | 1.30<br>(0.98 to 1.68)             | 1.29<br>(0.96 to 1.70)            | 1.29<br>(0.97 to 1.67)             |
| Syphilis                                                                | 14.34<br>(8.24 to 24.50)                    | 6.58<br>(4.13 to 10.52)                    | 5.71<br>(3.61 to 9.10)                     | 7.27<br>(4.47 to 11.90)                     | 0.39<br>(0.29 to 0.52)              | 0.32<br>(0.23 to 0.44)             | 0.30<br>(0.21 to 0.42)            | 0.33<br>(0.24 to 0.46)             |
| Chlamydial infection                                                    | 3.36<br>(2.76 to 4.00)                      | 2.74<br>(2.00 to 3.68)                     | 2.68<br>(1.93 to 3.63)                     | 2.76<br>(2.03 to 3.69)                      | 0.18<br>(0.15 to 0.21)              | 0.20<br>(0.15 to 0.28)             | 0.21<br>(0.16 to 0.28)            | 0.20<br>(0.15 to 0.27)             |
| Gonococcal infection                                                    | 9.69<br>(7.87 to 11.71)                     | 8.05<br>(5.79 to 10.77)                    | 7.87<br>(5.59 to 10.72)                    | 8.13<br>(5.91 to 10.85)                     | 0.52<br>(0.42 to 0.62)              | 0.59<br>(0.43 to 0.78)             | 0.60<br>(0.43 to 0.80)            | 0.57<br>(0.42 to 0.75)             |
| Other sexually transmitted infections                                   | 4.25<br>(3.47 to 5.13)                      | 3.15<br>(2.26 to 4.11)                     | 3.04<br>(2.17 to 4.02)                     | 3.21<br>(2.32 to 4.23)                      | 0.18<br>(0.15 to 0.22)              | 0.18<br>(0.14 to 0.24)             | 0.19<br>(0.14 to 0.25)            | 0.18<br>(0.13 to 0.24)             |
| Acute hepatitis                                                         | 92.82<br>(78.82 to 108.76)                  | 69.70<br>(43.93 to 103.61)                 | 55.52<br>(34.64 to 82.18)                  | 81.17<br>(50.88 to 121.49)                  | 3.07<br>(2.60 to 3.59)              | 2.97<br>(1.96 to 4.43)             | 2.45<br>(1.52 to 3.66)            | 3.37<br>(2.16 to 5.04)             |
| Acute hepatitis A                                                       | 4.26<br>(2.99 to 5.57)                      | 3.05<br>(1.82 to 4.73)                     | 2.58<br>(1.54 to 3.99)                     | 3.42<br>(2.07 to 5.29)                      | 0.10<br>(0.07 to 0.13)              | 0.11<br>(0.06 to 0.18)             | 0.10<br>(0.05 to 0.16)            | 0.12<br>(0.07 to 0.19)             |
| Acute hepatitis B                                                       | 77.79<br>(65.15 to 92.20)                   | 58.55<br>(35.97 to 87.95)                  | 46.29<br>(28.03 to 70.29)                  | 68.54<br>(42.11 to 103.84)                  | 2.54<br>(2.12 to 3.00)              | 2.31<br>(1.43 to 3.50)             | 1.87<br>(1.13 to 2.85)            | 2.66<br>(1.63 to 4.05)             |



| New Zealand                          |                                                 |                                                 |                                                 |                                                 |                                            |                                              |                                              |                                              |
|--------------------------------------|-------------------------------------------------|-------------------------------------------------|-------------------------------------------------|-------------------------------------------------|--------------------------------------------|----------------------------------------------|----------------------------------------------|----------------------------------------------|
| Cause                                | YLLs (actual counts)                            |                                                 |                                                 |                                                 | Deaths (actual counts)                     |                                              |                                              |                                              |
|                                      | 2016                                            | 2040 Forecast                                   | 2040 Better Scenario                            | 2040 Worse Scenario                             | 2016                                       | 2040 Forecast                                | 2040 Better Scenario                         | 2040 Worse Scenario                          |
| <b>Neoplasms</b>                     | <b>179,308.44</b><br>(162,649.99 to 198,032.17) | <b>229,631.73</b><br>(185,461.83 to 279,096.33) | <b>187,354.42</b><br>(152,181.42 to 226,013.70) | <b>268,193.66</b><br>(212,665.58 to 328,330.09) | <b>9,808.93</b><br>(8,949.72 to 10,760.41) | <b>16,021.32</b><br>(13,768.49 to 18,578.79) | <b>13,534.56</b><br>(11,623.26 to 15,580.17) | <b>18,081.92</b><br>(15,339.26 to 21,138.74) |
| Lip and oral cavity cancer           | 1,666.65<br>(1,470.99 to 1,869.16)              | 1,978.22<br>(1,100.55 to 3,151.88)              | 1,111.06<br>(673.83 to 1,702.67)                | 2,936.23<br>(1,571.02 to 4,745.83)              | 86.56<br>(77.44 to 96.44)                  | 129.75<br>(75.72 to 203.28)                  | 75.58<br>(48.69 to 112.08)                   | 186.52<br>(104.39 to 295.92)                 |
| Nasopharynx cancer                   | 605.19<br>(526.81 to 700.42)                    | 749.35<br>(417.62 to 1,258.47)                  | 386.72<br>(227.73 to 631.54)                    | 1,175.11<br>(647.33 to 1,997.30)                | 27.86<br>(24.33 to 32.14)                  | 43.44<br>(24.25 to 74.61)                    | 22.50<br>(13.49 to 37.47)                    | 66.83<br>(36.31 to 116.07)                   |
| Other pharynx cancer                 | 1,002.80<br>(875.76 to 1,150.44)                | 1,350.03<br>(768.53 to 2,254.91)                | 1,136.18<br>(675.46 to 1,877.50)                | 1,541.59<br>(868.59 to 2,574.52)                | 48.31<br>(42.85 to 54.76)                  | 83.75<br>(49.41 to 139.11)                   | 72.34<br>(44.90 to 117.84)                   | 93.23<br>(53.82 to 158.12)                   |
| Esophageal cancer                    | 4,428.39<br>(3,881.14 to 5,053.08)              | 6,197.20<br>(3,547.80 to 10,171.59)             | 3,757.14<br>(2,356.30 to 5,699.18)              | 8,539.05<br>(4,791.31 to 14,269.80)             | 260.49<br>(231.59 to 291.97)               | 440.27<br>(262.64 to 693.70)                 | 271.47<br>(179.55 to 400.30)                 | 594.38<br>(344.38 to 952.75)                 |
| Stomach cancer                       | 6,366.90<br>(5,682.61 to 7,110.48)              | 5,066.05<br>(3,961.86 to 6,570.32)              | 4,106.75<br>(3,245.63 to 5,241.83)              | 5,932.55<br>(4,448.21 to 7,891.82)              | 366.17<br>(328.32 to 405.69)               | 381.96<br>(302.63 to 483.95)                 | 318.63<br>(261.14 to 397.15)                 | 435.76<br>(336.57 to 577.41)                 |
| Colon and rectum cancer              | 24,836.35<br>(22,073.22 to 27,848.28)           | 32,138.84<br>(22,984.06 to 44,607.87)           | 25,053.58<br>(18,121.60 to 34,408.85)           | 38,286.47<br>(26,798.85 to 53,446.12)           | 1,530.09<br>(1,368.00 to 1,701.56)         | 2,507.21<br>(1,852.29 to 3,405.32)           | 2,028.14<br>(1,519.13 to 2,684.03)           | 2,899.45<br>(2,109.41 to 3,977.37)           |
| Liver cancer                         | 5,357.45<br>(4,667.17 to 6,147.69)              | 7,793.04<br>(4,850.49 to 12,033.63)             | 6,316.59<br>(4,214.64 to 9,329.42)              | 9,971.80<br>(5,805.67 to 15,976.48)             | 262.20<br>(232.01 to 300.10)               | 464.36<br>(304.69 to 682.71)                 | 391.02<br>(271.81 to 550.91)                 | 568.58<br>(350.96 to 866.60)                 |
| Liver cancer due to hepatitis B      | 1,238.24<br>(985.28 to 1,514.10)                | 1,634.54<br>(1,001.70 to 2,563.01)              | 1,428.42<br>(926.85 to 2,171.33)                | 1,906.03<br>(1,104.61 to 3,123.08)              | 51.48<br>(41.07 to 63.33)                  | 81.84<br>(51.87 to 126.76)                   | 73.37<br>(49.54 to 107.96)                   | 92.83<br>(55.84 to 147.10)                   |
| Liver cancer due to hepatitis C      | 1,312.52<br>(1,098.15 to 1,557.30)              | 2,043.91<br>(1,272.89 to 3,139.89)              | 1,810.84<br>(1,190.89 to 2,641.07)              | 2,329.20<br>(1,366.83 to 3,734.52)              | 73.01<br>(61.62 to 86.13)                  | 139.78<br>(90.66 to 208.22)                  | 127.89<br>(88.19 to 182.60)                  | 154.16<br>(95.34 to 236.04)                  |
| Liver cancer due to alcohol use      | 2,149.53<br>(1,820.84 to 2,536.19)              | 3,096.23<br>(1,894.79 to 4,797.77)              | 2,194.36<br>(1,440.54 to 3,272.65)              | 4,565.67<br>(2,616.70 to 7,399.71)              | 105.85<br>(90.25 to 123.55)                | 182.04<br>(116.35 to 271.81)                 | 135.92<br>(92.01 to 195.49)                  | 253.71<br>(153.30 to 396.29)                 |
| Liver cancer due to other causes     | 657.16<br>(547.76 to 790.95)                    | 1,018.36<br>(603.60 to 1,650.51)                | 882.97<br>(554.36 to 1,371.03)                  | 1,170.90<br>(656.60 to 1,952.75)                | 31.86<br>(26.71 to 37.95)                  | 60.70<br>(37.93 to 95.61)                    | 53.83<br>(35.81 to 80.76)                    | 67.88<br>(39.68 to 110.81)                   |
| Gallbladder and biliary tract cancer | 2,055.28<br>(1,807.97 to 2,313.30)              | 1,830.01<br>(1,557.87 to 2,140.72)              | 1,841.62<br>(1,552.31 to 2,179.84)              | 1,805.72<br>(1,541.19 to 2,083.37)              | 124.88<br>(111.36 to 139.96)               | 140.54<br>(123.65 to 158.05)                 | 145.99<br>(127.03 to 166.51)                 | 135.17<br>(119.95 to 150.81)                 |
| Pancreatic cancer                    | 9,060.73<br>(7,995.96 to 10,191.47)             | 12,824.78<br>(10,107.77 to 16,253.70)           | 11,630.40<br>(9,217.90 to 14,522.12)            | 13,708.38<br>(10,782.73 to 17,491.36)           | 514.60<br>(459.32 to 575.31)               | 889.60<br>(726.22 to 1,093.59)               | 824.07<br>(680.51 to 997.09)                 | 931.16<br>(753.71 to 1,153.39)               |
| Larynx cancer                        | 742.60<br>(646.21 to 849.06)                    | 771.64<br>(393.70 to 1,366.09)                  | 379.60<br>(200.75 to 631.41)                    | 1,167.57<br>(578.20 to 2,171.33)                | 41.25<br>(36.20 to 46.91)                  | 53.09<br>(27.59 to 96.05)                    | 26.44<br>(14.15 to 43.98)                    | 77.85<br>(39.04 to 142.99)                   |
| Tracheal, bronchus, and lung cancer  | 32,766.52<br>(29,331.49 to 36,796.16)           | 42,254.76<br>(29,558.06 to 60,591.23)           | 22,474.62<br>(16,145.87 to 31,056.94)           | 60,824.02<br>(42,173.12 to 86,099.69)           | 1,759.97<br>(1,583.38 to 1,968.00)         | 2,760.16<br>(1,980.78 to 3,911.78)           | 1,485.68<br>(1,101.05 to 2,039.17)           | 3,831.78<br>(2,723.13 to 5,406.29)           |
| Malignant skin melanoma              | 8,461.62<br>(6,929.63 to 9,888.67)              | 12,338.51<br>(9,696.37 to 14,611.36)            | 14,128.16<br>(11,117.85 to 16,833.68)           | 11,181.06<br>(8,812.31 to 13,272.67)            | 426.30<br>(333.10 to 492.82)               | 798.12<br>(602.39 to 932.77)                 | 947.87<br>(712.24 to 1,118.30)               | 702.39<br>(534.17 to 819.75)                 |
| Non-melanoma skin cancer             | 1,801.39<br>(1,591.67 to 2,033.84)              | 2,344.35<br>(1,975.25 to 2,792.31)              | 2,153.33<br>(1,795.32 to 2,590.35)              | 2,450.47<br>(2,060.39 to 2,876.78)              | 147.02<br>(131.52 to 164.33)               | 234.47<br>(202.15 to 270.32)                 | 223.95<br>(191.07 to 262.09)                 | 237.70<br>(201.90 to 275.58)                 |
| Breast cancer                        | 17,191.53<br>(14,497.46 to 20,205.30)           | 17,866.31<br>(12,102.01 to 25,321.14)           | 13,780.54<br>(9,502.56 to 19,017.67)            | 20,864.26<br>(13,807.13 to 30,047.96)           | 755.46<br>(639.11 to 875.76)               | 1,038.11<br>(738.62 to 1,432.39)             | 837.18<br>(611.93 to 1,128.74)               | 1,175.28<br>(828.21 to 1,641.10)             |
| Cervical cancer                      | 1,749.22<br>(1,448.83 to 2,066.62)              | 1,442.39<br>(989.65 to 2,012.96)                | 1,181.13<br>(835.80 to 1,624.07)                | 1,696.79<br>(1,116.79 to 2,448.28)              | 73.72<br>(61.43 to 86.44)                  | 78.50<br>(56.82 to 107.30)                   | 65.96<br>(49.22 to 87.26)                    | 90.08<br>(63.03 to 127.27)                   |

|                   |                                        |                                          |                                          |                                          |                                 |                                       |                                       |                                       |
|-------------------|----------------------------------------|------------------------------------------|------------------------------------------|------------------------------------------|---------------------------------|---------------------------------------|---------------------------------------|---------------------------------------|
|                   | 2,148.16<br>(1,782.09 to<br>2,556.18)  | 2,773.78<br>(2,079.16 to<br>3,555.15)    | 2,568.56<br>(1,917.52 to<br>3,312.16)    | 2,904.12<br>(2,202.37 to<br>3,698.11)    | 117.03<br>(97.59 to<br>137.96)  | 192.85<br>(152.36 to<br>234.91)       | 183.09<br>(143.06 to<br>225.97)       | 197.77<br>(156.93 to<br>239.87)       |
| Uterine cancer    |                                        |                                          |                                          |                                          |                                 |                                       |                                       |                                       |
|                   | 4,457.97<br>(3,767.88 to<br>5,282.57)  | 5,021.13<br>(3,597.65 to<br>6,797.72)    | 4,452.72<br>(3,237.85 to<br>5,927.16)    | 5,413.68<br>(3,820.11 to<br>7,461.09)    | 217.52<br>(185.47 to<br>255.67) | 305.37<br>(228.74 to<br>407.82)       | 271.99<br>(207.22 to<br>357.00)       | 324.48<br>(238.00 to<br>439.45)       |
| Ovarian cancer    |                                        |                                          |                                          |                                          |                                 |                                       |                                       |                                       |
|                   | 8,720.04<br>(7,224.01 to<br>11,006.54) | 14,533.25<br>(11,600.51 to<br>18,697.76) | 13,954.56<br>(11,037.91 to<br>18,238.82) | 14,676.90<br>(11,715.33 to<br>18,814.61) | 700.58<br>(591.69 to<br>893.08) | 1,457.24<br>(1,214.01 to<br>1,876.74) | 1,447.19<br>(1,199.88 to<br>1,884.86) | 1,431.89<br>(1,157.51 to<br>1,820.13) |
| Prostate cancer   |                                        |                                          |                                          |                                          |                                 |                                       |                                       |                                       |
|                   | 280.65<br>(230.59 to<br>344.59)        | 213.79<br>(155.02 to<br>286.25)          | 190.52<br>(136.19 to<br>256.87)          | 230.66<br>(166.83 to<br>308.40)          | 6.64<br>(5.53 to<br>8.00)       | 5.91<br>(4.56 to<br>7.50)             | 5.42<br>(4.16 to<br>6.89)             | 6.24<br>(4.80 to<br>7.87)             |
| Testicular cancer |                                        |                                          |                                          |                                          |                                 |                                       |                                       |                                       |



| New Zealand                     |                                                      |                                                     |                                                    |                                                      |                                                   |                                                   |                                                  |                                                   |
|---------------------------------|------------------------------------------------------|-----------------------------------------------------|----------------------------------------------------|------------------------------------------------------|---------------------------------------------------|---------------------------------------------------|--------------------------------------------------|---------------------------------------------------|
| Cause                           | YLLs (actual counts)                                 |                                                     |                                                    |                                                      | Deaths (actual counts)                            |                                                   |                                                  |                                                   |
|                                 | 2016                                                 | 2040 Forecast                                       | 2040 Better Scenario                               | 2040 Worse Scenario                                  | 2016                                              | 2040 Forecast                                     | 2040 Better Scenario                             | 2040 Worse Scenario                               |
| Kidney cancer                   | 4,371.62<br>(3,854.44 to<br>4,942.25)                | 6,035.23<br>(4,714.45 to<br>7,653.29)               | 5,723.74<br>(4,552.27 to<br>7,088.98)              | 6,201.69<br>(4,812.04 to<br>8,004.90)                | 233.57<br>(207.46 to<br>262.11)                   | 405.57<br>(327.89 to<br>497.44)                   | 394.51<br>(328.21 to<br>472.26)                  | 406.58<br>(322.17 to<br>509.06)                   |
| Bladder cancer                  | 2,830.44<br>(2,496.24 to<br>3,194.00)                | 4,473.01<br>(3,377.65 to<br>5,839.52)               | 3,666.91<br>(2,884.02 to<br>4,559.64)              | 4,986.16<br>(3,692.90 to<br>6,580.58)                | 215.43<br>(191.13 to<br>241.29)                   | 426.49<br>(331.45 to<br>543.97)                   | 358.60<br>(291.80 to<br>440.45)                  | 462.80<br>(349.53 to<br>598.34)                   |
| Brain and nervous system cancer | 7,821.78<br>(6,311.98 to<br>9,072.96)                | 9,235.48<br>(7,144.50 to<br>11,196.05)              | 8,845.64<br>(6,885.69 to<br>10,775.34)             | 9,464.38<br>(7,388.05 to<br>11,480.72)               | 281.62<br>(223.32 to<br>326.06)                   | 409.28<br>(317.24 to<br>482.55)                   | 401.85<br>(310.21 to<br>478.60)                  | 410.63<br>(318.96 to<br>483.14)                   |
| Thyroid cancer                  | 473.90<br>(417.00 to<br>537.85)                      | 551.78<br>(393.72 to<br>778.14)                     | 493.57<br>(360.82 to<br>678.84)                    | 619.52<br>(454.22 to<br>888.31)                      | 26.16<br>(23.03 to<br>29.48)                      | 38.56<br>(28.56 to<br>52.37)                      | 35.69<br>(26.79 to<br>47.77)                     | 41.91<br>(30.47 to<br>57.79)                      |
| Mesothelioma                    | 1,714.21<br>(1,460.04 to<br>1,990.92)                | 2,528.36<br>(2,022.22 to<br>3,019.91)               | 2,655.73<br>(2,102.60 to<br>3,212.54)              | 2,418.67<br>(1,956.25 to<br>2,859.12)                | 98.98<br>(83.88 to<br>114.68)                     | 176.74<br>(147.35 to<br>207.28)                   | 190.21<br>(157.02 to<br>226.18)                  | 165.76<br>(139.62 to<br>191.81)                   |
| Hodgkin lymphoma                | 508.38<br>(440.04 to<br>577.25)                      | 380.19<br>(303.55 to<br>472.35)                     | 323.11<br>(252.94 to<br>403.11)                    | 421.77<br>(332.15 to<br>523.40)                      | 20.67<br>(17.46 to<br>23.48)                      | 20.51<br>(15.97 to<br>25.06)                      | 18.04<br>(13.91 to<br>22.14)                     | 22.10<br>(17.15 to<br>26.84)                      |
| Non-Hodgkin lymphoma            | 6,769.62<br>(5,876.12 to<br>7,630.92)                | 8,303.37<br>(6,460.19 to<br>10,637.75)              | 7,697.59<br>(5,993.11 to<br>9,761.09)              | 8,882.17<br>(6,827.58 to<br>11,462.66)               | 364.90<br>(313.54 to<br>410.67)                   | 573.35<br>(464.18 to<br>706.22)                   | 549.35<br>(446.28 to<br>673.27)                  | 595.64<br>(476.61 to<br>741.94)                   |
| Multiple myeloma                | 3,685.69<br>(2,868.61 to<br>4,405.72)                | 5,114.90<br>(3,740.39 to<br>6,731.70)               | 4,923.48<br>(3,652.86 to<br>6,415.29)              | 5,344.93<br>(3,954.66 to<br>7,112.96)                | 222.26<br>(173.99 to<br>261.25)                   | 381.88<br>(291.58 to<br>487.33)                   | 379.51<br>(290.88 to<br>481.40)                  | 387.82<br>(294.94 to<br>500.07)                   |
| Leukemia                        | 8,995.77<br>(8,075.44 to<br>9,967.28)                | 12,228.64<br>(9,486.22 to<br>15,584.94)             | 10,988.93<br>(8,640.35 to<br>13,888.38)            | 13,437.11<br>(10,122.54 to<br>17,436.57)             | 448.88<br>(401.40 to<br>497.19)                   | 813.40<br>(643.06 to<br>1,038.29)                 | 750.22<br>(608.16 to<br>928.54)                  | 868.16<br>(669.21 to<br>1,127.50)                 |
| Acute lymphoid leukemia         | 1,707.96<br>(1,501.37 to<br>2,144.41)                | 1,727.27<br>(1,254.15 to<br>2,467.33)               | 1,492.38<br>(1,084.34 to<br>2,107.90)              | 1,938.81<br>(1,376.17 to<br>2,761.36)                | 56.93<br>(49.34 to<br>72.45)                      | 79.04<br>(58.43 to<br>111.56)                     | 69.75<br>(52.54 to<br>95.68)                     | 86.32<br>(62.54 to<br>123.08)                     |
| Chronic lymphoid leukemia       | 1,349.71<br>(1,126.93 to<br>1,562.85)                | 1,999.09<br>(1,447.18 to<br>2,661.34)               | 1,825.34<br>(1,354.40 to<br>2,376.92)              | 2,152.65<br>(1,513.32 to<br>2,939.09)                | 96.78<br>(82.52 to<br>111.19)                     | 178.25<br>(134.13 to<br>231.33)                   | 167.87<br>(130.33 to<br>211.81)                  | 186.29<br>(136.29 to<br>249.18)                   |
| Acute myeloid leukemia          | 4,252.17<br>(3,746.64 to<br>4,764.17)                | 6,509.11<br>(5,009.37 to<br>8,265.86)               | 6,010.83<br>(4,720.38 to<br>7,480.86)              | 7,051.79<br>(5,339.88 to<br>9,038.61)                | 195.92<br>(172.16 to<br>219.64)                   | 390.76<br>(306.60 to<br>492.82)                   | 369.83<br>(295.06 to<br>455.91)                  | 411.93<br>(315.49 to<br>529.50)                   |
| Chronic myeloid leukemia        | 513.19<br>(436.24 to<br>609.80)                      | 368.96<br>(257.07 to<br>511.71)                     | 278.33<br>(196.67 to<br>381.21)                    | 453.98<br>(304.30 to<br>646.11)                      | 27.87<br>(23.47 to<br>33.85)                      | 27.23<br>(19.30 to<br>38.62)                      | 21.26<br>(15.29 to<br>29.24)                     | 32.23<br>(22.19 to<br>46.16)                      |
| Other leukemia                  | 1,172.74<br>(997.00 to<br>1,340.28)                  | 1,624.21<br>(1,215.26 to<br>2,134.59)               | 1,382.06<br>(1,055.23 to<br>1,775.29)              | 1,839.88<br>(1,334.14 to<br>2,470.97)                | 71.38<br>(61.72 to<br>80.88)                      | 138.11<br>(105.67 to<br>179.68)                   | 121.53<br>(95.36 to<br>154.63)                   | 151.38<br>(113.91 to<br>200.82)                   |
| Other neoplasms                 | 8,437.58<br>(7,460.21 to<br>9,483.50)                | 11,293.32<br>(9,373.60 to<br>13,026.89)             | 11,431.94<br>(9,635.79 to<br>13,289.60)            | 11,110.81<br>(9,500.16 to<br>12,802.25)              | 429.78<br>(375.98 to<br>480.76)                   | 770.84<br>(677.74 to<br>868.55)                   | 812.08<br>(706.46 to<br>921.43)                  | 733.99<br>(646.20 to<br>823.17)                   |
| <b>Cardiovascular diseases</b>  | <b>132,922.63<br/>(120,943.10 to<br/>146,378.64)</b> | <b>126,523.11<br/>(93,009.58 to<br/>173,885.26)</b> | <b>90,993.92<br/>(69,123.74 to<br/>121,969.47)</b> | <b>179,842.01<br/>(126,673.02 to<br/>258,460.82)</b> | <b>11,187.61<br/>(10,289.77 to<br/>12,120.88)</b> | <b>13,292.98<br/>(10,300.64 to<br/>17,486.74)</b> | <b>10,289.59<br/>(8,206.60 to<br/>13,379.23)</b> | <b>17,343.00<br/>(13,004.86 to<br/>23,401.60)</b> |
| Rheumatic heart disease         | 2,691.18<br>(2,359.06 to<br>3,087.28)                | 1,817.14<br>(1,411.41 to<br>2,367.09)               | 1,582.00<br>(1,232.06 to<br>2,038.32)              | 2,009.75<br>(1,558.89 to<br>2,604.98)                | 151.62<br>(133.67 to<br>172.52)                   | 149.60<br>(122.04 to<br>188.31)                   | 136.01<br>(109.27 to<br>172.50)                  | 159.60<br>(128.64 to<br>201.73)                   |
| Ischemic heart disease          | 77,062.44<br>(69,608.91 to<br>85,533.35)             | 64,167.01<br>(39,898.26 to<br>102,747.46)           | 41,120.39<br>(26,421.10 to<br>62,632.91)           | 100,951.17<br>(59,488.31 to<br>163,525.89)           | 6,429.67<br>(5,899.77 to<br>7,010.21)             | 6,607.48<br>(4,234.91 to<br>9,870.05)             | 4,625.40<br>(3,006.29 to<br>6,827.69)            | 9,407.01<br>(5,873.59 to<br>14,563.80)            |
| Stroke                          | 27,441.94<br>(24,422.60 to<br>30,720.82)             | 23,717.43<br>(16,156.33 to<br>34,681.10)            | 15,228.56<br>(10,736.95 to<br>21,971.45)           | 34,508.21<br>(22,172.49 to<br>52,393.58)             | 2,589.44<br>(2,292.38 to<br>2,924.27)             | 2,719.56<br>(1,888.48 to<br>3,932.65)             | 1,932.22<br>(1,352.66 to<br>2,799.64)            | 3,597.09<br>(2,380.62 to<br>5,481.35)             |
| Ischemic stroke                 | 11,134.28<br>(9,785.52 to<br>12,625.98)              | 9,619.88<br>(5,893.33 to<br>15,893.40)              | 6,782.55<br>(4,283.42 to<br>11,451.74)             | 12,885.22<br>(7,522.63 to<br>22,547.60)              | 1,258.77<br>(1,097.11 to<br>1,429.94)             | 1,259.33<br>(769.33 to<br>2,171.25)               | 949.53<br>(600.40 to<br>1,628.20)                | 1,582.00<br>(922.09 to<br>2,854.03)               |

|                                |                                          |                                         |                                        |                                          |                                       |                                       |                                   |                                       |
|--------------------------------|------------------------------------------|-----------------------------------------|----------------------------------------|------------------------------------------|---------------------------------------|---------------------------------------|-----------------------------------|---------------------------------------|
|                                | 16,307.67<br>(14,445.90 to<br>18,280.52) | 14,097.55<br>(9,177.76 to<br>21,831.12) | 8,446.01<br>(5,786.89 to<br>12,283.59) | 21,622.99<br>(12,794.08 to<br>35,098.55) | 1,330.67<br>(1,176.22 to<br>1,505.95) | 1,460.23<br>(1,006.68 to<br>2,149.23) | 982.69<br>(699.25 to<br>1,370.65) | 2,015.09<br>(1,279.81 to<br>3,104.70) |
| Intracerebral hemorrhage       |                                          |                                         |                                        |                                          |                                       |                                       |                                   |                                       |
|                                | 2,294.02<br>(1,805.65 to<br>3,610.71)    | 4,420.35<br>(2,708.78 to<br>8,108.47)   | 3,702.96<br>(2,424.92 to<br>6,246.12)  | 5,946.42<br>(3,271.03 to<br>11,993.00)   | 217.12<br>(168.98 to<br>339.26)       | 547.45<br>(339.96 to<br>1,036.78)     | 483.72<br>(320.20 to<br>812.29)   | 697.62<br>(391.46 to<br>1,460.70)     |
| Hypertensive heart disease     |                                          |                                         |                                        |                                          |                                       |                                       |                                   |                                       |
|                                | 6,133.29<br>(5,203.90 to<br>7,625.21)    | 4,974.71<br>(3,792.50 to<br>6,878.61)   | 4,151.70<br>(3,137.24 to<br>5,749.87)  | 6,092.84<br>(4,634.83 to<br>8,425.43)    | 264.29<br>(220.94 to<br>358.44)       | 274.94<br>(202.79 to<br>423.30)       | 238.73<br>(174.43 to<br>373.65)   | 323.50<br>(238.82 to<br>487.37)       |
| Cardiomyopathy and myocarditis |                                          |                                         |                                        |                                          |                                       |                                       |                                   |                                       |
|                                | 891.18<br>(567.82 to<br>1,112.68)        | 803.14<br>(517.96 to<br>1,057.45)       | 784.70<br>(524.86 to<br>1,043.09)      | 817.47<br>(518.35 to<br>1,075.68)        | 27.51<br>(18.53 to<br>40.90)          | 34.81<br>(25.55 to<br>59.54)          | 36.16<br>(26.56 to<br>62.57)      | 33.77<br>(24.42 to<br>57.08)          |
| Myocarditis                    |                                          |                                         |                                        |                                          |                                       |                                       |                                   |                                       |

| New Zealand                                                   |                                                               |                                                               |                                                               |                                                               |                                                            |                                                            |                                                            |                                                            |
|---------------------------------------------------------------|---------------------------------------------------------------|---------------------------------------------------------------|---------------------------------------------------------------|---------------------------------------------------------------|------------------------------------------------------------|------------------------------------------------------------|------------------------------------------------------------|------------------------------------------------------------|
| Cause                                                         | YLLs (actual counts)                                          |                                                               |                                                               |                                                               | Deaths (actual counts)                                     |                                                            |                                                            |                                                            |
|                                                               | 2016                                                          | 2040 Forecast                                                 | 2040 Better Scenario                                          | 2040 Worse Scenario                                           | 2016                                                       | 2040 Forecast                                              | 2040 Better Scenario                                       | 2040 Worse Scenario                                        |
| Alcoholic cardiomyopathy                                      | 2,251.74<br>(1,721.83 to<br>3,113.25)                         | 2,095.67<br>(1,502.44 to<br>2,912.53)                         | 1,706.63<br>(1,207.33 to<br>2,355.45)                         | 2,746.57<br>(1,967.26 to<br>3,820.19)                         | 92.71<br>(69.77 to<br>136.06)                              | 99.60<br>(72.24 to<br>145.88)                              | 84.33<br>(60.69 to<br>122.33)                              | 126.36<br>(91.07 to<br>183.62)                             |
| Other cardiomyopathy                                          | 2,990.37<br>(2,502.80 to<br>3,813.01)                         | 2,075.90<br>(1,355.98 to<br>3,153.96)                         | 1,660.37<br>(1,087.23 to<br>2,540.89)                         | 2,528.79<br>(1,600.19 to<br>3,862.74)                         | 144.08<br>(114.96 to<br>205.82)                            | 140.53<br>(83.08 to<br>248.40)                             | 118.23<br>(70.19 to<br>212.38)                             | 163.36<br>(96.23 to<br>296.00)                             |
| Atrial fibrillation and flutter                               | 3,215.08<br>(2,526.27 to<br>4,038.68)                         | 5,944.15<br>(4,448.34 to<br>8,031.04)                         | 5,664.53<br>(4,271.29 to<br>7,544.08)                         | 6,428.64<br>(4,743.73 to<br>8,823.53)                         | 362.96<br>(281.94 to<br>465.43)                            | 752.26<br>(563.05 to<br>1,000.88)                          | 743.62<br>(564.12 to<br>979.85)                            | 781.96<br>(575.57 to<br>1,058.21)                          |
| Aortic aneurysm                                               | 5,521.83<br>(4,881.00 to<br>6,229.78)                         | 7,214.17<br>(5,741.78 to<br>9,306.07)                         | 6,877.46<br>(5,487.55 to<br>8,797.88)                         | 7,797.91<br>(6,048.58 to<br>10,275.95)                        | 412.29<br>(365.82 to<br>461.10)                            | 659.79<br>(547.27 to<br>816.81)                            | 655.36<br>(543.50 to<br>804.73)                            | 681.16<br>(557.11 to<br>858.67)                            |
| Peripheral artery disease                                     | 1,145.64<br>(837.01 to<br>2,041.54)                           | 3,078.83<br>(1,973.43 to<br>5,383.56)                         | 3,074.13<br>(1,982.97 to<br>5,387.74)                         | 3,146.74<br>(1,994.01 to<br>5,538.12)                         | 129.94<br>(94.03 to<br>234.43)                             | 401.65<br>(255.49 to<br>718.35)                            | 418.84<br>(268.31 to<br>745.51)                            | 393.11<br>(245.74 to<br>701.86)                            |
| Endocarditis                                                  | 725.78<br>(568.15 to<br>1,097.83)                             | 1,101.63<br>(760.22 to<br>1,759.16)                           | 1,090.19<br>(754.41 to<br>1,734.20)                           | 1,152.09<br>(776.72 to<br>1,827.14)                           | 45.14<br>(35.66 to<br>67.11)                               | 90.61<br>(61.54 to<br>145.37)                              | 93.61<br>(63.76 to<br>147.42)                              | 91.07<br>(61.00 to<br>147.11)                              |
| Other cardiovascular and circulatory diseases                 | 6,691.43<br>(5,942.33 to<br>7,456.91)                         | 10,087.68<br>(8,119.24 to<br>12,696.10)                       | 8,502.01<br>(6,865.61 to<br>10,610.95)                        | 11,808.26<br>(9,247.55 to<br>15,163.64)                       | 585.14<br>(519.72 to<br>650.58)                            | 1,089.63<br>(893.09 to<br>1,332.19)                        | 962.10<br>(795.33 to<br>1,161.14)                          | 1,210.89<br>(983.73 to<br>1,520.32)                        |
| <b>Chronic respiratory diseases</b>                           | <b>28,653.10</b><br><b>(25,706.81 to</b><br><b>31,855.35)</b> | <b>39,360.71</b><br><b>(30,466.19 to</b><br><b>49,371.27)</b> | <b>26,405.38</b><br><b>(21,210.72 to</b><br><b>32,550.10)</b> | <b>52,263.17</b><br><b>(39,447.93 to</b><br><b>66,520.39)</b> | <b>2,171.75</b><br><b>(1,949.00 to</b><br><b>2,397.53)</b> | <b>3,722.18</b><br><b>(2,970.51 to</b><br><b>4,588.95)</b> | <b>2,541.49</b><br><b>(2,087.73 to</b><br><b>3,050.47)</b> | <b>4,747.47</b><br><b>(3,708.74 to</b><br><b>5,910.68)</b> |
| Chronic obstructive pulmonary disease                         | 24,248.68<br>(21,610.76 to<br>27,032.44)                      | 33,156.34<br>(24,709.56 to<br>43,389.22)                      | 19,315.19<br>(14,508.88 to<br>25,380.18)                      | 46,417.33<br>(33,681.68 to<br>60,865.93)                      | 1,911.91<br>(1,710.92 to<br>2,121.66)                      | 3,206.07<br>(2,442.75 to<br>4,093.19)                      | 1,922.32<br>(1,473.69 to<br>2,451.12)                      | 4,285.97<br>(3,248.61 to<br>5,476.11)                      |
| Pneumoconiosis                                                | 151.66<br>(106.84 to<br>224.33)                               | 270.46<br>(179.63 to<br>425.78)                               | 309.34<br>(201.35 to<br>503.15)                               | 244.52<br>(165.22 to<br>378.52)                               | 11.59<br>(8.21 to<br>17.15)                                | 24.53<br>(16.45 to<br>38.59)                               | 28.83<br>(18.99 to<br>45.89)                               | 21.71<br>(14.65 to<br>33.69)                               |
| Silicosis                                                     | 1.57<br>(0.59 to<br>8.17)                                     | 1.86<br>(0.57 to<br>9.55)                                     | 1.58<br>(0.50 to<br>7.31)                                     | 2.07<br>(0.61 to<br>10.97)                                    | 0.14<br>(0.06 to<br>0.63)                                  | 0.20<br>(0.07 to<br>0.94)                                  | 0.18<br>(0.06 to<br>0.75)                                  | 0.21<br>(0.07 to<br>1.04)                                  |
| Asbestosis                                                    | 136.24<br>(96.63 to<br>204.29)                                | 254.03<br>(169.32 to<br>402.73)                               | 293.72<br>(190.22 to<br>475.11)                               | 226.71<br>(151.19 to<br>358.14)                               | 10.24<br>(7.31 to<br>15.06)                                | 22.70<br>(14.88 to<br>35.51)                               | 27.01<br>(17.56 to<br>43.11)                               | 19.79<br>(13.02 to<br>31.05)                               |
| Coal workers pneumoconiosis                                   | 0.79<br>(0.39 to<br>2.30)                                     | 1.47<br>(0.55 to<br>4.45)                                     | 1.52<br>(0.58 to<br>4.23)                                     | 1.49<br>(0.53 to<br>5.35)                                     | 0.08<br>(0.04 to<br>0.22)                                  | 0.17<br>(0.07 to<br>0.52)                                  | 0.19<br>(0.07 to<br>0.51)                                  | 0.17<br>(0.06 to<br>0.52)                                  |
| Other pneumoconiosis                                          | 13.07<br>(6.32 to<br>49.01)                                   | 13.10<br>(6.45 to<br>42.28)                                   | 12.53<br>(6.33 to<br>39.30)                                   | 14.24<br>(6.98 to<br>46.77)                                   | 1.12<br>(0.58 to<br>3.82)                                  | 1.47<br>(0.76 to<br>4.62)                                  | 1.47<br>(0.77 to<br>4.34)                                  | 1.53<br>(0.77 to<br>4.88)                                  |
| Asthma                                                        | 1,727.97<br>(1,472.55 to<br>2,452.82)                         | 757.42<br>(426.10 to<br>1,333.83)                             | 530.96<br>(306.52 to<br>938.74)                               | 1,095.29<br>(600.46 to<br>1,985.17)                           | 73.21<br>(61.96 to<br>103.71)                              | 47.50<br>(26.94 to<br>83.17)                               | 35.43<br>(20.31 to<br>61.35)                               | 64.34<br>(35.94 to<br>116.02)                              |
| Interstitial lung disease and pulmonary sarcoidosis           | 2,244.70<br>(1,188.67 to<br>2,833.23)                         | 4,887.81<br>(2,549.39 to<br>6,176.95)                         | 5,979.20<br>(3,360.81 to<br>7,496.10)                         | 4,204.22<br>(2,163.94 to<br>5,333.29)                         | 162.51<br>(83.20 to<br>205.81)                             | 426.58<br>(217.28 to<br>540.14)                            | 538.03<br>(294.66 to<br>674.71)                            | 357.74<br>(178.73 to<br>457.31)                            |
| Other chronic respiratory diseases                            | 280.07<br>(148.85 to<br>356.34)                               | 288.67<br>(154.96 to<br>403.24)                               | 270.69<br>(149.64 to<br>372.58)                               | 301.82<br>(158.23 to<br>422.09)                               | 12.53<br>(6.49 to<br>16.00)                                | 17.49<br>(9.36 to<br>24.57)                                | 16.88<br>(9.22 to<br>23.32)                                | 17.71<br>(9.30 to<br>24.84)                                |
| <b>Cirrhosis and other chronic liver diseases</b>             | <b>5,446.05</b><br><b>(4,739.87 to</b><br><b>6,182.76)</b>    | <b>5,168.07</b><br><b>(4,247.23 to</b><br><b>6,183.42)</b>    | <b>4,434.85</b><br><b>(3,622.95 to</b><br><b>5,388.38)</b>    | <b>5,857.86</b><br><b>(4,787.13 to</b><br><b>7,149.69)</b>    | <b>265.10</b><br><b>(236.56 to</b><br><b>297.30)</b>       | <b>326.78</b><br><b>(285.89 to</b><br><b>373.82)</b>       | <b>293.65</b><br><b>(252.31 to</b><br><b>340.71)</b>       | <b>355.41</b><br><b>(308.47 to</b><br><b>408.26)</b>       |
| Cirrhosis and other chronic liver diseases due to hepatitis B | 1,746.12<br>(1,473.35 to<br>2,077.51)                         | 1,649.06<br>(1,309.28 to<br>2,030.39)                         | 1,507.16<br>(1,181.94 to<br>1,867.04)                         | 1,738.73<br>(1,377.48 to<br>2,174.95)                         | 84.29<br>(72.42 to<br>98.31)                               | 100.84<br>(84.02 to<br>119.94)                             | 95.62<br>(78.69 to<br>114.03)                              | 103.25<br>(86.04 to<br>123.08)                             |
| Cirrhosis and other chronic liver diseases due to hepatitis C | 1,400.79<br>(1,179.61 to<br>1,630.84)                         | 1,313.42<br>(1,042.59 to<br>1,632.40)                         | 1,185.59<br>(933.18 to<br>1,483.62)                           | 1,397.73<br>(1,105.49 to<br>1,744.71)                         | 63.87<br>(54.91 to<br>73.52)                               | 75.59<br>(62.99 to<br>89.38)                               | 70.65<br>(58.21 to<br>84.73)                               | 78.24<br>(65.48 to<br>92.29)                               |

|                                                                |                                                             |                                                               |                                                              |                                                               |                                                      |                                                            |                                                            |                                                            |
|----------------------------------------------------------------|-------------------------------------------------------------|---------------------------------------------------------------|--------------------------------------------------------------|---------------------------------------------------------------|------------------------------------------------------|------------------------------------------------------------|------------------------------------------------------------|------------------------------------------------------------|
|                                                                | 1,525.85<br>(1,296.61 to<br>1,785.00)                       | 1,435.95<br>(1,137.50 to<br>1,762.74)                         | 1,036.91<br>(822.22 to<br>1,286.05)                          | 1,911.03<br>(1,510.33 to<br>2,354.43)                         | 75.50<br>(65.07 to<br>85.89)                         | 93.53<br>(78.54 to<br>110.37)                              | 72.92<br>(60.34 to<br>86.66)                               | 116.22<br>(96.88 to<br>136.78)                             |
| Cirrhosis and other chronic liver diseases due to alcohol use  |                                                             |                                                               |                                                              |                                                               |                                                      |                                                            |                                                            |                                                            |
|                                                                | 773.28<br>(653.95 to<br>900.19)                             | 769.65<br>(614.50 to<br>967.22)                               | 705.19<br>(555.79 to<br>885.34)                              | 810.38<br>(648.96 to<br>1,020.47)                             | 41.44<br>(35.30 to<br>48.01)                         | 56.81<br>(47.10 to<br>67.95)                               | 54.45<br>(44.87 to<br>65.34)                               | 57.69<br>(47.97 to<br>68.76)                               |
| Cirrhosis and other chronic liver diseases due to other causes |                                                             |                                                               |                                                              |                                                               |                                                      |                                                            |                                                            |                                                            |
| <b>Digestive diseases</b>                                      | <b>8,444.39</b><br><b>(7,240.64 to</b><br><b>10,239.25)</b> | <b>12,306.71</b><br><b>(10,328.84 to</b><br><b>15,022.94)</b> | <b>11,647.73</b><br><b>(9,690.26 to</b><br><b>14,173.82)</b> | <b>12,927.54</b><br><b>(10,666.78 to</b><br><b>15,650.28)</b> | <b>707.27</b><br><b>(611.75 to</b><br><b>830.42)</b> | <b>1,303.96</b><br><b>(1,124.28 to</b><br><b>1,534.99)</b> | <b>1,287.53</b><br><b>(1,108.35 to</b><br><b>1,510.09)</b> | <b>1,320.83</b><br><b>(1,118.42 to</b><br><b>1,561.69)</b> |
| Peptic ulcer disease                                           | 1,102.15<br>(937.33 to<br>1,449.88)                         | 1,066.10<br>(830.75 to<br>1,390.88)                           | 881.19<br>(661.87 to<br>1,157.09)                            | 1,232.10<br>(941.30 to<br>1,622.40)                           | 96.58<br>(82.47 to<br>121.37)                        | 119.61<br>(93.85 to<br>155.48)                             | 102.54<br>(78.95 to<br>134.53)                             | 133.41<br>(102.83 to<br>173.54)                            |

| New Zealand                                |                                       |                                       |                                       |                                       |                                    |                                    |                                    |                                    |
|--------------------------------------------|---------------------------------------|---------------------------------------|---------------------------------------|---------------------------------------|------------------------------------|------------------------------------|------------------------------------|------------------------------------|
| Cause                                      | YLLs (actual counts)                  |                                       |                                       |                                       | Deaths (actual counts)             |                                    |                                    |                                    |
|                                            | 2016                                  | 2040 Forecast                         | 2040 Better Scenario                  | 2040 Worse Scenario                   | 2016                               | 2040 Forecast                      | 2040 Better Scenario               | 2040 Worse Scenario                |
| Gastritis and duodenitis                   | 137.40<br>(108.09 to 190.29)          | 191.20<br>(133.46 to 274.54)          | 172.89<br>(118.08 to 251.23)          | 202.28<br>(140.44 to 293.36)          | 10.37<br>(8.02 to 13.67)           | 19.14<br>(13.31 to 26.63)          | 18.14<br>(12.39 to 25.56)          | 19.53<br>(13.50 to 27.75)          |
| Appendicitis                               | 137.16<br>(108.67 to 198.66)          | 114.45<br>(83.58 to 163.11)           | 95.83<br>(69.43 to 136.89)            | 127.67<br>(92.83 to 181.60)           | 8.18<br>(6.48 to 11.22)            | 9.36<br>(7.01 to 12.90)            | 8.18<br>(6.05 to 11.36)            | 10.09<br>(7.39 to 13.96)           |
| Paralytic ileus and intestinal obstruction | 1,635.64<br>(1,323.10 to 2,113.11)    | 2,894.16<br>(2,347.19 to 3,750.15)    | 3,050.11<br>(2,467.64 to 3,931.59)    | 2,752.11<br>(2,223.61 to 3,560.46)    | 149.45<br>(119.45 to 187.20)       | 329.04<br>(265.89 to 411.41)       | 358.97<br>(289.60 to 444.39)       | 304.29<br>(244.93 to 383.37)       |
| Inguinal, femoral, and abdominal hernia    | 351.46<br>(173.93 to 440.84)          | 303.91<br>(148.71 to 393.11)          | 287.05<br>(137.00 to 375.59)          | 311.50<br>(152.31 to 400.89)          | 30.38<br>(15.25 to 38.53)          | 32.87<br>(16.14 to 42.21)          | 32.26<br>(16.00 to 41.75)          | 32.68<br>(16.02 to 42.12)          |
| Inflammatory bowel disease                 | 352.16<br>(259.97 to 452.99)          | 565.92<br>(417.13 to 756.12)          | 581.48<br>(426.66 to 780.21)          | 549.27<br>(406.96 to 731.01)          | 25.16<br>(19.16 to 33.48)          | 52.81<br>(41.01 to 69.79)          | 56.51<br>(43.39 to 74.28)          | 49.61<br>(38.39 to 65.68)          |
| Vascular intestinal disorders              | 1,192.06<br>(950.16 to 1,448.95)      | 1,932.05<br>(1,526.97 to 2,377.62)    | 1,898.02<br>(1,483.10 to 2,347.53)    | 1,929.85<br>(1,531.19 to 2,375.48)    | 96.90<br>(79.15 to 116.51)         | 192.90<br>(158.38 to 230.98)       | 196.02<br>(159.82 to 234.70)       | 187.56<br>(153.41 to 226.27)       |
| Gallbladder and biliary diseases           | 1,009.10<br>(843.54 to 1,286.58)      | 1,366.08<br>(795.63 to 2,305.48)      | 1,085.50<br>(634.10 to 1,817.64)      | 1,737.41<br>(992.60 to 2,939.05)      | 86.96<br>(73.01 to 110.32)         | 147.57<br>(85.24 to 250.26)        | 122.71<br>(71.98 to 206.28)        | 179.85<br>(102.87 to 303.13)       |
| Pancreatitis                               | 869.67<br>(675.40 to 1,049.70)        | 1,083.80<br>(609.88 to 2,015.42)      | 820.95<br>(490.57 to 1,482.20)        | 1,326.34<br>(714.97 to 2,562.61)      | 52.22<br>(40.18 to 61.26)          | 85.80<br>(49.49 to 173.33)         | 67.43<br>(41.91 to 117.86)         | 101.23<br>(54.91 to 212.24)        |
| Other digestive diseases                   | 1,657.60<br>(1,306.04 to 2,025.77)    | 2,789.05<br>(2,221.94 to 3,380.66)    | 2,774.72<br>(2,183.82 to 3,303.01)    | 2,759.00<br>(2,204.50 to 3,319.36)    | 151.08<br>(122.78 to 180.04)       | 314.85<br>(257.44 to 375.15)       | 324.76<br>(266.17 to 387.71)       | 302.57<br>(246.82 to 359.93)       |
| Neurological disorders                     | 33,072.31<br>(28,799.50 to 38,558.92) | 62,855.55<br>(50,043.37 to 80,673.03) | 63,030.82<br>(50,673.23 to 79,589.07) | 64,649.94<br>(50,347.23 to 84,093.12) | 3,264.97<br>(2,771.67 to 3,854.78) | 7,391.91<br>(5,884.26 to 9,530.85) | 7,673.14<br>(6,144.21 to 9,749.48) | 7,403.44<br>(5,690.88 to 9,818.20) |
| Alzheimer's disease and other dementias    | 21,883.84<br>(18,164.73 to 26,691.18) | 46,652.08<br>(34,915.33 to 63,493.84) | 46,642.79<br>(35,501.89 to 62,416.54) | 48,518.70<br>(35,022.91 to 68,138.41) | 2,691.10<br>(2,225.91 to 3,249.52) | 6,314.76<br>(4,773.34 to 8,482.57) | 6,523.20<br>(5,015.65 to 8,547.40) | 6,380.30<br>(4,671.61 to 8,829.89) |
| Parkinson's disease                        | 2,879.96<br>(2,152.33 to 3,730.54)    | 5,677.07<br>(4,232.44 to 7,434.52)    | 6,183.18<br>(4,614.51 to 8,097.61)    | 5,281.57<br>(3,947.14 to 6,890.69)    | 258.07<br>(196.05 to 338.18)       | 570.38<br>(438.47 to 747.09)       | 637.20<br>(488.10 to 831.29)       | 520.06<br>(396.99 to 682.75)       |
| Epilepsy                                   | 2,158.69<br>(1,890.18 to 2,453.39)    | 2,728.15<br>(1,817.99 to 4,005.06)    | 2,302.11<br>(1,555.95 to 3,338.79)    | 3,133.49<br>(2,032.83 to 4,636.35)    | 53.26<br>(47.07 to 59.93)          | 86.66<br>(54.13 to 121.78)         | 75.89<br>(54.13 to 104.30)         | 96.87<br>(65.89 to 136.92)         |
| Multiple sclerosis                         | 982.25<br>(687.61 to 1,176.75)        | 1,062.83<br>(713.58 to 1,353.10)      | 1,080.86<br>(733.46 to 1,379.61)      | 1,080.50<br>(724.05 to 1,388.98)      | 37.32<br>(26.01 to 44.67)          | 47.68<br>(31.94 to 59.90)          | 49.39<br>(33.03 to 62.07)          | 47.54<br>(31.96 to 59.78)          |
| Motor neuron disease                       | 2,924.90<br>(2,561.91 to 3,293.32)    | 3,985.81<br>(3,269.35 to 4,735.11)    | 4,016.41<br>(3,284.26 to 4,819.63)    | 3,955.57<br>(3,255.29 to 4,619.95)    | 139.36<br>(121.99 to 157.31)       | 233.05<br>(194.24 to 274.16)       | 239.72<br>(285.89 to 207.71)       | 226.11<br>(189.23 to 263.63)       |
| Other neurological disorders               | 2,242.66<br>(1,997.69 to 2,497.13)    | 2,749.61<br>(2,315.94 to 3,192.78)    | 2,805.47<br>(2,352.54 to 3,269.62)    | 2,700.11<br>(2,284.53 to 3,127.98)    | 85.86<br>(76.40 to 96.59)          | 139.38<br>(121.00 to 159.43)       | 147.73<br>(127.31 to 169.81)       | 132.56<br>(116.17 to 150.64)       |
| Mental disorders                           | 4,595.54<br>(3,984.19 to 5,265.00)    | 7,571.37<br>(6,086.08 to 9,247.67)    | 8,477.80<br>(6,827.90 to 10,480.29)   | 7,088.93<br>(5,694.84 to 8,701.78)    | 125.20<br>(110.22 to 141.95)       | 221.18<br>(186.83 to 257.48)       | 248.28<br>(210.76 to 290.48)       | 206.56<br>(175.93 to 241.63)       |
| Alcohol use disorders                      | 1,562.79<br>(1,350.37 to 1,790.67)    | 1,618.67<br>(1,325.22 to 1,940.30)    | 1,600.62<br>(1,311.46 to 1,926.70)    | 1,675.32<br>(1,383.69 to 1,994.01)    | 54.74<br>(47.87 to 62.12)          | 74.08<br>(62.89 to 86.56)          | 76.36<br>(64.05 to 90.05)          | 74.09<br>(63.67 to 85.77)          |
| Drug use disorders                         | 2,993.14<br>(2,539.78 to 3,515.25)    | 5,918.32<br>(4,611.12 to 7,485.55)    | 6,839.17<br>(5,334.51 to 8,668.82)    | 5,381.48<br>(4,133.00 to 6,857.71)    | 69.72<br>(59.63 to 81.07)          | 146.43<br>(118.26 to 178.39)       | 171.19<br>(139.80 to 207.71)       | 131.85<br>(105.96 to 160.87)       |
| Opioid use disorders                       | 1,590.35<br>(1,244.38 to 1,936.41)    | 2,110.37<br>(1,494.04 to 2,865.95)    | 2,209.25<br>(1,580.81 to 2,984.71)    | 2,042.39<br>(1,464.18 to 2,754.54)    | 37.17<br>(29.00 to 44.39)          | 53.71<br>(37.92 to 68.29)          | 57.25<br>(39.51 to 73.36)          | 51.26<br>(36.79 to 65.34)          |

|                           |                                     |                                       |                                       |                                       |                              |                               |                                |                              |
|---------------------------|-------------------------------------|---------------------------------------|---------------------------------------|---------------------------------------|------------------------------|-------------------------------|--------------------------------|------------------------------|
|                           | 29.03<br>(13.29 to<br>39.23)        | 54.45<br>(26.21 to<br>78.41)          | 62.57<br>(30.32 to<br>89.99)          | 49.53<br>(22.90 to<br>72.68)          | 0.61<br>(0.28 to<br>0.81)    | 1.19<br>(0.57 to<br>1.65)     | 1.38<br>(0.68 to<br>1.90)      | 1.08<br>(0.51 to<br>1.52)    |
| Cocaine use disorders     | 161.87<br>(65.28 to<br>220.44)      | 483.58<br>(189.54 to<br>720.88)       | 606.26<br>(241.31 to<br>897.71)       | 415.25<br>(161.06 to<br>623.84)       | 3.23<br>(1.31 to<br>4.44)    | 9.80<br>(3.84 to<br>14.47)    | 12.31<br>(4.91 to<br>18.15)    | 8.39<br>(3.19 to<br>12.52)   |
| Amphetamine use disorders | 1,211.89<br>(951.34 to<br>1,556.52) | 3,269.92<br>(2,354.56 to<br>4,465.97) | 3,961.09<br>(2,883.05 to<br>5,386.33) | 2,874.31<br>(2,034.81 to<br>3,985.68) | 28.70<br>(23.06 to<br>37.17) | 81.73<br>(61.85 to<br>107.72) | 100.25<br>(76.77 to<br>130.86) | 71.12<br>(53.02 to<br>94.55) |
| Other drug use disorders  | 39.61<br>(29.47 to<br>52.97)        | 34.37<br>(21.31 to<br>52.45)          | 38.00<br>(23.59 to<br>58.08)          | 32.13<br>(19.95 to<br>48.32)          | 0.75<br>(0.57 to<br>1.00)    | 0.66<br>(0.42 to<br>1.00)     | 0.73<br>(0.46 to<br>1.11)      | 0.62<br>(0.40 to<br>0.93)    |
| Eating disorders          |                                     |                                       |                                       |                                       |                              |                               |                                |                              |

| New Zealand                                                |                                              |                                              |                                              |                                              |                                           |                                           |                                           |                                           |
|------------------------------------------------------------|----------------------------------------------|----------------------------------------------|----------------------------------------------|----------------------------------------------|-------------------------------------------|-------------------------------------------|-------------------------------------------|-------------------------------------------|
| Cause                                                      | YLLs (actual counts)                         |                                              |                                              |                                              | Deaths (actual counts)                    |                                           |                                           |                                           |
|                                                            | 2016                                         | 2040 Forecast                                | 2040 Better Scenario                         | 2040 Worse Scenario                          | 2016                                      | 2040 Forecast                             | 2040 Better Scenario                      | 2040 Worse Scenario                       |
| <b>Diabetes, urogenital, blood, and endocrine diseases</b> | <b>27,336.66</b><br>(24,648.80 to 30,353.60) | <b>41,523.34</b><br>(32,221.95 to 52,336.97) | <b>36,375.48</b><br>(28,714.03 to 45,373.14) | <b>47,312.46</b><br>(35,991.13 to 61,266.89) | <b>1,793.11</b><br>(1,632.56 to 1,975.51) | <b>3,691.18</b><br>(2,993.06 to 4,568.72) | <b>3,336.66</b><br>(2,741.51 to 4,116.07) | <b>4,103.22</b><br>(3,266.80 to 5,253.26) |
| Diabetes mellitus                                          | 9,123.92<br>(8,154.56 to 10,300.58)          | 11,068.80<br>(7,318.44 to 16,695.29)         | 8,458.43<br>(5,760.95 to 12,558.61)          | 13,410.83<br>(8,590.55 to 20,588.81)         | 603.16<br>(541.81 to 675.39)              | 967.55<br>(696.69 to 1,364.47)            | 787.89<br>(578.20 to 1,084.43)            | 1,114.19<br>(783.12 to 1,569.37)          |
| Acute glomerulonephritis                                   | 24.26<br>(21.94 to 26.77)                    | 22.84<br>(17.76 to 28.83)                    | 20.19<br>(15.44 to 25.81)                    | 24.82<br>(19.25 to 31.56)                    | 0.65<br>(0.57 to 0.73)                    | 0.66<br>(0.50 to 0.89)                    | 0.61<br>(0.45 to 0.83)                    | 0.70<br>(0.53 to 0.93)                    |
| Chronic kidney disease                                     | 10,296.31<br>(9,279.46 to 11,435.01)         | 17,350.71<br>(11,163.89 to 26,203.56)        | 14,734.29<br>(9,837.62 to 21,505.87)         | 20,940.60<br>(12,921.30 to 32,592.63)        | 755.19<br>(685.26 to 834.30)              | 1,742.55<br>(1,160.72 to 2,577.50)        | 1,540.14<br>(1,061.70 to 2,221.88)        | 2,039.30<br>(1,288.65 to 3,122.74)        |
| Chronic kidney disease due to diabetes mellitus            | 6,786.28<br>(6,085.73 to 7,580.59)           | 11,112.17<br>(7,152.93 to 16,825.57)         | 9,415.22<br>(6,282.33 to 13,770.58)          | 13,474.37<br>(8,316.42 to 21,348.89)         | 465.02<br>(421.67 to 515.42)              | 1,032.46<br>(688.41 to 1,544.64)          | 909.19<br>(625.32 to 1,311.53)            | 1,215.15<br>(771.04 to 1,864.21)          |
| Chronic kidney disease due to hypertension                 | 861.57<br>(759.05 to 981.58)                 | 2,180.48<br>(1,383.72 to 3,337.56)           | 1,951.11<br>(1,296.58 to 2,911.14)           | 2,527.58<br>(1,515.66 to 3,983.77)           | 99.70<br>(87.50 to 113.43)                | 305.71<br>(198.08 to 464.22)              | 283.17<br>(190.82 to 415.59)              | 344.49<br>(211.21 to 546.82)              |
| Chronic kidney disease due to glomerulonephritis           | 1,452.97<br>(1,298.87 to 1,627.09)           | 2,065.69<br>(1,309.38 to 3,213.30)           | 1,690.59<br>(1,102.54 to 2,586.16)           | 2,533.54<br>(1,525.45 to 4,131.04)           | 98.82<br>(88.14 to 110.76)                | 196.08<br>(123.49 to 305.60)              | 165.87<br>(109.11 to 250.08)              | 234.99<br>(140.92 to 379.89)              |
| Chronic kidney disease due to other and unspecified causes | 1,195.49<br>(1,071.75 to 1,338.36)           | 1,992.37<br>(1,301.17 to 2,998.21)           | 1,677.37<br>(1,134.22 to 2,467.12)           | 2,405.11<br>(1,498.80 to 3,769.54)           | 91.64<br>(81.78 to 102.86)                | 208.30<br>(136.77 to 309.16)              | 181.91<br>(123.81 to 264.94)              | 244.68<br>(154.81 to 377.63)              |
| Urinary diseases and male infertility                      | 1,743.30<br>(1,543.92 to 1,957.43)           | 3,485.15<br>(2,848.97 to 4,204.80)           | 3,289.46<br>(2,656.00 to 4,018.14)           | 3,573.23<br>(2,921.18 to 4,349.71)           | 174.46<br>(154.53 to 196.94)              | 446.58<br>(366.06 to 542.00)              | 437.94<br>(354.53 to 532.50)              | 444.18<br>(360.18 to 542.40)              |
| Urinary tract infections                                   | 1,414.92<br>(1,235.02 to 1,621.87)           | 3,120.33<br>(2,547.82 to 3,780.40)           | 2,971.39<br>(2,407.60 to 3,606.14)           | 3,177.17<br>(2,597.93 to 3,866.99)           | 152.34<br>(133.81 to 173.78)              | 413.16<br>(335.92 to 503.47)              | 407.55<br>(328.06 to 498.12)              | 409.12<br>(329.02 to 504.19)              |
| Urolithiasis                                               | 187.97<br>(126.46 to 233.68)                 | 199.20<br>(122.96 to 276.75)                 | 171.74<br>(106.28 to 243.18)                 | 218.37<br>(136.45 to 300.33)                 | 11.60<br>(7.94 to 14.75)                  | 15.55<br>(10.25 to 22.11)                 | 13.86<br>(8.98 to 19.70)                  | 16.59<br>(10.85 to 23.49)                 |
| Other urinary diseases                                     | 140.41<br>(90.81 to 184.36)                  | 165.62<br>(96.62 to 241.81)                  | 146.32<br>(83.30 to 218.45)                  | 177.69<br>(102.77 to 262.59)                 | 10.52<br>(6.48 to 14.21)                  | 17.87<br>(10.15 to 26.79)                 | 16.52<br>(9.50 to 25.03)                  | 18.48<br>(10.61 to 28.11)                 |
| Gynecological diseases                                     | 17.67<br>(13.36 to 28.70)                    | 10.88<br>(7.10 to 18.10)                     | 8.05<br>(5.14 to 13.44)                      | 13.30<br>(8.49 to 22.58)                     | 0.86<br>(0.66 to 1.41)                    | 0.92<br>(0.61 to 1.51)                    | 0.72<br>(0.46 to 1.21)                    | 1.07<br>(0.69 to 1.80)                    |
| Uterine fibroids                                           | 3.38<br>(2.23 to 5.27)                       | 1.79<br>(1.01 to 3.12)                       | 1.45<br>(0.80 to 2.52)                       | 2.06<br>(1.12 to 3.64)                       | 0.17<br>(0.11 to 0.28)                    | 0.11<br>(0.06 to 0.18)                    | 0.09<br>(0.05 to 0.15)                    | 0.12<br>(0.06 to 0.21)                    |
| Polycystic ovarian syndrome                                | 8.46<br>(6.01 to 13.82)                      | 1.97<br>(1.06 to 3.58)                       | 1.17<br>(0.62 to 2.12)                       | 2.79<br>(1.46 to 4.99)                       | 0.20<br>(0.14 to 0.33)                    | 0.05<br>(0.08 to 0.08)                    | 0.03<br>(0.01 to 0.05)                    | 0.07<br>(0.03 to 0.12)                    |
| Endometriosis                                              | 0.00<br>(0.00 to 0.01)                       | 0.00<br>(0.00 to 0.01)                       | 0.00<br>(0.00 to 0.01)                       | 0.00<br>(0.00 to 0.01)                       | 0.00<br>(0.00 to 0.00)                    | 0.00<br>(0.00 to 0.00)                    | 0.00<br>(0.00 to 0.00)                    | 0.00<br>(0.00 to 0.00)                    |
| Genital prolapse                                           | 1.47<br>(0.97 to 2.71)                       | 1.19<br>(0.57 to 2.45)                       | 0.91<br>(0.43 to 1.87)                       | 1.42<br>(0.67 to 2.95)                       | 0.11<br>(0.07 to 0.22)                    | 0.10<br>(0.05 to 0.22)                    | 0.08<br>(0.04 to 0.18)                    | 0.12<br>(0.06 to 0.25)                    |
| Other gynecological diseases                               | 4.36<br>(3.18 to 8.13)                       | 5.92<br>(3.73 to 10.58)                      | 4.52<br>(2.75 to 8.13)                       | 7.03<br>(4.29 to 12.79)                      | 0.38<br>(0.28 to 0.68)                    | 0.66<br>(0.41 to 1.14)                    | 0.52<br>(0.33 to 0.92)                    | 0.77<br>(0.47 to 1.30)                    |
| Hemoglobinopathies and hemolytic anemias                   | 301.81<br>(251.56 to 455.20)                 | 307.36<br>(240.45 to 487.53)                 | 280.36<br>(214.00 to 448.36)                 | 323.64<br>(247.49 to 513.95)                 | 20.53<br>(17.12 to 30.70)                 | 32.22<br>(25.48 to 49.87)                 | 30.32<br>(23.74 to 47.08)                 | 33.01<br>(25.74 to 51.60)                 |
| Thalassemias                                               | 68.26<br>(57.99 to 91.63)                    | 36.15<br>(25.90 to 55.70)                    | 35.21<br>(25.01 to 55.15)                    | 36.87<br>(26.56 to 56.07)                    | 1.04<br>(0.88 to 1.46)                    | 0.60<br>(0.45 to 0.94)                    | 0.58<br>(0.41 to 0.94)                    | 0.61<br>(0.44 to 0.94)                    |

|                                                   |                                       |                                        |                                        |                                        |                                 |                                 |                                 |                                 |
|---------------------------------------------------|---------------------------------------|----------------------------------------|----------------------------------------|----------------------------------------|---------------------------------|---------------------------------|---------------------------------|---------------------------------|
|                                                   | 13.16<br>(10.37 to<br>20.36)          | 11.88<br>(7.77 to<br>19.84)            | 9.87<br>(6.28 to<br>16.89)             | 13.43<br>(8.73 to<br>22.07)            | 0.33<br>(0.26 to<br>0.50)       | 0.41<br>(0.27 to<br>0.71)       | 0.35<br>(0.22 to<br>0.61)       | 0.46<br>(0.30 to<br>0.77)       |
| Sickle cell disorders                             |                                       |                                        |                                        |                                        |                                 |                                 |                                 |                                 |
|                                                   | 8.76<br>(6.71 to<br>13.83)            | 8.00<br>(5.37 to<br>13.45)             | 6.61<br>(4.38 to<br>11.26)             | 9.06<br>(6.02 to<br>15.06)             | 0.28<br>(0.21 to<br>0.44)       | 0.36<br>(0.25 to<br>0.59)       | 0.30<br>(0.21 to<br>0.50)       | 0.40<br>(0.27 to<br>0.65)       |
| G6PD deficiency                                   |                                       |                                        |                                        |                                        |                                 |                                 |                                 |                                 |
|                                                   | 211.64<br>(171.71 to<br>326.22)       | 251.34<br>(194.64 to<br>401.71)        | 228.67<br>(175.43 to<br>368.42)        | 264.27<br>(201.65 to<br>422.42)        | 18.88<br>(15.67 to<br>28.35)    | 30.85<br>(24.38 to<br>47.51)    | 29.08<br>(22.74 to<br>45.12)    | 31.54<br>(24.56 to<br>49.21)    |
| Other hemoglobinopathies and hemolytic anemias    |                                       |                                        |                                        |                                        |                                 |                                 |                                 |                                 |
|                                                   | 5,829.39<br>(4,409.88 to<br>6,885.13) | 9,277.59<br>(7,039.02 to<br>11,232.50) | 9,584.70<br>(7,320.44 to<br>11,673.99) | 9,026.03<br>(6,822.05 to<br>10,930.07) | 238.25<br>(185.39 to<br>280.74) | 500.60<br>(395.99 to<br>595.09) | 539.04<br>(430.32 to<br>643.04) | 470.77<br>(368.86 to<br>560.65) |
| Endocrine, metabolic, blood, and immune disorders |                                       |                                        |                                        |                                        |                                 |                                 |                                 |                                 |



| New Zealand                                   |                                              |                                             |                                             |                                              |                                     |                                     |                                     |                                     |
|-----------------------------------------------|----------------------------------------------|---------------------------------------------|---------------------------------------------|----------------------------------------------|-------------------------------------|-------------------------------------|-------------------------------------|-------------------------------------|
| Cause                                         | YLLs (actual counts)                         |                                             |                                             |                                              | Deaths (actual counts)              |                                     |                                     |                                     |
|                                               | 2016                                         | 2040 Forecast                               | 2040 Better Scenario                        | 2040 Worse Scenario                          | 2016                                | 2040 Forecast                       | 2040 Better Scenario                | 2040 Worse Scenario                 |
| <b>Musculoskeletal disorders</b>              | <b>2,686.28</b><br>(2,294.86 to 3,138.87)    | <b>4,018.66</b><br>(3,240.89 to 5,034.53)   | <b>3,714.27</b><br>(2,976.60 to 4,694.31)   | <b>4,244.67</b><br>(3,405.99 to 5,308.47)    | <b>170.94</b><br>(147.89 to 198.07) | <b>335.56</b><br>(279.95 to 401.67) | <b>321.74</b><br>(269.20 to 385.09) | <b>344.07</b><br>(284.18 to 415.80) |
| Rheumatoid arthritis                          | 750.85<br>(579.65 to 983.75)                 | 1,217.54<br>(859.26 to 1,753.72)            | 968.19<br>(668.72 to 1,379.38)              | 1,427.01<br>(1,014.48 to 2,020.02)           | 51.76<br>(40.05 to 66.71)           | 104.23<br>(74.50 to 146.72)         | 85.13<br>(60.20 to 119.23)          | 119.20<br>(86.03 to 164.83)         |
| Other musculoskeletal disorders               | 1,935.43<br>(1,639.67 to 2,267.58)           | 2,801.12<br>(2,275.02 to 3,445.12)          | 2,746.08<br>(2,214.40 to 3,419.09)          | 2,817.65<br>(2,288.55 to 3,449.98)           | 119.17<br>(101.34 to 139.63)        | 231.33<br>(192.38 to 275.99)        | 236.61<br>(195.00 to 283.00)        | 224.88<br>(185.59 to 267.36)        |
| <b>Other non-communicable diseases</b>        | <b>12,619.87</b><br>(10,672.09 to 16,102.62) | <b>13,630.86</b><br>(9,682.87 to 19,428.88) | <b>11,872.15</b><br>(8,499.59 to 16,963.53) | <b>15,209.86</b><br>(10,680.56 to 22,233.09) | <b>257.77</b><br>(210.28 to 326.49) | <b>522.19</b><br>(355.40 to 715.78) | <b>516.77</b><br>(344.77 to 715.31) | <b>525.61</b><br>(359.81 to 719.44) |
| Congenital birth defects                      | 9,436.79<br>(7,778.56 to 12,860.63)          | 8,625.61<br>(5,485.97 to 13,517.38)         | 7,141.75<br>(4,549.58 to 11,208.80)         | 9,970.73<br>(6,242.43 to 15,754.18)          | 135.21<br>(114.93 to 179.33)        | 131.42<br>(90.86 to 193.90)         | 112.48<br>(77.97 to 162.53)         | 148.57<br>(101.54 to 221.15)        |
| Neural tube defects                           | 568.35<br>(404.55 to 775.60)                 | 181.16<br>(77.72 to 374.13)                 | 128.20<br>(55.04 to 278.51)                 | 231.72<br>(98.88 to 495.54)                  | 7.10<br>(5.11 to 9.56)              | 2.42<br>(1.12 to 4.75)              | 1.72<br>(0.79 to 3.57)              | 3.07<br>(1.40 to 6.25)              |
| Congenital heart anomalies                    | 2,889.59<br>(2,229.17 to 4,641.72)           | 1,643.43<br>(928.86 to 2,858.71)            | 1,138.95<br>(622.60 to 2,010.46)            | 2,122.67<br>(1,173.04 to 3,705.67)           | 41.62<br>(33.58 to 64.25)           | 24.16<br>(14.26 to 40.78)           | 16.89<br>(9.51 to 28.95)            | 30.97<br>(17.91 to 52.53)           |
| Orofacial clefts                              | 5.37<br>(1.99 to 10.31)                      | 2.02<br>(0.61 to 4.77)                      | 1.25<br>(0.37 to 3.09)                      | 2.82<br>(0.82 to 6.52)                       | 0.06<br>(0.02 to 0.12)              | 0.02<br>(0.01 to 0.06)              | 0.01<br>(0.00 to 0.04)              | 0.03<br>(0.01 to 0.08)              |
| Down syndrome                                 | 1,057.20<br>(819.67 to 1,347.78)             | 1,725.32<br>(1,302.10 to 2,273.67)          | 1,765.78<br>(1,355.33 to 2,340.03)          | 1,700.02<br>(1,276.22 to 2,227.26)           | 22.86<br>(16.70 to 27.18)           | 38.95<br>(28.56 to 49.60)           | 40.26<br>(29.84 to 51.80)           | 38.03<br>(27.80 to 48.11)           |
| Other chromosomal abnormalities               | 1,695.55<br>(1,176.89 to 2,323.75)           | 2,670.34<br>(1,498.15 to 4,599.11)          | 2,305.06<br>(1,285.99 to 3,996.97)          | 2,968.07<br>(1,670.45 to 5,209.35)           | 21.62<br>(15.10 to 28.61)           | 34.27<br>(19.77 to 58.00)           | 29.75<br>(17.21 to 50.14)           | 37.93<br>(21.93 to 64.19)           |
| Congenital musculoskeletal and limb anomalies | 435.56<br>(322.85 to 599.97)                 | 319.00<br>(164.74 to 586.64)                | 239.04<br>(119.03 to 453.92)                | 391.10<br>(195.60 to 715.83)                 | 6.02<br>(4.60 to 8.04)              | 4.47<br>(2.41 to 7.76)              | 3.38<br>(1.78 to 6.02)              | 3.44<br>(2.89 to 9.63)              |
| Urogenital congenital anomalies               | 204.92<br>(106.84 to 298.56)                 | 174.37<br>(62.61 to 368.85)                 | 135.57<br>(48.71 to 290.64)                 | 208.71<br>(75.57 to 442.86)                  | 2.61<br>(1.42 to 3.72)              | 2.22<br>(0.86 to 4.53)              | 1.73<br>(0.66 to 3.54)              | 2.64<br>(1.01 to 5.51)              |
| Digestive congenital anomalies                | 570.85<br>(390.59 to 787.88)                 | 464.02<br>(210.69 to 928.47)                | 333.58<br>(146.91 to 684.53)                | 586.27<br>(262.08 to 1,192.43)               | 6.86<br>(4.74 to 9.37)              | 5.57<br>(2.60 to 11.01)             | 4.01<br>(1.83 to 8.12)              | 7.03<br>(3.20 to 14.06)             |
| Other congenital birth defects                | 2,009.40<br>(1,522.72 to 3,240.63)           | 1,445.94<br>(788.28 to 2,569.85)            | 1,094.33<br>(574.84 to 1,963.98)            | 1,759.37<br>(955.15 to 3,167.59)             | 26.46<br>(20.54 to 41.23)           | 19.33<br>(10.94 to 32.95)           | 14.72<br>(8.20 to 25.35)            | 23.41<br>(13.48 to 40.11)           |
| Skin and subcutaneous diseases                | 1,111.98<br>(646.20 to 1,692.83)             | 3,406.09<br>(1,969.12 to 5,126.12)          | 3,428.87<br>(1,970.61 to 5,129.89)          | 3,351.39<br>(1,947.52 to 5,041.97)           | 98.52<br>(54.95 to 148.56)          | 372.21<br>(207.95 to 554.35)        | 389.19<br>(216.16 to 576.83)        | 355.14<br>(197.86 to 534.97)        |
| Cellulitis                                    | 733.24<br>(398.33 to 1,119.85)               | 2,234.78<br>(1,234.67 to 3,373.79)          | 2,376.79<br>(1,261.43 to 3,408.71)          | 2,181.84<br>(1,188.50 to 3,289.71)           | 62.10<br>(32.02 to 94.87)           | 230.95<br>(119.63 to 350.49)        | 244.55<br>(128.93 to 367.68)        | 218.59<br>(111.92 to 335.38)        |
| Pyoderma                                      | 270.72<br>(131.81 to 462.47)                 | 957.11<br>(445.07 to 1,564.94)              | 950.57<br>(438.26 to 1,570.99)              | 948.91<br>(445.21 to 1,554.22)               | 25.84<br>(11.45 to 42.37)           | 114.88<br>(51.00 to 180.25)         | 118.90<br>(51.65 to 190.26)         | 110.17<br>(49.48 to 174.30)         |
| Decubitus ulcer                               | 69.29<br>(41.61 to 143.17)                   | 134.12<br>(73.77 to 292.88)                 | 124.43<br>(67.16 to 269.40)                 | 139.27<br>(74.58 to 303.66)                  | 7.83<br>(4.39 to 16.81)             | 18.67<br>(10.22 to 41.43)           | 17.98<br>(9.50 to 39.91)            | 18.80<br>(10.09 to 40.75)           |
| Other skin and subcutaneous diseases          | 38.73<br>(24.45 to 75.49)                    | 80.08<br>(47.40 to 160.28)                  | 77.08<br>(46.03 to 155.97)                  | 81.37<br>(48.68 to 164.43)                   | 2.76<br>(1.67 to 5.63)              | 7.72<br>(4.53 to 16.45)             | 7.75<br>(4.58 to 16.74)             | 7.57<br>(4.35 to 16.20)             |
| Sudden infant death syndrome                  | 2,071.11<br>(1,559.11 to 2,691.54)           | 1,599.15<br>(943.21 to 2,735.89)            | 1,301.53<br>(722.38 to 2,299.06)            | 1,887.73<br>(1,128.82 to 3,243.65)           | 24.04<br>(18.10 to 31.24)           | 18.56<br>(10.94 to 31.75)           | 15.10<br>(8.38 to 26.68)            | 21.90<br>(13.09 to 37.64)           |

|                          |                                          |                                          |                                          |                                           |                                       |                                       |                                       |                                       |
|--------------------------|------------------------------------------|------------------------------------------|------------------------------------------|-------------------------------------------|---------------------------------------|---------------------------------------|---------------------------------------|---------------------------------------|
| Injuries                 | 59,109.30<br>(52,260.05 to<br>66,395.69) | 50,238.21<br>(35,576.05 to<br>83,329.95) | 42,992.48<br>(30,473.55 to<br>68,108.85) | 64,322.90<br>(44,850.92 to<br>101,947.58) | 1,730.45<br>(1,514.93 to<br>1,932.22) | 2,143.10<br>(1,635.67 to<br>3,684.01) | 1,995.10<br>(1,522.76 to<br>3,621.51) | 2,423.84<br>(1,861.74 to<br>3,982.08) |
| Transport injuries       | 18,353.18<br>(16,161.94 to<br>20,934.66) | 13,455.13<br>(8,460.91 to<br>20,677.20)  | 11,340.02<br>(7,315.78 to<br>17,137.13)  | 21,851.59<br>(13,476.47 to<br>33,954.49)  | 409.39<br>(362.26 to<br>462.60)       | 347.80<br>(235.79 to<br>512.85)       | 300.44<br>(210.70 to<br>433.29)       | 529.74<br>(346.99 to<br>802.65)       |
| Road injuries            | 16,040.08<br>(14,189.03 to<br>18,200.15) | 11,334.46<br>(7,120.13 to<br>17,372.54)  | 9,759.35<br>(6,317.29 to<br>14,687.66)   | 19,133.79<br>(11,801.18 to<br>29,789.27)  | 355.29<br>(315.71 to<br>400.16)       | 294.95<br>(199.07 to<br>432.05)       | 260.56<br>(182.69 to<br>374.94)       | 462.79<br>(302.73 to<br>701.68)       |
| Pedestrian road injuries | 2,018.50<br>(1,485.86 to<br>2,428.03)    | 824.95<br>(548.61 to<br>1,189.43)        | 592.97<br>(386.89 to<br>854.13)          | 1,393.34<br>(865.79 to<br>2,074.23)       | 52.73<br>(38.59 to<br>63.42)          | 31.28<br>(21.59 to<br>44.12)          | 23.51<br>(16.25 to<br>32.56)          | 48.76<br>(33.00 to<br>70.25)          |

| New Zealand                                     |                                                     |                                                     |                                                    |                                                     |                                            |                                                |                                                |                                                |
|-------------------------------------------------|-----------------------------------------------------|-----------------------------------------------------|----------------------------------------------------|-----------------------------------------------------|--------------------------------------------|------------------------------------------------|------------------------------------------------|------------------------------------------------|
| Cause                                           | YLLs (actual counts)                                |                                                     |                                                    |                                                     | Deaths (actual counts)                     |                                                |                                                |                                                |
|                                                 | 2016                                                | 2040 Forecast                                       | 2040 Better Scenario                               | 2040 Worse Scenario                                 | 2016                                       | 2040 Forecast                                  | 2040 Better Scenario                           | 2040 Worse Scenario                            |
| Cyclist road injuries                           | 586.76<br>(418.24 to 701.76)                        | 456.77<br>(271.83 to 710.10)                        | 403.49<br>(245.64 to 613.55)                       | 763.08<br>(444.15 to 1,182.98)                      | 12.57<br>(8.99 to 15.14)                   | 11.62<br>(7.01 to 17.57)                       | 10.60<br>(6.58 to 15.95)                       | 17.44<br>(10.42 to 26.84)                      |
| Motorcyclist road injuries                      | 1,767.89<br>(1,144.76 to 2,230.73)                  | 1,748.60<br>(908.45 to 3,183.85)                    | 1,567.03<br>(843.84 to 2,798.56)                   | 2,511.89<br>(1,268.23 to 4,594.86)                  | 33.36<br>(21.73 to 41.72)                  | 34.11<br>(18.60 to 61.52)                      | 30.83<br>(17.28 to 53.89)                      | 47.62<br>(25.51 to 86.81)                      |
| Motor vehicle road injuries                     | 11,603.48<br>(10,058.49 to 13,925.69)               | 8,264.40<br>(5,145.60 to 12,637.00)                 | 7,161.07<br>(4,612.75 to 10,610.43)                | 14,400.53<br>(8,894.17 to 22,313.02)                | 255.18<br>(224.05 to 302.65)               | 216.93<br>(144.95 to 321.47)                   | 194.71<br>(135.72 to 282.94)                   | 347.42<br>(224.79 to 528.53)                   |
| Other road injuries                             | 63.45<br>(26.94 to 86.30)                           | 39.74<br>(15.78 to 66.90)                           | 34.79<br>(13.92 to 56.91)                          | 64.94<br>(25.77 to 108.72)                          | 1.45<br>(0.59 to 1.95)                     | 1.01<br>(0.39 to 1.70)                         | 0.91<br>(0.35 to 1.51)                         | 1.54<br>(0.58 to 2.64)                         |
| Other transport injuries                        | 2,313.10<br>(1,937.28 to 2,743.67)                  | 2,120.67<br>(1,312.47 to 3,354.64)                  | 1,580.67<br>(1,000.92 to 2,460.57)                 | 2,717.81<br>(1,621.92 to 4,361.34)                  | 54.09<br>(45.58 to 63.68)                  | 52.85<br>(33.98 to 83.14)                      | 39.88<br>(26.03 to 61.28)                      | 66.95<br>(41.77 to 105.47)                     |
| <b>Unintentional injuries</b>                   | <b>14,168.66</b><br><b>(11,381.95 to 15,976.35)</b> | <b>13,336.09</b><br><b>(10,522.43 to 15,846.34)</b> | <b>12,258.03</b><br><b>(9,624.73 to 14,655.70)</b> | <b>14,175.98</b><br><b>(11,032.77 to 17,006.23)</b> | <b>728.86</b><br><b>(588.16 to 827.24)</b> | <b>1,170.10</b><br><b>(909.53 to 1,382.43)</b> | <b>1,153.08</b><br><b>(890.77 to 1,364.90)</b> | <b>1,168.40</b><br><b>(890.57 to 1,387.30)</b> |
| Falls                                           | 5,675.63<br>(4,388.84 to 6,511.24)                  | 7,770.12<br>(5,839.47 to 9,033.13)                  | 7,459.78<br>(5,591.87 to 8,808.71)                 | 7,918.59<br>(5,895.52 to 9,276.41)                  | 510.11<br>(381.99 to 584.91)               | 952.99<br>(683.38 to 1,149.58)                 | 951.78<br>(686.14 to 1,140.64)                 | 938.87<br>(663.24 to 1,149.92)                 |
| Drowning                                        | 2,472.93<br>(2,168.37 to 2,850.59)                  | 1,434.21<br>(1,031.93 to 1,983.49)                  | 1,199.72<br>(866.86 to 1,629.60)                   | 1,660.12<br>(1,172.50 to 2,323.98)                  | 49.31<br>(43.51 to 56.30)                  | 33.86<br>(25.10 to 45.80)                      | 28.93<br>(21.81 to 38.52)                      | 38.45<br>(27.84 to 53.30)                      |
| Fire, heat, and hot substances                  | 702.42<br>(612.17 to 891.91)                        | 470.41<br>(342.13 to 679.70)                        | 378.49<br>(275.41 to 552.78)                       | 553.11<br>(393.84 to 805.49)                        | 23.64<br>(20.28 to 33.10)                  | 25.19<br>(18.58 to 40.18)                      | 21.69<br>(16.06 to 34.42)                      | 27.91<br>(20.06 to 44.62)                      |
| Poisonings                                      | 400.17<br>(312.16 to 488.52)                        | 145.72<br>(93.77 to 212.70)                         | 109.04<br>(69.51 to 158.70)                        | 181.50<br>(113.42 to 267.49)                        | 9.06<br>(7.25 to 11.05)                    | 4.45<br>(3.10 to 6.24)                         | 3.49<br>(2.49 to 4.83)                         | 5.30<br>(3.63 to 7.65)                         |
| Exposure to mechanical forces                   | 2,875.11<br>(1,336.33 to 3,837.48)                  | 1,633.06<br>(749.25 to 2,515.57)                    | 1,365.99<br>(639.40 to 2,120.80)                   | 1,869.79<br>(857.42 to 2,929.18)                    | 54.25<br>(30.27 to 67.88)                  | 38.60<br>(23.41 to 51.19)                      | 33.48<br>(20.93 to 45.54)                      | 42.75<br>(25.29 to 58.65)                      |
| Unintentional firearm injuries                  | 125.60<br>(103.22 to 188.27)                        | 86.61<br>(63.56 to 130.11)                          | 75.16<br>(55.61 to 111.54)                         | 96.16<br>(70.76 to 143.68)                          | 3.17<br>(2.70 to 4.43)                     | 3.12<br>(2.55 to 4.20)                         | 2.91<br>(2.36 to 3.83)                         | 3.26<br>(2.63 to 4.30)                         |
| Unintentional suffocation                       | 1,426.82<br>(251.88 to 2,299.47)                    | 741.88<br>(116.22 to 1,468.72)                      | 624.77<br>(97.12 to 1,229.40)                      | 854.22<br>(124.52 to 1,709.34)                      | 17.75<br>(3.54 to 28.07)                   | 9.52<br>(1.83 to 18.11)                        | 8.08<br>(1.58 to 15.29)                        | 10.90<br>(1.94 to 21.03)                       |
| Other exposure to mechanical forces             | 1,322.69<br>(891.33 to 1,594.28)                    | 804.57<br>(528.00 to 1,060.54)                      | 666.07<br>(439.92 to 871.36)                       | 919.41<br>(591.25 to 1,203.93)                      | 33.33<br>(22.85 to 39.81)                  | 25.96<br>(18.00 to 32.09)                      | 22.49<br>(15.68 to 28.01)                      | 28.59<br>(19.79 to 35.45)                      |
| Adverse effects of medical treatment            | 588.68<br>(477.57 to 839.54)                        | 685.99<br>(533.47 to 1,021.36)                      | 652.66<br>(502.22 to 970.25)                       | 707.81<br>(551.75 to 1,038.47)                      | 34.40<br>(26.76 to 52.36)                  | 56.56<br>(42.39 to 87.42)                      | 56.54<br>(42.05 to 88.27)                      | 55.91<br>(41.40 to 86.90)                      |
| Animal contact                                  | 103.97<br>(71.20 to 130.16)                         | 98.87<br>(64.51 to 133.94)                          | 85.71<br>(56.02 to 116.53)                         | 109.73<br>(70.45 to 150.09)                         | 2.93<br>(1.96 to 3.62)                     | 3.60<br>(2.36 to 4.55)                         | 3.26<br>(2.16 to 4.16)                         | 3.85<br>(2.47 to 4.95)                         |
| Venomous animal contact                         | 26.56<br>(19.78 to 34.15)                           | 26.23<br>(18.24 to 36.09)                           | 23.59<br>(16.21 to 31.95)                          | 28.42<br>(19.47 to 39.29)                           | 0.66<br>(0.48 to 0.83)                     | 0.75<br>(0.49 to 0.98)                         | 0.69<br>(0.45 to 0.91)                         | 0.79<br>(0.52 to 1.04)                         |
| Non-venomous animal contact                     | 77.41<br>(50.69 to 97.04)                           | 72.64<br>(45.68 to 99.15)                           | 62.12<br>(39.06 to 85.15)                          | 81.32<br>(49.86 to 113.12)                          | 2.27<br>(1.47 to 2.80)                     | 2.86<br>(1.86 to 3.61)                         | 2.57<br>(1.69 to 3.28)                         | 3.06<br>(1.98 to 3.97)                         |
| Foreign body                                    | 960.18<br>(816.10 to 1,298.38)                      | 860.81<br>(694.44 to 1,159.02)                      | 821.54<br>(658.66 to 1,101.24)                     | 893.12<br>(715.23 to 1,204.75)                      | 32.09<br>(27.08 to 44.97)                  | 41.87<br>(34.07 to 59.56)                      | 42.81<br>(34.60 to 60.94)                      | 40.98<br>(33.52 to 58.03)                      |
| Pulmonary aspiration and foreign body in airway | 923.75<br>(780.43 to 1,264.32)                      | 821.95<br>(656.48 to 1,116.75)                      | 780.67<br>(620.96 to 1,067.02)                     | 855.43<br>(680.16 to 1,168.00)                      | 30.71<br>(25.73 to 44.01)                  | 39.72<br>(31.59 to 58.30)                      | 40.43<br>(31.87 to 59.32)                      | 38.99<br>(31.24 to 56.63)                      |

|                                             |                                                               |                                                               |                                                               |                                                               |                                                      |                                                      |                                                      |                                                      |
|---------------------------------------------|---------------------------------------------------------------|---------------------------------------------------------------|---------------------------------------------------------------|---------------------------------------------------------------|------------------------------------------------------|------------------------------------------------------|------------------------------------------------------|------------------------------------------------------|
|                                             | 36.42<br>(24.31 to<br>43.21)                                  | 38.86<br>(23.59 to<br>49.39)                                  | 40.87<br>(24.36 to<br>52.29)                                  | 37.69<br>(22.95 to<br>47.85)                                  | 1.38<br>(0.67 to<br>1.80)                            | 2.15<br>(0.91 to<br>3.02)                            | 2.38<br>(1.00 to<br>3.34)                            | 1.99<br>(0.85 to<br>2.78)                            |
| Foreign body in other body part             |                                                               |                                                               |                                                               |                                                               |                                                      |                                                      |                                                      |                                                      |
|                                             | 154.24<br>(86.50 to<br>211.08)                                | 142.58<br>(80.19 to<br>209.03)                                | 120.01<br>(67.78 to<br>177.87)                                | 160.19<br>(90.27 to<br>234.88)                                | 7.35<br>(4.51 to<br>10.74)                           | 10.03<br>(6.15 to<br>15.45)                          | 8.98<br>(5.47 to<br>13.68)                           | 10.68<br>(6.61 to<br>16.07)                          |
| Environmental heat and cold exposure        |                                                               |                                                               |                                                               |                                                               |                                                      |                                                      |                                                      |                                                      |
|                                             | 235.33<br>(201.76 to<br>275.19)                               | 94.31<br>(66.83 to<br>129.95)                                 | 65.09<br>(45.23 to<br>88.45)                                  | 122.00<br>(83.01 to<br>168.52)                                | 5.72<br>(4.97 to<br>6.56)                            | 2.95<br>(2.20 to<br>3.86)                            | 2.12<br>(1.56 to<br>2.82)                            | 3.69<br>(2.63 to<br>4.90)                            |
| Other unintentional injuries                |                                                               |                                                               |                                                               |                                                               |                                                      |                                                      |                                                      |                                                      |
| <b>Self-harm and interpersonal violence</b> | <b>26,565.00</b><br><b>(21,663.09 to</b><br><b>30,829.68)</b> | <b>21,222.35</b><br><b>(12,826.76 to</b><br><b>33,463.50)</b> | <b>17,112.91</b><br><b>(10,769.11 to</b><br><b>26,359.27)</b> | <b>26,116.58</b><br><b>(15,195.91 to</b><br><b>42,615.53)</b> | <b>591.74</b><br><b>(490.31 to</b><br><b>696.70)</b> | <b>511.65</b><br><b>(330.19 to</b><br><b>785.71)</b> | <b>419.72</b><br><b>(278.91 to</b><br><b>627.88)</b> | <b>618.28</b><br><b>(381.60 to</b><br><b>969.85)</b> |

| New Zealand                                                                         |                                                   |                                                         |                                                         |                                                         |                                                |                                                      |                                                      |                                                      |
|-------------------------------------------------------------------------------------|---------------------------------------------------|---------------------------------------------------------|---------------------------------------------------------|---------------------------------------------------------|------------------------------------------------|------------------------------------------------------|------------------------------------------------------|------------------------------------------------------|
| Cause                                                                               | YLLs (actual counts)                              |                                                         |                                                         |                                                         | Deaths (actual counts)                         |                                                      |                                                      |                                                      |
|                                                                                     | 2016                                              | 2040 Forecast                                           | 2040 Better Scenario                                    | 2040 Worse Scenario                                     | 2016                                           | 2040 Forecast                                        | 2040 Better Scenario                                 | 2040 Worse Scenario                                  |
| Self-harm                                                                           | 23,776.45<br>(18,957.56 to<br>27,840.01)          | 19,597.36<br>(11,513.91 to<br>31,680.11)                | 15,750.91<br>(9,636.43 to<br>24,683.32)                 | 24,244.82<br>(13,706.79 to<br>40,178.87)                | 535.59<br>(436.23 to<br>633.05)                | 475.26<br>(298.29 to<br>746.75)                      | 388.79<br>(252.37 to<br>591.86)                      | 576.88<br>(346.47 to<br>926.63)                      |
| Self-harm by firearm                                                                | 1,701.60<br>(1,155.91 to<br>2,479.70)             | 1,111.57<br>(550.12 to<br>2,075.76)                     | 845.04<br>(426.61 to<br>1,522.56)                       | 1,440.27<br>(687.36 to<br>2,723.59)                     | 44.72<br>(31.15 to<br>65.98)                   | 32.83<br>(17.83 to<br>58.22)                         | 25.61<br>(14.28 to<br>45.36)                         | 41.47<br>(21.34 to<br>74.67)                         |
| Self-harm by other specified means                                                  | 22,074.85<br>(17,205.54 to<br>25,857.45)          | 18,485.78<br>(10,943.46 to<br>29,802.89)                | 14,905.87<br>(9,128.16 to<br>23,413.75)                 | 22,804.55<br>(12,990.93 to<br>37,694.61)                | 490.87<br>(383.77 to<br>578.75)                | 442.42<br>(278.97 to<br>692.16)                      | 363.18<br>(236.79 to<br>552.17)                      | 535.41<br>(323.14 to<br>856.17)                      |
| Interpersonal violence                                                              | 2,788.55<br>(1,900.27 to<br>3,747.07)             | 1,624.99<br>(1,060.24 to<br>2,378.76)                   | 1,362.00<br>(890.29 to<br>1,961.97)                     | 1,871.76<br>(1,190.34 to<br>2,753.49)                   | 56.15<br>(38.31 to<br>76.48)                   | 36.39<br>(24.51 to<br>52.62)                         | 30.93<br>(20.67 to<br>43.76)                         | 41.40<br>(27.12 to<br>60.07)                         |
| Physical violence by firearm                                                        | 326.74<br>(197.58 to<br>623.15)                   | 170.10<br>(102.75 to<br>326.49)                         | 140.89<br>(84.03 to<br>262.46)                          | 195.93<br>(117.91 to<br>385.59)                         | 6.82<br>(4.16 to<br>13.08)                     | 3.70<br>(2.24 to<br>7.08)                            | 3.09<br>(1.90 to<br>5.73)                            | 4.23<br>(2.58 to<br>8.17)                            |
| Physical violence by sharp object                                                   | 947.00<br>(582.25 to<br>1,375.36)                 | 533.69<br>(333.65 to<br>783.26)                         | 450.96<br>(286.16 to<br>662.91)                         | 607.10<br>(370.09 to<br>916.27)                         | 19.32<br>(12.22 to<br>28.36)                   | 11.94<br>(7.61 to<br>17.40)                          | 10.26<br>(6.62 to<br>14.99)                          | 13.39<br>(8.46 to<br>19.23)                          |
| Physical violence by other means                                                    | 1,514.81<br>(985.53 to<br>2,202.46)               | 921.20<br>(548.60 to<br>1,416.35)                       | 770.15<br>(464.67 to<br>1,184.14)                       | 1,068.74<br>(625.31 to<br>1,666.42)                     | 30.01<br>(19.59 to<br>44.91)                   | 20.75<br>(12.69 to<br>31.17)                         | 17.58<br>(10.76 to<br>26.39)                         | 23.78<br>(14.02 to<br>36.56)                         |
| <b>Forces of nature, conflict and terrorism, and executions and police conflict</b> | <b>22.47</b><br><b>(20.27 to</b><br><b>25.08)</b> | <b>2,224.65</b><br><b>(0.00 to</b><br><b>17,548.71)</b> | <b>2,281.52</b><br><b>(0.00 to</b><br><b>18,197.23)</b> | <b>2,178.75</b><br><b>(0.00 to</b><br><b>16,973.19)</b> | <b>0.46</b><br><b>(0.41 to</b><br><b>0.51)</b> | <b>113.56</b><br><b>(0.00 to</b><br><b>1,310.80)</b> | <b>121.86</b><br><b>(0.00 to</b><br><b>1,459.72)</b> | <b>107.42</b><br><b>(0.00 to</b><br><b>1,258.66)</b> |
| Exposure to forces of nature                                                        | 0.00<br>(0.00 to<br>0.00)                         | 2,046.82<br>(0.00 to<br>15,809.82)                      | 2,095.85<br>(0.00 to<br>16,369.60)                      | 2,007.32<br>(0.00 to<br>15,309.05)                      | 0.00<br>(0.00 to<br>0.00)                      | 101.94<br>(0.00 to<br>1,293.33)                      | 109.05<br>(0.00 to<br>1,459.72)                      | 96.70<br>(0.00 to<br>1,173.69)                       |
| Conflict and terrorism                                                              | 0.00<br>(0.00 to<br>0.00)                         | 177.82<br>(0.00 to<br>2,051.45)                         | 185.67<br>(0.00 to<br>2,200.41)                         | 171.44<br>(0.00 to<br>1,931.63)                         | 0.00<br>(0.00 to<br>0.00)                      | 11.62<br>(0.00 to<br>176.44)                         | 12.81<br>(0.00 to<br>198.02)                         | 10.72<br>(0.00 to<br>160.38)                         |
| Executions and police conflict                                                      | 22.47<br>(20.27 to<br>25.08)                      | 0.00<br>(0.00 to<br>0.00)                               | 0.00<br>(0.00 to<br>0.00)                               | 0.00<br>(0.00 to<br>0.00)                               | 0.46<br>(0.41 to<br>0.51)                      | 0.00<br>(0.00 to<br>0.00)                            | 0.00<br>(0.00 to<br>0.00)                            | 0.00<br>(0.00 to<br>0.00)                            |

| Western Europe                                                    |                                          |                                          |                                          |                                          |                                       |                                       |                                       |                                       |
|-------------------------------------------------------------------|------------------------------------------|------------------------------------------|------------------------------------------|------------------------------------------|---------------------------------------|---------------------------------------|---------------------------------------|---------------------------------------|
| Cause                                                             | YLLs (in 1000s)                          |                                          |                                          |                                          | Deaths (in 1000s)                     |                                       |                                       |                                       |
|                                                                   | 2016                                     | 2040 Forecast                            | 2040 Better Scenario                     | 2040 Worse Scenario                      | 2016                                  | 2040 Forecast                         | 2040 Better Scenario                  | 2040 Worse Scenario                   |
| All causes                                                        | 57,177.24<br>(55,921.10 to<br>58,431.41) | 56,612.41<br>(50,301.99 to<br>63,636.37) | 48,330.62<br>(43,378.89 to<br>53,903.63) | 69,135.49<br>(60,883.31 to<br>78,664.26) | 4,189.41<br>(4,104.54 to<br>4,272.88) | 5,006.76<br>(4,554.22 to<br>5,471.52) | 4,461.37<br>(4,077.71 to<br>4,862.23) | 5,762.82<br>(5,209.48 to<br>6,353.56) |
| Communicable, maternal, neonatal, and nutritional diseases        | 2,623.57<br>(2,486.11 to<br>2,752.07)    | 2,729.37<br>(2,354.00 to<br>3,212.69)    | 2,520.56<br>(2,204.55 to<br>2,916.23)    | 3,163.28<br>(2,661.69 to<br>3,856.46)    | 183.74<br>(169.81 to<br>198.18)       | 275.26<br>(231.66 to<br>330.52)       | 275.43<br>(236.43 to<br>324.60)       | 294.37<br>(240.23 to<br>364.76)       |
| HIV/AIDS and tuberculosis                                         | 177.74<br>(172.88 to<br>183.50)          | 66.75<br>(48.35 to<br>85.91)             | 41.01<br>(29.03 to<br>53.21)             | 122.33<br>(92.78 to<br>153.14)           | 6.77<br>(6.45 to<br>7.14)             | 3.30<br>(2.30 to<br>4.63)             | 2.23<br>(1.54 to<br>3.12)             | 5.17<br>(3.58 to<br>7.12)             |
| Tuberculosis                                                      | 52.23<br>(48.22 to<br>56.96)             | 29.26<br>(19.00 to<br>42.94)             | 19.60<br>(12.80 to<br>27.95)             | 43.01<br>(26.55 to<br>63.18)             | 3.63<br>(3.32 to<br>4.00)             | 2.61<br>(1.87 to<br>3.93)             | 1.83<br>(1.18 to<br>2.68)             | 3.71<br>(2.19 to<br>5.55)             |
| HIV/AIDS                                                          | 125.51<br>(123.05 to<br>128.32)          | 37.49<br>(22.63 to<br>52.68)             | 21.41<br>(11.44 to<br>31.31)             | 79.32<br>(55.65 to<br>104.11)            | 3.13<br>(3.07 to<br>3.20)             | 3.69<br>(0.40 to<br>9.97)             | 0.40<br>(0.20 to<br>0.58)             | 1.46<br>(1.00 to<br>1.93)             |
| Diarrhea, lower respiratory, and other common infectious diseases | 1,656.75<br>(1,541.38 to<br>1,772.28)    | 2,125.44<br>(1,745.98 to<br>2,596.76)    | 2,010.13<br>(1,698.14 to<br>2,399.24)    | 2,453.39<br>(1,962.19 to<br>3,127.21)    | 157.34<br>(144.03 to<br>171.78)       | 249.22<br>(205.15 to<br>306.13)       | 249.66<br>(210.14 to<br>300.14)       | 267.31<br>(213.27 to<br>336.55)       |
| Diarrheal diseases                                                | 151.98<br>(144.05 to<br>160.18)          | 397.19<br>(298.57 to<br>570.25)          | 526.32<br>(416.60 to<br>716.00)          | 335.23<br>(244.52 to<br>505.95)          | 14.69<br>(13.84 to<br>15.54)          | 48.86<br>(36.33 to<br>71.73)          | 66.89<br>(52.34 to<br>91.55)          | 39.94<br>(28.73 to<br>60.95)          |
| Intestinal infectious diseases                                    | 0.56<br>(0.27 to<br>1.02)                | 0.42<br>(0.20 to<br>0.76)                | 0.42<br>(0.20 to<br>0.77)                | 0.41<br>(0.20 to<br>0.75)                | 0.02<br>(0.01 to<br>0.04)             | 0.02<br>(0.01 to<br>0.04)             | 0.02<br>(0.01 to<br>0.05)             | 0.02<br>(0.01 to<br>0.04)             |
| Typhoid fever                                                     | 0.20<br>(0.07 to<br>0.45)                | 0.18<br>(0.06 to<br>0.39)                | 0.21<br>(0.07 to<br>0.44)                | 0.17<br>(0.06 to<br>0.37)                | 0.01<br>(0.00 to<br>0.01)             | 0.01<br>(0.00 to<br>0.01)             | 0.01<br>(0.00 to<br>0.01)             | 0.01<br>(0.00 to<br>0.01)             |
| Paratyphoid fever                                                 | 0.14<br>(0.04 to<br>0.34)                | 0.08<br>(0.02 to<br>0.20)                | 0.07<br>(0.02 to<br>0.17)                | 0.09<br>(0.03 to<br>0.21)                | 0.00<br>(0.00 to<br>0.01)             | 0.00<br>(0.00 to<br>0.01)             | 0.00<br>(0.00 to<br>0.00)             | 0.00<br>(0.00 to<br>0.01)             |
| Other intestinal infectious diseases                              | 0.22<br>(0.09 to<br>0.44)                | 0.16<br>(0.06 to<br>0.33)                | 0.15<br>(0.06 to<br>0.32)                | 0.16<br>(0.06 to<br>0.32)                | 0.01<br>(0.01 to<br>0.03)             | 0.02<br>(0.01 to<br>0.03)             | 0.02<br>(0.01 to<br>0.03)             | 0.01<br>(0.01 to<br>0.03)             |
| Lower respiratory infections                                      | 1,407.71<br>(1,300.27 to<br>1,523.33)    | 1,655.85<br>(1,301.22 to<br>2,153.01)    | 1,416.66<br>(1,125.85 to<br>1,815.43)    | 2,037.13<br>(1,556.08 to<br>2,739.27)    | 138.95<br>(126.05 to<br>152.81)       | 196.70<br>(156.35 to<br>249.03)       | 179.18<br>(142.92 to<br>228.14)       | 233.71<br>(173.92 to<br>291.65)       |
| Upper respiratory infections                                      | 0.63<br>(0.53 to<br>0.76)                | 0.46<br>(0.35 to<br>0.61)                | 0.36<br>(0.26 to<br>0.47)                | 0.51<br>(0.38 to<br>0.67)                | 0.03<br>(0.03 to<br>0.04)             | 0.03<br>(0.02 to<br>0.04)             | 0.03<br>(0.04 to<br>0.04)             | 0.03<br>(0.02 to<br>0.05)             |
| Otitis media                                                      | 0.48<br>(0.41 to<br>0.59)                | 0.11<br>(0.08 to<br>0.15)                | 0.11<br>(0.08 to<br>0.16)                | 0.11<br>(0.08 to<br>0.15)                | 0.02<br>(0.02 to<br>0.02)             | 0.01<br>(0.01 to<br>0.01)             | 0.01<br>(0.01 to<br>0.01)             | 0.01<br>(0.01 to<br>0.01)             |
| Meningitis                                                        | 51.72<br>(47.76 to<br>60.33)             | 26.81<br>(22.25 to<br>32.30)             | 23.44<br>(19.65 to<br>27.85)             | 32.51<br>(24.84 to<br>42.08)             | 1.63<br>(1.46 to<br>1.85)             | 1.08<br>(0.91 to<br>1.22)             | 1.00<br>(0.83 to<br>1.14)             | 1.14<br>(0.96 to<br>1.31)             |
| Pneumococcal meningitis                                           | 13.02<br>(11.86 to<br>15.40)             | 7.51<br>(6.44 to<br>9.10)                | 7.55<br>(6.38 to<br>9.15)                | 7.70<br>(6.61 to<br>9.36)                | 0.48<br>(0.42 to<br>0.54)             | 0.38<br>(0.31 to<br>0.43)             | 0.40<br>(0.32 to<br>0.45)             | 0.37<br>(0.31 to<br>0.43)             |
| H influenzae type B meningitis                                    | 4.25<br>(3.79 to<br>4.90)                | 6.84<br>(3.92 to<br>11.10)               | 5.78<br>(3.68 to<br>8.63)                | 11.22<br>(5.12 to<br>20.65)              | 0.12<br>(0.11 to<br>0.14)             | 0.14<br>(0.10 to<br>0.19)             | 0.13<br>(0.10 to<br>0.17)             | 0.19<br>(0.12 to<br>0.30)             |
| Meningococcal meningitis                                          | 18.21<br>(16.71 to<br>21.32)             | 5.94<br>(4.84 to<br>7.42)                | 4.91<br>(3.96 to<br>6.15)                | 6.53<br>(5.18 to<br>8.33)                | 0.46<br>(0.42 to<br>0.52)             | 0.22<br>(0.19 to<br>0.26)             | 0.19<br>(0.16 to<br>0.23)             | 0.23<br>(0.20 to<br>0.27)             |
| Other meningitis                                                  | 16.24<br>(14.82 to<br>19.00)             | 6.52<br>(5.57 to<br>7.78)                | 5.21<br>(4.35 to<br>6.24)                | 7.06<br>(5.96 to<br>8.55)                | 0.58<br>(0.51 to<br>0.65)             | 0.34<br>(0.28 to<br>0.38)             | 0.28<br>(0.23 to<br>0.32)             | 0.35<br>(0.29 to<br>0.40)             |
| Encephalitis                                                      | 35.41<br>(26.63 to<br>45.81)             | 36.55<br>(26.91 to<br>47.05)             | 35.98<br>(26.41 to<br>46.52)             | 36.28<br>(26.73 to<br>46.90)             | 1.36<br>(0.97 to<br>1.69)             | 1.86<br>(1.32 to<br>2.35)             | 1.89<br>(1.33 to<br>2.39)             | 1.78<br>(1.28 to<br>2.23)             |

|                |                           |                            |                           |                            |                           |                           |                           |                           |
|----------------|---------------------------|----------------------------|---------------------------|----------------------------|---------------------------|---------------------------|---------------------------|---------------------------|
| Diphtheria     | 0.09<br>(0.08 to<br>0.11) | 0.02<br>(0.02 to<br>0.03)  | 0.02<br>(0.01 to<br>0.02) | 0.03<br>(0.02 to<br>0.05)  | 0.00<br>(0.00 to<br>0.00) | 0.00<br>(0.00 to<br>0.00) | 0.00<br>(0.00 to<br>0.00) | 0.00<br>(0.00 to<br>0.00) |
| Whooping cough | 1.08<br>(0.34 to<br>1.84) | 0.39<br>(0.10 to<br>0.91)  | 0.15<br>(0.04 to<br>0.33) | 1.73<br>(0.40 to<br>4.02)  | 0.01<br>(0.00 to<br>0.02) | 0.00<br>(0.00 to<br>0.01) | 0.00<br>(0.00 to<br>0.00) | 0.02<br>(0.00 to<br>0.05) |
| Tetanus        | 0.51<br>(0.40 to<br>0.68) | 0.05<br>(0.04 to<br>0.06)  | 0.05<br>(0.03 to<br>0.06) | 0.07<br>(0.05 to<br>0.10)  | 0.03<br>(0.02 to<br>0.04) | 0.00<br>(0.00 to<br>0.00) | 0.00<br>(0.00 to<br>0.00) | 0.00<br>(0.00 to<br>0.00) |
| Measles        | 0.35<br>(0.30 to<br>0.40) | 2.56<br>(0.47 to<br>12.52) | 1.97<br>(0.43 to<br>8.26) | 4.40<br>(0.56 to<br>25.15) | 0.00<br>(0.00 to<br>0.01) | 0.04<br>(0.01 to<br>0.17) | 0.03<br>(0.01 to<br>0.12) | 0.06<br>(0.01 to<br>0.31) |

| Western Europe                                        |                                  |                                |                                |                                 |                               |                               |                               |                               |
|-------------------------------------------------------|----------------------------------|--------------------------------|--------------------------------|---------------------------------|-------------------------------|-------------------------------|-------------------------------|-------------------------------|
| Cause                                                 | YLLs (in 1000s)                  |                                |                                |                                 | Deaths (in 1000s)             |                               |                               |                               |
|                                                       | 2016                             | 2040 Forecast                  | 2040 Better Scenario           | 2040 Worse Scenario             | 2016                          | 2040 Forecast                 | 2040 Better Scenario          | 2040 Worse Scenario           |
| Varicella and herpes zoster                           | 6.23<br>(2.99 to 9.27)           | 5.01<br>(2.31 to 7.28)         | 4.66<br>(2.14 to 6.72)         | 4.99<br>(2.28 to 7.36)          | 0.59<br>(0.25 to 0.94)        | 0.62<br>(0.25 to 0.92)        | 0.60<br>(0.24 to 0.89)        | 0.58<br>(0.24 to 0.89)        |
| <b>Neglected tropical diseases and malaria</b>        | <b>3.92</b><br>(3.40 to 4.50)    | <b>2.98</b><br>(2.32 to 3.57)  | <b>3.04</b><br>(2.33 to 3.60)  | <b>2.94</b><br>(2.31 to 3.52)   | <b>0.14</b><br>(0.11 to 0.17) | <b>0.13</b><br>(0.08 to 0.17) | <b>0.14</b><br>(0.08 to 0.17) | <b>0.13</b><br>(0.08 to 0.16) |
| Malaria                                               | 0.00<br>(0.00 to 0.00)           | 0.00<br>(0.00 to 0.00)         | 0.00<br>(0.00 to 0.00)         | 0.00<br>(0.00 to 0.00)          | 0.00<br>(0.00 to 0.00)        | 0.00<br>(0.00 to 0.00)        | 0.00<br>(0.00 to 0.00)        | 0.00<br>(0.00 to 0.00)        |
| Chagas disease                                        | 0.00<br>(0.00 to 0.00)           | 0.00<br>(0.00 to 0.00)         | 0.00<br>(0.00 to 0.00)         | 0.00<br>(0.00 to 0.00)          | 0.00<br>(0.00 to 0.00)        | 0.00<br>(0.00 to 0.00)        | 0.00<br>(0.00 to 0.00)        | 0.00<br>(0.00 to 0.00)        |
| Leishmaniasis                                         | 0.79<br>(0.47 to 1.25)           | 0.18<br>(0.11 to 0.45)         | 0.16<br>(0.09 to 0.40)         | 0.18<br>(0.11 to 0.46)          | 0.03<br>(0.02 to 0.05)        | 0.01<br>(0.00 to 0.02)        | 0.01<br>(0.00 to 0.02)        | 0.01<br>(0.00 to 0.02)        |
| African trypanosomiasis                               | 0.00<br>(0.00 to 0.00)           | 0.00<br>(0.00 to 0.00)         | 0.00<br>(0.00 to 0.00)         | 0.00<br>(0.00 to 0.00)          | 0.00<br>(0.00 to 0.00)        | 0.00<br>(0.00 to 0.00)        | 0.00<br>(0.00 to 0.00)        | 0.00<br>(0.00 to 0.00)        |
| Schistosomiasis                                       | 0.00<br>(0.00 to 0.00)           | 0.00<br>(0.00 to 0.00)         | 0.00<br>(0.00 to 0.00)         | 0.00<br>(0.00 to 0.00)          | 0.00<br>(0.00 to 0.00)        | 0.00<br>(0.00 to 0.00)        | 0.00<br>(0.00 to 0.00)        | 0.00<br>(0.00 to 0.00)        |
| Cysticercosis                                         | 0.21<br>(0.19 to 0.23)           | 0.06<br>(0.06 to 0.07)         | 0.06<br>(0.06 to 0.07)         | 0.06<br>(0.06 to 0.07)          | 0.01<br>(0.01 to 0.01)        | 0.00<br>(0.00 to 0.00)        | 0.00<br>(0.00 to 0.00)        | 0.00<br>(0.00 to 0.00)        |
| Cystic echinococcosis                                 | 0.31<br>(0.27 to 0.36)           | 0.16<br>(0.12 to 0.23)         | 0.14<br>(0.11 to 0.20)         | 0.16<br>(0.13 to 0.23)          | 0.02<br>(0.02 to 0.02)        | 0.01<br>(0.01 to 0.02)        | 0.01<br>(0.01 to 0.02)        | 0.01<br>(0.01 to 0.02)        |
| Dengue                                                | 0.01<br>(0.01 to 0.01)           | 0.03<br>(0.02 to 0.04)         | 0.03<br>(0.02 to 0.04)         | 0.03<br>(0.02 to 0.04)          | 0.00<br>(0.00 to 0.00)        | 0.00<br>(0.00 to 0.00)        | 0.00<br>(0.00 to 0.00)        | 0.00<br>(0.00 to 0.00)        |
| Yellow fever                                          | 0.00<br>(0.00 to 0.00)           | 0.00<br>(0.00 to 0.00)         | 0.00<br>(0.00 to 0.00)         | 0.00<br>(0.00 to 0.00)          | 0.00<br>(0.00 to 0.00)        | 0.00<br>(0.00 to 0.00)        | 0.00<br>(0.00 to 0.00)        | 0.00<br>(0.00 to 0.00)        |
| Rabies                                                | 0.02<br>(0.02 to 0.02)           | 0.02<br>(0.02 to 0.02)         | 0.02<br>(0.02 to 0.02)         | 0.02<br>(0.02 to 0.02)          | 0.00<br>(0.00 to 0.00)        | 0.00<br>(0.00 to 0.00)        | 0.00<br>(0.00 to 0.00)        | 0.00<br>(0.00 to 0.00)        |
| Intestinal nematode infections                        | 0.00<br>(0.00 to 0.00)           | 0.00<br>(0.00 to 0.00)         | 0.00<br>(0.00 to 0.00)         | 0.00<br>(0.00 to 0.00)          | 0.00<br>(0.00 to 0.00)        | 0.00<br>(0.00 to 0.00)        | 0.00<br>(0.00 to 0.00)        | 0.00<br>(0.00 to 0.00)        |
| Other neglected tropical diseases                     | 2.57<br>(2.10 to 2.76)           | 2.53<br>(1.90 to 2.83)         | 2.63<br>(1.93 to 2.95)         | 2.48<br>(1.89 to 2.75)          | 0.08<br>(0.05 to 0.09)        | 0.11<br>(0.06 to 0.12)        | 0.12<br>(0.06 to 0.14)        | 0.10<br>(0.05 to 0.12)        |
| <b>Maternal disorders</b>                             | <b>14.59</b><br>(13.51 to 15.79) | <b>9.78</b><br>(8.17 to 11.70) | <b>8.57</b><br>(7.12 to 10.31) | <b>10.43</b><br>(8.66 to 12.50) | <b>0.28</b><br>(0.26 to 0.31) | <b>0.19</b><br>(0.16 to 0.22) | <b>0.17</b><br>(0.14 to 0.20) | <b>0.20</b><br>(0.17 to 0.24) |
| Maternal hemorrhage                                   | 1.83<br>(1.40 to 2.33)           | 1.15<br>(0.82 to 1.60)         | 1.02<br>(0.72 to 1.41)         | 1.22<br>(0.87 to 1.70)          | 0.04<br>(0.03 to 0.04)        | 0.02<br>(0.02 to 0.03)        | 0.02<br>(0.01 to 0.03)        | 0.02<br>(0.01 to 0.03)        |
| Maternal sepsis and other maternal infections         | 0.95<br>(0.72 to 1.23)           | 0.56<br>(0.40 to 0.75)         | 0.49<br>(0.35 to 0.66)         | 0.59<br>(0.42 to 0.80)          | 0.02<br>(0.01 to 0.02)        | 0.01<br>(0.01 to 0.01)        | 0.01<br>(0.01 to 0.01)        | 0.01<br>(0.01 to 0.02)        |
| Maternal hypertensive disorders                       | 1.41<br>(1.09 to 1.88)           | 1.01<br>(0.72 to 1.38)         | 0.88<br>(0.63 to 1.21)         | 1.07<br>(0.77 to 1.47)          | 0.03<br>(0.02 to 0.03)        | 0.02<br>(0.01 to 0.03)        | 0.02<br>(0.01 to 0.02)        | 0.02<br>(0.01 to 0.03)        |
| Maternal obstructed labor and uterine rupture         | 0.39<br>(0.25 to 0.54)           | 0.26<br>(0.16 to 0.39)         | 0.22<br>(0.14 to 0.34)         | 0.28<br>(0.17 to 0.42)          | 0.01<br>(0.01 to 0.01)        | 0.00<br>(0.00 to 0.01)        | 0.00<br>(0.00 to 0.01)        | 0.01<br>(0.00 to 0.01)        |
| Maternal abortion, miscarriage, and ectopic pregnancy | 2.70<br>(2.25 to 3.22)           | 1.64<br>(1.18 to 2.29)         | 1.42<br>(1.02 to 1.99)         | 1.75<br>(1.25 to 2.48)          | 0.06<br>(0.05 to 0.07)        | 0.03<br>(0.02 to 0.05)        | 0.03<br>(0.02 to 0.04)        | 0.04<br>(0.03 to 0.05)        |



|                                        |                           |                           |                           |                           |                           |                           |                           |                           |
|----------------------------------------|---------------------------|---------------------------|---------------------------|---------------------------|---------------------------|---------------------------|---------------------------|---------------------------|
| Indirect maternal deaths               | 2.13<br>(1.65 to<br>2.69) | 1.63<br>(1.12 to<br>2.25) | 1.41<br>(0.96 to<br>1.94) | 1.76<br>(1.20 to<br>2.42) | 0.04<br>(0.03 to<br>0.05) | 0.03<br>(0.02 to<br>0.04) | 0.03<br>(0.02 to<br>0.03) | 0.03<br>(0.02 to<br>0.04) |
| Late maternal deaths                   | 0.39<br>(0.29 to<br>0.54) | 0.27<br>(0.18 to<br>0.39) | 0.23<br>(0.16 to<br>0.33) | 0.28<br>(0.19 to<br>0.42) | 0.01<br>(0.01 to<br>0.01) | 0.01<br>(0.00 to<br>0.01) | 0.00<br>(0.00 to<br>0.01) | 0.01<br>(0.00 to<br>0.01) |
| Maternal deaths aggravated by HIV/AIDS | 0.01<br>(0.00 to<br>0.01) | 0.02<br>(0.01 to<br>0.05) | 0.02<br>(0.01 to<br>0.04) | 0.03<br>(0.01 to<br>0.05) | 0.00<br>(0.00 to<br>0.00) | 0.00<br>(0.00 to<br>0.00) | 0.00<br>(0.00 to<br>0.00) | 0.00<br>(0.00 to<br>0.00) |
| Other maternal disorders               | 4.79<br>(4.01 to<br>5.66) | 3.24<br>(2.49 to<br>4.17) | 2.89<br>(2.22 to<br>3.71) | 3.45<br>(2.63 to<br>4.48) | 0.09<br>(0.08 to<br>0.11) | 0.06<br>(0.05 to<br>0.08) | 0.06<br>(0.04 to<br>0.07) | 0.07<br>(0.05 to<br>0.09) |

| Western Europe                                                          |                                     |                                     |                                     |                                     |                               |                                 |                                  |                                 |
|-------------------------------------------------------------------------|-------------------------------------|-------------------------------------|-------------------------------------|-------------------------------------|-------------------------------|---------------------------------|----------------------------------|---------------------------------|
| Cause                                                                   | YLLs (in 1000s)                     |                                     |                                     |                                     | Deaths (in 1000s)             |                                 |                                  |                                 |
|                                                                         | 2016                                | 2040 Forecast                       | 2040 Better Scenario                | 2040 Worse Scenario                 | 2016                          | 2040 Forecast                   | 2040 Better Scenario             | 2040 Worse Scenario             |
| <b>Neonatal disorders</b>                                               | <b>606.74</b><br>(548.07 to 671.32) | <b>331.81</b><br>(260.74 to 437.68) | <b>260.76</b><br>(204.76 to 346.20) | <b>388.55</b><br>(307.31 to 515.19) | <b>7.01</b><br>(6.34 to 7.76) | <b>3.84</b><br>(3.01 to 5.06)   | <b>3.02</b><br>(2.37 to 4.00)    | <b>4.49</b><br>(3.55 to 5.96)   |
| Neonatal preterm birth                                                  | 316.32<br>(283.22 to 346.36)        | 141.51<br>(113.97 to 169.17)        | 96.87<br>(77.48 to 115.87)          | 176.39<br>(141.63 to 211.58)        | 3.66<br>(3.27 to 4.00)        | 1.64<br>(1.32 to 1.96)          | 1.12<br>(0.90 to 1.34)           | 2.04<br>(1.64 to 2.45)          |
| Neonatal encephalopathy due to birth asphyxia and trauma                | 128.23<br>(109.87 to 145.39)        | 59.11<br>(41.63 to 85.71)           | 46.49<br>(33.04 to 66.66)           | 68.44<br>(47.71 to 100.74)          | 1.48<br>(1.27 to 1.68)        | 0.68<br>(0.48 to 0.99)          | 0.54<br>(0.38 to 0.77)           | 0.79<br>(0.55 to 1.16)          |
| Neonatal sepsis and other neonatal infections                           | 43.55<br>(32.60 to 101.87)          | 35.72<br>(22.76 to 85.48)           | 29.62<br>(19.12 to 69.12)           | 40.54<br>(25.97 to 97.62)           | 0.50<br>(0.38 to 0.99)        | 0.41<br>(0.26 to 0.99)          | 0.34<br>(0.22 to 0.80)           | 0.47<br>(0.30 to 1.13)          |
| Hemolytic disease and other neonatal jaundice                           | 2.29<br>(1.81 to 2.85)              | 0.99<br>(0.62 to 1.61)              | 0.80<br>(0.52 to 1.28)              | 1.12<br>(0.71 to 1.84)              | 0.03<br>(0.02 to 0.03)        | 0.01<br>(0.01 to 0.02)          | 0.01<br>(0.01 to 0.01)           | 0.01<br>(0.01 to 0.02)          |
| Other neonatal disorders                                                | 116.34<br>(96.56 to 136.04)         | 94.48<br>(64.69 to 140.68)          | 86.98<br>(59.96 to 127.68)          | 102.06<br>(69.46 to 152.12)         | 1.35<br>(1.12 to 1.57)        | 1.09<br>(0.75 to 1.63)          | 1.01<br>(0.69 to 1.48)           | 1.18<br>(0.80 to 1.76)          |
| <b>Nutritional deficiencies</b>                                         | <b>57.87</b><br>(54.52 to 61.33)    | <b>77.06</b><br>(67.40 to 88.38)    | <b>85.19</b><br>(74.82 to 97.35)    | <b>70.71</b><br>(61.24 to 81.56)    | <b>7.22</b><br>(6.68 to 7.81) | <b>11.76</b><br>(9.86 to 13.97) | <b>13.39</b><br>(11.33 to 15.79) | <b>10.52</b><br>(8.73 to 12.61) |
| Protein-energy malnutrition                                             | 42.56<br>(32.01 to 47.24)           | 60.70<br>(45.20 to 73.18)           | 68.87<br>(51.92 to 82.46)           | 55.02<br>(40.36 to 67.06)           | 5.68<br>(4.10 to 6.45)        | 9.71<br>(7.03 to 12.07)         | 11.27<br>(8.36 to 13.88)         | 8.62<br>(6.03 to 10.84)         |
| Iodine deficiency                                                       | 0.95<br>(0.47 to 1.71)              | 2.69<br>(0.90 to 7.71)              | 2.74<br>(0.90 to 8.11)              | 2.55<br>(0.92 to 7.14)              | 0.07<br>(0.03 to 0.15)        | 0.33<br>(0.08 to 1.27)          | 0.35<br>(0.08 to 1.41)           | 0.31<br>(0.08 to 1.12)          |
| Dietary iron deficiency                                                 | 2.60<br>(1.02 to 3.33)              | 2.24<br>(0.81 to 3.04)              | 2.42<br>(0.84 to 3.28)              | 2.13<br>(0.80 to 2.85)              | 0.23<br>(0.04 to 0.34)        | 0.24<br>(0.04 to 0.37)          | 0.27<br>(0.04 to 0.43)           | 0.21<br>(0.04 to 0.34)          |
| Other nutritional deficiencies                                          | 11.76<br>(9.54 to 22.33)            | 11.42<br>(8.45 to 25.32)            | 11.16<br>(8.12 to 25.63)            | 11.01<br>(8.16 to 24.02)            | 1.24<br>(0.90 to 2.92)        | 1.48<br>(0.97 to 3.88)          | 1.50<br>(0.97 to 4.03)           | 1.38<br>(0.90 to 3.54)          |
| <b>Other communicable, maternal, neonatal, and nutritional diseases</b> | <b>105.96</b><br>(92.45 to 111.87)  | <b>115.56</b><br>(99.65 to 124.43)  | <b>111.86</b><br>(95.47 to 120.93)  | <b>114.93</b><br>(98.43 to 123.80)  | <b>4.98</b><br>(4.21 to 5.31) | <b>6.83</b><br>(5.70 to 7.40)   | <b>6.84</b><br>(5.69 to 7.41)    | <b>6.56</b><br>(5.46 to 7.11)   |
| Sexually transmitted infections excluding HIV                           | 3.94<br>(3.67 to 4.39)              | 2.13<br>(1.91 to 2.47)              | 2.03<br>(1.82 to 2.39)              | 2.14<br>(1.91 to 2.47)              | 0.21<br>(0.19 to 0.23)        | 0.15<br>(0.13 to 0.17)          | 0.15<br>(0.13 to 0.18)           | 0.14<br>(0.13 to 0.17)          |
| Syphilis                                                                | 1.37<br>(1.17 to 1.71)              | 0.58<br>(0.50 to 0.69)              | 0.52<br>(0.45 to 0.65)              | 0.59<br>(0.52 to 0.71)              | 0.06<br>(0.06 to 0.07)        | 0.04<br>(0.03 to 0.04)          | 0.04<br>(0.03 to 0.04)           | 0.04<br>(0.03 to 0.04)          |
| Chlamydial infection                                                    | 0.50<br>(0.47 to 0.53)              | 0.31<br>(0.27 to 0.35)              | 0.30<br>(0.26 to 0.35)              | 0.30<br>(0.27 to 0.35)              | 0.03<br>(0.03 to 0.03)        | 0.02<br>(0.02 to 0.03)          | 0.02<br>(0.02 to 0.03)           | 0.02<br>(0.02 to 0.03)          |
| Gonococcal infection                                                    | 1.44<br>(1.37 to 1.55)              | 0.89<br>(0.79 to 1.03)              | 0.87<br>(0.76 to 1.03)              | 0.88<br>(0.78 to 1.02)              | 0.08<br>(0.08 to 0.09)        | 0.07<br>(0.06 to 0.08)          | 0.07<br>(0.06 to 0.08)           | 0.06<br>(0.06 to 0.07)          |
| Other sexually transmitted infections                                   | 0.63<br>(0.60 to 0.68)              | 0.35<br>(0.31 to 0.41)              | 0.34<br>(0.30 to 0.40)              | 0.35<br>(0.31 to 0.41)              | 0.03<br>(0.03 to 0.03)        | 0.02<br>(0.02 to 0.02)          | 0.02<br>(0.02 to 0.03)           | 0.02<br>(0.02 to 0.02)          |
| Acute hepatitis                                                         | 27.57<br>(25.68 to 29.60)           | 19.10<br>(16.77 to 21.94)           | 15.78<br>(13.78 to 18.32)           | 19.82<br>(17.27 to 22.64)           | 1.33<br>(1.24 to 1.44)        | 1.12<br>(0.98 to 1.29)          | 0.95<br>(0.82 to 1.11)           | 1.13<br>(0.99 to 1.31)          |
| Acute hepatitis A                                                       | 1.60<br>(1.33 to 1.94)              | 0.95<br>(0.74 to 1.22)              | 0.84<br>(0.65 to 1.08)              | 0.98<br>(0.76 to 1.25)              | 0.06<br>(0.05 to 0.08)        | 0.05<br>(0.04 to 0.07)          | 0.05<br>(0.03 to 0.06)           | 0.05<br>(0.04 to 0.07)          |
| Acute hepatitis B                                                       | 21.26<br>(19.25 to 23.39)           | 14.36<br>(12.19 to 17.03)           | 11.72<br>(9.87 to 13.97)            | 14.98<br>(12.62 to 17.60)           | 0.97<br>(0.84 to 1.08)        | 0.77<br>(0.65 to 0.92)          | 0.64<br>(0.52 to 0.78)           | 0.78<br>(0.65 to 0.94)          |

|                                       |                                                               |                                                               |                                                               |                                                               |                                                            |                                                            |                                                            |                                                            |
|---------------------------------------|---------------------------------------------------------------|---------------------------------------------------------------|---------------------------------------------------------------|---------------------------------------------------------------|------------------------------------------------------------|------------------------------------------------------------|------------------------------------------------------------|------------------------------------------------------------|
|                                       | 1.44<br>(1.07 to<br>1.88)                                     | 1.05<br>(0.76 to<br>1.41)                                     | 0.87<br>(0.62 to<br>1.17)                                     | 1.09<br>(0.79 to<br>1.46)                                     | 0.07<br>(0.05 to<br>0.10)                                  | 0.06<br>(0.04 to<br>0.08)                                  | 0.05<br>(0.04 to<br>0.07)                                  | 0.06<br>(0.05 to<br>0.08)                                  |
| Acute hepatitis C                     |                                                               |                                                               |                                                               |                                                               |                                                            |                                                            |                                                            |                                                            |
|                                       | 3.27<br>(2.27 to<br>4.44)                                     | 2.73<br>(1.78 to<br>3.84)                                     | 2.35<br>(1.55 to<br>3.31)                                     | 2.77<br>(1.83 to<br>3.92)                                     | 0.23<br>(0.15 to<br>0.32)                                  | 0.24<br>(0.15 to<br>0.34)                                  | 0.21<br>(0.14 to<br>0.30)                                  | 0.23<br>(0.15 to<br>0.33)                                  |
| Acute hepatitis E                     |                                                               |                                                               |                                                               |                                                               |                                                            |                                                            |                                                            |                                                            |
|                                       | 74.45<br>(60.62 to<br>80.09)                                  | 94.34<br>(77.81 to<br>102.51)                                 | 94.04<br>(77.39 to<br>102.33)                                 | 92.97<br>(76.17 to<br>101.20)                                 | 3.44<br>(2.65 to<br>3.73)                                  | 5.56<br>(4.41 to<br>6.08)                                  | 5.74<br>(4.54 to<br>6.29)                                  | 5.28<br>(4.18 to<br>5.79)                                  |
| Other unspecified infectious diseases |                                                               |                                                               |                                                               |                                                               |                                                            |                                                            |                                                            |                                                            |
| <b>Non-communicable diseases</b>      | <b>50,010.07</b><br><b>(48,881.44 to</b><br><b>51,147.56)</b> | <b>50,397.17</b><br><b>(44,330.56 to</b><br><b>57,147.08)</b> | <b>42,770.15</b><br><b>(37,944.67 to</b><br><b>48,176.92)</b> | <b>61,806.29</b><br><b>(53,428.32 to</b><br><b>71,194.99)</b> | <b>3,818.23</b><br><b>(3,740.51 to</b><br><b>3,896.77)</b> | <b>4,532.49</b><br><b>(4,089.70 to</b><br><b>5,010.98)</b> | <b>3,998.88</b><br><b>(3,624.05 to</b><br><b>4,401.28)</b> | <b>5,256.01</b><br><b>(4,701.59 to</b><br><b>5,837.52)</b> |

| Western Europe                       |                                       |                                       |                                       |                                       |                                    |                                    |                                    |                                    |
|--------------------------------------|---------------------------------------|---------------------------------------|---------------------------------------|---------------------------------------|------------------------------------|------------------------------------|------------------------------------|------------------------------------|
| Cause                                | YLLs (in 1000s)                       |                                       |                                       |                                       | Deaths (in 1000s)                  |                                    |                                    |                                    |
|                                      | 2016                                  | 2040 Forecast                         | 2040 Better Scenario                  | 2040 Worse Scenario                   | 2016                               | 2040 Forecast                      | 2040 Better Scenario               | 2040 Worse Scenario                |
| Neoplasms                            | 19,757.41<br>(19,183.82 to 20,301.51) | 19,916.18<br>(17,663.36 to 22,484.03) | 16,941.37<br>(15,113.23 to 18,969.59) | 24,679.96<br>(21,517.27 to 28,230.28) | 1,161.27<br>(1,128.15 to 1,192.92) | 1,387.90<br>(1,247.15 to 1,545.72) | 1,218.20<br>(1,102.57 to 1,348.59) | 1,636.60<br>(1,446.92 to 1,852.54) |
| Lip and oral cavity cancer           | 274.83<br>(258.23 to 291.87)          | 219.92<br>(140.04 to 332.66)          | 147.82<br>(98.02 to 217.50)           | 384.00<br>(234.81 to 585.25)          | 13.45<br>(12.74 to 14.16)          | 12.38<br>(8.10 to 18.34)           | 8.48<br>(5.77 to 12.06)            | 20.87<br>(13.12 to 31.66)          |
| Nasopharynx cancer                   | 79.08<br>(74.16 to 85.99)             | 68.80<br>(44.43 to 102.77)            | 43.09<br>(29.38 to 61.86)             | 120.43<br>(75.37 to 182.90)           | 3.85<br>(3.63 to 4.16)             | 4.00<br>(2.52 to 6.11)             | 2.51<br>(1.66 to 3.68)             | 6.70<br>(4.09 to 10.49)            |
| Other pharynx cancer                 | 226.52<br>(212.99 to 239.43)          | 199.00<br>(122.17 to 296.60)          | 181.91<br>(113.72 to 269.33)          | 255.66<br>(152.66 to 389.15)          | 9.42<br>(8.91 to 9.90)             | 9.32<br>(5.80 to 13.94)            | 8.64<br>(5.46 to 12.75)            | 11.83<br>(7.21 to 18.01)           |
| Esophageal cancer                    | 571.37<br>(530.95 to 607.82)          | 552.33<br>(335.78 to 875.88)          | 382.93<br>(253.45 to 577.13)          | 866.98<br>(502.13 to 1,417.14)        | 30.49<br>(28.54 to 32.26)          | 33.46<br>(20.79 to 52.27)          | 23.36<br>(15.82 to 34.78)          | 50.58<br>(29.93 to 81.89)          |
| Stomach cancer                       | 971.72<br>(932.34 to 1,013.89)        | 691.26<br>(548.41 to 880.20)          | 572.80<br>(472.05 to 696.44)          | 760.90<br>(587.79 to 976.86)          | 63.30<br>(60.76 to 66.05)          | 53.92<br>(43.26 to 68.31)          | 45.92<br>(38.17 to 55.71)          | 57.36<br>(44.52 to 73.90)          |
| Colon and rectum cancer              | 2,133.94<br>(2,029.45 to 2,270.53)    | 2,267.84<br>(1,677.34 to 3,124.54)    | 1,883.58<br>(1,417.58 to 2,571.67)    | 2,798.21<br>(2,009.80 to 3,919.13)    | 142.67<br>(135.74 to 150.97)       | 180.30<br>(132.15 to 247.41)       | 154.29<br>(116.20 to 209.69)       | 215.51<br>(154.28 to 301.25)       |
| Liver cancer                         | 803.30<br>(740.14 to 858.38)          | 985.73<br>(683.49 to 1,442.09)        | 889.41<br>(643.93 to 1,237.69)        | 1,398.26<br>(884.21 to 2,139.26)      | 46.94<br>(43.54 to 49.91)          | 65.94<br>(46.88 to 92.89)          | 61.14<br>(45.45 to 83.41)          | 86.66<br>(58.43 to 131.77)         |
| Liver cancer due to hepatitis B      | 109.57<br>(85.40 to 142.27)           | 131.79<br>(83.97 to 209.08)           | 122.78<br>(82.30 to 187.90)           | 164.35<br>(95.77 to 278.92)           | 5.42<br>(4.16 to 7.03)             | 7.57<br>(4.96 to 11.57)            | 7.23<br>(4.93 to 10.81)            | 9.05<br>(5.51 to 15.09)            |
| Liver cancer due to hepatitis C      | 301.37<br>(259.75 to 347.04)          | 402.94<br>(279.72 to 587.22)          | 380.22<br>(273.92 to 534.15)          | 487.58<br>(312.13 to 745.45)          | 19.30<br>(16.70 to 22.10)          | 29.20<br>(20.66 to 40.90)          | 28.21<br>(20.71 to 38.48)          | 33.84<br>(22.09 to 50.13)          |
| Liver cancer due to alcohol use      | 285.35<br>(228.67 to 335.64)          | 310.89<br>(194.05 to 476.87)          | 256.05<br>(165.78 to 385.40)          | 573.13<br>(334.49 to 931.57)          | 15.92<br>(12.64 to 19.04)          | 19.69<br>(12.34 to 30.05)          | 16.67<br>(10.79 to 24.77)          | 34.50<br>(20.57 to 55.00)          |
| Liver cancer due to other causes     | 107.01<br>(87.84 to 129.55)           | 140.10<br>(90.54 to 219.46)           | 130.36<br>(87.29 to 197.73)           | 173.20<br>(103.12 to 285.16)          | 6.30<br>(5.14 to 7.64)             | 9.48<br>(6.21 to 14.52)            | 9.03<br>(6.16 to 13.30)            | 11.27<br>(6.87 to 18.41)           |
| Gallbladder and biliary tract cancer | 280.79<br>(264.71 to 297.41)          | 228.95<br>(212.00 to 247.61)          | 230.23<br>(211.80 to 250.33)          | 221.24<br>(205.42 to 238.12)          | 19.15<br>(18.10 to 20.23)          | 17.90<br>(16.77 to 19.14)          | 18.47<br>(17.23 to 19.87)          | 16.88<br>(15.67 to 18.06)          |
| Pancreatic cancer                    | 1,272.34<br>(1,198.90 to 1,336.46)    | 1,426.69<br>(1,193.07 to 1,720.24)    | 1,347.64<br>(1,141.31 to 1,620.50)    | 1,575.93<br>(1,293.95 to 1,946.60)    | 76.66<br>(72.40 to 80.38)          | 97.59<br>(82.35 to 117.00)         | 94.11<br>(80.22 to 112.31)         | 104.69<br>(85.94 to 128.87)        |
| Larynx cancer                        | 180.13<br>(171.53 to 188.60)          | 128.18<br>(66.90 to 217.41)           | 77.24<br>(41.88 to 126.81)            | 222.57<br>(109.91 to 393.89)          | 9.06<br>(8.67 to 9.49)             | 7.38<br>(3.88 to 12.54)            | 4.44<br>(2.43 to 7.32)             | 12.38<br>(6.14 to 21.65)           |
| Tracheal, bronchus, and lung cancer  | 4,282.11<br>(4,137.71 to 4,447.18)    | 3,792.64<br>(2,890.84 to 4,954.65)    | 2,360.38<br>(1,839.87 to 3,021.95)    | 6,192.92<br>(4,635.17 to 8,107.09)    | 231.68<br>(223.58 to 240.55)       | 236.37<br>(178.50 to 312.87)       | 148.97<br>(114.88 to 194.44)       | 366.57<br>(272.45 to 480.91)       |
| Malignant skin melanoma              | 319.32<br>(256.80 to 348.16)          | 357.79<br>(286.14 to 398.83)          | 394.70<br>(316.44 to 446.93)          | 335.51<br>(269.98 to 373.08)          | 15.56<br>(12.29 to 16.77)          | 20.95<br>(16.43 to 22.95)          | 23.70<br>(18.72 to 26.07)          | 19.13<br>(15.00 to 20.80)          |
| Non-melanoma skin cancer             | 89.71<br>(85.22 to 94.89)             | 109.40<br>(102.12 to 117.42)          | 101.43<br>(93.65 to 109.61)           | 108.23<br>(100.55 to 116.18)          | 7.04<br>(6.71 to 7.40)             | 10.19<br>(9.53 to 10.91)           | 9.81<br>(9.17 to 10.47)            | 9.75<br>(9.00 to 10.53)            |
| Breast cancer                        | 1,629.25<br>(1,537.83 to 1,719.63)    | 1,451.24<br>(1,155.38 to 1,823.88)    | 1,248.90<br>(998.27 to 1,563.28)      | 1,760.37<br>(1,355.86 to 2,321.28)    | 86.53<br>(81.69 to 91.50)          | 93.32<br>(74.23 to 116.99)         | 82.82<br>(66.13 to 103.48)         | 109.74<br>(84.73 to 143.37)        |
| Cervical cancer                      | 227.25<br>(215.36 to 242.53)          | 153.73<br>(125.48 to 189.15)          | 131.85<br>(109.56 to 158.98)          | 169.85<br>(133.71 to 218.02)          | 11.01<br>(10.43 to 11.81)          | 9.07<br>(7.50 to 11.04)            | 7.99<br>(6.73 to 9.58)             | 9.72<br>(7.79 to 12.31)            |



| Western Europe                  |                                                     |                                                    |                                                   |                                                     |                                                  |                                                  |                                                |                                                  |
|---------------------------------|-----------------------------------------------------|----------------------------------------------------|---------------------------------------------------|-----------------------------------------------------|--------------------------------------------------|--------------------------------------------------|------------------------------------------------|--------------------------------------------------|
| Cause                           | YLLs (in 1000s)                                     |                                                    |                                                   |                                                     | Deaths (in 1000s)                                |                                                  |                                                |                                                  |
|                                 | 2016                                                | 2040 Forecast                                      | 2040 Better Scenario                              | 2040 Worse Scenario                                 | 2016                                             | 2040 Forecast                                    | 2040 Better Scenario                           | 2040 Worse Scenario                              |
| Kidney cancer                   | 505.20<br>(475.58 to 531.16)                        | 620.47<br>(514.14 to 741.82)                       | 600.33<br>(510.09 to 692.91)                      | 657.05<br>(530.53 to 810.42)                        | 30.04<br>(28.43 to 31.45)                        | 42.67<br>(36.00 to 50.28)                        | 42.29<br>(36.84 to 48.43)                      | 43.64<br>(35.64 to 52.83)                        |
| Bladder cancer                  | 558.63<br>(531.56 to 584.14)                        | 606.97<br>(476.15 to 773.14)                       | 529.12<br>(430.88 to 659.98)                      | 695.93<br>(523.98 to 919.58)                        | 42.95<br>(40.98 to 44.95)                        | 54.61<br>(43.05 to 69.36)                        | 48.73<br>(39.99 to 60.29)                      | 60.23<br>(45.51 to 78.55)                        |
| Brain and nervous system cancer | 706.14<br>(562.52 to 780.71)                        | 731.48<br>(553.12 to 817.96)                       | 706.76<br>(539.60 to 817.96)                      | 729.34<br>(552.72 to 811.39)                        | 28.20<br>(20.81 to 30.45)                        | 34.54<br>(24.20 to 38.24)                        | 34.00<br>(23.59 to 37.96)                      | 33.75<br>(23.60 to 37.15)                        |
| Thyroid cancer                  | 63.18<br>(59.19 to 67.67)                           | 66.87<br>(51.92 to 90.37)                          | 61.46<br>(48.32 to 82.10)                         | 72.81<br>(54.18 to 102.06)                          | 3.78<br>(3.57 to 4.03)                           | 4.70<br>(3.71 to 6.28)                           | 4.43<br>(3.53 to 5.84)                         | 4.95<br>(3.77 to 6.79)                           |
| Mesothelioma                    | 180.32<br>(165.39 to 200.25)                        | 220.89<br>(198.04 to 258.67)                       | 229.11<br>(203.10 to 272.00)                      | 210.83<br>(189.90 to 240.75)                        | 10.48<br>(9.66 to 11.77)                         | 14.56<br>(13.26 to 16.64)                        | 15.42<br>(14.00 to 17.96)                      | 13.61<br>(12.44 to 15.34)                        |
| Hodgkin lymphoma                | 58.98<br>(56.23 to 66.31)                           | 42.70<br>(38.97 to 47.89)                          | 36.63<br>(33.17 to 41.70)                         | 44.20<br>(40.42 to 49.43)                           | 2.42<br>(2.31 to 2.56)                           | 2.14<br>(1.98 to 2.31)                           | 1.88<br>(1.72 to 2.05)                         | 2.16<br>(2.00 to 2.32)                           |
| Non-Hodgkin lymphoma            | 612.11<br>(562.75 to 701.16)                        | 640.20<br>(538.23 to 785.89)                       | 603.88<br>(511.24 to 732.50)                      | 663.54<br>(548.62 to 833.61)                        | 35.78<br>(33.02 to 39.23)                        | 44.08<br>(37.67 to 52.85)                        | 42.67<br>(36.81 to 50.48)                      | 44.39<br>(37.38 to 54.43)                        |
| Multiple myeloma                | 339.46<br>(276.75 to 409.13)                        | 410.08<br>(321.08 to 524.45)                       | 398.32<br>(310.80 to 503.47)                      | 420.22<br>(326.03 to 548.90)                        | 22.06<br>(17.57 to 25.63)                        | 30.07<br>(23.40 to 37.52)                        | 29.93<br>(23.40 to 36.97)                      | 30.01<br>(23.09 to 38.48)                        |
| Leukemia                        | 840.54<br>(792.72 to 878.44)                        | 895.52<br>(725.23 to 1,099.10)                     | 818.73<br>(678.89 to 985.22)                      | 991.48<br>(776.28 to 1,265.39)                      | 48.00<br>(45.81 to 49.96)                        | 62.18<br>(50.66 to 76.48)                        | 58.12<br>(48.59 to 69.13)                      | 66.46<br>(52.07 to 84.19)                        |
| Acute lymphoid leukemia         | 90.77<br>(79.31 to 100.71)                          | 63.80<br>(52.00 to 79.19)                          | 56.34<br>(46.46 to 69.16)                         | 72.44<br>(57.72 to 92.39)                           | 2.74<br>(2.42 to 2.99)                           | 2.40<br>(1.94 to 2.99)                           | 2.14<br>(1.76 to 2.64)                         | 2.69<br>(2.09 to 3.45)                           |
| Chronic lymphoid leukemia       | 131.60<br>(117.20 to 158.14)                        | 147.07<br>(111.95 to 195.23)                       | 138.03<br>(107.81 to 179.40)                      | 159.55<br>(117.06 to 217.47)                        | 10.16<br>(9.21 to 11.91)                         | 12.87<br>(10.08 to 16.76)                        | 12.40<br>(9.99 to 15.82)                       | 13.46<br>(10.15 to 17.89)                        |
| Acute myeloid leukemia          | 336.77<br>(287.30 to 355.40)                        | 394.75<br>(318.26 to 479.23)                       | 372.54<br>(304.72 to 442.05)                      | 434.51<br>(340.58 to 546.52)                        | 17.35<br>(14.93 to 18.30)                        | 24.04<br>(19.57 to 27.34)                        | 23.14<br>(19.05 to 27.34)                      | 25.67<br>(20.35 to 32.12)                        |
| Chronic myeloid leukemia        | 71.68<br>(64.83 to 76.89)                           | 41.24<br>(31.38 to 53.14)                          | 33.05<br>(25.80 to 41.99)                         | 47.98<br>(34.95 to 64.41)                           | 4.62<br>(4.25 to 4.95)                           | 3.12<br>(2.43 to 4.00)                           | 2.57<br>(2.05 to 3.19)                         | 3.49<br>(2.59 to 4.63)                           |
| Other leukemia                  | 209.73<br>(187.95 to 226.26)                        | 248.66<br>(197.88 to 313.14)                       | 218.76<br>(178.99 to 271.26)                      | 277.00<br>(210.97 to 362.49)                        | 13.13<br>(11.87 to 14.17)                        | 19.75<br>(15.85 to 24.66)                        | 17.87<br>(14.70 to 21.79)                      | 21.16<br>(16.28 to 27.30)                        |
| Other neoplasms                 | 880.14<br>(814.38 to 923.90)                        | 1,026.98<br>(937.53 to 1,105.09)                   | 1,037.34<br>(943.36 to 1,124.55)                  | 996.42<br>(914.87 to 1,065.07)                      | 50.33<br>(47.14 to 52.77)                        | 71.50<br>(66.90 to 75.69)                        | 74.48<br>(68.58 to 79.41)                      | 67.30<br>(62.22 to 71.11)                        |
| <b>Cardiovascular diseases</b>  | <b>15,445.26</b><br><b>(14,978.46 to 15,945.37)</b> | <b>12,727.53</b><br><b>(9,544.61 to 17,319.68)</b> | <b>9,356.38</b><br><b>(7,290.76 to 12,237.54)</b> | <b>17,169.20</b><br><b>(12,398.43 to 23,979.43)</b> | <b>1,418.36</b><br><b>(1,372.18 to 1,466.62)</b> | <b>1,368.27</b><br><b>(1,063.28 to 1,768.39)</b> | <b>1,080.72</b><br><b>(868.11 to 1,358.15)</b> | <b>1,698.23</b><br><b>(1,292.66 to 2,255.97)</b> |
| Rheumatic heart disease         | 206.75<br>(193.31 to 222.05)                        | 153.29<br>(128.66 to 191.92)                       | 137.10<br>(115.80 to 168.75)                      | 154.47<br>(130.20 to 191.92)                        | 18.24<br>(16.93 to 19.45)                        | 16.04<br>(13.68 to 19.89)                        | 14.86<br>(12.66 to 18.13)                      | 15.65<br>(13.37 to 19.47)                        |
| Ischemic heart disease          | 8,237.38<br>(7,896.66 to 8,657.73)                  | 5,818.67<br>(3,545.90 to 9,027.26)                 | 3,715.66<br>(2,320.85 to 5,805.11)                | 8,712.99<br>(5,094.83 to 13,796.57)                 | 742.22<br>(708.49 to 789.88)                     | 607.00<br>(381.18 to 916.93)                     | 423.60<br>(269.23 to 635.99)                   | 822.68<br>(499.91 to 1,258.92)                   |
| Stroke                          | 3,274.11<br>(3,051.02 to 3,523.09)                  | 2,194.79<br>(1,480.51 to 3,297.75)                 | 1,477.81<br>(1,026.43 to 2,199.49)                | 3,167.60<br>(2,053.66 to 4,819.06)                  | 310.01<br>(284.28 to 339.48)                     | 241.74<br>(164.23 to 371.63)                     | 177.99<br>(122.62 to 272.82)                   | 315.97<br>(207.09 to 495.88)                     |
| Ischemic stroke                 | 1,528.89<br>(1,408.34 to 1,667.72)                  | 1,031.88<br>(608.88 to 1,878.91)                   | 753.22<br>(458.51 to 1,334.08)                    | 1,360.51<br>(779.68 to 2,640.80)                    | 167.82<br>(152.67 to 185.52)                     | 128.75<br>(76.63 to 228.07)                      | 99.97<br>(60.68 to 173.63)                     | 158.17<br>(90.30 to 294.93)                      |

|                                |                                       |                                     |                                   |                                       |                                 |                                |                               |                                 |
|--------------------------------|---------------------------------------|-------------------------------------|-----------------------------------|---------------------------------------|---------------------------------|--------------------------------|-------------------------------|---------------------------------|
| Intracerebral hemorrhage       | 1,745.22<br>(1,635.48 to<br>1,859.72) | 1,162.91<br>(766.29 to<br>1,765.70) | 724.59<br>(508.54 to<br>1,027.25) | 1,807.08<br>(1,133.07 to<br>2,826.67) | 142.19<br>(131.18 to<br>154.82) | 112.99<br>(78.91 to<br>164.10) | 78.02<br>(56.46 to<br>108.82) | 157.80<br>(104.19 to<br>238.31) |
| Hypertensive heart disease     | 639.96<br>(411.57 to<br>805.43)       | 891.77<br>(434.16 to<br>1,812.56)   | 732.43<br>(381.46 to<br>1,256.82) | 1,196.67<br>(573.67 to<br>2,551.12)   | 68.53<br>(35.16 to<br>84.79)    | 111.07<br>(45.49 to<br>237.34) | 95.43<br>(41.51 to<br>172.20) | 143.37<br>(57.37 to<br>322.34)  |
| Cardiomyopathy and myocarditis | 579.74<br>(436.85 to<br>637.01)       | 524.03<br>(344.94 to<br>709.58)     | 464.01<br>(309.86 to<br>622.13)   | 580.31<br>(385.54 to<br>776.01)       | 46.53<br>(32.25 to<br>52.51)    | 53.74<br>(32.32 to<br>78.95)   | 49.89<br>(30.99 to<br>72.48)  | 55.05<br>(33.42 to<br>81.25)    |
| Myocarditis                    | 82.20<br>(53.93 to<br>95.70)          | 102.63<br>(67.98 to<br>124.88)      | 106.85<br>(71.44 to<br>129.11)    | 96.41<br>(63.57 to<br>117.28)         | 8.40<br>(4.55 to<br>10.57)      | 13.45<br>(7.47 to<br>17.60)    | 14.64<br>(8.40 to<br>18.86)   | 12.09<br>(6.65 to<br>16.11)     |

| Western Europe                                                |                                                            |                                                            |                                                            |                                                            |                                                      |                                                      |                                                      |                                                      |
|---------------------------------------------------------------|------------------------------------------------------------|------------------------------------------------------------|------------------------------------------------------------|------------------------------------------------------------|------------------------------------------------------|------------------------------------------------------|------------------------------------------------------|------------------------------------------------------|
| Cause                                                         | YLLs (in 1000s)                                            |                                                            |                                                            |                                                            | Deaths (in 1000s)                                    |                                                      |                                                      |                                                      |
|                                                               | 2016                                                       | 2040 Forecast                                              | 2040 Better Scenario                                       | 2040 Worse Scenario                                        | 2016                                                 | 2040 Forecast                                        | 2040 Better Scenario                                 | 2040 Worse Scenario                                  |
| Alcoholic cardiomyopathy                                      | 133.50<br>(81.72 to<br>156.02)                             | 100.27<br>(58.18 to<br>122.24)                             | 89.87<br>(51.02 to<br>110.67)                              | 144.38<br>(86.37 to<br>174.85)                             | 5.94<br>(3.28 to<br>7.08)                            | 5.20<br>(2.86 to<br>6.42)                            | 4.79<br>(2.59 to<br>6.02)                            | 7.34<br>(4.15 to<br>8.99)                            |
| Other cardiomyopathy                                          | 364.05<br>(283.96 to<br>397.27)                            | 321.13<br>(197.32 to<br>482.72)                            | 267.29<br>(166.02 to<br>397.94)                            | 339.53<br>(209.97 to<br>509.49)                            | 32.18<br>(23.16 to<br>37.10)                         | 35.09<br>(20.15 to<br>56.93)                         | 30.45<br>(17.60 to<br>50.17)                         | 35.63<br>(20.18 to<br>58.23)                         |
| Atrial fibrillation and flutter                               | 487.60<br>(386.02 to<br>599.70)                            | 647.31<br>(488.41 to<br>834.60)                            | 612.03<br>(466.52 to<br>782.42)                            | 703.76<br>(523.88 to<br>911.31)                            | 58.80<br>(45.81 to<br>72.82)                         | 83.47<br>(63.28 to<br>108.55)                        | 81.47<br>(62.27 to<br>105.45)                        | 87.66<br>(65.74 to<br>114.35)                        |
| Aortic aneurysm                                               | 444.86<br>(426.07 to<br>465.56)                            | 454.78<br>(372.25 to<br>579.34)                            | 420.77<br>(350.80 to<br>524.53)                            | 474.33<br>(380.79 to<br>607.67)                            | 34.23<br>(32.74 to<br>35.84)                         | 41.03<br>(34.79 to<br>50.38)                         | 39.91<br>(34.28 to<br>48.21)                         | 40.68<br>(34.03 to<br>50.46)                         |
| Peripheral artery disease                                     | 191.41<br>(129.79 to<br>269.96)                            | 324.23<br>(215.12 to<br>484.21)                            | 319.68<br>(216.16 to<br>473.54)                            | 342.22<br>(221.14 to<br>520.45)                            | 19.76<br>(13.21 to<br>29.16)                         | 38.22<br>(24.90 to<br>57.48)                         | 39.38<br>(25.63 to<br>59.27)                         | 38.34<br>(25.15 to<br>58.03)                         |
| Endocarditis                                                  | 192.09<br>(139.13 to<br>246.90)                            | 238.88<br>(153.68 to<br>345.63)                            | 231.72<br>(153.00 to<br>330.89)                            | 241.01<br>(153.62 to<br>353.20)                            | 15.23<br>(10.38 to<br>18.80)                         | 22.04<br>(13.41 to<br>33.20)                         | 22.11<br>(13.57 to<br>33.39)                         | 21.48<br>(12.95 to<br>32.71)                         |
| Other cardiovascular and circulatory diseases                 | 1,191.37<br>(1,134.29 to<br>1,253.77)                      | 1,479.77<br>(1,222.44 to<br>1,855.84)                      | 1,245.18<br>(1,047.87 to<br>1,517.89)                      | 1,595.83<br>(1,299.63 to<br>2,029.40)                      | 104.81<br>(99.56 to<br>110.29)                       | 153.91<br>(131.62 to<br>187.15)                      | 136.07<br>(117.84 to<br>163.08)                      | 157.36<br>(132.50 to<br>192.73)                      |
| <b>Chronic respiratory diseases</b>                           | <b>2,642.64</b><br><b>(2,560.56 to</b><br><b>2,737.12)</b> | <b>2,734.97</b><br><b>(2,213.31 to</b><br><b>3,361.69)</b> | <b>2,083.32</b><br><b>(1,751.02 to</b><br><b>2,493.42)</b> | <b>3,795.44</b><br><b>(3,011.11 to</b><br><b>4,790.38)</b> | <b>232.14</b><br><b>(224.52 to</b><br><b>240.61)</b> | <b>275.23</b><br><b>(224.00 to</b><br><b>335.85)</b> | <b>210.89</b><br><b>(177.86 to</b><br><b>249.82)</b> | <b>363.10</b><br><b>(288.54 to</b><br><b>454.11)</b> |
| Chronic obstructive pulmonary disease                         | 2,214.41<br>(2,121.42 to<br>2,363.93)                      | 2,205.75<br>(1,694.03 to<br>2,860.52)                      | 1,493.96<br>(1,165.53 to<br>1,898.22)                      | 3,291.31<br>(2,498.43 to<br>4,334.95)                      | 201.69<br>(193.38 to<br>213.95)                      | 232.36<br>(181.54 to<br>294.53)                      | 161.86<br>(128.75 to<br>203.90)                      | 323.47<br>(249.30 to<br>413.29)                      |
| Pneumoconiosis                                                | 32.64<br>(30.29 to<br>35.53)                               | 26.67<br>(23.57 to<br>30.63)                               | 26.77<br>(23.12 to<br>32.07)                               | 25.87<br>(23.06 to<br>29.14)                               | 2.81<br>(2.61 to<br>3.06)                            | 2.46<br>(2.17 to<br>2.80)                            | 2.51<br>(2.19 to<br>2.97)                            | 2.34<br>(2.06 to<br>2.65)                            |
| Silicosis                                                     | 15.31<br>(11.66 to<br>19.59)                               | 6.52<br>(4.46 to<br>10.22)                                 | 5.11<br>(3.42 to<br>8.72)                                  | 6.71<br>(4.49 to<br>10.24)                                 | 1.39<br>(0.99 to<br>1.78)                            | 0.64<br>(0.43 to<br>0.99)                            | 0.52<br>(0.35 to<br>0.87)                            | 0.65<br>(0.41 to<br>0.97)                            |
| Asbestosis                                                    | 11.98<br>(6.87 to<br>14.39)                                | 16.14<br>(11.28 to<br>19.09)                               | 18.04<br>(13.45 to<br>21.39)                               | 14.75<br>(9.93 to<br>17.40)                                | 0.95<br>(0.50 to<br>1.15)                            | 1.41<br>(0.93 to<br>1.67)                            | 1.61<br>(1.16 to<br>1.91)                            | 1.26<br>(0.78 to<br>1.50)                            |
| Coal workers pneumoconiosis                                   | 3.55<br>(2.80 to<br>6.15)                                  | 2.68<br>(1.54 to<br>5.57)                                  | 2.31<br>(1.24 to<br>5.35)                                  | 3.02<br>(1.72 to<br>5.83)                                  | 0.33<br>(0.26 to<br>0.59)                            | 0.27<br>(0.16 to<br>0.56)                            | 0.24<br>(0.13 to<br>0.54)                            | 0.30<br>(0.17 to<br>0.58)                            |
| Other pneumoconiosis                                          | 1.79<br>(1.50 to<br>3.14)                                  | 1.33<br>(1.09 to<br>2.27)                                  | 1.31<br>(1.04 to<br>2.29)                                  | 1.38<br>(1.14 to<br>2.27)                                  | 0.15<br>(0.12 to<br>0.28)                            | 0.14<br>(0.11 to<br>0.24)                            | 0.14<br>(0.11 to<br>0.25)                            | 0.14<br>(0.11 to<br>0.23)                            |
| Asthma                                                        | 98.54<br>(92.18 to<br>118.14)                              | 45.12<br>(28.40 to<br>71.55)                               | 33.80<br>(21.93 to<br>52.86)                               | 59.17<br>(35.52 to<br>96.54)                               | 6.52<br>(6.09 to<br>7.24)                            | 3.79<br>(2.40 to<br>5.98)                            | 2.99<br>(1.95 to<br>4.66)                            | 4.67<br>(2.80 to<br>7.53)                            |
| Interstitial lung disease and pulmonary sarcoidosis           | 267.91<br>(160.34 to<br>312.19)                            | 422.94<br>(263.26 to<br>492.63)                            | 495.63<br>(323.61 to<br>575.01)                            | 382.61<br>(232.23 to<br>448.00)                            | 19.45<br>(11.52 to<br>22.34)                         | 34.17<br>(20.68 to<br>39.73)                         | 41.11<br>(26.02 to<br>47.10)                         | 30.12<br>(17.76 to<br>35.15)                         |
| Other chronic respiratory diseases                            | 29.14<br>(20.61 to<br>42.10)                               | 34.50<br>(24.40 to<br>52.12)                               | 33.15<br>(23.28 to<br>51.11)                               | 36.48<br>(25.50 to<br>55.08)                               | 1.66<br>(1.12 to<br>2.42)                            | 2.45<br>(1.66 to<br>3.75)                            | 2.42<br>(1.65 to<br>3.75)                            | 2.51<br>(1.66 to<br>3.85)                            |
| <b>Cirrhosis and other chronic liver diseases</b>             | <b>1,669.20</b><br><b>(1,571.00 to</b><br><b>1,753.62)</b> | <b>1,342.51</b><br><b>(1,236.51 to</b><br><b>1,459.23)</b> | <b>1,165.24</b><br><b>(1,063.21 to</b><br><b>1,275.04)</b> | <b>1,662.35</b><br><b>(1,531.41 to</b><br><b>1,801.74)</b> | <b>74.95</b><br><b>(70.71 to</b><br><b>78.53)</b>    | <b>71.50</b><br><b>(59.36 to</b><br><b>76.11)</b>    | <b>63.78</b><br><b>(59.36 to</b><br><b>68.18)</b>    | <b>85.89</b><br><b>(80.10 to</b><br><b>91.46)</b>    |
| Cirrhosis and other chronic liver diseases due to hepatitis B | 224.88<br>(184.00 to<br>272.37)                            | 198.52<br>(162.95 to<br>243.15)                            | 183.22<br>(149.65 to<br>225.21)                            | 200.45<br>(163.46 to<br>244.40)                            | 10.18<br>(8.37 to<br>12.35)                          | 10.59<br>(8.68 to<br>13.07)                          | 9.99<br>(8.18 to<br>12.28)                           | 10.43<br>(8.58 to<br>12.84)                          |
| Cirrhosis and other chronic liver diseases due to hepatitis C | 546.79<br>(458.14 to<br>652.09)                            | 487.03<br>(405.80 to<br>576.50)                            | 444.04<br>(369.30 to<br>527.23)                            | 494.23<br>(407.70 to<br>598.38)                            | 24.25<br>(20.63 to<br>28.38)                         | 25.22<br>(21.28 to<br>29.47)                         | 23.45<br>(19.78 to<br>27.39)                         | 24.99<br>(20.77 to<br>29.87)                         |



|                                                                |                                                            |                                                            |                                                            |                                                            |                                                     |                                                      |                                                      |                                                      |
|----------------------------------------------------------------|------------------------------------------------------------|------------------------------------------------------------|------------------------------------------------------------|------------------------------------------------------------|-----------------------------------------------------|------------------------------------------------------|------------------------------------------------------|------------------------------------------------------|
| Cirrhosis and other chronic liver diseases due to alcohol use  | 782.28<br>(685.90 to<br>882.16)                            | 554.23<br>(478.43 to<br>637.99)                            | 443.29<br>(377.40 to<br>513.43)                            | 864.13<br>(757.72 to<br>977.01)                            | 34.76<br>(30.80 to<br>38.62)                        | 29.46<br>(25.66 to<br>33.35)                         | 24.44<br>(21.00 to<br>27.92)                         | 44.37<br>(39.18 to<br>49.25)                         |
| Cirrhosis and other chronic liver diseases due to other causes | 115.25<br>(91.79 to<br>144.09)                             | 102.73<br>(80.66 to<br>127.91)                             | 94.69<br>(74.35 to<br>118.18)                              | 103.55<br>(81.14 to<br>129.23)                             | 5.76<br>(4.63 to<br>7.29)                           | 6.24<br>(4.89 to<br>8.01)                            | 5.90<br>(4.64 to<br>7.60)                            | 6.10<br>(4.75 to<br>7.90)                            |
| <b>Digestive diseases</b>                                      | <b>1,311.51</b><br><b>(1,153.43 to</b><br><b>1,567.40)</b> | <b>1,463.49</b><br><b>(1,247.40 to</b><br><b>1,743.75)</b> | <b>1,396.66</b><br><b>(1,189.75 to</b><br><b>1,669.19)</b> | <b>1,505.96</b><br><b>(1,273.74 to</b><br><b>1,811.07)</b> | <b>108.99</b><br><b>(96.09 to</b><br><b>124.29)</b> | <b>146.34</b><br><b>(124.71 to</b><br><b>170.55)</b> | <b>144.47</b><br><b>(125.02 to</b><br><b>167.79)</b> | <b>145.18</b><br><b>(122.02 to</b><br><b>170.95)</b> |
| Peptic ulcer disease                                           | 166.93<br>(150.52 to<br>206.77)                            | 117.50<br>(96.92 to<br>143.61)                             | 99.64<br>(82.60 to<br>122.78)                              | 126.07<br>(102.58 to<br>155.78)                            | 13.42<br>(12.30 to<br>16.13)                        | 11.89<br>(10.02 to<br>14.32)                         | 10.46<br>(8.80 to<br>12.57)                          | 12.20<br>(10.14 to<br>14.80)                         |

| Western Europe                             |                                    |                                    |                                    |                                    |                              |                                |                                |                                |
|--------------------------------------------|------------------------------------|------------------------------------|------------------------------------|------------------------------------|------------------------------|--------------------------------|--------------------------------|--------------------------------|
| Cause                                      | YLLs (in 1000s)                    |                                    |                                    |                                    | Deaths (in 1000s)            |                                |                                |                                |
|                                            | 2016                               | 2040 Forecast                      | 2040 Better Scenario               | 2040 Worse Scenario                | 2016                         | 2040 Forecast                  | 2040 Better Scenario           | 2040 Worse Scenario            |
| Gastritis and duodenitis                   | 17.29<br>(13.31 to 22.88)          | 16.72<br>(13.13 to 21.81)          | 15.42<br>(12.08 to 20.14)          | 16.68<br>(13.11 to 21.74)          | 1.23<br>(0.88 to 1.52)       | 1.52<br>(1.08 to 1.92)         | 1.46<br>(1.06 to 1.82)         | 1.46<br>(1.00 to 1.84)         |
| Appendicitis                               | 17.35<br>(14.33 to 25.98)          | 14.65<br>(11.79 to 22.14)          | 12.80<br>(10.28 to 19.24)          | 15.04<br>(12.10 to 22.45)          | 1.14<br>(0.93 to 1.68)       | 1.22<br>(0.99 to 1.80)         | 1.10<br>(0.89 to 1.64)         | 1.22<br>(0.97 to 1.80)         |
| Paralytic ileus and intestinal obstruction | 248.56<br>(189.63 to 293.33)       | 329.86<br>(250.48 to 397.09)       | 342.51<br>(261.43 to 411.46)       | 311.19<br>(236.86 to 374.37)       | 22.31<br>(16.75 to 25.54)    | 34.97<br>(26.32 to 40.81)      | 37.37<br>(28.14 to 43.55)      | 32.08<br>(24.00 to 37.34)      |
| Inguinal, femoral, and abdominal hernia    | 47.54<br>(39.48 to 72.29)          | 38.18<br>(31.31 to 57.85)          | 36.42<br>(29.61 to 55.30)          | 37.32<br>(30.54 to 56.13)          | 4.42<br>(3.65 to 6.68)       | 4.13<br>(3.35 to 6.19)         | 4.07<br>(3.30 to 6.12)         | 3.92<br>(3.19 to 5.93)         |
| Inflammatory bowel disease                 | 99.95<br>(63.78 to 115.80)         | 112.07<br>(72.80 to 131.03)        | 114.63<br>(74.70 to 134.72)        | 106.97<br>(68.99 to 125.43)        | 7.96<br>(4.85 to 9.18)       | 10.76<br>(6.88 to 12.49)       | 11.36<br>(7.29 to 13.22)       | 9.94<br>(6.25 to 11.58)        |
| Vascular intestinal disorders              | 226.84<br>(191.28 to 264.70)       | 288.97<br>(240.23 to 336.43)       | 284.73<br>(236.57 to 333.25)       | 280.12<br>(232.98 to 326.39)       | 19.46<br>(16.50 to 21.88)    | 28.84<br>(24.12 to 32.89)      | 29.23<br>(24.14 to 33.38)      | 27.23<br>(22.47 to 31.24)      |
| Gallbladder and biliary diseases           | 142.84<br>(129.16 to 174.53)       | 165.15<br>(101.41 to 270.85)       | 137.95<br>(86.45 to 223.00)        | 200.39<br>(119.19 to 330.73)       | 14.08<br>(12.76 to 16.76)    | 18.96<br>(11.70 to 30.85)      | 16.37<br>(10.32 to 26.35)      | 22.14<br>(13.38 to 36.38)      |
| Pancreatitis                               | 161.33<br>(139.93 to 219.94)       | 150.28<br>(101.62 to 231.69)       | 124.89<br>(85.52 to 191.47)        | 189.70<br>(122.58 to 298.05)       | 9.21<br>(8.16 to 12.19)      | 10.57<br>(7.23 to 16.01)       | 9.05<br>(6.28 to 13.66)        | 12.98<br>(8.50 to 20.66)       |
| Other digestive diseases                   | 182.87<br>(144.27 to 216.36)       | 230.11<br>(184.38 to 271.34)       | 227.67<br>(182.58 to 267.20)       | 222.48<br>(177.42 to 260.88)       | 15.75<br>(13.04 to 18.13)    | 23.49<br>(19.46 to 27.47)      | 23.98<br>(20.06 to 27.85)      | 22.02<br>(18.27 to 25.75)      |
| Neurological disorders                     | 4,641.66<br>(4,134.25 to 5,226.24) | 6,471.17<br>(5,213.02 to 8,294.21) | 6,537.13<br>(5,315.92 to 8,193.41) | 6,732.60<br>(5,248.15 to 9,090.32) | 523.43<br>(458.12 to 594.62) | 803.04<br>(642.35 to 1,042.30) | 834.22<br>(676.77 to 1,056.96) | 814.26<br>(626.56 to 1,103.13) |
| Alzheimer's disease and other dementias    | 3,493.74<br>(3,024.78 to 4,104.39) | 5,069.76<br>(3,873.54 to 6,879.02) | 5,105.33<br>(3,938.98 to 6,754.19) | 5,342.87<br>(3,891.98 to 7,650.40) | 452.51<br>(389.89 to 523.95) | 699.11<br>(538.33 to 934.02)   | 723.69<br>(564.40 to 938.36)   | 715.40<br>(528.41 to 1,002.14) |
| Parkinson's disease                        | 391.99<br>(297.73 to 510.82)       | 594.85<br>(456.83 to 776.68)       | 640.88<br>(488.99 to 839.63)       | 552.32<br>(419.60 to 721.76)       | 38.23<br>(29.20 to 50.37)    | 61.97<br>(47.30 to 80.60)      | 68.25<br>(52.60 to 88.81)      | 56.39<br>(42.80 to 72.89)      |
| Epilepsy                                   | 197.77<br>(185.85 to 214.19)       | 203.67<br>(152.49 to 267.24)       | 182.89<br>(139.25 to 237.30)       | 242.23<br>(174.07 to 324.00)       | 7.84<br>(7.41 to 8.44)       | 10.20<br>(7.55 to 13.41)       | 9.56<br>(7.18 to 12.39)        | 11.85<br>(8.33 to 16.00)       |
| Multiple sclerosis                         | 123.45<br>(93.06 to 145.87)        | 113.25<br>(83.20 to 136.69)        | 112.51<br>(82.32 to 135.07)        | 116.07<br>(86.29 to 142.66)        | 4.80<br>(3.45 to 5.48)       | 4.87<br>(3.41 to 5.81)         | 4.92<br>(3.42 to 5.79)         | 4.90<br>(3.44 to 5.90)         |
| Motor neuron disease                       | 212.03<br>(199.14 to 222.00)       | 252.97<br>(230.94 to 276.69)       | 254.13<br>(230.73 to 276.69)       | 247.84<br>(227.37 to 268.84)       | 10.36<br>(9.72 to 10.82)     | 14.04<br>(12.90 to 15.23)      | 14.30<br>(13.06 to 15.65)      | 13.54<br>(12.49 to 14.62)      |
| Other neurological disorders               | 222.68<br>(200.43 to 236.20)       | 236.65<br>(211.60 to 257.24)       | 241.39<br>(215.02 to 263.83)       | 231.27<br>(206.84 to 250.91)       | 9.69<br>(8.95 to 10.22)      | 12.85<br>(11.75 to 13.77)      | 13.49<br>(12.30 to 14.52)      | 12.18<br>(11.18 to 12.98)      |
| Mental disorders                           | 851.32<br>(779.66 to 900.81)       | 1,049.15<br>(917.98 to 1,181.73)   | 1,132.22<br>(993.51 to 1,281.33)   | 1,059.65<br>(939.37 to 1,188.62)   | 25.81<br>(24.05 to 27.21)    | 34.37<br>(31.38 to 37.44)      | 37.64<br>(34.38 to 41.19)      | 34.50<br>(31.45 to 37.56)      |
| Alcohol use disorders                      | 443.19<br>(409.01 to 476.42)       | 379.26<br>(334.52 to 425.07)       | 378.70<br>(332.61 to 427.49)       | 427.67<br>(379.14 to 477.37)       | 15.26<br>(14.13 to 16.29)    | 14.62<br>(13.13 to 16.07)      | 14.82<br>(13.20 to 16.42)      | 16.27<br>(14.65 to 17.84)      |
| Drug use disorders                         | 403.38<br>(354.94 to 428.98)       | 665.62<br>(563.51 to 773.31)       | 748.96<br>(637.48 to 872.44)       | 627.82<br>(535.01 to 727.61)       | 10.46<br>(9.36 to 11.06)     | 19.67<br>(17.45 to 21.86)      | 22.73<br>(20.27 to 25.36)      | 18.15<br>(16.00 to 20.28)      |
| Opioid use disorders                       | 194.88<br>(162.11 to 229.89)       | 226.02<br>(178.69 to 287.04)       | 233.01<br>(183.16 to 300.17)       | 222.38<br>(177.05 to 281.57)       | 4.54<br>(3.74 to 5.30)       | 5.75<br>(4.52 to 6.99)         | 6.04<br>(4.74 to 7.46)         | 5.57<br>(4.40 to 6.78)         |

|                           |                                 |                                 |                                 |                                 |                           |                              |                              |                             |
|---------------------------|---------------------------------|---------------------------------|---------------------------------|---------------------------------|---------------------------|------------------------------|------------------------------|-----------------------------|
|                           | 5.02<br>(2.96 to<br>5.66)       | 12.30<br>(7.52 to<br>15.17)     | 13.78<br>(8.51 to<br>17.04)     | 11.61<br>(7.16 to<br>14.46)     | 0.12<br>(0.07 to<br>0.14) | 0.32<br>(0.20 to<br>0.38)    | 0.36<br>(0.22 to<br>0.43)    | 0.30<br>(0.18 to<br>0.35)   |
| Cocaine use disorders     | 15.49<br>(8.87 to<br>17.62)     | 56.82<br>(35.71 to<br>71.69)    | 67.71<br>(43.19 to<br>85.59)    | 32.00<br>(33.06 to<br>65.75)    | 0.32<br>(0.19 to<br>0.36) | 1.21<br>(0.78 to<br>1.49)    | 1.46<br>(0.96 to<br>1.80)    | 1.10<br>(0.72 to<br>1.36)   |
| Amphetamine use disorders | 187.99<br>(145.04 to<br>213.49) | 370.48<br>(294.69 to<br>441.73) | 434.46<br>(348.55 to<br>514.70) | 341.83<br>(268.48 to<br>409.46) | 5.47<br>(4.53 to<br>6.21) | 12.38<br>(10.50 to<br>14.14) | 14.87<br>(12.61 to<br>16.82) | 11.19<br>(9.53 to<br>12.77) |
| Other drug use disorders  | 4.75<br>(4.19 to<br>5.28)       | 4.27<br>(3.46 to<br>5.11)       | 4.56<br>(3.67 to<br>5.49)       | 4.16<br>(3.39 to<br>4.96)       | 0.09<br>(0.08 to<br>0.10) | 0.08<br>(0.07 to<br>0.10)    | 0.09<br>(0.07 to<br>0.11)    | 0.08<br>(0.07 to<br>0.10)   |
| Eating disorders          |                                 |                                 |                                 |                                 |                           |                              |                              |                             |

| Western Europe                                             |                                           |                                           |                                           |                                           |                                     |                                     |                                     |                                     |
|------------------------------------------------------------|-------------------------------------------|-------------------------------------------|-------------------------------------------|-------------------------------------------|-------------------------------------|-------------------------------------|-------------------------------------|-------------------------------------|
| Cause                                                      | YLLs (in 1000s)                           |                                           |                                           |                                           | Deaths (in 1000s)                   |                                     |                                     |                                     |
|                                                            | 2016                                      | 2040 Forecast                             | 2040 Better Scenario                      | 2040 Worse Scenario                       | 2016                                | 2040 Forecast                       | 2040 Better Scenario                | 2040 Worse Scenario                 |
| <b>Diabetes, urogenital, blood, and endocrine diseases</b> | <b>2,772.12</b><br>(2,662.00 to 2,867.36) | <b>3,775.39</b><br>(2,931.77 to 5,269.73) | <b>3,319.24</b><br>(2,604.27 to 4,589.98) | <b>4,248.95</b><br>(3,226.00 to 5,949.54) | <b>238.19</b><br>(229.38 to 246.76) | <b>386.59</b><br>(304.75 to 535.79) | <b>350.83</b><br>(280.35 to 485.70) | <b>420.75</b><br>(324.27 to 588.55) |
| Diabetes mellitus                                          | 1,092.96<br>(1,045.42 to 1,141.01)        | 1,196.72<br>(837.59 to 1,669.93)          | 972.05<br>(697.54 to 1,341.12)            | 1,397.59<br>(945.57 to 1,983.97)          | 90.72<br>(86.51 to 94.90)           | 117.15<br>(85.85 to 155.83)         | 99.97<br>(74.52 to 133.63)          | 129.84<br>(92.45 to 178.36)         |
| Acute glomerulonephritis                                   | 2.35<br>(2.24 to 2.44)                    | 1.81<br>(1.60 to 2.04)                    | 1.65<br>(1.45 to 1.89)                    | 1.88<br>(1.66 to 2.10)                    | 0.09<br>(0.08 to 0.09)              | 0.07<br>(0.06 to 0.09)              | 0.07<br>(0.06 to 0.08)              | 0.07<br>(0.06 to 0.08)              |
| Chronic kidney disease                                     | 887.61<br>(852.87 to 924.21)              | 1,528.14<br>(824.51 to 3,026.99)          | 1,305.54<br>(721.52 to 2,694.99)          | 1,827.53<br>(933.52 to 3,580.61)          | 88.65<br>(85.07 to 92.35)           | 171.60<br>(95.48 to 320.50)         | 151.63<br>(86.83 to 289.84)         | 198.55<br>(105.02 to 371.89)        |
| Chronic kidney disease due to diabetes mellitus            | 307.22<br>(285.89 to 329.83)              | 570.02<br>(296.62 to 1,189.38)            | 483.41<br>(260.89 to 1,001.46)            | 693.94<br>(339.58 to 1,380.48)            | 26.63<br>(24.41 to 29.15)           | 55.91<br>(29.60 to 110.75)          | 49.02<br>(26.83 to 98.50)           | 65.73<br>(33.05 to 127.19)          |
| Chronic kidney disease due to hypertension                 | 165.05<br>(144.56 to 188.11)              | 335.75<br>(176.08 to 645.42)              | 297.81<br>(164.25 to 571.42)              | 388.49<br>(195.10 to 731.56)              | 21.97<br>(19.13 to 25.18)           | 47.45<br>(25.82 to 87.06)           | 43.36<br>(24.80 to 79.65)           | 53.41<br>(27.64 to 97.69)           |
| Chronic kidney disease due to glomerulonephritis           | 159.19<br>(145.53 to 173.12)              | 225.27<br>(118.00 to 441.54)              | 187.14<br>(101.94 to 376.01)              | 271.48<br>(135.76 to 538.06)              | 14.54<br>(12.98 to 16.09)           | 23.65<br>(12.68 to 46.37)           | 20.20<br>(11.24 to 39.04)           | 27.76<br>(14.22 to 53.72)           |
| Chronic kidney disease due to other and unspecified causes | 256.15<br>(229.96 to 281.97)              | 397.10<br>(211.68 to 766.96)              | 337.17<br>(187.07 to 665.07)              | 473.62<br>(241.35 to 922.70)              | 25.51<br>(22.58 to 28.77)           | 44.59<br>(24.28 to 84.34)           | 39.04<br>(22.07 to 74.01)           | 51.65<br>(26.81 to 97.49)           |
| Urinary diseases and male infertility                      | 285.77<br>(275.27 to 298.03)              | 418.13<br>(385.52 to 453.97)              | 401.63<br>(365.45 to 440.82)              | 408.64<br>(376.44 to 443.62)              | 30.22<br>(29.03 to 31.54)           | 52.31<br>(47.88 to 56.82)           | 51.79<br>(47.27 to 56.53)           | 49.64<br>(45.13 to 54.27)           |
| Urinary tract infections                                   | 254.43<br>(239.15 to 265.61)              | 385.40<br>(353.30 to 418.39)              | 371.83<br>(338.02 to 409.32)              | 375.84<br>(344.58 to 407.15)              | 27.58<br>(26.09 to 28.82)           | 48.87<br>(44.80 to 53.16)           | 48.55<br>(44.32 to 52.93)           | 46.32<br>(42.00 to 50.79)           |
| Urolithiasis                                               | 12.91<br>(9.84 to 23.86)                  | 13.56<br>(9.82 to 25.39)                  | 12.19<br>(8.73 to 23.22)                  | 13.78<br>(10.01 to 25.89)                 | 1.05<br>(0.78 to 2.00)              | 1.29<br>(0.93 to 2.52)              | 1.20<br>(0.85 to 2.31)              | 1.27<br>(0.91 to 2.45)              |
| Other urinary diseases                                     | 18.43<br>(14.14 to 28.64)                 | 19.16<br>(14.14 to 31.46)                 | 17.61<br>(12.86 to 29.12)                 | 19.02<br>(14.09 to 30.80)                 | 1.60<br>(1.21 to 2.57)              | 2.14<br>(1.55 to 3.53)              | 2.04<br>(1.48 to 3.42)              | 2.05<br>(1.47 to 3.37)              |
| Gynecological diseases                                     | 3.25<br>(2.32 to 4.00)                    | 1.97<br>(1.48 to 2.50)                    | 1.59<br>(1.21 to 2.02)                    | 2.14<br>(1.59 to 2.68)                    | 0.19<br>(0.13 to 0.23)              | 0.14<br>(0.10 to 0.18)              | 0.12<br>(0.09 to 0.15)              | 0.15<br>(0.11 to 0.18)              |
| Uterine fibroids                                           | 0.84<br>(0.62 to 1.08)                    | 0.47<br>(0.34 to 0.63)                    | 0.40<br>(0.29 to 0.55)                    | 0.50<br>(0.37 to 0.68)                    | 0.03<br>(0.02 to 0.04)              | 0.02<br>(0.02 to 0.05)              | 0.02<br>(0.03 to 0.03)              | 0.02<br>(0.02 to 0.03)              |
| Polycystic ovarian syndrome                                | 0.09<br>(0.07 to 0.13)                    | 0.02<br>(0.02 to 0.04)                    | 0.02<br>(0.01 to 0.03)                    | 0.03<br>(0.02 to 0.04)                    | 0.00<br>(0.00 to 0.00)              | 0.00<br>(0.00 to 0.00)              | 0.00<br>(0.00 to 0.00)              | 0.00<br>(0.00 to 0.00)              |
| Endometriosis                                              | 0.02<br>(0.01 to 0.04)                    | 0.01<br>(0.01 to 0.02)                    | 0.01<br>(0.01 to 0.02)                    | 0.02<br>(0.01 to 0.03)                    | 0.00<br>(0.00 to 0.00)              | 0.00<br>(0.00 to 0.00)              | 0.00<br>(0.00 to 0.00)              | 0.00<br>(0.00 to 0.00)              |
| Genital prolapse                                           | 0.34<br>(0.17 to 0.45)                    | 0.20<br>(0.10 to 0.29)                    | 0.16<br>(0.08 to 0.24)                    | 0.22<br>(0.11 to 0.30)                    | 0.03<br>(0.01 to 0.04)              | 0.02<br>(0.01 to 0.03)              | 0.01<br>(0.01 to 0.02)              | 0.02<br>(0.01 to 0.03)              |
| Other gynecological diseases                               | 1.96<br>(1.40 to 2.49)                    | 1.26<br>(0.94 to 1.63)                    | 1.00<br>(0.75 to 1.34)                    | 1.38<br>(1.03 to 1.82)                    | 0.12<br>(0.09 to 0.16)              | 0.10<br>(0.07 to 0.13)              | 0.08<br>(0.06 to 0.11)              | 0.11<br>(0.08 to 0.14)              |
| Hemoglobinopathies and hemolytic anemias                   | 94.24<br>(82.52 to 124.00)                | 98.54<br>(83.74 to 129.11)                | 89.89<br>(76.51 to 116.90)                | 97.85<br>(83.29 to 129.03)                | 8.12<br>(6.63 to 10.40)             | 10.65<br>(8.54 to 13.24)            | 10.09<br>(7.98 to 12.47)            | 10.22<br>(8.19 to 12.84)            |
| Thalassemias                                               | 7.37<br>(6.37 to 9.76)                    | 3.92<br>(3.12 to 5.98)                    | 3.86<br>(3.06 to 5.97)                    | 3.94<br>(3.15 to 5.96)                    | 0.14<br>(0.08 to 0.20)              | 0.10<br>(0.08 to 0.17)              | 0.10<br>(0.08 to 0.17)              | 0.10<br>(0.08 to 0.16)              |

|                                                   |                                 |                                 |                                 |                                 |                              |                              |                              |                              |
|---------------------------------------------------|---------------------------------|---------------------------------|---------------------------------|---------------------------------|------------------------------|------------------------------|------------------------------|------------------------------|
|                                                   | 6.45<br>(5.20 to<br>10.18)      | 8.22<br>(6.28 to<br>13.56)      | 7.02<br>(5.30 to<br>11.51)      | 8.73<br>(6.62 to<br>14.19)      | 0.19<br>(0.15 to<br>0.29)    | 0.36<br>(0.27 to<br>0.58)    | 0.31<br>(0.23 to<br>0.50)    | 0.37<br>(0.28 to<br>0.60)    |
| Sickle cell disorders                             |                                 |                                 |                                 |                                 |                              |                              |                              |                              |
|                                                   | 11.23<br>(9.51 to<br>14.85)     | 13.16<br>(10.77 to<br>17.82)    | 11.05<br>(8.93 to<br>15.08)     | 13.58<br>(11.18 to<br>18.43)    | 0.43<br>(0.36 to<br>0.56)    | 0.72<br>(0.58 to<br>0.95)    | 0.62<br>(0.50 to<br>0.82)    | 0.72<br>(0.59 to<br>0.96)    |
| G6PD deficiency                                   |                                 |                                 |                                 |                                 |                              |                              |                              |                              |
|                                                   | 69.19<br>(59.16 to<br>91.11)    | 73.25<br>(60.53 to<br>94.34)    | 67.96<br>(55.92 to<br>86.60)    | 71.59<br>(58.91 to<br>92.53)    | 7.37<br>(5.93 to<br>9.33)    | 9.48<br>(7.44 to<br>11.69)   | 9.06<br>(7.06 to<br>10.99)   | 9.02<br>(7.05 to<br>11.13)   |
| Other hemoglobinopathies and hemolytic anemias    |                                 |                                 |                                 |                                 |                              |                              |                              |                              |
|                                                   | 405.92<br>(267.10 to<br>443.09) | 530.09<br>(342.87 to<br>597.59) | 546.90<br>(356.90 to<br>619.76) | 513.34<br>(333.47 to<br>575.51) | 20.19<br>(12.22 to<br>22.12) | 34.66<br>(21.02 to<br>38.62) | 37.17<br>(22.76 to<br>41.69) | 32.28<br>(19.49 to<br>36.03) |
| Endocrine, metabolic, blood, and immune disorders |                                 |                                 |                                 |                                 |                              |                              |                              |                              |

| Western Europe                                |                                     |                                     |                                     |                                     |                                  |                                  |                                  |                                  |
|-----------------------------------------------|-------------------------------------|-------------------------------------|-------------------------------------|-------------------------------------|----------------------------------|----------------------------------|----------------------------------|----------------------------------|
| Cause                                         | YLLs (in 1000s)                     |                                     |                                     |                                     | Deaths (in 1000s)                |                                  |                                  |                                  |
|                                               | 2016                                | 2040 Forecast                       | 2040 Better Scenario                | 2040 Worse Scenario                 | 2016                             | 2040 Forecast                    | 2040 Better Scenario             | 2040 Worse Scenario              |
| <b>Musculoskeletal disorders</b>              | <b>179.78</b><br>(161.91 to 193.59) | <b>245.41</b><br>(216.81 to 272.82) | <b>232.14</b><br>(205.28 to 261.62) | <b>245.95</b><br>(216.89 to 276.43) | <b>14.12</b><br>(12.22 to 15.26) | <b>23.18</b><br>(19.99 to 25.62) | <b>22.71</b><br>(19.41 to 25.28) | <b>22.48</b><br>(19.21 to 24.96) |
| Rheumatoid arthritis                          | 50.71<br>(42.90 to 70.99)           | 72.46<br>(59.48 to 100.51)          | 60.29<br>(48.72 to 84.76)           | 77.62<br>(62.46 to 108.75)          | 3.80<br>(3.26 to 5.47)           | 6.26<br>(5.17 to 8.67)           | 5.35<br>(4.41 to 7.57)           | 6.53<br>(5.39 to 9.04)           |
| Other musculoskeletal disorders               | 129.07<br>(102.70 to 139.11)        | 172.95<br>(136.78 to 192.40)        | 171.85<br>(139.24 to 192.11)        | 168.33<br>(131.84 to 186.87)        | 10.32<br>(8.12 to 11.14)         | 16.91<br>(13.99 to 18.86)        | 17.36<br>(13.94 to 19.27)        | 15.95<br>(12.51 to 17.94)        |
| <b>Other non-communicable diseases</b>        | <b>739.17</b><br>(646.08 to 818.90) | <b>671.37</b><br>(539.64 to 803.06) | <b>606.44</b><br>(480.49 to 730.71) | <b>706.23</b><br>(574.93 to 836.31) | <b>20.97</b><br>(15.20 to 26.97) | <b>36.06</b><br>(22.85 to 49.00) | <b>35.42</b><br>(21.49 to 48.41) | <b>35.03</b><br>(21.80 to 47.45) |
| Congenital birth defects                      | 549.74<br>(467.67 to 617.30)        | 364.25<br>(308.14 to 420.20)        | 310.33<br>(260.63 to 358.49)        | 401.96<br>(338.50 to 469.75)        | 8.24<br>(6.86 to 9.10)           | 8.22<br>(5.07 to 7.02)           | 5.49<br>(4.43 to 6.24)           | 6.70<br>(5.41 to 7.70)           |
| Neural tube defects                           | 14.45<br>(9.96 to 17.24)            | 4.04<br>(2.78 to 5.36)              | 3.06<br>(2.13 to 4.03)              | 4.76<br>(3.29 to 6.32)              | 0.19<br>(0.13 to 0.23)           | 0.06<br>(0.04 to 0.08)           | 0.05<br>(0.03 to 0.06)           | 0.07<br>(0.05 to 0.09)           |
| Congenital heart anomalies                    | 194.14<br>(157.71 to 222.64)        | 87.90<br>(71.18 to 107.39)          | 64.69<br>(52.31 to 81.12)           | 103.36<br>(82.17 to 127.74)         | 2.78<br>(2.34 to 3.24)           | 1.34<br>(1.11 to 1.72)           | 1.00<br>(0.82 to 1.31)           | 1.56<br>(1.28 to 1.99)           |
| Orofacial clefts                              | 0.27<br>(0.13 to 0.56)              | 0.11<br>(0.05 to 0.23)              | 0.07<br>(0.03 to 0.14)              | 0.13<br>(0.06 to 0.27)              | 0.00<br>(0.00 to 0.01)           | 0.00<br>(0.00 to 0.00)           | 0.00<br>(0.00 to 0.00)           | 0.00<br>(0.00 to 0.00)           |
| Down syndrome                                 | 74.16<br>(50.63 to 84.45)           | 85.36<br>(57.89 to 96.90)           | 86.62<br>(58.61 to 98.40)           | 85.09<br>(57.02 to 96.41)           | 1.75<br>(1.14 to 1.93)           | 2.21<br>(1.45 to 2.53)           | 2.26<br>(1.48 to 2.59)           | 2.19<br>(1.43 to 2.49)           |
| Other chromosomal abnormalities               | 81.06<br>(61.55 to 122.89)          | 87.34<br>(67.53 to 112.84)          | 77.77<br>(60.64 to 99.76)           | 94.70<br>(72.58 to 123.29)          | 1.07<br>(0.81 to 1.54)           | 1.21<br>(0.94 to 1.49)           | 1.09<br>(0.84 to 1.33)           | 1.31<br>(1.00 to 1.64)           |
| Congenital musculoskeletal and limb anomalies | 17.18<br>(12.92 to 24.49)           | 9.68<br>(7.37 to 13.83)             | 7.64<br>(5.85 to 10.99)             | 11.08<br>(8.39 to 15.55)            | 0.23<br>(0.18 to 0.31)           | 0.14<br>(0.11 to 0.18)           | 0.11<br>(0.08 to 0.14)           | 0.16<br>(0.12 to 0.20)           |
| Urogenital congenital anomalies               | 13.52<br>(6.06 to 18.89)            | 7.36<br>(3.34 to 10.73)             | 5.97<br>(2.74 to 8.78)              | 8.28<br>(3.76 to 12.07)             | 0.18<br>(0.09 to 0.26)           | 0.11<br>(0.05 to 0.15)           | 0.09<br>(0.04 to 0.12)           | 0.12<br>(0.06 to 0.17)           |
| Digestive congenital anomalies                | 35.46<br>(20.06 to 44.40)           | 18.53<br>(9.83 to 24.13)            | 14.13<br>(7.61 to 18.45)            | 21.63<br>(11.95 to 28.36)           | 0.44<br>(0.26 to 0.55)           | 0.24<br>(0.13 to 0.31)           | 0.18<br>(0.10 to 0.24)           | 0.28<br>(0.16 to 0.36)           |
| Other congenital birth defects                | 119.51<br>(95.87 to 152.80)         | 63.94<br>(50.97 to 85.37)           | 50.38<br>(40.01 to 67.68)           | 72.93<br>(58.19 to 96.62)           | 1.59<br>(1.28 to 1.99)           | 0.90<br>(0.73 to 1.16)           | 0.71<br>(0.58 to 0.93)           | 1.01<br>(0.82 to 1.31)           |
| Skin and subcutaneous diseases                | 126.01<br>(70.00 to 192.02)         | 274.77<br>(154.75 to 409.41)        | 268.76<br>(151.43 to 403.28)        | 267.84<br>(150.97 to 400.96)        | 11.99<br>(6.22 to 18.00)         | 29.47<br>(15.43 to 42.75)        | 29.62<br>(15.65 to 42.99)        | 27.91<br>(14.73 to 40.46)        |
| Cellulitis                                    | 32.69<br>(18.29 to 59.11)           | 74.69<br>(43.18 to 137.71)          | 74.73<br>(43.15 to 137.80)          | 72.62<br>(41.63 to 133.60)          | 2.53<br>(1.41 to 4.70)           | 6.58<br>(3.85 to 12.55)          | 6.79<br>(3.98 to 12.74)          | 6.19<br>(3.60 to 11.80)          |
| Pyoderma                                      | 53.76<br>(25.64 to 77.69)           | 143.21<br>(68.57 to 197.71)         | 141.06<br>(67.18 to 193.63)         | 138.96<br>(66.93 to 194.52)         | 4.94<br>(2.19 to 7.00)           | 15.49<br>(7.04 to 20.78)         | 15.77<br>(7.14 to 21.19)         | 14.57<br>(6.70 to 19.76)         |
| Decubitus ulcer                               | 32.33<br>(16.09 to 51.53)           | 46.90<br>(23.56 to 76.81)           | 43.36<br>(22.12 to 70.48)           | 46.52<br>(23.31 to 75.56)           | 3.84<br>(1.78 to 5.86)           | 6.32<br>(2.97 to 10.05)          | 5.98<br>(2.80 to 9.48)           | 6.13<br>(2.91 to 9.83)           |
| Other skin and subcutaneous diseases          | 7.23<br>(4.13 to 13.08)             | 9.97<br>(5.75 to 18.18)             | 9.62<br>(5.55 to 17.60)             | 9.74<br>(5.62 to 17.80)             | 0.68<br>(0.36 to 1.18)           | 1.08<br>(0.59 to 1.93)           | 1.07<br>(0.58 to 1.92)           | 1.02<br>(0.56 to 1.84)           |
| Sudden infant death syndrome                  | 63.42<br>(54.19 to 73.52)           | 32.35<br>(24.76 to 41.69)           | 27.35<br>(20.87 to 35.25)           | 36.43<br>(27.94 to 46.88)           | 0.74<br>(0.63 to 0.85)           | 0.38<br>(0.29 to 0.48)           | 0.32<br>(0.24 to 0.41)           | 0.42<br>(0.32 to 0.54)           |

|                          |                                       |                                       |                                       |                                       |                                 |                                 |                                 |                                 |
|--------------------------|---------------------------------------|---------------------------------------|---------------------------------------|---------------------------------------|---------------------------------|---------------------------------|---------------------------------|---------------------------------|
| Injuries                 | 4,543.61<br>(4,309.12 to<br>4,975.82) | 3,485.87<br>(2,878.00 to<br>4,293.65) | 3,039.91<br>(2,541.84 to<br>3,695.49) | 4,165.92<br>(3,325.01 to<br>5,313.33) | 187.43<br>(170.45 to<br>197.57) | 199.01<br>(169.29 to<br>227.03) | 187.06<br>(159.27 to<br>211.86) | 212.43<br>(178.76 to<br>248.17) |
| Transport injuries       | 1,103.20<br>(993.43 to<br>1,161.03)   | 662.79<br>(417.76 to<br>1,032.98)     | 493.17<br>(317.51 to<br>765.66)       | 1,056.68<br>(642.95 to<br>1,702.16)   | 31.32<br>(29.45 to<br>32.79)    | 22.92<br>(15.87 to<br>32.70)    | 18.47<br>(12.89 to<br>25.90)    | 33.59<br>(22.07 to<br>51.23)    |
| Road injuries            | 1,010.79<br>(908.68 to<br>1,067.00)   | 593.03<br>(373.92 to<br>923.09)       | 437.45<br>(281.26 to<br>675.01)       | 971.81<br>(587.46 to<br>1,560.00)     | 28.82<br>(27.03 to<br>30.25)    | 20.72<br>(14.32 to<br>29.63)    | 16.68<br>(11.70 to<br>23.29)    | 30.97<br>(20.41 to<br>47.11)    |
| Pedestrian road injuries | 216.64<br>(166.67 to<br>246.67)       | 93.95<br>(64.76 to<br>134.90)         | 62.11<br>(43.56 to<br>87.52)          | 149.50<br>(98.22 to<br>222.53)        | 8.27<br>(6.89 to<br>9.45)       | 4.93<br>(3.58 to<br>6.74)       | 3.57<br>(2.65 to<br>4.92)       | 7.15<br>(4.99 to<br>10.18)      |

| Western Europe                                  |                                                            |                                                            |                                                            |                                                            |                                                    |                                                      |                                                      |                                                      |
|-------------------------------------------------|------------------------------------------------------------|------------------------------------------------------------|------------------------------------------------------------|------------------------------------------------------------|----------------------------------------------------|------------------------------------------------------|------------------------------------------------------|------------------------------------------------------|
| Cause                                           | YLLs (in 1000s)                                            |                                                            |                                                            |                                                            | Deaths (in 1000s)                                  |                                                      |                                                      |                                                      |
|                                                 | 2016                                                       | 2040 Forecast                                              | 2040 Better Scenario                                       | 2040 Worse Scenario                                        | 2016                                               | 2040 Forecast                                        | 2040 Better Scenario                                 | 2040 Worse Scenario                                  |
| Cyclist road injuries                           | 56.20<br>(42.87 to<br>62.58)                               | 42.50<br>(27.70 to<br>64.12)                               | 34.14<br>(22.53 to<br>50.16)                               | 65.33<br>(40.97 to<br>101.72)                              | 1.83<br>(1.42 to<br>2.04)                          | 1.79<br>(1.17 to<br>2.58)                            | 1.60<br>(1.04 to<br>2.27)                            | 2.47<br>(1.58 to<br>3.67)                            |
| Motorcyclist road injuries                      | 185.98<br>(125.84 to<br>208.01)                            | 133.93<br>(74.54 to<br>231.38)                             | 108.77<br>(61.38 to<br>184.41)                             | 191.91<br>(102.57 to<br>346.04)                            | 3.88<br>(2.67 to<br>4.28)                          | 3.04<br>(1.80 to<br>4.94)                            | 2.57<br>(1.57 to<br>4.12)                            | 4.18<br>(2.35 to<br>7.20)                            |
| Motor vehicle road injuries                     | 540.20<br>(485.01 to<br>643.64)                            | 314.46<br>(191.33 to<br>485.54)                            | 226.49<br>(139.92 to<br>345.88)                            | 552.15<br>(320.32 to<br>889.59)                            | 14.52<br>(13.05 to<br>17.18)                       | 10.70<br>(7.26 to<br>15.54)                          | 8.71<br>(6.04 to<br>12.36)                           | 16.79<br>(10.80 to<br>25.67)                         |
| Other road injuries                             | 11.77<br>(8.77 to<br>17.82)                                | 8.17<br>(4.75 to<br>13.76)                                 | 5.93<br>(3.47 to<br>9.83)                                  | 12.92<br>(7.28 to<br>22.04)                                | 0.31<br>(0.21 to<br>0.43)                          | 0.27<br>(0.15 to<br>0.42)                            | 0.22<br>(0.12 to<br>0.35)                            | 0.39<br>(0.22 to<br>0.64)                            |
| Other transport injuries                        | 92.42<br>(83.56 to<br>99.66)                               | 69.77<br>(44.39 to<br>111.08)                              | 55.72<br>(36.00 to<br>88.51)                               | 84.87<br>(51.74 to<br>137.58)                              | 2.50<br>(2.32 to<br>2.68)                          | 2.20<br>(1.44 to<br>3.31)                            | 1.80<br>(1.21 to<br>2.67)                            | 2.62<br>(1.66 to<br>4.12)                            |
| <b>Unintentional injuries</b>                   | <b>1,484.53</b><br><b>(1,327.77 to</b><br><b>1,600.08)</b> | <b>1,409.47</b><br><b>(1,216.89 to</b><br><b>1,550.25)</b> | <b>1,328.82</b><br><b>(1,141.52 to</b><br><b>1,463.73)</b> | <b>1,411.71</b><br><b>(1,203.86 to</b><br><b>1,557.74)</b> | <b>99.38</b><br><b>(84.22 to</b><br><b>105.95)</b> | <b>128.38</b><br><b>(105.42 to</b><br><b>140.63)</b> | <b>126.32</b><br><b>(104.19 to</b><br><b>136.88)</b> | <b>122.82</b><br><b>(100.02 to</b><br><b>135.66)</b> |
| Falls                                           | 714.47<br>(591.05 to<br>779.18)                            | 802.08<br>(642.22 to<br>876.65)                            | 770.73<br>(617.76 to<br>843.62)                            | 784.94<br>(627.05 to<br>861.84)                            | 60.33<br>(48.31 to<br>64.55)                       | 85.50<br>(66.95 to<br>94.65)                         | 84.80<br>(66.57 to<br>92.91)                         | 80.82<br>(62.44 to<br>90.40)                         |
| Drowning                                        | 137.51<br>(129.64 to<br>143.40)                            | 79.74<br>(61.19 to<br>105.56)                              | 69.28<br>(53.31 to<br>90.65)                               | 88.69<br>(65.76 to<br>121.82)                              | 4.05<br>(3.88 to<br>4.20)                          | 2.92<br>(2.28 to<br>3.83)                            | 2.61<br>(2.05 to<br>3.37)                            | 3.16<br>(2.37 to<br>4.32)                            |
| Fire, heat, and hot substances                  | 92.80<br>(79.22 to<br>102.23)                              | 62.02<br>(47.65 to<br>81.37)                               | 53.18<br>(41.02 to<br>68.98)                               | 67.98<br>(50.12 to<br>91.65)                               | 5.37<br>(4.06 to<br>5.89)                          | 4.94<br>(3.53 to<br>6.40)                            | 4.45<br>(3.20 to<br>5.57)                            | 5.14<br>(3.63 to<br>6.95)                            |
| Poisonings                                      | 24.74<br>(21.86 to<br>40.14)                               | 10.63<br>(7.37 to<br>17.10)                                | 8.40<br>(5.92 to<br>13.24)                                 | 12.27<br>(8.31 to<br>19.75)                                | 0.81<br>(0.69 to<br>1.18)                          | 0.46<br>(0.34 to<br>0.65)                            | 0.38<br>(0.29 to<br>0.54)                            | 0.50<br>(0.36 to<br>0.74)                            |
| Exposure to mechanical forces                   | 113.29<br>(88.93 to<br>123.79)                             | 78.62<br>(60.76 to<br>88.43)                               | 69.02<br>(53.76 to<br>77.80)                               | 81.80<br>(63.43 to<br>92.45)                               | 4.46<br>(3.39 to<br>4.82)                          | 4.43<br>(3.39 to<br>4.91)                            | 4.11<br>(3.17 to<br>4.52)                            | 4.37<br>(3.35 to<br>4.85)                            |
| Unintentional firearm injuries                  | 19.11<br>(13.39 to<br>21.71)                               | 11.54<br>(7.99 to<br>13.54)                                | 10.30<br>(7.14 to<br>12.06)                                | 11.97<br>(8.27 to<br>14.05)                                | 0.68<br>(0.48 to<br>0.76)                          | 0.56<br>(0.39 to<br>0.63)                            | 0.54<br>(0.38 to<br>0.61)                            | 0.55<br>(0.39 to<br>0.62)                            |
| Unintentional suffocation                       | 13.92<br>(11.42 to<br>18.04)                               | 8.51<br>(6.94 to<br>11.18)                                 | 7.53<br>(6.12 to<br>9.90)                                  | 9.17<br>(7.45 to<br>12.02)                                 | 0.27<br>(0.21 to<br>0.33)                          | 0.19<br>(0.14 to<br>0.23)                            | 0.17<br>(0.13 to<br>0.21)                            | 0.20<br>(0.15 to<br>0.24)                            |
| Other exposure to mechanical forces             | 80.26<br>(60.28 to<br>90.09)                               | 58.57<br>(43.06 to<br>66.37)                               | 51.19<br>(38.06 to<br>58.42)                               | 60.66<br>(45.05 to<br>69.23)                               | 3.51<br>(2.61 to<br>3.86)                          | 3.68<br>(2.75 to<br>4.11)                            | 3.40<br>(2.57 to<br>3.77)                            | 3.62<br>(2.72 to<br>4.05)                            |
| Adverse effects of medical treatment            | 149.36<br>(116.85 to<br>195.53)                            | 158.56<br>(129.43 to<br>213.23)                            | 152.12<br>(124.52 to<br>202.10)                            | 156.74<br>(127.04 to<br>210.71)                            | 10.63<br>(8.76 to<br>14.03)                        | 13.91<br>(11.43 to<br>18.76)                         | 13.83<br>(11.47 to<br>18.58)                         | 13.27<br>(10.88 to<br>17.95)                         |
| Animal contact                                  | 9.92<br>(7.40 to<br>12.33)                                 | 9.34<br>(6.97 to<br>11.36)                                 | 8.45<br>(6.31 to<br>10.18)                                 | 9.66<br>(7.22 to<br>11.82)                                 | 0.38<br>(0.28 to<br>0.47)                          | 0.45<br>(0.34 to<br>0.56)                            | 0.42<br>(0.32 to<br>0.53)                            | 0.45<br>(0.34 to<br>0.55)                            |
| Venomous animal contact                         | 3.61<br>(2.33 to<br>4.49)                                  | 3.30<br>(1.99 to<br>4.11)                                  | 3.06<br>(1.85 to<br>3.77)                                  | 3.38<br>(2.05 to<br>4.19)                                  | 0.12<br>(0.07 to<br>0.15)                          | 0.14<br>(0.08 to<br>0.17)                            | 0.13<br>(0.07 to<br>0.16)                            | 0.14<br>(0.08 to<br>0.17)                            |
| Non-venomous animal contact                     | 6.32<br>(4.73 to<br>8.35)                                  | 6.04<br>(4.66 to<br>8.07)                                  | 5.39<br>(4.20 to<br>7.20)                                  | 6.28<br>(4.81 to<br>8.31)                                  | 0.26<br>(0.20 to<br>0.35)                          | 0.31<br>(0.25 to<br>0.42)                            | 0.29<br>(0.23 to<br>0.39)                            | 0.31<br>(0.25 to<br>0.42)                            |
| Foreign body                                    | 175.89<br>(148.34 to<br>218.36)                            | 159.79<br>(125.52 to<br>186.45)                            | 156.54<br>(122.18 to<br>182.42)                            | 158.62<br>(126.32 to<br>184.89)                            | 9.79<br>(6.71 to<br>11.60)                         | 12.05<br>(7.74 to<br>14.90)                          | 12.39<br>(7.89 to<br>15.30)                          | 11.41<br>(7.33 to<br>14.12)                          |
| Pulmonary aspiration and foreign body in airway | 169.42<br>(142.17 to<br>212.71)                            | 153.69<br>(120.51 to<br>180.27)                            | 150.18<br>(116.87 to<br>175.80)                            | 152.68<br>(121.65 to<br>178.48)                            | 9.54<br>(6.53 to<br>11.33)                         | 11.72<br>(7.50 to<br>14.53)                          | 12.02<br>(7.60 to<br>14.89)                          | 11.10<br>(7.15 to<br>13.78)                          |



|                                             |                                                            |                                                          |                                                          |                                                            |                                                   |                                                   |                                                   |                                                   |
|---------------------------------------------|------------------------------------------------------------|----------------------------------------------------------|----------------------------------------------------------|------------------------------------------------------------|---------------------------------------------------|---------------------------------------------------|---------------------------------------------------|---------------------------------------------------|
|                                             | 6.47<br>(4.78 to<br>8.43)                                  | 6.10<br>(4.35 to<br>7.70)                                | 6.36<br>(4.55 to<br>7.95)                                | 5.94<br>(4.25 to<br>7.56)                                  | 0.25<br>(0.16 to<br>0.29)                         | 0.33<br>(0.19 to<br>0.40)                         | 0.36<br>(0.21 to<br>0.43)                         | 0.31<br>(0.18 to<br>0.37)                         |
| Foreign body in other body part             |                                                            |                                                          |                                                          |                                                            |                                                   |                                                   |                                                   |                                                   |
|                                             | 40.73<br>(28.13 to<br>65.68)                               | 38.73<br>(27.03 to<br>63.62)                             | 33.83<br>(23.60 to<br>55.81)                             | 39.76<br>(27.66 to<br>65.79)                               | 2.74<br>(1.96 to<br>4.62)                         | 3.32<br>(2.35 to<br>5.75)                         | 3.02<br>(2.16 to<br>5.28)                         | 3.26<br>(2.35 to<br>5.66)                         |
| Environmental heat and cold exposure        |                                                            |                                                          |                                                          |                                                            |                                                   |                                                   |                                                   |                                                   |
|                                             | 25.80<br>(23.65 to<br>27.87)                               | 9.97<br>(8.67 to<br>11.49)                               | 7.26<br>(6.30 to<br>8.37)                                | 11.25<br>(9.70 to<br>12.99)                                | 0.81<br>(0.76 to<br>0.87)                         | 0.40<br>(0.36 to<br>0.46)                         | 0.31<br>(0.28 to<br>0.34)                         | 0.44<br>(0.39 to<br>0.49)                         |
| Other unintentional injuries                |                                                            |                                                          |                                                          |                                                            |                                                   |                                                   |                                                   |                                                   |
| <b>Self-harm and interpersonal violence</b> | <b>1,941.19</b><br><b>(1,774.13 to</b><br><b>2,475.17)</b> | <b>1,398.58</b><br><b>(965.08 to</b><br><b>2,001.59)</b> | <b>1,203.02</b><br><b>(857.86 to</b><br><b>1,706.42)</b> | <b>1,682.52</b><br><b>(1,091.90 to</b><br><b>2,554.84)</b> | <b>56.34</b><br><b>(49.73 to</b><br><b>68.49)</b> | <b>47.33</b><br><b>(33.58 to</b><br><b>66.10)</b> | <b>41.88</b><br><b>(30.41 to</b><br><b>57.37)</b> | <b>55.66</b><br><b>(37.33 to</b><br><b>81.32)</b> |

| Western Europe                                                                      |                                                  |                                                  |                                                  |                                                  |                                                |                                                |                                                |                                                |
|-------------------------------------------------------------------------------------|--------------------------------------------------|--------------------------------------------------|--------------------------------------------------|--------------------------------------------------|------------------------------------------------|------------------------------------------------|------------------------------------------------|------------------------------------------------|
| Cause                                                                               | YLLs (in 1000s)                                  |                                                  |                                                  |                                                  | Deaths (in 1000s)                              |                                                |                                                |                                                |
|                                                                                     | 2016                                             | 2040 Forecast                                    | 2040 Better Scenario                             | 2040 Worse Scenario                              | 2016                                           | 2040 Forecast                                  | 2040 Better Scenario                           | 2040 Worse Scenario                            |
| Self-harm                                                                           | 1,785.15<br>(1,616.96 to<br>2,345.59)            | 1,320.27<br>(894.76 to<br>1,916.95)              | 1,136.24<br>(792.59 to<br>1,613.23)              | 1,595.53<br>(1,005.11 to<br>2,454.24)            | 52.58<br>(46.62 to<br>65.12)                   | 45.09<br>(31.40 to<br>63.67)                   | 39.92<br>(28.51 to<br>55.24)                   | 53.22<br>(35.01 to<br>78.82)                   |
| Self-harm by firearm                                                                | 163.76<br>(121.09 to<br>262.70)                  | 102.18<br>(57.47 to<br>172.63)                   | 84.29<br>(48.68 to<br>140.82)                    | 125.71<br>(66.95 to<br>217.76)                   | 5.55<br>(3.70 to<br>8.00)                      | 4.06<br>(2.31 to<br>6.20)                      | 3.47<br>(1.99 to<br>5.30)                      | 4.85<br>(2.62 to<br>7.71)                      |
| Self-harm by other specified means                                                  | 1,621.39<br>(1,466.48 to<br>2,123.24)            | 1,218.09<br>(825.76 to<br>1,764.70)              | 1,051.94<br>(737.94 to<br>1,492.07)              | 1,469.82<br>(938.07 to<br>2,244.28)              | 47.03<br>(41.67 to<br>58.29)                   | 41.03<br>(28.68 to<br>58.11)                   | 36.46<br>(26.22 to<br>50.33)                   | 48.38<br>(32.12 to<br>71.60)                   |
| Interpersonal violence                                                              | 156.04<br>(104.41 to<br>203.85)                  | 78.31<br>(51.40 to<br>105.38)                    | 66.78<br>(44.26 to<br>90.18)                     | 86.98<br>(56.03 to<br>118.18)                    | 3.77<br>(2.51 to<br>4.90)                      | 2.24<br>(1.52 to<br>3.00)                      | 1.96<br>(1.35 to<br>2.59)                      | 2.44<br>(1.63 to<br>3.29)                      |
| Physical violence by firearm                                                        | 44.00<br>(22.90 to<br>62.32)                     | 19.60<br>(10.43 to<br>27.53)                     | 15.83<br>(8.48 to<br>22.62)                      | 21.32<br>(11.22 to<br>30.09)                     | 0.99<br>(0.53 to<br>1.38)                      | 0.48<br>(0.27 to<br>0.68)                      | 0.40<br>(0.22 to<br>0.56)                      | 0.52<br>(0.28 to<br>0.72)                      |
| Physical violence by sharp object                                                   | 44.88<br>(23.30 to<br>57.34)                     | 23.21<br>(12.49 to<br>29.35)                     | 20.02<br>(10.91 to<br>25.31)                     | 24.88<br>(13.07 to<br>31.47)                     | 1.13<br>(0.63 to<br>1.42)                      | 0.70<br>(0.43 to<br>0.90)                      | 0.62<br>(0.39 to<br>0.80)                      | 0.73<br>(0.44 to<br>0.93)                      |
| Physical violence by other means                                                    | 67.16<br>(47.10 to<br>104.98)                    | 35.50<br>(22.74 to<br>56.84)                     | 30.94<br>(19.97 to<br>48.19)                     | 40.79<br>(25.10 to<br>65.42)                     | 1.65<br>(1.14 to<br>2.47)                      | 1.06<br>(0.67 to<br>1.64)                      | 0.94<br>(0.61 to<br>1.44)                      | 1.19<br>(0.74 to<br>1.84)                      |
| <b>Forces of nature, conflict and terrorism, and executions and police conflict</b> | <b>14.69</b><br><b>(7.22 to</b><br><b>22.78)</b> | <b>15.03</b><br><b>(1.48 to</b><br><b>94.52)</b> | <b>14.91</b><br><b>(1.50 to</b><br><b>94.64)</b> | <b>15.01</b><br><b>(1.46 to</b><br><b>94.39)</b> | <b>0.39</b><br><b>(0.18 to</b><br><b>0.62)</b> | <b>0.38</b><br><b>(0.06 to</b><br><b>2.53)</b> | <b>0.38</b><br><b>(0.06 to</b><br><b>2.56)</b> | <b>0.37</b><br><b>(0.06 to</b><br><b>2.48)</b> |
| Exposure to forces of nature                                                        | 10.33<br>(3.06 to<br>18.25)                      | 6.76<br>(0.00 to<br>85.40)                       | 6.77<br>(0.00 to<br>85.51)                       | 6.76<br>(0.00 to<br>85.24)                       | 0.30<br>(0.09 to<br>0.52)                      | 0.19<br>(0.00 to<br>2.34)                      | 0.19<br>(0.00 to<br>2.38)                      | 0.18<br>(0.00 to<br>2.29)                      |
| Conflict and terrorism                                                              | 2.31<br>(1.04 to<br>3.60)                        | 8.27<br>(0.29 to<br>50.42)                       | 8.13<br>(0.29 to<br>50.49)                       | 8.25<br>(0.29 to<br>50.22)                       | 0.05<br>(0.02 to<br>0.08)                      | 0.19<br>(0.01 to<br>1.23)                      | 0.19<br>(0.01 to<br>1.26)                      | 0.19<br>(0.01 to<br>1.20)                      |
| Executions and police conflict                                                      | 2.05<br>(1.90 to<br>2.16)                        | 0.00<br>(0.00 to<br>0.00)                        | 0.00<br>(0.00 to<br>0.00)                        | 0.00<br>(0.00 to<br>0.00)                        | 0.04<br>(0.04 to<br>0.05)                      | 0.00<br>(0.00 to<br>0.00)                      | 0.00<br>(0.00 to<br>0.00)                      | 0.00<br>(0.00 to<br>0.00)                      |

| Andorra                                                           |                                        |                                         |                                        |                                          |                                 |                                   |                                 |                                     |
|-------------------------------------------------------------------|----------------------------------------|-----------------------------------------|----------------------------------------|------------------------------------------|---------------------------------|-----------------------------------|---------------------------------|-------------------------------------|
| Cause                                                             | YLLs (actual counts)                   |                                         |                                        |                                          | Deaths (actual counts)          |                                   |                                 |                                     |
|                                                                   | 2016                                   | 2040 Forecast                           | 2040 Better Scenario                   | 2040 Worse Scenario                      | 2016                            | 2040 Forecast                     | 2040 Better Scenario            | 2040 Worse Scenario                 |
| All causes                                                        | 9,656.05<br>(8,035.29 to<br>11,528.08) | 10,669.70<br>(8,468.02 to<br>13,380.90) | 9,411.00<br>(7,571.20 to<br>11,602.67) | 12,745.37<br>(10,145.36 to<br>16,084.97) | 731.01<br>(629.53 to<br>852.23) | 935.70<br>(804.59 to<br>1,084.90) | 854.10<br>(742.61 to<br>974.18) | 1,065.43<br>(916.82 to<br>1,229.49) |
| Communicable, maternal, neonatal, and nutritional diseases        | 507.27<br>(330.50 to<br>697.59)        | 619.63<br>(365.40 to<br>918.19)         | 563.08<br>(336.67 to<br>819.58)        | 727.06<br>(422.45 to<br>1,091.39)        | 43.09<br>(26.31 to<br>57.22)    | 66.40<br>(38.38 to<br>97.22)      | 63.19<br>(37.39 to<br>90.85)    | 73.67<br>(40.56 to<br>109.82)       |
| HIV/AIDS and tuberculosis                                         | 55.04<br>(11.01 to<br>169.50)          | 33.89<br>(3.73 to<br>124.47)            | 31.02<br>(2.47 to<br>121.83)           | 38.56<br>(6.58 to<br>129.66)             | 1.70<br>(0.48 to<br>4.77)       | 1.14<br>(0.19 to<br>3.69)         | 1.05<br>(0.14 to<br>3.66)       | 1.30<br>(0.30 to<br>3.85)           |
| Tuberculosis                                                      | 5.69<br>(3.84 to<br>11.19)             | 3.71<br>(1.57 to<br>8.44)               | 2.89<br>(1.33 to<br>6.14)              | 5.32<br>(2.37 to<br>12.00)               | 0.34<br>(0.23 to<br>0.68)       | 0.28<br>(0.12 to<br>0.62)         | 0.22<br>(0.10 to<br>0.46)       | 0.39<br>(0.17 to<br>0.82)           |
| HIV/AIDS                                                          | 49.35<br>(5.97 to<br>164.87)           | 30.18<br>(0.89 to<br>121.96)            | 28.13<br>(0.30 to<br>119.88)           | 33.24<br>(2.54 to<br>123.53)             | 1.35<br>(0.16 to<br>4.41)       | 0.86<br>(0.01 to<br>3.41)         | 0.82<br>(0.01 to<br>3.40)       | 0.92<br>(0.05 to<br>3.44)           |
| Diarrhea, lower respiratory, and other common infectious diseases | 376.96<br>(219.70 to<br>508.87)        | 529.55<br>(281.49 to<br>801.94)         | 481.52<br>(260.29 to<br>710.36)        | 628.62<br>(324.20 to<br>976.83)          | 39.77<br>(23.26 to<br>54.12)    | 63.49<br>(35.39 to<br>94.25)      | 60.41<br>(34.21 to<br>87.87)    | 70.61<br>(36.92 to<br>106.43)       |
| Diarrheal diseases                                                | 15.04<br>(7.73 to<br>24.23)            | 41.61<br>(12.86 to<br>90.67)            | 47.27<br>(17.52 to<br>90.32)           | 36.77<br>(13.08 to<br>73.60)             | 1.44<br>(0.65 to<br>2.47)       | 4.91<br>(1.44 to<br>10.65)        | 5.67<br>(2.03 to<br>10.87)      | 4.21<br>(1.41 to<br>8.62)           |
| Intestinal infectious diseases                                    | 0.09<br>(0.04 to<br>0.17)              | 0.06<br>(0.03 to<br>0.13)               | 0.06<br>(0.03 to<br>0.12)              | 0.06<br>(0.03 to<br>0.13)                | 0.00<br>(0.00 to<br>0.01)       | 0.00<br>(0.00 to<br>0.01)         | 0.00<br>(0.00 to<br>0.01)       | 0.00<br>(0.00 to<br>0.01)           |
| Typhoid fever                                                     | 0.02<br>(0.01 to<br>0.06)              | 0.02<br>(0.00 to<br>0.05)               | 0.02<br>(0.01 to<br>0.05)              | 0.02<br>(0.01 to<br>0.04)                | 0.00<br>(0.00 to<br>0.00)       | 0.00<br>(0.00 to<br>0.00)         | 0.00<br>(0.00 to<br>0.00)       | 0.00<br>(0.00 to<br>0.00)           |
| Paratyphoid fever                                                 | 0.03<br>(0.01 to<br>0.07)              | 0.02<br>(0.00 to<br>0.05)               | 0.02<br>(0.00 to<br>0.05)              | 0.02<br>(0.00 to<br>0.05)                | 0.00<br>(0.00 to<br>0.00)       | 0.00<br>(0.00 to<br>0.00)         | 0.00<br>(0.00 to<br>0.00)       | 0.00<br>(0.00 to<br>0.00)           |
| Other intestinal infectious diseases                              | 0.03<br>(0.01 to<br>0.07)              | 0.03<br>(0.01 to<br>0.06)               | 0.03<br>(0.01 to<br>0.06)              | 0.03<br>(0.01 to<br>0.06)                | 0.00<br>(0.00 to<br>0.01)       | 0.00<br>(0.00 to<br>0.01)         | 0.00<br>(0.00 to<br>0.01)       | 0.00<br>(0.00 to<br>0.01)           |
| Lower respiratory infections                                      | 341.98<br>(188.63 to<br>470.67)        | 470.64<br>(235.40 to<br>725.86)         | 419.00<br>(212.17 to<br>637.57)        | 569.22<br>(279.91 to<br>920.26)          | 37.75<br>(21.53 to<br>51.97)    | 57.98<br>(30.62 to<br>88.91)      | 54.16<br>(28.91 to<br>82.16)    | 65.75<br>(33.35 to<br>102.08)       |
| Upper respiratory infections                                      | 0.08<br>(0.04 to<br>0.14)              | 0.09<br>(0.02 to<br>0.24)               | 0.07<br>(0.02 to<br>0.18)              | 0.08<br>(0.02 to<br>0.21)                | 0.00<br>(0.00 to<br>0.01)       | 0.01<br>(0.00 to<br>0.02)         | 0.01<br>(0.00 to<br>0.01)       | 0.01<br>(0.00 to<br>0.02)           |
| Otitis media                                                      | 0.01<br>(0.01 to<br>0.04)              | 0.01<br>(0.00 to<br>0.02)               | 0.01<br>(0.00 to<br>0.02)              | 0.01<br>(0.00 to<br>0.02)                | 0.00<br>(0.00 to<br>0.00)       | 0.00<br>(0.00 to<br>0.00)         | 0.00<br>(0.00 to<br>0.00)       | 0.00<br>(0.00 to<br>0.00)           |
| Meningitis                                                        | 13.96<br>(9.89 to<br>21.01)            | 5.16<br>(2.45 to<br>10.43)              | 4.78<br>(2.31 to<br>9.16)              | 5.69<br>(2.60 to<br>11.70)               | 0.37<br>(0.27 to<br>0.58)       | 0.21<br>(0.12 to<br>0.38)         | 0.20<br>(0.12 to<br>0.35)       | 0.21<br>(0.12 to<br>0.39)           |
| Pneumococcal meningitis                                           | 3.48<br>(2.39 to<br>5.47)              | 1.45<br>(0.82 to<br>2.64)               | 1.46<br>(0.82 to<br>2.66)              | 1.50<br>(0.85 to<br>2.83)                | 0.11<br>(0.07 to<br>0.18)       | 0.07<br>(0.04 to<br>0.12)         | 0.07<br>(0.04 to<br>0.12)       | 0.07<br>(0.04 to<br>0.12)           |
| H influenzae type B meningitis                                    | 1.07<br>(0.72 to<br>1.64)              | 0.70<br>(0.21 to<br>1.86)               | 0.65<br>(0.21 to<br>1.63)              | 1.08<br>(0.23 to<br>3.47)                | 0.03<br>(0.02 to<br>0.04)       | 0.02<br>(0.01 to<br>0.03)         | 0.02<br>(0.01 to<br>0.03)       | 0.02<br>(0.01 to<br>0.05)           |
| Meningococcal meningitis                                          | 5.49<br>(3.76 to<br>8.18)              | 1.52<br>(0.58 to<br>3.52)               | 1.34<br>(0.56 to<br>2.85)              | 1.58<br>(0.63 to<br>3.65)                | 0.12<br>(0.08 to<br>0.18)       | 0.05<br>(0.03 to<br>0.11)         | 0.05<br>(0.03 to<br>0.09)       | 0.05<br>(0.03 to<br>0.10)           |
| Other meningitis                                                  | 3.92<br>(2.69 to<br>6.00)              | 1.50<br>(0.63 to<br>3.27)               | 1.32<br>(0.62 to<br>2.66)              | 1.53<br>(0.72 to<br>3.10)                | 0.12<br>(0.08 to<br>0.19)       | 0.07<br>(0.03 to<br>0.14)         | 0.06<br>(0.03 to<br>0.12)       | 0.07<br>(0.04 to<br>0.13)           |
| Encephalitis                                                      | 4.38<br>(2.97 to<br>6.53)              | 4.68<br>(2.89 to<br>7.48)               | 4.68<br>(2.93 to<br>7.44)              | 4.64<br>(2.85 to<br>7.43)                | 0.17<br>(0.11 to<br>0.25)       | 0.25<br>(0.17 to<br>0.38)         | 0.26<br>(0.17 to<br>0.39)       | 0.24<br>(0.16 to<br>0.37)           |

|                |                           |                            |                            |                            |                           |                           |                           |                           |
|----------------|---------------------------|----------------------------|----------------------------|----------------------------|---------------------------|---------------------------|---------------------------|---------------------------|
| Diphtheria     | 0.02<br>(0.01 to<br>0.03) | 0.00<br>(0.00 to<br>0.01)  | 0.00<br>(0.00 to<br>0.00)  | 0.00<br>(0.00 to<br>0.01)  | 0.00<br>(0.00 to<br>0.00) | 0.00<br>(0.00 to<br>0.00) | 0.00<br>(0.00 to<br>0.00) | 0.00<br>(0.00 to<br>0.00) |
| Whooping cough | 0.83<br>(0.08 to<br>2.73) | 0.47<br>(0.01 to<br>2.18)  | 0.17<br>(0.01 to<br>0.77)  | 2.04<br>(0.01 to<br>8.26)  | 0.01<br>(0.00 to<br>0.03) | 0.01<br>(0.00 to<br>0.03) | 0.00<br>(0.00 to<br>0.01) | 0.02<br>(0.00 to<br>0.10) |
| Tetanus        | 0.36<br>(0.30 to<br>0.44) | 0.02<br>(0.01 to<br>0.03)  | 0.02<br>(0.01 to<br>0.03)  | 0.02<br>(0.01 to<br>0.05)  | 0.01<br>(0.01 to<br>0.01) | 0.00<br>(0.00 to<br>0.00) | 0.00<br>(0.00 to<br>0.00) | 0.00<br>(0.00 to<br>0.00) |
| Measles        | 0.01<br>(0.00 to<br>0.02) | 6.63<br>(0.00 to<br>20.04) | 5.29<br>(0.00 to<br>15.81) | 9.90<br>(0.00 to<br>30.12) | 0.00<br>(0.00 to<br>0.00) | 0.11<br>(0.00 to<br>0.36) | 0.09<br>(0.00 to<br>0.29) | 0.15<br>(0.00 to<br>0.48) |

| Andorra                                               |                               |                               |                               |                               |                               |                               |                               |                               |
|-------------------------------------------------------|-------------------------------|-------------------------------|-------------------------------|-------------------------------|-------------------------------|-------------------------------|-------------------------------|-------------------------------|
| Cause                                                 | YLLs (actual counts)          |                               |                               |                               | Deaths (actual counts)        |                               |                               |                               |
|                                                       | 2016                          | 2040 Forecast                 | 2040 Better Scenario          | 2040 Worse Scenario           | 2016                          | 2040 Forecast                 | 2040 Better Scenario          | 2040 Worse Scenario           |
| Varicella and herpes zoster                           | 0.20<br>(0.15 to 0.27)        | 0.18<br>(0.08 to 0.34)        | 0.17<br>(0.09 to 0.31)        | 0.17<br>(0.09 to 0.32)        | 0.02<br>(0.01 to 0.03)        | 0.02<br>(0.01 to 0.04)        | 0.02<br>(0.01 to 0.03)        | 0.02<br>(0.01 to 0.03)        |
| <b>Neglected tropical diseases and malaria</b>        | <b>0.41</b><br>(0.33 to 0.50) | <b>0.40</b><br>(0.31 to 0.50) | <b>0.40</b><br>(0.31 to 0.51) | <b>0.40</b><br>(0.31 to 0.50) | <b>0.01</b><br>(0.01 to 0.01) | <b>0.01</b><br>(0.01 to 0.01) | <b>0.01</b><br>(0.01 to 0.01) | <b>0.01</b><br>(0.01 to 0.01) |
| Malaria                                               | 0.00<br>(0.00 to 0.00)        | 0.00<br>(0.00 to 0.00)        | 0.00<br>(0.00 to 0.00)        | 0.00<br>(0.00 to 0.00)        | 0.00<br>(0.00 to 0.00)        | 0.00<br>(0.00 to 0.00)        | 0.00<br>(0.00 to 0.00)        | 0.00<br>(0.00 to 0.00)        |
| Chagas disease                                        | 0.00<br>(0.00 to 0.00)        | 0.00<br>(0.00 to 0.00)        | 0.00<br>(0.00 to 0.00)        | 0.00<br>(0.00 to 0.00)        | 0.00<br>(0.00 to 0.00)        | 0.00<br>(0.00 to 0.00)        | 0.00<br>(0.00 to 0.00)        | 0.00<br>(0.00 to 0.00)        |
| Leishmaniasis                                         | 0.00<br>(0.00 to 0.00)        | 0.00<br>(0.00 to 0.00)        | 0.00<br>(0.00 to 0.00)        | 0.00<br>(0.00 to 0.00)        | 0.00<br>(0.00 to 0.00)        | 0.00<br>(0.00 to 0.00)        | 0.00<br>(0.00 to 0.00)        | 0.00<br>(0.00 to 0.00)        |
| African trypanosomiasis                               | 0.00<br>(0.00 to 0.00)        | 0.00<br>(0.00 to 0.00)        | 0.00<br>(0.00 to 0.00)        | 0.00<br>(0.00 to 0.00)        | 0.00<br>(0.00 to 0.00)        | 0.00<br>(0.00 to 0.00)        | 0.00<br>(0.00 to 0.00)        | 0.00<br>(0.00 to 0.00)        |
| Schistosomiasis                                       | 0.00<br>(0.00 to 0.00)        | 0.00<br>(0.00 to 0.00)        | 0.00<br>(0.00 to 0.00)        | 0.00<br>(0.00 to 0.00)        | 0.00<br>(0.00 to 0.00)        | 0.00<br>(0.00 to 0.00)        | 0.00<br>(0.00 to 0.00)        | 0.00<br>(0.00 to 0.00)        |
| Cysticercosis                                         | 0.04<br>(0.03 to 0.06)        | 0.02<br>(0.01 to 0.02)        | 0.02<br>(0.01 to 0.02)        | 0.02<br>(0.01 to 0.02)        | 0.00<br>(0.00 to 0.00)        | 0.00<br>(0.00 to 0.00)        | 0.00<br>(0.00 to 0.00)        | 0.00<br>(0.00 to 0.00)        |
| Cystic echinococcosis                                 | 0.00<br>(0.00 to 0.00)        | 0.00<br>(0.00 to 0.00)        | 0.00<br>(0.00 to 0.00)        | 0.00<br>(0.00 to 0.00)        | 0.00<br>(0.00 to 0.00)        | 0.00<br>(0.00 to 0.00)        | 0.00<br>(0.00 to 0.00)        | 0.00<br>(0.00 to 0.00)        |
| Dengue                                                | 0.00<br>(0.00 to 0.00)        | 0.00<br>(0.00 to 0.00)        | 0.00<br>(0.00 to 0.00)        | 0.00<br>(0.00 to 0.00)        | 0.00<br>(0.00 to 0.00)        | 0.00<br>(0.00 to 0.00)        | 0.00<br>(0.00 to 0.00)        | 0.00<br>(0.00 to 0.00)        |
| Yellow fever                                          | 0.00<br>(0.00 to 0.00)        | 0.00<br>(0.00 to 0.00)        | 0.00<br>(0.00 to 0.00)        | 0.00<br>(0.00 to 0.00)        | 0.00<br>(0.00 to 0.00)        | 0.00<br>(0.00 to 0.00)        | 0.00<br>(0.00 to 0.00)        | 0.00<br>(0.00 to 0.00)        |
| Rabies                                                | 0.00<br>(0.00 to 0.00)        | 0.00<br>(0.00 to 0.00)        | 0.00<br>(0.00 to 0.00)        | 0.00<br>(0.00 to 0.00)        | 0.00<br>(0.00 to 0.00)        | 0.00<br>(0.00 to 0.00)        | 0.00<br>(0.00 to 0.00)        | 0.00<br>(0.00 to 0.00)        |
| Intestinal nematode infections                        | 0.00<br>(0.00 to 0.00)        | 0.00<br>(0.00 to 0.00)        | 0.00<br>(0.00 to 0.00)        | 0.00<br>(0.00 to 0.00)        | 0.00<br>(0.00 to 0.00)        | 0.00<br>(0.00 to 0.00)        | 0.00<br>(0.00 to 0.00)        | 0.00<br>(0.00 to 0.00)        |
| Other neglected tropical diseases                     | 0.36<br>(0.30 to 0.44)        | 0.38<br>(0.30 to 0.48)        | 0.38<br>(0.30 to 0.48)        | 0.38<br>(0.30 to 0.48)        | 0.01<br>(0.01 to 0.01)        | 0.01<br>(0.01 to 0.01)        | 0.01<br>(0.01 to 0.01)        | 0.01<br>(0.01 to 0.01)        |
| <b>Maternal disorders</b>                             | <b>1.34</b><br>(0.79 to 2.07) | <b>0.95</b><br>(0.39 to 1.58) | <b>0.87</b><br>(0.39 to 1.70) | <b>0.98</b><br>(0.43 to 1.93) | <b>0.02</b><br>(0.01 to 0.04) | <b>0.02</b><br>(0.01 to 0.04) | <b>0.02</b><br>(0.01 to 0.03) | <b>0.02</b><br>(0.01 to 0.04) |
| Maternal hemorrhage                                   | 0.18<br>(0.10 to 0.29)        | 0.12<br>(0.04 to 0.25)        | 0.11<br>(0.04 to 0.21)        | 0.12<br>(0.05 to 0.23)        | 0.00<br>(0.00 to 0.01)        | 0.00<br>(0.00 to 0.00)        | 0.00<br>(0.00 to 0.00)        | 0.00<br>(0.00 to 0.00)        |
| Maternal sepsis and other maternal infections         | 0.05<br>(0.02 to 0.10)        | 0.03<br>(0.01 to 0.07)        | 0.03<br>(0.01 to 0.06)        | 0.03<br>(0.01 to 0.07)        | 0.00<br>(0.00 to 0.00)        | 0.00<br>(0.00 to 0.00)        | 0.00<br>(0.00 to 0.00)        | 0.00<br>(0.00 to 0.00)        |
| Maternal hypertensive disorders                       | 0.21<br>(0.11 to 0.35)        | 0.14<br>(0.05 to 0.30)        | 0.13<br>(0.05 to 0.26)        | 0.15<br>(0.06 to 0.30)        | 0.00<br>(0.00 to 0.01)        | 0.00<br>(0.00 to 0.01)        | 0.00<br>(0.00 to 0.00)        | 0.00<br>(0.00 to 0.01)        |
| Maternal obstructed labor and uterine rupture         | 0.03<br>(0.01 to 0.05)        | 0.02<br>(0.01 to 0.04)        | 0.02<br>(0.01 to 0.04)        | 0.02<br>(0.01 to 0.04)        | 0.00<br>(0.00 to 0.00)        | 0.00<br>(0.00 to 0.00)        | 0.00<br>(0.00 to 0.00)        | 0.00<br>(0.00 to 0.00)        |
| Maternal abortion, miscarriage, and ectopic pregnancy | 0.03<br>(0.01 to 0.07)        | 0.03<br>(0.01 to 0.06)        | 0.02<br>(0.01 to 0.05)        | 0.03<br>(0.01 to 0.06)        | 0.00<br>(0.00 to 0.00)        | 0.00<br>(0.00 to 0.00)        | 0.00<br>(0.00 to 0.00)        | 0.00<br>(0.00 to 0.00)        |

|                                        |                           |                           |                           |                           |                           |                           |                           |                           |
|----------------------------------------|---------------------------|---------------------------|---------------------------|---------------------------|---------------------------|---------------------------|---------------------------|---------------------------|
|                                        | 0.24<br>(0.13 to<br>0.41) | 0.19<br>(0.07 to<br>0.44) | 0.18<br>(0.07 to<br>0.37) | 0.20<br>(0.08 to<br>0.43) | 0.00<br>(0.00 to<br>0.01) | 0.00<br>(0.00 to<br>0.01) | 0.00<br>(0.00 to<br>0.01) | 0.00<br>(0.00 to<br>0.01) |
| Indirect maternal deaths               |                           |                           |                           |                           |                           |                           |                           |                           |
|                                        | 0.05<br>(0.02 to<br>0.08) | 0.03<br>(0.01 to<br>0.06) | 0.02<br>(0.01 to<br>0.05) | 0.03<br>(0.01 to<br>0.06) | 0.00<br>(0.00 to<br>0.00) | 0.00<br>(0.00 to<br>0.00) | 0.00<br>(0.00 to<br>0.00) | 0.00<br>(0.00 to<br>0.00) |
| Late maternal deaths                   |                           |                           |                           |                           |                           |                           |                           |                           |
|                                        | 0.00<br>(0.00 to<br>0.00) | 0.00<br>(0.00 to<br>0.02) | 0.00<br>(0.00 to<br>0.02) | 0.01<br>(0.00 to<br>0.03) | 0.00<br>(0.00 to<br>0.00) | 0.00<br>(0.00 to<br>0.00) | 0.00<br>(0.00 to<br>0.00) | 0.00<br>(0.00 to<br>0.00) |
| Maternal deaths aggravated by HIV/AIDS |                           |                           |                           |                           |                           |                           |                           |                           |
|                                        | 0.55<br>(0.31 to<br>0.86) | 0.39<br>(0.16 to<br>0.78) | 0.36<br>(0.16 to<br>0.71) | 0.40<br>(0.17 to<br>0.79) | 0.01<br>(0.01 to<br>0.02) | 0.01<br>(0.00 to<br>0.02) | 0.01<br>(0.00 to<br>0.01) | 0.01<br>(0.00 to<br>0.01) |
| Other maternal disorders               |                           |                           |                           |                           |                           |                           |                           |                           |

| Andorra                                                                 |                                  |                                  |                                  |                                  |                               |                               |                               |                               |
|-------------------------------------------------------------------------|----------------------------------|----------------------------------|----------------------------------|----------------------------------|-------------------------------|-------------------------------|-------------------------------|-------------------------------|
| Cause                                                                   | YLLs (actual counts)             |                                  |                                  |                                  | Deaths (actual counts)        |                               |                               |                               |
|                                                                         | 2016                             | 2040 Forecast                    | 2040 Better Scenario             | 2040 Worse Scenario              | 2016                          | 2040 Forecast                 | 2040 Better Scenario          | 2040 Worse Scenario           |
| <b>Neonatal disorders</b>                                               | <b>50.65</b><br>(37.72 to 66.19) | <b>28.14</b><br>(10.56 to 76.43) | <b>22.96</b><br>(9.32 to 58.08)  | <b>31.86</b><br>(13.17 to 79.63) | <b>0.59</b><br>(0.44 to 0.77) | <b>0.33</b><br>(0.12 to 0.88) | <b>0.27</b><br>(0.11 to 0.67) | <b>0.37</b><br>(0.15 to 0.92) |
| Neonatal preterm birth                                                  | 30.84<br>(20.29 to 43.37)        | 14.71<br>(4.35 to 44.23)         | 10.93<br>(3.56 to 30.68)         | 17.02<br>(5.76 to 46.99)         | 0.36<br>(0.23 to 0.50)        | 0.17<br>(0.05 to 0.51)        | 0.13<br>(0.04 to 0.36)        | 0.20<br>(0.07 to 0.54)        |
| Neonatal encephalopathy due to birth asphyxia and trauma                | 11.34<br>(7.24 to 16.78)         | 5.76<br>(1.92 to 16.27)          | 4.89<br>(1.87 to 12.38)          | 6.38<br>(2.45 to 16.20)          | 0.13<br>(0.08 to 0.19)        | 0.07<br>(0.02 to 0.19)        | 0.06<br>(0.02 to 0.14)        | 0.07<br>(0.03 to 0.19)        |
| Neonatal sepsis and other neonatal infections                           | 2.80<br>(1.36 to 8.06)           | 2.51<br>(0.67 to 7.95)           | 2.21<br>(0.65 to 6.97)           | 2.78<br>(0.82 to 8.95)           | 0.03<br>(0.02 to 0.09)        | 0.03<br>(0.01 to 0.09)        | 0.03<br>(0.01 to 0.08)        | 0.03<br>(0.01 to 0.10)        |
| Hemolytic disease and other neonatal jaundice                           | 0.09<br>(0.06 to 0.14)           | 0.07<br>(0.02 to 0.17)           | 0.06<br>(0.02 to 0.14)           | 0.07<br>(0.02 to 0.18)           | 0.00<br>(0.00 to 0.00)        | 0.00<br>(0.00 to 0.00)        | 0.00<br>(0.00 to 0.00)        | 0.00<br>(0.00 to 0.00)        |
| Other neonatal disorders                                                | 5.58<br>(3.10 to 9.17)           | 5.10<br>(2.02 to 11.37)          | 4.87<br>(1.95 to 10.92)          | 5.61<br>(2.24 to 12.40)          | 0.06<br>(0.04 to 0.11)        | 0.06<br>(0.02 to 0.13)        | 0.06<br>(0.02 to 0.13)        | 0.07<br>(0.03 to 0.14)        |
| <b>Nutritional deficiencies</b>                                         | <b>2.17</b><br>(1.77 to 2.67)    | <b>2.34</b><br>(1.89 to 2.88)    | <b>2.44</b><br>(1.95 to 3.00)    | <b>2.21</b><br>(1.78 to 2.74)    | <b>0.21</b><br>(0.17 to 0.26) | <b>0.27</b><br>(0.21 to 0.34) | <b>0.29</b><br>(0.22 to 0.37) | <b>0.25</b><br>(0.19 to 0.32) |
| Protein-energy malnutrition                                             | 1.19<br>(0.83 to 1.54)           | 1.27<br>(0.76 to 1.77)           | 1.36<br>(0.88 to 1.85)           | 1.18<br>(0.76 to 1.64)           | 0.12<br>(0.08 to 0.16)        | 0.16<br>(0.09 to 0.23)        | 0.17<br>(0.10 to 0.25)        | 0.14<br>(0.08 to 0.21)        |
| Iodine deficiency                                                       | 0.09<br>(0.01 to 0.23)           | 0.16<br>(0.01 to 0.51)           | 0.16<br>(0.01 to 0.53)           | 0.15<br>(0.01 to 0.48)           | 0.01<br>(0.00 to 0.02)        | 0.02<br>(0.00 to 0.07)        | 0.02<br>(0.00 to 0.08)        | 0.02<br>(0.00 to 0.06)        |
| Dietary iron deficiency                                                 | 0.22<br>(0.17 to 0.27)           | 0.19<br>(0.14 to 0.25)           | 0.19<br>(0.14 to 0.26)           | 0.19<br>(0.14 to 0.25)           | 0.01<br>(0.01 to 0.01)        | 0.01<br>(0.01 to 0.02)        | 0.01<br>(0.01 to 0.02)        | 0.01<br>(0.01 to 0.01)        |
| Other nutritional deficiencies                                          | 0.68<br>(0.50 to 1.09)           | 0.73<br>(0.42 to 1.24)           | 0.72<br>(0.43 to 1.24)           | 0.69<br>(0.41 to 1.16)           | 0.07<br>(0.05 to 0.12)        | 0.09<br>(0.05 to 0.15)        | 0.09<br>(0.05 to 0.16)        | 0.08<br>(0.05 to 0.14)        |
| <b>Other communicable, maternal, neonatal, and nutritional diseases</b> | <b>20.70</b><br>(12.69 to 31.42) | <b>24.36</b><br>(14.85 to 38.64) | <b>23.87</b><br>(14.80 to 36.54) | <b>24.43</b><br>(14.78 to 39.03) | <b>0.79</b><br>(0.53 to 1.02) | <b>1.14</b><br>(0.78 to 1.52) | <b>1.16</b><br>(0.78 to 1.51) | <b>1.11</b><br>(0.74 to 1.46) |
| Sexually transmitted infections excluding HIV                           | 0.90<br>(0.64 to 1.28)           | 0.50<br>(0.28 to 0.85)           | 0.49<br>(0.28 to 0.83)           | 0.50<br>(0.29 to 0.84)           | 0.05<br>(0.04 to 0.07)        | 0.04<br>(0.02 to 0.06)        | 0.04<br>(0.02 to 0.06)        | 0.04<br>(0.02 to 0.06)        |
| Syphilis                                                                | 0.32<br>(0.24 to 0.44)           | 0.14<br>(0.07 to 0.26)           | 0.13<br>(0.07 to 0.24)           | 0.14<br>(0.08 to 0.25)           | 0.01<br>(0.01 to 0.02)        | 0.01<br>(0.01 to 0.02)        | 0.01<br>(0.01 to 0.02)        | 0.01<br>(0.01 to 0.02)        |
| Chlamydial infection                                                    | 0.11<br>(0.07 to 0.17)           | 0.07<br>(0.04 to 0.12)           | 0.07<br>(0.04 to 0.12)           | 0.07<br>(0.04 to 0.12)           | 0.01<br>(0.01 to 0.01)        | 0.01<br>(0.01 to 0.01)        | 0.01<br>(0.01 to 0.01)        | 0.01<br>(0.01 to 0.01)        |
| Gonococcal infection                                                    | 0.33<br>(0.22 to 0.50)           | 0.21<br>(0.12 to 0.35)           | 0.21<br>(0.12 to 0.36)           | 0.21<br>(0.12 to 0.35)           | 0.02<br>(0.01 to 0.03)        | 0.02<br>(0.01 to 0.03)        | 0.02<br>(0.01 to 0.03)        | 0.02<br>(0.01 to 0.03)        |
| Other sexually transmitted infections                                   | 0.14<br>(0.09 to 0.21)           | 0.08<br>(0.04 to 0.14)           | 0.08<br>(0.04 to 0.14)           | 0.08<br>(0.04 to 0.14)           | 0.01<br>(0.00 to 0.01)        | 0.01<br>(0.00 to 0.01)        | 0.01<br>(0.00 to 0.01)        | 0.01<br>(0.00 to 0.01)        |
| Acute hepatitis                                                         | 2.72<br>(1.98 to 3.70)           | 1.88<br>(0.74 to 3.87)           | 1.67<br>(0.73 to 3.26)           | 1.88<br>(0.83 to 3.67)           | 0.09<br>(0.07 to 0.12)        | 0.08<br>(0.03 to 0.16)        | 0.07<br>(0.03 to 0.13)        | 0.08<br>(0.03 to 0.15)        |
| Acute hepatitis A                                                       | 0.18<br>(0.13 to 0.24)           | 0.09<br>(0.04 to 0.20)           | 0.09<br>(0.04 to 0.18)           | 0.10<br>(0.04 to 0.19)           | 0.00<br>(0.00 to 0.01)        | 0.00<br>(0.00 to 0.01)        | 0.00<br>(0.00 to 0.01)        | 0.00<br>(0.00 to 0.01)        |
| Acute hepatitis B                                                       | 2.15<br>(1.53 to 3.01)           | 1.50<br>(0.56 to 3.10)           | 1.32<br>(0.56 to 2.56)           | 1.50<br>(0.64 to 3.00)           | 0.07<br>(0.05 to 0.10)        | 0.06<br>(0.02 to 0.12)        | 0.05<br>(0.02 to 0.10)        | 0.06<br>(0.03 to 0.11)        |

|                                       |                                                             |                                                             |                                                             |                                                              |                                                      |                                                      |                                                      |                                                        |
|---------------------------------------|-------------------------------------------------------------|-------------------------------------------------------------|-------------------------------------------------------------|--------------------------------------------------------------|------------------------------------------------------|------------------------------------------------------|------------------------------------------------------|--------------------------------------------------------|
|                                       | 0.13<br>(0.08 to<br>0.19)                                   | 0.09<br>(0.03 to<br>0.20)                                   | 0.08<br>(0.03 to<br>0.17)                                   | 0.09<br>(0.04 to<br>0.19)                                    | 0.00<br>(0.00 to<br>0.01)                            | 0.00<br>(0.00 to<br>0.01)                            | 0.00<br>(0.00 to<br>0.01)                            | 0.00<br>(0.00 to<br>0.01)                              |
| Acute hepatitis C                     |                                                             |                                                             |                                                             |                                                              |                                                      |                                                      |                                                      |                                                        |
|                                       | 0.26<br>(0.17 to<br>0.40)                                   | 0.19<br>(0.08 to<br>0.43)                                   | 0.18<br>(0.08 to<br>0.36)                                   | 0.19<br>(0.09 to<br>0.40)                                    | 0.01<br>(0.01 to<br>0.02)                            | 0.01<br>(0.01 to<br>0.03)                            | 0.01<br>(0.01 to<br>0.02)                            | 0.01<br>(0.01 to<br>0.02)                              |
| Acute hepatitis E                     |                                                             |                                                             |                                                             |                                                              |                                                      |                                                      |                                                      |                                                        |
|                                       | 17.08<br>(9.43 to<br>27.71)                                 | 21.98<br>(13.27 to<br>35.01)                                | 21.71<br>(13.30 to<br>33.72)                                | 22.05<br>(13.15 to<br>35.75)                                 | 0.64<br>(0.40 to<br>0.86)                            | 1.03<br>(0.67 to<br>1.34)                            | 1.05<br>(0.68 to<br>1.36)                            | 0.99<br>(0.64 to<br>1.31)                              |
| Other unspecified infectious diseases |                                                             |                                                             |                                                             |                                                              |                                                      |                                                      |                                                      |                                                        |
| <b>Non-communicable diseases</b>      | <b>8,420.88</b><br><b>(7,016.32 to</b><br><b>10,051.49)</b> | <b>9,471.26</b><br><b>(7,513.03 to</b><br><b>11,856.88)</b> | <b>8,298.84</b><br><b>(6,705.55 to</b><br><b>10,315.77)</b> | <b>11,380.24</b><br><b>(8,959.35 to</b><br><b>14,370.76)</b> | <b>659.44</b><br><b>(567.80 to</b><br><b>769.28)</b> | <b>837.82</b><br><b>(717.68 to</b><br><b>987.47)</b> | <b>759.94</b><br><b>(656.20 to</b><br><b>881.40)</b> | <b>959.75</b><br><b>(815.80 to</b><br><b>1,120.22)</b> |



| Andorra                              |                                           |                                           |                                           |                                           |                                     |                                     |                                     |                                     |
|--------------------------------------|-------------------------------------------|-------------------------------------------|-------------------------------------------|-------------------------------------------|-------------------------------------|-------------------------------------|-------------------------------------|-------------------------------------|
| Cause                                | YLLs (actual counts)                      |                                           |                                           |                                           | Deaths (actual counts)              |                                     |                                     |                                     |
|                                      | 2016                                      | 2040 Forecast                             | 2040 Better Scenario                      | 2040 Worse Scenario                       | 2016                                | 2040 Forecast                       | 2040 Better Scenario                | 2040 Worse Scenario                 |
| <b>Neoplasms</b>                     | <b>3,309.19</b><br>(2,695.10 to 4,072.61) | <b>3,879.04</b><br>(2,895.01 to 5,132.78) | <b>3,432.80</b><br>(2,623.95 to 4,478.49) | <b>4,663.36</b><br>(3,394.31 to 6,266.46) | <b>201.40</b><br>(168.88 to 242.87) | <b>273.75</b><br>(219.52 to 335.66) | <b>248.78</b><br>(204.95 to 301.73) | <b>318.16</b><br>(251.00 to 399.17) |
| Lip and oral cavity cancer           | 42.49<br>(32.65 to 53.89)                 | 39.69<br>(19.10 to 73.64)                 | 28.56<br>(14.60 to 51.42)                 | 71.59<br>(33.79 to 132.69)                | 2.25<br>(1.82 to 2.76)              | 2.35<br>(1.20 to 4.21)              | 1.74<br>(0.92 to 3.03)              | 4.18<br>(2.02 to 7.47)              |
| Nasopharynx cancer                   | 15.59<br>(11.31 to 20.48)                 | 16.59<br>(7.33 to 32.61)                  | 11.42<br>(5.31 to 21.23)                  | 30.02<br>(13.00 to 58.91)                 | 0.85<br>(0.63 to 1.10)              | 1.04<br>(0.48 to 1.98)              | 0.74<br>(0.35 to 1.37)              | 1.86<br>(0.85 to 3.50)              |
| Other pharynx cancer                 | 25.40<br>(17.94 to 34.71)                 | 23.45<br>(11.50 to 41.17)                 | 22.08<br>(10.91 to 38.17)                 | 31.62<br>(15.38 to 54.79)                 | 1.12<br>(0.76 to 1.51)              | 1.19<br>(0.59 to 2.06)              | 1.13<br>(0.57 to 1.96)              | 1.58<br>(0.77 to 2.74)              |
| Esophageal cancer                    | 112.20<br>(80.47 to 154.64)               | 122.09<br>(61.81 to 217.09)               | 88.68<br>(47.90 to 150.61)                | 196.94<br>(93.49 to 368.27)               | 6.46<br>(4.78 to 8.56)              | 7.70<br>(4.18 to 12.86)             | 5.75<br>(3.33 to 9.17)              | 12.25<br>(6.34 to 21.47)            |
| Stomach cancer                       | 147.90<br>(117.09 to 179.29)              | 127.05<br>(88.81 to 176.13)               | 111.73<br>(82.03 to 146.69)               | 135.93<br>(95.12 to 187.55)               | 10.33<br>(8.46 to 12.28)            | 10.19<br>(7.48 to 13.63)            | 9.16<br>(7.10 to 11.77)             | 10.67<br>(7.85 to 14.39)            |
| Colon and rectum cancer              | 363.44<br>(268.68 to 461.45)              | 430.69<br>(274.59 to 639.40)              | 374.28<br>(245.84 to 542.96)              | 530.66<br>(332.21 to 803.74)              | 24.97<br>(18.86 to 30.93)           | 34.33<br>(22.74 to 48.87)           | 30.43<br>(20.72 to 43.15)           | 41.26<br>(26.88 to 60.47)           |
| Liver cancer                         | 84.55<br>(62.78 to 110.78)                | 112.07<br>(68.09 to 182.02)               | 100.36<br>(63.89 to 156.78)               | 163.35<br>(92.16 to 280.70)               | 4.89<br>(3.71 to 6.27)              | 7.34<br>(4.81 to 11.30)             | 6.75<br>(4.53 to 10.08)             | 10.25<br>(6.26 to 16.67)            |
| Liver cancer due to hepatitis B      | 12.77<br>(7.97 to 20.30)                  | 17.31<br>(9.25 to 31.50)                  | 15.78<br>(8.66 to 27.72)                  | 21.13<br>(10.60 to 40.73)                 | 0.62<br>(0.39 to 0.98)              | 0.97<br>(0.52 to 1.68)              | 0.91<br>(0.50 to 1.54)              | 1.15<br>(0.58 to 2.12)              |
| Liver cancer due to hepatitis C      | 24.19<br>(17.05 to 33.91)                 | 36.43<br>(21.79 to 58.08)                 | 33.90<br>(20.96 to 52.96)                 | 43.29<br>(23.36 to 73.45)                 | 1.58<br>(1.14 to 2.21)              | 2.66<br>(1.64 to 4.10)              | 2.53<br>(1.60 to 3.86)              | 3.06<br>(1.75 to 5.01)              |
| Liver cancer due to alcohol use      | 34.36<br>(23.13 to 47.96)                 | 39.36<br>(21.54 to 67.56)                 | 33.30<br>(18.84 to 54.80)                 | 75.79<br>(39.37 to 135.16)                | 1.91<br>(1.32 to 2.61)              | 2.45<br>(1.40 to 4.07)              | 2.13<br>(1.28 to 3.41)              | 4.55<br>(2.55 to 7.84)              |
| Liver cancer due to other causes     | 13.22<br>(8.58 to 19.06)                  | 18.96<br>(10.29 to 32.64)                 | 17.38<br>(9.71 to 28.82)                  | 23.15<br>(11.77 to 42.15)                 | 0.77<br>(0.51 to 1.11)              | 1.26<br>(0.70 to 2.07)              | 1.18<br>(0.67 to 1.89)              | 1.50<br>(0.79 to 2.59)              |
| Gallbladder and biliary tract cancer | 40.02<br>(28.68 to 54.26)                 | 35.52<br>(24.72 to 49.43)                 | 36.08<br>(25.11 to 50.54)                 | 34.16<br>(24.08 to 47.62)                 | 2.78<br>(2.09 to 3.74)              | 2.77<br>(2.10 to 3.74)              | 2.87<br>(2.16 to 3.92)              | 2.61<br>(1.99 to 3.50)              |
| Pancreatic cancer                    | 209.81<br>(165.56 to 265.04)              | 280.74<br>(203.45 to 390.53)              | 266.90<br>(195.32 to 363.87)              | 304.35<br>(215.42 to 435.80)              | 13.09<br>(10.65 to 16.11)           | 19.40<br>(14.84 to 25.53)           | 18.74<br>(14.40 to 24.37)           | 20.65<br>(15.50 to 27.68)           |
| Larynx cancer                        | 19.09<br>(13.90 to 25.07)                 | 16.43<br>(6.67 to 31.71)                  | 10.30<br>(4.60 to 19.52)                  | 29.26<br>(11.75 to 57.75)                 | 1.02<br>(0.77 to 1.32)              | 0.98<br>(0.44 to 1.85)              | 0.64<br>(0.30 to 1.16)              | 1.71<br>(0.74 to 3.29)              |
| Tracheal, bronchus, and lung cancer  | 587.47<br>(459.17 to 737.27)              | 662.46<br>(375.10 to 1,049.14)            | 423.79<br>(251.03 to 657.31)              | 1,045.90<br>(580.02 to 1,687.49)          | 34.19<br>(27.25 to 41.99)           | 42.71<br>(25.42 to 65.18)           | 28.40<br>(17.63 to 42.35)           | 65.31<br>(37.70 to 99.30)           |
| Malignant skin melanoma              | 67.00<br>(45.50 to 89.04)                 | 77.07<br>(52.31 to 102.80)                | 81.90<br>(55.47 to 108.75)                | 73.64<br>(50.38 to 98.27)                 | 3.26<br>(2.22 to 4.28)              | 4.49<br>(3.04 to 5.91)              | 4.85<br>(3.37 to 6.27)              | 4.20<br>(2.91 to 5.41)              |
| Non-melanoma skin cancer             | 17.73<br>(13.84 to 22.23)                 | 25.62<br>(18.28 to 33.85)                 | 24.94<br>(18.67 to 31.75)                 | 24.56<br>(18.42 to 31.43)                 | 1.40<br>(1.14 to 1.71)              | 2.28<br>(1.74 to 2.94)              | 2.28<br>(1.82 to 2.84)              | 2.12<br>(1.68 to 2.65)              |
| Breast cancer                        | 287.45<br>(180.75 to 462.32)              | 281.15<br>(151.64 to 510.16)              | 260.07<br>(143.99 to 465.38)              | 337.41<br>(180.38 to 621.89)              | 16.24<br>(10.71 to 25.21)           | 19.67<br>(11.50 to 32.67)           | 18.51<br>(11.25 to 30.12)           | 23.00<br>(13.39 to 38.69)           |
| Cervical cancer                      | 35.58<br>(22.69 to 57.95)                 | 27.15<br>(14.96 to 49.21)                 | 24.82<br>(14.51 to 43.43)                 | 28.27<br>(16.00 to 51.24)                 | 1.73<br>(1.14 to 2.71)              | 1.65<br>(1.01 to 2.74)              | 1.52<br>(0.95 to 2.47)              | 1.69<br>(1.05 to 2.77)              |

|                   |                                 |                                 |                                 |                                 |                              |                              |                              |                              |
|-------------------|---------------------------------|---------------------------------|---------------------------------|---------------------------------|------------------------------|------------------------------|------------------------------|------------------------------|
|                   | 21.69<br>(14.04 to<br>36.26)    | 28.97<br>(17.12 to<br>48.86)    | 27.99<br>(17.24 to<br>46.27)    | 28.69<br>(17.65 to<br>48.14)    | 1.45<br>(0.98 to<br>2.28)    | 2.22<br>(1.43 to<br>3.45)    | 2.18<br>(1.45 to<br>3.34)    | 2.17<br>(1.44 to<br>3.32)    |
| Uterine cancer    |                                 |                                 |                                 |                                 |                              |                              |                              |                              |
|                   | 120.17<br>(80.37 to<br>187.90)  | 119.84<br>(69.55 to<br>211.60)  | 114.28<br>(66.80 to<br>200.00)  | 125.77<br>(73.63 to<br>217.10)  | 6.48<br>(4.49 to<br>9.75)    | 7.46<br>(4.78 to<br>11.91)   | 7.13<br>(4.60 to<br>11.30)   | 7.81<br>(4.95 to<br>12.48)   |
| Ovarian cancer    |                                 |                                 |                                 |                                 |                              |                              |                              |                              |
|                   | 215.89<br>(150.10 to<br>286.22) | 338.43<br>(231.65 to<br>454.07) | 337.36<br>(236.99 to<br>444.79) | 326.67<br>(225.39 to<br>438.16) | 18.19<br>(13.02 to<br>23.57) | 31.23<br>(22.76 to<br>40.93) | 31.84<br>(23.37 to<br>40.71) | 29.39<br>(21.28 to<br>38.88) |
| Prostate cancer   |                                 |                                 |                                 |                                 |                              |                              |                              |                              |
|                   | 3.20<br>(2.11 to<br>4.53)       | 2.33<br>(1.32 to<br>3.69)       | 2.23<br>(1.29 to<br>3.51)       | 2.31<br>(1.37 to<br>3.54)       | 0.09<br>(0.06 to<br>0.12)    | 0.08<br>(0.06 to<br>0.12)    | 0.08<br>(0.06 to<br>0.12)    | 0.08<br>(0.05 to<br>0.11)    |
| Testicular cancer |                                 |                                 |                                 |                                 |                              |                              |                              |                              |

| Andorra                         |                                                  |                                                  |                                                  |                                                  |                                            |                                            |                                            |                                            |
|---------------------------------|--------------------------------------------------|--------------------------------------------------|--------------------------------------------------|--------------------------------------------------|--------------------------------------------|--------------------------------------------|--------------------------------------------|--------------------------------------------|
| Cause                           | YLLs (actual counts)                             |                                                  |                                                  |                                                  | Deaths (actual counts)                     |                                            |                                            |                                            |
|                                 | 2016                                             | 2040 Forecast                                    | 2040 Better Scenario                             | 2040 Worse Scenario                              | 2016                                       | 2040 Forecast                              | 2040 Better Scenario                       | 2040 Worse Scenario                        |
| Kidney cancer                   | 83.63<br>(60.39 to 114.53)                       | 113.38<br>(77.53 to 162.97)                      | 109.43<br>(75.53 to 153.77)                      | 119.98<br>(80.62 to 177.65)                      | 4.80<br>(3.60 to 6.53)                     | 7.39<br>(5.46 to 10.41)                    | 7.29<br>(5.46 to 10.02)                    | 7.65<br>(5.49 to 10.94)                    |
| Bladder cancer                  | 90.33<br>(66.89 to 111.67)                       | 114.51<br>(77.52 to 159.22)                      | 103.38<br>(71.91 to 141.02)                      | 130.34<br>(85.99 to 186.25)                      | 7.09<br>(5.39 to 8.60)                     | 10.04<br>(7.10 to 13.49)                   | 9.27<br>(6.73 to 12.27)                    | 11.20<br>(7.65 to 15.53)                   |
| Brain and nervous system cancer | 146.97<br>(111.48 to 191.28)                     | 162.69<br>(116.10 to 229.65)                     | 160.74<br>(116.10 to 223.19)                     | 160.59<br>(116.80 to 225.38)                     | 5.54<br>(4.26 to 7.14)                     | 7.39<br>(5.56 to 10.10)                    | 7.39<br>(5.58 to 9.91)                     | 7.17<br>(5.44 to 9.66)                     |
| Thyroid cancer                  | 8.72<br>(6.50 to 12.02)                          | 10.36<br>(6.67 to 16.05)                         | 9.88<br>(6.57 to 14.95)                          | 11.05<br>(7.12 to 17.41)                         | 0.54<br>(0.41 to 0.75)                     | 0.74<br>(0.51 to 1.09)                     | 0.72<br>(0.50 to 1.04)                     | 0.77<br>(0.52 to 1.15)                     |
| Mesothelioma                    | 55.91<br>(30.92 to 89.54)                        | 79.02<br>(44.59 to 126.06)                       | 82.00<br>(46.15 to 130.14)                       | 75.22<br>(42.75 to 120.57)                       | 3.29<br>(1.85 to 5.15)                     | 5.22<br>(3.08 to 8.07)                     | 5.50<br>(3.22 to 8.53)                     | 4.86<br>(2.85 to 7.65)                     |
| Hodgkin lymphoma                | 9.18<br>(6.06 to 13.86)                          | 7.52<br>(4.38 to 12.75)                          | 6.97<br>(4.24 to 10.97)                          | 7.50<br>(4.52 to 12.20)                          | 0.35<br>(0.24 to 0.51)                     | 0.36<br>(0.22 to 0.57)                     | 0.33<br>(0.21 to 0.51)                     | 0.35<br>(0.22 to 0.54)                     |
| Non-Hodgkin lymphoma            | 132.55<br>(105.09 to 168.18)                     | 156.76<br>(114.15 to 215.10)                     | 152.31<br>(111.77 to 204.08)                     | 159.60<br>(118.29 to 213.31)                     | 7.61<br>(6.15 to 9.43)                     | 10.63<br>(8.23 to 13.61)                   | 10.52<br>(8.24 to 13.34)                   | 10.57<br>(8.25 to 13.43)                   |
| Multiple myeloma                | 62.66<br>(45.37 to 80.21)                        | 85.76<br>(60.75 to 116.86)                       | 84.97<br>(60.40 to 115.06)                       | 86.91<br>(61.11 to 119.55)                       | 4.12<br>(3.05 to 5.23)                     | 6.34<br>(4.64 to 8.30)                     | 6.39<br>(4.68 to 8.29)                     | 6.28<br>(4.56 to 8.25)                     |
| Leukemia                        | 142.08<br>(109.83 to 184.14)                     | 177.72<br>(126.87 to 253.93)                     | 168.15<br>(121.78 to 234.21)                     | 193.65<br>(135.40 to 285.01)                     | 8.27<br>(6.48 to 10.60)                    | 12.50<br>(9.33 to 17.02)                   | 12.07<br>(9.15 to 16.20)                   | 13.30<br>(9.61 to 18.42)                   |
| Acute lymphoid leukemia         | 16.83<br>(12.45 to 22.44)                        | 12.91<br>(7.87 to 20.13)                         | 11.86<br>(7.46 to 17.94)                         | 14.27<br>(8.88 to 22.29)                         | 0.48<br>(0.36 to 0.64)                     | 0.48<br>(0.31 to 0.73)                     | 0.44<br>(0.30 to 0.65)                     | 0.53<br>(0.34 to 0.81)                     |
| Chronic lymphoid leukemia       | 21.53<br>(15.91 to 28.61)                        | 27.74<br>(18.55 to 39.88)                        | 26.61<br>(18.13 to 37.78)                        | 29.89<br>(19.47 to 44.41)                        | 1.74<br>(1.31 to 2.30)                     | 2.45<br>(1.70 to 3.46)                     | 2.41<br>(1.70 to 3.34)                     | 2.58<br>(1.74 to 3.77)                     |
| Acute myeloid leukemia          | 66.35<br>(48.89 to 84.82)                        | 93.48<br>(65.44 to 132.99)                       | 89.80<br>(63.36 to 125.42)                       | 101.77<br>(69.22 to 147.90)                      | 3.58<br>(2.61 to 4.55)                     | 6.05<br>(4.32 to 8.18)                     | 5.92<br>(4.29 to 7.86)                     | 6.44<br>(4.53 to 9.00)                     |
| Chronic myeloid leukemia        | 12.59<br>(8.68 to 17.34)                         | 8.76<br>(4.94 to 14.08)                          | 7.64<br>(4.65 to 11.64)                          | 9.71<br>(5.64 to 15.64)                          | 0.84<br>(0.59 to 1.15)                     | 0.68<br>(0.41 to 1.06)                     | 0.61<br>(0.39 to 0.90)                     | 0.74<br>(0.45 to 1.15)                     |
| Other leukemia                  | 24.77<br>(15.87 to 38.61)                        | 34.83<br>(19.76 to 58.19)                        | 32.24<br>(19.03 to 52.50)                        | 38.01<br>(21.81 to 63.82)                        | 1.62<br>(1.06 to 2.45)                     | 2.84<br>(1.75 to 4.60)                     | 2.69<br>(1.68 to 4.32)                     | 3.02<br>(1.82 to 4.99)                     |
| Other neoplasms                 | 160.47<br>(127.64 to 201.22)                     | 203.99<br>(156.92 to 263.35)                     | 207.20<br>(159.06 to 269.90)                     | 197.45<br>(152.68 to 254.68)                     | 8.99<br>(7.24 to 11.15)                    | 14.04<br>(11.31 to 17.03)                  | 14.55<br>(11.63 to 17.85)                  | 13.25<br>(10.70 to 16.08)                  |
| <b>Cardiovascular diseases</b>  | <b>2,650.42</b><br><b>(2,173.51 to 3,156.53)</b> | <b>2,391.46</b><br><b>(1,668.45 to 3,430.04)</b> | <b>1,837.21</b><br><b>(1,353.58 to 2,468.08)</b> | <b>3,118.66</b><br><b>(2,121.71 to 4,441.23)</b> | <b>237.69</b><br><b>(202.68 to 276.27)</b> | <b>240.22</b><br><b>(177.36 to 323.70)</b> | <b>196.78</b><br><b>(152.74 to 253.69)</b> | <b>290.34</b><br><b>(213.09 to 391.11)</b> |
| Rheumatic heart disease         | 23.36<br>(17.97 to 31.24)                        | 20.70<br>(13.62 to 31.78)                        | 19.41<br>(13.47 to 28.05)                        | 20.32<br>(13.84 to 30.48)                        | 2.03<br>(1.55 to 2.70)                     | 2.09<br>(1.43 to 3.13)                     | 2.00<br>(1.44 to 2.86)                     | 2.00<br>(1.42 to 2.94)                     |
| Ischemic heart disease          | 1,477.02<br>(1,177.96 to 1,788.93)               | 1,060.88<br>(620.01 to 1,717.56)                 | 688.16<br>(430.29 to 1,045.66)                   | 1,565.08<br>(873.38 to 2,537.86)                 | 126.86<br>(105.98 to 148.90)               | 101.55<br>(63.34 to 153.58)                | 71.64<br>(46.81 to 104.39)                 | 136.36<br>(82.45 to 210.34)                |
| Stroke                          | 483.86<br>(382.49 to 597.59)                     | 354.70<br>(207.29 to 592.90)                     | 262.28<br>(163.40 to 419.65)                     | 505.96<br>(295.45 to 836.75)                     | 48.17<br>(38.58 to 58.95)                  | 39.19<br>(23.65 to 62.83)                  | 31.30<br>(19.92 to 49.16)                  | 51.17<br>(30.04 to 85.84)                  |
| Ischemic stroke                 | 186.41<br>(144.90 to 232.54)                     | 135.29<br>(76.34 to 247.31)                      | 107.16<br>(62.47 to 191.62)                      | 173.28<br>(95.08 to 321.49)                      | 22.20<br>(17.69 to 27.64)                  | 17.19<br>(9.64 to 31.15)                   | 14.31<br>(8.37 to 25.46)                   | 20.73<br>(11.21 to 39.88)                  |

|                                |                                 |                                 |                                |                                 |                              |                              |                              |                              |
|--------------------------------|---------------------------------|---------------------------------|--------------------------------|---------------------------------|------------------------------|------------------------------|------------------------------|------------------------------|
| Intracerebral hemorrhage       | 297.45<br>(230.89 to<br>371.57) | 219.41<br>(122.51 to<br>374.43) | 155.13<br>(92.55 to<br>257.12) | 332.68<br>(179.35 to<br>557.86) | 25.96<br>(20.84 to<br>32.39) | 22.00<br>(12.79 to<br>36.45) | 16.99<br>(10.47 to<br>26.72) | 30.44<br>(17.38 to<br>50.88) |
| Hypertensive heart disease     | 54.11<br>(37.43 to<br>81.71)    | 82.30<br>(41.68 to<br>173.63)   | 65.40<br>(36.50 to<br>124.45)  | 110.87<br>(52.92 to<br>251.55)  | 4.73<br>(3.28 to<br>7.30)    | 8.33<br>(4.30 to<br>17.50)   | 6.86<br>(3.89 to<br>12.76)   | 10.80<br>(5.17 to<br>24.83)  |
| Cardiomyopathy and myocarditis | 87.07<br>(61.14 to<br>113.05)   | 81.13<br>(51.99 to<br>120.21)   | 74.66<br>(50.13 to<br>106.09)  | 87.25<br>(57.84 to<br>123.48)   | 6.22<br>(4.53 to<br>8.10)    | 7.36<br>(4.88 to<br>10.63)   | 7.02<br>(4.77 to<br>9.90)    | 7.37<br>(4.96 to<br>10.47)   |
| Myocarditis                    | 13.29<br>(8.88 to<br>18.12)     | 15.37<br>(10.24 to<br>21.31)    | 15.89<br>(10.54 to<br>22.22)   | 14.53<br>(9.66 to<br>20.26)     | 1.20<br>(0.79 to<br>1.70)    | 1.76<br>(1.15 to<br>2.53)    | 1.87<br>(1.22 to<br>2.70)    | 1.61<br>(1.03 to<br>2.35)    |

| Andorra                                                       |                                                      |                                                      |                                                      |                                                        |                                                   |                                                   |                                                   |                                                    |
|---------------------------------------------------------------|------------------------------------------------------|------------------------------------------------------|------------------------------------------------------|--------------------------------------------------------|---------------------------------------------------|---------------------------------------------------|---------------------------------------------------|----------------------------------------------------|
| Cause                                                         | YLLs (actual counts)                                 |                                                      |                                                      |                                                        | Deaths (actual counts)                            |                                                   |                                                   |                                                    |
|                                                               | 2016                                                 | 2040 Forecast                                        | 2040 Better Scenario                                 | 2040 Worse Scenario                                    | 2016                                              | 2040 Forecast                                     | 2040 Better Scenario                              | 2040 Worse Scenario                                |
| Alcoholic cardiomyopathy                                      | 17.40<br>(7.30 to<br>27.25)                          | 12.28<br>(5.01 to<br>19.54)                          | 11.54<br>(4.74 to<br>18.16)                          | 18.29<br>(8.37 to<br>28.42)                            | 0.69<br>(0.29 to<br>1.07)                         | 0.59<br>(0.23 to<br>0.91)                         | 0.56<br>(0.23 to<br>0.88)                         | 0.84<br>(0.38 to<br>1.28)                          |
| Other cardiomyopathy                                          | 56.39<br>(38.17 to<br>75.52)                         | 53.47<br>(29.80 to<br>87.41)                         | 47.23<br>(28.71 to<br>73.41)                         | 54.43<br>(31.64 to<br>86.24)                           | 4.33<br>(3.06 to<br>5.76)                         | 5.02<br>(2.87 to<br>7.88)                         | 4.58<br>(2.75 to<br>7.09)                         | 4.92<br>(2.87 to<br>7.78)                          |
| Atrial fibrillation and flutter                               | 95.50<br>(71.73 to<br>126.53)                        | 142.98<br>(98.43 to<br>203.96)                       | 137.50<br>(96.17 to<br>193.94)                       | 160.38<br>(107.76 to<br>238.75)                        | 12.24<br>(8.96 to<br>16.22)                       | 18.30<br>(12.99 to<br>26.20)                      | 18.01<br>(12.92 to<br>25.51)                      | 19.96<br>(13.59 to<br>29.66)                       |
| Aortic aneurysm                                               | 140.64<br>(108.49 to<br>184.05)                      | 172.61<br>(120.70 to<br>238.73)                      | 162.38<br>(118.86 to<br>220.22)                      | 175.26<br>(122.67 to<br>244.55)                        | 11.67<br>(9.23 to<br>14.89)                       | 15.79<br>(11.93 to<br>20.88)                      | 15.38<br>(11.95 to<br>19.98)                      | 15.43<br>(11.70 to<br>20.55)                       |
| Peripheral artery disease                                     | 32.08<br>(15.33 to<br>49.38)                         | 65.36<br>(29.70 to<br>108.77)                        | 63.28<br>(29.04 to<br>104.54)                        | 67.45<br>(30.46 to<br>112.72)                          | 3.89<br>(1.84 to<br>6.17)                         | 3.02<br>(3.68 to<br>13.28)                        | 8.00<br>(3.67 to<br>12.98)                        | 7.97<br>(3.62 to<br>13.32)                         |
| Endocarditis                                                  | 26.43<br>(19.39 to<br>34.76)                         | 38.87<br>(25.35 to<br>55.98)                         | 37.63<br>(24.93 to<br>54.01)                         | 38.64<br>(25.24 to<br>55.86)                           | 2.12<br>(1.55 to<br>2.75)                         | 3.43<br>(2.26 to<br>4.96)                         | 3.41<br>(2.26 to<br>4.88)                         | 3.31<br>(2.16 to<br>4.87)                          |
| Other cardiovascular and circulatory diseases                 | 230.34<br>(154.66 to<br>311.62)                      | 371.92<br>(229.15 to<br>548.62)                      | 326.50<br>(210.01 to<br>470.05)                      | 387.45<br>(236.97 to<br>573.77)                        | 19.76<br>(13.78 to<br>26.35)                      | 36.16<br>(24.08 to<br>51.40)                      | 33.16<br>(22.68 to<br>45.13)                      | 35.96<br>(23.61 to<br>50.48)                       |
| <b>Chronic respiratory diseases</b>                           | <b>488.10</b><br><b>(377.11 to</b><br><b>637.53)</b> | <b>564.33</b><br><b>(382.83 to</b><br><b>846.32)</b> | <b>436.73</b><br><b>(306.50 to</b><br><b>631.96)</b> | <b>811.15</b><br><b>(533.78 to</b><br><b>1,236.13)</b> | <b>41.87</b><br><b>(32.84 to</b><br><b>55.13)</b> | <b>52.40</b><br><b>(37.37 to</b><br><b>74.66)</b> | <b>41.49</b><br><b>(30.27 to</b><br><b>57.02)</b> | <b>72.95</b><br><b>(50.49 to</b><br><b>105.63)</b> |
| Chronic obstructive pulmonary disease                         | 408.49<br>(313.57 to<br>538.11)                      | 464.30<br>(291.38 to<br>717.60)                      | 330.20<br>(212.35 to<br>498.94)                      | 713.92<br>(445.43 to<br>1,119.38)                      | 36.49<br>(28.52 to<br>47.81)                      | 44.37<br>(29.41 to<br>64.61)                      | 32.74<br>(21.72 to<br>46.98)                      | 65.39<br>(43.20 to<br>96.76)                       |
| Pneumoconiosis                                                | 3.28<br>(1.40 to<br>5.72)                            | 4.18<br>(1.70 to<br>8.18)                            | 4.44<br>(1.72 to<br>9.09)                            | 3.96<br>(1.61 to<br>7.78)                              | 0.29<br>(0.12 to<br>0.50)                         | 0.39<br>(0.16 to<br>0.76)                         | 0.42<br>(0.17 to<br>0.84)                         | 0.36<br>(0.15 to<br>0.71)                          |
| Silicosis                                                     | 0.32<br>(0.08 to<br>1.41)                            | 0.21<br>(0.03 to<br>1.09)                            | 0.19<br>(0.03 to<br>0.94)                            | 0.20<br>(0.03 to<br>0.97)                              | 0.03<br>(0.01 to<br>0.12)                         | 0.02<br>(0.00 to<br>0.10)                         | 0.02<br>(0.00 to<br>0.10)                         | 0.02<br>(0.00 to<br>0.10)                          |
| Asbestosis                                                    | 1.96<br>(0.69 to<br>3.63)                            | 2.97<br>(1.13 to<br>5.27)                            | 3.31<br>(1.26 to<br>6.02)                            | 2.76<br>(1.06 to<br>5.02)                              | 0.16<br>(0.06 to<br>0.31)                         | 0.27<br>(0.10 to<br>0.49)                         | 0.30<br>(0.11 to<br>0.55)                         | 0.24<br>(0.09 to<br>0.45)                          |
| Coal workers pneumoconiosis                                   | 0.56<br>(0.13 to<br>1.60)                            | 0.64<br>(0.05 to<br>3.19)                            | 0.59<br>(0.04 to<br>3.07)                            | 0.64<br>(0.06 to<br>3.05)                              | 0.06<br>(0.01 to<br>0.16)                         | 0.07<br>(0.00 to<br>0.34)                         | 0.06<br>(0.01 to<br>0.32)                         | 0.07<br>(0.01 to<br>0.30)                          |
| Other pneumoconiosis                                          | 0.45<br>(0.13 to<br>1.23)                            | 0.36<br>(0.11 to<br>1.07)                            | 0.35<br>(0.11 to<br>1.06)                            | 0.36<br>(0.11 to<br>1.03)                              | 0.04<br>(0.01 to<br>0.11)                         | 0.04<br>(0.01 to<br>0.11)                         | 0.04<br>(0.01 to<br>0.11)                         | 0.04<br>(0.01 to<br>0.10)                          |
| Asthma                                                        | 19.44<br>(12.75 to<br>31.63)                         | 8.63<br>(3.89 to<br>17.74)                           | 7.05<br>(3.36 to<br>13.77)                           | 10.78<br>(5.05 to<br>21.83)                            | 1.09<br>(0.67 to<br>1.85)                         | 0.64<br>(0.31 to<br>1.27)                         | 0.55<br>(0.27 to<br>1.06)                         | 0.77<br>(0.37 to<br>1.51)                          |
| Interstitial lung disease and pulmonary sarcoidosis           | 50.97<br>(23.57 to<br>83.77)                         | 81.13<br>(37.14 to<br>133.97)                        | 89.13<br>(43.09 to<br>141.92)                        | 76.07<br>(34.79 to<br>127.14)                          | 3.72<br>(1.73 to<br>5.98)                         | 6.61<br>(2.96 to<br>10.83)                        | 7.39<br>(3.51 to<br>11.67)                        | 6.03<br>(2.76 to<br>10.08)                         |
| Other chronic respiratory diseases                            | 5.92<br>(3.31 to<br>9.56)                            | 6.10<br>(3.10 to<br>10.58)                           | 5.92<br>(3.04 to<br>10.23)                           | 6.42<br>(3.23 to<br>11.18)                             | 0.29<br>(0.15 to<br>0.48)                         | 0.38<br>(0.20 to<br>0.66)                         | 0.38<br>(0.19 to<br>0.65)                         | 0.39<br>(0.20 to<br>0.69)                          |
| <b>Cirrhosis and other chronic liver diseases</b>             | <b>236.48</b><br><b>(169.20 to</b><br><b>319.65)</b> | <b>179.02</b><br><b>(112.23 to</b><br><b>273.78)</b> | <b>165.74</b><br><b>(107.60 to</b><br><b>242.32)</b> | <b>228.74</b><br><b>(149.12 to</b><br><b>334.21)</b>   | <b>9.39</b><br><b>(6.93 to</b><br><b>12.40)</b>   | <b>8.50</b><br><b>(5.80 to</b><br><b>12.08)</b>   | <b>8.01</b><br><b>(5.67 to</b><br><b>11.08)</b>   | <b>10.65</b><br><b>(7.55 to</b><br><b>14.73)</b>   |
| Cirrhosis and other chronic liver diseases due to hepatitis B | 33.29<br>(21.48 to<br>49.41)                         | 30.19<br>(17.65 to<br>48.51)                         | 28.96<br>(17.36 to<br>45.03)                         | 29.80<br>(18.27 to<br>46.17)                           | 1.33<br>(0.88 to<br>1.90)                         | 1.43<br>(0.90 to<br>2.23)                         | 1.40<br>(0.90 to<br>2.10)                         | 1.38<br>(0.90 to<br>2.11)                          |
| Cirrhosis and other chronic liver diseases due to hepatitis C | 70.43<br>(46.23 to<br>101.50)                        | 62.65<br>(36.19 to<br>98.38)                         | 59.71<br>(36.10 to<br>90.61)                         | 62.26<br>(37.02 to<br>95.25)                           | 2.69<br>(1.85 to<br>3.78)                         | 2.81<br>(1.74 to<br>4.34)                         | 2.72<br>(1.73 to<br>3.99)                         | 2.75<br>(1.72 to<br>4.10)                          |

|                                                                |                                                      |                                                      |                                                      |                                                      |                                                   |                                                   |                                                   |                                                   |
|----------------------------------------------------------------|------------------------------------------------------|------------------------------------------------------|------------------------------------------------------|------------------------------------------------------|---------------------------------------------------|---------------------------------------------------|---------------------------------------------------|---------------------------------------------------|
|                                                                | 118.62<br>(81.94 to<br>165.79)                       | 73.37<br>(44.10 to<br>115.54)                        | 64.81<br>(40.81 to<br>98.68)                         | 124.04<br>(80.01 to<br>184.77)                       | 4.78<br>(3.44 to<br>6.35)                         | 3.57<br>(2.36 to<br>5.16)                         | 3.23<br>(2.21 to<br>4.57)                         | 5.86<br>(4.09 to<br>8.12)                         |
| Cirrhosis and other chronic liver diseases due to alcohol use  |                                                      |                                                      |                                                      |                                                      |                                                   |                                                   |                                                   |                                                   |
|                                                                | 14.15<br>(9.14 to<br>21.47)                          | 12.81<br>(7.29 to<br>21.12)                          | 12.26<br>(7.26 to<br>19.79)                          | 12.65<br>(7.36 to<br>20.28)                          | 0.60<br>(0.40 to<br>0.87)                         | 0.68<br>(0.40 to<br>1.08)                         | 0.66<br>(0.41 to<br>1.04)                         | 0.66<br>(0.40 to<br>1.03)                         |
| Cirrhosis and other chronic liver diseases due to other causes |                                                      |                                                      |                                                      |                                                      |                                                   |                                                   |                                                   |                                                   |
| <b>Digestive diseases</b>                                      | <b>231.73</b><br><b>(166.67 to</b><br><b>307.86)</b> | <b>290.73</b><br><b>(200.78 to</b><br><b>401.26)</b> | <b>283.84</b><br><b>(199.22 to</b><br><b>388.99)</b> | <b>295.34</b><br><b>(206.39 to</b><br><b>401.83)</b> | <b>19.52</b><br><b>(14.26 to</b><br><b>25.38)</b> | <b>28.26</b><br><b>(20.07 to</b><br><b>36.41)</b> | <b>28.26</b><br><b>(20.17 to</b><br><b>36.19)</b> | <b>27.79</b><br><b>(19.70 to</b><br><b>36.18)</b> |
| Peptic ulcer disease                                           | 38.47<br>(21.72 to<br>52.09)                         | 32.71<br>(16.03 to<br>52.33)                         | 29.26<br>(15.05 to<br>43.27)                         | 33.20<br>(16.84 to<br>49.40)                         | 3.14<br>(1.80 to<br>4.14)                         | 3.22<br>(1.63 to<br>5.01)                         | 2.97<br>(1.55 to<br>4.33)                         | 3.16<br>(1.65 to<br>4.63)                         |

| Andorra                                    |                                |                                    |                                    |                                    |                             |                              |                              |                              |
|--------------------------------------------|--------------------------------|------------------------------------|------------------------------------|------------------------------------|-----------------------------|------------------------------|------------------------------|------------------------------|
| Cause                                      | YLLs (actual counts)           |                                    |                                    |                                    | Deaths (actual counts)      |                              |                              |                              |
|                                            | 2016                           | 2040 Forecast                      | 2040 Better Scenario               | 2040 Worse Scenario                | 2016                        | 2040 Forecast                | 2040 Better Scenario         | 2040 Worse Scenario          |
| Gastritis and duodenitis                   | 3.09<br>(2.05 to 4.57)         | 3.68<br>(1.90 to 6.39)             | 3.49<br>(1.90 to 5.85)             | 3.57<br>(1.92 to 5.95)             | 0.20<br>(0.13 to 0.28)      | 0.29<br>(0.16 to 0.49)       | 0.28<br>(0.16 to 0.47)       | 0.27<br>(0.16 to 0.45)       |
| Appendicitis                               | 2.95<br>(1.61 to 4.20)         | 2.81<br>(1.44 to 4.80)             | 2.60<br>(1.36 to 4.10)             | 2.76<br>(1.46 to 4.34)             | 0.19<br>(0.11 to 0.27)      | 0.23<br>(0.12 to 0.35)       | 0.22<br>(0.12 to 0.32)       | 0.22<br>(0.12 to 0.33)       |
| Paralytic ileus and intestinal obstruction | 36.95<br>(23.77 to 51.51)      | 54.29<br>(35.79 to 71.45)          | 56.21<br>(37.26 to 74.37)          | 51.24<br>(33.88 to 68.09)          | 3.46<br>(2.23 to 4.75)      | 5.63<br>(3.75 to 7.35)       | 5.94<br>(3.99 to 7.79)       | 5.18<br>(3.37 to 6.82)       |
| Inguinal, femoral, and abdominal hernia    | 8.29<br>(4.87 to 11.96)        | 7.43<br>(4.18 to 11.24)            | 7.52<br>(4.15 to 10.96)            | 7.09<br>(4.04 to 10.48)            | 0.80<br>(0.46 to 1.16)      | 0.79<br>(0.44 to 1.16)       | 0.80<br>(0.45 to 1.16)       | 0.74<br>(0.42 to 1.08)       |
| Inflammatory bowel disease                 | 20.56<br>(9.50 to 32.25)       | 24.40<br>(11.46 to 38.32)          | 24.90<br>(11.79 to 39.05)          | 23.36<br>(10.91 to 36.55)          | 1.60<br>(0.75 to 2.46)      | 2.30<br>(1.06 to 3.32)       | 2.29<br>(1.10 to 3.43)       | 2.05<br>(0.97 to 3.06)       |
| Vascular intestinal disorders              | 34.71<br>(22.55 to 48.85)      | 48.83<br>(30.77 to 69.32)          | 48.79<br>(30.89 to 69.41)          | 46.80<br>(29.82 to 66.47)          | 2.93<br>(1.95 to 4.14)      | 4.63<br>(3.03 to 6.44)       | 4.72<br>(3.12 to 6.56)       | 4.35<br>(2.86 to 5.97)       |
| Gallbladder and biliary diseases           | 20.13<br>(14.23 to 27.20)      | 26.91<br>(14.81 to 43.72)          | 24.01<br>(13.78 to 38.26)          | 31.85<br>(17.25 to 52.91)          | 1.98<br>(1.39 to 2.62)      | 2.91<br>(1.62 to 4.65)       | 2.67<br>(1.52 to 4.21)       | 3.33<br>(1.80 to 5.53)       |
| Pancreatitis                               | 23.61<br>(15.53 to 33.93)      | 25.64<br>(10.39 to 56.99)          | 23.10<br>(9.77 to 52.84)           | 34.18<br>(12.74 to 76.42)          | 1.34<br>(0.90 to 1.91)      | 1.79<br>(0.75 to 4.12)       | 1.65<br>(0.70 to 3.73)       | 2.35<br>(0.89 to 5.64)       |
| Other digestive diseases                   | 42.97<br>(26.95 to 58.34)      | 64.02<br>(39.65 to 89.15)          | 64.17<br>(40.21 to 88.86)          | 61.30<br>(38.89 to 83.98)          | 3.90<br>(2.46 to 5.28)      | 6.57<br>(4.05 to 8.80)       | 6.73<br>(4.15 to 9.00)       | 6.14<br>(3.71 to 8.25)       |
| Neurological disorders                     | 931.23<br>(758.18 to 1,156.80) | 1,368.20<br>(1,069.25 to 1,754.81) | 1,376.82<br>(1,086.59 to 1,752.97) | 1,425.10<br>(1,072.04 to 1,918.68) | 112.72<br>(91.16 to 138.00) | 169.04<br>(133.02 to 217.51) | 173.05<br>(137.28 to 219.68) | 172.50<br>(129.99 to 231.96) |
| Alzheimer's disease and other dementias    | 710.41<br>(562.87 to 903.44)   | 1,083.66<br>(798.15 to 1,455.67)   | 1,085.63<br>(806.81 to 1,439.52)   | 1,142.98<br>(808.12 to 1,630.38)   | 99.06<br>(78.09 to 123.11)  | 147.92<br>(111.55 to 195.99) | 150.85<br>(117.04 to 195.37) | 152.42<br>(110.95 to 211.45) |
| Parkinson's disease                        | 76.70<br>(56.17 to 103.60)     | 126.26<br>(92.90 to 169.15)        | 133.57<br>(97.92 to 177.45)        | 117.90<br>(87.02 to 158.42)        | 7.70<br>(5.64 to 10.30)     | 13.04<br>(9.62 to 17.57)     | 13.99<br>(10.41 to 18.32)    | 11.96<br>(8.84 to 16.08)     |
| Epilepsy                                   | 35.83<br>(25.35 to 49.36)      | 32.95<br>(19.43 to 52.96)          | 31.07<br>(18.57 to 50.36)          | 40.95<br>(23.74 to 67.02)          | 1.09<br>(0.79 to 1.48)      | 1.35<br>(0.83 to 2.12)       | 1.30<br>(0.81 to 2.06)       | 1.64<br>(1.00 to 2.65)       |
| Multiple sclerosis                         | 25.03<br>(13.73 to 36.79)      | 23.90<br>(12.88 to 36.37)          | 23.51<br>(12.41 to 35.79)          | 24.37<br>(13.25 to 36.76)          | 0.96<br>(0.52 to 1.41)      | 1.05<br>(0.56 to 1.56)       | 1.04<br>(0.55 to 1.57)       | 1.05<br>(0.56 to 1.57)       |
| Motor neuron disease                       | 46.40<br>(32.08 to 57.95)      | 60.92<br>(40.71 to 79.68)          | 61.76<br>(41.12 to 81.03)          | 59.26<br>(39.49 to 77.15)          | 2.38<br>(1.65 to 2.98)      | 3.56<br>(2.41 to 4.47)       | 3.65<br>(2.45 to 4.62)       | 3.41<br>(2.30 to 4.28)       |
| Other neurological disorders               | 36.85<br>(29.02 to 46.78)      | 40.50<br>(30.80 to 52.64)          | 41.29<br>(31.00 to 53.92)          | 39.64<br>(30.23 to 51.52)          | 1.52<br>(1.21 to 1.91)      | 2.13<br>(1.71 to 2.63)       | 2.22<br>(1.77 to 2.76)       | 2.02<br>(1.64 to 2.49)       |
| Mental disorders                           | 126.03<br>(84.91 to 178.98)    | 156.32<br>(99.70 to 226.10)        | 164.49<br>(108.20 to 235.28)       | 157.95<br>(101.25 to 222.62)       | 3.08<br>(2.12 to 4.28)      | 4.15<br>(2.80 to 5.88)       | 4.39<br>(3.00 to 6.08)       | 4.19<br>(2.85 to 5.83)       |
| Alcohol use disorders                      | 36.72<br>(23.15 to 60.13)      | 29.38<br>(17.12 to 53.73)          | 29.60<br>(16.99 to 55.03)          | 34.06<br>(20.20 to 61.44)          | 1.11<br>(0.71 to 1.82)      | 1.02<br>(0.61 to 1.89)       | 1.04<br>(0.62 to 1.94)       | 1.17<br>(0.71 to 2.09)       |
| Drug use disorders                         | 89.01<br>(53.57 to 132.92)     | 126.67<br>(74.97 to 193.49)        | 134.62<br>(82.65 to 199.24)        | 123.62<br>(74.23 to 184.63)        | 1.97<br>(1.18 to 2.94)      | 3.12<br>(1.90 to 4.64)       | 3.34<br>(2.12 to 4.87)       | 3.01<br>(1.87 to 4.38)       |
| Opioid use disorders                       | 53.94<br>(31.00 to 83.01)      | 55.26<br>(32.53 to 86.24)          | 56.63<br>(32.95 to 87.90)          | 54.96<br>(31.61 to 85.88)          | 1.15<br>(0.67 to 1.76)      | 1.29<br>(0.77 to 1.97)       | 1.33<br>(0.80 to 2.02)       | 1.28<br>(0.75 to 1.95)       |

|                           |                              |                               |                               |                              |                           |                           |                           |                           |
|---------------------------|------------------------------|-------------------------------|-------------------------------|------------------------------|---------------------------|---------------------------|---------------------------|---------------------------|
|                           | 0.81<br>(0.43 to<br>1.23)    | 1.76<br>(0.89 to<br>2.99)     | 1.87<br>(1.01 to<br>3.15)     | 1.71<br>(0.89 to<br>2.85)    | 0.02<br>(0.01 to<br>0.03) | 0.04<br>(0.02 to<br>0.07) | 0.04<br>(0.02 to<br>0.07) | 0.04<br>(0.02 to<br>0.06) |
| Cocaine use disorders     | 2.22<br>(1.28 to<br>3.33)    | 7.61<br>(3.32 to<br>14.01)    | 8.35<br>(4.11 to<br>14.49)    | 7.27<br>(3.43 to<br>12.84)   | 0.05<br>(0.03 to<br>0.07) | 0.16<br>(0.07 to<br>0.29) | 0.18<br>(0.09 to<br>0.30) | 0.15<br>(0.07 to<br>0.27) |
| Amphetamine use disorders | 32.04<br>(17.72 to<br>48.72) | 62.05<br>(30.94 to<br>102.32) | 67.76<br>(38.13 to<br>107.72) | 59.69<br>(32.27 to<br>96.62) | 0.75<br>(0.43 to<br>1.14) | 1.63<br>(0.86 to<br>2.60) | 1.79<br>(1.06 to<br>2.72) | 1.55<br>(0.88 to<br>2.41) |
| Other drug use disorders  | 0.30<br>(0.17 to<br>0.69)    | 0.27<br>(0.14 to<br>0.62)     | 0.28<br>(0.14 to<br>0.64)     | 0.26<br>(0.14 to<br>0.59)    | 0.01<br>(0.00 to<br>0.01) | 0.01<br>(0.00 to<br>0.01) | 0.01<br>(0.00 to<br>0.01) | 0.01<br>(0.00 to<br>0.01) |
| Eating disorders          |                              |                               |                               |                              |                           |                           |                           |                           |



| Andorra                                                    |                              |                              |                              |                              |                           |                           |                           |                           |
|------------------------------------------------------------|------------------------------|------------------------------|------------------------------|------------------------------|---------------------------|---------------------------|---------------------------|---------------------------|
| Cause                                                      | YLLs (actual counts)         |                              |                              |                              | Deaths (actual counts)    |                           |                           |                           |
|                                                            | 2016                         | 2040 Forecast                | 2040 Better Scenario         | 2040 Worse Scenario          | 2016                      | 2040 Forecast             | 2040 Better Scenario      | 2040 Worse Scenario       |
|                                                            | 305.36<br>(249.29 to 375.06) | 445.77<br>(317.98 to 616.25) | 412.92<br>(305.30 to 561.30) | 485.95<br>(351.71 to 670.06) | 26.62<br>(22.13 to 32.48) | 46.15<br>(34.50 to 62.26) | 43.80<br>(34.05 to 57.52) | 48.61<br>(36.60 to 64.89) |
| Diabetes, urogenital, blood, and endocrine diseases        |                              |                              |                              |                              |                           |                           |                           |                           |
| Diabetes mellitus                                          | 117.01<br>(92.85 to 144.00)  | 140.08<br>(85.20 to 220.16)  | 121.25<br>(77.32 to 185.94)  | 164.17<br>(99.44 to 253.92)  | 9.38<br>(7.67 to 11.37)   | 13.18<br>(8.80 to 19.39)  | 11.88<br>(8.23 to 17.09)  | 14.61<br>(9.79 to 21.40)  |
| Acute glomerulonephritis                                   | 0.40<br>(0.33 to 0.48)       | 0.36<br>(0.22 to 0.58)       | 0.34<br>(0.22 to 0.53)       | 0.36<br>(0.23 to 0.55)       | 0.01<br>(0.01 to 0.02)    | 0.01<br>(0.01 to 0.02)    | 0.01<br>(0.01 to 0.02)    | 0.01<br>(0.01 to 0.02)    |
| Chronic kidney disease                                     | 78.39<br>(60.44 to 113.63)   | 133.19<br>(77.43 to 224.76)  | 119.80<br>(73.53 to 196.19)  | 156.30<br>(87.65 to 273.41)  | 7.85<br>(6.12 to 11.26)   | 15.20<br>(8.93 to 25.46)  | 13.92<br>(8.58 to 22.59)  | 17.42<br>(9.58 to 29.52)  |
| Chronic kidney disease due to diabetes mellitus            | 27.20<br>(19.64 to 40.88)    | 49.85<br>(27.96 to 86.02)    | 44.77<br>(26.08 to 75.74)    | 59.04<br>(32.13 to 104.97)   | 2.37<br>(1.69 to 3.51)    | 5.05<br>(2.81 to 8.77)    | 4.62<br>(2.70 to 7.79)    | 5.83<br>(3.12 to 10.25)   |
| Chronic kidney disease due to hypertension                 | 13.11<br>(9.51 to 18.87)     | 26.10<br>(14.43 to 44.07)    | 24.02<br>(13.66 to 39.83)    | 30.07<br>(15.38 to 53.52)    | 1.83<br>(1.29 to 2.60)    | 3.77<br>(2.05 to 6.38)    | 3.52<br>(2.03 to 5.88)    | 4.24<br>(2.19 to 7.44)    |
| Chronic kidney disease due to glomerulonephritis           | 14.69<br>(10.34 to 22.32)    | 20.20<br>(10.27 to 36.97)    | 17.82<br>(9.53 to 32.25)     | 23.76<br>(11.90 to 44.70)    | 1.30<br>(0.90 to 1.98)    | 2.13<br>(1.08 to 3.94)    | 1.91<br>(1.01 to 3.49)    | 2.47<br>(1.20 to 4.63)    |
| Chronic kidney disease due to other and unspecified causes | 23.39<br>(16.78 to 34.53)    | 37.04<br>(20.07 to 63.84)    | 33.19<br>(18.76 to 55.45)    | 43.43<br>(22.53 to 77.92)    | 2.34<br>(1.65 to 3.51)    | 4.25<br>(2.25 to 7.34)    | 3.87<br>(2.14 to 6.47)    | 4.87<br>(2.51 to 8.62)    |
| Urinary diseases and male infertility                      | 53.28<br>(40.46 to 71.97)    | 97.05<br>(63.63 to 142.65)   | 95.53<br>(65.31 to 136.31)   | 92.23<br>(62.53 to 134.94)   | 6.24<br>(4.70 to 8.43)    | 12.40<br>(8.32 to 18.04)  | 12.45<br>(8.67 to 17.65)  | 11.54<br>(7.86 to 16.62)  |
| Urinary tract infections                                   | 47.69<br>(35.69 to 65.24)    | 89.56<br>(59.14 to 133.18)   | 88.40<br>(60.51 to 127.41)   | 85.07<br>(57.74 to 123.76)   | 5.72<br>(4.24 to 7.77)    | 11.60<br>(7.76 to 16.82)  | 11.66<br>(8.14 to 16.64)  | 10.79<br>(7.39 to 15.57)  |
| Urolithiasis                                               | 2.87<br>(1.76 to 4.95)       | 3.65<br>(1.79 to 7.30)       | 3.44<br>(1.81 to 6.70)       | 3.56<br>(1.83 to 6.94)       | 0.26<br>(0.15 to 0.44)    | 0.36<br>(0.18 to 0.68)    | 0.34<br>(0.18 to 0.66)    | 0.34<br>(0.18 to 0.66)    |
| Other urinary diseases                                     | 2.72<br>(1.32 to 5.67)       | 3.84<br>(1.42 to 8.99)       | 3.70<br>(1.45 to 8.40)       | 3.61<br>(1.40 to 8.18)       | 0.27<br>(0.12 to 0.59)    | 0.45<br>(0.16 to 1.05)    | 0.44<br>(0.17 to 1.01)    | 0.41<br>(0.15 to 0.95)    |
| Gynecological diseases                                     | 0.54<br>(0.32 to 0.86)       | 0.46<br>(0.18 to 0.95)       | 0.40<br>(0.19 to 0.73)       | 0.46<br>(0.21 to 0.87)       | 0.03<br>(0.02 to 0.05)    | 0.04<br>(0.02 to 0.07)    | 0.03<br>(0.02 to 0.06)    | 0.04<br>(0.02 to 0.06)    |
| Uterine fibroids                                           | 0.06<br>(0.02 to 0.14)       | 0.04<br>(0.01 to 0.13)       | 0.04<br>(0.01 to 0.12)       | 0.04<br>(0.01 to 0.13)       | 0.00<br>(0.00 to 0.01)    | 0.00<br>(0.00 to 0.01)    | 0.00<br>(0.00 to 0.01)    | 0.00<br>(0.00 to 0.01)    |
| Polycystic ovarian syndrome                                | 0.02<br>(0.01 to 0.05)       | 0.01<br>(0.00 to 0.03)       | 0.01<br>(0.00 to 0.02)       | 0.01<br>(0.00 to 0.03)       | 0.00<br>(0.00 to 0.00)    | 0.00<br>(0.00 to 0.00)    | 0.00<br>(0.00 to 0.00)    | 0.00<br>(0.00 to 0.00)    |
| Endometriosis                                              | 0.00<br>(0.00 to 0.01)       | 0.00<br>(0.00 to 0.01)       | 0.00<br>(0.00 to 0.01)       | 0.00<br>(0.00 to 0.01)       | 0.00<br>(0.00 to 0.00)    | 0.00<br>(0.00 to 0.00)    | 0.00<br>(0.00 to 0.00)    | 0.00<br>(0.00 to 0.00)    |
| Genital prolapse                                           | 0.03<br>(0.01 to 0.07)       | 0.03<br>(0.01 to 0.07)       | 0.02<br>(0.01 to 0.06)       | 0.03<br>(0.01 to 0.07)       | 0.00<br>(0.00 to 0.01)    | 0.00<br>(0.00 to 0.01)    | 0.00<br>(0.00 to 0.01)    | 0.00<br>(0.00 to 0.01)    |
| Other gynecological diseases                               | 0.43<br>(0.25 to 0.69)       | 0.37<br>(0.15 to 0.78)       | 0.32<br>(0.14 to 0.61)       | 0.37<br>(0.17 to 0.70)       | 0.03<br>(0.02 to 0.04)    | 0.03<br>(0.01 to 0.06)    | 0.03<br>(0.01 to 0.05)    | 0.03<br>(0.01 to 0.05)    |
| Hemoglobinopathies and hemolytic anemias                   | 13.65<br>(10.32 to 18.48)    | 15.59<br>(9.85 to 23.52)     | 14.92<br>(10.07 to 21.46)    | 14.99<br>(10.32 to 21.37)    | 1.18<br>(0.90 to 1.61)    | 1.66<br>(1.13 to 2.44)    | 1.63<br>(1.14 to 2.33)    | 1.56<br>(1.12 to 2.19)    |
| Thalassemias                                               | 1.30<br>(0.71 to 1.99)       | 0.42<br>(0.16 to 0.84)       | 0.42<br>(0.16 to 0.83)       | 0.43<br>(0.17 to 0.85)       | 0.02<br>(0.01 to 0.03)    | 0.01<br>(0.00 to 0.01)    | 0.01<br>(0.00 to 0.01)    | 0.01<br>(0.00 to 0.01)    |

|                                                   |                              |                              |                              |                              |                           |                           |                           |                           |
|---------------------------------------------------|------------------------------|------------------------------|------------------------------|------------------------------|---------------------------|---------------------------|---------------------------|---------------------------|
|                                                   | 0.46<br>(0.18 to<br>0.95)    | 0.49<br>(0.14 to<br>1.13)    | 0.44<br>(0.14 to<br>1.00)    | 0.49<br>(0.16 to<br>1.08)    | 0.01<br>(0.00 to<br>0.02) | 0.02<br>(0.00 to<br>0.04) | 0.02<br>(0.00 to<br>0.04) | 0.02<br>(0.01 to<br>0.04) |
| Sickle cell disorders                             |                              |                              |                              |                              |                           |                           |                           |                           |
|                                                   | 2.08<br>(1.30 to<br>3.05)    | 2.60<br>(1.35 to<br>4.32)    | 2.38<br>(1.31 to<br>3.78)    | 2.59<br>(1.45 to<br>4.00)    | 0.07<br>(0.05 to<br>0.10) | 0.14<br>(0.07 to<br>0.22) | 0.13<br>(0.07 to<br>0.20) | 0.13<br>(0.08 to<br>0.20) |
| G6PD deficiency                                   |                              |                              |                              |                              |                           |                           |                           |                           |
|                                                   | 9.81<br>(7.33 to<br>13.50)   | 12.08<br>(7.94 to<br>18.01)  | 11.68<br>(8.07 to<br>16.77)  | 11.49<br>(7.99 to<br>16.37)  | 1.08<br>(0.81 to<br>1.48) | 1.50<br>(1.04 to<br>2.18) | 1.48<br>(1.05 to<br>2.09) | 1.40<br>(1.01 to<br>1.97) |
| Other hemoglobinopathies and hemolytic anemias    |                              |                              |                              |                              |                           |                           |                           |                           |
|                                                   | 42.09<br>(28.75 to<br>56.98) | 59.04<br>(42.08 to<br>80.17) | 60.68<br>(42.79 to<br>82.71) | 57.44<br>(40.31 to<br>78.79) | 1.93<br>(1.34 to<br>2.67) | 3.66<br>(2.64 to<br>4.82) | 3.87<br>(2.79 to<br>5.13) | 3.43<br>(2.44 to<br>4.58) |
| Endocrine, metabolic, blood, and immune disorders |                              |                              |                              |                              |                           |                           |                           |                           |

| Andorra                                       |                                    |                                    |                                    |                                    |                               |                                |                                |                                |
|-----------------------------------------------|------------------------------------|------------------------------------|------------------------------------|------------------------------------|-------------------------------|--------------------------------|--------------------------------|--------------------------------|
| Cause                                         | YLLs (actual counts)               |                                    |                                    |                                    | Deaths (actual counts)        |                                |                                |                                |
|                                               | 2016                               | 2040 Forecast                      | 2040 Better Scenario               | 2040 Worse Scenario                | 2016                          | 2040 Forecast                  | 2040 Better Scenario           | 2040 Worse Scenario            |
| <b>Musculoskeletal disorders</b>              | <b>40.74</b><br>(23.82 to 58.92)   | <b>65.79</b><br>(35.91 to 104.79)  | <b>63.36</b><br>(35.16 to 97.44)   | <b>64.40</b><br>(36.22 to 96.88)   | <b>3.49</b><br>(1.97 to 4.93) | <b>6.35</b><br>(3.39 to 9.40)  | <b>6.27</b><br>(3.37 to 9.10)  | <b>6.06</b><br>(3.32 to 8.63)  |
| Rheumatoid arthritis                          | 12.47<br>(8.06 to 19.38)           | 23.87<br>(11.90 to 43.24)          | 21.26<br>(11.65 to 35.88)          | 23.97<br>(12.96 to 39.34)          | 0.95<br>(0.63 to 1.49)        | 2.97<br>(1.04 to 3.61)         | 1.87<br>(1.04 to 3.13)         | 2.03<br>(1.11 to 3.33)         |
| Other musculoskeletal disorders               | 28.27<br>(14.39 to 41.61)          | 41.92<br>(19.80 to 64.39)          | 42.10<br>(19.92 to 64.68)          | 40.43<br>(19.13 to 61.59)          | 2.53<br>(1.22 to 3.68)        | 4.29<br>(1.97 to 6.41)         | 4.40<br>(2.03 to 6.52)         | 4.04<br>(1.85 to 6.01)         |
| <b>Other non-communicable diseases</b>        | <b>101.61</b><br>(78.37 to 127.18) | <b>130.60</b><br>(71.13 to 212.06) | <b>124.93</b><br>(68.92 to 189.30) | <b>129.59</b><br>(75.10 to 197.63) | <b>3.67</b><br>(2.19 to 5.00) | <b>9.00</b><br>(4.40 to 13.52) | <b>9.12</b><br>(4.51 to 13.45) | <b>8.50</b><br>(4.26 to 12.55) |
| Congenital birth defects                      | 71.49<br>(57.50 to 91.20)          | 50.07<br>(25.33 to 97.70)          | 44.31<br>(24.89 to 78.52)          | 52.32<br>(28.69 to 93.47)          | 1.15<br>(0.92 to 1.45)        | 0.94<br>(0.51 to 1.65)         | 0.85<br>(0.51 to 1.38)         | 0.96<br>(0.57 to 1.56)         |
| Neural tube defects                           | 0.91<br>(0.57 to 1.49)             | 0.31<br>(0.10 to 0.89)             | 0.26<br>(0.09 to 0.63)             | 0.32<br>(0.12 to 0.82)             | 0.01<br>(0.01 to 0.02)        | 0.01<br>(0.00 to 0.02)         | 0.00<br>(0.00 to 0.01)         | 0.01<br>(0.00 to 0.01)         |
| Congenital heart anomalies                    | 33.89<br>(22.37 to 43.54)          | 19.52<br>(7.45 to 43.11)           | 16.16<br>(7.10 to 31.28)           | 20.54<br>(9.08 to 39.65)           | 0.55<br>(0.35 to 0.71)        | 0.36<br>(0.14 to 0.75)         | 0.30<br>(0.16 to 0.56)         | 0.37<br>(0.17 to 0.67)         |
| Orofacial clefts                              | 0.04<br>(0.02 to 0.07)             | 0.02<br>(0.00 to 0.07)             | 0.02<br>(0.00 to 0.05)             | 0.02<br>(0.00 to 0.06)             | 0.00<br>(0.00 to 0.00)        | 0.00<br>(0.00 to 0.00)         | 0.00<br>(0.00 to 0.00)         | 0.00<br>(0.00 to 0.00)         |
| Down syndrome                                 | 6.88<br>(4.36 to 11.27)            | 9.57<br>(6.08 to 15.90)            | 9.76<br>(6.20 to 15.99)            | 9.56<br>(6.06 to 15.08)            | 0.17<br>(0.11 to 0.27)        | 0.27<br>(0.17 to 0.39)         | 0.27<br>(0.17 to 0.40)         | 0.26<br>(0.17 to 0.39)         |
| Other chromosomal abnormalities               | 5.69<br>(3.48 to 11.36)            | 6.68<br>(2.73 to 16.11)            | 6.16<br>(2.65 to 14.30)            | 7.06<br>(3.04 to 16.33)            | 0.08<br>(0.05 to 0.15)        | 0.10<br>(0.04 to 0.22)         | 0.09<br>(0.04 to 0.20)         | 0.10<br>(0.05 to 0.22)         |
| Congenital musculoskeletal and limb anomalies | 1.76<br>(0.89 to 5.18)             | 1.06<br>(0.29 to 3.22)             | 0.90<br>(0.28 to 2.64)             | 1.13<br>(0.35 to 3.32)             | 0.02<br>(0.01 to 0.07)        | 0.01<br>(0.00 to 0.04)         | 0.01<br>(0.00 to 0.04)         | 0.02<br>(0.01 to 0.05)         |
| Urogenital congenital anomalies               | 1.14<br>(0.77 to 1.71)             | 0.73<br>(0.28 to 1.90)             | 0.64<br>(0.28 to 1.54)             | 0.77<br>(0.33 to 1.83)             | 0.02<br>(0.01 to 0.03)        | 0.01<br>(0.01 to 0.03)         | 0.01<br>(0.01 to 0.02)         | 0.01<br>(0.01 to 0.03)         |
| Digestive congenital anomalies                | 2.84<br>(1.54 to 5.11)             | 1.70<br>(0.47 to 4.79)             | 1.40<br>(0.46 to 3.44)             | 1.81<br>(0.57 to 4.52)             | 0.04<br>(0.02 to 0.06)        | 0.02<br>(0.01 to 0.06)         | 0.02<br>(0.01 to 0.04)         | 0.02<br>(0.01 to 0.06)         |
| Other congenital birth defects                | 18.33<br>(12.95 to 26.01)          | 10.48<br>(4.27 to 23.22)           | 9.02<br>(4.22 to 18.13)            | 11.11<br>(5.08 to 21.76)           | 0.26<br>(0.19 to 0.36)        | 0.16<br>(0.07 to 0.35)         | 0.14<br>(0.07 to 0.26)         | 0.17<br>(0.08 to 0.31)         |
| Skin and subcutaneous diseases                | 25.86<br>(11.26 to 38.30)          | 78.38<br>(35.10 to 121.39)         | 78.81<br>(35.90 to 120.87)         | 74.97<br>(34.49 to 113.66)         | 2.47<br>(1.06 to 3.66)        | 8.04<br>(3.65 to 12.14)        | 8.25<br>(3.71 to 12.30)        | 7.51<br>(3.38 to 11.35)        |
| Cellulitis                                    | 11.80<br>(2.93 to 20.25)           | 34.43<br>(8.54 to 60.21)           | 34.98<br>(8.75 to 60.89)           | 32.92<br>(8.14 to 57.08)           | 1.04<br>(0.24 to 1.83)        | 3.25<br>(0.78 to 5.71)         | 3.37<br>(0.80 to 5.87)         | 3.03<br>(0.72 to 5.34)         |
| Pyoderma                                      | 10.47<br>(5.13 to 15.81)           | 37.73<br>(18.98 to 58.87)          | 37.79<br>(19.30 to 57.84)          | 36.10<br>(18.65 to 55.09)          | 1.03<br>(0.48 to 1.57)        | 4.05<br>(2.08 to 6.00)         | 4.14<br>(2.13 to 6.08)         | 3.78<br>(1.94 to 5.61)         |
| Decubitus ulcer                               | 2.52<br>(1.31 to 5.22)             | 4.42<br>(1.78 to 10.38)            | 4.25<br>(1.82 to 9.54)             | 4.22<br>(1.82 to 9.60)             | 0.29<br>(0.14 to 0.60)        | 0.55<br>(0.22 to 1.30)         | 0.54<br>(0.23 to 1.22)         | 0.51<br>(0.22 to 1.20)         |
| Other skin and subcutaneous diseases          | 1.07<br>(0.61 to 1.95)             | 1.80<br>(0.92 to 3.50)             | 1.79<br>(0.93 to 3.39)             | 1.72<br>(0.89 to 3.33)             | 0.11<br>(0.06 to 0.20)        | 0.19<br>(0.10 to 0.38)         | 0.20<br>(0.10 to 0.39)         | 0.18<br>(0.09 to 0.36)         |
| Sudden infant death syndrome                  | 4.26<br>(2.11 to 7.43)             | 2.15<br>(0.59 to 5.69)             | 1.82<br>(0.58 to 4.69)             | 2.30<br>(0.72 to 5.76)             | 0.05<br>(0.02 to 0.09)        | 0.02<br>(0.01 to 0.07)         | 0.02<br>(0.01 to 0.05)         | 0.03<br>(0.01 to 0.07)         |

|                          |                                 |                                 |                                 |                                 |                              |                              |                              |                              |
|--------------------------|---------------------------------|---------------------------------|---------------------------------|---------------------------------|------------------------------|------------------------------|------------------------------|------------------------------|
| Injuries                 | 727.90<br>(551.74 to<br>924.93) | 578.81<br>(409.36 to<br>788.40) | 549.08<br>(396.30 to<br>735.06) | 638.07<br>(444.37 to<br>867.10) | 28.48<br>(22.48 to<br>35.98) | 31.48<br>(24.59 to<br>40.32) | 30.97<br>(24.45 to<br>38.73) | 32.01<br>(24.99 to<br>40.42) |
| Transport injuries       | 166.73<br>(125.57 to<br>215.84) | 128.89<br>(77.09 to<br>202.03)  | 123.68<br>(75.86 to<br>191.43)  | 147.28<br>(84.67 to<br>237.52)  | 4.33<br>(3.31 to<br>5.57)    | 4.05<br>(2.61 to<br>6.07)    | 3.93<br>(2.55 to<br>5.81)    | 4.54<br>(2.79 to<br>7.14)    |
| Road injuries            | 155.99<br>(117.42 to<br>201.31) | 119.98<br>(73.06 to<br>187.01)  | 115.88<br>(71.50 to<br>179.14)  | 136.90<br>(78.54 to<br>221.40)  | 4.05<br>(3.09 to<br>5.21)    | 3.76<br>(2.45 to<br>5.59)    | 3.68<br>(2.42 to<br>5.42)    | 4.22<br>(2.60 to<br>6.62)    |
| Pedestrian road injuries | 31.33<br>(19.54 to<br>43.35)    | 18.07<br>(8.41 to<br>32.42)     | 15.99<br>(8.18 to<br>27.16)     | 20.77<br>(10.19 to<br>36.44)    | 1.04<br>(0.66 to<br>1.40)    | 0.85<br>(0.45 to<br>1.39)    | 0.77<br>(0.43 to<br>1.23)    | 0.96<br>(0.52 to<br>1.60)    |

| Andorra                                         |                                                      |                                                      |                                                      |                                                      |                                                   |                                                   |                                                   |                                                   |
|-------------------------------------------------|------------------------------------------------------|------------------------------------------------------|------------------------------------------------------|------------------------------------------------------|---------------------------------------------------|---------------------------------------------------|---------------------------------------------------|---------------------------------------------------|
| Cause                                           | YLLs (actual counts)                                 |                                                      |                                                      |                                                      | Deaths (actual counts)                            |                                                   |                                                   |                                                   |
|                                                 | 2016                                                 | 2040 Forecast                                        | 2040 Better Scenario                                 | 2040 Worse Scenario                                  | 2016                                              | 2040 Forecast                                     | 2040 Better Scenario                              | 2040 Worse Scenario                               |
| Cyclist road injuries                           | 7.73<br>(5.12 to<br>11.16)                           | 6.83<br>(3.73 to<br>11.28)                           | 6.70<br>(3.69 to<br>11.00)                           | 7.72<br>(4.11 to<br>13.19)                           | 0.19<br>(0.13 to<br>0.27)                         | 0.19<br>(0.11 to<br>0.31)                         | 0.19<br>(0.11 to<br>0.31)                         | 0.22<br>(0.12 to<br>0.37)                         |
| Motorcyclist road injuries                      | 27.62<br>(15.75 to<br>40.88)                         | 22.66<br>(10.66 to<br>41.38)                         | 22.10<br>(10.56 to<br>40.09)                         | 26.01<br>(11.64 to<br>50.00)                         | 0.56<br>(0.33 to<br>0.83)                         | 0.49<br>(0.24 to<br>0.89)                         | 0.48<br>(0.23 to<br>0.86)                         | 0.56<br>(0.26 to<br>1.05)                         |
| Motor vehicle road injuries                     | 88.23<br>(63.97 to<br>119.05)                        | 71.62<br>(42.85 to<br>112.25)                        | 70.31<br>(42.47 to<br>109.20)                        | 81.49<br>(46.33 to<br>132.72)                        | 2.24<br>(1.63 to<br>3.00)                         | 2.20<br>(1.38 to<br>3.37)                         | 2.21<br>(1.38 to<br>3.33)                         | 2.46<br>(1.45 to<br>3.86)                         |
| Other road injuries                             | 1.08<br>(0.69 to<br>1.75)                            | 0.80<br>(0.44 to<br>1.40)                            | 0.79<br>(0.43 to<br>1.38)                            | 0.91<br>(0.48 to<br>1.62)                            | 0.02<br>(0.02 to<br>0.04)                         | 0.02<br>(0.01 to<br>0.04)                         | 0.02<br>(0.01 to<br>0.04)                         | 0.02<br>(0.01 to<br>0.04)                         |
| Other transport injuries                        | 10.74<br>(6.41 to<br>15.33)                          | 8.91<br>(4.20 to<br>16.05)                           | 7.79<br>(3.89 to<br>13.37)                           | 10.38<br>(4.91 to<br>18.40)                          | 0.28<br>(0.17 to<br>0.40)                         | 0.28<br>(0.14 to<br>0.49)                         | 0.25<br>(0.13 to<br>0.41)                         | 0.32<br>(0.16 to<br>0.55)                         |
| <b>Unintentional injuries</b>                   | <b>235.55</b><br><b>(179.24 to</b><br><b>309.19)</b> | <b>231.59</b><br><b>(173.17 to</b><br><b>317.60)</b> | <b>225.94</b><br><b>(170.80 to</b><br><b>299.43)</b> | <b>226.57</b><br><b>(172.33 to</b><br><b>302.68)</b> | <b>15.75</b><br><b>(12.27 to</b><br><b>20.41)</b> | <b>20.85</b><br><b>(15.87 to</b><br><b>27.22)</b> | <b>20.94</b><br><b>(16.20 to</b><br><b>27.02)</b> | <b>19.64</b><br><b>(14.99 to</b><br><b>25.38)</b> |
| Falls                                           | 124.54<br>(89.26 to<br>165.66)                       | 145.49<br>(106.60 to<br>198.02)                      | 143.64<br>(106.44 to<br>191.55)                      | 139.77<br>(102.65 to<br>185.53)                      | 10.56<br>(7.74 to<br>13.90)                       | 15.13<br>(11.02 to<br>20.06)                      | 15.27<br>(11.32 to<br>19.86)                      | 14.12<br>(10.30 to<br>18.74)                      |
| Drowning                                        | 18.03<br>(13.58 to<br>27.54)                         | 9.93<br>(6.15 to<br>15.82)                           | 9.22<br>(5.97 to<br>14.39)                           | 10.77<br>(6.74 to<br>17.25)                          | 0.46<br>(0.34 to<br>0.71)                         | 0.33<br>(0.22 to<br>0.55)                         | 0.32<br>(0.22 to<br>0.51)                         | 0.36<br>(0.23 to<br>0.58)                         |
| Fire, heat, and hot substances                  | 16.48<br>(11.73 to<br>21.98)                         | 10.83<br>(6.60 to<br>16.25)                          | 9.98<br>(6.48 to<br>14.40)                           | 11.53<br>(7.29 to<br>17.19)                          | 0.84<br>(0.61 to<br>1.09)                         | 0.78<br>(0.51 to<br>1.09)                         | 0.74<br>(0.50 to<br>1.04)                         | 0.80<br>(0.51 to<br>1.14)                         |
| Poisonings                                      | 4.88<br>(3.27 to<br>7.55)                            | 1.99<br>(1.04 to<br>3.58)                            | 1.74<br>(0.97 to<br>3.02)                            | 2.18<br>(1.18 to<br>3.88)                            | 0.14<br>(0.10 to<br>0.22)                         | 0.08<br>(0.04 to<br>0.11)                         | 0.07<br>(0.04 to<br>0.11)                         | 0.08<br>(0.05 to<br>0.14)                         |
| Exposure to mechanical forces                   | 19.22<br>(12.70 to<br>26.99)                         | 13.43<br>(8.14 to<br>20.87)                          | 12.51<br>(7.97 to<br>18.43)                          | 13.47<br>(8.40 to<br>20.10)                          | 0.74<br>(0.53 to<br>0.99)                         | 0.76<br>(0.53 to<br>1.04)                         | 0.73<br>(0.53 to<br>0.97)                         | 0.75<br>(0.52 to<br>0.97)                         |
| Unintentional firearm injuries                  | 1.95<br>(1.12 to<br>3.20)                            | 1.20<br>(0.68 to<br>2.03)                            | 1.14<br>(0.66 to<br>1.89)                            | 1.20<br>(0.71 to<br>2.03)                            | 0.07<br>(0.04 to<br>0.10)                         | 0.06<br>(0.04 to<br>0.09)                         | 0.06<br>(0.04 to<br>0.09)                         | 0.06<br>(0.04 to<br>0.09)                         |
| Unintentional suffocation                       | 2.52<br>(1.41 to<br>4.25)                            | 1.53<br>(0.71 to<br>2.91)                            | 1.42<br>(0.69 to<br>2.63)                            | 1.58<br>(0.77 to<br>2.86)                            | 0.05<br>(0.03 to<br>0.07)                         | 0.03<br>(0.02 to<br>0.06)                         | 0.03<br>(0.02 to<br>0.05)                         | 0.03<br>(0.02 to<br>0.05)                         |
| Other exposure to mechanical forces             | 14.75<br>(9.03 to<br>21.81)                          | 10.69<br>(6.19 to<br>16.85)                          | 9.96<br>(6.08 to<br>14.92)                           | 10.69<br>(6.39 to<br>16.29)                          | 0.63<br>(0.42 to<br>0.86)                         | 0.67<br>(0.45 to<br>0.92)                         | 0.65<br>(0.44 to<br>0.86)                         | 0.64<br>(0.43 to<br>0.86)                         |
| Adverse effects of medical treatment            | 19.34<br>(14.16 to<br>25.78)                         | 21.38<br>(15.17 to<br>29.47)                         | 21.16<br>(15.35 to<br>29.15)                         | 20.68<br>(14.90 to<br>27.91)                         | 1.42<br>(1.04 to<br>1.96)                         | 1.91<br>(1.37 to<br>2.69)                         | 1.94<br>(1.40 to<br>2.73)                         | 1.80<br>(1.30 to<br>2.50)                         |
| Animal contact                                  | 1.78<br>(1.01 to<br>2.55)                            | 1.80<br>(0.93 to<br>2.87)                            | 1.69<br>(0.90 to<br>2.57)                            | 1.80<br>(0.95 to<br>2.73)                            | 0.07<br>(0.04 to<br>0.10)                         | 0.09<br>(0.05 to<br>0.13)                         | 0.08<br>(0.05 to<br>0.12)                         | 0.08<br>(0.05 to<br>0.12)                         |
| Venomous animal contact                         | 0.44<br>(0.22 to<br>0.68)                            | 0.40<br>(0.18 to<br>0.70)                            | 0.39<br>(0.18 to<br>0.66)                            | 0.41<br>(0.19 to<br>0.68)                            | 0.01<br>(0.01 to<br>0.02)                         | 0.01<br>(0.01 to<br>0.02)                         | 0.01<br>(0.01 to<br>0.02)                         | 0.01<br>(0.01 to<br>0.02)                         |
| Non-venomous animal contact                     | 1.35<br>(0.71 to<br>1.97)                            | 1.39<br>(0.67 to<br>2.26)                            | 1.30<br>(0.65 to<br>2.00)                            | 1.39<br>(0.71 to<br>2.15)                            | 0.05<br>(0.03 to<br>0.08)                         | 0.07<br>(0.04 to<br>0.11)                         | 0.07<br>(0.04 to<br>0.10)                         | 0.07<br>(0.04 to<br>0.10)                         |
| Foreign body                                    | 23.71<br>(17.65 to<br>35.66)                         | 20.22<br>(14.65 to<br>30.40)                         | 20.02<br>(14.66 to<br>29.83)                         | 19.93<br>(14.60 to<br>29.78)                         | 1.09<br>(0.84 to<br>1.54)                         | 1.26<br>(1.00 to<br>1.72)                         | 1.29<br>(1.02 to<br>1.77)                         | 1.19<br>(0.94 to<br>1.64)                         |
| Pulmonary aspiration and foreign body in airway | 22.86<br>(17.02 to<br>34.61)                         | 19.47<br>(13.94 to<br>29.75)                         | 19.25<br>(13.96 to<br>28.93)                         | 19.20<br>(13.95 to<br>28.91)                         | 1.06<br>(0.82 to<br>1.52)                         | 1.23<br>(0.96 to<br>1.70)                         | 1.25<br>(0.99 to<br>1.74)                         | 1.16<br>(0.91 to<br>1.61)                         |

|                                             |                                                      |                                                      |                                                      |                                                      |                                                 |                                                 |                                                |                                                 |
|---------------------------------------------|------------------------------------------------------|------------------------------------------------------|------------------------------------------------------|------------------------------------------------------|-------------------------------------------------|-------------------------------------------------|------------------------------------------------|-------------------------------------------------|
|                                             | 0.85<br>(0.56 to<br>1.26)                            | 0.75<br>(0.48 to<br>1.14)                            | 0.77<br>(0.48 to<br>1.17)                            | 0.73<br>(0.47 to<br>1.12)                            | 0.03<br>(0.02 to<br>0.04)                       | 0.03<br>(0.02 to<br>0.05)                       | 0.04<br>(0.02 to<br>0.05)                      | 0.03<br>(0.02 to<br>0.05)                       |
| Foreign body in other body part             |                                                      |                                                      |                                                      |                                                      |                                                 |                                                 |                                                |                                                 |
| Environmental heat and cold exposure        | 5.18<br>(3.41 to<br>8.69)                            | 5.40<br>(3.09 to<br>9.47)                            | 5.04<br>(2.99 to<br>8.63)                            | 5.28<br>(3.17 to<br>8.97)                            | 0.37<br>(0.24 to<br>0.61)                       | 0.47<br>(0.27 to<br>0.84)                       | 0.45<br>(0.27 to<br>0.80)                      | 0.44<br>(0.27 to<br>0.78)                       |
| Other unintentional injuries                | 2.39<br>(1.46 to<br>4.24)                            | 1.12<br>(0.52 to<br>2.25)                            | 0.94<br>(0.50 to<br>1.80)                            | 1.16<br>(0.60 to<br>2.15)                            | 0.07<br>(0.04 to<br>0.11)                       | 0.04<br>(0.02 to<br>0.08)                       | 0.04<br>(0.02 to<br>0.07)                      | 0.04<br>(0.03 to<br>0.08)                       |
| <b>Self-harm and interpersonal violence</b> | <b>325.26</b><br><b>(232.28 to</b><br><b>441.40)</b> | <b>218.33</b><br><b>(129.66 to</b><br><b>353.40)</b> | <b>199.47</b><br><b>(119.81 to</b><br><b>308.01)</b> | <b>264.22</b><br><b>(148.27 to</b><br><b>426.43)</b> | <b>8.40</b><br><b>(6.04 to</b><br><b>11.46)</b> | <b>6.59</b><br><b>(4.07 to</b><br><b>10.29)</b> | <b>6.11</b><br><b>(3.82 to</b><br><b>9.34)</b> | <b>7.84</b><br><b>(4.62 to</b><br><b>12.38)</b> |

| Andorra                                                                             |                                      |                                      |                                      |                                      |                                      |                                      |                                      |                                      |
|-------------------------------------------------------------------------------------|--------------------------------------|--------------------------------------|--------------------------------------|--------------------------------------|--------------------------------------|--------------------------------------|--------------------------------------|--------------------------------------|
| Cause                                                                               | YLLs (actual counts)                 |                                      |                                      |                                      | Deaths (actual counts)               |                                      |                                      |                                      |
|                                                                                     | 2016                                 | 2040 Forecast                        | 2040 Better Scenario                 | 2040 Worse Scenario                  | 2016                                 | 2040 Forecast                        | 2040 Better Scenario                 | 2040 Worse Scenario                  |
| Self-harm                                                                           | 301.82<br>(216.32 to 410.69)         | 206.41<br>(120.28 to 337.99)         | 188.45<br>(110.22 to 293.63)         | 251.20<br>(138.02 to 409.19)         | 7.84<br>(5.61 to 10.71)              | 6.24<br>(3.78 to 9.82)               | 5.78<br>(3.50 to 8.88)               | 7.46<br>(4.28 to 11.87)              |
| Self-harm by firearm                                                                | 20.34<br>(5.21 to 64.48)             | 12.76<br>(2.68 to 41.79)             | 11.34<br>(2.46 to 36.59)             | 15.49<br>(3.21 to 50.68)             | 0.59<br>(0.16 to 1.87)               | 0.45<br>(0.10 to 1.52)               | 0.41<br>(0.10 to 1.36)               | 0.53<br>(0.12 to 1.71)               |
| Self-harm by other specified means                                                  | 281.48<br>(202.17 to 383.58)         | 193.65<br>(111.36 to 311.46)         | 177.11<br>(103.59 to 277.25)         | 235.71<br>(129.88 to 384.67)         | 7.26<br>(5.25 to 9.77)               | 5.79<br>(3.50 to 8.89)               | 5.37<br>(3.25 to 8.09)               | 6.93<br>(3.93 to 10.95)              |
| Interpersonal violence                                                              | 23.44<br>(16.05 to 38.87)            | 11.92<br>(7.20 to 21.09)             | 11.02<br>(6.96 to 18.83)             | 13.01<br>(8.03 to 22.61)             | 0.55<br>(0.38 to 0.92)               | 0.35<br>(0.22 to 0.61)               | 0.33<br>(0.22 to 0.55)               | 0.37<br>(0.24 to 0.65)               |
| Physical violence by firearm                                                        | 4.42<br>(1.64 to 12.78)              | 2.20<br>(0.69 to 6.74)               | 1.99<br>(0.66 to 6.09)               | 2.28<br>(0.73 to 7.13)               | 0.10<br>(0.04 to 0.29)               | 0.06<br>(0.02 to 0.17)               | 0.05<br>(0.02 to 0.16)               | 0.06<br>(0.02 to 0.18)               |
| Physical violence by sharp object                                                   | 5.81<br>(3.64 to 10.89)              | 3.06<br>(1.65 to 5.88)               | 2.82<br>(1.60 to 5.27)               | 3.13<br>(1.78 to 5.86)               | 0.15<br>(0.09 to 0.27)               | 0.10<br>(0.06 to 0.19)               | 0.09<br>(0.06 to 0.17)               | 0.10<br>(0.06 to 0.19)               |
| Physical violence by other means                                                    | 13.21<br>(9.14 to 18.91)             | 6.67<br>(4.09 to 10.25)              | 6.21<br>(4.00 to 9.40)               | 7.61<br>(4.74 to 11.93)              | 0.31<br>(0.21 to 0.44)               | 0.19<br>(0.13 to 0.29)               | 0.18<br>(0.12 to 0.28)               | 0.22<br>(0.14 to 0.34)               |
| <b>Forces of nature, conflict and terrorism, and executions and police conflict</b> | <b>0.36</b><br><b>(0.29 to 0.43)</b> | <b>0.00</b><br><b>(0.00 to 0.00)</b> | <b>0.00</b><br><b>(0.00 to 0.00)</b> | <b>0.00</b><br><b>(0.00 to 0.00)</b> | <b>0.01</b><br><b>(0.01 to 0.01)</b> | <b>0.00</b><br><b>(0.00 to 0.00)</b> | <b>0.00</b><br><b>(0.00 to 0.00)</b> | <b>0.00</b><br><b>(0.00 to 0.00)</b> |
| Exposure to forces of nature                                                        | 0.00<br>(0.00 to 0.00)               | 0.00<br>(0.00 to 0.00)               | 0.00<br>(0.00 to 0.00)               | 0.00<br>(0.00 to 0.00)               | 0.00<br>(0.00 to 0.00)               | 0.00<br>(0.00 to 0.00)               | 0.00<br>(0.00 to 0.00)               | 0.00<br>(0.00 to 0.00)               |
| Conflict and terrorism                                                              | 0.00<br>(0.00 to 0.00)               | 0.00<br>(0.00 to 0.00)               | 0.00<br>(0.00 to 0.00)               | 0.00<br>(0.00 to 0.00)               | 0.00<br>(0.00 to 0.00)               | 0.00<br>(0.00 to 0.00)               | 0.00<br>(0.00 to 0.00)               | 0.00<br>(0.00 to 0.00)               |
| Executions and police conflict                                                      | 0.36<br>(0.29 to 0.43)               | 0.00<br>(0.00 to 0.00)               | 0.00<br>(0.00 to 0.00)               | 0.00<br>(0.00 to 0.00)               | 0.01<br>(0.01 to 0.01)               | 0.00<br>(0.00 to 0.00)               | 0.00<br>(0.00 to 0.00)               | 0.00<br>(0.00 to 0.00)               |

| Austria                                                           |                                                   |                                                   |                                                 |                                                   |                                          |                                            |                                           |                                             |
|-------------------------------------------------------------------|---------------------------------------------------|---------------------------------------------------|-------------------------------------------------|---------------------------------------------------|------------------------------------------|--------------------------------------------|-------------------------------------------|---------------------------------------------|
| Cause                                                             | YLLs (actual counts)                              |                                                   |                                                 |                                                   | Deaths (actual counts)                   |                                            |                                           |                                             |
|                                                                   | 2016                                              | 2040 Forecast                                     | 2040 Better Scenario                            | 2040 Worse Scenario                               | 2016                                     | 2040 Forecast                              | 2040 Better Scenario                      | 2040 Worse Scenario                         |
| All causes                                                        | 1,148,765.72<br>(1,090,787.27 to<br>1,208,691.76) | 1,201,105.27<br>(1,032,523.07 to<br>1,392,989.64) | 1,004,825.85<br>(875,528.14 to<br>1,144,720.17) | 1,440,594.68<br>(1,224,497.31 to<br>1,684,200.90) | 82,496.22<br>(78,805.93 to<br>86,400.31) | 104,877.22<br>(93,951.19 to<br>117,210.41) | 92,090.70<br>(83,621.25 to<br>102,275.11) | 119,399.81<br>(106,306.32 to<br>134,613.08) |
| Communicable, maternal, neonatal, and nutritional diseases        | 25,385.63<br>(22,200.14 to<br>29,072.47)          | 22,312.76<br>(17,541.01 to<br>28,376.30)          | 18,526.37<br>(14,670.91 to<br>23,348.98)        | 26,490.14<br>(20,370.76 to<br>34,846.76)          | 1,169.12<br>(1,038.09 to<br>1,315.04)    | 1,635.44<br>(1,254.87 to<br>2,186.00)      | 1,490.52<br>(1,158.81 to<br>1,922.62)     | 1,805.72<br>(1,335.33 to<br>2,493.96)       |
| HIV/AIDS and tuberculosis                                         | 2,426.06<br>(2,296.22 to<br>2,578.45)             | 1,575.16<br>(895.47 to<br>2,511.37)               | 910.95<br>(517.97 to<br>1,459.19)               | 2,328.65<br>(1,319.16 to<br>3,912.32)             | 86.16<br>(80.26 to<br>93.95)             | 51.41<br>(30.68 to<br>78.63)               | 33.89<br>(20.29 to<br>54.00)              | 73.84<br>(43.14 to<br>111.88)               |
| Tuberculosis                                                      | 920.58<br>(818.73 to<br>1,064.06)                 | 502.94<br>(277.92 to<br>865.21)                   | 346.90<br>(195.80 to<br>602.34)                 | 724.46<br>(398.70 to<br>1,261.21)                 | 50.55<br>(44.81 to<br>58.06)             | 34.94<br>(19.06 to<br>59.78)               | 25.23<br>(14.05 to<br>42.96)              | 48.78<br>(26.54 to<br>84.44)                |
| HIV/AIDS                                                          | 1,505.48<br>(1,431.78 to<br>1,589.31)             | 1,072.22<br>(459.24 to<br>1,950.39)               | 564.05<br>(224.65 to<br>1,022.50)               | 1,604.19<br>(666.40 to<br>3,187.41)               | 35.61<br>(33.94 to<br>37.44)             | 16.47<br>(7.01 to<br>29.19)                | 8.66<br>(3.41 to<br>15.70)                | 25.06<br>(10.51 to<br>48.23)                |
| Diarrhea, lower respiratory, and other common infectious diseases | 11,342.89<br>(10,189.75 to<br>12,679.80)          | 14,301.26<br>(10,802.10 to<br>19,472.78)          | 12,218.09<br>(9,418.14 to<br>16,099.47)         | 16,832.57<br>(12,150.61 to<br>23,855.76)          | 891.94<br>(772.04 to<br>1,030.48)        | 1,442.02<br>(1,074.37 to<br>1,968.26)      | 1,324.44<br>(999.62 to<br>1,761.31)       | 1,582.46<br>(1,138.07 to<br>2,249.26)       |
| Diarrheal diseases                                                | 895.15<br>(795.03 to<br>1,006.78)                 | 1,515.08<br>(1,000.82 to<br>2,301.28)             | 1,848.92<br>(1,281.96 to<br>2,773.51)           | 1,381.56<br>(855.63 to<br>2,238.13)               | 67.65<br>(59.84 to<br>76.51)             | 152.78<br>(98.44 to<br>235.00)             | 195.28<br>(132.29 to<br>296.00)           | 134.09<br>(80.39 to<br>220.50)              |
| Intestinal infectious diseases                                    | 10.08<br>(4.90 to<br>18.84)                       | 7.48<br>(3.61 to<br>13.92)                        | 7.26<br>(3.49 to<br>13.30)                      | 7.51<br>(3.65 to<br>13.92)                        | 0.51<br>(0.23 to<br>1.03)                | 0.53<br>(0.23 to<br>1.10)                  | 0.54<br>(0.23 to<br>1.11)                 | 0.51<br>(0.22 to<br>1.04)                   |
| Typhoid fever                                                     | 1.78<br>(0.56 to<br>4.01)                         | 1.58<br>(0.54 to<br>3.44)                         | 1.71<br>(0.60 to<br>3.64)                       | 1.53<br>(0.53 to<br>3.32)                         | 0.05<br>(0.02 to<br>0.11)                | 0.05<br>(0.02 to<br>0.10)                  | 0.05<br>(0.02 to<br>0.11)                 | 0.05<br>(0.02 to<br>0.10)                   |
| Paratyphoid fever                                                 | 1.95<br>(0.58 to<br>4.89)                         | 1.18<br>(0.36 to<br>2.92)                         | 1.02<br>(0.31 to<br>2.54)                       | 1.26<br>(0.38 to<br>3.05)                         | 0.05<br>(0.02 to<br>0.13)                | 0.05<br>(0.01 to<br>0.08)                  | 0.03<br>(0.01 to<br>0.08)                 | 0.04<br>(0.01 to<br>0.09)                   |
| Other intestinal infectious diseases                              | 6.34<br>(2.51 to<br>12.85)                        | 4.72<br>(1.72 to<br>10.06)                        | 4.52<br>(1.62 to<br>9.69)                       | 4.72<br>(1.72 to<br>9.92)                         | 0.41<br>(0.15 to<br>0.88)                | 0.45<br>(0.16 to<br>0.99)                  | 0.45<br>(0.16 to<br>0.99)                 | 0.43<br>(0.15 to<br>0.92)                   |
| Lower respiratory infections                                      | 8,715.28<br>(7,622.27 to<br>9,899.49)             | 11,477.54<br>(8,051.49 to<br>16,424.09)           | 9,161.37<br>(6,484.52 to<br>13,044.56)          | 14,067.28<br>(9,452.87 to<br>20,933.02)           | 762.11<br>(642.83 to<br>896.38)          | 1,228.73<br>(861.14 to<br>1,744.76)        | 1,070.26<br>(746.25 to<br>1,518.54)       | 1,387.88<br>(942.05 to<br>2,034.80)         |
| Upper respiratory infections                                      | 11.36<br>(6.17 to<br>18.80)                       | 9.17<br>(3.88 to<br>17.82)                        | 7.41<br>(3.15 to<br>14.88)                      | 10.07<br>(4.26 to<br>20.21)                       | 0.58<br>(0.29 to<br>0.99)                | 0.62<br>(0.24 to<br>1.30)                  | 0.53<br>(0.20 to<br>1.11)                 | 0.66<br>(0.25 to<br>1.42)                   |
| Otitis media                                                      | 1.14<br>(0.74 to<br>1.84)                         | 0.74<br>(0.25 to<br>2.05)                         | 0.79<br>(0.26 to<br>2.20)                       | 0.69<br>(0.23 to<br>1.91)                         | 0.11<br>(0.07 to<br>0.19)                | 0.08<br>(0.02 to<br>0.25)                  | 0.09<br>(0.03 to<br>0.25)                 | 0.07<br>(0.02 to<br>0.21)                   |
| Meningitis                                                        | 917.93<br>(810.29 to<br>1,086.96)                 | 422.02<br>(337.18 to<br>528.45)                   | 352.52<br>(281.64 to<br>436.63)                 | 477.19<br>(363.77 to<br>628.41)                   | 30.84<br>(26.30 to<br>34.36)             | 17.91<br>(14.11 to<br>21.00)               | 16.33<br>(12.73 to<br>19.28)              | 18.65<br>(14.59 to<br>23.32)                |
| Pneumococcal meningitis                                           | 198.62<br>(174.17 to<br>229.12)                   | 96.66<br>(75.23 to<br>118.16)                     | 93.57<br>(73.00 to<br>114.31)                   | 99.40<br>(76.94 to<br>122.29)                     | 7.69<br>(6.50 to<br>8.70)                | 4.98<br>(3.70 to<br>6.14)                  | 4.99<br>(3.73 to<br>6.15)                 | 4.95<br>(3.63 to<br>6.16)                   |
| H influenzae type B meningitis                                    | 74.52<br>(61.94 to<br>91.39)                      | 94.37<br>(47.00 to<br>182.91)                     | 63.09<br>(38.35 to<br>105.36)                   | 128.77<br>(54.95 to<br>267.47)                    | 2.28<br>(1.91 to<br>2.66)                | 2.22<br>(1.56 to<br>3.30)                  | 1.91<br>(1.46 to<br>2.51)                 | 2.57<br>(1.61 to<br>4.20)                   |
| Meningococcal meningitis                                          | 328.76<br>(281.98 to<br>408.24)                   | 104.77<br>(79.58 to<br>136.97)                    | 89.11<br>(67.48 to<br>118.68)                   | 113.28<br>(83.88 to<br>155.10)                    | 8.83<br>(7.72 to<br>10.08)               | 4.10<br>(3.27 to<br>4.95)                  | 3.63<br>(2.86 to<br>4.42)                 | 4.26<br>(3.34 to<br>5.23)                   |
| Other meningitis                                                  | 316.02<br>(275.57 to<br>366.60)                   | 126.22<br>(98.82 to<br>156.20)                    | 106.76<br>(82.67 to<br>132.74)                  | 135.73<br>(103.94 to<br>176.10)                   | 12.04<br>(9.99 to<br>13.52)              | 6.61<br>(5.00 to<br>8.00)                  | 5.80<br>(4.39 to<br>7.09)                 | 6.87<br>(5.17 to<br>8.46)                   |
| Encephalitis                                                      | 743.60<br>(594.92 to<br>1,024.76)                 | 830.08<br>(646.39 to<br>1,149.65)                 | 807.97<br>(618.17 to<br>1,124.02)               | 836.23<br>(648.54 to<br>1,151.54)                 | 26.39<br>(21.45 to<br>36.82)             | 38.53<br>(30.34 to<br>55.40)               | 38.70<br>(30.15 to<br>56.37)              | 37.70<br>(29.77 to<br>53.75)                |



|                |                           |                             |                            |                              |                           |                           |                           |                           |
|----------------|---------------------------|-----------------------------|----------------------------|------------------------------|---------------------------|---------------------------|---------------------------|---------------------------|
| Diphtheria     | 2.30<br>(1.42 to<br>3.46) | 0.57<br>(0.32 to<br>0.89)   | 0.47<br>(0.26 to<br>0.78)  | 0.68<br>(0.38 to<br>1.11)    | 0.05<br>(0.03 to<br>0.08) | 0.01<br>(0.01 to<br>0.02) | 0.01<br>(0.01 to<br>0.02) | 0.01<br>(0.01 to<br>0.02) |
| Whooping cough | 4.38<br>(1.27 to<br>8.73) | 1.92<br>(0.34 to<br>5.47)   | 0.33<br>(0.12 to<br>0.72)  | 3.17<br>(0.56 to<br>8.75)    | 0.06<br>(0.02 to<br>0.11) | 0.02<br>(0.00 to<br>0.07) | 0.01<br>(0.00 to<br>0.01) | 0.04<br>(0.01 to<br>0.10) |
| Tetanus        | 4.96<br>(3.36 to<br>6.46) | 0.51<br>(0.32 to<br>0.77)   | 0.44<br>(0.24 to<br>0.66)  | 0.58<br>(0.38 to<br>0.89)    | 0.18<br>(0.12 to<br>0.24) | 0.02<br>(0.01 to<br>0.03) | 0.02<br>(0.01 to<br>0.03) | 0.02<br>(0.01 to<br>0.03) |
| Measles        | 0.69<br>(0.54 to<br>0.87) | 12.96<br>(0.07 to<br>98.42) | 8.84<br>(0.06 to<br>66.79) | 24.35<br>(0.08 to<br>194.06) | 0.01<br>(0.01 to<br>0.01) | 0.20<br>(0.00 to<br>1.47) | 0.14<br>(0.00 to<br>0.92) | 0.34<br>(0.00 to<br>2.43) |

| Austria                                               |                                            |                                           |                                          |                                           |                                      |                                      |                                      |                                      |
|-------------------------------------------------------|--------------------------------------------|-------------------------------------------|------------------------------------------|-------------------------------------------|--------------------------------------|--------------------------------------|--------------------------------------|--------------------------------------|
| Cause                                                 | YLLs (actual counts)                       |                                           |                                          |                                           | Deaths (actual counts)               |                                      |                                      |                                      |
|                                                       | 2016                                       | 2040 Forecast                             | 2040 Better Scenario                     | 2040 Worse Scenario                       | 2016                                 | 2040 Forecast                        | 2040 Better Scenario                 | 2040 Worse Scenario                  |
| Varicella and herpes zoster                           | 36.03<br>(11.13 to 50.95)                  | 23.19<br>(6.62 to 35.37)                  | 21.76<br>(6.24 to 33.84)                 | 23.25<br>(6.78 to 36.31)                  | 3.46<br>(0.90 to 5.20)               | 2.58<br>(0.65 to 4.20)               | 2.54<br>(0.64 to 4.15)               | 2.48<br>(0.62 to 4.06)               |
| <b>Neglected tropical diseases and malaria</b>        | <b>48.57</b><br><b>(41.46 to 53.57)</b>    | <b>46.15</b><br><b>(36.02 to 54.06)</b>   | <b>47.27</b><br><b>(36.28 to 55.62)</b>  | <b>45.60</b><br><b>(35.97 to 53.05)</b>   | <b>1.41</b><br><b>(1.00 to 1.63)</b> | <b>1.71</b><br><b>(1.00 to 2.14)</b> | <b>1.84</b><br><b>(1.03 to 2.33)</b> | <b>1.62</b><br><b>(0.97 to 2.01)</b> |
| Malaria                                               | 0.00<br>(0.00 to 0.00)                     | 0.00<br>(0.00 to 0.00)                    | 0.00<br>(0.00 to 0.00)                   | 0.00<br>(0.00 to 0.00)                    | 0.00<br>(0.00 to 0.00)               | 0.00<br>(0.00 to 0.00)               | 0.00<br>(0.00 to 0.00)               | 0.00<br>(0.00 to 0.00)               |
| Chagas disease                                        | 0.00<br>(0.00 to 0.00)                     | 0.00<br>(0.00 to 0.00)                    | 0.00<br>(0.00 to 0.00)                   | 0.00<br>(0.00 to 0.00)                    | 0.00<br>(0.00 to 0.00)               | 0.00<br>(0.00 to 0.00)               | 0.00<br>(0.00 to 0.00)               | 0.00<br>(0.00 to 0.00)               |
| Leishmaniasis                                         | 0.00<br>(0.00 to 0.00)                     | 0.00<br>(0.00 to 0.00)                    | 0.00<br>(0.00 to 0.00)                   | 0.00<br>(0.00 to 0.00)                    | 0.00<br>(0.00 to 0.00)               | 0.00<br>(0.00 to 0.00)               | 0.00<br>(0.00 to 0.00)               | 0.00<br>(0.00 to 0.00)               |
| African trypanosomiasis                               | 0.00<br>(0.00 to 0.00)                     | 0.00<br>(0.00 to 0.00)                    | 0.00<br>(0.00 to 0.00)                   | 0.00<br>(0.00 to 0.00)                    | 0.00<br>(0.00 to 0.00)               | 0.00<br>(0.00 to 0.00)               | 0.00<br>(0.00 to 0.00)               | 0.00<br>(0.00 to 0.00)               |
| Schistosomiasis                                       | 0.00<br>(0.00 to 0.00)                     | 0.00<br>(0.00 to 0.00)                    | 0.00<br>(0.00 to 0.00)                   | 0.00<br>(0.00 to 0.00)                    | 0.00<br>(0.00 to 0.00)               | 0.00<br>(0.00 to 0.00)               | 0.00<br>(0.00 to 0.00)               | 0.00<br>(0.00 to 0.00)               |
| Cysticercosis                                         | 4.57<br>(4.03 to 5.13)                     | 1.53<br>(1.32 to 1.76)                    | 1.52<br>(1.30 to 1.76)                   | 1.53<br>(1.32 to 1.76)                    | 0.17<br>(0.15 to 0.19)               | 0.07<br>(0.06 to 0.08)               | 0.07<br>(0.06 to 0.08)               | 0.07<br>(0.06 to 0.08)               |
| Cystic echinococcosis                                 | 0.00<br>(0.00 to 0.00)                     | 0.00<br>(0.00 to 0.00)                    | 0.00<br>(0.00 to 0.00)                   | 0.00<br>(0.00 to 0.00)                    | 0.00<br>(0.00 to 0.00)               | 0.00<br>(0.00 to 0.00)               | 0.00<br>(0.00 to 0.00)               | 0.00<br>(0.00 to 0.00)               |
| Dengue                                                | 0.00<br>(0.00 to 0.00)                     | 0.00<br>(0.00 to 0.00)                    | 0.00<br>(0.00 to 0.00)                   | 0.00<br>(0.00 to 0.00)                    | 0.00<br>(0.00 to 0.00)               | 0.00<br>(0.00 to 0.00)               | 0.00<br>(0.00 to 0.00)               | 0.00<br>(0.00 to 0.00)               |
| Yellow fever                                          | 0.00<br>(0.00 to 0.00)                     | 0.00<br>(0.00 to 0.00)                    | 0.00<br>(0.00 to 0.00)                   | 0.00<br>(0.00 to 0.00)                    | 0.00<br>(0.00 to 0.00)               | 0.00<br>(0.00 to 0.00)               | 0.00<br>(0.00 to 0.00)               | 0.00<br>(0.00 to 0.00)               |
| Rabies                                                | 0.21<br>(0.17 to 0.26)                     | 0.19<br>(0.15 to 0.24)                    | 0.18<br>(0.14 to 0.22)                   | 0.19<br>(0.15 to 0.24)                    | 0.01<br>(0.01 to 0.01)               | 0.01<br>(0.01 to 0.01)               | 0.01<br>(0.01 to 0.01)               | 0.01<br>(0.01 to 0.01)               |
| Intestinal nematode infections                        | 0.00<br>(0.00 to 0.00)                     | 0.00<br>(0.00 to 0.00)                    | 0.00<br>(0.00 to 0.00)                   | 0.00<br>(0.00 to 0.00)                    | 0.00<br>(0.00 to 0.00)               | 0.00<br>(0.00 to 0.00)               | 0.00<br>(0.00 to 0.00)               | 0.00<br>(0.00 to 0.00)               |
| Other neglected tropical diseases                     | 43.79<br>(36.70 to 48.56)                  | 44.42<br>(34.24 to 52.30)                 | 45.58<br>(34.50 to 53.86)                | 43.88<br>(34.20 to 51.16)                 | 1.23<br>(0.83 to 1.45)               | 1.63<br>(0.91 to 2.06)               | 1.76<br>(0.94 to 2.24)               | 1.54<br>(0.89 to 1.93)               |
| <b>Maternal disorders</b>                             | <b>164.29</b><br><b>(136.07 to 195.09)</b> | <b>110.27</b><br><b>(77.68 to 148.76)</b> | <b>99.70</b><br><b>(69.43 to 135.25)</b> | <b>116.33</b><br><b>(80.12 to 159.14)</b> | <b>3.13</b><br><b>(2.61 to 3.71)</b> | <b>2.12</b><br><b>(1.50 to 2.83)</b> | <b>1.92</b><br><b>(1.35 to 2.59)</b> | <b>2.24</b><br><b>(1.35 to 3.03)</b> |
| Maternal hemorrhage                                   | 22.90<br>(16.17 to 30.99)                  | 14.76<br>(8.86 to 22.37)                  | 13.41<br>(8.01 to 20.58)                 | 15.48<br>(9.22 to 24.04)                  | 0.44<br>(0.31 to 0.58)               | 0.28<br>(0.17 to 0.43)               | 0.26<br>(0.15 to 0.39)               | 0.30<br>(0.18 to 0.45)               |
| Maternal sepsis and other maternal infections         | 13.34<br>(9.33 to 18.57)                   | 7.73<br>(4.62 to 12.17)                   | 6.98<br>(4.18 to 11.15)                  | 8.15<br>(4.80 to 12.97)                   | 0.26<br>(0.18 to 0.35)               | 0.15<br>(0.09 to 0.24)               | 0.14<br>(0.08 to 0.22)               | 0.16<br>(0.10 to 0.25)               |
| Maternal hypertensive disorders                       | 23.84<br>(16.85 to 32.68)                  | 15.53<br>(9.36 to 24.68)                  | 13.99<br>(8.17 to 22.54)                 | 16.39<br>(9.62 to 26.32)                  | 0.44<br>(0.31 to 0.59)               | 0.28<br>(0.17 to 0.45)               | 0.26<br>(0.15 to 0.41)               | 0.30<br>(0.18 to 0.48)               |
| Maternal obstructed labor and uterine rupture         | 1.15<br>(0.50 to 2.00)                     | 0.88<br>(0.38 to 1.63)                    | 0.79<br>(0.33 to 1.43)                   | 0.94<br>(0.39 to 1.77)                    | 0.02<br>(0.01 to 0.04)               | 0.02<br>(0.01 to 0.03)               | 0.02<br>(0.01 to 0.03)               | 0.02<br>(0.01 to 0.03)               |
| Maternal abortion, miscarriage, and ectopic pregnancy | 22.40<br>(16.60 to 29.57)                  | 16.85<br>(9.41 to 26.63)                  | 15.10<br>(8.45 to 23.84)                 | 17.76<br>(10.06 to 28.09)                 | 0.47<br>(0.34 to 0.63)               | 0.36<br>(0.20 to 0.57)               | 0.32<br>(0.18 to 0.51)               | 0.37<br>(0.21 to 0.60)               |

|                                        |                              |                              |                              |                              |                           |                           |                           |                           |
|----------------------------------------|------------------------------|------------------------------|------------------------------|------------------------------|---------------------------|---------------------------|---------------------------|---------------------------|
| Indirect maternal deaths               | 32.14<br>(23.00 to<br>43.66) | 21.12<br>(11.78 to<br>33.99) | 18.88<br>(10.53 to<br>30.16) | 22.49<br>(12.52 to<br>36.45) | 0.58<br>(0.42 to<br>0.78) | 0.38<br>(0.22 to<br>0.61) | 0.34<br>(0.19 to<br>0.54) | 0.41<br>(0.23 to<br>0.65) |
| Late maternal deaths                   | 1.92<br>(1.09 to<br>3.21)    | 1.15<br>(0.58 to<br>2.11)    | 1.03<br>(0.51 to<br>1.90)    | 1.22<br>(0.59 to<br>2.19)    | 0.04<br>(0.02 to<br>0.06) | 0.02<br>(0.01 to<br>0.04) | 0.02<br>(0.01 to<br>0.04) | 0.02<br>(0.01 to<br>0.04) |
| Maternal deaths aggravated by HIV/AIDS | 0.05<br>(0.01 to<br>0.11)    | 0.10<br>(0.02 to<br>0.29)    | 0.07<br>(0.01 to<br>0.21)    | 0.13<br>(0.02 to<br>0.35)    | 0.00<br>(0.00 to<br>0.00) | 0.00<br>(0.00 to<br>0.01) | 0.00<br>(0.00 to<br>0.00) | 0.00<br>(0.00 to<br>0.01) |
| Other maternal disorders               | 46.55<br>(35.25 to<br>60.40) | 32.14<br>(19.87 to<br>48.87) | 29.44<br>(18.09 to<br>44.65) | 33.77<br>(20.46 to<br>51.62) | 0.90<br>(0.68 to<br>1.16) | 0.62<br>(0.39 to<br>0.94) | 0.57<br>(0.36 to<br>0.86) | 0.65<br>(0.41 to<br>0.99) |

| Austria                                                                 |                                            |                                           |                                           |                                           |                                    |                                  |                                  |                                   |
|-------------------------------------------------------------------------|--------------------------------------------|-------------------------------------------|-------------------------------------------|-------------------------------------------|------------------------------------|----------------------------------|----------------------------------|-----------------------------------|
| Cause                                                                   | YLLs (actual counts)                       |                                           |                                           |                                           | Deaths (actual counts)             |                                  |                                  |                                   |
|                                                                         | 2016                                       | 2040 Forecast                             | 2040 Better Scenario                      | 2040 Worse Scenario                       | 2016                               | 2040 Forecast                    | 2040 Better Scenario             | 2040 Worse Scenario               |
| <b>Neonatal disorders</b>                                               | <b>9,798.94</b><br>(7,422.90 to 13,068.52) | <b>4,817.59</b><br>(2,992.34 to 7,670.13) | <b>3,806.48</b><br>(2,374.82 to 6,051.43) | <b>5,708.55</b><br>(3,545.64 to 9,081.95) | <b>113.26</b><br>(85.79 to 151.05) | <b>55.70</b><br>(34.61 to 88.69) | <b>44.01</b><br>(27.46 to 69.96) | <b>65.99</b><br>(41.01 to 104.96) |
| Neonatal preterm birth                                                  | 5,618.71<br>(4,221.94 to 7,524.40)         | 2,462.27<br>(1,528.76 to 3,720.92)        | 1,803.61<br>(1,103.55 to 2,757.96)        | 3,133.07<br>(1,917.59 to 4,899.87)        | 64.93<br>(48.80 to 86.96)          | 28.46<br>(17.67 to 43.04)        | 20.85<br>(12.76 to 31.88)        | 36.21<br>(22.16 to 56.62)         |
| Neonatal encephalopathy due to birth asphyxia and trauma                | 2,126.89<br>(1,501.96 to 2,879.96)         | 952.86<br>(513.09 to 1,781.45)            | 756.91<br>(411.80 to 1,418.54)            | 1,073.43<br>(574.54 to 2,037.07)          | 24.58<br>(17.36 to 33.28)          | 11.02<br>(5.94 to 20.59)         | 8.75<br>(4.76 to 16.40)          | 12.41<br>(6.64 to 23.54)          |
| Neonatal sepsis and other neonatal infections                           | 338.32<br>(188.43 to 889.77)               | 264.50<br>(116.97 to 725.26)              | 219.87<br>(98.06 to 602.95)               | 292.69<br>(128.50 to 798.56)              | 3.91<br>(2.18 to 10.29)            | 3.06<br>(1.35 to 8.38)           | 2.54<br>(1.13 to 6.97)           | 3.38<br>(1.49 to 9.23)            |
| Hemolytic disease and other neonatal jaundice                           | 33.16<br>(19.76 to 52.39)                  | 16.34<br>(7.30 to 36.70)                  | 13.41<br>(6.01 to 29.48)                  | 18.15<br>(8.03 to 40.68)                  | 0.38<br>(0.23 to 0.61)             | 0.19<br>(0.08 to 0.42)           | 0.16<br>(0.07 to 0.34)           | 0.21<br>(0.09 to 0.47)            |
| Other neonatal disorders                                                | 1,681.86<br>(1,161.60 to 2,349.97)         | 1,121.61<br>(617.45 to 2,019.07)          | 1,012.69<br>(562.67 to 1,807.19)          | 1,191.21<br>(647.30 to 2,142.41)          | 19.45<br>(13.44 to 27.18)          | 12.97<br>(7.15 to 23.34)         | 11.72<br>(6.51 to 20.89)         | 13.78<br>(7.51 to 24.76)          |
| <b>Nutritional deficiencies</b>                                         | <b>214.07</b><br>(195.08 to 234.78)        | <b>164.81</b><br>(141.87 to 189.40)       | <b>167.13</b><br>(143.69 to 192.03)       | <b>159.83</b><br>(137.44 to 182.98)       | <b>17.60</b><br>(15.62 to 19.77)   | <b>16.79</b><br>(13.63 to 20.44) | <b>17.73</b><br>(14.47 to 21.47) | <b>15.68</b><br>(12.67 to 19.26)  |
| Protein-energy malnutrition                                             | 42.40<br>(32.33 to 83.06)                  | 34.22<br>(23.84 to 67.92)                 | 37.19<br>(26.03 to 72.83)                 | 32.17<br>(22.50 to 63.71)                 | 2.67<br>(1.77 to 6.55)             | 3.31<br>(1.99 to 7.08)           | 3.78<br>(2.31 to 7.84)           | 2.97<br>(1.79 to 6.44)            |
| Iodine deficiency                                                       | 10.81<br>(1.52 to 26.74)                   | 13.46<br>(1.05 to 35.13)                  | 13.31<br>(1.01 to 35.07)                  | 13.21<br>(1.07 to 34.19)                  | 0.73<br>(0.05 to 2.39)             | 1.30<br>(0.04 to 4.52)           | 1.33<br>(0.04 to 4.76)           | 1.23<br>(0.04 to 4.18)            |
| Dietary iron deficiency                                                 | 38.13<br>(18.13 to 52.03)                  | 24.97<br>(11.91 to 36.26)                 | 26.21<br>(12.08 to 38.10)                 | 24.11<br>(11.91 to 34.81)                 | 3.17<br>(0.63 to 5.12)             | 3.06<br>(0.40 to 3.67)           | 2.29<br>(0.42 to 4.11)           | 1.88<br>(0.39 to 3.34)            |
| Other nutritional deficiencies                                          | 122.73<br>(99.64 to 145.32)                | 92.16<br>(66.46 to 117.87)                | 90.42<br>(63.57 to 117.08)                | 90.34<br>(64.46 to 115.16)                | 11.03<br>(8.85 to 13.98)           | 10.13<br>(6.62 to 13.88)         | 10.32<br>(6.60 to 14.27)         | 9.60<br>(6.31 to 13.13)           |
| <b>Other communicable, maternal, neonatal, and nutritional diseases</b> | <b>1,390.80</b><br>(1,023.17 to 1,583.39)  | <b>1,297.53</b><br>(923.84 to 1,546.50)   | <b>1,276.76</b><br>(903.27 to 1,528.24)   | <b>1,298.62</b><br>(914.72 to 1,547.17)   | <b>55.62</b><br>(39.80 to 63.41)   | <b>65.70</b><br>(47.03 to 77.56) | <b>66.70</b><br>(47.46 to 78.84) | <b>63.90</b><br>(45.22 to 75.95)  |
| Sexually transmitted infections excluding HIV                           | 50.10<br>(42.88 to 60.07)                  | 25.25<br>(20.46 to 31.60)                 | 24.30<br>(19.38 to 30.57)                 | 25.53<br>(20.60 to 31.80)                 | 2.20<br>(1.87 to 2.61)             | 1.50<br>(1.20 to 1.91)           | 1.49<br>(1.18 to 1.92)           | 1.46<br>(1.17 to 1.86)            |
| Syphilis                                                                | 19.56<br>(15.02 to 27.85)                  | 7.30<br>(5.64 to 9.82)                    | 6.70<br>(5.11 to 9.01)                    | 7.57<br>(5.75 to 10.30)                   | 0.76<br>(0.61 to 0.94)             | 0.40<br>(0.31 to 0.52)           | 0.38<br>(0.29 to 0.51)           | 0.40<br>(0.30 to 0.53)            |
| Chlamydial infection                                                    | 3.88<br>(5.09 to 6.84)                     | 3.51<br>(2.77 to 4.47)                    | 3.44<br>(2.70 to 4.44)                    | 3.50<br>(2.78 to 4.41)                    | 0.28<br>(0.24 to 0.35)             | 0.23<br>(0.18 to 0.30)           | 0.23<br>(0.18 to 0.31)           | 0.22<br>(0.17 to 0.28)            |
| Gonococcal infection                                                    | 16.91<br>(14.62 to 19.62)                  | 10.25<br>(7.97 to 13.41)                  | 10.06<br>(7.78 to 13.27)                  | 10.23<br>(7.98 to 13.45)                  | 0.83<br>(0.70 to 1.00)             | 0.66<br>(0.49 to 0.88)           | 0.67<br>(0.50 to 0.90)           | 0.64<br>(0.48 to 0.85)            |
| Other sexually transmitted infections                                   | 7.75<br>(6.72 to 8.95)                     | 4.20<br>(3.33 to 5.34)                    | 4.09<br>(3.21 to 5.26)                    | 4.23<br>(3.35 to 5.35)                    | 0.31<br>(0.27 to 0.37)             | 0.22<br>(0.17 to 0.28)           | 0.22<br>(0.17 to 0.28)           | 0.21<br>(0.17 to 0.27)            |
| Acute hepatitis                                                         | 119.30<br>(104.99 to 135.56)               | 99.12<br>(73.15 to 130.14)                | 86.91<br>(63.02 to 115.35)                | 104.53<br>(76.25 to 140.36)               | 4.52<br>(3.98 to 5.16)             | 4.97<br>(3.62 to 6.58)           | 4.45<br>(3.20 to 5.93)           | 5.13<br>(3.68 to 6.88)            |
| Acute hepatitis A                                                       | 8.48<br>(6.48 to 10.55)                    | 4.97<br>(3.29 to 7.19)                    | 4.52<br>(2.94 to 6.61)                    | 5.17<br>(3.35 to 7.47)                    | 0.23<br>(0.17 to 0.31)             | 0.23<br>(0.13 to 0.34)           | 0.20<br>(0.12 to 0.31)           | 0.22<br>(0.13 to 0.34)            |
| Acute hepatitis B                                                       | 89.40<br>(76.43 to 103.75)                 | 75.77<br>(52.74 to 103.51)                | 66.00<br>(44.81 to 92.12)                 | 80.19<br>(55.29 to 112.03)                | 3.37<br>(2.87 to 3.94)             | 3.58<br>(2.46 to 5.03)           | 3.17<br>(2.10 to 4.52)           | 3.73<br>(2.46 to 5.36)            |

|                                       |                                                                      |                                                                      |                                                                    |                                                                        |                                                               |                                                                |                                                               |                                                                 |
|---------------------------------------|----------------------------------------------------------------------|----------------------------------------------------------------------|--------------------------------------------------------------------|------------------------------------------------------------------------|---------------------------------------------------------------|----------------------------------------------------------------|---------------------------------------------------------------|-----------------------------------------------------------------|
|                                       | 6.16<br>(4.61 to<br>8.22)                                            | 5.37<br>(3.53 to<br>8.05)                                            | 4.72<br>(3.07 to<br>7.17)                                          | 5.66<br>(3.60 to<br>8.59)                                              | 0.25<br>(0.18 to<br>0.34)                                     | 0.27<br>(0.17 to<br>0.41)                                      | 0.24<br>(0.16 to<br>0.37)                                     | 0.28<br>(0.18 to<br>0.43)                                       |
| Acute hepatitis C                     |                                                                      |                                                                      |                                                                    |                                                                        |                                                               |                                                                |                                                               |                                                                 |
| Acute hepatitis E                     | 15.26<br>(11.26 to<br>21.25)                                         | 13.02<br>(7.65 to<br>20.96)                                          | 11.67<br>(6.90 to<br>18.38)                                        | 13.51<br>(7.99 to<br>22.01)                                            | 0.67<br>(0.43 to<br>1.00)                                     | 0.90<br>(0.50 to<br>1.44)                                      | 0.84<br>(0.46 to<br>1.31)                                     | 0.90<br>(0.51 to<br>1.47)                                       |
| Other unspecified infectious diseases | 1,221.40<br>(854.86 to<br>1,410.23)                                  | 1,173.16<br>(791.76 to<br>1,412.47)                                  | 1,165.55<br>(785.48 to<br>1,399.51)                                | 1,168.57<br>(787.34 to<br>1,405.23)                                    | 48.90<br>(33.12 to<br>56.63)                                  | 59.24<br>(40.49 to<br>71.29)                                   | 60.75<br>(41.47 to<br>73.04)                                  | 57.30<br>(38.81 to<br>69.01)                                    |
| <b>Non-communicable diseases</b>      | <b>1,017,169.67</b><br><b>(962,876.17 to</b><br><b>1,070,658.86)</b> | <b>1,098,205.17</b><br><b>(944,007.21 to</b><br><b>1,273,174.46)</b> | <b>912,327.16</b><br><b>(795,372.87 to</b><br><b>1,045,541.93)</b> | <b>1,317,434.00</b><br><b>(1,113,890.17 to</b><br><b>1,542,886.19)</b> | <b>77,149.94</b><br><b>(73,619.34 to</b><br><b>80,740.44)</b> | <b>98,728.10</b><br><b>(88,042.75 to</b><br><b>110,672.01)</b> | <b>86,218.00</b><br><b>(77,930.02 to</b><br><b>95,974.49)</b> | <b>112,724.56</b><br><b>(99,925.41 to</b><br><b>127,164.22)</b> |

| Austria                              |                                                 |                                                 |                                                 |                                                 |                                              |                                              |                                              |                                              |
|--------------------------------------|-------------------------------------------------|-------------------------------------------------|-------------------------------------------------|-------------------------------------------------|----------------------------------------------|----------------------------------------------|----------------------------------------------|----------------------------------------------|
| Cause                                | YLLs (actual counts)                            |                                                 |                                                 |                                                 | Deaths (actual counts)                       |                                              |                                              |                                              |
|                                      | 2016                                            | 2040 Forecast                                   | 2040 Better Scenario                            | 2040 Worse Scenario                             | 2016                                         | 2040 Forecast                                | 2040 Better Scenario                         | 2040 Worse Scenario                          |
| <b>Neoplasms</b>                     | <b>368,094.84</b><br>(344,211.05 to 391,347.69) | <b>412,044.32</b><br>(354,726.75 to 473,607.03) | <b>343,407.27</b><br>(298,234.15 to 391,887.42) | <b>489,511.05</b><br>(415,315.83 to 569,758.94) | <b>20,912.41</b><br>(19,619.67 to 22,142.67) | <b>28,168.14</b><br>(25,015.15 to 31,697.05) | <b>24,590.12</b><br>(22,037.00 to 27,436.55) | <b>31,986.74</b><br>(28,193.02 to 36,357.61) |
| Lip and oral cavity cancer           | 6,312.52<br>(5,588.72 to 7,077.15)              | 5,980.31<br>(3,090.74 to 10,570.59)             | 3,591.75<br>(1,919.68 to 6,287.04)              | 9,523.85<br>(4,786.94 to 16,921.13)             | 288.34<br>(259.11 to 318.58)                 | 315.24<br>(169.68 to 539.10)                 | 197.03<br>(111.49 to 333.76)                 | 488.55<br>(258.63 to 846.71)                 |
| Nasopharynx cancer                   | 1,377.86<br>(1,207.69 to 1,595.68)              | 1,201.74<br>(631.27 to 2,088.40)                | 706.93<br>(384.91 to 1,208.80)                  | 1,929.28<br>(1,034.05 to 3,318.35)              | 67.96<br>(60.24 to 78.07)                    | 70.91<br>(37.31 to 122.25)                   | 43.10<br>(23.49 to 73.95)                    | 110.37<br>(57.91 to 188.25)                  |
| Other pharynx cancer                 | 4,847.23<br>(4,315.86 to 5,453.79)              | 3,879.71<br>(2,019.58 to 6,695.03)              | 3,493.79<br>(1,840.56 to 5,995.23)              | 4,940.79<br>(2,578.98 to 8,242.18)              | 194.81<br>(174.84 to 216.64)                 | 179.31<br>(95.92 to 306.91)                  | 163.92<br>(88.51 to 280.89)                  | 226.10<br>(120.14 to 379.61)                 |
| Esophageal cancer                    | 7,686.08<br>(6,680.07 to 8,726.52)              | 7,737.97<br>(4,417.44 to 13,289.69)             | 4,985.35<br>(3,072.21 to 8,057.88)              | 11,400.70<br>(6,175.15 to 19,678.24)            | 375.47<br>(330.67 to 425.22)                 | 433.95<br>(255.50 to 715.99)                 | 288.35<br>(182.95 to 450.14)                 | 623.20<br>(348.61 to 1,034.02)               |
| Stomach cancer                       | 17,936.18<br>(16,518.94 to 19,521.86)           | 14,393.49<br>(11,105.69 to 18,556.76)           | 12,149.33<br>(9,676.57 to 15,186.10)            | 15,479.52<br>(11,791.22 to 20,138.96)           | 1,133.11<br>(1,049.48 to 1,231.45)           | 1,090.63<br>(853.39 to 1,391.42)             | 952.84<br>(774.57 to 1,185.75)               | 1,137.89<br>(881.54 to 1,472.63)             |
| Colon and rectum cancer              | 36,705.50<br>(33,584.42 to 40,534.43)           | 45,132.48<br>(31,317.59 to 63,941.55)           | 37,807.57<br>(26,635.61 to 52,759.48)           | 53,770.03<br>(36,649.35 to 78,217.69)           | 2,402.75<br>(2,205.92 to 2,637.29)           | 3,555.54<br>(2,502.69 to 4,959.74)           | 3,080.12<br>(2,203.88 to 4,249.43)           | 4,114.38<br>(2,794.23 to 5,851.29)           |
| Liver cancer                         | 16,665.22<br>(14,715.61 to 18,628.77)           | 21,767.76<br>(14,726.99 to 32,583.06)           | 18,776.97<br>(13,376.84 to 26,999.69)           | 31,222.70<br>(19,668.46 to 49,778.40)           | 907.99<br>(808.35 to 1,010.70)               | 1,357.49<br>(942.81 to 1,977.78)             | 1,212.73<br>(891.85 to 1,692.19)             | 1,856.74<br>(1,206.78 to 2,847.46)           |
| Liver cancer due to hepatitis B      | 1,444.75<br>(1,034.46 to 2,003.59)              | 1,880.03<br>(1,135.76 to 3,130.21)              | 1,690.46<br>(1,052.99 to 2,667.17)              | 2,303.03<br>(1,280.33 to 4,129.97)              | 66.00<br>(47.76 to 90.21)                    | 98.98<br>(61.19 to 161.24)                   | 91.65<br>(58.63 to 143.56)                   | 116.97<br>(67.99 to 198.32)                  |
| Liver cancer due to hepatitis C      | 5,164.14<br>(4,110.73 to 6,385.96)              | 7,504.08<br>(4,870.05 to 11,375.89)             | 6,891.02<br>(4,639.77 to 10,156.92)             | 8,924.85<br>(5,378.53 to 14,431.38)             | 302.58<br>(241.87 to 371.47)                 | 502.07<br>(334.54 to 724.55)                 | 476.43<br>(330.88 to 679.95)                 | 573.41<br>(355.72 to 884.70)                 |
| Liver cancer due to alcohol use      | 7,132.56<br>(5,792.34 to 8,487.18)              | 8,151.30<br>(5,239.30 to 12,755.29)             | 6,351.61<br>(4,233.14 to 9,689.52)              | 14,821.42<br>(8,942.61 to 24,628.84)            | 379.42<br>(304.70 to 453.06)                 | 490.22<br>(314.59 to 748.77)                 | 395.59<br>(260.75 to 584.83)                 | 852.87<br>(524.92 to 1,376.32)               |
| Liver cancer due to other causes     | 2,923.76<br>(2,254.96 to 3,738.17)              | 4,232.35<br>(2,592.64 to 6,475.74)              | 3,843.87<br>(2,459.36 to 5,696.02)              | 5,173.39<br>(2,938.69 to 8,421.95)              | 159.99<br>(121.10 to 206.96)                 | 266.21<br>(166.15 to 401.81)                 | 249.05<br>(160.82 to 363.76)                 | 313.49<br>(179.14 to 500.39)                 |
| Gallbladder and biliary tract cancer | 6,772.16<br>(6,087.90 to 7,442.06)              | 6,215.93<br>(5,475.22 to 7,032.34)              | 6,319.93<br>(5,514.67 to 7,186.53)              | 6,038.46<br>(5,334.24 to 6,802.10)              | 437.29<br>(394.35 to 479.83)                 | 472.27<br>(417.62 to 526.26)                 | 492.90<br>(437.23 to 551.45)                 | 448.47<br>(394.57 to 501.68)                 |
| Pancreatic cancer                    | 28,838.84<br>(25,907.14 to 31,602.41)           | 35,765.48<br>(29,078.97 to 43,204.46)           | 32,659.13<br>(27,070.85 to 38,954.24)           | 37,847.64<br>(30,364.60 to 46,437.99)           | 1,665.64<br>(1,499.31 to 1,818.38)           | 2,369.86<br>(1,969.99 to 2,850.90)           | 2,231.42<br>(1,881.21 to 2,657.32)           | 2,442.45<br>(1,983.29 to 2,977.06)           |
| Larynx cancer                        | 2,969.49<br>(2,628.49 to 3,308.90)              | 2,506.94<br>(1,233.07 to 4,655.97)              | 1,340.23<br>(689.67 to 2,390.21)                | 3,920.33<br>(1,843.35 to 7,348.24)              | 135.55<br>(121.61 to 149.59)                 | 132.12<br>(67.51 to 238.00)                  | 71.43<br>(38.10 to 122.30)                   | 202.21<br>(97.66 to 375.13)                  |
| Tracheal, bronchus, and lung cancer  | 76,709.13<br>(70,788.65 to 83,267.74)           | 81,110.58<br>(60,492.02 to 106,817.34)          | 43,282.41<br>(32,884.32 to 56,621.79)           | 119,073.56<br>(87,264.79 to 158,861.45)         | 3,893.53<br>(3,601.16 to 4,229.98)           | 4,745.81<br>(3,521.84 to 6,415.49)           | 2,596.35<br>(1,982.08 to 3,470.18)           | 6,741.16<br>(4,938.38 to 9,177.18)           |
| Malignant skin melanoma              | 7,493.41<br>(5,781.43 to 8,598.58)              | 9,891.78<br>(7,051.48 to 10,411.92)             | 9,849.04<br>(7,706.22 to 11,610.51)             | 8,455.70<br>(6,546.81 to 9,917.80)              | 366.75<br>(279.93 to 415.79)                 | 554.15<br>(428.03 to 632.38)                 | 626.19<br>(481.30 to 719.17)                 | 507.88<br>(390.49 to 583.53)                 |
| Non-melanoma skin cancer             | 1,841.13<br>(1,645.88 to 2,057.71)              | 2,037.55<br>(1,777.39 to 2,331.69)              | 1,961.69<br>(1,695.06 to 2,256.62)              | 2,014.11<br>(1,749.74 to 2,327.45)              | 137.93<br>(124.60 to 153.22)                 | 187.87<br>(165.16 to 215.81)                 | 188.21<br>(162.75 to 216.28)                 | 179.60<br>(154.90 to 208.42)                 |
| Breast cancer                        | 30,315.77<br>(26,874.21 to 34,131.91)           | 28,571.84<br>(21,361.48 to 37,716.01)           | 24,627.44<br>(18,591.62 to 32,285.46)           | 33,955.01<br>(24,640.37 to 46,139.64)           | 1,642.99<br>(1,469.38 to 1,838.40)           | 1,903.24<br>(1,464.16 to 2,466.57)           | 1,699.81<br>(1,323.80 to 2,167.87)           | 2,191.61<br>(1,628.12 to 2,901.79)           |
| Cervical cancer                      | 4,962.96<br>(4,400.62 to 5,599.96)              | 3,543.33<br>(2,676.38 to 4,709.98)              | 3,049.68<br>(2,389.65 to 3,902.64)              | 3,799.80<br>(2,752.58 to 5,174.59)              | 236.04<br>(210.31 to 263.75)                 | 203.61<br>(158.02 to 264.00)                 | 181.38<br>(145.03 to 226.51)                 | 212.52<br>(161.86 to 280.17)                 |

|                   |                                          |                                          |                                          |                                          |                                       |                                       |                                       |                                       |
|-------------------|------------------------------------------|------------------------------------------|------------------------------------------|------------------------------------------|---------------------------------------|---------------------------------------|---------------------------------------|---------------------------------------|
| Uterine cancer    | 3,687.44<br>(3,167.02 to<br>4,248.12)    | 5,184.23<br>(4,239.45 to<br>6,164.20)    | 4,990.75<br>(4,028.17 to<br>5,988.80)    | 5,213.31<br>(4,264.67 to<br>6,242.63)    | 230.75<br>(200.50 to<br>263.97)       | 375.66<br>(314.95 to<br>444.69)       | 369.95<br>(308.70 to<br>438.47)       | 370.22<br>(308.97 to<br>437.13)       |
| Ovarian cancer    | 10,731.36<br>(9,124.24 to<br>12,404.18)  | 10,437.81<br>(7,937.44 to<br>13,610.98)  | 9,795.93<br>(7,586.88 to<br>12,653.26)   | 11,195.89<br>(8,319.31 to<br>14,865.28)  | 579.65<br>(495.97 to<br>667.86)       | 632.61<br>(499.42 to<br>848.85)       | 618.92<br>(480.36 to<br>792.78)       | 694.50<br>(512.17 to<br>921.19)       |
| Prostate cancer   | 16,622.97<br>(13,570.02 to<br>19,594.60) | 26,119.35<br>(20,588.74 to<br>31,330.46) | 26,028.37<br>(20,308.20 to<br>31,313.14) | 25,290.73<br>(19,805.21 to<br>30,732.35) | 1,404.51<br>(1,095.76 to<br>1,628.64) | 2,617.88<br>(1,944.90 to<br>3,102.88) | 2,693.69<br>(2,015.99 to<br>3,182.38) | 2,466.08<br>(1,794.43 to<br>2,953.08) |
| Testicular cancer | 514.86<br>(384.90 to<br>625.24)          | 307.36<br>(231.07 to<br>395.22)          | 289.08<br>(216.28 to<br>373.86)          | 314.55<br>(234.01 to<br>407.02)          | 14.04<br>(11.47 to<br>16.56)          | 11.71<br>(9.73 to<br>13.99)           | 11.49<br>(9.45 to<br>13.80)           | 11.52<br>(9.46 to<br>13.88)           |

| Austria                         |                                          |                                          |                                          |                                          |                                       |                                       |                                       |                                       |
|---------------------------------|------------------------------------------|------------------------------------------|------------------------------------------|------------------------------------------|---------------------------------------|---------------------------------------|---------------------------------------|---------------------------------------|
| Cause                           | YLLs (actual counts)                     |                                          |                                          |                                          | Deaths (actual counts)                |                                       |                                       |                                       |
|                                 | 2016                                     | 2040 Forecast                            | 2040 Better Scenario                     | 2040 Worse Scenario                      | 2016                                  | 2040 Forecast                         | 2040 Better Scenario                  | 2040 Worse Scenario                   |
| Kidney cancer                   | 9,384.83<br>(8,434.61 to 10,324.03)      | 13,636.42<br>(11,357.44 to 16,500.86)    | 13,013.27<br>(11,063.93 to 15,371.18)    | 13,933.37<br>(11,319.37 to 17,272.90)    | 563.75<br>(511.96 to 615.47)          | 957.52<br>(807.63 to 1,136.88)        | 945.41<br>(818.68 to 1,093.84)        | 948.75<br>(786.44 to 1,149.19)        |
| Bladder cancer                  | 8,317.45<br>(7,509.63 to 9,116.69)       | 10,523.18<br>(8,243.39 to 13,349.74)     | 9,108.35<br>(7,425.24 to 11,173.96)      | 11,387.53<br>(8,653.15 to 14,871.67)     | 629.48<br>(567.46 to 690.23)          | 949.40<br>(746.75 to 1,197.94)        | 853.49<br>(694.96 to 1,037.12)        | 992.01<br>(753.33 to 1,288.35)        |
| Brain and nervous system cancer | 13,448.68<br>(10,731.97 to 15,608.94)    | 14,186.41<br>(10,785.83 to 16,685.31)    | 13,929.73<br>(10,712.75 to 16,540.02)    | 14,159.15<br>(10,710.04 to 16,638.97)    | 519.55<br>(388.59 to 590.16)          | 667.21<br>(469.88 to 769.65)          | 667.21<br>(480.00 to 778.78)          | 654.16<br>(455.79 to 751.16)          |
| Thyroid cancer                  | 1,234.69<br>(1,081.21 to 1,368.45)       | 1,505.72<br>(1,135.44 to 2,057.99)       | 1,443.70<br>(1,093.33 to 1,971.06)       | 1,659.40<br>(1,194.51 to 2,352.55)       | 75.17<br>(66.69 to 84.29)             | 109.98<br>(83.92 to 148.53)           | 108.28<br>(82.85 to 144.24)           | 117.24<br>(86.25 to 162.35)           |
| Mesothelioma                    | 2,280.22<br>(1,988.27 to 2,894.03)       | 2,770.14<br>(2,351.85 to 3,800.64)       | 2,873.60<br>(2,423.89 to 4,013.96)       | 2,666.20<br>(2,280.86 to 3,605.87)       | 121.35<br>(106.06 to 164.25)          | 173.72<br>(149.86 to 251.64)          | 184.09<br>(157.28 to 273.44)          | 164.03<br>(142.03 to 237.43)          |
| Hodgkin lymphoma                | 890.90<br>(783.21 to 1,256.95)           | 764.78<br>(642.27 to 1,031.60)           | 696.60<br>(578.77 to 949.91)             | 788.50<br>(655.05 to 1,076.79)           | 36.38<br>(32.62 to 46.24)             | 40.31<br>(34.78 to 49.44)             | 37.65<br>(32.13 to 45.76)             | 40.60<br>(34.60 to 50.19)             |
| Non-Hodgkin lymphoma            | 12,252.44<br>(10,758.18 to 13,979.94)    | 13,673.69<br>(11,070.93 to 16,765.02)    | 13,295.18<br>(10,820.19 to 16,197.66)    | 14,234.59<br>(11,259.04 to 17,938.79)    | 717.74<br>(618.21 to 797.52)          | 966.55<br>(788.88 to 1,161.03)        | 964.85<br>(784.44 to 1,145.50)        | 979.27<br>(789.99 to 1,203.17)        |
| Multiple myeloma                | 6,087.15<br>(4,605.64 to 7,224.22)       | 7,343.70<br>(5,370.66 to 9,297.50)       | 7,280.30<br>(5,382.03 to 9,187.29)       | 7,618.42<br>(5,569.06 to 9,809.18)       | 377.57<br>(283.98 to 445.13)          | 518.40<br>(381.29 to 654.07)          | 525.43<br>(391.82 to 662.70)          | 525.25<br>(379.09 to 671.34)          |
| Leukemia                        | 15,442.07<br>(13,991.07 to 16,765.06)    | 16,306.10<br>(13,168.60 to 20,262.63)    | 15,173.45<br>(12,537.72 to 18,448.96)    | 17,795.60<br>(13,968.58 to 22,764.46)    | 862.88<br>(786.87 to 937.94)          | 1,113.80<br>(909.50 to 1,379.98)      | 1,066.41<br>(894.59 to 1,281.60)      | 1,177.00<br>(932.87 to 1,504.26)      |
| Acute lymphoid leukemia         | 1,504.10<br>(1,333.86 to 1,675.29)       | 976.98<br>(752.63 to 1,241.93)           | 876.79<br>(684.43 to 1,108.83)           | 1,092.47<br>(820.36 to 1,410.22)         | 34.89<br>(27.38 to 49.34)             | 44.20<br>(39.10 to 44.10)             | 31.65<br>(25.09 to 39.60)             | 38.64<br>(29.38 to 49.67)             |
| Chronic lymphoid leukemia       | 3,175.12<br>(2,762.16 to 3,741.95)       | 3,811.31<br>(2,850.95 to 5,109.50)       | 3,621.34<br>(2,766.54 to 4,712.22)       | 4,074.85<br>(2,974.39 to 5,644.82)       | 242.84<br>(210.39 to 281.00)          | 329.74<br>(252.38 to 433.59)          | 323.54<br>(251.82 to 415.64)          | 340.91<br>(253.44 to 460.03)          |
| Acute myeloid leukemia          | 6,392.14<br>(5,095.50 to 7,191.46)       | 7,438.04<br>(5,662.39 to 9,367.72)       | 7,039.62<br>(5,417.53 to 8,649.17)       | 8,104.75<br>(5,996.25 to 10,449.41)      | 317.35<br>(255.16 to 357.29)          | 438.73<br>(339.78 to 553.09)          | 424.83<br>(332.52 to 523.53)          | 465.68<br>(350.67 to 596.75)          |
| Chronic myeloid leukemia        | 1,614.69<br>(1,422.64 to 1,859.67)       | 884.93<br>(659.55 to 1,195.49)           | 741.31<br>(557.63 to 998.07)             | 1,015.55<br>(727.42 to 1,419.06)         | 95.18<br>(83.75 to 109.48)            | 63.10<br>(48.19 to 83.86)             | 54.68<br>(42.63 to 72.08)             | 69.79<br>(50.58 to 95.45)             |
| Other leukemia                  | 2,756.02<br>(2,423.84 to 3,246.39)       | 3,194.85<br>(2,487.60 to 4,223.34)       | 2,894.40<br>(2,284.67 to 3,767.39)       | 3,507.98<br>(2,632.76 to 4,675.85)       | 163.31<br>(142.92 to 192.61)          | 247.34<br>(192.75 to 327.09)          | 231.72<br>(185.96 to 298.05)          | 261.99<br>(199.54 to 348.10)          |
| Other neoplasms                 | 15,776.32<br>(14,005.06 to 17,298.30)    | 20,458.54<br>(18,060.55 to 23,753.98)    | 20,887.71<br>(18,419.17 to 23,518.50)    | 19,882.32<br>(17,619.50 to 22,097.71)    | 893.45<br>(803.18 to 980.91)          | 1,441.40<br>(1,285.85 to 1,596.43)    | 1,517.47<br>(1,353.33 to 1,685.11)    | 1,362.97<br>(1,210.91 to 1,512.94)    |
| Cardiovascular diseases         | 345,333.79<br>(325,617.63 to 364,984.46) | 327,744.75<br>(238,410.76 to 450,861.93) | 341,167.65<br>(187,381.01 to 316,058.32) | 425,616.74<br>(299,251.56 to 599,276.29) | 33,488.94<br>(31,357.48 to 34,765.26) | 36,374.44<br>(27,941.35 to 47,358.12) | 29,022.39<br>(23,177.93 to 36,350.56) | 43,855.73<br>(33,103.61 to 57,201.60) |
| Rheumatic heart disease         | 3,632.62<br>(3,231.93 to 3,979.84)       | 3,185.49<br>(2,520.30 to 4,016.72)       | 2,975.16<br>(2,353.85 to 3,756.31)       | 3,200.98<br>(2,514.58 to 4,106.93)       | 341.46<br>(301.09 to 376.19)          | 351.17<br>(281.60 to 443.58)          | 340.40<br>(272.12 to 430.85)          | 342.32<br>(269.05 to 442.82)          |
| Ischemic heart disease          | 215,658.60<br>(200,192.22 to 234,001.52) | 170,330.45<br>(102,921.74 to 264,970.47) | 109,331.61<br>(69,077.61 to 165,554.55)  | 237,697.03<br>(140,025.80 to 381,463.66) | 20,758.21<br>(19,231.26 to 22,927.29) | 18,658.90<br>(11,835.04 to 27,690.73) | 13,188.29<br>(8,318.60 to 19,492.16)  | 23,893.13<br>(14,292.29 to 37,051.90) |
| Stroke                          | 44,434.62<br>(39,429.89 to 49,601.26)    | 36,598.95<br>(22,703.70 to 57,483.34)    | 25,037.72<br>(16,074.55 to 38,312.88)    | 52,450.90<br>(31,189.48 to 83,527.40)    | 3,888.17<br>(3,361.27 to 4,500.08)    | 3,854.89<br>(2,431.18 to 6,183.90)    | 2,927.93<br>(1,903.65 to 4,509.26)    | 5,008.34<br>(2,965.01 to 8,013.74)    |
| Ischemic stroke                 | 21,069.01<br>(18,232.77 to 24,148.87)    | 18,075.45<br>(10,412.07 to 32,281.36)    | 13,413.89<br>(7,967.56 to 23,036.13)     | 23,752.31<br>(13,162.61 to 43,075.24)    | 2,176.39<br>(1,858.80 to 2,551.24)    | 2,168.36<br>(1,246.74 to 4,016.92)    | 1,735.32<br>(1,019.87 to 3,051.52)    | 2,650.52<br>(1,474.24 to 4,986.40)    |



|                                |                                          |                                          |                                         |                                          |                                       |                                       |                                     |                                        |
|--------------------------------|------------------------------------------|------------------------------------------|-----------------------------------------|------------------------------------------|---------------------------------------|---------------------------------------|-------------------------------------|----------------------------------------|
|                                | 23,365.61<br>(20,957.99 to<br>25,869.55) | 18,523.49<br>(11,246.15 to<br>30,505.43) | 11,623.83<br>(7,427.58 to<br>18,164.77) | 28,698.59<br>(16,078.85 to<br>48,449.36) | 1,711.78<br>(1,488.84 to<br>1,961.56) | 1,686.53<br>(1,058.12 to<br>2,684.49) | 1,192.60<br>(782.69 to<br>1,820.12) | 2,357.82<br>(1,374.83 to<br>3,906.44)  |
| Intracerebral hemorrhage       |                                          |                                          |                                         |                                          |                                       |                                       |                                     |                                        |
|                                | 18,016.46<br>(8,463.16 to<br>23,191.91)  | 28,546.69<br>(9,437.27 to<br>64,417.76)  | 23,165.79<br>(8,166.79 to<br>46,822.32) | 38,199.58<br>(12,442.42 to<br>87,953.15) | 1,959.15<br>(716.05 to<br>2,706.81)   | 3,582.94<br>(1,017.66 to<br>8,451.96) | 3,077.42<br>(925.91 to<br>6,563.47) | 4,660.41<br>(1,291.05 to<br>11,515.39) |
| Hypertensive heart disease     |                                          |                                          |                                         |                                          |                                       |                                       |                                     |                                        |
|                                | 16,851.46<br>(10,820.57 to<br>19,710.18) | 20,194.22<br>(9,899.52 to<br>31,759.05)  | 18,454.38<br>(9,166.21 to<br>29,198.02) | 21,693.95<br>(11,007.79 to<br>33,901.99) | 1,665.72<br>(829.23 to<br>2,095.96)   | 2,494.94<br>(995.34 to<br>4,354.61)   | 2,367.88<br>(958.74 to<br>4,067.05) | 2,542.07<br>(1,006.38 to<br>4,495.17)  |
| Cardiomyopathy and myocarditis |                                          |                                          |                                         |                                          |                                       |                                       |                                     |                                        |
|                                | 1,608.25<br>(1,229.75 to<br>2,479.89)    | 2,177.70<br>(1,560.70 to<br>2,856.67)    | 2,248.00<br>(1,598.18 to<br>2,940.61)   | 2,081.12<br>(1,495.41 to<br>2,780.24)    | 125.77<br>(80.41 to<br>167.08)        | 232.57<br>(119.04 to<br>326.07)       | 253.63<br>(130.28 to<br>353.93)     | 212.19<br>(111.77 to<br>298.36)        |
| Myocarditis                    |                                          |                                          |                                         |                                          |                                       |                                       |                                     |                                        |

| Austria                                                       |                                                               |                                                               |                                                               |                                                               |                                                            |                                                            |                                                            |                                                            |
|---------------------------------------------------------------|---------------------------------------------------------------|---------------------------------------------------------------|---------------------------------------------------------------|---------------------------------------------------------------|------------------------------------------------------------|------------------------------------------------------------|------------------------------------------------------------|------------------------------------------------------------|
| Cause                                                         | YLLs (actual counts)                                          |                                                               |                                                               |                                                               | Deaths (actual counts)                                     |                                                            |                                                            |                                                            |
|                                                               | 2016                                                          | 2040 Forecast                                                 | 2040 Better Scenario                                          | 2040 Worse Scenario                                           | 2016                                                       | 2040 Forecast                                              | 2040 Better Scenario                                       | 2040 Worse Scenario                                        |
| Alcoholic cardiomyopathy                                      | 3,147.66<br>(1,615.87 to<br>4,434.56)                         | 2,261.97<br>(1,007.30 to<br>3,092.01)                         | 1,985.73<br>(867.46 to<br>2,726.49)                           | 3,271.13<br>(1,609.12 to<br>4,440.62)                         | 151.48<br>(68.49 to<br>195.72)                             | 134.50<br>(53.25 to<br>187.81)                             | 122.02<br>(46.95 to<br>172.22)                             | 190.79<br>(82.04 to<br>263.68)                             |
| Other cardiomyopathy                                          | 12,095.56<br>(7,330.69 to<br>14,590.62)                       | 15,754.55<br>(6,721.84 to<br>27,036.01)                       | 14,220.66<br>(5,995.81 to<br>24,243.26)                       | 16,341.70<br>(7,119.83 to<br>28,160.64)                       | 1,388.47<br>(624.47 to<br>1,782.14)                        | 2,127.87<br>(709.35 to<br>4,005.78)                        | 1,992.24<br>(658.66 to<br>3,642.13)                        | 2,139.09<br>(729.43 to<br>4,037.48)                        |
| Atrial fibrillation and flutter                               | 9,589.87<br>(7,417.14 to<br>12,117.67)                        | 14,130.99<br>(9,936.99 to<br>19,475.34)                       | 13,234.86<br>(9,394.55 to<br>18,137.07)                       | 15,384.35<br>(10,688.08 to<br>21,504.59)                      | 1,127.94<br>(852.38 to<br>1,451.95)                        | 1,767.50<br>(1,223.75 to<br>2,444.21)                      | 1,727.26<br>(1,218.95 to<br>2,399.55)                      | 1,863.00<br>(1,282.21 to<br>2,659.51)                      |
| Aortic aneurysm                                               | 6,975.61<br>(6,354.56 to<br>7,728.41)                         | 7,446.42<br>(5,738.57 to<br>9,699.69)                         | 6,719.90<br>(5,296.32 to<br>8,608.94)                         | 7,639.21<br>(5,852.96 to<br>9,913.23)                         | 497.94<br>(452.32 to<br>551.72)                            | 635.86<br>(509.69 to<br>795.23)                            | 614.50<br>(497.98 to<br>765.36)                            | 624.84<br>(491.63 to<br>789.71)                            |
| Peripheral artery disease                                     | 6,085.66<br>(4,192.09 to<br>8,913.41)                         | 12,096.58<br>(7,864.72 to<br>18,103.66)                       | 11,668.97<br>(7,669.70 to<br>17,650.23)                       | 12,404.29<br>(8,011.47 to<br>18,615.62)                       | 645.41<br>(424.43 to<br>966.93)                            | 1,442.89<br>(930.25 to<br>2,177.87)                        | 1,470.53<br>(956.14 to<br>2,208.43)                        | 1,413.94<br>(908.71 to<br>2,128.03)                        |
| Endocarditis                                                  | 2,787.31<br>(1,866.23 to<br>4,999.23)                         | 3,959.98<br>(2,205.45 to<br>7,852.77)                         | 3,888.53<br>(2,191.34 to<br>7,628.55)                         | 4,051.97<br>(2,228.36 to<br>8,122.82)                         | 210.95<br>(141.43 to<br>380.90)                            | 356.06<br>(191.82 to<br>722.45)                            | 364.01<br>(196.63 to<br>718.69)                            | 351.68<br>(185.82 to<br>722.40)                            |
| Other cardiovascular and circulatory diseases                 | 21,201.57<br>(19,245.31 to<br>23,159.39)                      | 31,254.97<br>(24,474.54 to<br>40,208.62)                      | 26,690.73<br>(21,284.94 to<br>33,503.43)                      | 32,894.49<br>(25,149.86 to<br>42,532.72)                      | 1,953.98<br>(1,743.83 to<br>2,177.43)                      | 3,229.29<br>(2,552.48 to<br>4,144.58)                      | 2,944.17<br>(2,343.26 to<br>3,689.54)                      | 3,255.99<br>(2,538.70 to<br>4,157.59)                      |
| <b>Chronic respiratory diseases</b>                           | <b>42,377.60</b><br><b>(39,400.03 to</b><br><b>45,818.57)</b> | <b>48,113.32</b><br><b>(36,844.65 to</b><br><b>61,233.47)</b> | <b>32,246.04</b><br><b>(25,738.82 to</b><br><b>39,803.84)</b> | <b>64,296.18</b><br><b>(47,898.31 to</b><br><b>84,160.70)</b> | <b>3,370.96</b><br><b>(3,136.28 to</b><br><b>3,630.40)</b> | <b>4,512.87</b><br><b>(3,462.16 to</b><br><b>5,725.91)</b> | <b>3,120.92</b><br><b>(2,511.79 to</b><br><b>3,788.69)</b> | <b>5,717.63</b><br><b>(4,266.75 to</b><br><b>7,428.14)</b> |
| Chronic obstructive pulmonary disease                         | 37,749.68<br>(34,866.62 to<br>40,954.13)                      | 42,259.99<br>(31,143.00 to<br>55,261.36)                      | 25,945.48<br>(19,641.06 to<br>33,095.17)                      | 58,553.47<br>(42,258.60 to<br>78,593.52)                      | 3,078.69<br>(2,853.88 to<br>3,216.23)                      | 4,066.74<br>(3,078.36 to<br>5,287.23)                      | 2,626.94<br>(2,041.88 to<br>3,285.98)                      | 5,291.18<br>(3,890.16 to<br>6,965.25)                      |
| Pneumoconiosis                                                | 268.68<br>(228.02 to<br>312.46)                               | 125.81<br>(99.24 to<br>156.12)                                | 119.77<br>(93.61 to<br>150.25)                                | 127.83<br>(98.09 to<br>162.01)                                | 18.19<br>(15.46 to<br>20.94)                               | 10.86<br>(8.54 to<br>13.32)                                | 10.71<br>(8.44 to<br>13.13)                                | 10.74<br>(8.27 to<br>13.45)                                |
| Silicosis                                                     | 171.20<br>(80.76 to<br>213.74)                                | 51.53<br>(20.02 to<br>80.02)                                  | 43.00<br>(16.81 to<br>70.20)                                  | 54.90<br>(22.76 to<br>87.24)                                  | 11.11<br>(5.30 to<br>14.11)                                | 4.07<br>(1.91 to<br>6.46)                                  | 3.49<br>(1.61 to<br>5.84)                                  | 4.25<br>(1.93 to<br>6.82)                                  |
| Asbestosis                                                    | 49.26<br>(18.20 to<br>69.82)                                  | 41.90<br>(17.59 to<br>58.54)                                  | 45.80<br>(19.92 to<br>62.85)                                  | 39.17<br>(16.29 to<br>55.20)                                  | 3.40<br>(0.93 to<br>4.90)                                  | 3.36<br>(1.14 to<br>4.82)                                  | 3.77<br>(1.32 to<br>5.33)                                  | 3.06<br>(1.03 to<br>4.52)                                  |
| Coal workers pneumoconiosis                                   | 9.27<br>(5.13 to<br>38.57)                                    | 7.74<br>(3.42 to<br>26.40)                                    | 7.00<br>(3.09 to<br>23.32)                                    | 8.38<br>(3.66 to<br>28.37)                                    | 0.70<br>(0.37 to<br>2.99)                                  | 0.74<br>(0.33 to<br>2.56)                                  | 0.70<br>(0.31 to<br>2.32)                                  | 0.77<br>(0.34 to<br>2.56)                                  |
| Other pneumoconiosis                                          | 38.95<br>(29.20 to<br>86.93)                                  | 24.63<br>(17.72 to<br>37.94)                                  | 23.97<br>(16.92 to<br>36.55)                                  | 25.38<br>(18.18 to<br>40.21)                                  | 2.98<br>(2.29 to<br>5.94)                                  | 2.69<br>(1.87 to<br>3.90)                                  | 2.75<br>(1.90 to<br>4.00)                                  | 2.66<br>(1.86 to<br>3.82)                                  |
| Asthma                                                        | 1,428.59<br>(1,241.07 to<br>1,956.45)                         | 809.19<br>(501.25 to<br>1,276.41)                             | 633.99<br>(394.17 to<br>996.75)                               | 1,052.97<br>(613.41 to<br>1,765.71)                           | 90.86<br>(78.88 to<br>107.78)                              | 67.41<br>(40.98 to<br>108.53)                              | 56.09<br>(35.31 to<br>88.52)                               | 83.17<br>(48.36 to<br>137.22)                              |
| Interstitial lung disease and pulmonary sarcoidosis           | 2,589.10<br>(1,890.30 to<br>3,753.25)                         | 4,566.50<br>(3,359.25 to<br>6,643.91)                         | 5,215.24<br>(3,945.97 to<br>7,430.98)                         | 4,198.95<br>(3,040.22 to<br>6,216.33)                         | 166.82<br>(127.55 to<br>247.55)                            | 346.18<br>(259.02 to<br>516.51)                            | 406.07<br>(311.66 to<br>590.07)                            | 310.92<br>(226.12 to<br>474.58)                            |
| Other chronic respiratory diseases                            | 341.55<br>(203.29 to<br>435.00)                               | 351.83<br>(205.14 to<br>492.86)                               | 331.57<br>(192.57 to<br>460.13)                               | 362.96<br>(208.01 to<br>510.34)                               | 16.40<br>(10.01 to<br>22.32)                               | 21.68<br>(12.89 to<br>31.80)                               | 21.11<br>(12.44 to<br>30.80)                               | 21.63<br>(12.74 to<br>31.36)                               |
| <b>Cirrhosis and other chronic liver diseases</b>             | <b>44,838.68</b><br><b>(40,208.17 to</b><br><b>49,323.34)</b> | <b>37,238.95</b><br><b>(32,121.11 to</b><br><b>42,956.58)</b> | <b>32,691.40</b><br><b>(27,912.62 to</b><br><b>38,004.81)</b> | <b>47,525.41</b><br><b>(40,832.65 to</b><br><b>55,415.19)</b> | <b>1,884.92</b><br><b>(1,711.63 to</b><br><b>2,052.14)</b> | <b>1,815.78</b><br><b>(1,604.42 to</b><br><b>2,048.14)</b> | <b>1,627.70</b><br><b>(1,422.07 to</b><br><b>1,855.71)</b> | <b>2,275.44</b><br><b>(1,996.61 to</b><br><b>2,584.18)</b> |
| Cirrhosis and other chronic liver diseases due to hepatitis B | 5,791.99<br>(4,321.71 to<br>7,555.04)                         | 5,357.38<br>(3,953.52 to<br>7,180.87)                         | 5,065.56<br>(3,724.83 to<br>6,880.52)                         | 5,438.87<br>(3,950.91 to<br>7,312.39)                         | 246.46<br>(188.77 to<br>318.10)                            | 263.17<br>(198.28 to<br>342.79)                            | 253.70<br>(191.18 to<br>332.39)                            | 262.57<br>(195.00 to<br>342.70)                            |
| Cirrhosis and other chronic liver diseases due to hepatitis C | 13,940.62<br>(10,472.79 to<br>18,317.15)                      | 12,793.64<br>(9,551.34 to<br>16,848.86)                       | 11,992.25<br>(8,972.03 to<br>15,678.29)                       | 13,101.56<br>(9,596.88 to<br>17,709.63)                       | 566.91<br>(437.06 to<br>720.35)                            | 595.58<br>(448.37 to<br>776.17)                            | 568.32<br>(432.39 to<br>732.67)                            | 600.08<br>(443.66 to<br>795.05)                            |

|                                                                |                                                               |                                                               |                                                               |                                                               |                                                            |                                                            |                                                            |                                                            |
|----------------------------------------------------------------|---------------------------------------------------------------|---------------------------------------------------------------|---------------------------------------------------------------|---------------------------------------------------------------|------------------------------------------------------------|------------------------------------------------------------|------------------------------------------------------------|------------------------------------------------------------|
|                                                                | 22,531.20<br>(18,432.62 to<br>26,716.06)                      | 16,695.83<br>(13,239.86 to<br>20,537.43)                      | 13,370.32<br>(10,437.85 to<br>16,634.45)                      | 26,553.99<br>(21,392.84 to<br>32,064.39)                      | 954.73<br>(795.04 to<br>1,114.12)                          | 828.11<br>(673.32 to<br>1,000.93)                          | 680.73<br>(543.16 to<br>832.68)                            | 1,284.53<br>(1,061.98 to<br>1,526.66)                      |
| Cirrhosis and other chronic liver diseases due to alcohol use  |                                                               |                                                               |                                                               |                                                               |                                                            |                                                            |                                                            |                                                            |
|                                                                | 2,574.87<br>(1,791.05 to<br>3,548.03)                         | 2,392.10<br>(1,633.87 to<br>3,336.49)                         | 2,263.28<br>(1,533.61 to<br>3,170.84)                         | 2,430.99<br>(1,642.37 to<br>3,466.36)                         | 116.82<br>(80.73 to<br>162.13)                             | 128.92<br>(89.42 to<br>179.95)                             | 124.95<br>(86.15 to<br>175.63)                             | 128.26<br>(88.34 to<br>182.46)                             |
| Cirrhosis and other chronic liver diseases due to other causes |                                                               |                                                               |                                                               |                                                               |                                                            |                                                            |                                                            |                                                            |
| <b>Digestive diseases</b>                                      | <b>18,891.21</b><br><b>(16,580.61 to</b><br><b>25,940.00)</b> | <b>23,569.56</b><br><b>(19,014.97 to</b><br><b>32,472.76)</b> | <b>22,753.15</b><br><b>(18,400.83 to</b><br><b>31,078.12)</b> | <b>24,516.18</b><br><b>(19,536.13 to</b><br><b>34,150.83)</b> | <b>1,478.24</b><br><b>(1,306.00 to</b><br><b>1,933.37)</b> | <b>2,241.91</b><br><b>(1,863.26 to</b><br><b>3,015.67)</b> | <b>2,251.74</b><br><b>(1,885.66 to</b><br><b>2,999.67)</b> | <b>2,244.32</b><br><b>(1,847.08 to</b><br><b>3,059.56)</b> |
| Peptic ulcer disease                                           | 2,569.73<br>(2,051.55 to<br>3,405.14)                         | 2,153.26<br>(1,652.97 to<br>2,870.89)                         | 1,839.01<br>(1,411.03 to<br>2,498.91)                         | 2,256.24<br>(1,671.25 to<br>3,063.48)                         | 196.02<br>(161.36 to<br>254.40)                            | 207.44<br>(160.18 to<br>269.70)                            | 186.61<br>(145.65 to<br>242.95)                            | 209.47<br>(159.62 to<br>279.97)                            |

| Austria                                    |                                       |                                          |                                          |                                          |                                     |                                       |                                       |                                       |
|--------------------------------------------|---------------------------------------|------------------------------------------|------------------------------------------|------------------------------------------|-------------------------------------|---------------------------------------|---------------------------------------|---------------------------------------|
| Cause                                      | YLLs (actual counts)                  |                                          |                                          |                                          | Deaths (actual counts)              |                                       |                                       |                                       |
|                                            | 2016                                  | 2040 Forecast                            | 2040 Better Scenario                     | 2040 Worse Scenario                      | 2016                                | 2040 Forecast                         | 2040 Better Scenario                  | 2040 Worse Scenario                   |
| Gastritis and duodenitis                   | 259.62<br>(191.21 to 351.17)          | 263.26<br>(183.34 to 361.41)             | 250.45<br>(172.62 to 346.27)             | 262.40<br>(182.38 to 357.28)             | 19.38<br>(13.41 to 24.06)           | 24.73<br>(16.67 to 33.91)             | 24.49<br>(16.32 to 33.39)             | 23.82<br>(15.90 to 33.00)             |
| Appendicitis                               | 229.20<br>(175.50 to 425.97)          | 237.06<br>(173.70 to 429.31)             | 215.58<br>(155.21 to 395.27)             | 242.11<br>(176.92 to 433.00)             | 15.00<br>(11.44 to 25.90)           | 19.65<br>(14.88 to 32.64)             | 18.49<br>(13.61 to 31.67)             | 19.48<br>(14.13 to 32.04)             |
| Paralytic ileus and intestinal obstruction | 2,920.91<br>(2,149.70 to 3,684.47)    | 4,053.57<br>(2,943.06 to 5,325.24)       | 4,228.52<br>(3,074.91 to 5,583.09)       | 3,855.18<br>(2,804.28 to 5,039.79)       | 246.67<br>(183.33 to 299.86)        | 407.22<br>(303.54 to 524.62)          | 438.46<br>(329.67 to 566.61)          | 376.79<br>(280.13 to 483.77)          |
| Inguinal, femoral, and abdominal hernia    | 688.70<br>(549.18 to 1,125.67)        | 616.69<br>(472.51 to 1,018.86)           | 605.89<br>(457.86 to 1,011.63)           | 602.32<br>(464.44 to 998.67)             | 61.33<br>(48.45 to 101.42)          | 64.80<br>(49.86 to 109.50)            | 65.89<br>(49.70 to 111.26)            | 61.51<br>(46.76 to 104.26)            |
| Inflammatory bowel disease                 | 1,731.17<br>(1,404.39 to 2,434.29)    | 2,155.53<br>(1,676.10 to 3,191.81)       | 2,214.45<br>(1,712.89 to 3,304.88)       | 2,075.43<br>(1,606.27 to 3,065.58)       | 124.73<br>(101.85 to 177.92)        | 193.67<br>(149.65 to 291.39)          | 206.26<br>(159.46 to 309.72)          | 180.70<br>(140.93 to 271.19)          |
| Vascular intestinal disorders              | 3,225.84<br>(2,675.29 to 4,455.90)    | 4,847.72<br>(3,931.48 to 6,548.50)       | 4,869.62<br>(3,933.96 to 6,664.98)       | 4,698.25<br>(3,803.37 to 6,392.62)       | 279.48<br>(237.46 to 359.22)        | 488.19<br>(400.96 to 639.86)          | 505.33<br>(417.26 to 655.81)          | 461.32<br>(377.97 to 605.79)          |
| Gallbladder and biliary diseases           | 1,804.95<br>(1,496.03 to 2,396.75)    | 2,405.08<br>(1,399.53 to 4,078.83)       | 2,136.91<br>(1,259.26 to 3,544.49)       | 3,005.96<br>(1,686.97 to 5,165.47)       | 166.65<br>(140.29 to 214.82)        | 260.42<br>(150.63 to 437.61)          | 240.56<br>(141.11 to 395.52)          | 312.64<br>(174.60 to 531.30)          |
| Pancreatitis                               | 2,780.34<br>(2,137.59 to 4,918.03)    | 3,017.25<br>(1,276.07 to 6,461.14)       | 2,556.60<br>(1,130.41 to 5,557.67)       | 3,811.45<br>(1,534.82 to 8,467.72)       | 142.36<br>(108.62 to 261.30)        | 195.24<br>(87.85 to 435.04)           | 170.82<br>(78.99 to 379.47)           | 239.41<br>(101.08 to 540.33)          |
| Other digestive diseases                   | 2,680.75<br>(2,012.89 to 3,343.52)    | 3,820.15<br>(2,924.34 to 4,791.17)       | 3,836.13<br>(2,940.05 to 4,832.72)       | 3,706.83<br>(2,821.31 to 4,635.23)       | 226.62<br>(180.21 to 273.66)        | 380.55<br>(301.28 to 472.52)          | 394.83<br>(312.66 to 494.40)          | 359.18<br>(280.86 to 445.70)          |
| Neurological disorders                     | 85,666.63<br>(75,017.38 to 98,388.46) | 126,755.18<br>(102,400.84 to 162,071.59) | 129,229.64<br>(105,548.19 to 161,322.39) | 132,651.27<br>(103,576.87 to 177,910.43) | 9,498.90<br>(8,171.94 to 10,969.02) | 15,706.49<br>(12,482.49 to 20,241.05) | 16,549.76<br>(13,505.46 to 20,803.93) | 16,006.31<br>(12,183.63 to 21,590.29) |
| Alzheimer's disease and other dementias    | 65,560.29<br>(55,399.03 to 78,205.82) | 101,757.40<br>(77,965.31 to 137,170.88)  | 103,549.38<br>(80,811.40 to 135,887.76)  | 107,967.88<br>(79,344.85 to 153,518.49)  | 8,270.43<br>(6,965.96 to 9,741.58)  | 13,806.63<br>(10,614.08 to 18,365.28) | 14,514.21<br>(11,432.46 to 18,695.68) | 14,206.60<br>(10,399.18 to 19,800.65) |
| Parkinson's disease                        | 7,738.29<br>(5,525.49 to 10,541.60)   | 12,687.65<br>(9,058.68 to 17,352.38)     | 13,656.92<br>(9,814.70 to 18,647.78)     | 11,867.66<br>(8,444.56 to 16,238.52)     | 743.75<br>(543.46 to 1,010.78)      | 1,304.26<br>(943.31 to 1,769.56)      | 1,436.25<br>(1,058.21 to 1,939.94)    | 1,196.74<br>(858.02 to 1,630.12)      |
| Epilepsy                                   | 2,696.01<br>(2,368.79 to 3,061.93)    | 2,866.55<br>(1,888.19 to 4,286.55)       | 2,577.24<br>(1,714.42 to 3,834.47)       | 3,470.28<br>(2,196.26 to 5,144.73)       | 87.73<br>(78.42 to 99.11)           | 121.76<br>(81.75 to 179.36)           | 113.01<br>(76.48 to 166.72)           | 143.87<br>(92.61 to 212.52)           |
| Multiple sclerosis                         | 2,544.89<br>(1,770.88 to 2,979.73)    | 2,161.78<br>(1,428.16 to 2,729.18)       | 2,075.67<br>(1,356.95 to 2,572.74)       | 2,174.78<br>(1,439.51 to 2,766.10)       | 97.44<br>(65.04 to 112.95)          | 94.14<br>(60.36 to 116.24)            | 92.55<br>(58.78 to 112.79)            | 93.28<br>(59.80 to 115.93)            |
| Motor neuron disease                       | 3,448.76<br>(3,088.96 to 3,835.99)    | 3,778.97<br>(3,273.88 to 4,345.43)       | 3,805.06<br>(3,277.65 to 4,407.78)       | 3,724.17<br>(3,234.05 to 4,266.77)       | 151.77<br>(136.29 to 168.15)        | 198.01<br>(173.06 to 227.40)          | 202.39<br>(174.95 to 233.33)          | 192.32<br>(168.79 to 218.99)          |
| Other neurological disorders               | 3,678.38<br>(3,202.55 to 4,076.66)    | 3,502.83<br>(2,990.01 to 4,041.25)       | 3,565.37<br>(3,035.05 to 4,122.07)       | 3,446.51<br>(2,938.36 to 3,966.84)       | 147.79<br>(130.90 to 163.56)        | 181.90<br>(159.51 to 204.76)          | 191.35<br>(168.69 to 216.59)          | 173.50<br>(151.62 to 195.41)          |
| Mental disorders                           | 21,580.96<br>(17,880.03 to 24,216.16) | 19,702.73<br>(15,709.92 to 24,182.25)    | 20,186.97<br>(15,949.75 to 24,755.18)    | 20,729.71<br>(16,402.12 to 25,257.75)    | 631.40<br>(546.27 to 699.74)        | 617.42<br>(517.93 to 719.05)          | 635.76<br>(532.96 to 741.60)          | 653.96<br>(548.43 to 756.09)          |
| Alcohol use disorders                      | 11,527.12<br>(9,921.21 to 12,960.29)  | 9,247.67<br>(7,608.90 to 11,053.55)      | 9,117.10<br>(7,441.98 to 10,904.21)      | 10,459.82<br>(8,677.80 to 12,476.86)     | 425.67<br>(373.92 to 476.14)        | 382.61<br>(325.31 to 448.84)          | 383.16<br>(322.78 to 451.66)          | 426.46<br>(361.56 to 497.02)          |
| Drug use disorders                         | 9,878.31<br>(7,501.10 to 11,918.49)   | 10,357.27<br>(7,614.81 to 13,592.19)     | 10,966.59<br>(7,989.18 to 14,420.67)     | 10,174.04<br>(7,359.08 to 13,471.06)     | 202.49<br>(157.60 to 242.09)        | 232.98<br>(181.92 to 292.37)          | 250.68<br>(195.33 to 312.58)          | 225.71<br>(171.90 to 287.63)          |
| Opioid use disorders                       | 4,746.61<br>(2,587.18 to 5,962.16)    | 5,546.57<br>(3,243.40 to 7,853.19)       | 5,595.99<br>(3,286.33 to 7,905.13)       | 5,577.04<br>(3,213.21 to 7,919.91)       | 90.53<br>(54.38 to 112.08)          | 114.52<br>(75.55 to 153.32)           | 116.77<br>(77.13 to 155.21)           | 113.96<br>(74.98 to 154.43)           |

|                           |                                       |                                       |                                       |                                       |                                |                                |                                |                                |
|---------------------------|---------------------------------------|---------------------------------------|---------------------------------------|---------------------------------------|--------------------------------|--------------------------------|--------------------------------|--------------------------------|
|                           | 33.69<br>(24.50 to<br>46.32)          | 61.69<br>(42.08 to<br>95.07)          | 66.69<br>(45.45 to<br>100.23)         | 59.68<br>(40.45 to<br>91.34)          | 0.80<br>(0.59 to<br>1.05)      | 1.68<br>(1.15 to<br>2.35)      | 1.84<br>(1.28 to<br>2.54)      | 1.60<br>(1.09 to<br>2.23)      |
| Cocaine use disorders     |                                       |                                       |                                       |                                       |                                |                                |                                |                                |
|                           | 78.11<br>(57.54 to<br>128.23)         | 282.72<br>(172.65 to<br>484.41)       | 321.34<br>(198.76 to<br>548.36)       | 268.47<br>(164.26 to<br>458.09)       | 1.57<br>(1.18 to<br>2.45)      | 6.13<br>(4.07 to<br>9.45)      | 7.05<br>(4.69 to<br>10.73)     | 5.75<br>(3.74 to<br>8.94)      |
| Amphetamine use disorders |                                       |                                       |                                       |                                       |                                |                                |                                |                                |
|                           | 5,019.89<br>(3,795.73 to<br>6,418.52) | 4,466.29<br>(3,154.85 to<br>6,146.31) | 4,982.58<br>(3,508.18 to<br>6,768.61) | 4,268.85<br>(2,899.20 to<br>5,903.42) | 109.59<br>(83.41 to<br>136.86) | 110.66<br>(80.00 to<br>143.58) | 125.01<br>(91.39 to<br>160.42) | 104.41<br>(73.22 to<br>136.44) |
| Other drug use disorders  |                                       |                                       |                                       |                                       |                                |                                |                                |                                |
|                           | 175.53<br>(130.81 to<br>229.81)       | 97.80<br>(60.15 to<br>147.04)         | 103.28<br>(63.68 to<br>156.16)        | 95.85<br>(59.62 to<br>144.41)         | 3.24<br>(2.44 to<br>4.22)      | 1.83<br>(1.17 to<br>2.72)      | 1.93<br>(1.25 to<br>2.92)      | 1.79<br>(1.13 to<br>2.67)      |
| Eating disorders          |                                       |                                       |                                       |                                       |                                |                                |                                |                                |

| Austria                                                    |                                              |                                               |                                               |                                               |                                           |                                            |                                           |                                            |
|------------------------------------------------------------|----------------------------------------------|-----------------------------------------------|-----------------------------------------------|-----------------------------------------------|-------------------------------------------|--------------------------------------------|-------------------------------------------|--------------------------------------------|
| Cause                                                      | YLLs (actual counts)                         |                                               |                                               |                                               | Deaths (actual counts)                    |                                            |                                           |                                            |
|                                                            | 2016                                         | 2040 Forecast                                 | 2040 Better Scenario                          | 2040 Worse Scenario                           | 2016                                      | 2040 Forecast                              | 2040 Better Scenario                      | 2040 Worse Scenario                        |
| <b>Diabetes, urogenital, blood, and endocrine diseases</b> | <b>74,806.12</b><br>(62,072.66 to 80,863.77) | <b>89,803.41</b><br>(68,278.60 to 118,330.01) | <b>78,430.78</b><br>(59,943.40 to 101,443.49) | <b>98,782.27</b><br>(73,801.48 to 133,980.64) | <b>5,883.92</b><br>(5,283.50 to 6,324.12) | <b>8,671.49</b><br>(6,860.68 to 11,204.83) | <b>7,807.85</b><br>(6,227.07 to 9,952.54) | <b>9,275.21</b><br>(7,151.92 to 12,249.69) |
| Diabetes mellitus                                          | 28,345.33<br>(25,910.09 to 30,666.00)        | 32,980.51<br>(21,828.92 to 48,963.74)         | 27,030.78<br>(18,548.67 to 39,622.40)         | 37,692.75<br>(24,031.50 to 57,169.83)         | 2,282.76<br>(2,085.10 to 2,482.59)        | 3,061.06<br>(2,127.55 to 4,344.65)         | 2,647.61<br>(1,882.65 to 3,655.51)        | 3,355.69<br>(2,267.37 to 4,875.12)         |
| Acute glomerulonephritis                                   | 37.67<br>(34.58 to 40.78)                    | 30.92<br>(25.39 to 37.34)                     | 28.54<br>(23.14 to 34.88)                     | 32.21<br>(26.40 to 39.00)                     | 0.89<br>(0.82 to 0.96)                    | 0.92<br>(0.75 to 1.15)                     | 0.87<br>(0.70 to 1.12)                    | 0.94<br>(0.76 to 1.17)                     |
| Chronic kidney disease                                     | 23,943.64<br>(22,038.08 to 25,785.33)        | 34,859.39<br>(21,494.33 to 55,374.61)         | 29,482.18<br>(19,125.76 to 45,560.29)         | 39,434.57<br>(23,251.22 to 64,788.27)         | 2,409.12<br>(2,201.29 to 2,615.34)        | 4,042.06<br>(2,554.31 to 6,349.36)         | 3,555.02<br>(2,374.07 to 5,417.40)        | 4,416.64<br>(2,673.24 to 7,118.52)         |
| Chronic kidney disease due to diabetes mellitus            | 8,463.22<br>(7,789.05 to 9,134.69)           | 13,091.29<br>(7,976.33 to 21,407.66)          | 10,981.25<br>(7,122.96 to 17,287.44)          | 14,983.04<br>(8,851.90 to 25,414.96)          | 729.82<br>(667.51 to 797.11)              | 1,323.88<br>(826.20 to 2,150.71)           | 1,153.13<br>(762.23 to 1,783.18)          | 1,464.42<br>(883.05 to 2,423.27)           |
| Chronic kidney disease due to hypertension                 | 4,737.29<br>(4,118.79 to 5,380.18)           | 7,498.94<br>(4,536.52 to 12,000.62)           | 6,594.44<br>(4,203.90 to 10,211.14)           | 8,228.06<br>(4,762.67 to 13,768.07)           | 637.60<br>(547.94 to 730.40)              | 1,106.75<br>(684.48 to 1,740.34)           | 1,009.26<br>(655.26 to 1,522.69)          | 1,176.43<br>(706.47 to 1,911.57)           |
| Chronic kidney disease due to glomerulonephritis           | 4,487.94<br>(4,098.37 to 4,950.82)           | 5,665.53<br>(3,334.96 to 9,673.93)            | 4,672.17<br>(2,929.55 to 7,521.67)            | 6,477.56<br>(3,678.77 to 11,091.54)           | 414.90<br>(371.54 to 463.47)              | 613.05<br>(372.41 to 1,012.79)             | 521.97<br>(334.52 to 835.98)              | 681.02<br>(396.57 to 1,138.10)             |
| Chronic kidney disease due to other and unspecified causes | 6,255.18<br>(5,708.86 to 6,845.15)           | 8,603.63<br>(5,260.88 to 14,020.74)           | 7,234.32<br>(4,653.32 to 11,705.34)           | 9,745.91<br>(5,730.95 to 16,210.69)           | 626.80<br>(560.41 to 698.22)              | 998.37<br>(628.59 to 1,607.99)             | 870.66<br>(576.12 to 1,360.05)            | 1,094.78<br>(660.15 to 1,790.53)           |
| Urinary diseases and male infertility                      | 3,297.35<br>(3,013.42 to 3,592.13)           | 5,382.46<br>(4,500.50 to 6,310.91)            | 5,221.77<br>(4,402.69 to 6,109.59)            | 5,304.09<br>(4,455.37 to 6,223.97)            | 298.70<br>(268.06 to 328.43)              | 593.85<br>(493.19 to 705.60)               | 593.85<br>(492.64 to 706.39)              | 562.96<br>(457.27 to 675.60)               |
| Urinary tract infections                                   | 2,448.64<br>(2,071.33 to 2,987.30)           | 4,556.25<br>(3,691.52 to 5,515.42)            | 4,448.93<br>(3,614.43 to 5,449.07)            | 4,473.99<br>(3,595.86 to 5,455.06)            | 229.65<br>(190.95 to 278.67)              | 508.01<br>(406.07 to 627.93)               | 514.62<br>(408.30 to 638.50)              | 483.70<br>(379.22 to 604.67)               |
| Urolithiasis                                               | 288.39<br>(159.56 to 366.78)                 | 347.67<br>(172.60 to 491.88)                  | 324.60<br>(159.88 to 469.61)                  | 350.60<br>(173.93 to 501.61)                  | 24.59<br>(12.41 to 32.74)                 | 34.06<br>(15.74 to 49.27)                  | 32.95<br>(15.27 to 48.23)                 | 33.34<br>(15.22 to 49.22)                  |
| Other urinary diseases                                     | 560.32<br>(224.92 to 784.45)                 | 478.54<br>(176.87 to 737.33)                  | 448.24<br>(167.82 to 694.81)                  | 479.49<br>(175.84 to 741.92)                  | 44.45<br>(16.50 to 65.01)                 | 47.43<br>(16.31 to 76.64)                  | 46.27<br>(15.78 to 75.07)                 | 45.93<br>(15.80 to 73.43)                  |
| Gynecological diseases                                     | 47.56<br>(24.03 to 60.64)                    | 25.95<br>(13.74 to 34.89)                     | 22.20<br>(12.11 to 30.36)                     | 27.59<br>(14.31 to 37.37)                     | 2.62<br>(1.32 to 3.29)                    | 1.94<br>(0.98 to 2.61)                     | 1.72<br>(1.01 to 2.31)                    | 1.99<br>(1.02 to 2.72)                     |
| Uterine fibroids                                           | 23.94<br>(12.79 to 31.47)                    | 10.74<br>(6.01 to 16.01)                      | 9.39<br>(5.36 to 13.92)                       | 11.37<br>(6.16 to 17.22)                      | 0.95<br>(0.53 to 1.21)                    | 0.54<br>(0.31 to 0.80)                     | 0.49<br>(0.28 to 0.72)                    | 0.56<br>(0.31 to 0.81)                     |
| Polycystic ovarian syndrome                                | 2.08<br>(1.04 to 3.69)                       | 0.49<br>(0.20 to 0.94)                        | 0.35<br>(0.14 to 0.69)                        | 0.57<br>(0.23 to 1.09)                        | 0.05<br>(0.03 to 0.09)                    | 0.01<br>(0.00 to 0.02)                     | 0.01<br>(0.00 to 0.02)                    | 0.01<br>(0.00 to 0.03)                     |
| Endometriosis                                              | 0.25<br>(0.11 to 0.57)                       | 0.27<br>(0.08 to 0.75)                        | 0.23<br>(0.07 to 0.63)                        | 0.30<br>(0.09 to 0.80)                        | 0.01<br>(0.00 to 0.01)                    | 0.01<br>(0.00 to 0.02)                     | 0.01<br>(0.00 to 0.02)                    | 0.01<br>(0.00 to 0.02)                     |
| Genital prolapse                                           | 0.66<br>(0.42 to 1.19)                       | 0.46<br>(0.23 to 1.14)                        | 0.39<br>(0.19 to 0.96)                        | 0.49<br>(0.25 to 1.18)                        | 0.04<br>(0.02 to 0.09)                    | 0.03<br>(0.01 to 0.11)                     | 0.03<br>(0.01 to 0.09)                    | 0.03<br>(0.01 to 0.11)                     |
| Other gynecological diseases                               | 20.63<br>(8.70 to 26.67)                     | 13.99<br>(6.11 to 19.63)                      | 11.85<br>(5.26 to 16.70)                      | 14.86<br>(6.20 to 21.41)                      | 1.58<br>(0.68 to 2.04)                    | 1.34<br>(0.58 to 1.91)                     | 1.18<br>(0.51 to 1.72)                    | 1.38<br>(0.56 to 2.04)                     |
| Hemoglobinopathies and hemolytic anemias                   | 1,485.79<br>(1,260.64 to 1,944.96)           | 1,772.25<br>(1,436.01 to 2,258.85)            | 1,678.59<br>(1,353.89 to 2,111.23)            | 1,768.80<br>(1,425.02 to 2,274.18)            | 126.18<br>(96.47 to 152.19)               | 189.55<br>(144.67 to 231.84)               | 187.01<br>(140.37 to 226.64)              | 182.74<br>(136.78 to 225.08)               |
| Thalassemias                                               | 59.32<br>(42.32 to 103.00)                   | 29.78<br>(19.87 to 51.92)                     | 29.25<br>(19.27 to 51.88)                     | 30.23<br>(20.21 to 52.38)                     | 1.10<br>(0.81 to 1.83)                    | 0.66<br>(0.45 to 1.10)                     | 0.65<br>(0.44 to 1.10)                    | 0.66<br>(0.46 to 1.08)                     |

|                                                   |                                         |                                         |                                         |                                         |                                 |                                 |                                   |                                 |
|---------------------------------------------------|-----------------------------------------|-----------------------------------------|-----------------------------------------|-----------------------------------------|---------------------------------|---------------------------------|-----------------------------------|---------------------------------|
|                                                   | 113.76<br>(75.75 to<br>199.69)          | 125.44<br>(82.16 to<br>202.88)          | 112.03<br>(71.40 to<br>186.93)          | 131.94<br>(85.29 to<br>211.29)          | 3.04<br>(2.12 to<br>4.93)       | 4.83<br>(3.22 to<br>7.46)       | 4.35<br>(2.81 to<br>6.96)         | 5.03<br>(3.28 to<br>7.75)       |
| Sickle cell disorders                             |                                         |                                         |                                         |                                         |                                 |                                 |                                   |                                 |
|                                                   | 190.33<br>(145.21 to<br>268.87)         | 255.29<br>(182.68 to<br>355.13)         | 227.16<br>(159.97 to<br>332.39)         | 266.63<br>(190.81 to<br>372.49)         | 7.03<br>(5.35 to<br>9.49)       | 13.69<br>(9.65 to<br>18.90)     | 12.46<br>(8.60 to<br>17.51)       | 14.00<br>(9.79 to<br>19.44)     |
| G6PD deficiency                                   |                                         |                                         |                                         |                                         |                                 |                                 |                                   |                                 |
|                                                   | 1,122.39<br>(906.43 to<br>1,431.36)     | 1,361.73<br>(1,056.57 to<br>1,692.25)   | 1,310.15<br>(1,024.27 to<br>1,611.87)   | 1,340.01<br>(1,024.17 to<br>1,671.49)   | 115.01<br>(86.06 to<br>137.23)  | 170.38<br>(126.53 to<br>209.15) | 169.55<br>(125.36 to<br>205.92)   | 163.05<br>(117.72 to<br>202.62) |
| Other hemoglobinopathies and hemolytic anemias    |                                         |                                         |                                         |                                         |                                 |                                 |                                   |                                 |
|                                                   | 17,648.77<br>(4,268.75 to<br>21,445.76) | 14,751.93<br>(3,549.77 to<br>18,992.08) | 14,966.71<br>(3,804.77 to<br>19,237.12) | 14,522.26<br>(3,322.85 to<br>18,733.05) | 763.64<br>(187.74 to<br>931.86) | 786.45<br>(213.78 to<br>985.77) | 821.78<br>(237.35 to<br>1,026.99) | 754.24<br>(195.10 to<br>950.08) |
| Endocrine, metabolic, blood, and immune disorders |                                         |                                         |                                         |                                         |                                 |                                 |                                   |                                 |

| Austria                                       |                                       |                                     |                                     |                                      |                              |                              |                              |                              |
|-----------------------------------------------|---------------------------------------|-------------------------------------|-------------------------------------|--------------------------------------|------------------------------|------------------------------|------------------------------|------------------------------|
| Cause                                         | YLLs (actual counts)                  |                                     |                                     |                                      | Deaths (actual counts)       |                              |                              |                              |
|                                               | 2016                                  | 2040 Forecast                       | 2040 Better Scenario                | 2040 Worse Scenario                  | 2016                         | 2040 Forecast                | 2040 Better Scenario         | 2040 Worse Scenario          |
|                                               | 2,804.98<br>(2,453.27 to 3,753.43)    | 3,783.80<br>(3,169.81 to 5,210.55)  | 3,619.44<br>(3,032.41 to 5,074.83)  | 3,796.31<br>(3,153.05 to 5,269.25)   | 192.89<br>(167.51 to 275.54) | 320.31<br>(265.98 to 471.54) | 318.06<br>(263.76 to 472.45) | 311.70<br>(256.26 to 461.54) |
| Musculoskeletal disorders                     |                                       |                                     |                                     |                                      |                              |                              |                              |                              |
| Rheumatoid arthritis                          | 698.70<br>(524.78 to 991.21)          | 1,111.44<br>(783.12 to 1,622.21)    | 950.31<br>(666.90 to 1,384.85)      | 1,172.51<br>(817.54 to 1,673.30)     | 46.80<br>(34.18 to 63.38)    | 89.02<br>(61.99 to 126.66)   | 78.48<br>(53.81 to 111.64)   | 91.80<br>(63.29 to 131.38)   |
| Other musculoskeletal disorders               | 2,106.28<br>(1,811.40 to 2,807.41)    | 2,672.35<br>(2,216.49 to 3,737.79)  | 2,669.13<br>(2,218.16 to 3,751.74)  | 2,623.79<br>(2,176.89 to 3,632.39)   | 146.09<br>(125.69 to 216.06) | 231.29<br>(187.65 to 352.97) | 239.58<br>(195.23 to 369.26) | 219.90<br>(177.54 to 358.74) |
| Other non-communicable diseases               | 12,874.86<br>(10,884.40 to 15,708.13) | 9,449.16<br>(7,892.35 to 11,965.28) | 8,594.82<br>(6,476.98 to 10,974.33) | 10,008.87<br>(7,403.19 to 13,136.40) | 247.35<br>(194.00 to 289.88) | 299.06<br>(217.79 to 384.54) | 293.69<br>(211.41 to 383.24) | 297.51<br>(215.65 to 387.24) |
| Congenital birth defects                      | 10,923.69<br>(8,123.13 to 13,446.51)  | 7,177.01<br>(5,015.74 to 9,288.74)  | 6,416.86<br>(4,419.71 to 8,361.98)  | 7,711.73<br>(5,333.68 to 10,309.85)  | 165.65<br>(120.62 to 197.41) | 126.11<br>(87.98 to 155.48)  | 116.53<br>(82.00 to 145.11)  | 132.63<br>(92.42 to 167.13)  |
| Neural tube defects                           | 145.72<br>(83.78 to 216.39)           | 41.50<br>(22.50 to 69.38)           | 33.06<br>(16.99 to 57.31)           | 47.24<br>(24.66 to 81.61)            | 1.88<br>(1.15 to 2.71)       | 0.59<br>(0.34 to 0.94)       | 0.48<br>(0.27 to 0.77)       | 0.67<br>(0.38 to 1.11)       |
| Congenital heart anomalies                    | 3,089.43<br>(2,129.53 to 3,904.30)    | 1,323.95<br>(831.84 to 1,944.40)    | 1,042.83<br>(649.01 to 1,563.42)    | 1,512.20<br>(927.46 to 2,337.17)     | 43.47<br>(32.59 to 54.17)    | 19.82<br>(13.43 to 28.57)    | 15.74<br>(10.36 to 23.21)    | 22.46<br>(14.63 to 33.40)    |
| Orofacial clefts                              | 3.16<br>(1.32 to 7.39)                | 1.21<br>(0.44 to 2.97)              | 0.89<br>(0.32 to 2.21)              | 1.44<br>(0.51 to 3.65)               | 0.04<br>(0.02 to 0.09)       | 0.01<br>(0.01 to 0.03)       | 0.01<br>(0.00 to 0.03)       | 0.02<br>(0.01 to 0.04)       |
| Down syndrome                                 | 2,137.47<br>(1,092.93 to 2,598.80)    | 2,285.51<br>(1,274.14 to 2,862.00)  | 2,310.55<br>(1,313.26 to 2,800.87)  | 2,282.23<br>(1,270.06 to 2,866.11)   | 48.09<br>(25.42 to 56.68)    | 58.00<br>(33.49 to 71.73)    | 59.09<br>(34.73 to 73.08)    | 57.43<br>(32.65 to 71.00)    |
| Other chromosomal abnormalities               | 1,793.27<br>(1,156.27 to 2,532.21)    | 1,635.83<br>(1,012.72 to 2,372.51)  | 1,471.55<br>(913.98 to 2,138.64)    | 1,754.10<br>(1,075.26 to 2,580.78)   | 23.12<br>(14.73 to 31.78)    | 21.79<br>(14.27 to 30.59)    | 19.71<br>(12.78 to 27.80)    | 23.24<br>(14.97 to 33.30)    |
| Congenital musculoskeletal and limb anomalies | 393.19<br>(267.77 to 548.42)          | 203.58<br>(123.86 to 331.07)        | 167.79<br>(102.18 to 268.36)        | 227.73<br>(137.57 to 374.12)         | 5.20<br>(3.64 to 7.04)       | 2.82<br>(1.79 to 4.30)       | 2.33<br>(1.45 to 3.56)       | 3.13<br>(1.95 to 4.83)       |
| Urogenital congenital anomalies               | 150.11<br>(63.79 to 251.07)           | 75.71<br>(33.12 to 139.55)          | 64.10<br>(28.55 to 116.51)          | 83.47<br>(36.46 to 152.88)           | 2.06<br>(0.99 to 3.27)       | 1.12<br>(0.57 to 1.95)       | 0.96<br>(0.50 to 1.63)       | 1.23<br>(0.60 to 2.08)       |
| Digestive congenital anomalies                | 664.69<br>(316.17 to 996.82)          | 342.27<br>(159.14 to 571.99)        | 274.18<br>(121.53 to 474.33)        | 389.70<br>(168.72 to 685.00)         | 8.14<br>(3.95 to 12.02)      | 4.28<br>(2.07 to 7.00)       | 3.44<br>(1.63 to 5.77)       | 4.86<br>(2.20 to 8.33)       |
| Other congenital birth defects                | 2,546.66<br>(1,865.42 to 3,452.74)    | 1,267.46<br>(804.12 to 1,908.00)    | 1,051.90<br>(655.20 to 1,610.85)    | 1,413.61<br>(880.91 to 2,197.51)     | 33.65<br>(25.48 to 44.47)    | 17.67<br>(11.82 to 25.63)    | 14.76<br>(9.56 to 22.04)     | 19.58<br>(12.77 to 29.15)    |
| Skin and subcutaneous diseases                | 785.96<br>(436.98 to 1,221.05)        | 1,643.10<br>(928.37 to 2,473.47)    | 1,637.33<br>(928.49 to 2,465.97)    | 1,602.83<br>(900.80 to 2,415.04)     | 68.17<br>(35.68 to 107.89)   | 165.65<br>(90.42 to 253.67)  | 170.89<br>(94.02 to 261.04)  | 156.83<br>(84.35 to 240.81)  |
| Cellulitis                                    | 113.23<br>(70.11 to 272.21)           | 307.34<br>(176.04 to 786.64)        | 312.90<br>(178.50 to 811.92)        | 297.40<br>(171.15 to 755.44)         | 8.12<br>(4.58 to 21.60)      | 27.28<br>(14.15 to 76.51)    | 28.79<br>(14.88 to 79.85)    | 25.58<br>(13.30 to 70.02)    |
| Pyoderma                                      | 439.57<br>(187.07 to 575.90)          | 1,016.58<br>(420.09 to 1,371.15)    | 1,016.78<br>(416.34 to 1,380.69)    | 989.16<br>(417.06 to 1,325.91)       | 38.18<br>(15.44 to 50.89)    | 103.04<br>(42.81 to 142.33)  | 106.97<br>(43.52 to 146.60)  | 97.22<br>(40.03 to 134.42)   |
| Decubitus ulcer                               | 161.40<br>(91.32 to 320.28)           | 228.06<br>(123.33 to 469.29)        | 217.79<br>(117.93 to 461.85)        | 226.58<br>(122.28 to 480.75)         | 16.50<br>(8.23 to 32.59)     | 27.23<br>(13.15 to 59.03)    | 26.83<br>(13.13 to 57.08)    | 26.32<br>(12.62 to 58.11)    |
| Other skin and subcutaneous diseases          | 71.77<br>(44.18 to 135.81)            | 91.12<br>(56.34 to 179.12)          | 89.85<br>(57.39 to 179.82)          | 89.69<br>(57.00 to 175.49)           | 5.36<br>(3.10 to 10.25)      | 8.10<br>(4.66 to 15.67)      | 8.30<br>(4.87 to 15.99)      | 7.71<br>(4.38 to 14.84)      |
| Sudden infant death syndrome                  | 1,165.22<br>(798.14 to 1,686.11)      | 629.06<br>(303.51 to 1,101.83)      | 540.63<br>(241.19 to 961.86)        | 694.32<br>(318.85 to 1,214.67)       | 13.53<br>(9.27 to 19.57)     | 7.30<br>(3.52 to 12.79)      | 6.27<br>(2.80 to 11.16)      | 8.06<br>(3.70 to 14.10)      |



|                          |                                            |                                           |                                          |                                           |                                       |                                       |                                       |                                       |
|--------------------------|--------------------------------------------|-------------------------------------------|------------------------------------------|-------------------------------------------|---------------------------------------|---------------------------------------|---------------------------------------|---------------------------------------|
| Injuries                 | 106,210.42<br>(96,912.22 to<br>125,651.06) | 80,587.33<br>(61,068.80 to<br>109,018.71) | 73,972.32<br>(57,157.51 to<br>98,187.75) | 96,670.54<br>(70,697.17 to<br>134,517.08) | 4,177.16<br>(3,831.88 to<br>4,800.94) | 4,513.67<br>(3,809.95 to<br>5,464.84) | 4,382.19<br>(3,758.94 to<br>5,250.51) | 4,869.53<br>(3,976.67 to<br>6,032.97) |
| Transport injuries       | 21,553.05<br>(18,122.75 to<br>23,870.65)   | 11,327.52<br>(6,525.90 to<br>19,028.19)   | 10,121.07<br>(5,965.40 to<br>16,665.92)  | 19,736.17<br>(10,903.61 to<br>33,966.98)  | 583.92<br>(520.32 to<br>640.15)       | 393.23<br>(253.26 to<br>603.19)       | 358.97<br>(235.83 to<br>540.34)       | 621.60<br>(376.63 to<br>972.57)       |
| Road injuries            | 18,949.16<br>(15,851.41 to<br>21,124.41)   | 9,493.78<br>(5,456.72 to<br>15,978.22)    | 8,584.44<br>(5,029.14 to<br>14,125.01)   | 17,506.18<br>(9,653.88 to<br>30,290.25)   | 512.16<br>(456.54 to<br>564.85)       | 330.69<br>(213.61 to<br>504.42)       | 305.40<br>(201.30 to<br>455.58)       | 547.49<br>(330.02 to<br>858.14)       |
| Pedestrian road injuries | 4,243.21<br>(3,240.22 to<br>5,193.74)      | 1,755.59<br>(1,133.47 to<br>2,726.65)     | 1,438.07<br>(935.04 to<br>2,207.48)      | 3,033.06<br>(1,861.23 to<br>4,921.29)     | 153.38<br>(121.05 to<br>181.02)       | 90.14<br>(61.29 to<br>131.57)         | 76.62<br>(52.99 to<br>111.55)         | 142.36<br>(91.28 to<br>217.83)        |

| Austria                                         |                                                               |                                                               |                                                               |                                                               |                                                            |                                                            |                                                            |                                                            |
|-------------------------------------------------|---------------------------------------------------------------|---------------------------------------------------------------|---------------------------------------------------------------|---------------------------------------------------------------|------------------------------------------------------------|------------------------------------------------------------|------------------------------------------------------------|------------------------------------------------------------|
| Cause                                           | YLLs (actual counts)                                          |                                                               |                                                               |                                                               | Deaths (actual counts)                                     |                                                            |                                                            |                                                            |
|                                                 | 2016                                                          | 2040 Forecast                                                 | 2040 Better Scenario                                          | 2040 Worse Scenario                                           | 2016                                                       | 2040 Forecast                                              | 2040 Better Scenario                                       | 2040 Worse Scenario                                        |
| Cyclist road injuries                           | 1,312.33<br>(991.75 to<br>1,532.30)                           | 920.70<br>(557.67 to<br>1,486.57)                             | 866.91<br>(538.27 to<br>1,369.86)                             | 1,526.05<br>(875.69 to<br>2,499.60)                           | 43.65<br>(31.97 to<br>50.61)                               | 39.32<br>(24.11 to<br>63.37)                               | 38.00<br>(23.70 to<br>59.48)                               | 58.46<br>(34.20 to<br>95.31)                               |
| Motorcyclist road injuries                      | 3,368.46<br>(2,007.26 to<br>4,103.55)                         | 2,168.61<br>(1,047.29 to<br>4,264.15)                         | 2,029.98<br>(1,004.23 to<br>3,931.30)                         | 3,387.35<br>(1,529.80 to<br>6,629.60)                         | 74.23<br>(46.72 to<br>88.78)                               | 56.79<br>(30.91 to<br>101.78)                              | 54.17<br>(30.37 to<br>94.50)                               | 81.98<br>(42.20 to<br>147.68)                              |
| Motor vehicle road injuries                     | 9,826.08<br>(8,195.18 to<br>11,680.67)                        | 4,538.17<br>(2,486.52 to<br>7,876.44)                         | 4,147.23<br>(2,320.08 to<br>7,049.98)                         | 9,345.00<br>(4,883.04 to<br>16,618.18)                        | 235.75<br>(206.06 to<br>291.67)                            | 140.57<br>(85.75 to<br>227.88)                             | 132.89<br>(83.34 to<br>213.67)                             | 258.09<br>(148.67 to<br>422.48)                            |
| Other road injuries                             | 199.09<br>(133.79 to<br>259.28)                               | 110.71<br>(55.75 to<br>205.37)                                | 102.24<br>(52.82 to<br>186.11)                                | 214.72<br>(104.98 to<br>399.11)                               | 5.16<br>(3.05 to<br>6.45)                                  | 3.87<br>(1.72 to<br>6.97)                                  | 3.72<br>(1.68 to<br>6.57)                                  | 6.60<br>(3.03 to<br>12.20)                                 |
| Other transport injuries                        | 2,603.89<br>(2,162.10 to<br>2,965.64)                         | 1,833.74<br>(1,077.31 to<br>3,146.20)                         | 1,536.64<br>(912.23 to<br>2,599.90)                           | 2,229.99<br>(1,241.65 to<br>3,883.13)                         | 71.76<br>(59.93 to<br>80.98)                               | 62.54<br>(38.59 to<br>102.11)                              | 53.57<br>(32.41 to<br>87.85)                               | 74.11<br>(42.16 to<br>125.77)                              |
| <b>Unintentional injuries</b>                   | <b>34,066.68</b><br><b>(29,256.38 to</b><br><b>37,782.49)</b> | <b>32,260.97</b><br><b>(27,593.59 to</b><br><b>36,636.02)</b> | <b>31,287.88</b><br><b>(27,006.31 to</b><br><b>35,531.88)</b> | <b>32,297.07</b><br><b>(27,522.20 to</b><br><b>36,747.83)</b> | <b>2,058.66</b><br><b>(1,855.69 to</b><br><b>2,300.71)</b> | <b>2,738.10</b><br><b>(2,430.55 to</b><br><b>3,125.76)</b> | <b>2,774.62</b><br><b>(2,480.25 to</b><br><b>3,219.91)</b> | <b>2,626.03</b><br><b>(2,289.87 to</b><br><b>3,052.54)</b> |
| Falls                                           | 18,940.89<br>(16,730.51 to<br>22,980.60)                      | 21,635.87<br>(18,884.06 to<br>26,276.03)                      | 21,315.41<br>(18,604.61 to<br>25,610.73)                      | 21,271.08<br>(18,457.88 to<br>25,767.48)                      | 1,415.01<br>(1,266.80 to<br>1,707.51)                      | 2,116.63<br>(1,848.67 to<br>2,539.86)                      | 2,163.13<br>(1,898.98 to<br>2,648.22)                      | 2,009.73<br>(1,729.62 to<br>2,477.01)                      |
| Drowning                                        | 2,215.71<br>(1,986.28 to<br>2,448.16)                         | 1,407.09<br>(1,020.25 to<br>1,973.77)                         | 1,274.40<br>(933.48 to<br>1,771.17)                           | 1,557.34<br>(1,092.79 to<br>2,243.30)                         | 65.82<br>(60.02 to<br>71.55)                               | 54.21<br>(40.33 to<br>73.81)                               | 50.46<br>(38.04 to<br>68.49)                               | 58.35<br>(41.96 to<br>83.06)                               |
| Fire, heat, and hot substances                  | 1,538.65<br>(1,090.60 to<br>1,753.10)                         | 869.11<br>(555.05 to<br>1,207.25)                             | 776.02<br>(495.70 to<br>1,053.47)                             | 954.59<br>(605.89 to<br>1,359.82)                             | 78.82<br>(53.03 to<br>89.19)                               | 61.52<br>(39.29 to<br>82.28)                               | 57.62<br>(37.04 to<br>76.44)                               | 64.65<br>(40.66 to<br>89.96)                               |
| Poisonings                                      | 689.25<br>(561.64 to<br>1,026.64)                             | 234.40<br>(152.56 to<br>377.88)                               | 198.40<br>(130.05 to<br>315.94)                               | 268.98<br>(168.94 to<br>444.26)                               | 20.73<br>(16.95 to<br>30.50)                               | 9.77<br>(6.91 to<br>14.08)                                 | 8.61<br>(6.18 to<br>12.36)                                 | 10.77<br>(7.27 to<br>16.22)                                |
| Exposure to mechanical forces                   | 2,862.57<br>(1,886.31 to<br>3,316.58)                         | 1,898.73<br>(1,292.69 to<br>2,347.20)                         | 1,719.55<br>(1,178.51 to<br>2,104.27)                         | 1,990.19<br>(1,336.23 to<br>2,468.87)                         | 95.71<br>(74.29 to<br>110.90)                              | 85.87<br>(72.05 to<br>105.47)                              | 81.37<br>(68.78 to<br>101.22)                              | 86.28<br>(70.68 to<br>104.51)                              |
| Unintentional firearm injuries                  | 233.33<br>(162.12 to<br>274.67)                               | 120.28<br>(86.80 to<br>150.95)                                | 112.14<br>(82.34 to<br>139.42)                                | 124.57<br>(90.44 to<br>157.61)                                | 7.47<br>(5.43 to<br>8.63)                                  | 5.83<br>(4.55 to<br>6.85)                                  | 5.73<br>(4.57 to<br>6.76)                                  | 5.74<br>(4.43 to<br>6.84)                                  |
| Unintentional suffocation                       | 106.15<br>(79.63 to<br>146.96)                                | 61.40<br>(43.72 to<br>88.84)                                  | 55.66<br>(39.34 to<br>81.62)                                  | 65.72<br>(45.87 to<br>96.42)                                  | 1.86<br>(1.52 to<br>2.49)                                  | 1.27<br>(0.99 to<br>1.72)                                  | 1.19<br>(0.91 to<br>1.64)                                  | 1.33<br>(1.01 to<br>1.85)                                  |
| Other exposure to mechanical forces             | 2,523.09<br>(1,610.60 to<br>2,947.80)                         | 1,717.05<br>(1,129.01 to<br>2,145.81)                         | 1,551.75<br>(1,036.26 to<br>1,913.65)                         | 1,799.90<br>(1,181.99 to<br>2,248.44)                         | 86.38<br>(65.22 to<br>101.52)                              | 78.77<br>(65.69 to<br>98.30)                               | 74.45<br>(62.09 to<br>93.95)                               | 79.21<br>(64.16 to<br>97.71)                               |
| Adverse effects of medical treatment            | 3,415.89<br>(2,027.92 to<br>4,176.05)                         | 3,146.98<br>(1,947.26 to<br>3,857.09)                         | 3,087.25<br>(1,931.17 to<br>3,789.69)                         | 3,124.18<br>(1,927.14 to<br>3,857.55)                         | 207.00<br>(147.33 to<br>245.87)                            | 241.16<br>(176.08 to<br>302.07)                            | 245.49<br>(181.28 to<br>309.65)                            | 251.21<br>(165.66 to<br>290.20)                            |
| Animal contact                                  | 250.83<br>(155.59 to<br>298.41)                               | 238.19<br>(144.10 to<br>297.59)                               | 222.39<br>(132.40 to<br>278.32)                               | 245.20<br>(146.50 to<br>308.90)                               | 9.17<br>(5.54 to<br>10.97)                                 | 10.88<br>(6.83 to<br>13.35)                                | 10.44<br>(6.63 to<br>12.76)                                | 10.89<br>(6.77 to<br>13.41)                                |
| Venomous animal contact                         | 114.65<br>(51.56 to<br>151.34)                                | 100.52<br>(41.58 to<br>138.37)                                | 95.18<br>(39.29 to<br>132.12)                                 | 103.10<br>(42.82 to<br>143.55)                                | 3.64<br>(1.52 to<br>4.85)                                  | 3.77<br>(1.53 to<br>5.21)                                  | 3.65<br>(1.49 to<br>5.03)                                  | 3.79<br>(1.53 to<br>5.23)                                  |
| Non-venomous animal contact                     | 136.18<br>(96.62 to<br>181.27)                                | 137.67<br>(94.74 to<br>182.27)                                | 127.21<br>(87.41 to<br>169.46)                                | 142.09<br>(98.54 to<br>189.81)                                | 5.53<br>(3.82 to<br>7.31)                                  | 7.11<br>(4.86 to<br>9.36)                                  | 6.79<br>(4.70 to<br>8.97)                                  | 7.10<br>(4.79 to<br>9.40)                                  |
| Foreign body                                    | 2,667.81<br>(1,875.13 to<br>3,218.11)                         | 1,910.02<br>(1,331.24 to<br>2,327.22)                         | 1,874.25<br>(1,321.77 to<br>2,285.28)                         | 1,921.36<br>(1,337.45 to<br>2,341.87)                         | 100.87<br>(73.10 to<br>119.39)                             | 101.32<br>(74.65 to<br>121.21)                             | 104.22<br>(76.95 to<br>124.40)                             | 97.45<br>(71.48 to<br>116.07)                              |
| Pulmonary aspiration and foreign body in airway | 2,595.95<br>(1,816.42 to<br>3,144.35)                         | 1,852.60<br>(1,287.77 to<br>2,264.45)                         | 1,814.69<br>(1,270.89 to<br>2,223.87)                         | 1,864.85<br>(1,287.81 to<br>2,281.80)                         | 98.52<br>(71.34 to<br>116.94)                              | 98.71<br>(72.86 to<br>118.13)                              | 101.39<br>(74.99 to<br>121.01)                             | 94.99<br>(69.79 to<br>113.31)                              |

|                                             |                                                               |                                                               |                                                               |                                                               |                                                            |                                                          |                                                          |                                                          |
|---------------------------------------------|---------------------------------------------------------------|---------------------------------------------------------------|---------------------------------------------------------------|---------------------------------------------------------------|------------------------------------------------------------|----------------------------------------------------------|----------------------------------------------------------|----------------------------------------------------------|
|                                             | 71.87<br>(51.11 to<br>84.65)                                  | 57.42<br>(37.77 to<br>72.26)                                  | 59.56<br>(39.16 to<br>75.18)                                  | 56.51<br>(37.15 to<br>70.97)                                  | 2.35<br>(1.45 to<br>2.80)                                  | 2.61<br>(1.50 to<br>3.27)                                | 2.83<br>(1.61 to<br>3.57)                                | 2.46<br>(1.42 to<br>3.08)                                |
| Foreign body in other body part             |                                                               |                                                               |                                                               |                                                               |                                                            |                                                          |                                                          |                                                          |
|                                             | 1,034.52<br>(427.30 to<br>1,301.02)                           | 770.65<br>(334.02 to<br>1,023.87)                             | 700.67<br>(312.74 to<br>932.73)                               | 795.52<br>(342.70 to<br>1,071.58)                             | 54.42<br>(26.82 to<br>67.61)                               | 52.32<br>(28.06 to<br>70.63)                             | 49.68<br>(27.28 to<br>66.92)                             | 51.84<br>(27.58 to<br>70.21)                             |
| Environmental heat and cold exposure        |                                                               |                                                               |                                                               |                                                               |                                                            |                                                          |                                                          |                                                          |
|                                             | 450.56<br>(369.63 to<br>515.95)                               | 149.92<br>(110.31 to<br>200.05)                               | 119.55<br>(87.06 to<br>160.49)                                | 168.65<br>(119.40 to<br>231.49)                               | 11.10<br>(9.51 to<br>12.62)                                | 4.42<br>(3.43 to<br>5.59)                                | 3.60<br>(2.77 to<br>4.53)                                | 4.85<br>(3.62 to<br>6.30)                                |
| Other unintentional injuries                |                                                               |                                                               |                                                               |                                                               |                                                            |                                                          |                                                          |                                                          |
| <b>Self-harm and interpersonal violence</b> | <b>50,553.99</b><br><b>(43,665.70 to</b><br><b>73,588.56)</b> | <b>36,769.82</b><br><b>(22,263.15 to</b><br><b>58,573.78)</b> | <b>32,333.85</b><br><b>(20,137.12 to</b><br><b>50,918.63)</b> | <b>44,408.73</b><br><b>(25,693.06 to</b><br><b>73,280.12)</b> | <b>1,533.75</b><br><b>(1,344.14 to</b><br><b>2,067.86)</b> | <b>1,376.17</b><br><b>(881.24 to</b><br><b>2,072.15)</b> | <b>1,242.34</b><br><b>(813.96 to</b><br><b>1,826.82)</b> | <b>1,615.84</b><br><b>(991.30 to</b><br><b>2,546.95)</b> |

| Austria                                                                             |                                                   |                                                    |                                                    |                                                    |                                                |                                                 |                                                 |                                                 |
|-------------------------------------------------------------------------------------|---------------------------------------------------|----------------------------------------------------|----------------------------------------------------|----------------------------------------------------|------------------------------------------------|-------------------------------------------------|-------------------------------------------------|-------------------------------------------------|
| Cause                                                                               | YLLs (actual counts)                              |                                                    |                                                    |                                                    | Deaths (actual counts)                         |                                                 |                                                 |                                                 |
|                                                                                     | 2016                                              | 2040 Forecast                                      | 2040 Better Scenario                               | 2040 Worse Scenario                                | 2016                                           | 2040 Forecast                                   | 2040 Better Scenario                            | 2040 Worse Scenario                             |
| Self-harm                                                                           | 47,772.29<br>(41,051.90 to<br>71,158.88)          | 35,371.21<br>(21,050.43 to<br>56,567.33)           | 31,070.50<br>(18,940.57 to<br>49,210.83)           | 42,856.92<br>(24,314.41 to<br>71,288.69)           | 1,465.72<br>(1,282.19 to<br>1,994.87)          | 1,334.00<br>(840.14 to<br>2,027.65)             | 1,203.47<br>(776.79 to<br>1,786.54)             | 1,569.97<br>(942.55 to<br>2,498.22)             |
| Self-harm by firearm                                                                | 6,716.11<br>(4,283.78 to<br>10,794.66)            | 4,038.13<br>(1,920.16 to<br>6,901.07)              | 3,441.57<br>(1,711.17 to<br>5,903.80)              | 4,945.68<br>(2,298.95 to<br>8,816.41)              | 232.02<br>(137.38 to<br>329.13)                | 172.74<br>(82.71 to<br>287.76)                  | 151.48<br>(74.92 to<br>253.18)                  | 205.33<br>(98.24 to<br>358.00)                  |
| Self-harm by other specified means                                                  | 41,056.18<br>(35,105.30 to<br>61,602.88)          | 31,333.08<br>(18,708.16 to<br>50,575.80)           | 27,628.93<br>(17,013.40 to<br>44,740.03)           | 37,911.24<br>(21,393.44 to<br>63,548.64)           | 1,233.70<br>(1,073.27 to<br>1,687.92)          | 1,161.26<br>(734.98 to<br>1,763.25)             | 1,051.99<br>(686.72 to<br>1,557.05)             | 1,364.64<br>(822.64 to<br>2,168.47)             |
| Interpersonal violence                                                              | 2,781.70<br>(2,153.51 to<br>4,158.91)             | 1,398.60<br>(994.73 to<br>2,158.65)                | 1,263.35<br>(912.32 to<br>1,946.44)                | 1,551.81<br>(1,096.09 to<br>2,451.67)              | 68.04<br>(52.81 to<br>98.71)                   | 42.17<br>(30.65 to<br>62.52)                    | 38.87<br>(28.70 to<br>58.10)                    | 45.87<br>(32.74 to<br>70.28)                    |
| Physical violence by firearm                                                        | 563.14<br>(388.76 to<br>1,078.75)                 | 263.62<br>(176.79 to<br>491.63)                    | 237.20<br>(157.86 to<br>445.31)                    | 280.96<br>(183.47 to<br>529.01)                    | 13.42<br>(9.14 to<br>24.93)                    | 7.23<br>(4.80 to<br>12.81)                      | 6.60<br>(4.37 to<br>11.75)                      | 7.58<br>(4.98 to<br>13.71)                      |
| Physical violence by sharp object                                                   | 738.51<br>(529.38 to<br>1,185.49)                 | 395.65<br>(279.27 to<br>621.41)                    | 362.30<br>(257.45 to<br>570.64)                    | 417.70<br>(291.23 to<br>667.66)                    | 18.88<br>(13.88 to<br>30.65)                   | 12.53<br>(9.20 to<br>19.85)                     | 11.74<br>(8.77 to<br>18.71)                     | 12.89<br>(9.37 to<br>20.62)                     |
| Physical violence by other means                                                    | 1,480.05<br>(1,067.83 to<br>2,353.04)             | 739.33<br>(471.42 to<br>1,229.23)                  | 663.85<br>(430.58 to<br>1,093.69)                  | 853.16<br>(530.69 to<br>1,440.31)                  | 35.74<br>(25.53 to<br>54.61)                   | 22.41<br>(14.43 to<br>35.41)                    | 20.53<br>(13.45 to<br>32.22)                    | 25.40<br>(15.78 to<br>41.05)                    |
| <b>Forces of nature, conflict and terrorism, and executions and police conflict</b> | <b>36.71</b><br><b>(33.66 to</b><br><b>39.84)</b> | <b>229.03</b><br><b>(0.00 to</b><br><b>993.94)</b> | <b>229.52</b><br><b>(0.00 to</b><br><b>995.69)</b> | <b>228.57</b><br><b>(0.00 to</b><br><b>992.60)</b> | <b>0.82</b><br><b>(0.76 to</b><br><b>0.88)</b> | <b>6.16</b><br><b>(0.00 to</b><br><b>28.20)</b> | <b>6.26</b><br><b>(0.00 to</b><br><b>28.78)</b> | <b>6.06</b><br><b>(0.00 to</b><br><b>27.61)</b> |
| Exposure to forces of nature                                                        | 0.00<br>(0.00 to<br>0.00)                         | 224.91<br>(0.00 to<br>993.94)                      | 225.38<br>(0.00 to<br>995.69)                      | 224.49<br>(0.00 to<br>992.60)                      | 0.00<br>(0.00 to<br>0.00)                      | 6.02<br>(0.00 to<br>28.20)                      | 6.12<br>(0.00 to<br>28.78)                      | 5.93<br>(0.00 to<br>27.61)                      |
| Conflict and terrorism                                                              | 0.00<br>(0.00 to<br>0.00)                         | 4.11<br>(0.00 to<br>39.85)                         | 4.14<br>(0.00 to<br>39.85)                         | 4.09<br>(0.00 to<br>39.86)                         | 0.00<br>(0.00 to<br>0.00)                      | 0.13<br>(0.00 to<br>1.39)                       | 0.14<br>(0.00 to<br>1.44)                       | 0.13<br>(0.00 to<br>1.31)                       |
| Executions and police conflict                                                      | 36.71<br>(33.66 to<br>39.84)                      | 0.00<br>(0.00 to<br>0.00)                          | 0.00<br>(0.00 to<br>0.00)                          | 0.00<br>(0.00 to<br>0.00)                          | 0.82<br>(0.76 to<br>0.88)                      | 0.00<br>(0.00 to<br>0.00)                       | 0.00<br>(0.00 to<br>0.00)                       | 0.00<br>(0.00 to<br>0.00)                       |

| Belgium                                                           |                                                |                                                |                                                |                                                |                                          |                                          |                                          |                                          |
|-------------------------------------------------------------------|------------------------------------------------|------------------------------------------------|------------------------------------------------|------------------------------------------------|------------------------------------------|------------------------------------------|------------------------------------------|------------------------------------------|
| Cause                                                             | YLLs (actual counts)                           |                                                |                                                |                                                | Deaths (actual counts)                   |                                          |                                          |                                          |
|                                                                   | 2016                                           | 2040 Forecast                                  | 2040 Better Scenario                           | 2040 Worse Scenario                            | 2016                                     | 2040 Forecast                            | 2040 Better Scenario                     | 2040 Worse Scenario                      |
| All causes                                                        | 1,586,011.76<br>(1,450,806.44 to 1,724,845.19) | 1,672,117.95<br>(1,436,914.68 to 1,923,082.45) | 1,422,047.40<br>(1,238,874.52 to 1,626,521.01) | 2,034,338.22<br>(1,724,687.22 to 2,366,721.15) | 112,945.17<br>(104,187.45 to 121,701.38) | 141,830.63<br>(127,300.29 to 157,883.92) | 127,283.50<br>(114,800.24 to 141,432.56) | 162,226.39<br>(145,994.71 to 180,771.68) |
| Communicable, maternal, neonatal, and nutritional diseases        | 90,105.09<br>(81,570.30 to 100,069.90)         | 103,419.03<br>(85,464.38 to 126,233.20)        | 97,010.06<br>(81,568.09 to 115,148.63)         | 117,358.12<br>(94,649.04 to 147,622.61)        | 6,830.36<br>(5,982.85 to 7,786.38)       | 10,474.86<br>(8,542.67 to 13,094.05)     | 10,564.40<br>(8,755.35 to 12,830.54)     | 10,947.31<br>(8,760.71 to 14,089.68)     |
| HIV/AIDS and tuberculosis                                         | 3,579.11<br>(3,368.24 to 3,808.56)             | 1,894.17<br>(1,235.96 to 2,660.36)             | 1,056.82<br>(690.35 to 1,524.36)               | 3,120.84<br>(2,031.40 to 4,478.57)             | 147.21<br>(135.10 to 160.32)             | 95.08<br>(56.50 to 153.95)               | 59.58<br>(36.07 to 95.70)                | 132.71<br>(79.42 to 207.43)              |
| Tuberculosis                                                      | 1,400.90<br>(1,228.79 to 1,589.70)             | 965.60<br>(525.08 to 1,637.44)                 | 607.58<br>(348.81 to 989.89)                   | 1,279.57<br>(675.09 to 2,160.32)               | 92.40<br>(80.92 to 105.01)               | 79.35<br>(41.80 to 138.44)               | 51.95<br>(28.66 to 87.56)                | 101.03<br>(52.03 to 172.55)              |
| HIV/AIDS                                                          | 2,178.21<br>(2,077.44 to 2,285.69)             | 928.57<br>(457.91 to 1,459.88)                 | 449.25<br>(217.47 to 736.57)                   | 1,841.27<br>(905.41 to 2,999.93)               | 54.81<br>(52.34 to 57.55)                | 15.72<br>(7.42 to 25.12)                 | 7.64<br>(3.44 to 13.12)                  | 31.69<br>(14.94 to 51.33)                |
| Diarrhea, lower respiratory, and other common infectious diseases | 62,730.53<br>(55,082.10 to 71,143.83)          | 83,999.58<br>(67,228.21 to 107,170.87)         | 79,585.83<br>(65,139.32 to 98,324.92)          | 95,433.05<br>(74,536.14 to 124,683.05)         | 5,955.44<br>(5,150.74 to 6,874.76)       | 9,565.43<br>(7,630.72 to 12,264.19)      | 9,645.44<br>(7,815.11 to 11,933.72)      | 10,040.08<br>(7,850.13 to 13,260.00)     |
| Diarrheal diseases                                                | 6,499.66<br>(5,728.19 to 7,347.90)             | 16,895.69<br>(11,176.38 to 26,183.24)          | 22,344.89<br>(16,360.95 to 31,532.13)          | 14,304.18<br>(8,972.57 to 22,705.90)           | 678.41<br>(586.22 to 782.23)             | 2,113.49<br>(1,356.89 to 3,328.15)       | 2,883.66<br>(2,051.05 to 4,087.92)       | 1,738.10<br>(1,073.00 to 2,813.64)       |
| Intestinal infectious diseases                                    | 10.66<br>(5.13 to 19.35)                       | 8.57<br>(4.09 to 15.68)                        | 8.62<br>(4.13 to 15.95)                        | 8.42<br>(3.99 to 15.55)                        | 0.47<br>(0.23 to 0.89)                   | 0.49<br>(0.23 to 0.98)                   | 0.50<br>(0.23 to 1.00)                   | 0.47<br>(0.21 to 0.92)                   |
| Typhoid fever                                                     | 3.09<br>(0.97 to 7.14)                         | 3.04<br>(1.07 to 6.59)                         | 3.42<br>(1.22 to 7.27)                         | 2.90<br>(0.99 to 6.29)                         | 0.08<br>(0.03 to 0.18)                   | 0.09<br>(0.03 to 0.19)                   | 0.10<br>(0.04 to 0.21)                   | 0.08<br>(0.03 to 0.17)                   |
| Paratyphoid fever                                                 | 1.93<br>(0.57 to 4.89)                         | 1.35<br>(0.44 to 3.37)                         | 1.18<br>(0.38 to 2.91)                         | 1.41<br>(0.46 to 3.42)                         | 0.05<br>(0.02 to 0.13)                   | 0.04<br>(0.01 to 0.10)                   | 0.04<br>(0.01 to 0.09)                   | 0.04<br>(0.01 to 0.10)                   |
| Other intestinal infectious diseases                              | 5.64<br>(2.24 to 11.44)                        | 4.18<br>(1.53 to 9.01)                         | 4.02<br>(1.42 to 8.68)                         | 4.11<br>(1.47 to 8.89)                         | 0.34<br>(0.13 to 0.74)                   | 0.37<br>(0.12 to 0.83)                   | 0.37<br>(0.12 to 0.84)                   | 0.34<br>(0.11 to 0.77)                   |
| Lower respiratory infections                                      | 53,177.38<br>(45,976.20 to 61,196.38)          | 64,824.66<br>(47,642.00 to 87,830.24)          | 55,065.36<br>(39,813.82 to 73,208.37)          | 78,542.21<br>(57,105.30 to 108,872.03)         | 5,162.39<br>(4,398.77 to 6,059.37)       | 7,337.93<br>(5,343.95 to 10,023.62)      | 6,648.05<br>(4,793.96 to 9,014.04)       | 8,188.70<br>(5,892.44 to 11,513.98)      |
| Upper respiratory infections                                      | 17.31<br>(9.45 to 28.64)                       | 15.60<br>(6.98 to 29.22)                       | 12.23<br>(5.67 to 23.19)                       | 16.74<br>(7.67 to 32.78)                       | 0.86<br>(0.40 to 1.52)                   | 1.03<br>(0.37 to 2.18)                   | 0.84<br>(0.30 to 1.87)                   | 1.06<br>(0.39 to 2.17)                   |
| Otitis media                                                      | 1.08<br>(0.80 to 1.44)                         | 0.39<br>(0.18 to 0.89)                         | 0.40<br>(0.18 to 0.93)                         | 0.37<br>(0.17 to 0.87)                         | 0.05<br>(0.03 to 0.06)                   | 0.02<br>(0.01 to 0.05)                   | 0.03<br>(0.01 to 0.06)                   | 0.02<br>(0.01 to 0.05)                   |
| Meningitis                                                        | 1,641.73<br>(1,429.32 to 1,881.92)             | 788.78<br>(613.91 to 989.23)                   | 726.17<br>(565.36 to 912.64)                   | 992.16<br>(697.44 to 1,334.78)                 | 49.99<br>(42.93 to 56.30)                | 32.02<br>(25.99 to 38.58)                | 30.75<br>(23.76 to 37.16)                | 33.95<br>(26.82 to 41.11)                |
| Pneumococcal meningitis                                           | 394.44<br>(345.09 to 450.40)                   | 213.17<br>(169.78 to 254.48)                   | 218.34<br>(170.99 to 264.49)                   | 271.39<br>(175.84 to 267.72)                   | 14.50<br>(12.33 to 16.46)                | 10.97<br>(8.27 to 13.28)                 | 11.69<br>(8.69 to 14.34)                 | 10.81<br>(8.16 to 13.02)                 |
| H influenzae type B meningitis                                    | 150.52<br>(123.71 to 183.70)                   | 189.14<br>(105.94 to 302.16)                   | 184.08<br>(107.34 to 288.27)                   | 359.27<br>(163.03 to 659.50)                   | 3.94<br>(3.23 to 4.61)                   | 4.13<br>(2.98 to 5.51)                   | 4.24<br>(3.10 to 5.64)                   | 5.98<br>(3.48 to 9.62)                   |
| Meningococcal meningitis                                          | 713.31<br>(611.64 to 836.85)                   | 231.72<br>(170.12 to 306.65)                   | 194.45<br>(142.99 to 258.39)                   | 247.70<br>(178.33 to 338.65)                   | 17.44<br>(14.96 to 19.86)                | 8.57<br>(6.58 to 10.78)                  | 7.54<br>(5.66 to 9.57)                   | 8.72<br>(6.60 to 11.01)                  |
| Other meningitis                                                  | 383.46<br>(336.60 to 437.39)                   | 154.74<br>(118.63 to 196.25)                   | 129.30<br>(99.73 to 162.63)                    | 163.80<br>(124.50 to 211.37)                   | 14.12<br>(12.09 to 16.05)                | 8.34<br>(6.29 to 10.58)                  | 7.28<br>(5.45 to 9.23)                   | 8.45<br>(6.39 to 10.68)                  |
| Encephalitis                                                      | 1,068.92<br>(828.86 to 1,424.91)               | 1,193.59<br>(914.56 to 1,598.15)               | 1,186.86<br>(887.36 to 1,591.20)               | 1,176.80<br>(895.48 to 1,578.48)               | 39.68<br>(29.27 to 51.17)                | 58.76<br>(42.09 to 75.22)                | 60.53<br>(43.28 to 78.42)                | 55.94<br>(40.32 to 71.82)                |

|                |                             |                              |                              |                               |                           |                           |                           |                            |
|----------------|-----------------------------|------------------------------|------------------------------|-------------------------------|---------------------------|---------------------------|---------------------------|----------------------------|
| Diphtheria     | 2.48<br>(1.56 to<br>3.76)   | 0.58<br>(0.34 to<br>0.93)    | 0.57<br>(0.32 to<br>0.91)    | 1.50<br>(0.59 to<br>3.19)     | 0.05<br>(0.03 to<br>0.08) | 0.01<br>(0.01 to<br>0.02) | 0.01<br>(0.01 to<br>0.02) | 0.02<br>(0.01 to<br>0.04)  |
| Whooping cough | 22.47<br>(6.59 to<br>41.19) | 5.02<br>(1.10 to<br>12.46)   | 3.94<br>(0.91 to<br>9.56)    | 61.93<br>(11.02 to<br>152.24) | 0.28<br>(0.09 to<br>0.50) | 0.06<br>(0.02 to<br>0.15) | 0.05<br>(0.01 to<br>0.12) | 0.73<br>(0.13 to<br>1.78)  |
| Tetanus        | 9.05<br>(6.86 to<br>11.42)  | 0.98<br>(0.65 to<br>1.40)    | 0.98<br>(0.65 to<br>1.40)    | 2.32<br>(1.32 to<br>4.35)     | 0.36<br>(0.24 to<br>0.46) | 0.04<br>(0.02 to<br>0.06) | 0.04<br>(0.03 to<br>0.06) | 0.06<br>(0.04 to<br>0.09)  |
| Measles        | 12.12<br>(9.18 to<br>15.85) | 68.49<br>(0.57 to<br>462.03) | 52.99<br>(0.49 to<br>330.28) | 131.41<br>(0.88 to<br>880.69) | 0.16<br>(0.13 to<br>0.21) | 0.95<br>(0.01 to<br>5.65) | 0.76<br>(0.01 to<br>4.22) | 1.71<br>(0.01 to<br>11.24) |

| Belgium                                               |                                     |                                     |                                     |                                     |                               |                               |                               |                               |
|-------------------------------------------------------|-------------------------------------|-------------------------------------|-------------------------------------|-------------------------------------|-------------------------------|-------------------------------|-------------------------------|-------------------------------|
| Cause                                                 | YLLs (actual counts)                |                                     |                                     |                                     | Deaths (actual counts)        |                               |                               |                               |
|                                                       | 2016                                | 2040 Forecast                       | 2040 Better Scenario                | 2040 Worse Scenario                 | 2016                          | 2040 Forecast                 | 2040 Better Scenario          | 2040 Worse Scenario           |
| Varicella and herpes zoster                           | 267.68<br>(88.40 to 374.14)         | 197.24<br>(67.65 to 295.78)         | 182.82<br>(61.75 to 275.70)         | 195.00<br>(66.07 to 296.98)         | 22.74<br>(6.97 to 33.37)      | 20.62<br>(6.13 to 32.86)      | 20.21<br>(5.96 to 32.37)      | 19.34<br>(6.02 to 30.80)      |
| <b>Neglected tropical diseases and malaria</b>        | <b>64.81</b><br>(55.69 to 72.50)    | <b>63.54</b><br>(52.96 to 73.79)    | <b>64.72</b><br>(53.41 to 75.48)    | <b>63.07</b><br>(52.79 to 73.28)    | <b>1.69</b><br>(1.31 to 1.91) | <b>2.00</b><br>(1.38 to 2.34) | <b>2.15</b><br>(1.43 to 2.55) | <b>1.90</b><br>(1.35 to 2.20) |
| Malaria                                               | 0.00<br>(0.00 to 0.00)              | 0.00<br>(0.00 to 0.00)              | 0.00<br>(0.00 to 0.00)              | 0.00<br>(0.00 to 0.00)              | 0.00<br>(0.00 to 0.00)        | 0.00<br>(0.00 to 0.00)        | 0.00<br>(0.00 to 0.00)        | 0.00<br>(0.00 to 0.00)        |
| Chagas disease                                        | 0.00<br>(0.00 to 0.00)              | 0.00<br>(0.00 to 0.00)              | 0.00<br>(0.00 to 0.00)              | 0.00<br>(0.00 to 0.00)              | 0.00<br>(0.00 to 0.00)        | 0.00<br>(0.00 to 0.00)        | 0.00<br>(0.00 to 0.00)        | 0.00<br>(0.00 to 0.00)        |
| Leishmaniasis                                         | 0.00<br>(0.00 to 0.00)              | 0.00<br>(0.00 to 0.00)              | 0.00<br>(0.00 to 0.00)              | 0.00<br>(0.00 to 0.00)              | 0.00<br>(0.00 to 0.00)        | 0.00<br>(0.00 to 0.00)        | 0.00<br>(0.00 to 0.00)        | 0.00<br>(0.00 to 0.00)        |
| African trypanosomiasis                               | 0.00<br>(0.00 to 0.00)              | 0.00<br>(0.00 to 0.00)              | 0.00<br>(0.00 to 0.00)              | 0.00<br>(0.00 to 0.00)              | 0.00<br>(0.00 to 0.00)        | 0.00<br>(0.00 to 0.00)        | 0.00<br>(0.00 to 0.00)        | 0.00<br>(0.00 to 0.00)        |
| Schistosomiasis                                       | 0.00<br>(0.00 to 0.00)              | 0.00<br>(0.00 to 0.00)              | 0.00<br>(0.00 to 0.00)              | 0.00<br>(0.00 to 0.00)              | 0.00<br>(0.00 to 0.00)        | 0.00<br>(0.00 to 0.00)        | 0.00<br>(0.00 to 0.00)        | 0.00<br>(0.00 to 0.00)        |
| Cysticercosis                                         | 5.35<br>(4.67 to 6.04)              | 1.91<br>(1.64 to 2.19)              | 1.89<br>(1.62 to 2.17)              | 1.89<br>(1.62 to 2.16)              | 0.19<br>(0.17 to 0.22)        | 0.08<br>(0.07 to 0.09)        | 0.08<br>(0.07 to 0.09)        | 0.08<br>(0.07 to 0.09)        |
| Cystic echinococcosis                                 | 0.00<br>(0.00 to 0.00)              | 0.00<br>(0.00 to 0.00)              | 0.00<br>(0.00 to 0.00)              | 0.00<br>(0.00 to 0.00)              | 0.00<br>(0.00 to 0.00)        | 0.00<br>(0.00 to 0.00)        | 0.00<br>(0.00 to 0.00)        | 0.00<br>(0.00 to 0.00)        |
| Dengue                                                | 0.00<br>(0.00 to 0.00)              | 0.00<br>(0.00 to 0.00)              | 0.00<br>(0.00 to 0.00)              | 0.00<br>(0.00 to 0.00)              | 0.00<br>(0.00 to 0.00)        | 0.00<br>(0.00 to 0.00)        | 0.00<br>(0.00 to 0.00)        | 0.00<br>(0.00 to 0.00)        |
| Yellow fever                                          | 0.00<br>(0.00 to 0.00)              | 0.00<br>(0.00 to 0.00)              | 0.00<br>(0.00 to 0.00)              | 0.00<br>(0.00 to 0.00)              | 0.00<br>(0.00 to 0.00)        | 0.00<br>(0.00 to 0.00)        | 0.00<br>(0.00 to 0.00)        | 0.00<br>(0.00 to 0.00)        |
| Rabies                                                | 0.75<br>(0.56 to 1.02)              | 0.73<br>(0.52 to 1.04)              | 0.66<br>(0.48 to 0.96)              | 0.76<br>(0.55 to 1.10)              | 0.02<br>(0.02 to 0.02)        | 0.03<br>(0.02 to 0.03)        | 0.03<br>(0.02 to 0.03)        | 0.03<br>(0.02 to 0.03)        |
| Intestinal nematode infections                        | 0.00<br>(0.00 to 0.00)              | 0.00<br>(0.00 to 0.00)              | 0.00<br>(0.00 to 0.00)              | 0.00<br>(0.00 to 0.00)              | 0.00<br>(0.00 to 0.00)        | 0.00<br>(0.00 to 0.00)        | 0.00<br>(0.00 to 0.00)        | 0.00<br>(0.00 to 0.00)        |
| Other neglected tropical diseases                     | 58.71<br>(49.85 to 65.86)           | 60.91<br>(50.57 to 71.25)           | 62.17<br>(51.08 to 72.53)           | 60.42<br>(50.14 to 70.19)           | 1.47<br>(1.10 to 1.68)        | 1.90<br>(1.28 to 2.25)        | 2.04<br>(1.32 to 2.44)        | 1.79<br>(1.24 to 2.09)        |
| <b>Maternal disorders</b>                             | <b>451.69</b><br>(362.30 to 549.37) | <b>335.26</b><br>(237.62 to 464.89) | <b>297.84</b><br>(208.23 to 408.43) | <b>352.60</b><br>(243.54 to 484.03) | <b>8.93</b><br>(7.20 to 9.84) | <b>6.64</b><br>(4.77 to 9.04) | <b>5.90</b><br>(4.13 to 7.99) | <b>6.98</b><br>(4.88 to 9.59) |
| Maternal hemorrhage                                   | 26.25<br>(16.60 to 38.15)           | 20.72<br>(11.44 to 34.14)           | 18.52<br>(10.22 to 30.69)           | 21.66<br>(12.01 to 36.42)           | 0.51<br>(0.33 to 0.74)        | 0.41<br>(0.23 to 0.66)        | 0.36<br>(0.20 to 0.58)        | 0.42<br>(0.24 to 0.70)        |
| Maternal sepsis and other maternal infections         | 50.33<br>(33.98 to 69.54)           | 31.97<br>(18.76 to 50.99)           | 28.36<br>(16.84 to 45.31)           | 33.57<br>(19.58 to 53.42)           | 0.99<br>(0.68 to 1.38)        | 0.64<br>(0.38 to 1.01)        | 0.56<br>(0.34 to 0.89)        | 0.67<br>(0.39 to 1.05)        |
| Maternal hypertensive disorders                       | 46.91<br>(31.36 to 66.53)           | 37.52<br>(21.35 to 59.61)           | 33.16<br>(18.43 to 53.63)           | 39.45<br>(22.26 to 63.78)           | 0.87<br>(0.59 to 1.22)        | 0.70<br>(0.41 to 1.11)        | 0.62<br>(0.36 to 1.00)        | 0.74<br>(0.42 to 1.18)        |
| Maternal obstructed labor and uterine rupture         | 14.68<br>(8.43 to 22.31)            | 11.66<br>(5.96 to 19.83)            | 10.13<br>(5.22 to 17.47)            | 12.33<br>(6.45 to 21.19)            | 0.30<br>(0.18 to 0.46)        | 0.24<br>(0.12 to 0.42)        | 0.21<br>(0.11 to 0.36)        | 0.26<br>(0.14 to 0.44)        |
| Maternal abortion, miscarriage, and ectopic pregnancy | 90.72<br>(64.83 to 118.12)          | 73.49<br>(43.29 to 114.84)          | 64.49<br>(38.52 to 101.73)          | 77.28<br>(45.21 to 122.64)          | 1.93<br>(1.39 to 2.49)        | 1.57<br>(0.92 to 2.48)        | 1.38<br>(0.80 to 2.15)        | 1.65<br>(0.95 to 2.64)        |

|                                        |                                 |                                |                                |                                |                           |                           |                           |                           |
|----------------------------------------|---------------------------------|--------------------------------|--------------------------------|--------------------------------|---------------------------|---------------------------|---------------------------|---------------------------|
| Indirect maternal deaths               | 33.91<br>(22.34 to<br>48.12)    | 30.49<br>(16.77 to<br>52.38)   | 26.68<br>(14.61 to<br>44.65)   | 32.38<br>(17.62 to<br>55.17)   | 0.63<br>(0.42 to<br>0.88) | 0.56<br>(0.31 to<br>0.92) | 0.49<br>(0.27 to<br>0.81) | 0.60<br>(0.33 to<br>1.00) |
| Late maternal deaths                   | 18.90<br>(12.48 to<br>27.22)    | 12.58<br>(6.85 to<br>21.27)    | 11.05<br>(6.03 to<br>18.62)    | 13.29<br>(7.23 to<br>22.20)    | 0.38<br>(0.25 to<br>0.54) | 0.25<br>(0.14 to<br>0.42) | 0.22<br>(0.12 to<br>0.37) | 0.27<br>(0.14 to<br>0.44) |
| Maternal deaths aggravated by HIV/AIDS | 0.20<br>(0.06 to<br>0.43)       | 0.60<br>(0.12 to<br>1.71)      | 0.46<br>(0.07 to<br>1.32)      | 0.74<br>(0.16 to<br>2.07)      | 0.00<br>(0.00 to<br>0.01) | 0.01<br>(0.00 to<br>0.03) | 0.01<br>(0.00 to<br>0.02) | 0.01<br>(0.00 to<br>0.04) |
| Other maternal disorders               | 169.79<br>(127.44 to<br>218.83) | 116.24<br>(71.07 to<br>175.34) | 104.99<br>(63.38 to<br>159.87) | 121.90<br>(72.09 to<br>186.01) | 3.31<br>(2.48 to<br>4.28) | 2.27<br>(1.41 to<br>3.39) | 2.05<br>(1.25 to<br>3.09) | 2.38<br>(1.44 to<br>3.59) |



| Belgium                                                          |                                       |                                     |                                     |                                      |                              |                              |                              |                              |
|------------------------------------------------------------------|---------------------------------------|-------------------------------------|-------------------------------------|--------------------------------------|------------------------------|------------------------------|------------------------------|------------------------------|
| Cause                                                            | YLLs (actual counts)                  |                                     |                                     |                                      | Deaths (actual counts)       |                              |                              |                              |
|                                                                  | 2016                                  | 2040 Forecast                       | 2040 Better Scenario                | 2040 Worse Scenario                  | 2016                         | 2040 Forecast                | 2040 Better Scenario         | 2040 Worse Scenario          |
| Neonatal disorders                                               | 16,548.26<br>(13,525.67 to 20,193.36) | 9,497.68<br>(6,330.15 to 13,458.64) | 8,154.30<br>(5,444.20 to 11,529.68) | 11,068.03<br>(7,357.07 to 15,634.49) | 191.26<br>(156.33 to 233.38) | 109.81<br>(73.19 to 155.59)  | 94.28<br>(62.98 to 133.26)   | 127.95<br>(85.07 to 180.71)  |
| Neonatal preterm birth                                           | 5,871.98<br>(4,676.46 to 7,311.98)    | 2,520.72<br>(1,694.52 to 3,571.62)  | 1,978.88<br>(1,346.81 to 2,785.20)  | 3,352.46<br>(2,238.43 to 4,701.15)   | 67.87<br>(54.05 to 84.49)    | 29.14<br>(19.59 to 41.29)    | 22.88<br>(15.58 to 32.19)    | 38.75<br>(25.88 to 54.34)    |
| Neonatal encephalopathy due to birth asphyxia and trauma         | 5,424.86<br>(4,263.68 to 6,880.30)    | 2,271.19<br>(1,396.27 to 3,535.15)  | 1,839.95<br>(1,147.29 to 2,813.68)  | 2,598.81<br>(1,565.86 to 4,027.46)   | 62.69<br>(49.27 to 79.50)    | 26.25<br>(16.15 to 40.85)    | 21.27<br>(13.27 to 32.51)    | 30.04<br>(18.11 to 46.55)    |
| Neonatal sepsis and other neonatal infections                    | 1,193.74<br>(718.31 to 4,091.66)      | 1,058.80<br>(534.05 to 3,241.13)    | 903.58<br>(460.73 to 2,818.52)      | 1,182.29<br>(599.95 to 3,650.59)     | 13.80<br>(8.30 to 47.28)     | 12.24<br>(6.18 to 37.47)     | 10.45<br>(5.33 to 32.60)     | 13.67<br>(6.94 to 42.22)     |
| Hemolytic disease and other neonatal jaundice                    | 60.52<br>(34.95 to 96.23)             | 33.11<br>(15.75 to 63.45)           | 27.82<br>(13.45 to 51.99)           | 37.30<br>(17.33 to 71.33)            | 0.70<br>(0.41 to 1.11)       | 0.38<br>(0.18 to 0.73)       | 0.32<br>(0.16 to 0.60)       | 0.43<br>(0.20 to 0.83)       |
| Other neonatal disorders                                         | 3,997.16<br>(3,071.62 to 5,182.38)    | 3,613.87<br>(2,186.25 to 5,646.74)  | 3,404.07<br>(2,068.40 to 5,270.80)  | 3,897.18<br>(2,328.71 to 6,172.47)   | 46.21<br>(35.50 to 59.90)    | 41.78<br>(25.28 to 65.26)    | 39.36<br>(23.91 to 60.96)    | 45.06<br>(26.95 to 71.36)    |
| Nutritional deficiencies                                         | 2,411.30<br>(2,129.60 to 2,681.72)    | 2,653.92<br>(2,147.26 to 3,275.18)  | 2,944.15<br>(2,379.31 to 3,627.76)  | 2,418.20<br>(1,940.03 to 3,003.60)   | 308.93<br>(268.29 to 353.51) | 393.57<br>(305.92 to 510.15) | 449.49<br>(348.20 to 577.47) | 349.48<br>(266.93 to 459.84) |
| Protein-energy malnutrition                                      | 1,906.50<br>(1,040.61 to 2,284.95)    | 2,030.95<br>(1,008.30 to 2,750.63)  | 2,312.12<br>(1,188.44 to 3,091.09)  | 1,829.03<br>(906.47 to 2,509.03)     | 250.89<br>(122.51 to 309.16) | 309.07<br>(137.68 to 446.08) | 360.97<br>(167.86 to 510.10) | 271.96<br>(120.47 to 395.93) |
| Iodine deficiency                                                | 35.64<br>(2.40 to 128.11)             | 102.72<br>(2.19 to 453.32)          | 106.66<br>(1.99 to 475.29)          | 96.65<br>(2.26 to 430.11)            | 2.66<br>(0.08 to 13.37)      | 12.94<br>(0.08 to 74.16)     | 13.85<br>(0.07 to 80.19)     | 11.83<br>(0.08 to 67.29)     |
| Dietary iron deficiency                                          | 39.75<br>(27.81 to 55.58)             | 37.93<br>(25.77 to 54.70)           | 39.97<br>(27.13 to 59.26)           | 36.71<br>(24.97 to 52.08)            | 1.54<br>(1.08 to 2.78)       | 2.42<br>(1.28 to 5.17)       | 2.73<br>(1.38 to 6.01)       | 2.22<br>(1.19 to 4.57)       |
| Other nutritional deficiencies                                   | 429.41<br>(252.70 to 1,210.12)        | 482.31<br>(249.41 to 1,452.26)      | 485.40<br>(242.31 to 1,543.47)      | 455.80<br>(237.77 to 1,343.30)       | 53.84<br>(26.98 to 174.00)   | 69.14<br>(29.97 to 233.79)   | 71.94<br>(30.88 to 253.94)   | 63.47<br>(27.75 to 211.44)   |
| Other communicable, maternal, neonatal, and nutritional diseases | 4,319.38<br>(3,334.54 to 4,917.05)    | 4,974.87<br>(3,860.26 to 5,841.71)  | 4,906.40<br>(3,775.36 to 5,757.38)  | 4,902.33<br>(3,789.91 to 5,725.73)   | 216.90<br>(158.83 to 249.84) | 302.33<br>(225.97 to 360.64) | 307.56<br>(231.19 to 365.19) | 288.19<br>(215.07 to 341.81) |
| Sexually transmitted infections excluding HIV                    | 91.18<br>(75.51 to 112.02)            | 56.32<br>(44.51 to 74.58)           | 54.44<br>(42.63 to 72.92)           | 56.24<br>(44.46 to 73.89)            | 4.88<br>(3.95 to 6.01)       | 3.85<br>(2.94 to 5.15)       | 3.87<br>(2.94 to 5.24)       | 3.71<br>(2.86 to 4.93)       |
| Syphilis                                                         | 28.97<br>(22.47 to 40.62)             | 15.16<br>(11.62 to 21.05)           | 13.92<br>(10.51 to 19.64)           | 15.50<br>(11.79 to 21.76)            | 1.29<br>(1.05 to 1.72)       | 0.96<br>(0.70 to 1.36)       | 0.92<br>(0.67 to 1.35)       | 0.94<br>(0.69 to 1.33)       |
| Chlamydial infection                                             | 12.25<br>(10.10 to 14.77)             | 8.21<br>(6.32 to 10.63)             | 8.10<br>(6.18 to 10.66)             | 8.11<br>(6.26 to 10.49)              | 0.75<br>(0.60 to 0.92)       | 0.61<br>(0.46 to 0.85)       | 0.63<br>(0.46 to 0.87)       | 0.58<br>(0.43 to 0.78)       |
| Gonococcal infection                                             | 34.90<br>(28.67 to 42.08)             | 23.54<br>(18.03 to 31.16)           | 23.22<br>(17.58 to 31.67)           | 23.25<br>(18.00 to 30.77)            | 2.12<br>(1.70 to 2.60)       | 1.73<br>(1.26 to 2.37)       | 1.76<br>(1.27 to 2.47)       | 1.65<br>(1.21 to 2.25)       |
| Other sexually transmitted infections                            | 15.05<br>(12.35 to 18.25)             | 9.42<br>(7.16 to 12.57)             | 9.20<br>(6.88 to 12.34)             | 9.38<br>(7.11 to 12.29)              | 0.73<br>(0.59 to 0.89)       | 0.56<br>(0.42 to 0.76)       | 0.56<br>(0.42 to 0.77)       | 0.54<br>(0.40 to 0.72)       |
| Acute hepatitis                                                  | 858.41<br>(743.66 to 985.97)          | 662.04<br>(494.24 to 862.79)        | 575.12<br>(431.22 to 772.54)        | 681.92<br>(502.11 to 890.21)         | 49.69<br>(42.01 to 58.46)    | 45.61<br>(33.17 to 61.45)    | 40.78<br>(29.40 to 56.40)    | 45.68<br>(33.03 to 61.61)    |
| Acute hepatitis A                                                | 44.87<br>(32.46 to 60.70)             | 35.22<br>(21.75 to 53.83)           | 32.01<br>(19.88 to 49.52)           | 35.82<br>(22.20 to 54.91)            | 2.08<br>(1.36 to 3.03)       | 2.18<br>(1.21 to 3.67)       | 2.04<br>(1.13 to 3.47)       | 2.15<br>(1.20 to 3.56)       |
| Acute hepatitis B                                                | 593.00<br>(479.69 to 718.98)          | 443.19<br>(307.56 to 616.52)        | 380.19<br>(258.07 to 538.80)        | 460.01<br>(315.30 to 639.13)         | 30.83<br>(23.50 to 38.78)    | 26.85<br>(17.91 to 39.04)    | 23.56<br>(15.31 to 34.90)    | 27.22<br>(17.57 to 39.52)    |



| Belgium                              |                                                 |                                                 |                                                 |                                                 |                                              |                                              |                                              |                                              |
|--------------------------------------|-------------------------------------------------|-------------------------------------------------|-------------------------------------------------|-------------------------------------------------|----------------------------------------------|----------------------------------------------|----------------------------------------------|----------------------------------------------|
| Cause                                | YLLs (actual counts)                            |                                                 |                                                 |                                                 | Deaths (actual counts)                       |                                              |                                              |                                              |
|                                      | 2016                                            | 2040 Forecast                                   | 2040 Better Scenario                            | 2040 Worse Scenario                             | 2016                                         | 2040 Forecast                                | 2040 Better Scenario                         | 2040 Worse Scenario                          |
| <b>Neoplasms</b>                     | <b>531,558.97</b><br>(480,143.50 to 582,479.76) | <b>584,169.40</b><br>(485,065.02 to 703,887.30) | <b>488,153.49</b><br>(408,533.21 to 582,688.10) | <b>727,848.75</b><br>(589,146.19 to 892,526.05) | <b>30,818.81</b><br>(28,009.25 to 33,563.44) | <b>39,505.49</b><br>(34,063.68 to 46,075.96) | <b>34,458.49</b><br>(29,970.26 to 39,990.04) | <b>46,701.61</b><br>(39,356.99 to 54,668.82) |
| Lip and oral cavity cancer           | 8,878.38<br>(7,659.33 to 10,193.37)             | 8,442.38<br>(4,488.69 to 15,038.13)             | 4,996.18<br>(2,797.57 to 8,719.32)              | 13,442.03<br>(7,066.33 to 24,066.83)            | 399.72<br>(350.98 to 451.91)                 | 418.49<br>(236.40 to 741.23)                 | 256.07<br>(149.18 to 437.94)                 | 649.94<br>(356.57 to 1,163.19)               |
| Nasopharynx cancer                   | 2,117.79<br>(1,818.09 to 2,473.03)              | 2,333.57<br>(1,295.37 to 4,067.87)              | 1,327.95<br>(766.61 to 2,278.05)                | 3,767.06<br>(2,016.86 to 6,564.80)              | 100.50<br>(87.34 to 115.84)                  | 128.11<br>(70.41 to 223.28)                  | 74.84<br>(42.52 to 127.17)                   | 201.17<br>(105.89 to 352.86)                 |
| Other pharynx cancer                 | 5,957.94<br>(5,168.23 to 6,830.53)              | 6,463.17<br>(3,447.89 to 11,152.15)             | 5,218.31<br>(2,888.04 to 8,856.09)              | 7,498.87<br>(3,894.64 to 12,904.92)             | 239.67<br>(209.10 to 272.84)                 | 288.15<br>(155.80 to 488.43)                 | 236.20<br>(133.84 to 392.80)                 | 329.87<br>(175.04 to 559.98)                 |
| Esophageal cancer                    | 16,847.71<br>(14,370.77 to 19,552.77)           | 17,598.38<br>(9,772.02 to 30,276.73)            | 11,409.81<br>(6,653.46 to 19,028.21)            | 26,747.55<br>(14,154.61 to 48,029.56)           | 862.13<br>(745.86 to 984.22)                 | 991.06<br>(558.48 to 1,654.97)               | 660.29<br>(403.74 to 1,066.50)               | 1,468.02<br>(801.47 to 2,527.76)             |
| Stomach cancer                       | 19,053.92<br>(17,050.38 to 21,125.67)           | 14,924.90<br>(11,562.67 to 19,448.14)           | 12,661.03<br>(10,152.38 to 15,952.45)           | 16,556.57<br>(12,324.00 to 22,102.64)           | 1,279.79<br>(1,155.49 to 1,413.19)           | 1,193.21<br>(934.70 to 1,537.84)             | 1,044.19<br>(856.69 to 1,302.90)             | 1,275.97<br>(967.40 to 1,675.29)             |
| Colon and rectum cancer              | 54,184.84<br>(48,019.55 to 60,548.99)           | 66,814.69<br>(47,307.33 to 95,239.18)           | 54,559.63<br>(39,473.82 to 77,308.80)           | 79,549.36<br>(54,195.39 to 115,765.51)          | 3,724.58<br>(3,326.59 to 4,131.31)           | 5,365.54<br>(3,818.75 to 7,585.27)           | 4,536.51<br>(3,330.34 to 6,386.42)           | 6,176.82<br>(4,317.72 to 8,857.82)           |
| Liver cancer                         | 14,807.15<br>(12,778.70 to 16,877.21)           | 19,091.37<br>(12,879.91 to 28,588.52)           | 16,203.27<br>(11,280.70 to 23,464.05)           | 27,360.42<br>(16,844.85 to 43,829.71)           | 846.38<br>(734.84 to 958.46)                 | 1,249.90<br>(875.41 to 1,775.58)             | 1,100.44<br>(795.34 to 1,508.87)             | 1,698.66<br>(1,082.65 to 2,595.10)           |
| Liver cancer due to hepatitis B      | 2,105.77<br>(1,476.46 to 2,990.32)              | 2,529.36<br>(1,512.60 to 4,184.56)              | 2,383.78<br>(1,457.08 to 3,836.77)              | 3,244.66<br>(1,795.49 to 5,721.89)              | 102.65<br>(70.50 to 146.53)                  | 143.30<br>(86.28 to 238.19)                  | 138.56<br>(85.49 to 222.03)                  | 176.11<br>(98.83 to 301.29)                  |
| Liver cancer due to hepatitis C      | 2,937.21<br>(2,076.14 to 3,931.58)              | 3,951.03<br>(2,368.42 to 6,048.69)              | 3,790.11<br>(2,342.48 to 5,687.98)              | 4,875.92<br>(2,757.77 to 7,914.29)              | 191.32<br>(132.11 to 261.23)                 | 295.97<br>(182.60 to 456.10)                 | 291.81<br>(183.78 to 441.58)                 | 347.87<br>(202.67 to 556.41)                 |
| Liver cancer due to alcohol use      | 7,132.76<br>(5,699.82 to 8,713.34)              | 9,041.86<br>(5,696.34 to 14,309.35)             | 6,635.60<br>(4,250.24 to 10,065.48)             | 14,660.45<br>(8,713.43 to 24,521.60)            | 398.75<br>(314.87 to 486.77)                 | 569.16<br>(360.64 to 641.06)                 | 434.68<br>(280.31 to 614.63)                 | 877.67<br>(519.92 to 1,423.63)               |
| Liver cancer due to other causes     | 2,631.41<br>(1,876.49 to 3,568.91)              | 3,569.12<br>(2,080.64 to 5,800.72)              | 3,393.79<br>(2,035.74 to 5,386.69)              | 4,579.39<br>(2,500.66 to 7,902.34)              | 153.66<br>(107.23 to 209.57)                 | 241.47<br>(141.91 to 387.81)                 | 235.39<br>(142.78 to 370.46)                 | 297.00<br>(162.43 to 505.60)                 |
| Gallbladder and biliary tract cancer | 5,047.35<br>(4,495.15 to 5,714.07)              | 4,592.83<br>(4,033.70 to 5,198.38)              | 4,663.23<br>(4,058.01 to 5,313.67)              | 4,406.68<br>(3,886.15 to 5,003.41)              | 345.48<br>(307.13 to 387.85)                 | 359.96<br>(321.99 to 403.64)                 | 375.04<br>(334.13 to 422.15)                 | 336.58<br>(302.23 to 379.90)                 |
| Pancreatic cancer                    | 30,500.44<br>(27,006.76 to 34,306.03)           | 36,203.34<br>(28,466.25 to 45,090.25)           | 34,067.57<br>(26,881.74 to 41,911.98)           | 50,386.51<br>(30,848.56 to 51,596.86)           | 1,807.89<br>(1,606.75 to 2,022.03)           | 2,403.17<br>(1,930.31 to 2,949.01)           | 2,321.78<br>(1,884.46 to 2,851.77)           | 2,601.12<br>(2,045.10 to 3,276.59)           |
| Larynx cancer                        | 4,906.58<br>(4,276.67 to 5,647.09)              | 4,445.16<br>(2,076.49 to 8,291.32)              | 2,578.85<br>(1,275.72 to 4,634.19)              | 7,081.22<br>(3,139.94 to 13,509.77)             | 231.61<br>(204.07 to 264.77)                 | 234.61<br>(110.84 to 433.74)                 | 138.33<br>(69.72 to 248.40)                  | 364.80<br>(167.28 to 498.45)                 |
| Tracheal, bronchus, and lung cancer  | 138,182.44<br>(123,152.87 to 154,259.45)        | 131,077.93<br>(89,497.58 to 182,298.27)         | 83,989.01<br>(58,233.28 to 115,840.24)          | 214,107.78<br>(144,860.55 to 295,136.10)        | 7,266.47<br>(6,492.73 to 8,090.22)           | 7,709.37<br>(5,269.16 to 10,799.45)          | 5,113.66<br>(3,525.50 to 7,123.22)           | 12,052.22<br>(8,181.11 to 16,527.91)         |
| Malignant skin melanoma              | 7,637.40<br>(6,008.60 to 8,936.49)              | 8,560.56<br>(6,716.13 to 10,193.77)             | 9,406.63<br>(7,437.07 to 11,163.81)             | 8,054.92<br>(6,339.44 to 9,516.93)              | 361.10<br>(286.49 to 419.35)                 | 483.78<br>(382.17 to 558.73)                 | 545.62<br>(435.93 to 631.60)                 | 442.64<br>(351.32 to 513.36)                 |
| Non-melanoma skin cancer             | 2,616.04<br>(2,302.68 to 2,981.70)              | 3,261.07<br>(2,831.49 to 3,742.57)              | 3,056.64<br>(2,667.44 to 3,488.62)              | 3,198.86<br>(2,788.07 to 3,685.65)              | 181.61<br>(162.20 to 203.59)                 | 266.85<br>(233.03 to 301.88)                 | 259.16<br>(227.36 to 291.33)                 | 252.72<br>(220.44 to 287.69)                 |
| Breast cancer                        | 49,203.04<br>(41,794.77 to 56,627.26)           | 50,668.50<br>(36,546.17 to 68,397.51)           | 41,868.66<br>(30,109.13 to 55,413.35)           | 59,283.37<br>(40,831.07 to 81,465.99)           | 2,604.66<br>(2,244.39 to 2,974.47)           | 3,119.13<br>(2,312.77 to 4,089.38)           | 2,663.30<br>(1,997.83 to 3,479.85)           | 3,544.87<br>(2,538.86 to 4,775.24)           |
| Cervical cancer                      | 6,170.41<br>(5,230.26 to 7,103.23)              | 4,654.64<br>(3,357.89 to 6,439.49)              | 4,004.91<br>(2,973.95 to 5,351.61)              | 5,128.57<br>(3,500.20 to 7,451.48)              | 307.34<br>(262.00 to 354.23)                 | 274.02<br>(207.88 to 358.89)                 | 243.57<br>(188.52 to 313.37)                 | 291.79<br>(209.71 to 400.46)                 |



| Belgium                         |                                             |                                             |                                             |                                             |                                          |                                          |                                          |                                          |
|---------------------------------|---------------------------------------------|---------------------------------------------|---------------------------------------------|---------------------------------------------|------------------------------------------|------------------------------------------|------------------------------------------|------------------------------------------|
| Cause                           | YLLs (actual counts)                        |                                             |                                             |                                             | Deaths (actual counts)                   |                                          |                                          |                                          |
|                                 | 2016                                        | 2040 Forecast                               | 2040 Better Scenario                        | 2040 Worse Scenario                         | 2016                                     | 2040 Forecast                            | 2040 Better Scenario                     | 2040 Worse Scenario                      |
| Kidney cancer                   | 12,968.26<br>(11,380.97 to<br>14,590.83)    | 16,711.10<br>(13,070.69 to<br>21,319.90)    | 16,140.61<br>(12,905.54 to<br>20,093.26)    | 17,842.31<br>(13,380.31 to<br>23,743.91)    | 788.40<br>(697.28 to<br>885.69)          | 1,149.28<br>(928.48 to<br>1,427.11)      | 1,143.32<br>(940.61 to<br>1,387.07)      | 1,186.07<br>(921.84 to<br>1,518.44)      |
| Bladder cancer                  | 14,423.53<br>(12,689.47 to<br>16,210.75)    | 16,580.88<br>(12,505.21 to<br>22,320.75)    | 14,633.85<br>(11,277.03 to<br>19,296.09)    | 19,330.26<br>(13,935.97 to<br>26,728.85)    | 1,108.97<br>(970.07 to<br>1,255.93)      | 1,454.79<br>(1,100.01 to<br>1,917.06)    | 1,320.35<br>(1,010.16 to<br>1,702.97)    | 1,634.76<br>(1,176.06 to<br>2,255.91)    |
| Brain and nervous system cancer | 17,569.77<br>(14,860.51 to<br>23,022.72)    | 20,853.55<br>(17,303.52 to<br>26,525.71)    | 20,338.21<br>(16,825.77 to<br>25,752.45)    | 20,670.51<br>(17,132.57 to<br>26,639.55)    | 676.14<br>(567.07 to<br>850.43)          | 958.65<br>(789.33 to<br>1,148.66)        | 952.84<br>(781.73 to<br>1,147.29)        | 930.32<br>(771.27 to<br>1,135.58)        |
| Thyroid cancer                  | 1,539.82<br>(1,333.31 to<br>1,773.58)       | 1,822.42<br>(1,350.49 to<br>2,476.85)       | 1,739.10<br>(1,307.17 to<br>2,363.20)       | 2,009.55<br>(1,426.74 to<br>2,877.48)       | 92.11<br>(79.49 to<br>104.98)            | 129.57<br>(99.56 to<br>172.84)           | 126.28<br>(98.04 to<br>166.54)           | 137.66<br>(101.94 to<br>190.67)          |
| Mesothelioma                    | 4,921.94<br>(4,188.98 to<br>5,746.14)       | 6,477.70<br>(5,434.71 to<br>7,586.23)       | 6,764.94<br>(5,634.82 to<br>8,036.68)       | 6,131.78<br>(5,199.92 to<br>7,130.28)       | 282.68<br>(242.85 to<br>329.52)          | 420.70<br>(361.14 to<br>482.08)          | 449.08<br>(383.43 to<br>521.89)          | 388.89<br>(341.56 to<br>441.65)          |
| Hodgkin lymphoma                | 1,245.29<br>(1,075.90 to<br>1,708.24)       | 1,078.28<br>(884.07 to<br>1,453.29)         | 956.83<br>(781.88 to<br>1,283.16)           | 1,103.70<br>(892.10 to<br>1,502.22)         | 51.03<br>(44.72 to<br>63.96)             | 53.93<br>(45.71 to<br>66.49)             | 49.04<br>(42.18 to<br>59.71)             | 53.76<br>(45.57 to<br>65.70)             |
| Non-Hodgkin lymphoma            | 14,834.51<br>(12,859.97 to<br>16,941.34)    | 16,568.01<br>(13,525.76 to<br>20,522.06)    | 15,986.46<br>(13,102.97 to<br>19,761.67)    | 17,142.66<br>(13,812.06 to<br>21,764.38)    | 877.06<br>(770.88 to<br>989.69)          | 1,134.88<br>(931.36 to<br>1,364.72)      | 1,122.85<br>(929.22 to<br>1,340.69)      | 1,139.17<br>(931.61 to<br>1,396.24)      |
| Multiple myeloma                | 8,955.80<br>(7,408.08 to<br>11,370.30)      | 11,388.68<br>(8,904.29 to<br>14,752.03)     | 11,303.41<br>(8,859.95 to<br>14,676.76)     | 11,679.76<br>(8,916.24 to<br>15,995.32)     | 581.48<br>(476.79 to<br>713.76)          | 829.74<br>(649.49 to<br>1,040.82)        | 843.22<br>(660.76 to<br>1,055.34)        | 826.87<br>(636.70 to<br>1,065.39)        |
| Leukemia                        | 21,668.32<br>(19,328.34 to<br>24,194.03)    | 24,526.94<br>(19,056.93 to<br>31,453.95)    | 22,726.05<br>(17,896.22 to<br>28,553.84)    | 27,601.86<br>(20,730.06 to<br>37,140.20)    | 1,220.48<br>(1,096.89 to<br>1,350.81)    | 1,672.35<br>(1,317.87 to<br>2,131.88)    | 1,588.20<br>(1,289.31 to<br>1,964.59)    | 1,819.16<br>(1,377.38 to<br>2,415.42)    |
| Acute lymphoid leukemia         | 1,744.14<br>(1,452.74 to<br>2,174.32)       | 1,461.71<br>(1,099.13 to<br>1,953.51)       | 1,311.55<br>(996.27 to<br>1,731.31)         | 1,672.49<br>(1,212.63 to<br>2,306.09)       | 56.55<br>(47.57 to<br>66.27)             | 58.37<br>(44.43 to<br>77.36)             | 53.15<br>(40.86 to<br>69.19)             | 66.04<br>(47.97 to<br>90.20)             |
| Chronic lymphoid leukemia       | 2,450.86<br>(2,047.82 to<br>3,288.16)       | 3,032.33<br>(2,183.18 to<br>4,317.42)       | 2,900.50<br>(2,128.09 to<br>4,073.06)       | 3,336.95<br>(2,300.83 to<br>4,940.49)       | 193.81<br>(163.84 to<br>247.36)          | 270.23<br>(199.95 to<br>367.01)          | 265.47<br>(199.47 to<br>355.80)          | 286.42<br>(202.12 to<br>402.22)          |
| Acute myeloid leukemia          | 8,105.60<br>(6,623.02 to<br>9,143.54)       | 10,094.05<br>(7,763.38 to<br>12,931.13)     | 9,655.79<br>(7,442.10 to<br>12,109.24)      | 11,288.43<br>(8,365.61 to<br>15,063.73)     | 417.69<br>(340.32 to<br>471.62)          | 605.28<br>(469.99 to<br>768.88)          | 591.97<br>(459.62 to<br>730.09)          | 657.86<br>(492.60 to<br>867.43)          |
| Chronic myeloid leukemia        | 1,552.51<br>(1,333.51 to<br>1,777.29)       | 1,008.92<br>(724.80 to<br>1,403.99)         | 830.87<br>(615.41 to<br>1,114.79)           | 1,186.44<br>(801.94 to<br>1,691.40)         | 99.58<br>(86.53 to<br>114.26)            | 75.97<br>(55.74 to<br>102.68)            | 64.49<br>(48.71 to<br>84.20)             | 85.72<br>(59.80 to<br>119.23)            |
| Other leukemia                  | 7,815.20<br>(6,720.24 to<br>8,909.06)       | 8,929.92<br>(6,801.44 to<br>11,877.33)      | 8,027.33<br>(6,198.22 to<br>10,446.91)      | 10,117.57<br>(7,417.14 to<br>13,951.45)     | 452.86<br>(394.44 to<br>515.00)          | 662.50<br>(507.72 to<br>866.84)          | 613.13<br>(482.05 to<br>781.60)          | 723.12<br>(537.70 to<br>967.60)          |
| Other neoplasms                 | 24,097.56<br>(20,955.07 to<br>27,281.53)    | 30,739.82<br>(26,450.99 to<br>34,812.00)    | 31,313.95<br>(26,870.76 to<br>35,692.98)    | 29,558.56<br>(25,556.26 to<br>33,399.26)    | 1,424.99<br>(1,247.70 to<br>1,608.70)    | 2,184.63<br>(1,908.61 to<br>2,433.65)    | 2,293.62<br>(1,990.91 to<br>2,569.22)    | 2,037.57<br>(1,785.05 to<br>2,367.48)    |
| Cardiovascular diseases         | 377,764.27<br>(343,914.35 to<br>410,901.35) | 327,620.07<br>(239,898.92 to<br>446,601.43) | 243,320.14<br>(188,573.12 to<br>320,485.28) | 436,914.53<br>(305,798.28 to<br>611,703.77) | 34,354.44<br>(31,632.41 to<br>36,911.11) | 34,554.71<br>(26,289.43 to<br>45,424.00) | 27,487.80<br>(21,879.99 to<br>35,018.84) | 42,035.19<br>(31,088.99 to<br>56,093.72) |
| Rheumatic heart disease         | 5,621.00<br>(4,996.06 to<br>6,289.36)       | 3,785.90<br>(3,097.83 to<br>4,741.76)       | 3,481.72<br>(2,890.21 to<br>4,346.72)       | 3,768.65<br>(3,064.03 to<br>4,785.03)       | 561.80<br>(502.92 to<br>625.52)          | 435.25<br>(355.32 to<br>546.40)          | 412.91<br>(341.98 to<br>513.08)          | 420.77<br>(335.70 to<br>533.70)          |
| Ischemic heart disease          | 198,299.98<br>(179,071.00 to<br>217,278.77) | 144,939.19<br>(86,871.61 to<br>236,879.93)  | 94,063.87<br>(58,329.13 to<br>147,149.51)   | 216,958.46<br>(126,714.02 to<br>345,205.47) | 17,532.55<br>(15,938.46 to<br>19,178.50) | 14,670.17<br>(8,940.75 to<br>22,719.74)  | 10,360.06<br>(6,521.53 to<br>15,711.22)  | 19,996.26<br>(11,839.20 to<br>30,827.73) |
| Stroke                          | 85,945.45<br>(76,017.72 to<br>96,232.99)    | 60,119.25<br>(38,369.61 to<br>92,145.89)    | 41,142.85<br>(27,407.34 to<br>61,865.41)    | 88,092.54<br>(53,660.30 to<br>137,281.31)   | 7,824.79<br>(6,806.06 to<br>8,886.12)    | 6,369.94<br>(4,091.71 to<br>9,838.30)    | 4,739.49<br>(3,143.83 to<br>7,225.39)    | 8,358.79<br>(5,276.54 to<br>13,237.15)   |
| Ischemic stroke                 | 36,535.76<br>(31,708.49 to<br>41,584.95)    | 24,843.42<br>(14,569.94 to<br>43,451.77)    | 18,624.63<br>(11,200.38 to<br>32,470.18)    | 33,206.52<br>(18,474.90 to<br>59,561.82)    | 3,888.70<br>(3,323.91 to<br>4,460.04)    | 3,008.40<br>(1,728.72 to<br>5,488.01)    | 2,392.47<br>(1,411.31 to<br>4,325.82)    | 3,716.93<br>(2,064.62 to<br>7,227.70)    |

|                                |                                          |                                          |                                          |                                          |                                       |                                       |                                       |                                       |
|--------------------------------|------------------------------------------|------------------------------------------|------------------------------------------|------------------------------------------|---------------------------------------|---------------------------------------|---------------------------------------|---------------------------------------|
|                                | 49,409.69<br>(43,739.76 to<br>55,261.83) | 35,275.83<br>(21,268.87 to<br>56,849.90) | 22,518.22<br>(14,545.83 to<br>33,505.41) | 54,886.02<br>(31,474.96 to<br>89,066.97) | 3,936.09<br>(3,447.14 to<br>4,466.20) | 3,361.54<br>(2,098.41 to<br>5,227.87) | 2,347.02<br>(1,566.66 to<br>3,513.73) | 4,641.86<br>(2,761.19 to<br>7,358.06) |
| Intracerebral hemorrhage       |                                          |                                          |                                          |                                          |                                       |                                       |                                       |                                       |
|                                | 6,601.98<br>(4,769.04 to<br>10,555.77)   | 12,307.49<br>(6,740.63 to<br>24,428.31)  | 9,021.50<br>(5,186.75 to<br>15,834.88)   | 15,171.60<br>(7,934.59 to<br>32,755.45)  | 691.84<br>(405.96 to<br>933.80)       | 1,541.73<br>(737.93 to<br>3,201.35)   | 1,168.85<br>(585.65 to<br>2,099.01)   | 1,809.83<br>(821.61 to<br>4,077.09)   |
| Hypertensive heart disease     |                                          |                                          |                                          |                                          |                                       |                                       |                                       |                                       |
|                                | 12,562.91<br>(8,546.08 to<br>15,017.46)  | 13,353.15<br>(7,522.34 to<br>19,419.05)  | 11,529.42<br>(6,550.28 to<br>16,719.28)  | 14,136.75<br>(8,077.87 to<br>20,448.29)  | 1,129.37<br>(624.84 to<br>1,422.72)   | 1,408.37<br>(647.58 to<br>2,296.29)   | 1,274.68<br>(599.33 to<br>2,014.08)   | 1,410.10<br>(664.67 to<br>2,315.14)   |
| Cardiomyopathy and myocarditis |                                          |                                          |                                          |                                          |                                       |                                       |                                       |                                       |
|                                | 1,672.77<br>(940.12 to<br>2,162.44)      | 1,911.30<br>(984.62 to<br>2,649.49)      | 1,983.88<br>(1,001.19 to<br>2,772.94)    | 1,805.46<br>(926.14 to<br>2,501.98)      | 165.56<br>(66.27 to<br>236.24)        | 226.70<br>(82.53 to<br>342.62)        | 245.32<br>(90.00 to<br>367.96)        | 205.69<br>(76.74 to<br>313.19)        |
| Myocarditis                    |                                          |                                          |                                          |                                          |                                       |                                       |                                       |                                       |

| Belgium                                                       |                                                     |                                                      |                                                     |                                                       |                                                  |                                                   |                                                  |                                                    |
|---------------------------------------------------------------|-----------------------------------------------------|------------------------------------------------------|-----------------------------------------------------|-------------------------------------------------------|--------------------------------------------------|---------------------------------------------------|--------------------------------------------------|----------------------------------------------------|
| Cause                                                         | YLLs (actual counts)                                |                                                      |                                                     |                                                       | Deaths (actual counts)                           |                                                   |                                                  |                                                    |
|                                                               | 2016                                                | 2040 Forecast                                        | 2040 Better Scenario                                | 2040 Worse Scenario                                   | 2016                                             | 2040 Forecast                                     | 2040 Better Scenario                             | 2040 Worse Scenario                                |
| Alcoholic cardiomyopathy                                      | 2,601.92<br>(1,529.02 to 3,314.49)                  | 2,372.63<br>(1,372.61 to 3,164.16)                   | 1,837.91<br>(1,045.04 to 2,472.72)                  | 2,979.22<br>(1,776.54 to 3,886.22)                    | 109.44<br>(62.04 to 138.59)                      | 116.27<br>(63.26 to 151.68)                       | 92.92<br>(49.56 to 122.31)                       | 142.42<br>(79.94 to 182.11)                        |
| Other cardiomyopathy                                          | 8,288.22<br>(5,523.76 to 9,978.68)                  | 9,069.22<br>(4,613.24 to 14,694.72)                  | 7,707.62<br>(3,929.03 to 12,290.36)                 | 9,352.07<br>(4,803.30 to 15,161.78)                   | 854.36<br>(458.94 to 1,088.08)                   | 1,065.40<br>(454.97 to 1,890.69)                  | 936.44<br>(401.28 to 1,627.51)                   | 1,062.00<br>(445.21 to 1,925.31)                   |
| Atrial fibrillation and flutter                               | 12,809.80<br>(9,855.61 to 16,059.72)                | 18,559.71<br>(13,349.98 to 24,384.06)                | 17,268.17<br>(12,583.46 to 22,523.12)               | 19,590.39<br>(14,022.96 to 26,252.41)                 | 1,552.11<br>(1,185.29 to 1,930.65)               | 2,379.42<br>(1,730.69 to 3,128.63)                | 2,281.43<br>(1,679.33 to 2,969.55)               | 2,426.43<br>(1,730.47 to 3,214.36)                 |
| Aortic aneurysm                                               | 10,298.41<br>(9,109.50 to 11,654.63)                | 11,615.30<br>(9,118.37 to 15,048.20)                 | 10,959.81<br>(8,853.94 to 13,944.44)                | 12,165.46<br>(9,428.22 to 15,914.15)                  | 838.11<br>(747.91 to 934.71)                     | 1,083.21<br>(883.42 to 1,366.76)                  | 1,069.24<br>(880.58 to 1,321.70)                 | 1,073.56<br>(864.11 to 1,358.95)                   |
| Peripheral artery disease                                     | 2,384.46<br>(1,690.38 to 3,559.31)                  | 4,275.94<br>(2,775.83 to 6,687.15)                   | 4,299.31<br>(2,827.02 to 6,744.16)                  | 4,524.75<br>(2,887.20 to 7,172.64)                    | 254.61<br>(173.47 to 392.56)                     | 514.33<br>(324.92 to 798.72)                      | 537.38<br>(338.88 to 832.60)                     | 517.37<br>(326.94 to 806.39)                       |
| Endocarditis                                                  | 6,417.93<br>(3,791.52 to 7,964.43)                  | 8,974.53<br>(4,719.70 to 13,816.57)                  | 8,683.63<br>(4,575.72 to 13,137.67)                 | 8,891.92<br>(4,664.05 to 13,784.66)                   | 553.98<br>(290.18 to 730.09)                     | 872.11<br>(409.27 to 1,506.00)                    | 872.27<br>(409.07 to 1,471.47)                   | 835.82<br>(387.09 to 1,433.24)                     |
| Other cardiovascular and circulatory diseases                 | 36,822.33<br>(32,674.87 to 41,023.74)               | 49,689.60<br>(39,407.57 to 62,881.35)                | 42,869.86<br>(35,235.77 to 53,075.35)               | 53,614.01<br>(42,090.59 to 69,600.94)                 | 3,415.28<br>(3,050.10 to 3,801.68)               | 5,280.19<br>(4,329.70 to 6,537.43)                | 4,771.50<br>(3,992.55 to 5,853.14)               | 5,386.26<br>(4,372.30 to 6,846.23)                 |
| <b>Chronic respiratory diseases</b>                           | <b>85,359.81</b><br><b>(77,287.90 to 93,832.19)</b> | <b>93,679.84</b><br><b>(70,748.07 to 121,307.44)</b> | <b>68,898.13</b><br><b>(53,229.52 to 88,165.98)</b> | <b>135,876.51</b><br><b>(99,650.26 to 182,112.73)</b> | <b>7,028.84</b><br><b>(6,362.78 to 7,684.01)</b> | <b>8,769.80</b><br><b>(6,760.84 to 11,367.62)</b> | <b>6,618.11</b><br><b>(5,235.30 to 8,412.13)</b> | <b>12,032.67</b><br><b>(9,098.44 to 15,973.03)</b> |
| Chronic obstructive pulmonary disease                         | 74,955.17<br>(67,422.48 to 82,728.36)               | 80,964.03<br>(58,445.34 to 108,393.05)               | 55,088.94<br>(40,063.97 to 73,641.22)               | 123,389.28<br>(87,659.52 to 169,722.55)               | 7,783.90<br>(5,711.43 to 6,940.08)               | 6,329.76<br>(5,791.93 to 10,357.76)               | 5,516.76<br>(4,151.40 to 7,300.51)               | 11,098.10<br>(8,140.77 to 14,956.80)               |
| Pneumoconiosis                                                | 1,267.57<br>(1,129.99 to 1,633.73)                  | 1,491.43<br>(1,101.41 to 1,961.64)                   | 1,413.11<br>(1,054.15 to 1,849.76)                  | 1,522.01<br>(1,146.66 to 2,015.96)                    | 116.65<br>(95.79 to 139.36)                      | 134.73<br>(102.15 to 178.15)                      | 130.29<br>(99.28 to 170.15)                      | 134.18<br>(100.33 to 178.09)                       |
| Silicosis                                                     | 208.33<br>(143.92 to 345.51)                        | 125.39<br>(72.38 to 223.09)                          | 98.78<br>(57.08 to 179.32)                          | 132.23<br>(73.67 to 238.92)                           | 16.29<br>(10.83 to 27.32)                        | 10.99<br>(6.41 to 19.28)                          | 8.91<br>(5.31 to 15.89)                          | 11.26<br>(6.40 to 20.14)                           |
| Asbestosis                                                    | 326.93<br>(195.05 to 519.62)                        | 627.91<br>(387.77 to 938.94)                         | 688.90<br>(454.70 to 995.49)                        | 581.12<br>(343.60 to 883.73)                          | 25.33<br>(14.62 to 40.50)                        | 52.73<br>(31.57 to 78.32)                         | 59.37<br>(38.31 to 86.80)                        | 47.52<br>(26.97 to 73.05)                          |
| Coal workers pneumoconiosis                                   | 789.85<br>(503.13 to 1,008.59)                      | 693.64<br>(335.04 to 1,169.66)                       | 581.27<br>(281.15 to 1,013.01)                      | 763.63<br>(375.89 to 1,279.99)                        | 71.50<br>(47.21 to 91.18)                        | 66.42<br>(33.13 to 111.06)                        | 57.25<br>(27.57 to 100.10)                       | 70.91<br>(34.79 to 117.29)                         |
| Other pneumoconiosis                                          | 42.46<br>(31.75 to 72.18)                           | 44.48<br>(30.52 to 78.66)                            | 44.17<br>(29.65 to 81.58)                           | 45.03<br>(31.26 to 77.58)                             | 3.53<br>(2.70 to 5.84)                           | 4.76<br>(3.08 to 8.12)                            | 4.76<br>(3.10 to 8.76)                           | 4.49<br>(3.04 to 7.68)                             |
| Asthma                                                        | 2,731.03<br>(2,380.37 to 3,364.52)                  | 1,298.51<br>(800.24 to 2,141.89)                     | 1,099.93<br>(635.48 to 1,627.68)                    | 1,782.02<br>(1,044.79 to 3,025.22)                    | 152.11<br>(130.98 to 181.25)                     | 89.68<br>(54.64 to 147.85)                        | 73.01<br>(65.59 to 115.12)                       | 115.58<br>(68.25 to 195.00)                        |
| Interstitial lung disease and pulmonary sarcoidosis           | 5,357.83<br>(3,180.48 to 6,779.79)                  | 8,927.22<br>(5,287.80 to 11,255.48)                  | 10,432.93<br>(6,495.60 to 12,966.51)                | 8,115.03<br>(4,712.59 to 10,274.00)                   | 380.03<br>(223.02 to 477.38)                     | 698.55<br>(411.80 to 878.95)                      | 836.16<br>(521.13 to 1,026.53)                   | 619.66<br>(359.85 to 785.48)                       |
| Other chronic respiratory diseases                            | 948.21<br>(578.76 to 1,201.15)                      | 998.63<br>(583.95 to 1,434.24)                       | 953.22<br>(567.03 to 1,354.56)                      | 1,068.16<br>(617.70 to 1,556.38)                      | 50.30<br>(29.12 to 65.75)                        | 62.95<br>(34.40 to 89.72)                         | 61.89<br>(34.52 to 88.06)                        | 65.15<br>(34.91 to 94.22)                          |
| <b>Cirrhosis and other chronic liver diseases</b>             | <b>42,424.33</b><br><b>(37,685.86 to 47,651.25)</b> | <b>40,418.83</b><br><b>(34,633.08 to 46,920.39)</b>  | <b>32,136.95</b><br><b>(27,537.69 to 37,448.35)</b> | <b>48,527.27</b><br><b>(41,393.90 to 57,228.53)</b>   | <b>1,917.48</b><br><b>(1,721.85 to 2,123.84)</b> | <b>2,112.35</b><br><b>(1,879.70 to 2,383.35)</b>  | <b>1,738.55</b><br><b>(1,543.70 to 1,944.12)</b> | <b>2,461.19</b><br><b>(2,171.64 to 2,797.10)</b>   |
| Cirrhosis and other chronic liver diseases due to hepatitis B | 3,837.07<br>(3,018.11 to 4,937.37)                  | 3,632.86<br>(2,764.58 to 4,738.50)                   | 3,382.73<br>(2,611.52 to 4,407.18)                  | 3,668.22<br>(2,795.84 to 4,758.33)                    | 174.46<br>(138.75 to 220.22)                     | 190.64<br>(148.36 to 244.50)                      | 181.94<br>(142.74 to 232.12)                     | 187.63<br>(147.18 to 240.38)                       |
| Cirrhosis and other chronic liver diseases due to hepatitis C | 11,164.89<br>(8,761.97 to 13,831.89)                | 10,549.17<br>(7,970.88 to 13,494.92)                 | 9,719.18<br>(7,457.47 to 12,228.02)                 | 10,735.21<br>(8,110.54 to 13,901.62)                  | 476.79<br>(375.53 to 585.62)                     | 513.51<br>(399.12 to 638.39)                      | 483.85<br>(382.72 to 601.45)                     | 510.56<br>(396.75 to 644.52)                       |

|                                                                |                                                               |                                                               |                                                               |                                                               |                                                            |                                                            |                                                            |                                                            |
|----------------------------------------------------------------|---------------------------------------------------------------|---------------------------------------------------------------|---------------------------------------------------------------|---------------------------------------------------------------|------------------------------------------------------------|------------------------------------------------------------|------------------------------------------------------------|------------------------------------------------------------|
|                                                                | 24,271.35<br>(20,468.60 to<br>28,274.27)                      | 23,200.18<br>(18,941.86 to<br>27,909.24)                      | 16,209.27<br>(13,257.28 to<br>19,756.82)                      | 31,048.34<br>(25,800.49 to<br>37,381.28)                      | 1,111.13<br>(943.50 to<br>1,275.05)                        | 1,231.02<br>(1,035.28 to<br>1,433.58)                      | 900.09<br>(751.97 to<br>1,064.20)                          | 1,588.58<br>(1,347.40 to<br>1,857.86)                      |
| Cirrhosis and other chronic liver diseases due to alcohol use  |                                                               |                                                               |                                                               |                                                               |                                                            |                                                            |                                                            |                                                            |
|                                                                | 3,151.02<br>(2,348.40 to<br>4,147.22)                         | 3,036.63<br>(2,219.66 to<br>4,088.36)                         | 2,825.77<br>(2,066.09 to<br>3,772.93)                         | 3,075.50<br>(2,220.37 to<br>4,182.48)                         | 155.10<br>(116.76 to<br>203.67)                            | 177.18<br>(130.81 to<br>239.37)                            | 169.66<br>(126.58 to<br>229.26)                            | 174.42<br>(126.62 to<br>234.71)                            |
| Cirrhosis and other chronic liver diseases due to other causes |                                                               |                                                               |                                                               |                                                               |                                                            |                                                            |                                                            |                                                            |
| <b>Digestive diseases</b>                                      | <b>36,000.51</b><br><b>(30,645.65 to</b><br><b>42,013.53)</b> | <b>45,034.65</b><br><b>(36,456.60 to</b><br><b>55,079.24)</b> | <b>43,447.38</b><br><b>(35,223.79 to</b><br><b>52,873.46)</b> | <b>45,531.32</b><br><b>(36,458.55 to</b><br><b>56,429.17)</b> | <b>3,085.16</b><br><b>(2,560.56 to</b><br><b>3,492.33)</b> | <b>4,550.07</b><br><b>(3,637.08 to</b><br><b>5,461.58)</b> | <b>4,546.34</b><br><b>(3,626.64 to</b><br><b>5,447.89)</b> | <b>4,462.10</b><br><b>(3,509.22 to</b><br><b>5,432.05)</b> |
| Peptic ulcer disease                                           | 4,296.13<br>(3,699.89 to<br>5,323.86)                         | 3,380.07<br>(2,630.14 to<br>4,337.83)                         | 2,908.26<br>(2,287.44 to<br>3,726.47)                         | 3,579.41<br>(2,703.51 to<br>4,633.77)                         | 363.59<br>(311.93 to<br>443.69)                            | 354.58<br>(271.77 to<br>460.64)                            | 315.79<br>(247.35 to<br>402.27)                            | 359.52<br>(270.26 to<br>469.07)                            |



| Belgium                                    |                                          |                                          |                                          |                                          |                                       |                                       |                                       |                                       |
|--------------------------------------------|------------------------------------------|------------------------------------------|------------------------------------------|------------------------------------------|---------------------------------------|---------------------------------------|---------------------------------------|---------------------------------------|
| Cause                                      | YLLs (actual counts)                     |                                          |                                          |                                          | Deaths (actual counts)                |                                       |                                       |                                       |
|                                            | 2016                                     | 2040 Forecast                            | 2040 Better Scenario                     | 2040 Worse Scenario                      | 2016                                  | 2040 Forecast                         | 2040 Better Scenario                  | 2040 Worse Scenario                   |
| Gastritis and duodenitis                   | 209.68<br>(165.68 to 292.31)             | 234.03<br>(175.25 to 336.51)             | 218.48<br>(165.09 to 313.84)             | 230.76<br>(170.71 to 333.13)             | 16.54<br>(11.92 to 21.73)             | 22.88<br>(16.18 to 31.90)             | 22.22<br>(15.90 to 31.02)             | 21.72<br>(14.98 to 30.52)             |
| Appendicitis                               | 382.46<br>(305.26 to 606.39)             | 390.11<br>(295.63 to 618.34)             | 344.98<br>(262.25 to 534.20)             | 394.60<br>(299.78 to 619.91)             | 26.62<br>(21.01 to 39.92)             | 33.66<br>(25.29 to 50.56)             | 30.73<br>(23.37 to 46.05)             | 32.98<br>(24.63 to 49.79)             |
| Paralytic ileus and intestinal obstruction | 6,536.63<br>(4,637.84 to 7,899.56)       | 9,233.07<br>(6,524.36 to 11,335.17)      | 9,639.57<br>(6,820.50 to 11,884.19)      | 8,669.40<br>(6,127.99 to 10,646.00)      | 584.35<br>(402.24 to 717.55)          | 960.93<br>(661.16 to 1,179.72)        | 1,031.72<br>(714.09 to 1,259.39)      | 877.75<br>(602.54 to 1,087.89)        |
| Inguinal, femoral, and abdominal hernia    | 1,141.45<br>(879.59 to 2,013.73)         | 1,023.44<br>(763.55 to 1,848.91)         | 987.98<br>(738.49 to 1,791.01)           | 989.62<br>(744.64 to 1,783.13)           | 103.89<br>(79.82 to 185.73)           | 107.06<br>(79.00 to 189.08)           | 106.69<br>(79.42 to 189.87)           | 100.48<br>(74.16 to 181.26)           |
| Inflammatory bowel disease                 | 3,083.07<br>(1,530.70 to 3,813.56)       | 3,772.01<br>(1,788.47 to 4,779.25)       | 3,897.92<br>(1,854.07 to 4,968.96)       | 3,569.91<br>(1,698.96 to 4,521.87)       | 274.16<br>(117.29 to 346.80)          | 392.91<br>(159.07 to 506.92)          | 419.31<br>(171.58 to 545.25)          | 360.69<br>(146.95 to 468.77)          |
| Vascular intestinal disorders              | 8,008.93<br>(6,419.70 to 9,499.92)       | 11,054.28<br>(8,694.97 to 13,017.52)     | 10,974.88<br>(8,619.87 to 13,042.97)     | 10,621.49<br>(8,274.12 to 12,548.36)     | 692.33<br>(544.23 to 808.40)          | 1,105.65<br>(839.65 to 1,299.21)      | 1,129.64<br>(851.62 to 1,333.32)      | 1,034.56<br>(769.90 to 1,227.07)      |
| Gallbladder and biliary diseases           | 3,556.15<br>(3,039.16 to 4,326.55)       | 4,783.88<br>(2,831.62 to 7,963.69)       | 4,260.41<br>(2,527.87 to 7,069.22)       | 5,985.10<br>(3,401.48 to 10,091.96)      | 372.96<br>(316.65 to 449.04)          | 575.16<br>(320.78 to 971.30)          | 527.09<br>(301.82 to 884.35)          | 694.53<br>(379.42 to 1,173.95)        |
| Pancreatitis                               | 3,559.70<br>(2,928.60 to 5,265.30)       | 4,239.04<br>(2,321.84 to 8,194.82)       | 3,325.48<br>(1,909.54 to 6,332.84)       | 4,836.89<br>(2,511.70 to 9,396.64)       | 198.58<br>(165.30 to 289.57)          | 290.04<br>(164.98 to 531.08)          | 237.01<br>(144.66 to 421.97)          | 319.81<br>(171.16 to 598.81)          |
| Other digestive diseases                   | 5,226.32<br>(3,976.91 to 6,166.01)       | 6,924.72<br>(5,241.27 to 8,411.60)       | 6,889.42<br>(5,273.73 to 8,436.80)       | 6,654.13<br>(4,978.38 to 8,097.82)       | 452.16<br>(362.16 to 530.62)          | 452.16<br>(362.16 to 530.62)          | 707.21<br>(578.62 to 878.64)          | 660.08<br>(516.83 to 799.68)          |
| Neurological disorders                     | 129,604.84<br>(111,600.10 to 149,493.58) | 183,623.43<br>(147,519.52 to 232,156.08) | 188,840.01<br>(153,085.52 to 236,059.68) | 193,285.17<br>(149,109.48 to 256,463.70) | 14,524.70<br>(12,310.14 to 17,046.32) | 22,276.97<br>(17,487.82 to 28,566.79) | 23,566.41<br>(18,665.73 to 29,629.46) | 22,931.34<br>(17,326.56 to 31,128.95) |
| Alzheimer's disease and other dementias    | 98,147.07<br>(82,241.78 to 117,505.31)   | 142,766.86<br>(107,189.98 to 190,053.02) | 147,672.23<br>(111,880.78 to 192,259.05) | 152,998.26<br>(109,752.06 to 215,111.76) | 12,590.48<br>(10,464.27 to 15,119.15) | 15,906.36<br>(14,584.10 to 25,596.26) | 20,447.21<br>(15,632.89 to 26,630.81) | 20,116.13<br>(14,498.15 to 28,203.09) |
| Parkinson's disease                        | 9,950.70<br>(7,449.48 to 12,928.87)      | 15,467.24<br>(11,587.65 to 20,017.43)    | 16,722.40<br>(12,511.77 to 21,874.00)    | 14,271.60<br>(10,576.36 to 18,640.19)    | 974.81<br>(732.31 to 1,276.33)        | 1,590.87<br>(1,184.81 to 2,095.62)    | 1,755.51<br>(1,321.07 to 2,301.14)    | 1,438.79<br>(1,071.12 to 1,910.52)    |
| Epilepsy                                   | 6,463.52<br>(5,675.96 to 7,362.81)       | 8,137.45<br>(5,239.34 to 12,096.41)      | 6,935.90<br>(4,577.92 to 10,026.26)      | 9,064.10<br>(6,300.99 to 13,300.99)      | 282.14<br>(248.00 to 321.40)          | 450.87<br>(284.76 to 660.61)          | 398.83<br>(260.71 to 571.48)          | 487.09<br>(297.65 to 718.53)          |
| Multiple sclerosis                         | 2,967.28<br>(2,344.84 to 3,741.75)       | 3,152.91<br>(2,366.07 to 3,953.48)       | 3,149.05<br>(2,341.03 to 3,924.51)       | 3,230.46<br>(2,407.61 to 4,091.91)       | 120.14<br>(86.28 to 143.11)           | 140.63<br>(95.99 to 171.60)           | 142.77<br>(96.32 to 173.74)           | 141.41<br>(96.16 to 173.94)           |
| Motor neuron disease                       | 5,590.55<br>(4,934.97 to 6,234.70)       | 6,306.62<br>(5,419.10 to 7,204.64)       | 6,366.06<br>(5,455.70 to 7,319.40)       | 6,153.82<br>(5,296.79 to 6,996.90)       | 263.48<br>(232.43 to 292.93)          | 342.21<br>(296.35 to 385.96)          | 350.66<br>(303.11 to 398.58)          | 328.41<br>(286.22 to 370.16)          |
| Other neurological disorders               | 6,485.72<br>(5,556.84 to 7,315.10)       | 7,792.36<br>(6,661.18 to 8,898.91)       | 7,994.38<br>(6,797.25 to 9,163.41)       | 7,566.93<br>(6,442.88 to 8,614.77)       | 293.65<br>(255.23 to 328.70)          | 446.04<br>(389.35 to 503.47)          | 471.42<br>(411.52 to 534.70)          | 419.52<br>(367.42 to 472.49)          |
| Mental disorders                           | 22,806.70<br>(19,711.17 to 26,285.80)    | 28,273.32<br>(23,016.71 to 34,098.82)    | 29,730.41<br>(24,525.02 to 35,836.24)    | 28,249.59<br>(23,284.31 to 34,396.07)    | 733.09<br>(640.85 to 838.68)          | 1,013.43<br>(870.32 to 1,175.60)      | 1,084.80<br>(938.35 to 1,254.91)      | 993.82<br>(856.97 to 1,147.55)        |
| Alcohol use disorders                      | 13,874.60<br>(12,040.62 to 16,079.05)    | 12,210.31<br>(9,865.59 to 15,157.83)     | 11,620.38<br>(9,324.88 to 14,425.90)     | 13,015.39<br>(10,604.24 to 16,066.04)    | 477.87<br>(416.22 to 549.37)          | 471.88<br>(393.10 to 566.15)          | 456.66<br>(376.98 to 552.46)          | 494.91<br>(412.21 to 592.00)          |
| Drug use disorders                         | 8,762.60<br>(6,916.80 to 10,771.92)      | 15,911.12<br>(12,289.50 to 19,862.44)    | 17,947.38<br>(14,100.04 to 22,171.96)    | 15,086.30<br>(11,562.89 to 19,082.17)    | 251.95<br>(204.90 to 301.80)          | 538.60<br>(435.07 to 645.95)          | 624.97<br>(513.57 to 745.53)          | 496.04<br>(401.64 to 597.99)          |
| Opioid use disorders                       | 3,975.00<br>(3,006.88 to 5,549.62)       | 4,755.34<br>(3,406.81 to 7,356.07)       | 4,934.49<br>(3,513.29 to 7,791.34)       | 4,658.62<br>(3,320.17 to 7,154.20)       | 103.67<br>(80.42 to 136.86)           | 142.96<br>(108.50 to 194.02)          | 152.00<br>(116.48 to 207.52)          | 136.73<br>(104.17 to 187.31)          |

|                           |                                       |                                        |                                         |                                        |                                 |                                 |                                 |                                 |
|---------------------------|---------------------------------------|----------------------------------------|-----------------------------------------|----------------------------------------|---------------------------------|---------------------------------|---------------------------------|---------------------------------|
|                           | 119.76<br>(71.53 to<br>161.06)        | 318.12<br>(202.31 to<br>452.94)        | 356.81<br>(229.34 to<br>516.81)         | 302.05<br>(191.17 to<br>433.31)        | 3.68<br>(2.19 to<br>4.67)       | 10.91<br>(6.63 to<br>14.50)     | 12.51<br>(7.69 to<br>16.62)     | 10.11<br>(6.27 to<br>13.43)     |
| Cocaine use disorders     |                                       |                                        |                                         |                                        |                                 |                                 |                                 |                                 |
|                           | 357.16<br>(170.13 to<br>493.76)       | 1,332.05<br>(688.82 to<br>1,960.51)    | 1,577.91<br>(845.55 to<br>2,323.34)     | 1,246.99<br>(639.37 to<br>1,868.36)    | 7.54<br>(3.96 to<br>10.24)      | 29.25<br>(16.50 to<br>41.34)    | 34.97<br>(20.31 to<br>48.66)    | 27.13<br>(15.21 to<br>39.28)    |
| Amphetamine use disorders |                                       |                                        |                                         |                                        |                                 |                                 |                                 |                                 |
|                           | 4,310.67<br>(2,688.89 to<br>5,473.89) | 9,505.62<br>(6,563.41 to<br>12,337.41) | 11,078.16<br>(7,982.03 to<br>14,162.58) | 8,878.64<br>(6,172.99 to<br>11,692.01) | 137.06<br>(103.64 to<br>167.53) | 355.48<br>(275.87 to<br>434.94) | 425.49<br>(334.08 to<br>517.75) | 322.06<br>(247.46 to<br>400.91) |
| Other drug use disorders  |                                       |                                        |                                         |                                        |                                 |                                 |                                 |                                 |
|                           | 169.51<br>(129.66 to<br>213.84)       | 151.89<br>(100.66 to<br>219.11)        | 162.65<br>(106.52 to<br>235.65)         | 147.90<br>(98.55 to<br>212.41)         | 3.27<br>(2.50 to<br>4.12)       | 2.96<br>(1.99 to<br>4.23)       | 3.17<br>(2.11 to<br>4.58)       | 2.88<br>(1.95 to<br>4.14)       |
| Eating disorders          |                                       |                                        |                                         |                                        |                                 |                                 |                                 |                                 |

| Belgium                                                    |                                              |                                               |                                               |                                                |                                           |                                            |                                            |                                             |
|------------------------------------------------------------|----------------------------------------------|-----------------------------------------------|-----------------------------------------------|------------------------------------------------|-------------------------------------------|--------------------------------------------|--------------------------------------------|---------------------------------------------|
| Cause                                                      | YLLs (actual counts)                         |                                               |                                               |                                                | Deaths (actual counts)                    |                                            |                                            |                                             |
|                                                            | 2016                                         | 2040 Forecast                                 | 2040 Better Scenario                          | 2040 Worse Scenario                            | 2016                                      | 2040 Forecast                              | 2040 Better Scenario                       | 2040 Worse Scenario                         |
| <b>Diabetes, urogenital, blood, and endocrine diseases</b> | <b>64,145.25</b><br>(58,376.13 to 69,878.94) | <b>91,299.47</b><br>(71,661.76 to 114,961.42) | <b>82,779.28</b><br>(65,695.40 to 103,975.42) | <b>100,949.74</b><br>(77,952.26 to 130,183.51) | <b>5,594.82</b><br>(5,078.10 to 6,073.18) | <b>9,381.05</b><br>(7,506.38 to 11,909.27) | <b>8,756.50</b><br>(7,010.38 to 10,925.17) | <b>10,079.19</b><br>(7,836.83 to 13,218.50) |
| Diabetes mellitus                                          | 21,090.27<br>(18,847.63 to 23,468.10)        | 25,436.80<br>(16,620.58 to 37,653.06)         | 20,801.50<br>(13,764.12 to 30,463.60)         | 29,471.74<br>(18,188.42 to 44,767.03)          | 1,716.31<br>(1,532.35 to 1,896.01)        | 2,444.01<br>(1,684.56 to 3,523.41)         | 2,097.37<br>(1,455.77 to 2,913.00)         | 2,680.89<br>(1,770.07 to 3,983.98)          |
| Acute glomerulonephritis                                   | 51.38<br>(46.53 to 56.07)                    | 44.40<br>(36.40 to 54.13)                     | 40.47<br>(33.11 to 48.90)                     | 46.03<br>(37.62 to 55.54)                      | 1.15<br>(1.05 to 1.26)                    | 1.13<br>(0.94 to 1.37)                     | 1.06<br>(0.86 to 1.28)                     | 1.15<br>(0.94 to 1.37)                      |
| Chronic kidney disease                                     | 21,229.79<br>(19,112.57 to 23,584.94)        | 35,280.43<br>(22,107.82 to 55,457.41)         | 31,345.76<br>(20,163.85 to 47,549.32)         | 41,944.77<br>(25,923.69 to 69,533.31)          | 2,167.20<br>(1,950.82 to 2,391.53)        | 4,101.01<br>(2,547.07 to 6,435.51)         | 3,751.97<br>(2,389.49 to 5,756.72)         | 4,745.26<br>(2,784.75 to 7,783.96)          |
| Chronic kidney disease due to diabetes mellitus            | 6,369.43<br>(5,702.81 to 7,137.48)           | 11,354.41<br>(7,168.98 to 17,648.95)          | 10,009.33<br>(6,454.31 to 15,152.66)          | 13,639.71<br>(8,092.43 to 22,322.68)           | 549.82<br>(489.76 to 617.52)              | 1,135.74<br>(716.55 to 1,747.04)           | 1,030.89<br>(662.65 to 1,579.93)           | 1,326.83<br>(788.15 to 2,170.72)            |
| Chronic kidney disease due to hypertension                 | 4,718.14<br>(4,075.04 to 5,406.28)           | 8,938.39<br>(5,378.30 to 14,336.49)           | 8,227.96<br>(5,151.82 to 12,734.42)           | 10,387.41<br>(5,919.28 to 17,504.58)           | 631.57<br>(544.22 to 724.71)              | 1,291.45<br>(779.89 to 2,105.48)           | 1,217.98<br>(768.12 to 1,909.67)           | 1,464.60<br>(829.66 to 2,495.63)            |
| Chronic kidney disease due to glomerulonephritis           | 3,003.33<br>(2,676.36 to 3,375.00)           | 4,292.34<br>(2,613.32 to 6,852.49)            | 3,697.65<br>(2,303.82 to 5,728.20)            | 5,162.66<br>(2,997.93 to 8,776.71)             | 273.76<br>(241.84 to 309.48)              | 456.57<br>(273.04 to 738.31)               | 402.98<br>(248.37 to 627.61)               | 537.82<br>(304.13 to 922.11)                |
| Chronic kidney disease due to other and unspecified causes | 7,138.90<br>(6,362.41 to 8,014.47)           | 10,695.29<br>(6,697.36 to 17,443.89)          | 9,410.82<br>(6,022.07 to 14,720.68)           | 12,754.99<br>(7,574.65 to 21,704.05)           | 712.05<br>(629.48 to 802.26)              | 1,217.25<br>(761.89 to 1,965.33)           | 1,100.11<br>(699.69 to 1,695.72)           | 1,416.02<br>(835.04 to 2,405.53)            |
| Urinary diseases and male infertility                      | 8,326.04<br>(7,361.29 to 9,347.43)           | 10,709.40<br>(8,868.90 to 12,704.97)          | 10,314.23<br>(8,604.61 to 12,223.06)          | 10,354.59<br>(8,726.92 to 12,197.80)           | 897.41<br>(792.61 to 1,011.00)            | 1,318.83<br>(1,077.58 to 1,601.70)         | 1,306.73<br>(1,081.72 to 1,576.68)         | 1,242.04<br>(1,012.33 to 1,497.69)          |
| Urinary tract infections                                   | 7,290.24<br>(6,304.53 to 8,233.83)           | 9,586.82<br>(7,911.33 to 11,469.77)           | 9,277.08<br>(7,569.19 to 11,046.76)           | 9,253.86<br>(7,600.12 to 10,993.80)            | 802.77<br>(692.61 to 910.05)              | 1,196.42<br>(969.38 to 1,457.92)           | 1,189.68<br>(965.17 to 1,447.83)           | 1,126.06<br>(908.26 to 1,369.74)            |
| Urolithiasis                                               | 415.51<br>(250.87 to 937.89)                 | 414.46<br>(230.69 to 970.86)                  | 379.74<br>(208.01 to 895.99)                  | 413.72<br>(229.33 to 969.91)                   | 37.42<br>(21.99 to 83.30)                 | 41.95<br>(22.76 to 94.77)                  | 39.70<br>(21.12 to 88.51)                  | 40.61<br>(21.71 to 90.98)                   |
| Other urinary diseases                                     | 620.28<br>(428.24 to 1,073.00)               | 708.12<br>(442.87 to 1,248.82)                | 657.41<br>(409.18 to 1,203.78)                | 687.02<br>(432.43 to 1,248.78)                 | 57.22<br>(38.27 to 103.14)                | 80.46<br>(48.15 to 146.59)                 | 77.35<br>(45.49 to 141.63)                 | 75.37<br>(44.62 to 137.47)                  |
| Gynecological diseases                                     | 51.43<br>(31.95 to 64.20)                    | 36.66<br>(22.24 to 49.28)                     | 30.00<br>(18.14 to 40.13)                     | 38.71<br>(22.88 to 53.11)                      | 3.68<br>(1.84 to 4.70)                    | 3.22<br>(1.54 to 4.65)                     | 2.72<br>(1.29 to 3.89)                     | 3.30<br>(1.54 to 4.86)                      |
| Uterine fibroids                                           | 12.36<br>(8.74 to 16.06)                     | 6.67<br>(4.38 to 9.83)                        | 5.65<br>(3.67 to 8.25)                        | 7.05<br>(4.58 to 10.19)                        | 0.43<br>(0.28 to 0.54)                    | 0.25<br>(0.16 to 0.36)                     | 0.21<br>(0.14 to 0.31)                     | 0.26<br>(0.16 to 0.37)                      |
| Polycystic ovarian syndrome                                | 1.29<br>(0.72 to 2.59)                       | 0.50<br>(0.22 to 1.10)                        | 0.34<br>(0.16 to 0.76)                        | 0.58<br>(0.26 to 1.27)                         | 0.03<br>(0.02 to 0.06)                    | 0.01<br>(0.01 to 0.05)                     | 0.01<br>(0.00 to 0.05)                     | 0.01<br>(0.01 to 0.03)                      |
| Endometriosis                                              | 0.16<br>(0.09 to 0.33)                       | 0.17<br>(0.06 to 0.41)                        | 0.13<br>(0.05 to 0.34)                        | 0.18<br>(0.07 to 0.46)                         | 0.00<br>(0.00 to 0.01)                    | 0.00<br>(0.00 to 0.01)                     | 0.00<br>(0.00 to 0.01)                     | 0.00<br>(0.00 to 0.01)                      |
| Genital prolapse                                           | 6.58<br>(1.04 to 9.61)                       | 3.85<br>(0.59 to 6.58)                        | 3.17<br>(0.52 to 5.39)                        | 4.03<br>(0.66 to 6.94)                         | 0.61<br>(0.09 to 0.91)                    | 0.38<br>(0.06 to 0.71)                     | 0.32<br>(0.05 to 0.59)                     | 0.39<br>(0.06 to 0.74)                      |
| Other gynecological diseases                               | 31.05<br>(19.56 to 38.93)                    | 25.48<br>(14.76 to 36.04)                     | 20.71<br>(11.96 to 28.83)                     | 26.87<br>(15.05 to 38.32)                      | 2.60<br>(1.32 to 3.37)                    | 2.58<br>(1.20 to 3.97)                     | 2.17<br>(1.00 to 3.22)                     | 2.63<br>(1.22 to 4.07)                      |
| Hemoglobinopathies and hemolytic anemias                   | 2,490.11<br>(2,042.46 to 3,165.33)           | 3,082.77<br>(2,415.50 to 3,847.55)            | 2,856.74<br>(2,256.60 to 3,577.85)            | 3,042.81<br>(2,391.53 to 3,820.30)             | 230.33<br>(163.64 to 270.82)              | 335.59<br>(235.80 to 405.01)               | 322.23<br>(226.97 to 389.83)               | 320.40<br>(223.56 to 389.99)                |
| Thalassemias                                               | 72.96<br>(55.91 to 106.53)                   | 28.91<br>(19.94 to 48.85)                     | 28.26<br>(19.43 to 47.85)                     | 29.51<br>(20.32 to 50.34)                      | 1.02<br>(0.78 to 1.54)                    | 0.47<br>(0.33 to 0.81)                     | 0.47<br>(0.33 to 0.80)                     | 0.48<br>(0.34 to 0.82)                      |

|                                                   |                                         |                                          |                                          |                                          |                                 |                                     |                                     |                                     |
|---------------------------------------------------|-----------------------------------------|------------------------------------------|------------------------------------------|------------------------------------------|---------------------------------|-------------------------------------|-------------------------------------|-------------------------------------|
|                                                   | 294.08<br>(231.02 to<br>481.10)         | 426.30<br>(305.67 to<br>667.75)          | 376.65<br>(265.45 to<br>603.42)          | 441.65<br>(319.03 to<br>716.82)          | 8.94<br>(7.14 to<br>13.60)      | 19.03<br>(13.60 to<br>28.57)        | 17.02<br>(11.93 to<br>25.80)        | 19.47<br>(13.93 to<br>29.78)        |
| Sickle cell disorders                             |                                         |                                          |                                          |                                          |                                 |                                     |                                     |                                     |
|                                                   | 248.65<br>(189.20 to<br>349.56)         | 362.55<br>(256.26 to<br>523.70)          | 315.68<br>(226.73 to<br>448.75)          | 374.16<br>(268.99 to<br>537.61)          | 9.84<br>(7.25 to<br>13.42)      | 30.25<br>(13.95 to<br>28.41)        | 18.05<br>(12.51 to<br>25.59)        | 20.38<br>(14.25 to<br>28.36)        |
| G6PD deficiency                                   |                                         |                                          |                                          |                                          |                                 |                                     |                                     |                                     |
|                                                   | 1,874.43<br>(1,428.08 to<br>2,268.46)   | 2,265.00<br>(1,662.29 to<br>2,780.49)    | 2,136.16<br>(1,579.15 to<br>2,604.50)    | 2,197.49<br>(1,615.67 to<br>2,675.93)    | 210.53<br>(144.22 to<br>245.70) | 295.83<br>(203.84 to<br>360.74)     | 286.70<br>(197.20 to<br>349.18)     | 280.07<br>(190.39 to<br>345.60)     |
| Other hemoglobinopathies and hemolytic anemias    |                                         |                                          |                                          |                                          |                                 |                                     |                                     |                                     |
|                                                   | 10,906.22<br>(8,046.78 to<br>12,675.64) | 16,709.01<br>(11,350.60 to<br>19,795.34) | 17,390.57<br>(11,897.78 to<br>20,660.92) | 16,051.09<br>(10,942.35 to<br>18,962.37) | 578.73<br>(348.99 to<br>682.57) | 1,177.26<br>(681.35 to<br>1,434.73) | 1,274.42<br>(731.66 to<br>1,556.44) | 1,086.16<br>(633.65 to<br>1,318.57) |
| Endocrine, metabolic, blood, and immune disorders |                                         |                                          |                                          |                                          |                                 |                                     |                                     |                                     |

| Belgium                                       |                                              |                                              |                                              |                                              |                                     |                                         |                                         |                                         |
|-----------------------------------------------|----------------------------------------------|----------------------------------------------|----------------------------------------------|----------------------------------------------|-------------------------------------|-----------------------------------------|-----------------------------------------|-----------------------------------------|
| Cause                                         | YLLs (actual counts)                         |                                              |                                              |                                              | Deaths (actual counts)              |                                         |                                         |                                         |
|                                               | 2016                                         | 2040 Forecast                                | 2040 Better Scenario                         | 2040 Worse Scenario                          | 2016                                | 2040 Forecast                           | 2040 Better Scenario                    | 2040 Worse Scenario                     |
| <b>Musculoskeletal disorders</b>              | <b>4,106.50</b><br>(3,483.03 to 4,722.33)    | <b>6,288.63</b><br>(5,183.97 to 7,414.44)    | <b>6,052.63</b><br>(4,959.09 to 7,027.21)    | <b>6,210.80</b><br>(5,026.78 to 7,281.09)    | <b>323.81</b><br>(267.19 to 372.40) | <b>587.59</b><br>(468.35 to 701.58)     | <b>584.43</b><br>(463.49 to 688.58)     | <b>562.57</b><br>(441.00 to 669.46)     |
| Rheumatoid arthritis                          | 954.58<br>(760.37 to 1,444.21)               | 1,694.46<br>(1,209.76 to 2,559.62)           | 1,432.27<br>(1,040.92 to 2,192.61)           | 1,781.83<br>(1,235.98 to 2,714.62)           | 69.82<br>(55.63 to 111.90)          | 141.95<br>(101.93 to 218.32)            | 122.82<br>(88.93 to 192.94)             | 145.48<br>(100.37 to 222.98)            |
| Other musculoskeletal disorders               | 3,151.91<br>(2,349.60 to 3,704.95)           | 4,594.16<br>(3,262.99 to 5,462.02)           | 4,620.36<br>(3,332.81 to 5,500.65)           | 4,428.97<br>(3,121.39 to 5,304.81)           | 253.99<br>(185.84 to 296.06)        | 445.64<br>(308.52 to 536.20)            | 461.61<br>(326.39 to 556.29)            | 417.09<br>(286.49 to 508.89)            |
| <b>Other non-communicable diseases</b>        | <b>21,594.32</b><br>(16,818.58 to 25,118.31) | <b>20,225.59</b><br>(14,222.22 to 24,881.47) | <b>18,390.77</b><br>(12,857.70 to 22,595.44) | <b>20,907.57</b><br>(15,099.42 to 25,915.46) | <b>645.66</b><br>(381.26 to 794.06) | <b>1,070.80</b><br>(540.70 to 1,401.43) | <b>1,048.01</b><br>(514.90 to 1,378.00) | <b>1,030.89</b><br>(528.69 to 1,361.31) |
| Congenital birth defects                      | 14,462.02<br>(10,798.92 to 17,290.89)        | 10,421.00<br>(7,524.51 to 13,282.88)         | 9,078.33<br>(6,671.77 to 11,518.22)          | 11,192.05<br>(8,020.32 to 14,231.45)         | 204.03<br>(151.85 to 238.00)        | 169.85<br>(125.32 to 208.66)            | 152.84<br>(114.41 to 186.58)            | 179.12<br>(131.55 to 219.05)            |
| Neural tube defects                           | 264.62<br>(144.84 to 385.92)                 | 84.73<br>(41.39 to 139.32)                   | 64.74<br>(31.77 to 107.32)                   | 95.80<br>(47.99 to 157.40)                   | 3.32<br>(1.87 to 4.73)              | 1.16<br>(0.62 to 1.84)                  | 0.90<br>(0.47 to 1.41)                  | 1.31<br>(0.67 to 2.04)                  |
| Congenital heart anomalies                    | 4,149.83<br>(2,562.78 to 5,119.41)           | 2,038.94<br>(1,247.35 to 2,889.82)           | 1,545.19<br>(933.66 to 2,175.83)             | 2,308.65<br>(1,393.00 to 3,275.96)           | 55.33<br>(37.64 to 66.69)           | 28.91<br>(19.57 to 39.89)               | 22.04<br>(14.68 to 30.04)               | 32.53<br>(21.35 to 44.72)               |
| Orofacial clefts                              | 3.67<br>(1.17 to 6.88)                       | 1.64<br>(0.38 to 3.57)                       | 1.16<br>(0.26 to 2.47)                       | 1.92<br>(0.46 to 4.13)                       | 0.04<br>(0.01 to 0.08)              | 0.02<br>(0.00 to 0.04)                  | 0.01<br>(0.00 to 0.03)                  | 0.02<br>(0.01 to 0.05)                  |
| Down syndrome                                 | 1,816.50<br>(1,124.50 to 2,181.63)           | 2,364.01<br>(1,509.30 to 2,891.37)           | 2,415.36<br>(1,587.21 to 2,930.87)           | 2,349.61<br>(1,501.06 to 2,872.97)           | 39.25<br>(24.90 to 46.07)           | 57.93<br>(38.46 to 70.82)               | 59.61<br>(40.18 to 72.72)               | 57.10<br>(37.02 to 69.69)               |
| Other chromosomal abnormalities               | 2,677.14<br>(1,998.27 to 4,379.10)           | 2,897.54<br>(2,042.92 to 4,150.74)           | 2,604.21<br>(1,832.66 to 3,634.63)           | 3,072.34<br>(2,141.20 to 4,400.89)           | 35.77<br>(27.14 to 54.23)           | 35.77<br>(28.98 to 55.70)               | 37.51<br>(26.54 to 49.78)               | 43.60<br>(30.89 to 58.71)               |
| Congenital musculoskeletal and limb anomalies | 520.40<br>(365.23 to 724.21)                 | 333.96<br>(206.86 to 504.96)                 | 268.12<br>(168.61 to 400.95)                 | 371.01<br>(230.00 to 546.01)                 | 6.58<br>(4.68 to 8.94)              | 4.45<br>(2.85 to 6.54)                  | 3.59<br>(2.32 to 5.12)                  | 4.91<br>(3.14 to 7.15)                  |
| Urogenital congenital anomalies               | 359.03<br>(169.95 to 624.18)                 | 205.86<br>(93.04 to 372.24)                  | 171.51<br>(75.06 to 308.16)                  | 225.07<br>(98.30 to 407.99)                  | 4.90<br>(2.43 to 8.02)              | 3.07<br>(1.55 to 5.13)                  | 2.58<br>(1.25 to 4.22)                  | 3.32<br>(1.60 to 5.57)                  |
| Digestive congenital anomalies                | 882.16<br>(347.39 to 1,265.50)               | 439.91<br>(155.88 to 716.95)                 | 343.87<br>(125.75 to 544.79)                 | 494.64<br>(184.48 to 800.16)                 | 10.84<br>(4.49 to 15.29)            | 5.57<br>(2.17 to 8.94)                  | 4.37<br>(1.72 to 6.74)                  | 6.24<br>(2.46 to 9.84)                  |
| Other congenital birth defects                | 3,788.67<br>(2,169.55 to 4,801.37)           | 2,054.40<br>(1,141.14 to 2,832.49)           | 1,664.17<br>(913.92 to 2,335.15)             | 2,272.99<br>(1,245.42 to 3,153.77)           | 48.01<br>(28.01 to 59.92)           | 27.32<br>(16.02 to 36.68)               | 22.24<br>(12.77 to 30.34)               | 30.08<br>(17.21 to 40.80)               |
| Skin and subcutaneous diseases                | 4,027.35<br>(1,881.38 to 5,197.58)           | 8,021.64<br>(3,715.20 to 10,431.40)          | 7,807.07<br>(3,573.17 to 10,267.99)          | 7,555.57<br>(3,541.21 to 10,095.73)          | 405.58<br>(168.40 to 540.16)        | 880.26<br>(359.57 to 1,207.67)          | 877.70<br>(355.05 to 1,194.47)          | 829.03<br>(335.05 to 1,137.81)          |
| Cellulitis                                    | 503.95<br>(274.72 to 979.36)                 | 1,043.22<br>(580.02 to 2,053.20)             | 1,046.12<br>(587.71 to 2,083.98)             | 1,009.82<br>(561.33 to 2,003.85)             | 36.56<br>(19.30 to 69.71)           | 83.64<br>(44.61 to 167.85)              | 86.40<br>(46.13 to 174.67)              | 78.51<br>(42.10 to 160.88)              |
| Pyoderma                                      | 1,616.09<br>(539.43 to 2,258.70)             | 3,986.16<br>(1,306.77 to 5,569.24)           | 3,935.80<br>(1,282.85 to 5,513.12)           | 3,832.92<br>(1,269.11 to 5,372.44)           | 149.02<br>(40.96 to 220.85)         | 417.27<br>(119.17 to 619.39)            | 425.23<br>(120.24 to 626.30)            | 389.46<br>(112.15 to 578.77)            |
| Decubitus ulcer                               | 1,715.33<br>(783.12 to 2,416.38)             | 2,753.68<br>(1,265.03 to 4,061.76)           | 2,593.93<br>(1,189.07 to 3,892.54)           | 2,679.56<br>(1,215.34 to 4,048.29)           | 204.19<br>(83.27 to 284.61)         | 357.58<br>(147.17 to 528.29)            | 344.24<br>(139.27 to 507.52)            | 340.49<br>(136.58 to 517.59)            |
| Other skin and subcutaneous diseases          | 191.98<br>(96.11 to 334.71)                  | 238.58<br>(116.57 to 417.19)                 | 231.21<br>(115.84 to 401.18)                 | 233.27<br>(115.40 to 419.99)                 | 15.81<br>(6.84 to 24.71)            | 21.77<br>(9.56 to 34.39)                | 21.82<br>(9.75 to 34.42)                | 20.56<br>(9.03 to 33.52)                |
| Sudden infant death syndrome                  | 3,104.95<br>(2,285.66 to 4,026.36)           | 1,782.94<br>(988.17 to 2,885.28)             | 1,505.38<br>(834.59 to 2,402.31)             | 1,959.95<br>(1,085.42 to 3,200.06)           | 36.04<br>(26.53 to 46.74)           | 20.69<br>(11.46 to 33.48)               | 17.47<br>(9.68 to 27.88)                | 22.74<br>(12.59 to 37.14)               |

|                          |                                             |                                             |                                            |                                             |                                       |                                       |                                       |                                        |
|--------------------------|---------------------------------------------|---------------------------------------------|--------------------------------------------|---------------------------------------------|---------------------------------------|---------------------------------------|---------------------------------------|----------------------------------------|
| Injuries                 | 180,541.17<br>(159,028.75 to<br>202,437.37) | 148,065.70<br>(110,645.66 to<br>202,496.47) | 123,288.14<br>(94,536.71 to<br>162,065.86) | 172,678.85<br>(124,083.97 to<br>239,480.78) | 7,087.99<br>(6,006.10 to<br>7,916.31) | 7,533.49<br>(6,053.88 to<br>9,266.06) | 6,832.66<br>(5,523.89 to<br>8,171.44) | 7,988.49<br>(6,400.34 to<br>10,017.16) |
| Transport injuries       | 40,835.33<br>(35,157.45 to<br>46,220.58)    | 27,596.36<br>(15,889.34 to<br>47,574.95)    | 18,052.24<br>(10,875.90 to<br>30,057.21)   | 42,547.38<br>(23,532.65 to<br>73,467.18)    | 1,184.41<br>(1,052.52 to<br>1,318.51) | 1,001.09<br>(633.96 to<br>1,559.53)   | 715.85<br>(473.90 to<br>1,076.19)     | 1,399.57<br>(856.05 to<br>2,226.83)    |
| Road injuries            | 37,739.40<br>(32,551.26 to<br>42,653.48)    | 24,656.86<br>(14,253.16 to<br>42,388.91)    | 15,786.53<br>(9,498.76 to<br>26,026.89)    | 39,150.91<br>(21,645.76 to<br>67,888.74)    | 1,104.67<br>(981.19 to<br>1,230.08)   | 911.73<br>(581.56 to<br>1,413.62)     | 645.28<br>(429.57 to<br>964.22)       | 1,299.05<br>(798.36 to<br>2,077.55)    |
| Pedestrian road injuries | 9,045.29<br>(6,769.30 to<br>10,524.50)      | 4,629.82<br>(2,872.53 to<br>7,309.69)       | 2,784.22<br>(1,811.40 to<br>4,341.84)      | 7,047.85<br>(4,259.45 to<br>11,339.18)      | 335.83<br>(283.57 to<br>395.34)       | 234.28<br>(156.46 to<br>352.30)       | 155.00<br>(108.18 to<br>228.27)       | 323.56<br>(210.38 to<br>502.87)        |

| Belgium                                         |                                               |                                               |                                               |                                               |                                            |                                            |                                            |                                            |
|-------------------------------------------------|-----------------------------------------------|-----------------------------------------------|-----------------------------------------------|-----------------------------------------------|--------------------------------------------|--------------------------------------------|--------------------------------------------|--------------------------------------------|
| Cause                                           | YLLs (actual counts)                          |                                               |                                               |                                               | Deaths (actual counts)                     |                                            |                                            |                                            |
|                                                 | 2016                                          | 2040 Forecast                                 | 2040 Better Scenario                          | 2040 Worse Scenario                           | 2016                                       | 2040 Forecast                              | 2040 Better Scenario                       | 2040 Worse Scenario                        |
| Cyclist road injuries                           | 2,514.34<br>(1,691.82 to 3,027.22)            | 2,055.35<br>(1,163.50 to 3,398.68)            | 1,446.41<br>(861.09 to 2,302.48)              | 3,031.44<br>(1,679.38 to 5,094.51)            | 80.82<br>(52.41 to 96.37)                  | 83.56<br>(48.28 to 133.18)                 | 65.07<br>(39.46 to 100.20)                 | 110.18<br>(60.61 to 178.99)                |
| Motorcyclist road injuries                      | 6,052.66<br>(3,667.48 to 7,554.09)            | 4,680.23<br>(2,209.96 to 9,404.52)            | 3,398.69<br>(1,656.82 to 6,649.47)            | 6,588.21<br>(3,010.77 to 13,287.85)           | 124.14<br>(77.41 to 152.74)                | 102.72<br>(52.07 to 190.17)                | 77.53<br>(41.29 to 139.93)                 | 139.10<br>(68.47 to 262.63)                |
| Motor vehicle road injuries                     | 19,535.53<br>(16,563.04 to 24,021.06)         | 12,843.54<br>(7,073.00 to 21,897.84)          | 7,875.97<br>(4,566.59 to 13,156.87)           | 21,740.96<br>(11,746.02 to 37,487.68)         | 549.25<br>(471.83 to 663.29)               | 477.56<br>(298.71 to 740.56)               | 338.09<br>(223.18 to 503.56)               | 705.99<br>(420.61 to 1,114.24)             |
| Other road injuries                             | 591.57<br>(442.85 to 926.39)                  | 447.92<br>(223.15 to 802.80)                  | 281.24<br>(144.01 to 495.59)                  | 742.44<br>(369.39 to 1,351.88)                | 14.63<br>(10.42 to 21.91)                  | 13.60<br>(7.31 to 23.11)                   | 9.60<br>(5.36 to 15.55)                    | 20.22<br>(10.49 to 35.14)                  |
| Other transport injuries                        | 3,095.93<br>(2,589.95 to 3,652.70)            | 2,939.50<br>(1,630.24 to 5,171.09)            | 2,265.71<br>(1,296.50 to 3,936.25)            | 3,396.48<br>(1,822.35 to 5,996.26)            | 79.74<br>(68.14 to 92.62)                  | 89.36<br>(52.49 to 148.92)                 | 70.57<br>(44.04 to 112.38)                 | 100.51<br>(58.05 to 170.81)                |
| <b>Unintentional injuries</b>                   | <b>52,600.12<br/>(41,298.31 to 59,383.28)</b> | <b>49,798.68<br/>(38,359.39 to 57,465.07)</b> | <b>47,227.60<br/>(36,350.27 to 54,295.45)</b> | <b>49,552.66<br/>(37,629.76 to 57,281.21)</b> | <b>3,458.57<br/>(2,621.68 to 3,906.36)</b> | <b>4,261.48<br/>(3,253.97 to 4,858.04)</b> | <b>4,213.59<br/>(3,263.78 to 4,768.47)</b> | <b>4,660.61<br/>(3,083.05 to 4,658.07)</b> |
| Falls                                           | 26,073.62<br>(18,652.35 to 29,953.52)         | 28,039.42<br>(20,401.23 to 32,587.63)         | 26,937.31<br>(19,867.65 to 30,979.66)         | 27,481.91<br>(19,738.83 to 31,627.81)         | 2,088.54<br>(1,544.96 to 2,371.70)         | 2,739.42<br>(2,084.26 to 3,171.44)         | 2,729.42<br>(2,109.37 to 3,114.25)         | 2,601.97<br>(1,955.23 to 2,999.92)         |
| Drowning                                        | 3,313.55<br>(2,945.98 to 3,716.65)            | 2,150.09<br>(1,552.15 to 3,057.68)            | 1,862.73<br>(1,374.77 to 2,550.64)            | 2,320.21<br>(1,642.78 to 3,337.09)            | 92.48<br>(83.34 to 103.56)                 | 74.02<br>(55.06 to 102.27)                 | 65.66<br>(50.41 to 88.65)                  | 77.81<br>(56.72 to 111.41)                 |
| Fire, heat, and hot substances                  | 3,587.91<br>(2,872.65 to 4,053.80)            | 2,438.05<br>(1,778.52 to 3,390.06)            | 2,079.16<br>(1,536.64 to 2,790.35)            | 2,597.61<br>(1,829.68 to 3,654.07)            | 191.51<br>(143.34 to 217.49)               | 179.46<br>(122.57 to 248.38)               | 161.23<br>(110.88 to 217.36)               | 181.63<br>(120.27 to 256.03)               |
| Poisonings                                      | 863.34<br>(661.68 to 1,968.19)                | 471.87<br>(290.28 to 1,082.71)                | 377.50<br>(238.19 to 871.02)                  | 525.27<br>(310.49 to 1,210.48)                | 27.18<br>(21.44 to 55.61)                  | 19.18<br>(12.61 to 38.12)                  | 15.96<br>(10.99 to 31.74)                  | 20.50<br>(13.00 to 41.78)                  |
| Exposure to mechanical forces                   | 3,542.01<br>(2,608.27 to 4,107.11)            | 2,511.55<br>(1,806.12 to 3,064.17)            | 2,244.02<br>(1,615.57 to 2,722.18)            | 2,602.30<br>(1,872.58 to 3,189.42)            | 133.17<br>(93.11 to 153.40)                | 132.99<br>(91.75 to 158.27)                | 125.36<br>(86.87 to 147.90)                | 130.72<br>(90.60 to 156.46)                |
| Unintentional firearm injuries                  | 571.32<br>(392.46 to 666.95)                  | 349.72<br>(234.57 to 432.29)                  | 320.85<br>(215.09 to 397.79)                  | 359.61<br>(238.81 to 452.65)                  | 19.79<br>(13.56 to 22.60)                  | 16.33<br>(11.20 to 19.42)                  | 15.77<br>(10.96 to 18.80)                  | 16.04<br>(11.07 to 19.03)                  |
| Unintentional suffocation                       | 562.53<br>(449.10 to 803.27)                  | 359.46<br>(270.83 to 516.20)                  | 322.39<br>(245.50 to 470.99)                  | 379.13<br>(284.53 to 554.01)                  | 12.59<br>(9.07 to 15.67)                   | 10.00<br>(6.30 to 12.94)                   | 9.36<br>(5.75 to 12.08)                    | 10.08<br>(6.47 to 12.89)                   |
| Other exposure to mechanical forces             | 2,408.16<br>(1,586.78 to 2,864.67)            | 1,802.37<br>(1,161.44 to 2,259.28)            | 1,600.78<br>(1,040.75 to 1,972.15)            | 1,863.57<br>(1,200.46 to 2,331.84)            | 100.79<br>(66.77 to 117.69)                | 106.66<br>(71.21 to 128.93)                | 100.23<br>(68.08 to 120.57)                | 104.59<br>(69.55 to 126.69)                |
| Adverse effects of medical treatment            | 4,745.90<br>(3,831.05 to 6,917.82)            | 5,499.60<br>(4,431.35 to 7,928.24)            | 5,350.50<br>(4,325.73 to 7,646.57)            | 5,392.00<br>(4,346.34 to 7,833.57)            | 345.28<br>(281.08 to 488.08)               | 474.47<br>(384.41 to 657.54)               | 478.05<br>(386.00 to 657.92)               | 448.62<br>(359.77 to 624.09)               |
| Animal contact                                  | 354.86<br>(216.05 to 428.42)                  | 336.60<br>(196.74 to 425.90)                  | 306.87<br>(181.32 to 388.01)                  | 345.64<br>(198.38 to 438.17)                  | 13.61<br>(7.62 to 16.38)                   | 15.92<br>(8.77 to 19.59)                   | 15.02<br>(8.40 to 18.42)                   | 15.75<br>(8.72 to 19.45)                   |
| Venomous animal contact                         | 123.13<br>(70.10 to 155.47)                   | 107.12<br>(56.61 to 143.23)                   | 99.78<br>(52.34 to 133.05)                    | 109.74<br>(57.04 to 148.31)                   | 3.99<br>(2.01 to 5.05)                     | 4.16<br>(1.99 to 5.51)                     | 4.00<br>(1.92 to 5.32)                     | 4.12<br>(1.95 to 5.49)                     |
| Non-venomous animal contact                     | 231.73<br>(138.63 to 285.26)                  | 229.48<br>(132.68 to 294.37)                  | 207.09<br>(119.43 to 263.45)                  | 235.90<br>(134.25 to 301.39)                  | 9.61<br>(5.25 to 11.79)                    | 11.76<br>(6.48 to 14.71)                   | 11.02<br>(6.18 to 13.65)                   | 11.62<br>(6.32 to 14.54)                   |
| Foreign body                                    | 8,148.86<br>(4,723.78 to 10,224.86)           | 6,936.76<br>(3,610.41 to 9,057.96)            | 6,849.71<br>(3,563.35 to 9,000.42)            | 6,825.71<br>(3,596.09 to 8,905.90)            | 457.68<br>(206.97 to 614.29)               | 503.48<br>(213.11 to 691.86)               | 519.86<br>(220.62 to 714.70)               | 473.52<br>(200.88 to 650.03)               |
| Pulmonary aspiration and foreign body in airway | 7,897.26<br>(4,577.58 to 9,923.53)            | 6,728.58<br>(3,487.86 to 8,807.09)            | 6,634.42<br>(3,458.05 to 8,746.56)            | 6,621.44<br>(3,460.19 to 8,640.81)            | 448.78<br>(201.95 to 603.99)               | 493.50<br>(207.27 to 680.83)               | 509.11<br>(214.44 to 702.52)               | 464.13<br>(195.25 to 640.26)               |

|                                             |                                                                |                                                                |                                                               |                                                                |                                                            |                                                            |                                                            |                                                            |
|---------------------------------------------|----------------------------------------------------------------|----------------------------------------------------------------|---------------------------------------------------------------|----------------------------------------------------------------|------------------------------------------------------------|------------------------------------------------------------|------------------------------------------------------------|------------------------------------------------------------|
|                                             | 251.59<br>(128.89 to<br>313.19)                                | 208.18<br>(103.18 to<br>271.60)                                | 215.29<br>(107.81 to<br>281.73)                               | 204.27<br>(100.12 to<br>265.75)                                | 8.90<br>(3.92 to<br>11.66)                                 | 9.98<br>(4.21 to<br>13.71)                                 | 10.74<br>(4.53 to<br>14.78)                                | 9.39<br>(3.99 to<br>12.85)                                 |
| Foreign body in other body part             |                                                                |                                                                |                                                               |                                                                |                                                            |                                                            |                                                            |                                                            |
|                                             | 1,051.60<br>(610.93 to<br>1,446.16)                            | 1,065.92<br>(594.82 to<br>1,452.56)                            | 954.32<br>(537.83 to<br>1,299.27)                             | 1,076.54<br>(601.35 to<br>1,518.39)                            | 79.55<br>(42.68 to<br>103.98)                              | 98.31<br>(51.54 to<br>131.69)                              | 91.83<br>(47.52 to<br>122.05)                              | 95.05<br>(50.17 to<br>128.87)                              |
| Environmental heat and cold exposure        |                                                                |                                                                |                                                               |                                                                |                                                            |                                                            |                                                            |                                                            |
|                                             | 918.47<br>(788.03 to<br>1,067.64)                              | 348.83<br>(263.99 to<br>468.49)                                | 265.48<br>(206.78 to<br>340.89)                               | 385.48<br>(289.43 to<br>506.13)                                | 29.57<br>(25.86 to<br>34.07)                               | 14.18<br>(11.21 to<br>18.17)                               | 11.21<br>(9.06 to<br>13.82)                                | 15.04<br>(11.84 to<br>19.19)                               |
| Other unintentional injuries                |                                                                |                                                                |                                                               |                                                                |                                                            |                                                            |                                                            |                                                            |
| <b>Self-harm and interpersonal violence</b> | <b>85,385.97</b><br><b>(73,390.07 to</b><br><b>104,764.06)</b> | <b>70,594.63</b><br><b>(44,185.27 to</b><br><b>114,533.65)</b> | <b>57,931.90</b><br><b>(37,641.67 to</b><br><b>89,055.85)</b> | <b>80,503.23</b><br><b>(47,175.30 to</b><br><b>133,370.86)</b> | <b>2,407.76</b><br><b>(2,061.11 to</b><br><b>2,884.17)</b> | <b>2,268.81</b><br><b>(1,482.88 to</b><br><b>3,562.94)</b> | <b>1,901.04</b><br><b>(1,286.62 to</b><br><b>2,834.06)</b> | <b>2,526.27</b><br><b>(1,541.63 to</b><br><b>4,026.40)</b> |



| Belgium                                                                             |                                                |                                         |                                         |                                         |                                         |                                       |                                       |                                       |
|-------------------------------------------------------------------------------------|------------------------------------------------|-----------------------------------------|-----------------------------------------|-----------------------------------------|-----------------------------------------|---------------------------------------|---------------------------------------|---------------------------------------|
| Cause                                                                               | YLLs (actual counts)                           |                                         |                                         |                                         | Deaths (actual counts)                  |                                       |                                       |                                       |
|                                                                                     | 2016                                           | 2040 Forecast                           | 2040 Better Scenario                    | 2040 Worse Scenario                     | 2016                                    | 2040 Forecast                         | 2040 Better Scenario                  | 2040 Worse Scenario                   |
| Self-harm                                                                           | 78,912.83<br>(67,289.95 to 98,535.44)          | 66,903.39<br>(40,635.80 to 110,582.23)  | 54,745.08<br>(34,655.03 to 86,373.57)   | 76,508.95<br>(43,325.38 to 128,429.64)  | 2,254.48<br>(1,919.05 to 2,722.62)      | 2,166.95<br>(1,382.63 to 3,454.96)    | 1,811.79<br>(1,212.98 to 2,755.02)    | 2,417.73<br>(1,442.07 to 3,902.90)    |
| Self-harm by firearm                                                                | 5,860.25<br>(3,742.40 to 9,018.69)             | 4,714.41<br>(2,307.08 to 8,687.73)      | 3,691.41<br>(1,890.33 to 6,671.24)      | 5,452.78<br>(2,572.83 to 10,204.17)     | 188.46<br>(114.55 to 279.45)            | 175.25<br>(89.25 to 311.07)           | 141.17<br>(76.24 to 243.16)           | 196.42<br>(97.97 to 351.36)           |
| Self-harm by other specified means                                                  | 73,052.58<br>(61,950.72 to 90,450.83)          | 62,188.97<br>(37,743.74 to 101,888.71)  | 51,053.67<br>(32,533.73 to 80,254.57)   | 71,056.17<br>(40,774.46 to 119,383.67)  | 2,066.01<br>(1,751.05 to 2,485.92)      | 1,991.69<br>(1,275.64 to 3,151.84)    | 1,670.62<br>(1,120.94 to 2,495.24)    | 2,221.31<br>(1,325.68 to 3,593.08)    |
| Interpersonal violence                                                              | 6,473.13<br>(4,349.46 to 8,331.14)             | 3,691.25<br>(2,359.54 to 5,139.13)      | 3,186.81<br>(2,063.19 to 4,389.09)      | 3,994.28<br>(2,547.24 to 5,620.86)      | 153.29<br>(103.26 to 195.62)            | 101.86<br>(68.22 to 139.43)           | 89.25<br>(60.40 to 121.63)            | 108.54<br>(70.52 to 148.25)           |
| Physical violence by firearm                                                        | 1,839.03<br>(1,085.45 to 3,023.68)             | 941.14<br>(561.79 to 1,489.34)          | 807.97<br>(491.84 to 1,308.79)          | 1,005.71<br>(587.02 to 1,680.91)        | 41.49<br>(25.09 to 66.73)               | 23.38<br>(14.30 to 38.39)             | 20.34<br>(12.72 to 33.17)             | 24.67<br>(14.93 to 41.74)             |
| Physical violence by sharp object                                                   | 1,831.74<br>(819.55 to 2,363.80)               | 1,080.02<br>(496.35 to 1,471.89)        | 952.78<br>(453.44 to 1,292.78)          | 1,138.76<br>(509.87 to 1,552.22)        | 44.95<br>(21.72 to 57.30)               | 30.65<br>(17.11 to 39.99)             | 27.54<br>(15.79 to 35.59)             | 31.71<br>(16.94 to 41.34)             |
| Physical violence by other means                                                    | 2,802.36<br>(1,833.18 to 4,144.59)             | 1,670.09<br>(982.43 to 2,558.06)        | 1,426.06<br>(866.51 to 2,201.74)        | 1,849.81<br>(1,078.39 to 2,857.59)      | 66.84<br>(43.44 to 95.77)               | 47.83<br>(28.37 to 72.25)             | 41.38<br>(24.86 to 61.94)             | 52.16<br>(30.64 to 80.10)             |
| <b>Forces of nature, conflict and terrorism, and executions and police conflict</b> | <b>1,719.75</b><br><b>(818.33 to 2,643.64)</b> | <b>76.03</b><br><b>(0.00 to 619.05)</b> | <b>76.41</b><br><b>(0.00 to 618.80)</b> | <b>75.58</b><br><b>(0.00 to 619.26)</b> | <b>37.24</b><br><b>(17.72 to 57.26)</b> | <b>2.12</b><br><b>(0.00 to 13.21)</b> | <b>2.18</b><br><b>(0.00 to 13.31)</b> | <b>2.05</b><br><b>(0.00 to 12.93)</b> |
| Exposure to forces of nature                                                        | 0.00<br>(0.00 to 0.00)                         | 25.66<br>(0.00 to 298.46)               | 25.69<br>(0.00 to 298.25)               | 25.62<br>(0.00 to 297.84)               | 0.00<br>(0.00 to 0.00)                  | 0.67<br>(0.00 to 7.76)                | 0.68<br>(0.00 to 7.89)                | 0.65<br>(0.00 to 7.61)                |
| Conflict and terrorism                                                              | 1,669.01<br>(767.47 to 2,590.74)               | 50.37<br>(0.00 to 331.77)               | 50.71<br>(0.00 to 330.79)               | 49.96<br>(0.00 to 332.90)               | 36.15<br>(16.62 to 56.11)               | 1.45<br>(0.00 to 10.05)               | 1.50<br>(0.00 to 10.74)               | 1.40<br>(0.00 to 9.22)                |
| Executions and police conflict                                                      | 50.74<br>(46.07 to 55.35)                      | 0.00<br>(0.00 to 0.00)                  | 0.00<br>(0.00 to 0.00)                  | 0.00<br>(0.00 to 0.00)                  | 1.10<br>(1.00 to 1.19)                  | 0.00<br>(0.00 to 0.00)                | 0.00<br>(0.00 to 0.00)                | 0.00<br>(0.00 to 0.00)                |

| Cyprus                                                            |                                             |                                             |                                            |                                             |                                       |                                         |                                        |                                          |
|-------------------------------------------------------------------|---------------------------------------------|---------------------------------------------|--------------------------------------------|---------------------------------------------|---------------------------------------|-----------------------------------------|----------------------------------------|------------------------------------------|
| Cause                                                             | YLLs (actual counts)                        |                                             |                                            |                                             | Deaths (actual counts)                |                                         |                                        |                                          |
|                                                                   | 2016                                        | 2040 Forecast                               | 2040 Better Scenario                       | 2040 Worse Scenario                         | 2016                                  | 2040 Forecast                           | 2040 Better Scenario                   | 2040 Worse Scenario                      |
| All causes                                                        | 107,889.86<br>(102,609.39 to<br>113,676.13) | 132,687.83<br>(111,746.59 to<br>166,147.46) | 111,738.95<br>(94,256.05 to<br>144,228.17) | 163,197.90<br>(133,606.76 to<br>203,272.21) | 7,228.78<br>(6,918.51 to<br>7,565.73) | 10,417.04<br>(9,043.24 to<br>12,228.57) | 9,219.65<br>(8,027.00 to<br>10,877.86) | 12,093.87<br>(10,352.05 to<br>14,148.76) |
| Communicable, maternal, neonatal, and nutritional diseases        | 4,153.66<br>(3,593.50 to<br>4,887.14)       | 5,308.37<br>(4,154.17 to<br>6,926.93)       | 5,289.17<br>(4,241.91 to<br>6,861.27)      | 5,509.64<br>(4,247.34 to<br>7,266.29)       | 223.33<br>(190.07 to<br>291.12)       | 468.96<br>(333.67 to<br>666.63)         | 508.44<br>(372.25 to<br>703.13)        | 447.18<br>(306.63 to<br>636.77)          |
| HIV/AIDS and tuberculosis                                         | 273.72<br>(234.44 to<br>314.24)             | 165.90<br>(88.86 to<br>252.58)              | 100.84<br>(44.96 to<br>171.02)             | 257.24<br>(158.15 to<br>373.33)             | 8.81<br>(7.82 to<br>9.85)             | 5.79<br>(3.62 to<br>8.70)               | 3.64<br>(2.20 to<br>5.55)              | 8.69<br>(5.43 to<br>12.97)               |
| Tuberculosis                                                      | 72.20<br>(64.69 to<br>81.76)                | 47.65<br>(28.05 to<br>80.74)                | 29.26<br>(18.47 to<br>46.33)               | 72.29<br>(39.82 to<br>124.11)               | 4.35<br>(3.86 to<br>4.97)             | 3.55<br>(2.10 to<br>5.94)               | 2.30<br>(1.47 to<br>3.62)              | 5.14<br>(2.86 to<br>8.89)                |
| HIV/AIDS                                                          | 201.52<br>(163.21 to<br>241.78)             | 118.25<br>(46.17 to<br>203.03)              | 71.58<br>(17.74 to<br>142.07)              | 184.95<br>(91.51 to<br>287.53)              | 4.47<br>(3.59 to<br>5.43)             | 2.24<br>(0.74 to<br>4.10)               | 1.34<br>(0.28 to<br>2.80)              | 3.55<br>(1.59 to<br>5.84)                |
| Diarrhea, lower respiratory, and other common infectious diseases | 2,245.43<br>(1,939.83 to<br>2,786.76)       | 4,282.86<br>(3,196.40 to<br>5,836.05)       | 4,388.91<br>(3,404.62 to<br>5,906.43)      | 4,319.34<br>(3,152.02 to<br>6,017.25)       | 182.36<br>(148.81 to<br>248.62)       | 430.02<br>(297.38 to<br>624.35)         | 470.64<br>(338.04 to<br>665.20)        | 406.30<br>(270.03 to<br>603.87)          |
| Diarrheal diseases                                                | 371.41<br>(246.69 to<br>577.47)             | 1,392.98<br>(730.22 to<br>2,363.77)         | 2,027.64<br>(1,269.48 to<br>3,017.84)      | 1,062.19<br>(520.20 to<br>1,930.35)         | 27.92<br>(16.13 to<br>46.49)          | 148.59<br>(77.76 to<br>256.09)          | 224.28<br>(136.50 to<br>344.42)        | 109.11<br>(52.50 to<br>205.25)           |
| Intestinal infectious diseases                                    | 1.00<br>(0.48 to<br>1.92)                   | 0.70<br>(0.26 to<br>1.48)                   | 0.72<br>(0.26 to<br>1.53)                  | 0.69<br>(0.25 to<br>1.47)                   | 0.04<br>(0.02 to<br>0.07)             | 0.04<br>(0.02 to<br>0.08)               | 0.04<br>(0.02 to<br>0.08)              | 0.04<br>(0.02 to<br>0.07)                |
| Typhoid fever                                                     | 0.28<br>(0.08 to<br>0.70)                   | 0.24<br>(0.05 to<br>0.67)                   | 0.29<br>(0.06 to<br>0.79)                  | 0.21<br>(0.05 to<br>0.60)                   | 0.01<br>(0.00 to<br>0.02)             | 0.01<br>(0.00 to<br>0.02)               | 0.01<br>(0.00 to<br>0.02)              | 0.01<br>(0.00 to<br>0.02)                |
| Paratyphoid fever                                                 | 0.32<br>(0.09 to<br>0.80)                   | 0.17<br>(0.03 to<br>0.51)                   | 0.14<br>(0.03 to<br>0.45)                  | 0.18<br>(0.03 to<br>0.55)                   | 0.01<br>(0.00 to<br>0.02)             | 0.01<br>(0.00 to<br>0.01)               | 0.00<br>(0.00 to<br>0.01)              | 0.01<br>(0.00 to<br>0.02)                |
| Other intestinal infectious diseases                              | 0.41<br>(0.16 to<br>0.82)                   | 0.30<br>(0.10 to<br>0.67)                   | 0.29<br>(0.09 to<br>0.67)                  | 0.30<br>(0.10 to<br>0.64)                   | 0.02<br>(0.01 to<br>0.05)             | 0.03<br>(0.01 to<br>0.06)               | 0.03<br>(0.01 to<br>0.06)              | 0.02<br>(0.01 to<br>0.05)                |
| Lower respiratory infections                                      | 1,640.62<br>(1,407.57 to<br>2,141.69)       | 2,551.08<br>(1,632.91 to<br>4,016.16)       | 2,039.18<br>(1,243.20 to<br>3,343.56)      | 2,896.42<br>(1,862.59 to<br>4,578.21)       | 147.08<br>(118.17 to<br>211.04)       | 269.18<br>(159.74 to<br>446.72)         | 234.16<br>(132.54 to<br>407.99)        | 284.84<br>(171.83 to<br>467.10)          |
| Upper respiratory infections                                      | 1.53<br>(0.84 to<br>2.43)                   | 1.21<br>(0.47 to<br>2.54)                   | 0.91<br>(0.34 to<br>1.95)                  | 1.43<br>(0.56 to<br>3.00)                   | 0.07<br>(0.04 to<br>0.12)             | 0.08<br>(0.03 to<br>0.19)               | 0.06<br>(0.02 to<br>0.15)              | 0.09<br>(0.03 to<br>0.21)                |
| Otitis media                                                      | 0.26<br>(0.15 to<br>0.52)                   | 0.05<br>(0.02 to<br>0.09)                   | 0.05<br>(0.02 to<br>0.09)                  | 0.04<br>(0.02 to<br>0.08)                   | 0.01<br>(0.01 to<br>0.01)             | 0.00<br>(0.00 to<br>0.01)               | 0.00<br>(0.00 to<br>0.01)              | 0.00<br>(0.00 to<br>0.01)                |
| Meningitis                                                        | 111.01<br>(91.42 to<br>155.05)              | 38.86<br>(21.34 to<br>67.74)                | 36.91<br>(19.53 to<br>64.32)               | 40.42<br>(22.30 to<br>69.29)                | 3.21<br>(2.45 to<br>4.33)             | 1.92<br>(1.23 to<br>2.74)               | 1.90<br>(1.18 to<br>2.76)              | 1.90<br>(1.22 to<br>2.72)                |
| Pneumococcal meningitis                                           | 35.86<br>(28.28 to<br>49.94)                | 17.69<br>(10.38 to<br>28.91)                | 18.83<br>(10.56 to<br>31.53)               | 16.99<br>(9.88 to<br>27.27)                 | 1.21<br>(0.90 to<br>1.58)             | 0.94<br>(0.59 to<br>1.36)               | 1.04<br>(0.63 to<br>1.49)              | 0.87<br>(0.55 to<br>1.26)                |
| H influenzae type B meningitis                                    | 6.21<br>(4.78 to<br>8.66)                   | 3.04<br>(1.27 to<br>6.22)                   | 3.17<br>(1.30 to<br>6.36)                  | 3.05<br>(1.26 to<br>6.40)                   | 0.16<br>(0.13 to<br>0.22)             | 0.12<br>(0.07 to<br>0.18)               | 0.13<br>(0.08 to<br>0.21)              | 0.11<br>(0.07 to<br>0.17)                |
| Meningococcal meningitis                                          | 43.95<br>(34.63 to<br>64.74)                | 10.27<br>(4.54 to<br>20.88)                 | 8.47<br>(3.66 to<br>16.75)                 | 11.54<br>(5.03 to<br>23.25)                 | 1.02<br>(0.77 to<br>1.45)             | 0.43<br>(0.26 to<br>0.68)               | 0.37<br>(0.21 to<br>0.60)              | 0.46<br>(0.26 to<br>0.73)                |
| Other meningitis                                                  | 24.99<br>(19.74 to<br>34.46)                | 7.86<br>(4.43 to<br>13.26)                  | 6.43<br>(3.52 to<br>10.81)                 | 8.84<br>(4.96 to<br>14.60)                  | 0.81<br>(0.61 to<br>1.08)             | 0.43<br>(0.26 to<br>0.61)               | 0.36<br>(0.22 to<br>0.54)              | 0.46<br>(0.28 to<br>0.69)                |
| Encephalitis                                                      | 109.13<br>(89.77 to<br>131.01)              | 118.17<br>(72.81 to<br>170.56)              | 121.30<br>(71.50 to<br>178.69)             | 115.71<br>(72.58 to<br>166.48)              | 3.67<br>(3.07 to<br>4.28)             | 6.11<br>(4.56 to<br>7.81)               | 6.51<br>(4.51 to<br>8.67)              | 5.75<br>(4.38 to<br>7.26)                |

|                |                           |                               |                               |                               |                           |                            |                            |                            |
|----------------|---------------------------|-------------------------------|-------------------------------|-------------------------------|---------------------------|----------------------------|----------------------------|----------------------------|
| Diphtheria     | 0.18<br>(0.12 to<br>0.25) | 0.03<br>(0.01 to<br>0.07)     | 0.03<br>(0.01 to<br>0.07)     | 0.03<br>(0.01 to<br>0.07)     | 0.00<br>(0.00 to<br>0.01) | 0.00<br>(0.00 to<br>0.00)  | 0.00<br>(0.00 to<br>0.00)  | 0.00<br>(0.00 to<br>0.00)  |
| Whooping cough | 1.78<br>(0.18 to<br>6.53) | 1.02<br>(0.00 to<br>5.63)     | 1.02<br>(0.00 to<br>5.37)     | 2.52<br>(0.00 to<br>13.14)    | 0.02<br>(0.00 to<br>0.08) | 0.01<br>(0.00 to<br>0.07)  | 0.01<br>(0.00 to<br>0.06)  | 0.03<br>(0.00 to<br>0.16)  |
| Tetanus        | 4.44<br>(4.06 to<br>4.77) | 0.24<br>(0.10 to<br>0.47)     | 0.25<br>(0.10 to<br>0.50)     | 0.25<br>(0.10 to<br>0.49)     | 0.11<br>(0.09 to<br>0.12) | 0.01<br>(0.00 to<br>0.01)  | 0.01<br>(0.00 to<br>0.01)  | 0.01<br>(0.00 to<br>0.01)  |
| Measles        | 0.01<br>(0.00 to<br>0.04) | 175.15<br>(0.00 to<br>520.06) | 157.76<br>(0.00 to<br>462.32) | 196.21<br>(0.00 to<br>600.85) | 0.00<br>(0.00 to<br>0.00) | 3.72<br>(0.00 to<br>11.62) | 3.33<br>(0.00 to<br>10.25) | 4.19<br>(0.00 to<br>13.48) |

| Cyprus                                                |                                                   |                                                   |                                                   |                                                   |                                                |                                                |                                                |                                                |
|-------------------------------------------------------|---------------------------------------------------|---------------------------------------------------|---------------------------------------------------|---------------------------------------------------|------------------------------------------------|------------------------------------------------|------------------------------------------------|------------------------------------------------|
| Cause                                                 | YLLs (actual counts)                              |                                                   |                                                   |                                                   | Deaths (actual counts)                         |                                                |                                                |                                                |
|                                                       | 2016                                              | 2040 Forecast                                     | 2040 Better Scenario                              | 2040 Worse Scenario                               | 2016                                           | 2040 Forecast                                  | 2040 Better Scenario                           | 2040 Worse Scenario                            |
| Varicella and herpes zoster                           | 4.07<br>(2.92 to<br>5.62)                         | 3.36<br>(1.74 to<br>5.30)                         | 3.15<br>(1.63 to<br>5.11)                         | 3.42<br>(1.77 to<br>5.40)                         | 0.23<br>(0.15 to<br>0.34)                      | 0.35<br>(0.18 to<br>0.58)                      | 0.34<br>(0.17 to<br>0.58)                      | 0.34<br>(0.17 to<br>0.56)                      |
| <b>Neglected tropical diseases and malaria</b>        | <b>10.14</b><br><b>(8.57 to</b><br><b>14.60)</b>  | <b>12.62</b><br><b>(9.22 to</b><br><b>15.87)</b>  | <b>13.09</b><br><b>(9.65 to</b><br><b>16.35)</b>  | <b>12.24</b><br><b>(8.98 to</b><br><b>15.27)</b>  | <b>0.42</b><br><b>(0.29 to</b><br><b>0.52)</b> | <b>0.70</b><br><b>(0.42 to</b><br><b>0.90)</b> | <b>0.75</b><br><b>(0.46 to</b><br><b>0.96)</b> | <b>0.65</b><br><b>(0.39 to</b><br><b>0.84)</b> |
| Malaria                                               | 0.00<br>(0.00 to<br>0.00)                         | 0.00<br>(0.00 to<br>0.00)                         | 0.00<br>(0.00 to<br>0.00)                         | 0.00<br>(0.00 to<br>0.00)                         | 0.00<br>(0.00 to<br>0.00)                      | 0.00<br>(0.00 to<br>0.00)                      | 0.00<br>(0.00 to<br>0.00)                      | 0.00<br>(0.00 to<br>0.00)                      |
| Chagas disease                                        | 0.00<br>(0.00 to<br>0.00)                         | 0.00<br>(0.00 to<br>0.00)                         | 0.00<br>(0.00 to<br>0.00)                         | 0.00<br>(0.00 to<br>0.00)                         | 0.00<br>(0.00 to<br>0.00)                      | 0.00<br>(0.00 to<br>0.00)                      | 0.00<br>(0.00 to<br>0.00)                      | 0.00<br>(0.00 to<br>0.00)                      |
| Leishmaniasis                                         | 0.17<br>(0.09 to<br>0.26)                         | 0.11<br>(0.06 to<br>0.17)                         | 0.10<br>(0.05 to<br>0.15)                         | 0.11<br>(0.06 to<br>0.18)                         | 0.01<br>(0.00 to<br>0.01)                      | 0.00<br>(0.00 to<br>0.01)                      | 0.00<br>(0.00 to<br>0.01)                      | 0.01<br>(0.00 to<br>0.01)                      |
| African trypanosomiasis                               | 0.00<br>(0.00 to<br>0.00)                         | 0.00<br>(0.00 to<br>0.00)                         | 0.00<br>(0.00 to<br>0.00)                         | 0.00<br>(0.00 to<br>0.00)                         | 0.00<br>(0.00 to<br>0.00)                      | 0.00<br>(0.00 to<br>0.00)                      | 0.00<br>(0.00 to<br>0.00)                      | 0.00<br>(0.00 to<br>0.00)                      |
| Schistosomiasis                                       | 0.00<br>(0.00 to<br>0.00)                         | 0.00<br>(0.00 to<br>0.00)                         | 0.00<br>(0.00 to<br>0.00)                         | 0.00<br>(0.00 to<br>0.00)                         | 0.00<br>(0.00 to<br>0.00)                      | 0.00<br>(0.00 to<br>0.00)                      | 0.00<br>(0.00 to<br>0.00)                      | 0.00<br>(0.00 to<br>0.00)                      |
| Cysticercosis                                         | 0.34<br>(0.27 to<br>0.42)                         | 0.14<br>(0.11 to<br>0.17)                         | 0.14<br>(0.11 to<br>0.17)                         | 0.14<br>(0.11 to<br>0.17)                         | 0.01<br>(0.01 to<br>0.01)                      | 0.01<br>(0.00 to<br>0.01)                      | 0.01<br>(0.01 to<br>0.01)                      | 0.01<br>(0.00 to<br>0.01)                      |
| Cystic echinococcosis                                 | 0.00<br>(0.00 to<br>0.00)                         | 0.00<br>(0.00 to<br>0.00)                         | 0.00<br>(0.00 to<br>0.00)                         | 0.00<br>(0.00 to<br>0.00)                         | 0.00<br>(0.00 to<br>0.00)                      | 0.00<br>(0.00 to<br>0.00)                      | 0.00<br>(0.00 to<br>0.00)                      | 0.00<br>(0.00 to<br>0.00)                      |
| Dengue                                                | 0.00<br>(0.00 to<br>0.00)                         | 0.00<br>(0.00 to<br>0.00)                         | 0.00<br>(0.00 to<br>0.00)                         | 0.00<br>(0.00 to<br>0.00)                         | 0.00<br>(0.00 to<br>0.00)                      | 0.00<br>(0.00 to<br>0.00)                      | 0.00<br>(0.00 to<br>0.00)                      | 0.00<br>(0.00 to<br>0.00)                      |
| Yellow fever                                          | 0.00<br>(0.00 to<br>0.00)                         | 0.00<br>(0.00 to<br>0.00)                         | 0.00<br>(0.00 to<br>0.00)                         | 0.00<br>(0.00 to<br>0.00)                         | 0.00<br>(0.00 to<br>0.00)                      | 0.00<br>(0.00 to<br>0.00)                      | 0.00<br>(0.00 to<br>0.00)                      | 0.00<br>(0.00 to<br>0.00)                      |
| Rabies                                                | 0.32<br>(0.19 to<br>0.95)                         | 0.32<br>(0.19 to<br>0.87)                         | 0.30<br>(0.18 to<br>0.80)                         | 0.32<br>(0.19 to<br>0.88)                         | 0.02<br>(0.01 to<br>0.03)                      | 0.03<br>(0.01 to<br>0.04)                      | 0.03<br>(0.01 to<br>0.04)                      | 0.02<br>(0.01 to<br>0.04)                      |
| Intestinal nematode infections                        | 0.00<br>(0.00 to<br>0.00)                         | 0.00<br>(0.00 to<br>0.00)                         | 0.00<br>(0.00 to<br>0.00)                         | 0.00<br>(0.00 to<br>0.00)                         | 0.00<br>(0.00 to<br>0.00)                      | 0.00<br>(0.00 to<br>0.00)                      | 0.00<br>(0.00 to<br>0.00)                      | 0.00<br>(0.00 to<br>0.00)                      |
| Other neglected tropical diseases                     | 9.31<br>(7.75 to<br>13.50)                        | 12.06<br>(8.54 to<br>15.26)                       | 12.55<br>(9.00 to<br>15.66)                       | 11.67<br>(8.25 to<br>14.73)                       | 0.39<br>(0.26 to<br>0.48)                      | 0.66<br>(0.39 to<br>0.86)                      | 0.72<br>(0.43 to<br>0.92)                      | 0.62<br>(0.36 to<br>0.80)                      |
| <b>Maternal disorders</b>                             | <b>57.12</b><br><b>(43.23 to</b><br><b>75.38)</b> | <b>44.33</b><br><b>(26.13 to</b><br><b>70.29)</b> | <b>38.33</b><br><b>(22.53 to</b><br><b>60.57)</b> | <b>48.63</b><br><b>(28.19 to</b><br><b>77.09)</b> | <b>1.03</b><br><b>(0.78 to</b><br><b>1.34)</b> | <b>0.81</b><br><b>(0.49 to</b><br><b>1.26)</b> | <b>0.70</b><br><b>(0.43 to</b><br><b>1.09)</b> | <b>0.89</b><br><b>(0.52 to</b><br><b>1.37)</b> |
| Maternal hemorrhage                                   | 8.06<br>(4.79 to<br>12.69)                        | 5.01<br>(2.48 to<br>9.38)                         | 4.34<br>(2.15 to<br>8.25)                         | 5.49<br>(2.71 to<br>10.30)                        | 0.14<br>(0.09 to<br>0.22)                      | 0.09<br>(0.05 to<br>0.17)                      | 0.08<br>(0.04 to<br>0.15)                      | 0.10<br>(0.05 to<br>0.19)                      |
| Maternal sepsis and other maternal infections         | 1.28<br>(0.57 to<br>2.25)                         | 0.89<br>(0.35 to<br>1.78)                         | 0.76<br>(0.29 to<br>1.53)                         | 0.97<br>(0.38 to<br>1.98)                         | 0.02<br>(0.01 to<br>0.04)                      | 0.02<br>(0.01 to<br>0.03)                      | 0.01<br>(0.01 to<br>0.03)                      | 0.02<br>(0.01 to<br>0.04)                      |
| Maternal hypertensive disorders                       | 9.08<br>(5.66 to<br>14.33)                        | 5.78<br>(2.83 to<br>11.09)                        | 4.93<br>(2.38 to<br>9.16)                         | 6.38<br>(3.10 to<br>12.12)                        | 0.16<br>(0.10 to<br>0.25)                      | 0.10<br>(0.05 to<br>0.19)                      | 0.09<br>(0.04 to<br>0.16)                      | 0.11<br>(0.06 to<br>0.21)                      |
| Maternal obstructed labor and uterine rupture         | 1.11<br>(0.48 to<br>2.13)                         | 0.89<br>(0.34 to<br>2.02)                         | 0.74<br>(0.27 to<br>1.66)                         | 1.00<br>(0.37 to<br>2.26)                         | 0.02<br>(0.01 to<br>0.04)                      | 0.02<br>(0.01 to<br>0.04)                      | 0.01<br>(0.01 to<br>0.03)                      | 0.02<br>(0.01 to<br>0.04)                      |
| Maternal abortion, miscarriage, and ectopic pregnancy | 4.86<br>(2.99 to<br>7.30)                         | 4.40<br>(2.18 to<br>7.85)                         | 3.75<br>(1.85 to<br>6.68)                         | 4.85<br>(2.39 to<br>8.43)                         | 0.09<br>(0.06 to<br>0.14)                      | 0.09<br>(0.04 to<br>0.15)                      | 0.07<br>(0.04 to<br>0.13)                      | 0.10<br>(0.05 to<br>0.17)                      |



| Cyprus                                                                  |                                         |                                     |                                     |                                       |                                  |                                  |                                  |                                  |
|-------------------------------------------------------------------------|-----------------------------------------|-------------------------------------|-------------------------------------|---------------------------------------|----------------------------------|----------------------------------|----------------------------------|----------------------------------|
| Cause                                                                   | YLLs (actual counts)                    |                                     |                                     |                                       | Deaths (actual counts)           |                                  |                                  |                                  |
|                                                                         | 2016                                    | 2040 Forecast                       | 2040 Better Scenario                | 2040 Worse Scenario                   | 2016                             | 2040 Forecast                    | 2040 Better Scenario             | 2040 Worse Scenario              |
| <b>Neonatal disorders</b>                                               | <b>1,291.05</b><br>(902.25 to 1,788.43) | <b>435.33</b><br>(218.84 to 856.13) | <b>378.93</b><br>(191.95 to 738.23) | <b>511.88</b><br>(258.56 to 1,001.39) | <b>14.92</b><br>(10.43 to 20.67) | <b>5.04</b><br>(2.53 to 9.89)    | <b>4.38</b><br>(2.22 to 8.54)    | <b>5.92</b><br>(2.99 to 11.57)   |
| Neonatal preterm birth                                                  | 484.70<br>(308.37 to 702.04)            | 89.07<br>(45.10 to 161.88)          | 66.95<br>(33.93 to 122.55)          | 127.98<br>(64.10 to 234.16)           | 5.60<br>(3.56 to 8.11)           | 1.03<br>(0.52 to 1.87)           | 0.77<br>(0.39 to 1.42)           | 1.48<br>(0.74 to 2.71)           |
| Neonatal encephalopathy due to birth asphyxia and trauma                | 236.94<br>(153.75 to 340.08)            | 53.22<br>(22.65 to 120.55)          | 41.71<br>(18.02 to 92.84)           | 63.98<br>(26.68 to 140.67)            | 2.74<br>(1.78 to 3.93)           | 0.62<br>(0.26 to 1.39)           | 0.48<br>(0.21 to 1.07)           | 0.74<br>(0.31 to 1.63)           |
| Neonatal sepsis and other neonatal infections                           | 128.28<br>(55.89 to 465.14)             | 58.07<br>(21.42 to 199.15)          | 48.59<br>(17.59 to 169.08)          | 66.99<br>(24.88 to 235.83)            | 1.48<br>(0.65 to 5.38)           | 0.67<br>(0.25 to 2.30)           | 0.56<br>(0.20 to 1.95)           | 0.78<br>(0.29 to 2.73)           |
| Hemolytic disease and other neonatal jaundice                           | 18.29<br>(10.09 to 30.97)               | 5.22<br>(1.83 to 12.86)             | 4.23<br>(1.49 to 10.41)             | 6.14<br>(2.09 to 15.09)               | 0.21<br>(0.12 to 0.36)           | 0.06<br>(0.02 to 0.15)           | 0.05<br>(0.02 to 0.12)           | 0.07<br>(0.02 to 0.17)           |
| Other neonatal disorders                                                | 422.84<br>(233.94 to 639.84)            | 229.75<br>(93.71 to 487.85)         | 217.45<br>(89.81 to 453.79)         | 246.79<br>(99.53 to 527.58)           | 4.89<br>(2.71 to 7.40)           | 2.66<br>(1.08 to 5.64)           | 2.51<br>(1.04 to 5.25)           | 2.85<br>(1.15 to 6.10)           |
| <b>Nutritional deficiencies</b>                                         | <b>68.87</b><br>(61.60 to 77.19)        | <b>99.30</b><br>(81.18 to 121.51)   | <b>107.31</b><br>(88.29 to 131.03)  | <b>91.45</b><br>(73.11 to 112.62)     | <b>7.03</b><br>(6.12 to 8.08)    | <b>11.95</b><br>(8.65 to 15.87)  | <b>13.50</b><br>(10.08 to 17.72) | <b>10.54</b><br>(7.21 to 14.08)  |
| Protein-energy malnutrition                                             | 31.53<br>(24.88 to 36.97)               | 52.19<br>(35.97 to 70.51)           | 61.12<br>(44.01 to 80.51)           | 45.34<br>(30.62 to 61.67)             | 3.74<br>(2.89 to 4.48)           | 7.03<br>(4.44 to 10.10)          | 8.50<br>(5.63 to 11.96)          | 5.91<br>(3.50 to 8.61)           |
| Iodine deficiency                                                       | 1.56<br>(0.16 to 4.44)                  | 4.71<br>(0.17 to 17.15)             | 4.72<br>(0.15 to 18.15)             | 4.54<br>(0.18 to 16.09)               | 0.10<br>(0.01 to 0.38)           | 0.49<br>(0.01 to 2.25)           | 0.51<br>(0.00 to 2.50)           | 0.45<br>(0.01 to 1.99)           |
| Dietary iron deficiency                                                 | 4.94<br>(3.24 to 6.68)                  | 7.21<br>(3.24 to 12.29)             | 7.71<br>(3.39 to 13.06)             | 6.72<br>(3.13 to 11.30)               | 0.26<br>(0.10 to 0.40)           | 0.48<br>(0.14 to 0.89)           | 0.53<br>(0.15 to 0.97)           | 0.44<br>(0.13 to 0.80)           |
| Other nutritional deficiencies                                          | 30.85<br>(26.17 to 38.34)               | 35.20<br>(26.28 to 48.55)           | 33.76<br>(25.07 to 46.78)           | 34.84<br>(25.85 to 47.79)             | 2.94<br>(2.40 to 3.86)           | 3.96<br>(2.57 to 5.83)           | 3.97<br>(2.62 to 5.83)           | 3.74<br>(2.40 to 5.55)           |
| <b>Other communicable, maternal, neonatal, and nutritional diseases</b> | <b>207.32</b><br>(185.12 to 241.69)     | <b>268.02</b><br>(230.53 to 311.03) | <b>261.76</b><br>(223.89 to 303.84) | <b>268.85</b><br>(228.22 to 311.57)   | <b>8.75</b><br>(7.62 to 9.67)    | <b>14.65</b><br>(11.92 to 17.09) | <b>14.82</b><br>(11.97 to 17.34) | <b>14.18</b><br>(11.50 to 16.54) |
| Sexually transmitted infections excluding HIV                           | 13.27<br>(11.28 to 18.49)               | 8.33<br>(6.42 to 12.30)             | 7.88<br>(6.01 to 11.75)             | 8.50<br>(6.52 to 12.65)               | 0.65<br>(0.54 to 0.95)           | 0.53<br>(0.38 to 0.82)           | 0.52<br>(0.37 to 0.81)           | 0.52<br>(0.38 to 0.80)           |
| Syphilis                                                                | 5.69<br>(4.73 to 8.25)                  | 2.26<br>(1.67 to 3.40)              | 1.99<br>(1.46 to 3.01)              | 2.42<br>(1.76 to 3.60)                | 0.26<br>(0.21 to 0.40)           | 0.14<br>(0.10 to 0.22)           | 0.13<br>(0.09 to 0.20)           | 0.15<br>(0.10 to 0.22)           |
| Chlamydial infection                                                    | 1.40<br>(1.15 to 1.96)                  | 1.17<br>(0.87 to 1.71)              | 1.14<br>(0.85 to 1.67)              | 1.17<br>(0.87 to 1.70)                | 0.08<br>(0.06 to 0.11)           | 0.08<br>(0.05 to 0.12)           | 0.08<br>(0.05 to 0.13)           | 0.08<br>(0.05 to 0.12)           |
| Gonococcal infection                                                    | 4.28<br>(3.57 to 6.04)                  | 3.51<br>(2.58 to 5.32)              | 3.42<br>(2.49 to 5.23)              | 3.52<br>(2.58 to 5.29)                | 0.23<br>(0.19 to 0.32)           | 0.23<br>(0.16 to 0.36)           | 0.23<br>(0.16 to 0.37)           | 0.22<br>(0.15 to 0.35)           |
| Other sexually transmitted infections                                   | 1.90<br>(1.59 to 2.71)                  | 1.38<br>(1.04 to 2.03)              | 1.33<br>(1.00 to 1.97)              | 1.40<br>(1.05 to 2.06)                | 0.08<br>(0.07 to 0.12)           | 0.07<br>(0.05 to 0.12)           | 0.07<br>(0.05 to 0.12)           | 0.07<br>(0.05 to 0.11)           |
| Acute hepatitis                                                         | 40.22<br>(34.88 to 45.97)               | 33.41<br>(24.95 to 44.30)           | 27.20<br>(20.02 to 35.64)           | 37.30<br>(26.75 to 49.71)             | 1.75<br>(1.50 to 2.03)           | 1.80<br>(1.30 to 2.47)           | 1.50<br>(1.08 to 2.08)           | 1.95<br>(1.38 to 2.69)           |
| Acute hepatitis A                                                       | 1.75<br>(1.31 to 2.30)                  | 1.13<br>(0.71 to 1.76)              | 0.99<br>(0.62 to 1.53)              | 1.22<br>(0.76 to 1.84)                | 0.06<br>(0.04 to 0.08)           | 0.06<br>(0.03 to 0.09)           | 0.05<br>(0.03 to 0.09)           | 0.06<br>(0.03 to 0.10)           |
| Acute hepatitis B                                                       | 32.09<br>(27.30 to 37.25)               | 26.20<br>(18.62 to 35.90)           | 21.12<br>(14.94 to 29.11)           | 29.45<br>(20.62 to 40.66)             | 1.32<br>(1.10 to 1.57)           | 1.30<br>(0.87 to 1.84)           | 1.07<br>(0.72 to 1.55)           | 1.43<br>(0.95 to 2.04)           |

|                                       |                                                               |                                                                 |                                                                |                                                                  |                                                            |                                                             |                                                            |                                                              |
|---------------------------------------|---------------------------------------------------------------|-----------------------------------------------------------------|----------------------------------------------------------------|------------------------------------------------------------------|------------------------------------------------------------|-------------------------------------------------------------|------------------------------------------------------------|--------------------------------------------------------------|
|                                       | 1.91<br>(1.36 to<br>2.65)                                     | 1.70<br>(1.07 to<br>2.61)                                       | 1.39<br>(0.88 to<br>2.08)                                      | 1.89<br>(1.21 to<br>2.95)                                        | 0.09<br>(0.06 to<br>0.13)                                  | 0.09<br>(0.06 to<br>0.14)                                   | 0.08<br>(0.05 to<br>0.12)                                  | 0.10<br>(0.06 to<br>0.16)                                    |
| Acute hepatitis C                     |                                                               |                                                                 |                                                                |                                                                  |                                                            |                                                             |                                                            |                                                              |
|                                       | 4.47<br>(2.88 to<br>6.68)                                     | 4.39<br>(2.41 to<br>7.26)                                       | 3.70<br>(2.08 to<br>6.13)                                      | 4.74<br>(2.60 to<br>7.83)                                        | 0.28<br>(0.17 to<br>0.43)                                  | 0.35<br>(0.18 to<br>0.58)                                   | 0.30<br>(0.16 to<br>0.50)                                  | 0.36<br>(0.19 to<br>0.62)                                    |
| Acute hepatitis E                     |                                                               |                                                                 |                                                                |                                                                  |                                                            |                                                             |                                                            |                                                              |
|                                       | 153.83<br>(133.83 to<br>185.99)                               | 226.28<br>(191.12 to<br>264.03)                                 | 226.69<br>(191.46 to<br>263.59)                                | 223.05<br>(187.68 to<br>262.53)                                  | 6.35<br>(5.19 to<br>7.17)                                  | 12.33<br>(9.55 to<br>14.58)                                 | 12.80<br>(9.83 to<br>15.21)                                | 11.71<br>(9.05 to<br>13.84)                                  |
| Other unspecified infectious diseases |                                                               |                                                                 |                                                                |                                                                  |                                                            |                                                             |                                                            |                                                              |
| <b>Non-communicable diseases</b>      | <b>91,627.67</b><br><b>(87,127.49 to</b><br><b>96,452.56)</b> | <b>116,843.63</b><br><b>(97,626.18 to</b><br><b>141,766.25)</b> | <b>96,934.77</b><br><b>(81,667.35 to</b><br><b>117,994.97)</b> | <b>143,758.05</b><br><b>(117,455.18 to</b><br><b>177,397.63)</b> | <b>6,610.06</b><br><b>(6,322.19 to</b><br><b>6,921.76)</b> | <b>9,487.74</b><br><b>(8,136.53 to</b><br><b>11,192.81)</b> | <b>8,278.04</b><br><b>(7,111.03 to</b><br><b>9,963.40)</b> | <b>11,109.20</b><br><b>(9,399.70 to</b><br><b>13,068.88)</b> |

| Cyprus                               |                                              |                                              |                                              |                                              |                                           |                                           |                                           |                                           |
|--------------------------------------|----------------------------------------------|----------------------------------------------|----------------------------------------------|----------------------------------------------|-------------------------------------------|-------------------------------------------|-------------------------------------------|-------------------------------------------|
| Cause                                | YLLs (actual counts)                         |                                              |                                              |                                              | Deaths (actual counts)                    |                                           |                                           |                                           |
|                                      | 2016                                         | 2040 Forecast                                | 2040 Better Scenario                         | 2040 Worse Scenario                          | 2016                                      | 2040 Forecast                             | 2040 Better Scenario                      | 2040 Worse Scenario                       |
| <b>Neoplasms</b>                     | <b>29,166.43</b><br>(27,352.20 to 30,879.88) | <b>36,576.25</b><br>(31,304.97 to 42,304.81) | <b>31,120.67</b><br>(26,873.29 to 35,674.44) | <b>44,005.74</b><br>(36,983.52 to 51,952.87) | <b>1,589.99</b><br>(1,493.89 to 1,682.74) | <b>2,282.63</b><br>(1,983.73 to 2,610.40) | <b>2,022.82</b><br>(1,781.76 to 2,287.64) | <b>2,635.15</b><br>(2,236.94 to 3,079.87) |
| Lip and oral cavity cancer           | 317.11<br>(282.90 to 358.21)                 | 382.39<br>(217.57 to 617.29)                 | 247.16<br>(152.62 to 378.44)                 | 604.78<br>(322.96 to 1,022.04)               | 15.20<br>(13.72 to 16.88)                 | 19.67<br>(11.58 to 30.39)                 | 13.42<br>(8.55 to 20.20)                  | 29.83<br>(16.23 to 48.15)                 |
| Nasopharynx cancer                   | 90.94<br>(80.11 to 103.44)                   | 88.40<br>(51.02 to 151.96)                   | 52.05<br>(31.79 to 86.75)                    | 148.98<br>(82.83 to 261.93)                  | 4.17<br>(3.66 to 4.74)                    | 4.44<br>(2.55 to 7.64)                    | 2.70<br>(1.62 to 4.47)                    | 7.30<br>(4.03 to 12.82)                   |
| Other pharynx cancer                 | 81.69<br>(72.27 to 93.60)                    | 117.02<br>(68.02 to 184.03)                  | 104.08<br>(62.51 to 161.93)                  | 143.75<br>(80.42 to 230.56)                  | 3.44<br>(3.06 to 3.89)                    | 5.51<br>(3.28 to 8.69)                    | 5.00<br>(3.08 to 7.78)                    | 6.64<br>(3.78 to 10.64)                   |
| Esophageal cancer                    | 348.77<br>(311.38 to 394.38)                 | 458.33<br>(278.74 to 730.23)                 | 315.82<br>(206.81 to 469.45)                 | 671.66<br>(380.85 to 1,118.66)               | 18.36<br>(16.56 to 20.62)                 | 26.21<br>(16.20 to 40.29)                 | 18.91<br>(12.79 to 27.34)                 | 37.03<br>(21.47 to 59.11)                 |
| Stomach cancer                       | 1,494.67<br>(1,375.32 to 1,618.67)           | 1,165.09<br>(908.54 to 1,514.01)             | 946.05<br>(773.00 to 1,166.81)               | 1,312.21<br>(999.74 to 1,711.94)             | 91.29<br>(83.49 to 99.20)                 | 81.03<br>(64.45 to 105.20)                | 68.03<br>(55.73 to 84.30)                 | 88.27<br>(68.28 to 115.71)                |
| Colon and rectum cancer              | 2,557.67<br>(2,309.42 to 2,801.30)           | 3,115.00<br>(2,178.95 to 4,355.49)           | 2,657.89<br>(1,864.05 to 3,738.71)           | 3,814.58<br>(2,616.37 to 5,494.36)           | 160.09<br>(144.87 to 174.84)              | 222.72<br>(155.87 to 312.38)              | 196.63<br>(137.32 to 275.76)              | 263.39<br>(175.21 to 378.98)              |
| Liver cancer                         | 1,070.46<br>(908.68 to 1,197.95)             | 1,794.46<br>(1,194.30 to 2,705.49)           | 1,579.04<br>(1,105.86 to 2,232.17)           | 2,278.85<br>(1,424.98 to 3,646.85)           | 59.82<br>(49.84 to 67.13)                 | 110.72<br>(75.27 to 162.90)               | 101.55<br>(72.36 to 140.93)               | 134.13<br>(85.72 to 206.23)               |
| Liver cancer due to hepatitis B      | 177.64<br>(119.79 to 253.05)                 | 283.26<br>(164.04 to 465.23)                 | 256.04<br>(153.46 to 397.15)                 | 328.09<br>(183.05 to 573.68)                 | 8.38<br>(5.51 to 12.17)                   | 15.02<br>(8.57 to 24.75)                  | 14.06<br>(8.42 to 22.07)                  | 16.77<br>(9.26 to 28.95)                  |
| Liver cancer due to hepatitis C      | 337.20<br>(253.63 to 421.83)                 | 583.25<br>(363.01 to 910.02)                 | 542.28<br>(354.46 to 810.89)                 | 655.31<br>(382.63 to 1,083.14)               | 20.91<br>(15.68 to 26.33)                 | 39.57<br>(25.11 to 59.53)                 | 38.24<br>(25.31 to 55.66)                 | 42.72<br>(25.77 to 67.79)                 |
| Liver cancer due to alcohol use      | 356.73<br>(268.97 to 458.17)                 | 593.87<br>(360.52 to 961.06)                 | 474.40<br>(299.63 to 728.31)                 | 903.76<br>(513.66 to 1,518.02)               | 19.34<br>(14.53 to 25.04)                 | 35.17<br>(21.08 to 55.72)                 | 29.33<br>(18.27 to 44.21)                 | 50.92<br>(29.12 to 85.53)                 |
| Liver cancer due to other causes     | 198.90<br>(138.24 to 271.07)                 | 334.07<br>(191.86 to 556.97)                 | 306.32<br>(180.96 to 492.80)                 | 391.69<br>(213.15 to 686.41)                 | 11.19<br>(7.87 to 15.53)                  | 20.95<br>(12.01 to 34.25)                 | 19.92<br>(11.90 to 31.81)                 | 23.71<br>(12.85 to 40.97)                 |
| Gallbladder and biliary tract cancer | 474.73<br>(400.25 to 565.72)                 | 484.27<br>(406.25 to 578.64)                 | 486.14<br>(407.98 to 583.37)                 | 472.62<br>(398.51 to 564.24)                 | 30.15<br>(25.63 to 35.34)                 | 34.06<br>(28.41 to 40.68)                 | 35.12<br>(29.28 to 42.09)                 | 32.32<br>(26.91 to 38.43)                 |
| Pancreatic cancer                    | 1,667.13<br>(1,532.97 to 1,825.61)           | 2,369.83<br>(1,925.25 to 2,940.02)           | 2,260.19<br>(1,838.15 to 2,797.52)           | 2,541.88<br>(2,020.25 to 3,250.63)           | 94.38<br>(86.83 to 103.38)                | 146.42<br>(118.29 to 181.48)              | 144.03<br>(117.26 to 178.56)              | 152.74<br>(120.39 to 194.14)              |
| Larynx cancer                        | 244.92<br>(216.54 to 275.56)                 | 245.81<br>(125.40 to 439.30)                 | 129.58<br>(72.06 to 221.77)                  | 423.35<br>(205.53 to 746.53)                 | 11.74<br>(10.44 to 13.13)                 | 12.94<br>(6.65 to 22.56)                  | 7.07<br>(4.00 to 11.69)                   | 21.78<br>(10.40 to 38.17)                 |
| Tracheal, bronchus, and lung cancer  | 5,544.86<br>(5,031.36 to 6,084.77)           | 6,452.05<br>(4,648.18 to 8,793.24)           | 3,761.61<br>(2,793.82 to 5,008.38)           | 10,370.12<br>(7,216.76 to 14,284.67)         | 286.12<br>(261.10 to 312.85)              | 363.13<br>(257.60 to 501.04)              | 271.28<br>(163.23 to 299.59)              | 567.65<br>(394.48 to 793.45)              |
| Malignant skin melanoma              | 446.69<br>(334.46 to 511.05)                 | 585.85<br>(422.26 to 697.04)                 | 655.84<br>(473.32 to 781.93)                 | 539.84<br>(393.97 to 633.15)                 | 19.48<br>(14.43 to 22.14)                 | 30.35<br>(21.78 to 35.69)                 | 34.85<br>(24.92 to 40.56)                 | 27.20<br>(19.27 to 31.77)                 |
| Non-melanoma skin cancer             | 223.21<br>(204.72 to 242.10)                 | 330.01<br>(287.50 to 376.91)                 | 300.73<br>(267.97 to 339.35)                 | 338.49<br>(293.33 to 389.06)                 | 16.32<br>(14.91 to 17.77)                 | 27.65<br>(23.01 to 32.32)                 | 26.19<br>(22.13 to 30.14)                 | 27.25<br>(22.03 to 32.23)                 |
| Breast cancer                        | 3,079.31<br>(2,559.62 to 3,493.71)           | 3,624.20<br>(2,565.87 to 5,034.39)           | 3,085.68<br>(2,209.60 to 4,188.20)           | 4,332.90<br>(2,968.06 to 6,215.74)           | 147.25<br>(125.75 to 166.63)              | 200.76<br>(145.56 to 274.11)              | 175.76<br>(128.38 to 237.79)              | 233.35<br>(161.39 to 330.40)              |
| Cervical cancer                      | 356.31<br>(229.32 to 425.76)                 | 312.55<br>(180.32 to 408.50)                 | 265.18<br>(155.80 to 339.47)                 | 345.22<br>(199.12 to 460.85)                 | 16.68<br>(10.10 to 19.86)                 | 16.58<br>(9.28 to 21.28)                  | 14.41<br>(8.16 to 18.17)                  | 17.87<br>(9.97 to 23.54)                  |





| Cyprus                          |                                                     |                                                     |                                                     |                                                     |                                                  |                                                  |                                                  |                                                  |
|---------------------------------|-----------------------------------------------------|-----------------------------------------------------|-----------------------------------------------------|-----------------------------------------------------|--------------------------------------------------|--------------------------------------------------|--------------------------------------------------|--------------------------------------------------|
| Cause                           | YLLs (actual counts)                                |                                                     |                                                     |                                                     | Deaths (actual counts)                           |                                                  |                                                  |                                                  |
|                                 | 2016                                                | 2040 Forecast                                       | 2040 Better Scenario                                | 2040 Worse Scenario                                 | 2016                                             | 2040 Forecast                                    | 2040 Better Scenario                             | 2040 Worse Scenario                              |
| Kidney cancer                   | 516.62<br>(463.13 to 578.74)                        | 827.01<br>(673.57 to 1,010.77)                      | 801.86<br>(671.63 to 956.22)                        | 851.42<br>(674.22 to 1,069.09)                      | 28.18<br>(25.42 to 31.25)                        | 51.39<br>(42.42 to 61.70)                        | 51.61<br>(43.92 to 61.09)                        | 51.15<br>(40.97 to 63.15)                        |
| Bladder cancer                  | 851.68<br>(761.02 to 947.46)                        | 1,180.60<br>(899.38 to 1,555.87)                    | 1,035.31<br>(815.34 to 1,332.66)                    | 1,341.77<br>(986.82 to 1,833.30)                    | 60.13<br>(54.17 to 67.27)                        | 94.71<br>(71.82 to 124.10)                       | 86.70<br>(68.02 to 111.22)                       | 103.75<br>(75.71 to 141.96)                      |
| Brain and nervous system cancer | 1,322.79<br>(1,171.29 to 1,566.86)                  | 1,690.89<br>(1,440.63 to 2,053.18)                  | 1,626.71<br>(1,386.09 to 1,960.93)                  | 1,713.64<br>(1,463.73 to 2,093.13)                  | 47.53<br>(42.30 to 54.94)                        | 72.48<br>(62.86 to 82.49)                        | 70.96<br>(61.43 to 80.49)                        | 72.03<br>(62.72 to 83.06)                        |
| Thyroid cancer                  | 121.17<br>(107.34 to 138.86)                        | 165.48<br>(123.75 to 228.63)                        | 149.16<br>(114.62 to 200.38)                        | 181.94<br>(131.39 to 259.79)                        | 6.86<br>(6.08 to 7.80)                           | 10.64<br>(8.14 to 14.56)                         | 9.87<br>(7.60 to 12.99)                          | 11.30<br>(8.35 to 15.67)                         |
| Mesothelioma                    | 226.36<br>(197.08 to 281.59)                        | 380.67<br>(327.49 to 465.44)                        | 397.48<br>(339.68 to 497.41)                        | 362.60<br>(314.34 to 435.84)                        | 12.34<br>(10.78 to 15.40)                        | 23.72<br>(20.39 to 29.33)                        | 25.33<br>(21.71 to 31.91)                        | 22.05<br>(18.85 to 27.14)                        |
| Hodgkin lymphoma                | 137.06<br>(114.72 to 181.64)                        | 110.29<br>(86.09 to 148.86)                         | 93.49<br>(73.09 to 126.45)                          | 120.38<br>(91.22 to 162.82)                         | 4.76<br>(3.95 to 6.21)                           | 4.85<br>(3.82 to 6.37)                           | 4.21<br>(3.35 to 5.45)                           | 5.16<br>(4.01 to 6.82)                           |
| Non-Hodgkin lymphoma            | 1,262.34<br>(1,133.50 to 1,492.06)                  | 1,609.10<br>(1,301.53 to 2,034.08)                  | 1,493.29<br>(1,218.55 to 1,867.68)                  | 1,696.78<br>(1,367.55 to 2,156.63)                  | 64.43<br>(57.93 to 75.72)                        | 96.68<br>(81.02 to 121.25)                       | 92.31<br>(77.91 to 114.01)                       | 98.74<br>(81.18 to 125.07)                       |
| Multiple myeloma                | 585.71<br>(494.74 to 691.50)                        | 889.54<br>(707.97 to 1,103.78)                      | 857.49<br>(686.83 to 1,056.92)                      | 917.09<br>(723.67 to 1,158.83)                      | 35.35<br>(30.15 to 41.29)                        | 59.49<br>(48.69 to 73.62)                        | 58.93<br>(48.35 to 72.19)                        | 59.47<br>(47.01 to 75.14)                        |
| Leukemia                        | 1,655.73<br>(1,339.25 to 1,837.16)                  | 2,099.28<br>(1,596.84 to 2,659.67)                  | 1,904.29<br>(1,457.59 to 2,333.95)                  | 2,310.53<br>(1,727.66 to 3,024.20)                  | 82.66<br>(69.08 to 91.89)                        | 127.80<br>(101.31 to 161.94)                     | 119.53<br>(95.62 to 146.39)                      | 135.77<br>(105.06 to 178.30)                     |
| Acute lymphoid leukemia         | 268.43<br>(206.68 to 306.07)                        | 221.24<br>(152.11 to 304.11)                        | 192.76<br>(133.52 to 268.60)                        | 251.32<br>(171.95 to 355.86)                        | 7.62<br>(5.74 to 8.67)                           | 7.89<br>(5.54 to 10.29)                          | 6.94<br>(4.95 to 8.93)                           | 8.84<br>(6.15 to 11.89)                          |
| Chronic lymphoid leukemia       | 233.84<br>(177.13 to 269.06)                        | 315.25<br>(221.60 to 413.55)                        | 294.85<br>(213.82 to 379.42)                        | 336.92<br>(233.06 to 458.77)                        | 16.82<br>(12.97 to 19.39)                        | 24.75<br>(18.10 to 32.13)                        | 23.99<br>(17.84 to 30.54)                        | 25.49<br>(18.00 to 34.56)                        |
| Acute myeloid leukemia          | 585.28<br>(462.43 to 675.84)                        | 873.40<br>(666.02 to 1,096.88)                      | 822.26<br>(633.93 to 1,018.83)                      | 942.89<br>(703.75 to 1,219.43)                      | 27.30<br>(22.38 to 32.13)                        | 48.20<br>(37.84 to 60.70)                        | 46.60<br>(37.54 to 57.34)                        | 50.48<br>(38.71 to 64.94)                        |
| Chronic myeloid leukemia        | 83.54<br>(59.99 to 98.10)                           | 52.50<br>(35.33 to 73.63)                           | 40.50<br>(27.56 to 55.20)                           | 63.73<br>(41.05 to 92.18)                           | 4.72<br>(3.48 to 5.63)                           | 3.42<br>(2.33 to 4.83)                           | 2.73<br>(1.92 to 3.73)                           | 3.99<br>(2.68 to 5.74)                           |
| Other leukemia                  | 484.62<br>(400.66 to 563.36)                        | 636.89<br>(470.16 to 841.99)                        | 553.92<br>(416.69 to 713.95)                        | 715.66<br>(517.43 to 974.28)                        | 26.20<br>(22.33 to 30.32)                        | 43.53<br>(32.92 to 57.84)                        | 39.27<br>(30.17 to 50.81)                        | 46.98<br>(34.44 to 64.49)                        |
| Other neoplasms                 | 1,485.78<br>(1,221.35 to 1,644.43)                  | 1,859.59<br>(1,503.82 to 2,137.22)                  | 1,876.40<br>(1,511.84 to 2,177.95)                  | 1,817.28<br>(1,460.79 to 2,085.37)                  | 73.07<br>(58.39 to 81.33)                        | 111.47<br>(87.12 to 136.15)                      | 115.96<br>(91.55 to 132.24)                      | 105.44<br>(82.41 to 119.46)                      |
| <b>Cardiovascular diseases</b>  | <b>32,501.62</b><br><b>(30,722.14 to 34,483.36)</b> | <b>31,981.44</b><br><b>(21,502.31 to 49,722.54)</b> | <b>21,471.13</b><br><b>(15,291.03 to 32,604.10)</b> | <b>44,860.39</b><br><b>(29,013.41 to 71,409.81)</b> | <b>2,666.59</b><br><b>(2,469.14 to 2,755.38)</b> | <b>2,832.15</b><br><b>(1,999.28 to 4,147.70)</b> | <b>2,112.60</b><br><b>(1,545.91 to 3,010.87)</b> | <b>3,672.20</b><br><b>(2,514.46 to 5,520.44)</b> |
| Rheumatic heart disease         | 662.33<br>(599.69 to 737.35)                        | 573.75<br>(448.88 to 762.50)                        | 498.99<br>(397.82 to 642.74)                        | 607.93<br>(464.93 to 811.09)                        | 47.96<br>(43.14 to 53.28)                        | 49.13<br>(38.60 to 65.02)                        | 44.26<br>(35.34 to 56.24)                        | 50.19<br>(38.25 to 66.84)                        |
| Ischemic heart disease          | 19,959.23<br>(18,712.19 to 21,315.07)               | 16,763.09<br>(9,090.71 to 32,180.88)                | 9,730.66<br>(5,434.38 to 18,198.57)                 | 25,762.92<br>(13,356.42 to 49,140.20)               | 1,540.21<br>(1,451.30 to 1,637.41)               | 1,398.77<br>(786.46 to 2,567.21)                 | 925.83<br>(521.43 to 1,668.32)                   | 1,981.43<br>(1,077.14 to 3,763.29)               |
| Stroke                          | 5,790.57<br>(5,163.92 to 6,423.35)                  | 4,826.90<br>(2,810.41 to 8,966.02)                  | 3,055.32<br>(1,862.43 to 5,777.99)                  | 7,540.44<br>(4,216.80 to 14,760.99)                 | 500.09<br>(439.20 to 562.40)                     | 449.80<br>(272.34 to 861.08)                     | 316.91<br>(191.14 to 620.56)                     | 639.58<br>(365.88 to 1,329.65)                   |
| Ischemic stroke                 | 2,482.34<br>(2,171.03 to 2,807.71)                  | 2,055.31<br>(1,018.86 to 5,428.65)                  | 1,447.08<br>(736.55 to 3,763.30)                    | 2,959.45<br>(1,422.55 to 8,487.83)                  | 252.44<br>(218.86 to 289.31)                     | 220.36<br>(110.05 to 548.25)                     | 166.44<br>(83.35 to 410.09)                      | 295.68<br>(140.71 to 834.95)                     |

|                                |                                       |                                       |                                       |                                       |                                 |                                 |                                 |                                 |
|--------------------------------|---------------------------------------|---------------------------------------|---------------------------------------|---------------------------------------|---------------------------------|---------------------------------|---------------------------------|---------------------------------|
|                                | 3,308.23<br>(2,973.37 to<br>3,664.56) | 2,771.59<br>(1,573.51 to<br>4,569.63) | 1,608.24<br>(993.95 to<br>2,549.22)   | 4,580.99<br>(2,430.93 to<br>8,192.36) | 247.65<br>(217.03 to<br>278.17) | 229.44<br>(137.93 to<br>367.80) | 150.46<br>(97.67 to<br>239.99)  | 343.90<br>(196.27 to<br>611.44) |
| Intracerebral hemorrhage       |                                       |                                       |                                       |                                       |                                 |                                 |                                 |                                 |
|                                | 1,193.72<br>(1,004.38 to<br>1,435.67) | 2,423.59<br>(1,440.39 to<br>4,890.23) | 1,851.86<br>(1,177.21 to<br>3,298.61) | 3,029.37<br>(1,670.61 to<br>6,428.63) | 115.61<br>(85.75 to<br>134.50)  | 257.11<br>(140.22 to<br>542.00) | 207.96<br>(121.44 to<br>389.81) | 308.10<br>(155.54 to<br>695.59) |
| Hypertensive heart disease     |                                       |                                       |                                       |                                       |                                 |                                 |                                 |                                 |
|                                | 667.51<br>(444.27 to<br>785.94)       | 819.22<br>(459.04 to<br>1,113.72)     | 755.01<br>(414.67 to<br>1,010.29)     | 861.53<br>(482.98 to<br>1,176.24)     | 51.01<br>(27.55 to<br>63.61)    | 74.70<br>(35.15 to<br>112.91)   | 72.60<br>(34.15 to<br>107.17)   | 74.04<br>(34.39 to<br>112.59)   |
| Cardiomyopathy and myocarditis |                                       |                                       |                                       |                                       |                                 |                                 |                                 |                                 |
|                                | 229.63<br>(173.60 to<br>275.63)       | 367.11<br>(241.65 to<br>466.40)       | 384.87<br>(246.69 to<br>492.05)       | 346.70<br>(229.03 to<br>441.98)       | 19.43<br>(12.21 to<br>25.09)    | 36.55<br>(20.28 to<br>50.48)    | 40.10<br>(22.04 to<br>54.14)    | 32.90<br>(18.23 to<br>46.64)    |
| Myocarditis                    |                                       |                                       |                                       |                                       |                                 |                                 |                                 |                                 |

| Cyprus                                                        |                                                            |                                                            |                                                            |                                                             |                                                      |                                                      |                                                      |                                                        |
|---------------------------------------------------------------|------------------------------------------------------------|------------------------------------------------------------|------------------------------------------------------------|-------------------------------------------------------------|------------------------------------------------------|------------------------------------------------------|------------------------------------------------------|--------------------------------------------------------|
| Cause                                                         | YLLs (actual counts)                                       |                                                            |                                                            |                                                             | Deaths (actual counts)                               |                                                      |                                                      |                                                        |
|                                                               | 2016                                                       | 2040 Forecast                                              | 2040 Better Scenario                                       | 2040 Worse Scenario                                         | 2016                                                 | 2040 Forecast                                        | 2040 Better Scenario                                 | 2040 Worse Scenario                                    |
| Alcoholic cardiomyopathy                                      | 65.00<br>(43.97 to<br>85.29)                               | 73.02<br>(43.40 to<br>95.70)                               | 64.92<br>(36.78 to<br>86.32)                               | 94.80<br>(58.85 to<br>124.32)                               | 3.05<br>(1.77 to<br>3.92)                            | 3.96<br>(1.92 to<br>5.51)                            | 3.65<br>(1.66 to<br>5.16)                            | 4.92<br>(2.54 to<br>6.75)                              |
| Other cardiomyopathy                                          | 372.88<br>(213.68 to<br>463.27)                            | 379.09<br>(153.54 to<br>621.95)                            | 305.22<br>(118.24 to<br>501.87)                            | 420.03<br>(171.95 to<br>694.54)                             | 28.52<br>(12.43 to<br>37.57)                         | 34.19<br>(10.67 to<br>63.21)                         | 28.85<br>(8.42 to<br>52.36)                          | 36.22<br>(11.06 to<br>65.59)                           |
| Atrial fibrillation and flutter                               | 664.66<br>(535.66 to<br>822.45)                            | 1,134.12<br>(851.24 to<br>1,482.16)                        | 1,051.05<br>(806.14 to<br>1,361.12)                        | 1,182.89<br>(874.69 to<br>1,566.49)                         | 76.70<br>(60.81 to<br>95.89)                         | 133.15<br>(95.85 to<br>176.98)                       | 128.90<br>(95.26 to<br>169.23)                       | 133.96<br>(92.90 to<br>181.21)                         |
| Aortic aneurysm                                               | 916.28<br>(820.13 to<br>1,031.06)                          | 1,192.47<br>(891.48 to<br>1,576.23)                        | 1,029.17<br>(803.16 to<br>1,312.10)                        | 1,236.27<br>(922.11 to<br>1,632.73)                         | 63.68<br>(57.02 to<br>71.01)                         | 93.43<br>(73.84 to<br>118.01)                        | 86.29<br>(68.59 to<br>107.24)                        | 92.68<br>(71.05 to<br>118.85)                          |
| Peripheral artery disease                                     | 153.84<br>(124.25 to<br>190.00)                            | 348.82<br>(242.43 to<br>502.08)                            | 342.67<br>(237.50 to<br>486.60)                            | 372.19<br>(248.44 to<br>535.56)                             | 16.05<br>(12.76 to<br>20.36)                         | 37.39<br>(24.65 to<br>53.41)                         | 38.65<br>(25.96 to<br>55.01)                         | 37.98<br>(24.82 to<br>54.84)                           |
| Endocarditis                                                  | 379.20<br>(320.11 to<br>454.55)                            | 643.34<br>(454.08 to<br>895.11)                            | 615.28<br>(438.36 to<br>838.21)                            | 649.16<br>(454.81 to<br>904.69)                             | 27.45<br>(23.52 to<br>32.14)                         | 51.78<br>(35.21 to<br>75.93)                         | 51.46<br>(36.02 to<br>73.59)                         | 50.33<br>(33.70 to<br>73.17)                           |
| Other cardiovascular and circulatory diseases                 | 2,114.29<br>(1,720.14 to<br>2,675.60)                      | 3,256.15<br>(2,359.26 to<br>4,431.75)                      | 2,541.12<br>(1,924.84 to<br>3,318.53)                      | 3,617.69<br>(2,527.77 to<br>4,944.10)                       | 167.84<br>(132.32 to<br>205.99)                      | 286.89<br>(208.38 to<br>382.63)                      | 239.74<br>(180.34 to<br>312.44)                      | 303.92<br>(211.90 to<br>409.99)                        |
| <b>Chronic respiratory diseases</b>                           | <b>4,922.52</b><br><b>(4,395.47 to</b><br><b>5,367.87)</b> | <b>7,455.25</b><br><b>(5,824.74 to</b><br><b>9,264.73)</b> | <b>6,133.14</b><br><b>(4,987.94 to</b><br><b>7,354.41)</b> | <b>9,446.88</b><br><b>(7,163.11 to</b><br><b>12,089.55)</b> | <b>421.18</b><br><b>(348.63 to</b><br><b>465.32)</b> | <b>680.65</b><br><b>(501.30 to</b><br><b>876.14)</b> | <b>576.44</b><br><b>(442.66 to</b><br><b>705.31)</b> | <b>828.61</b><br><b>(597.90 to</b><br><b>1,099.76)</b> |
| Chronic obstructive pulmonary disease                         | 3,569.30<br>(3,123.25 to<br>3,923.33)                      | 5,178.42<br>(3,716.16 to<br>6,903.61)                      | 3,516.29<br>(2,547.07 to<br>4,620.83)                      | 7,343.69<br>(5,160.34 to<br>10,025.00)                      | 331.89<br>(269.68 to<br>368.86)                      | 507.02<br>(350.41 to<br>691.78)                      | 370.35<br>(253.26 to<br>492.48)                      | 673.89<br>(449.76 to<br>934.80)                        |
| Pneumoconiosis                                                | 37.47<br>(30.23 to<br>45.03)                               | 48.56<br>(36.39 to<br>62.62)                               | 52.20<br>(38.14 to<br>67.64)                               | 46.93<br>(35.76 to<br>60.79)                                | 2.77<br>(2.26 to<br>3.31)                            | 4.15<br>(3.13 to<br>5.38)                            | 4.58<br>(3.40 to<br>5.91)                            | 3.91<br>(2.88 to<br>5.07)                              |
| Silicosis                                                     | 6.28<br>(3.34 to<br>8.34)                                  | 3.55<br>(1.69 to<br>5.55)                                  | 2.97<br>(1.44 to<br>4.71)                                  | 3.88<br>(1.86 to<br>6.24)                                   | 0.46<br>(0.25 to<br>0.61)                            | 0.30<br>(0.15 to<br>0.50)                            | 0.26<br>(0.13 to<br>0.44)                            | 0.32<br>(0.15 to<br>0.53)                              |
| Asbestosis                                                    | 12.88<br>(8.89 to<br>18.15)                                | 28.03<br>(19.54 to<br>39.57)                               | 32.75<br>(22.67 to<br>44.80)                               | 24.62<br>(16.88 to<br>35.37)                                | 0.94<br>(0.65 to<br>1.33)                            | 2.33<br>(1.59 to<br>3.29)                            | 2.79<br>(1.98 to<br>3.88)                            | 1.99<br>(1.30 to<br>2.86)                              |
| Coal workers pneumoconiosis                                   | 2.91<br>(1.93 to<br>4.24)                                  | 4.33<br>(2.27 to<br>7.64)                                  | 4.14<br>(2.09 to<br>7.41)                                  | 4.69<br>(2.48 to<br>8.25)                                   | 0.23<br>(0.15 to<br>0.34)                            | 0.39<br>(0.20 to<br>0.67)                            | 0.38<br>(0.18 to<br>0.69)                            | 0.41<br>(0.20 to<br>0.72)                              |
| Other pneumoconiosis                                          | 15.40<br>(11.28 to<br>19.64)                               | 12.65<br>(8.24 to<br>17.79)                                | 12.35<br>(7.73 to<br>17.81)                                | 13.74<br>(9.13 to<br>19.14)                                 | 1.13<br>(0.84 to<br>1.45)                            | 1.14<br>(0.72 to<br>1.64)                            | 1.15<br>(0.70 to<br>1.71)                            | 1.19<br>(0.77 to<br>1.69)                              |
| Asthma                                                        | 435.49<br>(331.30 to<br>499.33)                            | 224.70<br>(127.27 to<br>367.53)                            | 154.35<br>(89.52 to<br>249.48)                             | 300.54<br>(156.63 to<br>514.25)                             | 26.90<br>(17.42 to<br>31.77)                         | 16.78<br>(8.82 to<br>27.63)                          | 12.24<br>(6.22 to<br>20.03)                          | 21.22<br>(10.49 to<br>36.22)                           |
| Interstitial lung disease and pulmonary sarcoidosis           | 817.47<br>(666.67 to<br>1,057.13)                          | 1,909.84<br>(1,523.90 to<br>2,423.29)                      | 2,317.85<br>(1,925.71 to<br>2,739.56)                      | 1,660.82<br>(1,286.80 to<br>2,146.25)                       | 55.64<br>(45.20 to<br>72.19)                         | 145.74<br>(113.81 to<br>187.90)                      | 182.14<br>(149.74 to<br>223.18)                      | 123.83<br>(91.70 to<br>163.26)                         |
| Other chronic respiratory diseases                            | 62.80<br>(38.10 to<br>79.83)                               | 93.72<br>(47.47 to<br>137.98)                              | 92.44<br>(46.11 to<br>140.03)                              | 94.90<br>(48.72 to<br>140.03)                               | 3.99<br>(1.80 to<br>5.72)                            | 6.95<br>(2.80 to<br>11.05)                           | 7.13<br>(2.81 to<br>11.41)                           | 6.76<br>(2.69 to<br>10.84)                             |
| <b>Cirrhosis and other chronic liver diseases</b>             | <b>2,069.93</b><br><b>(1,850.76 to</b><br><b>2,332.12)</b> | <b>2,279.32</b><br><b>(1,940.53 to</b><br><b>2,668.04)</b> | <b>1,952.27</b><br><b>(1,669.96 to</b><br><b>2,274.49)</b> | <b>2,742.47</b><br><b>(2,318.45 to</b><br><b>3,215.80)</b>  | <b>90.98</b><br><b>(81.99 to</b><br><b>100.46)</b>   | <b>115.46</b><br><b>(99.98 to</b><br><b>131.09)</b>  | <b>101.76</b><br><b>(88.75 to</b><br><b>115.03)</b>  | <b>134.18</b><br><b>(115.88 to</b><br><b>154.17)</b>   |
| Cirrhosis and other chronic liver diseases due to hepatitis B | 295.35<br>(229.92 to<br>379.06)                            | 341.41<br>(261.09 to<br>448.50)                            | 310.96<br>(237.84 to<br>409.91)                            | 356.73<br>(268.34 to<br>468.63)                             | 13.09<br>(10.16 to<br>16.79)                         | 17.38<br>(13.27 to<br>22.57)                         | 16.22<br>(12.38 to<br>21.24)                         | 17.68<br>(13.40 to<br>23.13)                           |
| Cirrhosis and other chronic liver diseases due to hepatitis C | 642.55<br>(482.88 to<br>839.06)                            | 745.80<br>(543.24 to<br>973.65)                            | 671.10<br>(496.35 to<br>865.77)                            | 787.99<br>(560.47 to<br>1,041.07)                           | 27.06<br>(20.48 to<br>34.16)                         | 35.80<br>(26.30 to<br>46.20)                         | 32.95<br>(24.51 to<br>42.01)                         | 36.90<br>(26.45 to<br>47.54)                           |

|                                                                |                                                            |                                                            |                                                            |                                                            |                                                      |                                                      |                                                      |                                                      |
|----------------------------------------------------------------|------------------------------------------------------------|------------------------------------------------------------|------------------------------------------------------------|------------------------------------------------------------|------------------------------------------------------|------------------------------------------------------|------------------------------------------------------|------------------------------------------------------|
|                                                                | 996.76<br>(817.95 to<br>1,181.99)                          | 1,035.93<br>(826.52 to<br>1,264.71)                        | 828.22<br>(655.07 to<br>1,014.69)                          | 1,434.35<br>(1,143.37 to<br>1,759.52)                      | 44.65<br>(36.55 to<br>52.62)                         | 53.76<br>(43.13 to<br>64.94)                         | 44.61<br>(35.27 to<br>54.26)                         | 70.95<br>(56.49 to<br>84.71)                         |
| Cirrhosis and other chronic liver diseases due to alcohol use  |                                                            |                                                            |                                                            |                                                            |                                                      |                                                      |                                                      |                                                      |
|                                                                | 135.28<br>(100.03 to<br>180.94)                            | 156.17<br>(111.05 to<br>213.72)                            | 141.99<br>(101.47 to<br>194.46)                            | 163.41<br>(116.23 to<br>223.76)                            | 6.17<br>(4.44 to<br>8.56)                            | 8.52<br>(6.01 to<br>12.23)                           | 7.97<br>(5.56 to<br>11.49)                           | 8.65<br>(6.03 to<br>12.44)                           |
| Cirrhosis and other chronic liver diseases due to other causes |                                                            |                                                            |                                                            |                                                            |                                                      |                                                      |                                                      |                                                      |
| <b>Digestive diseases</b>                                      | <b>1,888.11</b><br><b>(1,693.31 to</b><br><b>2,075.69)</b> | <b>2,795.85</b><br><b>(2,273.73 to</b><br><b>3,368.00)</b> | <b>2,593.91</b><br><b>(2,128.16 to</b><br><b>3,099.52)</b> | <b>2,975.70</b><br><b>(2,381.47 to</b><br><b>3,691.51)</b> | <b>149.84</b><br><b>(133.14 to</b><br><b>165.77)</b> | <b>253.63</b><br><b>(199.40 to</b><br><b>310.67)</b> | <b>244.79</b><br><b>(193.21 to</b><br><b>293.75)</b> | <b>258.76</b><br><b>(195.79 to</b><br><b>322.37)</b> |
| Peptic ulcer disease                                           | 210.06<br>(177.66 to<br>240.20)                            | 186.66<br>(141.70 to<br>247.11)                            | 146.38<br>(113.15 to<br>182.32)                            | 205.27<br>(155.55 to<br>266.12)                            | 16.57<br>(13.98 to<br>18.93)                         | 17.08<br>(12.74 to<br>22.08)                         | 14.08<br>(10.71 to<br>17.70)                         | 18.09<br>(13.22 to<br>23.94)                         |

| Cyprus                                     |                                                   |                                                     |                                                     |                                                     |                                             |                                                   |                                                   |                                                 |
|--------------------------------------------|---------------------------------------------------|-----------------------------------------------------|-----------------------------------------------------|-----------------------------------------------------|---------------------------------------------|---------------------------------------------------|---------------------------------------------------|-------------------------------------------------|
| Cause                                      | YLLs (actual counts)                              |                                                     |                                                     |                                                     | Deaths (actual counts)                      |                                                   |                                                   |                                                 |
|                                            | 2016                                              | 2040 Forecast                                       | 2040 Better Scenario                                | 2040 Worse Scenario                                 | 2016                                        | 2040 Forecast                                     | 2040 Better Scenario                              | 2040 Worse Scenario                             |
| Gastritis and duodenitis                   | 18.85<br>(15.72 to 22.21)                         | 25.58<br>(19.50 to 32.23)                           | 23.08<br>(17.68 to 28.94)                           | 26.45<br>(20.15 to 33.25)                           | 1.37<br>(1.14 to 1.62)                      | 2.18<br>(1.60 to 2.84)                            | 2.04<br>(1.51 to 2.65)                            | 2.16<br>(1.57 to 2.84)                          |
| Appendicitis                               | 36.19<br>(29.04 to 42.27)                         | 38.70<br>(28.95 to 48.63)                           | 32.66<br>(24.48 to 40.01)                           | 41.72<br>(30.96 to 52.71)                           | 2.30<br>(1.77 to 2.72)                      | 2.99<br>(2.16 to 3.75)                            | 2.61<br>(1.89 to 3.23)                            | 3.11<br>(2.20 to 3.95)                          |
| Paralytic ileus and intestinal obstruction | 413.43<br>(318.30 to 480.82)                      | 725.80<br>(556.08 to 863.65)                        | 760.34<br>(581.51 to 901.32)                        | 681.32<br>(510.98 to 811.01)                        | 35.57<br>(26.46 to 41.97)                   | 70.44<br>(51.24 to 86.42)                         | 76.24<br>(56.24 to 92.66)                         | 63.90<br>(45.40 to 79.45)                       |
| Inguinal, femoral, and abdominal hernia    | 67.14<br>(52.52 to 92.63)                         | 68.19<br>(50.27 to 94.86)                           | 64.50<br>(47.05 to 90.24)                           | 67.96<br>(49.83 to 94.29)                           | 5.82<br>(4.38 to 8.02)                      | 6.66<br>(4.64 to 9.35)                            | 6.51<br>(4.63 to 9.14)                            | 6.41<br>(4.43 to 9.01)                          |
| Inflammatory bowel disease                 | 171.20<br>(145.55 to 206.95)                      | 289.51<br>(238.95 to 350.76)                        | 297.05<br>(243.84 to 363.62)                        | 276.90<br>(228.08 to 333.83)                        | 12.64<br>(10.50 to 15.05)                   | 34.68<br>(19.41 to 30.23)                         | 26.22<br>(20.81 to 32.34)                         | 22.75<br>(17.56 to 28.02)                       |
| Vascular intestinal disorders              | 142.17<br>(121.76 to 163.38)                      | 245.27<br>(198.22 to 292.35)                        | 240.76<br>(196.21 to 288.02)                        | 240.10<br>(194.33 to 286.34)                        | 11.60<br>(9.69 to 13.30)                    | 22.11<br>(16.99 to 26.92)                         | 22.55<br>(17.48 to 27.26)                         | 21.00<br>(16.11 to 25.61)                       |
| Gallbladder and biliary diseases           | 381.90<br>(328.07 to 441.70)                      | 562.15<br>(332.57 to 912.53)                        | 452.06<br>(273.84 to 727.19)                        | 693.51<br>(400.22 to 1,148.57)                      | 34.78<br>(29.18 to 40.44)                   | 56.97<br>(31.99 to 93.11)                         | 47.77<br>(27.77 to 77.04)                         | 67.30<br>(36.60 to 112.11)                      |
| Pancreatitis                               | 276.22<br>(236.27 to 348.50)                      | 363.33<br>(204.96 to 707.94)                        | 290.60<br>(169.29 to 519.96)                        | 458.56<br>(235.67 to 908.94)                        | 15.15<br>(12.81 to 19.77)                   | 23.64<br>(14.04 to 44.46)                         | 19.61<br>(12.09 to 33.93)                         | 28.62<br>(15.59 to 59.17)                       |
| Other digestive diseases                   | 170.94<br>(144.59 to 193.76)                      | 290.65<br>(238.78 to 343.63)                        | 286.48<br>(235.22 to 337.06)                        | 283.90<br>(232.15 to 334.87)                        | 14.04<br>(11.88 to 16.12)                   | 26.89<br>(21.11 to 32.90)                         | 27.37<br>(21.64 to 32.90)                         | 25.40<br>(19.86 to 30.63)                       |
| Neurological disorders                     | <b>7,116.81</b><br>(6,232.23 to <b>8,132.72</b> ) | <b>12,329.28</b><br>(9,678.51 to <b>16,076.85</b> ) | <b>12,482.83</b><br>(9,943.24 to <b>15,847.47</b> ) | <b>12,591.48</b><br>(9,422.24 to <b>17,002.30</b> ) | <b>771.17</b><br>(663.31 to <b>891.45</b> ) | <b>1,383.00</b><br>(1,017.53 to <b>1,821.39</b> ) | <b>1,447.18</b><br>(1,104.10 to <b>1,862.24</b> ) | <b>1,369.10</b><br>(958.78 to <b>1,885.12</b> ) |
| Alzheimer's disease and other dementias    | 5,381.31<br>(4,544.12 to 6,403.84)                | 9,595.36<br>(7,105.94 to 13,246.84)                 | 9,659.96<br>(7,308.75 to 12,924.91)                 | 9,932.29<br>(6,866.60 to 14,264.87)                 | 669.93<br>(564.35 to 795.13)                | 1,192.78<br>(841.52 to 1,632.77)                  | 1,241.91<br>(908.38 to 1,652.65)                  | 1,192.61<br>(788.26 to 1,723.38)                |
| Parkinson's disease                        | 613.65<br>(459.77 to 802.51)                      | 1,166.71<br>(872.42 to 1,525.63)                    | 1,276.17<br>(962.35 to 1,671.70)                    | 1,064.29<br>(793.38 to 1,407.19)                    | 57.75<br>(43.40 to 74.80)                   | 114.39<br>(86.97 to 151.31)                       | 128.15<br>(96.98 to 169.40)                       | 101.82<br>(74.50 to 136.33)                     |
| Epilepsy                                   | 253.82<br>(230.97 to 283.20)                      | 343.54<br>(234.41 to 509.66)                        | 309.45<br>(214.65 to 452.75)                        | 398.02<br>(258.84 to 606.81)                        | 8.25<br>(7.21 to 9.14)                      | 15.09<br>(10.48 to 21.20)                         | 14.17<br>(9.83 to 19.82)                          | 16.75<br>(11.15 to 24.33)                       |
| Multiple sclerosis                         | 146.95<br>(125.67 to 177.67)                      | 195.14<br>(153.91 to 245.30)                        | 188.12<br>(149.72 to 235.24)                        | 194.03<br>(152.85 to 247.16)                        | 5.30<br>(4.57 to 6.34)                      | 7.83<br>(6.33 to 9.55)                            | 7.71<br>(6.33 to 9.35)                            | 7.66<br>(6.22 to 9.35)                          |
| Motor neuron disease                       | 280.05<br>(252.22 to 313.86)                      | 443.45<br>(386.26 to 501.31)                        | 447.13<br>(384.98 to 508.68)                        | 434.83<br>(380.05 to 489.45)                        | 12.54<br>(11.31 to 13.91)                   | 23.48<br>(20.39 to 26.49)                         | 24.07<br>(20.76 to 27.23)                         | 22.60<br>(19.73 to 25.45)                       |
| Other neurological disorders               | 441.03<br>(400.77 to 484.67)                      | 585.09<br>(503.29 to 688.94)                        | 602.00<br>(514.65 to 713.03)                        | 568.01<br>(491.82 to 663.55)                        | 17.39<br>(15.84 to 19.04)                   | 29.43<br>(25.89 to 33.64)                         | 31.17<br>(27.34 to 35.89)                         | 27.66<br>(24.37 to 31.49)                       |
| Mental disorders                           | <b>1,026.45</b><br>(843.79 to <b>1,468.26</b> )   | <b>2,240.56</b><br>(1,614.91 to <b>3,224.47</b> )   | <b>2,589.40</b><br>(1,880.82 to <b>3,668.40</b> )   | <b>2,073.83</b><br>(1,521.35 to <b>2,970.85</b> )   | <b>23.92</b><br>(20.55 to <b>32.21</b> )    | <b>57.50</b><br>(45.03 to <b>75.18</b> )          | <b>67.08</b><br>(53.78 to <b>86.78</b> )          | <b>52.75</b><br>(42.06 to <b>69.08</b> )        |
| Alcohol use disorders                      | 205.80<br>(152.52 to 262.90)                      | 262.21<br>(167.76 to 348.29)                        | 266.21<br>(167.91 to 355.02)                        | 277.81<br>(181.32 to 364.67)                        | 6.49<br>(4.59 to 8.02)                      | 9.38<br>(5.93 to 12.03)                           | 9.67<br>(6.00 to 12.61)                           | 9.76<br>(6.19 to 12.43)                         |
| Drug use disorders                         | 800.40<br>(622.14 to 1,205.85)                    | 1,955.26<br>(1,354.20 to 2,962.69)                  | 2,297.71<br>(1,626.56 to 3,372.63)                  | 1,774.27<br>(1,239.51 to 2,640.77)                  | 17.05<br>(13.81 to 24.43)                   | 47.68<br>(36.13 to 65.16)                         | 56.92<br>(44.48 to 75.65)                         | 42.57<br>(32.28 to 58.72)                       |
| Opioid use disorders                       | 426.19<br>(320.88 to 693.94)                      | 582.20<br>(366.39 to 988.42)                        | 607.62<br>(384.72 to 1,031.07)                      | 566.58<br>(360.31 to 970.93)                        | 8.49<br>(6.46 to 13.57)                     | 13.02<br>(8.87 to 20.70)                          | 13.75<br>(9.45 to 21.28)                          | 12.52<br>(8.55 to 20.74)                        |



| Cyprus                                                     |                                              |                                              |                                              |                                              |                                     |                                           |                                           |                                           |
|------------------------------------------------------------|----------------------------------------------|----------------------------------------------|----------------------------------------------|----------------------------------------------|-------------------------------------|-------------------------------------------|-------------------------------------------|-------------------------------------------|
| Cause                                                      | YLLs (actual counts)                         |                                              |                                              |                                              | Deaths (actual counts)              |                                           |                                           |                                           |
|                                                            | 2016                                         | 2040 Forecast                                | 2040 Better Scenario                         | 2040 Worse Scenario                          | 2016                                | 2040 Forecast                             | 2040 Better Scenario                      | 2040 Worse Scenario                       |
| <b>Diabetes, urogenital, blood, and endocrine diseases</b> | <b>11,027.23</b><br>(10,314.75 to 11,792.95) | <b>18,948.99</b><br>(12,680.09 to 35,032.49) | <b>16,534.49</b><br>(11,171.54 to 31,881.16) | <b>22,734.17</b><br>(14,744.04 to 40,593.17) | <b>872.08</b><br>(813.72 to 930.24) | <b>1,731.44</b><br>(1,151.61 to 3,216.45) | <b>1,560.74</b><br>(1,041.91 to 3,012.13) | <b>2,008.27</b><br>(1,271.30 to 3,708.37) |
| Diabetes mellitus                                          | 5,833.19<br>(5,354.82 to 6,386.98)           | 7,637.35<br>(5,289.21 to 10,603.40)          | 6,021.86<br>(4,354.11 to 8,157.73)           | 9,032.29<br>(6,154.14 to 12,825.13)          | 461.11<br>(420.91 to 504.11)        | 685.07<br>(479.38 to 913.28)              | 566.41<br>(412.37 to 744.68)              | 769.35<br>(529.92 to 1,058.13)            |
| Acute glomerulonephritis                                   | 5.92<br>(5.34 to 6.55)                       | 5.64<br>(4.29 to 7.65)                       | 5.15<br>(3.83 to 7.16)                       | 5.87<br>(4.36 to 8.13)                       | 0.25<br>(0.21 to 0.30)              | 0.28<br>(0.19 to 0.42)                    | 0.27<br>(0.18 to 0.40)                    | 0.28<br>(0.19 to 0.42)                    |
| Chronic kidney disease                                     | 2,912.96<br>(2,551.48 to 3,182.65)           | 7,294.35<br>(1,830.98 to 24,747.04)          | 6,543.37<br>(1,693.49 to 22,757.93)          | 9,758.79<br>(2,517.17 to 28,156.34)          | 252.25<br>(222.25 to 276.55)        | 723.68<br>(186.12 to 2,322.49)            | 669.39<br>(180.33 to 2,208.66)            | 931.47<br>(242.93 to 2,642.32)            |
| Chronic kidney disease due to diabetes mellitus            | 1,001.01<br>(804.76 to 1,190.12)             | 2,711.99<br>(682.61 to 9,021.87)             | 2,420.37<br>(630.14 to 7,914.87)             | 3,683.47<br>(921.17 to 10,356.06)            | 77.09<br>(60.71 to 93.61)           | 242.16<br>(59.20 to 758.39)               | 222.88<br>(56.20 to 733.35)               | 315.78<br>(76.38 to 895.54)               |
| Chronic kidney disease due to hypertension                 | 449.87<br>(351.46 to 562.38)                 | 1,396.65<br>(324.51 to 4,783.46)             | 1,314.53<br>(309.62 to 4,661.52)             | 1,784.64<br>(412.59 to 5,255.45)             | 53.66<br>(41.61 to 67.02)           | 171.51<br>(44.32 to 554.71)               | 165.55<br>(44.48 to 539.64)               | 212.14<br>(53.33 to 635.32)               |
| Chronic kidney disease due to glomerulonephritis           | 578.97<br>(464.16 to 709.57)                 | 1,165.72<br>(286.16 to 4,134.19)             | 1,010.09<br>(252.26 to 3,639.59)             | 1,585.30<br>(378.78 to 4,721.78)             | 44.88<br>(34.55 to 57.34)           | 108.37<br>(24.86 to 377.11)               | 96.36<br>(22.94 to 338.51)                | 142.95<br>(32.84 to 446.53)               |
| Chronic kidney disease due to other and unspecified causes | 883.11<br>(714.52 to 1,070.04)               | 2,019.99<br>(512.41 to 6,622.03)             | 1,798.37<br>(466.07 to 6,030.76)             | 2,705.38<br>(688.57 to 7,869.72)             | 76.61<br>(59.05 to 93.25)           | 201.64<br>(51.08 to 655.37)               | 184.60<br>(47.94 to 601.38)               | 260.60<br>(65.08 to 771.91)               |
| Urinary diseases and male infertility                      | 853.52<br>(766.93 to 940.95)                 | 1,576.58<br>(1,286.29 to 1,866.57)           | 1,473.56<br>(1,227.61 to 1,745.82)           | 1,579.88<br>(1,282.95 to 1,872.93)           | 83.72<br>(74.70 to 94.01)           | 168.71<br>(129.10 to 208.47)              | 163.14<br>(128.87 to 198.32)              | 163.39<br>(123.12 to 204.00)              |
| Urinary tract infections                                   | 768.60<br>(689.19 to 851.03)                 | 1,479.32<br>(1,198.06 to 1,764.29)           | 1,388.52<br>(1,139.86 to 1,652.05)           | 1,478.28<br>(1,189.49 to 1,768.47)           | 76.66<br>(68.23 to 86.30)           | 159.57<br>(121.75 to 198.32)              | 154.82<br>(121.70 to 190.04)              | 154.21<br>(116.32 to 193.20)              |
| Urolithiasis                                               | 43.22<br>(32.72 to 59.11)                    | 49.06<br>(35.15 to 69.50)                    | 42.37<br>(30.58 to 59.86)                    | 52.02<br>(36.70 to 74.29)                    | 3.32<br>(2.55 to 4.47)              | 4.04<br>(2.89 to 5.71)                    | 3.61<br>(2.56 to 5.10)                    | 4.13<br>(2.83 to 5.83)                    |
| Other urinary diseases                                     | 41.70<br>(31.30 to 56.24)                    | 48.20<br>(32.38 to 69.77)                    | 42.87<br>(29.29 to 62.23)                    | 49.58<br>(32.91 to 73.37)                    | 3.74<br>(2.72 to 5.22)              | 5.10<br>(3.29 to 7.64)                    | 4.72<br>(3.09 to 7.10)                    | 5.05<br>(3.19 to 7.89)                    |
| Gynecological diseases                                     | 0.98<br>(0.77 to 1.22)                       | 0.56<br>(0.39 to 0.76)                       | 0.41<br>(0.30 to 0.56)                       | 0.65<br>(0.44 to 0.94)                       | 0.05<br>(0.04 to 0.06)              | 0.04<br>(0.02 to 0.05)                    | 0.03<br>(0.02 to 0.04)                    | 0.04<br>(0.02 to 0.06)                    |
| Uterine fibroids                                           | 0.08<br>(0.06 to 0.13)                       | 0.08<br>(0.05 to 0.13)                       | 0.07<br>(0.04 to 0.10)                       | 0.09<br>(0.06 to 0.15)                       | 0.00<br>(0.00 to 0.01)              | 0.01<br>(0.00 to 0.01)                    | 0.00<br>(0.00 to 0.01)                    | 0.01<br>(0.00 to 0.01)                    |
| Polycystic ovarian syndrome                                | 0.22<br>(0.14 to 0.36)                       | 0.05<br>(0.02 to 0.11)                       | 0.03<br>(0.02 to 0.07)                       | 0.07<br>(0.03 to 0.15)                       | 0.01<br>(0.00 to 0.01)              | 0.00<br>(0.00 to 0.00)                    | 0.00<br>(0.00 to 0.00)                    | 0.00<br>(0.00 to 0.00)                    |
| Endometriosis                                              | 0.03<br>(0.01 to 0.06)                       | 0.02<br>(0.01 to 0.04)                       | 0.01<br>(0.00 to 0.03)                       | 0.02<br>(0.01 to 0.05)                       | 0.00<br>(0.00 to 0.00)              | 0.00<br>(0.00 to 0.00)                    | 0.00<br>(0.00 to 0.00)                    | 0.00<br>(0.00 to 0.00)                    |
| Genital prolapse                                           | 0.08<br>(0.04 to 0.12)                       | 0.05<br>(0.02 to 0.07)                       | 0.03<br>(0.02 to 0.05)                       | 0.05<br>(0.02 to 0.09)                       | 0.00<br>(0.00 to 0.01)              | 0.00<br>(0.00 to 0.00)                    | 0.00<br>(0.00 to 0.00)                    | 0.00<br>(0.00 to 0.00)                    |
| Other gynecological diseases                               | 0.57<br>(0.41 to 0.73)                       | 0.36<br>(0.23 to 0.51)                       | 0.27<br>(0.18 to 0.37)                       | 0.41<br>(0.27 to 0.60)                       | 0.03<br>(0.03 to 0.04)              | 0.03<br>(0.02 to 0.04)                    | 0.02<br>(0.01 to 0.03)                    | 0.03<br>(0.02 to 0.04)                    |
| Hemoglobinopathies and hemolytic anemias                   | 265.75<br>(217.22 to 316.14)                 | 339.82<br>(267.61 to 416.10)                 | 310.42<br>(240.42 to 381.49)                 | 347.84<br>(267.64 to 429.89)                 | 20.62<br>(16.17 to 24.36)           | 30.24<br>(22.27 to 38.12)                 | 28.14<br>(20.86 to 35.07)                 | 30.07<br>(21.66 to 38.03)                 |
| Thalassemias                                               | 67.68<br>(57.55 to 84.24)                    | 65.68<br>(47.61 to 87.76)                    | 65.95<br>(47.22 to 88.74)                    | 65.13<br>(47.43 to 87.04)                    | 1.52<br>(1.28 to 1.89)              | 2.06<br>(1.50 to 2.75)                    | 2.08<br>(1.50 to 2.76)                    | 2.03<br>(1.48 to 2.69)                    |



|                                                   |                                     |                                       |                                       |                                       |                              |                                |                                |                                |
|---------------------------------------------------|-------------------------------------|---------------------------------------|---------------------------------------|---------------------------------------|------------------------------|--------------------------------|--------------------------------|--------------------------------|
|                                                   | 3.29<br>(1.13 to<br>6.88)           | 5.15<br>(1.38 to<br>11.73)            | 4.37<br>(1.13 to<br>10.06)            | 5.65<br>(1.50 to<br>13.09)            | 0.08<br>(0.02 to<br>0.17)    | 0.20<br>(0.04 to<br>0.50)      | 0.17<br>(0.04 to<br>0.44)      | 0.21<br>(0.05 to<br>0.54)      |
| Sickle cell disorders                             |                                     |                                       |                                       |                                       |                              |                                |                                |                                |
|                                                   | 35.43<br>(27.58 to<br>44.52)        | 61.51<br>(46.29 to<br>79.16)          | 51.30<br>(38.30 to<br>66.44)          | 67.07<br>(49.15 to<br>87.93)          | 1.63<br>(1.25 to<br>1.98)    | 3.63<br>(2.70 to<br>4.66)      | 3.10<br>(2.31 to<br>3.98)      | 3.87<br>(2.86 to<br>5.05)      |
| G6PD deficiency                                   |                                     |                                       |                                       |                                       |                              |                                |                                |                                |
|                                                   | 159.34<br>(125.30 to<br>188.38)     | 207.49<br>(155.05 to<br>263.19)       | 188.79<br>(139.98 to<br>238.62)       | 209.99<br>(153.66 to<br>268.98)       | 17.39<br>(13.35 to<br>20.51) | 24.35<br>(17.49 to<br>31.50)   | 22.80<br>(16.55 to<br>29.18)   | 23.96<br>(16.46 to<br>31.46)   |
| Other hemoglobinopathies and hemolytic anemias    |                                     |                                       |                                       |                                       |                              |                                |                                |                                |
|                                                   | 1,154.92<br>(950.48 to<br>1,330.88) | 2,094.70<br>(1,590.38 to<br>2,489.13) | 2,179.71<br>(1,651.18 to<br>2,586.36) | 2,008.85<br>(1,537.04 to<br>2,412.56) | 54.09<br>(38.81 to<br>61.66) | 123.43<br>(85.02 to<br>147.30) | 133.35<br>(91.39 to<br>158.63) | 113.66<br>(77.34 to<br>136.62) |
| Endocrine, metabolic, blood, and immune disorders |                                     |                                       |                                       |                                       |                              |                                |                                |                                |

| Cyprus                                        |                                        |                                        |                                        |                                        |                                  |                                   |                                   |                                   |
|-----------------------------------------------|----------------------------------------|----------------------------------------|----------------------------------------|----------------------------------------|----------------------------------|-----------------------------------|-----------------------------------|-----------------------------------|
| Cause                                         | YLLs (actual counts)                   |                                        |                                        |                                        | Deaths (actual counts)           |                                   |                                   |                                   |
|                                               | 2016                                   | 2040 Forecast                          | 2040 Better Scenario                   | 2040 Worse Scenario                    | 2016                             | 2040 Forecast                     | 2040 Better Scenario              | 2040 Worse Scenario               |
| <b>Musculoskeletal disorders</b>              | <b>428.98</b><br>(348.35 to 533.04)    | <b>731.94</b><br>(575.57 to 926.45)    | <b>660.55</b><br>(516.34 to 830.83)    | <b>763.89</b><br>(590.70 to 976.58)    | <b>29.86</b><br>(23.88 to 37.12) | <b>58.48</b><br>(44.37 to 75.77)  | <b>54.79</b><br>(42.24 to 69.79)  | <b>58.93</b><br>(43.82 to 75.52)  |
| Rheumatoid arthritis                          | 168.74<br>(133.38 to 227.18)           | 277.10<br>(195.87 to 407.36)           | 216.57<br>(153.74 to 314.33)           | 311.90<br>(214.39 to 445.95)           | 11.59<br>(9.17 to 16.37)         | 21.41<br>(15.05 to 31.49)         | 17.24<br>(12.05 to 25.27)         | 23.45<br>(15.97 to 34.23)         |
| Other musculoskeletal disorders               | 260.24<br>(198.49 to 320.57)           | 454.84<br>(332.85 to 576.31)           | 443.98<br>(329.92 to 549.90)           | 451.99<br>(321.63 to 567.31)           | 18.28<br>(13.80 to 22.76)        | 37.08<br>(25.60 to 47.64)         | 37.55<br>(26.50 to 48.13)         | 35.47<br>(23.96 to 46.34)         |
| <b>Other non-communicable diseases</b>        | <b>1479.57</b><br>(1189.11 to 1815.57) | <b>1504.74</b><br>(1097.26 to 1945.07) | <b>1396.38</b><br>(1018.44 to 1796.24) | <b>1563.50</b><br>(1134.53 to 2046.87) | <b>54.46</b><br>(36.48 to 71.09) | <b>92.80</b><br>(57.59 to 125.81) | <b>89.85</b><br>(55.13 to 121.64) | <b>91.26</b><br>(57.19 to 126.86) |
| Congenital birth defects                      | 950.31<br>(748.94 to 1232.54)          | 619.59<br>(474.77 to 843.13)           | 564.49<br>(434.76 to 765.39)           | 669.05<br>(498.06 to 921.61)           | 13.67<br>(11.13 to 17.10)        | 12.08<br>(9.83 to 15.13)          | 11.41<br>(9.26 to 14.42)          | 12.69<br>(10.24 to 16.34)         |
| Neural tube defects                           | 11.69<br>(7.55 to 17.35)               | 2.63<br>(1.63 to 4.30)                 | 1.95<br>(1.17 to 3.24)                 | 3.20<br>(1.85 to 5.45)                 | 0.16<br>(0.11 to 0.23)           | 0.04<br>(0.03 to 0.07)            | 0.03<br>(0.02 to 0.05)            | 0.05<br>(0.03 to 0.09)            |
| Congenital heart anomalies                    | 329.72<br>(217.15 to 449.09)           | 115.92<br>(71.58 to 178.11)            | 83.54<br>(50.86 to 128.42)             | 143.09<br>(86.17 to 227.66)            | 4.54<br>(3.20 to 5.91)           | 1.87<br>(1.22 to 2.68)            | 1.35<br>(0.90 to 1.95)            | 2.29<br>(1.49 to 3.44)            |
| Orofacial clefts                              | 5.01<br>(2.34 to 10.18)                | 1.27<br>(0.45 to 3.21)                 | 0.80<br>(0.28 to 2.01)                 | 1.72<br>(0.56 to 4.29)                 | 0.06<br>(0.03 to 0.12)           | 0.01<br>(0.01 to 0.04)            | 0.01<br>(0.02 to 0.02)            | 0.02<br>(0.01 to 0.05)            |
| Down syndrome                                 | 180.34<br>(135.60 to 234.02)           | 293.10<br>(230.72 to 377.11)           | 306.76<br>(241.30 to 390.53)           | 285.46<br>(224.83 to 361.57)           | 3.49<br>(2.80 to 4.14)           | 7.13<br>(5.87 to 8.88)            | 7.50<br>(6.19 to 9.30)            | 6.91<br>(5.70 to 8.56)            |
| Other chromosomal abnormalities               | 109.64<br>(71.24 to 183.54)            | 94.13<br>(56.02 to 168.87)             | 83.90<br>(49.46 to 147.48)             | 102.44<br>(60.32 to 184.00)            | 1.39<br>(0.93 to 2.24)           | 1.35<br>(0.85 to 2.25)            | 1.21<br>(0.75 to 1.98)            | 1.45<br>(0.91 to 2.46)            |
| Congenital musculoskeletal and limb anomalies | 30.67<br>(19.12 to 53.60)              | 11.35<br>(6.38 to 20.48)               | 8.77<br>(4.80 to 16.41)                | 13.47<br>(7.41 to 24.27)               | 0.40<br>(0.26 to 0.67)           | 0.17<br>(0.10 to 0.29)            | 0.13<br>(0.08 to 0.23)            | 0.20<br>(0.12 to 0.35)            |
| Urogenital congenital anomalies               | 41.18<br>(27.08 to 62.60)              | 12.70<br>(7.95 to 20.16)               | 10.31<br>(6.31 to 16.59)               | 14.63<br>(8.95 to 24.37)               | 0.54<br>(0.37 to 0.79)           | 0.21<br>(0.14 to 0.31)            | 0.17<br>(0.11 to 0.26)            | 0.24<br>(0.15 to 0.37)            |
| Digestive congenital anomalies                | 70.89<br>(43.20 to 112.47)             | 22.49<br>(12.22 to 38.01)              | 16.72<br>(8.83 to 28.36)               | 27.46<br>(14.34 to 47.51)              | 0.87<br>(0.54 to 1.35)           | 0.30<br>(0.18 to 0.49)            | 0.23<br>(0.13 to 0.37)            | 0.37<br>(0.21 to 0.61)            |
| Other congenital birth defects                | 171.17<br>(120.00 to 241.20)           | 65.99<br>(40.57 to 108.13)             | 51.74<br>(31.33 to 85.63)              | 77.58<br>(45.19 to 125.99)             | 2.23<br>(1.61 to 3.05)           | 0.99<br>(0.65 to 1.54)            | 0.78<br>(0.50 to 1.22)            | 1.16<br>(0.74 to 1.76)            |
| Skin and subcutaneous diseases                | 449.08<br>(276.80 to 667.93)           | 865.60<br>(525.08 to 1267.42)          | 817.45<br>(491.76 to 1203.22)          | 870.37<br>(529.60 to 1304.48)          | 39.86<br>(22.65 to 56.48)        | 80.49<br>(45.49 to 114.19)        | 78.28<br>(44.85 to 110.43)        | 78.29<br>(44.71 to 113.61)        |
| Cellulitis                                    | 49.35<br>(31.93 to 109.55)             | 116.01<br>(72.76 to 247.88)            | 115.88<br>(72.10 to 245.06)            | 113.77<br>(71.08 to 244.93)            | 2.84<br>(1.77 to 6.17)           | 7.63<br>(4.62 to 15.68)           | 7.92<br>(4.78 to 16.29)           | 7.20<br>(4.36 to 15.02)           |
| Pyoderma                                      | 110.92<br>(62.38 to 169.55)            | 315.20<br>(168.06 to 469.66)           | 304.90<br>(162.12 to 457.37)           | 313.11<br>(169.04 to 473.00)           | 8.23<br>(4.23 to 12.16)          | 27.11<br>(13.53 to 39.64)         | 27.28<br>(13.65 to 39.35)         | 25.84<br>(12.95 to 37.97)         |
| Decubitus ulcer                               | 264.80<br>(152.02 to 387.49)           | 400.38<br>(222.31 to 608.22)           | 363.59<br>(200.07 to 551.84)           | 409.89<br>(224.09 to 621.31)           | 27.03<br>(14.46 to 37.62)        | 42.83<br>(22.77 to 63.68)         | 40.09<br>(21.09 to 59.58)         | 42.50<br>(22.01 to 64.05)         |
| Other skin and subcutaneous diseases          | 24.00<br>(14.44 to 36.49)              | 34.01<br>(19.51 to 51.60)              | 33.08<br>(18.71 to 50.41)              | 33.60<br>(19.58 to 51.50)              | 1.76<br>(0.98 to 2.59)           | 2.92<br>(1.50 to 4.47)            | 2.98<br>(1.50 to 4.45)            | 2.75<br>(1.42 to 4.24)            |
| Sudden infant death syndrome                  | 80.18<br>(49.16 to 122.34)             | 19.55<br>(8.36 to 37.13)               | 14.44<br>(6.17 to 28.36)               | 24.08<br>(10.21 to 46.81)              | 0.93<br>(0.57 to 1.42)           | 0.23<br>(0.10 to 0.43)            | 0.17<br>(0.07 to 0.33)            | 0.28<br>(0.12 to 0.54)            |

|                          |                                          |                                         |                                        |                                         |                                 |                                 |                                 |                                 |
|--------------------------|------------------------------------------|-----------------------------------------|----------------------------------------|-----------------------------------------|---------------------------------|---------------------------------|---------------------------------|---------------------------------|
| Injuries                 | 12,108.54<br>(11,340.07 to<br>12,928.94) | 10,535.84<br>(7,207.62 to<br>17,192.39) | 9,515.01<br>(6,503.70 to<br>15,263.83) | 13,930.22<br>(8,977.11 to<br>25,691.73) | 395.40<br>(371.62 to<br>419.87) | 460.34<br>(359.37 to<br>607.20) | 433.17<br>(343.26 to<br>559.36) | 537.50<br>(402.20 to<br>764.35) |
| Transport injuries       | 5,388.34<br>(4,927.93 to<br>5,869.37)    | 3,593.99<br>(1,989.30 to<br>6,666.92)   | 3,246.49<br>(1,837.29 to<br>5,937.23)  | 6,335.52<br>(3,367.09 to<br>12,119.69)  | 133.45<br>(122.57 to<br>144.70) | 110.67<br>(70.60 to<br>180.30)  | 101.78<br>(67.13 to<br>161.35)  | 178.89<br>(109.35 to<br>305.55) |
| Road injuries            | 4,576.57<br>(4,162.31 to<br>4,992.64)    | 2,825.09<br>(1,534.97 to<br>5,385.35)   | 2,656.54<br>(1,475.81 to<br>4,939.36)  | 5,348.18<br>(2,800.99 to<br>10,454.26)  | 113.29<br>(104.08 to<br>123.07) | 88.06<br>(56.29 to<br>142.72)   | 84.10<br>(55.51 to<br>134.14)   | 150.60<br>(92.31 to<br>254.40)  |
| Pedestrian road injuries | 825.94<br>(685.85 to<br>944.28)          | 373.19<br>(236.15 to<br>605.32)         | 293.06<br>(193.39 to<br>448.55)        | 705.95<br>(419.79 to<br>1,212.59)       | 28.88<br>(24.72 to<br>32.57)    | 18.49<br>(13.25 to<br>26.15)    | 15.08<br>(11.05 to<br>20.68)    | 31.18<br>(20.69 to<br>47.15)    |

| Cyprus                                          |                                                  |                                                  |                                                  |                                                  |                                            |                                            |                                            |                                            |
|-------------------------------------------------|--------------------------------------------------|--------------------------------------------------|--------------------------------------------------|--------------------------------------------------|--------------------------------------------|--------------------------------------------|--------------------------------------------|--------------------------------------------|
| Cause                                           | YLLs (actual counts)                             |                                                  |                                                  |                                                  | Deaths (actual counts)                     |                                            |                                            |                                            |
|                                                 | 2016                                             | 2040 Forecast                                    | 2040 Better Scenario                             | 2040 Worse Scenario                              | 2016                                       | 2040 Forecast                              | 2040 Better Scenario                       | 2040 Worse Scenario                        |
| Cyclist road injuries                           | 124.56<br>(101.12 to 147.67)                     | 103.70<br>(58.74 to 180.86)                      | 101.45<br>(59.16 to 172.56)                      | 181.81<br>(97.71 to 326.96)                      | 3.60<br>(2.94 to 4.23)                     | 4.19<br>(2.48 to 6.70)                     | 4.22<br>(2.53 to 6.47)                     | 6.24<br>(3.58 to 10.20)                    |
| Motorcyclist road injuries                      | 1,181.68<br>(939.43 to 1,404.60)                 | 1,010.37<br>(465.94 to 2,154.90)                 | 965.28<br>(462.04 to 2,025.05)                   | 1,606.31<br>(713.09 to 3,476.83)                 | 22.80<br>(18.09 to 26.86)                  | 22.37<br>(11.27 to 43.94)                  | 21.60<br>(11.23 to 41.27)                  | 33.65<br>(16.41 to 67.95)                  |
| Motor vehicle road injuries                     | 2,417.14<br>(2,139.24 to 2,768.56)               | 1,319.08<br>(720.05 to 2,455.66)                 | 1,278.55<br>(728.00 to 2,316.80)                 | 2,815.53<br>(1,478.12 to 5,393.93)               | 57.37<br>(51.05 to 64.72)                  | 42.42<br>(26.96 to 66.54)                  | 42.61<br>(28.44 to 65.65)                  | 78.47<br>(47.46 to 130.81)                 |
| Other road injuries                             | 27.25<br>(21.64 to 38.85)                        | 18.76<br>(10.08 to 36.59)                        | 18.20<br>(10.08 to 34.82)                        | 38.58<br>(19.68 to 76.69)                        | 0.65<br>(0.54 to 0.82)                     | 0.59<br>(0.34 to 1.02)                     | 0.59<br>(0.35 to 0.99)                     | 1.05<br>(0.59 to 1.87)                     |
| Other transport injuries                        | 811.77<br>(688.28 to 937.70)                     | 768.90<br>(429.15 to 1,433.94)                   | 589.95<br>(339.25 to 1,028.10)                   | 987.34<br>(506.97 to 1,811.51)                   | 20.16<br>(17.33 to 23.04)                  | 22.61<br>(13.92 to 37.89)                  | 17.68<br>(11.02 to 28.65)                  | 28.28<br>(15.92 to 47.99)                  |
| <b>Unintentional injuries</b>                   | <b>3,938.41</b><br><b>(3,677.26 to 4,252.75)</b> | <b>3,884.10</b><br><b>(3,322.42 to 4,584.11)</b> | <b>3,549.38</b><br><b>(3,083.86 to 4,119.29)</b> | <b>4,101.95</b><br><b>(3,483.77 to 4,928.32)</b> | <b>192.59</b><br><b>(178.25 to 206.70)</b> | <b>263.67</b><br><b>(220.14 to 301.62)</b> | <b>253.80</b><br><b>(217.22 to 286.74)</b> | <b>262.02</b><br><b>(213.82 to 305.24)</b> |
| Falls                                           | 1,211.34<br>(1,096.71 to 1,342.56)               | 1,560.51<br>(1,356.05 to 1,766.24)               | 1,478.53<br>(1,301.74 to 1,680.67)               | 1,576.95<br>(1,357.35 to 1,815.72)               | 86.31<br>(76.87 to 95.52)                  | 137.78<br>(109.89 to 163.97)               | 135.64<br>(111.61 to 159.56)               | 133.12<br>(102.38 to 161.96)               |
| Drowning                                        | 912.27<br>(817.91 to 1,017.07)                   | 635.14<br>(452.70 to 935.33)                     | 547.45<br>(399.53 to 786.83)                     | 726.85<br>(506.23 to 1,103.38)                   | 23.87<br>(21.69 to 26.16)                  | 21.42<br>(16.15 to 29.46)                  | 18.91<br>(14.58 to 25.20)                  | 23.81<br>(17.65 to 33.56)                  |
| Fire, heat, and hot substances                  | 286.97<br>(251.39 to 334.58)                     | 214.51<br>(156.92 to 297.52)                     | 179.14<br>(133.73 to 241.06)                     | 245.71<br>(174.73 to 352.41)                     | 14.02<br>(10.98 to 15.79)                  | 14.22<br>(9.71 to 19.04)                   | 12.53<br>(8.67 to 16.29)                   | 15.32<br>(10.33 to 21.23)                  |
| Poisonings                                      | 41.35<br>(33.74 to 51.57)                        | 18.36<br>(11.81 to 30.69)                        | 14.16<br>(9.58 to 22.71)                         | 22.46<br>(14.09 to 37.28)                        | 1.18<br>(0.95 to 1.41)                     | 0.68<br>(0.47 to 1.02)                     | 0.55<br>(0.38 to 0.79)                     | 0.80<br>(0.53 to 1.19)                     |
| Exposure to mechanical forces                   | 512.54<br>(461.60 to 573.99)                     | 397.96<br>(324.92 to 500.33)                     | 341.71<br>(282.59 to 422.66)                     | 437.24<br>(349.55 to 549.50)                     | 16.91<br>(15.17 to 18.52)                  | 18.39<br>(15.04 to 21.69)                  | 16.65<br>(13.85 to 19.48)                  | 19.07<br>(15.49 to 23.02)                  |
| Unintentional firearm injuries                  | 75.65<br>(58.68 to 88.44)                        | 53.26<br>(39.88 to 69.44)                        | 46.94<br>(35.81 to 60.08)                        | 57.87<br>(42.94 to 76.37)                        | 2.06<br>(1.71 to 2.37)                     | 1.97<br>(1.60 to 2.41)                     | 1.83<br>(1.50 to 2.23)                     | 2.03<br>(1.63 to 2.51)                     |
| Unintentional suffocation                       | 31.75<br>(24.27 to 46.49)                        | 21.11<br>(14.42 to 34.38)                        | 18.50<br>(12.62 to 30.29)                        | 23.23<br>(15.52 to 38.74)                        | 0.57<br>(0.46 to 0.82)                     | 0.46<br>(0.35 to 0.68)                     | 0.41<br>(0.32 to 0.61)                     | 0.50<br>(0.37 to 0.75)                     |
| Other exposure to mechanical forces             | 405.14<br>(359.28 to 460.70)                     | 323.59<br>(260.37 to 409.63)                     | 276.27<br>(225.91 to 341.23)                     | 356.14<br>(282.43 to 449.00)                     | 14.28<br>(12.61 to 15.76)                  | 15.95<br>(12.80 to 19.09)                  | 14.40<br>(11.75 to 17.02)                  | 16.54<br>(13.22 to 20.13)                  |
| Adverse effects of medical treatment            | 340.35<br>(296.19 to 387.31)                     | 441.26<br>(363.78 to 521.70)                     | 420.22<br>(347.38 to 499.01)                     | 447.12<br>(371.81 to 534.25)                     | 22.07<br>(18.54 to 26.55)                  | 35.74<br>(27.32 to 41.48)                  | 33.31<br>(27.06 to 40.69)                  | 32.81<br>(26.00 to 40.68)                  |
| Animal contact                                  | 46.39<br>(39.90 to 58.68)                        | 59.02<br>(47.81 to 76.90)                        | 52.51<br>(42.38 to 69.10)                        | 63.55<br>(50.64 to 83.77)                        | 1.53<br>(1.32 to 1.88)                     | 2.41<br>(2.01 to 3.02)                     | 2.22<br>(1.83 to 2.75)                     | 2.50<br>(2.03 to 3.11)                     |
| Venomous animal contact                         | 13.26<br>(10.91 to 18.61)                        | 18.16<br>(14.15 to 24.84)                        | 16.73<br>(12.98 to 22.48)                        | 19.14<br>(14.78 to 26.11)                        | 0.43<br>(0.35 to 0.56)                     | 0.70<br>(0.56 to 0.92)                     | 0.67<br>(0.53 to 0.85)                     | 0.72<br>(0.57 to 0.94)                     |
| Non-venomous animal contact                     | 33.14<br>(27.72 to 41.95)                        | 40.86<br>(31.74 to 54.04)                        | 35.78<br>(27.75 to 48.20)                        | 44.42<br>(34.07 to 59.98)                        | 1.10<br>(0.92 to 1.38)                     | 1.71<br>(1.36 to 2.21)                     | 1.55<br>(1.21 to 2.01)                     | 1.78<br>(1.39 to 2.28)                     |
| Foreign body                                    | 345.85<br>(298.84 to 443.53)                     | 359.63<br>(303.20 to 437.62)                     | 352.49<br>(293.70 to 424.57)                     | 361.97<br>(303.33 to 449.60)                     | 14.92<br>(11.70 to 17.13)                  | 21.63<br>(15.36 to 26.77)                  | 22.25<br>(15.57 to 27.40)                  | 20.60<br>(14.80 to 25.58)                  |
| Pulmonary aspiration and foreign body in airway | 331.24<br>(283.49 to 425.13)                     | 341.03<br>(283.28 to 416.38)                     | 332.80<br>(271.11 to 399.82)                     | 343.95<br>(285.36 to 428.24)                     | 14.47<br>(11.18 to 16.68)                  | 20.85<br>(14.69 to 25.93)                  | 21.39<br>(14.79 to 26.56)                  | 19.88<br>(13.97 to 24.86)                  |

|                                             |                                                            |                                                            |                                                            |                                                            |                                                   |                                                   |                                                   |                                                    |
|---------------------------------------------|------------------------------------------------------------|------------------------------------------------------------|------------------------------------------------------------|------------------------------------------------------------|---------------------------------------------------|---------------------------------------------------|---------------------------------------------------|----------------------------------------------------|
|                                             | 14.61<br>(11.55 to<br>24.96)                               | 18.60<br>(13.94 to<br>31.49)                               | 19.69<br>(14.96 to<br>32.72)                               | 18.03<br>(13.51 to<br>30.14)                               | 0.45<br>(0.38 to<br>0.69)                         | 0.78<br>(0.61 to<br>1.07)                         | 0.87<br>(0.68 to<br>1.16)                         | 0.72<br>(0.57 to<br>1.01)                          |
| Foreign body in other body part             |                                                            |                                                            |                                                            |                                                            |                                                   |                                                   |                                                   |                                                    |
| Environmental heat and cold exposure        | 151.33<br>(125.65 to<br>219.51)                            | 163.73<br>(124.68 to<br>243.10)                            | 139.31<br>(107.49 to<br>203.94)                            | 177.71<br>(132.66 to<br>262.60)                            | 9.44<br>(7.59 to<br>13.50)                        | 12.26<br>(8.98 to<br>18.54)                       | 10.92<br>(8.16 to<br>16.48)                       | 12.63<br>(9.17 to<br>18.95)                        |
| Other unintentional injuries                | 90.02<br>(75.36 to<br>104.31)                              | 33.98<br>(24.49 to<br>48.12)                               | 23.86<br>(17.80 to<br>32.17)                               | 42.38<br>(28.53 to<br>61.26)                               | 2.35<br>(2.01 to<br>2.68)                         | 1.13<br>(0.86 to<br>1.49)                         | 0.82<br>(0.65 to<br>1.02)                         | 1.35<br>(0.97 to<br>1.82)                          |
| <b>Self-harm and interpersonal violence</b> | <b>2,758.35</b><br><b>(2,469.74 to</b><br><b>3,270.55)</b> | <b>2,062.03</b><br><b>(1,354.72 to</b><br><b>3,167.05)</b> | <b>1,719.40</b><br><b>(1,188.40 to</b><br><b>2,567.81)</b> | <b>2,501.26</b><br><b>(1,596.21 to</b><br><b>3,940.90)</b> | <b>68.90</b><br><b>(62.26 to</b><br><b>78.62)</b> | <b>61.51</b><br><b>(42.58 to</b><br><b>89.71)</b> | <b>52.55</b><br><b>(37.74 to</b><br><b>73.15)</b> | <b>72.68</b><br><b>(48.24 to</b><br><b>107.90)</b> |

| Cyprus                                                                              |                                                  |                                                      |                                                      |                                                      |                                                |                                                  |                                                  |                                                  |
|-------------------------------------------------------------------------------------|--------------------------------------------------|------------------------------------------------------|------------------------------------------------------|------------------------------------------------------|------------------------------------------------|--------------------------------------------------|--------------------------------------------------|--------------------------------------------------|
| Cause                                                                               | YLLs (actual counts)                             |                                                      |                                                      |                                                      | Deaths (actual counts)                         |                                                  |                                                  |                                                  |
|                                                                                     | 2016                                             | 2040 Forecast                                        | 2040 Better Scenario                                 | 2040 Worse Scenario                                  | 2016                                           | 2040 Forecast                                    | 2040 Better Scenario                             | 2040 Worse Scenario                              |
| Self-harm                                                                           | 1,930.20<br>(1,686.80 to<br>2,518.58)            | 1,604.44<br>(982.15 to<br>2,614.84)                  | 1,334.60<br>(851.76 to<br>2,096.01)                  | 1,971.78<br>(1,138.01 to<br>3,316.93)                | 50.87<br>(45.15 to<br>61.47)                   | 49.68<br>(32.41 to<br>75.48)                     | 42.43<br>(28.49 to<br>61.63)                     | 59.23<br>(36.19 to<br>92.56)                     |
| Self-harm by firearm                                                                | 373.92<br>(287.28 to<br>682.53)                  | 248.21<br>(132.19 to<br>476.36)                      | 194.34<br>(105.57 to<br>363.87)                      | 318.39<br>(155.07 to<br>634.38)                      | 10.00<br>(7.84 to<br>15.66)                    | 7.99<br>(4.44 to<br>13.52)                       | 6.45<br>(3.73 to<br>10.52)                       | 9.90<br>(5.19 to<br>17.09)                       |
| Self-harm by other specified means                                                  | 1,556.28<br>(1,329.18 to<br>1,972.88)            | 1,356.23<br>(824.97 to<br>2,198.58)                  | 1,140.26<br>(736.06 to<br>1,767.49)                  | 1,653.39<br>(964.44 to<br>2,727.11)                  | 40.88<br>(35.16 to<br>48.82)                   | 41.70<br>(27.36 to<br>62.23)                     | 35.97<br>(24.38 to<br>51.57)                     | 49.34<br>(30.23 to<br>76.14)                     |
| Interpersonal violence                                                              | 828.14<br>(635.69 to<br>960.71)                  | 457.60<br>(312.97 to<br>635.66)                      | 384.80<br>(268.82 to<br>531.49)                      | 529.47<br>(354.23 to<br>748.61)                      | 18.02<br>(13.90 to<br>20.83)                   | 11.82<br>(8.61 to<br>15.65)                      | 10.12<br>(7.45 to<br>13.09)                      | 13.45<br>(9.28 to<br>17.98)                      |
| Physical violence by firearm                                                        | 317.69<br>(206.62 to<br>438.42)                  | 152.60<br>(95.81 to<br>223.77)                       | 123.40<br>(77.35 to<br>176.05)                       | 176.18<br>(103.40 to<br>262.56)                      | 6.58<br>(4.31 to<br>9.00)                      | 3.53<br>(2.25 to<br>5.03)                        | 2.89<br>(1.84 to<br>3.99)                        | 4.03<br>(2.44 to<br>5.76)                        |
| Physical violence by sharp object                                                   | 174.55<br>(100.10 to<br>228.05)                  | 98.02<br>(55.66 to<br>138.14)                        | 82.51<br>(47.07 to<br>113.13)                        | 110.38<br>(60.33 to<br>153.64)                       | 3.87<br>(2.37 to<br>4.93)                      | 2.60<br>(1.74 to<br>3.37)                        | 2.23<br>(1.47 to<br>2.90)                        | 2.86<br>(1.78 to<br>3.78)                        |
| Physical violence by other means                                                    | 335.91<br>(242.75 to<br>423.58)                  | 206.97<br>(126.19 to<br>315.52)                      | 178.89<br>(108.42 to<br>266.58)                      | 242.92<br>(144.55 to<br>375.22)                      | 7.57<br>(5.58 to<br>9.44)                      | 5.70<br>(3.70 to<br>8.19)                        | 5.00<br>(3.34 to<br>7.02)                        | 6.57<br>(4.21 to<br>9.56)                        |
| <b>Forces of nature, conflict and terrorism, and executions and police conflict</b> | <b>23.44</b><br><b>(9.10 to</b><br><b>40.86)</b> | <b>995.71</b><br><b>(0.00 to</b><br><b>1,096.36)</b> | <b>999.75</b><br><b>(0.00 to</b><br><b>1,098.91)</b> | <b>991.49</b><br><b>(0.00 to</b><br><b>1,095.79)</b> | <b>0.46</b><br><b>(0.22 to</b><br><b>0.76)</b> | <b>24.49</b><br><b>(0.00 to</b><br><b>27.16)</b> | <b>25.05</b><br><b>(0.00 to</b><br><b>27.49)</b> | <b>23.91</b><br><b>(0.00 to</b><br><b>26.84)</b> |
| Exposure to forces of nature                                                        | 0.00<br>(0.00 to<br>0.00)                        | 27.75<br>(0.00 to<br>65.11)                          | 27.83<br>(0.00 to<br>65.42)                          | 27.65<br>(0.00 to<br>64.89)                          | 0.00<br>(0.00 to<br>0.00)                      | 0.69<br>(0.00 to<br>1.70)                        | 0.70<br>(0.00 to<br>1.73)                        | 0.68<br>(0.00 to<br>1.67)                        |
| Conflict and terrorism                                                              | 0.00<br>(0.00 to<br>0.00)                        | 967.97<br>(0.00 to<br>861.10)                        | 971.91<br>(0.00 to<br>862.90)                        | 963.84<br>(0.00 to<br>859.39)                        | 0.00<br>(0.00 to<br>0.00)                      | 23.81<br>(0.00 to<br>20.22)                      | 24.35<br>(0.00 to<br>20.56)                      | 23.23<br>(0.00 to<br>19.96)                      |
| Executions and police conflict                                                      | 23.44<br>(9.10 to<br>40.86)                      | 0.00<br>(0.00 to<br>0.00)                            | 0.00<br>(0.00 to<br>0.00)                            | 0.00<br>(0.00 to<br>0.00)                            | 0.46<br>(0.22 to<br>0.76)                      | 0.00<br>(0.00 to<br>0.00)                        | 0.00<br>(0.00 to<br>0.00)                        | 0.00<br>(0.00 to<br>0.00)                        |

| Denmark                                                           |                                          |                                          |                                          |                                              |                                       |                                       |                                       |                                       |
|-------------------------------------------------------------------|------------------------------------------|------------------------------------------|------------------------------------------|----------------------------------------------|---------------------------------------|---------------------------------------|---------------------------------------|---------------------------------------|
| Cause                                                             | YLLs (actual counts)                     |                                          |                                          |                                              | Deaths (actual counts)                |                                       |                                       |                                       |
|                                                                   | 2016                                     | 2040 Forecast                            | 2040 Better Scenario                     | 2040 Worse Scenario                          | 2016                                  | 2040 Forecast                         | 2040 Better Scenario                  | 2040 Worse Scenario                   |
| All causes                                                        | 783,833.49<br>(705,650.84 to 870,800.46) | 805,144.93<br>(694,949.40 to 921,186.40) | 714,449.90<br>(620,149.57 to 814,731.61) | 1,000,301.50<br>(851,622.90 to 1,170,902.29) | 52,781.61<br>(47,996.87 to 57,789.74) | 68,645.41<br>(62,427.28 to 76,023.54) | 63,196.86<br>(57,683.48 to 69,300.68) | 80,077.41<br>(72,191.21 to 88,865.45) |
| Communicable, maternal, neonatal, and nutritional diseases        | 40,072.57<br>(35,555.10 to 45,118.18)    | 47,343.59<br>(35,804.13 to 63,231.32)    | 45,736.50<br>(34,572.85 to 60,866.97)    | 54,488.42<br>(39,489.91 to 76,850.93)        | 2,980.40<br>(2,615.66 to 3,399.40)    | 5,037.03<br>(3,465.40 to 7,270.49)    | 5,232.34<br>(3,660.83 to 7,442.84)    | 5,406.79<br>(3,504.34 to 8,124.46)    |
| HIV/AIDS and tuberculosis                                         | 1,409.70<br>(1,320.79 to 1,511.29)       | 548.99<br>(305.57 to 846.88)             | 345.20<br>(210.13 to 539.73)             | 948.14<br>(533.74 to 1,414.59)               | 51.37<br>(46.62 to 56.76)             | 27.19<br>(14.82 to 46.09)             | 20.23<br>(11.62 to 36.24)             | 42.33<br>(23.27 to 72.68)             |
| Tuberculosis                                                      | 471.48<br>(393.73 to 559.97)             | 296.69<br>(154.03 to 526.92)             | 229.88<br>(119.05 to 408.30)             | 458.22<br>(228.79 to 824.46)                 | 26.95<br>(22.53 to 32.11)             | 22.83<br>(11.55 to 42.36)             | 18.26<br>(9.42 to 33.44)              | 33.71<br>(16.34 to 63.81)             |
| HIV/AIDS                                                          | 938.21<br>(890.76 to 989.24)             | 252.30<br>(104.56 to 482.56)             | 115.32<br>(44.11 to 189.21)              | 489.92<br>(209.03 to 837.90)                 | 24.42<br>(23.16 to 25.73)             | 4.36<br>(1.65 to 8.97)                | 1.97<br>(0.69 to 3.38)                | 8.62<br>(3.43 to 15.23)               |
| Diarrhea, lower respiratory, and other common infectious diseases | 26,465.92<br>(23,263.20 to 30,238.65)    | 36,536.25<br>(25,839.86 to 51,298.69)    | 36,559.00<br>(26,164.58 to 50,802.49)    | 42,466.36<br>(28,484.13 to 62,991.99)        | 2,678.58<br>(2,322.52 to 3,085.39)    | 4,658.20<br>(3,097.01 to 6,883.64)    | 4,856.40<br>(3,294.70 to 7,072.19)    | 5,034.37<br>(3,144.58 to 7,749.71)    |
| Diarrheal diseases                                                | 3,158.34<br>(2,753.68 to 3,622.84)       | 8,418.84<br>(5,395.24 to 12,623.16)      | 10,403.30<br>(7,428.49 to 14,738.97)     | 6,910.78<br>(4,503.11 to 10,754.73)          | 313.45<br>(268.46 to 361.83)          | 1,097.24<br>(684.23 to 1,705.58)      | 1,393.73<br>(947.00 to 2,022.86)      | 862.34<br>(536.71 to 1,381.74)        |
| Intestinal infectious diseases                                    | 17.93<br>(7.10 to 37.76)                 | 14.59<br>(5.95 to 30.87)                 | 15.37<br>(6.14 to 33.26)                 | 14.02<br>(5.62 to 30.34)                     | 0.59<br>(0.24 to 1.21)                | 0.60<br>(0.27 to 1.16)                | 0.64<br>(0.29 to 1.24)                | 0.55<br>(0.25 to 1.09)                |
| Typhoid fever                                                     | 12.21<br>(3.84 to 28.58)                 | 9.93<br>(3.23 to 23.45)                  | 10.98<br>(3.58 to 25.91)                 | 9.36<br>(2.99 to 23.31)                      | 0.34<br>(0.11 to 0.80)                | 0.31<br>(0.11 to 0.71)                | 0.35<br>(0.12 to 0.80)                | 0.29<br>(0.10 to 0.67)                |
| Paratyphoid fever                                                 | 3.20<br>(0.93 to 8.30)                   | 2.49<br>(0.69 to 6.65)                   | 2.24<br>(0.62 to 5.92)                   | 2.59<br>(0.72 to 6.89)                       | 0.09<br>(0.03 to 0.23)                | 0.08<br>(0.02 to 0.21)                | 0.07<br>(0.02 to 0.19)                | 0.08<br>(0.02 to 0.21)                |
| Other intestinal infectious diseases                              | 2.52<br>(0.99 to 5.14)                   | 2.18<br>(0.83 to 4.53)                   | 2.14<br>(0.79 to 4.55)                   | 2.07<br>(0.80 to 4.28)                       | 0.16<br>(0.06 to 0.32)                | 0.20<br>(0.07 to 0.46)                | 0.21<br>(0.08 to 0.47)                | 0.18<br>(0.07 to 0.40)                |
| Lower respiratory infections                                      | 22,025.40<br>(19,028.41 to 25,533.39)    | 27,040.43<br>(17,368.30 to 41,513.73)    | 25,173.90<br>(15,841.33 to 39,104.59)    | 34,438.62<br>(21,058.71 to 54,618.05)        | 2,315.91<br>(1,979.61 to 2,696.17)    | 3,508.02<br>(2,170.68 to 5,580.73)    | 3,410.61<br>(2,058.87 to 5,446.90)    | 4,121.78<br>(2,400.41 to 6,757.29)    |
| Upper respiratory infections                                      | 8.08<br>(4.08 to 13.81)                  | 8.43<br>(3.57 to 16.70)                  | 7.10<br>(3.11 to 13.99)                  | 8.77<br>(3.89 to 16.98)                      | 0.41<br>(0.19 to 0.75)                | 0.62<br>(0.23 to 1.39)                | 0.54<br>(0.20 to 1.23)                | 0.60<br>(0.23 to 1.32)                |
| Otitis media                                                      | 0.45<br>(0.34 to 0.59)                   | 0.10<br>(0.05 to 0.21)                   | 0.10<br>(0.05 to 0.22)                   | 0.09<br>(0.04 to 0.20)                       | 0.02<br>(0.01 to 0.03)                | 0.01<br>(0.00 to 0.02)                | 0.01<br>(0.00 to 0.02)                | 0.01<br>(0.00 to 0.02)                |
| Meningitis                                                        | 933.29<br>(789.72 to 1,225.73)           | 671.23<br>(522.56 to 921.81)             | 594.87<br>(465.48 to 816.10)             | 700.99<br>(531.74 to 969.95)                 | 33.99<br>(29.00 to 42.46)             | 31.05<br>(25.30 to 39.33)             | 29.95<br>(23.90 to 37.66)             | 29.85<br>(24.62 to 37.46)             |
| Pneumococcal meningitis                                           | 326.75<br>(275.88 to 428.24)             | 244.83<br>(193.04 to 331.97)             | 244.61<br>(191.31 to 332.58)             | 238.57<br>(189.62 to 325.48)                 | 13.64<br>(11.60 to 17.12)             | 13.77<br>(11.04 to 17.22)             | 14.24<br>(11.27 to 17.85)             | 12.76<br>(10.27 to 16.00)             |
| H influenzae type B meningitis                                    | 74.51<br>(61.27 to 95.63)                | 145.21<br>(68.25 to 270.23)              | 102.69<br>(58.30 to 170.25)              | 171.08<br>(69.84 to 334.58)                  | 2.54<br>(2.08 to 3.16)                | 3.35<br>(2.25 to 4.84)                | 2.97<br>(2.18 to 4.03)                | 3.48<br>(2.15 to 5.46)                |
| Meningococcal meningitis                                          | 347.03<br>(287.86 to 466.98)             | 169.78<br>(126.38 to 241.74)             | 149.65<br>(111.94 to 214.76)             | 176.63<br>(129.82 to 256.98)                 | 10.22<br>(8.65 to 12.95)              | 7.49<br>(5.87 to 9.56)                | 6.88<br>(5.30 to 8.89)                | 7.33<br>(5.75 to 9.49)                |
| Other meningitis                                                  | 185.01<br>(155.81 to 245.65)             | 111.41<br>(85.48 to 155.90)              | 97.92<br>(74.01 to 133.71)               | 114.70<br>(87.80 to 162.40)                  | 7.60<br>(6.38 to 9.53)                | 6.43<br>(5.00 to 8.40)                | 5.85<br>(4.51 to 7.59)                | 6.28<br>(4.89 to 8.20)                |
| Encephalitis                                                      | 258.22<br>(170.85 to 317.90)             | 289.12<br>(192.00 to 370.81)             | 288.39<br>(188.29 to 368.15)             | 282.87<br>(188.31 to 358.16)                 | 8.95<br>(5.98 to 10.89)               | 13.40<br>(9.14 to 16.96)              | 13.78<br>(9.42 to 17.52)              | 12.51<br>(8.54 to 15.62)              |

|                |                            |                              |                              |                              |                           |                           |                           |                           |
|----------------|----------------------------|------------------------------|------------------------------|------------------------------|---------------------------|---------------------------|---------------------------|---------------------------|
| Diphtheria     | 1.37<br>(0.86 to<br>2.02)  | 0.36<br>(0.20 to<br>0.61)    | 0.27<br>(0.15 to<br>0.46)    | 0.42<br>(0.22 to<br>0.75)    | 0.03<br>(0.02 to<br>0.05) | 0.01<br>(0.00 to<br>0.01) | 0.01<br>(0.00 to<br>0.01) | 0.01<br>(0.00 to<br>0.01) |
| Whooping cough | 5.86<br>(1.68 to<br>11.36) | 3.95<br>(0.58 to<br>11.97)   | 0.49<br>(0.13 to<br>1.15)    | 6.07<br>(0.77 to<br>18.37)   | 0.07<br>(0.02 to<br>0.14) | 0.05<br>(0.01 to<br>0.14) | 0.01<br>(0.00 to<br>0.02) | 0.07<br>(0.01 to<br>0.21) |
| Tetanus        | 3.34<br>(2.55 to<br>4.39)  | 0.40<br>(0.27 to<br>0.67)    | 0.30<br>(0.20 to<br>0.46)    | 0.47<br>(0.29 to<br>0.85)    | 0.11<br>(0.08 to<br>0.15) | 0.01<br>(0.01 to<br>0.02) | 0.01<br>(0.01 to<br>0.02) | 0.01<br>(0.01 to<br>0.02) |
| Measles        | 1.61<br>(1.19 to<br>2.17)  | 35.19<br>(0.29 to<br>247.99) | 23.32<br>(0.24 to<br>156.14) | 52.52<br>(0.35 to<br>376.85) | 0.03<br>(0.02 to<br>0.04) | 0.57<br>(0.00 to<br>3.73) | 0.42<br>(0.00 to<br>2.86) | 0.79<br>(0.01 to<br>5.19) |



| Denmark                                               |                                        |                                       |                                       |                                       |                                  |                                  |                                  |                                  |
|-------------------------------------------------------|----------------------------------------|---------------------------------------|---------------------------------------|---------------------------------------|----------------------------------|----------------------------------|----------------------------------|----------------------------------|
| Cause                                                 | YLLs (actual counts)                   |                                       |                                       |                                       | Deaths (actual counts)           |                                  |                                  |                                  |
|                                                       | 2016                                   | 2040 Forecast                         | 2040 Better Scenario                  | 2040 Worse Scenario                   | 2016                             | 2040 Forecast                    | 2040 Better Scenario             | 2040 Worse Scenario              |
| Varicella and herpes zoster                           | 52.03<br>(12.87 to<br>80.45)           | 53.61<br>(11.91 to<br>91.24)          | 51.60<br>(11.56 to<br>88.26)          | 50.75<br>(11.25 to<br>89.23)          | 5.02<br>(1.08 to<br>8.23)        | 6.65<br>(1.37 to<br>11.70)       | 6.70<br>(1.36 to<br>11.85)       | 5.85<br>(1.19 to<br>10.64)       |
| <b>Neglected tropical diseases and malaria</b>        | <b>33.36</b><br>(27.37 to<br>38.61)    | <b>32.26</b><br>(24.57 to<br>39.49)   | <b>32.73</b><br>(24.62 to<br>40.25)   | <b>31.70</b><br>(24.48 to<br>38.98)   | <b>0.93</b><br>(0.66 to<br>1.11) | <b>1.23</b><br>(0.68 to<br>1.53) | <b>1.33</b><br>(0.70 to<br>1.67) | <b>1.12</b><br>(0.65 to<br>1.39) |
| Malaria                                               | 0.00<br>(0.00 to<br>0.00)              | 0.00<br>(0.00 to<br>0.00)             | 0.00<br>(0.00 to<br>0.00)             | 0.00<br>(0.00 to<br>0.00)             | 0.00<br>(0.00 to<br>0.00)        | 0.00<br>(0.00 to<br>0.00)        | 0.00<br>(0.00 to<br>0.00)        | 0.00<br>(0.00 to<br>0.00)        |
| Chagas disease                                        | 0.00<br>(0.00 to<br>0.00)              | 0.00<br>(0.00 to<br>0.00)             | 0.00<br>(0.00 to<br>0.00)             | 0.00<br>(0.00 to<br>0.00)             | 0.00<br>(0.00 to<br>0.00)        | 0.00<br>(0.00 to<br>0.00)        | 0.00<br>(0.00 to<br>0.00)        | 0.00<br>(0.00 to<br>0.00)        |
| Leishmaniasis                                         | 0.00<br>(0.00 to<br>0.00)              | 0.00<br>(0.00 to<br>0.00)             | 0.00<br>(0.00 to<br>0.00)             | 0.00<br>(0.00 to<br>0.00)             | 0.00<br>(0.00 to<br>0.00)        | 0.00<br>(0.00 to<br>0.00)        | 0.00<br>(0.00 to<br>0.00)        | 0.00<br>(0.00 to<br>0.00)        |
| African trypanosomiasis                               | 0.00<br>(0.00 to<br>0.00)              | 0.00<br>(0.00 to<br>0.00)             | 0.00<br>(0.00 to<br>0.00)             | 0.00<br>(0.00 to<br>0.00)             | 0.00<br>(0.00 to<br>0.00)        | 0.00<br>(0.00 to<br>0.00)        | 0.00<br>(0.00 to<br>0.00)        | 0.00<br>(0.00 to<br>0.00)        |
| Schistosomiasis                                       | 0.00<br>(0.00 to<br>0.00)              | 0.00<br>(0.00 to<br>0.00)             | 0.00<br>(0.00 to<br>0.00)             | 0.00<br>(0.00 to<br>0.00)             | 0.00<br>(0.00 to<br>0.00)        | 0.00<br>(0.00 to<br>0.00)        | 0.00<br>(0.00 to<br>0.00)        | 0.00<br>(0.00 to<br>0.00)        |
| Cysticercosis                                         | 3.01<br>(2.60 to<br>3.48)              | 1.03<br>(0.86 to<br>1.20)             | 1.02<br>(0.85 to<br>1.20)             | 1.01<br>(0.85 to<br>1.18)             | 0.11<br>(0.10 to<br>0.13)        | 0.05<br>(0.04 to<br>0.06)        | 0.05<br>(0.04 to<br>0.06)        | 0.04<br>(0.04 to<br>0.05)        |
| Cystic echinococcosis                                 | 0.00<br>(0.00 to<br>0.00)              | 0.00<br>(0.00 to<br>0.00)             | 0.00<br>(0.00 to<br>0.00)             | 0.00<br>(0.00 to<br>0.00)             | 0.00<br>(0.00 to<br>0.00)        | 0.00<br>(0.00 to<br>0.00)        | 0.00<br>(0.00 to<br>0.00)        | 0.00<br>(0.00 to<br>0.00)        |
| Dengue                                                | 0.00<br>(0.00 to<br>0.00)              | 0.00<br>(0.00 to<br>0.00)             | 0.00<br>(0.00 to<br>0.00)             | 0.00<br>(0.00 to<br>0.00)             | 0.00<br>(0.00 to<br>0.00)        | 0.00<br>(0.00 to<br>0.00)        | 0.00<br>(0.00 to<br>0.00)        | 0.00<br>(0.00 to<br>0.00)        |
| Yellow fever                                          | 0.00<br>(0.00 to<br>0.00)              | 0.00<br>(0.00 to<br>0.00)             | 0.00<br>(0.00 to<br>0.00)             | 0.00<br>(0.00 to<br>0.00)             | 0.00<br>(0.00 to<br>0.00)        | 0.00<br>(0.00 to<br>0.00)        | 0.00<br>(0.00 to<br>0.00)        | 0.00<br>(0.00 to<br>0.00)        |
| Rabies                                                | 0.33<br>(0.26 to<br>0.42)              | 0.36<br>(0.27 to<br>0.48)             | 0.34<br>(0.26 to<br>0.46)             | 0.36<br>(0.27 to<br>0.50)             | 0.01<br>(0.01 to<br>0.01)        | 0.02<br>(0.01 to<br>0.02)        | 0.02<br>(0.01 to<br>0.02)        | 0.02<br>(0.01 to<br>0.02)        |
| Intestinal nematode infections                        | 0.00<br>(0.00 to<br>0.00)              | 0.00<br>(0.00 to<br>0.00)             | 0.00<br>(0.00 to<br>0.00)             | 0.00<br>(0.00 to<br>0.00)             | 0.00<br>(0.00 to<br>0.00)        | 0.00<br>(0.00 to<br>0.00)        | 0.00<br>(0.00 to<br>0.00)        | 0.00<br>(0.00 to<br>0.00)        |
| Other neglected tropical diseases                     | 30.02<br>(24.19 to<br>34.99)           | 30.88<br>(23.12 to<br>37.94)          | 31.37<br>(23.27 to<br>38.70)          | 30.33<br>(23.06 to<br>37.37)          | 0.81<br>(0.54 to<br>0.98)        | 1.17<br>(0.61 to<br>1.47)        | 1.26<br>(0.62 to<br>1.60)        | 1.06<br>(0.59 to<br>1.32)        |
| <b>Maternal disorders</b>                             | <b>131.89</b><br>(103.58 to<br>163.93) | <b>120.32</b><br>(77.86 to<br>177.80) | <b>109.68</b><br>(70.55 to<br>160.21) | <b>126.08</b><br>(81.04 to<br>186.14) | <b>2.50</b><br>(1.97 to<br>3.10) | <b>2.30</b><br>(1.51 to<br>3.34) | <b>2.09</b><br>(1.37 to<br>3.82) | <b>2.41</b><br>(1.58 to<br>3.51) |
| Maternal hemorrhage                                   | 11.37<br>(7.70 to<br>16.81)            | 9.75<br>(5.36 to<br>16.17)            | 8.94<br>(4.84 to<br>14.86)            | 10.15<br>(5.48 to<br>16.77)           | 0.21<br>(0.15 to<br>0.32)        | 0.18<br>(0.10 to<br>0.30)        | 0.17<br>(0.09 to<br>0.28)        | 0.19<br>(0.11 to<br>0.32)        |
| Maternal sepsis and other maternal infections         | 0.86<br>(0.39 to<br>1.55)              | 0.81<br>(0.32 to<br>1.53)             | 0.74<br>(0.28 to<br>1.42)             | 0.84<br>(0.33 to<br>1.61)             | 0.02<br>(0.01 to<br>0.03)        | 0.02<br>(0.01 to<br>0.03)        | 0.01<br>(0.01 to<br>0.03)        | 0.02<br>(0.01 to<br>0.03)        |
| Maternal hypertensive disorders                       | 18.07<br>(12.78 to<br>25.27)           | 15.08<br>(8.31 to<br>24.64)           | 13.71<br>(7.45 to<br>22.80)           | 15.77<br>(8.62 to<br>26.38)           | 0.32<br>(0.23 to<br>0.46)        | 0.27<br>(0.15 to<br>0.45)        | 0.25<br>(0.14 to<br>0.41)        | 0.29<br>(0.16 to<br>0.48)        |
| Maternal obstructed labor and uterine rupture         | 0.74<br>(0.32 to<br>1.39)              | 0.74<br>(0.28 to<br>1.48)             | 0.67<br>(0.25 to<br>1.34)             | 0.78<br>(0.29 to<br>1.60)             | 0.01<br>(0.01 to<br>0.03)        | 0.01<br>(0.01 to<br>0.03)        | 0.01<br>(0.01 to<br>0.03)        | 0.02<br>(0.01 to<br>0.03)        |
| Maternal abortion, miscarriage, and ectopic pregnancy | 27.67<br>(20.08 to<br>36.91)           | 25.94<br>(14.70 to<br>43.88)          | 23.48<br>(13.20 to<br>39.61)          | 27.20<br>(15.46 to<br>45.30)          | 0.57<br>(0.42 to<br>0.75)        | 0.54<br>(0.30 to<br>0.89)        | 0.49<br>(0.27 to<br>0.82)        | 0.56<br>(0.32 to<br>0.94)        |

|                                        |                              |                              |                              |                              |                           |                           |                           |                           |
|----------------------------------------|------------------------------|------------------------------|------------------------------|------------------------------|---------------------------|---------------------------|---------------------------|---------------------------|
| Indirect maternal deaths               | 21.52<br>(14.60 to<br>29.87) | 22.98<br>(12.21 to<br>39.31) | 20.70<br>(10.95 to<br>35.90) | 24.27<br>(12.81 to<br>41.43) | 0.38<br>(0.26 to<br>0.53) | 0.41<br>(0.23 to<br>0.70) | 0.37<br>(0.20 to<br>0.64) | 0.44<br>(0.23 to<br>0.74) |
| Late maternal deaths                   | 3.94<br>(2.49 to<br>5.71)    | 2.94<br>(1.55 to<br>5.16)    | 2.66<br>(1.39 to<br>4.60)    | 3.09<br>(1.61 to<br>5.30)    | 0.08<br>(0.05 to<br>0.11) | 0.06<br>(0.03 to<br>0.10) | 0.05<br>(0.03 to<br>0.09) | 0.06<br>(0.03 to<br>0.10) |
| Maternal deaths aggravated by HIV/AIDS | 0.05<br>(0.02 to<br>0.09)    | 0.22<br>(0.05 to<br>0.53)    | 0.17<br>(0.03 to<br>0.43)    | 0.26<br>(0.07 to<br>0.60)    | 0.00<br>(0.00 to<br>0.00) | 0.00<br>(0.00 to<br>0.01) | 0.00<br>(0.00 to<br>0.01) | 0.00<br>(0.00 to<br>0.01) |
| Other maternal disorders               | 47.67<br>(34.80 to<br>64.05) | 41.86<br>(25.17 to<br>65.79) | 38.62<br>(22.78 to<br>60.44) | 43.71<br>(25.91 to<br>68.79) | 0.90<br>(0.66 to<br>1.21) | 0.80<br>(0.48 to<br>1.24) | 0.74<br>(0.44 to<br>1.15) | 0.83<br>(0.50 to<br>1.30) |

| Denmark                                                                 |                                             |                                            |                                           |                                            |                                    |                                     |                                     |                                     |
|-------------------------------------------------------------------------|---------------------------------------------|--------------------------------------------|-------------------------------------------|--------------------------------------------|------------------------------------|-------------------------------------|-------------------------------------|-------------------------------------|
| Cause                                                                   | YLLs (actual counts)                        |                                            |                                           |                                            | Deaths (actual counts)             |                                     |                                     |                                     |
|                                                                         | 2016                                        | 2040 Forecast                              | 2040 Better Scenario                      | 2040 Worse Scenario                        | 2016                               | 2040 Forecast                       | 2040 Better Scenario                | 2040 Worse Scenario                 |
| <b>Neonatal disorders</b>                                               | <b>10,045.94</b><br>(7,923.35 to 12,645.40) | <b>7,252.10</b><br>(4,457.07 to 11,664.61) | <b>5,749.18</b><br>(3,487.69 to 9,047.98) | <b>8,240.23</b><br>(4,986.74 to 12,899.37) | <b>116.09</b><br>(91.56 to 146.14) | <b>83.82</b><br>(51.52 to 134.78)   | <b>66.46</b><br>(40.33 to 104.55)   | <b>95.24</b><br>(57.66 to 149.07)   |
| Neonatal preterm birth                                                  | 7,053.26<br>(5,526.75 to 8,888.75)          | 4,338.36<br>(2,848.23 to 6,638.70)         | 3,120.91<br>(2,005.65 to 4,733.25)        | 5,059.06<br>(3,228.20 to 7,632.35)         | 81.50<br>(63.86 to 102.70)         | 50.13<br>(32.91 to 76.72)           | 36.07<br>(23.18 to 54.70)           | 58.46<br>(37.31 to 88.18)           |
| Neonatal encephalopathy due to birth asphyxia and trauma                | 1,775.04<br>(1,326.33 to 2,331.71)          | 1,308.65<br>(705.55 to 2,313.46)           | 1,117.85<br>(601.34 to 1,970.38)          | 1,464.28<br>(777.60 to 2,614.79)           | 20.52<br>(15.33 to 26.95)          | 15.13<br>(8.16 to 26.74)            | 12.93<br>(6.96 to 22.78)            | 16.93<br>(9.00 to 30.22)            |
| Neonatal sepsis and other neonatal infections                           | 202.29<br>(136.26 to 303.69)                | 227.96<br>(113.90 to 439.65)               | 202.11<br>(101.35 to 385.93)              | 250.04<br>(124.11 to 482.17)               | 2.34<br>(1.58 to 3.51)             | 2.64<br>(1.32 to 5.08)              | 2.34<br>(1.17 to 4.46)              | 2.89<br>(1.44 to 5.57)              |
| Hemolytic disease and other neonatal jaundice                           | 37.09<br>(20.87 to 55.83)                   | 17.16<br>(7.53 to 34.02)                   | 15.04<br>(6.63 to 29.18)                  | 18.92<br>(8.24 to 37.12)                   | 0.43<br>(0.24 to 0.65)             | 0.20<br>(0.09 to 0.39)              | 0.17<br>(0.08 to 0.34)              | 0.22<br>(0.10 to 0.43)              |
| Other neonatal disorders                                                | 978.25<br>(731.17 to 1,328.76)              | 1,359.96<br>(705.20 to 2,487.43)           | 1,293.28<br>(678.59 to 2,355.87)          | 1,447.93<br>(744.60 to 2,642.71)           | 11.31<br>(8.45 to 15.35)           | 15.72<br>(8.16 to 28.74)            | 14.95<br>(7.85 to 27.23)            | 16.74<br>(8.61 to 30.54)            |
| <b>Nutritional deficiencies</b>                                         | <b>629.40</b><br>(555.27 to 710.79)         | <b>1,133.76</b><br>(935.51 to 1,365.78)    | <b>1,218.40</b><br>(1,012.47 to 1,467.72) | <b>1,008.51</b><br>(841.37 to 1,218.54)    | <b>68.00</b><br>(59.74 to 77.65)   | <b>157.90</b><br>(122.78 to 200.04) | <b>175.17</b><br>(137.05 to 220.06) | <b>133.82</b><br>(102.75 to 172.00) |
| Protein-energy malnutrition                                             | 327.49<br>(195.65 to 402.36)                | 685.97<br>(412.07 to 923.31)               | 765.23<br>(465.18 to 1,022.19)            | 596.42<br>(353.09 to 800.11)               | 37.34<br>(19.32 to 46.66)          | 100.31<br>(53.83 to 139.43)         | 114.93<br>(61.99 to 158.32)         | 83.59<br>(43.99 to 117.57)          |
| Iodine deficiency                                                       | 14.41<br>(1.22 to 43.85)                    | 49.62<br>(1.42 to 192.92)                  | 50.99<br>(203.87)                         | 45.70<br>(1.52 to 174.70)                  | 0.94<br>(0.04 to 3.45)             | 5.89<br>(0.05 to 27.86)             | 6.25<br>(0.04 to 30.85)             | 5.17<br>(0.05 to 24.00)             |
| Dietary iron deficiency                                                 | 22.35<br>(13.71 to 27.95)                   | 27.71<br>(15.98 to 37.54)                  | 28.67<br>(16.29 to 38.91)                 | 26.77<br>(15.88 to 35.46)                  | 1.06<br>(0.38 to 1.70)             | 1.42<br>(0.47 to 2.62)              | 1.56<br>(0.49 to 2.89)              | 1.26<br>(0.45 to 2.27)              |
| Other nutritional deficiencies                                          | 265.14<br>(200.33 to 407.74)                | 370.45<br>(249.11 to 663.93)               | 373.51<br>(250.79 to 686.65)              | 339.63<br>(233.75 to 597.73)               | 28.66<br>(21.51 to 48.76)          | 50.28<br>(30.20 to 101.77)          | 52.44<br>(31.82 to 108.47)          | 43.80<br>(25.82 to 86.79)           |
| <b>Other communicable, maternal, neonatal, and nutritional diseases</b> | <b>1,356.37</b><br>(1,113.06 to 1,554.70)   | <b>1,719.90</b><br>(1,393.39 to 2,007.28)  | <b>1,722.31</b><br>(1,387.15 to 2,022.74) | <b>1,667.41</b><br>(1,363.13 to 1,943.83)  | <b>62.93</b><br>(48.02 to 73.55)   | <b>106.38</b><br>(79.49 to 125.77)  | <b>110.65</b><br>(82.21 to 130.53)  | <b>97.50</b><br>(72.67 to 114.54)   |
| Sexually transmitted infections excluding HIV                           | 38.25<br>(31.05 to 53.46)                   | 44.00<br>(34.66 to 59.31)                  | 43.79<br>(34.26 to 58.79)                 | 41.61<br>(32.82 to 56.77)                  | 2.85<br>(2.29 to 3.62)             | 4.56<br>(3.41 to 6.06)              | 4.68<br>(3.55 to 6.19)              | 4.09<br>(3.03 to 5.49)              |
| Syphilis                                                                | 12.54<br>(9.89 to 18.44)                    | 11.98<br>(9.17 to 16.59)                   | 11.49<br>(8.68 to 15.84)                  | 11.61<br>(8.73 to 16.14)                   | 0.75<br>(0.61 to 0.98)             | 1.13<br>(0.81 to 1.55)              | 1.12<br>(0.81 to 1.52)              | 1.03<br>(0.74 to 1.42)              |
| Chlamydial infection                                                    | 5.22<br>(4.21 to 6.87)                      | 6.67<br>(5.05 to 9.09)                     | 6.76<br>(5.06 to 9.15)                    | 6.21<br>(4.71 to 8.45)                     | 0.45<br>(0.36 to 0.57)             | 0.76<br>(0.54 to 1.05)              | 0.79<br>(0.56 to 1.08)              | 0.67<br>(0.48 to 0.93)              |
| Gonococcal infection                                                    | 11.82<br>(11.87 to 19.47)                   | 18.96<br>(14.23 to 26.06)                  | 19.15<br>(14.27 to 26.24)                 | 17.73<br>(13.37 to 24.14)                  | 1.25<br>(1.01 to 1.59)             | 2.07<br>(1.49 to 2.85)              | 2.14<br>(1.54 to 2.96)              | 1.84<br>(1.33 to 2.55)              |
| Other sexually transmitted infections                                   | 5.67<br>(4.55 to 7.24)                      | 6.38<br>(4.92 to 8.91)                     | 6.39<br>(4.91 to 8.79)                    | 6.06<br>(4.69 to 8.43)                     | 0.39<br>(0.32 to 0.50)             | 0.61<br>(0.46 to 0.84)              | 0.63<br>(0.47 to 0.87)              | 0.55<br>(0.41 to 0.75)              |
| Acute hepatitis                                                         | 161.63<br>(134.89 to 189.82)                | 89.59<br>(66.75 to 119.83)                 | 79.36<br>(59.21 to 106.09)                | 92.91<br>(68.58 to 125.70)                 | 5.86<br>(4.87 to 6.88)             | 4.15<br>(3.14 to 5.48)              | 3.76<br>(2.81 to 4.95)              | 4.15<br>(3.07 to 5.54)              |
| Acute hepatitis A                                                       | 7.41<br>(5.44 to 10.04)                     | 3.11<br>(1.96 to 4.83)                     | 2.82<br>(1.77 to 4.35)                    | 3.23<br>(2.02 to 4.93)                     | 0.16<br>(0.11 to 0.21)             | 0.09<br>(0.06 to 0.14)              | 0.09<br>(0.05 to 0.13)              | 0.09<br>(0.06 to 0.14)              |
| Acute hepatitis B                                                       | 125.44<br>(102.46 to 150.12)                | 70.03<br>(49.87 to 96.89)                  | 61.73<br>(44.39 to 85.75)                 | 72.92<br>(51.68 to 101.15)                 | 4.50<br>(3.65 to 5.38)             | 3.04<br>(2.13 to 4.17)              | 2.72<br>(1.94 to 3.78)              | 3.08<br>(2.17 to 4.28)              |

|                                       |                                                                  |                                                                  |                                                                  |                                                                    |                                                               |                                                               |                                                               |                                                               |
|---------------------------------------|------------------------------------------------------------------|------------------------------------------------------------------|------------------------------------------------------------------|--------------------------------------------------------------------|---------------------------------------------------------------|---------------------------------------------------------------|---------------------------------------------------------------|---------------------------------------------------------------|
|                                       | 6.66<br>(4.67 to<br>9.18)                                        | 3.84<br>(2.48 to<br>5.61)                                        | 3.43<br>(2.20 to<br>4.99)                                        | 3.96<br>(2.57 to<br>6.00)                                          | 0.27<br>(0.19 to<br>0.38)                                     | 0.19<br>(0.12 to<br>0.28)                                     | 0.18<br>(0.11 to<br>0.26)                                     | 0.19<br>(0.12 to<br>0.29)                                     |
| Acute hepatitis C                     | 22.12<br>(16.03 to<br>30.65)                                     | 12.61<br>(7.90 to<br>19.16)                                      | 11.39<br>(7.10 to<br>17.70)                                      | 12.80<br>(7.97 to<br>19.48)                                        | 0.92<br>(0.61 to<br>1.37)                                     | 0.82<br>(0.49 to<br>1.31)                                     | 0.77<br>(0.45 to<br>1.25)                                     | 0.79<br>(0.45 to<br>1.24)                                     |
| Acute hepatitis E                     | 1,156.50<br>(918.09 to<br>1,337.50)                              | 1,586.31<br>(1,250.43 to<br>1,866.78)                            | 1,599.16<br>(1,245.89 to<br>1,891.72)                            | 1,532.89<br>(1,209.57 to<br>1,804.07)                              | 54.22<br>(39.37 to<br>64.08)                                  | 97.68<br>(69.07 to<br>116.62)                                 | 102.22<br>(73.65 to<br>122.00)                                | 89.25<br>(63.86 to<br>106.75)                                 |
| Other unspecified infectious diseases | <b>690,030.73</b><br><b>(618,678.44 to</b><br><b>763,531.90)</b> | <b>708,615.85</b><br><b>(608,290.10 to</b><br><b>819,208.93)</b> | <b>626,113.96</b><br><b>(540,974.71 to</b><br><b>716,129.08)</b> | <b>888,134.89</b><br><b>(751,992.53 to</b><br><b>1,048,525.08)</b> | <b>47,567.29</b><br><b>(43,049.31 to</b><br><b>52,049.26)</b> | <b>60,686.06</b><br><b>(54,353.22 to</b><br><b>67,862.09)</b> | <b>55,183.22</b><br><b>(49,826.31 to</b><br><b>61,235.11)</b> | <b>71,680.46</b><br><b>(64,003.72 to</b><br><b>80,737.20)</b> |
| Non-communicable diseases             |                                                                  |                                                                  |                                                                  |                                                                    |                                                               |                                                               |                                                               |                                                               |

| Denmark                              |                                                 |                                                 |                                                 |                                                 |                                              |                                              |                                              |                                              |
|--------------------------------------|-------------------------------------------------|-------------------------------------------------|-------------------------------------------------|-------------------------------------------------|----------------------------------------------|----------------------------------------------|----------------------------------------------|----------------------------------------------|
| Cause                                | YLLs (actual counts)                            |                                                 |                                                 |                                                 | Deaths (actual counts)                       |                                              |                                              |                                              |
|                                      | 2016                                            | 2040 Forecast                                   | 2040 Better Scenario                            | 2040 Worse Scenario                             | 2016                                         | 2040 Forecast                                | 2040 Better Scenario                         | 2040 Worse Scenario                          |
| <b>Neoplasms</b>                     | <b>292,732.61</b><br>(259,983.94 to 324,443.95) | <b>289,958.18</b><br>(238,380.19 to 348,494.67) | <b>257,672.96</b><br>(214,169.74 to 306,230.93) | <b>367,998.30</b><br>(295,589.73 to 449,559.35) | <b>16,838.63</b><br>(15,117.27 to 18,574.60) | <b>20,449.88</b><br>(17,521.73 to 23,672.80) | <b>18,747.76</b><br>(16,186.49 to 21,548.90) | <b>24,866.98</b><br>(20,885.72 to 29,274.43) |
| Lip and oral cavity cancer           | 3,791.65<br>(3,254.32 to 4,395.44)              | 2,693.03<br>(1,372.92 to 4,813.60)              | 2,016.73<br>(1,077.23 to 3,615.17)              | 5,287.43<br>(2,631.41 to 9,527.14)              | 190.97<br>(166.87 to 218.33)                 | 162.99<br>(88.96 to 282.55)                  | 127.88<br>(70.93 to 218.87)                  | 318.01<br>(166.52 to 564.23)                 |
| Nasopharynx cancer                   | 844.85<br>(717.62 to 1,005.77)                  | 679.04<br>(361.08 to 1,213.20)                  | 485.77<br>(268.13 to 849.19)                    | 1,312.95<br>(682.60 to 2,338.66)                | 43.17<br>(36.84 to 51.13)                    | 42.44<br>(22.38 to 74.40)                    | 31.63<br>(17.77 to 54.44)                    | 81.38<br>(42.01 to 141.76)                   |
| Other pharynx cancer                 | 4,002.68<br>(3,423.34 to 4,684.13)              | 2,838.13<br>(1,489.60 to 4,890.04)              | 2,691.95<br>(1,405.15 to 4,726.73)              | 3,797.47<br>(1,982.73 to 6,382.85)              | 170.76<br>(146.55 to 198.19)                 | 138.02<br>(73.69 to 235.82)                  | 132.70<br>(71.87 to 230.83)                  | 181.98<br>(95.35 to 304.24)                  |
| Esophageal cancer                    | 8,561.19<br>(7,288.63 to 10,014.56)             | 6,469.75<br>(3,548.51 to 10,581.23)             | 4,933.55<br>(2,902.82 to 7,787.38)              | 11,335.56<br>(6,077.88 to 19,137.17)            | 453.15<br>(390.63 to 523.99)                 | 394.44<br>(231.56 to 625.77)                 | 310.72<br>(195.13 to 479.08)                 | 686.61<br>(389.99 to 1,120.71)               |
| Stomach cancer                       | 9,087.84<br>(7,948.08 to 10,459.24)             | 6,653.88<br>(5,084.20 to 8,776.96)              | 5,834.68<br>(4,632.25 to 7,393.61)              | 7,400.85<br>(5,507.64 to 10,018.90)             | 543.86<br>(478.48 to 620.39)                 | 503.66<br>(390.82 to 651.15)                 | 454.33<br>(366.58 to 564.97)                 | 542.80<br>(409.11 to 725.00)                 |
| Colon and rectum cancer              | 33,573.88<br>(29,300.50 to 38,192.58)           | 36,012.10<br>(24,815.30 to 51,445.86)           | 31,060.61<br>(21,776.02 to 43,481.86)           | 45,741.97<br>(30,985.37 to 66,846.08)           | 2,173.99<br>(1,918.39 to 2,453.78)           | 2,894.16<br>(2,056.95 to 4,035.04)           | 2,563.93<br>(1,846.96 to 3,514.56)           | 3,547.79<br>(2,462.40 to 5,013.42)           |
| Liver cancer                         | 6,990.14<br>(5,997.01 to 8,194.63)              | 6,846.76<br>(4,611.65 to 10,061.78)             | 6,186.78<br>(4,358.15 to 8,812.06)              | 10,625.47<br>(6,516.17 to 16,814.24)            | 375.26<br>(324.37 to 437.87)                 | 439.16<br>(306.95 to 630.64)                 | 408.24<br>(297.18 to 563.27)                 | 651.41<br>(419.80 to 987.82)                 |
| Liver cancer due to hepatitis B      | 1,018.81<br>(674.09 to 1,501.03)                | 1,021.83<br>(591.90 to 1,729.04)                | 944.32<br>(565.96 to 1,547.38)                  | 1,288.98<br>(687.81 to 2,322.96)                | 47.63<br>(31.17 to 69.93)                    | 56.42<br>(32.73 to 92.09)                    | 53.44<br>(31.95 to 85.72)                    | 68.88<br>(36.71 to 116.45)                   |
| Liver cancer due to hepatitis C      | 1,815.88<br>(1,560.63 to 2,348.71)              | 2,078.69<br>(1,340.49 to 3,165.90)              | 1,950.40<br>(1,289.72 to 2,886.29)              | 2,551.90<br>(1,516.05 to 4,174.37)              | 107.13<br>(80.72 to 136.99)                  | 148.05<br>(97.44 to 219.05)                  | 142.83<br>(95.34 to 205.28)                  | 174.91<br>(106.01 to 273.96)                 |
| Liver cancer due to alcohol use      | 3,112.77<br>(2,431.97 to 3,865.72)              | 2,601.37<br>(1,620.95 to 4,032.44)              | 2,231.19<br>(1,425.01 to 3,368.32)              | 5,339.42<br>(3,113.43 to 8,564.28)              | 163.97<br>(128.59 to 202.97)                 | 160.21<br>(100.46 to 245.01)                 | 141.22<br>(91.99 to 210.02)                  | 316.51<br>(189.80 to 500.81)                 |
| Liver cancer due to other causes     | 1,042.68<br>(721.97 to 1,468.67)                | 1,144.87<br>(658.00 to 1,862.49)                | 1,060.87<br>(630.43 to 1,676.42)                | 1,445.17<br>(756.11 to 2,553.92)                | 56.54<br>(38.50 to 79.67)                    | 74.47<br>(42.58 to 118.48)                   | 70.75<br>(42.12 to 109.14)                   | 91.10<br>(49.08 to 157.55)                   |
| Gallbladder and biliary tract cancer | 3,127.65<br>(2,725.39 to 3,581.37)              | 2,614.92<br>(2,261.25 to 3,004.09)              | 2,649.05<br>(2,285.62 to 3,043.59)              | 2,478.48<br>(2,138.73 to 2,814.84)              | 197.70<br>(173.38 to 224.07)                 | 201.17<br>(177.58 to 224.89)                 | 208.35<br>(183.78 to 233.57)                 | 184.27<br>(162.99 to 205.02)                 |
| Pancreatic cancer                    | 19,045.63<br>(16,630.69 to 21,430.04)           | 19,938.92<br>(15,459.71 to 25,337.62)           | 18,999.92<br>(14,946.16 to 23,912.12)           | 22,878.05<br>(17,291.96 to 29,564.85)           | 1,088.52<br>(956.35 to 1,220.44)             | 1,338.47<br>(1,067.23 to 1,665.67)           | 1,303.89<br>(1,049.93 to 1,611.68)           | 1,503.74<br>(1,160.73 to 1,921.81)           |
| Larynx cancer                        | 1,898.15<br>(1,626.11 to 2,225.73)              | 1,270.65<br>(639.45 to 2,282.38)                | 882.55<br>(453.06 to 1,532.82)                  | 2,267.77<br>(1,066.76 to 4,380.90)              | 93.61<br>(80.79 to 109.19)                   | 72.24<br>(37.79 to 127.36)                   | 52.33<br>(27.95 to 86.62)                    | 126.75<br>(62.49 to 236.81)                  |
| Tracheal, bronchus, and lung cancer  | 70,440.52<br>(62,242.41 to 79,450.78)           | 57,136.56<br>(38,917.42 to 77,148.21)           | 40,171.70<br>(27,947.28 to 53,567.82)           | 99,733.70<br>(66,813.88 to 136,934.07)          | 3,927.14<br>(3,487.13 to 4,413.13)           | 3,662.33<br>(2,552.39 to 4,953.06)           | 2,662.74<br>(1,892.82 to 3,546.15)           | 6,221.51<br>(4,301.63 to 8,340.64)           |
| Malignant skin melanoma              | 6,666.13<br>(5,311.30 to 7,876.27)              | 6,949.86<br>(5,477.93 to 8,333.95)              | 7,492.73<br>(5,940.68 to 8,982.59)              | 6,480.26<br>(5,086.47 to 7,751.87)              | 323.13<br>(252.77 to 378.33)                 | 412.09<br>(319.48 to 478.60)                 | 454.27<br>(357.41 to 524.62)                 | 370.87<br>(286.44 to 429.95)                 |
| Non-melanoma skin cancer             | 1,166.52<br>(1,019.44 to 1,358.32)              | 1,676.91<br>(1,459.49 to 1,922.85)              | 1,621.49<br>(1,411.57 to 1,851.67)              | 1,596.26<br>(1,381.57 to 1,840.65)              | 91.50<br>(81.10 to 104.09)                   | 164.29<br>(138.75 to 189.11)                 | 164.09<br>(140.51 to 188.53)                 | 149.30<br>(122.66 to 173.84)                 |
| Breast cancer                        | 24,696.42<br>(20,501.60 to 29,101.81)           | 22,830.74<br>(15,554.46 to 33,007.49)           | 20,818.95<br>(14,179.97 to 29,754.80)           | 28,981.13<br>(19,232.16 to 42,651.91)           | 1,335.58<br>(1,120.87 to 1,572.40)           | 1,549.70<br>(1,116.03 to 2,121.48)           | 1,448.24<br>(1,050.35 to 1,963.50)           | 1,893.37<br>(1,305.56 to 2,694.34)           |
| Cervical cancer                      | 3,521.05<br>(2,904.42 to 4,252.47)              | 2,774.93<br>(1,907.24 to 4,006.89)              | 2,499.31<br>(1,727.61 to 3,535.35)              | 3,156.81<br>(2,021.24 to 4,765.60)              | 173.91<br>(145.06 to 207.25)                 | 170.16<br>(119.23 to 236.91)                 | 156.32<br>(112.00 to 213.77)                 | 188.14<br>(123.74 to 275.49)                 |

|                   |                                          |                                          |                                          |                                          |                                     |                                       |                                       |                                       |
|-------------------|------------------------------------------|------------------------------------------|------------------------------------------|------------------------------------------|-------------------------------------|---------------------------------------|---------------------------------------|---------------------------------------|
|                   | 2,279.04<br>(1,841.32 to<br>2,796.35)    | 3,151.31<br>(2,455.23 to<br>3,960.67)    | 3,039.46<br>(2,359.01 to<br>3,851.67)    | 3,076.59<br>(2,404.74 to<br>3,821.96)    | 146.04<br>(118.96 to<br>176.24)     | 237.74<br>(194.07 to<br>288.06)       | 233.13<br>(189.91 to<br>284.03)       | 225.35<br>(184.20 to<br>271.15)       |
| Uterine cancer    |                                          |                                          |                                          |                                          |                                     |                                       |                                       |                                       |
|                   | 8,785.67<br>(7,055.81 to<br>10,805.50)   | 8,893.17<br>(6,249.31 to<br>12,070.23)   | 8,187.47<br>(5,811.94 to<br>11,158.31)   | 9,330.04<br>(6,422.85 to<br>12,971.60)   | 465.03<br>(379.62 to<br>562.51)     | 549.01<br>(399.64 to<br>740.24)       | 504.61<br>(372.68 to<br>667.49)       | 567.06<br>(403.08 to<br>782.83)       |
| Ovarian cancer    |                                          |                                          |                                          |                                          |                                     |                                       |                                       |                                       |
|                   | 18,394.84<br>(12,504.93 to<br>22,522.50) | 25,576.81<br>(17,591.61 to<br>31,138.37) | 25,354.88<br>(17,717.56 to<br>31,108.33) | 24,733.99<br>(16,546.57 to<br>30,512.76) | 1,404.17<br>(951.76 to<br>1,690.80) | 2,395.28<br>(1,602.33 to<br>2,829.48) | 2,443.69<br>(1,680.83 to<br>2,908.96) | 2,238.37<br>(1,444.87 to<br>2,703.01) |
| Prostate cancer   |                                          |                                          |                                          |                                          |                                     |                                       |                                       |                                       |
|                   | 299.37<br>(231.68 to<br>379.36)          | 264.01<br>(193.39 to<br>356.58)          | 250.62<br>(183.00 to<br>336.04)          | 264.28<br>(191.04 to<br>354.90)          | 9.02<br>(7.24 to<br>11.18)          | 10.63<br>(8.50 to<br>13.15)           | 10.44<br>(8.30 to<br>12.99)           | 10.15<br>(8.11 to<br>12.48)           |
| Testicular cancer |                                          |                                          |                                          |                                          |                                     |                                       |                                       |                                       |

| Denmark                         |                                                                  |                                                                  |                                                                 |                                                                  |                                                               |                                                               |                                                               |                                                               |
|---------------------------------|------------------------------------------------------------------|------------------------------------------------------------------|-----------------------------------------------------------------|------------------------------------------------------------------|---------------------------------------------------------------|---------------------------------------------------------------|---------------------------------------------------------------|---------------------------------------------------------------|
| Cause                           | YLLs (actual counts)                                             |                                                                  |                                                                 |                                                                  | Deaths (actual counts)                                        |                                                               |                                                               |                                                               |
|                                 | 2016                                                             | 2040 Forecast                                                    | 2040 Better Scenario                                            | 2040 Worse Scenario                                              | 2016                                                          | 2040 Forecast                                                 | 2040 Better Scenario                                          | 2040 Worse Scenario                                           |
| Kidney cancer                   | 7,375.10<br>(6,308.20 to<br>8,417.63)                            | 8,608.44<br>(6,809.51 to<br>10,775.93)                           | 8,388.64<br>(6,725.23 to<br>10,298.09)                          | 9,269.85<br>(7,014.19 to<br>12,048.49)                           | 407.21<br>(351.25 to<br>459.16)                               | 569.00<br>(458.64 to<br>692.91)                               | 569.75<br>(467.71 to<br>681.41)                               | 596.61<br>(459.94 to<br>753.51)                               |
| Bladder cancer                  | 8,764.71<br>(7,594.10 to<br>10,017.83)                           | 9,564.52<br>(7,236.90 to<br>12,491.83)                           | 8,714.31<br>(6,782.02 to<br>11,174.78)                          | 11,456.94<br>(8,312.88 to<br>15,699.52)                          | 624.21<br>(542.68 to<br>705.63)                               | 833.49<br>(633.93 to<br>1,073.01)                             | 785.25<br>(612.79 to<br>990.49)                               | 974.58<br>(699.67 to<br>1,310.20)                             |
| Brain and nervous system cancer | 12,084.71<br>(9,884.88 to<br>14,033.01)                          | 12,991.68<br>(10,331.91 to<br>15,401.76)                         | 12,770.81<br>(10,138.02 to<br>15,200.82)                        | 12,750.51<br>(10,078.22 to<br>14,969.02)                         | 490.52<br>(376.60 to<br>569.19)                               | 633.19<br>(458.95 to<br>742.52)                               | 632.81<br>(461.73 to<br>742.78)                               | 605.31<br>(440.05 to<br>703.93)                               |
| Thyroid cancer                  | 492.75<br>(422.69 to<br>567.67)                                  | 552.92<br>(418.00 to<br>743.41)                                  | 521.01<br>(398.67 to<br>694.66)                                 | 581.72<br>(430.88 to<br>804.02)                                  | 30.00<br>(25.79 to<br>34.49)                                  | 40.99<br>(31.85 to<br>53.46)                                  | 39.56<br>(31.26 to<br>51.37)                                  | 41.19<br>(31.06 to<br>55.65)                                  |
| Mesothelioma                    | 2,475.31<br>(2,029.60 to<br>2,967.64)                            | 2,737.69<br>(2,241.59 to<br>3,322.44)                            | 2,822.12<br>(2,293.65 to<br>3,427.80)                           | 2,592.03<br>(2,130.33 to<br>3,100.80)                            | 172.19<br>(111.82 to<br>161.43)                               | 193.87<br>(145.98 to<br>204.82)                               | 180.62<br>(152.21 to<br>220.34)                               | 188.76<br>(134.33 to<br>186.38)                               |
| Hodgkin lymphoma                | 707.51<br>(607.93 to<br>839.28)                                  | 582.22<br>(478.90 to<br>702.92)                                  | 533.86<br>(440.67 to<br>647.20)                                 | 587.05<br>(486.58 to<br>717.22)                                  | 30.06<br>(26.16 to<br>34.61)                                  | 31.12<br>(26.30 to<br>36.50)                                  | 29.17<br>(24.88 to<br>33.92)                                  | 30.33<br>(25.76 to<br>35.43)                                  |
| Non-Hodgkin lymphoma            | 7,705.84<br>(6,501.29 to<br>9,142.71)                            | 8,432.91<br>(6,774.74 to<br>10,634.17)                           | 8,128.24<br>(6,562.32 to<br>10,140.87)                          | 8,512.27<br>(6,756.86 to<br>10,958.86)                           | 426.86<br>(365.33 to<br>498.94)                               | 580.60<br>(483.17 to<br>703.41)                               | 572.76<br>(481.67 to<br>687.61)                               | 564.00<br>(466.85 to<br>699.10)                               |
| Multiple myeloma                | 4,268.03<br>(3,458.39 to<br>5,183.34)                            | 5,243.13<br>(4,092.91 to<br>6,663.42)                            | 5,151.49<br>(4,052.10 to<br>6,482.86)                           | 5,240.93<br>(4,005.01 to<br>6,742.80)                            | 262.66<br>(210.30 to<br>313.27)                               | 380.88<br>(300.32 to<br>473.78)                               | 382.48<br>(303.41 to<br>474.99)                               | 367.61<br>(279.65 to<br>464.48)                               |
| Leukemia                        | 11,194.10<br>(9,780.19 to<br>12,787.16)                          | 12,844.30<br>(10,074.99 to<br>16,373.86)                         | 12,109.92<br>(9,681.90 to<br>15,173.64)                         | 14,066.90<br>(10,529.56 to<br>18,651.91)                         | 640.87<br>(568.46 to<br>722.90)                               | 925.91<br>(734.60 to<br>1,163.05)                             | 896.87<br>(727.82 to<br>1,103.96)                             | 979.20<br>(738.76 to<br>1,296.45)                             |
| Acute lymphoid leukemia         | 1,065.72<br>(840.11 to<br>1,269.34)                              | 768.41<br>(564.89 to<br>1,014.22)                                | 700.31<br>(517.09 to<br>916.57)                                 | 855.11<br>(618.22 to<br>1,155.37)                                | 31.69<br>(26.04 to<br>37.96)                                  | 28.11<br>(21.64 to<br>36.49)                                  | 25.88<br>(20.11 to<br>33.45)                                  | 31.04<br>(22.92 to<br>41.92)                                  |
| Chronic lymphoid leukemia       | 2,215.81<br>(1,803.27 to<br>2,650.78)                            | 2,622.08<br>(1,951.54 to<br>3,499.76)                            | 2,522.79<br>(1,917.47 to<br>3,319.53)                           | 2,825.43<br>(1,993.06 to<br>3,920.07)                            | 167.54<br>(139.80 to<br>199.01)                               | 238.60<br>(181.53 to<br>315.60)                               | 236.12<br>(183.19 to<br>304.74)                               | 247.47<br>(178.69 to<br>343.79)                               |
| Acute myeloid leukemia          | 4,761.34<br>(4,095.25 to<br>5,487.67)                            | 6,201.47<br>(4,787.81 to<br>7,967.99)                            | 5,937.52<br>(4,650.47 to<br>7,452.97)                           | 6,770.67<br>(5,069.24 to<br>8,959.96)                            | 249.03<br>(214.38 to<br>286.80)                               | 398.17<br>(312.89 to<br>499.65)                               | 390.73<br>(312.27 to<br>481.64)                               | 421.62<br>(319.07 to<br>547.14)                               |
| Chronic myeloid leukemia        | 977.92<br>(815.64 to<br>1,148.70)                                | 628.73<br>(451.79 to<br>853.78)                                  | 539.85<br>(395.24 to<br>721.73)                                 | 718.47<br>(487.02 to<br>1,027.63)                                | 61.53<br>(51.55 to<br>72.20)                                  | 49.28<br>(36.19 to<br>65.19)                                  | 43.57<br>(32.35 to<br>57.31)                                  | 54.08<br>(37.44 to<br>74.90)                                  |
| Other leukemia                  | 2,173.32<br>(1,824.73 to<br>2,523.08)                            | 2,623.59<br>(1,977.16 to<br>3,409.04)                            | 2,409.45<br>(1,858.15 to<br>3,073.42)                           | 2,897.21<br>(2,091.17 to<br>3,969.37)                            | 131.08<br>(112.31 to<br>150.29)                               | 211.74<br>(162.87 to<br>271.06)                               | 200.57<br>(156.62 to<br>252.87)                               | 224.99<br>(165.41 to<br>302.85)                               |
| Other neoplasms                 | 10,491.33<br>(8,971.69 to<br>11,885.79)                          | 13,128.90<br>(11,216.91 to<br>14,934.76)                         | 13,354.38<br>(11,396.57 to<br>15,258.09)                        | 12,461.07<br>(10,703.50 to<br>14,189.46)                         | 585.86<br>(507.67 to<br>660.42)                               | 944.54<br>(810.49 to<br>1,055.32)                             | 986.96<br>(852.47 to<br>1,108.51)                             | 860.55<br>(728.70 to<br>961.59)                               |
| <b>Cardiovascular diseases</b>  | <b>170,979.84</b><br><b>(151,735.19 to</b><br><b>190,911.43)</b> | <b>156,389.22</b><br><b>(114,561.83 to</b><br><b>211,649.88)</b> | <b>122,220.56</b><br><b>(94,163.06 to</b><br><b>160,102.71)</b> | <b>214,082.29</b><br><b>(148,042.98 to</b><br><b>301,687.01)</b> | <b>14,932.47</b><br><b>(13,489.57 to</b><br><b>16,422.05)</b> | <b>17,018.79</b><br><b>(12,792.42 to</b><br><b>23,012.45)</b> | <b>14,014.34</b><br><b>(10,770.88 to</b><br><b>18,140.99)</b> | <b>21,094.35</b><br><b>(15,413.62 to</b><br><b>28,714.64)</b> |
| Rheumatic heart disease         | 1,343.74<br>(1,167.71 to<br>1,545.58)                            | 1,289.26<br>(1,037.02 to<br>1,626.29)                            | 1,204.47<br>(978.88 to<br>1,476.72)                             | 1,247.03<br>(997.06 to<br>1,570.19)                              | 115.65<br>(101.14 to<br>132.18)                               | 139.04<br>(113.23 to<br>175.69)                               | 133.94<br>(110.14 to<br>166.53)                               | 128.58<br>(102.57 to<br>162.39)                               |
| Ischemic heart disease          | 86,465.65<br>(76,100.91 to<br>97,999.82)                         | 72,913.08<br>(43,952.18 to<br>113,920.83)                        | 50,183.08<br>(30,794.33 to<br>77,771.35)                        | 108,703.25<br>(62,892.72 to<br>175,509.20)                       | 7,600.63<br>(6,784.80 to<br>8,461.04)                         | 8,005.15<br>(4,910.35 to<br>12,128.16)                        | 5,888.67<br>(3,667.44 to<br>8,910.76)                         | 10,667.91<br>(6,323.64 to<br>16,830.76)                       |
| Stroke                          | 45,588.15<br>(40,033.16 to<br>51,578.07)                         | 31,694.46<br>(19,912.95 to<br>48,329.55)                         | 23,499.76<br>(15,462.06 to<br>34,588.11)                        | 48,132.32<br>(28,219.49 to<br>77,700.12)                         | 4,013.06<br>(3,537.53 to<br>4,533.27)                         | 3,467.53<br>(2,255.87 to<br>5,488.50)                         | 2,752.33<br>(1,815.40 to<br>4,055.10)                         | 4,654.62<br>(2,901.70 to<br>7,233.81)                         |
| Ischemic stroke                 | 20,227.16<br>(17,710.22 to<br>23,060.98)                         | 14,244.22<br>(8,357.49 to<br>25,949.35)                          | 11,069.36<br>(6,600.11 to<br>20,357.31)                         | 19,158.67<br>(10,500.84 to<br>36,358.28)                         | 2,061.25<br>(1,804.74 to<br>2,345.29)                         | 1,752.81<br>(1,005.04 to<br>3,263.64)                         | 1,435.73<br>(843.43 to<br>2,567.22)                           | 2,151.80<br>(1,163.71 to<br>4,118.25)                         |

|                                |                                          |                                          |                                         |                                          |                                       |                                       |                                     |                                       |
|--------------------------------|------------------------------------------|------------------------------------------|-----------------------------------------|------------------------------------------|---------------------------------------|---------------------------------------|-------------------------------------|---------------------------------------|
|                                | 25,361.00<br>(22,126.53 to<br>28,686.52) | 17,450.24<br>(10,718.70 to<br>27,466.16) | 12,430.39<br>(8,027.43 to<br>18,601.46) | 28,973.65<br>(16,508.27 to<br>47,235.77) | 1,951.81<br>(1,707.89 to<br>2,236.26) | 1,714.72<br>(1,105.37 to<br>2,653.30) | 1,316.59<br>(878.91 to<br>1,958.90) | 2,502.82<br>(1,464.87 to<br>3,987.55) |
| Intracerebral hemorrhage       |                                          |                                          |                                         |                                          |                                       |                                       |                                     |                                       |
|                                | 2,751.96<br>(2,140.34 to<br>4,260.40)    | 4,133.66<br>(2,386.92 to<br>7,549.20)    | 3,638.04<br>(2,223.52 to<br>5,948.01)   | 5,916.81<br>(3,218.29 to<br>11,550.33)   | 253.27<br>(167.38 to<br>326.42)       | 487.58<br>(239.73 to<br>981.06)       | 443.85<br>(229.77 to<br>738.79)     | 657.83<br>(308.72 to<br>1,412.57)     |
| Hypertensive heart disease     |                                          |                                          |                                         |                                          |                                       |                                       |                                     |                                       |
|                                | 4,534.47<br>(3,793.16 to<br>5,451.85)    | 4,111.28<br>(3,182.98 to<br>5,403.04)    | 3,875.67<br>(3,024.14 to<br>5,118.00)   | 4,570.04<br>(3,559.86 to<br>5,951.03)    | 279.34<br>(235.00 to<br>349.98)       | 357.54<br>(267.35 to<br>504.08)       | 354.50<br>(264.42 to<br>501.23)     | 354.42<br>(265.99 to<br>494.35)       |
| Cardiomyopathy and myocarditis |                                          |                                          |                                         |                                          |                                       |                                       |                                     |                                       |
|                                | 868.97<br>(630.64 to<br>1,120.35)        | 1,268.29<br>(963.66 to<br>1,632.61)      | 1,322.92<br>(1,026.96 to<br>1,710.91)   | 1,159.97<br>(874.68 to<br>1,496.98)      | 79.82<br>(56.18 to<br>107.22)         | 152.79<br>(109.75 to<br>204.18)       | 165.35<br>(122.20 to<br>222.86)     | 131.64<br>(92.73 to<br>178.28)        |
| Myocarditis                    |                                          |                                          |                                         |                                          |                                       |                                       |                                     |                                       |



| Denmark                                                       |                                                     |                                                     |                                                     |                                                      |                                                  |                                                  |                                                  |                                                  |
|---------------------------------------------------------------|-----------------------------------------------------|-----------------------------------------------------|-----------------------------------------------------|------------------------------------------------------|--------------------------------------------------|--------------------------------------------------|--------------------------------------------------|--------------------------------------------------|
| Cause                                                         | YLLs (actual counts)                                |                                                     |                                                     |                                                      | Deaths (actual counts)                           |                                                  |                                                  |                                                  |
|                                                               | 2016                                                | 2040 Forecast                                       | 2040 Better Scenario                                | 2040 Worse Scenario                                  | 2016                                             | 2040 Forecast                                    | 2040 Better Scenario                             | 2040 Worse Scenario                              |
| Alcoholic cardiomyopathy                                      | 1,108.39<br>(607.08 to 1,460.89)                    | 777.75<br>(421.13 to 1,053.63)                      | 725.49<br>(397.27 to 988.42)                        | 1,224.55<br>(715.02 to 1,637.41)                     | 44.62<br>(24.97 to 59.12)                        | 34.88<br>(20.15 to 46.77)                        | 33.01<br>(19.67 to 44.14)                        | 53.99<br>(32.44 to 70.92)                        |
| Other cardiomyopathy                                          | 2,557.12<br>(2,099.70 to 3,292.68)                  | 2,065.24<br>(1,287.44 to 3,149.31)                  | 1,827.26<br>(1,160.41 to 2,807.83)                  | 2,185.53<br>(1,352.70 to 3,379.61)                   | 154.90<br>(120.95 to 227.22)                     | 169.87<br>(93.14 to 307.25)                      | 156.14<br>(85.52 to 287.05)                      | 168.79<br>(93.94 to 295.19)                      |
| Atrial fibrillation and flutter                               | 5,740.53<br>(4,316.95 to 7,439.76)                  | 8,366.20<br>(5,989.52 to 11,346.74)                 | 8,211.96<br>(5,939.92 to 11,082.47)                 | 9,342.65<br>(6,554.26 to 12,933.18)                  | 661.64<br>(494.17 to 854.70)                     | 1,093.28<br>(781.99 to 1,489.62)                 | 1,099.07<br>(789.20 to 1,476.90)                 | 1,163.33<br>(808.89 to 1,611.04)                 |
| Aortic aneurysm                                               | 8,473.26<br>(7,299.18 to 9,841.06)                  | 8,516.33<br>(6,698.86 to 10,970.34)                 | 8,154.87<br>(6,526.78 to 10,282.99)                 | 9,068.55<br>(6,938.67 to 11,919.61)                  | 613.46<br>(533.87 to 703.55)                     | 736.15<br>(591.34 to 926.98)                     | 725.71<br>(594.81 to 899.59)                     | 740.51<br>(585.04 to 949.12)                     |
| Peripheral artery disease                                     | 2,296.58<br>(1,648.48 to 4,068.94)                  | 4,657.32<br>(2,933.02 to 8,197.49)                  | 4,629.62<br>(2,947.59 to 8,269.13)                  | 4,945.63<br>(3,091.77 to 8,881.20)                   | 231.20<br>(165.89 to 423.05)                     | 561.45<br>(347.23 to 1,042.50)                   | 576.94<br>(363.73 to 1,070.20)                   | 557.31<br>(343.22 to 1,031.81)                   |
| Endocarditis                                                  | 1,559.80<br>(910.84 to 1,979.08)                    | 1,941.94<br>(1,065.35 to 2,987.04)                  | 1,914.86<br>(1,043.57 to 2,920.09)                  | 1,935.17<br>(1,035.85 to 2,996.30)                   | 108.43<br>(63.60 to 136.52)                      | 169.99<br>(89.95 to 273.74)                      | 172.87<br>(91.71 to 275.05)                      | 160.97<br>(84.49 to 262.40)                      |
| Other cardiovascular and circulatory diseases                 | 12,225.68<br>(10,737.53 to 13,971.95)               | 18,765.70<br>(14,983.71 to 24,331.77)               | 16,908.22<br>(13,896.20 to 20,946.87)               | 20,220.83<br>(15,868.62 to 26,553.09)                | 1,055.78<br>(932.19 to 1,195.57)                 | 2,001.08<br>(1,627.03 to 2,543.18)               | 1,866.46<br>(1,552.60 to 2,297.28)               | 2,008.88<br>(1,587.55 to 2,571.95)               |
| <b>Chronic respiratory diseases</b>                           | <b>52,972.71</b><br><b>(46,609.66 to 59,637.17)</b> | <b>48,409.36</b><br><b>(36,521.07 to 64,126.55)</b> | <b>39,262.05</b><br><b>(30,285.34 to 51,015.01)</b> | <b>77,245.46</b><br><b>(56,369.12 to 104,127.74)</b> | <b>4,022.15</b><br><b>(3,563.79 to 4,490.07)</b> | <b>4,250.72</b><br><b>(3,265.88 to 5,450.56)</b> | <b>3,586.00</b><br><b>(2,793.65 to 4,528.19)</b> | <b>6,586.44</b><br><b>(4,861.45 to 8,634.61)</b> |
| Chronic obstructive pulmonary disease                         | 48,305.33<br>(42,427.64 to 54,416.22)               | 42,520.59<br>(30,700.66 to 57,257.73)               | 32,884.15<br>(23,884.09 to 44,107.52)               | 71,597.40<br>(50,639.20 to 98,133.19)                | 3,741.30<br>(3,318.73 to 4,175.14)               | 3,808.58<br>(2,813.95 to 5,027.51)               | 3,095.97<br>(2,295.52 to 4,030.83)               | 6,178.30<br>(4,482.10 to 8,219.47)               |
| Pneumoconiosis                                                | 187.25<br>(156.51 to 224.84)                        | 332.50<br>(256.08 to 422.06)                        | 362.04<br>(278.73 to 457.11)                        | 303.02<br>(235.83 to 383.58)                         | 14.13<br>(11.80 to 16.78)                        | 30.53<br>(23.34 to 39.05)                        | 33.99<br>(26.10 to 43.50)                        | 36.94<br>(20.22 to 34.45)                        |
| Silicosis                                                     | 12.48<br>(7.95 to 23.34)                            | 11.09<br>(6.58 to 22.66)                            | 9.98<br>(5.90 to 19.81)                             | 11.01<br>(6.27 to 21.97)                             | 0.96<br>(0.63 to 1.71)                           | 1.04<br>(0.62 to 2.04)                           | 0.97<br>(0.57 to 1.85)                           | 1.00<br>(0.57 to 1.95)                           |
| Asbestosis                                                    | 139.08<br>(99.58 to 173.13)                         | 283.98<br>(208.80 to 368.50)                        | 314.13<br>(232.59 to 407.88)                        | 254.99<br>(186.82 to 332.72)                         | 10.22<br>(7.15 to 12.68)                         | 25.46<br>(18.30 to 34.03)                        | 28.85<br>(20.95 to 38.48)                        | 22.12<br>(15.62 to 29.57)                        |
| Coal workers pneumoconiosis                                   | 5.46<br>(3.40 to 10.51)                             | 8.60<br>(3.70 to 17.56)                             | 8.88<br>(3.58 to 17.99)                             | 8.27<br>(3.54 to 17.00)                              | 0.49<br>(0.30 to 1.02)                           | 0.92<br>(0.40 to 1.98)                           | 0.97<br>(0.41 to 1.99)                           | 0.86<br>(0.38 to 1.90)                           |
| Other pneumoconiosis                                          | 30.33<br>(21.86 to 55.00)                           | 28.82<br>(19.31 to 49.47)                           | 29.04<br>(19.34 to 48.66)                           | 28.76<br>(19.38 to 49.07)                            | 2.47<br>(1.80 to 4.37)                           | 3.10<br>(2.03 to 5.35)                           | 2.96<br>(2.08 to 5.47)                           | 2.96<br>(1.92 to 5.03)                           |
| Asthma                                                        | 1,160.18<br>(978.29 to 1,411.87)                    | 647.07<br>(398.59 to 1,014.48)                      | 521.03<br>(336.73 to 800.91)                        | 848.63<br>(494.34 to 1,377.19)                       | 67.13<br>(55.37 to 79.31)                        | 50.66<br>(31.53 to 78.87)                        | 42.33<br>(27.60 to 65.37)                        | 61.83<br>(36.96 to 102.66)                       |
| Interstitial lung disease and pulmonary sarcoidosis           | 3,035.10<br>(2,401.78 to 4,344.59)                  | 4,659.77<br>(3,621.08 to 6,807.59)                  | 5,251.27<br>(4,152.97 to 7,480.07)                  | 4,229.05<br>(3,264.81 to 6,187.63)                   | 185.40<br>(143.85 to 282.50)                     | 345.03<br>(261.25 to 537.56)                     | 397.72<br>(309.12 to 610.56)                     | 302.66<br>(231.75 to 479.15)                     |
| Other chronic respiratory diseases                            | 284.75<br>(149.21 to 383.22)                        | 249.42<br>(126.66 to 367.55)                        | 243.55<br>(122.94 to 357.88)                        | 267.36<br>(133.99 to 405.63)                         | 14.19<br>(6.27 to 19.61)                         | 15.91<br>(6.80 to 24.08)                         | 16.00<br>(6.84 to 24.03)                         | 16.71<br>(6.97 to 25.71)                         |
| <b>Cirrhosis and other chronic liver diseases</b>             | <b>23,782.18</b><br><b>(20,234.20 to 27,635.47)</b> | <b>18,087.25</b><br><b>(14,880.68 to 21,826.23)</b> | <b>16,482.95</b><br><b>(13,584.99 to 19,732.90)</b> | <b>24,143.54</b><br><b>(19,952.17 to 29,039.96)</b>  | <b>961.57</b><br><b>(822.98 to 1,117.38)</b>     | <b>822.92</b><br><b>(702.20 to 953.44)</b>       | <b>763.35</b><br><b>(653.29 to 881.90)</b>       | <b>1,071.93</b><br><b>(918.52 to 1,250.49)</b>   |
| Cirrhosis and other chronic liver diseases due to hepatitis B | 3,302.06<br>(2,404.08 to 4,504.94)                  | 2,914.51<br>(2,114.39 to 3,998.81)                  | 2,756.32<br>(1,983.71 to 3,739.97)                  | 2,932.01<br>(2,102.55 to 4,035.71)                   | 134.85<br>(101.92 to 181.94)                     | 133.39<br>(101.27 to 177.69)                     | 128.27<br>(97.38 to 169.20)                      | 130.82<br>(98.56 to 174.07)                      |
| Cirrhosis and other chronic liver diseases due to hepatitis C | 6,894.68<br>(5,006.52 to 9,155.90)                  | 6,147.41<br>(4,465.99 to 8,263.19)                  | 5,773.95<br>(4,242.89 to 7,680.21)                  | 6,242.19<br>(4,447.96 to 8,571.33)                   | 270.84<br>(200.24 to 355.41)                     | 267.48<br>(201.48 to 345.17)                     | 254.98<br>(192.77 to 326.00)                     | 265.39<br>(195.46 to 348.25)                     |

|                                                                |                                                               |                                                               |                                                               |                                                               |                                                            |                                                            |                                                            |                                                            |
|----------------------------------------------------------------|---------------------------------------------------------------|---------------------------------------------------------------|---------------------------------------------------------------|---------------------------------------------------------------|------------------------------------------------------------|------------------------------------------------------------|------------------------------------------------------------|------------------------------------------------------------|
|                                                                | 12,143.58<br>(9,648.59 to<br>14,941.06)                       | 7,750.57<br>(5,955.84 to<br>9,884.77)                         | 6,746.07<br>(5,108.15 to<br>8,663.10)                         | 13,689.89<br>(10,669.64 to<br>17,211.01)                      | 493.92<br>(402.81 to<br>600.70)                            | 337.41<br>(286.42 to<br>438.70)                            | 317.62<br>(253.29 to<br>389.87)                            | 612.99<br>(499.50 to<br>738.96)                            |
| Cirrhosis and other chronic liver diseases due to alcohol use  |                                                               |                                                               |                                                               |                                                               |                                                            |                                                            |                                                            |                                                            |
|                                                                | 1,441.86<br>(957.86 to<br>2,069.76)                           | 1,274.76<br>(863.54 to<br>1,847.70)                           | 1,206.61<br>(802.67 to<br>1,758.33)                           | 1,279.44<br>(852.91 to<br>1,881.41)                           | 61.96<br>(43.03 to<br>88.13)                               | 64.64<br>(45.89 to<br>91.55)                               | 62.48<br>(44.25 to<br>89.24)                               | 62.73<br>(43.99 to<br>89.64)                               |
| Cirrhosis and other chronic liver diseases due to other causes |                                                               |                                                               |                                                               |                                                               |                                                            |                                                            |                                                            |                                                            |
| <b>Digestive diseases</b>                                      | <b>20,543.38</b><br><b>(17,090.03 to</b><br><b>24,599.18)</b> | <b>24,286.08</b><br><b>(19,517.18 to</b><br><b>29,726.10)</b> | <b>23,409.57</b><br><b>(19,017.70 to</b><br><b>28,487.60)</b> | <b>24,826.55</b><br><b>(19,686.85 to</b><br><b>30,835.23)</b> | <b>1,582.76</b><br><b>(1,323.32 to</b><br><b>1,860.57)</b> | <b>2,359.83</b><br><b>(1,922.45 to</b><br><b>2,820.62)</b> | <b>2,336.25</b><br><b>(1,913.74 to</b><br><b>2,775.10)</b> | <b>2,289.28</b><br><b>(1,849.61 to</b><br><b>2,769.89)</b> |
| Peptic ulcer disease                                           | 4,773.07<br>(4,015.93 to<br>6,182.58)                         | 4,080.49<br>(3,062.40 to<br>5,317.27)                         | 3,703.49<br>(2,844.46 to<br>4,920.56)                         | 4,401.98<br>(3,223.67 to<br>5,876.06)                         | 402.86<br>(340.45 to<br>500.53)                            | 444.79<br>(331.62 to<br>586.83)                            | 414.29<br>(313.02 to<br>540.07)                            | 455.20<br>(329.86 to<br>609.01)                            |

| Denmark                                    |                                       |                                       |                                       |                                       |                                    |                                     |                                     |                                     |
|--------------------------------------------|---------------------------------------|---------------------------------------|---------------------------------------|---------------------------------------|------------------------------------|-------------------------------------|-------------------------------------|-------------------------------------|
| Cause                                      | YLLs (actual counts)                  |                                       |                                       |                                       | Deaths (actual counts)             |                                     |                                     |                                     |
|                                            | 2016                                  | 2040 Forecast                         | 2040 Better Scenario                  | 2040 Worse Scenario                   | 2016                               | 2040 Forecast                       | 2040 Better Scenario                | 2040 Worse Scenario                 |
| Gastritis and duodenitis                   | 326.54<br>(213.26 to 416.00)          | 363.10<br>(219.49 to 476.46)          | 348.81<br>(210.01 to 458.75)          | 346.36<br>(216.23 to 456.80)          | 26.44<br>(14.08 to 32.81)          | 38.50<br>(18.48 to 51.91)           | 38.25<br>(18.16 to 51.83)           | 34.90<br>(17.12 to 47.38)           |
| Appendicitis                               | 438.87<br>(331.85 to 591.08)          | 437.80<br>(323.36 to 587.64)          | 401.83<br>(292.50 to 525.66)          | 431.08<br>(322.61 to 556.95)          | 29.46<br>(21.26 to 36.45)          | 38.39<br>(26.07 to 48.82)           | 36.30<br>(25.07 to 46.10)           | 36.13<br>(24.91 to 45.85)           |
| Paralytic ileus and intestinal obstruction | 3,391.73<br>(2,407.14 to 4,237.87)    | 4,729.38<br>(3,342.08 to 5,766.13)    | 4,907.53<br>(3,505.15 to 5,995.19)    | 4,358.72<br>(3,045.24 to 5,314.27)    | 274.52<br>(194.62 to 339.86)       | 474.72<br>(335.21 to 577.26)        | 505.59<br>(359.96 to 613.56)        | 420.13<br>(294.52 to 513.55)        |
| Inguinal, femoral, and abdominal hernia    | 668.93<br>(429.12 to 843.48)          | 599.20<br>(375.84 to 742.87)          | 586.54<br>(367.13 to 723.57)          | 564.76<br>(350.94 to 700.88)          | 57.59<br>(35.74 to 71.18)          | 63.15<br>(39.06 to 78.61)           | 63.57<br>(39.04 to 79.00)           | 57.18<br>(35.15 to 72.03)           |
| Inflammatory bowel disease                 | 1,088.63<br>(762.61 to 1,336.81)      | 1,207.90<br>(862.69 to 1,486.69)      | 1,230.76<br>(879.96 to 1,518.19)      | 1,138.27<br>(809.80 to 1,401.13)      | 72.04<br>(53.14 to 86.55)          | 99.67<br>(74.62 to 121.24)          | 104.35<br>(78.54 to 126.99)         | 90.01<br>(66.65 to 110.37)          |
| Vascular intestinal disorders              | 2,099.22<br>(1,681.24 to 2,552.31)    | 3,078.06<br>(2,429.29 to 3,775.49)    | 3,061.58<br>(2,418.18 to 3,760.11)    | 2,919.51<br>(2,326.01 to 3,570.67)    | 153.45<br>(124.72 to 185.27)       | 271.93<br>(215.23 to 332.19)        | 276.97<br>(219.02 to 338.97)        | 248.61<br>(194.33 to 303.76)        |
| Gallbladder and biliary diseases           | 1,800.82<br>(1,509.36 to 2,286.72)    | 2,549.10<br>(1,533.63 to 4,150.95)    | 2,300.69<br>(1,369.79 to 3,542.63)    | 2,940.87<br>(1,726.87 to 4,924.69)    | 169.26<br>(142.43 to 208.02)       | 292.43<br>(174.42 to 476.43)        | 259.66<br>(161.17 to 417.33)        | 320.16<br>(183.76 to 541.70)        |
| Pancreatitis                               | 2,854.24<br>(1,931.94 to 3,571.42)    | 2,676.53<br>(1,282.91 to 5,433.76)    | 2,383.49<br>(1,179.67 to 4,815.17)    | 3,458.18<br>(1,525.83 to 7,102.67)    | 140.77<br>(104.15 to 171.25)       | 164.17<br>(87.36 to 317.24)         | 149.97<br>(81.12 to 286.25)         | 203.83<br>(98.51 to 410.47)         |
| Other digestive diseases                   | 3,101.31<br>(2,323.77 to 3,771.37)    | 4,564.52<br>(3,423.94 to 5,491.21)    | 4,584.85<br>(3,463.26 to 5,519.66)    | 4,266.82<br>(3,205.78 to 5,109.26)    | 256.37<br>(197.78 to 305.88)       | 472.09<br>(355.25 to 576.64)        | 487.30<br>(367.62 to 592.81)        | 423.14<br>(313.59 to 519.70)        |
| Neurological disorders                     | 46,730.05<br>(40,172.53 to 54,047.45) | 70,268.83<br>(57,477.76 to 88,709.52) | 71,093.97<br>(58,837.71 to 88,452.23) | 71,440.89<br>(56,825.37 to 94,399.51) | 4,825.35<br>(4,028.02 to 5,653.65) | 8,604.06<br>(6,733.17 to 11,098.66) | 8,901.92<br>(7,124.91 to 11,201.56) | 8,395.26<br>(6,353.90 to 11,374.77) |
| Alzheimer's disease and other dementias    | 31,514.73<br>(26,026.03 to 38,116.45) | 52,531.16<br>(39,503.77 to 70,962.26) | 52,978.52<br>(41,283.77 to 69,571.80) | 53,757.68<br>(39,191.85 to 75,559.28) | 3,983.85<br>(3,263.67 to 4,767.59) | 7,371.57<br>(5,507.68 to 9,801.17)  | 7,601.25<br>(5,788.75 to 9,836.93)  | 7,237.67<br>(5,202.03 to 10,212.63) |
| Parkinson's disease                        | 4,414.73<br>(3,301.26 to 5,807.21)    | 6,718.65<br>(5,033.95 to 8,814.04)    | 7,168.29<br>(5,412.96 to 9,386.68)    | 6,101.24<br>(4,547.80 to 8,073.06)    | 410.81<br>(311.51 to 541.36)       | 703.52<br>(533.04 to 941.13)        | 765.54<br>(584.22 to 1,017.05)      | 620.16<br>(460.52 to 834.17)        |
| Epilepsy                                   | 2,684.39<br>(2,248.82 to 3,211.76)    | 2,393.21<br>(1,456.68 to 3,772.25)    | 2,240.47<br>(1,362.97 to 3,548.80)    | 2,989.93<br>(1,738.52 to 4,765.58)    | 87.95<br>(75.06 to 104.62)         | 99.42<br>(62.93 to 148.33)          | 95.47<br>(60.02 to 140.96)          | 120.72<br>(73.50 to 182.33)         |
| Multiple sclerosis                         | 2,832.54<br>(2,121.89 to 3,507.31)    | 2,488.31<br>(1,775.92 to 3,223.41)    | 2,519.07<br>(1,795.78 to 3,244.06)    | 2,618.22<br>(1,844.83 to 3,436.45)    | 112.39<br>(80.39 to 136.42)        | 109.57<br>(74.41 to 137.86)         | 112.07<br>(76.55 to 140.96)         | 113.01<br>(76.30 to 143.77)         |
| Motor neuron disease                       | 2,706.59<br>(2,279.07 to 3,133.19)    | 3,621.61<br>(2,079.02 to 4,266.60)    | 3,643.82<br>(2,987.25 to 4,310.27)    | 3,517.67<br>(2,925.18 to 4,113.63)    | 133.99<br>(113.99 to 156.18)       | 202.50<br>(169.57 to 235.23)        | 205.92<br>(172.23 to 240.83)        | 193.21<br>(163.01 to 223.07)        |
| Other neurological disorders               | 2,577.07<br>(2,127.77 to 2,983.27)    | 2,515.89<br>(2,044.89 to 2,991.68)    | 2,543.80<br>(2,075.22 to 3,034.77)    | 2,456.15<br>(2,000.23 to 2,916.40)    | 96.35<br>(81.98 to 111.61)         | 117.48<br>(100.79 to 134.48)        | 121.67<br>(103.93 to 139.99)        | 110.49<br>(94.52 to 126.54)         |
| Mental disorders                           | 29,130.43<br>(24,431.19 to 34,392.76) | 30,706.42<br>(23,853.55 to 38,760.20) | 32,394.41<br>(25,126.23 to 40,831.13) | 32,356.90<br>(25,283.67 to 40,392.07) | 944.94<br>(813.85 to 1,107.57)     | 983.16<br>(804.22 to 1,175.85)      | 1,036.53<br>(848.14 to 1,239.50)    | 1,046.13<br>(861.76 to 1,251.02)    |
| Alcohol use disorders                      | 19,835.46<br>(16,777.81 to 23,533.93) | 14,177.79<br>(11,405.67 to 17,551.59) | 14,288.61<br>(11,615.85 to 17,697.22) | 16,591.25<br>(13,459.47 to 20,291.79) | 724.84<br>(617.31 to 852.79)       | 564.55<br>(464.41 to 682.47)        | 574.65<br>(475.21 to 692.38)        | 651.88<br>(541.44 to 778.50)        |
| Drug use disorders                         | 9,224.87<br>(7,213.11 to 11,052.34)   | 16,467.00<br>(11,701.32 to 22,713.89) | 18,040.53<br>(12,753.73 to 24,474.08) | 15,705.97<br>(10,966.34 to 21,737.38) | 218.67<br>(176.96 to 258.46)       | 417.34<br>(319.63 to 544.83)        | 460.53<br>(351.82 to 594.08)        | 393.02<br>(296.55 to 516.15)        |
| Opioid use disorders                       | 4,225.41<br>(2,467.91 to 5,278.63)    | 4,548.27<br>(2,566.80 to 6,631.85)    | 4,662.60<br>(2,641.75 to 6,817.95)    | 4,470.28<br>(2,501.25 to 6,542.27)    | 96.29<br>(58.86 to 119.73)         | 111.67<br>(69.32 to 155.34)         | 115.33<br>(71.50 to 162.01)         | 108.63<br>(66.28 to 152.61)         |

|                           |                                       |                                        |                                         |                                        |                                |                                 |                                 |                                 |
|---------------------------|---------------------------------------|----------------------------------------|-----------------------------------------|----------------------------------------|--------------------------------|---------------------------------|---------------------------------|---------------------------------|
|                           | 102.15<br>(71.13 to<br>139.61)        | 275.40<br>(173.88 to<br>413.20)        | 299.24<br>(191.11 to<br>446.75)         | 263.38<br>(168.42 to<br>395.12)        | 2.26<br>(1.65 to<br>3.03)      | 6.49<br>(4.40 to<br>9.22)       | 7.09<br>(4.83 to<br>10.05)      | 6.14<br>(4.15 to<br>8.77)       |
| Cocaine use disorders     |                                       |                                        |                                         |                                        |                                |                                 |                                 |                                 |
|                           | 515.19<br>(368.49 to<br>707.89)       | 2,166.48<br>(1,321.60 to<br>3,255.74)  | 2,465.97<br>(1,521.68 to<br>3,701.10)   | 2,032.38<br>(1,249.41 to<br>3,082.73)  | 10.45<br>(7.68 to<br>14.46)    | 45.85<br>(29.28 to<br>67.00)    | 52.38<br>(34.12 to<br>78.82)    | 42.77<br>(26.91 to<br>63.48)    |
| Amphetamine use disorders |                                       |                                        |                                         |                                        |                                |                                 |                                 |                                 |
|                           | 4,382.11<br>(3,382.05 to<br>5,602.58) | 9,476.85<br>(6,651.31 to<br>13,235.99) | 10,612.72<br>(7,555.03 to<br>14,728.44) | 8,939.93<br>(6,186.95 to<br>12,711.10) | 109.67<br>(85.76 to<br>136.94) | 253.32<br>(188.98 to<br>336.95) | 285.73<br>(216.55 to<br>370.77) | 235.49<br>(173.08 to<br>317.33) |
| Other drug use disorders  |                                       |                                        |                                         |                                        |                                |                                 |                                 |                                 |
|                           | 70.11<br>(51.40 to<br>94.03)          | 61.63<br>(35.95 to<br>96.42)           | 65.27<br>(37.45 to<br>102.38)           | 59.68<br>(34.62 to<br>91.86)           | 1.43<br>(1.04 to<br>1.93)      | 1.27<br>(0.73 to<br>2.02)       | 1.35<br>(0.77 to<br>2.16)       | 1.23<br>(0.71 to<br>1.94)       |
| Eating disorders          |                                       |                                        |                                         |                                        |                                |                                 |                                 |                                 |

| Denmark                                                    |                                          |                                          |                                          |                                          |                                       |                                       |                                       |                                       |
|------------------------------------------------------------|------------------------------------------|------------------------------------------|------------------------------------------|------------------------------------------|---------------------------------------|---------------------------------------|---------------------------------------|---------------------------------------|
| Cause                                                      | YLLs (actual counts)                     |                                          |                                          |                                          | Deaths (actual counts)                |                                       |                                       |                                       |
|                                                            | 2016                                     | 2040 Forecast                            | 2040 Better Scenario                     | 2040 Worse Scenario                      | 2016                                  | 2040 Forecast                         | 2040 Better Scenario                  | 2040 Worse Scenario                   |
|                                                            | 40,273.56<br>(35,896.84 to<br>45,383.21) | 54,739.24<br>(40,097.74 to<br>89,994.76) | 48,808.53<br>(36,687.27 to<br>79,955.98) | 60,087.49<br>(42,863.47 to<br>99,337.66) | 2,960.49<br>(2,670.44 to<br>3,274.11) | 5,249.73<br>(3,960.05 to<br>8,871.81) | 4,853.56<br>(3,730.77 to<br>7,932.66) | 5,445.89<br>(4,000.86 to<br>9,317.90) |
| Diabetes, urogenital, blood, and endocrine diseases        |                                          |                                          |                                          |                                          |                                       |                                       |                                       |                                       |
| Diabetes mellitus                                          | 19,309.85<br>(16,925.45 to<br>21,966.83) | 19,312.32<br>(12,874.57 to<br>28,174.79) | 16,161.93<br>(10,919.07 to<br>23,424.53) | 22,857.42<br>(14,707.19 to<br>34,408.57) | 1,313.54<br>(1,163.15 to<br>1,485.47) | 1,653.48<br>(1,189.01 to<br>2,317.69) | 1,459.46<br>(1,044.33 to<br>2,033.35) | 1,825.24<br>(1,262.50 to<br>2,650.88) |
| Acute glomerulonephritis                                   | 37.01<br>(32.09 to<br>42.33)             | 33.39<br>(25.55 to<br>42.39)             | 31.53<br>(23.88 to<br>40.72)             | 33.58<br>(25.86 to<br>42.57)             | 1.46<br>(1.21 to<br>1.76)             | 1.58<br>(1.12 to<br>2.34)             | 1.54<br>(1.08 to<br>2.29)             | 1.51<br>(1.07 to<br>2.15)             |
| Chronic kidney disease                                     | 10,362.27<br>(9,163.17 to<br>11,699.71)  | 19,699.15<br>(9,301.62 to<br>37,084.98)  | 16,889.43<br>(8,260.62 to<br>48,586.81)  | 22,412.10<br>(9,878.13 to<br>61,235.81)  | 867.43<br>(773.40 to<br>967.48)       | 2,028.78<br>(951.96 to<br>5,674.50)   | 1,787.40<br>(882.96 to<br>4,906.02)   | 2,217.61<br>(983.07 to<br>6,348.53)   |
| Chronic kidney disease due to diabetes mellitus            | 3,760.29<br>(3,284.40 to<br>4,298.68)    | 7,643.48<br>(3,504.84 to<br>21,707.02)   | 6,507.65<br>(3,143.44 to<br>19,124.12)   | 8,827.06<br>(3,832.61 to<br>25,112.09)   | 276.08<br>(242.48 to<br>312.27)       | 702.36<br>(318.01 to<br>1,962.54)     | 613.98<br>(292.97 to<br>1,713.14)     | 779.40<br>(337.28 to<br>2,166.79)     |
| Chronic kidney disease due to hypertension                 | 1,414.81<br>(1,224.30 to<br>1,609.89)    | 3,451.40<br>(1,543.47 to<br>10,365.11)   | 3,061.92<br>(1,428.74 to<br>9,296.37)    | 3,782.12<br>(1,579.21 to<br>11,439.28)   | 168.55<br>(145.70 to<br>193.68)       | 454.34<br>(213.29 to<br>1,328.46)     | 413.64<br>(204.04 to<br>1,168.97)     | 479.95<br>(214.15 to<br>1,393.50)     |
| Chronic kidney disease due to glomerulonephritis           | 1,931.03<br>(1,697.35 to<br>2,181.07)    | 2,963.22<br>(1,382.41 to<br>8,439.15)    | 2,497.96<br>(1,202.59 to<br>7,315.54)    | 3,391.53<br>(1,483.24 to<br>9,519.13)    | 148.38<br>(130.50 to<br>167.96)       | 288.31<br>(131.56 to<br>859.64)       | 248.25<br>(117.99 to<br>737.30)       | 319.13<br>(136.64 to<br>935.53)       |
| Chronic kidney disease due to other and unspecified causes | 3,256.15<br>(2,851.73 to<br>3,698.88)    | 5,641.05<br>(2,615.70 to<br>15,180.88)   | 4,821.89<br>(2,384.29 to<br>13,410.68)   | 6,411.40<br>(2,834.63 to<br>17,272.88)   | 274.43<br>(240.75 to<br>309.82)       | 583.78<br>(282.28 to<br>1,658.37)     | 511.54<br>(257.24 to<br>1,432.55)     | 639.14<br>(288.43 to<br>1,800.54)     |
| Urinary diseases and male infertility                      | 3,806.43<br>(3,347.47 to<br>4,284.31)    | 7,600.50<br>(6,458.62 to<br>9,057.91)    | 7,516.59<br>(6,371.49 to<br>8,929.82)    | 7,019.68<br>(5,880.48 to<br>8,434.63)    | 428.18<br>(376.80 to<br>481.61)       | 1,010.95<br>(831.65 to<br>1,242.18)   | 1,026.67<br>(851.38 to<br>1,242.40)   | 896.95<br>(725.50 to<br>1,115.95)     |
| Urinary tract infections                                   | 3,312.96<br>(2,928.72 to<br>3,752.40)    | 6,891.18<br>(5,770.23 to<br>8,182.94)    | 6,943.89<br>(5,745.77 to<br>8,182.23)    | 6,344.02<br>(5,300.49 to<br>7,647.38)    | 384.91<br>(339.47 to<br>434.25)       | 930.49<br>(757.39 to<br>1,133.60)     | 947.76<br>(778.47 to<br>1,160.48)     | 823.88<br>(659.75 to<br>1,025.84)     |
| Urolithiasis                                               | 268.11<br>(199.25 to<br>393.61)          | 326.85<br>(228.94 to<br>513.54)          | 305.23<br>(212.99 to<br>482.61)          | 316.48<br>(222.07 to<br>492.25)          | 22.73<br>(16.16 to<br>35.98)          | 33.51<br>(22.00 to<br>57.17)          | 32.29<br>(21.14 to<br>55.56)          | 30.93<br>(20.42 to<br>52.68)          |
| Other urinary diseases                                     | 225.37<br>(158.58 to<br>328.86)          | 382.47<br>(242.16 to<br>646.99)          | 367.47<br>(231.87 to<br>622.60)          | 359.18<br>(232.48 to<br>588.98)          | 20.53<br>(13.61 to<br>33.83)          | 46.96<br>(26.82 to<br>87.54)          | 46.61<br>(26.77 to<br>87.49)          | 42.13<br>(23.96 to<br>76.70)          |
| Gynecological diseases                                     | 58.66<br>(42.78 to<br>78.68)             | 56.95<br>(38.20 to<br>78.53)             | 48.82<br>(33.45 to<br>67.89)             | 58.60<br>(39.60 to<br>84.48)             | 3.42<br>(2.38 to<br>4.43)             | 4.44<br>(2.92 to<br>6.13)             | 3.91<br>(2.60 to<br>5.52)             | 4.33<br>(2.79 to<br>6.04)             |
| Uterine fibroids                                           | 10.68<br>(7.23 to<br>17.46)              | 7.49<br>(4.32 to<br>13.28)               | 6.62<br>(3.79 to<br>12.20)               | 7.82<br>(4.44 to<br>13.77)               | 0.33<br>(0.22 to<br>0.49)             | 0.27<br>(0.16 to<br>0.41)             | 0.24<br>(0.14 to<br>0.38)             | 0.27<br>(0.16 to<br>0.42)             |
| Polycystic ovarian syndrome                                | 2.25<br>(1.28 to<br>3.75)                | 0.82<br>(0.37 to<br>1.64)                | 0.61<br>(0.28 to<br>1.26)                | 0.94<br>(0.41 to<br>1.91)                | 0.05<br>(0.03 to<br>0.09)             | 0.02<br>(0.01 to<br>0.04)             | 0.01<br>(0.01 to<br>0.03)             | 0.02<br>(0.01 to<br>0.05)             |
| Endometriosis                                              | 0.15<br>(0.08 to<br>0.30)                | 0.14<br>(0.05 to<br>0.31)                | 0.12<br>(0.04 to<br>0.28)                | 0.15<br>(0.06 to<br>0.35)                | 0.00<br>(0.00 to<br>0.01)             | 0.00<br>(0.00 to<br>0.01)             | 0.00<br>(0.00 to<br>0.01)             | 0.00<br>(0.00 to<br>0.01)             |
| Genital prolapse                                           | 1.57<br>(0.87 to<br>2.52)                | 3.27<br>(1.50 to<br>6.22)                | 2.83<br>(1.32 to<br>5.49)                | 3.33<br>(1.55 to<br>6.43)                | 0.11<br>(0.06 to<br>0.18)             | 0.29<br>(0.13 to<br>0.56)             | 0.25<br>(0.11 to<br>0.50)             | 0.28<br>(0.13 to<br>0.54)             |
| Other gynecological diseases                               | 44.01<br>(31.32 to<br>58.11)             | 45.22<br>(29.48 to<br>63.78)             | 38.64<br>(26.03 to<br>54.61)             | 46.37<br>(30.14 to<br>67.28)             | 2.93<br>(1.99 to<br>3.81)             | 3.86<br>(2.46 to<br>5.49)             | 3.40<br>(2.15 to<br>4.85)             | 3.75<br>(2.28 to<br>5.31)             |
| Hemoglobinopathies and hemolytic anemias                   | 923.17<br>(760.06 to<br>1,124.69)        | 1,074.62<br>(828.36 to<br>1,319.69)      | 1,026.62<br>(803.28 to<br>1,245.97)      | 1,024.00<br>(778.11 to<br>1,254.61)      | 75.09<br>(57.65 to<br>88.83)          | 119.95<br>(85.89 to<br>147.24)        | 118.00<br>(86.12 to<br>142.49)        | 109.04<br>(77.17 to<br>133.66)        |
| Thalassemias                                               | 94.03<br>(53.73 to<br>137.48)            | 38.71<br>(17.98 to<br>69.66)             | 37.82<br>(17.78 to<br>67.73)             | 39.34<br>(17.97 to<br>70.21)             | 1.32<br>(0.70 to<br>2.06)             | 0.58<br>(0.24 to<br>1.14)             | 0.56<br>(0.23 to<br>1.11)             | 0.58<br>(0.24 to<br>1.14)             |

|                                                   |                                       |                                       |                                       |                                       |                                 |                                 |                                 |                                 |
|---------------------------------------------------|---------------------------------------|---------------------------------------|---------------------------------------|---------------------------------------|---------------------------------|---------------------------------|---------------------------------|---------------------------------|
|                                                   | 30.21<br>(9.90 to<br>68.99)           | 28.47<br>(8.86 to<br>63.30)           | 25.84<br>(7.90 to<br>57.95)           | 29.50<br>(9.32 to<br>64.03)           | 0.70<br>(0.23 to<br>1.54)       | 0.91<br>(0.26 to<br>2.11)       | 0.83<br>(0.24 to<br>2.00)       | 0.93<br>(0.26 to<br>2.22)       |
| Sickle cell disorders                             |                                       |                                       |                                       |                                       |                                 |                                 |                                 |                                 |
|                                                   | 101.34<br>(72.67 to<br>142.33)        | 134.07<br>(93.62 to<br>188.60)        | 120.96<br>(84.69 to<br>172.04)        | 136.45<br>(94.85 to<br>194.78)        | 3.97<br>(2.81 to<br>5.51)       | 7.49<br>(5.11 to<br>10.47)      | 6.89<br>(4.66 to<br>9.64)       | 7.40<br>(4.97 to<br>10.46)      |
| G6PD deficiency                                   |                                       |                                       |                                       |                                       |                                 |                                 |                                 |                                 |
|                                                   | 697.59<br>(544.21 to<br>854.71)       | 873.37<br>(636.15 to<br>1,076.15)     | 842.01<br>(626.69 to<br>1,015.42)     | 818.71<br>(595.77 to<br>1,006.74)     | 69.10<br>(51.16 to<br>81.60)    | 110.97<br>(77.98 to<br>137.91)  | 109.72<br>(78.49 to<br>132.58)  | 100.13<br>(70.07 to<br>123.53)  |
| Other hemoglobinopathies and hemolytic anemias    |                                       |                                       |                                       |                                       |                                 |                                 |                                 |                                 |
|                                                   | 5,776.16<br>(2,341.55 to<br>7,049.60) | 6,962.33<br>(2,821.49 to<br>8,583.04) | 7,133.60<br>(2,918.87 to<br>8,797.16) | 6,682.10<br>(2,660.15 to<br>8,220.89) | 271.36<br>(103.94 to<br>333.53) | 430.54<br>(165.61 to<br>529.65) | 456.58<br>(180.62 to<br>562.31) | 391.21<br>(150.57 to<br>480.19) |
| Endocrine, metabolic, blood, and immune disorders |                                       |                                       |                                       |                                       |                                 |                                 |                                 |                                 |

| Denmark                                       |                                            |                                             |                                            |                                             |                                     |                                     |                                     |                                     |
|-----------------------------------------------|--------------------------------------------|---------------------------------------------|--------------------------------------------|---------------------------------------------|-------------------------------------|-------------------------------------|-------------------------------------|-------------------------------------|
| Cause                                         | YLLs (actual counts)                       |                                             |                                            |                                             | Deaths (actual counts)              |                                     |                                     |                                     |
|                                               | 2016                                       | 2040 Forecast                               | 2040 Better Scenario                       | 2040 Worse Scenario                         | 2016                                | 2040 Forecast                       | 2040 Better Scenario                | 2040 Worse Scenario                 |
| <b>Musculoskeletal disorders</b>              | <b>3,359.54</b><br>(2,818.37 to 4,092.31)  | <b>5,143.18</b><br>(4,237.02 to 6,200.22)   | <b>4,988.53</b><br>(4,126.99 to 5,993.44)  | <b>5,001.81</b><br>(4,106.35 to 6,054.01)   | <b>272.97</b><br>(227.81 to 324.22) | <b>502.29</b><br>(398.24 to 611.14) | <b>500.43</b><br>(396.84 to 605.04) | <b>466.94</b><br>(363.53 to 573.77) |
| Rheumatoid arthritis                          | 1,025.99<br>(747.31 to 1,326.03)           | 1,607.57<br>(1,107.95 to 2,215.62)          | 1,431.62<br>(994.93 to 1,944.03)           | 1,673.20<br>(1,155.92 to 2,323.07)          | 80.33<br>(59.22 to 104.41)          | 148.53<br>(103.51 to 205.99)        | 134.94<br>(93.80 to 183.72)         | 148.93<br>(102.71 to 207.19)        |
| Other musculoskeletal disorders               | 2,333.55<br>(1,940.64 to 2,791.13)         | 3,535.61<br>(2,873.78 to 4,295.65)          | 3,556.91<br>(2,912.81 to 4,319.40)         | 3,328.61<br>(2,711.65 to 4,054.59)          | 192.64<br>(154.32 to 227.87)        | 353.76<br>(268.18 to 440.79)        | 365.49<br>(281.41 to 451.88)        | 318.01<br>(238.61 to 399.62)        |
| <b>Other non-communicable diseases</b>        | <b>9,526.44</b><br>(7,906.04 to 11,231.90) | <b>10,628.09</b><br>(8,109.82 to 13,130.06) | <b>9,780.44</b><br>(7,443.59 to 12,086.16) | <b>10,951.67</b><br>(8,428.89 to 13,618.26) | <b>225.96</b><br>(160.10 to 272.50) | <b>444.68</b><br>(247.89 to 575.29) | <b>443.08</b><br>(240.98 to 573.98) | <b>417.24</b><br>(240.04 to 541.61) |
| Congenital birth defects                      | 7,966.94<br>(6,544.93 to 10,482.57)        | 7,366.17<br>(5,744.01 to 9,794.66)          | 6,556.98<br>(5,051.71 to 8,851.69)         | 7,849.33<br>(5,984.35 to 10,610.02)         | 119.18<br>(100.08 to 155.91)        | 120.91<br>(96.94 to 160.81)         | 110.16<br>(88.41 to 145.65)         | 126.90<br>(100.80 to 169.54)        |
| Neural tube defects                           | 139.81<br>(65.83 to 212.17)                | 64.66<br>(29.43 to 114.58)                  | 53.39<br>(23.45 to 95.47)                  | 71.53<br>(30.66 to 129.39)                  | 1.74<br>(0.89 to 2.57)              | 0.87<br>(0.45 to 1.44)              | 0.72<br>(0.38 to 1.21)              | 0.96<br>(0.48 to 1.64)              |
| Congenital heart anomalies                    | 2,711.77<br>(2,082.94 to 3,400.72)         | 1,729.62<br>(1,206.65 to 2,426.63)          | 1,403.09<br>(951.64 to 1,979.98)           | 1,923.84<br>(1,314.04 to 2,778.75)          | 38.19<br>(30.38 to 48.99)           | 25.37<br>(17.96 to 37.07)           | 20.68<br>(14.42 to 30.95)           | 28.05<br>(19.49 to 40.78)           |
| Orofacial clefts                              | 6.44<br>(3.24 to 14.78)                    | 3.94<br>(1.63 to 9.84)                      | 3.04<br>(1.25 to 7.98)                     | 4.49<br>(1.78 to 11.66)                     | 0.07<br>(0.04 to 0.17)              | 0.05<br>(0.02 to 0.11)              | 0.04<br>(0.01 to 0.09)              | 0.05<br>(0.02 to 0.13)              |
| Down syndrome                                 | 1,031.60<br>(725.74 to 1,332.27)           | 1,411.15<br>(989.22 to 1,762.12)            | 1,427.62<br>(1,015.08 to 1,776.57)         | 1,398.67<br>(967.97 to 1,741.15)            | 25.31<br>(17.80 to 30.61)           | 37.90<br>(26.54 to 47.73)           | 38.46<br>(27.51 to 48.11)           | 37.36<br>(26.18 to 46.98)           |
| Other chromosomal abnormalities               | 1,328.56<br>(736.33 to 2,692.96)           | 2,007.11<br>(1,258.06 to 3,458.49)          | 1,842.25<br>(1,162.87 to 3,135.15)         | 2,108.81<br>(1,317.32 to 3,705.69)          | 17.27<br>(9.95 to 34.04)            | 26.92<br>(17.15 to 46.99)           | 24.81<br>(15.89 to 42.05)           | 28.17<br>(18.01 to 48.72)           |
| Congenital musculoskeletal and limb anomalies | 216.43<br>(126.09 to 305.71)               | 163.40<br>(89.00 to 255.36)                 | 138.53<br>(74.15 to 212.09)                | 178.27<br>(96.52 to 278.40)                 | 2.82<br>(1.69 to 3.90)              | 2.26<br>(1.33 to 3.39)              | 1.92<br>(1.11 to 2.84)              | 2.45<br>(1.40 to 3.69)              |
| Urogenital congenital anomalies               | 180.03<br>(93.96 to 274.40)                | 137.90<br>(70.94 to 243.31)                 | 120.05<br>(59.63 to 205.89)                | 148.67<br>(73.27 to 257.87)                 | 2.43<br>(1.39 to 3.65)              | 1.92<br>(1.11 to 3.21)              | 1.68<br>(0.96 to 2.78)              | 2.06<br>(1.16 to 3.46)              |
| Digestive congenital anomalies                | 459.34<br>(175.58 to 659.73)               | 397.21<br>(134.26 to 639.33)                | 329.95<br>(112.73 to 529.89)               | 438.97<br>(147.28 to 710.29)                | 5.59<br>(2.24 to 7.93)              | 4.86<br>(1.78 to 7.69)              | 4.04<br>(1.48 to 6.34)              | 5.36<br>(1.95 to 8.54)              |
| Other congenital birth defects                | 1,892.96<br>(1,315.12 to 3,646.73)         | 1,451.19<br>(939.59 to 2,789.18)            | 1,239.06<br>(792.99 to 2,436.35)           | 1,576.08<br>(1,009.47 to 3,052.54)          | 25.77<br>(18.77 to 47.55)           | 20.78<br>(14.02 to 39.62)           | 17.82<br>(11.95 to 33.95)           | 22.44<br>(14.86 to 42.48)           |
| Skin and subcutaneous diseases                | 1,158.41<br>(435.02 to 1,561.93)           | 2,936.37<br>(1,119.80 to 3,982.25)          | 2,936.49<br>(1,128.65 to 3,974.80)         | 2,750.89<br>(1,044.33 to 3,719.73)          | 102.12<br>(36.16 to 140.40)         | 319.99<br>(111.84 to 445.78)        | 329.59<br>(116.23 to 459.85)        | 286.26<br>(99.94 to 401.92)         |
| Cellulitis                                    | 102.51<br>(58.46 to 228.51)                | 262.75<br>(151.57 to 647.19)                | 267.45<br>(153.19 to 664.33)               | 247.18<br>(143.49 to 606.69)                | 6.87<br>(3.98 to 17.50)             | 23.42<br>(12.00 to 67.00)           | 24.60<br>(12.57 to 70.28)           | 21.00<br>(10.80 to 59.85)           |
| Pyoderma                                      | 852.88<br>(252.61 to 1,226.41)             | 2,357.86<br>(701.54 to 3,392.89)            | 2,362.85<br>(697.97 to 3,403.40)           | 2,205.48<br>(664.20 to 3,155.82)            | 75.70<br>(21.13 to 111.53)          | 259.42<br>(72.91 to 387.61)         | 268.10<br>(75.14 to 401.79)         | 231.63<br>(65.14 to 347.25)         |
| Decubitus ulcer                               | 139.60<br>(62.68 to 217.56)                | 217.18<br>(93.85 to 364.01)                 | 208.73<br>(91.51 to 348.95)                | 204.75<br>(88.66 to 338.31)                 | 14.56<br>(6.16 to 22.87)            | 27.43<br>(10.78 to 46.06)           | 26.99<br>(10.97 to 47.01)           | 24.85<br>(9.85 to 43.29)            |
| Other skin and subcutaneous diseases          | 63.43<br>(29.42 to 99.08)                  | 98.59<br>(46.99 to 165.73)                  | 97.45<br>(46.28 to 163.04)                 | 93.48<br>(44.13 to 154.49)                  | 4.99<br>(2.27 to 7.90)              | 9.72<br>(4.41 to 16.24)             | 9.90<br>(4.56 to 16.61)             | 8.78<br>(3.93 to 14.39)             |
| Sudden infant death syndrome                  | 401.08<br>(274.16 to 567.93)               | 325.54<br>(194.37 to 529.05)                | 286.96<br>(171.63 to 450.11)               | 351.45<br>(205.50 to 566.72)                | 4.66<br>(3.18 to 6.59)              | 3.78<br>(2.26 to 6.14)              | 3.33<br>(1.99 to 5.22)              | 4.08<br>(2.38 to 6.58)              |

|                          |                                          |                                          |                                          |                                          |                                       |                                       |                                       |                                       |
|--------------------------|------------------------------------------|------------------------------------------|------------------------------------------|------------------------------------------|---------------------------------------|---------------------------------------|---------------------------------------|---------------------------------------|
| Injuries                 | 53,730.19<br>(46,624.45 to<br>63,970.37) | 49,185.49<br>(33,830.20 to<br>73,644.75) | 42,599.43<br>(29,963.51 to<br>62,270.77) | 57,678.19<br>(37,537.58 to<br>91,136.46) | 2,233.91<br>(1,908.57 to<br>2,537.83) | 2,922.32<br>(2,096.29 to<br>3,848.78) | 2,781.31<br>(1,976.10 to<br>3,581.53) | 2,990.17<br>(2,125.55 to<br>4,062.80) |
| Transport injuries       | 11,480.68<br>(9,505.12 to<br>13,348.13)  | 8,084.19<br>(3,925.49 to<br>14,716.27)   | 4,418.82<br>(2,221.53 to<br>8,065.93)    | 12,216.23<br>(5,660.62 to<br>23,077.64)  | 316.52<br>(273.48 to<br>366.05)       | 272.22<br>(156.30 to<br>458.42)       | 171.46<br>(101.29 to<br>286.34)       | 378.32<br>(199.38 to<br>675.01)       |
| Road injuries            | 10,508.11<br>(8,682.73 to<br>12,200.72)  | 7,163.36<br>(3,498.58 to<br>13,155.41)   | 3,639.79<br>(1,849.79 to<br>6,675.11)    | 11,095.93<br>(5,101.10 to<br>21,156.01)  | 289.19<br>(249.55 to<br>333.89)       | 241.90<br>(139.55 to<br>405.82)       | 145.15<br>(86.31 to<br>242.90)        | 342.49<br>(180.42 to<br>609.67)       |
| Pedestrian road injuries | 1,440.32<br>(1,033.14 to<br>1,726.01)    | 779.26<br>(444.99 to<br>1,308.65)        | 410.67<br>(244.81 to<br>671.66)          | 1,153.88<br>(616.23 to<br>2,028.90)      | 52.57<br>(41.04 to<br>62.59)          | 39.06<br>(24.58 to<br>61.51)          | 23.44<br>(15.20 to<br>36.86)          | 53.31<br>(30.71 to<br>91.00)          |



| Denmark                                         |                                                               |                                                               |                                                               |                                                               |                                                          |                                                            |                                                            |                                                            |
|-------------------------------------------------|---------------------------------------------------------------|---------------------------------------------------------------|---------------------------------------------------------------|---------------------------------------------------------------|----------------------------------------------------------|------------------------------------------------------------|------------------------------------------------------------|------------------------------------------------------------|
| Cause                                           | YLLs (actual counts)                                          |                                                               |                                                               |                                                               | Deaths (actual counts)                                   |                                                            |                                                            |                                                            |
|                                                 | 2016                                                          | 2040 Forecast                                                 | 2040 Better Scenario                                          | 2040 Worse Scenario                                           | 2016                                                     | 2040 Forecast                                              | 2040 Better Scenario                                       | 2040 Worse Scenario                                        |
| Cyclist road injuries                           | 1,263.08<br>(871.32 to<br>1,536.38)                           | 1,098.96<br>(576.81 to<br>1,941.60)                           | 604.19<br>(333.14 to<br>1,048.63)                             | 1,640.19<br>(809.03 to<br>3,003.50)                           | 39.17<br>(29.46 to<br>47.25)                             | 42.30<br>(24.57 to<br>70.98)                               | 28.69<br>(17.05 to<br>47.51)                               | 56.77<br>(30.77 to<br>99.44)                               |
| Motorcyclist road injuries                      | 1,581.66<br>(853.30 to<br>2,049.42)                           | 1,340.17<br>(561.72 to<br>2,897.08)                           | 884.49<br>(390.54 to<br>1,897.36)                             | 1,859.39<br>(729.48 to<br>4,176.89)                           | 37.20<br>(22.01 to<br>47.01)                             | 35.60<br>(17.21 to<br>70.22)                               | 26.68<br>(13.73 to<br>51.58)                               | 46.31<br>(20.80 to<br>95.13)                               |
| Motor vehicle road injuries                     | 6,154.11<br>(5,115.43 to<br>7,477.59)                         | 3,895.38<br>(1,805.44 to<br>7,517.67)                         | 1,715.72<br>(799.77 to<br>3,369.83)                           | 6,366.01<br>(2,793.17 to<br>12,453.72)                        | 158.53<br>(134.82 to<br>194.69)                          | 123.48<br>(68.25 to<br>217.28)                             | 65.48<br>(37.66 to<br>113.94)                              | 184.02<br>(94.57 to<br>331.53)                             |
| Other road injuries                             | 68.94<br>(41.42 to<br>124.61)                                 | 49.59<br>(21.95 to<br>96.57)                                  | 24.71<br>(0.77 to<br>48.82)                                   | 76.47<br>(32.67 to<br>150.42)                                 | 1.72<br>(0.91 to<br>2.98)                                | 1.46<br>(0.96 to<br>2.63)                                  | 0.85<br>(0.38 to<br>1.54)                                  | 2.08<br>(0.89 to<br>3.88)                                  |
| Other transport injuries                        | 972.57<br>(797.64 to<br>1,185.01)                             | 920.82<br>(453.48 to<br>1,681.49)                             | 779.03<br>(386.04 to<br>1,427.86)                             | 1,120.30<br>(525.96 to<br>2,061.93)                           | 27.33<br>(22.71 to<br>32.60)                             | 30.31<br>(16.36 to<br>53.65)                               | 26.30<br>(14.16 to<br>46.27)                               | 35.82<br>(18.52 to<br>65.14)                               |
| <b>Unintentional injuries</b>                   | <b>15,993.83</b><br><b>(12,594.71 to</b><br><b>18,353.04)</b> | <b>18,795.59</b><br><b>(13,814.40 to</b><br><b>23,012.67)</b> | <b>18,275.89</b><br><b>(13,275.44 to</b><br><b>22,526.26)</b> | <b>18,121.98</b><br><b>(13,135.79 to</b><br><b>22,269.21)</b> | <b>1,139.09</b><br><b>(772.77 to</b><br><b>1,327.78)</b> | <b>1,906.16</b><br><b>(1,193.79 to</b><br><b>2,367.26)</b> | <b>1,929.49</b><br><b>(1,220.51 to</b><br><b>2,382.02)</b> | <b>1,723.41</b><br><b>(1,075.10 to</b><br><b>2,161.34)</b> |
| Falls                                           | 7,963.02<br>(6,063.36 to<br>9,247.28)                         | 12,413.08<br>(8,654.07 to<br>15,104.37)                       | 12,300.48<br>(8,499.58 to<br>15,013.34)                       | 11,577.00<br>(8,035.00 to<br>14,092.67)                       | 760.53<br>(471.37 to<br>901.30)                          | 1,495.88<br>(877.24 to<br>1,886.98)                        | 1,526.32<br>(908.16 to<br>1,923.08)                        | 1,331.19<br>(770.57 to<br>1,703.39)                        |
| Drowning                                        | 1,289.67<br>(1,101.84 to<br>1,474.90)                         | 834.14<br>(570.49 to<br>1,251.01)                             | 757.94<br>(518.95 to<br>1,151.99)                             | 922.16<br>(618.14 to<br>1,423.25)                             | 35.48<br>(30.73 to<br>40.45)                             | 27.82<br>(19.67 to<br>40.66)                               | 25.87<br>(18.35 to<br>37.74)                               | 29.98<br>(20.44 to<br>45.19)                               |
| Fire, heat, and hot substances                  | 1,785.81<br>(1,203.54 to<br>2,113.68)                         | 1,234.27<br>(764.63 to<br>1,823.71)                           | 1,116.91<br>(689.18 to<br>1,634.55)                           | 1,340.06<br>(810.70 to<br>2,031.56)                           | 93.99<br>(59.79 to<br>111.74)                            | 89.20<br>(52.48 to<br>126.81)                              | 84.71<br>(50.28 to<br>119.87)                              | 90.56<br>(51.32 to<br>136.70)                              |
| Poisonings                                      | 337.63<br>(266.64 to<br>433.26)                               | 153.86<br>(93.10 to<br>259.88)                                | 131.17<br>(79.75 to<br>225.55)                                | 176.61<br>(102.37 to<br>306.84)                               | 9.59<br>(7.53 to<br>12.34)                               | 5.49<br>(3.64 to<br>8.49)                                  | 4.87<br>(3.24 to<br>7.61)                                  | 6.01<br>(3.83 to<br>9.48)                                  |
| Exposure to mechanical forces                   | 1,193.87<br>(759.17 to<br>1,448.56)                           | 907.68<br>(575.35 to<br>1,226.97)                             | 827.87<br>(525.84 to<br>1,111.05)                             | 926.36<br>(580.20 to<br>1,245.62)                             | 45.27<br>(29.46 to<br>54.25)                             | 47.11<br>(30.59 to<br>59.21)                               | 45.23<br>(29.85 to<br>56.57)                               | 44.79<br>(28.99 to<br>56.14)                               |
| Unintentional firearm injuries                  | 102.44<br>(82.90 to<br>128.21)                                | 77.88<br>(56.27 to<br>107.44)                                 | 72.41<br>(52.19 to<br>99.53)                                  | 78.98<br>(57.14 to<br>108.65)                                 | 3.64<br>(3.04 to<br>4.38)                                | 3.89<br>(3.04 to<br>4.80)                                  | 3.83<br>(2.99 to<br>4.74)                                  | 3.66<br>(2.86 to<br>4.51)                                  |
| Unintentional suffocation                       | 100.66<br>(71.01 to<br>140.78)                                | 69.38<br>(46.22 to<br>101.69)                                 | 62.99<br>(41.00 to<br>93.73)                                  | 72.93<br>(48.53 to<br>108.08)                                 | 1.73<br>(1.34 to<br>2.25)                                | 1.41<br>(0.99 to<br>1.89)                                  | 1.31<br>(0.91 to<br>1.77)                                  | 1.43<br>(1.02 to<br>1.97)                                  |
| Other exposure to mechanical forces             | 990.77<br>(581.53 to<br>1,232.56)                             | 760.42<br>(450.93 to<br>1,026.38)                             | 692.47<br>(405.76 to<br>938.37)                               | 774.46<br>(450.02 to<br>1,036.72)                             | 39.89<br>(24.29 to<br>48.38)                             | 41.82<br>(26.08 to<br>52.89)                               | 40.09<br>(25.28 to<br>50.65)                               | 39.70<br>(24.70 to<br>50.42)                               |
| Adverse effects of medical treatment            | 1,162.34<br>(628.84 to<br>1,546.41)                           | 1,190.83<br>(628.76 to<br>1,661.55)                           | 1,170.60<br>(628.59 to<br>1,634.08)                           | 1,139.32<br>(603.98 to<br>1,583.26)                           | 83.04<br>(43.38 to<br>112.05)                            | 108.20<br>(55.89 to<br>151.28)                             | 109.97<br>(56.58 to<br>154.18)                             | 98.26<br>(49.88 to<br>137.83)                              |
| Animal contact                                  | 103.91<br>(77.23 to<br>135.33)                                | 129.94<br>(94.47 to<br>170.50)                                | 120.51<br>(87.31 to<br>158.52)                                | 132.22<br>(96.54 to<br>175.33)                                | 3.81<br>(2.82 to<br>4.85)                                | 3.79<br>(4.43 to<br>7.46)                                  | 5.55<br>(4.25 to<br>7.24)                                  | 5.62<br>(4.25 to<br>7.33)                                  |
| Venomous animal contact                         | 39.09<br>(24.49 to<br>51.22)                                  | 43.91<br>(25.95 to<br>59.90)                                  | 41.29<br>(24.59 to<br>56.52)                                  | 44.61<br>(26.65 to<br>61.35)                                  | 1.21<br>(0.65 to<br>1.60)                                | 1.61<br>(0.90 to<br>2.18)                                  | 1.55<br>(0.87 to<br>2.09)                                  | 1.58<br>(0.89 to<br>2.14)                                  |
| Non-venomous animal contact                     | 64.83<br>(49.59 to<br>92.14)                                  | 86.03<br>(63.98 to<br>119.13)                                 | 79.21<br>(58.47 to<br>110.22)                                 | 87.61<br>(64.70 to<br>122.74)                                 | 2.60<br>(2.02 to<br>3.70)                                | 4.18<br>(3.28 to<br>5.87)                                  | 4.00<br>(3.15 to<br>5.72)                                  | 4.04<br>(3.11 to<br>5.71)                                  |
| Foreign body                                    | 1,536.56<br>(1,303.46 to<br>1,954.17)                         | 1,372.65<br>(1,090.69 to<br>1,763.86)                         | 1,349.28<br>(1,068.74 to<br>1,731.47)                         | 1,343.43<br>(1,073.32 to<br>1,721.58)                         | 72.26<br>(59.68 to<br>84.83)                             | 84.23<br>(66.74 to<br>101.85)                              | 86.82<br>(68.61 to<br>105.36)                              | 77.05<br>(60.83 to<br>93.51)                               |
| Pulmonary aspiration and foreign body in airway | 1,494.68<br>(1,256.99 to<br>1,910.85)                         | 1,323.91<br>(1,046.95 to<br>1,709.86)                         | 1,299.21<br>(1,020.22 to<br>1,674.46)                         | 1,296.47<br>(1,029.38 to<br>1,677.59)                         | 70.75<br>(58.03 to<br>83.25)                             | 81.63<br>(64.18 to<br>99.03)                               | 84.03<br>(65.79 to<br>101.99)                              | 74.70<br>(58.54 to<br>90.78)                               |

|                                             |                                                               |                                                               |                                                               |                                                               |                                                        |                                                        |                                                        |                                                        |
|---------------------------------------------|---------------------------------------------------------------|---------------------------------------------------------------|---------------------------------------------------------------|---------------------------------------------------------------|--------------------------------------------------------|--------------------------------------------------------|--------------------------------------------------------|--------------------------------------------------------|
|                                             | 41.88<br>(33.75 to<br>69.98)                                  | 48.74<br>(35.88 to<br>73.16)                                  | 50.07<br>(36.69 to<br>73.90)                                  | 46.96<br>(34.76 to<br>71.32)                                  | 1.51<br>(1.14 to<br>2.14)                              | 2.60<br>(1.76 to<br>3.39)                              | 2.79<br>(1.88 to<br>3.62)                              | 2.35<br>(1.62 to<br>3.07)                              |
| Foreign body in other body part             |                                                               |                                                               |                                                               |                                                               |                                                        |                                                        |                                                        |                                                        |
|                                             | 421.79<br>(259.89 to<br>589.38)                               | 431.65<br>(248.30 to<br>594.92)                               | 397.33<br>(227.88 to<br>557.60)                               | 427.08<br>(244.73 to<br>598.40)                               | 28.74<br>(17.27 to<br>40.07)                           | 36.97<br>(21.52 to<br>51.70)                           | 35.51<br>(20.46 to<br>49.64)                           | 34.34<br>(19.56 to<br>47.64)                           |
| Environmental heat and cold exposure        |                                                               |                                                               |                                                               |                                                               |                                                        |                                                        |                                                        |                                                        |
|                                             | 199.21<br>(164.90 to<br>235.67)                               | 127.49<br>(93.31 to<br>173.22)                                | 103.81<br>(77.01 to<br>139.19)                                | 137.73<br>(100.90 to<br>190.67)                               | 6.40<br>(5.43 to<br>7.54)                              | 5.47<br>(4.30 to<br>6.94)                              | 4.62<br>(3.71 to<br>5.81)                              | 5.61<br>(4.39 to<br>7.30)                              |
| Other unintentional injuries                |                                                               |                                                               |                                                               |                                                               |                                                        |                                                        |                                                        |                                                        |
| <b>Self-harm and interpersonal violence</b> | <b>26,229.64</b><br><b>(21,365.47 to</b><br><b>38,770.62)</b> | <b>22,291.45</b><br><b>(11,626.38 to</b><br><b>40,368.65)</b> | <b>19,890.47</b><br><b>(10,680.65 to</b><br><b>35,791.94)</b> | <b>27,325.75</b><br><b>(13,470.63 to</b><br><b>51,186.72)</b> | <b>777.74</b><br><b>(641.72 to</b><br><b>1,093.68)</b> | <b>743.61</b><br><b>(416.26 to</b><br><b>1,286.88)</b> | <b>680.02</b><br><b>(389.50 to</b><br><b>1,145.43)</b> | <b>888.11</b><br><b>(469.62 to</b><br><b>1,570.45)</b> |

| Denmark                                                                             |                                         |                                         |                                         |                                         |                                      |                                      |                                      |                                      |
|-------------------------------------------------------------------------------------|-----------------------------------------|-----------------------------------------|-----------------------------------------|-----------------------------------------|--------------------------------------|--------------------------------------|--------------------------------------|--------------------------------------|
| Cause                                                                               | YLLs (actual counts)                    |                                         |                                         |                                         | Deaths (actual counts)               |                                      |                                      |                                      |
|                                                                                     | 2016                                    | 2040 Forecast                           | 2040 Better Scenario                    | 2040 Worse Scenario                     | 2016                                 | 2040 Forecast                        | 2040 Better Scenario                 | 2040 Worse Scenario                  |
| Self-harm                                                                           | 24,200.08<br>(19,537.30 to 37,410.21)   | 21,191.40<br>(10,818.78 to 38,647.85)   | 18,898.89<br>(9,833.35 to 34,473.47)    | 26,098.82<br>(12,420.26 to 49,330.07)   | 730.09<br>(601.99 to 1,055.25)       | 713.73<br>(392.80 to 1,248.59)       | 652.51<br>(366.20 to 1,112.34)       | 855.38<br>(437.49 to 1,527.40)       |
| Self-harm by firearm                                                                | 2,319.09<br>(1,451.07 to 4,022.73)      | 1,500.82<br>(662.13 to 3,136.18)        | 1,291.99<br>(582.04 to 2,755.94)        | 1,868.87<br>(749.78 to 4,160.76)        | 72.32<br>(47.16 to 120.42)           | 52.85<br>(25.05 to 107.22)           | 46.70<br>(22.03 to 94.16)            | 63.95<br>(27.48 to 133.81)           |
| Self-harm by other specified means                                                  | 21,880.99<br>(17,700.66 to 34,119.54)   | 19,690.57<br>(10,044.95 to 35,544.76)   | 17,606.90<br>(9,182.40 to 31,915.92)    | 24,229.95<br>(11,596.21 to 45,566.98)   | 657.78<br>(540.55 to 957.99)         | 660.88<br>(365.00 to 1,143.43)       | 605.82<br>(342.22 to 1,040.66)       | 791.42<br>(408.46 to 1,404.21)       |
| Interpersonal violence                                                              | 2,029.56<br>(1,345.63 to 2,845.68)      | 1,100.05<br>(674.97 to 1,735.30)        | 991.58<br>(604.12 to 1,586.28)          | 1,226.93<br>(745.86 to 2,000.36)        | 47.65<br>(33.75 to 66.80)            | 29.88<br>(19.83 to 46.28)            | 27.51<br>(18.59 to 42.81)            | 32.73<br>(21.30 to 52.50)            |
| Physical violence by firearm                                                        | 383.85<br>(193.54 to 662.10)            | 186.34<br>(97.25 to 347.30)             | 163.80<br>(83.56 to 300.79)             | 198.37<br>(99.29 to 368.52)             | 8.01<br>(4.71 to 14.77)              | 4.26<br>(2.44 to 8.37)               | 3.79<br>(2.15 to 7.41)               | 4.47<br>(2.47 to 8.76)               |
| Physical violence by sharp object                                                   | 559.52<br>(296.80 to 750.80)            | 318.20<br>(175.29 to 492.69)            | 286.13<br>(159.59 to 447.48)            | 333.54<br>(183.00 to 520.72)            | 13.36<br>(8.15 to 18.63)             | 8.87<br>(5.73 to 13.39)              | 8.17<br>(5.33 to 12.57)              | 9.02<br>(5.66 to 14.14)              |
| Physical violence by other means                                                    | 1,086.18<br>(732.71 to 1,655.98)        | 595.51<br>(351.49 to 1,038.74)          | 541.66<br>(318.58 to 952.85)            | 695.02<br>(403.36 to 1,248.92)          | 26.27<br>(17.70 to 39.62)            | 16.75<br>(10.13 to 29.14)            | 15.54<br>(9.51 to 26.84)             | 19.25<br>(11.26 to 33.48)            |
| <b>Forces of nature, conflict and terrorism, and executions and police conflict</b> | <b>26.04</b><br><b>(22.89 to 29.17)</b> | <b>14.26</b><br><b>(0.00 to 134.70)</b> | <b>14.25</b><br><b>(0.00 to 134.47)</b> | <b>14.23</b><br><b>(0.00 to 134.42)</b> | <b>0.56</b><br><b>(0.50 to 0.63)</b> | <b>0.34</b><br><b>(0.00 to 3.33)</b> | <b>0.34</b><br><b>(0.00 to 3.40)</b> | <b>0.33</b><br><b>(0.00 to 3.24)</b> |
| Exposure to forces of nature                                                        | 0.00<br>(0.00 to 0.00)                  | 7.92<br>(0.00 to 53.62)                 | 7.89<br>(0.00 to 53.55)                 | 7.89<br>(0.00 to 53.51)                 | 0.00<br>(0.00 to 0.00)               | 0.21<br>(0.00 to 1.44)               | 0.21<br>(0.00 to 1.40)               | 0.20<br>(0.00 to 1.42)               |
| Conflict and terrorism                                                              | 0.00<br>(0.00 to 0.00)                  | 6.34<br>(0.00 to 47.24)                 | 6.32<br>(0.00 to 47.02)                 | 6.34<br>(0.00 to 47.39)                 | 0.00<br>(0.00 to 0.00)               | 0.13<br>(0.00 to 0.74)               | 0.13<br>(0.00 to 0.74)               | 0.12<br>(0.00 to 0.74)               |
| Executions and police conflict                                                      | 26.04<br>(22.89 to 29.17)               | 0.00<br>(0.00 to 0.00)                  | 0.00<br>(0.00 to 0.00)                  | 0.00<br>(0.00 to 0.00)                  | 0.56<br>(0.50 to 0.63)               | 0.00<br>(0.00 to 0.00)               | 0.00<br>(0.00 to 0.00)               | 0.00<br>(0.00 to 0.00)               |

| Finland                                                           |                                          |                                          |                                          |                                            |                                       |                                       |                                       |                                       |
|-------------------------------------------------------------------|------------------------------------------|------------------------------------------|------------------------------------------|--------------------------------------------|---------------------------------------|---------------------------------------|---------------------------------------|---------------------------------------|
| Cause                                                             | YLLs (actual counts)                     |                                          |                                          |                                            | Deaths (actual counts)                |                                       |                                       |                                       |
|                                                                   | 2016                                     | 2040 Forecast                            | 2040 Better Scenario                     | 2040 Worse Scenario                        | 2016                                  | 2040 Forecast                         | 2040 Better Scenario                  | 2040 Worse Scenario                   |
| All causes                                                        | 735,894.24<br>(684,536.51 to 784,858.13) | 759,009.75<br>(641,300.05 to 899,941.03) | 662,093.50<br>(567,052.35 to 768,326.76) | 896,961.76<br>(748,470.27 to 1,069,519.62) | 51,791.63<br>(48,379.13 to 54,798.52) | 72,750.74<br>(62,975.39 to 87,924.07) | 65,633.87<br>(56,952.05 to 78,331.51) | 81,681.34<br>(69,833.74 to 98,061.54) |
| Communicable, maternal, neonatal, and nutritional diseases        | 16,183.79<br>(14,298.84 to 18,270.24)    | 23,058.69<br>(14,611.66 to 36,700.20)    | 21,579.45<br>(13,879.59 to 33,927.84)    | 25,441.39<br>(15,638.98 to 42,206.72)      | 1,174.20<br>(1,006.88 to 1,362.43)    | 2,808.25<br>(1,605.16 to 4,758.62)    | 2,786.94<br>(1,647.33 to 4,644.72)    | 2,906.22<br>(1,601.14 to 5,199.75)    |
| HIV/AIDS and tuberculosis                                         | 943.94<br>(844.17 to 1,059.12)           | 518.17<br>(282.10 to 946.39)             | 342.47<br>(186.29 to 598.94)             | 760.41<br>(408.62 to 1,420.50)             | 60.24<br>(52.69 to 69.05)             | 47.79<br>(22.36 to 97.03)             | 33.90<br>(17.00 to 66.40)             | 65.62<br>(29.58 to 134.55)            |
| Tuberculosis                                                      | 696.94<br>(596.54 to 813.48)             | 441.57<br>(211.78 to 862.09)             | 304.09<br>(155.23 to 556.20)             | 621.80<br>(280.05 to 1,277.85)             | 53.88<br>(46.23 to 62.69)             | 46.50<br>(21.34 to 95.97)             | 33.26<br>(16.23 to 65.79)             | 63.20<br>(27.40 to 132.67)            |
| HIV/AIDS                                                          | 247.00<br>(235.83 to 258.75)             | 76.60<br>(34.39 to 132.35)               | 38.38<br>(18.00 to 67.30)                | 138.61<br>(67.68 to 223.78)                | 6.36<br>(6.05 to 6.66)                | 1.29<br>(0.51 to 2.44)                | 0.64<br>(0.26 to 1.23)                | 2.41<br>(1.04 to 4.16)                |
| Diarrhea, lower respiratory, and other common infectious diseases | 10,209.97<br>(8,900.86 to 11,734.95)     | 18,914.01<br>(11,146.56 to 32,078.13)    | 17,967.01<br>(10,800.43 to 30,124.02)    | 20,733.14<br>(11,810.00 to 36,601.01)      | 1,011.16<br>(847.39 to 1,196.22)      | 2,645.76<br>(1,471.16 to 4,527.25)    | 2,638.91<br>(1,527.84 to 4,448.55)    | 2,726.71<br>(1,461.39 to 4,986.23)    |
| Diarrheal diseases                                                | 528.27<br>(467.63 to 595.21)             | 1,881.78<br>(1,055.14 to 3,412.45)       | 2,561.75<br>(1,617.90 to 4,294.98)       | 1,601.78<br>(884.39 to 2,875.10)           | 53.03<br>(46.10 to 61.17)             | 270.21<br>(146.71 to 502.94)          | 380.49<br>(232.93 to 643.83)          | 223.60<br>(116.26 to 414.92)          |
| Intestinal infectious diseases                                    | 2.66<br>(1.21 to 5.07)                   | 1.80<br>(0.76 to 3.74)                   | 1.76<br>(0.74 to 3.69)                   | 1.77<br>(0.76 to 3.63)                     | 0.17<br>(0.07 to 0.36)                | 0.17<br>(0.07 to 0.39)                | 0.17<br>(0.07 to 0.40)                | 0.16<br>(0.06 to 0.37)                |
| Typhoid fever                                                     | 0.24<br>(0.07 to 0.58)                   | 0.22<br>(0.08 to 0.49)                   | 0.24<br>(0.09 to 0.52)                   | 0.21<br>(0.07 to 0.48)                     | 0.01<br>(0.00 to 0.01)                | 0.01<br>(0.00 to 0.01)                | 0.01<br>(0.00 to 0.01)                | 0.01<br>(0.00 to 0.01)                |
| Paratyphoid fever                                                 | 0.12<br>(0.04 to 0.33)                   | 0.07<br>(0.02 to 0.18)                   | 0.06<br>(0.02 to 0.15)                   | 0.07<br>(0.02 to 0.19)                     | 0.00<br>(0.00 to 0.01)                | 0.00<br>(0.00 to 0.00)                | 0.00<br>(0.00 to 0.00)                | 0.00<br>(0.00 to 0.00)                |
| Other intestinal infectious diseases                              | 2.29<br>(0.92 to 4.60)                   | 1.52<br>(0.52 to 3.27)                   | 1.46<br>(0.49 to 3.18)                   | 1.49<br>(0.51 to 3.27)                     | 0.16<br>(0.06 to 0.34)                | 0.16<br>(0.05 to 0.38)                | 0.17<br>(0.05 to 0.39)                | 0.15<br>(0.05 to 0.36)                |
| Lower respiratory infections                                      | 8,796.02<br>(7,517.43 to 10,279.75)      | 16,435.06<br>(9,258.27 to 28,732.01)     | 14,837.14<br>(8,440.85 to 26,168.19)     | 18,512.73<br>(10,038.39 to 33,971.00)      | 923.81<br>(763.18 to 1,105.34)        | 2,346.35<br>(1,258.30 to 4,190.42)    | 2,229.36<br>(1,206.92 to 3,927.82)    | 2,474.62<br>(1,287.67 to 4,588.52)    |
| Upper respiratory infections                                      | 7.80<br>(4.12 to 13.33)                  | 5.38<br>(2.24 to 10.77)                  | 4.14<br>(1.75 to 8.29)                   | 5.78<br>(2.51 to 12.20)                    | 0.41<br>(0.20 to 0.73)                | 0.42<br>(0.14 to 0.94)                | 0.34<br>(0.11 to 0.76)                | 0.43<br>(0.14 to 0.98)                |
| Otitis media                                                      | 3.53<br>(2.11 to 5.83)                   | 0.68<br>(0.17 to 1.96)                   | 0.75<br>(0.19 to 2.19)                   | 0.62<br>(0.16 to 1.79)                     | 0.35<br>(0.20 to 0.58)                | 0.08<br>(0.02 to 0.25)                | 0.09<br>(0.02 to 0.28)                | 0.07<br>(0.02 to 0.23)                |
| Meningitis                                                        | 466.04<br>(398.56 to 619.92)             | 236.66<br>(169.98 to 343.58)             | 216.91<br>(153.41 to 312.01)             | 252.94<br>(180.66 to 364.52)               | 17.02<br>(14.77 to 21.00)             | 10.38<br>(7.57 to 14.28)              | 9.98<br>(7.24 to 13.91)               | 10.34<br>(7.59 to 14.09)              |
| Pneumococcal meningitis                                           | 152.25<br>(130.13 to 198.48)             | 82.55<br>(58.09 to 119.24)               | 84.41<br>(58.89 to 123.33)               | 81.88<br>(57.71 to 118.78)                 | 6.23<br>(5.34 to 7.68)                | 4.34<br>(3.08 to 5.97)                | 4.61<br>(3.25 to 6.41)                | 4.15<br>(2.97 to 5.71)                |
| H influenzae type B meningitis                                    | 34.14<br>(28.23 to 45.43)                | 48.74<br>(28.44 to 76.35)                | 45.60<br>(27.52 to 70.44)                | 59.44<br>(31.36 to 98.49)                  | 1.19<br>(1.01 to 1.48)                | 1.16<br>(0.81 to 1.59)                | 1.17<br>(0.83 to 1.62)                | 1.24<br>(0.83 to 1.77)                |
| Meningococcal meningitis                                          | 185.81<br>(155.92 to 254.92)             | 67.63<br>(44.40 to 105.23)               | 56.01<br>(37.12 to 87.98)                | 71.78<br>(47.01 to 114.23)                 | 5.73<br>(4.97 to 7.17)                | 2.80<br>(1.95 to 3.95)                | 2.43<br>(1.73 to 3.45)                | 2.85<br>(1.99 to 4.03)                |
| Other meningitis                                                  | 93.84<br>(79.76 to 123.31)               | 37.74<br>(25.31 to 56.94)                | 30.90<br>(20.99 to 46.63)                | 39.83<br>(26.66 to 61.45)                  | 3.87<br>(3.28 to 4.73)                | 2.07<br>(1.40 to 2.98)                | 1.77<br>(1.21 to 2.54)                | 2.10<br>(1.44 to 3.04)                |
| Encephalitis                                                      | 373.62<br>(223.30 to 465.44)             | 317.29<br>(179.44 to 454.18)             | 313.85<br>(177.44 to 453.66)             | 315.97<br>(177.41 to 450.18)               | 14.17<br>(8.24 to 17.67)              | 15.27<br>(8.45 to 22.02)              | 15.71<br>(8.78 to 22.76)              | 14.65<br>(8.08 to 20.94)              |

|                |                           |                             |                            |                             |                           |                           |                           |                           |
|----------------|---------------------------|-----------------------------|----------------------------|-----------------------------|---------------------------|---------------------------|---------------------------|---------------------------|
| Diphtheria     | 0.95<br>(0.62 to<br>1.42) | 0.20<br>(0.11 to<br>0.32)   | 0.18<br>(0.10 to<br>0.30)  | 0.26<br>(0.14 to<br>0.46)   | 0.02<br>(0.01 to<br>0.03) | 0.00<br>(0.00 to<br>0.01) | 0.00<br>(0.00 to<br>0.01) | 0.00<br>(0.00 to<br>0.01) |
| Whooping cough | 2.89<br>(0.74 to<br>5.84) | 1.26<br>(0.25 to<br>3.40)   | 0.47<br>(0.12 to<br>1.18)  | 4.29<br>(0.69 to<br>11.47)  | 0.04<br>(0.01 to<br>0.07) | 0.02<br>(0.00 to<br>0.04) | 0.01<br>(0.00 to<br>0.01) | 0.05<br>(0.01 to<br>0.13) |
| Tetanus        | 2.69<br>(1.80 to<br>3.50) | 0.21<br>(0.13 to<br>0.33)   | 0.19<br>(0.11 to<br>0.30)  | 0.32<br>(0.18 to<br>0.55)   | 0.10<br>(0.06 to<br>0.13) | 0.01<br>(0.00 to<br>0.01) | 0.01<br>(0.00 to<br>0.01) | 0.01<br>(0.01 to<br>0.01) |
| Measles        | 0.80<br>(0.59 to<br>1.05) | 10.28<br>(0.08 to<br>70.28) | 8.21<br>(0.07 to<br>50.34) | 13.48<br>(0.09 to<br>96.19) | 0.01<br>(0.01 to<br>0.02) | 0.16<br>(0.00 to<br>0.96) | 0.13<br>(0.00 to<br>0.76) | 0.20<br>(0.00 to<br>1.28) |

| Finland                                               |                                       |                                      |                                      |                                      |                                  |                                  |                                  |                                  |
|-------------------------------------------------------|---------------------------------------|--------------------------------------|--------------------------------------|--------------------------------------|----------------------------------|----------------------------------|----------------------------------|----------------------------------|
| Cause                                                 | YLLs (actual counts)                  |                                      |                                      |                                      | Deaths (actual counts)           |                                  |                                  |                                  |
|                                                       | 2016                                  | 2040 Forecast                        | 2040 Better Scenario                 | 2040 Worse Scenario                  | 2016                             | 2040 Forecast                    | 2040 Better Scenario             | 2040 Worse Scenario              |
| Varicella and herpes zoster                           | 24.71<br>(11.87 to<br>36.41)          | 23.40<br>(10.31 to<br>37.86)         | 21.65<br>(9.77 to<br>35.10)          | 23.20<br>(10.24 to<br>37.79)         | 2.04<br>(0.92 to<br>2.96)        | 2.70<br>(1.19 to<br>4.70)        | 2.61<br>(1.18 to<br>4.64)        | 2.57<br>(1.14 to<br>4.55)        |
| <b>Neglected tropical diseases and malaria</b>        | <b>34.79</b><br>(27.88 to<br>40.27)   | <b>28.20</b><br>(20.39 to<br>37.19)  | <b>29.13</b><br>(20.79 to<br>38.68)  | <b>27.79</b><br>(20.24 to<br>36.88)  | <b>1.02</b><br>(0.69 to<br>1.20) | <b>1.01</b><br>(0.58 to<br>1.42) | <b>1.10</b><br>(0.61 to<br>1.55) | <b>0.95</b><br>(0.56 to<br>1.32) |
| Malaria                                               | 0.00<br>(0.00 to<br>0.00)             | 0.00<br>(0.00 to<br>0.00)            | 0.00<br>(0.00 to<br>0.00)            | 0.00<br>(0.00 to<br>0.00)            | 0.00<br>(0.00 to<br>0.00)        | 0.00<br>(0.00 to<br>0.00)        | 0.00<br>(0.00 to<br>0.00)        | 0.00<br>(0.00 to<br>0.00)        |
| Chagas disease                                        | 0.00<br>(0.00 to<br>0.00)             | 0.00<br>(0.00 to<br>0.00)            | 0.00<br>(0.00 to<br>0.00)            | 0.00<br>(0.00 to<br>0.00)            | 0.00<br>(0.00 to<br>0.00)        | 0.00<br>(0.00 to<br>0.00)        | 0.00<br>(0.00 to<br>0.00)        | 0.00<br>(0.00 to<br>0.00)        |
| Leishmaniasis                                         | 0.00<br>(0.00 to<br>0.00)             | 0.00<br>(0.00 to<br>0.00)            | 0.00<br>(0.00 to<br>0.00)            | 0.00<br>(0.00 to<br>0.00)            | 0.00<br>(0.00 to<br>0.00)        | 0.00<br>(0.00 to<br>0.00)        | 0.00<br>(0.00 to<br>0.00)        | 0.00<br>(0.00 to<br>0.00)        |
| African trypanosomiasis                               | 0.00<br>(0.00 to<br>0.00)             | 0.00<br>(0.00 to<br>0.00)            | 0.00<br>(0.00 to<br>0.00)            | 0.00<br>(0.00 to<br>0.00)            | 0.00<br>(0.00 to<br>0.00)        | 0.00<br>(0.00 to<br>0.00)        | 0.00<br>(0.00 to<br>0.00)        | 0.00<br>(0.00 to<br>0.00)        |
| Schistosomiasis                                       | 0.00<br>(0.00 to<br>0.00)             | 0.00<br>(0.00 to<br>0.00)            | 0.00<br>(0.00 to<br>0.00)            | 0.00<br>(0.00 to<br>0.00)            | 0.00<br>(0.00 to<br>0.00)        | 0.00<br>(0.00 to<br>0.00)        | 0.00<br>(0.00 to<br>0.00)        | 0.00<br>(0.00 to<br>0.00)        |
| Cysticercosis                                         | 3.79<br>(3.21 to<br>4.44)             | 0.99<br>(0.72 to<br>1.34)            | 0.98<br>(0.71 to<br>1.35)            | 0.99<br>(0.72 to<br>1.32)            | 0.14<br>(0.12 to<br>0.16)        | 0.05<br>(0.03 to<br>0.06)        | 0.05<br>(0.03 to<br>0.06)        | 0.04<br>(0.03 to<br>0.06)        |
| Cystic echinococcosis                                 | 0.00<br>(0.00 to<br>0.00)             | 0.00<br>(0.00 to<br>0.00)            | 0.00<br>(0.00 to<br>0.00)            | 0.00<br>(0.00 to<br>0.00)            | 0.00<br>(0.00 to<br>0.00)        | 0.00<br>(0.00 to<br>0.00)        | 0.00<br>(0.00 to<br>0.00)        | 0.00<br>(0.00 to<br>0.00)        |
| Dengue                                                | 0.00<br>(0.00 to<br>0.00)             | 0.00<br>(0.00 to<br>0.00)            | 0.00<br>(0.00 to<br>0.00)            | 0.00<br>(0.00 to<br>0.00)            | 0.00<br>(0.00 to<br>0.00)        | 0.00<br>(0.00 to<br>0.00)        | 0.00<br>(0.00 to<br>0.00)        | 0.00<br>(0.00 to<br>0.00)        |
| Yellow fever                                          | 0.00<br>(0.00 to<br>0.00)             | 0.00<br>(0.00 to<br>0.00)            | 0.00<br>(0.00 to<br>0.00)            | 0.00<br>(0.00 to<br>0.00)            | 0.00<br>(0.00 to<br>0.00)        | 0.00<br>(0.00 to<br>0.00)        | 0.00<br>(0.00 to<br>0.00)        | 0.00<br>(0.00 to<br>0.00)        |
| Rabies                                                | 0.14<br>(0.11 to<br>0.17)             | 0.10<br>(0.07 to<br>0.14)            | 0.10<br>(0.07 to<br>0.13)            | 0.11<br>(0.08 to<br>0.14)            | 0.01<br>(0.00 to<br>0.01)        | 0.01<br>(0.00 to<br>0.01)        | 0.01<br>(0.00 to<br>0.01)        | 0.01<br>(0.00 to<br>0.01)        |
| Intestinal nematode infections                        | 0.00<br>(0.00 to<br>0.00)             | 0.00<br>(0.00 to<br>0.00)            | 0.00<br>(0.00 to<br>0.00)            | 0.00<br>(0.00 to<br>0.00)            | 0.00<br>(0.00 to<br>0.00)        | 0.00<br>(0.00 to<br>0.00)        | 0.00<br>(0.00 to<br>0.00)        | 0.00<br>(0.00 to<br>0.00)        |
| Other neglected tropical diseases                     | 30.87<br>(23.92 to<br>36.06)          | 27.10<br>(19.37 to<br>35.73)         | 28.06<br>(19.74 to<br>37.39)         | 26.70<br>(19.30 to<br>35.32)         | 0.87<br>(0.55 to<br>1.04)        | 0.96<br>(0.53 to<br>1.36)        | 1.05<br>(0.56 to<br>1.49)        | 0.90<br>(0.51 to<br>1.26)        |
| <b>Maternal disorders</b>                             | <b>106.86</b><br>(87.71 to<br>127.60) | <b>88.02</b><br>(54.37 to<br>132.70) | <b>77.38</b><br>(47.45 to<br>118.13) | <b>92.63</b><br>(56.14 to<br>141.62) | <b>2.03</b><br>(1.67 to<br>2.43) | <b>1.64</b><br>(1.03 to<br>2.46) | <b>1.45</b><br>(0.90 to<br>2.19) | <b>1.73</b><br>(1.06 to<br>2.61) |
| Maternal hemorrhage                                   | 13.73<br>(9.76 to<br>18.88)           | 11.18<br>(6.18 to<br>18.81)          | 9.87<br>(5.26 to<br>16.60)           | 11.69<br>(6.32 to<br>19.77)          | 0.26<br>(0.19 to<br>0.35)        | 0.21<br>(0.11 to<br>0.35)        | 0.18<br>(0.10 to<br>0.31)        | 0.22<br>(0.12 to<br>0.37)        |
| Maternal sepsis and other maternal infections         | 6.97<br>(4.77 to<br>9.55)             | 4.76<br>(2.53 to<br>8.33)            | 4.16<br>(2.23 to<br>7.27)            | 5.00<br>(2.68 to<br>8.81)            | 0.13<br>(0.09 to<br>0.18)        | 0.09<br>(0.05 to<br>0.15)        | 0.08<br>(0.04 to<br>0.13)        | 0.09<br>(0.05 to<br>0.16)        |
| Maternal hypertensive disorders                       | 16.18<br>(11.84 to<br>22.45)          | 12.53<br>(6.46 to<br>21.71)          | 10.93<br>(5.76 to<br>19.01)          | 13.15<br>(6.75 to<br>22.95)          | 0.29<br>(0.22 to<br>0.41)        | 0.23<br>(0.12 to<br>0.39)        | 0.20<br>(0.11 to<br>0.34)        | 0.24<br>(0.12 to<br>0.42)        |
| Maternal obstructed labor and uterine rupture         | 2.52<br>(1.49 to<br>3.80)             | 2.01<br>(0.98 to<br>3.67)            | 1.72<br>(0.83 to<br>3.10)            | 2.12<br>(1.04 to<br>3.85)            | 0.05<br>(0.03 to<br>0.08)        | 0.04<br>(0.02 to<br>0.07)        | 0.03<br>(0.02 to<br>0.06)        | 0.04<br>(0.02 to<br>0.08)        |
| Maternal abortion, miscarriage, and ectopic pregnancy | 16.23<br>(12.11 to<br>21.38)          | 13.18<br>(6.84 to<br>22.35)          | 11.47<br>(6.08 to<br>19.64)          | 13.96<br>(7.27 to<br>23.44)          | 0.33<br>(0.25 to<br>0.44)        | 0.27<br>(0.14 to<br>0.46)        | 0.23<br>(0.12 to<br>0.39)        | 0.28<br>(0.15 to<br>0.47)        |

|                                        |                              |                              |                              |                              |                           |                           |                           |                           |
|----------------------------------------|------------------------------|------------------------------|------------------------------|------------------------------|---------------------------|---------------------------|---------------------------|---------------------------|
| Indirect maternal deaths               | 13.02<br>(9.18 to<br>18.05)  | 11.85<br>(6.14 to<br>20.96)  | 10.25<br>(5.25 to<br>18.23)  | 12.57<br>(6.53 to<br>22.31)  | 0.23<br>(0.17 to<br>0.33) | 0.21<br>(0.11 to<br>0.37) | 0.18<br>(0.10 to<br>0.32) | 0.22<br>(0.12 to<br>0.39) |
| Late maternal deaths                   | 3.30<br>(2.18 to<br>4.67)    | 2.22<br>(1.13 to<br>4.01)    | 1.92<br>(0.97 to<br>3.48)    | 2.35<br>(1.19 to<br>4.34)    | 0.06<br>(0.04 to<br>0.09) | 0.04<br>(0.02 to<br>0.08) | 0.04<br>(0.02 to<br>0.06) | 0.04<br>(0.02 to<br>0.08) |
| Maternal deaths aggravated by HIV/AIDS | 0.01<br>(0.00 to<br>0.02)    | 0.03<br>(0.00 to<br>0.08)    | 0.02<br>(0.00 to<br>0.06)    | 0.03<br>(0.01 to<br>0.09)    | 0.00<br>(0.00 to<br>0.00) | 0.00<br>(0.00 to<br>0.00) | 0.00<br>(0.00 to<br>0.00) | 0.00<br>(0.00 to<br>0.00) |
| Other maternal disorders               | 34.92<br>(25.94 to<br>44.59) | 30.27<br>(16.93 to<br>49.74) | 27.04<br>(14.96 to<br>44.52) | 31.76<br>(17.19 to<br>51.27) | 0.67<br>(0.49 to<br>0.85) | 0.56<br>(0.32 to<br>0.92) | 0.50<br>(0.28 to<br>0.81) | 0.59<br>(0.33 to<br>0.97) |

| Finland                                                                 |                                           |                                           |                                         |                                           |                                  |                                  |                                   |                                  |
|-------------------------------------------------------------------------|-------------------------------------------|-------------------------------------------|-----------------------------------------|-------------------------------------------|----------------------------------|----------------------------------|-----------------------------------|----------------------------------|
| Cause                                                                   | YLLs (actual counts)                      |                                           |                                         |                                           | Deaths (actual counts)           |                                  |                                   |                                  |
|                                                                         | 2016                                      | 2040 Forecast                             | 2040 Better Scenario                    | 2040 Worse Scenario                       | 2016                             | 2040 Forecast                    | 2040 Better Scenario              | 2040 Worse Scenario              |
| <b>Neonatal disorders</b>                                               | <b>3,810.93</b><br>(2,759.79 to 5,155.15) | <b>2,271.55</b><br>(1,123.05 to 3,975.71) | <b>1,928.60</b><br>(966.21 to 3,325.84) | <b>2,610.85</b><br>(1,300.39 to 4,494.84) | <b>44.06</b><br>(31.91 to 59.60) | <b>26.27</b><br>(12.99 to 45.95) | <b>22.31</b><br>(11.17 to 38.44)  | <b>30.19</b><br>(15.05 to 51.94) |
| Neonatal preterm birth                                                  | 1,729.15<br>(1,217.30 to 2,377.43)        | 681.54<br>(347.05 to 1,147.38)            | 521.09<br>(268.98 to 870.94)            | 891.17<br>(461.61 to 1,523.55)            | 19.99<br>(14.07 to 27.47)        | 7.88<br>(4.02 to 13.26)          | 6.03<br>(3.11 to 10.07)           | 10.30<br>(5.34 to 17.61)         |
| Neonatal encephalopathy due to birth asphyxia and trauma                | 886.99<br>(609.24 to 1,225.92)            | 367.17<br>(176.63 to 668.32)              | 291.61<br>(143.14 to 513.17)            | 410.56<br>(194.88 to 741.85)              | 10.26<br>(7.05 to 14.17)         | 4.25<br>(2.05 to 7.75)           | 3.38<br>(1.66 to 5.94)            | 4.76<br>(2.26 to 8.58)           |
| Neonatal sepsis and other neonatal infections                           | 224.61<br>(137.30 to 374.39)              | 161.45<br>(64.85 to 332.26)               | 134.28<br>(55.48 to 278.76)             | 177.78<br>(73.92 to 369.43)               | 2.60<br>(1.59 to 4.33)           | 1.87<br>(0.75 to 3.84)           | 1.55<br>(0.64 to 3.22)            | 2.06<br>(0.85 to 4.27)           |
| Hemolytic disease and other neonatal jaundice                           | 26.23<br>(15.22 to 48.26)                 | 11.59<br>(4.49 to 28.33)                  | 9.51<br>(3.71 to 21.77)                 | 12.79<br>(4.95 to 29.44)                  | 0.30<br>(0.18 to 0.56)           | 0.13<br>(0.05 to 0.33)           | 0.11<br>(0.04 to 0.25)            | 0.15<br>(0.06 to 0.34)           |
| Other neonatal disorders                                                | 943.95<br>(625.17 to 1,358.88)            | 1,049.81<br>(448.71 to 1,996.32)          | 972.12<br>(423.47 to 1,849.84)          | 1,118.55<br>(475.04 to 2,139.39)          | 10.91<br>(7.23 to 15.70)         | 12.14<br>(5.19 to 23.07)         | 11.24<br>(4.90 to 21.38)          | 12.93<br>(5.50 to 24.72)         |
| <b>Nutritional deficiencies</b>                                         | <b>175.27</b><br>(155.95 to 195.33)       | <b>131.19</b><br>(99.55 to 169.72)        | <b>132.20</b><br>(99.72 to 172.89)      | <b>126.90</b><br>(96.21 to 164.75)        | <b>11.13</b><br>(9.96 to 12.46)  | <b>12.80</b><br>(9.24 to 17.39)  | <b>13.69</b><br>(9.89 to 18.76)   | <b>11.79</b><br>(8.56 to 16.00)  |
| Protein-energy malnutrition                                             | 46.19<br>(30.67 to 71.66)                 | 41.43<br>(24.68 to 62.62)                 | 46.42<br>(27.98 to 69.75)               | 38.25<br>(22.77 to 58.69)                 | 3.72<br>(2.14 to 5.22)           | 5.41<br>(2.83 to 8.38)           | 6.33<br>(3.39 to 9.67)            | 4.80<br>(2.47 to 7.48)           |
| Iodine deficiency                                                       | 7.72<br>(0.85 to 21.69)                   | 9.15<br>(0.61 to 25.53)                   | 8.90<br>(0.52 to 26.23)                 | 8.96<br>(0.59 to 24.45)                   | 0.44<br>(0.02 to 1.36)           | 0.86<br>(0.02 to 2.98)           | 0.88<br>(0.02 to 3.17)            | 0.81<br>(0.02 to 2.76)           |
| Dietary iron deficiency                                                 | 14.82<br>(12.15 to 18.12)                 | 10.94<br>(7.77 to 15.26)                  | 11.18<br>(7.95 to 15.64)                | 10.88<br>(7.74 to 15.10)                  | 0.39<br>(0.21 to 0.52)           | 0.31<br>(0.21 to 0.45)           | 0.32<br>(0.22 to 0.48)            | 0.30<br>(0.20 to 0.43)           |
| Other nutritional deficiencies                                          | 106.55<br>(76.99 to 127.21)               | 69.67<br>(46.89 to 99.21)                 | 65.70<br>(44.27 to 94.56)               | 68.80<br>(46.84 to 96.86)                 | 6.59<br>(4.90 to 8.17)           | 6.23<br>(3.92 to 9.73)           | 6.16<br>(3.84 to 9.81)            | 5.89<br>(3.77 to 9.09)           |
| <b>Other communicable, maternal, neonatal, and nutritional diseases</b> | <b>902.02</b><br>(798.12 to 1,091.21)     | <b>1,107.55</b><br>(845.28 to 1,460.01)   | <b>1,102.66</b><br>(838.59 to 1,449.00) | <b>1,089.67</b><br>(828.39 to 1,427.90)   | <b>44.56</b><br>(38.47 to 50.57) | <b>72.96</b><br>(54.63 to 97.36) | <b>75.59</b><br>(56.20 to 100.52) | <b>69.23</b><br>(51.78 to 91.66) |
| Sexually transmitted infections excluding HIV                           | 36.04<br>(30.33 to 43.96)                 | 29.50<br>(19.79 to 44.00)                 | 29.14<br>(19.04 to 44.14)               | 28.96<br>(19.43 to 43.26)                 | 2.88<br>(2.39 to 3.49)           | 3.47<br>(2.12 to 5.46)           | 3.56<br>(2.17 to 5.63)            | 3.31<br>(2.04 to 5.27)           |
| Syphilis                                                                | 11.79<br>(9.30 to 15.91)                  | 7.63<br>(5.02 to 11.38)                   | 7.17<br>(4.67 to 10.71)                 | 7.66<br>(5.12 to 11.31)                   | 0.73<br>(0.61 to 0.88)           | 0.80<br>(0.48 to 1.28)           | 0.78<br>(0.48 to 1.26)            | 0.77<br>(0.48 to 1.23)           |
| Chlamydial infection                                                    | 4.96<br>(4.16 to 6.01)                    | 4.67<br>(3.13 to 7.01)                    | 4.71<br>(3.12 to 7.15)                  | 4.54<br>(3.05 to 6.76)                    | 0.47<br>(0.38 to 0.58)           | 0.60<br>(0.36 to 0.94)           | 0.62<br>(0.37 to 0.99)            | 0.57<br>(0.34 to 0.90)           |
| Gonococcal infection                                                    | 14.04<br>(11.67 to 17.22)                 | 12.95<br>(8.51 to 20.57)                  | 13.02<br>(8.39 to 21.05)                | 12.60<br>(8.18 to 19.70)                  | 1.29<br>(1.06 to 1.57)           | 1.61<br>(0.94 to 2.62)           | 1.67<br>(0.98 to 2.75)            | 1.53<br>(0.90 to 2.51)           |
| Other sexually transmitted infections                                   | 5.25<br>(4.41 to 6.36)                    | 4.25<br>(2.86 to 6.24)                    | 4.24<br>(2.79 to 6.35)                  | 4.17<br>(2.84 to 6.09)                    | 0.40<br>(0.33 to 0.48)           | 0.46<br>(0.28 to 0.71)           | 0.48<br>(0.29 to 0.75)            | 0.44<br>(0.27 to 0.66)           |
| Acute hepatitis                                                         | 70.89<br>(61.96 to 81.09)                 | 37.71<br>(25.56 to 53.79)                 | 31.46<br>(21.60 to 45.25)               | 39.73<br>(26.29 to 57.82)                 | 2.67<br>(2.32 to 3.11)           | 1.83<br>(1.21 to 2.63)           | 1.57<br>(1.02 to 2.28)            | 1.89<br>(1.21 to 2.78)           |
| Acute hepatitis A                                                       | 6.28<br>(4.76 to 8.12)                    | 2.63<br>(1.67 to 3.87)                    | 2.29<br>(1.47 to 3.34)                  | 2.75<br>(1.75 to 4.02)                    | 0.16<br>(0.11 to 0.21)           | 0.09<br>(0.05 to 0.15)           | 0.08<br>(0.05 to 0.13)            | 0.09<br>(0.06 to 0.15)           |
| Acute hepatitis B                                                       | 50.14<br>(42.77 to 58.60)                 | 27.32<br>(17.81 to 41.01)                 | 22.58<br>(14.90 to 33.70)               | 28.88<br>(18.37 to 43.87)                 | 1.91<br>(1.59 to 2.28)           | 1.26<br>(0.78 to 1.94)           | 1.06<br>(0.68 to 1.63)            | 1.31<br>(0.80 to 1.99)           |





| Finland                              |                                                 |                                                 |                                                 |                                                 |                                              |                                              |                                              |                                              |
|--------------------------------------|-------------------------------------------------|-------------------------------------------------|-------------------------------------------------|-------------------------------------------------|----------------------------------------------|----------------------------------------------|----------------------------------------------|----------------------------------------------|
| Cause                                | YLLs (actual counts)                            |                                                 |                                                 |                                                 | Deaths (actual counts)                       |                                              |                                              |                                              |
|                                      | 2016                                            | 2040 Forecast                                   | 2040 Better Scenario                            | 2040 Worse Scenario                             | 2016                                         | 2040 Forecast                                | 2040 Better Scenario                         | 2040 Worse Scenario                          |
| <b>Neoplasms</b>                     | <b>205,970.79</b><br>(189,991.64 to 220,265.48) | <b>211,852.43</b><br>(182,104.47 to 244,093.12) | <b>186,686.95</b><br>(161,245.36 to 213,690.90) | <b>248,722.19</b><br>(210,632.07 to 290,933.24) | <b>12,254.90</b><br>(11,350.24 to 13,087.61) | <b>16,341.02</b><br>(14,366.04 to 18,389.29) | <b>14,902.63</b><br>(13,198.39 to 16,722.28) | <b>18,497.74</b><br>(16,069.53 to 21,030.57) |
| Lip and oral cavity cancer           | 2,410.82<br>(2,135.51 to 2,688.31)              | 1,916.32<br>(1,128.11 to 3,037.34)              | 1,310.66<br>(800.48 to 1,980.05)                | 3,121.71<br>(1,764.40 to 5,027.44)              | 132.47<br>(118.89 to 145.90)                 | 135.86<br>(83.04 to 211.40)                  | 95.13<br>(61.03 to 144.55)                   | 215.78<br>(121.53 to 350.54)                 |
| Nasopharynx cancer                   | 352.78<br>(310.37 to 410.12)                    | 346.20<br>(202.45 to 568.83)                    | 224.62<br>(139.37 to 352.47)                    | 584.84<br>(329.57 to 981.52)                    | 20.00<br>(17.64 to 23.10)                    | 25.88<br>(14.65 to 44.44)                    | 17.22<br>(10.33 to 27.49)                    | 43.39<br>(23.67 to 74.22)                    |
| Other pharynx cancer                 | 1,471.68<br>(1,300.28 to 1,645.52)              | 1,162.21<br>(662.88 to 1,887.63)                | 1,052.25<br>(608.18 to 1,691.98)                | 1,473.71<br>(803.46 to 2,389.92)                | 67.58<br>(60.42 to 75.17)                    | 64.71<br>(37.62 to 105.47)                   | 60.03<br>(35.95 to 93.62)                    | 80.75<br>(44.96 to 133.33)                   |
| Esophageal cancer                    | 4,457.46<br>(3,904.54 to 5,057.92)              | 3,955.42<br>(2,422.47 to 6,184.20)              | 2,806.94<br>(1,826.53 to 4,222.19)              | 6,016.88<br>(3,480.96 to 9,833.23)              | 253.14<br>(225.85 to 282.97)                 | 280.30<br>(173.12 to 423.62)                 | 202.01<br>(135.05 to 295.03)                 | 417.78<br>(241.22 to 658.61)                 |
| Stomach cancer                       | 8,861.51<br>(7,997.32 to 9,804.84)              | 7,045.28<br>(5,381.31 to 9,191.42)              | 5,899.97<br>(4,705.86 to 7,372.97)              | 7,517.30<br>(5,651.60 to 9,789.49)              | 561.57<br>(511.10 to 619.03)                 | 590.39<br>(458.44 to 781.02)                 | 508.36<br>(411.61 to 642.04)                 | 614.41<br>(471.08 to 810.74)                 |
| Colon and rectum cancer              | 19,439.51<br>(17,261.36 to 21,821.22)           | 19,982.74<br>(14,167.08 to 28,041.51)           | 17,222.34<br>(12,398.28 to 23,434.31)           | 24,523.39<br>(16,981.76 to 34,614.75)           | 1,264.63<br>(1,136.32 to 1,411.89)           | 1,724.44<br>(1,241.34 to 2,388.30)           | 1,533.03<br>(1,108.44 to 2,075.28)           | 2,055.45<br>(1,440.94 to 2,917.13)           |
| Liver cancer                         | 7,478.72<br>(6,538.24 to 8,403.20)              | 8,815.12<br>(6,089.60 to 12,850.95)             | 8,099.54<br>(5,731.41 to 11,297.64)             | 11,754.21<br>(7,340.92 to 18,039.95)            | 459.41<br>(407.25 to 512.23)                 | 682.39<br>(475.28 to 984.41)                 | 647.05<br>(489.07 to 889.07)                 | 865.61<br>(563.81 to 1,292.63)               |
| Liver cancer due to hepatitis B      | 1,117.48<br>(742.71 to 1,628.20)                | 1,262.31<br>(740.46 to 2,090.62)                | 1,193.94<br>(719.82 to 1,942.05)                | 1,518.58<br>(858.52 to 2,648.13)                | 59.68<br>(39.04 to 87.24)                    | 84.34<br>(47.95 to 139.13)                   | 81.86<br>(48.05 to 132.60)                   | 97.80<br>(53.91 to 166.35)                   |
| Liver cancer due to hepatitis C      | 2,394.90<br>(1,829.58 to 3,032.76)              | 3,076.49<br>(1,989.56 to 4,662.01)              | 2,945.99<br>(2,005.74 to 4,303.13)              | 3,592.26<br>(2,192.92 to 5,678.15)              | 162.42<br>(126.93 to 205.79)                 | 264.90<br>(175.10 to 387.98)                 | 260.53<br>(176.69 to 373.76)                 | 298.54<br>(185.87 to 459.88)                 |
| Liver cancer due to alcohol use      | 2,623.21<br>(1,943.70 to 3,302.88)              | 2,803.37<br>(1,701.48 to 4,486.87)              | 2,369.35<br>(1,489.76 to 3,640.64)              | 4,611.92<br>(2,665.28 to 7,596.37)              | 154.26<br>(115.59 to 195.41)                 | 202.59<br>(121.72 to 319.68)                 | 177.38<br>(109.22 to 272.89)                 | 315.69<br>(182.32 to 517.24)                 |
| Liver cancer due to other causes     | 1,343.13<br>(942.26 to 1,854.66)                | 1,672.96<br>(982.18 to 2,671.12)                | 1,590.25<br>(953.41 to 2,502.63)                | 2,031.44<br>(1,125.27 to 3,425.59)              | 83.04<br>(57.29 to 113.55)                   | 130.55<br>(76.14 to 211.67)                  | 127.28<br>(76.40 to 201.05)                  | 153.59<br>(84.41 to 259.55)                  |
| Gallbladder and biliary tract cancer | 3,519.05<br>(3,049.33 to 3,904.47)              | 2,923.48<br>(2,471.67 to 3,298.14)              | 2,961.60<br>(2,483.30 to 3,372.12)              | 2,816.53<br>(2,371.24 to 3,175.10)              | 241.93<br>(209.71 to 266.84)                 | 258.50<br>(218.76 to 288.13)                 | 269.17<br>(229.05 to 301.20)                 | 243.20<br>(205.50 to 271.63)                 |
| Pancreatic cancer                    | 18,846.22<br>(16,613.57 to 20,902.04)           | 20,581.87<br>(16,560.33 to 25,474.13)           | 19,736.92<br>(15,970.96 to 24,332.03)           | 22,134.64<br>(17,313.60 to 27,948.84)           | 1,128.07<br>(1,000.59 to 1,246.40)           | 1,516.06<br>(1,228.43 to 1,860.23)           | 1,485.35<br>(1,214.06 to 1,830.02)           | 1,600.00<br>(1,269.65 to 2,018.92)           |
| Larynx cancer                        | 763.41<br>(674.17 to 860.40)                    | 551.08<br>(285.37 to 953.43)                    | 322.65<br>(183.31 to 536.85)                    | 934.89<br>(474.82 to 1,681.58)                  | 40.80<br>(36.31 to 45.55)                    | 36.69<br>(18.87 to 63.40)                    | 22.03<br>(12.31 to 37.77)                    | 60.65<br>(29.99 to 109.63)                   |
| Tracheal, bronchus, and lung cancer  | 38,446.55<br>(34,802.09 to 42,269.24)           | 34,493.54<br>(24,695.88 to 46,720.73)           | 21,250.31<br>(15,648.18 to 28,672.28)           | 53,853.91<br>(37,737.17 to 74,522.46)           | 2,187.05<br>(1,994.96 to 2,399.72)           | 2,386.23<br>(1,701.94 to 3,295.13)           | 1,512.56<br>(1,094.65 to 2,066.38)           | 3,616.62<br>(2,549.58 to 5,041.42)           |
| Malignant skin melanoma              | 4,410.42<br>(3,438.36 to 5,087.94)              | 5,010.23<br>(3,781.20 to 5,972.07)              | 5,610.00<br>(4,262.79 to 6,665.99)              | 4,679.06<br>(3,557.86 to 5,496.31)              | 337.70<br>(169.62 to 260.66)                 | 337.70<br>(237.67 to 400.23)                 | 389.55<br>(278.87 to 451.16)                 | 306.40<br>(218.26 to 358.05)                 |
| Non-melanoma skin cancer             | 701.06<br>(617.46 to 796.72)                    | 1,004.47<br>(854.21 to 1,171.37)                | 945.69<br>(810.62 to 1,101.99)                  | 974.93<br>(823.01 to 1,147.31)                  | 57.48<br>(51.26 to 64.19)                    | 110.86<br>(92.63 to 129.80)                  | 107.82<br>(91.93 to 125.45)                  | 104.65<br>(87.19 to 124.89)                  |
| Breast cancer                        | 16,958.30<br>(14,584.71 to 19,423.37)           | 14,677.17<br>(10,115.47 to 20,154.02)           | 12,702.94<br>(8,914.86 to 17,473.54)            | 17,613.79<br>(11,864.51 to 24,800.08)           | 889.18<br>(769.06 to 1,013.97)               | 988.57<br>(708.95 to 1,345.10)               | 884.08<br>(645.88 to 1,197.19)               | 1,156.10<br>(808.03 to 1,632.34)             |
| Cervical cancer                      | 1,296.20<br>(1,120.58 to 1,490.82)              | 1,056.08<br>(797.94 to 1,348.62)                | 920.24<br>(715.46 to 1,156.67)                  | 1,116.32<br>(821.66 to 1,466.95)                | 77.71<br>(67.86 to 88.72)                    | 83.98<br>(64.66 to 105.09)                   | 75.13<br>(59.78 to 92.07)                    | 86.87<br>(66.27 to 111.03)                   |

|                   |                                         |                                          |                                          |                                          |                                   |                                       |                                       |                                       |
|-------------------|-----------------------------------------|------------------------------------------|------------------------------------------|------------------------------------------|-----------------------------------|---------------------------------------|---------------------------------------|---------------------------------------|
|                   | 2,676.07<br>(2,241.58 to<br>3,144.91)   | 3,004.05<br>(2,378.12 to<br>3,681.58)    | 2,836.54<br>(2,266.70 to<br>3,518.60)    | 3,012.04<br>(2,414.22 to<br>3,704.76)    | 176.33<br>(148.08 to<br>206.55)   | 246.85<br>(205.27 to<br>295.90)       | 238.58<br>(195.82 to<br>287.15)       | 243.16<br>(201.37 to<br>292.90)       |
| Uterine cancer    |                                         |                                          |                                          |                                          |                                   |                                       |                                       |                                       |
|                   | 7,088.26<br>(5,923.70 to<br>8,324.19)   | 5,930.56<br>(4,236.71 to<br>8,041.66)    | 5,476.12<br>(3,929.39 to<br>7,455.42)    | 6,406.78<br>(4,416.13 to<br>9,033.18)    | 391.39<br>(330.28 to<br>451.71)   | 392.81<br>(286.09 to<br>525.04)       | 367.07<br>(268.92 to<br>490.92)       | 422.14<br>(299.40 to<br>587.69)       |
| Ovarian cancer    |                                         |                                          |                                          |                                          |                                   |                                       |                                       |                                       |
|                   | 12,569.72<br>(9,691.50 to<br>14,931.09) | 18,673.15<br>(14,488.46 to<br>22,377.36) | 18,364.62<br>(14,476.34 to<br>22,029.66) | 17,966.59<br>(13,432.33 to<br>21,982.12) | 997.32<br>(767.24 to<br>1,171.46) | 1,973.17<br>(1,492.88 to<br>2,381.69) | 1,998.71<br>(1,561.50 to<br>2,392.98) | 1,846.83<br>(1,327.60 to<br>2,284.48) |
| Prostate cancer   |                                         |                                          |                                          |                                          |                                   |                                       |                                       |                                       |
|                   | 200.37<br>(162.55 to<br>244.50)         | 125.24<br>(89.94 to<br>166.75)           | 114.94<br>(82.87 to<br>153.94)           | 126.86<br>(92.37 to<br>168.87)           | 5.44<br>(4.59 to<br>6.42)         | 4.92<br>(3.99 to<br>6.06)             | 4.73<br>(3.82 to<br>5.81)             | 4.74<br>(3.81 to<br>5.82)             |
| Testicular cancer |                                         |                                          |                                          |                                          |                                   |                                       |                                       |                                       |

| Finland                         |                                                  |                                                  |                                                  |                                                  |                                               |                                               |                                               |                                               |
|---------------------------------|--------------------------------------------------|--------------------------------------------------|--------------------------------------------------|--------------------------------------------------|-----------------------------------------------|-----------------------------------------------|-----------------------------------------------|-----------------------------------------------|
| Cause                           | YLLs (actual counts)                             |                                                  |                                                  |                                                  | Deaths (actual counts)                        |                                               |                                               |                                               |
|                                 | 2016                                             | 2040 Forecast                                    | 2040 Better Scenario                             | 2040 Worse Scenario                              | 2016                                          | 2040 Forecast                                 | 2040 Better Scenario                          | 2040 Worse Scenario                           |
| Kidney cancer                   | 7,093.92<br>(6,296.05 to 7,877.23)               | 8,714.80<br>(7,256.01 to 10,456.42)              | 8,609.38<br>(7,226.64 to 10,220.01)              | 8,975.45<br>(7,286.07 to 11,054.65)              | 425.46<br>(379.70 to 470.11)                  | 650.40<br>(548.74 to 767.59)                  | 661.48<br>(564.37 to 767.69)                  | 653.45<br>(535.89 to 790.42)                  |
| Bladder cancer                  | 4,000.20<br>(3,545.38 to 4,492.07)               | 4,880.24<br>(3,788.81 to 6,358.07)               | 4,411.78<br>(3,462.60 to 5,597.23)               | 5,475.50<br>(4,038.11 to 7,403.10)               | 310.85<br>(278.44 to 347.97)                  | 505.30<br>(387.62 to 660.54)                  | 470.12<br>(368.61 to 595.95)                  | 555.71<br>(402.32 to 750.23)                  |
| Brain and nervous system cancer | 8,837.00<br>(7,396.22 to 11,075.03)              | 9,024.40<br>(7,184.95 to 10,982.67)              | 8,761.22<br>(7,027.20 to 10,690.56)              | 8,957.47<br>(7,215.98 to 10,927.65)              | 356.30<br>(294.28 to 418.43)                  | 444.96<br>(343.42 to 514.70)                  | 441.81<br>(337.46 to 510.74)                  | 432.20<br>(327.91 to 497.55)                  |
| Thyroid cancer                  | 732.23<br>(648.69 to 834.76)                     | 842.55<br>(628.71 to 1,157.03)                   | 785.16<br>(590.49 to 1,068.38)                   | 909.98<br>(657.22 to 1,313.48)                   | 47.63<br>(42.23 to 54.56)                     | 70.83<br>(53.85 to 97.44)                     | 67.93<br>(52.14 to 91.70)                     | 73.92<br>(54.29 to 104.04)                    |
| Mesothelioma                    | 1,918.38<br>(1,606.53 to 2,247.30)               | 2,167.27<br>(1,806.66 to 2,576.16)               | 2,255.66<br>(1,878.02 to 2,717.23)               | 2,064.34<br>(1,717.13 to 2,429.99)               | 105.57<br>(89.45 to 122.03)                   | 147.37<br>(123.30 to 174.97)                  | 157.10<br>(132.82 to 190.72)                  | 137.14<br>(114.81 to 158.50)                  |
| Hodgkin lymphoma                | 508.71<br>(447.05 to 693.22)                     | 405.24<br>(325.12 to 542.13)                     | 355.07<br>(293.36 to 475.42)                     | 414.30<br>(333.50 to 566.39)                     | 21.00<br>(18.58 to 25.61)                     | 22.25<br>(18.73 to 26.75)                     | 20.12<br>(17.44 to 23.45)                     | 22.08<br>(18.50 to 26.39)                     |
| Non-Hodgkin lymphoma            | 9,211.14<br>(7,991.04 to 10,458.76)              | 9,527.56<br>(7,640.81 to 11,687.16)              | 9,062.78<br>(7,323.91 to 11,105.07)              | 9,819.65<br>(7,709.26 to 12,320.11)              | 544.89<br>(473.39 to 609.61)                  | 729.17<br>(600.30 to 876.61)                  | 713.20<br>(584.05 to 855.75)                  | 729.69<br>(583.27 to 897.84)                  |
| Multiple myeloma                | 4,343.68<br>(3,229.21 to 5,416.78)               | 5,103.51<br>(3,640.95 to 6,563.46)               | 4,996.75<br>(3,583.56 to 6,422.63)               | 5,213.47<br>(3,694.01 to 6,855.12)               | 280.67<br>(204.88 to 334.49)                  | 411.54<br>(289.44 to 522.51)                  | 413.67<br>(296.29 to 517.74)                  | 408.93<br>(285.23 to 529.71)                  |
| Leukemia                        | 7,639.33<br>(6,736.07 to 8,445.77)               | 8,539.12<br>(6,836.31 to 10,542.94)              | 8,006.53<br>(6,479.42 to 9,743.42)               | 9,261.54<br>(7,160.22 to 11,892.23)              | 432.69<br>(388.26 to 476.94)                  | 655.70<br>(531.35 to 811.92)                  | 632.86<br>(522.23 to 766.72)                  | 690.67<br>(544.12 to 885.20)                  |
| Acute lymphoid leukemia         | 1,087.79<br>(865.74 to 1,280.31)                 | 764.16<br>(552.80 to 1,021.98)                   | 684.51<br>(498.06 to 913.75)                     | 844.35<br>(596.13 to 1,150.59)                   | 31.38<br>(25.47 to 38.12)                     | 28.19<br>(21.66 to 36.74)                     | 25.67<br>(20.02 to 33.15)                     | 30.82<br>(23.24 to 40.75)                     |
| Chronic lymphoid leukemia       | 1,604.36<br>(1,241.38 to 1,899.41)               | 1,878.10<br>(1,357.10 to 2,475.98)               | 1,803.52<br>(1,337.19 to 2,339.54)               | 2,005.14<br>(1,397.42 to 2,700.34)               | 123.09<br>(97.14 to 144.37)                   | 184.83<br>(137.10 to 230.68)                  | 182.40<br>(138.80 to 230.68)                  | 191.88<br>(138.80 to 254.74)                  |
| Acute myeloid leukemia          | 3,209.86<br>(2,799.54 to 3,615.19)               | 3,991.13<br>(3,176.88 to 4,940.41)               | 3,830.87<br>(3,091.73 to 4,698.80)               | 4,310.24<br>(3,350.29 to 5,443.55)               | 275.93<br>(148.18 to 393.25)                  | 275.93<br>(218.62 to 344.60)                  | 272.03<br>(218.95 to 335.88)                  | 290.02<br>(226.54 to 368.00)                  |
| Chronic myeloid leukemia        | 573.14<br>(467.28 to 673.05)                     | 337.13<br>(244.01 to 454.55)                     | 275.48<br>(202.46 to 365.20)                     | 383.59<br>(267.22 to 546.77)                     | 35.13<br>(29.20 to 40.82)                     | 28.02<br>(20.52 to 38.22)                     | 23.65<br>(17.73 to 31.01)                     | 30.83<br>(21.92 to 42.95)                     |
| Other leukemia                  | 1,164.18<br>(949.31 to 1,369.46)                 | 1,568.60<br>(1,168.25 to 2,062.61)               | 1,412.15<br>(1,066.41 to 1,821.60)               | 1,718.22<br>(1,253.08 to 2,297.39)               | 71.24<br>(59.03 to 84.18)                     | 138.72<br>(104.81 to 182.80)                  | 129.11<br>(98.76 to 166.47)                   | 147.14<br>(106.18 to 201.18)                  |
| Other neoplasms                 | 9,738.08<br>(8,524.95 to 10,853.39)              | 11,393.54<br>(9,798.53 to 12,914.91)             | 11,583.74<br>(9,844.14 to 13,307.81)             | 11,003.10<br>(9,420.14 to 12,467.85)             | 549.57<br>(483.74 to 609.27)                  | 863.20<br>(745.47 to 974.44)                  | 906.72<br>(783.53 to 1,025.54)                | 809.43<br>(696.77 to 912.49)                  |
| <b>Cardiovascular diseases</b>  | <b>240,867.17<br/>(223,095.50 to 259,843.13)</b> | <b>209,405.15<br/>(144,890.10 to 308,839.72)</b> | <b>153,335.07<br/>(110,768.16 to 218,713.24)</b> | <b>274,671.02<br/>(183,883.22 to 406,433.60)</b> | <b>21,102.58<br/>(19,677.64 to 22,570.45)</b> | <b>24,420.88<br/>(17,387.58 to 38,189.31)</b> | <b>19,011.83<br/>(13,906.20 to 29,067.52)</b> | <b>29,542.12<br/>(20,514.38 to 45,517.73)</b> |
| Rheumatic heart disease         | 845.77<br>(742.67 to 943.38)                     | 812.51<br>(625.85 to 1,064.96)                   | 721.60<br>(569.94 to 913.63)                     | 814.04<br>(638.94 to 1,062.86)                   | 65.08<br>(57.62 to 72.79)                     | 88.11<br>(70.19 to 113.12)                    | 81.22<br>(66.06 to 101.50)                    | 85.66<br>(68.96 to 110.27)                    |
| Ischemic heart disease          | 137,532.25<br>(123,746.25 to 152,954.68)         | 111,729.11<br>(64,840.86 to 185,701.77)          | 73,996.04<br>(43,534.43 to 122,606.22)           | 156,335.62<br>(86,847.03 to 263,501.44)          | 12,039.80<br>(11,048.90 to 13,176.93)         | 12,991.30<br>(7,633.40 to 22,756.21)          | 9,233.10<br>(5,339.63 to 15,994.39)           | 16,570.88<br>(9,390.41 to 30,162.79)          |
| Stroke                          | 53,850.60<br>(47,135.17 to 60,933.87)            | 39,524.92<br>(23,591.49 to 74,397.25)            | 27,640.13<br>(16,609.98 to 52,398.02)            | 53,207.58<br>(30,600.42 to 100,380.56)           | 5,130.37<br>(4,430.35 to 5,911.80)            | 4,967.10<br>(2,857.66 to 10,237.55)           | 3,760.14<br>(2,209.61 to 7,575.99)            | 6,063.61<br>(3,428.00 to 12,550.49)           |
| Ischemic stroke                 | 32,532.54<br>(28,175.20 to 37,373.58)            | 25,786.61<br>(13,923.67 to 55,801.24)            | 19,166.66<br>(10,506.60 to 42,228.74)            | 32,139.43<br>(16,450.34 to 70,594.32)            | 3,670.47<br>(3,132.94 to 4,272.85)            | 3,701.83<br>(1,922.14 to 8,747.82)            | 2,891.82<br>(1,514.68 to 6,663.87)            | 4,346.22<br>(2,175.71 to 10,246.86)           |

|                                |                                          |                                         |                                        |                                          |                                       |                                     |                                     |                                     |
|--------------------------------|------------------------------------------|-----------------------------------------|----------------------------------------|------------------------------------------|---------------------------------------|-------------------------------------|-------------------------------------|-------------------------------------|
| Intracerebral hemorrhage       | 21,318.06<br>(18,769.54 to<br>24,146.10) | 13,738.31<br>(7,786.12 to<br>22,767.61) | 8,473.47<br>(5,208.86 to<br>12,713.44) | 21,068.15<br>(11,365.03 to<br>35,931.28) | 1,459.89<br>(1,276.40 to<br>1,673.89) | 1,265.27<br>(762.13 to<br>2,008.26) | 868.32<br>(552.80 to<br>1,309.90)   | 1,717.39<br>(987.44 to<br>2,820.49) |
| Hypertensive heart disease     | 7,386.13<br>(3,651.20 to<br>9,432.07)    | 10,884.86<br>(3,950.11 to<br>23,599.13) | 8,918.05<br>(3,558.67 to<br>16,417.80) | 14,304.08<br>(5,071.74 to<br>31,337.57)  | 667.22<br>(285.93 to<br>898.88)       | 1,395.35<br>(454.09 to<br>3,081.90) | 1,206.30<br>(425.19 to<br>2,315.79) | 1,766.41<br>(563.36 to<br>4,003.56) |
| Cardiomyopathy and myocarditis | 11,088.19<br>(7,494.66 to<br>13,348.49)  | 8,439.97<br>(6,441.68 to<br>10,960.09)  | 7,549.39<br>(5,903.06 to<br>9,700.18)  | 10,190.98<br>(7,305.92 to<br>13,310.84)  | 565.17<br>(483.81 to<br>660.24)       | 602.94<br>(433.03 to<br>909.28)     | 569.81<br>(405.40 to<br>888.86)     | 654.35<br>(489.65 to<br>946.40)     |
| Myocarditis                    | 1,397.35<br>(1,102.76 to<br>1,855.64)    | 1,965.95<br>(1,331.29 to<br>3,222.75)   | 2,001.59<br>(1,331.83 to<br>3,348.08)  | 1,911.63<br>(1,300.44 to<br>3,092.92)    | 84.54<br>(50.61 to<br>168.89)         | 194.69<br>(96.35 to<br>444.76)      | 209.07<br>(103.93 to<br>477.74)     | 180.82<br>(88.57 to<br>413.12)      |

| Finland                                                       |                                                               |                                                               |                                                               |                                                               |                                                            |                                                            |                                                            |                                                            |
|---------------------------------------------------------------|---------------------------------------------------------------|---------------------------------------------------------------|---------------------------------------------------------------|---------------------------------------------------------------|------------------------------------------------------------|------------------------------------------------------------|------------------------------------------------------------|------------------------------------------------------------|
| Cause                                                         | YLLs (actual counts)                                          |                                                               |                                                               |                                                               | Deaths (actual counts)                                     |                                                            |                                                            |                                                            |
|                                                               | 2016                                                          | 2040 Forecast                                                 | 2040 Better Scenario                                          | 2040 Worse Scenario                                           | 2016                                                       | 2040 Forecast                                              | 2040 Better Scenario                                       | 2040 Worse Scenario                                        |
| Alcoholic cardiomyopathy                                      | 5,919.36<br>(2,491.45 to<br>7,757.21)                         | 3,864.42<br>(1,649.41 to<br>5,433.74)                         | 3,356.99<br>(1,485.81 to<br>4,746.93)                         | 5,488.89<br>(2,414.75 to<br>7,651.41)                         | 225.88<br>(91.96 to<br>296.42)                             | 160.29<br>(71.69 to<br>221.20)                             | 143.04<br>(66.47 to<br>196.71)                             | 219.85<br>(101.08 to<br>299.28)                            |
| Other cardiomyopathy                                          | 3,771.48<br>(3,173.43 to<br>4,429.70)                         | 2,609.60<br>(1,644.94 to<br>4,054.13)                         | 2,190.81<br>(1,379.13 to<br>3,372.10)                         | 2,790.47<br>(1,718.50 to<br>4,430.23)                         | 254.75<br>(204.76 to<br>330.54)                            | 247.97<br>(134.20 to<br>438.40)                            | 217.70<br>(119.48 to<br>379.13)                            | 253.69<br>(138.19 to<br>443.63)                            |
| Atrial fibrillation and flutter                               | 5,483.39<br>(4,246.71 to<br>6,929.02)                         | 8,625.92<br>(6,350.11 to<br>11,602.35)                        | 8,220.00<br>(6,086.44 to<br>10,959.52)                        | 9,095.78<br>(6,700.39 to<br>12,369.36)                        | 639.79<br>(485.07 to<br>822.13)                            | 1,198.79<br>(884.04 to<br>1,604.14)                        | 1,175.83<br>(870.04 to<br>1,562.58)                        | 1,228.89<br>(893.12 to<br>1,690.36)                        |
| Aortic aneurysm                                               | 8,487.07<br>(7,496.22 to<br>9,514.40)                         | 8,472.71<br>(6,504.97 to<br>11,217.98)                        | 7,744.99<br>(6,117.20 to<br>10,003.59)                        | 8,789.10<br>(6,749.49 to<br>11,607.67)                        | 583.03<br>(523.34 to<br>645.32)                            | 748.46<br>(600.82 to<br>946.64)                            | 717.41<br>(585.21 to<br>891.97)                            | 739.05<br>(592.83 to<br>940.13)                            |
| Peripheral artery disease                                     | 2,680.33<br>(980.12 to<br>3,786.80)                           | 5,198.31<br>(1,699.23 to<br>8,586.03)                         | 5,226.50<br>(1,724.90 to<br>8,499.39)                         | 5,393.76<br>(1,802.71 to<br>8,942.10)                         | 299.82<br>(96.12 to<br>439.21)                             | 731.67<br>(219.71 to<br>1,213.16)                          | 760.41<br>(231.66 to<br>1,243.87)                          | 731.91<br>(221.20 to<br>1,229.10)                          |
| Endocarditis                                                  | 894.80<br>(689.04 to<br>1,373.14)                             | 1,170.72<br>(741.03 to<br>2,027.83)                           | 1,138.28<br>(722.90 to<br>1,966.10)                           | 1,194.10<br>(758.67 to<br>2,089.06)                           | 58.04<br>(42.74 to<br>95.76)                               | 102.38<br>(60.09 to<br>190.66)                             | 103.59<br>(60.81 to<br>194.33)                             | 100.51<br>(58.72 to<br>189.69)                             |
| Other cardiovascular and circulatory diseases                 | 12,618.63<br>(11,314.13 to<br>13,967.35)                      | 14,546.13<br>(11,075.18 to<br>19,140.91)                      | 12,180.08<br>(9,783.67 to<br>15,361.72)                       | 15,346.00<br>(11,704.65 to<br>20,382.74)                      | 1,054.26<br>(943.96 to<br>1,176.92)                        | 1,594.78<br>(1,258.71 to<br>2,048.99)                      | 1,404.01<br>(1,152.64 to<br>1,737.99)                      | 1,600.85<br>(1,265.99 to<br>2,042.12)                      |
| <b>Chronic respiratory diseases</b>                           | <b>22,096.12</b><br><b>(20,103.14 to</b><br><b>24,342.39)</b> | <b>24,198.68</b><br><b>(19,342.72 to</b><br><b>30,114.20)</b> | <b>19,814.01</b><br><b>(16,354.51 to</b><br><b>23,930.27)</b> | <b>31,778.77</b><br><b>(24,405.78 to</b><br><b>41,403.69)</b> | <b>1,661.63</b><br><b>(1,512.97 to</b><br><b>1,818.05)</b> | <b>2,331.42</b><br><b>(1,871.80 to</b><br><b>2,942.54)</b> | <b>1,949.81</b><br><b>(1,609.28 to</b><br><b>2,387.02)</b> | <b>2,979.09</b><br><b>(2,306.15 to</b><br><b>3,864.09)</b> |
| Chronic obstructive pulmonary disease                         | 17,019.18<br>(15,067.88 to<br>19,678.30)                      | 17,200.84<br>(12,709.19 to<br>23,831.17)                      | 11,868.23<br>(8,676.84 to<br>16,751.33)                       | 25,150.18<br>(18,138.68 to<br>35,452.19)                      | 1,284.68<br>(1,140.12 to<br>1,479.97)                      | 1,691.33<br>(1,235.42 to<br>2,294.84)                      | 1,208.88<br>(879.27 to<br>1,663.64)                        | 2,384.78<br>(1,723.50 to<br>3,327.49)                      |
| Pneumoconiosis                                                | 338.57<br>(282.00 to<br>417.27)                               | 528.97<br>(392.26 to<br>726.04)                               | 591.46<br>(432.23 to<br>831.74)                               | 487.04<br>(365.92 to<br>653.04)                               | 26.06<br>(21.64 to<br>31.71)                               | 49.39<br>(36.35 to<br>67.25)                               | 56.40<br>(41.39 to<br>78.83)                               | 44.51<br>(32.41 to<br>60.43)                               |
| Silicosis                                                     | 30.63<br>(21.73 to<br>176.22)                                 | 25.45<br>(7.16 to<br>137.25)                                  | 20.71<br>(5.53 to<br>114.27)                                  | 25.57<br>(7.26 to<br>128.29)                                  | 3.76<br>(1.57 to<br>13.38)                                 | 2.41<br>(0.67 to<br>12.81)                                 | 2.01<br>(0.53 to<br>10.98)                                 | 2.37<br>(0.68 to<br>11.39)                                 |
| Asbestosis                                                    | 264.72<br>(124.19 to<br>340.74)                               | 476.17<br>(321.57 to<br>640.67)                               | 543.49<br>(388.76 to<br>739.76)                               | 433.46<br>(287.75 to<br>583.53)                               | 20.31<br>(9.18 to<br>26.00)                                | 43.88<br>(28.46 to<br>60.11)                               | 51.21<br>(36.46 to<br>68.63)                               | 39.05<br>(24.70 to<br>53.95)                               |
| Coal workers pneumoconiosis                                   | 0.49<br>(0.19 to<br>2.30)                                     | 1.15<br>(0.36 to<br>5.18)                                     | 1.17<br>(0.37 to<br>5.22)                                     | 1.15<br>(0.36 to<br>5.27)                                     | 0.05<br>(0.02 to<br>0.21)                                  | 0.14<br>(0.05 to<br>0.57)                                  | 0.15<br>(0.05 to<br>0.56)                                  | 0.14<br>(0.04 to<br>0.58)                                  |
| Other pneumoconiosis                                          | 22.73<br>(10.76 to<br>83.07)                                  | 26.21<br>(11.29 to<br>87.94)                                  | 26.09<br>(11.07 to<br>87.77)                                  | 26.87<br>(12.09 to<br>89.43)                                  | 1.95<br>(0.95 to<br>6.75)                                  | 2.96<br>(1.35 to<br>9.49)                                  | 3.03<br>(1.35 to<br>9.75)                                  | 2.96<br>(1.39 to<br>9.31)                                  |
| Asthma                                                        | 1,108.49<br>(959.27 to<br>1,275.32)                           | 599.70<br>(350.63 to<br>975.52)                               | 465.42<br>(280.80 to<br>755.15)                               | 742.56<br>(421.73 to<br>1,255.21)                             | 93.27<br>(78.54 to<br>107.79)                              | 70.40<br>(40.24 to<br>114.27)                              | 57.11<br>(34.04 to<br>90.52)                               | 82.85<br>(46.81 to<br>137.81)                              |
| Interstitial lung disease and pulmonary sarcoidosis           | 3,434.92<br>(1,849.74 to<br>4,259.92)                         | 5,669.09<br>(3,141.37 to<br>7,239.93)                         | 6,694.34<br>(4,008.20 to<br>8,246.31)                         | 5,191.24<br>(2,793.00 to<br>6,670.20)                         | 247.49<br>(129.20 to<br>308.67)                            | 506.86<br>(275.66 to<br>655.71)                            | 613.95<br>(363.55 to<br>758.00)                            | 453.32<br>(237.40 to<br>594.92)                            |
| Other chronic respiratory diseases                            | 194.96<br>(98.70 to<br>255.82)                                | 200.08<br>(102.48 to<br>287.02)                               | 194.56<br>(100.91 to<br>275.74)                               | 207.76<br>(103.68 to<br>301.47)                               | 10.12<br>(5.02 to<br>13.07)                                | 13.45<br>(6.95 to<br>18.81)                                | 13.47<br>(7.27 to<br>18.71)                                | 13.64<br>(7.02 to<br>19.15)                                |
| <b>Cirrhosis and other chronic liver diseases</b>             | <b>28,329.81</b><br><b>(24,992.25 to</b><br><b>31,867.29)</b> | <b>17,785.20</b><br><b>(14,497.93 to</b><br><b>21,705.33)</b> | <b>15,262.73</b><br><b>(12,444.63 to</b><br><b>18,595.88)</b> | <b>22,137.18</b><br><b>(18,070.42 to</b><br><b>26,974.91)</b> | <b>1,062.31</b><br><b>(948.10 to</b><br><b>1,183.48)</b>   | <b>766.75</b><br><b>(653.84 to</b><br><b>899.35)</b>       | <b>673.91</b><br><b>(573.50 to</b><br><b>780.65)</b>       | <b>927.63</b><br><b>(782.32 to</b><br><b>1,081.86)</b>     |
| Cirrhosis and other chronic liver diseases due to hepatitis B | 4,033.01<br>(2,936.26 to<br>5,382.67)                         | 2,739.78<br>(1,966.07 to<br>3,748.93)                         | 2,511.08<br>(1,809.29 to<br>3,447.73)                         | 2,793.50<br>(2,007.49 to<br>3,829.10)                         | 152.18<br>(114.16 to<br>200.19)                            | 117.79<br>(89.52 to<br>156.43)                             | 109.94<br>(84.12 to<br>145.27)                             | 118.07<br>(89.59 to<br>157.05)                             |
| Cirrhosis and other chronic liver diseases due to hepatitis C | 8,819.45<br>(6,522.71 to<br>11,684.77)                        | 6,112.24<br>(4,382.77 to<br>8,333.89)                         | 5,551.33<br>(4,013.90 to<br>7,570.48)                         | 6,280.44<br>(4,416.11 to<br>8,793.22)                         | 323.69<br>(245.08 to<br>422.94)                            | 250.97<br>(185.22 to<br>324.61)                            | 231.60<br>(175.11 to<br>298.95)                            | 254.00<br>(186.54 to<br>343.55)                            |

|                                                                |                                                               |                                                               |                                                               |                                                               |                                                            |                                                            |                                                            |                                                            |
|----------------------------------------------------------------|---------------------------------------------------------------|---------------------------------------------------------------|---------------------------------------------------------------|---------------------------------------------------------------|------------------------------------------------------------|------------------------------------------------------------|------------------------------------------------------------|------------------------------------------------------------|
|                                                                | 13,902.29<br>(11,257.20 to<br>16,854.12)                      | 7,830.74<br>(5,915.30 to<br>10,145.64)                        | 6,188.19<br>(4,685.06 to<br>8,068.72)                         | 11,939.31<br>(9,164.87 to<br>15,107.65)                       | 524.30<br>(428.63 to<br>625.19)                            | 345.00<br>(272.04 to<br>430.92)                            | 282.57<br>(225.45 to<br>351.11)                            | 502.62<br>(402.92 to<br>613.61)                            |
| Cirrhosis and other chronic liver diseases due to alcohol use  |                                                               |                                                               |                                                               |                                                               |                                                            |                                                            |                                                            |                                                            |
|                                                                | 1,575.06<br>(1,063.15 to<br>2,274.92)                         | 1,102.44<br>(729.09 to<br>1,624.39)                           | 1,012.13<br>(670.08 to<br>1,486.12)                           | 1,123.93<br>(738.38 to<br>1,654.24)                           | 62.14<br>(42.90 to<br>88.62)                               | 52.99<br>(37.89 to<br>73.61)                               | 49.80<br>(34.98 to<br>70.01)                               | 52.93<br>(36.82 to<br>75.64)                               |
| Cirrhosis and other chronic liver diseases due to other causes |                                                               |                                                               |                                                               |                                                               |                                                            |                                                            |                                                            |                                                            |
| <b>Digestive diseases</b>                                      | <b>18,236.75</b><br><b>(15,507.33 to</b><br><b>21,810.81)</b> | <b>21,364.38</b><br><b>(16,961.73 to</b><br><b>27,824.75)</b> | <b>20,065.88</b><br><b>(15,863.14 to</b><br><b>25,975.22)</b> | <b>22,378.42</b><br><b>(17,578.94 to</b><br><b>30,164.08)</b> | <b>1,318.97</b><br><b>(1,148.89 to</b><br><b>1,615.64)</b> | <b>2,238.66</b><br><b>(1,834.28 to</b><br><b>2,914.91)</b> | <b>2,189.17</b><br><b>(1,793.21 to</b><br><b>2,819.00)</b> | <b>2,249.21</b><br><b>(1,813.73 to</b><br><b>2,923.53)</b> |
| Peptic ulcer disease                                           | 2,706.54<br>(2,302.05 to<br>3,729.49)                         | 1,957.15<br>(1,514.04 to<br>2,709.02)                         | 1,646.55<br>(1,297.16 to<br>2,308.10)                         | 2,080.24<br>(1,580.60 to<br>2,853.10)                         | 177.22<br>(151.88 to<br>238.62)                            | 193.00<br>(147.83 to<br>263.44)                            | 168.47<br>(130.53 to<br>227.12)                            | 196.23<br>(149.64 to<br>266.17)                            |

| Finland                                    |                                       |                                         |                                         |                                         |                                    |                                       |                                       |                                       |
|--------------------------------------------|---------------------------------------|-----------------------------------------|-----------------------------------------|-----------------------------------------|------------------------------------|---------------------------------------|---------------------------------------|---------------------------------------|
| Cause                                      | YLLs (actual counts)                  |                                         |                                         |                                         | Deaths (actual counts)             |                                       |                                       |                                       |
|                                            | 2016                                  | 2040 Forecast                           | 2040 Better Scenario                    | 2040 Worse Scenario                     | 2016                               | 2040 Forecast                         | 2040 Better Scenario                  | 2040 Worse Scenario                   |
| Gastritis and duodenitis                   | 492.45<br>(325.22 to 657.07)          | 415.02<br>(288.68 to 565.36)            | 373.85<br>(259.37 to 524.37)            | 418.30<br>(296.05 to 577.05)            | 24.17<br>(18.25 to 33.53)          | 30.35<br>(21.71 to 44.35)             | 28.57<br>(20.00 to 41.92)             | 29.41<br>(20.76 to 42.67)             |
| Appendicitis                               | 199.89<br>(150.24 to 329.81)          | 195.08<br>(138.89 to 317.25)            | 170.12<br>(124.07 to 267.78)            | 196.55<br>(140.33 to 308.32)            | 13.09<br>(9.87 to 20.16)           | 18.42<br>(13.25 to 27.56)             | 16.66<br>(12.06 to 24.49)             | 17.97<br>(12.89 to 26.50)             |
| Paralytic ileus and intestinal obstruction | 3,002.67<br>(2,429.77 to 4,297.74)    | 4,249.54<br>(3,419.38 to 6,374.92)      | 4,433.49<br>(3,575.84 to 6,729.54)      | 4,011.25<br>(3,237.73 to 5,972.86)      | 241.97<br>(197.60 to 350.87)       | 473.59<br>(378.24 to 722.46)          | 508.99<br>(411.43 to 772.09)          | 435.37<br>(345.10 to 654.49)          |
| Inguinal, femoral, and abdominal hernia    | 561.29<br>(386.06 to 725.77)          | 484.80<br>(342.72 to 673.78)            | 461.79<br>(329.88 to 645.92)            | 471.33<br>(341.23 to 642.39)            | 45.47<br>(32.75 to 65.01)          | 53.90<br>(38.75 to 80.87)             | 53.14<br>(38.53 to 80.35)             | 50.96<br>(36.65 to 74.93)             |
| Inflammatory bowel disease                 | 523.15<br>(380.48 to 646.77)          | 675.91<br>(503.83 to 862.65)            | 691.93<br>(511.43 to 891.60)            | 646.93<br>(480.26 to 820.43)            | 37.83<br>(28.43 to 46.37)          | 66.35<br>(49.82 to 84.84)             | 70.18<br>(52.52 to 89.71)             | 61.75<br>(46.25 to 78.83)             |
| Vascular intestinal disorders              | 2,392.09<br>(1,816.17 to 2,903.15)    | 3,475.05<br>(2,489.99 to 4,325.42)      | 3,454.50<br>(2,434.48 to 4,315.16)      | 3,343.33<br>(2,402.00 to 4,185.35)      | 210.36<br>(158.03 to 256.50)       | 400.35<br>(272.65 to 497.59)          | 409.05<br>(284.00 to 510.14)          | 376.81<br>(262.58 to 474.28)          |
| Gallbladder and biliary diseases           | 1,757.64<br>(1,461.22 to 2,362.11)    | 3,068.04<br>(1,721.84 to 5,375.11)      | 2,612.88<br>(1,504.38 to 4,524.02)      | 3,654.53<br>(2,028.32 to 6,428.61)      | 183.42<br>(152.02 to 235.99)       | 418.16<br>(232.75 to 733.45)          | 366.34<br>(206.10 to 627.63)          | 482.73<br>(262.94 to 833.47)          |
| Pancreatitis                               | 4,040.93<br>(2,750.27 to 5,006.72)    | 3,329.47<br>(1,612.63 to 6,583.01)      | 2,733.30<br>(1,372.22 to 5,321.27)      | 4,163.50<br>(1,921.96 to 8,383.73)      | 175.16<br>(140.13 to 225.57)       | 187.26<br>(102.63 to 352.76)          | 160.17<br>(90.73 to 291.26)           | 224.39<br>(116.86 to 438.38)          |
| Other digestive diseases                   | 2,560.11<br>(1,904.18 to 3,139.20)    | 3,514.32<br>(2,644.34 to 4,370.07)      | 3,487.48<br>(2,629.84 to 4,359.23)      | 3,392.44<br>(2,575.98 to 4,191.86)      | 210.27<br>(164.70 to 252.57)       | 397.28<br>(307.77 to 496.07)          | 407.58<br>(316.72 to 504.63)          | 373.59<br>(287.53 to 465.26)          |
| Neurological disorders                     | 70,254.21<br>(59,833.46 to 82,607.07) | 112,225.80<br>(87,380.97 to 146,506.94) | 114,293.47<br>(90,462.90 to 146,131.22) | 117,298.65<br>(88,558.73 to 160,501.07) | 7,674.30<br>(6,437.24 to 9,047.36) | 14,999.88<br>(11,360.63 to 19,797.20) | 15,644.73<br>(12,170.76 to 20,160.68) | 15,410.45<br>(11,215.18 to 20,981.81) |
| Alzheimer's disease and other dementias    | 53,568.23<br>(43,976.88 to 66,142.01) | 91,944.37<br>(67,260.22 to 126,627.69)  | 93,528.73<br>(69,537.51 to 125,733.07)  | 97,510.10<br>(68,999.72 to 140,532.96)  | 6,686.18<br>(5,485.58 to 8,081.66) | 13,480.20<br>(9,902.40 to 18,244.05)  | 14,023.06<br>(10,544.49 to 18,550.87) | 13,970.73<br>(9,745.93 to 19,630.46)  |
| Parkinson's disease                        | 5,757.25<br>(4,170.68 to 7,721.22)    | 8,816.11<br>(6,393.94 to 11,788.33)     | 9,519.54<br>(6,930.01 to 12,919.45)     | 8,211.13<br>(5,953.22 to 11,046.61)     | 525.44<br>(383.80 to 713.80)       | 950.94<br>(692.32 to 1,268.27)        | 1,048.32<br>(775.56 to 1,401.52)      | 869.42<br>(632.22 to 1,170.46)        |
| Epilepsy                                   | 2,514.74<br>(2,180.65 to 2,953.62)    | 2,576.85<br>(1,581.02 to 3,840.44)      | 2,282.35<br>(1,437.41 to 3,413.95)      | 3,107.86<br>(1,858.49 to 4,681.12)      | 77.39<br>(67.63 to 89.97)          | 93.94<br>(62.49 to 133.95)            | 85.80<br>(58.22 to 121.69)            | 110.64<br>(71.33 to 161.14)           |
| Multiple sclerosis                         | 1,538.55<br>(982.14 to 1,865.26)      | 1,312.95<br>(805.21 to 1,695.14)        | 1,305.53<br>(800.74 to 1,684.60)        | 1,342.01<br>(820.55 to 1,733.90)        | 59.12<br>(36.65 to 71.09)          | 55.61<br>(33.61 to 70.15)             | 56.35<br>(34.23 to 71.41)             | 55.77<br>(33.38 to 70.48)             |
| Motor neuron disease                       | 3,703.60<br>(3,199.14 to 4,128.39)    | 4,622.31<br>(3,814.02 to 5,396.69)      | 4,640.80<br>(3,810.45 to 5,473.84)      | 4,539.39<br>(3,764.38 to 5,296.01)      | 182.92<br>(159.30 to 204.04)       | 257.62<br>(216.16 to 299.37)          | 262.10<br>(218.97 to 307.68)          | 249.83<br>(210.28 to 289.53)          |
| Other neurological disorders               | 3,171.85<br>(2,716.55 to 3,563.68)    | 2,953.21<br>(2,442.62 to 3,452.76)      | 3,016.53<br>(2,488.00 to 3,546.02)      | 2,885.16<br>(2,392.86 to 3,352.59)      | 143.26<br>(124.72 to 159.75)       | 161.56<br>(139.56 to 184.13)          | 169.11<br>(144.66 to 194.47)          | 154.05<br>(132.52 to 175.51)          |
| Mental disorders                           | 29,116.99<br>(24,981.20 to 33,206.72) | 35,039.85<br>(26,737.32 to 44,334.92)   | 37,877.64<br>(29,343.20 to 47,692.36)   | 35,731.43<br>(27,976.29 to 44,680.30)   | 858.28<br>(750.02 to 974.62)       | 1,037.97<br>(843.92 to 1,263.99)      | 1,124.40<br>(927.24 to 1,362.54)      | 1,056.40<br>(865.51 to 1,275.84)      |
| Alcohol use disorders                      | 17,268.99<br>(14,825.12 to 19,980.23) | 13,694.86<br>(10,397.98 to 17,995.29)   | 13,606.75<br>(10,285.50 to 18,013.19)   | 15,360.65<br>(11,818.45 to 20,026.18)   | 573.04<br>(494.74 to 658.23)       | 475.77<br>(369.62 to 607.57)          | 478.98<br>(372.63 to 611.27)          | 525.30<br>(412.79 to 661.12)          |
| Drug use disorders                         | 11,817.41<br>(9,040.04 to 14,518.44)  | 21,307.34<br>(15,206.09 to 28,213.19)   | 24,229.86<br>(17,850.39 to 31,600.97)   | 20,334.40<br>(14,514.23 to 27,560.19)   | 284.61<br>(219.98 to 348.12)       | 561.42<br>(416.74 to 716.96)          | 644.57<br>(500.32 to 813.71)          | 530.36<br>(397.77 to 684.18)          |
| Opioid use disorders                       | 5,731.43<br>(4,269.64 to 7,478.11)    | 6,128.00<br>(4,044.52 to 8,989.88)      | 6,340.45<br>(4,198.17 to 9,269.20)      | 6,040.19<br>(4,016.43 to 8,791.25)      | 132.27<br>(98.70 to 171.80)        | 155.00<br>(106.65 to 220.55)          | 161.82<br>(112.61 to 230.54)          | 151.45<br>(106.56 to 212.61)          |



|                           |                                       |                                         |                                         |                                         |                                |                                 |                                 |                                 |
|---------------------------|---------------------------------------|-----------------------------------------|-----------------------------------------|-----------------------------------------|--------------------------------|---------------------------------|---------------------------------|---------------------------------|
|                           | 105.44<br>(62.59 to<br>147.94)        | 288.91<br>(172.71 to<br>443.25)         | 324.55<br>(199.26 to<br>488.64)         | 276.56<br>(169.61 to<br>418.38)         | 2.46<br>(1.55 to<br>3.38)      | 7.29<br>(4.76 to<br>10.42)      | 8.28<br>(5.51 to<br>11.73)      | 6.91<br>(4.49 to<br>9.90)       |
| Cocaine use disorders     |                                       |                                         |                                         |                                         |                                |                                 |                                 |                                 |
|                           | 609.53<br>(361.55 to<br>831.70)       | 2,838.36<br>(1,651.58 to<br>4,322.08)   | 3,402.43<br>(2,041.92 to<br>5,093.83)   | 2,663.12<br>(1,530.93 to<br>4,100.80)   | 11.97<br>(7.49 to<br>16.15)    | 57.92<br>(35.09 to<br>86.84)    | 69.71<br>(44.61 to<br>101.19)   | 54.17<br>(32.61 to<br>81.20)    |
| Amphetamine use disorders |                                       |                                         |                                         |                                         |                                |                                 |                                 |                                 |
|                           | 5,371.01<br>(3,667.93 to<br>6,983.19) | 12,052.06<br>(8,185.42 to<br>16,702.63) | 14,162.43<br>(9,957.04 to<br>19,312.34) | 11,354.53<br>(7,781.24 to<br>15,926.04) | 137.91<br>(98.46 to<br>176.11) | 341.22<br>(246.10 to<br>452.28) | 404.76<br>(302.52 to<br>518.18) | 317.84<br>(228.58 to<br>422.20) |
| Other drug use disorders  |                                       |                                         |                                         |                                         |                                |                                 |                                 |                                 |
|                           | 30.60<br>(22.43 to<br>40.25)          | 37.65<br>(21.98 to<br>59.58)            | 41.03<br>(23.67 to<br>64.53)            | 36.39<br>(21.21 to<br>57.00)            | 0.63<br>(0.46 to<br>0.83)      | 0.78<br>(0.46 to<br>1.24)       | 0.85<br>(0.49 to<br>1.35)       | 0.75<br>(0.44 to<br>1.18)       |
| Eating disorders          |                                       |                                         |                                         |                                         |                                |                                 |                                 |                                 |

| Finland                                                    |                                              |                                              |                                              |                                              |                                           |                                           |                                           |                                           |
|------------------------------------------------------------|----------------------------------------------|----------------------------------------------|----------------------------------------------|----------------------------------------------|-------------------------------------------|-------------------------------------------|-------------------------------------------|-------------------------------------------|
| Cause                                                      | YLLs (actual counts)                         |                                              |                                              |                                              | Deaths (actual counts)                    |                                           |                                           |                                           |
|                                                            | 2016                                         | 2040 Forecast                                | 2040 Better Scenario                         | 2040 Worse Scenario                          | 2016                                      | 2040 Forecast                             | 2040 Better Scenario                      | 2040 Worse Scenario                       |
| <b>Diabetes, urogenital, blood, and endocrine diseases</b> | <b>17,079.75</b><br>(15,713.91 to 18,392.92) | <b>28,092.75</b><br>(19,830.36 to 48,827.71) | <b>25,020.08</b><br>(17,741.60 to 43,511.45) | <b>30,422.08</b><br>(21,022.90 to 51,144.25) | <b>1,285.06</b><br>(1,180.03 to 1,385.96) | <b>3,390.56</b><br>(2,218.48 to 7,104.00) | <b>3,135.12</b><br>(2,053.20 to 6,541.32) | <b>3,516.72</b><br>(2,241.22 to 7,165.82) |
| Diabetes mellitus                                          | 6,599.84<br>(5,908.83 to 7,240.62)           | 6,736.72<br>(4,302.57 to 10,458.00)          | 5,438.33<br>(3,559.25 to 8,266.76)           | 7,919.27<br>(4,867.43 to 12,423.46)          | 406.26<br>(364.56 to 446.77)              | 588.32<br>(400.25 to 847.90)              | 506.92<br>(351.12 to 722.50)              | 645.09<br>(419.44 to 944.47)              |
| Acute glomerulonephritis                                   | 24.96<br>(22.30 to 27.57)                    | 21.54<br>(16.43 to 27.32)                    | 19.57<br>(14.90 to 24.98)                    | 22.19<br>(16.97 to 28.23)                    | 0.62<br>(0.56 to 0.69)                    | 0.72<br>(0.54 to 0.96)                    | 0.67<br>(0.49 to 0.92)                    | 0.71<br>(0.53 to 0.95)                    |
| Chronic kidney disease                                     | 5,211.28<br>(4,724.64 to 5,714.44)           | 11,393.39<br>(4,711.89 to 32,329.83)         | 9,780.18<br>(4,114.96 to 28,196.37)          | 12,865.19<br>(5,270.02 to 33,923.54)         | 487.01<br>(440.58 to 532.36)              | 1,612.05<br>(542.28 to 5,310.46)          | 1,430.74<br>(482.15 to 4,799.02)          | 1,752.97<br>(591.24 to 5,448.41)          |
| Chronic kidney disease due to diabetes mellitus            | 2,241.22<br>(2,007.69 to 2,483.37)           | 5,056.69<br>(2,188.57 to 13,719.69)          | 4,339.17<br>(1,905.08 to 11,957.80)          | 5,780.80<br>(2,489.23 to 14,426.93)          | 189.84<br>(169.42 to 211.14)              | 658.75<br>(226.38 to 2,018.37)            | 585.39<br>(204.55 to 1,945.17)            | 723.13<br>(259.32 to 2,112.82)            |
| Chronic kidney disease due to hypertension                 | 529.03<br>(428.38 to 642.61)                 | 1,707.31<br>(577.91 to 5,776.75)             | 1,528.63<br>(510.65 to 5,174.94)             | 1,859.44<br>(639.10 to 6,005.03)             | 68.53<br>(54.34 to 84.35)                 | 300.27<br>(84.54 to 1,119.98)             | 275.65<br>(76.52 to 996.00)               | 317.94<br>(91.78 to 1,080.52)             |
| Chronic kidney disease due to glomerulonephritis           | 870.28<br>(768.10 to 968.45)                 | 1,503.12<br>(623.88 to 4,279.04)             | 1,247.28<br>(516.72 to 3,652.02)             | 1,706.31<br>(686.04 to 4,656.28)             | 76.61<br>(66.63 to 86.95)                 | 200.88<br>(67.78 to 666.96)               | 171.88<br>(58.43 to 583.81)               | 220.48<br>(74.19 to 721.57)               |
| Chronic kidney disease due to other and unspecified causes | 1,570.76<br>(1,386.38 to 1,743.03)           | 3,126.27<br>(1,302.01 to 8,859.44)           | 2,665.10<br>(1,124.22 to 8,029.12)           | 3,518.64<br>(1,451.83 to 9,615.66)           | 152.03<br>(133.63 to 171.32)              | 452.16<br>(154.10 to 1,525.83)            | 397.84<br>(135.88 to 1,373.02)            | 491.42<br>(166.16 to 1,543.14)            |
| Urinary diseases and male infertility                      | 2,208.53<br>(1,965.20 to 2,458.16)           | 6,514.29<br>(5,415.32 to 7,760.47)           | 6,324.12<br>(5,254.82 to 7,502.58)           | 6,253.70<br>(5,164.38 to 7,457.31)           | 253.95<br>(226.25 to 284.79)              | 967.92<br>(784.13 to 1,175.47)            | 965.56<br>(779.16 to 1,162.92)            | 909.16<br>(719.53 to 1,119.82)            |
| Urinary tract infections                                   | 2,035.94<br>(1,797.89 to 2,305.04)           | 6,294.91<br>(5,181.69 to 7,558.04)           | 6,125.91<br>(5,064.19 to 7,273.18)           | 6,037.46<br>(4,958.09 to 7,267.57)           | 240.75<br>(213.15 to 273.40)              | 944.06<br>(758.95 to 1,153.30)            | 943.19<br>(757.69 to 1,142.95)            | 886.46<br>(697.81 to 1,093.51)            |
| Urolithiasis                                               | 60.50<br>(34.47 to 80.62)                    | 73.64<br>(39.26 to 104.97)                   | 65.86<br>(35.51 to 94.45)                    | 73.77<br>(40.02 to 105.62)                   | 4.62<br>(2.65 to 6.23)                    | 7.50<br>(4.14 to 10.83)                   | 6.95<br>(3.88 to 9.96)                    | 7.28<br>(4.04 to 10.51)                   |
| Other urinary diseases                                     | 112.09<br>(53.64 to 158.07)                  | 145.74<br>(67.00 to 226.12)                  | 132.35<br>(60.12 to 204.46)                  | 142.47<br>(64.11 to 222.40)                  | 8.58<br>(4.23 to 12.19)                   | 16.37<br>(7.67 to 26.25)                  | 15.41<br>(7.38 to 24.68)                  | 15.42<br>(7.14 to 25.35)                  |
| Gynecological diseases                                     | 18.20<br>(13.47 to 30.44)                    | 16.98<br>(10.81 to 29.76)                    | 13.80<br>(9.09 to 24.22)                     | 17.98<br>(11.87 to 31.13)                    | 0.94<br>(0.70 to 1.80)                    | 1.12<br>(0.72 to 2.39)                    | 0.93<br>(0.62 to 2.00)                    | 1.15<br>(0.74 to 2.48)                    |
| Uterine fibroids                                           | 11.27<br>(8.36 to 18.56)                     | 8.76<br>(5.50 to 15.65)                      | 7.36<br>(4.75 to 13.22)                      | 9.21<br>(5.81 to 15.89)                      | 0.47<br>(0.35 to 0.84)                    | 0.45<br>(0.27 to 0.86)                    | 0.39<br>(0.24 to 0.75)                    | 0.47<br>(0.28 to 0.87)                    |
| Polycystic ovarian syndrome                                | 0.75<br>(0.38 to 1.55)                       | 0.36<br>(0.13 to 0.85)                       | 0.23<br>(0.09 to 0.57)                       | 0.41<br>(0.15 to 1.01)                       | 0.02<br>(0.01 to 0.04)                    | 0.01<br>(0.00 to 0.02)                    | 0.01<br>(0.00 to 0.02)                    | 0.01<br>(0.00 to 0.02)                    |
| Endometriosis                                              | 0.14<br>(0.07 to 0.29)                       | 0.26<br>(0.08 to 0.76)                       | 0.20<br>(0.06 to 0.59)                       | 0.28<br>(0.08 to 0.90)                       | 0.00<br>(0.00 to 0.01)                    | 0.01<br>(0.00 to 0.02)                    | 0.01<br>(0.00 to 0.01)                    | 0.01<br>(0.00 to 0.02)                    |
| Genital prolapse                                           | 0.64<br>(0.40 to 1.41)                       | 0.78<br>(0.36 to 1.74)                       | 0.62<br>(0.30 to 1.43)                       | 0.83<br>(0.38 to 1.93)                       | 0.05<br>(0.03 to 0.12)                    | 0.06<br>(0.03 to 0.19)                    | 0.05<br>(0.02 to 0.15)                    | 0.07<br>(0.03 to 0.19)                    |
| Other gynecological diseases                               | 5.39<br>(3.78 to 10.33)                      | 6.83<br>(4.13 to 13.56)                      | 5.39<br>(3.31 to 10.38)                      | 7.26<br>(4.38 to 13.81)                      | 0.40<br>(0.28 to 0.95)                    | 0.59<br>(0.33 to 1.44)                    | 0.48<br>(0.28 to 1.17)                    | 0.60<br>(0.35 to 1.43)                    |
| Hemoglobinopathies and hemolytic anemias                   | 515.36<br>(442.07 to 698.18)                 | 494.17<br>(399.89 to 690.18)                 | 453.01<br>(364.27 to 634.13)                 | 490.02<br>(390.23 to 696.12)                 | 37.74<br>(31.98 to 53.37)                 | 55.10<br>(43.78 to 75.94)                 | 52.57<br>(41.89 to 74.20)                 | 52.76<br>(40.57 to 74.51)                 |
| Thalassemias                                               | 45.88<br>(24.52 to 75.13)                    | 20.21<br>(8.23 to 38.65)                     | 19.70<br>(8.31 to 37.38)                     | 20.58<br>(8.43 to 39.24)                     | 0.67<br>(0.32 to 1.19)                    | 0.32<br>(0.11 to 0.68)                    | 0.31<br>(0.11 to 0.65)                    | 0.32<br>(0.11 to 0.67)                    |

|                                                   |                                       |                                       |                                       |                                       |                               |                                 |                                 |                                 |
|---------------------------------------------------|---------------------------------------|---------------------------------------|---------------------------------------|---------------------------------------|-------------------------------|---------------------------------|---------------------------------|---------------------------------|
|                                                   | 21.63<br>(7.17 to<br>42.83)           | 18.46<br>(5.97 to<br>36.85)           | 15.83<br>(4.81 to<br>32.34)           | 19.41<br>(6.08 to<br>40.07)           | 0.52<br>(0.16 to<br>1.00)     | 0.55<br>(0.16 to<br>1.14)       | 0.47<br>(0.13 to<br>1.04)       | 0.57<br>(0.16 to<br>1.25)       |
| Sickle cell disorders                             |                                       |                                       |                                       |                                       |                               |                                 |                                 |                                 |
|                                                   | 77.68<br>(55.61 to<br>103.05)         | 71.76<br>(48.47 to<br>101.55)         | 60.54<br>(41.32 to<br>87.24)          | 75.00<br>(50.65 to<br>106.96)         | 2.62<br>(1.88 to<br>3.45)     | 3.31<br>(2.27 to<br>4.79)       | 2.86<br>(1.94 to<br>4.14)       | 3.38<br>(2.35 to<br>4.87)       |
| G6PD deficiency                                   |                                       |                                       |                                       |                                       |                               |                                 |                                 |                                 |
|                                                   | 370.17<br>(310.98 to<br>523.50)       | 383.74<br>(306.99 to<br>548.69)       | 356.94<br>(285.65 to<br>508.79)       | 375.03<br>(292.60 to<br>534.10)       | 33.94<br>(28.63 to<br>49.37)  | 50.93<br>(40.22 to<br>70.47)    | 48.93<br>(38.92 to<br>69.41)    | 48.49<br>(37.12 to<br>68.32)    |
| Other hemoglobinopathies and hemolytic anemias    |                                       |                                       |                                       |                                       |                               |                                 |                                 |                                 |
|                                                   | 2,501.58<br>(1,762.42 to<br>2,932.90) | 2,915.65<br>(2,136.99 to<br>3,563.23) | 2,991.06<br>(2,233.30 to<br>3,676.95) | 2,853.73<br>(2,091.42 to<br>3,490.23) | 98.54<br>(80.08 to<br>115.76) | 165.33<br>(135.38 to<br>205.82) | 177.72<br>(145.37 to<br>225.46) | 154.87<br>(126.95 to<br>191.05) |
| Endocrine, metabolic, blood, and immune disorders |                                       |                                       |                                       |                                       |                               |                                 |                                 |                                 |

| Finland                                       |                                           |                                           |                                           |                                           |                                     |                                     |                                     |                                     |
|-----------------------------------------------|-------------------------------------------|-------------------------------------------|-------------------------------------------|-------------------------------------------|-------------------------------------|-------------------------------------|-------------------------------------|-------------------------------------|
| Cause                                         | YLLs (actual counts)                      |                                           |                                           |                                           | Deaths (actual counts)              |                                     |                                     |                                     |
|                                               | 2016                                      | 2040 Forecast                             | 2040 Better Scenario                      | 2040 Worse Scenario                       | 2016                                | 2040 Forecast                       | 2040 Better Scenario                | 2040 Worse Scenario                 |
| <b>Musculoskeletal disorders</b>              | <b>2,679.65</b><br>(2,280.52 to 3,136.93) | <b>3,692.25</b><br>(2,922.57 to 4,803.10) | <b>3,267.76</b><br>(2,632.34 to 4,135.78) | <b>3,782.77</b><br>(3,003.00 to 4,940.78) | <b>188.81</b><br>(161.59 to 238.50) | <b>340.34</b><br>(270.34 to 477.88) | <b>312.42</b><br>(253.25 to 437.89) | <b>338.67</b><br>(270.62 to 473.36) |
| Rheumatoid arthritis                          | 1,475.28<br>(1,200.56 to 2,015.50)        | 2,325.52<br>(1,723.08 to 3,236.01)        | 1,911.20<br>(1,450.30 to 2,680.99)        | 2,450.02<br>(1,800.59 to 3,390.74)        | 100.99<br>(82.80 to 141.99)         | 203.04<br>(150.95 to 297.48)        | 171.47<br>(131.15 to 247.04)        | 208.59<br>(152.92 to 308.73)        |
| Other musculoskeletal disorders               | 1,204.37<br>(788.09 to 1,444.06)          | 1,366.73<br>(954.67 to 1,688.09)          | 1,356.56<br>(961.65 to 1,670.78)          | 1,332.75<br>(915.97 to 1,637.15)          | 87.82<br>(62.78 to 108.27)          | 137.29<br>(99.77 to 185.14)         | 140.95<br>(104.62 to 191.30)        | 130.07<br>(93.93 to 172.27)         |
| <b>Other non-communicable diseases</b>        | <b>7,971.47</b><br>(6,390.64 to 9,820.19) | <b>7,323.26</b><br>(5,533.40 to 9,333.70) | <b>6,555.56</b><br>(4,956.65 to 8,156.24) | <b>7,657.10</b><br>(5,801.61 to 9,776.65) | <b>172.24</b><br>(133.27 to 203.33) | <b>275.77</b><br>(183.77 to 346.22) | <b>268.48</b><br>(176.40 to 339.27) | <b>270.46</b><br>(181.38 to 339.56) |
| Congenital birth defects                      | 6,517.24<br>(5,089.46 to 8,200.95)        | 5,343.02<br>(3,949.13 to 7,070.48)        | 4,653.09<br>(3,428.59 to 6,048.11)        | 5,696.45<br>(4,124.09 to 7,439.75)        | 108.92<br>(84.25 to 131.01)         | 98.09<br>(71.65 to 124.00)          | 88.02<br>(63.82 to 109.00)          | 102.81<br>(74.45 to 130.05)         |
| Neural tube defects                           | 71.20<br>(33.79 to 109.47)                | 25.49<br>(13.50 to 43.04)                 | 19.74<br>(10.96 to 33.38)                 | 28.37<br>(14.46 to 49.67)                 | 1.08<br>(0.60 to 1.57)              | 0.44<br>(0.26 to 0.71)              | 0.34<br>(0.21 to 0.56)              | 0.48<br>(0.28 to 0.77)              |
| Congenital heart anomalies                    | 2,264.65<br>(1,749.32 to 3,049.19)        | 1,188.44<br>(753.16 to 1,846.41)          | 893.82<br>(574.30 to 1,403.10)            | 1,328.25<br>(832.46 to 2,120.83)          | 36.20<br>(29.03 to 50.85)           | 20.19<br>(12.79 to 33.45)           | 15.29<br>(9.87 to 26.38)            | 22.37<br>(14.05 to 37.05)           |
| Orofacial clefts                              | 2.96<br>(0.88 to 8.48)                    | 1.31<br>(0.29 to 4.00)                    | 0.92<br>(0.19 to 2.78)                    | 1.51<br>(0.32 to 4.60)                    | 0.03<br>(0.01 to 0.10)              | 0.02<br>(0.00 to 0.05)              | 0.01<br>(0.00 to 0.03)              | 0.02<br>(0.00 to 0.05)              |
| Down syndrome                                 | 875.84<br>(302.09 to 1,190.52)            | 1,163.98<br>(440.75 to 1,637.15)          | 1,188.73<br>(485.37 to 1,654.10)          | 1,152.27<br>(424.77 to 1,622.88)          | 25.74<br>(8.02 to 35.48)            | 34.53<br>(11.76 to 49.60)           | 35.28<br>(12.82 to 49.47)           | 34.10<br>(11.42 to 48.84)           |
| Other chromosomal abnormalities               | 1,348.71<br>(787.57 to 1,893.71)          | 1,769.26<br>(1,136.80 to 2,593.01)        | 1,589.63<br>(1,029.73 to 2,329.77)        | 1,872.82<br>(1,180.89 to 2,745.05)        | 18.22<br>(11.77 to 25.11)           | 24.95<br>(16.77 to 36.31)           | 22.55<br>(15.61 to 32.31)           | 26.26<br>(17.58 to 37.61)           |
| Congenital musculoskeletal and limb anomalies | 198.51<br>(119.43 to 279.54)              | 127.22<br>(77.51 to 196.37)               | 101.85<br>(62.97 to 154.08)               | 139.50<br>(83.17 to 213.73)               | 3.07<br>(2.09 to 4.03)              | 2.11<br>(1.34 to 3.22)              | 1.70<br>(1.07 to 2.57)              | 2.30<br>(1.42 to 3.45)              |
| Urogenital congenital anomalies               | 104.27<br>(26.41 to 183.70)               | 61.42<br>(18.09 to 113.83)                | 50.78<br>(15.74 to 94.38)                 | 67.13<br>(18.88 to 127.65)                | 1.42<br>(0.49 to 2.36)              | 0.86<br>(0.36 to 1.46)              | 0.72<br>(0.30 to 1.22)              | 0.94<br>(0.37 to 1.65)              |
| Digestive congenital anomalies                | 333.30<br>(123.64 to 538.41)              | 191.88<br>(73.28 to 346.05)               | 148.50<br>(58.82 to 257.65)               | 214.31<br>(82.28 to 376.47)               | 4.53<br>(1.92 to 6.86)              | 2.66<br>(1.18 to 4.48)              | 2.07<br>(0.98 to 3.35)              | 2.95<br>(1.29 to 4.87)              |
| Other congenital birth defects                | 1,317.82<br>(889.16 to 2,311.26)          | 814.01<br>(488.78 to 1,558.55)            | 659.12<br>(394.80 to 1,254.43)            | 892.29<br>(531.91 to 1,695.95)            | 18.64<br>(13.29 to 32.04)           | 12.33<br>(7.75 to 22.86)            | 10.05<br>(6.31 to 18.85)            | 13.41<br>(8.45 to 24.70)            |
| Skin and subcutaneous diseases                | 685.31<br>(317.80 to 876.23)              | 1,636.05<br>(785.51 to 2,159.05)          | 1,614.30<br>(784.61 to 2,151.14)          | 1,583.34<br>(775.31 to 2,078.06)          | 54.38<br>(26.62 to 73.57)           | 173.69<br>(87.79 to 241.04)         | 177.12<br>(90.02 to 246.45)         | 163.27<br>(81.21 to 227.19)         |
| Cellulitis                                    | 165.53<br>(93.52 to 313.18)               | 350.49<br>(217.67 to 775.84)              | 353.96<br>(218.52 to 796.08)              | 337.84<br>(209.42 to 749.44)              | 11.07<br>(6.78 to 23.87)            | 31.80<br>(18.61 to 81.78)           | 33.16<br>(19.25 to 85.54)           | 29.73<br>(17.33 to 75.83)           |
| Pyoderma                                      | 423.08<br>(139.49 to 579.44)              | 1,151.37<br>(420.91 to 1,603.64)          | 1,132.73<br>(414.73 to 1,572.92)          | 1,114.48<br>(404.21 to 1,544.46)          | 34.65<br>(12.10 to 47.27)           | 125.07<br>(47.95 to 173.69)         | 127.46<br>(48.41 to 177.01)         | 117.63<br>(45.00 to 163.60)         |
| Decubitus ulcer                               | 63.20<br>(36.01 to 113.18)                | 84.55<br>(46.47 to 166.40)                | 79.42<br>(43.00 to 156.21)                | 82.55<br>(44.51 to 162.90)                | 6.37<br>(3.46 to 11.83)             | 11.88<br>(5.84 to 25.35)            | 11.53<br>(5.67 to 23.57)            | 11.27<br>(5.60 to 23.09)            |
| Other skin and subcutaneous diseases          | 33.50<br>(18.95 to 55.24)                 | 49.63<br>(28.90 to 93.34)                 | 48.19<br>(27.90 to 89.67)                 | 48.47<br>(28.26 to 89.51)                 | 2.29<br>(1.32 to 4.14)              | 4.93<br>(2.82 to 9.92)              | 4.97<br>(2.80 to 9.93)              | 4.65<br>(2.62 to 9.40)              |
| Sudden infant death syndrome                  | 768.82<br>(483.19 to 1,131.28)            | 344.19<br>(174.64 to 594.88)              | 288.17<br>(143.70 to 508.54)              | 377.31<br>(189.01 to 663.72)              | 8.92<br>(5.61 to 13.13)             | 3.99<br>(2.05 to 6.90)              | 3.34<br>(1.67 to 5.90)              | 4.38<br>(2.19 to 7.70)              |

|                          |                                          |                                          |                                          |                                           |                                       |                                       |                                       |                                       |
|--------------------------|------------------------------------------|------------------------------------------|------------------------------------------|-------------------------------------------|---------------------------------------|---------------------------------------|---------------------------------------|---------------------------------------|
| Injuries                 | 77,107.83<br>(68,293.33 to<br>86,354.81) | 64,971.30<br>(46,850.47 to<br>91,624.13) | 58,334.89<br>(43,745.29 to<br>80,042.20) | 76,643.75<br>(53,355.79 to<br>110,735.18) | 3,038.36<br>(2,616.65 to<br>3,357.78) | 3,799.25<br>(3,065.82 to<br>4,630.87) | 3,634.42<br>(2,954.06 to<br>4,331.33) | 3,986.63<br>(3,171.42 to<br>4,962.34) |
| Transport injuries       | 12,215.42<br>(10,781.12 to<br>13,739.57) | 7,045.00<br>(4,148.78 to<br>11,816.03)   | 6,352.53<br>(3,846.08 to<br>10,498.38)   | 12,507.27<br>(7,028.43 to<br>21,456.20)   | 353.37<br>(316.92 to<br>393.46)       | 262.26<br>(174.28 to<br>400.33)       | 244.44<br>(167.09 to<br>359.09)       | 413.58<br>(257.81 to<br>637.85)       |
| Road injuries            | 9,671.85<br>(8,468.58 to<br>10,929.79)   | 4,771.16<br>(2,776.89 to<br>8,064.68)    | 4,524.96<br>(2,706.53 to<br>7,552.81)    | 9,770.42<br>(5,496.25 to<br>17,201.84)    | 277.69<br>(248.09 to<br>313.97)       | 187.98<br>(125.58 to<br>281.86)       | 183.68<br>(126.62 to<br>270.31)       | 325.89<br>(204.25 to<br>508.88)       |
| Pedestrian road injuries | 1,405.13<br>(1,059.42 to<br>1,674.98)    | 513.74<br>(332.29 to<br>802.60)          | 416.36<br>(278.47 to<br>619.14)          | 942.63<br>(562.09 to<br>1,523.88)         | 53.18<br>(40.94 to<br>62.95)          | 29.14<br>(20.12 to<br>41.68)          | 24.54<br>(17.07 to<br>34.13)          | 47.45<br>(30.68 to<br>72.57)          |

| Finland                                         |                                                               |                                                               |                                                               |                                                               |                                                            |                                                            |                                                            |                                                            |
|-------------------------------------------------|---------------------------------------------------------------|---------------------------------------------------------------|---------------------------------------------------------------|---------------------------------------------------------------|------------------------------------------------------------|------------------------------------------------------------|------------------------------------------------------------|------------------------------------------------------------|
| Cause                                           | YLLs (actual counts)                                          |                                                               |                                                               |                                                               | Deaths (actual counts)                                     |                                                            |                                                            |                                                            |
|                                                 | 2016                                                          | 2040 Forecast                                                 | 2040 Better Scenario                                          | 2040 Worse Scenario                                           | 2016                                                       | 2040 Forecast                                              | 2040 Better Scenario                                       | 2040 Worse Scenario                                        |
| Cyclist road injuries                           | 891.67<br>(736.35 to<br>1,132.49)                             | 736.41<br>(476.06 to<br>1,135.09)                             | 726.46<br>(478.53 to<br>1,096.16)                             | 1,255.47<br>(751.51 to<br>2,030.72)                           | 34.87<br>(29.45 to<br>42.03)                               | 41.53<br>(27.06 to<br>62.06)                               | 42.36<br>(27.89 to<br>62.97)                               | 59.26<br>(37.26 to<br>91.50)                               |
| Motorcyclist road injuries                      | 1,332.38<br>(830.71 to<br>1,699.73)                           | 846.32<br>(401.51 to<br>1,664.89)                             | 807.97<br>(394.00 to<br>1,575.17)                             | 1,443.83<br>(644.99 to<br>2,864.04)                           | 28.11<br>(19.11 to<br>34.86)                               | 20.52<br>(11.04 to<br>36.76)                               | 19.94<br>(11.12 to<br>35.40)                               | 31.71<br>(16.14 to<br>59.55)                               |
| Motor vehicle road injuries                     | 5,932.10<br>(5,149.24 to<br>6,997.58)                         | 2,617.31<br>(1,447.02 to<br>4,507.35)                         | 2,518.62<br>(1,440.23 to<br>4,241.78)                         | 6,013.95<br>(3,185.50 to<br>10,478.86)                        | 158.74<br>(138.63 to<br>189.89)                            | 94.68<br>(60.97 to<br>146.41)                              | 94.67<br>(62.91 to<br>142.87)                              | 183.98<br>(111.09 to<br>293.26)                            |
| Other road injuries                             | 110.57<br>(55.22 to<br>166.40)                                | 57.38<br>(22.67 to<br>111.41)                                 | 55.54<br>(22.19 to<br>105.01)                                 | 114.54<br>(46.91 to<br>222.23)                                | 2.80<br>(1.26 to<br>4.24)                                  | 2.12<br>(0.71 to<br>3.71)                                  | 2.16<br>(0.71 to<br>3.71)                                  | 3.49<br>(1.25 to<br>6.35)                                  |
| Other transport injuries                        | 2,543.56<br>(2,174.98 to<br>2,927.88)                         | 2,273.84<br>(1,270.55 to<br>3,941.87)                         | 1,827.57<br>(1,070.35 to<br>3,144.46)                         | 2,736.86<br>(1,507.20 to<br>4,847.53)                         | 75.67<br>(63.06 to<br>87.14)                               | 74.28<br>(44.35 to<br>118.97)                              | 60.77<br>(37.64 to<br>96.43)                               | 87.69<br>(50.74 to<br>146.54)                              |
| <b>Unintentional injuries</b>                   | <b>27,387.75</b><br><b>(19,959.14 to</b><br><b>31,208.97)</b> | <b>28,502.53</b><br><b>(20,403.53 to</b><br><b>34,383.27)</b> | <b>26,919.07</b><br><b>(19,433.86 to</b><br><b>31,786.49)</b> | <b>28,479.65</b><br><b>(19,969.56 to</b><br><b>34,268.63)</b> | <b>1,694.39</b><br><b>(1,232.39 to</b><br><b>1,914.99)</b> | <b>2,682.79</b><br><b>(1,996.30 to</b><br><b>3,132.59)</b> | <b>2,647.45</b><br><b>(1,968.83 to</b><br><b>3,042.63)</b> | <b>2,563.56</b><br><b>(1,864.76 to</b><br><b>3,045.36)</b> |
| Falls                                           | 15,596.50<br>(9,555.52 to<br>18,430.90)                       | 19,412.73<br>(12,085.70 to<br>23,357.48)                      | 18,783.33<br>(11,843.28 to<br>22,408.54)                      | 18,926.87<br>(11,570.28 to<br>22,807.39)                      | 1,234.35<br>(769.08 to<br>1,424.13)                        | 2,179.40<br>(1,368.40 to<br>2,619.60)                      | 2,174.69<br>(1,384.49 to<br>2,570.55)                      | 2,059.07<br>(1,268.38 to<br>2,510.65)                      |
| Drowning                                        | 3,418.36<br>(3,057.16 to<br>3,814.11)                         | 2,292.07<br>(1,560.06 to<br>3,335.47)                         | 2,018.86<br>(1,396.84 to<br>2,914.29)                         | 2,514.96<br>(1,663.92 to<br>3,773.30)                         | 107.39<br>(96.58 to<br>118.87)                             | 83.46<br>(59.69 to<br>116.84)                              | 75.12<br>(54.96 to<br>102.56)                              | 89.56<br>(62.37 to<br>129.73)                              |
| Fire, heat, and hot substances                  | 1,788.35<br>(1,425.27 to<br>2,074.41)                         | 1,135.83<br>(783.83 to<br>1,657.80)                           | 959.55<br>(680.15 to<br>1,361.04)                             | 1,254.87<br>(832.86 to<br>1,892.63)                           | 69.37<br>(61.25 to<br>83.40)                               | 61.36<br>(42.64 to<br>103.60)                              | 54.23<br>(38.74 to<br>92.39)                               | 64.92<br>(44.33 to<br>104.58)                              |
| Poisonings                                      | 381.13<br>(301.92 to<br>683.32)                               | 240.96<br>(140.48 to<br>473.31)                               | 192.54<br>(114.29 to<br>352.04)                               | 273.69<br>(149.40 to<br>527.79)                               | 12.32<br>(10.08 to<br>19.01)                               | 9.32<br>(6.23 to<br>15.95)                                 | 7.72<br>(5.30 to<br>12.78)                                 | 10.27<br>(6.49 to<br>17.35)                                |
| Exposure to mechanical forces                   | 1,190.55<br>(909.55 to<br>1,411.75)                           | 870.75<br>(661.27 to<br>1,143.57)                             | 765.83<br>(590.43 to<br>979.94)                               | 903.93<br>(677.24 to<br>1,171.29)                             | 39.93<br>(33.73 to<br>49.52)                               | 42.78<br>(33.50 to<br>60.22)                               | 39.62<br>(31.75 to<br>56.21)                               | 42.48<br>(33.47 to<br>59.46)                               |
| Unintentional firearm injuries                  | 157.85<br>(130.94 to<br>185.30)                               | 112.72<br>(84.35 to<br>149.23)                                | 102.05<br>(79.06 to<br>131.93)                                | 116.28<br>(87.59 to<br>152.37)                                | 4.84<br>(4.22 to<br>5.90)                                  | 5.18<br>(4.25 to<br>7.04)                                  | 5.01<br>(4.14 to<br>6.88)                                  | 5.09<br>(4.16 to<br>6.75)                                  |
| Unintentional suffocation                       | 103.64<br>(81.07 to<br>152.42)                                | 70.45<br>(48.81 to<br>106.64)                                 | 62.70<br>(43.62 to<br>93.82)                                  | 74.28<br>(51.26 to<br>116.01)                                 | 1.95<br>(1.59 to<br>2.73)                                  | 1.51<br>(1.12 to<br>2.08)                                  | 1.37<br>(1.03 to<br>1.90)                                  | 1.55<br>(1.16 to<br>2.25)                                  |
| Other exposure to mechanical forces             | 929.05<br>(665.06 to<br>1,130.00)                             | 687.59<br>(497.97 to<br>905.85)                               | 601.08<br>(448.43 to<br>779.95)                               | 713.37<br>(512.43 to<br>948.49)                               | 33.14<br>(27.01 to<br>42.45)                               | 36.09<br>(27.53 to<br>52.77)                               | 33.23<br>(26.08 to<br>48.96)                               | 35.84<br>(27.69 to<br>52.10)                               |
| Adverse effects of medical treatment            | 584.30<br>(443.78 to<br>920.19)                               | 673.87<br>(473.12 to<br>1,111.45)                             | 655.20<br>(460.62 to<br>1,095.66)                             | 661.68<br>(467.81 to<br>1,094.65)                             | 40.21<br>(28.64 to<br>66.79)                               | 65.65<br>(42.88 to<br>115.57)                              | 66.19<br>(43.35 to<br>115.49)                              | 62.31<br>(40.69 to<br>109.27)                              |
| Animal contact                                  | 161.09<br>(116.80 to<br>203.51)                               | 178.29<br>(128.82 to<br>240.86)                               | 161.92<br>(118.41 to<br>214.58)                               | 183.00<br>(129.35 to<br>243.87)                               | 5.92<br>(4.30 to<br>7.45)                                  | 8.54<br>(6.77 to<br>11.91)                                 | 8.05<br>(6.41 to<br>11.21)                                 | 8.46<br>(6.60 to<br>11.61)                                 |
| Venomous animal contact                         | 63.72<br>(34.94 to<br>81.57)                                  | 64.16<br>(32.66 to<br>89.14)                                  | 59.68<br>(30.39 to<br>83.09)                                  | 65.56<br>(33.02 to<br>91.23)                                  | 2.11<br>(0.99 to<br>2.75)                                  | 2.52<br>(1.13 to<br>3.45)                                  | 2.41<br>(1.09 to<br>3.28)                                  | 2.51<br>(1.12 to<br>3.48)                                  |
| Non-venomous animal contact                     | 97.38<br>(75.66 to<br>142.63)                                 | 114.13<br>(84.66 to<br>166.67)                                | 102.24<br>(77.25 to<br>147.50)                                | 117.44<br>(86.34 to<br>171.63)                                | 3.82<br>(3.07 to<br>5.70)                                  | 6.02<br>(4.66 to<br>9.32)                                  | 5.64<br>(4.44 to<br>8.81)                                  | 5.95<br>(4.64 to<br>9.15)                                  |
| Foreign body                                    | 1,831.76<br>(1,264.57 to<br>2,266.92)                         | 1,660.16<br>(1,205.12 to<br>2,093.04)                         | 1,625.21<br>(1,183.76 to<br>2,027.14)                         | 1,652.67<br>(1,187.35 to<br>2,086.06)                         | 84.24<br>(63.49 to<br>101.39)                              | 103.31<br>(82.55 to<br>132.77)                             | 105.75<br>(84.78 to<br>138.87)                             | 98.74<br>(79.31 to<br>124.61)                              |
| Pulmonary aspiration and foreign body in airway | 1,755.27<br>(1,195.01 to<br>2,184.90)                         | 1,571.31<br>(1,132.68 to<br>1,998.76)                         | 1,531.31<br>(1,116.32 to<br>1,927.52)                         | 1,566.59<br>(1,111.38 to<br>1,995.33)                         | 81.19<br>(61.27 to<br>98.00)                               | 98.01<br>(77.60 to<br>128.03)                              | 99.92<br>(79.06 to<br>134.45)                              | 93.81<br>(74.30 to<br>120.01)                              |

|                                             |                                                               |                                                               |                                                               |                                                               |                                                        |                                                        |                                                        |                                                          |
|---------------------------------------------|---------------------------------------------------------------|---------------------------------------------------------------|---------------------------------------------------------------|---------------------------------------------------------------|--------------------------------------------------------|--------------------------------------------------------|--------------------------------------------------------|----------------------------------------------------------|
|                                             | 76.49<br>(59.13 to<br>99.16)                                  | 88.85<br>(60.65 to<br>114.74)                                 | 93.89<br>(63.89 to<br>121.14)                                 | 86.08<br>(58.89 to<br>111.73)                                 | 3.05<br>(1.79 to<br>3.67)                              | 5.30<br>(2.73 to<br>6.76)                              | 5.83<br>(3.02 to<br>7.49)                              | 4.93<br>(2.51 to<br>6.37)                                |
| Foreign body in other body part             |                                                               |                                                               |                                                               |                                                               |                                                        |                                                        |                                                        |                                                          |
|                                             | 2,196.40<br>(1,046.54 to<br>2,786.83)                         | 1,930.40<br>(1,046.96 to<br>2,725.55)                         | 1,676.34<br>(918.54 to<br>2,407.81)                           | 1,990.43<br>(1,048.82 to<br>2,854.84)                         | 102.69<br>(63.89 to<br>163.77)                         | 124.34<br>(80.46 to<br>262.09)                         | 112.50<br>(74.91 to<br>239.77)                         | 122.88<br>(81.64 to<br>242.50)                           |
| Environmental heat and cold exposure        |                                                               |                                                               |                                                               |                                                               |                                                        |                                                        |                                                        |                                                          |
|                                             | 239.31<br>(209.27 to<br>276.64)                               | 107.47<br>(76.36 to<br>147.71)                                | 80.30<br>(60.37 to<br>104.77)                                 | 117.55<br>(82.37 to<br>165.32)                                | 7.97<br>(7.07 to<br>9.06)                              | 4.63<br>(3.51 to<br>6.14)                              | 3.58<br>(2.87 to<br>4.41)                              | 4.89<br>(3.63 to<br>6.58)                                |
| Other unintentional injuries                |                                                               |                                                               |                                                               |                                                               |                                                        |                                                        |                                                        |                                                          |
| <b>Self-harm and interpersonal violence</b> | <b>37,480.92</b><br><b>(31,916.99 to</b><br><b>50,576.71)</b> | <b>29,400.37</b><br><b>(16,446.44 to</b><br><b>50,617.44)</b> | <b>25,039.38</b><br><b>(14,096.64 to</b><br><b>42,203.99)</b> | <b>35,633.95</b><br><b>(18,648.15 to</b><br><b>62,320.98)</b> | <b>990.07</b><br><b>(841.15 to</b><br><b>1,365.66)</b> | <b>853.17</b><br><b>(518.75 to</b><br><b>1,406.46)</b> | <b>741.44</b><br><b>(460.54 to</b><br><b>1,187.08)</b> | <b>1,008.53</b><br><b>(581.00 to</b><br><b>1,672.16)</b> |

| Finland                                                                             |                                                   |                                                   |                                                   |                                                   |                                                |                                                |                                                |                                                |
|-------------------------------------------------------------------------------------|---------------------------------------------------|---------------------------------------------------|---------------------------------------------------|---------------------------------------------------|------------------------------------------------|------------------------------------------------|------------------------------------------------|------------------------------------------------|
| Cause                                                                               | YLLs (actual counts)                              |                                                   |                                                   |                                                   | Deaths (actual counts)                         |                                                |                                                |                                                |
|                                                                                     | 2016                                              | 2040 Forecast                                     | 2040 Better Scenario                              | 2040 Worse Scenario                               | 2016                                           | 2040 Forecast                                  | 2040 Better Scenario                           | 2040 Worse Scenario                            |
| Self-harm                                                                           | 33,962.82<br>(28,689.52 to<br>47,076.12)          | 27,535.30<br>(14,964.19 to<br>48,159.35)          | 23,414.61<br>(12,943.11 to<br>40,302.63)          | 33,581.59<br>(17,055.84 to<br>59,588.42)          | 907.38<br>(762.10 to<br>1,284.10)              | 802.93<br>(473.76 to<br>1,345.48)              | 696.78<br>(421.13 to<br>1,139.84)              | 954.10<br>(528.46 to<br>1,609.00)              |
| Self-harm by firearm                                                                | 5,744.85<br>(3,819.61 to<br>9,370.69)             | 3,617.28<br>(1,623.08 to<br>7,325.26)             | 2,943.40<br>(1,356.90 to<br>5,974.34)             | 4,465.14<br>(1,886.51 to<br>9,246.68)             | 168.01<br>(115.85 to<br>282.17)                | 120.70<br>(60.16 to<br>235.45)                 | 101.04<br>(53.63 to<br>189.38)                 | 143.98<br>(68.83 to<br>282.94)                 |
| Self-harm by other specified means                                                  | 28,217.97<br>(23,750.16 to<br>39,556.19)          | 23,918.02<br>(13,230.76 to<br>42,698.94)          | 20,471.21<br>(11,334.46 to<br>34,928.54)          | 29,116.45<br>(14,699.53 to<br>51,445.03)          | 739.38<br>(618.02 to<br>1,054.89)              | 682.23<br>(405.81 to<br>1,158.75)              | 595.74<br>(364.03 to<br>976.96)                | 810.12<br>(453.40 to<br>1,366.41)              |
| Interpersonal violence                                                              | 3,518.10<br>(2,316.42 to<br>4,993.90)             | 1,865.07<br>(1,133.06 to<br>2,832.59)             | 1,624.77<br>(990.08 to<br>2,422.51)               | 2,052.36<br>(990.08 to<br>3,193.70)               | 82.69<br>(54.86 to<br>115.10)                  | 50.24<br>(32.19 to<br>78.63)                   | 44.66<br>(29.22 to<br>68.95)                   | 54.43<br>(35.86 to<br>84.89)                   |
| Physical violence by firearm                                                        | 596.93<br>(337.44 to<br>917.93)                   | 296.20<br>(166.76 to<br>482.18)                   | 254.37<br>(138.99 to<br>392.26)                   | 314.69<br>(166.20 to<br>487.01)                   | 13.18<br>(7.85 to<br>20.44)                    | 7.00<br>(4.17 to<br>11.38)                     | 6.10<br>(3.59 to<br>9.86)                      | 7.37<br>(4.14 to<br>11.88)                     |
| Physical violence by sharp object                                                   | 1,270.19<br>(659.85 to<br>1,738.42)               | 675.74<br>(362.78 to<br>1,004.46)                 | 584.60<br>(315.26 to<br>846.18)                   | 714.49<br>(372.58 to<br>1,097.30)                 | 30.20<br>(16.83 to<br>41.44)                   | 18.30<br>(11.29 to<br>27.69)                   | 16.17<br>(10.19 to<br>25.15)                   | 18.99<br>(11.50 to<br>29.04)                   |
| Physical violence by other means                                                    | 1,650.98<br>(1,085.64 to<br>2,785.66)             | 893.13<br>(501.97 to<br>1,642.51)                 | 785.80<br>(443.78 to<br>1,454.88)                 | 1,023.17<br>(576.30 to<br>1,820.22)               | 39.31<br>(25.10 to<br>65.80)                   | 24.94<br>(15.06 to<br>43.19)                   | 22.40<br>(13.80 to<br>39.40)                   | 28.07<br>(16.44 to<br>48.56)                   |
| <b>Forces of nature, conflict and terrorism, and executions and police conflict</b> | <b>23.75</b><br><b>(21.34 to</b><br><b>26.17)</b> | <b>23.40</b><br><b>(0.00 to</b><br><b>122.80)</b> | <b>23.92</b><br><b>(0.00 to</b><br><b>124.43)</b> | <b>22.87</b><br><b>(0.00 to</b><br><b>120.92)</b> | <b>0.53</b><br><b>(0.48 to</b><br><b>0.58)</b> | <b>1.02</b><br><b>(0.00 to</b><br><b>5.71)</b> | <b>1.09</b><br><b>(0.00 to</b><br><b>6.12)</b> | <b>0.95</b><br><b>(0.00 to</b><br><b>5.40)</b> |
| Exposure to forces of nature                                                        | 0.00<br>(0.00 to<br>0.00)                         | 9.08<br>(0.00 to<br>85.49)                        | 9.08<br>(0.00 to<br>85.57)                        | 9.08<br>(0.00 to<br>85.35)                        | 0.00<br>(0.00 to<br>0.00)                      | 0.17<br>(0.00 to<br>1.57)                      | 0.17<br>(0.00 to<br>1.57)                      | 0.17<br>(0.00 to<br>1.57)                      |
| Conflict and terrorism                                                              | 0.00<br>(0.00 to<br>0.00)                         | 14.32<br>(0.00 to<br>102.01)                      | 14.83<br>(0.00 to<br>105.87)                      | 13.79<br>(0.00 to<br>97.77)                       | 0.00<br>(0.00 to<br>0.00)                      | 0.86<br>(4.80 to<br>5.32)                      | 0.93<br>(0.00 to<br>5.32)                      | 0.79<br>(0.00 to<br>4.33)                      |
| Executions and police conflict                                                      | 23.75<br>(21.34 to<br>26.17)                      | 0.00<br>(0.00 to<br>0.00)                         | 0.00<br>(0.00 to<br>0.00)                         | 0.00<br>(0.00 to<br>0.00)                         | 0.53<br>(0.48 to<br>0.58)                      | 0.00<br>(0.00 to<br>0.00)                      | 0.00<br>(0.00 to<br>0.00)                      | 0.00<br>(0.00 to<br>0.00)                      |



| France                                                            |                                    |                                    |                                    |                                      |                              |                              |                              |                              |
|-------------------------------------------------------------------|------------------------------------|------------------------------------|------------------------------------|--------------------------------------|------------------------------|------------------------------|------------------------------|------------------------------|
| Cause                                                             | YLLs (in 1000s)                    |                                    |                                    |                                      | Deaths (in 1000s)            |                              |                              |                              |
|                                                                   | 2016                               | 2040 Forecast                      | 2040 Better Scenario               | 2040 Worse Scenario                  | 2016                         | 2040 Forecast                | 2040 Better Scenario         | 2040 Worse Scenario          |
| All causes                                                        | 8,190.16<br>(7,824.28 to 8,556.23) | 8,395.40<br>(7,385.81 to 9,543.64) | 7,290.98<br>(6,462.13 to 8,208.25) | 10,115.96<br>(8,773.02 to 11,582.11) | 587.72<br>(564.31 to 610.35) | 752.23<br>(677.49 to 832.95) | 680.62<br>(616.65 to 745.74) | 855.37<br>(759.34 to 948.35) |
| Communicable, maternal, neonatal, and nutritional diseases        | 428.83<br>(389.88 to 472.11)       | 510.04<br>(431.29 to 606.14)       | 505.50<br>(435.06 to 592.21)       | 557.60<br>(463.11 to 688.65)         | 32.12<br>(28.88 to 35.68)    | 55.48<br>(45.90 to 67.07)    | 59.16<br>(50.55 to 70.39)    | 56.54<br>(45.82 to 69.77)    |
| HIV/AIDS and tuberculosis                                         | 29.09<br>(27.36 to 30.93)          | 14.60<br>(8.49 to 20.64)           | 11.17<br>(5.97 to 16.00)           | 22.20<br>(14.94 to 30.90)            | 1.50<br>(1.35 to 1.68)       | 0.97<br>(0.58 to 1.51)       | 0.71<br>(0.43 to 1.12)       | 1.45<br>(0.83 to 2.36)       |
| Tuberculosis                                                      | 11.64<br>(10.15 to 13.31)          | 7.49<br>(4.09 to 12.81)            | 5.17<br>(2.87 to 8.53)             | 11.41<br>(5.75 to 19.28)             | 1.05<br>(0.90 to 1.22)       | 0.82<br>(0.44 to 1.39)       | 0.59<br>(0.32 to 0.98)       | 1.22<br>(0.61 to 2.13)       |
| HIV/AIDS                                                          | 17.46<br>(16.57 to 18.30)          | 7.11<br>(2.16 to 10.44)            | 6.00<br>(1.38 to 9.81)             | 10.78<br>(6.71 to 13.84)             | 0.45<br>(0.43 to 0.47)       | 0.15<br>(0.04 to 0.23)       | 0.13<br>(0.03 to 0.22)       | 0.22<br>(0.12 to 0.30)       |
| Diarrhea, lower respiratory, and other common infectious diseases | 240.07<br>(217.32 to 264.78)       | 352.21<br>(275.98 to 442.51)       | 358.34<br>(289.89 to 444.17)       | 386.91<br>(292.84 to 510.59)         | 24.42<br>(21.40 to 27.80)    | 44.58<br>(35.15 to 56.07)    | 47.53<br>(38.11 to 58.98)    | 45.90<br>(35.32 to 59.21)    |
| Diarrheal diseases                                                | 31.12<br>(28.12 to 34.33)          | 102.70<br>(66.11 to 158.25)        | 140.07<br>(103.25 to 192.87)       | 86.02<br>(55.56 to 140.87)           | 3.11<br>(2.74 to 3.49)       | 13.45<br>(8.56 to 20.75)     | 18.91<br>(13.78 to 26.61)    | 10.98<br>(6.92 to 18.02)     |
| Intestinal infectious diseases                                    | 0.11<br>(0.05 to 0.22)             | 0.09<br>(0.04 to 0.17)             | 0.10<br>(0.04 to 0.19)             | 0.09<br>(0.04 to 0.17)               | 0.00<br>(0.00 to 0.01)       | 0.00<br>(0.00 to 0.01)       | 0.00<br>(0.00 to 0.01)       | 0.00<br>(0.00 to 0.01)       |
| Typhoid fever                                                     | 0.07<br>(0.02 to 0.16)             | 0.06<br>(0.02 to 0.13)             | 0.07<br>(0.02 to 0.15)             | 0.06<br>(0.02 to 0.13)               | 0.00<br>(0.00 to 0.00)       | 0.00<br>(0.00 to 0.00)       | 0.00<br>(0.00 to 0.00)       | 0.00<br>(0.00 to 0.00)       |
| Paratyphoid fever                                                 | 0.01<br>(0.00 to 0.03)             | 0.01<br>(0.00 to 0.02)             | 0.01<br>(0.00 to 0.02)             | 0.01<br>(0.00 to 0.02)               | 0.00<br>(0.00 to 0.00)       | 0.00<br>(0.00 to 0.00)       | 0.00<br>(0.00 to 0.00)       | 0.00<br>(0.00 to 0.00)       |
| Other intestinal infectious diseases                              | 0.03<br>(0.01 to 0.06)             | 0.02<br>(0.01 to 0.05)             | 0.02<br>(0.01 to 0.05)             | 0.02<br>(0.01 to 0.05)               | 0.00<br>(0.00 to 0.00)       | 0.00<br>(0.00 to 0.00)       | 0.00<br>(0.00 to 0.00)       | 0.00<br>(0.00 to 0.00)       |
| Lower respiratory infections                                      | 192.96<br>(171.08 to 215.97)       | 236.13<br>(166.87 to 326.96)       | 205.52<br>(141.30 to 286.76)       | 285.96<br>(195.50 to 414.61)         | 20.67<br>(17.74 to 23.92)    | 30.41<br>(21.26 to 42.13)    | 27.91<br>(19.33 to 39.44)    | 34.21<br>(23.65 to 48.31)    |
| Upper respiratory infections                                      | 0.10<br>(0.05 to 0.15)             | 0.07<br>(0.03 to 0.14)             | 0.06<br>(0.02 to 0.11)             | 0.08<br>(0.04 to 0.15)               | 0.00<br>(0.00 to 0.01)       | 0.00<br>(0.00 to 0.01)       | 0.00<br>(0.00 to 0.01)       | 0.01<br>(0.00 to 0.01)       |
| Otitis media                                                      | 0.07<br>(0.06 to 0.11)             | 0.03<br>(0.01 to 0.05)             | 0.03<br>(0.01 to 0.05)             | 0.02<br>(0.01 to 0.04)               | 0.00<br>(0.00 to 0.01)       | 0.00<br>(0.00 to 0.00)       | 0.00<br>(0.00 to 0.01)       | 0.00<br>(0.00 to 0.00)       |
| Meningitis                                                        | 8.00<br>(6.89 to 9.79)             | 4.42<br>(3.50 to 5.57)             | 4.08<br>(3.17 to 5.23)             | 5.05<br>(3.70 to 6.68)               | 0.26<br>(0.23 to 0.30)       | 0.19<br>(0.15 to 0.23)       | 0.18<br>(0.14 to 0.23)       | 0.20<br>(0.16 to 0.24)       |
| Pneumococcal meningitis                                           | 2.70<br>(2.34 to 3.33)             | 1.62<br>(1.30 to 2.09)             | 1.67<br>(1.32 to 2.13)             | 1.63<br>(1.32 to 2.08)               | 0.10<br>(0.09 to 0.11)       | 0.09<br>(0.07 to 0.10)       | 0.09<br>(0.07 to 0.11)       | 0.08<br>(0.07 to 0.10)       |
| H influenzae type B meningitis                                    | 0.60<br>(0.49 to 0.73)             | 1.01<br>(0.55 to 1.73)             | 0.95<br>(0.54 to 1.56)             | 1.51<br>(0.67 to 2.87)               | 0.02<br>(0.01 to 0.02)       | 0.02<br>(0.01 to 0.03)       | 0.02<br>(0.01 to 0.03)       | 0.03<br>(0.02 to 0.04)       |
| Meningococcal meningitis                                          | 1.73<br>(1.45 to 2.16)             | 0.57<br>(0.41 to 0.78)             | 0.46<br>(0.33 to 0.65)             | 0.61<br>(0.43 to 0.87)               | 0.04<br>(0.04 to 0.05)       | 0.02<br>(0.02 to 0.03)       | 0.02<br>(0.01 to 0.02)       | 0.02<br>(0.01 to 0.03)       |
| Other meningitis                                                  | 2.98<br>(2.55 to 3.62)             | 1.22<br>(0.94 to 1.56)             | 0.99<br>(0.75 to 1.30)             | 1.31<br>(0.97 to 1.73)               | 0.10<br>(0.09 to 0.12)       | 0.06<br>(0.05 to 0.08)       | 0.05<br>(0.04 to 0.07)       | 0.07<br>(0.05 to 0.08)       |
| Encephalitis                                                      | 5.92<br>(4.83 to 8.93)             | 7.00<br>(5.45 to 10.10)            | 7.00<br>(5.36 to 10.19)            | 6.86<br>(5.42 to 9.95)               | 0.23<br>(0.19 to 0.32)       | 0.37<br>(0.28 to 0.51)       | 0.38<br>(0.28 to 0.53)       | 0.35<br>(0.27 to 0.48)       |

|                |                           |                           |                           |                           |                           |                           |                           |                           |
|----------------|---------------------------|---------------------------|---------------------------|---------------------------|---------------------------|---------------------------|---------------------------|---------------------------|
| Diphtheria     | 0.01<br>(0.01 to<br>0.02) | 0.00<br>(0.00 to<br>0.01) | 0.00<br>(0.00 to<br>0.01) | 0.01<br>(0.00 to<br>0.01) | 0.00<br>(0.00 to<br>0.00) | 0.00<br>(0.00 to<br>0.00) | 0.00<br>(0.00 to<br>0.00) | 0.00<br>(0.00 to<br>0.00) |
| Whooping cough | 0.34<br>(0.13 to<br>0.79) | 0.14<br>(0.03 to<br>0.40) | 0.07<br>(0.02 to<br>0.18) | 0.79<br>(0.14 to<br>2.10) | 0.00<br>(0.00 to<br>0.01) | 0.00<br>(0.00 to<br>0.00) | 0.00<br>(0.00 to<br>0.00) | 0.01<br>(0.00 to<br>0.02) |
| Tetanus        | 0.06<br>(0.04 to<br>0.08) | 0.01<br>(0.01 to<br>0.01) | 0.01<br>(0.01 to<br>0.01) | 0.01<br>(0.01 to<br>0.02) | 0.00<br>(0.00 to<br>0.00) | 0.00<br>(0.00 to<br>0.00) | 0.00<br>(0.00 to<br>0.00) | 0.00<br>(0.00 to<br>0.00) |
| Measles        | 0.09<br>(0.07 to<br>0.13) | 0.53<br>(0.01 to<br>2.86) | 0.42<br>(0.01 to<br>2.33) | 0.92<br>(0.01 to<br>5.46) | 0.00<br>(0.00 to<br>0.00) | 0.01<br>(0.00 to<br>0.05) | 0.01<br>(0.00 to<br>0.04) | 0.01<br>(0.00 to<br>0.07) |

| France                                                |                                  |                                  |                                  |                                  |                                  |                                  |                                  |                                  |
|-------------------------------------------------------|----------------------------------|----------------------------------|----------------------------------|----------------------------------|----------------------------------|----------------------------------|----------------------------------|----------------------------------|
| Cause                                                 | YLLs (in 1000s)                  |                                  |                                  |                                  | Deaths (in 1000s)                |                                  |                                  |                                  |
|                                                       | 2016                             | 2040 Forecast                    | 2040 Better Scenario             | 2040 Worse Scenario              | 2016                             | 2040 Forecast                    | 2040 Better Scenario             | 2040 Worse Scenario              |
| Varicella and herpes zoster                           | 1.28<br>(0.70 to<br>2.26)        | 1.09<br>(0.57 to<br>1.95)        | 1.00<br>(0.53 to<br>1.81)        | 1.09<br>(0.56 to<br>1.99)        | 0.13<br>(0.06 to<br>0.23)        | 0.14<br>(0.07 to<br>0.24)        | 0.13<br>(0.06 to<br>0.24)        | 0.14<br>(0.06 to<br>0.24)        |
| Neglected tropical diseases and malaria               | <b>0.45</b><br>(0.37 to<br>0.49) | <b>0.42</b><br>(0.33 to<br>0.49) | <b>0.43</b><br>(0.33 to<br>0.50) | <b>0.41</b><br>(0.33 to<br>0.48) | <b>0.01</b><br>(0.01 to<br>0.02) | <b>0.02</b><br>(0.01 to<br>0.02) | <b>0.02</b><br>(0.01 to<br>0.02) | <b>0.02</b><br>(0.01 to<br>0.02) |
| Malaria                                               | 0.00<br>(0.00 to<br>0.00)        | 0.00<br>(0.00 to<br>0.00)        | 0.00<br>(0.00 to<br>0.00)        | 0.00<br>(0.00 to<br>0.00)        | 0.00<br>(0.00 to<br>0.00)        | 0.00<br>(0.00 to<br>0.00)        | 0.00<br>(0.00 to<br>0.00)        | 0.00<br>(0.00 to<br>0.00)        |
| Chagas disease                                        | 0.00<br>(0.00 to<br>0.00)        | 0.00<br>(0.00 to<br>0.00)        | 0.00<br>(0.00 to<br>0.00)        | 0.00<br>(0.00 to<br>0.00)        | 0.00<br>(0.00 to<br>0.00)        | 0.00<br>(0.00 to<br>0.00)        | 0.00<br>(0.00 to<br>0.00)        | 0.00<br>(0.00 to<br>0.00)        |
| Leishmaniasis                                         | 0.03<br>(0.02 to<br>0.05)        | 0.01<br>(0.01 to<br>0.02)        | 0.01<br>(0.01 to<br>0.02)        | 0.01<br>(0.01 to<br>0.02)        | 0.00<br>(0.00 to<br>0.00)        | 0.00<br>(0.00 to<br>0.00)        | 0.00<br>(0.00 to<br>0.00)        | 0.00<br>(0.00 to<br>0.00)        |
| African trypanosomiasis                               | 0.00<br>(0.00 to<br>0.00)        | 0.00<br>(0.00 to<br>0.00)        | 0.00<br>(0.00 to<br>0.00)        | 0.00<br>(0.00 to<br>0.00)        | 0.00<br>(0.00 to<br>0.00)        | 0.00<br>(0.00 to<br>0.00)        | 0.00<br>(0.00 to<br>0.00)        | 0.00<br>(0.00 to<br>0.00)        |
| Schistosomiasis                                       | 0.00<br>(0.00 to<br>0.00)        | 0.00<br>(0.00 to<br>0.00)        | 0.00<br>(0.00 to<br>0.00)        | 0.00<br>(0.00 to<br>0.00)        | 0.00<br>(0.00 to<br>0.00)        | 0.00<br>(0.00 to<br>0.00)        | 0.00<br>(0.00 to<br>0.00)        | 0.00<br>(0.00 to<br>0.00)        |
| Cysticercosis                                         | 0.03<br>(0.03 to<br>0.04)        | 0.01<br>(0.01 to<br>0.01)        | 0.01<br>(0.01 to<br>0.01)        | 0.01<br>(0.01 to<br>0.01)        | 0.00<br>(0.00 to<br>0.00)        | 0.00<br>(0.00 to<br>0.00)        | 0.00<br>(0.00 to<br>0.00)        | 0.00<br>(0.00 to<br>0.00)        |
| Cystic echinococcosis                                 | 0.00<br>(0.00 to<br>0.00)        | 0.00<br>(0.00 to<br>0.00)        | 0.00<br>(0.00 to<br>0.00)        | 0.00<br>(0.00 to<br>0.00)        | 0.00<br>(0.00 to<br>0.00)        | 0.00<br>(0.00 to<br>0.00)        | 0.00<br>(0.00 to<br>0.00)        | 0.00<br>(0.00 to<br>0.00)        |
| Dengue                                                | 0.00<br>(0.00 to<br>0.00)        | 0.00<br>(0.00 to<br>0.00)        | 0.00<br>(0.00 to<br>0.00)        | 0.00<br>(0.00 to<br>0.00)        | 0.00<br>(0.00 to<br>0.00)        | 0.00<br>(0.00 to<br>0.00)        | 0.00<br>(0.00 to<br>0.00)        | 0.00<br>(0.00 to<br>0.00)        |
| Yellow fever                                          | 0.00<br>(0.00 to<br>0.00)        | 0.00<br>(0.00 to<br>0.00)        | 0.00<br>(0.00 to<br>0.00)        | 0.00<br>(0.00 to<br>0.00)        | 0.00<br>(0.00 to<br>0.00)        | 0.00<br>(0.00 to<br>0.00)        | 0.00<br>(0.00 to<br>0.00)        | 0.00<br>(0.00 to<br>0.00)        |
| Rabies                                                | 0.00<br>(0.00 to<br>0.00)        | 0.00<br>(0.00 to<br>0.00)        | 0.00<br>(0.00 to<br>0.00)        | 0.00<br>(0.00 to<br>0.00)        | 0.00<br>(0.00 to<br>0.00)        | 0.00<br>(0.00 to<br>0.00)        | 0.00<br>(0.00 to<br>0.00)        | 0.00<br>(0.00 to<br>0.00)        |
| Intestinal nematode infections                        | 0.00<br>(0.00 to<br>0.00)        | 0.00<br>(0.00 to<br>0.00)        | 0.00<br>(0.00 to<br>0.00)        | 0.00<br>(0.00 to<br>0.00)        | 0.00<br>(0.00 to<br>0.00)        | 0.00<br>(0.00 to<br>0.00)        | 0.00<br>(0.00 to<br>0.00)        | 0.00<br>(0.00 to<br>0.00)        |
| Other neglected tropical diseases                     | 0.38<br>(0.31 to<br>0.42)        | 0.39<br>(0.30 to<br>0.46)        | 0.41<br>(0.31 to<br>0.47)        | 0.39<br>(0.30 to<br>0.45)        | 0.01<br>(0.01 to<br>0.01)        | 0.02<br>(0.01 to<br>0.02)        | 0.02<br>(0.01 to<br>0.02)        | 0.02<br>(0.01 to<br>0.02)        |
| Maternal disorders                                    | <b>3.13</b><br>(2.60 to<br>3.68) | <b>2.37</b><br>(1.69 to<br>3.23) | <b>2.06</b><br>(1.47 to<br>2.81) | <b>2.52</b><br>(1.78 to<br>3.44) | <b>0.06</b><br>(0.05 to<br>0.07) | <b>0.04</b><br>(0.03 to<br>0.06) | <b>0.04</b><br>(0.03 to<br>0.05) | <b>0.05</b><br>(0.03 to<br>0.07) |
| Maternal hemorrhage                                   | 0.55<br>(0.38 to<br>0.75)        | 0.57<br>(0.22 to<br>0.60)        | 0.32<br>(0.19 to<br>0.52)        | 0.59<br>(0.23 to<br>0.63)        | 0.01<br>(0.01 to<br>0.01)        | 0.01<br>(0.00 to<br>0.01)        | 0.01<br>(0.00 to<br>0.01)        | 0.01<br>(0.00 to<br>0.01)        |
| Maternal sepsis and other maternal infections         | 0.13<br>(0.08 to<br>0.19)        | 0.08<br>(0.04 to<br>0.14)        | 0.07<br>(0.04 to<br>0.12)        | 0.09<br>(0.05 to<br>0.15)        | 0.00<br>(0.00 to<br>0.00)        | 0.00<br>(0.00 to<br>0.00)        | 0.00<br>(0.00 to<br>0.00)        | 0.00<br>(0.00 to<br>0.00)        |
| Maternal hypertensive disorders                       | 0.34<br>(0.23 to<br>0.48)        | 0.26<br>(0.15 to<br>0.41)        | 0.22<br>(0.13 to<br>0.36)        | 0.27<br>(0.16 to<br>0.44)        | 0.01<br>(0.00 to<br>0.01)        | 0.00<br>(0.00 to<br>0.01)        | 0.00<br>(0.00 to<br>0.01)        | 0.01<br>(0.00 to<br>0.01)        |
| Maternal obstructed labor and uterine rupture         | 0.10<br>(0.06 to<br>0.15)        | 0.07<br>(0.04 to<br>0.13)        | 0.06<br>(0.03 to<br>0.11)        | 0.08<br>(0.04 to<br>0.13)        | 0.00<br>(0.00 to<br>0.00)        | 0.00<br>(0.00 to<br>0.00)        | 0.00<br>(0.00 to<br>0.00)        | 0.00<br>(0.00 to<br>0.00)        |
| Maternal abortion, miscarriage, and ectopic pregnancy | 0.35<br>(0.25 to<br>0.47)        | 0.28<br>(0.16 to<br>0.47)        | 0.24<br>(0.14 to<br>0.40)        | 0.30<br>(0.17 to<br>0.50)        | 0.01<br>(0.01 to<br>0.01)        | 0.01<br>(0.00 to<br>0.01)        | 0.00<br>(0.00 to<br>0.01)        | 0.01<br>(0.00 to<br>0.01)        |

|                                        |                           |                           |                           |                           |                           |                           |                           |                           |
|----------------------------------------|---------------------------|---------------------------|---------------------------|---------------------------|---------------------------|---------------------------|---------------------------|---------------------------|
|                                        | 0.50<br>(0.34 to<br>0.68) | 0.41<br>(0.23 to<br>0.68) | 0.35<br>(0.19 to<br>0.59) | 0.45<br>(0.24 to<br>0.75) | 0.01<br>(0.01 to<br>0.01) | 0.01<br>(0.00 to<br>0.01) | 0.01<br>(0.00 to<br>0.01) | 0.01<br>(0.00 to<br>0.01) |
| Indirect maternal deaths               | 0.09<br>(0.06 to<br>0.13) | 0.08<br>(0.05 to<br>0.14) | 0.07<br>(0.04 to<br>0.12) | 0.09<br>(0.05 to<br>0.15) | 0.00<br>(0.00 to<br>0.00) | 0.00<br>(0.00 to<br>0.00) | 0.00<br>(0.00 to<br>0.00) | 0.00<br>(0.00 to<br>0.00) |
| Late maternal deaths                   | 0.00<br>(0.00 to<br>0.00) | 0.01<br>(0.00 to<br>0.03) | 0.01<br>(0.00 to<br>0.02) | 0.01<br>(0.00 to<br>0.03) | 0.00<br>(0.00 to<br>0.00) | 0.00<br>(0.00 to<br>0.00) | 0.00<br>(0.00 to<br>0.00) | 0.00<br>(0.00 to<br>0.00) |
| Maternal deaths aggravated by HIV/AIDS | 1.06<br>(0.80 to<br>1.38) | 0.80<br>(0.49 to<br>1.22) | 0.71<br>(0.43 to<br>1.10) | 0.85<br>(0.52 to<br>1.31) | 0.02<br>(0.02 to<br>0.03) | 0.02<br>(0.01 to<br>0.02) | 0.01<br>(0.01 to<br>0.02) | 0.02<br>(0.01 to<br>0.02) |
| Other maternal disorders               |                           |                           |                           |                           |                           |                           |                           |                           |

| France                                                                  |                                    |                                   |                                  |                                   |                               |                               |                                |                               |
|-------------------------------------------------------------------------|------------------------------------|-----------------------------------|----------------------------------|-----------------------------------|-------------------------------|-------------------------------|--------------------------------|-------------------------------|
| Cause                                                                   | YLLs (in 1000s)                    |                                   |                                  |                                   | Deaths (in 1000s)             |                               |                                |                               |
|                                                                         | 2016                               | 2040 Forecast                     | 2040 Better Scenario             | 2040 Worse Scenario               | 2016                          | 2040 Forecast                 | 2040 Better Scenario           | 2040 Worse Scenario           |
| <b>Neonatal disorders</b>                                               | <b>111.27</b><br>(83.75 to 144.56) | <b>71.48</b><br>(44.24 to 113.54) | <b>59.33</b><br>(36.48 to 95.55) | <b>80.76</b><br>(50.00 to 130.14) | <b>1.29</b><br>(0.97 to 1.67) | <b>0.83</b><br>(0.51 to 1.31) | <b>0.69</b><br>(0.42 to 1.10)  | <b>0.93</b><br>(0.58 to 1.50) |
| Neonatal preterm birth                                                  | 32.52<br>(23.38 to 43.74)          | 15.89<br>(9.97 to 23.97)          | 11.05<br>(6.94 to 16.29)         | 19.42<br>(12.21 to 29.15)         | 0.38<br>(0.27 to 0.51)        | 0.18<br>(0.12 to 0.28)        | 0.13<br>(0.08 to 0.19)         | 0.22<br>(0.14 to 0.34)        |
| Neonatal encephalopathy due to birth asphyxia and trauma                | 33.34<br>(23.12 to 44.92)          | 16.67<br>(8.79 to 28.70)          | 13.08<br>(7.14 to 22.48)         | 19.15<br>(10.21 to 33.63)         | 0.39<br>(0.27 to 0.52)        | 0.19<br>(0.10 to 0.35)        | 0.15<br>(0.08 to 0.26)         | 0.22<br>(0.12 to 0.39)        |
| Neonatal sepsis and other neonatal infections                           | 10.55<br>(5.71 to 30.97)           | 10.22<br>(4.47 to 29.31)          | 8.49<br>(3.73 to 24.16)          | 11.47<br>(5.01 to 33.19)          | 0.12<br>(0.07 to 0.36)        | 0.12<br>(0.05 to 0.34)        | 0.10<br>(0.04 to 0.28)         | 0.13<br>(0.06 to 0.38)        |
| Hemolytic disease and other neonatal jaundice                           | 0.48<br>(0.27 to 0.77)             | 0.24<br>(0.10 to 0.50)            | 0.19<br>(0.08 to 0.40)           | 0.27<br>(0.11 to 0.56)            | 0.01<br>(0.00 to 0.01)        | 0.00<br>(0.00 to 0.01)        | 0.00<br>(0.00 to 0.00)         | 0.00<br>(0.00 to 0.01)        |
| Other neonatal disorders                                                | 34.37<br>(23.93 to 46.59)          | 28.46<br>(15.24 to 49.13)         | 26.52<br>(14.27 to 44.75)        | 30.45<br>(16.17 to 52.50)         | 0.40<br>(0.28 to 0.54)        | 0.33<br>(0.18 to 0.57)        | 0.31<br>(0.17 to 0.52)         | 0.35<br>(0.19 to 0.61)        |
| <b>Nutritional deficiencies</b>                                         | <b>28.59</b><br>(25.90 to 31.83)   | <b>46.33</b><br>(37.73 to 57.08)  | <b>51.99</b><br>(42.81 to 63.20) | <b>42.35</b><br>(34.56 to 52.31)  | <b>4.05</b><br>(3.58 to 4.60) | <b>7.63</b><br>(5.95 to 9.70) | <b>8.75</b><br>(6.95 to 11.02) | <b>6.84</b><br>(5.24 to 8.75) |
| Protein-energy malnutrition                                             | 25.73<br>(21.23 to 29.14)          | 41.93<br>(31.47 to 52.94)         | 47.63<br>(36.33 to 59.55)        | 38.10<br>(28.27 to 48.68)         | 3.76<br>(3.06 to 4.34)        | 7.04<br>(5.04 to 9.15)        | 8.15<br>(5.96 to 10.44)        | 6.28<br>(4.42 to 8.32)        |
| Iodine deficiency                                                       | 0.19<br>(0.01 to 0.64)             | 1.08<br>(0.02 to 5.73)            | 1.11<br>(0.01 to 6.22)           | 1.03<br>(0.02 to 5.13)            | 0.01<br>(0.00 to 0.06)        | 0.15<br>(0.00 to 1.01)        | 0.15<br>(0.00 to 1.11)         | 0.13<br>(0.00 to 0.94)        |
| Dietary iron deficiency                                                 | 0.33<br>(0.13 to 0.44)             | 0.40<br>(0.13 to 0.65)            | 0.43<br>(0.13 to 0.71)           | 0.38<br>(0.13 to 0.62)            | 0.02<br>(0.01 to 0.04)        | 0.02<br>(0.01 to 0.09)        | 0.04<br>(0.01 to 0.10)         | 0.04<br>(0.01 to 0.08)        |
| Other nutritional deficiencies                                          | 2.34<br>(1.56 to 6.41)             | 2.92<br>(1.62 to 9.54)            | 2.82<br>(1.50 to 9.68)           | 2.85<br>(1.58 to 9.36)            | 0.25<br>(0.13 to 0.95)        | 0.41<br>(0.18 to 1.65)        | 0.41<br>(0.17 to 1.70)         | 0.38<br>(0.17 to 1.53)        |
| <b>Other communicable, maternal, neonatal, and nutritional diseases</b> | <b>16.24</b><br>(13.49 to 18.08)   | <b>22.62</b><br>(18.42 to 25.93)  | <b>22.18</b><br>(18.10 to 25.43) | <b>22.45</b><br>(18.27 to 25.92)  | <b>0.79</b><br>(0.62 to 0.88) | <b>1.41</b><br>(1.11 to 1.64) | <b>1.42</b><br>(1.13 to 1.65)  | <b>1.36</b><br>(1.07 to 1.58) |
| Sexually transmitted infections excluding HIV                           | 0.48<br>(0.41 to 0.60)             | 0.26<br>(0.21 to 0.31)            | 0.24<br>(0.20 to 0.30)           | 0.26<br>(0.21 to 0.32)            | 0.03<br>(0.02 to 0.03)        | 0.02<br>(0.02 to 0.03)        | 0.02<br>(0.03 to 0.03)         | 0.02<br>(0.02 to 0.03)        |
| Syphilis                                                                | 0.17<br>(0.12 to 0.27)             | 0.07<br>(0.05 to 0.10)            | 0.06<br>(0.05 to 0.09)           | 0.07<br>(0.06 to 0.10)            | 0.01<br>(0.01 to 0.01)        | 0.00<br>(0.00 to 0.01)        | 0.00<br>(0.00 to 0.01)         | 0.00<br>(0.00 to 0.01)        |
| Chlamydial infection                                                    | 0.06<br>(0.05 to 0.07)             | 0.04<br>(0.03 to 0.05)            | 0.04<br>(0.03 to 0.05)           | 0.04<br>(0.03 to 0.05)            | 0.00<br>(0.00 to 0.01)        | 0.00<br>(0.00 to 0.00)        | 0.00<br>(0.00 to 0.00)         | 0.00<br>(0.00 to 0.00)        |
| Gonococcal infection                                                    | 0.17<br>(0.15 to 0.20)             | 0.11<br>(0.08 to 0.13)            | 0.10<br>(0.08 to 0.13)           | 0.11<br>(0.08 to 0.13)            | 0.01<br>(0.01 to 0.01)        | 0.01<br>(0.01 to 0.01)        | 0.01<br>(0.01 to 0.01)         | 0.01<br>(0.01 to 0.01)        |
| Other sexually transmitted infections                                   | 0.07<br>(0.07 to 0.09)             | 0.04<br>(0.03 to 0.05)            | 0.04<br>(0.03 to 0.05)           | 0.04<br>(0.03 to 0.05)            | 0.00<br>(0.00 to 0.00)        | 0.00<br>(0.00 to 0.00)        | 0.00<br>(0.00 to 0.00)         | 0.00<br>(0.00 to 0.00)        |
| Acute hepatitis                                                         | 1.50<br>(1.32 to 1.71)             | 1.63<br>(1.24 to 2.16)            | 1.35<br>(1.02 to 1.82)           | 1.73<br>(1.27 to 2.35)            | 0.07<br>(0.06 to 0.09)        | 0.11<br>(0.08 to 0.15)        | 0.09<br>(0.07 to 0.13)         | 0.11<br>(0.08 to 0.15)        |
| Acute hepatitis A                                                       | 0.09<br>(0.07 to 0.11)             | 0.08<br>(0.05 to 0.12)            | 0.07<br>(0.05 to 0.11)           | 0.09<br>(0.06 to 0.13)            | 0.00<br>(0.00 to 0.00)        | 0.00<br>(0.00 to 0.01)        | 0.00<br>(0.00 to 0.01)         | 0.00<br>(0.00 to 0.01)        |
| Acute hepatitis B                                                       | 1.12<br>(0.97 to 1.31)             | 1.20<br>(0.87 to 1.66)            | 0.99<br>(0.70 to 1.37)           | 1.28<br>(0.90 to 1.78)            | 0.05<br>(0.04 to 0.06)        | 0.07<br>(0.05 to 0.10)        | 0.06<br>(0.04 to 0.08)         | 0.07<br>(0.05 to 0.11)        |

|                                       |                                                            |                                                            |                                                            |                                                            |                                                      |                                                      |                                                      |                                                      |
|---------------------------------------|------------------------------------------------------------|------------------------------------------------------------|------------------------------------------------------------|------------------------------------------------------------|------------------------------------------------------|------------------------------------------------------|------------------------------------------------------|------------------------------------------------------|
|                                       | 0.06<br>(0.05 to<br>0.08)                                  | 0.07<br>(0.05 to<br>0.11)                                  | 0.06<br>(0.04 to<br>0.09)                                  | 0.07<br>(0.05 to<br>0.11)                                  | 0.00<br>(0.00 to<br>0.00)                            | 0.01<br>(0.00 to<br>0.01)                            | 0.00<br>(0.00 to<br>0.01)                            | 0.01<br>(0.00 to<br>0.01)                            |
| Acute hepatitis C                     |                                                            |                                                            |                                                            |                                                            |                                                      |                                                      |                                                      |                                                      |
|                                       | 0.23<br>(0.17 to<br>0.30)                                  | 0.28<br>(0.16 to<br>0.42)                                  | 0.24<br>(0.14 to<br>0.36)                                  | 0.29<br>(0.17 to<br>0.44)                                  | 0.02<br>(0.01 to<br>0.02)                            | 0.03<br>(0.02 to<br>0.05)                            | 0.03<br>(0.01 to<br>0.04)                            | 0.03<br>(0.02 to<br>0.05)                            |
| Acute hepatitis E                     |                                                            |                                                            |                                                            |                                                            |                                                      |                                                      |                                                      |                                                      |
|                                       | 14.26<br>(11.47 to<br>16.07)                               | 20.74<br>(16.63 to<br>23.95)                               | 20.58<br>(16.54 to<br>23.74)                               | 20.47<br>(16.39 to<br>23.72)                               | 0.69<br>(0.52 to<br>0.78)                            | 1.28<br>(0.98 to<br>1.50)                            | 1.31<br>(1.01 to<br>1.53)                            | 1.22<br>(0.94 to<br>1.44)                            |
| Other unspecified infectious diseases |                                                            |                                                            |                                                            |                                                            |                                                      |                                                      |                                                      |                                                      |
| <b>Non-communicable diseases</b>      | <b>6,781.04</b><br><b>(6,455.56 to</b><br><b>7,085.19)</b> | <b>7,064.05</b><br><b>(6,165.54 to</b><br><b>8,090.44)</b> | <b>6,091.04</b><br><b>(5,354.34 to</b><br><b>6,907.86)</b> | <b>8,604.64</b><br><b>(7,375.55 to</b><br><b>9,933.11)</b> | <b>513.13</b><br><b>(491.01 to</b><br><b>532.31)</b> | <b>647.83</b><br><b>(577.63 to</b><br><b>728.55)</b> | <b>576.40</b><br><b>(514.83 to</b><br><b>641.71)</b> | <b>747.15</b><br><b>(655.04 to</b><br><b>842.75)</b> |

| France                               |                                           |                                           |                                           |                                           |                                     |                                     |                                     |                                     |
|--------------------------------------|-------------------------------------------|-------------------------------------------|-------------------------------------------|-------------------------------------------|-------------------------------------|-------------------------------------|-------------------------------------|-------------------------------------|
| Cause                                | YLLs (in 1000s)                           |                                           |                                           |                                           | Deaths (in 1000s)                   |                                     |                                     |                                     |
|                                      | 2016                                      | 2040 Forecast                             | 2040 Better Scenario                      | 2040 Worse Scenario                       | 2016                                | 2040 Forecast                       | 2040 Better Scenario                | 2040 Worse Scenario                 |
| <b>Neoplasms</b>                     | <b>3,063.50</b><br>(2,898.23 to 3,227.33) | <b>3,099.83</b><br>(2,674.26 to 3,596.15) | <b>2,651.40</b><br>(2,291.63 to 3,065.56) | <b>3,899.95</b><br>(3,305.19 to 4,623.39) | <b>176.18</b><br>(167.40 to 185.14) | <b>215.94</b><br>(189.91 to 244.25) | <b>190.72</b><br>(168.78 to 214.44) | <b>256.94</b><br>(223.36 to 295.49) |
| Lip and oral cavity cancer           | 54.51<br>(48.78 to 60.78)                 | 45.33<br>(23.11 to 81.30)                 | 32.51<br>(17.07 to 58.96)                 | 80.81<br>(42.72 to 134.02)                | 2.48<br>(2.26 to 2.74)              | 2.31<br>(1.25 to 4.05)              | 1.67<br>(0.93 to 2.93)              | 4.03<br>(2.15 to 6.78)              |
| Nasopharynx cancer                   | 16.31<br>(14.49 to 18.34)                 | 13.35<br>(6.84 to 22.91)                  | 9.08<br>(4.73 to 15.64)                   | 24.68<br>(12.75 to 40.75)                 | 0.73<br>(0.65 to 0.81)              | 0.67<br>(0.35 to 1.15)              | 0.46<br>(0.25 to 0.76)              | 1.22<br>(0.64 to 2.03)              |
| Other pharynx cancer                 | 53.98<br>(47.75 to 60.50)                 | 51.22<br>(26.10 to 89.85)                 | 48.81<br>(25.23 to 85.63)                 | 66.92<br>(34.62 to 114.33)                | 2.22<br>(1.99 to 2.47)              | 2.37<br>(1.23 to 4.17)              | 2.28<br>(1.21 to 3.98)              | 3.07<br>(1.62 to 5.27)              |
| Esophageal cancer                    | 102.00<br>(89.34 to 114.78)               | 105.39<br>(57.91 to 187.20)               | 78.27<br>(45.19 to 133.92)                | 172.38<br>(90.62 to 312.47)               | 5.16<br>(4.59 to 5.75)              | 5.94<br>(3.43 to 10.00)             | 4.42<br>(2.66 to 7.14)              | 9.43<br>(5.09 to 16.64)             |
| Stomach cancer                       | 111.92<br>(103.18 to 120.75)              | 81.41<br>(62.14 to 105.96)                | 67.14<br>(53.87 to 82.77)                 | 90.54<br>(67.89 to 119.38)                | 7.42<br>(6.83 to 8.01)              | 6.71<br>(5.21 to 8.78)              | 5.66<br>(4.57 to 7.03)              | 7.19<br>(5.49 to 9.57)              |
| Colon and rectum cancer              | 313.40<br>(288.56 to 343.32)              | 335.76<br>(233.47 to 475.48)              | 281.91<br>(198.73 to 399.74)              | 424.72<br>(290.86 to 629.65)              | 21.81<br>(20.15 to 23.85)           | 28.45<br>(20.11 to 39.68)           | 24.50<br>(17.35 to 34.44)           | 34.89<br>(23.72 to 50.59)           |
| Liver cancer                         | 165.77<br>(146.51 to 185.77)              | 200.17<br>(131.52 to 300.82)              | 184.71<br>(127.16 to 270.10)              | 290.33<br>(172.44 to 472.66)              | 9.27<br>(8.20 to 10.35)             | 12.97<br>(8.90 to 18.96)            | 12.22<br>(8.81 to 17.02)            | 17.80<br>(11.23 to 27.99)           |
| Liver cancer due to hepatitis B      | 23.69<br>(17.13 to 32.23)                 | 29.43<br>(17.52 to 49.41)                 | 27.61<br>(17.34 to 44.38)                 | 37.19<br>(20.14 to 69.01)                 | 1.12<br>(0.79 to 1.58)              | 1.61<br>(1.00 to 2.57)              | 1.54<br>(0.99 to 2.41)              | 1.95<br>(1.09 to 3.43)              |
| Liver cancer due to hepatitis C      | 59.08<br>(46.82 to 74.05)                 | 80.62<br>(52.34 to 122.74)                | 76.52<br>(51.68 to 112.38)                | 98.31<br>(57.93 to 162.36)                | 3.60<br>(2.79 to 4.48)              | 5.66<br>(3.82 to 8.29)              | 5.48<br>(3.81 to 7.71)              | 6.38<br>(4.03 to 10.51)             |
| Liver cancer due to alcohol use      | 56.77<br>(35.88 to 73.92)                 | 55.21<br>(28.72 to 88.91)                 | 47.74<br>(25.20 to 76.22)                 | 111.01<br>(56.48 to 190.09)               | 3.06<br>(1.85 to 4.06)              | 3.41<br>(1.72 to 5.74)              | 3.01<br>(1.52 to 5.06)              | 6.51<br>(3.32 to 10.90)             |
| Liver cancer due to other causes     | 26.22<br>(19.83 to 34.00)                 | 34.92<br>(21.34 to 55.45)                 | 32.84<br>(20.75 to 50.26)                 | 43.82<br>(23.91 to 74.30)                 | 1.50<br>(1.12 to 1.94)              | 2.29<br>(1.43 to 3.60)              | 2.20<br>(1.40 to 3.35)              | 2.76<br>(1.53 to 4.64)              |
| Gallbladder and biliary tract cancer | 31.75<br>(29.05 to 34.43)                 | 27.50<br>(24.56 to 30.63)                 | 27.48<br>(24.40 to 30.78)                 | 26.79<br>(23.94 to 29.70)                 | 2.26<br>(2.06 to 2.44)              | 2.28<br>(2.03 to 2.54)              | 2.33<br>(2.08 to 2.60)              | 2.18<br>(1.94 to 2.41)              |
| Pancreatic cancer                    | 185.08<br>(167.26 to 202.43)              | 204.80<br>(168.95 to 250.49)              | 193.99<br>(160.86 to 234.23)              | 225.39<br>(180.90 to 282.52)              | 11.16<br>(10.14 to 12.15)           | 14.22<br>(11.80 to 17.28)           | 13.76<br>(11.42 to 16.62)           | 15.13<br>(12.32 to 18.72)           |
| Larynx cancer                        | 32.74<br>(29.27 to 36.21)                 | 23.39<br>(11.00 to 43.88)                 | 14.93<br>(7.17 to 27.71)                  | 41.50<br>(18.71 to 74.24)                 | 1.51<br>(1.37 to 1.66)              | 1.24<br>(0.60 to 2.22)              | 0.77<br>(0.39 to 1.40)              | 2.17<br>(1.00 to 3.97)              |
| Tracheal, bronchus, and lung cancer  | 680.38<br>(629.26 to 735.60)              | 574.79<br>(422.60 to 782.01)              | 361.33<br>(271.42 to 486.72)              | 920.95<br>(663.34 to 1,271.79)            | 33.13<br>(30.65 to 35.79)           | 32.50<br>(23.63 to 44.60)           | 20.50<br>(15.29 to 27.78)           | 49.92<br>(35.50 to 69.09)           |
| Malignant skin melanoma              | 43.38<br>(34.59 to 49.29)                 | 50.80<br>(40.40 to 58.98)                 | 56.12<br>(44.73 to 65.04)                 | 47.84<br>(38.37 to 55.78)                 | 2.11<br>(1.68 to 2.40)              | 3.03<br>(2.38 to 3.53)              | 3.43<br>(2.72 to 3.97)              | 2.79<br>(2.23 to 3.25)              |
| Non-melanoma skin cancer             | 15.39<br>(13.91 to 16.90)                 | 18.63<br>(16.34 to 21.31)                 | 16.99<br>(14.97 to 19.20)                 | 18.61<br>(16.27 to 21.46)                 | 1.24<br>(1.13 to 1.35)              | 1.77<br>(1.54 to 2.03)              | 1.67<br>(1.45 to 1.89)              | 1.72<br>(1.51 to 1.99)              |
| Breast cancer                        | 253.55<br>(227.33 to 281.81)              | 219.93<br>(164.93 to 291.46)              | 190.84<br>(144.92 to 247.07)              | 277.22<br>(202.42 to 370.62)              | 13.28<br>(11.85 to 14.80)           | 14.00<br>(10.70 to 18.34)           | 12.47<br>(9.54 to 15.98)            | 17.18<br>(12.83 to 22.52)           |
| Cervical cancer                      | 33.93<br>(29.85 to 37.83)                 | 23.85<br>(18.15 to 31.05)                 | 20.05<br>(15.87 to 25.15)                 | 26.18<br>(19.59 to 34.51)                 | 1.69<br>(1.50 to 1.90)              | 1.44<br>(1.15 to 1.82)              | 1.25<br>(1.01 to 1.55)              | 1.54<br>(1.21 to 1.97)              |

|                   |                                 |                                 |                                 |                                 |                              |                              |                              |                              |
|-------------------|---------------------------------|---------------------------------|---------------------------------|---------------------------------|------------------------------|------------------------------|------------------------------|------------------------------|
| Uterine cancer    | 25.89<br>(22.46 to<br>29.86)    | 30.74<br>(25.64 to<br>37.79)    | 28.59<br>(23.79 to<br>34.84)    | 31.32<br>(26.04 to<br>37.52)    | 1.68<br>(1.46 to<br>1.96)    | 2.33<br>(1.93 to<br>2.82)    | 2.20<br>(1.83 to<br>2.67)    | 2.34<br>(1.95 to<br>2.81)    |
| Ovarian cancer    | 72.25<br>(59.73 to<br>87.79)    | 67.65<br>(50.53 to<br>90.47)    | 60.93<br>(45.90 to<br>80.33)    | 72.68<br>(53.03 to<br>99.44)    | 4.01<br>(3.32 to<br>4.85)    | 4.30<br>(3.19 to<br>5.80)    | 3.87<br>(2.88 to<br>5.16)    | 4.61<br>(3.32 to<br>6.42)    |
| Prostate cancer   | 147.73<br>(124.32 to<br>185.40) | 211.66<br>(171.81 to<br>268.21) | 203.16<br>(166.68 to<br>257.87) | 208.43<br>(169.20 to<br>261.82) | 12.76<br>(10.87 to<br>15.75) | 21.85<br>(17.89 to<br>27.33) | 21.47<br>(17.72 to<br>26.66) | 20.91<br>(16.93 to<br>26.30) |
| Testicular cancer | 3.27<br>(2.56 to<br>3.92)       | 2.37<br>(1.80 to<br>2.99)       | 2.14<br>(1.61 to<br>2.73)       | 2.44<br>(1.83 to<br>3.11)       | 0.09<br>(0.07 to<br>0.10)    | 0.08<br>(0.07 to<br>0.10)    | 0.08<br>(0.06 to<br>0.09)    | 0.08<br>(0.07 to<br>0.10)    |



| France                          |                                                 |                                                  |                                                |                                                  |                                            |                                            |                                            |                                            |
|---------------------------------|-------------------------------------------------|--------------------------------------------------|------------------------------------------------|--------------------------------------------------|--------------------------------------------|--------------------------------------------|--------------------------------------------|--------------------------------------------|
| Cause                           | YLLs (in 1000s)                                 |                                                  |                                                |                                                  | Deaths (in 1000s)                          |                                            |                                            |                                            |
|                                 | 2016                                            | 2040 Forecast                                    | 2040 Better Scenario                           | 2040 Worse Scenario                              | 2016                                       | 2040 Forecast                              | 2040 Better Scenario                       | 2040 Worse Scenario                        |
| Kidney cancer                   | 77.63<br>(69.98 to 85.21)                       | 98.08<br>(80.10 to 120.41)                       | 95.24<br>(79.46 to 114.35)                     | 104.84<br>(81.81 to 133.49)                      | 4.67<br>(4.25 to 5.10)                     | 6.97<br>(5.80 to 8.39)                     | 6.92<br>(5.89 to 8.14)                     | 7.17<br>(5.75 to 8.84)                     |
| Bladder cancer                  | 78.57<br>(70.53 to 86.60)                       | 83.29<br>(64.70 to 106.84)                       | 73.30<br>(58.57 to 91.42)                      | 96.00<br>(71.56 to 128.41)                       | 6.06<br>(5.51 to 6.69)                     | 7.83<br>(6.14 to 9.90)                     | 7.01<br>(5.71 to 8.66)                     | 8.64<br>(6.56 to 11.47)                    |
| Brain and nervous system cancer | 92.10<br>(69.38 to 103.59)                      | 94.66<br>(68.75 to 109.99)                       | 90.95<br>(66.43 to 105.21)                     | 94.90<br>(68.69 to 109.81)                       | 3.57<br>(2.49 to 4.05)                     | 4.35<br>(2.86 to 5.06)                     | 4.25<br>(2.79 to 4.97)                     | 4.29<br>(2.83 to 4.98)                     |
| Thyroid cancer                  | 9.92<br>(8.77 to 11.06)                         | 10.78<br>(8.28 to 14.66)                         | 9.86<br>(7.68 to 13.12)                        | 11.86<br>(8.76 to 16.82)                         | 0.57<br>(0.51 to 0.63)                     | 0.74<br>(0.58 to 0.99)                     | 0.69<br>(0.54 to 0.92)                     | 0.79<br>(0.60 to 1.08)                     |
| Mesothelioma                    | 28.06<br>(24.63 to 31.74)                       | 32.98<br>(28.17 to 39.21)                        | 34.01<br>(29.02 to 40.35)                      | 31.62<br>(27.31 to 37.27)                        | 1.57<br>(1.39 to 1.82)                     | 2.19<br>(1.91 to 2.62)                     | 2.30<br>(1.99 to 2.77)                     | 2.06<br>(1.80 to 2.46)                     |
| Hodgkin lymphoma                | 8.40<br>(7.56 to 9.98)                          | 6.23<br>(5.19 to 7.65)                           | 5.34<br>(4.51 to 6.47)                         | 6.52<br>(5.49 to 7.88)                           | 0.33<br>(0.30 to 0.37)                     | 0.30<br>(0.25 to 0.35)                     | 0.26<br>(0.22 to 0.30)                     | 0.30<br>(0.26 to 0.36)                     |
| Non-Hodgkin lymphoma            | 98.26<br>(85.47 to 117.10)                      | 106.72<br>(86.69 to 133.21)                      | 100.10<br>(82.05 to 124.11)                    | 110.96<br>(88.76 to 141.72)                      | 5.97<br>(5.26 to 6.77)                     | 7.75<br>(6.41 to 9.37)                     | 7.43<br>(6.23 to 8.97)                     | 7.86<br>(6.37 to 9.68)                     |
| Multiple myeloma                | 54.79<br>(44.36 to 69.83)                       | 68.08<br>(52.03 to 88.35)                        | 65.87<br>(49.76 to 85.40)                      | 69.95<br>(52.68 to 93.07)                        | 3.71<br>(2.78 to 4.42)                     | 5.30<br>(3.86 to 6.65)                     | 5.23<br>(3.79 to 6.55)                     | 5.32<br>(3.85 to 6.82)                     |
| Leukemia                        | 135.14<br>(122.17 to 147.17)                    | 145.32<br>(117.34 to 180.12)                     | 132.42<br>(108.41 to 160.27)                   | 162.39<br>(126.07 to 208.67)                     | 7.88<br>(7.20 to 8.54)                     | 10.45<br>(8.42 to 13.01)                   | 9.70<br>(8.02 to 11.69)                    | 11.27<br>(8.86 to 14.41)                   |
| Acute lymphoid leukemia         | 13.13<br>(10.41 to 15.16)                       | 9.75<br>(7.47 to 12.48)                          | 8.62<br>(6.60 to 10.96)                        | 11.18<br>(8.23 to 14.92)                         | 0.40<br>(0.32 to 0.46)                     | 0.36<br>(0.28 to 0.46)                     | 0.32<br>(0.25 to 0.41)                     | 0.41<br>(0.31 to 0.54)                     |
| Chronic lymphoid leukemia       | 19.57<br>(16.30 to 24.20)                       | 22.21<br>(16.33 to 30.23)                        | 20.89<br>(15.72 to 28.09)                      | 24.28<br>(17.24 to 34.07)                        | 1.56<br>(1.30 to 1.89)                     | 2.04<br>(1.53 to 2.75)                     | 1.95<br>(1.50 to 2.59)                     | 2.14<br>(1.56 to 2.97)                     |
| Acute myeloid leukemia          | 47.51<br>(38.48 to 52.69)                       | 55.95<br>(43.70 to 69.22)                        | 52.96<br>(42.19 to 63.99)                      | 61.98<br>(47.49 to 79.32)                        | 2.44<br>(2.00 to 2.72)                     | 3.40<br>(2.70 to 4.19)                     | 3.28<br>(2.60 to 3.95)                     | 3.66<br>(2.81 to 4.67)                     |
| Chronic myeloid leukemia        | 11.52<br>(10.00 to 13.06)                       | 6.75<br>(4.98 to 9.16)                           | 5.36<br>(4.04 to 7.04)                         | 7.98<br>(5.63 to 11.17)                          | 0.76<br>(0.66 to 0.86)                     | 0.52<br>(0.39 to 0.69)                     | 0.42<br>(0.32 to 0.55)                     | 0.59<br>(0.43 to 0.80)                     |
| Other leukemia                  | 43.42<br>(37.13 to 48.73)                       | 50.66<br>(39.81 to 64.79)                        | 44.60<br>(35.55 to 55.34)                      | 56.97<br>(42.98 to 75.52)                        | 2.71<br>(2.37 to 3.06)                     | 4.13<br>(3.27 to 5.25)                     | 3.72<br>(2.99 to 4.63)                     | 4.47<br>(3.39 to 5.83)                     |
| Other neoplasms                 | 137.39<br>(121.29 to 150.54)                    | 164.96<br>(143.96 to 184.74)                     | 165.31<br>(144.69 to 185.24)                   | 161.20<br>(141.52 to 179.35)                     | 7.86<br>(7.03 to 8.60)                     | 11.60<br>(10.21 to 12.89)                  | 11.94<br>(10.57 to 13.29)                  | 11.04<br>(9.71 to 12.23)                   |
| <b>Cardiovascular diseases</b>  | <b>1734.06</b><br><b>(1,640.68 to 1,828.92)</b> | <b>1,505.13</b><br><b>(1,105.09 to 2,096.52)</b> | <b>1,120.66</b><br><b>(873.20 to 1,451.39)</b> | <b>1,965.65</b><br><b>(1,393.99 to 2,744.97)</b> | <b>168.18</b><br><b>(159.01 to 176.57)</b> | <b>174.34</b><br><b>(133.82 to 230.65)</b> | <b>137.89</b><br><b>(111.37 to 175.05)</b> | <b>212.88</b><br><b>(159.28 to 287.39)</b> |
| Rheumatic heart disease         | 30.75<br>(27.73 to 34.70)                       | 23.59<br>(18.68 to 30.61)                        | 20.75<br>(16.73 to 26.28)                      | 24.04<br>(18.83 to 31.26)                        | 2.87<br>(2.58 to 3.21)                     | 2.70<br>(2.17 to 3.49)                     | 2.44<br>(1.98 to 3.06)                     | 2.69<br>(2.14 to 3.53)                     |
| Ischemic heart disease          | 817.78<br>(760.53 to 876.44)                    | 557.05<br>(328.92 to 908.44)                     | 356.68<br>(216.25 to 563.05)                   | 825.13<br>(471.39 to 1,353.55)                   | 77.79<br>(72.21 to 84.56)                  | 62.71<br>(38.63 to 99.33)                  | 43.44<br>(26.89 to 66.72)                  | 85.16<br>(49.58 to 137.98)                 |
| Stroke                          | 396.34<br>(362.97 to 433.11)                    | 260.65<br>(160.55 to 410.58)                     | 171.35<br>(109.99 to 262.91)                   | 377.04<br>(221.69 to 609.95)                     | 38.56<br>(34.51 to 43.26)                  | 30.00<br>(18.68 to 46.02)                  | 21.57<br>(14.09 to 32.89)                  | 39.83<br>(23.99 to 63.93)                  |
| Ischemic stroke                 | 175.81<br>(158.48 to 197.74)                    | 115.71<br>(66.18 to 208.94)                      | 82.70<br>(48.91 to 144.26)                     | 151.86<br>(82.96 to 279.69)                      | 20.42<br>(17.99 to 23.38)                  | 15.44<br>(8.92 to 27.90)                   | 11.67<br>(6.99 to 20.61)                   | 19.14<br>(10.59 to 35.60)                  |

|                                |                                 |                                |                               |                                 |                              |                             |                            |                              |
|--------------------------------|---------------------------------|--------------------------------|-------------------------------|---------------------------------|------------------------------|-----------------------------|----------------------------|------------------------------|
|                                | 220.53<br>(202.20 to<br>239.53) | 144.94<br>(83.38 to<br>239.21) | 88.65<br>(54.23 to<br>139.03) | 225.18<br>(121.83 to<br>398.27) | 18.13<br>(16.25 to<br>20.34) | 14.56<br>(8.81 to<br>23.03) | 9.90<br>(6.28 to<br>15.41) | 20.69<br>(11.42 to<br>35.18) |
| Intracerebral hemorrhage       |                                 |                                |                               |                                 |                              |                             |                            |                              |
|                                | 46.38<br>(32.65 to<br>66.43)    | 74.95<br>(38.00 to<br>155.73)  | 61.21<br>(32.58 to<br>108.23) | 104.74<br>(50.60 to<br>228.34)  | 5.45<br>(2.90 to<br>6.93)    | 10.33<br>(4.25 to<br>22.38) | 8.71<br>(3.91 to<br>16.20) | 14.09<br>(5.69 to<br>32.84)  |
| Hypertensive heart disease     |                                 |                                |                               |                                 |                              |                             |                            |                              |
|                                | 72.27<br>(58.80 to<br>82.09)    | 63.46<br>(41.52 to<br>92.37)   | 53.82<br>(35.44 to<br>74.98)  | 71.15<br>(46.84 to<br>101.41)   | 6.21<br>(4.24 to<br>7.25)    | 6.84<br>(3.74 to<br>10.89)  | 5.93<br>(3.39 to<br>9.18)  | 7.23<br>(4.05 to<br>11.93)   |
| Cardiomyopathy and myocarditis |                                 |                                |                               |                                 |                              |                             |                            |                              |
|                                | 5.44<br>(3.08 to<br>6.79)       | 5.09<br>(2.89 to<br>6.73)      | 5.15<br>(2.95 to<br>6.84)     | 4.92<br>(2.83 to<br>6.50)       | 0.46<br>(0.23 to<br>0.63)    | 0.56<br>(0.28 to<br>0.82)   | 0.59<br>(0.29 to<br>0.86)  | 0.52<br>(0.26 to<br>0.78)    |
| Myocarditis                    |                                 |                                |                               |                                 |                              |                             |                            |                              |

| France                                                        |                                            |                                            |                                            |                                            |                                         |                                         |                                         |                                         |
|---------------------------------------------------------------|--------------------------------------------|--------------------------------------------|--------------------------------------------|--------------------------------------------|-----------------------------------------|-----------------------------------------|-----------------------------------------|-----------------------------------------|
| Cause                                                         | YLLs (in 1000s)                            |                                            |                                            |                                            | Deaths (in 1000s)                       |                                         |                                         |                                         |
|                                                               | 2016                                       | 2040 Forecast                              | 2040 Better Scenario                       | 2040 Worse Scenario                        | 2016                                    | 2040 Forecast                           | 2040 Better Scenario                    | 2040 Worse Scenario                     |
| Alcoholic cardiomyopathy                                      | 10.88<br>(6.58 to 15.48)                   | 6.88<br>(3.92 to 9.58)                     | 6.38<br>(3.69 to 8.74)                     | 10.73<br>(6.52 to 14.94)                   | 0.43<br>(0.24 to 0.56)                  | 0.31<br>(0.16 to 0.41)                  | 0.29<br>(0.16 to 0.39)                  | 0.47<br>(0.27 to 0.62)                  |
| Other cardiomyopathy                                          | 55.95<br>(46.47 to 62.76)                  | 51.49<br>(31.69 to 80.33)                  | 42.29<br>(26.74 to 62.80)                  | 55.50<br>(34.40 to 85.50)                  | 5.33<br>(3.63 to 6.22)                  | 5.97<br>(3.18 to 9.92)                  | 5.05<br>(2.76 to 8.26)                  | 6.24<br>(3.33 to 10.90)                 |
| Atrial fibrillation and flutter                               | 67.99<br>(53.03 to 85.36)                  | 92.38<br>(67.15 to 127.50)                 | 86.82<br>(63.13 to 117.69)                 | 103.55<br>(73.60 to 143.44)                | 8.66<br>(6.59 to 11.00)                 | 12.52<br>(9.05 to 17.28)                | 12.06<br>(8.78 to 16.42)                | 13.66<br>(9.70 to 19.05)                |
| Aortic aneurysm                                               | 48.22<br>(43.81 to 53.07)                  | 50.98<br>(39.87 to 66.45)                  | 46.45<br>(37.08 to 58.92)                  | 53.16<br>(41.29 to 69.57)                  | 3.88<br>(3.54 to 4.27)                  | 4.97<br>(3.99 to 6.27)                  | 4.75<br>(3.87 to 5.85)                  | 4.93<br>(3.90 to 6.28)                  |
| Peripheral artery disease                                     | 9.54<br>(6.18 to 14.64)                    | 16.71<br>(10.66 to 27.07)                  | 16.24<br>(10.47 to 26.47)                  | 17.49<br>(11.03 to 28.58)                  | 1.05<br>(0.68 to 1.66)                  | 2.12<br>(1.35 to 3.62)                  | 2.14<br>(1.36 to 3.64)                  | 2.13<br>(1.36 to 3.63)                  |
| Endocarditis                                                  | 33.68<br>(22.70 to 41.61)                  | 44.52<br>(27.22 to 64.87)                  | 43.11<br>(26.70 to 61.70)                  | 45.30<br>(27.75 to 66.68)                  | 2.83<br>(1.78 to 3.45)                  | 4.34<br>(2.46 to 6.81)                  | 4.31<br>(2.45 to 6.68)                  | 4.30<br>(2.43 to 6.90)                  |
| Other cardiovascular and circulatory diseases                 | 211.10<br>(193.67 to 231.51)               | 320.83<br>(253.12 to 415.76)               | 264.23<br>(216.23 to 325.70)               | 344.04<br>(268.23 to 445.31)               | 20.87<br>(19.07 to 22.91)               | 37.82<br>(30.50 to 48.07)               | 32.54<br>(26.84 to 39.63)               | 38.87<br>(30.49 to 49.26)               |
| <b>Chronic respiratory diseases</b>                           | <b>234.84</b><br><b>(217.64 to 251.47)</b> | <b>279.83</b><br><b>(220.91 to 350.97)</b> | <b>221.12</b><br><b>(182.42 to 268.97)</b> | <b>379.71</b><br><b>(290.45 to 490.31)</b> | <b>22.02</b><br><b>(20.34 to 23.72)</b> | <b>31.17</b><br><b>(24.31 to 39.92)</b> | <b>24.27</b><br><b>(19.86 to 29.88)</b> | <b>40.73</b><br><b>(30.56 to 53.63)</b> |
| Chronic obstructive pulmonary disease                         | 177.43<br>(162.65 to 194.64)               | 210.17<br>(152.98 to 280.06)               | 145.22<br>(108.88 to 191.31)               | 311.62<br>(221.59 to 426.22)               | 17.83<br>(16.38 to 19.56)               | 25.21<br>(18.30 to 34.05)               | 17.62<br>(13.54 to 23.06)               | 35.07<br>(24.86 to 47.59)               |
| Pneumoconiosis                                                | 7.37<br>(6.30 to 8.48)                     | 6.24<br>(4.88 to 7.93)                     | 6.35<br>(4.89 to 8.15)                     | 6.98<br>(4.81 to 7.72)                     | 0.65<br>(0.56 to 0.76)                  | 0.60<br>(0.47 to 0.77)                  | 0.62<br>(0.49 to 0.80)                  | 0.58<br>(0.45 to 0.73)                  |
| Silicosis                                                     | 3.57<br>(2.39 to 4.98)                     | 1.56<br>(0.85 to 2.91)                     | 1.22<br>(0.64 to 2.43)                     | 1.66<br>(0.85 to 2.94)                     | 0.33<br>(0.21 to 0.46)                  | 0.16<br>(0.09 to 0.30)                  | 0.13<br>(0.07 to 0.26)                  | 0.16<br>(0.09 to 0.29)                  |
| Asbestosis                                                    | 3.09<br>(1.49 to 3.95)                     | 4.06<br>(2.29 to 5.42)                     | 4.55<br>(2.91 to 5.98)                     | 3.74<br>(1.95 to 4.99)                     | 0.26<br>(0.11 to 0.34)                  | 0.38<br>(0.20 to 0.52)                  | 0.44<br>(0.26 to 0.58)                  | 0.34<br>(0.16 to 0.48)                  |
| Coal workers pneumoconiosis                                   | 0.41<br>(0.21 to 0.74)                     | 0.43<br>(0.17 to 0.70)                     | 0.38<br>(0.15 to 0.55)                     | 0.47<br>(0.18 to 0.82)                     | 0.03<br>(0.02 to 0.18)                  | 0.04<br>(0.02 to 0.19)                  | 0.04<br>(0.01 to 0.18)                  | 0.05<br>(0.02 to 0.19)                  |
| Other pneumoconiosis                                          | 0.31<br>(0.24 to 0.48)                     | 0.19<br>(0.14 to 0.35)                     | 0.19<br>(0.13 to 0.37)                     | 0.21<br>(0.15 to 0.36)                     | 0.03<br>(0.02 to 0.04)                  | 0.02<br>(0.01 to 0.04)                  | 0.02<br>(0.01 to 0.04)                  | 0.02<br>(0.01 to 0.04)                  |
| Asthma                                                        | 16.26<br>(14.13 to 18.73)                  | 7.44<br>(4.60 to 11.77)                    | 5.37<br>(3.43 to 8.35)                     | 9.71<br>(5.58 to 15.82)                    | 1.10<br>(0.95 to 1.27)                  | 0.65<br>(0.40 to 1.05)                  | 0.50<br>(0.31 to 0.78)                  | 0.81<br>(0.46 to 1.30)                  |
| Interstitial lung disease and pulmonary sarcoidosis           | 27.39<br>(19.27 to 37.56)                  | 49.03<br>(34.62 to 64.21)                  | 57.52<br>(41.98 to 72.79)                  | 44.88<br>(30.31 to 61.07)                  | 2.07<br>(1.37 to 2.76)                  | 4.21<br>(2.78 to 5.52)                  | 5.05<br>(3.57 to 6.34)                  | 3.77<br>(2.44 to 5.08)                  |
| Other chronic respiratory diseases                            | 6.39<br>(3.76 to 8.06)                     | 6.95<br>(4.00 to 9.63)                     | 6.66<br>(3.93 to 9.16)                     | 7.42<br>(4.27 to 10.42)                    | 0.38<br>(0.22 to 0.48)                  | 0.49<br>(0.28 to 0.69)                  | 0.48<br>(0.27 to 0.68)                  | 0.51<br>(0.29 to 0.72)                  |
| <b>Cirrhosis and other chronic liver diseases</b>             | <b>249.65</b><br><b>(225.02 to 272.77)</b> | <b>195.28</b><br><b>(169.36 to 223.91)</b> | <b>171.96</b><br><b>(149.40 to 195.92)</b> | <b>258.28</b><br><b>(222.83 to 295.36)</b> | <b>10.90</b><br><b>(9.96 to 11.81)</b>  | <b>9.94</b><br><b>(8.81 to 11.21)</b>   | <b>8.92</b><br><b>(7.96 to 9.94)</b>    | <b>12.89</b><br><b>(11.33 to 14.49)</b> |
| Cirrhosis and other chronic liver diseases due to hepatitis B | 33.71<br>(25.62 to 43.57)                  | 31.27<br>(23.70 to 40.93)                  | 28.60<br>(21.78 to 37.35)                  | 31.80<br>(23.73 to 41.78)                  | 1.49<br>(1.16 to 1.91)                  | 1.60<br>(1.24 to 2.07)                  | 1.49<br>(1.16 to 1.94)                  | 1.60<br>(1.22 to 2.09)                  |
| Cirrhosis and other chronic liver diseases due to hepatitis C | 75.64<br>(57.65 to 97.76)                  | 68.68<br>(51.49 to 89.59)                  | 62.23<br>(47.34 to 80.45)                  | 70.55<br>(52.59 to 94.10)                  | 3.18<br>(2.44 to 4.05)                  | 3.30<br>(2.52 to 4.20)                  | 3.04<br>(2.33 to 3.85)                  | 3.34<br>(2.46 to 4.39)                  |

|                                                                |                                                      |                                                      |                                                      |                                                      |                                                   |                                                   |                                                   |                                                   |
|----------------------------------------------------------------|------------------------------------------------------|------------------------------------------------------|------------------------------------------------------|------------------------------------------------------|---------------------------------------------------|---------------------------------------------------|---------------------------------------------------|---------------------------------------------------|
| Cirrhosis and other chronic liver diseases due to alcohol use  | 125.25<br>(103.88 to<br>147.26)                      | 81.34<br>(64.56 to<br>99.73)                         | 68.35<br>(54.46 to<br>83.44)                         | 141.65<br>(116.21 to<br>169.45)                      | 5.53<br>(4.67 to<br>6.38)                         | 4.25<br>(3.47 to<br>5.07)                         | 3.65<br>(2.96 to<br>4.39)                         | 7.16<br>(5.98 to<br>8.44)                         |
| Cirrhosis and other chronic liver diseases due to other causes | 15.06<br>(10.62 to<br>20.74)                         | 13.99<br>(9.88 to<br>19.38)                          | 12.78<br>(8.98 to<br>17.62)                          | 14.28<br>(9.85 to<br>19.94)                          | 0.71<br>(0.50 to<br>0.98)                         | 0.79<br>(0.55 to<br>1.12)                         | 0.74<br>(0.51 to<br>1.04)                         | 0.79<br>(0.55 to<br>1.14)                         |
| <b>Digestive diseases</b>                                      | <b>172.00</b><br><b>(150.54 to</b><br><b>214.11)</b> | <b>218.19</b><br><b>(180.99 to</b><br><b>282.67)</b> | <b>208.43</b><br><b>(173.00 to</b><br><b>263.77)</b> | <b>224.94</b><br><b>(182.72 to</b><br><b>290.31)</b> | <b>15.38</b><br><b>(13.24 to</b><br><b>18.43)</b> | <b>23.93</b><br><b>(19.75 to</b><br><b>29.46)</b> | <b>23.48</b><br><b>(19.51 to</b><br><b>28.48)</b> | <b>23.92</b><br><b>(19.69 to</b><br><b>29.55)</b> |
| Peptic ulcer disease                                           | 14.83<br>(12.78 to<br>19.05)                         | 11.67<br>(9.22 to<br>15.44)                          | 9.57<br>(7.60 to<br>12.54)                           | 12.54<br>(9.69 to<br>16.96)                          | 1.27<br>(1.10 to<br>1.61)                         | 1.28<br>(1.01 to<br>1.70)                         | 1.09<br>(0.84 to<br>1.40)                         | 1.33<br>(1.03 to<br>1.73)                         |

| France                                     |                                     |                                       |                                       |                                       |                                  |                                    |                                    |                                    |
|--------------------------------------------|-------------------------------------|---------------------------------------|---------------------------------------|---------------------------------------|----------------------------------|------------------------------------|------------------------------------|------------------------------------|
| Cause                                      | YLLs (in 1000s)                     |                                       |                                       |                                       | Deaths (in 1000s)                |                                    |                                    |                                    |
|                                            | 2016                                | 2040 Forecast                         | 2040 Better Scenario                  | 2040 Worse Scenario                   | 2016                             | 2040 Forecast                      | 2040 Better Scenario               | 2040 Worse Scenario                |
| Gastritis and duodenitis                   | 0.65<br>(0.51 to 1.05)              | 0.82<br>(0.60 to 1.33)                | 0.74<br>(0.54 to 1.22)                | 0.83<br>(0.60 to 1.32)                | 0.05<br>(0.04 to 0.08)           | 0.08<br>(0.06 to 0.13)             | 0.08<br>(0.05 to 0.12)             | 0.08<br>(0.06 to 0.12)             |
| Appendicitis                               | 2.38<br>(1.84 to 3.98)              | 2.22<br>(1.64 to 3.79)                | 1.89<br>(1.39 to 3.20)                | 2.30<br>(1.70 to 3.87)                | 0.17<br>(0.13 to 0.28)           | 0.20<br>(0.15 to 0.34)             | 0.18<br>(0.13 to 0.30)             | 0.21<br>(0.15 to 0.34)             |
| Paralytic ileus and intestinal obstruction | 44.81<br>(35.25 to 57.11)           | 66.54<br>(52.68 to 85.16)             | 68.50<br>(54.35 to 88.77)             | 63.30<br>(49.99 to 80.73)             | 4.31<br>(3.32 to 5.23)           | 7.63<br>(5.90 to 9.34)             | 8.04<br>(6.25 to 9.83)             | 7.11<br>(5.45 to 8.67)             |
| Inguinal, femoral, and abdominal hernia    | 7.00<br>(5.50 to 10.34)             | 6.57<br>(5.01 to 9.68)                | 6.17<br>(4.63 to 9.06)                | 6.48<br>(4.92 to 9.53)                | 0.70<br>(0.54 to 1.00)           | 0.77<br>(0.58 to 1.10)             | 0.74<br>(0.56 to 1.06)             | 0.74<br>(0.55 to 1.07)             |
| Inflammatory bowel disease                 | 12.25<br>(7.46 to 15.13)            | 16.46<br>(9.17 to 20.95)              | 16.74<br>(9.25 to 21.33)              | 15.81<br>(8.84 to 20.08)              | 1.12<br>(0.58 to 1.40)           | 1.81<br>(0.90 to 2.33)             | 1.88<br>(0.94 to 2.44)             | 1.70<br>(0.84 to 2.19)             |
| Vascular intestinal disorders              | 31.30<br>(23.88 to 37.05)           | 42.75<br>(31.97 to 52.19)             | 41.50<br>(30.53 to 50.39)             | 41.81<br>(30.48 to 50.86)             | 2.77<br>(2.17 to 3.23)           | 4.57<br>(3.48 to 5.49)             | 4.55<br>(3.44 to 5.50)             | 4.38<br>(3.28 to 5.26)             |
| Gallbladder and biliary diseases           | 17.92<br>(15.54 to 23.04)           | 24.53<br>(14.28 to 41.51)             | 20.22<br>(12.20 to 34.07)             | 29.85<br>(16.92 to 51.39)             | 1.98<br>(1.70 to 2.47)           | 3.12<br>(1.81 to 5.41)             | 2.63<br>(1.57 to 4.38)             | 3.69<br>(2.03 to 6.33)             |
| Pancreatitis                               | 20.66<br>(17.03 to 30.70)           | 19.12<br>(9.15 to 41.80)              | 16.28<br>(7.69 to 35.77)              | 25.17<br>(11.23 to 54.97)             | 1.15<br>(0.97 to 1.69)           | 1.37<br>(0.70 to 2.77)             | 1.19<br>(0.62 to 2.42)             | 1.75<br>(0.83 to 3.65)             |
| Other digestive diseases                   | 20.20<br>(15.11 to 25.21)           | 27.51<br>(20.75 to 34.83)             | 26.83<br>(20.10 to 33.60)             | 26.84<br>(20.00 to 33.72)             | 1.87<br>(1.47 to 2.29)           | 3.10<br>(2.39 to 3.84)             | 3.11<br>(2.42 to 3.87)             | 2.95<br>(2.27 to 3.62)             |
| Neurological disorders                     | <b>655.25</b><br>(576.26 to 745.04) | <b>940.78</b><br>(756.07 to 1,188.52) | <b>940.73</b><br>(761.39 to 1,168.11) | <b>983.22</b><br>(767.50 to 1,289.65) | <b>77.16</b><br>(66.34 to 89.49) | <b>121.07</b><br>(96.08 to 156.05) | <b>123.43</b><br>(98.81 to 155.73) | <b>124.12</b><br>(95.62 to 166.02) |
| Alzheimer's disease and other dementias    | 475.95<br>(402.59 to 566.66)        | 709.65<br>(529.85 to 959.65)          | 705.92<br>(532.74 to 926.69)          | 749.15<br>(548.39 to 1,057.25)        | 65.77<br>(55.18 to 78.17)        | 103.10<br>(78.25 to 137.09)        | 104.54<br>(80.40 to 136.42)        | 106.60<br>(77.71 to 148.88)        |
| Parkinson's disease                        | 56.45<br>(42.67 to 73.46)           | 90.67<br>(68.83 to 118.51)            | 96.85<br>(73.60 to 126.31)            | 84.84<br>(64.10 to 111.15)            | 5.80<br>(4.37 to 7.59)           | 10.00<br>(7.61 to 13.05)           | 10.86<br>(8.26 to 14.16)           | 9.21<br>(6.94 to 12.19)            |
| Epilepsy                                   | 38.44<br>(34.81 to 42.79)           | 42.12<br>(28.13 to 62.11)             | 38.99<br>(26.03 to 57.73)             | 52.49<br>(33.19 to 77.45)             | 1.70<br>(1.54 to 1.88)           | 2.46<br>(1.63 to 3.62)             | 2.36<br>(1.59 to 3.46)             | 2.99<br>(1.87 to 4.44)             |
| Multiple sclerosis                         | 14.32<br>(10.54 to 16.62)           | 13.95<br>(9.67 to 17.15)              | 13.65<br>(9.47 to 16.65)              | 14.15<br>(9.80 to 17.59)              | 0.55<br>(0.38 to 0.64)           | 0.60<br>(0.39 to 0.75)             | 0.59<br>(0.38 to 0.72)             | 0.59<br>(0.38 to 0.73)             |
| Motor neuron disease                       | 31.94<br>(29.02 to 34.98)           | 40.64<br>(35.70 to 46.03)             | 40.70<br>(35.55 to 46.14)             | 39.89<br>(35.06 to 45.07)             | 1.56<br>(1.41 to 1.71)           | 2.31<br>(2.02 to 2.62)             | 2.34<br>(2.03 to 2.66)             | 2.24<br>(1.96 to 2.53)             |
| Other neurological disorders               | 38.14<br>(33.22 to 42.26)           | 43.76<br>(37.62 to 49.30)             | 44.63<br>(38.41 to 50.29)             | 42.71<br>(36.84 to 48.02)             | 1.78<br>(1.60 to 1.95)           | 2.61<br>(2.30 to 2.95)             | 2.73<br>(2.38 to 3.08)             | 2.48<br>(2.18 to 2.80)             |
| Mental disorders                           | <b>155.09</b><br>(136.83 to 171.75) | <b>178.94</b><br>(152.31 to 206.95)   | <b>194.76</b><br>(167.30 to 224.12)   | <b>187.85</b><br>(160.33 to 218.05)   | <b>5.46</b><br>(4.94 to 5.96)    | <b>7.74</b><br>(6.79 to 8.76)      | <b>8.72</b><br>(7.73 to 9.77)      | <b>7.84</b><br>(6.91 to 8.86)      |
| Alcohol use disorders                      | 107.10<br>(94.11 to 119.51)         | 89.50<br>(74.95 to 105.43)            | 91.49<br>(76.86 to 107.84)            | 104.15<br>(88.52 to 120.96)           | 3.57<br>(3.19 to 3.97)           | 3.39<br>(2.89 to 3.91)             | 3.51<br>(2.97 to 4.06)             | 3.90<br>(3.36 to 4.47)             |
| Drug use disorders                         | 47.10<br>(39.50 to 53.32)           | 88.51<br>(71.34 to 106.12)            | 102.28<br>(84.03 to 120.90)           | 82.80<br>(66.47 to 101.19)            | 1.87<br>(1.62 to 2.09)           | 4.33<br>(3.61 to 5.09)             | 5.19<br>(4.42 to 5.98)             | 3.92<br>(3.22 to 4.68)             |
| Opioid use disorders                       | 19.76<br>(16.14 to 27.33)           | 24.11<br>(18.19 to 38.44)             | 25.12<br>(18.83 to 40.92)             | 23.59<br>(17.72 to 37.15)             | 0.61<br>(0.50 to 0.74)           | 0.84<br>(0.65 to 1.08)             | 0.90<br>(0.69 to 1.19)             | 0.80<br>(0.62 to 1.03)             |



| France                                                     |                                     |                                     |                                     |                                     |                                  |                                  |                                  |                                  |
|------------------------------------------------------------|-------------------------------------|-------------------------------------|-------------------------------------|-------------------------------------|----------------------------------|----------------------------------|----------------------------------|----------------------------------|
| Cause                                                      | YLLs (in 1000s)                     |                                     |                                     |                                     | Deaths (in 1000s)                |                                  |                                  |                                  |
|                                                            | 2016                                | 2040 Forecast                       | 2040 Better Scenario                | 2040 Worse Scenario                 | 2016                             | 2040 Forecast                    | 2040 Better Scenario             | 2040 Worse Scenario              |
| <b>Diabetes, urogenital, blood, and endocrine diseases</b> | <b>356.37</b><br>(332.37 to 381.22) | <b>478.92</b><br>(387.80 to 600.01) | <b>429.61</b><br>(354.10 to 526.25) | <b>532.78</b><br>(417.43 to 678.88) | <b>30.81</b><br>(28.77 to 32.81) | <b>51.04</b><br>(41.19 to 63.17) | <b>46.72</b><br>(38.40 to 57.00) | <b>55.48</b><br>(43.79 to 70.28) |
| Diabetes mellitus                                          | 146.44<br>(132.41 to 163.10)        | 151.68<br>(98.09 to 225.15)         | 122.94<br>(80.43 to 185.77)         | 181.13<br>(114.43 to 280.17)        | 12.29<br>(11.14 to 13.67)        | 15.36<br>(10.48 to 22.14)        | 12.97<br>(9.02 to 18.70)         | 17.51<br>(11.50 to 26.24)        |
| Acute glomerulonephritis                                   | 0.30<br>(0.27 to 0.32)              | 0.25<br>(0.21 to 0.30)              | 0.23<br>(0.19 to 0.27)              | 0.27<br>(0.22 to 0.31)              | 0.01<br>(0.01 to 0.01)           | 0.01<br>(0.01 to 0.01)           | 0.01<br>(0.01 to 0.01)           | 0.01<br>(0.01 to 0.01)           |
| Chronic kidney disease                                     | 92.22<br>(84.78 to 99.42)           | 146.08<br>(91.94 to 229.43)         | 126.90<br>(83.76 to 193.04)         | 174.79<br>(104.77 to 288.53)        | 9.85<br>(9.04 to 10.69)          | 18.40<br>(11.68 to 28.38)        | 16.35<br>(10.88 to 24.39)        | 21.49<br>(13.01 to 34.77)        |
| Chronic kidney disease due to diabetes mellitus            | 26.49<br>(24.03 to 28.95)           | 43.81<br>(27.60 to 69.07)           | 37.97<br>(25.13 to 59.52)           | 53.00<br>(31.93 to 88.02)           | 2.36<br>(2.11 to 2.62)           | 4.75<br>(2.95 to 7.49)           | 4.21<br>(2.72 to 6.50)           | 5.60<br>(3.36 to 9.24)           |
| Chronic kidney disease due to hypertension                 | 22.23<br>(19.24 to 25.23)           | 41.35<br>(25.25 to 66.66)           | 37.11<br>(23.44 to 57.05)           | 48.41<br>(27.91 to 79.62)           | 3.14<br>(2.69 to 3.60)           | 6.38<br>(3.98 to 10.08)          | 5.83<br>(3.72 to 8.95)           | 7.30<br>(4.33 to 11.87)          |
| Chronic kidney disease due to glomerulonephritis           | 15.77<br>(14.19 to 17.45)           | 23.22<br>(14.08 to 37.68)           | 19.44<br>(12.57 to 30.46)           | 28.11<br>(16.15 to 48.11)           | 1.49<br>(1.29 to 1.68)           | 2.64<br>(1.58 to 4.28)           | 2.25<br>(1.40 to 3.46)           | 3.14<br>(1.79 to 5.33)           |
| Chronic kidney disease due to other and unspecified causes | 27.73<br>(24.83 to 30.80)           | 37.70<br>(23.69 to 59.94)           | 32.38<br>(21.09 to 49.67)           | 45.27<br>(26.47 to 75.99)           | 2.86<br>(2.48 to 3.26)           | 4.64<br>(2.87 to 7.38)           | 4.06<br>(2.60 to 6.21)           | 5.44<br>(3.15 to 9.09)           |
| Urinary diseases and male infertility                      | 29.22<br>(26.75 to 31.81)           | 51.36<br>(43.62 to 61.29)           | 48.15<br>(40.48 to 57.63)           | 50.62<br>(42.65 to 60.27)           | 3.31<br>(2.98 to 3.65)           | 6.96<br>(5.82 to 8.50)           | 6.67<br>(5.54 to 8.07)           | 6.72<br>(5.55 to 8.14)           |
| Urinary tract infections                                   | 25.53<br>(23.11 to 28.18)           | 46.98<br>(39.10 to 56.51)           | 44.25<br>(36.84 to 53.29)           | 46.23<br>(38.39 to 55.06)           | 2.97<br>(2.66 to 3.30)           | 6.45<br>(5.32 to 7.92)           | 6.21<br>(5.12 to 7.59)           | 6.22<br>(5.12 to 7.59)           |
| Urolithiasis                                               | 1.30<br>(0.94 to 2.15)              | 1.41<br>(0.96 to 2.46)              | 1.24<br>(0.83 to 2.21)              | 1.44<br>(0.97 to 2.47)              | 0.11<br>(0.08 to 0.19)           | 0.14<br>(0.09 to 0.25)           | 0.13<br>(0.08 to 0.24)           | 0.14<br>(0.09 to 0.25)           |
| Other urinary diseases                                     | 2.39<br>(1.58 to 3.46)              | 2.98<br>(1.74 to 4.68)              | 2.66<br>(1.58 to 4.19)              | 2.96<br>(1.70 to 4.67)              | 0.23<br>(0.15 to 0.35)           | 0.37<br>(0.21 to 0.58)           | 0.34<br>(0.19 to 0.53)           | 0.36<br>(0.20 to 0.58)           |
| Gynecological diseases                                     | 0.56<br>(0.44 to 0.82)              | 0.40<br>(0.27 to 0.60)              | 0.31<br>(0.21 to 0.47)              | 0.43<br>(0.29 to 0.65)              | 0.04<br>(0.03 to 0.05)           | 0.03<br>(0.02 to 0.05)           | 0.03<br>(0.02 to 0.04)           | 0.03<br>(0.02 to 0.05)           |
| Uterine fibroids                                           | 0.11<br>(0.08 to 0.18)              | 0.06<br>(0.04 to 0.10)              | 0.05<br>(0.03 to 0.08)              | 0.07<br>(0.04 to 0.11)              | 0.00<br>(0.00 to 0.01)           | 0.00<br>(0.00 to 0.01)           | 0.00<br>(0.00 to 0.00)           | 0.00<br>(0.00 to 0.01)           |
| Polycystic ovarian syndrome                                | 0.01<br>(0.00 to 0.02)              | 0.00<br>(0.00 to 0.01)              | 0.00<br>(0.00 to 0.00)              | 0.00<br>(0.00 to 0.01)              | 0.00<br>(0.00 to 0.00)           | 0.00<br>(0.00 to 0.00)           | 0.00<br>(0.00 to 0.00)           | 0.00<br>(0.00 to 0.00)           |
| Endometriosis                                              | 0.00<br>(0.00 to 0.01)              | 0.00<br>(0.00 to 0.01)              | 0.00<br>(0.00 to 0.00)              | 0.00<br>(0.00 to 0.01)              | 0.00<br>(0.00 to 0.00)           | 0.00<br>(0.00 to 0.00)           | 0.00<br>(0.00 to 0.00)           | 0.00<br>(0.00 to 0.00)           |
| Genital prolapse                                           | 0.10<br>(0.05 to 0.15)              | 0.06<br>(0.03 to 0.11)              | 0.05<br>(0.02 to 0.08)              | 0.07<br>(0.03 to 0.12)              | 0.01<br>(0.00 to 0.01)           | 0.01<br>(0.00 to 0.01)           | 0.00<br>(0.00 to 0.01)           | 0.01<br>(0.00 to 0.01)           |
| Other gynecological diseases                               | 0.34<br>(0.26 to 0.56)              | 0.27<br>(0.18 to 0.44)              | 0.21<br>(0.14 to 0.33)              | 0.29<br>(0.19 to 0.47)              | 0.02<br>(0.02 to 0.04)           | 0.02<br>(0.01 to 0.04)           | 0.02<br>(0.03 to 0.03)           | 0.02<br>(0.02 to 0.04)           |
| Hemoglobinopathies and hemolytic anemias                   | 14.60<br>(12.67 to 21.05)           | 18.87<br>(15.13 to 27.64)           | 16.85<br>(13.29 to 24.70)           | 19.12<br>(15.25 to 28.38)           | 1.35<br>(1.18 to 1.85)           | 2.05<br>(1.64 to 2.79)           | 1.88<br>(1.50 to 2.56)           | 2.02<br>(1.60 to 2.74)           |
| Thalassemias                                               | 0.32<br>(0.23 to 0.47)              | 0.14<br>(0.10 to 0.24)              | 0.14<br>(0.09 to 0.24)              | 0.15<br>(0.10 to 0.24)              | 0.00<br>(0.00 to 0.01)           | 0.00<br>(0.00 to 0.00)           | 0.00<br>(0.00 to 0.00)           | 0.00<br>(0.00 to 0.00)           |

|                                                   |                              |                                |                                |                                |                           |                           |                            |                           |
|---------------------------------------------------|------------------------------|--------------------------------|--------------------------------|--------------------------------|---------------------------|---------------------------|----------------------------|---------------------------|
|                                                   | 3.36<br>(2.75 to<br>5.53)    | 5.07<br>(3.73 to<br>8.59)      | 4.37<br>(3.18 to<br>7.47)      | 5.31<br>(3.82 to<br>8.94)      | 0.11<br>(0.09 to<br>0.17) | 0.24<br>(0.17 to<br>0.39) | 0.21<br>(0.15 to<br>0.36)  | 0.25<br>(0.18 to<br>0.41) |
| Sickle cell disorders                             | 0.81<br>(0.67 to<br>1.11)    | 1.09<br>(0.82 to<br>1.54)      | 0.92<br>(0.68 to<br>1.29)      | 1.14<br>(0.85 to<br>1.61)      | 0.03<br>(0.03 to<br>0.05) | 0.06<br>(0.05 to<br>0.09) | 0.06<br>(0.04 to<br>0.08)  | 0.07<br>(0.05 to<br>0.09) |
| G6PD deficiency                                   | 10.12<br>(8.78 to<br>14.12)  | 12.57<br>(9.96 to<br>17.72)    | 11.42<br>(9.08 to<br>15.84)    | 12.52<br>(9.90 to<br>17.40)    | 1.21<br>(1.03 to<br>1.63) | 1.74<br>(1.38 to<br>2.32) | 1.62<br>(1.28 to<br>2.14)  | 1.70<br>(1.33 to<br>2.28) |
| Other hemoglobinopathies and hemolytic anemias    | 73.03<br>(54.46 to<br>82.21) | 110.27<br>(77.23 to<br>128.74) | 114.23<br>(80.90 to<br>133.47) | 106.42<br>(74.19 to<br>124.24) | 3.95<br>(2.50 to<br>4.54) | 8.24<br>(4.80 to<br>9.92) | 8.81<br>(5.21 to<br>10.63) | 7.70<br>(4.50 to<br>9.29) |
| Endocrine, metabolic, blood, and immune disorders |                              |                                |                                |                                |                           |                           |                            |                           |



| France                                        |                                     |                                    |                                    |                                    |                               |                                |                                |                                |
|-----------------------------------------------|-------------------------------------|------------------------------------|------------------------------------|------------------------------------|-------------------------------|--------------------------------|--------------------------------|--------------------------------|
| Cause                                         | YLLs (in 1000s)                     |                                    |                                    |                                    | Deaths (in 1000s)             |                                |                                |                                |
|                                               | 2016                                | 2040 Forecast                      | 2040 Better Scenario               | 2040 Worse Scenario                | 2016                          | 2040 Forecast                  | 2040 Better Scenario           | 2040 Worse Scenario            |
| <b>Musculoskeletal disorders</b>              | <b>33.58</b><br>(26.75 to 37.58)    | <b>46.61</b><br>(35.29 to 54.57)   | <b>44.68</b><br>(33.37 to 52.36)   | <b>46.29</b><br>(34.04 to 54.59)   | <b>3.03</b><br>(2.10 to 3.42) | <b>4.94</b><br>(3.29 to 5.94)  | <b>4.87</b><br>(3.21 to 5.82)  | <b>4.80</b><br>(3.18 to 5.75)  |
| Rheumatoid arthritis                          | 5.81<br>(4.61 to 9.37)              | 8.42<br>(6.06 to 13.96)            | 6.80<br>(4.80 to 11.69)            | 9.03<br>(6.37 to 14.48)            | 0.48<br>(0.36 to 0.85)        | 0.78<br>(0.54 to 1.35)         | 0.64<br>(0.45 to 1.16)         | 0.82<br>(0.57 to 1.40)         |
| Other musculoskeletal disorders               | 27.76<br>(20.02 to 31.42)           | 38.18<br>(25.55 to 45.69)          | 37.88<br>(25.34 to 45.20)          | 37.26<br>(24.67 to 44.51)          | 2.55<br>(1.60 to 2.92)        | 4.17<br>(2.49 to 5.11)         | 4.23<br>(2.57 to 5.16)         | 3.98<br>(2.35 to 4.92)         |
| <b>Other non-communicable diseases</b>        | <b>126.69</b><br>(103.66 to 152.40) | <b>120.56</b><br>(91.45 to 156.85) | <b>107.68</b><br>(81.98 to 139.97) | <b>125.97</b><br>(96.07 to 167.18) | <b>4.02</b><br>(2.76 to 5.54) | <b>7.70</b><br>(4.61 to 11.27) | <b>7.38</b><br>(4.39 to 10.85) | <b>7.55</b><br>(4.59 to 11.17) |
| Congenital birth defects                      | 85.66<br>(67.69 to 106.73)          | 55.59<br>(41.70 to 71.21)          | 46.68<br>(34.56 to 59.98)          | 60.82<br>(44.72 to 80.03)          | 1.29<br>(0.98 to 1.55)        | 0.95<br>(0.66 to 1.18)         | 0.83<br>(0.57 to 1.02)         | 1.02<br>(0.72 to 1.28)         |
| Neural tube defects                           | 1.66<br>(0.86 to 2.39)              | 0.46<br>(0.22 to 0.75)             | 0.34<br>(0.16 to 0.57)             | 0.53<br>(0.24 to 0.91)             | 0.02<br>(0.01 to 0.03)        | 0.01<br>(0.00 to 0.01)         | 0.00<br>(0.00 to 0.01)         | 0.01<br>(0.00 to 0.01)         |
| Congenital heart anomalies                    | 33.83<br>(24.51 to 42.52)           | 15.47<br>(10.22 to 22.02)          | 11.31<br>(7.43 to 15.98)           | 17.87<br>(11.13 to 25.90)          | 0.49<br>(0.37 to 0.60)        | 0.24<br>(0.16 to 0.33)         | 0.17<br>(0.12 to 0.24)         | 0.27<br>(0.18 to 0.38)         |
| Orofacial clefts                              | 0.04<br>(0.01 to 0.07)              | 0.01<br>(0.00 to 0.03)             | 0.01<br>(0.00 to 0.02)             | 0.02<br>(0.00 to 0.04)             | 0.00<br>(0.00 to 0.00)        | 0.00<br>(0.00 to 0.00)         | 0.00<br>(0.00 to 0.00)         | 0.00<br>(0.00 to 0.00)         |
| Down syndrome                                 | 8.63<br>(4.03 to 10.79)             | 11.40<br>(5.26 to 14.57)           | 11.70<br>(5.56 to 14.85)           | 11.28<br>(5.21 to 14.48)           | 0.22<br>(0.10 to 0.27)        | 0.30<br>(0.13 to 0.39)         | 0.31<br>(0.14 to 0.39)         | 0.29<br>(0.13 to 0.38)         |
| Other chromosomal abnormalities               | 10.22<br>(6.89 to 19.68)            | 11.52<br>(7.67 to 18.82)           | 10.23<br>(6.91 to 16.22)           | 12.29<br>(8.09 to 20.20)           | 0.15<br>(0.10 to 0.25)        | 0.17<br>(0.12 to 0.25)         | 0.16<br>(0.11 to 0.22)         | 0.18<br>(0.13 to 0.27)         |
| Congenital musculoskeletal and limb anomalies | 2.61<br>(1.69 to 4.33)              | 1.40<br>(0.87 to 2.42)             | 1.09<br>(0.69 to 1.90)             | 1.57<br>(0.97 to 2.74)             | 0.04<br>(0.02 to 0.05)        | 0.02<br>(0.01 to 0.03)         | 0.02<br>(0.01 to 0.02)         | 0.02<br>(0.01 to 0.04)         |
| Urogenital congenital anomalies               | 2.70<br>(1.18 to 4.47)              | 1.52<br>(0.61 to 2.67)             | 1.23<br>(0.49 to 2.22)             | 1.69<br>(0.66 to 3.07)             | 0.04<br>(0.02 to 0.06)        | 0.02<br>(0.01 to 0.04)         | 0.02<br>(0.01 to 0.03)         | 0.02<br>(0.01 to 0.04)         |
| Digestive congenital anomalies                | 7.16<br>(4.00 to 10.47)             | 3.77<br>(1.80 to 6.08)             | 2.85<br>(1.35 to 4.50)             | 4.32<br>(2.09 to 6.87)             | 0.09<br>(0.05 to 0.13)        | 0.05<br>(0.02 to 0.08)         | 0.04<br>(0.02 to 0.06)         | 0.06<br>(0.03 to 0.09)         |
| Other congenital birth defects                | 18.80<br>(13.44 to 26.35)           | 10.04<br>(6.57 to 14.84)           | 7.91<br>(5.29 to 11.71)            | 11.25<br>(7.52 to 17.08)           | 0.26<br>(0.19 to 0.34)        | 0.14<br>(0.10 to 0.20)         | 0.11<br>(0.08 to 0.16)         | 0.16<br>(0.11 to 0.23)         |
| Skin and subcutaneous diseases                | 22.98<br>(14.17 to 40.93)           | 55.27<br>(33.45 to 93.89)          | 52.83<br>(31.64 to 88.50)          | 54.42<br>(32.94 to 91.34)          | 2.52<br>(1.37 to 4.14)        | 6.64<br>(3.69 to 10.23)        | 6.46<br>(3.54 to 9.96)         | 6.41<br>(3.59 to 10.16)        |
| Cellulitis                                    | 3.56<br>(1.52 to 10.75)             | 9.81<br>(4.27 to 27.99)            | 9.66<br>(4.23 to 27.29)            | 9.63<br>(4.17 to 27.13)            | 0.27<br>(0.11 to 0.80)        | 0.86<br>(0.36 to 2.39)         | 0.87<br>(0.37 to 2.39)         | 0.83<br>(0.35 to 2.32)         |
| Pyoderma                                      | 9.06<br>(4.37 to 14.58)             | 27.74<br>(12.84 to 40.69)          | 26.82<br>(12.40 to 39.75)          | 27.19<br>(12.83 to 40.13)          | 0.90<br>(0.38 to 1.30)        | 3.21<br>(1.33 to 4.47)         | 3.19<br>(1.31 to 4.40)         | 3.08<br>(1.27 to 4.28)         |
| Decubitus ulcer                               | 8.44<br>(4.49 to 14.33)             | 14.66<br>(7.27 to 26.03)           | 13.41<br>(6.71 to 22.97)           | 14.61<br>(7.34 to 25.51)           | 1.14<br>(0.56 to 1.83)        | 2.18<br>(1.00 to 3.54)         | 2.03<br>(0.95 to 3.33)         | 2.14<br>(0.99 to 3.51)         |
| Other skin and subcutaneous diseases          | 1.91<br>(1.11 to 3.76)              | 3.05<br>(1.77 to 5.90)             | 2.94<br>(1.70 to 5.61)             | 3.00<br>(1.75 to 5.81)             | 0.22<br>(0.12 to 0.39)        | 0.38<br>(0.20 to 0.65)         | 0.37<br>(0.20 to 0.64)         | 0.36<br>(0.20 to 0.64)         |
| Sudden infant death syndrome                  | 18.05<br>(12.61 to 25.25)           | 9.69<br>(5.06 to 16.62)            | 8.18<br>(4.24 to 13.96)            | 10.73<br>(5.74 to 18.46)           | 0.21<br>(0.15 to 0.29)        | 0.11<br>(0.06 to 0.19)         | 0.09<br>(0.05 to 0.16)         | 0.12<br>(0.07 to 0.21)         |

|                          |                                   |                                   |                                 |                                   |                              |                              |                              |                              |
|--------------------------|-----------------------------------|-----------------------------------|---------------------------------|-----------------------------------|------------------------------|------------------------------|------------------------------|------------------------------|
| Injuries                 | 980.30<br>(906.40 to<br>1,094.46) | 821.31<br>(640.99 to<br>1,087.55) | 694.43<br>(550.74 to<br>906.76) | 953.72<br>(719.86 to<br>1,283.00) | 42.46<br>(37.54 to<br>45.79) | 48.93<br>(39.93 to<br>58.32) | 45.05<br>(36.98 to<br>53.40) | 51.68<br>(41.86 to<br>62.45) |
| Transport injuries       | 194.04<br>(162.40 to<br>215.24)   | 149.15<br>(89.25 to<br>255.47)    | 89.28<br>(52.15 to<br>154.26)   | 201.84<br>(111.58 to<br>354.97)   | 4.89<br>(4.36 to<br>5.31)    | 4.27<br>(2.71 to<br>6.75)    | 2.78<br>(1.78 to<br>4.36)    | 5.57<br>(3.33 to<br>9.19)    |
| Road injuries            | 175.56<br>(146.31 to<br>194.63)   | 133.17<br>(77.98 to<br>228.38)    | 76.69<br>(44.48 to<br>132.41)   | 181.94<br>(100.69 to<br>320.70)   | 4.41<br>(3.91 to<br>4.80)    | 3.80<br>(2.43 to<br>5.97)    | 2.41<br>(1.54 to<br>3.74)    | 5.00<br>(3.00 to<br>8.21)    |
| Pedestrian road injuries | 42.66<br>(28.01 to<br>49.69)      | 22.24<br>(13.12 to<br>35.50)      | 12.08<br>(7.33 to<br>19.03)     | 30.94<br>(17.57 to<br>51.98)      | 1.36<br>(1.00 to<br>1.55)    | 0.92<br>(0.60 to<br>1.38)    | 0.55<br>(0.36 to<br>0.81)    | 1.22<br>(0.74 to<br>1.91)    |

| France                                          |                                            |                                            |                                            |                                            |                                         |                                         |                                         |                                         |
|-------------------------------------------------|--------------------------------------------|--------------------------------------------|--------------------------------------------|--------------------------------------------|-----------------------------------------|-----------------------------------------|-----------------------------------------|-----------------------------------------|
| Cause                                           | YLLs (in 1000s)                            |                                            |                                            |                                            | Deaths (in 1000s)                       |                                         |                                         |                                         |
|                                                 | 2016                                       | 2040 Forecast                              | 2040 Better Scenario                       | 2040 Worse Scenario                        | 2016                                    | 2040 Forecast                           | 2040 Better Scenario                    | 2040 Worse Scenario                     |
| Cyclist road injuries                           | 6.43<br>(3.85 to 7.77)                     | 5.64<br>(2.85 to 9.81)                     | 3.51<br>(1.77 to 6.14)                     | 7.45<br>(3.60 to 13.52)                    | 0.17<br>(0.10 to 0.21)                  | 0.17<br>(0.09 to 0.29)                  | 0.12<br>(0.06 to 0.21)                  | 0.22<br>(0.10 to 0.38)                  |
| Motorcyclist road injuries                      | 36.35<br>(21.04 to 44.43)                  | 30.11<br>(13.54 to 58.73)                  | 20.75<br>(9.39 to 40.77)                   | 39.09<br>(16.71 to 79.41)                  | 0.70<br>(0.41 to 0.84)                  | 0.59<br>(0.28 to 1.15)                  | 0.42<br>(0.20 to 0.81)                  | 0.76<br>(0.34 to 1.52)                  |
| Motor vehicle road injuries                     | 86.95<br>(76.64 to 107.47)                 | 72.11<br>(41.21 to 120.47)                 | 38.61<br>(22.02 to 65.67)                  | 100.26<br>(53.99 to 176.43)                | 2.10<br>(1.87 to 2.64)                  | 2.03<br>(1.24 to 3.30)                  | 1.25<br>(0.78 to 2.03)                  | 2.69<br>(1.54 to 4.55)                  |
| Other road injuries                             | 3.17<br>(2.46 to 5.03)                     | 3.08<br>(1.61 to 5.63)                     | 1.74<br>(0.91 to 3.20)                     | 4.19<br>(2.11 to 7.85)                     | 0.08<br>(0.05 to 0.11)                  | 0.09<br>(0.05 to 0.15)                  | 0.06<br>(0.03 to 0.10)                  | 0.11<br>(0.06 to 0.20)                  |
| Other transport injuries                        | 18.48<br>(15.56 to 21.71)                  | 15.97<br>(9.33 to 27.25)                   | 12.59<br>(7.21 to 21.28)                   | 19.90<br>(10.79 to 34.28)                  | 0.47<br>(0.42 to 0.54)                  | 0.47<br>(0.28 to 0.78)                  | 0.37<br>(0.22 to 0.62)                  | 0.57<br>(0.31 to 0.98)                  |
| <b>Unintentional injuries</b>                   | <b>348.06</b><br><b>(313.98 to 390.85)</b> | <b>352.51</b><br><b>(300.60 to 400.86)</b> | <b>328.80</b><br><b>(277.09 to 373.12)</b> | <b>355.91</b><br><b>(299.97 to 407.58)</b> | <b>24.55</b><br><b>(20.11 to 27.00)</b> | <b>33.69</b><br><b>(26.70 to 38.45)</b> | <b>32.56</b><br><b>(25.58 to 37.10)</b> | <b>32.82</b><br><b>(25.89 to 37.86)</b> |
| Falls                                           | 149.90<br>(121.34 to 168.18)               | 178.01<br>(138.28 to 205.83)               | 167.62<br>(130.32 to 193.17)               | 176.48<br>(135.39 to 204.85)               | 13.52<br>(10.25 to 15.20)               | 20.08<br>(14.71 to 23.67)               | 19.39<br>(14.32 to 22.73)               | 19.42<br>(14.17 to 22.89)               |
| Drowning                                        | 35.80<br>(32.06 to 39.20)                  | 19.84<br>(14.70 to 27.41)                  | 17.35<br>(12.80 to 23.75)                  | 22.28<br>(15.87 to 32.26)                  | 1.06<br>(0.97 to 1.15)                  | 0.71<br>(0.53 to 0.97)                  | 0.64<br>(0.48 to 0.87)                  | 0.78<br>(0.57 to 1.12)                  |
| Fire, heat, and hot substances                  | 20.26<br>(16.56 to 23.01)                  | 14.13<br>(10.03 to 19.56)                  | 12.08<br>(8.60 to 16.43)                   | 15.78<br>(10.88 to 22.51)                  | 1.24<br>(0.88 to 1.41)                  | 1.24<br>(0.78 to 1.69)                  | 1.11<br>(0.69 to 1.49)                  | 1.33<br>(0.81 to 1.90)                  |
| Poisonings                                      | 4.60<br>(3.78 to 7.85)                     | 2.00<br>(1.32 to 3.39)                     | 1.59<br>(1.08 to 2.61)                     | 2.33<br>(1.47 to 3.93)                     | 0.17<br>(0.14 to 0.24)                  | 0.17<br>(0.07 to 0.24)                  | 0.10<br>(0.06 to 0.11)                  | 0.11<br>(0.07 to 0.16)                  |
| Exposure to mechanical forces                   | 23.22<br>(19.03 to 26.45)                  | 17.45<br>(13.47 to 20.60)                  | 15.21<br>(12.02 to 17.77)                  | 18.19<br>(14.26 to 21.87)                  | 0.99<br>(0.72 to 1.11)                  | 1.08<br>(0.77 to 1.27)                  | 0.98<br>(0.72 to 1.15)                  | 1.08<br>(0.78 to 1.27)                  |
| Unintentional firearm injuries                  | 5.60<br>(3.40 to 6.79)                     | 3.43<br>(2.13 to 4.39)                     | 3.02<br>(1.92 to 3.82)                     | 3.58<br>(2.25 to 4.62)                     | 0.17<br>(0.12 to 0.20)                  | 0.17<br>(0.11 to 0.17)                  | 0.12<br>(0.10 to 0.15)                  | 0.14<br>(0.11 to 0.17)                  |
| Unintentional suffocation                       | 2.26<br>(1.64 to 3.75)                     | 1.48<br>(1.02 to 2.60)                     | 1.29<br>(0.89 to 2.25)                     | 1.58<br>(1.07 to 2.80)                     | 0.04<br>(0.03 to 0.07)                  | 0.03<br>(0.02 to 0.05)                  | 0.03<br>(0.02 to 0.04)                  | 0.03<br>(0.02 to 0.05)                  |
| Other exposure to mechanical forces             | 15.36<br>(12.05 to 17.99)                  | 12.54<br>(9.15 to 14.92)                   | 10.89<br>(7.96 to 12.87)                   | 13.02<br>(9.43 to 15.59)                   | 0.78<br>(0.53 to 0.88)                  | 0.91<br>(0.61 to 1.09)                  | 0.83<br>(0.56 to 0.99)                  | 0.91<br>(0.61 to 1.09)                  |
| Adverse effects of medical treatment            | 38.31<br>(30.98 to 57.09)                  | 47.15<br>(38.12 to 68.81)                  | 44.93<br>(36.16 to 66.02)                  | 46.77<br>(37.53 to 69.44)                  | 2.94<br>(2.43 to 4.12)                  | 4.34<br>(3.51 to 6.08)                  | 4.26<br>(3.47 to 5.97)                  | 4.19<br>(3.39 to 5.91)                  |
| Animal contact                                  | 1.67<br>(1.33 to 2.33)                     | 1.80<br>(1.42 to 2.53)                     | 1.60<br>(1.24 to 2.22)                     | 1.87<br>(1.46 to 2.63)                     | 0.06<br>(0.05 to 0.08)                  | 0.08<br>(0.06 to 0.12)                  | 0.07<br>(0.06 to 0.11)                  | 0.08<br>(0.06 to 0.12)                  |
| Venomous animal contact                         | 0.61<br>(0.41 to 0.89)                     | 0.64<br>(0.39 to 0.91)                     | 0.58<br>(0.35 to 0.83)                     | 0.65<br>(0.40 to 0.94)                     | 0.02<br>(0.01 to 0.03)                  | 0.02<br>(0.01 to 0.04)                  | 0.02<br>(0.01 to 0.03)                  | 0.03<br>(0.01 to 0.04)                  |
| Non-venomous animal contact                     | 1.06<br>(0.84 to 1.59)                     | 1.16<br>(0.90 to 1.78)                     | 1.01<br>(0.78 to 1.54)                     | 1.22<br>(0.92 to 1.86)                     | 0.04<br>(0.03 to 0.06)                  | 0.05<br>(0.04 to 0.09)                  | 0.05<br>(0.04 to 0.08)                  | 0.05<br>(0.04 to 0.09)                  |
| Foreign body                                    | 56.48<br>(48.35 to 76.52)                  | 58.81<br>(46.24 to 71.95)                  | 57.37<br>(44.42 to 70.23)                  | 58.18<br>(46.39 to 71.50)                  | 3.53<br>(2.34 to 4.35)                  | 4.97<br>(3.03 to 6.46)                  | 5.06<br>(3.04 to 6.60)                  | 4.73<br>(2.91 to 6.10)                  |
| Pulmonary aspiration and foreign body in airway | 55.30<br>(47.23 to 75.39)                  | 57.67<br>(45.09 to 70.71)                  | 56.20<br>(43.43 to 69.26)                  | 57.06<br>(45.31 to 69.99)                  | 3.49<br>(2.30 to 4.31)                  | 4.92<br>(2.99 to 6.41)                  | 5.01<br>(2.99 to 6.54)                  | 4.68<br>(2.87 to 6.05)                  |

|                                             |                                                      |                                                      |                                                      |                                                      |                                                   |                                                  |                                                 |                                                  |
|---------------------------------------------|------------------------------------------------------|------------------------------------------------------|------------------------------------------------------|------------------------------------------------------|---------------------------------------------------|--------------------------------------------------|-------------------------------------------------|--------------------------------------------------|
|                                             | 1.18<br>(0.82 to<br>1.60)                            | 1.14<br>(0.78 to<br>1.61)                            | 1.17<br>(0.80 to<br>1.65)                            | 1.12<br>(0.76 to<br>1.57)                            | 0.04<br>(0.03 to<br>0.05)                         | 0.05<br>(0.03 to<br>0.07)                        | 0.05<br>(0.04 to<br>0.07)                       | 0.05<br>(0.03 to<br>0.07)                        |
| Foreign body in other body part             |                                                      |                                                      |                                                      |                                                      |                                                   |                                                  |                                                 |                                                  |
| Environmental heat and cold exposure        | 9.99<br>(7.13 to<br>17.31)                           | 10.22<br>(7.11 to<br>17.55)                          | 8.80<br>(6.19 to<br>15.41)                           | 10.56<br>(7.32 to<br>18.12)                          | 0.75<br>(0.53 to<br>1.21)                         | 0.96<br>(0.65 to<br>1.59)                        | 0.86<br>(0.60 to<br>1.45)                       | 0.96<br>(0.66 to<br>1.63)                        |
| Other unintentional injuries                | 7.83<br>(6.84 to<br>8.98)                            | 3.11<br>(2.44 to<br>4.03)                            | 2.26<br>(1.79 to<br>2.85)                            | 3.48<br>(2.63 to<br>4.51)                            | 0.28<br>(0.25 to<br>0.32)                         | 0.14<br>(0.11 to<br>0.18)                        | 0.11<br>(0.09 to<br>0.13)                       | 0.15<br>(0.12 to<br>0.20)                        |
| <b>Self-harm and interpersonal violence</b> | <b>437.90</b><br><b>(382.97 to</b><br><b>586.72)</b> | <b>318.49</b><br><b>(198.55 to</b><br><b>511.64)</b> | <b>275.18</b><br><b>(175.39 to</b><br><b>437.69)</b> | <b>394.81</b><br><b>(230.78 to</b><br><b>645.05)</b> | <b>13.02</b><br><b>(11.46 to</b><br><b>16.48)</b> | <b>10.93</b><br><b>(6.97 to</b><br><b>16.92)</b> | <b>9.68</b><br><b>(6.39 to</b><br><b>14.77)</b> | <b>13.26</b><br><b>(8.02 to</b><br><b>20.75)</b> |

| France                                                                              |                                                |                                                |                                                |                                                |                                                |                                                |                                                |                                                |
|-------------------------------------------------------------------------------------|------------------------------------------------|------------------------------------------------|------------------------------------------------|------------------------------------------------|------------------------------------------------|------------------------------------------------|------------------------------------------------|------------------------------------------------|
| Cause                                                                               | YLLs (in 1000s)                                |                                                |                                                |                                                | Deaths (in 1000s)                              |                                                |                                                |                                                |
|                                                                                     | 2016                                           | 2040 Forecast                                  | 2040 Better Scenario                           | 2040 Worse Scenario                            | 2016                                           | 2040 Forecast                                  | 2040 Better Scenario                           | 2040 Worse Scenario                            |
| Self-harm                                                                           | 412.48<br>(358.65 to<br>559.69)                | 305.20<br>(185.30 to<br>494.19)                | 263.81<br>(165.69 to<br>422.47)                | 380.06<br>(219.19 to<br>627.44)                | 12.42<br>(10.89 to<br>15.89)                   | 10.56<br>(6.66 to<br>16.50)                    | 9.36<br>(6.07 to<br>14.43)                     | 12.86<br>(7.64 to<br>20.25)                    |
| Self-harm by firearm                                                                | 55.78<br>(38.78 to<br>93.94)                   | 35.63<br>(17.82 to<br>66.24)                   | 29.41<br>(14.90 to<br>54.07)                   | 44.98<br>(21.51 to<br>84.87)                   | 1.93<br>(1.32 to<br>2.89)                      | 1.44<br>(0.71 to<br>2.47)                      | 1.22<br>(0.62 to<br>2.11)                      | 1.76<br>(0.85 to<br>3.10)                      |
| Self-harm by other specified means                                                  | 356.70<br>(308.26 to<br>489.18)                | 269.58<br>(164.51 to<br>431.83)                | 234.40<br>(147.36 to<br>365.14)                | 335.07<br>(193.45 to<br>554.06)                | 10.49<br>(9.13 to<br>13.65)                    | 9.13<br>(5.81 to<br>14.33)                     | 8.14<br>(5.31 to<br>12.46)                     | 11.09<br>(6.69 to<br>17.52)                    |
| Interpersonal violence                                                              | 25.43<br>(17.73 to<br>38.14)                   | 13.29<br>(9.10 to<br>20.24)                    | 11.37<br>(7.80 to<br>17.30)                    | 14.75<br>(9.95 to<br>22.88)                    | 0.60<br>(0.43 to<br>0.89)                      | 0.37<br>(0.26 to<br>0.55)                      | 0.32<br>(0.23 to<br>0.47)                      | 0.40<br>(0.28 to<br>0.60)                      |
| Physical violence by firearm                                                        | 9.63<br>(5.78 to<br>16.29)                     | 4.66<br>(2.86 to<br>7.91)                      | 3.86<br>(2.33 to<br>6.48)                      | 5.02<br>(2.94 to<br>8.42)                      | 0.22<br>(0.13 to<br>0.36)                      | 0.12<br>(0.07 to<br>0.19)                      | 0.10<br>(0.06 to<br>0.16)                      | 0.12<br>(0.08 to<br>0.21)                      |
| Physical violence by sharp object                                                   | 5.97<br>(3.24 to<br>8.66)                      | 3.35<br>(1.92 to<br>4.85)                      | 2.87<br>(1.66 to<br>4.05)                      | 3.56<br>(2.03 to<br>5.21)                      | 0.15<br>(0.08 to<br>0.22)                      | 0.10<br>(0.06 to<br>0.14)                      | 0.09<br>(0.06 to<br>0.12)                      | 0.10<br>(0.06 to<br>0.15)                      |
| Physical violence by other means                                                    | 9.82<br>(6.97 to<br>17.49)                     | 5.28<br>(3.33 to<br>9.68)                      | 4.64<br>(2.91 to<br>8.40)                      | 6.17<br>(3.79 to<br>11.45)                     | 0.23<br>(0.17 to<br>0.42)                      | 0.15<br>(0.10 to<br>0.26)                      | 0.14<br>(0.09 to<br>0.24)                      | 0.18<br>(0.11 to<br>0.30)                      |
| <b>Forces of nature, conflict and terrorism, and executions and police conflict</b> | <b>0.30</b><br><b>(0.27 to</b><br><b>0.32)</b> | <b>1.16</b><br><b>(0.00 to</b><br><b>5.84)</b> | <b>1.16</b><br><b>(0.00 to</b><br><b>5.83)</b> | <b>1.16</b><br><b>(0.00 to</b><br><b>5.84)</b> | <b>0.01</b><br><b>(0.01 to</b><br><b>0.01)</b> | <b>0.03</b><br><b>(0.00 to</b><br><b>0.15)</b> | <b>0.03</b><br><b>(0.00 to</b><br><b>0.15)</b> | <b>0.03</b><br><b>(0.00 to</b><br><b>0.15)</b> |
| Exposure to forces of nature                                                        | 0.00<br>(0.00 to<br>0.00)                      | 0.46<br>(0.00 to<br>3.01)                      | 0.46<br>(0.00 to<br>3.01)                      | 0.46<br>(0.00 to<br>3.00)                      | 0.00<br>(0.00 to<br>0.00)                      | 0.01<br>(0.00 to<br>0.08)                      | 0.01<br>(0.00 to<br>0.08)                      | 0.01<br>(0.00 to<br>0.08)                      |
| Conflict and terrorism                                                              | 0.00<br>(0.00 to<br>0.00)                      | 0.70<br>(0.00 to<br>5.84)                      | 0.70<br>(0.00 to<br>5.83)                      | 0.69<br>(0.00 to<br>5.84)                      | 0.00<br>(0.00 to<br>0.00)                      | 0.02<br>(0.00 to<br>0.15)                      | 0.02<br>(0.00 to<br>0.15)                      | 0.02<br>(0.00 to<br>0.15)                      |
| Executions and police conflict                                                      | 0.30<br>(0.27 to<br>0.32)                      | 0.00<br>(0.00 to<br>0.00)                      | 0.00<br>(0.00 to<br>0.00)                      | 0.00<br>(0.00 to<br>0.00)                      | 0.01<br>(0.01 to<br>0.01)                      | 0.00<br>(0.00 to<br>0.00)                      | 0.00<br>(0.00 to<br>0.00)                      | 0.00<br>(0.00 to<br>0.00)                      |

| Germany                                                           |                                          |                                          |                                         |                                          |                                 |                                     |                                   |                                       |
|-------------------------------------------------------------------|------------------------------------------|------------------------------------------|-----------------------------------------|------------------------------------------|---------------------------------|-------------------------------------|-----------------------------------|---------------------------------------|
| Cause                                                             | YLLs (in 1000s)                          |                                          |                                         |                                          | Deaths (in 1000s)               |                                     |                                   |                                       |
|                                                                   | 2016                                     | 2040 Forecast                            | 2040 Better Scenario                    | 2040 Worse Scenario                      | 2016                            | 2040 Forecast                       | 2040 Better Scenario              | 2040 Worse Scenario                   |
| All causes                                                        | 12,788.72<br>(11,898.33 to<br>13,764.30) | 11,795.24<br>(10,108.35 to<br>13,482.93) | 10,221.52<br>(8,823.88 to<br>11,623.68) | 14,502.08<br>(12,224.82 to<br>16,964.14) | 918.28<br>(861.07 to<br>979.32) | 1,032.44<br>(925.77 to<br>1,163.09) | 928.83<br>(838.86 to<br>1,037.59) | 1,192.87<br>(1,054.56 to<br>1,352.28) |
| Communicable, maternal, neonatal, and nutritional diseases        | 477.49<br>(432.51 to<br>525.87)          | 496.51<br>(404.55 to<br>614.76)          | 471.31<br>(388.97 to<br>577.19)         | 566.64<br>(446.88 to<br>727.48)          | 31.45<br>(27.93 to<br>35.32)    | 47.33<br>(37.16 to<br>60.01)        | 48.37<br>(38.62 to<br>60.36)      | 49.79<br>(37.79 to<br>65.18)          |
| HIV/AIDS and tuberculosis                                         | 22.60<br>(21.40 to<br>23.78)             | 7.99<br>(4.14 to<br>12.54)               | 4.84<br>(2.84 to<br>7.49)               | 14.40<br>(7.34 to<br>21.52)              | 0.86<br>(0.80 to<br>0.92)       | 0.43<br>(0.25 to<br>0.69)           | 0.31<br>(0.18 to<br>0.50)         | 0.67<br>(0.38 to<br>1.07)             |
| Tuberculosis                                                      | 7.06<br>(6.22 to<br>8.00)                | 4.18<br>(2.31 to<br>7.11)                | 3.20<br>(1.82 to<br>5.37)               | 6.17<br>(3.16 to<br>10.65)               | 0.45<br>(0.40 to<br>0.51)       | 0.35<br>(0.19 to<br>0.61)           | 0.28<br>(0.15 to<br>0.48)         | 0.50<br>(0.24 to<br>0.89)             |
| HIV/AIDS                                                          | 15.54<br>(14.80 to<br>16.29)             | 3.81<br>(0.93 to<br>7.47)                | 1.64<br>(0.58 to<br>3.55)               | 8.22<br>(2.34 to<br>14.04)               | 0.41<br>(0.39 to<br>0.43)       | 0.07<br>(0.01 to<br>0.16)           | 0.03<br>(0.01 to<br>0.07)         | 0.17<br>(0.04 to<br>0.30)             |
| Diarrhea, lower respiratory, and other common infectious diseases | 335.27<br>(299.09 to<br>376.04)          | 414.68<br>(327.38 to<br>533.26)          | 400.40<br>(322.22 to<br>503.03)         | 471.71<br>(355.09 to<br>634.65)          | 27.91<br>(24.56 to<br>31.66)    | 44.07<br>(33.95 to<br>56.72)        | 45.19<br>(35.38 to<br>57.14)      | 46.39<br>(34.33 to<br>61.84)          |
| Diarrheal diseases                                                | 50.82<br>(45.02 to<br>57.03)             | 110.45<br>(79.93 to<br>154.49)           | 137.01<br>(102.56 to<br>188.83)         | 97.72<br>(66.11 to<br>148.20)            | 4.86<br>(4.25 to<br>5.54)       | 12.98<br>(9.04 to<br>18.52)         | 16.57<br>(12.29 to<br>22.79)      | 11.12<br>(7.30 to<br>16.82)           |
| Intestinal infectious diseases                                    | 0.07<br>(0.03 to<br>0.12)                | 0.05<br>(0.02 to<br>0.10)                | 0.05<br>(0.02 to<br>0.10)               | 0.05<br>(0.02 to<br>0.09)                | 0.00<br>(0.00 to<br>0.01)       | 0.00<br>(0.00 to<br>0.01)           | 0.00<br>(0.00 to<br>0.01)         | 0.00<br>(0.00 to<br>0.01)             |
| Typhoid fever                                                     | 0.02<br>(0.00 to<br>0.03)                | 0.02<br>(0.01 to<br>0.03)                | 0.02<br>(0.01 to<br>0.04)               | 0.01<br>(0.01 to<br>0.03)                | 0.00<br>(0.00 to<br>0.00)       | 0.00<br>(0.00 to<br>0.00)           | 0.00<br>(0.00 to<br>0.00)         | 0.00<br>(0.00 to<br>0.00)             |
| Paratyphoid fever                                                 | 0.01<br>(0.00 to<br>0.02)                | 0.01<br>(0.00 to<br>0.01)                | 0.00<br>(0.00 to<br>0.01)               | 0.01<br>(0.00 to<br>0.01)                | 0.00<br>(0.00 to<br>0.00)       | 0.00<br>(0.00 to<br>0.00)           | 0.00<br>(0.00 to<br>0.00)         | 0.00<br>(0.00 to<br>0.00)             |
| Other intestinal infectious diseases                              | 0.04<br>(0.02 to<br>0.08)                | 0.03<br>(0.01 to<br>0.07)                | 0.03<br>(0.01 to<br>0.07)               | 0.03<br>(0.01 to<br>0.06)                | 0.00<br>(0.00 to<br>0.01)       | 0.00<br>(0.00 to<br>0.01)           | 0.00<br>(0.00 to<br>0.01)         | 0.00<br>(0.00 to<br>0.01)             |
| Lower respiratory infections                                      | 269.39<br>(237.08 to<br>307.18)          | 293.27<br>(209.24 to<br>406.24)          | 252.90<br>(176.56 to<br>354.50)         | 362.11<br>(247.38 to<br>526.87)          | 22.43<br>(19.32 to<br>25.90)    | 30.47<br>(21.31 to<br>43.15)        | 28.00<br>(18.91 to<br>39.66)      | 34.66<br>(23.39 to<br>50.41)          |
| Upper respiratory infections                                      | 0.12<br>(0.07 to<br>0.21)                | 0.10<br>(0.04 to<br>0.19)                | 0.08<br>(0.03 to<br>0.16)               | 0.10<br>(0.04 to<br>0.21)                | 0.01<br>(0.00 to<br>0.01)       | 0.01<br>(0.00 to<br>0.02)           | 0.01<br>(0.00 to<br>0.01)         | 0.01<br>(0.00 to<br>0.02)             |
| Otitis media                                                      | 0.15<br>(0.10 to<br>0.25)                | 0.02<br>(0.01 to<br>0.04)                | 0.02<br>(0.01 to<br>0.04)               | 0.02<br>(0.01 to<br>0.04)                | 0.00<br>(0.00 to<br>0.01)       | 0.00<br>(0.00 to<br>0.00)           | 0.00<br>(0.00 to<br>0.00)         | 0.00<br>(0.00 to<br>0.00)             |
| Meningitis                                                        | 7.43<br>(6.51 to<br>8.85)                | 3.53<br>(2.87 to<br>4.52)                | 3.26<br>(2.58 to<br>4.02)               | 4.10<br>(3.06 to<br>5.29)                | 0.26<br>(0.23 to<br>0.30)       | 0.17<br>(0.13 to<br>0.20)           | 0.16<br>(0.13 to<br>0.20)         | 0.17<br>(0.14 to<br>0.20)             |
| Pneumococcal meningitis                                           | 1.77<br>(1.53 to<br>2.13)                | 1.02<br>(0.82 to<br>1.25)                | 1.03<br>(0.82 to<br>1.27)               | 1.04<br>(0.84 to<br>1.28)                | 0.07<br>(0.06 to<br>0.09)       | 0.06<br>(0.04 to<br>0.07)           | 0.06<br>(0.05 to<br>0.07)         | 0.06<br>(0.04 to<br>0.07)             |
| H influenzae type B meningitis                                    | 0.61<br>(0.51 to<br>0.75)                | 0.69<br>(0.41 to<br>1.10)                | 0.63<br>(0.40 to<br>0.96)               | 1.15<br>(0.49 to<br>2.17)                | 0.02<br>(0.02 to<br>0.02)       | 0.02<br>(0.01 to<br>0.02)           | 0.02<br>(0.01 to<br>0.02)         | 0.02<br>(0.02 to<br>0.04)             |
| Meningococcal meningitis                                          | 3.26<br>(2.81 to<br>3.95)                | 1.08<br>(0.84 to<br>1.39)                | 0.94<br>(0.71 to<br>1.23)               | 1.13<br>(0.86 to<br>1.47)                | 0.09<br>(0.08 to<br>0.11)       | 0.05<br>(0.04 to<br>0.06)           | 0.04<br>(0.03 to<br>0.05)         | 0.05<br>(0.04 to<br>0.06)             |
| Other meningitis                                                  | 1.78<br>(1.55 to<br>2.13)                | 0.75<br>(0.59 to<br>0.94)                | 0.65<br>(0.49 to<br>0.83)               | 0.78<br>(0.60 to<br>0.99)                | 0.07<br>(0.06 to<br>0.09)       | 0.04<br>(0.03 to<br>0.05)           | 0.04<br>(0.03 to<br>0.05)         | 0.04<br>(0.03 to<br>0.06)             |
| Encephalitis                                                      | 5.85<br>(3.49 to<br>7.27)                | 5.85<br>(3.38 to<br>7.59)                | 5.79<br>(3.35 to<br>7.64)               | 5.77<br>(3.32 to<br>7.48)                | 0.23<br>(0.13 to<br>0.29)       | 0.30<br>(0.17 to<br>0.39)           | 0.31<br>(0.18 to<br>0.41)         | 0.29<br>(0.17 to<br>0.37)             |

|                |                           |                           |                           |                           |                           |                           |                           |                           |
|----------------|---------------------------|---------------------------|---------------------------|---------------------------|---------------------------|---------------------------|---------------------------|---------------------------|
| Diphtheria     | 0.02<br>(0.01 to<br>0.03) | 0.00<br>(0.00 to<br>0.01) | 0.00<br>(0.00 to<br>0.01) | 0.01<br>(0.00 to<br>0.01) | 0.00<br>(0.00 to<br>0.00) | 0.00<br>(0.00 to<br>0.00) | 0.00<br>(0.00 to<br>0.00) | 0.00<br>(0.00 to<br>0.00) |
| Whooping cough | 0.12<br>(0.05 to<br>0.31) | 0.04<br>(0.01 to<br>0.10) | 0.02<br>(0.01 to<br>0.04) | 0.21<br>(0.04 to<br>0.56) | 0.00<br>(0.00 to<br>0.00) | 0.00<br>(0.00 to<br>0.00) | 0.00<br>(0.00 to<br>0.00) | 0.00<br>(0.00 to<br>0.01) |
| Tetanus        | 0.05<br>(0.04 to<br>0.06) | 0.00<br>(0.00 to<br>0.01) | 0.00<br>(0.00 to<br>0.01) | 0.01<br>(0.00 to<br>0.01) | 0.00<br>(0.00 to<br>0.00) | 0.00<br>(0.00 to<br>0.00) | 0.00<br>(0.00 to<br>0.00) | 0.00<br>(0.00 to<br>0.00) |
| Measles        | 0.09<br>(0.07 to<br>0.12) | 0.38<br>(0.01 to<br>2.39) | 0.31<br>(0.01 to<br>1.82) | 0.65<br>(0.01 to<br>3.69) | 0.00<br>(0.00 to<br>0.00) | 0.01<br>(0.00 to<br>0.04) | 0.01<br>(0.00 to<br>0.03) | 0.01<br>(0.00 to<br>0.05) |

| Germany                                               |                                      |                                      |                                      |                                      |                                      |                                      |                                      |                                      |
|-------------------------------------------------------|--------------------------------------|--------------------------------------|--------------------------------------|--------------------------------------|--------------------------------------|--------------------------------------|--------------------------------------|--------------------------------------|
| Cause                                                 | YLLs (in 1000s)                      |                                      |                                      |                                      | Deaths (in 1000s)                    |                                      |                                      |                                      |
|                                                       | 2016                                 | 2040 Forecast                        | 2040 Better Scenario                 | 2040 Worse Scenario                  | 2016                                 | 2040 Forecast                        | 2040 Better Scenario                 | 2040 Worse Scenario                  |
| Varicella and herpes zoster                           | 1.15<br>(0.54 to 1.79)               | 0.99<br>(0.44 to 1.55)               | 0.95<br>(0.42 to 1.45)               | 0.96<br>(0.43 to 1.47)               | 0.12<br>(0.05 to 0.18)               | 0.13<br>(0.05 to 0.20)               | 0.13<br>(0.05 to 0.21)               | 0.12<br>(0.05 to 0.19)               |
| <b>Neglected tropical diseases and malaria</b>        | <b>0.55</b><br><b>(0.43 to 0.62)</b> | <b>0.53</b><br><b>(0.39 to 0.62)</b> | <b>0.55</b><br><b>(0.40 to 0.64)</b> | <b>0.52</b><br><b>(0.39 to 0.60)</b> | <b>0.02</b><br><b>(0.01 to 0.02)</b> | <b>0.02</b><br><b>(0.01 to 0.03)</b> | <b>0.03</b><br><b>(0.01 to 0.03)</b> | <b>0.02</b><br><b>(0.01 to 0.03)</b> |
| Malaria                                               | 0.00<br>(0.00 to 0.00)               | 0.00<br>(0.00 to 0.00)               | 0.00<br>(0.00 to 0.00)               | 0.00<br>(0.00 to 0.00)               | 0.00<br>(0.00 to 0.00)               | 0.00<br>(0.00 to 0.00)               | 0.00<br>(0.00 to 0.00)               | 0.00<br>(0.00 to 0.00)               |
| Chagas disease                                        | 0.00<br>(0.00 to 0.00)               | 0.00<br>(0.00 to 0.00)               | 0.00<br>(0.00 to 0.00)               | 0.00<br>(0.00 to 0.00)               | 0.00<br>(0.00 to 0.00)               | 0.00<br>(0.00 to 0.00)               | 0.00<br>(0.00 to 0.00)               | 0.00<br>(0.00 to 0.00)               |
| Leishmaniasis                                         | 0.00<br>(0.00 to 0.00)               | 0.00<br>(0.00 to 0.00)               | 0.00<br>(0.00 to 0.00)               | 0.00<br>(0.00 to 0.00)               | 0.00<br>(0.00 to 0.00)               | 0.00<br>(0.00 to 0.00)               | 0.00<br>(0.00 to 0.00)               | 0.00<br>(0.00 to 0.00)               |
| African trypanosomiasis                               | 0.00<br>(0.00 to 0.00)               | 0.00<br>(0.00 to 0.00)               | 0.00<br>(0.00 to 0.00)               | 0.00<br>(0.00 to 0.00)               | 0.00<br>(0.00 to 0.00)               | 0.00<br>(0.00 to 0.00)               | 0.00<br>(0.00 to 0.00)               | 0.00<br>(0.00 to 0.00)               |
| Schistosomiasis                                       | 0.00<br>(0.00 to 0.00)               | 0.00<br>(0.00 to 0.00)               | 0.00<br>(0.00 to 0.00)               | 0.00<br>(0.00 to 0.00)               | 0.00<br>(0.00 to 0.00)               | 0.00<br>(0.00 to 0.00)               | 0.00<br>(0.00 to 0.00)               | 0.00<br>(0.00 to 0.00)               |
| Cysticercosis                                         | 0.04<br>(0.04 to 0.05)               | 0.01<br>(0.01 to 0.02)               | 0.01<br>(0.01 to 0.02)               | 0.01<br>(0.01 to 0.02)               | 0.00<br>(0.00 to 0.00)               | 0.00<br>(0.00 to 0.00)               | 0.00<br>(0.00 to 0.00)               | 0.00<br>(0.00 to 0.00)               |
| Cystic echinococcosis                                 | 0.00<br>(0.00 to 0.00)               | 0.00<br>(0.00 to 0.00)               | 0.00<br>(0.00 to 0.00)               | 0.00<br>(0.00 to 0.00)               | 0.00<br>(0.00 to 0.00)               | 0.00<br>(0.00 to 0.00)               | 0.00<br>(0.00 to 0.00)               | 0.00<br>(0.00 to 0.00)               |
| Dengue                                                | 0.00<br>(0.00 to 0.00)               | 0.00<br>(0.00 to 0.00)               | 0.00<br>(0.00 to 0.00)               | 0.00<br>(0.00 to 0.00)               | 0.00<br>(0.00 to 0.00)               | 0.00<br>(0.00 to 0.00)               | 0.00<br>(0.00 to 0.00)               | 0.00<br>(0.00 to 0.00)               |
| Yellow fever                                          | 0.00<br>(0.00 to 0.00)               | 0.00<br>(0.00 to 0.00)               | 0.00<br>(0.00 to 0.00)               | 0.00<br>(0.00 to 0.00)               | 0.00<br>(0.00 to 0.00)               | 0.00<br>(0.00 to 0.00)               | 0.00<br>(0.00 to 0.00)               | 0.00<br>(0.00 to 0.00)               |
| Rabies                                                | 0.00<br>(0.00 to 0.00)               | 0.00<br>(0.00 to 0.00)               | 0.00<br>(0.00 to 0.00)               | 0.00<br>(0.00 to 0.00)               | 0.00<br>(0.00 to 0.00)               | 0.00<br>(0.00 to 0.00)               | 0.00<br>(0.00 to 0.00)               | 0.00<br>(0.00 to 0.00)               |
| Intestinal nematode infections                        | 0.00<br>(0.00 to 0.00)               | 0.00<br>(0.00 to 0.00)               | 0.00<br>(0.00 to 0.00)               | 0.00<br>(0.00 to 0.00)               | 0.00<br>(0.00 to 0.00)               | 0.00<br>(0.00 to 0.00)               | 0.00<br>(0.00 to 0.00)               | 0.00<br>(0.00 to 0.00)               |
| Other neglected tropical diseases                     | 0.50<br>(0.38 to 0.57)               | 0.52<br>(0.37 to 0.60)               | 0.53<br>(0.38 to 0.62)               | 0.51<br>(0.37 to 0.59)               | 0.02<br>(0.01 to 0.02)               | 0.02<br>(0.01 to 0.05)               | 0.03<br>(0.01 to 0.03)               | 0.02<br>(0.01 to 0.03)               |
| <b>Maternal disorders</b>                             | <b>2.83</b><br><b>(2.32 to 3.40)</b> | <b>1.72</b><br><b>(1.23 to 2.31)</b> | <b>1.58</b><br><b>(1.12 to 2.11)</b> | <b>1.80</b><br><b>(1.25 to 2.45)</b> | <b>0.06</b><br><b>(0.05 to 0.07)</b> | <b>0.04</b><br><b>(0.02 to 0.05)</b> | <b>0.03</b><br><b>(0.02 to 0.04)</b> | <b>0.04</b><br><b>(0.03 to 0.05)</b> |
| Maternal hemorrhage                                   | 0.35<br>(0.25 to 0.48)               | 0.20<br>(0.12 to 0.32)               | 0.19<br>(0.11 to 0.29)               | 0.21<br>(0.13 to 0.33)               | 0.01<br>(0.00 to 0.01)               | 0.00<br>(0.00 to 0.01)               | 0.00<br>(0.00 to 0.01)               | 0.00<br>(0.00 to 0.01)               |
| Maternal sepsis and other maternal infections         | 0.31<br>(0.22 to 0.43)               | 0.18<br>(0.11 to 0.27)               | 0.16<br>(0.10 to 0.25)               | 0.18<br>(0.11 to 0.28)               | 0.01<br>(0.00 to 0.01)               | 0.00<br>(0.00 to 0.01)               | 0.00<br>(0.00 to 0.01)               | 0.00<br>(0.00 to 0.01)               |
| Maternal hypertensive disorders                       | 0.22<br>(0.16 to 0.32)               | 0.15<br>(0.09 to 0.23)               | 0.13<br>(0.08 to 0.21)               | 0.15<br>(0.09 to 0.24)               | 0.00<br>(0.00 to 0.01)               | 0.00<br>(0.00 to 0.00)               | 0.00<br>(0.00 to 0.00)               | 0.00<br>(0.00 to 0.00)               |
| Maternal obstructed labor and uterine rupture         | 0.09<br>(0.06 to 0.14)               | 0.06<br>(0.03 to 0.11)               | 0.06<br>(0.03 to 0.10)               | 0.07<br>(0.04 to 0.11)               | 0.00<br>(0.00 to 0.00)               | 0.00<br>(0.00 to 0.00)               | 0.00<br>(0.00 to 0.00)               | 0.00<br>(0.00 to 0.00)               |
| Maternal abortion, miscarriage, and ectopic pregnancy | 0.43<br>(0.31 to 0.57)               | 0.31<br>(0.18 to 0.49)               | 0.28<br>(0.16 to 0.44)               | 0.32<br>(0.19 to 0.52)               | 0.01<br>(0.01 to 0.01)               | 0.01<br>(0.00 to 0.01)               | 0.01<br>(0.01 to 0.01)               | 0.01<br>(0.00 to 0.01)               |



|                                        |                           |                           |                           |                           |                           |                           |                           |                           |
|----------------------------------------|---------------------------|---------------------------|---------------------------|---------------------------|---------------------------|---------------------------|---------------------------|---------------------------|
|                                        | 0.36<br>(0.25 to<br>0.49) | 0.26<br>(0.15 to<br>0.41) | 0.23<br>(0.13 to<br>0.37) | 0.27<br>(0.15 to<br>0.44) | 0.01<br>(0.00 to<br>0.01) | 0.00<br>(0.00 to<br>0.01) | 0.00<br>(0.00 to<br>0.01) | 0.01<br>(0.00 to<br>0.01) |
| Indirect maternal deaths               |                           |                           |                           |                           |                           |                           |                           |                           |
|                                        | 0.08<br>(0.05 to<br>0.11) | 0.05<br>(0.03 to<br>0.08) | 0.04<br>(0.02 to<br>0.07) | 0.05<br>(0.03 to<br>0.08) | 0.00<br>(0.00 to<br>0.00) | 0.00<br>(0.00 to<br>0.00) | 0.00<br>(0.00 to<br>0.00) | 0.00<br>(0.00 to<br>0.00) |
| Late maternal deaths                   |                           |                           |                           |                           |                           |                           |                           |                           |
|                                        | 0.00<br>(0.00 to<br>0.00) | 0.00<br>(0.00 to<br>0.01) | 0.00<br>(0.00 to<br>0.01) | 0.00<br>(0.00 to<br>0.01) | 0.00<br>(0.00 to<br>0.00) | 0.00<br>(0.00 to<br>0.00) | 0.00<br>(0.00 to<br>0.00) | 0.00<br>(0.00 to<br>0.00) |
| Maternal deaths aggravated by HIV/AIDS |                           |                           |                           |                           |                           |                           |                           |                           |
|                                        | 0.98<br>(0.74 to<br>1.24) | 0.52<br>(0.33 to<br>0.76) | 0.48<br>(0.31 to<br>0.70) | 0.54<br>(0.35 to<br>0.80) | 0.02<br>(0.02 to<br>0.03) | 0.01<br>(0.01 to<br>0.02) | 0.01<br>(0.01 to<br>0.01) | 0.01<br>(0.01 to<br>0.02) |
| Other maternal disorders               |                           |                           |                           |                           |                           |                           |                           |                           |

| Germany                                                                 |                                   |                                  |                                  |                                  |                               |                               |                               |                               |
|-------------------------------------------------------------------------|-----------------------------------|----------------------------------|----------------------------------|----------------------------------|-------------------------------|-------------------------------|-------------------------------|-------------------------------|
| Cause                                                                   | YLLs (in 1000s)                   |                                  |                                  |                                  | Deaths (in 1000s)             |                               |                               |                               |
|                                                                         | 2016                              | 2040 Forecast                    | 2040 Better Scenario             | 2040 Worse Scenario              | 2016                          | 2040 Forecast                 | 2040 Better Scenario          | 2040 Worse Scenario           |
| <b>Neonatal disorders</b>                                               | <b>91.54</b><br>(72.03 to 119.39) | <b>42.94</b><br>(30.41 to 59.50) | <b>34.97</b><br>(25.09 to 48.37) | <b>50.58</b><br>(36.43 to 69.56) | <b>1.06</b><br>(0.83 to 1.38) | <b>0.50</b><br>(0.35 to 0.69) | <b>0.40</b><br>(0.29 to 0.56) | <b>0.58</b><br>(0.42 to 0.80) |
| Neonatal preterm birth                                                  | 54.96<br>(42.02 to 71.83)         | 21.40<br>(14.41 to 30.32)        | 16.18<br>(11.05 to 22.84)        | 26.90<br>(18.37 to 37.83)        | 0.64<br>(0.49 to 0.83)        | 0.25<br>(0.17 to 0.35)        | 0.19<br>(0.13 to 0.26)        | 0.31<br>(0.21 to 0.44)        |
| Neonatal encephalopathy due to birth asphyxia and trauma                | 18.20<br>(12.96 to 24.48)         | 6.63<br>(3.88 to 10.22)          | 5.44<br>(3.24 to 8.45)           | 7.47<br>(4.38 to 11.58)          | 0.21<br>(0.15 to 0.28)        | 0.08<br>(0.04 to 0.12)        | 0.06<br>(0.04 to 0.10)        | 0.09<br>(0.05 to 0.13)        |
| Neonatal sepsis and other neonatal infections                           | 3.95<br>(3.14 to 19.88)           | 4.65<br>(2.19 to 14.72)          | 3.96<br>(1.88 to 12.35)          | 5.18<br>(2.40 to 16.35)          | 0.07<br>(0.04 to 0.23)        | 0.05<br>(0.03 to 0.17)        | 0.05<br>(0.02 to 0.14)        | 0.06<br>(0.03 to 0.19)        |
| Hemolytic disease and other neonatal jaundice                           | 0.44<br>(0.27 to 0.78)            | 0.17<br>(0.08 to 0.34)           | 0.15<br>(0.07 to 0.28)           | 0.19<br>(0.10 to 0.38)           | 0.01<br>(0.00 to 0.01)        | 0.00<br>(0.00 to 0.00)        | 0.00<br>(0.00 to 0.00)        | 0.00<br>(0.00 to 0.00)        |
| Other neonatal disorders                                                | 11.99<br>(8.68 to 16.38)          | 10.09<br>(5.94 to 15.86)         | 9.24<br>(5.52 to 14.47)          | 10.85<br>(6.41 to 17.32)         | 0.14<br>(0.10 to 0.19)        | 0.12<br>(0.07 to 0.18)        | 0.11<br>(0.06 to 0.17)        | 0.13<br>(0.07 to 0.20)        |
| <b>Nutritional deficiencies</b>                                         | <b>5.82</b><br>(5.25 to 6.51)     | <b>6.14</b><br>(5.09 to 7.40)    | <b>6.62</b><br>(5.46 to 7.95)    | <b>5.61</b><br>(4.66 to 6.74)    | <b>0.60</b><br>(0.53 to 0.69) | <b>0.82</b><br>(0.65 to 1.04) | <b>0.92</b><br>(0.73 to 1.15) | <b>0.72</b><br>(0.56 to 0.92) |
| Protein-energy malnutrition                                             | 3.44<br>(2.16 to 4.21)            | 3.83<br>(2.27 to 5.08)           | 4.28<br>(2.58 to 5.66)           | 3.42<br>(1.95 to 4.59)           | 0.40<br>(0.22 to 0.48)        | 0.56<br>(0.30 to 0.77)        | 0.65<br>(0.37 to 0.88)        | 0.49<br>(0.25 to 0.67)        |
| Iodine deficiency                                                       | 0.19<br>(0.01 to 0.58)            | 0.38<br>(0.01 to 1.39)           | 0.39<br>(0.01 to 1.44)           | 0.35<br>(0.01 to 1.28)           | 0.01<br>(0.00 to 0.05)        | 0.04<br>(0.00 to 0.19)        | 0.05<br>(0.00 to 0.21)        | 0.04<br>(0.00 to 0.17)        |
| Dietary iron deficiency                                                 | 0.33<br>(0.15 to 0.45)            | 0.33<br>(0.12 to 0.54)           | 0.35<br>(0.13 to 0.58)           | 0.31<br>(0.12 to 0.50)           | 0.02<br>(0.01 to 0.03)        | 0.02<br>(0.01 to 0.06)        | 0.04<br>(0.01 to 0.07)        | 0.03<br>(0.01 to 0.06)        |
| Other nutritional deficiencies                                          | 1.86<br>(1.40 to 3.17)            | 1.60<br>(1.04 to 3.08)           | 1.60<br>(1.03 to 3.24)           | 1.52<br>(1.01 to 2.87)           | 0.17<br>(0.12 to 0.35)        | 0.18<br>(0.11 to 0.43)        | 0.19<br>(0.11 to 0.46)        | 0.17<br>(0.10 to 0.38)        |
| <b>Other communicable, maternal, neonatal, and nutritional diseases</b> | <b>18.89</b><br>(16.65 to 21.34)  | <b>22.51</b><br>(19.16 to 25.69) | <b>22.36</b><br>(18.87 to 25.62) | <b>22.01</b><br>(18.73 to 25.16) | <b>0.94</b><br>(0.81 to 1.05) | <b>1.45</b><br>(1.22 to 1.66) | <b>1.49</b><br>(1.24 to 1.70) | <b>1.37</b><br>(1.14 to 1.58) |
| Sexually transmitted infections excluding HIV                           | 0.58<br>(0.49 to 0.73)            | 0.35<br>(0.28 to 0.46)           | 0.34<br>(0.27 to 0.45)           | 0.35<br>(0.28 to 0.46)           | 0.03<br>(0.02 to 0.04)        | 0.02<br>(0.02 to 0.03)        | 0.02<br>(0.02 to 0.03)        | 0.02<br>(0.02 to 0.03)        |
| Syphilis                                                                | 0.20<br>(0.16 to 0.24)            | 0.09<br>(0.07 to 0.12)           | 0.09<br>(0.07 to 0.12)           | 0.09<br>(0.07 to 0.12)           | 0.01<br>(0.01 to 0.01)        | 0.01<br>(0.00 to 0.01)        | 0.01<br>(0.00 to 0.01)        | 0.01<br>(0.00 to 0.01)        |
| Chlamydial infection                                                    | 0.07<br>(0.06 to 0.09)            | 0.05<br>(0.04 to 0.07)           | 0.05<br>(0.04 to 0.07)           | 0.05<br>(0.04 to 0.07)           | 0.00<br>(0.00 to 0.00)        | 0.00<br>(0.00 to 0.00)        | 0.00<br>(0.00 to 0.01)        | 0.00<br>(0.00 to 0.00)        |
| Gonococcal infection                                                    | 0.21<br>(0.18 to 0.27)            | 0.15<br>(0.11 to 0.21)           | 0.15<br>(0.11 to 0.21)           | 0.15<br>(0.11 to 0.20)           | 0.01<br>(0.01 to 0.01)        | 0.01<br>(0.01 to 0.01)        | 0.01<br>(0.01 to 0.01)        | 0.01<br>(0.01 to 0.01)        |
| Other sexually transmitted infections                                   | 0.10<br>(0.08 to 0.12)            | 0.06<br>(0.05 to 0.08)           | 0.06<br>(0.05 to 0.08)           | 0.06<br>(0.05 to 0.08)           | 0.00<br>(0.00 to 0.01)        | 0.00<br>(0.00 to 0.00)        | 0.00<br>(0.00 to 0.00)        | 0.00<br>(0.00 to 0.00)        |
| Acute hepatitis                                                         | 4.67<br>(4.03 to 5.44)            | 3.62<br>(2.76 to 4.76)           | 3.26<br>(2.43 to 4.25)           | 3.68<br>(2.75 to 4.88)           | 0.23<br>(0.20 to 0.27)        | 0.23<br>(0.17 to 0.30)        | 0.21<br>(0.15 to 0.28)        | 0.23<br>(0.16 to 0.30)        |
| Acute hepatitis A                                                       | 0.34<br>(0.26 to 0.46)            | 0.23<br>(0.15 to 0.34)           | 0.21<br>(0.14 to 0.32)           | 0.23<br>(0.15 to 0.34)           | 0.01<br>(0.01 to 0.02)        | 0.01<br>(0.01 to 0.02)        | 0.01<br>(0.01 to 0.02)        | 0.01<br>(0.01 to 0.02)        |
| Acute hepatitis B                                                       | 3.40<br>(2.79 to 4.09)            | 2.54<br>(1.80 to 3.52)           | 2.27<br>(1.58 to 3.19)           | 2.60<br>(1.82 to 3.76)           | 0.16<br>(0.13 to 0.19)        | 0.14<br>(0.10 to 0.21)        | 0.13<br>(0.09 to 0.19)        | 0.14<br>(0.10 to 0.21)        |

|                                       |                                                               |                                                              |                                                             |                                                               |                                                      |                                                        |                                                      |                                                          |
|---------------------------------------|---------------------------------------------------------------|--------------------------------------------------------------|-------------------------------------------------------------|---------------------------------------------------------------|------------------------------------------------------|--------------------------------------------------------|------------------------------------------------------|----------------------------------------------------------|
|                                       | 0.23<br>(0.16 to<br>0.32)                                     | 0.18<br>(0.12 to<br>0.27)                                    | 0.17<br>(0.10 to<br>0.25)                                   | 0.19<br>(0.12 to<br>0.28)                                     | 0.01<br>(0.01 to<br>0.02)                            | 0.01<br>(0.01 to<br>0.02)                              | 0.01<br>(0.01 to<br>0.02)                            | 0.01<br>(0.01 to<br>0.02)                                |
| Acute hepatitis C                     |                                                               |                                                              |                                                             |                                                               |                                                      |                                                        |                                                      |                                                          |
|                                       | 0.70<br>(0.44 to<br>1.05)                                     | 0.66<br>(0.37 to<br>1.06)                                    | 0.61<br>(0.35 to<br>0.98)                                   | 0.66<br>(0.37 to<br>1.06)                                     | 0.05<br>(0.03 to<br>0.07)                            | 0.06<br>(0.03 to<br>0.09)                              | 0.06<br>(0.03 to<br>0.09)                            | 0.06<br>(0.03 to<br>0.09)                                |
| Acute hepatitis E                     |                                                               |                                                              |                                                             |                                                               |                                                      |                                                        |                                                      |                                                          |
|                                       | 13.64<br>(11.63 to<br>15.57)                                  | 18.54<br>(15.34 to<br>21.32)                                 | 18.76<br>(15.41 to<br>21.65)                                | 17.98<br>(14.80 to<br>20.77)                                  | 0.68<br>(0.55 to<br>0.77)                            | 1.20<br>(0.97 to<br>1.38)                              | 1.25<br>(1.02 to<br>1.44)                            | 1.12<br>(0.90 to<br>1.30)                                |
| Other unspecified infectious diseases |                                                               |                                                              |                                                             |                                                               |                                                      |                                                        |                                                      |                                                          |
| <b>Non-communicable diseases</b>      | <b>11,449.34</b><br><b>(10,640.02 to</b><br><b>12,342.92)</b> | <b>10,695.25</b><br><b>(9,108.12 to</b><br><b>12,319.16)</b> | <b>9,184.81</b><br><b>(7,892.90 to</b><br><b>10,514.85)</b> | <b>13,205.76</b><br><b>(11,053.03 to</b><br><b>15,551.06)</b> | <b>850.58</b><br><b>(796.34 to</b><br><b>908.13)</b> | <b>949.28</b><br><b>(841.62 to</b><br><b>1,079.20)</b> | <b>845.26</b><br><b>(753.87 to</b><br><b>953.79)</b> | <b>1,104.86</b><br><b>(965.83 to</b><br><b>1,268.46)</b> |

| Germany                              |                                    |                                    |                                    |                                    |                              |                              |                              |                              |
|--------------------------------------|------------------------------------|------------------------------------|------------------------------------|------------------------------------|------------------------------|------------------------------|------------------------------|------------------------------|
| Cause                                | YLLs (in 1000s)                    |                                    |                                    |                                    | Deaths (in 1000s)            |                              |                              |                              |
|                                      | 2016                               | 2040 Forecast                      | 2040 Better Scenario               | 2040 Worse Scenario                | 2016                         | 2040 Forecast                | 2040 Better Scenario         | 2040 Worse Scenario          |
| Neoplasms                            | 4,161.76<br>(3,846.49 to 4,491.24) | 3,927.96<br>(3,357.45 to 4,549.07) | 3,372.32<br>(2,899.73 to 3,870.97) | 4,835.80<br>(4,051.31 to 5,731.96) | 240.11<br>(222.65 to 256.96) | 272.44<br>(238.29 to 310.23) | 241.51<br>(212.07 to 273.43) | 317.30<br>(272.35 to 369.65) |
| Lip and oral cavity cancer           | 60.48<br>(53.11 to 68.50)          | 41.44<br>(22.81 to 69.84)          | 28.44<br>(16.08 to 46.40)          | 76.12<br>(39.91 to 133.13)         | 2.76<br>(2.47 to 3.10)       | 2.18<br>(1.22 to 3.62)       | 1.53<br>(0.89 to 2.49)       | 3.83<br>(2.09 to 6.65)       |
| Nasopharynx cancer                   | 13.03<br>(11.36 to 14.97)          | 10.01<br>(5.63 to 17.38)           | 6.55<br>(3.80 to 11.05)            | 18.17<br>(10.01 to 32.19)          | 0.64<br>(0.56 to 0.73)       | 0.58<br>(0.32 to 1.02)       | 0.38<br>(0.22 to 0.65)       | 1.00<br>(0.53 to 1.81)       |
| Other pharynx cancer                 | 67.35<br>(58.85 to 75.92)          | 50.62<br>(28.29 to 85.84)          | 47.40<br>(26.71 to 78.25)          | 68.13<br>(37.40 to 113.58)         | 2.74<br>(2.41 to 3.08)       | 2.27<br>(1.28 to 3.76)       | 2.15<br>(1.24 to 3.53)       | 3.02<br>(1.65 to 4.96)       |
| Esophageal cancer                    | 113.34<br>(97.83 to 129.26)        | 88.86<br>(48.78 to 150.76)         | 62.90<br>(37.16 to 100.55)         | 148.87<br>(76.45 to 260.73)        | 5.60<br>(4.91 to 6.35)       | 4.94<br>(2.83 to 8.18)       | 3.54<br>(2.19 to 5.58)       | 7.95<br>(4.23 to 13.45)      |
| Stomach cancer                       | 211.61<br>(192.02 to 231.98)       | 142.48<br>(110.08 to 182.81)       | 123.11<br>(99.23 to 152.24)        | 153.19<br>(116.38 to 200.44)       | 13.25<br>(12.08 to 14.49)    | 10.95<br>(8.62 to 14.17)     | 9.70<br>(7.96 to 12.04)      | 11.32<br>(8.68 to 14.96)     |
| Colon and rectum cancer              | 459.34<br>(414.03 to 508.95)       | 473.23<br>(329.55 to 660.73)       | 405.15<br>(287.71 to 563.76)       | 583.66<br>(397.77 to 848.32)       | 30.22<br>(27.26 to 33.23)    | 37.50<br>(26.18 to 51.99)    | 32.99<br>(23.58 to 45.68)    | 44.64<br>(30.17 to 63.86)    |
| Liver cancer                         | 141.76<br>(125.87 to 159.94)       | 156.74<br>(105.17 to 239.69)       | 136.66<br>(96.60 to 199.34)        | 230.86<br>(141.71 to 371.82)       | 8.16<br>(7.28 to 9.23)       | 10.49<br>(7.20 to 15.57)     | 9.40<br>(6.81 to 13.48)      | 14.56<br>(9.32 to 22.83)     |
| Liver cancer due to hepatitis B      | 17.16<br>(13.44 to 21.58)          | 19.08<br>(11.91 to 31.54)          | 17.07<br>(11.26 to 26.52)          | 23.39<br>(13.32 to 42.02)          | 0.84<br>(0.65 to 1.07)       | 1.10<br>(0.70 to 1.74)       | 1.01<br>(0.67 to 1.54)       | 1.28<br>(0.76 to 2.17)       |
| Liver cancer due to hepatitis C      | 44.88<br>(37.75 to 52.96)          | 55.14<br>(37.37 to 81.06)          | 50.17<br>(35.43 to 71.52)          | 65.05<br>(41.22 to 101.41)         | 2.80<br>(2.35 to 3.32)       | 4.02<br>(2.79 to 5.76)       | 3.75<br>(2.72 to 5.22)       | 4.51<br>(2.92 to 6.79)       |
| Liver cancer due to alcohol use      | 63.87<br>(53.65 to 75.04)          | 63.63<br>(39.93 to 100.61)         | 52.40<br>(34.44 to 80.23)          | 119.34<br>(70.02 to 198.59)        | 3.58<br>(2.99 to 4.23)       | 4.09<br>(2.61 to 6.35)       | 3.45<br>(2.32 to 5.17)       | 7.25<br>(4.39 to 11.72)      |
| Liver cancer due to other causes     | 15.85<br>(12.76 to 19.56)          | 18.90<br>(11.87 to 29.29)          | 17.03<br>(11.25 to 25.61)          | 23.08<br>(13.47 to 38.08)          | 0.93<br>(0.74 to 1.17)       | 1.29<br>(0.83 to 1.98)       | 1.19<br>(0.80 to 1.77)       | 1.51<br>(0.90 to 2.47)       |
| Gallbladder and biliary tract cancer | 70.35<br>(63.30 to 77.72)          | 55.73<br>(48.90 to 62.36)          | 56.58<br>(49.42 to 63.55)          | 53.36<br>(46.68 to 59.42)          | 4.65<br>(4.19 to 5.10)       | 4.32<br>(3.82 to 4.82)       | 4.48<br>(3.93 to 5.00)       | 4.03<br>(3.51 to 4.49)       |
| Pancreatic cancer                    | 299.28<br>(270.26 to 329.49)       | 314.44<br>(252.52 to 390.42)       | 295.51<br>(240.65 to 364.05)       | 343.93<br>(269.48 to 444.04)       | 17.84<br>(16.12 to 19.61)    | 21.56<br>(17.63 to 26.42)    | 20.70<br>(17.04 to 25.17)    | 22.78<br>(18.13 to 28.74)    |
| Larynx cancer                        | 32.59<br>(28.82 to 36.94)          | 20.81<br>(10.53 to 37.78)          | 12.64<br>(6.56 to 22.57)           | 35.88<br>(17.16 to 69.23)          | 1.56<br>(1.38 to 1.75)       | 1.15<br>(0.59 to 2.11)       | 0.69<br>(0.37 to 1.21)       | 1.90<br>(0.92 to 3.67)       |
| Tracheal, bronchus, and lung cancer  | 896.46<br>(813.44 to 987.24)       | 748.93<br>(523.93 to 1,046.15)     | 447.42<br>(323.56 to 614.49)       | 1,211.83<br>(832.52 to 1,720.77)   | 47.00<br>(42.80 to 51.51)    | 45.77<br>(32.23 to 63.18)    | 27.60<br>(20.21 to 37.59)    | 70.09<br>(48.51 to 99.39)    |
| Malignant skin melanoma              | 62.82<br>(48.01 to 71.81)          | 65.70<br>(49.93 to 76.28)          | 71.21<br>(54.06 to 82.77)          | 61.65<br>(46.47 to 71.85)          | 3.17<br>(2.36 to 3.63)       | 4.01<br>(2.93 to 4.64)       | 4.46<br>(3.22 to 5.17)       | 3.66<br>(2.65 to 4.22)       |
| Non-melanoma skin cancer             | 15.74<br>(14.11 to 17.67)          | 18.37<br>(16.21 to 20.70)          | 17.78<br>(15.60 to 19.99)          | 17.72<br>(15.54 to 20.18)          | 1.15<br>(1.04 to 1.27)       | 1.64<br>(1.42 to 1.86)       | 1.64<br>(1.44 to 1.85)       | 1.52<br>(1.30 to 1.75)       |
| Breast cancer                        | 350.40<br>(304.14 to 399.43)       | 283.01<br>(208.73 to 375.83)       | 255.41<br>(187.41 to 335.02)       | 351.69<br>(246.81 to 479.85)       | 18.73<br>(16.36 to 21.16)    | 18.42<br>(13.65 to 24.40)    | 17.07<br>(12.64 to 22.47)    | 22.13<br>(15.85 to 30.08)    |
| Cervical cancer                      | 50.62<br>(43.78 to 58.44)          | 32.61<br>(24.34 to 42.89)          | 29.09<br>(21.92 to 37.50)          | 35.41<br>(25.48 to 48.61)          | 2.44<br>(2.13 to 2.80)       | 1.95<br>(1.50 to 2.47)       | 1.79<br>(1.39 to 2.22)       | 2.04<br>(1.50 to 2.67)       |

|                   |                                 |                                 |                                 |                                 |                              |                              |                              |                              |
|-------------------|---------------------------------|---------------------------------|---------------------------------|---------------------------------|------------------------------|------------------------------|------------------------------|------------------------------|
|                   | 30.86<br>(26.28 to<br>36.40)    | 33.90<br>(27.57 to<br>40.65)    | 32.71<br>(26.30 to<br>39.23)    | 33.57<br>(27.23 to<br>40.30)    | 1.96<br>(1.68 to<br>2.31)    | 2.53<br>(2.09 to<br>3.02)    | 2.49<br>(2.05 to<br>3.00)    | 2.45<br>(2.03 to<br>2.94)    |
| Uterine cancer    |                                 |                                 |                                 |                                 |                              |                              |                              |                              |
|                   | 112.52<br>(95.50 to<br>130.59)  | 99.04<br>(72.50 to<br>131.98)   | 92.14<br>(68.45 to<br>120.25)   | 105.44<br>(75.35 to<br>142.54)  | 6.22<br>(5.30 to<br>7.23)    | 6.38<br>(4.74 to<br>8.42)    | 5.96<br>(4.45 to<br>7.75)    | 6.72<br>(4.84 to<br>9.15)    |
| Ovarian cancer    |                                 |                                 |                                 |                                 |                              |                              |                              |                              |
|                   | 206.02<br>(171.30 to<br>253.97) | 270.09<br>(218.11 to<br>339.70) | 267.65<br>(217.97 to<br>339.44) | 258.54<br>(204.77 to<br>326.74) | 16.16<br>(13.46 to<br>19.99) | 25.07<br>(20.12 to<br>30.90) | 25.53<br>(20.74 to<br>32.04) | 23.27<br>(17.99 to<br>29.16) |
| Prostate cancer   |                                 |                                 |                                 |                                 |                              |                              |                              |                              |
|                   | 5.81<br>(4.64 to<br>7.15)       | 3.39<br>(2.56 to<br>4.35)       | 3.23<br>(2.42 to<br>4.15)       | 3.40<br>(2.56 to<br>4.41)       | 0.17<br>(0.14 to<br>0.21)    | 0.13<br>(0.11 to<br>0.16)    | 0.13<br>(0.11 to<br>0.16)    | 0.13<br>(0.11 to<br>0.16)    |
| Testicular cancer |                                 |                                 |                                 |                                 |                              |                              |                              |                              |

| Germany                         |                                                  |                                                  |                                                  |                                                  |                                            |                                            |                                  |                                            |
|---------------------------------|--------------------------------------------------|--------------------------------------------------|--------------------------------------------------|--------------------------------------------------|--------------------------------------------|--------------------------------------------|----------------------------------|--------------------------------------------|
| Cause                           | YLLs (in 1000s)                                  |                                                  |                                                  |                                                  | Deaths (in 1000s)                          |                                            |                                  |                                            |
|                                 | 2016                                             | 2040 Forecast                                    | 2040 Better Scenario                             | 2040 Worse Scenario                              | 2016                                       | 2040 Forecast                              | 2040 Better Scenario             | 2040 Worse Scenario                        |
| Kidney cancer                   | 119.45<br>(106.99 to 133.16)                     | 144.23<br>(117.77 to 175.91)                     | 138.34<br>(115.13 to 164.60)                     | 149.95<br>(118.97 to 187.42)                     | 7.21<br>(6.49 to 7.96)                     | 10.11<br>(8.40 to 12.16)                   | 9.93<br>(8.49 to 11.59)          | 10.11<br>(8.15 to 12.58)                   |
| Bladder cancer                  | 100.36<br>(89.46 to 111.74)                      | 109.43<br>(83.84 to 143.96)                      | 96.29<br>(76.13 to 122.78)                       | 121.43<br>(89.47 to 165.18)                      | 7.53<br>(6.73 to 8.36)                     | 12.43<br>(7.60 to 12.93)                   | 9.88<br>(7.09 to 11.32)          | 10.50<br>(7.73 to 14.17)                   |
| Brain and nervous system cancer | 148.33<br>(115.99 to 170.19)                     | 144.41<br>(109.02 to 165.73)                     | 142.32<br>(108.65 to 164.12)                     | 142.35<br>(108.49 to 162.32)                     | 6.10<br>(4.49 to 6.94)                     | 7.08<br>(4.85 to 8.15)                     | 7.09<br>(4.95 to 8.20)           | 6.83<br>(4.80 to 7.84)                     |
| Thyroid cancer                  | 14.86<br>(13.23 to 16.73)                        | 15.35<br>(11.70 to 21.09)                        | 14.38<br>(11.01 to 19.37)                        | 16.44<br>(12.04 to 23.57)                        | 0.88<br>(0.78 to 0.98)                     | 1.08<br>(0.83 to 1.48)                     | 1.04<br>(0.81 to 1.39)           | 1.12<br>(0.83 to 1.57)                     |
| Mesothelioma                    | 29.87<br>(26.04 to 35.86)                        | 35.31<br>(30.21 to 42.48)                        | 36.71<br>(31.10 to 45.26)                        | 33.38<br>(28.77 to 39.34)                        | 1.77<br>(1.54 to 2.10)                     | 2.39<br>(2.08 to 2.86)                     | 2.54<br>(2.20 to 3.10)           | 2.21<br>(1.92 to 2.62)                     |
| Hodgkin lymphoma                | 9.05<br>(7.95 to 11.66)                          | 6.64<br>(5.67 to 8.07)                           | 6.12<br>(5.16 to 7.48)                           | 6.69<br>(5.67 to 8.20)                           | 0.40<br>(0.36 to 0.46)                     | 0.37<br>(0.32 to 0.42)                     | 0.35<br>(0.30 to 0.40)           | 0.36<br>(0.31 to 0.42)                     |
| Non-Hodgkin lymphoma            | 115.64<br>(101.83 to 130.02)                     | 113.05<br>(90.70 to 139.84)                      | 108.94<br>(87.84 to 134.42)                      | 115.11<br>(91.52 to 144.41)                      | 6.90<br>(5.94 to 7.72)                     | 7.91<br>(6.40 to 9.68)                     | 7.80<br>(6.34 to 9.43)           | 7.82<br>(6.20 to 9.68)                     |
| Multiple myeloma                | 67.73<br>(49.51 to 77.89)                        | 75.64<br>(53.30 to 95.69)                        | 74.18<br>(52.58 to 93.06)                        | 76.55<br>(53.11 to 98.49)                        | 4.27<br>(3.13 to 4.90)                     | 5.43<br>(3.87 to 6.78)                     | 5.44<br>(3.95 to 6.75)           | 5.35<br>(3.77 to 6.79)                     |
| Leukemia                        | 178.72<br>(161.35 to 196.29)                     | 183.02<br>(146.08 to 227.55)                     | 168.37<br>(138.18 to 203.90)                     | 198.76<br>(153.33 to 257.41)                     | 10.29<br>(9.36 to 11.27)                   | 12.75<br>(10.15 to 15.76)                  | 11.99<br>(9.87 to 14.48)         | 13.31<br>(10.31 to 17.09)                  |
| Acute lymphoid leukemia         | 16.30<br>(13.83 to 18.98)                        | 11.14<br>(8.62 to 14.26)                         | 10.01<br>(7.89 to 12.55)                         | 12.49<br>(9.50 to 16.25)                         | 0.53<br>(0.45 to 0.61)                     | 0.45<br>(0.35 to 0.57)                     | 0.41<br>(0.33 to 0.51)           | 0.49<br>(0.38 to 0.64)                     |
| Chronic lymphoid leukemia       | 31.56<br>(26.28 to 37.39)                        | 32.32<br>(23.85 to 43.57)                        | 30.27<br>(22.97 to 39.98)                        | 34.37<br>(24.78 to 48.21)                        | 2.32<br>(1.95 to 2.75)                     | 2.71<br>(2.03 to 3.60)                     | 2.61<br>(2.00 to 3.37)           | 2.77<br>(2.02 to 3.80)                     |
| Acute myeloid leukemia          | 72.96<br>(62.01 to 81.40)                        | 78.43<br>(61.62 to 96.70)                        | 73.60<br>(59.13 to 89.07)                        | 85.15<br>(65.46 to 108.44)                       | 3.80<br>(3.25 to 4.27)                     | 4.79<br>(3.77 to 5.89)                     | 4.58<br>(3.69 to 5.57)           | 5.03<br>(3.86 to 6.37)                     |
| Chronic myeloid leukemia        | 17.19<br>(14.52 to 19.76)                        | 9.50<br>(6.95 to 12.89)                          | 8.00<br>(6.01 to 10.49)                          | 10.67<br>(7.53 to 14.92)                         | 1.10<br>(0.93 to 1.26)                     | 0.72<br>(0.54 to 0.96)                     | 0.62<br>(0.48 to 0.81)           | 0.77<br>(0.55 to 1.06)                     |
| Other leukemia                  | 40.50<br>(34.79 to 47.03)                        | 51.64<br>(39.41 to 67.07)                        | 46.48<br>(36.49 to 59.21)                        | 56.07<br>(41.53 to 75.12)                        | 2.54<br>(2.18 to 2.96)                     | 4.08<br>(3.14 to 5.27)                     | 3.77<br>(2.98 to 4.75)           | 4.24<br>(3.13 to 5.62)                     |
| Other neoplasms                 | 177.35<br>(156.89 to 196.89)                     | 191.46<br>(166.24 to 213.48)                     | 195.12<br>(168.10 to 219.41)                     | 183.72<br>(159.13 to 204.42)                     | 10.34<br>(9.11 to 11.49)                   | 13.59<br>(11.79 to 15.18)                  | 14.20<br>(12.43 to 15.92)        | 12.66<br>(10.94 to 14.14)                  |
| <b>Cardiovascular diseases</b>  | <b>4,023.62</b><br><b>(3,741.78 to 4,326.44)</b> | <b>3,113.74</b><br><b>(2,272.31 to 4,256.75)</b> | <b>2,408.31</b><br><b>(1,838.53 to 3,186.71)</b> | <b>4,232.72</b><br><b>(2,954.62 to 6,029.62)</b> | <b>360.17</b><br><b>(336.37 to 384.98)</b> | <b>330.80</b><br><b>(252.49 to 434.58)</b> | <b>272.39</b><br><b>(350.38)</b> | <b>414.05</b><br><b>(306.20 to 563.99)</b> |
| Rheumatic heart disease         | 53.65<br>(48.03 to 59.64)                        | 39.77<br>(32.68 to 50.15)                        | 37.34<br>(30.81 to 46.09)                        | 38.93<br>(31.80 to 49.28)                        | 4.99<br>(4.47 to 5.53)                     | 4.36<br>(3.60 to 5.52)                     | 4.23<br>(3.51 to 5.26)           | 4.13<br>(3.35 to 5.21)                     |
| Ischemic heart disease          | 2,307.88<br>(2,109.50 to 2,511.16)               | 1,529.83<br>(919.43 to 2,388.34)                 | 1,048.99<br>(642.09 to 1,618.22)                 | 2,298.16<br>(1,314.97 to 3,799.86)               | 208.26<br>(191.47 to 227.09)               | 162.06<br>(100.95 to 247.57)               | 120.19<br>(76.12 to 181.58)      | 220.96<br>(132.40 to 347.11)               |
| Stroke                          | 658.66<br>(590.23 to 731.70)                     | 404.56<br>(254.83 to 646.54)                     | 297.16<br>(191.16 to 467.96)                     | 596.16<br>(351.19 to 986.07)                     | 57.72<br>(50.94 to 65.85)                  | 42.66<br>(27.25 to 69.15)                  | 33.95<br>(22.16 to 54.24)        | 56.42<br>(33.97 to 93.11)                  |
| Ischemic stroke                 | 355.30<br>(313.34 to 400.47)                     | 215.51<br>(122.62 to 394.30)                     | 166.51<br>(97.91 to 308.26)                      | 290.69<br>(157.80 to 584.05)                     | 34.73<br>(30.13 to 39.77)                  | 24.93<br>(14.30 to 45.07)                  | 20.49<br>(11.94 to 37.22)        | 30.94<br>(16.83 to 60.77)                  |

|                                |                                 |                                 |                                 |                                 |                              |                              |                              |                              |
|--------------------------------|---------------------------------|---------------------------------|---------------------------------|---------------------------------|------------------------------|------------------------------|------------------------------|------------------------------|
|                                | 303.37<br>(271.12 to<br>338.42) | 189.05<br>(114.84 to<br>301.99) | 130.66<br>(83.55 to<br>195.33)  | 305.47<br>(170.50 to<br>508.67) | 22.98<br>(20.22 to<br>26.16) | 17.73<br>(11.24 to<br>26.71) | 13.46<br>(8.84 to<br>19.77)  | 25.48<br>(14.96 to<br>40.75) |
| Intracerebral hemorrhage       |                                 |                                 |                                 |                                 |                              |                              |                              |                              |
|                                | 217.09<br>(158.72 to<br>304.14) | 300.24<br>(162.36 to<br>596.86) | 250.06<br>(142.72 to<br>427.81) | 395.58<br>(207.69 to<br>816.25) | 22.59<br>(13.15 to<br>27.89) | 36.93<br>(16.70 to<br>76.35) | 32.06<br>(15.20 to<br>55.20) | 46.45<br>(20.38 to<br>96.88) |
| Hypertensive heart disease     |                                 |                                 |                                 |                                 |                              |                              |                              |                              |
|                                | 156.74<br>(110.60 to<br>185.56) | 126.64<br>(82.19 to<br>167.56)  | 119.06<br>(78.13 to<br>157.04)  | 154.27<br>(100.70 to<br>202.86) | 11.23<br>(7.76 to<br>13.30)  | 11.68<br>(7.38 to<br>16.40)  | 11.38<br>(7.43 to<br>15.71)  | 12.72<br>(7.98 to<br>17.82)  |
| Cardiomyopathy and myocarditis |                                 |                                 |                                 |                                 |                              |                              |                              |                              |
|                                | 16.61<br>(13.67 to<br>20.93)    | 20.99<br>(15.72 to<br>26.73)    | 22.04<br>(16.52 to<br>27.77)    | 19.68<br>(14.93 to<br>25.73)    | 1.48<br>(1.03 to<br>1.96)    | 2.65<br>(1.74 to<br>3.53)    | 2.90<br>(1.92 to<br>3.83)    | 2.36<br>(1.53 to<br>3.23)    |
| Myocarditis                    |                                 |                                 |                                 |                                 |                              |                              |                              |                              |

| Germany                                                       |                                                      |                                                      |                                                      |                                                      |                                                   |                                                   |                                                   |                                                   |
|---------------------------------------------------------------|------------------------------------------------------|------------------------------------------------------|------------------------------------------------------|------------------------------------------------------|---------------------------------------------------|---------------------------------------------------|---------------------------------------------------|---------------------------------------------------|
| Cause                                                         | YLLs (in 1000s)                                      |                                                      |                                                      |                                                      | Deaths (in 1000s)                                 |                                                   |                                                   |                                                   |
|                                                               | 2016                                                 | 2040 Forecast                                        | 2040 Better Scenario                                 | 2040 Worse Scenario                                  | 2016                                              | 2040 Forecast                                     | 2040 Better Scenario                              | 2040 Worse Scenario                               |
| Alcoholic cardiomyopathy                                      | 74.55<br>(41.33 to<br>93.69)                         | 53.38<br>(27.36 to<br>70.47)                         | 49.88<br>(25.48 to<br>66.70)                         | 80.72<br>(43.59 to<br>104.19)                        | 3.56<br>(1.79 to<br>4.56)                         | 3.01<br>(1.43 to<br>4.07)                         | 2.87<br>(1.36 to<br>3.90)                         | 4.43<br>(2.25 to<br>5.83)                         |
| Other cardiomyopathy                                          | 65.57<br>(47.57 to<br>77.89)                         | 52.28<br>(30.31 to<br>82.56)                         | 47.14<br>(26.52 to<br>73.24)                         | 53.87<br>(31.59 to<br>87.77)                         | 6.19<br>(4.29 to<br>7.47)                         | 6.01<br>(3.15 to<br>9.76)                         | 5.61<br>(2.95 to<br>9.08)                         | 5.93<br>(3.10 to<br>9.98)                         |
| Atrial fibrillation and flutter                               | 104.84<br>(78.76 to<br>137.08)                       | 135.92<br>(96.07 to<br>183.14)                       | 130.89<br>(92.89 to<br>176.13)                       | 147.73<br>(102.03 to<br>204.25)                      | 11.88<br>(8.84 to<br>15.77)                       | 16.74<br>(11.79 to<br>22.60)                      | 16.64<br>(11.84 to<br>22.33)                      | 17.52<br>(11.98 to<br>23.89)                      |
| Aortic aneurysm                                               | 77.05<br>(69.04 to<br>85.42)                         | 73.73<br>(58.28 to<br>93.53)                         | 69.16<br>(56.01 to<br>86.07)                         | 75.10<br>(58.53 to<br>96.38)                         | 5.75<br>(5.17 to<br>6.35)                         | 6.74<br>(5.44 to<br>8.32)                         | 6.65<br>(5.45 to<br>8.10)                         | 6.51<br>(5.15 to<br>8.10)                         |
| Peripheral artery disease                                     | 74.04<br>(45.81 to<br>92.35)                         | 108.21<br>(63.99 to<br>155.09)                       | 105.55<br>(64.12 to<br>150.95)                       | 114.36<br>(66.00 to<br>161.82)                       | 6.91<br>(4.43 to<br>9.44)                         | 11.79<br>(7.37 to<br>17.14)                       | 12.01<br>(7.60 to<br>17.44)                       | 11.80<br>(7.18 to<br>17.18)                       |
| Endocarditis                                                  | 43.84<br>(34.78 to<br>63.23)                         | 52.50<br>(36.38 to<br>82.85)                         | 51.50<br>(36.05 to<br>80.47)                         | 52.50<br>(35.77 to<br>84.01)                         | 3.36<br>(2.55 to<br>4.79)                         | 4.78<br>(3.17 to<br>7.58)                         | 4.83<br>(3.26 to<br>7.63)                         | 4.59<br>(3.01 to<br>7.31)                         |
| Other cardiovascular and circulatory diseases                 | 329.82<br>(297.17 to<br>362.50)                      | 342.32<br>(272.83 to<br>435.15)                      | 298.60<br>(243.26 to<br>373.91)                      | 359.92<br>(281.70 to<br>462.38)                      | 27.48<br>(24.78 to<br>30.18)                      | 33.16<br>(27.18 to<br>41.31)                      | 30.44<br>(25.23 to<br>37.63)                      | 32.95<br>(26.44 to<br>41.77)                      |
| <b>Chronic respiratory diseases</b>                           | <b>561.54</b><br><b>(511.82 to</b><br><b>611.01)</b> | <b>537.51</b><br><b>(419.09 to</b><br><b>679.34)</b> | <b>398.07</b><br><b>(322.15 to</b><br><b>487.56)</b> | <b>749.09</b><br><b>(566.95 to</b><br><b>986.08)</b> | <b>44.53</b><br><b>(40.79 to</b><br><b>48.57)</b> | <b>50.52</b><br><b>(39.19 to</b><br><b>64.12)</b> | <b>37.88</b><br><b>(30.47 to</b><br><b>46.23)</b> | <b>66.68</b><br><b>(50.11 to</b><br><b>86.74)</b> |
| Chronic obstructive pulmonary disease                         | 481.48<br>(437.01 to<br>529.11)                      | 443.05<br>(327.91 to<br>583.69)                      | 296.46<br>(223.82 to<br>381.21)                      | 658.16<br>(478.57 to<br>891.31)                      | 39.26<br>(35.70 to<br>42.97)                      | 43.26<br>(31.80 to<br>56.67)                      | 29.89<br>(22.61 to<br>37.94)                      | 59.90<br>(43.74 to<br>79.51)                      |
| Pneumoconiosis                                                | 6.45<br>(5.33 to<br>7.88)                            | 6.08<br>(4.64 to<br>7.87)                            | 6.32<br>(4.80 to<br>8.24)                            | 5.73<br>(4.40 to<br>7.41)                            | 0.52<br>(0.43 to<br>0.64)                         | 0.51<br>(0.39 to<br>0.67)                         | 0.54<br>(0.41 to<br>0.71)                         | 0.48<br>(0.35 to<br>0.63)                         |
| Silicosis                                                     | 3.28<br>(2.04 to<br>4.81)                            | 1.47<br>(0.65 to<br>2.87)                            | 1.29<br>(0.56 to<br>2.70)                            | 1.47<br>(0.63 to<br>2.91)                            | 0.29<br>(0.17 to<br>0.41)                         | 0.14<br>(0.06 to<br>0.26)                         | 0.13<br>(0.05 to<br>0.24)                         | 0.14<br>(0.06 to<br>0.26)                         |
| Asbestosis                                                    | 2.74<br>(1.40 to<br>3.92)                            | 4.27<br>(2.72 to<br>5.80)                            | 4.70<br>(3.18 to<br>6.35)                            | 3.91<br>(2.41 to<br>5.35)                            | 0.20<br>(0.10 to<br>0.30)                         | 0.34<br>(0.22 to<br>0.47)                         | 0.38<br>(0.25 to<br>0.52)                         | 0.30<br>(0.19 to<br>0.42)                         |
| Coal workers pneumoconiosis                                   | 0.15<br>(0.09 to<br>0.45)                            | 0.14<br>(0.05 to<br>0.38)                            | 0.13<br>(0.05 to<br>0.38)                            | 0.15<br>(0.06 to<br>0.42)                            | 0.01<br>(0.01 to<br>0.04)                         | 0.01<br>(0.01 to<br>0.04)                         | 0.01<br>(0.01 to<br>0.04)                         | 0.01<br>(0.01 to<br>0.04)                         |
| Other pneumoconiosis                                          | 0.27<br>(0.20 to<br>0.59)                            | 0.20<br>(0.13 to<br>0.43)                            | 0.20<br>(0.13 to<br>0.44)                            | 0.20<br>(0.13 to<br>0.43)                            | 0.02<br>(0.02 to<br>0.05)                         | 0.02<br>(0.01 to<br>0.04)                         | 0.02<br>(0.01 to<br>0.04)                         | 0.02<br>(0.01 to<br>0.04)                         |
| Asthma                                                        | 22.89<br>(20.05 to<br>26.72)                         | 11.24<br>(6.77 to<br>19.05)                          | 8.73<br>(5.35 to<br>14.30)                           | 14.17<br>(8.23 to<br>24.24)                          | 1.37<br>(1.18 to<br>1.58)                         | 0.87<br>(0.52 to<br>1.45)                         | 0.71<br>(0.44 to<br>1.16)                         | 1.03<br>(0.60 to<br>1.74)                         |
| Interstitial lung disease and pulmonary sarcoidosis           | 46.68<br>(33.19 to<br>58.27)                         | 73.30<br>(52.57 to<br>90.57)                         | 82.90<br>(61.12 to<br>100.61)                        | 67.00<br>(47.30 to<br>83.88)                         | 3.17<br>(2.26 to<br>3.94)                         | 5.63<br>(4.12 to<br>7.05)                         | 6.50<br>(4.88 to<br>8.04)                         | 5.02<br>(3.62 to<br>6.34)                         |
| Other chronic respiratory diseases                            | 4.04<br>(2.32 to<br>5.14)                            | 3.85<br>(2.13 to<br>5.47)                            | 3.68<br>(2.09 to<br>5.16)                            | 4.03<br>(2.24 to<br>5.77)                            | 0.21<br>(0.12 to<br>0.27)                         | 0.25<br>(0.14 to<br>0.35)                         | 0.24<br>(0.14 to<br>0.34)                         | 0.25<br>(0.14 to<br>0.36)                         |
| <b>Cirrhosis and other chronic liver diseases</b>             | <b>443.83</b><br><b>(397.97 to</b><br><b>495.16)</b> | <b>325.83</b><br><b>(284.04 to</b><br><b>374.46)</b> | <b>298.06</b><br><b>(257.83 to</b><br><b>342.61)</b> | <b>417.81</b><br><b>(361.76 to</b><br><b>477.26)</b> | <b>19.47</b><br><b>(17.68 to</b><br><b>21.51)</b> | <b>16.77</b><br><b>(14.91 to</b><br><b>18.71)</b> | <b>15.67</b><br><b>(13.93 to</b><br><b>17.56)</b> | <b>20.95</b><br><b>(18.56 to</b><br><b>23.58)</b> |
| Cirrhosis and other chronic liver diseases due to hepatitis B | 60.55<br>(45.89 to<br>78.33)                         | 51.40<br>(39.01 to<br>66.65)                         | 49.04<br>(37.23 to<br>63.85)                         | 51.26<br>(38.54 to<br>66.81)                         | 2.69<br>(2.09 to<br>3.44)                         | 2.66<br>(2.04 to<br>3.46)                         | 2.58<br>(1.98 to<br>3.34)                         | 2.58<br>(1.96 to<br>3.34)                         |
| Cirrhosis and other chronic liver diseases due to hepatitis C | 128.81<br>(95.73 to<br>172.25)                       | 107.42<br>(80.28 to<br>141.19)                       | 101.69<br>(75.93 to<br>133.85)                       | 108.19<br>(78.10 to<br>146.30)                       | 5.43<br>(4.09 to<br>7.04)                         | 5.23<br>(3.98 to<br>6.74)                         | 5.04<br>(3.81 to<br>6.47)                         | 5.15<br>(3.79 to<br>6.82)                         |



|                                                                |                                                      |                                                      |                                                      |                                                      |                                                   |                                                   |                                                   |                                                   |
|----------------------------------------------------------------|------------------------------------------------------|------------------------------------------------------|------------------------------------------------------|------------------------------------------------------|---------------------------------------------------|---------------------------------------------------|---------------------------------------------------|---------------------------------------------------|
|                                                                | 226.86<br>(187.52 to<br>269.19)                      | 143.47<br>(115.10 to<br>175.71)                      | 124.86<br>(99.02 to<br>154.18)                       | 234.86<br>(192.36 to<br>282.26)                      | 10.03<br>(8.48 to<br>11.73)                       | 7.52<br>(6.10 to<br>9.06)                         | 6.72<br>(5.43 to<br>8.14)                         | 11.90<br>(10.01 to<br>14.03)                      |
| Cirrhosis and other chronic liver diseases due to alcohol use  |                                                      |                                                      |                                                      |                                                      |                                                   |                                                   |                                                   |                                                   |
|                                                                | 27.61<br>(19.46 to<br>38.67)                         | 23.55<br>(16.74 to<br>32.51)                         | 22.47<br>(15.83 to<br>31.41)                         | 23.50<br>(16.58 to<br>32.61)                         | 1.32<br>(0.95 to<br>1.84)                         | 1.36<br>(0.96 to<br>1.92)                         | 1.33<br>(0.93 to<br>1.90)                         | 1.32<br>(0.93 to<br>1.91)                         |
| Cirrhosis and other chronic liver diseases due to other causes |                                                      |                                                      |                                                      |                                                      |                                                   |                                                   |                                                   |                                                   |
| <b>Digestive diseases</b>                                      | <b>304.91</b><br><b>(260.75 to</b><br><b>349.90)</b> | <b>320.16</b><br><b>(265.21 to</b><br><b>385.29)</b> | <b>312.69</b><br><b>(258.81 to</b><br><b>375.68)</b> | <b>322.47</b><br><b>(264.18 to</b><br><b>393.77)</b> | <b>23.80</b><br><b>(20.65 to</b><br><b>27.05)</b> | <b>30.68</b><br><b>(25.42 to</b><br><b>36.29)</b> | <b>30.88</b><br><b>(25.72 to</b><br><b>36.56)</b> | <b>29.67</b><br><b>(24.22 to</b><br><b>35.93)</b> |
| Peptic ulcer disease                                           | 45.06<br>(38.57 to<br>53.12)                         | 29.40<br>(23.04 to<br>37.35)                         | 26.12<br>(20.48 to<br>32.89)                         | 30.32<br>(23.17 to<br>38.97)                         | 3.54<br>(3.08 to<br>4.15)                         | 2.94<br>(2.29 to<br>3.71)                         | 2.71<br>(2.11 to<br>3.42)                         | 2.90<br>(2.21 to<br>3.72)                         |

| Germany                                    |                                               |                                                 |                                                 |                                                 |                                           |                                             |                                             |                                             |
|--------------------------------------------|-----------------------------------------------|-------------------------------------------------|-------------------------------------------------|-------------------------------------------------|-------------------------------------------|---------------------------------------------|---------------------------------------------|---------------------------------------------|
| Cause                                      | YLLs (in 1000s)                               |                                                 |                                                 |                                                 | Deaths (in 1000s)                         |                                             |                                             |                                             |
|                                            | 2016                                          | 2040 Forecast                                   | 2040 Better Scenario                            | 2040 Worse Scenario                             | 2016                                      | 2040 Forecast                               | 2040 Better Scenario                        | 2040 Worse Scenario                         |
| Gastritis and duodenitis                   | 5.50<br>(3.56 to 6.53)                        | 4.79<br>(2.87 to 6.08)                          | 4.59<br>(2.78 to 5.86)                          | 4.66<br>(2.83 to 5.94)                          | 0.41<br>(0.23 to 0.49)                    | 0.46<br>(0.23 to 0.60)                      | 0.45<br>(0.24 to 0.59)                      | 0.43<br>(0.22 to 0.56)                      |
| Appendicitis                               | 3.92<br>(3.16 to 5.66)                        | 3.32<br>(2.58 to 4.87)                          | 3.05<br>(2.33 to 4.53)                          | 3.30<br>(2.53 to 4.90)                          | 0.26<br>(0.21 to 0.37)                    | 0.27<br>(0.21 to 0.39)                      | 0.26<br>(0.20 to 0.37)                      | 0.26<br>(0.20 to 0.38)                      |
| Paralytic ileus and intestinal obstruction | 57.48<br>(40.73 to 68.78)                     | 71.27<br>(50.68 to 85.80)                       | 74.25<br>(53.67 to 89.97)                       | 66.59<br>(47.07 to 80.03)                       | 4.85<br>(3.45 to 5.78)                    | 7.18<br>(5.14 to 8.70)                      | 7.68<br>(5.53 to 9.24)                      | 6.51<br>(4.61 to 7.92)                      |
| Inguinal, femoral, and abdominal hernia    | 7.29<br>(5.63 to 12.68)                       | 5.72<br>(4.28 to 10.21)                         | 5.63<br>(4.21 to 10.03)                         | 5.46<br>(4.07 to 9.80)                          | 0.63<br>(0.49 to 1.12)                    | 0.59<br>(0.43 to 1.05)                      | 0.60<br>(0.44 to 1.06)                      | 0.55<br>(0.40 to 0.97)                      |
| Inflammatory bowel disease                 | 27.63<br>(18.81 to 32.42)                     | 29.20<br>(20.03 to 35.18)                       | 30.06<br>(20.86 to 36.18)                       | 27.59<br>(18.51 to 33.26)                       | 2.17<br>(1.43 to 2.58)                    | 2.78<br>(1.82 to 3.42)                      | 2.95<br>(1.95 to 3.62)                      | 2.54<br>(1.65 to 3.16)                      |
| Vascular intestinal disorders              | 55.24<br>(46.88 to 65.32)                     | 70.70<br>(58.26 to 85.01)                       | 70.96<br>(58.69 to 85.83)                       | 67.30<br>(55.06 to 81.14)                       | 4.56<br>(3.92 to 5.30)                    | 6.95<br>(5.70 to 8.36)                      | 7.16<br>(5.88 to 8.61)                      | 6.43<br>(5.19 to 7.79)                      |
| Gallbladder and biliary diseases           | 26.13<br>(22.70 to 31.21)                     | 30.64<br>(17.65 to 52.11)                       | 26.18<br>(15.50 to 43.80)                       | 35.87<br>(20.30 to 60.75)                       | 2.34<br>(2.03 to 2.75)                    | 3.28<br>(1.87 to 5.54)                      | 2.89<br>(1.70 to 4.83)                      | 3.68<br>(2.07 to 6.30)                      |
| Pancreatitis                               | 38.23<br>(32.15 to 48.90)                     | 31.51<br>(17.52 to 59.83)                       | 28.14<br>(15.83 to 53.09)                       | 39.78<br>(20.63 to 76.35)                       | 2.00<br>(1.69 to 2.73)                    | 2.08<br>(1.20 to 3.94)                      | 1.91<br>(1.12 to 3.51)                      | 2.54<br>(1.34 to 4.92)                      |
| Other digestive diseases                   | 38.42<br>(28.96 to 45.21)                     | 43.61<br>(33.49 to 52.68)                       | 43.72<br>(33.73 to 52.35)                       | 41.60<br>(32.02 to 49.55)                       | 3.05<br>(2.41 to 3.58)                    | 4.14<br>(3.27 to 4.98)                      | 4.27<br>(3.42 to 5.12)                      | 3.83<br>(3.02 to 4.61)                      |
| Neurological disorders                     | <b>886.80</b><br>(763.64 to <b>1,034.58</b> ) | <b>1,218.43</b><br>(960.61 to <b>1,607.65</b> ) | <b>1,232.19</b><br>(975.77 to <b>1,580.94</b> ) | <b>1,255.87</b><br>(957.42 to <b>1,724.35</b> ) | <b>92.16</b><br>(76.65 to <b>108.13</b> ) | <b>146.01</b><br>(112.27 to <b>194.43</b> ) | <b>150.25</b><br>(117.80 to <b>194.06</b> ) | <b>145.76</b><br>(108.03 to <b>204.06</b> ) |
| Alzheimer's disease and other dementias    | 642.61<br>(527.72 to 786.12)                  | 948.76<br>(700.55 to 1,319.64)                  | 946.50<br>(709.30 to 1,304.46)                  | 986.65<br>(699.50 to 1,445.31)                  | 77.63<br>(62.76 to 93.49)                 | 126.30<br>(93.22 to 174.88)                 | 129.42<br>(97.72 to 173.93)                 | 126.95<br>(89.88 to 184.30)                 |
| Parkinson's disease                        | 78.01<br>(58.05 to 104.22)                    | 114.02<br>(83.72 to 149.82)                     | 122.00<br>(90.22 to 160.44)                     | 104.95<br>(76.65 to 138.58)                     | 7.31<br>(5.40 to 9.68)                    | 11.60<br>(8.60 to 15.21)                    | 12.65<br>(9.43 to 16.61)                    | 10.45<br>(7.68 to 13.68)                    |
| Epilepsy                                   | 52.68<br>(47.29 to 59.16)                     | 46.23<br>(31.07 to 67.40)                       | 43.48<br>(29.45 to 62.80)                       | 56.58<br>(36.13 to 84.77)                       | 2.31<br>(2.06 to 2.58)                    | 2.53<br>(1.68 to 3.66)                      | 2.45<br>(1.64 to 3.53)                      | 3.00<br>(1.86 to 4.45)                      |
| Multiple sclerosis                         | 29.23<br>(23.36 to 36.98)                     | 24.97<br>(19.04 to 32.03)                       | 24.60<br>(18.76 to 31.56)                       | 25.42<br>(19.25 to 32.97)                       | 1.16<br>(0.88 to 1.41)                    | 1.12<br>(0.81 to 1.39)                      | 1.12<br>(0.82 to 1.37)                      | 1.11<br>(0.81 to 1.38)                      |
| Motor neuron disease                       | 39.46<br>(35.24 to 43.71)                     | 43.70<br>(37.99 to 50.14)                       | 44.13<br>(38.10 to 50.87)                       | 42.51<br>(37.15 to 48.70)                       | 1.91<br>(1.70 to 2.13)                    | 2.40<br>(2.10 to 2.75)                      | 2.45<br>(2.15 to 2.81)                      | 2.30<br>(2.02 to 2.64)                      |
| Other neurological disorders               | 44.80<br>(39.57 to 49.67)                     | 40.75<br>(35.64 to 45.99)                       | 41.49<br>(36.07 to 46.90)                       | 39.75<br>(34.88 to 44.82)                       | 1.83<br>(1.64 to 2.03)                    | 2.06<br>(1.82 to 2.30)                      | 2.14<br>(1.89 to 2.40)                      | 1.95<br>(1.72 to 2.17)                      |
| Mental disorders                           | <b>225.81</b><br>(197.00 to <b>254.01</b> )   | <b>240.35</b><br>(199.76 to <b>288.05</b> )     | <b>251.16</b><br>(209.26 to <b>300.35</b> )     | <b>255.85</b><br>(213.80 to <b>304.40</b> )     | <b>7.24</b><br>(6.42 to <b>8.09</b> )     | <b>8.29</b><br>(7.13 to <b>9.49</b> )       | <b>8.74</b><br>(7.56 to <b>10.02</b> )      | <b>8.77</b><br>(7.65 to <b>9.95</b> )       |
| Alcohol use disorders                      | 160.20<br>(139.63 to 181.57)                  | 134.17<br>(110.13 to 159.61)                    | 134.96<br>(110.13 to 161.17)                    | 153.98<br>(127.37 to 181.50)                    | 5.61<br>(4.92 to 6.30)                    | 5.18<br>(4.37 to 6.01)                      | 5.28<br>(4.46 to 6.13)                      | 5.87<br>(5.04 to 6.75)                      |
| Drug use disorders                         | 64.34<br>(52.78 to 75.77)                     | 105.14<br>(82.34 to 134.47)                     | 115.10<br>(90.58 to 145.75)                     | 100.84<br>(77.43 to 128.08)                     | 1.60<br>(1.37 to 1.86)                    | 3.08<br>(2.58 to 3.67)                      | 3.44<br>(2.88 to 4.06)                      | 2.88<br>(2.37 to 3.44)                      |
| Opioid use disorders                       | 23.75<br>(18.59 to 34.77)                     | 29.36<br>(20.77 to 45.21)                       | 30.13<br>(21.23 to 47.13)                       | 28.92<br>(20.37 to 43.97)                       | 0.58<br>(0.46 to 0.83)                    | 0.82<br>(0.63 to 1.20)                      | 0.86<br>(0.65 to 1.27)                      | 0.79<br>(0.60 to 1.16)                      |



| Germany                                                    |                                     |                                       |                                       |                                         |                                  |                                   |                                   |                                   |
|------------------------------------------------------------|-------------------------------------|---------------------------------------|---------------------------------------|-----------------------------------------|----------------------------------|-----------------------------------|-----------------------------------|-----------------------------------|
| Cause                                                      | YLLs (in 1000s)                     |                                       |                                       |                                         | Deaths (in 1000s)                |                                   |                                   |                                   |
|                                                            | 2016                                | 2040 Forecast                         | 2040 Better Scenario                  | 2040 Worse Scenario                     | 2016                             | 2040 Forecast                     | 2040 Better Scenario              | 2040 Worse Scenario               |
| <b>Diabetes, urogenital, blood, and endocrine diseases</b> | <b>689.99</b><br>(634.37 to 742.14) | <b>879.02</b><br>(637.94 to 1,470.29) | <b>797.42</b><br>(584.74 to 1,339.16) | <b>1,000.76</b><br>(701.17 to 1,704.15) | <b>58.05</b><br>(53.57 to 62.39) | <b>86.55</b><br>(65.27 to 138.62) | <b>80.83</b><br>(61.65 to 128.53) | <b>94.86</b><br>(68.72 to 159.16) |
| Diabetes mellitus                                          | 263.54<br>(239.60 to 288.33)        | 276.06<br>(184.77 to 386.34)          | 233.83<br>(158.87 to 326.41)          | 318.77<br>(202.81 to 469.50)            | 21.25<br>(19.31 to 23.38)        | 26.81<br>(18.36 to 36.98)         | 23.85<br>(16.67 to 32.69)         | 29.36<br>(18.96 to 43.08)         |
| Acute glomerulonephritis                                   | 0.45<br>(0.40 to 0.50)              | 0.33<br>(0.27 to 0.41)                | 0.31<br>(0.26 to 0.39)                | 0.34<br>(0.28 to 0.41)                  | 0.02<br>(0.01 to 0.02)           | 0.01<br>(0.01 to 0.02)            | 0.01<br>(0.01 to 0.02)            | 0.01<br>(0.01 to 0.02)            |
| Chronic kidney disease                                     | 251.97<br>(230.67 to 273.68)        | 396.95<br>(194.84 to 1,020.00)        | 356.54<br>(182.82 to 912.00)          | 484.26<br>(219.76 to 1,249.76)          | 24.74<br>(22.55 to 27.02)        | 42.06<br>(22.38 to 99.75)         | 58.81<br>(21.59 to 91.81)         | 49.14<br>(24.59 to 112.82)        |
| Chronic kidney disease due to diabetes mellitus            | 99.11<br>(87.91 to 110.95)          | 173.31<br>(79.80 to 447.12)           | 155.31<br>(75.81 to 421.39)           | 215.04<br>(91.71 to 542.51)             | 8.73<br>(7.58 to 9.90)           | 16.51<br>(8.35 to 39.60)          | 15.19<br>(7.92 to 37.37)          | 19.62<br>(9.20 to 46.69)          |
| Chronic kidney disease due to hypertension                 | 36.47<br>(29.58 to 44.46)           | 65.35<br>(32.43 to 175.33)            | 60.60<br>(31.18 to 159.57)            | 76.65<br>(35.99 to 191.21)              | 4.67<br>(3.68 to 5.78)           | 8.79<br>(4.61 to 19.05)           | 8.36<br>(4.54 to 17.98)           | 9.90<br>(4.93 to 22.22)           |
| Chronic kidney disease due to glomerulonephritis           | 49.55<br>(43.35 to 55.91)           | 64.01<br>(29.67 to 170.17)            | 56.26<br>(27.21 to 153.36)            | 78.18<br>(34.26 to 207.44)              | 4.63<br>(3.98 to 5.33)           | 6.54<br>(3.26 to 17.51)           | 5.88<br>(3.07 to 14.94)           | 7.71<br>(3.66 to 19.83)           |
| Chronic kidney disease due to other and unspecified causes | 66.84<br>(56.80 to 78.08)           | 94.28<br>(46.16 to 241.97)            | 84.37<br>(43.39 to 217.06)            | 114.38<br>(52.47 to 284.88)             | 6.72<br>(5.48 to 8.01)           | 10.22<br>(5.32 to 23.76)          | 9.38<br>(5.03 to 22.19)           | 11.91<br>(5.84 to 27.40)          |
| Urinary diseases and male infertility                      | 59.28<br>(53.40 to 65.49)           | 71.91<br>(61.37 to 83.90)             | 70.40<br>(59.38 to 82.22)             | 68.70<br>(58.15 to 80.53)               | 5.51<br>(4.96 to 6.10)           | 7.92<br>(6.65 to 9.31)            | 7.97<br>(6.68 to 9.39)            | 7.33<br>(6.04 to 8.76)            |
| Urinary tract infections                                   | 51.98<br>(46.53 to 57.64)           | 65.41<br>(55.36 to 76.27)             | 64.25<br>(53.83 to 75.65)             | 62.38<br>(52.19 to 73.68)               | 4.93<br>(4.39 to 5.46)           | 7.27<br>(6.02 to 8.61)            | 7.34<br>(6.06 to 8.65)            | 6.72<br>(5.52 to 8.11)            |
| Urolithiasis                                               | 2.27<br>(1.45 to 5.05)              | 2.33<br>(1.40 to 5.30)                | 2.19<br>(1.30 to 5.12)                | 2.30<br>(1.38 to 5.22)                  | 0.17<br>(0.11 to 0.40)           | 0.21<br>(0.12 to 0.47)            | 0.20<br>(0.12 to 0.46)            | 0.20<br>(0.11 to 0.45)            |
| Other urinary diseases                                     | 5.02<br>(3.28 to 6.84)              | 4.16<br>(2.67 to 5.89)                | 3.96<br>(2.48 to 5.64)                | 4.01<br>(2.52 to 5.67)                  | 0.42<br>(0.25 to 0.55)           | 0.44<br>(0.25 to 0.61)            | 0.43<br>(0.24 to 0.60)            | 0.41<br>(0.24 to 0.57)            |
| Gynecological diseases                                     | 0.70<br>(0.50 to 0.91)              | 0.33<br>(0.23 to 0.46)                | 0.28<br>(0.19 to 0.40)                | 0.34<br>(0.23 to 0.49)                  | 0.03<br>(0.03 to 0.05)           | 0.02<br>(0.01 to 0.03)            | 0.02<br>(0.03 to 0.03)            | 0.02<br>(0.01 to 0.03)            |
| Uterine fibroids                                           | 0.17<br>(0.12 to 0.24)              | 0.10<br>(0.07 to 0.16)                | 0.09<br>(0.06 to 0.15)                | 0.11<br>(0.07 to 0.17)                  | 0.01<br>(0.00 to 0.01)           | 0.00<br>(0.00 to 0.01)            | 0.00<br>(0.00 to 0.01)            | 0.00<br>(0.00 to 0.01)            |
| Polycystic ovarian syndrome                                | 0.02<br>(0.01 to 0.03)              | 0.00<br>(0.00 to 0.01)                | 0.00<br>(0.00 to 0.01)                | 0.01<br>(0.00 to 0.01)                  | 0.00<br>(0.00 to 0.00)           | 0.00<br>(0.00 to 0.00)            | 0.00<br>(0.00 to 0.00)            | 0.00<br>(0.00 to 0.00)            |
| Endometriosis                                              | 0.01<br>(0.00 to 0.02)              | 0.00<br>(0.00 to 0.01)                | 0.00<br>(0.00 to 0.01)                | 0.00<br>(0.00 to 0.01)                  | 0.00<br>(0.00 to 0.00)           | 0.00<br>(0.00 to 0.00)            | 0.00<br>(0.00 to 0.00)            | 0.00<br>(0.00 to 0.00)            |
| Genital prolapse                                           | 0.07<br>(0.03 to 0.10)              | 0.03<br>(0.01 to 0.06)                | 0.03<br>(0.01 to 0.05)                | 0.03<br>(0.01 to 0.06)                  | 0.01<br>(0.00 to 0.01)           | 0.00<br>(0.00 to 0.00)            | 0.00<br>(0.00 to 0.00)            | 0.00<br>(0.00 to 0.00)            |
| Other gynecological diseases                               | 0.43<br>(0.30 to 0.57)              | 0.18<br>(0.12 to 0.27)                | 0.15<br>(0.10 to 0.23)                | 0.19<br>(0.12 to 0.29)                  | 0.02<br>(0.02 to 0.03)           | 0.01<br>(0.01 to 0.02)            | 0.01<br>(0.02 to 0.02)            | 0.01<br>(0.01 to 0.02)            |
| Hemoglobinopathies and hemolytic anemias                   | 22.15<br>(16.98 to 25.44)           | 22.45<br>(15.73 to 26.60)             | 21.58<br>(14.98 to 25.32)             | 21.59<br>(14.95 to 25.87)               | 2.02<br>(1.32 to 2.33)           | 2.66<br>(1.58 to 3.31)            | 2.64<br>(1.58 to 3.25)            | 2.46<br>(1.49 to 3.10)            |
| Thalassemias                                               | 0.52<br>(0.37 to 0.81)              | 0.18<br>(0.12 to 0.31)                | 0.18<br>(0.12 to 0.30)                | 0.19<br>(0.13 to 0.32)                  | 0.01<br>(0.01 to 0.01)           | 0.00<br>(0.00 to 0.01)            | 0.00<br>(0.00 to 0.01)            | 0.00<br>(0.00 to 0.01)            |

|                                                   |                               |                                |                                |                                |                           |                           |                           |                           |
|---------------------------------------------------|-------------------------------|--------------------------------|--------------------------------|--------------------------------|---------------------------|---------------------------|---------------------------|---------------------------|
|                                                   | 0.04<br>(0.03 to<br>0.06)     | 0.04<br>(0.03 to<br>0.06)      | 0.04<br>(0.02 to<br>0.06)      | 0.04<br>(0.03 to<br>0.06)      | 0.00<br>(0.00 to<br>0.00) | 0.00<br>(0.00 to<br>0.00) | 0.00<br>(0.00 to<br>0.00) | 0.00<br>(0.00 to<br>0.00) |
| Sickle cell disorders                             |                               |                                |                                |                                |                           |                           |                           |                           |
|                                                   | 3.09<br>(2.43 to<br>4.15)     | 3.08<br>(2.30 to<br>4.14)      | 2.79<br>(2.06 to<br>3.72)      | 3.14<br>(2.34 to<br>4.21)      | 0.11<br>(0.08 to<br>0.14) | 0.17<br>(0.12 to<br>0.22) | 0.15<br>(0.11 to<br>0.21) | 0.17<br>(0.11 to<br>0.22) |
| G6PD deficiency                                   |                               |                                |                                |                                |                           |                           |                           |                           |
|                                                   | 18.50<br>(13.39 to<br>21.09)  | 19.15<br>(12.78 to<br>23.23)   | 18.58<br>(12.45 to<br>22.25)   | 18.23<br>(12.00 to<br>22.16)   | 1.90<br>(1.22 to<br>2.21) | 2.49<br>(1.45 to<br>3.12) | 2.48<br>(1.46 to<br>3.09) | 2.29<br>(1.35 to<br>2.90) |
| Other hemoglobinopathies and hemolytic anemias    |                               |                                |                                |                                |                           |                           |                           |                           |
|                                                   | 91.91<br>(56.42 to<br>105.38) | 110.99<br>(66.69 to<br>128.55) | 114.47<br>(70.51 to<br>133.72) | 106.75<br>(63.32 to<br>123.36) | 4.47<br>(2.66 to<br>5.13) | 7.07<br>(4.35 to<br>8.28) | 7.53<br>(4.70 to<br>8.80) | 6.53<br>(3.99 to<br>7.66) |
| Endocrine, metabolic, blood, and immune disorders |                               |                                |                                |                                |                           |                           |                           |                           |

| Germany                                       |                                    |                                    |                                   |                                    |                               |                               |                               |                               |
|-----------------------------------------------|------------------------------------|------------------------------------|-----------------------------------|------------------------------------|-------------------------------|-------------------------------|-------------------------------|-------------------------------|
| Cause                                         | YLLs (in 1000s)                    |                                    |                                   |                                    | Deaths (in 1000s)             |                               |                               |                               |
|                                               | 2016                               | 2040 Forecast                      | 2040 Better Scenario              | 2040 Worse Scenario                | 2016                          | 2040 Forecast                 | 2040 Better Scenario          | 2040 Worse Scenario           |
| <b>Musculoskeletal disorders</b>              | <b>25.30</b><br>(21.88 to 28.92)   | <b>28.75</b><br>(23.68 to 33.81)   | <b>27.62</b><br>(22.91 to 32.67)  | <b>28.38</b><br>(23.29 to 33.59)   | <b>1.81</b><br>(1.55 to 2.06) | <b>2.47</b><br>(2.04 to 2.94) | <b>2.43</b><br>(2.00 to 2.90) | <b>2.35</b><br>(1.92 to 2.80) |
| Rheumatoid arthritis                          | 6.88<br>(5.47 to 11.36)            | 9.94<br>(7.22 to 15.21)            | 8.75<br>(6.33 to 13.56)           | 10.25<br>(7.33 to 15.60)           | 0.49<br>(0.39 to 0.80)        | 0.84<br>(0.61 to 1.26)        | 0.75<br>(0.55 to 1.15)        | 0.84<br>(0.60 to 1.26)        |
| Other musculoskeletal disorders               | 18.42<br>(13.28 to 21.11)          | 18.81<br>(13.14 to 22.31)          | 18.87<br>(13.38 to 22.35)         | 18.13<br>(12.34 to 21.41)          | 1.32<br>(0.99 to 1.51)        | 1.63<br>(1.17 to 1.97)        | 1.68<br>(1.24 to 2.02)        | 1.52<br>(1.07 to 1.85)        |
| <b>Other non-communicable diseases</b>        | <b>125.79</b><br>(99.36 to 150.38) | <b>103.51</b><br>(76.32 to 124.66) | <b>96.97</b><br>(70.47 to 117.39) | <b>107.02</b><br>(78.24 to 130.40) | <b>3.24</b><br>(2.18 to 3.85) | <b>4.68</b><br>(2.68 to 5.92) | <b>4.69</b><br>(2.68 to 5.92) | <b>4.47</b><br>(2.61 to 5.59) |
| Congenital birth defects                      | 91.06<br>(71.35 to 110.19)         | 59.50<br>(46.37 to 72.74)          | 53.86<br>(41.65 to 65.72)         | 63.86<br>(49.46 to 79.95)          | 1.39<br>(1.10 to 1.63)        | 1.04<br>(0.83 to 1.23)        | 0.97<br>(0.76 to 1.15)        | 1.09<br>(0.85 to 1.31)        |
| Neural tube defects                           | 2.05<br>(1.22 to 2.87)             | 0.55<br>(0.32 to 0.84)             | 0.45<br>(0.27 to 0.69)            | 0.61<br>(0.35 to 0.94)             | 0.03<br>(0.02 to 0.04)        | 0.01<br>(0.01 to 0.01)        | 0.01<br>(0.00 to 0.01)        | 0.01<br>(0.01 to 0.01)        |
| Congenital heart anomalies                    | 28.08<br>(19.34 to 35.52)          | 11.59<br>(7.88 to 15.65)           | 9.38<br>(6.45 to 12.71)           | 13.07<br>(8.66 to 18.45)           | 0.39<br>(0.30 to 0.48)        | 0.17<br>(0.13 to 0.23)        | 0.14<br>(0.10 to 0.19)        | 0.19<br>(0.14 to 0.27)        |
| Orofacial clefts                              | 0.05<br>(0.02 to 0.11)             | 0.02<br>(0.01 to 0.04)             | 0.01<br>(0.00 to 0.03)            | 0.02<br>(0.01 to 0.05)             | 0.00<br>(0.00 to 0.00)        | 0.00<br>(0.00 to 0.00)        | 0.00<br>(0.00 to 0.00)        | 0.00<br>(0.00 to 0.00)        |
| Down syndrome                                 | 14.80<br>(10.34 to 17.32)          | 16.69<br>(11.80 to 20.96)          | 16.95<br>(12.17 to 20.31)         | 16.64<br>(11.87 to 20.67)          | 0.36<br>(0.25 to 0.42)        | 0.44<br>(0.31 to 0.53)        | 0.45<br>(0.31 to 0.54)        | 0.43<br>(0.30 to 0.53)        |
| Other chromosomal abnormalities               | 18.21<br>(13.31 to 27.12)          | 17.09<br>(11.99 to 23.99)          | 15.61<br>(10.97 to 21.85)         | 18.42<br>(12.94 to 26.30)          | 0.23<br>(0.17 to 0.34)        | 0.23<br>(0.17 to 0.32)        | 0.21<br>(0.15 to 0.29)        | 0.24<br>(0.18 to 0.35)        |
| Congenital musculoskeletal and limb anomalies | 2.86<br>(2.07 to 4.15)             | 1.43<br>(0.97 to 2.12)             | 1.21<br>(0.81 to 1.79)            | 1.59<br>(1.06 to 2.39)             | 0.04<br>(0.03 to 0.05)        | 0.02<br>(0.01 to 0.03)        | 0.02<br>(0.01 to 0.02)        | 0.02<br>(0.01 to 0.03)        |
| Urogenital congenital anomalies               | 2.42<br>(0.99 to 3.81)             | 1.27<br>(0.52 to 2.19)             | 1.10<br>(0.44 to 1.93)            | 1.40<br>(0.56 to 2.45)             | 0.03<br>(0.02 to 0.05)        | 0.02<br>(0.01 to 0.03)        | 0.02<br>(0.01 to 0.03)        | 0.02<br>(0.01 to 0.03)        |
| Digestive congenital anomalies                | 5.17<br>(2.86 to 7.44)             | 2.32<br>(1.12 to 3.62)             | 1.91<br>(0.92 to 2.96)            | 2.62<br>(1.28 to 4.07)             | 0.06<br>(0.04 to 0.09)        | 0.03<br>(0.02 to 0.05)        | 0.03<br>(0.01 to 0.04)        | 0.03<br>(0.02 to 0.05)        |
| Other congenital birth defects                | 17.43<br>(12.07 to 22.29)          | 8.54<br>(5.52 to 11.65)            | 7.24<br>(4.74 to 9.97)            | 9.48<br>(6.19 to 13.07)            | 0.23<br>(0.16 to 0.29)        | 0.12<br>(0.08 to 0.16)        | 0.10<br>(0.07 to 0.13)        | 0.13<br>(0.09 to 0.18)        |
| Skin and subcutaneous diseases                | 20.94<br>(8.84 to 26.79)           | 37.20<br>(15.42 to 48.72)          | 37.14<br>(15.50 to 48.57)         | 35.62<br>(14.73 to 46.51)          | 1.69<br>(0.75 to 2.18)        | 3.56<br>(1.54 to 4.77)        | 3.65<br>(1.61 to 4.87)        | 3.29<br>(1.44 to 4.42)        |
| Cellulitis                                    | 4.10<br>(1.85 to 6.48)             | 7.98<br>(3.88 to 13.49)            | 8.12<br>(3.94 to 13.69)           | 7.63<br>(3.67 to 12.85)            | 0.27<br>(0.14 to 0.49)        | 0.65<br>(0.35 to 1.29)        | 0.68<br>(0.38 to 1.37)        | 0.60<br>(0.33 to 1.19)        |
| Pyoderma                                      | 10.46<br>(3.47 to 14.21)           | 23.00<br>(8.20 to 31.81)           | 23.02<br>(8.10 to 31.76)          | 21.97<br>(7.73 to 30.50)           | 0.84<br>(0.29 to 1.13)        | 2.24<br>(0.84 to 3.12)        | 2.32<br>(0.85 to 3.22)        | 2.07<br>(0.77 to 2.89)        |
| Decubitus ulcer                               | 5.48<br>(2.31 to 7.54)             | 5.30<br>(2.19 to 8.22)             | 5.09<br>(2.11 to 8.03)            | 5.13<br>(2.10 to 8.13)             | 0.51<br>(0.21 to 0.72)        | 0.58<br>(0.23 to 0.91)        | 0.57<br>(0.23 to 0.90)        | 0.54<br>(0.21 to 0.87)        |
| Other skin and subcutaneous diseases          | 0.90<br>(0.41 to 1.28)             | 0.92<br>(0.42 to 1.38)             | 0.91<br>(0.41 to 1.37)            | 0.89<br>(0.41 to 1.35)             | 0.07<br>(0.03 to 0.10)        | 0.08<br>(0.04 to 0.13)        | 0.08<br>(0.04 to 0.13)        | 0.08<br>(0.03 to 0.12)        |
| Sudden infant death syndrome                  | 13.80<br>(9.97 to 18.51)           | 6.81<br>(3.97 to 10.68)            | 5.96<br>(3.47 to 9.34)            | 7.54<br>(4.50 to 12.03)            | 0.16<br>(0.12 to 0.21)        | 0.08<br>(0.05 to 0.12)        | 0.07<br>(0.04 to 0.11)        | 0.09<br>(0.05 to 0.14)        |

|                          |                                 |                                 |                                 |                                 |                              |                              |                              |                              |
|--------------------------|---------------------------------|---------------------------------|---------------------------------|---------------------------------|------------------------------|------------------------------|------------------------------|------------------------------|
| Injuries                 | 861.89<br>(774.97 to<br>996.15) | 603.47<br>(480.32 to<br>770.03) | 565.39<br>(455.03 to<br>716.76) | 729.68<br>(549.92 to<br>980.43) | 36.25<br>(32.59 to<br>40.05) | 35.83<br>(30.45 to<br>42.11) | 35.20<br>(30.07 to<br>41.24) | 38.21<br>(31.53 to<br>46.58) |
| Transport injuries       | 181.03<br>(155.70 to<br>202.29) | 85.28<br>(51.35 to<br>143.20)   | 76.15<br>(46.70 to<br>126.57)   | 159.03<br>(90.62 to<br>277.83)  | 5.08<br>(4.54 to<br>5.61)    | 3.07<br>(2.05 to<br>4.68)    | 2.82<br>(1.92 to<br>4.24)    | 5.11<br>(3.18 to<br>8.24)    |
| Road injuries            | 165.31<br>(141.68 to<br>184.89) | 74.80<br>(44.94 to<br>125.46)   | 67.11<br>(40.92 to<br>111.26)   | 146.27<br>(82.48 to<br>255.55)  | 4.66<br>(4.17 to<br>5.15)    | 2.73<br>(1.83 to<br>4.14)    | 2.53<br>(1.73 to<br>3.77)    | 4.71<br>(2.95 to<br>7.53)    |
| Pedestrian road injuries | 30.92<br>(23.87 to<br>36.14)    | 10.38<br>(6.87 to<br>15.26)     | 8.52<br>(5.78 to<br>12.54)      | 18.73<br>(11.82 to<br>29.38)    | 1.13<br>(0.93 to<br>1.31)    | 0.55<br>(0.38 to<br>0.78)    | 0.47<br>(0.34 to<br>0.66)    | 0.89<br>(0.59 to<br>1.33)    |

| Germany                                         |                                                      |                                                      |                                                      |                                                      |                                                   |                                                   |                                                   |                                                   |
|-------------------------------------------------|------------------------------------------------------|------------------------------------------------------|------------------------------------------------------|------------------------------------------------------|---------------------------------------------------|---------------------------------------------------|---------------------------------------------------|---------------------------------------------------|
| Cause                                           | YLLs (in 1000s)                                      |                                                      |                                                      |                                                      | Deaths (in 1000s)                                 |                                                   |                                                   |                                                   |
|                                                 | 2016                                                 | 2040 Forecast                                        | 2040 Better Scenario                                 | 2040 Worse Scenario                                  | 2016                                              | 2040 Forecast                                     | 2040 Better Scenario                              | 2040 Worse Scenario                               |
| Cyclist road injuries                           | 13.26<br>(10.71 to<br>15.56)                         | 8.77<br>(5.69 to<br>13.58)                           | 8.22<br>(5.37 to<br>12.63)                           | 15.13<br>(9.24 to<br>24.56)                          | 0.49<br>(0.38 to<br>0.57)                         | 0.43<br>(0.28 to<br>0.66)                         | 0.42<br>(0.27 to<br>0.63)                         | 0.64<br>(0.39 to<br>1.03)                         |
| Motorcyclist road injuries                      | 31.53<br>(21.47 to<br>37.96)                         | 18.29<br>(9.70 to<br>34.06)                          | 17.01<br>(9.18 to<br>31.36)                          | 29.86<br>(14.90 to<br>58.68)                         | 0.69<br>(0.49 to<br>0.83)                         | 0.45<br>(0.25 to<br>0.78)                         | 0.42<br>(0.24 to<br>0.72)                         | 0.68<br>(0.37 to<br>1.24)                         |
| Motor vehicle road injuries                     | 87.66<br>(74.74 to<br>101.67)                        | 36.47<br>(20.93 to<br>60.93)                         | 32.54<br>(18.93 to<br>54.17)                         | 80.76<br>(43.90 to<br>141.72)                        | 2.29<br>(2.00 to<br>2.72)                         | 1.27<br>(0.82 to<br>1.98)                         | 1.18<br>(0.78 to<br>1.81)                         | 2.43<br>(1.46 to<br>3.93)                         |
| Other road injuries                             | 1.94<br>(1.42 to<br>3.04)                            | 0.89<br>(0.48 to<br>1.58)                            | 0.81<br>(0.44 to<br>1.41)                            | 1.79<br>(0.93 to<br>3.21)                            | 0.06<br>(0.03 to<br>0.08)                         | 0.04<br>(0.02 to<br>0.06)                         | 0.03<br>(0.02 to<br>0.06)                         | 0.06<br>(0.03 to<br>0.11)                         |
| Other transport injuries                        | 15.71<br>(13.34 to<br>18.28)                         | 10.49<br>(6.16 to<br>17.86)                          | 9.04<br>(5.39 to<br>15.44)                           | 12.77<br>(7.15 to<br>22.42)                          | 0.42<br>(0.36 to<br>0.48)                         | 0.34<br>(0.21 to<br>0.55)                         | 0.30<br>(0.18 to<br>0.48)                         | 0.40<br>(0.23 to<br>0.67)                         |
| <b>Unintentional injuries</b>                   | <b>274.99</b><br><b>(237.06 to</b><br><b>302.60)</b> | <b>250.31</b><br><b>(212.07 to</b><br><b>278.12)</b> | <b>244.49</b><br><b>(207.66 to</b><br><b>271.98)</b> | <b>245.38</b><br><b>(205.05 to</b><br><b>276.71)</b> | <b>18.47</b><br><b>(15.52 to</b><br><b>20.35)</b> | <b>22.57</b><br><b>(18.76 to</b><br><b>25.02)</b> | <b>22.84</b><br><b>(19.19 to</b><br><b>25.25)</b> | <b>21.11</b><br><b>(17.31 to</b><br><b>23.91)</b> |
| Falls                                           | 152.41<br>(125.07 to<br>172.27)                      | 162.35<br>(130.52 to<br>182.90)                      | 160.23<br>(129.69 to<br>181.53)                      | 156.13<br>(124.57 to<br>178.59)                      | 12.47<br>(9.98 to<br>13.99)                       | 16.66<br>(13.19 to<br>18.93)                      | 16.94<br>(13.33 to<br>19.22)                      | 15.42<br>(11.97 to<br>17.86)                      |
| Drowning                                        | 16.47<br>(14.75 to<br>18.30)                         | 9.44<br>(7.15 to<br>12.89)                           | 8.70<br>(6.62 to<br>11.82)                           | 10.43<br>(7.45 to<br>15.21)                          | 0.51<br>(0.47 to<br>0.56)                         | 0.38<br>(0.29 to<br>0.51)                         | 0.36<br>(0.28 to<br>0.48)                         | 0.41<br>(0.29 to<br>0.58)                         |
| Fire, heat, and hot substances                  | 15.62<br>(13.74 to<br>18.74)                         | 9.27<br>(6.94 to<br>12.77)                           | 8.44<br>(6.39 to<br>11.66)                           | 10.09<br>(7.27 to<br>14.64)                          | 0.83<br>(0.71 to<br>0.97)                         | 0.67<br>(0.50 to<br>0.95)                         | 0.64<br>(0.49 to<br>0.87)                         | 0.70<br>(0.50 to<br>1.01)                         |
| Poisonings                                      | 2.68<br>(2.26 to<br>3.61)                            | 0.95<br>(0.65 to<br>1.40)                            | 0.83<br>(0.58 to<br>1.22)                            | 1.07<br>(0.69 to<br>1.67)                            | 0.10<br>(0.07 to<br>0.11)                         | 0.05<br>(0.03 to<br>0.07)                         | 0.04<br>(0.03 to<br>0.06)                         | 0.05<br>(0.03 to<br>0.08)                         |
| Exposure to mechanical forces                   | 18.01<br>(14.93 to<br>21.46)                         | 11.50<br>(9.17 to<br>13.75)                          | 10.66<br>(8.57 to<br>12.84)                          | 11.76<br>(9.48 to<br>14.32)                          | 0.68<br>(0.56 to<br>0.80)                         | 0.63<br>(0.53 to<br>0.74)                         | 0.61<br>(0.52 to<br>0.72)                         | 0.61<br>(0.51 to<br>0.73)                         |
| Unintentional firearm injuries                  | 2.77<br>(2.11 to<br>3.20)                            | 1.78<br>(1.21 to<br>2.12)                            | 1.70<br>(1.13 to<br>2.03)                            | 1.79<br>(1.20 to<br>2.14)                            | 0.13<br>(0.08 to<br>0.15)                         | 0.12<br>(0.06 to<br>0.14)                         | 0.12<br>(0.06 to<br>0.14)                         | 0.11<br>(0.06 to<br>0.13)                         |
| Unintentional suffocation                       | 2.69<br>(2.06 to<br>4.65)                            | 1.58<br>(1.18 to<br>2.57)                            | 1.46<br>(1.10 to<br>2.36)                            | 1.67<br>(1.23 to<br>2.73)                            | 0.06<br>(0.05 to<br>0.09)                         | 0.04<br>(0.03 to<br>0.06)                         | 0.04<br>(0.03 to<br>0.05)                         | 0.04<br>(0.03 to<br>0.06)                         |
| Other exposure to mechanical forces             | 12.55<br>(9.39 to<br>15.03)                          | 8.13<br>(6.17 to<br>9.89)                            | 7.50<br>(5.75 to<br>9.24)                            | 8.30<br>(6.19 to<br>10.30)                           | 0.50<br>(0.40 to<br>0.60)                         | 0.47<br>(0.39 to<br>0.58)                         | 0.45<br>(0.36 to<br>0.56)                         | 0.45<br>(0.37 to<br>0.56)                         |
| Adverse effects of medical treatment            | 30.02<br>(19.45 to<br>35.88)                         | 26.17<br>(17.92 to<br>30.93)                         | 25.81<br>(17.88 to<br>30.60)                         | 25.48<br>(17.00 to<br>30.50)                         | 1.92<br>(1.42 to<br>2.28)                         | 2.12<br>(1.63 to<br>2.73)                         | 2.16<br>(1.69 to<br>2.79)                         | 1.99<br>(1.49 to<br>2.54)                         |
| Animal contact                                  | 1.92<br>(1.52 to<br>2.60)                            | 1.78<br>(1.42 to<br>2.43)                            | 1.69<br>(1.33 to<br>2.27)                            | 1.81<br>(1.42 to<br>2.46)                            | 0.08<br>(0.06 to<br>0.10)                         | 0.09<br>(0.07 to<br>0.12)                         | 0.09<br>(0.07 to<br>0.12)                         | 0.09<br>(0.07 to<br>0.12)                         |
| Venomous animal contact                         | 0.82<br>(0.54 to<br>1.12)                            | 0.75<br>(0.48 to<br>1.02)                            | 0.72<br>(0.46 to<br>0.98)                            | 0.76<br>(0.48 to<br>1.04)                            | 0.03<br>(0.02 to<br>0.04)                         | 0.03<br>(0.02 to<br>0.05)                         | 0.03<br>(0.02 to<br>0.04)                         | 0.03<br>(0.02 to<br>0.04)                         |
| Non-venomous animal contact                     | 1.09<br>(0.85 to<br>1.60)                            | 1.03<br>(0.82 to<br>1.52)                            | 0.97<br>(0.76 to<br>1.43)                            | 1.05<br>(0.82 to<br>1.54)                            | 0.05<br>(0.04 to<br>0.07)                         | 0.06<br>(0.05 to<br>0.09)                         | 0.06<br>(0.05 to<br>0.08)                         | 0.06<br>(0.04 to<br>0.08)                         |
| Foreign body                                    | 27.34<br>(22.39 to<br>31.43)                         | 22.20<br>(17.14 to<br>25.79)                         | 22.10<br>(16.93 to<br>25.83)                         | 21.81<br>(17.02 to<br>25.31)                         | 1.39<br>(1.01 to<br>1.65)                         | 1.50<br>(1.05 to<br>1.82)                         | 1.55<br>(1.09 to<br>1.89)                         | 1.40<br>(0.98 to<br>1.71)                         |
| Pulmonary aspiration and foreign body in airway | 26.28<br>(21.43 to<br>30.33)                         | 21.14<br>(16.23 to<br>24.64)                         | 20.99<br>(15.96 to<br>24.57)                         | 20.80<br>(16.04 to<br>24.25)                         | 1.34<br>(0.97 to<br>1.59)                         | 1.42<br>(1.00 to<br>1.74)                         | 1.47<br>(1.03 to<br>1.80)                         | 1.33<br>(0.93 to<br>1.64)                         |



|                                             |                                                      |                                                      |                                                      |                                                      |                                                   |                                                  |                                                 |                                                  |
|---------------------------------------------|------------------------------------------------------|------------------------------------------------------|------------------------------------------------------|------------------------------------------------------|---------------------------------------------------|--------------------------------------------------|-------------------------------------------------|--------------------------------------------------|
|                                             | 1.06<br>(0.83 to<br>1.51)                            | 1.06<br>(0.76 to<br>1.34)                            | 1.11<br>(0.80 to<br>1.39)                            | 1.02<br>(0.74 to<br>1.30)                            | 0.05<br>(0.03 to<br>0.06)                         | 0.07<br>(0.04 to<br>0.10)                        | 0.08<br>(0.04 to<br>0.10)                       | 0.07<br>(0.03 to<br>0.09)                        |
| Foreign body in other body part             |                                                      |                                                      |                                                      |                                                      |                                                   |                                                  |                                                 |                                                  |
| Environmental heat and cold exposure        | 5.89<br>(4.42 to<br>10.95)                           | 5.29<br>(3.75 to<br>10.53)                           | 4.89<br>(3.51 to<br>9.86)                            | 5.31<br>(3.81 to<br>10.41)                           | 0.35<br>(0.25 to<br>0.73)                         | 0.40<br>(0.27 to<br>0.88)                        | 0.39<br>(0.26 to<br>0.83)                       | 0.39<br>(0.26 to<br>0.83)                        |
| Other unintentional injuries                | 4.63<br>(3.99 to<br>5.28)                            | 1.38<br>(1.09 to<br>1.71)                            | 1.13<br>(0.89 to<br>1.43)                            | 1.49<br>(1.16 to<br>1.93)                            | 0.15<br>(0.13 to<br>0.17)                         | 0.06<br>(0.05 to<br>0.07)                        | 0.05<br>(0.04 to<br>0.06)                       | 0.06<br>(0.05 to<br>0.07)                        |
| <b>Self-harm and interpersonal violence</b> | <b>405.47</b><br><b>(349.81 to</b><br><b>554.09)</b> | <b>267.73</b><br><b>(173.13 to</b><br><b>405.65)</b> | <b>244.61</b><br><b>(160.85 to</b><br><b>365.68)</b> | <b>325.12</b><br><b>(196.29 to</b><br><b>513.18)</b> | <b>12.69</b><br><b>(10.94 to</b><br><b>16.02)</b> | <b>10.19</b><br><b>(6.88 to</b><br><b>14.84)</b> | <b>9.53</b><br><b>(6.65 to</b><br><b>13.80)</b> | <b>12.00</b><br><b>(7.55 to</b><br><b>18.11)</b> |

| Germany                                                                             |                                                |                                                |                                                |                                                |                                                |                                                |                                                |                                                |
|-------------------------------------------------------------------------------------|------------------------------------------------|------------------------------------------------|------------------------------------------------|------------------------------------------------|------------------------------------------------|------------------------------------------------|------------------------------------------------|------------------------------------------------|
| Cause                                                                               | YLLs (in 1000s)                                |                                                |                                                |                                                | Deaths (in 1000s)                              |                                                |                                                |                                                |
|                                                                                     | 2016                                           | 2040 Forecast                                  | 2040 Better Scenario                           | 2040 Worse Scenario                            | 2016                                           | 2040 Forecast                                  | 2040 Better Scenario                           | 2040 Worse Scenario                            |
| Self-harm                                                                           | 379.09<br>(325.75 to<br>526.62)                | 255.22<br>(161.23 to<br>390.66)                | 233.13<br>(151.08 to<br>352.19)                | 311.18<br>(183.35 to<br>498.97)                | 12.01<br>(10.33 to<br>15.36)                   | 9.80<br>(6.55 to<br>14.38)                     | 9.17<br>(6.24 to<br>13.35)                     | 11.57<br>(7.19 to<br>17.71)                    |
| Self-harm by firearm                                                                | 25.65<br>(17.62 to<br>41.13)                   | 14.62<br>(8.02 to<br>25.36)                    | 13.01<br>(7.24 to<br>22.48)                    | 17.87<br>(9.10 to<br>33.13)                    | 1.00<br>(0.64 to<br>1.36)                      | 0.70<br>(0.36 to<br>1.14)                      | 0.64<br>(0.33 to<br>1.04)                      | 0.82<br>(0.39 to<br>1.40)                      |
| Self-harm by other specified means                                                  | 353.44<br>(303.38 to<br>488.78)                | 240.59<br>(153.04 to<br>370.10)                | 220.12<br>(142.41 to<br>353.50)                | 293.31<br>(172.94 to<br>466.28)                | 11.01<br>(9.44 to<br>14.10)                    | 9.10<br>(6.08 to<br>13.35)                     | 8.53<br>(5.80 to<br>12.46)                     | 10.75<br>(6.63 to<br>16.32)                    |
| Interpersonal violence                                                              | 26.38<br>(19.53 to<br>38.15)                   | 12.51<br>(8.86 to<br>18.81)                    | 11.48<br>(8.13 to<br>17.62)                    | 15.94<br>(9.60 to<br>21.52)                    | 0.68<br>(0.50 to<br>0.97)                      | 0.39<br>(0.28 to<br>0.58)                      | 0.37<br>(0.27 to<br>0.53)                      | 0.43<br>(0.30 to<br>0.64)                      |
| Physical violence by firearm                                                        | 3.75<br>(2.28 to<br>7.01)                      | 1.65<br>(1.03 to<br>2.88)                      | 1.49<br>(0.94 to<br>2.58)                      | 1.74<br>(1.05 to<br>3.10)                      | 0.10<br>(0.06 to<br>0.16)                      | 0.05<br>(0.03 to<br>0.08)                      | 0.04<br>(0.03 to<br>0.07)                      | 0.05<br>(0.03 to<br>0.08)                      |
| Physical violence by sharp object                                                   | 8.37<br>(5.35 to<br>11.86)                     | 4.12<br>(2.65 to<br>5.82)                      | 3.79<br>(2.48 to<br>5.27)                      | 4.31<br>(2.76 to<br>6.20)                      | 0.22<br>(0.15 to<br>0.31)                      | 0.13<br>(0.10 to<br>0.19)                      | 0.13<br>(0.09 to<br>0.18)                      | 0.14<br>(0.10 to<br>0.19)                      |
| Physical violence by other means                                                    | 14.26<br>(10.17 to<br>22.60)                   | 6.74<br>(4.33 to<br>11.22)                     | 6.20<br>(4.02 to<br>10.32)                     | 7.89<br>(4.85 to<br>13.29)                     | 0.36<br>(0.26 to<br>0.55)                      | 0.21<br>(0.14 to<br>0.35)                      | 0.20<br>(0.13 to<br>0.32)                      | 0.24<br>(0.15 to<br>0.40)                      |
| <b>Forces of nature, conflict and terrorism, and executions and police conflict</b> | <b>0.40</b><br><b>(0.34 to</b><br><b>0.48)</b> | <b>0.15</b><br><b>(0.00 to</b><br><b>1.12)</b> | <b>0.15</b><br><b>(0.00 to</b><br><b>1.13)</b> | <b>0.14</b><br><b>(0.00 to</b><br><b>1.12)</b> | <b>0.01</b><br><b>(0.01 to</b><br><b>0.01)</b> | <b>0.00</b><br><b>(0.00 to</b><br><b>0.03)</b> | <b>0.01</b><br><b>(0.00 to</b><br><b>0.03)</b> | <b>0.00</b><br><b>(0.00 to</b><br><b>0.03)</b> |
| Exposure to forces of nature                                                        | 0.00<br>(0.00 to<br>0.00)                      | 0.11<br>(0.00 to<br>1.11)                      | 0.11<br>(0.00 to<br>1.11)                      | 0.11<br>(0.00 to<br>1.11)                      | 0.00<br>(0.00 to<br>0.00)                      | 0.00<br>(0.00 to<br>0.03)                      | 0.00<br>(0.00 to<br>0.03)                      | 0.00<br>(0.00 to<br>0.03)                      |
| Conflict and terrorism                                                              | 0.00<br>(0.00 to<br>0.00)                      | 0.04<br>(0.00 to<br>0.21)                      | 0.04<br>(0.00 to<br>0.21)                      | 0.04<br>(0.00 to<br>0.20)                      | 0.00<br>(0.00 to<br>0.00)                      | 0.00<br>(0.00 to<br>0.01)                      | 0.00<br>(0.00 to<br>0.01)                      | 0.00<br>(0.00 to<br>0.01)                      |
| Executions and police conflict                                                      | 0.40<br>(0.34 to<br>0.48)                      | 0.00<br>(0.00 to<br>0.00)                      | 0.00<br>(0.00 to<br>0.00)                      | 0.00<br>(0.00 to<br>0.00)                      | 0.01<br>(0.01 to<br>0.01)                      | 0.00<br>(0.00 to<br>0.00)                      | 0.00<br>(0.00 to<br>0.00)                      | 0.00<br>(0.00 to<br>0.00)                      |

| Greece                                                                   |                                                       |                                                       |                                                     |                                                       |                                                 |                                                 |                                               |                                                 |
|--------------------------------------------------------------------------|-------------------------------------------------------|-------------------------------------------------------|-----------------------------------------------------|-------------------------------------------------------|-------------------------------------------------|-------------------------------------------------|-----------------------------------------------|-------------------------------------------------|
| Cause                                                                    | YLLs (actual counts)                                  |                                                       |                                                     |                                                       | Deaths (actual counts)                          |                                                 |                                               |                                                 |
|                                                                          | 2016                                                  | 2040 Forecast                                         | 2040 Better Scenario                                | 2040 Worse Scenario                                   | 2016                                            | 2040 Forecast                                   | 2040 Better Scenario                          | 2040 Worse Scenario                             |
| <b>All causes</b>                                                        | <b>1,665,564.96</b><br>(1,560,142.46 to 1,779,781.39) | <b>1,421,733.26</b><br>(1,214,937.45 to 1,652,721.33) | <b>1,061,706.26</b><br>(932,958.19 to 1,214,798.25) | <b>1,781,185.48</b><br>(1,497,475.82 to 2,094,802.37) | <b>127,693.84</b><br>(120,355.82 to 135,108.42) | <b>124,765.84</b><br>(111,747.70 to 141,056.97) | <b>99,549.79</b><br>(90,447.81 to 111,606.95) | <b>145,390.60</b><br>(129,803.30 to 164,617.23) |
| <b>Communicable, maternal, neonatal, and nutritional diseases</b>        | <b>52,092.37</b><br>(46,930.01 to 58,726.97)          | <b>42,100.90</b><br>(33,272.48 to 53,006.47)          | <b>29,698.21</b><br>(23,829.33 to 36,672.56)        | <b>50,669.10</b><br>(38,634.85 to 65,728.85)          | <b>3,303.68</b><br>(2,933.64 to 3,720.41)       | <b>3,592.40</b><br>(2,822.03 to 4,502.52)       | <b>2,839.57</b><br>(2,255.47 to 3,534.81)     | <b>3,975.49</b><br>(2,973.40 to 5,244.10)       |
| <b>HIV/AIDS and tuberculosis</b>                                         | <b>3,085.30</b><br>(2,852.38 to 3,364.00)             | <b>1,438.14</b><br>(885.07 to 2,165.15)               | <b>623.88</b><br>(388.28 to 931.37)                 | <b>2,154.40</b><br>(1,369.74 to 3,211.09)             | <b>180.72</b><br>(163.00 to 201.55)             | <b>100.76</b><br>(58.70 to 161.59)              | <b>47.14</b><br>(28.51 to 74.12)              | <b>134.18</b><br>(78.05 to 219.42)              |
| <b>Tuberculosis</b>                                                      | <b>2,191.28</b><br>(1,964.28 to 2,464.69)             | <b>1,096.26</b><br>(612.87 to 1,820.99)               | <b>477.58</b><br>(279.68 to 765.37)                 | <b>1,472.63</b><br>(805.49 to 2,525.16)               | <b>160.15</b><br>(142.36 to 180.89)             | <b>94.65</b><br>(52.80 to 156.22)               | <b>44.67</b><br>(26.19 to 72.36)              | <b>121.45</b><br>(66.08 to 206.16)              |
| <b>HIV/AIDS</b>                                                          | <b>894.02</b><br>(848.49 to 946.39)                   | <b>341.88</b><br>(115.43 to 620.79)                   | <b>146.30</b><br>(46.19 to 295.14)                  | <b>681.77</b><br>(329.63 to 1,074.30)                 | <b>20.57</b><br>(19.57 to 21.75)                | <b>6.11</b><br>(1.71 to 11.88)                  | <b>2.47</b><br>(0.64 to 5.52)                 | <b>12.73</b><br>(5.51 to 21.31)                 |
| <b>Diarrhea, lower respiratory, and other common infectious diseases</b> | <b>33,067.41</b><br>(29,606.25 to 37,014.69)          | <b>33,326.77</b><br>(25,741.98 to 44,116.96)          | <b>24,162.96</b><br>(19,029.49 to 30,799.70)        | <b>39,641.88</b><br>(28,866.69 to 54,288.88)          | <b>2,782.18</b><br>(2,426.74 to 3,186.76)       | <b>3,295.04</b><br>(2,553.21 to 4,223.36)       | <b>2,634.77</b><br>(2,064.87 to 3,314.67)     | <b>3,633.68</b><br>(2,650.01 to 4,862.53)       |
| <b>Diarrheal diseases</b>                                                | <b>401.58</b><br>(353.17 to 460.77)                   | <b>645.34</b><br>(404.04 to 1,091.40)                 | <b>1,359.53</b><br>(929.96 to 2,091.40)             | <b>587.55</b><br>(360.12 to 1,017.69)                 | <b>28.01</b><br>(24.67 to 31.79)                | <b>62.68</b><br>(37.98 to 109.27)               | <b>143.64</b><br>(94.52 to 224.76)            | <b>54.15</b><br>(31.46 to 96.53)                |
| <b>Intestinal infectious diseases</b>                                    | <b>17.19</b><br>(7.55 to 33.62)                       | <b>11.99</b><br>(5.30 to 23.71)                       | <b>9.85</b><br>(4.46 to 19.29)                      | <b>12.01</b><br>(5.27 to 23.92)                       | <b>0.69</b><br>(0.32 to 1.27)                   | <b>0.60</b><br>(0.28 to 1.12)                   | <b>0.54</b><br>(0.25 to 1.01)                 | <b>0.57</b><br>(0.27 to 1.07)                   |
| <b>Typhoid fever</b>                                                     | <b>1.68</b><br>(0.56 to 3.97)                         | <b>1.66</b><br>(0.56 to 3.78)                         | <b>2.26</b><br>(0.76 to 4.94)                       | <b>1.62</b><br>(0.55 to 3.75)                         | <b>0.05</b><br>(0.02 to 0.11)                   | <b>0.06</b><br>(0.02 to 0.12)                   | <b>0.08</b><br>(0.03 to 0.17)                 | <b>0.05</b><br>(0.02 to 0.12)                   |
| <b>Paratyphoid fever</b>                                                 | <b>9.72</b><br>(2.83 to 24.96)                        | <b>6.39</b><br>(1.96 to 16.32)                        | <b>4.27</b><br>(1.28 to 11.12)                      | <b>6.58</b><br>(2.00 to 16.70)                        | <b>0.26</b><br>(0.08 to 0.67)                   | <b>0.26</b><br>(0.06 to 0.46)                   | <b>0.19</b><br>(0.04 to 0.32)                 | <b>0.19</b><br>(0.06 to 0.46)                   |
| <b>Other intestinal infectious diseases</b>                              | <b>5.79</b><br>(2.24 to 11.71)                        | <b>3.94</b><br>(1.46 to 8.56)                         | <b>3.32</b><br>(1.17 to 7.27)                       | <b>3.82</b><br>(1.42 to 8.27)                         | <b>0.38</b><br>(0.14 to 0.83)                   | <b>0.36</b><br>(0.12 to 0.79)                   | <b>0.33</b><br>(0.11 to 0.76)                 | <b>0.33</b><br>(0.11 to 0.73)                   |
| <b>Lower respiratory infections</b>                                      | <b>30,571.40</b><br>(27,118.09 to 34,419.50)          | <b>31,403.95</b><br>(23,683.86 to 41,938.23)          | <b>21,772.84</b><br>(16,575.91 to 28,461.96)        | <b>37,708.88</b><br>(26,940.90 to 52,519.13)          | <b>2,675.35</b><br>(2,322.84 to 3,077.76)       | <b>3,169.04</b><br>(2,420.84 to 4,106.27)       | <b>2,436.15</b><br>(1,868.41 to 3,124.74)     | <b>3,518.14</b><br>(2,538.67 to 4,762.17)       |
| <b>Upper respiratory infections</b>                                      | <b>21.15</b><br>(11.11 to 33.55)                      | <b>17.26</b><br>(8.34 to 33.66)                       | <b>8.60</b><br>(3.99 to 17.28)                      | <b>17.65</b><br>(7.95 to 36.06)                       | <b>1.13</b><br>(0.56 to 1.98)                   | <b>1.17</b><br>(0.48 to 2.54)                   | <b>0.63</b><br>(0.25 to 1.40)                 | <b>1.15</b><br>(0.46 to 2.60)                   |
| <b>Otitis media</b>                                                      | <b>5.90</b><br>(4.43 to 7.82)                         | <b>0.27</b><br>(0.14 to 0.51)                         | <b>0.30</b><br>(0.16 to 0.56)                       | <b>0.25</b><br>(0.14 to 0.48)                         | <b>0.53</b><br>(0.38 to 0.72)                   | <b>0.03</b><br>(0.01 to 0.06)                   | <b>0.03</b><br>(0.01 to 0.07)                 | <b>0.02</b><br>(0.01 to 0.05)                   |
| <b>Meningitis</b>                                                        | <b>1,401.75</b><br>(1,223.28 to 1,708.33)             | <b>626.83</b><br>(509.46 to 775.71)                   | <b>429.36</b><br>(344.34 to 533.60)                 | <b>672.93</b><br>(522.05 to 864.96)                   | <b>49.77</b><br>(43.12 to 56.18)                | <b>29.62</b><br>(23.74 to 35.21)                | <b>21.54</b><br>(16.96 to 25.98)              | <b>29.24</b><br>(22.95 to 36.16)                |
| <b>Pneumococcal meningitis</b>                                           | <b>124.19</b><br>(107.68 to 149.51)                   | <b>60.18</b><br>(49.56 to 73.59)                      | <b>61.29</b><br>(50.23 to 74.45)                    | <b>60.80</b><br>(49.61 to 74.74)                      | <b>4.91</b><br>(4.14 to 5.73)                   | <b>3.12</b><br>(2.42 to 3.77)                   | <b>3.38</b><br>(2.62 to 4.08)                 | <b>3.01</b><br>(2.34 to 3.67)                   |
| <b>H influenzae type B meningitis</b>                                    | <b>134.28</b><br>(111.20 to 170.30)                   | <b>90.68</b><br>(61.07 to 135.26)                     | <b>85.27</b><br>(60.15 to 120.81)                   | <b>122.50</b><br>(70.76 to 210.33)                    | <b>4.23</b><br>(3.59 to 4.95)                   | <b>2.99</b><br>(2.35 to 3.74)                   | <b>3.15</b><br>(2.48 to 3.87)                 | <b>3.21</b><br>(2.42 to 4.35)                   |
| <b>Meningococcal meningitis</b>                                          | <b>331.63</b><br>(280.96 to 426.17)                   | <b>118.60</b><br>(94.01 to 155.26)                    | <b>71.99</b><br>(55.31 to 95.78)                    | <b>123.25</b><br>(91.21 to 171.06)                    | <b>9.02</b><br>(7.88 to 10.46)                  | <b>4.60</b><br>(3.66 to 5.62)                   | <b>3.02</b><br>(2.36 to 3.73)                 | <b>4.53</b><br>(3.56 to 5.77)                   |
| <b>Other meningitis</b>                                                  | <b>811.65</b><br>(706.38 to 967.72)                   | <b>357.36</b><br>(285.12 to 443.53)                   | <b>210.80</b><br>(163.80 to 269.46)                 | <b>366.38</b><br>(280.25 to 476.26)                   | <b>31.61</b><br>(26.94 to 35.51)                | <b>18.91</b><br>(14.74 to 22.85)                | <b>11.99</b><br>(9.03 to 14.96)               | <b>18.48</b><br>(13.80 to 23.72)                |
| <b>Encephalitis</b>                                                      | <b>586.55</b><br>(457.40 to 817.91)                   | <b>579.71</b><br>(449.35 to 788.36)                   | <b>551.63</b><br>(424.82 to 750.38)                 | <b>571.50</b><br>(442.73 to 786.85)                   | <b>23.23</b><br>(17.38 to 30.75)                | <b>29.96</b><br>(22.17 to 38.74)                | <b>30.61</b><br>(22.34 to 38.85)              | <b>28.25</b><br>(21.00 to 36.78)                |

|                |                              |                              |                              |                              |                           |                           |                           |                           |
|----------------|------------------------------|------------------------------|------------------------------|------------------------------|---------------------------|---------------------------|---------------------------|---------------------------|
| Diphtheria     | 2.34<br>(1.53 to<br>3.46)    | 0.49<br>(0.29 to<br>0.80)    | 0.46<br>(0.27 to<br>0.75)    | 0.77<br>(0.41 to<br>1.42)    | 0.05<br>(0.03 to<br>0.07) | 0.01<br>(0.01 to<br>0.02) | 0.01<br>(0.01 to<br>0.02) | 0.01<br>(0.01 to<br>0.02) |
| Whooping cough | 6.72<br>(2.73 to<br>13.99)   | 1.68<br>(0.48 to<br>4.19)    | 0.84<br>(0.29 to<br>1.92)    | 10.92<br>(2.38 to<br>30.45)  | 0.09<br>(0.04 to<br>0.17) | 0.02<br>(0.01 to<br>0.05) | 0.01<br>(0.00 to<br>0.03) | 0.13<br>(0.03 to<br>0.36) |
| Tetanus        | 29.51<br>(17.82 to<br>40.08) | 2.22<br>(1.04 to<br>3.14)    | 2.25<br>(1.03 to<br>3.21)    | 2.67<br>(1.56 to<br>3.88)    | 1.56<br>(0.80 to<br>2.13) | 0.11<br>(0.05 to<br>0.16) | 0.12<br>(0.05 to<br>0.17) | 0.11<br>(0.05 to<br>0.16) |
| Measles        | 1.73<br>(1.28 to<br>2.39)    | 22.03<br>(0.12 to<br>159.88) | 15.91<br>(0.11 to<br>107.51) | 42.11<br>(0.17 to<br>293.87) | 0.03<br>(0.02 to<br>0.03) | 0.31<br>(0.00 to<br>2.15) | 0.23<br>(0.00 to<br>1.52) | 0.55<br>(0.00 to<br>3.94) |

| Greece                                                |                                                      |                                                      |                                                     |                                                      |                                                |                                                |                                                |                                                |
|-------------------------------------------------------|------------------------------------------------------|------------------------------------------------------|-----------------------------------------------------|------------------------------------------------------|------------------------------------------------|------------------------------------------------|------------------------------------------------|------------------------------------------------|
| Cause                                                 | YLLs (actual counts)                                 |                                                      |                                                     |                                                      | Deaths (actual counts)                         |                                                |                                                |                                                |
|                                                       | 2016                                                 | 2040 Forecast                                        | 2040 Better Scenario                                | 2040 Worse Scenario                                  | 2016                                           | 2040 Forecast                                  | 2040 Better Scenario                           | 2040 Worse Scenario                            |
| Varicella and herpes zoster                           | 21.61<br>(11.27 to<br>36.78)                         | 15.00<br>(7.98 to<br>26.62)                          | 11.40<br>(6.10 to<br>20.81)                         | 14.65<br>(7.82 to<br>25.64)                          | 1.76<br>(0.94 to<br>3.45)                      | 1.48<br>(0.79 to<br>2.87)                      | 1.25<br>(0.67 to<br>2.44)                      | 1.36<br>(0.71 to<br>2.68)                      |
| <b>Neglected tropical diseases and malaria</b>        | <b>180.55</b><br><b>(130.02 to</b><br><b>239.50)</b> | <b>56.51</b><br><b>(41.27 to</b><br><b>137.33)</b>   | <b>54.14</b><br><b>(39.07 to</b><br><b>127.30)</b>  | <b>56.34</b><br><b>(41.32 to</b><br><b>135.71)</b>   | <b>7.22</b><br><b>(4.85 to</b><br><b>9.82)</b> | <b>2.65</b><br><b>(1.09 to</b><br><b>6.40)</b> | <b>2.84</b><br><b>(1.07 to</b><br><b>6.45)</b> | <b>2.46</b><br><b>(1.07 to</b><br><b>6.05)</b> |
| Malaria                                               | 0.00<br>(0.00 to<br>0.00)                            | 0.00<br>(0.00 to<br>0.00)                            | 0.00<br>(0.00 to<br>0.00)                           | 0.00<br>(0.00 to<br>0.00)                            | 0.00<br>(0.00 to<br>0.00)                      | 0.00<br>(0.00 to<br>0.00)                      | 0.00<br>(0.00 to<br>0.00)                      | 0.00<br>(0.00 to<br>0.00)                      |
| Chagas disease                                        | 0.00<br>(0.00 to<br>0.00)                            | 0.00<br>(0.00 to<br>0.00)                            | 0.00<br>(0.00 to<br>0.00)                           | 0.00<br>(0.00 to<br>0.00)                            | 0.00<br>(0.00 to<br>0.00)                      | 0.00<br>(0.00 to<br>0.00)                      | 0.00<br>(0.00 to<br>0.00)                      | 0.00<br>(0.00 to<br>0.00)                      |
| Leishmaniasis                                         | 116.89<br>(66.65 to<br>173.63)                       | 17.36<br>(7.67 to<br>77.95)                          | 14.18<br>(6.20 to<br>63.55)                         | 17.34<br>(7.56 to<br>77.95)                          | 4.64<br>(2.68 to<br>7.08)                      | 4.64<br>(0.29 to<br>3.18)                      | 0.71<br>(0.24 to<br>2.71)                      | 0.69<br>(0.27 to<br>3.15)                      |
| African trypanosomiasis                               | 0.00<br>(0.00 to<br>0.00)                            | 0.00<br>(0.00 to<br>0.00)                            | 0.00<br>(0.00 to<br>0.00)                           | 0.00<br>(0.00 to<br>0.00)                            | 0.00<br>(0.00 to<br>0.00)                      | 0.00<br>(0.00 to<br>0.00)                      | 0.00<br>(0.00 to<br>0.00)                      | 0.00<br>(0.00 to<br>0.00)                      |
| Schistosomiasis                                       | 0.00<br>(0.00 to<br>0.00)                            | 0.00<br>(0.00 to<br>0.00)                            | 0.00<br>(0.00 to<br>0.00)                           | 0.00<br>(0.00 to<br>0.00)                            | 0.00<br>(0.00 to<br>0.00)                      | 0.00<br>(0.00 to<br>0.00)                      | 0.00<br>(0.00 to<br>0.00)                      | 0.00<br>(0.00 to<br>0.00)                      |
| Cysticercosis                                         | 6.07<br>(5.45 to<br>6.77)                            | 1.04<br>(0.71 to<br>1.93)                            | 0.92<br>(0.65 to<br>1.86)                           | 1.03<br>(0.70 to<br>1.91)                            | 0.22<br>(0.20 to<br>0.25)                      | 0.04<br>(0.03 to<br>0.08)                      | 0.04<br>(0.03 to<br>0.08)                      | 0.04<br>(0.03 to<br>0.08)                      |
| Cystic echinococcosis                                 | 0.00<br>(0.00 to<br>0.00)                            | 0.00<br>(0.00 to<br>0.00)                            | 0.00<br>(0.00 to<br>0.00)                           | 0.00<br>(0.00 to<br>0.00)                            | 0.00<br>(0.00 to<br>0.00)                      | 0.00<br>(0.00 to<br>0.00)                      | 0.00<br>(0.00 to<br>0.00)                      | 0.00<br>(0.00 to<br>0.00)                      |
| Dengue                                                | 0.00<br>(0.00 to<br>0.00)                            | 0.00<br>(0.00 to<br>0.00)                            | 0.00<br>(0.00 to<br>0.00)                           | 0.00<br>(0.00 to<br>0.00)                            | 0.00<br>(0.00 to<br>0.00)                      | 0.00<br>(0.00 to<br>0.00)                      | 0.00<br>(0.00 to<br>0.00)                      | 0.00<br>(0.00 to<br>0.00)                      |
| Yellow fever                                          | 0.00<br>(0.00 to<br>0.00)                            | 0.00<br>(0.00 to<br>0.00)                            | 0.00<br>(0.00 to<br>0.00)                           | 0.00<br>(0.00 to<br>0.00)                            | 0.00<br>(0.00 to<br>0.00)                      | 0.00<br>(0.00 to<br>0.00)                      | 0.00<br>(0.00 to<br>0.00)                      | 0.00<br>(0.00 to<br>0.00)                      |
| Rabies                                                | 0.59<br>(0.50 to<br>0.70)                            | 0.40<br>(0.27 to<br>0.61)                            | 0.36<br>(0.25 to<br>0.55)                           | 0.37<br>(0.25 to<br>0.57)                            | 0.07<br>(0.05 to<br>0.09)                      | 0.07<br>(0.04 to<br>0.11)                      | 0.07<br>(0.05 to<br>0.11)                      | 0.06<br>(0.04 to<br>0.10)                      |
| Intestinal nematode infections                        | 0.00<br>(0.00 to<br>0.00)                            | 0.00<br>(0.00 to<br>0.00)                            | 0.00<br>(0.00 to<br>0.00)                           | 0.00<br>(0.00 to<br>0.00)                            | 0.00<br>(0.00 to<br>0.00)                      | 0.00<br>(0.00 to<br>0.00)                      | 0.00<br>(0.00 to<br>0.00)                      | 0.00<br>(0.00 to<br>0.00)                      |
| Other neglected tropical diseases                     | 57.01<br>(49.37 to<br>63.05)                         | 37.72<br>(28.66 to<br>58.48)                         | 38.68<br>(28.99 to<br>62.61)                        | 37.60<br>(28.94 to<br>57.79)                         | 2.29<br>(1.13 to<br>2.90)                      | 1.83<br>(0.62 to<br>3.11)                      | 2.12<br>(0.65 to<br>3.68)                      | 1.67<br>(0.61 to<br>2.83)                      |
| <b>Maternal disorders</b>                             | <b>390.41</b><br><b>(323.97 to</b><br><b>458.29)</b> | <b>188.13</b><br><b>(137.04 to</b><br><b>250.35)</b> | <b>137.49</b><br><b>(98.47 to</b><br><b>184.37)</b> | <b>193.79</b><br><b>(137.36 to</b><br><b>264.57)</b> | <b>8.03</b><br><b>(6.70 to</b><br><b>9.46)</b> | <b>3.81</b><br><b>(2.78 to</b><br><b>5.02)</b> | <b>2.79</b><br><b>(2.02 to</b><br><b>3.72)</b> | <b>3.92</b><br><b>(2.79 to</b><br><b>5.35)</b> |
| Maternal hemorrhage                                   | 60.04<br>(43.68 to<br>81.41)                         | 29.10<br>(17.91 to<br>44.79)                         | 21.53<br>(13.05 to<br>33.35)                        | 29.82<br>(17.83 to<br>46.29)                         | 1.21<br>(0.88 to<br>1.64)                      | 0.58<br>(0.36 to<br>0.88)                      | 0.43<br>(0.26 to<br>0.65)                      | 0.60<br>(0.36 to<br>0.91)                      |
| Maternal sepsis and other maternal infections         | 35.16<br>(24.72 to<br>47.90)                         | 14.51<br>(8.75 to<br>22.98)                          | 10.56<br>(6.29 to<br>16.95)                         | 14.91<br>(8.94 to<br>23.71)                          | 0.72<br>(0.50 to<br>0.98)                      | 0.30<br>(0.18 to<br>0.47)                      | 0.22<br>(0.13 to<br>0.34)                      | 0.30<br>(0.18 to<br>0.48)                      |
| Maternal hypertensive disorders                       | 47.18<br>(33.73 to<br>63.97)                         | 22.46<br>(13.88 to<br>35.68)                         | 16.14<br>(9.80 to<br>25.34)                         | 23.10<br>(13.87 to<br>37.29)                         | 0.91<br>(0.65 to<br>1.23)                      | 0.43<br>(0.27 to<br>0.67)                      | 0.31<br>(0.19 to<br>0.48)                      | 0.44<br>(0.26 to<br>0.70)                      |
| Maternal obstructed labor and uterine rupture         | 12.08<br>(7.30 to<br>18.00)                          | 6.48<br>(3.52 to<br>10.73)                           | 4.44<br>(2.37 to<br>7.44)                           | 6.68<br>(3.53 to<br>11.29)                           | 0.26<br>(0.16 to<br>0.40)                      | 0.14<br>(0.08 to<br>0.23)                      | 0.10<br>(0.05 to<br>0.16)                      | 0.14<br>(0.08 to<br>0.24)                      |
| Maternal abortion, miscarriage, and ectopic pregnancy | 103.90<br>(78.94 to<br>133.44)                       | 48.74<br>(29.79 to<br>75.41)                         | 34.98<br>(21.48 to<br>54.24)                        | 50.15<br>(30.03 to<br>78.96)                         | 2.30<br>(1.75 to<br>2.98)                      | 1.07<br>(0.64 to<br>1.66)                      | 0.76<br>(0.47 to<br>1.19)                      | 1.10<br>(0.64 to<br>1.72)                      |

|                                        |                               |                              |                              |                              |                           |                           |                           |                           |
|----------------------------------------|-------------------------------|------------------------------|------------------------------|------------------------------|---------------------------|---------------------------|---------------------------|---------------------------|
| Indirect maternal deaths               | 40.54<br>(28.40 to<br>56.24)  | 24.66<br>(13.80 to<br>39.70) | 17.55<br>(9.66 to<br>28.25)  | 25.65<br>(14.34 to<br>41.94) | 0.77<br>(0.54 to<br>1.07) | 0.46<br>(0.26 to<br>0.73) | 0.33<br>(0.18 to<br>0.52) | 0.48<br>(0.27 to<br>0.77) |
| Late maternal deaths                   | 5.36<br>(2.87 to<br>8.48)     | 2.38<br>(1.11 to<br>4.36)    | 1.69<br>(0.78 to<br>3.13)    | 2.46<br>(1.16 to<br>4.53)    | 0.11<br>(0.06 to<br>0.18) | 0.05<br>(0.02 to<br>0.09) | 0.03<br>(0.02 to<br>0.06) | 0.05<br>(0.02 to<br>0.09) |
| Maternal deaths aggravated by HIV/AIDS | 0.02<br>(0.01 to<br>0.03)     | 0.03<br>(0.00 to<br>0.09)    | 0.01<br>(0.00 to<br>0.05)    | 0.05<br>(0.01 to<br>0.10)    | 0.00<br>(0.00 to<br>0.00) | 0.00<br>(0.00 to<br>0.00) | 0.00<br>(0.00 to<br>0.00) | 0.00<br>(0.00 to<br>0.00) |
| Other maternal disorders               | 86.13<br>(63.32 to<br>114.14) | 39.76<br>(24.28 to<br>60.10) | 30.60<br>(18.89 to<br>46.60) | 40.97<br>(24.61 to<br>63.21) | 1.75<br>(1.28 to<br>2.32) | 0.79<br>(0.49 to<br>1.18) | 0.61<br>(0.38 to<br>0.92) | 0.82<br>(0.50 to<br>1.26) |

| Greece                                                                  |                                             |                                           |                                           |                                            |                                     |                                    |                                   |                                    |
|-------------------------------------------------------------------------|---------------------------------------------|-------------------------------------------|-------------------------------------------|--------------------------------------------|-------------------------------------|------------------------------------|-----------------------------------|------------------------------------|
| Cause                                                                   | YLLs (actual counts)                        |                                           |                                           |                                            | Deaths (actual counts)              |                                    |                                   |                                    |
|                                                                         | 2016                                        | 2040 Forecast                             | 2040 Better Scenario                      | 2040 Worse Scenario                        | 2016                                | 2040 Forecast                      | 2040 Better Scenario              | 2040 Worse Scenario                |
| <b>Neonatal disorders</b>                                               | <b>12,066.91</b><br>(8,915.78 to 15,876.98) | <b>5,070.82</b><br>(2,845.98 to 8,882.45) | <b>3,076.19</b><br>(1,661.39 to 5,375.93) | <b>6,630.41</b><br>(3,571.50 to 11,614.54) | <b>139.40</b><br>(103.00 to 183.42) | <b>58.59</b><br>(32.89 to 102.63)  | <b>35.55</b><br>(19.20 to 62.12)  | <b>76.61</b><br>(41.27 to 134.19)  |
| Neonatal preterm birth                                                  | 8,849.14<br>(6,505.24 to 11,719.69)         | 3,379.88<br>(1,806.93 to 6,123.18)        | 1,883.71<br>(954.74 to 3,487.28)          | 4,677.48<br>(2,355.40 to 8,450.31)         | 102.22<br>(75.14 to 135.37)         | 39.05<br>(20.88 to 70.73)          | 21.76<br>(11.03 to 40.28)         | 54.03<br>(27.21 to 97.60)          |
| Neonatal encephalopathy due to birth asphyxia and trauma                | 1,702.93<br>(1,198.46 to 2,316.94)          | 808.09<br>(416.05 to 1,398.34)            | 482.34<br>(245.39 to 831.55)              | 946.64<br>(472.38 to 1,665.68)             | 19.67<br>(13.85 to 26.77)           | 9.34<br>(4.81 to 16.16)            | 5.57<br>(2.84 to 9.61)            | 10.94<br>(5.46 to 19.25)           |
| Neonatal sepsis and other neonatal infections                           | 406.03<br>(241.52 to 885.83)                | 322.53<br>(155.70 to 767.01)              | 218.45<br>(103.52 to 528.34)              | 371.75<br>(176.12 to 879.21)               | 4.69<br>(2.79 to 10.24)             | 3.73<br>(1.80 to 8.86)             | 2.52<br>(1.20 to 6.11)            | 4.30<br>(2.04 to 10.16)            |
| Hemolytic disease and other neonatal jaundice                           | 57.01<br>(30.55 to 95.90)                   | 19.81<br>(8.29 to 42.94)                  | 12.98<br>(5.39 to 27.31)                  | 22.99<br>(9.15 to 50.07)                   | 0.66<br>(0.35 to 1.11)              | 0.23<br>(0.10 to 0.50)             | 0.15<br>(0.06 to 0.32)            | 0.27<br>(0.11 to 0.58)             |
| Other neonatal disorders                                                | 1,051.80<br>(710.84 to 1,478.30)            | 540.52<br>(277.22 to 989.20)              | 478.71<br>(251.83 to 866.63)              | 611.55<br>(316.19 to 1,117.72)             | 12.16<br>(8.22 to 17.08)            | 6.25<br>(3.21 to 11.43)            | 5.53<br>(2.91 to 10.02)           | 7.07<br>(3.66 to 12.92)            |
| <b>Nutritional deficiencies</b>                                         | <b>126.01</b><br>(116.36 to 137.72)         | <b>137.15</b><br>(117.85 to 160.10)       | <b>149.62</b><br>(127.83 to 175.12)       | <b>129.10</b><br>(110.60 to 150.40)        | <b>9.45</b><br>(8.51 to 10.54)      | <b>14.49</b><br>(11.55 to 18.14)   | <b>17.31</b><br>(13.93 to 21.88)  | <b>12.99</b><br>(10.27 to 16.47)   |
| Protein-energy malnutrition                                             | 46.34<br>(37.57 to 70.03)                   | 61.93<br>(42.50 to 91.13)                 | 79.51<br>(55.75 to 111.06)                | 56.92<br>(38.97 to 85.25)                  | 3.93<br>(2.82 to 5.96)              | 7.77<br>(4.86 to 11.50)            | 10.73<br>(6.94 to 15.05)          | 6.86<br>(4.21 to 10.31)            |
| Iodine deficiency                                                       | 7.70<br>(1.15 to 17.88)                     | 10.61<br>(0.93 to 28.54)                  | 10.37<br>(0.69 to 30.11)                  | 10.10<br>(0.95 to 26.99)                   | 0.52<br>(0.04 to 1.46)              | 1.03<br>(0.03 to 3.81)             | 1.09<br>(0.02 to 4.42)            | 0.94<br>(0.03 to 3.37)             |
| Dietary iron deficiency                                                 | 19.88<br>(15.24 to 22.88)                   | 16.11<br>(11.45 to 19.55)                 | 17.44<br>(12.23 to 21.29)                 | 16.02<br>(11.57 to 19.40)                  | 0.59<br>(0.41 to 0.73)              | 0.59<br>(0.26 to 0.80)             | 0.68<br>(0.40 to 1.00)            | 0.56<br>(0.34 to 0.77)             |
| Other nutritional deficiencies                                          | 52.10<br>(33.37 to 62.05)                   | 48.49<br>(26.25 to 64.61)                 | 42.30<br>(21.34 to 57.69)                 | 46.06<br>(25.78 to 60.73)                  | 4.41<br>(2.55 to 5.48)              | 5.10<br>(2.54 to 7.31)             | 4.81<br>(2.30 to 7.12)            | 4.63<br>(2.32 to 6.61)             |
| <b>Other communicable, maternal, neonatal, and nutritional diseases</b> | <b>3,175.78</b><br>(2,823.51 to 3,546.66)   | <b>1,883.38</b><br>(1,593.71 to 2,192.58) | <b>1,493.94</b><br>(1,256.85 to 1,739.24) | <b>1,863.18</b><br>(1,550.44 to 2,202.38)  | <b>176.68</b><br>(153.92 to 201.04) | <b>117.06</b><br>(98.21 to 137.74) | <b>99.19</b><br>(82.50 to 116.99) | <b>111.65</b><br>(91.84 to 133.47) |
| Sexually transmitted infections excluding HIV                           | 86.22<br>(73.67 to 101.67)                  | 42.47<br>(34.40 to 52.10)                 | 39.07<br>(31.01 to 49.77)                 | 41.58<br>(33.54 to 50.89)                  | 4.52<br>(3.87 to 5.24)              | 3.54<br>(2.71 to 4.64)             | 3.58<br>(2.64 to 5.03)            | 3.31<br>(2.51 to 4.32)             |
| Syphilis                                                                | 28.84<br>(22.33 to 40.17)                   | 12.30<br>(9.45 to 16.03)                  | 9.91<br>(7.35 to 13.16)                   | 12.34<br>(9.32 to 16.42)                   | 1.21<br>(1.03 to 1.44)              | 0.88<br>(0.65 to 1.18)             | 0.79<br>(0.56 to 1.12)            | 0.84<br>(0.61 to 1.12)             |
| Chlamydial infection                                                    | 11.29<br>(9.49 to 13.04)                    | 6.09<br>(4.80 to 7.72)                    | 5.94<br>(4.62 to 7.78)                    | 5.88<br>(4.69 to 7.47)                     | 0.69<br>(0.58 to 0.81)              | 0.57<br>(0.42 to 0.79)             | 0.61<br>(0.44 to 0.88)            | 0.53<br>(0.39 to 0.73)             |
| Gonococcal infection                                                    | 32.00<br>(27.17 to 37.03)                   | 17.59<br>(13.64 to 22.23)                 | 17.06<br>(12.99 to 22.37)                 | 17.02<br>(13.23 to 21.34)                  | 1.93<br>(1.64 to 2.26)              | 1.60<br>(1.15 to 2.16)             | 1.68<br>(1.19 to 2.42)            | 1.48<br>(1.06 to 2.01)             |
| Other sexually transmitted infections                                   | 14.10<br>(11.88 to 16.39)                   | 6.49<br>(5.21 to 8.02)                    | 6.16<br>(4.87 to 7.78)                    | 6.35<br>(5.08 to 7.89)                     | 0.68<br>(0.58 to 0.79)              | 0.49<br>(0.38 to 0.65)             | 0.51<br>(0.37 to 0.71)            | 0.46<br>(0.35 to 0.60)             |
| Acute hepatitis                                                         | 2,309.70<br>(2,018.04 to 2,630.81)          | 1,085.16<br>(839.90 to 1,361.79)          | 712.26<br>(529.88 to 924.42)              | 1,085.22<br>(815.43 to 1,404.55)           | 132.96<br>(114.92 to 154.98)        | 67.98<br>(51.23 to 86.88)          | 47.07<br>(34.20 to 63.41)         | 66.00<br>(49.83 to 86.10)          |
| Acute hepatitis A                                                       | 98.92<br>(73.94 to 132.76)                  | 39.56<br>(25.63 to 61.22)                 | 29.92<br>(19.25 to 46.77)                 | 39.60<br>(25.86 to 61.26)                  | 4.90<br>(3.30 to 7.43)              | 2.38<br>(1.40 to 3.98)             | 1.91<br>(1.10 to 3.28)            | 2.29<br>(1.35 to 3.79)             |
| Acute hepatitis B                                                       | 1,916.24<br>(1,651.71 to 2,215.09)          | 895.21<br>(666.11 to 1,158.61)            | 577.04<br>(419.13 to 775.48)              | 898.95<br>(647.39 to 1,198.53)             | 102.35<br>(84.91 to 121.39)         | 51.56<br>(36.88 to 69.51)          | 34.69<br>(24.07 to 48.50)         | 50.48<br>(36.05 to 69.05)          |

|                                       |                                                                        |                                                                        |                                                                    |                                                                        |                                                                  |                                                                  |                                                                |                                                                  |
|---------------------------------------|------------------------------------------------------------------------|------------------------------------------------------------------------|--------------------------------------------------------------------|------------------------------------------------------------------------|------------------------------------------------------------------|------------------------------------------------------------------|----------------------------------------------------------------|------------------------------------------------------------------|
|                                       | 102.91<br>(71.72 to<br>142.99)                                         | 50.29<br>(32.32 to<br>75.03)                                           | 33.63<br>(20.92 to<br>50.86)                                       | 50.10<br>(31.65 to<br>75.60)                                           | 6.75<br>(4.55 to<br>9.64)                                        | 3.42<br>(2.13 to<br>5.18)                                        | 2.40<br>(1.45 to<br>3.69)                                      | 3.31<br>(2.03 to<br>5.10)                                        |
| Acute hepatitis C                     |                                                                        |                                                                        |                                                                    |                                                                        |                                                                  |                                                                  |                                                                |                                                                  |
|                                       | 191.63<br>(115.82 to<br>296.93)                                        | 100.09<br>(55.20 to<br>162.80)                                         | 71.67<br>(38.78 to<br>119.05)                                      | 96.58<br>(51.80 to<br>164.12)                                          | 18.96<br>(10.70 to<br>30.40)                                     | 10.62<br>(5.38 to<br>17.35)                                      | 8.06<br>(4.06 to<br>13.55)                                     | 9.91<br>(5.12 to<br>16.91)                                       |
| Acute hepatitis E                     |                                                                        |                                                                        |                                                                    |                                                                        |                                                                  |                                                                  |                                                                |                                                                  |
|                                       | 779.86<br>(622.18 to<br>880.31)                                        | 755.75<br>(610.29 to<br>856.42)                                        | 742.61<br>(597.10 to<br>842.52)                                    | 736.37<br>(593.34 to<br>838.90)                                        | 39.20<br>(27.67 to<br>45.29)                                     | 45.53<br>(33.59 to<br>53.34)                                     | 48.53<br>(35.41 to<br>56.45)                                   | 42.35<br>(31.16 to<br>49.87)                                     |
| Other unspecified infectious diseases |                                                                        |                                                                        |                                                                    |                                                                        |                                                                  |                                                                  |                                                                |                                                                  |
| <b>Non-communicable diseases</b>      | <b>1,498,808.20</b><br><b>(1,402,014.94 to</b><br><b>1,600,477.46)</b> | <b>1,314,385.63</b><br><b>(1,117,145.31 to</b><br><b>1,538,482.47)</b> | <b>977,887.20</b><br><b>(855,587.23 to</b><br><b>1,121,218.53)</b> | <b>1,636,063.47</b><br><b>(1,374,453.27 to</b><br><b>1,935,747.15)</b> | <b>120,510.22</b><br><b>(113,723.20 to</b><br><b>127,466.06)</b> | <b>118,175.20</b><br><b>(105,686.85 to</b><br><b>133,628.97)</b> | <b>94,112.49</b><br><b>(85,138.54 to</b><br><b>106,468.27)</b> | <b>137,790.57</b><br><b>(122,290.05 to</b><br><b>157,577.47)</b> |



| Greece                               |                                                 |                                                 |                                                 |                                                 |                                              |                                              |                                              |                                              |
|--------------------------------------|-------------------------------------------------|-------------------------------------------------|-------------------------------------------------|-------------------------------------------------|----------------------------------------------|----------------------------------------------|----------------------------------------------|----------------------------------------------|
| Cause                                | YLLs (actual counts)                            |                                                 |                                                 |                                                 | Deaths (actual counts)                       |                                              |                                              |                                              |
|                                      | 2016                                            | 2040 Forecast                                   | 2040 Better Scenario                            | 2040 Worse Scenario                             | 2016                                         | 2040 Forecast                                | 2040 Better Scenario                         | 2040 Worse Scenario                          |
| <b>Neoplasms</b>                     | <b>509,772.19</b><br>(473,118.95 to 548,003.72) | <b>480,030.66</b><br>(416,036.09 to 550,329.63) | <b>393,901.25</b><br>(341,694.68 to 449,683.47) | <b>602,617.86</b><br>(511,074.14 to 704,921.99) | <b>30,833.77</b><br>(28,700.69 to 32,970.45) | <b>32,762.62</b><br>(29,187.56 to 36,420.51) | <b>28,195.24</b><br>(25,194.80 to 31,158.68) | <b>39,017.37</b><br>(33,990.45 to 44,513.28) |
| Lip and oral cavity cancer           | 3,984.05<br>(3,582.06 to 4,385.88)              | 2,969.71<br>(1,674.18 to 5,187.25)              | 2,003.64<br>(1,152.91 to 3,432.12)              | 5,194.19<br>(2,825.36 to 8,894.68)              | 232.43<br>(211.04 to 254.77)                 | 191.19<br>(113.64 to 321.27)                 | 134.68<br>(81.72 to 220.67)                  | 320.07<br>(178.39 to 542.84)                 |
| Nasopharynx cancer                   | 2,792.51<br>(2,493.65 to 3,121.59)              | 2,152.77<br>(1,159.31 to 3,668.85)              | 1,302.65<br>(711.71 to 2,215.15)                | 3,979.12<br>(2,091.32 to 6,854.27)              | 135.74<br>(121.59 to 151.47)                 | 113.70<br>(62.01 to 192.28)                  | 70.65<br>(39.02 to 118.36)                   | 205.23<br>(107.58 to 348.13)                 |
| Other pharynx cancer                 | 1,440.54<br>(1,300.38 to 1,595.22)              | 1,255.85<br>(687.76 to 2,073.20)                | 1,164.09<br>(650.68 to 1,893.09)                | 1,626.48<br>(867.22 to 2,672.02)                | 62.39<br>(56.45 to 68.63)                    | 61.05<br>(34.64 to 100.95)                   | 58.49<br>(33.92 to 95.59)                    | 77.56<br>(42.77 to 129.98)                   |
| Esophageal cancer                    | 4,884.74<br>(4,321.81 to 5,503.59)              | 4,449.90<br>(2,621.50 to 7,088.66)              | 3,452.21<br>(2,122.90 to 5,414.06)              | 7,316.42<br>(4,070.26 to 12,152.51)             | 289.87<br>(258.64 to 324.86)                 | 286.14<br>(176.36 to 450.55)                 | 227.28<br>(147.06 to 343.67)                 | 453.63<br>(261.52 to 734.15)                 |
| Stomach cancer                       | 29,980.85<br>(27,328.90 to 32,765.07)           | 19,814.40<br>(15,386.46 to 25,418.91)           | 13,872.18<br>(11,171.59 to 17,339.30)           | 21,706.21<br>(16,178.95 to 28,776.47)           | 1,927.31<br>(1,767.36 to 2,104.37)           | 1,433.81<br>(1,136.35 to 1,838.72)           | 1,051.93<br>(856.87 to 1,303.21)             | 1,511.59<br>(1,151.74 to 1,985.73)           |
| Colon and rectum cancer              | 43,233.47<br>(38,996.14 to 47,734.59)           | 42,529.02<br>(30,132.45 to 58,808.90)           | 32,090.47<br>(23,172.15 to 44,439.76)           | 50,208.47<br>(34,745.78 to 71,477.89)           | 3,043.36<br>(2,754.43 to 3,364.77)           | 3,406.22<br>(2,450.97 to 4,675.71)           | 2,707.47<br>(1,972.90 to 3,745.48)           | 3,870.14<br>(2,703.84 to 5,456.70)           |
| Liver cancer                         | 24,164.46<br>(21,547.62 to 26,621.77)           | 36,911.72<br>(24,646.81 to 54,701.59)           | 35,210.55<br>(24,604.99 to 50,212.15)           | 51,887.90<br>(31,592.01 to 82,993.17)           | 1,599.29<br>(1,433.53 to 1,757.66)           | 2,677.94<br>(1,845.74 to 3,892.09)           | 2,683.77<br>(1,946.38 to 3,735.36)           | 3,540.60<br>(2,243.33 to 5,415.13)           |
| Liver cancer due to hepatitis B      | 7,936.74<br>(6,459.96 to 9,592.43)              | 12,103.73<br>(7,681.79 to 18,926.93)            | 11,883.00<br>(7,843.23 to 17,886.08)            | 14,945.34<br>(8,782.17 to 25,274.81)            | 469.15<br>(373.70 to 576.15)                 | 790.71<br>(516.31 to 1,180.26)               | 813.66<br>(556.16 to 1,179.70)               | 926.19<br>(559.45 to 1,494.64)               |
| Liver cancer due to hepatitis C      | 3,564.45<br>(2,865.31 to 4,436.47)              | 5,907.82<br>(3,892.98 to 8,796.82)              | 5,936.01<br>(4,050.28 to 8,575.00)              | 6,949.53<br>(4,294.96 to 10,777.19)             | 275.41<br>(222.11 to 349.36)                 | 497.36<br>(332.87 to 730.23)                 | 524.38<br>(364.26 to 751.27)                 | 555.90<br>(352.04 to 845.09)                 |
| Liver cancer due to alcohol use      | 8,428.23<br>(6,523.83 to 10,390.40)             | 11,928.22<br>(7,206.05 to 18,994.35)            | 10,482.26<br>(6,478.66 to 16,038.02)            | 21,461.68<br>(12,182.54 to 35,970.36)           | 553.36<br>(422.35 to 689.71)                 | 851.93<br>(520.27 to 1,352.17)               | 788.44<br>(498.36 to 1,186.03)               | 1,431.48<br>(823.19 to 2,344.50)             |
| Liver cancer due to other causes     | 4,235.04<br>(3,037.93 to 5,754.42)              | 6,971.95<br>(4,091.81 to 11,031.31)             | 6,909.28<br>(4,258.61 to 10,624.14)             | 8,531.35<br>(4,678.71 to 14,551.44)             | 301.37<br>(211.98 to 409.76)                 | 537.93<br>(321.30 to 849.44)                 | 557.28<br>(344.92 to 846.62)                 | 627.03<br>(351.03 to 1,040.58)               |
| Gallbladder and biliary tract cancer | 8,336.63<br>(7,042.85 to 9,168.61)              | 5,298.29<br>(4,402.91 to 5,902.06)              | 5,190.46<br>(4,300.71 to 5,816.58)              | 5,067.97<br>(4,195.84 to 5,989.99)              | 566.31<br>(484.96 to 622.50)                 | 390.48<br>(327.27 to 433.33)                 | 399.84<br>(335.04 to 445.74)                 | 363.59<br>(305.50 to 402.18)                 |
| Pancreatic cancer                    | 31,962.78<br>(28,989.88 to 35,089.61)           | 33,665.18<br>(27,621.78 to 40,806.26)           | 32,655.26<br>(27,031.57 to 39,125.29)           | 37,563.67<br>(30,403.91 to 46,943.47)           | 1,969.50<br>(1,793.96 to 2,167.32)           | 2,242.19<br>(1,881.59 to 2,695.88)           | 2,256.19<br>(1,906.15 to 2,705.59)           | 2,417.14<br>(1,972.54 to 2,987.29)           |
| Larynx cancer                        | 6,497.37<br>(5,749.46 to 7,296.33)              | 4,363.19<br>(2,186.98 to 8,269.19)              | 2,534.43<br>(1,315.28 to 4,776.00)              | 8,030.18<br>(3,815.73 to 15,106.73)             | 363.82<br>(325.81 to 405.80)                 | 255.67<br>(129.46 to 460.73)                 | 149.79<br>(78.70 to 268.82)                  | 459.10<br>(221.44 to 854.73)                 |
| Tracheal, bronchus, and lung cancer  | 133,403.24<br>(121,993.77 to 147,008.30)        | 106,415.21<br>(80,281.14 to 141,726.63)         | 70,666.27<br>(53,455.63 to 93,557.51)           | 178,944.89<br>(129,619.48 to 239,579.07)        | 6,949.53<br>(6,665.38 to 8,014.27)           | 275.41<br>(232.87 to 320.13)                 | 497.36<br>(4,189.34 to 8,058.96)             | 524.38<br>(3,213.68 to 13,179.52)            |
| Malignant skin melanoma              | 5,360.92<br>(4,050.63 to 6,100.00)              | 4,767.04<br>(3,571.22 to 5,522.62)              | 5,863.15<br>(4,465.75 to 6,840.25)              | 4,556.68<br>(3,449.22 to 5,272.53)              | 254.54<br>(197.26 to 289.16)                 | 265.26<br>(206.87 to 302.60)                 | 338.39<br>(267.71 to 386.57)                 | 246.52<br>(190.99 to 281.21)                 |
| Non-melanoma skin cancer             | 3,230.35<br>(2,925.16 to 3,562.05)              | 3,687.15<br>(3,258.90 to 4,148.19)              | 2,924.50<br>(2,561.79 to 3,291.09)              | 3,521.83<br>(3,053.24 to 4,008.84)              | 250.15<br>(227.34 to 273.94)                 | 330.39<br>(285.01 to 382.16)                 | 281.06<br>(241.96 to 320.13)                 | 303.73<br>(254.33 to 356.58)                 |
| Breast cancer                        | 41,861.62<br>(37,335.08 to 46,865.96)           | 36,097.75<br>(27,437.75 to 46,576.03)           | 27,711.94<br>(20,734.06 to 35,550.69)           | 42,415.90<br>(31,079.79 to 56,247.80)           | 2,366.84<br>(2,108.36 to 2,639.80)           | 2,418.23<br>(1,828.57 to 3,070.90)           | 1,963.49<br>(1,491.22 to 2,479.63)           | 2,749.43<br>(2,010.08 to 3,589.97)           |
| Cervical cancer                      | 6,550.31<br>(5,698.86 to 7,510.84)              | 4,279.24<br>(3,301.78 to 5,490.19)              | 3,079.74<br>(2,451.95 to 3,941.23)              | 4,489.24<br>(3,395.09 to 6,014.24)              | 331.49<br>(288.85 to 377.96)                 | 260.64<br>(207.04 to 326.64)                 | 198.02<br>(159.08 to 247.41)                 | 265.75<br>(205.35 to 343.62)                 |

|                   |                                          |                                          |                                          |                                          |                                       |                                       |                                       |                                       |
|-------------------|------------------------------------------|------------------------------------------|------------------------------------------|------------------------------------------|---------------------------------------|---------------------------------------|---------------------------------------|---------------------------------------|
|                   | 4,574.14<br>(3,989.23 to<br>5,212.67)    | 4,595.18<br>(3,800.98 to<br>5,458.89)    | 3,872.82<br>(3,149.73 to<br>4,646.76)    | 4,544.13<br>(3,751.42 to<br>5,398.60)    | 271.57<br>(237.05 to<br>307.43)       | 317.90<br>(268.46 to<br>370.44)       | 279.69<br>(233.33 to<br>328.52)       | 307.24<br>(258.70 to<br>361.43)       |
| Uterine cancer    |                                          |                                          |                                          |                                          |                                       |                                       |                                       |                                       |
|                   | 12,858.63<br>(11,230.26 to<br>14,716.14) | 11,046.46<br>(8,536.78 to<br>14,281.53)  | 9,466.93<br>(7,389.24 to<br>12,184.29)   | 11,404.79<br>(8,690.95 to<br>15,017.77)  | 689.06<br>(604.23 to<br>786.27)       | 675.76<br>(530.17 to<br>864.46)       | 596.29<br>(475.21 to<br>757.25)       | 685.51<br>(522.41 to<br>892.15)       |
| Ovarian cancer    |                                          |                                          |                                          |                                          |                                       |                                       |                                       |                                       |
|                   | 23,176.03<br>(19,671.80 to<br>36,575.54) | 27,974.19<br>(22,745.06 to<br>43,947.00) | 25,344.69<br>(20,706.51 to<br>38,601.34) | 26,751.00<br>(21,544.03 to<br>42,807.80) | 2,178.06<br>(1,866.99 to<br>3,215.23) | 2,805.32<br>(2,274.21 to<br>4,013.23) | 2,673.77<br>(2,205.66 to<br>3,811.22) | 2,586.32<br>(2,015.13 to<br>3,849.16) |
| Prostate cancer   |                                          |                                          |                                          |                                          |                                       |                                       |                                       |                                       |
|                   | 788.86<br>(638.04 to<br>953.66)          | 462.48<br>(361.69 to<br>605.34)          | 368.76<br>(286.12 to<br>485.73)          | 456.80<br>(352.90 to<br>599.47)          | 24.97<br>(20.69 to<br>29.09)          | 19.08<br>(15.54 to<br>22.98)          | 16.34<br>(13.36 to<br>19.69)          | 17.91<br>(14.52 to<br>21.72)          |
| Testicular cancer |                                          |                                          |                                          |                                          |                                       |                                       |                                       |                                       |

| Greece                          |                                                                  |                                                                  |                                                                  |                                                                  |                                                               |                                                               |                                                               |                                                               |
|---------------------------------|------------------------------------------------------------------|------------------------------------------------------------------|------------------------------------------------------------------|------------------------------------------------------------------|---------------------------------------------------------------|---------------------------------------------------------------|---------------------------------------------------------------|---------------------------------------------------------------|
| Cause                           | YLLs (actual counts)                                             |                                                                  |                                                                  |                                                                  | Deaths (actual counts)                                        |                                                               |                                                               |                                                               |
|                                 | 2016                                                             | 2040 Forecast                                                    | 2040 Better Scenario                                             | 2040 Worse Scenario                                              | 2016                                                          | 2040 Forecast                                                 | 2040 Better Scenario                                          | 2040 Worse Scenario                                           |
| Kidney cancer                   | 10,855.24<br>(9,734.31 to<br>12,013.20)                          | 11,918.85<br>(9,561.25 to<br>14,856.82)                          | 11,961.12<br>(9,824.46 to<br>14,710.15)                          | 13,001.14<br>(9,976.31 to<br>16,787.93)                          | 660.14<br>(594.95 to<br>731.26)                               | 792.82<br>(654.20 to<br>965.93)                               | 834.14<br>(703.32 to<br>990.78)                               | 830.36<br>(652.67 to<br>1,055.62)                             |
| Bladder cancer                  | 17,387.48<br>(15,467.39 to<br>19,357.76)                         | 16,291.21<br>(12,556.82 to<br>21,347.93)                         | 14,005.60<br>(11,017.14 to<br>17,833.74)                         | 19,283.72<br>(13,970.41 to<br>26,482.84)                         | 1,332.11<br>(1,194.88 to<br>1,469.27)                         | 1,368.52<br>(1,046.63 to<br>1,753.81)                         | 1,229.29<br>(980.84 to<br>1,528.80)                           | 1,548.55<br>(1,117.85 to<br>2,092.78)                         |
| Brain and nervous system cancer | 27,918.21<br>(24,420.86 to<br>33,269.12)                         | 30,260.11<br>(25,168.98 to<br>34,647.76)                         | 27,561.55<br>(22,565.05 to<br>31,527.80)                         | 29,685.83<br>(25,124.07 to<br>33,965.87)                         | 1,209.85<br>(946.07 to<br>1,354.96)                           | 1,512.32<br>(1,106.75 to<br>1,693.36)                         | 1,423.24<br>(1,010.95 to<br>1,613.98)                         | 1,450.25<br>(1,066.69 to<br>1,622.27)                         |
| Thyroid cancer                  | 1,383.61<br>(1,232.59 to<br>1,539.00)                            | 1,711.48<br>(1,299.11 to<br>2,378.80)                            | 1,423.54<br>(1,090.17 to<br>1,899.94)                            | 1,784.28<br>(1,318.22 to<br>2,523.23)                            | 94.40<br>(84.01 to<br>105.80)                                 | 135.62<br>(103.26 to<br>181.45)                               | 117.76<br>(91.43 to<br>153.84)                                | 156.23<br>(100.97 to<br>197.60)                               |
| Mesothelioma                    | 1,547.97<br>(1,349.29 to<br>2,194.26)                            | 1,729.66<br>(1,470.24 to<br>2,590.14)                            | 1,806.24<br>(1,527.44 to<br>2,731.54)                            | 1,654.80<br>(1,415.55 to<br>2,487.50)                            | 83.50<br>(72.55 to<br>128.37)                                 | 83.50<br>(88.24 to<br>165.32)                                 | 110.53<br>(94.73 to<br>179.67)                                | 95.33<br>(82.35 to<br>152.90)                                 |
| Hodgkin lymphoma                | 4,353.55<br>(3,870.49 to<br>4,834.63)                            | 3,336.61<br>(2,767.26 to<br>3,918.32)                            | 2,350.18<br>(1,933.72 to<br>2,765.24)                            | 3,309.82<br>(2,725.67 to<br>3,944.87)                            | 205.49<br>(155.34 to<br>230.88)                               | 184.32<br>(128.95 to<br>216.27)                               | 135.25<br>(93.36 to<br>158.75)                                | 177.97<br>(128.19 to<br>213.17)                               |
| Non-Hodgkin lymphoma            | 8,282.42<br>(7,282.94 to<br>10,941.09)                           | 8,159.01<br>(6,580.81 to<br>11,651.61)                           | 6,955.19<br>(5,654.94 to<br>9,901.84)                            | 8,269.21<br>(6,581.78 to<br>11,995.15)                           | 444.87<br>(389.59 to<br>601.37)                               | 508.32<br>(416.48 to<br>728.85)                               | 453.89<br>(374.72 to<br>644.10)                               | 498.87<br>(403.51 to<br>723.73)                               |
| Multiple myeloma                | 7,105.52<br>(6,125.81 to<br>8,926.71)                            | 7,805.61<br>(6,216.29 to<br>10,352.79)                           | 7,162.80<br>(5,746.23 to<br>9,355.22)                            | 7,857.01<br>(6,176.75 to<br>10,536.86)                           | 455.99<br>(395.52 to<br>580.50)                               | 536.11<br>(431.76 to<br>709.07)                               | 513.21<br>(419.38 to<br>672.63)                               | 524.42<br>(416.29 to<br>706.73)                               |
| Leukemia                        | 26,363.90<br>(24,113.49 to<br>28,776.83)                         | 26,881.39<br>(21,318.74 to<br>33,970.42)                         | 22,714.97<br>(18,395.28 to<br>27,745.08)                         | 29,698.63<br>(22,227.26 to<br>38,870.44)                         | 1,596.97<br>(1,405.62 to<br>1,759.90)                         | 1,915.26<br>(1,524.28 to<br>2,421.93)                         | 1,683.77<br>(1,380.80 to<br>2,046.97)                         | 2,031.82<br>(1,527.89 to<br>2,661.66)                         |
| Acute lymphoid leukemia         | 2,074.69<br>(1,844.83 to<br>2,389.39)                            | 1,477.17<br>(1,170.16 to<br>1,863.62)                            | 1,181.89<br>(939.49 to<br>1,513.63)                              | 1,661.57<br>(1,254.71 to<br>2,186.69)                            | 67.97<br>(60.45 to<br>76.99)                                  | 59.89<br>(46.67 to<br>75.63)                                  | 49.23<br>(39.02 to<br>61.98)                                  | 66.07<br>(49.18 to<br>86.97)                                  |
| Chronic lymphoid leukemia       | 2,954.97<br>(2,518.05 to<br>4,179.83)                            | 3,001.52<br>(2,215.30 to<br>4,663.96)                            | 2,760.49<br>(2,081.37 to<br>4,202.18)                            | 3,263.49<br>(2,287.81 to<br>5,190.37)                            | 232.43<br>(197.82 to<br>320.47)                               | 255.28<br>(193.13 to<br>382.17)                               | 246.01<br>(189.87 to<br>360.31)                               | 265.54<br>(189.49 to<br>404.83)                               |
| Acute myeloid leukemia          | 7,448.90<br>(6,024.23 to<br>8,446.15)                            | 8,335.74<br>(6,412.01 to<br>10,397.98)                           | 7,809.77<br>(6,033.31 to<br>9,498.95)                            | 9,260.34<br>(6,895.74 to<br>11,968.13)                           | 391.01<br>(315.06 to<br>445.76)                               | 492.67<br>(379.11 to<br>608.71)                               | 479.21<br>(376.64 to<br>579.28)                               | 529.91<br>(396.07 to<br>684.71)                               |
| Chronic myeloid leukemia        | 2,020.60<br>(1,787.66 to<br>2,319.59)                            | 1,159.66<br>(848.47 to<br>1,580.50)                              | 726.40<br>(541.79 to<br>949.29)                                  | 1,309.56<br>(871.24 to<br>1,849.80)                              | 134.06<br>(117.45 to<br>153.10)                               | 85.78<br>(62.87 to<br>113.30)                                 | 56.36<br>(42.88 to<br>71.91)                                  | 92.79<br>(63.85 to<br>129.00)                                 |
| Other leukemia                  | 11,864.74<br>(10,641.89 to<br>13,133.85)                         | 12,907.30<br>(10,016.61 to<br>16,637.97)                         | 10,236.42<br>(8,128.61 to<br>12,941.68)                          | 14,203.66<br>(10,499.64 to<br>19,214.87)                         | 771.49<br>(692.01 to<br>853.09)                               | 1,021.64<br>(800.82 to<br>1,300.66)                           | 852.96<br>(684.64 to<br>1,054.23)                             | 1,077.51<br>(798.93 to<br>1,421.69)                           |
| Other neoplasms                 | 15,492.81<br>(14,114.24 to<br>16,968.22)                         | 19,201.89<br>(17,322.68 to<br>21,431.27)                         | 19,185.35<br>(17,117.11 to<br>21,426.37)                         | 18,407.56<br>(16,629.11 to<br>20,480.44)                         | 889.38<br>(804.26 to<br>976.22)                               | 1,337.88<br>(1,195.00 to<br>1,494.55)                         | 1,417.68<br>(1,267.14 to<br>1,585.62)                         | 1,237.81<br>(1,091.30 to<br>1,390.08)                         |
| <b>Cardiovascular diseases</b>  | <b>650,264.05</b><br><b>(606,346.94 to</b><br><b>692,924.61)</b> | <b>472,121.16</b><br><b>(331,507.52 to</b><br><b>654,872.09)</b> | <b>260,207.63</b><br><b>(196,274.51 to</b><br><b>348,217.87)</b> | <b>629,370.91</b><br><b>(425,576.61 to</b><br><b>888,575.31)</b> | <b>58,166.61</b><br><b>(55,057.04 to</b><br><b>62,088.13)</b> | <b>47,552.48</b><br><b>(36,145.52 to</b><br><b>61,938.48)</b> | <b>29,723.38</b><br><b>(23,378.30 to</b><br><b>37,878.82)</b> | <b>58,053.90</b><br><b>(42,795.41 to</b><br><b>76,218.38)</b> |
| Rheumatic heart disease         | 3,422.39<br>(3,101.19 to<br>3,814.95)                            | 2,833.67<br>(2,300.84 to<br>3,590.04)                            | 2,141.63<br>(1,789.40 to<br>2,643.23)                            | 2,719.41<br>(2,205.19 to<br>3,464.01)                            | 325.18<br>(292.61 to<br>361.01)                               | 318.49<br>(256.57 to<br>407.99)                               | 257.18<br>(211.76 to<br>319.83)                               | 294.51<br>(234.10 to<br>382.06)                               |
| Ischemic heart disease          | 395,194.01<br>(367,427.47 to<br>425,959.69)                      | 250,273.66<br>(150,813.70 to<br>398,411.00)                      | 121,377.75<br>(77,911.51 to<br>189,396.34)                       | 357,189.27<br>(209,258.31 to<br>577,123.81)                      | 34,403.97<br>(32,207.28 to<br>36,928.21)                      | 23,993.62<br>(15,559.09 to<br>35,425.94)                      | 13,403.32<br>(8,859.40 to<br>19,973.62)                       | 31,096.15<br>(19,272.68 to<br>46,939.58)                      |
| Stroke                          | 166,048.43<br>(149,954.48 to<br>184,216.06)                      | 119,320.34<br>(77,658.68 to<br>176,754.34)                       | 61,594.50<br>(42,065.44 to<br>88,566.28)                         | 161,573.84<br>(99,457.20 to<br>246,105.68)                       | 15,891.01<br>(14,178.96 to<br>17,757.06)                      | 12,632.36<br>(8,551.23 to<br>18,227.04)                       | 7,367.91<br>(5,110.79 to<br>10,647.09)                        | 15,623.47<br>(10,116.74 to<br>23,067.77)                      |
| Ischemic stroke                 | 76,841.75<br>(68,380.99 to<br>86,600.87)                         | 52,830.24<br>(32,261.73 to<br>89,295.13)                         | 30,560.33<br>(19,205.25 to<br>50,603.27)                         | 65,661.16<br>(38,331.24 to<br>114,628.07)                        | 8,485.87<br>(7,481.79 to<br>9,577.29)                         | 6,371.39<br>(3,893.57 to<br>10,781.19)                        | 4,013.73<br>(2,475.36 to<br>6,866.31)                         | 7,430.10<br>(4,370.86 to<br>13,224.68)                        |

|                                |                                          |                                           |                                          |                                           |                                       |                                       |                                       |                                        |
|--------------------------------|------------------------------------------|-------------------------------------------|------------------------------------------|-------------------------------------------|---------------------------------------|---------------------------------------|---------------------------------------|----------------------------------------|
| Intracerebral hemorrhage       | 89,206.67<br>(80,302.39 to<br>98,452.46) | 66,490.10<br>(39,787.83 to<br>102,776.31) | 31,034.17<br>(20,630.47 to<br>44,797.20) | 95,912.68<br>(54,854.30 to<br>154,860.89) | 7,405.15<br>(6,593.61 to<br>8,289.02) | 6,260.97<br>(3,990.26 to<br>9,268.50) | 3,354.18<br>(2,308.66 to<br>4,780.06) | 8,193.37<br>(5,006.19 to<br>12,596.28) |
| Hypertensive heart disease     | 19,815.97<br>(9,004.74 to<br>26,090.86)  | 25,860.57<br>(9,282.60 to<br>58,305.21)   | 18,593.55<br>(7,044.40 to<br>37,748.37)  | 32,085.34<br>(11,195.16 to<br>77,613.80)  | 2,105.72<br>(786.27 to<br>2,910.45)   | 3,108.55<br>(940.79 to<br>7,046.87)   | 2,413.10<br>(780.93 to<br>4,770.98)   | 3,688.77<br>(1,065.90 to<br>8,857.44)  |
| Cardiomyopathy and myocarditis | 12,982.42<br>(8,472.38 to<br>15,599.78)  | 11,490.99<br>(6,368.39 to<br>17,511.89)   | 7,786.93<br>(4,311.45 to<br>11,208.29)   | 11,569.72<br>(6,211.79 to<br>17,421.80)   | 1,110.98<br>(652.34 to<br>1,389.16)   | 1,180.99<br>(602.68 to<br>1,945.06)   | 860.11<br>(444.22 to<br>1,355.27)     | 1,131.38<br>(560.58 to<br>1,837.88)    |
| Myocarditis                    | 908.75<br>(658.38 to<br>1,114.10)        | 902.68<br>(611.08 to<br>1,176.13)         | 945.40<br>(621.96 to<br>1,229.35)        | 843.78<br>(570.80 to<br>1,098.99)         | 93.38<br>(51.01 to<br>128.80)         | 103.22<br>(54.59 to<br>152.48)        | 117.90<br>(63.67 to<br>168.96)        | 91.96<br>(49.04 to<br>135.92)          |

| Greece                                                        |                                                     |                                                     |                                                     |                                                     |                                                  |                                                  |                                                  |                                                  |
|---------------------------------------------------------------|-----------------------------------------------------|-----------------------------------------------------|-----------------------------------------------------|-----------------------------------------------------|--------------------------------------------------|--------------------------------------------------|--------------------------------------------------|--------------------------------------------------|
| Cause                                                         | YLLs (actual counts)                                |                                                     |                                                     |                                                     | Deaths (actual counts)                           |                                                  |                                                  |                                                  |
|                                                               | 2016                                                | 2040 Forecast                                       | 2040 Better Scenario                                | 2040 Worse Scenario                                 | 2016                                             | 2040 Forecast                                    | 2040 Better Scenario                             | 2040 Worse Scenario                              |
| Alcoholic cardiomyopathy                                      | 615.92<br>(438.50 to 1,020.81)                      | 427.92<br>(287.74 to 667.59)                        | 383.71<br>(261.05 to 549.54)                        | 609.78<br>(415.80 to 913.77)                        | 27.59<br>(17.90 to 37.62)                        | 21.44<br>(13.07 to 29.03)                        | 20.35<br>(12.39 to 27.23)                        | 29.26<br>(18.50 to 38.87)                        |
| Other cardiomyopathy                                          | 11,457.76<br>(6,968.55 to 13,989.54)                | 10,160.39<br>(5,082.66 to 16,188.32)                | 6,457.83<br>(3,197.15 to 9,825.57)                  | 10,116.17<br>(4,954.40 to 15,983.54)                | 990.01<br>(561.91 to 1,254.28)                   | 1,056.33<br>(495.12 to 1,835.73)                 | 721.86<br>(341.83 to 1,184.28)                   | 1,010.17<br>(467.15 to 1,679.37)                 |
| Atrial fibrillation and flutter                               | 13,436.24<br>(10,019.12 to 17,465.22)               | 15,171.90<br>(10,702.09 to 21,067.99)               | 13,754.04<br>(9,697.56 to 18,894.54)                | 16,073.72<br>(11,218.91 to 22,794.07)               | 1,602.62<br>(1,186.53 to 2,114.34)               | 1,907.60<br>(1,353.55 to 2,629.31)               | 1,839.87<br>(1,309.00 to 2,522.00)               | 1,940.58<br>(1,355.94 to 2,718.88)               |
| Aortic aneurysm                                               | 17,746.12<br>(16,080.67 to 19,846.50)               | 15,342.07<br>(11,816.74 to 20,066.56)               | 12,342.51<br>(9,847.83 to 15,573.86)                | 15,804.72<br>(12,009.92 to 20,983.10)               | 1,267.63<br>(1,149.59 to 1,409.54)               | 1,229.27<br>(997.88 to 1,523.09)                 | 1,099.11<br>(918.67 to 1,332.07)                 | 1,198.73<br>(943.35 to 1,504.87)                 |
| Peripheral artery disease                                     | 908.17<br>(652.48 to 1,493.08)                      | 1,373.86<br>(872.65 to 2,353.66)                    | 1,370.79<br>(873.39 to 2,396.37)                    | 1,412.12<br>(892.75 to 2,423.08)                    | 100.10<br>(69.47 to 170.60)                      | 164.27<br>(100.30 to 293.80)                     | 177.26<br>(110.67 to 319.31)                     | 160.88<br>(98.31 to 285.67)                      |
| Endocarditis                                                  | 4,201.46<br>(2,496.31 to 5,237.39)                  | 4,791.51<br>(2,473.54 to 7,282.41)                  | 4,473.58<br>(2,370.42 to 6,778.95)                  | 4,685.61<br>(2,424.36 to 7,112.33)                  | 361.01<br>(193.71 to 479.52)                     | 469.86<br>(219.52 to 798.00)                     | 468.92<br>(220.69 to 786.75)                     | 443.19<br>(206.70 to 766.36)                     |
| Other cardiovascular and circulatory diseases                 | 16,508.85<br>(15,035.73 to 18,255.52)               | 25,662.60<br>(19,927.91 to 32,781.70)               | 16,772.34<br>(13,573.75 to 20,853.37)               | 26,257.15<br>(20,006.27 to 34,181.21)               | 1,448.39<br>(1,309.38 to 1,610.47)               | 2,547.46<br>(2,027.94 to 3,152.84)               | 1,836.61<br>(1,506.68 to 2,244.11)               | 2,476.23<br>(1,947.49 to 3,141.93)               |
| <b>Chronic respiratory diseases</b>                           | <b>68,996.90</b><br><b>(63,567.78 to 74,796.00)</b> | <b>49,667.25</b><br><b>(38,343.33 to 62,906.74)</b> | <b>36,323.55</b><br><b>(29,012.81 to 44,593.70)</b> | <b>73,280.76</b><br><b>(55,085.09 to 95,822.42)</b> | <b>7,108.09</b><br><b>(6,571.46 to 7,696.67)</b> | <b>5,361.85</b><br><b>(4,083.43 to 6,834.82)</b> | <b>4,016.52</b><br><b>(3,180.63 to 4,973.88)</b> | <b>7,636.18</b><br><b>(5,628.82 to 9,987.76)</b> |
| Chronic obstructive pulmonary disease                         | 63,172.13<br>(57,962.64 to 68,631.41)               | 44,780.82<br>(33,718.06 to 57,941.58)               | 29,960.35<br>(22,870.32 to 38,314.12)               | 68,541.60<br>(50,375.97 to 90,455.33)               | 6,701.75<br>(6,172.58 to 7,255.09)               | 4,991.33<br>(3,723.03 to 6,442.82)               | 3,511.59<br>(2,689.00 to 4,446.88)               | 7,288.05<br>(5,269.05 to 9,620.61)               |
| Pneumoconiosis                                                | 156.38<br>(133.77 to 181.07)                        | 86.39<br>(69.58 to 104.72)                          | 80.55<br>(63.98 to 98.95)                           | 86.53<br>(68.75 to 107.97)                          | 12.30<br>(10.48 to 14.10)                        | 7.59<br>(5.96 to 9.54)                           | 7.26<br>(5.69 to 9.17)                           | 7.38<br>(5.65 to 9.52)                           |
| Silicosis                                                     | 16.57<br>(11.73 to 21.84)                           | 5.32<br>(3.21 to 8.50)                              | 2.80<br>(1.67 to 4.31)                              | 5.26<br>(2.97 to 8.63)                              | 1.25<br>(0.89 to 1.65)                           | 0.47<br>(0.29 to 0.73)                           | 0.27<br>(0.17 to 0.42)                           | 0.45<br>(0.26 to 0.71)                           |
| Asbestosis                                                    | 35.47<br>(28.98 to 48.00)                           | 31.03<br>(23.98 to 42.76)                           | 38.10<br>(29.35 to 51.78)                           | 29.44<br>(22.80 to 40.02)                           | 1.95<br>(1.53 to 2.87)                           | 1.96<br>(1.45 to 2.86)                           | 2.51<br>(1.91 to 3.61)                           | 1.80<br>(1.33 to 2.56)                           |
| Coal workers pneumoconiosis                                   | 2.90<br>(1.55 to 12.11)                             | 1.96<br>(0.83 to 7.21)                              | 1.58<br>(0.72 to 4.72)                              | 2.03<br>(0.84 to 8.29)                              | 0.26<br>(0.13 to 1.22)                           | 0.20<br>(0.09 to 0.79)                           | 0.18<br>(0.08 to 0.52)                           | 0.20<br>(0.08 to 0.83)                           |
| Other pneumoconiosis                                          | 101.44<br>(82.13 to 119.22)                         | 48.09<br>(34.63 to 62.19)                           | 38.08<br>(26.95 to 50.65)                           | 49.80<br>(35.18 to 66.97)                           | 8.84<br>(7.26 to 10.39)                          | 4.96<br>(3.46 to 6.65)                           | 4.31<br>(2.97 to 5.84)                           | 4.93<br>(3.43 to 6.67)                           |
| Asthma                                                        | 1,217.89<br>(1,053.04 to 1,474.78)                  | 564.07<br>(339.21 to 949.06)                        | 297.42<br>(183.92 to 474.56)                        | 667.97<br>(381.77 to 1,139.54)                      | 82.01<br>(69.71 to 95.55)                        | 46.17<br>(27.60 to 76.62)                        | 26.98<br>(17.16 to 43.66)                        | 51.71<br>(29.82 to 87.31)                        |
| Interstitial lung disease and pulmonary sarcoidosis           | 4,171.10<br>(2,268.94 to 5,148.87)                  | 3,996.12<br>(2,192.70 to 5,033.48)                  | 5,751.64<br>(3,345.67 to 7,046.56)                  | 3,727.25<br>(2,007.85 to 4,751.76)                  | 298.25<br>(165.73 to 371.17)                     | 302.62<br>(167.50 to 378.95)                     | 456.15<br>(271.46 to 558.60)                     | 274.43<br>(157.16 to 353.62)                     |
| Other chronic respiratory diseases                            | 279.40<br>(216.41 to 449.41)                        | 239.84<br>(168.81 to 401.74)                        | 233.59<br>(161.14 to 396.25)                        | 257.41<br>(179.75 to 428.88)                        | 13.79<br>(10.02 to 25.82)                        | 14.13<br>(8.91 to 26.94)                         | 14.55<br>(9.08 to 28.48)                         | 14.61<br>(9.16 to 27.81)                         |
| <b>Cirrhosis and other chronic liver diseases</b>             | <b>24,505.75</b><br><b>(21,991.08 to 27,328.57)</b> | <b>22,001.94</b><br><b>(19,207.20 to 24,994.91)</b> | <b>17,141.57</b><br><b>(14,798.48 to 19,694.71)</b> | <b>26,288.28</b><br><b>(22,618.86 to 30,481.93)</b> | <b>1,290.91</b><br><b>(1,174.44 to 1,424.61)</b> | <b>1,373.39</b><br><b>(1,231.47 to 1,526.36)</b> | <b>1,124.63</b><br><b>(1,001.49 to 1,253.56)</b> | <b>1,575.32</b><br><b>(1,384.22 to 1,780.11)</b> |
| Cirrhosis and other chronic liver diseases due to hepatitis B | 5,281.13<br>(4,155.72 to 6,659.42)                  | 5,227.80<br>(4,080.87 to 6,712.75)                  | 4,281.50<br>(3,293.77 to 5,574.94)                  | 5,102.25<br>(3,935.30 to 6,653.15)                  | 278.89<br>(218.86 to 351.78)                     | 320.69<br>(252.74 to 405.79)                     | 274.71<br>(216.36 to 353.70)                     | 304.02<br>(235.76 to 390.44)                     |
| Cirrhosis and other chronic liver diseases due to hepatitis C | 6,096.03<br>(4,604.10 to 7,978.37)                  | 6,038.78<br>(4,484.42 to 7,809.01)                  | 4,851.69<br>(3,555.03 to 6,328.23)                  | 5,936.41<br>(4,257.40 to 7,900.91)                  | 305.61<br>(228.46 to 394.53)                     | 351.13<br>(259.36 to 464.24)                     | 294.66<br>(214.30 to 387.94)                     | 335.57<br>(238.68 to 449.99)                     |

|                                                                |                                                               |                                                               |                                                               |                                                               |                                                            |                                                            |                                                            |                                                            |
|----------------------------------------------------------------|---------------------------------------------------------------|---------------------------------------------------------------|---------------------------------------------------------------|---------------------------------------------------------------|------------------------------------------------------------|------------------------------------------------------------|------------------------------------------------------------|------------------------------------------------------------|
|                                                                | 11,654.36<br>(9,783.24 to<br>13,760.13)                       | 9,276.05<br>(7,459.20 to<br>11,220.59)                        | 6,805.24<br>(5,455.53 to<br>8,328.81)                         | 13,824.35<br>(11,295.97 to<br>16,740.45)                      | 622.95<br>(518.36 to<br>727.83)                            | 598.71<br>(481.27 to<br>719.62)                            | 465.45<br>(372.52 to<br>565.05)                            | 838.63<br>(679.14 to<br>996.95)                            |
| Cirrhosis and other chronic liver diseases due to alcohol use  |                                                               |                                                               |                                                               |                                                               |                                                            |                                                            |                                                            |                                                            |
|                                                                | 1,474.23<br>(1,091.34 to<br>1,997.54)                         | 1,459.31<br>(1,045.23 to<br>2,023.68)                         | 1,203.14<br>(862.71 to<br>1,679.46)                           | 1,425.27<br>(1,006.86 to<br>1,984.32)                         | 85.45<br>(59.95 to<br>122.61)                              | 102.86<br>(68.82 to<br>152.18)                             | 89.81<br>(60.61 to<br>136.55)                              | 97.11<br>(65.30 to<br>147.42)                              |
| Cirrhosis and other chronic liver diseases due to other causes |                                                               |                                                               |                                                               |                                                               |                                                            |                                                            |                                                            |                                                            |
| <b>Digestive diseases</b>                                      | <b>25,711.72</b><br><b>(22,228.23 to</b><br><b>29,575.27)</b> | <b>22,999.45</b><br><b>(18,612.38 to</b><br><b>28,873.81)</b> | <b>19,376.87</b><br><b>(15,686.40 to</b><br><b>23,640.98)</b> | <b>23,485.72</b><br><b>(18,422.99 to</b><br><b>29,987.08)</b> | <b>2,192.47</b><br><b>(1,853.85 to</b><br><b>2,493.23)</b> | <b>2,229.42</b><br><b>(1,763.63 to</b><br><b>2,752.95)</b> | <b>2,000.72</b><br><b>(1,610.73 to</b><br><b>2,398.92)</b> | <b>2,184.50</b><br><b>(1,676.38 to</b><br><b>2,740.01)</b> |
| Peptic ulcer disease                                           | 6,074.54<br>(5,152.77 to<br>7,190.28)                         | 3,489.13<br>(2,678.26 to<br>4,470.31)                         | 2,207.52<br>(1,690.55 to<br>2,812.56)                         | 3,492.04<br>(2,595.12 to<br>4,480.87)                         | 525.35<br>(450.52 to<br>630.79)                            | 352.60<br>(268.72 to<br>452.50)                            | 237.71<br>(181.61 to<br>302.49)                            | 339.06<br>(249.60 to<br>439.51)                            |

| Greece                                     |                                          |                                          |                                          |                                          |                                       |                                       |                                       |                                       |
|--------------------------------------------|------------------------------------------|------------------------------------------|------------------------------------------|------------------------------------------|---------------------------------------|---------------------------------------|---------------------------------------|---------------------------------------|
| Cause                                      | YLLs (actual counts)                     |                                          |                                          |                                          | Deaths (actual counts)                |                                       |                                       |                                       |
|                                            | 2016                                     | 2040 Forecast                            | 2040 Better Scenario                     | 2040 Worse Scenario                      | 2016                                  | 2040 Forecast                         | 2040 Better Scenario                  | 2040 Worse Scenario                   |
| Gastritis and duodenitis                   | 104.94<br>(79.82 to 154.90)              | 97.89<br>(70.68 to 149.86)               | 74.93<br>(52.67 to 116.23)               | 94.88<br>(66.53 to 147.81)               | 6.91<br>(5.22 to 10.37)               | 7.90<br>(5.43 to 12.48)               | 6.54<br>(4.52 to 10.51)               | 7.32<br>(5.10 to 11.69)               |
| Appendicitis                               | 270.70<br>(217.38 to 401.54)             | 250.28<br>(189.71 to 376.39)             | 170.47<br>(129.78 to 256.87)             | 244.57<br>(182.98 to 364.18)             | 18.73<br>(14.93 to 27.19)             | 20.77<br>(15.41 to 31.66)             | 15.04<br>(11.29 to 23.23)             | 19.60<br>(14.60 to 29.80)             |
| Paralytic ileus and intestinal obstruction | 5,863.43<br>(3,953.93 to 7,210.59)       | 6,047.14<br>(4,108.94 to 7,474.04)       | 6,355.53<br>(4,370.63 to 7,792.53)       | 5,637.46<br>(3,821.11 to 7,010.83)       | 542.94<br>(355.87 to 677.55)          | 627.84<br>(414.19 to 804.89)          | 697.05<br>(468.67 to 875.09)          | 566.76<br>(371.76 to 736.24)          |
| Inguinal, femoral, and abdominal hernia    | 746.50<br>(590.45 to 1,281.16)           | 542.52<br>(406.70 to 978.70)             | 456.31<br>(337.12 to 829.49)             | 515.20<br>(390.55 to 917.04)             | 63.80<br>(47.87 to 117.27)            | 52.38<br>(36.49 to 103.13)            | 47.09<br>(32.22 to 92.46)             | 48.05<br>(33.33 to 94.86)             |
| Inflammatory bowel disease                 | 631.47<br>(440.17 to 734.59)             | 579.21<br>(403.74 to 692.06)             | 590.74<br>(408.65 to 709.25)             | 547.36<br>(379.75 to 653.98)             | 50.45<br>(34.92 to 59.29)             | 53.71<br>(35.35 to 66.96)             | 58.89<br>(39.30 to 74.49)             | 48.87<br>(32.57 to 61.55)             |
| Vascular intestinal disorders              | 2,773.17<br>(2,332.17 to 3,924.28)       | 3,129.26<br>(2,560.66 to 4,493.44)       | 2,881.91<br>(2,308.35 to 4,033.73)       | 2,968.56<br>(2,412.95 to 4,241.54)       | 234.01<br>(196.81 to 326.16)          | 292.88<br>(236.10 to 407.01)          | 285.40<br>(227.21 to 391.29)          | 270.05<br>(214.21 to 380.95)          |
| Gallbladder and biliary diseases           | 3,076.69<br>(2,638.98 to 3,658.27)       | 2,815.61<br>(1,656.61 to 4,717.17)       | 1,948.06<br>(1,188.49 to 3,209.00)       | 3,163.35<br>(1,844.54 to 5,246.67)       | 307.62<br>(257.11 to 373.35)          | 314.21<br>(182.63 to 534.35)          | 319.29<br>(140.88 to 396.36)          | 339.98<br>(191.92 to 573.59)          |
| Pancreatitis                               | 4,477.05<br>(3,609.72 to 5,321.89)       | 4,326.93<br>(2,334.17 to 8,177.96)       | 3,105.42<br>(1,726.97 to 5,840.14)       | 5,187.48<br>(2,633.88 to 10,092.79)      | 307.37<br>(217.02 to 358.26)          | 348.37<br>(190.33 to 618.68)          | 263.99<br>(146.59 to 461.77)          | 399.29<br>(204.72 to 753.72)          |
| Other digestive diseases                   | 1,693.22<br>(1,307.69 to 2,117.74)       | 1,721.49<br>(1,337.02 to 2,231.66)       | 1,585.97<br>(1,245.20 to 2,050.51)       | 1,634.82<br>(1,264.80 to 2,125.06)       | 135.29<br>(110.09 to 171.78)          | 158.76<br>(126.52 to 207.49)          | 156.36<br>(124.76 to 206.79)          | 145.52<br>(114.24 to 191.35)          |
| Neurological disorders                     | 121,573.38<br>(104,603.47 to 142,112.90) | 151,949.52<br>(130,130.40 to 196,346.15) | 157,421.74<br>(127,268.70 to 195,746.98) | 153,230.84<br>(117,415.95 to 205,825.63) | 14,120.00<br>(11,959.52 to 16,455.90) | 18,947.94<br>(14,567.50 to 24,726.33) | 20,711.40<br>(16,513.46 to 26,080.46) | 18,551.99<br>(13,538.19 to 25,386.75) |
| Alzheimer's disease and other dementias    | 99,187.77<br>(83,167.41 to 119,832.99)   | 126,714.31<br>(95,836.98 to 171,524.53)  | 130,395.26<br>(101,639.46 to 169,006.10) | 128,914.30<br>(93,172.72 to 181,331.87)  | 12,568.27<br>(10,418.02 to 14,980.82) | 16,948.93<br>(12,571.21 to 22,665.48) | 18,422.61<br>(14,202.45 to 23,835.93) | 16,707.31<br>(11,722.15 to 23,653.28) |
| Parkinson's disease                        | 10,743.03<br>(8,057.00 to 13,898.77)     | 13,684.20<br>(10,320.08 to 17,753.43)    | 15,625.89<br>(11,880.78 to 20,105.16)    | 12,602.70<br>(9,359.19 to 16,332.89)     | 1,065.80<br>(800.61 to 1,387.29)      | 1,403.66<br>(1,045.24 to 1,818.11)    | 1,668.78<br>(1,268.69 to 2,150.57)    | 1,262.71<br>(932.62 to 1,651.13)      |
| Epilepsy                                   | 2,181.43<br>(1,971.87 to 2,455.73)       | 1,972.88<br>(1,327.83 to 2,871.81)       | 1,677.95<br>(1,155.12 to 2,414.53)       | 2,348.85<br>(1,527.71 to 3,507.65)       | 75.10<br>(67.81 to 83.97)             | 84.95<br>(58.03 to 122.38)            | 76.98<br>(54.36 to 108.91)            | 97.85<br>(63.83 to 142.37)            |
| Multiple sclerosis                         | 2,371.32<br>(1,500.78 to 2,831.16)       | 1,831.65<br>(1,147.27 to 2,359.50)       | 1,769.48<br>(1,128.08 to 2,241.87)       | 1,851.67<br>(1,140.72 to 2,405.15)       | 80.67<br>(55.87 to 93.29)             | 89.27<br>(48.72 to 85.35)             | 68.73<br>(49.16 to 83.89)             | 69.12<br>(47.53 to 86.11)             |
| Motor neuron disease                       | 2,751.98<br>(2,372.72 to 3,122.14)       | 2,193.00<br>(1,871.24 to 2,514.43)       | 2,149.81<br>(1,817.10 to 2,485.44)       | 2,151.09<br>(1,837.30 to 2,455.98)       | 110.77<br>(96.39 to 124.50)           | 100.76<br>(86.45 to 114.58)           | 100.64<br>(85.33 to 116.10)           | 97.35<br>(83.72 to 110.57)            |
| Other neurological disorders               | 4,377.86<br>(3,769.82 to 4,830.59)       | 5,553.48<br>(4,772.96 to 6,276.84)       | 5,803.34<br>(4,936.52 to 6,616.74)       | 5,362.24<br>(4,601.73 to 6,026.31)       | 219.38<br>(190.75 to 245.80)          | 340.37<br>(293.57 to 387.84)          | 373.66<br>(322.57 to 428.81)          | 317.67<br>(273.11 to 362.88)          |
| Mental disorders                           | 13,242.96<br>(10,471.75 to 16,584.37)    | 12,679.62<br>(9,490.72 to 17,121.73)     | 13,966.90<br>(10,532.60 to 18,648.19)    | 12,704.47<br>(9,377.75 to 17,123.73)     | 280.68<br>(224.22 to 347.89)          | 283.11<br>(220.49 to 363.32)          | 324.67<br>(256.59 to 414.25)          | 281.98<br>(218.15 to 361.96)          |
| Alcohol use disorders                      | 1,054.58<br>(927.68 to 1,208.42)         | 848.19<br>(703.17 to 1,022.97)           | 911.40<br>(743.33 to 1,111.95)           | 952.12<br>(791.30 to 1,133.13)           | 36.06<br>(32.10 to 40.91)             | 34.00<br>(28.87 to 39.80)             | 37.78<br>(31.64 to 44.62)             | 37.30<br>(31.73 to 43.36)             |
| Drug use disorders                         | 12,094.05<br>(9,347.50 to 15,336.08)     | 11,786.80<br>(8,580.10 to 16,196.49)     | 13,002.88<br>(9,664.30 to 17,527.40)     | 11,708.16<br>(8,442.97 to 16,098.18)     | 242.79<br>(187.53 to 307.24)          | 248.24<br>(185.89 to 326.51)          | 285.87<br>(219.24 to 376.02)          | 243.82<br>(179.58 to 325.04)          |
| Opioid use disorders                       | 11,053.88<br>(8,459.15 to 14,074.68)     | 10,292.67<br>(7,306.18 to 14,384.18)     | 10,785.57<br>(7,689.60 to 14,747.60)     | 10,271.11<br>(7,258.62 to 14,309.35)     | 213.09<br>(164.36 to 270.14)          | 198.39<br>(144.42 to 271.22)          | 209.56<br>(154.53 to 284.75)          | 197.07<br>(141.62 to 270.57)          |

|                           |                                   |                                     |                                       |                                     |                              |                              |                              |                              |
|---------------------------|-----------------------------------|-------------------------------------|---------------------------------------|-------------------------------------|------------------------------|------------------------------|------------------------------|------------------------------|
|                           | 30.89<br>(15.80 to<br>51.09)      | 38.21<br>(18.06 to<br>66.42)        | 50.29<br>(25.18 to<br>85.44)          | 37.29<br>(18.39 to<br>64.39)        | 0.70<br>(0.33 to<br>1.14)    | 0.95<br>(0.39 to<br>1.51)    | 1.26<br>(0.57 to<br>2.01)    | 0.92<br>(0.40 to<br>1.47)    |
| Cocaine use disorders     |                                   |                                     |                                       |                                     |                              |                              |                              |                              |
|                           | 85.15<br>(55.15 to<br>142.15)     | 174.04<br>(105.56 to<br>310.42)     | 271.60<br>(167.89 to<br>483.92)       | 168.51<br>(98.74 to<br>305.06)      | 1.80<br>(1.15 to<br>2.86)    | 3.77<br>(2.31 to<br>6.22)    | 5.94<br>(3.78 to<br>9.69)    | 3.63<br>(2.21 to<br>6.10)    |
| Amphetamine use disorders |                                   |                                     |                                       |                                     |                              |                              |                              |                              |
|                           | 924.12<br>(597.40 to<br>1,401.10) | 1,281.88<br>(823.10 to<br>1,904.16) | 1,895.43<br>(1,256.89 to<br>2,761.60) | 1,231.25<br>(793.40 to<br>1,865.03) | 27.20<br>(18.18 to<br>38.56) | 45.13<br>(31.24 to<br>60.53) | 69.10<br>(50.48 to<br>91.87) | 42.20<br>(28.75 to<br>58.37) |
| Other drug use disorders  |                                   |                                     |                                       |                                     |                              |                              |                              |                              |
|                           | 94.33<br>(67.98 to<br>118.64)     | 44.64<br>(28.55 to<br>63.95)        | 52.61<br>(33.73 to<br>77.14)          | 44.19<br>(29.64 to<br>63.40)        | 1.83<br>(1.35 to<br>2.30)    | 0.87<br>(0.58 to<br>1.22)    | 1.02<br>(0.67 to<br>1.47)    | 0.86<br>(0.59 to<br>1.21)    |
| Eating disorders          |                                   |                                     |                                       |                                     |                              |                              |                              |                              |



| Greece                                                     |                                              |                                               |                                               |                                                |                                           |                                            |                                            |                                             |
|------------------------------------------------------------|----------------------------------------------|-----------------------------------------------|-----------------------------------------------|------------------------------------------------|-------------------------------------------|--------------------------------------------|--------------------------------------------|---------------------------------------------|
| Cause                                                      | YLLs (actual counts)                         |                                               |                                               |                                                | Deaths (actual counts)                    |                                            |                                            |                                             |
|                                                            | 2016                                         | 2040 Forecast                                 | 2040 Better Scenario                          | 2040 Worse Scenario                            | 2016                                      | 2040 Forecast                              | 2040 Better Scenario                       | 2040 Worse Scenario                         |
| <b>Diabetes, urogenital, blood, and endocrine diseases</b> | <b>66,960.72</b><br>(61,937.40 to 72,238.81) | <b>91,204.85</b><br>(65,774.69 to 180,844.12) | <b>71,248.60</b><br>(51,701.75 to 137,642.46) | <b>102,670.55</b><br>(72,000.29 to 197,385.82) | <b>5,689.78</b><br>(5,254.54 to 6,127.02) | <b>9,204.13</b><br>(6,638.21 to 18,412.00) | <b>7,616.83</b><br>(5,514.01 to 15,660.95) | <b>10,044.57</b><br>(7,050.14 to 19,831.32) |
| Diabetes mellitus                                          | 17,586.85<br>(16,028.74 to 19,378.03)        | 17,901.20<br>(12,056.72 to 25,894.43)         | 11,949.37<br>(8,273.02 to 16,879.85)          | 20,506.72<br>(13,215.02 to 30,979.17)          | 1,315.82<br>(1,198.87 to 1,450.00)        | 1,551.06<br>(1,103.60 to 2,132.62)         | 1,103.17<br>(805.82 to 1,509.42)           | 1,688.31<br>(1,134.59 to 2,495.30)          |
| Acute glomerulonephritis                                   | 48.48<br>(45.32 to 52.04)                    | 37.28<br>(31.74 to 43.42)                     | 28.78<br>(24.16 to 33.79)                     | 38.26<br>(32.39 to 44.84)                      | 1.12<br>(1.04 to 1.21)                    | 0.97<br>(0.81 to 1.14)                     | 0.77<br>(0.64 to 0.93)                     | 0.97<br>(0.81 to 1.14)                      |
| Chronic kidney disease                                     | 35,277.40<br>(32,382.51 to 38,453.96)        | 57,852.18<br>(34,592.77 to 147,711.37)        | 45,031.95<br>(27,332.75 to 113,316.68)        | 67,423.84<br>(38,167.63 to 163,864.81)         | 3,315.03<br>(3,019.16 to 3,615.42)        | 6,198.42<br>(3,686.00 to 15,233.04)        | 5,123.06<br>(3,082.48 to 13,404.41)        | 7,022.41<br>(3,970.65 to 17,015.58)         |
| Chronic kidney disease due to diabetes mellitus            | 13,910.13<br>(12,699.98 to 15,254.47)        | 23,346.39<br>(14,073.58 to 54,684.75)         | 18,024.63<br>(11,034.07 to 42,282.84)         | 27,439.72<br>(15,631.26 to 62,574.39)          | 1,158.43<br>(1,052.50 to 1,278.46)        | 2,217.86<br>(1,327.12 to 5,479.17)         | 1,813.95<br>(1,093.81 to 4,608.73)         | 2,531.86<br>(1,451.15 to 5,923.95)          |
| Chronic kidney disease due to hypertension                 | 6,289.90<br>(5,467.92 to 7,187.78)           | 11,352.90<br>(6,440.63 to 28,839.65)          | 9,694.43<br>(5,588.37 to 25,032.26)           | 12,926.58<br>(6,989.31 to 31,737.22)           | 785.90<br>(682.33 to 902.37)              | 1,553.80<br>(890.81 to 4,056.92)           | 1,394.84<br>(812.43 to 3,754.04)           | 1,722.46<br>(940.89 to 4,396.24)            |
| Chronic kidney disease due to glomerulonephritis           | 6,571.12<br>(5,949.65 to 7,267.03)           | 9,867.37<br>(5,746.25 to 23,488.32)           | 7,161.81<br>(4,204.66 to 17,612.18)           | 11,560.92<br>(6,304.64 to 26,829.32)           | 568.65<br>(505.85 to 635.26)              | 999.75<br>(573.82 to 2,343.38)             | 763.10<br>(442.82 to 1,895.87)             | 1,146.30<br>(630.00 to 2,709.05)            |
| Chronic kidney disease due to other and unspecified causes | 8,506.26<br>(7,687.26 to 9,462.19)           | 13,285.51<br>(7,857.17 to 30,598.92)          | 10,151.09<br>(6,105.11 to 24,924.62)          | 15,496.62<br>(8,632.72 to 36,287.66)           | 802.04<br>(718.01 to 900.52)              | 1,427.01<br>(835.40 to 3,542.14)           | 1,151.16<br>(688.65 to 3,072.86)           | 1,621.80<br>(913.00 to 3,936.36)            |
| Urinary diseases and male infertility                      | 2,447.48<br>(2,197.04 to 2,701.53)           | 4,147.82<br>(3,483.63 to 4,874.01)            | 3,529.02<br>(2,940.26 to 4,194.58)            | 3,891.33<br>(3,186.96 to 4,646.63)             | 262.58<br>(234.35 to 290.14)              | 515.15<br>(410.62 to 627.59)               | 463.88<br>(373.60 to 561.89)               | 468.63<br>(362.49 to 582.77)                |
| Urinary tract infections                                   | 2,175.86<br>(1,945.32 to 2,424.99)           | 3,898.20<br>(3,228.36 to 4,602.48)            | 3,347.30<br>(2,770.44 to 3,996.93)            | 3,653.47<br>(2,966.15 to 4,417.50)             | 239.63<br>(212.35 to 266.83)              | 490.04<br>(388.22 to 598.26)               | 444.29<br>(355.64 to 543.06)               | 445.76<br>(342.24 to 557.71)                |
| Urolithiasis                                               | 64.52<br>(46.41 to 94.20)                    | 63.60<br>(42.50 to 98.59)                     | 44.81<br>(29.60 to 72.91)                     | 62.46<br>(41.03 to 98.98)                      | 4.23<br>(2.91 to 6.88)                    | 5.04<br>(3.21 to 8.88)                     | 3.81<br>(2.42 to 7.12)                     | 4.74<br>(2.94 to 8.62)                      |
| Other urinary diseases                                     | 207.10<br>(127.69 to 282.64)                 | 186.02<br>(107.72 to 263.48)                  | 136.92<br>(76.43 to 199.15)                   | 175.40<br>(99.73 to 257.50)                    | 18.72<br>(11.57 to 27.00)                 | 20.07<br>(11.16 to 30.69)                  | 15.78<br>(8.87 to 24.83)                   | 18.13<br>(10.03 to 28.10)                   |
| Gynecological diseases                                     | 13.94<br>(10.82 to 21.11)                    | 8.36<br>(6.04 to 14.71)                       | 4.90<br>(3.45 to 8.65)                        | 8.53<br>(5.99 to 14.88)                        | 0.65<br>(0.50 to 1.22)                    | 0.53<br>(0.37 to 1.14)                     | 0.32<br>(0.22 to 0.69)                     | 0.52<br>(0.35 to 1.11)                      |
| Uterine fibroids                                           | 8.34<br>(6.14 to 11.69)                      | 4.35<br>(2.98 to 6.85)                        | 2.75<br>(1.86 to 4.39)                        | 4.45<br>(2.96 to 6.92)                         | 0.30<br>(0.23 to 0.50)                    | 0.19<br>(0.13 to 0.36)                     | 0.13<br>(0.08 to 0.25)                     | 0.19<br>(0.13 to 0.37)                      |
| Polycystic ovarian syndrome                                | 1.47<br>(0.85 to 2.96)                       | 0.42<br>(0.19 to 0.91)                        | 0.15<br>(0.06 to 0.32)                        | 0.45<br>(0.19 to 0.93)                         | 0.04<br>(0.02 to 0.07)                    | 0.01<br>(0.00 to 0.02)                     | 0.01<br>(0.00 to 0.02)                     | 0.01<br>(0.00 to 0.02)                      |
| Endometriosis                                              | 0.33<br>(0.13 to 0.78)                       | 0.28<br>(0.12 to 0.88)                        | 0.21<br>(0.07 to 0.51)                        | 0.40<br>(0.12 to 0.96)                         | 0.01<br>(0.00 to 0.02)                    | 0.01<br>(0.00 to 0.02)                     | 0.01<br>(0.00 to 0.01)                     | 0.01<br>(0.00 to 0.02)                      |
| Genital prolapse                                           | 0.34<br>(0.21 to 1.13)                       | 0.29<br>(0.15 to 1.02)                        | 0.17<br>(0.08 to 0.66)                        | 0.30<br>(0.14 to 1.03)                         | 0.02<br>(0.01 to 0.11)                    | 0.02<br>(0.01 to 0.12)                     | 0.02<br>(0.01 to 0.08)                     | 0.03<br>(0.01 to 0.11)                      |
| Other gynecological diseases                               | 3.47<br>(2.57 to 6.78)                       | 2.92<br>(1.82 to 6.07)                        | 1.63<br>(1.00 to 3.43)                        | 2.93<br>(1.81 to 6.07)                         | 0.28<br>(0.20 to 0.62)                    | 0.29<br>(0.18 to 0.65)                     | 0.17<br>(0.11 to 0.39)                     | 0.28<br>(0.17 to 0.63)                      |
| Hemoglobinopathies and hemolytic anemias                   | 5,097.04<br>(4,278.67 to 7,233.76)           | 4,852.95<br>(3,929.15 to 7,068.92)            | 3,819.41<br>(3,060.24 to 5,512.24)            | 4,681.88<br>(3,684.63 to 6,812.56)             | 412.52<br>(346.44 to 579.92)              | 478.81<br>(372.66 to 687.53)               | 396.88<br>(312.11 to 568.42)               | 444.23<br>(339.68 to 651.43)                |
| Thalassemias                                               | 1,048.80<br>(868.51 to 1,392.80)             | 540.58<br>(403.86 to 837.93)                  | 524.75<br>(388.41 to 821.42)                  | 543.19<br>(406.54 to 838.98)                   | 20.97<br>(17.22 to 29.64)                 | 13.32<br>(9.66 to 22.58)                   | 13.07<br>(9.42 to 22.54)                   | 13.30<br>(9.64 to 22.44)                    |

|                                                   |                                       |                                       |                                       |                                       |                                 |                                 |                                 |                                 |
|---------------------------------------------------|---------------------------------------|---------------------------------------|---------------------------------------|---------------------------------------|---------------------------------|---------------------------------|---------------------------------|---------------------------------|
|                                                   | 102.37<br>(73.67 to<br>147.16)        | 126.57<br>(82.95 to<br>225.74)        | 88.36<br>(56.58 to<br>160.26)         | 128.50<br>(83.84 to<br>226.96)        | 2.95<br>(2.09 to<br>4.71)       | 5.60<br>(3.51 to<br>10.39)      | 4.04<br>(2.48 to<br>7.56)       | 5.61<br>(3.46 to<br>10.56)      |
| Sickle cell disorders                             |                                       |                                       |                                       |                                       |                                 |                                 |                                 |                                 |
|                                                   | 588.51<br>(474.26 to<br>804.03)       | 937.50<br>(695.36 to<br>1,369.50)     | 617.15<br>(449.69 to<br>944.10)       | 940.39<br>(684.73 to<br>1,403.34)     | 22.21<br>(17.58 to<br>32.16)    | 49.54<br>(37.38 to<br>73.35)    | 34.13<br>(25.38 to<br>51.73)    | 48.42<br>(35.52 to<br>72.42)    |
| G6PD deficiency                                   |                                       |                                       |                                       |                                       |                                 |                                 |                                 |                                 |
|                                                   | 3,357.35<br>(2,777.64 to<br>4,957.48) | 3,248.29<br>(2,529.73 to<br>4,802.91) | 2,589.15<br>(2,036.77 to<br>3,770.79) | 3,069.80<br>(2,349.80 to<br>4,567.50) | 366.39<br>(307.21 to<br>517.14) | 410.34<br>(313.83 to<br>588.84) | 345.64<br>(269.00 to<br>487.04) | 376.90<br>(281.58 to<br>549.33) |
| Other hemoglobinopathies and hemolytic anemias    |                                       |                                       |                                       |                                       |                                 |                                 |                                 |                                 |
|                                                   | 6,489.52<br>(3,150.40 to<br>7,580.79) | 6,405.06<br>(2,824.36 to<br>7,714.89) | 6,885.16<br>(2,999.44 to<br>8,391.54) | 6,120.00<br>(2,721.30 to<br>7,345.55) | 382.06<br>(144.87 to<br>457.72) | 459.18<br>(164.27 to<br>572.57) | 528.75<br>(186.64 to<br>658.13) | 419.50<br>(151.36 to<br>524.61) |
| Endocrine, metabolic, blood, and immune disorders |                                       |                                       |                                       |                                       |                                 |                                 |                                 |                                 |

| Greece                                        |                                       |                                     |                                    |                                      |                              |                              |                              |                              |
|-----------------------------------------------|---------------------------------------|-------------------------------------|------------------------------------|--------------------------------------|------------------------------|------------------------------|------------------------------|------------------------------|
| Cause                                         | YLLs (actual counts)                  |                                     |                                    |                                      | Deaths (actual counts)       |                              |                              |                              |
|                                               | 2016                                  | 2040 Forecast                       | 2040 Better Scenario               | 2040 Worse Scenario                  | 2016                         | 2040 Forecast                | 2040 Better Scenario         | 2040 Worse Scenario          |
|                                               | 1,783.84<br>(1,516.64 to 2,031.00)    | 1,964.11<br>(1,639.75 to 2,343.97)  | 1,668.95<br>(1,377.78 to 2,016.69) | 1,921.37<br>(1,575.12 to 2,335.86)   | 114.09<br>(99.64 to 138.12)  | 147.90<br>(121.96 to 193.91) | 132.16<br>(109.07 to 179.40) | 140.27<br>(115.02 to 179.37) |
| Musculoskeletal disorders                     |                                       |                                     |                                    |                                      |                              |                              |                              |                              |
| Rheumatoid arthritis                          | 514.52<br>(408.64 to 717.28)          | 516.46<br>(371.88 to 710.51)        | 311.71<br>(223.76 to 444.82)       | 519.48<br>(363.22 to 742.47)         | 36.01<br>(28.10 to 45.62)    | 40.46<br>(29.60 to 54.59)    | 25.64<br>(18.18 to 34.97)    | 39.63<br>(27.91 to 55.00)    |
| Other musculoskeletal disorders               | 1,269.32<br>(935.89 to 1,465.38)      | 1,447.65<br>(1,112.59 to 1,731.70)  | 1,357.25<br>(1,081.26 to 1,625.53) | 1,401.89<br>(1,074.94 to 1,675.69)   | 78.08<br>(64.40 to 96.99)    | 107.44<br>(86.58 to 143.80)  | 106.52<br>(85.98 to 147.49)  | 100.64<br>(79.89 to 132.33)  |
| Other non-communicable diseases               | 15,996.69<br>(11,869.66 to 20,850.76) | 9,767.07<br>(7,216.43 to 13,014.45) | 6,630.14<br>(4,969.76 to 8,955.01) | 10,492.70<br>(7,577.26 to 14,812.10) | 263.82<br>(211.83 to 334.96) | 312.36<br>(238.76 to 511.45) | 266.94<br>(201.74 to 468.34) | 364.48<br>(227.20 to 496.63) |
| Congenital birth defects                      | 14,722.02<br>(9,393.37 to 18,764.30)  | 7,555.12<br>(5,008.05 to 10,812.75) | 4,668.06<br>(3,054.09 to 6,753.72) | 8,363.30<br>(5,132.69 to 12,552.40)  | 189.51<br>(134.79 to 234.86) | 104.94<br>(75.92 to 143.45)  | 67.61<br>(48.90 to 95.87)    | 114.63<br>(79.70 to 164.33)  |
| Neural tube defects                           | 400.04<br>(268.68 to 564.88)          | 100.42<br>(57.56 to 160.81)         | 49.93<br>(27.55 to 83.48)          | 113.75<br>(61.42 to 194.22)          | 4.87<br>(3.32 to 6.79)       | 1.31<br>(0.80 to 2.02)       | 0.66<br>(0.37 to 1.07)       | 1.47<br>(0.84 to 2.43)       |
| Congenital heart anomalies                    | 5,714.34<br>(3,286.21 to 7,606.45)    | 2,648.39<br>(1,434.45 to 4,013.39)  | 1,261.68<br>(633.40 to 2,043.11)   | 2,987.85<br>(1,504.99 to 4,929.76)   | 73.00<br>(45.33 to 94.68)    | 35.14<br>(20.86 to 51.26)    | 16.84<br>(9.44 to 26.24)     | 39.33<br>(21.88 to 63.35)    |
| Orofacial clefts                              | 15.60<br>(3.99 to 63.27)              | 8.76<br>(1.72 to 38.01)             | 3.49<br>(0.68 to 15.97)            | 10.23<br>(1.89 to 44.66)             | 0.18<br>(0.05 to 0.73)       | 0.10<br>(0.02 to 0.44)       | 0.04<br>(0.01 to 0.19)       | 0.12<br>(0.02 to 0.52)       |
| Down syndrome                                 | 1,601.99<br>(1,189.70 to 2,323.18)    | 1,294.68<br>(873.11 to 2,240.08)    | 1,289.45<br>(895.91 to 2,146.92)   | 1,344.26<br>(908.72 to 2,270.07)     | 24.96<br>(17.51 to 46.38)    | 23.47<br>(14.78 to 55.56)    | 23.46<br>(15.52 to 31.78)    | 23.95<br>(15.23 to 54.94)    |
| Other chromosomal abnormalities               | 632.28<br>(260.84 to 1,001.77)        | 498.98<br>(190.39 to 885.56)        | 369.52<br>(128.15 to 664.07)       | 549.56<br>(195.80 to 980.93)         | 7.45<br>(3.12 to 11.78)      | 5.96<br>(2.32 to 10.44)      | 4.43<br>(1.57 to 7.88)       | 6.55<br>(2.45 to 11.60)      |
| Congenital musculoskeletal and limb anomalies | 324.45<br>(95.06 to 482.74)           | 152.47<br>(44.50 to 262.24)         | 84.42<br>(21.77 to 147.85)         | 172.42<br>(47.93 to 308.44)          | 3.84<br>(1.18 to 5.67)       | 1.82<br>(0.56 to 3.11)       | 1.01<br>(0.28 to 1.75)       | 2.06<br>(0.61 to 3.65)       |
| Urogenital congenital anomalies               | 136.17<br>(94.20 to 255.43)           | 72.60<br>(46.56 to 122.59)          | 45.34<br>(27.71 to 76.79)          | 78.68<br>(47.94 to 136.78)           | 2.08<br>(1.44 to 3.33)       | 1.26<br>(0.75 to 1.85)       | 0.81<br>(0.43 to 1.21)       | 1.34<br>(0.79 to 2.05)       |
| Digestive congenital anomalies                | 864.82<br>(407.63 to 1,257.62)        | 427.13<br>(182.37 to 710.76)        | 222.37<br>(82.89 to 380.95)        | 483.56<br>(190.15 to 842.59)         | 10.41<br>(4.96 to 14.95)     | 5.23<br>(2.26 to 8.53)       | 2.74<br>(1.03 to 4.60)       | 5.90<br>(2.35 to 10.16)      |
| Other congenital birth defects                | 5,032.33<br>(2,863.84 to 6,845.77)    | 2,351.68<br>(1,229.09 to 3,463.46)  | 1,341.85<br>(627.54 to 2,079.12)   | 2,623.01<br>(1,292.11 to 4,221.62)   | 62.73<br>(36.61 to 84.31)    | 30.64<br>(16.71 to 44.21)    | 17.62<br>(8.58 to 26.71)     | 33.92<br>(17.19 to 52.90)    |
| Skin and subcutaneous diseases                | 764.81<br>(324.83 to 1,517.66)        | 1,984.41<br>(1,399.96 to 3,902.76)  | 1,802.47<br>(1,253.51 to 3,533.59) | 1,875.90<br>(1,301.34 to 3,682.10)   | 68.39<br>(46.00 to 139.20)   | 204.78<br>(136.48 to 400.95) | 197.48<br>(130.90 to 393.03) | 186.91<br>(125.29 to 375.22) |
| Cellulitis                                    | 73.13<br>(44.38 to 180.20)            | 171.54<br>(99.59 to 444.06)         | 166.54<br>(95.02 to 436.09)        | 164.01<br>(95.58 to 420.43)          | 4.98<br>(2.92 to 12.93)      | 13.66<br>(7.52 to 34.82)     | 14.13<br>(7.70 to 36.10)     | 12.55<br>(6.91 to 33.03)     |
| Pyoderma                                      | 442.50<br>(300.40 to 901.78)          | 1,501.22<br>(1,030.98 to 2,991.90)  | 1,381.43<br>(937.39 to 2,695.62)   | 1,413.83<br>(954.85 to 2,816.68)     | 40.21<br>(26.25 to 84.71)    | 157.82<br>(105.41 to 313.75) | 154.80<br>(102.73 to 307.32) | 143.60<br>(95.87 to 283.99)  |
| Decubitus ulcer                               | 151.00<br>(86.50 to 319.91)           | 197.13<br>(101.62 to 457.66)        | 154.30<br>(78.69 to 356.48)        | 187.87<br>(95.63 to 443.93)          | 15.79<br>(8.76 to 32.94)     | 23.59<br>(11.84 to 55.25)    | 19.52<br>(9.37 to 45.91)     | 21.76<br>(10.95 to 51.80)    |
| Other skin and subcutaneous diseases          | 98.18<br>(54.64 to 187.54)            | 114.52<br>(62.20 to 225.54)         | 100.20<br>(54.77 to 195.15)        | 110.19<br>(60.04 to 215.99)          | 7.41<br>(4.23 to 15.68)      | 9.71<br>(5.39 to 20.64)      | 9.03<br>(5.07 to 19.28)      | 9.00<br>(4.94 to 19.53)      |
| Sudden infant death syndrome                  | 509.86<br>(320.57 to 820.78)          | 227.55<br>(123.65 to 411.30)        | 159.60<br>(85.38 to 277.07)        | 253.50<br>(137.56 to 454.50)         | 5.92<br>(3.72 to 9.53)       | 2.64<br>(1.43 to 4.77)       | 1.85<br>(0.99 to 3.21)       | 2.94<br>(1.60 to 5.27)       |

|                          |                                             |                                          |                                          |                                           |                                       |                                       |                                       |                                       |
|--------------------------|---------------------------------------------|------------------------------------------|------------------------------------------|-------------------------------------------|---------------------------------------|---------------------------------------|---------------------------------------|---------------------------------------|
| Injuries                 | 114,664.39<br>(104,083.96 to<br>128,310.34) | 65,246.73<br>(50,999.76 to<br>86,477.51) | 54,120.85<br>(42,921.43 to<br>72,926.15) | 94,452.91<br>(70,926.19 to<br>131,107.83) | 3,879.94<br>(3,435.52 to<br>4,785.06) | 2,998.24<br>(2,411.15 to<br>4,155.52) | 2,597.74<br>(2,082.91 to<br>3,666.90) | 3,624.54<br>(2,815.86 to<br>4,925.05) |
| Transport injuries       | 53,524.05<br>(48,355.95 to<br>59,317.09)    | 20,835.43<br>(12,621.67 to<br>34,244.02) | 18,708.70<br>(11,577.59 to<br>29,971.37) | 47,504.61<br>(28,209.71 to<br>77,356.75)  | 1,374.39<br>(1,251.62 to<br>1,515.65) | 621.80<br>(399.94 to<br>976.38)       | 547.74<br>(359.64 to<br>839.41)       | 1,273.13<br>(789.20 to<br>2,000.73)   |
| Road injuries            | 51,943.92<br>(46,948.95 to<br>57,536.12)    | 19,750.67<br>(11,968.40 to<br>32,257.30) | 18,041.33<br>(11,184.52 to<br>28,840.74) | 46,237.69<br>(27,413.78 to<br>75,277.51)  | 1,334.91<br>(1,216.44 to<br>1,473.06) | 591.70<br>(381.27 to<br>923.76)       | 528.76<br>(348.33 to<br>811.11)       | 1,238.61<br>(767.98 to<br>1,943.27)   |
| Pedestrian road injuries | 10,090.42<br>(8,332.72 to<br>13,392.19)     | 3,523.24<br>(2,313.40 to<br>5,441.08)    | 2,226.73<br>(1,468.84 to<br>3,371.35)    | 6,799.99<br>(4,204.47 to<br>10,929.68)    | 393.24<br>(297.07 to<br>446.80)       | 177.31<br>(107.11 to<br>268.04)       | 117.50<br>(67.52 to<br>177.19)        | 307.39<br>(189.21 to<br>471.00)       |

| Greece                                          |                                                     |                                                     |                                                     |                                                     |                                                  |                                                  |                                                  |                                                  |
|-------------------------------------------------|-----------------------------------------------------|-----------------------------------------------------|-----------------------------------------------------|-----------------------------------------------------|--------------------------------------------------|--------------------------------------------------|--------------------------------------------------|--------------------------------------------------|
| Cause                                           | YLLs (actual counts)                                |                                                     |                                                     |                                                     | Deaths (actual counts)                           |                                                  |                                                  |                                                  |
|                                                 | 2016                                                | 2040 Forecast                                       | 2040 Better Scenario                                | 2040 Worse Scenario                                 | 2016                                             | 2040 Forecast                                    | 2040 Better Scenario                             | 2040 Worse Scenario                              |
| Cyclist road injuries                           | 604.99<br>(490.76 to 747.49)                        | 236.77<br>(136.91 to 401.09)                        | 233.24<br>(138.92 to 389.48)                        | 494.72<br>(286.17 to 844.08)                        | 15.34<br>(12.23 to 19.09)                        | 7.55<br>(4.43 to 12.45)                          | 7.63<br>(4.59 to 12.40)                          | 13.68<br>(7.89 to 22.71)                         |
| Motorcyclist road injuries                      | 6,910.05<br>(5,464.04 to 8,515.65)                  | 3,376.06<br>(1,688.58 to 6,381.51)                  | 3,283.05<br>(1,712.12 to 6,080.48)                  | 6,015.96<br>(3,039.22 to 11,607.28)                 | 138.22<br>(110.88 to 171.53)                     | 74.63<br>(40.06 to 138.95)                       | 73.47<br>(41.24 to 133.61)                       | 123.79<br>(64.67 to 233.16)                      |
| Motor vehicle road injuries                     | 34,262.65<br>(29,211.14 to 39,037.62)               | 12,589.81<br>(7,389.02 to 20,667.52)                | 12,273.87<br>(7,470.29 to 19,882.08)                | 32,869.03<br>(19,105.58 to 53,715.56)               | 786.13<br>(693.00 to 923.56)                     | 331.39<br>(202.80 to 517.57)                     | 329.29<br>(208.31 to 506.64)                     | 792.15<br>(474.24 to 1,248.09)                   |
| Other road injuries                             | 75.81<br>(53.66 to 91.81)                           | 24.78<br>(14.84 to 40.34)                           | 24.44<br>(14.75 to 39.02)                           | 58.00<br>(35.23 to 93.07)                           | 1.99<br>(1.18 to 2.51)                           | 0.82<br>(0.38 to 1.46)                           | 0.86<br>(0.38 to 1.55)                           | 1.61<br>(0.82 to 2.83)                           |
| Other transport injuries                        | 1,580.13<br>(1,317.97 to 1,851.60)                  | 1,084.76<br>(641.54 to 1,821.50)                    | 667.37<br>(402.60 to 1,102.55)                      | 1,266.92<br>(722.85 to 2,125.58)                    | 39.48<br>(33.37 to 45.68)                        | 30.11<br>(18.01 to 49.40)                        | 18.98<br>(11.92 to 30.87)                        | 34.52<br>(20.26 to 57.13)                        |
| <b>Unintentional injuries</b>                   | <b>38,422.81</b><br><b>(34,283.75 to 46,019.62)</b> | <b>30,600.43</b><br><b>(25,828.31 to 39,451.49)</b> | <b>25,053.86</b><br><b>(21,013.33 to 32,843.22)</b> | <b>30,792.51</b><br><b>(25,426.52 to 40,398.73)</b> | <b>1,872.81</b><br><b>(1,570.26 to 2,734.75)</b> | <b>1,935.74</b><br><b>(1,543.86 to 3,006.86)</b> | <b>1,706.69</b><br><b>(1,349.54 to 2,689.23)</b> | <b>1,848.29</b><br><b>(1,437.72 to 2,861.10)</b> |
| Falls                                           | 11,526.61<br>(9,787.38 to 17,232.34)                | 11,450.65<br>(9,308.32 to 18,114.74)                | 9,728.75<br>(7,819.66 to 15,556.49)                 | 11,156.21<br>(9,061.43 to 17,696.96)                | 707.56<br>(539.58 to 1,395.16)                   | 870.40<br>(633.90 to 1,758.36)                   | 782.49<br>(563.06 to 1,605.00)                   | 811.26<br>(586.23 to 1,664.28)                   |
| Drowning                                        | 9,903.42<br>(8,978.23 to 10,934.72)                 | 5,669.27<br>(4,167.28 to 7,895.67)                  | 4,313.87<br>(3,207.70 to 5,861.50)                  | 6,124.44<br>(4,318.50 to 8,761.93)                  | 354.19<br>(321.39 to 388.21)                     | 235.92<br>(177.58 to 317.88)                     | 185.67<br>(140.90 to 248.02)                     | 247.56<br>(177.32 to 346.31)                     |
| Fire, heat, and hot substances                  | 2,289.11<br>(1,859.48 to 2,698.53)                  | 1,441.84<br>(1,029.33 to 1,970.25)                  | 998.35<br>(727.96 to 1,338.72)                      | 1,537.10<br>(1,060.16 to 2,165.02)                  | 119.94<br>(95.12 to 137.14)                      | 94.53<br>(68.40 to 127.41)                       | 70.87<br>(51.07 to 93.39)                        | 95.73<br>(65.95 to 132.78)                       |
| Poisonings                                      | 885.06<br>(735.62 to 1,204.31)                      | 372.41<br>(247.92 to 576.71)                        | 224.64<br>(152.84 to 334.50)                        | 410.93<br>(257.88 to 655.17)                        | 28.82<br>(24.02 to 35.30)                        | 15.33<br>(10.72 to 21.62)                        | 9.96<br>(7.11 to 13.60)                          | 16.12<br>(10.80 to 23.33)                        |
| Exposure to mechanical forces                   | 2,913.06<br>(1,885.86 to 3,415.48)                  | 1,755.70<br>(1,119.01 to 2,166.06)                  | 1,234.65<br>(795.84 to 1,524.97)                    | 1,788.44<br>(1,137.14 to 2,243.55)                  | 91.14<br>(68.07 to 106.93)                       | 67.32<br>(52.76 to 81.27)                        | 50.56<br>(41.55 to 61.55)                        | 65.99<br>(51.39 to 81.35)                        |
| Unintentional firearm injuries                  | 524.31<br>(419.91 to 608.14)                        | 305.50<br>(238.32 to 377.36)                        | 226.25<br>(176.72 to 279.32)                        | 311.31<br>(237.78 to 387.39)                        | 14.67<br>(12.60 to 17.39)                        | 10.68<br>(9.00 to 13.19)                         | 8.63<br>(7.21 to 10.86)                          | 10.44<br>(8.69 to 12.89)                         |
| Unintentional suffocation                       | 106.13<br>(76.08 to 132.33)                         | 58.87<br>(43.02 to 75.57)                           | 44.93<br>(32.67 to 57.86)                           | 62.16<br>(44.45 to 81.16)                           | 2.05<br>(1.49 to 2.47)                           | 1.26<br>(0.93 to 1.58)                           | 0.99<br>(0.71 to 1.25)                           | 1.30<br>(0.94 to 1.66)                           |
| Other exposure to mechanical forces             | 2,282.62<br>(1,324.82 to 2,729.36)                  | 1,391.33<br>(800.74 to 1,764.07)                    | 963.46<br>(562.06 to 1,213.14)                      | 1,414.97<br>(805.26 to 1,817.81)                    | 74.42<br>(51.47 to 89.79)                        | 55.37<br>(41.34 to 69.06)                        | 40.94<br>(32.55 to 51.62)                        | 54.25<br>(39.54 to 68.60)                        |
| Adverse effects of medical treatment            | 5,561.70<br>(4,608.13 to 7,692.30)                  | 5,781.36<br>(4,697.74 to 8,047.76)                  | 5,133.05<br>(4,165.93 to 7,302.23)                  | 5,600.64<br>(4,550.42 to 7,965.53)                  | 373.26<br>(298.86 to 557.37)                     | 456.81<br>(352.32 to 705.89)                     | 430.95<br>(331.35 to 660.64)                     | 424.51<br>(321.88 to 655.41)                     |
| Animal contact                                  | 175.26<br>(127.99 to 223.57)                        | 158.53<br>(113.48 to 199.16)                        | 126.33<br>(89.64 to 160.95)                         | 159.71<br>(114.80 to 206.24)                        | 6.42<br>(4.88 to 8.50)                           | 6.95<br>(5.06 to 9.28)                           | 5.81<br>(4.31 to 7.60)                           | 6.71<br>(5.08 to 8.95)                           |
| Venomous animal contact                         | 101.83<br>(59.41 to 128.60)                         | 87.56<br>(49.11 to 113.15)                          | 72.79<br>(41.46 to 95.12)                           | 88.27<br>(49.98 to 114.37)                          | 3.19<br>(1.79 to 4.02)                           | 3.15<br>(1.72 to 4.11)                           | 2.71<br>(1.51 to 3.53)                           | 3.08<br>(1.70 to 3.96)                           |
| Non-venomous animal contact                     | 73.43<br>(58.85 to 115.33)                          | 70.97<br>(54.75 to 112.77)                          | 53.55<br>(40.94 to 85.98)                           | 71.44<br>(53.62 to 115.54)                          | 3.24<br>(2.60 to 5.11)                           | 3.80<br>(2.95 to 5.96)                           | 3.10<br>(2.38 to 4.83)                           | 3.64<br>(2.76 to 5.82)                           |
| Foreign body                                    | 3,765.45<br>(2,952.54 to 5,554.30)                  | 3,026.60<br>(2,282.95 to 4,706.88)                  | 2,731.57<br>(2,050.09 to 4,252.72)                  | 3,052.41<br>(2,284.70 to 4,750.06)                  | 134.02<br>(95.66 to 231.94)                      | 137.86<br>(93.05 to 254.38)                      | 135.54<br>(90.35 to 252.20)                      | 131.71<br>(89.05 to 241.44)                      |
| Pulmonary aspiration and foreign body in airway | 3,710.02<br>(2,898.31 to 5,498.10)                  | 2,985.31<br>(2,240.14 to 4,670.94)                  | 2,686.69<br>(2,005.42 to 4,213.59)                  | 3,011.27<br>(2,244.87 to 4,711.49)                  | 132.22<br>(93.80 to 230.28)                      | 136.13<br>(91.13 to 253.19)                      | 133.50<br>(88.13 to 250.48)                      | 130.09<br>(87.35 to 240.03)                      |

|                                             |                                                               |                                                              |                                                              |                                                              |                                                      |                                                      |                                                      |                                                      |
|---------------------------------------------|---------------------------------------------------------------|--------------------------------------------------------------|--------------------------------------------------------------|--------------------------------------------------------------|------------------------------------------------------|------------------------------------------------------|------------------------------------------------------|------------------------------------------------------|
|                                             | 55.43<br>(49.21 to<br>60.91)                                  | 41.29<br>(34.10 to<br>48.16)                                 | 44.88<br>(36.73 to<br>52.60)                                 | 41.14<br>(34.37 to<br>47.75)                                 | 1.81<br>(1.24 to<br>2.12)                            | 1.73<br>(1.01 to<br>2.22)                            | 2.04<br>(1.14 to<br>2.63)                            | 1.62<br>(1.00 to<br>2.05)                            |
| Foreign body in other body part             |                                                               |                                                              |                                                              |                                                              |                                                      |                                                      |                                                      |                                                      |
|                                             | 572.12<br>(404.95 to<br>1,001.17)                             | 506.14<br>(350.41 to<br>837.43)                              | 353.95<br>(241.58 to<br>608.65)                              | 499.16<br>(341.76 to<br>872.53)                              | 36.75<br>(27.28 to<br>68.38)                         | 38.38<br>(27.03 to<br>69.86)                         | 28.82<br>(19.96 to<br>52.82)                         | 36.06<br>(24.53 to<br>67.60)                         |
| Environmental heat and cold exposure        |                                                               |                                                              |                                                              |                                                              |                                                      |                                                      |                                                      |                                                      |
|                                             | 831.03<br>(715.26 to<br>974.44)                               | 437.94<br>(324.92 to<br>573.33)                              | 208.69<br>(154.54 to<br>267.97)                              | 463.47<br>(334.46 to<br>632.69)                              | 20.71<br>(18.01 to<br>23.91)                         | 12.24<br>(9.43 to<br>15.61)                          | 6.02<br>(4.59 to<br>7.58)                            | 12.64<br>(9.43 to<br>16.82)                          |
| Other unintentional injuries                |                                                               |                                                              |                                                              |                                                              |                                                      |                                                      |                                                      |                                                      |
| <b>Self-harm and interpersonal violence</b> | <b>22,669.60</b><br><b>(19,028.46 to</b><br><b>28,824.97)</b> | <b>13,458.06</b><br><b>(8,797.20 to</b><br><b>20,015.46)</b> | <b>10,004.25</b><br><b>(6,585.73 to</b><br><b>14,821.88)</b> | <b>15,803.11</b><br><b>(9,836.29 to</b><br><b>24,373.38)</b> | <b>631.67</b><br><b>(521.95 to</b><br><b>732.62)</b> | <b>430.72</b><br><b>(277.47 to</b><br><b>630.46)</b> | <b>332.99</b><br><b>(217.79 to</b><br><b>482.51)</b> | <b>493.36</b><br><b>(305.70 to</b><br><b>736.56)</b> |

| Greece                                                                              |                                                   |                                                      |                                                      |                                                      |                                                |                                                 |                                                  |                                                 |
|-------------------------------------------------------------------------------------|---------------------------------------------------|------------------------------------------------------|------------------------------------------------------|------------------------------------------------------|------------------------------------------------|-------------------------------------------------|--------------------------------------------------|-------------------------------------------------|
| Cause                                                                               | YLLs (actual counts)                              |                                                      |                                                      |                                                      | Deaths (actual counts)                         |                                                 |                                                  |                                                 |
|                                                                                     | 2016                                              | 2040 Forecast                                        | 2040 Better Scenario                                 | 2040 Worse Scenario                                  | 2016                                           | 2040 Forecast                                   | 2040 Better Scenario                             | 2040 Worse Scenario                             |
| Self-harm                                                                           | 17,939.92<br>(15,112.49 to<br>24,727.06)          | 11,186.99<br>(6,975.91 to<br>17,504.68)              | 8,396.41<br>(5,444.38 to<br>12,952.58)               | 13,356.75<br>(7,937.55 to<br>22,023.83)              | 513.15<br>(424.04 to<br>623.85)                | 364.87<br>(230.55 to<br>553.71)                 | 284.15<br>(182.61 to<br>421.64)                  | 423.76<br>(256.78 to<br>654.54)                 |
| Self-harm by firearm                                                                | 3,841.51<br>(2,863.00 to<br>5,707.35)             | 1,898.42<br>(993.01 to<br>3,306.39)                  | 1,276.80<br>(682.30 to<br>2,216.12)                  | 2,288.98<br>(1,165.83 to<br>4,151.45)                | 110.30<br>(76.41 to<br>145.31)                 | 61.96<br>(31.88 to<br>102.96)                   | 43.37<br>(22.14 to<br>72.86)                     | 72.52<br>(35.60 to<br>126.50)                   |
| Self-harm by other specified means                                                  | 14,098.41<br>(11,761.88 to<br>20,290.66)          | 9,288.57<br>(5,941.31 to<br>14,541.55)               | 7,119.61<br>(4,690.31 to<br>10,813.41)               | 11,067.77<br>(6,616.09 to<br>17,850.09)              | 402.85<br>(333.61 to<br>520.76)                | 302.91<br>(192.85 to<br>450.23)                 | 240.78<br>(155.22 to<br>355.65)                  | 351.23<br>(214.18 to<br>547.88)                 |
| Interpersonal violence                                                              | 4,729.68<br>(2,624.66 to<br>6,198.67)             | 2,271.07<br>(1,214.12 to<br>3,234.20)                | 1,607.84<br>(867.97 to<br>2,273.44)                  | 2,446.36<br>(1,255.65 to<br>3,568.95)                | 118.52<br>(64.37 to<br>153.80)                 | 65.86<br>(34.25 to<br>92.51)                    | 48.84<br>(25.48 to<br>67.69)                     | 69.60<br>(35.08 to<br>99.26)                    |
| Physical violence by firearm                                                        | 1,823.70<br>(786.84 to<br>2,532.41)               | 781.37<br>(329.93 to<br>1,179.23)                    | 497.36<br>(216.85 to<br>733.44)                      | 814.93<br>(340.03 to<br>1,229.36)                    | 41.44<br>(17.19 to<br>57.98)                   | 19.12<br>(7.90 to<br>28.20)                     | 12.36<br>(5.29 to<br>17.91)                      | 19.72<br>(7.77 to<br>29.43)                     |
| Physical violence by sharp object                                                   | 1,276.58<br>(610.68 to<br>1,747.57)               | 639.06<br>(294.62 to<br>894.40)                      | 444.90<br>(213.36 to<br>622.83)                      | 661.45<br>(298.14 to<br>964.84)                      | 32.75<br>(15.75 to<br>44.16)                   | 18.91<br>(9.14 to<br>25.45)                     | 13.82<br>(7.05 to<br>18.49)                      | 19.08<br>(9.09 to<br>26.60)                     |
| Physical violence by other means                                                    | 1,629.40<br>(896.19 to<br>2,225.35)               | 850.64<br>(414.35 to<br>1,327.88)                    | 665.58<br>(316.29 to<br>1,030.79)                    | 969.99<br>(461.87 to<br>1,554.29)                    | 44.33<br>(22.60 to<br>56.89)                   | 27.83<br>(12.59 to<br>43.32)                    | 22.66<br>(10.33 to<br>34.67)                     | 30.79<br>(13.63 to<br>48.17)                    |
| <b>Forces of nature, conflict and terrorism, and executions and police conflict</b> | <b>47.93</b><br><b>(44.80 to</b><br><b>51.55)</b> | <b>352.80</b><br><b>(0.00 to</b><br><b>1,404.18)</b> | <b>354.05</b><br><b>(0.00 to</b><br><b>1,400.69)</b> | <b>352.67</b><br><b>(0.00 to</b><br><b>1,405.77)</b> | <b>1.08</b><br><b>(1.01 to</b><br><b>1.15)</b> | <b>9.98</b><br><b>(0.00 to</b><br><b>31.89)</b> | <b>10.32</b><br><b>(0.00 to</b><br><b>32.01)</b> | <b>9.75</b><br><b>(0.00 to</b><br><b>31.70)</b> |
| Exposure to forces of nature                                                        | 0.00<br>(0.00 to<br>0.00)                         | 287.45<br>(0.00 to<br>1,395.11)                      | 288.76<br>(0.00 to<br>1,394.62)                      | 287.10<br>(0.00 to<br>1,399.70)                      | 0.00<br>(0.00 to<br>0.00)                      | 8.46<br>(0.00 to<br>31.73)                      | 8.75<br>(0.00 to<br>31.85)                       | 8.26<br>(0.00 to<br>31.55)                      |
| Conflict and terrorism                                                              | 0.00<br>(0.00 to<br>0.00)                         | 65.35<br>(0.00 to<br>431.71)                         | 65.29<br>(0.00 to<br>432.21)                         | 65.57<br>(0.00 to<br>432.85)                         | 0.00<br>(0.00 to<br>0.00)                      | 1.52<br>(0.00 to<br>11.62)                      | 1.57<br>(0.00 to<br>12.13)                       | 1.49<br>(0.00 to<br>11.36)                      |
| Executions and police conflict                                                      | 47.93<br>(44.80 to<br>51.55)                      | 0.00<br>(0.00 to<br>0.00)                            | 0.00<br>(0.00 to<br>0.00)                            | 0.00<br>(0.00 to<br>0.00)                            | 1.08<br>(1.01 to<br>1.15)                      | 0.00<br>(0.00 to<br>0.00)                       | 0.00<br>(0.00 to<br>0.00)                        | 0.00<br>(0.00 to<br>0.00)                       |

| Iceland                                                           |                                       |                                       |                                       |                                       |                                    |                                    |                                    |                                    |
|-------------------------------------------------------------------|---------------------------------------|---------------------------------------|---------------------------------------|---------------------------------------|------------------------------------|------------------------------------|------------------------------------|------------------------------------|
| Cause                                                             | YLLs (actual counts)                  |                                       |                                       |                                       | Deaths (actual counts)             |                                    |                                    |                                    |
|                                                                   | 2016                                  | 2040 Forecast                         | 2040 Better Scenario                  | 2040 Worse Scenario                   | 2016                               | 2040 Forecast                      | 2040 Better Scenario               | 2040 Worse Scenario                |
| All causes                                                        | 32,455.15<br>(29,990.69 to 35,033.74) | 43,100.90<br>(35,200.55 to 52,929.77) | 39,119.64<br>(32,335.43 to 47,451.29) | 53,900.81<br>(43,826.16 to 66,105.41) | 2,249.25<br>(2,096.99 to 2,412.76) | 3,676.18<br>(3,034.68 to 4,356.36) | 3,417.27<br>(2,844.70 to 4,030.98) | 4,327.56<br>(3,585.73 to 5,086.73) |
| Communicable, maternal, neonatal, and nutritional diseases        | 1,439.07<br>(1,294.59 to 1,616.90)    | 2,152.97<br>(1,618.65 to 2,883.23)    | 1,997.11<br>(1,519.23 to 2,578.41)    | 2,487.35<br>(1,834.99 to 3,389.14)    | 111.02<br>(96.48 to 128.17)        | 237.75<br>(171.45 to 331.74)       | 229.08<br>(167.90 to 307.43)       | 251.41<br>(180.71 to 358.77)       |
| HIV/AIDS and tuberculosis                                         | 68.06<br>(64.71 to 71.56)             | 39.49<br>(22.99 to 62.81)             | 22.48<br>(13.62 to 35.62)             | 72.48<br>(42.57 to 119.89)            | 2.47<br>(2.29 to 2.65)             | 2.45<br>(1.29 to 4.28)             | 1.63<br>(0.95 to 2.79)             | 3.49<br>(1.92 to 6.13)             |
| Tuberculosis                                                      | 22.45<br>(20.11 to 25.12)             | 25.54<br>(13.09 to 45.93)             | 17.38<br>(9.59 to 29.82)              | 35.09<br>(16.79 to 65.59)             | 1.47<br>(1.31 to 1.65)             | 2.20<br>(1.07 to 4.04)             | 1.54<br>(0.83 to 2.68)             | 2.88<br>(1.34 to 5.41)             |
| HIV/AIDS                                                          | 45.60<br>(43.31 to 48.09)             | 13.95<br>(4.70 to 25.50)              | 5.09<br>(0.81 to 11.69)               | 37.39<br>(14.69 to 70.04)             | 1.00<br>(0.95 to 1.05)             | 0.24<br>(0.08 to 0.45)             | 0.09<br>(0.01 to 0.21)             | 0.61<br>(0.22 to 1.14)             |
| Diarrhea, lower respiratory, and other common infectious diseases | 1,080.99<br>(958.22 to 1,229.10)      | 1,885.16<br>(1,373.38 to 2,592.28)    | 1,761.32<br>(1,313.22 to 2,327.04)    | 2,157.95<br>(1,536.85 to 3,097.55)    | 102.22<br>(87.81 to 118.96)        | 225.68<br>(159.76 to 319.65)       | 217.62<br>(157.79 to 294.39)       | 238.76<br>(169.32 to 347.83)       |
| Diarrheal diseases                                                | 56.66<br>(49.99 to 64.02)             | 221.23<br>(147.17 to 335.62)          | 252.70<br>(176.02 to 369.23)          | 164.08<br>(97.80 to 267.36)           | 4.75<br>(4.16 to 5.42)             | 25.70<br>(16.68 to 39.54)          | 30.10<br>(20.64 to 44.27)          | 18.17<br>(10.32 to 30.32)          |
| Intestinal infectious diseases                                    | 0.65<br>(0.26 to 1.37)                | 0.75<br>(0.29 to 1.62)                | 0.77<br>(0.30 to 1.68)                | 0.72<br>(0.28 to 1.54)                | 0.02<br>(0.01 to 0.04)             | 0.03<br>(0.01 to 0.06)             | 0.03<br>(0.01 to 0.06)             | 0.03<br>(0.01 to 0.05)             |
| Typhoid fever                                                     | 0.39<br>(0.12 to 0.92)                | 0.50<br>(0.16 to 1.14)                | 0.53<br>(0.17 to 1.24)                | 0.45<br>(0.15 to 1.05)                | 0.01<br>(0.00 to 0.02)             | 0.01<br>(0.01 to 0.05)             | 0.02<br>(0.01 to 0.04)             | 0.01<br>(0.00 to 0.03)             |
| Paratyphoid fever                                                 | 0.15<br>(0.05 to 0.39)                | 0.14<br>(0.04 to 0.35)                | 0.13<br>(0.03 to 0.34)                | 0.15<br>(0.04 to 0.40)                | 0.00<br>(0.00 to 0.01)             | 0.00<br>(0.00 to 0.01)             | 0.00<br>(0.01 to 0.01)             | 0.00<br>(0.00 to 0.01)             |
| Other intestinal infectious diseases                              | 0.11<br>(0.04 to 0.22)                | 0.11<br>(0.04 to 0.24)                | 0.11<br>(0.04 to 0.24)                | 0.11<br>(0.04 to 0.24)                | 0.01<br>(0.00 to 0.01)             | 0.01<br>(0.00 to 0.02)             | 0.01<br>(0.00 to 0.02)             | 0.01<br>(0.00 to 0.02)             |
| Lower respiratory infections                                      | 956.84<br>(838.17 to 1,099.02)        | 1,602.13<br>(1,107.17 to 2,299.59)    | 1,452.46<br>(1,023.50 to 2,002.87)    | 1,929.69<br>(1,305.32 to 2,844.90)    | 95.18<br>(80.78 to 112.10)         | 197.16<br>(132.01 to 291.38)       | 184.77<br>(126.53 to 261.56)       | 217.83<br>(147.91 to 325.94)       |
| Upper respiratory infections                                      | 0.35<br>(0.19 to 0.57)                | 0.41<br>(0.16 to 0.84)                | 0.36<br>(0.14 to 0.75)                | 0.49<br>(0.18 to 1.01)                | 0.02<br>(0.01 to 0.03)             | 0.03<br>(0.01 to 0.07)             | 0.03<br>(0.01 to 0.06)             | 0.03<br>(0.01 to 0.08)             |
| Otitis media                                                      | 0.47<br>(0.25 to 0.84)                | 0.25<br>(0.05 to 1.03)                | 0.26<br>(0.05 to 1.04)                | 0.25<br>(0.05 to 1.02)                | 0.01<br>(0.01 to 0.03)             | 0.01<br>(0.00 to 0.05)             | 0.01<br>(0.00 to 0.03)             | 0.01<br>(0.00 to 0.03)             |
| Meningitis                                                        | 48.27<br>(41.60 to 63.26)             | 33.74<br>(24.55 to 48.28)             | 29.15<br>(21.54 to 41.21)             | 35.67<br>(26.14 to 52.02)             | 1.54<br>(1.36 to 1.92)             | 1.36<br>(1.07 to 1.79)             | 1.29<br>(1.01 to 1.71)             | 1.36<br>(1.08 to 1.83)             |
| Pneumococcal meningitis                                           | 15.34<br>(12.96 to 19.64)             | 11.13<br>(8.49 to 15.63)              | 10.92<br>(8.34 to 15.33)              | 10.78<br>(8.30 to 15.25)              | 0.57<br>(0.49 to 0.70)             | 0.58<br>(0.46 to 0.76)             | 0.59<br>(0.46 to 0.77)             | 0.54<br>(0.42 to 0.70)             |
| H influenzae type B meningitis                                    | 2.58<br>(2.06 to 3.34)                | 8.55<br>(3.42 to 16.91)               | 5.47<br>(2.64 to 9.74)                | 8.75<br>(3.42 to 17.71)               | 0.07<br>(0.06 to 0.09)             | 0.15<br>(0.09 to 0.25)             | 0.12<br>(0.08 to 0.17)             | 0.15<br>(0.08 to 0.25)             |
| Meningococcal meningitis                                          | 19.01<br>(15.71 to 25.10)             | 8.00<br>(5.21 to 13.14)               | 7.25<br>(4.75 to 11.63)               | 9.19<br>(5.92 to 14.75)               | 0.48<br>(0.41 to 0.61)             | 0.30<br>(0.22 to 0.43)             | 0.28<br>(0.21 to 0.40)             | 0.33<br>(0.24 to 0.48)             |
| Other meningitis                                                  | 11.34<br>(9.42 to 14.84)              | 6.07<br>(4.11 to 9.32)                | 5.51<br>(3.78 to 8.53)                | 6.96<br>(4.68 to 10.50)               | 0.41<br>(0.34 to 0.52)             | 0.32<br>(0.23 to 0.45)             | 0.31<br>(0.21 to 0.42)             | 0.35<br>(0.24 to 0.50)             |
| Encephalitis                                                      | 15.04<br>(11.98 to 20.54)             | 22.08<br>(16.85 to 31.93)             | 21.99<br>(16.60 to 32.02)             | 21.99<br>(16.74 to 31.86)             | 0.50<br>(0.40 to 0.68)             | 1.05<br>(0.82 to 1.49)             | 1.06<br>(0.83 to 1.51)             | 1.00<br>(0.79 to 1.41)             |



|                |                           |                            |                           |                            |                           |                           |                           |                           |
|----------------|---------------------------|----------------------------|---------------------------|----------------------------|---------------------------|---------------------------|---------------------------|---------------------------|
| Diphtheria     | 0.07<br>(0.05 to<br>0.11) | 0.02<br>(0.01 to<br>0.04)  | 0.01<br>(0.01 to<br>0.02) | 0.02<br>(0.01 to<br>0.04)  | 0.00<br>(0.00 to<br>0.00) | 0.00<br>(0.00 to<br>0.00) | 0.00<br>(0.00 to<br>0.00) | 0.00<br>(0.00 to<br>0.00) |
| Whooping cough | 0.29<br>(0.13 to<br>0.78) | 0.32<br>(0.09 to<br>1.01)  | 0.03<br>(0.01 to<br>0.08) | 0.33<br>(0.08 to<br>1.02)  | 0.00<br>(0.00 to<br>0.01) | 0.00<br>(0.00 to<br>0.01) | 0.00<br>(0.00 to<br>0.00) | 0.00<br>(0.00 to<br>0.01) |
| Tetanus        | 0.20<br>(0.11 to<br>0.24) | 0.03<br>(0.01 to<br>0.04)  | 0.02<br>(0.01 to<br>0.03) | 0.03<br>(0.01 to<br>0.04)  | 0.01<br>(0.00 to<br>0.01) | 0.00<br>(0.00 to<br>0.00) | 0.00<br>(0.00 to<br>0.00) | 0.00<br>(0.00 to<br>0.00) |
| Measles        | 0.03<br>(0.02 to<br>0.04) | 1.35<br>(0.00 to<br>12.70) | 0.81<br>(0.00 to<br>6.98) | 1.80<br>(0.01 to<br>17.05) | 0.00<br>(0.00 to<br>0.00) | 0.02<br>(0.00 to<br>0.16) | 0.01<br>(0.00 to<br>0.10) | 0.02<br>(0.00 to<br>0.21) |

| Iceland                                               |                               |                               |                               |                               |                               |                               |                               |                               |
|-------------------------------------------------------|-------------------------------|-------------------------------|-------------------------------|-------------------------------|-------------------------------|-------------------------------|-------------------------------|-------------------------------|
| Cause                                                 | YLLs (actual counts)          |                               |                               |                               | Deaths (actual counts)        |                               |                               |                               |
|                                                       | 2016                          | 2040 Forecast                 | 2040 Better Scenario          | 2040 Worse Scenario           | 2016                          | 2040 Forecast                 | 2040 Better Scenario          | 2040 Worse Scenario           |
| Varicella and herpes zoster                           | 2.12<br>(1.37 to 4.79)        | 2.83<br>(1.66 to 6.51)        | 2.74<br>(1.62 to 6.21)        | 2.88<br>(1.67 to 6.34)        | 0.18<br>(0.11 to 0.38)        | 0.32<br>(0.19 to 0.72)        | 0.32<br>(0.18 to 0.73)        | 0.31<br>(0.18 to 0.69)        |
| <b>Neglected tropical diseases and malaria</b>        | <b>2.33</b><br>(1.76 to 5.50) | <b>3.28</b><br>(2.35 to 6.86) | <b>3.32</b><br>(2.40 to 6.87) | <b>3.18</b><br>(2.25 to 6.88) | <b>0.08</b><br>(0.06 to 0.17) | <b>0.17</b><br>(0.13 to 0.32) | <b>0.17</b><br>(0.13 to 0.33) | <b>0.15</b><br>(0.11 to 0.30) |
| Malaria                                               | 0.00<br>(0.00 to 0.00)        | 0.00<br>(0.00 to 0.00)        | 0.00<br>(0.00 to 0.00)        | 0.00<br>(0.00 to 0.00)        | 0.00<br>(0.00 to 0.00)        | 0.00<br>(0.00 to 0.00)        | 0.00<br>(0.00 to 0.00)        | 0.00<br>(0.00 to 0.00)        |
| Chagas disease                                        | 0.00<br>(0.00 to 0.00)        | 0.00<br>(0.00 to 0.00)        | 0.00<br>(0.00 to 0.00)        | 0.00<br>(0.00 to 0.00)        | 0.00<br>(0.00 to 0.00)        | 0.00<br>(0.00 to 0.00)        | 0.00<br>(0.00 to 0.00)        | 0.00<br>(0.00 to 0.00)        |
| Leishmaniasis                                         | 0.00<br>(0.00 to 0.00)        | 0.00<br>(0.00 to 0.00)        | 0.00<br>(0.00 to 0.00)        | 0.00<br>(0.00 to 0.00)        | 0.00<br>(0.00 to 0.00)        | 0.00<br>(0.00 to 0.00)        | 0.00<br>(0.00 to 0.00)        | 0.00<br>(0.00 to 0.00)        |
| African trypanosomiasis                               | 0.00<br>(0.00 to 0.00)        | 0.00<br>(0.00 to 0.00)        | 0.00<br>(0.00 to 0.00)        | 0.00<br>(0.00 to 0.00)        | 0.00<br>(0.00 to 0.00)        | 0.00<br>(0.00 to 0.00)        | 0.00<br>(0.00 to 0.00)        | 0.00<br>(0.00 to 0.00)        |
| Schistosomiasis                                       | 0.00<br>(0.00 to 0.00)        | 0.00<br>(0.00 to 0.00)        | 0.00<br>(0.00 to 0.00)        | 0.00<br>(0.00 to 0.00)        | 0.00<br>(0.00 to 0.00)        | 0.00<br>(0.00 to 0.00)        | 0.00<br>(0.00 to 0.00)        | 0.00<br>(0.00 to 0.00)        |
| Cysticercosis                                         | 0.00<br>(0.00 to 0.00)        | 0.00<br>(0.00 to 0.00)        | 0.00<br>(0.00 to 0.00)        | 0.00<br>(0.00 to 0.00)        | 0.00<br>(0.00 to 0.00)        | 0.00<br>(0.00 to 0.00)        | 0.00<br>(0.00 to 0.00)        | 0.00<br>(0.00 to 0.00)        |
| Cystic echinococcosis                                 | 0.00<br>(0.00 to 0.00)        | 0.00<br>(0.00 to 0.00)        | 0.00<br>(0.00 to 0.00)        | 0.00<br>(0.00 to 0.00)        | 0.00<br>(0.00 to 0.00)        | 0.00<br>(0.00 to 0.00)        | 0.00<br>(0.00 to 0.00)        | 0.00<br>(0.00 to 0.00)        |
| Dengue                                                | 0.00<br>(0.00 to 0.00)        | 0.00<br>(0.00 to 0.00)        | 0.00<br>(0.00 to 0.00)        | 0.00<br>(0.00 to 0.00)        | 0.00<br>(0.00 to 0.00)        | 0.00<br>(0.00 to 0.00)        | 0.00<br>(0.00 to 0.00)        | 0.00<br>(0.00 to 0.00)        |
| Yellow fever                                          | 0.00<br>(0.00 to 0.00)        | 0.00<br>(0.00 to 0.00)        | 0.00<br>(0.00 to 0.00)        | 0.00<br>(0.00 to 0.00)        | 0.00<br>(0.00 to 0.00)        | 0.00<br>(0.00 to 0.00)        | 0.00<br>(0.00 to 0.00)        | 0.00<br>(0.00 to 0.00)        |
| Rabies                                                | 0.06<br>(0.05 to 0.08)        | 0.15<br>(0.11 to 0.20)        | 0.15<br>(0.11 to 0.21)        | 0.14<br>(0.10 to 0.18)        | 0.01<br>(0.01 to 0.01)        | 0.02<br>(0.02 to 0.04)        | 0.03<br>(0.02 to 0.04)        | 0.02<br>(0.01 to 0.03)        |
| Intestinal nematode infections                        | 0.00<br>(0.00 to 0.00)        | 0.00<br>(0.00 to 0.00)        | 0.00<br>(0.00 to 0.00)        | 0.00<br>(0.00 to 0.00)        | 0.00<br>(0.00 to 0.00)        | 0.00<br>(0.00 to 0.00)        | 0.00<br>(0.00 to 0.00)        | 0.00<br>(0.00 to 0.00)        |
| Other neglected tropical diseases                     | 2.27<br>(1.70 to 5.43)        | 3.13<br>(2.20 to 6.72)        | 3.17<br>(2.25 to 6.72)        | 3.04<br>(2.11 to 6.75)        | 0.07<br>(0.05 to 0.16)        | 0.14<br>(0.10 to 0.29)        | 0.15<br>(0.11 to 0.30)        | 0.13<br>(0.09 to 0.27)        |
| <b>Maternal disorders</b>                             | <b>4.66</b><br>(3.89 to 5.65) | <b>2.28</b><br>(1.36 to 3.53) | <b>2.15</b><br>(1.26 to 3.74) | <b>2.50</b><br>(1.47 to 4.25) | <b>0.09</b><br>(0.08 to 0.11) | <b>0.05</b><br>(0.05 to 0.06) | <b>0.04</b><br>(0.02 to 0.07) | <b>0.05</b><br>(0.02 to 0.08) |
| Maternal hemorrhage                                   | 0.33<br>(0.21 to 0.48)        | 0.15<br>(0.07 to 0.28)        | 0.14<br>(0.07 to 0.27)        | 0.16<br>(0.08 to 0.31)        | 0.01<br>(0.00 to 0.01)        | 0.00<br>(0.00 to 0.01)        | 0.00<br>(0.00 to 0.01)        | 0.00<br>(0.00 to 0.01)        |
| Maternal sepsis and other maternal infections         | 0.06<br>(0.03 to 0.12)        | 0.03<br>(0.01 to 0.06)        | 0.03<br>(0.01 to 0.05)        | 0.03<br>(0.01 to 0.06)        | 0.00<br>(0.00 to 0.00)        | 0.00<br>(0.00 to 0.00)        | 0.00<br>(0.00 to 0.00)        | 0.00<br>(0.00 to 0.00)        |
| Maternal hypertensive disorders                       | 0.44<br>(0.29 to 0.64)        | 0.20<br>(0.10 to 0.41)        | 0.19<br>(0.09 to 0.38)        | 0.22<br>(0.11 to 0.44)        | 0.01<br>(0.01 to 0.01)        | 0.00<br>(0.00 to 0.01)        | 0.00<br>(0.00 to 0.01)        | 0.00<br>(0.00 to 0.01)        |
| Maternal obstructed labor and uterine rupture         | 0.06<br>(0.03 to 0.11)        | 0.03<br>(0.01 to 0.06)        | 0.03<br>(0.01 to 0.06)        | 0.03<br>(0.01 to 0.07)        | 0.00<br>(0.00 to 0.00)        | 0.00<br>(0.00 to 0.00)        | 0.00<br>(0.00 to 0.00)        | 0.00<br>(0.00 to 0.00)        |
| Maternal abortion, miscarriage, and ectopic pregnancy | 0.28<br>(0.19 to 0.42)        | 0.15<br>(0.07 to 0.27)        | 0.14<br>(0.07 to 0.26)        | 0.16<br>(0.08 to 0.30)        | 0.01<br>(0.00 to 0.01)        | 0.00<br>(0.00 to 0.01)        | 0.00<br>(0.00 to 0.01)        | 0.00<br>(0.00 to 0.01)        |

|                                        |                           |                           |                           |                           |                           |                           |                           |                           |
|----------------------------------------|---------------------------|---------------------------|---------------------------|---------------------------|---------------------------|---------------------------|---------------------------|---------------------------|
| Indirect maternal deaths               | 0.42<br>(0.27 to<br>0.63) | 0.22<br>(0.10 to<br>0.46) | 0.20<br>(0.09 to<br>0.43) | 0.24<br>(0.11 to<br>0.49) | 0.01<br>(0.01 to<br>0.01) | 0.00<br>(0.00 to<br>0.01) | 0.00<br>(0.00 to<br>0.01) | 0.00<br>(0.00 to<br>0.01) |
| Late maternal deaths                   | 0.11<br>(0.06 to<br>0.18) | 0.04<br>(0.02 to<br>0.09) | 0.04<br>(0.02 to<br>0.08) | 0.05<br>(0.02 to<br>0.10) | 0.00<br>(0.00 to<br>0.00) | 0.00<br>(0.00 to<br>0.00) | 0.00<br>(0.00 to<br>0.00) | 0.00<br>(0.00 to<br>0.00) |
| Maternal deaths aggravated by HIV/AIDS | 0.00<br>(0.00 to<br>0.00) | 0.00<br>(0.00 to<br>0.01) | 0.00<br>(0.00 to<br>0.01) | 0.00<br>(0.00 to<br>0.01) | 0.00<br>(0.00 to<br>0.00) | 0.00<br>(0.00 to<br>0.00) | 0.00<br>(0.00 to<br>0.00) | 0.00<br>(0.00 to<br>0.00) |
| Other maternal disorders               | 2.96<br>(2.38 to<br>3.67) | 1.47<br>(0.81 to<br>2.60) | 1.39<br>(0.77 to<br>2.50) | 1.60<br>(0.90 to<br>2.82) | 0.06<br>(0.05 to<br>0.07) | 0.03<br>(0.02 to<br>0.05) | 0.03<br>(0.02 to<br>0.05) | 0.03<br>(0.02 to<br>0.06) |

| Iceland                                                                 |                                     |                                    |                                    |                                    |                               |                               |                               |                               |
|-------------------------------------------------------------------------|-------------------------------------|------------------------------------|------------------------------------|------------------------------------|-------------------------------|-------------------------------|-------------------------------|-------------------------------|
| Cause                                                                   | YLLs (actual counts)                |                                    |                                    |                                    | Deaths (actual counts)        |                               |                               |                               |
|                                                                         | 2016                                | 2040 Forecast                      | 2040 Better Scenario               | 2040 Worse Scenario                | 2016                          | 2040 Forecast                 | 2040 Better Scenario          | 2040 Worse Scenario           |
| <b>Neonatal disorders</b>                                               | <b>226.77</b><br>(168.03 to 299.96) | <b>122.90</b><br>(73.61 to 198.88) | <b>106.32</b><br>(63.60 to 174.19) | <b>155.73</b><br>(91.77 to 256.93) | <b>2.62</b><br>(1.94 to 3.47) | <b>1.42</b><br>(0.85 to 2.30) | <b>1.23</b><br>(0.74 to 2.01) | <b>1.80</b><br>(1.06 to 2.97) |
| Neonatal preterm birth                                                  | 119.25<br>(86.84 to 156.44)         | 53.75<br>(32.27 to 82.61)          | 44.82<br>(26.97 to 69.21)          | 76.69<br>(46.04 to 120.51)         | 1.38<br>(1.00 to 1.81)        | 0.62<br>(0.37 to 0.95)        | 0.52<br>(0.31 to 0.80)        | 0.89<br>(0.53 to 1.39)        |
| Neonatal encephalopathy due to birth asphyxia and trauma                | 51.00<br>(36.85 to 69.28)           | 26.52<br>(13.35 to 48.64)          | 22.79<br>(11.58 to 41.40)          | 32.11<br>(15.47 to 59.19)          | 0.59<br>(0.43 to 0.80)        | 0.31<br>(0.15 to 0.56)        | 0.26<br>(0.13 to 0.48)        | 0.37<br>(0.18 to 0.68)        |
| Neonatal sepsis and other neonatal infections                           | 14.24<br>(8.61 to 35.58)            | 11.61<br>(5.03 to 29.94)           | 10.15<br>(4.49 to 26.34)           | 13.56<br>(5.94 to 35.00)           | 0.16<br>(0.10 to 0.41)        | 0.13<br>(0.06 to 0.35)        | 0.12<br>(0.05 to 0.30)        | 0.16<br>(0.07 to 0.40)        |
| Hemolytic disease and other neonatal jaundice                           | 1.83<br>(1.13 to 3.04)              | 1.25<br>(0.54 to 2.62)             | 1.08<br>(0.48 to 2.25)             | 1.47<br>(0.63 to 3.10)             | 0.02<br>(0.01 to 0.04)        | 0.01<br>(0.01 to 0.03)        | 0.01<br>(0.01 to 0.03)        | 0.02<br>(0.01 to 0.04)        |
| Other neonatal disorders                                                | 40.46<br>(27.93 to 57.24)           | 29.77<br>(15.91 to 56.97)          | 27.48<br>(14.72 to 52.33)          | 31.89<br>(16.95 to 62.77)          | 0.47<br>(0.32 to 0.66)        | 0.34<br>(0.18 to 0.66)        | 0.32<br>(0.17 to 0.61)        | 0.37<br>(0.20 to 0.73)        |
| <b>Nutritional deficiencies</b>                                         | <b>15.55</b><br>(13.92 to 17.44)    | <b>25.32</b><br>(20.61 to 30.49)   | <b>26.77</b><br>(21.54 to 32.33)   | <b>22.39</b><br>(18.44 to 26.81)   | <b>1.76</b><br>(1.54 to 2.00) | <b>3.51</b><br>(2.74 to 4.39) | <b>3.79</b><br>(2.96 to 4.76) | <b>2.96</b><br>(2.33 to 3.69) |
| Protein-energy malnutrition                                             | 9.35<br>(5.17 to 11.27)             | 17.49<br>(9.73 to 23.13)           | 18.89<br>(10.86 to 25.14)          | 14.88<br>(8.28 to 19.94)           | 1.16<br>(0.56 to 1.44)        | 2.59<br>(1.31 to 3.60)        | 2.84<br>(1.50 to 3.91)        | 2.12<br>(1.07 to 2.95)        |
| Iodine deficiency                                                       | 0.36<br>(0.03 to 1.10)              | 1.24<br>(0.02 to 4.63)             | 1.27<br>(0.02 to 4.89)             | 1.15<br>(0.05 to 4.10)             | 0.03<br>(0.00 to 0.10)        | 0.15<br>(0.00 to 0.72)        | 0.16<br>(0.00 to 0.77)        | 0.13<br>(0.00 to 0.62)        |
| Dietary iron deficiency                                                 | 0.66<br>(0.47 to 0.78)              | 0.76<br>(0.53 to 1.10)             | 0.77<br>(0.54 to 1.13)             | 0.74<br>(0.51 to 1.04)             | 0.02<br>(0.01 to 0.03)        | 0.02<br>(0.02 to 0.06)        | 0.03<br>(0.02 to 0.07)        | 0.03<br>(0.02 to 0.05)        |
| Other nutritional deficiencies                                          | 3.19<br>(3.99 to 8.93)              | 5.83<br>(3.77 to 12.28)            | 5.84<br>(3.71 to 12.72)            | 5.61<br>(3.60 to 11.29)            | 0.55<br>(0.39 to 1.10)        | 0.75<br>(0.43 to 1.79)        | 0.77<br>(0.43 to 1.88)        | 0.68<br>(0.40 to 1.59)        |
| <b>Other communicable, maternal, neonatal, and nutritional diseases</b> | <b>40.71</b><br>(35.66 to 51.87)    | <b>74.54</b><br>(62.47 to 92.18)   | <b>74.76</b><br>(62.33 to 92.32)   | <b>73.13</b><br>(61.21 to 91.19)   | <b>1.79</b><br>(1.57 to 2.11) | <b>4.48</b><br>(3.79 to 5.27) | <b>4.59</b><br>(3.85 to 5.43) | <b>4.20</b><br>(3.55 to 4.92) |
| Sexually transmitted infections excluding HIV                           | 1.63<br>(1.38 to 2.50)              | 1.75<br>(1.34 to 2.52)             | 1.72<br>(1.31 to 2.44)             | 1.77<br>(1.35 to 2.55)             | 0.08<br>(0.07 to 0.13)        | 0.12<br>(0.09 to 0.16)        | 0.12<br>(0.09 to 0.17)        | 0.11<br>(0.09 to 0.16)        |
| Syphilis                                                                | 0.54<br>(0.44 to 0.92)              | 0.46<br>(0.34 to 0.81)             | 0.44<br>(0.32 to 0.73)             | 0.49<br>(0.35 to 0.81)             | 0.03<br>(0.02 to 0.05)        | 0.03<br>(0.02 to 0.05)        | 0.03<br>(0.02 to 0.05)        | 0.03<br>(0.02 to 0.05)        |
| Chlamydial infection                                                    | 0.22<br>(0.18 to 0.27)              | 0.26<br>(0.19 to 0.38)             | 0.25<br>(0.19 to 0.38)             | 0.25<br>(0.19 to 0.38)             | 0.01<br>(0.01 to 0.01)        | 0.02<br>(0.01 to 0.05)        | 0.02<br>(0.01 to 0.03)        | 0.02<br>(0.01 to 0.03)        |
| Gonococcal infection                                                    | 0.60<br>(0.51 to 0.76)              | 0.74<br>(0.55 to 1.08)             | 0.74<br>(0.54 to 1.08)             | 0.74<br>(0.55 to 1.07)             | 0.03<br>(0.03 to 0.04)        | 0.05<br>(0.04 to 0.07)        | 0.05<br>(0.04 to 0.08)        | 0.05<br>(0.04 to 0.07)        |
| Other sexually transmitted infections                                   | 0.27<br>(0.23 to 0.35)              | 0.30<br>(0.22 to 0.44)             | 0.29<br>(0.22 to 0.43)             | 0.30<br>(0.22 to 0.44)             | 0.01<br>(0.01 to 0.01)        | 0.02<br>(0.01 to 0.02)        | 0.02<br>(0.01 to 0.02)        | 0.02<br>(0.01 to 0.02)        |
| Acute hepatitis                                                         | 4.49<br>(3.88 to 5.22)              | 3.35<br>(2.28 to 4.85)             | 3.08<br>(2.11 to 4.43)             | 3.77<br>(2.53 to 5.55)             | 0.19<br>(0.16 to 0.22)        | 0.19<br>(0.13 to 0.27)        | 0.17<br>(0.12 to 0.26)        | 0.20<br>(0.13 to 0.30)        |
| Acute hepatitis A                                                       | 0.24<br>(0.17 to 0.31)              | 0.11<br>(0.07 to 0.18)             | 0.11<br>(0.06 to 0.17)             | 0.12<br>(0.07 to 0.19)             | 0.01<br>(0.00 to 0.01)        | 0.00<br>(0.00 to 0.01)        | 0.00<br>(0.00 to 0.01)        | 0.01<br>(0.00 to 0.01)        |
| Acute hepatitis B                                                       | 3.19<br>(2.64 to 3.75)              | 2.47<br>(1.61 to 3.71)             | 2.26<br>(1.50 to 3.36)             | 2.80<br>(1.79 to 4.26)             | 0.13<br>(0.11 to 0.16)        | 0.13<br>(0.08 to 0.20)        | 0.12<br>(0.07 to 0.18)        | 0.14<br>(0.09 to 0.22)        |

|                                       |                                                               |                                                               |                                                               |                                                               |                                                            |                                                            |                                                            |                                                            |
|---------------------------------------|---------------------------------------------------------------|---------------------------------------------------------------|---------------------------------------------------------------|---------------------------------------------------------------|------------------------------------------------------------|------------------------------------------------------------|------------------------------------------------------------|------------------------------------------------------------|
|                                       | 0.27<br>(0.19 to<br>0.37)                                     | 0.20<br>(0.11 to<br>0.31)                                     | 0.18<br>(0.10 to<br>0.29)                                     | 0.22<br>(0.13 to<br>0.36)                                     | 0.01<br>(0.01 to<br>0.02)                                  | 0.01<br>(0.01 to<br>0.02)                                  | 0.01<br>(0.01 to<br>0.02)                                  | 0.01<br>(0.01 to<br>0.02)                                  |
| Acute hepatitis C                     |                                                               |                                                               |                                                               |                                                               |                                                            |                                                            |                                                            |                                                            |
|                                       | 0.80<br>(0.58 to<br>1.05)                                     | 0.57<br>(0.30 to<br>0.95)                                     | 0.53<br>(0.29 to<br>0.87)                                     | 0.62<br>(0.33 to<br>1.08)                                     | 0.04<br>(0.02 to<br>0.06)                                  | 0.04<br>(0.02 to<br>0.07)                                  | 0.04<br>(0.02 to<br>0.07)                                  | 0.05<br>(0.02 to<br>0.08)                                  |
| Acute hepatitis E                     |                                                               |                                                               |                                                               |                                                               |                                                            |                                                            |                                                            |                                                            |
|                                       | 34.59<br>(29.95 to<br>45.73)                                  | 69.44<br>(57.15 to<br>87.48)                                  | 69.96<br>(57.69 to<br>87.87)                                  | 67.59<br>(56.06 to<br>84.94)                                  | 1.52<br>(1.30 to<br>1.83)                                  | 4.18<br>(3.47 to<br>4.94)                                  | 4.30<br>(3.54 to<br>5.07)                                  | 3.88<br>(3.22 to<br>4.59)                                  |
| Other unspecified infectious diseases |                                                               |                                                               |                                                               |                                                               |                                                            |                                                            |                                                            |                                                            |
| <b>Non-communicable diseases</b>      | <b>27,678.41</b><br><b>(25,558.35 to</b><br><b>29,980.29)</b> | <b>37,117.02</b><br><b>(30,576.98 to</b><br><b>45,303.71)</b> | <b>33,768.66</b><br><b>(28,047.58 to</b><br><b>40,597.62)</b> | <b>47,141.74</b><br><b>(38,423.34 to</b><br><b>57,361.26)</b> | <b>2,018.78</b><br><b>(1,880.29 to</b><br><b>2,171.17)</b> | <b>3,250.26</b><br><b>(2,672.57 to</b><br><b>3,897.62)</b> | <b>3,013.21</b><br><b>(2,486.40 to</b><br><b>3,594.20)</b> | <b>3,883.14</b><br><b>(3,173.54 to</b><br><b>4,595.49)</b> |

| Iceland                              |                                              |                                              |                                              |                                              |                                     |                                         |                                         |                                           |
|--------------------------------------|----------------------------------------------|----------------------------------------------|----------------------------------------------|----------------------------------------------|-------------------------------------|-----------------------------------------|-----------------------------------------|-------------------------------------------|
| Cause                                | YLLs (actual counts)                         |                                              |                                              |                                              | Deaths (actual counts)              |                                         |                                         |                                           |
|                                      | 2016                                         | 2040 Forecast                                | 2040 Better Scenario                         | 2040 Worse Scenario                          | 2016                                | 2040 Forecast                           | 2040 Better Scenario                    | 2040 Worse Scenario                       |
| <b>Neoplasms</b>                     | <b>11,929.05</b><br>(10,956.70 to 12,966.05) | <b>15,739.47</b><br>(13,128.40 to 18,832.52) | <b>14,617.34</b><br>(12,182.77 to 17,577.33) | <b>20,953.46</b><br>(17,170.85 to 25,415.37) | <b>669.59</b><br>(618.44 to 722.84) | <b>1,076.36</b><br>(915.94 to 1,256.19) | <b>1,022.99</b><br>(869.20 to 1,193.52) | <b>1,371.75</b><br>(1,151.11 to 1,613.87) |
| Lip and oral cavity cancer           | 143.27<br>(128.05 to 160.38)                 | 166.49<br>(88.57 to 286.36)                  | 114.69<br>(66.84 to 188.86)                  | 304.92<br>(153.49 to 531.89)                 | 7.25<br>(6.54 to 8.06)              | 9.60<br>(5.16 to 16.44)                 | 6.87<br>(4.06 to 11.20)                 | 17.30<br>(8.94 to 29.66)                  |
| Nasopharynx cancer                   | 31.99<br>(28.67 to 35.82)                    | 44.63<br>(25.57 to 73.66)                    | 29.67<br>(18.03 to 46.96)                    | 84.28<br>(45.43 to 147.02)                   | 1.49<br>(1.35 to 1.66)              | 2.40<br>(1.41 to 4.00)                  | 1.66<br>(1.02 to 2.72)                  | 4.53<br>(2.44 to 7.93)                    |
| Other pharynx cancer                 | 51.62<br>(46.01 to 57.49)                    | 89.78<br>(45.60 to 153.84)                   | 64.04<br>(36.24 to 107.10)                   | 93.26<br>(46.55 to 160.89)                   | 2.22<br>(1.99 to 2.46)              | 4.40<br>(2.31 to 7.65)                  | 3.20<br>(1.85 to 5.31)                  | 4.46<br>(2.32 to 7.81)                    |
| Esophageal cancer                    | 402.34<br>(358.43 to 448.34)                 | 518.51<br>(303.46 to 836.85)                 | 384.43<br>(244.22 to 590.08)                 | 877.31<br>(472.42 to 1,509.55)               | 21.61<br>(19.42 to 23.84)           | 31.27<br>(19.23 to 48.83)               | 23.94<br>(15.64 to 35.44)               | 52.51<br>(29.39 to 88.33)                 |
| Stomach cancer                       | 478.08<br>(434.47 to 524.43)                 | 486.03<br>(374.78 to 628.85)                 | 453.08<br>(354.91 to 570.99)                 | 590.18<br>(434.86 to 776.96)                 | 30.66<br>(27.93 to 33.45)           | 38.21<br>(29.81 to 49.37)               | 36.27<br>(28.77 to 45.76)               | 44.75<br>(33.32 to 59.22)                 |
| Colon and rectum cancer              | 1,016.92<br>(924.09 to 1,121.71)             | 1,502.37<br>(1,022.73 to 2,177.83)           | 1,266.85<br>(887.23 to 1,784.61)             | 1,820.05<br>(1,215.02 to 2,668.26)           | 65.86<br>(60.03 to 72.61)           | 119.13<br>(79.63 to 170.20)             | 102.75<br>(70.70 to 142.62)             | 139.19<br>(93.03 to 200.76)               |
| Liver cancer                         | 292.15<br>(259.05 to 329.18)                 | 492.33<br>(325.12 to 749.32)                 | 434.33<br>(295.01 to 641.08)                 | 651.48<br>(391.14 to 1,054.84)               | 16.63<br>(14.84 to 18.67)           | 32.34<br>(21.80 to 47.49)               | 29.43<br>(20.46 to 42.74)               | 41.27<br>(25.66 to 65.14)                 |
| Liver cancer due to hepatitis B      | 54.34<br>(37.18 to 76.24)                    | 81.83<br>(46.36 to 140.27)                   | 77.98<br>(45.32 to 130.49)                   | 106.50<br>(55.59 to 197.61)                  | 2.65<br>(1.70 to 3.78)              | 4.66<br>(2.61 to 7.78)                  | 4.54<br>(2.60 to 7.40)                  | 5.87<br>(3.11 to 10.57)                   |
| Liver cancer due to hepatitis C      | 92.54<br>(71.78 to 116.00)                   | 154.08<br>(95.91 to 239.73)                  | 149.40<br>(95.78 to 227.45)                  | 196.20<br>(114.00 to 328.09)                 | 3.85<br>(4.61 to 7.35)              | 5.85<br>(7.17 to 16.99)                 | 11.20<br>(7.22 to 16.43)                | 13.86<br>(8.26 to 22.02)                  |
| Liver cancer due to alcohol use      | 92.67<br>(69.85 to 120.28)                   | 166.57<br>(98.05 to 275.86)                  | 120.93<br>(71.73 to 194.98)                  | 231.72<br>(124.32 to 407.02)                 | 5.10<br>(3.82 to 6.68)              | 10.30<br>(6.15 to 16.85)                | 7.75<br>(4.61 to 12.58)                 | 13.89<br>(7.71 to 23.77)                  |
| Liver cancer due to other causes     | 52.59<br>(36.30 to 70.93)                    | 89.85<br>(51.25 to 152.20)                   | 86.02<br>(49.90 to 139.22)                   | 117.07<br>(62.88 to 205.78)                  | 3.04<br>(2.10 to 4.11)              | 6.07<br>(3.44 to 9.48)                  | 5.93<br>(3.44 to 9.48)                  | 7.66<br>(4.11 to 13.58)                   |
| Gallbladder and biliary tract cancer | 120.06<br>(107.57 to 133.63)                 | 136.13<br>(116.40 to 156.59)                 | 137.51<br>(116.17 to 159.54)                 | 131.25<br>(113.23 to 149.05)                 | 7.79<br>(7.00 to 8.62)              | 10.56<br>(9.14 to 12.02)                | 10.84<br>(9.27 to 12.44)                | 9.81<br>(8.63 to 10.98)                   |
| Pancreatic cancer                    | 824.20<br>(746.43 to 911.22)                 | 1,209.14<br>(972.89 to 1,509.67)             | 1,215.90<br>(976.52 to 1,521.47)             | 1,450.33<br>(1,137.26 to 1,852.20)           | 47.84<br>(43.38 to 52.65)           | 81.71<br>(67.07 to 101.14)              | 83.38<br>(67.73 to 103.34)              | 95.67<br>(76.14 to 121.00)                |
| Larynx cancer                        | 51.57<br>(46.03 to 57.86)                    | 44.20<br>(24.03 to 73.00)                    | 33.90<br>(19.19 to 53.91)                    | 89.62<br>(45.86 to 169.80)                   | 2.61<br>(2.36 to 2.89)              | 2.49<br>(1.35 to 4.09)                  | 1.98<br>(1.13 to 3.12)                  | 5.07<br>(2.62 to 9.33)                    |
| Tracheal, bronchus, and lung cancer  | 2,762.87<br>(2,506.55 to 3,048.80)           | 2,539.96<br>(1,880.08 to 3,324.00)           | 2,211.83<br>(1,654.94 to 2,920.58)           | 5,720.52<br>(4,160.96 to 7,707.61)           | 148.57<br>(134.74 to 163.16)        | 154.58<br>(115.79 to 204.18)            | 137.34<br>(103.60 to 180.00)            | 345.90<br>(255.03 to 459.67)              |
| Malignant skin melanoma              | 208.08<br>(165.34 to 239.68)                 | 302.01<br>(229.31 to 369.55)                 | 318.89<br>(242.49 to 394.46)                 | 273.63<br>(209.55 to 335.93)                 | 9.51<br>(7.59 to 10.91)             | 17.35<br>(13.36 to 20.56)               | 18.62<br>(14.30 to 22.21)               | 15.13<br>(11.79 to 17.98)                 |
| Non-melanoma skin cancer             | 22.62<br>(20.51 to 24.95)                    | 37.62<br>(31.29 to 44.43)                    | 36.61<br>(30.39 to 43.47)                    | 38.23<br>(32.00 to 45.22)                    | 1.63<br>(1.49 to 1.79)              | 3.42<br>(2.83 to 4.03)                  | 3.41<br>(2.80 to 4.04)                  | 3.31<br>(2.78 to 3.94)                    |
| Breast cancer                        | 915.75<br>(792.03 to 1,054.45)               | 1,142.37<br>(790.81 to 1,639.85)             | 960.13<br>(683.84 to 1,344.29)               | 1,375.49<br>(922.62 to 2,051.65)             | 45.63<br>(39.78 to 52.02)           | 71.04<br>(50.23 to 98.56)               | 61.13<br>(44.25 to 82.27)               | 82.53<br>(55.98 to 117.45)                |
| Cervical cancer                      | 111.93<br>(94.59 to 131.24)                  | 102.20<br>(69.94 to 148.79)                  | 96.01<br>(66.28 to 139.56)                   | 127.71<br>(79.69 to 201.24)                  | 4.90<br>(4.18 to 5.67)              | 5.47<br>(3.89 to 7.64)                  | 5.22<br>(3.76 to 7.21)                  | 6.66<br>(4.33 to 10.00)                   |

|                   |                                 |                                       |                                       |                                       |                              |                                 |                                 |                                 |
|-------------------|---------------------------------|---------------------------------------|---------------------------------------|---------------------------------------|------------------------------|---------------------------------|---------------------------------|---------------------------------|
|                   | 67.57<br>(57.07 to<br>80.64)    | 128.48<br>(101.34 to<br>162.70)       | 125.22<br>(99.07 to<br>157.04)        | 131.72<br>(104.17 to<br>163.52)       | 4.10<br>(3.49 to<br>4.83)    | 9.33<br>(7.53 to<br>11.37)      | 9.21<br>(7.38 to<br>11.22)      | 9.29<br>(7.49 to<br>11.10)      |
| Uterine cancer    |                                 |                                       |                                       |                                       |                              |                                 |                                 |                                 |
|                   | 286.57<br>(244.92 to<br>332.70) | 401.64<br>(293.24 to<br>543.76)       | 377.90<br>(277.26 to<br>508.03)       | 434.81<br>(312.03 to<br>605.29)       | 14.87<br>(12.75 to<br>17.17) | 25.03<br>(18.60 to<br>33.15)    | 23.51<br>(17.67 to<br>30.66)    | 26.62<br>(19.48 to<br>36.26)    |
| Ovarian cancer    |                                 |                                       |                                       |                                       |                              |                                 |                                 |                                 |
|                   | 711.40<br>(599.76 to<br>839.03) | 1,417.10<br>(1,108.58 to<br>1,751.30) | 1,424.59<br>(1,110.23 to<br>1,785.15) | 1,418.18<br>(1,121.85 to<br>1,758.50) | 59.92<br>(51.15 to<br>69.56) | 139.03<br>(108.90 to<br>171.85) | 142.35<br>(111.60 to<br>177.27) | 133.91<br>(106.10 to<br>164.76) |
| Prostate cancer   |                                 |                                       |                                       |                                       |                              |                                 |                                 |                                 |
|                   | 6.67<br>(5.45 to<br>7.99)       | 6.81<br>(4.42 to<br>10.56)            | 6.57<br>(4.31 to<br>10.23)            | 7.16<br>(4.73 to<br>11.04)            | 0.17<br>(0.15 to<br>0.20)    | 0.24<br>(0.18 to<br>0.32)       | 0.24<br>(0.18 to<br>0.32)       | 0.24<br>(0.18 to<br>0.32)       |
| Testicular cancer |                                 |                                       |                                       |                                       |                              |                                 |                                 |                                 |

| Iceland                         |                                                  |                                                   |                                                   |                                                    |                                            |                                              |                                              |                                                |
|---------------------------------|--------------------------------------------------|---------------------------------------------------|---------------------------------------------------|----------------------------------------------------|--------------------------------------------|----------------------------------------------|----------------------------------------------|------------------------------------------------|
| Cause                           | YLLs (actual counts)                             |                                                   |                                                   |                                                    | Deaths (actual counts)                     |                                              |                                              |                                                |
|                                 | 2016                                             | 2040 Forecast                                     | 2040 Better Scenario                              | 2040 Worse Scenario                                | 2016                                       | 2040 Forecast                                | 2040 Better Scenario                         | 2040 Worse Scenario                            |
| Kidney cancer                   | 546.93<br>(492.14 to 605.13)                     | 832.28<br>(676.50 to 1,011.81)                    | 849.01<br>(686.93 to 1,034.59)                    | 928.19<br>(727.00 to 1,182.66)                     | 30.69<br>(27.77 to 33.87)                  | 56.53<br>(47.28 to 67.15)                    | 58.75<br>(48.78 to 70.72)                    | 61.10<br>(48.94 to 75.39)                      |
| Bladder cancer                  | 262.48<br>(236.01 to 292.02)                     | 378.82<br>(296.46 to 485.40)                      | 377.46<br>(295.42 to 483.79)                      | 499.13<br>(369.55 to 664.67)                       | 19.64<br>(17.70 to 21.89)                  | 33.90<br>(26.47 to 43.67)                    | 34.44<br>(26.72 to 44.69)                    | 43.25<br>(32.08 to 58.06)                      |
| Brain and nervous system cancer | 809.46<br>(672.08 to 920.65)                     | 1,080.70<br>(828.49 to 1,336.25)                  | 1,065.44<br>(824.99 to 1,328.61)                  | 1,092.05<br>(846.61 to 1,340.06)                   | 29.53<br>(23.79 to 33.16)                  | 48.53<br>(37.45 to 57.51)                    | 48.45<br>(37.28 to 57.48)                    | 47.75<br>(36.88 to 55.79)                      |
| Thyroid cancer                  | 99.63<br>(88.30 to 111.76)                       | 141.91<br>(103.73 to 201.82)                      | 133.39<br>(99.91 to 186.43)                       | 156.96<br>(110.99 to 231.50)                       | 5.78<br>(5.15 to 6.44)                     | 9.91<br>(7.32 to 13.94)                      | 9.51<br>(7.21 to 13.22)                      | 10.48<br>(7.55 to 15.05)                       |
| Mesothelioma                    | 68.48<br>(59.90 to 86.65)                        | 117.99<br>(98.14 to 155.00)                       | 120.85<br>(99.91 to 158.73)                       | 111.42<br>(93.70 to 145.24)                        | 3.86<br>(3.42 to 4.89)                     | 7.96<br>(6.71 to 10.04)                      | 8.26<br>(6.85 to 10.45)                      | 7.29<br>(6.24 to 9.14)                         |
| Hodgkin lymphoma                | 28.79<br>(25.18 to 36.82)                        | 27.83<br>(21.35 to 37.66)                         | 26.13<br>(20.07 to 35.12)                         | 30.36<br>(23.13 to 41.21)                          | 1.07<br>(0.94 to 1.30)                     | 1.34<br>(1.07 to 1.69)                       | 1.27<br>(1.03 to 1.59)                       | 1.41<br>(1.13 to 1.80)                         |
| Non-Hodgkin lymphoma            | 346.05<br>(304.73 to 406.90)                     | 472.89<br>(375.35 to 612.97)                      | 455.48<br>(361.54 to 585.92)                      | 499.11<br>(386.59 to 657.37)                       | 18.23<br>(16.17 to 21.02)                  | 30.87<br>(25.04 to 38.80)                    | 30.29<br>(24.64 to 37.72)                    | 31.27<br>(25.13 to 39.54)                      |
| Multiple myeloma                | 256.71<br>(208.46 to 301.82)                     | 418.47<br>(324.99 to 537.00)                      | 409.52<br>(318.98 to 521.61)                      | 431.69<br>(333.34 to 560.75)                       | 15.92<br>(13.20 to 18.61)                  | 30.61<br>(24.10 to 38.63)                    | 30.47<br>(24.04 to 38.11)                    | 30.39<br>(23.85 to 39.12)                      |
| Leukemia                        | 467.31<br>(425.36 to 514.40)                     | 674.15<br>(529.96 to 857.69)                      | 653.56<br>(517.03 to 827.18)                      | 784.14<br>(587.50 to 1,025.65)                     | 23.75<br>(21.60 to 26.06)                  | 44.25<br>(35.04 to 55.41)                    | 43.84<br>(34.75 to 54.78)                    | 49.75<br>(37.71 to 65.86)                      |
| Acute lymphoid leukemia         | 57.09<br>(46.51 to 70.99)                        | 54.37<br>(36.38 to 84.23)                         | 51.16<br>(34.40 to 80.52)                         | 63.88<br>(42.73 to 100.25)                         | 1.54<br>(1.21 to 1.87)                     | 1.82<br>(2.51)                               | 1.74<br>(2.40)                               | 2.14<br>(1.49 to 3.02)                         |
| Chronic lymphoid leukemia       | 46.18<br>(34.58 to 67.79)                        | 84.63<br>(56.74 to 127.68)                        | 83.69<br>(55.99 to 126.45)                        | 96.23<br>(62.36 to 148.46)                         | 3.27<br>(2.50 to 4.89)                     | 7.40<br>(5.08 to 11.16)                      | 7.47<br>(5.12 to 11.27)                      | 8.07<br>(5.35 to 12.61)                        |
| Acute myeloid leukemia          | 188.73<br>(164.44 to 231.74)                     | 333.81<br>(256.88 to 429.49)                      | 327.74<br>(254.03 to 421.42)                      | 381.10<br>(282.17 to 509.29)                       | 8.77<br>(7.53 to 11.20)                    | 19.92<br>(15.47 to 26.22)                    | 19.96<br>(15.47 to 26.33)                    | 22.05<br>(16.27 to 29.80)                      |
| Chronic myeloid leukemia        | 38.26<br>(28.17 to 45.73)                        | 29.37<br>(18.45 to 41.92)                         | 26.85<br>(16.90 to 38.17)                         | 37.87<br>(23.43 to 56.99)                          | 2.36<br>(1.72 to 2.82)                     | 2.18<br>(1.38 to 3.06)                       | 2.04<br>(1.32 to 2.86)                       | 2.69<br>(1.67 to 4.02)                         |
| Other leukemia                  | 137.05<br>(105.93 to 158.67)                     | 171.97<br>(117.62 to 228.40)                      | 164.12<br>(112.01 to 217.85)                      | 205.06<br>(137.25 to 290.14)                       | 7.81<br>(6.06 to 9.06)                     | 12.93<br>(9.01 to 17.14)                     | 12.64<br>(8.67 to 16.75)                     | 14.79<br>(9.85 to 20.49)                       |
| Other neoplasms                 | 537.57<br>(484.47 to 594.45)                     | 826.64<br>(698.93 to 969.42)                      | 834.34<br>(703.25 to 987.08)                      | 800.26<br>(683.32 to 930.89)                       | 27.83<br>(24.86 to 30.86)                  | 54.82<br>(47.28 to 62.91)                    | 56.38<br>(48.34 to 65.49)                    | 50.89<br>(44.33 to 57.52)                      |
| <b>Cardiovascular diseases</b>  | <b>8,361.33</b><br><b>(7,713.93 to 9,017.82)</b> | <b>9,044.88</b><br><b>(6,137.02 to 13,442.48)</b> | <b>7,133.63</b><br><b>(4,980.13 to 10,003.20)</b> | <b>12,332.52</b><br><b>(7,956.81 to 18,378.04)</b> | <b>765.87</b><br><b>(715.44 to 818.63)</b> | <b>987.90</b><br><b>(660.61 to 1,419.48)</b> | <b>812.07</b><br><b>(559.35 to 1,125.60)</b> | <b>1,218.47</b><br><b>(800.54 to 1,763.40)</b> |
| Rheumatic heart disease         | 64.19<br>(57.24 to 71.83)                        | 60.13<br>(47.23 to 78.20)                         | 57.01<br>(45.35 to 72.85)                         | 62.94<br>(48.57 to 82.43)                          | 4.84<br>(4.35 to 5.33)                     | 5.87<br>(4.60 to 7.62)                       | 5.69<br>(4.50 to 7.28)                       | 5.86<br>(4.57 to 7.68)                         |
| Ischemic heart disease          | 5,137.86<br>(4,724.48 to 5,583.58)               | 4,876.54<br>(2,735.92 to 8,155.52)                | 3,577.48<br>(2,093.94 to 5,746.05)                | 7,244.87<br>(3,981.95 to 12,027.15)                | 463.81<br>(430.48 to 498.66)               | 523.89<br>(295.38 to 851.07)                 | 404.52<br>(231.82 to 635.05)                 | 694.92<br>(388.62 to 1,131.61)                 |
| Stroke                          | 1,689.62<br>(1,491.06 to 1,888.06)               | 1,534.69<br>(964.90 to 2,416.36)                  | 1,155.85<br>(744.87 to 1,704.11)                  | 2,189.13<br>(1,295.90 to 3,514.67)                 | 162.97<br>(142.69 to 184.15)               | 174.68<br>(107.09 to 282.40)                 | 138.55<br>(86.87 to 215.77)                  | 224.24<br>(135.54 to 368.38)                   |
| Ischemic stroke                 | 781.80<br>(682.12 to 891.41)                     | 698.03<br>(376.91 to 1,279.15)                    | 562.51<br>(321.51 to 1,003.16)                    | 923.49<br>(496.82 to 1,812.24)                     | 87.25<br>(75.35 to 99.36)                  | 88.52<br>(46.72 to 168.49)                   | 73.85<br>(40.64 to 135.29)                   | 108.54<br>(56.95 to 213.52)                    |



|                                |                                   |                                   |                                 |                                     |                              |                               |                              |                                |
|--------------------------------|-----------------------------------|-----------------------------------|---------------------------------|-------------------------------------|------------------------------|-------------------------------|------------------------------|--------------------------------|
| Intracerebral hemorrhage       | 907.81<br>(805.31 to<br>1,013.17) | 836.66<br>(505.27 to<br>1,354.27) | 593.33<br>(386.16 to<br>877.28) | 1,265.63<br>(715.01 to<br>2,123.52) | 75.72<br>(66.29 to<br>85.54) | 86.16<br>(52.74 to<br>135.20) | 64.70<br>(42.09 to<br>94.32) | 115.70<br>(67.21 to<br>191.01) |
| Hypertensive heart disease     | 196.85<br>(128.45 to<br>249.12)   | 449.56<br>(210.67 to<br>877.40)   | 345.70<br>(170.67 to<br>585.36) | 537.72<br>(252.34 to<br>1,094.89)   | 19.12<br>(10.04 to<br>24.12) | 53.50<br>(20.99 to<br>109.98) | 42.17<br>(17.73 to<br>76.81) | 60.15<br>(23.58 to<br>130.60)  |
| Cardiomyopathy and myocarditis | 127.63<br>(101.31 to<br>145.39)   | 182.21<br>(118.38 to<br>251.37)   | 170.16<br>(107.34 to<br>232.64) | 188.29<br>(121.48 to<br>264.24)     | 10.11<br>(6.57 to<br>12.19)  | 18.42<br>(10.18 to<br>27.83)  | 17.94<br>(9.75 to<br>26.78)  | 17.99<br>(9.88 to<br>27.35)    |
| Myocarditis                    | 37.95<br>(29.85 to<br>44.35)      | 63.31<br>(42.83 to<br>80.53)      | 65.05<br>(43.66 to<br>83.89)    | 59.14<br>(41.40 to<br>74.74)        | 3.23<br>(1.86 to<br>4.12)    | 7.09<br>(3.67 to<br>9.81)     | 7.50<br>(3.88 to<br>10.44)   | 6.23<br>(3.23 to<br>8.60)      |

| Iceland                                                       |                                                  |                                                  |                                                  |                                                  |                                            |                                            |                                            |                                            |
|---------------------------------------------------------------|--------------------------------------------------|--------------------------------------------------|--------------------------------------------------|--------------------------------------------------|--------------------------------------------|--------------------------------------------|--------------------------------------------|--------------------------------------------|
| Cause                                                         | YLLs (actual counts)                             |                                                  |                                                  |                                                  | Deaths (actual counts)                     |                                            |                                            |                                            |
|                                                               | 2016                                             | 2040 Forecast                                    | 2040 Better Scenario                             | 2040 Worse Scenario                              | 2016                                       | 2040 Forecast                              | 2040 Better Scenario                       | 2040 Worse Scenario                        |
| Alcoholic cardiomyopathy                                      | 17.30<br>(13.00 to 24.69)                        | 23.12<br>(16.03 to 31.69)                        | 17.60<br>(11.84 to 24.35)                        | 24.20<br>(16.94 to 33.06)                        | 0.76<br>(0.51 to 0.94)                     | 1.18<br>(0.74 to 1.57)                     | 0.92<br>(0.56 to 1.24)                     | 1.20<br>(0.77 to 1.58)                     |
| Other cardiomyopathy                                          | 72.38<br>(52.88 to 85.21)                        | 95.77<br>(50.69 to 154.12)                       | 87.51<br>(46.18 to 139.11)                       | 104.95<br>(56.76 to 168.68)                      | 6.13<br>(3.67 to 7.68)                     | 10.15<br>(4.53 to 17.98)                   | 9.52<br>(4.21 to 16.87)                    | 10.56<br>(4.72 to 18.91)                   |
| Atrial fibrillation and flutter                               | 276.60<br>(210.09 to 355.27)                     | 589.89<br>(402.09 to 827.92)                     | 546.23<br>(381.62 to 748.62)                     | 601.72<br>(412.20 to 845.27)                     | 32.25<br>(24.15 to 41.23)                  | 74.54<br>(50.66 to 105.71)                 | 70.34<br>(48.48 to 96.79)                  | 72.59<br>(49.42 to 102.55)                 |
| Aortic aneurysm                                               | 235.40<br>(209.68 to 259.90)                     | 340.95<br>(261.51 to 450.09)                     | 332.14<br>(260.09 to 429.51)                     | 366.89<br>(277.86 to 485.09)                     | 17.91<br>(16.11 to 19.77)                  | 31.35<br>(24.53 to 40.32)                  | 31.25<br>(24.79 to 39.67)                  | 31.54<br>(24.67 to 40.57)                  |
| Peripheral artery disease                                     | 31.60<br>(23.03 to 58.32)                        | 84.95<br>(51.91 to 160.03)                       | 84.45<br>(51.72 to 156.48)                       | 88.34<br>(54.93 to 165.01)                       | 3.51<br>(2.50 to 6.66)                     | 10.56<br>(6.38 to 20.11)                   | 10.73<br>(6.45 to 20.34)                   | 10.33<br>(6.24 to 19.59)                   |
| Endocarditis                                                  | 53.06<br>(39.03 to 68.22)                        | 94.93<br>(61.71 to 138.81)                       | 92.57<br>(60.63 to 133.60)                       | 94.66<br>(61.00 to 138.23)                       | 3.69<br>(2.60 to 4.65)                     | 8.14<br>(5.05 to 12.30)                    | 8.12<br>(5.09 to 12.20)                    | 7.73<br>(4.80 to 11.64)                    |
| Other cardiovascular and circulatory diseases                 | 548.53<br>(492.78 to 607.53)                     | 831.03<br>(636.88 to 1,088.98)                   | 772.05<br>(600.00 to 985.72)                     | 957.97<br>(716.78 to 1,281.28)                   | 47.66<br>(42.60 to 52.75)                  | 86.95<br>(67.28 to 111.63)                 | 82.77<br>(64.51 to 104.95)                 | 93.11<br>(71.10 to 121.43)                 |
| <b>Chronic respiratory diseases</b>                           | <b>1,330.25</b><br><b>(1,211.40 to 1,461.98)</b> | <b>1,455.97</b><br><b>(1,128.03 to 1,804.25)</b> | <b>1,410.47</b><br><b>(1,102.63 to 1,757.57)</b> | <b>2,674.15</b><br><b>(1,980.84 to 3,433.31)</b> | <b>111.62</b><br><b>(102.44 to 122.08)</b> | <b>139.35</b><br><b>(108.48 to 172.76)</b> | <b>137.96</b><br><b>(107.11 to 171.33)</b> | <b>250.32</b><br><b>(188.13 to 320.31)</b> |
| Chronic obstructive pulmonary disease                         | 1,129.26<br>(1,023.00 to 1,249.95)               | 1,122.49<br>(817.86 to 1,450.29)                 | 1,055.25<br>(777.00 to 1,368.27)                 | 2,364.01<br>(1,696.51 to 3,124.36)               | 98.67<br>(90.10 to 108.67)                 | 112.44<br>(82.72 to 146.22)                | 108.79<br>(80.02 to 141.54)                | 226.33<br>(165.79 to 293.97)               |
| Pneumoconiosis                                                | 2.78<br>(2.37 to 3.20)                           | 6.61<br>(5.10 to 8.37)                           | 6.99<br>(5.26 to 8.93)                           | 5.98<br>(4.70 to 7.48)                           | 0.21<br>(0.18 to 0.24)                     | 0.60<br>(0.46 to 0.77)                     | 0.65<br>(0.49 to 0.83)                     | 0.53<br>(0.41 to 0.67)                     |
| Silicosis                                                     | 0.12<br>(0.06 to 0.16)                           | 0.15<br>(0.09 to 0.25)                           | 0.15<br>(0.08 to 0.24)                           | 0.16<br>(0.09 to 0.25)                           | 0.01<br>(0.01 to 0.01)                     | 0.01<br>(0.01 to 0.03)                     | 0.01<br>(0.01 to 0.02)                     | 0.01<br>(0.01 to 0.02)                     |
| Asbestosis                                                    | 1.71<br>(1.37 to 2.38)                           | 5.31<br>(3.86 to 7.06)                           | 5.71<br>(4.09 to 7.54)                           | 4.61<br>(3.36 to 6.07)                           | 0.12<br>(0.10 to 0.17)                     | 0.47<br>(0.34 to 0.63)                     | 0.51<br>(0.36 to 0.69)                     | 0.39<br>(0.28 to 0.53)                     |
| Coal workers pneumoconiosis                                   | 0.15<br>(0.08 to 0.21)                           | 0.27<br>(0.13 to 0.47)                           | 0.27<br>(0.13 to 0.46)                           | 0.29<br>(0.14 to 0.52)                           | 0.01<br>(0.01 to 0.02)                     | 0.03<br>(0.01 to 0.05)                     | 0.03<br>(0.01 to 0.05)                     | 0.03<br>(0.01 to 0.05)                     |
| Other pneumoconiosis                                          | 0.79<br>(0.34 to 1.03)                           | 0.88<br>(0.54 to 1.24)                           | 0.87<br>(0.54 to 1.24)                           | 0.92<br>(0.55 to 1.29)                           | 0.07<br>(0.03 to 0.08)                     | 0.09<br>(0.06 to 0.13)                     | 0.10<br>(0.06 to 0.14)                     | 0.09<br>(0.06 to 0.13)                     |
| Asthma                                                        | 60.41<br>(51.66 to 72.88)                        | 35.04<br>(20.41 to 58.54)                        | 30.13<br>(18.10 to 50.99)                        | 51.12<br>(28.09 to 88.09)                        | 3.61<br>(3.07 to 4.24)                     | 2.85<br>(1.70 to 4.73)                     | 2.52<br>(1.51 to 4.16)                     | 3.87<br>(2.18 to 6.60)                     |
| Interstitial lung disease and pulmonary sarcoidosis           | 130.61<br>(87.06 to 161.28)                      | 279.04<br>(191.39 to 345.19)                     | 305.08<br>(214.84 to 376.29)                     | 238.95<br>(158.42 to 309.75)                     | 8.77<br>(5.99 to 10.80)                    | 22.56<br>(15.72 to 28.04)                  | 25.07<br>(18.13 to 31.05)                  | 18.63<br>(12.82 to 23.96)                  |
| Other chronic respiratory diseases                            | 7.18<br>(5.16 to 12.78)                          | 12.79<br>(8.27 to 22.08)                         | 13.02<br>(8.36 to 22.42)                         | 14.08<br>(9.06 to 24.33)                         | 0.36<br>(0.26 to 0.60)                     | 0.89<br>(0.56 to 1.48)                     | 0.94<br>(0.58 to 1.57)                     | 0.96<br>(0.60 to 1.59)                     |
| <b>Cirrhosis and other chronic liver diseases</b>             | <b>345.55</b><br><b>(308.90 to 386.44)</b>       | <b>432.17</b><br><b>(358.40 to 530.25)</b>       | <b>344.84</b><br><b>(285.35 to 424.61)</b>       | <b>479.15</b><br><b>(396.65 to 582.30)</b>       | <b>15.87</b><br><b>(14.34 to 17.60)</b>    | <b>23.44</b><br><b>(20.07 to 27.60)</b>    | <b>19.19</b><br><b>(16.29 to 22.65)</b>    | <b>25.12</b><br><b>(21.50 to 29.25)</b>    |
| Cirrhosis and other chronic liver diseases due to hepatitis B | 72.50<br>(56.72 to 90.50)                        | 84.52<br>(62.91 to 113.13)                       | 81.24<br>(60.33 to 107.37)                       | 88.24<br>(65.12 to 118.08)                       | 3.37<br>(2.65 to 4.26)                     | 4.66<br>(3.45 to 6.18)                     | 4.54<br>(3.41 to 5.95)                     | 4.71<br>(3.50 to 6.23)                     |
| Cirrhosis and other chronic liver diseases due to hepatitis C | 62.00<br>(43.55 to 86.97)                        | 73.50<br>(49.63 to 103.91)                       | 70.23<br>(48.05 to 98.52)                        | 77.46<br>(51.68 to 111.63)                       | 2.73<br>(1.94 to 3.70)                     | 3.79<br>(2.59 to 5.20)                     | 3.67<br>(2.55 to 5.00)                     | 3.88<br>(2.63 to 5.39)                     |

|                                                                |                                                      |                                                          |                                                        |                                                          |                                                   |                                                     |                                                     |                                                    |
|----------------------------------------------------------------|------------------------------------------------------|----------------------------------------------------------|--------------------------------------------------------|----------------------------------------------------------|---------------------------------------------------|-----------------------------------------------------|-----------------------------------------------------|----------------------------------------------------|
|                                                                | 206.28<br>(176.52 to<br>241.44)                      | 269.12<br>(218.30 to<br>335.22)                          | 188.55<br>(151.14 to<br>238.93)                        | 308.18<br>(250.18 to<br>384.70)                          | 9.56<br>(8.25 to<br>11.10)                        | 14.70<br>(12.04 to<br>17.70)                        | 10.69<br>(8.74 to<br>13.05)                         | 16.25<br>(13.37 to<br>19.55)                       |
| Cirrhosis and other chronic liver diseases due to alcohol use  |                                                      |                                                          |                                                        |                                                          |                                                   |                                                     |                                                     |                                                    |
|                                                                | -4.76<br>(3.97 to<br>5.76)                           | 5.03<br>(3.90 to<br>6.52)                                | 4.83<br>(3.73 to<br>6.29)                              | -5.27<br>(4.09 to<br>6.86)                               | 0.21<br>(0.17 to<br>0.25)                         | 0.29<br>(0.22 to<br>0.36)                           | 0.28<br>(0.22 to<br>0.35)                           | 0.29<br>(0.23 to<br>0.37)                          |
| Cirrhosis and other chronic liver diseases due to other causes |                                                      |                                                          |                                                        |                                                          |                                                   |                                                     |                                                     |                                                    |
| <b>Digestive diseases</b>                                      | <b>607.67</b><br><b>(541.68 to</b><br><b>731.23)</b> | <b>1,018.40</b><br><b>(819.93 to</b><br><b>1,262.53)</b> | <b>984.46</b><br><b>(799.81 to</b><br><b>1,207.43)</b> | <b>1,039.88</b><br><b>(840.29 to</b><br><b>1,303.64)</b> | <b>49.75</b><br><b>(44.72 to</b><br><b>56.78)</b> | <b>101.65</b><br><b>(82.80 to</b><br><b>123.48)</b> | <b>100.81</b><br><b>(81.71 to</b><br><b>122.11)</b> | <b>99.16</b><br><b>(81.22 to</b><br><b>121.64)</b> |
| Peptic ulcer disease                                           | 64.94<br>(56.24 to<br>79.48)                         | 64.94<br>(48.59 to<br>83.94)                             | 61.07<br>(46.08 to<br>78.78)                           | 75.46<br>(55.21 to<br>103.48)                            | 5.33<br>(4.65 to<br>6.28)                         | 6.75<br>(4.98 to<br>8.71)                           | 6.47<br>(4.84 to<br>8.34)                           | 7.42<br>(5.51 to<br>10.00)                         |

| Iceland                                    |                                                   |                                                   |                                                   |                                                   |                                             |                                             |                                             |                                             |
|--------------------------------------------|---------------------------------------------------|---------------------------------------------------|---------------------------------------------------|---------------------------------------------------|---------------------------------------------|---------------------------------------------|---------------------------------------------|---------------------------------------------|
| Cause                                      | YLLs (actual counts)                              |                                                   |                                                   |                                                   | Deaths (actual counts)                      |                                             |                                             |                                             |
|                                            | 2016                                              | 2040 Forecast                                     | 2040 Better Scenario                              | 2040 Worse Scenario                               | 2016                                        | 2040 Forecast                               | 2040 Better Scenario                        | 2040 Worse Scenario                         |
| Gastritis and duodenitis                   | 8.34<br>(6.76 to 13.90)                           | 13.77<br>(9.75 to 22.82)                          | 13.31<br>(9.42 to 21.93)                          | 14.19<br>(10.07 to 23.78)                         | 0.59<br>(0.48 to 0.88)                      | 1.24<br>(0.85 to 1.91)                      | 1.22<br>(0.84 to 1.85)                      | 1.21<br>(0.85 to 1.85)                      |
| Appendicitis                               | 8.04<br>(6.54 to 12.33)                           | 9.34<br>(6.80 to 14.65)                           | 8.79<br>(6.50 to 13.42)                           | 10.08<br>(7.38 to 15.60)                          | 0.52<br>(0.42 to 0.74)                      | 0.78<br>(0.57 to 1.15)                      | 0.75<br>(0.55 to 1.10)                      | 0.80<br>(0.59 to 1.17)                      |
| Paralytic ileus and intestinal obstruction | 100.76<br>(71.59 to 121.76)                       | 181.88<br>(123.58 to 226.91)                      | 187.34<br>(128.64 to 235.42)                      | 168.81<br>(116.19 to 209.33)                      | 8.87<br>(6.07 to 11.00)                     | 19.17<br>(12.60 to 24.60)                   | 20.11<br>(13.17 to 25.99)                   | 17.06<br>(11.27 to 21.65)                   |
| Inguinal, femoral, and abdominal hernia    | 14.47<br>(11.60 to 22.00)                         | 15.58<br>(11.58 to 24.31)                         | 15.44<br>(11.52 to 24.20)                         | 15.34<br>(11.65 to 24.11)                         | 1.33<br>(1.06 to 2.05)                      | 1.69<br>(1.27 to 2.66)                      | 1.71<br>(1.25 to 2.66)                      | 1.60<br>(1.20 to 2.46)                      |
| Inflammatory bowel disease                 | 43.34<br>(36.68 to 56.21)                         | 76.31<br>(60.46 to 98.42)                         | 77.94<br>(61.18 to 99.72)                         | 72.07<br>(57.95 to 91.82)                         | 3.37<br>(2.83 to 4.03)                      | 7.30<br>(5.70 to 9.13)                      | 7.61<br>(5.89 to 9.57)                      | 6.57<br>(5.24 to 8.10)                      |
| Vascular intestinal disorders              | 92.29<br>(80.09 to 110.51)                        | 177.39<br>(143.54 to 214.47)                      | 178.11<br>(144.13 to 215.26)                      | 171.54<br>(140.88 to 205.55)                      | 8.01<br>(6.90 to 9.38)                      | 18.11<br>(14.60 to 22.04)                   | 18.49<br>(14.86 to 22.59)                   | 16.85<br>(13.76 to 20.19)                   |
| Gallbladder and biliary diseases           | 70.61<br>(61.83 to 86.74)                         | 119.43<br>(65.84 to 202.46)                       | 105.43<br>(59.23 to 178.62)                       | 149.35<br>(81.51 to 256.30)                       | 6.64<br>(5.72 to 7.95)                      | 13.40<br>(7.36 to 22.82)                    | 12.13<br>(6.81 to 21.11)                    | 15.86<br>(8.76 to 27.38)                    |
| Pancreatitis                               | 74.91<br>(63.97 to 101.20)                        | 112.99<br>(63.81 to 212.97)                       | 89.22<br>(55.85 to 153.04)                        | 124.38<br>(69.09 to 240.89)                       | 4.22<br>(3.61 to 5.52)                      | 8.04<br>(4.75 to 15.01)                     | 6.54<br>(4.23 to 10.97)                     | 8.51<br>(4.87 to 16.38)                     |
| Other digestive diseases                   | 129.98<br>(107.62 to 160.83)                      | 246.78<br>(202.60 to 304.47)                      | 247.82<br>(202.44 to 305.43)                      | 238.67<br>(196.88 to 292.31)                      | 10.87<br>(9.31 to 13.03)                    | 25.17<br>(20.48 to 31.71)                   | 25.78<br>(20.74 to 31.71)                   | 23.29<br>(19.30 to 28.21)                   |
| Neurological disorders                     | <b>2,821.48</b><br>(2,445.87 to <b>3,233.10</b> ) | <b>5,626.77</b><br>(4,326.53 to <b>7,374.50</b> ) | <b>5,595.88</b><br>(4,331.64 to <b>7,270.88</b> ) | <b>5,750.38</b><br>(4,334.06 to <b>7,758.79</b> ) | <b>291.28</b><br>(247.54 to <b>336.89</b> ) | <b>666.89</b><br>(495.02 to <b>893.91</b> ) | <b>674.88</b><br>(502.45 to <b>891.60</b> ) | <b>638.59</b><br>(476.51 to <b>914.42</b> ) |
| Alzheimer's disease and other dementias    | 1,518.00<br>(1,595.71 to 2,289.17)                | 4,213.70<br>(3,012.57 to 5,915.11)                | 4,180.23<br>(3,041.27 to 5,770.98)                | 4,391.31<br>(3,042.13 to 6,370.36)                | 241.35<br>(199.04 to 286.90)                | 565.75<br>(399.31 to 794.93)                | 570.77<br>(406.99 to 780.91)                | 566.03<br>(390.30 to 824.57)                |
| Parkinson's disease                        | 232.54<br>(174.72 to 304.24)                      | 530.80<br>(396.49 to 701.93)                      | 555.65<br>(416.24 to 739.01)                      | 479.37<br>(357.24 to 630.22)                      | 22.27<br>(16.57 to 28.99)                   | 54.84<br>(41.03 to 72.02)                   | 58.16<br>(43.60 to 77.09)                   | 48.09<br>(35.83 to 64.05)                   |
| Epilepsy                                   | 122.82<br>(110.05 to 135.98)                      | 170.96<br>(102.32 to 280.08)                      | 140.98<br>(90.67 to 219.36)                       | 180.39<br>(107.73 to 292.34)                      | 4.35<br>(3.92 to 4.80)                      | 8.36<br>(5.24 to 12.37)                     | 7.07<br>(4.70 to 10.16)                     | 8.41<br>(5.26 to 12.65)                     |
| Multiple sclerosis                         | 115.39<br>(80.76 to 133.60)                       | 121.58<br>(80.53 to 152.62)                       | 123.30<br>(81.36 to 155.20)                       | 125.97<br>(82.70 to 158.36)                       | 4.29<br>(2.98 to 4.97)                      | 5.14<br>(3.39 to 6.37)                      | 5.25<br>(3.46 to 6.51)                      | 5.22<br>(3.41 to 6.47)                      |
| Motor neuron disease                       | 174.59<br>(156.44 to 194.50)                      | 259.66<br>(220.35 to 308.92)                      | 261.26<br>(220.36 to 311.35)                      | 254.15<br>(217.45 to 298.96)                      | 8.04<br>(7.19 to 9.00)                      | 14.48<br>(12.38 to 16.75)                   | 14.71<br>(12.51 to 17.13)                   | 13.86<br>(11.94 to 15.84)                   |
| Other neurological disorders               | 258.14<br>(232.70 to 285.91)                      | 330.07<br>(275.62 to 402.98)                      | 334.46<br>(278.03 to 409.43)                      | 319.18<br>(268.64 to 389.09)                      | 10.98<br>(9.94 to 12.12)                    | 18.32<br>(15.78 to 21.02)                   | 18.93<br>(16.18 to 21.84)                   | 16.99<br>(14.71 to 19.37)                   |
| Mental disorders                           | <b>755.02</b><br>(665.28 to <b>849.55</b> )       | <b>1,426.73</b><br>(1,052.26 to <b>2,094.33</b> ) | <b>1,477.71</b><br>(1,073.09 to <b>2,188.33</b> ) | <b>1,310.92</b><br>(937.80 to <b>1,924.05</b> )   | <b>21.34</b><br>(19.11 to <b>23.75</b> )    | <b>45.20</b><br>(36.79 to <b>57.67</b> )    | <b>47.08</b><br>(38.14 to <b>60.82</b> )    | <b>40.55</b><br>(32.07 to <b>52.17</b> )    |
| Alcohol use disorders                      | 292.02<br>(255.52 to 330.82)                      | 323.69<br>(250.84 to 403.91)                      | 298.11<br>(230.52 to 379.34)                      | 317.21<br>(247.74 to 399.82)                      | 9.82<br>(8.65 to 11.10)                     | 12.59<br>(10.23 to 15.31)                   | 11.73<br>(9.46 to 14.40)                    | 12.09<br>(9.87 to 14.67)                    |
| Drug use disorders                         | 462.02<br>(393.81 to 532.01)                      | 1,100.85<br>(771.20 to 1,685.82)                  | 1,177.33<br>(823.85 to 1,814.35)                  | 991.66<br>(672.51 to 1,551.56)                    | 11.50<br>(10.07 to 13.07)                   | 32.57<br>(25.57 to 43.04)                   | 35.31<br>(27.85 to 46.75)                   | 28.42<br>(21.50 to 38.46)                   |
| Opioid use disorders                       | 198.20<br>(156.02 to 245.90)                      | 301.94<br>(185.83 to 514.38)                      | 309.15<br>(189.14 to 533.79)                      | 290.98<br>(180.01 to 493.65)                      | 4.34<br>(3.60 to 5.42)                      | 7.58<br>(5.29 to 11.45)                     | 7.84<br>(5.48 to 11.82)                     | 7.14<br>(4.96 to 10.66)                     |

|                           |                                 |                                 |                                   |                                 |                           |                              |                              |                              |
|---------------------------|---------------------------------|---------------------------------|-----------------------------------|---------------------------------|---------------------------|------------------------------|------------------------------|------------------------------|
|                           | 10.37<br>(7.29 to<br>14.04)     | 31.36<br>(17.71 to<br>55.65)    | 33.38<br>(18.97 to<br>59.28)      | 28.49<br>(15.88 to<br>49.71)    | 0.23<br>(0.17 to<br>0.30) | 0.78<br>(0.52 to<br>1.21)    | 0.84<br>(0.55 to<br>1.31)    | 0.70<br>(0.45 to<br>1.11)    |
| Cocaine use disorders     |                                 |                                 |                                   |                                 |                           |                              |                              |                              |
|                           | 33.85<br>(24.25 to<br>43.11)    | 161.87<br>(94.58 to<br>280.88)  | 177.46<br>(105.25 to<br>304.74)   | 140.39<br>(77.72 to<br>247.60)  | 0.68<br>(0.48 to<br>0.85) | 3.48<br>(2.14 to<br>5.56)    | 3.84<br>(2.44 to<br>5.97)    | 2.98<br>(1.76 to<br>4.75)    |
| Amphetamine use disorders |                                 |                                 |                                   |                                 |                           |                              |                              |                              |
|                           | 219.60<br>(171.12 to<br>259.11) | 605.68<br>(402.84 to<br>905.53) | 657.34<br>(441.64 to<br>1,002.86) | 531.80<br>(350.13 to<br>815.79) | 6.25<br>(4.98 to<br>7.18) | 20.72<br>(15.94 to<br>26.25) | 22.78<br>(17.69 to<br>29.24) | 17.61<br>(13.16 to<br>23.20) |
| Other drug use disorders  |                                 |                                 |                                   |                                 |                           |                              |                              |                              |
|                           | 0.98<br>(0.75 to<br>1.28)       | 2.19<br>(1.25 to<br>3.98)       | 2.28<br>(1.31 to<br>4.22)         | 2.05<br>(1.19 to<br>3.83)       | 0.02<br>(0.01 to<br>0.02) | 0.04<br>(0.02 to<br>0.07)    | 0.04<br>(0.03 to<br>0.08)    | 0.04<br>(0.02 to<br>0.07)    |
| Eating disorders          |                                 |                                 |                                   |                                 |                           |                              |                              |                              |

| Iceland                                                    |                                       |                                           |                                           |                                           |                                  |                                     |                                     |                                     |
|------------------------------------------------------------|---------------------------------------|-------------------------------------------|-------------------------------------------|-------------------------------------------|----------------------------------|-------------------------------------|-------------------------------------|-------------------------------------|
| Cause                                                      | YLLs (actual counts)                  |                                           |                                           |                                           | Deaths (actual counts)           |                                     |                                     |                                     |
|                                                            | 2016                                  | 2040 Forecast                             | 2040 Better Scenario                      | 2040 Worse Scenario                       | 2016                             | 2040 Forecast                       | 2040 Better Scenario                | 2040 Worse Scenario                 |
| <b>Diabetes, urogenital, blood, and endocrine diseases</b> | <b>973.56</b><br>(893.43 to 1,068.49) | <b>1,778.96</b><br>(1,336.37 to 2,345.92) | <b>1,639.10</b><br>(1,244.19 to 2,135.51) | <b>1,964.55</b><br>(1,457.80 to 2,612.08) | <b>78.40</b><br>(72.28 to 85.12) | <b>179.71</b><br>(134.07 to 241.76) | <b>168.50</b><br>(126.11 to 221.69) | <b>189.99</b><br>(140.37 to 256.82) |
| Diabetes mellitus                                          | 321.96<br>(289.57 to 356.73)          | 465.70<br>(301.50 to 712.52)              | 405.93<br>(268.03 to 597.09)              | 561.02<br>(359.57 to 862.91)              | 24.24<br>(21.84 to 26.89)        | 43.12<br>(28.78 to 61.74)           | 38.91<br>(26.47 to 54.83)           | 48.58<br>(32.29 to 71.67)           |
| Acute glomerulonephritis                                   | 1.61<br>(1.47 to 1.75)                | 1.84<br>(1.30 to 2.76)                    | 1.75<br>(1.25 to 2.63)                    | 1.95<br>(1.40 to 2.88)                    | 0.04<br>(0.04 to 0.05)           | 0.06<br>(0.04 to 0.10)              | 0.06<br>(0.04 to 0.10)              | 0.07<br>(0.05 to 0.10)              |
| Chronic kidney disease                                     | 313.08<br>(284.53 to 343.93)          | 588.90<br>(398.97 to 1,095.78)            | 670.25<br>(361.25 to 937.90)              | 777.59<br>(441.62 to 1,298.13)            | 28.83<br>(26.23 to 31.60)        | 75.43<br>(43.41 to 123.40)          | 67.37<br>(40.28 to 108.59)          | 84.17<br>(47.44 to 143.63)          |
| Chronic kidney disease due to diabetes mellitus            | 70.39<br>(60.68 to 81.65)             | 156.43<br>(91.48 to 260.43)               | 136.75<br>(81.16 to 223.35)               | 183.77<br>(101.95 to 308.25)              | 5.48<br>(4.62 to 6.51)           | 15.35<br>(8.58 to 25.95)            | 13.63<br>(7.81 to 22.48)            | 17.34<br>(9.20 to 29.92)            |
| Chronic kidney disease due to hypertension                 | 70.15<br>(62.06 to 79.52)             | 189.76<br>(107.13 to 318.31)              | 169.74<br>(100.92 to 276.09)              | 212.10<br>(116.38 to 362.24)              | 8.69<br>(7.63 to 9.85)           | 26.01<br>(14.61 to 43.70)           | 23.64<br>(13.84 to 38.12)           | 28.08<br>(15.14 to 48.10)           |
| Chronic kidney disease due to glomerulonephritis           | 65.94<br>(58.45 to 74.41)             | 108.64<br>(61.28 to 182.33)               | 94.10<br>(55.00 to 154.24)                | 129.49<br>(69.15 to 226.89)               | 5.25<br>(4.50 to 6.04)           | 10.84<br>(5.93 to 18.59)            | 9.50<br>(5.40 to 15.67)             | 12.51<br>(6.69 to 22.45)            |
| Chronic kidney disease due to other and unspecified causes | 106.59<br>(95.04 to 118.97)           | 215.42<br>(122.59 to 364.38)              | 188.32<br>(113.74 to 305.42)              | 252.23<br>(139.71 to 437.29)              | 9.41<br>(8.34 to 10.65)          | 23.23<br>(12.74 to 39.51)           | 20.60<br>(11.87 to 34.44)           | 26.23<br>(14.04 to 45.81)           |
| Urinary diseases and male infertility                      | 154.70<br>(138.22 to 172.60)          | 312.79<br>(248.99 to 382.19)              | 308.56<br>(242.73 to 383.18)              | 309.48<br>(248.62 to 374.59)              | 15.43<br>(13.75 to 17.27)        | 37.68<br>(29.73 to 46.80)           | 37.87<br>(29.59 to 47.48)           | 35.76<br>(28.83 to 43.96)           |
| Urinary tract infections                                   | 115.66<br>(100.51 to 136.35)          | 265.81<br>(207.72 to 333.16)              | 263.17<br>(205.94 to 331.84)              | 261.27<br>(205.78 to 324.06)              | 11.88<br>(10.25 to 14.00)        | 32.46<br>(24.90 to 40.97)           | 32.72<br>(24.85 to 41.81)           | 30.64<br>(23.78 to 38.52)           |
| Urolithiasis                                               | 9.37<br>(6.41 to 13.08)               | 11.54<br>(7.29 to 16.15)                  | 11.04<br>(7.07 to 15.62)                  | 12.11<br>(7.69 to 17.00)                  | 0.71<br>(0.48 to 0.98)           | 1.05<br>(0.68 to 1.45)              | 1.02<br>(0.66 to 1.43)              | 1.05<br>(0.66 to 1.46)              |
| Other urinary diseases                                     | 29.67<br>(15.93 to 37.66)             | 35.43<br>(17.61 to 51.74)                 | 34.35<br>(16.44 to 51.31)                 | 36.10<br>(16.94 to 52.81)                 | 2.83<br>(1.43 to 3.71)           | 4.17<br>(1.93 to 6.25)              | 4.12<br>(1.88 to 6.18)              | 4.07<br>(1.86 to 6.04)              |
| Gynecological diseases                                     | 0.20<br>(0.16 to 0.29)                | 0.18<br>(0.12 to 0.29)                    | 0.17<br>(0.11 to 0.28)                    | 0.21<br>(0.14 to 0.35)                    | 0.01<br>(0.01 to 0.01)           | 0.01<br>(0.01 to 0.02)              | 0.01<br>(0.01 to 0.02)              | 0.01<br>(0.01 to 0.02)              |
| Uterine fibroids                                           | 0.15<br>(0.12 to 0.22)                | 0.12<br>(0.07 to 0.19)                    | 0.11<br>(0.07 to 0.18)                    | 0.13<br>(0.08 to 0.22)                    | 0.01<br>(0.00 to 0.01)           | 0.01<br>(0.00 to 0.01)              | 0.00<br>(0.00 to 0.01)              | 0.01<br>(0.00 to 0.01)              |
| Polycystic ovarian syndrome                                | 0.01<br>(0.00 to 0.02)                | 0.00<br>(0.00 to 0.01)                    | 0.00<br>(0.00 to 0.01)                    | 0.01<br>(0.00 to 0.02)                    | 0.00<br>(0.00 to 0.00)           | 0.00<br>(0.00 to 0.00)              | 0.00<br>(0.00 to 0.00)              | 0.00<br>(0.00 to 0.00)              |
| Endometriosis                                              | 0.00<br>(0.00 to 0.00)                | 0.00<br>(0.00 to 0.01)                    | 0.00<br>(0.00 to 0.01)                    | 0.00<br>(0.00 to 0.01)                    | 0.00<br>(0.00 to 0.00)           | 0.00<br>(0.00 to 0.00)              | 0.00<br>(0.00 to 0.00)              | 0.00<br>(0.00 to 0.00)              |
| Genital prolapse                                           | 0.01<br>(0.00 to 0.01)                | 0.01<br>(0.00 to 0.01)                    | 0.01<br>(0.00 to 0.01)                    | 0.01<br>(0.00 to 0.01)                    | 0.00<br>(0.00 to 0.00)           | 0.00<br>(0.00 to 0.00)              | 0.00<br>(0.00 to 0.00)              | 0.00<br>(0.00 to 0.00)              |
| Other gynecological diseases                               | 0.03<br>(0.02 to 0.06)                | 0.05<br>(0.03 to 0.12)                    | 0.04<br>(0.03 to 0.10)                    | 0.06<br>(0.03 to 0.13)                    | 0.00<br>(0.00 to 0.01)           | 0.01<br>(0.00 to 0.01)              | 0.00<br>(0.01 to 0.01)              | 0.01<br>(0.00 to 0.01)              |
| Hemoglobinopathies and hemolytic anemias                   | 29.48<br>(24.69 to 39.70)             | 40.12<br>(30.67 to 53.97)                 | 38.84<br>(29.72 to 50.37)                 | 41.06<br>(31.65 to 55.23)                 | 2.38<br>(1.89 to 3.02)           | 4.30<br>(3.20 to 5.58)              | 4.24<br>(3.15 to 5.47)              | 4.20<br>(3.15 to 5.45)              |
| Thalassemias                                               | 3.09<br>(1.60 to 5.17)                | 1.53<br>(0.57 to 3.23)                    | 1.50<br>(0.57 to 3.17)                    | 1.56<br>(0.57 to 3.31)                    | 0.05<br>(0.02 to 0.08)           | 0.02<br>(0.01 to 0.06)              | 0.02<br>(0.01 to 0.05)              | 0.02<br>(0.01 to 0.06)              |

|                                                   |                                 |                                 |                                 |                                 |                           |                              |                              |                              |
|---------------------------------------------------|---------------------------------|---------------------------------|---------------------------------|---------------------------------|---------------------------|------------------------------|------------------------------|------------------------------|
|                                                   | 1.19<br>(0.39 to<br>2.62)       | 1.34<br>(0.39 to<br>3.00)       | 1.26<br>(0.37 to<br>2.80)       | 1.48<br>(0.46 to<br>3.20)       | 0.03<br>(0.01 to<br>0.06) | 0.04<br>(0.01 to<br>0.10)    | 0.04<br>(0.01 to<br>0.09)    | 0.05<br>(0.01 to<br>0.11)    |
| Sickle cell disorders                             |                                 |                                 |                                 |                                 |                           |                              |                              |                              |
|                                                   | 3.30<br>(2.33 to<br>4.83)       | 4.58<br>(2.95 to<br>6.95)       | 4.26<br>(2.77 to<br>6.43)       | 5.06<br>(3.25 to<br>7.64)       | 0.12<br>(0.08 to<br>0.17) | 0.24<br>(0.15 to<br>0.35)    | 0.22<br>(0.15 to<br>0.34)    | 0.25<br>(0.17 to<br>0.37)    |
| G6PD deficiency                                   |                                 |                                 |                                 |                                 |                           |                              |                              |                              |
|                                                   | 21.90<br>(18.03 to<br>29.24)    | 32.68<br>(25.11 to<br>43.21)    | 31.81<br>(24.07 to<br>41.15)    | 32.96<br>(25.10 to<br>43.51)    | 2.19<br>(1.72 to<br>2.73) | 3.99<br>(2.90 to<br>5.14)    | 3.95<br>(2.91 to<br>5.10)    | 3.88<br>(2.88 to<br>5.03)    |
| Other hemoglobinopathies and hemolytic anemias    |                                 |                                 |                                 |                                 |                           |                              |                              |                              |
|                                                   | 152.54<br>(119.62 to<br>174.92) | 288.07<br>(208.26 to<br>354.42) | 294.95<br>(213.84 to<br>366.50) | 273.24<br>(197.61 to<br>335.04) | 7.47<br>(5.03 to<br>8.52) | 19.11<br>(11.71 to<br>23.22) | 20.05<br>(12.28 to<br>24.58) | 17.20<br>(10.50 to<br>20.70) |
| Endocrine, metabolic, blood, and immune disorders |                                 |                                 |                                 |                                 |                           |                              |                              |                              |

| Iceland                                       |                                     |                                     |                                     |                                     |                               |                                  |                                  |                                  |
|-----------------------------------------------|-------------------------------------|-------------------------------------|-------------------------------------|-------------------------------------|-------------------------------|----------------------------------|----------------------------------|----------------------------------|
| Cause                                         | YLLs (actual counts)                |                                     |                                     |                                     | Deaths (actual counts)        |                                  |                                  |                                  |
|                                               | 2016                                | 2040 Forecast                       | 2040 Better Scenario                | 2040 Worse Scenario                 | 2016                          | 2040 Forecast                    | 2040 Better Scenario             | 2040 Worse Scenario              |
| <b>Musculoskeletal disorders</b>              | <b>92.32</b><br>(79.76 to 108.16)   | <b>171.16</b><br>(136.23 to 209.78) | <b>167.81</b><br>(134.51 to 206.31) | <b>174.73</b><br>(138.08 to 216.17) | <b>6.80</b><br>(5.80 to 8.04) | <b>15.60</b><br>(12.41 to 19.18) | <b>15.62</b><br>(12.38 to 19.35) | <b>15.19</b><br>(12.07 to 18.60) |
| Rheumatoid arthritis                          | 21.94<br>(16.50 to 29.11)           | 40.32<br>(27.81 to 57.36)           | 37.05<br>(25.96 to 53.04)           | 46.72<br>(32.13 to 69.54)           | 1.49<br>(1.12 to 1.98)        | 3.37<br>(2.31 to 4.88)           | 3.14<br>(2.20 to 4.57)           | 3.77<br>(2.56 to 5.57)           |
| Other musculoskeletal disorders               | 70.38<br>(58.42 to 82.54)           | 130.84<br>(104.48 to 160.05)        | 130.77<br>(105.11 to 160.31)        | 128.02<br>(102.17 to 156.37)        | 5.31<br>(4.47 to 6.22)        | 12.23<br>(9.54 to 15.10)         | 12.48<br>(9.79 to 15.28)         | 11.42<br>(8.91 to 14.07)         |
| <b>Other non-communicable diseases</b>        | <b>462.20</b><br>(369.68 to 556.19) | <b>422.52</b><br>(311.08 to 562.24) | <b>397.41</b><br>(293.17 to 531.18) | <b>461.99</b><br>(337.71 to 634.98) | <b>8.26</b><br>(6.58 to 9.62) | <b>14.18</b><br>(9.61 to 18.18)  | <b>14.11</b><br>(9.47 to 18.30)  | <b>14.01</b><br>(9.87 to 17.92)  |
| Congenital birth defects                      | 386.31<br>(299.26 to 473.81)        | 313.63<br>(220.15 to 437.63)        | 291.21<br>(206.16 to 412.30)        | 350.78<br>(239.49 to 497.49)        | 5.71<br>(4.57 to 6.80)        | 5.56<br>(4.07 to 7.57)           | 5.28<br>(3.85 to 7.06)           | 6.04<br>(4.38 to 8.20)           |
| Neural tube defects                           | 5.50<br>(2.35 to 8.31)              | 1.81<br>(0.81 to 3.19)              | 1.58<br>(0.71 to 2.74)              | 2.20<br>(0.96 to 3.88)              | 0.07<br>(0.03 to 0.10)        | 0.03<br>(0.01 to 0.04)           | 0.02<br>(0.01 to 0.04)           | 0.03<br>(0.02 to 0.05)           |
| Congenital heart anomalies                    | 126.10<br>(95.15 to 156.66)         | 69.35<br>(42.10 to 108.49)          | 59.30<br>(35.18 to 94.75)           | 87.41<br>(49.71 to 143.54)          | 1.74<br>(1.38 to 2.16)        | 0.90<br>(0.64 to 1.66)           | 0.55<br>(0.44 to 1.44)           | 1.31<br>(0.79 to 2.10)           |
| Orofacial clefts                              | 0.14<br>(0.04 to 0.37)              | 0.05<br>(0.01 to 0.14)              | 0.04<br>(0.01 to 0.12)              | 0.07<br>(0.02 to 0.20)              | 0.00<br>(0.00 to 0.00)        | 0.00<br>(0.00 to 0.00)           | 0.00<br>(0.00 to 0.00)           | 0.00<br>(0.00 to 0.00)           |
| Down syndrome                                 | 74.16<br>(45.20 to 90.18)           | 110.95<br>(78.56 to 146.46)         | 111.80<br>(80.47 to 148.91)         | 108.80<br>(75.79 to 143.60)         | 1.52<br>(1.00 to 1.78)        | 2.62<br>(1.96 to 3.38)           | 2.66<br>(1.99 to 3.46)           | 2.56<br>(1.88 to 3.28)           |
| Other chromosomal abnormalities               | 38.97<br>(25.07 to 66.54)           | 49.44<br>(30.48 to 80.11)           | 46.23<br>(28.50 to 74.31)           | 53.91<br>(32.36 to 85.00)           | 0.51<br>(0.34 to 0.84)        | 0.70<br>(0.44 to 1.09)           | 0.66<br>(0.41 to 1.01)           | 0.76<br>(0.47 to 1.16)           |
| Congenital musculoskeletal and limb anomalies | 16.91<br>(11.04 to 29.82)           | 9.66<br>(5.39 to 17.98)             | 8.51<br>(4.87 to 15.85)             | 11.60<br>(6.45 to 21.56)            | 0.23<br>(0.16 to 0.38)        | 0.15<br>(0.09 to 0.25)           | 0.13<br>(0.08 to 0.23)           | 0.17<br>(0.10 to 0.30)           |
| Urogenital congenital anomalies               | 6.31<br>(2.70 to 11.64)             | 3.95<br>(1.74 to 7.41)              | 3.54<br>(1.58 to 6.64)              | 4.61<br>(1.97 to 8.71)              | 0.09<br>(0.04 to 0.15)        | 0.06<br>(0.03 to 0.11)           | 0.05<br>(0.03 to 0.10)           | 0.07<br>(0.03 to 0.12)           |
| Digestive congenital anomalies                | 21.48<br>(10.03 to 33.79)           | 12.50<br>(5.40 to 22.62)            | 10.76<br>(4.51 to 19.67)            | 15.47<br>(6.40 to 29.16)            | 0.27<br>(0.13 to 0.41)        | 0.16<br>(0.08 to 0.29)           | 0.14<br>(0.06 to 0.25)           | 0.20<br>(0.09 to 0.37)           |
| Other congenital birth defects                | 96.74<br>(66.55 to 128.18)          | 55.92<br>(33.19 to 89.59)           | 49.45<br>(29.34 to 79.11)           | 66.70<br>(38.73 to 107.87)          | 1.28<br>(0.90 to 1.64)        | 0.80<br>(0.50 to 1.24)           | 0.71<br>(0.44 to 1.10)           | 0.94<br>(0.57 to 1.47)           |
| Skin and subcutaneous diseases                | 20.84<br>(11.63 to 29.45)           | 76.81<br>(40.60 to 104.30)          | 77.67<br>(40.91 to 103.26)          | 73.33<br>(39.42 to 98.55)           | 1.92<br>(0.92 to 2.51)        | 8.24<br>(3.95 to 11.00)          | 8.50<br>(4.08 to 11.44)          | 7.53<br>(3.67 to 10.06)          |
| Cellulitis                                    | 8.27<br>(5.07 to 16.00)             | 30.22<br>(18.48 to 58.20)           | 30.90<br>(18.58 to 59.59)           | 28.44<br>(17.47 to 55.89)           | 0.68<br>(0.40 to 1.24)        | 2.88<br>(1.68 to 5.34)           | 3.00<br>(1.75 to 5.57)           | 2.58<br>(1.50 to 4.84)           |
| Pyoderma                                      | 9.91<br>(3.68 to 13.58)             | 40.59<br>(13.87 to 57.76)           | 40.85<br>(13.91 to 58.62)           | 38.94<br>(13.46 to 54.76)           | 1.01<br>(0.33 to 1.43)        | 4.70<br>(1.48 to 6.93)           | 4.82<br>(1.52 to 7.17)           | 4.32<br>(1.39 to 6.30)           |
| Decubitus ulcer                               | 1.45<br>(0.82 to 2.35)              | 2.96<br>(1.42 to 4.90)              | 2.90<br>(1.36 to 4.81)              | 2.97<br>(1.44 to 4.89)              | 0.13<br>(0.06 to 0.21)        | 0.34<br>(0.14 to 0.59)           | 0.35<br>(0.14 to 0.59)           | 0.33<br>(0.14 to 0.55)           |
| Other skin and subcutaneous diseases          | 1.21<br>(0.77 to 2.11)              | 3.03<br>(1.72 to 5.69)              | 3.02<br>(1.70 to 5.43)              | 2.97<br>(1.74 to 5.39)              | 0.10<br>(0.05 to 0.17)        | 0.29<br>(0.16 to 0.59)           | 0.33<br>(0.16 to 0.61)           | 0.30<br>(0.15 to 0.55)           |
| Sudden infant death syndrome                  | 55.05<br>(38.81 to 76.64)           | 32.08<br>(18.05 to 53.76)           | 28.52<br>(15.71 to 47.57)           | 37.88<br>(20.65 to 64.62)           | 0.64<br>(0.45 to 0.89)        | 0.37<br>(0.21 to 0.62)           | 0.33<br>(0.18 to 0.55)           | 0.44<br>(0.24 to 0.75)           |



|                          |                                       |                                       |                                       |                                       |                                 |                                 |                                 |                                 |
|--------------------------|---------------------------------------|---------------------------------------|---------------------------------------|---------------------------------------|---------------------------------|---------------------------------|---------------------------------|---------------------------------|
| Injuries                 | 3,337.67<br>(3,019.54 to<br>3,763.80) | 3,830.91<br>(2,488.03 to<br>6,631.15) | 3,353.87<br>(2,296.15 to<br>5,469.15) | 4,271.72<br>(2,716.75 to<br>7,474.54) | 119.44<br>(106.88 to<br>130.73) | 188.17<br>(141.91 to<br>256.65) | 174.98<br>(135.08 to<br>230.49) | 193.00<br>(143.78 to<br>271.85) |
| Transport injuries       | 818.68<br>(724.08 to<br>910.32)       | 855.39<br>(432.98 to<br>1,810.68)     | 736.20<br>(394.90 to<br>1,498.98)     | 1,099.12<br>(551.30 to<br>2,315.09)   | 21.14<br>(18.98 to<br>23.33)    | 28.19<br>(16.89 to<br>47.23)    | 24.72<br>(15.63 to<br>40.56)    | 33.83<br>(19.49 to<br>59.66)    |
| Road injuries            | 574.53<br>(500.11 to<br>642.02)       | 524.64<br>(266.04 to<br>1,104.62)     | 466.71<br>(251.67 to<br>957.54)       | 714.28<br>(360.05 to<br>1,527.55)     | 15.04<br>(13.47 to<br>16.61)    | 18.21<br>(11.19 to<br>30.59)    | 16.48<br>(10.61 to<br>26.44)    | 22.60<br>(13.41 to<br>39.39)    |
| Pedestrian road injuries | 68.10<br>(51.87 to<br>80.60)          | 45.92<br>(27.56 to<br>75.76)          | 38.09<br>(23.93 to<br>59.88)          | 64.23<br>(38.14 to<br>108.21)         | 2.47<br>(1.97 to<br>2.90)       | 2.55<br>(1.70 to<br>3.76)       | 2.16<br>(1.51 to<br>3.08)       | 3.29<br>(2.11 to<br>5.13)       |

| Iceland                                         |                                                        |                                                          |                                                          |                                                          |                                                   |                                                    |                                                    |                                                    |
|-------------------------------------------------|--------------------------------------------------------|----------------------------------------------------------|----------------------------------------------------------|----------------------------------------------------------|---------------------------------------------------|----------------------------------------------------|----------------------------------------------------|----------------------------------------------------|
| Cause                                           | YLLs (actual counts)                                   |                                                          |                                                          |                                                          | Deaths (actual counts)                            |                                                    |                                                    |                                                    |
|                                                 | 2016                                                   | 2040 Forecast                                            | 2040 Better Scenario                                     | 2040 Worse Scenario                                      | 2016                                              | 2040 Forecast                                      | 2040 Better Scenario                               | 2040 Worse Scenario                                |
| Cyclist road injuries                           | 14.16<br>(10.17 to<br>17.04)                           | 16.97<br>(9.44 to<br>29.84)                              | 15.33<br>(8.86 to<br>25.98)                              | 21.15<br>(11.40 to<br>38.23)                             | 0.43<br>(0.32 to<br>0.50)                         | 0.76<br>(0.45 to<br>1.23)                          | 0.69<br>(0.43 to<br>1.07)                          | 0.84<br>(0.50 to<br>1.36)                          |
| Motorcyclist road injuries                      | 57.37<br>(34.18 to<br>71.87)                           | 64.53<br>(24.93 to<br>173.07)                            | 57.03<br>(23.52 to<br>142.86)                            | 78.08<br>(29.78 to<br>214.63)                            | 1.15<br>(0.72 to<br>1.41)                         | 1.44<br>(0.66 to<br>3.30)                          | 1.28<br>(0.63 to<br>2.83)                          | 1.67<br>(0.75 to<br>3.95)                          |
| Motor vehicle road injuries                     | 407.12<br>(354.95 to<br>462.72)                        | 373.98<br>(187.11 to<br>778.88)                          | 335.37<br>(179.34 to<br>681.71)                          | 519.23<br>(252.73 to<br>1,100.37)                        | 10.30<br>(9.13 to<br>11.58)                       | 12.69<br>(7.58 to<br>21.04)                        | 11.64<br>(7.38 to<br>18.69)                        | 15.86<br>(9.24 to<br>27.50)                        |
| Other road injuries                             | 27.79<br>(18.12 to<br>39.99)                           | 23.23<br>(10.80 to<br>47.39)                             | 20.89<br>(10.10 to<br>41.37)                             | 31.59<br>(14.64 to<br>64.67)                             | 0.69<br>(0.41 to<br>0.95)                         | 0.77<br>(0.37 to<br>1.37)                          | 0.70<br>(0.34 to<br>1.21)                          | 0.94<br>(0.45 to<br>1.72)                          |
| Other transport injuries                        | 244.15<br>(207.68 to<br>291.57)                        | 330.76<br>(163.18 to<br>674.46)                          | 269.49<br>(141.71 to<br>544.40)                          | 384.84<br>(184.94 to<br>802.78)                          | 6.09<br>(5.29 to<br>7.11)                         | 9.98<br>(5.57 to<br>17.57)                         | 8.24<br>(4.96 to<br>13.94)                         | 11.23<br>(6.12 to<br>20.05)                        |
| <b>Unintentional injuries</b>                   | <b>928.81</b><br><b>(818.62 to</b><br><b>1,021.95)</b> | <b>1,134.07</b><br><b>(908.62 to</b><br><b>1,406.02)</b> | <b>1,099.66</b><br><b>(887.31 to</b><br><b>1,359.01)</b> | <b>1,153.23</b><br><b>(924.83 to</b><br><b>1,436.96)</b> | <b>54.37</b><br><b>(45.34 to</b><br><b>59.83)</b> | <b>99.40</b><br><b>(78.19 to</b><br><b>118.13)</b> | <b>99.39</b><br><b>(77.90 to</b><br><b>118.65)</b> | <b>94.86</b><br><b>(75.53 to</b><br><b>112.71)</b> |
| Falls                                           | 426.89<br>(334.66 to<br>481.83)                        | 640.81<br>(483.98 to<br>781.89)                          | 634.19<br>(479.58 to<br>772.44)                          | 633.86<br>(484.37 to<br>767.89)                          | 33.12<br>(25.41 to<br>37.33)                      | 66.95<br>(49.88 to<br>80.70)                       | 67.61<br>(50.18 to<br>82.07)                       | 63.06<br>(46.89 to<br>76.05)                       |
| Drowning                                        | 142.36<br>(124.44 to<br>159.59)                        | 99.43<br>(66.01 to<br>160.03)                            | 88.51<br>(59.81 to<br>139.73)                            | 108.91<br>(71.69 to<br>173.65)                           | 3.58<br>(3.18 to<br>3.99)                         | 3.34<br>(2.41 to<br>4.76)                          | 3.01<br>(2.23 to<br>4.21)                          | 3.52<br>(2.51 to<br>5.18)                          |
| Fire, heat, and hot substances                  | 57.17<br>(49.19 to<br>64.70)                           | 52.98<br>(36.49 to<br>76.54)                             | 47.02<br>(33.02 to<br>65.21)                             | 57.68<br>(38.45 to<br>86.37)                             | 2.93<br>(2.19 to<br>3.29)                         | 4.16<br>(2.74 to<br>5.74)                          | 3.81<br>(2.55 to<br>5.99)                          | 4.23<br>(2.77 to<br>6.08)                          |
| Poisonings                                      | 22.22<br>(18.25 to<br>39.36)                           | 13.97<br>(8.25 to<br>26.22)                              | 11.90<br>(7.24 to<br>22.21)                              | 16.38<br>(9.51 to<br>31.47)                              | 0.65<br>(0.55 to<br>1.00)                         | 0.56<br>(0.39 to<br>0.88)                          | 0.49<br>(0.35 to<br>0.76)                          | 0.62<br>(0.41 to<br>1.02)                          |
| Exposure to mechanical forces                   | 68.10<br>(59.24 to<br>91.66)                           | 65.09<br>(46.89 to<br>95.57)                             | 61.25<br>(44.39 to<br>88.34)                             | 71.15<br>(51.01 to<br>106.46)                            | 2.31<br>(1.95 to<br>2.78)                         | 3.28<br>(2.54 to<br>4.11)                          | 3.19<br>(2.48 to<br>3.99)                          | 3.34<br>(2.58 to<br>4.26)                          |
| Unintentional firearm injuries                  | 7.02<br>(6.03 to<br>8.04)                              | 5.84<br>(4.21 to<br>8.67)                                | 5.58<br>(4.04 to<br>8.25)                                | 6.26<br>(4.46 to<br>9.24)                                | 0.22<br>(0.19 to<br>0.24)                         | 0.26<br>(0.21 to<br>0.34)                          | 0.26<br>(0.20 to<br>0.33)                          | 0.26<br>(0.21 to<br>0.34)                          |
| Unintentional suffocation                       | 4.62<br>(3.28 to<br>7.73)                              | 4.10<br>(2.30 to<br>8.11)                                | 3.85<br>(2.18 to<br>7.66)                                | 4.50<br>(2.53 to<br>8.78)                                | 0.08<br>(0.06 to<br>0.13)                         | 0.09<br>(0.05 to<br>0.15)                          | 0.08<br>(0.05 to<br>0.15)                          | 0.09<br>(0.06 to<br>0.17)                          |
| Other exposure to mechanical forces             | 56.46<br>(47.24 to<br>77.04)                           | 55.15<br>(39.63 to<br>81.23)                             | 51.82<br>(37.15 to<br>76.07)                             | 60.39<br>(42.16 to<br>90.22)                             | 2.01<br>(1.64 to<br>2.47)                         | 2.93<br>(2.20 to<br>3.72)                          | 2.85<br>(2.15 to<br>3.60)                          | 2.99<br>(2.25 to<br>3.84)                          |
| Adverse effects of medical treatment            | 68.09<br>(55.69 to<br>91.77)                           | 104.63<br>(81.66 to<br>145.63)                           | 103.60<br>(80.62 to<br>143.64)                           | 103.88<br>(80.89 to<br>144.84)                           | 4.60<br>(3.84 to<br>6.20)                         | 9.35<br>(7.27 to<br>13.14)                         | 9.45<br>(7.35 to<br>13.30)                         | 8.83<br>(6.87 to<br>13.37)                         |
| Animal contact                                  | 7.27<br>(5.83 to<br>9.99)                              | 9.24<br>(6.80 to<br>13.21)                               | 8.78<br>(6.42 to<br>12.56)                               | 9.92<br>(7.21 to<br>14.46)                               | 0.26<br>(0.20 to<br>0.35)                         | 0.44<br>(0.33 to<br>0.62)                          | 0.43<br>(0.32 to<br>0.59)                          | 0.45<br>(0.34 to<br>0.62)                          |
| Venomous animal contact                         | 1.89<br>(1.53 to<br>2.70)                              | 2.23<br>(1.58 to<br>3.36)                                | 2.14<br>(1.53 to<br>3.29)                                | 2.35<br>(1.66 to<br>3.60)                                | 0.05<br>(0.04 to<br>0.07)                         | 0.08<br>(0.06 to<br>0.12)                          | 0.08<br>(0.06 to<br>0.11)                          | 0.08<br>(0.06 to<br>0.12)                          |
| Non-venomous animal contact                     | 5.38<br>(4.20 to<br>7.42)                              | 7.01<br>(5.12 to<br>9.99)                                | 6.64<br>(4.78 to<br>9.49)                                | 7.57<br>(5.35 to<br>11.13)                               | 0.21<br>(0.16 to<br>0.28)                         | 0.36<br>(0.27 to<br>0.51)                          | 0.35<br>(0.26 to<br>0.49)                          | 0.37<br>(0.27 to<br>0.51)                          |
| Foreign body                                    | 82.49<br>(66.99 to<br>96.09)                           | 95.81<br>(65.57 to<br>120.09)                            | 95.63<br>(64.70 to<br>121.13)                            | 94.39<br>(66.16 to<br>117.85)                            | 4.33<br>(2.75 to<br>5.42)                         | 7.28<br>(4.04 to<br>9.81)                          | 7.49<br>(4.12 to<br>10.10)                         | 6.71<br>(3.84 to<br>8.95)                          |
| Pulmonary aspiration and foreign body in airway | 79.46<br>(63.28 to<br>92.71)                           | 91.37<br>(61.14 to<br>115.48)                            | 91.08<br>(60.38 to<br>116.22)                            | 90.16<br>(61.78 to<br>112.77)                            | 4.23<br>(2.64 to<br>5.31)                         | 7.04<br>(3.85 to<br>9.56)                          | 7.24<br>(3.87 to<br>9.83)                          | 6.50<br>(3.62 to<br>8.72)                          |

|                                             |                                                            |                                                          |                                                          |                                                            |                                                   |                                                    |                                                   |                                                    |
|---------------------------------------------|------------------------------------------------------------|----------------------------------------------------------|----------------------------------------------------------|------------------------------------------------------------|---------------------------------------------------|----------------------------------------------------|---------------------------------------------------|----------------------------------------------------|
|                                             | 3.03<br>(2.42 to<br>5.42)                                  | 4.44<br>(3.20 to<br>7.60)                                | 4.55<br>(3.30 to<br>7.77)                                | 4.23<br>(3.04 to<br>7.39)                                  | 0.11<br>(0.08 to<br>0.16)                         | 0.24<br>(0.16 to<br>0.32)                          | 0.25<br>(0.17 to<br>0.33)                         | 0.21<br>(0.15 to<br>0.29)                          |
| Foreign body in other body part             |                                                            |                                                          |                                                          |                                                            |                                                   |                                                    |                                                   |                                                    |
|                                             | 32.52<br>(22.55 to<br>56.67)                               | 44.31<br>(28.38 to<br>77.29)                             | 41.99<br>(27.02 to<br>71.69)                             | 47.50<br>(30.41 to<br>79.85)                               | 1.99<br>(1.40 to<br>3.36)                         | 3.74<br>(2.39 to<br>6.21)                          | 3.64<br>(2.32 to<br>6.04)                         | 3.75<br>(2.42 to<br>6.28)                          |
| Environmental heat and cold exposure        |                                                            |                                                          |                                                          |                                                            |                                                   |                                                    |                                                   |                                                    |
|                                             | 21.70<br>(18.37 to<br>25.10)                               | 7.81<br>(5.00 to<br>12.42)                               | 6.79<br>(4.39 to<br>10.90)                               | 9.75<br>(6.08 to<br>16.09)                                 | 0.59<br>(0.51 to<br>0.67)                         | 0.30<br>(0.21 to<br>0.41)                          | 0.26<br>(0.19 to<br>0.36)                         | 0.35<br>(0.24 to<br>0.52)                          |
| Other unintentional injuries                |                                                            |                                                          |                                                          |                                                            |                                                   |                                                    |                                                   |                                                    |
| <b>Self-harm and interpersonal violence</b> | <b>1,587.16</b><br><b>(1,385.21 to</b><br><b>2,045.14)</b> | <b>1,811.76</b><br><b>(945.40 to</b><br><b>3,615.69)</b> | <b>1,488.48</b><br><b>(858.40 to</b><br><b>2,804.31)</b> | <b>1,989.62</b><br><b>(1,020.18 to</b><br><b>4,135.50)</b> | <b>43.87</b><br><b>(37.92 to</b><br><b>53.52)</b> | <b>59.91</b><br><b>(34.34 to</b><br><b>102.68)</b> | <b>50.19</b><br><b>(31.62 to</b><br><b>79.88)</b> | <b>63.64</b><br><b>(36.26 to</b><br><b>113.14)</b> |

| Iceland                                                                             |                                                |                                                   |                                                   |                                                   |                                                |                                                |                                                |                                                |
|-------------------------------------------------------------------------------------|------------------------------------------------|---------------------------------------------------|---------------------------------------------------|---------------------------------------------------|------------------------------------------------|------------------------------------------------|------------------------------------------------|------------------------------------------------|
| Cause                                                                               | YLLs (actual counts)                           |                                                   |                                                   |                                                   | Deaths (actual counts)                         |                                                |                                                |                                                |
|                                                                                     | 2016                                           | 2040 Forecast                                     | 2040 Better Scenario                              | 2040 Worse Scenario                               | 2016                                           | 2040 Forecast                                  | 2040 Better Scenario                           | 2040 Worse Scenario                            |
| Self-harm                                                                           | 1,483.92<br>(1,287.67 to<br>1,921.72)          | 1,733.52<br>(885.40 to<br>3,467.55)               | 1,419.30<br>(800.37 to<br>2,684.30)               | 1,903.24<br>(953.28 to<br>3,964.39)               | 41.54<br>(35.88 to<br>50.81)                   | 57.77<br>(32.63 to<br>99.86)                   | 48.29<br>(30.12 to<br>77.51)                   | 61.34<br>(34.33 to<br>109.79)                  |
| Self-harm by firearm                                                                | 168.75<br>(112.88 to<br>277.18)                | 162.83<br>(70.14 to<br>355.97)                    | 129.49<br>(60.49 to<br>273.35)                    | 184.01<br>(77.17 to<br>413.66)                    | 4.84<br>(3.37 to<br>7.49)                      | 5.88<br>(2.89 to<br>11.38)                     | 4.79<br>(2.54 to<br>8.68)                      | 6.40<br>(3.06 to<br>12.64)                     |
| Self-harm by other specified means                                                  | 1,315.17<br>(1,127.94 to<br>1,699.94)          | 1,570.69<br>(811.53 to<br>3,091.99)               | 1,289.81<br>(743.33 to<br>2,404.93)               | 1,719.23<br>(865.90 to<br>3,533.15)               | 36.70<br>(30.99 to<br>44.94)                   | 51.89<br>(29.42 to<br>90.52)                   | 43.50<br>(27.19 to<br>70.52)                   | 54.95<br>(30.88 to<br>97.88)                   |
| Interpersonal violence                                                              | 103.24<br>(75.08 to<br>154.21)                 | 78.23<br>(48.23 to<br>137.83)                     | 69.18<br>(43.28 to<br>120.93)                     | 86.38<br>(52.11 to<br>154.28)                     | 2.33<br>(1.70 to<br>3.33)                      | 2.14<br>(1.40 to<br>3.46)                      | 1.91<br>(1.28 to<br>3.03)                      | 2.30<br>(1.47 to<br>3.78)                      |
| Physical violence by firearm                                                        | 11.34<br>(5.10 to<br>21.95)                    | 7.01<br>(2.73 to<br>14.46)                        | 6.45<br>(2.47 to<br>13.51)                        | 8.03<br>(2.99 to<br>16.11)                        | 0.24<br>(0.11 to<br>0.45)                      | 0.16<br>(0.07 to<br>0.30)                      | 0.15<br>(0.06 to<br>0.28)                      | 0.18<br>(0.07 to<br>0.33)                      |
| Physical violence by sharp object                                                   | 26.95<br>(17.45 to<br>40.54)                   | 20.25<br>(11.68 to<br>34.18)                      | 18.95<br>(10.95 to<br>32.17)                      | 22.49<br>(13.08 to<br>39.72)                      | 0.62<br>(0.41 to<br>0.92)                      | 0.57<br>(0.37 to<br>0.87)                      | 0.55<br>(0.35 to<br>0.84)                      | 0.62<br>(0.40 to<br>0.97)                      |
| Physical violence by other means                                                    | 64.94<br>(46.98 to<br>101.22)                  | 50.97<br>(29.00 to<br>94.55)                      | 43.78<br>(25.88 to<br>80.12)                      | 55.86<br>(31.65 to<br>106.46)                     | 1.46<br>(1.05 to<br>2.19)                      | 1.40<br>(0.86 to<br>2.39)                      | 1.21<br>(0.78 to<br>2.01)                      | 1.50<br>(0.90 to<br>2.63)                      |
| <b>Forces of nature, conflict and terrorism, and executions and police conflict</b> | <b>3.01</b><br><b>(1.78 to</b><br><b>4.10)</b> | <b>29.69</b><br><b>(0.00 to</b><br><b>388.12)</b> | <b>29.53</b><br><b>(0.00 to</b><br><b>386.74)</b> | <b>29.74</b><br><b>(0.00 to</b><br><b>387.45)</b> | <b>0.06</b><br><b>(0.04 to</b><br><b>0.08)</b> | <b>0.68</b><br><b>(0.00 to</b><br><b>9.74)</b> | <b>0.68</b><br><b>(0.00 to</b><br><b>9.80)</b> | <b>0.67</b><br><b>(0.00 to</b><br><b>9.57)</b> |
| Exposure to forces of nature                                                        | 0.00<br>(0.00 to<br>0.00)                      | 29.69<br>(0.00 to<br>388.12)                      | 29.53<br>(0.00 to<br>386.74)                      | 29.74<br>(0.00 to<br>387.45)                      | 0.00<br>(0.00 to<br>0.00)                      | 0.68<br>(0.00 to<br>9.74)                      | 0.68<br>(0.00 to<br>9.80)                      | 0.67<br>(0.00 to<br>9.57)                      |
| Conflict and terrorism                                                              | 0.00<br>(0.00 to<br>0.00)                      | 0.00<br>(0.00 to<br>0.00)                         | 0.00<br>(0.00 to<br>0.00)                         | 0.00<br>(0.00 to<br>0.00)                         | 0.00<br>(0.00 to<br>0.00)                      | 0.00<br>(0.00 to<br>0.00)                      | 0.00<br>(0.00 to<br>0.00)                      | 0.00<br>(0.00 to<br>0.00)                      |
| Executions and police conflict                                                      | 3.01<br>(1.78 to<br>4.10)                      | 0.00<br>(0.00 to<br>0.00)                         | 0.00<br>(0.00 to<br>0.00)                         | 0.00<br>(0.00 to<br>0.00)                         | 0.06<br>(0.04 to<br>0.08)                      | 0.00<br>(0.00 to<br>0.00)                      | 0.00<br>(0.00 to<br>0.00)                      | 0.00<br>(0.00 to<br>0.00)                      |

| Ireland                                                           |                                             |                                             |                                             |                                             |                                          |                                          |                                          |                                          |
|-------------------------------------------------------------------|---------------------------------------------|---------------------------------------------|---------------------------------------------|---------------------------------------------|------------------------------------------|------------------------------------------|------------------------------------------|------------------------------------------|
| Cause                                                             | YLLs (actual counts)                        |                                             |                                             |                                             | Deaths (actual counts)                   |                                          |                                          |                                          |
|                                                                   | 2016                                        | 2040 Forecast                               | 2040 Better Scenario                        | 2040 Worse Scenario                         | 2016                                     | 2040 Forecast                            | 2040 Better Scenario                     | 2040 Worse Scenario                      |
| All causes                                                        | 496,395.14<br>(443,681.51 to<br>557,528.98) | 614,836.32<br>(505,317.13 to<br>739,321.12) | 539,948.76<br>(446,924.10 to<br>644,537.10) | 780,154.86<br>(630,852.90 to<br>939,290.59) | 31,059.90<br>(28,022.43 to<br>34,520.11) | 48,316.30<br>(41,890.80 to<br>55,727.01) | 43,669.75<br>(38,075.10 to<br>50,006.85) | 57,563.33<br>(49,334.48 to<br>66,288.74) |
| Communicable, maternal, neonatal, and nutritional diseases        | 24,786.87<br>(21,360.35 to<br>28,995.45)    | 34,250.95<br>(25,511.43 to<br>47,418.37)    | 30,612.39<br>(22,989.00 to<br>42,224.94)    | 43,471.92<br>(30,698.46 to<br>63,337.37)    | 1,575.88<br>(1,366.84 to<br>1,832.68)    | 3,277.09<br>(2,333.91 to<br>4,599.92)    | 3,091.29<br>(2,249.00 to<br>4,308.79)    | 3,867.78<br>(2,587.16 to<br>5,754.20)    |
| HIV/AIDS and tuberculosis                                         | 921.62<br>(833.93 to<br>1,022.57)           | 617.32<br>(383.34 to<br>925.09)             | 408.46<br>(244.88 to<br>641.49)             | 1,045.85<br>(666.94 to<br>1,584.35)         | 38.28<br>(33.42 to<br>44.16)             | 29.98<br>(17.74 to<br>49.67)             | 22.24<br>(12.93 to<br>37.73)             | 45.60<br>(26.68 to<br>77.21)             |
| Tuberculosis                                                      | 519.77<br>(435.01 to<br>623.51)             | 352.63<br>(181.51 to<br>614.40)             | 267.03<br>(140.72 to<br>470.86)             | 533.32<br>(264.16 to<br>949.93)             | 29.74<br>(24.95 to<br>35.65)             | 25.53<br>(13.21 to<br>45.35)             | 19.87<br>(10.39 to<br>34.23)             | 36.99<br>(18.70 to<br>66.65)             |
| HIV/AIDS                                                          | 401.86<br>(380.15 to<br>427.09)             | 264.69<br>(117.70 to<br>409.27)             | 141.43<br>(51.31 to<br>241.38)              | 512.53<br>(267.38 to<br>829.98)             | 8.54<br>(8.09 to<br>9.04)                | 4.45<br>(1.92 to<br>6.90)                | 2.36<br>(0.81 to<br>4.05)                | 8.62<br>(4.31 to<br>13.74)               |
| Diarrhea, lower respiratory, and other common infectious diseases | 15,122.11<br>(13,152.97 to<br>17,542.68)    | 26,876.93<br>(18,789.57 to<br>38,863.20)    | 24,358.78<br>(17,494.67 to<br>35,213.10)    | 34,551.68<br>(22,695.65 to<br>53,494.77)    | 1,400.50<br>(1,186.32 to<br>1,649.09)    | 3,102.80<br>(2,149.65 to<br>4,438.68)    | 2,932.64<br>(2,098.95 to<br>4,144.60)    | 3,670.14<br>(2,396.17 to<br>5,543.13)    |
| Diarrheal diseases                                                | 530.32<br>(449.65 to<br>624.61)             | 1,409.02<br>(919.39 to<br>2,178.25)         | 1,680.54<br>(1,169.04 to<br>2,460.79)       | 1,235.48<br>(786.67 to<br>1,928.27)         | 31.73<br>(26.95 to<br>36.87)             | 134.24<br>(83.90 to<br>211.38)           | 167.09<br>(111.07 to<br>257.89)          | 110.46<br>(66.12 to<br>182.27)           |
| Intestinal infectious diseases                                    | 3.57<br>(1.71 to<br>6.42)                   | 3.07<br>(1.46 to<br>5.60)                   | 2.96<br>(1.39 to<br>5.44)                   | 3.09<br>(1.46 to<br>5.69)                   | 0.13<br>(0.06 to<br>0.25)                | 0.16<br>(0.07 to<br>0.33)                | 0.16<br>(0.07 to<br>0.33)                | 0.15<br>(0.07 to<br>0.30)                |
| Typhoid fever                                                     | 0.47<br>(0.15 to<br>1.08)                   | 0.56<br>(0.19 to<br>1.27)                   | 0.61<br>(0.21 to<br>1.36)                   | 0.54<br>(0.18 to<br>1.23)                   | 0.01<br>(0.00 to<br>0.03)                | 0.01<br>(0.01 to<br>0.05)                | 0.02<br>(0.01 to<br>0.03)                | 0.01<br>(0.00 to<br>0.03)                |
| Paratyphoid fever                                                 | 1.09<br>(0.32 to<br>2.66)                   | 0.86<br>(0.27 to<br>2.10)                   | 0.77<br>(0.24 to<br>1.94)                   | 0.92<br>(0.30 to<br>2.24)                   | 0.02<br>(0.01 to<br>0.06)                | 0.02<br>(0.01 to<br>0.05)                | 0.02<br>(0.01 to<br>0.05)                | 0.02<br>(0.01 to<br>0.06)                |
| Other intestinal infectious diseases                              | 2.01<br>(0.81 to<br>4.11)                   | 1.65<br>(0.60 to<br>3.58)                   | 1.59<br>(0.57 to<br>3.43)                   | 1.63<br>(0.60 to<br>3.60)                   | 0.10<br>(0.04 to<br>0.20)                | 0.13<br>(0.04 to<br>0.29)                | 0.13<br>(0.04 to<br>0.29)                | 0.12<br>(0.04 to<br>0.26)                |
| Lower respiratory infections                                      | 13,594.99<br>(11,676.76 to<br>15,878.30)    | 24,722.40<br>(16,640.02 to<br>36,714.96)    | 21,998.96<br>(15,023.07 to<br>32,584.79)    | 32,285.50<br>(20,460.89 to<br>51,493.30)    | 1,343.27<br>(1,133.00 to<br>1,591.05)    | 2,941.53<br>(2,006.39 to<br>4,249.29)    | 2,739.40<br>(1,898.58 to<br>3,963.73)    | 3,530.10<br>(2,269.85 to<br>5,400.63)    |
| Upper respiratory infections                                      | 5.37<br>(2.99 to<br>8.49)                   | 5.44<br>(2.36 to<br>10.46)                  | 4.54<br>(1.97 to<br>8.85)                   | 5.87<br>(2.58 to<br>11.41)                  | 0.23<br>(0.11 to<br>0.39)                | 0.32<br>(0.12 to<br>0.67)                | 0.28<br>(0.10 to<br>0.59)                | 0.33<br>(0.12 to<br>0.70)                |
| Otitis media                                                      | 0.22<br>(0.15 to<br>0.34)                   | 0.05<br>(0.03 to<br>0.08)                   | 0.05<br>(0.03 to<br>0.08)                   | 0.05<br>(0.03 to<br>0.08)                   | 0.01<br>(0.00 to<br>0.01)                | 0.00<br>(0.00 to<br>0.00)                | 0.00<br>(0.00 to<br>0.00)                | 0.00<br>(0.00 to<br>0.00)                |
| Meningitis                                                        | 709.16<br>(584.73 to<br>868.73)             | 389.35<br>(280.55 to<br>533.19)             | 338.14<br>(246.68 to<br>459.04)             | 640.60<br>(392.33 to<br>1,005.50)           | 15.06<br>(12.90 to<br>18.14)             | 10.82<br>(8.46 to<br>13.88)              | 9.98<br>(7.90 to<br>12.87)               | 13.79<br>(10.11 to<br>18.67)             |
| Pneumococcal meningitis                                           | 120.07<br>(99.81 to<br>148.65)              | 76.03<br>(59.60 to<br>102.60)               | 74.77<br>(58.34 to<br>100.30)               | 92.13<br>(69.24 to<br>126.46)               | 3.06<br>(2.61 to<br>3.77)                | 2.88<br>(2.37 to<br>3.62)                | 2.94<br>(2.40 to<br>3.71)                | 3.14<br>(2.56 to<br>3.99)                |
| H influenzae type B meningitis                                    | 52.51<br>(40.84 to<br>66.96)                | 105.47<br>(45.98 to<br>212.13)              | 83.71<br>(40.52 to<br>162.34)               | 319.65<br>(105.68 to<br>696.51)             | 1.03<br>(0.85 to<br>1.26)                | 1.67<br>(0.96 to<br>2.98)                | 1.44<br>(0.91 to<br>2.36)                | 4.15<br>(1.65 to<br>8.56)                |
| Meningococcal meningitis                                          | 336.08<br>(275.10 to<br>409.55)             | 120.67<br>(83.64 to<br>176.31)              | 104.52<br>(70.74 to<br>155.01)              | 133.52<br>(88.01 to<br>202.52)              | 6.04<br>(5.13 to<br>7.31)                | 3.04<br>(2.28 to<br>4.12)                | 2.71<br>(2.03 to<br>3.68)                | 3.18<br>(2.37 to<br>4.36)                |
| Other meningitis                                                  | 200.51<br>(164.35 to<br>244.95)             | 87.18<br>(63.56 to<br>122.83)               | 75.14<br>(55.43 to<br>106.08)               | 95.29<br>(68.08 to<br>137.34)               | 4.94<br>(4.22 to<br>6.03)                | 3.23<br>(2.50 to<br>4.31)                | 2.89<br>(2.20 to<br>3.78)                | 3.31<br>(2.53 to<br>4.40)                |
| Encephalitis                                                      | 237.76<br>(188.19 to<br>328.84)             | 291.65<br>(221.56 to<br>406.21)             | 287.41<br>(216.12 to<br>400.01)             | 292.56<br>(222.06 to<br>407.65)             | 7.02<br>(5.47 to<br>9.68)                | 11.63<br>(8.96 to<br>16.21)              | 11.79<br>(9.01 to<br>16.57)              | 11.13<br>(8.64 to<br>15.45)              |

|                |                            |                              |                              |                              |                           |                           |                           |                           |
|----------------|----------------------------|------------------------------|------------------------------|------------------------------|---------------------------|---------------------------|---------------------------|---------------------------|
| Diphtheria     | 1.25<br>(0.81 to<br>1.85)  | 0.41<br>(0.24 to<br>0.63)    | 0.36<br>(0.22 to<br>0.55)    | 1.02<br>(0.42 to<br>2.19)    | 0.02<br>(0.01 to<br>0.03) | 0.01<br>(0.00 to<br>0.01) | 0.01<br>(0.00 to<br>0.01) | 0.02<br>(0.01 to<br>0.03) |
| Whooping cough | 5.23<br>(1.48 to<br>10.25) | 2.83<br>(0.56 to<br>7.98)    | 1.17<br>(0.27 to<br>3.05)    | 8.02<br>(1.51 to<br>21.89)   | 0.07<br>(0.02 to<br>0.13) | 0.04<br>(0.01 to<br>0.10) | 0.02<br>(0.00 to<br>0.05) | 0.10<br>(0.02 to<br>0.26) |
| Tetanus        | 2.17<br>(1.61 to<br>3.10)  | 0.30<br>(0.19 to<br>0.50)    | 0.25<br>(0.16 to<br>0.40)    | 0.59<br>(0.34 to<br>1.06)    | 0.06<br>(0.04 to<br>0.09) | 0.01<br>(0.01 to<br>0.01) | 0.01<br>(0.01 to<br>0.01) | 0.01<br>(0.01 to<br>0.02) |
| Measles        | 1.22<br>(0.86 to<br>1.75)  | 19.57<br>(0.11 to<br>161.49) | 13.10<br>(0.09 to<br>101.79) | 47.01<br>(0.15 to<br>427.37) | 0.02<br>(0.01 to<br>0.02) | 0.27<br>(0.00 to<br>2.29) | 0.19<br>(0.00 to<br>1.39) | 0.60<br>(0.00 to<br>5.04) |

| Ireland                                               |                                                      |                                                     |                                                    |                                                     |                                                |                                                |                                                |                                                |
|-------------------------------------------------------|------------------------------------------------------|-----------------------------------------------------|----------------------------------------------------|-----------------------------------------------------|------------------------------------------------|------------------------------------------------|------------------------------------------------|------------------------------------------------|
| Cause                                                 | YLLs (actual counts)                                 |                                                     |                                                    |                                                     | Deaths (actual counts)                         |                                                |                                                |                                                |
|                                                       | 2016                                                 | 2040 Forecast                                       | 2040 Better Scenario                               | 2040 Worse Scenario                                 | 2016                                           | 2040 Forecast                                  | 2040 Better Scenario                           | 2040 Worse Scenario                            |
| Varicella and herpes zoster                           | 30.84<br>(12.18 to<br>43.79)                         | 32.83<br>(10.93 to<br>52.35)                        | 31.30<br>(10.22 to<br>49.67)                       | 31.90<br>(10.95 to<br>49.54)                        | 2.89<br>(0.70 to<br>4.79)                      | 3.76<br>(0.87 to<br>6.64)                      | 3.70<br>(0.87 to<br>6.55)                      | 3.45<br>(0.80 to<br>6.14)                      |
| <b>Neglected tropical diseases and malaria</b>        | <b>29.74</b><br><b>(24.91 to</b><br><b>34.60)</b>    | <b>32.07</b><br><b>(25.91 to</b><br><b>39.57)</b>   | <b>32.13</b><br><b>(25.89 to</b><br><b>39.69)</b>  | <b>32.45</b><br><b>(26.11 to</b><br><b>40.06)</b>   | <b>0.61</b><br><b>(0.53 to</b><br><b>0.70)</b> | <b>0.72</b><br><b>(0.60 to</b><br><b>0.85)</b> | <b>0.74</b><br><b>(0.61 to</b><br><b>0.87)</b> | <b>0.71</b><br><b>(0.60 to</b><br><b>0.83)</b> |
| Malaria                                               | 0.00<br>(0.00 to<br>0.00)                            | 0.00<br>(0.00 to<br>0.00)                           | 0.00<br>(0.00 to<br>0.00)                          | 0.00<br>(0.00 to<br>0.00)                           | 0.00<br>(0.00 to<br>0.00)                      | 0.00<br>(0.00 to<br>0.00)                      | 0.00<br>(0.00 to<br>0.00)                      | 0.00<br>(0.00 to<br>0.00)                      |
| Chagas disease                                        | 0.00<br>(0.00 to<br>0.00)                            | 0.00<br>(0.00 to<br>0.00)                           | 0.00<br>(0.00 to<br>0.00)                          | 0.00<br>(0.00 to<br>0.00)                           | 0.00<br>(0.00 to<br>0.00)                      | 0.00<br>(0.00 to<br>0.00)                      | 0.00<br>(0.00 to<br>0.00)                      | 0.00<br>(0.00 to<br>0.00)                      |
| Leishmaniasis                                         | 0.00<br>(0.00 to<br>0.00)                            | 0.00<br>(0.00 to<br>0.00)                           | 0.00<br>(0.00 to<br>0.00)                          | 0.00<br>(0.00 to<br>0.00)                           | 0.00<br>(0.00 to<br>0.00)                      | 0.00<br>(0.00 to<br>0.00)                      | 0.00<br>(0.00 to<br>0.00)                      | 0.00<br>(0.00 to<br>0.00)                      |
| African trypanosomiasis                               | 0.00<br>(0.00 to<br>0.00)                            | 0.00<br>(0.00 to<br>0.00)                           | 0.00<br>(0.00 to<br>0.00)                          | 0.00<br>(0.00 to<br>0.00)                           | 0.00<br>(0.00 to<br>0.00)                      | 0.00<br>(0.00 to<br>0.00)                      | 0.00<br>(0.00 to<br>0.00)                      | 0.00<br>(0.00 to<br>0.00)                      |
| Schistosomiasis                                       | 0.00<br>(0.00 to<br>0.00)                            | 0.00<br>(0.00 to<br>0.00)                           | 0.00<br>(0.00 to<br>0.00)                          | 0.00<br>(0.00 to<br>0.00)                           | 0.00<br>(0.00 to<br>0.00)                      | 0.00<br>(0.00 to<br>0.00)                      | 0.00<br>(0.00 to<br>0.00)                      | 0.00<br>(0.00 to<br>0.00)                      |
| Cysticercosis                                         | 2.54<br>(2.16 to<br>2.98)                            | 1.03<br>(0.86 to<br>1.25)                           | 1.02<br>(0.84 to<br>1.25)                          | 1.02<br>(0.86 to<br>1.24)                           | 0.08<br>(0.07 to<br>0.10)                      | 0.04<br>(0.03 to<br>0.05)                      | 0.04<br>(0.03 to<br>0.05)                      | 0.04<br>(0.03 to<br>0.05)                      |
| Cystic echinococcosis                                 | 0.00<br>(0.00 to<br>0.00)                            | 0.00<br>(0.00 to<br>0.00)                           | 0.00<br>(0.00 to<br>0.00)                          | 0.00<br>(0.00 to<br>0.00)                           | 0.00<br>(0.00 to<br>0.00)                      | 0.00<br>(0.00 to<br>0.00)                      | 0.00<br>(0.00 to<br>0.00)                      | 0.00<br>(0.00 to<br>0.00)                      |
| Dengue                                                | 0.00<br>(0.00 to<br>0.00)                            | 0.00<br>(0.00 to<br>0.00)                           | 0.00<br>(0.00 to<br>0.00)                          | 0.00<br>(0.00 to<br>0.00)                           | 0.00<br>(0.00 to<br>0.00)                      | 0.00<br>(0.00 to<br>0.00)                      | 0.00<br>(0.00 to<br>0.00)                      | 0.00<br>(0.00 to<br>0.00)                      |
| Yellow fever                                          | 0.00<br>(0.00 to<br>0.00)                            | 0.00<br>(0.00 to<br>0.00)                           | 0.00<br>(0.00 to<br>0.00)                          | 0.00<br>(0.00 to<br>0.00)                           | 0.00<br>(0.00 to<br>0.00)                      | 0.00<br>(0.00 to<br>0.00)                      | 0.00<br>(0.00 to<br>0.00)                      | 0.00<br>(0.00 to<br>0.00)                      |
| Rabies                                                | 0.19<br>(0.14 to<br>0.25)                            | 0.18<br>(0.13 to<br>0.24)                           | 0.16<br>(0.12 to<br>0.22)                          | 0.19<br>(0.14 to<br>0.25)                           | 0.00<br>(0.00 to<br>0.01)                      | 0.01<br>(0.00 to<br>0.01)                      | 0.01<br>(0.00 to<br>0.01)                      | 0.01<br>(0.00 to<br>0.01)                      |
| Intestinal nematode infections                        | 0.00<br>(0.00 to<br>0.00)                            | 0.00<br>(0.00 to<br>0.00)                           | 0.00<br>(0.00 to<br>0.00)                          | 0.00<br>(0.00 to<br>0.00)                           | 0.00<br>(0.00 to<br>0.00)                      | 0.00<br>(0.00 to<br>0.00)                      | 0.00<br>(0.00 to<br>0.00)                      | 0.00<br>(0.00 to<br>0.00)                      |
| Other neglected tropical diseases                     | 27.02<br>(22.36 to<br>31.74)                         | 30.86<br>(24.77 to<br>38.13)                        | 30.95<br>(24.75 to<br>38.46)                       | 31.24<br>(25.07 to<br>38.64)                        | 0.52<br>(0.44 to<br>0.60)                      | 0.68<br>(0.56 to<br>0.80)                      | 0.69<br>(0.57 to<br>0.82)                      | 0.66<br>(0.56 to<br>0.79)                      |
| <b>Maternal disorders</b>                             | <b>169.41</b><br><b>(130.45 to</b><br><b>214.14)</b> | <b>105.48</b><br><b>(68.54 to</b><br><b>157.63)</b> | <b>96.45</b><br><b>(62.94 to</b><br><b>143.53)</b> | <b>111.77</b><br><b>(72.47 to</b><br><b>171.78)</b> | <b>3.25</b><br><b>(2.51 to</b><br><b>4.11)</b> | <b>2.00</b><br><b>(1.31 to</b><br><b>2.96)</b> | <b>1.83</b><br><b>(1.19 to</b><br><b>2.72)</b> | <b>2.11</b><br><b>(1.37 to</b><br><b>3.21)</b> |
| Maternal hemorrhage                                   | 15.03<br>(9.36 to<br>22.98)                          | 8.36<br>(4.37 to<br>14.36)                          | 7.69<br>(4.05 to<br>13.35)                         | 8.74<br>(4.59 to<br>14.82)                          | 0.29<br>(0.18 to<br>0.44)                      | 0.16<br>(0.08 to<br>0.27)                      | 0.15<br>(0.08 to<br>0.25)                      | 0.17<br>(0.09 to<br>0.29)                      |
| Maternal sepsis and other maternal infections         | 2.44<br>(1.02 to<br>4.48)                            | 1.32<br>(0.51 to<br>2.62)                           | 1.21<br>(0.46 to<br>2.44)                          | 1.39<br>(0.53 to<br>2.73)                           | 0.05<br>(0.02 to<br>0.09)                      | 0.03<br>(0.01 to<br>0.05)                      | 0.02<br>(0.01 to<br>0.05)                      | 0.03<br>(0.01 to<br>0.05)                      |
| Maternal hypertensive disorders                       | 16.56<br>(9.96 to<br>25.77)                          | 9.86<br>(5.27 to<br>16.83)                          | 9.01<br>(4.77 to<br>15.53)                         | 10.37<br>(5.44 to<br>18.38)                         | 0.31<br>(0.19 to<br>0.49)                      | 0.18<br>(0.10 to<br>0.31)                      | 0.17<br>(0.09 to<br>0.29)                      | 0.19<br>(0.10 to<br>0.34)                      |
| Maternal obstructed labor and uterine rupture         | 2.13<br>(0.83 to<br>4.03)                            | 1.30<br>(0.45 to<br>2.66)                           | 1.17<br>(0.40 to<br>2.43)                          | 1.38<br>(0.47 to<br>2.86)                           | 0.04<br>(0.02 to<br>0.08)                      | 0.03<br>(0.01 to<br>0.05)                      | 0.02<br>(0.01 to<br>0.05)                      | 0.03<br>(0.01 to<br>0.06)                      |
| Maternal abortion, miscarriage, and ectopic pregnancy | 9.35<br>(5.54 to<br>14.48)                           | 5.65<br>(2.97 to<br>10.66)                          | 5.14<br>(2.65 to<br>9.67)                          | 5.96<br>(3.09 to<br>11.26)                          | 0.19<br>(0.11 to<br>0.29)                      | 0.11<br>(0.06 to<br>0.21)                      | 0.10<br>(0.05 to<br>0.19)                      | 0.12<br>(0.06 to<br>0.23)                      |

|                                        |                              |                              |                              |                              |                           |                           |                           |                           |
|----------------------------------------|------------------------------|------------------------------|------------------------------|------------------------------|---------------------------|---------------------------|---------------------------|---------------------------|
|                                        | 55.56<br>(38.88 to<br>78.78) | 38.56<br>(20.42 to<br>68.24) | 34.88<br>(18.54 to<br>60.87) | 41.25<br>(21.76 to<br>73.18) | 1.04<br>(0.72 to<br>1.47) | 0.71<br>(0.37 to<br>1.27) | 0.64<br>(0.34 to<br>1.11) | 0.76<br>(0.40 to<br>1.36) |
| Indirect maternal deaths               |                              |                              |                              |                              |                           |                           |                           |                           |
|                                        | 3.25<br>(1.64 to<br>5.86)    | 1.70<br>(0.72 to<br>3.38)    | 1.54<br>(0.65 to<br>3.07)    | 1.80<br>(0.76 to<br>3.60)    | 0.06<br>(0.03 to<br>0.11) | 0.03<br>(0.01 to<br>0.06) | 0.03<br>(0.01 to<br>0.06) | 0.03<br>(0.01 to<br>0.07) |
| Late maternal deaths                   |                              |                              |                              |                              |                           |                           |                           |                           |
|                                        | 0.05<br>(0.01 to<br>0.11)    | 0.11<br>(0.02 to<br>0.30)    | 0.08<br>(0.01 to<br>0.25)    | 0.14<br>(0.02 to<br>0.39)    | 0.00<br>(0.00 to<br>0.00) | 0.00<br>(0.00 to<br>0.01) | 0.00<br>(0.00 to<br>0.00) | 0.00<br>(0.00 to<br>0.01) |
| Maternal deaths aggravated by HIV/AIDS |                              |                              |                              |                              |                           |                           |                           |                           |
|                                        | 65.04<br>(45.99 to<br>87.49) | 38.61<br>(22.33 to<br>61.88) | 35.71<br>(20.51 to<br>57.45) | 40.74<br>(23.26 to<br>67.12) | 1.27<br>(0.90 to<br>1.70) | 0.74<br>(0.43 to<br>1.19) | 0.69<br>(0.40 to<br>1.10) | 0.78<br>(0.45 to<br>1.28) |
| Other maternal disorders               |                              |                              |                              |                              |                           |                           |                           |                           |



| Ireland                                                                 |                                            |                                           |                                           |                                            |                                   |                                   |                                  |                                   |
|-------------------------------------------------------------------------|--------------------------------------------|-------------------------------------------|-------------------------------------------|--------------------------------------------|-----------------------------------|-----------------------------------|----------------------------------|-----------------------------------|
| Cause                                                                   | YLLs (actual counts)                       |                                           |                                           |                                            | Deaths (actual counts)            |                                   |                                  |                                   |
|                                                                         | 2016                                       | 2040 Forecast                             | 2040 Better Scenario                      | 2040 Worse Scenario                        | 2016                              | 2040 Forecast                     | 2040 Better Scenario             | 2040 Worse Scenario               |
| <b>Neonatal disorders</b>                                               | <b>7,301.20</b><br>(5,124.52 to 10,239.17) | <b>5,073.72</b><br>(2,735.85 to 9,336.48) | <b>4,187.48</b><br>(2,254.85 to 7,768.88) | <b>6,197.36</b><br>(3,283.84 to 11,533.32) | <b>84.40</b><br>(59.24 to 118.35) | <b>58.67</b><br>(31.65 to 107.91) | <b>48.42</b><br>(26.09 to 89.79) | <b>71.65</b><br>(37.98 to 133.29) |
| Neonatal preterm birth                                                  | 4,252.41<br>(2,957.39 to 6,010.78)         | 2,447.87<br>(1,303.01 to 4,585.65)        | 1,885.46<br>(990.22 to 3,477.67)          | 3,262.13<br>(1,700.13 to 6,119.34)         | 49.14<br>(34.17 to 69.46)         | 28.29<br>(15.06 to 52.98)         | 21.79<br>(11.45 to 40.18)        | 37.70<br>(19.65 to 70.70)         |
| Neonatal encephalopathy due to birth asphyxia and trauma                | 1,493.82<br>(995.87 to 2,154.17)           | 940.57<br>(444.46 to 1,949.39)            | 775.97<br>(361.30 to 1,609.94)            | 1,082.93<br>(503.54 to 2,303.55)           | 17.27<br>(11.51 to 24.90)         | 10.88<br>(5.14 to 22.53)          | 8.97<br>(4.18 to 18.60)          | 12.52<br>(5.83 to 26.62)          |
| Neonatal sepsis and other neonatal infections                           | 389.29<br>(206.26 to 1,013.18)             | 413.62<br>(172.47 to 1,111.82)            | 355.51<br>(148.72 to 953.99)              | 468.02<br>(195.76 to 1,253.61)             | 4.50<br>(2.38 to 11.71)           | 4.78<br>(1.99 to 12.85)           | 4.11<br>(1.72 to 11.03)          | 5.41<br>(2.26 to 14.48)           |
| Hemolytic disease and other neonatal jaundice                           | 46.46<br>(22.35 to 80.32)                  | 21.65<br>(7.90 to 52.82)                  | 18.36<br>(6.79 to 45.38)                  | 24.56<br>(8.99 to 60.22)                   | 0.54<br>(0.26 to 0.93)            | 0.25<br>(0.09 to 0.61)            | 0.21<br>(0.08 to 0.53)           | 0.28<br>(0.10 to 0.70)            |
| Other neonatal disorders                                                | 1,119.22<br>(731.28 to 1,646.79)           | 1,250.02<br>(610.39 to 2,544.73)          | 1,152.18<br>(561.23 to 2,306.02)          | 1,359.72<br>(661.60 to 2,799.63)           | 12.95<br>(8.46 to 19.05)          | 14.47<br>(7.07 to 29.43)          | 13.34<br>(6.50 to 26.67)         | 15.74<br>(7.67 to 32.37)          |
| <b>Nutritional deficiencies</b>                                         | <b>167.80</b><br>(147.76 to 190.71)        | <b>272.15</b><br>(226.99 to 324.61)       | <b>284.51</b><br>(236.95 to 340.30)       | <b>251.32</b><br>(208.74 to 298.18)        | <b>13.63</b><br>(11.84 to 15.66)  | <b>28.78</b><br>(22.90 to 36.14)  | <b>31.02</b><br>(24.90 to 38.47) | <b>25.29</b><br>(19.43 to 32.10)  |
| Protein-energy malnutrition                                             | 82.12<br>(61.52 to 118.93)                 | 144.04<br>(97.72 to 204.92)               | 156.65<br>(105.99 to 216.13)              | 129.96<br>(88.59 to 185.47)                | 7.01<br>(5.04 to 9.85)            | 15.90<br>(10.21 to 22.51)         | 17.80<br>(11.55 to 24.93)        | 13.71<br>(8.60 to 19.75)          |
| Iodine deficiency                                                       | 6.23<br>(0.71 to 16.27)                    | 15.86<br>(0.66 to 52.53)                  | 15.99<br>(0.59 to 53.76)                  | 15.06<br>(0.66 to 48.27)                   | 0.38<br>(0.03 to 1.24)            | 1.49<br>(0.02 to 5.88)            | 1.55<br>(0.02 to 6.20)           | 1.35<br>(0.02 to 5.14)            |
| Dietary iron deficiency                                                 | 16.11<br>(8.40 to 20.79)                   | 19.14<br>(8.72 to 27.59)                  | 19.91<br>(8.80 to 28.78)                  | 18.24<br>(8.75 to 25.96)                   | 0.76<br>(0.24 to 1.11)            | 1.25<br>(0.29 to 2.18)            | 1.36<br>(0.29 to 2.40)           | 1.09<br>(0.27 to 1.88)            |
| Other nutritional deficiencies                                          | 63.33<br>(36.27 to 81.64)                  | 93.10<br>(50.41 to 130.96)                | 91.95<br>(48.08 to 132.15)                | 88.07<br>(48.43 to 123.73)                 | 5.49<br>(3.25 to 7.51)            | 10.13<br>(5.28 to 15.25)          | 10.31<br>(5.40 to 15.87)         | 9.14<br>(4.72 to 13.66)           |
| <b>Other communicable, maternal, neonatal, and nutritional diseases</b> | <b>1,074.98</b><br>(915.86 to 1,240.65)    | <b>1,273.28</b><br>(1,046.30 to 1,535.30) | <b>1,244.58</b><br>(1,017.16 to 1,502.63) | <b>1,281.49</b><br>(1,057.94 to 1,545.91)  | <b>35.20</b><br>(29.59 to 40.51)  | <b>54.15</b><br>(44.51 to 64.14)  | <b>54.41</b><br>(44.31 to 64.26) | <b>52.27</b><br>(43.20 to 61.28)  |
| Sexually transmitted infections excluding HIV                           | 35.78<br>(28.07 to 43.54)                  | 24.48<br>(18.61 to 31.54)                 | 23.95<br>(17.98 to 31.20)                 | 24.25<br>(18.36 to 30.93)                  | 1.84<br>(1.44 to 2.28)            | 1.63<br>(1.20 to 2.11)            | 1.63<br>(1.21 to 2.14)           | 1.55<br>(1.15 to 2.01)            |
| Syphilis                                                                | 9.04<br>(7.30 to 11.13)                    | 6.07<br>(4.54 to 8.23)                    | 5.75<br>(4.23 to 7.88)                    | 6.13<br>(4.60 to 8.21)                     | 0.46<br>(0.36 to 0.57)            | 0.40<br>(0.27 to 0.55)            | 0.39<br>(0.26 to 0.53)           | 0.38<br>(0.27 to 0.53)            |
| Chlamydial infection                                                    | 5.28<br>(4.08 to 6.48)                     | 3.64<br>(2.73 to 4.72)                    | 3.60<br>(2.71 to 4.69)                    | 3.57<br>(2.71 to 4.63)                     | 0.29<br>(0.22 to 0.35)            | 0.26<br>(0.19 to 0.33)            | 0.26<br>(0.19 to 0.34)           | 0.24<br>(0.18 to 0.32)            |
| Gonococcal infection                                                    | 14.89<br>(11.43 to 18.26)                  | 10.61<br>(7.76 to 13.99)                  | 10.51<br>(7.63 to 13.99)                  | 10.42<br>(7.65 to 13.61)                   | 0.81<br>(0.63 to 1.02)            | 0.74<br>(0.53 to 0.99)            | 0.75<br>(0.53 to 1.01)           | 0.70<br>(0.49 to 0.93)            |
| Other sexually transmitted infections                                   | 6.56<br>(5.12 to 8.07)                     | 4.16<br>(3.09 to 5.43)                    | 4.09<br>(3.02 to 5.35)                    | 4.13<br>(3.08 to 5.36)                     | 0.29<br>(0.22 to 0.35)            | 0.24<br>(0.18 to 0.31)            | 0.24<br>(0.18 to 0.31)           | 0.22<br>(0.17 to 0.29)            |
| Acute hepatitis                                                         | 291.83<br>(234.90 to 358.72)               | 166.05<br>(116.99 to 228.93)              | 147.10<br>(103.32 to 205.36)              | 175.71<br>(122.11 to 246.71)               | 8.49<br>(6.97 to 10.32)           | 6.04<br>(4.43 to 8.12)            | 5.44<br>(3.95 to 7.38)           | 6.21<br>(4.50 to 8.46)            |
| Acute hepatitis A                                                       | 17.23<br>(12.34 to 23.56)                  | 8.98<br>(5.70 to 13.93)                   | 8.22<br>(5.19 to 12.83)                   | 9.41<br>(5.87 to 14.70)                    | 0.41<br>(0.29 to 0.57)            | 0.29<br>(0.18 to 0.43)            | 0.27<br>(0.17 to 0.41)           | 0.29<br>(0.18 to 0.45)            |
| Acute hepatitis B                                                       | 236.58<br>(186.38 to 296.33)               | 133.32<br>(91.00 to 188.24)               | 117.57<br>(79.48 to 167.89)               | 141.55<br>(95.08 to 204.24)                | 6.78<br>(5.47 to 8.39)            | 4.57<br>(3.15 to 6.36)            | 4.08<br>(2.82 to 5.71)           | 4.75<br>(3.25 to 6.63)            |

|                                       |                                                                  |                                                                  |                                                                  |                                                                  |                                                               |                                                               |                                                               |                                                               |
|---------------------------------------|------------------------------------------------------------------|------------------------------------------------------------------|------------------------------------------------------------------|------------------------------------------------------------------|---------------------------------------------------------------|---------------------------------------------------------------|---------------------------------------------------------------|---------------------------------------------------------------|
| Acute hepatitis C                     | 11.34<br>(7.93 to<br>15.71)                                      | 7.09<br>(4.49 to<br>10.92)                                       | 6.31<br>(3.94 to<br>9.73)                                        | 7.46<br>(4.69 to<br>11.48)                                       | 0.37<br>(0.26 to<br>0.51)                                     | 0.29<br>(0.18 to<br>0.43)                                     | 0.26<br>(0.17 to<br>0.38)                                     | 0.29<br>(0.19 to<br>0.44)                                     |
| Acute hepatitis E                     | 26.67<br>(18.55 to<br>38.11)                                     | 16.66<br>(10.10 to<br>25.36)                                     | 14.99<br>(9.07 to<br>22.61)                                      | 17.29<br>(10.34 to<br>26.58)                                     | 0.93<br>(0.61 to<br>1.35)                                     | 0.90<br>(0.52 to<br>1.38)                                     | 0.84<br>(0.48 to<br>1.28)                                     | 0.88<br>(0.51 to<br>1.36)                                     |
| Other unspecified infectious diseases | 747.37<br>(608.00 to<br>874.97)                                  | 1,082.75<br>(874.49 to<br>1,312.39)                              | 1,073.53<br>(860.81 to<br>1,302.62)                              | 1,081.53<br>(870.33 to<br>1,305.81)                              | 24.86<br>(19.57 to<br>29.08)                                  | 46.49<br>(37.16 to<br>54.65)                                  | 47.34<br>(37.85 to<br>56.11)                                  | 44.52<br>(35.53 to<br>52.22)                                  |
| <b>Non-communicable diseases</b>      | <b>426,916.97</b><br><b>(381,184.60 to</b><br><b>479,477.35)</b> | <b>541,544.62</b><br><b>(441,200.44 to</b><br><b>654,948.20)</b> | <b>475,143.52</b><br><b>(391,598.31 to</b><br><b>568,240.38)</b> | <b>684,587.29</b><br><b>(547,813.16 to</b><br><b>837,219.61)</b> | <b>28,170.29</b><br><b>(25,356.79 to</b><br><b>31,322.20)</b> | <b>43,496.45</b><br><b>(37,208.35 to</b><br><b>51,187.78)</b> | <b>39,142.67</b><br><b>(33,727.87 to</b><br><b>45,630.49)</b> | <b>51,906.76</b><br><b>(44,133.40 to</b><br><b>60,508.72)</b> |

| Ireland                              |                                                 |                                                 |                                                 |                                                 |                                            |                                              |                                              |                                              |
|--------------------------------------|-------------------------------------------------|-------------------------------------------------|-------------------------------------------------|-------------------------------------------------|--------------------------------------------|----------------------------------------------|----------------------------------------------|----------------------------------------------|
| Cause                                | YLLs (actual counts)                            |                                                 |                                                 |                                                 | Deaths (actual counts)                     |                                              |                                              |                                              |
|                                      | 2016                                            | 2040 Forecast                                   | 2040 Better Scenario                            | 2040 Worse Scenario                             | 2016                                       | 2040 Forecast                                | 2040 Better Scenario                         | 2040 Worse Scenario                          |
| <b>Neoplasms</b>                     | <b>171,979.27</b><br>(152,615.48 to 194,207.77) | <b>214,079.95</b><br>(173,018.99 to 257,915.75) | <b>190,767.00</b><br>(154,611.16 to 229,032.64) | <b>272,278.08</b><br>(215,088.50 to 334,925.33) | <b>9,259.59</b><br>(8,257.80 to 10,390.56) | <b>13,855.68</b><br>(11,775.13 to 16,067.11) | <b>12,563.75</b><br>(10,790.50 to 14,505.13) | <b>16,918.21</b><br>(14,056.30 to 20,099.43) |
| Lip and oral cavity cancer           | 1,984.90<br>(1,682.13 to 2,309.82)              | 1,877.63<br>(999.17 to 3,306.18)                | 1,408.50<br>(758.65 to 2,431.36)                | 3,699.15<br>(1,951.91 to 6,481.02)              | 99.19<br>(84.96 to 114.14)                 | 111.71<br>(60.86 to 191.62)                  | 83.71<br>(46.96 to 141.30)                   | 212.11<br>(112.18 to 370.07)                 |
| Nasopharynx cancer                   | 567.34<br>(473.87 to 681.43)                    | 564.52<br>(300.67 to 997.25)                    | 414.22<br>(227.57 to 687.81)                    | 1,116.12<br>(578.34 to 1,968.60)                | 27.58<br>(23.13 to 32.97)                  | 33.01<br>(17.38 to 57.89)                    | 24.08<br>(13.13 to 40.22)                    | 62.94<br>(32.32 to 110.22)                   |
| Other pharynx cancer                 | 1,212.67<br>(1,027.42 to 1,426.39)              | 1,413.84<br>(759.41 to 2,374.43)                | 1,319.83<br>(722.59 to 2,236.28)                | 1,880.12<br>(1,003.80 to 3,184.18)              | 53.27<br>(45.47 to 61.91)                  | 72.18<br>(39.56 to 118.97)                   | 68.31<br>(38.14 to 112.47)                   | 94.52<br>(50.83 to 157.80)                   |
| Esophageal cancer                    | 7,227.46<br>(6,052.29 to 8,566.16)              | 7,441.80<br>(4,485.88 to 12,015.47)             | 5,929.49<br>(3,734.72 to 9,369.71)              | 13,654.59<br>(7,556.58 to 23,308.89)            | 391.78<br>(332.50 to 458.89)               | 466.25<br>(283.39 to 728.45)                 | 371.25<br>(237.18 to 565.49)                 | 828.52<br>(469.23 to 1,353.81)               |
| Stomach cancer                       | 7,625.16<br>(6,603.64 to 8,798.67)              | 6,939.50<br>(5,177.42 to 9,110.14)              | 6,043.65<br>(4,594.36 to 7,909.43)              | 7,704.64<br>(5,522.90 to 10,497.61)             | 449.65<br>(396.02 to 516.47)               | 491.49<br>(377.43 to 638.61)                 | 434.87<br>(343.10 to 549.06)                 | 528.49<br>(392.14 to 699.87)                 |
| Colon and rectum cancer              | 19,147.28<br>(16,495.04 to 22,032.18)           | 26,161.98<br>(18,131.59 to 37,135.32)           | 22,419.51<br>(15,496.50 to 31,321.52)           | 32,457.92<br>(21,812.49 to 46,772.73)           | 1,129.65<br>(982.11 to 1,291.46)           | 1,851.07<br>(1,307.70 to 2,584.66)           | 1,618.68<br>(1,163.00 to 2,212.39)           | 2,226.15<br>(1,541.04 to 3,201.40)           |
| Liver cancer                         | 4,402.82<br>(3,761.42 to 5,154.19)              | 6,135.06<br>(4,080.60 to 9,332.97)              | 5,517.75<br>(3,797.79 to 8,226.17)              | 9,362.89<br>(5,788.63 to 15,344.71)             | 239.85<br>(205.04 to 278.51)               | 390.70<br>(269.94 to 574.06)                 | 357.84<br>(253.23 to 516.10)                 | 565.72<br>(363.79 to 877.37)                 |
| Liver cancer due to hepatitis B      | 664.85<br>(450.26 to 962.16)                    | 912.74<br>(529.69 to 1,548.67)                  | 853.06<br>(504.74 to 1,407.62)                  | 1,152.47<br>(618.02 to 2,098.14)                | 30.36<br>(20.02 to 44.89)                  | 49.50<br>(28.36 to 84.88)                    | 46.82<br>(27.24 to 78.99)                    | 60.18<br>(32.57 to 108.11)                   |
| Liver cancer due to hepatitis C      | 1,173.45<br>(888.97 to 1,543.74)                | 1,856.13<br>(1,163.69 to 2,856.96)              | 1,742.40<br>(1,113.87 to 2,620.30)              | 2,270.75<br>(1,311.50 to 3,777.19)              | 72.24<br>(55.34 to 95.11)                  | 132.06<br>(84.42 to 196.22)                  | 126.09<br>(82.96 to 183.23)                  | 154.86<br>(93.41 to 246.87)                  |
| Liver cancer due to alcohol use      | 1,931.14<br>(1,494.85 to 2,396.00)              | 2,398.04<br>(1,488.68 to 3,850.52)              | 2,016.00<br>(1,278.25 to 3,202.67)              | 4,718.07<br>(2,759.54 to 7,921.06)              | 103.05<br>(79.31 to 128.89)                | 147.51<br>(91.81 to 234.55)                  | 126.47<br>(80.96 to 196.34)                  | 275.47<br>(162.64 to 456.06)                 |
| Liver cancer due to other causes     | 633.38<br>(448.44 to 876.94)                    | 968.15<br>(558.27 to 1,612.95)                  | 906.29<br>(529.69 to 1,485.29)                  | 1,221.61<br>(652.66 to 2,161.36)                | 34.21<br>(23.50 to 47.81)                  | 61.63<br>(34.34 to 100.02)                   | 58.46<br>(33.31 to 94.18)                    | 75.21<br>(38.54 to 128.80)                   |
| Gallbladder and biliary tract cancer | 1,799.40<br>(1,551.55 to 2,073.13)              | 2,000.67<br>(1,697.71 to 2,327.52)              | 2,016.88<br>(1,702.34 to 2,384.07)              | 1,913.53<br>(1,629.47 to 2,212.76)              | 110.06<br>(96.18 to 125.55)                | 142.99<br>(124.17 to 161.04)                 | 147.07<br>(127.65 to 166.91)                 | 132.53<br>(114.92 to 148.94)                 |
| Pancreatic cancer                    | 10,318.58<br>(8,919.01 to 12,044.41)            | 15,317.88<br>(11,810.45 to 19,427.24)           | 14,648.75<br>(11,378.00 to 18,519.66)           | 17,290.24<br>(13,076.00 to 22,596.90)           | 590.89<br>(513.61 to 680.13)               | 1,007.68<br>(797.09 to 1,257.86)             | 974.84<br>(778.31 to 1,215.03)               | 1,109.19<br>(855.82 to 1,420.46)             |
| Larynx cancer                        | 1,284.01<br>(1,092.97 to 1,519.50)              | 965.90<br>(483.55 to 1,810.67)                  | 681.13<br>(346.12 to 1,226.11)                  | 1,872.63<br>(854.56 to 3,671.22)                | 62.53<br>(53.89 to 73.09)                  | 55.29<br>(28.03 to 100.61)                   | 39.05<br>(69.34 to 192.53)                   | 101.50<br>(48.00 to 192.53)                  |
| Tracheal, bronchus, and lung cancer  | 34,743.42<br>(30,445.12 to 39,901.34)           | 36,338.68<br>(24,892.00 to 49,974.68)           | 25,494.90<br>(17,643.29 to 34,598.12)           | 66,535.70<br>(44,065.87 to 93,571.92)           | 1,913.01<br>(1,681.90 to 2,173.68)         | 2,290.11<br>(1,595.63 to 3,100.97)           | 1,623.12<br>(1,148.10 to 2,183.84)           | 4,006.86<br>(2,735.31 to 5,503.18)           |
| Malignant skin melanoma              | 3,437.97<br>(2,730.47 to 4,191.12)              | 4,579.33<br>(3,612.36 to 5,578.10)              | 4,901.71<br>(3,862.19 to 6,017.25)              | 4,287.98<br>(3,365.75 to 5,221.64)              | 153.45<br>(121.01 to 183.30)               | 256.26<br>(200.39 to 302.31)                 | 280.46<br>(218.47 to 331.78)                 | 231.52<br>(179.96 to 271.57)                 |
| Non-melanoma skin cancer             | 1,091.93<br>(940.58 to 1,265.34)                | 1,675.54<br>(1,429.16 to 1,950.72)              | 1,607.96<br>(1,366.22 to 1,873.86)              | 1,614.53<br>(1,373.67 to 1,905.06)              | 77.27<br>(67.39 to 88.61)                  | 144.84<br>(122.28 to 165.62)                 | 143.04<br>(122.87 to 163.48)                 | 133.40<br>(109.77 to 156.61)                 |
| Breast cancer                        | 15,615.53<br>(12,660.45 to 19,105.01)           | 17,401.72<br>(11,775.83 to 25,477.13)           | 15,678.24<br>(10,812.25 to 22,679.45)           | 21,358.61<br>(13,815.52 to 32,037.78)           | 718.07<br>(592.46 to 870.56)               | 989.25<br>(709.28 to 1,388.92)               | 908.52<br>(656.33 to 1,262.35)               | 1,179.27<br>(798.77 to 1,706.05)             |
| Cervical cancer                      | 2,701.61<br>(2,168.34 to 3,315.86)              | 1,947.45<br>(1,381.07 to 2,742.18)              | 1,739.98<br>(1,245.74 to 2,411.80)              | 2,164.76<br>(1,472.50 to 3,189.87)              | 101.33<br>(82.71 to 122.51)                | 90.30<br>(64.25 to 122.20)                   | 81.39<br>(59.00 to 109.47)                   | 98.98<br>(68.35 to 144.45)                   |

|                   |                                        |                                          |                                          |                                          |                                 |                                       |                                       |                                     |
|-------------------|----------------------------------------|------------------------------------------|------------------------------------------|------------------------------------------|---------------------------------|---------------------------------------|---------------------------------------|-------------------------------------|
|                   | 1,388.05<br>(1,100.46 to<br>1,690.86)  | 2,063.94<br>(1,571.82 to<br>2,633.31)    | 1,983.66<br>(1,511.18 to<br>2,517.08)    | 2,057.29<br>(1,582.22 to<br>2,601.26)    | 77.46<br>(62.33 to<br>93.76)    | 133.72<br>(106.59 to<br>164.09)       | 130.58<br>(102.62 to<br>161.59)       | 130.13<br>(104.06 to<br>158.78)     |
| Uterine cancer    | 6,171.16<br>(4,973.32 to<br>7,528.54)  | 7,210.79<br>(5,102.65 to<br>9,922.22)    | 6,882.60<br>(4,863.27 to<br>9,350.20)    | 7,641.38<br>(5,307.58 to<br>10,827.92)   | 296.40<br>(240.29 to<br>358.72) | 394.56<br>(286.26 to<br>524.90)       | 380.22<br>(277.42 to<br>505.88)       | 413.94<br>(293.64 to<br>562.28)     |
| Ovarian cancer    | 8,864.81<br>(6,958.15 to<br>11,001.09) | 15,633.00<br>(11,737.22 to<br>19,673.10) | 15,434.43<br>(11,615.86 to<br>19,314.73) | 15,036.20<br>(11,289.29 to<br>18,938.69) | 682.72<br>(531.74 to<br>834.23) | 1,408.52<br>(1,107.42 to<br>1,725.72) | 1,421.43<br>(1,126.75 to<br>1,720.54) | 1,303.27<br>(982.17 to<br>1,644.82) |
| Prostate cancer   | 205.19<br>(164.81 to<br>259.57)        | 197.22<br>(139.94 to<br>272.28)          | 185.54<br>(131.72 to<br>258.57)          | 200.44<br>(142.24 to<br>280.94)          | 5.09<br>(4.14 to<br>6.34)       | 5.99<br>(4.69 to<br>7.58)             | 5.79<br>(4.53 to<br>7.42)             | 5.83<br>(4.56 to<br>7.52)           |
| Testicular cancer |                                        |                                          |                                          |                                          |                                 |                                       |                                       |                                     |

| Ireland                         |                                                        |                                                       |                                                       |                                                        |                                                    |                                                    |                                                    |                                                     |
|---------------------------------|--------------------------------------------------------|-------------------------------------------------------|-------------------------------------------------------|--------------------------------------------------------|----------------------------------------------------|----------------------------------------------------|----------------------------------------------------|-----------------------------------------------------|
| Cause                           | YLLs (actual counts)                                   |                                                       |                                                       |                                                        | Deaths (actual counts)                             |                                                    |                                                    |                                                     |
|                                 | 2016                                                   | 2040 Forecast                                         | 2040 Better Scenario                                  | 2040 Worse Scenario                                    | 2016                                               | 2040 Forecast                                      | 2040 Better Scenario                               | 2040 Worse Scenario                                 |
| Kidney cancer                   | 4,655.54<br>(3,960.02 to 5,415.60)                     | 6,491.11<br>(5,023.55 to 8,123.34)                    | 6,355.21<br>(4,953.30 to 7,819.25)                    | 6,971.27<br>(5,192.82 to 9,043.76)                     | 240.16<br>(204.93 to 278.42)                       | 396.78<br>(313.14 to 483.98)                       | 393.81<br>(317.95 to 472.45)                       | 412.62<br>(316.90 to 519.38)                        |
| Bladder cancer                  | 3,193.33<br>(2,749.36 to 3,688.19)                     | 4,215.58<br>(3,173.08 to 5,573.30)                    | 3,845.90<br>(2,933.48 to 4,963.53)                    | 4,981.04<br>(3,591.69 to 6,833.80)                     | 227.25<br>(195.81 to 260.40)                       | 356.59<br>(273.83 to 461.28)                       | 329.82<br>(256.89 to 418.29)                       | 406.13<br>(295.62 to 558.78)                        |
| Brain and nervous system cancer | 7,694.65<br>(6,293.36 to 10,187.25)                    | 10,123.79<br>(7,835.44 to 13,105.13)                  | 9,907.71<br>(7,662.75 to 12,736.85)                   | 10,037.94<br>(7,817.92 to 12,982.17)                   | 274.85<br>(223.91 to 340.24)                       | 439.09<br>(343.37 to 523.43)                       | 436.12<br>(338.98 to 521.16)                       | 424.94<br>(333.00 to 508.38)                        |
| Thyroid cancer                  | 414.12<br>(349.13 to 485.53)                           | 561.08<br>(413.94 to 774.24)                          | 526.84<br>(390.65 to 716.38)                          | 606.62<br>(426.76 to 860.99)                           | 22.68<br>(19.22 to 26.52)                          | 36.70<br>(27.62 to 50.17)                          | 35.18<br>(26.82 to 47.41)                          | 38.19<br>(27.91 to 53.99)                           |
| Mesothelioma                    | 835.00<br>(689.12 to 999.86)                           | 1,342.33<br>(1,071.88 to 1,638.82)                    | 1,382.51<br>(1,090.22 to 1,709.33)                    | 1,266.50<br>(1,030.54 to 1,512.34)                     | 45.62<br>(37.39 to 54.30)                          | 83.72<br>(68.74 to 97.57)                          | 87.51<br>(71.16 to 103.13)                         | 77.06<br>(64.48 to 89.12)                           |
| Hodgkin lymphoma                | 606.18<br>(522.23 to 717.96)                           | 537.47<br>(433.12 to 674.78)                          | 489.94<br>(390.34 to 617.55)                          | 552.71<br>(438.90 to 698.82)                           | 20.37<br>(17.70 to 24.02)                          | 22.15<br>(18.61 to 26.74)                          | 20.53<br>(17.13 to 24.97)                          | 22.16<br>(18.47 to 26.95)                           |
| Non-Hodgkin lymphoma            | 6,228.76<br>(5,251.05 to 7,283.34)                     | 8,013.99<br>(6,266.04 to 10,210.22)                   | 7,669.30<br>(6,020.07 to 9,688.12)                    | 8,266.21<br>(6,370.40 to 10,646.03)                    | 308.92<br>(260.55 to 358.95)                       | 475.20<br>(381.68 to 587.53)                       | 463.70<br>(375.57 to 570.11)                       | 474.08<br>(374.20 to 594.92)                        |
| Multiple myeloma                | 3,225.88<br>(2,541.84 to 4,004.79)                     | 5,144.06<br>(3,841.97 to 6,828.26)                    | 5,039.66<br>(3,789.25 to 6,587.25)                    | 5,217.59<br>(3,869.76 to 7,038.27)                     | 191.99<br>(149.25 to 231.04)                       | 353.83<br>(266.64 to 450.93)                       | 353.54<br>(265.50 to 446.08)                       | 346.99<br>(260.42 to 451.54)                        |
| Leukemia                        | 7,733.94<br>(6,763.96 to 8,795.97)                     | 10,323.41<br>(8,090.77 to 13,090.17)                  | 9,682.48<br>(7,655.99 to 12,239.61)                   | 11,482.74<br>(8,654.04 to 15,038.35)                   | 378.91<br>(332.97 to 431.21)                       | 649.38<br>(511.45 to 803.65)                       | 618.97<br>(498.78 to 755.37)                       | 696.77<br>(528.48 to 901.27)                        |
| Acute lymphoid leukemia         | 960.12<br>(829.41 to 1,261.14)                         | 830.06<br>(630.47 to 1,133.62)                        | 763.69<br>(583.45 to 1,055.83)                        | 933.34<br>(694.69 to 1,304.09)                         | 25.81<br>(22.22 to 32.91)                          | 29.80<br>(23.46 to 38.88)                          | 27.71<br>(21.92 to 35.88)                          | 32.92<br>(24.89 to 44.81)                           |
| Chronic lymphoid leukemia       | 1,183.53<br>(894.40 to 1,462.19)                       | 1,641.13<br>(1,160.59 to 2,245.48)                    | 1,568.30<br>(1,116.16 to 2,113.85)                    | 1,795.67<br>(1,238.56 to 2,549.72)                     | 81.52<br>(63.46 to 100.05)                         | 130.57<br>(94.68 to 173.59)                        | 127.09<br>(93.38 to 167.73)                        | 137.21<br>(95.38 to 187.25)                         |
| Acute myeloid leukemia          | 3,028.26<br>(2,440.70 to 3,529.56)                     | 4,179.13<br>(3,182.23 to 5,320.66)                    | 4,005.15<br>(3,066.82 to 5,070.40)                    | 4,621.29<br>(3,459.72 to 6,046.61)                     | 136.03<br>(109.47 to 158.68)                       | 230.55<br>(178.03 to 288.72)                       | 224.02<br>(174.33 to 277.09)                       | 247.69<br>(187.07 to 321.52)                        |
| Chronic myeloid leukemia        | 537.45<br>(458.39 to 633.92)                           | 381.72<br>(276.37 to 514.81)                          | 328.31<br>(239.17 to 438.65)                          | 445.90<br>(305.79 to 640.59)                           | 27.90<br>(23.90 to 32.68)                          | 25.02<br>(18.37 to 33.00)                          | 21.94<br>(16.55 to 28.47)                          | 27.98<br>(19.53 to 38.44)                           |
| Other leukemia                  | 2,024.59<br>(1,732.51 to 2,376.43)                     | 3,291.37<br>(2,515.05 to 4,362.65)                    | 3,017.03<br>(2,319.42 to 3,895.63)                    | 3,686.54<br>(2,691.85 to 4,956.91)                     | 107.65<br>(91.72 to 126.24)                        | 233.43<br>(180.11 to 301.05)                       | 218.21<br>(171.77 to 279.00)                       | 250.97<br>(184.55 to 338.06)                        |
| Other neoplasms                 | 7,602.57<br>(6,588.57 to 8,729.95)                     | 11,460.69<br>(9,661.90 to 13,401.69)                  | 11,558.72<br>(9,703.35 to 13,570.06)                  | 11,046.78<br>(9,349.03 to 12,843.50)                   | 369.57<br>(317.73 to 425.53)                       | 706.36<br>(610.13 to 797.06)                       | 730.31<br>(629.58 to 831.01)                       | 654.43<br>(561.92 to 742.28)                        |
| <b>Cardiovascular diseases</b>  | <b>128,456.44</b><br><b>(114,151.02 to 145,577.50)</b> | <b>132,646.80</b><br><b>(89,317.05 to 197,298.87)</b> | <b>101,032.17</b><br><b>(70,824.63 to 149,767.62)</b> | <b>189,036.20</b><br><b>(120,131.03 to 291,588.58)</b> | <b>10,158.87</b><br><b>(9,156.16 to 11,326.17)</b> | <b>12,540.93</b><br><b>(8,922.40 to 18,232.97)</b> | <b>10,195.47</b><br><b>(7,545.20 to 15,026.07)</b> | <b>16,114.91</b><br><b>(11,039.61 to 23,872.36)</b> |
| Rheumatic heart disease         | 1,146.44<br>(976.88 to 1,360.65)                       | 1,054.25<br>(812.64 to 1,385.99)                      | 971.50<br>(753.08 to 1,257.89)                        | 1,055.66<br>(810.78 to 1,401.77)                       | 77.47<br>(66.88 to 90.78)                          | 91.43<br>(73.11 to 118.16)                         | 86.69<br>(69.57 to 110.28)                         | 87.65<br>(69.35 to 116.13)                          |
| Ischemic heart disease          | 79,409.85<br>(70,066.29 to 90,190.11)                  | 74,502.50<br>(41,197.23 to 129,890.14)                | 50,922.29<br>(28,773.76 to 89,269.04)                 | 114,816.14<br>(59,960.49 to 201,350.77)                | 6,206.88<br>(5,589.13 to 6,943.94)                 | 6,851.36<br>(4,017.34 to 12,024.40)                | 5,069.09<br>(2,943.31 to 9,000.97)                 | 9,427.93<br>(5,342.57 to 16,339.62)                 |
| Stroke                          | 22,853.19<br>(19,831.16 to 26,230.10)                  | 18,812.44<br>(11,132.24 to 34,045.80)                 | 14,187.12<br>(8,746.83 to 26,286.94)                  | 30,283.07<br>(17,239.08 to 55,416.12)                  | 1,915.18<br>(1,654.41 to 2,180.84)                 | 1,945.41<br>(1,148.76 to 3,704.60)                 | 1,570.96<br>(944.60 to 3,083.40)                   | 2,743.29<br>(1,571.92 to 5,445.90)                  |
| Ischemic stroke                 | 9,265.43<br>(7,970.12 to 10,751.45)                    | 8,687.23<br>(4,484.88 to 20,241.02)                   | 7,022.96<br>(3,729.81 to 16,331.17)                   | 12,183.10<br>(5,976.70 to 30,981.30)                   | 970.21<br>(833.45 to 1,112.10)                     | 1,046.27<br>(536.84 to 2,420.16)                   | 884.64<br>(450.46 to 2,075.75)                     | 1,343.67<br>(648.63 to 3,460.30)                    |

|                                |                                          |                                         |                                        |                                         |                                   |                                   |                                   |                                     |
|--------------------------------|------------------------------------------|-----------------------------------------|----------------------------------------|-----------------------------------------|-----------------------------------|-----------------------------------|-----------------------------------|-------------------------------------|
| Intracerebral hemorrhage       | 13,587.76<br>(11,852.40 to<br>15,635.40) | 10,125.21<br>(5,807.30 to<br>17,116.18) | 7,164.16<br>(4,317.37 to<br>11,491.50) | 18,099.97<br>(9,681.86 to<br>32,004.80) | 944.97<br>(820.34 to<br>1,080.70) | 899.14<br>(537.67 to<br>1,459.53) | 686.32<br>(426.55 to<br>1,073.74) | 1,399.62<br>(780.41 to<br>2,388.37) |
| Hypertensive heart disease     | 1,972.05<br>(1,398.37 to<br>2,884.54)    | 3,390.17<br>(1,746.62 to<br>6,951.19)   | 2,819.03<br>(1,580.07 to<br>5,314.25)  | 4,907.86<br>(2,374.48 to<br>10,278.27)  | 161.00<br>(103.51 to<br>215.10)   | 344.21<br>(162.03 to<br>721.52)   | 298.97<br>(152.51 to<br>564.20)   | 472.05<br>(210.33 to<br>1,056.38)   |
| Cardiomyopathy and myocarditis | 4,810.14<br>(3,954.02 to<br>6,405.39)    | 5,310.29<br>(3,709.78 to<br>7,276.36)   | 4,803.85<br>(3,434.22 to<br>6,509.71)  | 5,940.35<br>(4,170.03 to<br>8,207.55)   | 312.78<br>(250.79 to<br>361.84)   | 457.01<br>(307.61 to<br>666.45)   | 428.83<br>(295.88 to<br>618.61)   | 467.27<br>(312.13 to<br>691.56)     |
| Myocarditis                    | 891.90<br>(367.94 to<br>1,223.89)        | 858.67<br>(333.16 to<br>1,234.63)       | 867.85<br>(339.60 to<br>1,246.43)      | 816.65<br>(316.14 to<br>1,181.68)       | 67.96<br>(23.91 to<br>99.01)      | 81.36<br>(27.09 to<br>126.48)     | 85.98<br>(29.19 to<br>132.95)     | 72.11<br>(24.15 to<br>113.83)       |

| Ireland                                                       |                                                     |                                                     |                                                     |                                                     |                                                  |                                                  |                                                  |                                                  |
|---------------------------------------------------------------|-----------------------------------------------------|-----------------------------------------------------|-----------------------------------------------------|-----------------------------------------------------|--------------------------------------------------|--------------------------------------------------|--------------------------------------------------|--------------------------------------------------|
| Cause                                                         | YLLs (actual counts)                                |                                                     |                                                     |                                                     | Deaths (actual counts)                           |                                                  |                                                  |                                                  |
|                                                               | 2016                                                | 2040 Forecast                                       | 2040 Better Scenario                                | 2040 Worse Scenario                                 | 2016                                             | 2040 Forecast                                    | 2040 Better Scenario                             | 2040 Worse Scenario                              |
| Alcoholic cardiomyopathy                                      | 1,266.19<br>(897.46 to 2,167.40)                    | 924.96<br>(590.77 to 1,450.44)                      | 831.75<br>(534.39 to 1,295.89)                      | 1,397.23<br>(931.07 to 2,164.83)                    | 50.43<br>(33.35 to 75.91)                        | 42.59<br>(24.63 to 58.92)                        | 39.14<br>(22.56 to 53.62)                        | 62.56<br>(37.64 to 87.04)                        |
| Other cardiomyopathy                                          | 2,652.05<br>(2,042.87 to 4,043.73)                  | 3,526.66<br>(2,170.47 to 5,329.96)                  | 3,104.26<br>(1,912.03 to 4,635.92)                  | 3,726.48<br>(2,218.64 to 5,707.24)                  | 194.39<br>(159.08 to 252.81)                     | 333.07<br>(202.18 to 521.90)                     | 303.71<br>(184.93 to 473.59)                     | 332.60<br>(197.88 to 538.41)                     |
| Atrial fibrillation and flutter                               | 3,392.84<br>(2,550.52 to 4,328.96)                  | 6,163.52<br>(4,296.73 to 8,495.25)                  | 5,851.90<br>(4,187.25 to 7,957.59)                  | 6,873.34<br>(4,624.44 to 9,740.13)                  | 373.94<br>(280.92 to 479.46)                     | 741.51<br>(509.82 to 1,028.79)                   | 724.15<br>(509.13 to 991.84)                     | 788.69<br>(525.84 to 1,129.94)                   |
| Aortic aneurysm                                               | 4,653.76<br>(4,019.99 to 5,405.14)                  | 6,048.62<br>(4,520.50 to 7,967.60)                  | 5,676.84<br>(4,328.70 to 7,336.29)                  | 6,334.03<br>(4,668.27 to 8,396.65)                  | 337.78<br>(293.54 to 388.21)                     | 507.75<br>(403.11 to 643.41)                     | 493.18<br>(398.42 to 615.51)                     | 503.18<br>(393.61 to 650.81)                     |
| Peripheral artery disease                                     | 1,744.60<br>(1,166.36 to 3,465.50)                  | 4,404.49<br>(2,641.51 to 8,603.78)                  | 4,351.28<br>(2,639.51 to 8,443.36)                  | 4,711.47<br>(2,754.61 to 9,473.39)                  | 174.76<br>(117.55 to 345.20)                     | 493.28<br>(300.67 to 947.64)                     | 504.07<br>(311.51 to 962.61)                     | 495.86<br>(295.76 to 945.06)                     |
| Endocarditis                                                  | 1,102.23<br>(822.84 to 1,513.23)                    | 1,822.40<br>(1,206.43 to 2,724.77)                  | 1,776.58<br>(1,179.98 to 2,659.74)                  | 1,856.90<br>(1,222.35 to 2,804.46)                  | 72.57<br>(52.80 to 99.42)                        | 147.54<br>(94.70 to 232.57)                      | 148.44<br>(96.45 to 232.58)                      | 143.20<br>(90.39 to 230.20)                      |
| Other cardiovascular and circulatory diseases                 | 7,371.36<br>(6,407.40 to 8,515.14)                  | 11,138.12<br>(8,496.24 to 14,705.15)                | 9,671.78<br>(7,508.43 to 12,582.46)                 | 12,257.40<br>(9,155.80 to 16,436.08)                | 526.51<br>(459.79 to 605.10)                     | 961.43<br>(762.70 to 1,229.14)                   | 871.09<br>(697.04 to 1,085.90)                   | 985.78<br>(757.21 to 1,303.91)                   |
| <b>Chronic respiratory diseases</b>                           | <b>26,931.88</b><br><b>(23,844.99 to 30,696.93)</b> | <b>36,871.42</b><br><b>(28,283.72 to 47,468.79)</b> | <b>30,130.90</b><br><b>(23,565.20 to 38,093.88)</b> | <b>53,467.36</b><br><b>(39,459.22 to 71,483.89)</b> | <b>2,210.17</b><br><b>(1,974.94 to 2,501.14)</b> | <b>3,428.88</b><br><b>(2,637.51 to 4,362.00)</b> | <b>2,799.42</b><br><b>(2,212.76 to 3,471.09)</b> | <b>4,776.73</b><br><b>(3,547.99 to 6,277.85)</b> |
| Chronic obstructive pulmonary disease                         | 21,549.12<br>(18,712.72 to 24,866.94)               | 27,968.48<br>(19,992.85 to 38,138.68)               | 20,468.06<br>(14,492.35 to 27,968.55)               | 45,015.78<br>(31,887.28 to 63,111.45)               | 1,882.87<br>(1,660.88 to 2,140.28)               | 2,782.81<br>(1,993.28 to 3,679.87)               | 2,081.51<br>(1,508.87 to 2,748.38)               | 4,187.61<br>(2,979.16 to 5,675.76)               |
| Pneumoconiosis                                                | 80.72<br>(65.19 to 99.05)                           | 112.65<br>(85.21 to 150.06)                         | 119.62<br>(89.44 to 164.23)                         | 104.60<br>(80.06 to 134.22)                         | 5.46<br>(4.50 to 6.66)                           | 9.10<br>(7.04 to 11.73)                          | 9.86<br>(7.49 to 13.15)                          | 8.16<br>(6.31 to 10.32)                          |
| Silicosis                                                     | 3.05<br>(1.68 to 7.80)                              | 2.29<br>(0.96 to 7.99)                              | 2.03<br>(0.84 to 7.10)                              | 2.33<br>(1.01 to 7.83)                              | 0.19<br>(0.11 to 0.56)                           | 0.18<br>(0.08 to 0.69)                           | 0.17<br>(0.07 to 0.63)                           | 0.18<br>(0.08 to 0.67)                           |
| Asbestosis                                                    | 58.40<br>(35.16 to 75.52)                           | 92.93<br>(62.92 to 125.65)                          | 101.16<br>(71.60 to 139.89)                         | 84.55<br>(54.89 to 112.34)                          | 3.84<br>(2.17 to 4.97)                           | 7.26<br>(4.77 to 9.73)                           | 8.06<br>(5.58 to 10.74)                          | 6.37<br>(3.89 to 8.44)                           |
| Coal workers pneumoconiosis                                   | 6.45<br>(3.45 to 16.45)                             | 5.10<br>(1.75 to 17.95)                             | 4.50<br>(1.55 to 16.72)                             | 5.43<br>(1.93 to 17.52)                             | 0.45<br>(0.25 to 1.19)                           | 0.44<br>(0.15 to 1.55)                           | 0.40<br>(0.14 to 1.52)                           | 0.45<br>(0.16 to 1.53)                           |
| Other pneumoconiosis                                          | 12.83<br>(8.35 to 29.18)                            | 12.33<br>(7.73 to 27.12)                            | 11.94<br>(7.33 to 27.03)                            | 12.29<br>(7.81 to 26.10)                            | 0.98<br>(0.67 to 2.18)                           | 1.23<br>(0.77 to 2.51)                           | 1.23<br>(0.76 to 2.53)                           | 1.16<br>(0.74 to 2.33)                           |
| Asthma                                                        | 1,014.58<br>(851.48 to 1,363.97)                    | 542.75<br>(318.65 to 924.75)                        | 430.47<br>(256.96 to 740.42)                        | 724.04<br>(411.28 to 1,283.39)                      | 47.71<br>(40.07 to 63.32)                        | 34.42<br>(21.03 to 56.97)                        | 28.40<br>(17.54 to 46.51)                        | 42.81<br>(24.97 to 72.18)                        |
| Interstitial lung disease and pulmonary sarcoidosis           | 3,980.92<br>(2,052.58 to 5,088.01)                  | 7,805.75<br>(4,153.38 to 9,930.31)                  | 8,681.89<br>(4,862.60 to 10,961.68)                 | 7,149.93<br>(3,573.08 to 9,202.88)                  | 260.56<br>(135.10 to 334.12)                     | 577.81<br>(303.58 to 727.86)                     | 655.19<br>(363.88 to 816.57)                     | 512.46<br>(265.22 to 652.48)                     |
| Other chronic respiratory diseases                            | 306.54<br>(227.39 to 523.74)                        | 441.79<br>(292.07 to 775.31)                        | 430.86<br>(279.62 to 788.44)                        | 473.00<br>(310.21 to 814.08)                        | 13.58<br>(9.95 to 23.82)                         | 24.75<br>(15.60 to 45.24)                        | 24.46<br>(15.26 to 46.24)                        | 25.70<br>(16.31 to 46.26)                        |
| <b>Cirrhosis and other chronic liver diseases</b>             | <b>10,116.73</b><br><b>(8,686.89 to 11,948.67)</b>  | <b>7,969.42</b><br><b>(6,558.67 to 9,695.73)</b>    | <b>7,129.88</b><br><b>(5,803.50 to 8,739.86)</b>    | <b>10,824.15</b><br><b>(8,892.57 to 13,260.82)</b>  | <b>389.26</b><br><b>(337.91 to 455.29)</b>       | <b>384.44</b><br><b>(330.62 to 450.12)</b>       | <b>351.06</b><br><b>(301.01 to 413.16)</b>       | <b>504.04</b><br><b>(432.18 to 598.86)</b>       |
| Cirrhosis and other chronic liver diseases due to hepatitis B | 1,345.55<br>(973.77 to 1,753.68)                    | 1,200.75<br>(880.12 to 1,624.50)                    | 1,138.53<br>(827.03 to 1,545.50)                    | 1,214.84<br>(882.57 to 1,650.93)                    | 52.15<br>(39.27 to 68.27)                        | 57.83<br>(43.76 to 76.92)                        | 55.82<br>(41.84 to 75.00)                        | 56.83<br>(42.29 to 75.98)                        |
| Cirrhosis and other chronic liver diseases due to hepatitis C | 2,578.91<br>(1,872.37 to 3,502.04)                  | 2,309.45<br>(1,659.32 to 3,150.61)                  | 2,174.59<br>(1,556.34 to 2,954.41)                  | 2,361.49<br>(1,632.10 to 3,310.41)                  | 95.82<br>(71.73 to 126.56)                       | 105.15<br>(76.84 to 138.90)                      | 100.63<br>(73.36 to 133.57)                      | 104.69<br>(74.07 to 141.34)                      |

|                                                                |                                                              |                                                               |                                                               |                                                               |                                                      |                                                            |                                                            |                                                            |
|----------------------------------------------------------------|--------------------------------------------------------------|---------------------------------------------------------------|---------------------------------------------------------------|---------------------------------------------------------------|------------------------------------------------------|------------------------------------------------------------|------------------------------------------------------------|------------------------------------------------------------|
|                                                                | 5,512.35<br>(4,461.83 to<br>6,687.85)                        | 3,835.07<br>(2,962.88 to<br>4,857.45)                         | 3,225.47<br>(2,487.72 to<br>4,119.91)                         | 6,614.48<br>(5,214.03 to<br>8,173.04)                         | 214.75<br>(176.41 to<br>256.14)                      | 189.61<br>(153.89 to<br>231.92)                            | 163.73<br>(132.15 to<br>202.04)                            | 311.29<br>(257.36 to<br>376.34)                            |
| Cirrhosis and other chronic liver diseases due to alcohol use  |                                                              |                                                               |                                                               |                                                               |                                                      |                                                            |                                                            |                                                            |
|                                                                | 679.91<br>(483.06 to<br>938.43)                              | 624.15<br>(440.41 to<br>884.91)                               | 591.29<br>(418.86 to<br>833.71)                               | 633.35<br>(440.83 to<br>896.27)                               | 26.55<br>(19.19 to<br>36.64)                         | 31.86<br>(22.52 to<br>44.84)                               | 30.87<br>(21.84 to<br>43.41)                               | 31.22<br>(21.88 to<br>44.26)                               |
| Cirrhosis and other chronic liver diseases due to other causes |                                                              |                                                               |                                                               |                                                               |                                                      |                                                            |                                                            |                                                            |
| <b>Digestive diseases</b>                                      | <b>10,125.24</b><br><b>(8,371.35 to</b><br><b>12,491.34)</b> | <b>14,722.88</b><br><b>(11,659.38 to</b><br><b>18,676.89)</b> | <b>14,274.02</b><br><b>(11,449.21 to</b><br><b>18,063.58)</b> | <b>14,899.19</b><br><b>(11,688.90 to</b><br><b>18,876.41)</b> | <b>735.45</b><br><b>(613.73 to</b><br><b>862.82)</b> | <b>1,317.46</b><br><b>(1,053.63 to</b><br><b>1,578.62)</b> | <b>1,313.09</b><br><b>(1,066.88 to</b><br><b>1,570.23)</b> | <b>1,270.77</b><br><b>(1,002.96 to</b><br><b>1,540.94)</b> |
| Peptic ulcer disease                                           | 1,518.38<br>(1,266.86 to<br>2,038.17)                        | 1,538.13<br>(1,182.08 to<br>2,070.16)                         | 1,370.86<br>(1,048.98 to<br>1,837.23)                         | 1,637.34<br>(1,231.83 to<br>2,168.74)                         | 110.63<br>(93.43 to<br>139.48)                       | 141.14<br>(109.38 to<br>182.24)                            | 129.32<br>(99.86 to<br>167.21)                             | 142.74<br>(107.93 to<br>187.22)                            |



| Ireland                                    |                                       |                                       |                                       |                                       |                                    |                                    |                                    |                                    |
|--------------------------------------------|---------------------------------------|---------------------------------------|---------------------------------------|---------------------------------------|------------------------------------|------------------------------------|------------------------------------|------------------------------------|
| Cause                                      | YLLs (actual counts)                  |                                       |                                       |                                       | Deaths (actual counts)             |                                    |                                    |                                    |
|                                            | 2016                                  | 2040 Forecast                         | 2040 Better Scenario                  | 2040 Worse Scenario                   | 2016                               | 2040 Forecast                      | 2040 Better Scenario               | 2040 Worse Scenario                |
| Gastritis and duodenitis                   | 190.72<br>(126.92 to 262.80)          | 252.78<br>(150.03 to 340.79)          | 240.61<br>(146.67 to 324.72)          | 246.65<br>(143.29 to 330.97)          | 13.08<br>(7.00 to 16.25)           | 22.71<br>(10.98 to 31.24)          | 22.28<br>(11.04 to 30.38)          | 21.15<br>(9.97 to 28.96)           |
| Appendicitis                               | 109.52<br>(83.93 to 164.68)           | 117.57<br>(86.34 to 177.80)           | 107.17<br>(77.99 to 163.43)           | 118.53<br>(87.52 to 176.67)           | 6.19<br>(4.74 to 8.77)             | 8.73<br>(6.60 to 12.37)            | 8.17<br>(6.03 to 11.67)            | 8.43<br>(6.25 to 11.64)            |
| Paralytic ileus and intestinal obstruction | 1,485.89<br>(1,082.71 to 1,923.56)    | 2,656.01<br>(1,934.32 to 3,363.15)    | 2,742.41<br>(1,991.82 to 3,465.50)    | 2,469.56<br>(1,802.11 to 3,138.42)    | 114.00<br>(82.52 to 139.45)        | 249.31<br>(179.87 to 307.13)       | 264.13<br>(191.29 to 322.36)       | 222.34<br>(158.90 to 274.29)       |
| Inguinal, femoral, and abdominal hernia    | 360.91<br>(276.23 to 528.04)          | 369.37<br>(275.04 to 558.50)          | 359.27<br>(270.92 to 545.53)          | 353.69<br>(267.39 to 529.00)          | 28.86<br>(22.53 to 41.90)          | 28.86<br>(26.45 to 52.91)          | 35.28<br>(27.09 to 52.67)          | 32.38<br>(24.21 to 48.50)          |
| Inflammatory bowel disease                 | 895.03<br>(439.14 to 1,182.79)        | 1,319.95<br>(610.23 to 1,798.90)      | 1,347.36<br>(618.00 to 1,826.69)      | 1,244.57<br>(584.48 to 1,684.31)      | 64.08<br>(27.94 to 84.94)          | 116.31<br>(49.79 to 159.24)        | 121.96<br>(52.62 to 164.96)        | 105.13<br>(44.72 to 143.31)        |
| Vascular intestinal disorders              | 1,591.65<br>(1,196.70 to 1,956.94)    | 2,396.88<br>(1,781.12 to 2,963.75)    | 2,374.86<br>(1,756.39 to 2,935.40)    | 2,298.41<br>(1,720.44 to 2,855.09)    | 113.64<br>(87.10 to 136.27)        | 201.19<br>(152.12 to 249.27)       | 203.61<br>(153.95 to 251.50)       | 186.74<br>(139.56 to 229.35)       |
| Gallbladder and biliary diseases           | 921.21<br>(755.39 to 1,212.08)        | 1,318.70<br>(786.33 to 2,211.61)      | 1,134.23<br>(680.40 to 1,855.90)      | 1,598.91<br>(918.58 to 2,698.19)      | 74.97<br>(61.92 to 94.26)          | 129.17<br>(77.55 to 213.26)        | 114.34<br>(69.17 to 188.01)        | 148.59<br>(86.00 to 250.02)        |
| Pancreatitis                               | 990.89<br>(734.32 to 1,249.78)        | 1,119.07<br>(470.69 to 2,420.52)      | 966.64<br>(421.20 to 1,985.57)        | 1,478.00<br>(573.33 to 3,150.52)      | 47.55<br>(35.57 to 57.85)          | 69.00<br>(30.57 to 145.35)         | 61.02<br>(28.29 to 124.03)         | 88.15<br>(35.72 to 190.56)         |
| Other digestive diseases                   | 2,061.03<br>(1,672.44 to 2,663.61)    | 3,634.41<br>(2,927.92 to 4,578.66)    | 3,630.62<br>(2,916.06 to 4,580.55)    | 3,453.53<br>(2,797.36 to 4,381.90)    | 162.43<br>(133.74 to 200.41)       | 344.62<br>(278.82 to 421.12)       | 353.00<br>(286.65 to 432.04)       | 315.13<br>(248.47 to 385.75)       |
| Neurological disorders                     | 33,284.91<br>(28,366.69 to 38,675.84) | 46,946.50<br>(49,293.17 to 76,871.09) | 41,198.12<br>(49,989.89 to 76,107.98) | 42,898.51<br>(49,061.47 to 82,034.03) | 2,791.15<br>(2,280.48 to 3,336.67) | 5,911.94<br>(4,337.48 to 7,909.30) | 6,059.91<br>(4,545.94 to 8,035.90) | 5,921.90<br>(4,163.24 to 8,246.00) |
| Alzheimer's disease and other dementias    | 22,920.78<br>(18,779.70 to 27,749.48) | 45,095.90<br>(33,786.00 to 61,176.18) | 45,190.21<br>(34,350.40 to 59,952.78) | 46,989.28<br>(33,841.44 to 66,293.91) | 2,791.15<br>(2,280.48 to 3,336.67) | 5,911.94<br>(4,337.48 to 7,909.30) | 6,059.91<br>(4,545.94 to 8,035.90) | 5,921.90<br>(4,163.24 to 8,246.00) |
| Parkinson's disease                        | 2,755.45<br>(2,063.54 to 3,663.63)    | 5,479.61<br>(4,091.83 to 7,154.37)    | 5,810.81<br>(4,345.38 to 7,645.19)    | 4,995.69<br>(3,701.53 to 6,605.21)    | 251.30<br>(187.22 to 334.84)       | 544.59<br>(407.74 to 727.64)       | 587.95<br>(441.02 to 787.47)       | 482.44<br>(353.85 to 646.65)       |
| Epilepsy                                   | 2,152.05<br>(1,845.96 to 2,527.28)    | 2,692.95<br>(1,640.47 to 4,320.28)    | 2,473.52<br>(1,526.80 to 3,882.83)    | 3,332.26<br>(1,961.27 to 5,334.70)    | 59.75<br>(51.45 to 69.90)          | 96.45<br>(61.57 to 147.66)         | 91.04<br>(58.97 to 137.62)         | 115.29<br>(71.20 to 178.52)        |
| Multiple sclerosis                         | 1,464.61<br>(1,094.16 to 1,998.88)    | 1,634.27<br>(1,159.88 to 2,268.35)    | 1,623.64<br>(1,148.00 to 2,252.85)    | 1,691.30<br>(1,190.45 to 2,357.80)    | 51.96<br>(38.33 to 70.22)          | 66.94<br>(48.22 to 89.82)          | 67.30<br>(47.82 to 90.55)          | 67.92<br>(48.97 to 91.14)          |
| Motor neuron disease                       | 2,750.38<br>(2,396.90 to 3,159.87)    | 3,852.70<br>(3,196.14 to 4,539.48)    | 3,870.60<br>(3,184.27 to 4,579.36)    | 3,761.88<br>(3,132.88 to 4,409.57)    | 119.94<br>(103.51 to 138.26)       | 203.06<br>(171.95 to 235.50)       | 206.74<br>(173.98 to 243.18)       | 193.81<br>(165.20 to 224.00)       |
| Other neurological disorders               | 1,241.43<br>(1,052.79 to 1,433.98)    | 2,191.06<br>(1,831.64 to 2,634.37)    | 2,239.33<br>(1,863.80 to 2,692.29)    | 2,128.11<br>(1,778.77 to 2,543.95)    | 50.00<br>(42.68 to 57.61)          | 120.78<br>(102.08 to 138.76)       | 126.87<br>(107.45 to 146.43)       | 111.22<br>(93.66 to 127.55)        |
| Mental disorders                           | 11,614.88<br>(9,450.84 to 14,045.51)  | 17,123.93<br>(13,193.05 to 22,617.12) | 18,123.28<br>(13,939.78 to 23,757.64) | 17,209.74<br>(13,151.65 to 22,742.28) | 269.14<br>(221.49 to 319.82)       | 410.28<br>(327.50 to 519.70)       | 435.04<br>(348.97 to 549.63)       | 413.48<br>(326.46 to 526.71)       |
| Alcohol use disorders                      | 3,150.92<br>(2,667.60 to 3,747.76)    | 3,049.70<br>(2,399.87 to 3,825.83)    | 3,014.15<br>(2,353.02 to 3,806.57)    | 3,596.25<br>(2,866.06 to 4,446.68)    | 88.30<br>(74.94 to 104.70)         | 96.42<br>(76.94 to 119.09)         | 95.92<br>(76.27 to 119.60)         | 112.60<br>(91.22 to 137.73)        |
| Drug use disorders                         | 8,440.33<br>(6,527.56 to 10,525.60)   | 14,047.34<br>(10,367.61 to 19,142.48) | 15,080.85<br>(11,157.13 to 20,244.44) | 13,587.31<br>(9,934.56 to 18,435.08)  | 180.38<br>(141.46 to 222.23)       | 313.34<br>(237.75 to 409.34)       | 338.58<br>(257.44 to 442.08)       | 300.39<br>(225.08 to 392.71)       |
| Opioid use disorders                       | 4,413.00<br>(2,669.38 to 5,689.62)    | 5,338.11<br>(2,827.33 to 7,710.70)    | 5,424.75<br>(2,835.55 to 7,828.78)    | 5,310.01<br>(2,848.14 to 7,782.94)    | 89.89<br>(54.65 to 114.52)         | 110.29<br>(59.55 to 155.85)        | 112.58<br>(60.38 to 160.38)        | 109.01<br>(59.15 to 154.05)        |

|                           |                                       |                                        |                                        |                                        |                               |                                 |                                 |                                 |
|---------------------------|---------------------------------------|----------------------------------------|----------------------------------------|----------------------------------------|-------------------------------|---------------------------------|---------------------------------|---------------------------------|
|                           | 95.06<br>(29.96 to<br>151.34)         | 228.36<br>(80.87 to<br>373.97)         | 245.51<br>(88.86 to<br>402.56)         | 220.43<br>(77.10 to<br>369.91)         | 1.92<br>(0.64 to<br>3.00)     | -4.80<br>(1.74 to<br>7.62)      | 5.18<br>(1.88 to<br>8.22)       | 4.61<br>(1.69 to<br>7.47)       |
| Cocaine use disorders     |                                       |                                        |                                        |                                        |                               |                                 |                                 |                                 |
|                           | 428.62<br>(125.09 to<br>713.44)       | 1,080.24<br>(356.81 to<br>1,746.90)    | 1,214.38<br>(409.63 to<br>1,948.01)    | 1,021.54<br>(331.81 to<br>1,698.04)    | 8.24<br>(2.65 to<br>13.57)    | 20.90<br>(7.65 to<br>33.07)     | 23.54<br>(8.54 to<br>36.70)     | 19.71<br>(7.06 to<br>31.88)     |
| Amphetamine use disorders |                                       |                                        |                                        |                                        |                               |                                 |                                 |                                 |
|                           | 3,503.65<br>(2,506.73 to<br>5,186.35) | 7,400.63<br>(5,194.92 to<br>10,575.54) | 8,196.22<br>(5,791.87 to<br>11,573.95) | 7,035.33<br>(4,857.50 to<br>10,204.20) | 80.33<br>(58.36 to<br>114.54) | 177.35<br>(128.96 to<br>243.97) | 197.28<br>(145.21 to<br>266.66) | 167.06<br>(119.11 to<br>230.54) |
| Other drug use disorders  |                                       |                                        |                                        |                                        |                               |                                 |                                 |                                 |
|                           | 23.63<br>(16.86 to<br>31.68)          | 26.89<br>(16.96 to<br>40.60)           | 28.28<br>(17.74 to<br>42.59)           | 26.19<br>(16.73 to<br>38.72)           | 0.46<br>(0.33 to<br>0.61)     | 0.51<br>(0.33 to<br>0.77)       | 0.54<br>(0.34 to<br>0.81)       | 0.50<br>(0.32 to<br>0.74)       |
| Eating disorders          |                                       |                                        |                                        |                                        |                               |                                 |                                 |                                 |

| Ireland                                                    |                                              |                                              |                                              |                                              |                                           |                                           |                                           |                                            |
|------------------------------------------------------------|----------------------------------------------|----------------------------------------------|----------------------------------------------|----------------------------------------------|-------------------------------------------|-------------------------------------------|-------------------------------------------|--------------------------------------------|
| Cause                                                      | YLLs (actual counts)                         |                                              |                                              |                                              | Deaths (actual counts)                    |                                           |                                           |                                            |
|                                                            | 2016                                         | 2040 Forecast                                | 2040 Better Scenario                         | 2040 Worse Scenario                          | 2016                                      | 2040 Forecast                             | 2040 Better Scenario                      | 2040 Worse Scenario                        |
| <b>Diabetes, urogenital, blood, and endocrine diseases</b> | <b>19,168.44</b><br>(17,132.85 to 21,593.67) | <b>40,258.12</b><br>(24,096.13 to 85,128.56) | <b>36,933.24</b><br>(22,583.20 to 79,317.67) | <b>46,012.51</b><br>(26,377.63 to 95,435.05) | <b>1,450.30</b><br>(1,308.26 to 1,623.13) | <b>3,932.01</b><br>(2,217.05 to 9,320.47) | <b>3,678.91</b><br>(2,121.55 to 8,537.94) | <b>4,350.73</b><br>(2,305.77 to 10,193.02) |
| Diabetes mellitus                                          | 6,190.78<br>(5,406.71 to 7,099.53)           | 8,297.82<br>(5,569.16 to 11,932.68)          | 7,281.76<br>(4,911.94 to 10,339.67)          | 9,694.26<br>(6,173.50 to 14,732.52)          | 465.19<br>(405.72 to 529.18)              | 746.06<br>(528.99 to 1,019.74)            | 678.29<br>(484.61 to 917.92)              | 818.53<br>(545.52 to 1,169.51)             |
| Acute glomerulonephritis                                   | 23.35<br>(20.90 to 26.21)                    | 21.84<br>(17.60 to 27.79)                    | 20.29<br>(16.27 to 25.87)                    | 22.80<br>(23.01)                             | 0.54<br>(0.48 to 0.62)                    | 0.52<br>(0.41 to 0.65)                    | 0.49<br>(0.39 to 0.61)                    | 0.52<br>(0.42 to 0.65)                     |
| Chronic kidney disease                                     | 6,555.82<br>(5,831.03 to 7,445.47)           | 20,299.25<br>(5,588.09 to 66,359.38)         | 18,015.22<br>(5,071.57 to 59,359.59)         | 25,073.66<br>(6,629.67 to 76,655.97)         | 591.79<br>(530.22 to 666.96)              | 2,243.26<br>(559.79 to 7,328.94)          | 2,040.10<br>(515.65 to 6,907.70)          | 2,667.20<br>(654.36 to 8,695.50)           |
| Chronic kidney disease due to diabetes mellitus            | 2,122.32<br>(1,740.10 to 2,597.85)           | 7,059.44<br>(1,960.53 to 22,964.78)          | 6,229.56<br>(1,779.32 to 20,786.48)          | 8,867.97<br>(2,350.57 to 26,395.02)          | 169.28<br>(134.87 to 210.19)              | 694.32<br>(170.73 to 2,449.51)            | 627.94<br>(157.97 to 2,244.54)            | 838.18<br>(197.05 to 2,566.63)             |
| Chronic kidney disease due to hypertension                 | 1,066.65<br>(840.72 to 1,331.45)             | 4,180.90<br>(983.71 to 14,564.56)            | 3,822.40<br>(909.47 to 13,750.86)            | 4,989.70<br>(1,158.55 to 16,399.63)          | 131.77<br>(102.86 to 166.37)              | 572.06<br>(137.54 to 2,102.25)            | 534.53<br>(131.87 to 1,970.30)            | 659.39<br>(153.78 to 2,289.52)             |
| Chronic kidney disease due to glomerulonephritis           | 1,318.49<br>(1,043.43 to 1,649.15)           | 3,238.68<br>(879.06 to 11,614.68)            | 2,819.68<br>(777.93 to 10,057.13)            | 4,030.98<br>(1,042.21 to 13,812.74)          | 106.38<br>(81.70 to 138.14)               | 333.88<br>(77.53 to 1,203.04)             | 296.50<br>(71.04 to 1,076.35)             | 403.18<br>(92.08 to 1,407.25)              |
| Chronic kidney disease due to other and unspecified causes | 2,048.35<br>(1,654.63 to 2,499.75)           | 5,820.24<br>(1,596.94 to 19,442.21)          | 5,143.58<br>(1,466.06 to 17,509.25)          | 7,185.01<br>(1,903.87 to 22,990.05)          | 184.36<br>(144.34 to 228.17)              | 643.01<br>(156.87 to 2,277.87)            | 581.13<br>(145.69 to 2,115.09)            | 766.45<br>(180.23 to 2,670.60)             |
| Urinary diseases and male infertility                      | 2,039.93<br>(1,803.63 to 2,341.77)           | 4,598.37<br>(3,892.90 to 5,425.12)           | 4,499.81<br>(3,817.41 to 5,326.84)           | 4,363.38<br>(3,662.44 to 5,157.00)           | 201.13<br>(177.16 to 230.05)              | 536.42<br>(435.88 to 648.04)              | 538.19<br>(438.57 to 646.27)              | 489.93<br>(387.62 to 601.40)               |
| Urinary tract infections                                   | 1,859.56<br>(1,633.46 to 2,147.69)           | 4,344.47<br>(3,661.44 to 5,144.17)           | 4,261.98<br>(3,598.05 to 5,054.21)           | 4,115.00<br>(3,418.22 to 4,876.24)           | 188.33<br>(165.24 to 215.71)              | 512.89<br>(409.15 to 625.02)              | 515.44<br>(414.79 to 620.67)              | 468.09<br>(366.14 to 577.95)               |
| Urolithiasis                                               | 72.17<br>(44.35 to 93.44)                    | 93.69<br>(55.53 to 127.11)                   | 86.88<br>(51.24 to 116.91)                   | 93.58<br>(55.28 to 127.23)                   | 4.93<br>(2.96 to 6.49)                    | 7.62<br>(4.46 to 10.43)                   | 7.28<br>(4.28 to 10.05)                   | 7.26<br>(4.26 to 10.03)                    |
| Other urinary diseases                                     | 108.20<br>(64.62 to 156.17)                  | 160.22<br>(88.31 to 249.29)                  | 150.95<br>(83.72 to 235.37)                  | 154.80<br>(86.43 to 236.22)                  | 7.86<br>(4.61 to 12.13)                   | 15.91<br>(8.66 to 25.31)                  | 15.47<br>(8.42 to 25.07)                  | 14.58<br>(7.79 to 23.33)                   |
| Gynecological diseases                                     | 16.74<br>(11.76 to 25.09)                    | 14.81<br>(9.92 to 23.60)                     | 12.80<br>(8.67 to 20.15)                     | 15.59<br>(10.37 to 24.98)                    | 0.74<br>(0.55 to 1.19)                    | 0.91<br>(0.62 to 1.49)                    | 0.80<br>(0.55 to 1.33)                    | 0.93<br>(0.64 to 1.49)                     |
| Uterine fibroids                                           | 7.89<br>(5.07 to 11.36)                      | 4.40<br>(2.62 to 7.58)                       | 3.90<br>(2.36 to 6.70)                       | 4.64<br>(2.76 to 8.07)                       | 0.24<br>(0.16 to 0.36)                    | 0.15<br>(0.09 to 0.24)                    | 0.13<br>(0.08 to 0.22)                    | 0.15<br>(0.09 to 0.26)                     |
| Polycystic ovarian syndrome                                | 1.16<br>(0.54 to 2.17)                       | 0.41<br>(0.18 to 0.87)                       | 0.31<br>(0.13 to 0.63)                       | 0.47<br>(0.21 to 0.98)                       | 0.03<br>(0.02 to 0.05)                    | 0.01<br>(0.00 to 0.02)                    | 0.01<br>(0.00 to 0.02)                    | 0.01<br>(0.00 to 0.02)                     |
| Endometriosis                                              | 0.15<br>(0.07 to 0.31)                       | 0.20<br>(0.07 to 0.49)                       | 0.17<br>(0.06 to 0.43)                       | 0.21<br>(0.08 to 0.52)                       | 0.00<br>(0.00 to 0.01)                    | 0.01<br>(0.00 to 0.01)                    | 0.00<br>(0.00 to 0.01)                    | 0.01<br>(0.00 to 0.01)                     |
| Genital prolapse                                           | 0.30<br>(0.18 to 0.77)                       | 0.40<br>(0.20 to 1.04)                       | 0.34<br>(0.17 to 0.92)                       | 0.42<br>(0.21 to 1.12)                       | 0.02<br>(0.01 to 0.06)                    | 0.03<br>(0.01 to 0.08)                    | 0.02<br>(0.01 to 0.07)                    | 0.03<br>(0.01 to 0.09)                     |
| Other gynecological diseases                               | 7.24<br>(5.11 to 12.21)                      | 9.40<br>(5.92 to 15.03)                      | 8.07<br>(5.07 to 13.09)                      | 9.84<br>(6.31 to 16.28)                      | 0.45<br>(0.33 to 0.76)                    | 0.73<br>(0.47 to 1.19)                    | 0.64<br>(0.42 to 1.06)                    | 0.73<br>(0.48 to 1.18)                     |
| Hemoglobinopathies and hemolytic anemias                   | 585.73<br>(485.94 to 862.26)                 | 730.20<br>(585.39 to 1,040.57)               | 692.61<br>(552.54 to 982.50)                 | 712.86<br>(568.14 to 1,028.81)               | 42.04<br>(35.17 to 57.00)                 | 70.81<br>(54.06 to 93.87)                 | 69.09<br>(53.94 to 91.78)                 | 65.98<br>(49.19 to 87.11)                  |
| Thalassemias                                               | 67.43<br>(37.17 to 129.26)                   | 33.96<br>(13.28 to 81.67)                    | 33.06<br>(13.15 to 79.74)                    | 35.03<br>(13.80 to 83.52)                    | 0.96<br>(0.48 to 1.98)                    | 0.53<br>(0.18 to 1.34)                    | 0.52<br>(0.18 to 1.31)                    | 0.54<br>(0.19 to 1.37)                     |

|                                                   |                                       |                                       |                                       |                                       |                                 |                                 |                                 |                                 |
|---------------------------------------------------|---------------------------------------|---------------------------------------|---------------------------------------|---------------------------------------|---------------------------------|---------------------------------|---------------------------------|---------------------------------|
|                                                   | 25.83<br>(8.37 to<br>61.43)           | 28.81<br>(8.43 to<br>66.36)           | 26.18<br>(7.69 to<br>59.67)           | 30.09<br>(8.97 to<br>68.79)           | 0.60<br>(0.19 to<br>1.36)       | 0.88<br>(0.23 to<br>2.14)       | 0.80<br>(0.21 to<br>1.94)       | 0.91<br>(0.25 to<br>2.19)       |
| Sickle cell disorders                             |                                       |                                       |                                       |                                       |                                 |                                 |                                 |                                 |
|                                                   | 83.63<br>(59.31 to<br>131.19)         | 114.74<br>(76.89 to<br>176.69)        | 103.59<br>(68.37 to<br>160.88)        | 118.31<br>(77.94 to<br>184.97)        | 2.86<br>(2.04 to<br>4.18)       | 5.59<br>(3.77 to<br>8.33)       | 5.13<br>(3.45 to<br>7.69)       | 5.61<br>(3.76 to<br>8.35)       |
| G6PD deficiency                                   |                                       |                                       |                                       |                                       |                                 |                                 |                                 |                                 |
|                                                   | 408.84<br>(335.68 to<br>580.82)       | 552.68<br>(438.48 to<br>765.61)       | 529.78<br>(419.06 to<br>735.04)       | 529.43<br>(411.06 to<br>737.62)       | 37.63<br>(31.25 to<br>50.37)    | 63.81<br>(48.79 to<br>84.29)    | 62.64<br>(48.12 to<br>82.59)    | 58.92<br>(42.99 to<br>78.00)    |
| Other hemoglobinopathies and hemolytic anemias    |                                       |                                       |                                       |                                       |                                 |                                 |                                 |                                 |
|                                                   | 3,756.10<br>(2,979.29 to<br>4,443.91) | 6,295.84<br>(4,832.30 to<br>7,758.59) | 6,410.77<br>(4,927.45 to<br>7,895.92) | 6,129.96<br>(4,668.66 to<br>7,557.55) | 148.87<br>(105.66 to<br>173.66) | 334.03<br>(229.00 to<br>397.26) | 351.96<br>(241.68 to<br>420.35) | 307.64<br>(211.67 to<br>368.54) |
| Endocrine, metabolic, blood, and immune disorders |                                       |                                       |                                       |                                       |                                 |                                 |                                 |                                 |

| Ireland                                       |                                             |                                             |                                             |                                              |                                     |                                     |                                     |                                     |
|-----------------------------------------------|---------------------------------------------|---------------------------------------------|---------------------------------------------|----------------------------------------------|-------------------------------------|-------------------------------------|-------------------------------------|-------------------------------------|
| Cause                                         | YLLs (actual counts)                        |                                             |                                             |                                              | Deaths (actual counts)              |                                     |                                     |                                     |
|                                               | 2016                                        | 2040 Forecast                               | 2040 Better Scenario                        | 2040 Worse Scenario                          | 2016                                | 2040 Forecast                       | 2040 Better Scenario                | 2040 Worse Scenario                 |
|                                               | <b>2,180.95</b><br>(1,756.25 to 2,597.82)   | <b>3,620.76</b><br>(2,799.06 to 4,446.20)   | <b>3,431.00</b><br>(2,654.25 to 4,255.93)   | <b>3,633.58</b><br>(2,819.47 to 4,493.27)    | <b>142.00</b><br>(115.33 to 169.50) | <b>280.57</b><br>(219.51 to 341.36) | <b>272.41</b><br>(211.32 to 332.11) | <b>271.03</b><br>(208.49 to 334.98) |
| Musculoskeletal disorders                     |                                             |                                             |                                             |                                              |                                     |                                     |                                     |                                     |
| Rheumatoid arthritis                          | 838.63<br>(628.26 to 1,069.35)              | 1,492.00<br>(1,066.59 to 1,990.16)          | 1,313.77<br>(926.51 to 1,757.29)            | 1,572.19<br>(1,093.40 to 2,143.68)           | 55.82<br>(41.49 to 71.10)           | 113.84<br>(80.90 to 151.93)         | 102.25<br>(72.99 to 137.19)         | 116.07<br>(82.44 to 158.64)         |
| Other musculoskeletal disorders               | 1,342.32<br>(961.13 to 1,603.14)            | 2,128.76<br>(1,515.39 to 2,660.69)          | 2,117.23<br>(1,524.96 to 2,623.15)          | 2,061.39<br>(1,446.41 to 2,559.58)           | 86.18<br>(63.83 to 103.76)          | 166.73<br>(119.84 to 203.13)        | 170.15<br>(123.83 to 209.23)        | 154.96<br>(107.50 to 190.36)        |
| Other non-communicable diseases               | <b>13,658.23</b><br>(9,942.61 to 16,927.16) | <b>13,304.85</b><br>(9,463.12 to 18,993.67) | <b>12,123.91</b><br>(8,676.04 to 17,316.96) | <b>14,327.96</b><br>(10,018.95 to 20,895.30) | <b>231.41</b><br>(183.84 to 290.00) | <b>402.42</b><br>(287.93 to 545.21) | <b>393.73</b><br>(279.10 to 530.80) | <b>394.27</b><br>(280.46 to 535.54) |
| Congenital birth defects                      | 10,536.88<br>(7,680.05 to 13,845.86)        | 9,439.02<br>(6,135.74 to 14,507.20)         | 8,423.17<br>(5,473.59 to 13,076.09)         | 10,422.92<br>(6,738.06 to 16,440.69)         | 142.65<br>(108.16 to 182.49)        | 139.71<br>(98.75 to 202.79)         | 126.98<br>(89.49 to 180.91)         | 151.50<br>(105.58 to 222.99)        |
| Neural tube defects                           | 790.48<br>(468.63 to 1,180.31)              | 284.06<br>(140.32 to 571.78)                | 232.36<br>(114.36 to 460.44)                | 329.32<br>(159.29 to 654.81)                 | 9.60<br>(5.83 to 14.02)             | 3.60<br>(1.88 to 7.00)              | 2.96<br>(1.56 to 5.66)              | 4.16<br>(2.13 to 8.00)              |
| Congenital heart anomalies                    | 3,006.74<br>(2,253.16 to 4,092.63)          | 1,800.18<br>(1,102.75 to 2,976.24)          | 1,464.38<br>(901.52 to 2,451.79)            | 2,077.87<br>(1,276.67 to 3,431.95)           | 41.44<br>(32.20 to 56.56)           | 26.20<br>(16.69 to 42.52)           | 21.44<br>(13.68 to 35.22)           | 29.91<br>(18.94 to 48.62)           |
| Orofacial clefts                              | 3.81<br>(1.62 to 7.51)                      | 2.53<br>(0.90 to 5.78)                      | 1.95<br>(0.68 to 4.35)                      | 3.05<br>(1.06 to 7.14)                       | 0.04<br>(0.02 to 0.09)              | 0.03<br>(0.01 to 0.07)              | 0.02<br>(0.01 to 0.05)              | 0.04<br>(0.01 to 0.08)              |
| Down syndrome                                 | 1,226.63<br>(884.34 to 1,547.28)            | 1,811.88<br>(1,346.05 to 2,350.23)          | 1,825.41<br>(1,361.29 to 2,358.83)          | 1,830.41<br>(1,346.49 to 2,377.44)           | 23.67<br>(18.19 to 29.18)           | 40.74<br>(30.80 to 52.60)           | 41.35<br>(31.29 to 53.07)           | 40.55<br>(30.38 to 52.19)           |
| Other chromosomal abnormalities               | 2,295.37<br>(964.58 to 3,470.10)            | 3,205.48<br>(1,366.92 to 5,643.28)          | 2,920.57<br>(1,261.89 to 5,169.19)          | 3,527.58<br>(1,452.25 to 6,264.82)           | 27.31<br>(11.76 to 41.10)           | 38.53<br>(17.19 to 67.02)           | 35.16<br>(16.01 to 61.22)           | 42.29<br>(18.50 to 74.02)           |
| Congenital musculoskeletal and limb anomalies | 422.22<br>(265.52 to 1,110.05)              | 371.39<br>(200.15 to 1,026.37)              | 315.97<br>(169.25 to 887.05)                | 418.67<br>(217.41 to 1,209.46)               | 5.75<br>(3.87 to 13.48)             | 3.32<br>(3.10 to 13.09)             | 4.55<br>(2.69 to 11.06)             | 3.94<br>(3.39 to 14.81)             |
| Urogenital congenital anomalies               | 322.11<br>(112.37 to 583.87)                | 237.40<br>(75.47 to 513.73)                 | 204.72<br>(66.10 to 438.99)                 | 268.22<br>(83.35 to 591.04)                  | 3.99<br>(1.51 to 7.00)              | 3.03<br>(1.11 to 6.31)              | 2.62<br>(0.97 to 5.41)              | 3.40<br>(1.20 to 7.10)              |
| Digestive congenital anomalies                | 567.10<br>(324.74 to 864.49)                | 439.70<br>(216.51 to 834.32)                | 363.95<br>(178.04 to 684.28)                | 508.89<br>(246.60 to 983.32)                 | 6.86<br>(4.01 to 10.36)             | 5.41<br>(2.78 to 9.95)              | 4.49<br>(2.27 to 8.20)              | 6.23<br>(3.14 to 11.83)             |
| Other congenital birth defects                | 1,892.43<br>(1,372.92 to 2,657.53)          | 1,286.42<br>(767.62 to 2,163.64)            | 1,093.84<br>(651.06 to 1,869.73)            | 1,458.92<br>(857.12 to 2,486.48)             | 23.99<br>(17.83 to 32.97)           | 16.85<br>(10.58 to 27.39)           | 14.38<br>(8.94 to 23.43)            | 18.98<br>(11.77 to 31.15)           |
| Skin and subcutaneous diseases                | 843.63<br>(500.59 to 1,467.21)              | 2,617.32<br>(1,590.16 to 4,207.61)          | 2,611.30<br>(1,583.03 to 4,192.89)          | 2,489.59<br>(1,518.44 to 4,040.27)           | 69.17<br>(39.29 to 115.10)          | 248.22<br>(146.09 to 382.65)        | 254.11<br>(150.07 to 389.33)        | 226.35<br>(131.42 to 352.86)        |
| Cellulitis                                    | 425.10<br>(217.45 to 707.98)                | 1,367.16<br>(688.02 to 2,192.42)            | 1,381.42<br>(697.29 to 2,192.38)            | 1,295.30<br>(654.19 to 2,100.04)             | 33.74<br>(15.52 to 51.85)           | 122.67<br>(55.07 to 190.63)         | 127.16<br>(57.87 to 196.79)         | 111.54<br>(50.89 to 173.53)         |
| Pyoderma                                      | 262.84<br>(139.62 to 488.76)                | 886.61<br>(477.12 to 1,618.05)              | 880.10<br>(473.14 to 1,622.22)              | 843.07<br>(454.57 to 1,538.27)               | 22.10<br>(11.26 to 40.46)           | 87.76<br>(46.41 to 162.24)          | 89.69<br>(47.95 to 166.10)          | 79.76<br>(42.40 to 147.51)          |
| Decubitus ulcer                               | 109.35<br>(67.70 to 266.32)                 | 289.64<br>(163.29 to 664.13)                | 277.54<br>(154.40 to 657.81)                | 279.53<br>(154.75 to 652.15)                 | 9.74<br>(5.85 to 22.82)             | 31.32<br>(17.01 to 73.54)           | 30.76<br>(16.65 to 72.90)           | 29.06<br>(15.40 to 67.71)           |
| Other skin and subcutaneous diseases          | 46.34<br>(28.10 to 103.40)                  | 73.90<br>(44.14 to 160.78)                  | 72.24<br>(42.87 to 156.77)                  | 71.69<br>(42.64 to 156.60)                   | 3.59<br>(1.99 to 8.09)              | 6.47<br>(3.51 to 15.03)             | 6.51<br>(3.59 to 15.05)             | 5.99<br>(3.20 to 14.16)             |
| Sudden infant death syndrome                  | 1,687.72<br>(1,115.41 to 2,456.25)          | 1,248.50<br>(633.27 to 2,331.55)            | 1,089.43<br>(557.74 to 2,019.52)            | 1,415.44<br>(716.00 to 2,631.60)             | 19.59<br>(12.95 to 28.51)           | 14.49<br>(7.35 to 27.05)            | 12.64<br>(6.47 to 23.43)            | 16.42<br>(8.31 to 30.53)            |

|                          |                                          |                                          |                                          |                                          |                                       |                                       |                                       |                                       |
|--------------------------|------------------------------------------|------------------------------------------|------------------------------------------|------------------------------------------|---------------------------------------|---------------------------------------|---------------------------------------|---------------------------------------|
| Injuries                 | 44,691.29<br>(38,070.29 to<br>52,047.93) | 39,040.75<br>(27,667.98 to<br>59,308.33) | 34,192.84<br>(24,426.87 to<br>49,937.08) | 52,095.64<br>(35,133.33 to<br>83,415.32) | 1,313.74<br>(1,145.43 to<br>1,520.06) | 1,542.76<br>(1,227.25 to<br>1,988.20) | 1,435.78<br>(1,161.86 to<br>1,825.47) | 1,788.79<br>(1,388.59 to<br>2,409.70) |
| Transport injuries       | 9,703.72<br>(8,368.16 to<br>11,357.94)   | 5,976.58<br>(3,196.84 to<br>11,626.77)   | 4,219.14<br>(2,296.87 to<br>8,102.40)    | 13,705.80<br>(7,115.22 to<br>27,015.58)  | 234.92<br>(204.30 to<br>272.97)       | 177.36<br>(107.89 to<br>303.68)       | 133.49<br>(82.91 to<br>227.26)        | 356.99<br>(203.81 to<br>631.13)       |
| Road injuries            | 8,854.34<br>(7,649.74 to<br>10,370.83)   | 5,229.62<br>(2,794.59 to<br>10,312.02)   | 3,589.79<br>(1,953.60 to<br>6,811.53)    | 12,768.23<br>(6,634.95 to<br>25,568.36)  | 215.48<br>(188.10 to<br>250.88)       | 158.64<br>(97.30 to<br>272.29)        | 117.50<br>(73.58 to<br>197.89)        | 334.00<br>(191.36 to<br>589.73)       |
| Pedestrian road injuries | 1,864.74<br>(1,429.40 to<br>2,565.62)    | 824.57<br>(507.88 to<br>1,410.48)        | 554.05<br>(342.75 to<br>937.66)          | 1,726.68<br>(1,003.24 to<br>3,112.56)    | 55.95<br>(44.44 to<br>74.36)          | 35.91<br>(23.69 to<br>56.43)          | 25.99<br>(17.39 to<br>40.91)          | 65.77<br>(40.93 to<br>109.51)         |

| Ireland                                         |                                                     |                                                     |                                                     |                                                     |                                            |                                              |                                              |                                              |
|-------------------------------------------------|-----------------------------------------------------|-----------------------------------------------------|-----------------------------------------------------|-----------------------------------------------------|--------------------------------------------|----------------------------------------------|----------------------------------------------|----------------------------------------------|
| Cause                                           | YLLs (actual counts)                                |                                                     |                                                     |                                                     | Deaths (actual counts)                     |                                              |                                              |                                              |
|                                                 | 2016                                                | 2040 Forecast                                       | 2040 Better Scenario                                | 2040 Worse Scenario                                 | 2016                                       | 2040 Forecast                                | 2040 Better Scenario                         | 2040 Worse Scenario                          |
| Cyclist road injuries                           | 407.26<br>(286.68 to 528.54)                        | 312.49<br>(167.69 to 587.72)                        | 226.63<br>(123.23 to 420.58)                        | 714.71<br>(373.90 to 1,350.25)                      | 9.49<br>(6.58 to 12.28)                    | 10.01<br>(5.69 to 17.32)                     | 8.01<br>(4.63 to 13.76)                      | 18.86<br>(10.40 to 33.44)                    |
| Motorcyclist road injuries                      | 930.22<br>(609.97 to 1,208.55)                      | 960.36<br>(440.25 to 2,243.85)                      | 745.91<br>(347.99 to 1,623.93)                      | 1,816.75<br>(820.33 to 4,206.36)                    | 17.70<br>(11.68 to 22.86)                  | 19.31<br>(9.42 to 41.13)                     | 15.56<br>(7.75 to 31.78)                     | 34.36<br>(16.12 to 73.75)                    |
| Motor vehicle road injuries                     | 5,594.31<br>(4,719.95 to 6,974.29)                  | 3,106.73<br>(1,615.99 to 6,173.87)                  | 2,045.89<br>(1,077.20 to 3,959.55)                  | 8,444.78<br>(4,223.29 to 16,941.99)                 | 131.00<br>(112.16 to 160.31)               | 92.57<br>(55.05 to 163.28)                   | 67.31<br>(41.15 to 115.70)                   | 213.27<br>(117.68 to 393.55)                 |
| Other road injuries                             | 57.82<br>(31.82 to 74.93)                           | 25.48<br>(11.97 to 47.57)                           | 17.31<br>(8.03 to 31.59)                            | 65.31<br>(30.50 to 123.71)                          | 1.34<br>(0.62 to 1.75)                     | 0.83<br>(0.28 to 1.52)                       | 0.63<br>(0.21 to 1.15)                       | 1.74<br>(0.65 to 3.27)                       |
| Other transport injuries                        | 849.38<br>(640.36 to 1,128.08)                      | 746.96<br>(386.02 to 1,493.45)                      | 629.35<br>(330.72 to 1,273.55)                      | 937.56<br>(473.11 to 1,878.67)                      | 19.43<br>(14.89 to 25.07)                  | 18.73<br>(10.35 to 35.67)                    | 15.99<br>(9.03 to 29.41)                     | 22.99<br>(12.37 to 43.26)                    |
| <b>Unintentional injuries</b>                   | <b>12,508.16</b><br><b>(10,899.53 to 14,874.94)</b> | <b>13,193.37</b><br><b>(10,923.09 to 16,527.18)</b> | <b>12,546.67</b><br><b>(10,411.89 to 15,705.01)</b> | <b>13,439.62</b><br><b>(11,014.45 to 16,845.87)</b> | <b>562.74</b><br><b>(487.71 to 701.09)</b> | <b>888.50</b><br><b>(744.77 to 1,149.02)</b> | <b>879.70</b><br><b>(742.13 to 1,137.41)</b> | <b>842.34</b><br><b>(696.44 to 1,089.79)</b> |
| Falls                                           | 5,220.61<br>(4,455.99 to 6,775.01)                  | 6,949.02<br>(5,854.94 to 9,166.16)                  | 6,751.61<br>(5,686.77 to 8,995.20)                  | 6,795.49<br>(5,739.98 to 9,050.92)                  | 321.40<br>(273.98 to 432.76)               | 594.50<br>(485.97 to 826.44)                 | 595.55<br>(490.44 to 829.16)                 | 550.09<br>(441.04 to 775.91)                 |
| Drowning                                        | 2,069.05<br>(1,769.08 to 2,425.32)                  | 1,517.45<br>(992.34 to 2,370.12)                    | 1,375.68<br>(899.56 to 2,166.59)                    | 1,716.88<br>(1,067.02 to 2,770.05)                  | 48.44<br>(41.57 to 56.71)                  | 41.51<br>(28.28 to 62.70)                    | 38.16<br>(26.23 to 56.93)                    | 45.88<br>(29.74 to 69.62)                    |
| Fire, heat, and hot substances                  | 1,121.24<br>(952.33 to 1,504.99)                    | 889.13<br>(619.94 to 1,340.89)                      | 797.66<br>(561.26 to 1,185.06)                      | 982.10<br>(649.77 to 1,520.78)                      | 44.15<br>(37.84 to 57.46)                  | 51.35<br>(36.71 to 74.19)                    | 47.94<br>(34.77 to 68.41)                    | 53.16<br>(36.01 to 79.41)                    |
| Poisonings                                      | 444.94<br>(357.18 to 613.63)                        | 215.68<br>(131.73 to 365.14)                        | 184.15<br>(113.68 to 306.28)                        | 251.17<br>(145.26 to 424.34)                        | 11.15<br>(8.86 to 15.21)                   | 6.68<br>(4.30 to 10.40)                      | 5.86<br>(3.85 to 9.00)                       | 7.46<br>(4.57 to 11.86)                      |
| Exposure to mechanical forces                   | 1,105.59<br>(886.61 to 1,347.22)                    | 866.84<br>(668.58 to 1,140.87)                      | 785.56<br>(603.98 to 1,042.68)                      | 918.71<br>(699.75 to 1,210.62)                      | 29.42<br>(24.82 to 37.15)                  | 31.55<br>(25.45 to 42.52)                    | 29.70<br>(23.88 to 40.83)                    | 31.51<br>(25.11 to 41.86)                    |
| Unintentional firearm injuries                  | 130.61<br>(100.92 to 160.60)                        | 85.63<br>(63.39 to 112.81)                          | 78.98<br>(58.88 to 105.24)                          | 90.12<br>(66.46 to 120.71)                          | 3.31<br>(2.69 to 3.97)                     | 2.94<br>(2.37 to 3.59)                       | 2.82<br>(2.26 to 3.45)                       | 2.91<br>(2.30 to 3.58)                       |
| Unintentional suffocation                       | 99.85<br>(67.94 to 127.74)                          | 71.11<br>(47.34 to 99.92)                           | 64.86<br>(42.79 to 89.80)                           | 76.95<br>(50.89 to 111.76)                          | 1.62<br>(1.17 to 2.00)                     | 1.27<br>(0.90 to 1.69)                       | 1.17<br>(0.83 to 1.56)                       | 1.35<br>(0.95 to 1.85)                       |
| Other exposure to mechanical forces             | 875.12<br>(693.27 to 1,096.99)                      | 710.09<br>(544.05 to 943.87)                        | 641.72<br>(483.22 to 861.27)                        | 751.64<br>(558.29 to 1,038.66)                      | 24.49<br>(20.17 to 32.11)                  | 27.34<br>(21.61 to 38.18)                    | 25.72<br>(20.32 to 36.27)                    | 27.25<br>(21.26 to 38.04)                    |
| Adverse effects of medical treatment            | 746.64<br>(546.04 to 914.88)                        | 979.97<br>(723.50 to 1,204.04)                      | 958.15<br>(707.98 to 1,177.56)                      | 961.27<br>(713.48 to 1,182.72)                      | 45.75<br>(33.49 to 56.04)                  | 77.07<br>(55.97 to 94.09)                    | 77.69<br>(57.26 to 94.95)                    | 71.79<br>(51.88 to 88.08)                    |
| Animal contact                                  | 89.76<br>(54.71 to 113.24)                          | 112.97<br>(62.42 to 147.57)                         | 103.94<br>(58.01 to 135.37)                         | 116.93<br>(64.43 to 154.85)                         | 3.25<br>(1.70 to 4.20)                     | 5.10<br>(2.59 to 6.75)                       | 4.80<br>(2.42 to 6.32)                       | 5.08<br>(2.51 to 6.75)                       |
| Venomous animal contact                         | 17.60<br>(14.08 to 23.98)                           | 16.96<br>(12.68 to 24.18)                           | 15.94<br>(11.91 to 22.80)                           | 17.76<br>(13.37 to 25.37)                           | 0.42<br>(0.31 to 0.54)                     | 0.49<br>(0.33 to 0.63)                       | 0.47<br>(0.32 to 0.62)                       | 0.50<br>(0.34 to 0.64)                       |
| Non-venomous animal contact                     | 72.16<br>(39.90 to 92.86)                           | 96.00<br>(48.97 to 128.58)                          | 88.01<br>(44.46 to 117.75)                          | 99.17<br>(50.19 to 134.04)                          | 2.83<br>(1.37 to 3.69)                     | 4.61<br>(2.21 to 6.17)                       | 4.32<br>(2.06 to 5.78)                       | 4.58<br>(2.10 to 6.16)                       |
| Foreign body                                    | 1,365.02<br>(1,137.31 to 1,859.84)                  | 1,326.21<br>(1,068.80 to 1,798.28)                  | 1,288.82<br>(1,038.08 to 1,743.36)                  | 1,348.61<br>(1,087.65 to 1,842.19)                  | 44.36<br>(36.60 to 61.18)                  | 58.83<br>(46.20 to 84.97)                    | 59.40<br>(46.34 to 85.77)                    | 56.24<br>(44.57 to 80.87)                    |
| Pulmonary aspiration and foreign body in airway | 1,337.71<br>(1,112.65 to 1,835.09)                  | 1,298.87<br>(1,044.25 to 1,770.00)                  | 1,261.09<br>(1,013.38 to 1,713.64)                  | 1,321.22<br>(1,062.40 to 1,817.85)                  | 43.65<br>(35.92 to 60.59)                  | 57.87<br>(45.26 to 84.22)                    | 58.39<br>(45.44 to 84.76)                    | 55.34<br>(43.65 to 80.11)                    |

|                                             |                                                               |                                                               |                                                              |                                                               |                                                      |                                                      |                                                      |                                                      |
|---------------------------------------------|---------------------------------------------------------------|---------------------------------------------------------------|--------------------------------------------------------------|---------------------------------------------------------------|------------------------------------------------------|------------------------------------------------------|------------------------------------------------------|------------------------------------------------------|
|                                             | 27.31<br>(23.44 to<br>31.61)                                  | 27.34<br>(21.86 to<br>33.95)                                  | 27.73<br>(22.01 to<br>34.89)                                 | 27.39<br>(21.95 to<br>34.13)                                  | 0.71<br>(0.53 to<br>0.85)                            | 0.96<br>(0.64 to<br>1.22)                            | 1.01<br>(0.67 to<br>1.28)                            | 0.91<br>(0.60 to<br>1.14)                            |
| Foreign body in other body part             |                                                               |                                                               |                                                              |                                                               |                                                      |                                                      |                                                      |                                                      |
| Environmental heat and cold exposure        | 194.09<br>(135.06 to<br>321.77)                               | 260.09<br>(168.11 to<br>414.79)                               | 239.22<br>(156.38 to<br>381.40)                              | 262.77<br>(172.47 to<br>418.59)                               | 11.23<br>(7.45 to<br>17.49)                          | 19.76<br>(12.17 to<br>29.06)                         | 18.81<br>(11.71 to<br>27.55)                         | 18.80<br>(11.66 to<br>27.38)                         |
| Other unintentional injuries                | 151.21<br>(126.75 to<br>182.56)                               | 76.01<br>(54.59 to<br>106.51)                                 | 61.88<br>(44.56 to<br>86.24)                                 | 85.68<br>(59.86 to<br>121.99)                                 | 3.58<br>(3.02 to<br>4.30)                            | 2.15<br>(1.63 to<br>2.80)                            | 1.79<br>(1.37 to<br>2.33)                            | 2.33<br>(1.72 to<br>3.16)                            |
| <b>Self-harm and interpersonal violence</b> | <b>22,457.02</b><br><b>(16,302.70 to</b><br><b>27,511.94)</b> | <b>19,835.75</b><br><b>(11,155.74 to</b><br><b>33,519.53)</b> | <b>17,391.97</b><br><b>(9,866.22 to</b><br><b>29,355.30)</b> | <b>24,915.28</b><br><b>(13,209.64 to</b><br><b>43,880.47)</b> | <b>515.63</b><br><b>(381.46 to</b><br><b>630.52)</b> | <b>475.89</b><br><b>(280.14 to</b><br><b>760.77)</b> | <b>421.57</b><br><b>(253.95 to</b><br><b>672.50)</b> | <b>588.49</b><br><b>(323.30 to</b><br><b>971.63)</b> |



| Ireland                                                                             |                                         |                                         |                                         |                                         |                                      |                                      |                                      |                                      |
|-------------------------------------------------------------------------------------|-----------------------------------------|-----------------------------------------|-----------------------------------------|-----------------------------------------|--------------------------------------|--------------------------------------|--------------------------------------|--------------------------------------|
| Cause                                                                               | YLLs (actual counts)                    |                                         |                                         |                                         | Deaths (actual counts)               |                                      |                                      |                                      |
|                                                                                     | 2016                                    | 2040 Forecast                           | 2040 Better Scenario                    | 2040 Worse Scenario                     | 2016                                 | 2040 Forecast                        | 2040 Better Scenario                 | 2040 Worse Scenario                  |
| Self-harm                                                                           | 20,882.83<br>(14,866.23 to 25,762.06)   | 18,826.28<br>(10,194.70 to 32,523.76)   | 16,487.08<br>(9,063.30 to 28,059.66)    | 23,770.87<br>(12,099.99 to 42,480.60)   | 482.09<br>(347.78 to 593.93)         | 451.86<br>(259.23 to 737.24)         | 399.69<br>(234.77 to 642.76)         | 561.74<br>(301.01 to 938.29)         |
| Self-harm by firearm                                                                | 973.15<br>(557.01 to 1,542.99)          | 725.16<br>(291.96 to 1,500.11)          | 613.53<br>(254.47 to 1,259.97)          | 929.20<br>(352.48 to 2,014.66)          | 23.74<br>(14.02 to 35.78)            | 19.05<br>(8.70 to 37.10)             | 16.44<br>(7.58 to 31.78)             | 23.69<br>(9.97 to 48.39)             |
| Self-harm by other specified means                                                  | 19,909.69<br>(13,911.36 to 24,423.12)   | 18,101.13<br>(9,896.52 to 31,108.46)    | 15,873.55<br>(8,775.97 to 27,102.28)    | 22,841.67<br>(11,703.98 to 40,666.46)   | 458.36<br>(328.61 to 563.00)         | 432.81<br>(249.33 to 707.90)         | 383.26<br>(225.15 to 614.06)         | 538.05<br>(289.45 to 898.19)         |
| Interpersonal violence                                                              | 1,574.19<br>(928.17 to 2,195.36)        | 1,009.47<br>(562.90 to 1,547.52)        | 904.89<br>(506.63 to 1,399.49)          | 1,144.40<br>(617.73 to 1,783.66)        | 33.54<br>(19.90 to 45.81)            | 24.03<br>(14.13 to 36.28)            | 21.87<br>(12.88 to 32.83)            | 26.75<br>(15.24 to 41.34)            |
| Physical violence by firearm                                                        | 385.80<br>(90.77 to 616.51)             | 227.16<br>(57.97 to 381.41)             | 198.91<br>(50.47 to 339.59)             | 248.85<br>(63.88 to 424.98)             | 7.88<br>(1.89 to 12.45)              | 4.76<br>(1.34 to 7.68)               | 4.19<br>(1.18 to 6.84)               | 5.17<br>(1.39 to 8.55)               |
| Physical violence by sharp object                                                   | 414.49<br>(207.69 to 670.78)            | 272.53<br>(137.20 to 459.16)            | 242.99<br>(123.94 to 408.61)            | 295.23<br>(146.83 to 512.89)            | 8.79<br>(4.65 to 14.05)              | 6.46<br>(3.64 to 10.44)              | 5.88<br>(3.32 to 9.48)               | 6.81<br>(3.72 to 11.11)              |
| Physical violence by other means                                                    | 773.91<br>(496.84 to 1,276.42)          | 509.79<br>(284.99 to 883.12)            | 462.99<br>(258.29 to 808.28)            | 600.32<br>(325.76 to 1,059.85)          | 16.87<br>(10.59 to 26.75)            | 12.81<br>(7.29 to 21.15)             | 11.80<br>(6.82 to 19.48)             | 14.77<br>(8.24 to 24.84)             |
| <b>Forces of nature, conflict and terrorism, and executions and police conflict</b> | <b>22.39</b><br><b>(20.08 to 25.12)</b> | <b>35.04</b><br><b>(0.00 to 266.15)</b> | <b>35.06</b><br><b>(0.00 to 265.26)</b> | <b>34.95</b><br><b>(0.00 to 267.33)</b> | <b>0.45</b><br><b>(0.40 to 0.51)</b> | <b>1.00</b><br><b>(0.00 to 6.72)</b> | <b>1.02</b><br><b>(0.00 to 6.78)</b> | <b>0.98</b><br><b>(0.00 to 6.63)</b> |
| Exposure to forces of nature                                                        | 0.00<br>(0.00 to 0.00)                  | 11.00<br>(0.00 to 64.91)                | 10.96<br>(0.00 to 64.67)                | 11.05<br>(0.00 to 65.12)                | 0.00<br>(0.00 to 0.00)               | 0.27<br>(0.00 to 1.64)               | 0.27<br>(0.00 to 1.65)               | 0.27<br>(0.00 to 1.61)               |
| Conflict and terrorism                                                              | 0.00<br>(0.00 to 0.00)                  | 24.04<br>(0.00 to 108.20)               | 24.10<br>(0.00 to 107.81)               | 23.90<br>(0.00 to 108.72)               | 0.00<br>(0.00 to 0.00)               | 0.73<br>(3.30 to 3.35)               | 0.75<br>(3.35 to 3.35)               | 0.71<br>(3.19 to 3.19)               |
| Executions and police conflict                                                      | 22.39<br>(20.08 to 25.12)               | 0.00<br>(0.00 to 0.00)                  | 0.00<br>(0.00 to 0.00)                  | 0.00<br>(0.00 to 0.00)                  | 0.45<br>(0.40 to 0.51)               | 0.00<br>(0.00 to 0.00)               | 0.00<br>(0.00 to 0.00)               | 0.00<br>(0.00 to 0.00)               |

| Israel                                                                   |                                                 |                                                   |                                                   |                                                     |                                              |                                              |                                              |                                               |
|--------------------------------------------------------------------------|-------------------------------------------------|---------------------------------------------------|---------------------------------------------------|-----------------------------------------------------|----------------------------------------------|----------------------------------------------|----------------------------------------------|-----------------------------------------------|
| Cause                                                                    | YLLs (actual counts)                            |                                                   |                                                   |                                                     | Deaths (actual counts)                       |                                              |                                              |                                               |
|                                                                          | 2016                                            | 2040 Forecast                                     | 2040 Better Scenario                              | 2040 Worse Scenario                                 | 2016                                         | 2040 Forecast                                | 2040 Better Scenario                         | 2040 Worse Scenario                           |
| <b>All causes</b>                                                        | <b>715,414.37</b><br>(613,975.09 to 837,577.88) | <b>910,763.92</b><br>(624,180.19 to 1,302,921.79) | <b>717,087.11</b><br>(491,186.69 to 1,019,967.22) | <b>1,150,600.45</b><br>(782,278.16 to 1,618,048.18) | <b>46,010.65</b><br>(39,734.77 to 53,314.28) | <b>69,334.80</b><br>(50,860.95 to 95,031.71) | <b>57,934.75</b><br>(41,481.91 to 80,315.26) | <b>82,870.21</b><br>(59,461.80 to 113,828.68) |
| <b>Communicable, maternal, neonatal, and nutritional diseases</b>        | <b>49,991.53</b><br>(44,317.99 to 56,395.08)    | <b>50,304.97</b><br>(37,406.07 to 65,771.03)      | <b>43,925.35</b><br>(33,357.81 to 57,463.62)      | <b>59,725.65</b><br>(43,349.48 to 81,390.36)        | <b>2,454.36</b><br>(2,115.53 to 2,859.34)    | <b>3,616.67</b><br>(2,601.56 to 4,733.74)    | <b>3,715.90</b><br>(2,714.96 to 4,854.24)    | <b>3,848.76</b><br>(2,681.66 to 5,088.59)     |
| <b>HIV/AIDS and tuberculosis</b>                                         | <b>1,910.30</b><br>(1,799.83 to 2,042.08)       | <b>2,240.05</b><br>(1,376.84 to 3,265.94)         | <b>1,189.42</b><br>(668.93 to 1,758.91)           | <b>3,306.77</b><br>(2,093.14 to 4,749.29)           | <b>62.02</b><br>(56.70 to 68.86)             | <b>63.33</b><br>(41.19 to 93.80)             | <b>32.90</b><br>(20.81 to 47.45)             | <b>91.04</b><br>(59.25 to 132.67)             |
| <b>Tuberculosis</b>                                                      | <b>467.26</b><br>(381.43 to 535.24)             | <b>436.73</b><br>(231.60 to 736.86)               | <b>195.18</b><br>(114.89 to 297.93)               | <b>640.63</b><br>(347.53 to 1,128.45)               | <b>28.49</b><br>(23.27 to 35.04)             | <b>33.48</b><br>(17.81 to 57.57)             | <b>16.09</b><br>(9.66 to 25.45)              | <b>46.26</b><br>(24.26 to 79.09)              |
| <b>HIV/AIDS</b>                                                          | <b>1,443.05</b><br>(1,380.42 to 1,508.58)       | <b>1,803.33</b><br>(962.82 to 2,847.43)           | <b>994.24</b><br>(477.43 to 1,568.71)             | <b>2,666.14</b><br>(1,473.13 to 4,087.93)           | <b>33.53</b><br>(32.06 to 35.04)             | <b>29.85</b><br>(15.28 to 47.00)             | <b>16.81</b><br>(7.26 to 27.38)              | <b>44.78</b><br>(24.16 to 68.70)              |
| <b>Diarrhea, lower respiratory, and other common infectious diseases</b> | <b>26,201.33</b><br>(22,202.34 to 30,772.27)    | <b>33,529.92</b><br>(23,864.94 to 45,741.31)      | <b>31,644.93</b><br>(23,051.34 to 42,535.62)      | <b>39,105.26</b><br>(27,041.09 to 56,186.66)        | <b>2,022.39</b><br>(1,711.01 to 2,393.07)    | <b>3,203.72</b><br>(2,222.07 to 4,298.33)    | <b>3,362.96</b><br>(2,403.45 to 4,455.97)    | <b>3,387.48</b><br>(2,290.35 to 4,585.58)     |
| <b>Diarrheal diseases</b>                                                | <b>3,337.78</b><br>(2,848.45 to 3,912.61)       | <b>7,232.50</b><br>(4,234.34 to 11,952.14)        | <b>13,054.07</b><br>(8,951.45 to 19,068.59)       | <b>5,266.19</b><br>(2,930.53 to 9,099.38)           | <b>259.85</b><br>(218.70 to 307.05)          | <b>767.32</b><br>(428.18 to 1,288.30)        | <b>1,468.25</b><br>(982.02 to 2,196.68)      | <b>532.54</b><br>(281.03 to 945.86)           |
| <b>Intestinal infectious diseases</b>                                    | <b>11.78</b><br>(5.40 to 22.26)                 | <b>10.81</b><br>(4.69 to 21.08)                   | <b>10.99</b><br>(4.63 to 22.07)                   | <b>10.78</b><br>(4.71 to 21.23)                     | <b>0.34</b><br>(0.16 to 0.62)                | <b>0.37</b><br>(0.17 to 0.69)                | <b>0.38</b><br>(0.16 to 0.72)                | <b>0.37</b><br>(0.17 to 0.69)                 |
| <b>Typhoid fever</b>                                                     | <b>5.05</b><br>(1.56 to 11.96)                  | <b>6.08</b><br>(2.06 to 13.93)                    | <b>7.49</b><br>(2.59 to 16.80)                    | <b>5.41</b><br>(1.74 to 12.46)                      | <b>0.11</b><br>(0.04 to 0.28)                | <b>0.15</b><br>(0.05 to 0.35)                | <b>0.19</b><br>(0.06 to 0.41)                | <b>0.13</b><br>(0.04 to 0.30)                 |
| <b>Paratyphoid fever</b>                                                 | <b>2.70</b><br>(0.78 to 7.29)                   | <b>2.09</b><br>(0.55 to 5.59)                     | <b>1.36</b><br>(0.34 to 3.77)                     | <b>2.54</b><br>(0.67 to 6.94)                       | <b>0.06</b><br>(0.02 to 0.15)                | <b>0.05</b><br>(0.01 to 0.15)                | <b>0.03</b><br>(0.01 to 0.09)                | <b>0.06</b><br>(0.01 to 0.15)                 |
| <b>Other intestinal infectious diseases</b>                              | <b>4.03</b><br>(1.60 to 8.49)                   | <b>2.64</b><br>(0.90 to 5.88)                     | <b>2.14</b><br>(0.65 to 4.96)                     | <b>2.83</b><br>(0.97 to 6.17)                       | <b>0.17</b><br>(0.06 to 0.37)                | <b>0.18</b><br>(0.06 to 0.43)                | <b>0.16</b><br>(0.05 to 0.38)                | <b>0.18</b><br>(0.06 to 0.42)                 |
| <b>Lower respiratory infections</b>                                      | <b>20,815.51</b><br>(17,252.60 to 24,604.59)    | <b>24,653.47</b><br>(16,335.95 to 36,491.52)      | <b>17,306.01</b><br>(10,899.79 to 25,938.83)      | <b>31,969.36</b><br>(20,362.38 to 48,471.07)        | <b>1,704.98</b><br>(1,424.15 to 2,041.94)    | <b>2,375.99</b><br>(1,541.40 to 3,403.97)    | <b>1,842.11</b><br>(1,136.46 to 2,715.90)    | <b>2,790.78</b><br>(1,736.27 to 4,000.91)     |
| <b>Upper respiratory infections</b>                                      | <b>10.48</b><br>(5.72 to 17.17)                 | <b>8.33</b><br>(3.33 to 18.36)                    | <b>4.33</b><br>(1.43 to 10.00)                    | <b>11.37</b><br>(4.01 to 25.41)                     | <b>0.42</b><br>(0.21 to 0.73)                | <b>0.46</b><br>(0.16 to 1.04)                | <b>0.26</b><br>(0.08 to 0.60)                | <b>0.60</b><br>(0.20 to 1.31)                 |
| <b>Otitis media</b>                                                      | <b>0.42</b><br>(0.30 to 0.60)                   | <b>0.18</b><br>(0.10 to 0.31)                     | <b>0.18</b><br>(0.10 to 0.32)                     | <b>0.18</b><br>(0.10 to 0.30)                       | <b>0.01</b><br>(0.01 to 0.02)                | <b>0.01</b><br>(0.01 to 0.05)                | <b>0.01</b><br>(0.01 to 0.03)                | <b>0.01</b><br>(0.01 to 0.02)                 |
| <b>Meningitis</b>                                                        | <b>1,289.67</b><br>(1,077.52 to 1,668.31)       | <b>752.45</b><br>(483.80 to 1,153.67)             | <b>528.55</b><br>(325.85 to 819.61)               | <b>893.43</b><br>(558.56 to 1,419.29)               | <b>34.66</b><br>(29.17 to 41.32)             | <b>26.69</b><br>(18.54 to 36.44)             | <b>21.03</b><br>(13.29 to 30.20)             | <b>29.53</b><br>(20.33 to 40.72)              |
| <b>Pneumococcal meningitis</b>                                           | <b>284.18</b><br>(236.81 to 360.31)             | <b>176.61</b><br>(126.65 to 248.21)               | <b>167.35</b><br>(111.03 to 247.63)               | <b>177.66</b><br>(129.57 to 249.29)                 | <b>9.16</b><br>(7.53 to 11.11)               | <b>8.31</b><br>(5.82 to 10.93)               | <b>8.46</b><br>(5.53 to 11.83)               | <b>7.95</b><br>(5.73 to 10.32)                |
| <b>H influenzae type B meningitis</b>                                    | <b>109.84</b><br>(88.06 to 140.25)              | <b>207.51</b><br>(88.09 to 434.45)                | <b>139.84</b><br>(68.46 to 267.00)                | <b>256.92</b><br>(94.47 to 566.31)                  | <b>2.62</b><br>(2.18 to 3.16)                | <b>3.76</b><br>(2.18 to 6.39)                | <b>3.06</b><br>(1.90 to 4.78)                | <b>4.24</b><br>(2.21 to 7.88)                 |
| <b>Meningococcal meningitis</b>                                          | <b>507.02</b><br>(415.34 to 677.90)             | <b>188.30</b><br>(110.46 to 316.60)               | <b>113.78</b><br>(61.15 to 192.18)                | <b>233.52</b><br>(132.74 to 398.96)                 | <b>10.87</b><br>(9.22 to 13.33)              | <b>6.13</b><br>(4.08 to 9.01)                | <b>4.04</b><br>(2.39 to 6.18)                | <b>7.24</b><br>(4.67 to 10.55)                |
| <b>Other meningitis</b>                                                  | <b>388.63</b><br>(324.43 to 492.25)             | <b>180.03</b><br>(111.93 to 292.37)               | <b>107.58</b><br>(60.77 to 174.85)                | <b>225.32</b><br>(134.91 to 355.69)                 | <b>12.02</b><br>(9.70 to 14.49)              | <b>8.49</b><br>(5.40 to 12.49)               | <b>5.47</b><br>(3.10 to 8.44)                | <b>10.10</b><br>(6.30 to 14.90)               |
| <b>Encephalitis</b>                                                      | <b>600.50</b><br>(465.77 to 919.21)             | <b>715.26</b><br>(506.42 to 1,086.32)             | <b>643.79</b><br>(435.64 to 978.93)               | <b>732.23</b><br>(523.18 to 1,112.81)               | <b>17.24</b><br>(13.39 to 24.53)             | <b>28.11</b><br>(19.83 to 39.32)             | <b>27.05</b><br>(18.14 to 38.14)             | <b>27.62</b><br>(19.84 to 38.55)              |

|                |                              |                              |                              |                               |                           |                           |                           |                           |
|----------------|------------------------------|------------------------------|------------------------------|-------------------------------|---------------------------|---------------------------|---------------------------|---------------------------|
| Diphtheria     | 2.38<br>(1.52 to<br>3.63)    | 0.64<br>(0.35 to<br>1.11)    | 0.42<br>(0.24 to<br>0.67)    | 0.82<br>(0.41 to<br>1.59)     | 0.04<br>(0.03 to<br>0.06) | 0.01<br>(0.01 to<br>0.02) | 0.01<br>(0.00 to<br>0.01) | 0.01<br>(0.01 to<br>0.02) |
| Whooping cough | 35.19<br>(16.04 to<br>79.58) | 20.04<br>(5.05 to<br>62.04)  | 3.75<br>(1.05 to<br>8.68)    | 35.17<br>(8.22 to<br>109.33)  | 0.42<br>(0.20 to<br>0.95) | 0.24<br>(0.07 to<br>0.73) | 0.05<br>(0.02 to<br>0.12) | 0.42<br>(0.10 to<br>1.30) |
| Tetanus        | 4.10<br>(3.16 to<br>5.45)    | 0.53<br>(0.31 to<br>0.89)    | 0.39<br>(0.21 to<br>0.67)    | 0.66<br>(0.38 to<br>1.20)     | 0.10<br>(0.07 to<br>0.14) | 0.01<br>(0.01 to<br>0.02) | 0.01<br>(0.01 to<br>0.02) | 0.02<br>(0.01 to<br>0.02) |
| Measles        | 8.84<br>(6.37 to<br>12.55)   | 80.49<br>(0.38 to<br>506.79) | 52.78<br>(0.31 to<br>309.73) | 122.53<br>(0.48 to<br>811.75) | 0.11<br>(0.08 to<br>0.16) | 1.05<br>(0.01 to<br>6.58) | 0.71<br>(0.00 to<br>4.27) | 1.56<br>(0.01 to<br>9.98) |

| Israel                                                |                                     |                                     |                                     |                                     |                                 |                                |                                |                                |
|-------------------------------------------------------|-------------------------------------|-------------------------------------|-------------------------------------|-------------------------------------|---------------------------------|--------------------------------|--------------------------------|--------------------------------|
| Cause                                                 | YLLs (actual counts)                |                                     |                                     |                                     | Deaths (actual counts)          |                                |                                |                                |
|                                                       | 2016                                | 2040 Forecast                       | 2040 Better Scenario                | 2040 Worse Scenario                 | 2016                            | 2040 Forecast                  | 2040 Better Scenario           | 2040 Worse Scenario            |
| Varicella and herpes zoster                           | 84.67<br>(30.50 to 118.54)          | 55.23<br>(18.69 to 94.88)           | 39.66<br>(13.10 to 70.60)           | 62.54<br>(20.41 to 110.03)          | 4.20<br>(1.63 to 5.85)          | 3.84<br>(1.24 to 6.44)         | 3.08<br>(1.00 to 5.41)         | 4.02<br>(1.22 to 6.73)         |
| <b>Neglected tropical diseases and malaria</b>        | <b>95.29</b><br>(55.29 to 121.89)   | <b>131.26</b><br>(55.33 to 177.47)  | <b>146.50</b><br>(55.64 to 203.29)  | <b>121.67</b><br>(54.51 to 161.60)  | <b>3.46</b><br>(1.11 to 4.80)   | <b>6.05</b><br>(1.31 to 8.55)  | <b>7.32</b><br>(1.39 to 10.55) | <b>5.31</b><br>(1.26 to 7.47)  |
| Malaria                                               | 0.00<br>(0.00 to 0.00)              | 0.00<br>(0.00 to 0.00)              | 0.00<br>(0.00 to 0.00)              | 0.00<br>(0.00 to 0.00)              | 0.00<br>(0.00 to 0.00)          | 0.00<br>(0.00 to 0.00)         | 0.00<br>(0.00 to 0.00)         | 0.00<br>(0.00 to 0.00)         |
| Chagas disease                                        | 0.00<br>(0.00 to 0.00)              | 0.00<br>(0.00 to 0.00)              | 0.00<br>(0.00 to 0.00)              | 0.00<br>(0.00 to 0.00)              | 0.00<br>(0.00 to 0.00)          | 0.00<br>(0.00 to 0.00)         | 0.00<br>(0.00 to 0.00)         | 0.00<br>(0.00 to 0.00)         |
| Leishmaniasis                                         | 1.42<br>(0.74 to 2.27)              | 0.85<br>(0.47 to 1.45)              | 0.67<br>(0.37 to 1.15)              | 0.94<br>(0.52 to 1.63)              | 0.06<br>(0.03 to 0.09)          | 0.04<br>(0.02 to 0.06)         | 0.03<br>(0.02 to 0.05)         | 0.04<br>(0.02 to 0.07)         |
| African trypanosomiasis                               | 0.00<br>(0.00 to 0.00)              | 0.00<br>(0.00 to 0.00)              | 0.00<br>(0.00 to 0.00)              | 0.00<br>(0.00 to 0.00)              | 0.00<br>(0.00 to 0.00)          | 0.00<br>(0.00 to 0.00)         | 0.00<br>(0.00 to 0.00)         | 0.00<br>(0.00 to 0.00)         |
| Schistosomiasis                                       | 0.00<br>(0.00 to 0.00)              | 0.00<br>(0.00 to 0.00)              | 0.00<br>(0.00 to 0.00)              | 0.00<br>(0.00 to 0.00)              | 0.00<br>(0.00 to 0.00)          | 0.00<br>(0.00 to 0.00)         | 0.00<br>(0.00 to 0.00)         | 0.00<br>(0.00 to 0.00)         |
| Cysticercosis                                         | 2.11<br>(1.63 to 2.68)              | 0.84<br>(0.62 to 1.11)              | 0.79<br>(0.58 to 1.06)              | 0.86<br>(0.64 to 1.13)              | 0.07<br>(0.05 to 0.09)          | 0.03<br>(0.02 to 0.04)         | 0.03<br>(0.02 to 0.04)         | 0.03<br>(0.02 to 0.04)         |
| Cystic echinococcosis                                 | 0.00<br>(0.00 to 0.00)              | 0.00<br>(0.00 to 0.00)              | 0.00<br>(0.00 to 0.00)              | 0.00<br>(0.00 to 0.00)              | 0.00<br>(0.00 to 0.00)          | 0.00<br>(0.00 to 0.00)         | 0.00<br>(0.00 to 0.00)         | 0.00<br>(0.00 to 0.00)         |
| Dengue                                                | 0.00<br>(0.00 to 0.00)              | 0.00<br>(0.00 to 0.00)              | 0.00<br>(0.00 to 0.00)              | 0.00<br>(0.00 to 0.00)              | 0.00<br>(0.00 to 0.00)          | 0.00<br>(0.00 to 0.00)         | 0.00<br>(0.00 to 0.00)         | 0.00<br>(0.00 to 0.00)         |
| Yellow fever                                          | 0.00<br>(0.00 to 0.00)              | 0.00<br>(0.00 to 0.00)              | 0.00<br>(0.00 to 0.00)              | 0.00<br>(0.00 to 0.00)              | 0.00<br>(0.00 to 0.00)          | 0.00<br>(0.00 to 0.00)         | 0.00<br>(0.00 to 0.00)         | 0.00<br>(0.00 to 0.00)         |
| Rabies                                                | 0.31<br>(0.24 to 0.39)              | 0.30<br>(0.22 to 0.41)              | 0.24<br>(0.17 to 0.31)              | 0.33<br>(0.24 to 0.46)              | 0.01<br>(0.01 to 0.01)          | 0.01<br>(0.01 to 0.01)         | 0.01<br>(0.01 to 0.01)         | 0.01<br>(0.01 to 0.01)         |
| Intestinal nematode infections                        | 0.00<br>(0.00 to 0.00)              | 0.00<br>(0.00 to 0.00)              | 0.00<br>(0.00 to 0.00)              | 0.00<br>(0.00 to 0.00)              | 0.00<br>(0.00 to 0.00)          | 0.00<br>(0.00 to 0.00)         | 0.00<br>(0.00 to 0.00)         | 0.00<br>(0.00 to 0.00)         |
| Other neglected tropical diseases                     | 91.45<br>(51.42 to 117.80)          | 129.27<br>(53.73 to 175.29)         | 144.80<br>(54.03 to 201.38)         | 119.54<br>(52.75 to 159.26)         | 3.33<br>(0.97 to 4.66)          | 5.98<br>(1.25 to 8.47)         | 7.25<br>(10.48)                | 5.23<br>(1.19 to 7.38)         |
| <b>Maternal disorders</b>                             | <b>547.41</b><br>(397.19 to 757.98) | <b>453.53</b><br>(272.55 to 727.09) | <b>339.72</b><br>(197.50 to 555.98) | <b>522.73</b><br>(306.15 to 878.70) | <b>10.23</b><br>(7.45 to 13.99) | <b>8.42</b><br>(5.11 to 13.63) | <b>6.33</b><br>(3.71 to 10.31) | <b>9.70</b><br>(5.72 to 16.16) |
| Maternal hemorrhage                                   | 29.92<br>(17.52 to 48.25)           | 24.93<br>(11.59 to 46.41)           | 18.91<br>(8.82 to 35.45)            | 28.47<br>(13.33 to 53.51)           | 0.55<br>(0.33 to 0.90)          | 0.46<br>(0.22 to 0.87)         | 0.35<br>(0.16 to 0.65)         | 0.53<br>(0.25 to 0.98)         |
| Maternal sepsis and other maternal infections         | 61.12<br>(39.19 to 91.64)           | 47.86<br>(24.50 to 84.77)           | 35.73<br>(17.96 to 63.42)           | 55.27<br>(27.97 to 101.17)          | 1.15<br>(0.73 to 1.73)          | 0.89<br>(0.45 to 1.58)         | 0.67<br>(0.34 to 1.18)         | 1.03<br>(0.52 to 1.87)         |
| Maternal hypertensive disorders                       | 43.09<br>(26.79 to 68.41)           | 36.13<br>(17.80 to 65.34)           | 26.66<br>(13.07 to 49.78)           | 41.80<br>(20.51 to 77.96)           | 0.78<br>(0.48 to 1.23)          | 0.65<br>(0.32 to 1.17)         | 0.48<br>(0.23 to 0.90)         | 0.75<br>(0.37 to 1.37)         |
| Maternal obstructed labor and uterine rupture         | 5.48<br>(2.39 to 10.26)             | 4.82<br>(1.78 to 10.22)             | 3.43<br>(1.23 to 7.26)              | 5.72<br>(2.10 to 12.16)             | 0.10<br>(0.04 to 0.20)          | 0.09<br>(0.03 to 0.19)         | 0.06<br>(0.02 to 0.14)         | 0.11<br>(0.04 to 0.23)         |
| Maternal abortion, miscarriage, and ectopic pregnancy | 99.27<br>(64.64 to 146.66)          | 95.62<br>(45.89 to 174.84)          | 70.61<br>(34.10 to 134.94)          | 110.49<br>(51.79 to 212.57)         | 1.95<br>(1.28 to 2.88)          | 1.87<br>(0.91 to 3.37)         | 1.39<br>(0.68 to 2.65)         | 2.16<br>(1.03 to 4.10)         |

|                                        |                                 |                                |                                |                                |                           |                           |                           |                           |
|----------------------------------------|---------------------------------|--------------------------------|--------------------------------|--------------------------------|---------------------------|---------------------------|---------------------------|---------------------------|
|                                        | 79.78<br>(50.92 to<br>119.96)   | 73.25<br>(35.01 to<br>130.82)  | 52.82<br>(24.60 to<br>97.59)   | 86.24<br>(40.62 to<br>159.44)  | 1.43<br>(0.91 to<br>2.16) | 1.30<br>(0.62 to<br>2.28) | 0.94<br>(0.44 to<br>1.70) | 1.53<br>(0.73 to<br>2.80) |
| Indirect maternal deaths               |                                 |                                |                                |                                |                           |                           |                           |                           |
|                                        | 40.29<br>(23.05 to<br>77.98)    | 19.60<br>(9.03 to<br>42.64)    | 14.17<br>(6.30 to<br>31.27)    | 22.95<br>(10.23 to<br>49.96)   | 0.74<br>(0.43 to<br>1.39) | 0.36<br>(0.17 to<br>0.76) | 0.26<br>(0.12 to<br>0.57) | 0.42<br>(0.19 to<br>0.89) |
| Late maternal deaths                   |                                 |                                |                                |                                |                           |                           |                           |                           |
|                                        | 0.16<br>(0.04 to<br>0.37)       | 0.38<br>(0.03 to<br>1.19)      | 0.14<br>(0.00 to<br>0.51)      | 0.58<br>(0.06 to<br>1.68)      | 0.00<br>(0.00 to<br>0.01) | 0.01<br>(0.00 to<br>0.02) | 0.00<br>(0.00 to<br>0.01) | 0.01<br>(0.00 to<br>0.03) |
| Maternal deaths aggravated by HIV/AIDS |                                 |                                |                                |                                |                           |                           |                           |                           |
|                                        | 188.29<br>(124.90 to<br>269.49) | 150.94<br>(84.83 to<br>251.96) | 117.24<br>(64.37 to<br>201.43) | 171.21<br>(92.81 to<br>290.91) | 3.52<br>(2.33 to<br>5.05) | 2.79<br>(1.56 to<br>4.63) | 2.18<br>(1.21 to<br>3.79) | 3.17<br>(1.72 to<br>5.42) |
| Other maternal disorders               |                                 |                                |                                |                                |                           |                           |                           |                           |

| Israel                                                                  |                                              |                                             |                                            |                                             |                                     |                                    |                                    |                                    |
|-------------------------------------------------------------------------|----------------------------------------------|---------------------------------------------|--------------------------------------------|---------------------------------------------|-------------------------------------|------------------------------------|------------------------------------|------------------------------------|
| Cause                                                                   | YLLs (actual counts)                         |                                             |                                            |                                             | Deaths (actual counts)              |                                    |                                    |                                    |
|                                                                         | 2016                                         | 2040 Forecast                               | 2040 Better Scenario                       | 2040 Worse Scenario                         | 2016                                | 2040 Forecast                      | 2040 Better Scenario               | 2040 Worse Scenario                |
| <b>Neonatal disorders</b>                                               | <b>18,376.66</b><br>(15,510.42 to 21,865.32) | <b>10,523.00</b><br>(5,200.56 to 19,309.16) | <b>7,362.35</b><br>(3,643.09 to 13,619.91) | <b>13,203.90</b><br>(6,447.15 to 24,570.58) | <b>212.45</b><br>(179.31 to 252.80) | <b>121.71</b><br>(60.16 to 223.19) | <b>85.16</b><br>(42.16 to 157.51)  | <b>152.70</b><br>(74.63 to 284.14) |
| Neonatal preterm birth                                                  | 8,706.31<br>(7,160.59 to 10,531.50)          | 3,592.96<br>(1,774.53 to 6,193.31)          | 2,165.37<br>(1,022.07 to 3,824.04)         | 5,432.38<br>(2,583.68 to 9,564.33)          | 100.64<br>(82.78 to 121.72)         | 41.55<br>(20.52 to 71.62)          | 25.04<br>(11.82 to 44.23)          | 62.81<br>(29.88 to 110.56)         |
| Neonatal encephalopathy due to birth asphyxia and trauma                | 3,322.67<br>(2,537.78 to 4,233.78)           | 1,512.91<br>(665.16 to 2,951.65)            | 896.16<br>(396.38 to 1,768.57)             | 1,896.30<br>(822.73 to 3,791.82)            | 38.43<br>(29.37 to 48.96)           | 17.52<br>(7.70 to 34.12)           | 10.38<br>(4.59 to 20.47)           | 21.95<br>(9.54 to 43.85)           |
| Neonatal sepsis and other neonatal infections                           | 1,553.64<br>(810.97 to 4,767.09)             | 1,209.03<br>(468.07 to 3,808.71)            | 804.79<br>(304.99 to 2,637.67)             | 1,429.10<br>(546.83 to 4,590.74)            | 15.65<br>(9.38 to 55.10)            | 13.98<br>(5.41 to 44.03)           | 9.31<br>(2.53 to 30.51)            | 16.53<br>(6.33 to 53.09)           |
| Hemolytic disease and other neonatal jaundice                           | 62.13<br>(37.04 to 94.11)                    | 28.82<br>(10.75 to 68.69)                   | 18.44<br>(6.90 to 44.68)                   | 34.67<br>(12.56 to 85.71)                   | 0.72<br>(0.43 to 1.09)              | 0.33<br>(0.13 to 0.80)             | 0.21<br>(0.08 to 0.52)             | 0.40<br>(0.15 to 0.99)             |
| Other neonatal disorders                                                | 4,931.90<br>(3,816.65 to 6,225.68)           | 4,179.30<br>(1,884.66 to 8,314.63)          | 3,477.59<br>(1,620.44 to 6,848.06)         | 4,411.44<br>(1,973.33 to 8,793.07)          | 57.01<br>(44.13 to 71.97)           | 48.33<br>(21.80 to 96.10)          | 40.22<br>(18.75 to 79.14)          | 51.01<br>(22.84 to 101.62)         |
| <b>Nutritional deficiencies</b>                                         | <b>576.42</b><br>(494.02 to 676.39)          | <b>640.18</b><br>(503.68 to 785.25)         | <b>709.72</b><br>(561.71 to 878.83)        | <b>584.58</b><br>(459.12 to 719.68)         | <b>54.32</b><br>(45.99 to 63.80)    | <b>75.88</b><br>(52.01 to 100.08)  | <b>88.63</b><br>(64.74 to 115.70)  | <b>66.27</b><br>(43.35 to 87.70)   |
| Protein-energy malnutrition                                             | 421.69<br>(299.89 to 504.74)                 | 431.45<br>(262.37 to 582.01)                | 516.83<br>(328.45 to 682.56)               | 376.72<br>(224.58 to 506.31)                | 40.65<br>(24.28 to 50.35)           | 52.65<br>(26.47 to 76.17)          | 66.16<br>(34.99 to 93.19)          | 44.11<br>(21.91 to 64.52)          |
| Iodine deficiency                                                       | 14.33<br>(1.62 to 41.10)                     | 31.55<br>(1.81 to 112.33)                   | 30.68<br>(1.25 to 117.47)                  | 30.77<br>(1.87 to 104.04)                   | 0.83<br>(0.05 to 3.21)              | 3.15<br>(0.05 to 16.07)            | 3.20<br>(0.04 to 16.65)            | 2.95<br>(0.05 to 14.82)            |
| Dietary iron deficiency                                                 | 32.36<br>(22.17 to 41.75)                    | 35.00<br>(21.43 to 48.05)                   | 36.55<br>(21.41 to 50.31)                  | 33.29<br>(20.87 to 44.95)                   | 1.46<br>(0.60 to 2.32)              | 1.87<br>(0.66 to 3.38)             | 2.18<br>(0.71 to 4.02)             | 1.66<br>(0.61 to 2.95)             |
| Other nutritional deficiencies                                          | 108.03<br>(74.02 to 229.83)                  | 142.19<br>(85.12 to 297.45)                 | 125.66<br>(69.39 to 289.85)                | 143.80<br>(85.87 to 291.88)                 | 11.38<br>(7.09 to 27.73)            | 18.21<br>(9.01 to 43.31)           | 17.09<br>(8.46 to 44.61)           | 17.54<br>(8.46 to 40.40)           |
| <b>Other communicable, maternal, neonatal, and nutritional diseases</b> | <b>2,284.12</b><br>(1,833.47 to 2,714.30)    | <b>2,787.03</b><br>(1,955.91 to 3,712.72)   | <b>2,532.71</b><br>(1,742.77 to 3,444.89)  | <b>2,880.74</b><br>(2,038.81 to 3,835.79)   | <b>89.50</b><br>(65.12 to 109.25)   | <b>137.56</b><br>(92.00 to 178.65) | <b>132.61</b><br>(87.74 to 175.41) | <b>156.26</b><br>(92.76 to 177.05) |
| Sexually transmitted infections excluding HIV                           | 50.83<br>(40.36 to 66.33)                    | 33.82<br>(22.12 to 50.80)                   | 29.64<br>(18.94 to 45.18)                  | 35.53<br>(23.91 to 51.60)                   | 2.18<br>(1.70 to 2.89)              | 1.89<br>(1.27 to 2.72)             | 1.77<br>(1.14 to 2.71)             | 1.88<br>(1.28 to 2.70)             |
| Syphilis                                                                | 18.69<br>(14.60 to 24.04)                    | 9.16<br>(6.07 to 13.96)                     | 7.06<br>(4.58 to 10.88)                    | 10.21<br>(6.85 to 15.42)                    | 0.70<br>(0.55 to 0.90)              | 0.47<br>(0.32 to 0.71)             | 0.40<br>(0.26 to 0.61)             | 0.50<br>(0.34 to 0.74)             |
| Chlamydial infection                                                    | 6.22<br>(4.67 to 8.39)                       | 4.83<br>(3.13 to 7.15)                      | 4.43<br>(2.80 to 6.72)                     | 4.94<br>(3.25 to 7.20)                      | 0.30<br>(0.23 to 0.41)              | 0.29<br>(0.19 to 0.44)             | 0.29<br>(0.18 to 0.45)             | 0.28<br>(0.19 to 0.42)             |
| Gonococcal infection                                                    | 17.55<br>(13.19 to 23.95)                    | 13.75<br>(8.97 to 20.74)                    | 12.65<br>(7.91 to 19.82)                   | 14.07<br>(9.14 to 21.01)                    | 0.85<br>(0.65 to 1.18)              | 0.83<br>(0.53 to 1.23)             | 0.81<br>(0.49 to 1.23)             | 0.81<br>(0.53 to 1.19)             |
| Other sexually transmitted infections                                   | 8.37<br>(6.29 to 11.28)                      | 6.09<br>(3.90 to 9.24)                      | 5.50<br>(3.45 to 8.62)                     | 6.31<br>(4.06 to 9.47)                      | 0.32<br>(0.25 to 0.44)              | 0.29<br>(0.19 to 0.43)             | 0.27<br>(0.18 to 0.41)             | 0.28<br>(0.19 to 0.41)             |
| Acute hepatitis                                                         | 358.34<br>(290.75 to 442.76)                 | 377.46<br>(230.12 to 591.66)                | 250.77<br>(143.40 to 399.16)               | 454.47<br>(267.80 to 730.91)                | 14.44<br>(11.49 to 17.74)           | 18.27<br>(11.40 to 28.12)          | 12.53<br>(7.17 to 19.52)           | 21.42<br>(12.94 to 33.77)          |
| Acute hepatitis A                                                       | 33.44<br>(24.54 to 44.71)                    | 24.16<br>(13.96 to 38.38)                   | 17.57<br>(9.94 to 28.57)                   | 27.59<br>(16.19 to 44.12)                   | 0.81<br>(0.59 to 1.12)              | 0.91<br>(0.50 to 1.45)             | 0.70<br>(0.37 to 1.16)             | 1.01<br>(0.56 to 1.62)             |
| Acute hepatitis B                                                       | 262.34<br>(204.24 to 330.05)                 | 287.20<br>(168.10 to 470.39)                | 188.24<br>(105.44 to 310.20)               | 348.93<br>(201.93 to 567.18)                | 10.67<br>(8.28 to 13.63)            | 13.28<br>(7.90 to 21.51)           | 8.91<br>(4.86 to 14.77)            | 15.78<br>(9.11 to 25.74)           |

|                                       |                                                                  |                                                                    |                                                                  |                                                                    |                                                               |                                                               |                                                               |                                                                |
|---------------------------------------|------------------------------------------------------------------|--------------------------------------------------------------------|------------------------------------------------------------------|--------------------------------------------------------------------|---------------------------------------------------------------|---------------------------------------------------------------|---------------------------------------------------------------|----------------------------------------------------------------|
|                                       | 18.11<br>(12.67 to<br>25.29)                                     | 20.08<br>(10.63 to<br>34.61)                                       | 13.49<br>(6.90 to<br>23.23)                                      | 24.04<br>(12.74 to<br>40.80)                                       | 0.80<br>(0.55 to<br>1.13)                                     | 1.00<br>(0.54 to<br>1.69)                                     | 0.69<br>(0.36 to<br>1.15)                                     | 1.17<br>(0.64 to<br>1.95)                                      |
| Acute hepatitis C                     |                                                                  |                                                                    |                                                                  |                                                                    |                                                               |                                                               |                                                               |                                                                |
|                                       | 44.45<br>(31.28 to<br>61.01)                                     | 46.03<br>(24.73 to<br>77.46)                                       | 31.48<br>(16.35 to<br>54.20)                                     | 33.91<br>(28.60 to<br>92.48)                                       | 2.16<br>(1.41 to<br>3.15)                                     | 3.08<br>(1.58 to<br>5.16)                                     | 2.24<br>(1.08 to<br>3.87)                                     | 3.46<br>(1.71 to<br>5.78)                                      |
| Acute hepatitis E                     |                                                                  |                                                                    |                                                                  |                                                                    |                                                               |                                                               |                                                               |                                                                |
|                                       | 1,874.95<br>(1,432.91 to<br>2,246.11)                            | 2,375.74<br>(1,640.02 to<br>3,148.01)                              | 2,252.30<br>(1,539.80 to<br>3,018.60)                            | 2,390.74<br>(1,668.25 to<br>3,142.44)                              | 72.88<br>(48.86 to<br>90.14)                                  | 117.40<br>(75.79 to<br>152.59)                                | 118.31<br>(74.52 to<br>154.97)                                | 112.96<br>(73.23 to<br>144.74)                                 |
| Other unspecified infectious diseases |                                                                  |                                                                    |                                                                  |                                                                    |                                                               |                                                               |                                                               |                                                                |
| <b>Non-communicable diseases</b>      | <b>584,499.24</b><br><b>(497,937.24 to</b><br><b>686,234.47)</b> | <b>780,538.03</b><br><b>(519,462.33 to</b><br><b>1,138,999.15)</b> | <b>619,945.75</b><br><b>(417,126.64 to</b><br><b>909,584.35)</b> | <b>992,505.19</b><br><b>(653,429.80 to</b><br><b>1,437,361.33)</b> | <b>41,044.64</b><br><b>(35,455.48 to</b><br><b>47,673.75)</b> | <b>62,721.83</b><br><b>(44,237.93 to</b><br><b>88,046.21)</b> | <b>51,969.93</b><br><b>(36,304.80 to</b><br><b>73,949.74)</b> | <b>75,626.59</b><br><b>(53,349.18 to</b><br><b>105,830.74)</b> |

| Israel                               |                                             |                                             |                                             |                                             |                                          |                                          |                                          |                                          |
|--------------------------------------|---------------------------------------------|---------------------------------------------|---------------------------------------------|---------------------------------------------|------------------------------------------|------------------------------------------|------------------------------------------|------------------------------------------|
| Cause                                | YLLs (actual counts)                        |                                             |                                             |                                             | Deaths (actual counts)                   |                                          |                                          |                                          |
|                                      | 2016                                        | 2040 Forecast                               | 2040 Better Scenario                        | 2040 Worse Scenario                         | 2016                                     | 2040 Forecast                            | 2040 Better Scenario                     | 2040 Worse Scenario                      |
| Neoplasms                            | 231,231.23<br>(194,437.51 to<br>274,468.86) | 292,632.05<br>(200,560.43 to<br>416,843.94) | 242,570.28<br>(166,420.93 to<br>345,665.38) | 360,737.72<br>(242,796.05 to<br>535,943.18) | 12,553.57<br>(10,681.72 to<br>14,760.69) | 17,962.89<br>(12,834.25 to<br>23,897.05) | 15,419.40<br>(10,882.36 to<br>20,597.51) | 21,222.96<br>(15,153.50 to<br>29,012.60) |
| Lip and oral cavity cancer           | 1,683.51<br>(1,375.02 to<br>2,056.99)       | 2,063.08<br>(1,115.44 to<br>3,538.42)       | 1,290.62<br>(744.30 to<br>2,106.87)         | 3,084.20<br>(1,562.96 to<br>5,461.27)       | 91.33<br>(76.42 to<br>109.22)            | 119.38<br>(69.70 to<br>190.54)           | 78.19<br>(50.04 to<br>117.56)            | 170.69<br>(94.84 to<br>280.66)           |
| Nasopharynx cancer                   | 736.30<br>(588.71 to<br>914.85)             | 1,266.33<br>(665.21 to<br>2,306.75)         | 687.01<br>(379.66 to<br>1,191.02)           | 1,996.39<br>(973.21 to<br>3,745.18)         | 35.02<br>(28.26 to<br>42.95)             | 67.15<br>(37.06 to<br>112.23)            | 37.79<br>(22.05 to<br>60.58)             | 100.45<br>(50.74 to<br>174.61)           |
| Other pharynx cancer                 | 594.75<br>(481.27 to<br>730.18)             | 923.97<br>(508.34 to<br>1,620.46)           | 750.17<br>(445.05 to<br>1,211.11)           | 938.29<br>(503.84 to<br>1,633.20)           | 24.73<br>(20.33 to<br>29.95)             | 42.04<br>(24.23 to<br>69.79)             | 35.33<br>(21.97 to<br>55.09)             | 41.69<br>(23.83 to<br>69.06)             |
| Esophageal cancer                    | 2,473.67<br>(2,005.43 to<br>3,024.81)       | 3,532.57<br>(1,919.29 to<br>6,115.01)       | 2,577.97<br>(1,512.70 to<br>4,214.27)       | 4,895.67<br>(2,454.88 to<br>9,061.21)       | 150.05<br>(124.64 to<br>180.32)          | 227.16<br>(137.14 to<br>369.21)          | 171.79<br>(110.12 to<br>261.51)          | 301.20<br>(171.34 to<br>510.75)          |
| Stomach cancer                       | 11,622.47<br>(9,627.51 to<br>14,086.82)     | 10,065.12<br>(6,449.59 to<br>15,215.48)     | 7,214.66<br>(4,668.29 to<br>10,523.22)      | 12,261.42<br>(7,715.02 to<br>18,697.66)     | 675.31<br>(566.04 to<br>800.77)          | 668.60<br>(455.09 to<br>954.44)          | 495.33<br>(339.76 to<br>683.24)          | 782.59<br>(509.21 to<br>1,121.43)        |
| Colon and rectum cancer              | 25,470.94<br>(21,143.76 to<br>30,434.03)    | 37,270.58<br>(21,965.59 to<br>57,098.91)    | 28,117.57<br>(16,506.43 to<br>42,241.04)    | 43,517.92<br>(25,390.52 to<br>67,682.70)    | 1,645.70<br>(1,388.38 to<br>1,956.40)    | 2,726.76<br>(1,715.63 to<br>4,047.55)    | 2,146.22<br>(1,351.67 to<br>3,138.66)    | 3,068.27<br>(1,934.49 to<br>4,650.63)    |
| Liver cancer                         | 6,636.91<br>(5,384.66 to<br>8,117.98)       | 10,814.32<br>(6,190.14 to<br>17,636.15)     | 10,078.92<br>(5,904.98 to<br>16,167.23)     | 12,966.70<br>(6,918.22 to<br>22,144.59)     | 364.03<br>(300.98 to<br>439.36)          | 650.81<br>(404.70 to<br>1,007.23)        | 628.27<br>(396.80 to<br>953.08)          | 747.16<br>(436.90 to<br>1,196.12)        |
| Liver cancer due to hepatitis B      | 1,244.27<br>(830.57 to<br>1,790.77)         | 1,881.49<br>(1,005.37 to<br>3,412.84)       | 1,794.83<br>(959.47 to<br>3,120.57)         | 2,262.35<br>(1,125.27 to<br>4,268.29)       | 56.68<br>(36.77 to<br>80.76)             | 94.60<br>(50.65 to<br>162.41)            | 92.78<br>(51.48 to<br>154.97)            | 109.41<br>(56.59 to<br>193.61)           |
| Liver cancer due to hepatitis C      | 2,329.45<br>(1,756.12 to<br>3,065.14)       | 3,796.48<br>(2,103.12 to<br>6,336.92)       | 3,682.22<br>(2,077.50 to<br>6,020.78)       | 4,429.18<br>(2,340.95 to<br>7,779.27)       | 143.66<br>(109.40 to<br>185.85)          | 256.82<br>(152.44 to<br>410.87)          | 256.89<br>(154.03 to<br>393.90)          | 286.46<br>(162.98 to<br>472.92)          |
| Liver cancer due to alcohol use      | 1,504.28<br>(1,040.83 to<br>2,114.93)       | 2,580.38<br>(1,358.10 to<br>4,772.97)       | 2,148.84<br>(1,170.10 to<br>3,834.21)       | 3,187.75<br>(1,563.98 to<br>6,108.28)       | 79.34<br>(55.17 to<br>110.00)            | 145.42<br>(80.72 to<br>254.62)           | 126.28<br>(72.37 to<br>213.95)           | 172.08<br>(88.93 to<br>313.73)           |
| Liver cancer due to other causes     | 1,558.91<br>(1,100.68 to<br>2,172.77)       | 2,555.96<br>(1,335.48 to<br>4,462.03)       | 2,453.03<br>(1,306.54 to<br>4,136.27)       | 3,087.42<br>(1,527.46 to<br>5,658.39)       | 84.35<br>(59.45 to<br>118.15)            | 153.97<br>(83.02 to<br>256.87)           | 152.31<br>(84.24 to<br>247.90)           | 179.21<br>(90.73 to<br>304.15)           |
| Gallbladder and biliary tract cancer | 2,004.53<br>(1,619.79 to<br>2,968.70)       | 2,314.88<br>(1,600.94 to<br>3,557.14)       | 2,236.40<br>(1,532.35 to<br>3,471.17)       | 2,280.93<br>(1,626.27 to<br>3,503.10)       | 128.91<br>(105.34 to<br>186.73)          | 166.78<br>(125.34 to<br>241.39)          | 167.05<br>(122.41 to<br>251.61)          | 158.78<br>(121.14 to<br>222.37)          |
| Pancreatic cancer                    | 17,482.68<br>(14,503.97 to<br>21,043.48)    | 24,577.74<br>(15,976.19 to<br>36,920.67)    | 23,733.42<br>(15,356.98 to<br>35,371.39)    | 27,696.55<br>(17,469.81 to<br>42,421.81)    | 1,014.88<br>(854.86 to<br>1,206.74)      | 1,536.38<br>(1,033.11 to<br>2,205.11)    | 1,520.85<br>(1,017.02 to<br>2,179.01)    | 1,679.30<br>(1,113.26 to<br>2,464.90)    |
| Larynx cancer                        | 1,532.57<br>(1,172.86 to<br>1,904.49)       | 1,523.59<br>(699.85 to<br>2,947.17)         | 850.31<br>(408.73 to<br>1,612.28)           | 2,657.57<br>(1,129.91 to<br>5,424.17)       | 81.35<br>(64.27 to<br>99.61)             | 87.86<br>(42.05 to<br>161.59)            | 50.50<br>(26.15 to<br>86.93)             | 145.26<br>(67.97 to<br>279.52)           |
| Tracheal, bronchus, and lung cancer  | 41,047.66<br>(33,519.10 to<br>50,156.72)    | 42,553.74<br>(24,287.28 to<br>71,813.95)    | 27,357.17<br>(16,186.04 to<br>45,685.34)    | 80,004.39<br>(44,099.89 to<br>138,848.92)   | 2,150.79<br>(1,771.51 to<br>2,602.55)    | 2,389.74<br>(1,440.17 to<br>3,782.85)    | 1,604.19<br>(989.34 to<br>2,477.71)      | 4,321.21<br>(2,484.61 to<br>7,143.49)    |
| Malignant skin melanoma              | 5,487.18<br>(4,327.26 to<br>7,336.63)       | 8,107.22<br>(5,668.75 to<br>11,567.85)      | 9,695.47<br>(6,695.43 to<br>13,848.36)      | 7,290.22<br>(5,259.68 to<br>10,453.82)      | 251.76<br>(203.29 to<br>314.82)          | 416.46<br>(310.29 to<br>545.41)          | 512.73<br>(374.40 to<br>678.56)          | 362.80<br>(277.51 to<br>472.16)          |
| Non-melanoma skin cancer             | 1,582.55<br>(1,304.47 to<br>1,892.37)       | 2,060.73<br>(1,530.05 to<br>2,664.29)       | 1,642.23<br>(1,173.84 to<br>2,164.38)       | 2,207.87<br>(1,620.06 to<br>2,844.45)       | 123.28<br>(104.37 to<br>143.76)          | 174.50<br>(134.25 to<br>217.02)          | 145.81<br>(110.50 to<br>184.60)          | 178.97<br>(135.76 to<br>224.37)          |
| Breast cancer                        | 24,265.37<br>(18,913.35 to<br>31,641.33)    | 29,277.24<br>(15,698.03 to<br>48,585.37)    | 21,940.86<br>(11,866.63 to<br>36,778.74)    | 34,069.94<br>(17,925.21 to<br>57,601.21)    | 1,173.06<br>(929.94 to<br>1,507.93)      | 1,615.95<br>(916.75 to<br>2,545.17)      | 1,263.88<br>(739.03 to<br>2,023.39)      | 1,826.19<br>(1,032.13 to<br>2,941.96)    |
| Cervical cancer                      | 3,103.31<br>(2,362.57 to<br>4,050.18)       | 2,564.06<br>(1,432.41 to<br>4,371.13)       | 1,911.46<br>(1,084.56 to<br>3,167.81)       | 3,078.83<br>(1,706.57 to<br>5,121.03)       | 141.18<br>(109.77 to<br>181.43)          | 133.07<br>(78.62 to<br>208.17)           | 102.01<br>(61.58 to<br>153.04)           | 155.82<br>(90.64 to<br>247.15)           |





| Israel                          |                                                 |                                                |                                               |                                                 |                                              |                                             |                                            |                                              |
|---------------------------------|-------------------------------------------------|------------------------------------------------|-----------------------------------------------|-------------------------------------------------|----------------------------------------------|---------------------------------------------|--------------------------------------------|----------------------------------------------|
| Cause                           | YLLs (actual counts)                            |                                                |                                               |                                                 | Deaths (actual counts)                       |                                             |                                            |                                              |
|                                 | 2016                                            | 2040 Forecast                                  | 2040 Better Scenario                          | 2040 Worse Scenario                             | 2016                                         | 2040 Forecast                               | 2040 Better Scenario                       | 2040 Worse Scenario                          |
| Kidney cancer                   | 5,182.89<br>(4,258.59 to 6,243.07)              | 7,926.22<br>(5,325.30 to 11,107.18)            | 7,838.44<br>(5,354.26 to 10,899.63)           | 8,436.01<br>(5,541.47 to 12,185.83)             | 289.91<br>(242.36 to 344.31)                 | 488.37<br>(354.25 to 636.26)                | 500.57<br>(361.28 to 647.01)               | 498.48<br>(360.42 to 663.00)                 |
| Bladder cancer                  | 5,633.98<br>(4,571.61 to 6,844.98)              | 7,207.30<br>(4,701.08 to 10,541.24)            | 6,223.45<br>(4,042.57 to 8,885.29)            | 8,742.60<br>(5,470.55 to 13,242.99)             | 427.00<br>(356.18 to 509.24)                 | 605.28<br>(423.74 to 847.60)                | 538.97<br>(375.40 to 736.14)               | 699.50<br>(473.93 to 1,020.41)               |
| Brain and nervous system cancer | 12,959.02<br>(9,831.19 to 15,964.22)            | 16,140.02<br>(10,710.84 to 22,184.78)          | 14,436.70<br>(9,369.42 to 20,127.07)          | 16,683.71<br>(10,971.59 to 22,627.99)           | 445.70<br>(308.94 to 547.55)                 | 638.89<br>(396.12 to 864.04)                | 589.69<br>(363.36 to 805.04)               | 644.64<br>(402.81 to 865.25)                 |
| Thyroid cancer                  | 1,172.22<br>(951.84 to 1,414.46)                | 1,568.26<br>(980.20 to 2,363.27)               | 1,298.72<br>(822.23 to 1,952.39)              | 1,780.09<br>(1,106.45 to 2,760.50)              | 68.44<br>(56.20 to 82.25)                    | 101.06<br>(66.35 to 146.25)                 | 86.39<br>(56.08 to 124.03)                 | 110.57<br>(72.53 to 162.09)                  |
| Mesothelioma                    | 962.96<br>(760.37 to 1,282.12)                  | 1,423.17<br>(984.19 to 2,126.20)               | 1,455.51<br>(996.15 to 2,228.09)              | 1,370.33<br>(959.54 to 2,019.09)                | 47.74<br>(38.07 to 69.12)                    | 78.31<br>(57.40 to 123.93)                  | 82.29<br>(58.84 to 129.87)                 | 73.36<br>(54.66 to 113.19)                   |
| Hodgkin lymphoma                | 1,184.41<br>(963.55 to 1,481.36)                | 1,083.36<br>(735.31 to 1,530.43)               | 772.44<br>(522.13 to 1,113.23)                | 1,258.74<br>(851.92 to 1,839.69)                | 36.46<br>(29.90 to 45.25)                    | 37.93<br>(26.56 to 52.99)                   | 27.75<br>(19.15 to 39.01)                  | 42.96<br>(30.28 to 61.50)                    |
| Non-Hodgkin lymphoma            | 11,287.94<br>(9,147.28 to 13,843.17)            | 14,134.07<br>(9,608.83 to 19,937.17)           | 12,093.23<br>(7,945.62 to 16,962.73)          | 15,290.49<br>(10,309.20 to 21,744.77)           | 589.40<br>(482.20 to 715.29)                 | 851.09<br>(601.72 to 1,132.20)              | 755.38<br>(521.13 to 1,014.35)             | 888.21<br>(625.76 to 1,198.29)               |
| Multiple myeloma                | 4,692.37<br>(3,601.46 to 6,225.77)              | 6,671.30<br>(4,393.95 to 9,845.39)             | 6,078.32<br>(3,919.44 to 9,004.44)            | 7,022.46<br>(4,606.63 to 10,413.83)             | 271.86<br>(216.20 to 363.25)                 | 427.77<br>(295.94 to 609.70)                | 402.67<br>(274.64 to 570.86)               | 435.25<br>(302.85 to 617.79)                 |
| Leukemia                        | 13,801.66<br>(11,676.10 to 16,520.83)           | 18,379.25<br>(12,630.02 to 25,571.85)          | 16,009.07<br>(10,803.20 to 22,271.39)         | 20,880.62<br>(13,844.01 to 29,933.03)           | 681.85<br>(577.27 to 810.67)                 | 1,068.94<br>(756.68 to 1,431.55)            | 966.81<br>(674.52 to 1,287.98)             | 1,168.63<br>(813.73 to 1,598.78)             |
| Acute lymphoid leukemia         | 1,819.53<br>(1,481.10 to 2,258.14)              | 1,733.79<br>(1,158.75 to 2,505.93)             | 1,373.52<br>(904.09 to 2,002.25)              | 2,032.08<br>(1,333.48 to 2,982.60)              | 47.19<br>(38.07 to 57.89)                    | 53.17<br>(36.27 to 75.19)                   | 43.33<br>(29.51 to 61.68)                  | 61.88<br>(40.98 to 89.35)                    |
| Chronic lymphoid leukemia       | 2,652.05<br>(2,110.92 to 3,469.06)              | 3,547.02<br>(2,286.70 to 5,248.97)             | 3,233.23<br>(2,076.55 to 4,741.99)            | 3,919.30<br>(2,485.97 to 6,027.34)              | 195.44<br>(160.52 to 246.27)                 | 286.53<br>(199.95 to 393.53)                | 270.11<br>(188.04 to 372.38)               | 302.84<br>(208.99 to 423.89)                 |
| Acute myeloid leukemia          | 6,111.63<br>(4,813.68 to 7,437.64)              | 8,706.53<br>(5,793.26 to 12,355.89)            | 8,026.26<br>(5,389.03 to 11,367.46)           | 9,649.81<br>(6,318.97 to 13,873.58)             | 273.16<br>(214.52 to 329.99)                 | 448.84<br>(306.39 to 611.02)                | 427.80<br>(292.09 to 578.90)               | 482.16<br>(321.87 to 662.04)                 |
| Chronic myeloid leukemia        | 785.90<br>(631.29 to 966.18)                    | 587.51<br>(364.13 to 880.59)                   | 380.92<br>(237.77 to 564.30)                  | 771.62<br>(471.73 to 1,176.83)                  | 45.58<br>(37.11 to 55.11)                    | 39.43<br>(26.17 to 57.41)                   | 26.67<br>(17.67 to 37.11)                  | 49.19<br>(32.31 to 71.07)                    |
| Other leukemia                  | 2,432.55<br>(1,943.70 to 3,005.35)              | 3,804.41<br>(2,494.65 to 5,458.23)             | 2,995.14<br>(1,981.73 to 4,371.28)            | 4,507.81<br>(2,935.58 to 6,725.96)              | 120.48<br>(95.86 to 151.05)                  | 240.96<br>(166.95 to 336.34)                | 198.91<br>(135.97 to 281.06)               | 272.57<br>(187.13 to 391.09)                 |
| Other neoplasms                 | 12,183.40<br>(10,153.88 to 14,526.01)           | 16,840.61<br>(12,498.02 to 21,823.86)          | 16,296.38<br>(11,943.33 to 21,409.31)         | 16,625.95<br>(12,332.28 to 21,451.58)           | 580.37<br>(488.52 to 689.22)                 | 972.46<br>(748.74 to 1,207.79)              | 991.67<br>(750.71 to 1,249.50)             | 919.66<br>(720.96 to 1,126.42)               |
| <b>Cardiovascular diseases</b>  | <b>146,015.51</b><br>(123,263.83 to 173,841.86) | <b>159,900.23</b><br>(91,920.40 to 267,016.01) | <b>95,280.31</b><br>(57,107.39 to 153,340.50) | <b>245,372.83</b><br>(135,940.94 to 412,390.27) | <b>12,571.71</b><br>(10,861.60 to 14,567.27) | <b>15,184.50</b><br>(9,350.47 to 24,382.02) | <b>9,972.91</b><br>(6,239.74 to 15,015.31) | <b>20,889.83</b><br>(12,381.56 to 32,877.30) |
| Rheumatic heart disease         | 3,268.02<br>(2,700.45 to 3,984.68)              | 2,454.89<br>(1,595.51 to 3,685.33)             | 1,817.84<br>(1,167.89 to 2,748.35)            | 2,775.67<br>(1,810.96 to 4,169.40)              | 215.84<br>(181.59 to 258.71)                 | 195.89<br>(136.41 to 283.01)                | 152.42<br>(104.22 to 216.79)               | 211.95<br>(145.45 to 299.10)                 |
| Ischemic heart disease          | 80,097.50<br>(67,108.63 to 95,779.79)           | 85,322.36<br>(42,087.73 to 165,874.81)         | 43,544.23<br>(22,498.27 to 82,267.52)         | 145,675.62<br>(69,598.97 to 282,526.23)         | 6,948.71<br>(5,961.05 to 8,078.74)           | 7,980.96<br>(4,126.93 to 14,531.57)         | 4,553.08<br>(2,396.04 to 8,012.52)         | 12,114.14<br>(6,073.35 to 22,157.20)         |
| Stroke                          | 32,302.46<br>(26,782.05 to 38,625.94)           | 29,180.32<br>(15,749.81 to 52,557.18)          | 15,859.63<br>(8,798.63 to 26,971.80)          | 47,218.52<br>(25,010.41 to 88,344.26)           | 2,739.61<br>(2,317.77 to 3,226.36)           | 2,713.20<br>(1,525.51 to 4,923.58)          | 1,642.41<br>(942.50 to 2,857.86)           | 3,908.76<br>(2,180.09 to 7,353.65)           |
| Ischemic stroke                 | 13,545.55<br>(11,244.15 to 16,149.07)           | 12,090.68<br>(5,887.43 to 28,663.32)           | 7,349.94<br>(3,618.64 to 16,874.44)           | 18,132.63<br>(8,679.45 to 44,903.50)            | 1,368.16<br>(1,150.63 to 1,620.55)           | 1,318.36<br>(643.49 to 2,978.27)            | 865.05<br>(430.62 to 1,858.35)             | 1,802.18<br>(872.73 to 4,476.28)             |

|                                |                                          |                                         |                                        |                                          |                                       |                                     |                                   |                                       |
|--------------------------------|------------------------------------------|-----------------------------------------|----------------------------------------|------------------------------------------|---------------------------------------|-------------------------------------|-----------------------------------|---------------------------------------|
|                                | 18,756.91<br>(15,587.16 to<br>22,598.94) | 17,089.64<br>(8,930.51 to<br>29,926.92) | 8,509.69<br>(4,883.09 to<br>14,171.49) | 29,085.88<br>(14,565.07 to<br>53,831.98) | 1,371.45<br>(1,155.70 to<br>1,628.06) | 1,394.83<br>(806.82 to<br>2,244.80) | 777.36<br>(467.66 to<br>1,211.18) | 2,106.58<br>(1,172.21 to<br>3,651.75) |
| Intracerebral hemorrhage       |                                          |                                         |                                        |                                          |                                       |                                     |                                   |                                       |
|                                | 2,730.12<br>(1,728.98 to<br>5,713.61)    | 5,713.41<br>(2,524.08 to<br>13,176.03)  | 4,167.83<br>(2,084.71 to<br>9,088.62)  | 7,101.51<br>(2,943.44 to<br>17,038.70)   | 246.22<br>(176.42 to<br>444.83)       | 600.74<br>(298.35 to<br>1,327.36)   | 468.00<br>(257.82 to<br>946.46)   | 703.87<br>(327.42 to<br>1,569.38)     |
| Hypertensive heart disease     |                                          |                                         |                                        |                                          |                                       |                                     |                                   |                                       |
|                                | 3,856.66<br>(3,108.06 to<br>5,242.66)    | 4,045.88<br>(2,609.38 to<br>6,425.42)   | 2,881.75<br>(1,867.75 to<br>4,265.19)  | 4,758.14<br>(2,997.75 to<br>7,261.07)    | 228.63<br>(185.94 to<br>296.30)       | 283.40<br>(181.98 to<br>450.78)     | 212.86<br>(138.46 to<br>326.64)   | 317.55<br>(204.55 to<br>492.92)       |
| Cardiomyopathy and myocarditis |                                          |                                         |                                        |                                          |                                       |                                     |                                   |                                       |
|                                | 717.62<br>(513.72 to<br>1,157.35)        | 895.99<br>(573.42 to<br>1,498.18)       | 840.63<br>(543.91 to<br>1,407.70)      | 904.17<br>(582.67 to<br>1,524.38)        | 36.43<br>(23.20 to<br>71.86)          | 58.40<br>(34.34 to<br>115.41)       | 58.91<br>(34.26 to<br>115.52)     | 55.28<br>(33.00 to<br>111.85)         |
| Myocarditis                    |                                          |                                         |                                        |                                          |                                       |                                     |                                   |                                       |

| Israel                                                        |                                                     |                                                     |                                                     |                                                     |                                                  |                                                  |                                                  |                                                  |
|---------------------------------------------------------------|-----------------------------------------------------|-----------------------------------------------------|-----------------------------------------------------|-----------------------------------------------------|--------------------------------------------------|--------------------------------------------------|--------------------------------------------------|--------------------------------------------------|
| Cause                                                         | YLLs (actual counts)                                |                                                     |                                                     |                                                     | Deaths (actual counts)                           |                                                  |                                                  |                                                  |
|                                                               | 2016                                                | 2040 Forecast                                       | 2040 Better Scenario                                | 2040 Worse Scenario                                 | 2016                                             | 2040 Forecast                                    | 2040 Better Scenario                             | 2040 Worse Scenario                              |
| Alcoholic cardiomyopathy                                      | 156.29<br>(88.23 to 252.38)                         | 161.70<br>(81.96 to 264.91)                         | 135.59<br>(68.98 to 221.91)                         | 168.49<br>(84.25 to 274.32)                         | 5.97<br>(3.08 to 8.75)                           | 6.70<br>(3.19 to 10.15)                          | 5.79<br>(2.71 to 8.89)                           | 6.82<br>(3.28 to 10.30)                          |
| Other cardiomyopathy                                          | 2,982.75<br>(2,397.39 to 3,934.10)                  | 2,988.19<br>(1,810.03 to 4,930.64)                  | 1,905.53<br>(1,152.15 to 2,935.69)                  | 3,685.47<br>(2,163.73 to 5,787.24)                  | 186.24<br>(152.21 to 227.92)                     | 218.30<br>(128.15 to 359.89)                     | 148.16<br>(85.56 to 241.65)                      | 255.45<br>(150.83 to 414.28)                     |
| Atrial fibrillation and flutter                               | 4,693.66<br>(3,544.53 to 6,157.56)                  | 7,417.58<br>(4,932.38 to 10,394.21)                 | 6,669.10<br>(4,388.43 to 9,319.76)                  | 7,660.41<br>(5,052.80 to 10,866.56)                 | 559.14<br>(422.36 to 734.39)                     | 918.79<br>(611.14 to 1,301.10)                   | 859.94<br>(570.24 to 1,200.80)                   | 908.43<br>(603.42 to 1,297.16)                   |
| Aortic aneurysm                                               | 2,720.52<br>(2,247.43 to 3,305.99)                  | 3,165.22<br>(2,095.74 to 4,542.51)                  | 2,698.65<br>(1,790.22 to 3,879.79)                  | 3,528.21<br>(2,328.25 to 5,170.61)                  | 201.95<br>(170.64 to 240.29)                     | 268.00<br>(189.26 to 361.05)                     | 244.35<br>(173.77 to 329.71)                     | 277.92<br>(198.28 to 378.56)                     |
| Peripheral artery disease                                     | 2,606.85<br>(1,750.68 to 3,635.56)                  | 4,737.95<br>(2,702.78 to 7,202.14)                  | 4,610.13<br>(2,640.20 to 7,094.79)                  | 5,311.02<br>(3,019.68 to 8,203.51)                  | 261.44<br>(183.55 to 379.06)                     | 522.53<br>(309.56 to 811.36)                     | 535.33<br>(314.68 to 836.30)                     | 546.11<br>(321.58 to 854.51)                     |
| Endocarditis                                                  | 2,008.95<br>(1,504.14 to 2,862.43)                  | 2,930.44<br>(1,800.58 to 4,644.52)                  | 2,688.64<br>(1,670.35 to 4,199.11)                  | 3,037.68<br>(1,863.24 to 4,813.34)                  | 134.92<br>(99.08 to 188.14)                      | 223.13<br>(137.79 to 355.16)                     | 215.38<br>(131.76 to 342.08)                     | 220.95<br>(135.00 to 353.70)                     |
| Other cardiovascular and circulatory diseases                 | 11,730.77<br>(9,811.92 to 14,066.09)                | 14,932.18<br>(9,766.52 to 21,852.81)                | 10,342.51<br>(6,771.93 to 14,524.85)                | 18,206.04<br>(11,779.70 to 26,627.77)               | 1,035.25<br>(873.55 to 1,226.99)                 | 1,477.87<br>(986.39 to 2,073.63)                 | 1,089.14<br>(735.76 to 1,505.13)                 | 1,680.16<br>(1,120.88 to 2,394.99)               |
| <b>Chronic respiratory diseases</b>                           | <b>23,855.43</b><br><b>(20,023.12 to 28,527.86)</b> | <b>27,243.26</b><br><b>(18,049.85 to 40,589.12)</b> | <b>20,799.60</b><br><b>(13,845.19 to 29,677.03)</b> | <b>42,679.76</b><br><b>(26,885.19 to 66,408.51)</b> | <b>1,883.79</b><br><b>(1,610.45 to 2,210.92)</b> | <b>2,363.19</b><br><b>(1,655.89 to 3,271.63)</b> | <b>1,826.42</b><br><b>(1,284.13 to 2,479.02)</b> | <b>3,521.86</b><br><b>(2,373.21 to 5,017.07)</b> |
| Chronic obstructive pulmonary disease                         | 18,934.51<br>(15,824.71 to 22,726.76)               | 21,315.89<br>(13,213.91 to 33,013.30)               | 13,943.03<br>(8,682.44 to 20,970.51)                | 36,780.12<br>(22,014.27 to 57,971.79)               | 1,596.66<br>(1,360.54 to 1,876.39)               | 1,964.08<br>(1,302.07 to 2,803.71)               | 1,344.59<br>(885.41 to 1,887.31)                 | 3,141.14<br>(2,029.70 to 4,598.44)               |
| Pneumoconiosis                                                | 102.07<br>(78.25 to 130.89)                         | 77.57<br>(53.71 to 106.00)                          | 79.13<br>(53.03 to 109.94)                          | 78.76<br>(55.75 to 107.87)                          | 5.38<br>(4.28 to 6.65)                           | 5.55<br>(3.99 to 7.29)                           | 5.93<br>(4.23 to 7.92)                           | 5.37<br>(3.94 to 7.00)                           |
| Silicosis                                                     | 42.08<br>(22.20 to 57.37)                           | 11.32<br>(5.27 to 21.03)                            | 6.68<br>(3.07 to 12.20)                             | 14.80<br>(6.67 to 26.61)                            | 1.64<br>(1.10 to 2.21)                           | 0.61<br>(0.33 to 1.07)                           | 0.40<br>(0.20 to 0.73)                           | 0.75<br>(0.38 to 1.27)                           |
| Asbestosis                                                    | 32.37<br>(23.24 to 48.48)                           | 40.56<br>(28.01 to 55.99)                           | 48.78<br>(33.04 to 68.01)                           | 36.16<br>(25.34 to 49.08)                           | 1.73<br>(1.22 to 2.36)                           | 2.61<br>(1.75 to 3.62)                           | 3.25<br>(2.21 to 4.41)                           | 2.23<br>(1.51 to 3.03)                           |
| Coal workers pneumoconiosis                                   | 4.64<br>(3.11 to 10.16)                             | 5.73<br>(2.83 to 11.16)                             | 5.38<br>(2.57 to 10.17)                             | 6.19<br>(3.17 to 12.80)                             | 0.35<br>(0.23 to 0.87)                           | 0.55<br>(0.26 to 1.13)                           | 0.56<br>(0.27 to 1.07)                           | 0.55<br>(0.27 to 1.21)                           |
| Other pneumoconiosis                                          | 22.98<br>(17.00 to 30.44)                           | 19.95<br>(12.31 to 28.84)                           | 18.29<br>(11.08 to 27.93)                           | 21.61<br>(13.54 to 30.95)                           | 1.66<br>(1.23 to 2.12)                           | 1.78<br>(1.17 to 2.61)                           | 1.72<br>(1.08 to 2.62)                           | 1.84<br>(1.20 to 2.65)                           |
| Asthma                                                        | 2,019.38<br>(1,653.41 to 2,447.93)                  | 1,146.82<br>(605.39 to 2,027.35)                    | 665.93<br>(347.60 to 1,143.74)                      | 1,735.58<br>(878.80 to 3,166.81)                    | 120.75<br>(97.91 to 146.38)                      | 83.74<br>(44.43 to 146.78)                       | 52.21<br>(27.77 to 89.47)                        | 117.66<br>(61.06 to 208.80)                      |
| Interstitial lung disease and pulmonary sarcoidosis           | 2,279.67<br>(1,615.80 to 3,063.32)                  | 4,124.98<br>(2,766.14 to 5,790.65)                  | 5,571.70<br>(3,763.05 to 7,877.72)                  | 3,477.75<br>(2,298.72 to 5,007.56)                  | 142.34<br>(106.36 to 198.82)                     | 284.92<br>(196.26 to 399.73)                     | 398.95<br>(285.47 to 548.85)                     | 222.13<br>(165.32 to 334.93)                     |
| Other chronic respiratory diseases                            | 519.80<br>(364.72 to 705.66)                        | 578.00<br>(383.93 to 841.12)                        | 539.81<br>(357.53 to 795.27)                        | 607.55<br>(400.01 to 904.32)                        | 18.66<br>(12.35 to 26.18)                        | 24.90<br>(15.43 to 37.34)                        | 24.75<br>(15.64 to 37.45)                        | 25.56<br>(15.80 to 38.12)                        |
| <b>Cirrhosis and other chronic liver diseases</b>             | <b>12,991.93</b><br><b>(10,695.79 to 15,846.58)</b> | <b>15,948.63</b><br><b>(11,016.23 to 21,988.74)</b> | <b>12,372.33</b><br><b>(8,462.13 to 17,370.66)</b>  | <b>17,408.81</b><br><b>(12,149.50 to 24,101.75)</b> | <b>677.76</b><br><b>(570.89 to 808.12)</b>       | <b>940.96</b><br><b>(697.15 to 1,202.91)</b>     | <b>760.30</b><br><b>(549.57 to 976.46)</b>       | <b>991.51</b><br><b>(742.17 to 1,268.78)</b>     |
| Cirrhosis and other chronic liver diseases due to hepatitis B | 1,908.20<br>(1,399.12 to 2,569.39)                  | 2,312.29<br>(1,521.64 to 3,406.17)                  | 1,915.20<br>(1,227.21 to 2,850.94)                  | 2,481.32<br>(1,622.93 to 3,669.12)                  | 100.87<br>(75.43 to 133.08)                      | 137.37<br>(92.81 to 194.99)                      | 117.64<br>(76.83 to 170.13)                      | 142.49<br>(96.40 to 205.27)                      |
| Cirrhosis and other chronic liver diseases due to hepatitis C | 4,317.47<br>(3,181.45 to 5,782.23)                  | 5,286.48<br>(3,432.78 to 7,701.70)                  | 4,299.65<br>(2,740.02 to 6,346.24)                  | 5,735.97<br>(3,696.11 to 8,387.50)                  | 216.30<br>(158.61 to 285.97)                     | 297.62<br>(202.25 to 416.78)                     | 249.94<br>(163.78 to 358.59)                     | 312.68<br>(211.42 to 439.20)                     |

|                                                                |                                                               |                                                               |                                                               |                                                               |                                                          |                                                            |                                                            |                                                            |
|----------------------------------------------------------------|---------------------------------------------------------------|---------------------------------------------------------------|---------------------------------------------------------------|---------------------------------------------------------------|----------------------------------------------------------|------------------------------------------------------------|------------------------------------------------------------|------------------------------------------------------------|
|                                                                | 5,722.80<br>(4,425.79 to<br>7,170.60)                         | 7,218.43<br>(4,927.56 to<br>10,155.77)                        | 5,234.57<br>(3,498.63 to<br>7,567.12)                         | 7,972.79<br>(5,460.38 to<br>11,359.01)                        | 309.75<br>(244.47 to<br>383.65)                          | 437.54<br>(316.28 to<br>574.35)                            | 333.96<br>(235.56 to<br>445.69)                            | 465.62<br>(336.46 to<br>615.36)                            |
| Cirrhosis and other chronic liver diseases due to alcohol use  |                                                               |                                                               |                                                               |                                                               |                                                          |                                                            |                                                            |                                                            |
|                                                                | 1,043.47<br>(781.75 to<br>1,381.92)                           | 1,131.44<br>(727.53 to<br>1,706.76)                           | 922.91<br>(575.41 to<br>1,401.62)                             | 1,218.73<br>(794.04 to<br>1,834.43)                           | 50.84<br>(34.73 to<br>74.46)                             | 68.43<br>(42.75 to<br>105.75)                              | 58.76<br>(36.22 to<br>93.23)                               | 70.72<br>(44.36 to<br>107.69)                              |
| Cirrhosis and other chronic liver diseases due to other causes |                                                               |                                                               |                                                               |                                                               |                                                          |                                                            |                                                            |                                                            |
| <b>Digestive diseases</b>                                      | <b>13,317.92</b><br><b>(10,814.72 to</b><br><b>17,117.01)</b> | <b>18,390.19</b><br><b>(13,036.08 to</b><br><b>24,895.87)</b> | <b>15,907.10</b><br><b>(11,162.67 to</b><br><b>21,444.00)</b> | <b>19,614.92</b><br><b>(14,061.00 to</b><br><b>26,613.23)</b> | <b>1,080.22</b><br><b>(889.94 to</b><br><b>1,328.78)</b> | <b>1,724.25</b><br><b>(1,208.94 to</b><br><b>2,293.88)</b> | <b>1,556.53</b><br><b>(1,115.99 to</b><br><b>2,032.89)</b> | <b>1,775.23</b><br><b>(1,276.54 to</b><br><b>2,378.72)</b> |
| Peptic ulcer disease                                           | 1,041.60<br>(832.20 to<br>1,360.85)                           | 957.23<br>(641.10 to<br>1,389.13)                             | 643.01<br>(423.78 to<br>910.64)                               | 1,173.46<br>(780.69 to<br>1,670.01)                           | 85.35<br>(70.52 to<br>106.59)                            | 92.48<br>(64.17 to<br>130.25)                              | 64.73<br>(43.11 to<br>89.58)                               | 107.72<br>(70.76 to<br>150.77)                             |

| Israel                                     |                                       |                                        |                                        |                                        |                                    |                                     |                                     |                                     |
|--------------------------------------------|---------------------------------------|----------------------------------------|----------------------------------------|----------------------------------------|------------------------------------|-------------------------------------|-------------------------------------|-------------------------------------|
| Cause                                      | YLLs (actual counts)                  |                                        |                                        |                                        | Deaths (actual counts)             |                                     |                                     |                                     |
|                                            | 2016                                  | 2040 Forecast                          | 2040 Better Scenario                   | 2040 Worse Scenario                    | 2016                               | 2040 Forecast                       | 2040 Better Scenario                | 2040 Worse Scenario                 |
| Gastritis and duodenitis                   | 114.81<br>(81.29 to 176.00)           | 143.16<br>(86.70 to 217.68)            | 111.25<br>(65.32 to 170.90)            | 157.31<br>(96.27 to 244.35)            | 7.45<br>(5.09 to 9.99)             | 11.17<br>(6.56 to 16.36)            | 9.19<br>(5.31 to 13.77)             | 11.68<br>(6.82 to 17.35)            |
| Appendicitis                               | 269.08<br>(193.40 to 388.21)          | 242.92<br>(150.27 to 374.65)           | 168.41<br>(104.24 to 259.90)           | 281.64<br>(178.82 to 434.30)           | 15.58<br>(10.61 to 21.13)          | 17.77<br>(10.91 to 26.45)           | 12.96<br>(7.82 to 19.14)            | 19.69<br>(12.29 to 28.92)           |
| Paralytic ileus and intestinal obstruction | 2,862.15<br>(2,253.88 to 3,796.85)    | 4,211.02<br>(3,059.00 to 5,676.37)     | 4,272.09<br>(3,045.91 to 5,797.40)     | 4,012.67<br>(2,949.18 to 5,346.85)     | 229.17<br>(173.24 to 284.89)       | 399.80<br>(284.76 to 517.35)        | 424.04<br>(305.35 to 552.98)        | 366.03<br>(258.02 to 472.01)        |
| Inguinal, femoral, and abdominal hernia    | 503.04<br>(381.61 to 816.56)          | 515.40<br>(345.11 to 853.14)           | 439.92<br>(287.26 to 723.90)           | 533.75<br>(365.03 to 871.84)           | 45.67<br>(35.59 to 70.98)          | 52.66<br>(35.96 to 81.59)           | 47.01<br>(31.40 to 73.17)           | 52.37<br>(36.32 to 80.61)           |
| Inflammatory bowel disease                 | 821.12<br>(591.88 to 1,058.23)        | 1,038.02<br>(696.39 to 1,451.25)       | 1,010.06<br>(669.82 to 1,419.96)       | 1,021.12<br>(690.61 to 1,414.80)       | 50.03<br>(37.93 to 62.36)          | 75.02<br>(52.63 to 99.44)           | 76.68<br>(52.69 to 102.46)          | 70.65<br>(49.77 to 92.26)           |
| Vascular intestinal disorders              | 2,125.06<br>(1,668.81 to 2,833.52)    | 3,247.85<br>(2,311.79 to 4,504.58)     | 2,967.52<br>(2,066.39 to 4,097.33)     | 3,269.72<br>(2,373.77 to 4,415.36)     | 175.00<br>(140.92 to 220.14)       | 298.55<br>(222.40 to 387.52)        | 283.99<br>(204.84 to 377.16)        | 289.59<br>(217.74 to 377.94)        |
| Gallbladder and biliary diseases           | 2,063.53<br>(1,632.63 to 2,626.05)    | 3,026.60<br>(1,566.41 to 5,463.10)     | 2,136.82<br>(1,111.31 to 3,886.52)     | 3,906.24<br>(2,039.79 to 7,092.85)     | 210.78<br>(166.58 to 261.80)       | 343.29<br>(172.42 to 618.46)        | 253.66<br>(130.25 to 453.14)        | 423.33<br>(213.00 to 768.66)        |
| Pancreatitis                               | 1,398.09<br>(1,077.93 to 1,865.03)    | 1,934.95<br>(1,125.34 to 3,814.35)     | 1,341.90<br>(817.92 to 2,382.74)       | 2,172.81<br>(1,284.51 to 4,319.97)     | 86.60<br>(61.20 to 108.37)         | 138.98<br>(77.65 to 280.67)         | 100.82<br>(59.03 to 168.21)         | 150.44<br>(86.32 to 316.47)         |
| Other digestive diseases                   | 2,119.45<br>(1,603.95 to 2,755.83)    | 3,073.05<br>(2,120.79 to 4,074.40)     | 2,816.12<br>(1,923.51 to 3,811.02)     | 3,086.18<br>(2,160.21 to 4,084.74)     | 174.59<br>(138.07 to 217.14)       | 294.73<br>(210.95 to 376.41)        | 283.44<br>(200.19 to 368.22)        | 283.74<br>(199.48 to 359.29)        |
| Neurological disorders                     | 49,361.59<br>(40,700.70 to 59,784.23) | 78,922.60<br>(55,228.71 to 109,832.90) | 79,238.60<br>(54,894.23 to 109,984.22) | 81,560.03<br>(56,126.32 to 117,115.60) | 5,428.78<br>(4,453.46 to 6,647.95) | 9,211.42<br>(6,128.39 to 13,423.84) | 9,620.07<br>(6,541.98 to 13,728.99) | 9,238.46<br>(5,861.50 to 14,183.73) |
| Alzheimer's disease and other dementias    | 36,400.31<br>(29,086.51 to 45,829.79) | 60,130.69<br>(38,862.91 to 89,062.69)  | 60,457.41<br>(38,950.35 to 89,043.38)  | 63,281.28<br>(40,142.61 to 97,624.78)  | 4,730.20<br>(3,860.27 to 5,905.93) | 8,004.53<br>(5,092.16 to 12,252.42) | 8,321.67<br>(5,516.76 to 12,315.06) | 8,126.79<br>(4,981.01 to 13,037.02) |
| Parkinson's disease                        | 4,255.63<br>(3,148.21 to 5,608.65)    | 7,414.56<br>(5,189.88 to 9,996.33)     | 8,215.35<br>(5,681.54 to 11,190.79)    | 6,730.89<br>(4,803.82 to 9,011.88)     | 410.97<br>(304.29 to 543.67)       | 744.80<br>(540.73 to 1,013.30)      | 848.55<br>(608.61 to 1,148.90)      | 658.51<br>(475.03 to 895.67)        |
| Epilepsy                                   | 3,065.55<br>(2,543.96 to 3,657.73)    | 3,854.19<br>(2,587.04 to 5,696.34)     | 3,131.98<br>(2,149.21 to 4,533.59)     | 4,092.07<br>(2,739.22 to 6,086.85)     | 92.92<br>(77.45 to 110.66)         | 148.05<br>(102.02 to 211.82)        | 127.67<br>(89.76 to 177.58)         | 150.78<br>(102.12 to 216.34)        |
| Multiple sclerosis                         | 695.20<br>(421.79 to 880.70)          | 744.70<br>(415.01 to 1,094.32)         | 755.72<br>(423.27 to 1,105.95)         | 767.56<br>(432.02 to 1,124.70)         | 23.65<br>(14.73 to 29.65)          | 27.37<br>(16.10 to 38.91)           | 28.15<br>(16.55 to 40.10)           | 27.75<br>(16.36 to 39.65)           |
| Motor neuron disease                       | 1,824.99<br>(1,484.92 to 2,205.08)    | 2,737.44<br>(1,904.76 to 3,848.72)     | 2,677.89<br>(1,834.10 to 3,773.65)     | 2,720.99<br>(1,923.16 to 3,764.84)     | 72.89<br>(59.38 to 88.60)          | 127.84<br>(91.08 to 172.79)         | 127.57<br>(88.74 to 173.81)         | 124.76<br>(90.07 to 166.17)         |
| Other neurological disorders               | 3,119.91<br>(2,624.09 to 3,652.67)    | 4,041.02<br>(3,102.53 to 5,176.05)     | 4,000.26<br>(3,031.35 to 5,189.74)     | 3,967.25<br>(3,076.36 to 5,072.96)     | 98.15<br>(83.11 to 115.42)         | 158.83<br>(124.85 to 195.60)        | 166.46<br>(128.94 to 208.36)        | 149.88<br>(119.39 to 181.55)        |
| Mental disorders                           | 4,701.62<br>(3,509.73 to 6,199.20)    | 13,270.02<br>(8,796.91 to 18,989.00)   | 17,476.34<br>(11,815.52 to 25,063.84)  | 11,589.67<br>(7,740.32 to 16,711.20)   | 137.35<br>(105.68 to 177.59)       | 403.91<br>(288.57 to 547.74)        | 534.20<br>(381.32 to 725.40)        | 347.30<br>(249.91 to 473.32)        |
| Alcohol use disorders                      | 2,096.21<br>(1,584.16 to 2,716.04)    | 3,046.70<br>(1,967.64 to 4,412.52)     | 3,191.16<br>(1,998.69 to 4,645.16)     | 2,916.09<br>(1,887.26 to 4,212.32)     | 65.98<br>(50.66 to 84.22)          | 108.39<br>(73.98 to 148.34)         | 116.23<br>(80.37 to 160.24)         | 101.50<br>(69.86 to 140.02)         |
| Drug use disorders                         | 2,589.83<br>(1,776.83 to 3,644.59)    | 10,193.84<br>(6,565.16 to 14,969.42)   | 14,253.09<br>(9,457.45 to 20,619.95)   | 8,645.21<br>(5,504.09 to 12,925.12)    | 71.08<br>(51.33 to 96.47)          | 294.97<br>(205.66 to 409.09)        | 417.38<br>(290.60 to 572.09)        | 245.28<br>(168.06 to 349.55)        |
| Opioid use disorders                       | 662.12<br>(405.69 to 1,554.25)        | 1,558.92<br>(902.23 to 3,947.28)       | 1,701.24<br>(979.85 to 4,526.56)       | 1,481.07<br>(864.30 to 3,756.93)       | 20.54<br>(14.41 to 34.85)          | 54.50<br>(37.27 to 95.05)           | 62.35<br>(42.31 to 108.86)          | 49.61<br>(34.29 to 87.74)           |

|                           |                                     |                                        |                                         |                                        |                              |                                 |                                 |                                 |
|---------------------------|-------------------------------------|----------------------------------------|-----------------------------------------|----------------------------------------|------------------------------|---------------------------------|---------------------------------|---------------------------------|
|                           | 53.74<br>(26.24 to<br>84.65)        | 261.97<br>(136.31 to<br>430.25)        | 338.50<br>(183.43 to<br>555.64)         | 229.70<br>(119.81 to<br>392.83)        | 1.20<br>(0.71 to<br>1.78)    | 6.06<br>(3.64 to<br>9.36)       | 7.95<br>(4.95 to<br>12.17)      | 5.24<br>(3.11 to<br>8.36)       |
| Cocaine use disorders     |                                     |                                        |                                         |                                        |                              |                                 |                                 |                                 |
|                           | 41.45<br>(20.27 to<br>73.13)        | 514.89<br>(259.91 to<br>1,018.23)      | 769.22<br>(407.46 to<br>1,620.23)       | 422.04<br>(208.53 to<br>811.58)        | 0.88<br>(0.51 to<br>1.54)    | 10.64<br>(5.89 to<br>19.92)     | 16.08<br>(9.11 to<br>32.93)     | 8.65<br>(4.67 to<br>16.49)      |
| Amphetamine use disorders |                                     |                                        |                                         |                                        |                              |                                 |                                 |                                 |
|                           | 1,832.52<br>(938.63 to<br>2,741.45) | 7,858.07<br>(4,200.76 to<br>12,399.41) | 11,444.13<br>(6,367.34 to<br>17,320.61) | 6,512.40<br>(3,393.95 to<br>10,217.97) | 48.46<br>(30.88 to<br>69.42) | 223.77<br>(142.94 to<br>324.98) | 330.99<br>(217.67 to<br>464.09) | 181.78<br>(113.47 to<br>267.94) |
| Other drug use disorders  |                                     |                                        |                                         |                                        |                              |                                 |                                 |                                 |
|                           | 15.58<br>(11.63 to<br>20.86)        | 29.48<br>(19.11 to<br>45.09)           | 32.09<br>(20.34 to<br>49.77)            | 28.37<br>(18.72 to<br>42.50)           | 0.29<br>(0.22 to<br>0.39)    | 0.55<br>(0.35 to<br>0.81)       | 0.59<br>(0.38 to<br>0.89)       | 0.53<br>(0.35 to<br>0.77)       |
| Eating disorders          |                                     |                                        |                                         |                                        |                              |                                 |                                 |                                 |

| Israel                                                     |                                              |                                                |                                                |                                                |                                           |                                             |                                             |                                             |
|------------------------------------------------------------|----------------------------------------------|------------------------------------------------|------------------------------------------------|------------------------------------------------|-------------------------------------------|---------------------------------------------|---------------------------------------------|---------------------------------------------|
| Cause                                                      | YLLs (actual counts)                         |                                                |                                                |                                                | Deaths (actual counts)                    |                                             |                                             |                                             |
|                                                            | 2016                                         | 2040 Forecast                                  | 2040 Better Scenario                           | 2040 Worse Scenario                            | 2016                                      | 2040 Forecast                               | 2040 Better Scenario                        | 2040 Worse Scenario                         |
| <b>Diabetes, urogenital, blood, and endocrine diseases</b> | <b>74,679.19</b><br>(63,742.52 to 88,208.71) | <b>148,114.29</b><br>(72,919.87 to 363,471.37) | <b>116,258.40</b><br>(55,375.29 to 292,410.14) | <b>184,172.94</b><br>(87,777.71 to 409,498.93) | <b>5,873.04</b><br>(5,058.13 to 6,841.39) | <b>13,658.74</b><br>(7,033.56 to 33,260.89) | <b>11,162.27</b><br>(5,607.43 to 27,904.46) | <b>16,335.26</b><br>(8,203.55 to 36,826.96) |
| Diabetes mellitus                                          | 30,777.58<br>(25,763.41 to 37,020.80)        | 38,220.07<br>(24,360.42 to 56,497.18)          | 26,045.13<br>(16,697.92 to 37,812.89)          | 46,789.72<br>(29,620.33 to 69,458.15)          | 2,338.96<br>(1,980.26 to 2,769.61)        | 3,316.95<br>(2,162.97 to 4,703.27)          | 2,397.34<br>(1,615.07 to 3,289.58)          | 3,824.98<br>(2,550.85 to 5,404.95)          |
| Acute glomerulonephritis                                   | 45.05<br>(39.17 to 52.57)                    | 46.82<br>(34.43 to 62.96)                      | 35.96<br>(25.37 to 48.92)                      | 51.94<br>(38.14 to 69.80)                      | 0.96<br>(0.82 to 1.14)                    | 1.08<br>(0.76 to 1.52)                      | 0.87<br>(0.59 to 1.24)                      | 1.18<br>(0.83 to 1.61)                      |
| Chronic kidney disease                                     | 27,320.72<br>(22,904.36 to 32,809.55)        | 85,878.34<br>(21,537.59 to 296,754.22)         | 67,520.69<br>(17,095.69 to 243,299.50)         | 113,435.58<br>(28,903.13 to 332,955.09)        | 2,371.49<br>(2,028.35 to 2,779.30)        | 8,297.06<br>(2,251.64 to 28,416.52)         | 6,773.71<br>(1,877.20 to 23,687.28)         | 10,539.91<br>(2,837.25 to 31,421.29)        |
| Chronic kidney disease due to diabetes mellitus            | 16,894.74<br>(14,043.94 to 20,538.94)        | 52,289.93<br>(13,174.60 to 185,890.18)         | 40,892.43<br>(10,189.98 to 152,200.99)         | 69,742.31<br>(17,283.08 to 220,468.40)         | 1,343.88<br>(1,133.42 to 1,592.04)        | 4,675.14<br>(1,237.55 to 15,320.11)         | 3,791.50<br>(1,007.60 to 13,158.95)         | 5,988.50<br>(1,567.27 to 17,599.11)         |
| Chronic kidney disease due to hypertension                 | 3,617.79<br>(2,910.56 to 4,472.17)           | 13,346.89<br>(3,196.21 to 46,418.95)           | 11,234.20<br>(2,768.43 to 41,840.47)           | 16,737.97<br>(4,051.73 to 53,082.76)           | 461.88<br>(372.27 to 566.41)              | 1,659.78<br>(486.82 to 5,557.42)            | 1,438.71<br>(424.61 to 5,048.75)            | 2,019.46<br>(581.55 to 6,038.86)            |
| Chronic kidney disease due to glomerulonephritis           | 2,856.78<br>(1,922.11 to 3,841.84)           | 7,366.47<br>(1,770.37 to 26,714.32)            | 5,450.76<br>(1,286.78 to 20,093.02)            | 9,929.09<br>(2,366.41 to 33,037.77)            | 222.31<br>(144.64 to 314.22)              | 686.66<br>(153.31 to 2,724.34)              | 898.87<br>(118.80 to 2,066.65)              | 1,105.58<br>(201.28 to 3,077.39)            |
| Chronic kidney disease due to other and unspecified causes | 3,951.41<br>(3,257.33 to 4,759.40)           | 12,875.05<br>(3,330.20 to 42,475.73)           | 9,943.30<br>(2,573.97 to 35,576.63)            | 17,026.21<br>(4,442.09 to 49,502.08)           | 343.42<br>(286.56 to 417.50)              | 1,275.47<br>(339.91 to 4,330.87)            | 1,018.80<br>(277.91 to 3,454.14)            | 1,633.07<br>(441.26 to 5,001.16)            |
| Urinary diseases and male infertility                      | 5,748.01<br>(4,807.14 to 6,805.20)           | 8,422.83<br>(6,145.14 to 10,906.94)            | 7,084.35<br>(4,953.35 to 9,345.28)             | 8,754.51<br>(6,390.64 to 11,334.51)            | 609.54<br>(515.90 to 718.40)              | 1,013.30<br>(732.35 to 1,339.01)            | 888.28<br>(633.23 to 1,201.21)              | 1,015.58<br>(716.71 to 1,336.42)            |
| Urinary tract infections                                   | 5,117.35<br>(4,285.56 to 6,077.22)           | 7,714.20<br>(5,659.96 to 10,084.51)            | 6,556.83<br>(4,659.82 to 8,704.58)             | 7,969.60<br>(5,863.46 to 10,443.01)            | 557.04<br>(471.99 to 654.64)              | 942.91<br>(672.36 to 1,248.06)              | 833.20<br>(583.85 to 1,118.20)              | 941.11<br>(651.04 to 1,240.60)              |
| Urolithiasis                                               | 287.38<br>(176.79 to 605.08)                 | 362.60<br>(186.51 to 782.97)                   | 270.51<br>(133.74 to 600.89)                   | 402.85<br>(214.28 to 857.56)                   | 26.05<br>(15.26 to 54.56)                 | 36.06<br>(18.45 to 76.62)                   | 28.15<br>(13.77 to 62.42)                   | 38.42<br>(19.64 to 80.66)                   |
| Other urinary diseases                                     | 343.28<br>(204.17 to 699.15)                 | 346.04<br>(175.35 to 752.62)                   | 257.01<br>(123.27 to 573.49)                   | 382.05<br>(190.25 to 806.26)                   | 26.45<br>(14.18 to 57.99)                 | 34.33<br>(16.03 to 79.17)                   | 26.94<br>(11.85 to 65.60)                   | 36.05<br>(16.71 to 80.04)                   |
| Gynecological diseases                                     | 37.41<br>(17.14 to 51.35)                    | 30.63<br>(11.61 to 51.75)                      | 18.06<br>(6.92 to 30.83)                       | 38.92<br>(14.60 to 66.03)                      | 2.46<br>(0.87 to 3.37)                    | 2.34<br>(0.69 to 3.93)                      | 1.42<br>(0.37 to 2.39)                      | 2.87<br>(0.88 to 4.69)                      |
| Uterine fibroids                                           | 8.13<br>(4.47 to 11.86)                      | 5.30<br>(2.23 to 8.94)                         | 3.49<br>(1.49 to 5.99)                         | 6.46<br>(2.85 to 11.34)                        | 0.23<br>(0.13 to 0.32)                    | 0.16<br>(0.07 to 0.26)                      | 0.11<br>(0.05 to 0.17)                      | 0.19<br>(0.09 to 0.31)                      |
| Polycystic ovarian syndrome                                | 1.18<br>(0.67 to 2.22)                       | 0.49<br>(0.18 to 1.15)                         | 0.19<br>(0.07 to 0.45)                         | 0.77<br>(0.28 to 1.78)                         | 0.03<br>(0.01 to 0.05)                    | 0.01<br>(0.00 to 0.05)                      | 0.00<br>(0.00 to 0.01)                      | 0.02<br>(0.01 to 0.04)                      |
| Endometriosis                                              | 0.11<br>(0.06 to 0.21)                       | 0.13<br>(0.04 to 0.33)                         | 0.08<br>(0.03 to 0.19)                         | 0.17<br>(0.06 to 0.43)                         | 0.00<br>(0.00 to 0.01)                    | 0.00<br>(0.00 to 0.01)                      | 0.00<br>(0.00 to 0.00)                      | 0.00<br>(0.00 to 0.01)                      |
| Genital prolapse                                           | 0.40<br>(0.17 to 0.61)                       | 0.51<br>(0.17 to 1.05)                         | 0.31<br>(0.10 to 0.66)                         | 0.64<br>(0.22 to 1.28)                         | 0.03<br>(0.01 to 0.04)                    | 0.03<br>(0.01 to 0.10)                      | 0.03<br>(0.01 to 0.06)                      | 0.05<br>(0.02 to 0.11)                      |
| Other gynecological diseases                               | 27.60<br>(10.95 to 38.53)                    | 24.19<br>(8.87 to 42.93)                       | 13.99<br>(4.65 to 24.57)                       | 30.88<br>(10.40 to 53.08)                      | 2.17<br>(0.67 to 3.01)                    | 2.12<br>(0.59 to 3.71)                      | 1.28<br>(0.35 to 2.18)                      | 2.61<br>(0.70 to 4.36)                      |
| Hemoglobinopathies and hemolytic anemias                   | 1,174.96<br>(962.97 to 1,489.12)             | 1,374.89<br>(914.48 to 2,019.72)               | 1,023.55<br>(673.53 to 1,519.14)               | 1,545.03<br>(1,048.51 to 2,228.68)             | 70.45<br>(56.98 to 93.85)                 | 99.72<br>(68.25 to 140.99)                  | 78.88<br>(53.19 to 115.80)                  | 106.57<br>(74.87 to 150.73)                 |
| Thalassemias                                               | 72.62<br>(51.80 to 96.64)                    | 28.93<br>(18.34 to 42.03)                      | 25.79<br>(16.36 to 37.44)                      | 29.43<br>(18.53 to 43.28)                      | 0.96<br>(0.70 to 1.27)                    | 0.44<br>(0.29 to 0.62)                      | 0.40<br>(0.26 to 0.57)                      | 0.44<br>(0.29 to 0.63)                      |



|                                                   |                                        |                                         |                                         |                                         |                                 |                                   |                                     |                                   |
|---------------------------------------------------|----------------------------------------|-----------------------------------------|-----------------------------------------|-----------------------------------------|---------------------------------|-----------------------------------|-------------------------------------|-----------------------------------|
|                                                   | 448.83<br>(358.24 to<br>580.23)        | 608.50<br>(365.52 to<br>975.65)         | 434.13<br>(252.57 to<br>709.31)         | 707.97<br>(424.13 to<br>1,116.70)       | 11.34<br>(8.90 to<br>15.28)     | 23.06<br>(13.38 to<br>37.99)      | 16.90<br>(9.45 to<br>27.88)         | 26.39<br>(15.42 to<br>41.99)      |
| Sickle cell disorders                             |                                        |                                         |                                         |                                         |                                 |                                   |                                     |                                   |
|                                                   | 141.00<br>(111.63 to<br>177.96)        | 166.43<br>(105.26 to<br>251.87)         | 112.96<br>(69.91 to<br>172.84)          | 197.11<br>(124.16 to<br>291.57)         | 4.46<br>(3.48 to<br>5.77)       | 7.42<br>(4.74 to<br>10.77)        | 5.24<br>(3.24 to<br>7.79)           | 8.53<br>(5.49 to<br>12.41)        |
| G6PD deficiency                                   |                                        |                                         |                                         |                                         |                                 |                                   |                                     |                                   |
|                                                   | 512.50<br>(414.62 to<br>683.78)        | 571.04<br>(394.13 to<br>817.55)         | 450.67<br>(300.35 to<br>652.89)         | 610.51<br>(430.59 to<br>857.50)         | 53.68<br>(43.66 to<br>72.90)    | 68.80<br>(47.59 to<br>98.78)      | 56.35<br>(38.02 to<br>81.09)        | 71.20<br>(48.52 to<br>102.16)     |
| Other hemoglobinopathies and hemolytic anemias    |                                        |                                         |                                         |                                         |                                 |                                   |                                     |                                   |
|                                                   | 9,575.46<br>(6,633.60 to<br>11,369.90) | 14,140.71<br>(8,182.04 to<br>18,656.65) | 14,530.66<br>(8,270.74 to<br>19,456.90) | 13,557.26<br>(7,919.13 to<br>17,835.48) | 479.19<br>(215.04 to<br>588.79) | 928.29<br>(337.78 to<br>1,253.29) | 1,021.77<br>(367.11 to<br>1,399.47) | 844.18<br>(317.49 to<br>1,130.10) |
| Endocrine, metabolic, blood, and immune disorders |                                        |                                         |                                         |                                         |                                 |                                   |                                     |                                   |

| Israel                                        |                                              |                                              |                                             |                                              |                                     |                                         |                                       |                                         |
|-----------------------------------------------|----------------------------------------------|----------------------------------------------|---------------------------------------------|----------------------------------------------|-------------------------------------|-----------------------------------------|---------------------------------------|-----------------------------------------|
| Cause                                         | YLLs (actual counts)                         |                                              |                                             |                                              | Deaths (actual counts)              |                                         |                                       |                                         |
|                                               | 2016                                         | 2040 Forecast                                | 2040 Better Scenario                        | 2040 Worse Scenario                          | 2016                                | 2040 Forecast                           | 2040 Better Scenario                  | 2040 Worse Scenario                     |
| <b>Musculoskeletal disorders</b>              | <b>2,168.67</b><br>(1,670.75 to 2,647.11)    | <b>3,070.87</b><br>(2,051.47 to 4,269.33)    | <b>2,721.01</b><br>(1,825.61 to 3,831.12)   | <b>3,213.96</b><br>(2,210.76 to 4,510.45)    | <b>126.47</b><br>(103.50 to 155.22) | <b>218.31</b><br>(152.44 to 290.63)     | <b>200.97</b><br>(139.89 to 273.18)   | <b>219.85</b><br>(156.72 to 293.71)     |
| Rheumatoid arthritis                          | 346.45<br>(260.32 to 512.47)                 | 467.57<br>(279.16 to 751.74)                 | 301.02<br>(174.03 to 487.02)                | 573.94<br>(338.33 to 939.52)                 | 23.82<br>(17.45 to 34.53)           | 38.24<br>(22.82 to 58.92)               | 25.58<br>(15.07 to 39.79)             | 45.12<br>(27.04 to 71.92)               |
| Other musculoskeletal disorders               | 1,822.22<br>(1,378.05 to 2,225.84)           | 2,603.30<br>(1,772.46 to 3,594.84)           | 2,419.99<br>(1,650.24 to 3,403.17)          | 2,640.02<br>(1,828.02 to 3,599.62)           | 102.65<br>(83.09 to 126.07)         | 180.06<br>(126.18 to 239.27)            | 175.39<br>(121.57 to 237.35)          | 174.73<br>(124.20 to 231.32)            |
| <b>Other non-communicable diseases</b>        | <b>26,176.15</b><br>(18,632.24 to 31,172.75) | <b>23,045.88</b><br>(12,394.10 to 34,684.84) | <b>17,321.78</b><br>(8,557.21 to 26,698.67) | <b>26,354.55</b><br>(13,963.08 to 40,532.62) | <b>711.95</b><br>(331.30 to 964.28) | <b>1,053.67</b><br>(345.71 to 1,670.39) | <b>916.86</b><br>(273.74 to 1,496.86) | <b>1,084.32</b><br>(349.56 to 1,736.78) |
| Congenital birth defects                      | 19,203.70<br>(14,321.50 to 22,684.70)        | 13,629.59<br>(8,549.92 to 22,146.57)         | 9,203.85<br>(5,498.64 to 14,542.83)         | 16,434.64<br>(9,339.54 to 26,096.21)         | 243.41<br>(184.87 to 286.22)        | 190.66<br>(122.98 to 302.02)            | 135.75<br>(85.56 to 207.28)           | 225.71<br>(137.77 to 347.77)            |
| Neural tube defects                           | 633.37<br>(382.07 to 923.62)                 | 196.98<br>(81.63 to 401.66)                  | 101.62<br>(38.31 to 223.09)                 | 268.53<br>(105.96 to 588.76)                 | 7.55<br>(4.62 to 10.91)             | 2.45<br>(1.06 to 4.89)                  | 1.27<br>(0.50 to 2.69)                | 3.33<br>(1.38 to 7.10)                  |
| Congenital heart anomalies                    | 5,954.62<br>(4,172.72 to 7,262.89)           | 3,083.70<br>(1,681.21 to 5,281.45)           | 1,544.80<br>(758.15 to 2,684.30)            | 4,224.15<br>(2,088.93 to 7,467.31)           | 74.52<br>(54.24 to 89.70)           | 40.38<br>(22.67 to 68.51)               | 20.42<br>(10.47 to 35.21)             | 55.18<br>(28.25 to 95.17)               |
| Orofacial clefts                              | 5.72<br>(2.22 to 11.22)                      | 2.57<br>(0.81 to 6.07)                       | 1.12<br>(0.34 to 2.78)                      | 3.78<br>(1.13 to 9.20)                       | 0.07<br>(0.03 to 0.13)              | 0.03<br>(0.01 to 0.07)                  | 0.01<br>(0.00 to 0.03)                | 0.04<br>(0.01 to 0.11)                  |
| Down syndrome                                 | 1,732.80<br>(1,304.44 to 2,448.71)           | 2,414.88<br>(1,625.09 to 3,467.18)           | 2,393.66<br>(1,607.22 to 3,449.77)          | 2,376.72<br>(1,606.44 to 3,410.19)           | 29.12<br>(22.59 to 40.15)           | 48.31<br>(32.58 to 69.84)               | 48.90<br>(32.79 to 69.99)             | 47.37<br>(31.91 to 68.03)               |
| Other chromosomal abnormalities               | 3,139.27<br>(1,905.07 to 4,213.20)           | 3,391.06<br>(1,867.45 to 5,468.60)           | 2,514.53<br>(1,342.89 to 4,177.16)          | 3,799.92<br>(2,007.70 to 6,205.24)           | 37.74<br>(22.70 to 50.28)           | 42.00<br>(23.61 to 67.20)               | 31.32<br>(17.05 to 51.59)             | 46.99<br>(25.72 to 75.94)               |
| Congenital musculoskeletal and limb anomalies | 886.23<br>(618.81 to 1,385.01)               | 521.11<br>(274.85 to 902.55)                 | 300.21<br>(148.15 to 544.64)                | 666.89<br>(322.53 to 1,264.90)               | 10.96<br>(7.70 to 16.60)            | 6.75<br>(3.66 to 11.57)                 | 3.93<br>(2.01 to 7.11)                | 8.62<br>(4.27 to 15.75)                 |
| Urogenital congenital anomalies               | 854.47<br>(419.53 to 1,333.15)               | 471.57<br>(209.56 to 913.11)                 | 295.46<br>(118.40 to 611.30)                | 578.01<br>(238.29 to 1,146.92)               | 10.90<br>(5.21 to 16.47)            | 6.52<br>(2.85 to 12.37)                 | 4.16<br>(1.64 to 8.31)                | 7.96<br>(3.25 to 15.60)                 |
| Digestive congenital anomalies                | 1,043.20<br>(514.69 to 1,508.89)             | 546.28<br>(228.14 to 1,015.66)               | 297.29<br>(118.99 to 586.20)                | 719.74<br>(278.06 to 1,415.10)               | 12.42<br>(6.28 to 17.87)            | 6.64<br>(2.88 to 12.18)                 | 3.63<br>(1.47 to 7.00)                | 8.74<br>(3.46 to 16.99)                 |
| Other congenital birth defects                | 4,954.02<br>(3,605.89 to 6,127.21)           | 3,001.43<br>(1,669.94 to 5,109.84)           | 1,755.16<br>(924.90 to 3,107.34)            | 3,796.90<br>(2,013.31 to 6,724.69)           | 60.14<br>(44.21 to 74.32)           | 37.59<br>(21.52 to 63.09)               | 22.12<br>(11.95 to 38.49)             | 47.49<br>(25.81 to 83.40)               |
| Skin and subcutaneous diseases                | 4,659.10<br>(1,895.98 to 7,068.16)           | 8,336.57<br>(1,893.20 to 13,700.35)          | 7,345.65<br>(1,611.65 to 12,200.32)         | 8,548.36<br>(1,893.15 to 13,962.09)          | 441.69<br>(90.30 to 679.76)         | 850.48<br>(169.33 to 1,422.95)          | 772.15<br>(148.84 to 1,302.48)        | 843.86<br>(156.78 to 1,411.47)          |
| Cellulitis                                    | 978.81<br>(209.71 to 1,549.00)               | 2,365.60<br>(481.22 to 3,916.10)             | 2,289.65<br>(447.97 to 3,853.45)            | 2,326.20<br>(483.10 to 3,815.35)             | 77.64<br>(13.47 to 126.87)          | 207.98<br>(36.95 to 349.93)             | 209.00<br>(36.04 to 354.19)           | 196.84<br>(35.18 to 329.83)             |
| Pyoderma                                      | 786.53<br>(163.32 to 1,250.32)               | 2,281.80<br>(397.02 to 3,849.89)             | 2,063.73<br>(361.71 to 3,504.38)            | 2,301.99<br>(403.25 to 3,803.64)             | 67.23<br>(9.80 to 111.73)           | 232.67<br>(32.28 to 407.53)             | 220.68<br>(30.54 to 393.63)           | 234.99<br>(31.32 to 392.76)             |
| Decubitus ulcer                               | 2,748.72<br>(582.17 to 4,156.73)             | 3,498.24<br>(699.29 to 6,020.91)             | 2,825.66<br>(539.43 to 5,020.66)            | 3,723.20<br>(740.87 to 6,446.13)             | 284.52<br>(55.12 to 434.14)         | 392.13<br>(72.31 to 349.93)             | 326.26<br>(58.95 to 589.76)           | 404.54<br>(74.44 to 731.29)             |
| Other skin and subcutaneous diseases          | 145.04<br>(32.82 to 229.40)                  | 190.93<br>(40.71 to 326.54)                  | 166.62<br>(33.35 to 288.51)                 | 196.97<br>(41.96 to 337.12)                  | 12.30<br>(2.06 to 20.34)            | 17.70<br>(2.75 to 32.23)                | 16.21<br>(2.40 to 29.24)              | 17.49<br>(2.76 to 30.84)                |
| Sudden infant death syndrome                  | 2,313.36<br>(1,701.44 to 3,034.11)           | 1,079.72<br>(523.67 to 2,034.08)             | 772.28<br>(369.61 to 1,495.90)              | 1,271.55<br>(590.13 to 2,415.38)             | 26.85<br>(19.75 to 35.22)           | 12.53<br>(6.07 to 23.60)                | 8.96<br>(4.29 to 17.36)               | 14.75<br>(6.85 to 28.03)                |

|                          |                                          |                                           |                                          |                                           |                                       |                                       |                                       |                                       |
|--------------------------|------------------------------------------|-------------------------------------------|------------------------------------------|-------------------------------------------|---------------------------------------|---------------------------------------|---------------------------------------|---------------------------------------|
| Injuries                 | 80,923.60<br>(66,619.59 to<br>99,503.42) | 79,920.92<br>(53,122.16 to<br>129,809.71) | 53,216.01<br>(35,081.05 to<br>92,160.01) | 98,369.61<br>(65,750.87 to<br>149,260.11) | 2,511.65<br>(2,100.34 to<br>3,027.30) | 2,996.30<br>(2,203.22 to<br>4,069.22) | 2,248.92<br>(1,646.79 to<br>3,134.96) | 3,394.85<br>(2,497.45 to<br>4,606.07) |
| Transport injuries       | 25,733.06<br>(21,083.88 to<br>31,476.38) | 21,336.52<br>(13,030.65 to<br>34,426.14)  | 7,670.71<br>(4,733.80 to<br>12,219.11)   | 33,266.75<br>(20,443.27 to<br>53,380.16)  | 700.05<br>(582.87 to<br>842.46)       | 666.79<br>(442.88 to<br>961.66)       | 293.68<br>(200.84 to<br>408.33)       | 947.39<br>(623.27 to<br>1,383.81)     |
| Road injuries            | 24,765.57<br>(20,343.58 to<br>30,340.51) | 20,329.47<br>(12,445.55 to<br>32,885.89)  | 7,051.82<br>(4,365.53 to<br>11,246.51)   | 32,027.80<br>(19,720.04 to<br>50,950.76)  | 672.85<br>(561.08 to<br>810.67)       | 633.85<br>(421.34 to<br>912.87)       | 272.25<br>(187.86 to<br>378.15)       | 908.63<br>(599.37 to<br>1,323.99)     |
| Pedestrian road injuries | 6,652.00<br>(5,060.88 to<br>8,156.65)    | 3,737.73<br>(2,357.54 to<br>5,728.75)     | 1,195.64<br>(750.97 to<br>1,764.04)      | 6,078.71<br>(3,724.73 to<br>9,468.04)     | 240.55<br>(194.90 to<br>293.98)       | 183.48<br>(123.92 to<br>261.42)       | 71.81<br>(48.48 to<br>101.26)         | 268.62<br>(175.69 to<br>390.37)       |

| Israel                                          |                                                     |                                                     |                                                     |                                                     |                                              |                                                  |                                                |                                                  |
|-------------------------------------------------|-----------------------------------------------------|-----------------------------------------------------|-----------------------------------------------------|-----------------------------------------------------|----------------------------------------------|--------------------------------------------------|------------------------------------------------|--------------------------------------------------|
| Cause                                           | YLLs (actual counts)                                |                                                     |                                                     |                                                     | Deaths (actual counts)                       |                                                  |                                                |                                                  |
|                                                 | 2016                                                | 2040 Forecast                                       | 2040 Better Scenario                                | 2040 Worse Scenario                                 | 2016                                         | 2040 Forecast                                    | 2040 Better Scenario                           | 2040 Worse Scenario                              |
| Cyclist road injuries                           | 725.31<br>(486.41 to 950.14)                        | 677.66<br>(397.09 to 1,091.88)                      | 288.78<br>(174.73 to 453.88)                        | 992.24<br>(582.36 to 1,575.33)                      | 19.66<br>(13.62 to 25.88)                    | 21.98<br>(13.67 to 34.63)                        | 12.47<br>(7.76 to 19.28)                       | 28.20<br>(17.54 to 43.18)                        |
| Motorcyclist road injuries                      | 3,220.03<br>(1,795.59 to 4,603.16)                  | 3,332.97<br>(1,608.65 to 6,061.14)                  | 1,683.45<br>(852.88 to 3,003.50)                    | 4,416.88<br>(2,106.00 to 8,079.85)                  | 62.79<br>(37.49 to 88.18)                    | 66.98<br>(35.44 to 117.05)                       | 37.23<br>(20.80 to 62.65)                      | 85.66<br>(45.39 to 152.46)                       |
| Motor vehicle road injuries                     | 14,081.89<br>(11,124.14 to 18,252.71)               | 12,502.07<br>(7,192.31 to 21,134.29)                | 3,854.58<br>(2,274.87 to 6,483.54)                  | 20,418.24<br>(11,943.46 to 34,305.41)               | 347.45<br>(276.84 to 435.29)                 | 358.47<br>(231.29 to 535.00)                     | 149.04<br>(100.95 to 211.69)                   | 522.40<br>(336.24 to 784.36)                     |
| Other road injuries                             | 86.35<br>(60.46 to 160.40)                          | 79.05<br>(45.12 to 150.20)                          | 29.36<br>(17.25 to 52.56)                           | 121.74<br>(68.48 to 236.32)                         | 2.40<br>(1.56 to 3.42)                       | 2.95<br>(1.45 to 4.76)                           | 1.71<br>(0.63 to 3.00)                         | 3.75<br>(2.11 to 5.96)                           |
| Other transport injuries                        | 967.49<br>(745.85 to 1,299.11)                      | 1,007.05<br>(579.56 to 1,671.01)                    | 618.89<br>(361.31 to 1,033.90)                      | 1,238.95<br>(712.87 to 2,067.64)                    | 27.20<br>(21.90 to 33.73)                    | 32.94<br>(21.31 to 50.13)                        | 21.42<br>(13.72 to 31.63)                      | 38.76<br>(24.24 to 61.14)                        |
| <b>Unintentional injuries</b>                   | <b>20,601.39</b><br><b>(16,872.90 to 25,936.92)</b> | <b>20,965.18</b><br><b>(15,186.04 to 28,174.34)</b> | <b>17,069.01</b><br><b>(12,237.83 to 22,969.43)</b> | <b>22,655.49</b><br><b>(16,377.53 to 30,558.35)</b> | <b>998.97</b><br><b>(822.42 to 1,258.30)</b> | <b>1,376.49</b><br><b>(1,027.80 to 1,788.12)</b> | <b>1,216.19</b><br><b>(916.02 to 1,565.12)</b> | <b>1,394.25</b><br><b>(1,017.91 to 1,854.64)</b> |
| Falls                                           | 5,184.23<br>(4,126.14 to 6,473.11)                  | 6,452.97<br>(4,881.86 to 8,268.19)                  | 5,512.58<br>(4,039.59 to 7,176.80)                  | 6,736.24<br>(5,033.55 to 8,768.37)                  | 374.16<br>(303.83 to 453.05)                 | 584.64<br>(422.08 to 751.42)                     | 523.36<br>(380.58 to 667.40)                   | 582.58<br>(401.86 to 755.45)                     |
| Drowning                                        | 2,884.86<br>(2,361.24 to 3,531.08)                  | 2,067.04<br>(1,398.55 to 2,921.60)                  | 1,497.75<br>(996.69 to 2,102.97)                    | 2,358.12<br>(1,552.35 to 3,372.52)                  | 60.25<br>(49.28 to 73.23)                    | 50.61<br>(35.33 to 69.67)                        | 37.99<br>(26.18 to 51.94)                      | 56.51<br>(38.60 to 79.45)                        |
| Fire, heat, and hot substances                  | 2,012.02<br>(1,666.28 to 2,518.45)                  | 1,445.62<br>(982.25 to 2,036.24)                    | 988.33<br>(664.63 to 1,306.87)                      | 1,686.61<br>(1,158.56 to 2,448.64)                  | 86.79<br>(65.55 to 103.88)                   | 83.62<br>(53.30 to 113.70)                       | 62.26<br>(39.75 to 84.82)                      | 91.27<br>(57.82 to 126.56)                       |
| Poisonings                                      | 519.97<br>(413.17 to 762.28)                        | 246.58<br>(152.64 to 401.85)                        | 148.19<br>(88.53 to 248.63)                         | 309.62<br>(186.54 to 526.48)                        | 12.60<br>(9.97 to 17.73)                     | 7.35<br>(4.86 to 10.85)                          | 4.71<br>(3.02 to 7.07)                         | 8.85<br>(5.73 to 13.78)                          |
| Exposure to mechanical forces                   | 1,870.60<br>(1,488.51 to 2,354.37)                  | 1,671.65<br>(1,141.47 to 2,356.85)                  | 1,225.10<br>(824.98 to 1,721.39)                    | 1,915.16<br>(1,271.47 to 2,762.11)                  | 59.81<br>(43.04 to 72.14)                    | 68.47<br>(43.41 to 90.96)                        | 54.61<br>(32.80 to 74.75)                      | 73.76<br>(45.64 to 99.45)                        |
| Unintentional firearm injuries                  | 618.29<br>(439.89 to 794.84)                        | 547.23<br>(340.57 to 825.10)                        | 404.79<br>(249.31 to 599.42)                        | 626.72<br>(384.88 to 939.73)                        | 14.41<br>(10.84 to 18.03)                    | 14.69<br>(10.42 to 20.07)                        | 14.69<br>(8.23 to 15.98)                       | 16.09<br>(11.04 to 22.48)                        |
| Unintentional suffocation                       | 198.22<br>(140.73 to 348.23)                        | 182.10<br>(101.28 to 354.93)                        | 134.12<br>(72.53 to 261.09)                         | 206.69<br>(108.72 to 409.83)                        | 3.12<br>(2.25 to 5.50)                       | 3.13<br>(1.81 to 5.87)                           | 2.36<br>(1.35 to 4.40)                         | 3.52<br>(1.98 to 6.81)                           |
| Other exposure to mechanical forces             | 1,054.09<br>(826.21 to 1,403.83)                    | 942.32<br>(639.06 to 1,336.18)                      | 686.18<br>(439.73 to 967.99)                        | 1,081.75<br>(697.18 to 1,559.52)                    | 42.27<br>(26.65 to 52.16)                    | 50.65<br>(27.16 to 69.52)                        | 40.55<br>(21.35 to 57.48)                      | 54.15<br>(28.93 to 75.56)                        |
| Adverse effects of medical treatment            | 3,785.32<br>(2,505.06 to 6,552.19)                  | 4,888.76<br>(2,789.96 to 8,964.09)                  | 4,208.41<br>(2,366.51 to 7,469.05)                  | 5,120.19<br>(2,935.99 to 9,289.10)                  | 219.82<br>(130.35 to 412.37)                 | 344.72<br>(192.80 to 648.40)                     | 314.73<br>(174.00 to 589.38)                   | 343.87<br>(190.39 to 654.70)                     |
| Animal contact                                  | 171.52<br>(134.22 to 281.96)                        | 207.44<br>(137.77 to 351.53)                        | 160.21<br>(104.83 to 268.77)                        | 230.82<br>(148.13 to 395.78)                        | 5.82<br>(4.66 to 8.82)                       | 9.00<br>(6.26 to 12.90)                          | 7.53<br>(5.05 to 10.71)                        | 9.45<br>(6.51 to 13.74)                          |
| Venomous animal contact                         | 55.30<br>(41.35 to 95.51)                           | 66.96<br>(42.08 to 127.38)                          | 53.34<br>(33.05 to 100.98)                          | 73.51<br>(45.38 to 138.54)                          | 1.17<br>(0.85 to 2.14)                       | 1.77<br>(1.14 to 3.39)                           | 1.49<br>(0.95 to 2.88)                         | 1.88<br>(1.19 to 3.58)                           |
| Non-venomous animal contact                     | 116.23<br>(91.09 to 184.47)                         | 140.48<br>(94.04 to 227.74)                         | 106.87<br>(70.42 to 175.06)                         | 157.31<br>(102.47 to 255.72)                        | 4.64<br>(3.66 to 6.76)                       | 7.24<br>(4.79 to 10.08)                          | 6.05<br>(3.92 to 8.48)                         | 7.58<br>(5.08 to 10.43)                          |
| Foreign body                                    | 2,929.80<br>(2,445.29 to 3,681.85)                  | 2,914.62<br>(2,072.60 to 3,835.13)                  | 2,642.63<br>(1,788.01 to 3,497.47)                  | 2,982.23<br>(2,099.43 to 3,913.43)                  | 129.07<br>(77.82 to 167.47)                  | 171.42<br>(84.26 to 245.22)                      | 170.42<br>(79.75 to 248.57)                    | 163.86<br>(82.62 to 233.44)                      |
| Pulmonary aspiration and foreign body in airway | 2,825.23<br>(2,347.72 to 3,546.47)                  | 2,778.36<br>(1,908.42 to 3,669.72)                  | 2,502.38<br>(1,659.73 to 3,334.54)                  | 2,850.61<br>(1,975.93 to 3,756.89)                  | 125.98<br>(74.44 to 164.23)                  | 165.92<br>(79.60 to 239.19)                      | 164.29<br>(75.03 to 240.55)                    | 158.84<br>(79.49 to 227.14)                      |

|                                             |                                                               |                                                               |                                                               |                                                               |                                                        |                                                        |                                                      |                                                        |
|---------------------------------------------|---------------------------------------------------------------|---------------------------------------------------------------|---------------------------------------------------------------|---------------------------------------------------------------|--------------------------------------------------------|--------------------------------------------------------|------------------------------------------------------|--------------------------------------------------------|
|                                             | 104.57<br>(77.78 to<br>188.22)                                | 136.26<br>(94.29 to<br>245.68)                                | 140.25<br>(97.24 to<br>250.64)                                | 131.61<br>(90.96 to<br>240.43)                                | 3.09<br>(2.29 to<br>4.76)                              | 5.50<br>(3.58 to<br>7.75)                              | 6.13<br>(3.95 to<br>8.44)                            | 5.02<br>(3.33 to<br>7.17)                              |
| Foreign body in other body part             |                                                               |                                                               |                                                               |                                                               |                                                        |                                                        |                                                      |                                                        |
|                                             | 698.82<br>(495.53 to<br>1,211.18)                             | 756.14<br>(445.99 to<br>1,415.88)                             | 516.98<br>(303.51 to<br>976.78)                               | 853.71<br>(517.96 to<br>1,557.28)                             | 37.28<br>(26.95 to<br>67.68)                           | 47.03<br>(30.03 to<br>89.18)                           | 35.46<br>(21.82 to<br>65.60)                         | 51.28<br>(31.69 to<br>92.12)                           |
| Environmental heat and cold exposure        |                                                               |                                                               |                                                               |                                                               |                                                        |                                                        |                                                      |                                                        |
|                                             | 544.25<br>(428.34 to<br>683.21)                               | 334.36<br>(203.94 to<br>547.43)                               | 168.82<br>(100.50 to<br>267.17)                               | 462.78<br>(262.12 to<br>783.24)                               | 13.38<br>(10.76 to<br>16.62)                           | 9.62<br>(6.39 to<br>14.85)                             | 5.11<br>(3.29 to<br>7.52)                            | 12.81<br>(8.05 to<br>20.27)                            |
| Other unintentional injuries                |                                                               |                                                               |                                                               |                                                               |                                                        |                                                        |                                                      |                                                        |
| <b>Self-harm and interpersonal violence</b> | <b>33,904.41</b><br><b>(25,329.99 to</b><br><b>45,147.34)</b> | <b>33,265.35</b><br><b>(20,619.55 to</b><br><b>52,715.36)</b> | <b>24,268.46</b><br><b>(15,372.85 to</b><br><b>37,495.45)</b> | <b>38,104.99</b><br><b>(23,155.62 to</b><br><b>61,172.94)</b> | <b>799.76</b><br><b>(604.26 to</b><br><b>1,043.91)</b> | <b>863.78</b><br><b>(552.12 to</b><br><b>1,314.40)</b> | <b>650.36</b><br><b>(429.24 to</b><br><b>959.41)</b> | <b>965.45</b><br><b>(606.99 to</b><br><b>1,484.50)</b> |

| Israel                                                                              |                                              |                                               |                                               |                                               |                                        |                                         |                                         |                                         |
|-------------------------------------------------------------------------------------|----------------------------------------------|-----------------------------------------------|-----------------------------------------------|-----------------------------------------------|----------------------------------------|-----------------------------------------|-----------------------------------------|-----------------------------------------|
| Cause                                                                               | YLLs (actual counts)                         |                                               |                                               |                                               | Deaths (actual counts)                 |                                         |                                         |                                         |
|                                                                                     | 2016                                         | 2040 Forecast                                 | 2040 Better Scenario                          | 2040 Worse Scenario                           | 2016                                   | 2040 Forecast                           | 2040 Better Scenario                    | 2040 Worse Scenario                     |
| Self-harm                                                                           | 25,378.49<br>(18,934.68 to 36,668.57)        | 27,979.93<br>(17,238.30 to 45,833.60)         | 20,633.21<br>(12,989.49 to 32,777.89)         | 31,797.15<br>(19,288.31 to 53,206.15)         | 627.52<br>(471.84 to 867.92)           | 748.67<br>(479.01 to 1,161.34)          | 569.00<br>(375.77 to 850.17)            | 830.15<br>(523.34 to 1,311.60)          |
| Self-harm by firearm                                                                | 3,478.93<br>(2,229.18 to 5,238.12)           | 3,236.15<br>(1,653.48 to 6,052.34)            | 2,137.11<br>(1,094.26 to 3,681.81)            | 3,877.60<br>(1,908.54 to 7,221.28)            | 76.92<br>(51.57 to 117.36)             | 76.78<br>(41.61 to 135.76)              | 51.87<br>(28.25 to 89.45)               | 90.20<br>(47.40 to 165.84)              |
| Self-harm by other specified means                                                  | 21,899.56<br>(16,189.21 to 32,444.31)        | 24,743.78<br>(15,352.86 to 40,738.52)         | 18,496.10<br>(11,625.42 to 29,480.93)         | 27,919.55<br>(17,007.73 to 46,445.90)         | 550.60<br>(410.16 to 777.10)           | 671.89<br>(428.31 to 1,044.03)          | 517.13<br>(340.25 to 769.52)            | 739.95<br>(465.24 to 1,170.19)          |
| Interpersonal violence                                                              | 8,525.92<br>(3,936.12 to 12,650.75)          | 5,285.42<br>(2,122.99 to 8,930.38)            | 3,635.25<br>(1,438.08 to 6,101.25)            | 6,307.84<br>(2,455.97 to 10,949.97)           | 172.24<br>(79.82 to 255.92)            | 115.12<br>(48.16 to 190.83)             | 81.35<br>(35.41 to 133.07)              | 135.30<br>(54.00 to 229.70)             |
| Physical violence by firearm                                                        | 3,980.50<br>(1,159.47 to 6,475.14)           | 2,304.16<br>(604.83 to 4,276.73)              | 1,493.10<br>(400.33 to 2,783.18)              | 2,847.24<br>(734.54 to 5,502.73)              | 77.21<br>(23.13 to 125.12)             | 45.61<br>(12.85 to 83.42)               | 29.88<br>(8.73 to 54.27)                | 56.06<br>(15.43 to 107.19)              |
| Physical violence by sharp object                                                   | 2,645.21<br>(990.37 to 4,064.15)             | 1,717.31<br>(573.73 to 2,971.23)              | 1,195.80<br>(384.99 to 2,034.45)              | 2,046.65<br>(644.33 to 3,595.57)              | 54.96<br>(21.27 to 82.89)              | 38.34<br>(14.23 to 64.11)               | 27.53<br>(10.35 to 44.73)               | 44.95<br>(15.66 to 76.18)               |
| Physical violence by other means                                                    | 1,900.21<br>(1,222.33 to 3,275.67)           | 1,263.95<br>(636.08 to 2,162.80)              | 946.34<br>(473.16 to 1,566.01)                | 1,413.95<br>(711.78 to 2,433.92)              | 40.07<br>(24.05 to 60.92)              | 31.16<br>(15.38 to 50.28)               | 23.94<br>(11.94 to 38.03)               | 34.29<br>(16.77 to 55.40)               |
| <b>Forces of nature, conflict and terrorism, and executions and police conflict</b> | <b>684.73</b><br><b>(319.71 to 1,051.86)</b> | <b>4,353.88</b><br><b>(0.00 to 47,786.52)</b> | <b>4,207.83</b><br><b>(0.00 to 46,435.18)</b> | <b>4,342.38</b><br><b>(0.00 to 47,663.72)</b> | <b>12.88</b><br><b>(6.00 to 19.79)</b> | <b>89.23</b><br><b>(0.00 to 963.15)</b> | <b>88.70</b><br><b>(0.00 to 960.52)</b> | <b>87.76</b><br><b>(0.00 to 947.98)</b> |
| Exposure to forces of nature                                                        | 0.00<br>(0.00 to 0.00)                       | 43.07<br>(0.00 to 561.25)                     | 41.60<br>(0.00 to 535.65)                     | 42.89<br>(0.00 to 560.40)                     | 0.00<br>(0.00 to 0.00)                 | 1.00<br>(0.00 to 12.09)                 | 1.00<br>(0.00 to 11.98)                 | 0.98<br>(0.00 to 11.96)                 |
| Conflict and terrorism                                                              | 642.02<br>(277.33 to 1,011.94)               | 4,310.80<br>(0.00 to 47,786.52)               | 4,166.23<br>(0.00 to 46,435.18)               | 4,299.48<br>(0.00 to 47,663.72)               | 12.08<br>(5.22 to 19.04)               | 88.23<br>(0.00 to 963.15)               | 87.71<br>(0.00 to 960.52)               | 86.78<br>(0.00 to 947.98)               |
| Executions and police conflict                                                      | 42.72<br>(37.11 to 49.56)                    | 0.00<br>(0.00 to 0.00)                        | 0.00<br>(0.00 to 0.00)                        | 0.00<br>(0.00 to 0.00)                        | 0.80<br>(0.68 to 0.94)                 | 0.00<br>(0.00 to 0.00)                  | 0.00<br>(0.00 to 0.00)                  | 0.00<br>(0.00 to 0.00)                  |

| Italy                                                             |                                       |                                       |                                       |                                        |                                 |                                 |                                 |                                 |
|-------------------------------------------------------------------|---------------------------------------|---------------------------------------|---------------------------------------|----------------------------------------|---------------------------------|---------------------------------|---------------------------------|---------------------------------|
| Cause                                                             | YLLs (in 1000s)                       |                                       |                                       |                                        | Deaths (in 1000s)               |                                 |                                 |                                 |
|                                                                   | 2016                                  | 2040 Forecast                         | 2040 Better Scenario                  | 2040 Worse Scenario                    | 2016                            | 2040 Forecast                   | 2040 Better Scenario            | 2040 Worse Scenario             |
| All causes                                                        | 8,251.59<br>(7,782.34 to<br>8,740.21) | 7,693.55<br>(6,794.99 to<br>8,705.54) | 6,494.33<br>(5,802.81 to<br>7,220.12) | 9,312.61<br>(8,132.72 to<br>10,630.06) | 667.28<br>(634.48 to<br>702.25) | 715.30<br>(654.34 to<br>781.98) | 628.98<br>(580.47 to<br>681.77) | 818.80<br>(744.63 to<br>900.32) |
| Communicable, maternal, neonatal, and nutritional diseases        | 237.70<br>(210.23 to<br>268.64)       | 184.62<br>(151.12 to<br>230.24)       | 156.09<br>(128.05 to<br>195.03)       | 226.31<br>(177.57 to<br>291.10)        | 13.87<br>(12.42 to<br>15.72)    | 15.52<br>(12.32 to<br>19.95)    | 14.61<br>(11.60 to<br>18.74)    | 17.40<br>(13.24 to<br>23.55)    |
| HIV/AIDS and tuberculosis                                         | 30.64<br>(28.97 to<br>32.54)          | 13.55<br>(7.37 to<br>20.44)           | 7.17<br>(3.71 to<br>11.70)            | 25.46<br>(15.99 to<br>38.83)           | 1.04<br>(0.97 to<br>1.11)       | 0.44<br>(0.27 to<br>0.65)       | 0.26<br>(0.16 to<br>0.40)       | 0.72<br>(0.47 to<br>1.07)       |
| Tuberculosis                                                      | 6.33<br>(5.64 to<br>7.08)             | 3.16<br>(1.79 to<br>5.16)             | 1.97<br>(1.13 to<br>3.18)             | 4.50<br>(2.43 to<br>7.89)              | 0.43<br>(0.38 to<br>0.49)       | 0.26<br>(0.15 to<br>0.43)       | 0.17<br>(0.10 to<br>0.28)       | 0.36<br>(0.19 to<br>0.62)       |
| HIV/AIDS                                                          | 24.31<br>(22.91 to<br>25.94)          | 10.40<br>(4.51 to<br>17.04)           | 5.20<br>(1.86 to<br>9.43)             | 20.96<br>(11.68 to<br>33.73)           | 0.61<br>(0.57 to<br>0.65)       | 0.18<br>(0.07 to<br>0.30)       | 0.09<br>(0.03 to<br>0.17)       | 0.37<br>(0.20 to<br>0.58)       |
| Diarrhea, lower respiratory, and other common infectious diseases | 117.33<br>(104.36 to<br>132.54)       | 120.64<br>(93.08 to<br>160.49)        | 107.01<br>(83.27 to<br>142.00)        | 146.68<br>(106.21 to<br>207.82)        | 10.32<br>(8.96 to<br>12.03)     | 13.12<br>(9.92 to<br>17.47)     | 12.43<br>(9.56 to<br>16.47)     | 14.77<br>(10.59 to<br>20.87)    |
| Diarrheal diseases                                                | 5.88<br>(5.16 to<br>6.66)             | 10.80<br>(6.53 to<br>19.73)           | 16.02<br>(10.13 to<br>26.77)          | 10.33<br>(5.89 to<br>20.16)            | 0.53<br>(0.46 to<br>0.61)       | 1.26<br>(0.72 to<br>2.32)       | 1.96<br>(1.21 to<br>3.30)       | 1.17<br>(0.63 to<br>2.27)       |
| Intestinal infectious diseases                                    | 0.08<br>(0.04 to<br>0.15)             | 0.06<br>(0.03 to<br>0.11)             | 0.06<br>(0.03 to<br>0.11)             | 0.06<br>(0.03 to<br>0.11)              | 0.00<br>(0.00 to<br>0.01)       | 0.00<br>(0.00 to<br>0.01)       | 0.00<br>(0.00 to<br>0.01)       | 0.00<br>(0.00 to<br>0.01)       |
| Typhoid fever                                                     | 0.02<br>(0.01 to<br>0.05)             | 0.01<br>(0.01 to<br>0.04)             | 0.01<br>(0.01 to<br>0.04)             | 0.01<br>(0.01 to<br>0.04)              | 0.00<br>(0.00 to<br>0.00)       | 0.00<br>(0.00 to<br>0.00)       | 0.00<br>(0.00 to<br>0.00)       | 0.00<br>(0.00 to<br>0.00)       |
| Paratyphoid fever                                                 | 0.02<br>(0.00 to<br>0.04)             | 0.01<br>(0.00 to<br>0.02)             | 0.01<br>(0.00 to<br>0.02)             | 0.01<br>(0.00 to<br>0.02)              | 0.00<br>(0.00 to<br>0.00)       | 0.00<br>(0.00 to<br>0.00)       | 0.00<br>(0.00 to<br>0.00)       | 0.00<br>(0.00 to<br>0.00)       |
| Other intestinal infectious diseases                              | 0.05<br>(0.02 to<br>0.09)             | 0.03<br>(0.01 to<br>0.07)             | 0.03<br>(0.01 to<br>0.07)             | 0.03<br>(0.01 to<br>0.07)              | 0.00<br>(0.00 to<br>0.01)       | 0.00<br>(0.00 to<br>0.01)       | 0.00<br>(0.00 to<br>0.01)       | 0.00<br>(0.00 to<br>0.01)       |
| Lower respiratory infections                                      | 97.92<br>(85.84 to<br>112.64)         | 99.54<br>(72.37 to<br>139.53)         | 81.44<br>(58.71 to<br>116.46)         | 125.69<br>(85.67 to<br>186.20)         | 9.23<br>(7.91 to<br>10.91)      | 11.31<br>(8.26 to<br>15.83)     | 9.95<br>(7.17 to<br>14.12)      | 13.08<br>(9.13 to<br>19.30)     |
| Upper respiratory infections                                      | 0.09<br>(0.05 to<br>0.14)             | 0.07<br>(0.03 to<br>0.13)             | 0.05<br>(0.02 to<br>0.09)             | 0.07<br>(0.03 to<br>0.13)              | 0.00<br>(0.00 to<br>0.01)       | 0.01<br>(0.00 to<br>0.01)       | 0.00<br>(0.00 to<br>0.01)       | 0.00<br>(0.00 to<br>0.01)       |
| Otitis media                                                      | 0.08<br>(0.06 to<br>0.10)             | 0.02<br>(0.01 to<br>0.05)             | 0.02<br>(0.01 to<br>0.05)             | 0.02<br>(0.01 to<br>0.04)              | 0.00<br>(0.00 to<br>0.01)       | 0.00<br>(0.00 to<br>0.00)       | 0.00<br>(0.00 to<br>0.00)       | 0.00<br>(0.00 to<br>0.00)       |
| Meningitis                                                        | 5.07<br>(4.37 to<br>5.92)             | 2.26<br>(1.85 to<br>2.76)             | 1.86<br>(1.52 to<br>2.27)             | 2.53<br>(1.95 to<br>3.26)              | 0.19<br>(0.16 to<br>0.21)       | 0.11<br>(0.08 to<br>0.13)       | 0.09<br>(0.07 to<br>0.11)       | 0.11<br>(0.09 to<br>0.13)       |
| Pneumococcal meningitis                                           | 1.22<br>(1.04 to<br>1.41)             | 0.62<br>(0.50 to<br>0.73)             | 0.62<br>(0.50 to<br>0.74)             | 0.64<br>(0.52 to<br>0.77)              | 0.05<br>(0.04 to<br>0.06)       | 0.03<br>(0.03 to<br>0.04)       | 0.03<br>(0.03 to<br>0.04)       | 0.03<br>(0.02 to<br>0.04)       |
| H influenzae type B meningitis                                    | 0.40<br>(0.33 to<br>0.49)             | 0.36<br>(0.20 to<br>0.65)             | 0.29<br>(0.18 to<br>0.46)             | 0.58<br>(0.24 to<br>1.21)              | 0.01<br>(0.01 to<br>0.02)       | 0.01<br>(0.01 to<br>0.01)       | 0.01<br>(0.01 to<br>0.01)       | 0.01<br>(0.01 to<br>0.02)       |
| Meningococcal meningitis                                          | 1.03<br>(0.86 to<br>1.25)             | 0.32<br>(0.24 to<br>0.40)             | 0.24<br>(0.18 to<br>0.31)             | 0.32<br>(0.24 to<br>0.42)              | 0.03<br>(0.02 to<br>0.03)       | 0.01<br>(0.01 to<br>0.02)       | 0.01<br>(0.01 to<br>0.01)       | 0.01<br>(0.01 to<br>0.02)       |
| Other meningitis                                                  | 2.42<br>(2.09 to<br>2.79)             | 0.97<br>(0.77 to<br>1.19)             | 0.72<br>(0.57 to<br>0.89)             | 0.98<br>(0.77 to<br>1.24)              | 0.10<br>(0.08 to<br>0.11)       | 0.05<br>(0.04 to<br>0.06)       | 0.04<br>(0.03 to<br>0.05)       | 0.05<br>(0.04 to<br>0.06)       |
| Encephalitis                                                      | 7.32<br>(5.37 to<br>9.60)             | 7.23<br>(5.23 to<br>9.35)             | 7.03<br>(5.11 to<br>9.08)             | 7.15<br>(5.13 to<br>9.28)              | 0.30<br>(0.21 to<br>0.38)       | 0.37<br>(0.27 to<br>0.47)       | 0.38<br>(0.27 to<br>0.48)       | 0.36<br>(0.25 to<br>0.45)       |

|                |                           |                           |                           |                           |                           |                           |                           |                           |
|----------------|---------------------------|---------------------------|---------------------------|---------------------------|---------------------------|---------------------------|---------------------------|---------------------------|
| Diphtheria     | 0.01<br>(0.01 to<br>0.02) | 0.00<br>(0.00 to<br>0.00) | 0.00<br>(0.00 to<br>0.00) | 0.00<br>(0.00 to<br>0.01) | 0.00<br>(0.00 to<br>0.00) | 0.00<br>(0.00 to<br>0.00) | 0.00<br>(0.00 to<br>0.00) | 0.00<br>(0.00 to<br>0.00) |
| Whooping cough | 0.08<br>(0.03 to<br>0.16) | 0.03<br>(0.01 to<br>0.08) | 0.01<br>(0.00 to<br>0.02) | 0.08<br>(0.02 to<br>0.20) | 0.00<br>(0.00 to<br>0.00) | 0.00<br>(0.00 to<br>0.00) | 0.00<br>(0.00 to<br>0.00) | 0.00<br>(0.00 to<br>0.00) |
| Tetanus        | 0.22<br>(0.17 to<br>0.31) | 0.02<br>(0.01 to<br>0.02) | 0.02<br>(0.01 to<br>0.02) | 0.02<br>(0.01 to<br>0.02) | 0.01<br>(0.01 to<br>0.02) | 0.00<br>(0.00 to<br>0.00) | 0.00<br>(0.00 to<br>0.00) | 0.00<br>(0.00 to<br>0.00) |
| Measles        | 0.05<br>(0.04 to<br>0.07) | 0.24<br>(0.00 to<br>1.36) | 0.18<br>(0.00 to<br>0.96) | 0.37<br>(0.01 to<br>2.22) | 0.00<br>(0.00 to<br>0.00) | 0.00<br>(0.00 to<br>0.02) | 0.00<br>(0.00 to<br>0.02) | 0.01<br>(0.00 to<br>0.03) |



| Italy                                                 |                               |                               |                               |                               |                               |                               |                               |                               |
|-------------------------------------------------------|-------------------------------|-------------------------------|-------------------------------|-------------------------------|-------------------------------|-------------------------------|-------------------------------|-------------------------------|
| Cause                                                 | YLLs (in 1000s)               |                               |                               |                               | Deaths (in 1000s)             |                               |                               |                               |
|                                                       | 2016                          | 2040 Forecast                 | 2040 Better Scenario          | 2040 Worse Scenario           | 2016                          | 2040 Forecast                 | 2040 Better Scenario          | 2040 Worse Scenario           |
| Varicella and herpes zoster                           | 0.53<br>(0.28 to 0.89)        | 0.37<br>(0.20 to 0.64)        | 0.33<br>(0.17 to 0.58)        | 0.36<br>(0.19 to 0.63)        | 0.05<br>(0.03 to 0.10)        | 0.04<br>(0.02 to 0.08)        | 0.04<br>(0.02 to 0.08)        | 0.04<br>(0.02 to 0.08)        |
| Neglected tropical diseases and malaria               | <b>0.72</b><br>(0.61 to 0.87) | <b>0.42</b><br>(0.36 to 0.58) | <b>0.41</b><br>(0.35 to 0.56) | <b>0.41</b><br>(0.35 to 0.57) | <b>0.03</b><br>(0.03 to 0.04) | <b>0.02</b><br>(0.02 to 0.03) | <b>0.02</b><br>(0.02 to 0.03) | <b>0.02</b><br>(0.02 to 0.03) |
| Malaria                                               | 0.00<br>(0.00 to 0.00)        | 0.00<br>(0.00 to 0.00)        | 0.00<br>(0.00 to 0.00)        | 0.00<br>(0.00 to 0.00)        | 0.00<br>(0.00 to 0.00)        | 0.00<br>(0.00 to 0.00)        | 0.00<br>(0.00 to 0.00)        | 0.00<br>(0.00 to 0.00)        |
| Chagas disease                                        | 0.00<br>(0.00 to 0.00)        | 0.00<br>(0.00 to 0.00)        | 0.00<br>(0.00 to 0.00)        | 0.00<br>(0.00 to 0.00)        | 0.00<br>(0.00 to 0.00)        | 0.00<br>(0.00 to 0.00)        | 0.00<br>(0.00 to 0.00)        | 0.00<br>(0.00 to 0.00)        |
| Leishmaniasis                                         | 0.21<br>(0.12 to 0.33)        | 0.06<br>(0.04 to 0.13)        | 0.05<br>(0.03 to 0.11)        | 0.06<br>(0.04 to 0.13)        | 0.01<br>(0.00 to 0.01)        | 0.00<br>(0.00 to 0.01)        | 0.00<br>(0.00 to 0.00)        | 0.00<br>(0.00 to 0.01)        |
| African trypanosomiasis                               | 0.00<br>(0.00 to 0.00)        | 0.00<br>(0.00 to 0.00)        | 0.00<br>(0.00 to 0.00)        | 0.00<br>(0.00 to 0.00)        | 0.00<br>(0.00 to 0.00)        | 0.00<br>(0.00 to 0.00)        | 0.00<br>(0.00 to 0.00)        | 0.00<br>(0.00 to 0.00)        |
| Schistosomiasis                                       | 0.00<br>(0.00 to 0.00)        | 0.00<br>(0.00 to 0.00)        | 0.00<br>(0.00 to 0.00)        | 0.00<br>(0.00 to 0.00)        | 0.00<br>(0.00 to 0.00)        | 0.00<br>(0.00 to 0.00)        | 0.00<br>(0.00 to 0.00)        | 0.00<br>(0.00 to 0.00)        |
| Cysticercosis                                         | 0.03<br>(0.02 to 0.03)        | 0.01<br>(0.01 to 0.01)        | 0.01<br>(0.01 to 0.01)        | 0.01<br>(0.01 to 0.01)        | 0.00<br>(0.00 to 0.00)        | 0.00<br>(0.00 to 0.00)        | 0.00<br>(0.00 to 0.00)        | 0.00<br>(0.00 to 0.00)        |
| Cystic echinococcosis                                 | 0.15<br>(0.13 to 0.18)        | 0.09<br>(0.07 to 0.12)        | 0.08<br>(0.06 to 0.10)        | 0.09<br>(0.07 to 0.12)        | 0.01<br>(0.01 to 0.01)        | 0.01<br>(0.01 to 0.01)        | 0.01<br>(0.01 to 0.01)        | 0.01<br>(0.01 to 0.01)        |
| Dengue                                                | 0.00<br>(0.00 to 0.00)        | 0.00<br>(0.00 to 0.00)        | 0.00<br>(0.00 to 0.00)        | 0.00<br>(0.00 to 0.00)        | 0.00<br>(0.00 to 0.00)        | 0.00<br>(0.00 to 0.00)        | 0.00<br>(0.00 to 0.00)        | 0.00<br>(0.00 to 0.00)        |
| Yellow fever                                          | 0.00<br>(0.00 to 0.00)        | 0.00<br>(0.00 to 0.00)        | 0.00<br>(0.00 to 0.00)        | 0.00<br>(0.00 to 0.00)        | 0.00<br>(0.00 to 0.00)        | 0.00<br>(0.00 to 0.00)        | 0.00<br>(0.00 to 0.00)        | 0.00<br>(0.00 to 0.00)        |
| Rabies                                                | 0.00<br>(0.00 to 0.00)        | 0.00<br>(0.00 to 0.00)        | 0.00<br>(0.00 to 0.00)        | 0.00<br>(0.00 to 0.00)        | 0.00<br>(0.00 to 0.00)        | 0.00<br>(0.00 to 0.00)        | 0.00<br>(0.00 to 0.00)        | 0.00<br>(0.00 to 0.00)        |
| Intestinal nematode infections                        | 0.00<br>(0.00 to 0.00)        | 0.00<br>(0.00 to 0.00)        | 0.00<br>(0.00 to 0.00)        | 0.00<br>(0.00 to 0.00)        | 0.00<br>(0.00 to 0.00)        | 0.00<br>(0.00 to 0.00)        | 0.00<br>(0.00 to 0.00)        | 0.00<br>(0.00 to 0.00)        |
| Other neglected tropical diseases                     | 0.33<br>(0.29 to 0.41)        | 0.26<br>(0.20 to 0.34)        | 0.28<br>(0.21 to 0.35)        | 0.26<br>(0.20 to 0.33)        | 0.01<br>(0.01 to 0.01)        | 0.01<br>(0.01 to 0.02)        | 0.01<br>(0.01 to 0.02)        | 0.01<br>(0.01 to 0.02)        |
| Maternal disorders                                    | <b>0.97</b><br>(0.82 to 1.14) | <b>0.66</b><br>(0.47 to 0.90) | <b>0.55</b><br>(0.39 to 0.74) | <b>0.67</b><br>(0.47 to 0.92) | <b>0.02</b><br>(0.02 to 0.02) | <b>0.01</b><br>(0.01 to 0.02) | <b>0.01</b><br>(0.01 to 0.01) | <b>0.01</b><br>(0.01 to 0.02) |
| Maternal hemorrhage                                   | 0.21<br>(0.15 to 0.28)        | 0.14<br>(0.08 to 0.21)        | 0.12<br>(0.07 to 0.18)        | 0.14<br>(0.08 to 0.22)        | 0.00<br>(0.00 to 0.01)        | 0.00<br>(0.00 to 0.00)        | 0.00<br>(0.00 to 0.00)        | 0.00<br>(0.00 to 0.00)        |
| Maternal sepsis and other maternal infections         | 0.04<br>(0.03 to 0.06)        | 0.02<br>(0.01 to 0.04)        | 0.02<br>(0.01 to 0.03)        | 0.02<br>(0.01 to 0.04)        | 0.00<br>(0.00 to 0.00)        | 0.00<br>(0.00 to 0.00)        | 0.00<br>(0.00 to 0.00)        | 0.00<br>(0.00 to 0.00)        |
| Maternal hypertensive disorders                       | 0.10<br>(0.07 to 0.14)        | 0.07<br>(0.04 to 0.11)        | 0.06<br>(0.03 to 0.09)        | 0.07<br>(0.04 to 0.11)        | 0.00<br>(0.00 to 0.00)        | 0.00<br>(0.00 to 0.00)        | 0.00<br>(0.00 to 0.00)        | 0.00<br>(0.00 to 0.00)        |
| Maternal obstructed labor and uterine rupture         | 0.04<br>(0.02 to 0.05)        | 0.02<br>(0.01 to 0.04)        | 0.02<br>(0.01 to 0.03)        | 0.02<br>(0.01 to 0.04)        | 0.00<br>(0.00 to 0.00)        | 0.00<br>(0.00 to 0.00)        | 0.00<br>(0.00 to 0.00)        | 0.00<br>(0.00 to 0.00)        |
| Maternal abortion, miscarriage, and ectopic pregnancy | 0.16<br>(0.12 to 0.22)        | 0.11<br>(0.06 to 0.19)        | 0.09<br>(0.05 to 0.15)        | 0.12<br>(0.07 to 0.19)        | 0.00<br>(0.00 to 0.00)        | 0.00<br>(0.00 to 0.00)        | 0.00<br>(0.00 to 0.00)        | 0.00<br>(0.00 to 0.00)        |

|                                        |                           |                           |                           |                           |                           |                           |                           |                           |
|----------------------------------------|---------------------------|---------------------------|---------------------------|---------------------------|---------------------------|---------------------------|---------------------------|---------------------------|
| Indirect maternal deaths               | 0.18<br>(0.13 to<br>0.25) | 0.13<br>(0.07 to<br>0.20) | 0.10<br>(0.06 to<br>0.17) | 0.13<br>(0.07 to<br>0.21) | 0.00<br>(0.00 to<br>0.00) | 0.00<br>(0.00 to<br>0.00) | 0.00<br>(0.00 to<br>0.00) | 0.00<br>(0.00 to<br>0.00) |
| Late maternal deaths                   | 0.05<br>(0.03 to<br>0.07) | 0.03<br>(0.02 to<br>0.05) | 0.03<br>(0.01 to<br>0.04) | 0.03<br>(0.02 to<br>0.05) | 0.00<br>(0.00 to<br>0.00) | 0.00<br>(0.00 to<br>0.00) | 0.00<br>(0.00 to<br>0.00) | 0.00<br>(0.00 to<br>0.00) |
| Maternal deaths aggravated by HIV/AIDS | 0.00<br>(0.00 to<br>0.00) | 0.00<br>(0.00 to<br>0.01) | 0.00<br>(0.00 to<br>0.01) | 0.00<br>(0.00 to<br>0.01) | 0.00<br>(0.00 to<br>0.00) | 0.00<br>(0.00 to<br>0.00) | 0.00<br>(0.00 to<br>0.00) | 0.00<br>(0.00 to<br>0.00) |
| Other maternal disorders               | 0.19<br>(0.13 to<br>0.26) | 0.14<br>(0.08 to<br>0.21) | 0.12<br>(0.07 to<br>0.18) | 0.14<br>(0.08 to<br>0.22) | 0.00<br>(0.00 to<br>0.01) | 0.00<br>(0.00 to<br>0.00) | 0.00<br>(0.00 to<br>0.00) | 0.00<br>(0.00 to<br>0.00) |

| Italy                                                                   |                                  |                                  |                                  |                                  |                               |                               |                               |                               |
|-------------------------------------------------------------------------|----------------------------------|----------------------------------|----------------------------------|----------------------------------|-------------------------------|-------------------------------|-------------------------------|-------------------------------|
| Cause                                                                   | YLLs (in 1000s)                  |                                  |                                  |                                  | Deaths (in 1000s)             |                               |                               |                               |
|                                                                         | 2016                             | 2040 Forecast                    | 2040 Better Scenario             | 2040 Worse Scenario              | 2016                          | 2040 Forecast                 | 2040 Better Scenario          | 2040 Worse Scenario           |
| <b>Neonatal disorders</b>                                               | <b>63.99</b><br>(43.74 to 88.42) | <b>30.13</b><br>(16.55 to 47.72) | <b>22.66</b><br>(12.42 to 36.43) | <b>34.43</b><br>(19.03 to 55.87) | <b>0.74</b><br>(0.51 to 1.02) | <b>0.35</b><br>(0.19 to 0.55) | <b>0.26</b><br>(0.14 to 0.42) | <b>0.40</b><br>(0.22 to 0.65) |
| Neonatal preterm birth                                                  | 32.95<br>(22.19 to 47.06)        | 12.86<br>(7.41 to 20.97)         | 8.10<br>(4.63 to 13.18)          | 15.15<br>(8.64 to 24.44)         | 0.38<br>(0.26 to 0.54)        | 0.15<br>(0.09 to 0.24)        | 0.09<br>(0.05 to 0.15)        | 0.18<br>(0.10 to 0.28)        |
| Neonatal encephalopathy due to birth asphyxia and trauma                | 11.17<br>(7.33 to 16.26)         | 4.99<br>(2.47 to 8.92)           | 3.67<br>(1.83 to 6.59)           | 5.64<br>(2.78 to 10.26)          | 0.13<br>(0.08 to 0.19)        | 0.06<br>(0.03 to 0.10)        | 0.04<br>(0.02 to 0.08)        | 0.07<br>(0.03 to 0.12)        |
| Neonatal sepsis and other neonatal infections                           | 4.34<br>(2.51 to 7.12)           | 2.81<br>(1.39 to 5.09)           | 2.25<br>(1.08 to 4.08)           | 3.14<br>(1.51 to 5.78)           | 0.05<br>(0.03 to 0.08)        | 0.03<br>(0.02 to 0.06)        | 0.03<br>(0.01 to 0.05)        | 0.04<br>(0.02 to 0.07)        |
| Hemolytic disease and other neonatal jaundice                           | 0.24<br>(0.14 to 0.41)           | 0.10<br>(0.04 to 0.22)           | 0.08<br>(0.04 to 0.17)           | 0.11<br>(0.05 to 0.25)           | 0.00<br>(0.00 to 0.00)        | 0.00<br>(0.00 to 0.00)        | 0.00<br>(0.00 to 0.00)        | 0.00<br>(0.00 to 0.00)        |
| Other neonatal disorders                                                | 15.29<br>(9.79 to 22.22)         | 9.37<br>(4.71 to 16.30)          | 8.59<br>(4.43 to 14.50)          | 10.38<br>(5.21 to 18.10)         | 0.18<br>(0.11 to 0.26)        | 0.11<br>(0.05 to 0.19)        | 0.10<br>(0.05 to 0.17)        | 0.12<br>(0.06 to 0.21)        |
| <b>Nutritional deficiencies</b>                                         | <b>7.68</b><br>(6.91 to 8.53)    | <b>5.59</b><br>(4.68 to 6.59)    | <b>6.04</b><br>(5.04 to 7.12)    | <b>5.20</b><br>(4.33 to 6.17)    | <b>0.88</b><br>(0.78 to 0.99) | <b>0.76</b><br>(0.60 to 0.95) | <b>0.86</b><br>(0.69 to 1.06) | <b>0.68</b><br>(0.54 to 0.86) |
| Protein-energy malnutrition                                             | 3.97<br>(1.55 to 4.97)           | 2.92<br>(0.98 to 4.05)           | 3.39<br>(1.21 to 4.62)           | 2.69<br>(0.89 to 3.70)           | 0.46<br>(0.15 to 0.60)        | 0.41<br>(0.12 to 0.60)        | 0.49<br>(0.15 to 0.70)        | 0.36<br>(0.10 to 0.54)        |
| Iodine deficiency                                                       | 0.18<br>(0.01 to 0.56)           | 0.30<br>(0.01 to 1.07)           | 0.30<br>(0.01 to 1.15)           | 0.28<br>(0.01 to 1.03)           | 0.01<br>(0.00 to 0.05)        | 0.04<br>(0.00 to 0.17)        | 0.04<br>(0.00 to 0.18)        | 0.03<br>(0.00 to 0.15)        |
| Dietary iron deficiency                                                 | 0.95<br>(0.26 to 1.43)           | 0.49<br>(0.13 to 0.81)           | 0.54<br>(0.14 to 0.89)           | 0.46<br>(0.13 to 0.76)           | 0.12<br>(0.01 to 0.20)        | 0.07<br>(0.01 to 0.14)        | 0.08<br>(0.01 to 0.16)        | 0.06<br>(0.01 to 0.12)        |
| Other nutritional deficiencies                                          | 2.58<br>(1.78 to 5.40)           | 1.89<br>(1.15 to 4.05)           | 1.81<br>(1.05 to 4.18)           | 1.77<br>(1.08 to 3.81)           | 0.29<br>(0.18 to 0.68)        | 0.25<br>(0.13 to 0.58)        | 0.25<br>(0.13 to 0.63)        | 0.23<br>(0.12 to 0.53)        |
| <b>Other communicable, maternal, neonatal, and nutritional diseases</b> | <b>16.37</b><br>(14.19 to 18.24) | <b>13.62</b><br>(11.56 to 15.63) | <b>12.26</b><br>(10.43 to 14.19) | <b>13.45</b><br>(11.32 to 15.64) | <b>0.84</b><br>(0.72 to 0.94) | <b>0.82</b><br>(0.68 to 0.94) | <b>0.76</b><br>(0.64 to 0.88) | <b>0.79</b><br>(0.66 to 0.92) |
| Sexually transmitted infections excluding HIV                           | 0.55<br>(0.47 to 0.67)           | 0.23<br>(0.19 to 0.29)           | 0.21<br>(0.17 to 0.27)           | 0.23<br>(0.19 to 0.28)           | 0.03<br>(0.03 to 0.04)        | 0.02<br>(0.01 to 0.02)        | 0.02<br>(0.01 to 0.02)        | 0.02<br>(0.01 to 0.02)        |
| Syphilis                                                                | 0.23<br>(0.18 to 0.33)           | 0.07<br>(0.06 to 0.10)           | 0.06<br>(0.05 to 0.08)           | 0.07<br>(0.06 to 0.10)           | 0.01<br>(0.01 to 0.01)        | 0.00<br>(0.00 to 0.01)        | 0.00<br>(0.00 to 0.01)        | 0.00<br>(0.00 to 0.01)        |
| Chlamydial infection                                                    | 0.06<br>(0.05 to 0.07)           | 0.03<br>(0.02 to 0.04)           | 0.03<br>(0.02 to 0.04)           | 0.03<br>(0.02 to 0.04)           | 0.00<br>(0.00 to 0.00)        | 0.00<br>(0.00 to 0.00)        | 0.00<br>(0.00 to 0.00)        | 0.00<br>(0.00 to 0.00)        |
| Gonococcal infection                                                    | 0.18<br>(0.16 to 0.21)           | 0.09<br>(0.07 to 0.12)           | 0.09<br>(0.07 to 0.12)           | 0.09<br>(0.07 to 0.12)           | 0.01<br>(0.01 to 0.01)        | 0.01<br>(0.01 to 0.01)        | 0.01<br>(0.01 to 0.01)        | 0.01<br>(0.01 to 0.01)        |
| Other sexually transmitted infections                                   | 0.08<br>(0.07 to 0.09)           | 0.04<br>(0.03 to 0.05)           | 0.03<br>(0.03 to 0.04)           | 0.04<br>(0.03 to 0.04)           | 0.00<br>(0.00 to 0.00)        | 0.00<br>(0.00 to 0.00)        | 0.00<br>(0.00 to 0.00)        | 0.00<br>(0.00 to 0.00)        |
| Acute hepatitis                                                         | 8.65<br>(7.48 to 10.01)          | 5.75<br>(4.43 to 7.44)           | 4.51<br>(3.40 to 6.01)           | 5.74<br>(4.28 to 7.67)           | 0.46<br>(0.39 to 0.53)        | 0.35<br>(0.27 to 0.45)        | 0.28<br>(0.21 to 0.38)        | 0.34<br>(0.25 to 0.45)        |
| Acute hepatitis A                                                       | 0.44<br>(0.33 to 0.57)           | 0.24<br>(0.16 to 0.37)           | 0.21<br>(0.13 to 0.32)           | 0.24<br>(0.15 to 0.37)           | 0.02<br>(0.01 to 0.03)        | 0.01<br>(0.01 to 0.02)        | 0.01<br>(0.01 to 0.02)        | 0.01<br>(0.01 to 0.02)        |
| Acute hepatitis B                                                       | 6.85<br>(5.84 to 8.06)           | 4.47<br>(3.30 to 5.91)           | 3.47<br>(2.51 to 4.69)           | 4.48<br>(3.26 to 6.06)           | 0.34<br>(0.28 to 0.40)        | 0.25<br>(0.18 to 0.34)        | 0.20<br>(0.14 to 0.28)        | 0.25<br>(0.18 to 0.34)        |

|                                       |                                       |                                       |                                       |                                       |                                 |                                 |                                 |                                 |
|---------------------------------------|---------------------------------------|---------------------------------------|---------------------------------------|---------------------------------------|---------------------------------|---------------------------------|---------------------------------|---------------------------------|
|                                       | 0.51<br>(0.36 to<br>0.71)             | 0.36<br>(0.22 to<br>0.54)             | 0.29<br>(0.17 to<br>0.43)             | 0.36<br>(0.22 to<br>0.56)             | 0.03<br>(0.02 to<br>0.04)       | 0.02<br>(0.01 to<br>0.03)       | 0.02<br>(0.01 to<br>0.03)       | 0.02<br>(0.01 to<br>0.03)       |
| Acute hepatitis C                     | 0.86<br>(0.56 to<br>1.25)             | 0.67<br>(0.39 to<br>1.05)             | 0.55<br>(0.31 to<br>0.87)             | 0.66<br>(0.37 to<br>1.02)             | 0.07<br>(0.04 to<br>0.10)       | 0.06<br>(0.03 to<br>0.09)       | 0.05<br>(0.03 to<br>0.08)       | 0.06<br>(0.03 to<br>0.09)       |
| Acute hepatitis E                     | 7.16<br>(5.30 to<br>8.21)             | 7.64<br>(5.84 to<br>8.85)             | 7.54<br>(5.75 to<br>8.68)             | 7.48<br>(5.69 to<br>8.68)             | 0.36<br>(0.25 to<br>0.41)       | 0.46<br>(0.34 to<br>0.53)       | 0.47<br>(0.34 to<br>0.54)       | 0.43<br>(0.32 to<br>0.51)       |
| Other unspecified infectious diseases | 7,453.23<br>(7,025.33 to<br>7,888.99) | 7,125.92<br>(6,267.14 to<br>8,064.84) | 5,986.95<br>(5,329.01 to<br>6,665.12) | 8,635.15<br>(7,524.15 to<br>9,890.79) | 627.62<br>(596.07 to<br>660.08) | 674.95<br>(613.64 to<br>740.77) | 590.66<br>(544.14 to<br>640.52) | 775.34<br>(703.00 to<br>855.53) |
| Non-communicable diseases             |                                       |                                       |                                       |                                       |                                 |                                 |                                 |                                 |

| Italy                                |                                           |                                           |                                           |                                           |                                     |                                     |                                     |                                     |
|--------------------------------------|-------------------------------------------|-------------------------------------------|-------------------------------------------|-------------------------------------------|-------------------------------------|-------------------------------------|-------------------------------------|-------------------------------------|
| Cause                                | YLLs (in 1000s)                           |                                           |                                           |                                           | Deaths (in 1000s)                   |                                     |                                     |                                     |
|                                      | 2016                                      | 2040 Forecast                             | 2040 Better Scenario                      | 2040 Worse Scenario                       | 2016                                | 2040 Forecast                       | 2040 Better Scenario                | 2040 Worse Scenario                 |
| <b>Neoplasms</b>                     | <b>2,967.71</b><br>(2,784.47 to 3,176.40) | <b>2,782.56</b><br>(2,404.73 to 3,183.98) | <b>2,392.45</b><br>(2,086.40 to 2,705.93) | <b>3,496.13</b><br>(2,939.79 to 4,072.75) | <b>184.59</b><br>(173.44 to 197.28) | <b>198.99</b><br>(175.47 to 224.36) | <b>175.76</b><br>(157.05 to 196.87) | <b>238.47</b><br>(206.00 to 272.92) |
| Lip and oral cavity cancer           | 37.80<br>(33.80 to 42.35)                 | 24.24<br>(13.07 to 41.08)                 | 18.09<br>(9.99 to 30.60)                  | 48.08<br>(23.81 to 83.02)                 | 2.06<br>(1.87 to 2.27)              | 1.54<br>(0.86 to 2.57)              | 1.16<br>(0.68 to 1.91)              | 2.91<br>(1.50 to 5.02)              |
| Nasopharynx cancer                   | 10.98<br>(9.71 to 12.55)                  | 6.90<br>(3.78 to 11.83)                   | 4.85<br>(2.68 to 8.16)                    | 14.05<br>(7.19 to 24.42)                  | 0.56<br>(0.50 to 0.64)              | 0.42<br>(0.22 to 0.72)              | 0.30<br>(0.16 to 0.49)              | 0.82<br>(0.42 to 1.42)              |
| Other pharynx cancer                 | 21.09<br>(18.81 to 23.65)                 | 16.71<br>(8.88 to 29.06)                  | 16.54<br>(9.00 to 29.09)                  | 23.45<br>(12.11 to 40.64)                 | 0.95<br>(0.85 to 1.05)              | 0.85<br>(0.46 to 1.47)              | 0.85<br>(0.47 to 1.48)              | 1.17<br>(0.60 to 1.97)              |
| Esophageal cancer                    | 40.24<br>(34.10 to 46.73)                 | 32.55<br>(19.02 to 53.58)                 | 25.68<br>(15.86 to 40.50)                 | 58.35<br>(31.14 to 101.91)                | 2.32<br>(2.01 to 2.65)              | 2.11<br>(1.28 to 3.34)              | 1.68<br>(1.07 to 2.55)              | 3.63<br>(2.02 to 6.08)              |
| Stomach cancer                       | 192.74<br>(176.08 to 209.85)              | 135.42<br>(104.76 to 173.45)              | 108.03<br>(87.71 to 133.23)               | 146.94<br>(112.29 to 189.46)              | 13.34<br>(12.21 to 14.56)           | 10.74<br>(8.40 to 13.73)            | 8.82<br>(7.27 to 10.88)             | 11.32<br>(8.73 to 14.75)            |
| Colon and rectum cancer              | 313.98<br>(282.47 to 348.96)              | 303.43<br>(210.46 to 431.04)              | 246.95<br>(174.01 to 343.67)              | 371.46<br>(253.57 to 535.50)              | 21.63<br>(19.55 to 23.93)           | 24.00<br>(17.17 to 33.58)           | 20.15<br>(14.76 to 27.67)           | 28.46<br>(19.73 to 40.71)           |
| Liver cancer                         | 171.53<br>(150.30 to 194.54)              | 208.39<br>(147.88 to 293.86)              | 201.52<br>(147.60 to 275.09)              | 300.47<br>(191.67 to 455.33)              | 10.75<br>(9.50 to 12.07)            | 14.52<br>(10.54 to 20.21)           | 14.32<br>(10.69 to 19.35)           | 19.88<br>(13.11 to 29.84)           |
| Liver cancer due to hepatitis B      | 19.95<br>(15.78 to 25.09)                 | 23.12<br>(15.47 to 34.79)                 | 22.50<br>(15.57 to 32.75)                 | 29.80<br>(18.12 to 49.12)                 | 1.04<br>(0.82 to 1.32)              | 1.38<br>(0.92 to 2.01)              | 1.36<br>(0.95 to 1.90)              | 1.71<br>(1.06 to 2.71)              |
| Liver cancer due to hepatitis C      | 94.99<br>(81.74 to 109.46)                | 123.65<br>(88.41 to 171.70)               | 121.06<br>(88.73 to 164.16)               | 154.24<br>(100.68 to 232.76)              | 6.34<br>(5.47 to 7.28)              | 9.07<br>(6.56 to 12.57)             | 9.05<br>(6.81 to 12.20)             | 10.88<br>(7.22 to 16.13)            |
| Liver cancer due to alcohol use      | 45.66<br>(36.03 to 56.28)                 | 47.93<br>(30.23 to 74.63)                 | 44.85<br>(29.21 to 67.65)                 | 99.07<br>(57.22 to 163.60)                | 2.67<br>(2.12 to 3.33)              | 3.10<br>(1.99 to 4.68)              | 2.96<br>(1.95 to 4.37)              | 6.11<br>(3.63 to 9.95)              |
| Liver cancer due to other causes     | 10.94<br>(8.62 to 13.60)                  | 13.69<br>(8.93 to 20.65)                  | 13.11<br>(8.69 to 19.25)                  | 17.35<br>(10.40 to 28.16)                 | 0.70<br>(0.55 to 0.88)              | 0.97<br>(0.63 to 1.46)              | 0.94<br>(0.64 to 1.38)              | 1.18<br>(0.73 to 1.91)              |
| Gallbladder and biliary tract cancer | 61.22<br>(55.59 to 67.56)                 | 46.81<br>(41.37 to 52.27)                 | 46.51<br>(41.30 to 51.98)                 | 45.01<br>(39.99 to 50.14)                 | 4.34<br>(3.96 to 4.78)              | 3.65<br>(3.24 to 4.07)              | 3.73<br>(3.33 to 4.17)              | 3.43<br>(3.04 to 3.82)              |
| Pancreatic cancer                    | 196.21<br>(175.55 to 217.17)              | 213.85<br>(173.96 to 261.99)              | 203.38<br>(166.68 to 244.68)              | 237.80<br>(189.07 to 296.77)              | 12.45<br>(11.24 to 13.70)           | 14.95<br>(12.19 to 18.32)           | 14.50<br>(11.99 to 17.48)           | 16.20<br>(12.89 to 20.21)           |
| Larynx cancer                        | 30.10<br>(26.92 to 33.94)                 | 18.17<br>(9.00 to 32.26)                  | 11.84<br>(6.04 to 20.47)                  | 36.25<br>(16.60 to 67.14)                 | 1.71<br>(1.53 to 1.92)              | 1.18<br>(0.59 to 2.11)              | 0.77<br>(0.40 to 1.33)              | 2.25<br>(1.04 to 4.14)              |
| Tracheal, bronchus, and lung cancer  | 615.27<br>(562.82 to 676.08)              | 505.73<br>(354.45 to 713.28)              | 327.18<br>(235.73 to 456.13)              | 877.44<br>(604.92 to 1,230.12)            | 36.45<br>(33.35 to 39.81)           | 33.76<br>(23.58 to 47.81)           | 22.19<br>(15.73 to 31.11)           | 55.02<br>(38.09 to 76.81)           |
| Malignant skin melanoma              | 40.52<br>(31.32 to 46.45)                 | 40.89<br>(32.55 to 47.35)                 | 46.56<br>(37.32 to 54.48)                 | 39.22<br>(31.07 to 45.99)                 | 1.97<br>(1.59 to 2.25)              | 2.39<br>(1.97 to 2.74)              | 2.81<br>(2.32 to 3.22)              | 2.24<br>(1.83 to 2.57)              |
| Non-melanoma skin cancer             | 12.41<br>(11.19 to 13.72)                 | 14.54<br>(12.82 to 16.33)                 | 12.91<br>(11.33 to 14.46)                 | 13.86<br>(12.08 to 15.76)                 | 1.03<br>(0.93 to 1.12)              | 1.38<br>(1.18 to 1.57)              | 1.28<br>(1.11 to 1.45)              | 1.28<br>(1.09 to 1.47)              |
| Breast cancer                        | 241.71<br>(214.31 to 271.35)              | 195.60<br>(149.44 to 256.87)              | 167.19<br>(128.50 to 218.59)              | 230.82<br>(171.24 to 308.82)              | 13.34<br>(11.83 to 14.94)           | 12.97<br>(9.92 to 16.87)            | 11.44<br>(8.85 to 14.76)            | 14.86<br>(11.05 to 19.85)           |
| Cervical cancer                      | 29.67<br>(25.96 to 34.06)                 | 19.72<br>(15.55 to 24.74)                 | 16.20<br>(12.92 to 20.25)                 | 20.79<br>(15.85 to 27.31)                 | 1.54<br>(1.34 to 1.75)              | 1.22<br>(0.97 to 1.54)              | 1.03<br>(0.83 to 1.27)              | 1.26<br>(0.96 to 1.65)              |

|                   |                                |                                 |                                 |                                 |                             |                              |                              |                              |
|-------------------|--------------------------------|---------------------------------|---------------------------------|---------------------------------|-----------------------------|------------------------------|------------------------------|------------------------------|
|                   | 21.45<br>(18.64 to<br>24.87)   | 22.08<br>(18.39 to<br>26.29)    | 20.01<br>(16.49 to<br>24.00)    | 21.80<br>(17.98 to<br>26.01)    | 1.34<br>(1.15 to<br>1.56)   | 1.55<br>(1.30 to<br>1.85)    | 1.44<br>(1.20 to<br>1.73)    | 1.51<br>(1.26 to<br>1.80)    |
| Uterine cancer    |                                |                                 |                                 |                                 |                             |                              |                              |                              |
|                   | 73.55<br>(61.20 to<br>88.16)   | 65.73<br>(47.30 to<br>88.05)    | 56.73<br>(42.14 to<br>74.40)    | 69.29<br>(48.81 to<br>95.26)    | 4.03<br>(3.37 to<br>4.81)   | 4.13<br>(2.93 to<br>5.56)    | 3.58<br>(2.62 to<br>4.73)    | 4.31<br>(2.99 to<br>5.93)    |
| Ovarian cancer    |                                |                                 |                                 |                                 |                             |                              |                              |                              |
|                   | 112.92<br>(95.53 to<br>136.62) | 144.19<br>(116.96 to<br>180.42) | 137.34<br>(111.79 to<br>171.20) | 139.33<br>(111.90 to<br>175.21) | 10.18<br>(8.55 to<br>12.14) | 14.43<br>(11.35 to<br>17.79) | 14.27<br>(11.37 to<br>17.49) | 13.55<br>(10.45 to<br>16.89) |
| Prostate cancer   |                                |                                 |                                 |                                 |                             |                              |                              |                              |
|                   | 2.63<br>(2.14 to<br>3.17)      | 1.58<br>(1.24 to<br>1.97)       | 1.40<br>(1.10 to<br>1.75)       | 1.55<br>(1.22 to<br>1.94)       | 0.08<br>(0.07 to<br>0.10)   | 0.07<br>(0.05 to<br>0.08)    | 0.06<br>(0.05 to<br>0.07)    | 0.06<br>(0.05 to<br>0.08)    |
| Testicular cancer |                                |                                 |                                 |                                 |                             |                              |                              |                              |

| Italy                           |                                                  |                                                  |                                                  |                                                  |                                            |                                            |                                            |                                            |
|---------------------------------|--------------------------------------------------|--------------------------------------------------|--------------------------------------------------|--------------------------------------------------|--------------------------------------------|--------------------------------------------|--------------------------------------------|--------------------------------------------|
| Cause                           | YLLs (in 1000s)                                  |                                                  |                                                  |                                                  | Deaths (in 1000s)                          |                                            |                                            |                                            |
|                                 | 2016                                             | 2040 Forecast                                    | 2040 Better Scenario                             | 2040 Worse Scenario                              | 2016                                       | 2040 Forecast                              | 2040 Better Scenario                       | 2040 Worse Scenario                        |
| Kidney cancer                   | 70.36<br>(62.51 to 78.38)                        | 80.14<br>(65.55 to 98.01)                        | 79.06<br>(65.98 to 94.54)                        | 86.97<br>(68.11 to 110.69)                       | 4.44<br>(3.96 to 4.94)                     | 5.71<br>(4.59 to 7.02)                     | 5.79<br>(4.82 to 6.91)                     | 6.01<br>(4.65 to 7.65)                     |
| Bladder cancer                  | 101.60<br>(90.18 to 113.60)                      | 101.92<br>(77.67 to 134.49)                      | 88.39<br>(70.04 to 112.90)                       | 118.74<br>(86.40 to 161.60)                      | 8.12<br>(7.27 to 9.06)                     | 9.11<br>(6.92 to 12.00)                    | 8.11<br>(6.41 to 10.31)                    | 10.24<br>(7.46 to 14.10)                   |
| Brain and nervous system cancer | 95.26<br>(74.42 to 110.89)                       | 98.58<br>(73.24 to 113.76)                       | 93.62<br>(69.76 to 109.03)                       | 96.76<br>(72.59 to 111.62)                       | 4.06<br>(2.87 to 4.62)                     | 5.01<br>(3.41 to 5.79)                     | 4.85<br>(3.26 to 5.62)                     | 4.83<br>(3.29 to 5.59)                     |
| Thyroid cancer                  | 11.32<br>(10.00 to 12.79)                        | 10.91<br>(8.46 to 14.77)                         | 9.82<br>(7.68 to 13.01)                          | 11.70<br>(8.85 to 16.41)                         | 0.69<br>(0.61 to 0.77)                     | 0.75<br>(0.59 to 1.01)                     | 0.69<br>(0.55 to 0.91)                     | 0.78<br>(0.60 to 1.09)                     |
| Mesothelioma                    | 29.85<br>(26.23 to 35.06)                        | 34.77<br>(29.94 to 43.20)                        | 35.88<br>(30.74 to 44.65)                        | 33.37<br>(29.01 to 41.12)                        | 1.73<br>(1.52 to 2.09)                     | 2.22<br>(1.94 to 2.74)                     | 2.35<br>(2.04 to 2.94)                     | 2.10<br>(1.83 to 2.56)                     |
| Hodgkin lymphoma                | 10.45<br>(9.43 to 11.74)                         | 7.35<br>(6.32 to 8.56)                           | 6.02<br>(5.19 to 7.05)                           | 7.28<br>(6.20 to 8.56)                           | 0.43<br>(0.39 to 0.48)                     | 0.38<br>(0.32 to 0.43)                     | 0.32<br>(0.27 to 0.36)                     | 0.36<br>(0.31 to 0.42)                     |
| Non-Hodgkin lymphoma            | 98.90<br>(86.44 to 115.52)                       | 98.48<br>(81.59 to 123.00)                       | 90.78<br>(75.44 to 112.90)                       | 100.32<br>(81.10 to 128.58)                      | 5.85<br>(5.16 to 6.67)                     | 6.73<br>(5.62 to 8.15)                     | 6.38<br>(5.41 to 7.73)                     | 6.68<br>(5.49 to 8.26)                     |
| Multiple myeloma                | 54.75<br>(46.17 to 70.33)                        | 63.53<br>(51.11 to 82.54)                        | 61.07<br>(49.29 to 79.44)                        | 64.56<br>(51.18 to 86.66)                        | 3.69<br>(3.12 to 4.55)                     | 4.68<br>(3.79 to 5.97)                     | 4.62<br>(3.79 to 5.86)                     | 4.64<br>(3.72 to 6.00)                     |
| Leukemia                        | 139.28<br>(124.88 to 153.71)                     | 131.14<br>(105.48 to 163.46)                     | 119.49<br>(97.19 to 146.64)                      | 146.02<br>(112.00 to 189.63)                     | 7.87<br>(7.13 to 8.61)                     | 8.89<br>(7.11 to 11.09)                    | 8.28<br>(6.71 to 10.11)                    | 9.62<br>(7.29 to 12.55)                    |
| Acute lymphoid leukemia         | 18.24<br>(15.94 to 20.82)                        | 10.83<br>(8.56 to 13.64)                         | 9.45<br>(7.52 to 11.88)                          | 12.13<br>(9.25 to 15.83)                         | 0.55<br>(0.48 to 0.63)                     | 0.42<br>(0.33 to 0.53)                     | 0.37<br>(0.29 to 0.46)                     | 0.47<br>(0.35 to 0.62)                     |
| Chronic lymphoid leukemia       | 23.01<br>(19.01 to 29.64)                        | 23.27<br>(17.14 to 32.47)                        | 21.93<br>(16.40 to 30.26)                        | 25.70<br>(17.93 to 37.29)                        | 1.78<br>(1.48 to 2.24)                     | 1.98<br>(1.47 to 2.70)                     | 1.91<br>(1.47 to 2.55)                     | 2.11<br>(1.51 to 2.98)                     |
| Acute myeloid leukemia          | 54.78<br>(41.90 to 61.84)                        | 54.84<br>(41.77 to 68.04)                        | 52.29<br>(40.43 to 63.79)                        | 61.16<br>(45.57 to 78.98)                        | 2.76<br>(2.16 to 3.11)                     | 3.25<br>(2.54 to 4.00)                     | 3.16<br>(2.50 to 3.84)                     | 3.54<br>(2.68 to 4.54)                     |
| Chronic myeloid leukemia        | 12.66<br>(10.92 to 14.44)                        | 6.65<br>(4.91 to 8.85)                           | 5.06<br>(3.81 to 6.65)                           | 7.52<br>(5.25 to 10.43)                          | 0.83<br>(0.72 to 0.96)                     | 0.50<br>(0.37 to 0.65)                     | 0.39<br>(0.30 to 0.50)                     | 0.54<br>(0.38 to 0.76)                     |
| Other leukemia                  | 30.60<br>(26.68 to 35.34)                        | 35.55<br>(27.37 to 46.12)                        | 30.76<br>(24.13 to 39.50)                        | 39.52<br>(29.16 to 53.17)                        | 1.95<br>(1.69 to 2.26)                     | 2.75<br>(2.12 to 3.55)                     | 2.45<br>(1.93 to 3.11)                     | 2.96<br>(2.19 to 3.97)                     |
| Other neoplasms                 | 129.82<br>(114.54 to 142.82)                     | 139.22<br>(122.12 to 155.48)                     | 139.43<br>(122.15 to 155.04)                     | 134.45<br>(117.87 to 149.84)                     | 7.63<br>(6.77 to 8.39)                     | 8.64<br>(8.42 to 10.72)                    | 9.99<br>(8.78 to 11.14)                    | 9.06<br>(7.85 to 10.14)                    |
| <b>Cardiovascular diseases</b>  | <b>2,345.02</b><br><b>(2,203.01 to 2,504.53)</b> | <b>1,875.05</b><br><b>(1,398.74 to 2,556.63)</b> | <b>1,333.23</b><br><b>(1,045.41 to 1,717.07)</b> | <b>2,426.16</b><br><b>(1,725.74 to 3,384.29)</b> | <b>236.77</b><br><b>(223.51 to 252.57)</b> | <b>211.40</b><br><b>(165.26 to 274.97)</b> | <b>161.82</b><br><b>(131.31 to 205.02)</b> | <b>254.60</b><br><b>(191.31 to 338.91)</b> |
| Rheumatic heart disease         | 36.82<br>(32.99 to 41.12)                        | 24.90<br>(19.97 to 32.01)                        | 21.01<br>(16.95 to 26.45)                        | 24.49<br>(19.53 to 31.47)                        | 3.14<br>(2.79 to 3.50)                     | 2.37<br>(1.94 to 3.01)                     | 2.08<br>(1.69 to 2.60)                     | 2.27<br>(1.82 to 2.92)                     |
| Ischemic heart disease          | 1,200.92<br>(1,106.78 to 1,316.45)               | 814.97<br>(498.36 to 1,280.21)                   | 484.35<br>(306.05 to 752.91)                     | 1,133.53<br>(667.86 to 1,824.23)                 | 119.31<br>(109.38 to 132.84)               | 89.02<br>(55.67 to 133.44)                 | 58.23<br>(37.00 to 87.40)                  | 112.96<br>(67.09 to 176.21)                |
| Stroke                          | 515.45<br>(456.86 to 582.55)                     | 341.44<br>(212.47 to 517.09)                     | 213.72<br>(138.34 to 316.70)                     | 461.40<br>(271.21 to 707.91)                     | 52.33<br>(45.54 to 60.77)                  | 38.40<br>(24.17 to 59.32)                  | 26.50<br>(17.04 to 40.79)                  | 47.50<br>(28.72 to 76.32)                  |
| Ischemic stroke                 | 228.64<br>(197.59 to 263.17)                     | 155.81<br>(87.89 to 283.84)                      | 105.93<br>(61.19 to 182.10)                      | 191.67<br>(105.15 to 365.74)                     | 27.18<br>(23.26 to 31.88)                  | 19.94<br>(11.12 to 36.70)                  | 14.54<br>(8.31 to 25.95)                   | 23.07<br>(12.52 to 43.68)                  |

|                                |                                 |                                 |                                |                                 |                              |                              |                              |                              |
|--------------------------------|---------------------------------|---------------------------------|--------------------------------|---------------------------------|------------------------------|------------------------------|------------------------------|------------------------------|
| Intracerebral hemorrhage       | 286.81<br>(256.94 to<br>322.95) | 185.62<br>(112.47 to<br>292.65) | 107.79<br>(69.01 to<br>157.76) | 269.73<br>(154.65 to<br>429.81) | 25.15<br>(21.95 to<br>29.13) | 18.46<br>(11.81 to<br>28.20) | 11.96<br>(7.86 to<br>17.53)  | 24.43<br>(14.56 to<br>38.40) |
| Hypertensive heart disease     | 181.74<br>(100.58 to<br>225.30) | 225.57<br>(94.02 to<br>473.41)  | 192.44<br>(85.16 to<br>347.45) | 320.46<br>(130.80 to<br>725.68) | 20.99<br>(9.35 to<br>27.52)  | 29.02<br>(10.48 to<br>63.10) | 25.98<br>(10.04 to<br>49.34) | 39.64<br>(13.92 to<br>90.37) |
| Cardiomyopathy and myocarditis | 100.94<br>(72.27 to<br>117.01)  | 112.49<br>(66.82 to<br>163.98)  | 99.28<br>(59.00 to<br>140.94)  | 111.81<br>(67.74 to<br>162.84)  | 10.44<br>(6.27 to<br>12.79)  | 14.06<br>(7.25 to<br>22.06)  | 13.24<br>(7.00 to<br>20.10)  | 13.33<br>(6.93 to<br>21.08)  |
| Myocarditis                    | 26.24<br>(12.96 to<br>34.79)    | 38.32<br>(17.87 to<br>54.98)    | 40.22<br>(19.30 to<br>56.66)   | 35.31<br>(16.78 to<br>51.08)    | 3.53<br>(1.20 to<br>5.21)    | 5.93<br>(2.04 to<br>9.22)    | 6.48<br>(2.35 to<br>9.83)    | 5.29<br>(1.83 to<br>8.37)    |



| Italy                                                         |                                          |                                          |                                          |                                          |                                       |                                       |                                       |                                       |
|---------------------------------------------------------------|------------------------------------------|------------------------------------------|------------------------------------------|------------------------------------------|---------------------------------------|---------------------------------------|---------------------------------------|---------------------------------------|
| Cause                                                         | YLLs (in 1000s)                          |                                          |                                          |                                          | Deaths (in 1000s)                     |                                       |                                       |                                       |
|                                                               | 2016                                     | 2040 Forecast                            | 2040 Better Scenario                     | 2040 Worse Scenario                      | 2016                                  | 2040 Forecast                         | 2040 Better Scenario                  | 2040 Worse Scenario                   |
| Alcoholic cardiomyopathy                                      | 3.00<br>(1.80 to<br>5.52)                | 1.91<br>(1.16 to<br>3.14)                | 1.85<br>(1.15 to<br>2.95)                | 2.96<br>(1.84 to<br>4.88)                | 0.12<br>(0.07 to<br>0.19)             | 0.09<br>(0.05 to<br>0.13)             | 0.09<br>(0.05 to<br>0.13)             | 0.14<br>(0.08 to<br>0.19)             |
| Other cardiomyopathy                                          | 71.70<br>(54.99 to<br>85.11)             | 72.26<br>(43.85 to<br>114.69)            | 57.20<br>(35.06 to<br>89.92)             | 73.54<br>(44.34 to<br>115.39)            | 6.79<br>(4.77 to<br>9.14)             | 8.04<br>(4.46 to<br>14.35)            | 6.67<br>(3.78 to<br>11.94)            | 7.90<br>(4.40 to<br>14.05)            |
| Atrial fibrillation and flutter                               | 76.77<br>(60.36 to<br>95.75)             | 87.22<br>(62.42 to<br>115.91)            | 83.38<br>(60.45 to<br>110.41)            | 96.38<br>(67.09 to<br>131.93)            | 9.60<br>(7.44 to<br>12.06)            | 11.38<br>(8.27 to<br>15.34)           | 11.27<br>(8.10 to<br>15.17)           | 12.11<br>(8.56 to<br>17.12)           |
| Aortic aneurysm                                               | 62.78<br>(56.30 to<br>70.14)             | 56.21<br>(43.34 to<br>73.88)             | 49.82<br>(39.45 to<br>64.78)             | 58.47<br>(44.10 to<br>76.93)             | 4.79<br>(4.26 to<br>5.39)             | 4.77<br>(3.77 to<br>6.15)             | 4.47<br>(3.59 to<br>5.65)             | 4.72<br>(3.63 to<br>6.12)             |
| Peripheral artery disease                                     | 25.39<br>(17.60 to<br>51.02)             | 45.42<br>(27.19 to<br>91.35)             | 43.87<br>(26.28 to<br>87.71)             | 46.81<br>(27.63 to<br>95.20)             | 2.94<br>(2.04 to<br>5.97)             | 2.94<br>(3.32 to<br>11.25)            | 5.60<br>(3.41 to<br>11.66)            | 5.72<br>(3.23 to<br>11.21)            |
| Endocarditis                                                  | 22.68<br>(14.65 to<br>27.26)             | 24.06<br>(14.48 to<br>34.79)             | 23.32<br>(14.20 to<br>33.56)             | 24.57<br>(14.54 to<br>35.99)             | 1.83<br>(1.16 to<br>2.24)             | 2.16<br>(1.27 to<br>3.36)             | 2.18<br>(1.31 to<br>3.40)             | 2.13<br>(1.24 to<br>3.36)             |
| Other cardiovascular and circulatory diseases                 | 121.52<br>(109.98 to<br>133.06)          | 142.77<br>(113.12 to<br>182.09)          | 112.05<br>(91.53 to<br>140.69)           | 148.26<br>(114.96 to<br>191.87)          | 11.39<br>(10.22 to<br>12.71)          | 14.63<br>(11.69 to<br>18.67)          | 12.16<br>(9.87 to<br>15.33)           | 14.43<br>(11.30 to<br>18.45)          |
| <b>Chronic respiratory diseases</b>                           | <b>311.64<br/>(287.73 to<br/>339.01)</b> | <b>291.18<br/>(228.94 to<br/>376.39)</b> | <b>229.44<br/>(185.08 to<br/>287.56)</b> | <b>419.09<br/>(318.95 to<br/>554.52)</b> | <b>31.37<br/>(29.00 to<br/>34.12)</b> | <b>31.71<br/>(24.17 to<br/>41.70)</b> | <b>25.03<br/>(19.84 to<br/>32.37)</b> | <b>43.74<br/>(33.37 to<br/>58.66)</b> |
| Chronic obstructive pulmonary disease                         | 264.00<br>(242.03 to<br>292.62)          | 238.20<br>(175.71 to<br>319.42)          | 168.90<br>(125.87 to<br>223.90)          | 366.95<br>(267.32 to<br>501.19)          | 27.75<br>(25.55 to<br>30.54)          | 27.36<br>(20.04 to<br>37.13)          | 19.95<br>(14.96 to<br>27.07)          | 39.56<br>(29.52 to<br>54.27)          |
| Pneumoconiosis                                                | 5.82<br>(4.90 to<br>6.84)                | 3.48<br>(2.67 to<br>4.60)                | 3.08<br>(2.36 to<br>3.99)                | 3.33<br>(2.51 to<br>4.40)                | 0.56<br>(0.46 to<br>0.66)             | 0.34<br>(0.26 to<br>0.45)             | 0.30<br>(0.23 to<br>0.40)             | 0.32<br>(0.23 to<br>0.42)             |
| Silicosis                                                     | 4.21<br>(3.19 to<br>5.19)                | 1.86<br>(1.05 to<br>2.85)                | 1.31<br>(0.75 to<br>2.11)                | 1.79<br>(0.97 to<br>2.78)                | 0.43<br>(0.32 to<br>0.52)             | 0.20<br>(0.11 to<br>0.30)             | 0.14<br>(0.08 to<br>0.23)             | 0.18<br>(0.10 to<br>0.28)             |
| Asbestosis                                                    | 1.26<br>(0.76 to<br>1.85)                | 1.38<br>(0.89 to<br>1.96)                | 1.56<br>(1.10 to<br>2.10)                | 1.29<br>(0.82 to<br>1.82)                | 0.10<br>(0.05 to<br>0.15)             | 0.12<br>(0.07 to<br>0.17)             | 0.14<br>(0.09 to<br>0.19)             | 0.11<br>(0.06 to<br>0.16)             |
| Coal workers pneumoconiosis                                   | 0.11<br>(0.04 to<br>0.71)                | 0.09<br>(0.03 to<br>0.57)                | 0.08<br>(0.02 to<br>0.46)                | 0.10<br>(0.03 to<br>0.59)                | 0.01<br>(0.00 to<br>0.07)             | 0.01<br>(0.00 to<br>0.06)             | 0.01<br>(0.00 to<br>0.05)             | 0.01<br>(0.00 to<br>0.06)             |
| Other pneumoconiosis                                          | 0.24<br>(0.19 to<br>0.38)                | 0.14<br>(0.10 to<br>0.21)                | 0.13<br>(0.09 to<br>0.20)                | 0.14<br>(0.10 to<br>0.21)                | 0.02<br>(0.02 to<br>0.04)             | 0.01<br>(0.01 to<br>0.02)             | 0.01<br>(0.01 to<br>0.02)             | 0.01<br>(0.01 to<br>0.02)             |
| Asthma                                                        | 7.21<br>(6.23 to<br>9.93)                | 3.75<br>(2.36 to<br>6.05)                | 2.65<br>(1.72 to<br>4.15)                | 4.58<br>(2.68 to<br>7.73)                | 0.59<br>(0.51 to<br>0.69)             | 0.38<br>(0.23 to<br>0.59)             | 0.28<br>(0.18 to<br>0.44)             | 0.44<br>(0.26 to<br>0.72)             |
| Interstitial lung disease and pulmonary sarcoidosis           | 30.66<br>(15.68 to<br>37.94)             | 39.16<br>(20.71 to<br>48.97)             | 48.34<br>(26.64 to<br>59.81)             | 37.17<br>(19.10 to<br>46.91)             | 2.21<br>(1.17 to<br>2.75)             | 3.09<br>(1.68 to<br>3.90)             | 3.95<br>(2.23 to<br>4.88)             | 2.86<br>(1.51 to<br>3.65)             |
| Other chronic respiratory diseases                            | 3.95<br>(2.35 to<br>8.37)                | 6.60<br>(3.72 to<br>13.59)               | 6.48<br>(3.65 to<br>13.52)               | 7.06<br>(3.86 to<br>14.89)               | 0.27<br>(0.19 to<br>0.51)             | 0.54<br>(0.34 to<br>1.03)             | 0.55<br>(0.35 to<br>1.04)             | 0.56<br>(0.35 to<br>1.09)             |
| <b>Cirrhosis and other chronic liver diseases</b>             | <b>223.90<br/>(199.72 to<br/>251.03)</b> | <b>215.28<br/>(187.06 to<br/>242.92)</b> | <b>190.00<br/>(163.83 to<br/>216.25)</b> | <b>228.67<br/>(196.60 to<br/>261.63)</b> | <b>12.32<br/>(11.09 to<br/>13.62)</b> | <b>13.52<br/>(11.95 to<br/>15.09)</b> | <b>12.25<br/>(10.81 to<br/>13.72)</b> | <b>14.01<br/>(12.23 to<br/>15.83)</b> |
| Cirrhosis and other chronic liver diseases due to hepatitis B | 33.76<br>(28.33 to<br>40.26)             | 34.01<br>(27.63 to<br>40.95)             | 30.38<br>(24.70 to<br>36.69)             | 33.17<br>(27.02 to<br>40.32)             | 1.85<br>(1.54 to<br>2.21)             | 2.13<br>(1.72 to<br>2.55)             | 1.95<br>(1.59 to<br>2.35)             | 2.03<br>(1.66 to<br>2.47)             |
| Cirrhosis and other chronic liver diseases due to hepatitis C | 124.40<br>(109.06 to<br>140.39)          | 127.34<br>(107.96 to<br>147.33)          | 112.41<br>(94.47 to<br>130.98)           | 124.72<br>(104.95 to<br>145.70)          | 6.72<br>(5.90 to<br>7.57)             | 7.76<br>(6.68 to<br>8.88)             | 7.02<br>(6.01 to<br>8.04)             | 7.45<br>(6.33 to<br>8.67)             |

|                                                                |                                                      |                                                      |                                                      |                                                      |                                                   |                                                   |                                                   |                                                   |
|----------------------------------------------------------------|------------------------------------------------------|------------------------------------------------------|------------------------------------------------------|------------------------------------------------------|---------------------------------------------------|---------------------------------------------------|---------------------------------------------------|---------------------------------------------------|
|                                                                | 40.79<br>(34.41 to<br>47.41)                         | 28.89<br>(23.76 to<br>34.65)                         | 24.78<br>(20.47 to<br>29.68)                         | 46.54<br>(38.47 to<br>54.70)                         | 2.20<br>(1.86 to<br>2.56)                         | 1.84<br>(1.52 to<br>2.20)                         | 1.62<br>(1.33 to<br>1.93)                         | 2.82<br>(2.34 to<br>3.35)                         |
| Cirrhosis and other chronic liver diseases due to alcohol use  |                                                      |                                                      |                                                      |                                                      |                                                   |                                                   |                                                   |                                                   |
|                                                                | 24.95<br>(20.39 to<br>29.92)                         | 25.03<br>(19.90 to<br>30.80)                         | 22.42<br>(17.77 to<br>27.60)                         | 24.44<br>(19.38 to<br>30.32)                         | 1.56<br>(1.27 to<br>1.90)                         | 1.79<br>(1.42 to<br>2.23)                         | 1.66<br>(1.32 to<br>2.08)                         | 1.71<br>(1.35 to<br>2.14)                         |
| Cirrhosis and other chronic liver diseases due to other causes |                                                      |                                                      |                                                      |                                                      |                                                   |                                                   |                                                   |                                                   |
|                                                                | <b>161.72</b><br><b>(141.45 to</b><br><b>207.69)</b> | <b>174.29</b><br><b>(143.75 to</b><br><b>224.42)</b> | <b>163.20</b><br><b>(135.55 to</b><br><b>208.14)</b> | <b>177.45</b><br><b>(144.28 to</b><br><b>233.14)</b> | <b>14.45</b><br><b>(12.70 to</b><br><b>17.30)</b> | <b>17.70</b><br><b>(14.65 to</b><br><b>21.90)</b> | <b>17.22</b><br><b>(14.37 to</b><br><b>21.01)</b> | <b>17.40</b><br><b>(14.08 to</b><br><b>21.75)</b> |
| Digestive diseases                                             |                                                      |                                                      |                                                      |                                                      |                                                   |                                                   |                                                   |                                                   |
|                                                                | 14.70<br>(12.27 to<br>18.79)                         | 11.76<br>(9.09 to<br>15.07)                          | 9.18<br>(7.23 to<br>11.63)                           | 11.91<br>(9.06 to<br>15.34)                          | 1.31<br>(1.13 to<br>1.59)                         | 1.22<br>(0.96 to<br>1.56)                         | 0.99<br>(0.79 to<br>1.28)                         | 1.19<br>(0.91 to<br>1.53)                         |
| Peptic ulcer disease                                           |                                                      |                                                      |                                                      |                                                      |                                                   |                                                   |                                                   |                                                   |

| Italy                                      |                              |                                  |                                  |                                  |                             |                              |                              |                              |
|--------------------------------------------|------------------------------|----------------------------------|----------------------------------|----------------------------------|-----------------------------|------------------------------|------------------------------|------------------------------|
| Cause                                      | YLLs (in 1000s)              |                                  |                                  |                                  | Deaths (in 1000s)           |                              |                              |                              |
|                                            | 2016                         | 2040 Forecast                    | 2040 Better Scenario             | 2040 Worse Scenario              | 2016                        | 2040 Forecast                | 2040 Better Scenario         | 2040 Worse Scenario          |
| Gastritis and duodenitis                   | 2.43<br>(1.78 to 3.97)       | 2.82<br>(2.00 to 4.41)           | 2.47<br>(1.71 to 3.84)           | 2.71<br>(1.86 to 4.21)           | 0.20<br>(0.16 to 0.31)      | 0.28<br>(0.20 to 0.42)       | 0.25<br>(0.18 to 0.37)       | 0.26<br>(0.18 to 0.39)       |
| Appendicitis                               | 1.68<br>(1.27 to 2.96)       | 1.41<br>(1.04 to 2.42)           | 1.14<br>(0.83 to 1.96)           | 1.38<br>(1.00 to 2.35)           | 0.12<br>(0.09 to 0.19)      | 0.12<br>(0.09 to 0.20)       | 0.10<br>(0.07 to 0.16)       | 0.11<br>(0.08 to 0.18)       |
| Paralytic ileus and intestinal obstruction | 37.25<br>(29.40 to 46.95)    | 46.10<br>(36.40 to 58.54)        | 47.73<br>(37.87 to 60.84)        | 43.35<br>(34.11 to 54.98)        | 3.51<br>(2.72 to 4.23)      | 4.89<br>(3.76 to 5.94)       | 5.24<br>(4.09 to 6.33)       | 4.47<br>(3.41 to 5.45)       |
| Inguinal, femoral, and abdominal hernia    | 6.65<br>(5.17 to 11.59)      | 5.26<br>(3.91 to 9.46)           | 4.82<br>(3.61 to 8.57)           | 4.99<br>(3.73 to 8.89)           | 0.64<br>(0.50 to 1.12)      | 0.56<br>(0.42 to 1.01)       | 0.54<br>(0.40 to 0.96)       | 0.52<br>(0.38 to 0.93)       |
| Inflammatory bowel disease                 | 14.41<br>(6.88 to 18.03)     | 12.98<br>(6.12 to 16.72)         | 13.13<br>(6.18 to 16.88)         | 12.35<br>(5.79 to 15.84)         | 1.21<br>(0.57 to 1.50)      | 1.23<br>(0.58 to 1.60)       | 1.30<br>(0.60 to 1.69)       | 1.14<br>(0.53 to 1.48)       |
| Vascular intestinal disorders              | 23.43<br>(19.26 to 31.95)    | 29.15<br>(23.41 to 38.58)        | 27.96<br>(22.49 to 37.23)        | 27.72<br>(22.26 to 37.19)        | 2.16<br>(1.83 to 2.73)      | 2.94<br>(2.37 to 3.70)       | 2.92<br>(2.39 to 3.72)       | 2.73<br>(2.17 to 3.44)       |
| Gallbladder and biliary diseases           | 20.43<br>(17.38 to 26.09)    | 22.72<br>(13.84 to 38.35)        | 18.34<br>(11.34 to 30.94)        | 27.07<br>(15.70 to 45.96)        | 2.04<br>(1.75 to 2.51)      | 2.56<br>(1.50 to 4.31)       | 2.15<br>(1.29 to 3.58)       | 2.94<br>(1.65 to 5.07)       |
| Pancreatitis                               | 19.13<br>(14.73 to 34.01)    | 17.38<br>(8.22 to 38.93)         | 14.62<br>(7.06 to 32.00)         | 22.46<br>(9.52 to 50.95)         | 1.28<br>(1.05 to 1.90)      | 1.36<br>(0.71 to 2.75)       | 1.18<br>(0.62 to 2.39)       | 1.70<br>(0.78 to 3.73)       |
| Other digestive diseases                   | 21.62<br>(15.76 to 26.06)    | 24.71<br>(18.48 to 30.17)        | 23.80<br>(17.84 to 29.04)        | 23.51<br>(17.54 to 28.61)        | 1.98<br>(1.55 to 2.31)      | 2.53<br>(1.96 to 3.09)       | 2.54<br>(1.99 to 3.09)       | 2.35<br>(1.80 to 2.86)       |
| Neurological disorders                     | 836.84<br>(729.67 to 957.24) | 1,037.49<br>(837.51 to 1,325.61) | 1,055.27<br>(866.73 to 1,313.20) | 1,081.36<br>(840.31 to 1,433.18) | 101.49<br>(87.18 to 116.39) | 132.75<br>(104.24 to 169.17) | 139.43<br>(112.76 to 173.54) | 135.02<br>(102.95 to 179.47) |
| Alzheimer's disease and other dementias    | 687.35<br>(587.69 to 803.75) | 861.98<br>(659.93 to 1,158.05)   | 872.09<br>(685.02 to 1,137.51)   | 909.83<br>(671.68 to 1,267.26)   | 90.98<br>(76.55 to 105.86)  | 118.65<br>(90.22 to 155.92)  | 124.12<br>(97.23 to 159.16)  | 121.69<br>(89.19 to 168.17)  |
| Parkinson's disease                        | 66.21<br>(49.61 to 86.90)    | 90.41<br>(68.22 to 118.73)       | 98.27<br>(75.30 to 129.30)       | 84.69<br>(62.95 to 111.64)       | 6.52<br>(4.88 to 8.60)      | 9.24<br>(6.95 to 12.21)      | 10.32<br>(7.81 to 13.48)     | 8.49<br>(6.34 to 11.21)      |
| Epilepsy                                   | 15.28<br>(13.67 to 17.51)    | 13.47<br>(8.97 to 19.83)         | 12.60<br>(8.48 to 18.47)         | 16.54<br>(10.34 to 25.62)        | 0.73<br>(0.65 to 0.83)      | 0.81<br>(0.54 to 1.19)       | 0.79<br>(0.54 to 1.16)       | 0.96<br>(0.62 to 1.47)       |
| Multiple sclerosis                         | 10.53<br>(7.31 to 12.52)     | 8.51<br>(5.91 to 10.59)          | 8.47<br>(5.91 to 10.49)          | 8.76<br>(6.05 to 10.97)          | 0.40<br>(0.28 to 0.47)      | 0.36<br>(0.25 to 0.45)       | 0.37<br>(0.26 to 0.45)       | 0.37<br>(0.26 to 0.46)       |
| Motor neuron disease                       | 28.50<br>(25.35 to 31.41)    | 31.53<br>(27.52 to 35.81)        | 31.40<br>(27.31 to 35.74)        | 30.83<br>(26.97 to 34.94)        | 1.42<br>(1.27 to 1.57)      | 1.74<br>(1.52 to 1.97)       | 1.76<br>(1.54 to 2.00)       | 1.68<br>(1.47 to 1.90)       |
| Other neurological disorders               | 28.98<br>(24.58 to 32.47)    | 31.57<br>(26.73 to 35.86)        | 32.44<br>(27.43 to 36.89)        | 30.71<br>(25.99 to 34.86)        | 1.45<br>(1.27 to 1.62)      | 1.95<br>(1.66 to 2.21)       | 2.07<br>(1.77 to 2.56)       | 1.84<br>(1.57 to 2.08)       |
| Mental disorders                           | 37.36<br>(32.30 to 42.66)    | 48.74<br>(40.09 to 58.85)        | 55.35<br>(45.99 to 67.01)        | 49.02<br>(40.37 to 59.56)        | 1.17<br>(1.04 to 1.31)      | 1.70<br>(1.49 to 1.95)       | 2.00<br>(1.76 to 2.29)       | 1.68<br>(1.46 to 1.94)       |
| Alcohol use disorders                      | 9.73<br>(8.50 to 11.01)      | 7.68<br>(6.49 to 9.03)           | 8.17<br>(6.84 to 9.72)           | 8.82<br>(7.48 to 10.41)          | 0.40<br>(0.35 to 0.44)      | 0.38<br>(0.33 to 0.44)       | 0.42<br>(0.37 to 0.49)       | 0.43<br>(0.37 to 0.49)       |
| Drug use disorders                         | 27.26<br>(22.37 to 31.85)    | 40.68<br>(32.40 to 50.21)        | 46.76<br>(37.76 to 57.70)        | 39.82<br>(31.54 to 49.77)        | 0.77<br>(0.65 to 0.88)      | 1.31<br>(1.10 to 1.52)       | 1.57<br>(1.35 to 1.84)       | 1.24<br>(1.03 to 1.47)       |
| Opioid use disorders                       | 13.55<br>(10.56 to 21.07)    | 18.84<br>(13.15 to 29.39)        | 19.51<br>(13.55 to 31.96)        | 18.64<br>(12.95 to 28.91)        | 0.33<br>(0.26 to 0.49)      | 0.49<br>(0.38 to 0.72)       | 0.52<br>(0.40 to 0.79)       | 0.48<br>(0.36 to 0.70)       |

|                           |                             |                             |                              |                             |                           |                           |                           |                           |
|---------------------------|-----------------------------|-----------------------------|------------------------------|-----------------------------|---------------------------|---------------------------|---------------------------|---------------------------|
|                           | 0.45<br>(0.18 to<br>0.61)   | 0.98<br>(0.37 to<br>1.51)   | 1.14<br>(0.46 to<br>1.72)    | 0.96<br>(0.36 to<br>1.49)   | 0.01<br>(0.01 to<br>0.02) | 0.03<br>(0.01 to<br>0.04) | 0.04<br>(0.02 to<br>0.05) | 0.03<br>(0.01 to<br>0.04) |
| Cocaine use disorders     | 0.86<br>(0.33 to<br>1.16)   | 2.49<br>(1.01 to<br>3.64)   | 3.20<br>(1.37 to<br>4.64)    | 2.42<br>(0.95 to<br>3.61)   | 0.02<br>(0.01 to<br>0.03) | 0.07<br>(0.04 to<br>0.10) | 0.10<br>(0.05 to<br>0.13) | 0.07<br>(0.04 to<br>0.10) |
| Amphetamine use disorders | 12.40<br>(5.07 to<br>15.96) | 18.37<br>(8.31 to<br>24.71) | 22.91<br>(10.92 to<br>30.69) | 17.80<br>(7.87 to<br>24.33) | 0.41<br>(0.24 to<br>0.49) | 0.71<br>(0.47 to<br>0.88) | 0.92<br>(0.62 to<br>1.13) | 0.67<br>(0.43 to<br>0.83) |
| Other drug use disorders  | 0.37<br>(0.29 to<br>0.47)   | 0.38<br>(0.26 to<br>0.54)   | 0.42<br>(0.28 to<br>0.61)    | 0.38<br>(0.26 to<br>0.55)   | 0.01<br>(0.01 to<br>0.01) | 0.01<br>(0.01 to<br>0.01) | 0.01<br>(0.01 to<br>0.01) | 0.01<br>(0.01 to<br>0.01) |
| Eating disorders          |                             |                             |                              |                             |                           |                           |                           |                           |

| Italy                                                      |                                     |                                     |                                     |                                       |                                  |                                  |                                  |                                   |
|------------------------------------------------------------|-------------------------------------|-------------------------------------|-------------------------------------|---------------------------------------|----------------------------------|----------------------------------|----------------------------------|-----------------------------------|
| Cause                                                      | YLLs (in 1000s)                     |                                     |                                     |                                       | Deaths (in 1000s)                |                                  |                                  |                                   |
|                                                            | 2016                                | 2040 Forecast                       | 2040 Better Scenario                | 2040 Worse Scenario                   | 2016                             | 2040 Forecast                    | 2040 Better Scenario             | 2040 Worse Scenario               |
| <b>Diabetes, urogenital, blood, and endocrine diseases</b> | <b>469.88</b><br>(431.72 to 509.06) | <b>611.54</b><br>(458.75 to 987.44) | <b>499.46</b><br>(384.04 to 796.20) | <b>667.13</b><br>(491.10 to 1,086.67) | <b>41.44</b><br>(38.32 to 44.70) | <b>61.50</b><br>(46.16 to 98.37) | <b>51.81</b><br>(40.34 to 81.00) | <b>64.99</b><br>(48.08 to 103.49) |
| Diabetes mellitus                                          | 239.56<br>(212.75 to 267.44)        | 247.72<br>(168.33 to 355.31)        | 196.40<br>(134.54 to 274.49)        | 281.15<br>(186.28 to 410.70)          | 20.95<br>(18.72 to 23.26)        | 24.33<br>(17.25 to 33.47)        | 20.18<br>(14.56 to 27.54)        | 26.20<br>(18.27 to 37.50)         |
| Acute glomerulonephritis                                   | 0.27<br>(0.25 to 0.30)              | 0.21<br>(0.18 to 0.26)              | 0.19<br>(0.15 to 0.23)              | 0.21<br>(0.18 to 0.26)                | 0.01<br>(0.01 to 0.01)           | 0.01<br>(0.01 to 0.01)           | 0.01<br>(0.01 to 0.01)           | 0.01<br>(0.01 to 0.01)            |
| Chronic kidney disease                                     | 140.92<br>(129.27 to 153.44)        | 255.60<br>(132.64 to 672.32)        | 196.12<br>(108.10 to 500.66)        | 281.30<br>(139.58 to 721.98)          | 14.63<br>(13.39 to 15.91)        | 28.67<br>(15.11 to 66.14)        | 23.03<br>(13.08 to 52.79)        | 30.86<br>(15.70 to 69.55)         |
| Chronic kidney disease due to diabetes mellitus            | 40.44<br>(34.64 to 47.07)           | 77.01<br>(39.34 to 208.40)          | 57.86<br>(31.56 to 149.42)          | 84.94<br>(41.59 to 232.62)            | 3.58<br>(2.98 to 4.30)           | 7.43<br>(3.78 to 18.47)          | 5.83<br>(3.19 to 14.12)          | 8.01<br>(3.91 to 19.89)           |
| Chronic kidney disease due to hypertension                 | 32.20<br>(26.36 to 38.17)           | 70.21<br>(34.07 to 180.21)          | 56.79<br>(29.79 to 146.86)          | 76.24<br>(35.11 to 190.95)            | 4.30<br>(3.51 to 5.20)           | 9.62<br>(4.99 to 21.54)          | 8.12<br>(4.49 to 17.34)          | 10.23<br>(5.04 to 22.92)          |
| Chronic kidney disease due to glomerulonephritis           | 25.62<br>(21.39 to 30.27)           | 36.65<br>(17.96 to 95.66)           | 27.10<br>(14.04 to 69.33)           | 40.92<br>(19.15 to 106.16)            | 2.39<br>(1.93 to 2.88)           | 3.77<br>(1.88 to 9.36)           | 2.89<br>(1.53 to 6.95)           | 4.13<br>(1.96 to 10.39)           |
| Chronic kidney disease due to other and unspecified causes | 42.65<br>(36.84 to 49.52)           | 71.73<br>(35.63 to 181.41)          | 54.37<br>(29.10 to 139.47)          | 79.20<br>(37.93 to 205.17)            | 4.35<br>(3.64 to 5.18)           | 7.84<br>(3.94 to 18.61)          | 6.19<br>(3.29 to 14.84)          | 8.48<br>(4.10 to 20.29)           |
| Urinary diseases and male infertility                      | 15.47<br>(14.03 to 17.10)           | 20.48<br>(17.27 to 23.99)           | 18.64<br>(15.57 to 21.91)           | 19.38<br>(16.17 to 22.86)             | 1.59<br>(1.43 to 1.77)           | 2.45<br>(2.02 to 2.94)           | 2.33<br>(1.93 to 2.78)           | 2.25<br>(1.83 to 2.71)            |
| Urinary tract infections                                   | 12.33<br>(10.78 to 14.11)           | 17.27<br>(14.25 to 20.62)           | 15.91<br>(13.07 to 19.02)           | 16.30<br>(13.33 to 19.39)             | 1.32<br>(1.15 to 1.50)           | 2.12<br>(1.71 to 2.60)           | 2.03<br>(1.65 to 2.51)           | 1.94<br>(1.55 to 2.41)            |
| Urolithiasis                                               | 1.59<br>(0.96 to 2.87)              | 1.73<br>(0.99 to 3.23)              | 1.46<br>(0.82 to 2.78)              | 1.68<br>(0.97 to 3.15)                | 0.14<br>(0.08 to 0.26)           | 0.17<br>(0.10 to 0.32)           | 0.15<br>(0.09 to 0.29)           | 0.16<br>(0.09 to 0.31)            |
| Other urinary diseases                                     | 1.54<br>(0.94 to 2.19)              | 1.48<br>(0.85 to 2.26)              | 1.27<br>(0.74 to 1.92)              | 1.40<br>(0.80 to 2.12)                | 0.14<br>(0.08 to 0.21)           | 0.16<br>(0.09 to 0.26)           | 0.15<br>(0.09 to 0.23)           | 0.15<br>(0.09 to 0.24)            |
| Gynecological diseases                                     | 0.34<br>(0.24 to 0.44)              | 0.19<br>(0.13 to 0.26)              | 0.14<br>(0.10 to 0.19)              | 0.19<br>(0.13 to 0.27)                | 0.02<br>(0.01 to 0.03)           | 0.01<br>(0.01 to 0.02)           | 0.01<br>(0.01 to 0.01)           | 0.01<br>(0.01 to 0.02)            |
| Uterine fibroids                                           | 0.12<br>(0.08 to 0.16)              | 0.06<br>(0.04 to 0.09)              | 0.05<br>(0.03 to 0.07)              | 0.06<br>(0.04 to 0.09)                | 0.01<br>(0.00 to 0.01)           | 0.00<br>(0.00 to 0.01)           | 0.00<br>(0.00 to 0.00)           | 0.00<br>(0.00 to 0.01)            |
| Polycystic ovarian syndrome                                | 0.01<br>(0.01 to 0.02)              | 0.00<br>(0.00 to 0.01)              | 0.00<br>(0.00 to 0.00)              | 0.00<br>(0.00 to 0.01)                | 0.00<br>(0.00 to 0.00)           | 0.00<br>(0.00 to 0.00)           | 0.00<br>(0.00 to 0.00)           | 0.00<br>(0.00 to 0.00)            |
| Endometriosis                                              | 0.00<br>(0.00 to 0.01)              | 0.00<br>(0.00 to 0.00)              | 0.00<br>(0.00 to 0.00)              | 0.00<br>(0.00 to 0.00)                | 0.00<br>(0.00 to 0.00)           | 0.00<br>(0.00 to 0.00)           | 0.00<br>(0.00 to 0.00)           | 0.00<br>(0.00 to 0.00)            |
| Genital prolapse                                           | 0.04<br>(0.01 to 0.06)              | 0.02<br>(0.01 to 0.03)              | 0.01<br>(0.00 to 0.02)              | 0.02<br>(0.01 to 0.03)                | 0.00<br>(0.00 to 0.01)           | 0.00<br>(0.00 to 0.00)           | 0.00<br>(0.00 to 0.00)           | 0.00<br>(0.00 to 0.00)            |
| Other gynecological diseases                               | 0.17<br>(0.13 to 0.23)              | 0.11<br>(0.07 to 0.16)              | 0.07<br>(0.05 to 0.11)              | 0.11<br>(0.07 to 0.16)                | 0.01<br>(0.01 to 0.02)           | 0.01<br>(0.01 to 0.01)           | 0.01<br>(0.01 to 0.01)           | 0.01<br>(0.01 to 0.01)            |
| Hemoglobinopathies and hemolytic anemias                   | 15.45<br>(13.31 to 21.68)           | 15.08<br>(12.30 to 21.94)           | 13.22<br>(10.71 to 19.66)           | 14.59<br>(11.79 to 21.42)             | 1.21<br>(1.03 to 1.79)           | 1.42<br>(1.13 to 2.15)           | 1.27<br>(1.03 to 1.92)           | 1.33<br>(1.04 to 2.06)            |
| Thalassemias                                               | 3.77<br>(3.19 to 4.91)              | 2.29<br>(1.76 to 3.48)              | 2.28<br>(1.73 to 3.57)              | 2.29<br>(1.77 to 3.45)                | 0.08<br>(0.07 to 0.12)           | 0.07<br>(0.05 to 0.11)           | 0.07<br>(0.05 to 0.12)           | 0.07<br>(0.05 to 0.11)            |

|                                                   |                              |                              |                              |                              |                           |                           |                           |                           |
|---------------------------------------------------|------------------------------|------------------------------|------------------------------|------------------------------|---------------------------|---------------------------|---------------------------|---------------------------|
|                                                   | 0.01<br>(0.01 to<br>0.02)    | 0.02<br>(0.01 to<br>0.03)    | 0.02<br>(0.01 to<br>0.02)    | 0.02<br>(0.01 to<br>0.03)    | 0.00<br>(0.00 to<br>0.00) | 0.00<br>(0.00 to<br>0.00) | 0.00<br>(0.00 to<br>0.00) | 0.00<br>(0.00 to<br>0.00) |
| Sickle cell disorders                             |                              |                              |                              |                              |                           |                           |                           |                           |
|                                                   | 2.37<br>(2.02 to<br>3.09)    | 3.50<br>(2.76 to<br>4.89)    | 2.79<br>(2.18 to<br>4.07)    | 3.47<br>(2.73 to<br>4.92)    | 0.11<br>(0.09 to<br>0.15) | 0.21<br>(0.17 to<br>0.30) | 0.17<br>(0.13 to<br>0.25) | 0.20<br>(0.16 to<br>0.29) |
| G6PD deficiency                                   |                              |                              |                              |                              |                           |                           |                           |                           |
|                                                   | 9.30<br>(7.78 to<br>13.89)   | 9.27<br>(7.32 to<br>14.37)   | 8.14<br>(6.42 to<br>12.46)   | 8.81<br>(6.92 to<br>13.62)   | 1.02<br>(0.85 to<br>1.54) | 1.14<br>(0.88 to<br>1.76) | 1.03<br>(0.81 to<br>1.59) | 1.05<br>(0.81 to<br>1.66) |
| Other hemoglobinopathies and hemolytic anemias    |                              |                              |                              |                              |                           |                           |                           |                           |
|                                                   | 57.88<br>(27.98 to<br>69.14) | 72.24<br>(35.77 to<br>88.03) | 74.75<br>(38.11 to<br>91.07) | 70.32<br>(34.21 to<br>85.65) | 3.03<br>(1.41 to<br>3.61) | 4.61<br>(2.19 to<br>5.61) | 4.97<br>(2.43 to<br>6.06) | 4.33<br>(2.05 to<br>5.30) |
| Endocrine, metabolic, blood, and immune disorders |                              |                              |                              |                              |                           |                           |                           |                           |

| Italy                                         |                                  |                                  |                                  |                                  |                               |                               |                               |                               |
|-----------------------------------------------|----------------------------------|----------------------------------|----------------------------------|----------------------------------|-------------------------------|-------------------------------|-------------------------------|-------------------------------|
| Cause                                         | YLLs (in 1000s)                  |                                  |                                  |                                  | Deaths (in 1000s)             |                               |                               |                               |
|                                               | 2016                             | 2040 Forecast                    | 2040 Better Scenario             | 2040 Worse Scenario              | 2016                          | 2040 Forecast                 | 2040 Better Scenario          | 2040 Worse Scenario           |
| <b>Musculoskeletal disorders</b>              | <b>24.51</b><br>(20.60 to 28.11) | <b>30.39</b><br>(25.14 to 36.15) | <b>27.13</b><br>(22.33 to 32.10) | <b>29.86</b><br>(24.19 to 35.79) | <b>1.80</b><br>(1.53 to 2.11) | <b>2.59</b><br>(2.13 to 3.15) | <b>2.40</b><br>(1.96 to 2.95) | <b>2.47</b><br>(2.00 to 3.02) |
| Rheumatoid arthritis                          | 7.75<br>(6.13 to 10.47)          | 10.17<br>(7.54 to 13.67)         | 7.66<br>(5.71 to 10.43)          | 10.25<br>(7.40 to 14.28)         | 0.59<br>(0.46 to 0.78)        | 0.85<br>(0.62 to 1.14)        | 0.66<br>(0.49 to 0.88)        | 0.84<br>(0.60 to 1.16)        |
| Other musculoskeletal disorders               | 16.77<br>(12.56 to 19.62)        | 20.22<br>(15.26 to 24.44)        | 19.46<br>(15.02 to 23.47)        | 19.61<br>(14.66 to 23.85)        | 1.20<br>(0.96 to 1.42)        | 1.73<br>(1.35 to 2.20)        | 1.74<br>(1.36 to 2.18)        | 1.63<br>(1.25 to 2.07)        |
| <b>Other non-communicable diseases</b>        | <b>74.65</b><br>(59.65 to 95.26) | <b>59.42</b><br>(46.99 to 76.78) | <b>51.42</b><br>(40.24 to 67.90) | <b>60.28</b><br>(47.42 to 78.40) | <b>2.22</b><br>(1.64 to 3.08) | <b>3.10</b><br>(2.97 to 4.54) | <b>2.95</b><br>(1.91 to 4.34) | <b>2.95</b><br>(1.99 to 4.32) |
| Congenital birth defects                      | 60.58<br>(46.29 to 80.01)        | 35.47<br>(26.04 to 47.09)        | 28.82<br>(21.29 to 38.14)        | 37.31<br>(26.54 to 50.18)        | 0.96<br>(0.75 to 1.19)        | 0.66<br>(0.50 to 0.82)        | 0.56<br>(0.43 to 0.70)        | 0.68<br>(0.52 to 0.86)        |
| Neural tube defects                           | 0.90<br>(0.45 to 1.46)           | 0.24<br>(0.11 to 0.42)           | 0.16<br>(0.07 to 0.29)           | 0.25<br>(0.12 to 0.47)           | 0.01<br>(0.01 to 0.02)        | 0.00<br>(0.00 to 0.01)        | 0.00<br>(0.00 to 0.00)        | 0.00<br>(0.00 to 0.01)        |
| Congenital heart anomalies                    | 21.64<br>(13.22 to 30.29)        | 9.07<br>(5.08 to 13.87)          | 5.97<br>(3.25 to 9.44)           | 9.77<br>(5.46 to 15.13)          | 0.31<br>(0.20 to 0.42)        | 0.14<br>(0.08 to 0.21)        | 0.15<br>(0.14 to 0.14)        | 0.15<br>(0.09 to 0.23)        |
| Orofacial clefts                              | 0.04<br>(0.01 to 0.13)           | 0.02<br>(0.00 to 0.06)           | 0.01<br>(0.00 to 0.03)           | 0.02<br>(0.00 to 0.06)           | 0.00<br>(0.00 to 0.00)        | 0.00<br>(0.00 to 0.00)        | 0.00<br>(0.00 to 0.00)        | 0.00<br>(0.00 to 0.00)        |
| Down syndrome                                 | 11.01<br>(8.05 to 17.49)         | 10.48<br>(7.69 to 15.32)         | 10.62<br>(7.86 to 15.08)         | 10.51<br>(7.70 to 15.50)         | 0.26<br>(0.20 to 0.37)        | 0.28<br>(0.21 to 0.38)        | 0.28<br>(0.21 to 0.38)        | 0.28<br>(0.21 to 0.38)        |
| Other chromosomal abnormalities               | 7.77<br>(4.13 to 14.56)          | 5.94<br>(2.98 to 10.45)          | 5.02<br>(2.45 to 8.77)           | 6.30<br>(3.10 to 11.23)          | 0.10<br>(0.06 to 0.18)        | 0.09<br>(0.04 to 0.15)        | 0.07<br>(0.04 to 0.12)        | 0.09<br>(0.05 to 0.16)        |
| Congenital musculoskeletal and limb anomalies | 1.65<br>(0.99 to 3.61)           | 0.90<br>(0.50 to 1.75)           | 0.65<br>(0.35 to 1.20)           | 0.96<br>(0.52 to 1.81)           | 0.02<br>(0.01 to 0.05)        | 0.02<br>(0.01 to 0.02)        | 0.01<br>(0.01 to 0.02)        | 0.02<br>(0.01 to 0.03)        |
| Urogenital congenital anomalies               | 1.92<br>(0.83 to 3.20)           | 0.86<br>(0.35 to 1.51)           | 0.65<br>(0.26 to 1.18)           | 0.92<br>(0.37 to 1.67)           | 0.03<br>(0.01 to 0.04)        | 0.01<br>(0.01 to 0.02)        | 0.01<br>(0.00 to 0.02)        | 0.01<br>(0.01 to 0.02)        |
| Digestive congenital anomalies                | 3.74<br>(1.77 to 6.34)           | 1.85<br>(0.79 to 3.34)           | 1.27<br>(0.52 to 2.36)           | 2.02<br>(0.84 to 3.81)           | 0.05<br>(0.02 to 0.08)        | 0.02<br>(0.01 to 0.04)        | 0.02<br>(0.03 to 0.03)        | 0.03<br>(0.01 to 0.05)        |
| Other congenital birth defects                | 11.92<br>(8.31 to 18.18)         | 6.13<br>(3.94 to 9.28)           | 4.47<br>(2.77 to 6.62)           | 6.56<br>(4.09 to 10.17)          | 0.17<br>(0.12 to 0.24)        | 0.09<br>(0.06 to 0.15)        | 0.07<br>(0.04 to 0.10)        | 0.10<br>(0.06 to 0.14)        |
| Skin and subcutaneous diseases                | 12.57<br>(7.55 to 21.57)         | 23.29<br>(13.93 to 38.92)        | 22.06<br>(13.23 to 37.04)        | 22.25<br>(13.58 to 37.38)        | 1.24<br>(0.68 to 2.05)        | 2.43<br>(1.36 to 3.90)        | 2.38<br>(1.32 to 3.78)        | 2.26<br>(1.25 to 3.67)        |
| Cellulitis                                    | 2.84<br>(1.33 to 7.77)           | 7.04<br>(3.40 to 17.97)          | 6.87<br>(3.37 to 17.27)          | 6.79<br>(3.27 to 17.33)          | 0.22<br>(0.10 to 0.63)        | 0.61<br>(0.27 to 1.67)        | 0.62<br>(0.28 to 1.66)        | 0.57<br>(0.26 to 1.58)        |
| Pyoderma                                      | 4.62<br>(1.85 to 6.25)           | 9.73<br>(3.72 to 13.33)          | 9.28<br>(3.50 to 12.80)          | 9.29<br>(3.62 to 12.93)          | 0.41<br>(0.16 to 0.57)        | 0.97<br>(0.37 to 1.36)        | 0.96<br>(0.36 to 1.37)        | 0.90<br>(0.34 to 1.27)        |
| Decubitus ulcer                               | 3.62<br>(1.90 to 6.33)           | 4.70<br>(2.18 to 7.64)           | 4.19<br>(1.95 to 6.71)           | 4.44<br>(2.11 to 7.41)           | 0.46<br>(0.22 to 0.76)        | 0.66<br>(0.28 to 1.03)        | 0.61<br>(0.25 to 0.95)        | 0.61<br>(0.26 to 0.97)        |
| Other skin and subcutaneous diseases          | 1.49<br>(0.85 to 2.87)           | 1.82<br>(0.97 to 3.22)           | 1.71<br>(0.89 to 3.03)           | 1.73<br>(0.92 to 3.11)           | 0.14<br>(0.08 to 0.26)        | 0.19<br>(0.09 to 0.35)        | 0.19<br>(0.09 to 0.31)        | 0.18<br>(0.09 to 0.31)        |
| Sudden infant death syndrome                  | 1.50<br>(0.93 to 2.31)           | 0.67<br>(0.34 to 1.14)           | 0.54<br>(0.27 to 0.93)           | 0.72<br>(0.36 to 1.25)           | 0.02<br>(0.01 to 0.03)        | 0.01<br>(0.00 to 0.01)        | 0.01<br>(0.01 to 0.01)        | 0.01<br>(0.00 to 0.01)        |

|                          |                                 |                                 |                                 |                                 |                              |                              |                              |                              |
|--------------------------|---------------------------------|---------------------------------|---------------------------------|---------------------------------|------------------------------|------------------------------|------------------------------|------------------------------|
| Injuries                 | 560.66<br>(514.30 to<br>628.76) | 383.01<br>(310.11 to<br>481.91) | 351.29<br>(286.51 to<br>443.91) | 451.16<br>(346.07 to<br>602.54) | 25.79<br>(23.08 to<br>28.07) | 24.83<br>(20.83 to<br>29.12) | 23.71<br>(20.06 to<br>27.71) | 26.07<br>(21.45 to<br>31.66) |
| Transport injuries       | 205.57<br>(185.82 to<br>226.97) | 115.74<br>(72.11 to<br>177.48)  | 111.10<br>(70.04 to<br>169.20)  | 167.06<br>(97.19 to<br>267.85)  | 7.08<br>(6.50 to<br>7.72)    | 5.12<br>(3.53 to<br>7.36)    | 5.04<br>(3.53 to<br>7.20)    | 6.75<br>(4.37 to<br>10.20)   |
| Road injuries            | 193.10<br>(174.38 to<br>213.54) | 109.00<br>(67.93 to<br>167.23)  | 105.90<br>(66.81 to<br>161.37)  | 159.14<br>(92.04 to<br>255.64)  | 6.72<br>(6.18 to<br>7.35)    | 4.89<br>(3.39 to<br>7.03)    | 4.86<br>(3.41 to<br>6.92)    | 6.49<br>(4.19 to<br>9.81)    |
| Pedestrian road injuries | 42.75<br>(32.32 to<br>49.86)    | 18.94<br>(12.89 to<br>26.79)    | 14.94<br>(10.31 to<br>21.52)    | 26.01<br>(16.58 to<br>39.37)    | 2.15<br>(1.85 to<br>2.53)    | 1.32<br>(0.93 to<br>1.89)    | 1.09<br>(0.77 to<br>1.59)    | 1.68<br>(1.12 to<br>2.49)    |



| Italy                                           |                                                      |                                                      |                                                      |                                                      |                                                   |                                                   |                                                   |                                                   |
|-------------------------------------------------|------------------------------------------------------|------------------------------------------------------|------------------------------------------------------|------------------------------------------------------|---------------------------------------------------|---------------------------------------------------|---------------------------------------------------|---------------------------------------------------|
| Cause                                           | YLLs (in 1000s)                                      |                                                      |                                                      |                                                      | Deaths (in 1000s)                                 |                                                   |                                                   |                                                   |
|                                                 | 2016                                                 | 2040 Forecast                                        | 2040 Better Scenario                                 | 2040 Worse Scenario                                  | 2016                                              | 2040 Forecast                                     | 2040 Better Scenario                              | 2040 Worse Scenario                               |
| Cyclist road injuries                           | 9.40<br>(7.14 to<br>11.30)                           | 7.08<br>(4.39 to<br>11.05)                           | 7.22<br>(4.52 to<br>11.23)                           | 9.74<br>(5.74 to<br>15.59)                           | 0.35<br>(0.27 to<br>0.42)                         | 0.35<br>(0.21 to<br>0.55)                         | 0.36<br>(0.22 to<br>0.57)                         | 0.44<br>(0.25 to<br>0.72)                         |
| Motorcyclist road injuries                      | 39.80<br>(26.58 to<br>47.46)                         | 24.90<br>(13.54 to<br>42.73)                         | 24.88<br>(13.74 to<br>42.42)                         | 34.24<br>(17.58 to<br>60.04)                         | 0.83<br>(0.57 to<br>0.99)                         | 0.59<br>(0.34 to<br>0.99)                         | 0.59<br>(0.35 to<br>0.99)                         | 0.78<br>(0.43 to<br>1.37)                         |
| Motor vehicle road injuries                     | 98.84<br>(86.76 to<br>121.52)                        | 56.52<br>(34.69 to<br>87.46)                         | 57.28<br>(35.75 to<br>87.57)                         | 86.77<br>(49.70 to<br>139.17)                        | 3.32<br>(2.85 to<br>3.85)                         | 2.58<br>(1.75 to<br>3.75)                         | 2.75<br>(1.90 to<br>3.92)                         | 3.52<br>(2.23 to<br>5.44)                         |
| Other road injuries                             | 2.31<br>(1.69 to<br>3.72)                            | 1.56<br>(0.83 to<br>2.85)                            | 1.57<br>(0.85 to<br>2.82)                            | 2.39<br>(1.20 to<br>4.48)                            | 0.07<br>(0.05 to<br>0.10)                         | 0.06<br>(0.03 to<br>0.09)                         | 0.06<br>(0.04 to<br>0.10)                         | 0.08<br>(0.04 to<br>0.14)                         |
| Other transport injuries                        | 12.47<br>(8.59 to<br>14.40)                          | 6.73<br>(3.95 to<br>10.32)                           | 5.21<br>(3.07 to<br>8.06)                            | 7.92<br>(4.36 to<br>12.76)                           | 0.35<br>(0.23 to<br>0.41)                         | 0.22<br>(0.13 to<br>0.35)                         | 0.18<br>(0.10 to<br>0.28)                         | 0.26<br>(0.14 to<br>0.42)                         |
| <b>Unintentional injuries</b>                   | <b>174.25</b><br><b>(156.53 to</b><br><b>196.10)</b> | <b>162.18</b><br><b>(144.03 to</b><br><b>182.35)</b> | <b>148.45</b><br><b>(129.88 to</b><br><b>165.28)</b> | <b>157.19</b><br><b>(137.66 to</b><br><b>180.17)</b> | <b>13.20</b><br><b>(11.15 to</b><br><b>14.55)</b> | <b>15.79</b><br><b>(13.18 to</b><br><b>17.81)</b> | <b>15.15</b><br><b>(12.74 to</b><br><b>16.91)</b> | <b>14.68</b><br><b>(12.02 to</b><br><b>16.75)</b> |
| Falls                                           | 87.96<br>(77.45 to<br>109.22)                        | 96.07<br>(83.72 to<br>113.43)                        | 89.65<br>(77.94 to<br>105.10)                        | 91.30<br>(78.93 to<br>109.12)                        | 8.09<br>(6.96 to<br>9.19)                         | 10.60<br>(8.78 to<br>12.24)                       | 10.26<br>(8.61 to<br>11.77)                       | 9.75<br>(8.00 to<br>11.45)                        |
| Drowning                                        | 14.38<br>(12.87 to<br>15.92)                         | 7.72<br>(5.83 to<br>10.65)                           | 6.63<br>(5.00 to<br>9.04)                            | 8.39<br>(6.02 to<br>12.00)                           | 0.43<br>(0.39 to<br>0.47)                         | 0.29<br>(0.23 to<br>0.40)                         | 0.26<br>(0.20 to<br>0.35)                         | 0.31<br>(0.23 to<br>0.44)                         |
| Fire, heat, and hot substances                  | 11.89<br>(7.80 to<br>13.70)                          | 8.35<br>(4.63 to<br>11.27)                           | 7.05<br>(3.80 to<br>9.58)                            | 8.66<br>(4.89 to<br>12.52)                           | 0.98<br>(0.47 to<br>1.16)                         | 0.85<br>(0.36 to<br>1.18)                         | 0.75<br>(0.31 to<br>1.04)                         | 0.84<br>(0.36 to<br>1.22)                         |
| Poisonings                                      | 2.75<br>(2.15 to<br>5.71)                            | 1.36<br>(0.89 to<br>2.70)                            | 1.04<br>(0.68 to<br>2.05)                            | 1.49<br>(0.91 to<br>3.06)                            | 0.10<br>(0.08 to<br>0.19)                         | 0.06<br>(0.04 to<br>0.11)                         | 0.05<br>(0.04 to<br>0.09)                         | 0.07<br>(0.04 to<br>0.12)                         |
| Exposure to mechanical forces                   | 18.67<br>(13.29 to<br>21.37)                         | 13.41<br>(8.84 to<br>15.65)                          | 11.32<br>(7.64 to<br>13.30)                          | 13.23<br>(8.96 to<br>15.75)                          | 0.91<br>(0.59 to<br>1.05)                         | 0.91<br>(0.57 to<br>1.09)                         | 0.82<br>(0.51 to<br>0.98)                         | 0.86<br>(0.54 to<br>1.05)                         |
| Unintentional firearm injuries                  | 2.96<br>(1.58 to<br>3.50)                            | 1.52<br>(0.78 to<br>1.85)                            | 1.33<br>(0.69 to<br>1.61)                            | 1.51<br>(0.79 to<br>1.83)                            | 0.12<br>(0.06 to<br>0.14)                         | 0.09<br>(0.04 to<br>0.10)                         | 0.08<br>(0.04 to<br>0.10)                         | 0.08<br>(0.04 to<br>0.10)                         |
| Unintentional suffocation                       | 0.82<br>(0.58 to<br>1.13)                            | 0.44<br>(0.32 to<br>0.61)                            | 0.37<br>(0.27 to<br>0.52)                            | 0.45<br>(0.33 to<br>0.65)                            | 0.01<br>(0.01 to<br>0.02)                         | 0.01<br>(0.01 to<br>0.01)                         | 0.01<br>(0.01 to<br>0.01)                         | 0.01<br>(0.01 to<br>0.01)                         |
| Other exposure to mechanical forces             | 14.89<br>(10.29 to<br>17.17)                         | 11.45<br>(7.53 to<br>13.48)                          | 9.61<br>(6.47 to<br>11.36)                           | 11.27<br>(7.54 to<br>13.50)                          | 0.77<br>(0.50 to<br>0.90)                         | 0.82<br>(0.51 to<br>0.98)                         | 0.73<br>(0.46 to<br>0.89)                         | 0.77<br>(0.48 to<br>0.94)                         |
| Adverse effects of medical treatment            | 16.77<br>(12.79 to<br>21.53)                         | 17.25<br>(13.22 to<br>21.95)                         | 16.34<br>(12.52 to<br>20.65)                         | 16.54<br>(12.61 to<br>21.33)                         | 1.39<br>(1.03 to<br>1.67)                         | 1.65<br>(1.19 to<br>2.02)                         | 1.63<br>(1.18 to<br>1.98)                         | 1.53<br>(1.10 to<br>1.88)                         |
| Animal contact                                  | 1.27<br>(0.80 to<br>1.52)                            | 1.08<br>(0.65 to<br>1.32)                            | 0.94<br>(0.57 to<br>1.18)                            | 1.07<br>(0.65 to<br>1.35)                            | 0.06<br>(0.03 to<br>0.07)                         | 0.06<br>(0.03 to<br>0.08)                         | 0.06<br>(0.03 to<br>0.07)                         | 0.06<br>(0.03 to<br>0.07)                         |
| Venomous animal contact                         | 0.48<br>(0.27 to<br>0.61)                            | 0.42<br>(0.21 to<br>0.54)                            | 0.38<br>(0.19 to<br>0.49)                            | 0.41<br>(0.21 to<br>0.54)                            | 0.02<br>(0.01 to<br>0.02)                         | 0.02<br>(0.01 to<br>0.03)                         | 0.02<br>(0.01 to<br>0.03)                         | 0.02<br>(0.01 to<br>0.03)                         |
| Non-venomous animal contact                     | 0.78<br>(0.50 to<br>1.03)                            | 0.66<br>(0.43 to<br>0.90)                            | 0.57<br>(0.36 to<br>0.77)                            | 0.65<br>(0.42 to<br>0.92)                            | 0.04<br>(0.02 to<br>0.05)                         | 0.04<br>(0.02 to<br>0.06)                         | 0.04<br>(0.02 to<br>0.05)                         | 0.04<br>(0.02 to<br>0.05)                         |
| Foreign body                                    | 12.46<br>(10.42 to<br>18.09)                         | 10.70<br>(8.97 to<br>14.28)                          | 10.45<br>(8.81 to<br>13.56)                          | 10.43<br>(8.72 to<br>14.21)                          | 0.69<br>(0.53 to<br>0.81)                         | 0.81<br>(0.58 to<br>1.00)                         | 0.84<br>(0.58 to<br>1.04)                         | 0.75<br>(0.54 to<br>0.93)                         |
| Pulmonary aspiration and foreign body in airway | 11.48<br>(9.43 to<br>17.24)                          | 9.88<br>(8.19 to<br>13.70)                           | 9.58<br>(7.97 to<br>12.93)                           | 9.64<br>(7.94 to<br>13.47)                           | 0.64<br>(0.49 to<br>0.77)                         | 0.75<br>(0.54 to<br>0.94)                         | 0.78<br>(0.54 to<br>0.97)                         | 0.70<br>(0.50 to<br>0.87)                         |

|                                             |                                                      |                                                     |                                                    |                                                     |                                                |                                                |                                                |                                                |
|---------------------------------------------|------------------------------------------------------|-----------------------------------------------------|----------------------------------------------------|-----------------------------------------------------|------------------------------------------------|------------------------------------------------|------------------------------------------------|------------------------------------------------|
|                                             | 0.99<br>(0.66 to<br>1.34)                            | 0.82<br>(0.53 to<br>1.05)                           | 0.87<br>(0.57 to<br>1.11)                          | 0.79<br>(0.52 to<br>1.03)                           | 0.05<br>(0.03 to<br>0.06)                      | 0.05<br>(0.03 to<br>0.07)                      | 0.06<br>(0.03 to<br>0.08)                      | 0.05<br>(0.02 to<br>0.07)                      |
| Foreign body in other body part             |                                                      |                                                     |                                                    |                                                     |                                                |                                                |                                                |                                                |
| Environmental heat and cold exposure        | 5.47<br>(3.69 to<br>8.73)                            | 5.21<br>(3.39 to<br>8.02)                           | 4.35<br>(2.78 to<br>6.63)                          | 5.03<br>(3.26 to<br>8.00)                           | 0.47<br>(0.29 to<br>0.65)                      | 0.52<br>(0.31 to<br>0.73)                      | 0.46<br>(0.27 to<br>0.63)                      | 0.49<br>(0.29 to<br>0.69)                      |
| Other unintentional injuries                | 2.66<br>(2.31 to<br>3.04)                            | 1.03<br>(0.81 to<br>1.29)                           | 0.68<br>(0.54 to<br>0.85)                          | 1.06<br>(0.82 to<br>1.36)                           | 0.08<br>(0.07 to<br>0.09)                      | 0.04<br>(0.03 to<br>0.04)                      | 0.02<br>(0.02 to<br>0.03)                      | 0.04<br>(0.03 to<br>0.04)                      |
| <b>Self-harm and interpersonal violence</b> | <b>170.26</b><br><b>(144.48 to</b><br><b>233.11)</b> | <b>102.25</b><br><b>(67.58 to</b><br><b>149.99)</b> | <b>88.88</b><br><b>(59.40 to</b><br><b>131.68)</b> | <b>124.06</b><br><b>(75.81 to</b><br><b>190.06)</b> | <b>5.21</b><br><b>(4.35 to</b><br><b>6.43)</b> | <b>3.84</b><br><b>(2.58 to</b><br><b>5.59)</b> | <b>3.43</b><br><b>(2.34 to</b><br><b>5.00)</b> | <b>4.55</b><br><b>(2.87 to</b><br><b>6.87)</b> |

| Italy                                                                               |                                                  |                                                 |                                                 |                                                 |                                                |                                                |                                                |                                                |
|-------------------------------------------------------------------------------------|--------------------------------------------------|-------------------------------------------------|-------------------------------------------------|-------------------------------------------------|------------------------------------------------|------------------------------------------------|------------------------------------------------|------------------------------------------------|
| Cause                                                                               | YLLs (in 1000s)                                  |                                                 |                                                 |                                                 | Deaths (in 1000s)                              |                                                |                                                |                                                |
|                                                                                     | 2016                                             | 2040 Forecast                                   | 2040 Better Scenario                            | 2040 Worse Scenario                             | 2016                                           | 2040 Forecast                                  | 2040 Better Scenario                           | 2040 Worse Scenario                            |
| Self-harm                                                                           | 149.74<br>(124.47 to<br>218.30)                  | 93.50<br>(59.76 to<br>139.04)                   | 81.70<br>(53.01 to<br>122.33)                   | 114.84<br>(67.18 to<br>178.60)                  | 4.70<br>(3.95 to<br>6.07)                      | 3.57<br>(2.33 to<br>5.31)                      | 3.20<br>(2.10 to<br>4.78)                      | 4.27<br>(2.57 to<br>6.59)                      |
| Self-harm by firearm                                                                | 17.29<br>(11.31 to<br>28.97)                     | 8.83<br>(4.64 to<br>15.61)                      | 7.28<br>(3.78 to<br>13.13)                      | 10.96<br>(5.39 to<br>20.15)                     | 0.62<br>(0.39 to<br>0.89)                      | 0.38<br>(0.18 to<br>0.64)                      | 0.33<br>(0.16 to<br>0.55)                      | 0.46<br>(0.21 to<br>0.81)                      |
| Self-harm by other specified means                                                  | 132.44<br>(109.68 to<br>194.37)                  | 84.67<br>(54.66 to<br>126.60)                   | 74.41<br>(48.07 to<br>110.64)                   | 103.88<br>(60.90 to<br>161.29)                  | 4.08<br>(3.38 to<br>5.31)                      | 3.18<br>(2.07 to<br>4.71)                      | 2.88<br>(1.89 to<br>4.26)                      | 3.81<br>(2.30 to<br>5.84)                      |
| Interpersonal violence                                                              | 20.52<br>(12.11 to<br>25.48)                     | 8.74<br>(5.21 to<br>11.64)                      | 7.18<br>(4.24 to<br>9.48)                       | 9.21<br>(5.34 to<br>12.33)                      | 0.52<br>(0.31 to<br>0.63)                      | 0.27<br>(0.17 to<br>0.35)                      | 0.23<br>(0.14 to<br>0.29)                      | 0.28<br>(0.17 to<br>0.36)                      |
| Physical violence by firearm                                                        | 10.00<br>(4.48 to<br>13.46)                      | 3.74<br>(1.73 to<br>5.24)                       | 2.91<br>(1.39 to<br>4.01)                       | 3.82<br>(1.81 to<br>5.48)                       | 0.23<br>(0.11 to<br>0.30)                      | 0.09<br>(0.05 to<br>0.13)                      | 0.07<br>(0.04 to<br>0.10)                      | 0.10<br>(0.05 to<br>0.13)                      |
| Physical violence by sharp object                                                   | 5.09<br>(2.31 to<br>6.53)                        | 2.44<br>(1.14 to<br>3.20)                       | 2.03<br>(0.97 to<br>2.65)                       | 2.46<br>(1.14 to<br>3.26)                       | 0.14<br>(0.07 to<br>0.17)                      | 0.08<br>(0.04 to<br>0.10)                      | 0.07<br>(0.04 to<br>0.09)                      | 0.08<br>(0.04 to<br>0.10)                      |
| Physical violence by other means                                                    | 5.42<br>(3.57 to<br>9.22)                        | 2.57<br>(1.61 to<br>4.17)                       | 2.25<br>(1.39 to<br>3.61)                       | 2.93<br>(1.75 to<br>4.81)                       | 0.15<br>(0.09 to<br>0.23)                      | 0.09<br>(0.06 to<br>0.14)                      | 0.08<br>(0.05 to<br>0.13)                      | 0.10<br>(0.06 to<br>0.16)                      |
| <b>Forces of nature, conflict and terrorism, and executions and police conflict</b> | <b>10.58</b><br><b>(3.30 to</b><br><b>18.48)</b> | <b>2.85</b><br><b>(0.02 to</b><br><b>14.10)</b> | <b>2.85</b><br><b>(0.02 to</b><br><b>14.12)</b> | <b>2.85</b><br><b>(0.02 to</b><br><b>14.09)</b> | <b>0.30</b><br><b>(0.09 to</b><br><b>0.53)</b> | <b>0.08</b><br><b>(0.00 to</b><br><b>0.43)</b> | <b>0.09</b><br><b>(0.00 to</b><br><b>0.44)</b> | <b>0.08</b><br><b>(0.00 to</b><br><b>0.42)</b> |
| Exposure to forces of nature                                                        | 10.33<br>(3.06 to<br>18.25)                      | 2.57<br>(0.00 to<br>14.02)                      | 2.57<br>(0.00 to<br>14.04)                      | 2.56<br>(0.00 to<br>14.01)                      | 0.30<br>(0.09 to<br>0.52)                      | 0.08<br>(0.00 to<br>0.43)                      | 0.08<br>(0.00 to<br>0.43)                      | 0.08<br>(0.00 to<br>0.42)                      |
| Conflict and terrorism                                                              | 0.00<br>(0.00 to<br>0.00)                        | 0.28<br>(0.00 to<br>1.45)                       | 0.28<br>(0.00 to<br>1.43)                       | 0.28<br>(0.00 to<br>1.48)                       | 0.00<br>(0.00 to<br>0.00)                      | 0.01<br>(0.00 to<br>0.03)                      | 0.01<br>(0.00 to<br>0.03)                      | 0.01<br>(0.00 to<br>0.03)                      |
| Executions and police conflict                                                      | 0.25<br>(0.23 to<br>0.27)                        | 0.00<br>(0.00 to<br>0.00)                       | 0.00<br>(0.00 to<br>0.00)                       | 0.00<br>(0.00 to<br>0.00)                       | 0.01<br>(0.01 to<br>0.01)                      | 0.00<br>(0.00 to<br>0.00)                      | 0.00<br>(0.00 to<br>0.00)                      | 0.00<br>(0.00 to<br>0.00)                      |

| Luxembourg                                                        |                                          |                                          |                                          |                                           |                                       |                                       |                                       |                                       |
|-------------------------------------------------------------------|------------------------------------------|------------------------------------------|------------------------------------------|-------------------------------------------|---------------------------------------|---------------------------------------|---------------------------------------|---------------------------------------|
| Cause                                                             | YLLs (actual counts)                     |                                          |                                          |                                           | Deaths (actual counts)                |                                       |                                       |                                       |
|                                                                   | 2016                                     | 2040 Forecast                            | 2040 Better Scenario                     | 2040 Worse Scenario                       | 2016                                  | 2040 Forecast                         | 2040 Better Scenario                  | 2040 Worse Scenario                   |
| All causes                                                        | 61,094.22<br>(55,549.97 to<br>67,202.00) | 78,591.75<br>(60,581.21 to<br>97,676.58) | 68,051.87<br>(53,160.24 to<br>83,426.12) | 96,805.60<br>(72,927.74 to<br>121,638.66) | 4,110.61<br>(3,772.73 to<br>4,451.50) | 6,345.78<br>(5,357.21 to<br>7,296.55) | 5,681.08<br>(4,809.34 to<br>6,507.36) | 7,408.91<br>(6,174.06 to<br>8,568.59) |
| Communicable, maternal, neonatal, and nutritional diseases        | 2,560.85<br>(2,291.08 to<br>2,865.39)    | 3,709.15<br>(2,851.54 to<br>4,694.72)    | 3,382.48<br>(2,649.80 to<br>4,220.73)    | 4,284.48<br>(3,199.98 to<br>5,559.59)     | 177.03<br>(154.29 to<br>200.44)       | 354.39<br>(267.72 to<br>455.38)       | 339.75<br>(263.26 to<br>429.42)       | 381.07<br>(277.50 to<br>501.00)       |
| HIV/AIDS and tuberculosis                                         | 136.08<br>(128.37 to<br>143.54)          | 82.19<br>(44.25 to<br>127.39)            | 46.87<br>(23.26 to<br>72.94)             | 175.26<br>(102.77 to<br>260.48)           | 4.28<br>(3.98 to<br>4.59)             | 3.45<br>(2.16 to<br>5.45)             | 2.39<br>(1.52 to<br>3.86)             | 5.39<br>(3.52 to<br>8.01)             |
| Tuberculosis                                                      | 30.51<br>(26.23 to<br>35.09)             | 31.90<br>(17.71 to<br>59.97)             | 23.79<br>(13.39 to<br>43.43)             | 42.58<br>(23.37 to<br>77.80)              | 1.92<br>(1.65 to<br>2.20)             | 2.56<br>(1.45 to<br>4.71)             | 1.96<br>(1.14 to<br>3.43)             | 3.30<br>(1.85 to<br>5.91)             |
| HIV/AIDS                                                          | 105.56<br>(99.95 to<br>111.38)           | 50.29<br>(19.58 to<br>86.54)             | 23.08<br>(4.33 to<br>40.90)              | 132.68<br>(63.65 to<br>215.18)            | 2.36<br>(2.24 to<br>2.48)             | 0.89<br>(0.34 to<br>1.52)             | 0.43<br>(0.08 to<br>0.79)             | 2.09<br>(1.08 to<br>3.36)             |
| Diarrhea, lower respiratory, and other common infectious diseases | 1,610.96<br>(1,412.51 to<br>1,819.82)    | 2,772.01<br>(1,986.01 to<br>3,723.77)    | 2,525.84<br>(1,875.14 to<br>3,303.11)    | 3,235.85<br>(2,237.06 to<br>4,538.49)     | 147.76<br>(126.18 to<br>169.27)       | 313.38<br>(227.59 to<br>414.62)       | 298.73<br>(222.60 to<br>388.56)       | 340.01<br>(235.56 to<br>461.18)       |
| Diarrheal diseases                                                | 211.78<br>(186.66 to<br>238.96)          | 507.02<br>(356.00 to<br>747.28)          | 579.71<br>(423.89 to<br>819.39)          | 447.07<br>(311.74 to<br>673.28)           | 17.79<br>(15.35 to<br>20.24)          | 57.55<br>(38.48 to<br>86.70)          | 67.88<br>(47.83 to<br>97.31)          | 49.00<br>(32.26 to<br>76.68)          |
| Intestinal infectious diseases                                    | 1.00<br>(0.41 to<br>2.09)                | 0.89<br>(0.35 to<br>2.04)                | 0.89<br>(0.35 to<br>2.03)                | 0.89<br>(0.35 to<br>1.98)                 | 0.03<br>(0.01 to<br>0.06)             | 0.04<br>(0.02 to<br>0.07)             | 0.04<br>(0.02 to<br>0.07)             | 0.04<br>(0.02 to<br>0.07)             |
| Typhoid fever                                                     | 0.37<br>(0.12 to<br>0.89)                | 0.38<br>(0.12 to<br>0.92)                | 0.41<br>(0.13 to<br>0.98)                | 0.37<br>(0.12 to<br>0.88)                 | 0.01<br>(0.00 to<br>0.02)             | 0.01<br>(0.00 to<br>0.03)             | 0.01<br>(0.00 to<br>0.03)             | 0.01<br>(0.00 to<br>0.03)             |
| Paratyphoid fever                                                 | 0.43<br>(0.13 to<br>1.08)                | 0.33<br>(0.09 to<br>0.92)                | 0.31<br>(0.09 to<br>0.85)                | 0.35<br>(0.10 to<br>0.97)                 | 0.01<br>(0.00 to<br>0.03)             | 0.01<br>(0.00 to<br>0.02)             | 0.01<br>(0.00 to<br>0.02)             | 0.01<br>(0.00 to<br>0.03)             |
| Other intestinal infectious diseases                              | 0.20<br>(0.08 to<br>0.40)                | 0.18<br>(0.06 to<br>0.38)                | 0.17<br>(0.06 to<br>0.37)                | 0.17<br>(0.06 to<br>0.37)                 | 0.01<br>(0.00 to<br>0.03)             | 0.02<br>(0.01 to<br>0.04)             | 0.02<br>(0.01 to<br>0.04)             | 0.01<br>(0.01 to<br>0.03)             |
| Lower respiratory infections                                      | 1,299.21<br>(1,111.82 to<br>1,499.26)    | 2,164.14<br>(1,379.45 to<br>3,150.20)    | 1,848.46<br>(1,196.75 to<br>2,628.02)    | 2,681.47<br>(1,642.96 to<br>3,989.75)     | 126.44<br>(106.29 to<br>146.97)       | 251.11<br>(164.23 to<br>351.33)       | 226.13<br>(151.20 to<br>317.24)       | 286.39<br>(180.84 to<br>409.70)       |
| Upper respiratory infections                                      | 0.44<br>(0.23 to<br>0.77)                | 0.52<br>(0.22 to<br>1.03)                | 0.45<br>(0.19 to<br>0.91)                | 0.54<br>(0.23 to<br>1.05)                 | 0.02<br>(0.01 to<br>0.04)             | 0.04<br>(0.01 to<br>0.08)             | 0.03<br>(0.01 to<br>0.07)             | 0.04<br>(0.01 to<br>0.08)             |
| Otitis media                                                      | 0.02<br>(0.02 to<br>0.04)                | 0.01<br>(0.00 to<br>0.01)                | 0.01<br>(0.00 to<br>0.01)                | 0.01<br>(0.00 to<br>0.01)                 | 0.00<br>(0.00 to<br>0.00)             | 0.00<br>(0.00 to<br>0.00)             | 0.00<br>(0.00 to<br>0.00)             | 0.00<br>(0.00 to<br>0.00)             |
| Meningitis                                                        | 39.31<br>(34.26 to<br>47.86)             | 26.60<br>(19.27 to<br>36.89)             | 25.08<br>(18.07 to<br>34.64)             | 27.17<br>(19.57 to<br>37.50)              | 1.31<br>(1.13 to<br>1.52)             | 1.14<br>(0.90 to<br>1.41)             | 1.11<br>(0.86 to<br>1.36)             | 1.13<br>(0.90 to<br>1.37)             |
| Pneumococcal meningitis                                           | 8.47<br>(7.17 to<br>10.31)               | 6.15<br>(4.71 to<br>8.15)                | 6.22<br>(4.66 to<br>8.30)                | 6.05<br>(4.65 to<br>8.01)                 | 0.32<br>(0.27 to<br>0.38)             | 0.31<br>(0.24 to<br>0.38)             | 0.32<br>(0.25 to<br>0.40)             | 0.30<br>(0.23 to<br>0.37)             |
| H influenzae type B meningitis                                    | 2.30<br>(1.87 to<br>2.88)                | 4.32<br>(2.28 to<br>6.95)                | 4.24<br>(2.32 to<br>6.86)                | 4.49<br>(2.19 to<br>7.34)                 | 0.07<br>(0.06 to<br>0.08)             | 0.09<br>(0.07 to<br>0.13)             | 0.10<br>(0.07 to<br>0.13)             | 0.09<br>(0.06 to<br>0.13)             |
| Meningococcal meningitis                                          | 14.21<br>(12.17 to<br>17.57)             | 7.30<br>(4.86 to<br>10.98)               | 6.62<br>(4.42 to<br>10.08)               | 7.53<br>(5.04 to<br>11.39)                | 0.39<br>(0.33 to<br>0.46)             | 0.28<br>(0.21 to<br>0.37)             | 0.26<br>(0.20 to<br>0.35)             | 0.28<br>(0.21 to<br>0.36)             |
| Other meningitis                                                  | 14.33<br>(12.25 to<br>17.44)             | 8.84<br>(6.26 to<br>12.14)               | 8.00<br>(5.64 to<br>10.86)               | 9.10<br>(6.50 to<br>12.32)                | 0.53<br>(0.45 to<br>0.63)             | 0.46<br>(0.34 to<br>0.59)             | 0.43<br>(0.32 to<br>0.55)             | 0.46<br>(0.35 to<br>0.58)             |
| Encephalitis                                                      | 47.13<br>(37.39 to<br>64.65)             | 59.02<br>(41.09 to<br>84.42)             | 58.74<br>(40.39 to<br>83.92)             | 58.34<br>(41.36 to<br>82.85)              | 1.68<br>(1.27 to<br>2.22)             | 2.77<br>(2.05 to<br>3.74)             | 2.82<br>(2.05 to<br>3.80)             | 2.66<br>(1.95 to<br>3.59)             |

|                |                            |                            |                            |                            |                           |                           |                           |                           |
|----------------|----------------------------|----------------------------|----------------------------|----------------------------|---------------------------|---------------------------|---------------------------|---------------------------|
| Diphtheria     | 0.09<br>(0.06 to<br>0.13)  | 0.02<br>(0.01 to<br>0.04)  | 0.02<br>(0.01 to<br>0.04)  | 0.03<br>(0.01 to<br>0.04)  | 0.00<br>(0.00 to<br>0.00) | 0.00<br>(0.00 to<br>0.00) | 0.00<br>(0.00 to<br>0.00) | 0.00<br>(0.00 to<br>0.00) |
| Whooping cough | 5.33<br>(2.38 to<br>14.78) | 2.28<br>(0.58 to<br>7.82)  | 1.98<br>(0.54 to<br>6.75)  | 5.91<br>(1.26 to<br>19.27) | 0.07<br>(0.03 to<br>0.19) | 0.03<br>(0.01 to<br>0.10) | 0.03<br>(0.01 to<br>0.09) | 0.07<br>(0.02 to<br>0.23) |
| Tetanus        | 0.39<br>(0.29 to<br>0.65)  | 0.05<br>(0.03 to<br>0.09)  | 0.05<br>(0.03 to<br>0.09)  | 0.06<br>(0.04 to<br>0.10)  | 0.02<br>(0.01 to<br>0.02) | 0.00<br>(0.00 to<br>0.00) | 0.00<br>(0.00 to<br>0.00) | 0.00<br>(0.00 to<br>0.00) |
| Measles        | 0.83<br>(0.64 to<br>1.05)  | 5.59<br>(0.12 to<br>30.84) | 4.73<br>(0.11 to<br>23.62) | 8.71<br>(0.18 to<br>44.49) | 0.01<br>(0.01 to<br>0.02) | 0.09<br>(0.00 to<br>0.43) | 0.08<br>(0.00 to<br>0.37) | 0.13<br>(0.00 to<br>0.60) |

| Luxembourg                                            |                                         |                                         |                                         |                                         |                                      |                                      |                                      |                                      |
|-------------------------------------------------------|-----------------------------------------|-----------------------------------------|-----------------------------------------|-----------------------------------------|--------------------------------------|--------------------------------------|--------------------------------------|--------------------------------------|
| Cause                                                 | YLLs (actual counts)                    |                                         |                                         |                                         | Deaths (actual counts)               |                                      |                                      |                                      |
|                                                       | 2016                                    | 2040 Forecast                           | 2040 Better Scenario                    | 2040 Worse Scenario                     | 2016                                 | 2040 Forecast                        | 2040 Better Scenario                 | 2040 Worse Scenario                  |
| Varicella and herpes zoster                           | 5.42<br>(2.98 to 10.48)                 | 5.86<br>(2.97 to 10.66)                 | 5.72<br>(2.87 to 10.32)                 | 5.66<br>(2.78 to 10.39)                 | 0.40<br>(0.21 to 0.61)               | 0.61<br>(0.29 to 0.99)               | 0.62<br>(0.29 to 0.99)               | 0.56<br>(0.26 to 0.92)               |
| <b>Neglected tropical diseases and malaria</b>        | <b>9.03</b><br><b>(6.48 to 14.44)</b>   | <b>11.95</b><br><b>(7.30 to 16.48)</b>  | <b>12.30</b><br><b>(7.45 to 16.91)</b>  | <b>11.56</b><br><b>(7.18 to 16.15)</b>  | <b>0.41</b><br><b>(0.21 to 0.52)</b> | <b>0.72</b><br><b>(0.36 to 0.91)</b> | <b>0.77</b><br><b>(0.38 to 0.98)</b> | <b>0.67</b><br><b>(0.33 to 0.85)</b> |
| Malaria                                               | 0.00<br>(0.00 to 0.00)                  | 0.00<br>(0.00 to 0.00)                  | 0.00<br>(0.00 to 0.00)                  | 0.00<br>(0.00 to 0.00)                  | 0.00<br>(0.00 to 0.00)               | 0.00<br>(0.00 to 0.00)               | 0.00<br>(0.00 to 0.00)               | 0.00<br>(0.00 to 0.00)               |
| Chagas disease                                        | 0.00<br>(0.00 to 0.00)                  | 0.00<br>(0.00 to 0.00)                  | 0.00<br>(0.00 to 0.00)                  | 0.00<br>(0.00 to 0.00)                  | 0.00<br>(0.00 to 0.00)               | 0.00<br>(0.00 to 0.00)               | 0.00<br>(0.00 to 0.00)               | 0.00<br>(0.00 to 0.00)               |
| Leishmaniasis                                         | 0.00<br>(0.00 to 0.00)                  | 0.00<br>(0.00 to 0.00)                  | 0.00<br>(0.00 to 0.00)                  | 0.00<br>(0.00 to 0.00)                  | 0.00<br>(0.00 to 0.00)               | 0.00<br>(0.00 to 0.00)               | 0.00<br>(0.00 to 0.00)               | 0.00<br>(0.00 to 0.00)               |
| African trypanosomiasis                               | 0.00<br>(0.00 to 0.00)                  | 0.00<br>(0.00 to 0.00)                  | 0.00<br>(0.00 to 0.00)                  | 0.00<br>(0.00 to 0.00)                  | 0.00<br>(0.00 to 0.00)               | 0.00<br>(0.00 to 0.00)               | 0.00<br>(0.00 to 0.00)               | 0.00<br>(0.00 to 0.00)               |
| Schistosomiasis                                       | 0.00<br>(0.00 to 0.00)                  | 0.00<br>(0.00 to 0.00)                  | 0.00<br>(0.00 to 0.00)                  | 0.00<br>(0.00 to 0.00)                  | 0.00<br>(0.00 to 0.00)               | 0.00<br>(0.00 to 0.00)               | 0.00<br>(0.00 to 0.00)               | 0.00<br>(0.00 to 0.00)               |
| Cysticercosis                                         | 0.26<br>(0.23 to 0.30)                  | 0.10<br>(0.08 to 0.12)                  | 0.10<br>(0.08 to 0.12)                  | 0.10<br>(0.08 to 0.12)                  | 0.01<br>(0.01 to 0.01)               | 0.00<br>(0.00 to 0.01)               | 0.00<br>(0.00 to 0.01)               | 0.00<br>(0.00 to 0.00)               |
| Cystic echinococcosis                                 | 0.00<br>(0.00 to 0.00)                  | 0.00<br>(0.00 to 0.00)                  | 0.00<br>(0.00 to 0.00)                  | 0.00<br>(0.00 to 0.00)                  | 0.00<br>(0.00 to 0.00)               | 0.00<br>(0.00 to 0.00)               | 0.00<br>(0.00 to 0.00)               | 0.00<br>(0.00 to 0.00)               |
| Dengue                                                | 0.00<br>(0.00 to 0.00)                  | 0.00<br>(0.00 to 0.00)                  | 0.00<br>(0.00 to 0.00)                  | 0.00<br>(0.00 to 0.00)                  | 0.00<br>(0.00 to 0.00)               | 0.00<br>(0.00 to 0.00)               | 0.00<br>(0.00 to 0.00)               | 0.00<br>(0.00 to 0.00)               |
| Yellow fever                                          | 0.00<br>(0.00 to 0.00)                  | 0.00<br>(0.00 to 0.00)                  | 0.00<br>(0.00 to 0.00)                  | 0.00<br>(0.00 to 0.00)                  | 0.00<br>(0.00 to 0.00)               | 0.00<br>(0.00 to 0.00)               | 0.00<br>(0.00 to 0.00)               | 0.00<br>(0.00 to 0.00)               |
| Rabies                                                | 0.13<br>(0.10 to 0.17)                  | 0.18<br>(0.14 to 0.24)                  | 0.18<br>(0.14 to 0.24)                  | 0.17<br>(0.13 to 0.23)                  | 0.01<br>(0.01 to 0.01)               | 0.02<br>(0.01 to 0.03)               | 0.02<br>(0.01 to 0.03)               | 0.02<br>(0.01 to 0.03)               |
| Intestinal nematode infections                        | 0.00<br>(0.00 to 0.00)                  | 0.00<br>(0.00 to 0.00)                  | 0.00<br>(0.00 to 0.00)                  | 0.00<br>(0.00 to 0.00)                  | 0.00<br>(0.00 to 0.00)               | 0.00<br>(0.00 to 0.00)               | 0.00<br>(0.00 to 0.00)               | 0.00<br>(0.00 to 0.00)               |
| Other neglected tropical diseases                     | 8.63<br>(6.07 to 14.06)                 | 11.66<br>(6.96 to 16.20)                | 12.02<br>(7.14 to 16.56)                | 11.29<br>(6.89 to 15.84)                | 0.39<br>(0.19 to 0.50)               | 0.70<br>(0.33 to 0.89)               | 0.74<br>(0.35 to 0.95)               | 0.65<br>(0.31 to 0.83)               |
| <b>Maternal disorders</b>                             | <b>32.42</b><br><b>(26.53 to 38.61)</b> | <b>20.21</b><br><b>(11.27 to 33.12)</b> | <b>18.95</b><br><b>(10.56 to 31.20)</b> | <b>20.89</b><br><b>(11.61 to 33.54)</b> | <b>0.63</b><br><b>(0.52 to 0.75)</b> | <b>0.39</b><br><b>(0.23 to 0.62)</b> | <b>0.37</b><br><b>(0.23 to 0.58)</b> | <b>0.40</b><br><b>(0.24 to 0.64)</b> |
| Maternal hemorrhage                                   | 3.10<br>(1.92 to 4.62)                  | 1.79<br>(0.88 to 3.32)                  | 1.68<br>(0.82 to 3.06)                  | 1.84<br>(0.91 to 3.37)                  | 0.06<br>(0.04 to 0.09)               | 0.04<br>(0.02 to 0.06)               | 0.03<br>(0.02 to 0.06)               | 0.04<br>(0.02 to 0.06)               |
| Maternal sepsis and other maternal infections         | 0.64<br>(0.30 to 1.06)                  | 0.35<br>(0.14 to 0.74)                  | 0.33<br>(0.13 to 0.69)                  | 0.36<br>(0.15 to 0.76)                  | 0.01<br>(0.01 to 0.02)               | 0.01<br>(0.00 to 0.01)               | 0.01<br>(0.00 to 0.01)               | 0.01<br>(0.00 to 0.01)               |
| Maternal hypertensive disorders                       | 3.84<br>(2.56 to 5.50)                  | 2.28<br>(1.05 to 4.63)                  | 2.13<br>(0.99 to 4.27)                  | 2.35<br>(1.11 to 4.79)                  | 0.07<br>(0.05 to 0.10)               | 0.04<br>(0.02 to 0.08)               | 0.04<br>(0.02 to 0.08)               | 0.04<br>(0.02 to 0.09)               |
| Maternal obstructed labor and uterine rupture         | 0.55<br>(0.23 to 0.97)                  | 0.34<br>(0.12 to 0.69)                  | 0.32<br>(0.12 to 0.64)                  | 0.35<br>(0.13 to 0.72)                  | 0.01<br>(0.00 to 0.02)               | 0.01<br>(0.00 to 0.01)               | 0.01<br>(0.00 to 0.01)               | 0.01<br>(0.00 to 0.01)               |
| Maternal abortion, miscarriage, and ectopic pregnancy | 2.57<br>(1.62 to 3.64)                  | 1.69<br>(0.81 to 3.21)                  | 1.58<br>(0.76 to 2.97)                  | 1.75<br>(0.84 to 3.29)                  | 0.05<br>(0.03 to 0.08)               | 0.04<br>(0.02 to 0.07)               | 0.03<br>(0.02 to 0.06)               | 0.04<br>(0.02 to 0.07)               |

|                                        |                              |                            |                            |                            |                           |                           |                           |                           |
|----------------------------------------|------------------------------|----------------------------|----------------------------|----------------------------|---------------------------|---------------------------|---------------------------|---------------------------|
|                                        | 5.67<br>(3.87 to<br>7.96)    | 3.89<br>(1.63 to<br>7.81)  | 3.61<br>(1.52 to<br>7.25)  | 4.05<br>(1.72 to<br>8.08)  | 0.10<br>(0.07 to<br>0.15) | 0.07<br>(0.03 to<br>0.14) | 0.07<br>(0.03 to<br>0.13) | 0.07<br>(0.03 to<br>0.15) |
| Indirect maternal deaths               |                              |                            |                            |                            |                           |                           |                           |                           |
|                                        | 1.09<br>(0.63 to<br>1.82)    | 0.50<br>(0.22 to<br>1.01)  | 0.46<br>(0.20 to<br>0.95)  | 0.52<br>(0.23 to<br>1.06)  | 0.02<br>(0.01 to<br>0.04) | 0.01<br>(0.00 to<br>0.02) | 0.01<br>(0.00 to<br>0.02) | 0.01<br>(0.00 to<br>0.02) |
| Late maternal deaths                   |                              |                            |                            |                            |                           |                           |                           |                           |
|                                        | 0.01<br>(0.00 to<br>0.02)    | 0.02<br>(0.00 to<br>0.07)  | 0.01<br>(0.00 to<br>0.03)  | 0.02<br>(0.00 to<br>0.09)  | 0.00<br>(0.00 to<br>0.00) | 0.00<br>(0.00 to<br>0.00) | 0.00<br>(0.00 to<br>0.00) | 0.00<br>(0.00 to<br>0.00) |
| Maternal deaths aggravated by HIV/AIDS |                              |                            |                            |                            |                           |                           |                           |                           |
|                                        | 14.95<br>(11.62 to<br>19.08) | 9.35<br>(4.92 to<br>16.67) | 8.83<br>(4.70 to<br>15.71) | 9.65<br>(5.11 to<br>17.02) | 0.29<br>(0.23 to<br>0.37) | 0.18<br>(0.10 to<br>0.31) | 0.17<br>(0.09 to<br>0.30) | 0.19<br>(0.10 to<br>0.32) |
| Other maternal disorders               |                              |                            |                            |                            |                           |                           |                           |                           |

| Luxembourg                                                              |                                     |                                     |                                     |                                     |                                 |                                  |                                  |                                  |
|-------------------------------------------------------------------------|-------------------------------------|-------------------------------------|-------------------------------------|-------------------------------------|---------------------------------|----------------------------------|----------------------------------|----------------------------------|
| Cause                                                                   | YLLs (actual counts)                |                                     |                                     |                                     | Deaths (actual counts)          |                                  |                                  |                                  |
|                                                                         | 2016                                | 2040 Forecast                       | 2040 Better Scenario                | 2040 Worse Scenario                 | 2016                            | 2040 Forecast                    | 2040 Better Scenario             | 2040 Worse Scenario              |
| <b>Neonatal disorders</b>                                               | <b>477.60</b><br>(347.40 to 642.22) | <b>388.12</b><br>(168.05 to 776.38) | <b>337.30</b><br>(149.81 to 668.56) | <b>419.16</b><br>(179.50 to 822.63) | <b>5.52</b><br>(4.02 to 7.42)   | <b>4.49</b><br>(1.94 to 8.97)    | <b>3.90</b><br>(1.73 to 7.73)    | <b>4.85</b><br>(2.08 to 9.51)    |
| Neonatal preterm birth                                                  | 128.85<br>(90.08 to 180.94)         | 76.58<br>(36.86 to 136.51)          | 55.48<br>(27.51 to 95.85)           | 86.76<br>(42.56 to 153.00)          | 1.49<br>(1.04 to 2.09)          | 0.88<br>(0.43 to 1.58)           | 0.64<br>(0.32 to 1.11)           | 1.00<br>(0.49 to 1.77)           |
| Neonatal encephalopathy due to birth asphyxia and trauma                | 116.88<br>(80.93 to 160.66)         | 76.20<br>(30.30 to 161.22)          | 64.98<br>(26.27 to 137.23)          | 83.54<br>(33.43 to 178.48)          | 1.35<br>(0.94 to 1.86)          | 0.88<br>(0.35 to 1.86)           | 0.75<br>(0.30 to 1.59)           | 0.97<br>(0.39 to 2.06)           |
| Neonatal sepsis and other neonatal infections                           | 28.51<br>(17.38 to 48.15)           | 26.20<br>(9.08 to 63.41)            | 23.04<br>(8.10 to 55.72)            | 28.39<br>(9.83 to 69.56)            | 0.33<br>(0.20 to 0.56)          | 0.30<br>(0.11 to 0.75)           | 0.27<br>(0.09 to 0.64)           | 0.33<br>(0.11 to 0.80)           |
| Hemolytic disease and other neonatal jaundice                           | 2.76<br>(1.57 to 5.41)              | 2.02<br>(0.64 to 5.40)              | 1.76<br>(0.57 to 4.73)              | 2.19<br>(0.71 to 5.93)              | 0.03<br>(0.02 to 0.06)          | 0.02<br>(0.01 to 0.06)           | 0.02<br>(0.01 to 0.05)           | 0.03<br>(0.01 to 0.07)           |
| Other neonatal disorders                                                | 200.60<br>(139.84 to 280.72)        | 207.12<br>(85.64 to 422.78)         | 192.04<br>(81.04 to 392.98)         | 218.29<br>(89.23 to 446.34)         | 2.32<br>(1.62 to 3.25)          | 2.39<br>(0.99 to 4.89)           | 2.22<br>(0.94 to 4.54)           | 2.52<br>(1.03 to 5.16)           |
| <b>Nutritional deficiencies</b>                                         | <b>69.40</b><br>(60.49 to 78.92)    | <b>88.39</b><br>(70.70 to 107.77)   | <b>94.35</b><br>(75.30 to 115.17)   | <b>81.54</b><br>(64.39 to 99.41)    | <b>8.13</b><br>(6.98 to 9.40)   | <b>11.90</b><br>(8.90 to 15.48)  | <b>13.01</b><br>(9.80 to 16.82)  | <b>10.65</b><br>(7.75 to 14.15)  |
| Protein-energy malnutrition                                             | 54.77<br>(28.77 to 66.92)           | 67.06<br>(34.13 to 87.86)           | 72.72<br>(38.04 to 94.46)           | 61.29<br>(31.01 to 81.17)           | 6.68<br>(3.28 to 8.34)          | 9.32<br>(4.41 to 12.80)          | 10.33<br>(5.00 to 14.16)         | 8.29<br>(3.80 to 11.60)          |
| Iodine deficiency                                                       | 0.91<br>(0.06 to 3.52)              | 3.28<br>(0.06 to 13.25)             | 3.36<br>(0.06 to 13.85)             | 3.10<br>(0.06 to 12.23)             | 0.07<br>(0.00 to 0.34)          | 0.38<br>(0.00 to 1.91)           | 0.40<br>(0.00 to 2.12)           | 0.35<br>(0.00 to 1.71)           |
| Dietary iron deficiency                                                 | 1.54<br>(1.19 to 2.63)              | 1.60<br>(0.91 to 3.33)              | 1.64<br>(0.92 to 3.48)              | 1.57<br>(0.90 to 3.26)              | 0.05<br>(0.03 to 0.11)          | 0.07<br>(0.03 to 0.25)           | 0.07<br>(0.03 to 0.25)           | 0.06<br>(0.03 to 0.20)           |
| Other nutritional deficiencies                                          | 12.17<br>(7.32 to 34.89)            | 16.45<br>(9.04 to 44.81)            | 16.63<br>(9.03 to 46.41)            | 15.59<br>(8.62 to 42.03)            | 1.34<br>(0.67 to 4.58)          | 2.13<br>(0.99 to 6.42)           | 2.21<br>(1.02 to 6.78)           | 1.95<br>(0.90 to 5.93)           |
| <b>Other communicable, maternal, neonatal, and nutritional diseases</b> | <b>225.36</b><br>(186.12 to 257.84) | <b>346.29</b><br>(272.43 to 415.97) | <b>346.88</b><br>(271.06 to 414.95) | <b>340.20</b><br>(268.55 to 407.72) | <b>10.30</b><br>(8.02 to 11.90) | <b>20.07</b><br>(15.60 to 23.31) | <b>20.59</b><br>(15.99 to 23.90) | <b>19.10</b><br>(14.85 to 22.13) |
| Sexually transmitted infections excluding HIV                           | 7.17<br>(5.95 to 9.06)              | 4.78<br>(3.55 to 6.28)              | 4.66<br>(3.45 to 6.09)              | 4.76<br>(3.57 to 6.15)              | 0.36<br>(0.30 to 0.46)          | 0.30<br>(0.23 to 0.39)           | 0.30<br>(0.23 to 0.39)           | 0.29<br>(0.22 to 0.37)           |
| Syphilis                                                                | 2.98<br>(2.34 to 3.97)              | 1.52<br>(1.10 to 2.12)              | 1.43<br>(1.05 to 2.01)              | 1.54<br>(1.13 to 2.13)              | 0.14<br>(0.11 to 0.19)          | 0.09<br>(0.07 to 0.15)           | 0.09<br>(0.06 to 0.12)           | 0.09<br>(0.07 to 0.12)           |
| Chlamydial infection                                                    | 0.79<br>(0.65 to 0.98)              | 0.63<br>(0.46 to 0.84)              | 0.62<br>(0.46 to 0.84)              | 0.62<br>(0.46 to 0.82)              | 0.04<br>(0.04 to 0.05)          | 0.04<br>(0.03 to 0.06)           | 0.04<br>(0.03 to 0.06)           | 0.04<br>(0.03 to 0.05)           |
| Gonococcal infection                                                    | 2.34<br>(1.92 to 2.91)              | 1.86<br>(1.35 to 2.50)              | 1.84<br>(1.33 to 2.51)              | 1.83<br>(1.34 to 2.48)              | 0.13<br>(0.10 to 0.16)          | 0.12<br>(0.09 to 0.17)           | 0.12<br>(0.09 to 0.17)           | 0.12<br>(0.09 to 0.16)           |
| Other sexually transmitted infections                                   | 1.06<br>(0.87 to 1.32)              | 0.77<br>(0.56 to 1.04)              | 0.76<br>(0.55 to 1.03)              | 0.77<br>(0.56 to 1.04)              | 0.05<br>(0.04 to 0.06)          | 0.04<br>(0.03 to 0.05)           | 0.04<br>(0.03 to 0.05)           | 0.04<br>(0.03 to 0.05)           |
| Acute hepatitis                                                         | 19.70<br>(16.58 to 22.98)           | 19.77<br>(13.82 to 27.37)           | 18.21<br>(12.93 to 25.33)           | 20.19<br>(14.29 to 27.58)           | 0.87<br>(0.73 to 1.02)          | 1.10<br>(0.79 to 1.47)           | 1.03<br>(0.75 to 1.39)           | 1.10<br>(0.79 to 1.47)           |
| Acute hepatitis A                                                       | 1.20<br>(0.91 to 1.57)              | 0.99<br>(0.61 to 1.53)              | 0.94<br>(0.58 to 1.44)              | 1.00<br>(0.62 to 1.53)              | 0.04<br>(0.03 to 0.06)          | 0.05<br>(0.03 to 0.08)           | 0.05<br>(0.03 to 0.08)           | 0.05<br>(0.03 to 0.08)           |
| Acute hepatitis B                                                       | 14.93<br>(12.28 to 17.73)           | 14.84<br>(9.91 to 20.81)            | 13.60<br>(9.01 to 19.27)            | 15.23<br>(10.24 to 21.39)           | 0.62<br>(0.50 to 0.75)          | 0.76<br>(0.51 to 1.08)           | 0.70<br>(0.47 to 1.00)           | 0.76<br>(0.52 to 1.07)           |





| Luxembourg                           |                                              |                                              |                                              |                                              |                                           |                                           |                                           |                                           |
|--------------------------------------|----------------------------------------------|----------------------------------------------|----------------------------------------------|----------------------------------------------|-------------------------------------------|-------------------------------------------|-------------------------------------------|-------------------------------------------|
| Cause                                | YLLs (actual counts)                         |                                              |                                              |                                              | Deaths (actual counts)                    |                                           |                                           |                                           |
|                                      | 2016                                         | 2040 Forecast                                | 2040 Better Scenario                         | 2040 Worse Scenario                          | 2016                                      | 2040 Forecast                             | 2040 Better Scenario                      | 2040 Worse Scenario                       |
| <b>Neoplasms</b>                     | <b>21,440.99</b><br>(19,342.51 to 23,758.68) | <b>27,955.32</b><br>(20,980.02 to 35,623.43) | <b>23,872.71</b><br>(18,189.11 to 30,113.13) | <b>34,671.69</b><br>(25,680.51 to 45,016.15) | <b>1,182.08</b><br>(1,071.87 to 1,296.43) | <b>1,831.96</b><br>(1,481.75 to 2,200.56) | <b>1,613.23</b><br>(1,317.91 to 1,927.01) | <b>2,181.01</b><br>(1,748.30 to 2,668.85) |
| Lip and oral cavity cancer           | 318.85<br>(270.66 to 374.41)                 | 373.10<br>(176.94 to 719.50)                 | 242.53<br>(122.05 to 450.11)                 | 603.52<br>(290.52 to 1,127.78)               | 14.53<br>(12.57 to 16.70)                 | 19.72<br>(10.32 to 35.25)                 | 13.11<br>(7.18 to 23.08)                  | 31.47<br>(16.54 to 55.51)                 |
| Nasopharynx cancer                   | 108.88<br>(91.50 to 130.29)                  | 141.20<br>(69.46 to 250.91)                  | 90.34<br>(46.53 to 153.23)                   | 229.60<br>(117.77 to 400.32)                 | 4.99<br>(4.27 to 5.89)                    | 7.81<br>(3.96 to 13.55)                   | 5.09<br>(2.67 to 8.41)                    | 12.50<br>(6.55 to 21.75)                  |
| Other pharynx cancer                 | 282.34<br>(240.55 to 325.85)                 | 345.31<br>(175.57 to 606.75)                 | 306.85<br>(155.91 to 539.67)                 | 411.24<br>(211.53 to 713.97)                 | 11.09<br>(9.56 to 12.69)                  | 15.59<br>(8.30 to 26.96)                  | 13.95<br>(7.41 to 23.91)                  | 18.40<br>(9.92 to 31.21)                  |
| Esophageal cancer                    | 605.19<br>(514.97 to 715.46)                 | 724.83<br>(379.67 to 1,305.43)               | 505.70<br>(283.02 to 877.89)                 | 1,105.65<br>(563.83 to 2,070.71)             | 30.46<br>(26.34 to 35.29)                 | 41.57<br>(23.73 to 70.06)                 | 29.62<br>(17.84 to 47.74)                 | 62.38<br>(34.66 to 109.33)                |
| Stomach cancer                       | 836.17<br>(745.58 to 938.58)                 | 838.53<br>(592.39 to 1,174.83)               | 734.55<br>(540.38 to 994.67)                 | 912.66<br>(635.72 to 1,271.42)               | 52.20<br>(46.84 to 58.06)                 | 62.56<br>(46.86 to 83.76)                 | 56.03<br>(43.56 to 72.91)                 | 66.11<br>(49.17 to 89.99)                 |
| Colon and rectum cancer              | 2,278.82<br>(2,024.81 to 2,582.97)           | 3,439.24<br>(2,200.67 to 5,230.26)           | 2,941.10<br>(1,937.40 to 4,507.89)           | 4,214.00<br>(2,680.71 to 6,621.81)           | 148.21<br>(132.49 to 166.08)              | 263.40<br>(176.62 to 387.11)              | 230.42<br>(157.13 to 338.96)              | 314.20<br>(207.25 to 474.91)              |
| Liver cancer                         | 838.41<br>(726.30 to 952.56)                 | 1,328.19<br>(830.66 to 2,139.36)             | 1,053.52<br>(689.59 to 1,609.40)             | 1,951.96<br>(1,142.76 to 3,296.98)           | 46.34<br>(40.65 to 51.96)                 | 83.96<br>(55.88 to 128.70)                | 68.81<br>(47.78 to 100.95)                | 118.41<br>(73.36 to 192.13)               |
| Liver cancer due to hepatitis B      | 118.71<br>(80.75 to 172.80)                  | 174.47<br>(94.60 to 319.35)                  | 150.36<br>(85.94 to 261.30)                  | 213.30<br>(108.72 to 412.67)                 | 5.57<br>(3.74 to 8.14)                    | 9.58<br>(5.33 to 17.04)                   | 8.47<br>(4.90 to 14.60)                   | 11.32<br>(5.91 to 20.90)                  |
| Liver cancer due to hepatitis C      | 218.68<br>(164.70 to 276.61)                 | 365.60<br>(217.82 to 600.22)                 | 322.87<br>(204.42 to 507.69)                 | 434.24<br>(242.48 to 756.58)                 | 13.56<br>(10.33 to 17.18)                 | 25.74<br>(16.00 to 39.63)                 | 23.38<br>(15.36 to 34.59)                 | 29.48<br>(17.24 to 47.64)                 |
| Liver cancer due to alcohol use      | 399.17<br>(321.20 to 483.67)                 | 610.39<br>(360.15 to 1,023.19)               | 425.41<br>(262.29 to 680.22)                 | 1,086.47<br>(616.68 to 1,894.62)             | 21.49<br>(17.25 to 25.96)                 | 37.09<br>(22.60 to 60.36)                 | 26.64<br>(16.54 to 41.98)                 | 63.87<br>(37.87 to 109.08)                |
| Liver cancer due to other causes     | 101.85<br>(70.68 to 140.22)                  | 177.72<br>(97.37 to 309.26)                  | 154.89<br>(88.37 to 258.57)                  | 217.94<br>(112.45 to 397.54)                 | 5.73<br>(3.98 to 7.90)                    | 11.56<br>(6.38 to 19.36)                  | 10.33<br>(5.94 to 16.67)                  | 13.74<br>(7.27 to 23.95)                  |
| Gallbladder and biliary tract cancer | 222.67<br>(195.64 to 254.80)                 | 235.20<br>(190.04 to 283.28)                 | 238.61<br>(190.52 to 290.82)                 | 226.49<br>(185.69 to 271.52)                 | 14.14<br>(12.60 to 16.08)                 | 17.26<br>(14.96 to 19.96)                 | 17.84<br>(15.31 to 20.82)                 | 16.20<br>(14.15 to 18.66)                 |
| Pancreatic cancer                    | 1,410.23<br>(1,244.71 to 1,596.55)           | 1,948.34<br>(1,427.11 to 2,592.77)           | 1,825.12<br>(1,340.59 to 2,419.02)           | 2,157.69<br>(1,559.18 to 2,922.80)           | 82.85<br>(73.65 to 93.64)                 | 128.41<br>(98.34 to 165.43)               | 122.70<br>(94.27 to 157.02)               | 138.82<br>(104.96 to 181.93)              |
| Larynx cancer                        | 206.91<br>(177.13 to 237.23)                 | 207.98<br>(90.53 to 417.30)                  | 125.64<br>(56.40 to 244.81)                  | 335.90<br>(145.20 to 689.46)                 | 9.57<br>(8.32 to 10.90)                   | 11.15<br>(4.97 to 21.96)                  | 6.84<br>(3.21 to 12.90)                   | 17.83<br>(8.19 to 35.28)                  |
| Tracheal, bronchus, and lung cancer  | 4,718.30<br>(4,171.73 to 5,312.62)           | 5,187.35<br>(3,316.65 to 7,562.05)           | 3,247.75<br>(2,122.75 to 4,673.75)           | 8,722.18<br>(5,550.09 to 12,729.49)          | 242.65<br>(216.97 to 271.56)              | 303.43<br>(202.14 to 429.55)              | 195.37<br>(132.14 to 276.12)              | 493.06<br>(320.42 to 716.55)              |
| Malignant skin melanoma              | 410.57<br>(316.50 to 488.63)                 | 493.95<br>(360.75 to 630.72)                 | 522.37<br>(379.78 to 668.19)                 | 470.68<br>(347.32 to 596.22)                 | 18.22<br>(14.15 to 21.54)                 | 26.97<br>(21.12 to 32.40)                 | 29.06<br>(22.50 to 35.02)                 | 25.04<br>(19.68 to 30.01)                 |
| Non-melanoma skin cancer             | 90.16<br>(78.45 to 103.48)                   | 151.57<br>(123.89 to 181.80)                 | 148.45<br>(120.22 to 179.77)                 | 146.80<br>(121.86 to 174.45)                 | 6.56<br>(5.81 to 7.41)                    | 13.38<br>(11.54 to 15.50)                 | 13.45<br>(11.62 to 15.58)                 | 12.52<br>(10.78 to 14.46)                 |
| Breast cancer                        | 1,992.34<br>(1,654.15 to 2,367.39)           | 2,483.72<br>(1,572.16 to 3,921.53)           | 2,166.49<br>(1,401.66 to 3,357.85)           | 2,883.19<br>(1,767.16 to 4,712.93)           | 101.31<br>(84.33 to 119.43)               | 147.13<br>(101.25 to 216.31)              | 131.31<br>(92.47 to 189.94)               | 166.20<br>(111.59 to 252.48)              |
| Cervical cancer                      | 248.26<br>(206.97 to 294.39)                 | 228.06<br>(154.57 to 324.52)                 | 207.39<br>(141.55 to 288.47)                 | 248.58<br>(163.28 to 365.26)                 | 11.78<br>(9.92 to 13.85)                  | 12.59<br>(9.24 to 16.88)                  | 11.69<br>(8.76 to 15.38)                  | 13.32<br>(9.64 to 18.39)                  |

|                   |                                   |                                       |                                       |                                       |                               |                                 |                                 |                                 |
|-------------------|-----------------------------------|---------------------------------------|---------------------------------------|---------------------------------------|-------------------------------|---------------------------------|---------------------------------|---------------------------------|
| Uterine cancer    | 196.38<br>(162.37 to<br>233.55)   | 330.31<br>(248.76 to<br>414.96)       | 321.82<br>(239.96 to<br>409.40)       | 328.00<br>(248.03 to<br>410.71)       | 12.11<br>(10.12 to<br>14.15)  | 22.36<br>(18.07 to<br>27.02)    | 22.10<br>(17.74 to<br>26.96)    | 21.77<br>(17.70 to<br>25.96)    |
| Ovarian cancer    | 709.95<br>(558.48 to<br>879.53)   | 829.23<br>(547.45 to<br>1,194.13)     | 789.44<br>(524.53 to<br>1,133.49)     | 874.82<br>(567.21 to<br>1,280.85)     | 38.84<br>(30.95 to<br>47.58)  | 50.20<br>(35.08 to<br>71.12)    | 48.13<br>(33.64 to<br>67.75)    | 52.45<br>(35.97 to<br>75.50)    |
| Prostate cancer   | 814.03<br>(651.64 to<br>1,451.08) | 1,550.13<br>(1,168.49 to<br>2,614.81) | 1,547.59<br>(1,160.40 to<br>2,543.63) | 1,495.24<br>(1,135.74 to<br>2,571.12) | 68.15<br>(55.45 to<br>112.32) | 153.76<br>(122.26 to<br>237.76) | 156.90<br>(125.75 to<br>239.25) | 144.19<br>(113.55 to<br>232.40) |
| Testicular cancer | 25.85<br>(19.66 to<br>32.41)      | 21.08<br>(13.28 to<br>32.25)          | 20.41<br>(12.89 to<br>31.43)          | 21.02<br>(13.41 to<br>31.98)          | 0.73<br>(0.59 to<br>0.90)     | 0.85<br>(0.64 to<br>1.11)       | 0.84<br>(0.63 to<br>1.10)       | 0.81<br>(0.61 to<br>1.06)       |

| Luxembourg                      |                                                     |                                                     |                                                     |                                                     |                                                  |                                                  |                                                  |                                                  |
|---------------------------------|-----------------------------------------------------|-----------------------------------------------------|-----------------------------------------------------|-----------------------------------------------------|--------------------------------------------------|--------------------------------------------------|--------------------------------------------------|--------------------------------------------------|
| Cause                           | YLLs (actual counts)                                |                                                     |                                                     |                                                     | Deaths (actual counts)                           |                                                  |                                                  |                                                  |
|                                 | 2016                                                | 2040 Forecast                                       | 2040 Better Scenario                                | 2040 Worse Scenario                                 | 2016                                             | 2040 Forecast                                    | 2040 Better Scenario                             | 2040 Worse Scenario                              |
| Kidney cancer                   | 299.70<br>(263.76 to 348.20)                        | 432.01<br>(324.13 to 557.09)                        | 412.46<br>(313.03 to 529.48)                        | 457.60<br>(338.12 to 601.71)                        | 16.34<br>(14.61 to 18.60)                        | 27.76<br>(22.15 to 34.43)                        | 27.08<br>(21.79 to 33.05)                        | 28.62<br>(22.35 to 36.35)                        |
| Bladder cancer                  | 533.93<br>(472.03 to 604.66)                        | 725.76<br>(526.33 to 982.99)                        | 644.85<br>(475.80 to 861.50)                        | 836.52<br>(587.42 to 1,162.35)                      | 38.84<br>(34.38 to 43.96)                        | 62.20<br>(47.15 to 81.80)                        | 56.53<br>(43.53 to 72.45)                        | 69.73<br>(50.72 to 95.64)                        |
| Brain and nervous system cancer | 1,052.22<br>(857.11 to 1,313.18)                    | 1,355.26<br>(977.68 to 1,822.14)                    | 1,342.21<br>(966.54 to 1,789.81)                    | 1,340.42<br>(973.60 to 1,780.87)                    | 38.66<br>(30.50 to 46.53)                        | 59.72<br>(44.59 to 74.68)                        | 59.92<br>(44.41 to 75.11)                        | 57.98<br>(43.53 to 72.47)                        |
| Thyroid cancer                  | 96.22<br>(83.29 to 111.25)                          | 148.96<br>(101.00 to 216.29)                        | 138.45<br>(95.27 to 196.37)                         | 158.78<br>(106.64 to 236.18)                        | 5.35<br>(4.66 to 6.10)                           | 9.67<br>(7.07 to 13.61)                          | 9.20<br>(6.80 to 12.62)                          | 9.98<br>(7.16 to 14.37)                          |
| Mesothelioma                    | 151.52<br>(126.85 to 181.26)                        | 223.78<br>(168.55 to 291.80)                        | 231.26<br>(171.79 to 307.03)                        | 213.29<br>(162.30 to 274.20)                        | 8.10<br>(6.88 to 9.60)                           | 14.10<br>(11.23 to 17.65)                        | 14.79<br>(11.60 to 18.69)                        | 13.15<br>(10.69 to 16.26)                        |
| Hodgkin lymphoma                | 50.57<br>(43.81 to 64.39)                           | 50.17<br>(37.41 to 68.73)                           | 47.19<br>(35.19 to 64.05)                           | 50.71<br>(38.38 to 68.12)                           | 1.87<br>(1.63 to 2.27)                           | 2.32<br>(1.84 to 2.91)                           | 2.21<br>(1.77 to 2.79)                           | 2.29<br>(1.85 to 2.86)                           |
| Non-Hodgkin lymphoma            | 660.93<br>(562.26 to 813.39)                        | 864.11<br>(653.21 to 1,130.61)                      | 881.36<br>(629.13 to 1,080.93)                      | 881.36<br>(662.76 to 1,169.68)                      | 34.77<br>(30.25 to 41.77)                        | 54.71<br>(43.66 to 69.04)                        | 53.69<br>(43.00 to 67.06)                        | 54.27<br>(43.22 to 69.27)                        |
| Multiple myeloma                | 360.78<br>(288.42 to 487.68)                        | 547.66<br>(390.81 to 771.52)                        | 534.36<br>(382.46 to 749.42)                        | 555.46<br>(397.57 to 790.80)                        | 22.02<br>(17.84 to 29.08)                        | 37.71<br>(28.68 to 51.54)                        | 37.50<br>(28.65 to 51.10)                        | 37.25<br>(28.12 to 51.18)                        |
| Leukemia                        | 1,026.48<br>(904.13 to 1,158.72)                    | 1,433.17<br>(1,058.52 to 1,912.89)                  | 1,316.99<br>(974.71 to 1,719.08)                    | 1,565.52<br>(1,136.88 to 2,132.32)                  | 54.56<br>(48.81 to 60.91)                        | 96.17<br>(75.21 to 122.47)                       | 90.17<br>(72.16 to 112.61)                       | 101.91<br>(77.25 to 133.37)                      |
| Acute lymphoid leukemia         | 67.74<br>(54.64 to 81.89)                           | 63.74<br>(40.90 to 106.68)                          | 57.95<br>(37.01 to 96.27)                           | 70.32<br>(44.73 to 113.24)                          | 1.97<br>(1.63 to 2.33)                           | 2.26<br>(1.59 to 3.20)                           | 2.06<br>(1.46 to 2.83)                           | 2.48<br>(1.74 to 3.57)                           |
| Chronic lymphoid leukemia       | 104.61<br>(86.62 to 128.22)                         | 144.83<br>(103.24 to 199.61)                        | 135.73<br>(98.26 to 183.64)                         | 155.41<br>(108.57 to 219.57)                        | 7.87<br>(6.51 to 9.73)                           | 12.35<br>(9.10 to 16.19)                         | 11.86<br>(8.95 to 15.31)                         | 12.83<br>(9.20 to 17.59)                         |
| Acute myeloid leukemia          | 366.38<br>(311.09 to 419.97)                        | 522.40<br>(376.89 to 697.16)                        | 488.65<br>(354.12 to 633.92)                        | 569.19<br>(402.10 to 771.99)                        | 17.26<br>(14.89 to 19.82)                        | 30.02<br>(22.46 to 38.71)                        | 28.55<br>(21.71 to 36.24)                        | 31.91<br>(23.26 to 42.06)                        |
| Chronic myeloid leukemia        | 64.47<br>(53.47 to 75.64)                           | 51.62<br>(36.20 to 73.72)                           | 44.40<br>(31.27 to 61.94)                           | 58.34<br>(39.65 to 84.42)                           | 3.66<br>(3.01 to 4.28)                           | 3.63<br>(2.65 to 4.98)                           | 3.21<br>(2.35 to 4.25)                           | 3.96<br>(2.81 to 5.52)                           |
| Other leukemia                  | 423.27<br>(358.97 to 485.44)                        | 650.58<br>(471.67 to 871.81)                        | 590.26<br>(433.77 to 777.38)                        | 712.25<br>(512.85 to 976.50)                        | 23.80<br>(20.38 to 27.30)                        | 47.90<br>(36.74 to 61.83)                        | 44.49<br>(34.89 to 56.33)                        | 50.73<br>(37.45 to 67.50)                        |
| Other neoplasms                 | 894.35<br>(773.06 to 1,015.04)                      | 1,317.12<br>(1,040.93 to 1,626.93)                  | 1,338.02<br>(1,046.59 to 1,659.23)                  | 1,272.82<br>(1,016.37 to 1,556.14)                  | 46.80<br>(40.95 to 52.86)                        | 85.52<br>(72.27 to 98.31)                        | 88.86<br>(75.01 to 103.01)                       | 80.16<br>(68.28 to 91.49)                        |
| <b>Cardiovascular diseases</b>  | <b>16,008.40</b><br><b>(14,496.66 to 17,652.75)</b> | <b>18,064.87</b><br><b>(12,100.09 to 25,649.22)</b> | <b>14,210.89</b><br><b>(10,082.44 to 19,276.22)</b> | <b>24,606.98</b><br><b>(15,650.89 to 36,201.93)</b> | <b>1,405.30</b><br><b>(1,288.28 to 1,526.33)</b> | <b>1,834.28</b><br><b>(1,347.97 to 2,459.41)</b> | <b>1,528.95</b><br><b>(1,167.96 to 1,987.04)</b> | <b>2,290.29</b><br><b>(1,633.31 to 3,144.80)</b> |
| Rheumatic heart disease         | 207.27<br>(181.95 to 239.03)                        | 204.08<br>(154.12 to 273.70)                        | 192.36<br>(146.24 to 253.40)                        | 203.20<br>(154.31 to 272.03)                        | 15.39<br>(13.69 to 17.51)                        | 18.97<br>(15.32 to 24.51)                        | 18.39<br>(14.91 to 23.18)                        | 18.24<br>(14.54 to 23.92)                        |
| Ischemic heart disease          | 8,051.03<br>(7,273.09 to 8,922.36)                  | 7,248.32<br>(3,975.89 to 12,177.32)                 | 5,030.75<br>(2,906.57 to 8,198.59)                  | 11,297.63<br>(5,851.86 to 19,975.88)                | 700.26<br>(640.01 to 767.86)                     | 723.07<br>(438.15 to 1,153.55)                   | 541.89<br>(341.88 to 846.63)                     | 1,013.60<br>(591.61 to 1,660.29)                 |
| Stroke                          | 3,665.61<br>(3,249.30 to 4,132.56)                  | 3,678.19<br>(2,208.40 to 5,795.40)                  | 2,718.74<br>(1,727.19 to 4,116.75)                  | 5,489.28<br>(3,159.49 to 8,971.73)                  | 333.52<br>(294.17 to 376.64)                     | 388.21<br>(248.24 to 585.82)                     | 307.75<br>(201.64 to 467.95)                     | 520.81<br>(323.13 to 814.88)                     |
| Ischemic stroke                 | 1,534.18<br>(1,347.97 to 1,731.79)                  | 1,479.26<br>(836.45 to 2,643.24)                    | 1,179.35<br>(690.42 to 2,101.54)                    | 2,011.58<br>(1,085.07 to 3,806.71)                  | 162.80<br>(141.09 to 184.45)                     | 177.43<br>(102.70 to 329.09)                     | 148.79<br>(87.60 to 275.16)                      | 223.10<br>(121.47 to 438.31)                     |

|                                |                                       |                                       |                                     |                                       |                                 |                                 |                                 |                                 |
|--------------------------------|---------------------------------------|---------------------------------------|-------------------------------------|---------------------------------------|---------------------------------|---------------------------------|---------------------------------|---------------------------------|
| Intracerebral hemorrhage       | 2,131.43<br>(1,880.10 to<br>2,388.69) | 2,198.93<br>(1,237.39 to<br>3,713.29) | 1,539.40<br>(926.80 to<br>2,408.29) | 3,477.70<br>(1,882.35 to<br>5,918.15) | 170.72<br>(149.40 to<br>193.07) | 210.79<br>(129.44 to<br>334.62) | 158.96<br>(102.83 to<br>244.62) | 297.71<br>(173.73 to<br>492.22) |
| Hypertensive heart disease     | 381.47<br>(259.39 to<br>555.38)       | 732.48<br>(345.94 to<br>1,568.05)     | 595.32<br>(299.60 to<br>1,172.32)   | 1,008.80<br>(453.32 to<br>2,265.69)   | 36.44<br>(21.08 to<br>47.81)    | 82.86<br>(35.77 to<br>177.72)   | 70.12<br>(31.56 to<br>134.92)   | 109.48<br>(46.16 to<br>253.09)  |
| Cardiomyopathy and myocarditis | 492.11<br>(403.87 to<br>633.48)       | 653.45<br>(445.92 to<br>912.14)       | 615.27<br>(414.56 to<br>850.63)     | 693.97<br>(479.61 to<br>970.03)       | 40.48<br>(28.27 to<br>48.22)    | 66.24<br>(39.11 to<br>98.40)    | 64.88<br>(38.35 to<br>96.79)    | 66.15<br>(39.22 to<br>100.68)   |
| Myocarditis                    | 148.93<br>(95.47 to<br>192.55)        | 208.16<br>(124.58 to<br>269.55)       | 214.76<br>(128.57 to<br>277.73)     | 196.95<br>(119.28 to<br>253.35)       | 13.51<br>(7.49 to<br>17.75)     | 23.14<br>(12.19 to<br>31.23)    | 24.65<br>(13.05 to<br>33.25)    | 20.97<br>(10.93 to<br>28.75)    |

| Luxembourg                                                    |                                                            |                                                            |                                                            |                                                            |                                                      |                                                      |                                                      |                                                      |
|---------------------------------------------------------------|------------------------------------------------------------|------------------------------------------------------------|------------------------------------------------------------|------------------------------------------------------------|------------------------------------------------------|------------------------------------------------------|------------------------------------------------------|------------------------------------------------------|
| Cause                                                         | YLLs (actual counts)                                       |                                                            |                                                            |                                                            | Deaths (actual counts)                               |                                                      |                                                      |                                                      |
|                                                               | 2016                                                       | 2040 Forecast                                              | 2040 Better Scenario                                       | 2040 Worse Scenario                                        | 2016                                                 | 2040 Forecast                                        | 2040 Better Scenario                                 | 2040 Worse Scenario                                  |
| Alcoholic cardiomyopathy                                      | 85.21<br>(60.21 to<br>168.88)                              | 85.33<br>(54.31 to<br>146.33)                              | 70.47<br>(44.78 to<br>121.02)                              | 122.17<br>(80.08 to<br>205.69)                             | 4.23<br>(2.82 to<br>6.34)                            | 5.17<br>(2.82 to<br>7.06)                            | 4.35<br>(2.25 to<br>6.06)                            | 7.25<br>(4.23 to<br>9.75)                            |
| Other cardiomyopathy                                          | 257.97<br>(207.72 to<br>324.59)                            | 359.96<br>(207.97 to<br>574.42)                            | 330.04<br>(193.39 to<br>513.57)                            | 374.86<br>(216.44 to<br>599.17)                            | 22.74<br>(16.28 to<br>27.26)                         | 37.94<br>(20.37 to<br>67.96)                         | 35.88<br>(19.44 to<br>62.26)                         | 37.92<br>(20.11 to<br>68.27)                         |
| Atrial fibrillation and flutter                               | 438.09<br>(338.08 to<br>555.47)                            | 752.54<br>(512.38 to<br>1,084.44)                          | 690.75<br>(478.01 to<br>987.44)                            | 828.55<br>(553.85 to<br>1,206.78)                          | 50.97<br>(39.07 to<br>65.36)                         | 92.87<br>(64.01 to<br>132.67)                        | 87.65<br>(61.85 to<br>123.39)                        | 98.49<br>(67.47 to<br>142.75)                        |
| Aortic aneurysm                                               | 400.30<br>(349.65 to<br>464.33)                            | 540.68<br>(382.77 to<br>743.94)                            | 506.03<br>(366.19 to<br>688.47)                            | 564.72<br>(401.08 to<br>783.38)                            | 29.53<br>(26.11 to<br>33.64)                         | 46.45<br>(36.16 to<br>60.26)                         | 45.27<br>(35.97 to<br>58.01)                         | 46.04<br>(35.60 to<br>60.14)                         |
| Peripheral artery disease                                     | 91.94<br>(65.75 to<br>156.64)                              | 191.91<br>(119.20 to<br>331.26)                            | 187.67<br>(117.84 to<br>324.55)                            | 205.78<br>(125.92 to<br>358.00)                            | 9.16<br>(6.45 to<br>15.30)                           | 21.47<br>(13.63 to<br>35.35)                         | 21.76<br>(13.91 to<br>36.01)                         | 21.82<br>(13.83 to<br>36.36)                         |
| Endocarditis                                                  | 276.72<br>(203.83 to<br>362.43)                            | 414.93<br>(260.77 to<br>620.62)                            | 407.83<br>(260.65 to<br>601.80)                            | 425.24<br>(263.66 to<br>647.77)                            | 20.66<br>(14.24 to<br>26.58)                         | 35.70<br>(21.93 to<br>55.10)                         | 36.05<br>(22.44 to<br>55.65)                         | 35.28<br>(21.64 to<br>55.41)                         |
| Other cardiovascular and circulatory diseases                 | 2,003.85<br>(1,772.23 to<br>2,259.16)                      | 3,648.29<br>(2,697.84 to<br>4,867.99)                      | 3,266.18<br>(2,464.35 to<br>4,272.36)                      | 3,889.82<br>(2,842.69 to<br>5,237.82)                      | 168.90<br>(150.24 to<br>188.62)                      | 358.43<br>(286.83 to<br>449.39)                      | 335.18<br>(272.68 to<br>416.36)                      | 360.38<br>(283.80 to<br>457.73)                      |
| <b>Chronic respiratory diseases</b>                           | <b>2,723.86</b><br><b>(2,449.49 to</b><br><b>3,025.93)</b> | <b>3,433.84</b><br><b>(2,488.83 to</b><br><b>4,584.60)</b> | <b>2,532.31</b><br><b>(1,879.76 to</b><br><b>3,262.10)</b> | <b>5,159.31</b><br><b>(3,611.74 to</b><br><b>7,036.95)</b> | <b>225.64</b><br><b>(202.90 to</b><br><b>247.90)</b> | <b>324.19</b><br><b>(246.66 to</b><br><b>413.06)</b> | <b>244.38</b><br><b>(191.31 to</b><br><b>304.91)</b> | <b>464.85</b><br><b>(341.76 to</b><br><b>610.45)</b> |
| Chronic obstructive pulmonary disease                         | 2,310.86<br>(2,061.99 to<br>2,561.68)                      | 2,938.13<br>(2,080.63 to<br>3,991.78)                      | 2,028.16<br>(1,476.69 to<br>2,696.57)                      | 4,657.13<br>(3,203.43 to<br>6,451.76)                      | 199.83<br>(178.96 to<br>220.05)                      | 286.71<br>(212.32 to<br>373.94)                      | 205.31<br>(155.70 to<br>264.29)                      | 428.28<br>(310.10 to<br>568.21)                      |
| Pneumoconiosis                                                | 18.74<br>(16.01 to<br>22.06)                               | 19.54<br>(14.96 to<br>24.79)                               | 19.49<br>(14.83 to<br>24.73)                               | 19.22<br>(14.84 to<br>24.16)                               | 1.24<br>(1.14 to<br>1.56)                            | 1.69<br>(1.33 to<br>2.11)                            | 1.72<br>(1.34 to<br>2.16)                            | 1.62<br>(1.28 to<br>2.02)                            |
| Silicosis                                                     | 9.74<br>(6.72 to<br>12.10)                                 | 6.93<br>(3.96 to<br>10.61)                                 | 6.32<br>(3.58 to<br>9.60)                                  | 6.99<br>(3.98 to<br>10.42)                                 | 0.69<br>(0.47 to<br>0.85)                            | 0.59<br>(0.35 to<br>0.87)                            | 0.55<br>(0.32 to<br>0.83)                            | 0.58<br>(0.35 to<br>0.88)                            |
| Asbestosis                                                    | 4.77<br>(3.06 to<br>6.57)                                  | 6.81<br>(4.41 to<br>9.61)                                  | 7.27<br>(4.76 to<br>10.22)                                 | 6.37<br>(4.10 to<br>9.00)                                  | 0.32<br>(0.20 to<br>0.45)                            | 0.37<br>(0.26 to<br>0.75)                            | 0.59<br>(0.40 to<br>0.81)                            | 0.50<br>(0.33 to<br>0.68)                            |
| Coal workers pneumoconiosis                                   | 1.24<br>(0.88 to<br>2.41)                                  | 2.16<br>(1.22 to<br>3.81)                                  | 2.18<br>(1.22 to<br>3.84)                                  | 2.19<br>(1.25 to<br>3.80)                                  | 0.10<br>(0.07 to<br>0.19)                            | 0.20<br>(0.11 to<br>0.35)                            | 0.21<br>(0.11 to<br>0.36)                            | 0.20<br>(0.11 to<br>0.35)                            |
| Other pneumoconiosis                                          | 2.99<br>(2.38 to<br>3.85)                                  | 3.63<br>(2.54 to<br>5.42)                                  | 3.73<br>(2.57 to<br>5.67)                                  | 3.67<br>(2.60 to<br>5.36)                                  | 0.23<br>(0.18 to<br>0.29)                            | 0.35<br>(0.24 to<br>0.53)                            | 0.37<br>(0.25 to<br>0.56)                            | 0.34<br>(0.24 to<br>0.51)                            |
| Asthma                                                        | 174.81<br>(150.25 to<br>218.03)                            | 115.57<br>(69.83 to<br>191.98)                             | 92.22<br>(56.14 to<br>147.24)                              | 145.65<br>(84.43 to<br>241.27)                             | 10.23<br>(8.67 to<br>12.19)                          | 8.63<br>(5.31 to<br>13.92)                           | 7.18<br>(4.53 to<br>11.28)                           | 10.22<br>(6.03 to<br>16.60)                          |
| Interstitial lung disease and pulmonary sarcoidosis           | 209.18<br>(115.10 to<br>268.53)                            | 346.24<br>(198.02 to<br>455.64)                            | 378.71<br>(220.03 to<br>500.21)                            | 322.14<br>(175.34 to<br>427.50)                            | 13.72<br>(7.70 to<br>17.39)                          | 26.20<br>(15.37 to<br>33.60)                         | 29.23<br>(17.41 to<br>37.27)                         | 23.74<br>(13.40 to<br>30.67)                         |
| Other chronic respiratory diseases                            | 10.26<br>(7.27 to<br>18.89)                                | 14.35<br>(9.00 to<br>26.80)                                | 13.73<br>(8.65 to<br>25.75)                                | 15.18<br>(9.47 to<br>28.75)                                | 0.53<br>(0.39 to<br>0.90)                            | 0.96<br>(0.63 to<br>1.63)                            | 0.94<br>(0.62 to<br>1.61)                            | 0.99<br>(0.63 to<br>1.70)                            |
| <b>Cirrhosis and other chronic liver diseases</b>             | <b>2,175.30</b><br><b>(1,905.61 to</b><br><b>2,468.52)</b> | <b>2,534.44</b><br><b>(1,978.49 to</b><br><b>3,241.65)</b> | <b>2,136.98</b><br><b>(1,650.44 to</b><br><b>2,713.73)</b> | <b>3,303.69</b><br><b>(2,560.09 to</b><br><b>4,166.92)</b> | <b>91.81</b><br><b>(81.56 to</b><br><b>102.55)</b>   | <b>126.52</b><br><b>(106.35 to</b><br><b>151.34)</b> | <b>108.76</b><br><b>(90.81 to</b><br><b>130.26)</b>  | <b>161.02</b><br><b>(135.96 to</b><br><b>190.71)</b> |
| Cirrhosis and other chronic liver diseases due to hepatitis B | 289.21<br>(217.41 to<br>372.75)                            | 340.89<br>(237.98 to<br>470.92)                            | 327.88<br>(230.32 to<br>453.00)                            | 343.52<br>(244.44 to<br>477.55)                            | 12.31<br>(9.56 to<br>15.70)                          | 17.18<br>(12.65 to<br>22.82)                         | 16.80<br>(12.24 to<br>22.23)                         | 16.92<br>(12.46 to<br>22.77)                         |
| Cirrhosis and other chronic liver diseases due to hepatitis C | 550.95<br>(401.16 to<br>728.56)                            | 678.04<br>(458.75 to<br>953.67)                            | 647.12<br>(439.51 to<br>899.86)                            | 689.15<br>(453.91 to<br>988.76)                            | 22.29<br>(16.56 to<br>28.44)                         | 32.13<br>(22.82 to<br>43.25)                         | 31.14<br>(22.30 to<br>41.55)                         | 31.97<br>(22.24 to<br>43.35)                         |

|                                                                |                                                            |                                                            |                                                            |                                                            |                                                     |                                                      |                                                      |                                                      |
|----------------------------------------------------------------|------------------------------------------------------------|------------------------------------------------------------|------------------------------------------------------------|------------------------------------------------------------|-----------------------------------------------------|------------------------------------------------------|------------------------------------------------------|------------------------------------------------------|
|                                                                | 1,195.27<br>(991.79 to<br>1,432.47)                        | 1,352.52<br>(1,013.88 to<br>1,770.14)                      | 1,005.51<br>(742.40 to<br>1,321.39)                        | 2,106.36<br>(1,596.39 to<br>2,702.34)                      | 50.94<br>(43.04 to<br>60.16)                        | 68.43<br>(54.28 to<br>84.79)                         | 52.22<br>(40.73 to<br>64.92)                         | 103.49<br>(83.81 to<br>125.96)                       |
| Cirrhosis and other chronic liver diseases due to alcohol use  |                                                            |                                                            |                                                            |                                                            |                                                     |                                                      |                                                      |                                                      |
|                                                                | 139.86<br>(101.28 to<br>190.45)                            | 162.98<br>(111.16 to<br>238.19)                            | 156.46<br>(107.10 to<br>227.70)                            | 164.66<br>(112.19 to<br>239.66)                            | 6.27<br>(4.61 to<br>8.48)                           | 8.78<br>(6.16 to<br>12.58)                           | 8.60<br>(6.08 to<br>12.26)                           | 8.64<br>(6.02 to<br>12.30)                           |
| Cirrhosis and other chronic liver diseases due to other causes |                                                            |                                                            |                                                            |                                                            |                                                     |                                                      |                                                      |                                                      |
| <b>Digestive diseases</b>                                      | <b>1,311.18</b><br><b>(1,118.26 to</b><br><b>1,711.64)</b> | <b>2,021.81</b><br><b>(1,540.93 to</b><br><b>2,764.89)</b> | <b>1,953.30</b><br><b>(1,509.47 to</b><br><b>2,624.78)</b> | <b>2,053.17</b><br><b>(1,565.80 to</b><br><b>2,825.36)</b> | <b>104.36</b><br><b>(90.22 to</b><br><b>127.34)</b> | <b>189.68</b><br><b>(154.85 to</b><br><b>237.56)</b> | <b>188.48</b><br><b>(154.77 to</b><br><b>235.53)</b> | <b>185.44</b><br><b>(149.79 to</b><br><b>235.70)</b> |
| Peptic ulcer disease                                           | 136.08<br>(112.04 to<br>178.77)                            | 146.16<br>(110.54 to<br>193.09)                            | 133.64<br>(101.11 to<br>178.06)                            | 152.85<br>(115.52 to<br>202.98)                            | 10.93<br>(9.24 to<br>13.82)                         | 14.35<br>(11.16 to<br>18.64)                         | 13.53<br>(10.55 to<br>17.63)                         | 14.34<br>(10.97 to<br>18.59)                         |

| Luxembourg                                 |                                    |                                    |                                    |                                    |                              |                                |                                |                                |
|--------------------------------------------|------------------------------------|------------------------------------|------------------------------------|------------------------------------|------------------------------|--------------------------------|--------------------------------|--------------------------------|
| Cause                                      | YLLs (actual counts)               |                                    |                                    |                                    | Deaths (actual counts)       |                                |                                |                                |
|                                            | 2016                               | 2040 Forecast                      | 2040 Better Scenario               | 2040 Worse Scenario                | 2016                         | 2040 Forecast                  | 2040 Better Scenario           | 2040 Worse Scenario            |
| Gastritis and duodenitis                   | 12.61<br>(9.27 to 20.88)           | 17.28<br>(12.07 to 26.61)          | 16.73<br>(11.71 to 25.64)          | 16.96<br>(11.86 to 26.46)          | 0.88<br>(0.68 to 1.32)       | 1.51<br>(1.09 to 2.21)         | 1.50<br>(1.06 to 2.22)         | 1.43<br>(1.02 to 2.15)         |
| Appendicitis                               | 27.12<br>(20.65 to 45.81)          | 35.19<br>(24.79 to 61.32)          | 33.08<br>(23.23 to 56.93)          | 35.15<br>(25.30 to 60.54)          | 1.72<br>(1.30 to 2.81)       | 2.76<br>(2.05 to 4.31)         | 2.66<br>(1.97 to 4.33)         | 2.67<br>(2.00 to 4.25)         |
| Paralytic ileus and intestinal obstruction | 240.90<br>(185.35 to 325.28)       | 399.31<br>(306.37 to 545.87)       | 412.74<br>(312.72 to 568.20)       | 376.84<br>(290.83 to 515.69)       | 20.75<br>(16.03 to 26.14)    | 40.17<br>(30.25 to 51.35)      | 42.48<br>(32.06 to 54.27)      | 36.79<br>(27.99 to 47.21)      |
| Inguinal, femoral, and abdominal hernia    | 52.76<br>(41.45 to 87.46)          | 58.62<br>(43.89 to 94.44)          | 58.13<br>(43.15 to 94.79)          | 56.35<br>(42.82 to 90.47)          | 4.70<br>(3.70 to 7.60)       | 6.01<br>(4.64 to 9.69)         | 6.10<br>(4.67 to 9.77)         | 5.61<br>(4.30 to 9.01)         |
| Inflammatory bowel disease                 | 115.33<br>(71.22 to 146.44)        | 156.69<br>(93.51 to 208.24)        | 160.27<br>(95.63 to 212.71)        | 149.62<br>(89.38 to 197.45)        | 8.66<br>(5.13 to 10.78)      | 14.09<br>(8.33 to 18.22)       | 14.78<br>(8.75 to 19.00)       | 13.02<br>(7.66 to 16.78)       |
| Vascular intestinal disorders              | 280.38<br>(227.04 to 370.58)       | 479.47<br>(374.84 to 628.62)       | 481.28<br>(372.43 to 624.36)       | 460.63<br>(361.54 to 596.30)       | 23.04<br>(19.05 to 28.75)    | 45.03<br>(36.79 to 55.52)      | 46.21<br>(37.27 to 57.19)      | 42.06<br>(34.38 to 52.08)      |
| Gallbladder and biliary diseases           | 137.91<br>(114.71 to 179.06)       | 237.67<br>(136.57 to 389.35)       | 201.86<br>(117.80 to 334.74)       | 276.71<br>(154.13 to 463.79)       | 12.83<br>(10.76 to 15.95)    | 25.52<br>(15.18 to 42.37)      | 22.42<br>(13.56 to 36.46)      | 28.46<br>(16.40 to 47.10)      |
| Pancreatitis                               | 143.09<br>(111.96 to 232.47)       | 222.20<br>(79.21 to 537.93)        | 184.85<br>(69.65 to 427.58)        | 269.63<br>(96.73 to 665.28)        | 7.47<br>(5.96 to 11.48)      | 14.40<br>(5.94 to 34.06)       | 12.20<br>(5.26 to 28.39)       | 17.05<br>(6.86 to 41.02)       |
| Other digestive diseases                   | 164.99<br>(126.48 to 213.50)       | 269.23<br>(199.47 to 345.02)       | 270.72<br>(199.04 to 346.88)       | 258.42<br>(191.67 to 330.27)       | 13.39<br>(10.76 to 16.58)    | 25.82<br>(20.44 to 32.21)      | 26.60<br>(21.17 to 33.28)      | 24.01<br>(18.73 to 30.12)      |
| Neurological disorders                     | 4,132.65<br>(3,580.04 to 4,763.35) | 6,966.77<br>(5,547.09 to 8,926.88) | 6,870.62<br>(5,527.02 to 8,731.25) | 7,191.20<br>(5,556.88 to 9,430.48) | 428.42<br>(361.97 to 498.30) | 801.91<br>(631.87 to 1,047.75) | 809.43<br>(648.39 to 1,026.73) | 803.29<br>(610.27 to 1,081.52) |
| Alzheimer's disease and other dementias    | 2,809.61<br>(2,331.53 to 3,364.58) | 5,013.45<br>(3,700.69 to 6,915.53) | 4,919.93<br>(3,684.58 to 6,611.38) | 5,229.51<br>(3,731.49 to 7,458.20) | 352.71<br>(290.24 to 420.70) | 667.75<br>(494.82 to 912.86)   | 670.94<br>(515.73 to 884.20)   | 674.43<br>(478.47 to 960.98)   |
| Parkinson's disease                        | 419.63<br>(311.80 to 547.02)       | 757.51<br>(548.08 to 1,002.07)     | 798.17<br>(576.37 to 1,054.78)     | 706.02<br>(516.28 to 937.06)       | 39.84<br>(29.67 to 52.88)    | 75.67<br>(56.84 to 100.23)     | 81.02<br>(60.69 to 107.12)     | 69.06<br>(51.34 to 91.15)      |
| Epilepsy                                   | 318.27<br>(275.04 to 371.54)       | 440.68<br>(253.52 to 764.72)       | 393.05<br>(233.35 to 662.16)       | 506.59<br>(293.34 to 880.36)       | 11.37<br>(9.92 to 13.10)     | 20.68<br>(13.12 to 32.91)      | 18.84<br>(12.24 to 30.20)      | 23.14<br>(14.62 to 37.44)      |
| Multiple sclerosis                         | 188.27<br>(133.53 to 239.51)       | 197.80<br>(127.80 to 265.09)       | 195.65<br>(126.00 to 263.46)       | 204.29<br>(131.92 to 275.16)       | 6.76<br>(4.75 to 8.62)       | 8.08<br>(5.34 to 10.67)        | 8.08<br>(5.32 to 10.69)        | 8.21<br>(5.43 to 10.87)        |
| Motor neuron disease                       | 198.51<br>(174.08 to 225.47)       | 293.53<br>(230.94 to 364.20)       | 295.85<br>(230.75 to 368.64)       | 287.31<br>(228.11 to 352.75)       | 9.12<br>(7.96 to 10.35)      | 15.67<br>(12.74 to 18.88)      | 15.96<br>(12.88 to 19.42)      | 15.11<br>(12.44 to 18.14)      |
| Other neurological disorders               | 188.27<br>(166.97 to 229.94)       | 263.80<br>(202.11 to 338.50)       | 267.96<br>(204.54 to 345.63)       | 257.47<br>(198.15 to 326.30)       | 8.62<br>(7.50 to 9.92)       | 14.06<br>(11.66 to 16.53)      | 14.58<br>(11.94 to 17.26)      | 13.34<br>(11.14 to 15.52)      |
| Mental disorders                           | 1,506.83<br>(1,236.88 to 1,800.57) | 2,207.41<br>(1,495.09 to 3,187.66) | 2,261.85<br>(1,521.96 to 3,305.89) | 2,262.78<br>(1,522.81 to 3,254.79) | 42.59<br>(35.89 to 49.99)    | 70.66<br>(52.98 to 92.43)      | 72.10<br>(54.21 to 96.13)      | 71.47<br>(54.14 to 93.92)      |
| Alcohol use disorders                      | 721.45<br>(610.89 to 860.92)       | 768.92<br>(557.32 to 1,030.66)     | 721.74<br>(515.14 to 979.23)       | 877.34<br>(640.38 to 1,166.10)     | 23.69<br>(20.28 to 28.10)    | 29.57<br>(22.54 to 38.07)      | 28.07<br>(21.24 to 36.45)      | 33.26<br>(25.53 to 42.28)      |
| Drug use disorders                         | 780.49<br>(583.58 to 1,000.12)     | 1,433.52<br>(873.58 to 2,242.82)   | 1,535.00<br>(950.25 to 2,404.64)   | 1,380.54<br>(840.90 to 2,195.53)   | 18.82<br>(14.63 to 23.81)    | 40.40<br>(28.34 to 57.25)      | 43.94<br>(31.23 to 62.03)      | 38.12<br>(26.51 to 54.77)      |
| Opioid use disorders                       | 315.97<br>(228.05 to 429.24)       | 397.16<br>(224.88 to 686.98)       | 404.97<br>(228.76 to 704.16)       | 391.75<br>(222.39 to 673.72)       | 6.79<br>(5.01 to 9.26)       | 9.89<br>(6.26 to 15.62)        | 10.20<br>(6.51 to 16.10)       | 9.61<br>(6.06 to 15.25)        |



|                           |                                 |                                   |                                   |                                   |                             |                              |                              |                              |
|---------------------------|---------------------------------|-----------------------------------|-----------------------------------|-----------------------------------|-----------------------------|------------------------------|------------------------------|------------------------------|
|                           | 18.39<br>(10.85 to<br>26.75)    | 45.33<br>(23.06 to<br>80.03)      | 48.24<br>(24.38 to<br>84.93)      | 43.79<br>(22.39 to<br>77.26)      | 0.40<br>(0.25 to<br>0.58)   | 1.09<br>(0.63 to<br>1.78)    | 1.17<br>(0.68 to<br>1.90)    | 1.04<br>(0.59 to<br>1.72)    |
| Cocaine use disorders     | 62.67<br>(33.73 to<br>86.84)    | 228.73<br>(113.17 to<br>407.96)   | 251.23<br>(122.44 to<br>443.83)   | 218.22<br>(106.64 to<br>388.94)   | 1.26<br>(0.70 to<br>1.74)   | 4.80<br>(2.53 to<br>7.89)    | 5.29<br>(2.88 to<br>8.75)    | 4.55<br>(2.41 to<br>7.65)    |
| Amphetamine use disorders | 383.47<br>(250.05 to<br>506.87) | 762.30<br>(451.01 to<br>1,211.29) | 830.56<br>(492.10 to<br>1,306.44) | 726.78<br>(419.26 to<br>1,157.44) | 10.36<br>(7.27 to<br>13.50) | 24.63<br>(16.83 to<br>34.99) | 27.28<br>(18.70 to<br>38.62) | 22.92<br>(15.57 to<br>32.94) |
| Other drug use disorders  | 4.89<br>(3.86 to<br>6.07)       | 4.97<br>(2.84 to<br>8.29)         | 5.11<br>(2.92 to<br>8.50)         | 4.90<br>(2.82 to<br>8.11)         | 0.09<br>(0.07 to<br>0.12)   | 0.10<br>(0.06 to<br>0.15)    | 0.10<br>(0.06 to<br>0.16)    | 0.09<br>(0.06 to<br>0.15)    |
| Eating disorders          |                                 |                                   |                                   |                                   |                             |                              |                              |                              |

| Luxembourg                                                 |                                           |                                           |                                           |                                           |                                     |                                     |                                     |                                       |
|------------------------------------------------------------|-------------------------------------------|-------------------------------------------|-------------------------------------------|-------------------------------------------|-------------------------------------|-------------------------------------|-------------------------------------|---------------------------------------|
| Cause                                                      | YLLs (actual counts)                      |                                           |                                           |                                           | Deaths (actual counts)              |                                     |                                     |                                       |
|                                                            | 2016                                      | 2040 Forecast                             | 2040 Better Scenario                      | 2040 Worse Scenario                       | 2016                                | 2040 Forecast                       | 2040 Better Scenario                | 2040 Worse Scenario                   |
| <b>Diabetes, urogenital, blood, and endocrine diseases</b> | <b>2,471.65</b><br>(2,228.73 to 2,753.17) | <b>4,438.24</b><br>(2,839.09 to 8,936.11) | <b>4,060.43</b><br>(2,669.00 to 8,446.26) | <b>5,024.47</b><br>(3,136.97 to 9,887.22) | <b>191.88</b><br>(174.60 to 210.46) | <b>427.15</b><br>(283.96 to 919.14) | <b>399.12</b><br>(270.69 to 865.27) | <b>472.20</b><br>(305.10 to 1,058.26) |
| Diabetes mellitus                                          | 846.41<br>(753.69 to 948.16)              | 1,176.32<br>(755.07 to 1,822.83)          | 998.71<br>(655.14 to 1,526.10)            | 1,363.83<br>(841.02 to 2,131.61)          | 63.93<br>(57.26 to 71.43)           | 107.01<br>(72.88 to 157.37)         | 94.71<br>(66.31 to 134.87)          | 117.48<br>(77.42 to 175.04)           |
| Acute glomerulonephritis                                   | 2.71<br>(2.41 to 2.99)                    | 2.85<br>(1.84 to 4.55)                    | 2.72<br>(1.76 to 4.35)                    | 2.89<br>(1.87 to 4.65)                    | 0.08<br>(0.07 to 0.09)              | 0.10<br>(0.07 to 0.14)              | 0.09<br>(0.07 to 0.14)              | 0.09<br>(0.07 to 0.13)                |
| Chronic kidney disease                                     | 895.25<br>(800.86 to 996.28)              | 2,099.41<br>(953.24 to 6,685.57)          | 1,890.50<br>(886.08 to 6,145.91)          | 2,535.87<br>(1,083.72 to 7,686.64)        | 80.86<br>(72.39 to 89.58)           | 227.14<br>(105.51 to 742.05)        | 208.74<br>(100.93 to 690.09)        | 267.89<br>(117.30 to 860.51)          |
| Chronic kidney disease due to diabetes mellitus            | 306.32<br>(254.27 to 364.88)              | 757.08<br>(347.83 to 2,349.40)            | 679.11<br>(321.43 to 2,137.96)            | 922.25<br>(403.71 to 2,755.94)            | 24.13<br>(19.25 to 29.89)           | 73.26<br>(32.23 to 240.99)          | 67.08<br>(30.98 to 223.28)          | 87.09<br>(36.62 to 286.56)            |
| Chronic kidney disease due to hypertension                 | 141.68<br>(111.61 to 177.29)              | 408.16<br>(171.98 to 1,390.68)            | 376.37<br>(165.17 to 1,316.19)            | 483.39<br>(190.54 to 1,652.74)            | 17.75<br>(14.08 to 22.69)           | 55.41<br>(24.17 to 188.76)          | 52.06<br>(23.50 to 172.76)          | 64.08<br>(26.46 to 220.24)            |
| Chronic kidney disease due to glomerulonephritis           | 177.08<br>(141.69 to 217.95)              | 341.30<br>(136.80 to 1,195.68)            | 302.78<br>(126.54 to 1,106.78)            | 414.46<br>(157.96 to 1,506.32)            | 14.40<br>(10.95 to 18.33)           | 34.18<br>(13.45 to 116.92)          | 30.81<br>(12.57 to 110.45)          | 40.77<br>(15.41 to 133.74)            |
| Chronic kidney disease due to other and unspecified causes | 270.17<br>(220.40 to 322.86)              | 592.87<br>(257.96 to 1,866.18)            | 532.23<br>(241.53 to 1,679.05)            | 715.77<br>(299.24 to 2,259.52)            | 24.58<br>(19.07 to 30.15)           | 64.29<br>(27.72 to 208.20)          | 58.78<br>(26.32 to 193.38)          | 75.95<br>(31.09 to 238.87)            |
| Urinary diseases and male infertility                      | 137.25<br>(121.74 to 154.01)              | 239.62<br>(199.79 to 280.93)              | 237.13<br>(196.84 to 281.64)              | 229.54<br>(193.72 to 268.01)              | 13.45<br>(11.77 to 15.11)           | 27.99<br>(23.05 to 33.74)           | 28.37<br>(23.27 to 33.96)           | 26.00<br>(21.17 to 31.23)             |
| Urinary tract infections                                   | 108.36<br>(90.14 to 124.42)               | 198.68<br>(158.08 to 239.87)              | 197.57<br>(158.09 to 239.03)              | 189.81<br>(154.19 to 226.88)              | 11.04<br>(9.25 to 12.70)            | 23.71<br>(18.94 to 29.14)           | 24.12<br>(19.32 to 29.50)           | 21.99<br>(17.51 to 26.87)             |
| Urolithiasis                                               | 7.62<br>(5.43 to 14.08)                   | 10.17<br>(6.60 to 18.83)                  | 9.69<br>(6.14 to 18.17)                   | 10.08<br>(6.59 to 18.84)                  | 0.55<br>(0.37 to 1.07)              | 0.86<br>(0.56 to 1.68)              | 0.85<br>(0.55 to 1.64)              | 0.83<br>(0.54 to 1.60)                |
| Other urinary diseases                                     | 21.28<br>(15.00 to 34.12)                 | 30.77<br>(20.53 to 48.63)                 | 29.86<br>(19.70 to 46.99)                 | 29.65<br>(19.77 to 46.67)                 | 1.87<br>(1.29 to 3.18)              | 3.41<br>(2.19 to 5.51)              | 3.40<br>(2.14 to 5.51)              | 3.18<br>(2.04 to 5.10)                |
| Gynecological diseases                                     | 0.45<br>(0.32 to 0.96)                    | 0.51<br>(0.33 to 1.14)                    | 0.47<br>(0.30 to 1.06)                    | 0.53<br>(0.34 to 1.19)                    | 0.02<br>(0.02 to 0.05)              | 0.04<br>(0.03 to 0.08)              | 0.04<br>(0.03 to 0.08)              | 0.04<br>(0.02 to 0.08)                |
| Uterine fibroids                                           | 0.31<br>(0.22 to 0.62)                    | 0.27<br>(0.16 to 0.57)                    | 0.25<br>(0.14 to 0.53)                    | 0.28<br>(0.16 to 0.60)                    | 0.01<br>(0.01 to 0.02)              | 0.01<br>(0.01 to 0.05)              | 0.01<br>(0.01 to 0.05)              | 0.01<br>(0.01 to 0.05)                |
| Polycystic ovarian syndrome                                | 0.04<br>(0.02 to 0.09)                    | 0.03<br>(0.01 to 0.06)                    | 0.02<br>(0.01 to 0.05)                    | 0.03<br>(0.01 to 0.07)                    | 0.00<br>(0.00 to 0.00)              | 0.00<br>(0.00 to 0.00)              | 0.00<br>(0.00 to 0.00)              | 0.00<br>(0.00 to 0.00)                |
| Endometriosis                                              | 0.00<br>(0.00 to 0.01)                    | 0.00<br>(0.00 to 0.01)                    | 0.00<br>(0.00 to 0.01)                    | 0.00<br>(0.00 to 0.01)                    | 0.00<br>(0.00 to 0.00)              | 0.00<br>(0.00 to 0.00)              | 0.00<br>(0.00 to 0.00)              | 0.00<br>(0.00 to 0.00)                |
| Genital prolapse                                           | 0.01<br>(0.01 to 0.03)                    | 0.02<br>(0.01 to 0.04)                    | 0.02<br>(0.01 to 0.04)                    | 0.02<br>(0.01 to 0.04)                    | 0.00<br>(0.00 to 0.00)              | 0.00<br>(0.00 to 0.00)              | 0.00<br>(0.00 to 0.00)              | 0.00<br>(0.00 to 0.00)                |
| Other gynecological diseases                               | 0.09<br>(0.06 to 0.25)                    | 0.20<br>(0.12 to 0.52)                    | 0.18<br>(0.11 to 0.46)                    | 0.20<br>(0.12 to 0.51)                    | 0.01<br>(0.01 to 0.02)              | 0.02<br>(0.01 to 0.05)              | 0.02<br>(0.01 to 0.05)              | 0.02<br>(0.01 to 0.05)                |
| Hemoglobinopathies and hemolytic anemias                   | 145.13<br>(121.23 to 219.63)              | 194.31<br>(151.66 to 286.81)              | 188.26<br>(145.14 to 275.68)              | 189.68<br>(148.65 to 275.89)              | 11.73<br>(9.87 to 16.67)            | 19.70<br>(15.64 to 26.62)           | 19.57<br>(15.61 to 26.32)           | 18.58<br>(14.46 to 25.08)             |
| Thalassemias                                               | 12.27<br>(5.55 to 24.47)                  | 7.13<br>(1.99 to 18.35)                   | 7.03<br>(1.98 to 18.08)                   | 7.20<br>(2.01 to 18.58)                   | 0.19<br>(0.08 to 0.41)              | 0.12<br>(0.05 to 0.32)              | 0.12<br>(0.03 to 0.31)              | 0.12<br>(0.03 to 0.32)                |

|                                                   |                                 |                                 |                                 |                                 |                              |                              |                              |                              |
|---------------------------------------------------|---------------------------------|---------------------------------|---------------------------------|---------------------------------|------------------------------|------------------------------|------------------------------|------------------------------|
|                                                   | 5.95<br>(1.88 to<br>14.02)      | 7.58<br>(2.17 to<br>17.86)      | 7.09<br>(2.03 to<br>16.46)      | 7.77<br>(2.29 to<br>17.91)      | 0.14<br>(0.05 to<br>0.34)    | 0.24<br>(0.06 to<br>0.57)    | 0.23<br>(0.06 to<br>0.53)    | 0.25<br>(0.07 to<br>0.57)    |
| Sickle cell disorders                             |                                 |                                 |                                 |                                 |                              |                              |                              |                              |
|                                                   | 19.13<br>(13.43 to<br>29.73)    | 30.73<br>(19.33 to<br>49.76)    | 28.59<br>(17.81 to<br>46.26)    | 31.25<br>(19.95 to<br>50.93)    | 0.68<br>(0.49 to<br>1.01)    | 1.55<br>(1.03 to<br>2.35)    | 1.46<br>(0.97 to<br>2.18)    | 1.54<br>(1.04 to<br>2.32)    |
| G6PD deficiency                                   |                                 |                                 |                                 |                                 |                              |                              |                              |                              |
|                                                   | 107.77<br>(89.22 to<br>160.06)  | 148.87<br>(116.67 to<br>210.93) | 145.56<br>(112.90 to<br>205.26) | 143.47<br>(112.89 to<br>205.06) | 10.72<br>(8.91 to<br>15.09)  | 17.79<br>(13.90 to<br>23.68) | 17.77<br>(13.94 to<br>23.51) | 16.68<br>(12.77 to<br>22.44) |
| Other hemoglobinopathies and hemolytic anemias    |                                 |                                 |                                 |                                 |                              |                              |                              |                              |
|                                                   | 444.45<br>(348.73 to<br>539.18) | 725.21<br>(495.58 to<br>939.69) | 742.65<br>(508.93 to<br>964.96) | 702.13<br>(483.27 to<br>909.12) | 21.80<br>(14.87 to<br>25.63) | 45.18<br>(28.86 to<br>54.75) | 47.60<br>(29.95 to<br>57.70) | 42.12<br>(26.51 to<br>50.92) |
| Endocrine, metabolic, blood, and immune disorders |                                 |                                 |                                 |                                 |                              |                              |                              |                              |

| Luxembourg                                    |                                     |                                     |                                     |                                     |                                  |                                  |                                  |                                  |
|-----------------------------------------------|-------------------------------------|-------------------------------------|-------------------------------------|-------------------------------------|----------------------------------|----------------------------------|----------------------------------|----------------------------------|
| Cause                                         | YLLs (actual counts)                |                                     |                                     |                                     | Deaths (actual counts)           |                                  |                                  |                                  |
|                                               | 2016                                | 2040 Forecast                       | 2040 Better Scenario                | 2040 Worse Scenario                 | 2016                             | 2040 Forecast                    | 2040 Better Scenario             | 2040 Worse Scenario              |
| <b>Musculoskeletal disorders</b>              | <b>124.75</b><br>(104.71 to 150.35) | <b>226.16</b><br>(176.79 to 286.22) | <b>220.86</b><br>(173.30 to 278.91) | <b>223.46</b><br>(175.65 to 281.66) | <b>9.02</b><br>(7.52 to 11.00)   | <b>19.26</b><br>(15.54 to 23.41) | <b>19.30</b><br>(15.66 to 23.34) | <b>18.42</b><br>(14.83 to 22.16) |
| Rheumatoid arthritis                          | 30.76<br>(22.22 to 40.85)           | 63.86<br>(43.80 to 90.76)           | 58.05<br>(39.45 to 81.87)           | 66.14<br>(45.66 to 91.97)           | 2.09<br>(1.51 to 2.74)           | 5.04<br>(3.50 to 7.04)           | 4.67<br>(3.25 to 6.54)           | 5.09<br>(3.58 to 6.92)           |
| Other musculoskeletal disorders               | 93.99<br>(77.96 to 113.01)          | 162.30<br>(127.46 to 204.17)        | 162.81<br>(127.39 to 206.53)        | 157.32<br>(123.32 to 196.84)        | 6.93<br>(5.76 to 8.31)           | 14.22<br>(11.28 to 17.36)        | 14.63<br>(11.61 to 17.82)        | 13.33<br>(10.58 to 16.35)        |
| <b>Other non-communicable diseases</b>        | <b>548.61</b><br>(440.63 to 681.51) | <b>643.41</b><br>(463.82 to 913.23) | <b>607.54</b><br>(443.41 to 846.42) | <b>656.22</b><br>(475.22 to 920.66) | <b>14.22</b><br>(10.43 to 18.71) | <b>31.72</b><br>(19.99 to 43.30) | <b>31.86</b><br>(19.75 to 43.28) | <b>30.18</b><br>(19.11 to 41.17) |
| Congenital birth defects                      | 345.51<br>(269.79 to 447.94)        | 304.96<br>(196.89 to 462.24)        | 276.80<br>(179.87 to 412.36)        | 322.55<br>(208.72 to 482.87)        | 5.21<br>(4.17 to 6.49)           | 5.12<br>(3.46 to 7.32)           | 4.71<br>(3.17 to 6.64)           | 5.36<br>(3.58 to 7.59)           |
| Neural tube defects                           | 9.96<br>(4.11 to 14.85)             | 5.04<br>(2.13 to 8.60)              | 4.37<br>(1.84 to 7.41)              | 5.44<br>(2.21 to 9.24)              | 0.14<br>(0.06 to 0.20)           | 0.08<br>(0.04 to 0.13)           | 0.07<br>(0.03 to 0.11)           | 0.09<br>(0.04 to 0.14)           |
| Congenital heart anomalies                    | 102.12<br>(66.79 to 136.48)         | 69.80<br>(39.09 to 117.09)          | 59.73<br>(33.26 to 98.03)           | 75.83<br>(42.43 to 124.66)          | 1.52<br>(1.13 to 1.97)           | 1.12<br>(0.68 to 1.83)           | 0.97<br>(0.57 to 1.55)           | 1.21<br>(0.72 to 1.93)           |
| Orofacial clefts                              | 0.26<br>(0.06 to 0.75)              | 0.18<br>(0.03 to 0.54)              | 0.15<br>(0.03 to 0.44)              | 0.20<br>(0.04 to 0.62)              | 0.00<br>(0.00 to 0.01)           | 0.00<br>(0.00 to 0.01)           | 0.00<br>(0.00 to 0.01)           | 0.00<br>(0.00 to 0.01)           |
| Down syndrome                                 | 27.22<br>(19.13 to 35.29)           | 37.05<br>(23.71 to 51.22)           | 37.52<br>(24.07 to 51.86)           | 36.81<br>(23.61 to 51.14)           | 0.64<br>(0.48 to 0.82)           | 0.96<br>(0.64 to 1.33)           | 0.98<br>(0.65 to 1.34)           | 0.95<br>(0.64 to 1.31)           |
| Other chromosomal abnormalities               | 62.20<br>(37.06 to 106.61)          | 80.92<br>(45.67 to 133.96)          | 75.85<br>(43.41 to 122.78)          | 84.38<br>(47.03 to 139.15)          | 0.87<br>(0.53 to 1.40)           | 1.22<br>(0.72 to 1.91)           | 1.15<br>(0.68 to 1.77)           | 1.26<br>(0.75 to 1.95)           |
| Congenital musculoskeletal and limb anomalies | 33.97<br>(19.94 to 61.60)           | 30.32<br>(16.41 to 54.10)           | 26.86<br>(14.73 to 47.50)           | 32.41<br>(17.34 to 56.84)           | 0.52<br>(0.34 to 0.80)           | 0.51<br>(0.30 to 0.81)           | 0.46<br>(0.27 to 0.74)           | 0.54<br>(0.31 to 0.86)           |
| Urogenital congenital anomalies               | 4.91<br>(1.99 to 7.81)              | 3.59<br>(1.49 to 6.35)              | 3.24<br>(1.38 to 5.68)              | 3.80<br>(1.59 to 6.70)              | 0.08<br>(0.04 to 0.11)           | 0.06<br>(0.03 to 0.10)           | 0.06<br>(0.03 to 0.09)           | 0.06<br>(0.03 to 0.10)           |
| Digestive congenital anomalies                | 12.88<br>(4.61 to 21.12)            | 10.59<br>(3.54 to 19.66)            | 9.20<br>(3.08 to 17.02)             | 11.47<br>(3.78 to 21.27)            | 0.17<br>(0.07 to 0.27)           | 0.15<br>(0.06 to 0.26)           | 0.13<br>(0.05 to 0.22)           | 0.16<br>(0.06 to 0.28)           |
| Other congenital birth defects                | 92.00<br>(50.88 to 127.47)          | 67.46<br>(34.49 to 111.95)          | 59.88<br>(31.23 to 97.64)           | 72.20<br>(37.69 to 119.47)          | 1.27<br>(0.74 to 1.70)           | 1.01<br>(0.57 to 1.61)           | 0.90<br>(0.50 to 1.41)           | 1.08<br>(0.62 to 1.72)           |
| Skin and subcutaneous diseases                | 85.43<br>(51.12 to 140.22)          | 254.70<br>(152.81 to 398.61)        | 255.02<br>(151.95 to 404.77)        | 244.09<br>(147.45 to 387.78)        | 7.64<br>(4.32 to 11.97)          | 25.62<br>(14.61 to 37.54)        | 26.27<br>(14.74 to 38.79)        | 23.78<br>(13.45 to 35.35)        |
| Cellulitis                                    | 15.95<br>(9.60 to 41.61)            | 48.80<br>(27.18 to 127.26)          | 49.36<br>(27.52 to 128.77)          | 46.98<br>(26.31 to 124.29)          | 1.20<br>(0.72 to 3.00)           | 4.09<br>(2.26 to 10.64)          | 4.24<br>(2.38 to 11.09)          | 3.82<br>(2.11 to 9.88)           |
| Pyoderma                                      | 44.33<br>(20.42 to 64.59)           | 157.26<br>(69.84 to 217.85)         | 157.65<br>(69.17 to 217.52)         | 150.48<br>(66.49 to 209.05)         | 3.76<br>(1.63 to 5.13)           | 15.68<br>(6.34 to 21.33)         | 16.14<br>(6.38 to 21.79)         | 14.51<br>(5.91 to 19.87)         |
| Decubitus ulcer                               | 20.05<br>(11.09 to 36.53)           | 39.31<br>(21.22 to 70.19)           | 38.70<br>(20.48 to 68.72)           | 37.64<br>(20.41 to 66.84)           | 2.25<br>(1.16 to 3.75)           | 4.93<br>(2.48 to 8.37)           | 4.96<br>(2.50 to 8.37)           | 4.59<br>(2.34 to 7.96)           |
| Other skin and subcutaneous diseases          | 5.11<br>(3.01 to 10.38)             | 9.34<br>(5.55 to 19.37)             | 9.32<br>(5.49 to 19.08)             | 8.99<br>(5.36 to 18.50)             | 0.44<br>(0.23 to 0.81)           | 0.92<br>(0.51 to 1.77)           | 0.94<br>(0.52 to 1.83)           | 0.85<br>(0.47 to 1.66)           |
| Sudden infant death syndrome                  | 117.66<br>(76.66 to 170.51)         | 83.75<br>(31.79 to 169.04)          | 75.72<br>(28.97 to 152.37)          | 89.58<br>(34.58 to 179.89)          | 1.37<br>(0.89 to 1.98)           | 0.97<br>(0.37 to 1.96)           | 0.88<br>(0.34 to 1.77)           | 1.04<br>(0.40 to 2.09)           |

|                          |                                       |                                        |                                       |                                        |                                 |                                 |                                 |                                 |
|--------------------------|---------------------------------------|----------------------------------------|---------------------------------------|----------------------------------------|---------------------------------|---------------------------------|---------------------------------|---------------------------------|
| Injuries                 | 6,089.16<br>(5,320.44 to<br>7,467.58) | 6,390.33<br>(3,934.94 to<br>10,832.46) | 5,941.89<br>(3,778.83 to<br>9,844.76) | 7,368.12<br>(4,366.15 to<br>12,816.92) | 238.25<br>(212.15 to<br>275.75) | 334.68<br>(256.46 to<br>447.62) | 325.73<br>(256.20 to<br>423.85) | 349.65<br>(262.45 to<br>481.47) |
| Transport injuries       | 1,430.95<br>(1,209.67 to<br>1,653.72) | 1,218.82<br>(500.11 to<br>2,913.40)    | 1,126.83<br>(477.69 to<br>2,672.42)   | 1,783.29<br>(711.18 to<br>4,403.57)    | 37.93<br>(33.19 to<br>43.35)    | 39.40<br>(20.88 to<br>80.92)    | 36.89<br>(20.24 to<br>74.76)    | 53.74<br>(27.18 to<br>115.40)   |
| Road injuries            | 1,316.64<br>(1,114.12 to<br>1,519.69) | 1,074.51<br>(441.11 to<br>2,563.68)    | 1,003.29<br>(419.92 to<br>2,407.88)   | 1,616.38<br>(639.77 to<br>4,020.29)    | 34.94<br>(30.42 to<br>39.98)    | 35.05<br>(18.78 to<br>72.09)    | 33.12<br>(18.16 to<br>66.57)    | 48.79<br>(24.59 to<br>104.93)   |
| Pedestrian road injuries | 231.68<br>(151.77 to<br>288.72)       | 166.72<br>(85.19 to<br>344.08)         | 144.71<br>(74.81 to<br>290.43)        | 237.25<br>(116.21 to<br>494.70)        | 8.21<br>(6.07 to<br>10.19)      | 7.93<br>(4.84 to<br>13.86)      | 7.04<br>(4.33 to<br>11.92)      | 10.56<br>(6.15 to<br>19.15)     |

| Luxembourg                                      |                                                            |                                                            |                                                            |                                                            |                                                      |                                                      |                                                      |                                                      |
|-------------------------------------------------|------------------------------------------------------------|------------------------------------------------------------|------------------------------------------------------------|------------------------------------------------------------|------------------------------------------------------|------------------------------------------------------|------------------------------------------------------|------------------------------------------------------|
| Cause                                           | YLLs (actual counts)                                       |                                                            |                                                            |                                                            | Deaths (actual counts)                               |                                                      |                                                      |                                                      |
|                                                 | 2016                                                       | 2040 Forecast                                              | 2040 Better Scenario                                       | 2040 Worse Scenario                                        | 2016                                                 | 2040 Forecast                                        | 2040 Better Scenario                                 | 2040 Worse Scenario                                  |
| Cyclist road injuries                           | 48.00<br>(28.99 to<br>59.75)                               | 51.96<br>(21.44 to<br>121.24)                              | 49.49<br>(21.26 to<br>113.65)                              | 73.72<br>(29.53 to<br>176.73)                              | 1.47<br>(0.94 to<br>1.81)                            | 2.04<br>(0.95 to<br>4.08)                            | 1.97<br>(0.95 to<br>3.88)                            | 2.63<br>(1.22 to<br>5.43)                            |
| Motorcyclist road injuries                      | 160.33<br>(84.66 to<br>205.19)                             | 159.45<br>(47.30 to<br>477.14)                             | 150.36<br>(45.93 to<br>423.04)                             | 220.00<br>(63.99 to<br>649.32)                             | 3.32<br>(1.87 to<br>4.20)                            | 3.58<br>(1.26 to<br>9.68)                            | 3.39<br>(1.22 to<br>8.67)                            | 4.75<br>(1.65 to<br>12.64)                           |
| Motor vehicle road injuries                     | 764.71<br>(637.97 to<br>924.25)                            | 610.26<br>(244.41 to<br>1,554.98)                          | 577.29<br>(234.04 to<br>1,428.94)                          | 955.16<br>(364.81 to<br>2,446.62)                          | 19.08<br>(16.33 to<br>23.25)                         | 18.85<br>(9.64 to<br>39.38)                          | 18.17<br>(9.53 to<br>36.74)                          | 27.15<br>(13.12 to<br>59.92)                         |
| Other road injuries                             | 111.91<br>(64.98 to<br>161.22)                             | 86.12<br>(30.23 to<br>209.49)                              | 81.45<br>(28.73 to<br>191.96)                              | 130.26<br>(44.79 to<br>317.33)                             | 2.87<br>(1.48 to<br>3.93)                            | 2.65<br>(0.94 to<br>5.90)                            | 2.55<br>(0.91 to<br>5.56)                            | 3.70<br>(1.30 to<br>8.53)                            |
| Other transport injuries                        | 114.31<br>(95.55 to<br>138.92)                             | 144.31<br>(61.09 to<br>342.30)                             | 123.54<br>(54.04 to<br>285.83)                             | 166.90<br>(70.92 to<br>393.76)                             | 2.99<br>(2.54 to<br>3.57)                            | 4.35<br>(2.15 to<br>9.32)                            | 3.77<br>(1.94 to<br>7.94)                            | 4.95<br>(2.43 to<br>10.71)                           |
| <b>Unintentional injuries</b>                   | <b>2,043.86</b><br><b>(1,790.86 to</b><br><b>2,453.41)</b> | <b>2,484.58</b><br><b>(1,995.43 to</b><br><b>3,198.97)</b> | <b>2,434.90</b><br><b>(1,980.32 to</b><br><b>3,122.06)</b> | <b>2,448.85</b><br><b>(1,968.47 to</b><br><b>3,193.66)</b> | <b>126.06</b><br><b>(109.47 to</b><br><b>143.24)</b> | <b>206.15</b><br><b>(172.66 to</b><br><b>239.64)</b> | <b>208.81</b><br><b>(176.67 to</b><br><b>239.96)</b> | <b>194.17</b><br><b>(161.21 to</b><br><b>227.54)</b> |
| Falls                                           | 1,029.62<br>(879.47 to<br>1,341.84)                        | 1,408.15<br>(1,135.75 to<br>1,795.28)                      | 1,397.73<br>(1,140.23 to<br>1,787.92)                      | 1,363.66<br>(1,112.38 to<br>1,751.58)                      | 78.16<br>(67.07 to<br>92.85)                         | 137.32<br>(112.38 to<br>165.30)                      | 139.94<br>(116.15 to<br>166.67)                      | 128.05<br>(103.27 to<br>156.09)                      |
| Drowning                                        | 111.55<br>(94.91 to<br>127.37)                             | 94.47<br>(54.01 to<br>179.33)                              | 87.06<br>(51.18 to<br>162.50)                              | 101.81<br>(58.08 to<br>196.58)                             | 3.12<br>(2.74 to<br>3.53)                            | 3.26<br>(2.09 to<br>5.31)                            | 3.05<br>(2.03 to<br>4.85)                            | 3.44<br>(2.17 to<br>5.65)                            |
| Fire, heat, and hot substances                  | 85.39<br>(73.40 to<br>106.71)                              | 83.86<br>(56.30 to<br>130.30)                              | 76.84<br>(53.01 to<br>115.18)                              | 88.91<br>(58.01 to<br>138.59)                              | 4.70<br>(3.71 to<br>5.29)                            | 6.18<br>(4.33 to<br>8.70)                            | 5.86<br>(4.20 to<br>8.99)                            | 6.25<br>(4.20 to<br>8.99)                            |
| Poisonings                                      | 27.30<br>(21.18 to<br>56.48)                               | 19.58<br>(10.06 to<br>42.80)                               | 17.26<br>(9.14 to<br>37.31)                                | 21.52<br>(11.01 to<br>46.87)                               | 0.85<br>(0.69 to<br>1.57)                            | 0.77<br>(0.49 to<br>1.42)                            | 0.69<br>(0.45 to<br>1.26)                            | 0.82<br>(0.49 to<br>1.49)                            |
| Exposure to mechanical forces                   | 162.78<br>(133.15 to<br>213.95)                            | 159.36<br>(107.73 to<br>241.79)                            | 150.55<br>(101.80 to<br>224.74)                            | 162.20<br>(110.13 to<br>245.02)                            | 5.81<br>(4.76 to<br>7.00)                            | 7.81<br>(6.10 to<br>9.92)                            | 7.63<br>(6.01 to<br>9.67)                            | 7.59<br>(5.92 to<br>9.76)                            |
| Unintentional firearm injuries                  | 18.62<br>(14.71 to<br>21.53)                               | 15.80<br>(10.34 to<br>24.24)                               | 15.17<br>(9.97 to<br>22.91)                                | 16.01<br>(10.59 to<br>24.13)                               | 0.62<br>(0.51 to<br>0.72)                            | 0.69<br>(0.53 to<br>0.88)                            | 0.69<br>(0.52 to<br>0.87)                            | 0.67<br>(0.51 to<br>0.86)                            |
| Unintentional suffocation                       | 28.84<br>(21.28 to<br>56.03)                               | 26.44<br>(14.20 to<br>61.46)                               | 24.89<br>(13.34 to<br>56.26)                               | 27.41<br>(14.83 to<br>62.76)                               | 0.57<br>(0.44 to<br>1.03)                            | 0.57<br>(0.38 to<br>1.13)                            | 0.55<br>(0.36 to<br>1.06)                            | 0.58<br>(0.38 to<br>1.15)                            |
| Other exposure to mechanical forces             | 115.32<br>(84.46 to<br>151.88)                             | 117.11<br>(76.14 to<br>175.96)                             | 110.49<br>(71.12 to<br>166.60)                             | 118.78<br>(75.90 to<br>180.29)                             | 4.62<br>(3.55 to<br>5.67)                            | 6.54<br>(4.87 to<br>8.32)                            | 6.40<br>(4.87 to<br>8.99)                            | 6.34<br>(4.72 to<br>7.96)                            |
| Adverse effects of medical treatment            | 191.82<br>(148.84 to<br>291.13)                            | 264.62<br>(197.36 to<br>407.90)                            | 262.64<br>(196.07 to<br>407.33)                            | 258.31<br>(193.91 to<br>398.99)                            | 12.77<br>(10.20 to<br>18.71)                         | 21.37<br>(16.59 to<br>32.06)                         | 21.77<br>(16.98 to<br>32.49)                         | 20.12<br>(15.47 to<br>30.17)                         |
| Animal contact                                  | 26.06<br>(19.35 to<br>36.98)                               | 34.28<br>(22.66 to<br>52.92)                               | 32.55<br>(21.54 to<br>49.51)                               | 34.87<br>(23.35 to<br>53.27)                               | 0.92<br>(0.67 to<br>1.32)                            | 1.49<br>(1.07 to<br>2.15)                            | 1.45<br>(1.06 to<br>2.10)                            | 1.47<br>(1.06 to<br>2.13)                            |
| Venomous animal contact                         | 6.82<br>(4.44 to<br>10.53)                                 | 8.68<br>(5.33 to<br>13.84)                                 | 8.40<br>(5.21 to<br>13.19)                                 | 8.76<br>(5.46 to<br>13.97)                                 | 0.23<br>(0.14 to<br>0.33)                            | 0.36<br>(0.20 to<br>0.51)                            | 0.35<br>(0.20 to<br>0.50)                            | 0.35<br>(0.20 to<br>0.50)                            |
| Non-venomous animal contact                     | 19.23<br>(13.08 to<br>29.17)                               | 25.61<br>(16.24 to<br>41.17)                               | 24.15<br>(15.57 to<br>38.61)                               | 26.10<br>(16.79 to<br>41.33)                               | 0.69<br>(0.49 to<br>1.07)                            | 1.13<br>(0.79 to<br>1.70)                            | 1.10<br>(0.78 to<br>1.67)                            | 1.12<br>(0.78 to<br>1.70)                            |
| Foreign body                                    | 290.64<br>(234.45 to<br>408.73)                            | 321.51<br>(232.61 to<br>438.84)                            | 321.31<br>(230.23 to<br>434.10)                            | 315.38<br>(230.20 to<br>434.49)                            | 15.02<br>(10.23 to<br>17.86)                         | 22.30<br>(14.28 to<br>27.93)                         | 23.07<br>(14.69 to<br>28.89)                         | 20.87<br>(13.43 to<br>26.05)                         |
| Pulmonary aspiration and foreign body in airway | 286.99<br>(229.70 to<br>404.62)                            | 317.69<br>(229.08 to<br>433.30)                            | 317.39<br>(227.09 to<br>431.09)                            | 311.63<br>(227.37 to<br>430.59)                            | 14.91<br>(10.14 to<br>17.77)                         | 22.13<br>(14.11 to<br>27.75)                         | 22.90<br>(14.52 to<br>28.70)                         | 20.71<br>(13.27 to<br>25.90)                         |

|                                             |                                                            |                                                            |                                                            |                                                            |                                                    |                                                    |                                                    |                                                     |
|---------------------------------------------|------------------------------------------------------------|------------------------------------------------------------|------------------------------------------------------------|------------------------------------------------------------|----------------------------------------------------|----------------------------------------------------|----------------------------------------------------|-----------------------------------------------------|
|                                             | 3.65<br>(2.92 to<br>5.38)                                  | 3.82<br>(2.47 to<br>6.38)                                  | 3.91<br>(2.54 to<br>6.50)                                  | 3.76<br>(2.43 to<br>6.26)                                  | 0.12<br>(0.09 to<br>0.16)                          | 0.17<br>(0.11 to<br>0.22)                          | 0.18<br>(0.11 to<br>0.24)                          | 0.16<br>(0.10 to<br>0.22)                           |
| Foreign body in other body part             |                                                            |                                                            |                                                            |                                                            |                                                    |                                                    |                                                    |                                                     |
| Environmental heat and cold exposure        | 31.86<br>(23.41 to<br>61.70)                               | 42.58<br>(28.19 to<br>78.10)                               | 40.33<br>(26.97 to<br>74.04)                               | 42.51<br>(28.29 to<br>77.70)                               | 1.99<br>(1.44 to<br>3.76)                          | 3.41<br>(2.35 to<br>6.15)                          | 3.33<br>(2.29 to<br>6.03)                          | 3.25<br>(2.21 to<br>5.92)                           |
| Other unintentional injuries                | 86.84<br>(72.78 to<br>102.69)                              | 56.16<br>(34.96 to<br>92.78)                               | 48.64<br>(30.84 to<br>77.06)                               | 59.66<br>(38.53 to<br>95.06)                               | 2.71<br>(2.31 to<br>3.13)                          | 2.25<br>(1.69 to<br>3.07)                          | 2.00<br>(1.51 to<br>2.69)                          | 2.31<br>(1.72 to<br>3.12)                           |
| <b>Self-harm and interpersonal violence</b> | <b>2,611.90</b><br><b>(2,175.65 to</b><br><b>3,822.72)</b> | <b>2,684.31</b><br><b>(1,252.64 to</b><br><b>5,343.75)</b> | <b>2,377.53</b><br><b>(1,146.47 to</b><br><b>4,675.09)</b> | <b>3,133.39</b><br><b>(1,430.53 to</b><br><b>6,373.96)</b> | <b>74.21</b><br><b>(62.03 to</b><br><b>103.04)</b> | <b>89.05</b><br><b>(46.41 to</b><br><b>158.34)</b> | <b>79.96</b><br><b>(43.89 to</b><br><b>136.76)</b> | <b>101.66</b><br><b>(52.86 to</b><br><b>182.76)</b> |

| Luxembourg                                                                          |                                                |                                                 |                                                 |                                                 |                                                |                                                |                                                |                                                |
|-------------------------------------------------------------------------------------|------------------------------------------------|-------------------------------------------------|-------------------------------------------------|-------------------------------------------------|------------------------------------------------|------------------------------------------------|------------------------------------------------|------------------------------------------------|
| Cause                                                                               | YLLs (actual counts)                           |                                                 |                                                 |                                                 | Deaths (actual counts)                         |                                                |                                                |                                                |
|                                                                                     | 2016                                           | 2040 Forecast                                   | 2040 Better Scenario                            | 2040 Worse Scenario                             | 2016                                           | 2040 Forecast                                  | 2040 Better Scenario                           | 2040 Worse Scenario                            |
| Self-harm                                                                           | 2,354.70<br>(1,940.26 to<br>3,587.09)          | 2,510.03<br>(1,127.04 to<br>5,076.37)           | 2,216.60<br>(1,037.17 to<br>4,424.89)           | 2,946.45<br>(1,292.06 to<br>6,068.27)           | 68.19<br>(56.65 to<br>97.44)                   | 84.34<br>(43.28 to<br>151.87)                  | 75.57<br>(40.42 to<br>130.99)                  | 96.67<br>(49.09 to<br>176.63)                  |
| Self-harm by firearm                                                                | 229.77<br>(140.63 to<br>381.32)                | 201.28<br>(72.18 to<br>452.87)                  | 174.69<br>(65.64 to<br>389.20)                  | 238.16<br>(85.29 to<br>543.99)                  | 7.06<br>(4.47 to<br>11.10)                     | 7.64<br>(3.22 to<br>15.00)                     | 6.76<br>(2.94 to<br>13.13)                     | 8.79<br>(3.67 to<br>17.55)                     |
| Self-harm by other specified means                                                  | 2,124.93<br>(1,745.24 to<br>3,234.02)          | 2,308.75<br>(1,048.70 to<br>4,711.02)           | 2,041.91<br>(962.65 to<br>4,098.42)             | 2,708.29<br>(1,204.55 to<br>5,616.93)           | 61.13<br>(50.24 to<br>87.01)                   | 76.69<br>(39.71 to<br>138.59)                  | 68.81<br>(37.20 to<br>119.53)                  | 87.87<br>(45.11 to<br>162.17)                  |
| Interpersonal violence                                                              | 257.20<br>(176.01 to<br>330.89)                | 174.28<br>(96.22 to<br>301.36)                  | 160.94<br>(90.19 to<br>277.77)                  | 186.94<br>(104.23 to<br>325.03)                 | 6.02<br>(4.21 to<br>7.61)                      | 4.71<br>(2.89 to<br>7.17)                      | 4.39<br>(2.74 to<br>6.55)                      | 5.00<br>(3.03 to<br>7.61)                      |
| Physical violence by firearm                                                        | 52.81<br>(28.11 to<br>78.56)                   | 33.79<br>(16.36 to<br>58.02)                    | 31.59<br>(15.16 to<br>54.92)                    | 35.06<br>(16.38 to<br>60.96)                    | 1.19<br>(0.62 to<br>1.74)                      | 0.84<br>(0.43 to<br>1.35)                      | 0.79<br>(0.41 to<br>1.27)                      | 0.86<br>(0.44 to<br>1.38)                      |
| Physical violence by sharp object                                                   | 83.43<br>(39.49 to<br>107.97)                  | 58.51<br>(25.61 to<br>96.69)                    | 55.15<br>(24.61 to<br>91.70)                    | 60.41<br>(26.50 to<br>98.45)                    | 1.97<br>(0.98 to<br>2.52)                      | 1.59<br>(0.84 to<br>2.35)                      | 1.51<br>(0.82 to<br>2.22)                      | 1.61<br>(0.84 to<br>2.36)                      |
| Physical violence by other means                                                    | 120.96<br>(90.20 to<br>193.60)                 | 81.97<br>(43.43 to<br>161.34)                   | 74.20<br>(39.87 to<br>146.08)                   | 91.47<br>(48.39 to<br>182.16)                   | 2.86<br>(2.13 to<br>4.48)                      | 2.29<br>(1.34 to<br>4.02)                      | 2.09<br>(1.25 to<br>3.60)                      | 2.52<br>(1.45 to<br>4.45)                      |
| <b>Forces of nature, conflict and terrorism, and executions and police conflict</b> | <b>2.46</b><br><b>(2.20 to</b><br><b>2.72)</b> | <b>2.62</b><br><b>(0.00 to</b><br><b>74.80)</b> | <b>2.63</b><br><b>(0.00 to</b><br><b>74.84)</b> | <b>2.60</b><br><b>(0.00 to</b><br><b>74.70)</b> | <b>0.05</b><br><b>(0.05 to</b><br><b>0.06)</b> | <b>0.07</b><br><b>(0.00 to</b><br><b>1.37)</b> | <b>0.08</b><br><b>(0.00 to</b><br><b>1.37)</b> | <b>0.07</b><br><b>(0.00 to</b><br><b>1.37)</b> |
| Exposure to forces of nature                                                        | 0.00<br>(0.00 to<br>0.00)                      | 2.26<br>(0.00 to<br>74.80)                      | 2.26<br>(0.00 to<br>74.84)                      | 2.25<br>(0.00 to<br>74.70)                      | 0.00<br>(0.00 to<br>0.00)                      | 0.05<br>(0.00 to<br>1.37)                      | 0.05<br>(0.00 to<br>1.37)                      | 0.05<br>(0.00 to<br>1.37)                      |
| Conflict and terrorism                                                              | 0.00<br>(0.00 to<br>0.00)                      | 0.36<br>(0.00 to<br>4.09)                       | 0.37<br>(0.00 to<br>4.37)                       | 0.35<br>(0.00 to<br>3.66)                       | 0.00<br>(0.00 to<br>0.00)                      | 0.02<br>(0.00 to<br>0.75)                      | 0.02<br>(0.00 to<br>0.80)                      | 0.02<br>(0.00 to<br>0.66)                      |
| Executions and police conflict                                                      | 2.46<br>(2.20 to<br>2.72)                      | 0.00<br>(0.00 to<br>0.00)                       | 0.00<br>(0.00 to<br>0.00)                       | 0.00<br>(0.00 to<br>0.00)                       | 0.05<br>(0.05 to<br>0.06)                      | 0.00<br>(0.00 to<br>0.00)                      | 0.00<br>(0.00 to<br>0.00)                      | 0.00<br>(0.00 to<br>0.00)                      |



| Malta                                                             |                                          |                                          |                                          |                                          |                                       |                                       |                                       |                                       |
|-------------------------------------------------------------------|------------------------------------------|------------------------------------------|------------------------------------------|------------------------------------------|---------------------------------------|---------------------------------------|---------------------------------------|---------------------------------------|
| Cause                                                             | YLLs (actual counts)                     |                                          |                                          |                                          | Deaths (actual counts)                |                                       |                                       |                                       |
|                                                                   | 2016                                     | 2040 Forecast                            | 2040 Better Scenario                     | 2040 Worse Scenario                      | 2016                                  | 2040 Forecast                         | 2040 Better Scenario                  | 2040 Worse Scenario                   |
| All causes                                                        | 52,693.60<br>(44,824.37 to<br>61,694.67) | 53,467.68<br>(38,375.95 to<br>73,138.87) | 46,036.12<br>(33,969.72 to<br>62,272.28) | 66,009.82<br>(47,212.59 to<br>91,382.78) | 3,448.99<br>(2,964.96 to<br>3,993.57) | 4,695.08<br>(3,692.56 to<br>5,915.58) | 4,241.29<br>(3,346.34 to<br>5,361.42) | 5,419.75<br>(4,287.07 to<br>6,798.79) |
| Communicable, maternal, neonatal, and nutritional diseases        | 2,708.20<br>(2,320.75 to<br>3,162.48)    | 2,381.44<br>(1,831.10 to<br>3,110.57)    | 2,074.71<br>(1,618.80 to<br>2,628.90)    | 2,860.54<br>(2,153.12 to<br>3,818.44)    | 148.26<br>(126.48 to<br>174.06)       | 221.56<br>(167.90 to<br>303.31)       | 209.09<br>(162.97 to<br>274.43)       | 242.81<br>(176.29 to<br>344.04)       |
| HIV/AIDS and tuberculosis                                         | 82.61<br>(77.89 to<br>87.62)             | 24.21<br>(13.34 to<br>40.02)             | 11.39<br>(6.44 to<br>19.10)              | 48.22<br>(26.62 to<br>76.25)             | 2.55<br>(2.34 to<br>2.82)             | 1.05<br>(0.63 to<br>1.68)             | 0.64<br>(0.39 to<br>1.01)             | 1.64<br>(0.98 to<br>2.59)             |
| Tuberculosis                                                      | 19.57<br>(16.18 to<br>24.09)             | 9.62<br>(4.91 to<br>16.66)               | 6.39<br>(3.62 to<br>10.67)               | 13.62<br>(6.90 to<br>25.22)              | 1.15<br>(0.93 to<br>1.40)             | 0.80<br>(0.42 to<br>1.39)             | 0.56<br>(0.32 to<br>0.92)             | 1.07<br>(0.55 to<br>1.95)             |
| HIV/AIDS                                                          | 63.04<br>(59.49 to<br>66.61)             | 14.59<br>(5.07 to<br>27.21)              | 5.00<br>(1.23 to<br>11.48)               | 34.60<br>(14.27 to<br>60.77)             | 1.40<br>(1.33 to<br>1.48)             | 0.25<br>(0.07 to<br>0.48)             | 0.08<br>(0.02 to<br>0.21)             | 0.57<br>(0.21 to<br>1.03)             |
| Diarrhea, lower respiratory, and other common infectious diseases | 1,589.76<br>(1,346.34 to<br>1,884.69)    | 1,834.64<br>(1,372.16 to<br>2,525.54)    | 1,642.92<br>(1,254.23 to<br>2,184.50)    | 2,175.18<br>(1,586.43 to<br>3,061.47)    | 130.35<br>(109.71 to<br>155.12)       | 208.87<br>(156.30 to<br>291.72)       | 197.61<br>(151.56 to<br>261.43)       | 228.71<br>(162.98 to<br>328.30)       |
| Diarrheal diseases                                                | 36.95<br>(31.12 to<br>43.35)             | 114.84<br>(74.31 to<br>184.54)           | 140.77<br>(94.04 to<br>218.37)           | 83.53<br>(50.71 to<br>139.23)            | 2.70<br>(2.26 to<br>3.21)             | 13.34<br>(8.36 to<br>22.26)           | 16.96<br>(11.03 to<br>26.75)          | 9.25<br>(5.26 to<br>15.73)            |
| Intestinal infectious diseases                                    | 0.31<br>(0.15 to<br>0.57)                | 0.21<br>(0.09 to<br>0.40)                | 0.20<br>(0.09 to<br>0.40)                | 0.21<br>(0.10 to<br>0.42)                | 0.01<br>(0.01 to<br>0.03)             | 0.01<br>(0.01 to<br>0.03)             | 0.01<br>(0.01 to<br>0.03)             | 0.01<br>(0.01 to<br>0.03)             |
| Typhoid fever                                                     | 0.04<br>(0.01 to<br>0.09)                | 0.04<br>(0.01 to<br>0.10)                | 0.04<br>(0.01 to<br>0.11)                | 0.04<br>(0.01 to<br>0.10)                | 0.00<br>(0.00 to<br>0.00)             | 0.00<br>(0.00 to<br>0.00)             | 0.00<br>(0.00 to<br>0.00)             | 0.00<br>(0.00 to<br>0.00)             |
| Paratyphoid fever                                                 | 0.08<br>(0.02 to<br>0.20)                | 0.04<br>(0.01 to<br>0.12)                | 0.04<br>(0.01 to<br>0.11)                | 0.05<br>(0.01 to<br>0.14)                | 0.00<br>(0.00 to<br>0.00)             | 0.00<br>(0.00 to<br>0.00)             | 0.00<br>(0.00 to<br>0.00)             | 0.00<br>(0.00 to<br>0.00)             |
| Other intestinal infectious diseases                              | 0.19<br>(0.07 to<br>0.38)                | 0.12<br>(0.05 to<br>0.27)                | 0.12<br>(0.04 to<br>0.26)                | 0.13<br>(0.05 to<br>0.28)                | 0.01<br>(0.00 to<br>0.02)             | 0.01<br>(0.00 to<br>0.03)             | 0.01<br>(0.00 to<br>0.03)             | 0.01<br>(0.00 to<br>0.02)             |
| Lower respiratory infections                                      | 1,453.50<br>(1,219.38 to<br>1,734.00)    | 1,655.46<br>(1,206.43 to<br>2,330.63)    | 1,440.95<br>(1,070.28 to<br>1,971.23)    | 2,016.78<br>(1,443.24 to<br>2,907.59)    | 124.30<br>(104.23 to<br>148.68)       | 192.53<br>(141.65 to<br>273.89)       | 177.65<br>(132.33 to<br>240.62)       | 216.38<br>(151.89 to<br>313.57)       |
| Upper respiratory infections                                      | 0.69<br>(0.34 to<br>1.16)                | 0.39<br>(0.16 to<br>0.80)                | 0.33<br>(0.13 to<br>0.66)                | 0.49<br>(0.19 to<br>1.00)                | 0.03<br>(0.01 to<br>0.06)             | 0.03<br>(0.01 to<br>0.06)             | 0.02<br>(0.01 to<br>0.06)             | 0.03<br>(0.01 to<br>0.07)             |
| Otitis media                                                      | 0.19<br>(0.13 to<br>0.31)                | 0.03<br>(0.01 to<br>0.05)                | 0.03<br>(0.01 to<br>0.05)                | 0.03<br>(0.01 to<br>0.05)                | 0.00<br>(0.00 to<br>0.01)             | 0.00<br>(0.00 to<br>0.00)             | 0.00<br>(0.00 to<br>0.00)             | 0.00<br>(0.00 to<br>0.00)             |
| Meningitis                                                        | 51.25<br>(43.02 to<br>63.34)             | 19.37<br>(14.54 to<br>26.18)             | 17.61<br>(13.11 to<br>23.97)             | 26.06<br>(18.50 to<br>37.11)             | 1.56<br>(1.31 to<br>1.87)             | 0.84<br>(0.66 to<br>1.05)             | 0.80<br>(0.62 to<br>1.02)             | 0.95<br>(0.76 to<br>1.19)             |
| Pneumococcal meningitis                                           | 9.87<br>(7.95 to<br>12.51)               | 4.90<br>(3.58 to<br>6.77)                | 4.94<br>(3.58 to<br>6.81)                | 5.31<br>(3.86 to<br>7.33)                | 0.35<br>(0.27 to<br>0.44)             | 0.25<br>(0.18 to<br>0.33)             | 0.26<br>(0.19 to<br>0.35)             | 0.26<br>(0.18 to<br>0.34)             |
| H influenzae type B meningitis                                    | 2.97<br>(2.42 to<br>3.70)                | 3.07<br>(1.66 to<br>5.39)                | 2.70<br>(1.57 to<br>4.46)                | 7.06<br>(2.64 to<br>14.51)               | 0.08<br>(0.07 to<br>0.10)             | 0.08<br>(0.06 to<br>0.11)             | 0.08<br>(0.06 to<br>0.10)             | 0.12<br>(0.07 to<br>0.21)             |
| Meningococcal meningitis                                          | 20.39<br>(16.96 to<br>25.49)             | 5.62<br>(3.92 to<br>8.56)                | 4.92<br>(3.36 to<br>7.37)                | 6.75<br>(4.41 to<br>10.35)               | 0.51<br>(0.42 to<br>0.62)             | 0.21<br>(0.16 to<br>0.28)             | 0.19<br>(0.15 to<br>0.26)             | 0.24<br>(0.18 to<br>0.32)             |
| Other meningitis                                                  | 18.01<br>(15.01 to<br>22.19)             | 5.78<br>(4.18 to<br>8.27)                | 5.05<br>(3.60 to<br>7.12)                | 6.94<br>(4.92 to<br>9.88)                | 0.62<br>(0.51 to<br>0.76)             | 0.30<br>(0.22 to<br>0.39)             | 0.27<br>(0.21 to<br>0.36)             | 0.34<br>(0.26 to<br>0.44)             |
| Encephalitis                                                      | 40.76<br>(30.41 to<br>54.79)             | 38.81<br>(26.24 to<br>54.27)             | 38.40<br>(25.87 to<br>54.05)             | 39.13<br>(26.28 to<br>54.97)             | 1.44<br>(1.03 to<br>1.86)             | 1.83<br>(1.25 to<br>2.41)             | 1.87<br>(1.27 to<br>2.48)             | 1.75<br>(1.20 to<br>2.27)             |

|                |                           |                            |                            |                            |                           |                           |                           |                           |
|----------------|---------------------------|----------------------------|----------------------------|----------------------------|---------------------------|---------------------------|---------------------------|---------------------------|
| Diphtheria     | 0.09<br>(0.06 to<br>0.13) | 0.02<br>(0.01 to<br>0.04)  | 0.02<br>(0.01 to<br>0.04)  | 0.05<br>(0.02 to<br>0.09)  | 0.00<br>(0.00 to<br>0.00) | 0.00<br>(0.00 to<br>0.00) | 0.00<br>(0.00 to<br>0.00) | 0.00<br>(0.00 to<br>0.00) |
| Whooping cough | 0.98<br>(0.42 to<br>2.01) | 0.31<br>(0.08 to<br>0.79)  | 0.14<br>(0.04 to<br>0.34)  | 1.30<br>(0.31 to<br>3.38)  | 0.01<br>(0.01 to<br>0.03) | 0.00<br>(0.00 to<br>0.01) | 0.00<br>(0.00 to<br>0.00) | 0.02<br>(0.00 to<br>0.04) |
| Tetanus        | 1.48<br>(1.10 to<br>2.29) | 0.17<br>(0.11 to<br>0.30)  | 0.18<br>(0.11 to<br>0.30)  | 0.19<br>(0.13 to<br>0.34)  | 0.09<br>(0.06 to<br>0.11) | 0.01<br>(0.01 to<br>0.02) | 0.01<br>(0.01 to<br>0.02) | 0.01<br>(0.01 to<br>0.02) |
| Measles        | 0.48<br>(0.34 to<br>0.69) | 2.75<br>(0.03 to<br>14.67) | 2.11<br>(0.03 to<br>11.06) | 5.05<br>(0.04 to<br>27.30) | 0.01<br>(0.00 to<br>0.01) | 0.04<br>(0.00 to<br>0.25) | 0.03<br>(0.00 to<br>0.20) | 0.07<br>(0.00 to<br>0.39) |

| Malta                                                 |                                                  |                                                 |                                                 |                                                 |                                                |                                                |                                                |                                                |
|-------------------------------------------------------|--------------------------------------------------|-------------------------------------------------|-------------------------------------------------|-------------------------------------------------|------------------------------------------------|------------------------------------------------|------------------------------------------------|------------------------------------------------|
| Cause                                                 | YLLs (actual counts)                             |                                                 |                                                 |                                                 | Deaths (actual counts)                         |                                                |                                                |                                                |
|                                                       | 2016                                             | 2040 Forecast                                   | 2040 Better Scenario                            | 2040 Worse Scenario                             | 2016                                           | 2040 Forecast                                  | 2040 Better Scenario                           | 2040 Worse Scenario                            |
| Varicella and herpes zoster                           | 3.07<br>(1.70 to<br>5.36)                        | 2.27<br>(1.11 to<br>3.89)                       | 2.19<br>(1.08 to<br>3.72)                       | 2.37<br>(1.17 to<br>4.22)                       | 0.21<br>(0.10 to<br>0.32)                      | 0.24<br>(0.11 to<br>0.37)                      | 0.24<br>(0.11 to<br>0.37)                      | 0.23<br>(0.11 to<br>0.37)                      |
| <b>Neglected tropical diseases and malaria</b>        | <b>5.64</b><br><b>(4.39 to</b><br><b>7.28)</b>   | <b>4.42</b><br><b>(3.09 to</b><br><b>6.35)</b>  | <b>4.55</b><br><b>(3.12 to</b><br><b>6.54)</b>  | <b>4.26</b><br><b>(3.03 to</b><br><b>6.15)</b>  | <b>0.22</b><br><b>(0.13 to</b><br><b>0.28)</b> | <b>0.22</b><br><b>(0.11 to</b><br><b>0.31)</b> | <b>0.25</b><br><b>(0.12 to</b><br><b>0.33)</b> | <b>0.20</b><br><b>(0.10 to</b><br><b>0.27)</b> |
| Malaria                                               | 0.00<br>(0.00 to<br>0.00)                        | 0.00<br>(0.00 to<br>0.00)                       | 0.00<br>(0.00 to<br>0.00)                       | 0.00<br>(0.00 to<br>0.00)                       | 0.00<br>(0.00 to<br>0.00)                      | 0.00<br>(0.00 to<br>0.00)                      | 0.00<br>(0.00 to<br>0.00)                      | 0.00<br>(0.00 to<br>0.00)                      |
| Chagas disease                                        | 0.00<br>(0.00 to<br>0.00)                        | 0.00<br>(0.00 to<br>0.00)                       | 0.00<br>(0.00 to<br>0.00)                       | 0.00<br>(0.00 to<br>0.00)                       | 0.00<br>(0.00 to<br>0.00)                      | 0.00<br>(0.00 to<br>0.00)                      | 0.00<br>(0.00 to<br>0.00)                      | 0.00<br>(0.00 to<br>0.00)                      |
| Leishmaniasis                                         | 1.18<br>(0.64 to<br>1.88)                        | 0.29<br>(0.15 to<br>0.61)                       | 0.27<br>(0.14 to<br>0.58)                       | 0.31<br>(0.17 to<br>0.68)                       | 0.05<br>(0.02 to<br>0.07)                      | 0.01<br>(0.01 to<br>0.03)                      | 0.01<br>(0.01 to<br>0.03)                      | 0.01<br>(0.01 to<br>0.03)                      |
| African trypanosomiasis                               | 0.00<br>(0.00 to<br>0.00)                        | 0.00<br>(0.00 to<br>0.00)                       | 0.00<br>(0.00 to<br>0.00)                       | 0.00<br>(0.00 to<br>0.00)                       | 0.00<br>(0.00 to<br>0.00)                      | 0.00<br>(0.00 to<br>0.00)                      | 0.00<br>(0.00 to<br>0.00)                      | 0.00<br>(0.00 to<br>0.00)                      |
| Schistosomiasis                                       | 0.00<br>(0.00 to<br>0.00)                        | 0.00<br>(0.00 to<br>0.00)                       | 0.00<br>(0.00 to<br>0.00)                       | 0.00<br>(0.00 to<br>0.00)                       | 0.00<br>(0.00 to<br>0.00)                      | 0.00<br>(0.00 to<br>0.00)                      | 0.00<br>(0.00 to<br>0.00)                      | 0.00<br>(0.00 to<br>0.00)                      |
| Cysticercosis                                         | 0.00<br>(0.00 to<br>0.00)                        | 0.00<br>(0.00 to<br>0.00)                       | 0.00<br>(0.00 to<br>0.00)                       | 0.00<br>(0.00 to<br>0.00)                       | 0.00<br>(0.00 to<br>0.00)                      | 0.00<br>(0.00 to<br>0.00)                      | 0.00<br>(0.00 to<br>0.00)                      | 0.00<br>(0.00 to<br>0.00)                      |
| Cystic echinococcosis                                 | 0.00<br>(0.00 to<br>0.00)                        | 0.00<br>(0.00 to<br>0.00)                       | 0.00<br>(0.00 to<br>0.00)                       | 0.00<br>(0.00 to<br>0.00)                       | 0.00<br>(0.00 to<br>0.00)                      | 0.00<br>(0.00 to<br>0.00)                      | 0.00<br>(0.00 to<br>0.00)                      | 0.00<br>(0.00 to<br>0.00)                      |
| Dengue                                                | 0.00<br>(0.00 to<br>0.00)                        | 0.00<br>(0.00 to<br>0.00)                       | 0.00<br>(0.00 to<br>0.00)                       | 0.00<br>(0.00 to<br>0.00)                       | 0.00<br>(0.00 to<br>0.00)                      | 0.00<br>(0.00 to<br>0.00)                      | 0.00<br>(0.00 to<br>0.00)                      | 0.00<br>(0.00 to<br>0.00)                      |
| Yellow fever                                          | 0.00<br>(0.00 to<br>0.00)                        | 0.00<br>(0.00 to<br>0.00)                       | 0.00<br>(0.00 to<br>0.00)                       | 0.00<br>(0.00 to<br>0.00)                       | 0.00<br>(0.00 to<br>0.00)                      | 0.00<br>(0.00 to<br>0.00)                      | 0.00<br>(0.00 to<br>0.00)                      | 0.00<br>(0.00 to<br>0.00)                      |
| Rabies                                                | 0.12<br>(0.08 to<br>0.17)                        | 0.08<br>(0.05 to<br>0.12)                       | 0.07<br>(0.05 to<br>0.11)                       | 0.09<br>(0.06 to<br>0.13)                       | 0.00<br>(0.00 to<br>0.00)                      | 0.00<br>(0.00 to<br>0.01)                      | 0.00<br>(0.00 to<br>0.01)                      | 0.00<br>(0.00 to<br>0.01)                      |
| Intestinal nematode infections                        | 0.00<br>(0.00 to<br>0.00)                        | 0.00<br>(0.00 to<br>0.00)                       | 0.00<br>(0.00 to<br>0.00)                       | 0.00<br>(0.00 to<br>0.00)                       | 0.00<br>(0.00 to<br>0.00)                      | 0.00<br>(0.00 to<br>0.00)                      | 0.00<br>(0.00 to<br>0.00)                      | 0.00<br>(0.00 to<br>0.00)                      |
| Other neglected tropical diseases                     | 4.34<br>(3.35 to<br>5.77)                        | 4.05<br>(2.76 to<br>5.94)                       | 4.20<br>(2.84 to<br>6.16)                       | 3.86<br>(2.68 to<br>5.69)                       | 0.17<br>(0.09 to<br>0.22)                      | 0.21<br>(0.10 to<br>0.28)                      | 0.23<br>(0.11 to<br>0.31)                      | 0.18<br>(0.09 to<br>0.25)                      |
| <b>Maternal disorders</b>                             | <b>11.48</b><br><b>(8.27 to</b><br><b>15.49)</b> | <b>8.22</b><br><b>(3.80 to</b><br><b>16.77)</b> | <b>7.55</b><br><b>(3.47 to</b><br><b>15.33)</b> | <b>9.23</b><br><b>(4.28 to</b><br><b>18.79)</b> | <b>0.20</b><br><b>(0.15 to</b><br><b>0.27)</b> | <b>0.15</b><br><b>(0.07 to</b><br><b>0.29)</b> | <b>0.14</b><br><b>(0.06 to</b><br><b>0.26)</b> | <b>0.16</b><br><b>(0.08 to</b><br><b>0.32)</b> |
| Maternal hemorrhage                                   | 0.77<br>(0.43 to<br>1.23)                        | 0.50<br>(0.20 to<br>1.07)                       | 0.46<br>(0.18 to<br>0.99)                       | 0.56<br>(0.21 to<br>1.21)                       | 0.01<br>(0.01 to<br>0.02)                      | 0.01<br>(0.00 to<br>0.02)                      | 0.01<br>(0.00 to<br>0.02)                      | 0.01<br>(0.00 to<br>0.02)                      |
| Maternal sepsis and other maternal infections         | 0.15<br>(0.06 to<br>0.27)                        | 0.09<br>(0.03 to<br>0.22)                       | 0.08<br>(0.03 to<br>0.20)                       | 0.10<br>(0.03 to<br>0.24)                       | 0.00<br>(0.00 to<br>0.00)                      | 0.00<br>(0.00 to<br>0.00)                      | 0.00<br>(0.00 to<br>0.00)                      | 0.00<br>(0.00 to<br>0.00)                      |
| Maternal hypertensive disorders                       | 0.96<br>(0.57 to<br>1.52)                        | 0.60<br>(0.23 to<br>1.35)                       | 0.55<br>(0.21 to<br>1.23)                       | 0.69<br>(0.27 to<br>1.55)                       | 0.02<br>(0.01 to<br>0.03)                      | 0.01<br>(0.00 to<br>0.02)                      | 0.01<br>(0.00 to<br>0.02)                      | 0.01<br>(0.00 to<br>0.03)                      |
| Maternal obstructed labor and uterine rupture         | 0.13<br>(0.05 to<br>0.25)                        | 0.09<br>(0.03 to<br>0.20)                       | 0.08<br>(0.03 to<br>0.18)                       | 0.10<br>(0.03 to<br>0.23)                       | 0.00<br>(0.00 to<br>0.00)                      | 0.00<br>(0.00 to<br>0.00)                      | 0.00<br>(0.00 to<br>0.00)                      | 0.00<br>(0.00 to<br>0.00)                      |
| Maternal abortion, miscarriage, and ectopic pregnancy | 0.08<br>(0.03 to<br>0.21)                        | 0.07<br>(0.02 to<br>0.20)                       | 0.06<br>(0.01 to<br>0.18)                       | 0.08<br>(0.02 to<br>0.23)                       | 0.00<br>(0.00 to<br>0.00)                      | 0.00<br>(0.00 to<br>0.00)                      | 0.00<br>(0.00 to<br>0.00)                      | 0.00<br>(0.00 to<br>0.00)                      |

|                                        |                            |                            |                            |                            |                           |                           |                           |                           |
|----------------------------------------|----------------------------|----------------------------|----------------------------|----------------------------|---------------------------|---------------------------|---------------------------|---------------------------|
|                                        | 1.25<br>(0.73 to<br>1.95)  | 0.95<br>(0.36 to<br>2.34)  | 0.86<br>(0.33 to<br>2.12)  | 1.10<br>(0.42 to<br>2.70)  | 0.02<br>(0.01 to<br>0.03) | 0.02<br>(0.01 to<br>0.04) | 0.01<br>(0.01 to<br>0.04) | 0.02<br>(0.01 to<br>0.05) |
| Indirect maternal deaths               |                            |                            |                            |                            |                           |                           |                           |                           |
|                                        | 0.23<br>(0.12 to<br>0.44)  | 0.13<br>(0.05 to<br>0.33)  | 0.12<br>(0.04 to<br>0.30)  | 0.15<br>(0.05 to<br>0.38)  | 0.00<br>(0.00 to<br>0.01) | 0.00<br>(0.00 to<br>0.01) | 0.00<br>(0.00 to<br>0.01) | 0.00<br>(0.00 to<br>0.01) |
| Late maternal deaths                   |                            |                            |                            |                            |                           |                           |                           |                           |
|                                        | 0.00<br>(0.00 to<br>0.01)  | 0.01<br>(0.00 to<br>0.02)  | 0.00<br>(0.00 to<br>0.02)  | 0.01<br>(0.00 to<br>0.03)  | 0.00<br>(0.00 to<br>0.00) | 0.00<br>(0.00 to<br>0.00) | 0.00<br>(0.00 to<br>0.00) | 0.00<br>(0.00 to<br>0.00) |
| Maternal deaths aggravated by HIV/AIDS |                            |                            |                            |                            |                           |                           |                           |                           |
|                                        | 7.91<br>(5.54 to<br>10.91) | 5.78<br>(2.57 to<br>12.06) | 5.33<br>(2.43 to<br>10.95) | 6.45<br>(2.91 to<br>13.34) | 0.14<br>(0.10 to<br>0.19) | 0.10<br>(0.05 to<br>0.21) | 0.10<br>(0.04 to<br>0.19) | 0.12<br>(0.05 to<br>0.23) |
| Other maternal disorders               |                            |                            |                            |                            |                           |                           |                           |                           |

| Malta                                                                   |                                       |                                     |                                     |                                     |                                 |                               |                               |                                |
|-------------------------------------------------------------------------|---------------------------------------|-------------------------------------|-------------------------------------|-------------------------------------|---------------------------------|-------------------------------|-------------------------------|--------------------------------|
| Cause                                                                   | YLLs (actual counts)                  |                                     |                                     |                                     | Deaths (actual counts)          |                               |                               |                                |
|                                                                         | 2016                                  | 2040 Forecast                       | 2040 Better Scenario                | 2040 Worse Scenario                 | 2016                            | 2040 Forecast                 | 2040 Better Scenario          | 2040 Worse Scenario            |
| <b>Neonatal disorders</b>                                               | <b>935.27</b><br>(691.66 to 1,273.82) | <b>420.64</b><br>(245.50 to 686.42) | <b>318.38</b><br>(186.28 to 519.22) | <b>535.27</b><br>(313.99 to 879.55) | <b>10.81</b><br>(7.99 to 14.72) | <b>4.86</b><br>(2.84 to 7.93) | <b>3.68</b><br>(2.15 to 6.00) | <b>6.19</b><br>(3.63 to 10.17) |
| Neonatal preterm birth                                                  | 646.65<br>(479.53 to 894.64)          | 271.90<br>(154.06 to 447.81)        | 186.85<br>(106.57 to 315.63)        | 357.35<br>(205.04 to 616.91)        | 7.47<br>(5.54 to 10.34)         | 3.14<br>(1.78 to 5.17)        | 2.16<br>(1.23 to 3.65)        | 4.13<br>(2.37 to 7.13)         |
| Neonatal encephalopathy due to birth asphyxia and trauma                | 152.20<br>(105.97 to 218.48)          | 54.53<br>(30.06 to 90.74)           | 45.72<br>(24.83 to 76.34)           | 70.12<br>(38.11 to 119.44)          | 1.76<br>(1.22 to 2.52)          | 0.63<br>(0.35 to 1.05)        | 0.53<br>(0.29 to 0.88)        | 0.81<br>(0.44 to 1.38)         |
| Neonatal sepsis and other neonatal infections                           | 27.17<br>(15.29 to 75.96)             | 19.78<br>(8.87 to 50.61)            | 17.13<br>(7.72 to 44.01)            | 24.25<br>(11.03 to 61.01)           | 0.31<br>(0.18 to 0.88)          | 0.23<br>(0.10 to 0.59)        | 0.20<br>(0.09 to 0.51)        | 0.28<br>(0.13 to 0.71)         |
| Hemolytic disease and other neonatal jaundice                           | 9.20<br>(5.22 to 15.65)               | 3.13<br>(1.37 to 6.57)              | 2.69<br>(1.18 to 5.60)              | 3.90<br>(1.67 to 8.25)              | 0.11<br>(0.06 to 0.18)          | 0.04<br>(0.02 to 0.08)        | 0.03<br>(0.01 to 0.06)        | 0.05<br>(0.02 to 0.10)         |
| Other neonatal disorders                                                | 100.04<br>(67.30 to 144.67)           | 71.30<br>(35.97 to 125.99)          | 65.99<br>(33.94 to 117.22)          | 79.64<br>(39.97 to 140.86)          | 1.16<br>(0.78 to 1.67)          | 0.82<br>(0.42 to 1.46)        | 0.76<br>(0.39 to 1.35)        | 0.92<br>(0.46 to 1.63)         |
| <b>Nutritional deficiencies</b>                                         | <b>12.79</b><br>(10.69 to 15.23)      | <b>16.73</b><br>(13.43 to 20.40)    | <b>18.03</b><br>(14.33 to 22.24)    | <b>15.04</b><br>(12.04 to 18.10)    | <b>1.07</b><br>(0.90 to 1.27)   | <b>2.13</b><br>(1.62 to 2.68) | <b>2.38</b><br>(1.83 to 2.99) | <b>1.81</b><br>(1.34 to 2.30)  |
| Protein-energy malnutrition                                             | 5.97<br>(3.39 to 7.77)                | 9.50<br>(4.70 to 13.09)             | 10.71<br>(5.38 to 14.53)            | 8.00<br>(3.79 to 10.93)             | 0.55<br>(0.26 to 0.72)          | 1.33<br>(0.59 to 1.88)        | 1.54<br>(0.71 to 2.17)        | 1.07<br>(0.45 to 1.56)         |
| Iodine deficiency                                                       | 0.47<br>(0.05 to 1.32)                | 0.85<br>(0.04 to 3.07)              | 0.88<br>(0.04 to 3.27)              | 0.81<br>(0.05 to 2.77)              | 0.03<br>(0.00 to 0.10)          | 0.10<br>(0.00 to 0.44)        | 0.10<br>(0.00 to 0.48)        | 0.09<br>(0.00 to 0.37)         |
| Dietary iron deficiency                                                 | 1.19<br>(0.92 to 1.55)                | 1.07<br>(0.66 to 1.78)              | 1.10<br>(0.67 to 1.87)              | 1.02<br>(0.64 to 1.67)              | 0.03<br>(0.02 to 0.06)          | 0.04<br>(0.02 to 0.11)        | 0.04<br>(0.02 to 0.12)        | 0.04<br>(0.02 to 0.09)         |
| Other nutritional deficiencies                                          | 3.16<br>(3.88 to 7.48)                | 5.31<br>(3.47 to 9.49)              | 5.35<br>(3.46 to 9.94)              | 5.21<br>(3.44 to 8.82)              | 0.45<br>(0.33 to 0.73)          | 0.66<br>(0.41 to 1.29)        | 0.69<br>(0.41 to 1.41)        | 0.62<br>(0.38 to 1.15)         |
| <b>Other communicable, maternal, neonatal, and nutritional diseases</b> | <b>70.67</b><br>(57.99 to 84.01)      | <b>72.29</b><br>(55.70 to 94.41)    | <b>71.89</b><br>(54.69 to 93.73)    | <b>73.33</b><br>(56.52 to 95.04)    | <b>3.06</b><br>(2.47 to 3.68)   | <b>4.27</b><br>(3.40 to 5.24) | <b>4.39</b><br>(3.48 to 5.43) | <b>4.10</b><br>(3.30 to 5.00)  |
| Sexually transmitted infections excluding HIV                           | 2.60<br>(2.01 to 3.39)                | 1.33<br>(0.89 to 2.03)              | 1.30<br>(0.87 to 2.00)              | 1.38<br>(0.94 to 2.06)              | 0.12<br>(0.09 to 0.16)          | 0.09<br>(0.07 to 0.13)        | 0.09<br>(0.07 to 0.13)        | 0.09<br>(0.07 to 0.12)         |
| Syphilis                                                                | 0.95<br>(0.75 to 1.25)                | 0.36<br>(0.25 to 0.55)              | 0.34<br>(0.23 to 0.52)              | 0.40<br>(0.28 to 0.61)              | 0.04<br>(0.03 to 0.06)          | 0.02<br>(0.02 to 0.05)        | 0.02<br>(0.02 to 0.03)        | 0.02<br>(0.02 to 0.03)         |
| Chlamydial infection                                                    | 0.32<br>(0.24 to 0.42)                | 0.20<br>(0.13 to 0.30)              | 0.20<br>(0.13 to 0.30)              | 0.20<br>(0.13 to 0.30)              | 0.02<br>(0.01 to 0.02)          | 0.01<br>(0.01 to 0.02)        | 0.01<br>(0.01 to 0.02)        | 0.01<br>(0.01 to 0.02)         |
| Gonococcal infection                                                    | 0.92<br>(0.68 to 1.24)                | 0.55<br>(0.37 to 0.85)              | 0.55<br>(0.36 to 0.85)              | 0.56<br>(0.37 to 0.83)              | 0.05<br>(0.04 to 0.07)          | 0.04<br>(0.03 to 0.06)        | 0.04<br>(0.03 to 0.06)        | 0.04<br>(0.03 to 0.06)         |
| Other sexually transmitted infections                                   | 0.41<br>(0.30 to 0.54)                | 0.22<br>(0.14 to 0.36)              | 0.22<br>(0.14 to 0.35)              | 0.23<br>(0.15 to 0.36)              | 0.02<br>(0.01 to 0.02)          | 0.01<br>(0.01 to 0.02)        | 0.01<br>(0.01 to 0.02)        | 0.01<br>(0.01 to 0.02)         |
| Acute hepatitis                                                         | 14.99<br>(11.97 to 18.58)             | 8.55<br>(5.65 to 12.60)             | 7.71<br>(5.11 to 11.66)             | 9.81<br>(6.58 to 14.56)             | 0.67<br>(0.53 to 0.82)          | 0.49<br>(0.34 to 0.71)        | 0.46<br>(0.31 to 0.67)        | 0.54<br>(0.37 to 0.76)         |
| Acute hepatitis A                                                       | 0.88<br>(0.65 to 1.17)                | 0.45<br>(0.27 to 0.73)              | 0.42<br>(0.25 to 0.67)              | 0.50<br>(0.30 to 0.80)              | 0.03<br>(0.02 to 0.04)          | 0.02<br>(0.01 to 0.04)        | 0.02<br>(0.01 to 0.04)        | 0.02<br>(0.01 to 0.04)         |
| Acute hepatitis B                                                       | 11.52<br>(9.08 to 14.56)              | 6.38<br>(4.10 to 9.73)              | 5.71<br>(3.61 to 8.84)              | 7.40<br>(4.71 to 11.09)             | 0.49<br>(0.39 to 0.63)          | 0.34<br>(0.22 to 0.50)        | 0.31<br>(0.19 to 0.46)        | 0.38<br>(0.25 to 0.55)         |

|                                       |                                                               |                                                               |                                                               |                                                               |                                                            |                                                            |                                                            |                                                            |
|---------------------------------------|---------------------------------------------------------------|---------------------------------------------------------------|---------------------------------------------------------------|---------------------------------------------------------------|------------------------------------------------------------|------------------------------------------------------------|------------------------------------------------------------|------------------------------------------------------------|
|                                       | 0.78<br>(0.53 to<br>1.12)                                     | 0.45<br>(0.26 to<br>0.77)                                     | 0.41<br>(0.23 to<br>0.70)                                     | 0.52<br>(0.30 to<br>0.87)                                     | 0.04<br>(0.03 to<br>0.05)                                  | 0.03<br>(0.02 to<br>0.04)                                  | 0.02<br>(0.01 to<br>0.04)                                  | 0.03<br>(0.02 to<br>0.05)                                  |
| Acute hepatitis C                     |                                                               |                                                               |                                                               |                                                               |                                                            |                                                            |                                                            |                                                            |
|                                       | 1.81<br>(1.15 to<br>2.77)                                     | 1.27<br>(0.67 to<br>2.15)                                     | 1.17<br>(0.61 to<br>1.99)                                     | 1.40<br>(0.75 to<br>2.40)                                     | 0.10<br>(0.06 to<br>0.16)                                  | 0.11<br>(0.06 to<br>0.18)                                  | 0.10<br>(0.05 to<br>0.18)                                  | 0.11<br>(0.06 to<br>0.20)                                  |
| Acute hepatitis E                     |                                                               |                                                               |                                                               |                                                               |                                                            |                                                            |                                                            |                                                            |
|                                       | 53.08<br>(42.64 to<br>64.39)                                  | 62.70<br>(47.34 to<br>81.32)                                  | 62.88<br>(47.24 to<br>82.02)                                  | 62.14<br>(47.56 to<br>79.89)                                  | 2.27<br>(1.76 to<br>2.79)                                  | 3.69<br>(2.88 to<br>4.59)                                  | 3.84<br>(2.97 to<br>4.76)                                  | 3.47<br>(2.73 to<br>4.27)                                  |
| Other unspecified infectious diseases |                                                               |                                                               |                                                               |                                                               |                                                            |                                                            |                                                            |                                                            |
| <b>Non-communicable diseases</b>      | <b>46,742.32</b><br><b>(39,784.27 to</b><br><b>54,820.66)</b> | <b>48,608.34</b><br><b>(34,312.05 to</b><br><b>67,859.60)</b> | <b>41,699.73</b><br><b>(30,196.44 to</b><br><b>57,349.03)</b> | <b>60,284.10</b><br><b>(42,550.72 to</b><br><b>84,411.53)</b> | <b>3,178.60</b><br><b>(2,734.98 to</b><br><b>3,676.04)</b> | <b>4,327.59</b><br><b>(3,378.96 to</b><br><b>5,562.64)</b> | <b>3,889.89</b><br><b>(3,055.34 to</b><br><b>4,988.37)</b> | <b>5,025.76</b><br><b>(3,905.69 to</b><br><b>6,404.50)</b> |

| Malta                                |                                              |                                              |                                              |                                              |                                       |                                         |                                         |                                         |
|--------------------------------------|----------------------------------------------|----------------------------------------------|----------------------------------------------|----------------------------------------------|---------------------------------------|-----------------------------------------|-----------------------------------------|-----------------------------------------|
| Cause                                | YLLs (actual counts)                         |                                              |                                              |                                              | Deaths (actual counts)                |                                         |                                         |                                         |
|                                      | 2016                                         | 2040 Forecast                                | 2040 Better Scenario                         | 2040 Worse Scenario                          | 2016                                  | 2040 Forecast                           | 2040 Better Scenario                    | 2040 Worse Scenario                     |
| <b>Neoplasms</b>                     | <b>16,382.50</b><br>(13,890.94 to 19,344.94) | <b>17,197.09</b><br>(12,228.23 to 24,513.94) | <b>14,719.02</b><br>(10,563.87 to 20,681.82) | <b>20,454.32</b><br>(14,206.83 to 29,291.01) | <b>888.95</b><br>(761.12 to 1,037.49) | <b>1,157.54</b><br>(883.63 to 1,510.43) | <b>1,028.30</b><br>(789.77 to 1,324.02) | <b>1,306.18</b><br>(978.04 to 1,709.03) |
| Lip and oral cavity cancer           | 213.08<br>(174.90 to 259.38)                 | 237.80<br>(119.92 to 440.32)                 | 140.73<br>(76.57 to 247.89)                  | 334.15<br>(158.68 to 627.39)                 | 10.33<br>(8.65 to 12.44)              | 13.46<br>(7.53 to 23.33)                | 8.46<br>(5.11 to 13.74)                 | 17.80<br>(9.26 to 31.97)                |
| Nasopharynx cancer                   | 151.81<br>(121.43 to 185.56)                 | 169.62<br>(82.41 to 329.84)                  | 92.88<br>(48.57 to 170.78)                   | 254.26<br>(120.16 to 506.48)                 | 7.15<br>(5.77 to 8.68)                | 9.60<br>(4.89 to 17.43)                 | 5.41<br>(2.99 to 9.33)                  | 13.66<br>(6.73 to 25.63)                |
| Other pharynx cancer                 | 108.58<br>(87.74 to 132.85)                  | 145.65<br>(72.13 to 263.18)                  | 109.01<br>(58.49 to 191.15)                  | 152.97<br>(75.83 to 275.14)                  | 4.54<br>(3.70 to 5.50)                | 6.80<br>(3.52 to 11.91)                 | 5.21<br>(2.88 to 8.83)                  | 6.98<br>(3.56 to 12.16)                 |
| Esophageal cancer                    | 333.27<br>(266.86 to 411.95)                 | 427.17<br>(208.51 to 797.90)                 | 272.01<br>(145.58 to 477.69)                 | 579.06<br>(262.47 to 1,142.02)               | 17.32<br>(14.11 to 20.95)             | 25.51<br>(13.49 to 43.97)               | 16.95<br>(10.01 to 28.06)               | 32.86<br>(16.29 to 59.77)               |
| Stomach cancer                       | 792.78<br>(656.34 to 951.25)                 | 561.04<br>(375.26 to 820.89)                 | 487.67<br>(337.46 to 700.19)                 | 641.97<br>(421.65 to 937.78)                 | 47.97<br>(40.30 to 56.84)             | 42.75<br>(30.54 to 59.66)               | 38.20<br>(28.35 to 52.33)               | 46.84<br>(33.34 to 64.87)               |
| Colon and rectum cancer              | 1,675.80<br>(1,378.53 to 2,029.31)           | 1,860.65<br>(1,166.54 to 2,870.88)           | 1,554.57<br>(977.90 to 2,410.08)             | 2,145.00<br>(1,337.37 to 3,289.27)           | 101.60<br>(84.70 to 122.28)           | 142.52<br>(94.64 to 210.47)             | 123.28<br>(82.43 to 180.90)             | 157.75<br>(102.82 to 232.28)            |
| Liver cancer                         | 402.90<br>(330.92 to 489.77)                 | 597.76<br>(346.65 to 1,030.22)               | 507.00<br>(306.93 to 829.42)                 | 717.27<br>(381.50 to 1,304.36)               | 22.22<br>(18.38 to 26.73)             | 38.89<br>(24.09 to 62.16)               | 34.29<br>(22.23 to 51.90)               | 44.27<br>(26.10 to 74.64)               |
| Liver cancer due to hepatitis B      | 66.37<br>(42.62 to 98.27)                    | 90.39<br>(45.85 to 169.10)                   | 81.24<br>(43.55 to 148.54)                   | 107.39<br>(52.22 to 215.60)                  | 3.18<br>(1.96 to 4.79)                | 5.07<br>(2.68 to 9.20)                  | 4.69<br>(2.55 to 8.10)                  | 5.73<br>(2.93 to 10.92)                 |
| Liver cancer due to hepatitis C      | 131.71<br>(97.53 to 173.18)                  | 195.72<br>(113.89 to 329.71)                 | 180.09<br>(106.30 to 294.03)                 | 223.08<br>(121.49 to 387.60)                 | 7.88<br>(5.92 to 10.43)               | 14.14<br>(8.70 to 22.27)                | 13.43<br>(8.39 to 20.69)                | 15.29<br>(8.94 to 24.96)                |
| Liver cancer due to alcohol use      | 125.68<br>(90.20 to 170.45)                  | 193.77<br>(104.41 to 350.47)                 | 138.69<br>(76.49 to 244.44)                  | 246.90<br>(122.55 to 481.36)                 | 6.76<br>(4.84 to 9.14)                | 11.85<br>(6.59 to 20.81)                | 8.85<br>(5.04 to 15.04)                 | 14.39<br>(7.58 to 26.32)                |
| Liver cancer due to other causes     | 79.14<br>(53.04 to 111.70)                   | 117.88<br>(60.89 to 210.99)                  | 106.99<br>(56.80 to 183.35)                  | 139.90<br>(67.34 to 263.14)                  | 4.40<br>(2.95 to 6.18)                | 7.84<br>(4.22 to 13.47)                 | 7.32<br>(4.07 to 12.10)                 | 8.86<br>(4.55 to 15.84)                 |
| Gallbladder and biliary tract cancer | 147.02<br>(122.81 to 176.21)                 | 126.06<br>(96.47 to 165.65)                  | 128.79<br>(97.21 to 172.59)                  | 121.80<br>(95.11 to 156.28)                  | 9.06<br>(7.63 to 10.79)               | 9.67<br>(7.98 to 11.72)                 | 10.12<br>(8.23 to 12.52)                | 9.02<br>(7.53 to 10.65)                 |
| Pancreatic cancer                    | 1,281.15<br>(1,042.24 to 1,547.15)           | 1,525.14<br>(1,021.94 to 2,230.51)           | 1,458.32<br>(985.51 to 2,128.67)             | 1,619.68<br>(1,076.48 to 2,394.23)           | 72.34<br>(59.33 to 87.02)             | 102.15<br>(75.67 to 140.52)             | 100.17<br>(73.48 to 137.41)             | 104.48<br>(76.20 to 144.16)             |
| Larynx cancer                        | 178.41<br>(143.27 to 219.81)                 | 160.49<br>(67.10 to 319.93)                  | 84.81<br>(39.46 to 162.62)                   | 257.20<br>(103.07 to 528.24)                 | 8.60<br>(6.96 to 10.48)               | 9.05<br>(4.15 to 17.73)                 | 4.92<br>(2.54 to 9.05)                  | 13.76<br>(6.12 to 27.59)                |
| Tracheal, bronchus, and lung cancer  | 3,083.79<br>(2,517.09 to 3,754.95)           | 2,913.75<br>(1,620.37 to 5,013.82)           | 1,797.77<br>(1,037.64 to 3,038.84)           | 4,688.75<br>(2,544.58 to 8,183.69)           | 164.67<br>(134.92 to 199.57)          | 180.52<br>(107.68 to 291.98)            | 115.88<br>(72.01 to 183.46)             | 273.70<br>(157.50 to 454.09)            |
| Malignant skin melanoma              | 213.48<br>(166.43 to 267.66)                 | 266.17<br>(187.13 to 367.05)                 | 288.11<br>(200.92 to 401.47)                 | 238.54<br>(168.92 to 323.50)                 | 9.70<br>(7.58 to 12.00)               | 15.32<br>(11.73 to 19.39)               | 16.99<br>(12.72 to 21.78)               | 13.25<br>(10.08 to 16.66)               |
| Non-melanoma skin cancer             | 77.87<br>(63.21 to 93.88)                    | 93.55<br>(72.83 to 118.70)                   | 91.06<br>(70.35 to 118.18)                   | 96.41<br>(76.91 to 119.27)                   | 5.28<br>(4.39 to 6.27)                | 8.43<br>(6.99 to 9.97)                  | 8.48<br>(6.91 to 10.16)                 | 8.29<br>(6.80 to 9.76)                  |
| Breast cancer                        | 1,549.20<br>(1,164.51 to 2,004.98)           | 1,389.10<br>(781.85 to 2,274.42)             | 1,178.26<br>(666.80 to 1,945.44)             | 1,593.80<br>(896.20 to 2,644.66)             | 77.11<br>(58.41 to 98.09)             | 88.74<br>(54.92 to 134.97)              | 77.71<br>(48.40 to 117.16)              | 98.44<br>(60.94 to 152.56)              |
| Cervical cancer                      | 186.52<br>(140.04 to 241.11)                 | 121.34<br>(72.67 to 193.04)                  | 110.56<br>(66.16 to 176.23)                  | 136.14<br>(82.58 to 214.50)                  | 8.52<br>(6.51 to 10.94)               | 6.87<br>(4.62 to 9.92)                  | 6.41<br>(4.34 to 9.36)                  | 7.46<br>(5.12 to 10.72)                 |

|                   |                                 |                                   |                                   |                                   |                              |                               |                               |                              |
|-------------------|---------------------------------|-----------------------------------|-----------------------------------|-----------------------------------|------------------------------|-------------------------------|-------------------------------|------------------------------|
|                   | 241.58<br>(175.03 to<br>326.85) | 221.07<br>(133.02 to<br>358.37)   | 212.89<br>(127.41 to<br>345.28)   | 232.74<br>(141.61 to<br>368.47)   | 13.14<br>(9.54 to<br>17.65)  | 14.56<br>(9.63 to<br>21.62)   | 14.24<br>(9.35 to<br>21.60)   | 15.00<br>(10.05 to<br>21.67) |
| Uterine cancer    |                                 |                                   |                                   |                                   |                              |                               |                               |                              |
|                   | 663.53<br>(459.27 to<br>893.93) | 503.68<br>(269.52 to<br>847.53)   | 475.68<br>(257.36 to<br>799.40)   | 561.39<br>(299.16 to<br>956.15)   | 31.82<br>(22.27 to<br>42.57) | 28.29<br>(16.75 to<br>45.48)  | 26.91<br>(15.77 to<br>43.66)  | 31.27<br>(18.49 to<br>51.26) |
| Ovarian cancer    |                                 |                                   |                                   |                                   |                              |                               |                               |                              |
|                   | 589.66<br>(447.40 to<br>809.94) | 815.94<br>(607.72 to<br>1,161.20) | 818.40<br>(604.29 to<br>1,173.87) | 800.65<br>(602.70 to<br>1,121.25) | 44.78<br>(34.61 to<br>60.36) | 79.03<br>(60.52 to<br>104.36) | 81.52<br>(62.75 to<br>110.48) | 74.34<br>(55.77 to<br>96.77) |
| Prostate cancer   |                                 |                                   |                                   |                                   |                              |                               |                               |                              |
|                   | 30.89<br>(22.47 to<br>40.97)    | 18.29<br>(12.05 to<br>26.36)      | 17.46<br>(11.50 to<br>25.55)      | 19.50<br>(12.97 to<br>28.13)      | 0.84<br>(0.62 to<br>1.08)    | 0.70<br>(0.53 to<br>0.91)     | 0.69<br>(0.52 to<br>0.92)     | 0.71<br>(0.54 to<br>0.91)    |
| Testicular cancer |                                 |                                   |                                   |                                   |                              |                               |                               |                              |



| Malta                           |                                                     |                                                    |                                                    |                                                     |                                                  |                                                |                                                |                                                  |
|---------------------------------|-----------------------------------------------------|----------------------------------------------------|----------------------------------------------------|-----------------------------------------------------|--------------------------------------------------|------------------------------------------------|------------------------------------------------|--------------------------------------------------|
| Cause                           | YLLs (actual counts)                                |                                                    |                                                    |                                                     | Deaths (actual counts)                           |                                                |                                                |                                                  |
|                                 | 2016                                                | 2040 Forecast                                      | 2040 Better Scenario                               | 2040 Worse Scenario                                 | 2016                                             | 2040 Forecast                                  | 2040 Better Scenario                           | 2040 Worse Scenario                              |
| Kidney cancer                   | 442.06<br>(362.40 to 535.30)                        | 575.54<br>(406.48 to 821.42)                       | 557.86<br>(395.12 to 784.19)                       | 592.41<br>(413.35 to 862.95)                        | 24.25<br>(20.09 to 29.04)                        | 38.64<br>(29.41 to 50.33)                      | 38.48<br>(29.64 to 50.08)                      | 38.06<br>(28.57 to 50.34)                        |
| Bladder cancer                  | 525.38<br>(429.03 to 640.13)                        | 605.00<br>(425.28 to 863.15)                       | 544.74<br>(392.25 to 763.33)                       | 684.29<br>(468.39 to 980.47)                        | 35.80<br>(29.62 to 42.90)                        | 52.74<br>(39.21 to 69.59)                      | 48.95<br>(37.03 to 64.55)                      | 56.82<br>(41.22 to 77.48)                        |
| Brain and nervous system cancer | 681.90<br>(520.85 to 855.46)                        | 697.61<br>(475.63 to 984.39)                       | 687.24<br>(462.38 to 976.99)                       | 710.50<br>(485.56 to 984.45)                        | 26.03<br>(19.96 to 32.17)                        | 31.57<br>(21.84 to 42.53)                      | 31.69<br>(21.56 to 43.44)                      | 31.27<br>(21.89 to 41.39)                        |
| Thyroid cancer                  | 68.81<br>(55.54 to 84.39)                           | 77.51<br>(49.73 to 118.64)                         | 72.72<br>(46.40 to 109.97)                         | 86.88<br>(55.27 to 134.46)                          | 3.92<br>(3.19 to 4.79)                           | 5.47<br>(3.79 to 7.75)                         | 5.27<br>(3.67 to 7.42)                         | 5.89<br>(4.04 to 8.51)                           |
| Mesothelioma                    | 170.37<br>(132.38 to 221.07)                        | 207.25<br>(147.80 to 284.96)                       | 216.01<br>(152.16 to 305.41)                       | 194.49<br>(142.53 to 263.51)                        | 9.32<br>(7.31 to 11.88)                          | 13.56<br>(10.33 to 17.44)                      | 14.22<br>(10.77 to 18.80)                      | 12.16<br>(9.55 to 15.47)                         |
| Hodgkin lymphoma                | 82.51<br>(67.39 to 104.87)                          | 52.78<br>(36.36 to 76.68)                          | 48.68<br>(33.39 to 71.62)                          | 58.87<br>(41.07 to 85.56)                           | 3.14<br>(2.59 to 3.90)                           | 2.57<br>(1.94 to 3.41)                         | 2.43<br>(1.84 to 3.24)                         | 2.78<br>(2.12 to 3.62)                           |
| Non-Hodgkin lymphoma            | 652.25<br>(525.75 to 801.00)                        | 639.45<br>(453.82 to 887.00)                       | 616.17<br>(436.49 to 861.59)                       | 681.59<br>(485.23 to 935.86)                        | 33.53<br>(27.28 to 40.89)                        | 41.90<br>(31.75 to 54.27)                      | 41.47<br>(31.37 to 53.77)                      | 42.86<br>(32.18 to 55.92)                        |
| Multiple myeloma                | 264.73<br>(211.01 to 333.25)                        | 311.70<br>(210.93 to 435.67)                       | 306.69<br>(207.65 to 431.19)                       | 322.83<br>(221.89 to 453.93)                        | 15.74<br>(12.64 to 19.45)                        | 22.64<br>(16.63 to 30.06)                      | 22.83<br>(16.68 to 30.28)                      | 22.58<br>(16.44 to 30.12)                        |
| Leukemia                        | 712.33<br>(588.51 to 858.43)                        | 814.23<br>(569.58 to 1,150.51)                     | 761.53<br>(539.52 to 1,083.27)                     | 899.64<br>(618.58 to 1,290.65)                      | 36.42<br>(30.41 to 43.31)                        | 54.08<br>(40.21 to 72.53)                      | 51.95<br>(38.92 to 69.13)                      | 57.14<br>(41.35 to 78.24)                        |
| Acute lymphoid leukemia         | 103.79<br>(85.40 to 128.31)                         | 82.22<br>(52.97 to 128.44)                         | 74.39<br>(48.53 to 116.25)                         | 95.42<br>(61.58 to 148.39)                          | 3.27<br>(2.65 to 4.08)                           | 3.19<br>(2.18 to 4.84)                         | 2.93<br>(2.02 to 4.35)                         | 3.61<br>(2.47 to 5.39)                           |
| Chronic lymphoid leukemia       | 73.70<br>(57.30 to 97.00)                           | 93.44<br>(63.10 to 136.95)                         | 89.10<br>(60.64 to 128.59)                         | 99.71<br>(65.59 to 149.75)                          | 5.25<br>(4.18 to 6.69)                           | 8.43<br>(6.02 to 11.85)                        | 8.27<br>(5.97 to 11.60)                        | 8.58<br>(5.88 to 12.39)                          |
| Acute myeloid leukemia          | 380.03<br>(304.02 to 462.88)                        | 488.67<br>(335.69 to 695.74)                       | 463.25<br>(320.48 to 661.38)                       | 530.12<br>(362.56 to 762.13)                        | 18.87<br>(15.40 to 22.73)                        | 30.47<br>(22.18 to 40.88)                      | 29.61<br>(21.75 to 39.48)                      | 31.70<br>(22.91 to 43.41)                        |
| Chronic myeloid leukemia        | 66.21<br>(53.27 to 81.70)                           | 36.70<br>(24.50 to 54.37)                          | 31.38<br>(21.15 to 45.78)                          | 45.76<br>(29.82 to 69.60)                           | 3.92<br>(3.16 to 4.76)                           | 2.82<br>(2.02 to 3.97)                         | 2.49<br>(1.81 to 3.43)                         | 3.34<br>(2.30 to 4.84)                           |
| Other leukemia                  | 88.60<br>(71.61 to 110.37)                          | 113.21<br>(77.01 to 161.84)                        | 103.40<br>(70.21 to 148.03)                        | 128.63<br>(85.75 to 187.22)                         | 5.10<br>(4.11 to 6.39)                           | 9.18<br>(6.51 to 12.66)                        | 8.65<br>(6.23 to 11.78)                        | 9.91<br>(6.88 to 13.97)                          |
| Other neoplasms                 | 860.86<br>(708.06 to 1,035.62)                      | 1,061.74<br>(790.78 to 1,405.64)                   | 1,081.42<br>(796.48 to 1,442.46)                   | 1,031.53<br>(781.43 to 1,336.57)                    | 43.80<br>(36.09 to 52.37)                        | 71.69<br>(57.50 to 87.01)                      | 75.17<br>(59.18 to 92.90)                      | 66.77<br>(54.54 to 80.32)                        |
| <b>Cardiovascular diseases</b>  | <b>17,563.65</b><br><b>(14,925.48 to 20,579.73)</b> | <b>13,788.47</b><br><b>(8,495.56 to 22,852.71)</b> | <b>10,333.33</b><br><b>(6,737.17 to 16,623.66)</b> | <b>20,438.29</b><br><b>(12,123.51 to 34,736.67)</b> | <b>1,358.90</b><br><b>(1,174.86 to 1,573.30)</b> | <b>1,397.18</b><br><b>(927.74 to 2,089.99)</b> | <b>1,124.30</b><br><b>(766.38 to 1,634.54)</b> | <b>1,859.83</b><br><b>(1,198.83 to 2,834.13)</b> |
| Rheumatic heart disease         | 190.35<br>(157.41 to 228.54)                        | 125.97<br>(89.23 to 180.43)                        | 117.04<br>(82.28 to 166.49)                        | 135.41<br>(96.71 to 192.00)                         | 12.80<br>(10.74 to 15.14)                        | 11.99<br>(9.07 to 16.20)                       | 11.52<br>(8.75 to 15.21)                       | 12.30<br>(9.31 to 16.50)                         |
| Ischemic heart disease          | 11,439.29<br>(9,713.23 to 13,431.90)                | 7,751.42<br>(4,075.95 to 14,730.41)                | 5,266.62<br>(2,924.17 to 9,514.90)                 | 12,898.38<br>(6,604.78 to 24,958.49)                | 873.66<br>(755.03 to 1,008.99)                   | 759.53<br>(430.11 to 1,287.04)                 | 559.72<br>(323.43 to 928.32)                   | 1,124.38<br>(620.06 to 1,936.86)                 |
| Stroke                          | 3,076.63<br>(2,599.49 to 3,651.97)                  | 2,083.61<br>(1,215.85 to 3,441.77)                 | 1,534.19<br>(925.48 to 2,529.17)                   | 3,173.87<br>(1,816.82 to 5,538.48)                  | 250.18<br>(212.04 to 293.13)                     | 215.92<br>(132.37 to 356.39)                   | 170.85<br>(107.14 to 279.90)                   | 296.33<br>(180.53 to 496.23)                     |
| Ischemic stroke                 | 1,371.66<br>(1,156.71 to 1,629.41)                  | 949.34<br>(513.01 to 1,915.77)                     | 755.28<br>(417.34 to 1,442.55)                     | 1,350.57<br>(691.07 to 2,773.21)                    | 127.55<br>(107.96 to 150.32)                     | 109.56<br>(59.84 to 214.40)                    | 91.63<br>(51.40 to 175.73)                     | 144.28<br>(75.47 to 287.41)                      |

|                                |                                       |                                     |                                   |                                     |                                 |                                |                               |                                |
|--------------------------------|---------------------------------------|-------------------------------------|-----------------------------------|-------------------------------------|---------------------------------|--------------------------------|-------------------------------|--------------------------------|
| Intracerebral hemorrhage       | 1,704.97<br>(1,425.92 to<br>2,019.78) | 1,134.27<br>(644.29 to<br>1,909.52) | 778.91<br>(468.76 to<br>1,237.65) | 1,823.30<br>(970.15 to<br>3,187.57) | 122.63<br>(102.66 to<br>144.09) | 106.36<br>(63.96 to<br>172.12) | 79.23<br>(51.14 to<br>121.86) | 152.04<br>(88.07 to<br>250.36) |
| Hypertensive heart disease     | 459.06<br>(336.26 to<br>720.79)       | 791.22<br>(387.21 to<br>1,750.65)   | 598.26<br>(330.64 to<br>1,163.11) | 977.63<br>(467.43 to<br>2,298.14)   | 36.65<br>(24.88 to<br>52.35)    | 88.42<br>(42.99 to<br>208.77)  | 70.68<br>(38.02 to<br>143.07) | 103.04<br>(48.91 to<br>248.46) |
| Cardiomyopathy and myocarditis | 546.96<br>(434.25 to<br>711.43)       | 574.86<br>(393.60 to<br>811.97)     | 544.29<br>(372.84 to<br>761.59)   | 609.81<br>(420.04 to<br>882.50)     | 37.84<br>(30.60 to<br>45.90)    | 58.74<br>(40.86 to<br>83.48)   | 58.54<br>(40.88 to<br>82.81)  | 58.58<br>(40.03 to<br>86.44)   |
| Myocarditis                    | 191.85<br>(138.23 to<br>260.65)       | 251.15<br>(173.04 to<br>331.58)     | 260.84<br>(181.68 to<br>348.25)   | 237.72<br>(163.44 to<br>309.26)     | 13.98<br>(9.40 to<br>17.79)     | 28.12<br>(18.39 to<br>37.11)   | 30.41<br>(20.37 to<br>40.37)  | 25.10<br>(16.35 to<br>33.32)   |

| Malta                                                         |                                                  |                                                  |                                                  |                                                  |                                            |                                            |                                            |                                            |
|---------------------------------------------------------------|--------------------------------------------------|--------------------------------------------------|--------------------------------------------------|--------------------------------------------------|--------------------------------------------|--------------------------------------------|--------------------------------------------|--------------------------------------------|
| Cause                                                         | YLLs (actual counts)                             |                                                  |                                                  |                                                  | Deaths (actual counts)                     |                                            |                                            |                                            |
|                                                               | 2016                                             | 2040 Forecast                                    | 2040 Better Scenario                             | 2040 Worse Scenario                              | 2016                                       | 2040 Forecast                              | 2040 Better Scenario                       | 2040 Worse Scenario                        |
| Alcoholic cardiomyopathy                                      | 44.67<br>(28.67 to 77.97)                        | 41.99<br>(24.75 to 71.05)                        | 33.03<br>(19.24 to 55.02)                        | 44.86<br>(26.70 to 77.18)                        | 1.76<br>(1.10 to 2.76)                     | 1.84<br>(1.17 to 2.80)                     | 1.49<br>(0.94 to 2.30)                     | 1.92<br>(1.24 to 2.93)                     |
| Other cardiomyopathy                                          | 310.44<br>(240.48 to 423.63)                     | 281.71<br>(157.29 to 463.24)                     | 250.42<br>(137.63 to 413.46)                     | 327.22<br>(186.30 to 531.53)                     | 22.10<br>(17.70 to 27.72)                  | 28.78<br>(14.48 to 50.80)                  | 26.63<br>(13.27 to 47.29)                  | 31.55<br>(16.66 to 55.85)                  |
| Atrial fibrillation and flutter                               | 423.82<br>(334.50 to 545.47)                     | 695.05<br>(498.04 to 956.00)                     | 649.68<br>(473.01 to 885.41)                     | 695.06<br>(498.27 to 947.75)                     | 44.85<br>(34.95 to 57.31)                  | 90.40<br>(64.81 to 122.51)                 | 87.45<br>(63.71 to 117.35)                 | 86.62<br>(62.37 to 116.08)                 |
| Aortic aneurysm                                               | 290.46<br>(240.49 to 349.22)                     | 290.28<br>(202.32 to 425.60)                     | 271.83<br>(193.44 to 393.82)                     | 310.65<br>(216.08 to 450.87)                     | 19.56<br>(16.29 to 23.32)                  | 25.20<br>(19.02 to 34.00)                  | 24.69<br>(18.89 to 32.92)                  | 25.24<br>(19.04 to 33.38)                  |
| Peripheral artery disease                                     | 129.56<br>(61.58 to 179.14)                      | 251.51<br>(107.46 to 423.27)                     | 248.62<br>(107.95 to 414.17)                     | 263.08<br>(111.78 to 442.71)                     | 11.75<br>(5.36 to 16.39)                   | 28.64<br>(12.45 to 45.71)                  | 29.41<br>(12.86 to 46.69)                  | 28.29<br>(11.86 to 44.83)                  |
| Endocarditis                                                  | 229.60<br>(165.08 to 317.13)                     | 290.70<br>(169.82 to 476.94)                     | 284.01<br>(168.91 to 457.87)                     | 297.59<br>(171.54 to 489.63)                     | 15.10<br>(10.58 to 20.71)                  | 25.85<br>(15.03 to 42.04)                  | 26.16<br>(15.45 to 41.87)                  | 25.17<br>(14.53 to 40.84)                  |
| Other cardiovascular and circulatory diseases                 | 777.92<br>(642.41 to 933.79)                     | 933.85<br>(647.39 to 1,346.46)                   | 818.78<br>(579.52 to 1,169.36)                   | 1,076.81<br>(742.69 to 1,550.00)                 | 56.52<br>(47.30 to 67.38)                  | 92.49<br>(69.37 to 124.29)                 | 85.27<br>(64.22 to 114.31)                 | 99.89<br>(73.87 to 132.57)                 |
| <b>Chronic respiratory diseases</b>                           | <b>1,995.35</b><br><b>(1,676.37 to 2,367.59)</b> | <b>2,589.93</b><br><b>(1,825.29 to 3,731.43)</b> | <b>2,157.59</b><br><b>(1,572.48 to 2,997.12)</b> | <b>3,255.27</b><br><b>(2,231.44 to 4,752.78)</b> | <b>151.02</b><br><b>(128.80 to 176.88)</b> | <b>245.48</b><br><b>(180.97 to 332.35)</b> | <b>209.11</b><br><b>(159.72 to 275.76)</b> | <b>292.93</b><br><b>(207.19 to 402.03)</b> |
| Chronic obstructive pulmonary disease                         | 1,488.56<br>(1,229.19 to 1,787.29)               | 1,779.38<br>(1,124.83 to 2,730.13)               | 1,258.45<br>(820.13 to 1,925.68)                 | 2,549.83<br>(1,613.31 to 3,998.30)               | 118.52<br>(99.31 to 140.38)                | 179.85<br>(120.36 to 260.53)               | 134.44<br>(92.09 to 190.57)                | 237.96<br>(154.66 to 348.96)               |
| Pneumoconiosis                                                | 11.60<br>(9.09 to 14.45)                         | 22.44<br>(16.16 to 30.72)                        | 24.56<br>(17.32 to 34.62)                        | 19.77<br>(14.72 to 26.09)                        | 0.81<br>(0.64 to 1.00)                     | 1.94<br>(1.44 to 2.58)                     | 1.94<br>(1.60 to 2.18)                     | 1.66<br>(1.24 to 2.14)                     |
| Silicosis                                                     | 0.40<br>(0.25 to 0.59)                           | 0.38<br>(0.18 to 0.70)                           | 0.37<br>(0.18 to 0.70)                           | 0.39<br>(0.19 to 0.69)                           | 0.03<br>(0.02 to 0.05)                     | 0.04<br>(0.02 to 0.06)                     | 0.04<br>(0.02 to 0.07)                     | 0.04<br>(0.02 to 0.06)                     |
| Asbestosis                                                    | 9.36<br>(6.91 to 12.03)                          | 19.09<br>(13.04 to 26.93)                        | 21.08<br>(14.24 to 30.41)                        | 16.48<br>(11.55 to 22.60)                        | 0.64<br>(0.47 to 0.82)                     | 1.60<br>(1.13 to 2.20)                     | 1.81<br>(1.26 to 2.52)                     | 1.33<br>(0.93 to 1.82)                     |
| Coal workers pneumoconiosis                                   | 0.49<br>(0.30 to 1.26)                           | 0.67<br>(0.32 to 1.64)                           | 0.66<br>(0.31 to 1.57)                           | 0.70<br>(0.34 to 1.76)                           | 0.04<br>(0.02 to 0.10)                     | 0.07<br>(0.03 to 0.15)                     | 0.07<br>(0.03 to 0.15)                     | 0.07<br>(0.03 to 0.16)                     |
| Other pneumoconiosis                                          | 1.35<br>(1.00 to 1.94)                           | 2.30<br>(1.40 to 3.67)                           | 2.44<br>(1.46 to 3.98)                           | 2.19<br>(1.37 to 3.42)                           | 0.10<br>(0.08 to 0.15)                     | 0.24<br>(0.15 to 0.38)                     | 0.26<br>(0.16 to 0.41)                     | 0.22<br>(0.14 to 0.34)                     |
| Asthma                                                        | 79.66<br>(64.21 to 108.48)                       | 34.17<br>(18.29 to 60.09)                        | 27.15<br>(14.62 to 48.08)                        | 48.05<br>(24.63 to 87.43)                        | 4.75<br>(3.86 to 6.00)                     | 2.86<br>(1.60 to 4.77)                     | 2.38<br>(1.34 to 3.96)                     | 3.75<br>(2.01 to 6.51)                     |
| Interstitial lung disease and pulmonary sarcoidosis           | 401.15<br>(249.69 to 504.83)                     | 733.36<br>(461.31 to 1,005.52)                   | 827.27<br>(550.65 to 1,130.34)                   | 616.81<br>(377.32 to 850.28)                     | 26.14<br>(16.30 to 33.03)                  | 59.28<br>(38.52 to 75.84)                  | 68.54<br>(45.63 to 87.79)                  | 48.08<br>(30.08 to 62.02)                  |
| Other chronic respiratory diseases                            | 14.38<br>(10.14 to 26.44)                        | 20.57<br>(12.83 to 36.51)                        | 20.17<br>(12.48 to 36.37)                        | 20.81<br>(12.92 to 36.57)                        | 0.81<br>(0.53 to 1.26)                     | 1.54<br>(0.92 to 2.33)                     | 1.56<br>(0.95 to 2.39)                     | 1.49<br>(0.88 to 2.24)                     |
| <b>Cirrhosis and other chronic liver diseases</b>             | <b>941.23</b><br><b>(769.64 to 1,137.57)</b>     | <b>865.38</b><br><b>(634.84 to 1,199.17)</b>     | <b>735.56</b><br><b>(538.92 to 1,024.18)</b>     | <b>955.12</b><br><b>(710.53 to 1,292.60)</b>     | <b>41.52</b><br><b>(34.56 to 49.64)</b>    | <b>45.96</b><br><b>(36.69 to 59.02)</b>    | <b>40.28</b><br><b>(31.88 to 51.95)</b>    | <b>49.03</b><br><b>(39.25 to 61.00)</b>    |
| Cirrhosis and other chronic liver diseases due to hepatitis B | 138.77<br>(99.99 to 185.70)                      | 122.61<br>(80.56 to 179.81)                      | 117.46<br>(76.85 to 173.29)                      | 129.27<br>(86.77 to 186.31)                      | 6.20<br>(4.58 to 8.17)                     | 6.56<br>(4.56 to 9.05)                     | 6.44<br>(4.49 to 8.85)                     | 6.69<br>(4.79 to 9.06)                     |
| Cirrhosis and other chronic liver diseases due to hepatitis C | 300.34<br>(217.49 to 404.41)                     | 265.76<br>(175.28 to 394.32)                     | 252.32<br>(165.27 to 374.66)                     | 283.26<br>(187.18 to 417.63)                     | 12.80<br>(9.32 to 17.21)                   | 13.43<br>(9.34 to 19.13)                   | 13.04<br>(9.13 to 18.60)                   | 13.87<br>(9.77 to 19.58)                   |

|                                                                |                                                          |                                                          |                                                          |                                                          |                                                   |                                                     |                                                     |                                                     |
|----------------------------------------------------------------|----------------------------------------------------------|----------------------------------------------------------|----------------------------------------------------------|----------------------------------------------------------|---------------------------------------------------|-----------------------------------------------------|-----------------------------------------------------|-----------------------------------------------------|
|                                                                | 445.13<br>(339.19 to<br>563.88)                          | 427.77<br>(303.09 to<br>592.81)                          | 318.62<br>(221.81 to<br>446.95)                          | 490.54<br>(351.72 to<br>690.41)                          | 19.92<br>(15.36 to<br>24.83)                      | 23.06<br>(17.38 to<br>29.75)                        | 17.95<br>(13.26 to<br>23.52)                        | 25.51<br>(19.36 to<br>32.80)                        |
| Cirrhosis and other chronic liver diseases due to alcohol use  |                                                          |                                                          |                                                          |                                                          |                                                   |                                                     |                                                     |                                                     |
|                                                                | 57.00<br>(39.73 to<br>81.09)                             | 49.24<br>(31.64 to<br>76.45)                             | 47.16<br>(30.23 to<br>72.49)                             | 52.05<br>(33.29 to<br>80.35)                             | 2.60<br>(1.77 to<br>3.77)                         | 2.90<br>(1.89 to<br>4.38)                           | 2.85<br>(1.84 to<br>4.35)                           | 2.95<br>(1.93 to<br>4.41)                           |
| Cirrhosis and other chronic liver diseases due to other causes |                                                          |                                                          |                                                          |                                                          |                                                   |                                                     |                                                     |                                                     |
| <b>Digestive diseases</b>                                      | <b>1,019.82</b><br><b>(821.48 to</b><br><b>1,275.92)</b> | <b>1,161.43</b><br><b>(866.75 to</b><br><b>1,504.93)</b> | <b>1,122.86</b><br><b>(840.06 to</b><br><b>1,464.45)</b> | <b>1,203.65</b><br><b>(898.29 to</b><br><b>1,558.52)</b> | <b>74.59</b><br><b>(60.43 to</b><br><b>91.40)</b> | <b>113.74</b><br><b>(89.44 to</b><br><b>140.23)</b> | <b>113.84</b><br><b>(88.57 to</b><br><b>141.11)</b> | <b>112.89</b><br><b>(89.83 to</b><br><b>138.54)</b> |
| Peptic ulcer disease                                           | 155.32<br>(124.93 to<br>196.38)                          | 105.48<br>(78.91 to<br>139.66)                           | 95.55<br>(71.21 to<br>128.30)                            | 121.01<br>(90.18 to<br>160.09)                           | 11.27<br>(9.19 to<br>14.01)                       | 10.41<br>(8.02 to<br>13.37)                         | 9.74<br>(7.37 to<br>12.53)                          | 11.36<br>(8.65 to<br>14.42)                         |

| Malta                                      |                                    |                                    |                                    |                                    |                              |                                |                                |                                |
|--------------------------------------------|------------------------------------|------------------------------------|------------------------------------|------------------------------------|------------------------------|--------------------------------|--------------------------------|--------------------------------|
| Cause                                      | YLLs (actual counts)               |                                    |                                    |                                    | Deaths (actual counts)       |                                |                                |                                |
|                                            | 2016                               | 2040 Forecast                      | 2040 Better Scenario               | 2040 Worse Scenario                | 2016                         | 2040 Forecast                  | 2040 Better Scenario           | 2040 Worse Scenario            |
| Gastritis and duodenitis                   | 25.10<br>(18.43 to 38.88)          | 25.32<br>(17.19 to 37.95)          | 24.35<br>(16.44 to 37.07)          | 26.59<br>(18.23 to 40.86)          | 1.66<br>(1.24 to 2.33)       | 2.32<br>(1.59 to 3.27)         | 2.31<br>(1.56 to 3.24)         | 2.32<br>(1.59 to 3.24)         |
| Appendicitis                               | 14.40<br>(10.88 to 21.10)          | 11.08<br>(7.83 to 16.36)           | 10.25<br>(7.12 to 15.25)           | 12.29<br>(8.59 to 18.05)           | 0.87<br>(0.66 to 1.21)       | 0.93<br>(0.67 to 1.28)         | 0.88<br>(0.64 to 1.24)         | 0.99<br>(0.72 to 1.36)         |
| Paralytic ileus and intestinal obstruction | 178.87<br>(128.62 to 224.77)       | 257.28<br>(178.20 to 330.74)       | 269.31<br>(185.69 to 350.92)       | 239.96<br>(169.75 to 302.76)       | 14.00<br>(9.93 to 17.56)     | 27.03<br>(19.28 to 33.67)      | 29.08<br>(20.82 to 36.58)      | 24.23<br>(17.35 to 30.09)      |
| Inguinal, femoral, and abdominal hernia    | 52.92<br>(39.76 to 82.74)          | 43.32<br>(31.79 to 67.75)          | 43.06<br>(31.00 to 67.67)          | 43.41<br>(32.16 to 66.57)          | 4.52<br>(3.31 to 6.66)       | 4.64<br>(3.47 to 7.11)         | 4.74<br>(3.52 to 7.31)         | 4.47<br>(3.36 to 6.85)         |
| Inflammatory bowel disease                 | 72.79<br>(41.97 to 98.32)          | 85.50<br>(47.91 to 117.15)         | 88.29<br>(49.54 to 122.72)         | 81.34<br>(45.67 to 110.61)         | 5.05<br>(2.82 to 6.78)       | 8.04<br>(4.43 to 10.79)        | 8.55<br>(4.76 to 11.67)        | 7.33<br>(4.05 to 9.77)         |
| Vascular intestinal disorders              | 145.84<br>(113.24 to 187.36)       | 193.32<br>(144.12 to 253.02)       | 194.77<br>(143.10 to 258.24)       | 190.05<br>(143.14 to 246.53)       | 11.15<br>(8.81 to 13.99)     | 18.93<br>(14.73 to 23.49)      | 19.55<br>(14.96 to 24.57)      | 17.96<br>(14.08 to 22.21)      |
| Gallbladder and biliary diseases           | 111.35<br>(89.55 to 141.29)        | 135.38<br>(75.33 to 236.98)        | 116.97<br>(65.92 to 203.60)        | 170.77<br>(93.65 to 291.63)        | 9.30<br>(7.51 to 11.50)      | 14.87<br>(8.33 to 25.48)       | 13.25<br>(7.54 to 22.95)       | 17.86<br>(9.80 to 30.53)       |
| Pancreatitis                               | 127.81<br>(96.50 to 181.87)        | 131.36<br>(72.65 to 247.72)        | 105.24<br>(61.82 to 184.33)        | 148.16<br>(78.73 to 281.63)        | 6.77<br>(5.22 to 9.01)       | 9.14<br>(5.45 to 16.80)        | 7.63<br>(4.90 to 12.61)        | 9.92<br>(5.71 to 18.56)        |
| Other digestive diseases                   | 135.42<br>(100.81 to 169.74)       | 173.38<br>(126.46 to 235.56)       | 175.07<br>(126.98 to 232.46)       | 170.08<br>(125.68 to 215.05)       | 10.20<br>(7.88 to 12.59)     | 17.45<br>(13.70 to 21.56)      | 18.10<br>(14.04 to 23.62)      | 16.46<br>(12.96 to 20.04)      |
| Neurological disorders                     | 3,692.41<br>(3,020.48 to 4,497.72) | 6,342.41<br>(4,715.58 to 8,618.10) | 6,434.06<br>(4,836.17 to 8,586.05) | 6,376.76<br>(4,654.77 to 8,911.45) | 368.20<br>(300.48 to 448.05) | 808.82<br>(609.84 to 1,121.01) | 842.04<br>(638.79 to 1,140.73) | 786.13<br>(573.86 to 1,130.30) |
| Alzheimer's disease and other dementias    | 2,695.54<br>(2,135.80 to 3,379.79) | 5,021.58<br>(3,553.09 to 7,184.69) | 5,079.99<br>(3,630.73 to 7,179.31) | 5,123.04<br>(3,506.54 to 7,588.75) | 311.59<br>(250.09 to 384.43) | 708.69<br>(509.66 to 1,015.88) | 735.29<br>(535.07 to 1,034.07) | 695.91<br>(486.19 to 1,040.55) |
| Parkinson's disease                        | 334.56<br>(242.61 to 448.72)       | 564.13<br>(413.47 to 757.44)       | 607.88<br>(440.90 to 821.94)       | 503.77<br>(368.92 to 671.38)       | 29.13<br>(21.46 to 38.93)    | 59.73<br>(44.65 to 79.73)      | 65.75<br>(49.00 to 87.58)      | 51.73<br>(38.01 to 68.83)      |
| Epilepsy                                   | 121.09<br>(98.90 to 148.11)        | 136.29<br>(77.08 to 224.40)        | 115.57<br>(69.38 to 183.90)        | 145.79<br>(81.61 to 243.73)        | 4.19<br>(3.43 to 5.12)       | 6.74<br>(4.15 to 10.31)        | 5.94<br>(3.85 to 8.89)         | 6.85<br>(4.13 to 10.69)        |
| Multiple sclerosis                         | 51.47<br>(36.78 to 67.36)          | 48.99<br>(29.75 to 73.05)          | 48.37<br>(29.23 to 71.81)          | 49.26<br>(30.37 to 72.88)          | 1.96<br>(1.40 to 2.53)       | 2.10<br>(1.31 to 3.07)         | 2.11<br>(3.06)                 | 2.06<br>(1.32 to 2.95)         |
| Motor neuron disease                       | 180.61<br>(151.18 to 220.54)       | 215.41<br>(156.68 to 302.81)       | 218.22<br>(157.04 to 310.38)       | 210.69<br>(155.50 to 290.50)       | 8.39<br>(7.03 to 10.21)      | 11.98<br>(9.05 to 16.90)       | 12.32<br>(9.18 to 16.90)       | 11.45<br>(8.85 to 15.14)       |
| Other neurological disorders               | 309.14<br>(253.12 to 369.77)       | 356.00<br>(266.00 to 472.74)       | 364.03<br>(270.30 to 487.38)       | 344.21<br>(260.90 to 451.50)       | 12.94<br>(10.67 to 15.48)    | 19.58<br>(15.28 to 24.31)      | 20.63<br>(15.86 to 26.03)      | 18.13<br>(14.43 to 22.25)      |
| Mental disorders                           | 396.84<br>(305.73 to 504.19)       | 671.56<br>(439.84 to 970.00)       | 723.27<br>(471.44 to 1,039.13)     | 603.54<br>(387.16 to 875.77)       | 9.67<br>(7.67 to 12.05)      | 19.21<br>(14.09 to 25.96)      | 21.03<br>(15.49 to 28.33)      | 16.80<br>(12.16 to 22.67)      |
| Alcohol use disorders                      | 74.24<br>(58.46 to 93.04)          | 78.48<br>(54.29 to 112.08)         | 74.88<br>(51.47 to 107.91)         | 76.12<br>(53.31 to 106.98)         | 2.51<br>(2.00 to 3.13)       | 3.08<br>(2.23 to 4.21)         | 2.99<br>(2.16 to 4.12)         | 2.92<br>(2.14 to 3.93)         |
| Drug use disorders                         | 317.68<br>(238.00 to 410.96)       | 588.11<br>(379.40 to 863.76)       | 643.26<br>(413.25 to 946.41)       | 522.63<br>(332.72 to 771.76)       | 7.07<br>(5.45 to 8.93)       | 16.03<br>(11.54 to 21.95)      | 17.95<br>(13.06 to 24.47)      | 13.79<br>(9.84 to 18.89)       |
| Opioid use disorders                       | 160.10<br>(115.78 to 219.05)       | 179.20<br>(103.28 to 299.21)       | 183.13<br>(105.85 to 306.76)       | 174.09<br>(100.24 to 286.23)       | 3.29<br>(2.43 to 4.44)       | 4.37<br>(2.86 to 6.82)         | 4.55<br>(2.97 to 7.14)         | 4.15<br>(2.71 to 6.36)         |

|                           |                                |                                 |                                 |                                 |                           |                            |                             |                           |
|---------------------------|--------------------------------|---------------------------------|---------------------------------|---------------------------------|---------------------------|----------------------------|-----------------------------|---------------------------|
|                           | 5.67<br>(3.36 to<br>8.11)      | 14.53<br>(7.88 to<br>24.07)     | 15.74<br>(8.41 to<br>26.08)     | 13.04<br>(6.96 to<br>22.05)     | 0.12<br>(0.08 to<br>0.17) | 0.38<br>(0.24 to<br>0.58)  | 0.42<br>(0.26 to<br>0.63)   | 0.33<br>(0.20 to<br>0.51) |
| Cocaine use disorders     |                                |                                 |                                 |                                 |                           |                            |                             |                           |
|                           | 31.58<br>(17.17 to<br>46.81)   | 118.98<br>(62.68 to<br>200.27)  | 134.15<br>(71.20 to<br>227.51)  | 101.16<br>(51.03 to<br>171.46)  | 0.61<br>(0.34 to<br>0.87) | 2.49<br>(1.45 to<br>4.03)  | 2.83<br>(1.66 to<br>4.51)   | 2.10<br>(1.17 to<br>3.37) |
| Amphetamine use disorders |                                |                                 |                                 |                                 |                           |                            |                             |                           |
|                           | 120.32<br>(78.06 to<br>163.98) | 275.40<br>(164.84 to<br>419.80) | 310.24<br>(187.66 to<br>463.84) | 234.34<br>(141.19 to<br>357.95) | 3.04<br>(2.10 to<br>3.96) | 8.79<br>(6.19 to<br>12.10) | 10.15<br>(7.24 to<br>13.98) | 7.21<br>(5.04 to<br>9.91) |
| Other drug use disorders  |                                |                                 |                                 |                                 |                           |                            |                             |                           |
|                           | 5.03<br>(3.79 to<br>6.76)      | 4.97<br>(2.62 to<br>9.38)       | 5.13<br>(2.66 to<br>9.78)       | 4.78<br>(2.57 to<br>8.89)       | 0.09<br>(0.07 to<br>0.12) | 0.09<br>(0.05 to<br>0.17)  | 0.10<br>(0.05 to<br>0.18)   | 0.09<br>(0.05 to<br>0.16) |
| Eating disorders          |                                |                                 |                                 |                                 |                           |                            |                             |                           |

| Malta                                                      |                                           |                                           |                                           |                                            |                                     |                                     |                                     |                                     |
|------------------------------------------------------------|-------------------------------------------|-------------------------------------------|-------------------------------------------|--------------------------------------------|-------------------------------------|-------------------------------------|-------------------------------------|-------------------------------------|
| Cause                                                      | YLLs (actual counts)                      |                                           |                                           |                                            | Deaths (actual counts)              |                                     |                                     |                                     |
|                                                            | 2016                                      | 2040 Forecast                             | 2040 Better Scenario                      | 2040 Worse Scenario                        | 2016                                | 2040 Forecast                       | 2040 Better Scenario                | 2040 Worse Scenario                 |
| <b>Diabetes, urogenital, blood, and endocrine diseases</b> | <b>3,144.53</b><br>(2,651.67 to 3,689.20) | <b>4,498.95</b><br>(2,689.46 to 8,751.42) | <b>4,061.19</b><br>(2,471.65 to 8,263.41) | <b>5,381.80</b><br>(3,195.57 to 10,571.56) | <b>222.66</b><br>(189.89 to 256.63) | <b>435.91</b><br>(281.12 to 826.81) | <b>407.18</b><br>(264.54 to 777.16) | <b>498.45</b><br>(317.04 to 931.48) |
| Diabetes mellitus                                          | 1,432.45<br>(1,173.08 to 1,709.78)        | 1,539.03<br>(933.15 to 2,397.38)          | 1,305.66<br>(806.49 to 2,014.55)          | 1,857.96<br>(1,120.71 to 2,909.29)         | 98.22<br>(81.06 to 115.87)          | 142.91<br>(95.62 to 202.49)         | 127.46<br>(86.41 to 181.02)         | 162.00<br>(107.29 to 233.79)        |
| Acute glomerulonephritis                                   | 3.17<br>(2.67 to 3.75)                    | 2.86<br>(1.94 to 4.26)                    | 2.73<br>(1.80 to 4.11)                    | 3.05<br>(2.08 to 4.55)                     | 0.13<br>(0.11 to 0.17)              | 0.15<br>(0.10 to 0.23)              | 0.15<br>(0.10 to 0.23)              | 0.15<br>(0.10 to 0.23)              |
| Chronic kidney disease                                     | 1,077.14<br>(911.30 to 1,275.54)          | 2,068.68<br>(844.50 to 6,529.30)          | 1,861.69<br>(781.04 to 5,926.02)          | 2,640.86<br>(1,029.44 to 7,810.33)         | 79.94<br>(68.61 to 93.14)           | 207.23<br>(88.17 to 608.77)         | 191.44<br>(84.32 to 574.84)         | 254.62<br>(105.81 to 698.46)        |
| Chronic kidney disease due to diabetes mellitus            | 415.46<br>(332.25 to 518.11)              | 835.60<br>(322.14 to 2,846.11)            | 748.24<br>(296.13 to 2,564.41)            | 1,077.85<br>(400.22 to 3,557.65)           | 28.02<br>(22.36 to 34.95)           | 75.12<br>(29.42 to 220.63)          | 68.99<br>(28.00 to 210.84)          | 93.37<br>(35.50 to 271.59)          |
| Chronic kidney disease due to hypertension                 | 139.40<br>(106.95 to 175.72)              | 374.56<br>(150.34 to 1,108.75)            | 347.86<br>(142.33 to 1,084.42)            | 456.97<br>(175.64 to 1,281.96)             | 14.39<br>(11.17 to 18.24)           | 47.52<br>(20.74 to 135.83)          | 45.20<br>(20.31 to 135.84)          | 55.87<br>(23.46 to 151.51)          |
| Chronic kidney disease due to glomerulonephritis           | 209.26<br>(162.24 to 268.03)              | 300.48<br>(115.31 to 964.38)              | 265.12<br>(104.96 to 837.94)              | 392.25<br>(146.56 to 1,252.52)             | 14.17<br>(10.76 to 18.65)           | 28.19<br>(10.89 to 87.83)           | 25.42<br>(10.05 to 80.20)           | 35.71<br>(13.34 to 108.41)          |
| Chronic kidney disease due to other and unspecified causes | 313.02<br>(243.77 to 392.09)              | 558.03<br>(218.78 to 1,719.62)            | 500.47<br>(201.27 to 1,585.83)            | 713.80<br>(276.02 to 2,020.45)             | 23.35<br>(17.89 to 29.34)           | 56.40<br>(23.29 to 154.87)          | 51.83<br>(21.76 to 149.73)          | 69.67<br>(28.24 to 184.63)          |
| Urinary diseases and male infertility                      | 289.08<br>(243.30 to 339.13)              | 440.04<br>(345.75 to 549.29)              | 435.80<br>(337.02 to 555.82)              | 442.27<br>(352.61 to 541.27)               | 25.53<br>(21.59 to 29.60)           | 52.33<br>(42.25 to 64.25)           | 53.34<br>(42.24 to 65.75)           | 50.51<br>(40.31 to 62.17)           |
| Urinary tract infections                                   | 251.71<br>(210.79 to 297.13)              | 401.50<br>(312.40 to 499.99)              | 398.95<br>(307.63 to 508.04)              | 401.64<br>(317.80 to 494.02)               | 22.69<br>(19.19 to 26.42)           | 48.32<br>(38.68 to 59.66)           | 49.36<br>(38.87 to 61.76)           | 46.47<br>(37.06 to 57.44)           |
| Urolithiasis                                               | 15.35<br>(10.16 to 29.75)                 | 15.18<br>(9.11 to 31.67)                  | 14.29<br>(8.40 to 30.40)                  | 16.42<br>(9.97 to 33.34)                   | 1.10<br>(0.72 to 2.13)              | 1.41<br>(0.87 to 2.90)              | 1.37<br>(0.83 to 2.86)              | 1.46<br>(0.89 to 2.94)              |
| Other urinary diseases                                     | 22.02<br>(15.23 to 34.61)                 | 23.36<br>(14.82 to 38.10)                 | 22.56<br>(14.17 to 37.36)                 | 24.21<br>(15.24 to 40.04)                  | 1.74<br>(1.18 to 2.77)              | 2.61<br>(1.58 to 4.43)              | 2.61<br>(1.58 to 4.50)              | 2.58<br>(1.52 to 4.36)              |
| Gynecological diseases                                     | 0.33<br>(0.21 to 0.60)                    | 0.18<br>(0.10 to 0.36)                    | 0.16<br>(0.09 to 0.32)                    | 0.22<br>(0.12 to 0.41)                     | 0.01<br>(0.01 to 0.03)              | 0.01<br>(0.01 to 0.03)              | 0.01<br>(0.01 to 0.02)              | 0.01<br>(0.01 to 0.03)              |
| Uterine fibroids                                           | 0.25<br>(0.16 to 0.42)                    | 0.11<br>(0.06 to 0.21)                    | 0.10<br>(0.05 to 0.20)                    | 0.13<br>(0.07 to 0.25)                     | 0.01<br>(0.01 to 0.02)              | 0.01<br>(0.00 to 0.01)              | 0.00<br>(0.00 to 0.01)              | 0.01<br>(0.00 to 0.01)              |
| Polycystic ovarian syndrome                                | 0.02<br>(0.01 to 0.04)                    | 0.01<br>(0.00 to 0.01)                    | 0.00<br>(0.00 to 0.01)                    | 0.01<br>(0.00 to 0.02)                     | 0.00<br>(0.00 to 0.00)              | 0.00<br>(0.00 to 0.00)              | 0.00<br>(0.00 to 0.00)              | 0.00<br>(0.00 to 0.00)              |
| Endometriosis                                              | 0.00<br>(0.00 to 0.01)                    | 0.00<br>(0.00 to 0.01)                    | 0.00<br>(0.00 to 0.00)                    | 0.00<br>(0.00 to 0.01)                     | 0.00<br>(0.00 to 0.00)              | 0.00<br>(0.00 to 0.00)              | 0.00<br>(0.00 to 0.00)              | 0.00<br>(0.00 to 0.00)              |
| Genital prolapse                                           | 0.01<br>(0.01 to 0.02)                    | 0.01<br>(0.00 to 0.01)                    | 0.01<br>(0.00 to 0.01)                    | 0.01<br>(0.00 to 0.02)                     | 0.00<br>(0.00 to 0.00)              | 0.00<br>(0.00 to 0.00)              | 0.00<br>(0.00 to 0.00)              | 0.00<br>(0.00 to 0.00)              |
| Other gynecological diseases                               | 0.04<br>(0.03 to 0.12)                    | 0.06<br>(0.03 to 0.14)                    | 0.05<br>(0.03 to 0.13)                    | 0.07<br>(0.04 to 0.17)                     | 0.00<br>(0.00 to 0.01)              | 0.01<br>(0.00 to 0.02)              | 0.01<br>(0.00 to 0.02)              | 0.01<br>(0.00 to 0.02)              |
| Hemoglobinopathies and hemolytic anemias                   | 111.38<br>(87.68 to 163.51)               | 107.92<br>(81.25 to 158.89)               | 103.59<br>(77.03 to 153.62)               | 113.55<br>(85.90 to 167.21)                | 8.09<br>(6.49 to 11.45)             | 11.25<br>(8.86 to 15.19)            | 11.14<br>(8.66 to 15.26)            | 11.31<br>(8.90 to 15.38)            |
| Thalassemias                                               | 9.39<br>(4.57 to 16.53)                   | 4.56<br>(1.70 to 9.51)                    | 4.44<br>(1.68 to 9.28)                    | 4.71<br>(1.73 to 9.88)                     | 0.14<br>(0.06 to 0.25)              | 0.07<br>(0.02 to 0.16)              | 0.07<br>(0.02 to 0.15)              | 0.07<br>(0.02 to 0.16)              |

|                                                   |                                 |                                 |                                 |                                 |                             |                              |                              |                              |
|---------------------------------------------------|---------------------------------|---------------------------------|---------------------------------|---------------------------------|-----------------------------|------------------------------|------------------------------|------------------------------|
|                                                   | 4.12<br>(1.32 to<br>9.45)       | 3.36<br>(0.99 to<br>8.01)       | 3.06<br>(0.89 to<br>7.20)       | 3.82<br>(1.12 to<br>8.81)       | 0.09<br>(0.03 to<br>0.22)   | 0.10<br>(0.03 to<br>0.26)    | 0.09<br>(0.02 to<br>0.24)    | 0.12<br>(0.03 to<br>0.28)    |
| Sickle cell disorders                             |                                 |                                 |                                 |                                 |                             |                              |                              |                              |
|                                                   | 16.79<br>(11.57 to<br>26.14)    | 17.36<br>(10.74 to<br>28.05)    | 15.79<br>(9.53 to<br>25.64)     | 19.71<br>(12.30 to<br>31.92)    | 0.62<br>(0.43 to<br>0.93)   | 0.92<br>(0.59 to<br>1.44)    | 0.85<br>(0.53 to<br>1.34)    | 1.01<br>(0.66 to<br>1.58)    |
| G6PD deficiency                                   |                                 |                                 |                                 |                                 |                             |                              |                              |                              |
|                                                   | 81.08<br>(63.53 to<br>118.62)   | 82.64<br>(63.07 to<br>117.88)   | 80.30<br>(59.45 to<br>116.00)   | 85.31<br>(64.97 to<br>122.16)   | 7.24<br>(5.84 to<br>10.09)  | 10.15<br>(7.93 to<br>13.51)  | 10.12<br>(7.87 to<br>13.68)  | 10.11<br>(7.78 to<br>13.62)  |
| Other hemoglobinopathies and hemolytic anemias    |                                 |                                 |                                 |                                 |                             |                              |                              |                              |
|                                                   | 230.98<br>(166.95 to<br>283.20) | 340.24<br>(220.49 to<br>456.02) | 351.56<br>(225.49 to<br>475.10) | 323.90<br>(208.42 to<br>430.15) | 10.74<br>(6.70 to<br>13.25) | 22.02<br>(12.48 to<br>27.71) | 23.65<br>(13.35 to<br>30.27) | 19.85<br>(11.32 to<br>24.66) |
| Endocrine, metabolic, blood, and immune disorders |                                 |                                 |                                 |                                 |                             |                              |                              |                              |



| Malta                                         |                                           |                                         |                                         |                                           |                                  |                                   |                                   |                                   |
|-----------------------------------------------|-------------------------------------------|-----------------------------------------|-----------------------------------------|-------------------------------------------|----------------------------------|-----------------------------------|-----------------------------------|-----------------------------------|
| Cause                                         | YLLs (actual counts)                      |                                         |                                         |                                           | Deaths (actual counts)           |                                   |                                   |                                   |
|                                               | 2016                                      | 2040 Forecast                           | 2040 Better Scenario                    | 2040 Worse Scenario                       | 2016                             | 2040 Forecast                     | 2040 Better Scenario              | 2040 Worse Scenario               |
| <b>Musculoskeletal disorders</b>              | <b>123.73</b><br>(99.14 to 156.45)        | <b>175.10</b><br>(129.12 to 239.23)     | <b>173.29</b><br>(126.65 to 238.70)     | <b>177.77</b><br>(132.74 to 239.08)       | <b>8.31</b><br>(6.69 to 10.25)   | <b>16.13</b><br>(12.62 to 20.19)  | <b>16.47</b><br>(12.79 to 20.87)  | <b>15.66</b><br>(12.36 to 19.70)  |
| Rheumatoid arthritis                          | 30.03<br>(21.56 to 41.89)                 | 35.77<br>(23.03 to 55.59)               | 31.88<br>(20.23 to 49.97)               | 41.57<br>(27.23 to 64.53)                 | 1.93<br>(1.38 to 2.69)           | 2.95<br>(2.01 to 4.34)            | 2.69<br>(1.79 to 4.02)            | 3.32<br>(2.26 to 4.88)            |
| Other musculoskeletal disorders               | 93.70<br>(73.71 to 117.61)                | 139.33<br>(103.08 to 187.25)            | 141.41<br>(103.34 to 191.52)            | 136.20<br>(102.25 to 180.68)              | 6.38<br>(5.09 to 7.99)           | 13.18<br>(10.28 to 16.63)         | 13.78<br>(10.59 to 17.52)         | 12.35<br>(9.64 to 15.50)          |
| <b>Other non-communicable diseases</b>        | <b>1,482.15</b><br>(1,166.74 to 1,829.98) | <b>1,318.01</b><br>(947.23 to 1,898.92) | <b>1,239.56</b><br>(883.93 to 1,778.63) | <b>1,437.59</b><br>(1,050.14 to 2,064.69) | <b>54.77</b><br>(35.60 to 82.67) | <b>87.64</b><br>(52.79 to 137.24) | <b>87.34</b><br>(52.36 to 137.47) | <b>87.87</b><br>(53.36 to 138.23) |
| Congenital birth defects                      | 977.10<br>(742.11 to 1,234.37)            | 579.25<br>(380.65 to 880.04)            | 514.18<br>(341.51 to 786.59)            | 682.67<br>(442.56 to 1,042.33)            | 13.39<br>(10.63 to 16.58)        | 9.01<br>(6.30 to 13.40)           | 8.19<br>(5.67 to 12.21)           | 10.32<br>(7.05 to 15.38)          |
| Neural tube defects                           | 50.41<br>(30.59 to 74.36)                 | 9.70<br>(4.74 to 18.36)                 | 7.81<br>(3.87 to 14.64)                 | 12.97<br>(6.17 to 25.46)                  | 0.62<br>(0.39 to 0.90)           | 0.13<br>(0.07 to 0.24)            | 0.10<br>(0.05 to 0.19)            | 0.17<br>(0.09 to 0.33)            |
| Congenital heart anomalies                    | 239.92<br>(154.17 to 327.35)              | 87.35<br>(47.55 to 147.58)              | 70.13<br>(38.38 to 120.33)              | 117.05<br>(62.56 to 197.80)               | 3.23<br>(2.35 to 4.20)           | 1.24<br>(0.74 to 2.08)            | 1.01<br>(0.60 to 1.69)            | 1.65<br>(0.98 to 2.76)            |
| Orofacial clefts                              | 0.61<br>(0.24 to 1.90)                    | 0.19<br>(0.06 to 0.59)                  | 0.14<br>(0.05 to 0.46)                  | 0.28<br>(0.08 to 0.91)                    | 0.01<br>(0.00 to 0.02)           | 0.00<br>(0.00 to 0.01)            | 0.00<br>(0.00 to 0.01)            | 0.00<br>(0.00 to 0.01)            |
| Down syndrome                                 | 113.65<br>(62.59 to 162.07)               | 119.32<br>(70.80 to 175.86)             | 119.63<br>(71.84 to 175.49)             | 118.57<br>(68.25 to 175.99)               | 2.27<br>(1.36 to 3.15)           | 2.81<br>(1.78 to 4.15)            | 2.84<br>(1.81 to 4.23)            | 2.76<br>(1.72 to 4.01)            |
| Other chromosomal abnormalities               | 217.70<br>(140.88 to 347.17)              | 201.66<br>(113.71 to 341.71)            | 181.99<br>(103.55 to 314.27)            | 229.60<br>(129.75 to 389.35)              | 2.76<br>(1.81 to 4.36)           | 2.68<br>(1.57 to 4.46)            | 2.44<br>(1.43 to 4.09)            | 3.03<br>(1.77 to 5.10)            |
| Congenital musculoskeletal and limb anomalies | 37.73<br>(26.87 to 63.84)                 | 18.94<br>(10.89 to 36.20)               | 15.86<br>(9.06 to 30.08)                | 23.98<br>(13.29 to 44.60)                 | 0.51<br>(0.37 to 0.81)           | 0.27<br>(0.16 to 0.48)            | 0.23<br>(0.13 to 0.40)            | 0.34<br>(0.20 to 0.60)            |
| Urogenital congenital anomalies               | 32.66<br>(15.90 to 51.25)                 | 15.52<br>(6.21 to 31.83)                | 13.20<br>(5.45 to 27.08)                | 19.13<br>(7.58 to 39.37)                  | 0.42<br>(0.22 to 0.64)           | 0.21<br>(0.09 to 0.40)            | 0.18<br>(0.08 to 0.34)            | 0.25<br>(0.11 to 0.49)            |
| Digestive congenital anomalies                | 89.74<br>(56.51 to 128.76)                | 37.23<br>(18.29 to 66.81)               | 30.27<br>(15.02 to 54.40)               | 48.85<br>(24.20 to 89.24)                 | 1.08<br>(0.69 to 1.54)           | 0.46<br>(0.23 to 0.82)            | 0.37<br>(0.19 to 0.67)            | 0.60<br>(0.31 to 1.08)            |
| Other congenital birth defects                | 194.68<br>(142.05 to 259.30)              | 89.33<br>(53.30 to 152.03)              | 75.15<br>(44.68 to 126.46)              | 112.24<br>(65.58 to 192.05)               | 2.49<br>(1.88 to 3.30)           | 1.20<br>(0.73 to 1.98)            | 1.02<br>(0.63 to 1.66)            | 1.50<br>(0.92 to 2.51)            |
| Skin and subcutaneous diseases                | 495.43<br>(288.47 to 878.33)              | 734.18<br>(422.49 to 1,253.65)          | 721.23<br>(413.56 to 1,217.03)          | 749.63<br>(423.10 to 1,275.40)            | 41.27<br>(22.37 to 70.04)        | 78.58<br>(42.76 to 128.02)        | 79.10<br>(43.66 to 129.81)        | 77.49<br>(42.37 to 126.43)        |
| Cellulitis                                    | 96.84<br>(58.49 to 210.34)                | 177.67<br>(106.67 to 376.07)            | 179.03<br>(106.58 to 380.88)            | 175.33<br>(104.37 to 372.72)              | 5.88<br>(3.40 to 13.11)          | 14.21<br>(8.24 to 30.57)          | 14.80<br>(8.62 to 31.94)          | 13.39<br>(7.81 to 29.29)          |
| Pyoderma                                      | 42.43<br>(17.13 to 66.03)                 | 85.83<br>(31.50 to 133.73)              | 85.66<br>(30.86 to 135.73)              | 85.74<br>(31.62 to 131.89)                | 2.83<br>(0.97 to 4.23)           | 8.13<br>(2.71 to 12.25)           | 8.42<br>(2.76 to 12.90)           | 7.70<br>(2.60 to 11.63)           |
| Decubitus ulcer                               | 338.90<br>(184.96 to 575.90)              | 450.20<br>(237.85 to 722.69)            | 436.51<br>(231.80 to 697.73)            | 467.49<br>(249.27 to 763.01)              | 31.41<br>(16.16 to 52.81)        | 54.39<br>(27.12 to 86.85)         | 54.02<br>(26.99 to 86.05)         | 54.61<br>(27.32 to 87.54)         |
| Other skin and subcutaneous diseases          | 17.25<br>(9.62 to 34.90)                  | 20.47<br>(10.63 to 40.06)               | 20.03<br>(10.46 to 39.51)               | 21.07<br>(10.95 to 42.29)                 | 1.16<br>(0.55 to 2.29)           | 1.84<br>(0.90 to 3.48)            | 1.87<br>(0.90 to 3.57)            | 1.80<br>(0.88 to 3.46)            |
| Sudden infant death syndrome                  | 9.62<br>(6.26 to 14.23)                   | 4.59<br>(2.35 to 8.20)                  | 4.15<br>(2.13 to 7.36)                  | 5.29<br>(2.76 to 9.37)                    | 0.11<br>(0.07 to 0.17)           | 0.05<br>(0.03 to 0.10)            | 0.05<br>(0.02 to 0.09)            | 0.06<br>(0.03 to 0.11)            |

|                          |                                       |                                       |                                       |                                       |                                 |                                 |                                 |                                 |
|--------------------------|---------------------------------------|---------------------------------------|---------------------------------------|---------------------------------------|---------------------------------|---------------------------------|---------------------------------|---------------------------------|
| Injuries                 | 3,243.08<br>(2,633.61 to<br>3,988.91) | 2,477.90<br>(1,788.03 to<br>3,552.32) | 2,261.67<br>(1,661.74 to<br>3,160.38) | 2,865.19<br>(2,041.71 to<br>4,093.80) | 122.14<br>(102.92 to<br>146.45) | 145.94<br>(120.37 to<br>177.26) | 142.32<br>(118.48 to<br>171.00) | 151.18<br>(122.57 to<br>186.98) |
| Transport injuries       | 770.01<br>(618.62 to<br>968.06)       | 465.57<br>(242.38 to<br>849.49)       | 409.03<br>(224.19 to<br>723.45)       | 710.21<br>(368.69 to<br>1,307.41)     | 19.43<br>(15.81 to<br>24.13)    | 14.66<br>(8.66 to<br>24.31)     | 13.15<br>(8.23 to<br>20.61)     | 20.54<br>(11.73 to<br>34.34)    |
| Road injuries            | 623.09<br>(498.28 to<br>788.15)       | 362.43<br>(187.84 to<br>672.48)       | 325.90<br>(178.55 to<br>577.64)       | 584.07<br>(297.77 to<br>1,087.93)     | 15.73<br>(12.83 to<br>19.50)    | 11.54<br>(6.85 to<br>19.02)     | 10.59<br>(6.63 to<br>16.61)     | 16.84<br>(9.75 to<br>28.14)     |
| Pedestrian road injuries | 120.29<br>(85.81 to<br>155.33)        | 45.86<br>(27.63 to<br>74.06)          | 37.71<br>(23.52 to<br>58.95)          | 77.38<br>(44.92 to<br>130.77)         | 4.16<br>(3.19 to<br>5.23)       | 2.33<br>(1.55 to<br>3.44)       | 1.99<br>(1.38 to<br>2.85)       | 3.52<br>(2.29 to<br>5.41)       |

| Malta                                           |                                                            |                                                          |                                                          |                                                            |                                                   |                                                     |                                                     |                                                     |
|-------------------------------------------------|------------------------------------------------------------|----------------------------------------------------------|----------------------------------------------------------|------------------------------------------------------------|---------------------------------------------------|-----------------------------------------------------|-----------------------------------------------------|-----------------------------------------------------|
| Cause                                           | YLLs (actual counts)                                       |                                                          |                                                          |                                                            | Deaths (actual counts)                            |                                                     |                                                     |                                                     |
|                                                 | 2016                                                       | 2040 Forecast                                            | 2040 Better Scenario                                     | 2040 Worse Scenario                                        | 2016                                              | 2040 Forecast                                       | 2040 Better Scenario                                | 2040 Worse Scenario                                 |
| Cyclist road injuries                           | 17.56<br>(11.75 to<br>22.85)                               | 14.19<br>(7.72 to<br>24.39)                              | 13.12<br>(7.54 to<br>21.71)                              | 20.86<br>(11.12 to<br>36.59)                               | 0.54<br>(0.38 to<br>0.70)                         | 0.62<br>(0.36 to<br>0.99)                           | 0.59<br>(0.36 to<br>0.92)                           | 0.77<br>(0.44 to<br>1.26)                           |
| Motorcyclist road injuries                      | 167.43<br>(98.76 to<br>228.69)                             | 124.85<br>(57.97 to<br>259.19)                           | 112.75<br>(55.02 to<br>218.59)                           | 171.66<br>(78.35 to<br>355.03)                             | 3.44<br>(2.12 to<br>4.63)                         | 2.94<br>(1.49 to<br>5.71)                           | 2.68<br>(1.43 to<br>4.95)                           | 3.79<br>(1.84 to<br>7.48)                           |
| Motor vehicle road injuries                     | 295.62<br>(230.82 to<br>388.74)                            | 165.69<br>(81.22 to<br>312.35)                           | 151.43<br>(79.05 to<br>271.92)                           | 294.26<br>(143.65 to<br>553.31)                            | 7.05<br>(5.52 to<br>9.28)                         | 5.26<br>(3.01 to<br>8.72)                           | 4.96<br>(3.01 to<br>7.98)                           | 8.19<br>(4.53 to<br>13.98)                          |
| Other road injuries                             | 22.19<br>(12.45 to<br>34.65)                               | 11.85<br>(4.97 to<br>23.07)                              | 10.89<br>(4.80 to<br>21.05)                              | 19.89<br>(8.59 to<br>39.59)                                | 0.55<br>(0.27 to<br>0.81)                         | 0.39<br>(0.15 to<br>0.72)                           | 0.37<br>(0.14 to<br>0.65)                           | 0.57<br>(0.23 to<br>1.07)                           |
| Other transport injuries                        | 146.93<br>(112.39 to<br>191.38)                            | 103.14<br>(54.79 to<br>186.32)                           | 83.13<br>(46.24 to<br>142.90)                            | 126.15<br>(65.98 to<br>229.08)                             | 3.70<br>(2.93 to<br>4.64)                         | 3.12<br>(1.75 to<br>5.19)                           | 2.56<br>(1.51 to<br>4.14)                           | 3.70<br>(2.06 to<br>6.26)                           |
| <b>Unintentional injuries</b>                   | <b>1,382.02</b><br><b>(1,150.44 to</b><br><b>1,670.93)</b> | <b>1,234.79</b><br><b>(988.56 to</b><br><b>1,551.64)</b> | <b>1,199.17</b><br><b>(963.77 to</b><br><b>1,530.91)</b> | <b>1,278.57</b><br><b>(1,027.26 to</b><br><b>1,609.41)</b> | <b>73.31</b><br><b>(62.22 to</b><br><b>88.11)</b> | <b>105.41</b><br><b>(87.96 to</b><br><b>123.26)</b> | <b>106.92</b><br><b>(88.79 to</b><br><b>124.89)</b> | <b>162.55</b><br><b>(85.43 to</b><br><b>119.84)</b> |
| Falls                                           | 661.04<br>(542.79 to<br>826.78)                            | 748.47<br>(602.22 to<br>924.01)                          | 742.94<br>(587.49 to<br>922.09)                          | 753.49<br>(602.92 to<br>921.24)                            | 45.82<br>(38.18 to<br>55.15)                      | 76.01<br>(61.27 to<br>90.61)                        | 77.85<br>(63.00 to<br>92.37)                        | 73.04<br>(58.70 to<br>88.47)                        |
| Drowning                                        | 156.01<br>(129.70 to<br>189.49)                            | 84.85<br>(55.33 to<br>127.77)                            | 74.89<br>(50.10 to<br>108.86)                            | 94.84<br>(61.72 to<br>143.76)                              | 4.23<br>(3.50 to<br>5.14)                         | 3.00<br>(2.09 to<br>4.29)                           | 2.71<br>(1.96 to<br>3.81)                           | 3.23<br>(2.25 to<br>4.64)                           |
| Fire, heat, and hot substances                  | 51.20<br>(41.57 to<br>64.21)                               | 32.64<br>(23.15 to<br>47.31)                             | 28.73<br>(20.99 to<br>39.38)                             | 36.57<br>(25.48 to<br>53.87)                               | 2.39<br>(1.97 to<br>2.91)                         | 2.41<br>(1.74 to<br>3.28)                           | 2.23<br>(1.67 to<br>2.91)                           | 2.51<br>(1.78 to<br>3.48)                           |
| Poisonings                                      | 18.60<br>(13.62 to<br>37.50)                               | 7.12<br>(4.12 to<br>14.65)                               | 5.93<br>(3.58 to<br>12.25)                               | 8.62<br>(4.84 to<br>18.90)                                 | 0.55<br>(0.43 to<br>0.95)                         | 0.30<br>(0.21 to<br>0.49)                           | 0.26<br>(0.19 to<br>0.42)                           | 0.34<br>(0.23 to<br>0.59)                           |
| Exposure to mechanical forces                   | 167.95<br>(127.56 to<br>212.74)                            | 98.73<br>(69.45 to<br>137.44)                            | 91.16<br>(64.51 to<br>126.91)                            | 110.40<br>(77.29 to<br>156.44)                             | 5.25<br>(3.98 to<br>6.50)                         | 4.69<br>(3.56 to<br>5.84)                           | 4.54<br>(3.50 to<br>5.63)                           | 4.90<br>(3.80 to<br>6.15)                           |
| Unintentional firearm injuries                  | 32.24<br>(24.44 to<br>41.09)                               | 16.81<br>(11.76 to<br>24.01)                             | 15.78<br>(11.04 to<br>22.38)                             | 18.40<br>(12.74 to<br>26.21)                               | 0.94<br>(0.73 to<br>1.17)                         | 0.74<br>(0.57 to<br>0.95)                           | 0.73<br>(0.56 to<br>0.92)                           | 0.75<br>(0.58 to<br>0.95)                           |
| Unintentional suffocation                       | 10.35<br>(7.56 to<br>17.74)                                | 6.20<br>(3.79 to<br>11.59)                               | 5.70<br>(3.47 to<br>10.72)                               | 6.98<br>(4.31 to<br>13.15)                                 | 0.19<br>(0.14 to<br>0.32)                         | 0.13<br>(0.09 to<br>0.22)                           | 0.12<br>(0.09 to<br>0.21)                           | 0.14<br>(0.10 to<br>0.24)                           |
| Other exposure to mechanical forces             | 125.36<br>(91.45 to<br>162.00)                             | 75.72<br>(51.28 to<br>106.17)                            | 69.68<br>(47.85 to<br>97.88)                             | 85.02<br>(56.86 to<br>120.46)                              | 4.12<br>(2.99 to<br>5.15)                         | 3.82<br>(2.81 to<br>4.77)                           | 3.69<br>(2.70 to<br>4.63)                           | 4.01<br>(2.96 to<br>5.06)                           |
| Adverse effects of medical treatment            | 104.67<br>(80.56 to<br>152.47)                             | 112.33<br>(82.10 to<br>161.91)                           | 111.51<br>(81.36 to<br>162.19)                           | 113.14<br>(83.97 to<br>161.74)                             | 6.40<br>(4.93 to<br>9.27)                         | 9.45<br>(7.31 to<br>13.69)                          | 9.69<br>(7.50 to<br>13.94)                          | 9.06<br>(7.01 to<br>13.12)                          |
| Animal contact                                  | 12.03<br>(8.76 to<br>16.10)                                | 10.41<br>(6.91 to<br>15.50)                              | 9.69<br>(6.38 to<br>14.07)                               | 11.49<br>(7.58 to<br>16.91)                                | 0.42<br>(0.31 to<br>0.56)                         | 0.47<br>(0.34 to<br>0.65)                           | 0.46<br>(0.33 to<br>0.63)                           | 0.50<br>(0.35 to<br>0.69)                           |
| Venomous animal contact                         | 2.31<br>(1.70 to<br>3.13)                                  | 1.94<br>(1.24 to<br>2.94)                                | 1.85<br>(1.17 to<br>2.79)                                | 2.09<br>(1.36 to<br>3.17)                                  | 0.07<br>(0.04 to<br>0.09)                         | 0.07<br>(0.04 to<br>0.10)                           | 0.07<br>(0.04 to<br>0.10)                           | 0.07<br>(0.04 to<br>0.10)                           |
| Non-venomous animal contact                     | 9.72<br>(6.93 to<br>13.22)                                 | 8.46<br>(5.46 to<br>12.60)                               | 7.85<br>(5.08 to<br>11.36)                               | 9.40<br>(6.14 to<br>13.94)                                 | 0.35<br>(0.26 to<br>0.47)                         | 0.40<br>(0.28 to<br>0.56)                           | 0.39<br>(0.28 to<br>0.54)                           | 0.42<br>(0.29 to<br>0.59)                           |
| Foreign body                                    | 105.81<br>(86.37 to<br>137.17)                             | 93.98<br>(70.43 to<br>121.90)                            | 93.62<br>(69.65 to<br>122.21)                            | 94.45<br>(72.21 to<br>123.51)                              | 4.60<br>(3.36 to<br>5.66)                         | 6.30<br>(4.10 to<br>8.06)                           | 6.57<br>(4.23 to<br>8.48)                           | 5.91<br>(3.91 to<br>7.48)                           |
| Pulmonary aspiration and foreign body in airway | 101.50<br>(82.31 to<br>133.08)                             | 89.91<br>(66.78 to<br>116.43)                            | 89.45<br>(66.05 to<br>116.64)                            | 90.50<br>(69.00 to<br>118.83)                              | 4.47<br>(3.24 to<br>5.52)                         | 6.10<br>(3.95 to<br>7.83)                           | 6.36<br>(4.08 to<br>8.25)                           | 5.73<br>(3.76 to<br>7.26)                           |

|                                             |                                                          |                                                        |                                                        |                                                        |                                                   |                                                   |                                                   |                                                   |
|---------------------------------------------|----------------------------------------------------------|--------------------------------------------------------|--------------------------------------------------------|--------------------------------------------------------|---------------------------------------------------|---------------------------------------------------|---------------------------------------------------|---------------------------------------------------|
|                                             | 4.31<br>(2.88 to<br>6.48)                                | 4.07<br>(2.47 to<br>6.58)                              | 4.17<br>(2.53 to<br>6.70)                              | 3.95<br>(2.41 to<br>6.28)                              | 0.14<br>(0.08 to<br>0.20)                         | 0.20<br>(0.11 to<br>0.27)                         | 0.21<br>(0.12 to<br>0.30)                         | 0.18<br>(0.10 to<br>0.25)                         |
| Foreign body in other body part             |                                                          |                                                        |                                                        |                                                        |                                                   |                                                   |                                                   |                                                   |
|                                             | 24.92<br>(17.39 to<br>47.08)                             | 22.59<br>(14.90 to<br>42.32)                           | 21.09<br>(13.98 to<br>39.28)                           | 24.82<br>(16.55 to<br>46.41)                           | 1.46<br>(1.05 to<br>2.63)                         | 1.90<br>(1.29 to<br>3.45)                         | 1.84<br>(1.25 to<br>3.30)                         | 1.96<br>(1.34 to<br>3.51)                         |
| Environmental heat and cold exposure        |                                                          |                                                        |                                                        |                                                        |                                                   |                                                   |                                                   |                                                   |
|                                             | 79.80<br>(62.44 to<br>101.31)                            | 23.68<br>(15.53 to<br>35.24)                           | 19.62<br>(12.87 to<br>29.23)                           | 30.76<br>(20.05 to<br>46.55)                           | 2.19<br>(1.75 to<br>2.73)                         | 0.89<br>(0.65 to<br>1.19)                         | 0.76<br>(0.56 to<br>1.02)                         | 1.09<br>(0.79 to<br>1.50)                         |
| Other unintentional injuries                |                                                          |                                                        |                                                        |                                                        |                                                   |                                                   |                                                   |                                                   |
| <b>Self-harm and interpersonal violence</b> | <b>1,085.74</b><br><b>(837.26 to</b><br><b>1,512.17)</b> | <b>776.81</b><br><b>(446.97 to</b><br><b>1,312.27)</b> | <b>652.75</b><br><b>(397.90 to</b><br><b>1,063.02)</b> | <b>875.68</b><br><b>(485.71 to</b><br><b>1,491.60)</b> | <b>29.29</b><br><b>(23.04 to</b><br><b>38.51)</b> | <b>25.84</b><br><b>(15.65 to</b><br><b>40.36)</b> | <b>22.22</b><br><b>(14.11 to</b><br><b>33.55)</b> | <b>28.07</b><br><b>(16.89 to</b><br><b>44.63)</b> |

| Malta                                                                               |                                                |                                                |                                                |                                                |                                                |                                                |                                                |                                                |
|-------------------------------------------------------------------------------------|------------------------------------------------|------------------------------------------------|------------------------------------------------|------------------------------------------------|------------------------------------------------|------------------------------------------------|------------------------------------------------|------------------------------------------------|
| Cause                                                                               | YLLs (actual counts)                           |                                                |                                                |                                                | Deaths (actual counts)                         |                                                |                                                |                                                |
|                                                                                     | 2016                                           | 2040 Forecast                                  | 2040 Better Scenario                           | 2040 Worse Scenario                            | 2016                                           | 2040 Forecast                                  | 2040 Better Scenario                           | 2040 Worse Scenario                            |
| Self-harm                                                                           | 868.49<br>(656.47 to<br>1,276.69)              | 676.95<br>(367.75 to<br>1,152.84)              | 564.02<br>(326.25 to<br>920.96)                | 762.01<br>(403.34 to<br>1,322.50)              | 24.34<br>(19.05 to<br>32.82)                   | 23.19<br>(13.47 to<br>36.70)                   | 19.83<br>(12.34 to<br>30.21)                   | 25.12<br>(14.48 to<br>40.05)                   |
| Self-harm by firearm                                                                | 85.51<br>(52.84 to<br>149.11)                  | 52.48<br>(24.16 to<br>106.42)                  | 42.29<br>(20.73 to<br>83.85)                   | 61.30<br>(27.19 to<br>126.32)                  | 2.57<br>(1.63 to<br>4.00)                      | 2.05<br>(0.97 to<br>3.71)                      | 1.71<br>(0.85 to<br>2.91)                      | 2.28<br>(1.06 to<br>4.15)                      |
| Self-harm by other specified means                                                  | 782.99<br>(589.85 to<br>1,155.62)              | 624.47<br>(340.32 to<br>1,055.27)              | 521.72<br>(304.47 to<br>849.03)                | 700.70<br>(371.16 to<br>1,229.89)              | 21.77<br>(16.84 to<br>29.37)                   | 21.15<br>(12.27 to<br>33.41)                   | 18.13<br>(11.30 to<br>27.57)                   | 22.84<br>(13.30 to<br>36.54)                   |
| Interpersonal violence                                                              | 217.25<br>(154.48 to<br>313.32)                | 99.86<br>(60.11 to<br>169.30)                  | 88.73<br>(53.65 to<br>149.20)                  | 113.68<br>(68.49 to<br>191.49)                 | 4.95<br>(3.48 to<br>6.99)                      | 2.65<br>(1.70 to<br>4.28)                      | 2.39<br>(1.54 to<br>3.79)                      | 2.94<br>(1.87 to<br>4.78)                      |
| Physical violence by firearm                                                        | 85.19<br>(42.52 to<br>136.41)                  | 31.12<br>(14.42 to<br>54.97)                   | 27.71<br>(13.07 to<br>48.95)                   | 36.67<br>(16.91 to<br>65.21)                   | 1.84<br>(0.93 to<br>2.90)                      | 1.84<br>(0.36 to<br>1.25)                      | 0.73<br>(0.33 to<br>1.12)                      | 0.85<br>(0.41 to<br>1.49)                      |
| Physical violence by sharp object                                                   | 56.53<br>(29.76 to<br>79.11)                   | 28.03<br>(13.36 to<br>46.80)                   | 25.90<br>(12.54 to<br>43.73)                   | 31.37<br>(14.73 to<br>52.51)                   | 1.35<br>(0.75 to<br>1.88)                      | 0.78<br>(0.44 to<br>1.21)                      | 0.73<br>(0.42 to<br>1.13)                      | 0.85<br>(0.47 to<br>1.34)                      |
| Physical violence by other means                                                    | 75.53<br>(53.21 to<br>132.91)                  | 40.72<br>(22.84 to<br>77.69)                   | 35.12<br>(20.45 to<br>66.75)                   | 45.64<br>(25.15 to<br>87.65)                   | 1.75<br>(1.21 to<br>2.99)                      | 1.14<br>(0.67 to<br>2.06)                      | 1.00<br>(0.61 to<br>1.80)                      | 1.24<br>(0.72 to<br>2.24)                      |
| <b>Forces of nature, conflict and terrorism, and executions and police conflict</b> | <b>5.30</b><br><b>(2.96 to</b><br><b>7.65)</b> | <b>0.73</b><br><b>(0.00 to</b><br><b>6.74)</b> | <b>0.73</b><br><b>(0.00 to</b><br><b>6.77)</b> | <b>0.72</b><br><b>(0.00 to</b><br><b>6.65)</b> | <b>0.11</b><br><b>(0.07 to</b><br><b>0.15)</b> | <b>0.02</b><br><b>(0.00 to</b><br><b>0.38)</b> | <b>0.03</b><br><b>(0.00 to</b><br><b>0.38)</b> | <b>0.02</b><br><b>(0.00 to</b><br><b>0.36)</b> |
| Exposure to forces of nature                                                        | 0.00<br>(0.00 to<br>0.00)                      | 0.06<br>(0.00 to<br>0.60)                      | 0.06<br>(0.00 to<br>0.67)                      | 0.06<br>(0.00 to<br>0.65)                      | 0.00<br>(0.00 to<br>0.00)                      | 0.00<br>(0.00 to<br>0.00)                      | 0.00<br>(0.00 to<br>0.00)                      | 0.00<br>(0.00 to<br>0.00)                      |
| Conflict and terrorism                                                              | 0.00<br>(0.00 to<br>0.00)                      | 0.66<br>(0.00 to<br>6.74)                      | 0.67<br>(0.00 to<br>6.77)                      | 0.65<br>(0.00 to<br>6.65)                      | 0.00<br>(0.00 to<br>0.00)                      | 0.02<br>(0.00 to<br>0.19)                      | 0.02<br>(0.00 to<br>0.19)                      | 0.02<br>(0.00 to<br>0.18)                      |
| Executions and police conflict                                                      | 3.30<br>(2.96 to<br>7.65)                      | 0.00<br>(0.00 to<br>0.00)                      | 0.00<br>(0.00 to<br>0.00)                      | 0.00<br>(0.00 to<br>0.00)                      | 0.11<br>(0.07 to<br>0.15)                      | 0.00<br>(0.00 to<br>0.00)                      | 0.00<br>(0.00 to<br>0.00)                      | 0.00<br>(0.00 to<br>0.00)                      |

| Netherlands                                                       |                                                |                                                |                                                |                                                |                                          |                                          |                                          |                                          |
|-------------------------------------------------------------------|------------------------------------------------|------------------------------------------------|------------------------------------------------|------------------------------------------------|------------------------------------------|------------------------------------------|------------------------------------------|------------------------------------------|
| Cause                                                             | YLLs (actual counts)                           |                                                |                                                |                                                | Deaths (actual counts)                   |                                          |                                          |                                          |
|                                                                   | 2016                                           | 2040 Forecast                                  | 2040 Better Scenario                           | 2040 Worse Scenario                            | 2016                                     | 2040 Forecast                            | 2040 Better Scenario                     | 2040 Worse Scenario                      |
| All causes                                                        | 2,117,465.01<br>(1,971,666.87 to 2,296,533.06) | 2,414,098.43<br>(2,091,094.50 to 2,807,786.09) | 2,146,850.60<br>(1,875,661.32 to 2,492,680.88) | 2,938,337.49<br>(2,529,000.13 to 3,417,141.97) | 147,924.30<br>(138,906.83 to 158,691.24) | 221,615.18<br>(195,565.26 to 252,807.31) | 205,141.16<br>(181,152.72 to 235,940.22) | 253,148.51<br>(222,545.48 to 289,252.48) |
| Communicable, maternal, neonatal, and nutritional diseases        | 116,505.00<br>(105,721.98 to 128,885.41)       | 141,141.71<br>(116,366.70 to 171,383.80)       | 132,236.20<br>(110,971.95 to 156,880.58)       | 161,082.82<br>(128,319.58 to 206,711.56)       | 8,880.16<br>(7,961.38 to 9,991.17)       | 15,272.38<br>(12,018.04 to 19,372.45)    | 15,063.15<br>(12,118.58 to 18,567.84)    | 16,383.21<br>(12,268.33 to 21,788.20)    |
| HIV/AIDS and tuberculosis                                         | 3,175.24<br>(3,014.64 to 3,347.47)             | 1,477.88<br>(927.41 to 2,202.23)               | 1,007.43<br>(656.09 to 1,492.79)               | 2,735.09<br>(1,703.02 to 3,846.72)             | 136.53<br>(126.76 to 146.93)             | 103.59<br>(63.86 to 168.53)              | 81.09<br>(51.12 to 127.65)               | 150.37<br>(91.53 to 240.83)              |
| Tuberculosis                                                      | 1,175.69<br>(1,049.39 to 1,307.81)             | 962.27<br>(573.59 to 1,590.82)                 | 762.64<br>(466.14 to 1,240.81)                 | 1,321.73<br>(731.34 to 2,321.98)               | 86.47<br>(76.53 to 96.95)                | 94.19<br>(54.79 to 158.89)               | 76.83<br>(46.97 to 121.88)               | 123.79<br>(67.77 to 219.48)              |
| HIV/AIDS                                                          | 1,999.55<br>(1,900.24 to 2,104.72)             | 515.60<br>(184.70 to 849.35)                   | 244.79<br>(101.73 to 463.05)                   | 1,413.35<br>(662.55 to 2,119.65)               | 50.06<br>(47.60 to 52.66)                | 9.40<br>(2.96 to 16.27)                  | 4.26<br>(1.56 to 8.68)                   | 26.59<br>(11.54 to 40.31)                |
| Diarrhea, lower respiratory, and other common infectious diseases | 80,047.80<br>(71,410.28 to 89,527.82)          | 114,681.25<br>(91,402.95 to 143,596.53)        | 108,668.85<br>(88,471.13 to 133,924.19)        | 132,061.52<br>(100,321.58 to 176,732.99)       | 8,065.25<br>(7,154.67 to 9,152.11)       | 14,301.02<br>(11,037.74 to 18,318.70)    | 14,099.81<br>(11,209.21 to 17,648.33)    | 15,411.84<br>(11,407.60 to 20,790.80)    |
| Diarrheal diseases                                                | 5,906.85<br>(5,311.87 to 6,636.71)             | 15,514.22<br>(10,683.88 to 23,206.55)          | 17,317.51<br>(12,491.71 to 25,106.57)          | 12,915.17<br>(8,502.25 to 20,325.29)           | 589.57<br>(519.66 to 664.34)             | 1,984.88<br>(1,321.19 to 3,038.92)       | 2,264.26<br>(1,569.31 to 3,312.31)       | 1,596.14<br>(1,001.22 to 2,591.92)       |
| Intestinal infectious diseases                                    | 27.43<br>(12.03 to 54.18)                      | 22.09<br>(9.76 to 41.86)                       | 22.22<br>(9.75 to 42.05)                       | 21.89<br>(9.58 to 41.95)                       | 0.98<br>(0.46 to 1.81)                   | 1.06<br>(0.50 to 1.94)                   | 1.09<br>(0.52 to 2.01)                   | 1.01<br>(0.48 to 1.85)                   |
| Typhoid fever                                                     | 12.19<br>(3.94 to 29.11)                       | 10.46<br>(3.60 to 23.01)                       | 10.93<br>(3.81 to 23.67)                       | 10.02<br>(3.31 to 22.19)                       | 0.32<br>(0.11 to 0.76)                   | 0.32<br>(0.10 to 0.71)                   | 0.34<br>(0.11 to 0.76)                   | 0.30<br>(0.09 to 0.66)                   |
| Paratyphoid fever                                                 | 8.20<br>(2.41 to 20.90)                        | 5.70<br>(1.78 to 14.22)                        | 5.36<br>(1.66 to 13.68)                        | 6.06<br>(1.86 to 15.35)                        | 0.21<br>(0.06 to 0.54)                   | 0.17<br>(0.05 to 0.42)                   | 0.16<br>(0.05 to 0.40)                   | 0.18<br>(0.05 to 0.44)                   |
| Other intestinal infectious diseases                              | 7.04<br>(2.76 to 14.14)                        | 5.93<br>(2.21 to 12.34)                        | 5.92<br>(2.19 to 12.68)                        | 5.82<br>(2.18 to 12.51)                        | 0.44<br>(0.16 to 0.96)                   | 0.57<br>(0.19 to 1.31)                   | 0.59<br>(0.19 to 1.36)                   | 0.53<br>(0.18 to 1.22)                   |
| Lower respiratory infections                                      | 69,951.36<br>(61,848.46 to 78,863.72)          | 95,544.61<br>(71,178.09 to 125,754.44)         | 87,911.08<br>(66,684.37 to 112,685.39)         | 115,455.37<br>(83,598.80 to 159,902.76)        | 7,298.31<br>(6,410.35 to 8,370.90)       | 12,101.87<br>(8,931.53 to 15,982.39)     | 11,619.42<br>(8,721.58 to 15,015.34)     | 13,610.97<br>(9,842.95 to 18,799.22)     |
| Upper respiratory infections                                      | 21.33<br>(11.09 to 35.98)                      | 19.78<br>(8.87 to 37.86)                       | 18.17<br>(8.15 to 34.45)                       | 21.23<br>(9.34 to 41.15)                       | 1.10<br>(0.52 to 1.89)                   | 1.50<br>(0.54 to 3.29)                   | 1.42<br>(0.51 to 3.04)                   | 1.53<br>(0.57 to 3.26)                   |
| Otitis media                                                      | 18.43<br>(14.16 to 23.98)                      | 3.99<br>(1.88 to 8.61)                         | 4.12<br>(1.93 to 8.96)                         | 3.81<br>(1.81 to 8.21)                         | 0.84<br>(0.65 to 1.09)                   | 0.27<br>(0.11 to 0.62)                   | 0.29<br>(0.12 to 0.66)                   | 0.25<br>(0.10 to 0.57)                   |
| Meningitis                                                        | 2,630.37<br>(2,293.45 to 3,038.61)             | 1,633.53<br>(1,279.80 to 2,042.04)             | 1,485.21<br>(1,184.39 to 1,797.50)             | 1,698.63<br>(1,282.21 to 2,157.31)             | 87.55<br>(75.85 to 98.08)                | 71.31<br>(56.83 to 84.08)                | 69.97<br>(55.99 to 82.60)                | 69.99<br>(55.81 to 83.23)                |
| Pneumococcal meningitis                                           | 755.73<br>(655.49 to 864.16)                   | 499.99<br>(406.84 to 599.59)                   | 499.57<br>(407.27 to 595.70)                   | 489.11<br>(399.52 to 583.52)                   | 29.75<br>(25.22 to 33.61)                | 28.45<br>(22.21 to 34.37)                | 29.29<br>(22.80 to 35.59)                | 26.66<br>(20.91 to 32.13)                |
| H influenzae type B meningitis                                    | 214.86<br>(179.91 to 264.21)                   | 447.38<br>(208.94 to 806.58)                   | 344.92<br>(188.45 to 565.66)                   | 480.28<br>(211.53 to 896.62)                   | 6.30<br>(5.16 to 7.37)                   | 9.16<br>(6.04 to 13.65)                  | 8.20<br>(5.78 to 11.22)                  | 9.21<br>(5.78 to 14.34)                  |
| Meningococcal meningitis                                          | 1,004.14<br>(857.22 to 1,174.17)               | 378.33<br>(290.83 to 485.04)                   | 353.01<br>(274.16 to 448.76)                   | 403.62<br>(309.49 to 526.36)                   | 26.42<br>(23.07 to 29.97)                | 15.76<br>(12.59 to 19.19)                | 15.21<br>(12.13 to 18.55)                | 15.97<br>(12.63 to 19.49)                |
| Other meningitis                                                  | 655.64<br>(570.12 to 745.67)                   | 307.84<br>(247.86 to 377.03)                   | 287.69<br>(229.80 to 353.06)                   | 325.63<br>(257.52 to 402.62)                   | 25.08<br>(21.18 to 28.46)                | 17.94<br>(13.57 to 22.05)                | 17.27<br>(13.02 to 21.24)                | 18.15<br>(13.41 to 22.42)                |
| Encephalitis                                                      | 1,013.68<br>(730.67 to 1,748.28)               | 1,377.73<br>(1,016.54 to 2,279.48)             | 1,383.11<br>(1,020.75 to 2,267.14)             | 1,361.90<br>(1,001.32 to 2,251.46)             | 37.39<br>(28.55 to 60.08)                | 72.83<br>(55.74 to 112.37)               | 75.01<br>(57.40 to 115.29)               | 69.19<br>(53.02 to 107.02)               |

|                |                             |                              |                              |                               |                           |                           |                           |                            |
|----------------|-----------------------------|------------------------------|------------------------------|-------------------------------|---------------------------|---------------------------|---------------------------|----------------------------|
| Diphtheria     | 3.51<br>(2.21 to<br>5.13)   | 0.79<br>(0.46 to<br>1.25)    | 0.60<br>(0.36 to<br>0.91)    | 0.84<br>(0.49 to<br>1.39)     | 0.07<br>(0.04 to<br>0.11) | 0.02<br>(0.01 to<br>0.02) | 0.01<br>(0.01 to<br>0.02) | 0.02<br>(0.01 to<br>0.03)  |
| Whooping cough | 21.51<br>(4.31 to<br>43.03) | 12.19<br>(1.54 to<br>36.06)  | 1.86<br>(0.39 to<br>4.31)    | 15.24<br>(1.83 to<br>45.83)   | 0.26<br>(0.06 to<br>0.51) | 0.15<br>(0.02 to<br>0.42) | 0.02<br>(0.01 to<br>0.05) | 0.18<br>(0.02 to<br>0.54)  |
| Tetanus        | 9.56<br>(6.09 to<br>11.86)  | 1.10<br>(0.67 to<br>1.60)    | 0.87<br>(0.48 to<br>1.18)    | 1.16<br>(0.71 to<br>1.77)     | 0.31<br>(0.19 to<br>0.39) | 0.04<br>(0.02 to<br>0.05) | 0.04<br>(0.02 to<br>0.05) | 0.04<br>(0.02 to<br>0.05)  |
| Measles        | 9.94<br>(7.08 to<br>14.10)  | 89.52<br>(0.55 to<br>610.78) | 61.86<br>(0.49 to<br>367.64) | 121.99<br>(0.63 to<br>832.42) | 0.14<br>(0.11 to<br>0.19) | 1.26<br>(0.01 to<br>8.02) | 0.93<br>(0.01 to<br>5.45) | 1.67<br>(0.01 to<br>10.56) |

| Netherlands                                           |                                     |                                     |                                     |                                     |                                 |                                |                                |                                |
|-------------------------------------------------------|-------------------------------------|-------------------------------------|-------------------------------------|-------------------------------------|---------------------------------|--------------------------------|--------------------------------|--------------------------------|
| Cause                                                 | YLLs (actual counts)                |                                     |                                     |                                     | Deaths (actual counts)          |                                |                                |                                |
|                                                       | 2016                                | 2040 Forecast                       | 2040 Better Scenario                | 2040 Worse Scenario                 | 2016                            | 2040 Forecast                  | 2040 Better Scenario           | 2040 Worse Scenario            |
| Varicella and herpes zoster                           | 433.85<br>(140.96 to 610.58)        | 461.71<br>(132.51 to 749.71)        | 462.25<br>(130.61 to 749.15)        | 444.28<br>(127.42 to 717.35)        | 48.72<br>(11.43 to 76.31)       | 65.84<br>(15.51 to 115.13)     | 67.37<br>(16.01 to 116.79)     | 60.85<br>(14.19 to 107.76)     |
| <b>Neglected tropical diseases and malaria</b>        | <b>134.00</b><br>(87.70 to 159.52)  | <b>142.50</b><br>(79.72 to 171.32)  | <b>147.17</b><br>(80.47 to 177.23)  | <b>137.46</b><br>(79.23 to 164.60)  | <b>4.48</b><br>(2.09 to 5.52)   | <b>7.16</b><br>(2.27 to 9.47)  | <b>7.82</b><br>(2.34 to 10.34) | <b>6.44</b><br>(2.17 to 8.44)  |
| Malaria                                               | 0.00<br>(0.00 to 0.00)              | 0.00<br>(0.00 to 0.00)              | 0.00<br>(0.00 to 0.00)              | 0.00<br>(0.00 to 0.00)              | 0.00<br>(0.00 to 0.00)          | 0.00<br>(0.00 to 0.00)         | 0.00<br>(0.00 to 0.00)         | 0.00<br>(0.00 to 0.00)         |
| Chagas disease                                        | 0.00<br>(0.00 to 0.00)              | 0.00<br>(0.00 to 0.00)              | 0.00<br>(0.00 to 0.00)              | 0.00<br>(0.00 to 0.00)              | 0.00<br>(0.00 to 0.00)          | 0.00<br>(0.00 to 0.00)         | 0.00<br>(0.00 to 0.00)         | 0.00<br>(0.00 to 0.00)         |
| Leishmaniasis                                         | 0.00<br>(0.00 to 0.00)              | 0.00<br>(0.00 to 0.00)              | 0.00<br>(0.00 to 0.00)              | 0.00<br>(0.00 to 0.00)              | 0.00<br>(0.00 to 0.00)          | 0.00<br>(0.00 to 0.00)         | 0.00<br>(0.00 to 0.00)         | 0.00<br>(0.00 to 0.00)         |
| African trypanosomiasis                               | 0.00<br>(0.00 to 0.00)              | 0.00<br>(0.00 to 0.00)              | 0.00<br>(0.00 to 0.00)              | 0.00<br>(0.00 to 0.00)              | 0.00<br>(0.00 to 0.00)          | 0.00<br>(0.00 to 0.00)         | 0.00<br>(0.00 to 0.00)         | 0.00<br>(0.00 to 0.00)         |
| Schistosomiasis                                       | 0.00<br>(0.00 to 0.00)              | 0.00<br>(0.00 to 0.00)              | 0.00<br>(0.00 to 0.00)              | 0.00<br>(0.00 to 0.00)              | 0.00<br>(0.00 to 0.00)          | 0.00<br>(0.00 to 0.00)         | 0.00<br>(0.00 to 0.00)         | 0.00<br>(0.00 to 0.00)         |
| Cysticercosis                                         | 7.03<br>(6.29 to 7.90)              | 2.38<br>(2.08 to 2.71)              | 2.38<br>(2.08 to 2.73)              | 2.35<br>(2.06 to 2.68)              | 0.26<br>(0.24 to 0.29)          | 0.11<br>(0.10 to 0.13)         | 0.11<br>(0.10 to 0.13)         | 0.11<br>(0.09 to 0.12)         |
| Cystic echinococcosis                                 | 0.00<br>(0.00 to 0.00)              | 0.00<br>(0.00 to 0.00)              | 0.00<br>(0.00 to 0.00)              | 0.00<br>(0.00 to 0.00)              | 0.00<br>(0.00 to 0.00)          | 0.00<br>(0.00 to 0.00)         | 0.00<br>(0.00 to 0.00)         | 0.00<br>(0.00 to 0.00)         |
| Dengue                                                | 0.00<br>(0.00 to 0.00)              | 0.00<br>(0.00 to 0.00)              | 0.00<br>(0.00 to 0.00)              | 0.00<br>(0.00 to 0.00)              | 0.00<br>(0.00 to 0.00)          | 0.00<br>(0.00 to 0.00)         | 0.00<br>(0.00 to 0.00)         | 0.00<br>(0.00 to 0.00)         |
| Yellow fever                                          | 0.00<br>(0.00 to 0.00)              | 0.00<br>(0.00 to 0.00)              | 0.00<br>(0.00 to 0.00)              | 0.00<br>(0.00 to 0.00)              | 0.00<br>(0.00 to 0.00)          | 0.00<br>(0.00 to 0.00)         | 0.00<br>(0.00 to 0.00)         | 0.00<br>(0.00 to 0.00)         |
| Rabies                                                | 1.51<br>(1.23 to 1.86)              | 1.49<br>(1.22 to 1.85)              | 1.46<br>(1.20 to 1.81)              | 1.51<br>(1.22 to 1.87)              | 0.05<br>(0.04 to 0.06)          | 0.09<br>(0.06 to 0.12)         | 0.10<br>(0.07 to 0.13)         | 0.08<br>(0.06 to 0.11)         |
| Intestinal nematode infections                        | 0.00<br>(0.00 to 0.00)              | 0.00<br>(0.00 to 0.00)              | 0.00<br>(0.00 to 0.00)              | 0.00<br>(0.00 to 0.00)              | 0.00<br>(0.00 to 0.00)          | 0.00<br>(0.00 to 0.00)         | 0.00<br>(0.00 to 0.00)         | 0.00<br>(0.00 to 0.00)         |
| Other neglected tropical diseases                     | 125.46<br>(79.08 to 150.65)         | 138.64<br>(75.75 to 167.09)         | 143.32<br>(76.43 to 173.22)         | 133.60<br>(75.29 to 160.62)         | 4.17<br>(1.77 to 5.20)          | 6.96<br>(2.04 to 9.26)         | 7.61<br>(1.95 to 10.13)        | 6.25<br>(1.95 to 8.23)         |
| <b>Maternal disorders</b>                             | <b>558.40</b><br>(452.47 to 678.08) | <b>483.99</b><br>(332.80 to 680.88) | <b>458.93</b><br>(315.74 to 649.46) | <b>510.70</b><br>(350.09 to 724.23) | <b>10.72</b><br>(8.70 to 12.96) | <b>9.29</b><br>(6.46 to 12.88) | <b>8.81</b><br>(6.19 to 12.31) | <b>9.80</b><br>(6.79 to 13.79) |
| Maternal hemorrhage                                   | 57.50<br>(39.97 to 81.11)           | 47.95<br>(28.19 to 75.56)           | 45.77<br>(26.76 to 70.52)           | 50.26<br>(29.14 to 79.87)           | 1.10<br>(0.77 to 1.55)          | 0.93<br>(0.54 to 1.41)         | 0.88<br>(0.52 to 1.35)         | 0.97<br>(0.57 to 1.52)         |
| Maternal sepsis and other maternal infections         | 42.66<br>(28.81 to 60.11)           | 30.73<br>(17.57 to 51.06)           | 29.21<br>(16.83 to 48.50)           | 32.35<br>(18.23 to 55.01)           | 0.83<br>(0.56 to 1.17)          | 0.60<br>(0.34 to 0.98)         | 0.57<br>(0.32 to 0.95)         | 0.63<br>(0.36 to 1.05)         |
| Maternal hypertensive disorders                       | 94.17<br>(67.03 to 128.72)          | 91.12<br>(51.92 to 147.32)          | 86.55<br>(48.86 to 140.32)          | 96.01<br>(53.94 to 156.25)          | 1.74<br>(1.24 to 2.35)          | 1.70<br>(0.97 to 2.74)         | 1.61<br>(0.92 to 2.62)         | 1.79<br>(1.01 to 2.87)         |
| Maternal obstructed labor and uterine rupture         | 13.58<br>(7.98 to 21.44)            | 11.47<br>(5.92 to 19.40)            | 10.82<br>(5.59 to 18.14)            | 12.16<br>(6.25 to 20.65)            | 0.28<br>(0.17 to 0.43)          | 0.23<br>(0.12 to 0.39)         | 0.22<br>(0.12 to 0.37)         | 0.25<br>(0.13 to 0.42)         |
| Maternal abortion, miscarriage, and ectopic pregnancy | 49.19<br>(35.50 to 67.80)           | 42.80<br>(23.99 to 74.02)           | 40.31<br>(22.43 to 68.74)           | 45.18<br>(24.69 to 78.74)           | 1.03<br>(0.74 to 1.41)          | 0.90<br>(0.50 to 1.53)         | 0.84<br>(0.47 to 1.44)         | 0.94<br>(0.52 to 1.63)         |



|                                        |                                 |                                |                                |                                |                           |                           |                           |                           |
|----------------------------------------|---------------------------------|--------------------------------|--------------------------------|--------------------------------|---------------------------|---------------------------|---------------------------|---------------------------|
|                                        | 102.13<br>(72.99 to<br>140.48)  | 114.64<br>(63.38 to<br>185.17) | 107.88<br>(60.23 to<br>174.73) | 122.02<br>(68.03 to<br>195.46) | 1.87<br>(1.33 to<br>2.57) | 2.12<br>(1.18 to<br>3.39) | 1.99<br>(1.11 to<br>3.19) | 2.25<br>(1.25 to<br>3.63) |
| Indirect maternal deaths               |                                 |                                |                                |                                |                           |                           |                           |                           |
|                                        | 17.65<br>(11.73 to<br>26.11)    | 14.93<br>(8.23 to<br>26.32)    | 14.12<br>(7.71 to<br>24.84)    | 15.82<br>(8.68 to<br>27.93)    | 0.35<br>(0.24 to<br>0.51) | 0.29<br>(0.17 to<br>0.51) | 0.28<br>(0.16 to<br>0.49) | 0.31<br>(0.17 to<br>0.54) |
| Late maternal deaths                   |                                 |                                |                                |                                |                           |                           |                           |                           |
|                                        | 0.13<br>(0.04 to<br>0.28)       | 0.62<br>(0.14 to<br>1.59)      | 0.53<br>(0.09 to<br>1.40)      | 0.74<br>(0.18 to<br>1.81)      | 0.00<br>(0.00 to<br>0.01) | 0.01<br>(0.00 to<br>0.03) | 0.01<br>(0.00 to<br>0.03) | 0.01<br>(0.00 to<br>0.04) |
| Maternal deaths aggravated by HIV/AIDS |                                 |                                |                                |                                |                           |                           |                           |                           |
|                                        | 181.38<br>(134.77 to<br>235.66) | 129.72<br>(76.89 to<br>203.89) | 123.74<br>(73.65 to<br>194.67) | 136.18<br>(79.62 to<br>214.55) | 3.51<br>(2.62 to<br>4.56) | 2.51<br>(1.49 to<br>3.91) | 2.39<br>(1.44 to<br>3.73) | 2.63<br>(1.57 to<br>4.16) |
| Other maternal disorders               |                                 |                                |                                |                                |                           |                           |                           |                           |

| Netherlands                                                             |                                              |                                              |                                             |                                              |                                     |                                     |                                     |                                     |
|-------------------------------------------------------------------------|----------------------------------------------|----------------------------------------------|---------------------------------------------|----------------------------------------------|-------------------------------------|-------------------------------------|-------------------------------------|-------------------------------------|
| Cause                                                                   | YLLs (actual counts)                         |                                              |                                             |                                              | Deaths (actual counts)              |                                     |                                     |                                     |
|                                                                         | 2016                                         | 2040 Forecast                                | 2040 Better Scenario                        | 2040 Worse Scenario                          | 2016                                | 2040 Forecast                       | 2040 Better Scenario                | 2040 Worse Scenario                 |
| <b>Neonatal disorders</b>                                               | <b>27,165.80</b><br>(21,402.29 to 34,462.69) | <b>17,164.09</b><br>(11,659.20 to 23,967.00) | <b>14,538.47</b><br>(9,929.06 to 20,287.99) | <b>18,799.94</b><br>(12,713.86 to 26,736.72) | <b>313.95</b><br>(247.32 to 398.26) | <b>198.39</b><br>(134.78 to 276.99) | <b>168.05</b><br>(114.76 to 234.49) | <b>217.29</b><br>(146.94 to 308.96) |
| Neonatal preterm birth                                                  | 11,502.01<br>(8,785.49 to 14,591.71)         | 5,878.42<br>(3,899.48 to 8,151.97)           | 4,319.00<br>(2,871.37 to 5,965.22)          | 6,727.95<br>(4,449.53 to 9,333.37)           | 132.93<br>(101.52 to 168.64)        | 67.94<br>(45.08 to 94.22)           | 49.92<br>(33.19 to 68.93)           | 77.76<br>(51.43 to 107.89)          |
| Neonatal encephalopathy due to birth asphyxia and trauma                | 6,362.08<br>(4,752.35 to 8,274.18)           | 3,243.40<br>(1,974.10 to 4,917.00)           | 2,833.62<br>(1,749.38 to 4,265.43)          | 3,586.52<br>(2,148.34 to 5,451.71)           | 73.51<br>(54.91 to 95.59)           | 37.48<br>(22.82 to 56.82)           | 32.75<br>(20.22 to 49.29)           | 41.45<br>(24.84 to 63.01)           |
| Neonatal sepsis and other neonatal infections                           | 3,250.87<br>(2,110.08 to 4,675.06)           | 2,627.10<br>(1,429.72 to 4,252.18)           | 2,353.81<br>(1,299.28 to 3,818.44)          | 2,847.62<br>(1,533.75 to 4,640.41)           | 37.57<br>(24.38 to 54.02)           | 30.36<br>(16.53 to 49.14)           | 27.20<br>(15.02 to 44.12)           | 32.91<br>(17.73 to 53.62)           |
| Hemolytic disease and other neonatal jaundice                           | 71.42<br>(42.79 to 123.66)                   | 42.05<br>(21.01 to 83.37)                    | 37.48<br>(18.98 to 73.90)                   | 45.80<br>(22.70 to 91.52)                    | 0.83<br>(0.50 to 1.43)              | 0.49<br>(0.24 to 0.97)              | 0.43<br>(0.22 to 0.86)              | 0.53<br>(0.26 to 1.06)              |
| Other neonatal disorders                                                | 5,979.41<br>(4,351.89 to 7,920.67)           | 5,373.12<br>(3,108.68 to 8,439.31)           | 4,994.55<br>(2,904.18 to 7,724.04)          | 5,592.05<br>(3,205.92 to 8,827.06)           | 69.11<br>(50.31 to 91.56)           | 62.11<br>(35.95 to 97.55)           | 57.74<br>(33.59 to 89.28)           | 64.64<br>(37.08 to 102.01)          |
| <b>Nutritional deficiencies</b>                                         | <b>1,584.43</b><br>(1,435.99 to 1,757.26)    | <b>2,640.71</b><br>(2,151.49 to 3,181.41)    | <b>2,820.25</b><br>(2,304.41 to 3,403.48)   | <b>2,383.99</b><br>(1,940.15 to 2,856.72)    | <b>174.50</b><br>(154.69 to 197.89) | <b>373.51</b><br>(285.52 to 471.30) | <b>408.17</b><br>(311.23 to 514.60) | <b>324.51</b><br>(240.83 to 414.55) |
| Protein-energy malnutrition                                             | 864.28<br>(580.00 to 1,130.41)               | 1,788.32<br>(1,162.09 to 2,378.82)           | 1,944.87<br>(1,299.62 to 2,554.89)          | 1,581.20<br>(1,007.76 to 2,109.53)           | 100.24<br>(56.07 to 125.86)         | 265.42<br>(153.76 to 362.39)        | 294.49<br>(177.29 to 398.84)        | 226.81<br>(130.05 to 314.36)        |
| Iodine deficiency                                                       | 34.06<br>(2.73 to 104.61)                    | 108.68<br>(2.84 to 455.98)                   | 112.56<br>(2.83 to 484.55)                  | 101.92<br>(2.89 to 409.72)                   | 2.17<br>(0.08 to 8.20)              | 12.67<br>(0.09 to 70.14)            | 13.40<br>(0.09 to 74.45)            | 11.44<br>(0.09 to 63.32)            |
| Dietary iron deficiency                                                 | 62.59<br>(29.45 to 80.62)                    | 70.11<br>(28.36 to 105.73)                   | 72.43<br>(28.51 to 110.76)                  | 66.91<br>(28.17 to 100.48)                   | 3.28<br>(0.95 to 4.93)              | 4.83<br>(0.97 to 9.62)              | 5.17<br>(1.04 to 10.39)             | 4.33<br>(0.89 to 8.68)              |
| Other nutritional deficiencies                                          | 623.50<br>(403.68 to 893.28)                 | 673.59<br>(427.27 to 1,190.90)               | 690.59<br>(445.80 to 1,241.44)              | 633.97<br>(402.35 to 1,101.96)               | 68.80<br>(50.57 to 111.21)          | 90.58<br>(54.99 to 187.70)          | 95.11<br>(58.09 to 198.93)          | 81.93<br>(49.52 to 167.02)          |
| <b>Other communicable, maternal, neonatal, and nutritional diseases</b> | <b>3,839.33</b><br>(3,072.64 to 4,322.83)    | <b>4,551.30</b><br>(3,539.01 to 5,269.64)    | <b>4,595.11</b><br>(3,568.13 to 5,331.14)   | <b>4,454.12</b><br>(3,458.93 to 5,170.04)    | <b>174.74</b><br>(134.43 to 199.80) | <b>279.43</b><br>(206.04 to 331.42) | <b>289.40</b><br>(214.04 to 343.77) | <b>262.96</b><br>(193.44 to 313.12) |
| Sexually transmitted infections excluding HIV                           | 117.32<br>(101.47 to 149.48)                 | 91.79<br>(72.55 to 122.41)                   | 91.15<br>(71.74 to 120.78)                  | 90.73<br>(71.84 to 121.74)                   | 6.01<br>(5.08 to 7.56)              | 6.55<br>(4.93 to 8.78)              | 6.64<br>(5.00 to 9.04)              | 6.21<br>(4.72 to 8.20)              |
| Syphilis                                                                | 42.88<br>(35.06 to 51.96)                    | 23.95<br>(18.95 to 31.67)                    | 23.31<br>(18.42 to 31.54)                   | 24.16<br>(19.36 to 32.44)                    | 2.16<br>(1.75 to 2.65)              | 1.69<br>(1.25 to 2.37)              | 1.68<br>(1.25 to 2.37)              | 1.64<br>(1.22 to 2.28)              |
| Chlamydial infection                                                    | 14.39<br>(12.19 to 17.42)                    | 13.41<br>(10.03 to 18.56)                    | 13.44<br>(10.03 to 18.71)                   | 13.11<br>(9.88 to 18.09)                     | 0.77<br>(0.64 to 0.96)              | 1.03<br>(0.74 to 1.49)              | 1.05<br>(0.76 to 1.52)              | 0.96<br>(0.69 to 1.40)              |
| Gonococcal infection                                                    | 41.53<br>(35.01 to 50.38)                    | 39.12<br>(29.58 to 56.12)                    | 39.16<br>(29.61 to 57.29)                   | 38.30<br>(29.30 to 54.07)                    | 2.26<br>(1.89 to 2.79)              | 2.91<br>(2.11 to 4.17)              | 2.97<br>(2.16 to 4.29)              | 2.73<br>(1.97 to 3.84)              |
| Other sexually transmitted infections                                   | 18.53<br>(15.74 to 22.56)                    | 15.31<br>(11.71 to 21.06)                    | 15.24<br>(11.64 to 20.97)                   | 15.16<br>(11.65 to 20.86)                    | 0.82<br>(0.69 to 1.00)              | 0.93<br>(0.70 to 1.29)              | 0.94<br>(0.71 to 1.32)              | 0.88<br>(0.67 to 1.21)              |
| Acute hepatitis                                                         | 417.45<br>(362.25 to 481.28)                 | 209.19<br>(160.74 to 267.71)                 | 198.09<br>(152.33 to 255.03)                | 218.36<br>(167.27 to 281.89)                 | 17.05<br>(14.76 to 19.74)           | 11.79<br>(8.92 to 15.62)            | 11.43<br>(8.70 to 15.21)            | 11.86<br>(8.95 to 15.72)            |
| Acute hepatitis A                                                       | 31.56<br>(24.11 to 40.58)                    | 10.81<br>(7.49 to 15.25)                     | 10.34<br>(7.16 to 14.72)                    | 11.22<br>(7.71 to 15.78)                     | 0.79<br>(0.60 to 1.03)              | 0.46<br>(0.28 to 0.73)              | 0.46<br>(0.28 to 0.71)              | 0.46<br>(0.28 to 0.71)              |
| Acute hepatitis B                                                       | 330.45<br>(284.28 to 388.32)                 | 167.25<br>(125.70 to 220.85)                 | 157.77<br>(118.53 to 210.12)                | 175.45<br>(131.34 to 233.21)                 | 13.30<br>(11.31 to 15.75)           | 8.72<br>(6.28 to 12.05)             | 8.39<br>(5.98 to 11.59)             | 8.88<br>(6.38 to 12.27)             |



| Netherlands                          |                                                 |                                                   |                                                 |                                                     |                                              |                                              |                                              |                                              |
|--------------------------------------|-------------------------------------------------|---------------------------------------------------|-------------------------------------------------|-----------------------------------------------------|----------------------------------------------|----------------------------------------------|----------------------------------------------|----------------------------------------------|
| Cause                                | YLLs (actual counts)                            |                                                   |                                                 |                                                     | Deaths (actual counts)                       |                                              |                                              |                                              |
|                                      | 2016                                            | 2040 Forecast                                     | 2040 Better Scenario                            | 2040 Worse Scenario                                 | 2016                                         | 2040 Forecast                                | 2040 Better Scenario                         | 2040 Worse Scenario                          |
| <b>Neoplasms</b>                     | <b>864,542.66</b><br>(798,979.66 to 945,275.87) | <b>906,539.41</b><br>(764,773.89 to 1,077,325.75) | <b>788,437.49</b><br>(673,896.38 to 924,413.86) | <b>1,137,641.34</b><br>(941,163.95 to 1,379,685.65) | <b>49,193.15</b><br>(45,649.73 to 53,379.11) | <b>65,112.25</b><br>(56,249.72 to 75,155.83) | <b>58,315.08</b><br>(51,008.24 to 66,729.90) | <b>77,635.56</b><br>(65,599.96 to 90,629.66) |
| Lip and oral cavity cancer           | 8,643.59<br>(7,773.45 to 9,679.39)              | 7,510.18<br>(4,232.53 to 12,456.17)               | 4,976.05<br>(2,996.32 to 7,947.21)              | 13,116.59<br>(7,099.96 to 22,884.82)                | 442.93<br>(400.94 to 491.67)                 | 476.69<br>(283.98 to 761.23)                 | 327.26<br>(203.58 to 501.77)                 | 802.53<br>(456.70 to 1,348.13)               |
| Nasopharynx cancer                   | 2,825.02<br>(2,482.98 to 3,247.22)              | 2,802.13<br>(1,573.16 to 4,781.59)                | 1,758.94<br>(1,046.27 to 2,888.87)              | 4,799.64<br>(2,632.57 to 8,356.60)                  | 145.08<br>(128.03 to 166.93)                 | 185.08<br>(99.63 to 322.93)                  | 117.53<br>(68.17 to 195.80)                  | 300.26<br>(159.84 to 519.50)                 |
| Other pharynx cancer                 | 5,724.92<br>(5,059.77 to 6,459.20)              | 5,628.25<br>(3,141.97 to 9,059.94)                | 4,666.79<br>(2,725.71 to 7,383.82)              | 6,874.29<br>(3,737.54 to 11,352.25)                 | 247.98<br>(221.35 to 278.08)                 | 288.35<br>(164.86 to 461.18)                 | 243.82<br>(146.87 to 383.14)                 | 344.77<br>(192.15 to 568.11)                 |
| Esophageal cancer                    | 37,240.00<br>(32,676.10 to 42,441.15)           | 30,377.09<br>(17,562.74 to 51,302.39)             | 20,446.54<br>(12,840.44 to 32,297.89)           | 48,706.02<br>(26,749.20 to 83,684.27)               | 1,992.61<br>(1,770.85 to 2,246.21)           | 1,977.58<br>(1,162.09 to 3,191.23)           | 1,364.70<br>(869.02 to 2,051.64)             | 3,067.01<br>(1,708.86 to 5,075.10)           |
| Stomach cancer                       | 37,049.23<br>(33,404.02 to 41,132.00)           | 29,723.16<br>(23,085.69 to 38,544.49)             | 26,683.50<br>(21,227.24 to 33,369.82)           | 33,128.51<br>(24,708.87 to 44,107.82)               | 2,412.59<br>(2,188.56 to 2,660.35)           | 2,459.83<br>(1,926.56 to 3,129.71)           | 2,257.83<br>(1,830.56 to 2,782.03)           | 2,646.39<br>(2,001.19 to 3,482.47)           |
| Colon and rectum cancer              | 99,207.19<br>(89,912.42 to 110,135.77)          | 113,663.35<br>(81,437.68 to 159,992.53)           | 98,972.95<br>(72,709.80 to 138,081.47)          | 138,660.26<br>(95,944.26 to 200,884.93)             | 6,293.45<br>(5,710.68 to 6,938.52)           | 9,207.27<br>(6,612.54 to 12,764.75)          | 8,233.06<br>(6,073.21 to 11,312.92)          | 10,829.72<br>(7,528.03 to 15,359.58)         |
| Liver cancer                         | 18,265.20<br>(16,227.55 to 20,552.08)           | 20,533.74<br>(14,132.13 to 30,293.06)             | 17,441.82<br>(12,651.32 to 24,411.18)           | 27,956.23<br>(17,549.35 to 43,464.17)               | 1,034.94<br>(922.76 to 1,161.23)             | 1,432.94<br>(1,008.53 to 2,049.26)           | 1,254.66<br>(922.36 to 1,715.07)             | 1,850.34<br>(1,203.84 to 2,785.60)           |
| Liver cancer due to hepatitis B      | 3,133.23<br>(2,330.79 to 4,175.49)              | 3,163.87<br>(1,957.78 to 4,992.20)                | 2,832.07<br>(1,811.27 to 4,202.93)              | 3,928.69<br>(2,253.92 to 6,500.34)                  | 148.92<br>(110.33 to 202.39)                 | 187.67<br>(114.84 to 291.22)                 | 171.68<br>(108.64 to 257.43)                 | 223.10<br>(127.13 to 365.28)                 |
| Liver cancer due to hepatitis C      | 4,152.43<br>(3,177.00 to 5,327.30)              | 5,031.27<br>(3,171.52 to 7,425.44)                | 4,589.23<br>(3,009.42 to 6,595.73)              | 6,055.00<br>(3,535.39 to 9,589.81)                  | 269.19<br>(207.80 to 340.25)                 | 401.49<br>(260.55 to 585.51)                 | 375.77<br>(251.48 to 535.98)                 | 461.48<br>(280.86 to 724.18)                 |
| Liver cancer due to alcohol use      | 6,988.79<br>(5,361.14 to 8,551.56)              | 7,710.58<br>(4,794.59 to 11,651.88)               | 5,857.65<br>(3,751.00 to 8,646.70)              | 12,203.76<br>(7,164.07 to 19,674.64)                | 385.55<br>(290.87 to 480.89)                 | 513.37<br>(323.90 to 765.41)                 | 403.60<br>(261.58 to 593.42)                 | 769.81<br>(456.54 to 1,218.17)               |
| Liver cancer due to other causes     | 3,990.75<br>(3,109.03 to 5,073.88)              | 4,628.03<br>(2,889.10 to 7,068.77)                | 4,162.86<br>(2,733.39 to 6,216.51)              | 5,768.79<br>(3,342.58 to 9,394.45)                  | 231.29<br>(178.35 to 294.81)                 | 330.42<br>(207.10 to 504.38)                 | 303.62<br>(198.43 to 454.22)                 | 395.95<br>(228.52 to 632.53)                 |
| Gallbladder and biliary tract cancer | 10,354.58<br>(9,377.38 to 11,690.36)            | 9,479.96<br>(8,375.90 to 10,702.07)               | 9,690.79<br>(8,555.92 to 10,985.89)             | 9,088.68<br>(8,058.65 to 10,267.89)                 | 672.98<br>(613.07 to 746.81)                 | 760.24<br>(677.51 to 858.80)                 | 792.53<br>(709.79 to 898.81)                 | 707.25<br>(627.89 to 798.01)                 |
| Pancreatic cancer                    | 55,184.68<br>(49,459.57 to 61,706.17)           | 61,470.42<br>(48,703.32 to 77,417.32)             | 58,115.39<br>(46,396.74 to 72,574.88)           | 70,696.69<br>(54,474.24 to 91,367.06)               | 3,209.99<br>(2,884.02 to 3,566.59)           | 4,319.10<br>(3,435.45 to 5,350.07)           | 4,158.56<br>(3,362.76 to 5,139.23)           | 4,831.58<br>(3,746.99 to 6,192.32)           |
| Larynx cancer                        | 4,816.36<br>(4,270.99 to 5,430.21)              | 3,744.12<br>(1,934.55 to 6,865.10)                | 2,423.23<br>(1,286.65 to 4,109.93)              | 6,095.85<br>(2,976.98 to 12,021.25)                 | 247.17<br>(219.95 to 276.76)                 | 241.20<br>(121.81 to 448.00)                 | 157.73<br>(83.41 to 272.82)                  | 373.22<br>(187.84 to 713.74)                 |
| Tracheal, bronchus, and lung cancer  | 215,544.09<br>(196,418.29 to 238,417.44)        | 194,407.91<br>(135,933.02 to 274,069.27)          | 130,254.58<br>(92,553.85 to 180,838.90)         | 328,523.27<br>(229,031.70 to 454,032.11)            | 11,498.83<br>(10,513.87 to 12,647.62)        | 12,535.47<br>(8,759.93 to 17,530.70)         | 8,574.32<br>(6,031.30 to 12,062.96)          | 20,091.70<br>(14,071.40 to 27,488.69)        |
| Malignant skin melanoma              | 18,721.60<br>(12,875.59 to 21,768.57)           | 18,871.14<br>(12,813.95 to 22,175.08)             | 19,829.98<br>(13,495.97 to 23,439.52)           | 17,757.19<br>(12,159.53 to 20,784.14)               | 832.54<br>(576.56 to 961.60)                 | 1,039.36<br>(715.53 to 1,390.81)             | 1,114.12<br>(777.82 to 1,274.74)             | 948.96<br>(650.37 to 1,093.05)               |
| Non-melanoma skin cancer             | 2,507.87<br>(2,241.80 to 2,807.56)              | 3,873.20<br>(3,436.93 to 4,328.79)                | 3,885.91<br>(3,428.70 to 4,341.25)              | 3,776.09<br>(3,318.17 to 4,239.51)                  | 188.42<br>(170.37 to 208.85)                 | 362.21<br>(311.08 to 412.62)                 | 373.39<br>(324.70 to 424.23)                 | 340.05<br>(285.03 to 391.73)                 |
| Breast cancer                        | 71,406.56<br>(62,192.34 to 81,956.27)           | 70,704.71<br>(50,758.22 to 97,366.79)             | 62,639.87<br>(45,788.51 to 84,457.26)           | 84,693.18<br>(59,144.29 to 119,791.19)              | 3,670.74<br>(3,218.61 to 4,176.23)           | 4,756.49<br>(3,581.92 to 6,334.69)           | 4,341.61<br>(3,309.20 to 5,729.71)           | 5,477.57<br>(3,907.68 to 7,543.03)           |
| Cervical cancer                      | 6,887.13<br>(5,956.92 to 7,987.52)              | 5,146.29<br>(3,694.95 to 7,151.05)                | 4,815.46<br>(3,584.72 to 6,547.33)              | 5,884.59<br>(3,966.61 to 8,746.12)                  | 344.04<br>(299.64 to 392.30)                 | 337.86<br>(254.80 to 445.33)                 | 324.27<br>(249.15 to 422.77)                 | 372.26<br>(260.63 to 525.73)                 |

|                   |                                          |                                          |                                          |                                          |                                       |                                       |                                       |                                       |
|-------------------|------------------------------------------|------------------------------------------|------------------------------------------|------------------------------------------|---------------------------------------|---------------------------------------|---------------------------------------|---------------------------------------|
|                   | 7,152.94<br>(6,091.81 to<br>8,404.54)    | 9,036.27<br>(7,319.71 to<br>10,980.97)   | 8,912.06<br>(7,168.66 to<br>10,915.58)   | 8,961.95<br>(7,301.62 to<br>10,850.94)   | 448.11<br>(382.04 to<br>521.51)       | 709.28<br>(585.31 to<br>846.60)       | 709.43<br>(585.64 to<br>846.37)       | 684.06<br>(568.44 to<br>814.86)       |
| Uterine cancer    |                                          |                                          |                                          |                                          |                                       |                                       |                                       |                                       |
| Ovarian cancer    | 22,094.79<br>(18,304.04 to<br>26,415.91) | 22,427.79<br>(16,379.26 to<br>30,973.68) | 21,109.87<br>(15,558.49 to<br>28,595.17) | 24,106.39<br>(17,039.01 to<br>34,209.44) | 1,192.87<br>(991.17 to<br>1,420.43)   | 1,436.16<br>(1,054.84 to<br>1,960.44) | 1,346.13<br>(1,007.63 to<br>1,815.02) | 1,527.84<br>(1,077.11 to<br>2,152.30) |
| Prostate cancer   | 41,307.30<br>(32,761.76 to<br>49,101.04) | 66,102.44<br>(51,506.44 to<br>80,756.15) | 66,584.40<br>(52,165.98 to<br>81,235.61) | 64,531.76<br>(49,910.14 to<br>79,633.40) | 3,267.07<br>(2,604.72 to<br>3,827.51) | 6,418.49<br>(5,045.14 to<br>7,666.56) | 6,620.22<br>(5,256.75 to<br>7,886.07) | 6,068.32<br>(4,625.84 to<br>7,340.96) |
| Testicular cancer | 825.71<br>(675.56 to<br>1,004.40)        | 559.59<br>(441.89 to<br>699.95)          | 546.05<br>(429.59 to<br>683.98)          | 570.75<br>(453.68 to<br>719.69)          | 22.76<br>(19.11 to<br>26.93)          | 19.74<br>(16.42 to<br>23.36)          | 19.85<br>(16.54 to<br>23.58)          | 19.39<br>(16.03 to<br>23.13)          |

| Netherlands                     |                                          |                                          |                                          |                                          |                                       |                                       |                                       |                                       |
|---------------------------------|------------------------------------------|------------------------------------------|------------------------------------------|------------------------------------------|---------------------------------------|---------------------------------------|---------------------------------------|---------------------------------------|
| Cause                           | YLLs (actual counts)                     |                                          |                                          |                                          | Deaths (actual counts)                |                                       |                                       |                                       |
|                                 | 2016                                     | 2040 Forecast                            | 2040 Better Scenario                     | 2040 Worse Scenario                      | 2016                                  | 2040 Forecast                         | 2040 Better Scenario                  | 2040 Worse Scenario                   |
| Kidney cancer                   | 24,431.38<br>(21,667.88 to 27,338.31)    | 30,030.44<br>(23,760.60 to 37,975.54)    | 28,680.12<br>(23,351.87 to 35,508.89)    | 32,270.46<br>(24,623.84 to 42,118.78)    | 1,371.42<br>(1,226.20 to 1,530.35)    | 2,086.52<br>(1,681.55 to 2,610.91)    | 2,027.01<br>(1,671.43 to 2,461.73)    | 2,168.00<br>(1,692.36 to 2,786.17)    |
| Bladder cancer                  | 22,725.48<br>(20,406.88 to 25,365.82)    | 26,767.13<br>(20,252.05 to 35,407.11)    | 23,892.25<br>(18,585.61 to 30,957.28)    | 31,644.48<br>(23,059.57 to 43,805.69)    | 1,619.86<br>(1,463.42 to 1,801.29)    | 2,427.43<br>(1,834.21 to 3,248.07)    | 2,207.89<br>(1,716.94 to 2,842.04)    | 2,762.29<br>(2,008.69 to 3,804.37)    |
| Brain and nervous system cancer | 26,759.53<br>(18,287.82 to 30,746.73)    | 26,719.21<br>(18,211.24 to 31,562.66)    | 26,590.07<br>(18,226.11 to 31,506.84)    | 26,605.58<br>(17,869.34 to 31,336.02)    | 988.47<br>(679.56 to 1,136.70)        | 1,184.51<br>(805.93 to 1,385.41)      | 1,193.92<br>(825.55 to 1,399.60)      | 1,156.63<br>(791.35 to 1,354.53)      |
| Thyroid cancer                  | 2,184.16<br>(1,925.56 to 2,458.10)       | 2,252.97<br>(1,693.67 to 3,076.21)       | 2,157.86<br>(1,645.80 to 2,866.87)       | 2,414.52<br>(1,756.23 to 3,438.27)       | 127.75<br>(112.68 to 143.05)          | 162.48<br>(124.76 to 216.24)          | 158.83<br>(123.94 to 206.78)          | 168.02<br>(125.10 to 230.25)          |
| Mesothelioma                    | 11,232.46<br>(9,575.92 to 13,164.01)     | 15,485.87<br>(12,953.58 to 18,335.67)    | 16,050.09<br>(13,399.61 to 19,174.46)    | 14,709.53<br>(12,458.24 to 17,125.00)    | 646.53<br>(553.88 to 751.16)          | 1,046.91<br>(899.76 to 1,193.28)      | 1,104.42<br>(945.04 to 1,265.62)      | 971.36<br>(840.65 to 1,105.81)        |
| Hodgkin lymphoma                | 2,035.75<br>(1,816.16 to 2,303.09)       | 1,586.26<br>(1,374.98 to 1,841.51)       | 1,526.87<br>(1,311.31 to 1,770.13)       | 1,627.61<br>(1,398.09 to 1,911.06)       | 85.06<br>(75.13 to 95.09)             | 85.61<br>(72.83 to 97.45)             | 84.13<br>(71.00 to 97.30)             | 85.16<br>(71.43 to 97.93)             |
| Non-Hodgkin lymphoma            | 25,035.18<br>(21,841.23 to 28,993.09)    | 29,188.83<br>(23,870.52 to 35,623.83)    | 28,699.06<br>(23,542.82 to 34,806.64)    | 29,830.97<br>(24,047.19 to 37,166.43)    | 1,426.28<br>(1,253.25 to 1,617.00)    | 2,085.60<br>(1,745.69 to 2,474.97)    | 2,092.63<br>(1,752.01 to 2,466.04)    | 2,063.14<br>(1,692.48 to 2,503.92)    |
| Multiple myeloma                | 14,209.54<br>(11,614.09 to 16,576.66)    | 18,632.46<br>(14,454.42 to 23,385.15)    | 18,514.91<br>(14,444.56 to 23,013.40)    | 18,870.48<br>(14,609.39 to 24,234.37)    | 883.80<br>(714.36 to 1,016.22)        | 1,385.02<br>(1,089.67 to 1,703.52)    | 1,403.27<br>(1,107.16 to 1,709.61)    | 1,360.92<br>(1,052.75 to 1,722.15)    |
| Leukemia                        | 29,897.69<br>(27,191.32 to 33,015.58)    | 33,747.13<br>(26,536.05 to 42,437.97)    | 31,518.81<br>(25,427.73 to 38,806.55)    | 37,398.42<br>(28,052.25 to 48,781.96)    | 1,683.07<br>(1,539.70 to 1,849.27)    | 2,401.96<br>(1,890.42 to 3,045.54)    | 2,280.00<br>(1,845.77 to 2,789.56)    | 2,567.55<br>(1,931.97 to 3,386.10)    |
| Acute lymphoid leukemia         | 3,034.79<br>(2,528.06 to 3,787.28)       | 2,336.70<br>(1,763.17 to 3,018.55)       | 2,163.53<br>(1,657.11 to 2,784.11)       | 2,635.89<br>(1,943.09 to 3,476.55)       | 97.66<br>(82.34 to 113.87)            | 94.30<br>(71.52 to 121.83)            | 87.74<br>(67.99 to 110.24)            | 104.82<br>(76.82 to 138.43)           |
| Chronic lymphoid leukemia       | 1,752.37<br>(1,244.69 to 4,064.07)       | 3,470.59<br>(2,160.98 to 8,438.81)       | 3,283.23<br>(2,114.47 to 7,956.89)       | 3,753.65<br>(2,228.51 to 9,336.55)       | 127.13<br>(90.59 to 300.16)           | 319.78<br>(204.62 to 745.01)          | 309.12<br>(203.97 to 712.59)          | 332.01<br>(203.22 to 799.02)          |
| Acute myeloid leukemia          | 12,244.83<br>(10,409.65 to 13,734.93)    | 14,814.02<br>(11,472.60 to 18,788.27)    | 13,965.77<br>(11,080.09 to 17,275.49)    | 16,400.78<br>(12,259.68 to 21,448.86)    | 612.76<br>(532.21 to 691.17)          | 878.69<br>(677.96 to 1,111.79)        | 838.56<br>(661.34 to 1,033.33)        | 945.57<br>(708.50 to 1,242.29)        |
| Chronic myeloid leukemia        | 1,958.16<br>(1,668.94 to 2,232.30)       | 1,320.23<br>(942.66 to 1,771.82)         | 1,174.67<br>(866.18 to 1,544.68)         | 1,533.55<br>(1,055.45 to 2,134.81)       | 123.29<br>(106.64 to 140.69)          | 101.70<br>(74.31 to 135.80)           | 92.35<br>(68.41 to 119.54)            | 113.20<br>(78.69 to 155.00)           |
| Other leukemia                  | 10,907.54<br>(8,836.69 to 12,289.62)     | 11,805.59<br>(8,496.81 to 15,453.65)     | 10,931.61<br>(8,028.30 to 14,051.53)     | 13,074.55<br>(9,187.71 to 17,668.31)     | 722.23<br>(579.38 to 819.10)          | 1,007.49<br>(702.38 to 1,333.88)      | 952.23<br>(671.70 to 1,211.95)        | 1,071.94<br>(737.93 to 1,468.98)      |
| Other neoplasms                 | 40,272.73<br>(34,992.39 to 44,936.84)    | 46,067.40<br>(39,523.82 to 51,946.54)    | 47,053.26<br>(40,252.96 to 53,423.64)    | 44,341.37<br>(37,818.69 to 49,988.64)    | 2,195.81<br>(1,927.68 to 2,444.38)    | 3,282.85<br>(2,753.41 to 3,855.64)    | 3,431.97<br>(2,903.07 to 3,832.23)    | 3,049.27<br>(2,513.50 to 3,385.60)    |
| Cardiovascular diseases         | 476,317.71<br>(439,234.63 to 517,915.32) | 471,949.84<br>(444,184.78 to 662,742.96) | 384,866.57<br>(295,134.77 to 533,716.59) | 623,664.03<br>(435,972.53 to 902,201.85) | 40,864.90<br>(38,006.61 to 44,131.04) | 50,465.79<br>(38,689.98 to 72,359.98) | 43,524.58<br>(34,210.17 to 60,805.61) | 60,943.21<br>(44,016.53 to 90,255.90) |
| Rheumatic heart disease         | 4,512.01<br>(4,075.23 to 5,047.03)       | 3,895.42<br>(3,180.33 to 4,843.96)       | 3,825.00<br>(3,166.35 to 4,710.00)       | 3,823.67<br>(3,106.10 to 4,827.29)       | 409.47<br>(369.14 to 453.44)          | 453.04<br>(368.13 to 580.05)          | 456.59<br>(375.24 to 563.75)          | 428.42<br>(341.08 to 560.38)          |
| Ischemic heart disease          | 229,218.36<br>(209,927.46 to 250,948.30) | 190,662.96<br>(109,793.37 to 347,931.06) | 134,210.53<br>(78,869.29 to 238,748.05)  | 289,430.30<br>(158,380.24 to 526,417.13) | 18,782.63<br>(17,330.62 to 20,431.47) | 19,460.07<br>(11,079.44 to 36,093.70) | 14,773.40<br>(8,607.55 to 27,334.56)  | 26,609.19<br>(14,565.94 to 49,102.35) |
| Stroke                          | 122,474.73<br>(110,357.63 to 135,687.57) | 93,249.92<br>(59,229.40 to 157,153.67)   | 72,035.23<br>(46,789.63 to 123,343.06)   | 132,593.85<br>(79,368.57 to 232,385.36)  | 11,132.39<br>(9,949.70 to 12,433.59)  | 10,398.03<br>(6,555.03 to 18,528.83)  | 8,617.51<br>(5,600.59 to 15,127.94)   | 13,340.58<br>(8,168.29 to 23,702.45)  |
| Ischemic stroke                 | 56,571.53<br>(50,289.37 to 63,188.49)    | 43,137.09<br>(23,366.67 to 97,136.96)    | 35,313.57<br>(19,885.60 to 75,051.71)    | 56,711.02<br>(29,747.01 to 131,082.65)   | 5,858.62<br>(5,164.99 to 6,583.61)    | 5,317.59<br>(2,883.62 to 11,522.67)   | 4,581.57<br>(2,517.68 to 9,846.98)    | 6,480.38<br>(3,372.93 to 15,590.82)   |

|                                |                                          |                                          |                                          |                                           |                                       |                                       |                                       |                                        |
|--------------------------------|------------------------------------------|------------------------------------------|------------------------------------------|-------------------------------------------|---------------------------------------|---------------------------------------|---------------------------------------|----------------------------------------|
|                                | 65,903.19<br>(59,601.97 to<br>73,189.96) | 50,112.84<br>(30,781.24 to<br>81,189.24) | 36,721.66<br>(24,268.46 to<br>56,499.53) | 75,882.83<br>(42,858.67 to<br>128,270.20) | 5,273.77<br>(4,708.56 to<br>5,888.53) | 5,080.44<br>(3,246.20 to<br>8,079.24) | 4,035.94<br>(2,717.50 to<br>6,336.85) | 6,860.20<br>(4,074.58 to<br>11,647.28) |
| Intracerebral hemorrhage       |                                          |                                          |                                          |                                           |                                       |                                       |                                       |                                        |
|                                | 7,842.56<br>(5,511.04 to<br>10,771.75)   | 14,346.11<br>(7,697.11 to<br>27,579.74)  | 11,369.68<br>(6,349.14 to<br>19,446.25)  | 17,909.35<br>(9,049.95 to<br>38,370.99)   | 760.65<br>(440.82 to<br>927.17)       | 1,787.36<br>(820.29 to<br>3,630.60)   | 1,454.86<br>(704.77 to<br>2,549.81)   | 2,111.66<br>(918.88 to<br>4,849.87)    |
| Hypertensive heart disease     |                                          |                                          |                                          |                                           |                                       |                                       |                                       |                                        |
|                                | 16,154.71<br>(13,902.22 to<br>21,738.45) | 19,418.63<br>(14,813.17 to<br>26,265.35) | 18,305.32<br>(14,037.80 to<br>24,213.71) | 20,440.98<br>(15,497.40 to<br>28,026.27)  | 1,234.79<br>(1,081.02 to<br>1,427.88) | 1,998.40<br>(1,456.81 to<br>2,790.64) | 1,969.22<br>(1,452.65 to<br>2,723.05) | 1,955.67<br>(1,404.32 to<br>2,737.97)  |
| Cardiomyopathy and myocarditis |                                          |                                          |                                          |                                           |                                       |                                       |                                       |                                        |
|                                | 2,869.92<br>(2,223.60 to<br>4,430.05)    | 4,619.61<br>(3,439.50 to<br>5,831.84)    | 4,830.79<br>(3,657.44 to<br>6,058.37)    | 4,288.74<br>(3,192.10 to<br>5,451.39)     | 266.76<br>(185.91 to<br>326.77)       | 592.33<br>(384.33 to<br>786.01)       | 637.61<br>(425.99 to<br>843.29)       | 523.58<br>(335.79 to<br>704.65)        |
| Myocarditis                    |                                          |                                          |                                          |                                           |                                       |                                       |                                       |                                        |

| Netherlands                                                   |                                                        |                                                        |                                                       |                                                        |                                                   |                                                     |                                                    |                                                     |
|---------------------------------------------------------------|--------------------------------------------------------|--------------------------------------------------------|-------------------------------------------------------|--------------------------------------------------------|---------------------------------------------------|-----------------------------------------------------|----------------------------------------------------|-----------------------------------------------------|
| Cause                                                         | YLLs (actual counts)                                   |                                                        |                                                       |                                                        | Deaths (actual counts)                            |                                                     |                                                    |                                                     |
|                                                               | 2016                                                   | 2040 Forecast                                          | 2040 Better Scenario                                  | 2040 Worse Scenario                                    | 2016                                              | 2040 Forecast                                       | 2040 Better Scenario                               | 2040 Worse Scenario                                 |
| Alcoholic cardiomyopathy                                      | 3,844.74<br>(2,905.27 to 6,667.03)                     | 3,940.02<br>(2,907.40 to 6,229.67)                     | 3,385.57<br>(2,483.21 to 5,273.89)                    | 4,987.16<br>(3,729.00 to 7,854.20)                     | 161.54<br>(122.99 to 250.26)                      | 204.70<br>(155.55 to 286.85)                        | 181.56<br>(136.33 to 259.08)                       | 249.39<br>(192.19 to 352.27)                        |
| Other cardiomyopathy                                          | 9,440.06<br>(8,022.01 to 12,734.16)                    | 10,859.00<br>(7,023.39 to 16,664.09)                   | 10,088.97<br>(6,601.34 to 15,238.87)                  | 11,165.08<br>(7,222.61 to 17,070.51)                   | 796.49<br>(689.96 to 963.40)                      | 1,201.38<br>(721.54 to 1,952.29)                    | 1,150.06<br>(704.02 to 1,855.59)                   | 1,182.70<br>(718.11 to 1,940.37)                    |
| Atrial fibrillation and flutter                               | 16,148.50<br>(12,491.64 to 20,297.21)                  | 27,027.73<br>(19,551.23 to 36,134.66)                  | 26,157.95<br>(19,440.26 to 34,342.44)                 | 28,567.48<br>(20,425.19 to 38,670.36)                  | 1,840.68<br>(1,418.38 to 2,350.06)                | 3,482.24<br>(2,511.49 to 4,624.17)                  | 3,450.82<br>(2,487.05 to 4,514.06)                 | 3,528.64<br>(2,509.67 to 4,769.95)                  |
| Aortic aneurysm                                               | 20,638.71<br>(18,566.45 to 23,122.62)                  | 25,230.98<br>(20,215.79 to 32,236.85)                  | 24,671.73<br>(20,232.50 to 30,784.20)                 | 26,438.70<br>(20,720.39 to 34,046.68)                  | 1,561.77<br>(1,408.63 to 1,736.43)                | 2,300.23<br>(1,902.03 to 2,892.62)                  | 2,347.20<br>(1,949.44 to 2,856.50)                 | 2,318.47<br>(1,857.44 to 2,942.25)                  |
| Peripheral artery disease                                     | 8,486.01<br>(6,415.29 to 13,919.19)                    | 17,353.93<br>(11,256.55 to 29,758.04)                  | 17,468.24<br>(11,463.81 to 29,948.48)                 | 18,665.24<br>(11,936.00 to 32,378.36)                  | 834.23<br>(625.12 to 1,432.60)                    | 2,078.88<br>(1,308.19 to 3,755.05)                  | 2,150.72<br>(1,391.98 to 3,879.75)                 | 2,114.27<br>(1,319.47 to 3,829.18)                  |
| Endocarditis                                                  | 9,218.43<br>(5,024.28 to 11,683.33)                    | 14,836.98<br>(6,772.65 to 23,986.79)                   | 14,520.39<br>(6,673.28 to 23,094.73)                  | 14,474.71<br>(6,680.75 to 22,958.73)                   | 747.21<br>(350.18 to 1,009.07)                    | 1,467.00<br>(584.42 to 2,623.73)                    | 1,474.07<br>(585.07 to 2,595.06)                   | 1,378.93<br>(549.27 to 2,441.90)                    |
| Other cardiovascular and circulatory diseases                 | 41,623.70<br>(37,489.06 to 46,363.91)                  | 65,927.17<br>(53,508.89 to 83,687.82)                  | 62,302.48<br>(51,575.62 to 77,204.38)                 | 71,319.74<br>(56,477.25 to 91,731.71)                  | 3,571.08<br>(3,241.75 to 3,940.69)                | 7,010.53<br>(5,683.44 to 8,635.55)                  | 6,830.17<br>(5,626.60 to 8,331.06)                 | 7,157.38<br>(5,677.85 to 9,064.34)                  |
| <b>Chronic respiratory diseases</b>                           | <b>116,840.38</b><br><b>(107,008.37 to 128,160.45)</b> | <b>135,446.97</b><br><b>(102,715.83 to 177,681.40)</b> | <b>102,994.78</b><br><b>(80,020.97 to 132,015.44)</b> | <b>205,115.42</b><br><b>(150,499.07 to 273,021.13)</b> | <b>9,659.77</b><br><b>(8,930.49 to 10,527.85)</b> | <b>13,518.34</b><br><b>(10,261.04 to 17,474.79)</b> | <b>10,590.10</b><br><b>(8,237.78 to 13,435.09)</b> | <b>19,177.90</b><br><b>(14,673.38 to 25,559.86)</b> |
| Chronic obstructive pulmonary disease                         | 105,467.54<br>(95,705.72 to 116,438.01)                | 120,730.22<br>(87,950.47 to 163,166.08)                | 87,418.56<br>(64,628.88 to 115,335.27)                | 191,227.01<br>(135,861.19 to 259,574.43)               | 8,927.26<br>(8,185.45 to 9,806.69)                | 12,377.41<br>(9,065.76 to 16,445.96)                | 9,357.47<br>(6,994.79 to 12,237.01)                | 18,674.41<br>(13,475.83 to 24,565.62)               |
| Pneumoconiosis                                                | 354.24<br>(298.93 to 417.72)                           | 395.95<br>(309.73 to 503.70)                           | 403.93<br>(316.74 to 515.02)                          | 380.46<br>(297.68 to 485.76)                           | 27.95<br>(23.77 to 32.95)                         | 37.42<br>(28.73 to 47.68)                           | 38.86<br>(29.93 to 49.77)                          | 35.03<br>(26.60 to 44.74)                           |
| Silicosis                                                     | 134.18<br>(91.80 to 237.11)                            | 104.29<br>(49.50 to 217.77)                            | 98.72<br>(45.62 to 218.25)                            | 108.06<br>(52.65 to 215.95)                            | 11.03<br>(7.60 to 19.14)                          | 10.33<br>(4.99 to 21.19)                            | 9.97<br>(4.75 to 21.85)                            | 10.42<br>(4.94 to 20.79)                            |
| Asbestosis                                                    | 169.13<br>(54.67 to 230.72)                            | 224.50<br>(84.46 to 320.39)                            | 238.47<br>(96.88 to 336.82)                           | 207.27<br>(72.69 to 296.80)                            | 12.57<br>(3.46 to 17.36)                          | 19.52<br>(6.48 to 30.12)                            | 21.17<br>(7.57 to 30.12)                           | 17.54<br>(5.43 to 25.31)                            |
| Coal workers pneumoconiosis                                   | 7.51<br>(3.03 to 41.85)                                | 17.44<br>(6.11 to 86.56)                               | 17.46<br>(6.10 to 84.28)                              | 16.92<br>(5.93 to 82.67)                               | 0.68<br>(0.27 to 3.67)                            | 1.90<br>(0.66 to 8.82)                              | 1.95<br>(0.68 to 9.11)                             | 1.78<br>(0.61 to 8.44)                              |
| Other pneumoconiosis                                          | 43.42<br>(30.07 to 103.79)                             | 49.72<br>(31.51 to 89.90)                              | 49.29<br>(30.51 to 92.35)                             | 48.21<br>(30.86 to 86.25)                              | 3.67<br>(2.63 to 8.21)                            | 5.67<br>(3.55 to 9.85)                              | 5.77<br>(3.55 to 10.24)                            | 5.29<br>(3.34 to 9.07)                              |
| Asthma                                                        | 1,609.97<br>(1,390.69 to 2,223.23)                     | 713.13<br>(432.57 to 1,164.17)                         | 613.16<br>(384.04 to 976.68)                          | 944.28<br>(588.92 to 1,602.64)                         | 95.46<br>(82.14 to 122.62)                        | 58.53<br>(35.48 to 95.83)                           | 52.05<br>(32.54 to 83.55)                          | 72.38<br>(41.80 to 121.07)                          |
| Interstitial lung disease and pulmonary sarcoidosis           | 8,430.19<br>(4,223.61 to 10,736.91)                    | 12,613.69<br>(6,552.71 to 16,156.56)                   | 13,607.78<br>(7,251.60 to 17,292.74)                  | 11,487.69<br>(5,779.24 to 14,889.15)                   | 560.40<br>(287.39 to 706.25)                      | 980.79<br>(511.88 to 1,255.92)                      | 1,079.21<br>(579.77 to 1,368.97)                   | 868.70<br>(442.42 to 1,137.59)                      |
| Other chronic respiratory diseases                            | 978.44<br>(615.26 to 1,284.72)                         | 993.98<br>(628.81 to 1,396.44)                         | 951.35<br>(611.01 to 1,336.84)                        | 1,075.99<br>(643.53 to 1,518.99)                       | 48.69<br>(28.98 to 65.05)                         | 64.20<br>(38.04 to 95.98)                           | 62.51<br>(37.99 to 92.54)                          | 67.37<br>(38.64 to 101.87)                          |
| <b>Cirrhosis and other chronic liver diseases</b>             | <b>32,257.65</b><br><b>(28,890.58 to 36,083.54)</b>    | <b>32,073.07</b><br><b>(28,437.11 to 36,106.79)</b>    | <b>29,106.33</b><br><b>(25,746.22 to 32,729.98)</b>   | <b>36,934.59</b><br><b>(32,824.93 to 41,951.99)</b>    | <b>1,667.59</b><br><b>(1,513.43 to 1,844.47)</b>  | <b>2,253.01</b><br><b>(1,994.78 to 2,494.01)</b>    | <b>2,112.82</b><br><b>(1,878.40 to 2,335.72)</b>   | <b>2,465.72</b><br><b>(2,173.98 to 2,742.79)</b>    |
| Cirrhosis and other chronic liver diseases due to hepatitis B | 4,851.21<br>(3,754.65 to 6,257.24)                     | 5,025.62<br>(3,857.85 to 6,455.80)                     | 4,969.53<br>(3,805.83 to 6,398.26)                    | 5,007.88<br>(3,829.76 to 6,499.66)                     | 251.54<br>(195.49 to 323.78)                      | 347.28<br>(264.98 to 451.76)                        | 352.29<br>(268.39 to 454.11)                       | 332.69<br>(252.32 to 433.84)                        |
| Cirrhosis and other chronic liver diseases due to hepatitis C | 9,123.89<br>(6,923.45 to 11,878.92)                    | 9,306.46<br>(7,129.01 to 11,863.37)                    | 9,135.21<br>(7,006.02 to 11,535.25)                   | 9,362.89<br>(7,029.95 to 12,363.19)                    | 445.59<br>(336.35 to 565.54)                      | 604.89<br>(445.30 to 785.77)                        | 608.83<br>(444.70 to 786.25)                       | 585.00<br>(420.39 to 772.39)                        |



|                                                                |                                                               |                                                               |                                                               |                                                               |                                                            |                                                            |                                                            |                                                            |
|----------------------------------------------------------------|---------------------------------------------------------------|---------------------------------------------------------------|---------------------------------------------------------------|---------------------------------------------------------------|------------------------------------------------------------|------------------------------------------------------------|------------------------------------------------------------|------------------------------------------------------------|
|                                                                | 16,085.45<br>(13,428.42 to<br>18,910.17)                      | 15,380.85<br>(12,845.55 to<br>18,265.63)                      | 12,668.35<br>(10,496.27 to<br>15,059.86)                      | 20,221.50<br>(17,063.25 to<br>23,732.47)                      | 844.69<br>(713.01 to<br>977.58)                            | 1,109.00<br>(898.05 to<br>1,328.25)                        | 957.08<br>(766.79 to<br>1,163.33)                          | 1,366.20<br>(1,123.58 to<br>1,619.38)                      |
| Cirrhosis and other chronic liver diseases due to alcohol use  |                                                               |                                                               |                                                               |                                                               |                                                            |                                                            |                                                            |                                                            |
|                                                                | 2,197.10<br>(1,622.91 to<br>2,950.25)                         | 2,360.14<br>(1,727.11 to<br>3,214.75)                         | 2,333.24<br>(1,700.90 to<br>3,165.71)                         | 2,342.31<br>(1,697.91 to<br>3,226.72)                         | 125.77<br>(89.93 to<br>177.47)                             | 191.84<br>(127.22 to<br>292.99)                            | 194.63<br>(129.68 to<br>299.40)                            | 181.84<br>(119.92 to<br>280.53)                            |
| Cirrhosis and other chronic liver diseases due to other causes |                                                               |                                                               |                                                               |                                                               |                                                            |                                                            |                                                            |                                                            |
| <b>Digestive diseases</b>                                      | <b>44,784.06</b><br><b>(39,513.14 to</b><br><b>56,224.64)</b> | <b>67,164.28</b><br><b>(56,474.28 to</b><br><b>83,487.02)</b> | <b>67,149.54</b><br><b>(56,782.13 to</b><br><b>82,771.90)</b> | <b>66,826.94</b><br><b>(55,963.96 to</b><br><b>84,027.24)</b> | <b>3,714.84</b><br><b>(3,321.29 to</b><br><b>4,337.28)</b> | <b>7,081.58</b><br><b>(5,866.36 to</b><br><b>8,544.93)</b> | <b>7,251.26</b><br><b>(6,080.45 to</b><br><b>8,662.37)</b> | <b>6,778.51</b><br><b>(5,525.31 to</b><br><b>8,350.04)</b> |
| Peptic ulcer disease                                           | 4,332.10<br>(3,646.49 to<br>5,395.71)                         | 4,292.19<br>(3,401.36 to<br>5,500.89)                         | 4,134.86<br>(3,283.32 to<br>5,279.96)                         | 4,615.98<br>(3,588.26 to<br>6,013.66)                         | 368.68<br>(320.73 to<br>433.88)                            | 481.57<br>(374.99 to<br>630.22)                            | 474.25<br>(372.54 to<br>612.21)                            | 495.24<br>(370.03 to<br>659.94)                            |

| Netherlands                                |                                          |                                          |                                          |                                          |                                       |                                       |                                       |                                       |
|--------------------------------------------|------------------------------------------|------------------------------------------|------------------------------------------|------------------------------------------|---------------------------------------|---------------------------------------|---------------------------------------|---------------------------------------|
| Cause                                      | YLLs (actual counts)                     |                                          |                                          |                                          | Deaths (actual counts)                |                                       |                                       |                                       |
|                                            | 2016                                     | 2040 Forecast                            | 2040 Better Scenario                     | 2040 Worse Scenario                      | 2016                                  | 2040 Forecast                         | 2040 Better Scenario                  | 2040 Worse Scenario                   |
| Gastritis and duodenitis                   | 358.81<br>(261.83 to 761.06)             | 515.90<br>(375.92 to 1,032.31)           | 512.12<br>(373.54 to 1,019.09)           | 505.78<br>(365.41 to 1,045.98)           | 27.01<br>(21.28 to 51.75)             | 52.18<br>(36.57 to 96.78)             | 53.19<br>(37.50 to 97.99)             | 48.95<br>(34.12 to 93.41)             |
| Appendicitis                               | 706.13<br>(541.19 to 1,192.42)           | 762.11<br>(579.23 to 1,234.09)           | 738.50<br>(562.84 to 1,191.33)           | 768.55<br>(583.83 to 1,256.37)           | 45.07<br>(36.01 to 70.42)             | 66.00<br>(51.38 to 99.90)             | 65.55<br>(50.90 to 99.05)             | 64.03<br>(49.13 to 97.52)             |
| Paralytic ileus and intestinal obstruction | 9,784.48<br>(7,305.10 to 11,709.43)      | 16,786.11<br>(12,306.28 to 20,309.03)    | 17,570.14<br>(12,884.35 to 21,232.72)    | 15,561.97<br>(11,491.71 to 18,759.65)    | 885.69<br>(634.81 to 1,068.90)        | 1,884.58<br>(1,301.88 to 2,569.54)    | 2,013.27<br>(1,407.64 to 2,522.42)    | 1,689.95<br>(1,168.38 to 2,147.44)    |
| Inguinal, femoral, and abdominal hernia    | 1,683.46<br>(1,308.10 to 2,861.12)       | 1,648.42<br>(1,265.43 to 2,720.16)       | 1,673.23<br>(1,287.66 to 2,778.14)       | 1,575.62<br>(1,205.77 to 2,611.23)       | 154.56<br>(123.54 to 248.25)          | 185.46<br>(140.90 to 296.22)          | 192.54<br>(146.66 to 308.26)          | 171.34<br>(128.98 to 271.95)          |
| Inflammatory bowel disease                 | 3,545.91<br>(2,761.79 to 5,539.89)       | 6,589.09<br>(5,130.30 to 9,923.77)       | 6,834.02<br>(5,324.91 to 10,276.93)      | 6,176.45<br>(4,820.42 to 9,321.74)       | 284.92<br>(234.59 to 408.21)          | 691.75<br>(538.75 to 986.30)          | 734.09<br>(571.05 to 1,041.62)        | 624.52<br>(481.84 to 893.30)          |
| Vascular intestinal disorders              | 7,053.21<br>(5,794.27 to 8,620.96)       | 10,401.60<br>(8,369.87 to 12,843.39)     | 10,557.48<br>(8,482.11 to 13,051.85)     | 9,988.71<br>(8,068.17 to 12,321.48)      | 521.20<br>(443.24 to 634.97)          | 967.14<br>(783.82 to 1,202.93)        | 1,001.12<br>(813.74 to 1,260.83)      | 899.76<br>(731.99 to 1,121.37)        |
| Gallbladder and biliary diseases           | 5,065.35<br>(4,326.72 to 5,999.98)       | 7,763.72<br>(4,605.69 to 12,920.25)      | 7,013.82<br>(4,277.91 to 11,283.56)      | 9,161.73<br>(5,203.92 to 15,294.38)      | 481.88<br>(418.76 to 562.25)          | 899.52<br>(527.87 to 1,479.34)        | 831.60<br>(503.25 to 1,344.95)        | 1,018.51<br>(581.48 to 1,724.09)      |
| Pancreatitis                               | 4,276.35<br>(3,418.09 to 6,155.40)       | 4,969.32<br>(2,961.06 to 8,683.63)       | 4,366.27<br>(2,718.69 to 7,306.14)       | 5,744.70<br>(3,211.13 to 10,564.61)      | 240.63<br>(202.19 to 327.96)          | 368.52<br>(228.60 to 625.94)          | 334.30<br>(217.87 to 537.57)          | 407.38<br>(236.64 to 720.31)          |
| Other digestive diseases                   | 7,978.27<br>(6,477.16 to 10,195.48)      | 13,435.81<br>(10,964.54 to 16,716.04)    | 13,749.11<br>(11,234.11 to 17,132.42)    | 12,727.46<br>(10,420.14 to 15,965.96)    | 705.19<br>(610.35 to 862.29)          | 1,484.87<br>(1,202.67 to 1,838.62)    | 1,551.34<br>(1,259.62 to 1,927.25)    | 1,358.84<br>(1,078.09 to 1,671.69)    |
| Neurological disorders                     | 159,547.56<br>(142,364.10 to 179,672.55) | 266,033.12<br>(216,411.85 to 334,149.87) | 269,282.82<br>(222,182.94 to 333,235.10) | 272,753.17<br>(215,387.99 to 355,823.56) | 16,693.96<br>(14,663.88 to 19,067.88) | 33,027.58<br>(25,901.13 to 42,641.34) | 34,020.86<br>(27,218.53 to 43,221.04) | 32,859.96<br>(24,668.48 to 44,087.33) |
| Alzheimer's disease and other dementias    | 107,389.08<br>(92,084.91 to 125,890.67)  | 196,596.26<br>(150,241.27 to 264,549.18) | 198,364.29<br>(154,163.05 to 260,084.85) | 205,199.88<br>(149,721.42 to 287,426.43) | 13,712.89<br>(11,747.45 to 15,989.44) | 27,821.86<br>(20,903.67 to 37,195.39) | 28,551.26<br>(21,889.57 to 37,505.01) | 28,112.58<br>(19,965.46 to 39,376.97) |
| Parkinson's disease                        | 15,781.10<br>(11,700.66 to 20,477.04)    | 29,037.74<br>(21,637.94 to 37,513.31)    | 30,822.24<br>(23,005.94 to 39,984.28)    | 26,606.78<br>(19,602.30 to 34,630.12)    | 1,467.26<br>(1,099.27 to 1,920.45)    | 3,041.91<br>(2,304.52 to 4,030.04)    | 3,281.83<br>(2,499.06 to 4,350.64)    | 2,720.76<br>(2,030.10 to 3,651.85)    |
| Epilepsy                                   | 7,230.66<br>(6,467.91 to 8,107.84)       | 8,160.06<br>(5,452.21 to 11,773.46)      | 7,375.53<br>(5,103.48 to 10,390.16)      | 9,235.02<br>(5,921.55 to 13,495.83)      | 268.04<br>(239.71 to 298.86)          | 440.84<br>(292.09 to 635.51)          | 410.49<br>(285.08 to 570.92)          | 477.21<br>(304.03 to 697.99)          |
| Multiple sclerosis                         | 5,753.71<br>(4,548.93 to 7,038.41)       | 5,309.10<br>(4,004.67 to 6,568.98)       | 5,341.05<br>(4,043.03 to 6,586.87)       | 5,532.88<br>(4,172.90 to 6,922.39)       | 218.51<br>(168.87 to 262.30)          | 233.62<br>(177.17 to 283.30)          | 237.52<br>(180.64 to 288.53)          | 238.42<br>(182.97 to 293.04)          |
| Motor neuron disease                       | 10,402.84<br>(9,320.50 to 11,605.03)     | 13,295.30<br>(11,676.20 to 15,371.00)    | 13,496.11<br>(11,817.21 to 15,738.34)    | 12,922.75<br>(11,390.05 to 14,794.16)    | 493.78<br>(442.54 to 554.44)          | 768.29<br>(676.44 to 872.26)          | 789.74<br>(692.25 to 903.51)          | 732.60<br>(648.75 to 830.66)          |
| Other neurological disorders               | 12,990.18<br>(11,620.79 to 14,512.20)    | 13,634.66<br>(11,935.75 to 15,486.52)    | 13,882.81<br>(12,064.55 to 15,805.26)    | 13,255.86<br>(11,602.79 to 15,019.12)    | 533.49<br>(481.61 to 589.89)          | 721.05<br>(636.23 to 813.68)          | 750.12<br>(660.06 to 850.83)          | 678.38<br>(601.74 to 762.11)          |
| Mental disorders                           | 17,932.56<br>(16,043.03 to 20,254.31)    | 19,709.90<br>(16,935.51 to 22,853.46)    | 19,961.33<br>(17,093.90 to 23,228.26)    | 19,705.33<br>(16,885.82 to 22,767.91)    | 622.68<br>(564.83 to 696.70)          | 785.79<br>(698.38 to 875.60)          | 809.91<br>(719.11 to 906.42)          | 765.40<br>(678.53 to 855.88)          |
| Alcohol use disorders                      | 10,666.90<br>(9,449.61 to 12,196.05)     | 8,593.59<br>(7,309.43 to 10,116.13)      | 8,292.75<br>(7,020.13 to 9,812.13)       | 9,130.44<br>(7,817.16 to 10,712.30)      | 414.29<br>(370.65 to 469.99)          | 401.61<br>(351.01 to 460.40)          | 396.50<br>(342.46 to 456.20)          | 413.76<br>(363.30 to 474.33)          |
| Drug use disorders                         | 6,907.69<br>(5,853.69 to 7,888.48)       | 10,907.78<br>(8,838.95 to 13,230.19)     | 11,453.75<br>(9,349.10 to 13,851.34)     | 10,372.34<br>(8,336.59 to 12,569.11)     | 201.57<br>(175.58 to 227.35)          | 380.11<br>(325.51 to 439.44)          | 409.22<br>(351.76 to 472.56)          | 347.68<br>(292.30 to 402.62)          |
| Opioid use disorders                       | 3,770.11<br>(3,087.24 to 5,169.13)       | 4,242.56<br>(3,182.59 to 6,557.03)       | 4,319.84<br>(3,250.24 to 6,717.03)       | 4,161.67<br>(3,113.25 to 6,454.69)       | 99.81<br>(84.06 to 130.37)            | 133.21<br>(107.51 to 181.77)          | 139.34<br>(112.88 to 188.51)          | 126.06<br>(100.78 to 174.39)          |

|                           |                                       |                                       |                                       |                                       |                               |                                 |                                 |                                 |
|---------------------------|---------------------------------------|---------------------------------------|---------------------------------------|---------------------------------------|-------------------------------|---------------------------------|---------------------------------|---------------------------------|
|                           | 179.83<br>(80.15 to<br>229.13)        | -422.96<br>(186.61 to<br>591.17)      | 443.85<br>(196.40 to<br>615.04)       | 401.33<br>(179.47 to<br>558.82)       | 6.47<br>(2.35 to<br>8.05)     | 15.67<br>(5.64 to<br>21.02)     | 16.77<br>(6.31 to<br>22.55)     | 14.31<br>(5.40 to<br>19.10)     |
| Cocaine use disorders     |                                       |                                       |                                       |                                       |                               |                                 |                                 |                                 |
|                           | 328.69<br>(154.89 to<br>432.49)       | 1,181.06<br>(603.26 to<br>1,684.35)   | 1,269.41<br>(660.79 to<br>1,789.01)   | 1,097.94<br>(555.85 to<br>1,565.14)   | 8.88<br>(3.83 to<br>11.23)    | 35.43<br>(15.26 to<br>48.57)    | 38.86<br>(17.04 to<br>53.11)    | 31.71<br>(14.53 to<br>43.18)    |
| Amphetamine use disorders |                                       |                                       |                                       |                                       |                               |                                 |                                 |                                 |
|                           | 2,629.05<br>(1,474.77 to<br>3,228.92) | 5,061.20<br>(3,226.15 to<br>6,540.15) | 5,420.65<br>(3,501.58 to<br>7,038.91) | 4,711.40<br>(2,951.16 to<br>6,137.97) | 86.41<br>(60.46 to<br>102.29) | 195.79<br>(153.19 to<br>238.17) | 214.25<br>(167.52 to<br>260.58) | 175.59<br>(134.73 to<br>214.59) |
| Other drug use disorders  |                                       |                                       |                                       |                                       |                               |                                 |                                 |                                 |
|                           | 357.97<br>(275.29 to<br>457.46)       | 208.53<br>(128.93 to<br>300.73)       | 214.83<br>(131.17 to<br>311.46)       | 202.54<br>(125.25 to<br>290.76)       | 6.81<br>(5.25 to<br>8.76)     | 4.07<br>(2.58 to<br>5.81)       | 4.19<br>(2.64 to<br>6.01)       | 3.95<br>(2.52 to<br>5.64)       |
| Eating disorders          |                                       |                                       |                                       |                                       |                               |                                 |                                 |                                 |

| Netherlands                                                |                                               |                                                 |                                                 |                                                 |                                           |                                              |                                              |                                              |
|------------------------------------------------------------|-----------------------------------------------|-------------------------------------------------|-------------------------------------------------|-------------------------------------------------|-------------------------------------------|----------------------------------------------|----------------------------------------------|----------------------------------------------|
| Cause                                                      | YLLs (actual counts)                          |                                                 |                                                 |                                                 | Deaths (actual counts)                    |                                              |                                              |                                              |
|                                                            | 2016                                          | 2040 Forecast                                   | 2040 Better Scenario                            | 2040 Worse Scenario                             | 2016                                      | 2040 Forecast                                | 2040 Better Scenario                         | 2040 Worse Scenario                          |
| <b>Diabetes, urogenital, blood, and endocrine diseases</b> | <b>97,850.18</b><br>(89,996.17 to 107,380.99) | <b>188,252.61</b><br>(120,990.98 to 365,388.59) | <b>177,366.58</b><br>(115,285.57 to 343,243.78) | <b>208,550.06</b><br>(129,872.00 to 407,017.92) | <b>8,355.22</b><br>(7,722.43 to 9,083.00) | <b>21,528.20</b><br>(13,407.86 to 44,423.98) | <b>20,873.37</b><br>(13,202.78 to 43,044.14) | <b>22,978.63</b><br>(13,563.26 to 48,609.88) |
| Diabetes mellitus                                          | 38,567.19<br>(34,129.34 to 43,360.14)         | 48,648.16<br>(32,088.86 to 69,995.81)           | 42,635.68<br>(28,949.65 to 59,893.97)           | 55,069.88<br>(35,029.16 to 80,701.67)           | 2,987.90<br>(2,683.85 to 3,338.75)        | 4,840.97<br>(3,321.91 to 6,719.94)           | 4,453.50<br>(3,138.56 to 5,994.32)           | 5,166.35<br>(3,454.68 to 7,348.17)           |
| Acute glomerulonephritis                                   | 82.35<br>(75.12 to 89.79)                     | 67.70<br>(57.20 to 79.17)                       | 65.23<br>(55.03 to 76.52)                       | 70.07<br>(59.29 to 81.68)                       | 2.24<br>(2.00 to 2.49)                    | 2.07<br>(1.64 to 2.66)                       | 2.04<br>(1.61 to 2.65)                       | 2.06<br>(1.65 to 2.61)                       |
| Chronic kidney disease                                     | 26,496.95<br>(24,181.01 to 29,063.73)         | 80,887.60<br>(20,628.09 to 261,793.87)          | 74,929.72<br>(19,379.64 to 247,300.35)          | 97,558.23<br>(23,779.83 to 298,797.26)          | 2,594.01<br>(2,354.95 to 2,835.34)        | 9,991.35<br>(2,291.29 to 33,143.58)          | 9,448.81<br>(2,252.93 to 32,595.83)          | 11,676.28<br>(2,674.60 to 38,433.56)         |
| Chronic kidney disease due to diabetes mellitus            | 6,618.32<br>(5,968.77 to 7,365.57)            | 18,810.99<br>(5,310.08 to 60,333.45)            | 17,233.36<br>(4,933.11 to 57,106.46)            | 23,058.92<br>(6,249.99 to 72,867.78)            | 533.53<br>(475.40 to 598.34)              | 2,027.42<br>(503.81 to 6,815.50)             | 1,901.50<br>(485.52 to 6,557.44)             | 2,398.62<br>(576.29 to 7,699.69)             |
| Chronic kidney disease due to hypertension                 | 6,753.02<br>(5,942.41 to 7,683.83)            | 25,337.47<br>(5,489.29 to 87,282.58)            | 23,941.22<br>(5,318.12 to 86,017.41)            | 29,756.29<br>(6,258.03 to 92,908.53)            | 869.42<br>(762.49 to 993.45)              | 3,650.51<br>(836.22 to 12,878.73)            | 3,507.99<br>(832.24 to 12,706.14)            | 4,176.25<br>(917.68 to 14,142.06)            |
| Chronic kidney disease due to glomerulonephritis           | 4,216.37<br>(3,785.21 to 4,669.81)            | 11,195.08<br>(2,824.87 to 36,615.79)            | 10,226.54<br>(2,678.25 to 34,675.63)            | 13,726.96<br>(3,362.66 to 42,911.35)            | 361.86<br>(319.38 to 407.39)              | 1,271.35<br>(284.14 to 4,301.20)             | 1,182.05<br>(267.67 to 4,188.25)             | 1,516.51<br>(331.30 to 4,947.75)             |
| Chronic kidney disease due to other and unspecified causes | 8,909.25<br>(8,061.51 to 9,859.77)            | 25,544.06<br>(6,511.28 to 83,592.88)            | 23,528.60<br>(7,706.90 to 79,706.90)            | 31,016.06<br>(7,696.27 to 95,539.25)            | 829.20<br>(739.43 to 926.41)              | 3,042.07<br>(719.24 to 9,845.01)             | 2,857.27<br>(696.80 to 9,474.13)             | 3,584.89<br>(810.25 to 11,286.04)            |
| Urinary diseases and male infertility                      | 16,879.86<br>(15,184.52 to 18,757.74)         | 36,531.38<br>(30,692.23 to 42,569.65)           | 37,190.26<br>(31,252.54 to 43,492.59)           | 34,525.58<br>(28,544.52 to 40,385.40)           | 1,909.32<br>(1,706.88 to 2,115.45)        | 5,013.96<br>(3,969.24 to 6,020.02)           | 5,206.01<br>(4,152.30 to 6,211.22)           | 4,590.37<br>(3,535.30 to 5,604.31)           |
| Urinary tract infections                                   | 15,061.51<br>(13,490.20 to 16,841.27)         | 34,023.91<br>(28,315.63 to 40,118.78)           | 34,694.80<br>(28,859.79 to 40,997.58)           | 32,078.57<br>(26,329.31 to 38,080.12)           | 1,756.93<br>(1,561.59 to 1,967.74)        | 4,734.73<br>(3,670.35 to 5,730.11)           | 4,919.81<br>(3,881.61 to 5,903.21)           | 4,228.30<br>(3,304.44 to 5,271.30)           |
| Urolithiasis                                               | 667.04<br>(467.95 to 1,203.62)                | 989.01<br>(627.90 to 1,897.74)                  | 969.91<br>(605.68 to 1,868.62)                  | 979.27<br>(623.97 to 1,879.04)                  | 53.97<br>(34.84 to 105.22)                | 101.94<br>(58.61 to 211.91)                  | 102.53<br>(58.31 to 213.18)                  | 96.97<br>(56.58 to 202.87)                   |
| Other urinary diseases                                     | 1,151.31<br>(804.90 to 1,679.37)              | 1,516.46<br>(976.75 to 2,539.26)                | 1,525.55<br>(972.38 to 2,590.20)                | 1,467.74<br>(948.68 to 2,429.41)                | 177.30<br>(69.11 to 161.27)               | 98.43<br>(103.72 to 331.56)                  | 183.68<br>(107.40 to 347.41)                 | 165.10<br>(96.70 to 311.42)                  |
| Gynecological diseases                                     | 133.04<br>(103.43 to 199.93)                  | 106.92<br>(77.97 to 161.82)                     | 98.78<br>(70.95 to 145.42)                      | 113.16<br>(79.38 to 170.03)                     | 8.09<br>(6.17 to 10.78)                   | 8.00<br>(5.53 to 11.45)                      | 7.54<br>(5.22 to 10.75)                      | 8.10<br>(5.54 to 11.85)                      |
| Uterine fibroids                                           | 33.64<br>(24.95 to 56.93)                     | 18.16<br>(11.58 to 31.64)                       | 16.96<br>(10.78 to 29.11)                       | 19.30<br>(12.35 to 33.97)                       | 1.10<br>(0.82 to 1.70)                    | 0.68<br>(0.43 to 1.06)                       | 0.40<br>(0.20 to 1.02)                       | 0.70<br>(0.44 to 1.13)                       |
| Polycystic ovarian syndrome                                | 3.06<br>(1.64 to 6.20)                        | 1.02<br>(0.46 to 2.21)                          | 0.87<br>(0.39 to 1.88)                          | 1.20<br>(0.54 to 2.58)                          | 0.08<br>(0.04 to 0.16)                    | 0.03<br>(0.01 to 0.06)                       | 0.02<br>(0.01 to 0.06)                       | 0.03<br>(0.01 to 0.06)                       |
| Endometriosis                                              | 0.60<br>(0.29 to 1.15)                        | 0.50<br>(0.17 to 1.26)                          | 0.46<br>(0.15 to 1.13)                          | 0.55<br>(0.18 to 1.34)                          | 0.01<br>(0.01 to 0.03)                    | 0.01<br>(0.00 to 0.03)                       | 0.01<br>(0.00 to 0.03)                       | 0.01<br>(0.00 to 0.03)                       |
| Genital prolapse                                           | 34.06<br>(14.30 to 46.04)                     | 23.62<br>(9.50 to 38.53)                        | 21.87<br>(8.54 to 35.54)                        | 24.90<br>(10.03 to 40.60)                       | 2.73<br>(1.18 to 3.83)                    | 1.91<br>(0.77 to 3.26)                       | 1.80<br>(0.71 to 3.02)                       | 1.95<br>(0.76 to 3.29)                       |
| Other gynecological diseases                               | 61.68<br>(46.63 to 114.07)                    | 63.61<br>(42.80 to 110.09)                      | 58.62<br>(39.61 to 97.71)                       | 67.21<br>(44.84 to 115.36)                      | 4.17<br>(3.13 to 6.80)                    | 5.37<br>(3.37 to 8.31)                       | 5.07<br>(3.22 to 7.83)                       | 5.41<br>(3.41 to 8.54)                       |
| Hemoglobinopathies and hemolytic anemias                   | 3,497.79<br>(2,899.50 to 4,387.23)            | 4,069.87<br>(3,134.20 to 4,914.22)              | 4,041.79<br>(3,091.99 to 4,855.77)              | 3,969.54<br>(3,022.20 to 4,780.83)              | 301.82<br>(219.94 to 350.08)              | 467.19<br>(318.67 to 571.77)                 | 476.08<br>(329.42 to 584.79)                 | 437.27<br>(294.69 to 547.85)                 |
| Thalassemias                                               | 147.59<br>(105.94 to 225.88)                  | 58.47<br>(39.00 to 95.45)                       | 57.77<br>(38.70 to 94.44)                       | 59.34<br>(39.46 to 96.87)                       | 2.28<br>(1.68 to 3.51)                    | 1.08<br>(0.75 to 1.79)                       | 1.07<br>(0.74 to 1.78)                       | 1.09<br>(0.75 to 1.79)                       |

|                                                   |                                          |                                          |                                          |                                          |                                 |                                     |                                       |                                     |
|---------------------------------------------------|------------------------------------------|------------------------------------------|------------------------------------------|------------------------------------------|---------------------------------|-------------------------------------|---------------------------------------|-------------------------------------|
|                                                   | 181.02<br>(136.73 to<br>291.20)          | 194.67<br>(142.60 to<br>303.86)          | 184.84<br>(134.88 to<br>289.20)          | 203.03<br>(149.57 to<br>317.22)          | 4.91<br>(3.88 to<br>7.40)       | 8.21<br>(6.00 to<br>11.95)          | 7.87<br>(5.67 to<br>11.58)            | 8.42<br>(6.17 to<br>12.35)          |
| Sickle cell disorders                             |                                          |                                          |                                          |                                          |                                 |                                     |                                       |                                     |
|                                                   | 494.70<br>(391.14 to<br>685.12)          | 554.21<br>(417.54 to<br>780.05)          | 525.66<br>(394.93 to<br>743.53)          | 577.19<br>(432.59 to<br>796.40)          | 16.98<br>(12.96 to<br>22.94)    | 28.67<br>(20.38 to<br>39.16)        | 27.75<br>(19.46 to<br>38.35)          | 28.95<br>(20.50 to<br>39.73)        |
| G6PD deficiency                                   |                                          |                                          |                                          |                                          |                                 |                                     |                                       |                                     |
|                                                   | 2,674.48<br>(2,129.97 to<br>3,196.48)    | 3,262.53<br>(2,363.74 to<br>3,964.28)    | 3,273.52<br>(2,351.08 to<br>3,984.16)    | 3,129.98<br>(2,287.26 to<br>3,821.03)    | 277.64<br>(198.40 to<br>320.75) | 429.23<br>(284.38 to<br>532.35)     | 439.39<br>(295.29 to<br>546.44)       | 398.82<br>(262.55 to<br>505.29)     |
| Other hemoglobinopathies and hemolytic anemias    |                                          |                                          |                                          |                                          |                                 |                                     |                                       |                                     |
|                                                   | 12,192.99<br>(10,742.19 to<br>16,077.98) | 17,940.98<br>(15,210.83 to<br>22,801.11) | 18,405.10<br>(15,711.96 to<br>23,304.68) | 17,243.60<br>(14,705.87 to<br>22,191.71) | 551.85<br>(474.23 to<br>704.61) | 1,204.67<br>(970.84 to<br>1,520.15) | 1,279.39<br>(1,054.57 to<br>1,598.20) | 1,098.20<br>(888.72 to<br>1,376.51) |
| Endocrine, metabolic, blood, and immune disorders |                                          |                                          |                                          |                                          |                                 |                                     |                                       |                                     |

| Netherlands                                   |                                              |                                              |                                              |                                              |                                         |                                           |                                           |                                           |
|-----------------------------------------------|----------------------------------------------|----------------------------------------------|----------------------------------------------|----------------------------------------------|-----------------------------------------|-------------------------------------------|-------------------------------------------|-------------------------------------------|
| Cause                                         | YLLs (actual counts)                         |                                              |                                              |                                              | Deaths (actual counts)                  |                                           |                                           |                                           |
|                                               | 2016                                         | 2040 Forecast                                | 2040 Better Scenario                         | 2040 Worse Scenario                          | 2016                                    | 2040 Forecast                             | 2040 Better Scenario                      | 2040 Worse Scenario                       |
| <b>Musculoskeletal disorders</b>              | <b>7,923.51</b><br>(6,909.59 to 11,151.37)   | <b>12,752.85</b><br>(10,668.35 to 18,318.29) | <b>12,677.78</b><br>(10,633.21 to 18,213.30) | <b>12,638.49</b><br>(10,477.59 to 18,067.45) | <b>579.51</b><br>(504.91 to 814.33)     | <b>1,190.81</b><br>(974.98 to 1,745.78)   | <b>1,207.07</b><br>(990.50 to 1,798.68)   | <b>1,138.44</b><br>(923.08 to 1,615.46)   |
| Rheumatoid arthritis                          | 2,095.42<br>(1,459.56 to 2,656.70)           | 3,904.26<br>(2,776.59 to 5,277.63)           | 3,706.18<br>(2,611.08 to 5,007.17)           | 4,119.56<br>(2,889.90 to 5,620.69)           | 163.18<br>(110.98 to 202.36)            | 368.52<br>(250.80 to 492.23)              | 355.40<br>(244.34 to 474.74)              | 376.72<br>(256.51 to 516.20)              |
| Other musculoskeletal disorders               | 5,828.09<br>(5,014.18 to 8,759.78)           | 8,848.59<br>(7,263.44 to 13,663.28)          | 8,971.59<br>(7,377.57 to 13,690.96)          | 8,518.93<br>(6,959.72 to 13,115.01)          | 416.33<br>(357.03 to 642.44)            | 822.30<br>(646.43 to 1,243.42)            | 851.67<br>(674.93 to 1,293.02)            | 761.72<br>(591.57 to 1,149.70)            |
| <b>Other non-communicable diseases</b>        | <b>31,480.14</b><br>(26,288.50 to 38,895.74) | <b>39,723.53</b><br>(31,054.08 to 48,931.71) | <b>38,849.71</b><br>(29,765.02 to 48,181.69) | <b>40,281.96</b><br>(31,575.52 to 50,167.58) | <b>1,021.89</b><br>(704.99 to 1,315.67) | <b>2,486.31</b><br>(1,383.33 to 3,229.31) | <b>2,552.42</b><br>(1,403.75 to 3,284.10) | <b>2,336.96</b><br>(1,343.21 to 3,039.33) |
| Congenital birth defects                      | 24,179.45<br>(20,009.44 to 31,605.08)        | 21,230.91<br>(16,972.06 to 26,995.40)        | 20,084.76<br>(15,955.05 to 25,399.99)        | 22,577.19<br>(17,758.74 to 28,745.19)        | 388.31<br>(331.80 to 462.90)            | 386.53<br>(314.92 to 469.94)              | 371.80<br>(302.25 to 450.76)              | 403.20<br>(325.91 to 493.19)              |
| Neural tube defects                           | 822.12<br>(456.10 to 1,155.78)               | 329.56<br>(164.15 to 549.77)                 | 295.68<br>(146.75 to 483.01)                 | 369.76<br>(186.67 to 615.29)                 | 10.73<br>(6.37 to 14.61)                | 4.83<br>(2.71 to 7.46)                    | 4.35<br>(2.50 to 6.70)                    | 5.38<br>(3.01 to 8.35)                    |
| Congenital heart anomalies                    | 6,822.69<br>(5,356.24 to 8,911.36)           | 3,747.59<br>(2,613.44 to 5,131.40)           | 3,335.95<br>(2,352.48 to 4,645.62)           | 4,232.98<br>(2,891.72 to 5,949.47)           | 98.90<br>(78.77 to 133.37)              | 57.39<br>(41.85 to 81.81)                 | 51.30<br>(37.39 to 72.43)                 | 64.43<br>(46.11 to 92.60)                 |
| Orofacial clefts                              | 6.80<br>(3.06 to 16.14)                      | 3.46<br>(1.22 to 8.55)                       | 2.98<br>(1.04 to 7.28)                       | 4.06<br>(1.38 to 10.00)                      | 0.08<br>(0.04 to 0.19)                  | 0.04<br>(0.01 to 0.10)                    | 0.03<br>(0.01 to 0.08)                    | 0.05<br>(0.02 to 0.12)                    |
| Down syndrome                                 | 4,295.20<br>(2,219.78 to 5,259.45)           | 5,929.06<br>(3,123.02 to 7,535.22)           | 5,981.55<br>(3,211.18 to 7,566.91)           | 5,870.66<br>(3,080.15 to 7,485.15)           | 114.11<br>(54.20 to 142.27)             | 163.68<br>(80.71 to 211.19)               | 165.59<br>(82.05 to 212.98)               | 161.26<br>(77.34 to 208.82)               |
| Other chromosomal abnormalities               | 3,807.91<br>(2,295.63 to 8,746.56)           | 5,876.54<br>(3,789.40 to 10,729.33)          | 5,596.77<br>(3,610.26 to 10,148.00)          | 6,201.18<br>(3,943.03 to 11,433.51)          | 52.80<br>(34.45 to 110.05)              | 86.33<br>(59.52 to 149.68)                | 82.60<br>(57.32 to 142.37)                | 90.53<br>(61.98 to 156.36)                |
| Congenital musculoskeletal and limb anomalies | 973.42<br>(654.31 to 2,079.61)               | 667.20<br>(426.29 to 1,379.62)               | 608.17<br>(392.85 to 1,237.41)               | 735.07<br>(463.30 to 1,580.69)               | 13.94<br>(10.06 to 26.58)               | 10.20<br>(7.08 to 18.28)                  | 9.34<br>(6.52 to 16.80)                   | 11.16<br>(7.62 to 20.14)                  |
| Urogenital congenital anomalies               | 528.43<br>(301.02 to 906.13)                 | 340.17<br>(175.79 to 610.01)                 | 314.17<br>(160.90 to 573.40)                 | 370.44<br>(191.94 to 658.95)                 | 7.21<br>(4.40 to 12.35)                 | 4.88<br>(2.89 to 8.73)                    | 4.52<br>(2.68 to 8.27)                    | 5.28<br>(3.05 to 9.35)                    |
| Digestive congenital anomalies                | 1,557.65<br>(1,000.63 to 2,330.79)           | 976.05<br>(532.94 to 1,555.55)               | 877.40<br>(476.87 to 1,364.46)               | 1,093.33<br>(591.92 to 1,730.62)             | 19.39<br>(12.79 to 28.35)               | 12.35<br>(7.17 to 19.00)                  | 11.13<br>(6.40 to 16.89)                  | 13.80<br>(8.01 to 21.52)                  |
| Other congenital birth defects                | 5,365.22<br>(3,890.72 to 7,816.88)           | 3,361.26<br>(2,155.31 to 5,030.03)           | 3,072.08<br>(1,982.85 to 4,602.50)           | 3,699.71<br>(2,337.83 to 5,607.74)           | 71.15<br>(53.57 to 101.54)              | 46.84<br>(31.92 to 68.96)                 | 42.94<br>(29.62 to 62.84)                 | 51.31<br>(34.53 to 75.15)                 |
| Skin and subcutaneous diseases                | 6,262.35<br>(5,362.30 to 10,252.18)          | 17,822.90<br>(9,668.32 to 26,616.45)         | 18,147.89<br>(9,744.11 to 26,774.41)         | 16,972.44<br>(9,235.42 to 25,426.69)         | 621.53<br>(316.94 to 912.66)            | 2,092.01<br>(1,006.28 to 2,877.99)        | 2,173.46<br>(1,031.46 to 2,941.49)        | 1,925.26<br>(941.58 to 2,693.15)          |
| Cellulitis                                    | 949.80<br>(492.65 to 2,567.91)               | 2,635.12<br>(1,352.92 to 7,123.80)           | 2,686.59<br>(1,378.77 to 7,291.05)           | 2,531.32<br>(1,302.12 to 6,829.39)           | 68.65<br>(37.19 to 182.12)              | 229.19<br>(118.51 to 614.53)              | 239.16<br>(124.36 to 640.36)              | 212.39<br>(109.19 to 571.76)              |
| Pyoderma                                      | 3,305.71<br>(1,428.42 to 4,427.10)           | 10,915.56<br>(4,373.36 to 14,879.28)         | 11,159.10<br>(4,428.65 to 15,265.79)         | 10,360.73<br>(4,157.09 to 14,053.26)         | 305.85<br>(108.68 to 428.63)            | 1,258.34<br>(424.01 to 1,896.58)          | 1,315.73<br>(440.55 to 1,896.77)          | 1,151.97<br>(393.19 to 1,671.30)          |
| Decubitus ulcer                               | 1,771.95<br>(914.93 to 3,273.92)             | 3,814.53<br>(1,877.32 to 7,474.18)           | 3,838.07<br>(1,893.05 to 7,454.83)           | 3,641.88<br>(1,787.72 to 7,181.90)           | 225.56<br>(103.27 to 392.71)            | 553.80<br>(245.94 to 1,049.28)            | 566.03<br>(253.94 to 1,079.40)            | 514.07<br>(220.00 to 983.78)              |
| Other skin and subcutaneous diseases          | 235.09<br>(142.61 to 481.81)                 | 457.69<br>(274.86 to 884.63)                 | 464.13<br>(277.40 to 890.09)                 | 438.50<br>(265.43 to 862.94)                 | 21.47<br>(11.66 to 39.26)               | 50.68<br>(26.75 to 95.91)                 | 52.54<br>(27.12 to 98.34)                 | 46.84<br>(24.39 to 89.07)                 |
| Sudden infant death syndrome                  | 1,038.14<br>(723.40 to 1,431.53)             | 669.72<br>(386.86 to 1,038.05)               | 617.05<br>(353.43 to 960.97)                 | 732.32<br>(418.52 to 1,134.63)               | 12.05<br>(8.40 to 16.62)                | 7.77<br>(4.49 to 12.05)                   | 7.16<br>(4.10 to 11.15)                   | 8.50<br>(4.86 to 13.17)                   |

|                          |                                             |                                            |                                            |                                             |                                       |                                        |                                        |                                        |
|--------------------------|---------------------------------------------|--------------------------------------------|--------------------------------------------|---------------------------------------------|---------------------------------------|----------------------------------------|----------------------------------------|----------------------------------------|
| Injuries                 | 151,483.60<br>(130,118.36 to<br>168,817.93) | 133,311.13<br>(99,578.44 to<br>184,783.67) | 123,922.26<br>(92,833.77 to<br>173,469.65) | 153,143.34<br>(113,598.71 to<br>213,762.00) | 6,670.65<br>(5,014.15 to<br>7,518.06) | 8,893.13<br>(5,753.48 to<br>11,044.83) | 8,820.42<br>(5,663.76 to<br>10,839.85) | 9,045.01<br>(5,934.05 to<br>11,283.02) |
| Transport injuries       | 30,065.91<br>(26,284.05 to<br>34,036.30)    | 19,420.52<br>(12,130.25 to<br>30,999.49)   | 15,958.39<br>(10,333.23 to<br>24,566.89)   | 32,048.42<br>(19,427.29 to<br>51,669.49)    | 917.76<br>(828.38 to<br>1,021.05)     | 848.75<br>(575.50 to<br>1,256.26)      | 744.40<br>(522.56 to<br>1,060.84)      | 1,212.18<br>(787.67 to<br>1,849.67)    |
| Road injuries            | 28,109.70<br>(24,571.43 to<br>31,936.77)    | 17,915.78<br>(11,232.28 to<br>28,244.73)   | 14,637.46<br>(9,504.95 to<br>22,568.04)    | 30,278.03<br>(18,334.54 to<br>48,808.83)    | 867.14<br>(782.39 to<br>965.05)       | 800.89<br>(545.34 to<br>1,174.96)      | 701.51<br>(494.43 to<br>992.26)        | 1,157.59<br>(755.41 to<br>1,765.10)    |
| Pedestrian road injuries | 3,144.48<br>(2,431.83 to<br>4,150.27)       | 1,541.75<br>(1,060.39 to<br>2,299.06)      | 1,232.32<br>(869.93 to<br>1,808.93)        | 2,440.16<br>(1,570.52 to<br>3,712.31)       | 131.55<br>(111.84 to<br>176.59)       | 104.43<br>(72.75 to<br>154.45)         | 88.02<br>(63.63 to<br>129.69)          | 147.40<br>(99.05 to<br>219.51)         |

| Netherlands                                     |                                                               |                                                               |                                                               |                                                               |                                                            |                                                            |                                                            |                                                            |
|-------------------------------------------------|---------------------------------------------------------------|---------------------------------------------------------------|---------------------------------------------------------------|---------------------------------------------------------------|------------------------------------------------------------|------------------------------------------------------------|------------------------------------------------------------|------------------------------------------------------------|
| Cause                                           | YLLs (actual counts)                                          |                                                               |                                                               |                                                               | Deaths (actual counts)                                     |                                                            |                                                            |                                                            |
|                                                 | 2016                                                          | 2040 Forecast                                                 | 2040 Better Scenario                                          | 2040 Worse Scenario                                           | 2016                                                       | 2040 Forecast                                              | 2040 Better Scenario                                       | 2040 Worse Scenario                                        |
| Cyclist road injuries                           | 5,607.65<br>(4,153.57 to<br>6,526.49)                         | 4,451.23<br>(2,959.15 to<br>6,766.82)                         | 3,796.98<br>(2,573.85 to<br>5,649.00)                         | 6,932.08<br>(4,387.22 to<br>10,841.40)                        | 206.76<br>(164.22 to<br>237.98)                            | 245.59<br>(159.46 to<br>369.54)                            | 224.89<br>(150.77 to<br>325.06)                            | 322.99<br>(201.89 to<br>496.81)                            |
| Motorcyclist road injuries                      | 4,691.55<br>(2,813.79 to<br>5,746.12)                         | 3,885.07<br>(2,008.11 to<br>7,100.82)                         | 3,303.98<br>(1,789.23 to<br>5,904.18)                         | 5,771.59<br>(2,859.68 to<br>10,828.65)                        | 107.40<br>(70.66 to<br>129.43)                             | 109.66<br>(63.87 to<br>183.87)                             | 97.86<br>(59.90 to<br>160.50)                              | 147.91<br>(81.49 to<br>256.37)                             |
| Motor vehicle road injuries                     | 14,364.54<br>(12,346.94 to<br>17,720.63)                      | 7,866.87<br>(4,734.97 to<br>12,987.45)                        | 6,164.13<br>(3,831.55 to<br>9,990.56)                         | 14,848.24<br>(8,552.39 to<br>24,528.49)                       | 411.80<br>(359.05 to<br>495.91)                            | 332.74<br>(223.02 to<br>509.11)                            | 283.19<br>(195.67 to<br>419.98)                            | 527.54<br>(337.18 to<br>821.72)                            |
| Other road injuries                             | 301.48<br>(169.26 to<br>513.45)                               | 170.86<br>(74.12 to<br>295.70)                                | 140.05<br>(60.10 to<br>237.95)                                | 285.96<br>(131.05 to<br>506.89)                               | 9.63<br>(3.90 to<br>13.33)                                 | 8.48<br>(2.59 to<br>15.17)                                 | 7.56<br>(2.27 to<br>13.39)                                 | 11.74<br>(3.84 to<br>20.90)                                |
| Other transport injuries                        | 1,956.20<br>(1,638.27 to<br>2,306.91)                         | 1,504.74<br>(894.57 to<br>2,455.69)                           | 1,320.93<br>(811.84 to<br>2,107.96)                           | 1,770.38<br>(1,042.09 to<br>2,953.24)                         | 50.62<br>(43.20 to<br>59.07)                               | 47.86<br>(29.82 to<br>75.45)                               | 42.89<br>(27.75 to<br>66.84)                               | 54.59<br>(32.59 to<br>87.47)                               |
| Unintentional injuries                          | <b>45,970.81</b><br><b>(34,202.62 to</b><br><b>51,956.67)</b> | <b>55,233.28</b><br><b>(35,751.53 to</b><br><b>64,341.35)</b> | <b>55,565.75</b><br><b>(36,034.59 to</b><br><b>64,702.88)</b> | <b>53,626.75</b><br><b>(34,944.38 to</b><br><b>63,068.14)</b> | <b>3,639.58</b><br><b>(2,157.74 to</b><br><b>4,266.67)</b> | <b>6,101.21</b><br><b>(3,322.36 to</b><br><b>7,471.15)</b> | <b>6,305.81</b><br><b>(3,447.50 to</b><br><b>7,652.60)</b> | <b>5,658.71</b><br><b>(3,017.36 to</b><br><b>7,112.38)</b> |
| Falls                                           | 28,478.41<br>(16,716.15 to<br>33,258.48)                      | 38,679.91<br>(20,310.79 to<br>46,720.15)                      | 39,292.61<br>(20,574.59 to<br>47,210.75)                      | 36,970.19<br>(19,223.50 to<br>45,193.00)                      | 2,724.33<br>(1,356.67 to<br>3,275.75)                      | 4,733.62<br>(2,182.48 to<br>5,983.41)                      | 4,911.68<br>(2,262.97 to<br>6,161.49)                      | 4,361.74<br>(1,989.66 to<br>5,659.58)                      |
| Drowning                                        | 3,475.98<br>(3,095.82 to<br>3,874.72)                         | 2,084.27<br>(1,598.96 to<br>2,816.11)                         | 1,955.33<br>(1,508.13 to<br>2,580.31)                         | 2,253.74<br>(1,683.91 to<br>3,171.59)                         | 104.23<br>(94.70 to<br>114.34)                             | 87.40<br>(67.88 to<br>116.29)                              | 84.46<br>(66.12 to<br>109.99)                              | 90.34<br>(68.03 to<br>124.95)                              |
| Fire, heat, and hot substances                  | 2,054.94<br>(1,816.94 to<br>2,599.80)                         | 2,098.46<br>(1,588.92 to<br>2,832.41)                         | 2,005.96<br>(1,538.61 to<br>2,620.43)                         | 2,176.98<br>(1,633.70 to<br>2,989.14)                         | 147.40<br>(105.63 to<br>165.97)                            | 224.42<br>(133.29 to<br>306.56)                            | 221.68<br>(133.92 to<br>296.16)                            | 220.59<br>(129.07 to<br>308.35)                            |
| Poisonings                                      | 305.19<br>(412.23 to<br>935.00)                               | 233.33<br>(160.86 to<br>423.13)                               | 212.00<br>(148.99 to<br>375.33)                               | 259.99<br>(176.05 to<br>475.86)                               | 17.08<br>(14.43 to<br>27.09)                               | 11.94<br>(8.72 to<br>17.27)                                | 11.24<br>(8.37 to<br>15.83)                                | 12.54<br>(8.95 to<br>18.80)                                |
| Exposure to mechanical forces                   | 3,590.61<br>(2,929.61 to<br>4,192.15)                         | 2,859.73<br>(2,155.06 to<br>3,337.92)                         | 2,773.08<br>(2,075.92 to<br>3,231.11)                         | 2,923.33<br>(2,187.84 to<br>3,483.41)                         | 146.80<br>(104.68 to<br>167.45)                            | 198.13<br>(123.43 to<br>240.67)                            | 199.98<br>(125.03 to<br>242.49)                            | 189.07<br>(119.20 to<br>232.28)                            |
| Unintentional firearm injuries                  | 415.71<br>(247.98 to<br>481.45)                               | 303.31<br>(133.38 to<br>369.63)                               | 301.51<br>(129.96 to<br>366.90)                               | 299.61<br>(133.93 to<br>364.73)                               | 23.90<br>(8.74 to<br>28.45)                                | 27.65<br>(7.15 to<br>36.03)                                | 28.41<br>(7.31 to<br>36.72)                                | 25.73<br>(6.81 to<br>33.45)                                |
| Unintentional suffocation                       | 758.19<br>(571.07 to<br>1,050.01)                             | 478.96<br>(358.13 to<br>657.53)                               | 457.69<br>(345.15 to<br>620.69)                               | 504.39<br>(371.31 to<br>702.91)                               | 16.76<br>(12.47 to<br>20.57)                               | 14.16<br>(8.54 to<br>17.93)                                | 13.92<br>(8.33 to<br>17.61)                                | 14.23<br>(8.82 to<br>18.09)                                |
| Other exposure to mechanical forces             | 2,416.72<br>(1,837.33 to<br>2,842.32)                         | 2,077.45<br>(1,511.00 to<br>2,474.85)                         | 2,013.87<br>(1,461.02 to<br>2,383.66)                         | 2,119.33<br>(1,536.81 to<br>2,567.27)                         | 106.14<br>(78.87 to<br>122.04)                             | 156.32<br>(102.84 to<br>192.36)                            | 157.65<br>(104.49 to<br>193.80)                            | 149.11<br>(97.18 to<br>185.65)                             |
| Adverse effects of medical treatment            | 2,793.35<br>(2,177.34 to<br>4,262.32)                         | 3,919.66<br>(3,118.74 to<br>5,789.13)                         | 3,962.02<br>(3,163.72 to<br>5,826.17)                         | 3,794.72<br>(3,020.89 to<br>5,610.29)                         | 204.25<br>(165.98 to<br>290.70)                            | 377.77<br>(300.63 to<br>525.84)                            | 391.66<br>(312.87 to<br>542.85)                            | 350.20<br>(276.15 to<br>490.70)                            |
| Animal contact                                  | 389.11<br>(269.63 to<br>473.96)                               | 383.30<br>(249.48 to<br>466.66)                               | 372.54<br>(242.00 to<br>454.71)                               | 392.30<br>(254.93 to<br>481.56)                               | 15.27<br>(9.84 to<br>18.18)                                | 21.79<br>(12.95 to<br>26.74)                               | 21.91<br>(13.09 to<br>26.83)                               | 21.11<br>(12.47 to<br>26.15)                               |
| Venomous animal contact                         | 112.87<br>(75.19 to<br>139.83)                                | 106.54<br>(59.66 to<br>135.98)                                | 104.99<br>(58.00 to<br>135.09)                                | 107.85<br>(61.93 to<br>138.88)                                | 4.14<br>(2.05 to<br>5.25)                                  | 5.84<br>(2.18 to<br>8.12)                                  | 5.99<br>(2.21 to<br>8.37)                                  | 5.56<br>(2.16 to<br>7.66)                                  |
| Non-venomous animal contact                     | 276.24<br>(190.13 to<br>345.34)                               | 276.76<br>(178.39 to<br>350.09)                               | 267.55<br>(175.04 to<br>336.83)                               | 284.45<br>(182.84 to<br>363.04)                               | 11.13<br>(7.49 to<br>13.88)                                | 15.95<br>(10.33 to<br>20.58)                               | 15.92<br>(10.45 to<br>20.64)                               | 15.55<br>(10.08 to<br>19.98)                               |
| Foreign body                                    | 3,574.98<br>(3,049.99 to<br>4,730.40)                         | 3,817.31<br>(3,001.13 to<br>4,475.10)                         | 3,874.69<br>(3,057.76 to<br>4,506.21)                         | 3,702.42<br>(2,927.18 to<br>4,377.11)                         | 207.32<br>(151.99 to<br>247.19)                            | 325.29<br>(213.07 to<br>414.70)                            | 341.37<br>(223.83 to<br>432.77)                            | 298.18<br>(192.52 to<br>377.16)                            |
| Pulmonary aspiration and foreign body in airway | 3,315.63<br>(2,806.41 to<br>4,515.64)                         | 3,530.63<br>(2,824.06 to<br>4,184.63)                         | 3,575.81<br>(2,867.49 to<br>4,235.12)                         | 3,431.06<br>(2,741.89 to<br>4,106.87)                         | 193.22<br>(143.84 to<br>230.38)                            | 301.32<br>(201.43 to<br>382.87)                            | 315.52<br>(211.12 to<br>400.71)                            | 276.76<br>(184.54 to<br>350.15)                            |



|                                      |                                                               |                                                               |                                                               |                                                                |                                                            |                                                            |                                                            |                                                            |
|--------------------------------------|---------------------------------------------------------------|---------------------------------------------------------------|---------------------------------------------------------------|----------------------------------------------------------------|------------------------------------------------------------|------------------------------------------------------------|------------------------------------------------------------|------------------------------------------------------------|
|                                      | 259.35<br>(170.67 to<br>314.55)                               | 286.68<br>(141.06 to<br>369.54)                               | 298.88<br>(143.05 to<br>386.97)                               | 271.37<br>(138.43 to<br>346.65)                                | 14.10<br>(5.05 to<br>18.91)                                | 23.96<br>(5.76 to<br>35.27)                                | 25.85<br>(6.07 to<br>37.97)                                | 21.41<br>(5.38 to<br>31.93)                                |
| Foreign body in other body part      | 651.55<br>(477.55 to<br>1,110.92)                             | 948.21<br>(614.28 to<br>1,399.13)                             | 936.14<br>(599.59 to<br>1,342.98)                             | 935.57<br>(608.27 to<br>1,392.63)                              | 55.86<br>(34.00 to<br>76.96)                               | 108.65<br>(59.42 to<br>145.94)                             | 110.22<br>(60.56 to<br>147.66)                             | 102.50<br>(56.52 to<br>138.56)                             |
| Environmental heat and cold exposure | 456.69<br>(394.65 to<br>525.76)                               | 199.11<br>(162.03 to<br>242.73)                               | 181.38<br>(146.79 to<br>219.18)                               | 217.52<br>(172.72 to<br>275.71)                                | 17.05<br>(15.17 to<br>19.22)                               | 12.20<br>(9.77 to<br>14.91)                                | 11.62<br>(9.36 to<br>14.20)                                | 12.44<br>(9.58 to<br>15.54)                                |
| Other unintentional injuries         | <b>75,369.05</b><br><b>(64,042.39 to</b><br><b>89,184.87)</b> | <b>56,672.09</b><br><b>(36,475.15 to</b><br><b>84,163.50)</b> | <b>50,400.30</b><br><b>(34,149.41 to</b><br><b>72,178.48)</b> | <b>65,478.41</b><br><b>(39,797.09 to</b><br><b>100,110.93)</b> | <b>2,111.61</b><br><b>(1,794.58 to</b><br><b>2,447.65)</b> | <b>1,890.22</b><br><b>(1,257.04 to</b><br><b>2,759.82)</b> | <b>1,716.52</b><br><b>(1,198.68 to</b><br><b>2,417.18)</b> | <b>2,122.33</b><br><b>(1,320.45 to</b><br><b>3,147.73)</b> |
| Self-harm and interpersonal violence |                                                               |                                                               |                                                               |                                                                |                                                            |                                                            |                                                            |                                                            |

| Netherlands                                                                         |                                         |                                               |                                               |                                               |                                      |                                         |                                         |                                         |
|-------------------------------------------------------------------------------------|-----------------------------------------|-----------------------------------------------|-----------------------------------------------|-----------------------------------------------|--------------------------------------|-----------------------------------------|-----------------------------------------|-----------------------------------------|
| Cause                                                                               | YLLs (actual counts)                    |                                               |                                               |                                               | Deaths (actual counts)               |                                         |                                         |                                         |
|                                                                                     | 2016                                    | 2040 Forecast                                 | 2040 Better Scenario                          | 2040 Worse Scenario                           | 2016                                 | 2040 Forecast                           | 2040 Better Scenario                    | 2040 Worse Scenario                     |
| Self-harm                                                                           | 69,004.92<br>(58,539.50 to 83,466.56)   | 53,272.08<br>(33,099.29 to 80,152.79)         | 47,232.65<br>(31,050.83 to 68,972.22)         | 61,770.67<br>(36,386.65 to 95,444.05)         | 1,962.31<br>(1,655.85 to 2,304.40)   | 1,792.13<br>(1,175.54 to 2,666.12)      | 1,623.89<br>(1,118.82 to 2,317.51)      | 2,017.73<br>(1,226.44 to 3,036.70)      |
| Self-harm by firearm                                                                | 1,949.08<br>(1,148.39 to 2,822.68)      | 1,273.12<br>(642.57 to 2,228.09)              | 1,115.70<br>(582.27 to 1,917.31)              | 1,490.65<br>(719.00 to 2,721.76)              | 68.00<br>(41.20 to 91.38)            | 58.70<br>(31.46 to 98.40)               | 53.61<br>(29.81 to 86.66)               | 65.14<br>(32.94 to 112.98)              |
| Self-harm by other specified means                                                  | 67,055.83<br>(56,832.92 to 81,289.88)   | 51,998.96<br>(32,317.84 to 78,509.03)         | 46,116.96<br>(30,254.28 to 67,087.59)         | 60,280.02<br>(35,493.50 to 93,144.33)         | 1,894.31<br>(1,600.91 to 2,232.52)   | 1,733.43<br>(1,142.62 to 2,570.11)      | 1,570.28<br>(1,081.80 to 2,239.59)      | 1,952.58<br>(1,190.27 to 2,931.62)      |
| Interpersonal violence                                                              | 6,364.14<br>(4,030.23 to 8,122.55)      | 3,400.01<br>(2,144.68 to 4,709.45)            | 3,167.65<br>(2,004.02 to 4,307.02)            | 3,707.74<br>(2,327.67 to 5,170.30)            | 149.30<br>(99.80 to 188.37)          | 98.09<br>(66.71 to 134.41)              | 92.63<br>(64.23 to 126.99)              | 104.60<br>(69.49 to 145.47)             |
| Physical violence by firearm                                                        | 1,624.50<br>(459.62 to 2,255.93)        | 748.25<br>(238.40 to 1,084.75)                | 697.21<br>(227.16 to 994.25)                  | 809.99<br>(255.79 to 1,188.53)                | 34.51<br>(10.96 to 47.23)            | 17.22<br>(6.48 to 24.14)                | 16.16<br>(6.23 to 22.35)                | 18.44<br>(6.83 to 26.52)                |
| Physical violence by sharp object                                                   | 2,089.66<br>(1,184.04 to 2,816.84)      | 1,175.90<br>(672.93 to 1,569.39)              | 1,117.95<br>(648.77 to 1,490.75)              | 1,244.95<br>(690.23 to 1,680.20)              | 51.34<br>(31.86 to 69.56)            | 35.61<br>(24.23 to 49.10)               | 34.44<br>(23.63 to 47.78)               | 36.64<br>(23.80 to 50.48)               |
| Physical violence by other means                                                    | 2,649.98<br>(1,964.15 to 4,359.82)      | 1,475.86<br>(958.51 to 2,496.03)              | 1,352.49<br>(883.25 to 2,228.02)              | 1,652.80<br>(1,020.42 to 2,792.08)            | 63.46<br>(45.90 to 102.02)           | 45.26<br>(28.89 to 73.93)               | 42.03<br>(27.32 to 67.10)               | 49.53<br>(30.36 to 82.06)               |
| <b>Forces of nature, conflict and terrorism, and executions and police conflict</b> | <b>77.83</b><br><b>(71.29 to 84.43)</b> | <b>1,995.24</b><br><b>(0.00 to 10,903.31)</b> | <b>1,997.82</b><br><b>(0.00 to 10,907.25)</b> | <b>1,989.76</b><br><b>(0.00 to 10,895.70)</b> | <b>1.69</b><br><b>(1.56 to 1.84)</b> | <b>52.95</b><br><b>(0.00 to 279.85)</b> | <b>53.69</b><br><b>(0.00 to 285.28)</b> | <b>51.80</b><br><b>(0.00 to 273.08)</b> |
| Exposure to forces of nature                                                        | 0.00<br>(0.00 to 0.00)                  | 1,786.02<br>(0.00 to 264.62)                  | 1,788.45<br>(0.00 to 264.69)                  | 1,780.84<br>(0.00 to 264.33)                  | 0.00<br>(0.00 to 0.00)               | 48.00<br>(7.40 to 0.00)                 | 48.66<br>(0.00 to 7.18)                 | 46.96<br>(0.00 to 6.95)                 |
| Conflict and terrorism                                                              | 0.00<br>(0.00 to 0.00)                  | 209.23<br>(0.00 to 1,387.68)                  | 209.38<br>(0.00 to 1,383.78)                  | 208.92<br>(0.00 to 1,393.41)                  | 0.00<br>(0.00 to 0.00)               | 4.95<br>(0.00 to 28.46)                 | 5.04<br>(0.00 to 28.46)                 | 4.84<br>(0.00 to 28.44)                 |
| Executions and police conflict                                                      | 77.83<br>(71.29 to 84.43)               | 0.00<br>(0.00 to 0.00)                        | 0.00<br>(0.00 to 0.00)                        | 0.00<br>(0.00 to 0.00)                        | 1.69<br>(1.56 to 1.84)               | 0.00<br>(0.00 to 0.00)                  | 0.00<br>(0.00 to 0.00)                  | 0.00<br>(0.00 to 0.00)                  |

| Norway                                                                   |                                                 |                                                 |                                                 |                                                   |                                              |                                              |                                              |                                              |
|--------------------------------------------------------------------------|-------------------------------------------------|-------------------------------------------------|-------------------------------------------------|---------------------------------------------------|----------------------------------------------|----------------------------------------------|----------------------------------------------|----------------------------------------------|
| Cause                                                                    | YLLs (actual counts)                            |                                                 |                                                 |                                                   | Deaths (actual counts)                       |                                              |                                              |                                              |
|                                                                          | 2016                                            | 2040 Forecast                                   | 2040 Better Scenario                            | 2040 Worse Scenario                               | 2016                                         | 2040 Forecast                                | 2040 Better Scenario                         | 2040 Worse Scenario                          |
| <b>All causes</b>                                                        | <b>578,517.48</b><br>(526,671.52 to 632,336.88) | <b>733,320.04</b><br>(626,215.93 to 845,533.45) | <b>656,581.02</b><br>(563,430.76 to 753,572.32) | <b>883,418.76</b><br>(740,094.59 to 1,030,890.88) | <b>41,871.42</b><br>(38,554.94 to 45,364.89) | <b>63,049.79</b><br>(55,565.56 to 71,983.72) | <b>57,997.51</b><br>(51,528.86 to 65,523.97) | <b>71,970.60</b><br>(63,267.53 to 82,166.09) |
| <b>Communicable, maternal, neonatal, and nutritional diseases</b>        | <b>26,981.74</b><br>(23,898.48 to 30,172.06)    | <b>41,802.55</b><br>(34,424.06 to 51,027.13)    | <b>40,277.28</b><br>(33,599.15 to 47,803.88)    | <b>46,072.53</b><br>(37,067.55 to 58,185.93)      | <b>2,361.72</b><br>(2,045.12 to 2,694.58)    | <b>4,850.94</b><br>(3,852.21 to 6,272.33)    | <b>4,885.67</b><br>(3,951.52 to 6,141.16)    | <b>5,047.55</b><br>(3,918.49 to 6,792.25)    |
| <b>HIV/AIDS and tuberculosis</b>                                         | <b>1,005.11</b><br>(922.26 to 1,094.93)         | <b>858.72</b><br>(540.64 to 1,247.76)           | <b>569.62</b><br>(346.56 to 834.13)             | <b>1,315.22</b><br>(827.87 to 1,906.51)           | <b>49.03</b><br>(43.01 to 55.64)             | <b>50.25</b><br>(27.65 to 84.44)             | <b>36.57</b><br>(21.52 to 58.54)             | <b>66.43</b><br>(37.43 to 112.04)            |
| <b>Tuberculosis</b>                                                      | <b>475.86</b><br>(399.29 to 559.06)             | <b>468.70</b><br>(247.58 to 810.71)             | <b>341.49</b><br>(191.32 to 561.84)             | <b>610.93</b><br>(309.71 to 1,069.12)             | <b>36.30</b><br>(30.55 to 42.78)             | <b>43.65</b><br>(22.22 to 72.21)             | <b>32.69</b><br>(18.05 to 54.67)             | <b>54.64</b><br>(25.92 to 98.19)             |
| <b>HIV/AIDS</b>                                                          | <b>529.24</b><br>(503.29 to 556.29)             | <b>390.02</b><br>(196.13 to 608.02)             | <b>228.14</b><br>(88.78 to 371.60)              | <b>704.29</b><br>(384.60 to 1,082.18)             | <b>12.73</b><br>(12.13 to 13.37)             | <b>6.60</b><br>(3.15 to 10.33)               | <b>3.87</b><br>(1.40 to 6.42)                | <b>11.78</b><br>(6.26 to 18.13)              |
| <b>Diarrhea, lower respiratory, and other common infectious diseases</b> | <b>18,398.85</b><br>(16,040.60 to 20,903.45)    | <b>34,559.40</b><br>(27,551.08 to 44,454.97)    | <b>33,907.55</b><br>(27,582.20 to 41,767.32)    | <b>37,903.01</b><br>(29,474.38 to 50,241.24)      | <b>2,133.14</b><br>(1,824.26 to 2,454.45)    | <b>4,593.00</b><br>(3,606.65 to 6,026.62)    | <b>4,640.80</b><br>(3,706.44 to 5,923.17)    | <b>4,779.14</b><br>(3,661.44 to 6,529.47)    |
| <b>Diarrheal diseases</b>                                                | <b>2,823.25</b><br>(2,462.85 to 3,205.21)       | <b>8,122.56</b><br>(5,583.21 to 12,057.68)      | <b>9,649.66</b><br>(6,972.44 to 13,625.11)      | <b>7,026.40</b><br>(4,708.22 to 10,859.33)        | <b>323.85</b><br>(279.77 to 372.99)          | <b>1,077.10</b><br>(726.38 to 1,632.26)      | <b>1,308.36</b><br>(914.55 to 1,879.12)      | <b>903.97</b><br>(582.31 to 1,418.20)        |
| <b>Intestinal infectious diseases</b>                                    | <b>6.40</b><br>(2.86 to 12.22)                  | <b>6.25</b><br>(2.77 to 12.14)                  | <b>6.35</b><br>(2.74 to 12.32)                  | <b>6.15</b><br>(2.72 to 12.07)                    | <b>0.24</b><br>(0.12 to 0.44)                | <b>0.30</b><br>(0.14 to 0.55)                | <b>0.30</b><br>(0.13 to 0.57)                | <b>0.28</b><br>(0.13 to 0.52)                |
| <b>Typhoid fever</b>                                                     | <b>2.79</b><br>(0.88 to 6.50)                   | <b>3.06</b><br>(1.01 to 6.99)                   | <b>3.31</b><br>(1.12 to 7.42)                   | <b>2.94</b><br>(0.98 to 6.76)                     | <b>0.07</b><br>(0.02 to 0.17)                | <b>0.09</b><br>(0.05 to 0.20)                | <b>0.10</b><br>(0.03 to 0.22)                | <b>0.08</b><br>(0.03 to 0.19)                |
| <b>Paratyphoid fever</b>                                                 | <b>1.65</b><br>(0.49 to 4.15)                   | <b>1.38</b><br>(0.41 to 3.52)                   | <b>1.26</b><br>(0.37 to 3.28)                   | <b>1.44</b><br>(0.43 to 3.69)                     | <b>0.04</b><br>(0.01 to 0.10)                | <b>0.04</b><br>(0.01 to 0.10)                | <b>0.04</b><br>(0.01 to 0.09)                | <b>0.04</b><br>(0.01 to 0.10)                |
| <b>Other intestinal infectious diseases</b>                              | <b>1.96</b><br>(0.78 to 3.90)                   | <b>1.81</b><br>(0.64 to 3.77)                   | <b>1.78</b><br>(0.64 to 3.77)                   | <b>1.76</b><br>(0.65 to 3.59)                     | <b>0.13</b><br>(0.05 to 0.27)                | <b>0.17</b><br>(0.06 to 0.37)                | <b>0.17</b><br>(0.06 to 0.38)                | <b>0.16</b><br>(0.06 to 0.35)                |
| <b>Lower respiratory infections</b>                                      | <b>14,596.21</b><br>(12,482.68 to 16,817.59)    | <b>25,476.81</b><br>(18,494.49 to 34,951.38)    | <b>23,365.53</b><br>(16,952.91 to 31,077.27)    | <b>29,827.62</b><br>(21,452.66 to 41,742.87)      | <b>1,766.87</b><br>(1,477.62 to 2,067.54)    | <b>3,464.68</b><br>(2,461.43 to 4,910.41)    | <b>3,281.85</b><br>(2,324.30 to 4,528.61)    | <b>3,825.16</b><br>(2,684.24 to 5,524.60)    |
| <b>Upper respiratory infections</b>                                      | <b>5.01</b><br>(2.71 to 8.05)                   | <b>6.06</b><br>(2.74 to 11.38)                  | <b>5.22</b><br>(2.36 to 9.76)                   | <b>6.31</b><br>(2.88 to 11.71)                    | <b>0.26</b><br>(0.12 to 0.43)                | <b>0.43</b><br>(0.16 to 0.94)                | <b>0.38</b><br>(0.14 to 0.85)                | <b>0.42</b><br>(0.17 to 0.91)                |
| <b>Otitis media</b>                                                      | <b>0.36</b><br>(0.26 to 0.50)                   | <b>0.15</b><br>(0.08 to 0.28)                   | <b>0.15</b><br>(0.08 to 0.29)                   | <b>0.15</b><br>(0.08 to 0.27)                     | <b>0.02</b><br>(0.01 to 0.02)                | <b>0.01</b><br>(0.01 to 0.02)                | <b>0.01</b><br>(0.01 to 0.02)                | <b>0.01</b><br>(0.00 to 0.02)                |
| <b>Meningitis</b>                                                        | <b>592.22</b><br>(502.17 to 788.66)             | <b>476.06</b><br>(357.67 to 649.64)             | <b>421.00</b><br>(319.45 to 581.17)             | <b>555.14</b><br>(387.68 to 787.48)               | <b>19.34</b><br>(16.78 to 24.57)             | <b>18.55</b><br>(14.95 to 23.38)             | <b>17.74</b><br>(14.31 to 22.37)             | <b>19.08</b><br>(15.31 to 24.22)             |
| <b>Pneumococcal meningitis</b>                                           | <b>190.68</b><br>(161.51 to 256.55)             | <b>156.97</b><br>(122.67 to 223.27)             | <b>155.86</b><br>(120.76 to 222.23)             | <b>160.52</b><br>(124.42 to 228.50)               | <b>7.28</b><br>(6.27 to 9.30)                | <b>7.90</b><br>(6.30 to 10.13)               | <b>8.08</b><br>(6.44 to 10.35)               | <b>7.73</b><br>(6.17 to 9.94)                |
| <b>H influenzae type B meningitis</b>                                    | <b>57.18</b><br>(46.88 to 73.64)                | <b>130.51</b><br>(61.48 to 244.57)              | <b>96.76</b><br>(52.48 to 168.74)               | <b>197.48</b><br>(77.10 to 397.90)                | <b>1.70</b><br>(1.45 to 2.15)                | <b>2.63</b><br>(1.71 to 3.98)                | <b>2.29</b><br>(1.66 to 3.15)                | <b>3.34</b><br>(1.83 to 5.71)                |
| <b>Meningococcal meningitis</b>                                          | <b>221.16</b><br>(184.46 to 292.59)             | <b>111.83</b><br>(78.36 to 170.00)              | <b>99.90</b><br>(69.83 to 153.28)               | <b>117.44</b><br>(81.81 to 178.52)                | <b>5.67</b><br>(4.88 to 7.25)                | <b>4.03</b><br>(3.09 to 5.46)                | <b>3.71</b><br>(2.80 to 5.02)                | <b>4.04</b><br>(3.09 to 5.49)                |
| <b>Other meningitis</b>                                                  | <b>123.20</b><br>(103.74 to 165.41)             | <b>76.75</b><br>(57.29 to 109.30)               | <b>68.48</b><br>(50.20 to 98.10)                | <b>79.70</b><br>(58.42 to 114.89)                 | <b>4.68</b><br>(4.02 to 5.93)                | <b>3.99</b><br>(3.06 to 5.22)                | <b>3.66</b><br>(2.75 to 4.81)                | <b>3.98</b><br>(3.07 to 5.25)                |
| <b>Encephalitis</b>                                                      | <b>256.89</b><br>(180.00 to 325.90)             | <b>329.61</b><br>(219.23 to 422.40)             | <b>328.06</b><br>(216.52 to 424.67)             | <b>326.25</b><br>(216.44 to 413.37)               | <b>9.20</b><br>(5.93 to 11.47)               | <b>15.61</b><br>(9.61 to 19.97)              | <b>15.94</b><br>(9.70 to 20.51)              | <b>14.90</b><br>(9.21 to 18.85)              |

|                |                           |                              |                             |                              |                           |                           |                           |                           |
|----------------|---------------------------|------------------------------|-----------------------------|------------------------------|---------------------------|---------------------------|---------------------------|---------------------------|
| Diphtheria     | 1.07<br>(0.67 to<br>1.52) | 0.31<br>(0.18 to<br>0.50)    | 0.26<br>(0.15 to<br>0.40)   | 0.43<br>(0.22 to<br>0.76)    | 0.02<br>(0.01 to<br>0.03) | 0.01<br>(0.00 to<br>0.01) | 0.01<br>(0.00 to<br>0.01) | 0.01<br>(0.00 to<br>0.01) |
| Whooping cough | 2.45<br>(0.71 to<br>4.59) | 1.59<br>(0.31 to<br>4.23)    | 0.29<br>(0.11 to<br>0.63)   | 4.03<br>(0.67 to<br>10.37)   | 0.03<br>(0.01 to<br>0.06) | 0.02<br>(0.00 to<br>0.05) | 0.00<br>(0.00 to<br>0.01) | 0.05<br>(0.01 to<br>0.12) |
| Tetanus        | 2.79<br>(1.74 to<br>3.79) | 0.37<br>(0.21 to<br>0.56)    | 0.30<br>(0.15 to<br>0.46)   | 0.50<br>(0.29 to<br>0.84)    | 0.09<br>(0.05 to<br>0.13) | 0.01<br>(0.01 to<br>0.02) | 0.01<br>(0.01 to<br>0.02) | 0.01<br>(0.01 to<br>0.02) |
| Measles        | 0.73<br>(0.55 to<br>0.96) | 18.35<br>(0.10 to<br>138.29) | 12.89<br>(0.09 to<br>86.11) | 33.81<br>(0.13 to<br>266.94) | 0.01<br>(0.01 to<br>0.02) | 0.27<br>(0.00 to<br>1.86) | 0.21<br>(0.00 to<br>1.31) | 0.46<br>(0.00 to<br>3.20) |

| Norway                                                |                                                     |                                                     |                                                     |                                                     |                                                |                                                |                                                |                                                |
|-------------------------------------------------------|-----------------------------------------------------|-----------------------------------------------------|-----------------------------------------------------|-----------------------------------------------------|------------------------------------------------|------------------------------------------------|------------------------------------------------|------------------------------------------------|
| Cause                                                 | YLLs (actual counts)                                |                                                     |                                                     |                                                     | Deaths (actual counts)                         |                                                |                                                |                                                |
|                                                       | 2016                                                | 2040 Forecast                                       | 2040 Better Scenario                                | 2040 Worse Scenario                                 | 2016                                           | 2040 Forecast                                  | 2040 Better Scenario                           | 2040 Worse Scenario                            |
| Varicella and herpes zoster                           | 111.47<br>(29.34 to<br>168.83)                      | 121.27<br>(27.83 to<br>205.86)                      | 117.83<br>(26.69 to<br>199.41)                      | 116.23<br>(27.19 to<br>196.86)                      | 13.21<br>(2.38 to<br>22.30)                    | 16.02<br>(2.72 to<br>28.78)                    | 15.99<br>(2.73 to<br>28.87)                    | 14.77<br>(2.49 to<br>26.76)                    |
| <b>Neglected tropical diseases and malaria</b>        | <b>27.17</b><br><b>(24.32 to</b><br><b>29.99)</b>   | <b>29.63</b><br><b>(24.56 to</b><br><b>35.97)</b>   | <b>29.73</b><br><b>(24.59 to</b><br><b>36.09)</b>   | <b>29.62</b><br><b>(24.63 to</b><br><b>35.94)</b>   | <b>0.64</b><br><b>(0.57 to</b><br><b>0.71)</b> | <b>0.79</b><br><b>(0.68 to</b><br><b>0.91)</b> | <b>0.81</b><br><b>(0.69 to</b><br><b>0.94)</b> | <b>0.77</b><br><b>(0.66 to</b><br><b>0.89)</b> |
| Malaria                                               | 0.00<br>(0.00 to<br>0.00)                           | 0.00<br>(0.00 to<br>0.00)                           | 0.00<br>(0.00 to<br>0.00)                           | 0.00<br>(0.00 to<br>0.00)                           | 0.00<br>(0.00 to<br>0.00)                      | 0.00<br>(0.00 to<br>0.00)                      | 0.00<br>(0.00 to<br>0.00)                      | 0.00<br>(0.00 to<br>0.00)                      |
| Chagas disease                                        | 0.00<br>(0.00 to<br>0.00)                           | 0.00<br>(0.00 to<br>0.00)                           | 0.00<br>(0.00 to<br>0.00)                           | 0.00<br>(0.00 to<br>0.00)                           | 0.00<br>(0.00 to<br>0.00)                      | 0.00<br>(0.00 to<br>0.00)                      | 0.00<br>(0.00 to<br>0.00)                      | 0.00<br>(0.00 to<br>0.00)                      |
| Leishmaniasis                                         | 0.00<br>(0.00 to<br>0.00)                           | 0.00<br>(0.00 to<br>0.00)                           | 0.00<br>(0.00 to<br>0.00)                           | 0.00<br>(0.00 to<br>0.00)                           | 0.00<br>(0.00 to<br>0.00)                      | 0.00<br>(0.00 to<br>0.00)                      | 0.00<br>(0.00 to<br>0.00)                      | 0.00<br>(0.00 to<br>0.00)                      |
| African trypanosomiasis                               | 0.00<br>(0.00 to<br>0.00)                           | 0.00<br>(0.00 to<br>0.00)                           | 0.00<br>(0.00 to<br>0.00)                           | 0.00<br>(0.00 to<br>0.00)                           | 0.00<br>(0.00 to<br>0.00)                      | 0.00<br>(0.00 to<br>0.00)                      | 0.00<br>(0.00 to<br>0.00)                      | 0.00<br>(0.00 to<br>0.00)                      |
| Schistosomiasis                                       | 0.00<br>(0.00 to<br>0.00)                           | 0.00<br>(0.00 to<br>0.00)                           | 0.00<br>(0.00 to<br>0.00)                           | 0.00<br>(0.00 to<br>0.00)                           | 0.00<br>(0.00 to<br>0.00)                      | 0.00<br>(0.00 to<br>0.00)                      | 0.00<br>(0.00 to<br>0.00)                      | 0.00<br>(0.00 to<br>0.00)                      |
| Cysticercosis                                         | 2.70<br>(2.32 to<br>3.14)                           | 1.13<br>(0.94 to<br>1.35)                           | 1.12<br>(0.94 to<br>1.34)                           | 1.12<br>(0.94 to<br>1.33)                           | 0.10<br>(0.08 to<br>0.11)                      | 0.05<br>(0.04 to<br>0.06)                      | 0.05<br>(0.04 to<br>0.06)                      | 0.05<br>(0.04 to<br>0.06)                      |
| Cystic echinococcosis                                 | 0.00<br>(0.00 to<br>0.00)                           | 0.00<br>(0.00 to<br>0.00)                           | 0.00<br>(0.00 to<br>0.00)                           | 0.00<br>(0.00 to<br>0.00)                           | 0.00<br>(0.00 to<br>0.00)                      | 0.00<br>(0.00 to<br>0.00)                      | 0.00<br>(0.00 to<br>0.00)                      | 0.00<br>(0.00 to<br>0.00)                      |
| Dengue                                                | 0.00<br>(0.00 to<br>0.00)                           | 0.00<br>(0.00 to<br>0.00)                           | 0.00<br>(0.00 to<br>0.00)                           | 0.00<br>(0.00 to<br>0.00)                           | 0.00<br>(0.00 to<br>0.00)                      | 0.00<br>(0.00 to<br>0.00)                      | 0.00<br>(0.00 to<br>0.00)                      | 0.00<br>(0.00 to<br>0.00)                      |
| Yellow fever                                          | 0.00<br>(0.00 to<br>0.00)                           | 0.00<br>(0.00 to<br>0.00)                           | 0.00<br>(0.00 to<br>0.00)                           | 0.00<br>(0.00 to<br>0.00)                           | 0.00<br>(0.00 to<br>0.00)                      | 0.00<br>(0.00 to<br>0.00)                      | 0.00<br>(0.00 to<br>0.00)                      | 0.00<br>(0.00 to<br>0.00)                      |
| Rabies                                                | 0.15<br>(0.12 to<br>0.19)                           | 0.17<br>(0.14 to<br>0.22)                           | 0.16<br>(0.13 to<br>0.21)                           | 0.17<br>(0.14 to<br>0.22)                           | 0.00<br>(0.00 to<br>0.01)                      | 0.01<br>(0.01 to<br>0.01)                      | 0.01<br>(0.01 to<br>0.01)                      | 0.01<br>(0.01 to<br>0.01)                      |
| Intestinal nematode infections                        | 0.00<br>(0.00 to<br>0.00)                           | 0.00<br>(0.00 to<br>0.00)                           | 0.00<br>(0.00 to<br>0.00)                           | 0.00<br>(0.00 to<br>0.00)                           | 0.00<br>(0.00 to<br>0.00)                      | 0.00<br>(0.00 to<br>0.00)                      | 0.00<br>(0.00 to<br>0.00)                      | 0.00<br>(0.00 to<br>0.00)                      |
| Other neglected tropical diseases                     | 24.31<br>(21.75 to<br>26.85)                        | 28.33<br>(23.41 to<br>34.56)                        | 28.45<br>(23.40 to<br>34.73)                        | 28.33<br>(23.44 to<br>34.59)                        | 0.54<br>(0.48 to<br>0.60)                      | 0.73<br>(0.62 to<br>0.86)                      | 0.75<br>(0.64 to<br>0.88)                      | 0.71<br>(0.61 to<br>0.83)                      |
| <b>Maternal disorders</b>                             | <b>123.87</b><br><b>(99.67 to</b><br><b>152.60)</b> | <b>124.78</b><br><b>(99.57 to</b><br><b>192.27)</b> | <b>115.59</b><br><b>(73.36 to</b><br><b>180.11)</b> | <b>129.67</b><br><b>(83.31 to</b><br><b>202.32)</b> | <b>2.29</b><br><b>(1.84 to</b><br><b>2.82)</b> | <b>2.32</b><br><b>(1.50 to</b><br><b>3.53)</b> | <b>2.15</b><br><b>(1.39 to</b><br><b>3.29)</b> | <b>2.41</b><br><b>(1.57 to</b><br><b>3.67)</b> |
| Maternal hemorrhage                                   | 6.92<br>(4.38 to<br>10.67)                          | 6.70<br>(3.51 to<br>11.95)                          | 6.24<br>(3.26 to<br>11.28)                          | 6.92<br>(3.61 to<br>12.29)                          | 0.13<br>(0.08 to<br>0.19)                      | 0.12<br>(0.07 to<br>0.22)                      | 0.12<br>(0.06 to<br>0.20)                      | 0.13<br>(0.07 to<br>0.22)                      |
| Maternal sepsis and other maternal infections         | 1.50<br>(0.67 to<br>2.60)                           | 1.30<br>(0.53 to<br>2.56)                           | 1.21<br>(0.48 to<br>2.40)                           | 1.35<br>(0.54 to<br>2.66)                           | 0.03<br>(0.01 to<br>0.05)                      | 0.02<br>(0.01 to<br>0.05)                      | 0.02<br>(0.01 to<br>0.04)                      | 0.03<br>(0.01 to<br>0.05)                      |
| Maternal hypertensive disorders                       | 25.59<br>(18.05 to<br>35.55)                        | 25.17<br>(13.54 to<br>44.75)                        | 23.29<br>(12.40 to<br>42.07)                        | 26.09<br>(13.85 to<br>46.78)                        | 0.46<br>(0.32 to<br>0.64)                      | 0.45<br>(0.24 to<br>0.79)                      | 0.42<br>(0.22 to<br>0.74)                      | 0.47<br>(0.25 to<br>0.82)                      |
| Maternal obstructed labor and uterine rupture         | 1.12<br>(0.49 to<br>1.98)                           | 1.17<br>(0.43 to<br>2.49)                           | 1.07<br>(0.40 to<br>2.26)                           | 1.22<br>(0.46 to<br>2.56)                           | 0.02<br>(0.01 to<br>0.04)                      | 0.02<br>(0.01 to<br>0.05)                      | 0.02<br>(0.01 to<br>0.04)                      | 0.02<br>(0.01 to<br>0.05)                      |
| Maternal abortion, miscarriage, and ectopic pregnancy | 28.70<br>(20.91 to<br>38.14)                        | 31.01<br>(16.95 to<br>53.45)                        | 28.51<br>(15.56 to<br>48.76)                        | 32.26<br>(17.85 to<br>55.85)                        | 0.56<br>(0.41 to<br>0.74)                      | 0.61<br>(0.34 to<br>1.02)                      | 0.56<br>(0.31 to<br>0.92)                      | 0.63<br>(0.35 to<br>1.06)                      |

|                                        |                              |                              |                              |                              |                           |                           |                           |                           |
|----------------------------------------|------------------------------|------------------------------|------------------------------|------------------------------|---------------------------|---------------------------|---------------------------|---------------------------|
|                                        | 10.69<br>(7.09 to<br>15.92)  | 12.01<br>(5.82 to<br>21.47)  | 11.00<br>(5.38 to<br>19.84)  | 12.58<br>(6.16 to<br>22.62)  | 0.19<br>(0.13 to<br>0.28) | 0.21<br>(0.11 to<br>0.37) | 0.20<br>(0.10 to<br>0.34) | 0.22<br>(0.11 to<br>0.39) |
| Indirect maternal deaths               |                              |                              |                              |                              |                           |                           |                           |                           |
|                                        | 1.99<br>(1.09 to<br>3.43)    | 1.75<br>(0.79 to<br>3.48)    | 1.61<br>(0.72 to<br>3.22)    | 1.82<br>(0.83 to<br>3.65)    | 0.04<br>(0.02 to<br>0.06) | 0.03<br>(0.01 to<br>0.06) | 0.03<br>(0.01 to<br>0.06) | 0.03<br>(0.02 to<br>0.07) |
| Late maternal deaths                   |                              |                              |                              |                              |                           |                           |                           |                           |
|                                        | 0.03<br>(0.01 to<br>0.06)    | 0.10<br>(0.01 to<br>0.30)    | 0.06<br>(0.00 to<br>0.19)    | 0.13<br>(0.02 to<br>0.36)    | 0.00<br>(0.00 to<br>0.00) | 0.00<br>(0.00 to<br>0.01) | 0.00<br>(0.00 to<br>0.00) | 0.00<br>(0.00 to<br>0.01) |
| Maternal deaths aggravated by HIV/AIDS |                              |                              |                              |                              |                           |                           |                           |                           |
|                                        | 47.35<br>(35.11 to<br>62.62) | 45.57<br>(25.45 to<br>80.34) | 42.59<br>(23.57 to<br>76.01) | 47.29<br>(26.55 to<br>84.06) | 0.87<br>(0.65 to<br>1.16) | 0.84<br>(0.48 to<br>1.46) | 0.79<br>(0.45 to<br>1.37) | 0.87<br>(0.50 to<br>1.51) |
| Other maternal disorders               |                              |                              |                              |                              |                           |                           |                           |                           |

| Norway                                                                  |                                           |                                           |                                           |                                           |                                  |                                   |                                    |                                   |
|-------------------------------------------------------------------------|-------------------------------------------|-------------------------------------------|-------------------------------------------|-------------------------------------------|----------------------------------|-----------------------------------|------------------------------------|-----------------------------------|
| Cause                                                                   | YLLs (actual counts)                      |                                           |                                           |                                           | Deaths (actual counts)           |                                   |                                    |                                   |
|                                                                         | 2016                                      | 2040 Forecast                             | 2040 Better Scenario                      | 2040 Worse Scenario                       | 2016                             | 2040 Forecast                     | 2040 Better Scenario               | 2040 Worse Scenario               |
| <b>Neonatal disorders</b>                                               | <b>5,881.61</b><br>(4,433.49 to 7,502.81) | <b>4,292.55</b><br>(2,766.14 to 6,500.73) | <b>3,694.22</b><br>(2,364.24 to 5,636.20) | <b>4,821.41</b><br>(3,118.61 to 7,260.58) | <b>68.00</b><br>(51.25 to 86.75) | <b>49.64</b><br>(32.01 to 75.16)  | <b>42.73</b><br>(27.35 to 65.16)   | <b>55.76</b><br>(36.06 to 83.95)  |
| Neonatal preterm birth                                                  | 2,093.88<br>(1,549.19 to 2,707.17)        | 1,124.36<br>(746.50 to 1,595.15)          | 875.03<br>(580.58 to 1,241.04)            | 1,360.12<br>(905.18 to 1,938.34)          | 24.22<br>(17.92 to 31.32)        | 13.01<br>(8.64 to 18.46)          | 10.12<br>(6.72 to 14.37)           | 15.73<br>(10.47 to 22.41)         |
| Neonatal encephalopathy due to birth asphyxia and trauma                | 2,364.81<br>(1,745.18 to 3,106.45)        | 1,484.60<br>(871.50 to 2,426.25)          | 1,261.65<br>(748.87 to 2,049.21)          | 1,655.29<br>(969.30 to 2,712.05)          | 27.34<br>(20.18 to 35.91)        | 17.17<br>(10.08 to 28.04)         | 14.59<br>(8.66 to 23.69)           | 19.14<br>(11.22 to 31.35)         |
| Neonatal sepsis and other neonatal infections                           | 277.89<br>(180.19 to 422.99)              | 259.77<br>(135.55 to 477.97)              | 228.74<br>(119.80 to 425.48)              | 284.58<br>(147.39 to 525.35)              | 3.21<br>(2.08 to 4.89)           | 3.00<br>(1.57 to 5.52)            | 2.64<br>(1.39 to 4.92)             | 3.29<br>(1.70 to 6.07)            |
| Hemolytic disease and other neonatal jaundice                           | 25.29<br>(15.87 to 44.57)                 | 15.69<br>(7.70 to 30.78)                  | 13.68<br>(6.69 to 27.14)                  | 17.29<br>(8.42 to 34.68)                  | 0.29<br>(0.18 to 0.52)           | 0.18<br>(0.09 to 0.36)            | 0.16<br>(0.08 to 0.31)             | 0.20<br>(0.10 to 0.40)            |
| Other neonatal disorders                                                | 1,119.75<br>(763.57 to 1,542.18)          | 1,408.14<br>(814.00 to 2,346.90)          | 1,315.13<br>(771.90 to 2,190.31)          | 1,504.12<br>(862.81 to 2,538.33)          | 12.94<br>(8.83 to 17.82)         | 16.28<br>(9.41 to 27.12)          | 15.21<br>(8.93 to 25.31)           | 17.39<br>(9.98 to 29.33)          |
| <b>Nutritional deficiencies</b>                                         | <b>460.66</b><br>(406.71 to 524.48)       | <b>423.35</b><br>(345.87 to 513.43)       | <b>445.52</b><br>(364.02 to 543.43)       | <b>391.73</b><br>(318.83 to 473.25)       | <b>52.82</b><br>(45.74 to 61.26) | <b>56.26</b><br>(43.60 to 71.71)  | <b>61.00</b><br>(47.56 to 77.89)   | <b>50.06</b><br>(38.22 to 64.82)  |
| Protein-energy malnutrition                                             | 311.58<br>(132.78 to 392.02)              | 250.47<br>(66.63 to 361.79)               | 271.59<br>(75.02 to 392.04)               | 227.14<br>(61.16 to 328.95)               | 40.71<br>(15.49 to 53.10)        | 36.92<br>(7.89 to 55.65)          | 40.89<br>(9.13 to 61.06)           | 32.49<br>(6.82 to 49.63)          |
| Iodine deficiency                                                       | 13.14<br>(1.05 to 43.64)                  | 24.75<br>(1.23 to 89.40)                  | 25.11<br>(1.11 to 92.88)                  | 23.47<br>(1.24 to 83.76)                  | 0.98<br>(0.04 to 5.15)           | 2.82<br>(0.04 to 13.24)           | 2.94<br>(0.04 to 14.13)            | 2.57<br>(0.04 to 11.77)           |
| Dietary iron deficiency                                                 | 27.49<br>(22.30 to 36.73)                 | 22.71<br>(16.59 to 29.86)                 | 23.53<br>(17.03 to 31.33)                 | 21.83<br>(16.14 to 28.64)                 | 1.22<br>(0.87 to 1.96)           | 1.59<br>(2.60)                    | 1.72<br>(2.85)                     | 1.43<br>(2.32)                    |
| Other nutritional deficiencies                                          | 108.45<br>(65.87 to 278.33)               | 125.43<br>(68.89 to 306.69)               | 125.29<br>(66.73 to 315.50)               | 119.28<br>(66.64 to 282.31)               | 9.91<br>(4.23 to 35.24)          | 14.93<br>(6.32 to 43.94)          | 15.45<br>(6.38 to 46.80)           | 13.57<br>(5.89 to 39.22)          |
| <b>Other communicable, maternal, neonatal, and nutritional diseases</b> | <b>1,084.48</b><br>(829.67 to 1,244.16)   | <b>1,514.12</b><br>(1,111.52 to 1,807.09) | <b>1,515.04</b><br>(1,101.78 to 1,814.22) | <b>1,481.87</b><br>(1,092.25 to 1,766.16) | <b>55.78</b><br>(37.06 to 66.54) | <b>98.68</b><br>(65.39 to 122.46) | <b>101.61</b><br>(66.63 to 126.17) | <b>92.99</b><br>(61.37 to 115.55) |
| Sexually transmitted infections excluding HIV                           | 24.52<br>(20.42 to 29.92)                 | 23.39<br>(18.14 to 30.24)                 | 23.13<br>(17.88 to 29.98)                 | 22.84<br>(17.69 to 29.52)                 | 1.64<br>(1.36 to 2.00)           | 1.97<br>(1.49 to 2.63)            | 2.00<br>(1.50 to 2.70)             | 1.85<br>(1.38 to 2.45)            |
| Syphilis                                                                | 6.42<br>(5.42 to 7.91)                    | 5.96<br>(4.50 to 7.88)                    | 5.74<br>(4.28 to 7.59)                    | 5.90<br>(4.41 to 7.82)                    | 0.40<br>(0.33 to 0.49)           | 0.48<br>(0.35 to 0.64)            | 0.47<br>(0.35 to 0.64)             | 0.45<br>(0.33 to 0.61)            |
| Chlamydial infection                                                    | 3.65<br>(3.04 to 4.43)                    | 3.58<br>(2.76 to 4.65)                    | 3.58<br>(2.76 to 4.66)                    | 3.46<br>(2.68 to 4.47)                    | 0.26<br>(0.22 to 0.32)           | 0.32<br>(0.24 to 0.45)            | 0.33<br>(0.24 to 0.46)             | 0.30<br>(0.22 to 0.42)            |
| Gonococcal infection                                                    | 10.22<br>(8.45 to 12.41)                  | 10.10<br>(7.58 to 13.13)                  | 10.09<br>(7.53 to 13.14)                  | 9.79<br>(7.37 to 12.67)                   | 0.73<br>(0.61 to 0.89)           | 0.90<br>(0.64 to 1.26)            | 0.92<br>(0.65 to 1.29)             | 0.84<br>(0.59 to 1.17)            |
| Other sexually transmitted infections                                   | 4.24<br>(3.51 to 5.16)                    | 3.76<br>(2.97 to 4.88)                    | 3.73<br>(2.92 to 4.85)                    | 3.68<br>(2.91 to 4.79)                    | 0.24<br>(0.20 to 0.29)           | 0.27<br>(0.21 to 0.37)            | 0.28<br>(0.21 to 0.38)             | 0.26<br>(0.20 to 0.34)            |
| Acute hepatitis                                                         | 138.20<br>(116.32 to 164.37)              | 108.62<br>(75.98 to 150.37)               | 97.83<br>(67.54 to 134.41)                | 112.87<br>(77.84 to 154.47)               | 4.54<br>(3.80 to 5.40)           | 4.24<br>(3.06 to 5.75)            | 3.87<br>(2.74 to 5.26)             | 4.31<br>(3.06 to 5.78)            |
| Acute hepatitis A                                                       | 9.54<br>(7.04 to 12.49)                   | 5.88<br>(3.79 to 8.65)                    | 5.43<br>(3.51 to 8.02)                    | 6.08<br>(3.91 to 8.90)                    | 0.23<br>(0.17 to 0.31)           | 0.19<br>(0.12 to 0.29)            | 0.18<br>(0.11 to 0.27)             | 0.20<br>(0.12 to 0.29)            |
| Acute hepatitis B                                                       | 107.59<br>(88.94 to 130.41)               | 86.22<br>(57.45 to 123.00)                | 77.35<br>(51.69 to 108.63)                | 89.82<br>(59.93 to 124.46)                | 3.50<br>(2.87 to 4.25)           | 3.18<br>(2.17 to 4.55)            | 2.88<br>(1.97 to 4.12)             | 3.27<br>(2.25 to 4.59)            |





| Norway                               |                                             |                                             |                                             |                                             |                                          |                                          |                                          |                                          |
|--------------------------------------|---------------------------------------------|---------------------------------------------|---------------------------------------------|---------------------------------------------|------------------------------------------|------------------------------------------|------------------------------------------|------------------------------------------|
| Cause                                | YLLs (actual counts)                        |                                             |                                             |                                             | Deaths (actual counts)                   |                                          |                                          |                                          |
|                                      | 2016                                        | 2040 Forecast                               | 2040 Better Scenario                        | 2040 Worse Scenario                         | 2016                                     | 2040 Forecast                            | 2040 Better Scenario                     | 2040 Worse Scenario                      |
| Neoplasms                            | 198,797.44<br>(179,177.41 to<br>219,697.04) | 252,226.91<br>(211,313.45 to<br>294,131.66) | 227,149.04<br>(190,773.94 to<br>267,373.88) | 309,705.76<br>(252,935.50 to<br>370,596.35) | 11,545.73<br>(10,473.90 to<br>12,670.30) | 17,356.47<br>(14,949.83 to<br>19,940.36) | 16,026.01<br>(13,824.52 to<br>18,289.93) | 20,476.57<br>(17,222.47 to<br>24,165.37) |
| Lip and oral cavity cancer           | 1,843.14<br>(1,605.24 to<br>2,114.54)       | 2,180.28<br>(1,219.94 to<br>3,675.01)       | 1,502.41<br>(883.06 to<br>2,440.01)         | 3,768.81<br>(1,941.20 to<br>6,472.60)       | 99.77<br>(88.30 to<br>112.52)            | 135.53<br>(76.75 to<br>232.66)           | 96.67<br>(57.96 to<br>155.54)            | 230.66<br>(120.30 to<br>404.95)          |
| Nasopharynx cancer                   | 512.41<br>(437.55 to<br>597.08)             | 662.78<br>(375.65 to<br>1,138.34)           | 432.25<br>(261.83 to<br>722.39)             | 1,113.51<br>(595.96 to<br>1,942.70)         | 26.02<br>(22.30 to<br>29.90)             | 40.63<br>(22.87 to<br>70.15)             | 26.99<br>(16.10 to<br>45.85)             | 66.91<br>(35.79 to<br>119.00)            |
| Other pharynx cancer                 | 1,258.88<br>(1,103.90 to<br>1,422.30)       | 1,721.11<br>(925.30 to<br>2,835.53)         | 1,399.28<br>(807.11 to<br>2,198.85)         | 2,033.38<br>(1,079.35 to<br>3,445.32)       | 57.39<br>(50.75 to<br>64.46)             | 88.65<br>(49.13 to<br>145.73)            | 73.28<br>(43.08 to<br>117.38)            | 102.83<br>(54.60 to<br>173.13)           |
| Esophageal cancer                    | 4,018.19<br>(3,452.29 to<br>4,616.90)       | 4,369.17<br>(2,504.33 to<br>6,865.83)       | 3,147.18<br>(1,941.04 to<br>4,693.77)       | 6,994.36<br>(3,696.37 to<br>11,640.81)      | 217.76<br>(190.13 to<br>246.08)          | 268.26<br>(158.83 to<br>426.66)          | 197.68<br>(126.81 to<br>296.81)          | 422.57<br>(229.40 to<br>693.81)          |
| Stomach cancer                       | 6,904.66<br>(6,134.39 to<br>7,764.17)       | 6,967.98<br>(5,273.74 to<br>9,022.36)       | 6,181.30<br>(4,829.06 to<br>7,824.77)       | 7,642.95<br>(5,686.84 to<br>9,984.55)       | 442.54<br>(395.32 to<br>498.36)          | 529.79<br>(407.37 to<br>691.66)          | 479.83<br>(382.92 to<br>614.25)          | 565.08<br>(430.12 to<br>748.81)          |
| Colon and rectum cancer              | 26,454.12<br>(23,526.13 to<br>29,773.55)    | 36,467.40<br>(26,289.17 to<br>50,875.69)    | 30,934.08<br>(22,628.56 to<br>43,233.14)    | 43,745.04<br>(30,925.83 to<br>62,719.02)    | 1,720.71<br>(1,539.90 to<br>1,919.04)    | 2,796.68<br>(2,022.14 to<br>3,893.14)    | 2,431.63<br>(1,798.21 to<br>3,340.90)    | 3,262.23<br>(2,308.81 to<br>4,657.53)    |
| Liver cancer                         | 3,971.73<br>(3,464.45 to<br>4,471.34)       | 5,461.03<br>(3,746.43 to<br>8,140.28)       | 4,756.30<br>(3,393.70 to<br>6,697.05)       | 7,035.80<br>(4,462.82 to<br>10,936.87)      | 215.28<br>(189.55 to<br>240.74)          | 343.74<br>(242.44 to<br>490.47)          | 308.54<br>(224.81 to<br>426.65)          | 427.47<br>(283.82 to<br>634.84)          |
| Liver cancer due to hepatitis B      | 686.14<br>(475.12 to<br>963.66)             | 862.71<br>(510.51 to<br>1,439.24)           | 785.59<br>(489.68 to<br>1,256.99)           | 1,043.07<br>(575.45 to<br>1,826.37)         | 30.88<br>(20.95 to<br>44.15)             | 45.50<br>(27.33 to<br>75.12)             | 42.38<br>(26.60 to<br>68.03)             | 53.52<br>(30.61 to<br>90.67)             |
| Liver cancer due to hepatitis C      | 1,255.12<br>(964.67 to<br>1,584.40)         | 1,775.90<br>(1,165.37 to<br>2,646.59)       | 1,645.18<br>(1,115.54 to<br>2,353.19)       | 2,109.49<br>(1,287.74 to<br>3,267.84)       | 76.75<br>(59.92 to<br>95.59)             | 126.01<br>(83.67 to<br>182.19)           | 119.82<br>(83.23 to<br>168.52)           | 144.60<br>(88.79 to<br>217.64)           |
| Liver cancer due to alcohol use      | 1,260.07<br>(942.04 to<br>1,629.08)         | 1,742.08<br>(1,066.26 to<br>2,822.85)       | 1,334.49<br>(847.81 to<br>2,095.57)         | 2,566.26<br>(1,488.77 to<br>4,263.23)       | 66.29<br>(50.18 to<br>85.51)             | 103.89<br>(64.10 to<br>164.70)           | 82.18<br>(52.37 to<br>125.72)            | 148.13<br>(87.58 to<br>241.47)           |
| Liver cancer due to other causes     | 770.39<br>(554.78 to<br>1,034.48)           | 1,080.33<br>(650.28 to<br>1,726.52)         | 991.04<br>(622.55 to<br>1,541.36)           | 1,316.98<br>(738.07 to<br>2,192.50)         | 41.36<br>(28.74 to<br>56.03)             | 68.35<br>(40.31 to<br>108.62)            | 64.15<br>(38.96 to<br>99.39)             | 81.22<br>(45.51 to<br>134.68)            |
| Gallbladder and biliary tract cancer | 1,971.59<br>(1,745.37 to<br>2,225.17)       | 1,928.43<br>(1,673.84 to<br>2,196.66)       | 1,945.24<br>(1,675.08 to<br>2,229.43)       | 1,853.35<br>(1,619.82 to<br>2,107.70)       | 126.80<br>(112.54 to<br>142.23)          | 143.98<br>(128.29 to<br>161.84)          | 148.09<br>(131.22 to<br>167.55)          | 134.66<br>(120.48 to<br>150.41)          |
| Pancreatic cancer                    | 13,525.52<br>(11,999.45 to<br>15,241.60)    | 18,403.17<br>(14,688.87 to<br>23,086.36)    | 17,881.96<br>(14,228.07 to<br>22,333.53)    | 21,012.65<br>(16,232.66 to<br>27,093.83)    | 785.08<br>(699.31 to<br>880.62)          | 1,218.61<br>(973.82 to<br>1,514.92)      | 1,203.97<br>(965.74 to<br>1,495.84)      | 1,362.92<br>(1,062.30 to<br>1,725.15)    |
| Larynx cancer                        | 693.51<br>(602.28 to<br>790.93)             | 668.36<br>(347.69 to<br>1,150.30)           | 447.75<br>(245.93 to<br>732.51)             | 1,149.01<br>(580.16 to<br>2,089.93)         | 38.03<br>(33.27 to<br>43.12)             | 43.21<br>(22.48 to<br>72.68)             | 29.60<br>(16.08 to<br>48.42)             | 72.60<br>(36.51 to<br>130.46)            |
| Tracheal, bronchus, and lung cancer  | 40,680.28<br>(36,152.02 to<br>45,722.89)    | 38,615.87<br>(26,883.05 to<br>52,505.62)    | 28,075.25<br>(20,147.25 to<br>37,665.44)    | 73,544.80<br>(50,347.47 to<br>101,013.34)   | 2,721.78<br>(1,980.25 to<br>2,493.08)    | 2,369.90<br>(1,659.08 to<br>3,200.19)    | 1,751.00<br>(1,255.16 to<br>2,353.93)    | 4,389.32<br>(3,022.38 to<br>6,025.94)    |
| Malignant skin melanoma              | 7,152.15<br>(5,435.36 to<br>8,335.56)       | 9,253.22<br>(7,131.93 to<br>11,005.11)      | 9,861.18<br>(7,578.91 to<br>11,702.12)      | 8,764.42<br>(6,720.53 to<br>10,425.04)      | 337.31<br>(256.07 to<br>389.94)          | 507.46<br>(387.92 to<br>590.08)          | 550.62<br>(420.34 to<br>640.42)          | 468.27<br>(356.25 to<br>542.39)          |
| Non-melanoma skin cancer             | 717.06<br>(623.01 to<br>817.89)             | 1,139.04<br>(980.17 to<br>1,315.39)         | 1,106.42<br>(949.87 to<br>1,281.78)         | 1,097.25<br>(954.93 to<br>1,267.36)         | 60.21<br>(53.35 to<br>67.60)             | 109.72<br>(93.80 to<br>126.62)           | 109.57<br>(94.06 to<br>126.57)           | 101.90<br>(86.64 to<br>117.51)           |
| Breast cancer                        | 14,350.23<br>(12,123.44 to<br>16,777.26)    | 17,313.37<br>(12,164.36 to<br>23,658.84)    | 15,089.34<br>(10,795.84 to<br>20,511.13)    | 20,727.77<br>(14,183.54 to<br>28,844.65)    | 736.48<br>(629.20 to<br>853.65)          | 1,055.08<br>(764.51 to<br>1,411.74)      | 942.90<br>(689.84 to<br>1,262.92)        | 1,223.16<br>(851.20 to<br>1,698.57)      |
| Cervical cancer                      | 2,667.90<br>(2,243.19 to<br>3,152.40)       | 2,438.79<br>(1,814.77 to<br>3,283.78)       | 2,242.26<br>(1,650.88 to<br>3,006.84)       | 2,716.36<br>(1,897.93 to<br>3,813.32)       | 125.62<br>(106.46 to<br>147.45)          | 133.89<br>(100.46 to<br>175.46)          | 125.33<br>(95.89 to<br>163.01)           | 145.90<br>(104.59 to<br>201.56)          |

|                   |                                         |                                          |                                          |                                          |                                     |                                       |                                       |                                       |
|-------------------|-----------------------------------------|------------------------------------------|------------------------------------------|------------------------------------------|-------------------------------------|---------------------------------------|---------------------------------------|---------------------------------------|
|                   | 1,975.30<br>(1,626.91 to<br>2,381.66)   | 3,033.67<br>(2,443.06 to<br>3,717.71)    | 2,933.52<br>(2,381.57 to<br>3,595.42)    | 2,995.40<br>(2,431.63 to<br>3,643.00)    | 122.66<br>(102.33 to<br>146.65)     | 214.88<br>(178.23 to<br>257.19)       | 211.05<br>(173.94 to<br>251.11)       | 207.30<br>(173.08 to<br>245.48)       |
| Uterine cancer    |                                         |                                          |                                          |                                          |                                     |                                       |                                       |                                       |
|                   | 7,094.86<br>(5,784.91 to<br>8,564.66)   | 8,343.49<br>(6,187.12 to<br>11,056.28)   | 7,800.56<br>(5,819.30 to<br>10,283.42)   | 8,723.80<br>(6,311.28 to<br>11,748.57)   | 363.68<br>(300.36 to<br>435.46)     | 481.58<br>(361.09 to<br>633.51)       | 449.86<br>(340.64 to<br>586.43)       | 497.86<br>(366.78 to<br>666.58)       |
| Ovarian cancer    |                                         |                                          |                                          |                                          |                                     |                                       |                                       |                                       |
|                   | 13,829.78<br>(9,924.65 to<br>16,502.29) | 24,693.40<br>(18,270.19 to<br>29,773.01) | 24,615.05<br>(18,568.77 to<br>29,687.05) | 23,925.15<br>(17,348.68 to<br>28,736.94) | 1,158.38<br>(837.44 to<br>1,361.73) | 2,398.60<br>(1,761.95 to<br>2,829.02) | 2,446.87<br>(1,833.34 to<br>2,879.49) | 2,258.11<br>(1,548.99 to<br>2,683.73) |
| Prostate cancer   |                                         |                                          |                                          |                                          |                                     |                                       |                                       |                                       |
|                   | 271.15<br>(215.74 to<br>328.59)         | 250.32<br>(185.79 to<br>330.62)          | 239.03<br>(177.37 to<br>317.41)          | 251.57<br>(187.62 to<br>334.36)          | 7.60<br>(6.21 to<br>9.02)           | 8.79<br>(7.05 to<br>10.82)            | 8.59<br>(6.82 to<br>10.59)            | 8.55<br>(6.85 to<br>10.43)            |
| Testicular cancer |                                         |                                          |                                          |                                          |                                     |                                       |                                       |                                       |

| Norway                          |                                                        |                                                        |                                                       |                                                        |                                                     |                                                     |                                                     |                                                     |
|---------------------------------|--------------------------------------------------------|--------------------------------------------------------|-------------------------------------------------------|--------------------------------------------------------|-----------------------------------------------------|-----------------------------------------------------|-----------------------------------------------------|-----------------------------------------------------|
| Cause                           | YLLs (actual counts)                                   |                                                        |                                                       |                                                        | Deaths (actual counts)                              |                                                     |                                                     |                                                     |
|                                 | 2016                                                   | 2040 Forecast                                          | 2040 Better Scenario                                  | 2040 Worse Scenario                                    | 2016                                                | 2040 Forecast                                       | 2040 Better Scenario                                | 2040 Worse Scenario                                 |
| Kidney cancer                   | 5,681.17<br>(4,997.15 to 6,450.09)                     | 8,300.03<br>(6,651.46 to 10,140.40)                    | 8,185.98<br>(6,607.28 to 9,875.53)                    | 8,881.31<br>(6,940.96 to 11,203.42)                    | 322.87<br>(285.20 to 361.88)                        | 551.65<br>(456.93 to 662.01)                        | 555.12<br>(465.39 to 657.02)                        | 575.37<br>(464.10 to 712.13)                        |
| Bladder cancer                  | 5,025.09<br>(4,391.49 to 5,682.77)                     | 6,930.96<br>(5,299.24 to 9,060.29)                     | 6,502.90<br>(5,024.08 to 8,458.73)                    | 8,231.68<br>(5,973.42 to 11,162.71)                    | 395.26<br>(348.44 to 444.25)                        | 632.82<br>(486.84 to 817.36)                        | 608.34<br>(477.79 to 776.89)                        | 731.58<br>(535.19 to 973.97)                        |
| Brain and nervous system cancer | 9,568.02<br>(7,735.46 to 11,031.65)                    | 12,207.84<br>(9,595.49 to 14,329.70)                   | 12,006.55<br>(9,551.57 to 14,198.79)                  | 12,078.88<br>(9,447.36 to 14,226.85)                   | 361.08<br>(275.59 to 413.69)                        | 538.48<br>(401.41 to 622.66)                        | 536.50<br>(404.53 to 622.51)                        | 522.52<br>(386.63 to 602.72)                        |
| Thyroid cancer                  | 511.72<br>(449.44 to 587.62)                           | 742.57<br>(566.93 to 999.68)                           | 691.15<br>(533.04 to 911.06)                          | 775.87<br>(577.62 to 1,062.46)                         | 32.72<br>(28.86 to 37.44)                           | 55.19<br>(42.56 to 72.79)                           | 52.62<br>(41.42 to 68.56)                           | 55.71<br>(42.18 to 74.97)                           |
| Mesothelioma                    | 1,436.42<br>(1,189.56 to 1,691.40)                     | 2,129.79<br>(1,723.60 to 2,540.17)                     | 2,189.79<br>(1,768.33 to 2,631.22)                    | 2,031.52<br>(1,650.94 to 2,398.52)                     | 81.78<br>(68.17 to 95.16)                           | 137.90<br>(114.83 to 161.13)                        | 143.92<br>(119.54 to 168.62)                        | 128.85<br>(106.86 to 149.32)                        |
| Hodgkin lymphoma                | 412.20<br>(359.03 to 486.80)                           | 401.44<br>(323.05 to 494.18)                           | 372.72<br>(300.53 to 459.69)                          | 405.67<br>(329.37 to 499.54)                           | 16.47<br>(14.42 to 18.68)                           | 19.62<br>(16.19 to 22.94)                           | 18.54<br>(15.46 to 21.80)                           | 19.32<br>(16.27 to 22.54)                           |
| Non-Hodgkin lymphoma            | 6,531.44<br>(5,638.50 to 7,808.67)                     | 8,820.81<br>(7,129.18 to 11,332.67)                    | 8,440.34<br>(6,852.68 to 10,769.48)                   | 8,932.95<br>(7,148.66 to 11,687.16)                    | 360.82<br>(315.41 to 421.89)                        | 577.20<br>(483.34 to 717.58)                        | 564.02<br>(474.53 to 696.78)                        | 567.32<br>(468.41 to 708.65)                        |
| Multiple myeloma                | 4,214.86<br>(3,431.47 to 5,402.98)                     | 6,474.39<br>(5,085.41 to 8,623.18)                     | 6,305.32<br>(4,983.55 to 8,261.54)                    | 6,491.43<br>(5,046.91 to 8,731.90)                     | 264.97<br>(216.34 to 325.38)                        | 466.93<br>(371.49 to 595.89)                        | 463.94<br>(374.02 to 589.07)                        | 455.27<br>(359.09 to 588.34)                        |
| Leukemia                        | 7,429.53<br>(6,577.27 to 8,250.79)                     | 10,258.22<br>(8,099.06 to 12,864.52)                   | 9,674.91<br>(7,740.12 to 11,907.55)                   | 11,162.69<br>(8,528.13 to 14,399.48)                   | 403.58<br>(360.66 to 445.53)                        | 682.24<br>(552.14 to 838.79)                        | 657.71<br>(535.10 to 797.98)                        | 719.93<br>(563.48 to 919.03)                        |
| Acute lymphoid leukemia         | 932.93<br>(776.77 to 1,090.78)                         | 813.91<br>(585.31 to 1,096.68)                         | 748.78<br>(543.43 to 1,015.71)                        | 895.63<br>(634.49 to 1,235.74)                         | 27.11<br>(22.89 to 31.58)                           | 28.73<br>(21.91 to 37.62)                           | 26.70<br>(20.39 to 34.32)                           | 31.34<br>(23.26 to 41.59)                           |
| Chronic lymphoid leukemia       | 1,107.28<br>(855.05 to 1,314.04)                       | 1,559.37<br>(1,129.17 to 2,078.73)                     | 1,497.42<br>(1,092.13 to 1,963.49)                    | 1,666.16<br>(1,176.54 to 2,301.03)                     | 87.56<br>(68.92 to 103.49)                          | 140.47<br>(102.17 to 182.96)                        | 138.05<br>(102.65 to 176.26)                        | 145.17<br>(102.32 to 195.88)                        |
| Acute myeloid leukemia          | 3,429.19<br>(3,022.15 to 3,883.80)                     | 5,412.05<br>(4,267.85 to 6,796.62)                     | 5,170.65<br>(4,106.84 to 6,419.95)                    | 5,881.64<br>(4,509.73 to 7,600.11)                     | 171.05<br>(149.45 to 196.57)                        | 323.41<br>(256.66 to 406.52)                        | 315.12<br>(252.34 to 393.87)                        | 342.19<br>(263.64 to 445.14)                        |
| Chronic myeloid leukemia        | 627.09<br>(524.33 to 737.31)                           | 490.95<br>(353.21 to 664.30)                           | 428.33<br>(312.99 to 570.08)                          | 552.37<br>(385.48 to 773.13)                           | 38.28<br>(32.45 to 45.37)                           | 36.08<br>(26.59 to 48.17)                           | 32.28<br>(24.28 to 42.49)                           | 39.20<br>(28.27 to 53.36)                           |
| Other leukemia                  | 1,333.03<br>(1,108.92 to 1,543.79)                     | 1,981.95<br>(1,505.29 to 2,556.27)                     | 1,829.73<br>(1,413.20 to 2,317.79)                    | 2,166.88<br>(1,597.50 to 2,890.82)                     | 79.58<br>(67.54 to 92.13)                           | 153.54<br>(118.40 to 198.62)                        | 145.57<br>(114.32 to 185.31)                        | 162.02<br>(120.38 to 215.63)                        |
| Other neoplasms                 | 8,094.52<br>(7,076.68 to 9,096.97)                     | 12,049.95<br>(10,383.55 to 13,688.75)                  | 12,189.02<br>(10,444.17 to 13,890.15)                 | 11,618.36<br>(10,043.98 to 13,161.35)                  | 443.10<br>(391.83 to 496.34)                        | 805.47<br>(699.46 to 899.61)                        | 833.24<br>(721.46 to 931.76)                        | 752.39<br>(586.24 to 839.42)                        |
| <b>Cardiovascular diseases</b>  | <b>142,034.35</b><br><b>(128,744.73 to 156,538.84)</b> | <b>151,798.97</b><br><b>(106,720.73 to 215,610.23)</b> | <b>117,284.61</b><br><b>(85,961.70 to 161,663.95)</b> | <b>204,149.89</b><br><b>(138,218.99 to 296,870.83)</b> | <b>13,378.06</b><br><b>(12,199.06 to 14,701.56)</b> | <b>16,447.77</b><br><b>(12,077.81 to 22,964.52)</b> | <b>13,372.82</b><br><b>(10,171.96 to 18,287.60)</b> | <b>20,112.16</b><br><b>(14,332.87 to 29,404.20)</b> |
| Rheumatic heart disease         | 1,149.13<br>(997.34 to 1,308.85)                       | 1,368.96<br>(1,095.16 to 1,759.69)                     | 1,286.08<br>(1,033.83 to 1,635.39)                    | 1,336.68<br>(1,065.41 to 1,738.49)                     | 110.89<br>(96.60 to 125.15)                         | 154.66<br>(123.50 to 200.37)                        | 149.17<br>(120.50 to 190.72)                        | 146.01<br>(116.13 to 190.12)                        |
| Ischemic heart disease          | 80,723.77<br>(72,596.20 to 89,438.52)                  | 74,625.57<br>(43,177.44 to 121,729.34)                 | 51,515.36<br>(30,879.59 to 81,509.90)                 | 113,240.05<br>(63,262.63 to 188,356.59)                | 7,478.98<br>(6,804.58 to 8,250.29)                  | 7,899.30<br>(4,757.91 to 12,509.19)                 | 5,794.57<br>(3,592.10 to 9,232.27)                  | 10,721.06<br>(6,207.89 to 17,767.13)                |
| Stroke                          | 30,371.57<br>(26,637.92 to 34,185.04)                  | 28,107.09<br>(17,563.08 to 45,459.00)                  | 20,595.23<br>(13,373.27 to 31,280.50)                 | 38,948.78<br>(23,579.62 to 63,605.13)                  | 2,947.26<br>(2,559.52 to 3,352.81)                  | 3,143.64<br>(1,984.67 to 5,035.43)                  | 2,458.24<br>(1,609.11 to 3,828.96)                  | 3,928.90<br>(2,390.41 to 6,468.40)                  |
| Ischemic stroke                 | 13,812.94<br>(11,954.42 to 15,832.78)                  | 12,468.48<br>(6,944.09 to 23,773.78)                   | 9,773.36<br>(5,632.98 to 18,133.69)                   | 15,950.51<br>(8,708.85 to 30,905.00)                   | 1,554.40<br>(1,331.65 to 1,787.85)                  | 1,566.61<br>(867.55 to 3,078.56)                    | 1,285.80<br>(727.65 to 2,466.71)                    | 1,863.46<br>(1,000.66 to 3,742.90)                  |

|                                |                                          |                                         |                                         |                                          |                                       |                                     |                                     |                                       |
|--------------------------------|------------------------------------------|-----------------------------------------|-----------------------------------------|------------------------------------------|---------------------------------------|-------------------------------------|-------------------------------------|---------------------------------------|
| Intracerebral hemorrhage       | 16,558.63<br>(14,521.55 to<br>18,759.79) | 15,638.61<br>(9,659.68 to<br>24,831.56) | 10,821.87<br>(7,183.10 to<br>16,052.94) | 22,998.27<br>(13,585.95 to<br>37,799.63) | 1,392.86<br>(1,206.13 to<br>1,589.12) | 1,577.03<br>(995.59 to<br>2,496.86) | 1,172.44<br>(784.61 to<br>1,757.55) | 2,065.43<br>(1,245.18 to<br>3,382.12) |
| Hypertensive heart disease     | 1,757.59<br>(1,220.27 to<br>2,500.95)    | 3,724.98<br>(1,867.81 to<br>7,728.08)   | 2,861.65<br>(1,582.39 to<br>5,364.91)   | 4,594.26<br>(2,253.17 to<br>9,980.96)    | 186.83<br>(103.97 to<br>237.63)       | 464.89<br>(194.42 to<br>1,026.91)   | 367.52<br>(166.55 to<br>688.17)     | 545.87<br>(220.52 to<br>1,229.73)     |
| Cardiomyopathy and myocarditis | 3,775.09<br>(3,257.86 to<br>4,439.32)    | 4,107.74<br>(3,108.50 to<br>5,436.23)   | 3,744.14<br>(2,864.37 to<br>4,934.84)   | 4,276.37<br>(3,242.88 to<br>5,709.25)    | 271.72<br>(238.20 to<br>314.20)       | 364.76<br>(273.07 to<br>500.14)     | 349.62<br>(263.40 to<br>474.73)     | 355.21<br>(262.32 to<br>493.98)       |
| Myocarditis                    | 709.63<br>(499.85 to<br>857.45)          | 1,000.31<br>(749.36 to<br>1,242.10)     | 1,031.76<br>(783.48 to<br>1,282.91)     | 944.09<br>(694.23 to<br>1,168.92)        | 65.70<br>(46.39 to<br>81.29)          | 113.72<br>(82.45 to<br>147.11)      | 121.98<br>(88.75 to<br>155.94)      | 101.62<br>(73.58 to<br>133.41)        |

| Norway                                                        |                                                     |                                                     |                                                     |                                                     |                                                  |                                                  |                                                  |                                                  |
|---------------------------------------------------------------|-----------------------------------------------------|-----------------------------------------------------|-----------------------------------------------------|-----------------------------------------------------|--------------------------------------------------|--------------------------------------------------|--------------------------------------------------|--------------------------------------------------|
| Cause                                                         | YLLs (actual counts)                                |                                                     |                                                     |                                                     | Deaths (actual counts)                           |                                                  |                                                  |                                                  |
|                                                               | 2016                                                | 2040 Forecast                                       | 2040 Better Scenario                                | 2040 Worse Scenario                                 | 2016                                             | 2040 Forecast                                    | 2040 Better Scenario                             | 2040 Worse Scenario                              |
| Alcoholic cardiomyopathy                                      | 780.48<br>(490.99 to 1,064.22)                      | 817.05<br>(521.66 to 1,121.87)                      | 691.49<br>(443.91 to 953.83)                        | 962.77<br>(619.50 to 1,334.48)                      | 31.01<br>(19.31 to 41.47)                        | 36.09<br>(23.78 to 48.87)                        | 31.09<br>(20.65 to 42.36)                        | 41.71<br>(27.91 to 55.84)                        |
| Other cardiomyopathy                                          | 2,284.98<br>(1,953.25 to 2,776.09)                  | 2,290.38<br>(1,538.69 to 3,382.03)                  | 2,020.89<br>(1,369.23 to 2,950.14)                  | 2,369.51<br>(1,562.33 to 3,472.64)                  | 175.01<br>(147.77 to 215.80)                     | 214.95<br>(134.78 to 340.52)                     | 196.55<br>(125.42 to 304.95)                     | 211.88<br>(134.21 to 341.67)                     |
| Atrial fibrillation and flutter                               | 4,532.37<br>(3,537.91 to 5,711.96)                  | 7,895.82<br>(5,788.33 to 10,706.33)                 | 7,423.70<br>(5,531.11 to 9,832.35)                  | 8,272.72<br>(6,011.13 to 11,298.61)                 | 547.48<br>(422.05 to 703.81)                     | 1,006.95<br>(725.13 to 1,403.91)                 | 970.37<br>(720.95 to 1,325.87)                   | 1,016.16<br>(719.95 to 1,422.79)                 |
| Aortic aneurysm                                               | 7,099.03<br>(6,235.13 to 8,046.93)                  | 9,092.57<br>(7,048.55 to 11,781.14)                 | 8,646.23<br>(6,792.16 to 11,046.06)                 | 9,530.22<br>(7,328.71 to 12,344.20)                 | 552.84<br>(489.14 to 618.67)                     | 810.73<br>(649.12 to 1,021.30)                   | 794.16<br>(647.73 to 987.03)                     | 808.47<br>(641.09 to 1,019.92)                   |
| Peripheral artery disease                                     | 1,479.03<br>(987.14 to 2,840.30)                    | 3,606.79<br>(2,096.56 to 6,863.56)                  | 3,588.54<br>(2,108.69 to 6,807.11)                  | 3,852.23<br>(2,215.72 to 7,418.20)                  | 161.89<br>(113.13 to 304.06)                     | 441.01<br>(265.88 to 844.63)                     | 451.71<br>(275.19 to 863.83)                     | 446.11<br>(266.89 to 845.35)                     |
| Endocarditis                                                  | 1,341.57<br>(792.52 to 1,695.31)                    | 2,198.57<br>(1,106.49 to 3,431.09)                  | 2,118.01<br>(1,073.10 to 3,261.11)                  | 2,182.80<br>(1,091.43 to 3,408.80)                  | 108.56<br>(56.20 to 145.24)                      | 206.12<br>(92.99 to 353.10)                      | 204.69<br>(92.26 to 344.78)                      | 196.40<br>(89.03 to 333.69)                      |
| Other cardiovascular and circulatory diseases                 | 9,805.19<br>(8,714.18 to 11,011.03)                 | 17,070.89<br>(13,525.45 to 21,874.88)               | 15,505.69<br>(12,578.49 to 19,486.97)               | 17,915.79<br>(14,021.83 to 22,959.24)               | 1,011.60<br>(902.88 to 1,128.34)                 | 1,955.72<br>(1,570.14 to 2,468.32)               | 1,832.77<br>(1,507.16 to 2,270.86)               | 1,947.98<br>(1,553.06 to 2,452.38)               |
| <b>Chronic respiratory diseases</b>                           | <b>32,455.92</b><br><b>(29,045.72 to 36,297.81)</b> | <b>33,040.85</b><br><b>(25,619.92 to 42,472.05)</b> | <b>27,886.23</b><br><b>(21,840.42 to 35,249.76)</b> | <b>53,657.78</b><br><b>(40,188.82 to 71,351.08)</b> | <b>2,597.73</b><br><b>(2,345.55 to 2,883.43)</b> | <b>2,986.78</b><br><b>(2,343.70 to 3,815.72)</b> | <b>2,583.95</b><br><b>(2,066.10 to 3,236.84)</b> | <b>4,725.51</b><br><b>(3,578.41 to 6,218.59)</b> |
| Chronic obstructive pulmonary disease                         | 28,354.84<br>(25,235.58 to 31,876.90)               | 27,059.94<br>(20,000.61 to 36,366.49)               | 21,574.93<br>(16,077.40 to 28,742.92)               | 47,793.19<br>(34,502.96 to 65,169.18)               | 2,321.75<br>(2,090.95 to 2,589.97)               | 2,520.29<br>(1,888.64 to 3,351.68)               | 2,083.02<br>(1,565.15 to 2,743.61)               | 4,281.04<br>(3,122.25 to 5,805.53)               |
| Pneumoconiosis                                                | 144.02<br>(119.65 to 175.60)                        | 271.87<br>(204.04 to 359.96)                        | 290.32<br>(216.40 to 387.23)                        | 253.72<br>(193.13 to 331.57)                        | 10.85<br>(9.01 to 13.22)                         | 23.04<br>(17.48 to 30.92)                        | 24.97<br>(18.81 to 33.83)                        | 21.05<br>(15.95 to 27.72)                        |
| Silicosis                                                     | 15.82<br>(8.60 to 43.02)                            | 14.10<br>(5.84 to 46.54)                            | 12.59<br>(5.19 to 42.18)                            | 14.02<br>(6.02 to 45.31)                            | 1.30<br>(0.71 to 3.47)                           | 1.32<br>(0.56 to 4.33)                           | 1.20<br>(0.50 to 3.83)                           | 1.29<br>(0.55 to 3.93)                           |
| Asbestosis                                                    | 111.95<br>(65.07 to 141.91)                         | 238.71<br>(166.90 to 324.51)                        | 258.71<br>(179.89 to 355.82)                        | 220.18<br>(151.04 to 302.82)                        | 8.14<br>(4.42 to 10.38)                          | 19.69<br>(13.46 to 26.64)                        | 20.82<br>(15.04 to 29.61)                        | 17.77<br>(11.93 to 24.32)                        |
| Coal workers pneumoconiosis                                   | 1.84<br>(1.06 to 5.91)                              | 3.23<br>(1.44 to 11.55)                             | 3.24<br>(1.44 to 10.94)                             | 3.27<br>(1.45 to 12.42)                             | 0.16<br>(0.09 to 0.54)                           | 0.33<br>(0.14 to 1.16)                           | 0.34<br>(0.14 to 1.10)                           | 0.32<br>(0.13 to 1.19)                           |
| Other pneumoconiosis                                          | 14.41<br>(8.67 to 41.44)                            | 15.83<br>(9.13 to 42.57)                            | 15.79<br>(9.05 to 41.89)                            | 16.26<br>(9.55 to 42.94)                            | 1.25<br>(0.78 to 3.34)                           | 1.70<br>(0.97 to 4.08)                           | 1.68<br>(0.99 to 4.16)                           | 1.68<br>(0.98 to 3.96)                           |
| Asthma                                                        | 1,358.72<br>(1,166.93 to 1,663.18)                  | 967.97<br>(594.77 to 1,580.15)                      | 787.51<br>(496.21 to 1,255.41)                      | 1,207.45<br>(706.59 to 2,005.21)                    | 93.30<br>(79.93 to 108.34)                       | 81.94<br>(50.89 to 131.84)                       | 69.04<br>(44.07 to 107.10)                       | 96.40<br>(57.67 to 156.73)                       |
| Interstitial lung disease and pulmonary sarcoidosis           | 2,449.55<br>(1,598.59 to 3,032.00)                  | 4,567.01<br>(3,097.97 to 5,556.62)                  | 5,061.40<br>(3,541.73 to 6,146.43)                  | 4,218.39<br>(2,808.48 to 5,141.44)                  | 164.39<br>(112.32 to 201.34)                     | 350.60<br>(240.89 to 428.86)                     | 395.86<br>(282.92 to 481.66)                     | 315.65<br>(213.41 to 388.42)                     |
| Other chronic respiratory diseases                            | 148.79<br>(86.95 to 191.35)                         | 174.05<br>(96.09 to 237.11)                         | 172.07<br>(95.10 to 233.01)                         | 185.03<br>(99.17 to 253.88)                         | 7.45<br>(3.72 to 9.73)                           | 10.90<br>(5.29 to 15.48)                         | 11.06<br>(5.34 to 15.71)                         | 11.35<br>(5.38 to 16.26)                         |
| <b>Cirrhosis and other chronic liver diseases</b>             | <b>7,628.92</b><br><b>(6,682.55 to 8,674.76)</b>    | <b>8,665.83</b><br><b>(7,350.23 to 10,262.58)</b>   | <b>7,606.94</b><br><b>(6,404.37 to 8,925.71)</b>    | <b>9,776.68</b><br><b>(8,359.90 to 11,353.38)</b>   | <b>360.63</b><br><b>(320.87 to 405.34)</b>       | <b>476.48</b><br><b>(415.96 to 538.92)</b>       | <b>428.79</b><br><b>(371.64 to 485.36)</b>       | <b>521.54</b><br><b>(456.88 to 587.79)</b>       |
| Cirrhosis and other chronic liver diseases due to hepatitis B | 1,087.49<br>(828.53 to 1,411.08)                    | 1,249.37<br>(930.50 to 1,657.98)                    | 1,197.37<br>(893.44 to 1,593.21)                    | 1,248.89<br>(940.09 to 1,660.20)                    | 51.76<br>(40.30 to 65.79)                        | 68.98<br>(52.24 to 89.71)                        | 67.42<br>(50.48 to 87.63)                        | 67.03<br>(50.33 to 86.64)                        |
| Cirrhosis and other chronic liver diseases due to hepatitis C | 2,450.09<br>(1,888.92 to 3,195.09)                  | 2,854.13<br>(2,133.01 to 3,766.22)                  | 2,714.93<br>(2,043.55 to 3,500.96)                  | 2,873.48<br>(2,122.80 to 3,817.69)                  | 110.59<br>(84.98 to 140.51)                      | 148.43<br>(112.41 to 191.66)                     | 143.83<br>(108.38 to 183.84)                     | 145.48<br>(108.68 to 188.62)                     |

|                                                                |                                                              |                                                               |                                                               |                                                               |                                                        |                                                            |                                                            |                                                            |
|----------------------------------------------------------------|--------------------------------------------------------------|---------------------------------------------------------------|---------------------------------------------------------------|---------------------------------------------------------------|--------------------------------------------------------|------------------------------------------------------------|------------------------------------------------------------|------------------------------------------------------------|
| Cirrhosis and other chronic liver diseases due to alcohol use  | 3,597.05<br>(2,870.44 to<br>4,305.76)                        | 3,994.25<br>(3,177.59 to<br>4,922.00)                         | 3,149.89<br>(2,451.70 to<br>3,951.57)                         | 5,087.07<br>(4,040.54 to<br>6,159.16)                         | 172.82<br>(141.86 to<br>204.31)                        | 223.68<br>(182.10 to<br>268.47)                            | 182.76<br>(147.07 to<br>224.07)                            | 274.92<br>(224.74 to<br>326.56)                            |
| Cirrhosis and other chronic liver diseases due to other causes | 494.29<br>(355.95 to<br>679.37)                              | 568.08<br>(401.84 to<br>780.20)                               | 544.75<br>(386.68 to<br>749.82)                               | 567.23<br>(402.26 to<br>789.81)                               | 25.46<br>(17.94 to<br>36.07)                           | 35.39<br>(24.18 to<br>50.83)                               | 34.77<br>(23.76 to<br>50.26)                               | 34.11<br>(23.27 to<br>48.56)                               |
| <b>Digestive diseases</b>                                      | <b>11,250.29</b><br><b>(9,765.40 to</b><br><b>14,039.28)</b> | <b>16,366.31</b><br><b>(13,601.05 to</b><br><b>20,457.91)</b> | <b>15,718.29</b><br><b>(13,059.05 to</b><br><b>19,502.36)</b> | <b>16,471.27</b><br><b>(13,569.57 to</b><br><b>20,874.55)</b> | <b>962.95</b><br><b>(843.93 to</b><br><b>1,127.12)</b> | <b>1,650.50</b><br><b>(1,372.47 to</b><br><b>2,029.95)</b> | <b>1,622.03</b><br><b>(1,345.94 to</b><br><b>1,989.21)</b> | <b>1,608.52</b><br><b>(1,319.33 to</b><br><b>1,991.67)</b> |
| Peptic ulcer disease                                           | 2,320.00<br>(1,985.07 to<br>3,132.74)                        | 2,175.77<br>(1,674.66 to<br>2,890.94)                         | 2,004.54<br>(1,528.58 to<br>2,697.28)                         | 2,305.23<br>(1,777.52 to<br>3,108.49)                         | 203.47<br>(173.41 to<br>259.17)                        | 232.57<br>(178.95 to<br>307.21)                            | 219.13<br>(167.76 to<br>289.68)                            | 236.40<br>(179.24 to<br>314.23)                            |

| Norway                                     |                                       |                                        |                                        |                                        |                                    |                                      |                                      |                                      |
|--------------------------------------------|---------------------------------------|----------------------------------------|----------------------------------------|----------------------------------------|------------------------------------|--------------------------------------|--------------------------------------|--------------------------------------|
| Cause                                      | YLLs (actual counts)                  |                                        |                                        |                                        | Deaths (actual counts)             |                                      |                                      |                                      |
|                                            | 2016                                  | 2040 Forecast                          | 2040 Better Scenario                   | 2040 Worse Scenario                    | 2016                               | 2040 Forecast                        | 2040 Better Scenario                 | 2040 Worse Scenario                  |
| Gastritis and duodenitis                   | 265.91<br>(206.67 to 434.30)          | 307.84<br>(226.31 to 492.88)           | 292.27<br>(213.04 to 460.64)           | 305.31<br>(224.36 to 487.03)           | 15.31<br>(12.23 to 22.95)          | 22.87<br>(16.92 to 33.52)            | 22.43<br>(16.47 to 32.81)            | 21.72<br>(16.04 to 32.20)            |
| Appendicitis                               | 175.75<br>(133.19 to 268.43)          | 200.38<br>(148.78 to 291.51)           | 186.26<br>(139.58 to 272.56)           | 199.26<br>(148.63 to 294.29)           | 12.12<br>(8.75 to 15.74)           | 17.02<br>(12.26 to 21.86)            | 16.21<br>(11.93 to 21.03)            | 16.34<br>(11.57 to 20.92)            |
| Paralytic ileus and intestinal obstruction | 1,910.39<br>(1,373.29 to 2,385.68)    | 3,252.51<br>(2,309.28 to 4,067.12)     | 3,358.65<br>(2,385.77 to 4,184.87)     | 3,056.55<br>(2,161.39 to 3,867.75)     | 165.73<br>(113.87 to 205.77)       | 332.99<br>(227.93 to 416.19)         | 351.68<br>(241.76 to 439.94)         | 303.23<br>(204.84 to 377.73)         |
| Inguinal, femoral, and abdominal hernia    | 340.92<br>(215.54 to 425.39)          | 357.83<br>(222.85 to 446.83)           | 351.53<br>(222.13 to 440.62)           | 342.43<br>(215.54 to 426.90)           | 32.06<br>(19.20 to 39.49)          | 38.56<br>(23.22 to 48.40)            | 38.81<br>(23.34 to 48.94)            | 35.77<br>(21.54 to 44.84)            |
| Inflammatory bowel disease                 | 601.60<br>(457.13 to 738.03)          | 791.37<br>(621.31 to 988.00)           | 801.40<br>(623.04 to 1,010.74)         | 760.95<br>(599.36 to 948.90)           | 38.38<br>(31.87 to 47.60)          | 61.06<br>(48.50 to 81.68)            | 63.45<br>(50.32 to 86.47)            | 56.63<br>(45.31 to 74.94)            |
| Vascular intestinal disorders              | 1,324.95<br>(1,097.42 to 1,744.56)    | 2,193.03<br>(1,786.46 to 2,860.30)     | 2,185.47<br>(1,775.43 to 2,864.43)     | 2,105.11<br>(1,716.94 to 2,742.42)     | 106.01<br>(89.29 to 130.79)        | 203.42<br>(167.25 to 252.95)         | 206.93<br>(168.78 to 257.07)         | 189.88<br>(156.00 to 239.15)         |
| Gallbladder and biliary diseases           | 1,235.36<br>(1,058.44 to 1,585.35)    | 2,351.67<br>(1,385.92 to 3,956.05)     | 2,020.51<br>(1,222.26 to 3,285.99)     | 2,644.09<br>(1,501.02 to 4,433.23)     | 136.54<br>(114.44 to 169.83)       | 289.90<br>(170.46 to 487.07)         | 255.83<br>(154.12 to 417.80)         | 314.43<br>(178.74 to 525.72)         |
| Pancreatitis                               | 1,008.38<br>(796.74 to 1,304.14)      | 1,460.94<br>(874.96 to 2,513.79)       | 1,229.67<br>(785.00 to 2,069.14)       | 1,635.05<br>(925.01 to 2,918.46)       | 59.39<br>(45.94 to 70.91)          | 104.36<br>(63.36 to 180.87)          | 90.52<br>(57.80 to 145.89)           | 113.03<br>(64.96 to 208.76)          |
| Other digestive diseases                   | 2,067.02<br>(1,595.33 to 2,458.89)    | 3,274.97<br>(2,482.72 to 3,969.04)     | 3,288.00<br>(2,501.69 to 3,965.32)     | 3,117.31<br>(2,541.68 to 3,771.00)     | 193.95<br>(157.51 to 235.95)       | 347.74<br>(270.47 to 415.44)         | 357.04<br>(277.37 to 426.23)         | 321.08<br>(248.97 to 384.60)         |
| Neurological disorders                     | 49,869.52<br>(42,997.44 to 57,826.89) | 83,858.57<br>(67,335.88 to 107,542.57) | 83,085.88<br>(67,444.97 to 104,468.01) | 86,461.78<br>(67,309.59 to 114,686.44) | 5,506.14<br>(4,662.48 to 6,480.44) | 10,018.26<br>(7,776.37 to 13,203.22) | 10,142.29<br>(7,999.57 to 13,043.94) | 10,039.92<br>(7,519.35 to 13,771.38) |
| Alzheimer's disease and other dementias    | 36,486.97<br>(30,516.01 to 44,009.38) | 64,819.16<br>(48,877.28 to 88,624.60)  | 64,096.92<br>(49,058.92 to 85,018.75)  | 67,453.36<br>(48,797.01 to 96,342.39)  | 4,777.26<br>(3,968.92 to 5,735.91) | 8,797.47<br>(6,508.94 to 12,017.68)  | 8,884.24<br>(6,749.22 to 11,761.87)  | 8,873.29<br>(6,355.11 to 12,622.89)  |
| Parkinson's disease                        | 3,542.02<br>(2,642.88 to 4,589.89)    | 6,077.84<br>(4,524.71 to 7,990.71)     | 6,397.11<br>(4,762.52 to 8,393.61)     | 5,660.05<br>(4,208.51 to 7,465.34)     | 342.16<br>(257.58 to 447.21)       | 620.95<br>(466.29 to 815.95)         | 664.75<br>(504.57 to 875.19)         | 565.10<br>(422.23 to 747.08)         |
| Epilepsy                                   | 2,435.05<br>(2,121.85 to 2,801.98)    | 3,405.89<br>(2,207.84 to 5,173.91)     | 2,976.07<br>(2,003.02 to 4,404.32)     | 3,816.15<br>(2,394.11 to 5,954.77)     | 78.84<br>(69.56 to 89.76)          | 138.36<br>(90.70 to 201.69)          | 123.76<br>(85.19 to 176.12)          | 150.74<br>(95.46 to 226.38)          |
| Multiple sclerosis                         | 2,281.58<br>(1,454.33 to 2,768.07)    | 2,426.94<br>(1,472.00 to 3,050.58)     | 2,444.07<br>(1,498.97 to 3,072.66)     | 2,535.89<br>(1,555.82 to 3,240.04)     | 88.07<br>(54.05 to 107.57)         | 102.53<br>(59.78 to 127.80)          | 104.14<br>(60.87 to 129.96)          | 105.32<br>(62.05 to 132.80)          |
| Motor neuron disease                       | 2,542.43<br>(2,205.18 to 2,887.47)    | 3,894.96<br>(3,263.60 to 4,514.53)     | 3,912.32<br>(3,266.85 to 4,540.60)     | 3,811.43<br>(3,212.57 to 4,395.81)     | 123.93<br>(107.35 to 141.02)       | 215.16<br>(182.00 to 249.06)         | 218.16<br>(184.86 to 253.12)         | 207.52<br>(177.72 to 238.42)         |
| Other neurological disorders               | 2,581.47<br>(2,227.80 to 2,906.32)    | 3,233.77<br>(2,751.62 to 3,780.18)     | 3,259.39<br>(2,757.83 to 3,814.97)     | 3,184.91<br>(2,714.11 to 3,730.24)     | 95.87<br>(84.25 to 107.48)         | 143.79<br>(125.23 to 164.12)         | 147.54<br>(127.94 to 168.07)         | 137.96<br>(121.04 to 157.25)         |
| Mental disorders                           | 21,768.76<br>(18,614.21 to 25,052.96) | 34,189.78<br>(26,566.93 to 42,718.44)  | 35,307.42<br>(27,618.51 to 43,857.94)  | 34,015.98<br>(26,539.74 to 42,400.42)  | 579.02<br>(500.96 to 660.50)       | 933.07<br>(765.35 to 1,107.67)       | 960.09<br>(786.95 to 1,144.28)       | 927.68<br>(762.05 to 1,102.97)       |
| Alcohol use disorders                      | 7,124.03<br>(6,038.54 to 8,227.47)    | 9,174.66<br>(7,403.76 to 11,018.73)    | 8,829.90<br>(7,097.13 to 10,666.50)    | 9,661.27<br>(7,864.43 to 11,549.78)    | 254.69<br>(217.66 to 293.73)       | 361.01<br>(298.60 to 427.00)         | 351.27<br>(287.92 to 417.77)         | 374.64<br>(311.63 to 441.40)         |
| Drug use disorders                         | 14,607.94<br>(12,107.45 to 17,068.22) | 24,949.18<br>(18,621.58 to 32,326.48)  | 26,408.28<br>(19,793.98 to 34,021.98)  | 24,290.34<br>(17,999.14 to 31,729.74)  | 323.59<br>(272.21 to 376.19)       | 570.74<br>(445.43 to 715.19)         | 607.43<br>(471.83 to 752.95)         | 551.76<br>(425.69 to 700.03)         |
| Opioid use disorders                       | 7,311.18<br>(4,923.59 to 8,899.22)    | 11,493.40<br>(7,462.55 to 15,926.89)   | 11,659.47<br>(7,498.37 to 16,140.33)   | 11,403.08<br>(7,399.53 to 15,761.80)   | 153.42<br>(108.08 to 187.45)       | 250.18<br>(172.51 to 331.02)         | 254.82<br>(175.14 to 338.80)         | 246.91<br>(169.37 to 327.66)         |

|                           |                                       |                                         |                                         |                                         |                                 |                                 |                                 |                                 |
|---------------------------|---------------------------------------|-----------------------------------------|-----------------------------------------|-----------------------------------------|---------------------------------|---------------------------------|---------------------------------|---------------------------------|
|                           | 122.12<br>(59.20 to<br>164.04)        | 216.21<br>(113.45 to<br>323.56)         | 230.44<br>(122.86 to<br>347.06)         | 209.49<br>(112.25 to<br>320.40)         | 2.78<br>(1.30 to<br>3.63)       | 5.13<br>(2.53 to<br>7.39)       | 5.51<br>(2.69 to<br>7.99)       | 4.92<br>(2.42 to<br>7.10)       |
| Cocaine use disorders     |                                       |                                         |                                         |                                         |                                 |                                 |                                 |                                 |
|                           | 787.92<br>(365.80 to<br>1,067.16)     | 2,525.95<br>(1,300.04 to<br>3,956.13)   | 2,798.05<br>(1,489.90 to<br>4,381.39)   | 2,412.36<br>(1,206.51 to<br>3,838.25)   | 15.35<br>(7.40 to<br>20.84)     | 50.00<br>(26.77 to<br>75.47)    | 55.51<br>(30.52 to<br>84.43)    | 47.61<br>(24.57 to<br>73.00)    |
| Amphetamine use disorders |                                       |                                         |                                         |                                         |                                 |                                 |                                 |                                 |
|                           | 6,386.71<br>(5,067.96 to<br>8,175.82) | 10,713.62<br>(7,507.21 to<br>14,588.26) | 11,720.31<br>(8,253.17 to<br>15,888.63) | 10,265.42<br>(7,198.11 to<br>14,015.22) | 152.03<br>(121.84 to<br>191.48) | 265.43<br>(197.32 to<br>344.74) | 291.59<br>(217.35 to<br>378.84) | 252.31<br>(186.16 to<br>329.58) |
| Other drug use disorders  |                                       |                                         |                                         |                                         |                                 |                                 |                                 |                                 |
|                           | 36.80<br>(28.03 to<br>48.73)          | 65.94<br>(41.48 to<br>103.50)           | 69.24<br>(43.18 to<br>109.00)           | 64.36<br>(40.86 to<br>99.83)            | 0.74<br>(0.56 to<br>0.98)       | 1.32<br>(0.84 to<br>2.03)       | 1.39<br>(0.88 to<br>2.16)       | 1.29<br>(0.82 to<br>1.98)       |
| Eating disorders          |                                       |                                         |                                         |                                         |                                 |                                 |                                 |                                 |



| Norway                                                     |                                              |                                              |                                              |                                              |                                           |                                           |                                           |                                           |
|------------------------------------------------------------|----------------------------------------------|----------------------------------------------|----------------------------------------------|----------------------------------------------|-------------------------------------------|-------------------------------------------|-------------------------------------------|-------------------------------------------|
| Cause                                                      | YLLs (actual counts)                         |                                              |                                              |                                              | Deaths (actual counts)                    |                                           |                                           |                                           |
|                                                            | 2016                                         | 2040 Forecast                                | 2040 Better Scenario                         | 2040 Worse Scenario                          | 2016                                      | 2040 Forecast                             | 2040 Better Scenario                      | 2040 Worse Scenario                       |
| <b>Diabetes, urogenital, blood, and endocrine diseases</b> | <b>22,947.19</b><br>(20,755.03 to 25,261.18) | <b>40,758.56</b><br>(29,745.92 to 68,294.82) | <b>37,129.04</b><br>(27,616.37 to 63,087.88) | <b>44,339.07</b><br>(31,494.75 to 72,853.23) | <b>1,950.43</b><br>(1,783.09 to 2,134.90) | <b>4,255.33</b><br>(3,144.08 to 7,726.25) | <b>3,990.85</b><br>(2,978.07 to 6,923.98) | <b>4,438.53</b><br>(3,210.80 to 7,957.74) |
| Diabetes mellitus                                          | 8,938.70<br>(7,965.89 to 10,013.39)          | 11,874.03<br>(7,834.21 to 17,561.88)         | 9,956.39<br>(6,708.14 to 14,402.59)          | 13,636.05<br>(8,688.74 to 20,627.89)         | 668.26<br>(595.28 to 746.87)              | 1,073.74<br>(746.78 to 1,498.02)          | 944.96<br>(668.43 to 1,292.29)            | 1,160.11<br>(785.41 to 1,652.12)          |
| Acute glomerulonephritis                                   | 24.28<br>(21.78 to 26.99)                    | 26.30<br>(20.48 to 33.98)                    | 24.78<br>(19.23 to 32.38)                    | 26.98<br>(21.07 to 34.59)                    | 0.54<br>(0.48 to 0.60)                    | 0.68<br>(0.53 to 0.86)                    | 0.65<br>(0.51 to 0.84)                    | 0.68<br>(0.54 to 0.87)                    |
| Chronic kidney disease                                     | 6,108.17<br>(5,458.94 to 6,792.07)           | 14,126.56<br>(6,031.56 to 42,811.98)         | 12,382.07<br>(5,563.50 to 37,729.70)         | 16,634.41<br>(6,748.74 to 45,178.25)         | 601.06<br>(538.43 to 668.70)              | 1,614.38<br>(882.26 to 5,058.44)          | 1,444.90<br>(626.28 to 4,577.83)          | 1,840.50<br>(734.11 to 5,450.71)          |
| Chronic kidney disease due to diabetes mellitus            | 1,407.89<br>(1,238.23 to 1,592.88)           | 3,351.58<br>(1,451.54 to 10,530.10)          | 2,926.13<br>(1,308.98 to 9,299.09)           | 4,023.94<br>(1,661.60 to 11,697.13)          | 114.91<br>(101.53 to 130.14)              | 332.79<br>(139.28 to 1,047.59)            | 296.95<br>(128.38 to 961.24)              | 386.29<br>(154.35 to 1,139.18)            |
| Chronic kidney disease due to hypertension                 | 1,378.14<br>(1,206.04 to 1,567.81)           | 3,636.54<br>(1,459.46 to 11,164.44)          | 3,267.83<br>(1,358.38 to 10,465.10)          | 4,170.05<br>(1,599.81 to 12,570.42)          | 183.74<br>(160.06 to 209.80)              | 507.17<br>(206.34 to 1,510.17)            | 464.08<br>(196.02 to 1,370.31)            | 564.86<br>(219.12 to 1,627.83)            |
| Chronic kidney disease due to glomerulonephritis           | 1,423.33<br>(1,263.86 to 1,600.08)           | 2,857.74<br>(1,225.86 to 8,288.88)           | 2,456.48<br>(1,099.54 to 7,621.39)           | 3,386.29<br>(1,385.15 to 9,297.57)           | 122.15<br>(108.01 to 137.78)              | 297.95<br>(121.24 to 916.50)              | 260.50<br>(110.81 to 802.70)              | 343.65<br>(134.32 to 1,013.94)            |
| Chronic kidney disease due to other and unspecified causes | 1,898.80<br>(1,685.92 to 2,125.46)           | 4,280.69<br>(1,866.78 to 12,499.04)          | 3,731.63<br>(1,681.68 to 10,668.75)          | 5,054.13<br>(2,088.06 to 13,582.94)          | 180.26<br>(159.40 to 203.06)              | 476.46<br>(203.72 to 1,447.85)            | 423.36<br>(188.86 to 1,310.90)            | 545.71<br>(220.52 to 1,589.43)            |
| Urinary diseases and male infertility                      | 3,590.94<br>(3,197.20 to 4,043.92)           | 8,191.64<br>(6,865.07 to 9,676.54)           | 8,143.44<br>(6,804.18 to 9,645.72)           | 7,697.82<br>(6,453.09 to 9,113.62)           | 448.33<br>(399.49 to 503.60)              | 1,126.91<br>(920.61 to 1,351.11)          | 1,144.09<br>(940.02 to 1,381.14)          | 1,029.42<br>(828.92 to 1,234.05)          |
| Urinary tract infections                                   | 3,278.80<br>(2,913.58 to 3,680.32)           | 7,696.63<br>(6,446.03 to 9,097.16)           | 7,670.81<br>(6,423.93 to 9,089.31)           | 7,219.97<br>(6,007.01 to 8,563.63)           | 419.10<br>(371.89 to 472.91)              | 1,071.65<br>(865.41 to 1,284.15)          | 1,089.92<br>(887.97 to 1,316.14)          | 977.95<br>(773.74 to 1,184.77)            |
| Urolithiasis                                               | 171.31<br>(118.71 to 293.85)                 | 281.03<br>(175.30 to 528.87)                 | 266.60<br>(164.86 to 512.70)                 | 272.90<br>(172.76 to 510.89)                 | 16.46<br>(10.42 to 31.63)                 | 30.37<br>(17.40 to 61.95)                 | 29.51<br>(16.62 to 61.66)                 | 28.52<br>(16.26 to 57.73)                 |
| Other urinary diseases                                     | 140.82<br>(93.13 to 248.05)                  | 213.98<br>(118.15 to 429.72)                 | 206.03<br>(112.36 to 423.07)                 | 204.95<br>(114.42 to 411.63)                 | 12.77<br>(7.19 to 25.63)                  | 24.89<br>(11.62 to 56.39)                 | 24.67<br>(11.18 to 56.55)                 | 22.95<br>(10.72 to 53.37)                 |
| Gynecological diseases                                     | 19.24<br>(14.57 to 33.00)                    | 21.88<br>(15.10 to 36.00)                    | 19.43<br>(13.50 to 32.38)                    | 22.41<br>(15.63 to 36.50)                    | 1.14<br>(0.88 to 1.84)                    | 1.63<br>(1.13 to 2.56)                    | 1.47<br>(1.01 to 2.31)                    | 1.61<br>(1.11 to 2.51)                    |
| Uterine fibroids                                           | 7.74<br>(5.62 to 13.62)                      | 6.51<br>(4.01 to 11.42)                      | 5.90<br>(3.53 to 10.60)                      | 6.73<br>(4.11 to 11.63)                      | 0.25<br>(0.18 to 0.44)                    | 0.23<br>(0.15 to 0.40)                    | 0.21<br>(0.13 to 0.37)                    | 0.23<br>(0.15 to 0.41)                    |
| Polycystic ovarian syndrome                                | 1.10<br>(0.64 to 2.28)                       | 0.64<br>(0.30 to 1.43)                       | 0.50<br>(0.24 to 1.14)                       | 0.70<br>(0.34 to 1.53)                       | 0.03<br>(0.02 to 0.06)                    | 0.02<br>(0.01 to 0.05)                    | 0.01<br>(0.01 to 0.03)                    | 0.02<br>(0.01 to 0.04)                    |
| Endometriosis                                              | 0.11<br>(0.05 to 0.25)                       | 0.14<br>(0.05 to 0.37)                       | 0.12<br>(0.04 to 0.33)                       | 0.15<br>(0.05 to 0.40)                       | 0.00<br>(0.00 to 0.01)                    | 0.00<br>(0.00 to 0.01)                    | 0.00<br>(0.00 to 0.01)                    | 0.00<br>(0.00 to 0.01)                    |
| Genital prolapse                                           | 1.10<br>(0.68 to 1.93)                       | 2.11<br>(1.03 to 3.95)                       | 1.86<br>(0.91 to 3.62)                       | 2.16<br>(1.05 to 4.05)                       | 0.07<br>(0.05 to 0.14)                    | 0.17<br>(0.08 to 0.35)                    | 0.15<br>(0.07 to 0.32)                    | 0.17<br>(0.08 to 0.35)                    |
| Other gynecological diseases                               | 9.19<br>(6.89 to 15.75)                      | 12.48<br>(8.19 to 21.04)                     | 11.05<br>(7.14 to 18.71)                     | 12.66<br>(8.34 to 21.57)                     | 0.79<br>(0.60 to 1.18)                    | 1.22<br>(0.80 to 1.90)                    | 1.10<br>(0.72 to 1.74)                    | 1.19<br>(0.77 to 1.87)                    |
| Hemoglobinopathies and hemolytic anemias                   | 711.77<br>(557.36 to 844.69)                 | 983.08<br>(720.39 to 1,182.15)               | 950.84<br>(703.06 to 1,160.42)               | 945.07<br>(698.52 to 1,140.16)               | 68.39<br>(44.22 to 80.12)                 | 116.17<br>(70.84 to 145.92)               | 115.18<br>(71.55 to 145.14)               | 107.73<br>(66.28 to 135.54)               |
| Thalassemias                                               | 71.07<br>(57.93 to 105.62)                   | 44.88<br>(30.53 to 75.36)                    | 44.57<br>(30.04 to 76.00)                    | 45.07<br>(30.82 to 74.37)                    | 1.28<br>(1.04 to 1.96)                    | 0.97<br>(0.67 to 1.63)                    | 0.97<br>(0.67 to 1.64)                    | 0.97<br>(0.67 to 1.62)                    |

|                                                   |                                       |                                       |                                       |                                       |                                |                                 |                                 |                                 |
|---------------------------------------------------|---------------------------------------|---------------------------------------|---------------------------------------|---------------------------------------|--------------------------------|---------------------------------|---------------------------------|---------------------------------|
|                                                   | 25.32<br>(19.98 to<br>36.45)          | 35.48<br>(25.23 to<br>51.88)          | 32.58<br>(23.02 to<br>48.31)          | 36.51<br>(25.84 to<br>52.77)          | 0.70<br>(0.56 to<br>0.96)      | 1.50<br>(1.07 to<br>2.11)       | 1.39<br>(1.01 to<br>1.93)       | 1.51<br>(1.09 to<br>2.09)       |
| Sickle cell disorders                             |                                       |                                       |                                       |                                       |                                |                                 |                                 |                                 |
|                                                   | 68.95<br>(51.36 to<br>97.32)          | 105.55<br>(74.81 to<br>151.31)        | 96.93<br>(68.85 to<br>140.58)         | 107.30<br>(75.66 to<br>153.37)        | 2.56<br>(1.88 to<br>3.46)      | 5.71<br>(3.93 to<br>7.94)       | 5.34<br>(3.65 to<br>7.40)       | 5.65<br>(3.90 to<br>7.84)       |
| G6PD deficiency                                   |                                       |                                       |                                       |                                       |                                |                                 |                                 |                                 |
|                                                   | 546.43<br>(401.04 to<br>639.32)       | 797.17<br>(538.75 to<br>978.45)       | 776.76<br>(525.13 to<br>960.51)       | 756.39<br>(511.49 to<br>938.43)       | 63.85<br>(39.54 to<br>75.29)   | 107.98<br>(63.33 to<br>136.74)  | 107.47<br>(64.08 to<br>137.51)  | 99.59<br>(58.78 to<br>126.58)   |
| Other hemoglobinopathies and hemolytic anemias    |                                       |                                       |                                       |                                       |                                |                                 |                                 |                                 |
|                                                   | 3,554.09<br>(2,208.59 to<br>4,142.14) | 5,535.07<br>(3,441.08 to<br>6,670.22) | 5,652.09<br>(3,587.60 to<br>6,838.22) | 5,376.33<br>(3,324.95 to<br>6,479.01) | 162.70<br>(90.96 to<br>189.91) | 321.83<br>(181.80 to<br>385.01) | 339.60<br>(192.76 to<br>410.42) | 298.47<br>(168.61 to<br>354.85) |
| Endocrine, metabolic, blood, and immune disorders |                                       |                                       |                                       |                                       |                                |                                 |                                 |                                 |

| Norway                                        |                                            |                                             |                                             |                                             |                                     |                                     |                                     |                                     |
|-----------------------------------------------|--------------------------------------------|---------------------------------------------|---------------------------------------------|---------------------------------------------|-------------------------------------|-------------------------------------|-------------------------------------|-------------------------------------|
| Cause                                         | YLLs (actual counts)                       |                                             |                                             |                                             | Deaths (actual counts)              |                                     |                                     |                                     |
|                                               | 2016                                       | 2040 Forecast                               | 2040 Better Scenario                        | 2040 Worse Scenario                         | 2016                                | 2040 Forecast                       | 2040 Better Scenario                | 2040 Worse Scenario                 |
| <b>Musculoskeletal disorders</b>              | <b>2,218.68</b><br>(1,881.34 to 2,952.07)  | <b>4,202.55</b><br>(3,442.15 to 5,622.09)   | <b>4,047.66</b><br>(3,340.70 to 5,483.29)   | <b>4,174.24</b><br>(3,441.09 to 5,589.30)   | <b>167.32</b><br>(142.69 to 221.60) | <b>369.01</b><br>(305.24 to 490.55) | <b>363.55</b><br>(298.15 to 484.41) | <b>354.22</b><br>(293.39 to 465.63) |
| Rheumatoid arthritis                          | 709.89<br>(526.47 to 915.86)               | 1,607.03<br>(1,181.34 to 2,196.28)          | 1,454.40<br>(1,064.76 to 1,988.73)          | 1,668.15<br>(1,224.09 to 2,348.92)          | 52.71<br>(38.47 to 68.04)           | 139.22<br>(101.04 to 190.24)        | 128.13<br>(92.50 to 175.28)         | 140.46<br>(102.18 to 193.43)        |
| Other musculoskeletal disorders               | 1,508.79<br>(1,261.37 to 1,983.48)         | 2,595.53<br>(2,110.33 to 3,557.78)          | 2,593.26<br>(2,102.70 to 3,608.53)          | 2,506.09<br>(2,031.77 to 3,422.51)          | 114.62<br>(96.68 to 157.12)         | 229.79<br>(183.88 to 318.95)        | 235.42<br>(188.59 to 331.80)        | 213.76<br>(170.80 to 299.77)        |
| <b>Other non-communicable diseases</b>        | <b>8,769.05</b><br>(7,143.75 to 10,700.60) | <b>10,926.74</b><br>(7,750.94 to 13,707.06) | <b>10,301.92</b><br>(7,315.94 to 13,057.70) | <b>11,170.75</b><br>(8,095.91 to 14,052.15) | <b>242.23</b><br>(147.60 to 307.64) | <b>547.71</b><br>(244.72 to 750.19) | <b>551.72</b><br>(238.43 to 760.82) | <b>517.59</b><br>(240.00 to 706.34) |
| Congenital birth defects                      | 6,751.34<br>(5,487.31 to 8,914.98)         | 6,867.94<br>(5,332.20 to 8,888.20)          | 6,291.73<br>(4,854.97 to 8,118.22)          | 7,251.70<br>(5,532.05 to 9,499.73)          | 106.07<br>(87.92 to 131.65)         | 127.17<br>(99.05 to 157.30)         | 119.61<br>(93.55 to 147.78)         | 131.74<br>(102.00 to 163.31)        |
| Neural tube defects                           | 84.78<br>(48.07 to 129.36)                 | 35.93<br>(20.35 to 59.83)                   | 30.29<br>(17.37 to 51.15)                   | 39.56<br>(21.93 to 66.10)                   | 1.09<br>(0.65 to 1.60)              | 0.51<br>(0.31 to 0.81)              | 0.44<br>(0.27 to 0.70)              | 0.56<br>(0.33 to 0.90)              |
| Congenital heart anomalies                    | 2,309.45<br>(1,805.97 to 3,215.31)         | 1,592.68<br>(1,053.58 to 2,411.86)          | 1,337.70<br>(866.42 to 2,018.94)            | 1,748.31<br>(1,149.65 to 2,623.92)          | 34.13<br>(27.06 to 48.83)           | 25.55<br>(16.83 to 41.32)           | 21.62<br>(13.84 to 35.09)           | 27.80<br>(18.23 to 44.67)           |
| Orofacial clefts                              | 1.55<br>(0.41 to 2.92)                     | 0.76<br>(0.18 to 1.55)                      | 0.60<br>(0.15 to 1.21)                      | 0.86<br>(0.21 to 1.79)                      | 0.02<br>(0.00 to 0.03)              | 0.01<br>(0.00 to 0.02)              | 0.01<br>(0.00 to 0.01)              | 0.01<br>(0.00 to 0.02)              |
| Down syndrome                                 | 966.98<br>(537.22 to 1,190.90)             | 1,874.89<br>(1,098.21 to 2,379.84)          | 1,904.95<br>(1,143.90 to 2,413.28)          | 1,856.70<br>(1,086.33 to 2,357.32)          | 26.09<br>(12.64 to 33.05)           | 54.31<br>(28.94 to 71.50)           | 55.34<br>(30.58 to 72.31)           | 53.53<br>(28.68 to 70.49)           |
| Other chromosomal abnormalities               | 1,227.42<br>(714.04 to 1,715.15)           | 1,713.32<br>(1,048.39 to 2,414.83)          | 1,585.98<br>(986.20 to 2,247.92)            | 1,811.88<br>(1,109.73 to 2,560.13)          | 15.73<br>(9.70 to 21.55)            | 23.21<br>(15.38 to 32.28)           | 21.60<br>(14.31 to 30.14)           | 24.40<br>(16.12 to 33.92)           |
| Congenital musculoskeletal and limb anomalies | 230.17<br>(148.92 to 332.72)               | 169.47<br>(102.53 to 273.12)                | 146.59<br>(90.46 to 240.02)                 | 184.52<br>(114.75 to 301.74)                | 3.01<br>(2.01 to 4.21)              | 2.35<br>(1.48 to 3.65)              | 2.04<br>(1.30 to 3.23)              | 2.54<br>(1.62 to 3.96)              |
| Urogenital congenital anomalies               | 138.07<br>(52.13 to 226.45)                | 97.29<br>(41.11 to 176.05)                  | 86.10<br>(36.50 to 157.90)                  | 104.77<br>(44.82 to 189.28)                 | 1.96<br>(0.82 to 3.07)              | 1.51<br>(0.75 to 2.48)              | 1.34<br>(0.65 to 2.23)              | 1.60<br>(0.78 to 2.67)              |
| Digestive congenital anomalies                | 336.95<br>(151.58 to 501.28)               | 296.37<br>(140.07 to 484.05)                | 251.14<br>(119.58 to 415.86)                | 326.97<br>(155.45 to 545.44)                | 4.15<br>(1.96 to 6.08)              | 3.71<br>(1.89 to 6.02)              | 3.15<br>(1.62 to 5.14)              | 4.08<br>(2.06 to 6.69)              |
| Other congenital birth defects                | 1,455.96<br>(1,000.48 to 2,815.09)         | 1,087.24<br>(693.19 to 2,097.13)            | 948.39<br>(599.47 to 1,820.06)              | 1,178.12<br>(744.39 to 2,256.76)            | 19.88<br>(14.38 to 36.38)           | 16.02<br>(10.61 to 28.89)           | 14.06<br>(9.30 to 25.37)            | 17.22<br>(11.37 to 31.44)           |
| Skin and subcutaneous diseases                | 1,193.44<br>(408.51 to 1,644.68)           | 3,484.25<br>(1,105.44 to 4,878.84)          | 3,507.54<br>(1,098.77 to 4,940.62)          | 3,291.03<br>(1,048.55 to 4,600.65)          | 126.59<br>(34.27 to 182.74)         | 413.88<br>(105.95 to 699.55)        | 426.28<br>(62.05 to 626.05)         | 378.57<br>(100.40 to 560.71)        |
| Cellulitis                                    | 1,773.93<br>(81.03 to 320.35)              | 447.94<br>(222.05 to 906.73)                | 453.05<br>(221.43 to 924.34)                | 429.56<br>(209.59 to 857.99)                | 12.90<br>(6.12 to 24.28)            | 37.20<br>(18.45 to 82.64)           | 38.57<br>(19.01 to 86.86)           | 34.45<br>(17.04 to 74.47)           |
| Pyoderma                                      | 794.64<br>(183.37 to 1,200.29)             | 2,630.79<br>(595.41 to 4,017.49)            | 2,656.15<br>(595.27 to 4,073.86)            | 2,475.22<br>(563.34 to 3,756.04)            | 88.56<br>(15.27 to 141.33)          | 336.05<br>(59.48 to 542.52)         | 336.90<br>(60.52 to 542.52)         | 297.40<br>(54.92 to 480.88)         |
| Decubitus ulcer                               | 167.32<br>(77.03 to 286.14)                | 306.12<br>(146.27 to 607.83)                | 298.73<br>(139.05 to 602.73)                | 291.87<br>(135.27 to 584.21)                | 19.89<br>(8.43 to 33.81)            | 39.50<br>(16.99 to 78.54)           | 39.36<br>(17.08 to 79.46)           | 36.56<br>(15.62 to 70.94)           |
| Other skin and subcutaneous diseases          | 53.55<br>(25.17 to 90.73)                  | 99.41<br>(42.76 to 197.15)                  | 99.61<br>(41.65 to 198.33)                  | 94.38<br>(41.43 to 183.09)                  | 5.24<br>(1.99 to 9.31)              | 11.12<br>(4.16 to 24.44)            | 11.45<br>(4.27 to 25.75)            | 10.15<br>(3.79 to 22.21)            |
| Sudden infant death syndrome                  | 824.28<br>(559.80 to 1,131.41)             | 574.55<br>(315.96 to 917.96)                | 502.65<br>(277.53 to 802.32)                | 628.03<br>(342.39 to 1,004.01)              | 9.57<br>(6.50 to 13.13)             | 6.67<br>(3.66 to 10.65)             | 5.83<br>(3.22 to 9.31)              | 7.29<br>(3.97 to 11.65)             |

|                          |                                          |                                          |                                          |                                          |                                       |                                       |                                       |                                       |
|--------------------------|------------------------------------------|------------------------------------------|------------------------------------------|------------------------------------------|---------------------------------------|---------------------------------------|---------------------------------------|---------------------------------------|
| Injuries                 | 53,795.61<br>(47,159.99 to<br>60,484.91) | 55,482.42<br>(41,541.72 to<br>76,012.56) | 50,786.72<br>(38,900.37 to<br>66,975.44) | 63,423.02<br>(46,203.53 to<br>89,028.87) | 2,219.45<br>(1,722.11 to<br>2,514.29) | 3,157.45<br>(2,229.48 to<br>3,761.54) | 3,069.45<br>(2,147.54 to<br>3,618.21) | 3,200.80<br>(2,278.22 to<br>3,892.64) |
| Transport injuries       | 10,594.26<br>(9,107.98 to<br>12,159.51)  | 8,195.20<br>(4,705.26 to<br>14,281.98)   | 7,343.68<br>(4,337.31 to<br>12,323.04)   | 13,205.40<br>(7,257.95 to<br>23,279.78)  | 270.34<br>(235.19 to<br>306.60)       | 250.82<br>(158.18 to<br>388.51)       | 227.84<br>(149.38 to<br>342.77)       | 372.53<br>(225.39 to<br>597.55)       |
| Road injuries            | 8,495.04<br>(7,350.02 to<br>9,695.49)    | 5,539.27<br>(3,099.05 to<br>10,007.54)   | 5,122.28<br>(2,964.98 to<br>8,840.56)    | 10,196.59<br>(5,505.99 to<br>18,480.11)  | 216.84<br>(189.75 to<br>246.73)       | 175.38<br>(111.24 to<br>269.58)       | 164.16<br>(108.16 to<br>246.87)       | 288.64<br>(175.39 to<br>467.81)       |
| Pedestrian road injuries | 1,215.70<br>(933.78 to<br>1,483.51)      | 625.92<br>(408.76 to<br>943.07)          | 532.67<br>(361.00 to<br>789.13)          | 1,029.00<br>(634.13 to<br>1,613.88)      | 41.50<br>(33.59 to<br>49.55)          | 30.75<br>(21.53 to<br>43.42)          | 26.79<br>(18.96 to<br>37.05)          | 45.73<br>(30.49 to<br>67.20)          |

| Norway                                          |                                                     |                                                     |                                                     |                                                     |                                                |                                                  |                                                  |                                                  |
|-------------------------------------------------|-----------------------------------------------------|-----------------------------------------------------|-----------------------------------------------------|-----------------------------------------------------|------------------------------------------------|--------------------------------------------------|--------------------------------------------------|--------------------------------------------------|
| Cause                                           | YLLs (actual counts)                                |                                                     |                                                     |                                                     | Deaths (actual counts)                         |                                                  |                                                  |                                                  |
|                                                 | 2016                                                | 2040 Forecast                                       | 2040 Better Scenario                                | 2040 Worse Scenario                                 | 2016                                           | 2040 Forecast                                    | 2040 Better Scenario                             | 2040 Worse Scenario                              |
| Cyclist road injuries                           | 473.14<br>(362.96 to 612.30)                        | 386.63<br>(237.01 to 598.54)                        | 364.50<br>(232.44 to 549.05)                        | 643.98<br>(375.69 to 1,020.08)                      | 14.17<br>(11.30 to 17.58)                      | 15.86<br>(10.02 to 23.76)                        | 15.20<br>(9.96 to 22.35)                         | 22.48<br>(13.91 to 34.45)                        |
| Motorcyclist road injuries                      | 1,214.14<br>(798.58 to 1,543.08)                    | 1,147.01<br>(557.60 to 2,264.87)                    | 1,063.32<br>(538.60 to 2,016.43)                    | 1,726.45<br>(801.30 to 3,501.02)                    | 25.39<br>(17.41 to 31.96)                      | 27.38<br>(15.05 to 49.06)                        | 25.63<br>(14.61 to 44.22)                        | 38.25<br>(20.09 to 71.31)                        |
| Motor vehicle road injuries                     | 5,525.78<br>(4,710.41 to 6,630.50)                  | 3,332.05<br>(1,806.31 to 6,073.39)                  | 3,116.76<br>(1,775.47 to 5,479.22)                  | 6,709.25<br>(3,531.14 to 12,401.04)                 | 133.95<br>(115.54 to 160.21)                   | 99.63<br>(60.83 to 157.51)                       | 94.84<br>(60.40 to 145.73)                       | 179.42<br>(104.49 to 293.43)                     |
| Other road injuries                             | 66.28<br>(50.49 to 108.87)                          | 47.67<br>(26.77 to 87.83)                           | 45.03<br>(25.68 to 80.09)                           | 87.91<br>(47.32 to 166.21)                          | 1.83<br>(1.20 to 2.55)                         | 1.76<br>(0.86 to 2.96)                           | 1.70<br>(0.82 to 2.72)                           | 2.76<br>(1.45 to 4.66)                           |
| Other transport injuries                        | 2,099.22<br>(1,745.35 to 2,510.37)                  | 2,655.93<br>(1,550.36 to 4,495.28)                  | 2,221.40<br>(1,347.26 to 3,630.53)                  | 3,008.82<br>(1,726.89 to 5,081.60)                  | 53.50<br>(45.03 to 63.05)                      | 75.44<br>(46.77 to 117.76)                       | 63.68<br>(41.07 to 97.39)                        | 83.89<br>(50.46 to 134.26)                       |
| <b>Unintentional injuries</b>                   | <b>17,997.18</b><br><b>(13,997.09 to 20,405.25)</b> | <b>22,892.01</b><br><b>(16,264.53 to 26,370.20)</b> | <b>22,273.50</b><br><b>(15,704.69 to 25,757.90)</b> | <b>22,415.04</b><br><b>(15,978.25 to 25,880.80)</b> | <b>1,317.68</b><br><b>(853.31 to 1,535.31)</b> | <b>2,240.95</b><br><b>(1,368.63 to 2,623.02)</b> | <b>2,259.27</b><br><b>(1,377.32 to 2,652.71)</b> | <b>2,083.88</b><br><b>(1,265.66 to 2,461.69)</b> |
| Falls                                           | 9,261.32<br>(6,451.20 to 10,729.61)                 | 14,671.95<br>(9,447.67 to 17,082.23)                | 14,582.22<br>(9,330.24 to 16,957.25)                | 13,989.99<br>(8,924.62 to 16,267.23)                | 910.00<br>(520.02 to 1,079.31)                 | 1,723.35<br>(940.37 to 2,062.65)                 | 1,753.00<br>(967.94 to 2,097.46)                 | 1,584.21<br>(861.96 to 1,918.92)                 |
| Drowning                                        | 2,161.43<br>(1,887.46 to 2,455.83)                  | 1,764.47<br>(1,257.03 to 2,475.45)                  | 1,589.90<br>(1,151.91 to 2,183.96)                  | 1,893.13<br>(1,321.26 to 2,696.73)                  | 59.59<br>(52.36 to 67.45)                      | 57.85<br>(42.69 to 79.46)                        | 52.85<br>(40.17 to 70.80)                        | 60.72<br>(43.96 to 85.56)                        |
| Fire, heat, and hot substances                  | 1,787.88<br>(1,275.89 to 2,072.87)                  | 1,480.20<br>(909.57 to 2,047.05)                    | 1,326.60<br>(892.74 to 1,783.03)                    | 1,562.45<br>(1,007.44 to 2,197.79)                  | 94.34<br>(62.71 to 109.62)                     | 104.31<br>(66.02 to 142.56)                      | 97.20<br>(62.24 to 127.94)                       | 104.19<br>(63.57 to 144.83)                      |
| Poisonings                                      | 334.63<br>(272.66 to 437.73)                        | 172.10<br>(113.19 to 264.44)                        | 147.48<br>(99.43 to 221.02)                         | 189.09<br>(120.18 to 304.14)                        | 10.31<br>(7.97 to 12.36)                       | 6.61<br>(4.59 to 9.51)                           | 5.81<br>(4.13 to 8.14)                           | 7.02<br>(4.72 to 10.22)                          |
| Exposure to mechanical forces                   | 1,228.72<br>(790.01 to 1,478.15)                    | 1,070.52<br>(675.63 to 1,369.35)                    | 994.03<br>(634.12 to 1,274.73)                      | 1,099.98<br>(694.02 to 1,414.42)                    | 42.87<br>(28.05 to 50.54)                      | 50.30<br>(34.45 to 59.99)                        | 48.53<br>(33.69 to 57.92)                        | 48.95<br>(32.52 to 58.78)                        |
| Unintentional firearm injuries                  | 97.67<br>(80.53 to 113.91)                          | 87.12<br>(63.63 to 112.46)                          | 82.86<br>(59.92 to 106.98)                          | 88.43<br>(65.05 to 114.62)                          | 3.71<br>(2.42 to 4.31)                         | 4.77<br>(2.76 to 5.75)                           | 4.77<br>(2.79 to 5.79)                           | 4.54<br>(2.66 to 5.51)                           |
| Unintentional suffocation                       | 85.18<br>(43.80 to 115.23)                          | 60.09<br>(32.71 to 87.96)                           | 55.72<br>(30.70 to 82.02)                           | 63.29<br>(34.96 to 93.43)                           | 1.41<br>(0.83 to 1.80)                         | 1.12<br>(0.69 to 1.52)                           | 1.05<br>(0.65 to 1.44)                           | 1.16<br>(0.71 to 1.59)                           |
| Other exposure to mechanical forces             | 1,045.87<br>(642.98 to 1,274.08)                    | 923.31<br>(571.48 to 1,176.74)                      | 855.45<br>(530.70 to 1,097.84)                      | 948.26<br>(581.66 to 1,228.68)                      | 37.76<br>(24.27 to 44.83)                      | 44.40<br>(30.00 to 53.12)                        | 42.71<br>(29.44 to 51.28)                        | 43.25<br>(28.87 to 52.21)                        |
| Adverse effects of medical treatment            | 608.94<br>(442.15 to 759.10)                        | 833.09<br>(586.08 to 999.22)                        | 828.48<br>(575.49 to 998.96)                        | 802.79<br>(568.13 to 964.48)                        | 51.72<br>(32.75 to 64.72)                      | 83.99<br>(50.38 to 109.00)                       | 85.89<br>(50.84 to 112.00)                       | 77.55<br>(46.78 to 106.59)                       |
| Animal contact                                  | 81.22<br>(60.01 to 103.02)                          | 110.93<br>(75.94 to 141.60)                         | 105.20<br>(71.84 to 134.67)                         | 112.45<br>(78.93 to 143.91)                         | 3.47<br>(2.15 to 4.23)                         | 5.92<br>(3.41 to 7.18)                           | 5.78<br>(3.35 to 7.00)                           | 5.73<br>(3.30 to 6.98)                           |
| Venomous animal contact                         | 30.16<br>(21.61 to 37.03)                           | 36.18<br>(23.18 to 47.13)                           | 34.66<br>(22.34 to 45.06)                           | 36.77<br>(23.96 to 47.94)                           | 1.03<br>(0.60 to 1.30)                         | 1.52<br>(0.78 to 1.99)                           | 1.49<br>(0.76 to 1.97)                           | 1.49<br>(0.77 to 1.95)                           |
| Non-venomous animal contact                     | 51.06<br>(37.98 to 67.09)                           | 74.75<br>(51.56 to 99.65)                           | 70.54<br>(48.49 to 92.97)                           | 75.68<br>(53.36 to 100.10)                          | 2.44<br>(1.52 to 3.07)                         | 4.40<br>(2.59 to 5.54)                           | 4.29<br>(2.52 to 5.40)                           | 4.24<br>(2.47 to 5.36)                           |
| Foreign body                                    | 1,442.59<br>(1,087.44 to 1,737.36)                  | 1,606.66<br>(1,077.55 to 1,980.87)                  | 1,607.25<br>(1,067.43 to 1,994.68)                  | 1,566.42<br>(1,071.07 to 1,912.23)                  | 87.38<br>(46.73 to 114.49)                     | 127.58<br>(61.79 to 176.07)                      | 132.41<br>(63.40 to 182.03)                      | 117.81<br>(57.65 to 161.84)                      |
| Pulmonary aspiration and foreign body in airway | 1,400.78<br>(1,054.60 to 1,690.54)                  | 1,558.69<br>(1,044.58 to 1,928.83)                  | 1,557.73<br>(1,034.38 to 1,936.55)                  | 1,519.69<br>(1,034.49 to 1,861.35)                  | 85.63<br>(45.69 to 112.35)                     | 124.77<br>(59.85 to 172.59)                      | 129.40<br>(61.89 to 178.56)                      | 115.22<br>(55.88 to 158.71)                      |

|                                             |                                                               |                                                               |                                                               |                                                               |                                                      |                                                        |                                                      |                                                        |
|---------------------------------------------|---------------------------------------------------------------|---------------------------------------------------------------|---------------------------------------------------------------|---------------------------------------------------------------|------------------------------------------------------|--------------------------------------------------------|------------------------------------------------------|--------------------------------------------------------|
|                                             | 41.82<br>(28.99 to<br>49.89)                                  | 47.97<br>(28.23 to<br>61.05)                                  | 49.52<br>(28.55 to<br>63.16)                                  | 46.73<br>(28.14 to<br>59.27)                                  | 1.75<br>(0.76 to<br>2.28)                            | 2.81<br>(0.98 to<br>3.94)                              | 3.01<br>(1.03 to<br>4.23)                            | 2.59<br>(0.92 to<br>3.63)                              |
| Foreign body in other body part             |                                                               |                                                               |                                                               |                                                               |                                                      |                                                        |                                                      |                                                        |
|                                             | 970.29<br>(590.11 to<br>1,413.39)                             | 1,098.32<br>(691.93 to<br>1,669.55)                           | 1,021.43<br>(653.81 to<br>1,579.65)                           | 1,108.57<br>(689.56 to<br>1,688.91)                           | 54.57<br>(37.71 to<br>94.36)                         | 77.96<br>(54.72 to<br>141.18)                          | 75.13<br>(52.62 to<br>135.54)                        | 74.53<br>(51.84 to<br>132.66)                          |
| Environmental heat and cold exposure        |                                                               |                                                               |                                                               |                                                               |                                                      |                                                        |                                                      |                                                        |
|                                             | 120.16<br>(101.94 to<br>142.27)                               | 83.78<br>(62.26 to<br>112.81)                                 | 70.90<br>(52.13 to<br>94.88)                                  | 90.17<br>(66.15 to<br>122.83)                                 | 3.43<br>(2.96 to<br>3.99)                            | 3.07<br>(2.45 to<br>3.81)                              | 2.66<br>(2.13 to<br>3.28)                            | 3.17<br>(2.52 to<br>3.97)                              |
| Other unintentional injuries                |                                                               |                                                               |                                                               |                                                               |                                                      |                                                        |                                                      |                                                        |
| <b>Self-harm and interpersonal violence</b> | <b>25,180.43</b><br><b>(21,480.68 to</b><br><b>31,673.26)</b> | <b>24,274.61</b><br><b>(14,494.18 to</b><br><b>39,731.20)</b> | <b>21,049.51</b><br><b>(13,270.19 to</b><br><b>33,264.54)</b> | <b>27,681.36</b><br><b>(15,685.19 to</b><br><b>46,762.69)</b> | <b>630.92</b><br><b>(537.49 to</b><br><b>801.19)</b> | <b>663.23</b><br><b>(424.15 to</b><br><b>1,041.18)</b> | <b>579.88</b><br><b>(388.72 to</b><br><b>870.91)</b> | <b>741.94</b><br><b>(448.29 to</b><br><b>1,215.67)</b> |

| Norway                                                                              |                                         |                                          |                                          |                                          |                                      |                                       |                                       |                                       |
|-------------------------------------------------------------------------------------|-----------------------------------------|------------------------------------------|------------------------------------------|------------------------------------------|--------------------------------------|---------------------------------------|---------------------------------------|---------------------------------------|
| Cause                                                                               | YLLs (actual counts)                    |                                          |                                          |                                          | Deaths (actual counts)               |                                       |                                       |                                       |
|                                                                                     | 2016                                    | 2040 Forecast                            | 2040 Better Scenario                     | 2040 Worse Scenario                      | 2016                                 | 2040 Forecast                         | 2040 Better Scenario                  | 2040 Worse Scenario                   |
| Self-harm                                                                           | 23,407.77<br>(19,745.83 to 29,433.28)   | 23,041.17<br>(13,274.44 to 38,164.01)    | 19,932.72<br>(12,305.98 to 31,985.43)    | 26,354.97<br>(14,620.14 to 45,330.13)    | 590.93<br>(498.59 to 751.51)         | 631.23<br>(392.66 to 1,007.25)        | 550.60<br>(360.60 to 837.04)          | 708.10<br>(414.00 to 1,175.78)        |
| Self-harm by firearm                                                                | 2,912.71<br>(1,859.04 to 4,761.50)      | 2,706.95<br>(1,354.14 to 5,740.84)       | 2,269.04<br>(1,170.41 to 4,708.11)       | 3,111.86<br>(1,467.07 to 6,943.28)       | 82.10<br>(53.79 to 129.01)           | 84.80<br>(45.03 to 163.52)            | 72.11<br>(40.23 to 132.31)            | 94.76<br>(48.54 to 186.49)            |
| Self-harm by other specified means                                                  | 20,495.06<br>(17,025.24 to 25,967.47)   | 20,334.22<br>(11,851.74 to 33,691.96)    | 17,663.69<br>(10,927.87 to 28,030.19)    | 23,243.12<br>(13,043.58 to 39,738.43)    | 508.83<br>(423.17 to 653.47)         | 546.43<br>(341.78 to 864.09)          | 478.49<br>(315.99 to 725.09)          | 613.34<br>(360.78 to 1,014.97)        |
| Interpersonal violence                                                              | 1,772.66<br>(1,228.83 to 2,441.91)      | 1,233.44<br>(798.87 to 1,811.65)         | 1,116.78<br>(717.22 to 1,656.16)         | 1,326.38<br>(840.59 to 2,006.46)         | 39.99<br>(27.73 to 53.93)            | 32.00<br>(21.31 to 45.94)             | 29.27<br>(19.76 to 42.79)             | 33.84<br>(22.35 to 49.92)             |
| Physical violence by firearm                                                        | 327.64<br>(181.63 to 527.43)            | 207.75<br>(113.05 to 347.63)             | 188.65<br>(103.96 to 322.25)             | 219.35<br>(118.81 to 372.34)             | 6.81<br>(4.01 to 11.28)              | 4.65<br>(2.75 to 7.99)                | 4.25<br>(2.50 to 7.34)                | 4.86<br>(2.80 to 8.40)                |
| Physical violence by sharp object                                                   | 631.77<br>(323.78 to 832.43)            | 451.86<br>(229.07 to 635.11)             | 418.37<br>(210.52 to 595.51)             | 471.39<br>(233.25 to 673.87)             | 14.56<br>(7.91 to 19.24)             | 11.93<br>(7.06 to 16.27)              | 11.19<br>(6.64 to 15.14)              | 12.19<br>(6.85 to 16.64)              |
| Physical violence by other means                                                    | 813.24<br>(567.54 to 1,295.42)          | 573.83<br>(342.10 to 985.82)             | 509.76<br>(313.00 to 886.31)             | 635.64<br>(367.58 to 1,112.95)           | 18.62<br>(12.74 to 28.76)            | 15.42<br>(9.33 to 25.79)              | 13.83<br>(8.66 to 22.80)              | 16.79<br>(10.01 to 28.42)             |
| <b>Forces of nature, conflict and terrorism, and executions and police conflict</b> | <b>23.74</b><br><b>(21.30 to 26.33)</b> | <b>120.60</b><br><b>(0.00 to 887.40)</b> | <b>120.04</b><br><b>(0.00 to 880.87)</b> | <b>121.22</b><br><b>(0.00 to 895.43)</b> | <b>0.50</b><br><b>(0.45 to 0.55)</b> | <b>2.45</b><br><b>(0.00 to 15.21)</b> | <b>2.46</b><br><b>(0.00 to 15.12)</b> | <b>2.45</b><br><b>(0.00 to 15.31)</b> |
| Exposure to forces of nature                                                        | 0.00<br>(0.00 to 0.00)                  | 99.07<br>(0.00 to 412.44)                | 98.57<br>(0.00 to 410.82)                | 99.64<br>(0.00 to 414.28)                | 0.00<br>(0.00 to 0.00)               | 1.95<br>(0.00 to 8.68)                | 1.95<br>(0.00 to 8.88)                | 1.96<br>(0.00 to 8.66)                |
| Conflict and terrorism                                                              | 0.00<br>(0.00 to 0.00)                  | 21.53<br>(0.00 to 60.42)                 | 21.47<br>(0.00 to 60.08)                 | 21.58<br>(0.00 to 60.73)                 | 0.00<br>(0.00 to 0.00)               | 0.50<br>(0.00 to 1.06)                | 0.51<br>(0.00 to 1.05)                | 0.49<br>(0.00 to 1.06)                |
| Executions and police conflict                                                      | 23.74<br>(21.30 to 26.33)               | 0.00<br>(0.00 to 0.00)                   | 0.00<br>(0.00 to 0.00)                   | 0.00<br>(0.00 to 0.00)                   | 0.50<br>(0.45 to 0.55)               | 0.00<br>(0.00 to 0.00)                | 0.00<br>(0.00 to 0.00)                | 0.00<br>(0.00 to 0.00)                |

| Portugal                                                          |                                                   |                                                   |                                                 |                                                   |                                             |                                            |                                            |                                             |
|-------------------------------------------------------------------|---------------------------------------------------|---------------------------------------------------|-------------------------------------------------|---------------------------------------------------|---------------------------------------------|--------------------------------------------|--------------------------------------------|---------------------------------------------|
| Cause                                                             | YLLs (actual counts)                              |                                                   |                                                 |                                                   | Deaths (actual counts)                      |                                            |                                            |                                             |
|                                                                   | 2016                                              | 2040 Forecast                                     | 2040 Better Scenario                            | 2040 Worse Scenario                               | 2016                                        | 2040 Forecast                              | 2040 Better Scenario                       | 2040 Worse Scenario                         |
| All causes                                                        | 1,560,045.80<br>(1,469,683.20 to<br>1,650,875.82) | 1,284,006.82<br>(1,018,595.15 to<br>1,627,002.56) | 1,056,308.93<br>(846,290.47 to<br>1,323,118.88) | 1,584,439.75<br>(1,238,758.50 to<br>2,015,907.87) | 111,840.15<br>(106,052.01 to<br>117,583.42) | 117,302.12<br>(99,933.32 to<br>138,224.01) | 101,566.62<br>(86,969.20 to<br>118,110.82) | 135,686.24<br>(114,750.61 to<br>159,609.04) |
| Communicable, maternal, neonatal, and nutritional diseases        | 108,349.51<br>(100,261.62 to<br>117,746.30)       | 78,022.34<br>(60,192.57 to<br>101,964.99)         | 66,181.85<br>(51,712.86 to<br>85,117.95)        | 100,476.64<br>(74,830.52 to<br>135,611.16)        | 7,622.98<br>(6,839.62 to<br>8,573.31)       | 7,975.44<br>(6,159.47 to<br>10,379.84)     | 7,362.75<br>(5,803.93 to<br>9,453.55)      | 9,229.16<br>(6,862.28 to<br>12,369.43)      |
| HIV/AIDS and tuberculosis                                         | 22,482.03<br>(21,430.53 to<br>23,583.18)          | 3,739.61<br>(1,906.72 to<br>6,333.97)             | 2,232.55<br>(1,148.55 to<br>3,952.33)           | 9,872.74<br>(4,858.63 to<br>15,571.92)            | 670.78<br>(636.07 to<br>709.14)             | 149.62<br>(86.27 to<br>264.28)             | 95.04<br>(57.29 to<br>165.88)              | 299.78<br>(175.66 to<br>500.47)             |
| Tuberculosis                                                      | 4,175.58<br>(3,717.08 to<br>4,788.90)             | 1,649.69<br>(842.56 to<br>3,447.19)               | 1,023.85<br>(545.82 to<br>2,097.89)             | 2,541.44<br>(1,247.25 to<br>5,349.65)             | 222.25<br>(197.71 to<br>255.65)             | 112.83<br>(61.86 to<br>216.72)             | 74.08<br>(42.36 to<br>138.73)              | 168.15<br>(87.23 to<br>337.91)              |
| HIV/AIDS                                                          | 18,306.45<br>(17,357.72 to<br>19,220.33)          | 2,089.92<br>(606.70 to<br>4,177.24)               | 1,208.69<br>(302.59 to<br>2,767.91)             | 7,331.30<br>(2,876.87 to<br>11,812.50)            | 448.53<br>(426.80 to<br>469.95)             | 36.79<br>(9.55 to<br>78.55)                | 20.96<br>(4.65 to<br>51.57)                | 131.63<br>(47.63 to<br>221.27)              |
| Diarrhea, lower respiratory, and other common infectious diseases | 72,562.81<br>(64,956.59 to<br>81,393.01)          | 67,289.70<br>(50,100.06 to<br>90,943.29)          | 57,584.52<br>(43,828.14 to<br>76,468.48)        | 82,986.45<br>(58,847.16 to<br>116,993.43)         | 6,574.36<br>(5,826.80 to<br>7,511.35)       | 7,466.06<br>(5,688.92 to<br>9,881.16)      | 6,877.30<br>(5,329.77 to<br>8,982.08)      | 8,587.60<br>(6,232.26 to<br>11,694.07)      |
| Diarrheal diseases                                                | 2,024.72<br>(1,826.67 to<br>2,247.62)             | 2,111.23<br>(1,219.84 to<br>3,746.89)             | 3,072.07<br>(1,940.07 to<br>5,063.88)           | 1,880.79<br>(1,051.50 to<br>3,491.02)             | 157.61<br>(139.37 to<br>178.60)             | 227.04<br>(125.37 to<br>407.47)            | 348.20<br>(214.54 to<br>585.94)            | 194.78<br>(101.46 to<br>368.36)             |
| Intestinal infectious diseases                                    | 30.96<br>(12.09 to<br>66.69)                      | 17.58<br>(6.80 to<br>36.34)                       | 17.76<br>(6.86 to<br>36.65)                     | 17.50<br>(6.75 to<br>36.27)                       | 1.06<br>(0.46 to<br>2.07)                   | 0.80<br>(0.35 to<br>1.52)                  | 0.83<br>(0.36 to<br>1.57)                  | 0.77<br>(0.34 to<br>1.47)                   |
| Typhoid fever                                                     | 12.35<br>(4.06 to<br>28.35)                       | 8.94<br>(3.01 to<br>19.74)                        | 10.45<br>(3.62 to<br>23.17)                     | 8.33<br>(2.78 to<br>18.66)                        | 0.38<br>(0.12 to<br>0.86)                   | 0.34<br>(0.12 to<br>0.75)                  | 0.41<br>(0.15 to<br>0.90)                  | 0.31<br>(0.11 to<br>0.71)                   |
| Paratyphoid fever                                                 | 14.37<br>(4.27 to<br>37.18)                       | 6.28<br>(1.84 to<br>15.96)                        | 5.10<br>(1.46 to<br>12.78)                      | 6.81<br>(2.00 to<br>17.25)                        | 0.41<br>(0.12 to<br>1.04)                   | 0.22<br>(0.07 to<br>0.54)                  | 0.18<br>(0.05 to<br>0.45)                  | 0.23<br>(0.07 to<br>0.57)                   |
| Other intestinal infectious diseases                              | 4.24<br>(1.68 to<br>8.58)                         | 2.36<br>(0.84 to<br>5.18)                         | 2.21<br>(0.77 to<br>5.09)                       | 2.36<br>(0.85 to<br>5.13)                         | 0.28<br>(0.10 to<br>0.59)                   | 0.23<br>(0.08 to<br>0.54)                  | 0.23<br>(0.08 to<br>0.55)                  | 0.22<br>(0.08 to<br>0.52)                   |
| Lower respiratory infections                                      | 67,953.49<br>(60,442.93 to<br>76,607.28)          | 63,679.95<br>(46,287.00 to<br>86,945.04)          | 53,147.73<br>(39,210.02 to<br>71,600.94)        | 79,486.90<br>(54,997.17 to<br>113,279.10)         | 6,329.39<br>(5,590.37 to<br>7,263.53)       | 7,168.66<br>(5,356.84 to<br>9,606.62)      | 6,461.59<br>(4,890.09 to<br>8,574.65)      | 8,322.01<br>(5,968.91 to<br>11,482.63)      |
| Upper respiratory infections                                      | 20.05<br>(10.88 to<br>32.94)                      | 11.48<br>(5.26 to<br>21.19)                       | 8.01<br>(3.60 to<br>15.02)                      | 13.05<br>(5.85 to<br>24.91)                       | 1.03<br>(0.51 to<br>1.82)                   | 0.85<br>(0.33 to<br>1.83)                  | 0.62<br>(0.23 to<br>1.33)                  | 0.93<br>(0.36 to<br>1.90)                   |
| Otitis media                                                      | 9.27<br>(6.70 to<br>13.64)                        | 2.33<br>(1.32 to<br>4.14)                         | 2.35<br>(1.33 to<br>4.22)                       | 2.30<br>(1.29 to<br>4.09)                         | 0.21<br>(0.17 to<br>0.28)                   | 0.11<br>(0.06 to<br>0.21)                  | 0.12<br>(0.06 to<br>0.23)                  | 0.10<br>(0.06 to<br>0.20)                   |
| Meningitis                                                        | 1,396.19<br>(1,227.48 to<br>1,627.43)             | 557.34<br>(442.60 to<br>703.72)                   | 464.58<br>(371.14 to<br>584.76)                 | 621.27<br>(483.21 to<br>783.46)                   | 43.87<br>(38.16 to<br>50.41)                | 23.62<br>(19.54 to<br>28.09)               | 20.57<br>(17.25 to<br>24.52)               | 24.86<br>(20.50 to<br>29.68)                |
| Pneumococcal meningitis                                           | 291.83<br>(249.77 to<br>339.77)                   | 128.99<br>(100.15 to<br>161.84)                   | 128.96<br>(99.82 to<br>163.34)                  | 130.24<br>(101.86 to<br>162.76)                   | 10.13<br>(8.61 to<br>11.66)                 | 6.00<br>(4.82 to<br>7.39)                  | 6.23<br>(4.99 to<br>7.69)                  | 5.89<br>(4.69 to<br>7.29)                   |
| H influenzae type B meningitis                                    | 100.03<br>(85.38 to<br>118.91)                    | 77.41<br>(46.66 to<br>129.31)                     | 70.78<br>(44.24 to<br>113.28)                   | 101.88<br>(52.41 to<br>191.43)                    | 2.90<br>(2.45 to<br>3.41)                   | 2.13<br>(1.60 to<br>2.82)                  | 2.14<br>(1.62 to<br>2.77)                  | 2.35<br>(1.63 to<br>3.42)                   |
| Meningococcal meningitis                                          | 466.60<br>(412.67 to<br>558.32)                   | 141.78<br>(107.63 to<br>191.14)                   | 107.93<br>(82.44 to<br>142.74)                  | 157.15<br>(118.23 to<br>209.19)                   | 11.99<br>(10.56 to<br>14.01)                | 5.28<br>(4.34 to<br>6.48)                  | 4.21<br>(3.51 to<br>5.08)                  | 5.66<br>(4.62 to<br>6.97)                   |
| Other meningitis                                                  | 537.73<br>(468.58 to<br>616.49)                   | 209.16<br>(163.79 to<br>265.66)                   | 156.90<br>(125.50 to<br>194.55)                 | 232.00<br>(182.00 to<br>291.90)                   | 18.84<br>(16.23 to<br>21.45)                | 10.20<br>(8.20 to<br>12.52)                | 7.99<br>(6.61 to<br>9.68)                  | 10.97<br>(8.88 to<br>13.51)                 |
| Encephalitis                                                      | 1,040.12<br>(840.46 to<br>1,516.23)               | 828.79<br>(623.32 to<br>1,253.80)                 | 805.98<br>(600.81 to<br>1,227.23)               | 826.54<br>(621.65 to<br>1,261.27)                 | 37.00<br>(29.09 to<br>57.58)                | 41.81<br>(30.89 to<br>68.57)               | 42.49<br>(31.33 to<br>70.26)               | 40.35<br>(29.86 to<br>65.86)                |



|                                                |                                                      |                                                      |                                                     |                                                      |                                                  |                                                  |                                                  |                                                  |
|------------------------------------------------|------------------------------------------------------|------------------------------------------------------|-----------------------------------------------------|------------------------------------------------------|--------------------------------------------------|--------------------------------------------------|--------------------------------------------------|--------------------------------------------------|
| Diphtheria                                     | 2.27<br>(1.44 to<br>3.40)                            | 0.37<br>(0.21 to<br>0.66)                            | 0.34<br>(0.19 to<br>0.61)                           | 0.50<br>(0.26 to<br>0.93)                            | 0.05<br>(0.03 to<br>0.08)                        | 0.01<br>(0.00 to<br>0.02)                        | 0.01<br>(0.00 to<br>0.01)                        | 0.01<br>(0.00 to<br>0.02)                        |
| Whooping cough                                 | 20.88<br>(5.75 to<br>40.85)                          | 3.80<br>(0.66 to<br>10.76)                           | 1.45<br>(0.33 to<br>3.73)                           | 16.93<br>(2.04 to<br>52.78)                          | 0.26<br>(0.08 to<br>0.49)                        | 0.05<br>(0.01 to<br>0.13)                        | 0.02<br>(0.01 to<br>0.05)                        | 0.20<br>(0.03 to<br>0.62)                        |
| Tetanus                                        | 14.97<br>(11.84 to<br>21.56)                         | 1.61<br>(1.11 to<br>2.62)                            | 1.59<br>(1.08 to<br>2.62)                           | 1.83<br>(1.28 to<br>2.79)                            | 0.70<br>(0.54 to<br>1.04)                        | 0.09<br>(0.06 to<br>0.15)                        | 0.09<br>(0.06 to<br>0.16)                        | 0.09<br>(0.06 to<br>0.14)                        |
| Measles                                        | 4.76<br>(3.41 to<br>6.63)                            | 51.76<br>(0.42 to<br>320.94)                         | 42.12<br>(0.40 to<br>244.04)                        | 94.74<br>(0.70 to<br>525.98)                         | 0.06<br>(0.05 to<br>0.09)                        | 0.71<br>(0.01 to<br>4.04)                        | 0.59<br>(0.01 to<br>3.29)                        | 1.23<br>(0.01 to<br>6.60)                        |
| <b>Portugal</b>                                |                                                      |                                                      |                                                     |                                                      |                                                  |                                                  |                                                  |                                                  |
| Cause                                          | YLLs (actual counts)                                 |                                                      |                                                     |                                                      | Deaths (actual counts)                           |                                                  |                                                  |                                                  |
|                                                | 2016                                                 | 2040 Forecast                                        | 2040 Better Scenario                                | 2040 Worse Scenario                                  | 2016                                             | 2040 Forecast                                    | 2040 Better Scenario                             | 2040 Worse Scenario                              |
| Varicella and herpes zoster                    | 45.12<br>(23.04 to<br>69.95)                         | 23.45<br>(11.85 to<br>38.37)                         | 20.53<br>(10.75 to<br>35.12)                        | 24.10<br>(12.13 to<br>39.06)                         | 3.12<br>(1.70 to<br>5.74)                        | 2.32<br>(1.27 to<br>4.53)                        | 2.16<br>(1.20 to<br>4.25)                        | 2.27<br>(1.19 to<br>4.42)                        |
| <b>Neglected tropical diseases and malaria</b> | <b>200.61</b><br><b>(124.99 to</b><br><b>246.20)</b> | <b>171.11</b><br><b>(85.00 to</b><br><b>212.41)</b>  | <b>184.49</b><br><b>(89.97 to</b><br><b>230.48)</b> | <b>163.13</b><br><b>(82.23 to</b><br><b>201.24)</b>  | <b>10.03</b><br><b>(4.59 to</b><br><b>12.36)</b> | <b>11.49</b><br><b>(4.79 to</b><br><b>14.62)</b> | <b>12.90</b><br><b>(5.46 to</b><br><b>16.42)</b> | <b>10.60</b><br><b>(4.40 to</b><br><b>13.48)</b> |
| Malaria                                        | 0.00<br>(0.00 to<br>0.00)                            | 0.00<br>(0.00 to<br>0.00)                            | 0.00<br>(0.00 to<br>0.00)                           | 0.00<br>(0.00 to<br>0.00)                            | 0.00<br>(0.00 to<br>0.00)                        | 0.00<br>(0.00 to<br>0.00)                        | 0.00<br>(0.00 to<br>0.00)                        | 0.00<br>(0.00 to<br>0.00)                        |
| Chagas disease                                 | 0.00<br>(0.00 to<br>0.00)                            | 0.00<br>(0.00 to<br>0.00)                            | 0.00<br>(0.00 to<br>0.00)                           | 0.00<br>(0.00 to<br>0.00)                            | 0.00<br>(0.00 to<br>0.00)                        | 0.00<br>(0.00 to<br>0.00)                        | 0.00<br>(0.00 to<br>0.00)                        | 0.00<br>(0.00 to<br>0.00)                        |
| Leishmaniasis                                  | 5.97<br>(3.24 to<br>9.25)                            | 2.08<br>(1.17 to<br>3.40)                            | 1.84<br>(1.02 to<br>3.02)                           | 2.17<br>(1.24 to<br>3.52)                            | 0.24<br>(0.13 to<br>0.37)                        | 0.10<br>(0.05 to<br>0.16)                        | 0.09<br>(0.04 to<br>0.15)                        | 0.10<br>(0.05 to<br>0.17)                        |
| African trypanosomiasis                        | 0.00<br>(0.00 to<br>0.00)                            | 0.00<br>(0.00 to<br>0.00)                            | 0.00<br>(0.00 to<br>0.00)                           | 0.00<br>(0.00 to<br>0.00)                            | 0.00<br>(0.00 to<br>0.00)                        | 0.00<br>(0.00 to<br>0.00)                        | 0.00<br>(0.00 to<br>0.00)                        | 0.00<br>(0.00 to<br>0.00)                        |
| Schistosomiasis                                | 0.00<br>(0.00 to<br>0.00)                            | 0.00<br>(0.00 to<br>0.00)                            | 0.00<br>(0.00 to<br>0.00)                           | 0.00<br>(0.00 to<br>0.00)                            | 0.00<br>(0.00 to<br>0.00)                        | 0.00<br>(0.00 to<br>0.00)                        | 0.00<br>(0.00 to<br>0.00)                        | 0.00<br>(0.00 to<br>0.00)                        |
| Cysticercosis                                  | 6.53<br>(5.82 to<br>7.19)                            | 1.63<br>(1.37 to<br>1.96)                            | 1.61<br>(1.34 to<br>1.95)                           | 1.63<br>(1.37 to<br>1.94)                            | 0.23<br>(0.21 to<br>0.26)                        | 0.08<br>(0.07 to<br>0.09)                        | 0.08<br>(0.07 to<br>0.09)                        | 0.07<br>(0.06 to<br>0.09)                        |
| Cystic echinococcosis                          | 21.27<br>(18.31 to<br>24.59)                         | 11.40<br>(9.25 to<br>14.13)                          | 9.73<br>(8.01 to<br>12.01)                          | 11.90<br>(9.80 to<br>14.25)                          | 1.10<br>(0.95 to<br>1.26)                        | 0.84<br>(0.68 to<br>1.04)                        | 0.75<br>(0.61 to<br>0.92)                        | 0.84<br>(0.69 to<br>1.04)                        |
| Dengue                                         | 0.00<br>(0.00 to<br>0.00)                            | 0.00<br>(0.00 to<br>0.00)                            | 0.00<br>(0.00 to<br>0.00)                           | 0.00<br>(0.00 to<br>0.00)                            | 0.00<br>(0.00 to<br>0.00)                        | 0.00<br>(0.00 to<br>0.00)                        | 0.00<br>(0.00 to<br>0.00)                        | 0.00<br>(0.00 to<br>0.00)                        |
| Yellow fever                                   | 0.00<br>(0.00 to<br>0.00)                            | 0.00<br>(0.00 to<br>0.00)                            | 0.00<br>(0.00 to<br>0.00)                           | 0.00<br>(0.00 to<br>0.00)                            | 0.00<br>(0.00 to<br>0.00)                        | 0.00<br>(0.00 to<br>0.00)                        | 0.00<br>(0.00 to<br>0.00)                        | 0.00<br>(0.00 to<br>0.00)                        |
| Rabies                                         | 0.36<br>(0.30 to<br>0.44)                            | 0.19<br>(0.14 to<br>0.25)                            | 0.17<br>(0.13 to<br>0.23)                           | 0.20<br>(0.15 to<br>0.26)                            | 0.01<br>(0.01 to<br>0.02)                        | 0.01<br>(0.01 to<br>0.01)                        | 0.01<br>(0.01 to<br>0.01)                        | 0.01<br>(0.01 to<br>0.01)                        |
| Intestinal nematode infections                 | 0.00<br>(0.00 to<br>0.00)                            | 0.00<br>(0.00 to<br>0.00)                            | 0.00<br>(0.00 to<br>0.00)                           | 0.00<br>(0.00 to<br>0.00)                            | 0.00<br>(0.00 to<br>0.00)                        | 0.00<br>(0.00 to<br>0.00)                        | 0.00<br>(0.00 to<br>0.00)                        | 0.00<br>(0.00 to<br>0.00)                        |
| Other neglected tropical diseases              | 166.48<br>(89.19 to<br>212.39)                       | 155.80<br>(68.88 to<br>196.25)                       | 171.14<br>(74.26 to<br>216.52)                      | 147.24<br>(65.55 to<br>184.40)                       | 8.44<br>(2.99 to<br>10.73)                       | 10.47<br>(3.69 to<br>13.55)                      | 11.98<br>(4.44 to<br>15.42)                      | 9.57<br>(3.31 to<br>12.43)                       |
| <b>Maternal disorders</b>                      | <b>430.81</b><br><b>(362.80 to</b><br><b>501.91)</b> | <b>159.57</b><br><b>(106.36 to</b><br><b>236.99)</b> | <b>134.55</b><br><b>(87.26 to</b><br><b>204.33)</b> | <b>172.44</b><br><b>(113.73 to</b><br><b>259.65)</b> | <b>8.37</b><br><b>(7.07 to</b><br><b>9.76)</b>   | <b>3.09</b><br><b>(2.08 to</b><br><b>4.53)</b>   | <b>2.60</b><br><b>(1.72 to</b><br><b>3.85)</b>   | <b>3.33</b><br><b>(2.20 to</b><br><b>4.94)</b>   |
| Maternal hemorrhage                            | 51.14<br>(36.60 to<br>68.87)                         | 22.15<br>(12.11 to<br>36.57)                         | 18.84<br>(10.45 to<br>31.56)                        | 23.75<br>(13.03 to<br>39.92)                         | 0.97<br>(0.69 to<br>1.31)                        | 0.43<br>(0.24 to<br>0.69)                        | 0.36<br>(0.20 to<br>0.60)                        | 0.46<br>(0.26 to<br>0.76)                        |

|                                                       |                              |                           |                           |                           |                        |                        |                        |                        |
|-------------------------------------------------------|------------------------------|---------------------------|---------------------------|---------------------------|------------------------|------------------------|------------------------|------------------------|
| Maternal sepsis and other maternal infections         | 27.05<br>(18.51 to 37.76)    | 12.48<br>(6.96 to 20.62)  | 10.51<br>(5.76 to 17.39)  | 13.44<br>(7.42 to 22.51)  | 0.52<br>(0.35 to 0.72) | 0.24<br>(0.14 to 0.40) | 0.21<br>(0.11 to 0.34) | 0.26<br>(0.14 to 0.43) |
| Maternal hypertensive disorders                       | 42.12<br>(29.09 to 58.55)    | 22.34<br>(12.39 to 38.14) | 18.71<br>(10.22 to 32.19) | 24.14<br>(13.23 to 41.73) | 0.77<br>(0.53 to 1.09) | 0.41<br>(0.23 to 0.70) | 0.35<br>(0.19 to 0.59) | 0.45<br>(0.24 to 0.75) |
| Maternal obstructed labor and uterine rupture         | 7.52<br>(4.17 to 11.42)      | 4.08<br>(2.01 to 7.24)    | 3.33<br>(1.63 to 6.09)    | 4.45<br>(2.10 to 7.88)    | 0.15<br>(0.08 to 0.22) | 0.08<br>(0.04 to 0.14) | 0.07<br>(0.03 to 0.12) | 0.09<br>(0.04 to 0.16) |
| Maternal abortion, miscarriage, and ectopic pregnancy | 198.05<br>(159.91 to 242.77) | 37.38<br>(21.54 to 63.04) | 31.14<br>(17.70 to 52.52) | 40.41<br>(22.56 to 68.28) | 3.98<br>(3.22 to 4.86) | 0.76<br>(0.43 to 1.27) | 0.63<br>(0.36 to 1.05) | 0.82<br>(0.46 to 1.37) |
| Indirect maternal deaths                              | 34.24<br>(23.42 to 47.80)    | 19.95<br>(10.38 to 35.69) | 16.57<br>(8.44 to 29.45)  | 21.76<br>(11.24 to 38.68) | 0.62<br>(0.43 to 0.86) | 0.36<br>(0.19 to 0.65) | 0.30<br>(0.16 to 0.54) | 0.40<br>(0.21 to 0.70) |
| Late maternal deaths                                  | 3.75<br>(1.98 to 6.44)       | 2.01<br>(0.88 to 3.78)    | 1.67<br>(0.73 to 3.19)    | 2.19<br>(0.95 to 4.06)    | 0.07<br>(0.04 to 0.12) | 0.04<br>(0.02 to 0.07) | 0.03<br>(0.01 to 0.06) | 0.04<br>(0.02 to 0.08) |
| Maternal deaths aggravated by HIV/AIDS                | 1.07<br>(0.29 to 2.26)       | 1.39<br>(0.25 to 3.72)    | 1.08<br>(0.13 to 3.00)    | 1.90<br>(0.39 to 4.70)    | 0.02<br>(0.01 to 0.05) | 0.03<br>(0.00 to 0.07) | 0.02<br>(0.00 to 0.05) | 0.04<br>(0.01 to 0.09) |
| Other maternal disorders                              | 65.87<br>(47.72 to 89.96)    | 37.80<br>(21.58 to 61.85) | 32.71<br>(18.72 to 54.22) | 40.41<br>(22.96 to 67.24) | 1.27<br>(0.92 to 1.72) | 0.73<br>(0.42 to 1.19) | 0.63<br>(0.37 to 1.02) | 0.78<br>(0.45 to 1.29) |

**Portugal**

| Cause                                                                   | YLLs (actual counts)                       |                                           |                                           |                                           | Deaths (actual counts)              |                                     |                                     |                                     |
|-------------------------------------------------------------------------|--------------------------------------------|-------------------------------------------|-------------------------------------------|-------------------------------------------|-------------------------------------|-------------------------------------|-------------------------------------|-------------------------------------|
|                                                                         | 2016                                       | 2040 Forecast                             | 2040 Better Scenario                      | 2040 Worse Scenario                       | 2016                                | 2040 Forecast                       | 2040 Better Scenario                | 2040 Worse Scenario                 |
| <b>Neonatal disorders</b>                                               | <b>8,602.01</b><br>(7,166.79 to 10,288.93) | <b>3,303.53</b><br>(1,808.08 to 5,506.39) | <b>2,605.36</b><br>(1,436.88 to 4,311.76) | <b>4,015.71</b><br>(2,227.07 to 6,798.12) | <b>99.44</b><br>(82.85 to 118.96)   | <b>38.20</b><br>(20.92 to 63.65)    | <b>30.13</b><br>(16.63 to 49.83)    | <b>46.43</b><br>(25.76 to 78.56)    |
| Neonatal preterm birth                                                  | 5,374.96<br>(2,672.66 to 4,211.67)         | 1,002.83<br>(554.20 to 1,687.82)          | 723.94<br>(406.10 to 1,225.87)            | 1,429.39<br>(788.82 to 2,399.40)          | 39.00<br>(30.89 to 48.68)           | 11.59<br>(6.41 to 19.51)            | 8.37<br>(4.70 to 14.17)             | 16.52<br>(9.12 to 27.72)            |
| Neonatal encephalopathy due to birth asphyxia and trauma                | 1,594.72<br>(1,235.12 to 2,035.63)         | 583.41<br>(282.08 to 1,074.99)            | 423.89<br>(206.89 to 780.48)              | 687.45<br>(337.70 to 1,285.89)            | 18.43<br>(14.28 to 23.53)           | 6.75<br>(3.26 to 12.43)             | 4.90<br>(2.40 to 9.02)              | 7.95<br>(3.91 to 14.86)             |
| Neonatal sepsis and other neonatal infections                           | 1,055.64<br>(768.22 to 1,496.79)           | 648.21<br>(327.33 to 1,189.96)            | 503.88<br>(249.67 to 919.16)              | 741.96<br>(359.24 to 1,397.83)            | 12.20<br>(8.88 to 17.31)            | 7.49<br>(3.78 to 13.75)             | 5.82<br>(2.89 to 10.62)             | 8.57<br>(4.15 to 16.15)             |
| Hemolytic disease and other neonatal jaundice                           | 29.87<br>(18.66 to 44.10)                  | 12.87<br>(5.33 to 25.93)                  | 9.81<br>(4.11 to 19.73)                   | 14.85<br>(6.08 to 30.26)                  | 0.35<br>(0.22 to 0.51)              | 0.15<br>(0.06 to 0.30)              | 0.11<br>(0.05 to 0.23)              | 0.17<br>(0.07 to 0.35)              |
| Other neonatal disorders                                                | 2,546.81<br>(1,995.53 to 3,240.07)         | 1,056.20<br>(526.57 to 1,942.71)          | 943.85<br>(477.55 to 1,726.34)            | 1,142.05<br>(568.27 to 2,097.05)          | 29.46<br>(23.09 to 37.47)           | 12.22<br>(6.10 to 22.48)            | 10.92<br>(5.53 to 19.97)            | 13.21<br>(6.58 to 24.25)            |
| <b>Nutritional deficiencies</b>                                         | <b>1,459.07</b><br>(1,320.76 to 1,615.74)  | <b>1,501.49</b><br>(1,184.19 to 1,855.82) | <b>1,710.11</b><br>(1,383.17 to 2,102.92) | <b>1,370.80</b><br>(1,076.68 to 1,710.73) | <b>156.01</b><br>(138.92 to 175.97) | <b>208.95</b><br>(158.86 to 273.83) | <b>248.21</b><br>(184.91 to 318.08) | <b>185.18</b><br>(131.48 to 246.17) |
| Protein-energy malnutrition                                             | 1,005.75<br>(808.62 to 1,261.91)           | 1,134.29<br>(788.16 to 1,514.51)          | 1,344.29<br>(964.41 to 1,761.36)          | 1,015.28<br>(693.63 to 1,358.32)          | 109.50<br>(79.33 to 135.15)         | 163.49<br>(103.13 to 227.51)        | 201.07<br>(134.79 to 272.33)        | 142.49<br>(87.97 to 201.38)         |
| Iodine deficiency                                                       | 23.10<br>(15.8 to 86.68)                   | 58.61<br>(0.92 to 254.31)                 | 60.99<br>(0.82 to 284.71)                 | 55.75<br>(1.01 to 242.74)                 | 1.67<br>(0.05 to 9.06)              | 7.16<br>(0.04 to 38.08)             | 7.75<br>(0.03 to 41.44)             | 6.62<br>(0.04 to 35.51)             |
| Dietary iron deficiency                                                 | 81.59<br>(15.72 to 126.52)                 | 42.65<br>(7.77 to 72.61)                  | 47.17<br>(8.12 to 81.88)                  | 40.10<br>(7.82 to 68.00)                  | 7.49<br>(0.64 to 12.42)             | 4.20<br>(0.36 to 8.53)              | 4.96<br>(0.39 to 10.50)             | 3.76<br>(0.33 to 7.60)              |
| Other nutritional deficiencies                                          | 348.64<br>(185.84 to 548.73)               | 265.95<br>(139.53 to 487.50)              | 257.66<br>(132.47 to 490.38)              | 259.67<br>(133.93 to 469.56)              | 37.35<br>(21.90 to 69.14)           | 34.10<br>(18.71 to 72.49)           | 34.43<br>(18.76 to 75.59)           | 32.31<br>(17.54 to 68.38)           |
| <b>Other communicable, maternal, neonatal, and nutritional diseases</b> | <b>2,612.17</b><br>(2,246.69 to 2,928.53)  | <b>1,857.33</b><br>(1,503.77 to 2,277.67) | <b>1,730.27</b><br>(1,383.71 to 2,107.16) | <b>1,895.37</b><br>(1,523.42 to 2,299.68) | <b>103.99</b><br>(88.79 to 115.69)  | <b>98.03</b><br>(80.43 to 113.39)   | <b>96.57</b><br>(78.27 to 112.62)   | <b>96.24</b><br>(78.17 to 112.23)   |

|                                               |                                                   |                                                 |                                               |                                                   |                                           |                                            |                                           |                                             |
|-----------------------------------------------|---------------------------------------------------|-------------------------------------------------|-----------------------------------------------|---------------------------------------------------|-------------------------------------------|--------------------------------------------|-------------------------------------------|---------------------------------------------|
| Sexually transmitted infections excluding HIV | 137.22<br>(112.06 to<br>160.30)                   | 43.81<br>(34.37 to<br>54.84)                    | 40.52<br>(31.85 to<br>51.02)                  | 44.97<br>(35.47 to<br>56.09)                      | 5.64<br>(4.77 to<br>6.61)                 | 2.49<br>(1.98 to<br>3.16)                  | 2.41<br>(1.90 to<br>3.08)                 | 2.48<br>(1.98 to<br>3.17)                   |
| Syphilis                                      | 46.42<br>(30.62 to<br>58.53)                      | 11.84<br>(8.97 to<br>15.40)                     | 10.08<br>(7.71 to<br>12.89)                   | 12.59<br>(9.47 to<br>16.31)                       | 1.84<br>(1.43 to<br>2.26)                 | 0.66<br>(0.51 to<br>0.87)                  | 0.59<br>(0.46 to<br>0.77)                 | 0.68<br>(0.52 to<br>0.89)                   |
| Chlamydial infection                          | 17.16<br>(14.01 to<br>20.29)                      | 6.17<br>(4.78 to<br>7.93)                       | 5.90<br>(4.59 to<br>7.57)                     | 6.24<br>(4.83 to<br>7.95)                         | 0.75<br>(0.64 to<br>0.89)                 | 0.38<br>(0.29 to<br>0.49)                  | 0.37<br>(0.28 to<br>0.49)                 | 0.37<br>(0.28 to<br>0.48)                   |
| Gonococcal infection                          | 49.76<br>(41.05 to<br>58.36)                      | 18.03<br>(13.81 to<br>23.23)                    | 17.20<br>(13.23 to<br>22.28)                  | 18.23<br>(14.06 to<br>23.50)                      | 2.19<br>(1.87 to<br>2.56)                 | 1.08<br>(0.82 to<br>1.45)                  | 1.08<br>(0.81 to<br>1.45)                 | 1.07<br>(0.80 to<br>1.45)                   |
| Other sexually transmitted infections         | 23.88<br>(19.41 to<br>28.24)                      | 7.77<br>(5.83 to<br>10.02)                      | 7.33<br>(5.50 to<br>9.45)                     | 7.92<br>(5.95 to<br>10.24)                        | 0.86<br>(0.72 to<br>1.00)                 | 0.37<br>(0.29 to<br>0.47)                  | 0.36<br>(0.28 to<br>0.47)                 | 0.37<br>(0.29 to<br>0.47)                   |
| Acute hepatitis                               | 808.33<br>(687.04 to<br>956.46)                   | 497.21<br>(374.26 to<br>654.51)                 | 390.73<br>(293.72 to<br>516.52)               | 543.73<br>(400.53 to<br>717.14)                   | 28.08<br>(24.32 to<br>32.61)              | 22.15<br>(17.18 to<br>28.17)               | 17.97<br>(13.83 to<br>22.91)              | 23.64<br>(18.14 to<br>30.29)                |
| Acute hepatitis A                             | 40.98<br>(29.36 to<br>54.61)                      | 24.63<br>(15.19 to<br>37.28)                    | 20.76<br>(12.79 to<br>30.89)                  | 26.29<br>(16.20 to<br>39.38)                      | 1.18<br>(0.82 to<br>1.60)                 | 1.01<br>(0.61 to<br>1.53)                  | 0.88<br>(0.54 to<br>1.32)                 | 1.05<br>(0.65 to<br>1.58)                   |
| Acute hepatitis B                             | 658.98<br>(549.89 to<br>797.82)                   | 395.87<br>(282.26 to<br>537.76)                 | 308.06<br>(219.61 to<br>426.58)               | 434.92<br>(306.65 to<br>596.12)                   | 22.12<br>(18.74 to<br>26.11)              | 16.36<br>(12.10 to<br>22.21)               | 13.03<br>(9.46 to<br>17.73)               | 17.64<br>(12.87 to<br>23.79)                |
| Acute hepatitis C                             | 39.64<br>(28.81 to<br>53.15)                      | 27.42<br>(17.92 to<br>40.01)                    | 21.68<br>(14.34 to<br>31.11)                  | 29.86<br>(19.68 to<br>43.47)                      | 1.52<br>(1.10 to<br>2.03)                 | 1.28<br>(0.88 to<br>1.86)                  | 1.04<br>(0.71 to<br>1.49)                 | 1.37<br>(0.92 to<br>1.98)                   |
| Acute hepatitis E                             | 68.74<br>(48.92 to<br>93.43)                      | 49.29<br>(31.15 to<br>73.17)                    | 40.23<br>(26.04 to<br>59.67)                  | 52.66<br>(33.81 to<br>78.72)                      | 3.27<br>(2.16 to<br>4.65)                 | 3.50<br>(2.03 to<br>5.25)                  | 3.01<br>(1.77 to<br>4.45)                 | 3.58<br>(2.13 to<br>5.43)                   |
| Other unspecified infectious diseases         | 1,666.62<br>(1,332.03 to<br>1,904.08)             | 1,316.31<br>(1,034.95 to<br>1,615.41)           | 1,299.02<br>(1,011.41 to<br>1,594.95)         | 1,306.66<br>(1,016.54 to<br>1,594.95)             | 70.27<br>(55.58 to<br>79.86)              | 73.39<br>(56.44 to<br>86.51)               | 76.19<br>(58.41 to<br>89.76)              | 70.12<br>(53.76 to<br>82.86)                |
| Non-communicable diseases                     | 1,322,301.08<br>(1,242,490.04 to<br>1,401,618.71) | 1,138,511.90<br>(885,614.67 to<br>1,460,982.35) | 930,313.95<br>(738,000.14 to<br>1,184,949.70) | 1,398,882.72<br>(1,071,693.96 to<br>1,782,639.29) | 99,484.02<br>(94,213.96 to<br>104,820.78) | 105,656.42<br>(88,595.25 to<br>125,207.75) | 90,746.93<br>(76,649.75 to<br>107,593.36) | 122,044.76<br>(101,880.55 to<br>144,414.14) |

| Portugal                   |                                             |                                             |                                             |                                             |                                          |                                          |                                          |                                          |
|----------------------------|---------------------------------------------|---------------------------------------------|---------------------------------------------|---------------------------------------------|------------------------------------------|------------------------------------------|------------------------------------------|------------------------------------------|
| Cause                      | YLLs (actual counts)                        |                                             |                                             |                                             | Deaths (actual counts)                   |                                          |                                          |                                          |
|                            | 2016                                        | 2040 Forecast                               | 2040 Better Scenario                        | 2040 Worse Scenario                         | 2016                                     | 2040 Forecast                            | 2040 Better Scenario                     | 2040 Worse Scenario                      |
| Neoplasms                  | 504,677.01<br>(470,067.33 to<br>541,246.72) | 417,570.34<br>(325,602.24 to<br>532,213.95) | 350,783.12<br>(273,491.68 to<br>446,768.43) | 499,266.57<br>(383,880.17 to<br>638,603.58) | 28,308.64<br>(26,487.48 to<br>30,184.41) | 29,224.80<br>(24,282.20 to<br>35,168.46) | 25,571.45<br>(21,238.97 to<br>30,471.70) | 33,011.63<br>(27,175.94 to<br>40,187.77) |
| Lip and oral cavity cancer | 8,947.68<br>(7,945.09 to<br>10,059.37)      | 5,909.81<br>(2,932.34 to<br>10,431.74)      | 3,977.72<br>(2,021.16 to<br>7,139.66)       | 9,537.27<br>(4,849.47 to<br>16,364.76)      | 400.48<br>(362.22 to<br>444.96)          | 321.63<br>(169.74 to<br>562.86)          | 219.18<br>(119.64 to<br>366.90)          | 497.74<br>(265.31 to<br>851.70)          |
| Nasopharynx cancer         | 2,692.51<br>(2,371.72 to<br>3,073.23)       | 1,827.32<br>(921.62 to<br>3,211.33)         | 1,140.64<br>(581.13 to<br>1,944.53)         | 3,070.36<br>(1,536.99 to<br>5,153.37)       | 110.75<br>(98.65 to<br>125.13)           | 90.93<br>(47.00 to<br>151.79)            | 56.17<br>(29.65 to<br>91.45)             | 147.02<br>(74.93 to<br>244.51)           |
| Other pharynx cancer       | 7,701.19<br>(6,737.61 to<br>8,809.10)       | 4,236.42<br>(2,180.78 to<br>7,427.82)       | 4,038.73<br>(2,069.80 to<br>7,034.11)       | 5,233.80<br>(2,733.94 to<br>9,193.44)       | 282.15<br>(249.56 to<br>318.52)          | 179.27<br>(94.94 to<br>308.01)           | 173.34<br>(90.79 to<br>296.23)           | 220.71<br>(117.92 to<br>379.57)          |
| Esophageal cancer          | 14,146.92<br>(12,252.38 to<br>16,374.22)    | 11,002.54<br>(5,705.26 to<br>20,268.91)     | 7,850.04<br>(4,463.66 to<br>13,675.70)      | 16,311.52<br>(7,959.98 to<br>31,062.59)     | 651.47<br>(570.85 to<br>739.40)          | 610.37<br>(337.92 to<br>1,079.16)        | 437.89<br>(263.67 to<br>720.00)          | 858.68<br>(449.67 to<br>1,558.43)        |
| Stomach cancer             | 47,689.60<br>(43,661.97 to<br>51,885.60)    | 29,190.89<br>(21,055.13 to<br>40,980.67)    | 23,056.48<br>(17,221.91 to<br>31,798.17)    | 31,971.07<br>(22,835.59 to<br>45,388.94)    | 2,794.71<br>(2,564.37 to<br>3,026.15)    | 2,117.80<br>(1,591.98 to<br>2,873.72)    | 1,734.54<br>(1,355.14 to<br>2,275.80)    | 2,226.29<br>(1,656.32 to<br>3,046.94)    |
| Colon and rectum cancer    | 67,432.67<br>(61,678.71 to<br>74,557.29)    | 60,418.55<br>(39,465.76 to<br>93,393.34)    | 49,683.15<br>(32,662.30 to<br>75,236.71)    | 74,132.44<br>(46,624.37 to<br>117,935.96)   | 4,303.63<br>(3,936.37 to<br>4,731.10)    | 4,716.10<br>(3,193.16 to<br>6,934.38)    | 4,027.60<br>(2,771.39 to<br>5,797.37)    | 5,605.55<br>(3,706.20 to<br>8,437.49)    |
| Liver cancer               | 20,074.02<br>(17,793.83 to<br>22,686.67)    | 18,262.95<br>(11,476.90 to<br>29,035.54)    | 16,305.85<br>(10,739.42 to<br>24,851.72)    | 26,221.69<br>(15,292.64 to<br>43,450.74)    | 1,073.20<br>(956.50 to<br>1,209.42)      | 1,168.08<br>(795.62 to<br>1,727.57)      | 1,081.25<br>(760.19 to<br>1,567.47)      | 1,570.35<br>(1,000.93 to<br>2,424.84)    |

|                                      |                                          |                                          |                                          |                                           |                                       |                                       |                                       |                                       |  |
|--------------------------------------|------------------------------------------|------------------------------------------|------------------------------------------|-------------------------------------------|---------------------------------------|---------------------------------------|---------------------------------------|---------------------------------------|--|
|                                      | 3,121.03<br>(2,142.03 to<br>4,417.96)    | 2,800.63<br>(1,540.95 to<br>4,784.81)    | 2,578.27<br>(1,458.86 to<br>4,263.04)    | 3,403.59<br>(1,740.79 to<br>6,287.26)     | 139.77<br>(94.40 to<br>201.23)        | 151.94<br>(86.07 to<br>258.89)        | 144.13<br>(85.82 to<br>236.92)        | 174.81<br>(93.55 to<br>305.94)        |  |
| Liver cancer due to hepatitis B      | 5,475.81<br>(4,287.74 to<br>6,865.75)    | 5,773.67<br>(3,534.67 to<br>9,128.48)    | 5,434.86<br>(3,468.54 to<br>8,391.83)    | 6,680.64<br>(3,841.40 to<br>10,969.28)    | 331.28<br>(259.33 to<br>423.27)       | 415.13<br>(269.87 to<br>629.16)       | 404.12<br>(270.66 to<br>600.42)       | 455.06<br>(279.47 to<br>720.95)       |  |
| Liver cancer due to hepatitis C      | 8,623.66<br>(6,767.28 to<br>10,487.87)   | 6,908.00<br>(4,055.76 to<br>11,602.01)   | 5,712.15<br>(3,484.08 to<br>9,182.07)    | 12,784.27<br>(7,202.21 to<br>22,223.95)   | 446.90<br>(347.69 to<br>544.65)       | 420.18<br>(253.51 to<br>686.27)       | 360.01<br>(226.01 to<br>567.22)       | 733.24<br>(426.36 to<br>1,221.55)     |  |
| Liver cancer due to alcohol use      | 2,853.52<br>(2,044.88 to<br>3,861.22)    | 2,780.65<br>(1,536.17 to<br>4,686.04)    | 2,580.57<br>(1,481.85 to<br>4,192.39)    | 3,353.19<br>(1,704.72 to<br>6,073.97)     | 155.25<br>(109.94 to<br>211.75)       | 180.83<br>(102.53 to<br>295.36)       | 173.00<br>(101.26 to<br>272.34)       | 207.24<br>(111.06 to<br>353.96)       |  |
| Liver cancer due to other causes     | 6,344.92<br>(5,677.92 to<br>6,988.56)    | 4,301.55<br>(3,559.70 to<br>5,223.45)    | 4,319.33<br>(3,529.54 to<br>5,309.57)    | 4,187.60<br>(3,504.53 to<br>5,027.87)     | 415.29<br>(375.10 to<br>455.63)       | 332.98<br>(286.01 to<br>383.33)       | 345.90<br>(293.52 to<br>402.32)       | 316.18<br>(273.93 to<br>359.08)       |  |
| Gallbladder and biliary tract cancer | 26,340.74<br>(23,604.06 to<br>29,155.03) | 25,901.31<br>(19,565.20 to<br>34,628.76) | 24,660.49<br>(18,677.62 to<br>32,737.43) | 27,564.65<br>(20,377.93 to<br>37,465.61)  | 1,557.32<br>(1,404.47 to<br>1,711.80) | 1,795.95<br>(1,418.22 to<br>2,312.27) | 1,759.61<br>(1,378.51 to<br>2,272.96) | 1,839.82<br>(1,424.03 to<br>2,404.96) |  |
| Pancreatic cancer                    | 8,561.61<br>(7,557.16 to<br>9,697.03)    | 5,445.66<br>(2,398.31 to<br>10,955.26)   | 3,049.64<br>(1,413.90 to<br>5,977.29)    | 9,274.42<br>(3,965.55 to<br>18,566.66)    | 373.72<br>(333.57 to<br>419.33)       | 285.70<br>(133.46 to<br>545.18)       | 154.40<br>(76.82 to<br>290.23)        | 465.06<br>(207.56 to<br>872.56)       |  |
| Larynx cancer                        | 82,930.58<br>(75,399.95 to<br>90,412.07) | 64,791.40<br>(44,075.05 to<br>93,813.24) | 38,004.90<br>(26,522.15 to<br>53,759.29) | 96,976.07<br>(64,768.64 to<br>143,029.87) | 4,116.63<br>(3,764.71 to<br>4,478.42) | 3,928.33<br>(2,755.44 to<br>5,618.06) | 2,278.53<br>(1,652.18 to<br>3,149.19) | 5,491.11<br>(3,784.41 to<br>7,932.70) |  |
| Tracheal, bronchus, and lung cancer  | 5,783.54<br>(4,074.13 to<br>6,625.90)    | 4,627.06<br>(2,993.38 to<br>6,051.78)    | 5,228.72<br>(3,344.04 to<br>6,818.39)    | 4,316.07<br>(2,766.20 to<br>5,557.87)     | 278.70<br>(191.27 to<br>320.75)       | 279.01<br>(181.16 to<br>341.49)       | 324.96<br>(210.52 to<br>402.02)       | 254.07<br>(164.78 to<br>310.91)       |  |
| Malignant skin melanoma              | 2,985.64<br>(2,701.23 to<br>3,328.02)    | 3,066.72<br>(2,595.37 to<br>3,618.62)    | 2,788.43<br>(2,344.02 to<br>3,311.71)    | 3,079.30<br>(2,631.90 to<br>3,603.53)     | 232.66<br>(213.23 to<br>254.67)       | 304.00<br>(261.09 to<br>351.28)       | 290.54<br>(251.75 to<br>333.83)       | 294.79<br>(253.47 to<br>339.69)       |  |
| Non-melanoma skin cancer             | 37,094.51<br>(32,849.04 to<br>41,749.40) | 26,362.73<br>(18,054.52 to<br>42,445.99) | 22,730.82<br>(15,467.66 to<br>35,801.69) | 31,431.99<br>(20,346.48 to<br>52,249.90)  | 1,888.05<br>(1,678.93 to<br>2,118.42) | 1,759.83<br>(1,264.89 to<br>2,710.82) | 1,578.29<br>(1,134.93 to<br>2,378.91) | 2,024.29<br>(1,393.58 to<br>3,240.49) |  |
| Breast cancer                        | 7,914.35<br>(6,924.37 to<br>9,098.82)    | 4,337.85<br>(3,150.72 to<br>6,005.50)    | 3,607.06<br>(2,591.50 to<br>4,903.58)    | 4,700.23<br>(3,313.56 to<br>6,562.11)     | 367.10<br>(322.95 to<br>418.45)       | 253.99<br>(196.99 to<br>328.81)       | 217.55<br>(166.51 to<br>279.82)       | 266.32<br>(202.97 to<br>348.98)       |  |
| Cervical cancer                      | 5,294.38<br>(4,544.57 to<br>6,182.25)    | 4,835.42<br>(3,701.65 to<br>6,483.54)    | 4,423.82<br>(3,351.32 to<br>5,999.19)    | 4,971.32<br>(3,804.03 to<br>6,572.51)     | 320.23<br>(276.93 to<br>371.24)       | 344.39<br>(277.90 to<br>434.32)       | 323.00<br>(259.16 to<br>413.55)       | 347.60<br>(281.17 to<br>434.92)       |  |
| Uterine cancer                       | 9,308.68<br>(8,007.85 to<br>10,653.01)   | 7,098.82<br>(4,854.32 to<br>10,243.12)   | 6,505.30<br>(4,498.68 to<br>9,556.71)    | 7,612.11<br>(5,125.56 to<br>11,295.51)    | 477.77<br>(412.22 to<br>547.16)       | 441.84<br>(317.67 to<br>614.69)       | 411.48<br>(297.05 to<br>577.19)       | 468.02<br>(328.77 to<br>669.22)       |  |
| Ovarian cancer                       | 26,307.72<br>(22,297.67 to<br>38,631.59) | 31,514.17<br>(25,294.67 to<br>44,859.94) | 30,636.78<br>(24,695.39 to<br>43,800.84) | 30,532.71<br>(24,815.68 to<br>45,412.17)  | 2,255.54<br>(1,926.79 to<br>3,129.37) | 3,181.91<br>(2,538.93 to<br>4,290.77) | 3,222.91<br>(2,634.00 to<br>4,370.50) | 2,980.84<br>(2,284.55 to<br>4,089.57) |  |
| Prostate cancer                      | 485.20<br>(405.59 to<br>581.82)          | 266.29<br>(197.57 to<br>375.36)          | 240.95<br>(175.81 to<br>337.15)          | 271.67<br>(198.71 to<br>376.78)           | 16.51<br>(14.09 to<br>19.45)          | 13.31<br>(10.54 to<br>16.36)          | 12.84<br>(10.21 to<br>15.97)          | 12.91<br>(10.37 to<br>15.77)          |  |
| Testicular cancer                    | <b>Portugal</b>                          |                                          |                                          |                                           |                                       |                                       |                                       |                                       |  |
| Cause                                | YLLs (actual counts)                     |                                          |                                          |                                           | Deaths (actual counts)                |                                       |                                       |                                       |  |
|                                      | 2016                                     | 2040 Forecast                            | 2040 Better Scenario                     | 2040 Worse Scenario                       | 2016                                  | 2040 Forecast                         | 2040 Better Scenario                  | 2040 Worse Scenario                   |  |
| Kidney cancer                        | 8,183.17<br>(7,251.56 to<br>9,193.33)    | 8,200.70<br>(6,297.96 to<br>10,755.50)   | 7,931.95<br>(6,159.83 to<br>10,294.69)   | 8,495.61<br>(6,408.35 to<br>11,255.85)    | 458.21<br>(406.71 to<br>512.17)       | 545.70<br>(441.63 to<br>674.05)       | 546.72<br>(443.91 to<br>670.44)       | 540.22<br>(432.87 to<br>677.62)       |  |
| Bladder cancer                       | 13,736.72<br>(12,409.16 to<br>15,228.08) | 12,721.62<br>(9,553.35 to<br>17,053.06)  | 11,027.50<br>(8,297.80 to<br>14,625.76)  | 13,940.71<br>(10,131.67 to<br>19,254.39)  | 1,024.33<br>(926.08 to<br>1,130.37)   | 1,155.01<br>(883.02 to<br>1,494.10)   | 1,033.25<br>(817.22 to<br>1,301.70)   | 1,205.31<br>(898.66 to<br>1,612.02)   |  |
| Brain and nervous system cancer      | 21,132.16<br>(15,525.47 to<br>25,934.88) | 17,053.81<br>(11,386.19 to<br>21,842.88) | 16,311.36<br>(10,850.28 to<br>21,037.98) | 17,115.28<br>(11,559.32 to<br>21,696.30)  | 857.12<br>(573.73 to<br>972.87)       | 846.00<br>(512.38 to<br>1,062.56)     | 829.56<br>(502.99 to<br>1,063.91)     | 832.08<br>(511.16 to<br>1,028.88)     |  |
| Thyroid cancer                       | 1,643.39<br>(1,453.15 to<br>1,857.72)    | 1,587.88<br>(1,126.19 to<br>2,241.08)    | 1,429.74<br>(1,028.26 to<br>1,998.46)    | 1,744.83<br>(1,223.04 to<br>2,535.40)     | 101.51<br>(89.88 to<br>114.53)        | 121.22<br>(90.45 to<br>164.17)        | 112.45<br>(84.30 to<br>149.88)        | 129.04<br>(94.79 to<br>176.17)        |  |

|                                |                                             |                                             |                                             |                                             |                                          |                                          |                                          |                                          |
|--------------------------------|---------------------------------------------|---------------------------------------------|---------------------------------------------|---------------------------------------------|------------------------------------------|------------------------------------------|------------------------------------------|------------------------------------------|
| Mesothelioma                   | 1,294.25<br>(1,126.48 to<br>1,909.24)       | 1,119.48<br>(859.58 to<br>1,824.28)         | 1,163.10<br>(881.40 to<br>1,925.36)         | 1,073.58<br>(832.37 to<br>1,749.36)         | 67.26<br>(58.30 to<br>108.85)            | 70.52<br>(56.87 to<br>120.50)            | 75.65<br>(59.86 to<br>131.69)            | 66.00<br>(54.34 to<br>111.71)            |
| Hodgkin lymphoma               | 1,469.17<br>(1,312.99 to<br>1,655.23)       | 804.63<br>(628.90 to<br>1,055.36)           | 669.67<br>(518.23 to<br>869.16)             | 854.25<br>(657.68 to<br>1,094.70)           | 55.73<br>(50.03 to<br>62.19)             | 38.84<br>(31.57 to<br>48.41)             | 33.36<br>(27.06 to<br>41.48)             | 40.24<br>(32.54 to<br>49.30)             |
| Non-Hodgkin lymphoma           | 16,700.93<br>(14,630.11 to<br>19,439.04)    | 13,135.42<br>(9,904.20 to<br>17,419.41)     | 12,120.44<br>(9,189.10 to<br>16,096.18)     | 13,810.80<br>(10,378.25 to<br>18,179.23)    | 892.74<br>(788.93 to<br>1,048.54)        | 845.28<br>(667.25 to<br>1,071.50)        | 804.74<br>(638.23 to<br>1,030.10)        | 865.00<br>(679.01 to<br>1,099.25)        |
| Multiple myeloma               | 8,501.81<br>(6,284.25 to<br>10,205.63)      | 8,087.08<br>(5,627.21 to<br>11,065.67)      | 7,767.73<br>(5,439.42 to<br>10,628.84)      | 8,372.45<br>(5,843.13 to<br>11,690.81)      | 525.25<br>(403.30 to<br>644.54)          | 570.28<br>(424.78 to<br>753.87)          | 564.82<br>(420.88 to<br>747.11)          | 575.15<br>(427.86 to<br>771.96)          |
| Leukemia                       | 19,775.34<br>(17,941.20 to<br>21,597.95)    | 16,915.99<br>(12,694.24 to<br>22,250.70)    | 15,281.81<br>(11,717.95 to<br>19,824.26)    | 18,568.27<br>(13,765.48 to<br>25,055.89)    | 1,064.26<br>(967.27 to<br>1,164.57)      | 1,154.50<br>(902.41 to<br>1,455.47)      | 1,074.62<br>(863.43 to<br>1,328.18)      | 1,216.20<br>(935.42 to<br>1,569.85)      |
| Acute lymphoid leukemia        | 2,437.03<br>(2,164.40 to<br>2,774.87)       | 1,379.35<br>(988.39 to<br>1,901.75)         | 1,188.05<br>(864.57 to<br>1,621.44)         | 1,576.04<br>(1,113.97 to<br>2,194.44)       | 73.49<br>(64.83 to<br>83.00)             | 54.88<br>(40.89 to<br>73.11)             | 48.15<br>(36.54 to<br>63.48)             | 61.12<br>(44.90 to<br>82.94)             |
| Chronic lymphoid leukemia      | 3,270.89<br>(2,710.32 to<br>3,746.40)       | 2,994.29<br>(2,147.41 to<br>4,020.80)       | 2,802.46<br>(2,039.83 to<br>3,716.88)       | 3,180.15<br>(2,248.62 to<br>4,386.41)       | 249.07<br>(204.78 to<br>285.01)          | 263.54<br>(196.16 to<br>337.22)          | 254.99<br>(194.52 to<br>321.05)          | 269.26<br>(198.33 to<br>353.81)          |
| Acute myeloid leukemia         | 7,913.66<br>(6,434.07 to<br>8,811.37)       | 7,372.27<br>(5,363.23 to<br>9,765.76)       | 6,904.67<br>(5,083.45 to<br>9,114.00)       | 8,042.16<br>(5,750.64 to<br>10,942.71)      | 370.89<br>(314.91 to<br>412.69)          | 425.08<br>(323.53 to<br>543.44)          | 408.87<br>(315.16 to<br>522.62)          | 447.50<br>(337.82 to<br>582.21)          |
| Chronic myeloid leukemia       | 1,561.52<br>(1,384.77 to<br>1,781.09)       | 781.26<br>(553.05 to<br>1,098.13)           | 593.71<br>(438.45 to<br>808.13)             | 920.85<br>(639.12 to<br>1,321.77)           | 91.88<br>(81.67 to<br>103.31)            | 57.56<br>(43.06 to<br>77.04)             | 45.37<br>(34.78 to<br>59.26)             | 64.73<br>(47.57 to<br>89.42)             |
| Other leukemia                 | 4,592.24<br>(4,017.60 to<br>5,322.78)       | 4,388.82<br>(3,263.06 to<br>5,859.37)       | 3,792.93<br>(2,869.91 to<br>5,043.31)       | 4,849.06<br>(3,518.96 to<br>6,617.62)       | 278.93<br>(241.66 to<br>326.80)          | 353.44<br>(269.47 to<br>458.39)          | 317.24<br>(248.67 to<br>404.57)          | 373.60<br>(281.84 to<br>493.13)          |
| Other neoplasms                | 24,203.63<br>(21,636.60 to<br>26,664.02)    | 24,546.25<br>(20,046.80 to<br>29,615.68)    | 24,830.98<br>(20,074.18 to<br>30,645.59)    | 23,894.49<br>(19,675.90 to<br>28,637.30)    | 1,346.32<br>(1,214.42 to<br>1,485.58)    | 1,752.92<br>(1,500.92 to<br>2,030.51)    | 1,846.29<br>(1,568.47 to<br>2,174.48)    | 1,655.05<br>(1,423.50 to<br>1,902.01)    |
| Cardiovascular diseases        | 416,953.38<br>(391,193.24 to<br>444,008.46) | 314,560.04<br>(206,466.89 to<br>471,057.14) | 216,725.17<br>(151,720.37 to<br>315,897.16) | 429,897.82<br>(271,154.09 to<br>658,566.82) | 37,274.02<br>(35,163.91 to<br>39,572.62) | 33,675.22<br>(24,126.12 to<br>46,488.26) | 25,373.78<br>(19,110.97 to<br>33,982.42) | 42,697.80<br>(29,954.56 to<br>58,716.04) |
| Rheumatic heart disease        | 5,575.21<br>(4,929.41 to<br>6,341.88)       | 3,216.46<br>(2,410.13 to<br>4,362.05)       | 2,743.59<br>(2,090.87 to<br>3,711.07)       | 3,334.71<br>(2,517.94 to<br>4,587.47)       | 435.74<br>(385.76 to<br>491.60)          | 316.76<br>(249.48 to<br>420.95)          | 283.81<br>(227.49 to<br>361.61)          | 317.27<br>(253.49 to<br>418.25)          |
| Ischemic heart disease         | 175,659.70<br>(163,043.30 to<br>189,775.80) | 120,221.12<br>(65,969.25 to<br>202,948.34)  | 73,282.46<br>(42,246.80 to<br>125,115.89)   | 173,365.25<br>(90,686.50 to<br>298,561.95)  | 15,622.01<br>(14,493.46 to<br>16,775.19) | 12,643.40<br>(7,464.15 to<br>19,959.46)  | 8,557.14<br>(5,167.37 to<br>13,498.48)   | 16,720.57<br>(9,664.19 to<br>26,971.56)  |
| Stroke                         | 156,341.96<br>(143,552.94 to<br>170,067.55) | 106,484.43<br>(62,706.67 to<br>173,361.92)  | 68,120.07<br>(41,743.44 to<br>108,852.95)   | 158,179.61<br>(89,647.39 to<br>264,701.73)  | 14,111.71<br>(12,858.09 to<br>15,477.99) | 11,408.89<br>(6,988.55 to<br>18,110.73)  | 8,046.73<br>(5,066.29 to<br>12,567.00)   | 15,573.67<br>(9,333.19 to<br>25,060.98)  |
| Ischemic stroke                | 70,240.61<br>(63,853.89 to<br>77,398.85)    | 50,460.11<br>(27,564.73 to<br>96,881.25)    | 35,129.73<br>(20,123.26 to<br>67,810.29)    | 68,776.31<br>(36,911.83 to<br>138,401.10)   | 7,359.92<br>(6,647.83 to<br>8,146.55)    | 6,070.04<br>(3,421.03 to<br>11,379.86)   | 4,532.62<br>(2,630.08 to<br>8,563.08)    | 7,776.92<br>(4,257.73 to<br>15,272.63)   |
| Intracerebral hemorrhage       | 86,101.35<br>(78,888.63 to<br>93,710.53)    | 56,024.32<br>(30,618.21 to<br>100,639.06)   | 32,990.34<br>(19,369.93 to<br>55,616.95)    | 89,403.30<br>(46,224.45 to<br>162,490.77)   | 6,751.79<br>(6,123.69 to<br>7,407.96)    | 5,338.85<br>(3,215.25 to<br>8,771.29)    | 3,514.11<br>(2,233.78 to<br>5,355.02)    | 7,796.75<br>(4,452.89 to<br>12,882.30)   |
| Hypertensive heart disease     | 12,162.08<br>(6,928.09 to<br>15,813.23)     | 15,876.79<br>(5,902.68 to<br>35,714.97)     | 12,714.58<br>(4,838.70 to<br>24,868.11)     | 20,771.51<br>(7,519.46 to<br>48,411.18)     | 1,292.59<br>(572.46 to<br>1,742.64)      | 2,007.28<br>(631.12 to<br>4,567.72)      | 1,692.64<br>(558.94 to<br>3,280.19)      | 2,547.88<br>(780.60 to<br>6,022.04)      |
| Cardiomyopathy and myocarditis | 10,196.67<br>(6,761.00 to<br>12,050.71)     | 7,246.22<br>(4,023.94 to<br>10,551.65)      | 6,115.71<br>(3,522.46 to<br>8,723.89)       | 8,234.00<br>(4,594.21 to<br>12,029.92)      | 779.30<br>(493.11 to<br>929.16)          | 729.02<br>(405.72 to<br>1,068.78)        | 647.13<br>(371.64 to<br>935.17)          | 773.47<br>(429.78 to<br>1,153.87)        |
| Myocarditis                    | 1,270.63<br>(720.57 to<br>1,600.00)         | 1,181.73<br>(607.96 to<br>1,627.19)         | 1,236.34<br>(636.98 to<br>1,702.78)         | 1,127.08<br>(583.54 to<br>1,546.20)         | 129.16<br>(59.41 to<br>176.04)           | 150.99<br>(69.33 to<br>224.47)           | 165.66<br>(79.89 to<br>240.26)           | 138.76<br>(63.77 to<br>207.98)           |

Portugal

| Cause | YLLs (actual counts) |               |                      |                     | Deaths (actual counts) |               |                      |                     |
|-------|----------------------|---------------|----------------------|---------------------|------------------------|---------------|----------------------|---------------------|
|       | 2016                 | 2040 Forecast | 2040 Better Scenario | 2040 Worse Scenario | 2016                   | 2040 Forecast | 2040 Better Scenario | 2040 Worse Scenario |



|                                            | 34,516.66<br>(29,471.12 to<br>42,650.74)            | 28,565.70<br>(21,396.97 to<br>40,151.31)             | 26,409.45<br>(19,818.28 to<br>35,927.27)             | 30,635.15<br>(22,468.08 to<br>43,506.10)             | 2,734.57<br>(2,321.81 to<br>3,250.17)             | 2,737.12<br>(2,122.12 to<br>3,573.56)             | 2,644.90<br>(2,067.21 to<br>3,387.87)             | 2,823.63<br>(2,158.51 to<br>3,750.95)             |
|--------------------------------------------|-----------------------------------------------------|------------------------------------------------------|------------------------------------------------------|------------------------------------------------------|---------------------------------------------------|---------------------------------------------------|---------------------------------------------------|---------------------------------------------------|
| <b>Digestive diseases</b>                  |                                                     |                                                      |                                                      |                                                      |                                                   |                                                   |                                                   |                                                   |
| Peptic ulcer disease                       | 3,785.46<br>(3,151.77 to<br>4,869.14)               | 2,245.10<br>(1,666.65 to<br>2,948.18)                | 1,800.10<br>(1,356.10 to<br>2,359.28)                | 2,420.16<br>(1,801.91 to<br>3,126.49)                | 294.46<br>(248.06 to<br>365.86)                   | 221.21<br>(171.72 to<br>283.53)                   | 186.03<br>(144.59 to<br>236.48)                   | 229.48<br>(176.48 to<br>293.62)                   |
| <b>Portugal</b>                            |                                                     |                                                      |                                                      |                                                      |                                                   |                                                   |                                                   |                                                   |
| Cause                                      | YLLs (actual counts)                                |                                                      |                                                      |                                                      | Deaths (actual counts)                            |                                                   |                                                   |                                                   |
|                                            | 2016                                                | 2040 Forecast                                        | 2040 Better Scenario                                 | 2040 Worse Scenario                                  | 2016                                              | 2040 Forecast                                     | 2040 Better Scenario                              | 2040 Worse Scenario                               |
| Gastritis and duodenitis                   | 280.97<br>(209.05 to<br>503.45)                     | 273.01<br>(187.29 to<br>465.57)                      | 244.53<br>(167.29 to<br>418.87)                      | 277.22<br>(190.28 to<br>472.47)                      | 22.08<br>(17.06 to<br>35.54)                      | 27.21<br>(18.83 to<br>43.68)                      | 25.58<br>(17.48 to<br>41.13)                      | 26.67<br>(18.13 to<br>42.47)                      |
| Appendicitis                               | 588.41<br>(454.60 to<br>909.99)                     | 358.84<br>(246.73 to<br>577.84)                      | 294.51<br>(201.14 to<br>478.20)                      | 379.92<br>(261.76 to<br>602.13)                      | 34.45<br>(26.47 to<br>57.05)                      | 27.62<br>(19.55 to<br>46.26)                      | 23.64<br>(16.74 to<br>38.94)                      | 28.31<br>(20.14 to<br>48.32)                      |
| Paralytic ileus and intestinal obstruction | 4,926.00<br>(4,066.77 to<br>7,029.37)               | 4,877.36<br>(3,818.16 to<br>7,404.73)                | 5,091.04<br>(3,929.53 to<br>7,655.01)                | 4,635.80<br>(3,678.49 to<br>6,999.64)                | 403.54<br>(332.20 to<br>575.71)                   | 488.05<br>(387.91 to<br>716.48)                   | 529.69<br>(417.89 to<br>789.76)                   | 450.52<br>(355.53 to<br>666.04)                   |
| Inguinal, femoral, and abdominal hernia    | 1,418.77<br>(1,142.49 to<br>2,137.05)               | 859.47<br>(644.50 to<br>1,363.04)                    | 799.85<br>(586.80 to<br>1,281.55)                    | 856.69<br>(642.65 to<br>1,337.80)                    | 121.47<br>(96.20 to<br>191.72)                    | 87.99<br>(66.51 to<br>143.05)                     | 85.58<br>(63.66 to<br>138.68)                     | 85.00<br>(64.72 to<br>137.27)                     |
| Inflammatory bowel disease                 | 2,715.80<br>(1,132.35 to<br>3,478.00)               | 2,073.29<br>(812.49 to<br>2,887.38)                  | 2,129.43<br>(828.29 to<br>3,017.26)                  | 1,992.38<br>(778.24 to<br>2,749.87)                  | 225.00<br>(85.78 to<br>292.15)                    | 208.33<br>(76.90 to<br>285.85)                    | 223.14<br>(83.27 to<br>308.92)                    | 194.10<br>(72.40 to<br>264.77)                    |
| Vascular intestinal disorders              | 7,754.43<br>(5,799.84 to<br>9,263.67)               | 7,336.18<br>(5,051.11 to<br>9,420.75)                | 7,126.86<br>(4,838.87 to<br>9,230.22)                | 7,203.28<br>(4,991.77 to<br>9,139.63)                | 666.21<br>(482.75 to<br>790.58)                   | 731.67<br>(522.58 to<br>895.08)                   | 737.07<br>(513.47 to<br>918.57)                   | 700.30<br>(495.90 to<br>863.03)                   |
| Gallbladder and biliary diseases           | 4,416.44<br>(3,671.40 to<br>5,539.33)               | 3,541.13<br>(1,994.78 to<br>6,075.48)                | 2,838.74<br>(1,658.17 to<br>4,901.92)                | 4,367.89<br>(2,442.02 to<br>7,381.47)                | 394.77<br>(328.68 to<br>485.75)                   | 378.56<br>(216.71 to<br>650.62)                   | 317.21<br>(185.60 to<br>546.84)                   | 449.70<br>(251.05 to<br>782.81)                   |
| Pancreatitis                               | 5,452.39<br>(4,464.24 to<br>8,081.61)               | 4,332.68<br>(1,636.33 to<br>10,250.99)               | 3,501.31<br>(1,325.12 to<br>8,081.68)                | 5,873.67<br>(2,074.29 to<br>14,031.87)               | 321.11<br>(263.54 to<br>433.40)                   | 316.27<br>(131.13 to<br>744.56)                   | 263.97<br>(113.86 to<br>597.33)                   | 420.82<br>(166.21 to<br>989.69)                   |
| Other digestive diseases                   | 3,178.00<br>(2,300.08 to<br>4,076.06)               | 2,668.65<br>(1,890.03 to<br>3,474.83)                | 2,583.08<br>(1,808.15 to<br>3,386.15)                | 2,628.14<br>(1,864.15 to<br>3,398.24)                | 241.49<br>(185.04 to<br>313.14)                   | 250.21<br>(188.87 to<br>330.89)                   | 252.99<br>(191.00 to<br>337.97)                   | 238.73<br>(181.09 to<br>313.36)                   |
| <b>Neurological disorders</b>              | <b>109,213.08<br/>(94,526.47 to<br/>127,447.70)</b> | <b>131,591.63<br/>(100,835.87 to<br/>176,879.20)</b> | <b>135,209.58<br/>(104,929.99 to<br/>177,248.01)</b> | <b>136,844.06<br/>(101,290.71 to<br/>191,016.94)</b> | <b>12,188.49<br/>(10,380.88 to<br/>14,191.18)</b> | <b>16,969.18<br/>(12,883.91 to<br/>22,312.04)</b> | <b>18,050.15<br/>(13,997.94 to<br/>23,196.32)</b> | <b>17,198.99<br/>(12,639.40 to<br/>23,897.31)</b> |
| Alzheimer's disease and other dementias    | 87,636.21<br>(73,230.86 to<br>105,364.31)           | 111,117.09<br>(81,855.62 to<br>154,788.66)           | 113,875.16<br>(85,023.67 to<br>155,125.89)           | 116,692.27<br>(82,505.33 to<br>169,158.71)           | 10,824.18<br>(9,034.48 to<br>12,860.00)           | 15,333.32<br>(11,281.58 to<br>20,704.84)          | 16,259.17<br>(12,272.28 to<br>21,386.59)          | 15,656.24<br>(10,975.81 to<br>22,371.55)          |
| Parkinson's disease                        | 8,768.34<br>(6,615.65 to<br>11,584.54)              | 11,021.12<br>(8,246.53 to<br>14,508.78)              | 12,097.26<br>(9,041.61 to<br>15,926.75)              | 10,230.87<br>(7,609.54 to<br>13,599.23)              | 842.48<br>(633.92 to<br>1,118.86)                 | 1,159.85<br>(876.32 to<br>1,525.61)               | 1,310.61<br>(993.32 to<br>1,728.04)               | 1,054.12<br>(788.59 to<br>1,396.82)               |
| Epilepsy                                   | 4,171.42<br>(3,729.12 to<br>4,710.32)               | 2,622.14<br>(1,622.15 to<br>4,413.68)                | 2,378.20<br>(1,487.62 to<br>3,928.26)                | 3,174.34<br>(1,906.14 to<br>5,346.39)                | 169.06<br>(151.66 to<br>190.21)                   | 137.57<br>(89.90 to<br>219.31)                    | 131.56<br>(86.59 to<br>206.90)                    | 161.20<br>(102.91 to<br>261.80)                   |
| Multiple sclerosis                         | 1,334.02<br>(1,038.49 to<br>2,154.84)               | 1,035.32<br>(710.36 to<br>1,771.85)                  | 1,024.63<br>(707.32 to<br>1,727.73)                  | 1,033.34<br>(709.15 to<br>1,766.99)                  | 49.77<br>(38.75 to<br>81.64)                      | 46.08<br>(33.44 to<br>76.63)                      | 47.06<br>(34.02 to<br>76.62)                      | 45.11<br>(32.70 to<br>75.12)                      |
| Motor neuron disease                       | 4,349.12<br>(3,880.86 to<br>4,812.47)               | 3,423.24<br>(2,688.62 to<br>4,426.95)                | 3,405.82<br>(2,640.71 to<br>4,460.99)                | 3,388.93<br>(2,668.64 to<br>4,327.30)                | 184.78<br>(166.04 to<br>204.72)                   | 166.18<br>(132.15 to<br>214.60)                   | 167.61<br>(132.07 to<br>218.92)                   | 162.55<br>(130.46 to<br>207.40)                   |
| Other neurological disorders               | 2,953.97<br>(2,570.02 to<br>3,300.40)               | 2,372.71<br>(1,884.77 to<br>3,014.76)                | 2,428.51<br>(1,906.85 to<br>3,114.56)                | 2,324.32<br>(1,855.57 to<br>2,933.82)                | 118.21<br>(104.90 to<br>132.17)                   | 126.17<br>(105.57 to<br>150.67)                   | 134.13<br>(110.99 to<br>162.06)                   | 119.78<br>(101.32 to<br>141.15)                   |
| <b>Mental disorders</b>                    | <b>9,964.34<br/>(8,685.13 to<br/>11,089.88)</b>     | <b>9,010.54<br/>(6,921.88 to<br/>11,814.02)</b>      | <b>9,859.30<br/>(7,557.81 to<br/>12,957.09)</b>      | <b>9,143.24<br/>(7,103.80 to<br/>11,935.14)</b>      | <b>367.73<br/>(330.94 to<br/>404.67)</b>          | <b>426.26<br/>(359.17 to<br/>500.80)</b>          | <b>493.88<br/>(418.01 to<br/>581.66)</b>          | <b>416.13<br/>(354.50 to<br/>486.92)</b>          |
| Alcohol use disorders                      | 5,816.66<br>(5,061.95 to<br>6,591.68)               | 3,706.79<br>(2,817.20 to<br>4,745.80)                | 3,830.01<br>(2,881.18 to<br>4,940.10)                | 4,150.65<br>(3,197.76 to<br>5,257.32)                | 217.88<br>(191.77 to<br>244.88)                   | 175.99<br>(142.43 to<br>212.74)                   | 189.42<br>(152.34 to<br>230.68)                   | 191.54<br>(157.95 to<br>229.05)                   |

|                                                            |                                                    |                                                   |                                                   |                                                   |                                              |                                                |                                                |                                                |
|------------------------------------------------------------|----------------------------------------------------|---------------------------------------------------|---------------------------------------------------|---------------------------------------------------|----------------------------------------------|------------------------------------------------|------------------------------------------------|------------------------------------------------|
| Drug use disorders                                         | 4,126.54<br>(3,375.84 to<br>4,692.51)              | 5,291.88<br>(3,817.19 to<br>7,279.35)             | 6,016.92<br>(4,405.16 to<br>8,270.24)             | 4,980.90<br>(3,628.32 to<br>6,943.33)             | 149.41<br>(128.42 to<br>166.70)              | 250.02<br>(206.81 to<br>303.43)                | 304.20<br>(254.89 to<br>363.73)                | 224.35<br>(185.53 to<br>270.46)                |
| Opioid use disorders                                       | 2,546.35<br>(2,079.66 to<br>3,268.95)              | 2,829.91<br>(1,982.67 to<br>4,201.15)             | 2,962.30<br>(2,083.04 to<br>4,418.95)             | 2,753.53<br>(1,941.58 to<br>4,077.27)             | 78.37<br>(65.28 to<br>90.26)                 | 111.65<br>(80.87 to<br>143.54)                 | 123.99<br>(86.38 to<br>160.41)                 | 104.00<br>(77.33 to<br>132.73)                 |
| Cocaine use disorders                                      | 83.28<br>(32.80 to<br>107.15)                      | 139.30<br>(48.80 to<br>210.68)                    | 161.87<br>(60.61 to<br>242.13)                    | 129.85<br>(45.80 to<br>197.14)                    | 4.15<br>(1.39 to<br>5.38)                    | 7.93<br>(2.42 to<br>11.47)                     | 9.65<br>(2.80 to<br>13.82)                     | 7.14<br>(2.22 to<br>10.06)                     |
| Amphetamine use disorders                                  | 116.07<br>(53.03 to<br>155.25)                     | 320.24<br>(151.51 to<br>467.14)                   | 411.10<br>(197.18 to<br>588.92)                   | 286.82<br>(127.94 to<br>425.57)                   | 4.89<br>(1.75 to<br>6.20)                    | 17.43<br>(5.28 to<br>24.67)                    | 23.69<br>(6.41 to<br>33.29)                    | 14.98<br>(4.50 to<br>21.26)                    |
| Other drug use disorders                                   | 1,380.85<br>(695.60 to<br>1,750.62)                | 2,002.43<br>(1,166.71 to<br>2,918.98)             | 2,481.65<br>(1,465.59 to<br>3,554.48)             | 1,810.71<br>(992.20 to<br>2,631.91)               | 62.00<br>(49.18 to<br>72.82)                 | 113.00<br>(86.63 to<br>146.71)                 | 146.87<br>(114.11 to<br>191.96)                | 98.23<br>(74.34 to<br>128.79)                  |
| Eating disorders                                           | 21.13<br>(17.49 to<br>25.25)                       | 11.87<br>(7.93 to<br>17.66)                       | 12.37<br>(8.11 to<br>19.21)                       | 11.69<br>(7.88 to<br>17.49)                       | 0.44<br>(0.36 to<br>0.53)                    | 0.25<br>(0.17 to<br>0.37)                      | 0.26<br>(0.17 to<br>0.39)                      | 0.24<br>(0.17 to<br>0.36)                      |
| <b>Portugal</b>                                            |                                                    |                                                   |                                                   |                                                   |                                              |                                                |                                                |                                                |
| Cause                                                      | YLLs (actual counts)                               |                                                   |                                                   |                                                   | Deaths (actual counts)                       |                                                |                                                |                                                |
|                                                            | 2016                                               | 2040 Forecast                                     | 2040 Better Scenario                              | 2040 Worse Scenario                               | 2016                                         | 2040 Forecast                                  | 2040 Better Scenario                           | 2040 Worse Scenario                            |
| <b>Diabetes, urogenital, blood, and endocrine diseases</b> | <b>108,266.34</b><br>(100,219.74 to<br>116,252.08) | <b>121,528.47</b><br>(82,756.55 to<br>216,787.96) | <b>101,621.77</b><br>(70,815.31 to<br>184,845.04) | <b>140,182.15</b><br>(93,272.28 to<br>246,054.88) | <b>9,261.10</b><br>(8,584.77 to<br>9,946.52) | <b>12,536.80</b><br>(8,810.70 to<br>22,158.42) | <b>10,933.62</b><br>(7,837.15 to<br>19,676.84) | <b>13,990.88</b><br>(9,715.10 to<br>24,758.19) |
| Diabetes mellitus                                          | 47,982.29<br>(43,632.35 to<br>52,520.76)           | 48,155.64<br>(30,598.92 to<br>75,107.50)          | 38,221.66<br>(24,452.28 to<br>58,043.73)          | 56,662.64<br>(34,475.39 to<br>89,827.57)          | 3,994.79<br>(3,635.13 to<br>4,401.67)        | 4,730.12<br>(3,152.87 to<br>6,821.46)          | 3,945.19<br>(2,712.05 to<br>5,558.88)          | 5,336.59<br>(3,486.56 to<br>7,974.41)          |
| Acute glomerulonephritis                                   | 73.24<br>(65.21 to<br>81.53)                       | 32.55<br>(24.83 to<br>43.10)                      | 29.16<br>(22.16 to<br>38.62)                      | 33.85<br>(25.85 to<br>44.14)                      | 4.08<br>(3.43 to<br>4.85)                    | 1.84<br>(1.22 to<br>2.84)                      | 1.76<br>(1.14 to<br>2.71)                      | 1.81<br>(1.22 to<br>2.72)                      |
| Chronic kidney disease                                     | 33,658.34<br>(31,084.93 to<br>36,376.91)           | 51,769.20<br>(24,951.99 to<br>157,592.08)         | 42,505.67<br>(21,584.79 to<br>126,447.21)         | 62,168.67<br>(29,650.87 to<br>180,676.86)         | 3,118.94<br>(2,878.62 to<br>3,391.74)        | 5,636.05<br>(2,848.23 to<br>15,866.82)         | 4,824.48<br>(2,582.02 to<br>14,078.61)         | 6,569.31<br>(3,246.56 to<br>17,893.11)         |
| Chronic kidney disease due to diabetes mellitus            | 14,523.44<br>(13,043.06 to<br>16,095.49)           | 22,609.43<br>(10,687.12 to<br>68,162.99)          | 18,365.17<br>(9,161.91 to<br>55,690.37)           | 27,421.90<br>(12,952.65 to<br>78,058.51)          | 1,176.68<br>(1,041.65 to<br>1,324.96)        | 2,179.05<br>(1,072.96 to<br>6,415.98)          | 1,844.80<br>(961.38 to<br>5,438.38)            | 2,565.25<br>(1,238.85 to<br>7,310.96)          |
| Chronic kidney disease due to hypertension                 | 6,507.05<br>(5,491.04 to<br>7,669.56)              | 11,647.50<br>(5,562.20 to<br>32,825.94)           | 10,065.79<br>(4,957.68 to<br>29,167.10)           | 13,572.15<br>(6,197.19 to<br>36,926.90)           | 803.01<br>(673.48 to<br>952.07)              | 1,581.83<br>(789.42 to<br>4,308.87)            | 1,416.02<br>(733.22 to<br>3,831.00)            | 1,794.68<br>(864.29 to<br>4,790.23)            |
| Chronic kidney disease due to glomerulonephritis           | 3,870.45<br>(3,078.55 to<br>4,707.81)              | 4,987.03<br>(2,194.83 to<br>14,809.81)            | 3,921.74<br>(1,802.87 to<br>11,523.51)            | 6,082.56<br>(2,631.26 to<br>17,553.87)            | 328.12<br>(252.81 to<br>414.93)              | 513.10<br>(225.03 to<br>1,408.29)              | 417.51<br>(192.46 to<br>1,127.49)              | 611.25<br>(265.20 to<br>1,612.66)              |
| Chronic kidney disease due to other and unspecified causes | 8,757.40<br>(7,640.62 to<br>10,072.93)             | 12,525.24<br>(6,083.79 to<br>36,688.20)           | 10,152.97<br>(5,112.54 to<br>29,355.27)           | 15,092.07<br>(7,188.88 to<br>42,547.61)           | 811.13<br>(689.16 to<br>951.21)              | 1,362.08<br>(683.29 to<br>3,971.99)            | 1,146.15<br>(591.96 to<br>3,346.75)            | 1,598.13<br>(768.93 to<br>4,423.67)            |
| Urinary diseases and male infertility                      | 12,841.80<br>(11,719.63 to<br>14,134.47)           | 10,768.74<br>(8,994.60 to<br>12,851.27)           | 10,035.05<br>(8,228.44 to<br>12,047.31)           | 10,713.89<br>(9,023.02 to<br>12,772.87)           | 1,309.05<br>(1,184.12 to<br>1,454.45)        | 1,310.88<br>(1,081.87 to<br>1,558.46)          | 1,271.66<br>(1,040.29 to<br>1,509.95)          | 1,267.81<br>(1,037.74 to<br>1,513.47)          |
| Urinary tract infections                                   | 11,870.70<br>(10,505.69 to<br>13,119.18)           | 10,076.07<br>(8,335.80 to<br>12,099.68)           | 9,334.29<br>(7,722.91 to<br>11,508.30)            | 10,002.91<br>(8,331.49 to<br>11,988.01)           | 1,231.11<br>(1,089.46 to<br>1,371.29)        | 1,240.90<br>(1,006.59 to<br>1,487.04)          | 1,207.92<br>(987.43 to<br>1,454.52)            | 1,198.48<br>(968.19 to<br>1,445.92)            |
| Urolithiasis                                               | 400.75<br>(200.10 to<br>1,070.21)                  | 301.44<br>(133.40 to<br>840.18)                   | 259.09<br>(113.06 to<br>728.53)                   | 313.51<br>(139.22 to<br>874.32)                   | 31.97<br>(14.94 to<br>87.92)                 | 28.91<br>(12.45 to<br>81.72)                   | 26.01<br>(11.00 to<br>72.18)                   | 29.13<br>(12.47 to<br>80.86)                   |
| Other urinary diseases                                     | 570.35<br>(331.98 to<br>1,180.60)                  | 391.23<br>(208.25 to<br>832.57)                   | 341.66<br>(182.19 to<br>747.08)                   | 397.47<br>(212.98 to<br>844.49)                   | 45.96<br>(24.99 to<br>99.48)                 | 41.06<br>(20.33 to<br>92.35)                   | 37.72<br>(18.92 to<br>83.34)                   | 40.20<br>(20.22 to<br>88.72)                   |
| Gynecological diseases                                     | 45.30<br>(30.38 to<br>60.21)                       | 19.37<br>(11.87 to<br>27.72)                      | 14.46<br>(9.08 to<br>21.07)                       | 21.63<br>(13.50 to<br>32.00)                      | 2.63<br>(1.68 to<br>3.44)                    | 1.61<br>(1.00 to<br>2.31)                      | 1.25<br>(0.76 to<br>1.81)                      | 1.75<br>(1.06 to<br>2.53)                      |
| Uterine fibroids                                           | 18.04<br>(12.22 to<br>24.08)                       | 6.30<br>(3.68 to<br>9.76)                         | 4.90<br>(2.92 to<br>7.86)                         | 6.98<br>(4.15 to<br>11.14)                        | 0.63<br>(0.44 to<br>0.85)                    | 0.28<br>(0.17 to<br>0.46)                      | 0.22<br>(0.13 to<br>0.36)                      | 0.31<br>(0.18 to<br>0.48)                      |







|                                                 |                                          |                                          |                                          |                                          |                                       |                                     |                                     |                                     |
|-------------------------------------------------|------------------------------------------|------------------------------------------|------------------------------------------|------------------------------------------|---------------------------------------|-------------------------------------|-------------------------------------|-------------------------------------|
| Falls                                           | 13,541.00<br>(11,675.30 to<br>20,998.10) | 12,067.23<br>(9,605.29 to<br>18,830.52)  | 11,315.34<br>(8,983.47 to<br>18,068.49)  | 12,181.45<br>(9,776.09 to<br>19,475.76)  | 874.65<br>(719.39 to<br>1,537.07)     | 1,080.31<br>(834.87 to<br>1,920.20) | 1,055.48<br>(817.89 to<br>1,893.75) | 1,050.66<br>(800.80 to<br>1,887.68) |
| Drowning                                        | 4,150.97<br>(3,751.83 to<br>4,571.69)    | 2,001.00<br>(1,294.49 to<br>3,235.88)    | 1,730.09<br>(1,124.39 to<br>2,760.97)    | 2,276.15<br>(1,444.57 to<br>3,804.71)    | 128.62<br>(117.18 to<br>140.31)       | 84.24<br>(59.65 to<br>124.64)       | 76.10<br>(54.66 to<br>112.72)       | 91.90<br>(62.83 to<br>143.46)       |
| Fire, heat, and hot substances                  | 2,512.56<br>(2,130.28 to<br>2,938.83)    | 1,483.47<br>(1,034.06 to<br>2,243.32)    | 1,242.40<br>(880.21 to<br>1,865.89)      | 1,671.63<br>(1,119.64 to<br>2,598.48)    | 140.05<br>(106.57 to<br>159.86)       | 116.19<br>(81.23 to<br>164.99)      | 102.98<br>(71.99 to<br>143.32)      | 124.50<br>(86.05 to<br>182.59)      |
| Poisonings                                      | 851.53<br>(684.87 to<br>1,575.73)        | 297.83<br>(183.17 to<br>540.28)          | 231.56<br>(144.70 to<br>408.82)          | 351.93<br>(205.26 to<br>677.55)          | 32.08<br>(24.95 to<br>45.48)          | 17.50<br>(10.54 to<br>26.85)        | 14.72<br>(8.76 to<br>21.94)         | 19.29<br>(11.74 to<br>30.25)        |
| Exposure to mechanical forces                   | 3,169.45<br>(2,750.85 to<br>3,767.01)    | 1,729.99<br>(1,337.21 to<br>2,298.16)    | 1,484.51<br>(1,148.85 to<br>1,942.93)    | 1,852.08<br>(1,435.92 to<br>2,408.27)    | 110.00<br>(97.29 to<br>132.37)        | 86.59<br>(72.03 to<br>114.18)       | 79.09<br>(65.47 to<br>103.79)       | 88.04<br>(72.71 to<br>116.19)       |
| Unintentional firearm injuries                  | 1,146.96<br>(890.00 to<br>1,343.61)      | 551.75<br>(381.20 to<br>736.29)          | 489.20<br>(334.93 to<br>644.45)          | 582.23<br>(399.68 to<br>762.90)          | 42.55<br>(31.12 to<br>49.27)          | 29.16<br>(19.40 to<br>35.69)        | 27.63<br>(18.20 to<br>33.67)        | 29.12<br>(19.60 to<br>35.85)        |
| Unintentional suffocation                       | 277.49<br>(164.12 to<br>641.79)          | 153.88<br>(88.25 to<br>351.50)           | 133.68<br>(77.29 to<br>300.59)           | 166.10<br>(93.67 to<br>386.42)           | 6.36<br>(4.60 to<br>12.20)            | 4.47<br>(3.37 to<br>7.54)           | 4.06<br>(3.07 to<br>6.58)           | 4.62<br>(3.44 to<br>7.98)           |
| Other exposure to mechanical forces             | 1,744.99<br>(1,352.68 to<br>2,094.87)    | 1,024.37<br>(759.19 to<br>1,405.72)      | 861.63<br>(649.97 to<br>1,177.09)        | 1,103.75<br>(819.29 to<br>1,468.34)      | 61.08<br>(52.56 to<br>81.79)          | 52.96<br>(41.14 to<br>77.59)        | 47.40<br>(36.62 to<br>71.60)        | 54.30<br>(42.13 to<br>79.61)        |
| Adverse effects of medical treatment            | 4,018.68<br>(3,099.44 to<br>5,120.39)    | 3,324.44<br>(2,589.39 to<br>4,696.54)    | 3,167.04<br>(2,442.90 to<br>4,463.67)    | 3,343.04<br>(2,621.88 to<br>4,641.51)    | 245.88<br>(200.72 to<br>363.00)       | 267.70<br>(202.86 to<br>419.79)     | 266.51<br>(201.01 to<br>418.57)     | 258.97<br>(196.10 to<br>402.81)     |
| Animal contact                                  | 608.11<br>(374.50 to<br>716.72)          | 383.00<br>(231.72 to<br>498.33)          | 343.69<br>(201.06 to<br>447.66)          | 401.80<br>(238.52 to<br>519.95)          | 25.50<br>(13.92 to<br>30.17)          | 22.74<br>(11.30 to<br>28.06)        | 21.61<br>(10.33 to<br>26.83)        | 22.66<br>(11.51 to<br>28.24)        |
| Venomous animal contact                         | 243.97<br>(137.65 to<br>312.13)          | 147.36<br>(77.39 to<br>203.40)           | 135.93<br>(71.47 to<br>189.67)           | 152.66<br>(81.29 to<br>209.67)           | 9.31<br>(4.88 to<br>11.91)            | 7.88<br>(3.51 to<br>10.38)          | 7.68<br>(3.37 to<br>10.20)          | 7.74<br>(3.50 to<br>10.24)          |
| Non-venomous animal contact                     | 364.14<br>(218.27 to<br>442.16)          | 235.64<br>(137.25 to<br>313.46)          | 207.76<br>(120.47 to<br>270.60)          | 249.14<br>(146.11 to<br>324.23)          | 16.19<br>(8.68 to<br>19.95)           | 14.87<br>(7.07 to<br>19.26)         | 13.92<br>(6.65 to<br>18.07)         | 14.92<br>(7.18 to<br>19.49)         |
| Foreign body                                    | 5,649.24<br>(4,616.42 to<br>7,193.85)    | 3,900.80<br>(2,951.20 to<br>5,069.34)    | 3,829.44<br>(2,875.32 to<br>4,944.35)    | 3,912.07<br>(3,003.86 to<br>5,024.22)    | 258.20<br>(198.65 to<br>307.11)       | 261.80<br>(190.75 to<br>321.94)     | 272.65<br>(195.41 to<br>337.59)     | 249.05<br>(184.85 to<br>305.30)     |
| Pulmonary aspiration and foreign body in airway | 5,009.73<br>(4,156.78 to<br>6,619.47)    | 3,465.39<br>(2,675.74 to<br>4,531.52)    | 3,364.52<br>(2,576.50 to<br>4,378.41)    | 3,488.54<br>(2,723.12 to<br>4,534.59)    | 233.87<br>(184.06 to<br>285.09)       | 236.92<br>(175.15 to<br>292.39)     | 244.64<br>(179.07 to<br>304.57)     | 226.07<br>(169.96 to<br>278.02)     |
| Foreign body in other body part                 | 639.51<br>(327.02 to<br>796.80)          | 435.40<br>(200.70 to<br>604.25)          | 464.92<br>(213.21 to<br>645.51)          | 423.53<br>(213.21 to<br>578.64)          | 24.92<br>(10.53 to<br>31.77)          | 24.87<br>(9.35 to<br>34.71)         | 28.01<br>(10.23 to<br>38.76)        | 22.98<br>(8.81 to<br>31.76)         |
| Environmental heat and cold exposure            | 1,248.05<br>(866.89 to<br>2,140.48)      | 911.88<br>(626.43 to<br>1,612.55)        | 770.09<br>(531.58 to<br>1,348.24)        | 962.86<br>(658.33 to<br>1,674.14)        | 72.42<br>(53.83 to<br>129.91)         | 71.59<br>(51.23 to<br>131.92)       | 63.80<br>(45.39 to<br>118.11)       | 72.14<br>(50.00 to<br>133.23)       |
| Other unintentional injuries                    | 1,142.45<br>(991.37 to<br>1,313.40)      | 455.74<br>(327.21 to<br>645.45)          | 312.49<br>(230.67 to<br>416.61)          | 534.69<br>(382.20 to<br>723.15)          | 35.83<br>(31.76 to<br>40.80)          | 19.19<br>(14.99 to<br>24.21)        | 13.85<br>(11.27 to<br>16.89)        | 21.48<br>(16.77 to<br>27.29)        |
| Self-harm and interpersonal violence            | 49,619.64<br>(43,272.80 to<br>62,573.09) | 27,974.79<br>(15,598.82 to<br>47,158.64) | 23,932.90<br>(13,623.04 to<br>40,207.22) | 34,583.24<br>(18,827.58 to<br>59,369.49) | 1,578.24<br>(1,267.82 to<br>1,808.23) | 1,133.91<br>(663.11 to<br>1,807.63) | 1,008.11<br>(582.79 to<br>1,604.01) | 1,356.29<br>(777.94 to<br>2,242.96) |

**Portugal**

| Cause                | YLLs (actual counts)                     |                                          |                                          |                                          | Deaths (actual counts)                |                                     |                                   |                                     |
|----------------------|------------------------------------------|------------------------------------------|------------------------------------------|------------------------------------------|---------------------------------------|-------------------------------------|-----------------------------------|-------------------------------------|
|                      | 2016                                     | 2040 Forecast                            | 2040 Better Scenario                     | 2040 Worse Scenario                      | 2016                                  | 2040 Forecast                       | 2040 Better Scenario              | 2040 Worse Scenario                 |
| Self-harm            | 43,587.22<br>(37,086.82 to<br>56,432.74) | 25,772.07<br>(14,002.82 to<br>44,652.83) | 22,072.73<br>(12,011.69 to<br>37,634.83) | 32,077.48<br>(16,923.03 to<br>56,503.87) | 1,427.09<br>(1,142.90 to<br>1,646.51) | 1,064.98<br>(608.22 to<br>1,737.90) | 948.34<br>(529.40 to<br>1,526.01) | 1,279.41<br>(716.90 to<br>2,159.02) |
| Self-harm by firearm | 4,848.38<br>(3,233.15 to<br>6,865.46)    | 2,146.21<br>(955.73 to<br>4,121.81)      | 1,724.75<br>(775.70 to<br>3,290.44)      | 2,743.58<br>(1,226.76 to<br>5,440.89)    | 159.95<br>(88.39 to<br>200.33)        | 86.77<br>(34.48 to<br>158.02)       | 72.50<br>(28.51 to<br>131.29)     | 107.22<br>(42.39 to<br>201.64)      |

|                                                                              |                                          |                                          |                                          |                                          |                                       |                                   |                                   |                                     |
|------------------------------------------------------------------------------|------------------------------------------|------------------------------------------|------------------------------------------|------------------------------------------|---------------------------------------|-----------------------------------|-----------------------------------|-------------------------------------|
| Self-harm by other specified means                                           | 38,738.84<br>(32,979.09 to<br>51,690.79) | 23,625.86<br>(12,775.91 to<br>40,631.09) | 20,347.98<br>(11,107.02 to<br>34,295.43) | 29,333.89<br>(15,481.55 to<br>51,270.60) | 1,267.14<br>(1,008.82 to<br>1,460.36) | 978.22<br>(558.93 to<br>1,582.10) | 875.84<br>(492.14 to<br>1,394.57) | 1,172.19<br>(661.46 to<br>1,973.54) |
| Interpersonal violence                                                       | 6,032.39<br>(3,846.50 to<br>8,164.35)    | 2,202.71<br>(1,260.45 to<br>3,602.40)    | 1,860.16<br>(1,085.08 to<br>3,047.29)    | 2,505.77<br>(1,422.69 to<br>4,049.49)    | 151.15<br>(96.99 to<br>196.17)        | 68.93<br>(40.85 to<br>107.09)     | 59.77<br>(36.11 to<br>90.84)      | 76.88<br>(45.21 to<br>118.57)       |
| Physical violence by firearm                                                 | 1,973.05<br>(1,022.66 to<br>2,888.62)    | 632.16<br>(288.66 to<br>1,055.91)        | 512.47<br>(233.60 to<br>833.35)          | 705.76<br>(327.36 to<br>1,169.61)        | 45.41<br>(22.83 to<br>64.65)          | 16.70<br>(7.94 to<br>25.69)       | 13.76<br>(6.66 to<br>21.02)       | 18.37<br>(8.82 to<br>27.72)         |
| Physical violence by sharp object                                            | 1,655.23<br>(679.53 to<br>2,207.42)      | 639.86<br>(248.18 to<br>980.47)          | 536.57<br>(208.86 to<br>808.97)          | 700.53<br>(267.13 to<br>1,050.01)        | 43.38<br>(17.51 to<br>57.06)          | 20.89<br>(9.35 to<br>30.45)       | 18.03<br>(8.31 to<br>25.72)       | 22.31<br>(9.67 to<br>31.69)         |
| Physical violence by other means                                             | 2,404.11<br>(1,583.07 to<br>4,150.85)    | 930.69<br>(512.54 to<br>1,734.28)        | 811.13<br>(450.44 to<br>1,483.08)        | 1,099.48<br>(587.41 to<br>2,050.28)      | 62.35<br>(40.58 to<br>100.55)         | 31.34<br>(17.99 to<br>54.21)      | 27.98<br>(16.32 to<br>48.16)      | 36.20<br>(20.65 to<br>64.11)        |
| Forces of nature, conflict and terrorism, and executions and police conflict | <b>44.12</b><br>(41.10 to<br>47.13)      | <b>115.46</b><br>(60.00 to<br>657.64)    | <b>116.03</b><br>(60.00 to<br>660.20)    | <b>115.02</b><br>(60.00 to<br>653.55)    | <b>1.01</b><br>(0.94 to<br>1.08)      | <b>3.48</b><br>(0.00 to<br>19.78) | <b>3.58</b><br>(0.00 to<br>20.39) | <b>3.40</b><br>(0.00 to<br>19.22)   |
| Exposure to forces of nature                                                 | 0.00<br>(0.00 to<br>0.00)                | 110.13<br>(0.00 to<br>645.26)            | 110.67<br>(0.00 to<br>647.88)            | 109.73<br>(0.00 to<br>641.22)            | 0.00<br>(0.00 to<br>0.00)             | 0.00<br>(0.00 to<br>19.44)        | 3.44<br>(0.00 to<br>20.05)        | 3.27<br>(0.00 to<br>18.90)          |
| Conflict and terrorism                                                       | 0.00<br>(0.00 to<br>0.00)                | 5.32<br>(0.00 to<br>32.09)               | 5.36<br>(0.00 to<br>32.21)               | 5.30<br>(0.00 to<br>31.98)               | 0.00<br>(0.00 to<br>0.00)             | 0.14<br>(0.00 to<br>0.89)         | 0.14<br>(0.00 to<br>0.95)         | 0.13<br>(0.00 to<br>0.85)           |
| Executions and police conflict                                               | 44.12<br>(41.10 to<br>47.13)             | 0.00<br>(0.00 to<br>0.00)                | 0.00<br>(0.00 to<br>0.00)                | 0.00<br>(0.00 to<br>0.00)                | 1.01<br>(0.94 to<br>1.08)             | 0.00<br>(0.00 to<br>0.00)         | 0.00<br>(0.00 to<br>0.00)         | 0.00<br>(0.00 to<br>0.00)           |
| <b>Spain</b>                                                                 |                                          |                                          |                                          |                                          |                                       |                                   |                                   |                                     |
| Cause                                                                        | YLLs (in 1000s)                          |                                          |                                          |                                          | Deaths (in 1000s)                     |                                   |                                   |                                     |
|                                                                              | 2016                                     | 2040 Forecast                            | 2040 Better Scenario                     | 2040 Worse Scenario                      | 2016                                  | 2040 Forecast                     | 2040 Better Scenario              | 2040 Worse Scenario                 |
| All causes                                                                   | 5,428.97<br>(5,203.41 to<br>5,661.48)    | 5,315.50<br>(4,463.13 to<br>6,359.33)    | 4,478.50<br>(3,792.25 to<br>5,343.56)    | 6,507.00<br>(5,368.52 to<br>7,943.58)    | 418.52<br>(404.28 to<br>433.37)       | 492.38<br>(435.15 to<br>559.06)   | 433.82<br>(383.77 to<br>489.11)   | 571.00<br>(497.41 to<br>654.54)     |
| Communicable, maternal, neonatal, and nutritional diseases                   | 233.23<br>(210.26 to<br>259.36)          | 186.93<br>(145.08 to<br>243.98)          | 170.41<br>(134.04 to<br>218.19)          | 227.45<br>(169.54 to<br>309.92)          | 14.85<br>(13.21 to<br>16.48)          | 18.41<br>(14.28 to<br>23.97)      | 18.35<br>(14.58 to<br>23.32)      | 20.55<br>(15.33 to<br>28.43)        |
| HIV/AIDS and tuberculosis                                                    | 34.39<br>(32.69 to<br>36.19)             | 6.67<br>(3.31 to<br>10.41)               | 4.24<br>(2.10 to<br>7.29)                | 14.39<br>(8.68 to<br>19.94)              | 1.09<br>(1.03 to<br>1.16)             | 0.30<br>(0.17 to<br>0.48)         | 0.21<br>(0.12 to<br>0.33)         | 0.53<br>(0.33 to<br>0.83)           |
| Tuberculosis                                                                 | 6.32<br>(5.59 to<br>7.09)                | 2.71<br>(1.42 to<br>5.11)                | 1.88<br>(1.03 to<br>3.48)                | 4.26<br>(2.15 to<br>8.53)                | 0.40<br>(0.35 to<br>0.45)             | 0.22<br>(0.12 to<br>0.41)         | 0.16<br>(0.09 to<br>0.28)         | 0.34<br>(0.18 to<br>0.62)           |
| HIV/AIDS                                                                     | 28.06<br>(26.61 to<br>29.61)             | 3.96<br>(1.07 to<br>7.03)                | 2.36<br>(0.51 to<br>5.08)                | 10.13<br>(4.97 to<br>14.14)              | 0.69<br>(0.66 to<br>0.73)             | 0.08<br>(0.02 to<br>0.14)         | 0.05<br>(0.01 to<br>0.10)         | 0.19<br>(0.09 to<br>0.27)           |
| Diarrhea, lower respiratory, and other common infectious diseases            | 131.76<br>(117.87 to<br>147.12)          | 143.40<br>(104.71 to<br>198.89)          | 133.75<br>(106.30 to<br>178.89)          | 172.06<br>(118.56 to<br>252.88)          | 12.20<br>(10.61 to<br>13.86)          | 16.67<br>(12.69 to<br>22.17)      | 16.69<br>(13.05 to<br>21.51)      | 18.59<br>(13.48 to<br>26.24)        |
| Diarrheal diseases                                                           | 8.75<br>(7.91 to<br>9.69)                | 27.18<br>(18.05 to<br>42.42)             | 35.63<br>(26.06 to<br>50.78)             | 22.48<br>(14.26 to<br>34.37)             | 0.87<br>(0.77 to<br>0.98)             | 3.53<br>(2.31 to<br>5.41)         | 4.79<br>(3.41 to<br>6.85)         | 2.85<br>(1.74 to<br>4.45)           |
| Intestinal infectious diseases                                               | 0.08<br>(0.03 to<br>0.17)                | 0.05<br>(0.02 to<br>0.11)                | 0.05<br>(0.02 to<br>0.11)                | 0.05<br>(0.02 to<br>0.11)                | 0.00<br>(0.00 to<br>0.01)             | 0.00<br>(0.00 to<br>0.00)         | 0.00<br>(0.00 to<br>0.00)         | 0.00<br>(0.00 to<br>0.00)           |
| Typhoid fever                                                                | 0.03<br>(0.01 to<br>0.08)                | 0.03<br>(0.01 to<br>0.06)                | 0.03<br>(0.01 to<br>0.07)                | 0.03<br>(0.01 to<br>0.06)                | 0.00<br>(0.00 to<br>0.00)             | 0.00<br>(0.00 to<br>0.00)         | 0.00<br>(0.00 to<br>0.00)         | 0.00<br>(0.00 to<br>0.00)           |
| Paratyphoid fever                                                            | 0.03<br>(0.01 to<br>0.08)                | 0.01<br>(0.00 to<br>0.03)                | 0.01<br>(0.00 to<br>0.03)                | 0.01<br>(0.00 to<br>0.04)                | 0.00<br>(0.00 to<br>0.00)             | 0.00<br>(0.00 to<br>0.00)         | 0.00<br>(0.00 to<br>0.00)         | 0.00<br>(0.00 to<br>0.00)           |
| Other intestinal infectious diseases                                         | 0.02<br>(0.01 to<br>0.03)                | 0.01<br>(0.00 to<br>0.02)                | 0.01<br>(0.00 to<br>0.02)                | 0.01<br>(0.00 to<br>0.02)                | 0.00<br>(0.00 to<br>0.00)             | 0.00<br>(0.00 to<br>0.00)         | 0.00<br>(0.00 to<br>0.00)         | 0.00<br>(0.00 to<br>0.00)           |



|                                                       |                                |                                |                                |                                |                                |                                |                                |                                |
|-------------------------------------------------------|--------------------------------|--------------------------------|--------------------------------|--------------------------------|--------------------------------|--------------------------------|--------------------------------|--------------------------------|
| Cysticercosis                                         | 0.02<br>(0.02 to 0.02)         | 0.00<br>(0.00 to 0.01)         | 0.00<br>(0.00 to 0.01)         | 0.00<br>(0.00 to 0.01)         | 0.00<br>(0.00 to 0.00)         | 0.00<br>(0.00 to 0.00)         | 0.00<br>(0.00 to 0.00)         | 0.00<br>(0.00 to 0.00)         |
| Cystic echinococcosis                                 | 0.13<br>(0.11 to 0.15)         | 0.05<br>(0.03 to 0.09)         | 0.04<br>(0.03 to 0.08)         | 0.05<br>(0.03 to 0.10)         | 0.01<br>(0.01 to 0.01)         | 0.00<br>(0.00 to 0.01)         | 0.00<br>(0.00 to 0.01)         | 0.00<br>(0.00 to 0.01)         |
| Dengue                                                | 0.00<br>(0.00 to 0.00)         | 0.00<br>(0.00 to 0.00)         | 0.00<br>(0.00 to 0.00)         | 0.00<br>(0.00 to 0.00)         | 0.00<br>(0.00 to 0.00)         | 0.00<br>(0.00 to 0.00)         | 0.00<br>(0.00 to 0.00)         | 0.00<br>(0.00 to 0.00)         |
| Yellow fever                                          | 0.00<br>(0.00 to 0.00)         | 0.00<br>(0.00 to 0.00)         | 0.00<br>(0.00 to 0.00)         | 0.00<br>(0.00 to 0.00)         | 0.00<br>(0.00 to 0.00)         | 0.00<br>(0.00 to 0.00)         | 0.00<br>(0.00 to 0.00)         | 0.00<br>(0.00 to 0.00)         |
| Rabies                                                | 0.00<br>(0.00 to 0.00)         | 0.00<br>(0.00 to 0.00)         | 0.00<br>(0.00 to 0.00)         | 0.00<br>(0.00 to 0.00)         | 0.00<br>(0.00 to 0.00)         | 0.00<br>(0.00 to 0.00)         | 0.00<br>(0.00 to 0.00)         | 0.00<br>(0.00 to 0.00)         |
| Intestinal nematode infections                        | 0.00<br>(0.00 to 0.00)         | 0.00<br>(0.00 to 0.00)         | 0.00<br>(0.00 to 0.00)         | 0.00<br>(0.00 to 0.00)         | 0.00<br>(0.00 to 0.00)         | 0.00<br>(0.00 to 0.00)         | 0.00<br>(0.00 to 0.00)         | 0.00<br>(0.00 to 0.00)         |
| Other neglected tropical diseases                     | 0.23<br>(0.21 to 0.26)         | 0.12<br>(0.09 to 0.19)         | 0.12<br>(0.09 to 0.19)         | 0.12<br>(0.09 to 0.19)         | 0.01<br>(0.01 to 0.01)         | 0.00<br>(0.00 to 0.01)         | 0.00<br>(0.00 to 0.01)         | 0.00<br>(0.00 to 0.01)         |
| <b>Maternal disorders</b>                             | <b>1.05<br/>(0.91 to 1.22)</b> | <b>0.49<br/>(0.35 to 0.68)</b> | <b>0.44<br/>(0.30 to 0.59)</b> | <b>0.53<br/>(0.37 to 0.74)</b> | <b>0.02<br/>(0.02 to 0.02)</b> | <b>0.01<br/>(0.01 to 0.01)</b> | <b>0.01<br/>(0.01 to 0.01)</b> | <b>0.01<br/>(0.01 to 0.01)</b> |
| Maternal hemorrhage                                   | 0.12<br>(0.09 to 0.17)         | 0.07<br>(0.04 to 0.11)         | 0.06<br>(0.03 to 0.10)         | 0.07<br>(0.04 to 0.12)         | 0.00<br>(0.00 to 0.00)         | 0.00<br>(0.00 to 0.00)         | 0.00<br>(0.00 to 0.00)         | 0.00<br>(0.00 to 0.00)         |
| Maternal sepsis and other maternal infections         | 0.08<br>(0.05 to 0.10)         | 0.04<br>(0.02 to 0.07)         | 0.04<br>(0.02 to 0.06)         | 0.05<br>(0.03 to 0.07)         | 0.00<br>(0.00 to 0.00)         | 0.00<br>(0.00 to 0.00)         | 0.00<br>(0.00 to 0.00)         | 0.00<br>(0.00 to 0.00)         |
| Maternal hypertensive disorders                       | 0.08<br>(0.05 to 0.11)         | 0.05<br>(0.03 to 0.08)         | 0.04<br>(0.03 to 0.07)         | 0.05<br>(0.03 to 0.09)         | 0.00<br>(0.00 to 0.00)         | 0.00<br>(0.00 to 0.00)         | 0.00<br>(0.00 to 0.00)         | 0.00<br>(0.00 to 0.00)         |
| Maternal obstructed labor and uterine rupture         | 0.03<br>(0.02 to 0.05)         | 0.02<br>(0.01 to 0.03)         | 0.02<br>(0.01 to 0.03)         | 0.02<br>(0.01 to 0.03)         | 0.00<br>(0.00 to 0.00)         | 0.00<br>(0.00 to 0.00)         | 0.00<br>(0.00 to 0.00)         | 0.00<br>(0.00 to 0.00)         |
| Maternal abortion, miscarriage, and ectopic pregnancy | 0.47<br>(0.38 to 0.58)         | 0.14<br>(0.08 to 0.21)         | 0.12<br>(0.07 to 0.19)         | 0.15<br>(0.08 to 0.23)         | 0.01<br>(0.01 to 0.01)         | 0.00<br>(0.00 to 0.00)         | 0.00<br>(0.00 to 0.00)         | 0.00<br>(0.00 to 0.00)         |
| Indirect maternal deaths                              | 0.05<br>(0.04 to 0.07)         | 0.04<br>(0.02 to 0.07)         | 0.03<br>(0.02 to 0.06)         | 0.04<br>(0.02 to 0.08)         | 0.00<br>(0.00 to 0.00)         | 0.00<br>(0.00 to 0.00)         | 0.00<br>(0.00 to 0.00)         | 0.00<br>(0.00 to 0.00)         |
| Late maternal deaths                                  | 0.03<br>(0.02 to 0.04)         | 0.02<br>(0.01 to 0.03)         | 0.01<br>(0.01 to 0.02)         | 0.02<br>(0.01 to 0.03)         | 0.00<br>(0.00 to 0.00)         | 0.00<br>(0.00 to 0.00)         | 0.00<br>(0.00 to 0.00)         | 0.00<br>(0.00 to 0.00)         |
| Maternal deaths aggravated by HIV/AIDS                | 0.00<br>(0.00 to 0.00)         | 0.00<br>(0.00 to 0.01)         | 0.00<br>(0.00 to 0.01)         | 0.00<br>(0.00 to 0.01)         | 0.00<br>(0.00 to 0.00)         | 0.00<br>(0.00 to 0.00)         | 0.00<br>(0.00 to 0.00)         | 0.00<br>(0.00 to 0.00)         |
| Other maternal disorders                              | 0.19<br>(0.14 to 0.25)         | 0.12<br>(0.07 to 0.19)         | 0.11<br>(0.07 to 0.17)         | 0.13<br>(0.08 to 0.20)         | 0.00<br>(0.00 to 0.01)         | 0.00<br>(0.00 to 0.00)         | 0.00<br>(0.00 to 0.00)         | 0.00<br>(0.00 to 0.00)         |

**Spain**

| Cause                                                    | YLLs (in 1000s)                   |                                   |                                   |                                   | Deaths (in 1000s)              |                                |                                |                                |
|----------------------------------------------------------|-----------------------------------|-----------------------------------|-----------------------------------|-----------------------------------|--------------------------------|--------------------------------|--------------------------------|--------------------------------|
|                                                          | 2016                              | 2040 Forecast                     | 2040 Better Scenario              | 2040 Worse Scenario               | 2016                           | 2040 Forecast                  | 2040 Better Scenario           | 2040 Worse Scenario            |
| <b>Neonatal disorders</b>                                | <b>51.26<br/>(36.98 to 69.96)</b> | <b>22.56<br/>(13.72 to 36.29)</b> | <b>18.23<br/>(10.96 to 30.04)</b> | <b>26.70<br/>(15.89 to 43.24)</b> | <b>0.59<br/>(0.43 to 0.81)</b> | <b>0.26<br/>(0.16 to 0.42)</b> | <b>0.21<br/>(0.13 to 0.35)</b> | <b>0.31<br/>(0.18 to 0.50)</b> |
| Neonatal preterm birth                                   | 19.33<br>(13.32 to 27.50)         | 6.88<br>(4.11 to 11.11)           | 4.47<br>(2.61 to 7.23)            | 8.28<br>(4.75 to 13.35)           | 0.22<br>(0.15 to 0.32)         | 0.08<br>(0.05 to 0.15)         | 0.05<br>(0.03 to 0.08)         | 0.10<br>(0.05 to 0.15)         |
| Neonatal encephalopathy due to birth asphyxia and trauma | 9.99<br>(6.28 to 14.14)           | 3.21<br>(1.67 to 5.49)            | 2.58<br>(1.34 to 4.42)            | 3.97<br>(2.09 to 7.08)            | 0.12<br>(0.07 to 0.16)         | 0.04<br>(0.02 to 0.06)         | 0.03<br>(0.02 to 0.05)         | 0.05<br>(0.02 to 0.08)         |

|                                                                         |                                                            |                                                            |                                                            |                                                            |                                                      |                                                      |                                                      |                                                      |
|-------------------------------------------------------------------------|------------------------------------------------------------|------------------------------------------------------------|------------------------------------------------------------|------------------------------------------------------------|------------------------------------------------------|------------------------------------------------------|------------------------------------------------------|------------------------------------------------------|
| Neonatal sepsis and other neonatal infections                           | 7.99<br>(4.65 to<br>17.98)                                 | 4.49<br>(2.32 to<br>9.47)                                  | 3.79<br>(1.97 to<br>7.77)                                  | 5.38<br>(2.73 to<br>11.54)                                 | 0.09<br>(0.05 to<br>0.21)                            | 0.05<br>(0.03 to<br>0.11)                            | 0.04<br>(0.02 to<br>0.09)                            | 0.06<br>(0.03 to<br>0.13)                            |
| Hemolytic disease and other neonatal jaundice                           | 0.20<br>(0.10 to<br>0.32)                                  | 0.06<br>(0.02 to<br>0.12)                                  | 0.05<br>(0.02 to<br>0.10)                                  | 0.07<br>(0.03 to<br>0.15)                                  | 0.00<br>(0.00 to<br>0.00)                            | 0.00<br>(0.00 to<br>0.00)                            | 0.00<br>(0.00 to<br>0.00)                            | 0.00<br>(0.00 to<br>0.00)                            |
| Other neonatal disorders                                                | 13.75<br>(8.82 to<br>20.43)                                | 7.91<br>(4.06 to<br>14.58)                                 | 7.34<br>(3.78 to<br>13.21)                                 | 8.99<br>(4.53 to<br>16.70)                                 | 0.16<br>(0.10 to<br>0.24)                            | 0.09<br>(0.05 to<br>0.17)                            | 0.08<br>(0.04 to<br>0.15)                            | 0.10<br>(0.05 to<br>0.19)                            |
| <b>Nutritional deficiencies</b>                                         | <b>4.06</b><br><b>(3.67 to</b><br><b>4.47)</b>             | <b>4.48</b><br><b>(3.74 to</b><br><b>5.25)</b>             | <b>4.78</b><br><b>(4.02 to</b><br><b>5.61)</b>             | <b>4.24</b><br><b>(3.55 to</b><br><b>5.00)</b>             | <b>0.45</b><br><b>(0.41 to</b><br><b>0.51)</b>       | <b>0.62</b><br><b>(0.49 to</b><br><b>0.78)</b>       | <b>0.69</b><br><b>(0.55 to</b><br><b>0.85)</b>       | <b>0.58</b><br><b>(0.45 to</b><br><b>0.73)</b>       |
| Protein-energy malnutrition                                             | 1.91<br>(1.40 to<br>2.81)                                  | 2.36<br>(1.56 to<br>3.55)                                  | 2.65<br>(1.78 to<br>3.68)                                  | 2.16<br>(1.44 to<br>3.07)                                  | 0.22<br>(0.14 to<br>0.31)                            | 0.34<br>(0.21 to<br>0.49)                            | 0.40<br>(0.25 to<br>0.55)                            | 0.31<br>(0.19 to<br>0.44)                            |
| Iodine deficiency                                                       | 0.09<br>(0.01 to<br>0.26)                                  | 0.19<br>(0.01 to<br>0.74)                                  | 0.19<br>(0.00 to<br>0.78)                                  | 0.19<br>(0.01 to<br>0.71)                                  | 0.01<br>(0.00 to<br>0.03)                            | 0.02<br>(0.00 to<br>0.11)                            | 0.02<br>(0.00 to<br>0.12)                            | 0.02<br>(0.00 to<br>0.11)                            |
| Dietary iron deficiency                                                 | 0.36<br>(0.09 to<br>0.53)                                  | 0.45<br>(0.07 to<br>0.83)                                  | 0.50<br>(0.07 to<br>0.92)                                  | 0.42<br>(0.07 to<br>0.77)                                  | 0.04<br>(0.00 to<br>0.07)                            | 0.07<br>(0.00 to<br>0.14)                            | 0.08<br>(0.00 to<br>0.15)                            | 0.06<br>(0.00 to<br>0.12)                            |
| Other nutritional deficiencies                                          | 1.70<br>(1.08 to<br>2.29)                                  | 1.48<br>(0.93 to<br>2.31)                                  | 1.44<br>(0.90 to<br>2.37)                                  | 1.47<br>(0.93 to<br>2.25)                                  | 0.19<br>(0.13 to<br>0.29)                            | 0.19<br>(0.12 to<br>0.35)                            | 0.20<br>(0.12 to<br>0.37)                            | 0.19<br>(0.12 to<br>0.33)                            |
| <b>Other communicable, maternal, neonatal, and nutritional diseases</b> | <b>9.93</b><br><b>(8.55 to</b><br><b>10.91)</b>            | <b>9.07</b><br><b>(7.59 to</b><br><b>10.56)</b>            | <b>8.72</b><br><b>(7.22 to</b><br><b>10.20)</b>            | <b>9.27</b><br><b>(7.64 to</b><br><b>10.83)</b>            | <b>0.45</b><br><b>(0.39 to</b><br><b>0.50)</b>       | <b>0.53</b><br><b>(0.44 to</b><br><b>0.61)</b>       | <b>0.53</b><br><b>(0.44 to</b><br><b>0.60)</b>       | <b>0.53</b><br><b>(0.44 to</b><br><b>0.61)</b>       |
| Sexually transmitted infections excluding HIV                           | 0.38<br>(0.33 to<br>0.48)                                  | 0.16<br>(0.13 to<br>0.21)                                  | 0.16<br>(0.13 to<br>0.20)                                  | 0.17<br>(0.14 to<br>0.22)                                  | 0.02<br>(0.02 to<br>0.03)                            | 0.01<br>(0.01 to<br>0.02)                            | 0.01<br>(0.01 to<br>0.02)                            | 0.01<br>(0.01 to<br>0.02)                            |
| Syphilis                                                                | 0.16<br>(0.13 to<br>0.22)                                  | 0.05<br>(0.04 to<br>0.07)                                  | 0.04<br>(0.03 to<br>0.06)                                  | 0.05<br>(0.04 to<br>0.08)                                  | 0.01<br>(0.01 to<br>0.01)                            | 0.00<br>(0.00 to<br>0.00)                            | 0.00<br>(0.00 to<br>0.00)                            | 0.00<br>(0.00 to<br>0.00)                            |
| Chlamydial infection                                                    | 0.04<br>(0.04 to<br>0.05)                                  | 0.02<br>(0.02 to<br>0.03)                                  | 0.02<br>(0.02 to<br>0.03)                                  | 0.02<br>(0.02 to<br>0.03)                                  | 0.00<br>(0.00 to<br>0.00)                            | 0.00<br>(0.00 to<br>0.00)                            | 0.00<br>(0.00 to<br>0.00)                            | 0.00<br>(0.00 to<br>0.00)                            |
| Gonococcal infection                                                    | 0.12<br>(0.11 to<br>0.15)                                  | 0.07<br>(0.05 to<br>0.09)                                  | 0.06<br>(0.05 to<br>0.08)                                  | 0.07<br>(0.05 to<br>0.09)                                  | 0.01<br>(0.01 to<br>0.01)                            | 0.00<br>(0.00 to<br>0.01)                            | 0.00<br>(0.00 to<br>0.01)                            | 0.00<br>(0.00 to<br>0.01)                            |
| Other sexually transmitted infections                                   | 0.06<br>(0.05 to<br>0.07)                                  | 0.03<br>(0.02 to<br>0.03)                                  | 0.03<br>(0.02 to<br>0.03)                                  | 0.03<br>(0.02 to<br>0.03)                                  | 0.00<br>(0.00 to<br>0.00)                            | 0.00<br>(0.00 to<br>0.00)                            | 0.00<br>(0.00 to<br>0.00)                            | 0.00<br>(0.00 to<br>0.00)                            |
| Acute hepatitis                                                         | 2.97<br>(2.60 to<br>3.39)                                  | 2.07<br>(1.54 to<br>2.65)                                  | 1.77<br>(1.28 to<br>2.35)                                  | 2.26<br>(1.64 to<br>3.00)                                  | 0.14<br>(0.12 to<br>0.16)                            | 0.12<br>(0.09 to<br>0.16)                            | 0.11<br>(0.08 to<br>0.14)                            | 0.13<br>(0.09 to<br>0.17)                            |
| Acute hepatitis A                                                       | 0.19<br>(0.15 to<br>0.24)                                  | 0.11<br>(0.07 to<br>0.16)                                  | 0.10<br>(0.07 to<br>0.15)                                  | 0.12<br>(0.08 to<br>0.17)                                  | 0.01<br>(0.01 to<br>0.01)                            | 0.01<br>(0.00 to<br>0.01)                            | 0.01<br>(0.00 to<br>0.01)                            | 0.01<br>(0.00 to<br>0.01)                            |
| Acute hepatitis B                                                       | 2.18<br>(1.85 to<br>2.56)                                  | 1.45<br>(1.02 to<br>2.00)                                  | 1.25<br>(0.84 to<br>1.73)                                  | 1.59<br>(1.09 to<br>2.24)                                  | 0.10<br>(0.08 to<br>0.12)                            | 0.08<br>(0.05 to<br>0.11)                            | 0.07<br>(0.05 to<br>0.10)                            | 0.08<br>(0.05 to<br>0.12)                            |
| Acute hepatitis C                                                       | 0.17<br>(0.13 to<br>0.23)                                  | 0.14<br>(0.09 to<br>0.21)                                  | 0.12<br>(0.08 to<br>0.18)                                  | 0.15<br>(0.09 to<br>0.23)                                  | 0.01<br>(0.01 to<br>0.01)                            | 0.01<br>(0.01 to<br>0.01)                            | 0.01<br>(0.00 to<br>0.01)                            | 0.01<br>(0.01 to<br>0.01)                            |
| Acute hepatitis E                                                       | 0.42<br>(0.29 to<br>0.59)                                  | 0.37<br>(0.23 to<br>0.57)                                  | 0.32<br>(0.19 to<br>0.49)                                  | 0.39<br>(0.24 to<br>0.62)                                  | 0.03<br>(0.02 to<br>0.04)                            | 0.03<br>(0.02 to<br>0.05)                            | 0.03<br>(0.02 to<br>0.04)                            | 0.03<br>(0.02 to<br>0.05)                            |
| Other unspecified infectious diseases                                   | 6.57<br>(5.17 to<br>7.38)                                  | 6.84<br>(5.41 to<br>8.00)                                  | 6.80<br>(5.39 to<br>7.97)                                  | 6.85<br>(5.38 to<br>8.03)                                  | 0.29<br>(0.23 to<br>0.33)                            | 0.40<br>(0.31 to<br>0.46)                            | 0.41<br>(0.32 to<br>0.47)                            | 0.39<br>(0.30 to<br>0.45)                            |
| <b>Non-communicable diseases</b>                                        | <b>4,826.97</b><br><b>(4,628.33 to</b><br><b>5,032.98)</b> | <b>4,905.56</b><br><b>(4,072.93 to</b><br><b>5,937.98)</b> | <b>4,101.70</b><br><b>(3,448.91 to</b><br><b>4,909.74)</b> | <b>5,985.55</b><br><b>(4,928.63 to</b><br><b>7,359.62)</b> | <b>388.62</b><br><b>(374.96 to</b><br><b>402.49)</b> | <b>460.69</b><br><b>(405.13 to</b><br><b>526.74)</b> | <b>402.66</b><br><b>(354.81 to</b><br><b>457.99)</b> | <b>535.17</b><br><b>(463.44 to</b><br><b>617.21)</b> |
| <b>Spain</b>                                                            |                                                            |                                                            |                                                            |                                                            |                                                      |                                                      |                                                      |                                                      |
| <b>YLLs (in 1000s)</b>                                                  |                                                            |                                                            |                                                            |                                                            | <b>Deaths (in 1000s)</b>                             |                                                      |                                                      |                                                      |

| Cause                                | 2016                                      | 2040 Forecast                             | 2040 Better Scenario                      | 2040 Worse Scenario                       | 2016                                | 2040 Forecast                       | 2040 Better Scenario               | 2040 Worse Scenario                 |
|--------------------------------------|-------------------------------------------|-------------------------------------------|-------------------------------------------|-------------------------------------------|-------------------------------------|-------------------------------------|------------------------------------|-------------------------------------|
| <b>Neoplasms</b>                     | <b>1,921.87</b><br>(1,833.79 to 2,021.02) | <b>1,925.94</b><br>(1,591.12 to 2,260.67) | <b>1,588.96</b><br>(1,320.23 to 1,955.38) | <b>2,343.40</b><br>(1,913.13 to 2,941.26) | <b>111.96</b><br>(106.82 to 117.52) | <b>132.73</b><br>(113.61 to 157.22) | <b>113.73</b><br>(97.69 to 135.32) | <b>154.37</b><br>(130.47 to 186.32) |
| Lip and oral cavity cancer           | 28.44<br>(25.61 to 31.50)                 | 24.60<br>(12.86 to 42.93)                 | 16.00<br>(8.66 to 26.90)                  | 40.24<br>(20.80 to 69.55)                 | 1.44<br>(1.31 to 1.57)              | 1.43<br>(0.80 to 2.45)              | 0.95<br>(0.54 to 1.55)             | 2.25<br>(1.21 to 3.88)              |
| Nasopharynx cancer                   | 9.44<br>(8.47 to 10.64)                   | 8.10<br>(4.35 to 13.84)                   | 4.94<br>(2.77 to 8.14)                    | 13.76<br>(7.39 to 23.81)                  | 0.45<br>(0.41 to 0.50)              | 0.46<br>(0.25 to 0.79)              | 0.29<br>(0.16 to 0.47)             | 0.77<br>(0.40 to 1.31)              |
| Other pharynx cancer                 | 21.30<br>(19.06 to 23.52)                 | 18.56<br>(10.03 to 31.98)                 | 17.57<br>(9.40 to 29.59)                  | 23.80<br>(12.78 to 40.69)                 | 0.85<br>(0.77 to 0.94)              | 0.83<br>(0.45 to 1.40)              | 0.80<br>(0.43 to 1.32)             | 1.07<br>(0.57 to 1.77)              |
| Esophageal cancer                    | 41.23<br>(35.26 to 47.34)                 | 43.77<br>(24.42 to 76.50)                 | 29.71<br>(17.87 to 49.12)                 | 64.18<br>(34.36 to 116.97)                | 2.05<br>(1.78 to 2.33)              | 2.46<br>(1.44 to 4.16)              | 1.69<br>(1.08 to 2.66)             | 3.49<br>(1.95 to 6.12)              |
| Stomach cancer                       | 110.45<br>(102.53 to 118.67)              | 75.31<br>(56.90 to 100.64)                | 61.66<br>(48.86 to 79.51)                 | 82.87<br>(61.50 to 111.16)                | 7.03<br>(6.52 to 7.54)              | 5.68<br>(4.39 to 7.53)              | 4.79<br>(3.89 to 6.00)             | 6.06<br>(4.62 to 8.17)              |
| Colon and rectum cancer              | 238.14<br>(218.24 to 260.85)              | 234.57<br>(160.02 to 350.76)              | 195.77<br>(135.15 to 286.63)              | 295.56<br>(193.24 to 459.09)              | 15.98<br>(14.71 to 17.50)           | 18.37<br>(12.79 to 26.67)           | 15.80<br>(11.21 to 22.61)          | 22.46<br>(15.17 to 33.20)           |
| Liver cancer                         | 90.40<br>(78.97 to 100.18)                | 123.26<br>(79.66 to 186.95)               | 107.64<br>(73.23 to 158.04)               | 171.18<br>(101.34 to 277.72)              | 5.26<br>(4.65 to 5.78)              | 8.27<br>(5.53 to 12.08)             | 7.45<br>(5.27 to 10.53)            | 10.84<br>(6.86 to 16.84)            |
| Liver cancer due to hepatitis B      | 8.78<br>(6.48 to 11.85)                   | 11.15<br>(6.43 to 19.23)                  | 9.91<br>(6.05 to 16.27)                   | 13.56<br>(7.21 to 24.97)                  | 0.41<br>(0.30 to 0.55)              | 0.62<br>(0.37 to 1.01)              | 0.57<br>(0.35 to 0.89)             | 0.73<br>(0.41 to 1.27)              |
| Liver cancer due to hepatitis C      | 41.36<br>(34.06 to 50.07)                 | 63.48<br>(39.59 to 99.88)                 | 57.65<br>(38.30 to 86.05)                 | 74.52<br>(42.59 to 124.01)                | 2.62<br>(2.12 to 3.19)              | 4.53<br>(2.99 to 6.87)              | 4.23<br>(2.91 to 6.19)             | 5.10<br>(3.09 to 8.18)              |
| Liver cancer due to alcohol use      | 32.57<br>(22.50 to 41.31)                 | 37.27<br>(19.71 to 63.82)                 | 29.91<br>(16.28 to 49.37)                 | 69.32<br>(35.52 to 120.78)                | 1.78<br>(1.15 to 2.34)              | 2.35<br>(1.21 to 3.98)              | 1.94<br>(1.02 to 3.21)             | 4.12<br>(2.12 to 7.14)              |
| Liver cancer due to other causes     | 7.68<br>(5.95 to 9.73)                    | 11.35<br>(6.71 to 18.83)                  | 10.18<br>(6.32 to 16.20)                  | 13.78<br>(7.54 to 24.12)                  | 0.45<br>(0.34 to 0.57)              | 0.76<br>(0.46 to 1.23)              | 0.70<br>(0.44 to 1.11)             | 0.89<br>(0.49 to 1.56)              |
| Gallbladder and biliary tract cancer | 25.26<br>(23.25 to 27.98)                 | 21.60<br>(18.84 to 25.18)                 | 21.76<br>(18.74 to 25.50)                 | 21.26<br>(18.59 to 24.80)                 | 1.79<br>(1.65 to 1.95)              | 1.70<br>(1.52 to 1.92)              | 1.76<br>(1.56 to 2.01)             | 1.64<br>(1.47 to 1.84)              |
| Pancreatic cancer                    | 110.43<br>(100.08 to 120.33)              | 125.38<br>(97.69 to 159.32)               | 116.65<br>(91.45 to 148.65)               | 134.46<br>(103.66 to 175.83)              | 6.47<br>(5.89 to 7.02)              | 8.30<br>(6.61 to 10.42)             | 7.91<br>(6.34 to 9.89)             | 8.66<br>(6.80 to 11.14)             |
| Larynx cancer                        | 30.25<br>(27.14 to 33.30)                 | 23.74<br>(11.07 to 44.99)                 | 13.00<br>(6.48 to 23.92)                  | 39.88<br>(17.72 to 77.60)                 | 1.50<br>(1.35 to 1.65)              | 1.34<br>(0.65 to 2.42)              | 0.72<br>(0.38 to 1.27)             | 2.19<br>(1.02 to 4.15)              |
| Tracheal, bronchus, and lung cancer  | 408.24<br>(378.73 to 441.21)              | 390.03<br>(278.97 to 542.58)              | 217.44<br>(159.49 to 293.11)              | 570.70<br>(399.52 to 802.99)              | 20.89<br>(19.42 to 22.54)           | 23.22<br>(16.62 to 32.84)           | 13.02<br>(9.68 to 17.97)           | 32.59<br>(22.87 to 46.33)           |
| Malignant skin melanoma              | 23.40<br>(18.77 to 27.04)                 | 25.33<br>(19.95 to 30.99)                 | 27.85<br>(21.84 to 34.04)                 | 23.74<br>(18.73 to 28.90)                 | 1.15<br>(0.93 to 1.30)              | 1.55<br>(1.24 to 1.81)              | 1.75<br>(1.40 to 2.04)             | 1.43<br>(1.15 to 1.67)              |
| Non-melanoma skin cancer             | 10.00<br>(9.18 to 11.02)                  | 12.92<br>(11.27 to 14.73)                 | 12.17<br>(10.60 to 13.95)                 | 13.13<br>(11.46 to 15.05)                 | 0.86<br>(0.79 to 0.93)              | 1.30<br>(1.14 to 1.48)              | 1.27<br>(1.13 to 1.44)             | 1.29<br>(1.13 to 1.49)              |
| Breast cancer                        | 134.79<br>(122.49 to 148.38)              | 109.71<br>(76.88 to 168.37)               | 95.46<br>(68.02 to 142.79)                | 129.80<br>(86.61 to 211.77)               | 6.95<br>(6.29 to 7.66)              | 6.98<br>(5.08 to 10.27)             | 6.28<br>(4.63 to 8.99)             | 8.03<br>(5.59 to 12.44)             |
| Cervical cancer                      | 22.25<br>(19.83 to 25.12)                 | 13.08<br>(10.25 to 16.65)                 | 11.40<br>(8.98 to 14.40)                  | 14.36<br>(10.97 to 18.78)                 | 1.04<br>(0.94 to 1.16)              | 0.76<br>(0.62 to 0.95)              | 0.68<br>(0.56 to 0.84)             | 0.82<br>(0.66 to 1.02)              |
| Uterine cancer                       | 20.41<br>(18.08 to 23.21)                 | 22.05<br>(17.58 to 28.19)                 | 20.73<br>(16.58 to 26.80)                 | 22.79<br>(18.17 to 29.18)                 | 1.30<br>(1.15 to 1.50)              | 1.57<br>(1.29 to 1.93)              | 1.50<br>(1.22 to 1.87)             | 1.60<br>(1.31 to 1.98)              |



|                                 |                                                            |                                                          |                                                        |                                                            |                                                      |                                                     |                                                    |                                                      |
|---------------------------------|------------------------------------------------------------|----------------------------------------------------------|--------------------------------------------------------|------------------------------------------------------------|------------------------------------------------------|-----------------------------------------------------|----------------------------------------------------|------------------------------------------------------|
| Ovarian cancer                  | 43.79<br>(37.01 to<br>51.05)                               | 37.34<br>(26.06 to<br>52.03)                             | 34.61<br>(24.38 to<br>48.17)                           | 40.60<br>(27.48 to<br>57.67)                               | 2.23<br>(1.88 to<br>2.59)                            | 2.19<br>(1.55 to<br>3.02)                           | 2.04<br>(1.47 to<br>2.79)                          | 2.37<br>(1.47 to<br>3.35)                            |
| Prostate cancer                 | 81.88<br>(69.43 to<br>126.25)                              | 112.43<br>(91.05 to<br>174.16)                           | 109.57<br>(89.44 to<br>168.39)                         | 111.58<br>(90.08 to<br>173.30)                             | 7.36<br>(6.27 to<br>10.65)                           | 11.30<br>(9.38 to<br>16.46)                         | 11.38<br>(9.53 to<br>16.43)                        | 10.90<br>(8.99 to<br>16.17)                          |
| Testicular cancer               | 1.55<br>(1.24 to<br>1.92)                                  | 0.76<br>(0.53 to<br>1.14)                                | 0.71<br>(0.49 to<br>1.08)                              | 0.79<br>(0.54 to<br>1.18)                                  | 0.05<br>(0.04 to<br>0.06)                            | 0.04<br>(0.03 to<br>0.05)                           | 0.03<br>(0.03 to<br>0.04)                          | 0.04<br>(0.03 to<br>0.05)                            |
| <b>Spain</b>                    |                                                            |                                                          |                                                        |                                                            |                                                      |                                                     |                                                    |                                                      |
| Cause                           | YLLs (in 1000s)                                            |                                                          |                                                        |                                                            | Deaths (in 1000s)                                    |                                                     |                                                    |                                                      |
|                                 | 2016                                                       | 2040 Forecast                                            | 2040 Better Scenario                                   | 2040 Worse Scenario                                        | 2016                                                 | 2040 Forecast                                       | 2040 Better Scenario                               | 2040 Worse Scenario                                  |
| Kidney cancer                   | 42.22<br>(37.63 to<br>46.84)                               | 51.13<br>(40.24 to<br>64.57)                             | 48.09<br>(38.89 to<br>59.40)                           | 53.22<br>(41.12 to<br>68.84)                               | 2.43<br>(2.17 to<br>2.69)                            | 3.43<br>(2.79 to<br>4.24)                           | 3.32<br>(2.77 to<br>3.98)                          | 3.46<br>(2.77 to<br>4.39)                            |
| Bladder cancer                  | 75.49<br>(68.38 to<br>82.99)                               | 83.37<br>(62.43 to<br>110.70)                            | 70.17<br>(54.74 to<br>90.66)                           | 93.31<br>(67.17 to<br>128.58)                              | 5.76<br>(5.24 to<br>6.34)                            | 7.16<br>(5.47 to<br>9.40)                           | 6.20<br>(4.92 to<br>7.77)                          | 7.74<br>(5.69 to<br>10.41)                           |
| Brain and nervous system cancer | 71.64<br>(57.06 to<br>86.83)                               | 69.73<br>(50.14 to<br>84.68)                             | 67.90<br>(47.93 to<br>83.11)                           | 70.37<br>(50.43 to<br>86.08)                               | 2.90<br>(2.10 to<br>3.27)                            | 3.49<br>(2.25 to<br>4.16)                           | 3.45<br>(2.20 to<br>4.18)                          | 3.47<br>(2.24 to<br>4.13)                            |
| Thyroid cancer                  | 6.15<br>(5.55 to<br>6.86)                                  | 6.13<br>(4.49 to<br>8.56)                                | 5.65<br>(4.13 to<br>7.80)                              | 6.88<br>(4.77 to<br>10.02)                                 | 0.36<br>(0.32 to<br>0.40)                            | 0.42<br>(0.31 to<br>0.57)                           | 0.39<br>(0.29 to<br>0.54)                          | 0.46<br>(0.32 to<br>0.65)                            |
| Mesothelioma                    | 9.54<br>(8.15 to<br>13.60)                                 | 11.49<br>(9.24 to<br>18.27)                              | 11.88<br>(9.46 to<br>19.28)                            | 11.12<br>(8.99 to<br>17.35)                                | 0.51<br>(0.44 to<br>0.79)                            | 0.71<br>(0.59 to<br>1.18)                           | 0.75<br>(0.61 to<br>1.24)                          | 0.68<br>(0.56 to<br>1.12)                            |
| Hodgkin lymphoma                | 5.93<br>(5.45 to<br>6.86)                                  | 3.82<br>(3.12 to<br>4.76)                                | 3.38<br>(2.72 to<br>4.25)                              | 4.08<br>(3.24 to<br>5.14)                                  | 0.24<br>(0.22 to<br>0.27)                            | 0.19<br>(0.16 to<br>0.23)                           | 0.17<br>(0.15 to<br>0.21)                          | 0.20<br>(0.17 to<br>0.25)                            |
| Non-Hodgkin lymphoma            | 56.05<br>(48.54 to<br>74.89)                               | 54.16<br>(41.68 to<br>76.35)                             | 51.22<br>(39.16 to<br>71.68)                           | 57.59<br>(42.97 to<br>82.41)                               | 3.17<br>(2.78 to<br>4.15)                            | 3.61<br>(2.84 to<br>4.98)                           | 3.50<br>(2.77 to<br>4.83)                          | 3.75<br>(2.90 to<br>5.29)                            |
| Multiple myeloma                | 30.28<br>(26.05 to<br>39.16)                               | 36.52<br>(27.82 to<br>50.33)                             | 35.49<br>(26.95 to<br>48.74)                           | 38.25<br>(28.80 to<br>53.10)                               | 2.00<br>(1.73 to<br>2.52)                            | 2.65<br>(2.08 to<br>3.55)                           | 2.63<br>(2.06 to<br>3.52)                          | 2.71<br>(2.09 to<br>3.67)                            |
| Leukemia                        | 74.75<br>(68.52 to<br>80.66)                               | 77.23<br>(58.80 to<br>100.10)                            | 69.43<br>(54.33 to<br>88.06)                           | 85.88<br>(63.69 to<br>114.85)                              | 4.28<br>(3.96 to<br>4.61)                            | 5.49<br>(4.27 to<br>6.97)                           | 5.05<br>(4.04 to<br>6.30)                          | 5.92<br>(4.51 to<br>7.76)                            |
| Acute lymphoid leukemia         | 9.37<br>(7.96 to<br>11.04)                                 | 5.76<br>(4.25 to<br>7.82)                                | 5.06<br>(3.75 to<br>6.88)                              | 6.60<br>(4.83 to<br>8.98)                                  | 0.27<br>(0.23 to<br>0.32)                            | 0.23<br>(0.17 to<br>0.31)                           | 0.20<br>(0.15 to<br>0.27)                          | 0.26<br>(0.19 to<br>0.36)                            |
| Chronic lymphoid leukemia       | 10.33<br>(8.52 to<br>12.15)                                | 11.85<br>(8.39 to<br>16.41)                              | 10.94<br>(8.00 to<br>14.44)                            | 12.85<br>(8.91 to<br>18.17)                                | 0.84<br>(0.70 to<br>0.97)                            | 1.05<br>(0.78 to<br>1.40)                           | 0.99<br>(0.76 to<br>1.29)                          | 1.10<br>(0.80 to<br>1.48)                            |
| Acute myeloid leukemia          | 26.05<br>(21.72 to<br>28.78)                               | 29.29<br>(22.26 to<br>38.07)                             | 27.16<br>(21.21 to<br>34.63)                           | 32.13<br>(23.98 to<br>42.49)                               | 1.33<br>(1.14 to<br>1.47)                            | 1.79<br>(1.36 to<br>2.29)                           | 1.69<br>(1.31 to<br>2.14)                          | 1.91<br>(1.43 to<br>2.49)                            |
| Chronic myeloid leukemia        | 5.19<br>(4.59 to<br>5.91)                                  | 2.90<br>(2.06 to<br>4.07)                                | 2.31<br>(1.70 to<br>3.16)                              | 3.45<br>(2.35 to<br>4.93)                                  | 0.33<br>(0.30 to<br>0.38)                            | 0.22<br>(0.17 to<br>0.30)                           | 0.18<br>(0.14 to<br>0.24)                          | 0.25<br>(0.18 to<br>0.35)                            |
| Other leukemia                  | 23.82<br>(20.73 to<br>26.59)                               | 27.43<br>(20.55 to<br>36.64)                             | 23.96<br>(18.32 to<br>31.13)                           | 30.85<br>(22.52 to<br>42.11)                               | 1.52<br>(1.34 to<br>1.71)                            | 2.20<br>(1.68 to<br>2.89)                           | 1.98<br>(1.55 to<br>2.54)                          | 2.40<br>(1.78 to<br>3.17)                            |
| Other neoplasms                 | 98.15<br>(87.09 to<br>107.15)                              | 109.81<br>(92.58 to<br>128.36)                           | 111.12<br>(93.00 to<br>130.78)                         | 108.02<br>(90.94 to<br>125.36)                             | 5.68<br>(5.04 to<br>6.24)                            | 7.82<br>(6.71 to<br>8.87)                           | 8.15<br>(6.91 to<br>9.33)                          | 7.50<br>(6.47 to<br>8.44)                            |
| <b>Cardiovascular diseases</b>  | <b>1,349.50</b><br><b>(1,280.09 to</b><br><b>1,418.08)</b> | <b>1,082.87</b><br><b>(758.53 to</b><br><b>1,562.30)</b> | <b>778.25</b><br><b>(580.85 to</b><br><b>1,063.23)</b> | <b>1,481.86</b><br><b>(1,001.34 to</b><br><b>2,197.95)</b> | <b>126.86</b><br><b>(120.40 to</b><br><b>133.08)</b> | <b>117.68</b><br><b>(88.43 to</b><br><b>158.79)</b> | <b>91.66</b><br><b>(71.50 to</b><br><b>118.26)</b> | <b>149.48</b><br><b>(109.08 to</b><br><b>204.27)</b> |
| Rheumatic heart disease         | 29.13<br>(26.13 to<br>32.38)                               | 20.43<br>(15.72 to<br>27.14)                             | 18.17<br>(14.20 to<br>24.33)                           | 21.48<br>(16.46 to<br>28.70)                               | 2.51<br>(2.24 to<br>2.76)                            | 2.03<br>(1.62 to<br>2.66)                           | 1.86<br>(1.51 to<br>2.41)                          | 2.08<br>(1.66 to<br>2.75)                            |

|                                               |                                            |                                            |                                            |                                            |                                         |                                         |                                         |                                         |
|-----------------------------------------------|--------------------------------------------|--------------------------------------------|--------------------------------------------|--------------------------------------------|-----------------------------------------|-----------------------------------------|-----------------------------------------|-----------------------------------------|
| Ischemic heart disease                        | 668.37<br>(626.03 to 712.49)               | 468.97<br>(264.55 to 791.45)               | 284.89<br>(172.57 to 452.07)               | 712.43<br>(387.29 to 1,215.65)             | 60.98<br>(57.09 to 65.80)               | 49.19<br>(30.80 to 75.16)               | 33.34<br>(21.57 to 50.66)               | 68.20<br>(40.19 to 108.30)              |
| Stroke                                        | 299.84<br>(271.68 to 329.40)               | 195.27<br>(122.19 to 303.25)               | 131.24<br>(85.15 to 198.93)                | 297.32<br>(179.05 to 477.58)               | 29.65<br>(26.21 to 33.33)               | 21.93<br>(13.93 to 33.50)               | 16.27<br>(10.60 to 24.74)               | 30.52<br>(19.24 to 48.61)               |
| Ischemic stroke                               | 126.32<br>(112.41 to 142.01)               | 87.07<br>(49.62 to 152.52)                 | 64.13<br>(38.00 to 111.43)                 | 120.87<br>(66.81 to 232.37)                | 15.09<br>(13.15 to 17.33)               | 11.35<br>(6.42 to 20.59)                | 8.92<br>(5.33 to 15.53)                 | 14.79<br>(8.30 to 28.88)                |
| Intracerebral hemorrhage                      | 173.52<br>(158.55 to 189.47)               | 108.20<br>(64.47 to 174.67)                | 67.11<br>(42.62 to 101.44)                 | 176.45<br>(97.26 to 303.98)                | 14.56<br>(12.96 to 16.26)               | 10.58<br>(6.70 to 16.29)                | 7.34<br>(4.89 to 10.70)                 | 15.73<br>(9.31 to 25.46)                |
| Hypertensive heart disease                    | 42.36<br>(22.52 to 54.12)                  | 62.64<br>(23.06 to 138.35)                 | 47.92<br>(18.64 to 92.13)                  | 81.07<br>(29.21 to 187.64)                 | 4.88<br>(2.00 to 6.75)                  | 8.30<br>(2.54 to 18.77)                 | 6.60<br>(2.21 to 12.83)                 | 10.34<br>(3.07 to 24.37)                |
| Cardiomyopathy and myocarditis                | 68.33<br>(46.24 to 79.11)                  | 51.91<br>(28.63 to 78.71)                  | 43.91<br>(24.93 to 64.20)                  | 57.88<br>(32.65 to 85.70)                  | 5.58<br>(3.62 to 6.62)                  | 5.36<br>(2.87 to 8.49)                  | 4.74<br>(2.64 to 7.26)                  | 5.70<br>(3.08 to 8.89)                  |
| Myocarditis                                   | 5.04<br>(2.54 to 6.53)                     | 4.56<br>(2.13 to 6.49)                     | 4.73<br>(2.20 to 6.71)                     | 4.41<br>(2.06 to 6.24)                     | 0.58<br>(0.21 to 0.86)                  | 0.67<br>(0.23 to 1.07)                  | 0.72<br>(0.25 to 1.14)                  | 0.62<br>(0.22 to 1.01)                  |
| <b>Spain</b>                                  |                                            |                                            |                                            |                                            |                                         |                                         |                                         |                                         |
| Cause                                         | YLLs (in 1000s)                            |                                            |                                            |                                            | Deaths (in 1000s)                       |                                         |                                         |                                         |
|                                               | 2016                                       | 2040 Forecast                              | 2040 Better Scenario                       | 2040 Worse Scenario                        | 2016                                    | 2040 Forecast                           | 2040 Better Scenario                    | 2040 Worse Scenario                     |
| Alcoholic cardiomyopathy                      | 5.11<br>(3.21 to 6.74)                     | 3.56<br>(1.89 to 4.91)                     | 3.27<br>(1.72 to 4.53)                     | 5.46<br>(2.99 to 7.39)                     | 0.21<br>(0.12 to 0.27)                  | 0.17<br>(0.08 to 0.23)                  | 0.16<br>(0.08 to 0.22)                  | 0.25<br>(0.12 to 0.34)                  |
| Other cardiomyopathy                          | 58.18<br>(40.01 to 67.25)                  | 43.78<br>(22.82 to 69.77)                  | 35.91<br>(19.54 to 54.63)                  | 48.02<br>(26.11 to 74.95)                  | 4.79<br>(3.22 to 5.67)                  | 4.53<br>(2.45 to 7.36)                  | 3.86<br>(2.16 to 6.23)                  | 4.82<br>(2.60 to 7.86)                  |
| Atrial fibrillation and flutter               | 50.81<br>(39.61 to 64.02)                  | 63.79<br>(43.54 to 90.34)                  | 58.67<br>(41.56 to 84.06)                  | 71.26<br>(48.79 to 107.57)                 | 6.39<br>(4.96 to 8.16)                  | 6.39<br>(5.96 to 11.73)                 | 8.00<br>(5.81 to 11.18)                 | 9.11<br>(6.41 to 13.19)                 |
| Aortic aneurysm                               | 37.08<br>(33.62 to 40.83)                  | 34.11<br>(25.37 to 46.57)                  | 30.55<br>(23.69 to 40.47)                  | 36.63<br>(27.11 to 51.27)                  | 2.76<br>(2.52 to 3.04)                  | 2.93<br>(2.35 to 3.77)                  | 2.79<br>(2.28 to 3.52)                  | 3.00<br>(2.37 to 3.92)                  |
| Peripheral artery disease                     | 14.88<br>(9.43 to 21.66)                   | 26.39<br>(15.67 to 39.89)                  | 26.08<br>(15.76 to 39.27)                  | 28.39<br>(17.03 to 43.08)                  | 1.72<br>(1.01 to 2.49)                  | 1.72<br>(1.90 to 5.13)                  | 3.48<br>(1.93 to 5.24)                  | 3.46<br>(1.93 to 5.23)                  |
| Endocarditis                                  | 25.89<br>(20.96 to 38.15)                  | 31.66<br>(21.26 to 52.49)                  | 29.81<br>(20.22 to 48.48)                  | 32.19<br>(21.34 to 53.36)                  | 2.08<br>(1.61 to 3.01)                  | 2.86<br>(1.87 to 4.63)                  | 2.79<br>(1.85 to 4.41)                  | 2.84<br>(1.85 to 4.60)                  |
| Other cardiovascular and circulatory diseases | 112.80<br>(103.46 to 123.70)               | 128.72<br>(98.41 to 170.68)                | 107.01<br>(84.23 to 138.12)                | 143.21<br>(106.38 to 193.02)               | 10.31<br>(9.36 to 11.35)                | 13.41<br>(10.72 to 16.96)               | 11.79<br>(9.58 to 14.67)                | 14.24<br>(11.33 to 18.39)               |
| <b>Chronic respiratory diseases</b>           | <b>324.38</b><br><b>(303.53 to 347.04)</b> | <b>386.93</b><br><b>(299.03 to 494.93)</b> | <b>284.34</b><br><b>(229.96 to 350.03)</b> | <b>482.83</b><br><b>(361.97 to 628.78)</b> | <b>33.42</b><br><b>(31.22 to 35.62)</b> | <b>43.19</b><br><b>(33.26 to 55.20)</b> | <b>31.56</b><br><b>(25.62 to 38.96)</b> | <b>51.70</b><br><b>(39.30 to 67.22)</b> |
| Chronic obstructive pulmonary disease         | 268.93<br>(250.34 to 291.92)               | 311.01<br>(225.37 to 419.56)               | 199.90<br>(149.67 to 263.80)               | 411.18<br>(290.38 to 560.79)               | 28.95<br>(26.79 to 31.07)               | 26.71<br>(26.81 to 48.72)               | 24.17<br>(18.64 to 31.16)               | 45.70<br>(33.03 to 61.54)               |
| Pneumoconiosis                                | 3.27<br>(2.81 to 3.77)                     | 1.78<br>(1.40 to 2.28)                     | 1.71<br>(1.31 to 2.18)                     | 1.83<br>(1.42 to 2.35)                     | 0.28<br>(0.24 to 0.32)                  | 0.17<br>(0.13 to 0.21)                  | 0.17<br>(0.13 to 0.21)                  | 0.17<br>(0.13 to 0.21)                  |
| Silicosis                                     | 2.06<br>(1.63 to 2.59)                     | 0.72<br>(0.40 to 1.13)                     | 0.57<br>(0.32 to 0.99)                     | 0.81<br>(0.45 to 1.29)                     | 0.18<br>(0.14 to 0.23)                  | 0.07<br>(0.04 to 0.11)                  | 0.06<br>(0.03 to 0.10)                  | 0.07<br>(0.04 to 0.12)                  |
| Asbestosis                                    | 0.86<br>(0.32 to 1.17)                     | 0.80<br>(0.36 to 1.10)                     | 0.87<br>(0.41 to 1.19)                     | 0.74<br>(0.32 to 1.04)                     | 0.07<br>(0.02 to 0.10)                  | 0.07<br>(0.03 to 0.10)                  | 0.08<br>(0.04 to 0.11)                  | 0.07<br>(0.02 to 0.09)                  |
| Coal workers pneumoconiosis                   | 0.12<br>(0.07 to 0.37)                     | 0.10<br>(0.05 to 0.30)                     | 0.10<br>(0.05 to 0.30)                     | 0.11<br>(0.05 to 0.33)                     | 0.01<br>(0.01 to 0.04)                  | 0.01<br>(0.01 to 0.05)                  | 0.01<br>(0.01 to 0.03)                  | 0.01<br>(0.01 to 0.04)                  |

|                                                                |                                                      |                                                      |                                                      |                                                      |                                                   |                                                   |                                                   |                                                   |
|----------------------------------------------------------------|------------------------------------------------------|------------------------------------------------------|------------------------------------------------------|------------------------------------------------------|---------------------------------------------------|---------------------------------------------------|---------------------------------------------------|---------------------------------------------------|
| Other pneumoconiosis                                           | 0.24<br>(0.19 to<br>0.37)                            | 0.17<br>(0.11 to<br>0.26)                            | 0.17<br>(0.11 to<br>0.27)                            | 0.17<br>(0.12 to<br>0.26)                            | 0.02<br>(0.02 to<br>0.04)                         | 0.02<br>(0.01 to<br>0.03)                         | 0.02<br>(0.01 to<br>0.03)                         | 0.02<br>(0.01 to<br>0.03)                         |
| Asthma                                                         | 10.39<br>(9.05 to<br>11.87)                          | 4.36<br>(2.50 to<br>7.38)                            | 3.34<br>(1.95 to<br>5.55)                            | 5.72<br>(3.15 to<br>9.67)                            | 0.93<br>(0.80 to<br>1.06)                         | 0.45<br>(0.26 to<br>0.77)                         | 0.36<br>(0.21 to<br>0.61)                         | 0.56<br>(0.32 to<br>0.96)                         |
| Interstitial lung disease and pulmonary sarcoidosis            | 37.81<br>(23.86 to<br>48.64)                         | 63.83<br>(39.77 to<br>81.50)                         | 73.77<br>(47.24 to<br>91.93)                         | 57.95<br>(35.33 to<br>76.18)                         | 3.00<br>(1.75 to<br>3.73)                         | 5.39<br>(3.21 to<br>6.73)                         | 6.39<br>(3.98 to<br>7.84)                         | 4.78<br>(2.74 to<br>6.13)                         |
| Other chronic respiratory diseases                             | 3.98<br>(2.63 to<br>7.80)                            | 5.94<br>(3.57 to<br>11.82)                           | 5.62<br>(3.41 to<br>11.08)                           | 6.14<br>(3.67 to<br>12.19)                           | 0.27<br>(0.20 to<br>0.48)                         | 0.48<br>(0.31 to<br>0.90)                         | 0.47<br>(0.30 to<br>0.87)                         | 0.48<br>(0.30 to<br>0.89)                         |
| <b>Cirrhosis and other chronic liver diseases</b>              | <b>159.35</b><br><b>(145.75 to</b><br><b>173.07)</b> | <b>127.14</b><br><b>(109.72 to</b><br><b>147.36)</b> | <b>111.19</b><br><b>(95.07 to</b><br><b>130.25)</b>  | <b>172.89</b><br><b>(147.62 to</b><br><b>201.60)</b> | <b>7.75</b><br><b>(7.18 to</b><br><b>8.34)</b>    | <b>7.66</b><br><b>(6.85 to</b><br><b>8.58)</b>    | <b>6.87</b><br><b>(6.03 to</b><br><b>7.77)</b>    | <b>10.08</b><br><b>(8.81 to</b><br><b>11.35)</b>  |
| Cirrhosis and other chronic liver diseases due to hepatitis B  | 14.82<br>(12.13 to<br>18.19)                         | 13.77<br>(10.82 to<br>17.31)                         | 12.88<br>(10.04 to<br>16.47)                         | 14.15<br>(11.00 to<br>18.08)                         | 0.73<br>(0.60 to<br>0.88)                         | 0.82<br>(0.66 to<br>1.02)                         | 0.78<br>(0.62 to<br>0.98)                         | 0.83<br>(0.65 to<br>1.05)                         |
| Cirrhosis and other chronic liver diseases due to hepatitis C  | 46.22<br>(38.85 to<br>53.98)                         | 41.42<br>(33.11 to<br>51.06)                         | 38.40<br>(30.71 to<br>47.58)                         | 42.95<br>(33.38 to<br>53.63)                         | 2.14<br>(1.82 to<br>2.49)                         | 2.32<br>(1.87 to<br>2.84)                         | 2.20<br>(1.78 to<br>2.71)                         | 2.37<br>(1.87 to<br>2.94)                         |
| Cirrhosis and other chronic liver diseases due to alcohol use  | 92.47<br>(82.57 to<br>103.33)                        | 66.63<br>(55.94 to<br>78.49)                         | 54.93<br>(45.32 to<br>65.84)                         | 110.29<br>(91.66 to<br>129.89)                       | 4.57<br>(4.11 to<br>5.03)                         | 4.16<br>(3.61 to<br>4.75)                         | 3.54<br>(3.02 to<br>4.11)                         | 6.52<br>(5.59 to<br>7.46)                         |
| Cirrhosis and other chronic liver diseases due to other causes | 5.83<br>(4.66 to<br>7.17)                            | 5.33<br>(3.96 to<br>7.02)                            | 4.98<br>(3.66 to<br>6.58)                            | 5.50<br>(4.05 to<br>7.32)                            | 0.32<br>(0.24 to<br>0.42)                         | 0.36<br>(0.26 to<br>0.50)                         | 0.35<br>(0.28 to<br>0.48)                         | 0.37<br>(0.26 to<br>0.50)                         |
| <b>Digestive diseases</b>                                      | <b>140.55</b><br><b>(116.59 to</b><br><b>169.64)</b> | <b>153.54</b><br><b>(116.15 to</b><br><b>203.21)</b> | <b>145.65</b><br><b>(111.76 to</b><br><b>192.28)</b> | <b>165.90</b><br><b>(122.69 to</b><br><b>227.27)</b> | <b>12.85</b><br><b>(10.31 to</b><br><b>14.42)</b> | <b>16.13</b><br><b>(12.09 to</b><br><b>20.30)</b> | <b>15.78</b><br><b>(11.91 to</b><br><b>19.53)</b> | <b>16.88</b><br><b>(12.62 to</b><br><b>21.75)</b> |
| Peptic ulcer disease                                           | 9.76<br>(8.13 to<br>11.70)                           | 6.93<br>(5.24 to<br>9.04)                            | 5.90<br>(4.51 to<br>7.64)                            | 7.66<br>(5.69 to<br>10.11)                           | 0.84<br>(0.72 to<br>0.99)                         | 0.73<br>(0.57 to<br>0.93)                         | 0.64<br>(0.51 to<br>0.81)                         | 0.77<br>(0.60 to<br>1.00)                         |

| Spain                                      |                              |                              |                              |                              |                           |                           |                           |                           |
|--------------------------------------------|------------------------------|------------------------------|------------------------------|------------------------------|---------------------------|---------------------------|---------------------------|---------------------------|
| Cause                                      | YLLs (in 1000s)              |                              |                              |                              | Deaths (in 1000s)         |                           |                           |                           |
|                                            | 2016                         | 2040 Forecast                | 2040 Better Scenario         | 2040 Worse Scenario          | 2016                      | 2040 Forecast             | 2040 Better Scenario      | 2040 Worse Scenario       |
| Gastritis and duodenitis                   | 0.77<br>(0.59 to<br>1.06)    | 0.78<br>(0.57 to<br>1.09)    | 0.73<br>(0.53 to<br>1.03)    | 0.80<br>(0.58 to<br>1.12)    | 0.07<br>(0.05 to<br>0.08) | 0.08<br>(0.05 to<br>0.11) | 0.08<br>(0.05 to<br>0.11) | 0.08<br>(0.05 to<br>0.11) |
| Appendicitis                               | 1.89<br>(1.45 to<br>2.92)    | 1.46<br>(1.06 to<br>2.21)    | 1.28<br>(0.94 to<br>1.96)    | 1.56<br>(1.12 to<br>2.34)    | 0.13<br>(0.10 to<br>0.19) | 0.12<br>(0.09 to<br>0.18) | 0.11<br>(0.08 to<br>0.17) | 0.13<br>(0.09 to<br>0.19) |
| Paralytic ileus and intestinal obstruction | 25.13<br>(17.39 to<br>30.27) | 31.61<br>(21.41 to<br>39.72) | 32.86<br>(22.31 to<br>41.62) | 30.33<br>(20.62 to<br>37.91) | 2.41<br>(1.58 to<br>2.97) | 3.45<br>(2.27 to<br>4.31) | 3.68<br>(2.41 to<br>4.62) | 3.23<br>(2.11 to<br>4.05) |
| Inguinal, femoral, and abdominal hernia    | 6.09<br>(4.75 to<br>8.81)    | 4.69<br>(3.54 to<br>6.84)    | 4.50<br>(3.40 to<br>6.48)    | 4.71<br>(3.58 to<br>6.81)    | 0.61<br>(0.46 to<br>0.86) | 0.52<br>(0.40 to<br>0.76) | 0.52<br>(0.39 to<br>0.73) | 0.51<br>(0.39 to<br>0.72) |
| Inflammatory bowel disease                 | 5.93<br>(3.54 to<br>7.34)    | 6.29<br>(3.90 to<br>8.52)    | 6.39<br>(4.00 to<br>8.68)    | 6.15<br>(3.78 to<br>8.22)    | 0.43<br>(0.29 to<br>0.53) | 0.56<br>(0.37 to<br>0.74) | 0.59<br>(0.39 to<br>0.78) | 0.53<br>(0.35 to<br>0.70) |
| Vascular intestinal disorders              | 32.65<br>(24.88 to<br>38.32) | 41.09<br>(30.12 to<br>50.37) | 40.60<br>(29.65 to<br>50.08) | 40.64<br>(30.48 to<br>49.73) | 3.21<br>(2.40 to<br>3.68) | 4.46<br>(3.12 to<br>5.25) | 4.53<br>(3.22 to<br>5.40) | 4.31<br>(3.08 to<br>5.09) |
| Gallbladder and biliary diseases           | 21.26<br>(16.71 to<br>25.60) | 23.17<br>(12.98 to<br>39.60) | 19.48<br>(11.06 to<br>33.16) | 28.95<br>(15.90 to<br>49.29) | 2.34<br>(1.75 to<br>2.76) | 2.81<br>(1.55 to<br>4.86) | 2.44<br>(1.35 to<br>4.14) | 3.40<br>(1.80 to<br>5.74) |
| Pancreatitis                               | 22.13<br>(18.50 to<br>33.00) | 20.32<br>(8.01 to<br>49.99)  | 16.95<br>(6.87 to<br>41.30)  | 28.08<br>(10.16 to<br>71.83) | 1.45<br>(1.19 to<br>1.86) | 1.61<br>(0.70 to<br>3.72) | 1.37<br>(0.61 to<br>3.03) | 2.17<br>(0.86 to<br>5.23) |
| Other digestive diseases                   | 14.95<br>(11.34 to<br>18.60) | 17.18<br>(12.76 to<br>21.50) | 16.95<br>(12.75 to<br>21.23) | 17.03<br>(12.69 to<br>21.11) | 1.36<br>(1.11 to<br>1.63) | 1.79<br>(1.39 to<br>2.20) | 1.83<br>(1.43 to<br>2.25) | 1.74<br>(1.35 to<br>2.11) |

|                                                            |                                                   |                                                   |                                                   |                                                   |                                                |                                                |                                                |                                                |
|------------------------------------------------------------|---------------------------------------------------|---------------------------------------------------|---------------------------------------------------|---------------------------------------------------|------------------------------------------------|------------------------------------------------|------------------------------------------------|------------------------------------------------|
|                                                            | 533.43<br>(471.15 to<br>596.72)                   | 732.06<br>(570.49 to<br>978.42)                   | 736.27<br>(580.47 to<br>959.34)                   | 778.80<br>(581.30 to<br>1,082.81)                 | 63.96<br>(55.96 to<br>72.19)                   | 94.13<br>(74.16 to<br>123.48)                  | 97.04<br>(77.48 to<br>124.47)                  | 98.09<br>(74.58 to<br>133.96)                  |
| <b>Neurological disorders</b>                              |                                                   |                                                   |                                                   |                                                   |                                                |                                                |                                                |                                                |
| Alzheimer's disease and other dementias                    | 433.21<br>(373.25 to<br>497.53)                   | 608.74<br>(450.87 to<br>846.32)                   | 608.55<br>(460.91 to<br>824.41)                   | 657.71<br>(464.91 to<br>955.84)                   | 57.10<br>(49.11 to<br>65.39)                   | 84.11<br>(64.16 to<br>113.74)                  | 86.32<br>(67.31 to<br>113.38)                  | 88.55<br>(65.20 to<br>124.25)                  |
| Parkinson's disease                                        | 43.37<br>(32.74 to<br>56.82)                      | 65.68<br>(49.44 to<br>86.75)                      | 70.45<br>(53.07 to<br>93.40)                      | 61.85<br>(46.33 to<br>81.73)                      | 4.36<br>(3.32 to<br>5.78)                      | 6.90<br>(5.24 to<br>9.12)                      | 7.56<br>(5.79 to<br>9.89)                      | 6.38<br>(4.85 to<br>8.47)                      |
| Epilepsy                                                   | 10.40<br>(9.31 to<br>12.01)                       | 9.10<br>(5.89 to<br>14.49)                        | 8.36<br>(5.51 to<br>13.18)                        | 11.06<br>(6.96 to<br>17.98)                       | 0.45<br>(0.41 to<br>0.51)                      | 0.55<br>(0.37 to<br>0.85)                      | 0.52<br>(0.36 to<br>0.78)                      | 0.64<br>(0.42 to<br>1.01)                      |
| Multiple sclerosis                                         | 5.93<br>(4.52 to<br>7.59)                         | 4.94<br>(3.46 to<br>6.81)                         | 4.83<br>(3.43 to<br>6.61)                         | 5.06<br>(3.54 to<br>7.04)                         | 0.21<br>(0.17 to<br>0.28)                      | 0.21<br>(0.15 to<br>0.29)                      | 0.21<br>(0.15 to<br>0.29)                      | 0.21<br>(0.15 to<br>0.30)                      |
| Motor neuron disease                                       | 19.31<br>(17.39 to<br>21.23)                      | 22.37<br>(18.90 to<br>27.19)                      | 22.42<br>(18.84 to<br>27.59)                      | 22.20<br>(18.76 to<br>26.75)                      | 0.91<br>(0.82 to<br>0.99)                      | 1.18<br>(1.00 to<br>1.45)                      | 1.20<br>(1.00 to<br>1.46)                      | 1.16<br>(0.99 to<br>1.40)                      |
| Other neurological disorders                               | 21.21<br>(17.71 to<br>23.79)                      | 21.23<br>(16.59 to<br>25.59)                      | 21.65<br>(16.82 to<br>26.12)                      | 20.93<br>(16.44 to<br>25.18)                      | 0.93<br>(0.80 to<br>1.03)                      | 1.17<br>(0.96 to<br>1.38)                      | 1.23<br>(0.99 to<br>1.45)                      | 1.13<br>(0.93 to<br>1.32)                      |
| <b>Mental disorders</b>                                    | <b>41.90</b><br><b>(36.00 to</b><br><b>46.87)</b> | <b>52.02</b><br><b>(38.34 to</b><br><b>76.20)</b> | <b>57.73</b><br><b>(42.87 to</b><br><b>84.15)</b> | <b>50.37</b><br><b>(37.47 to</b><br><b>71.77)</b> | <b>1.30</b><br><b>(1.15 to</b><br><b>1.44)</b> | <b>1.85</b><br><b>(1.52 to</b><br><b>2.32)</b> | <b>2.11</b><br><b>(1.75 to</b><br><b>2.62)</b> | <b>1.76</b><br><b>(1.45 to</b><br><b>2.18)</b> |
| Alcohol use disorders                                      | 10.95<br>(9.65 to<br>12.38)                       | 9.09<br>(7.26 to<br>11.21)                        | 9.18<br>(7.27 to<br>11.46)                        | 10.35<br>(8.37 to<br>12.72)                       | 0.40<br>(0.35 to<br>0.45)                      | 0.40<br>(0.33 to<br>0.49)                      | 0.42<br>(0.34 to<br>0.50)                      | 0.45<br>(0.37 to<br>0.54)                      |
| Drug use disorders                                         | 30.75<br>(25.42 to<br>35.20)                      | 42.80<br>(30.17 to<br>65.70)                      | 48.39<br>(34.54 to<br>74.29)                      | 39.88<br>(27.69 to<br>60.19)                      | 0.90<br>(0.77 to<br>1.01)                      | 1.45<br>(1.14 to<br>1.86)                      | 1.69<br>(1.37 to<br>2.16)                      | 1.31<br>(1.02 to<br>1.71)                      |
| Opioid use disorders                                       | 15.25<br>(12.34 to<br>21.06)                      | 12.84<br>(8.20 to<br>23.76)                       | 13.28<br>(8.40 to<br>24.74)                       | 12.59<br>(8.05 to<br>22.73)                       | 0.38<br>(0.31 to<br>0.49)                      | 0.35<br>(0.26 to<br>0.54)                      | 0.37<br>(0.27 to<br>0.56)                      | 0.34<br>(0.25 to<br>0.52)                      |
| Cocaine use disorders                                      | 0.40<br>(0.14 to<br>0.56)                         | 0.79<br>(0.31 to<br>1.43)                         | 0.87<br>(0.35 to<br>1.56)                         | 0.74<br>(0.29 to<br>1.31)                         | 0.01<br>(0.00 to<br>0.01)                      | 0.02<br>(0.01 to<br>0.03)                      | 0.02<br>(0.01 to<br>0.03)                      | 0.02<br>(0.01 to<br>0.03)                      |
| Amphetamine use disorders                                  | 1.30<br>(0.53 to<br>1.75)                         | 4.70<br>(2.05 to<br>8.46)                         | 5.55<br>(2.49 to<br>9.97)                         | 4.28<br>(1.82 to<br>7.65)                         | 0.03<br>(0.01 to<br>0.04)                      | 0.10<br>(0.05 to<br>0.16)                      | 0.11<br>(0.06 to<br>0.20)                      | 0.09<br>(0.04 to<br>0.15)                      |
| Other drug use disorders                                   | 13.80<br>(7.62 to<br>17.17)                       | 24.47<br>(14.59 to<br>37.32)                      | 28.68<br>(17.69 to<br>43.54)                      | 22.28<br>(12.95 to<br>33.89)                      | 0.48<br>(0.35 to<br>0.56)                      | 0.98<br>(0.73 to<br>1.25)                      | 1.18<br>(0.90 to<br>1.49)                      | 0.86<br>(0.62 to<br>1.12)                      |
| Eating disorders                                           | 0.20<br>(0.16 to<br>0.24)                         | 0.14<br>(0.09 to<br>0.21)                         | 0.15<br>(0.10 to<br>0.22)                         | 0.14<br>(0.09 to<br>0.20)                         | 0.00<br>(0.00 to<br>0.00)                      | 0.00<br>(0.00 to<br>0.00)                      | 0.00<br>(0.00 to<br>0.00)                      | 0.00<br>(0.00 to<br>0.00)                      |
| <b>Spain</b>                                               |                                                   |                                                   |                                                   |                                                   |                                                |                                                |                                                |                                                |
| <b>Cause</b>                                               | <b>YLLs (in 1000s)</b>                            |                                                   |                                                   |                                                   | <b>Deaths (in 1000s)</b>                       |                                                |                                                |                                                |
|                                                            | <b>2016</b>                                       | <b>2040 Forecast</b>                              | <b>2040 Better Scenario</b>                       | <b>2040 Worse Scenario</b>                        | <b>2016</b>                                    | <b>2040 Forecast</b>                           | <b>2040 Better Scenario</b>                    | <b>2040 Worse Scenario</b>                     |
| <b>Diabetes, urogenital, blood, and endocrine diseases</b> | 278.38<br>(260.37 to<br>296.44)                   | 369.12<br>(279.59 to<br>489.41)                   | 328.22<br>(251.40 to<br>429.37)                   | 429.67<br>(313.13 to<br>581.93)                   | 27.21<br>(25.50 to<br>28.91)                   | 41.36<br>(32.11 to<br>53.32)                   | 38.00<br>(29.83 to<br>48.04)                   | 46.90<br>(35.49 to<br>61.88)                   |
| Diabetes mellitus                                          | 94.13<br>(85.61 to<br>103.62)                     | 114.65<br>(78.13 to<br>168.06)                    | 93.39<br>(65.61 to<br>135.96)                     | 136.85<br>(89.96 to<br>211.58)                    | 9.18<br>(8.33 to<br>10.11)                     | 12.56<br>(9.04 to<br>17.55)                    | 10.73<br>(7.86 to<br>14.91)                    | 14.38<br>(9.98 to<br>21.15)                    |
| Acute glomerulonephritis                                   | 0.22<br>(0.21 to<br>0.24)                         | 0.15<br>(0.12 to<br>0.19)                         | 0.14<br>(0.11 to<br>0.18)                         | 0.16<br>(0.12 to<br>0.20)                         | 0.01<br>(0.01 to<br>0.01)                      | 0.01<br>(0.01 to<br>0.01)                      | 0.01<br>(0.01 to<br>0.01)                      | 0.01<br>(0.01 to<br>0.01)                      |
| Chronic kidney disease                                     | 99.42<br>(92.65 to<br>106.53)                     | 149.34<br>(90.51 to<br>246.68)                    | 131.32<br>(82.09 to<br>206.07)                    | 187.92<br>(105.91 to<br>313.98)                   | 10.70<br>(9.91 to<br>11.53)                    | 17.84<br>(11.00 to<br>28.15)                   | 16.23<br>(10.38 to<br>24.52)                   | 21.83<br>(12.73 to<br>35.95)                   |
| Chronic kidney disease due to diabetes mellitus            | 30.19<br>(27.64 to<br>33.22)                      | 51.14<br>(30.79 to<br>86.97)                      | 44.58<br>(27.94 to<br>72.01)                      | 64.93<br>(36.71 to<br>115.30)                     | 2.77<br>(2.49 to<br>3.14)                      | 5.25<br>(3.20 to<br>8.22)                      | 4.74<br>(2.98 to<br>7.17)                      | 6.48<br>(3.72 to<br>10.64)                     |

|                                                            |                              |                              |                              |                              |                           |                           |                           |                            |
|------------------------------------------------------------|------------------------------|------------------------------|------------------------------|------------------------------|---------------------------|---------------------------|---------------------------|----------------------------|
| Chronic kidney disease due to hypertension                 | 21.45<br>(18.69 to<br>24.65) | 36.91<br>(21.36 to<br>59.91) | 33.76<br>(20.38 to<br>53.34) | 45.19<br>(24.55 to<br>77.86) | 3.03<br>(2.62 to<br>3.51) | 5.55<br>(3.32 to<br>8.79) | 5.21<br>(3.25 to<br>8.02) | 6.62<br>(3.73 to<br>10.83) |
| Chronic kidney disease due to glomerulonephritis           | 17.73<br>(16.04 to<br>19.52) | 21.88<br>(12.59 to<br>38.02) | 18.64<br>(11.06 to<br>31.40) | 27.99<br>(15.19 to<br>51.24) | 1.72<br>(1.52 to<br>1.93) | 2.41<br>(1.41 to<br>3.97) | 2.11<br>(1.29 to<br>3.37) | 3.02<br>(1.69 to<br>5.25)  |
| Chronic kidney disease due to other and unspecified causes | 30.05<br>(26.91 to<br>33.36) | 39.41<br>(23.46 to<br>65.15) | 34.34<br>(21.34 to<br>54.97) | 49.81<br>(28.25 to<br>87.04) | 3.18<br>(2.79 to<br>3.59) | 4.63<br>(2.82 to<br>7.52) | 4.16<br>(2.62 to<br>6.40) | 5.71<br>(3.29 to<br>9.76)  |
| Urinary diseases and male infertility                      | 36.87<br>(33.82 to<br>40.42) | 50.27<br>(42.37 to<br>59.81) | 48.12<br>(40.35 to<br>57.93) | 50.64<br>(42.43 to<br>60.39) | 4.24<br>(3.84 to<br>4.71) | 6.54<br>(5.50 to<br>7.71) | 6.45<br>(5.43 to<br>7.59) | 6.44<br>(5.27 to<br>7.67)  |
| Urinary tract infections                                   | 33.85<br>(30.46 to<br>37.13) | 47.34<br>(39.82 to<br>56.57) | 45.45<br>(37.92 to<br>54.57) | 47.60<br>(39.86 to<br>56.74) | 3.98<br>(3.57 to<br>4.39) | 6.23<br>(5.19 to<br>7.36) | 6.15<br>(5.13 to<br>7.23) | 6.12<br>(5.04 to<br>7.22)  |
| Urolithiasis                                               | 1.15<br>(0.73 to<br>2.57)    | 1.16<br>(0.65 to<br>2.76)    | 1.05<br>(0.58 to<br>2.51)    | 1.22<br>(0.68 to<br>2.91)    | 0.10<br>(0.06 to<br>0.24) | 0.12<br>(0.06 to<br>0.28) | 0.11<br>(0.06 to<br>0.26) | 0.12<br>(0.06 to<br>0.29)  |
| Other urinary diseases                                     | 1.88<br>(1.28 to<br>3.44)    | 1.77<br>(1.07 to<br>3.58)    | 1.62<br>(0.98 to<br>3.31)    | 1.83<br>(1.09 to<br>3.65)    | 0.16<br>(0.10 to<br>0.33) | 0.20<br>(0.11 to<br>0.45) | 0.19<br>(0.10 to<br>0.42) | 0.20<br>(0.11 to<br>0.44)  |
| Gynecological diseases                                     | 0.35<br>(0.18 to<br>0.44)    | 0.17<br>(0.08 to<br>0.23)    | 0.14<br>(0.07 to<br>0.19)    | 0.19<br>(0.09 to<br>0.27)    | 0.02<br>(0.01 to<br>0.03) | 0.01<br>(0.01 to<br>0.02) | 0.01<br>(0.01 to<br>0.02) | 0.01<br>(0.01 to<br>0.02)  |
| Uterine fibroids                                           | 0.08<br>(0.05 to<br>0.10)    | 0.04<br>(0.02 to<br>0.06)    | 0.03<br>(0.02 to<br>0.05)    | 0.04<br>(0.03 to<br>0.06)    | 0.00<br>(0.00 to<br>0.00) | 0.00<br>(0.00 to<br>0.00) | 0.00<br>(0.00 to<br>0.00) | 0.00<br>(0.00 to<br>0.00)  |
| Polycystic ovarian syndrome                                | 0.01<br>(0.01 to<br>0.01)    | 0.00<br>(0.00 to<br>0.00)    | 0.00<br>(0.00 to<br>0.00)    | 0.00<br>(0.00 to<br>0.00)    | 0.00<br>(0.00 to<br>0.00) | 0.00<br>(0.00 to<br>0.00) | 0.00<br>(0.00 to<br>0.00) | 0.00<br>(0.00 to<br>0.00)  |
| Endometriosis                                              | 0.00<br>(0.00 to<br>0.01)    | 0.00<br>(0.00 to<br>0.00)    | 0.00<br>(0.00 to<br>0.00)    | 0.00<br>(0.00 to<br>0.00)    | 0.00<br>(0.00 to<br>0.00) | 0.00<br>(0.00 to<br>0.00) | 0.00<br>(0.00 to<br>0.00) | 0.00<br>(0.00 to<br>0.00)  |
| Genital prolapse                                           | 0.01<br>(0.00 to<br>0.02)    | 0.01<br>(0.00 to<br>0.01)    | 0.00<br>(0.00 to<br>0.01)    | 0.01<br>(0.00 to<br>0.01)    | 0.00<br>(0.00 to<br>0.00) | 0.00<br>(0.00 to<br>0.00) | 0.00<br>(0.00 to<br>0.00) | 0.00<br>(0.00 to<br>0.00)  |
| Other gynecological diseases                               | 0.24<br>(0.11 to<br>0.31)    | 0.12<br>(0.05 to<br>0.18)    | 0.10<br>(0.04 to<br>0.14)    | 0.14<br>(0.06 to<br>0.20)    | 0.02<br>(0.01 to<br>0.02) | 0.01<br>(0.00 to<br>0.01) | 0.01<br>(0.00 to<br>0.01) | 0.01<br>(0.00 to<br>0.02)  |
| Hemoglobinopathies and hemolytic anemias                   | 11.05<br>(9.65 to<br>15.51)  | 9.59<br>(7.76 to<br>13.30)   | 8.82<br>(7.12 to<br>12.10)   | 9.92<br>(8.00 to<br>13.68)   | 1.02<br>(0.83 to<br>1.32) | 1.13<br>(0.89 to<br>1.45) | 1.08<br>(0.85 to<br>1.37) | 1.14<br>(0.89 to<br>1.48)  |
| Thalassemias                                               | 0.23<br>(0.13 to<br>0.38)    | 0.07<br>(0.03 to<br>0.12)    | 0.06<br>(0.03 to<br>0.12)    | 0.07<br>(0.04 to<br>0.13)    | 0.00<br>(0.00 to<br>0.01) | 0.00<br>(0.00 to<br>0.00) | 0.00<br>(0.00 to<br>0.00) | 0.00<br>(0.00 to<br>0.00)  |
| Sickle cell disorders                                      | 0.68<br>(0.30 to<br>1.47)    | 0.42<br>(0.15 to<br>0.92)    | 0.37<br>(0.13 to<br>0.81)    | 0.46<br>(0.16 to<br>1.02)    | 0.01<br>(0.01 to<br>0.03) | 0.01<br>(0.00 to<br>0.05) | 0.01<br>(0.00 to<br>0.03) | 0.01<br>(0.00 to<br>0.03)  |
| G6PD deficiency                                            | 0.94<br>(0.72 to<br>1.29)    | 0.77<br>(0.55 to<br>1.18)    | 0.67<br>(0.48 to<br>1.01)    | 0.84<br>(0.60 to<br>1.28)    | 0.03<br>(0.03 to<br>0.04) | 0.04<br>(0.03 to<br>0.06) | 0.03<br>(0.03 to<br>0.05) | 0.04<br>(0.03 to<br>0.06)  |
| Other hemoglobinopathies and hemolytic anemias             | 9.19<br>(7.93 to<br>12.72)   | 8.32<br>(6.68 to<br>11.27)   | 7.72<br>(6.19 to<br>10.35)   | 8.54<br>(6.80 to<br>11.59)   | 0.97<br>(0.78 to<br>1.24) | 1.08<br>(0.84 to<br>1.38) | 1.03<br>(0.80 to<br>1.31) | 1.08<br>(0.84 to<br>1.40)  |
| Endocrine, metabolic, blood, and immune disorders          | 36.33<br>(20.24 to<br>42.40) | 44.96<br>(23.16 to<br>55.70) | 46.29<br>(24.03 to<br>57.45) | 43.98<br>(22.45 to<br>54.73) | 2.04<br>(0.96 to<br>2.42) | 3.27<br>(1.47 to<br>4.03) | 3.49<br>(1.58 to<br>4.34) | 3.09<br>(1.39 to<br>3.82)  |

**Spain**

| Cause                     | YLLs (in 1000s)              |                              |                              |                              | Deaths (in 1000s)         |                           |                           |                           |
|---------------------------|------------------------------|------------------------------|------------------------------|------------------------------|---------------------------|---------------------------|---------------------------|---------------------------|
|                           | 2016                         | 2040 Forecast                | 2040 Better Scenario         | 2040 Worse Scenario          | 2016                      | 2040 Forecast             | 2040 Better Scenario      | 2040 Worse Scenario       |
| Musculoskeletal disorders | 12.78<br>(11.20 to<br>16.86) | 21.13<br>(17.49 to<br>27.82) | 20.15<br>(16.63 to<br>26.29) | 21.58<br>(17.88 to<br>28.28) | 1.06<br>(0.93 to<br>1.38) | 2.26<br>(1.88 to<br>2.83) | 2.24<br>(1.86 to<br>2.79) | 2.24<br>(1.84 to<br>2.80) |

|                                               |                                                      |                                                      |                                                      |                                                      |                                                   |                                                   |                                                   |                                                   |
|-----------------------------------------------|------------------------------------------------------|------------------------------------------------------|------------------------------------------------------|------------------------------------------------------|---------------------------------------------------|---------------------------------------------------|---------------------------------------------------|---------------------------------------------------|
| Rheumatoid arthritis                          | 4.28<br>(3.52 to<br>6.84)                            | 6.45<br>(4.70 to<br>10.19)                           | 5.40<br>(3.92 to<br>8.85)                            | 7.13<br>(5.06 to<br>11.33)                           | 0.30<br>(0.25 to<br>0.49)                         | 0.55<br>(0.41 to<br>0.93)                         | 0.48<br>(0.35 to<br>0.84)                         | 0.40<br>(0.43 to<br>0.99)                         |
| Other musculoskeletal disorders               | 8.50<br>(6.52 to<br>10.62)                           | 14.68<br>(11.23 to<br>18.74)                         | 14.75<br>(11.41 to<br>18.81)                         | 14.45<br>(10.94 to<br>18.43)                         | 0.76<br>(0.59 to<br>0.89)                         | 1.71<br>(1.29 to<br>2.12)                         | 1.77<br>(1.37 to<br>2.19)                         | 1.64<br>(1.22 to<br>2.07)                         |
| <b>Other non-communicable diseases</b>        | <b>64.84</b><br><b>(52.94 to</b><br><b>80.61)</b>    | <b>54.81</b><br><b>(41.77 to</b><br><b>72.50)</b>    | <b>50.95</b><br><b>(37.86 to</b><br><b>68.15)</b>    | <b>58.26</b><br><b>(44.02 to</b><br><b>78.11)</b>    | <b>2.24</b><br><b>(1.54 to</b><br><b>3.07)</b>    | <b>3.69</b><br><b>(2.21 to</b><br><b>5.25)</b>    | <b>3.67</b><br><b>(2.18 to</b><br><b>5.26)</b>    | <b>3.66</b><br><b>(2.22 to</b><br><b>5.20)</b>    |
| Congenital birth defects                      | 46.26<br>(36.30 to<br>58.77)                         | 23.50<br>(16.94 to<br>31.92)                         | 20.45<br>(14.52 to<br>28.23)                         | 26.77<br>(18.69 to<br>37.14)                         | 0.69<br>(0.55 to<br>0.87)                         | 0.41<br>(0.31 to<br>0.56)                         | 0.37<br>(0.27 to<br>0.50)                         | 0.45<br>(0.33 to<br>0.62)                         |
| Neural tube defects                           | 0.53<br>(0.26 to<br>0.79)                            | 0.13<br>(0.06 to<br>0.21)                            | 0.10<br>(0.04 to<br>0.17)                            | 0.16<br>(0.07 to<br>0.28)                            | 0.01<br>(0.00 to<br>0.01)                         | 0.00<br>(0.00 to<br>0.00)                         | 0.00<br>(0.00 to<br>0.00)                         | 0.00<br>(0.00 to<br>0.00)                         |
| Congenital heart anomalies                    | 15.78<br>(10.06 to<br>21.40)                         | 5.35<br>(2.82 to<br>8.02)                            | 4.02<br>(2.03 to<br>6.16)                            | 6.66<br>(5.28 to<br>10.59)                           | 0.22<br>(0.14 to<br>0.29)                         | 0.08<br>(0.04 to<br>0.11)                         | 0.06<br>(0.03 to<br>0.09)                         | 0.10<br>(0.05 to<br>0.15)                         |
| Orofacial clefts                              | 0.01<br>(0.00 to<br>0.02)                            | 0.00<br>(0.00 to<br>0.01)                            | 0.00<br>(0.00 to<br>0.00)                            | 0.00<br>(0.00 to<br>0.01)                            | 0.00<br>(0.00 to<br>0.00)                         | 0.00<br>(0.00 to<br>0.00)                         | 0.00<br>(0.00 to<br>0.00)                         | 0.00<br>(0.00 to<br>0.00)                         |
| Down syndrome                                 | 9.67<br>(7.16 to<br>15.11)                           | 7.49<br>(5.28 to<br>11.71)                           | 7.51<br>(5.35 to<br>11.51)                           | 7.59<br>(5.32 to<br>11.87)                           | 0.20<br>(0.15 to<br>0.30)                         | 0.18<br>(0.13 to<br>0.28)                         | 0.18<br>(0.13 to<br>0.28)                         | 0.18<br>(0.13 to<br>0.28)                         |
| Other chromosomal abnormalities               | 7.29<br>(4.22 to<br>15.83)                           | 4.98<br>(2.74 to<br>9.42)                            | 4.40<br>(2.41 to<br>8.40)                            | 5.66<br>(3.06 to<br>11.18)                           | 0.09<br>(0.05 to<br>0.19)                         | 0.07<br>(0.04 to<br>0.12)                         | 0.06<br>(0.03 to<br>0.11)                         | 0.08<br>(0.04 to<br>0.14)                         |
| Congenital musculoskeletal and limb anomalies | 1.09<br>(0.69 to<br>1.70)                            | 0.50<br>(0.28 to<br>0.79)                            | 0.40<br>(0.22 to<br>0.64)                            | 0.60<br>(0.33 to<br>0.98)                            | 0.01<br>(0.01 to<br>0.02)                         | 0.01<br>(0.00 to<br>0.01)                         | 0.01<br>(0.00 to<br>0.01)                         | 0.01<br>(0.00 to<br>0.01)                         |
| Urogenital congenital anomalies               | 0.78<br>(0.25 to<br>1.27)                            | 0.31<br>(0.09 to<br>0.55)                            | 0.25<br>(0.07 to<br>0.47)                            | 0.36<br>(0.10 to<br>0.67)                            | 0.01<br>(0.00 to<br>0.01)                         | 0.00<br>(0.00 to<br>0.01)                         | 0.00<br>(0.00 to<br>0.01)                         | 0.00<br>(0.00 to<br>0.01)                         |
| Digestive congenital anomalies                | 2.68<br>(1.12 to<br>4.01)                            | 1.10<br>(0.37 to<br>1.82)                            | 0.85<br>(0.29 to<br>1.44)                            | 1.36<br>(0.46 to<br>2.28)                            | 0.03<br>(0.01 to<br>0.05)                         | 0.01<br>(0.01 to<br>0.02)                         | 0.01<br>(0.00 to<br>0.02)                         | 0.02<br>(0.01 to<br>0.03)                         |
| Other congenital birth defects                | 8.44<br>(5.54 to<br>11.67)                           | 3.64<br>(1.99 to<br>5.37)                            | 2.91<br>(1.54 to<br>4.43)                            | 4.37<br>(2.31 to<br>6.67)                            | 0.11<br>(0.07 to<br>0.15)                         | 0.05<br>(0.03 to<br>0.07)                         | 0.04<br>(0.02 to<br>0.06)                         | 0.06<br>(0.03 to<br>0.09)                         |
| Skin and subcutaneous diseases                | 14.66<br>(8.61 to<br>24.10)                          | 29.88<br>(18.08 to<br>48.33)                         | 29.27<br>(17.34 to<br>46.52)                         | 29.82<br>(17.59 to<br>47.47)                         | 1.50<br>(0.78 to<br>2.29)                         | 3.27<br>(1.78 to<br>4.85)                         | 3.19<br>(1.81 to<br>4.87)                         | 3.19<br>(1.73 to<br>4.75)                         |
| Cellulitis                                    | 3.58<br>(2.07 to<br>7.13)                            | 7.75<br>(4.45 to<br>15.59)                           | 7.75<br>(4.45 to<br>15.49)                           | 7.67<br>(4.43 to<br>15.38)                           | 0.28<br>(0.15 to<br>0.52)                         | 0.67<br>(0.36 to<br>1.26)                         | 0.69<br>(0.37 to<br>1.29)                         | 0.65<br>(0.35 to<br>1.21)                         |
| Pyoderma                                      | 5.99<br>(3.08 to<br>9.32)                            | 15.53<br>(8.46 to<br>23.36)                          | 15.28<br>(8.14 to<br>22.81)                          | 15.44<br>(8.30 to<br>23.36)                          | 0.59<br>(0.27 to<br>0.84)                         | 1.70<br>(0.81 to<br>2.34)                         | 1.73<br>(0.82 to<br>2.35)                         | 1.65<br>(0.78 to<br>2.29)                         |
| Decubitus ulcer                               | 4.53<br>(2.39 to<br>7.86)                            | 5.84<br>(2.97 to<br>10.30)                           | 5.50<br>(2.76 to<br>9.70)                            | 5.95<br>(2.98 to<br>10.53)                           | 0.59<br>(0.28 to<br>0.95)                         | 0.82<br>(0.39 to<br>1.43)                         | 0.79<br>(0.37 to<br>1.36)                         | 0.82<br>(0.39 to<br>1.44)                         |
| Other skin and subcutaneous diseases          | 0.56<br>(0.34 to<br>1.15)                            | 0.76<br>(0.44 to<br>1.57)                            | 0.74<br>(0.42 to<br>1.55)                            | 0.76<br>(0.43 to<br>1.54)                            | 0.05<br>(0.03 to<br>0.10)                         | 0.08<br>(0.04 to<br>0.16)                         | 0.08<br>(0.04 to<br>0.16)                         | 0.07<br>(0.04 to<br>0.15)                         |
| Sudden infant death syndrome                  | 3.92<br>(2.64 to<br>5.74)                            | 1.42<br>(0.75 to<br>2.48)                            | 1.23<br>(0.63 to<br>2.14)                            | 1.67<br>(0.85 to<br>2.80)                            | 0.05<br>(0.03 to<br>0.07)                         | 0.02<br>(0.01 to<br>0.03)                         | 0.01<br>(0.01 to<br>0.02)                         | 0.02<br>(0.01 to<br>0.03)                         |
| <b>Injuries</b>                               | <b>368.76</b><br><b>(339.86 to</b><br><b>419.02)</b> | <b>223.01</b><br><b>(160.83 to</b><br><b>341.16)</b> | <b>206.39</b><br><b>(149.74 to</b><br><b>308.90)</b> | <b>294.00</b><br><b>(197.35 to</b><br><b>485.06)</b> | <b>15.05</b><br><b>(13.90 to</b><br><b>17.11)</b> | <b>13.28</b><br><b>(11.04 to</b><br><b>16.67)</b> | <b>12.81</b><br><b>(10.79 to</b><br><b>15.93)</b> | <b>15.28</b><br><b>(12.22 to</b><br><b>19.98)</b> |
| <b>Transport injuries</b>                     | <b>102.00</b><br><b>(91.31 to</b><br><b>111.84)</b>  | <b>43.36</b><br><b>(21.54 to</b><br><b>104.87)</b>   | <b>40.65</b><br><b>(20.39 to</b><br><b>96.67)</b>    | <b>90.00</b><br><b>(42.07 to</b><br><b>217.64)</b>   | <b>2.90</b><br><b>(2.67 to</b><br><b>3.18)</b>    | <b>1.58</b><br><b>(0.92 to</b><br><b>2.98)</b>    | <b>1.50</b><br><b>(0.89 to</b><br><b>2.83)</b>    | <b>2.93</b><br><b>(1.61 to</b><br><b>5.84)</b>    |
| Road injuries                                 | 92.90<br>(82.79 to<br>101.79)                        | 37.59<br>(18.59 to<br>90.37)                         | 35.86<br>(17.98 to<br>85.61)                         | 82.49<br>(38.27 to<br>200.35)                        | 2.63<br>(2.41 to<br>2.89)                         | 1.37<br>(0.81 to<br>2.59)                         | 1.31<br>(0.79 to<br>2.48)                         | 2.66<br>(1.46 to<br>5.33)                         |

|                                      |                                                      |                                                     |                                                    |                                                     |                                                |                                                 |                                                 |                                                 |
|--------------------------------------|------------------------------------------------------|-----------------------------------------------------|----------------------------------------------------|-----------------------------------------------------|------------------------------------------------|-------------------------------------------------|-------------------------------------------------|-------------------------------------------------|
| Pedestrian road injuries             | 19.96<br>(14.79 to<br>26.70)                         | 6.76<br>(4.10 to<br>12.16)                          | 5.64<br>(3.45 to<br>10.11)                         | 13.64<br>(7.59 to<br>25.91)                         | 0.78<br>(0.58 to<br>0.94)                      | 0.38<br>(0.24 to<br>0.59)                       | 0.32<br>(0.20 to<br>0.50)                       | 0.68<br>(0.41 to<br>1.15)                       |
| <b>Spain</b>                         |                                                      |                                                     |                                                    |                                                     |                                                |                                                 |                                                 |                                                 |
| Cause                                | YLLs (in 1000s)                                      |                                                     |                                                    |                                                     | Deaths (in 1000s)                              |                                                 |                                                 |                                                 |
|                                      | 2016                                                 | 2040 Forecast                                       | 2040 Better Scenario                               | 2040 Worse Scenario                                 | 2016                                           | 2040 Forecast                                   | 2040 Better Scenario                            | 2040 Worse Scenario                             |
| Cyclist road injuries                | 3.28<br>(2.13 to<br>4.01)                            | 1.65<br>(0.77 to<br>3.54)                           | 1.63<br>(0.77 to<br>3.41)                          | 3.18<br>(1.43 to<br>7.14)                           | 0.09<br>(0.06 to<br>0.11)                      | 0.06<br>(0.03 to<br>0.12)                       | 0.07<br>(0.03 to<br>0.12)                       | 0.11<br>(0.05 to<br>0.22)                       |
| Motorcyclist road injuries           | 14.57<br>(8.71 to<br>17.61)                          | 8.38<br>(3.01 to<br>25.68)                          | 8.20<br>(2.99 to<br>24.59)                         | 14.77<br>(5.03 to<br>45.60)                         | 0.32<br>(0.20 to<br>0.38)                      | 0.21<br>(0.09 to<br>0.54)                       | 0.21<br>(0.09 to<br>0.52)                       | 0.34<br>(0.14 to<br>0.92)                       |
| Motor vehicle road injuries          | 54.33<br>(46.24 to<br>65.04)                         | 20.58<br>(10.08 to<br>46.96)                        | 20.16<br>(10.08 to<br>45.87)                       | 50.39<br>(22.94 to<br>120.32)                       | 1.42<br>(1.25 to<br>1.73)                      | 0.71<br>(0.40 to<br>1.38)                       | 0.71<br>(0.41 to<br>1.38)                       | 1.52<br>(0.79 to<br>3.16)                       |
| Other road injuries                  | 0.57<br>(0.29 to<br>0.79)                            | 0.23<br>(0.07 to<br>0.53)                           | 0.23<br>(0.07 to<br>0.51)                          | 0.51<br>(0.16 to<br>1.25)                           | 0.02<br>(0.01 to<br>0.02)                      | 0.01<br>(0.00 to<br>0.02)                       | 0.01<br>(0.00 to<br>0.02)                       | 0.02<br>(0.00 to<br>0.04)                       |
| Other transport injuries             | 9.09<br>(7.95 to<br>10.57)                           | 5.77<br>(2.92 to<br>12.16)                          | 4.79<br>(2.37 to<br>10.14)                         | 7.50<br>(3.47 to<br>16.40)                          | 0.27<br>(0.24 to<br>0.31)                      | 0.21<br>(0.12 to<br>0.42)                       | 0.18<br>(0.10 to<br>0.35)                       | 0.27<br>(0.14 to<br>0.53)                       |
| <b>Unintentional injuries</b>        | <b>131.33</b><br><b>(120.45 to</b><br><b>153.22)</b> | <b>103.97</b><br><b>(89.41 to</b><br><b>128.88)</b> | <b>98.82</b><br><b>(84.78 to</b><br><b>122.73)</b> | <b>108.30</b><br><b>(92.07 to</b><br><b>136.29)</b> | <b>8.06</b><br><b>(7.31 to</b><br><b>9.87)</b> | <b>8.70</b><br><b>(7.65 to</b><br><b>10.94)</b> | <b>8.60</b><br><b>(7.58 to</b><br><b>10.73)</b> | <b>8.68</b><br><b>(7.52 to</b><br><b>11.05)</b> |
| Falls                                | 54.69<br>(48.88 to<br>72.95)                         | 50.09<br>(42.83 to<br>68.24)                        | 48.05<br>(40.93 to<br>66.12)                       | 51.15<br>(43.50 to<br>69.64)                        | 4.08<br>(3.57 to<br>5.89)                      | 4.75<br>(4.01 to<br>6.93)                       | 4.70<br>(4.00 to<br>6.82)                       | 4.71<br>(3.94 to<br>7.00)                       |
| Drowning                             | 15.18<br>(13.78 to<br>16.59)                         | 8.19<br>(5.41 to<br>13.65)                          | 7.35<br>(4.91 to<br>12.25)                         | 9.46<br>(5.98 to<br>16.20)                          | 0.45<br>(0.42 to<br>0.49)                      | 0.32<br>(0.23 to<br>0.49)                       | 0.30<br>(0.21 to<br>0.45)                       | 0.36<br>(0.25 to<br>0.59)                       |
| Fire, heat, and hot substances       | 6.51<br>(5.72 to<br>7.71)                            | 3.69<br>(2.60 to<br>5.52)                           | 3.23<br>(2.32 to<br>4.85)                          | 4.25<br>(2.89 to<br>6.60)                           | 0.35<br>(0.30 to<br>0.42)                      | 0.28<br>(0.21 to<br>0.39)                       | 0.25<br>(0.19 to<br>0.35)                       | 0.31<br>(0.22 to<br>0.44)                       |
| Poisonings                           | 2.28<br>(1.86 to<br>4.40)                            | 0.85<br>(0.52 to<br>1.56)                           | 0.70<br>(0.44 to<br>1.30)                          | 1.03<br>(0.60 to<br>1.99)                           | 0.08<br>(0.07 to<br>0.14)                      | 0.04<br>(0.03 to<br>0.07)                       | 0.04<br>(0.02 to<br>0.06)                       | 0.05<br>(0.03 to<br>0.08)                       |
| Exposure to mechanical forces        | 9.64<br>(7.68 to<br>11.03)                           | 5.65<br>(4.31 to<br>7.61)                           | 5.04<br>(3.85 to<br>6.77)                          | 6.14<br>(4.63 to<br>8.19)                           | 0.35<br>(0.31 to<br>0.45)                      | 0.30<br>(0.25 to<br>0.41)                       | 0.28<br>(0.23 to<br>0.38)                       | 0.31<br>(0.25 to<br>0.42)                       |
| Unintentional firearm injuries       | 1.66<br>(1.41 to<br>1.97)                            | 0.93<br>(0.70 to<br>1.32)                           | 0.85<br>(0.64 to<br>1.21)                          | 1.00<br>(0.75 to<br>1.44)                           | 0.05<br>(0.05 to<br>0.07)                      | 0.04<br>(0.04 to<br>0.06)                       | 0.04<br>(0.03 to<br>0.06)                       | 0.04<br>(0.04 to<br>0.06)                       |
| Unintentional suffocation            | 0.51<br>(0.38 to<br>0.66)                            | 0.24<br>(0.16 to<br>0.33)                           | 0.21<br>(0.15 to<br>0.30)                          | 0.27<br>(0.18 to<br>0.38)                           | 0.01<br>(0.01 to<br>0.01)                      | 0.00<br>(0.00 to<br>0.01)                       | 0.00<br>(0.00 to<br>0.01)                       | 0.01<br>(0.00 to<br>0.01)                       |
| Other exposure to mechanical forces  | 7.46<br>(5.57 to<br>8.75)                            | 4.48<br>(3.33 to<br>6.08)                           | 3.98<br>(2.97 to<br>5.40)                          | 4.87<br>(3.59 to<br>6.59)                           | 0.29<br>(0.25 to<br>0.38)                      | 0.25<br>(0.20 to<br>0.36)                       | 0.23<br>(0.19 to<br>0.33)                       | 0.26<br>(0.21 to<br>0.37)                       |
| Adverse effects of medical treatment | 14.17<br>(10.88 to<br>22.65)                         | 14.45<br>(10.58 to<br>23.55)                        | 14.02<br>(10.15 to<br>23.06)                       | 14.67<br>(10.75 to<br>23.97)                        | 1.01<br>(0.74 to<br>1.66)                      | 1.28<br>(0.90 to<br>2.14)                       | 1.28<br>(0.89 to<br>2.12)                       | 1.26<br>(0.88 to<br>2.10)                       |
| Animal contact                       | 0.87<br>(0.67 to<br>1.22)                            | 0.73<br>(0.53 to<br>1.09)                           | 0.66<br>(0.48 to<br>0.98)                          | 0.79<br>(0.58 to<br>1.17)                           | 0.03<br>(0.02 to<br>0.05)                      | 0.03<br>(0.03 to<br>0.05)                       | 0.03<br>(0.03 to<br>0.05)                       | 0.04<br>(0.03 to<br>0.05)                       |
| Venomous animal contact              | 0.22<br>(0.16 to<br>0.30)                            | 0.16<br>(0.09 to<br>0.23)                           | 0.15<br>(0.09 to<br>0.21)                          | 0.17<br>(0.10 to<br>0.24)                           | 0.01<br>(0.00 to<br>0.01)                      | 0.01<br>(0.00 to<br>0.01)                       | 0.01<br>(0.00 to<br>0.01)                       | 0.01<br>(0.00 to<br>0.01)                       |
| Non-venomous animal contact          | 0.64<br>(0.49 to<br>0.94)                            | 0.57<br>(0.42 to<br>0.88)                           | 0.51<br>(0.37 to<br>0.79)                          | 0.62<br>(0.45 to<br>0.96)                           | 0.02<br>(0.02 to<br>0.04)                      | 0.03<br>(0.02 to<br>0.04)                       | 0.03<br>(0.02 to<br>0.04)                       | 0.03<br>(0.02 to<br>0.05)                       |
| Foreign body                         | 22.60<br>(16.92 to<br>26.90)                         | 17.13<br>(10.96 to<br>21.52)                        | 17.00<br>(10.67 to<br>21.18)                       | 17.29<br>(11.37 to<br>21.40)                        | 1.45<br>(0.77 to<br>1.89)                      | 1.47<br>(0.68 to<br>2.00)                       | 1.52<br>(0.70 to<br>2.06)                       | 1.41<br>(0.67 to<br>1.94)                       |

|                                                                                     |                                                                        |                                                                        |                                                                      |                                                                        |                                                                |                                                                  |                                                                 |                                                                  |
|-------------------------------------------------------------------------------------|------------------------------------------------------------------------|------------------------------------------------------------------------|----------------------------------------------------------------------|------------------------------------------------------------------------|----------------------------------------------------------------|------------------------------------------------------------------|-----------------------------------------------------------------|------------------------------------------------------------------|
|                                                                                     | 22.02<br>(16.33 to<br>26.46)                                           | 16.68<br>(10.48 to<br>20.82)                                           | 16.53<br>(10.24 to<br>20.70)                                         | 16.84<br>(10.86 to<br>20.84)                                           | 1.43<br>(0.76 to<br>1.87)                                      | 1.44<br>(0.65 to<br>1.97)                                        | 1.50<br>(0.67 to<br>2.03)                                       | 1.39<br>(0.64 to<br>1.91)                                        |
| Pulmonary aspiration and foreign body in airway                                     |                                                                        |                                                                        |                                                                      |                                                                        |                                                                |                                                                  |                                                                 |                                                                  |
|                                                                                     | 0.58<br>(0.43 to<br>0.87)                                              | 0.45<br>(0.31 to<br>0.69)                                              | 0.47<br>(0.33 to<br>0.72)                                            | 0.45<br>(0.32 to<br>0.69)                                              | 0.02<br>(0.01 to<br>0.03)                                      | 0.02<br>(0.02 to<br>0.03)                                        | 0.03<br>(0.02 to<br>0.04)                                       | 0.02<br>(0.02 to<br>0.03)                                        |
| Foreign body in other body part                                                     |                                                                        |                                                                        |                                                                      |                                                                        |                                                                |                                                                  |                                                                 |                                                                  |
|                                                                                     | 3.17<br>(2.42 to<br>6.34)                                              | 2.54<br>(1.69 to<br>5.54)                                              | 2.25<br>(1.51 to<br>4.99)                                            | 2.73<br>(1.82 to<br>5.89)                                              | 0.19<br>(0.13 to<br>0.44)                                      | 0.20<br>(0.13 to<br>0.50)                                        | 0.19<br>(0.12 to<br>0.47)                                       | 0.21<br>(0.13 to<br>0.52)                                        |
| Environmental heat and cold exposure                                                |                                                                        |                                                                        |                                                                      |                                                                        |                                                                |                                                                  |                                                                 |                                                                  |
|                                                                                     | 2.23<br>(1.93 to<br>2.55)                                              | 0.66<br>(0.44 to<br>1.08)                                              | 0.50<br>(0.34 to<br>0.82)                                            | 0.80<br>(0.52 to<br>1.29)                                              | 0.06<br>(0.05 to<br>0.06)                                      | 0.02<br>(0.02 to<br>0.03)                                        | 0.02<br>(0.01 to<br>0.02)                                       | 0.03<br>(0.02 to<br>0.04)                                        |
| Other unintentional injuries                                                        |                                                                        |                                                                        |                                                                      |                                                                        |                                                                |                                                                  |                                                                 |                                                                  |
| <b>Self-harm and interpersonal violence</b>                                         | <b>135.23</b><br><b>(117.68 to</b><br><b>177.15)</b>                   | <b>74.89</b><br><b>(42.85 to</b><br><b>129.18)</b>                     | <b>66.14</b><br><b>(38.28 to</b><br><b>111.77)</b>                   | <b>94.91</b><br><b>(52.40 to</b><br><b>165.60)</b>                     | <b>4.09</b><br><b>(3.47 to</b><br><b>4.89)</b>                 | <b>2.97</b><br><b>(1.75 to</b><br><b>4.70)</b>                   | <b>2.70</b><br><b>(1.58 to</b><br><b>4.17)</b>                  | <b>3.65</b><br><b>(2.11 to</b><br><b>6.00)</b>                   |
| <b>Spain</b>                                                                        |                                                                        |                                                                        |                                                                      |                                                                        |                                                                |                                                                  |                                                                 |                                                                  |
| Cause                                                                               | YLLs (in 1000s)                                                        |                                                                        |                                                                      |                                                                        | Deaths (in 1000s)                                              |                                                                  |                                                                 |                                                                  |
|                                                                                     | 2016                                                                   | 2040 Forecast                                                          | 2040 Better Scenario                                                 | 2040 Worse Scenario                                                    | 2016                                                           | 2040 Forecast                                                    | 2040 Better Scenario                                            | 2040 Worse Scenario                                              |
|                                                                                     | 122.52<br>(105.14 to<br>167.89)                                        | 70.14<br>(38.99 to<br>123.59)                                          | 61.91<br>(34.68 to<br>106.51)                                        | 89.47<br>(47.96 to<br>159.92)                                          | 3.76<br>(3.19 to<br>4.63)                                      | 2.81<br>(1.63 to<br>4.47)                                        | 2.55<br>(1.47 to<br>4.01)                                       | 3.47<br>(1.96 to<br>5.77)                                        |
| Self-harm                                                                           |                                                                        |                                                                        |                                                                      |                                                                        |                                                                |                                                                  |                                                                 |                                                                  |
|                                                                                     | 7.05<br>(4.14 to<br>10.60)                                             | 2.86<br>(1.21 to<br>5.89)                                              | 2.42<br>(1.05 to<br>4.94)                                            | 3.79<br>(1.57 to<br>7.97)                                              | 0.21<br>(0.12 to<br>0.30)                                      | 0.11<br>(0.05 to<br>0.20)                                        | 0.09<br>(0.04 to<br>0.17)                                       | 0.14<br>(0.06 to<br>0.26)                                        |
| Self-harm by firearm                                                                |                                                                        |                                                                        |                                                                      |                                                                        |                                                                |                                                                  |                                                                 |                                                                  |
|                                                                                     | 115.47<br>(99.35 to<br>158.17)                                         | 67.27<br>(37.42 to<br>117.99)                                          | 59.49<br>(33.47 to<br>101.47)                                        | 85.69<br>(45.65 to<br>151.76)                                          | 3.55<br>(3.02 to<br>4.38)                                      | 2.70<br>(1.55 to<br>4.32)                                        | 2.46<br>(1.40 to<br>3.86)                                       | 3.34<br>(1.90 to<br>5.54)                                        |
| Self-harm by other specified means                                                  |                                                                        |                                                                        |                                                                      |                                                                        |                                                                |                                                                  |                                                                 |                                                                  |
|                                                                                     | 12.71<br>(7.64 to<br>15.66)                                            | 4.75<br>(2.62 to<br>7.44)                                              | 4.23<br>(2.35 to<br>6.50)                                            | 5.44<br>(2.96 to<br>8.67)                                              | 0.33<br>(0.19 to<br>0.40)                                      | 0.16<br>(0.09 to<br>0.23)                                        | 0.15<br>(0.08 to<br>0.21)                                       | 0.18<br>(0.10 to<br>0.27)                                        |
| Interpersonal violence                                                              |                                                                        |                                                                        |                                                                      |                                                                        |                                                                |                                                                  |                                                                 |                                                                  |
|                                                                                     | 2.69<br>(1.17 to<br>3.75)                                              | 0.80<br>(0.34 to<br>1.35)                                              | 0.69<br>(0.30 to<br>1.14)                                            | 0.91<br>(0.39 to<br>1.50)                                              | 0.06<br>(0.03 to<br>0.09)                                      | 0.02<br>(0.01 to<br>0.03)                                        | 0.02<br>(0.01 to<br>0.03)                                       | 0.02<br>(0.01 to<br>0.04)                                        |
| Physical violence by firearm                                                        |                                                                        |                                                                        |                                                                      |                                                                        |                                                                |                                                                  |                                                                 |                                                                  |
|                                                                                     | 3.35<br>(2.15 to<br>6.91)                                              | 2.03<br>(0.79 to<br>3.13)                                              | 1.81<br>(0.71 to<br>2.80)                                            | 2.25<br>(0.85 to<br>3.40)                                              | 0.14<br>(0.06 to<br>0.18)                                      | 0.07<br>(0.03 to<br>0.09)                                        | 0.06<br>(0.03 to<br>0.08)                                       | 0.07<br>(0.03 to<br>0.10)                                        |
| Physical violence by sharp object                                                   |                                                                        |                                                                        |                                                                      |                                                                        |                                                                |                                                                  |                                                                 |                                                                  |
|                                                                                     | 4.67<br>(3.34 to<br>7.76)                                              | 1.92<br>(1.08 to<br>3.48)                                              | 1.72<br>(0.99 to<br>3.09)                                            | 2.29<br>(1.25 to<br>4.18)                                              | 0.13<br>(0.08 to<br>0.19)                                      | 0.07<br>(0.04 to<br>0.11)                                        | 0.06<br>(0.04 to<br>0.10)                                       | 0.08<br>(0.05 to<br>0.14)                                        |
| Physical violence by other means                                                    |                                                                        |                                                                        |                                                                      |                                                                        |                                                                |                                                                  |                                                                 |                                                                  |
| <b>Forces of nature, conflict and terrorism, and executions and police conflict</b> | <b>0.20</b><br><b>(0.19 to</b><br><b>0.21)</b>                         | <b>0.78</b><br><b>(0.00 to</b><br><b>4.25)</b>                         | <b>0.79</b><br><b>(0.00 to</b><br><b>4.26)</b>                       | <b>0.78</b><br><b>(0.00 to</b><br><b>4.25)</b>                         | <b>0.00</b><br><b>(0.00 to</b><br><b>0.00)</b>                 | <b>0.02</b><br><b>(0.00 to</b><br><b>0.11)</b>                   | <b>0.02</b><br><b>(0.00 to</b><br><b>0.11)</b>                  | <b>0.02</b><br><b>(0.00 to</b><br><b>0.11)</b>                   |
| Exposure to forces of nature                                                        |                                                                        |                                                                        |                                                                      |                                                                        |                                                                |                                                                  |                                                                 |                                                                  |
|                                                                                     | 0.00<br>(0.00 to<br>0.00)                                              | 0.35<br>(0.00 to<br>2.15)                                              | 0.35<br>(0.00 to<br>2.15)                                            | 0.35<br>(0.00 to<br>2.15)                                              | 0.00<br>(0.00 to<br>0.00)                                      | 0.01<br>(0.00 to<br>0.06)                                        | 0.01<br>(0.00 to<br>0.07)                                       | 0.01<br>(0.00 to<br>0.06)                                        |
| Conflict and terrorism                                                              |                                                                        |                                                                        |                                                                      |                                                                        |                                                                |                                                                  |                                                                 |                                                                  |
|                                                                                     | 0.00<br>(0.00 to<br>0.20)                                              | 0.44<br>(0.00 to<br>2.83)                                              | 0.44<br>(0.00 to<br>2.84)                                            | 0.44<br>(0.00 to<br>2.82)                                              | 0.00<br>(0.00 to<br>0.00)                                      | 0.01<br>(0.00 to<br>0.07)                                        | 0.01<br>(0.00 to<br>0.07)                                       | 0.01<br>(0.00 to<br>0.07)                                        |
| Executions and police conflict                                                      |                                                                        |                                                                        |                                                                      |                                                                        |                                                                |                                                                  |                                                                 |                                                                  |
|                                                                                     | 0.20<br>(0.19 to<br>0.21)                                              | 0.00<br>(0.00 to<br>0.00)                                              | 0.00<br>(0.00 to<br>0.00)                                            | 0.00<br>(0.00 to<br>0.00)                                              | 0.00<br>(0.00 to<br>0.00)                                      | 0.00<br>(0.00 to<br>0.00)                                        | 0.00<br>(0.00 to<br>0.00)                                       | 0.00<br>(0.00 to<br>0.00)                                        |
| <b>Sweden</b>                                                                       |                                                                        |                                                                        |                                                                      |                                                                        |                                                                |                                                                  |                                                                 |                                                                  |
| Cause                                                                               | YLLs (actual counts)                                                   |                                                                        |                                                                      |                                                                        | Deaths (actual counts)                                         |                                                                  |                                                                 |                                                                  |
|                                                                                     | 2016                                                                   | 2040 Forecast                                                          | 2040 Better Scenario                                                 | 2040 Worse Scenario                                                    | 2016                                                           | 2040 Forecast                                                    | 2040 Better Scenario                                            | 2040 Worse Scenario                                              |
| <b>All causes</b>                                                                   | <b>1,223,927.31</b><br><b>(1,102,643.49 to</b><br><b>1,355,038.18)</b> | <b>1,294,499.34</b><br><b>(1,120,102.69 to</b><br><b>1,498,879.55)</b> | <b>1,123,679.56</b><br><b>(983,099.65 to</b><br><b>1,275,357.60)</b> | <b>1,549,632.13</b><br><b>(1,325,989.95 to</b><br><b>1,806,531.24)</b> | <b>94,078.05</b><br><b>(85,529.10 to</b><br><b>103,016.69)</b> | <b>119,195.90</b><br><b>(105,305.05 to</b><br><b>135,843.49)</b> | <b>107,093.57</b><br><b>(95,841.11 to</b><br><b>120,823.61)</b> | <b>134,923.02</b><br><b>(119,358.74 to</b><br><b>153,763.50)</b> |
| Communicable, maternal, neonatal, and nutritional diseases                          |                                                                        |                                                                        |                                                                      |                                                                        |                                                                |                                                                  |                                                                 |                                                                  |
|                                                                                     | 50,954.48<br>(44,791.35 to<br>57,424.32)                               | 61,689.20<br>(49,892.53 to<br>76,208.27)                               | 60,200.26<br>(49,860.37 to<br>73,321.44)                             | 68,524.72<br>(53,906.77 to<br>87,430.13)                               | 4,212.20<br>(3,656.16 to<br>4,818.77)                          | 7,131.90<br>(5,437.60 to<br>9,466.94)                            | 7,445.49<br>(5,868.72 to<br>9,558.47)                           | 7,296.99<br>(5,361.86 to<br>9,948.21)                            |



|                                                                   |                                          |                                          |                                          |                                          |                                       |                                       |                                       |                                       |
|-------------------------------------------------------------------|------------------------------------------|------------------------------------------|------------------------------------------|------------------------------------------|---------------------------------------|---------------------------------------|---------------------------------------|---------------------------------------|
|                                                                   | 1,752.40<br>(1,639.96 to<br>1,878.76)    | 1,136.85<br>(739.76 to<br>1,620.78)      | 690.40<br>(457.54 to<br>991.32)          | 1,780.92<br>(1,166.89 to<br>2,541.81)    | 100.20<br>(90.08 to<br>111.67)        | 87.35<br>(50.12 to<br>146.00)         | 56.82<br>(33.53 to<br>92.44)          | 118.59<br>(65.68 to<br>200.84)        |
| HIV/AIDS and tuberculosis                                         |                                          |                                          |                                          |                                          |                                       |                                       |                                       |                                       |
| Tuberculosis                                                      | 855.57<br>(745.99 to<br>975.85)          | 714.10<br>(399.24 to<br>1,206.74)        | 453.46<br>(264.26 to<br>742.80)          | 967.87<br>(526.56 to<br>1,646.90)        | 78.04<br>(67.95 to<br>89.35)          | 80.04<br>(43.81 to<br>138.87)         | 52.74<br>(29.97 to<br>88.47)          | 104.49<br>(52.97 to<br>186.37)        |
| HIV/AIDS                                                          | 896.83<br>(865.91 to<br>927.13)          | 422.75<br>(247.98 to<br>628.61)          | 236.94<br>(124.71 to<br>360.71)          | 813.05<br>(469.43 to<br>1,190.13)        | 22.16<br>(21.36 to<br>22.90)          | 7.31<br>(4.12 to<br>10.86)            | 4.08<br>(2.05 to<br>6.34)             | 14.10<br>(7.96 to<br>21.07)           |
| Diarrhea, lower respiratory, and other common infectious diseases | 35,106.01<br>(30,539.62 to<br>40,261.82) | 49,388.01<br>(38,763.21 to<br>63,462.82) | 49,388.20<br>(39,850.67 to<br>61,872.16) | 54,178.64<br>(41,007.92 to<br>71,653.82) | 3,735.20<br>(3,208.86 to<br>4,324.88) | 6,535.46<br>(4,891.05 to<br>8,791.56) | 6,853.20<br>(5,305.02 to<br>8,962.53) | 6,690.42<br>(4,798.39 to<br>9,323.85) |
| Diarrheal diseases                                                | 4,821.64<br>(4,277.95 to<br>5,495.48)    | 11,588.62<br>(8,005.66 to<br>17,206.66)  | 15,677.60<br>(11,355.54 to<br>21,400.38) | 9,553.91<br>(6,075.33 to<br>15,151.94)   | 569.81<br>(500.78 to<br>651.82)       | 1,638.40<br>(1,093.60 to<br>2,429.14) | 2,291.81<br>(1,621.92 to<br>3,130.79) | 1,306.89<br>(796.66 to<br>2,062.03)   |
| Intestinal infectious diseases                                    | 13.18<br>(5.84 to<br>25.56)              | 11.24<br>(5.03 to<br>21.31)              | 10.91<br>(4.85 to<br>20.60)              | 11.50<br>(5.08 to<br>22.13)              | 0.52<br>(0.25 to<br>0.97)             | 0.56<br>(0.26 to<br>1.07)             | 0.56<br>(0.25 to<br>1.07)             | 0.54<br>(0.25 to<br>1.03)             |
| Typhoid fever                                                     | 3.46<br>(1.06 to<br>8.39)                | 3.96<br>(1.25 to<br>9.29)                | 4.40<br>(1.43 to<br>10.30)               | 3.84<br>(1.22 to<br>9.11)                | 0.08<br>(0.02 to<br>0.18)             | 0.10<br>(0.03 to<br>0.22)             | 0.11<br>(0.04 to<br>0.25)             | 0.09<br>(0.03 to<br>0.21)             |
| Paratyphoid fever                                                 | 5.26<br>(1.46 to<br>12.77)               | 3.78<br>(1.11 to<br>9.41)                | 3.21<br>(0.93 to<br>8.11)                | 4.15<br>(1.18 to<br>10.27)               | 0.14<br>(0.04 to<br>0.35)             | 0.11<br>(0.03 to<br>0.28)             | 0.10<br>(0.03 to<br>0.25)             | 0.12<br>(0.03 to<br>0.30)             |
| Other intestinal infectious diseases                              | 4.47<br>(1.81 to<br>9.13)                | 3.50<br>(1.31 to<br>7.21)                | 3.30<br>(1.20 to<br>6.81)                | 3.52<br>(1.30 to<br>7.22)                | 0.31<br>(0.12 to<br>0.67)             | 0.35<br>(0.12 to<br>0.77)             | 0.35<br>(0.12 to<br>0.78)             | 0.33<br>(0.11 to<br>0.72)             |
| Lower respiratory infections                                      | 28,659.91<br>(24,663.44 to<br>33,153.08) | 36,337.07<br>(25,937.59 to<br>49,801.29) | 32,380.59<br>(23,034.95 to<br>44,500.22) | 43,125.81<br>(29,944.42 to<br>61,009.55) | 3,079.14<br>(2,584.87 to<br>3,609.65) | 4,800.25<br>(3,217.96 to<br>7,022.21) | 4,467.07<br>(3,082.85 to<br>6,418.11) | 5,289.87<br>(3,505.44 to<br>7,918.00) |
| Upper respiratory infections                                      | 12.39<br>(7.39 to<br>19.05)              | 9.96<br>(5.03 to<br>17.91)               | 7.54<br>(3.71 to<br>13.61)               | 11.13<br>(5.48 to<br>20.87)              | 0.68<br>(0.37 to<br>1.17)             | 0.79<br>(0.32 to<br>1.57)             | 0.59<br>(0.24 to<br>1.29)             | 0.79<br>(0.34 to<br>1.73)             |
| Otitis media                                                      | 0.45<br>(0.34 to<br>0.63)                | 0.44<br>(0.16 to<br>1.28)                | 0.47<br>(0.16 to<br>1.38)                | 0.41<br>(0.15 to<br>1.16)                | 0.04<br>(0.02 to<br>0.06)             | 0.05<br>(0.02 to<br>0.15)             | 0.06<br>(0.02 to<br>0.16)             | 0.05<br>(0.01 to<br>0.13)             |
| Meningitis                                                        | 797.91<br>(677.82 to<br>1,078.28)        | 518.38<br>(405.23 to<br>718.76)          | 455.30<br>(353.04 to<br>627.03)          | 553.53<br>(425.43 to<br>770.11)          | 31.13<br>(26.79 to<br>37.88)          | 24.07<br>(19.15 to<br>29.98)          | 22.66<br>(17.74 to<br>28.27)          | 24.03<br>(19.11 to<br>29.97)          |
| Pneumococcal meningitis                                           | 219.52<br>(186.89 to<br>293.81)          | 148.64<br>(117.00 to<br>211.43)          | 149.26<br>(116.45 to<br>214.96)          | 147.04<br>(117.06 to<br>211.06)          | 9.74<br>(8.31 to<br>11.90)            | 8.74<br>(6.92 to<br>11.06)            | 9.17<br>(7.14 to<br>11.57)            | 8.23<br>(6.57 to<br>10.27)            |
| H influenzae type B meningitis                                    | 82.02<br>(69.60 to<br>104.05)            | 151.24<br>(85.27 to<br>241.14)           | 128.99<br>(80.04 to<br>192.99)           | 165.81<br>(88.70 to<br>273.69)           | 2.93<br>(2.48 to<br>3.45)             | 3.61<br>(2.61 to<br>4.89)             | 3.49<br>(2.59 to<br>4.47)             | 3.64<br>(2.58 to<br>5.11)             |
| Meningococcal meningitis                                          | 266.29<br>(220.27 to<br>376.03)          | 107.76<br>(78.02 to<br>173.95)           | 87.59<br>(61.82 to<br>141.44)            | 119.44<br>(82.38 to<br>190.78)           | 8.28<br>(7.09 to<br>10.61)            | 4.94<br>(3.78 to<br>6.67)             | 4.25<br>(3.21 to<br>5.81)             | 5.13<br>(3.86 to<br>6.93)             |
| Other meningitis                                                  | 250.07<br>(195.97 to<br>306.11)          | 110.75<br>(83.92 to<br>156.83)           | 89.46<br>(67.13 to<br>128.10)            | 121.23<br>(89.68 to<br>174.79)           | 10.18<br>(8.70 to<br>12.40)           | 6.78<br>(5.17 to<br>8.71)             | 5.74<br>(4.30 to<br>7.50)             | 7.03<br>(5.23 to<br>9.16)             |
| Encephalitis                                                      | 510.26<br>(395.29 to<br>798.41)          | 601.40<br>(464.24 to<br>910.86)          | 586.10<br>(446.97 to<br>885.37)          | 607.24<br>(472.91 to<br>925.41)          | 20.79<br>(15.95 to<br>28.22)          | 31.47<br>(23.30 to<br>41.55)          | 31.96<br>(23.16 to<br>42.32)          | 30.30<br>(22.48 to<br>40.05)          |
| Diphtheria                                                        | 1.74<br>(1.21 to<br>2.37)                | 0.40<br>(0.24 to<br>0.65)                | 0.32<br>(0.20 to<br>0.48)                | 0.44<br>(0.25 to<br>0.71)                | 0.03<br>(0.02 to<br>0.05)             | 0.01<br>(0.00 to<br>0.01)             | 0.01<br>(0.00 to<br>0.01)             | 0.01<br>(0.00 to<br>0.01)             |
| Whooping cough                                                    | 7.59<br>(2.41 to<br>14.27)               | 5.90<br>(1.26 to<br>15.34)               | 1.16<br>(0.37 to<br>2.65)                | 7.47<br>(1.46 to<br>19.85)               | 0.09<br>(0.03 to<br>0.17)             | 0.07<br>(0.02 to<br>0.18)             | 0.02<br>(0.01 to<br>0.03)             | 0.09<br>(0.02 to<br>0.23)             |
| Tetanus                                                           | 5.90<br>(4.54 to<br>7.72)                | 0.72<br>(0.49 to<br>1.12)                | 0.58<br>(0.39 to<br>0.84)                | 0.77<br>(0.52 to<br>1.25)                | 0.19<br>(0.15 to<br>0.25)             | 0.02<br>(0.02 to<br>0.03)             | 0.02<br>(0.01 to<br>0.03)             | 0.02<br>(0.02 to<br>0.03)             |
| Measles                                                           | 2.32<br>(1.84 to<br>2.85)                | 27.18<br>(0.13 to<br>220.98)             | 20.15<br>(0.12 to<br>152.41)             | 41.68<br>(0.15 to<br>335.17)             | 0.04<br>(0.03 to<br>0.05)             | 0.42<br>(0.00 to<br>3.36)             | 0.33<br>(0.00 to<br>2.56)             | 0.60<br>(0.00 to<br>4.60)             |

| Sweden                                                |                                     |                                     |                                     |                                     |                               |                               |                               |                               |
|-------------------------------------------------------|-------------------------------------|-------------------------------------|-------------------------------------|-------------------------------------|-------------------------------|-------------------------------|-------------------------------|-------------------------------|
| Cause                                                 | YLLs (actual counts)                |                                     |                                     |                                     | Deaths (actual counts)        |                               |                               |                               |
|                                                       | 2016                                | 2040 Forecast                       | 2040 Better Scenario                | 2040 Worse Scenario                 | 2016                          | 2040 Forecast                 | 2040 Better Scenario          | 2040 Worse Scenario           |
| Varicella and herpes zoster                           | 272.74<br>(82.36 to 395.26)         | 266.69<br>(71.30 to 429.48)         | 247.49<br>(64.01 to 404.48)         | 264.75<br>(70.55 to 429.73)         | 32.73<br>(7.10 to 52.24)      | 39.39<br>(8.21 to 69.09)      | 38.11<br>(7.94 to 67.06)      | 37.23<br>(7.86 to 65.73)      |
| <b>Neglected tropical diseases and malaria</b>        | <b>60.65</b><br>(51.76 to 68.51)    | <b>68.88</b><br>(57.06 to 81.42)    | <b>70.58</b><br>(57.45 to 83.28)    | <b>68.79</b><br>(57.46 to 80.93)    | <b>1.82</b><br>(1.33 to 2.10) | <b>2.54</b><br>(1.70 to 2.99) | <b>2.78</b><br>(1.81 to 3.29) | <b>2.39</b><br>(1.63 to 2.84) |
| Malaria                                               | 0.00<br>(0.00 to 0.00)              | 0.00<br>(0.00 to 0.00)              | 0.00<br>(0.00 to 0.00)              | 0.00<br>(0.00 to 0.00)              | 0.00<br>(0.00 to 0.00)        | 0.00<br>(0.00 to 0.00)        | 0.00<br>(0.00 to 0.00)        | 0.00<br>(0.00 to 0.00)        |
| Chagas disease                                        | 0.00<br>(0.00 to 0.00)              | 0.00<br>(0.00 to 0.00)              | 0.00<br>(0.00 to 0.00)              | 0.00<br>(0.00 to 0.00)              | 0.00<br>(0.00 to 0.00)        | 0.00<br>(0.00 to 0.00)        | 0.00<br>(0.00 to 0.00)        | 0.00<br>(0.00 to 0.00)        |
| Leishmaniasis                                         | 0.00<br>(0.00 to 0.00)              | 0.00<br>(0.00 to 0.00)              | 0.00<br>(0.00 to 0.00)              | 0.00<br>(0.00 to 0.00)              | 0.00<br>(0.00 to 0.00)        | 0.00<br>(0.00 to 0.00)        | 0.00<br>(0.00 to 0.00)        | 0.00<br>(0.00 to 0.00)        |
| African trypanosomiasis                               | 0.00<br>(0.00 to 0.00)              | 0.00<br>(0.00 to 0.00)              | 0.00<br>(0.00 to 0.00)              | 0.00<br>(0.00 to 0.00)              | 0.00<br>(0.00 to 0.00)        | 0.00<br>(0.00 to 0.00)        | 0.00<br>(0.00 to 0.00)        | 0.00<br>(0.00 to 0.00)        |
| Schistosomiasis                                       | 0.00<br>(0.00 to 0.00)              | 0.00<br>(0.00 to 0.00)              | 0.00<br>(0.00 to 0.00)              | 0.00<br>(0.00 to 0.00)              | 0.00<br>(0.00 to 0.00)        | 0.00<br>(0.00 to 0.00)        | 0.00<br>(0.00 to 0.00)        | 0.00<br>(0.00 to 0.00)        |
| Cysticercosis                                         | 4.93<br>(4.21 to 5.75)              | 1.90<br>(1.60 to 2.26)              | 1.87<br>(1.57 to 2.23)              | 1.89<br>(1.59 to 2.25)              | 0.19<br>(0.16 to 0.22)        | 0.09<br>(0.07 to 0.10)        | 0.09<br>(0.07 to 0.10)        | 0.08<br>(0.07 to 0.10)        |
| Cystic echinococcosis                                 | 0.00<br>(0.00 to 0.00)              | 0.00<br>(0.00 to 0.00)              | 0.00<br>(0.00 to 0.00)              | 0.00<br>(0.00 to 0.00)              | 0.00<br>(0.00 to 0.00)        | 0.00<br>(0.00 to 0.00)        | 0.00<br>(0.00 to 0.00)        | 0.00<br>(0.00 to 0.00)        |
| Dengue                                                | 0.00<br>(0.00 to 0.00)              | 0.00<br>(0.00 to 0.00)              | 0.00<br>(0.00 to 0.00)              | 0.00<br>(0.00 to 0.00)              | 0.00<br>(0.00 to 0.00)        | 0.00<br>(0.00 to 0.00)        | 0.00<br>(0.00 to 0.00)        | 0.00<br>(0.00 to 0.00)        |
| Yellow fever                                          | 0.00<br>(0.00 to 0.00)              | 0.00<br>(0.00 to 0.00)              | 0.00<br>(0.00 to 0.00)              | 0.00<br>(0.00 to 0.00)              | 0.00<br>(0.00 to 0.00)        | 0.00<br>(0.00 to 0.00)        | 0.00<br>(0.00 to 0.00)        | 0.00<br>(0.00 to 0.00)        |
| Rabies                                                | 0.35<br>(0.28 to 0.43)              | 0.37<br>(0.29 to 0.46)              | 0.33<br>(0.27 to 0.41)              | 0.39<br>(0.31 to 0.50)              | 0.01<br>(0.01 to 0.01)        | 0.02<br>(0.01 to 0.02)        | 0.02<br>(0.01 to 0.02)        | 0.02<br>(0.01 to 0.02)        |
| Intestinal nematode infections                        | 0.00<br>(0.00 to 0.00)              | 0.00<br>(0.00 to 0.00)              | 0.00<br>(0.00 to 0.00)              | 0.00<br>(0.00 to 0.00)              | 0.00<br>(0.00 to 0.00)        | 0.00<br>(0.00 to 0.00)        | 0.00<br>(0.00 to 0.00)        | 0.00<br>(0.00 to 0.00)        |
| Other neglected tropical diseases                     | 55.37<br>(46.54 to 62.63)           | 66.61<br>(54.68 to 79.00)           | 68.38<br>(55.28 to 80.90)           | 66.51<br>(55.25 to 78.48)           | 1.62<br>(1.13 to 1.88)        | 2.44<br>(1.59 to 2.90)        | 2.67<br>(1.70 to 3.18)        | 2.29<br>(1.52 to 2.73)        |
| <b>Maternal disorders</b>                             | <b>239.88</b><br>(193.46 to 293.48) | <b>192.63</b><br>(137.44 to 276.90) | <b>169.19</b><br>(117.04 to 245.42) | <b>206.15</b><br>(142.91 to 294.55) | <b>4.50</b><br>(3.63 to 5.50) | <b>3.63</b><br>(2.59 to 4.61) | <b>3.19</b><br>(2.23 to 4.61) | <b>3.88</b><br>(2.70 to 5.53) |
| Maternal hemorrhage                                   | 16.61<br>(10.62 to 24.47)           | 13.18<br>(7.41 to 21.29)            | 11.62<br>(6.60 to 18.76)            | 14.05<br>(7.93 to 22.74)            | 0.31<br>(0.20 to 0.46)        | 0.25<br>(0.14 to 0.40)        | 0.22<br>(0.13 to 0.35)        | 0.26<br>(0.15 to 0.43)        |
| Maternal sepsis and other maternal infections         | 14.41<br>(9.37 to 20.98)            | 8.97<br>(5.15 to 14.35)             | 7.84<br>(4.49 to 12.64)             | 9.59<br>(5.38 to 15.58)             | 0.27<br>(0.18 to 0.39)        | 0.17<br>(0.10 to 0.27)        | 0.15<br>(0.08 to 0.24)        | 0.18<br>(0.10 to 0.29)        |
| Maternal hypertensive disorders                       | 24.06<br>(15.28 to 35.25)           | 16.32<br>(9.10 to 27.05)            | 14.20<br>(7.93 to 23.74)            | 17.48<br>(9.76 to 28.55)            | 0.43<br>(0.27 to 0.63)        | 0.29<br>(0.16 to 0.49)        | 0.25<br>(0.14 to 0.43)        | 0.31<br>(0.18 to 0.51)        |
| Maternal obstructed labor and uterine rupture         | 3.95<br>(2.23 to 6.07)              | 3.13<br>(1.56 to 5.31)              | 2.67<br>(1.35 to 4.55)              | 3.38<br>(1.69 to 5.70)              | 0.08<br>(0.04 to 0.12)        | 0.06<br>(0.03 to 0.11)        | 0.05<br>(0.03 to 0.09)        | 0.07<br>(0.03 to 0.11)        |
| Maternal abortion, miscarriage, and ectopic pregnancy | 48.37<br>(33.37 to 67.77)           | 40.54<br>(22.89 to 67.21)           | 34.98<br>(19.48 to 58.38)           | 43.37<br>(24.05 to 70.97)           | 0.96<br>(0.67 to 1.36)        | 0.81<br>(0.46 to 1.34)        | 0.70<br>(0.39 to 1.16)        | 0.87<br>(0.49 to 1.42)        |

|                                                                  |                                         |                                       |                                       |                                        |                                |                                 |                                 |                                 |
|------------------------------------------------------------------|-----------------------------------------|---------------------------------------|---------------------------------------|----------------------------------------|--------------------------------|---------------------------------|---------------------------------|---------------------------------|
| Indirect maternal deaths                                         | 17.36<br>(9.49 to<br>28.98)             | 16.62<br>(7.95 to<br>30.54)           | 14.32<br>(6.76 to<br>26.58)           | 18.03<br>(8.63 to<br>33.07)            | 0.31<br>(0.17 to<br>0.51)      | 0.30<br>(0.15 to<br>0.53)       | 0.26<br>(0.13 to<br>0.46)       | 0.32<br>(0.16 to<br>0.59)       |
| Late maternal deaths                                             | 3.29<br>(1.62 to<br>6.17)               | 2.31<br>(1.01 to<br>4.79)             | 2.00<br>(0.88 to<br>4.12)             | 2.49<br>(1.09 to<br>5.22)              | 0.06<br>(0.03 to<br>0.12)      | 0.04<br>(0.02 to<br>0.09)       | 0.04<br>(0.02 to<br>0.08)       | 0.05<br>(0.02 to<br>0.10)       |
| Maternal deaths aggravated by HIV/AIDS                           | 0.05<br>(0.02 to<br>0.10)               | 0.18<br>(0.05 to<br>0.42)             | 0.15<br>(0.04 to<br>0.35)             | 0.21<br>(0.06 to<br>0.50)              | 0.00<br>(0.00 to<br>0.00)      | 0.00<br>(0.00 to<br>0.01)       | 0.00<br>(0.00 to<br>0.01)       | 0.00<br>(0.00 to<br>0.01)       |
| Other maternal disorders                                         | 111.79<br>(87.10 to<br>141.29)          | 91.38<br>(58.76 to<br>138.61)         | 81.41<br>(52.22 to<br>123.48)         | 97.55<br>(62.69 to<br>147.07)          | 2.08<br>(1.60 to<br>2.63)      | 1.70<br>(1.09 to<br>2.57)       | 1.51<br>(0.97 to<br>2.31)       | 1.81<br>(1.17 to<br>2.76)       |
| <b>Sweden</b>                                                    |                                         |                                       |                                       |                                        |                                |                                 |                                 |                                 |
| Cause                                                            | YLLs (actual counts)                    |                                       |                                       |                                        | Deaths (actual counts)         |                                 |                                 |                                 |
|                                                                  | 2016                                    | 2040 Forecast                         | 2040 Better Scenario                  | 2040 Worse Scenario                    | 2016                           | 2040 Forecast                   | 2040 Better Scenario            | 2040 Worse Scenario             |
| Neonatal disorders                                               | 10,492.95<br>(7,026.76 to<br>13,971.08) | 6,371.33<br>(3,713.49 to<br>9,579.49) | 5,179.35<br>(2,950.71 to<br>7,791.02) | 7,924.69<br>(4,607.42 to<br>11,842.92) | 121.33<br>(81.26 to<br>161.56) | 73.69<br>(42.96 to<br>110.75)   | 59.91<br>(34.14 to<br>90.10)    | 91.65<br>(53.29 to<br>136.96)   |
| Neonatal preterm birth                                           | 3,839.31<br>(2,523.34 to<br>5,269.00)   | 1,720.13<br>(1,001.27 to<br>2,572.52) | 1,282.17<br>(743.80 to<br>1,910.69)   | 2,439.27<br>(1,388.28 to<br>3,634.54)  | 44.40<br>(29.19 to<br>60.93)   | 19.90<br>(11.59 to<br>29.76)    | 14.83<br>(8.60 to<br>22.10)     | 28.21<br>(16.06 to<br>42.02)    |
| Neonatal encephalopathy due to birth asphyxia and trauma         | 3,336.31<br>(2,297.44 to<br>4,468.89)   | 1,615.83<br>(876.34 to<br>2,591.37)   | 1,230.81<br>(664.11 to<br>1,947.73)   | 1,985.74<br>(1,050.84 to<br>3,155.49)  | 38.57<br>(26.56 to<br>51.67)   | 18.69<br>(10.14 to<br>29.98)    | 14.24<br>(7.69 to<br>22.52)     | 22.97<br>(12.16 to<br>36.49)    |
| Neonatal sepsis and other neonatal infections                    | 600.04<br>(375.98 to<br>904.58)         | 621.77<br>(348.82 to<br>1,108.35)     | 499.84<br>(276.03 to<br>895.84)       | 745.52<br>(403.00 to<br>1,340.93)      | 6.93<br>(4.35 to<br>10.45)     | 7.19<br>(4.03 to<br>12.81)      | 5.78<br>(3.19 to<br>10.35)      | 8.62<br>(4.66 to<br>15.49)      |
| Hemolytic disease and other neonatal jaundice                    | 37.52<br>(19.47 to<br>56.04)            | 17.51<br>(8.32 to<br>29.33)           | 13.94<br>(6.61 to<br>23.35)           | 21.05<br>(9.98 to<br>35.59)            | 0.43<br>(0.23 to<br>0.65)      | 0.20<br>(0.10 to<br>0.34)       | 0.16<br>(0.08 to<br>0.27)       | 0.24<br>(0.12 to<br>0.41)       |
| Other neonatal disorders                                         | 2,679.77<br>(1,716.32 to<br>3,585.93)   | 2,396.09<br>(1,282.41 to<br>3,980.64) | 2,152.58<br>(1,157.91 to<br>3,553.01) | 2,733.10<br>(1,458.77 to<br>4,562.25)  | 30.99<br>(19.84 to<br>41.46)   | 27.71<br>(14.84 to<br>46.04)    | 24.90<br>(13.40 to<br>41.08)    | 31.61<br>(16.87 to<br>52.75)    |
| Nutritional deficiencies                                         | 932.16<br>(829.99 to<br>1,041.72)       | 1,284.71<br>(1,073.94 to<br>1,528.22) | 1,425.06<br>(1,199.45 to<br>1,692.33) | 1,166.76<br>(966.04 to<br>1,385.30)    | 107.41<br>(95.05 to<br>120.63) | 184.33<br>(145.81 to<br>230.61) | 212.54<br>(170.94 to<br>264.44) | 161.13<br>(124.99 to<br>202.85) |
| Protein-energy malnutrition                                      | 699.32<br>(471.68 to<br>818.04)         | 970.12<br>(619.83 to<br>1,232.07)     | 1,110.40<br>(731.73 to<br>1,408.80)   | 866.32<br>(545.25 to<br>1,112.62)      | 142.84<br>(51.15 to<br>97.17)  | 142.84<br>(83.28 to<br>194.65)  | 169.47<br>(104.97 to<br>227.08) | 123.11<br>(70.05 to<br>168.93)  |
| Iodine deficiency                                                | 19.96<br>(3.36 to<br>54.82)             | 55.61<br>(2.00 to<br>207.34)          | 57.05<br>(1.86 to<br>216.66)          | 52.53<br>(2.07 to<br>192.59)           | 1.44<br>(0.14 to<br>4.84)      | 6.99<br>(0.08 to<br>35.07)      | 7.44<br>(0.07 to<br>38.90)      | 6.35<br>(0.08 to<br>30.73)      |
| Dietary iron deficiency                                          | 27.21<br>(16.83 to<br>33.70)            | 27.70<br>(17.10 to<br>36.27)          | 28.63<br>(17.81 to<br>38.86)          | 27.42<br>(17.09 to<br>35.31)           | 0.95<br>(0.56 to<br>1.41)      | 1.21<br>(0.71 to<br>2.24)       | 1.34<br>(0.78 to<br>2.61)       | 1.12<br>(0.66 to<br>2.00)       |
| Other nutritional deficiencies                                   | 185.67<br>(132.76 to<br>403.87)         | 231.28<br>(140.47 to<br>538.11)       | 228.98<br>(140.34 to<br>538.11)       | 220.49<br>(137.20 to<br>495.32)        | 22.74<br>(15.24 to<br>53.96)   | 33.30<br>(18.83 to<br>84.74)    | 34.29<br>(19.47 to<br>91.67)    | 30.55<br>(16.95 to<br>76.89)    |
| Other communicable, maternal, neonatal, and nutritional diseases | 2,370.43<br>(1,897.28 to<br>2,689.03)   | 3,266.80<br>(2,476.54 to<br>3,819.57) | 3,277.47<br>(2,467.43 to<br>3,839.97) | 3,198.77<br>(2,456.84 to<br>3,733.56)  | 141.74<br>(99.12 to<br>165.31) | 244.90<br>(166.54 to<br>293.42) | 257.05<br>(171.88 to<br>307.68) | 228.94<br>(156.46 to<br>273.87) |
| Sexually transmitted infections excluding HIV                    | 57.90<br>(47.85 to<br>74.81)            | 42.57<br>(34.34 to<br>55.90)          | 41.11<br>(32.97 to<br>53.54)          | 42.36<br>(34.08 to<br>54.89)           | 3.41<br>(2.84 to<br>4.44)      | 3.21<br>(2.56 to<br>4.33)       | 3.25<br>(2.58 to<br>4.39)       | 3.04<br>(2.42 to<br>4.04)       |
| Syphilis                                                         | 15.80<br>(13.14 to<br>22.02)            | 10.58<br>(8.30 to<br>14.48)           | 9.73<br>(7.66 to<br>13.44)            | 10.81<br>(8.39 to<br>14.77)            | 0.87<br>(0.72 to<br>1.30)      | 0.76<br>(0.59 to<br>1.08)       | 0.73<br>(0.56 to<br>1.04)       | 0.74<br>(0.57 to<br>1.06)       |
| Chlamydia infection                                              | 8.30<br>(6.82 to<br>10.58)              | 6.39<br>(5.03 to<br>8.30)             | 6.29<br>(4.95 to<br>8.18)             | 6.29<br>(4.95 to<br>8.24)              | 0.53<br>(0.44 to<br>0.66)      | 0.52<br>(0.40 to<br>0.75)       | 0.54<br>(0.41 to<br>0.79)       | 0.49<br>(0.37 to<br>0.69)       |
| Gonococcal infection                                             | 23.64<br>(19.38 to<br>30.32)            | 18.27<br>(14.23 to<br>24.42)          | 17.96<br>(13.99 to<br>24.06)          | 17.97<br>(14.03 to<br>23.76)           | 1.50<br>(1.25 to<br>1.90)      | 1.46<br>(1.09 to<br>2.05)       | 1.50<br>(1.12 to<br>2.12)       | 1.37<br>(1.02 to<br>1.89)       |

|                                       |                                                 |                                                 |                                               |                                                   |                                          |                                            |                                           |                                             |
|---------------------------------------|-------------------------------------------------|-------------------------------------------------|-----------------------------------------------|---------------------------------------------------|------------------------------------------|--------------------------------------------|-------------------------------------------|---------------------------------------------|
| Other sexually transmitted infections | 10.16<br>(8.31 to<br>12.99)                     | 7.33<br>(5.77 to<br>9.67)                       | 7.13<br>(5.60 to<br>9.47)                     | 7.31<br>(5.76 to<br>9.55)                         | 0.51<br>(0.42 to<br>0.65)                | 0.47<br>(0.37 to<br>0.65)                  | 0.48<br>(0.37 to<br>0.65)                 | 0.44<br>(0.35 to<br>0.59)                   |
| Acute hepatitis                       | 217.14<br>(187.94 to<br>251.57)                 | 153.51<br>(118.32 to<br>201.23)                 | 128.15<br>(97.16 to<br>169.98)                | 164.77<br>(123.99 to<br>221.37)                   | 8.49<br>(7.35 to<br>9.82)                | 7.51<br>(5.82 to<br>9.68)                  | 6.47<br>(4.94 to<br>8.44)                 | 7.80<br>(5.91 to<br>10.31)                  |
| Acute hepatitis A                     | 17.57<br>(14.29 to<br>21.62)                    | 9.04<br>(6.49 to<br>12.48)                      | 7.91<br>(5.60 to<br>10.78)                    | 9.62<br>(6.69 to<br>13.28)                        | 0.51<br>(0.40 to<br>0.65)                | 0.37<br>(0.25 to<br>0.53)                  | 0.34<br>(0.23 to<br>0.47)                 | 0.38<br>(0.26 to<br>0.55)                   |
| Acute hepatitis B                     | 161.24<br>(135.59 to<br>191.25)                 | 115.19<br>(85.35 to<br>158.12)                  | 95.21<br>(69.27 to<br>131.66)                 | 124.30<br>(88.70 to<br>173.45)                    | 6.07<br>(5.06 to<br>7.17)                | 5.04<br>(3.69 to<br>6.88)                  | 4.26<br>(3.12 to<br>5.85)                 | 5.32<br>(3.78 to<br>7.42)                   |
| Acute hepatitis C                     | 9.22<br>(6.92 to<br>12.18)                      | 7.17<br>(4.82 to<br>10.51)                      | 6.03<br>(4.03 to<br>8.80)                     | 7.64<br>(5.02 to<br>11.44)                        | 0.42<br>(0.31 to<br>0.55)                | 0.38<br>(0.27 to<br>0.55)                  | 0.33<br>(0.23 to<br>0.48)                 | 0.40<br>(0.27 to<br>0.58)                   |
| Acute hepatitis E                     | 29.10<br>(22.91 to<br>35.87)                    | 22.11<br>(15.43 to<br>30.93)                    | 19.01<br>(13.14 to<br>26.76)                  | 23.20<br>(15.73 to<br>32.98)                      | 1.50<br>(1.11 to<br>1.94)                | 1.71<br>(1.15 to<br>2.52)                  | 1.55<br>(1.04 to<br>2.27)                 | 1.70<br>(1.12 to<br>2.56)                   |
| Other unspecified infectious diseases | 2,095.39<br>(1,642.03 to<br>2,391.97)           | 3,070.72<br>(2,304.24 to<br>3,604.79)           | 3,108.21<br>(2,311.05 to<br>3,639.09)         | 2,991.64<br>(2,271.87 to<br>3,483.88)             | 129.84<br>(87.23 to<br>152.30)           | 129.84<br>(155.87 to<br>282.34)            | 247.33<br>(162.20 to<br>298.03)           | 218.10<br>(145.10 to<br>262.52)             |
| Non-communicable diseases             | 1,064,573.06<br>(958,067.23 to<br>1,181,479.64) | 1,134,336.75<br>(970,000.31 to<br>1,334,745.75) | 982,191.53<br>(849,621.65 to<br>1,132,295.38) | 1,369,220.17<br>(1,156,429.36 to<br>1,615,770.15) | 85,351.12<br>(77,640.28 to<br>93,630.80) | 106,798.64<br>(93,950.80 to<br>123,902.71) | 94,826.45<br>(84,131.24 to<br>108,548.28) | 122,194.67<br>(106,626.01 to<br>140,364.19) |

Sweden

| Cause                            | YLLs (actual counts)                        |                                             |                                             |                                             | Deaths (actual counts)                   |                                          |                                          |                                          |
|----------------------------------|---------------------------------------------|---------------------------------------------|---------------------------------------------|---------------------------------------------|------------------------------------------|------------------------------------------|------------------------------------------|------------------------------------------|
|                                  | 2016                                        | 2040 Forecast                               | 2040 Better Scenario                        | 2040 Worse Scenario                         | 2016                                     | 2040 Forecast                            | 2040 Better Scenario                     | 2040 Worse Scenario                      |
| Neoplasms                        | 400,003.24<br>(356,507.61 to<br>444,843.05) | 425,144.98<br>(364,743.48 to<br>497,584.88) | 390,214.39<br>(336,086.79 to<br>454,225.58) | 517,409.57<br>(431,582.87 to<br>618,960.55) | 24,792.57<br>(22,251.74 to<br>27,379.30) | 30,668.59<br>(26,655.90 to<br>35,073.93) | 29,066.25<br>(25,573.79 to<br>32,931.24) | 35,990.37<br>(30,571.25 to<br>41,722.08) |
| Lip and oral cavity cancer       | 3,519.06<br>(3,100.75 to<br>3,993.82)       | 3,121.49<br>(1,727.96 to<br>5,388.57)       | 2,242.56<br>(1,324.62 to<br>3,812.44)       | 5,569.24<br>(2,949.84 to<br>9,786.59)       | 215.88<br>(192.01 to<br>241.07)          | 219.82<br>(124.51 to<br>384.53)          | 165.06<br>(99.55 to<br>281.84)           | 394.91<br>(210.01 to<br>691.41)          |
| Nasopharynx cancer               | 791.96<br>(683.00 to<br>930.44)             | 754.06<br>(453.94 to<br>1,220.25)           | 515.60<br>(320.98 to<br>827.56)             | 1,295.89<br>(754.45 to<br>2,157.64)         | 44.94<br>(39.08 to<br>52.29)             | 50.50<br>(29.94 to<br>79.88)             | 35.93<br>(22.01 to<br>56.29)             | 86.63<br>(48.19 to<br>144.57)            |
| Other pharynx cancer             | 2,198.74<br>(1,920.78 to<br>2,511.27)       | 2,472.03<br>(1,322.31 to<br>4,168.13)       | 1,994.44<br>(1,127.99 to<br>3,287.76)       | 2,866.88<br>(1,522.75 to<br>4,863.40)       | 111.17<br>(97.67 to<br>126.26)           | 139.56<br>(73.32 to<br>233.57)           | 115.34<br>(67.21 to<br>185.67)           | 158.72<br>(85.38 to<br>265.37)           |
| Esophageal cancer                | 8,682.37<br>(7,640.97 to<br>9,973.59)       | 8,163.11<br>(5,364.85 to<br>12,414.01)      | 6,399.45<br>(4,352.53 to<br>9,536.49)       | 13,257.11<br>(7,925.75 to<br>21,572.76)     | 504.88<br>(448.91 to<br>571.85)          | 522.03<br>(350.74 to<br>784.46)          | 422.42<br>(294.85 to<br>612.59)          | 849.92<br>(524.87 to<br>1,353.12)        |
| Stomach cancer                   | 14,080.01<br>(12,370.74 to<br>15,857.95)    | 10,503.14<br>(8,117.43 to<br>13,600.88)     | 9,005.53<br>(7,186.91 to<br>11,462.14)      | 11,675.38<br>(8,805.82 to<br>15,408.86)     | 958.97<br>(853.54 to<br>1,068.87)        | 848.29<br>(660.16 to<br>1,108.54)        | 750.78<br>(601.30 to<br>944.83)          | 918.99<br>(687.92 to<br>1,222.93)        |
| Colon and rectum cancer          | 49,114.08<br>(43,170.42 to<br>55,554.83)    | 54,560.43<br>(38,566.93 to<br>78,968.63)    | 43,711.17<br>(32,011.31 to<br>61,369.52)    | 65,830.39<br>(45,257.61 to<br>97,125.04)    | 3,304.24<br>(2,923.24 to<br>3,721.36)    | 4,327.03<br>(3,097.18 to<br>6,175.40)    | 3,595.00<br>(2,638.09 to<br>5,043.15)    | 5,076.28<br>(3,484.28 to<br>7,351.24)    |
| Liver cancer                     | 12,150.77<br>(10,725.79 to<br>13,824.66)    | 17,520.67<br>(12,129.42 to<br>26,260.25)    | 15,919.62<br>(11,377.15 to<br>22,894.28)    | 22,565.04<br>(14,601.85 to<br>35,208.15)    | 721.81<br>(641.98 to<br>816.23)          | 1,188.50<br>(842.87 to<br>1,726.66)      | 1,121.38<br>(822.23 to<br>1,578.59)      | 1,481.28<br>(973.82 to<br>2,237.47)      |
| Liver cancer due to hepatitis B  | 679.32<br>(363.33 to<br>1,402.67)           | 961.34<br>(458.53 to<br>1,986.44)           | 928.78<br>(448.45 to<br>1,914.95)           | 1,146.24<br>(520.60 to<br>2,431.07)         | 38.56<br>(18.70 to<br>79.39)             | 62.93<br>(25.80 to<br>134.47)            | 62.88<br>(26.04 to<br>133.92)            | 72.83<br>(28.97 to<br>154.76)            |
| Liver cancer due to hepatitis C  | 1,404.00<br>(1,156.91 to<br>1,671.39)       | 2,022.46<br>(1,393.10 to<br>3,001.41)       | 1,975.52<br>(1,401.42 to<br>2,849.88)       | 2,382.37<br>(1,549.68 to<br>3,653.72)       | 91.56<br>(77.00 to<br>108.93)            | 152.51<br>(107.01 to<br>216.51)          | 154.02<br>(111.62 to<br>214.09)          | 174.14<br>(115.16 to<br>256.72)          |
| Liver cancer due to alcohol use  | 3,125.56<br>(2,581.07 to<br>3,770.52)       | 4,508.45<br>(2,939.72 to<br>7,049.41)       | 3,400.70<br>(2,284.57 to<br>5,160.53)       | 7,005.88<br>(4,316.19 to<br>11,045.37)      | 177.11<br>(147.53 to<br>214.95)          | 285.08<br>(190.27 to<br>430.18)          | 224.75<br>(155.80 to<br>333.30)          | 431.11<br>(272.96 to<br>671.47)          |
| Liver cancer due to other causes | 6,941.89<br>(5,911.20 to<br>8,102.27)       | 10,028.43<br>(6,676.09 to<br>15,187.27)     | 9,614.62<br>(6,628.25 to<br>13,986.02)      | 12,030.54<br>(7,473.11 to<br>19,114.58)     | 414.58<br>(355.73 to<br>478.80)          | 687.99<br>(471.94 to<br>1,020.35)        | 679.73<br>(479.24 to<br>979.64)          | 803.21<br>(515.46 to<br>1,248.20)        |

|                                      |                                          |                                          |                                          |                                           |                                       |                                       |                                       |                                       |
|--------------------------------------|------------------------------------------|------------------------------------------|------------------------------------------|-------------------------------------------|---------------------------------------|---------------------------------------|---------------------------------------|---------------------------------------|
|                                      | 8,513.35<br>(7,431.81 to<br>9,740.54)    | 6,378.29<br>(5,556.91 to<br>7,293.40)    | 6,380.39<br>(5,592.99 to<br>7,340.73)    | 6,181.02<br>(5,420.68 to<br>7,037.75)     | 559.72<br>(493.20 to<br>638.75)       | 479.56<br>(429.10 to<br>536.44)       | 493.87<br>(442.99 to<br>556.19)       | 451.77<br>(401.05 to<br>506.77)       |
| Gallbladder and biliary tract cancer |                                          |                                          |                                          |                                           |                                       |                                       |                                       |                                       |
|                                      | 29,131.01<br>(25,618.81 to<br>32,951.32) | 33,279.41<br>(26,332.36 to<br>42,695.12) | 32,979.44<br>(26,203.80 to<br>42,129.67) | 37,431.41<br>(29,049.41 to<br>49,278.56)  | 1,768.58<br>(1,571.45 to<br>1,991.62) | 2,229.98<br>(1,798.02 to<br>2,820.28) | 2,260.90<br>(1,829.29 to<br>2,811.12) | 2,468.41<br>(1,951.26 to<br>3,193.05) |
| Pancreatic cancer                    |                                          |                                          |                                          |                                           |                                       |                                       |                                       |                                       |
|                                      | 1,242.82<br>(1,084.30 to<br>1,417.93)    | 871.38<br>(465.23 to<br>1,399.75)        | 630.21<br>(353.07 to<br>1,001.25)        | 1,608.64<br>(827.91 to<br>2,904.10)       | 72.41<br>(63.40 to<br>82.74)          | 57.72<br>(30.82 to<br>93.30)          | 43.44<br>(23.86 to<br>69.15)          | 105.88<br>(55.51 to<br>186.58)        |
| Larynx cancer                        |                                          |                                          |                                          |                                           |                                       |                                       |                                       |                                       |
|                                      | 66,877.89<br>(59,218.14 to<br>74,957.12) | 48,162.58<br>(34,545.55 to<br>65,169.59) | 39,677.16<br>(29,041.85 to<br>53,086.30) | 99,510.42<br>(68,746.40 to<br>138,545.93) | 3,887.80<br>(3,443.87 to<br>4,367.15) | 3,069.38<br>(2,199.62 to<br>4,141.51) | 2,600.07<br>(1,876.79 to<br>3,491.71) | 6,257.02<br>(4,313.28 to<br>8,703.12) |
| Tracheal, bronchus, and lung cancer  |                                          |                                          |                                          |                                           |                                       |                                       |                                       |                                       |
|                                      | 11,747.17<br>(9,245.36 to<br>13,739.13)  | 14,463.21<br>(11,413.64 to<br>17,070.88) | 16,016.89<br>(12,610.55 to<br>18,980.00) | 13,486.54<br>(10,551.49 to<br>15,862.60)  | 602.89<br>(468.79 to<br>697.26)       | 865.79<br>(672.03 to<br>997.88)       | 987.20<br>(761.32 to<br>1,142.13)     | 783.98<br>(600.97 to<br>912.06)       |
| Malignant skin melanoma              |                                          |                                          |                                          |                                           |                                       |                                       |                                       |                                       |
|                                      | 1,434.82<br>(1,279.41 to<br>1,619.82)    | 1,649.79<br>(1,453.62 to<br>1,861.99)    | 1,529.32<br>(1,341.86 to<br>1,723.07)    | 1,641.19<br>(1,424.69 to<br>1,874.95)     | 108.45<br>(97.61 to<br>120.58)        | 151.28<br>(129.92 to<br>172.86)       | 146.49<br>(129.04 to<br>166.19)       | 144.60<br>(119.47 to<br>165.66)       |
| Non-melanoma skin cancer             |                                          |                                          |                                          |                                           |                                       |                                       |                                       |                                       |
|                                      | 31,527.50<br>(26,033.21 to<br>38,717.11) | 31,459.97<br>(22,146.96 to<br>45,732.22) | 26,667.08<br>(18,894.42 to<br>37,465.60) | 37,766.84<br>(25,573.15 to<br>55,303.77)  | 1,736.99<br>(1,447.29 to<br>2,140.05) | 2,046.98<br>(1,466.21 to<br>2,880.50) | 1,790.90<br>(1,306.85 to<br>2,486.17) | 2,379.80<br>(1,630.12 to<br>3,373.03) |
| Breast cancer                        |                                          |                                          |                                          |                                           |                                       |                                       |                                       |                                       |
|                                      | 5,466.38<br>(4,581.21 to<br>6,495.95)    | 3,837.66<br>(2,884.28 to<br>5,034.40)    | 3,396.79<br>(2,595.15 to<br>4,424.54)    | 4,335.37<br>(3,100.87 to<br>6,055.17)     | 307.29<br>(260.42 to<br>360.29)       | 260.94<br>(202.10 to<br>337.07)       | 239.10<br>(184.50 to<br>307.02)       | 287.58<br>(207.82 to<br>398.64)       |
| Cervical cancer                      |                                          |                                          |                                          |                                           |                                       |                                       |                                       |                                       |
|                                      | 3,918.41<br>(3,239.52 to<br>4,759.80)    | 4,814.09<br>(3,938.95 to<br>5,882.40)    | 4,527.54<br>(3,684.44 to<br>5,541.21)    | 4,810.48<br>(3,979.42 to<br>5,890.68)     | 267.76<br>(223.02 to<br>324.23)       | 371.53<br>(312.55 to<br>445.26)       | 358.14<br>(300.25 to<br>429.71)       | 361.74<br>(303.85 to<br>431.34)       |
| Uterine cancer                       |                                          |                                          |                                          |                                           |                                       |                                       |                                       |                                       |
|                                      | 14,534.52<br>(10,889.45 to<br>19,204.36) | 14,092.78<br>(9,526.60 to<br>20,317.48)  | 12,842.46<br>(8,877.73 to<br>18,197.68)  | 14,981.71<br>(9,895.93 to<br>21,845.20)   | 799.15<br>(608.05 to<br>1,043.88)     | 841.06<br>(570.27 to<br>1,197.35)     | 770.84<br>(538.09 to<br>1,073.07)     | 885.29<br>(583.56 to<br>1,294.78)     |
| Ovarian cancer                       |                                          |                                          |                                          |                                           |                                       |                                       |                                       |                                       |
|                                      | 31,841.60<br>(24,267.29 to<br>37,946.49) | 43,262.93<br>(33,251.14 to<br>51,000.13) | 42,731.67<br>(33,430.92 to<br>50,584.21) | 42,446.87<br>(31,069.10 to<br>50,645.58)  | 2,730.88<br>(2,033.78 to<br>3,216.39) | 4,354.32<br>(3,002.87 to<br>5,151.10) | 4,449.92<br>(3,253.99 to<br>5,183.02) | 4,154.64<br>(2,747.35 to<br>4,980.35) |
| Prostate cancer                      |                                          |                                          |                                          |                                           |                                       |                                       |                                       |                                       |
|                                      | 345.67<br>(283.32 to<br>420.29)          | 246.03<br>(191.74 to<br>320.34)          | 223.89<br>(171.69 to<br>293.55)          | 253.97<br>(197.19 to<br>335.09)           | 9.85<br>(8.29 to<br>11.66)            | 8.75<br>(7.29 to<br>10.39)            | 8.29<br>(6.94 to<br>9.88)             | 8.70<br>(7.24 to<br>10.35)            |
| Testicular cancer                    |                                          |                                          |                                          |                                           |                                       |                                       |                                       |                                       |
| <b>Sweden</b>                        |                                          |                                          |                                          |                                           |                                       |                                       |                                       |                                       |
| Cause                                | YLLs (actual counts)                     |                                          |                                          |                                           | Deaths (actual counts)                |                                       |                                       |                                       |
|                                      | 2016                                     | 2040 Forecast                            | 2040 Better Scenario                     | 2040 Worse Scenario                       | 2016                                  | 2040 Forecast                         | 2040 Better Scenario                  | 2040 Worse Scenario                   |
| Kidney cancer                        | 12,088.22<br>(10,611.54 to<br>13,670.00) | 16,869.79<br>(14,348.50 to<br>20,028.11) | 17,288.37<br>(14,645.47 to<br>20,502.73) | 17,763.19<br>(14,649.80 to<br>21,785.53)  | 749.25<br>(661.08 to<br>843.28)       | 1,174.80<br>(1,010.32 to<br>1,368.71) | 1,239.22<br>(1,068.36 to<br>1,433.36) | 1,210.21<br>(1,006.51 to<br>1,461.32) |
| Bladder cancer                       | 10,847.95<br>(9,551.56 to<br>12,249.61)  | 11,635.69<br>(9,074.55 to<br>14,994.79)  | 11,197.99<br>(8,851.38 to<br>14,289.66)  | 13,787.16<br>(10,252.11 to<br>18,450.73)  | 842.11<br>(751.35 to<br>945.55)       | 1,057.23<br>(824.73 to<br>1,366.00)   | 1,050.82<br>(835.25 to<br>1,335.08)   | 1,226.49<br>(907.64 to<br>1,659.56)   |
| Brain and nervous system cancer      | 15,527.15<br>(13,134.06 to<br>18,303.71) | 17,975.03<br>(14,926.95 to<br>21,160.97) | 17,294.42<br>(14,317.02 to<br>20,459.15) | 18,051.15<br>(15,102.53 to<br>21,163.62)  | 604.45<br>(504.68 to<br>699.94)       | 792.77<br>(658.99 to<br>912.79)       | 777.43<br>(641.71 to<br>895.91)       | 778.15<br>(635.36 to<br>899.79)       |
| Thyroid cancer                       | 1,122.87<br>(980.10 to<br>1,275.35)      | 1,348.61<br>(1,028.66 to<br>1,816.95)    | 1,230.46<br>(969.22 to<br>1,617.28)      | 1,435.32<br>(1,064.56 to<br>1,977.14)     | 76.38<br>(67.21 to<br>86.82)          | 106.79<br>(83.94 to<br>139.95)        | 100.65<br>(80.51 to<br>128.84)        | 109.55<br>(83.66 to<br>147.38)        |
| Mesothelioma                         | 2,967.88<br>(2,515.85 to<br>3,730.78)    | 3,782.01<br>(3,213.33 to<br>4,763.27)    | 3,915.52<br>(3,321.87 to<br>4,998.96)    | 3,605.82<br>(3,078.29 to<br>4,487.24)     | 176.85<br>(151.89 to<br>220.41)       | 257.71<br>(224.97 to<br>316.38)       | 273.76<br>(239.02 to<br>341.51)       | 239.77<br>(208.90 to<br>290.00)       |
| Hodgkin lymphoma                     | 830.44<br>(722.41 to<br>958.40)          | 648.10<br>(541.14 to<br>767.79)          | 565.05<br>(469.78 to<br>673.35)          | 675.17<br>(568.28 to<br>819.08)           | 37.14<br>(30.55 to<br>42.90)          | 35.51<br>(28.07 to<br>41.36)          | 31.88<br>(25.28 to<br>37.13)          | 35.84<br>(28.62 to<br>42.46)          |
| Non-Hodgkin lymphoma                 | 13,311.97<br>(11,598.74 to<br>15,466.17) | 15,551.09<br>(12,803.30 to<br>19,397.77) | 14,591.35<br>(12,069.08 to<br>18,021.57) | 15,957.44<br>(12,923.41 to<br>20,142.63)  | 825.46<br>(714.36 to<br>947.69)       | 1,131.51<br>(929.21 to<br>1,359.89)   | 1,094.90<br>(912.65 to<br>1,299.69)   | 1,123.72<br>(907.58 to<br>1,376.15)   |
| Multiple myeloma                     | 8,230.81<br>(5,602.80 to<br>9,768.50)    | 10,437.95<br>(7,097.49 to<br>13,310.65)  | 10,070.54<br>(6,821.10 to<br>12,563.46)  | 10,585.62<br>(7,152.80 to<br>13,622.66)   | 545.76<br>(367.41 to<br>645.09)       | 786.26<br>(528.05 to<br>979.84)       | 780.34<br>(522.13 to<br>953.13)       | 774.62<br>(509.35 to<br>980.11)       |



|                                                                |                                                               |                                                               |                                                               |                                                               |                                                            |                                                            |                                                            |                                                            |
|----------------------------------------------------------------|---------------------------------------------------------------|---------------------------------------------------------------|---------------------------------------------------------------|---------------------------------------------------------------|------------------------------------------------------------|------------------------------------------------------------|------------------------------------------------------------|------------------------------------------------------------|
|                                                                | 2,335.08<br>(1,493.88 to<br>3,249.41)                         | 4,768.77<br>(2,790.20 to<br>7,127.38)                         | 4,707.81<br>(2,774.95 to<br>7,006.74)                         | 4,931.38<br>(2,885.57 to<br>7,489.94)                         | 278.77<br>(166.53 to<br>382.69)                            | 646.31<br>(339.37 to<br>962.02)                            | 661.63<br>(360.84 to<br>970.00)                            | 635.33<br>(338.74 to<br>952.91)                            |
| Peripheral artery disease                                      | 2,732.87<br>(1,680.91 to<br>3,409.39)                         | 3,741.79<br>(2,012.16 to<br>5,669.14)                         | 3,617.59<br>(1,979.71 to<br>5,511.39)                         | 3,744.41<br>(2,015.89 to<br>5,693.35)                         | 226.50<br>(123.03 to<br>298.37)                            | 369.08<br>(171.36 to<br>622.23)                            | 371.93<br>(173.83 to<br>627.72)                            | 353.80<br>(164.31 to<br>599.62)                            |
| Endocarditis                                                   | 21,922.47<br>(19,365.40 to<br>24,809.38)                      | 30,793.07<br>(24,586.49 to<br>39,216.41)                      | 26,277.06<br>(21,503.23 to<br>33,030.47)                      | 33,299.00<br>(25,890.50 to<br>43,191.92)                      | 2,121.05<br>(1,886.78 to<br>2,372.12)                      | 3,519.69<br>(2,803.07 to<br>4,469.64)                      | 3,142.97<br>(2,558.52 to<br>3,923.45)                      | 3,584.52<br>(2,774.53 to<br>4,586.59)                      |
| Other cardiovascular and circulatory diseases                  | <b>49,961.77</b><br><b>(44,419.16 to</b><br><b>55,852.07)</b> | <b>41,956.16</b><br><b>(32,788.77 to</b><br><b>52,374.73)</b> | <b>40,090.60</b><br><b>(31,730.08 to</b><br><b>49,367.44)</b> | <b>68,745.19</b><br><b>(51,013.25 to</b><br><b>90,598.49)</b> | <b>4,320.78</b><br><b>(3,877.16 to</b><br><b>4,795.51)</b> | <b>4,142.12</b><br><b>(3,258.48 to</b><br><b>5,154.96)</b> | <b>4,057.45</b><br><b>(3,229.68 to</b><br><b>5,003.79)</b> | <b>6,690.55</b><br><b>(4,907.13 to</b><br><b>8,751.95)</b> |
| Chronic respiratory diseases                                   | 41,524.66<br>(36,469.75 to<br>47,313.50)                      | 30,839.59<br>(22,246.44 to<br>41,188.22)                      | 27,421.93<br>(19,605.23 to<br>37,077.72)                      | 58,262.09<br>(40,754.97 to<br>80,519.09)                      | 3,696.40<br>(3,283.56 to<br>4,164.47)                      | 3,197.98<br>(2,318.06 to<br>4,324.04)                      | 2,950.69<br>(2,156.34 to<br>4,005.98)                      | 5,825.86<br>(4,034.78 to<br>7,936.83)                      |
| Chronic obstructive pulmonary disease                          | 235.00<br>(95.36 to<br>293.78)                                | 283.48<br>(211.76 to<br>383.02)                               | 310.67<br>(232.66 to<br>428.29)                               | 264.61<br>(201.79 to<br>345.82)                               | 19.55<br>(15.93 to<br>24.70)                               | 28.22<br>(20.15 to<br>38.59)                               | 31.79<br>(23.06 to<br>44.36)                               | 25.67<br>(18.51 to<br>34.64)                               |
| Pneumoconiosis                                                 | 34.83<br>(21.13 to<br>84.55)                                  | 25.41<br>(10.83 to<br>81.64)                                  | 20.65<br>(8.31 to<br>71.84)                                   | 26.44<br>(11.38 to<br>85.05)                                  | 3.21<br>(1.88 to<br>8.20)                                  | 2.78<br>(1.12 to<br>9.37)                                  | 2.32<br>(0.90 to<br>8.41)                                  | 2.82<br>(1.13 to<br>9.12)                                  |
| Silicosis                                                      | 162.78<br>(102.20 to<br>204.61)                               | 228.72<br>(163.27 to<br>304.07)                               | 260.60<br>(192.03 to<br>346.45)                               | 207.46<br>(146.60 to<br>271.05)                               | 13.22<br>(7.31 to<br>16.75)                                | 22.34<br>(14.37 to<br>30.38)                               | 26.26<br>(18.35 to<br>36.18)                               | 19.72<br>(11.71 to<br>27.19)                               |
| Asbestosis                                                     | 4.53<br>(2.71 to<br>15.59)                                    | 5.11<br>(2.26 to<br>20.28)                                    | 5.09<br>(2.23 to<br>19.46)                                    | 5.25<br>(2.37 to<br>21.00)                                    | 0.43<br>(0.25 to<br>1.56)                                  | 0.59<br>(0.25 to<br>2.41)                                  | 0.61<br>(0.26 to<br>2.29)                                  | 0.59<br>(0.25 to<br>2.25)                                  |
| Coal workers pneumoconiosis                                    | 32.86<br>(23.56 to<br>67.37)                                  | 24.24<br>(15.39 to<br>54.14)                                  | 24.33<br>(15.09 to<br>55.67)                                  | 25.46<br>(16.64 to<br>54.16)                                  | 2.68<br>(1.86 to<br>6.28)                                  | 2.51<br>(1.47 to<br>6.12)                                  | 2.60<br>(1.51 to<br>6.40)                                  | 2.54<br>(1.53 to<br>5.83)                                  |
| Other pneumoconiosis                                           | 1,848.21<br>(1,589.74 to<br>2,330.63)                         | 964.43<br>(599.84 to<br>1,589.19)                             | 735.97<br>(460.75 to<br>1,193.22)                             | 1,238.20<br>(727.27 to<br>2,061.42)                           | 136.90<br>(117.31 to<br>163.57)                            | 90.33<br>(55.47 to<br>148.98)                              | 72.37<br>(45.63 to<br>115.56)                              | 108.72<br>(64.32 to<br>177.64)                             |
| Asthma                                                         | 5,979.92<br>(3,520.83 to<br>7,374.96)                         | 9,450.02<br>(5,944.39 to<br>11,486.99)                        | 11,196.00<br>(7,337.67 to<br>13,456.29)                       | 8,534.34<br>(5,023.75 to<br>10,618.75)                        | 444.82<br>(257.39 to<br>543.31)                            | 793.66<br>(492.30 to<br>970.09)                            | 908.77<br>(617.51 to<br>1,168.89)                          | 697.08<br>(399.77 to<br>876.99)                            |
| Interstitial lung disease and pulmonary sarcoidosis            | 373.98<br>(208.65 to<br>472.41)                               | 418.64<br>(219.45 to<br>583.44)                               | 426.03<br>(224.25 to<br>597.05)                               | 445.95<br>(228.69 to<br>632.08)                               | 23.11<br>(10.03 to<br>31.56)                               | 31.93<br>(13.26 to<br>48.65)                               | 33.84<br>(13.92 to<br>51.05)                               | 33.23<br>(13.65 to<br>51.01)                               |
| Other chronic respiratory diseases                             | <b>21,450.87</b><br><b>(18,980.49 to</b><br><b>24,403.76)</b> | <b>18,575.00</b><br><b>(16,253.96 to</b><br><b>21,358.51)</b> | <b>15,138.15</b><br><b>(13,168.92 to</b><br><b>17,505.90)</b> | <b>22,189.00</b><br><b>(19,198.07 to</b><br><b>25,594.46)</b> | <b>1,046.31</b><br><b>(933.00 to</b><br><b>1,181.14)</b>   | <b>1,041.08</b><br><b>(928.36 to</b><br><b>1,168.95)</b>   | <b>882.23</b><br><b>(792.46 to</b><br><b>990.84)</b>       | <b>1,204.97</b><br><b>(1,069.43 to</b><br><b>1,354.81)</b> |
| Cirrhosis and other chronic liver diseases                     | 2,420.41<br>(2,002.83 to<br>2,871.47)                         | 2,130.10<br>(1,740.64 to<br>2,569.23)                         | 1,961.83<br>(1,600.46 to<br>2,376.37)                         | 2,169.92<br>(1,755.89 to<br>2,635.21)                         | 116.81<br>(98.05 to<br>138.58)                             | 115.98<br>(97.67 to<br>137.49)                             | 109.70<br>(92.18 to<br>129.87)                             | 114.99<br>(96.73 to<br>137.80)                             |
| Cirrhosis and other chronic liver diseases due to hepatitis B  | 2,870.03<br>(2,228.83 to<br>3,615.25)                         | 2,579.37<br>(1,979.82 to<br>3,259.25)                         | 2,354.61<br>(1,818.22 to<br>2,957.44)                         | 2,643.73<br>(1,997.28 to<br>3,399.94)                         | 130.64<br>(103.21 to<br>161.91)                            | 131.30<br>(102.26 to<br>161.03)                            | 122.89<br>(96.66 to<br>150.25)                             | 131.16<br>(102.05 to<br>162.79)                            |
| Cirrhosis and other chronic liver diseases due to hepatitis C  | 10,756.27<br>(9,373.06 to<br>12,363.38)                       | 9,301.95<br>(7,942.02 to<br>11,025.85)                        | 6,594.97<br>(5,569.18 to<br>7,885.26)                         | 12,750.28<br>(10,765.97 to<br>14,960.39)                      | 522.41<br>(457.31 to<br>596.75)                            | 512.10<br>(445.59 to<br>587.18)                            | 379.74<br>(326.53 to<br>438.23)                            | 683.19<br>(592.86 to<br>783.81)                            |
| Cirrhosis and other chronic liver diseases due to alcohol use  | 5,404.17<br>(4,564.05 to<br>6,395.33)                         | 4,563.58<br>(3,819.23 to<br>5,381.77)                         | 4,226.74<br>(3,555.42 to<br>5,001.43)                         | 4,625.07<br>(3,797.32 to<br>5,503.15)                         | 276.45<br>(237.76 to<br>321.48)                            | 281.71<br>(240.43 to<br>325.54)                            | 269.90<br>(231.07 to<br>310.66)                            | 275.64<br>(232.85 to<br>322.18)                            |
| Cirrhosis and other chronic liver diseases due to other causes | <b>23,862.97</b><br><b>(20,899.63 to</b><br><b>29,176.95)</b> | <b>27,748.52</b><br><b>(23,361.45 to</b><br><b>34,677.23)</b> | <b>26,091.66</b><br><b>(22,292.67 to</b><br><b>32,447.92)</b> | <b>28,408.89</b><br><b>(23,683.92 to</b><br><b>35,899.24)</b> | <b>1,972.56</b><br><b>(1,749.58 to</b><br><b>2,334.85)</b> | <b>2,820.93</b><br><b>(2,390.73 to</b><br><b>3,387.51)</b> | <b>2,765.86</b><br><b>(2,373.09 to</b><br><b>3,387.51)</b> | <b>2,772.09</b><br><b>(2,299.92 to</b><br><b>3,485.23)</b> |
| Digestive diseases                                             | 4,888.16<br>(4,223.71 to<br>6,190.88)                         | 3,343.02<br>(2,699.20 to<br>4,208.44)                         | 2,879.88<br>(2,324.12 to<br>3,685.26)                         | 3,662.69<br>(2,846.94 to<br>4,726.41)                         | 395.68<br>(344.59 to<br>482.69)                            | 345.52<br>(277.76 to<br>439.10)                            | 307.69<br>(250.77 to<br>385.29)                            | 360.74<br>(279.38 to<br>463.40)                            |
| Peptic ulcer disease                                           | <b>Sweden</b>                                                 |                                                               |                                                               |                                                               |                                                            |                                                            |                                                            |                                                            |
| Cause                                                          | YLLs (actual counts)                                          |                                                               |                                                               |                                                               | Deaths (actual counts)                                     |                                                            |                                                            |                                                            |
|                                                                | 2016                                                          | 2040 Forecast                                                 | 2040 Better Scenario                                          | 2040 Worse Scenario                                           | 2016                                                       | 2040 Forecast                                              | 2040 Better Scenario                                       | 2040 Worse Scenario                                        |





|                                                            |                                                               |                                                                |                                                               |                                                                |                                                            |                                                             |                                                             |                                                             |
|------------------------------------------------------------|---------------------------------------------------------------|----------------------------------------------------------------|---------------------------------------------------------------|----------------------------------------------------------------|------------------------------------------------------------|-------------------------------------------------------------|-------------------------------------------------------------|-------------------------------------------------------------|
| Other drug use disorders                                   | 7,044.61<br>(5,498.41 to<br>8,753.53)                         | 12,144.59<br>(8,610.17 to<br>16,822.22)                        | 14,226.78<br>(10,293.46 to<br>19,892.28)                      | 11,327.93<br>(7,964.57 to<br>15,839.87)                        | 165.85<br>(131.93 to<br>202.97)                            | 304.28<br>(232.24 to<br>397.83)                             | 360.33<br>(276.88 to<br>465.72)                             | 280.11<br>(207.98 to<br>369.10)                             |
| Eating disorders                                           | 69.52<br>(53.48 to<br>88.98)                                  | 76.48<br>(50.45 to<br>111.39)                                  | 82.50<br>(54.14 to<br>121.05)                                 | 73.98<br>(49.29 to<br>108.59)                                  | 1.35<br>(1.04 to<br>1.72)                                  | 1.51<br>(1.00 to<br>2.19)                                   | 1.63<br>(1.07 to<br>2.37)                                   | 1.46<br>(0.97 to<br>2.12)                                   |
| <b>Sweden</b>                                              |                                                               |                                                                |                                                               |                                                                |                                                            |                                                             |                                                             |                                                             |
| Cause                                                      | YLLs (actual counts)                                          |                                                                |                                                               |                                                                | Deaths (actual counts)                                     |                                                             |                                                             |                                                             |
|                                                            | 2016                                                          | 2040 Forecast                                                  | 2040 Better Scenario                                          | 2040 Worse Scenario                                            | 2016                                                       | 2040 Forecast                                               | 2040 Better Scenario                                        | 2040 Worse Scenario                                         |
| <b>Diabetes, urogenital, blood, and endocrine diseases</b> | <b>49,550.11</b><br><b>(44,188.15 to</b><br><b>55,756.36)</b> | <b>74,680.30</b><br><b>(54,078.15 to</b><br><b>110,349.82)</b> | <b>61,609.06</b><br><b>(45,733.57 to</b><br><b>89,534.90)</b> | <b>80,388.11</b><br><b>(58,036.51 to</b><br><b>118,493.87)</b> | <b>4,259.49</b><br><b>(3,837.03 to</b><br><b>4,676.68)</b> | <b>8,045.95</b><br><b>(5,732.05 to</b><br><b>12,400.97)</b> | <b>6,895.88</b><br><b>(5,143.71 to</b><br><b>10,509.60)</b> | <b>8,226.62</b><br><b>(5,813.75 to</b><br><b>12,774.11)</b> |
| Diabetes mellitus                                          | 23,106.54<br>(20,403.40 to<br>26,040.41)                      | 24,682.23<br>(17,074.91 to<br>35,260.32)                       | 20,113.92<br>(14,053.88 to<br>27,931.34)                      | 29,447.94<br>(19,699.91 to<br>42,546.16)                       | 1,802.29<br>(1,603.04 to<br>2,020.22)                      | 2,344.64<br>(1,686.20 to<br>3,166.07)                       | 2,016.64<br>(1,487.79 to<br>2,655.16)                       | 2,609.23<br>(1,848.52 to<br>3,579.10)                       |
| Acute glomerulonephritis                                   | 46.75<br>(41.43 to<br>51.95)                                  | 54.60<br>(44.64 to<br>66.49)                                   | 49.39<br>(39.47 to<br>60.84)                                  | 57.59<br>(46.28 to<br>70.11)                                   | 1.07<br>(0.95 to<br>1.20)                                  | 2.00<br>(1.53 to<br>2.67)                                   | 1.89<br>(1.43 to<br>2.57)                                   | 2.00<br>(1.54 to<br>2.66)                                   |
| Chronic kidney disease                                     | 14,410.26<br>(12,893.18 to<br>16,164.55)                      | 29,744.48<br>(11,525.47 to<br>66,370.47)                       | 21,405.52<br>(8,862.76 to<br>49,664.20)                       | 31,365.72<br>(12,272.95 to<br>70,101.42)                       | 1,398.38<br>(1,258.61 to<br>1,549.78)                      | 3,464.08<br>(1,290.44 to<br>7,830.58)                       | 2,595.76<br>(1,031.50 to<br>6,108.67)                       | 3,533.23<br>(1,292.70 to<br>7,933.67)                       |
| Chronic kidney disease due to diabetes mellitus            | 4,866.12<br>(3,927.85 to<br>5,846.95)                         | 11,057.77<br>(4,187.40 to<br>25,053.32)                        | 7,869.47<br>(3,152.20 to<br>18,358.66)                        | 11,739.94<br>(4,334.46 to<br>25,968.89)                        | 420.44<br>(336.67 to<br>519.58)                            | 1,157.42<br>(404.12 to<br>2,761.57)                         | 859.07<br>(328.37 to<br>2,080.46)                           | 1,187.28<br>(420.86 to<br>2,785.76)                         |
| Chronic kidney disease due to hypertension                 | 1,873.52<br>(1,500.88 to<br>2,321.27)                         | 5,146.18<br>(1,832.13 to<br>11,911.97)                         | 3,894.68<br>(1,478.85 to<br>9,171.09)                         | 5,247.10<br>(1,916.47 to<br>11,923.85)                         | 247.95<br>(194.01 to<br>316.08)                            | 756.10<br>(266.38 to<br>1,795.55)                           | 592.34<br>(225.43 to<br>1,422.03)                           | 750.57<br>(261.86 to<br>1,737.63)                           |
| Chronic kidney disease due to glomerulonephritis           | 3,068.47<br>(2,401.23 to<br>3,815.78)                         | 5,117.78<br>(1,957.65 to<br>11,688.52)                         | 3,595.57<br>(1,433.83 to<br>8,315.99)                         | 5,486.80<br>(2,079.91 to<br>12,436.42)                         | 275.35<br>(207.07 to<br>353.31)                            | 558.23<br>(200.03 to<br>1,383.96)                           | 405.18<br>(151.36 to<br>1,020.04)                           | 580.45<br>(206.96 to<br>1,425.58)                           |
| Chronic kidney disease due to other and unspecified causes | 4,602.16<br>(3,717.81 to<br>5,607.99)                         | 8,422.75<br>(3,271.28 to<br>19,050.88)                         | 6,945.79<br>(2,452.74 to<br>13,995.53)                        | 8,891.87<br>(3,448.43 to<br>19,707.02)                         | 454.63<br>(358.01 to<br>562.08)                            | 992.33<br>(359.21 to<br>2,247.42)                           | 739.17<br>(288.02 to<br>1,740.20)                           | 1,014.93<br>(374.57 to<br>2,224.61)                         |
| Urinary diseases and male infertility                      | 4,549.98<br>(4,402.03 to<br>5,583.26)                         | 10,416.71<br>(8,842.70 to<br>12,216.35)                        | 10,080.66<br>(8,568.90 to<br>11,729.16)                       | 10,034.01<br>(8,324.99 to<br>11,891.96)                        | 564.24<br>(502.29 to<br>636.75)                            | 1,412.03<br>(1,136.70 to<br>1,695.39)                       | 1,411.78<br>(1,173.02 to<br>1,672.70)                       | 1,319.27<br>(1,041.01 to<br>1,610.76)                       |
| Urinary tract infections                                   | 4,384.14<br>(3,873.39 to<br>4,935.30)                         | 9,773.18<br>(8,237.62 to<br>11,503.10)                         | 9,499.39<br>(8,065.74 to<br>11,132.73)                        | 9,387.83<br>(7,764.44 to<br>11,158.66)                         | 513.48<br>(457.13 to<br>576.47)                            | 1,340.55<br>(1,069.09 to<br>1,624.46)                       | 1,344.55<br>(1,109.04 to<br>1,598.04)                       | 1,250.24<br>(976.59 to<br>1,530.32)                         |
| Urolithiasis                                               | 329.54<br>(248.78 to<br>487.45)                               | 378.98<br>(272.14 to<br>574.94)                                | 340.23<br>(247.55 to<br>513.46)                               | 381.85<br>(272.11 to<br>582.34)                                | 30.94<br>(23.45 to<br>45.35)                               | 41.59<br>(29.13 to<br>64.41)                                | 38.81<br>(27.74 to<br>59.23)                                | 40.35<br>(28.25 to<br>61.85)                                |
| Other urinary diseases                                     | 236.30<br>(164.73 to<br>321.21)                               | 264.56<br>(179.95 to<br>416.98)                                | 241.05<br>(164.83 to<br>385.83)                               | 264.34<br>(178.26 to<br>410.88)                                | 19.82<br>(14.66 to<br>30.91)                               | 29.89<br>(19.32 to<br>52.77)                                | 28.42<br>(18.75 to<br>50.35)                                | 28.68<br>(17.67 to<br>50.33)                                |
| Gynecological diseases                                     | 72.73<br>(34.57 to<br>91.38)                                  | 49.43<br>(21.42 to<br>66.22)                                   | 39.86<br>(16.89 to<br>83.36)                                  | 53.02<br>(23.35 to<br>73.10)                                   | 5.02<br>(2.03 to<br>6.34)                                  | 4.08<br>(1.59 to<br>5.71)                                   | 3.39<br>(1.33 to<br>4.80)                                   | 4.22<br>(1.64 to<br>6.01)                                   |
| Uterine fibroids                                           | 17.64<br>(9.30 to<br>23.49)                                   | 11.89<br>(5.66 to<br>17.41)                                    | 9.95<br>(4.76 to<br>14.69)                                    | 12.76<br>(6.32 to<br>19.24)                                    | 0.54<br>(0.28 to<br>0.70)                                  | 0.47<br>(0.22 to<br>0.67)                                   | 0.40<br>(0.19 to<br>0.57)                                   | 0.49<br>(0.24 to<br>0.70)                                   |
| Polycystic ovarian syndrome                                | 1.96<br>(0.98 to<br>3.51)                                     | 0.61<br>(0.24 to<br>1.21)                                      | 0.40<br>(0.16 to<br>0.83)                                     | 0.74<br>(0.30 to<br>1.53)                                      | 0.05<br>(0.02 to<br>0.09)                                  | 0.02<br>(0.01 to<br>0.03)                                   | 0.01<br>(0.00 to<br>0.02)                                   | 0.02<br>(0.01 to<br>0.04)                                   |
| Endometriosis                                              | 0.39<br>(0.15 to<br>0.70)                                     | 0.36<br>(0.11 to<br>0.85)                                      | 0.29<br>(0.09 to<br>0.68)                                     | 0.40<br>(0.13 to<br>0.94)                                      | 0.01<br>(0.00 to<br>0.02)                                  | 0.01<br>(0.00 to<br>0.02)                                   | 0.01<br>(0.00 to<br>0.02)                                   | 0.01<br>(0.00 to<br>0.02)                                   |
| Genital prolapse                                           | 10.93<br>(1.41 to<br>15.10)                                   | 4.58<br>(0.54 to<br>7.74)                                      | 3.70<br>(0.44 to<br>6.42)                                     | 4.89<br>(0.59 to<br>8.40)                                      | 1.01<br>(0.12 to<br>1.42)                                  | 0.42<br>(0.04 to<br>0.74)                                   | 0.35<br>(0.04 to<br>0.63)                                   | 0.44<br>(0.05 to<br>0.78)                                   |
| Other gynecological diseases                               | 41.81<br>(20.50 to<br>53.02)                                  | 31.99<br>(13.48 to<br>45.04)                                   | 25.52<br>(10.46 to<br>35.98)                                  | 34.24<br>(14.83 to<br>49.39)                                   | 3.41<br>(1.43 to<br>4.38)                                  | 3.17<br>(1.13 to<br>4.62)                                   | 2.62<br>(0.96 to<br>3.86)                                   | 3.26<br>(1.23 to<br>4.89)                                   |

|                                                   |                                                 |                                                 |                                                 |                                                 |                                        |                                            |                                            |                                            |
|---------------------------------------------------|-------------------------------------------------|-------------------------------------------------|-------------------------------------------------|-------------------------------------------------|----------------------------------------|--------------------------------------------|--------------------------------------------|--------------------------------------------|
| Hemoglobinopathies and hemolytic anemias          | 1,749.30<br>(1,448.35 to<br>2,165.83)           | 1,957.87<br>(1,491.35 to<br>2,383.67)           | 1,805.37<br>(1,395.03 to<br>2,185.80)           | 1,947.34<br>(1,505.30 to<br>2,398.56)           | 167.21<br>(121.93 to<br>196.00)        | 227.72<br>(155.08 to<br>279.70)            | 218.42<br>(150.33 to<br>267.08)            | 217.84<br>(145.92 to<br>274.26)            |
| Thalassemias                                      | 57.41<br>(44.84 to<br>89.52)                    | 30.43<br>(21.10 to<br>52.15)                    | 29.80<br>(20.55 to<br>51.47)                    | 31.31<br>(21.59 to<br>53.30)                    | 0.97<br>(0.76 to<br>1.56)              | 0.60<br>(0.43 to<br>1.02)                  | 0.59<br>(0.42 to<br>1.00)                  | 0.61<br>(0.43 to<br>1.04)                  |
| Sickle cell disorders                             | 138.62<br>(112.03 to<br>205.87)                 | 166.34<br>(123.83 to<br>258.40)                 | 143.23<br>(106.65 to<br>219.52)                 | 176.83<br>(128.90 to<br>277.96)                 | 4.03<br>(3.26 to<br>5.89)              | 6.85<br>(5.15 to<br>10.24)                 | 5.97<br>(4.49 to<br>9.00)                  | 7.17<br>(5.29 to<br>10.71)                 |
| G6PD deficiency                                   | 178.31<br>(142.57 to<br>262.27)                 | 216.76<br>(166.32 to<br>307.86)                 | 184.95<br>(141.75 to<br>261.80)                 | 229.81<br>(172.93 to<br>327.72)                 | 6.56<br>(5.31 to<br>8.69)              | 11.38<br>(8.81 to<br>14.74)                | 9.98<br>(7.78 to<br>12.99)                 | 11.70<br>(8.94 to<br>15.52)                |
| Other hemoglobinopathies and hemolytic anemias    | 1,374.95<br>(1,090.51 to<br>1,637.21)           | 1,544.34<br>(1,109.69 to<br>1,881.08)           | 1,447.39<br>(1,044.54 to<br>1,751.08)           | 1,509.39<br>(1,085.12 to<br>1,867.33)           | 155.65<br>(110.69 to<br>182.51)        | 208.89<br>(137.24 to<br>255.63)            | 201.87<br>(134.47 to<br>248.59)            | 198.36<br>(128.11 to<br>253.10)            |
| Endocrine, metabolic, blood, and immune disorders | 5,214.55<br>(4,485.38 to<br>7,244.58)           | 7,774.97<br>(6,556.55 to<br>9,972.17)           | 8,114.34<br>(6,847.45 to<br>10,175.39)          | 7,482.48<br>(6,329.05 to<br>9,929.80)           | 521.29<br>(240.81 to<br>373.91)        | 591.39<br>(413.79 to<br>692.46)            | 648.00<br>(451.93 to<br>759.16)            | 540.83<br>(378.51 to<br>639.14)            |
| <b>Sweden</b>                                     |                                                 |                                                 |                                                 |                                                 |                                        |                                            |                                            |                                            |
| Cause                                             | YLLs (actual counts)                            |                                                 |                                                 |                                                 | Deaths (actual counts)                 |                                            |                                            |                                            |
|                                                   | 2016                                            | 2040 Forecast                                   | 2040 Better Scenario                            | 2040 Worse Scenario                             | 2016                                   | 2040 Forecast                              | 2040 Better Scenario                       | 2040 Worse Scenario                        |
| <b>Musculoskeletal disorders</b>                  | <b>4,453.35</b><br>(3,720.42 to<br>5,228.32)    | <b>6,227.96</b><br>(5,157.07 to<br>7,312.02)    | <b>5,771.30</b><br>(4,758.62 to<br>6,839.88)    | <b>6,327.48</b><br>(5,209.93 to<br>7,593.34)    | <b>352.77</b><br>(295.20 to<br>411.22) | <b>579.16</b><br>(472.08 to<br>695.51)     | <b>555.85</b><br>(458.36 to<br>663.64)     | <b>566.25</b><br>(447.28 to<br>680.55)     |
| Rheumatoid arthritis                              | 1,705.70<br>(1,371.62 to<br>2,207.56)           | 2,558.11<br>(1,862.49 to<br>3,377.41)           | 2,133.92<br>(1,556.20 to<br>2,837.07)           | 2,758.97<br>(2,001.64 to<br>3,664.47)           | 136.02<br>(109.30 to<br>175.81)        | 236.34<br>(171.32 to<br>312.28)            | 202.59<br>(144.11 to<br>268.44)            | 246.36<br>(174.05 to<br>328.08)            |
| Other musculoskeletal disorders                   | 2,747.64<br>(2,152.21 to<br>3,231.89)           | 3,669.84<br>(2,884.44 to<br>4,373.14)           | 3,637.38<br>(2,898.70 to<br>4,318.79)           | 3,568.51<br>(2,787.82 to<br>4,224.07)           | 216.75<br>(172.98 to<br>255.40)        | 342.82<br>(264.57 to<br>423.89)            | 353.26<br>(279.68 to<br>432.68)            | 319.90<br>(240.08 to<br>399.02)            |
| <b>Other non-communicable diseases</b>            | <b>17,323.31</b><br>(14,113.70 to<br>23,514.77) | <b>20,173.44</b><br>(15,659.90 to<br>26,049.94) | <b>18,286.99</b><br>(14,019.02 to<br>23,693.11) | <b>21,555.84</b><br>(16,780.39 to<br>28,240.48) | <b>520.88</b><br>(363.77 to<br>642.36) | <b>1,145.96</b><br>(643.94 to<br>1,451.71) | <b>1,151.20</b><br>(633.29 to<br>1,461.74) | <b>1,095.52</b><br>(637.47 to<br>1,373.31) |
| Congenital birth defects                          | 12,626.80<br>(10,012.30 to<br>19,327.53)        | 11,334.54<br>(8,662.30 to<br>17,043.28)         | 9,658.72<br>(7,308.59 to<br>14,506.79)          | 12,847.73<br>(9,519.73 to<br>19,235.79)         | 201.15<br>(165.99 to<br>289.23)        | 199.36<br>(160.61 to<br>282.79)            | 176.06<br>(141.29 to<br>246.11)            | 218.76<br>(171.28 to<br>312.35)            |
| Neural tube defects                               | 272.76<br>(181.60 to<br>347.68)                 | 99.86<br>(69.13 to<br>140.77)                   | 74.60<br>(50.55 to<br>106.12)                   | 117.75<br>(76.47 to<br>171.09)                  | 4.77<br>(3.44 to<br>5.85)              | 1.94<br>(1.36 to<br>2.69)                  | 1.46<br>(1.02 to<br>2.06)                  | 2.24<br>(1.51 to<br>3.24)                  |
| Congenital heart anomalies                        | 3,724.04<br>(2,779.45 to<br>6,290.42)           | 2,203.40<br>(1,384.30 to<br>4,209.41)           | 1,622.70<br>(1,002.43 to<br>3,171.89)           | 2,651.62<br>(1,602.73 to<br>5,035.56)           | 57.92<br>(43.88 to<br>99.91)           | 36.26<br>(23.15 to<br>69.30)               | 27.02<br>(16.83 to<br>54.18)               | 42.79<br>(26.19 to<br>82.83)               |
| Orofacial clefts                                  | 6.48<br>(2.18 to<br>15.92)                      | 3.14<br>(0.92 to<br>7.72)                       | 2.11<br>(0.64 to<br>5.23)                       | 4.05<br>(1.19 to<br>9.90)                       | 0.07<br>(0.03 to<br>0.18)              | 0.04<br>(0.01 to<br>0.09)                  | 0.02<br>(0.01 to<br>0.06)                  | 0.05<br>(0.01 to<br>0.11)                  |
| Down syndrome                                     | 1,690.34<br>(1,063.21 to<br>2,059.77)           | 2,693.11<br>(1,822.93 to<br>3,214.82)           | 2,739.73<br>(1,904.50 to<br>3,353.72)           | 2,712.14<br>(1,797.02 to<br>3,355.14)           | 41.86<br>(25.74 to<br>51.20)           | 71.16<br>(47.65 to<br>88.63)               | 73.01<br>(50.61 to<br>90.52)               | 70.58<br>(46.82 to<br>87.77)               |
| Other chromosomal abnormalities                   | 1,924.27<br>(948.61 to<br>3,083.20)             | 2,899.83<br>(1,658.98 to<br>4,655.95)           | 2,520.94<br>(1,491.06 to<br>4,008.75)           | 3,305.06<br>(1,862.85 to<br>5,288.59)           | 24.50<br>(12.76 to<br>38.96)           | 37.95<br>(23.17 to<br>60.41)               | 33.23<br>(20.81 to<br>53.46)               | 42.81<br>(25.23 to<br>67.98)               |
| Congenital musculoskeletal and limb anomalies     | 468.97<br>(259.63 to<br>636.15)                 | 301.61<br>(178.96 to<br>442.02)                 | 234.01<br>(139.51 to<br>342.56)                 | 359.83<br>(204.50 to<br>548.69)                 | 6.46<br>(3.77 to<br>8.50)              | 4.33<br>(2.66 to<br>6.10)                  | 3.39<br>(2.17 to<br>4.72)                  | 5.09<br>(3.07 to<br>7.39)                  |
| Urogenital congenital anomalies                   | 348.80<br>(93.32 to<br>592.34)                  | 220.01<br>(66.24 to<br>411.96)                  | 176.23<br>(54.34 to<br>326.51)                  | 260.27<br>(74.73 to<br>494.25)                  | 4.71<br>(1.56 to<br>7.56)              | 3.10<br>(1.15 to<br>5.40)                  | 2.51<br>(0.98 to<br>4.30)                  | 3.61<br>(1.31 to<br>6.32)                  |
| Digestive congenital anomalies                    | 551.01<br>(243.38 to<br>814.23)                 | 415.90<br>(186.23 to<br>655.15)                 | 310.81<br>(142.65 to<br>496.45)                 | 511.41<br>(228.01 to<br>815.02)                 | 6.82<br>(3.23 to<br>9.93)              | 5.18<br>(2.52 to<br>7.98)                  | 3.89<br>(1.96 to<br>6.05)                  | 6.33<br>(3.03 to<br>9.91)                  |
| Other congenital birth defects                    | 3,640.14<br>(2,428.03 to<br>8,132.44)           | 2,497.68<br>(1,525.10 to<br>5,748.71)           | 1,977.57<br>(1,207.32 to<br>4,561.28)           | 2,925.60<br>(1,728.92 to<br>6,715.82)           | 54.03<br>(39.30 to<br>107.90)          | 39.39<br>(26.23 to<br>81.19)               | 31.53<br>(20.78 to<br>65.03)               | 45.27<br>(29.28 to<br>91.83)               |

|                                      |                                            |                                           |                                           |                                            |                                       |                                       |                                       |                                       |
|--------------------------------------|--------------------------------------------|-------------------------------------------|-------------------------------------------|--------------------------------------------|---------------------------------------|---------------------------------------|---------------------------------------|---------------------------------------|
| Skin and subcutaneous diseases       | 2,957.47<br>(1,599.99 to<br>4,149.78)      | 7,830.55<br>(4,144.87 to<br>10,467.29)    | 7,803.72<br>(4,119.23 to<br>10,333.78)    | 7,502.07<br>(3,968.34 to<br>10,090.79)     | 299.55<br>(145.21 to<br>391.09)       | 934.00<br>(423.48 to<br>1,239.25)     | 965.57<br>(438.14 to<br>1,273.75)     | 862.76<br>(391.74 to<br>1,152.03)     |
| Cellulitis                           | 566.10<br>(188.81 to<br>1,820.91)          | 1,677.43<br>(541.62 to<br>5,272.88)       | 1,689.19<br>(555.13 to<br>5,264.58)       | 1,610.36<br>(525.52 to<br>5,009.05)        | 45.66<br>(13.36 to<br>154.33)         | 160.93<br>(45.86 to<br>517.28)        | 168.37<br>(48.83 to<br>534.15)        | 148.86<br>(42.65 to<br>479.78)        |
| Pyoderma                             | 2,046.48<br>(629.00 to<br>2,913.70)        | 5,596.55<br>(1,560.00 to<br>8,309.94)     | 5,587.17<br>(1,543.52 to<br>8,359.28)     | 5,347.01<br>(1,503.51 to<br>7,904.25)      | 216.10<br>(57.42 to<br>321.53)        | 701.99<br>(175.73 to<br>1,091.89)     | 727.45<br>(182.84 to<br>1,123.26)     | 646.97<br>(161.34 to<br>1,010.19)     |
| Decubitus ulcer                      | 219.56<br>(132.41 to<br>471.56)            | 355.35<br>(189.47 to<br>761.59)           | 330.81<br>(173.83 to<br>710.36)           | 349.50<br>(187.42 to<br>772.10)            | 24.78<br>(14.38 to<br>55.10)          | 47.53<br>(23.47 to<br>110.55)         | 45.79<br>(22.80 to<br>106.74)         | 45.07<br>(21.67 to<br>104.90)         |
| Other skin and subcutaneous diseases | 125.32<br>(71.48 to<br>265.82)             | 201.22<br>(107.33 to<br>429.05)           | 196.55<br>(105.46 to<br>416.92)           | 195.20<br>(104.30 to<br>405.50)            | 13.01<br>(6.68 to<br>28.86)           | 23.56<br>(11.32 to<br>52.12)          | 23.97<br>(11.38 to<br>51.74)          | 21.87<br>(10.29 to<br>47.95)          |
| Sudden infant death syndrome         | 1,739.05<br>(1,098.56 to<br>2,433.75)      | 1,008.35<br>(520.52 to<br>1,735.09)       | 824.55<br>(427.34 to<br>1,414.99)         | 1,206.03<br>(602.95 to<br>2,062.24)        | 20.19<br>(12.75 to<br>28.25)          | 11.70<br>(6.04 to<br>20.13)           | 9.57<br>(4.96 to<br>16.42)            | 13.99<br>(6.99 to<br>23.92)           |
| Injuries                             | 108,399.77<br>(91,294.54 to<br>123,769.30) | 98,473.39<br>(72,717.58 to<br>134,994.70) | 81,287.76<br>(61,380.69 to<br>109,234.05) | 111,887.24<br>(81,106.80 to<br>156,466.83) | 4,514.73<br>(3,503.39 to<br>5,158.34) | 5,265.36<br>(3,738.97 to<br>6,461.32) | 4,821.63<br>(3,423.43 to<br>5,799.58) | 5,431.36<br>(3,874.93 to<br>6,775.46) |
| Transport injuries                   | 17,458.09<br>(14,925.42 to<br>20,041.38)   | 14,670.96<br>(8,539.68 to<br>23,989.08)   | 8,928.71<br>(5,423.55 to<br>14,154.44)    | 21,001.41<br>(11,759.13 to<br>35,075.15)   | 482.49<br>(421.58 to<br>551.44)       | 471.89<br>(306.44 to<br>709.12)       | 317.95<br>(217.59 to<br>463.73)       | 624.68<br>(387.35 to<br>971.05)       |
| Road injuries                        | 15,206.89<br>(13,001.67 to<br>17,493.70)   | 12,241.80<br>(7,122.11 to<br>20,142.68)   | 7,083.17<br>(4,298.10 to<br>11,259.20)    | 18,170.60<br>(10,238.06 to<br>30,573.76)   | 418.90<br>(365.49 to<br>478.27)       | 395.05<br>(257.43 to<br>593.90)       | 258.19<br>(178.40 to<br>376.49)       | 537.25<br>(338.18 to<br>837.93)       |
| Pedestrian road injuries             | 2,291.50<br>(1,632.73 to<br>2,827.03)      | 1,190.40<br>(772.94 to<br>1,830.07)       | 658.19<br>(444.60 to<br>1,008.62)         | 1,732.17<br>(1,077.35 to<br>2,686.60)      | 87.09<br>(67.61 to<br>104.48)         | 61.69<br>(42.12 to<br>92.07)          | 38.16<br>(27.10 to<br>55.64)          | 82.33<br>(54.11 to<br>125.12)         |
| <b>Sweden</b>                        |                                            |                                           |                                           |                                            |                                       |                                       |                                       |                                       |
| Cause                                | YLLs (actual counts)                       |                                           |                                           |                                            | Deaths (actual counts)                |                                       |                                       |                                       |
|                                      | 2016                                       | 2040 Forecast                             | 2040 Better Scenario                      | 2040 Worse Scenario                        | 2016                                  | 2040 Forecast                         | 2040 Better Scenario                  | 2040 Worse Scenario                   |
| Cyclist road injuries                | 974.04<br>(682.34 to<br>1,212.64)          | 1,052.99<br>(650.49 to<br>1,649.22)       | 683.30<br>(444.49 to<br>1,010.20)         | 1,467.78<br>(853.25 to<br>2,351.70)        | 33.38<br>(25.01 to<br>39.69)          | 45.82<br>(29.20 to<br>68.26)          | 34.84<br>(23.49 to<br>49.77)          | 56.53<br>(34.79 to<br>87.41)          |
| Motorcyclist road injuries           | 2,489.60<br>(1,463.98 to<br>3,129.93)      | 2,435.51<br>(1,220.48 to<br>4,327.00)     | 1,669.27<br>(879.18 to<br>2,911.88)       | 3,214.47<br>(1,569.02 to<br>5,846.57)      | 54.55<br>(34.13 to<br>66.89)          | 57.85<br>(32.22 to<br>97.21)          | 43.10<br>(25.52 to<br>69.55)          | 72.19<br>(38.55 to<br>123.44)         |
| Motor vehicle road injuries          | 9,265.58<br>(7,754.36 to<br>11,242.50)     | 7,389.53<br>(4,140.17 to<br>12,372.00)    | 3,969.39<br>(2,321.96 to<br>6,554.49)     | 11,498.23<br>(6,285.82 to<br>19,673.83)    | 238.53<br>(201.89 to<br>287.57)       | 223.74<br>(139.40 to<br>349.80)       | 137.89<br>(91.74 to<br>204.57)        | 318.31<br>(192.90 to<br>499.02)       |
| Other road injuries                  | 186.18<br>(109.06 to<br>424.36)            | 173.38<br>(77.23 to<br>415.09)            | 103.02<br>(48.55 to<br>247.56)            | 257.95<br>(110.62 to<br>630.57)            | 5.34<br>(3.83 to<br>10.19)            | 5.95<br>(3.37 to<br>11.09)            | 4.19<br>(2.41 to<br>7.37)             | 7.88<br>(4.23 to<br>15.57)            |
| Other transport injuries             | 2,251.19<br>(1,865.07 to<br>2,782.05)      | 2,429.16<br>(1,435.29 to<br>3,930.69)     | 1,845.54<br>(1,118.17 to<br>2,994.64)     | 2,830.82<br>(1,595.09 to<br>4,842.69)      | 63.59<br>(53.51 to<br>75.84)          | 76.85<br>(47.64 to<br>120.26)         | 59.76<br>(38.96 to<br>92.00)          | 87.43<br>(51.63 to<br>141.16)         |
| Unintentional injuries               | 34,231.21<br>(26,922.26 to<br>39,159.77)   | 34,181.12<br>(25,325.18 to<br>39,621.51)  | 32,085.34<br>(23,466.90 to<br>36,878.70)  | 34,286.22<br>(25,096.46 to<br>40,256.86)   | 2,493.92<br>(1,692.21 to<br>2,889.91) | 3,305.66<br>(2,124.51 to<br>3,925.69) | 3,273.58<br>(2,113.30 to<br>3,888.77) | 3,140.83<br>(1,976.90 to<br>3,773.51) |
| Falls                                | 16,232.73<br>(10,566.48 to<br>19,108.76)   | 19,354.84<br>(11,821.55 to<br>22,653.05)  | 18,732.27<br>(11,499.14 to<br>21,917.18)  | 18,849.72<br>(11,340.00 to<br>22,458.84)   | 1,554.73<br>(898.44 to<br>1,844.40)   | 2,235.27<br>(1,233.96 to<br>2,732.84) | 2,242.46<br>(1,264.11 to<br>2,708.03) | 2,096.27<br>(1,132.27 to<br>2,601.03) |
| Drowning                             | 3,481.42<br>(3,016.27 to<br>3,972.85)      | 2,438.92<br>(1,765.72 to<br>3,354.56)     | 2,080.09<br>(1,542.53 to<br>2,797.16)     | 2,671.76<br>(1,876.67 to<br>3,739.37)      | 107.13<br>(94.34 to<br>121.92)        | 89.91<br>(67.94 to<br>121.05)         | 78.83<br>(60.79 to<br>103.53)         | 95.58<br>(70.03 to<br>132.94)         |
| Fire, heat, and hot substances       | 2,965.15<br>(2,333.68 to<br>3,411.10)      | 2,116.57<br>(1,488.61 to<br>2,902.70)     | 1,781.71<br>(1,291.85 to<br>2,389.43)     | 2,292.71<br>(1,587.75 to<br>3,206.00)      | 166.50<br>(129.92 to<br>198.76)       | 174.58<br>(113.86 to<br>227.99)       | 148.46<br>(105.38 to<br>197.57)       | 170.39<br>(110.84 to<br>242.50)       |
| Poisonings                           | 1,406.58<br>(1,043.14 to<br>1,710.58)      | 563.45<br>(357.48 to<br>861.96)           | 436.44<br>(281.77 to<br>653.65)           | 647.21<br>(386.50 to<br>997.10)            | 38.71<br>(29.63 to<br>46.19)          | 18.35<br>(12.57 to<br>27.11)          | 14.68<br>(10.35 to<br>21.50)          | 20.44<br>(13.60 to<br>30.63)          |

|                                                 |                                                               |                                                               |                                                               |                                                               |                                                            |                                                          |                                                          |                                                            |
|-------------------------------------------------|---------------------------------------------------------------|---------------------------------------------------------------|---------------------------------------------------------------|---------------------------------------------------------------|------------------------------------------------------------|----------------------------------------------------------|----------------------------------------------------------|------------------------------------------------------------|
|                                                 | 2,665.08<br>(2,239.60 to<br>3,709.75)                         | 2,155.30<br>(1,793.42 to<br>2,856.37)                         | 1,900.45<br>(1,574.14 to<br>2,504.13)                         | 2,257.16<br>(1,836.59 to<br>3,052.14)                         | 121.04<br>(103.87 to<br>142.81)                            | 139.20<br>(115.37 to<br>162.20)                          | 130.99<br>(109.75 to<br>152.79)                          | 136.36<br>(112.18 to<br>159.48)                            |
| Exposure to mechanical forces                   |                                                               |                                                               |                                                               |                                                               |                                                            |                                                          |                                                          |                                                            |
| Unintentional firearm injuries                  | 221.70<br>(187.59 to<br>263.06)                               | 157.50<br>(130.86 to<br>196.53)                               | 142.74<br>(118.69 to<br>177.73)                               | 163.59<br>(134.27 to<br>205.51)                               | 8.41<br>(6.96 to<br>9.70)                                  | 8.41<br>(6.90 to<br>10.58)                               | 8.80<br>(6.74 to<br>10.41)                               | 8.68<br>(6.58 to<br>10.27)                                 |
| Unintentional suffocation                       | 166.89<br>(129.35 to<br>277.91)                               | 120.34<br>(85.59 to<br>195.95)                                | 104.91<br>(75.36 to<br>168.80)                                | 132.33<br>(92.00 to<br>214.52)                                | 3.13<br>(2.53 to<br>4.96)                                  | 2.54<br>(2.01 to<br>3.78)                                | 2.28<br>(1.81 to<br>3.41)                                | 2.70<br>(2.06 to<br>4.09)                                  |
| Other exposure to mechanical forces             | 2,276.48<br>(1,891.81 to<br>3,264.81)                         | 1,877.46<br>(1,556.93 to<br>2,495.34)                         | 1,652.80<br>(1,358.63 to<br>2,173.06)                         | 1,961.24<br>(1,593.43 to<br>2,674.84)                         | 109.49<br>(92.05 to<br>130.14)                             | 127.68<br>(102.92 to<br>150.22)                          | 119.91<br>(98.58 to<br>141.76)                           | 124.98<br>(100.92 to<br>147.38)                            |
| Adverse effects of medical treatment            | 2,337.62<br>(1,504.81 to<br>2,844.32)                         | 2,698.02<br>(1,664.50 to<br>3,374.31)                         | 2,639.11<br>(1,625.88 to<br>3,332.09)                         | 2,628.54<br>(1,622.58 to<br>3,282.54)                         | 203.57<br>(112.80 to<br>266.30)                            | 286.42<br>(151.57 to<br>390.86)                          | 291.44<br>(154.18 to<br>394.25)                          | 267.71<br>(142.51 to<br>368.50)                            |
| Animal contact                                  | 194.54<br>(137.21 to<br>240.02)                               | 209.90<br>(145.07 to<br>264.95)                               | 188.48<br>(132.15 to<br>236.52)                               | 219.92<br>(149.99 to<br>275.59)                               | 7.08<br>(5.09 to<br>8.83)                                  | 9.09<br>(6.77 to<br>11.86)                               | 8.47<br>(6.41 to<br>11.07)                               | 9.14<br>(6.68 to<br>11.80)                                 |
| Venomous animal contact                         | 82.98<br>(44.44 to<br>104.65)                                 | 79.77<br>(39.63 to<br>105.24)                                 | 73.19<br>(36.38 to<br>96.92)                                  | 83.13<br>(41.34 to<br>110.25)                                 | 2.67<br>(1.25 to<br>3.44)                                  | 2.91<br>(1.32 to<br>3.84)                                | 2.75<br>(1.27 to<br>3.61)                                | 2.94<br>(1.29 to<br>3.94)                                  |
| Non-venomous animal contact                     | 111.57<br>(84.79 to<br>156.33)                                | 130.13<br>(96.05 to<br>184.91)                                | 115.29<br>(85.27 to<br>167.85)                                | 136.79<br>(99.50 to<br>188.07)                                | 4.41<br>(3.46 to<br>6.50)                                  | 6.18<br>(4.78 to<br>9.20)                                | 5.72<br>(4.47 to<br>8.78)                                | 6.20<br>(4.75 to<br>9.08)                                  |
| Foreign body                                    | 2,530.40<br>(2,041.62 to<br>3,230.93)                         | 2,679.69<br>(2,007.08 to<br>3,169.67)                         | 2,642.79<br>(1,957.63 to<br>3,123.86)                         | 2,650.24<br>(1,998.38 to<br>3,157.81)                         | 158.53<br>(99.54 to<br>198.29)                             | 218.63<br>(128.36 to<br>284.49)                          | 228.48<br>(133.65 to<br>296.95)                          | 203.21<br>(119.01 to<br>265.11)                            |
| Pulmonary aspiration and foreign body in airway | 2,425.91<br>(1,939.40 to<br>3,151.33)                         | 2,556.94<br>(1,896.70 to<br>3,042.86)                         | 2,514.08<br>(1,831.80 to<br>2,988.89)                         | 2,531.26<br>(1,898.63 to<br>3,032.52)                         | 153.63<br>(96.22 to<br>192.49)                             | 210.37<br>(122.85 to<br>274.53)                          | 219.29<br>(127.25 to<br>286.81)                          | 195.72<br>(114.91 to<br>256.46)                            |
| Foreign body in other body part                 | 104.49<br>(79.30 to<br>137.12)                                | 122.75<br>(85.37 to<br>150.18)                                | 128.71<br>(89.07 to<br>157.36)                                | 118.97<br>(83.46 to<br>147.33)                                | 4.89<br>(2.59 to<br>6.15)                                  | 8.26<br>(3.46 to<br>11.39)                               | 9.20<br>(3.76 to<br>12.65)                               | 7.49<br>(3.26 to<br>10.28)                                 |
| Environmental heat and cold exposure            | 1,826.28<br>(1,162.67 to<br>2,800.44)                         | 1,770.93<br>(1,156.95 to<br>2,871.32)                         | 1,541.80<br>(1,007.38 to<br>2,499.39)                         | 1,845.66<br>(1,190.07 to<br>2,839.50)                         | 111.98<br>(79.64 to<br>194.52)                             | 135.72<br>(95.67 to<br>244.34)                           | 124.76<br>(87.89 to<br>224.46)                           | 133.65<br>(89.62 to<br>243.89)                             |
| Other unintentional injuries                    | 591.41<br>(508.94 to<br>688.59)                               | 193.49<br>(150.15 to<br>249.03)                               | 142.20<br>(110.22 to<br>179.46)                               | 223.31<br>(162.92 to<br>300.62)                               | 16.58<br>(14.49 to<br>19.08)                               | 6.56<br>(5.39 to<br>8.02)                                | 5.01<br>(4.12 to<br>6.03)                                | 7.27<br>(5.59 to<br>9.43)                                  |
| <b>Self-harm and interpersonal violence</b>     | <b>56,647.45</b><br><b>(45,720.78 to</b><br><b>67,064.31)</b> | <b>49,570.95</b><br><b>(30,457.26 to</b><br><b>81,266.79)</b> | <b>40,223.66</b><br><b>(26,015.95 to</b><br><b>63,293.53)</b> | <b>56,548.69</b><br><b>(33,395.67 to</b><br><b>93,103.60)</b> | <b>1,537.03</b><br><b>(1,222.88 to</b><br><b>1,800.74)</b> | <b>1,486.76</b><br><b>(940.60 to</b><br><b>2,284.78)</b> | <b>1,229.05</b><br><b>(829.51 to</b><br><b>1,819.74)</b> | <b>1,665.60</b><br><b>(1,025.16 to</b><br><b>2,611.26)</b> |

**Sweden**

| Cause                              | YLLs (actual counts)                     |                                          |                                          |                                          | Deaths (actual counts)                |                                     |                                     |                                     |
|------------------------------------|------------------------------------------|------------------------------------------|------------------------------------------|------------------------------------------|---------------------------------------|-------------------------------------|-------------------------------------|-------------------------------------|
|                                    | 2016                                     | 2040 Forecast                            | 2040 Better Scenario                     | 2040 Worse Scenario                      | 2016                                  | 2040 Forecast                       | 2040 Better Scenario                | 2040 Worse Scenario                 |
| Self-harm                          | 51,863.66<br>(41,728.16 to<br>61,349.16) | 46,717.23<br>(27,883.87 to<br>77,928.18) | 37,810.99<br>(23,741.81 to<br>60,543.13) | 53,382.06<br>(30,349.36 to<br>89,176.73) | 1,425.99<br>(1,137.59 to<br>1,668.72) | 1,411.75<br>(877.01 to<br>2,204.21) | 1,164.40<br>(760.96 to<br>1,729.61) | 1,583.93<br>(942.07 to<br>2,523.21) |
| Self-harm by firearm               | 4,153.66<br>(2,506.82 to<br>5,722.84)    | 3,121.55<br>(1,575.32 to<br>5,700.14)    | 2,395.56<br>(1,242.63 to<br>4,189.55)    | 3,585.12<br>(1,772.30 to<br>6,722.29)    | 137.44<br>(85.11 to<br>181.89)        | 115.26<br>(60.30 to<br>195.30)      | 91.26<br>(49.80 to<br>148.84)       | 128.84<br>(65.01 to<br>224.86)      |
| Self-harm by other specified means | 47,710.00<br>(37,736.87 to<br>56,712.76) | 43,595.68<br>(26,077.06 to<br>72,364.14) | 35,415.43<br>(22,442.70 to<br>56,253.95) | 49,796.94<br>(28,527.92 to<br>83,033.71) | 1,288.55<br>(1,017.84 to<br>1,507.75) | 1,296.50<br>(810.05 to<br>2,023.19) | 1,073.14<br>(706.17 to<br>1,599.83) | 1,455.09<br>(867.58 to<br>2,325.19) |
| Interpersonal violence             | 4,783.79<br>(2,844.89 to<br>6,021.44)    | 2,853.71<br>(1,648.14 to<br>4,048.47)    | 2,412.67<br>(1,394.74 to<br>3,415.75)    | 3,166.64<br>(1,829.73 to<br>4,566.28)    | 111.05<br>(68.11 to<br>139.67)        | 75.00<br>(45.68 to<br>102.82)       | 64.64<br>(40.61 to<br>86.79)        | 81.67<br>(50.21 to<br>114.50)       |
| Physical violence by firearm       | 943.62<br>(348.00 to<br>1,305.65)        | 469.06<br>(179.18 to<br>699.63)          | 387.71<br>(153.82 to<br>578.57)          | 515.42<br>(197.53 to<br>777.12)          | 19.46<br>(7.77 to<br>26.69)           | 10.30<br>(4.32 to<br>14.80)         | 8.64<br>(3.79 to<br>12.36)          | 11.17<br>(4.63 to<br>16.20)         |
| Physical violence by sharp object  | 1,505.58<br>(712.21 to<br>2,000.44)      | 897.53<br>(446.91 to<br>1,231.24)        | 772.71<br>(387.94 to<br>1,065.55)        | 965.50<br>(472.65 to<br>1,354.53)        | 35.45<br>(18.30 to<br>46.23)          | 23.93<br>(14.16 to<br>31.23)        | 21.12<br>(13.07 to<br>27.24)        | 25.14<br>(14.48 to<br>33.20)        |

|                                                                                     |                                                                    |                                                                      |                                                                    |                                                                      |                                                               |                                                                |                                                                |                                                                 |
|-------------------------------------------------------------------------------------|--------------------------------------------------------------------|----------------------------------------------------------------------|--------------------------------------------------------------------|----------------------------------------------------------------------|---------------------------------------------------------------|----------------------------------------------------------------|----------------------------------------------------------------|-----------------------------------------------------------------|
| Physical violence by other means                                                    | 2,334.59<br>(1,405.59 to<br>3,037.49)                              | 1,487.12<br>(819.96 to<br>2,261.46)                                  | 1,252.24<br>(698.99 to<br>1,883.36)                                | 1,685.71<br>(926.97 to<br>2,607.88)                                  | 56.14<br>(33.44 to<br>71.20)                                  | 40.78<br>(22.57 to<br>60.38)                                   | 34.89<br>(19.82 to<br>51.40)                                   | 45.36<br>(24.85 to<br>69.46)                                    |
| <b>Forces of nature, conflict and terrorism, and executions and police conflict</b> | <b>63.02</b><br><b>(44.23 to</b><br><b>79.76)</b>                  | <b>50.36</b><br><b>(0.00 to</b><br><b>316.40)</b>                    | <b>50.07</b><br><b>(0.00 to</b><br><b>314.15)</b>                  | <b>50.91</b><br><b>(0.00 to</b><br><b>319.84)</b>                    | <b>1.28</b><br><b>(0.97 to</b><br><b>1.59)</b>                | <b>1.05</b><br><b>(0.00 to</b><br><b>7.22)</b>                 | <b>1.05</b><br><b>(0.00 to</b><br><b>7.29)</b>                 | <b>1.05</b><br><b>(0.00 to</b><br><b>7.14)</b>                  |
| Exposure to forces of nature                                                        | 0.00<br>(0.00 to<br>0.00)                                          | 44.67<br>(0.00 to<br>316.40)                                         | 44.40<br>(0.00 to<br>314.15)                                       | 45.17<br>(0.00 to<br>319.84)                                         | 0.00<br>(0.00 to<br>0.00)                                     | 0.93<br>(0.00 to<br>7.22)                                      | 0.93<br>(0.00 to<br>7.29)                                      | 0.93<br>(0.00 to<br>7.14)                                       |
| Conflict and terrorism                                                              | 0.00<br>(0.00 to<br>0.00)                                          | 5.69<br>(0.00 to<br>40.33)                                           | 5.67<br>(0.00 to<br>40.08)                                         | 5.74<br>(0.00 to<br>40.82)                                           | 0.00<br>(0.00 to<br>0.00)                                     | 0.12<br>(0.00 to<br>0.92)                                      | 0.12<br>(0.00 to<br>0.94)                                      | 0.12<br>(0.00 to<br>0.91)                                       |
| Executions and police conflict                                                      | 63.02<br>(44.23 to<br>79.76)                                       | 0.00<br>(0.00 to<br>0.00)                                            | 0.00<br>(0.00 to<br>0.00)                                          | 0.00<br>(0.00 to<br>0.00)                                            | 1.28<br>(0.97 to<br>1.59)                                     | 0.00<br>(0.00 to<br>0.00)                                      | 0.00<br>(0.00 to<br>0.00)                                      | 0.00<br>(0.00 to<br>0.00)                                       |
| <b>Switzerland</b>                                                                  |                                                                    |                                                                      |                                                                    |                                                                      |                                                               |                                                                |                                                                |                                                                 |
| Cause                                                                               | YLLs (actual counts)                                               |                                                                      |                                                                    |                                                                      | Deaths (actual counts)                                        |                                                                |                                                                |                                                                 |
|                                                                                     | 2016                                                               | 2040 Forecast                                                        | 2040 Better Scenario                                               | 2040 Worse Scenario                                                  | 2016                                                          | 2040 Forecast                                                  | 2040 Better Scenario                                           | 2040 Worse Scenario                                             |
| <b>All causes</b>                                                                   | <b>894,191.54</b><br><b>(720,417.93 to</b><br><b>1,106,411.34)</b> | <b>1,090,591.43</b><br><b>(847,108.71 to</b><br><b>1,378,882.19)</b> | <b>945,455.97</b><br><b>(744,657.88 to</b><br><b>1,180,548.47)</b> | <b>1,302,058.90</b><br><b>(994,148.84 to</b><br><b>1,673,959.00)</b> | <b>67,014.82</b><br><b>(55,772.63 to</b><br><b>80,411.64)</b> | <b>99,908.95</b><br><b>(87,350.58 to</b><br><b>112,918.32)</b> | <b>89,777.81</b><br><b>(78,947.55 to</b><br><b>100,843.05)</b> | <b>114,242.15</b><br><b>(98,719.74 to</b><br><b>129,792.98)</b> |
| <b>Communicable, maternal, neonatal, and nutritional diseases</b>                   | <b>39,127.54</b><br><b>(32,895.09 to</b><br><b>45,557.31)</b>      | <b>47,800.62</b><br><b>(38,025.49 to</b><br><b>60,373.11)</b>        | <b>42,572.99</b><br><b>(34,149.44 to</b><br><b>52,805.20)</b>      | <b>54,855.10</b><br><b>(42,885.25 to</b><br><b>71,702.15)</b>        | <b>2,494.11</b><br><b>(2,027.68 to</b><br><b>3,010.51)</b>    | <b>4,809.33</b><br><b>(3,793.18 to</b><br><b>6,219.81)</b>     | <b>4,530.53</b><br><b>(3,604.99 to</b><br><b>5,707.24)</b>     | <b>5,178.63</b><br><b>(3,903.25 to</b><br><b>6,966.21)</b>      |
| <b>HIV/AIDS and tuberculosis</b>                                                    | <b>2,140.58</b><br><b>(1,993.91 to</b><br><b>2,305.47)</b>         | <b>1,137.11</b><br><b>(669.24 to</b><br><b>1,682.18)</b>             | <b>693.55</b><br><b>(388.26 to</b><br><b>1,046.97)</b>             | <b>2,488.68</b><br><b>(1,487.20 to</b><br><b>3,366.72)</b>           | <b>78.42</b><br><b>(69.57 to</b><br><b>88.60)</b>             | <b>59.52</b><br><b>(34.77 to</b><br><b>91.24)</b>              | <b>42.01</b><br><b>(24.06 to</b><br><b>64.06)</b>              | <b>97.65</b><br><b>(59.99 to</b><br><b>141.51)</b>              |
| Tuberculosis                                                                        | 510.42<br>(388.08 to<br>647.47)                                    | 483.68<br>(248.10 to<br>821.06)                                      | 355.36<br>(187.02 to<br>578.51)                                    | 666.79<br>(324.49 to<br>1,137.77)                                    | 38.03<br>(29.21 to<br>47.90)                                  | 47.31<br>(25.08 to<br>78.72)                                   | 35.92<br>(19.65 to<br>57.98)                                   | 62.87<br>(30.78 to<br>105.93)                                   |
| HIV/AIDS                                                                            | 1,630.16<br>(1,552.51 to<br>1,717.78)                              | 653.43<br>(264.72 to<br>1,031.63)                                    | 338.19<br>(117.71 to<br>608.50)                                    | 1,821.90<br>(874.71 to<br>2,622.90)                                  | 40.39<br>(38.52 to<br>42.49)                                  | 12.20<br>(4.57 to<br>19.84)                                    | 6.09<br>(1.91 to<br>11.37)                                     | 34.77<br>(16.28 to<br>50.19)                                    |
| <b>Diarrhea, lower respiratory, and other common infectious diseases</b>            | <b>19,424.38</b><br><b>(15,505.85 to</b><br><b>24,092.67)</b>      | <b>33,427.16</b><br><b>(25,705.83 to</b><br><b>44,756.19)</b>        | <b>30,252.16</b><br><b>(23,668.92 to</b><br><b>39,444.97)</b>      | <b>38,091.62</b><br><b>(28,185.78 to</b><br><b>54,317.93)</b>        | <b>2,029.30</b><br><b>(1,605.78 to</b><br><b>2,506.42)</b>    | <b>4,284.37</b><br><b>(3,256.80 to</b><br><b>5,696.82)</b>     | <b>4,030.76</b><br><b>(3,106.33 to</b><br><b>5,197.12)</b>     | <b>4,622.11</b><br><b>(3,351.36 to</b><br><b>6,444.82)</b>      |
| Diarrheal diseases                                                                  | 1,854.90<br>(1,514.93 to<br>2,235.71)                              | 4,478.90<br>(2,780.41 to<br>7,126.35)                                | 5,330.25<br>(3,520.78 to<br>7,926.75)                              | 4,068.93<br>(2,577.55 to<br>6,436.14)                                | 163.40<br>(128.91 to<br>199.97)                               | 553.43<br>(338.54 to<br>903.50)                                | 677.68<br>(440.17 to<br>1,020.48)                              | 485.86<br>(294.95 to<br>793.30)                                 |
| Intestinal infectious diseases                                                      | 8.59<br>(3.86 to<br>16.52)                                         | 7.04<br>(3.19 to<br>13.18)                                           | 7.17<br>(3.23 to<br>13.61)                                         | 6.96<br>(3.15 to<br>13.07)                                           | 0.35<br>(0.16 to<br>0.65)                                     | 0.42<br>(0.19 to<br>0.83)                                      | 0.43<br>(0.19 to<br>0.84)                                      | 0.40<br>(0.18 to<br>0.79)                                       |
| Typhoid fever                                                                       | 4.29<br>(1.31 to<br>9.84)                                          | 3.50<br>(1.15 to<br>7.97)                                            | 3.78<br>(1.25 to<br>8.65)                                          | 3.44<br>(1.12 to<br>7.80)                                            | 0.11<br>(0.03 to<br>0.25)                                     | 0.11<br>(0.03 to<br>0.25)                                      | 0.12<br>(0.04 to<br>0.26)                                      | 0.10<br>(0.03 to<br>0.24)                                       |
| Paratyphoid fever                                                                   | 1.21<br>(0.35 to<br>3.23)                                          | 0.83<br>(0.23 to<br>2.19)                                            | 0.75<br>(0.21 to<br>1.98)                                          | 0.86<br>(0.24 to<br>2.22)                                            | 0.03<br>(0.01 to<br>0.08)                                     | 0.03<br>(0.01 to<br>0.07)                                      | 0.02<br>(0.01 to<br>0.06)                                      | 0.03<br>(0.01 to<br>0.07)                                       |
| Other intestinal infectious diseases                                                | 3.08<br>(1.18 to<br>6.70)                                          | 2.71<br>(0.99 to<br>5.83)                                            | 2.64<br>(0.94 to<br>5.74)                                          | 2.66<br>(0.99 to<br>5.75)                                            | 0.21<br>(0.08 to<br>0.46)                                     | 0.29<br>(0.10 to<br>0.62)                                      | 0.29<br>(0.10 to<br>0.62)                                      | 0.27<br>(0.09 to<br>0.57)                                       |
| Lower respiratory infections                                                        | 16,289.53<br>(12,726.91 to<br>20,661.49)                           | 27,649.92<br>(20,026.52 to<br>38,939.80)                             | 23,687.25<br>(17,178.54 to<br>32,858.84)                           | 32,647.82<br>(23,074.32 to<br>49,143.82)                             | 1,804.58<br>(1,408.65 to<br>2,245.75)                         | 3,646.17<br>(2,585.67 to<br>5,069.79)                          | 3,269.34<br>(2,324.47 to<br>4,467.63)                          | 4,053.51<br>(2,795.87 to<br>5,894.41)                           |
| Upper respiratory infections                                                        | 8.20<br>(4.38 to<br>13.96)                                         | 8.79<br>(3.31 to<br>18.31)                                           | 7.35<br>(2.78 to<br>15.34)                                         | 9.07<br>(3.48 to<br>18.37)                                           | 0.43<br>(0.20 to<br>0.77)                                     | 0.67<br>(0.20 to<br>1.57)                                      | 0.57<br>(0.18 to<br>1.37)                                      | 0.66<br>(0.21 to<br>1.54)                                       |
| Otitis media                                                                        | 0.44<br>(0.31 to<br>0.62)                                          | 0.20<br>(0.09 to<br>0.47)                                            | 0.21<br>(0.09 to<br>0.50)                                          | 0.19<br>(0.09 to<br>0.43)                                            | 0.03<br>(0.02 to<br>0.05)                                     | 0.02<br>(0.01 to<br>0.06)                                      | 0.02<br>(0.01 to<br>0.06)                                      | 0.02<br>(0.01 to<br>0.05)                                       |
| Meningitis                                                                          | 572.20<br>(418.86 to<br>979.99)                                    | 497.25<br>(328.05 to<br>857.03)                                      | 454.22<br>(297.93 to<br>786.20)                                    | 555.58<br>(360.33 to<br>953.46)                                      | 24.76<br>(19.10 to<br>35.49)                                  | 29.55<br>(22.51 to<br>40.24)                                   | 28.51<br>(21.56 to<br>38.76)                                   | 29.64<br>(22.55 to<br>40.87)                                    |



|                                                          |                                                               |                                                             |                                                             |                                                             |                                                      |                                                     |                                                      |                                                     |
|----------------------------------------------------------|---------------------------------------------------------------|-------------------------------------------------------------|-------------------------------------------------------------|-------------------------------------------------------------|------------------------------------------------------|-----------------------------------------------------|------------------------------------------------------|-----------------------------------------------------|
| Rabies                                                   | 0.24<br>(0.18 to<br>0.31)                                     | 0.26<br>(0.20 to<br>0.33)                                   | 0.25<br>(0.19 to<br>0.32)                                   | 0.26<br>(0.20 to<br>0.33)                                   | 0.01<br>(0.01 to<br>0.01)                            | 0.02<br>(0.02 to<br>0.03)                           | 0.02<br>(0.02 to<br>0.03)                            | 0.02<br>(0.02 to<br>0.03)                           |
| Intestinal nematode infections                           | 0.00<br>(0.00 to<br>0.00)                                     | 0.00<br>(0.00 to<br>0.00)                                   | 0.00<br>(0.00 to<br>0.00)                                   | 0.00<br>(0.00 to<br>0.00)                                   | 0.00<br>(0.00 to<br>0.00)                            | 0.00<br>(0.00 to<br>0.00)                           | 0.00<br>(0.00 to<br>0.00)                            | 0.00<br>(0.00 to<br>0.00)                           |
| Other neglected tropical diseases                        | 71.88<br>(36.81 to<br>98.01)                                  | 87.05<br>(35.86 to<br>122.45)                               | 89.17<br>(36.14 to<br>125.90)                               | 85.60<br>(35.61 to<br>119.23)                               | 3.11<br>(0.84 to<br>4.47)                            | 5.11<br>(1.07 to<br>7.10)                           | 5.38<br>(1.12 to<br>7.50)                            | 4.85<br>(1.05 to<br>6.77)                           |
| <b>Maternal disorders</b>                                | <b>236.19</b><br><b>(153.98 to</b><br><b>349.57)</b>          | <b>162.61</b><br><b>(80.71 to</b><br><b>283.99)</b>         | <b>149.38</b><br><b>(73.86 to</b><br><b>263.14)</b>         | <b>167.83</b><br><b>(83.84 to</b><br><b>296.27)</b>         | <b>4.60</b><br><b>(2.99 to</b><br><b>6.82)</b>       | <b>3.18</b><br><b>(1.62 to</b><br><b>5.49)</b>      | <b>2.92</b><br><b>(1.48 to</b><br><b>5.08)</b>       | <b>3.29</b><br><b>(1.68 to</b><br><b>5.75)</b>      |
| Maternal hemorrhage                                      | 29.49<br>(17.18 to<br>46.59)                                  | 24.40<br>(10.52 to<br>45.93)                                | 22.53<br>(9.84 to<br>42.56)                                 | 25.02<br>(10.81 to<br>46.55)                                | 0.56<br>(0.33 to<br>0.88)                            | 0.48<br>(0.21 to<br>0.89)                           | 0.44<br>(0.20 to<br>0.82)                            | 0.49<br>(0.21 to<br>0.90)                           |
| Maternal sepsis and other maternal infections            | 1.67<br>(0.69 to<br>3.20)                                     | 1.51<br>(0.52 to<br>3.28)                                   | 1.39<br>(0.48 to<br>3.02)                                   | 1.56<br>(0.53 to<br>3.35)                                   | 0.03<br>(0.01 to<br>0.06)                            | 0.03<br>(0.01 to<br>0.06)                           | 0.03<br>(0.01 to<br>0.06)                            | 0.03<br>(0.01 to<br>0.07)                           |
| Maternal hypertensive disorders                          | 30.88<br>(17.69 to<br>49.15)                                  | 23.51<br>(9.92 to<br>47.15)                                 | 21.55<br>(9.22 to<br>42.88)                                 | 24.15<br>(10.33 to<br>48.41)                                | 0.57<br>(0.32 to<br>0.91)                            | 0.44<br>(0.19 to<br>0.87)                           | 0.40<br>(0.18 to<br>0.80)                            | 0.45<br>(0.20 to<br>0.89)                           |
| Maternal obstructed labor and uterine rupture            | 1.43<br>(0.53 to<br>2.77)                                     | 1.42<br>(0.46 to<br>3.42)                                   | 1.28<br>(0.41 to<br>3.05)                                   | 1.46<br>(0.47 to<br>3.45)                                   | 0.03<br>(0.01 to<br>0.06)                            | 0.03<br>(0.01 to<br>0.07)                           | 0.03<br>(0.01 to<br>0.06)                            | 0.03<br>(0.01 to<br>0.07)                           |
| Maternal abortion, miscarriage, and ectopic pregnancy    | 83.77<br>(52.62 to<br>125.52)                                 | 31.32<br>(14.61 to<br>60.65)                                | 28.47<br>(13.17 to<br>55.35)                                | 32.33<br>(15.23 to<br>63.24)                                | 1.72<br>(1.08 to<br>2.60)                            | 0.66<br>(0.31 to<br>1.26)                           | 0.60<br>(0.29 to<br>1.15)                            | 0.69<br>(0.32 to<br>1.32)                           |
| Indirect maternal deaths                                 | 21.51<br>(12.08 to<br>36.23)                                  | 20.82<br>(8.38 to<br>44.97)                                 | 18.92<br>(7.64 to<br>40.84)                                 | 21.64<br>(8.68 to<br>46.22)                                 | 0.39<br>(0.22 to<br>0.65)                            | 0.38<br>(0.16 to<br>0.82)                           | 0.35<br>(0.14 to<br>0.74)                            | 0.40<br>(0.17 to<br>0.84)                           |
| Late maternal deaths                                     | 6.17<br>(3.46 to<br>10.02)                                    | 4.36<br>(1.87 to<br>8.78)                                   | 3.97<br>(1.73 to<br>7.87)                                   | 4.51<br>(1.95 to<br>9.02)                                   | 0.12<br>(0.07 to<br>0.20)                            | 0.09<br>(0.04 to<br>0.17)                           | 0.08<br>(0.04 to<br>0.16)                            | 0.09<br>(0.04 to<br>0.18)                           |
| Maternal deaths aggravated by HIV/AIDS                   | 0.14<br>(0.05 to<br>0.28)                                     | 0.66<br>(0.14 to<br>1.72)                                   | 0.55<br>(0.09 to<br>1.50)                                   | 0.81<br>(0.20 to<br>2.11)                                   | 0.00<br>(0.00 to<br>0.01)                            | 0.01<br>(0.00 to<br>0.03)                           | 0.01<br>(0.00 to<br>0.03)                            | 0.02<br>(0.00 to<br>0.04)                           |
| Other maternal disorders                                 | 61.13<br>(37.46 to<br>99.23)                                  | 54.61<br>(25.10 to<br>100.10)                               | 50.71<br>(23.35 to<br>93.09)                                | 56.35<br>(25.89 to<br>103.68)                               | 1.17<br>(0.72 to<br>1.90)                            | 1.06<br>(0.50 to<br>1.93)                           | 0.99<br>(0.47 to<br>1.79)                            | 1.09<br>(0.52 to<br>1.97)                           |
| <b>Switzerland</b>                                       |                                                               |                                                             |                                                             |                                                             |                                                      |                                                     |                                                      |                                                     |
| Cause                                                    | YLLs (actual counts)                                          |                                                             |                                                             |                                                             | Deaths (actual counts)                               |                                                     |                                                      |                                                     |
|                                                          | 2016                                                          | 2040 Forecast                                               | 2040 Better Scenario                                        | 2040 Worse Scenario                                         | 2016                                                 | 2040 Forecast                                       | 2040 Better Scenario                                 | 2040 Worse Scenario                                 |
| <b>Neonatal disorders</b>                                | <b>13,111.57</b><br><b>(10,147.53 to</b><br><b>16,546.76)</b> | <b>8,304.21</b><br><b>(5,279.24 to</b><br><b>12,639.62)</b> | <b>6,770.66</b><br><b>(4,305.41 to</b><br><b>10,309.63)</b> | <b>9,405.68</b><br><b>(5,991.66 to</b><br><b>14,274.41)</b> | <b>151.49</b><br><b>(117.25 to</b><br><b>191.20)</b> | <b>95.96</b><br><b>(61.01 to</b><br><b>146.05)</b>  | <b>78.25</b><br><b>(49.76 to</b><br><b>119.13)</b>   | <b>108.69</b><br><b>(69.25 to</b><br><b>164.92)</b> |
| Neonatal preterm birth                                   | 6,196.86<br>(4,688.11 to<br>7,912.44)                         | 3,438.18<br>(2,091.95 to<br>5,249.04)                       | 2,406.52<br>(1,452.35 to<br>3,664.20)                       | 3,997.67<br>(2,422.12 to<br>5,995.84)                       | 71.59<br>(54.16 to<br>91.41)                         | 39.73<br>(24.17 to<br>60.65)                        | 27.81<br>(16.78 to<br>42.34)                         | 46.19<br>(27.99 to<br>69.27)                        |
| Neonatal encephalopathy due to birth asphyxia and trauma | 3,856.73<br>(2,770.76 to<br>5,146.38)                         | 1,792.78<br>(1,018.88 to<br>3,111.11)                       | 1,515.35<br>(871.96 to<br>2,592.31)                         | 2,028.90<br>(1,150.01 to<br>3,459.68)                       | 44.56<br>(32.01 to<br>59.46)                         | 20.72<br>(11.78 to<br>35.96)                        | 17.51<br>(10.08 to<br>29.96)                         | 23.45<br>(13.29 to<br>39.97)                        |
| Neonatal sepsis and other neonatal infections            | 622.47<br>(410.22 to<br>883.61)                               | 559.49<br>(299.73 to<br>1,020.62)                           | 489.65<br>(263.32 to<br>877.49)                             | 625.64<br>(332.83 to<br>1,144.76)                           | 7.19<br>(4.74 to<br>10.21)                           | 6.47<br>(3.46 to<br>11.79)                          | 5.66<br>(3.04 to<br>10.14)                           | 7.23<br>(3.85 to<br>13.23)                          |
| Hemolytic disease and other neonatal jaundice            | 54.79<br>(31.74 to<br>103.36)                                 | 26.60<br>(11.39 to<br>63.80)                                | 23.03<br>(9.83 to<br>54.02)                                 | 29.86<br>(12.73 to<br>71.93)                                | 0.63<br>(0.37 to<br>1.19)                            | 0.31<br>(0.13 to<br>0.74)                           | 0.27<br>(0.11 to<br>0.62)                            | 0.35<br>(0.15 to<br>0.83)                           |
| Other neonatal disorders                                 | 2,380.71<br>(1,644.44 to<br>3,222.86)                         | 2,487.16<br>(1,370.38 to<br>4,216.04)                       | 2,336.10<br>(1,312.10 to<br>3,904.64)                       | 2,723.60<br>(1,497.21 to<br>4,585.26)                       | 27.51<br>(19.00 to<br>37.24)                         | 28.74<br>(15.85 to<br>48.73)                        | 27.00<br>(15.17 to<br>45.12)                         | 31.48<br>(17.31 to<br>53.00)                        |
| <b>Nutritional deficiencies</b>                          | <b>606.01</b><br><b>(479.72 to</b><br><b>744.49)</b>          | <b>917.02</b><br><b>(753.90 to</b><br><b>1,099.83)</b>      | <b>962.70</b><br><b>(786.36 to</b><br><b>1,157.28)</b>      | <b>864.50</b><br><b>(715.43 to</b><br><b>1,036.50)</b>      | <b>64.86</b><br><b>(51.65 to</b><br><b>79.19)</b>    | <b>124.45</b><br><b>(97.53 to</b><br><b>155.70)</b> | <b>134.78</b><br><b>(106.53 to</b><br><b>167.59)</b> | <b>113.46</b><br><b>(87.02 to</b><br><b>143.48)</b> |

|                                                                         |                                                      |                                                        |                                                        |                                                          |                                                   |                                                    |                                                   |                                                     |
|-------------------------------------------------------------------------|------------------------------------------------------|--------------------------------------------------------|--------------------------------------------------------|----------------------------------------------------------|---------------------------------------------------|----------------------------------------------------|---------------------------------------------------|-----------------------------------------------------|
| Protein-energy malnutrition                                             | 365.34<br>(187.05 to<br>489.40)                      | 558.44<br>(263.07 to<br>761.42)                        | 608.07<br>(291.26 to<br>822.86)                        | 516.95<br>(247.07 to<br>710.23)                          | 44.83<br>(19.63 to<br>59.50)                      | 84.78<br>(35.40 to<br>119.60)                      | 94.40<br>(40.51 to<br>131.37)                     | 76.39<br>(31.80 to<br>108.69)                       |
| Iodine deficiency                                                       | 17.49<br>(1.66 to<br>50.41)                          | 45.31<br>(1.55 to<br>156.29)                           | 45.58<br>(1.43 to<br>161.32)                           | 43.66<br>(1.59 to<br>146.33)                             | 1.19<br>(0.06 to<br>4.88)                         | 5.09<br>(0.07 to<br>23.86)                         | 5.27<br>(0.06 to<br>26.05)                        | 4.74<br>(0.07 to<br>21.93)                          |
| Dietary iron deficiency                                                 | 35.44<br>(23.51 to<br>46.56)                         | 34.25<br>(22.76 to<br>47.47)                           | 35.16<br>(23.22 to<br>49.00)                           | 33.98<br>(22.76 to<br>46.96)                             | 1.29<br>(0.66 to<br>1.80)                         | 1.53<br>(0.78 to<br>2.52)                          | 1.63<br>(0.81 to<br>2.69)                         | 1.45<br>(0.76 to<br>2.35)                           |
| Other nutritional deficiencies                                          | 187.74<br>(129.92 to<br>352.00)                      | 279.02<br>(178.06 to<br>551.09)                        | 273.89<br>(172.01 to<br>554.53)                        | 269.91<br>(173.80 to<br>520.79)                          | 17.55<br>(10.60 to<br>41.56)                      | 33.05<br>(18.16 to<br>77.56)                       | 33.48<br>(18.07 to<br>81.60)                      | 30.88<br>(17.03 to<br>72.28)                        |
| <b>Other communicable, maternal, neonatal, and nutritional diseases</b> | <b>3,533.62<br/>(2,761.07 to<br/>4,541.64)</b>       | <b>3,764.07<br/>(2,865.32 to<br/>4,831.07)</b>         | <b>3,654.01<br/>(2,771.28 to<br/>4,693.28)</b>         | <b>3,749.82<br/>(2,873.14 to<br/>4,794.20)</b>           | <b>162.20<br/>(128.15 to<br/>205.15)</b>          | <b>236.65<br/>(191.06 to<br/>284.23)</b>           | <b>236.34<br/>(189.83 to<br/>283.76)</b>          | <b>228.50<br/>(185.52 to<br/>273.68)</b>            |
| Sexually transmitted infections excluding HIV                           | 49.22<br>(35.75 to<br>67.31)                         | 44.54<br>(31.04 to<br>62.59)                           | 43.66<br>(30.36 to<br>61.99)                           | 43.92<br>(31.00 to<br>61.16)                             | 3.17<br>(2.31 to<br>4.33)                         | 3.85<br>(2.84 to<br>5.23)                          | 3.86<br>(2.83 to<br>5.31)                         | 3.69<br>(2.75 to<br>4.97)                           |
| Syphilis                                                                | 16.52<br>(12.46 to<br>21.63)                         | 12.89<br>(8.86 to<br>18.47)                            | 12.20<br>(8.35 to<br>17.54)                            | 12.89<br>(8.94 to<br>18.12)                              | 0.97<br>(0.73 to<br>1.30)                         | 1.03<br>(0.74 to<br>1.44)                          | 1.00<br>(0.71 to<br>1.42)                         | 1.01<br>(0.72 to<br>1.38)                           |
| Chlamydial infection                                                    | 6.43<br>(4.57 to<br>8.98)                            | 6.35<br>(4.36 to<br>8.88)                              | 6.33<br>(4.31 to<br>8.97)                              | 6.21<br>(4.29 to<br>8.58)                                | 0.46<br>(0.32 to<br>0.63)                         | 0.60<br>(0.43 to<br>0.81)                          | 0.61<br>(0.43 to<br>0.83)                         | 0.57<br>(0.41 to<br>0.77)                           |
| Gonococcal infection                                                    | 18.66<br>(13.09 to<br>26.32)                         | 18.65<br>(12.59 to<br>26.96)                           | 18.56<br>(12.44 to<br>27.19)                           | 18.27<br>(12.44 to<br>25.95)                             | 1.31<br>(0.92 to<br>1.81)                         | 1.70<br>(1.20 to<br>2.36)                          | 1.72<br>(1.21 to<br>2.40)                         | 1.62<br>(1.15 to<br>2.23)                           |
| Other sexually transmitted infections                                   | 7.61<br>(5.30 to<br>10.76)                           | 6.65<br>(4.46 to<br>9.70)                              | 6.57<br>(4.35 to<br>9.71)                              | 6.56<br>(4.44 to<br>9.45)                                | 0.43<br>(0.31 to<br>0.60)                         | 0.52<br>(0.38 to<br>0.72)                          | 0.53<br>(0.38 to<br>0.74)                         | 0.50<br>(0.36 to<br>0.69)                           |
| Acute hepatitis                                                         | 1,982.81<br>(1,475.55 to<br>2,657.04)                | 1,182.65<br>(728.40 to<br>1,784.37)                    | 1,058.55<br>(637.80 to<br>1,602.26)                    | 1,209.89<br>(740.45 to<br>1,829.52)                      | 85.85<br>(65.78 to<br>111.69)                     | 65.38<br>(39.77 to<br>97.55)                       | 59.50<br>(36.58 to<br>89.32)                      | 65.51<br>(40.87 to<br>96.39)                        |
| Acute hepatitis A                                                       | 67.24<br>(44.94 to<br>95.87)                         | 34.13<br>(18.67 to<br>55.86)                           | 31.66<br>(17.23 to<br>52.12)                           | 34.79<br>(19.18 to<br>56.85)                             | 2.36<br>(1.56 to<br>3.50)                         | 1.71<br>(0.92 to<br>2.95)                          | 1.61<br>(0.87 to<br>2.76)                         | 1.70<br>(0.92 to<br>2.92)                           |
| Acute hepatitis B                                                       | 1,598.84<br>(1,167.24 to<br>2,180.23)                | 921.48<br>(546.03 to<br>1,428.45)                      | 820.33<br>(481.28 to<br>1,265.13)                      | 946.27<br>(564.14 to<br>1,441.28)                        | 64.72<br>(47.31 to<br>86.60)                      | 46.56<br>(26.60 to<br>72.99)                       | 41.99<br>(23.78 to<br>66.21)                      | 46.99<br>(26.95 to<br>72.29)                        |
| Acute hepatitis C                                                       | 101.93<br>(65.62 to<br>148.21)                       | 62.51<br>(33.48 to<br>103.94)                          | 56.15<br>(30.39 to<br>92.90)                           | 63.88<br>(34.66 to<br>105.94)                            | 4.65<br>(3.05 to<br>6.74)                         | 3.46<br>(1.89 to<br>5.79)                          | 3.15<br>(1.73 to<br>5.26)                         | 3.47<br>(1.91 to<br>5.82)                           |
| Acute hepatitis E                                                       | 214.80<br>(127.65 to<br>329.76)                      | 164.52<br>(79.66 to<br>291.65)                         | 150.41<br>(72.77 to<br>265.84)                         | 164.95<br>(80.50 to<br>294.43)                           | 14.13<br>(8.27 to<br>21.81)                       | 13.66<br>(6.49 to<br>24.47)                        | 12.74<br>(6.12 to<br>23.10)                       | 13.35<br>(6.33 to<br>24.10)                         |
| Other unspecified infectious diseases                                   | 1,501.59<br>(1,166.69 to<br>1,923.66)                | 2,536.88<br>(1,982.79 to<br>3,188.51)                  | 2,551.81<br>(1,987.56 to<br>3,222.18)                  | 2,496.01<br>(1,961.25 to<br>3,142.39)                    | 73.18<br>(55.14 to<br>91.65)                      | 167.41<br>(132.01 to<br>199.61)                    | 172.98<br>(136.51 to<br>205.87)                   | 159.29<br>(127.00 to<br>189.83)                     |
| <b>Non-communicable diseases</b>                                        | <b>765,338.01<br/>(618,532.75 to<br/>945,626.32)</b> | <b>951,632.55<br/>(735,585.85 to<br/>1,211,561.68)</b> | <b>821,309.45<br/>(641,106.56 to<br/>1,032,371.17)</b> | <b>1,146,465.21<br/>(867,376.45 to<br/>1,486,176.68)</b> | <b>60,569.75<br/>(50,368.43 to<br/>72,694.97)</b> | <b>89,260.17<br/>(76,963.09 to<br/>101,441.45)</b> | <b>79,680.79<br/>(69,347.24 to<br/>90,308.22)</b> | <b>103,125.24<br/>(88,011.27 to<br/>118,549.06)</b> |
| <b>Switzerland</b>                                                      |                                                      |                                                        |                                                        |                                                          |                                                   |                                                    |                                                   |                                                     |
| Cause                                                                   | YLLs (actual counts)                                 |                                                        |                                                        |                                                          | Deaths (actual counts)                            |                                                    |                                                   |                                                     |
|                                                                         | 2016                                                 | 2040 Forecast                                          | 2040 Better Scenario                                   | 2040 Worse Scenario                                      | 2016                                              | 2040 Forecast                                      | 2040 Better Scenario                              | 2040 Worse Scenario                                 |
| Neoplasms                                                               | 305,648.45<br>(240,888.43 to<br>385,847.04)          | 374,183.19<br>(263,695.12 to<br>515,353.87)            | 321,000.44<br>(233,465.04 to<br>430,740.03)            | 451,807.69<br>(308,027.04 to<br>640,553.85)              | 17,683.70<br>(14,254.62 to<br>21,937.89)          | 26,163.96<br>(20,360.80 to<br>33,001.52)           | 23,388.38<br>(18,617.59 to<br>28,967.18)          | 30,246.16<br>(22,874.79 to<br>38,858.20)            |
| Lip and oral cavity cancer                                              | 5,994.89<br>(4,588.05 to<br>7,842.64)                | 5,861.77<br>(2,674.62 to<br>11,465.78)                 | 3,663.50<br>(1,783.69 to<br>6,697.09)                  | 9,735.17<br>(4,096.76 to<br>19,248.42)                   | 287.90<br>(223.69 to<br>366.12)                   | 320.13<br>(163.35 to<br>577.71)                    | 210.55<br>(115.33 to<br>355.96)                   | 523.83<br>(251.25 to<br>954.86)                     |
| Nasopharynx cancer                                                      | 1,093.04<br>(824.31 to<br>1,472.62)                  | 1,136.73<br>(506.27 to<br>2,230.69)                    | 670.84<br>(321.35 to<br>1,225.09)                      | 1,912.83<br>(817.82 to<br>3,815.45)                      | 47.70<br>(36.35 to<br>63.31)                      | 56.50<br>(27.09 to<br>104.69)                      | 34.57<br>(17.99 to<br>59.67)                      | 93.91<br>(44.44 to<br>177.07)                       |



|                                      |                                          |                                           |                                          |                                            |                                       |                                       |                                       |                                        |  |
|--------------------------------------|------------------------------------------|-------------------------------------------|------------------------------------------|--------------------------------------------|---------------------------------------|---------------------------------------|---------------------------------------|----------------------------------------|--|
|                                      | 3,433.18<br>(2,589.78 to<br>4,542.72)    | 3,472.78<br>(1,715.73 to<br>6,231.70)     | 3,047.07<br>(1,530.56 to<br>5,455.86)    | 4,511.09<br>(2,126.73 to<br>8,248.44)      | 147.91<br>(113.52 to<br>193.75)       | 171.68<br>(89.45 to<br>297.55)        | 152.77<br>(81.93 to<br>260.78)        | 219.68<br>(107.66 to<br>390.55)        |  |
| Other pharynx cancer                 | 9,193.73<br>(6,995.36 to<br>12,294.80)   | 10,236.32<br>(4,774.23 to<br>20,070.49)   | 6,722.61<br>(3,445.06 to<br>11,980.83)   | 15,802.09<br>(6,883.13 to<br>32,380.16)    | 490.09<br>(381.86 to<br>631.18)       | 611.20<br>(317.61 to<br>1,104.65)     | 419.03<br>(237.94 to<br>700.26)       | 931.53<br>(452.11 to<br>1,719.12)      |  |
| Esophageal cancer                    | 9,967.58<br>(7,707.71 to<br>12,771.72)   | 9,306.05<br>(6,245.50 to<br>13,347.17)    | 8,002.08<br>(5,549.18 to<br>11,318.22)   | 9,946.98<br>(6,574.11 to<br>14,521.42)     | 627.61<br>(492.83 to<br>782.02)       | 723.77<br>(530.31 to<br>986.57)       | 639.24<br>(480.95 to<br>849.47)       | 755.04<br>(552.02 to<br>1,028.01)      |  |
| Stomach cancer                       | 26,763.34<br>(20,787.70 to<br>34,020.59) | 32,746.86<br>(21,298.02 to<br>48,783.56)  | 27,982.67<br>(18,282.84 to<br>41,334.96) | 39,160.55<br>(25,093.37 to<br>59,572.75)   | 1,708.80<br>(1,360.48 to<br>2,127.63) | 2,563.57<br>(1,756.16 to<br>3,614.80) | 2,246.87<br>(1,553.69 to<br>3,185.33) | 2,985.45<br>(2,018.36 to<br>4,314.78)  |  |
| Colon and rectum cancer              | 12,714.57<br>(9,763.39 to<br>16,657.99)  | 17,213.61<br>(10,260.49 to<br>29,276.06)  | 15,038.01<br>(9,435.66 to<br>24,658.77)  | 23,307.19<br>(13,181.58 to<br>41,793.03)   | 692.44<br>(541.47 to<br>883.79)       | 1,087.23<br>(701.64 to<br>1,749.38)   | 977.84<br>(662.33 to<br>1,516.87)     | 1,424.99<br>(866.34 to<br>2,388.16)    |  |
| Liver cancer                         | 2,027.57<br>(1,217.24 to<br>3,148.56)    | 2,582.05<br>(1,324.27 to<br>4,873.18)     | 2,325.39<br>(1,228.29 to<br>4,175.55)    | 3,134.54<br>(1,489.00 to<br>6,296.87)      | 95.03<br>(56.93 to<br>146.21)         | 142.39<br>(77.19 to<br>253.05)        | 131.48<br>(74.25 to<br>223.40)        | 168.59<br>(84.64 to<br>315.93)         |  |
| Liver cancer due to hepatitis B      | 3,867.14<br>(2,745.30 to<br>5,251.00)    | 5,503.52<br>(3,192.84 to<br>9,208.98)     | 5,056.54<br>(3,041.38 to<br>8,215.67)    | 6,546.02<br>(3,617.47 to<br>11,451.00)     | 230.73<br>(168.67 to<br>311.07)       | 380.18<br>(237.64 to<br>595.86)       | 358.78<br>(233.27 to<br>539.68)       | 439.76<br>(262.21 to<br>720.33)        |  |
| Liver cancer due to hepatitis C      | 4,582.81<br>(3,219.05 to<br>6,411.33)    | 6,000.38<br>(3,270.98 to<br>10,873.76)    | 4,808.50<br>(2,707.49 to<br>8,354.30)    | 9,794.93<br>(5,027.46 to<br>18,528.66)     | 243.12<br>(169.84 to<br>339.01)       | 363.17<br>(204.41 to<br>630.86)       | 299.52<br>(173.38 to<br>495.77)       | 575.37<br>(309.86 to<br>1,035.08)      |  |
| Liver cancer due to alcohol use      | 2,237.04<br>(1,446.85 to<br>3,270.44)    | 3,127.66<br>(1,612.24 to<br>5,747.04)     | 2,847.59<br>(1,531.14 to<br>4,950.38)    | 3,831.70<br>(1,847.37 to<br>7,221.82)      | 123.56<br>(81.56 to<br>179.15)        | 201.50<br>(108.29 to<br>345.29)       | 188.06<br>(104.87 to<br>314.50)       | 241.27<br>(119.77 to<br>428.36)        |  |
| Liver cancer due to other causes     | 3,917.97<br>(3,028.88 to<br>4,914.57)    | 3,802.16<br>(2,934.65 to<br>4,741.61)     | 3,836.79<br>(2,955.78 to<br>4,833.47)    | 3,678.64<br>(2,864.71 to<br>4,531.43)      | 263.28<br>(206.61 to<br>324.81)       | 299.22<br>(245.44 to<br>348.30)       | 307.10<br>(251.05 to<br>361.86)       | 283.54<br>(234.48 to<br>328.84)        |  |
| Gallbladder and biliary tract cancer | 21,912.74<br>(17,033.16 to<br>27,679.59) | 28,685.95<br>(19,724.92 to<br>40,843.17)  | 26,839.67<br>(18,670.22 to<br>37,354.56) | 31,187.24<br>(20,818.79 to<br>45,331.51)   | 1,285.94<br>(1,020.51 to<br>1,696.04) | 1,919.24<br>(1,499.70 to<br>2,570.14) | 1,840.66<br>(1,363.38 to<br>2,433.78) | 2,047.47<br>(1,470.70 to<br>2,798.03)  |  |
| Pancreatic cancer                    | 1,949.29<br>(1,446.16 to<br>2,670.06)    | 1,882.81<br>(748.40 to<br>4,160.13)       | 1,049.66<br>(454.29 to<br>2,119.67)      | 2,976.13<br>(1,136.06 to<br>6,815.65)      | 98.73<br>(74.75 to<br>133.23)         | 109.38<br>(88.46 to<br>226.53)        | 63.60<br>(29.85 to<br>123.16)         | 172.28<br>(70.04 to<br>368.51)         |  |
| Larynx cancer                        | 64,773.26<br>(49,847.06 to<br>82,684.79) | 70,727.31<br>(36,750.41 to<br>123,836.74) | 41,789.94<br>(23,236.25 to<br>69,727.32) | 112,626.07<br>(57,891.05 to<br>195,986.38) | 3,407.26<br>(2,648.29 to<br>4,313.15) | 4,182.52<br>(2,314.81 to<br>6,925.00) | 2,586.49<br>(1,514.55 to<br>4,089.07) | 6,511.28<br>(3,527.40 to<br>10,950.90) |  |
| Tracheal, bronchus, and lung cancer  | 6,981.08<br>(5,055.18 to<br>9,226.00)    | 8,470.71<br>(6,072.53 to<br>11,266.09)    | 9,150.23<br>(6,516.55 to<br>12,202.86)   | 8,063.88<br>(5,838.53 to<br>10,615.74)     | 351.57<br>(262.63 to<br>452.26)       | 535.11<br>(400.52 to<br>665.08)       | 589.42<br>(438.16 to<br>738.45)       | 497.41<br>(374.25 to<br>607.17)        |  |
| Malignant skin melanoma              | 1,502.32<br>(1,174.39 to<br>1,922.04)    | 2,406.93<br>(1,922.34 to<br>3,007.64)     | 2,318.25<br>(1,841.62 to<br>2,927.87)    | 2,329.75<br>(1,878.75 to<br>2,887.03)      | 127.38<br>(103.29 to<br>157.70)       | 240.02<br>(203.14 to<br>280.64)       | 236.86<br>(189.13 to<br>278.54)       | 225.94<br>(189.51 to<br>264.66)        |  |
| Non-melanoma skin cancer             | 28,020.96<br>(19,266.25 to<br>39,509.70) | 29,993.54<br>(17,467.50 to<br>47,005.50)  | 26,667.58<br>(15,743.94 to<br>41,370.28) | 36,660.11<br>(20,864.20 to<br>58,910.82)   | 1,471.50<br>(1,048.45 to<br>2,016.00) | 1,929.08<br>(1,265.75 to<br>2,765.71) | 1,753.91<br>(1,164.51 to<br>2,484.54) | 2,293.25<br>(1,472.36 to<br>3,384.31)  |  |
| Breast cancer                        | 2,496.36<br>(1,728.52 to<br>3,592.44)    | 2,297.08<br>(1,323.55 to<br>3,845.53)     | 2,052.78<br>(1,207.81 to<br>3,338.50)    | 2,463.52<br>(1,359.36 to<br>4,286.03)      | 126.50<br>(89.45 to<br>176.43)        | 139.90<br>(92.34 to<br>212.35)        | 127.79<br>(84.50 to<br>190.89)        | 146.01<br>(94.11 to<br>231.56)         |  |
| Cervical cancer                      | 2,767.78<br>(1,892.73 to<br>3,855.47)    | 4,351.88<br>(2,806.21 to<br>6,389.96)     | 4,186.85<br>(2,694.66 to<br>6,171.29)    | 4,308.31<br>(2,821.72 to<br>6,291.09)      | 181.97<br>(127.78 to<br>253.71)       | 329.74<br>(237.59 to<br>446.15)       | 321.38<br>(229.08 to<br>436.52)       | 320.85<br>(233.61 to<br>432.81)        |  |
| Uterine cancer                       | 8,496.71<br>(5,763.29 to<br>12,339.36)   | 9,466.49<br>(5,763.35 to<br>14,638.41)    | 8,925.75<br>(5,410.49 to<br>13,889.42)   | 10,079.64<br>(6,074.80 to<br>15,208.03)    | 473.09<br>(327.49 to<br>676.68)       | 601.66<br>(390.90 to<br>865.68)       | 567.88<br>(370.67 to<br>814.88)       | 638.86<br>(407.12 to<br>935.54)        |  |
| Ovarian cancer                       | 17,919.38<br>(12,667.30 to<br>24,935.03) | 31,382.22<br>(22,181.39 to<br>42,139.95)  | 30,967.51<br>(21,790.03 to<br>41,679.64) | 30,418.12<br>(21,843.92 to<br>40,793.18)   | 1,513.00<br>(1,107.63 to<br>2,044.63) | 3,163.80<br>(2,456.02 to<br>3,849.06) | 3,194.64<br>(2,488.13 to<br>3,897.92) | 2,996.35<br>(2,354.46 to<br>3,687.36)  |  |
| Prostate cancer                      | 570.61<br>(372.24 to<br>827.96)          | 432.78<br>(249.17 to<br>722.74)           | 411.50<br>(235.14 to<br>693.18)          | 434.43<br>(250.82 to<br>723.66)            | 14.98<br>(10.16 to<br>21.59)          | 14.82<br>(10.10 to<br>21.41)          | 14.40<br>(9.76 to<br>21.05)           | 14.50<br>(9.94 to<br>21.08)            |  |
| Testicular cancer                    | <b>Switzerland</b>                       |                                           |                                          |                                            |                                       |                                       |                                       |                                        |  |
|                                      | <b>YLLs (actual counts)</b>              |                                           |                                          |                                            | <b>Deaths (actual counts)</b>         |                                       |                                       |                                        |  |

| Cause                           | 2016                                                   | 2040 Forecast                                          | 2040 Better Scenario                                   | 2040 Worse Scenario                                    | 2016                                                | 2040 Forecast                                       | 2040 Better Scenario                                | 2040 Worse Scenario                                 |
|---------------------------------|--------------------------------------------------------|--------------------------------------------------------|--------------------------------------------------------|--------------------------------------------------------|-----------------------------------------------------|-----------------------------------------------------|-----------------------------------------------------|-----------------------------------------------------|
| Kidney cancer                   | 6,656.38<br>(5,190.18 to 8,545.06)                     | 9,707.37<br>(6,834.30 to 13,696.15)                    | 9,311.46<br>(6,692.84 to 12,771.89)                    | 10,057.98<br>(6,949.88 to 14,522.91)                   | 409.38<br>(325.66 to 516.59)                        | 700.23<br>(534.09 to 916.08)                        | 689.75<br>(534.44 to 881.27)                        | 710.19<br>(537.32 to 953.80)                        |
| Bladder cancer                  | 7,370.21<br>(5,697.91 to 9,543.32)                     | 9,878.52<br>(6,652.23 to 14,933.28)                    | 8,756.78<br>(6,080.32 to 12,625.11)                    | 11,060.86<br>(7,255.60 to 17,261.11)                   | 570.23<br>(448.63 to 718.34)                        | 900.26<br>(665.19 to 1,221.52)                      | 823.55<br>(623.39 to 1,093.83)                      | 988.22<br>(699.70 to 1,399.09)                      |
| Brain and nervous system cancer | 11,231.16<br>(8,156.88 to 14,786.50)                   | 13,197.40<br>(8,971.56 to 17,843.61)                   | 12,996.31<br>(8,765.35 to 17,793.45)                   | 13,051.60<br>(8,989.75 to 17,583.22)                   | 444.89<br>(310.42 to 582.64)                        | 639.05<br>(425.16 to 838.45)                        | 636.76<br>(428.78 to 842.95)                        | 621.99<br>(413.87 to 807.24)                        |
| Thyroid cancer                  | 1,007.44<br>(774.96 to 1,276.62)                       | 1,380.99<br>(981.75 to 1,935.55)                       | 1,315.13<br>(933.61 to 1,831.38)                       | 1,473.78<br>(1,024.95 to 2,109.09)                     | 67.68<br>(52.93 to 85.08)                           | 111.54<br>(84.47 to 149.69)                         | 108.07<br>(82.29 to 142.87)                         | 115.72<br>(85.93 to 158.44)                         |
| Mesothelioma                    | 3,672.80<br>(2,701.05 to 5,114.81)                     | 5,005.84<br>(3,582.06 to 6,948.78)                     | 5,171.46<br>(3,640.23 to 7,339.24)                     | 4,810.81<br>(3,487.85 to 6,558.95)                     | 206.34<br>(153.55 to 283.39)                        | 328.65<br>(251.88 to 422.80)                        | 344.74<br>(259.94 to 452.12)                        | 310.08<br>(240.86 to 391.97)                        |
| Hodgkin lymphoma                | 766.33<br>(588.25 to 990.68)                           | 681.16<br>(490.97 to 930.77)                           | 628.49<br>(450.80 to 865.17)                           | 682.87<br>(498.44 to 926.88)                           | 33.18<br>(25.40 to 42.74)                           | 38.17<br>(28.34 to 49.47)                           | 35.75<br>(26.21 to 46.70)                           | 37.51<br>(28.43 to 47.99)                           |
| Non-Hodgkin lymphoma            | 10,593.71<br>(8,015.74 to 13,580.38)                   | 13,638.74<br>(9,912.12 to 18,065.82)                   | 13,207.83<br>(9,568.04 to 17,572.14)                   | 13,934.82<br>(10,078.84 to 18,633.60)                  | 629.02<br>(487.14 to 793.46)                        | 992.38<br>(763.55 to 1,230.41)                      | 977.76<br>(753.68 to 1,217.84)                      | 990.13<br>(761.11 to 1,237.29)                      |
| Multiple myeloma                | 6,144.34<br>(4,527.97 to 8,138.75)                     | 8,788.66<br>(6,200.34 to 11,790.32)                    | 8,656.53<br>(6,094.25 to 11,752.00)                    | 8,966.31<br>(6,290.03 to 12,112.56)                    | 388.99<br>(293.44 to 501.20)                        | 646.84<br>(482.65 to 828.89)                        | 647.59<br>(483.09 to 833.64)                        | 645.45<br>(476.80 to 833.94)                        |
| Leukemia                        | 10,172.46<br>(7,933.55 to 12,956.65)                   | 12,446.35<br>(8,813.09 to 17,209.63)                   | 11,638.65<br>(8,312.88 to 15,813.12)                   | 13,463.01<br>(9,387.86 to 18,978.18)                   | 549.77<br>(436.92 to 690.22)                        | 856.04<br>(642.27 to 1,124.10)                      | 818.01<br>(664.95 to 1,055.06)                      | 903.30<br>(664.95 to 1,220.96)                      |
| Acute lymphoid leukemia         | 1,277.00<br>(979.28 to 1,671.25)                       | 1,011.07<br>(655.80 to 1,513.28)                       | 918.75<br>(612.76 to 1,366.19)                         | 1,109.26<br>(713.02 to 1,608.56)                       | 35.76<br>(27.47 to 47.85)                           | 37.99<br>(26.32 to 53.92)                           | 34.90<br>(24.75 to 48.73)                           | 41.14<br>(27.98 to 59.56)                           |
| Chronic lymphoid leukemia       | 1,796.49<br>(1,357.19 to 2,344.10)                     | 2,566.95<br>(1,767.16 to 3,588.90)                     | 2,446.56<br>(1,685.51 to 3,337.83)                     | 2,725.45<br>(1,849.43 to 3,930.21)                     | 150.04<br>(116.10 to 190.24)                        | 247.46<br>(183.36 to 323.48)                        | 241.66<br>(181.40 to 310.13)                        | 256.09<br>(184.55 to 345.16)                        |
| Acute myeloid leukemia          | 4,842.69<br>(3,717.02 to 6,204.95)                     | 6,562.42<br>(4,497.33 to 9,239.58)                     | 6,214.49<br>(4,346.16 to 8,511.23)                     | 7,109.00<br>(4,813.83 to 10,248.71)                    | 228.53<br>(177.97 to 290.51)                        | 387.40<br>(275.94 to 523.30)                        | 373.47<br>(270.84 to 497.36)                        | 411.41<br>(290.80 to 572.40)                        |
| Chronic myeloid leukemia        | 925.74<br>(689.45 to 1,220.45)                         | 717.91<br>(470.35 to 1,080.24)                         | 612.03<br>(407.23 to 887.66)                           | 798.43<br>(520.24 to 1,216.03)                         | 55.74<br>(42.82 to 71.68)                           | 54.39<br>(38.72 to 76.12)                           | 47.63<br>(34.39 to 65.90)                           | 58.77<br>(41.01 to 84.73)                           |
| Other leukemia                  | 1,330.54<br>(1,020.34 to 1,718.73)                     | 1,588.00<br>(1,113.49 to 2,250.05)                     | 1,446.82<br>(1,020.48 to 2,017.37)                     | 1,720.87<br>(1,183.86 to 2,490.18)                     | 79.69<br>(62.23 to 100.35)                          | 128.80<br>(95.40 to 171.98)                         | 120.35<br>(89.81 to 159.07)                         | 135.89<br>(99.18 to 184.76)                         |
| Other neoplasms                 | 17,564.82<br>(13,546.36 to 22,253.70)                  | 25,584.19<br>(19,544.30 to 31,990.24)                  | 25,994.49<br>(19,815.53 to 32,661.12)                  | 24,703.94<br>(19,008.57 to 30,632.48)                  | 1,066.57<br>(828.67 to 1,320.65)                    | 1,952.25<br>(1,578.11 to 2,300.22)                  | 2,021.40<br>(1,622.47 to 2,399.20)                  | 1,841.40<br>(1,509.16 to 2,148.65)                  |
| <b>Cardiovascular diseases</b>  | <b>228,815.90</b><br><b>(183,890.97 to 280,802.25)</b> | <b>244,508.94</b><br><b>(176,866.77 to 342,594.22)</b> | <b>187,580.31</b><br><b>(138,437.79 to 256,987.69)</b> | <b>322,737.63</b><br><b>(217,702.20 to 465,993.57)</b> | <b>23,057.95</b><br><b>(18,996.35 to 27,634.11)</b> | <b>28,843.84</b><br><b>(22,131.86 to 37,230.83)</b> | <b>23,366.04</b><br><b>(18,376.35 to 29,887.31)</b> | <b>35,601.41</b><br><b>(26,550.55 to 46,794.43)</b> |
| Rheumatic heart disease         | 1,900.45<br>(1,472.44 to 2,394.26)                     | 2,374.98<br>(1,818.75 to 3,060.88)                     | 2,212.49<br>(1,688.74 to 2,847.34)                     | 2,334.29<br>(1,798.46 to 3,028.07)                     | 189.38<br>(150.20 to 233.05)                        | 289.12<br>(231.80 to 364.63)                        | 275.91<br>(219.91 to 346.14)                        | 276.62<br>(218.34 to 353.52)                        |
| Ischemic heart disease          | 131,586.97<br>(103,419.91 to 163,140.93)               | 113,435.26<br>(65,136.15 to 182,586.67)                | 77,057.73<br>(45,964.95 to 122,377.44)                 | 167,147.03<br>(90,539.31 to 278,198.50)                | 13,076.76<br>(10,588.85 to 16,038.30)               | 13,095.16<br>(8,072.62 to 19,584.93)                | 9,539.22<br>(6,042.04 to 14,305.62)                 | 17,704.14<br>(10,358.49 to 27,536.80)               |
| Stroke                          | 41,934.46<br>(32,591.00 to 53,116.08)                  | 38,179.57<br>(24,096.99 to 59,065.51)                  | 27,761.11<br>(17,896.46 to 42,817.80)                  | 52,453.30<br>(31,494.30 to 83,583.86)                  | 4,438.98<br>(3,481.55 to 5,643.17)                  | 4,661.02<br>(2,953.38 to 7,245.71)                  | 3,631.86<br>(2,355.86 to 5,630.30)                  | 5,872.84<br>(3,593.13 to 9,409.46)                  |
| Ischemic stroke                 | 20,634.59<br>(15,966.38 to 26,274.45)                  | 18,141.81<br>(10,261.59 to 32,606.86)                  | 14,021.71<br>(8,064.64 to 25,498.29)                   | 22,977.31<br>(12,752.55 to 44,327.75)                  | 2,485.80<br>(1,933.65 to 3,179.50)                  | 2,478.01<br>(1,391.21 to 4,672.68)                  | 2,008.26<br>(1,156.50 to 3,695.87)                  | 2,957.70<br>(1,625.09 to 5,863.74)                  |
| Intracerebral hemorrhage        | 21,299.87<br>(16,623.59 to 26,933.04)                  | 20,037.75<br>(12,059.31 to 32,224.42)                  | 13,739.40<br>(8,704.76 to 21,568.54)                   | 29,475.99<br>(16,735.47 to 49,661.68)                  | 1,953.18<br>(1,527.30 to 2,475.45)                  | 2,183.01<br>(1,398.10 to 3,439.66)                  | 1,623.60<br>(1,074.32 to 2,462.58)                  | 2,915.14<br>(1,760.83 to 4,770.28)                  |



|                                                                |                                           |                                             |                                             |                                             |                                        |                                          |                                          |                                          |
|----------------------------------------------------------------|-------------------------------------------|---------------------------------------------|---------------------------------------------|---------------------------------------------|----------------------------------------|------------------------------------------|------------------------------------------|------------------------------------------|
|                                                                | 20,144.59<br>(15,277.14 to<br>26,041.77)  | 20,492.81<br>(14,766.90 to<br>27,960.44)    | 18,421.48<br>(13,327.44 to<br>25,085.16)    | 24,494.67<br>(17,979.62 to<br>32,820.44)    | 940.99<br>(722.57 to<br>1,183.19)      | 1,143.74<br>(905.74 to<br>1,442.53)      | 1,048.51<br>(821.87 to<br>1,324.66)      | 1,333.47<br>(1,065.07 to<br>1,666.02)    |
| <b>Cirrhosis and other chronic liver diseases</b>              |                                           |                                             |                                             |                                             |                                        |                                          |                                          |                                          |
|                                                                | 2,826.48<br>(1,956.49 to<br>4,060.07)     | 3,135.04<br>(2,064.71 to<br>4,569.02)       | 2,987.60<br>(1,973.39 to<br>4,361.18)       | 3,126.24<br>(2,069.68 to<br>4,582.75)       | 133.66<br>(95.85 to<br>187.71)         | 176.09<br>(125.42 to<br>243.26)          | 170.61<br>(121.92 to<br>237.70)          | 172.17<br>(123.27 to<br>237.56)          |
| Cirrhosis and other chronic liver diseases due to hepatitis B  |                                           |                                             |                                             |                                             |                                        |                                          |                                          |                                          |
|                                                                | 6,213.71<br>(4,208.02 to<br>8,824.04)     | 6,861.74<br>(4,443.73 to<br>10,254.28)      | 6,491.27<br>(4,160.85 to<br>9,708.76)       | 6,889.31<br>(4,446.93 to<br>10,346.06)      | 278.01<br>(193.72 to<br>383.52)        | 361.96<br>(253.58 to<br>503.37)          | 347.77<br>(244.24 to<br>483.75)          | 356.67<br>(248.53 to<br>497.51)          |
| Cirrhosis and other chronic liver diseases due to hepatitis C  |                                           |                                             |                                             |                                             |                                        |                                          |                                          |                                          |
|                                                                | 9,870.14<br>(7,255.03 to<br>13,183.88)    | 9,124.51<br>(6,292.28 to<br>12,685.38)      | 7,636.02<br>(5,254.83 to<br>10,737.08)      | 13,111.88<br>(9,271.29 to<br>17,869.04)     | 466.38<br>(352.21 to<br>609.92)        | 519.51<br>(387.32 to<br>680.28)          | 446.42<br>(327.51 to<br>588.16)          | 720.77<br>(543.85 to<br>934.19)          |
| Cirrhosis and other chronic liver diseases due to alcohol use  |                                           |                                             |                                             |                                             |                                        |                                          |                                          |                                          |
|                                                                | 1,234.26<br>(809.25 to<br>1,847.40)       | 1,371.52<br>(861.01 to<br>2,099.47)         | 1,306.59<br>(817.62 to<br>2,002.77)         | 1,367.24<br>(859.76 to<br>2,092.06)         | 62.94<br>(41.50 to<br>93.42)           | 86.18<br>(55.96 to<br>128.83)            | 83.71<br>(53.77 to<br>125.22)            | 83.87<br>(53.85 to<br>125.67)            |
| Cirrhosis and other chronic liver diseases due to other causes |                                           |                                             |                                             |                                             |                                        |                                          |                                          |                                          |
|                                                                | 18,644.21<br>(14,070.24 to<br>23,879.75)  | 26,293.57<br>(19,731.32 to<br>33,086.74)    | 25,498.13<br>(19,214.63 to<br>32,651.79)    | 26,509.22<br>(19,957.50 to<br>33,435.11)    | 1,710.55<br>(1,289.66 to<br>2,124.05)  | 2,877.78<br>(2,166.78 to<br>3,420.56)    | 2,855.12<br>(2,168.71 to<br>3,374.29)    | 2,820.95<br>(2,085.32 to<br>3,389.26)    |
| <b>Digestive diseases</b>                                      |                                           |                                             |                                             |                                             |                                        |                                          |                                          |                                          |
|                                                                | 2,403.16<br>(1,837.36 to<br>3,366.66)     | 2,344.16<br>(1,638.43 to<br>3,251.67)       | 2,055.12<br>(1,440.65 to<br>2,857.82)       | 2,421.13<br>(1,714.43 to<br>3,349.61)       | 218.94<br>(167.97 to<br>293.60)        | 263.13<br>(193.55 to<br>362.67)          | 236.94<br>(174.55 to<br>320.75)          | 263.42<br>(191.72 to<br>359.71)          |
| Peptic ulcer disease                                           |                                           |                                             |                                             |                                             |                                        |                                          |                                          |                                          |
| <b>Switzerland</b>                                             |                                           |                                             |                                             |                                             |                                        |                                          |                                          |                                          |
| Cause                                                          | YLLs (actual counts)                      |                                             |                                             |                                             | Deaths (actual counts)                 |                                          |                                          |                                          |
|                                                                | 2016                                      | 2040 Forecast                               | 2040 Better Scenario                        | 2040 Worse Scenario                         | 2016                                   | 2040 Forecast                            | 2040 Better Scenario                     | 2040 Worse Scenario                      |
| Gastritis and duodenitis                                       | 278.82<br>(189.91 to<br>401.34)           | 358.78<br>(224.53 to<br>517.18)             | 341.12<br>(214.37 to<br>488.54)             | 350.65<br>(224.07 to<br>497.38)             | 22.45<br>(13.59 to<br>30.06)           | 37.16<br>(21.68 to<br>53.28)             | 36.29<br>(21.03 to<br>52.39)             | 35.21<br>(21.14 to<br>50.87)             |
| Appendicitis                                                   | 297.92<br>(216.73 to<br>450.31)           | 332.93<br>(252.46 to<br>489.35)             | 305.34<br>(211.94 to<br>445.15)             | 330.00<br>(232.97 to<br>479.32)             | 21.77<br>(15.21 to<br>30.21)           | 31.20<br>(21.01 to<br>43.35)             | 29.30<br>(19.86 to<br>40.40)             | 30.06<br>(20.38 to<br>41.15)             |
| Paralytic ileus and intestinal obstruction                     | 3,338.99<br>(2,245.17 to<br>4,493.27)     | 4,985.84<br>(3,282.66 to<br>6,439.74)       | 5,137.53<br>(3,384.19 to<br>6,631.24)       | 4,737.66<br>(3,116.32 to<br>6,086.58)       | 312.88<br>(191.42 to<br>423.09)        | 556.04<br>(346.17 to<br>712.24)          | 584.52<br>(363.55 to<br>748.51)          | 515.67<br>(322.74 to<br>666.94)          |
| Inguinal, femoral, and abdominal hernia                        | 661.32<br>(397.96 to<br>875.47)           | 651.27<br>(390.91 to<br>831.18)             | 634.41<br>(382.02 to<br>813.00)             | 626.88<br>(379.00 to<br>797.63)             | 66.71<br>(37.61 to<br>88.25)           | 76.50<br>(43.38 to<br>97.36)             | 76.24<br>(43.28 to<br>96.88)             | 71.84<br>(40.67 to<br>92.24)             |
| Inflammatory bowel disease                                     | 1,624.77<br>(969.35 to<br>2,179.52)       | 2,276.32<br>(1,266.93 to<br>2,970.64)       | 2,321.93<br>(1,303.94 to<br>3,030.76)       | 2,178.97<br>(1,203.79 to<br>2,836.67)       | 141.69<br>(75.20 to<br>188.22)         | 238.16<br>(127.28 to<br>306.46)          | 248.34<br>(133.55 to<br>321.44)          | 222.06<br>(117.74 to<br>286.68)          |
| Vascular intestinal disorders                                  | 2,485.45<br>(1,814.87 to<br>3,207.87)     | 3,846.77<br>(2,809.94 to<br>4,928.10)       | 3,816.92<br>(2,792.55 to<br>4,928.89)       | 3,710.56<br>(2,708.02 to<br>4,686.91)       | 221.19<br>(162.19 to<br>281.97)        | 398.52<br>(292.04 to<br>488.03)          | 403.10<br>(300.20 to<br>501.66)          | 376.05<br>(277.76 to<br>458.41)          |
| Gallbladder and biliary diseases                               | 1,841.62<br>(1,382.77 to<br>2,479.47)     | 2,893.39<br>(1,693.20 to<br>4,932.29)       | 2,536.75<br>(1,516.43 to<br>4,186.87)       | 3,464.61<br>(1,971.23 to<br>5,917.21)       | 191.03<br>(141.41 to<br>257.46)        | 349.85<br>(202.29 to<br>574.94)          | 313.91<br>(184.80 to<br>518.92)          | 406.59<br>(227.09 to<br>674.77)          |
| Pancreatitis                                                   | 1,615.26<br>(1,124.75 to<br>2,239.16)     | 1,955.27<br>(1,026.10 to<br>3,489.23)       | 1,703.83<br>(924.31 to<br>2,931.67)         | 2,316.72<br>(1,150.42 to<br>4,416.14)       | 93.79<br>(66.27 to<br>123.74)          | 143.25<br>(81.63 to<br>242.69)           | 127.82<br>(74.98 to<br>209.13)           | 165.15<br>(86.67 to<br>297.38)           |
| Other digestive diseases                                       | 4,096.88<br>(2,932.83 to<br>5,326.10)     | 6,648.84<br>(4,765.86 to<br>8,418.27)       | 6,645.17<br>(4,794.54 to<br>8,471.19)       | 6,372.03<br>(4,602.92 to<br>7,997.27)       | 420.10<br>(313.94 to<br>536.41)        | 783.97<br>(585.11 to<br>961.11)          | 798.66<br>(599.19 to<br>975.95)          | 724.89<br>(546.07 to<br>901.81)          |
| <b>Neurological disorders</b>                                  | 83,914.52<br>(65,815.93 to<br>105,868.45) | 133,828.95<br>(105,178.06 to<br>172,818.80) | 133,637.61<br>(105,691.26 to<br>169,059.68) | 141,476.77<br>(108,172.42 to<br>190,017.29) | 9,558.29<br>(7,551.56 to<br>11,993.39) | 16,923.81<br>(13,367.34 to<br>21,476.80) | 17,207.65<br>(13,751.34 to<br>21,476.56) | 17,540.91<br>(13,215.71 to<br>23,568.29) |
| Alzheimer's disease and other dementias                        | 63,124.42<br>(48,589.52 to<br>81,243.73)  | 104,510.29<br>(78,025.20 to<br>141,262.52)  | 103,883.56<br>(78,542.70 to<br>137,682.34)  | 112,328.55<br>(81,116.41 to<br>159,496.59)  | 8,233.85<br>(6,372.52 to<br>10,456.38) | 14,664.52<br>(11,102.66 to<br>19,380.28) | 14,855.48<br>(11,455.91 to<br>19,135.68) | 15,365.31<br>(11,116.22 to<br>21,376.88) |
| Parkinson's disease                                            | 7,132.43<br>(5,125.79 to<br>9,749.44)     | 12,197.73<br>(9,204.53 to<br>16,366.61)     | 12,849.41<br>(9,617.27 to<br>17,233.65)     | 11,519.43<br>(8,612.34 to<br>15,355.13)     | 695.20<br>(498.94 to<br>942.08)        | 1,278.55<br>(988.18 to<br>1,687.82)      | 1,367.32<br>(1,050.76 to<br>1,812.30)    | 1,186.35<br>(906.62 to<br>1,563.04)      |
| Epilepsy                                                       | 2,573.20<br>(2,018.60 to<br>3,277.47)     | 3,517.91<br>(2,168.03 to<br>5,502.96)       | 3,218.55<br>(2,025.44 to<br>4,963.34)       | 4,151.69<br>(2,467.67 to<br>6,554.49)       | 106.77<br>(84.28 to<br>133.85)         | 206.10<br>(130.08 to<br>312.29)          | 193.43<br>(124.89 to<br>285.50)          | 237.05<br>(142.35 to<br>375.11)          |

|                              |                                                               |                                                               |                                                               |                                                               |                                                      |                                                        |                                                        |                                                        |
|------------------------------|---------------------------------------------------------------|---------------------------------------------------------------|---------------------------------------------------------------|---------------------------------------------------------------|------------------------------------------------------|--------------------------------------------------------|--------------------------------------------------------|--------------------------------------------------------|
| Multiple sclerosis           | 3,069.92<br>(2,094.19 to<br>4,488.91)                         | 3,264.41<br>(2,072.44 to<br>4,697.28)                         | 3,219.22<br>(2,043.34 to<br>4,635.33)                         | 3,346.20<br>(2,127.64 to<br>4,876.72)                         | 127.02<br>(82.14 to<br>173.46)                       | 156.59<br>(93.60 to<br>214.99)                         | 156.43<br>(93.18 to<br>215.77)                         | 157.99<br>(94.47 to<br>216.42)                         |
| Motor neuron disease         | 3,664.78<br>(2,851.49 to<br>4,632.49)                         | 5,339.93<br>(3,950.01 to<br>6,974.37)                         | 5,372.71<br>(3,938.37 to<br>7,078.44)                         | 5,240.12<br>(3,900.05 to<br>6,821.25)                         | 184.13<br>(142.96 to<br>233.44)                      | 310.20<br>(238.33 to<br>395.81)                        | 315.17<br>(239.32 to<br>404.46)                        | 300.58<br>(232.75 to<br>378.72)                        |
| Other neurological disorders | 4,349.76<br>(3,379.65 to<br>5,477.37)                         | 4,998.68<br>(3,867.06 to<br>6,360.35)                         | 5,094.15<br>(3,912.26 to<br>6,543.26)                         | 4,890.78<br>(3,835.14 to<br>6,177.73)                         | 211.31<br>(167.68 to<br>263.33)                      | 307.85<br>(254.46 to<br>370.42)                        | 319.82<br>(260.85 to<br>386.95)                        | 293.63<br>(244.00 to<br>350.09)                        |
| <b>Mental disorders</b>      | <b>16,895.93</b><br><b>(12,373.00 to</b><br><b>22,750.88)</b> | <b>23,339.39</b><br><b>(15,168.33 to</b><br><b>34,000.90)</b> | <b>24,571.96</b><br><b>(15,817.23 to</b><br><b>36,262.41)</b> | <b>23,730.33</b><br><b>(15,645.68 to</b><br><b>34,352.11)</b> | <b>483.82</b><br><b>(364.32 to</b><br><b>639.76)</b> | <b>742.02</b><br><b>(535.02 to</b><br><b>1,005.03)</b> | <b>779.63</b><br><b>(562.44 to</b><br><b>1,070.31)</b> | <b>758.18</b><br><b>(557.51 to</b><br><b>1,012.36)</b> |
| Alcohol use disorders        | 6,917.74<br>(5,189.51 to<br>9,166.43)                         | 7,609.35<br>(5,289.49 to<br>10,454.01)                        | 7,562.70<br>(5,225.21 to<br>10,452.66)                        | 8,418.74<br>(5,885.58 to<br>11,472.17)                        | 265.93<br>(203.61 to<br>347.64)                      | 352.58<br>(259.66 to<br>462.88)                        | 355.35<br>(259.70 to<br>471.84)                        | 382.61<br>(285.59 to<br>498.80)                        |
| Drug use disorders           | 9,725.08<br>(6,804.93 to<br>13,342.87)                        | 15,518.19<br>(9,146.84 to<br>24,168.91)                       | 16,784.38<br>(9,921.94 to<br>26,373.33)                       | 15,104.13<br>(8,964.27 to<br>23,182.65)                       | 213.03<br>(152.93 to<br>288.17)                      | 385.31<br>(257.35 to<br>560.72)                        | 419.90<br>(276.81 to<br>607.48)                        | 371.53<br>(245.74 to<br>540.32)                        |
| Opioid use disorders         | 4,132.92<br>(2,545.60 to<br>5,838.78)                         | 5,421.03<br>(2,909.30 to<br>9,651.30)                         | 5,557.05<br>(2,972.05 to<br>9,984.61)                         | 5,365.03<br>(2,889.32 to<br>9,440.93)                         | 86.01<br>(56.30 to<br>120.44)                        | 128.64<br>(78.40 to<br>209.26)                         | 132.88<br>(80.58 to<br>218.58)                         | 126.15<br>(76.05 to<br>203.71)                         |
| Cocaine use disorders        | 137.86<br>(88.80 to<br>208.18)                                | 382.00<br>(197.67 to<br>683.76)                               | 412.69<br>(215.13 to<br>742.93)                               | 372.20<br>(193.20 to<br>662.98)                               | 2.80<br>(1.79 to<br>4.16)                            | 8.17<br>(4.64 to<br>13.89)                             | 8.85<br>(4.49 to<br>15.09)                             | 7.93<br>(4.45 to<br>13.33)                             |
| Amphetamine use disorders    | 338.81<br>(205.25 to<br>475.04)                               | 937.76<br>(454.55 to<br>1,743.74)                             | 1,061.72<br>(511.83 to<br>1,960.04)                           | 900.69<br>(433.69 to<br>1,665.78)                             | 6.53<br>(3.97 to<br>9.14)                            | 18.87<br>(9.62 to<br>33.00)                            | 21.41<br>(10.80 to<br>37.36)                           | 18.07<br>(9.11 to<br>31.76)                            |
| Other drug use disorders     | 5,115.49<br>(3,546.71 to<br>7,170.23)                         | 8,777.39<br>(5,165.87 to<br>13,749.57)                        | 9,752.91<br>(5,699.98 to<br>15,228.49)                        | 8,466.21<br>(4,931.02 to<br>13,223.74)                        | 117.70<br>(82.60 to<br>162.39)                       | 229.63<br>(151.43 to<br>336.79)                        | 256.76<br>(168.89 to<br>375.39)                        | 219.39<br>(143.84 to<br>319.46)                        |
| Eating disorders             | 253.11<br>(148.04 to<br>379.35)                               | 211.85<br>(98.84 to<br>384.66)                                | 224.89<br>(105.21 to<br>410.35)                               | 207.46<br>(96.53 to<br>376.60)                                | 4.85<br>(2.85 to<br>7.27)                            | 4.13<br>(1.97 to<br>7.47)                              | 4.38<br>(2.10 to<br>7.95)                              | 4.04<br>(1.92 to<br>7.25)                              |

**Switzerland**

| Cause                                                      | YLLs (actual counts)                                          |                                                               |                                                               |                                                                | Deaths (actual counts)                                     |                                                            |                                                            |                                                             |
|------------------------------------------------------------|---------------------------------------------------------------|---------------------------------------------------------------|---------------------------------------------------------------|----------------------------------------------------------------|------------------------------------------------------------|------------------------------------------------------------|------------------------------------------------------------|-------------------------------------------------------------|
|                                                            | 2016                                                          | 2040 Forecast                                                 | 2040 Better Scenario                                          | 2040 Worse Scenario                                            | 2016                                                       | 2040 Forecast                                              | 2040 Better Scenario                                       | 2040 Worse Scenario                                         |
| <b>Diabetes, urogenital, blood, and endocrine diseases</b> | <b>38,461.23</b><br><b>(30,738.06 to</b><br><b>47,061.78)</b> | <b>62,481.28</b><br><b>(45,757.53 to</b><br><b>96,350.79)</b> | <b>56,129.12</b><br><b>(41,418.44 to</b><br><b>86,651.82)</b> | <b>69,826.88</b><br><b>(49,895.34 to</b><br><b>114,498.85)</b> | <b>3,530.31</b><br><b>(2,901.30 to</b><br><b>4,237.41)</b> | <b>6,893.49</b><br><b>(5,384.14 to</b><br><b>9,942.39)</b> | <b>6,346.02</b><br><b>(4,997.10 to</b><br><b>9,022.18)</b> | <b>7,477.06</b><br><b>(5,734.65 to</b><br><b>11,252.09)</b> |
| Diabetes mellitus                                          | 15,322.46<br>(12,056.35 to<br>18,930.85)                      | 23,665.77<br>(15,366.22 to<br>35,024.61)                      | 19,855.06<br>(13,216.81 to<br>28,961.78)                      | 26,835.19<br>(16,934.00 to<br>41,297.13)                       | 1,356.05<br>(1,096.57 to<br>1,648.81)                      | 2,532.30<br>(1,762.28 to<br>3,536.23)                      | 2,212.04<br>(1,574.65 to<br>3,031.98)                      | 2,738.74<br>(1,824.60 to<br>3,975.94)                       |
| Acute glomerulonephritis                                   | 39.53<br>(31.67 to<br>48.47)                                  | 34.02<br>(22.96 to<br>47.95)                                  | 31.92<br>(21.50 to<br>45.14)                                  | 34.79<br>(23.81 to<br>48.55)                                   | 1.00<br>(0.78 to<br>1.25)                                  | 1.13<br>(0.76 to<br>1.63)                                  | 1.08<br>(0.72 to<br>1.57)                                  | 1.12<br>(0.76 to<br>1.60)                                   |
| Chronic kidney disease                                     | 12,736.39<br>(10,205.65 to<br>15,633.73)                      | 22,891.72<br>(12,784.48 to<br>55,518.00)                      | 20,485.46<br>(11,816.33 to<br>51,121.06)                      | 27,566.99<br>(14,545.65 to<br>70,506.72)                       | 1,395.29<br>(1,140.74 to<br>1,685.34)                      | 2,780.16<br>(1,657.83 to<br>5,935.06)                      | 2,541.12<br>(1,558.32 to<br>5,394.74)                      | 3,255.10<br>(1,798.83 to<br>7,030.36)                       |
| Chronic kidney disease due to diabetes mellitus            | 4,395.14<br>(3,389.09 to<br>5,577.08)                         | 8,579.81<br>(4,539.39 to<br>21,857.48)                        | 7,639.35<br>(4,205.09 to<br>19,862.54)                        | 10,478.90<br>(5,234.22 to<br>27,316.32)                        | 403.99<br>(314.01 to<br>512.34)                            | 906.17<br>(494.97 to<br>2,140.83)                          | 823.89<br>(463.83 to<br>1,968.33)                          | 1,077.37<br>(553.28 to<br>2,631.11)                         |
| Chronic kidney disease due to hypertension                 | 3,326.98<br>(2,594.14 to<br>4,186.32)                         | 6,271.24<br>(3,452.65 to<br>14,390.05)                        | 5,743.31<br>(3,256.67 to<br>12,858.10)                        | 7,394.06<br>(3,821.97 to<br>17,918.23)                         | 468.38<br>(368.44 to<br>583.25)                            | 935.42<br>(521.76 to<br>1,990.56)                          | 872.59<br>(510.02 to<br>1,838.70)                          | 1,073.47<br>(573.76 to<br>2,310.88)                         |
| Chronic kidney disease due to glomerulonephritis           | 1,680.99<br>(1,236.32 to<br>2,226.37)                         | 2,521.75<br>(1,269.02 to<br>5,877.16)                         | 2,202.94<br>(1,142.30 to<br>5,283.19)                         | 3,046.45<br>(1,465.87 to<br>7,268.90)                          | 167.26<br>(120.71 to<br>225.93)                            | 282.60<br>(148.35 to<br>644.48)                            | 251.15<br>(136.58 to<br>557.11)                            | 333.97<br>(167.15 to<br>765.81)                             |
| Chronic kidney disease due to other and unspecified causes | 3,333.29<br>(2,544.12 to<br>4,204.70)                         | 5,518.91<br>(3,076.53 to<br>13,622.55)                        | 4,899.85<br>(2,795.33 to<br>12,001.53)                        | 6,647.58<br>(3,530.64 to<br>16,386.99)                         | 355.66<br>(269.84 to<br>452.24)                            | 655.97<br>(383.48 to<br>1,429.31)                          | 593.48<br>(358.69 to<br>1,299.35)                          | 770.30<br>(422.64 to<br>1,709.41)                           |
| Urinary diseases and male infertility                      | 3,616.96<br>(2,890.87 to<br>4,505.81)                         | 6,966.80<br>(5,569.32 to<br>8,490.96)                         | 6,775.32<br>(5,381.95 to<br>8,308.54)                         | 6,674.51<br>(5,359.82 to<br>8,147.16)                          | 399.96<br>(323.55 to<br>493.85)                            | 905.09<br>(736.27 to<br>1,108.43)                          | 900.01<br>(730.25 to<br>1,105.50)                          | 845.41<br>(678.25 to<br>1,043.07)                           |

|                                                   |                                          |                                          |                                          |                                          |                                 |                                   |                                   |                                 |
|---------------------------------------------------|------------------------------------------|------------------------------------------|------------------------------------------|------------------------------------------|---------------------------------|-----------------------------------|-----------------------------------|---------------------------------|
| Urinary tract infections                          | 3,256.59<br>(2,604.89 to<br>4,050.24)    | 6,408.64<br>(5,121.13 to<br>7,778.49)    | 6,232.45<br>(4,985.04 to<br>7,651.29)    | 6,130.96<br>(4,956.45 to<br>7,490.34)    | 369.20<br>(299.17 to<br>455.77) | 844.69<br>(681.11 to<br>1,029.42) | 842.01<br>(679.12 to<br>1,028.35) | 788.26<br>(634.23 to<br>967.74) |
| Urolithiasis                                      | 134.89<br>(88.41 to<br>229.69)           | 198.55<br>(118.49 to<br>349.84)          | 184.01<br>(109.09 to<br>327.56)          | 196.14<br>(120.62 to<br>350.67)          | 10.79<br>(7.01 to<br>18.62)     | 18.80<br>(11.65 to<br>32.85)      | 17.79<br>(11.01 to<br>31.62)      | 18.10<br>(11.24 to<br>31.94)    |
| Other urinary diseases                            | 225.48<br>(145.34 to<br>383.43)          | 359.62<br>(208.16 to<br>671.37)          | 338.86<br>(193.58 to<br>634.28)          | 347.41<br>(204.18 to<br>636.98)          | 19.97<br>(12.19 to<br>36.27)    | 41.60<br>(21.95 to<br>80.19)      | 40.21<br>(21.04 to<br>78.38)      | 39.05<br>(21.11 to<br>76.10)    |
| Gynecological diseases                            | 60.65<br>(38.30 to<br>91.64)             | 48.24<br>(27.27 to<br>76.80)             | 41.54<br>(23.59 to<br>65.67)             | 49.19<br>(28.49 to<br>77.11)             | 4.17<br>(2.27 to<br>6.04)       | 4.21<br>(2.08 to<br>6.21)         | 3.71<br>(1.86 to<br>5.50)         | 4.15<br>(2.07 to<br>6.06)       |
| Uterine fibroids                                  | 14.85<br>(8.98 to<br>24.59)              | 8.62<br>(4.51 to<br>15.34)               | 7.65<br>(4.01 to<br>13.27)               | 8.87<br>(4.64 to<br>15.24)               | 0.51<br>(0.32 to<br>0.80)       | 0.38<br>(0.21 to<br>0.60)         | 0.34<br>(0.19 to<br>0.54)         | 0.38<br>(0.22 to<br>0.59)       |
| Polycystic ovarian syndrome                       | 2.52<br>(1.35 to<br>4.63)                | 0.99<br>(0.40 to<br>2.17)                | 0.74<br>(0.30 to<br>1.64)                | 1.07<br>(0.43 to<br>2.34)                | 0.06<br>(0.03 to<br>0.12)       | 0.02<br>(0.01 to<br>0.05)         | 0.02<br>(0.01 to<br>0.04)         | 0.03<br>(0.01 to<br>0.06)       |
| Endometriosis                                     | 0.24<br>(0.10 to<br>0.53)                | 0.20<br>(0.06 to<br>0.55)                | 0.17<br>(0.05 to<br>0.47)                | 0.21<br>(0.06 to<br>0.57)                | 0.01<br>(0.00 to<br>0.01)       | 0.01<br>(0.00 to<br>0.01)         | 0.00<br>(0.00 to<br>0.01)         | 0.01<br>(0.00 to<br>0.01)       |
| Genital prolapse                                  | 9.86<br>(2.82 to<br>15.58)               | 7.41<br>(2.09 to<br>13.51)               | 6.40<br>(1.84 to<br>11.61)               | 7.51<br>(2.07 to<br>13.45)               | 0.94<br>(0.23 to<br>1.50)       | 0.73<br>(0.17 to<br>1.41)         | 0.65<br>(0.15 to<br>1.23)         | 0.72<br>(0.17 to<br>1.34)       |
| Other gynecological diseases                      | 33.18<br>(20.66 to<br>50.03)             | 31.02<br>(17.15 to<br>50.18)             | 26.57<br>(14.65 to<br>42.97)             | 31.54<br>(17.28 to<br>49.91)             | 2.65<br>(1.47 to<br>3.83)       | 3.07<br>(1.49 to<br>4.65)         | 2.69<br>(1.32 to<br>4.13)         | 3.01<br>(1.49 to<br>4.55)       |
| Hemoglobinopathies and hemolytic anemias          | 1,175.48<br>(912.87 to<br>1,564.18)      | 1,564.09<br>(1,197.70 to<br>1,951.44)    | 1,484.31<br>(1,135.15 to<br>1,861.61)    | 1,517.94<br>(1,173.43 to<br>1,889.66)    | 109.37<br>(78.78 to<br>138.73)  | 192.50<br>(133.50 to<br>240.56)   | 187.20<br>(132.28 to<br>231.79)   | 181.19<br>(125.73 to<br>226.71) |
| Thalassemias                                      | 124.37<br>(71.88 to<br>187.68)           | 49.23<br>(22.22 to<br>90.88)             | 48.28<br>(21.95 to<br>89.43)             | 50.92<br>(23.22 to<br>93.20)             | 1.73<br>(0.93 to<br>2.75)       | 0.73<br>(0.30 to<br>1.52)         | 0.72<br>(0.30 to<br>1.51)         | 0.75<br>(0.31 to<br>1.55)       |
| Sickle cell disorders                             | 36.48<br>(10.62 to<br>85.96)             | 39.60<br>(10.64 to<br>93.27)             | 36.03<br>(9.45 to<br>86.87)              | 40.60<br>(10.84 to<br>96.73)             | 0.86<br>(0.24 to<br>1.97)       | 1.36<br>(0.32 to<br>3.39)         | 1.24<br>(0.29 to<br>3.10)         | 1.38<br>(0.33 to<br>3.49)       |
| G6PD deficiency                                   | 128.78<br>(85.52 to<br>212.34)           | 201.07<br>(125.78 to<br>327.86)          | 181.50<br>(114.04 to<br>299.92)          | 203.47<br>(128.49 to<br>327.67)          | 4.96<br>(3.39 to<br>7.58)       | 11.74<br>(7.45 to<br>17.88)       | 10.77<br>(6.94 to<br>16.27)       | 11.62<br>(7.50 to<br>17.34)     |
| Other hemoglobinopathies and hemolytic anemias    | 885.86<br>(668.53 to<br>1,157.07)        | 1,274.19<br>(950.38 to<br>1,570.41)      | 1,218.50<br>(910.54 to<br>1,509.15)      | 1,222.96<br>(915.65 to<br>1,504.70)      | 101.82<br>(71.96 to<br>129.55)  | 178.68<br>(120.25 to<br>224.13)   | 174.47<br>(119.13 to<br>215.99)   | 167.43<br>(111.35 to<br>212.88) |
| Endocrine, metabolic, blood, and immune disorders | 5,509.76<br>(2,650.92 to<br>7,163.89)    | 7,310.63<br>(3,452.76 to<br>9,785.29)    | 7,455.51<br>(3,610.33 to<br>9,994.26)    | 7,148.27<br>(3,318.28 to<br>9,487.71)    | 264.46<br>(117.55 to<br>343.93) | 478.10<br>(224.83 to<br>603.85)   | 500.86<br>(240.19 to<br>633.79)   | 451.34<br>(208.30 to<br>568.22) |
| <b>Switzerland</b>                                |                                          |                                          |                                          |                                          |                                 |                                   |                                   |                                 |
| Cause                                             | YLLs (actual counts)                     |                                          |                                          |                                          | Deaths (actual counts)          |                                   |                                   |                                 |
|                                                   | 2016                                     | 2040 Forecast                            | 2040 Better Scenario                     | 2040 Worse Scenario                      | 2016                            | 2040 Forecast                     | 2040 Better Scenario              | 2040 Worse Scenario             |
| Musculoskeletal disorders                         | 3,366.24<br>(2,457.95 to<br>4,410.73)    | 6,337.44<br>(4,461.08 to<br>8,216.78)    | 6,100.44<br>(4,307.89 to<br>7,911.71)    | 6,228.88<br>(4,431.10 to<br>8,081.70)    | 296.57<br>(210.62 to<br>388.43) | 659.17<br>(445.31 to<br>808.51)   | 648.77<br>(433.12 to<br>799.44)   | 631.34<br>(435.50 to<br>770.71) |
| Rheumatoid arthritis                              | 851.78<br>(598.14 to<br>1,247.16)        | 1,897.73<br>(1,233.66 to<br>2,832.55)    | 1,668.09<br>(1,097.55 to<br>2,509.58)    | 1,939.35<br>(1,273.51 to<br>2,859.19)    | 71.70<br>(49.00 to<br>108.79)   | 182.28<br>(121.08 to<br>265.07)   | 163.00<br>(108.35 to<br>239.84)   | 182.33<br>(121.23 to<br>260.88) |
| Other musculoskeletal disorders                   | 2,514.46<br>(1,763.62 to<br>3,270.78)    | 4,439.72<br>(3,023.59 to<br>5,699.77)    | 4,432.34<br>(3,063.15 to<br>5,673.94)    | 4,289.53<br>(2,924.52 to<br>5,463.25)    | 224.87<br>(147.42 to<br>288.78) | 476.88<br>(311.14 to<br>588.75)   | 485.76<br>(323.24 to<br>600.90)   | 449.01<br>(285.11 to<br>558.49) |
| Other non-communicable diseases                   | 15,562.11<br>(12,568.32 to<br>19,141.87) | 15,945.39<br>(11,308.02 to<br>21,126.34) | 14,774.28<br>(10,525.82 to<br>19,675.37) | 16,651.70<br>(11,790.57 to<br>22,376.50) | 339.01<br>(245.52 to<br>419.33) | 605.76<br>(357.54 to<br>786.38)   | 596.89<br>(350.00 to<br>777.55)   | 591.47<br>(355.05 to<br>763.08) |
| Congenital birth defects                          | 13,280.61<br>(10,558.32 to<br>16,413.30) | 11,592.49<br>(7,882.25 to<br>15,919.90)  | 10,515.17<br>(7,249.57 to<br>14,454.82)  | 12,378.36<br>(8,472.05 to<br>16,981.87)  | 197.33<br>(156.38 to<br>238.21) | 197.25<br>(138.88 to<br>262.86)   | 183.80<br>(128.89 to<br>244.66)   | 206.35<br>(145.37 to<br>272.22) |

|                                               |                                                  |                                                  |                                                  |                                                   |                                              |                                              |                                              |                                              |
|-----------------------------------------------|--------------------------------------------------|--------------------------------------------------|--------------------------------------------------|---------------------------------------------------|----------------------------------------------|----------------------------------------------|----------------------------------------------|----------------------------------------------|
|                                               | 333.68<br>(152.94 to<br>513.35)                  | 97.75<br>(38.89 to<br>184.93)                    | 80.42<br>(32.13 to<br>147.58)                    | 108.23<br>(42.90 to<br>206.58)                    | 4.09<br>(1.94 to<br>6.21)                    | 1.30<br>(0.55 to<br>2.35)                    | 1.07<br>(0.47 to<br>1.89)                    | 1.43<br>(0.62 to<br>2.57)                    |
| Neural tube defects                           |                                                  |                                                  |                                                  |                                                   |                                              |                                              |                                              |                                              |
|                                               | 3,505.01<br>(2,135.68 to<br>4,662.27)            | 2,025.48<br>(1,025.29 to<br>3,263.16)            | 1,650.78<br>(836.10 to<br>2,581.87)              | 2,240.29<br>(1,120.72 to<br>3,608.28)             | 47.60<br>(31.40 to<br>61.04)                 | 29.12<br>(15.80 to<br>46.70)                 | 23.86<br>(13.12 to<br>37.62)                 | 31.89<br>(17.58 to<br>50.43)                 |
| Congenital heart anomalies                    |                                                  |                                                  |                                                  |                                                   |                                              |                                              |                                              |                                              |
|                                               | 3.37<br>(1.30 to<br>6.84)                        | 1.67<br>(0.48 to<br>3.90)                        | 1.28<br>(0.37 to<br>3.00)                        | 1.90<br>(0.57 to<br>4.36)                         | 0.04<br>(0.02 to<br>0.08)                    | 0.02<br>(0.01 to<br>0.05)                    | 0.01<br>(0.00 to<br>0.03)                    | 0.02<br>(0.01 to<br>0.05)                    |
| Orofacial clefts                              |                                                  |                                                  |                                                  |                                                   |                                              |                                              |                                              |                                              |
|                                               | 2,202.52<br>(1,392.80 to<br>2,790.40)            | 2,813.81<br>(1,700.38 to<br>3,857.22)            | 2,854.46<br>(1,738.21 to<br>3,947.23)            | 2,822.34<br>(1,700.88 to<br>3,833.55)             | 52.52<br>(30.48 to<br>68.33)                 | 77.34<br>(42.32 to<br>109.61)                | 78.77<br>(44.02 to<br>111.21)                | 76.87<br>(41.82 to<br>107.95)                |
| Down syndrome                                 |                                                  |                                                  |                                                  |                                                   |                                              |                                              |                                              |                                              |
|                                               | 3,275.60<br>(2,287.63 to<br>5,159.70)            | 3,808.99<br>(2,400.94 to<br>5,912.26)            | 3,503.21<br>(2,211.47 to<br>5,387.56)            | 4,084.77<br>(2,554.85 to<br>6,268.78)             | 42.09<br>(29.95 to<br>63.60)                 | 51.15<br>(33.01 to<br>77.05)                 | 47.27<br>(30.55 to<br>71.25)                 | 54.43<br>(34.84 to<br>81.91)                 |
| Other chromosomal abnormalities               |                                                  |                                                  |                                                  |                                                   |                                              |                                              |                                              |                                              |
|                                               | 470.02<br>(303.04 to<br>663.23)                  | 321.66<br>(171.79 to<br>521.98)                  | 273.85<br>(147.67 to<br>441.52)                  | 351.72<br>(191.00 to<br>576.66)                   | 6.31<br>(4.02 to<br>8.43)                    | 4.59<br>(2.47 to<br>7.22)                    | 3.93<br>(2.14 to<br>6.15)                    | 4.97<br>(2.73 to<br>7.83)                    |
| Congenital musculoskeletal and limb anomalies |                                                  |                                                  |                                                  |                                                   |                                              |                                              |                                              |                                              |
|                                               | 244.66<br>(89.03 to<br>385.94)                   | 166.89<br>(52.79 to<br>320.52)                   | 145.16<br>(46.22 to<br>281.77)                   | 182.07<br>(57.40 to<br>352.15)                    | 3.15<br>(1.22 to<br>4.79)                    | 2.24<br>(0.80 to<br>4.10)                    | 1.95<br>(0.70 to<br>3.62)                    | 2.42<br>(0.87 to<br>4.50)                    |
| Urogenital congenital anomalies               |                                                  |                                                  |                                                  |                                                   |                                              |                                              |                                              |                                              |
|                                               | 578.15<br>(291.64 to<br>859.08)                  | 423.55<br>(176.76 to<br>754.89)                  | 351.92<br>(146.43 to<br>623.71)                  | 469.72<br>(204.05 to<br>819.38)                   | 7.19<br>(3.70 to<br>10.55)                   | 5.41<br>(2.36 to<br>9.35)                    | 4.51<br>(1.95 to<br>7.63)                    | 5.97<br>(2.67 to<br>10.03)                   |
| Digestive congenital anomalies                |                                                  |                                                  |                                                  |                                                   |                                              |                                              |                                              |                                              |
|                                               | 2,667.61<br>(1,887.08 to<br>4,269.72)            | 1,932.68<br>(1,115.72 to<br>3,425.27)            | 1,654.08<br>(960.48 to<br>2,942.11)              | 2,117.31<br>(1,224.65 to<br>3,703.71)             | 34.34<br>(24.87 to<br>54.60)                 | 26.08<br>(15.46 to<br>46.07)                 | 22.42<br>(13.41 to<br>39.66)                 | 28.35<br>(16.64 to<br>49.62)                 |
| Other congenital birth defects                |                                                  |                                                  |                                                  |                                                   |                                              |                                              |                                              |                                              |
|                                               | 1,430.69<br>(630.95 to<br>2,048.08)              | 3,827.33<br>(1,699.99 to<br>5,307.11)            | 3,802.07<br>(1,704.56 to<br>5,330.19)            | 3,694.49<br>(1,663.54 to<br>5,061.41)             | 131.81<br>(56.14 to<br>187.66)               | 402.41<br>(174.97 to<br>544.58)              | 407.78<br>(177.32 to<br>551.67)              | 378.40<br>(164.49 to<br>508.70)              |
| Skin and subcutaneous diseases                |                                                  |                                                  |                                                  |                                                   |                                              |                                              |                                              |                                              |
|                                               | 408.08<br>(231.00 to<br>741.51)                  | 1,150.42<br>(697.37 to<br>2,222.13)              | 1,157.42<br>(711.28 to<br>2,227.35)              | 1,114.60<br>(673.11 to<br>2,143.26)               | 28.68<br>(17.25 to<br>58.67)                 | 97.39<br>(58.31 to<br>212.83)                | 100.20<br>(60.44 to<br>218.51)               | 91.86<br>(55.88 to<br>200.50)                |
| Cellulitis                                    |                                                  |                                                  |                                                  |                                                   |                                              |                                              |                                              |                                              |
|                                               | 684.89<br>(170.69 to<br>1,114.01)                | 2,128.20<br>(518.73 to<br>3,319.18)              | 2,115.91<br>(510.71 to<br>3,307.57)              | 2,049.11<br>(500.72 to<br>3,194.37)               | 65.13<br>(14.34 to<br>106.58)                | 235.16<br>(50.67 to<br>367.11)               | 239.14<br>(52.01 to<br>373.96)               | 220.55<br>(48.45 to<br>344.53)               |
| Pyoderma                                      |                                                  |                                                  |                                                  |                                                   |                                              |                                              |                                              |                                              |
|                                               | 248.30<br>(104.36 to<br>402.36)                  | 393.07<br>(158.70 to<br>702.58)                  | 375.74<br>(148.95 to<br>669.13)                  | 379.67<br>(157.96 to<br>674.07)                   | 30.60<br>(11.57 to<br>48.39)                 | 54.26<br>(19.86 to<br>96.92)                 | 52.74<br>(19.37 to<br>94.51)                 | 51.28<br>(18.96 to<br>92.76)                 |
| Decubitus ulcer                               |                                                  |                                                  |                                                  |                                                   |                                              |                                              |                                              |                                              |
|                                               | 89.43<br>(51.34 to<br>152.61)                    | 155.64<br>(87.75 to<br>287.30)                   | 153.00<br>(84.95 to<br>281.77)                   | 151.11<br>(85.24 to<br>282.36)                    | 7.40<br>(3.87 to<br>12.56)                   | 15.60<br>(8.33 to<br>28.57)                  | 15.71<br>(8.30 to<br>28.74)                  | 14.70<br>(7.87 to<br>27.00)                  |
| Other skin and subcutaneous diseases          |                                                  |                                                  |                                                  |                                                   |                                              |                                              |                                              |                                              |
|                                               | 850.81<br>(590.58 to<br>1,165.09)                | 525.56<br>(230.81 to<br>982.66)                  | 457.04<br>(202.05 to<br>847.22)                  | 578.85<br>(254.10 to<br>1,059.49)                 | 9.88<br>(6.86 to<br>13.53)                   | 6.10<br>(2.68 to<br>11.40)                   | 5.30<br>(2.34 to<br>9.83)                    | 6.72<br>(2.95 to<br>12.30)                   |
| Sudden infant death syndrome                  |                                                  |                                                  |                                                  |                                                   |                                              |                                              |                                              |                                              |
|                                               | <b>89,726.00</b><br>(68,954.49 to<br>118,260.01) | <b>91,158.26</b><br>(60,301.39 to<br>138,939.47) | <b>81,573.53</b><br>(55,143.46 to<br>121,761.39) | <b>100,738.59</b><br>(63,358.55 to<br>160,015.78) | <b>3,950.97</b><br>(3,099.32 to<br>4,979.35) | <b>5,839.45</b><br>(4,663.94 to<br>7,134.09) | <b>5,566.49</b><br>(4,450.84 to<br>6,688.57) | <b>5,938.28</b><br>(4,621.55 to<br>7,508.05) |
| Injuries                                      |                                                  |                                                  |                                                  |                                                   |                                              |                                              |                                              |                                              |
|                                               | 15,552.39<br>(11,569.63 to<br>20,834.32)         | 13,195.31<br>(6,664.10 to<br>24,109.10)          | 9,364.45<br>(4,845.09 to<br>16,787.93)           | 16,729.19<br>(7,906.41 to<br>30,823.95)           | 441.38<br>(337.75 to<br>580.43)              | 477.74<br>(285.72 to<br>756.79)              | 361.95<br>(222.81 to<br>560.66)              | 579.81<br>(326.56 to<br>953.34)              |
| Transport injuries                            |                                                  |                                                  |                                                  |                                                   |                                              |                                              |                                              |                                              |
|                                               | 12,889.23<br>(9,637.10 to<br>17,343.65)          | 10,455.32<br>(5,295.48 to<br>19,046.48)          | 7,061.63<br>(3,690.16 to<br>12,680.41)           | 13,574.91<br>(6,508.17 to<br>25,255.27)           | 371.31<br>(286.74 to<br>487.99)              | 387.16<br>(233.87 to<br>607.16)              | 284.39<br>(178.07 to<br>435.77)              | 477.38<br>(270.96 to<br>777.66)              |
| Road injuries                                 |                                                  |                                                  |                                                  |                                                   |                                              |                                              |                                              |                                              |
|                                               | 2,874.68<br>(2,074.53 to<br>3,787.15)            | 1,873.49<br>(1,116.12 to<br>3,014.80)            | 1,223.61<br>(752.22 to<br>1,930.95)              | 2,404.18<br>(1,359.99 to<br>3,979.50)             | 108.06<br>(82.95 to<br>139.94)               | 101.75<br>(67.56 to<br>148.83)               | 71.62<br>(49.08 to<br>103.49)                | 124.50<br>(79.89 to<br>190.70)               |
| Pedestrian road injuries                      |                                                  |                                                  |                                                  |                                                   |                                              |                                              |                                              |                                              |
| <b>Switzerland</b>                            |                                                  |                                                  |                                                  |                                                   |                                              |                                              |                                              |                                              |
| Cause                                         | YLLs (actual counts)                             |                                                  |                                                  |                                                   | Deaths (actual counts)                       |                                              |                                              |                                              |
|                                               | 2016                                             | 2040 Forecast                                    | 2040 Better Scenario                             | 2040 Worse Scenario                               | 2016                                         | 2040 Forecast                                | 2040 Better Scenario                         | 2040 Worse Scenario                          |
| Cyclist road injuries                         | 1,093.36<br>(759.42 to<br>1,482.56)              | 1,104.02<br>(589.07 to<br>1,913.56)              | 795.21<br>(435.75 to<br>1,348.11)                | 1,395.50<br>(716.09 to<br>2,456.53)               | 36.22<br>(25.49 to<br>48.87)                 | 47.15<br>(27.10 to<br>76.87)                 | 37.84<br>(22.62 to<br>59.85)                 | 56.10<br>(30.96 to<br>93.75)                 |





|                                                                              |                                          |                                          |                                          |                                          |                                       |                                     |                                     |                                     |
|------------------------------------------------------------------------------|------------------------------------------|------------------------------------------|------------------------------------------|------------------------------------------|---------------------------------------|-------------------------------------|-------------------------------------|-------------------------------------|
| Self-harm and interpersonal violence                                         | 45,785.82<br>(33,253.08 to<br>69,742.92) | 40,392.36<br>(19,816.05 to<br>76,070.22) | 35,788.65<br>(18,242.99 to<br>65,984.06) | 47,229.92<br>(21,408.96 to<br>90,117.94) | 1,369.16<br>(1,013.00 to<br>1,973.20) | 1,488.87<br>(846.70 to<br>2,475.70) | 1,344.59<br>(791.23 to<br>2,168.63) | 1,701.10<br>(892.11 to<br>2,891.88) |
| <b>Switzerland</b>                                                           |                                          |                                          |                                          |                                          |                                       |                                     |                                     |                                     |
| Cause                                                                        | YLLs (actual counts)                     |                                          |                                          |                                          | Deaths (actual counts)                |                                     |                                     |                                     |
|                                                                              | 2016                                     | 2040 Forecast                            | 2040 Better Scenario                     | 2040 Worse Scenario                      | 2016                                  | 2040 Forecast                       | 2040 Better Scenario                | 2040 Worse Scenario                 |
| Self-harm                                                                    | 43,052.07<br>(31,070.11 to<br>67,362.82) | 38,903.96<br>(18,731.09 to<br>73,411.15) | 34,439.40<br>(17,186.07 to<br>64,144.14) | 45,633.87<br>(20,404.67 to<br>87,936.31) | 1,305.32<br>(962.79 to<br>1,893.93)   | 1,445.61<br>(812.44 to<br>2,124.96) | 1,304.76<br>(755.94 to<br>2,124.96) | 1,655.35<br>(855.95 to<br>2,830.41) |
| Self-harm by firearm                                                         | 8,804.47<br>(5,146.21 to<br>15,195.27)   | 6,771.00<br>(2,804.35 to<br>14,763.33)   | 5,816.50<br>(2,473.56 to<br>12,424.74)   | 7,972.77<br>(3,093.44 to<br>17,964.89)   | 278.85<br>(173.12 to<br>450.72)       | 260.53<br>(123.14 to<br>513.66)     | 228.18<br>(110.63 to<br>432.76)     | 299.43<br>(134.19 to<br>597.18)     |
| Self-harm by other specified means                                           | 34,247.61<br>(24,635.69 to<br>52,398.77) | 32,132.97<br>(15,816.40 to<br>60,312.49) | 28,622.90<br>(14,588.48 to<br>52,577.44) | 37,661.10<br>(17,209.34 to<br>71,723.87) | 1,026.47<br>(747.51 to<br>1,510.51)   | 1,185.08<br>(675.78 to<br>1,945.02) | 1,076.58<br>(628.04 to<br>1,728.54) | 1,355.92<br>(708.84 to<br>2,284.22) |
| Interpersonal violence                                                       | 2,733.75<br>(1,899.55 to<br>4,137.99)    | 1,488.39<br>(908.89 to<br>2,446.47)      | 1,349.25<br>(819.86 to<br>2,190.82)      | 1,596.05<br>(968.29 to<br>2,656.84)      | 63.84<br>(44.65 to<br>97.11)          | 43.26<br>(29.35 to<br>67.89)        | 39.83<br>(26.79 to<br>61.90)        | 45.75<br>(30.57 to<br>72.75)        |
| Physical violence by firearm                                                 | 894.29<br>(510.21 to<br>1,451.96)        | 466.80<br>(233.57 to<br>811.32)          | 422.40<br>(213.78 to<br>734.64)          | 481.99<br>(242.74 to<br>842.84)          | 20.77<br>(12.05 to<br>33.53)          | 12.56<br>(6.94 to<br>21.37)         | 11.47<br>(6.40 to<br>19.45)         | 12.84<br>(7.08 to<br>21.20)         |
| Physical violence by sharp object                                            | 659.89<br>(364.94 to<br>962.53)          | 381.77<br>(204.20 to<br>628.72)          | 349.54<br>(189.25 to<br>571.31)          | 391.58<br>(209.96 to<br>640.60)          | 16.19<br>(10.08 to<br>23.47)          | 11.85<br>(7.83 to<br>18.66)         | 11.07<br>(7.34 to<br>17.65)         | 11.90<br>(7.86 to<br>18.79)         |
| Physical violence by other means                                             | 1,179.58<br>(804.82 to<br>2,004.65)      | 639.82<br>(370.63 to<br>1,199.00)        | 577.31<br>(341.12 to<br>1,072.22)        | 722.48<br>(409.03 to<br>1,341.51)        | 26.87<br>(18.39 to<br>45.34)          | 18.85<br>(11.40 to<br>33.99)        | 17.29<br>(10.66 to<br>30.57)        | 21.02<br>(12.41 to<br>37.27)        |
| Forces of nature, conflict and terrorism, and executions and police conflict | 37.20<br>(29.76 to<br>45.56)             | 427.17<br>(0.00 to<br>4,033.01)          | 427.36<br>(0.00 to<br>4,034.65)          | 428.43<br>(0.00 to<br>4,038.94)          | 0.82<br>(0.65 to<br>1.02)             | 11.01<br>(0.00 to<br>114.58)        | 11.12<br>(0.00 to<br>116.26)        | 10.89<br>(0.00 to<br>112.88)        |
| Exposure to forces of nature                                                 | 0.00<br>(0.00 to<br>0.00)                | 496.22<br>(0.00 to<br>4,033.01)          | 396.36<br>(0.00 to<br>4,034.65)          | 397.39<br>(0.00 to<br>4,038.94)          | 0.00<br>(0.00 to<br>0.00)             | 10.14<br>(0.00 to<br>114.58)        | 10.24<br>(0.00 to<br>116.26)        | 10.04<br>(0.00 to<br>112.88)        |
| Conflict and terrorism                                                       | 0.00<br>(0.00 to<br>0.00)                | 30.95<br>(0.00 to<br>270.09)             | 30.99<br>(0.00 to<br>269.95)             | 31.04<br>(0.00 to<br>271.52)             | 0.00<br>(0.00 to<br>0.00)             | 0.86<br>(0.00 to<br>6.83)           | 0.88<br>(0.00 to<br>6.94)           | 0.85<br>(0.00 to<br>6.73)           |
| Executions and police conflict                                               | 37.20<br>(29.76 to<br>45.56)             | 0.00<br>(0.00 to<br>0.00)                | 0.00<br>(0.00 to<br>0.00)                | 0.00<br>(0.00 to<br>0.00)                | 0.82<br>(0.65 to<br>1.02)             | 0.00<br>(0.00 to<br>0.00)           | 0.00<br>(0.00 to<br>0.00)           | 0.00<br>(0.00 to<br>0.00)           |
| <b>United Kingdom</b>                                                        |                                          |                                          |                                          |                                          |                                       |                                     |                                     |                                     |
| Cause                                                                        | YLLs (in 1000s)                          |                                          |                                          |                                          | Deaths (in 1000s)                     |                                     |                                     |                                     |
|                                                                              | 2016                                     | 2040 Forecast                            | 2040 Better Scenario                     | 2040 Worse Scenario                      | 2016                                  | 2040 Forecast                       | 2040 Better Scenario                | 2040 Worse Scenario                 |
| All causes                                                                   | 8,747.98<br>(8,615.69 to<br>8,890.36)    | 8,840.71<br>(7,631.18 to<br>10,195.57)   | 7,475.49<br>(6,459.24 to<br>8,617.44)    | 10,898.85<br>(9,261.42 to<br>12,918.41)  | 612.34<br>(604.19 to<br>621.14)       | 732.29<br>(662.42 to<br>806.69)     | 650.81<br>(587.07 to<br>720.21)     | 850.14<br>(762.87 to<br>948.86)     |
| Communicable, maternal, neonatal, and nutritional diseases                   | 594.41<br>(563.48 to<br>623.38)          | 641.34<br>(514.09 to<br>820.75)          | 573.09<br>(470.65 to<br>718.69)          | 757.83<br>(598.63 to<br>1,015.57)        | 45.69<br>(41.98 to<br>49.41)          | 66.45<br>(51.96 to<br>87.65)        | 64.33<br>(51.77 to<br>81.87)        | 73.53<br>(55.19 to<br>98.13)        |
| HIV/AIDS and tuberculosis                                                    | 15.58<br>(15.16 to<br>16.03)             | 6.34<br>(4.05 to<br>9.02)                | 3.28<br>(2.14 to<br>4.67)                | 13.32<br>(8.84 to<br>18.11)              | 0.60<br>(0.57 to<br>0.62)             | 0.28<br>(0.16 to<br>0.44)           | 0.16<br>(0.10 to<br>0.25)           | 0.46<br>(0.29 to<br>0.72)           |
| Tuberculosis                                                                 | 6.87<br>(6.47 to<br>7.32)                | 3.20<br>(1.76 to<br>5.34)                | 1.92<br>(1.08 to<br>3.10)                | 4.62<br>(2.36 to<br>7.86)                | 0.39<br>(0.37 to<br>0.42)             | 0.23<br>(0.12 to<br>0.38)           | 0.14<br>(0.08 to<br>0.23)           | 0.31<br>(0.15 to<br>0.56)           |
| HIV/AIDS                                                                     | 8.70<br>(8.64 to<br>8.77)                | 3.14<br>(1.64 to<br>4.85)                | 1.36<br>(0.68 to<br>2.34)                | 8.70<br>(5.30 to<br>12.26)               | 0.20<br>(0.20 to<br>0.21)             | 0.05<br>(0.02 to<br>0.08)           | 0.02<br>(0.01 to<br>0.04)           | 0.15<br>(0.08 to<br>0.21)           |
| Diarrhea, lower respiratory, and other common infectious diseases            | 414.74<br>(386.23 to<br>442.42)          | 534.50<br>(416.08 to<br>714.33)          | 491.74<br>(394.42 to<br>626.77)          | 627.32<br>(474.04 to<br>868.66)          | 42.60<br>(38.89 to<br>46.36)          | 64.22<br>(49.95 to<br>85.26)        | 62.44<br>(49.93 to<br>79.76)        | 69.97<br>(52.72 to<br>95.70)        |

|                                         |                                 |                                 |                                 |                                 |                              |                              |                              |                              |
|-----------------------------------------|---------------------------------|---------------------------------|---------------------------------|---------------------------------|------------------------------|------------------------------|------------------------------|------------------------------|
| Diarrheal diseases                      | 21.95<br>(21.26 to<br>22.66)    | 63.62<br>(43.89 to<br>95.56)    | 89.78<br>(62.19 to<br>129.98)   | 49.85<br>(31.49 to<br>79.39)    | 2.03<br>(1.96 to<br>2.10)    | 7.26<br>(4.75 to<br>11.24)   | 10.73<br>(7.19 to<br>15.86)  | 5.46<br>(3.32 to<br>8.70)    |
| Intestinal infectious diseases          | 0.06<br>(0.03 to<br>0.11)       | 0.04<br>(0.02 to<br>0.08)       | 0.04<br>(0.02 to<br>0.07)       | 0.04<br>(0.02 to<br>0.08)       | 0.00<br>(0.00 to<br>0.00)    | 0.00<br>(0.00 to<br>0.01)    | 0.00<br>(0.00 to<br>0.01)    | 0.00<br>(0.00 to<br>0.00)    |
| Typhoid fever                           | 0.01<br>(0.00 to<br>0.01)       | 0.01<br>(0.00 to<br>0.01)       | 0.01<br>(0.00 to<br>0.01)       | 0.01<br>(0.00 to<br>0.01)       | 0.00<br>(0.00 to<br>0.00)    | 0.00<br>(0.00 to<br>0.00)    | 0.00<br>(0.00 to<br>0.00)    | 0.00<br>(0.00 to<br>0.00)    |
| Paratyphoid fever                       | 0.02<br>(0.00 to<br>0.04)       | 0.01<br>(0.00 to<br>0.03)       | 0.01<br>(0.00 to<br>0.02)       | 0.01<br>(0.00 to<br>0.03)       | 0.00<br>(0.00 to<br>0.00)    | 0.00<br>(0.00 to<br>0.00)    | 0.00<br>(0.00 to<br>0.00)    | 0.00<br>(0.00 to<br>0.00)    |
| Other intestinal infectious diseases    | 0.04<br>(0.01 to<br>0.07)       | 0.02<br>(0.01 to<br>0.05)       | 0.02<br>(0.01 to<br>0.05)       | 0.02<br>(0.01 to<br>0.05)       | 0.00<br>(0.00 to<br>0.00)    | 0.00<br>(0.00 to<br>0.00)    | 0.00<br>(0.00 to<br>0.00)    | 0.00<br>(0.00 to<br>0.00)    |
| Lower respiratory infections            | 374.66<br>(346.70 to<br>402.30) | 458.39<br>(333.75 to<br>640.68) | 390.88<br>(291.37 to<br>532.22) | 561.25<br>(399.19 to<br>817.55) | 40.00<br>(36.37 to<br>43.75) | 56.49<br>(41.79 to<br>78.32) | 51.26<br>(38.36 to<br>68.89) | 64.00<br>(46.35 to<br>90.73) |
| Upper respiratory infections            | 0.11<br>(0.10 to<br>0.12)       | 0.06<br>(0.03 to<br>0.10)       | 0.05<br>(0.02 to<br>0.08)       | 0.07<br>(0.04 to<br>0.13)       | 0.01<br>(0.00 to<br>0.01)    | 0.00<br>(0.00 to<br>0.01)    | 0.00<br>(0.00 to<br>0.01)    | 0.00<br>(0.00 to<br>0.01)    |
| Otitis media                            | 0.12<br>(0.11 to<br>0.14)       | 0.03<br>(0.02 to<br>0.05)       | 0.03<br>(0.02 to<br>0.05)       | 0.03<br>(0.02 to<br>0.04)       | 0.00<br>(0.00 to<br>0.00)    | 0.00<br>(0.00 to<br>0.00)    | 0.00<br>(0.00 to<br>0.00)    | 0.00<br>(0.00 to<br>0.00)    |
| Meningitis                              | 11.79<br>(10.97 to<br>12.89)    | 6.67<br>(4.74 to<br>8.96)       | 5.67<br>(4.05 to<br>7.68)       | 9.48<br>(5.66 to<br>13.99)      | 0.29<br>(0.27 to<br>0.32)    | 0.18<br>(0.14 to<br>0.22)    | 0.16<br>(0.12 to<br>0.21)    | 0.21<br>(0.15 to<br>0.28)    |
| Pneumococcal meningitis                 | 2.63<br>(2.41 to<br>2.92)       | 1.53<br>(1.19 to<br>1.95)       | 1.51<br>(1.16 to<br>1.95)       | 1.63<br>(1.25 to<br>2.09)       | 0.08<br>(0.07 to<br>0.09)    | 0.06<br>(0.05 to<br>0.07)    | 0.06<br>(0.05 to<br>0.07)    | 0.06<br>(0.05 to<br>0.07)    |
| H influenzae type B meningitis          | 1.10<br>(1.01 to<br>1.21)       | 2.60<br>(1.22 to<br>4.40)       | 2.11<br>(1.15 to<br>3.34)       | 4.88<br>(1.80 to<br>9.58)       | 0.02<br>(0.02 to<br>0.03)    | 0.04<br>(0.02 to<br>0.06)    | 0.03<br>(0.02 to<br>0.05)    | 0.07<br>(0.03 to<br>0.12)    |
| Meningococcal meningitis                | 4.96<br>(4.59 to<br>5.41)       | 1.48<br>(1.01 to<br>2.17)       | 1.19<br>(0.75 to<br>1.81)       | 1.73<br>(1.10 to<br>2.62)       | 0.10<br>(0.10 to<br>0.12)    | 0.04<br>(0.05 to<br>0.05)    | 0.03<br>(0.02 to<br>0.05)    | 0.04<br>(0.03 to<br>0.06)    |
| Other meningitis                        | 3.10<br>(2.86 to<br>3.45)       | 1.06<br>(0.75 to<br>1.52)       | 0.85<br>(0.55 to<br>1.26)       | 1.25<br>(0.82 to<br>1.86)       | 0.08<br>(0.08 to<br>0.10)    | 0.04<br>(0.03 to<br>0.05)    | 0.03<br>(0.02 to<br>0.05)    | 0.04<br>(0.03 to<br>0.06)    |
| Encephalitis                            | 4.47<br>(2.60 to<br>5.27)       | 4.14<br>(2.35 to<br>5.33)       | 4.06<br>(2.30 to<br>5.34)       | 4.17<br>(2.36 to<br>5.33)       | 0.16<br>(0.09 to<br>0.20)    | 0.19<br>(0.10 to<br>0.24)    | 0.19<br>(0.10 to<br>0.26)    | 0.18<br>(0.10 to<br>0.23)    |
| Diphtheria                              | 0.02<br>(0.02 to<br>0.02)       | 0.00<br>(0.00 to<br>0.00)       | 0.00<br>(0.00 to<br>0.00)       | 0.01<br>(0.00 to<br>0.01)       | 0.00<br>(0.00 to<br>0.00)    | 0.00<br>(0.00 to<br>0.00)    | 0.00<br>(0.00 to<br>0.00)    | 0.00<br>(0.00 to<br>0.00)    |
| Whooping cough                          | 0.14<br>(0.02 to<br>0.22)       | 0.06<br>(0.01 to<br>0.17)       | 0.02<br>(0.00 to<br>0.05)       | 0.27<br>(0.03 to<br>0.73)       | 0.00<br>(0.00 to<br>0.00)    | 0.00<br>(0.00 to<br>0.00)    | 0.00<br>(0.00 to<br>0.00)    | 0.00<br>(0.00 to<br>0.01)    |
| Tetanus                                 | 0.04<br>(0.04 to<br>0.04)       | 0.00<br>(0.00 to<br>0.00)       | 0.00<br>(0.00 to<br>0.00)       | 0.01<br>(0.00 to<br>0.01)       | 0.00<br>(0.00 to<br>0.00)    | 0.00<br>(0.00 to<br>0.00)    | 0.00<br>(0.00 to<br>0.00)    | 0.00<br>(0.00 to<br>0.00)    |
| Measles                                 | 0.05<br>(0.04 to<br>0.05)       | 0.59<br>(0.00 to<br>4.43)       | 0.42<br>(0.00 to<br>2.88)       | 1.20<br>(0.01 to<br>8.70)       | 0.00<br>(0.00 to<br>0.00)    | 0.01<br>(0.00 to<br>0.06)    | 0.01<br>(0.00 to<br>0.05)    | 0.02<br>(0.01 to<br>0.11)    |
| <b>United Kingdom</b>                   |                                 |                                 |                                 |                                 |                              |                              |                              |                              |
| Cause                                   | YLLs (in 1000s)                 |                                 |                                 |                                 | Deaths (in 1000s)            |                              |                              |                              |
|                                         | 2016                            | 2040 Forecast                   | 2040 Better Scenario            | 2040 Worse Scenario             | 2016                         | 2040 Forecast                | 2040 Better Scenario         | 2040 Worse Scenario          |
| Varicella and herpes zoster             | 1.34<br>(0.70 to<br>2.17)       | 0.89<br>(0.47 to<br>1.51)       | 0.80<br>(0.41 to<br>1.40)       | 0.93<br>(0.49 to<br>1.65)       | 0.10<br>(0.05 to<br>0.20)    | 0.09<br>(0.04 to<br>0.16)    | 0.08<br>(0.04 to<br>0.16)    | 0.08<br>(0.04 to<br>0.16)    |
| Neglected tropical diseases and malaria | 0.40<br>(0.37 to<br>0.41)       | 0.43<br>(0.39 to<br>0.47)       | 0.43<br>(0.39 to<br>0.47)       | 0.43<br>(0.39 to<br>0.46)       | 0.01<br>(0.01 to<br>0.01)    | 0.01<br>(0.01 to<br>0.01)    | 0.01<br>(0.01 to<br>0.01)    | 0.01<br>(0.01 to<br>0.01)    |

|                                                       |                                                |                                                |                                                |                                                |                                                |                                                |                                                |                                                |
|-------------------------------------------------------|------------------------------------------------|------------------------------------------------|------------------------------------------------|------------------------------------------------|------------------------------------------------|------------------------------------------------|------------------------------------------------|------------------------------------------------|
| Malaria                                               | 0.00<br>(0.00 to<br>0.00)                      | 0.00<br>(0.00 to<br>0.00)                      | 0.00<br>(0.00 to<br>0.00)                      | 0.00<br>(0.00 to<br>0.00)                      | 0.00<br>(0.00 to<br>0.00)                      | 0.00<br>(0.00 to<br>0.00)                      | 0.00<br>(0.00 to<br>0.00)                      | 0.00<br>(0.00 to<br>0.00)                      |
| Chagas disease                                        | 0.00<br>(0.00 to<br>0.00)                      | 0.00<br>(0.00 to<br>0.00)                      | 0.00<br>(0.00 to<br>0.00)                      | 0.00<br>(0.00 to<br>0.00)                      | 0.00<br>(0.00 to<br>0.00)                      | 0.00<br>(0.00 to<br>0.00)                      | 0.00<br>(0.00 to<br>0.00)                      | 0.00<br>(0.00 to<br>0.00)                      |
| Leishmaniasis                                         | 0.00<br>(0.00 to<br>0.00)                      | 0.00<br>(0.00 to<br>0.00)                      | 0.00<br>(0.00 to<br>0.00)                      | 0.00<br>(0.00 to<br>0.00)                      | 0.00<br>(0.00 to<br>0.00)                      | 0.00<br>(0.00 to<br>0.00)                      | 0.00<br>(0.00 to<br>0.00)                      | 0.00<br>(0.00 to<br>0.00)                      |
| African trypanosomiasis                               | 0.00<br>(0.00 to<br>0.00)                      | 0.00<br>(0.00 to<br>0.00)                      | 0.00<br>(0.00 to<br>0.00)                      | 0.00<br>(0.00 to<br>0.00)                      | 0.00<br>(0.00 to<br>0.00)                      | 0.00<br>(0.00 to<br>0.00)                      | 0.00<br>(0.00 to<br>0.00)                      | 0.00<br>(0.00 to<br>0.00)                      |
| Schistosomiasis                                       | 0.00<br>(0.00 to<br>0.00)                      | 0.00<br>(0.00 to<br>0.00)                      | 0.00<br>(0.00 to<br>0.00)                      | 0.00<br>(0.00 to<br>0.00)                      | 0.00<br>(0.00 to<br>0.00)                      | 0.00<br>(0.00 to<br>0.00)                      | 0.00<br>(0.00 to<br>0.00)                      | 0.00<br>(0.00 to<br>0.00)                      |
| Cysticercosis                                         | 0.05<br>(0.03 to<br>0.04)                      | 0.01<br>(0.01 to<br>0.01)                      | 0.01<br>(0.01 to<br>0.01)                      | 0.01<br>(0.01 to<br>0.01)                      | 0.00<br>(0.01 to<br>0.01)                      | 0.00<br>(0.00 to<br>0.00)                      | 0.00<br>(0.00 to<br>0.00)                      | 0.00<br>(0.00 to<br>0.00)                      |
| Cystic echinococcosis                                 | 0.01<br>(0.01 to<br>0.01)                      | 0.01<br>(0.01 to<br>0.01)                      | 0.01<br>(0.01 to<br>0.01)                      | 0.01<br>(0.01 to<br>0.01)                      | 0.00<br>(0.00 to<br>0.00)                      | 0.00<br>(0.00 to<br>0.00)                      | 0.00<br>(0.00 to<br>0.00)                      | 0.00<br>(0.00 to<br>0.00)                      |
| Dengue                                                | 0.01<br>(0.01 to<br>0.01)                      | 0.03<br>(0.02 to<br>0.04)                      | 0.03<br>(0.02 to<br>0.04)                      | 0.03<br>(0.02 to<br>0.04)                      | 0.00<br>(0.00 to<br>0.00)                      | 0.00<br>(0.00 to<br>0.00)                      | 0.00<br>(0.00 to<br>0.00)                      | 0.00<br>(0.00 to<br>0.00)                      |
| Yellow fever                                          | 0.00<br>(0.00 to<br>0.00)                      | 0.00<br>(0.00 to<br>0.00)                      | 0.00<br>(0.00 to<br>0.00)                      | 0.00<br>(0.00 to<br>0.00)                      | 0.00<br>(0.00 to<br>0.00)                      | 0.00<br>(0.00 to<br>0.00)                      | 0.00<br>(0.00 to<br>0.00)                      | 0.00<br>(0.00 to<br>0.00)                      |
| Rabies                                                | 0.01<br>(0.01 to<br>0.01)                      | 0.01<br>(0.01 to<br>0.01)                      | 0.01<br>(0.01 to<br>0.01)                      | 0.01<br>(0.01 to<br>0.01)                      | 0.00<br>(0.00 to<br>0.00)                      | 0.00<br>(0.00 to<br>0.00)                      | 0.00<br>(0.00 to<br>0.00)                      | 0.00<br>(0.00 to<br>0.00)                      |
| Intestinal nematode infections                        | 0.00<br>(0.00 to<br>0.00)                      | 0.00<br>(0.00 to<br>0.00)                      | 0.00<br>(0.00 to<br>0.00)                      | 0.00<br>(0.00 to<br>0.00)                      | 0.00<br>(0.00 to<br>0.00)                      | 0.00<br>(0.00 to<br>0.00)                      | 0.00<br>(0.00 to<br>0.00)                      | 0.00<br>(0.00 to<br>0.00)                      |
| Other neglected tropical diseases                     | 0.33<br>(0.31 to<br>0.34)                      | 0.37<br>(0.33 to<br>0.40)                      | 0.37<br>(0.33 to<br>0.41)                      | 0.36<br>(0.33 to<br>0.40)                      | 0.01<br>(0.01 to<br>0.01)                      | 0.01<br>(0.01 to<br>0.01)                      | 0.01<br>(0.01 to<br>0.01)                      | 0.01<br>(0.01 to<br>0.01)                      |
| <b>Maternal disorders</b>                             | <b>2.96</b><br><b>(2.80 to</b><br><b>3.12)</b> | <b>1.93</b><br><b>(1.40 to</b><br><b>2.59)</b> | <b>1.68</b><br><b>(1.19 to</b><br><b>2.30)</b> | <b>2.12</b><br><b>(1.47 to</b><br><b>2.93)</b> | <b>0.06</b><br><b>(0.05 to</b><br><b>0.06)</b> | <b>0.04</b><br><b>(0.03 to</b><br><b>0.05)</b> | <b>0.03</b><br><b>(0.02 to</b><br><b>0.04)</b> | <b>0.04</b><br><b>(0.03 to</b><br><b>0.05)</b> |
| Maternal hemorrhage                                   | 0.24<br>(0.18 to<br>0.32)                      | 0.14<br>(0.08 to<br>0.21)                      | 0.12<br>(0.07 to<br>0.19)                      | 0.15<br>(0.09 to<br>0.24)                      | 0.00<br>(0.00 to<br>0.01)                      | 0.00<br>(0.00 to<br>0.00)                      | 0.00<br>(0.00 to<br>0.00)                      | 0.00<br>(0.00 to<br>0.00)                      |
| Maternal sepsis and other maternal infections         | 0.13<br>(0.10 to<br>0.17)                      | 0.07<br>(0.04 to<br>0.10)                      | 0.06<br>(0.03 to<br>0.09)                      | 0.07<br>(0.04 to<br>0.11)                      | 0.00<br>(0.00 to<br>0.00)                      | 0.00<br>(0.00 to<br>0.00)                      | 0.00<br>(0.00 to<br>0.00)                      | 0.00<br>(0.00 to<br>0.00)                      |
| Maternal hypertensive disorders                       | 0.22<br>(0.17 to<br>0.29)                      | 0.15<br>(0.09 to<br>0.25)                      | 0.13<br>(0.07 to<br>0.21)                      | 0.16<br>(0.09 to<br>0.26)                      | 0.00<br>(0.00 to<br>0.01)                      | 0.00<br>(0.00 to<br>0.00)                      | 0.00<br>(0.00 to<br>0.00)                      | 0.00<br>(0.00 to<br>0.00)                      |
| Maternal obstructed labor and uterine rupture         | 0.06<br>(0.04 to<br>0.08)                      | 0.04<br>(0.02 to<br>0.06)                      | 0.03<br>(0.02 to<br>0.05)                      | 0.04<br>(0.02 to<br>0.07)                      | 0.00<br>(0.00 to<br>0.00)                      | 0.00<br>(0.00 to<br>0.00)                      | 0.00<br>(0.00 to<br>0.00)                      | 0.00<br>(0.00 to<br>0.00)                      |
| Maternal abortion, miscarriage, and ectopic pregnancy | 0.49<br>(0.41 to<br>0.57)                      | 0.33<br>(0.20 to<br>0.53)                      | 0.29<br>(0.17 to<br>0.46)                      | 0.37<br>(0.22 to<br>0.59)                      | 0.01<br>(0.01 to<br>0.01)                      | 0.01<br>(0.00 to<br>0.01)                      | 0.01<br>(0.00 to<br>0.01)                      | 0.01<br>(0.00 to<br>0.01)                      |
| Indirect maternal deaths                              | 0.56<br>(0.44 to<br>0.71)                      | 0.37<br>(0.22 to<br>0.58)                      | 0.32<br>(0.18 to<br>0.51)                      | 0.42<br>(0.24 to<br>0.66)                      | 0.01<br>(0.01 to<br>0.01)                      | 0.01<br>(0.00 to<br>0.01)                      | 0.01<br>(0.00 to<br>0.01)                      | 0.01<br>(0.00 to<br>0.01)                      |
| Late maternal deaths                                  | 0.03<br>(0.02 to<br>0.05)                      | 0.02<br>(0.01 to<br>0.03)                      | 0.02<br>(0.01 to<br>0.03)                      | 0.02<br>(0.01 to<br>0.04)                      | 0.00<br>(0.00 to<br>0.00)                      | 0.00<br>(0.00 to<br>0.00)                      | 0.00<br>(0.00 to<br>0.00)                      | 0.00<br>(0.00 to<br>0.00)                      |
| Maternal deaths aggravated by HIV/AIDS                | 0.00<br>(0.00 to<br>0.00)                      | 0.00<br>(0.00 to<br>0.00)                      | 0.00<br>(0.00 to<br>0.00)                      | 0.00<br>(0.00 to<br>0.00)                      | 0.00<br>(0.00 to<br>0.00)                      | 0.00<br>(0.00 to<br>0.00)                      | 0.00<br>(0.00 to<br>0.00)                      | 0.00<br>(0.00 to<br>0.00)                      |
| Other maternal disorders                              | 1.22<br>(1.06 to<br>1.40)                      | 0.81<br>(0.54 to<br>1.18)                      | 0.72<br>(0.46 to<br>1.05)                      | 0.89<br>(0.57 to<br>1.31)                      | 0.02<br>(0.02 to<br>0.03)                      | 0.02<br>(0.01 to<br>0.02)                      | 0.01<br>(0.01 to<br>0.02)                      | 0.02<br>(0.01 to<br>0.02)                      |

| United Kingdom                                                          |                                     |                                  |                                  |                                   |                               |                               |                               |                               |
|-------------------------------------------------------------------------|-------------------------------------|----------------------------------|----------------------------------|-----------------------------------|-------------------------------|-------------------------------|-------------------------------|-------------------------------|
| Cause                                                                   | YLLs (in 1000s)                     |                                  |                                  |                                   | Deaths (in 1000s)             |                               |                               |                               |
|                                                                         | 2016                                | 2040 Forecast                    | 2040 Better Scenario             | 2040 Worse Scenario               | 2016                          | 2040 Forecast                 | 2040 Better Scenario          | 2040 Worse Scenario           |
| <b>Neonatal disorders</b>                                               | <b>142.50</b><br>(131.86 to 149.10) | <b>79.00</b><br>(61.90 to 99.26) | <b>57.09</b><br>(43.69 to 73.73) | <b>95.40</b><br>(73.16 to 122.63) | <b>1.65</b><br>(1.52 to 1.72) | <b>0.91</b><br>(0.72 to 1.15) | <b>0.66</b><br>(0.51 to 0.85) | <b>1.10</b><br>(0.85 to 1.42) |
| Neonatal preterm birth                                                  | 106.05<br>(96.19 to 110.91)         | 51.23<br>(38.00 to 66.53)        | 33.66<br>(24.14 to 45.01)        | 64.03<br>(47.43 to 85.30)         | 1.23<br>(1.11 to 1.28)        | 0.59<br>(0.44 to 0.77)        | 0.39<br>(0.28 to 0.52)        | 0.74<br>(0.55 to 0.99)        |
| Neonatal encephalopathy due to birth asphyxia and trauma                | 20.71<br>(19.21 to 22.10)           | 10.44<br>(7.44 to 14.78)         | 8.06<br>(5.68 to 11.45)          | 12.46<br>(8.80 to 18.09)          | 0.24<br>(0.22 to 0.26)        | 0.12<br>(0.09 to 0.17)        | 0.09<br>(0.07 to 0.13)        | 0.14<br>(0.10 to 0.21)        |
| Neonatal sepsis and other neonatal infections                           | 4.60<br>(3.81 to 8.75)              | 5.01<br>(3.19 to 9.76)           | 4.10<br>(2.57 to 7.96)           | 5.78<br>(3.64 to 11.24)           | 0.05<br>(0.04 to 0.10)        | 0.06<br>(0.04 to 0.11)        | 0.05<br>(0.03 to 0.09)        | 0.07<br>(0.04 to 0.13)        |
| Hemolytic disease and other neonatal jaundice                           | 0.37<br>(0.26 to 0.43)              | 0.14<br>(0.08 to 0.21)           | 0.11<br>(0.07 to 0.17)           | 0.16<br>(0.09 to 0.25)            | 0.00<br>(0.00 to 0.00)        | 0.00<br>(0.00 to 0.00)        | 0.00<br>(0.00 to 0.00)        | 0.00<br>(0.00 to 0.00)        |
| Other neonatal disorders                                                | 10.77<br>(9.54 to 11.83)            | 12.18<br>(8.44 to 17.18)         | 11.16<br>(7.79 to 15.69)         | 12.96<br>(9.00 to 18.30)          | 0.12<br>(0.11 to 0.14)        | 0.14<br>(0.10 to 0.20)        | 0.13<br>(0.09 to 0.18)        | 0.15<br>(0.10 to 0.21)        |
| <b>Nutritional deficiencies</b>                                         | <b>2.22</b><br>(2.15 to 2.29)       | <b>2.31</b><br>(2.04 to 2.61)    | <b>2.47</b><br>(2.17 to 2.80)    | <b>2.16</b><br>(1.90 to 2.44)     | <b>0.17</b><br>(0.17 to 0.18) | <b>0.23</b><br>(0.20 to 0.28) | <b>0.26</b><br>(0.22 to 0.31) | <b>0.21</b><br>(0.17 to 0.25) |
| Protein-energy malnutrition                                             | 1.30<br>(0.86 to 1.49)              | 1.33<br>(0.84 to 1.71)           | 1.50<br>(0.98 to 1.90)           | 1.20<br>(0.74 to 1.55)            | 0.10<br>(0.07 to 0.12)        | 0.14<br>(0.07 to 0.19)        | 0.16<br>(0.11 to 0.22)        | 0.12<br>(0.08 to 0.16)        |
| Iodine deficiency                                                       | 0.10<br>(0.07 to 0.14)              | 0.20<br>(0.03 to 0.48)           | 0.20<br>(0.03 to 0.50)           | 0.01<br>(0.03 to 0.47)            | 0.01<br>(0.00 to 0.01)        | 0.02<br>(0.00 to 0.06)        | 0.02<br>(0.00 to 0.07)        | 0.02<br>(0.00 to 0.06)        |
| Dietary iron deficiency                                                 | 0.20<br>(0.15 to 0.25)              | 0.19<br>(0.13 to 0.23)           | 0.20<br>(0.14 to 0.25)           | 0.18<br>(0.13 to 0.22)            | 0.01<br>(0.00 to 0.01)        | 0.01<br>(0.00 to 0.01)        | 0.01<br>(0.00 to 0.02)        | 0.01<br>(0.00 to 0.01)        |
| Other nutritional deficiencies                                          | 0.63<br>(0.49 to 1.00)              | 0.59<br>(0.42 to 0.97)           | 0.57<br>(0.39 to 0.97)           | 0.58<br>(0.41 to 0.95)            | 0.06<br>(0.04 to 0.09)        | 0.06<br>(0.04 to 0.11)        | 0.06<br>(0.04 to 0.11)        | 0.06<br>(0.04 to 0.10)        |
| <b>Other communicable, maternal, neonatal, and nutritional diseases</b> | <b>16.02</b><br>(13.83 to 16.71)    | <b>16.84</b><br>(14.29 to 19.23) | <b>16.40</b><br>(13.81 to 18.74) | <b>17.10</b><br>(14.46 to 19.60)  | <b>0.61</b><br>(0.52 to 0.64) | <b>0.76</b><br>(0.64 to 0.85) | <b>0.77</b><br>(0.64 to 0.87) | <b>0.74</b><br>(0.62 to 0.83) |
| Sexually transmitted infections excluding HIV                           | 1.14<br>(1.06 to 1.23)              | 0.60<br>(0.50 to 0.73)           | 0.58<br>(0.47 to 0.71)           | 0.61<br>(0.50 to 0.74)            | 0.06<br>(0.06 to 0.06)        | 0.04<br>(0.03 to 0.05)        | 0.04<br>(0.03 to 0.05)        | 0.04<br>(0.03 to 0.05)        |
| Syphilis                                                                | 0.34<br>(0.29 to 0.42)              | 0.15<br>(0.11 to 0.19)           | 0.13<br>(0.10 to 0.18)           | 0.16<br>(0.12 to 0.21)            | 0.02<br>(0.01 to 0.02)        | 0.01<br>(0.01 to 0.01)        | 0.01<br>(0.01 to 0.01)        | 0.01<br>(0.01 to 0.01)        |
| Chlamydial infection                                                    | 0.16<br>(0.15 to 0.16)              | 0.09<br>(0.07 to 0.11)           | 0.09<br>(0.07 to 0.11)           | 0.09<br>(0.07 to 0.11)            | 0.01<br>(0.01 to 0.01)        | 0.01<br>(0.00 to 0.01)        | 0.01<br>(0.00 to 0.01)        | 0.01<br>(0.00 to 0.01)        |
| Gonococcal infection                                                    | 0.45<br>(0.43 to 0.48)              | 0.26<br>(0.21 to 0.32)           | 0.25<br>(0.20 to 0.32)           | 0.26<br>(0.21 to 0.32)            | 0.03<br>(0.02 to 0.03)        | 0.02<br>(0.01 to 0.02)        | 0.02<br>(0.01 to 0.02)        | 0.02<br>(0.01 to 0.02)        |
| Other sexually transmitted infections                                   | 0.20<br>(0.19 to 0.21)              | 0.11<br>(0.08 to 0.13)           | 0.10<br>(0.08 to 0.13)           | 0.11<br>(0.08 to 0.13)            | 0.01<br>(0.01 to 0.01)        | 0.01<br>(0.00 to 0.01)        | 0.01<br>(0.00 to 0.01)        | 0.01<br>(0.00 to 0.01)        |
| Acute hepatitis                                                         | 1.96<br>(1.88 to 2.05)              | 1.28<br>(0.89 to 1.82)           | 1.05<br>(0.69 to 1.55)           | 1.45<br>(0.96 to 2.13)            | 0.06<br>(0.06 to 0.07)        | 0.05<br>(0.03 to 0.07)        | 0.04<br>(0.03 to 0.06)        | 0.05<br>(0.04 to 0.08)        |
| Acute hepatitis A                                                       | 0.16<br>(0.14 to 0.18)              | 0.07<br>(0.05 to 0.10)           | 0.06<br>(0.04 to 0.09)           | 0.08<br>(0.06 to 0.11)            | 0.00<br>(0.00 to 0.00)        | 0.00<br>(0.00 to 0.00)        | 0.00<br>(0.00 to 0.00)        | 0.00<br>(0.00 to 0.00)        |
| Acute hepatitis B                                                       | 1.52<br>(1.41 to 1.62)              | 1.02<br>(0.68 to 1.50)           | 0.83<br>(0.53 to 1.26)           | 1.16<br>(0.74 to 1.74)            | 0.05<br>(0.05 to 0.05)        | 0.04<br>(0.02 to 0.05)        | 0.03<br>(0.02 to 0.05)        | 0.04<br>(0.03 to 0.06)        |

|                                       |                                                            |                                                            |                                                            |                                                             |                                                      |                                                      |                                                      |                                                      |
|---------------------------------------|------------------------------------------------------------|------------------------------------------------------------|------------------------------------------------------------|-------------------------------------------------------------|------------------------------------------------------|------------------------------------------------------|------------------------------------------------------|------------------------------------------------------|
| Acute hepatitis C                     | 0.08<br>(0.06 to<br>0.10)                                  | 0.06<br>(0.03 to<br>0.09)                                  | 0.05<br>(0.03 to<br>0.07)                                  | 0.06<br>(0.04 to<br>0.10)                                   | 0.00<br>(0.00 to<br>0.00)                            | 0.00<br>(0.00 to<br>0.00)                            | 0.00<br>(0.00 to<br>0.00)                            | 0.00<br>(0.00 to<br>0.00)                            |
| Acute hepatitis E                     | 0.20<br>(0.16 to<br>0.25)                                  | 0.13<br>(0.08 to<br>0.20)                                  | 0.11<br>(0.07 to<br>0.17)                                  | 0.14<br>(0.09 to<br>0.22)                                   | 0.01<br>(0.01 to<br>0.01)                            | 0.01<br>(0.00 to<br>0.01)                            | 0.01<br>(0.00 to<br>0.01)                            | 0.01<br>(0.00 to<br>0.01)                            |
| Other unspecified infectious diseases | 12.92<br>(10.75 to<br>13.60)                               | 14.97<br>(12.47 to<br>16.94)                               | 14.77<br>(12.19 to<br>16.74)                               | 15.04<br>(12.58 to<br>17.08)                                | 0.49<br>(0.40 to<br>0.51)                            | 0.67<br>(0.55 to<br>0.75)                            | 0.69<br>(0.57 to<br>0.78)                            | 0.65<br>(0.53 to<br>0.73)                            |
| <b>Non-communicable diseases</b>      | <b>7,597.74</b><br><b>(7,482.13 to</b><br><b>7,730.68)</b> | <b>7,744.43</b><br><b>(6,647.17 to</b><br><b>8,997.60)</b> | <b>6,541.68</b><br><b>(5,620.10 to</b><br><b>7,574.86)</b> | <b>9,607.69</b><br><b>(8,097.53 to</b><br><b>11,413.62)</b> | <b>546.01</b><br><b>(537.82 to</b><br><b>554.70)</b> | <b>644.17</b><br><b>(577.26 to</b><br><b>714.09)</b> | <b>567.09</b><br><b>(507.44 to</b><br><b>631.17)</b> | <b>754.55</b><br><b>(668.99 to</b><br><b>847.06)</b> |
| <b>United Kingdom</b>                 |                                                            |                                                            |                                                            |                                                             |                                                      |                                                      |                                                      |                                                      |
| <b>Cause</b>                          | <b>YLLs (in 1000s)</b>                                     |                                                            |                                                            |                                                             | <b>Deaths (in 1000s)</b>                             |                                                      |                                                      |                                                      |
|                                       | <b>2016</b>                                                | <b>2040 Forecast</b>                                       | <b>2040 Better Scenario</b>                                | <b>2040 Worse Scenario</b>                                  | <b>2016</b>                                          | <b>2040 Forecast</b>                                 | <b>2040 Better Scenario</b>                          | <b>2040 Worse Scenario</b>                           |
| <b>Neoplasms</b>                      | 2,975.33<br>(2,921.48 to<br>3,036.54)                      | 3,199.19<br>(2,705.86 to<br>3,715.97)                      | 2,651.69<br>(2,240.47 to<br>3,065.75)                      | 3,970.75<br>(3,301.36 to<br>4,667.93)                       | 178.91<br>(175.35 to<br>182.74)                      | 222.34<br>(193.83 to<br>253.24)                      | 188.21<br>(164.37 to<br>213.16)                      | 263.64<br>(226.35 to<br>304.07)                      |
| Lip and oral cavity cancer            | 34.58<br>(33.31 to<br>35.74)                               | 32.36<br>(17.95 to<br>54.94)                               | 18.89<br>(11.17 to<br>30.53)                               | 51.36<br>(27.89 to<br>86.93)                                | 1.77<br>(1.71 to<br>1.82)                            | 1.92<br>(1.07 to<br>3.23)                            | 1.13<br>(0.68 to<br>1.81)                            | 2.90<br>(1.56 to<br>4.93)                            |
| Nasopharynx cancer                    | 12.21<br>(11.67 to<br>12.96)                               | 14.18<br>(7.58 to<br>24.21)                                | 7.69<br>(4.36 to<br>12.75)                                 | 22.02<br>(11.31 to<br>38.33)                                | 0.65<br>(0.62 to<br>0.69)                            | 0.93<br>(0.48 to<br>1.65)                            | 0.50<br>(0.28 to<br>0.85)                            | 1.35<br>(0.69 to<br>2.34)                            |
| Other pharynx cancer                  | 22.40<br>(21.67 to<br>23.13)                               | 25.51<br>(13.06 to<br>42.51)                               | 19.96<br>(10.84 to<br>32.84)                               | 28.59<br>(14.58 to<br>47.04)                                | 0.98<br>(0.95 to<br>1.01)                            | 1.25<br>(0.65 to<br>2.05)                            | 1.00<br>(0.56 to<br>1.60)                            | 1.38<br>(0.71 to<br>2.25)                            |
| Esophageal cancer                     | 147.34<br>(140.65 to<br>153.96)                            | 163.63<br>(92.35 to<br>265.28)                             | 103.76<br>(63.11 to<br>159.70)                             | 236.47<br>(125.88 to<br>397.28)                             | 8.63<br>(8.26 to<br>9.00)                            | 10.78<br>(6.18 to<br>17.26)                          | 6.83<br>(4.32 to<br>10.31)                           | 14.93<br>(8.21 to<br>24.97)                          |
| Stomach cancer                        | 121.39<br>(117.92 to<br>125.19)                            | 87.28<br>(70.98 to<br>108.83)                              | 73.00<br>(60.22 to<br>89.03)                               | 100.07<br>(78.35 to<br>128.48)                              | 8.22<br>(7.99 to<br>8.47)                            | 6.91<br>(5.64 to<br>8.52)                            | 5.90<br>(4.92 to<br>7.09)                            | 7.66<br>(5.99 to<br>9.81)                            |
| Colon and rectum cancer               | 300.47<br>(289.37 to<br>313.52)                            | 356.63<br>(233.02 to<br>470.98)                            | 268.70<br>(188.40 to<br>374.10)                            | 416.36<br>(282.64 to<br>596.82)                             | 19.80<br>(19.07 to<br>20.62)                         | 25.91<br>(18.63 to<br>36.29)                         | 21.31<br>(15.37 to<br>29.40)                         | 31.13<br>(21.57 to<br>44.42)                         |
| Liver cancer                          | 82.83<br>(79.13 to<br>85.42)                               | 102.52<br>(68.64 to<br>152.96)                             | 84.81<br>(59.42 to<br>122.09)                              | 136.04<br>(85.25 to<br>209.42)                              | 4.83<br>(4.62 to<br>4.97)                            | 6.69<br>(4.58 to<br>9.72)                            | 5.68<br>(4.07 to<br>7.96)                            | 8.47<br>(5.43 to<br>12.83)                           |
| Liver cancer due to hepatitis B       | 14.38<br>(10.56 to<br>19.11)                               | 16.27<br>(10.12 to<br>26.41)                               | 14.80<br>(9.45 to<br>23.17)                                | 20.10<br>(11.72 to<br>34.58)                                | 0.71<br>(0.50 to<br>0.98)                            | 0.91<br>(0.55 to<br>1.47)                            | 0.84<br>(0.53 to<br>1.31)                            | 1.08<br>(0.62 to<br>1.80)                            |
| Liver cancer due to hepatitis C       | 24.72<br>(21.57 to<br>27.58)                               | 30.06<br>(20.19 to<br>43.71)                               | 27.60<br>(19.40 to<br>38.76)                               | 36.07<br>(22.76 to<br>54.59)                                | 1.63<br>(1.45 to<br>1.82)                            | 2.24<br>(1.53 to<br>3.16)                            | 2.09<br>(1.49 to<br>2.89)                            | 2.57<br>(1.64 to<br>3.76)                            |
| Liver cancer due to alcohol use       | 29.02<br>(25.64 to<br>32.60)                               | 38.58<br>(24.92 to<br>59.19)                               | 26.35<br>(17.82 to<br>39.45)                               | 58.13<br>(35.14 to<br>93.66)                                | 1.62<br>(1.43 to<br>1.83)                            | 2.37<br>(1.56 to<br>3.59)                            | 1.66<br>(1.14 to<br>2.44)                            | 3.44<br>(2.13 to<br>5.42)                            |
| Liver cancer due to other causes      | 14.71<br>(12.67 to<br>16.92)                               | 17.61<br>(11.33 to<br>27.84)                               | 16.05<br>(10.76 to<br>24.70)                               | 21.74<br>(12.93 to<br>35.47)                                | 0.86<br>(0.74 to<br>0.99)                            | 1.17<br>(0.75 to<br>1.81)                            | 1.08<br>(0.73 to<br>1.62)                            | 1.39<br>(0.84 to<br>2.25)                            |
| Gallbladder and biliary tract cancer  | 29.50<br>(28.44 to<br>31.89)                               | 24.23<br>(21.41 to<br>27.61)                               | 24.45<br>(21.33 to<br>28.25)                               | 23.64<br>(20.99 to<br>26.73)                                | 1.99<br>(1.92 to<br>2.14)                            | 1.85<br>(1.69 to<br>2.06)                            | 1.93<br>(1.73 to<br>2.17)                            | 1.76<br>(1.60 to<br>1.94)                            |
| Pancreatic cancer                     | 172.87<br>(167.64 to<br>177.81)                            | 205.75<br>(171.17 to<br>251.19)                            | 192.83<br>(161.31 to<br>233.45)                            | 231.09<br>(188.46 to<br>287.48)                             | 10.56<br>(10.23 to<br>10.86)                         | 14.10<br>(11.79 to<br>16.99)                         | 13.37<br>(11.29 to<br>16.09)                         | 15.40<br>(12.63 to<br>18.90)                         |
| Larynx cancer                         | 16.63<br>(16.12 to<br>17.19)                               | 13.03<br>(6.97 to<br>22.38)                                | 7.58<br>(4.09 to<br>12.51)                                 | 19.86<br>(10.21 to<br>35.69)                                | 0.91<br>(0.88 to<br>0.94)                            | 0.83<br>(0.44 to<br>1.46)                            | 0.48<br>(0.26 to<br>0.79)                            | 1.17<br>(0.61 to<br>2.10)                            |
| Tracheal, bronchus, and lung cancer   | 661.18<br>(643.15 to<br>681.99)                            | 645.90<br>(481.31 to<br>850.82)                            | 402.88<br>(307.66 to<br>527.84)                            | 1,051.97<br>(774.77 to<br>1,392.19)                         | 39.56<br>(38.24 to<br>41.22)                         | 44.36<br>(32.97 to<br>59.55)                         | 27.73<br>(21.00 to<br>37.07)                         | 67.06<br>(49.82 to<br>88.29)                         |

|                          |                                 |                                 |                                 |                                 |                              |                              |                              |                              |
|--------------------------|---------------------------------|---------------------------------|---------------------------------|---------------------------------|------------------------------|------------------------------|------------------------------|------------------------------|
| Malignant skin melanoma  | 56.98<br>(48.36 to<br>63.50)    | 70.35<br>(57.96 to<br>80.91)    | 77.81<br>(63.61 to<br>89.97)    | 64.95<br>(53.81 to<br>74.72)    | 2.76<br>(2.23 to<br>3.00)    | 3.88<br>(3.10 to<br>4.37)    | 4.42<br>(3.51 to<br>5.01)    | 3.49<br>(2.80 to<br>3.92)    |
| Non-melanoma skin cancer | 14.36<br>(13.78 to<br>14.98)    | 16.65<br>(14.48 to<br>18.97)    | 15.50<br>(13.11 to<br>18.32)    | 17.11<br>(14.62 to<br>19.87)    | 1.11<br>(1.07 to<br>1.15)    | 1.48<br>(1.32 to<br>1.66)    | 1.44<br>(1.25 to<br>1.64)    | 1.47<br>(1.28 to<br>1.70)    |
| Breast cancer            | 255.66<br>(245.16 to<br>266.70) | 257.36<br>(192.35 to<br>343.55) | 212.04<br>(160.02 to<br>280.47) | 309.71<br>(225.95 to<br>422.98) | 13.61<br>(13.08 to<br>14.22) | 16.21<br>(12.17 to<br>21.36) | 13.78<br>(10.48 to<br>18.19) | 18.90<br>(13.59 to<br>25.85) |
| Cervical cancer          | 36.08<br>(34.51 to<br>38.14)    | 24.66<br>(18.80 to<br>32.00)    | 20.96<br>(16.29 to<br>26.72)    | 29.02<br>(21.12 to<br>39.74)    | 1.61<br>(1.54 to<br>1.70)    | 1.30<br>(0.98 to<br>1.75)    | 1.13<br>(0.87 to<br>1.47)    | 1.50<br>(1.06 to<br>2.12)    |
| Uterine cancer           | 28.45<br>(27.08 to<br>30.13)    | 28.39<br>(23.83 to<br>33.41)    | 26.62<br>(22.07 to<br>31.83)    | 29.20<br>(24.57 to<br>34.40)    | 1.75<br>(1.67 to<br>1.85)    | 2.00<br>(1.72 to<br>2.32)    | 1.92<br>(1.64 to<br>2.25)    | 2.00<br>(1.73 to<br>2.33)    |
| Ovarian cancer           | 91.66<br>(87.54 to<br>95.69)    | 96.78<br>(73.80 to<br>126.87)   | 84.60<br>(65.85 to<br>107.04)   | 104.73<br>(78.22 to<br>141.44)  | 4.92<br>(4.70 to<br>5.12)    | 5.79<br>(4.34 to<br>7.58)    | 5.03<br>(3.91 to<br>6.45)    | 6.16<br>(4.48 to<br>8.32)    |
| Prostate cancer          | 160.08<br>(147.86 to<br>185.70) | 211.74<br>(175.83 to<br>259.21) | 205.16<br>(169.17 to<br>253.67) | 212.26<br>(171.92 to<br>261.19) | 13.64<br>(12.47 to<br>15.44) | 20.60<br>(17.50 to<br>24.50) | 20.57<br>(17.54 to<br>24.27) | 20.04<br>(16.63 to<br>24.19) |
| Testicular cancer        | 2.70<br>(2.55 to<br>2.90)       | 2.06<br>(1.62 to<br>2.56)       | 1.87<br>(1.44 to<br>2.38)       | 2.18<br>(1.70 to<br>2.71)       | 0.07<br>(0.07 to<br>0.08)    | 0.07<br>(0.06 to<br>0.08)    | 0.06<br>(0.05 to<br>0.08)    | 0.07<br>(0.06 to<br>0.08)    |

**United Kingdom**

| Cause                           | YLLs (in 1000s)                 |                                 |                                 |                                 | Deaths (in 1000s)         |                            |                            |                             |
|---------------------------------|---------------------------------|---------------------------------|---------------------------------|---------------------------------|---------------------------|----------------------------|----------------------------|-----------------------------|
|                                 | 2016                            | 2040 Forecast                   | 2040 Better Scenario            | 2040 Worse Scenario             | 2016                      | 2040 Forecast              | 2040 Better Scenario       | 2040 Worse Scenario         |
| Kidney cancer                   | 79.10<br>(76.46 to<br>81.44)    | 96.41<br>(78.32 to<br>116.11)   | 92.59<br>(76.87 to<br>109.04)   | 102.60<br>(81.55 to<br>126.24)  | 4.50<br>(4.36 to<br>4.63) | 6.16<br>(5.04 to<br>7.38)  | 6.00<br>(5.05 to<br>6.97)  | 6.33<br>(5.07 to<br>7.77)   |
| Bladder cancer                  | 78.92<br>(76.72 to<br>80.91)    | 88.21<br>(68.08 to<br>114.64)   | 75.45<br>(60.12 to<br>96.07)    | 102.98<br>(77.56 to<br>137.19)  | 6.20<br>(6.03 to<br>6.36) | 8.08<br>(6.19 to<br>10.58) | 6.98<br>(5.60 to<br>8.86)  | 9.05<br>(6.72 to<br>12.15)  |
| Brain and nervous system cancer | 110.07<br>(88.42 to<br>116.17)  | 117.65<br>(92.95 to<br>134.62)  | 113.48<br>(89.97 to<br>132.82)  | 119.36<br>(94.33 to<br>136.88)  | 4.19<br>(3.16 to<br>4.43) | 5.07<br>(3.71 to<br>5.79)  | 4.98<br>(3.60 to<br>5.77)  | 5.04<br>(3.62 to<br>5.75)   |
| Thyroid cancer                  | 7.12<br>(6.81 to<br>7.44)       | 7.22<br>(5.44 to<br>9.78)       | 6.62<br>(5.08 to<br>8.90)       | 8.08<br>(5.85 to<br>11.48)      | 0.43<br>(0.41 to<br>0.44) | 0.49<br>(0.38 to<br>0.66)  | 0.46<br>(0.36 to<br>0.62)  | 0.53<br>(0.39 to<br>0.74)   |
| Mesothelioma                    | 46.78<br>(44.00 to<br>49.18)    | 58.95<br>(49.38 to<br>70.05)    | 61.51<br>(50.90 to<br>73.76)    | 56.21<br>(47.50 to<br>65.55)    | 2.86<br>(2.70 to<br>3.00) | 3.94<br>(3.40 to<br>4.50)  | 4.21<br>(3.63 to<br>4.89)  | 3.68<br>(3.24 to<br>4.12)   |
| Hodgkin lymphoma                | 9.83<br>(9.17 to<br>10.26)      | 6.46<br>(5.31 to<br>7.75)       | 5.59<br>(4.45 to<br>6.91)       | 7.05<br>(5.66 to<br>8.59)       | 0.37<br>(0.33 to<br>0.39) | 0.28<br>(0.24 to<br>0.34)  | 0.25<br>(0.20 to<br>0.30)  | 0.30<br>(0.25 to<br>0.36)   |
| Non-Hodgkin lymphoma            | 98.23<br>(90.99 to<br>107.00)   | 104.60<br>(84.62 to<br>130.81)  | 98.47<br>(79.52 to<br>122.00)   | 111.03<br>(88.09 to<br>139.78)  | 5.69<br>(5.02 to<br>5.92) | 6.93<br>(5.66 to<br>8.35)  | 6.72<br>(5.49 to<br>8.09)  | 7.12<br>(5.72 to<br>8.66)   |
| Multiple myeloma                | 50.39<br>(42.88 to<br>62.08)    | 62.56<br>(49.73 to<br>80.48)    | 60.82<br>(48.50 to<br>78.12)    | 65.07<br>(50.71 to<br>84.81)    | 3.27<br>(2.70 to<br>3.84) | 4.52<br>(3.58 to<br>5.66)  | 4.53<br>(3.59 to<br>5.60)  | 4.56<br>(3.58 to<br>5.83)   |
| Leukemia                        | 121.87<br>(118.64 to<br>125.47) | 144.16<br>(114.59 to<br>179.88) | 132.35<br>(106.32 to<br>161.91) | 161.30<br>(123.93 to<br>207.80) | 7.03<br>(6.85 to<br>7.25) | 9.87<br>(7.77 to<br>12.29) | 9.22<br>(7.48 to<br>11.12) | 10.64<br>(8.05 to<br>13.79) |
| Acute lymphoid leukemia         | 13.32<br>(12.43 to<br>15.49)    | 10.85<br>(8.64 to<br>13.77)     | 9.59<br>(7.55 to<br>12.21)      | 12.56<br>(9.82 to<br>16.35)     | 0.38<br>(0.36 to<br>0.44) | 0.37<br>(0.29 to<br>0.47)  | 0.32<br>(0.26 to<br>0.42)  | 0.42<br>(0.32 to<br>0.56)   |
| Chronic lymphoid leukemia       | 19.28<br>(17.74 to<br>22.79)    | 22.92<br>(17.09 to<br>30.56)    | 21.31<br>(16.32 to<br>27.92)    | 25.09<br>(17.97 to<br>34.33)    | 1.53<br>(1.42 to<br>1.77) | 2.05<br>(1.56 to<br>2.68)  | 1.95<br>(1.54 to<br>2.48)  | 2.16<br>(1.59 to<br>2.93)   |
| Acute myeloid leukemia          | 60.13<br>(54.78 to<br>62.60)    | 82.24<br>(64.90 to<br>101.15)   | 77.42<br>(61.95 to<br>94.16)    | 90.81<br>(69.55 to<br>114.95)   | 3.26<br>(2.93 to<br>3.40) | 5.20<br>(4.12 to<br>6.43)  | 4.98<br>(4.05 to<br>5.99)  | 5.55<br>(4.28 to<br>7.08)   |

|                                |                                                            |                                                            |                                                          |                                                            |                                                      |                                                      |                                                      |                                                      |
|--------------------------------|------------------------------------------------------------|------------------------------------------------------------|----------------------------------------------------------|------------------------------------------------------------|------------------------------------------------------|------------------------------------------------------|------------------------------------------------------|------------------------------------------------------|
| Chronic myeloid leukemia       | 10.37<br>(9.79 to<br>11.27)                                | 6.18<br>(4.46 to<br>8.37)                                  | 4.89<br>(3.60 to<br>6.48)                                | 7.60<br>(5.26 to<br>10.61)                                 | 0.69<br>(0.35 to<br>0.76)                            | 0.48<br>(0.25 to<br>0.64)                            | 0.39<br>(0.29 to<br>0.51)                            | 0.56<br>(0.39 to<br>0.78)                            |
| Other leukemia                 | 18.77<br>(17.26 to<br>20.04)                               | 21.98<br>(16.65 to<br>28.85)                               | 19.14<br>(14.88 to<br>24.77)                             | 25.23<br>(18.34 to<br>34.27)                               | 1.17<br>(1.10 to<br>1.26)                            | 1.77<br>(1.32 to<br>2.33)                            | 1.58<br>(1.24 to<br>2.03)                            | 1.95<br>(1.40 to<br>2.62)                            |
| Other neoplasms                | 125.67<br>(121.42 to<br>129.66)                            | 153.96<br>(137.43 to<br>170.91)                            | 155.70<br>(136.96 to<br>174.13)                          | 150.44<br>(134.85 to<br>165.75)                            | 6.99<br>(6.78 to<br>7.18)                            | 10.15<br>(9.33 to<br>10.96)                          | 10.66<br>(9.71 to<br>11.65)                          | 9.56<br>(8.82 to<br>10.31)                           |
| <b>Cardiovascular diseases</b> | <b>2,218.56</b><br><b>(2,169.30 to</b><br><b>2,270.08)</b> | <b>1,762.91</b><br><b>(1,281.80 to</b><br><b>2,437.08)</b> | <b>1,305.73</b><br><b>(976.59 to</b><br><b>1,746.33)</b> | <b>2,511.36</b><br><b>(1,727.72 to</b><br><b>3,582.02)</b> | <b>184.63</b><br><b>(180.25 to</b><br><b>189.13)</b> | <b>170.39</b><br><b>(133.40 to</b><br><b>217.87)</b> | <b>136.85</b><br><b>(109.09 to</b><br><b>171.33)</b> | <b>219.78</b><br><b>(166.25 to</b><br><b>292.95)</b> |
| Rheumatic heart disease        | 19.83<br>(18.94 to<br>21.04)                               | 14.79<br>(12.28 to<br>18.17)                               | 13.30<br>(10.74 to<br>16.54)                             | 15.54<br>(12.65 to<br>19.27)                               | 1.51<br>(1.45 to<br>1.61)                            | 1.35<br>(1.16 to<br>1.60)                            | 1.26<br>(1.06 to<br>1.50)                            | 1.37<br>(1.16 to<br>1.65)                            |
| Ischemic heart disease         | 1,171.90<br>(1,143.78 to<br>1,209.24)                      | 822.61<br>(474.80 to<br>1,349.10)                          | 526.68<br>(312.74 to<br>838.91)                          | 1,349.82<br>(739.27 to<br>2,263.49)                        | 91.42<br>(89.27 to<br>93.97)                         | 74.26<br>(46.58 to<br>112.72)                        | 52.35<br>(32.39 to<br>78.83)                         | 109.35<br>(66.51 to<br>169.68)                       |
| Stroke                         | 509.97<br>(480.06 to<br>537.77)                            | 320.93<br>(216.64 to<br>480.85)                            | 220.98<br>(148.59 to<br>325.23)                          | 474.14<br>(311.47 to<br>740.21)                            | 48.63<br>(45.35 to<br>51.91)                         | 35.03<br>(23.73 to<br>52.88)                         | 26.45<br>(18.16 to<br>39.85)                         | 46.39<br>(30.77 to<br>69.06)                         |
| Ischemic stroke                | 225.89<br>(210.78 to<br>240.07)                            | 141.90<br>(83.73 to<br>251.66)                             | 108.10<br>(64.13 to<br>188.59)                           | 191.91<br>(109.36 to<br>350.60)                            | 25.34<br>(23.51 to<br>27.18)                         | 17.76<br>(10.43 to<br>31.72)                         | 14.38<br>(8.52 to<br>25.64)                          | 22.33<br>(12.55 to<br>40.30)                         |
| Intracerebral hemorrhage       | 284.08<br>(268.96 to<br>298.38)                            | 179.03<br>(112.57 to<br>277.31)                            | 112.89<br>(74.54 to<br>166.08)                           | 282.23<br>(164.80 to<br>468.65)                            | 23.29<br>(21.75 to<br>24.72)                         | 17.26<br>(11.52 to<br>25.68)                         | 12.07<br>(8.35 to<br>17.31)                          | 24.06<br>(15.18 to<br>37.61)                         |
| Hypertensive heart disease     | 50.76<br>(35.88 to<br>68.36)                               | 66.69<br>(38.70 to<br>108.94)                              | 54.01<br>(32.34 to<br>81.78)                             | 85.50<br>(47.52 to<br>142.49)                              | 3.92<br>(2.81 to<br>5.31)                            | 6.19<br>(3.74 to<br>10.06)                           | 5.33<br>(3.38 to<br>7.99)                            | 7.54<br>(4.35 to<br>12.78)                           |
| Cardiomyopathy and myocarditis | 64.46<br>(55.78 to<br>71.81)                               | 51.35<br>(39.56 to<br>65.63)                               | 44.63<br>(34.12 to<br>57.29)                             | 57.18<br>(43.28 to<br>74.72)                               | 4.08<br>(3.53 to<br>4.44)                            | 3.83<br>(3.10 to<br>5.43)                            | 3.83<br>(2.91 to<br>5.16)                            | 4.24<br>(3.14 to<br>5.77)                            |
| Myocarditis                    | 11.72<br>(7.86 to<br>13.21)                                | 11.88<br>(8.16 to<br>14.39)                                | 12.28<br>(8.54 to<br>14.97)                              | 11.41<br>(7.65 to<br>13.80)                                | 0.91<br>(0.62 to<br>1.03)                            | 1.21<br>(0.83 to<br>1.49)                            | 1.32<br>(0.93 to<br>1.62)                            | 1.10<br>(0.74 to<br>1.36)                            |

**United Kingdom**

| Cause                                         | YLLs (in 1000s)                                      |                                                      |                                                      |                                                        | Deaths (in 1000s)                                 |                                                   |                                                   |                                                   |
|-----------------------------------------------|------------------------------------------------------|------------------------------------------------------|------------------------------------------------------|--------------------------------------------------------|---------------------------------------------------|---------------------------------------------------|---------------------------------------------------|---------------------------------------------------|
|                                               | 2016                                                 | 2040 Forecast                                        | 2040 Better Scenario                                 | 2040 Worse Scenario                                    | 2016                                              | 2040 Forecast                                     | 2040 Better Scenario                              | 2040 Worse Scenario                               |
| Alcoholic cardiomyopathy                      | 13.65<br>(10.77 to<br>17.78)                         | 13.21<br>(10.00 to<br>17.59)                         | 10.15<br>(7.59 to<br>13.81)                          | 15.82<br>(12.23 to<br>20.78)                           | 0.52<br>(0.40 to<br>0.71)                         | 0.58<br>(0.44 to<br>0.80)                         | 0.46<br>(0.35 to<br>0.65)                         | 0.68<br>(0.52 to<br>0.91)                         |
| Other cardiomyopathy                          | 39.09<br>(33.88 to<br>44.84)                         | 26.26<br>(17.81 to<br>36.77)                         | 22.19<br>(14.38 to<br>32.25)                         | 29.96<br>(19.57 to<br>44.82)                           | 2.64<br>(2.32 to<br>3.00)                         | 2.30<br>(1.46 to<br>3.50)                         | 2.05<br>(1.28 to<br>3.18)                         | 2.47<br>(1.53 to<br>3.82)                         |
| Atrial fibrillation and flutter               | 76.77<br>(63.79 to<br>91.17)                         | 107.76<br>(82.81 to<br>141.01)                       | 100.82<br>(78.64 to<br>141.01)                       | 112.64<br>(86.37 to<br>150.31)                         | 9.14<br>(7.45 to<br>11.07)                        | 13.68<br>(10.47 to<br>17.84)                      | 13.24<br>(10.26 to<br>17.08)                      | 13.78<br>(10.64 to<br>18.10)                      |
| Aortic aneurysm                               | 101.14<br>(97.97 to<br>104.52)                       | 111.88<br>(91.74 to<br>139.94)                       | 106.92<br>(87.63 to<br>131.48)                       | 117.15<br>(94.47 to<br>149.15)                         | 8.23<br>(7.99 to<br>8.49)                         | 10.33<br>(8.88 to<br>12.46)                       | 10.31<br>(8.83 to<br>12.21)                       | 10.30<br>(8.81 to<br>12.54)                       |
| Peripheral artery disease                     | 27.63<br>(15.42 to<br>34.08)                         | 48.73<br>(25.93 to<br>68.58)                         | 49.80<br>(26.46 to<br>69.56)                         | 51.85<br>(26.62 to<br>73.10)                           | 2.93<br>(1.61 to<br>3.68)                         | 5.72<br>(2.99 to<br>8.07)                         | 6.10<br>(3.23 to<br>8.59)                         | 5.77<br>(3.00 to<br>8.19)                         |
| Endocarditis                                  | 21.68<br>(13.80 to<br>25.08)                         | 25.70<br>(15.23 to<br>37.25)                         | 25.62<br>(15.25 to<br>36.37)                         | 26.22<br>(15.36 to<br>38.65)                           | 1.55<br>(0.96 to<br>1.80)                         | 2.14<br>(1.23 to<br>3.25)                         | 2.22<br>(1.28 to<br>3.36)                         | 2.09<br>(1.19 to<br>3.23)                         |
| Other cardiovascular and circulatory diseases | 174.43<br>(168.76 to<br>180.63)                      | 192.47<br>(158.91 to<br>239.11)                      | 162.97<br>(133.17 to<br>199.85)                      | 221.33<br>(175.64 to<br>285.30)                        | 13.22<br>(12.79 to<br>13.69)                      | 17.62<br>(15.01 to<br>20.98)                      | 15.76<br>(13.33 to<br>18.47)                      | 18.94<br>(15.67 to<br>23.29)                      |
| <b>Chronic respiratory diseases</b>           | <b>573.22</b><br><b>(559.06 to</b><br><b>588.96)</b> | <b>571.75</b><br><b>(451.92 to</b><br><b>712.64)</b> | <b>436.15</b><br><b>(353.98 to</b><br><b>533.65)</b> | <b>786.43</b><br><b>(605.87 to</b><br><b>1,025.07)</b> | <b>46.41</b><br><b>(45.27 to</b><br><b>47.63)</b> | <b>53.47</b><br><b>(42.67 to</b><br><b>66.24)</b> | <b>49.90</b><br><b>(33.46 to</b><br><b>49.51)</b> | <b>68.77</b><br><b>(54.06 to</b><br><b>86.58)</b> |

|                                                                |                                                      |                                                      |                                                      |                                                      |                                                   |                                                   |                                                   |                                                   |
|----------------------------------------------------------------|------------------------------------------------------|------------------------------------------------------|------------------------------------------------------|------------------------------------------------------|---------------------------------------------------|---------------------------------------------------|---------------------------------------------------|---------------------------------------------------|
| Chronic obstructive pulmonary disease                          | 469.56<br>(448.86 to<br>511.66)                      | 440.32<br>(321.83 to<br>595.09)                      | 285.25<br>(203.89 to<br>397.37)                      | 665.84<br>(483.63 to<br>916.90)                      | 39.16<br>(37.51 to<br>42.50)                      | 42.90<br>(31.68 to<br>57.37)                      | 28.36<br>(20.61 to<br>39.27)                      | 59.43<br>(44.55 to<br>78.09)                      |
| Pneumoconiosis                                                 | 4.91<br>(4.50 to<br>5.47)                            | 4.62<br>(3.46 to<br>6.09)                            | 4.90<br>(3.57 to<br>6.81)                            | 4.49<br>(3.44 to<br>5.82)                            | 0.44<br>(0.40 to<br>0.48)                         | 0.43<br>(0.33 to<br>0.56)                         | 0.47<br>(0.34 to<br>0.63)                         | 0.41<br>(0.32 to<br>0.53)                         |
| Silicosis                                                      | 0.25<br>(0.17 to<br>0.68)                            | 0.09<br>(0.04 to<br>0.26)                            | 0.07<br>(0.03 to<br>0.23)                            | 0.10<br>(0.05 to<br>0.29)                            | 0.02<br>(0.01 to<br>0.06)                         | 0.01<br>(0.00 to<br>0.03)                         | 0.01<br>(0.00 to<br>0.02)                         | 0.01<br>(0.00 to<br>0.03)                         |
| Asbestosis                                                     | 2.52<br>(1.54 to<br>3.28)                            | 3.13<br>(2.22 to<br>4.24)                            | 3.59<br>(2.63 to<br>5.03)                            | 2.78<br>(1.80 to<br>3.71)                            | 0.28<br>(0.12 to<br>0.27)                         | 0.28<br>(0.19 to<br>0.37)                         | 0.33<br>(0.24 to<br>0.45)                         | 0.24<br>(0.15 to<br>0.33)                         |
| Coal workers pneumoconiosis                                    | 1.90<br>(0.91 to<br>2.99)                            | 1.15<br>(0.35 to<br>2.59)                            | 0.97<br>(0.26 to<br>2.47)                            | 1.35<br>(0.42 to<br>2.84)                            | 0.19<br>(0.09 to<br>0.29)                         | 0.12<br>(0.04 to<br>0.26)                         | 0.11<br>(0.03 to<br>0.26)                         | 0.14<br>(0.04 to<br>0.29)                         |
| Other pneumoconiosis                                           | 0.25<br>(0.19 to<br>0.61)                            | 0.25<br>(0.18 to<br>0.45)                            | 0.26<br>(0.17 to<br>0.47)                            | 0.26<br>(0.19 to<br>0.47)                            | 0.02<br>(0.02 to<br>0.06)                         | 0.03<br>(0.02 to<br>0.05)                         | 0.03<br>(0.02 to<br>0.05)                         | 0.03<br>(0.02 to<br>0.05)                         |
| Asthma                                                         | 22.32<br>(20.90 to<br>28.05)                         | 7.92<br>(4.64 to<br>13.23)                           | 5.93<br>(3.52 to<br>10.01)                           | 11.27<br>(6.19 to<br>19.67)                          | 1.28<br>(1.20 to<br>1.54)                         | 0.57<br>(0.34 to<br>0.93)                         | 0.45<br>(0.27 to<br>0.73)                         | 0.75<br>(0.42 to<br>1.28)                         |
| Interstitial lung disease and pulmonary sarcoidosis            | 71.29<br>(34.97 to<br>83.15)                         | 113.75<br>(57.12 to<br>140.57)                       | 135.16<br>(73.69 to<br>165.99)                       | 99.36<br>(48.36 to<br>123.94)                        | 5.29<br>(2.45 to<br>6.22)                         | 9.26<br>(4.40 to<br>11.42)                        | 11.33<br>(5.93 to<br>13.88)                       | 7.86<br>(3.63 to<br>9.95)                         |
| Other chronic respiratory diseases                             | 5.13<br>(2.93 to<br>6.12)                            | 5.14<br>(2.88 to<br>6.86)                            | 4.91<br>(2.86 to<br>6.58)                            | 5.47<br>(2.98 to<br>7.41)                            | 0.25<br>(0.14 to<br>0.30)                         | 0.30<br>(0.17 to<br>0.43)                         | 0.30<br>(0.17 to<br>0.41)                         | 0.32<br>(0.17 to<br>0.44)                         |
| <b>Cirrhosis and other chronic liver diseases</b>              | <b>265.06</b><br><b>(255.88 to</b><br><b>274.72)</b> | <b>197.02</b><br><b>(166.88 to</b><br><b>234.46)</b> | <b>154.19</b><br><b>(126.47 to</b><br><b>186.51)</b> | <b>238.75</b><br><b>(198.75 to</b><br><b>287.40)</b> | <b>9.87</b><br><b>(9.52 to</b><br><b>10.20)</b>   | <b>8.35</b><br><b>(7.24 to</b><br><b>9.67)</b>    | <b>6.69</b><br><b>(5.63 to</b><br><b>7.90)</b>    | <b>9.92</b><br><b>(8.44 to</b><br><b>11.60)</b>   |
| Cirrhosis and other chronic liver diseases due to hepatitis B  | 37.07<br>(32.15 to<br>42.83)                         | 26.37<br>(21.15 to<br>32.98)                         | 24.01<br>(18.85 to<br>30.29)                         | 27.91<br>(22.02 to<br>35.18)                         | 1.39<br>(1.22 to<br>1.59)                         | 1.12<br>(0.93 to<br>1.37)                         | 1.05<br>(0.85 to<br>1.28)                         | 1.16<br>(0.95 to<br>1.42)                         |
| Cirrhosis and other chronic liver diseases due to hepatitis C  | 80.75<br>(70.23 to<br>92.67)                         | 58.06<br>(46.20 to<br>71.88)                         | 52.37<br>(41.43 to<br>65.60)                         | 61.87<br>(48.57 to<br>77.63)                         | 2.91<br>(2.58 to<br>3.30)                         | 2.35<br>(1.92 to<br>2.83)                         | 2.16<br>(1.76 to<br>2.65)                         | 2.45<br>(1.99 to<br>3.00)                         |
| Cirrhosis and other chronic liver diseases due to alcohol use  | 130.04<br>(118.83 to<br>141.81)                      | 100.42<br>(83.87 to<br>121.83)                       | 66.72<br>(53.52 to<br>83.10)                         | 136.09<br>(112.11 to<br>165.75)                      | 4.91<br>(4.51 to<br>5.32)                         | 4.33<br>(3.68 to<br>5.12)                         | 2.96<br>(2.45 to<br>3.56)                         | 5.74<br>(4.81 to<br>6.79)                         |
| Cirrhosis and other chronic liver diseases due to other causes | 17.20<br>(14.20 to<br>20.77)                         | 12.18<br>(9.45 to<br>15.52)                          | 11.09<br>(8.44 to<br>14.27)                          | 12.88<br>(9.79 to<br>16.56)                          | 0.66<br>(0.56 to<br>0.79)                         | 0.56<br>(0.45 to<br>0.69)                         | 0.52<br>(0.41 to<br>0.65)                         | 0.57<br>(0.45 to<br>0.72)                         |
| <b>Digestive diseases</b>                                      | <b>251.38</b><br><b>(220.61 to</b><br><b>282.52)</b> | <b>252.21</b><br><b>(209.56 to</b><br><b>299.92)</b> | <b>238.41</b><br><b>(196.67 to</b><br><b>285.99)</b> | <b>262.17</b><br><b>(197.75 to</b><br><b>320.50)</b> | <b>19.56</b><br><b>(17.63 to</b><br><b>21.66)</b> | <b>23.26</b><br><b>(19.75 to</b><br><b>26.95)</b> | <b>22.97</b><br><b>(19.41 to</b><br><b>26.61)</b> | <b>23.21</b><br><b>(19.62 to</b><br><b>27.51)</b> |
| Peptic ulcer disease                                           | 41.27<br>(38.04 to<br>50.97)                         | 25.14<br>(19.50 to<br>31.91)                         | 21.11<br>(15.91 to<br>27.51)                         | 28.89<br>(21.61 to<br>37.60)                         | 3.08<br>(2.86 to<br>3.75)                         | 2.33<br>(1.82 to<br>2.92)                         | 2.04<br>(1.57 to<br>2.63)                         | 2.55<br>(1.95 to<br>3.27)                         |
| <b>United Kingdom</b>                                          |                                                      |                                                      |                                                      |                                                      |                                                   |                                                   |                                                   |                                                   |
| Cause                                                          | YLLs (in 1000s)                                      |                                                      |                                                      |                                                      | Deaths (in 1000s)                                 |                                                   |                                                   |                                                   |
|                                                                | 2016                                                 | 2040 Forecast                                        | 2040 Better Scenario                                 | 2040 Worse Scenario                                  | 2016                                              | 2040 Forecast                                     | 2040 Better Scenario                              | 2040 Worse Scenario                               |
| Gastritis and duodenitis                                       | 4.73<br>(3.32 to<br>5.90)                            | 3.83<br>(2.62 to<br>5.18)                            | 3.47<br>(2.37 to<br>4.85)                            | 4.03<br>(2.76 to<br>5.47)                            | 0.28<br>(0.20 to<br>0.35)                         | 0.29<br>(0.20 to<br>0.39)                         | 0.27<br>(0.19 to<br>0.38)                         | 0.29<br>(0.20 to<br>0.40)                         |
| Appendicitis                                                   | 3.35<br>(2.73 to<br>4.46)                            | 2.28<br>(1.73 to<br>3.13)                            | 1.97<br>(1.45 to<br>2.70)                            | 2.49<br>(1.84 to<br>3.50)                            | 0.20<br>(0.16 to<br>0.26)                         | 0.17<br>(0.13 to<br>0.23)                         | 0.15<br>(0.12 to<br>0.21)                         | 0.18<br>(0.14 to<br>0.25)                         |
| Paralytic ileus and intestinal obstruction                     | 32.69<br>(25.09 to<br>38.54)                         | 41.68<br>(31.70 to<br>50.03)                         | 43.52<br>(33.10 to<br>52.37)                         | 39.46<br>(29.83 to<br>46.90)                         | 2.78<br>(2.12 to<br>3.25)                         | 4.18<br>(3.19 to<br>4.90)                         | 4.52<br>(3.45 to<br>5.31)                         | 3.81<br>(2.89 to<br>4.52)                         |
| Inguinal, femoral, and abdominal hernia                        | 10.72<br>(8.07 to<br>14.33)                          | 7.37<br>(5.55 to<br>9.80)                            | 7.08<br>(5.28 to<br>9.46)                            | 7.38<br>(5.67 to<br>9.81)                            | 0.96<br>(0.73 to<br>1.30)                         | 0.76<br>(0.57 to<br>1.03)                         | 0.76<br>(0.58 to<br>1.02)                         | 0.74<br>(0.56 to<br>1.00)                         |



|                                         |                                 |                                   |                                   |                                   |                              |                                |                                |                                |
|-----------------------------------------|---------------------------------|-----------------------------------|-----------------------------------|-----------------------------------|------------------------------|--------------------------------|--------------------------------|--------------------------------|
|                                         | 20.97<br>(13.05 to<br>24.42)    | 22.12<br>(13.55 to<br>27.07)      | 22.63<br>(13.83 to<br>27.96)      | 21.30<br>(12.97 to<br>26.04)      | 1.55<br>(0.97 to<br>1.80)    | 1.93<br>(1.19 to<br>2.36)      | 2.05<br>(1.28 to<br>2.51)      | 1.78<br>(1.11 to<br>2.19)      |
| Inflammatory bowel disease              |                                 |                                   |                                   |                                   |                              |                                |                                |                                |
|                                         | 39.83<br>(32.23 to<br>43.51)    | 44.78<br>(35.40 to<br>53.09)      | 44.01<br>(34.40 to<br>52.75)      | 44.23<br>(34.92 to<br>52.27)      | 3.08<br>(2.58 to<br>3.36)    | 4.00<br>(3.28 to<br>4.63)      | 4.06<br>(3.28 to<br>4.75)      | 3.83<br>(3.10 to<br>4.46)      |
| Vascular intestinal disorders           |                                 |                                   |                                   |                                   |                              |                                |                                |                                |
|                                         | 26.27<br>(23.93 to<br>31.87)    | 22.90<br>(13.39 to<br>39.20)      | 19.01<br>(11.37 to<br>32.10)      | 29.22<br>(16.67 to<br>50.28)      | 2.36<br>(2.18 to<br>2.81)    | 2.39<br>(1.41 to<br>4.05)      | 2.08<br>(1.25 to<br>3.46)      | 2.91<br>(1.68 to<br>4.93)      |
| Gallbladder and biliary diseases        |                                 |                                   |                                   |                                   |                              |                                |                                |                                |
|                                         | 25.29<br>(20.19 to<br>28.17)    | 24.62<br>(12.97 to<br>44.88)      | 18.59<br>(10.60 to<br>32.21)      | 28.84<br>(14.35 to<br>55.45)      | 1.33<br>(1.10 to<br>1.50)    | 1.56<br>(0.85 to<br>2.99)      | 1.22<br>(0.74 to<br>2.21)      | 1.78<br>(0.93 to<br>3.43)      |
| Pancreatitis                            |                                 |                                   |                                   |                                   |                              |                                |                                |                                |
|                                         | 46.26<br>(39.09 to<br>54.48)    | 57.49<br>(47.54 to<br>68.63)      | 57.00<br>(46.97 to<br>68.70)      | 56.33<br>(46.46 to<br>66.95)      | 3.93<br>(3.43 to<br>4.48)    | 5.65<br>(4.80 to<br>6.70)      | 5.81<br>(4.91 to<br>6.92)      | 5.34<br>(4.46 to<br>6.36)      |
| Other digestive diseases                |                                 |                                   |                                   |                                   |                              |                                |                                |                                |
|                                         | 673.62<br>(608.34 to<br>761.04) | 954.78<br>(768.74 to<br>1,212.01) | 971.29<br>(785.98 to<br>1,213.87) | 992.23<br>(775.98 to<br>1,310.97) | 72.01<br>(62.94 to<br>82.54) | 111.88<br>(88.12 to<br>146.83) | 117.90<br>(94.27 to<br>151.16) | 112.61<br>(85.29 to<br>153.41) |
| Neurological disorders                  |                                 |                                   |                                   |                                   |                              |                                |                                |                                |
|                                         | 466.98<br>(398.02 to<br>552.72) | 698.67<br>(525.50 to<br>951.57)   | 714.00<br>(544.14 to<br>950.20)   | 738.20<br>(529.13 to<br>1,050.15) | 60.53<br>(51.58 to<br>70.83) | 95.01<br>(71.58 to<br>129.58)  | 100.23<br>(76.81 to<br>132.37) | 96.89<br>(70.20 to<br>137.51)  |
| Alzheimer's disease and other dementias |                                 |                                   |                                   |                                   |                              |                                |                                |                                |
|                                         | 55.90<br>(42.69 to<br>72.10)    | 86.45<br>(66.06 to<br>113.41)     | 93.89<br>(71.77 to<br>122.32)     | 79.65<br>(60.53 to<br>103.41)     | 5.44<br>(4.19 to<br>7.10)    | 8.89<br>(6.86 to<br>11.56)     | 9.91<br>(7.62 to<br>12.91)     | 8.00<br>(6.04 to<br>10.45)     |
| Parkinson's disease                     |                                 |                                   |                                   |                                   |                              |                                |                                |                                |
|                                         | 38.58<br>(37.23 to<br>40.29)    | 44.84<br>(28.75 to<br>67.26)      | 37.34<br>(25.02 to<br>55.04)      | 50.27<br>(31.21 to<br>76.87)      | 1.12<br>(1.09 to<br>1.17)    | 1.60<br>(1.05 to<br>2.41)      | 1.37<br>(0.92 to<br>2.03)      | 1.74<br>(1.12 to<br>2.65)      |
| Epilepsy                                |                                 |                                   |                                   |                                   |                              |                                |                                |                                |
|                                         | 33.08<br>(25.07 to<br>36.35)    | 31.96<br>(23.33 to<br>38.44)      | 32.11<br>(23.37 to<br>38.56)      | 32.90<br>(24.17 to<br>40.22)      | 1.29<br>(0.92 to<br>1.41)    | 1.33<br>(0.91 to<br>1.58)      | 1.35<br>(0.92 to<br>1.62)      | 1.34<br>(0.92 to<br>1.61)      |
| Multiple sclerosis                      |                                 |                                   |                                   |                                   |                              |                                |                                |                                |
|                                         | 42.52<br>(40.12 to<br>44.12)    | 52.90<br>(45.22 to<br>60.32)      | 53.32<br>(44.99 to<br>61.22)      | 51.93<br>(44.67 to<br>58.62)      | 2.20<br>(2.07 to<br>2.28)    | 2.99<br>(2.59 to<br>3.36)      | 3.07<br>(2.65 to<br>3.46)      | 2.88<br>(2.52 to<br>3.22)      |
| Motor neuron disease                    |                                 |                                   |                                   |                                   |                              |                                |                                |                                |
|                                         | 36.56<br>(34.63 to<br>37.79)    | 39.96<br>(35.32 to<br>45.14)      | 40.63<br>(35.69 to<br>46.24)      | 39.27<br>(34.88 to<br>44.07)      | 1.44<br>(1.37 to<br>1.49)    | 1.86<br>(1.69 to<br>2.05)      | 1.96<br>(1.77 to<br>2.16)      | 1.76<br>(1.61 to<br>1.93)      |
| Other neurological disorders            |                                 |                                   |                                   |                                   |                              |                                |                                |                                |
|                                         | 162.37<br>(150.67 to<br>172.06) | 240.36<br>(205.84 to<br>282.38)   | 264.74<br>(227.18 to<br>310.09)   | 226.56<br>(192.44 to<br>267.72)   | 3.88<br>(3.62 to<br>4.09)    | 5.81<br>(5.06 to<br>6.67)      | 6.41<br>(5.62 to<br>7.37)      | 5.47<br>(4.73 to<br>6.36)      |
| Mental disorders                        |                                 |                                   |                                   |                                   |                              |                                |                                |                                |
|                                         | 44.20<br>(41.88 to<br>46.57)    | 39.12<br>(33.12 to<br>45.83)      | 36.86<br>(30.78 to<br>43.48)      | 40.92<br>(34.94 to<br>47.51)      | 1.31<br>(1.24 to<br>1.38)    | 1.26<br>(1.07 to<br>1.47)      | 1.20<br>(1.02 to<br>1.40)      | 1.31<br>(1.12 to<br>1.50)      |
| Alcohol use disorders                   |                                 |                                   |                                   |                                   |                              |                                |                                |                                |
|                                         | 117.49<br>(106.57 to<br>125.38) | 200.52<br>(169.69 to<br>239.75)   | 227.10<br>(192.69 to<br>270.45)   | 184.96<br>(153.33 to<br>222.97)   | 2.56<br>(2.31 to<br>2.72)    | 4.54<br>(3.89 to<br>5.31)      | 5.20<br>(4.49 to<br>6.10)      | 4.15<br>(3.49 to<br>4.92)      |
| Drug use disorders                      |                                 |                                   |                                   |                                   |                              |                                |                                |                                |
|                                         | 61.52<br>(38.68 to<br>66.69)    | 68.91<br>(39.40 to<br>90.69)      | 70.98<br>(39.70 to<br>94.53)      | 67.47<br>(39.02 to<br>87.88)      | 1.30<br>(0.81 to<br>1.40)    | 1.50<br>(0.85 to<br>1.92)      | 1.56<br>(0.86 to<br>2.00)      | 1.46<br>(0.84 to<br>1.86)      |
| Opioid use disorders                    |                                 |                                   |                                   |                                   |                              |                                |                                |                                |
|                                         | 1.74<br>(0.57 to<br>2.46)       | 4.20<br>(1.38 to<br>5.92)         | 4.73<br>(1.63 to<br>6.66)         | 3.87<br>(1.27 to<br>5.59)         | 0.04<br>(0.01 to<br>0.05)    | 0.09<br>(0.03 to<br>0.12)      | 0.10<br>(0.04 to<br>0.14)      | 0.08<br>(0.03 to<br>0.11)      |
| Cocaine use disorders                   |                                 |                                   |                                   |                                   |                              |                                |                                |                                |
|                                         | 5.48<br>(2.46 to<br>7.75)       | 21.04<br>(9.76 to<br>30.61)       | 25.45<br>(11.62 to<br>36.37)      | 18.56<br>(8.21 to<br>26.58)       | 0.11<br>(0.05 to<br>0.15)    | 0.41<br>(0.20 to<br>0.60)      | 0.50<br>(0.24 to<br>0.70)      | 0.36<br>(0.16 to<br>0.52)      |
| Amphetamine use disorders               |                                 |                                   |                                   |                                   |                              |                                |                                |                                |
|                                         | 48.75<br>(40.16 to<br>71.80)    | 106.37<br>(81.93 to<br>140.45)    | 125.94<br>(98.73 to<br>163.72)    | 95.05<br>(71.85 to<br>126.95)     | 1.12<br>(0.93 to<br>1.61)    | 2.54<br>(2.01 to<br>3.29)      | 3.04<br>(2.45 to<br>3.83)      | 2.25<br>(1.76 to<br>2.93)      |
| Other drug use disorders                |                                 |                                   |                                   |                                   |                              |                                |                                |                                |
|                                         | 0.67<br>(0.61 to<br>0.74)       | 0.72<br>(0.52 to<br>0.94)         | 0.77<br>(0.54 to<br>1.01)         | 0.68<br>(0.49 to<br>0.90)         | 0.01<br>(0.01 to<br>0.01)    | 0.01<br>(0.01 to<br>0.02)      | 0.01<br>(0.01 to<br>0.02)      | 0.01<br>(0.01 to<br>0.02)      |
| Eating disorders                        |                                 |                                   |                                   |                                   |                              |                                |                                |                                |

**United Kingdom**

| Cause | YLLs (in 1000s) |               |                      |                     | Deaths (in 1000s) |               |                      |                     |
|-------|-----------------|---------------|----------------------|---------------------|-------------------|---------------|----------------------|---------------------|
|       | 2016            | 2040 Forecast | 2040 Better Scenario | 2040 Worse Scenario | 2016              | 2040 Forecast | 2040 Better Scenario | 2040 Worse Scenario |

|                                                            |                                 |                                 |                                 |                                 |                              |                              |                              |                              |
|------------------------------------------------------------|---------------------------------|---------------------------------|---------------------------------|---------------------------------|------------------------------|------------------------------|------------------------------|------------------------------|
|                                                            | 285.38<br>(277.64 to<br>305.33) | 372.09<br>(303.88 to<br>452.98) | 341.52<br>(280.76 to<br>413.12) | 412.83<br>(325.05 to<br>518.70) | 23.20<br>(22.54 to<br>24.41) | 36.23<br>(30.26 to<br>43.62) | 34.54<br>(28.81 to<br>41.42) | 38.78<br>(31.24 to<br>48.22) |
| <b>Diabetes, urogenital, blood, and endocrine diseases</b> |                                 |                                 |                                 |                                 |                              |                              |                              |                              |
| Diabetes mellitus                                          | 76.92<br>(74.75 to<br>79.31)    | 88.66<br>(56.33 to<br>135.02)   | 70.27<br>(45.48 to<br>106.71)   | 108.87<br>(65.94 to<br>171.85)  | 5.74<br>(5.58 to<br>5.91)    | 8.11<br>(5.52 to<br>11.49)   | 6.85<br>(4.79 to<br>9.55)    | 9.33<br>(6.16 to<br>13.66)   |
| Acute glomerulonephritis                                   | 0.56<br>(0.54 to<br>0.58)       | 0.39<br>(0.32 to<br>0.48)       | 0.36<br>(0.28 to<br>0.45)       | 0.41<br>(0.33 to<br>0.51)       | 0.03<br>(0.03 to<br>0.03)    | 0.02<br>(0.01 to<br>0.03)    | 0.02<br>(0.01 to<br>0.03)    | 0.02<br>(0.01 to<br>0.03)    |
| Chronic kidney disease                                     | 74.50<br>(72.38 to<br>76.65)    | 101.87<br>(66.97 to<br>151.61)  | 92.74<br>(61.87 to<br>137.22)   | 123.90<br>(75.94 to<br>196.17)  | 6.97<br>(6.76 to<br>7.18)    | 11.23<br>(7.25 to<br>16.88)  | 10.61<br>(7.03 to<br>16.07)  | 13.26<br>(8.00 to<br>21.05)  |
| Chronic kidney disease due to diabetes mellitus            | 23.60<br>(20.66 to<br>26.62)    | 35.48<br>(22.82 to<br>54.11)    | 32.20<br>(21.02 to<br>48.40)    | 43.48<br>(26.04 to<br>69.13)    | 1.97<br>(1.67 to<br>2.34)    | 3.50<br>(2.15 to<br>5.34)    | 3.30<br>(2.06 to<br>5.03)    | 4.16<br>(2.37 to<br>6.70)    |
| Chronic kidney disease due to hypertension                 | 9.67<br>(8.06 to<br>11.55)      | 16.72<br>(9.98 to<br>26.72)     | 15.99<br>(9.79 to<br>25.45)     | 19.65<br>(11.04 to<br>32.65)    | 1.27<br>(1.04 to<br>1.55)    | 2.40<br>(1.41 to<br>3.85)    | 2.37<br>(1.42 to<br>3.74)    | 2.74<br>(1.49 to<br>4.59)    |
| Chronic kidney disease due to glomerulonephritis           | 14.18<br>(12.17 to<br>16.47)    | 15.80<br>(9.82 to<br>25.34)     | 13.91<br>(8.85 to<br>22.28)     | 19.50<br>(11.63 to<br>32.36)    | 1.18<br>(0.96 to<br>1.44)    | 1.59<br>(0.94 to<br>2.59)    | 1.44<br>(0.88 to<br>2.37)    | 1.92<br>(1.08 to<br>3.29)    |
| Chronic kidney disease due to other and unspecified causes | 27.05<br>(23.59 to<br>30.33)    | 33.87<br>(21.98 to<br>51.23)    | 30.64<br>(20.00 to<br>46.60)    | 41.27<br>(25.01 to<br>65.42)    | 2.54<br>(2.12 to<br>2.92)    | 3.74<br>(2.35 to<br>5.83)    | 3.50<br>(2.21 to<br>5.43)    | 4.44<br>(2.62 to<br>7.14)    |
| Urinary diseases and male infertility                      | 73.69<br>(71.24 to<br>76.40)    | 100.82<br>(85.59 to<br>117.75)  | 96.71<br>(80.20 to<br>115.74)   | 100.69<br>(84.08 to<br>120.14)  | 7.84<br>(7.58 to<br>8.14)    | 12.38<br>(10.34 to<br>14.43) | 12.31<br>(10.26 to<br>14.56) | 11.93<br>(9.86 to<br>14.34)  |
| Urinary tract infections                                   | 67.35<br>(62.50 to<br>70.22)    | 94.37<br>(79.17 to<br>111.30)   | 90.90<br>(75.10 to<br>109.20)   | 93.92<br>(78.58 to<br>112.66)   | 7.33<br>(6.87 to<br>7.65)    | 11.73<br>(9.75 to<br>13.75)  | 11.71<br>(9.71 to<br>13.88)  | 11.28<br>(9.22 to<br>13.72)  |
| Urolithiasis                                               | 3.36<br>(2.57 to<br>5.74)       | 2.99<br>(1.97 to<br>5.34)       | 2.66<br>(1.71 to<br>4.94)       | 3.17<br>(2.04 to<br>5.68)       | 0.25<br>(0.18 to<br>0.45)    | 0.26<br>(0.17 to<br>0.48)    | 0.24<br>(0.15 to<br>0.44)    | 0.26<br>(0.17 to<br>0.49)    |
| Other urinary diseases                                     | 2.98<br>(1.88 to<br>7.18)       | 3.45<br>(1.88 to<br>8.81)       | 3.15<br>(1.66 to<br>8.11)       | 3.59<br>(1.90 to<br>8.96)       | 0.26<br>(0.15 to<br>0.64)    | 0.38<br>(0.20 to<br>0.99)    | 0.37<br>(0.19 to<br>0.97)    | 0.39<br>(0.20 to<br>0.98)    |
| Gynecological diseases                                     | 0.73<br>(0.53 to<br>0.90)       | 0.45<br>(0.31 to<br>0.62)       | 0.35<br>(0.24 to<br>0.50)       | 0.52<br>(0.35 to<br>0.73)       | 0.04<br>(0.03 to<br>0.05)    | 0.03<br>(0.02 to<br>0.04)    | 0.02<br>(0.02 to<br>0.03)    | 0.03<br>(0.02 to<br>0.05)    |
| Uterine fibroids                                           | 0.18<br>(0.13 to<br>0.23)       | 0.10<br>(0.07 to<br>0.14)       | 0.08<br>(0.05 to<br>0.12)       | 0.11<br>(0.07 to<br>0.16)       | 0.01<br>(0.00 to<br>0.01)    | 0.00<br>(0.00 to<br>0.01)    | 0.00<br>(0.00 to<br>0.01)    | 0.00<br>(0.00 to<br>0.01)    |
| Polycystic ovarian syndrome                                | 0.01<br>(0.01 to<br>0.02)       | 0.00<br>(0.00 to<br>0.01)       | 0.00<br>(0.00 to<br>0.00)       | 0.00<br>(0.00 to<br>0.01)       | 0.00<br>(0.00 to<br>0.00)    | 0.00<br>(0.00 to<br>0.00)    | 0.00<br>(0.00 to<br>0.00)    | 0.00<br>(0.00 to<br>0.00)    |
| Endometriosis                                              | 0.00<br>(0.00 to<br>0.00)       | 0.00<br>(0.00 to<br>0.01)       | 0.00<br>(0.00 to<br>0.00)       | 0.00<br>(0.00 to<br>0.01)       | 0.00<br>(0.00 to<br>0.00)    | 0.00<br>(0.00 to<br>0.00)    | 0.00<br>(0.00 to<br>0.00)    | 0.00<br>(0.00 to<br>0.00)    |
| Genital prolapse                                           | 0.06<br>(0.04 to<br>0.08)       | 0.04<br>(0.02 to<br>0.06)       | 0.03<br>(0.01 to<br>0.05)       | 0.04<br>(0.02 to<br>0.07)       | 0.01<br>(0.00 to<br>0.01)    | 0.00<br>(0.00 to<br>0.00)    | 0.00<br>(0.00 to<br>0.00)    | 0.00<br>(0.00 to<br>0.01)    |
| Other gynecological diseases                               | 0.47<br>(0.34 to<br>0.59)       | 0.30<br>(0.20 to<br>0.43)       | 0.24<br>(0.15 to<br>0.35)       | 0.35<br>(0.23 to<br>0.52)       | 0.03<br>(0.02 to<br>0.04)    | 0.02<br>(0.01 to<br>0.03)    | 0.02<br>(0.01 to<br>0.03)    | 0.02<br>(0.02 to<br>0.03)    |
| Hemoglobinopathies and hemolytic anemias                   | 7.65<br>(6.86 to<br>11.25)      | 7.23<br>(5.65 to<br>11.42)      | 6.57<br>(4.92 to<br>10.53)      | 7.56<br>(5.77 to<br>11.84)      | 0.55<br>(0.49 to<br>0.85)    | 0.68<br>(0.53 to<br>1.10)    | 0.64<br>(0.49 to<br>1.05)    | 0.68<br>(0.52 to<br>1.11)    |
| Thalassemias                                               | 0.53<br>(0.45 to<br>0.73)       | 0.24<br>(0.18 to<br>0.36)       | 0.23<br>(0.17 to<br>0.35)       | 0.24<br>(0.18 to<br>0.36)       | 0.01<br>(0.01 to<br>0.01)    | 0.00<br>(0.00 to<br>0.01)    | 0.00<br>(0.01 to<br>0.01)    | 0.00<br>(0.00 to<br>0.01)    |
| Sickle cell disorders                                      | 0.84<br>(0.73 to<br>1.22)       | 0.80<br>(0.55 to<br>1.34)       | 0.69<br>(0.45 to<br>1.20)       | 0.88<br>(0.59 to<br>1.48)       | 0.02<br>(0.02 to<br>0.03)    | 0.03<br>(0.02 to<br>0.05)    | 0.03<br>(0.02 to<br>0.05)    | 0.03<br>(0.02 to<br>0.06)    |
| G6PD deficiency                                            | 1.20<br>(1.04 to<br>1.57)       | 1.15<br>(0.85 to<br>1.72)       | 0.97<br>(0.69 to<br>1.51)       | 1.28<br>(0.93 to<br>1.93)       | 0.04<br>(0.03 to<br>0.05)    | 0.05<br>(0.04 to<br>0.08)    | 0.04<br>(0.03 to<br>0.07)    | 0.06<br>(0.04 to<br>0.09)    |

|                                                   |                                        |                                        |                                       |                                        |                                  |                                   |                                   |                                   |
|---------------------------------------------------|----------------------------------------|----------------------------------------|---------------------------------------|----------------------------------------|----------------------------------|-----------------------------------|-----------------------------------|-----------------------------------|
| Other hemoglobinopathies and hemolytic anemias    | 5.08<br>(4.47 to<br>5.72)              | 5.04<br>(3.95 to<br>8.23)              | 4.67<br>(3.52 to<br>7.54)             | 5.15<br>(3.93 to<br>8.23)              | 0.49<br>(0.43 to<br>0.77)        | 0.60<br>(0.47 to<br>0.98)         | 0.57<br>(0.44 to<br>0.93)         | 0.59<br>(0.45 to<br>0.96)         |
| Endocrine, metabolic, blood, and immune disorders | 51.32<br>(46.26 to<br>65.47)           | 72.67<br>(61.14 to<br>94.39)           | 74.53<br>(62.13 to<br>96.71)          | 70.89<br>(60.10 to<br>92.68)           | 2.03<br>(1.85 to<br>2.75)        | 3.79<br>(3.25 to<br>5.26)         | 4.08<br>(3.49 to<br>5.67)         | 3.52<br>(3.03 to<br>4.92)         |
| <b>United Kingdom</b>                             |                                        |                                        |                                       |                                        |                                  |                                   |                                   |                                   |
| Cause                                             | YLLs (in 1000s)                        |                                        |                                       |                                        | Deaths (in 1000s)                |                                   |                                   |                                   |
|                                                   | 2016                                   | 2040 Forecast                          | 2040 Better Scenario                  | 2040 Worse Scenario                    | 2016                             | 2040 Forecast                     | 2040 Better Scenario              | 2040 Worse Scenario               |
| <b>Musculoskeletal disorders</b>                  | <b>42.22</b><br>(38.09 to<br>45.70)    | <b>56.39</b><br>(46.37 to<br>67.47)    | <b>53.59</b><br>(43.61 to<br>64.51)   | <b>57.72</b><br>(47.58 to<br>68.77)    | <b>3.42</b><br>(2.83 to<br>3.60) | <b>5.33</b><br>(4.16 to<br>6.12)  | <b>5.29</b><br>(4.10 to<br>6.22)  | <b>5.23</b><br>(4.14 to<br>6.19)  |
| Rheumatoid arthritis                              | 13.41<br>(11.05 to<br>17.64)           | 16.66<br>(12.10 to<br>22.95)           | 13.77<br>(9.62 to<br>19.85)           | 18.94<br>(13.21 to<br>26.52)           | 1.02<br>(0.85 to<br>1.39)        | 1.42<br>(1.04 to<br>2.05)         | 1.21<br>(0.85 to<br>1.79)         | 1.56<br>(1.10 to<br>2.21)         |
| Other musculoskeletal disorders                   | 28.81<br>(23.50 to<br>30.77)           | 39.73<br>(31.32 to<br>46.29)           | 39.82<br>(31.32 to<br>46.92)          | 38.78<br>(30.52 to<br>45.04)           | 2.40<br>(1.80 to<br>2.55)        | 3.91<br>(2.82 to<br>4.62)         | 4.09<br>(2.97 to<br>4.84)         | 3.66<br>(2.62 to<br>4.37)         |
| <b>Other non-communicable diseases</b>            | <b>150.61</b><br>(135.04 to<br>168.90) | <b>137.73</b><br>(103.95 to<br>179.82) | <b>124.37</b><br>(92.19 to<br>167.09) | <b>148.88</b><br>(112.72 to<br>196.49) | <b>4.11</b><br>(3.05 to<br>5.71) | <b>7.30</b><br>(4.67 to<br>11.43) | <b>7.32</b><br>(4.59 to<br>11.61) | <b>7.13</b><br>(4.54 to<br>11.12) |
| Congenital birth defects                          | 113.26<br>(103.38 to<br>128.26)        | 71.88<br>(54.47 to<br>94.33)           | 59.71<br>(44.41 to<br>80.85)          | 83.34<br>(61.39 to<br>113.07)          | 1.68<br>(1.45 to<br>1.83)        | 1.19<br>(0.89 to<br>1.53)         | 1.02<br>(0.74 to<br>1.35)         | 1.35<br>(1.01 to<br>1.78)         |
| Neural tube defects                               | 5.14<br>(4.22 to<br>5.90)              | 1.25<br>(0.78 to<br>1.93)              | 0.93<br>(0.55 to<br>1.50)             | 1.54<br>(0.93 to<br>2.49)              | 0.07<br>(0.06 to<br>0.08)        | 0.02<br>(0.01 to<br>0.03)         | 0.01<br>(0.01 to<br>0.02)         | 0.02<br>(0.01 to<br>0.04)         |
| Congenital heart anomalies                        | 47.21<br>(42.91 to<br>65.17)           | 21.31<br>(14.07 to<br>35.27)           | 15.70<br>(9.78 to<br>26.93)           | 26.65<br>(16.49 to<br>44.30)           | 0.70<br>(0.64 to<br>0.95)        | 0.34<br>(0.25 to<br>0.55)         | 0.25<br>(0.16 to<br>0.43)         | 0.42<br>(0.26 to<br>0.69)         |
| Orofacial clefts                                  | 0.06<br>(0.03 to<br>0.11)              | 0.02<br>(0.01 to<br>0.04)              | 0.01<br>(0.01 to<br>0.03)             | 0.03<br>(0.01 to<br>0.06)              | 0.00<br>(0.00 to<br>0.00)        | 0.00<br>(0.00 to<br>0.00)         | 0.00<br>(0.00 to<br>0.00)         | 0.00<br>(0.00 to<br>0.00)         |
| Down syndrome                                     | 8.42<br>(3.66 to<br>10.28)             | 11.60<br>(5.67 to<br>14.92)            | 11.85<br>(6.12 to<br>15.23)           | 11.44<br>(5.53 to<br>14.60)            | 0.22<br>(0.08 to<br>0.27)        | 0.31<br>(0.14 to<br>0.41)         | 0.32<br>(0.15 to<br>0.42)         | 0.30<br>(0.13 to<br>0.40)         |
| Other chromosomal abnormalities                   | 12.59<br>(7.75 to<br>14.12)            | 16.95<br>(10.29 to<br>22.98)           | 14.98<br>(9.12 to<br>20.32)           | 18.68<br>(11.27 to<br>25.60)           | 0.17<br>(0.10 to<br>0.19)        | 0.24<br>(0.13 to<br>0.33)         | 0.22<br>(0.12 to<br>0.30)         | 0.27<br>(0.15 to<br>0.36)         |
| Congenital musculoskeletal and limb anomalies     | 3.51<br>(1.88 to<br>4.02)              | 1.92<br>(0.99 to<br>2.84)              | 1.50<br>(0.79 to<br>2.30)             | 2.31<br>(1.22 to<br>3.51)              | 0.05<br>(0.02 to<br>0.06)        | 0.03<br>(0.01 to<br>0.04)         | 0.02<br>(0.01 to<br>0.03)         | 0.03<br>(0.01 to<br>0.05)         |
| Urogenital congenital anomalies                   | 2.09<br>(1.08 to<br>2.66)              | 1.21<br>(0.60 to<br>1.98)              | 0.98<br>(0.47 to<br>1.65)             | 1.42<br>(0.67 to<br>2.37)              | 0.03<br>(0.02 to<br>0.04)        | 0.02<br>(0.01 to<br>0.05)         | 0.01<br>(0.01 to<br>0.02)         | 0.02<br>(0.01 to<br>0.03)         |
| Digestive congenital anomalies                    | 8.27<br>(5.49 to<br>9.60)              | 4.30<br>(2.58 to<br>6.43)              | 3.25<br>(1.85 to<br>5.15)             | 5.31<br>(3.08 to<br>8.59)              | 0.10<br>(0.07 to<br>0.12)        | 0.06<br>(0.03 to<br>0.08)         | 0.04<br>(0.02 to<br>0.07)         | 0.07<br>(0.04 to<br>0.11)         |
| Other congenital birth defects                    | 25.95<br>(22.31 to<br>31.90)           | 13.33<br>(9.32 to<br>19.14)            | 10.49<br>(7.07 to<br>15.72)           | 15.06<br>(10.79 to<br>23.52)           | 0.34<br>(0.29 to<br>0.41)        | 0.18<br>(0.13 to<br>0.26)         | 0.14<br>(0.10 to<br>0.21)         | 0.21<br>(0.15 to<br>0.31)         |
| Skin and subcutaneous diseases                    | 26.09<br>(14.28 to<br>41.67)           | 60.76<br>(33.99 to<br>96.19)           | 60.47<br>(33.79 to<br>96.92)          | 59.54<br>(32.81 to<br>93.81)           | 2.30<br>(1.27 to<br>3.92)        | 6.05<br>(3.38 to<br>10.06)        | 6.25<br>(3.52 to<br>10.50)        | 5.72<br>(3.15 to<br>9.40)         |
| Cellulitis                                        | 13.08<br>(5.32 to<br>16.99)            | 28.04<br>(11.19 to<br>38.06)           | 28.25<br>(11.25 to<br>38.74)          | 27.31<br>(10.81 to<br>37.19)           | 1.07<br>(0.43 to<br>1.46)        | 2.54<br>(0.98 to<br>3.45)         | 2.66<br>(1.05 to<br>3.63)         | 2.39<br>(0.92 to<br>3.29)         |
| Pyoderma                                          | 10.17<br>(6.34 to<br>20.89)            | 28.51<br>(18.11 to<br>54.71)           | 28.25<br>(18.19 to<br>55.28)          | 27.96<br>(17.56 to<br>53.75)           | 0.94<br>(0.58 to<br>2.00)        | 3.02<br>(1.91 to<br>5.93)         | 3.11<br>(1.98 to<br>6.18)         | 2.85<br>(1.78 to<br>5.72)         |
| Decubitus ulcer                                   | 1.93<br>(1.13 to<br>3.99)              | 2.92<br>(1.65 to<br>6.08)              | 2.72<br>(1.53 to<br>5.84)             | 2.98<br>(1.68 to<br>6.26)              | 0.21<br>(0.12 to<br>0.45)        | 0.36<br>(0.20 to<br>0.78)         | 0.34<br>(0.19 to<br>0.77)         | 0.35<br>(0.19 to<br>0.79)         |

|                                      |                                     |                                     |                                     |                                     |                                  |                                  |                                  |                                  |
|--------------------------------------|-------------------------------------|-------------------------------------|-------------------------------------|-------------------------------------|----------------------------------|----------------------------------|----------------------------------|----------------------------------|
| Other skin and subcutaneous diseases | 0.91<br>(0.52 to 1.74)              | 1.29<br>(0.72 to 2.50)              | 1.25<br>(0.70 to 2.44)              | 1.28<br>(0.73 to 2.47)              | 0.08<br>(0.05 to 0.17)           | 0.13<br>(0.07 to 0.26)           | 0.13<br>(0.07 to 0.27)           | 0.12<br>(0.07 to 0.25)           |
| Sudden infant death syndrome         | 11.26<br>(10.07 to 12.51)           | 5.09<br>(3.42 to 7.40)              | 4.19<br>(2.78 to 6.03)              | 6.01<br>(3.86 to 8.92)              | 0.13<br>(0.12 to 0.15)           | 0.06<br>(0.04 to 0.09)           | 0.05<br>(0.03 to 0.07)           | 0.07<br>(0.04 to 0.10)           |
| <b>Injuries</b>                      | <b>555.82</b><br>(500.52 to 578.76) | <b>454.93</b><br>(350.69 to 600.23) | <b>360.72</b><br>(286.92 to 468.30) | <b>533.32</b><br>(402.88 to 723.02) | <b>20.64</b><br>(17.86 to 21.57) | <b>21.67</b><br>(17.50 to 26.17) | <b>19.39</b><br>(15.62 to 23.24) | <b>23.06</b><br>(18.55 to 28.53) |
| <b>Transport injuries</b>            | <b>120.44</b><br>(116.17 to 127.36) | <b>91.82</b><br>(54.78 to 147.10)   | <b>47.37</b><br>(29.17 to 74.82)    | <b>132.24</b><br>(78.02 to 215.35)  | <b>3.06</b><br>(2.96 to 3.22)    | <b>2.71</b><br>(1.75 to 4.18)    | <b>1.56</b><br>(1.05 to 2.32)    | <b>3.67</b><br>(2.27 to 5.71)    |
| Road injuries                        | 111.37<br>(107.26 to 118.94)        | 85.07<br>(50.85 to 136.89)          | 42.35<br>(26.28 to 67.73)           | 124.11<br>(72.72 to 202.65)         | 2.83<br>(2.74 to 3.00)           | 2.52<br>(1.61 to 3.85)           | 1.41<br>(0.96 to 2.11)           | 3.44<br>(2.13 to 5.33)           |
| Pedestrian road injuries             | 21.79<br>(17.44 to 26.37)           | 10.39<br>(6.83 to 15.71)            | 4.95<br>(3.37 to 7.46)              | 15.70<br>(9.89 to 24.22)            | 0.71<br>(0.58 to 0.85)           | 0.47<br>(0.32 to 0.68)           | 0.25<br>(0.18 to 0.36)           | 0.65<br>(0.43 to 0.98)           |
| <b>United Kingdom</b>                |                                     |                                     |                                     |                                     |                                  |                                  |                                  |                                  |
| Cause                                | YLLs (in 1000s)                     |                                     |                                     |                                     | Deaths (in 1000s)                |                                  |                                  |                                  |
|                                      | 2016                                | 2040 Forecast                       | 2040 Better Scenario                | 2040 Worse Scenario                 | 2016                             | 2040 Forecast                    | 2040 Better Scenario             | 2040 Worse Scenario              |
| Cyclist road injuries                | 6.31<br>(5.08 to 7.02)              | 5.60<br>(3.35 to 9.23)              | 2.82<br>(1.77 to 4.57)              | 8.13<br>(4.81 to 13.40)             | 0.15<br>(0.12 to 0.17)           | 0.15<br>(0.10 to 0.24)           | 0.09<br>(0.06 to 0.14)           | 0.20<br>(0.12 to 0.33)           |
| Motorcyclist road injuries           | 21.88<br>(16.81 to 24.35)           | 21.89<br>(12.06 to 37.28)           | 13.64<br>(7.83 to 22.70)            | 28.17<br>(15.36 to 48.66)           | 0.45<br>(0.34 to 0.50)           | 0.47<br>(0.27 to 0.78)           | 0.31<br>(0.19 to 0.50)           | 0.59<br>(0.34 to 1.00)           |
| Motor vehicle road injuries          | 60.41<br>(56.44 to 72.41)           | 46.47<br>(26.92 to 78.96)           | 20.61<br>(12.52 to 34.51)           | 71.02<br>(40.53 to 118.11)          | 1.50<br>(1.39 to 1.78)           | 1.41<br>(0.89 to 2.24)           | 0.75<br>(0.49 to 1.13)           | 1.97<br>(1.20 to 3.22)           |
| Other road injuries                  | 0.98<br>(0.54 to 1.21)              | 0.72<br>(0.36 to 1.22)              | 0.34<br>(0.17 to 0.57)              | 1.09<br>(1.85 to 1.85)              | 0.02<br>(0.01 to 0.03)           | 0.02<br>(0.01 to 0.03)           | 0.01<br>(0.01 to 0.01)           | 0.02<br>(0.01 to 0.04)           |
| Other transport injuries             | 9.07<br>(8.39 to 9.83)              | 6.75<br>(4.12 to 10.85)             | 5.01<br>(3.14 to 7.94)              | 8.13<br>(4.85 to 13.24)             | 0.23<br>(0.21 to 0.25)           | 0.20<br>(0.12 to 0.30)           | 0.15<br>(0.10 to 0.23)           | 0.23<br>(0.14 to 0.37)           |
| <b>Unintentional injuries</b>        | <b>182.34</b><br>(151.99 to 191.98) | <b>160.11</b><br>(125.70 to 183.92) | <b>149.80</b><br>(118.12 to 174.66) | <b>164.89</b><br>(128.32 to 192.63) | <b>11.34</b><br>(8.94 to 12.07)  | <b>13.49</b><br>(10.13 to 15.44) | <b>13.36</b><br>(10.22 to 15.50) | <b>13.16</b><br>(9.95 to 15.41)  |
| Falls                                | 89.07<br>(65.63 to 95.60)           | 90.61<br>(63.91 to 104.47)          | 86.86<br>(62.40 to 101.83)          | 91.13<br>(63.89 to 106.66)          | 7.22<br>(5.12 to 7.80)           | 9.19<br>(6.42 to 10.78)          | 9.20<br>(6.40 to 10.88)          | 8.87<br>(6.01 to 10.58)          |
| Drowning                             | 14.01<br>(13.52 to 14.73)           | 7.90<br>(5.85 to 10.82)             | 6.63<br>(4.94 to 8.86)              | 8.84<br>(6.24 to 12.32)             | 0.35<br>(0.34 to 0.36)           | 0.24<br>(0.18 to 0.35)           | 0.21<br>(0.16 to 0.28)           | 0.26<br>(0.19 to 0.36)           |
| Fire, heat, and hot substances       | 13.61<br>(12.52 to 15.54)           | 8.76<br>(6.73 to 11.77)             | 7.24<br>(5.65 to 9.51)              | 9.84<br>(7.14 to 13.69)             | 0.66<br>(0.59 to 0.73)           | 0.58<br>(0.45 to 0.79)           | 0.51<br>(0.41 to 0.68)           | 0.62<br>(0.46 to 0.87)           |
| Poisonings                           | 4.85<br>(4.30 to 6.71)              | 2.06<br>(1.40 to 3.22)              | 1.58<br>(1.09 to 2.45)              | 2.46<br>(1.60 to 3.85)              | 0.13<br>(0.12 to 0.19)           | 0.07<br>(0.05 to 0.11)           | 0.06<br>(0.04 to 0.09)           | 0.08<br>(0.06 to 0.12)           |
| Exposure to mechanical forces        | 15.55<br>(11.59 to 17.12)           | 9.92<br>(6.86 to 12.29)             | 8.67<br>(6.17 to 11.01)             | 10.81<br>(7.52 to 13.85)            | 0.51<br>(0.38 to 0.56)           | 0.46<br>(0.33 to 0.55)           | 0.43<br>(0.31 to 0.52)           | 0.47<br>(0.34 to 0.58)           |
| Unintentional firearm injuries       | 1.49<br>(1.25 to 1.59)              | 0.86<br>(0.71 to 1.06)              | 0.77<br>(0.63 to 0.96)              | 0.93<br>(0.75 to 1.15)              | 0.05<br>(0.04 to 0.05)           | 0.04<br>(0.03 to 0.05)           | 0.04<br>(0.03 to 0.05)           | 0.04<br>(0.03 to 0.05)           |
| Unintentional suffocation            | 4.85<br>(2.68 to 5.70)              | 2.92<br>(1.47 to 4.17)              | 2.54<br>(1.28 to 3.71)              | 3.23<br>(1.60 to 4.74)              | 0.09<br>(0.05 to 0.10)           | 0.06<br>(0.03 to 0.08)           | 0.05<br>(0.03 to 0.07)           | 0.06<br>(0.03 to 0.09)           |
| Other exposure to mechanical forces  | 9.21<br>(7.06 to 10.42)             | 6.13<br>(4.56 to 7.45)              | 5.35<br>(4.03 to 6.68)              | 6.66<br>(4.92 to 8.28)              | 0.38<br>(0.28 to 0.41)           | 0.37<br>(0.26 to 0.44)           | 0.35<br>(0.25 to 0.42)           | 0.38<br>(0.27 to 0.46)           |

|                                                 |                                                      |                                                      |                                                      |                                                      |                                                |                                                |                                                |                                                |
|-------------------------------------------------|------------------------------------------------------|------------------------------------------------------|------------------------------------------------------|------------------------------------------------------|------------------------------------------------|------------------------------------------------|------------------------------------------------|------------------------------------------------|
| Adverse effects of medical treatment            | 18.60<br>(12.69 to<br>20.63)                         | 18.20<br>(12.31 to<br>21.96)                         | 17.51<br>(11.84 to<br>21.22)                         | 18.34<br>(12.25 to<br>22.22)                         | 1.22<br>(0.89 to<br>1.43)                      | 1.53<br>(1.09 to<br>1.84)                      | 1.54<br>(1.10 to<br>1.87)                      | 1.47<br>(1.04 to<br>1.78)                      |
| Animal contact                                  | 1.32<br>(0.84 to<br>1.49)                            | 1.11<br>(0.71 to<br>1.39)                            | 0.99<br>(0.63 to<br>1.26)                            | 1.19<br>(0.75 to<br>1.53)                            | 0.04<br>(0.03 to<br>0.05)                      | 0.05<br>(0.03 to<br>0.05)                      | 0.04<br>(0.03 to<br>0.05)                      | 0.05<br>(0.03 to<br>0.06)                      |
| Venomous animal contact                         | 0.36<br>(0.24 to<br>0.41)                            | 0.33<br>(0.21 to<br>0.40)                            | 0.30<br>(0.19 to<br>0.37)                            | 0.35<br>(0.23 to<br>0.43)                            | 0.01<br>(0.01 to<br>0.01)                      | 0.01<br>(0.01 to<br>0.01)                      | 0.01<br>(0.01 to<br>0.01)                      | 0.01<br>(0.01 to<br>0.01)                      |
| Non-venomous animal contact                     | 0.96<br>(0.58 to<br>1.10)                            | 0.78<br>(0.47 to<br>1.00)                            | 0.69<br>(0.42 to<br>0.90)                            | 0.85<br>(0.50 to<br>1.12)                            | 0.03<br>(0.02 to<br>0.04)                      | 0.03<br>(0.02 to<br>0.04)                      | 0.03<br>(0.02 to<br>0.04)                      | 0.04<br>(0.02 to<br>0.05)                      |
| Foreign body                                    | 18.41<br>(15.69 to<br>21.79)                         | 16.44<br>(13.53 to<br>19.55)                         | 15.98<br>(13.13 to<br>18.94)                         | 16.62<br>(13.68 to<br>19.92)                         | 0.84<br>(0.68 to<br>0.94)                      | 0.98<br>(0.76 to<br>1.14)                      | 1.02<br>(0.79 to<br>1.19)                      | 0.93<br>(0.72 to<br>1.08)                      |
| Pulmonary aspiration and foreign body in airway | 17.51<br>(14.91 to<br>20.87)                         | 15.42<br>(12.67 to<br>18.48)                         | 14.94<br>(12.22 to<br>17.85)                         | 15.63<br>(12.79 to<br>18.87)                         | 0.82<br>(0.66 to<br>0.91)                      | 0.94<br>(0.73 to<br>1.10)                      | 0.98<br>(0.75 to<br>1.15)                      | 0.90<br>(0.69 to<br>1.05)                      |
| Foreign body in other body part                 | 0.90<br>(0.72 to<br>1.13)                            | 1.01<br>(0.79 to<br>1.30)                            | 1.04<br>(0.81 to<br>1.33)                            | 0.99<br>(0.76 to<br>1.26)                            | 0.03<br>(0.02 to<br>0.03)                      | 0.04<br>(0.03 to<br>0.05)                      | 0.04<br>(0.03 to<br>0.05)                      | 0.03<br>(0.03 to<br>0.04)                      |
| Environmental heat and cold exposure            | 4.63<br>(2.91 to<br>6.74)                            | 4.19<br>(2.57 to<br>6.35)                            | 3.66<br>(2.23 to<br>5.51)                            | 4.51<br>(2.77 to<br>6.97)                            | 0.30<br>(0.20 to<br>0.46)                      | 0.35<br>(0.22 to<br>0.54)                      | 0.32<br>(0.20 to<br>0.51)                      | 0.36<br>(0.22 to<br>0.55)                      |
| Other unintentional injuries                    | 2.28<br>(2.18 to<br>2.42)                            | 0.92<br>(0.71 to<br>1.18)                            | 0.67<br>(0.49 to<br>0.89)                            | 1.14<br>(0.82 to<br>1.55)                            | 0.06<br>(0.06 to<br>0.07)                      | 0.03<br>(0.03 to<br>0.04)                      | 0.03<br>(0.03 to<br>0.03)                      | 0.04<br>(0.03 to<br>0.05)                      |
| <b>Self-harm and interpersonal violence</b>     | <b>252.68</b><br><b>(211.78 to</b><br><b>271.27)</b> | <b>201.75</b><br><b>(129.72 to</b><br><b>312.64)</b> | <b>162.30</b><br><b>(111.20 to</b><br><b>239.48)</b> | <b>234.93</b><br><b>(146.87 to</b><br><b>376.65)</b> | <b>6.22</b><br><b>(5.24 to</b><br><b>6.85)</b> | <b>5.43</b><br><b>(3.60 to</b><br><b>8.22)</b> | <b>4.44</b><br><b>(3.10 to</b><br><b>6.48)</b> | <b>6.20</b><br><b>(3.96 to</b><br><b>9.66)</b> |

**United Kingdom**

| Cause                                                                               | YLLs (in 1000s)                                |                                                |                                                |                                                | Deaths (in 1000s)                              |                                                |                                                |                                                |
|-------------------------------------------------------------------------------------|------------------------------------------------|------------------------------------------------|------------------------------------------------|------------------------------------------------|------------------------------------------------|------------------------------------------------|------------------------------------------------|------------------------------------------------|
|                                                                                     | 2016                                           | 2040 Forecast                                  | 2040 Better Scenario                           | 2040 Worse Scenario                            | 2016                                           | 2040 Forecast                                  | 2040 Better Scenario                           | 2040 Worse Scenario                            |
| Self-harm                                                                           | 234.42<br>(193.79 to<br>252.60)                | 191.44<br>(120.84 to<br>300.19)                | 153.68<br>(103.61 to<br>229.73)                | 223.33<br>(135.58 to<br>363.36)                | 5.80<br>(4.89 to<br>6.41)                      | 5.15<br>(3.34 to<br>7.92)                      | 4.20<br>(2.88 to<br>6.21)                      | 5.90<br>(3.71 to<br>9.34)                      |
| Self-harm by firearm                                                                | 5.52<br>(3.80 to<br>7.65)                      | 3.70<br>(1.89 to<br>6.39)                      | 2.82<br>(1.60 to<br>4.77)                      | 4.44<br>(2.30 to<br>8.00)                      | 0.16<br>(0.11 to<br>0.22)                      | 0.12<br>(0.07 to<br>0.20)                      | 0.09<br>(0.06 to<br>0.16)                      | 0.14<br>(0.07 to<br>0.24)                      |
| Self-harm by other specified means                                                  | 228.90<br>(189.48 to<br>246.58)                | 187.74<br>(118.67 to<br>294.10)                | 150.86<br>(101.87 to<br>225.56)                | 218.89<br>(133.19 to<br>355.82)                | 5.65<br>(4.75 to<br>6.19)                      | 5.03<br>(3.26 to<br>7.73)                      | 4.11<br>(2.82 to<br>6.07)                      | 5.76<br>(3.62 to<br>9.12)                      |
| Interpersonal violence                                                              | 18.26<br>(11.95 to<br>23.23)                   | 10.31<br>(6.39 to<br>14.83)                    | 8.62<br>(5.39 to<br>12.23)                     | 11.60<br>(6.98 to<br>16.85)                    | 0.42<br>(0.28 to<br>0.53)                      | 0.28<br>(0.18 to<br>0.39)                      | 0.24<br>(0.15 to<br>0.33)                      | 0.30<br>(0.19 to<br>0.43)                      |
| Physical violence by firearm                                                        | 2.12<br>(1.11 to<br>3.35)                      | 0.98<br>(0.54 to<br>1.57)                      | 0.81<br>(0.46 to<br>1.27)                      | 1.11<br>(0.59 to<br>1.74)                      | 0.05<br>(0.02 to<br>0.07)                      | 0.02<br>(0.01 to<br>0.04)                      | 0.02<br>(0.01 to<br>0.03)                      | 0.03<br>(0.01 to<br>0.04)                      |
| Physical violence by sharp object                                                   | 4.47<br>(2.48 to<br>5.84)                      | 2.40<br>(1.38 to<br>3.20)                      | 2.05<br>(1.22 to<br>2.78)                      | 2.66<br>(1.52 to<br>3.67)                      | 0.11<br>(0.06 to<br>0.14)                      | 0.07<br>(0.04 to<br>0.09)                      | 0.06<br>(0.04 to<br>0.08)                      | 0.07<br>(0.04 to<br>0.10)                      |
| Physical violence by other means                                                    | 11.66<br>(7.60 to<br>15.44)                    | 6.94<br>(4.02 to<br>10.63)                     | 5.76<br>(3.44 to<br>8.57)                      | 7.83<br>(4.42 to<br>11.68)                     | 0.27<br>(0.18 to<br>0.35)                      | 0.19<br>(0.11 to<br>0.27)                      | 0.16<br>(0.10 to<br>0.23)                      | 0.21<br>(0.12 to<br>0.31)                      |
| <b>Forces of nature, conflict and terrorism, and executions and police conflict</b> | <b>0.37</b><br><b>(0.31 to</b><br><b>0.41)</b> | <b>1.26</b><br><b>(0.01 to</b><br><b>5.59)</b> | <b>1.26</b><br><b>(0.01 to</b><br><b>5.58)</b> | <b>1.26</b><br><b>(0.01 to</b><br><b>5.59)</b> | <b>0.01</b><br><b>(0.01 to</b><br><b>0.01)</b> | <b>0.03</b><br><b>(0.00 to</b><br><b>0.14)</b> | <b>0.03</b><br><b>(0.00 to</b><br><b>0.14)</b> | <b>0.03</b><br><b>(0.00 to</b><br><b>0.13)</b> |
| Exposure to forces of nature                                                        | 0.00<br>(0.00 to<br>0.00)                      | 0.17<br>(0.00 to<br>1.40)                      | 0.17<br>(0.00 to<br>1.40)                      | 0.17<br>(0.00 to<br>1.40)                      | 0.00<br>(0.00 to<br>0.00)                      | 0.00<br>(0.00 to<br>0.04)                      | 0.00<br>(0.00 to<br>0.04)                      | 0.00<br>(0.00 to<br>0.04)                      |
| Conflict and terrorism                                                              | 0.00<br>(0.00 to<br>0.00)                      | 1.09<br>(0.00 to<br>5.47)                      | 1.09<br>(0.00 to<br>5.47)                      | 1.09<br>(0.00 to<br>5.48)                      | 0.00<br>(0.00 to<br>0.00)                      | 0.03<br>(0.00 to<br>0.13)                      | 0.03<br>(0.00 to<br>0.14)                      | 0.03<br>(0.00 to<br>0.13)                      |

|                                                                          |                                               |                                                |                                              |                                                 |                                        |                                        |                                        |                                        |
|--------------------------------------------------------------------------|-----------------------------------------------|------------------------------------------------|----------------------------------------------|-------------------------------------------------|----------------------------------------|----------------------------------------|----------------------------------------|----------------------------------------|
|                                                                          | 0.37<br>(0.31 to<br>0.41)                     | 0.00<br>(0.00 to<br>0.00)                      | 0.00<br>(0.00 to<br>0.00)                    | 0.00<br>(0.00 to<br>0.00)                       | 0.01<br>(0.01 to<br>0.01)              | 0.00<br>(0.00 to<br>0.00)              | 0.00<br>(0.00 to<br>0.00)              | 0.00<br>(0.00 to<br>0.00)              |
| Executions and police conflict                                           |                                               |                                                |                                              |                                                 |                                        |                                        |                                        |                                        |
| <b>Southern Latin America</b>                                            |                                               |                                                |                                              |                                                 |                                        |                                        |                                        |                                        |
| Cause                                                                    | YLLs (in 1000s)                               |                                                |                                              |                                                 | Deaths (in 1000s)                      |                                        |                                        |                                        |
|                                                                          | 2016                                          | 2040 Forecast                                  | 2040 Better Scenario                         | 2040 Worse Scenario                             | 2016                                   | 2040 Forecast                          | 2040 Better Scenario                   | 2040 Worse Scenario                    |
| <b>All causes</b>                                                        | <b>9,336.02</b><br>(8,754.71 to<br>10,000.82) | <b>10,624.16</b><br>(9,349.37 to<br>12,228.54) | <b>7,503.09</b><br>(6,580.10 to<br>8,582.90) | <b>13,047.04</b><br>(11,313.71 to<br>15,074.30) | <b>476.59</b><br>(448.41 to<br>506.37) | <b>656.30</b><br>(589.74 to<br>728.76) | <b>499.27</b><br>(448.80 to<br>552.64) | <b>761.78</b><br>(680.21 to<br>845.94) |
| <b>Communicable, maternal, neonatal, and nutritional diseases</b>        | <b>1,237.40</b><br>(1,151.54 to<br>1,327.78)  | <b>1,004.56</b><br>(811.52 to<br>1,264.55)     | <b>675.19</b><br>(557.46 to<br>835.56)       | <b>1,263.57</b><br>(997.31 to<br>1,631.97)      | <b>48.49</b><br>(44.79 to<br>51.96)    | <b>58.30</b><br>(46.04 to<br>76.11)    | <b>44.62</b><br>(35.88 to<br>57.00)    | <b>66.74</b><br>(50.86 to<br>89.61)    |
| <b>HIV/AIDS and tuberculosis</b>                                         | <b>129.85</b><br>(125.13 to<br>135.70)        | <b>63.74</b><br>(43.12 to<br>92.68)            | <b>40.21</b><br>(22.60 to<br>65.69)          | <b>103.51</b><br>(82.42 to<br>128.09)           | <b>3.43</b><br>(3.28 to<br>3.61)       | <b>2.00</b><br>(1.35 to<br>2.79)       | <b>1.13</b><br>(0.65 to<br>1.77)       | <b>3.01</b><br>(2.25 to<br>3.90)       |
| Tuberculosis                                                             | 31.43<br>(27.87 to<br>35.57)                  | 25.85<br>(16.56 to<br>38.34)                   | 8.63<br>(5.77 to<br>12.76)                   | 35.69<br>(22.42 to<br>53.38)                    | 1.18<br>(1.05 to<br>1.33)              | 1.17<br>(0.74 to<br>1.72)              | 0.41<br>(0.28 to<br>0.61)              | 1.54<br>(0.96 to<br>2.32)              |
| HIV/AIDS                                                                 | 98.42<br>(94.87 to<br>102.15)                 | 37.89<br>(20.55 to<br>65.89)                   | 31.58<br>(14.91 to<br>57.16)                 | 67.81<br>(52.91 to<br>89.99)                    | 2.25<br>(2.17 to<br>2.33)              | 0.83<br>(0.39 to<br>1.52)              | 0.72<br>(0.29 to<br>1.34)              | 1.47<br>(1.07 to<br>2.02)              |
| <b>Diarrhea, lower respiratory, and other common infectious diseases</b> | <b>590.15</b><br>(545.52 to<br>634.31)        | <b>656.65</b><br>(490.07 to<br>890.76)         | <b>449.05</b><br>(346.07 to<br>593.50)       | <b>831.02</b><br>(587.35 to<br>1,186.24)        | <b>36.26</b><br>(32.83 to<br>39.44)    | <b>49.92</b><br>(38.02 to<br>67.45)    | <b>37.71</b><br>(29.02 to<br>49.87)    | <b>57.04</b><br>(41.58 to<br>79.60)    |
| Diarrheal diseases                                                       | 27.29<br>(24.24 to<br>30.86)                  | 14.86<br>(7.41 to<br>31.57)                    | 31.36<br>(15.99 to<br>62.94)                 | 18.87<br>(8.08 to<br>44.63)                     | 1.21<br>(1.10 to<br>1.33)              | 1.14<br>(0.56 to<br>2.37)              | 2.63<br>(1.32 to<br>5.18)              | 1.32<br>(0.56 to<br>3.07)              |
| Intestinal infectious diseases                                           | 0.18<br>(0.08 to<br>0.28)                     | 0.15<br>(0.06 to<br>0.30)                      | 0.19<br>(0.08 to<br>0.38)                    | 0.14<br>(0.06 to<br>0.30)                       | 0.00<br>(0.00 to<br>0.01)              | 0.00<br>(0.00 to<br>0.01)              | 0.00<br>(0.00 to<br>0.01)              | 0.00<br>(0.00 to<br>0.01)              |
| Typhoid fever                                                            | 0.16<br>(0.07 to<br>0.33)                     | 0.13<br>(0.05 to<br>0.26)                      | 0.17<br>(0.07 to<br>0.36)                    | 0.12<br>(0.05 to<br>0.27)                       | 0.00<br>(0.00 to<br>0.01)              | 0.00<br>(0.00 to<br>0.01)              | 0.00<br>(0.00 to<br>0.01)              | 0.00<br>(0.00 to<br>0.01)              |
| Paratyphoid fever                                                        | 0.02<br>(0.01 to<br>0.04)                     | 0.02<br>(0.01 to<br>0.04)                      | 0.01<br>(0.00 to<br>0.02)                    | 0.02<br>(0.01 to<br>0.04)                       | 0.00<br>(0.00 to<br>0.00)              | 0.00<br>(0.00 to<br>0.00)              | 0.00<br>(0.00 to<br>0.00)              | 0.00<br>(0.00 to<br>0.00)              |
| Other intestinal infectious diseases                                     | 0.01<br>(0.00 to<br>0.01)                     | 0.00<br>(0.00 to<br>0.01)                      | 0.00<br>(0.00 to<br>0.00)                    | 0.00<br>(0.00 to<br>0.01)                       | 0.00<br>(0.00 to<br>0.00)              | 0.00<br>(0.00 to<br>0.00)              | 0.00<br>(0.00 to<br>0.00)              | 0.00<br>(0.00 to<br>0.00)              |
| Lower respiratory infections                                             | 516.74<br>(475.45 to<br>556.81)               | 607.95<br>(446.88 to<br>836.28)                | 393.53<br>(298.37 to<br>532.80)              | 771.83<br>(539.31 to<br>1,120.38)               | 34.02<br>(30.75 to<br>37.11)           | 47.85<br>(35.96 to<br>65.20)           | 34.35<br>(26.01 to<br>46.24)           | 54.73<br>(39.54 to<br>76.86)           |
| Upper respiratory infections                                             | 0.20<br>(0.12 to<br>0.30)                     | 0.20<br>(0.12 to<br>0.35)                      | 0.08<br>(0.05 to<br>0.15)                    | 0.22<br>(0.12 to<br>0.38)                       | 0.01<br>(0.00 to<br>0.01)              | 0.01<br>(0.00 to<br>0.01)              | 0.00<br>(0.00 to<br>0.01)              | 0.01<br>(0.01 to<br>0.02)              |
| Otitis media                                                             | 0.01<br>(0.01 to<br>0.01)                     | 0.00<br>(0.00 to<br>0.00)                      | 0.00<br>(0.00 to<br>0.00)                    | 0.00<br>(0.00 to<br>0.00)                       | 0.00<br>(0.00 to<br>0.00)              | 0.00<br>(0.00 to<br>0.00)              | 0.00<br>(0.00 to<br>0.00)              | 0.00<br>(0.00 to<br>0.00)              |
| Meningitis                                                               | 27.37<br>(24.13 to<br>30.53)                  | 16.93<br>(13.66 to<br>20.48)                   | 11.34<br>(9.13 to<br>13.77)                  | 19.26<br>(14.86 to<br>24.36)                    | 0.64<br>(0.56 to<br>0.72)              | 0.50<br>(0.42 to<br>0.59)              | 0.37<br>(0.31 to<br>0.43)              | 0.52<br>(0.44 to<br>0.61)              |
| Pneumococcal meningitis                                                  | 8.63<br>(7.55 to<br>9.63)                     | 4.68<br>(3.78 to<br>5.56)                      | 4.47<br>(3.64 to<br>5.31)                    | 4.93<br>(3.95 to<br>5.93)                       | 0.23<br>(0.20 to<br>0.26)              | 0.17<br>(0.14 to<br>0.20)              | 0.17<br>(0.14 to<br>0.20)              | 0.17<br>(0.14 to<br>0.20)              |
| H influenzae type B meningitis                                           | 1.99<br>(1.70 to<br>2.33)                     | 2.66<br>(1.21 to<br>5.38)                      | 1.73<br>(1.00 to<br>3.01)                    | 4.43<br>(1.58 to<br>9.79)                       | 0.04<br>(0.04 to<br>0.05)              | 0.05<br>(0.03 to<br>0.08)              | 0.04<br>(0.03 to<br>0.05)              | 0.07<br>(0.03 to<br>0.13)              |
| Meningococcal meningitis                                                 | 11.84<br>(10.37 to<br>13.36)                  | 6.28<br>(4.94 to<br>7.69)                      | 3.40<br>(2.58 to<br>4.42)                    | 6.53<br>(5.10 to<br>7.99)                       | 0.24<br>(0.21 to<br>0.27)              | 0.17<br>(0.14 to<br>0.20)              | 0.10<br>(0.08 to<br>0.12)              | 0.17<br>(0.14 to<br>0.20)              |
| Other meningitis                                                         | 4.91<br>(4.25 to<br>5.55)                     | 3.30<br>(2.66 to<br>3.95)                      | 1.74<br>(1.34 to<br>2.20)                    | 3.38<br>(2.73 to<br>4.01)                       | 0.13<br>(0.11 to<br>0.15)              | 0.12<br>(0.10 to<br>0.14)              | 0.07<br>(0.05 to<br>0.08)              | 0.12<br>(0.10 to<br>0.13)              |

|                                                |                                                   |                                                   |                                                  |                                                   |                                                |                                                |                                                |                                                |
|------------------------------------------------|---------------------------------------------------|---------------------------------------------------|--------------------------------------------------|---------------------------------------------------|------------------------------------------------|------------------------------------------------|------------------------------------------------|------------------------------------------------|
| Encephalitis                                   | 12.23<br>(9.24 to<br>15.85)                       | 12.02<br>(8.72 to<br>15.36)                       | 10.51<br>(7.70 to<br>13.50)                      | 12.30<br>(8.90 to<br>15.64)                       | 0.29<br>(0.21 to<br>0.35)                      | 0.35<br>(0.24 to<br>0.43)                      | 0.32<br>(0.22 to<br>0.40)                      | 0.34<br>(0.22 to<br>0.43)                      |
| Diphtheria                                     | 0.04<br>(0.03 to<br>0.06)                         | 0.01<br>(0.01 to<br>0.02)                         | 0.01<br>(0.01 to<br>0.01)                        | 0.02<br>(0.01 to<br>0.04)                         | 0.00<br>(0.00 to<br>0.00)                      | 0.00<br>(0.00 to<br>0.00)                      | 0.00<br>(0.00 to<br>0.00)                      | 0.00<br>(0.00 to<br>0.00)                      |
| Whooping cough                                 | 4.06<br>(1.75 to<br>7.73)                         | 1.63<br>(0.43 to<br>4.07)                         | 0.36<br>(0.10 to<br>0.77)                        | 3.96<br>(1.03 to<br>9.43)                         | 0.05<br>(0.02 to<br>0.09)                      | 0.02<br>(0.01 to<br>0.05)                      | 0.00<br>(0.00 to<br>0.01)                      | 0.05<br>(0.01 to<br>0.11)                      |
| Tetanus                                        | 0.15<br>(0.13 to<br>0.22)                         | 0.03<br>(0.02 to<br>0.04)                         | 0.02<br>(0.02 to<br>0.04)                        | 0.03<br>(0.02 to<br>0.04)                         | 0.01<br>(0.00 to<br>0.01)                      | 0.00<br>(0.00 to<br>0.00)                      | 0.00<br>(0.00 to<br>0.00)                      | 0.00<br>(0.00 to<br>0.00)                      |
| Measles                                        | 0.14<br>(0.10 to<br>0.20)                         | 2.01<br>(0.02 to<br>15.38)                        | 1.14<br>(0.02 to<br>7.97)                        | 3.44<br>(0.02 to<br>26.84)                        | 0.00<br>(0.00 to<br>0.00)                      | 0.03<br>(0.00 to<br>0.21)                      | 0.02<br>(0.00 to<br>0.10)                      | 0.04<br>(0.00 to<br>0.33)                      |
| <b>Southern Latin America</b>                  |                                                   |                                                   |                                                  |                                                   |                                                |                                                |                                                |                                                |
| Cause                                          | YLLs (in 1000s)                                   |                                                   |                                                  |                                                   | Deaths (in 1000s)                              |                                                |                                                |                                                |
|                                                | 2016                                              | 2040 Forecast                                     | 2040 Better Scenario                             | 2040 Worse Scenario                               | 2016                                           | 2040 Forecast                                  | 2040 Better Scenario                           | 2040 Worse Scenario                            |
| Varicella and herpes zoster                    | 1.73<br>(0.92 to<br>2.71)                         | 0.87<br>(0.42 to<br>1.44)                         | 0.51<br>(0.25 to<br>0.84)                        | 0.95<br>(0.46 to<br>1.56)                         | 0.03<br>(0.02 to<br>0.06)                      | 0.02<br>(0.01 to<br>0.04)                      | 0.02<br>(0.01 to<br>0.03)                      | 0.02<br>(0.01 to<br>0.04)                      |
| <b>Neglected tropical diseases and malaria</b> | <b>14.80</b><br><b>(11.77 to</b><br><b>21.33)</b> | <b>9.49</b><br><b>(7.71 to</b><br><b>13.01)</b>   | <b>10.71</b><br><b>(8.96 to</b><br><b>13.72)</b> | <b>9.12</b><br><b>(7.41 to</b><br><b>12.86)</b>   | <b>0.56</b><br><b>(0.49 to</b><br><b>0.69)</b> | <b>0.41</b><br><b>(0.36 to</b><br><b>0.49)</b> | <b>0.44</b><br><b>(0.44 to</b><br><b>0.58)</b> | <b>0.38</b><br><b>(0.33 to</b><br><b>0.46)</b> |
| Malaria                                        | 0.08<br>(0.07 to<br>0.10)                         | 0.06<br>(0.05 to<br>0.07)                         | 0.05<br>(0.04 to<br>0.07)                        | 0.06<br>(0.05 to<br>0.07)                         | 0.00<br>(0.00 to<br>0.00)                      | 0.00<br>(0.00 to<br>0.00)                      | 0.00<br>(0.00 to<br>0.00)                      | 0.00<br>(0.00 to<br>0.00)                      |
| Chagas disease                                 | 10.85<br>(9.56 to<br>12.31)                       | 7.42<br>(6.42 to<br>8.57)                         | 8.99<br>(7.81 to<br>10.25)                       | 6.96<br>(6.03 to<br>7.97)                         | 0.48<br>(0.43 to<br>0.55)                      | 0.36<br>(0.32 to<br>0.41)                      | 0.45<br>(0.40 to<br>0.52)                      | 0.33<br>(0.29 to<br>0.38)                      |
| Leishmaniasis                                  | 0.08<br>(0.05 to<br>0.12)                         | 0.06<br>(0.03 to<br>0.09)                         | 0.04<br>(0.02 to<br>0.06)                        | 0.06<br>(0.04 to<br>0.09)                         | 0.00<br>(0.00 to<br>0.00)                      | 0.00<br>(0.00 to<br>0.00)                      | 0.00<br>(0.00 to<br>0.00)                      | 0.00<br>(0.00 to<br>0.00)                      |
| African trypanosomiasis                        | 0.00<br>(0.00 to<br>0.00)                         | 0.00<br>(0.00 to<br>0.00)                         | 0.00<br>(0.00 to<br>0.00)                        | 0.00<br>(0.00 to<br>0.00)                         | 0.00<br>(0.00 to<br>0.00)                      | 0.00<br>(0.00 to<br>0.00)                      | 0.00<br>(0.00 to<br>0.00)                      | 0.00<br>(0.00 to<br>0.00)                      |
| Schistosomiasis                                | 0.00<br>(0.00 to<br>0.00)                         | 0.00<br>(0.00 to<br>0.00)                         | 0.00<br>(0.00 to<br>0.00)                        | 0.00<br>(0.00 to<br>0.00)                         | 0.00<br>(0.00 to<br>0.00)                      | 0.00<br>(0.00 to<br>0.00)                      | 0.00<br>(0.00 to<br>0.00)                      | 0.00<br>(0.00 to<br>0.00)                      |
| Cysticercosis                                  | 0.06<br>(0.05 to<br>0.07)                         | 0.03<br>(0.02 to<br>0.03)                         | 0.02<br>(0.02 to<br>0.03)                        | 0.03<br>(0.02 to<br>0.03)                         | 0.00<br>(0.00 to<br>0.00)                      | 0.00<br>(0.00 to<br>0.00)                      | 0.00<br>(0.00 to<br>0.00)                      | 0.00<br>(0.00 to<br>0.00)                      |
| Cystic echinococcosis                          | 0.09<br>(0.06 to<br>0.11)                         | 0.06<br>(0.05 to<br>0.08)                         | 0.04<br>(0.03 to<br>0.05)                        | 0.07<br>(0.05 to<br>0.09)                         | 0.00<br>(0.00 to<br>0.00)                      | 0.00<br>(0.00 to<br>0.00)                      | 0.00<br>(0.00 to<br>0.00)                      | 0.00<br>(0.00 to<br>0.00)                      |
| Dengue                                         | 0.01<br>(0.00 to<br>0.01)                         | 0.03<br>(0.02 to<br>0.05)                         | 0.03<br>(0.02 to<br>0.05)                        | 0.03<br>(0.02 to<br>0.05)                         | 0.00<br>(0.00 to<br>0.00)                      | 0.00<br>(0.00 to<br>0.00)                      | 0.00<br>(0.00 to<br>0.00)                      | 0.00<br>(0.00 to<br>0.00)                      |
| Yellow fever                                   | 2.90<br>(0.49 to<br>9.43)                         | 1.19<br>(0.18 to<br>4.49)                         | 0.88<br>(0.12 to<br>3.41)                        | 1.26<br>(0.19 to<br>4.56)                         | 0.05<br>(0.01 to<br>0.17)                      | 0.02<br>(0.00 to<br>0.08)                      | 0.02<br>(0.00 to<br>0.06)                      | 0.02<br>(0.00 to<br>0.08)                      |
| Rabies                                         | 0.00<br>(0.00 to<br>0.00)                         | 0.00<br>(0.00 to<br>0.00)                         | 0.00<br>(0.00 to<br>0.00)                        | 0.00<br>(0.00 to<br>0.00)                         | 0.00<br>(0.00 to<br>0.00)                      | 0.00<br>(0.00 to<br>0.00)                      | 0.00<br>(0.00 to<br>0.00)                      | 0.00<br>(0.00 to<br>0.00)                      |
| Intestinal nematode infections                 | 0.08<br>(0.03 to<br>0.14)                         | 0.07<br>(0.03 to<br>0.13)                         | 0.07<br>(0.03 to<br>0.12)                        | 0.07<br>(0.04 to<br>0.13)                         | 0.00<br>(0.00 to<br>0.00)                      | 0.00<br>(0.00 to<br>0.00)                      | 0.00<br>(0.00 to<br>0.00)                      | 0.00<br>(0.00 to<br>0.00)                      |
| Other neglected tropical diseases              | 0.65<br>(0.53 to<br>1.07)                         | 0.57<br>(0.45 to<br>0.92)                         | 0.58<br>(0.45 to<br>0.95)                        | 0.59<br>(0.47 to<br>0.94)                         | 0.01<br>(0.01 to<br>0.02)                      | 0.02<br>(0.01 to<br>0.03)                      | 0.02<br>(0.01 to<br>0.03)                      | 0.02<br>(0.01 to<br>0.03)                      |
| <b>Maternal disorders</b>                      | <b>24.57</b><br><b>(21.31 to</b><br><b>28.25)</b> | <b>15.55</b><br><b>(11.58 to</b><br><b>20.85)</b> | <b>9.99</b><br><b>(7.29 to</b><br><b>13.54)</b>  | <b>16.89</b><br><b>(12.22 to</b><br><b>22.88)</b> | <b>0.44</b><br><b>(0.38 to</b><br><b>0.51)</b> | <b>0.28</b><br><b>(0.21 to</b><br><b>0.38)</b> | <b>0.18</b><br><b>(0.13 to</b><br><b>0.24)</b> | <b>0.31</b><br><b>(0.23 to</b><br><b>0.41)</b> |

|                                                          |                              |                              |                             |                              |                        |                        |                        |                        |
|----------------------------------------------------------|------------------------------|------------------------------|-----------------------------|------------------------------|------------------------|------------------------|------------------------|------------------------|
| Maternal hemorrhage                                      | 3.36<br>(2.55 to 4.36)       | 1.96<br>(1.24 to 2.99)       | 1.29<br>(0.82 to 1.95)      | 2.12<br>(1.33 to 3.30)       | 0.06<br>(0.05 to 0.08) | 0.04<br>(0.02 to 0.05) | 0.02<br>(0.02 to 0.04) | 0.04<br>(0.02 to 0.06) |
| Maternal sepsis and other maternal infections            | 5.63<br>(4.21 to 7.08)       | 2.87<br>(1.82 to 4.18)       | 1.85<br>(1.14 to 2.77)      | 3.11<br>(1.90 to 4.66)       | 0.10<br>(0.08 to 0.13) | 0.05<br>(0.03 to 0.08) | 0.03<br>(0.02 to 0.05) | 0.06<br>(0.04 to 0.08) |
| Maternal hypertensive disorders                          | 4.32<br>(3.09 to 5.66)       | 2.30<br>(1.42 to 3.48)       | 1.46<br>(0.91 to 2.17)      | 2.50<br>(1.50 to 3.72)       | 0.08<br>(0.05 to 0.10) | 0.04<br>(0.03 to 0.06) | 0.03<br>(0.02 to 0.04) | 0.04<br>(0.03 to 0.07) |
| Maternal obstructed labor and uterine rupture            | 0.41<br>(0.21 to 0.64)       | 0.22<br>(0.10 to 0.38)       | 0.13<br>(0.06 to 0.23)      | 0.24<br>(0.11 to 0.43)       | 0.01<br>(0.00 to 0.01) | 0.00<br>(0.00 to 0.01) | 0.00<br>(0.00 to 0.00) | 0.00<br>(0.00 to 0.01) |
| Maternal abortion, miscarriage, and ectopic pregnancy    | 3.09<br>(2.21 to 4.22)       | 4.17<br>(2.49 to 6.68)       | 2.65<br>(1.61 to 4.27)      | 4.53<br>(2.77 to 7.11)       | 0.06<br>(0.04 to 0.08) | 0.08<br>(0.05 to 0.12) | 0.05<br>(0.03 to 0.08) | 0.08<br>(0.05 to 0.13) |
| Indirect maternal deaths                                 | 4.01<br>(2.81 to 5.98)       | 2.09<br>(1.22 to 3.54)       | 1.32<br>(0.77 to 2.24)      | 2.28<br>(1.32 to 3.85)       | 0.07<br>(0.05 to 0.10) | 0.04<br>(0.02 to 0.06) | 0.02<br>(0.01 to 0.04) | 0.04<br>(0.02 to 0.07) |
| Late maternal deaths                                     | 1.29<br>(0.96 to 1.72)       | 0.56<br>(0.34 to 0.89)       | 0.35<br>(0.21 to 0.56)      | 0.61<br>(0.36 to 0.95)       | 0.02<br>(0.02 to 0.03) | 0.01<br>(0.01 to 0.02) | 0.01<br>(0.00 to 0.01) | 0.01<br>(0.01 to 0.02) |
| Maternal deaths aggravated by HIV/AIDS                   | 0.03<br>(0.01 to 0.06)       | 0.09<br>(0.03 to 0.20)       | 0.07<br>(0.02 to 0.14)      | 0.11<br>(0.04 to 0.23)       | 0.00<br>(0.00 to 0.00) | 0.00<br>(0.00 to 0.00) | 0.00<br>(0.00 to 0.00) | 0.00<br>(0.00 to 0.00) |
| Other maternal disorders                                 | 2.44<br>(1.81 to 3.11)       | 1.27<br>(0.82 to 1.96)       | 0.88<br>(0.57 to 1.35)      | 1.38<br>(0.86 to 2.15)       | 0.04<br>(0.03 to 0.06) | 0.02<br>(0.01 to 0.04) | 0.02<br>(0.01 to 0.02) | 0.03<br>(0.02 to 0.04) |
| <b>Southern Latin America</b>                            |                              |                              |                             |                              |                        |                        |                        |                        |
| Cause                                                    | YLLs (in 1000s)              |                              |                             |                              | Deaths (in 1000s)      |                        |                        |                        |
|                                                          | 2016                         | 2040 Forecast                | 2040 Better Scenario        | 2040 Worse Scenario          | 2016                   | 2040 Forecast          | 2040 Better Scenario   | 2040 Worse Scenario    |
| Neonatal disorders                                       | 404.09<br>(353.31 to 466.44) | 203.79<br>(147.95 to 289.05) | 111.35<br>(79.69 to 157.94) | 247.39<br>(178.93 to 348.77) | 4.67<br>(4.08 to 5.39) | 2.36<br>(1.71 to 3.34) | 1.29<br>(0.92 to 1.82) | 2.86<br>(2.07 to 4.03) |
| Neonatal preterm birth                                   | 241.28<br>(208.44 to 281.52) | 102.69<br>(73.46 to 146.59)  | 47.46<br>(33.09 to 68.50)   | 130.80<br>(93.91 to 183.74)  | 2.79<br>(2.41 to 3.25) | 1.19<br>(0.85 to 1.69) | 0.55<br>(0.38 to 0.79) | 1.51<br>(1.09 to 2.12) |
| Neonatal encephalopathy due to birth asphyxia and trauma | 51.77<br>(42.73 to 63.14)    | 27.16<br>(17.49 to 44.82)    | 13.93<br>(9.03 to 22.62)    | 31.44<br>(20.10 to 51.27)    | 0.60<br>(0.49 to 0.73) | 0.31<br>(0.20 to 0.52) | 0.16<br>(0.10 to 0.26) | 0.36<br>(0.23 to 0.59) |
| Neonatal sepsis and other neonatal infections            | 52.50<br>(39.00 to 73.76)    | 40.31<br>(25.70 to 68.56)    | 23.76<br>(14.80 to 38.48)   | 46.36<br>(29.28 to 78.02)    | 0.61<br>(0.45 to 0.85) | 0.47<br>(0.30 to 0.79) | 0.27<br>(0.17 to 0.44) | 0.54<br>(0.34 to 0.90) |
| Hemolytic disease and other neonatal jaundice            | 1.53<br>(1.00 to 2.21)       | 0.70<br>(0.35 to 1.36)       | 0.39<br>(0.20 to 0.76)      | 0.81<br>(0.40 to 1.56)       | 0.02<br>(0.01 to 0.03) | 0.01<br>(0.00 to 0.02) | 0.00<br>(0.00 to 0.01) | 0.01<br>(0.00 to 0.02) |
| Other neonatal disorders                                 | 57.01<br>(46.39 to 70.42)    | 32.93<br>(21.14 to 52.95)    | 25.82<br>(16.93 to 40.32)   | 37.98<br>(24.10 to 60.57)    | 0.66<br>(0.54 to 0.81) | 0.38<br>(0.24 to 0.61) | 0.30<br>(0.20 to 0.47) | 0.44<br>(0.28 to 0.70) |
| Nutritional deficiencies                                 | 33.22<br>(30.00 to 36.71)    | 28.62<br>(25.25 to 32.50)    | 32.66<br>(28.77 to 37.08)   | 27.80<br>(24.21 to 31.80)    | 2.18<br>(1.96 to 2.42) | 2.44<br>(2.10 to 2.84) | 3.04<br>(2.63 to 3.52) | 2.26<br>(1.90 to 2.66) |
| Protein-energy malnutrition                              | 29.75<br>(26.25 to 33.31)    | 24.49<br>(20.73 to 28.27)    | 29.28<br>(25.12 to 33.41)   | 23.68<br>(19.86 to 27.46)    | 1.99<br>(1.74 to 2.23) | 2.15<br>(1.77 to 2.55) | 2.79<br>(2.32 to 3.27) | 1.98<br>(1.61 to 2.38) |
| Iodine deficiency                                        | 0.21<br>(0.04 to 0.62)       | 0.78<br>(0.09 to 2.27)       | 0.71<br>(0.06 to 2.37)      | 0.77<br>(0.09 to 2.18)       | 0.01<br>(0.00 to 0.03) | 0.06<br>(0.00 to 0.22) | 0.06<br>(0.00 to 0.25) | 0.05<br>(0.00 to 0.20) |
| Dietary iron deficiency                                  | 0.34<br>(0.20 to 0.54)       | 0.26<br>(0.16 to 0.39)       | 0.26<br>(0.15 to 0.41)      | 0.27<br>(0.16 to 0.39)       | 0.01<br>(0.00 to 0.01) | 0.01<br>(0.00 to 0.01) | 0.01<br>(0.00 to 0.01) | 0.01<br>(0.00 to 0.01) |
| Other nutritional deficiencies                           | 2.92<br>(1.75 to 5.04)       | 3.09<br>(1.70 to 5.42)       | 2.40<br>(1.25 to 4.43)      | 3.08<br>(1.69 to 5.40)       | 0.18<br>(0.10 to 0.35) | 0.23<br>(0.12 to 0.45) | 0.19<br>(0.10 to 0.40) | 0.22<br>(0.12 to 0.43) |



|                                                                         |                                           |                                           |                                           |                                             |                                     |                                     |                                     |                                     |
|-------------------------------------------------------------------------|-------------------------------------------|-------------------------------------------|-------------------------------------------|---------------------------------------------|-------------------------------------|-------------------------------------|-------------------------------------|-------------------------------------|
| <b>Other communicable, maternal, neonatal, and nutritional diseases</b> | <b>40.72</b><br>(21.62 to 72.17)          | <b>26.74</b><br>(19.11 to 39.91)          | <b>21.22</b><br>(15.68 to 30.46)          | <b>27.85</b><br>(19.41 to 43.07)            | <b>0.93</b><br>(0.68 to 1.34)       | <b>0.89</b><br>(0.75 to 1.06)       | <b>0.77</b><br>(0.65 to 0.90)       | <b>0.88</b><br>(0.73 to 1.08)       |
| Sexually transmitted infections excluding HIV                           | 21.71<br>(3.21 to 52.32)                  | 6.71<br>(1.38 to 18.28)                   | 4.42<br>(1.06 to 11.75)                   | 7.39<br>(1.44 to 20.54)                     | 0.30<br>(0.08 to 0.66)              | 0.11<br>(0.04 to 0.24)              | 0.08<br>(0.04 to 0.17)              | 0.11<br>(0.04 to 0.27)              |
| Syphilis                                                                | 20.22<br>(1.67 to 50.80)                  | 5.81<br>(0.53 to 17.35)                   | 3.64<br>(0.33 to 10.96)                   | 6.47<br>(0.57 to 19.69)                     | 0.25<br>(0.03 to 0.61)              | 0.08<br>(0.01 to 0.21)              | 0.05<br>(0.01 to 0.13)              | 0.08<br>(0.01 to 0.24)              |
| Chlamydial infection                                                    | 0.29<br>(0.25 to 0.35)                    | 0.18<br>(0.14 to 0.23)                    | 0.15<br>(0.12 to 0.20)                    | 0.18<br>(0.14 to 0.23)                      | 0.01<br>(0.01 to 0.01)              | 0.01<br>(0.00 to 0.01)              | 0.01<br>(0.00 to 0.01)              | 0.01<br>(0.00 to 0.01)              |
| Gonococcal infection                                                    | 0.79<br>(0.68 to 0.95)                    | 0.48<br>(0.39 to 0.61)                    | 0.42<br>(0.33 to 0.53)                    | 0.49<br>(0.39 to 0.62)                      | 0.02<br>(0.02 to 0.03)              | 0.02<br>(0.01 to 0.02)              | 0.02<br>(0.01 to 0.02)              | 0.02<br>(0.01 to 0.02)              |
| Other sexually transmitted infections                                   | 0.41<br>(0.35 to 0.50)                    | 0.24<br>(0.19 to 0.31)                    | 0.21<br>(0.16 to 0.27)                    | 0.25<br>(0.19 to 0.32)                      | 0.01<br>(0.01 to 0.01)              | 0.01<br>(0.01 to 0.01)              | 0.01<br>(0.01 to 0.01)              | 0.01<br>(0.01 to 0.01)              |
| Acute hepatitis                                                         | 5.43<br>(4.81 to 6.05)                    | 4.95<br>(4.00 to 6.07)                    | 2.92<br>(2.26 to 3.83)                    | 5.08<br>(4.19 to 6.18)                      | 0.18<br>(0.15 to 0.20)              | 0.19<br>(0.15 to 0.23)              | 0.11<br>(0.09 to 0.15)              | 0.19<br>(0.16 to 0.23)              |
| Acute hepatitis A                                                       | 0.66<br>(0.52 to 0.80)                    | 0.39<br>(0.26 to 0.57)                    | 0.26<br>(0.17 to 0.39)                    | 0.41<br>(0.27 to 0.61)                      | 0.01<br>(0.01 to 0.02)              | 0.01<br>(0.01 to 0.01)              | 0.01<br>(0.01 to 0.01)              | 0.01<br>(0.01 to 0.01)              |
| Acute hepatitis B                                                       | 3.86<br>(3.34 to 4.39)                    | 3.75<br>(2.93 to 4.74)                    | 2.17<br>(1.60 to 2.94)                    | 3.84<br>(3.02 to 4.83)                      | 0.13<br>(0.11 to 0.15)              | 0.14<br>(0.10 to 0.18)              | 0.08<br>(0.06 to 0.11)              | 0.14<br>(0.11 to 0.18)              |
| Acute hepatitis C                                                       | 0.28<br>(0.21 to 0.37)                    | 0.31<br>(0.21 to 0.43)                    | 0.18<br>(0.12 to 0.26)                    | 0.31<br>(0.21 to 0.42)                      | 0.01<br>(0.01 to 0.01)              | 0.01<br>(0.01 to 0.02)              | 0.01<br>(0.01 to 0.01)              | 0.01<br>(0.01 to 0.02)              |
| Acute hepatitis E                                                       | 0.63<br>(0.50 to 0.79)                    | 0.50<br>(0.34 to 0.69)                    | 0.30<br>(0.20 to 0.43)                    | 0.52<br>(0.35 to 0.72)                      | 0.02<br>(0.01 to 0.03)              | 0.02<br>(0.01 to 0.03)              | 0.01<br>(0.01 to 0.03)              | 0.02<br>(0.01 to 0.03)              |
| Other unspecified infectious diseases                                   | 13.58<br>(11.15 to 15.48)                 | 15.08<br>(12.27 to 17.87)                 | 13.88<br>(11.32 to 16.39)                 | 15.38<br>(12.59 to 18.38)                   | 0.46<br>(0.38 to 0.52)              | 0.59<br>(0.50 to 0.68)              | 0.58<br>(0.49 to 0.66)              | 0.58<br>(0.48 to 0.66)              |
| <b>Non-communicable diseases</b>                                        | <b>6757.77</b><br>(6,311.61 to 7,251.15)  | <b>8,454.05</b><br>(7,328.13 to 9,803.50) | <b>6,106.94</b><br>(5,320.91 to 7,028.97) | <b>10,385.02</b><br>(8,819.43 to 12,239.11) | <b>394.66</b><br>(370.73 to 420.15) | <b>562.22</b><br>(496.91 to 635.02) | <b>430.52</b><br>(379.50 to 482.48) | <b>654.50</b><br>(570.05 to 745.10) |
| <b>Southern Latin America</b>                                           |                                           |                                           |                                           |                                             |                                     |                                     |                                     |                                     |
| <b>Cause</b>                                                            | <b>YLLs (in 1000s)</b>                    |                                           |                                           |                                             | <b>Deaths (in 1000s)</b>            |                                     |                                     |                                     |
|                                                                         | <b>2016</b>                               | <b>2040 Forecast</b>                      | <b>2040 Better Scenario</b>               | <b>2040 Worse Scenario</b>                  | <b>2016</b>                         | <b>2040 Forecast</b>                | <b>2040 Better Scenario</b>         | <b>2040 Worse Scenario</b>          |
| <b>Neoplasms</b>                                                        | <b>2,239.57</b><br>(2,075.77 to 2,413.29) | <b>3,010.31</b><br>(2,627.10 to 3,462.64) | <b>2,408.51</b><br>(2,080.66 to 2,750.98) | <b>3,543.33</b><br>(3,051.28 to 4,127.85)   | <b>110.68</b><br>(102.83 to 118.96) | <b>166.72</b><br>(147.57 to 188.94) | <b>139.15</b><br>(122.29 to 157.07) | <b>189.04</b><br>(164.12 to 217.72) |
| Lip and oral cavity cancer                                              | 22.33<br>(20.24 to 24.51)                 | 25.30<br>(15.33 to 40.47)                 | 15.91<br>(10.20 to 24.55)                 | 43.14<br>(23.38 to 73.18)                   | 1.04<br>(0.96 to 1.13)              | 1.27<br>(0.77 to 1.99)              | 0.83<br>(0.54 to 1.24)              | 2.06<br>(1.18 to 3.42)              |
| Nasopharynx cancer                                                      | 3.81<br>(3.48 to 4.19)                    | 4.87<br>(3.17 to 7.37)                    | 2.57<br>(1.69 to 3.83)                    | 8.46<br>(5.10 to 13.37)                     | 0.14<br>(0.13 to 0.15)              | 0.19<br>(0.12 to 0.29)              | 0.10<br>(0.07 to 0.15)              | 0.33<br>(0.20 to 0.52)              |
| Other pharynx cancer                                                    | 8.32<br>(7.47 to 9.28)                    | 10.62<br>(6.24 to 17.00)                  | 10.11<br>(6.16 to 15.79)                  | 13.49<br>(7.53 to 22.19)                    | 0.34<br>(0.31 to 0.38)              | 0.47<br>(0.29 to 0.75)              | 0.46<br>(0.29 to 0.71)              | 0.58<br>(0.34 to 0.95)              |
| Esophageal cancer                                                       | 67.15<br>(60.81 to 73.64)                 | 81.51<br>(52.58 to 124.50)                | 63.74<br>(43.00 to 93.95)                 | 130.75<br>(77.19 to 216.10)                 | 3.66<br>(3.34 to 3.99)              | 4.78<br>(3.14 to 7.12)              | 3.85<br>(2.68 to 5.56)              | 7.30<br>(4.36 to 11.84)             |
| Stomach cancer                                                          | 189.47<br>(170.79 to 211.24)              | 192.16<br>(149.19 to 243.90)              | 130.66<br>(102.07 to 165.52)              | 211.24<br>(159.58 to 274.30)                | 10.06<br>(9.09 to 11.14)            | 11.40<br>(9.02 to 14.58)            | 8.05<br>(6.37 to 10.11)             | 12.18<br>(9.34 to 15.80)            |
| Colon and rectum cancer                                                 | 227.78<br>(209.14 to 247.64)              | 358.68<br>(249.68 to 505.34)              | 262.64<br>(187.57 to 365.56)              | 403.18<br>(275.08 to 583.23)                | 12.80<br>(11.78 to 13.84)           | 22.49<br>(15.76 to 31.76)           | 17.20<br>(12.53 to 24.32)           | 24.44<br>(16.60 to 35.28)           |

|                                      |                                 |                                 |                                 |                                 |                              |                              |                              |                              |
|--------------------------------------|---------------------------------|---------------------------------|---------------------------------|---------------------------------|------------------------------|------------------------------|------------------------------|------------------------------|
| Liver cancer                         | 69.48<br>(62.67 to<br>77.34)    | 109.99<br>(72.24 to<br>162.87)  | 102.55<br>(70.54 to<br>147.92)  | 137.71<br>(86.12 to<br>211.31)  | 3.61<br>(3.27 to<br>3.98)    | 6.29<br>(4.30 to<br>9.20)    | 6.11<br>(4.35 to<br>8.60)    | 7.52<br>(4.82 to<br>11.31)   |
| Liver cancer due to hepatitis B      | 10.07<br>(8.01 to<br>12.62)     | 15.32<br>(9.41 to<br>24.56)     | 14.75<br>(9.38 to<br>22.79)     | 18.34<br>(10.59 to<br>31.10)    | 0.43<br>(0.34 to<br>0.55)    | 0.73<br>(0.46 to<br>1.16)    | 0.73<br>(0.48 to<br>1.12)    | 0.85<br>(0.51 to<br>1.41)    |
| Liver cancer due to hepatitis C      | 31.17<br>(27.27 to<br>35.18)    | 49.74<br>(33.31 to<br>72.54)    | 48.14<br>(33.88 to<br>68.77)    | 57.37<br>(36.60 to<br>85.95)    | 1.76<br>(1.55 to<br>1.98)    | 3.07<br>(2.12 to<br>4.41)    | 3.09<br>(2.22 to<br>4.31)    | 3.42<br>(2.26 to<br>5.00)    |
| Liver cancer due to alcohol use      | 19.07<br>(15.86 to<br>22.74)    | 30.04<br>(18.48 to<br>48.57)    | 25.24<br>(16.10 to<br>39.41)    | 44.28<br>(25.14 to<br>73.43)    | 0.95<br>(0.80 to<br>1.12)    | 1.62<br>(1.01 to<br>2.56)    | 1.42<br>(0.92 to<br>2.19)    | 2.26<br>(1.32 to<br>3.73)    |
| Liver cancer due to other causes     | 9.18<br>(7.82 to<br>10.68)      | 14.89<br>(9.31 to<br>23.28)     | 14.42<br>(9.59 to<br>22.36)     | 17.72<br>(10.34 to<br>29.24)    | 0.48<br>(0.40 to<br>0.55)    | 0.86<br>(0.56 to<br>1.35)    | 0.87<br>(0.59 to<br>1.30)    | 0.99<br>(0.60 to<br>1.57)    |
| Gallbladder and biliary tract cancer | 106.13<br>(93.12 to<br>121.66)  | 107.55<br>(92.24 to<br>125.04)  | 102.16<br>(86.65 to<br>120.56)  | 103.77<br>(89.25 to<br>120.29)  | 5.65<br>(5.02 to<br>6.40)    | 6.38<br>(5.59 to<br>7.22)    | 6.27<br>(5.42 to<br>7.17)    | 6.03<br>(5.21 to<br>6.81)    |
| Pancreatic cancer                    | 128.24<br>(117.77 to<br>139.92) | 192.36<br>(158.71 to<br>233.66) | 186.36<br>(155.07 to<br>224.90) | 208.87<br>(168.87 to<br>260.18) | 6.95<br>(6.41 to<br>7.55)    | 11.05<br>(9.19 to<br>13.47)  | 11.07<br>(9.25 to<br>13.31)  | 11.65<br>(9.51 to<br>14.58)  |
| Larynx cancer                        | 25.92<br>(23.42 to<br>28.71)    | 27.78<br>(15.11 to<br>47.51)    | 15.45<br>(8.92 to<br>26.01)     | 49.54<br>(24.24 to<br>92.91)    | 1.21<br>(1.10 to<br>1.32)    | 1.34<br>(0.76 to<br>2.22)    | 0.77<br>(0.46 to<br>1.28)    | 2.33<br>(1.20 to<br>4.19)    |
| Tracheal, bronchus, and lung cancer  | 336.37<br>(307.37 to<br>366.43) | 412.50<br>(315.74 to<br>528.70) | 266.74<br>(209.41 to<br>334.83) | 708.46<br>(524.20 to<br>930.53) | 16.31<br>(14.98 to<br>17.68) | 21.13<br>(16.45 to<br>27.08) | 14.21<br>(11.36 to<br>17.79) | 35.27<br>(26.49 to<br>46.17) |
| Malignant skin melanoma              | 20.31<br>(17.02 to<br>23.49)    | 25.01<br>(20.77 to<br>29.33)    | 32.17<br>(26.68 to<br>38.28)    | 23.55<br>(19.71 to<br>27.56)    | 0.87<br>(0.73 to<br>0.99)    | 1.22<br>(1.01 to<br>1.40)    | 1.63<br>(1.35 to<br>1.91)    | 1.11<br>(0.93 to<br>1.28)    |
| Non-melanoma skin cancer             | 13.20<br>(12.06 to<br>14.52)    | 17.73<br>(15.93 to<br>19.63)    | 13.14<br>(11.63 to<br>14.95)    | 17.07<br>(15.54 to<br>18.86)    | 0.86<br>(0.79 to<br>0.94)    | 1.27<br>(1.16 to<br>1.39)    | 0.99<br>(0.89 to<br>1.11)    | 1.18<br>(1.07 to<br>1.29)    |
| Breast cancer                        | 187.77<br>(166.41 to<br>210.06) | 272.32<br>(204.88 to<br>361.75) | 188.64<br>(142.74 to<br>248.16) | 298.62<br>(223.58 to<br>400.84) | 8.71<br>(7.80 to<br>9.71)    | 13.95<br>(10.52 to<br>18.62) | 10.08<br>(7.69 to<br>13.25)  | 14.94<br>(11.11 to<br>20.30) |
| Cervical cancer                      | 105.44<br>(93.14 to<br>118.82)  | 104.38<br>(82.45 to<br>133.56)  | 70.95<br>(56.16 to<br>89.48)    | 111.87<br>(86.30 to<br>146.43)  | 4.12<br>(3.67 to<br>4.64)    | 4.56<br>(3.67 to<br>5.73)    | 3.20<br>(2.55 to<br>4.01)    | 4.78<br>(3.77 to<br>6.19)    |
| Uterine cancer                       | 22.01<br>(19.22 to<br>25.42)    | 33.49<br>(28.28 to<br>39.95)    | 26.89<br>(22.13 to<br>32.08)    | 33.45<br>(28.27 to<br>39.32)    | 1.21<br>(1.06 to<br>1.39)    | 1.66<br>(1.72 to<br>2.31)    | 1.66<br>(1.40 to<br>1.95)    | 1.97<br>(1.69 to<br>2.28)    |
| Ovarian cancer                       | 45.65<br>(39.04 to<br>53.43)    | 65.50<br>(48.72 to<br>86.23)    | 54.74<br>(41.45 to<br>72.10)    | 66.50<br>(48.22 to<br>90.00)    | 2.00<br>(1.72 to<br>2.32)    | 3.17<br>(2.36 to<br>4.21)    | 2.70<br>(2.04 to<br>3.55)    | 3.18<br>(2.31 to<br>4.32)    |
| Prostate cancer                      | 108.01<br>(92.29 to<br>128.24)  | 203.67<br>(171.64 to<br>239.35) | 179.24<br>(149.88 to<br>214.23) | 191.53<br>(161.57 to<br>227.59) | 8.11<br>(7.01 to<br>9.48)    | 16.43<br>(14.21 to<br>18.93) | 15.07<br>(13.05 to<br>17.30) | 14.99<br>(12.85 to<br>17.38) |
| Testicular cancer                    | 15.14<br>(12.54 to<br>18.18)    | 12.64<br>(10.09 to<br>16.12)    | 9.37<br>(7.35 to<br>12.01)      | 12.81<br>(10.22 to<br>16.16)    | 0.32<br>(0.27 to<br>0.38)    | 0.30<br>(0.25 to<br>0.37)    | 0.23<br>(0.19 to<br>0.28)    | 0.30<br>(0.25 to<br>0.37)    |

**Southern Latin America**

| Cause                           | YLLs (in 1000s)              |                                |                                |                                | Deaths (in 1000s)         |                           |                           |                           |
|---------------------------------|------------------------------|--------------------------------|--------------------------------|--------------------------------|---------------------------|---------------------------|---------------------------|---------------------------|
|                                 | 2016                         | 2040 Forecast                  | 2040 Better Scenario           | 2040 Worse Scenario            | 2016                      | 2040 Forecast             | 2040 Better Scenario      | 2040 Worse Scenario       |
| Kidney cancer                   | 70.64<br>(64.12 to<br>77.58) | 110.66<br>(91.80 to<br>132.06) | 111.66<br>(93.95 to<br>131.90) | 116.40<br>(93.08 to<br>143.08) | 3.31<br>(3.00 to<br>3.63) | 5.59<br>(4.72 to<br>6.56) | 5.87<br>(4.99 to<br>6.81) | 5.71<br>(4.63 to<br>6.94) |
| Bladder cancer                  | 39.34<br>(35.77 to<br>43.43) | 53.46<br>(42.33 to<br>68.07)   | 45.25<br>(36.36 to<br>56.44)   | 60.91<br>(46.25 to<br>81.17)   | 2.54<br>(2.32 to<br>2.79) | 3.75<br>(3.03 to<br>4.70) | 3.32<br>(2.72 to<br>4.10) | 4.11<br>(3.14 to<br>5.39) |
| Brain and nervous system cancer | 61.68<br>(54.68 to<br>68.93) | 85.93<br>(75.24 to<br>97.36)   | 75.87<br>(65.76 to<br>86.21)   | 84.14<br>(73.39 to<br>94.87)   | 2.04<br>(1.78 to<br>2.27) | 3.34<br>(2.91 to<br>3.72) | 3.06<br>(2.61 to<br>3.44) | 3.19<br>(2.78 to<br>3.56) |

|                                |                                                            |                                                            |                                                            |                                                            |                                                      |                                                      |                                                     |                                                      |
|--------------------------------|------------------------------------------------------------|------------------------------------------------------------|------------------------------------------------------------|------------------------------------------------------------|------------------------------------------------------|------------------------------------------------------|-----------------------------------------------------|------------------------------------------------------|
| Thyroid cancer                 | 7.54<br>(6.73 to<br>8.44)                                  | 10.81<br>(7.95 to<br>15.02)                                | 8.38<br>(6.29 to<br>11.49)                                 | 11.45<br>(8.25 to<br>16.22)                                | 0.39<br>(0.35 to<br>0.44)                            | 0.62<br>(0.46 to<br>0.85)                            | 0.50<br>(0.38 to<br>0.68)                           | 0.64<br>(0.47 to<br>0.89)                            |
| Mesothelioma                   | 6.77<br>(6.00 to<br>7.59)                                  | 8.25<br>(7.09 to<br>9.40)                                  | 8.49<br>(7.26 to<br>9.74)                                  | 7.94<br>(6.90 to<br>9.02)                                  | 0.30<br>(0.26 to<br>0.33)                            | 0.40<br>(0.35 to<br>0.45)                            | 0.43<br>(0.37 to<br>0.48)                           | 0.37<br>(0.33 to<br>0.42)                            |
| Hodgkin lymphoma               | 8.75<br>(7.85 to<br>10.63)                                 | 9.10<br>(7.85 to<br>11.14)                                 | 5.86<br>(4.88 to<br>7.29)                                  | 9.24<br>(7.99 to<br>11.34)                                 | 0.29<br>(0.26 to<br>0.34)                            | 0.35<br>(0.31 to<br>0.41)                            | 0.23<br>(0.20 to<br>0.28)                           | 0.35<br>(0.31 to<br>0.40)                            |
| Non-Hodgkin lymphoma           | 69.96<br>(63.33 to<br>78.98)                               | 101.82<br>(82.73 to<br>127.29)                             | 83.61<br>(68.64 to<br>103.92)                              | 102.57<br>(82.52 to<br>130.42)                             | 2.94<br>(2.67 to<br>3.26)                            | 4.97<br>(4.09 to<br>6.09)                            | 4.24<br>(3.52 to<br>5.11)                           | 4.87<br>(3.98 to<br>6.09)                            |
| Multiple myeloma               | 28.32<br>(23.84 to<br>33.85)                               | 46.83<br>(36.54 to<br>61.10)                               | 41.75<br>(32.82 to<br>53.22)                               | 46.85<br>(36.38 to<br>61.24)                               | 1.44<br>(1.22 to<br>1.71)                            | 2.57<br>(2.01 to<br>3.26)                            | 2.36<br>(1.87 to<br>2.95)                           | 2.51<br>(1.95 to<br>3.21)                            |
| Leukemia                       | 100.18<br>(92.38 to<br>108.67)                             | 123.78<br>(101.58 to<br>150.18)                            | 99.89<br>(82.83 to<br>119.76)                              | 134.23<br>(107.13 to<br>168.34)                            | 3.60<br>(3.32 to<br>3.91)                            | 5.63<br>(4.61 to<br>6.92)                            | 4.74<br>(3.91 to<br>5.71)                           | 5.93<br>(4.69 to<br>7.54)                            |
| Acute lymphoid leukemia        | 24.13<br>(21.82 to<br>26.68)                               | 20.60<br>(17.12 to<br>24.90)                               | 15.38<br>(12.81 to<br>18.54)                               | 22.16<br>(18.14 to<br>27.11)                               | 0.49<br>(0.44 to<br>0.53)                            | 0.52<br>(0.43 to<br>0.63)                            | 0.40<br>(0.33 to<br>0.48)                           | 0.55<br>(0.45 to<br>0.69)                            |
| Chronic lymphoid leukemia      | 5.56<br>(4.82 to<br>6.68)                                  | 7.91<br>(6.00 to<br>10.49)                                 | 7.14<br>(5.47 to<br>9.30)                                  | 8.37<br>(6.16 to<br>11.35)                                 | 0.36<br>(0.32 to<br>0.43)                            | 0.56<br>(0.43 to<br>0.74)                            | 0.53<br>(0.41 to<br>0.69)                           | 0.57<br>(0.42 to<br>0.77)                            |
| Acute myeloid leukemia         | 30.66<br>(27.38 to<br>34.00)                               | 43.72<br>(35.85 to<br>53.14)                               | 39.97<br>(33.35 to<br>47.98)                               | 47.14<br>(37.75 to<br>58.87)                               | 1.01<br>(0.90 to<br>1.13)                            | 1.73<br>(1.41 to<br>2.14)                            | 1.65<br>(1.36 to<br>1.98)                           | 1.83<br>(1.45 to<br>2.33)                            |
| Chronic myeloid leukemia       | 5.24<br>(4.69 to<br>5.82)                                  | 5.51<br>(4.12 to<br>7.29)                                  | 3.20<br>(2.40 to<br>4.21)                                  | 6.12<br>(4.43 to<br>8.44)                                  | 0.24<br>(0.21 to<br>0.26)                            | 0.29<br>(0.22 to<br>0.38)                            | 0.18<br>(0.13 to<br>0.23)                           | 0.31<br>(0.23 to<br>0.42)                            |
| Other leukemia                 | 34.60<br>(31.63 to<br>38.06)                               | 46.05<br>(36.77 to<br>57.87)                               | 34.21<br>(27.48 to<br>42.22)                               | 50.45<br>(39.25 to<br>65.44)                               | 1.50<br>(1.37 to<br>1.64)                            | 2.53<br>(2.04 to<br>3.15)                            | 1.99<br>(1.61 to<br>2.46)                           | 2.67<br>(2.07 to<br>3.45)                            |
| Other neoplasms                | 143.74<br>(133.46 to<br>155.87)                            | 201.60<br>(182.87 to<br>221.50)                            | 193.73<br>(173.99 to<br>214.41)                            | 195.58<br>(178.48 to<br>213.96)                            | 5.86<br>(5.42 to<br>6.34)                            | 9.80<br>(9.01 to<br>10.62)                           | 9.92<br>(9.01 to<br>10.81)                          | 9.21<br>(8.48 to<br>9.94)                            |
| <b>Cardiovascular diseases</b> | <b>2,236.43</b><br><b>(2,084.81 to</b><br><b>2,395.71)</b> | <b>2,392.88</b><br><b>(1,805.72 to</b><br><b>3,223.61)</b> | <b>1,311.20</b><br><b>(1,007.87 to</b><br><b>1,725.09)</b> | <b>3,411.07</b><br><b>(2,404.71 to</b><br><b>4,784.77)</b> | <b>152.99</b><br><b>(143.87 to</b><br><b>162.24)</b> | <b>185.20</b><br><b>(142.38 to</b><br><b>240.52)</b> | <b>112.18</b><br><b>(87.90 to</b><br><b>146.55)</b> | <b>237.25</b><br><b>(176.42 to</b><br><b>317.68)</b> |
| Rheumatic heart disease        | 59.94<br>(54.26 to<br>66.13)                               | 50.64<br>(42.23 to<br>62.37)                               | 35.04<br>(28.41 to<br>44.62)                               | 51.04<br>(41.86 to<br>65.08)                               | 4.31<br>(3.92 to<br>4.72)                            | 4.24<br>(3.55 to<br>5.38)                            | 3.14<br>(2.57 to<br>3.99)                           | 4.12<br>(3.45 to<br>5.38)                            |
| Ischemic heart disease         | 1,106.51<br>(1,019.33 to<br>1,196.78)                      | 1,081.76<br>(683.42 to<br>1,646.14)                        | 511.35<br>(324.20 to<br>780.35)                            | 1,704.14<br>(1,031.31 to<br>2,658.53)                      | 77.45<br>(72.37 to<br>82.46)                         | 84.57<br>(58.08 to<br>125.75)                        | 44.33<br>(28.57 to<br>64.44)                        | 118.00<br>(73.74 to<br>177.63)                       |
| Stroke                         | 555.65<br>(508.86 to<br>605.97)                            | 504.94<br>(329.67 to<br>757.56)                            | 223.16<br>(150.43 to<br>326.26)                            | 798.52<br>(487.07 to<br>1,258.93)                          | 35.36<br>(32.34 to<br>38.40)                         | 36.71<br>(24.97 to<br>55.43)                         | 18.53<br>(12.53 to<br>27.51)                        | 50.51<br>(33.28 to<br>77.20)                         |
| Ischemic stroke                | 226.17<br>(205.80 to<br>246.10)                            | 222.88<br>(138.03 to<br>375.82)                            | 113.58<br>(71.49 to<br>184.00)                             | 308.97<br>(183.83 to<br>541.79)                            | 19.16<br>(17.33 to<br>20.77)                         | 20.55<br>(12.58 to<br>35.14)                         | 11.47<br>(7.07 to<br>19.44)                         | 25.77<br>(15.58 to<br>46.13)                         |
| Intracerebral hemorrhage       | 329.49<br>(301.02 to<br>362.12)                            | 282.06<br>(174.16 to<br>448.95)                            | 109.58<br>(71.01 to<br>169.24)                             | 489.55<br>(279.86 to<br>830.59)                            | 16.20<br>(14.80 to<br>17.67)                         | 16.16<br>(10.60 to<br>24.69)                         | 7.06<br>(4.75 to<br>10.37)                          | 21.74<br>(15.13 to<br>39.26)                         |
| Hypertensive heart disease     | 119.71<br>(92.87 to<br>174.21)                             | 188.50<br>(113.64 to<br>342.29)                            | 136.70<br>(88.92 to<br>229.90)                             | 251.36<br>(139.04 to<br>502.45)                            | 9.82<br>(7.39 to<br>14.25)                           | 17.50<br>(10.62 to<br>33.24)                         | 13.46<br>(8.82 to<br>23.57)                         | 22.00<br>(12.28 to<br>47.08)                         |
| Cardiomyopathy and myocarditis | 99.40<br>(87.35 to<br>123.22)                              | 138.44<br>(103.87 to<br>191.21)                            | 89.05<br>(66.22 to<br>123.08)                              | 143.95<br>(105.69 to<br>201.36)                            | 5.31<br>(4.72 to<br>6.27)                            | 8.66<br>(6.25 to<br>12.33)                           | 5.80<br>(4.11 to<br>8.37)                           | 8.60<br>(6.09 to<br>12.49)                           |
| Myocarditis                    | 7.69<br>(6.40 to<br>10.38)                                 | 8.18<br>(6.52 to<br>10.65)                                 | 7.50<br>(6.07 to<br>9.50)                                  | 8.09<br>(6.42 to<br>10.67)                                 | 0.30<br>(0.24 to<br>0.36)                            | 0.39<br>(0.30 to<br>0.49)                            | 0.40<br>(0.30 to<br>0.49)                           | 0.37<br>(0.29 to<br>0.46)                            |
| <b>Southern Latin America</b>  |                                                            |                                                            |                                                            |                                                            |                                                      |                                                      |                                                     |                                                      |
| <b>YLLs (in 1000s)</b>         |                                                            |                                                            |                                                            |                                                            | <b>Deaths (in 1000s)</b>                             |                                                      |                                                     |                                                      |

| Cause                                                         | 2016                                                 | 2040 Forecast                                        | 2040 Better Scenario                                 | 2040 Worse Scenario                                  | 2016                                              | 2040 Forecast                                     | 2040 Better Scenario                              | 2040 Worse Scenario                               |
|---------------------------------------------------------------|------------------------------------------------------|------------------------------------------------------|------------------------------------------------------|------------------------------------------------------|---------------------------------------------------|---------------------------------------------------|---------------------------------------------------|---------------------------------------------------|
| Alcoholic cardiomyopathy                                      | 6.54<br>(4.92 to<br>11.37)                           | 9.37<br>(6.75 to<br>17.47)                           | 8.69<br>(6.30 to<br>15.15)                           | 11.26<br>(8.24 to<br>20.45)                          | 0.26<br>(0.20 to<br>0.45)                         | 0.40<br>(0.29 to<br>0.74)                         | 0.39<br>(0.28 to<br>0.68)                         | 0.47<br>(0.34 to<br>0.84)                         |
| Other cardiomyopathy                                          | 85.17<br>(74.90 to<br>104.74)                        | 120.89<br>(86.48 to<br>166.28)                       | 72.85<br>(50.90 to<br>102.45)                        | 124.60<br>(88.10 to<br>175.33)                       | 4.76<br>(4.21 to<br>5.59)                         | 7.86<br>(5.50 to<br>11.37)                        | 5.02<br>(3.33 to<br>7.53)                         | 7.76<br>(5.32 to<br>11.51)                        |
| Atrial fibrillation and flutter                               | 35.27<br>(27.98 to<br>44.47)                         | 60.03<br>(44.28 to<br>79.30)                         | 53.22<br>(39.48 to<br>69.30)                         | 62.49<br>(45.29 to<br>83.74)                         | 3.94<br>(3.06 to<br>4.98)                         | 6.88<br>(5.09 to<br>9.08)                         | 6.37<br>(4.76 to<br>8.30)                         | 6.88<br>(5.02 to<br>9.10)                         |
| Aortic aneurysm                                               | 60.79<br>(55.00 to<br>66.53)                         | 79.12<br>(63.22 to<br>100.61)                        | 65.52<br>(53.05 to<br>82.39)                         | 84.03<br>(64.87 to<br>109.37)                        | 3.88<br>(3.54 to<br>4.21)                         | 5.55<br>(4.62 to<br>6.89)                         | 4.99<br>(4.13 to<br>6.08)                         | 5.54<br>(4.49 to<br>7.00)                         |
| Peripheral artery disease                                     | 5.80<br>(4.21 to<br>8.78)                            | 13.72<br>(9.09 to<br>21.54)                          | 13.24<br>(8.52 to<br>20.78)                          | 14.62<br>(9.60 to<br>22.41)                          | 0.53<br>(0.38 to<br>0.84)                         | 1.37<br>(0.91 to<br>2.18)                         | 1.40<br>(0.92 to<br>2.36)                         | 1.38<br>(0.91 to<br>2.17)                         |
| Endocarditis                                                  | 34.95<br>(26.46 to<br>48.16)                         | 49.03<br>(33.69 to<br>73.00)                         | 45.03<br>(30.99 to<br>66.26)                         | 50.46<br>(34.32 to<br>76.02)                         | 2.13<br>(1.53 to<br>2.83)                         | 3.37<br>(2.16 to<br>5.25)                         | 3.28<br>(2.12 to<br>5.00)                         | 3.34<br>(2.11 to<br>5.30)                         |
| Other cardiovascular and circulatory diseases                 | 158.41<br>(144.75 to<br>173.04)                      | 226.69<br>(183.87 to<br>286.68)                      | 138.89<br>(110.30 to<br>177.85)                      | 250.46<br>(195.70 to<br>325.14)                      | 10.26<br>(9.37 to<br>11.24)                       | 16.35<br>(13.57 to<br>20.06)                      | 10.87<br>(8.76 to<br>13.64)                       | 16.89<br>(13.66 to<br>21.05)                      |
| <b>Chronic respiratory diseases</b>                           | <b>397.35</b><br><b>(367.71 to</b><br><b>427.03)</b> | <b>446.22</b><br><b>(371.57 to</b><br><b>535.15)</b> | <b>346.53</b><br><b>(298.70 to</b><br><b>403.61)</b> | <b>639.45</b><br><b>(513.03 to</b><br><b>810.08)</b> | <b>28.60</b><br><b>(26.62 to</b><br><b>30.68)</b> | <b>34.13</b><br><b>(28.75 to</b><br><b>40.36)</b> | <b>27.85</b><br><b>(24.47 to</b><br><b>32.25)</b> | <b>46.82</b><br><b>(37.72 to</b><br><b>57.61)</b> |
| Chronic obstructive pulmonary disease                         | 307.15<br>(282.21 to<br>330.90)                      | 333.08<br>(259.52 to<br>424.00)                      | 208.26<br>(165.35 to<br>264.68)                      | 526.06<br>(396.52 to<br>691.91)                      | 23.29<br>(21.61 to<br>24.94)                      | 26.55<br>(21.19 to<br>32.94)                      | 17.94<br>(14.51 to<br>22.08)                      | 39.54<br>(30.23 to<br>50.28)                      |
| Pneumoconiosis                                                | 2.85<br>(2.31 to<br>3.44)                            | 2.86<br>(2.30 to<br>3.60)                            | 1.97<br>(1.59 to<br>2.42)                            | 2.93<br>(2.35 to<br>3.61)                            | 0.20<br>(0.16 to<br>0.24)                         | 0.23<br>(0.18 to<br>0.29)                         | 0.17<br>(0.14 to<br>0.21)                         | 0.23<br>(0.18 to<br>0.28)                         |
| Silicosis                                                     | 1.92<br>(1.43 to<br>2.49)                            | 1.67<br>(1.13 to<br>2.33)                            | 0.74<br>(0.51 to<br>1.08)                            | 1.76<br>(1.26 to<br>2.39)                            | 0.13<br>(0.10 to<br>0.17)                         | 0.13<br>(0.09 to<br>0.17)                         | 0.06<br>(0.04 to<br>0.09)                         | 0.13<br>(0.10 to<br>0.18)                         |
| Asbestosis                                                    | 0.43<br>(0.34 to<br>0.55)                            | 0.55<br>(0.41 to<br>0.75)                            | 0.69<br>(0.52 to<br>0.89)                            | 0.52<br>(0.39 to<br>0.71)                            | 0.03<br>(0.02 to<br>0.04)                         | 0.04<br>(0.03 to<br>0.06)                         | 0.06<br>(0.04 to<br>0.08)                         | 0.04<br>(0.03 to<br>0.06)                         |
| Coal workers pneumoconiosis                                   | 0.21<br>(0.14 to<br>0.29)                            | 0.28<br>(0.17 to<br>0.45)                            | 0.28<br>(0.15 to<br>0.47)                            | 0.29<br>(0.17 to<br>0.48)                            | 0.02<br>(0.01 to<br>0.02)                         | 0.02<br>(0.01 to<br>0.04)                         | 0.03<br>(0.01 to<br>0.05)                         | 0.03<br>(0.01 to<br>0.05)                         |
| Other pneumoconiosis                                          | 0.29<br>(0.23 to<br>0.46)                            | 0.35<br>(0.27 to<br>0.57)                            | 0.26<br>(0.19 to<br>0.40)                            | 0.36<br>(0.28 to<br>0.57)                            | 0.02<br>(0.01 to<br>0.03)                         | 0.03<br>(0.02 to<br>0.05)                         | 0.02<br>(0.02 to<br>0.04)                         | 0.03<br>(0.02 to<br>0.05)                         |
| Asthma                                                        | 18.27<br>(16.13 to<br>20.98)                         | 13.65<br>(8.25 to<br>22.38)                          | 6.49<br>(3.97 to<br>11.01)                           | 16.98<br>(9.86 to<br>28.25)                          | 0.94<br>(0.83 to<br>1.09)                         | 0.82<br>(0.49 to<br>1.39)                         | 0.42<br>(0.25 to<br>0.71)                         | 0.97<br>(0.56 to<br>1.62)                         |
| Interstitial lung disease and pulmonary sarcoidosis           | 44.85<br>(33.17 to<br>54.10)                         | 66.17<br>(48.96 to<br>80.07)                         | 100.05<br>(77.25 to<br>121.49)                       | 61.27<br>(44.00 to<br>73.80)                         | 2.91<br>(2.16 to<br>3.47)                         | 4.70<br>(3.39 to<br>5.61)                         | 7.39<br>(5.61 to<br>8.76)                         | 4.25<br>(3.04 to<br>5.03)                         |
| Other chronic respiratory diseases                            | 24.24<br>(17.28 to<br>34.49)                         | 30.45<br>(20.41 to<br>44.43)                         | 29.77<br>(20.08 to<br>42.38)                         | 32.21<br>(21.23 to<br>47.79)                         | 1.26<br>(0.85 to<br>1.80)                         | 1.83<br>(1.15 to<br>2.64)                         | 1.92<br>(1.23 to<br>2.72)                         | 1.83<br>(1.13 to<br>2.73)                         |
| <b>Cirrhosis and other chronic liver diseases</b>             | <b>320.09</b><br><b>(284.73 to</b><br><b>366.12)</b> | <b>401.28</b><br><b>(348.52 to</b><br><b>464.85)</b> | <b>291.43</b><br><b>(249.55 to</b><br><b>344.59)</b> | <b>434.89</b><br><b>(380.94 to</b><br><b>503.56)</b> | <b>13.17</b><br><b>(11.84 to</b><br><b>14.80)</b> | <b>18.12</b><br><b>(16.03 to</b><br><b>20.57)</b> | <b>13.54</b><br><b>(11.88 to</b><br><b>15.52)</b> | <b>19.15</b><br><b>(17.13 to</b><br><b>21.59)</b> |
| Cirrhosis and other chronic liver diseases due to hepatitis B | 54.61<br>(45.22 to<br>65.40)                         | 71.40<br>(57.88 to<br>87.86)                         | 55.35<br>(44.57 to<br>68.84)                         | 70.92<br>(57.58 to<br>87.41)                         | 2.29<br>(1.92 to<br>2.75)                         | 3.25<br>(2.72 to<br>3.92)                         | 2.59<br>(2.14 to<br>3.15)                         | 3.17<br>(2.66 to<br>3.82)                         |
| Cirrhosis and other chronic liver diseases due to hepatitis C | 109.93<br>(95.06 to<br>128.81)                       | 142.48<br>(118.61 to<br>169.39)                      | 108.42<br>(89.33 to<br>131.60)                       | 142.16<br>(119.41 to<br>169.05)                      | 4.33<br>(3.80 to<br>5.02)                         | 6.07<br>(5.19 to<br>7.08)                         | 4.73<br>(4.02 to<br>5.62)                         | 5.94<br>(5.08 to<br>6.93)                         |
| Cirrhosis and other chronic liver diseases due to alcohol use | 113.62<br>(98.09 to<br>132.41)                       | 137.72<br>(115.08 to<br>162.97)                      | 89.42<br>(74.12 to<br>106.69)                        | 172.13<br>(146.82 to<br>203.16)                      | 4.78<br>(4.17 to<br>5.48)                         | 6.38<br>(5.51 to<br>7.42)                         | 4.28<br>(3.65 to<br>5.00)                         | 7.67<br>(6.66 to<br>8.79)                         |

|                                                                |                                                      |                                                      |                                                      |                                                      |                                                   |                                                   |                                                   |                                                   |
|----------------------------------------------------------------|------------------------------------------------------|------------------------------------------------------|------------------------------------------------------|------------------------------------------------------|---------------------------------------------------|---------------------------------------------------|---------------------------------------------------|---------------------------------------------------|
| Cirrhosis and other chronic liver diseases due to other causes | 41.92<br>(35.71 to<br>49.24)                         | 49.69<br>(41.61 to<br>59.64)                         | 38.24<br>(31.66 to<br>46.14)                         | 49.68<br>(41.49 to<br>59.91)                         | 1.77<br>(1.52 to<br>2.09)                         | 2.42<br>(2.05 to<br>2.90)                         | 1.94<br>(1.62 to<br>2.34)                         | 2.37<br>(1.99 to<br>2.86)                         |
| <b>Digestive diseases</b>                                      | <b>194.17</b><br><b>(174.52 to</b><br><b>226.63)</b> | <b>261.18</b><br><b>(217.88 to</b><br><b>319.38)</b> | <b>205.25</b><br><b>(174.86 to</b><br><b>248.32)</b> | <b>270.93</b><br><b>(221.27 to</b><br><b>337.59)</b> | <b>11.65</b><br><b>(10.58 to</b><br><b>13.30)</b> | <b>18.65</b><br><b>(15.21 to</b><br><b>21.91)</b> | <b>15.21</b><br><b>(13.03 to</b><br><b>18.21)</b> | <b>17.95</b><br><b>(14.92 to</b><br><b>22.06)</b> |
| Peptic ulcer disease                                           | 20.67<br>(17.98 to<br>24.22)                         | 17.73<br>(13.85 to<br>22.06)                         | 10.24<br>(7.96 to<br>13.27)                          | 18.98<br>(15.00 to<br>24.07)                         | 1.22<br>(1.08 to<br>1.41)                         | 1.24<br>(1.00 to<br>1.52)                         | 0.75<br>(0.60 to<br>0.95)                         | 1.27<br>(1.01 to<br>1.56)                         |
| <b>Southern Latin America</b>                                  |                                                      |                                                      |                                                      |                                                      |                                                   |                                                   |                                                   |                                                   |
| <b>Cause</b>                                                   | <b>YLLs (in 1000s)</b>                               |                                                      |                                                      |                                                      | <b>Deaths (in 1000s)</b>                          |                                                   |                                                   |                                                   |
|                                                                | <b>2016</b>                                          | <b>2040 Forecast</b>                                 | <b>2040 Better Scenario</b>                          | <b>2040 Worse Scenario</b>                           | <b>2016</b>                                       | <b>2040 Forecast</b>                              | <b>2040 Better Scenario</b>                       | <b>2040 Worse Scenario</b>                        |
| Gastritis and duodenitis                                       | 2.36<br>(1.88 to<br>3.51)                            | 4.25<br>(3.24 to<br>6.11)                            | 3.03<br>(2.28 to<br>4.52)                            | 4.18<br>(3.21 to<br>5.94)                            | 0.14<br>(0.12 to<br>0.21)                         | 0.29<br>(0.23 to<br>0.44)                         | 0.22<br>(0.17 to<br>0.34)                         | 0.27<br>(0.21 to<br>0.42)                         |
| Appendicitis                                                   | 6.88<br>(5.57 to<br>9.95)                            | 7.21<br>(5.73 to<br>10.52)                           | 4.34<br>(3.34 to<br>6.36)                            | 7.33<br>(5.92 to<br>10.54)                           | 0.27<br>(0.22 to<br>0.39)                         | 0.35<br>(0.29 to<br>0.53)                         | 0.22<br>(0.18 to<br>0.35)                         | 0.35<br>(0.28 to<br>0.52)                         |
| Paralytic ileus and intestinal obstruction                     | 50.37<br>(38.41 to<br>58.49)                         | 65.93<br>(49.69 to<br>76.93)                         | 65.90<br>(50.96 to<br>76.85)                         | 62.84<br>(47.47 to<br>73.35)                         | 3.39<br>(2.63 to<br>3.90)                         | 5.17<br>(3.99 to<br>6.00)                         | 5.44<br>(4.24 to<br>6.29)                         | 4.77<br>(3.64 to<br>5.56)                         |
| Inguinal, femoral, and abdominal hernia                        | 6.99<br>(4.96 to<br>8.72)                            | 6.40<br>(4.38 to<br>7.90)                            | 4.98<br>(3.33 to<br>6.33)                            | 6.25<br>(4.28 to<br>7.65)                            | 0.45<br>(0.33 to<br>0.58)                         | 0.47<br>(0.34 to<br>0.60)                         | 0.39<br>(0.27 to<br>0.51)                         | 0.45<br>(0.32 to<br>0.57)                         |
| Inflammatory bowel disease                                     | 4.93<br>(4.12 to<br>5.92)                            | 6.22<br>(5.11 to<br>7.50)                            | 5.93<br>(4.84 to<br>7.29)                            | 6.03<br>(5.00 to<br>7.24)                            | 0.23<br>(0.20 to<br>0.28)                         | 0.34<br>(0.29 to<br>0.42)                         | 0.34<br>(0.28 to<br>0.43)                         | 0.32<br>(0.27 to<br>0.39)                         |
| Vascular intestinal disorders                                  | 24.08<br>(20.65 to<br>29.68)                         | 37.11<br>(31.59 to<br>46.76)                         | 32.24<br>(27.13 to<br>41.34)                         | 35.76<br>(30.54 to<br>45.49)                         | 1.66<br>(1.44 to<br>2.03)                         | 2.82<br>(2.42 to<br>3.56)                         | 2.57<br>(2.18 to<br>3.23)                         | 2.65<br>(2.27 to<br>3.35)                         |
| Gallbladder and biliary diseases                               | 24.09<br>(21.32 to<br>28.26)                         | 41.90<br>(23.77 to<br>71.79)                         | 24.96<br>(14.52 to<br>42.53)                         | 48.95<br>(27.09 to<br>83.30)                         | 1.61<br>(1.41 to<br>1.88)                         | 3.16<br>(1.77 to<br>5.47)                         | 2.00<br>(1.16 to<br>3.47)                         | 3.53<br>(1.96 to<br>6.05)                         |
| Pancreatitis                                                   | 30.54<br>(26.10 to<br>39.81)                         | 45.01<br>(28.64 to<br>73.13)                         | 28.52<br>(18.62 to<br>44.90)                         | 51.80<br>(30.77 to<br>88.74)                         | 1.30<br>(1.12 to<br>1.70)                         | 2.21<br>(1.45 to<br>3.53)                         | 1.45<br>(0.99 to<br>2.28)                         | 2.45<br>(1.51 to<br>4.05)                         |
| Other digestive diseases                                       | 23.26<br>(18.98 to<br>28.10)                         | 29.44<br>(23.37 to<br>36.13)                         | 25.10<br>(20.02 to<br>30.98)                         | 28.81<br>(22.87 to<br>35.77)                         | 1.37<br>(1.17 to<br>1.64)                         | 2.01<br>(1.64 to<br>2.51)                         | 1.82<br>(1.50 to<br>2.27)                         | 1.90<br>(1.56 to<br>2.35)                         |
| <b>Neurological disorders</b>                                  | <b>309.40</b><br><b>(268.97 to</b><br><b>357.13)</b> | <b>509.64</b><br><b>(401.38 to</b><br><b>657.66)</b> | <b>513.20</b><br><b>(414.42 to</b><br><b>646.32)</b> | <b>512.36</b><br><b>(395.53 to</b><br><b>688.12)</b> | <b>29.83</b><br><b>(25.27 to</b><br><b>34.72)</b> | <b>52.04</b><br><b>(39.54 to</b><br><b>70.25)</b> | <b>54.89</b><br><b>(42.93 to</b><br><b>71.47)</b> | <b>50.92</b><br><b>(37.80 to</b><br><b>70.98)</b> |
| Alzheimer's disease and other dementias                        | 200.26<br>(164.33 to<br>244.88)                      | 346.08<br>(242.37 to<br>492.42)                      | 343.01<br>(249.59 to<br>473.66)                      | 353.63<br>(239.79 to<br>531.27)                      | 23.83<br>(19.46 to<br>28.67)                      | 41.49<br>(29.57 to<br>59.72)                      | 42.95<br>(31.35 to<br>59.01)                      | 41.22<br>(28.36 to<br>61.24)                      |
| Parkinson's disease                                            | 46.25<br>(34.63 to<br>59.25)                         | 85.72<br>(63.59 to<br>110.64)                        | 99.17<br>(74.80 to<br>126.94)                        | 77.57<br>(57.32 to<br>100.58)                        | 4.15<br>(3.11 to<br>5.41)                         | 7.80<br>(5.92 to<br>10.18)                        | 9.31<br>(7.11 to<br>12.01)                        | 6.93<br>(5.16 to<br>9.11)                         |
| Epilepsy                                                       | 24.06<br>(21.29 to<br>27.26)                         | 26.30<br>(18.82 to<br>36.36)                         | 19.65<br>(14.44 to<br>26.81)                         | 30.52<br>(21.27 to<br>42.93)                         | 0.59<br>(0.52 to<br>0.67)                         | 0.79<br>(0.57 to<br>1.08)                         | 0.62<br>(0.46 to<br>0.83)                         | 0.89<br>(0.63 to<br>1.23)                         |
| Multiple sclerosis                                             | 4.68<br>(3.79 to<br>6.72)                            | 6.00<br>(4.70 to<br>8.80)                            | 6.16<br>(4.85 to<br>9.01)                            | 6.14<br>(4.77 to<br>9.00)                            | 0.16<br>(0.13 to<br>0.22)                         | 0.22<br>(0.18 to<br>0.32)                         | 0.23<br>(0.19 to<br>0.33)                         | 0.22<br>(0.18 to<br>0.32)                         |
| Motor neuron disease                                           | 11.84<br>(10.49 to<br>13.28)                         | 18.62<br>(16.25 to<br>21.28)                         | 18.38<br>(15.98 to<br>21.13)                         | 18.01<br>(15.77 to<br>20.41)                         | 0.48<br>(0.42 to<br>0.53)                         | 0.82<br>(0.72 to<br>0.93)                         | 0.82<br>(0.72 to<br>0.94)                         | 0.78<br>(0.69 to<br>0.88)                         |
| Other neurological disorders                                   | 22.30<br>(20.24 to<br>24.55)                         | 26.92<br>(23.94 to<br>30.52)                         | 26.83<br>(23.86 to<br>30.53)                         | 26.50<br>(23.63 to<br>30.16)                         | 0.63<br>(0.57 to<br>0.68)                         | 0.92<br>(0.83 to<br>1.01)                         | 0.96<br>(0.86 to<br>1.07)                         | 0.88<br>(0.79 to<br>0.97)                         |
| <b>Mental disorders</b>                                        | <b>63.04</b><br><b>(56.33 to</b><br><b>71.44)</b>    | <b>100.82</b><br><b>(88.46 to</b><br><b>114.97)</b>  | <b>122.72</b><br><b>(105.99 to</b><br><b>142.22)</b> | <b>101.59</b><br><b>(89.54 to</b><br><b>115.13)</b>  | <b>2.31</b><br><b>(2.10 to</b><br><b>2.58)</b>    | <b>4.27</b><br><b>(3.86 to</b><br><b>4.75)</b>    | <b>5.68</b><br><b>(4.93 to</b><br><b>6.46)</b>    | <b>4.14</b><br><b>(3.74 to</b><br><b>4.59)</b>    |

|                                                            |                                        |                                            |                                        |                                            |                                     |                                     |                                     |                                      |
|------------------------------------------------------------|----------------------------------------|--------------------------------------------|----------------------------------------|--------------------------------------------|-------------------------------------|-------------------------------------|-------------------------------------|--------------------------------------|
| Alcohol use disorders                                      | 37.75<br>(32.71 to<br>43.95)           | 48.29<br>(40.06 to<br>57.14)               | 51.67<br>(42.43 to<br>61.77)           | 51.11<br>(42.69 to<br>60.17)               | 1.27<br>(1.11 to<br>1.46)           | 1.78<br>(1.49 to<br>2.08)           | 1.95<br>(1.61 to<br>2.30)           | 1.84<br>(1.56 to<br>2.15)            |
| Drug use disorders                                         | 25.00<br>(21.91 to<br>28.10)           | 52.09<br>(45.37 to<br>59.16)               | 70.58<br>(59.46 to<br>81.78)           | 50.04<br>(43.42 to<br>56.86)               | 1.04<br>(0.93 to<br>1.15)           | 2.49<br>(2.19 to<br>2.80)           | 3.72<br>(3.11 to<br>4.33)           | 2.29<br>(2.00 to<br>2.58)            |
| Opioid use disorders                                       | 14.71<br>(12.58 to<br>17.43)           | 22.88<br>(18.64 to<br>28.74)               | 24.96<br>(20.23 to<br>32.12)           | 22.44<br>(18.25 to<br>28.30)               | 0.45<br>(0.37 to<br>0.51)           | 0.78<br>(0.61 to<br>0.92)           | 0.89<br>(0.68 to<br>1.08)           | 0.74<br>(0.59 to<br>0.88)            |
| Cocaine use disorders                                      | 1.45<br>(1.05 to<br>1.80)              | 5.03<br>(3.63 to<br>6.47)                  | 6.88<br>(5.10 to<br>8.87)              | 4.89<br>(3.51 to<br>6.35)                  | 0.05<br>(0.04 to<br>0.06)           | 0.18<br>(0.14 to<br>0.23)           | 0.26<br>(0.19 to<br>0.33)           | 0.17<br>(0.13 to<br>0.22)            |
| Amphetamine use disorders                                  | 0.87<br>(0.61 to<br>1.12)              | 3.53<br>(2.47 to<br>4.79)                  | 5.81<br>(3.98 to<br>7.89)              | 3.44<br>(2.42 to<br>4.60)                  | 0.03<br>(0.02 to<br>0.03)           | 0.11<br>(0.08 to<br>0.15)           | 0.19<br>(0.13 to<br>0.26)           | 0.11<br>(0.08 to<br>0.14)            |
| Other drug use disorders                                   | 7.97<br>(6.25 to<br>9.15)              | 20.65<br>(16.77 to<br>24.03)               | 32.91<br>(25.79 to<br>39.63)           | 19.28<br>(15.60 to<br>22.58)               | 0.52<br>(0.45 to<br>0.59)           | 1.42<br>(1.18 to<br>1.68)           | 2.38<br>(1.88 to<br>2.88)           | 1.27<br>(1.04 to<br>1.51)            |
| Eating disorders                                           | 0.29<br>(0.24 to<br>0.35)              | 0.44<br>(0.34 to<br>0.58)                  | 0.47<br>(0.36 to<br>0.64)              | 0.44<br>(0.34 to<br>0.58)                  | 0.01<br>(0.00 to<br>0.01)           | 0.01<br>(0.01 to<br>0.01)           | 0.01<br>(0.01 to<br>0.01)           | 0.01<br>(0.01 to<br>0.01)            |
| <b>Southern Latin America</b>                              |                                        |                                            |                                        |                                            |                                     |                                     |                                     |                                      |
| Cause                                                      | YLLs (in 1000s)                        |                                            |                                        |                                            | Deaths (in 1000s)                   |                                     |                                     |                                      |
|                                                            | 2016                                   | 2040 Forecast                              | 2040 Better Scenario                   | 2040 Worse Scenario                        | 2016                                | 2040 Forecast                       | 2040 Better Scenario                | 2040 Worse Scenario                  |
| <b>Diabetes, urogenital, blood, and endocrine diseases</b> | <b>617.94</b><br>(573.46 to<br>667.24) | <b>1,021.04</b><br>(820.05 to<br>1,268.36) | <b>714.15</b><br>(575.87 to<br>885.38) | <b>1,142.49</b><br>(908.98 to<br>1,448.69) | <b>38.25</b><br>(35.60 to<br>41.14) | <b>74.24</b><br>(61.10 to<br>91.29) | <b>54.74</b><br>(44.91 to<br>66.98) | <b>79.94</b><br>(64.55 to<br>100.52) |
| Diabetes mellitus                                          | 231.71<br>(212.47 to<br>251.72)        | 365.68<br>(240.21 to<br>536.53)            | 224.67<br>(149.59 to<br>331.73)        | 416.22<br>(264.16 to<br>633.92)            | 13.89<br>(12.74 to<br>15.06)        | 24.81<br>(16.86 to<br>35.14)        | 16.05<br>(11.13 to<br>23.76)        | 27.00<br>(17.76 to<br>39.79)         |
| Acute glomerulonephritis                                   | 0.36<br>(0.33 to<br>0.39)              | 0.37<br>(0.32 to<br>0.42)                  | 0.27<br>(0.23 to<br>0.31)              | 0.38<br>(0.33 to<br>0.44)                  | 0.01<br>(0.01 to<br>0.01)           | 0.01<br>(0.01 to<br>0.01)           | 0.01<br>(0.01 to<br>0.01)           | 0.01<br>(0.01 to<br>0.01)            |
| Chronic kidney disease                                     | 245.38<br>(226.04 to<br>266.40)        | 427.96<br>(277.75 to<br>654.67)            | 295.67<br>(197.57 to<br>438.73)        | 506.17<br>(306.88 to<br>807.47)            | 15.80<br>(14.65 to<br>17.06)        | 31.91<br>(20.36 to<br>49.05)        | 23.21<br>(15.40 to<br>34.31)        | 36.60<br>(22.22 to<br>57.86)         |
| Chronic kidney disease due to diabetes mellitus            | 86.91<br>(74.02 to<br>100.16)          | 164.77<br>(102.53 to<br>260.39)            | 113.39<br>(74.18 to<br>175.07)         | 197.83<br>(116.43 to<br>330.43)            | 4.93<br>(4.17 to<br>5.69)           | 10.51<br>(6.47 to<br>16.79)         | 7.51<br>(4.79 to<br>11.54)          | 12.29<br>(7.17 to<br>20.21)          |
| Chronic kidney disease due to hypertension                 | 48.42<br>(41.23 to<br>56.70)           | 94.14<br>(56.23 to<br>154.10)              | 70.67<br>(44.13 to<br>111.40)          | 108.69<br>(61.85 to<br>183.70)             | 4.53<br>(3.88 to<br>5.31)           | 9.67<br>(5.82 to<br>15.11)          | 7.61<br>(4.78 to<br>11.63)          | 10.79<br>(6.22 to<br>17.42)          |
| Chronic kidney disease due to glomerulonephritis           | 31.37<br>(26.26 to<br>37.56)           | 44.46<br>(27.60 to<br>72.71)               | 28.16<br>(18.01 to<br>44.35)           | 52.43<br>(30.71 to<br>89.83)               | 1.63<br>(1.31 to<br>2.04)           | 2.84<br>(1.66 to<br>4.91)           | 1.87<br>(1.14 to<br>3.15)           | 3.29<br>(1.88 to<br>5.90)            |
| Chronic kidney disease due to other and unspecified causes | 78.67<br>(67.28 to<br>91.58)           | 124.58<br>(78.10 to<br>197.39)             | 83.46<br>(54.34 to<br>128.14)          | 147.23<br>(88.22 to<br>238.33)             | 4.72<br>(3.94 to<br>5.58)           | 8.89<br>(5.42 to<br>14.28)          | 6.22<br>(3.97 to<br>9.44)           | 10.25<br>(5.98 to<br>16.77)          |
| Urinary diseases and male infertility                      | 68.80<br>(63.38 to<br>74.66)           | 133.13<br>(119.93 to<br>148.04)            | 105.05<br>(95.12 to<br>118.69)         | 127.39<br>(114.58 to<br>141.31)            | 5.44<br>(4.99 to<br>5.91)           | 12.21<br>(10.81 to<br>13.69)        | 10.20<br>(8.99 to<br>11.50)         | 11.34<br>(9.92 to<br>12.88)          |
| Urinary tract infections                                   | 64.59<br>(59.35 to<br>70.12)           | 128.28<br>(115.29 to<br>143.25)            | 101.91<br>(89.92 to<br>115.33)         | 122.59<br>(109.94 to<br>136.50)            | 5.22<br>(4.79 to<br>5.67)           | 11.90<br>(10.56 to<br>13.34)        | 9.99<br>(8.81 to<br>11.27)          | 11.05<br>(9.66 to<br>12.56)          |
| Urolithiasis                                               | 0.79<br>(0.62 to<br>1.16)              | 1.06<br>(0.80 to<br>1.59)                  | 0.69<br>(0.51 to<br>1.07)              | 1.06<br>(0.81 to<br>1.57)                  | 0.04<br>(0.03 to<br>0.06)           | 0.06<br>(0.04 to<br>0.10)           | 0.04<br>(0.03 to<br>0.07)           | 0.06<br>(0.04 to<br>0.10)            |
| Other urinary diseases                                     | 3.41<br>(2.62 to<br>5.29)              | 3.79<br>(2.75 to<br>6.17)                  | 2.45<br>(1.72 to<br>4.12)              | 3.73<br>(2.73 to<br>6.10)                  | 0.18<br>(0.14 to<br>0.30)           | 0.24<br>(0.17 to<br>0.43)           | 0.17<br>(0.11 to<br>0.30)           | 0.23<br>(0.16 to<br>0.40)            |
| Gynecological diseases                                     | 0.95<br>(0.69 to<br>1.24)              | 1.01<br>(0.73 to<br>1.35)                  | 0.49<br>(0.35 to<br>0.71)              | 1.06<br>(0.77 to<br>1.42)                  | 0.03<br>(0.02 to<br>0.04)           | 0.03<br>(0.02 to<br>0.05)           | 0.02<br>(0.02 to<br>0.02)           | 0.04<br>(0.03 to<br>0.05)            |

|                                                   |                                        |                                        |                                        |                                        |                                  |                                  |                                  |                                  |
|---------------------------------------------------|----------------------------------------|----------------------------------------|----------------------------------------|----------------------------------------|----------------------------------|----------------------------------|----------------------------------|----------------------------------|
| Uterine fibroids                                  | 0.23<br>(0.17 to<br>0.33)              | 0.21<br>(0.15 to<br>0.32)              | 0.12<br>(0.08 to<br>0.18)              | 0.23<br>(0.15 to<br>0.33)              | 0.01<br>(0.00 to<br>0.01)        | 0.01<br>(0.00 to<br>0.01)        | 0.00<br>(0.00 to<br>0.00)        | 0.01<br>(0.00 to<br>0.01)        |
| Polycystic ovarian syndrome                       | 0.04<br>(0.03 to<br>0.06)              | 0.03<br>(0.02 to<br>0.04)              | 0.01<br>(0.00 to<br>0.01)              | 0.03<br>(0.02 to<br>0.05)              | 0.00<br>(0.00 to<br>0.00)        | 0.00<br>(0.00 to<br>0.00)        | 0.00<br>(0.00 to<br>0.00)        | 0.00<br>(0.00 to<br>0.00)        |
| Endometriosis                                     | 0.01<br>(0.00 to<br>0.01)              | 0.01<br>(0.00 to<br>0.01)              | 0.00<br>(0.00 to<br>0.01)              | 0.01<br>(0.00 to<br>0.01)              | 0.00<br>(0.00 to<br>0.00)        | 0.00<br>(0.00 to<br>0.00)        | 0.00<br>(0.00 to<br>0.00)        | 0.00<br>(0.00 to<br>0.00)        |
| Genital prolapse                                  | 0.02<br>(0.01 to<br>0.03)              | 0.01<br>(0.01 to<br>0.02)              | 0.01<br>(0.00 to<br>0.01)              | 0.01<br>(0.01 to<br>0.02)              | 0.00<br>(0.00 to<br>0.00)        | 0.00<br>(0.00 to<br>0.00)        | 0.00<br>(0.00 to<br>0.00)        | 0.00<br>(0.00 to<br>0.00)        |
| Other gynecological diseases                      | 0.65<br>(0.48 to<br>0.83)              | 0.75<br>(0.53 to<br>1.02)              | 0.35<br>(0.24 to<br>0.53)              | 0.78<br>(0.56 to<br>1.04)              | 0.02<br>(0.02 to<br>0.03)        | 0.03<br>(0.02 to<br>0.04)        | 0.01<br>(0.01 to<br>0.02)        | 0.03<br>(0.02 to<br>0.04)        |
| Hemoglobinopathies and hemolytic anemias          | 21.96<br>(18.56 to<br>27.07)           | 22.75<br>(18.48 to<br>28.16)           | 15.72<br>(12.69 to<br>19.65)           | 22.56<br>(18.54 to<br>27.99)           | 1.17<br>(0.94 to<br>1.48)        | 1.57<br>(1.23 to<br>1.98)        | 1.17<br>(0.91 to<br>1.48)        | 1.50<br>(1.16 to<br>1.90)        |
| Thalassemias                                      | 2.49<br>(2.09 to<br>3.04)              | 0.91<br>(0.71 to<br>1.21)              | 0.81<br>(0.64 to<br>1.07)              | 0.93<br>(0.73 to<br>1.23)              | 0.03<br>(0.03 to<br>0.04)        | 0.01<br>(0.01 to<br>0.02)        | 0.01<br>(0.01 to<br>0.01)        | 0.01<br>(0.01 to<br>0.02)        |
| Sickle cell disorders                             | 1.98<br>(1.71 to<br>2.47)              | 2.17<br>(1.74 to<br>2.75)              | 1.35<br>(1.04 to<br>1.78)              | 2.22<br>(1.79 to<br>2.82)              | 0.04<br>(0.04 to<br>0.05)        | 0.06<br>(0.05 to<br>0.07)        | 0.04<br>(0.03 to<br>0.05)        | 0.06<br>(0.05 to<br>0.07)        |
| G6PD deficiency                                   | 3.37<br>(2.85 to<br>4.13)              | 4.69<br>(3.73 to<br>5.78)              | 2.82<br>(2.19 to<br>3.69)              | 4.80<br>(3.91 to<br>5.94)              | 0.09<br>(0.08 to<br>0.11)        | 0.16<br>(0.13 to<br>0.20)        | 0.10<br>(0.08 to<br>0.13)        | 0.16<br>(0.13 to<br>0.20)        |
| Other hemoglobinopathies and hemolytic anemias    | 14.11<br>(11.32 to<br>17.79)           | 14.98<br>(11.69 to<br>18.77)           | 10.74<br>(8.37 to<br>13.67)            | 14.61<br>(11.51 to<br>18.43)           | 1.01<br>(0.79 to<br>1.29)        | 1.34<br>(1.03 to<br>1.71)        | 1.02<br>(0.78 to<br>1.31)        | 1.27<br>(0.97 to<br>1.63)        |
| Endocrine, metabolic, blood, and immune disorders | 48.77<br>(43.15 to<br>69.71)           | 70.14<br>(60.96 to<br>100.96)          | 72.27<br>(62.65 to<br>102.20)          | 68.72<br>(60.01 to<br>98.24)           | 1.90<br>(1.68 to<br>2.77)        | 3.70<br>(3.21 to<br>5.54)        | 4.10<br>(3.57 to<br>6.12)        | 3.46<br>(2.98 to<br>5.15)        |
| <b>Southern Latin America</b>                     |                                        |                                        |                                        |                                        |                                  |                                  |                                  |                                  |
| Cause                                             | YLLs (in 1000s)                        |                                        |                                        |                                        | Deaths (in 1000s)                |                                  |                                  |                                  |
|                                                   | 2016                                   | 2040 Forecast                          | 2040 Better Scenario                   | 2040 Worse Scenario                    | 2016                             | 2040 Forecast                    | 2040 Better Scenario             | 2040 Worse Scenario              |
| <b>Musculoskeletal disorders</b>                  | <b>30.84</b><br>(20.92 to<br>35.78)    | <b>43.04</b><br>(29.09 to<br>50.96)    | <b>35.28</b><br>(24.56 to<br>41.90)    | <b>42.69</b><br>(28.77 to<br>50.84)    | <b>1.15</b><br>(0.80 to<br>1.34) | <b>1.99</b><br>(1.36 to<br>2.32) | <b>1.66</b><br>(1.18 to<br>1.94) | <b>1.93</b><br>(1.31 to<br>2.26) |
| Rheumatoid arthritis                              | 7.94<br>(5.43 to<br>11.41)             | 9.12<br>(6.01 to<br>13.26)             | 5.03<br>(3.44 to<br>7.84)              | 9.54<br>(6.51 to<br>13.85)             | 0.39<br>(0.26 to<br>0.55)        | 0.53<br>(0.36 to<br>0.78)        | 0.31<br>(0.21 to<br>0.48)        | 0.55<br>(0.36 to<br>0.78)        |
| Other musculoskeletal disorders                   | 22.90<br>(15.14 to<br>26.93)           | 33.92<br>(23.00 to<br>40.20)           | 30.25<br>(21.12 to<br>35.87)           | 33.15<br>(22.02 to<br>39.45)           | 0.76<br>(0.50 to<br>0.89)        | 1.45<br>(0.96 to<br>1.71)        | 1.36<br>(0.93 to<br>1.58)        | 1.39<br>(0.90 to<br>1.64)        |
| <b>Other non-communicable diseases</b>            | <b>348.94</b><br>(276.39 to<br>397.59) | <b>267.64</b><br>(197.76 to<br>322.68) | <b>158.67</b><br>(111.19 to<br>200.13) | <b>286.22</b><br>(210.15 to<br>348.77) | <b>6.03</b><br>(4.27 to<br>7.09) | <b>7.45</b><br>(4.18 to<br>9.30) | <b>5.61</b><br>(2.85 to<br>7.29) | <b>7.35</b><br>(4.34 to<br>9.16) |
| Congenital birth defects                          | 295.77<br>(233.27 to<br>340.99)        | 191.40<br>(146.33 to<br>232.69)        | 97.68<br>(73.64 to<br>127.16)          | 211.38<br>(162.51 to<br>257.00)        | 3.65<br>(2.88 to<br>4.18)        | 2.52<br>(1.93 to<br>3.02)        | 1.33<br>(1.03 to<br>1.70)        | 2.76<br>(2.13 to<br>3.33)        |
| Neural tube defects                               | 17.32<br>(12.34 to<br>22.45)           | 5.31<br>(3.37 to<br>7.94)              | 2.17<br>(1.35 to<br>3.46)              | 6.08<br>(3.81 to<br>9.39)              | 0.21<br>(0.15 to<br>0.27)        | 0.07<br>(0.04 to<br>0.10)        | 0.03<br>(0.02 to<br>0.04)        | 0.08<br>(0.05 to<br>0.11)        |
| Congenital heart anomalies                        | 118.95<br>(92.09 to<br>140.84)         | 74.90<br>(55.72 to<br>93.37)           | 30.69<br>(22.09 to<br>42.06)           | 82.73<br>(62.30 to<br>103.38)          | 1.48<br>(1.15 to<br>1.73)        | 0.99<br>(0.75 to<br>1.21)        | 0.41<br>(0.30 to<br>0.55)        | 1.09<br>(0.84 to<br>1.33)        |
| Orofacial clefts                                  | 0.06<br>(0.03 to<br>0.10)              | 0.03<br>(0.01 to<br>0.06)              | 0.01<br>(0.00 to<br>0.02)              | 0.04<br>(0.01 to<br>0.07)              | 0.00<br>(0.00 to<br>0.00)        | 0.00<br>(0.00 to<br>0.00)        | 0.00<br>(0.00 to<br>0.00)        | 0.00<br>(0.00 to<br>0.00)        |
| Down syndrome                                     | 15.99<br>(10.10 to<br>19.41)           | 12.79<br>(8.85 to<br>15.74)            | 12.43<br>(8.80 to<br>15.27)            | 13.42<br>(9.07 to<br>16.55)            | 0.24<br>(0.16 to<br>0.29)        | 0.24<br>(0.16 to<br>0.28)        | 0.24<br>(0.17 to<br>0.28)        | 0.24<br>(0.17 to<br>0.29)        |

|                                               |                                       |                                     |                                   |                                       |                              |                              |                              |                              |
|-----------------------------------------------|---------------------------------------|-------------------------------------|-----------------------------------|---------------------------------------|------------------------------|------------------------------|------------------------------|------------------------------|
| Other chromosomal abnormalities               | 28.29<br>(20.57 to<br>36.48)          | 25.03<br>(17.11 to<br>33.77)        | 16.79<br>(11.73 to<br>22.29)      | 27.72<br>(19.39 to<br>37.28)          | 0.34<br>(0.25 to<br>0.44)    | 0.31<br>(0.22 to<br>0.42)    | 0.21<br>(0.15 to<br>0.28)    | 0.34<br>(0.24 to<br>0.46)    |
| Congenital musculoskeletal and limb anomalies | 6.30<br>(4.72 to<br>7.75)             | 4.12<br>(2.92 to<br>5.67)           | 2.00<br>(1.38 to<br>2.83)         | 4.59<br>(3.26 to<br>6.26)             | 0.08<br>(0.06 to<br>0.09)    | 0.05<br>(0.04 to<br>0.07)    | 0.03<br>(0.02 to<br>0.04)    | 0.06<br>(0.04 to<br>0.08)    |
| Urogenital congenital anomalies               | 11.60<br>(7.66 to<br>18.00)           | 7.00<br>(4.24 to<br>10.83)          | 3.78<br>(2.21 to<br>5.97)         | 7.69<br>(4.56 to<br>12.06)            | 0.15<br>(0.10 to<br>0.22)    | 0.10<br>(0.06 to<br>0.15)    | 0.06<br>(0.03 to<br>0.09)    | 0.11<br>(0.07 to<br>0.16)    |
| Digestive congenital anomalies                | 30.16<br>(22.56 to<br>38.86)          | 20.30<br>(13.75 to<br>28.28)        | 9.07<br>(6.05 to<br>13.34)        | 22.82<br>(15.92 to<br>31.94)          | 0.35<br>(0.27 to<br>0.46)    | 0.24<br>(0.17 to<br>0.34)    | 0.11<br>(0.07 to<br>0.16)    | 0.27<br>(0.19 to<br>0.38)    |
| Other congenital birth defects                | 67.10<br>(46.45 to<br>82.19)          | 41.93<br>(28.99 to<br>54.77)        | 20.73<br>(13.99 to<br>28.88)      | 46.29<br>(31.44 to<br>60.66)          | 0.81<br>(0.56 to<br>0.98)    | 0.52<br>(0.37 to<br>0.67)    | 0.26<br>(0.18 to<br>0.36)    | 0.57<br>(0.40 to<br>0.74)    |
| Skin and subcutaneous diseases                | 29.15<br>(9.70 to<br>38.18)           | 62.59<br>(21.59 to<br>82.85)        | 53.11<br>(18.39 to<br>71.27)      | 59.78<br>(20.44 to<br>79.21)          | 2.11<br>(0.71 to<br>2.80)    | 4.77<br>(1.59 to<br>6.44)    | 4.19<br>(1.42 to<br>5.69)    | 4.42<br>(1.48 to<br>6.01)    |
| Cellulitis                                    | 5.89<br>(2.25 to<br>8.84)             | 15.93<br>(6.71 to<br>23.34)         | 15.05<br>(6.33 to<br>21.92)       | 15.25<br>(6.39 to<br>22.43)           | 0.31<br>(0.12 to<br>0.46)    | 0.94<br>(0.39 to<br>1.40)    | 0.92<br>(0.38 to<br>1.37)    | 0.87<br>(0.36 to<br>1.32)    |
| Pyoderma                                      | 11.55<br>(2.66 to<br>16.84)           | 27.66<br>(5.98 to<br>41.14)         | 23.55<br>(5.03 to<br>35.57)       | 26.53<br>(5.83 to<br>39.28)           | 0.72<br>(0.14 to<br>1.09)    | 1.97<br>(0.41 to<br>3.04)    | 1.80<br>(0.38 to<br>2.78)    | 1.82<br>(0.38 to<br>2.85)    |
| Decubitus ulcer                               | 10.53<br>(3.81 to<br>13.72)           | 17.01<br>(6.48 to<br>23.37)         | 12.86<br>(4.93 to<br>18.05)       | 16.06<br>(6.13 to<br>21.88)           | 1.02<br>(0.38 to<br>1.34)    | 1.75<br>(0.65 to<br>2.48)    | 1.37<br>(0.51 to<br>1.96)    | 1.62<br>(0.61 to<br>2.32)    |
| Other skin and subcutaneous diseases          | 1.17<br>(0.44 to<br>1.52)             | 2.00<br>(0.75 to<br>2.64)           | 1.65<br>(0.65 to<br>2.21)         | 1.94<br>(0.72 to<br>2.58)             | 0.06<br>(0.02 to<br>0.08)    | 0.11<br>(0.05 to<br>0.15)    | 0.10<br>(0.04 to<br>0.13)    | 0.11<br>(0.04 to<br>0.14)    |
| Sudden infant death syndrome                  | 24.02<br>(18.98 to<br>30.61)          | 13.64<br>(8.77 to<br>20.52)         | 7.88<br>(5.08 to<br>11.82)        | 15.06<br>(9.73 to<br>22.53)           | 0.28<br>(0.22 to<br>0.36)    | 0.16<br>(0.10 to<br>0.23)    | 0.09<br>(0.06 to<br>0.14)    | 0.17<br>(0.11 to<br>0.26)    |
| Injuries                                      | 1,340.85<br>(1,233.66 to<br>1,471.89) | 1,165.55<br>(884.98 to<br>1,670.66) | 720.97<br>(536.17 to<br>1,085.31) | 1,398.45<br>(1,041.21 to<br>1,994.90) | 33.44<br>(30.79 to<br>36.79) | 35.78<br>(29.47 to<br>46.35) | 24.12<br>(19.69 to<br>32.12) | 40.54<br>(32.27 to<br>53.26) |
| Transport injuries                            | 432.23<br>(390.49 to<br>478.07)       | 312.10<br>(204.54 to<br>482.04)     | 108.24<br>(69.98 to<br>166.46)    | 482.32<br>(308.10 to<br>760.77)       | 10.14<br>(9.21 to<br>11.20)  | 8.58<br>(5.90 to<br>12.55)   | 3.27<br>(2.27 to<br>4.74)    | 12.53<br>(8.23 to<br>18.86)  |
| Road injuries                                 | 401.08<br>(362.56 to<br>442.93)       | 266.39<br>(173.03 to<br>411.04)     | 82.14<br>(53.02 to<br>128.73)     | 431.24<br>(274.42 to<br>682.97)       | 9.39<br>(8.52 to<br>10.37)   | 7.32<br>(5.08 to<br>10.69)   | 2.53<br>(1.78 to<br>3.64)    | 11.15<br>(7.38 to<br>16.79)  |
| Pedestrian road injuries                      | 113.52<br>(95.11 to<br>140.87)        | 76.52<br>(53.19 to<br>112.87)       | 19.68<br>(13.69 to<br>28.58)      | 118.90<br>(79.51 to<br>179.88)        | 3.26<br>(2.79 to<br>3.92)    | 2.80<br>(2.02 to<br>4.01)    | 0.85<br>(0.61 to<br>1.18)    | 4.04<br>(2.81 to<br>5.87)    |
| <b>Southern Latin America</b>                 |                                       |                                     |                                   |                                       |                              |                              |                              |                              |
| Cause                                         | YLLs (in 1000s)                       |                                     |                                   |                                       | Deaths (in 1000s)            |                              |                              |                              |
|                                               | 2016                                  | 2040 Forecast                       | 2040 Better Scenario              | 2040 Worse Scenario                   | 2016                         | 2040 Forecast                | 2040 Better Scenario         | 2040 Worse Scenario          |
| Cyclist road injuries                         | 13.43<br>(11.47 to<br>16.14)          | 10.59<br>(7.05 to<br>15.93)         | 4.41<br>(3.00 to<br>6.61)         | 16.13<br>(10.42 to<br>25.10)          | 0.35<br>(0.30 to<br>0.43)    | 0.33<br>(0.22 to<br>0.49)    | 0.17<br>(0.12 to<br>0.25)    | 0.46<br>(0.30 to<br>0.69)    |
| Motorcyclist road injuries                    | 68.71<br>(56.21 to<br>78.54)          | 45.36<br>(25.29 to<br>80.76)        | 21.73<br>(12.28 to<br>38.87)      | 65.59<br>(35.78 to<br>119.21)         | 1.26<br>(1.02 to<br>1.44)    | 0.88<br>(0.52 to<br>1.50)    | 0.46<br>(0.27 to<br>0.77)    | 1.24<br>(0.70 to<br>2.15)    |
| Motor vehicle road injuries                   | 200.68<br>(167.53 to<br>226.62)       | 130.49<br>(82.87 to<br>199.11)      | 35.22<br>(22.60 to<br>53.36)      | 224.57<br>(138.21 to<br>349.62)       | 4.41<br>(3.65 to<br>4.96)    | 3.22<br>(2.14 to<br>4.69)    | 1.02<br>(0.69 to<br>1.47)    | 5.26<br>(3.36 to<br>7.89)    |
| Other road injuries                           | 4.74<br>(3.78 to<br>6.47)             | 3.43<br>(2.06 to<br>5.90)           | 1.11<br>(0.67 to<br>1.85)         | 6.05<br>(3.53 to<br>10.71)            | 0.11<br>(0.09 to<br>0.15)    | 0.09<br>(0.06 to<br>0.16)    | 0.04<br>(0.02 to<br>0.06)    | 0.15<br>(0.09 to<br>0.27)    |
| Other transport injuries                      | 31.15<br>(26.79 to<br>36.47)          | 45.71<br>(29.95 to<br>69.00)        | 26.10<br>(16.31 to<br>39.83)      | 51.08<br>(32.25 to<br>78.46)          | 0.74<br>(0.65 to<br>0.85)    | 1.26<br>(0.85 to<br>1.87)    | 0.74<br>(0.48 to<br>1.11)    | 1.38<br>(0.90 to<br>2.10)    |



|                                                 |                                     |                                     |                                     |                                     |                                  |                                  |                                  |                                  |
|-------------------------------------------------|-------------------------------------|-------------------------------------|-------------------------------------|-------------------------------------|----------------------------------|----------------------------------|----------------------------------|----------------------------------|
| <b>Unintentional injuries</b>                   | <b>388.54</b><br>(357.85 to 427.15) | <b>347.94</b><br>(302.14 to 403.85) | <b>256.16</b><br>(221.50 to 300.93) | <b>354.83</b><br>(306.28 to 416.87) | <b>11.92</b><br>(10.99 to 13.05) | <b>14.55</b><br>(13.12 to 16.29) | <b>11.68</b><br>(10.57 to 13.16) | <b>14.18</b><br>(12.64 to 16.07) |
| Falls                                           | 58.88<br>(51.66 to 73.13)           | 75.08<br>(65.84 to 90.35)           | 60.59<br>(52.86 to 71.93)           | 73.48<br>(64.08 to 90.20)           | 3.17<br>(2.76 to 3.72)           | 5.19<br>(4.55 to 6.03)           | 4.36<br>(3.84 to 4.93)           | 4.91<br>(4.25 to 5.73)           |
| Drowning                                        | 65.16<br>(58.40 to 72.97)           | 47.74<br>(34.50 to 65.50)           | 32.78<br>(23.90 to 45.41)           | 51.68<br>(36.90 to 73.93)           | 1.27<br>(1.14 to 1.43)           | 1.12<br>(0.83 to 1.53)           | 0.79<br>(0.60 to 1.07)           | 1.20<br>(0.85 to 1.68)           |
| Fire, heat, and hot substances                  | 38.34<br>(31.26 to 42.87)           | 29.29<br>(21.69 to 38.63)           | 18.05<br>(13.27 to 23.78)           | 31.30<br>(22.80 to 43.01)           | 1.27<br>(1.00 to 1.43)           | 1.30<br>(0.97 to 1.72)           | 0.87<br>(0.64 to 1.14)           | 1.33<br>(0.98 to 1.81)           |
| Poisonings                                      | 13.21<br>(11.35 to 15.92)           | 6.84<br>(4.66 to 10.41)             | 3.64<br>(2.45 to 5.69)              | 7.51<br>(5.05 to 11.72)             | 0.29<br>(0.25 to 0.36)           | 0.19<br>(0.14 to 0.29)           | 0.11<br>(0.08 to 0.17)           | 0.20<br>(0.14 to 0.32)           |
| Exposure to mechanical forces                   | 56.38<br>(49.30 to 64.10)           | 42.89<br>(35.39 to 52.13)           | 28.51<br>(23.10 to 35.69)           | 44.19<br>(36.07 to 53.26)           | 1.22<br>(1.06 to 1.36)           | 1.10<br>(0.93 to 1.28)           | 0.76<br>(0.63 to 0.92)           | 1.11<br>(0.92 to 1.28)           |
| Unintentional firearm injuries                  | 24.02<br>(19.18 to 27.91)           | 16.64<br>(12.72 to 21.99)           | 11.55<br>(8.89 to 15.48)            | 17.04<br>(12.94 to 22.22)           | 0.53<br>(0.43 to 0.61)           | 0.44<br>(0.35 to 0.54)           | 0.32<br>(0.26 to 0.39)           | 0.44<br>(0.35 to 0.53)           |
| Unintentional suffocation                       | 9.55<br>(7.33 to 11.95)             | 6.07<br>(4.59 to 8.02)              | 4.13<br>(3.03 to 5.54)              | 6.38<br>(4.70 to 8.37)              | 0.14<br>(0.11 to 0.17)           | 0.10<br>(0.08 to 0.13)           | 0.07<br>(0.05 to 0.09)           | 0.11<br>(0.08 to 0.13)           |
| Other exposure to mechanical forces             | 22.81<br>(18.29 to 27.76)           | 20.19<br>(15.96 to 25.01)           | 12.83<br>(9.76 to 16.44)            | 20.77<br>(16.12 to 26.10)           | 0.54<br>(0.42 to 0.65)           | 0.56<br>(0.44 to 0.67)           | 0.37<br>(0.29 to 0.46)           | 0.57<br>(0.44 to 0.69)           |
| Adverse effects of medical treatment            | 46.32<br>(37.32 to 60.72)           | 51.11<br>(41.37 to 66.85)           | 42.28<br>(34.37 to 55.60)           | 50.39<br>(40.84 to 66.76)           | 2.08<br>(1.64 to 2.64)           | 2.78<br>(2.22 to 3.57)           | 2.44<br>(1.96 to 3.11)           | 2.64<br>(2.09 to 3.42)           |
| Animal contact                                  | 3.32<br>(2.60 to 4.58)              | 3.49<br>(2.67 to 4.88)              | 2.45<br>(1.85 to 3.37)              | 3.63<br>(2.77 to 5.10)              | 0.08<br>(0.06 to 0.10)           | 0.10<br>(0.08 to 0.14)           | 0.07<br>(0.06 to 0.10)           | 0.10<br>(0.08 to 0.14)           |
| Venomous animal contact                         | 1.26<br>(0.88 to 1.90)              | 1.36<br>(0.97 to 2.05)              | 1.04<br>(0.73 to 1.58)              | 1.40<br>(1.00 to 2.17)              | 0.03<br>(0.02 to 0.05)           | 0.04<br>(0.03 to 0.06)           | 0.03<br>(0.02 to 0.05)           | 0.04<br>(0.03 to 0.07)           |
| Non-venomous animal contact                     | 2.05<br>(1.54 to 2.95)              | 2.13<br>(1.55 to 3.06)              | 1.40<br>(1.00 to 1.96)              | 2.23<br>(1.61 to 3.25)              | 0.04<br>(0.03 to 0.06)           | 0.06<br>(0.04 to 0.08)           | 0.04<br>(0.03 to 0.05)           | 0.06<br>(0.04 to 0.08)           |
| Foreign body                                    | 73.16<br>(62.91 to 86.14)           | 65.51<br>(55.93 to 79.53)           | 55.62<br>(47.64 to 66.31)           | 65.62<br>(55.62 to 80.45)           | 1.81<br>(1.61 to 2.16)           | 2.10<br>(1.86 to 2.56)           | 1.95<br>(1.72 to 2.36)           | 2.01<br>(1.77 to 2.44)           |
| Pulmonary aspiration and foreign body in airway | 69.61<br>(59.60 to 81.72)           | 62.32<br>(52.84 to 76.36)           | 52.29<br>(44.22 to 62.54)           | 62.41<br>(52.65 to 76.21)           | 1.72<br>(1.53 to 2.07)           | 2.01<br>(1.77 to 2.45)           | 1.84<br>(1.62 to 2.24)           | 1.92<br>(1.68 to 2.33)           |
| Foreign body in other body part                 | 3.55<br>(2.91 to 5.34)              | 3.19<br>(2.46 to 4.85)              | 3.33<br>(2.61 to 4.94)              | 3.21<br>(2.47 to 4.93)              | 0.08<br>(0.07 to 0.12)           | 0.09<br>(0.07 to 0.14)           | 0.10<br>(0.08 to 0.15)           | 0.09<br>(0.07 to 0.14)           |
| Environmental heat and cold exposure            | 6.16<br>(3.82 to 9.67)              | 6.24<br>(3.76 to 10.25)             | 3.80<br>(2.23 to 6.20)              | 6.50<br>(3.89 to 10.66)             | 0.17<br>(0.11 to 0.27)           | 0.20<br>(0.12 to 0.34)           | 0.13<br>(0.08 to 0.21)           | 0.20<br>(0.13 to 0.34)           |
| Other unintentional injuries                    | 27.60<br>(24.28 to 31.30)           | 19.75<br>(15.57 to 24.83)           | 8.44<br>(6.23 to 11.84)             | 20.54<br>(16.79 to 25.22)           | 0.56<br>(0.49 to 0.63)           | 0.46<br>(0.38 to 0.56)           | 0.20<br>(0.15 to 0.27)           | 0.47<br>(0.40 to 0.56)           |
| Self-harm and interpersonal violence            | 519.70<br>(433.73 to 598.67)        | 458.40<br>(308.26 to 676.35)        | 310.08<br>(211.33 to 439.62)        | 514.09<br>(326.72 to 791.65)        | 11.38<br>(9.71 to 13.20)         | 11.62<br>(8.13 to 16.12)         | 8.14<br>(5.81 to 11.35)          | 12.80<br>(8.43 to 18.73)         |

**Southern Latin America**

| Cause     | YLLs (in 1000s)              |                              |                              |                              | Deaths (in 1000s)      |                         |                        |                         |
|-----------|------------------------------|------------------------------|------------------------------|------------------------------|------------------------|-------------------------|------------------------|-------------------------|
|           | 2016                         | 2040 Forecast                | 2040 Better Scenario         | 2040 Worse Scenario          | 2016                   | 2040 Forecast           | 2040 Better Scenario   | 2040 Worse Scenario     |
| Self-harm | 339.87<br>(277.11 to 392.11) | 328.41<br>(199.92 to 510.76) | 230.08<br>(146.22 to 350.93) | 381.17<br>(215.05 to 626.18) | 7.81<br>(6.63 to 9.24) | 8.77<br>(5.56 to 12.95) | 6.34<br>(4.27 to 8.95) | 9.90<br>(5.84 to 15.42) |

|                                                                              |                                 |                                 |                                 |                                 |                           |                            |                           |                            |
|------------------------------------------------------------------------------|---------------------------------|---------------------------------|---------------------------------|---------------------------------|---------------------------|----------------------------|---------------------------|----------------------------|
| Self-harm by firearm                                                         | 61.98<br>(45.64 to<br>82.31)    | 58.95<br>(32.06 to<br>105.94)   | 37.56<br>(20.60 to<br>65.04)    | 69.03<br>(35.35 to<br>130.29)   | 1.56<br>(1.18 to<br>2.15) | 1.72<br>(1.00 to<br>2.86)  | 1.14<br>(0.69 to<br>1.88) | 1.94<br>(1.05 to<br>3.35)  |
| Self-harm by other specified means                                           | 277.89<br>(215.88 to<br>326.63) | 269.46<br>(166.25 to<br>414.26) | 192.52<br>(123.08 to<br>286.19) | 312.14<br>(176.76 to<br>509.46) | 6.25<br>(4.96 to<br>7.52) | 7.05<br>(4.51 to<br>10.42) | 5.20<br>(3.48 to<br>7.46) | 7.96<br>(4.77 to<br>12.25) |
| Interpersonal violence                                                       | 179.83<br>(113.70 to<br>247.19) | 129.99<br>(79.99 to<br>190.39)  | 80.00<br>(49.22 to<br>116.47)   | 132.93<br>(81.92 to<br>195.92)  | 3.58<br>(2.25 to<br>4.95) | 2.85<br>(1.77 to<br>4.11)  | 1.80<br>(1.11 to<br>2.58) | 2.90<br>(1.78 to<br>4.23)  |
| Physical violence by firearm                                                 | 98.22<br>(54.97 to<br>141.90)   | 68.95<br>(37.57 to<br>105.81)   | 40.36<br>(21.71 to<br>62.41)    | 69.75<br>(37.05 to<br>107.15)   | 1.87<br>(1.07 to<br>2.73) | 1.41<br>(0.77 to<br>2.16)  | 0.84<br>(0.45 to<br>1.31) | 1.42<br>(0.76 to<br>2.19)  |
| Physical violence by sharp object                                            | 59.89<br>(32.92 to<br>88.42)    | 45.07<br>(24.77 to<br>69.48)    | 27.92<br>(15.99 to<br>43.02)    | 45.69<br>(24.71 to<br>71.44)    | 1.21<br>(0.68 to<br>1.80) | 0.99<br>(0.57 to<br>1.54)  | 0.63<br>(0.37 to<br>0.95) | 1.00<br>(0.56 to<br>1.56)  |
| Physical violence by other means                                             | 21.72<br>(11.88 to<br>31.94)    | 15.96<br>(8.00 to<br>24.82)     | 11.72<br>(5.35 to<br>18.31)     | 17.49<br>(8.64 to<br>27.85)     | 0.50<br>(0.25 to<br>0.72) | 0.45<br>(0.22 to<br>0.69)  | 0.34<br>(0.17 to<br>0.52) | 0.48<br>(0.23 to<br>0.75)  |
| Forces of nature, conflict and terrorism, and executions and police conflict | 0.39<br>(0.32 to<br>1.16)       | 47.12<br>(0.00 to<br>367.38)    | 46.49<br>(0.00 to<br>360.79)    | 47.19<br>(0.00 to<br>367.04)    | 0.01<br>(0.01 to<br>0.02) | 1.03<br>(0.00 to<br>7.67)  | 1.04<br>(0.00 to<br>7.65) | 1.03<br>(0.00 to<br>7.61)  |
| Exposure to forces of nature                                                 | 0.00<br>(0.00 to<br>0.00)       | 6.18<br>(0.00 to<br>41.42)      | 6.11<br>(0.00 to<br>41.00)      | 6.22<br>(0.00 to<br>41.65)      | 0.00<br>(0.00 to<br>0.00) | 0.16<br>(0.00 to<br>1.10)  | 0.17<br>(0.00 to<br>1.13) | 0.16<br>(0.00 to<br>1.09)  |
| Conflict and terrorism                                                       | 0.00<br>(0.00 to<br>0.00)       | 0.28<br>(0.00 to<br>2.31)       | 0.27<br>(0.00 to<br>2.25)       | 0.28<br>(0.00 to<br>2.32)       | 0.00<br>(0.00 to<br>0.00) | 0.01<br>(0.00 to<br>0.05)  | 0.01<br>(0.00 to<br>0.05) | 0.01<br>(0.00 to<br>0.05)  |
| Executions and police conflict                                               | 0.39<br>(0.32 to<br>1.16)       | 40.66<br>(0.00 to<br>362.96)    | 40.10<br>(0.00 to<br>356.48)    | 40.70<br>(0.00 to<br>362.62)    | 0.01<br>(0.01 to<br>0.02) | 0.86<br>(0.00 to<br>7.56)  | 0.86<br>(0.00 to<br>7.54) | 0.86<br>(0.00 to<br>7.50)  |

**Argentina**

| Cause                                                                    | YLLs (in 1000s)                       |                                       |                                       |                                        | Deaths (in 1000s)               |                                 |                                 |                                 |
|--------------------------------------------------------------------------|---------------------------------------|---------------------------------------|---------------------------------------|----------------------------------------|---------------------------------|---------------------------------|---------------------------------|---------------------------------|
|                                                                          | 2016                                  | 2040 Forecast                         | 2040 Better Scenario                  | 2040 Worse Scenario                    | 2016                            | 2040 Forecast                   | 2040 Better Scenario            | 2040 Worse Scenario             |
| <b>All causes</b>                                                        | 6,662.42<br>(6,260.13 to<br>7,098.88) | 7,445.59<br>(6,642.31 to<br>8,390.01) | 5,225.56<br>(4,640.79 to<br>5,910.02) | 9,210.68<br>(8,079.49 to<br>10,562.26) | 335.01<br>(314.61 to<br>354.83) | 444.04<br>(406.22 to<br>478.97) | 336.84<br>(308.88 to<br>367.75) | 517.37<br>(472.07 to<br>564.94) |
| <b>Communicable, maternal, neonatal, and nutritional diseases</b>        | 998.04<br>(918.20 to<br>1,082.32)     | 751.99<br>(604.75 to<br>954.03)       | 500.18<br>(407.44 to<br>616.74)       | 961.08<br>(748.23 to<br>1,257.09)      | 37.97<br>(34.82 to<br>41.22)    | 40.33<br>(31.57 to<br>52.82)    | 30.61<br>(24.44 to<br>38.98)    | 46.93<br>(35.51 to<br>63.80)    |
| <b>HIV/AIDS and tuberculosis</b>                                         | 91.11<br>(87.39 to<br>95.34)          | 32.90<br>(19.33 to<br>56.70)          | 18.15<br>(8.04 to<br>39.76)           | 64.31<br>(49.10 to<br>83.05)           | 2.27<br>(2.18 to<br>2.38)       | 0.92<br>(0.56 to<br>1.51)       | 0.46<br>(0.23 to<br>0.97)       | 1.67<br>(1.22 to<br>2.22)       |
| <b>Tuberculosis</b>                                                      | 19.86<br>(17.93 to<br>22.03)          | 15.44<br>(9.40 to<br>23.96)           | 5.30<br>(3.16 to<br>8.74)             | 21.66<br>(12.43 to<br>35.15)           | 0.66<br>(0.60 to<br>0.73)       | 0.58<br>(0.36 to<br>0.90)       | 0.21<br>(0.13 to<br>0.33)       | 0.79<br>(0.46 to<br>1.25)       |
| <b>HIV/AIDS</b>                                                          | 71.25<br>(67.84 to<br>74.91)          | 17.46<br>(6.60 to<br>41.04)           | 12.85<br>(3.21 to<br>34.28)           | 42.65<br>(31.26 to<br>59.67)           | 1.61<br>(1.53 to<br>1.69)       | 0.34<br>(0.11 to<br>0.90)       | 0.25<br>(0.05 to<br>0.75)       | 0.88<br>(0.58 to<br>1.30)       |
| <b>Diarrhea, lower respiratory, and other common infectious diseases</b> | 488.90<br>(448.46 to<br>530.53)       | 494.23<br>(370.39 to<br>677.42)       | 336.65<br>(258.42 to<br>448.50)       | 636.62<br>(447.44 to<br>931.21)        | 28.94<br>(26.03 to<br>31.91)    | 34.75<br>(26.18 to<br>47.09)    | 26.08<br>(20.11 to<br>34.37)    | 40.34<br>(28.96 to<br>57.36)    |
| <b>Diarrheal diseases</b>                                                | 19.83<br>(17.07 to<br>23.21)          | 8.03<br>(3.77 to<br>17.80)            | 16.00<br>(7.13 to<br>34.14)           | 11.17<br>(4.30 to<br>28.33)            | 0.71<br>(0.64 to<br>0.79)       | 0.50<br>(0.23 to<br>1.10)       | 1.12<br>(0.48 to<br>2.44)       | 0.63<br>(0.24 to<br>1.60)       |
| <b>Intestinal infectious diseases</b>                                    | 0.06<br>(0.03 to<br>0.11)             | 0.05<br>(0.02 to<br>0.09)             | 0.06<br>(0.03 to<br>0.12)             | 0.05<br>(0.02 to<br>0.10)              | 0.00<br>(0.00 to<br>0.00)       | 0.00<br>(0.00 to<br>0.00)       | 0.00<br>(0.00 to<br>0.00)       | 0.00<br>(0.00 to<br>0.00)       |
| <b>Typhoid fever</b>                                                     | 0.05<br>(0.02 to<br>0.10)             | 0.04<br>(0.02 to<br>0.08)             | 0.06<br>(0.02 to<br>0.11)             | 0.04<br>(0.02 to<br>0.08)              | 0.00<br>(0.00 to<br>0.00)       | 0.00<br>(0.00 to<br>0.00)       | 0.00<br>(0.00 to<br>0.00)       | 0.00<br>(0.00 to<br>0.00)       |
| <b>Paratyphoid fever</b>                                                 | 0.01<br>(0.00 to<br>0.02)             | 0.01<br>(0.00 to<br>0.02)             | 0.00<br>(0.00 to<br>0.01)             | 0.01<br>(0.00 to<br>0.02)              | 0.00<br>(0.00 to<br>0.00)       | 0.00<br>(0.00 to<br>0.00)       | 0.00<br>(0.00 to<br>0.00)       | 0.00<br>(0.00 to<br>0.00)       |



|                                                       |                                                   |                                                  |                                                 |                                                   |                                                |                                                |                                                |                                                |
|-------------------------------------------------------|---------------------------------------------------|--------------------------------------------------|-------------------------------------------------|---------------------------------------------------|------------------------------------------------|------------------------------------------------|------------------------------------------------|------------------------------------------------|
| Schistosomiasis                                       | 0.00<br>(0.00 to<br>0.00)                         | 0.00<br>(0.00 to<br>0.00)                        | 0.00<br>(0.00 to<br>0.00)                       | 0.00<br>(0.00 to<br>0.00)                         | 0.00<br>(0.00 to<br>0.00)                      | 0.00<br>(0.00 to<br>0.00)                      | 0.00<br>(0.00 to<br>0.00)                      | 0.00<br>(0.00 to<br>0.00)                      |
| Cysticercosis                                         | 0.04<br>(0.04 to<br>0.05)                         | 0.02<br>(0.02 to<br>0.02)                        | 0.02<br>(0.01 to<br>0.02)                       | 0.02<br>(0.02 to<br>0.02)                         | 0.00<br>(0.00 to<br>0.00)                      | 0.00<br>(0.00 to<br>0.00)                      | 0.00<br>(0.00 to<br>0.00)                      | 0.00<br>(0.00 to<br>0.00)                      |
| Cystic echinococcosis                                 | 0.00<br>(0.00 to<br>0.00)                         | 0.00<br>(0.00 to<br>0.00)                        | 0.00<br>(0.00 to<br>0.00)                       | 0.00<br>(0.00 to<br>0.00)                         | 0.00<br>(0.00 to<br>0.00)                      | 0.00<br>(0.00 to<br>0.00)                      | 0.00<br>(0.00 to<br>0.00)                      | 0.00<br>(0.00 to<br>0.00)                      |
| Dengue                                                | 0.01<br>(0.00 to<br>0.01)                         | 0.03<br>(0.02 to<br>0.05)                        | 0.03<br>(0.02 to<br>0.05)                       | 0.03<br>(0.02 to<br>0.05)                         | 0.00<br>(0.00 to<br>0.00)                      | 0.00<br>(0.00 to<br>0.00)                      | 0.00<br>(0.00 to<br>0.00)                      | 0.00<br>(0.00 to<br>0.00)                      |
| Yellow fever                                          | 2.90<br>(0.49 to<br>9.43)                         | 1.19<br>(0.18 to<br>4.49)                        | 0.88<br>(0.12 to<br>3.40)                       | 1.26<br>(0.19 to<br>4.56)                         | 0.05<br>(0.01 to<br>0.17)                      | 0.02<br>(0.00 to<br>0.08)                      | 0.02<br>(0.00 to<br>0.06)                      | 0.02<br>(0.00 to<br>0.08)                      |
| Rabies                                                | 0.00<br>(0.00 to<br>0.00)                         | 0.00<br>(0.00 to<br>0.00)                        | 0.00<br>(0.00 to<br>0.00)                       | 0.00<br>(0.00 to<br>0.00)                         | 0.00<br>(0.00 to<br>0.00)                      | 0.00<br>(0.00 to<br>0.00)                      | 0.00<br>(0.00 to<br>0.00)                      | 0.00<br>(0.00 to<br>0.00)                      |
| Intestinal nematode infections                        | 0.07<br>(0.02 to<br>0.13)                         | 0.06<br>(0.03 to<br>0.12)                        | 0.06<br>(0.03 to<br>0.11)                       | 0.06<br>(0.03 to<br>0.12)                         | 0.00<br>(0.00 to<br>0.00)                      | 0.00<br>(0.00 to<br>0.00)                      | 0.00<br>(0.00 to<br>0.00)                      | 0.00<br>(0.00 to<br>0.00)                      |
| Other neglected tropical diseases                     | 0.50<br>(0.40 to<br>0.85)                         | 0.45<br>(0.34 to<br>0.75)                        | 0.46<br>(0.35 to<br>0.77)                       | 0.47<br>(0.36 to<br>0.75)                         | 0.01<br>(0.01 to<br>0.02)                      | 0.01<br>(0.01 to<br>0.02)                      | 0.01<br>(0.01 to<br>0.02)                      | 0.01<br>(0.01 to<br>0.02)                      |
| <b>Maternal disorders</b>                             | <b>21.17</b><br><b>(18.17 to</b><br><b>24.76)</b> | <b>13.68</b><br><b>(9.74 to</b><br><b>18.86)</b> | <b>8.73</b><br><b>(6.19 to</b><br><b>12.04)</b> | <b>14.86</b><br><b>(10.47 to</b><br><b>20.45)</b> | <b>0.38</b><br><b>(0.33 to</b><br><b>0.45)</b> | <b>0.25</b><br><b>(0.18 to</b><br><b>0.34)</b> | <b>0.16</b><br><b>(0.11 to</b><br><b>0.22)</b> | <b>0.27</b><br><b>(0.19 to</b><br><b>0.37)</b> |
| Maternal hemorrhage                                   | 3.04<br>(2.27 to<br>3.94)                         | 1.79<br>(1.11 to<br>2.77)                        | 1.17<br>(0.72 to<br>1.80)                       | 1.94<br>(1.18 to<br>3.07)                         | 0.06<br>(0.04 to<br>0.07)                      | 0.03<br>(0.02 to<br>0.05)                      | 0.02<br>(0.01 to<br>0.03)                      | 0.04<br>(0.02 to<br>0.06)                      |
| Maternal sepsis and other maternal infections         | 5.15<br>(3.89 to<br>6.51)                         | 2.63<br>(1.61 to<br>3.87)                        | 1.68<br>(1.02 to<br>2.59)                       | 2.85<br>(1.69 to<br>4.31)                         | 0.10<br>(0.07 to<br>0.12)                      | 0.05<br>(0.03 to<br>0.07)                      | 0.03<br>(0.02 to<br>0.05)                      | 0.05<br>(0.03 to<br>0.08)                      |
| Maternal hypertensive disorders                       | 3.60<br>(2.49 to<br>4.75)                         | 1.92<br>(1.09 to<br>3.00)                        | 1.20<br>(0.70 to<br>1.88)                       | 2.08<br>(1.17 to<br>3.27)                         | 0.06<br>(0.04 to<br>0.08)                      | 0.03<br>(0.02 to<br>0.05)                      | 0.02<br>(0.01 to<br>0.03)                      | 0.04<br>(0.02 to<br>0.06)                      |
| Maternal obstructed labor and uterine rupture         | 0.37<br>(0.19 to<br>0.58)                         | 0.19<br>(0.09 to<br>0.34)                        | 0.11<br>(0.05 to<br>0.21)                       | 0.21<br>(0.09 to<br>0.38)                         | 0.01<br>(0.00 to<br>0.01)                      | 0.00<br>(0.00 to<br>0.01)                      | 0.00<br>(0.00 to<br>0.00)                      | 0.00<br>(0.00 to<br>0.01)                      |
| Maternal abortion, miscarriage, and ectopic pregnancy | 2.57<br>(1.79 to<br>3.63)                         | 3.82<br>(2.22 to<br>6.23)                        | 2.42<br>(1.40 to<br>3.98)                       | 4.15<br>(2.43 to<br>6.60)                         | 0.05<br>(0.03 to<br>0.07)                      | 0.07<br>(0.04 to<br>0.11)                      | 0.04<br>(0.03 to<br>0.07)                      | 0.08<br>(0.05 to<br>0.12)                      |
| Indirect maternal deaths                              | 3.36<br>(2.28 to<br>5.24)                         | 1.72<br>(0.93 to<br>3.11)                        | 1.07<br>(0.59 to<br>1.97)                       | 1.88<br>(1.00 to<br>3.37)                         | 0.06<br>(0.04 to<br>0.09)                      | 0.03<br>(0.02 to<br>0.05)                      | 0.02<br>(0.01 to<br>0.03)                      | 0.03<br>(0.02 to<br>0.06)                      |
| Late maternal deaths                                  | 0.99<br>(0.73 to<br>1.31)                         | 0.47<br>(0.27 to<br>0.78)                        | 0.29<br>(0.17 to<br>0.49)                       | 0.52<br>(0.29 to<br>0.84)                         | 0.02<br>(0.01 to<br>0.02)                      | 0.01<br>(0.00 to<br>0.01)                      | 0.01<br>(0.00 to<br>0.01)                      | 0.01<br>(0.01 to<br>0.01)                      |
| Maternal deaths aggravated by HIV/AIDS                | 0.03<br>(0.01 to<br>0.05)                         | 0.09<br>(0.03 to<br>0.19)                        | 0.06<br>(0.02 to<br>0.14)                       | 0.11<br>(0.04 to<br>0.22)                         | 0.00<br>(0.00 to<br>0.00)                      | 0.00<br>(0.00 to<br>0.00)                      | 0.00<br>(0.00 to<br>0.00)                      | 0.00<br>(0.00 to<br>0.00)                      |
| Other maternal disorders                              | 2.06<br>(1.51 to<br>2.68)                         | 1.05<br>(0.64 to<br>1.67)                        | 0.71<br>(0.43 to<br>1.15)                       | 1.14<br>(0.68 to<br>1.86)                         | 0.04<br>(0.03 to<br>0.05)                      | 0.02<br>(0.01 to<br>0.03)                      | 0.01<br>(0.01 to<br>0.02)                      | 0.02<br>(0.01 to<br>0.03)                      |
| <b>Argentina</b>                                      |                                                   |                                                  |                                                 |                                                   |                                                |                                                |                                                |                                                |
| Cause                                                 | YLLs (in 1000s)                                   |                                                  |                                                 |                                                   | Deaths (in 1000s)                              |                                                |                                                |                                                |
|                                                       | 2016                                              | 2040 Forecast                                    | 2040 Better Scenario                            | 2040 Worse Scenario                               | 2016                                           | 2040 Forecast                                  | 2040 Better Scenario                           | 2040 Worse Scenario                            |
| Neonatal disorders                                    | 327.16<br>(279.01 to<br>384.50)                   | 162.72<br>(113.93 to<br>235.15)                  | 89.38<br>(61.47 to<br>132.25)                   | 196.62<br>(136.39 to<br>281.61)                   | 3.78<br>(3.22 to<br>4.44)                      | 1.88<br>(1.32 to<br>2.72)                      | 1.03<br>(0.71 to<br>1.53)                      | 2.27<br>(1.58 to<br>3.25)                      |
| Neonatal preterm birth                                | 195.76<br>(162.78 to<br>233.80)                   | 80.10<br>(54.33 to<br>117.97)                    | 37.49<br>(24.25 to<br>59.09)                    | 101.94<br>(68.92 to<br>150.98)                    | 2.26<br>(1.88 to<br>2.70)                      | 0.93<br>(0.63 to<br>1.36)                      | 0.43<br>(0.28 to<br>0.68)                      | 1.18<br>(0.80 to<br>1.74)                      |

|                                                                         |                                                |                                                |                                                |                                                |                                          |                                          |                                          |                                          |
|-------------------------------------------------------------------------|------------------------------------------------|------------------------------------------------|------------------------------------------------|------------------------------------------------|------------------------------------------|------------------------------------------|------------------------------------------|------------------------------------------|
| Neonatal encephalopathy due to birth asphyxia and trauma                | 40.75<br>(31.89 to<br>51.81)                   | 21.34<br>(13.24 to<br>36.08)                   | 10.94<br>(6.68 to<br>18.61)                    | 24.39<br>(15.02 to<br>41.02)                   | 0.47<br>(0.37 to<br>0.60)                | 0.25<br>(0.15 to<br>0.42)                | 0.13<br>(0.08 to<br>0.22)                | 0.28<br>(0.17 to<br>0.47)                |
| Neonatal sepsis and other neonatal infections                           | 44.45<br>(31.56 to<br>62.10)                   | 34.39<br>(21.01 to<br>57.00)                   | 20.23<br>(12.21 to<br>33.08)                   | 39.29<br>(23.64 to<br>65.58)                   | 0.51<br>(0.36 to<br>0.72)                | 0.40<br>(0.24 to<br>0.66)                | 0.23<br>(0.14 to<br>0.38)                | 0.45<br>(0.27 to<br>0.76)                |
| Hemolytic disease and other neonatal jaundice                           | 1.31<br>(0.81 to<br>1.99)                      | 0.60<br>(0.28 to<br>1.19)                      | 0.34<br>(0.16 to<br>0.66)                      | 0.70<br>(0.32 to<br>1.36)                      | 0.02<br>(0.01 to<br>0.02)                | 0.01<br>(0.00 to<br>0.01)                | 0.00<br>(0.00 to<br>0.01)                | 0.01<br>(0.00 to<br>0.02)                |
| Other neonatal disorders                                                | 44.90<br>(34.72 to<br>57.51)                   | 26.28<br>(16.30 to<br>44.53)                   | 20.38<br>(12.69 to<br>33.51)                   | 30.30<br>(18.51 to<br>50.98)                   | 0.52<br>(0.40 to<br>0.66)                | 0.30<br>(0.19 to<br>0.51)                | 0.24<br>(0.15 to<br>0.39)                | 0.35<br>(0.21 to<br>0.59)                |
| <b>Nutritional deficiencies</b>                                         | <b>23.50<br/>(20.89 to<br/>26.26)</b>          | <b>19.94<br/>(17.23 to<br/>23.38)</b>          | <b>22.30<br/>(19.15 to<br/>25.94)</b>          | <b>19.57<br/>(16.45 to<br/>23.03)</b>          | <b>1.40<br/>(1.26 to<br/>1.56)</b>       | <b>1.56<br/>(1.27 to<br/>1.87)</b>       | <b>1.92<br/>(1.57 to<br/>2.30)</b>       | <b>1.44<br/>(1.16 to<br/>1.77)</b>       |
| Protein-energy malnutrition                                             | 21.24<br>(18.69 to<br>23.85)                   | 17.07<br>(13.95 to<br>20.42)                   | 19.98<br>(16.52 to<br>23.44)                   | 16.71<br>(13.44 to<br>20.08)                   | 1.30<br>(1.15 to<br>1.45)                | 1.37<br>(1.06 to<br>1.71)                | 1.76<br>(1.39 to<br>2.14)                | 1.27<br>(0.98 to<br>1.61)                |
| Iodine deficiency                                                       | 0.15<br>(0.01 to<br>0.53)                      | 0.56<br>(0.01 to<br>2.02)                      | 0.51<br>(0.01 to<br>2.04)                      | 0.56<br>(0.01 to<br>1.87)                      | 0.01<br>(0.00 to<br>0.02)                | 0.04<br>(0.00 to<br>0.20)                | 0.04<br>(0.00 to<br>0.22)                | 0.04<br>(0.00 to<br>0.18)                |
| Dietary iron deficiency                                                 | 0.23<br>(0.14 to<br>0.37)                      | 0.19<br>(0.11 to<br>0.29)                      | 0.19<br>(0.10 to<br>0.29)                      | 0.19<br>(0.11 to<br>0.30)                      | 0.00<br>(0.00 to<br>0.01)                | 0.00<br>(0.00 to<br>0.01)                | 0.00<br>(0.00 to<br>0.01)                | 0.00<br>(0.00 to<br>0.01)                |
| Other nutritional deficiencies                                          | 1.88<br>(1.01 to<br>3.14)                      | 2.13<br>(1.00 to<br>3.59)                      | 1.62<br>(0.73 to<br>2.84)                      | 2.11<br>(1.03 to<br>3.52)                      | 0.09<br>(0.04 to<br>0.18)                | 0.14<br>(0.06 to<br>0.26)                | 0.12<br>(0.05 to<br>0.23)                | 0.13<br>(0.06 to<br>0.25)                |
| <b>Other communicable, maternal, neonatal, and nutritional diseases</b> | <b>32.84<br/>(14.58 to<br/>63.75)</b>          | <b>20.02<br/>(12.84 to<br/>33.05)</b>          | <b>15.39<br/>(10.30 to<br/>24.39)</b>          | <b>20.94<br/>(12.98 to<br/>35.88)</b>          | <b>0.70<br/>(0.47 to<br/>1.08)</b>       | <b>0.62<br/>(0.50 to<br/>0.78)</b>       | <b>0.53<br/>(0.43 to<br/>0.64)</b>       | <b>0.62<br/>(0.49 to<br/>0.80)</b>       |
| Sexually transmitted infections excluding HIV                           | 19.81<br>(1.80 to<br>50.43)                    | 6.06<br>(0.90 to<br>17.45)                     | 3.98<br>(0.72 to<br>11.15)                     | 6.67<br>(0.92 to<br>19.90)                     | 0.26<br>(0.05 to<br>0.62)                | 0.09<br>(0.03 to<br>0.22)                | 0.06<br>(0.02 to<br>0.15)                | 0.10<br>(0.03 to<br>0.25)                |
| Syphilis                                                                | 18.63<br>(0.65 to<br>49.07)                    | 5.35<br>(0.26 to<br>16.68)                     | 3.37<br>(0.17 to<br>10.54)                     | 5.94<br>(0.27 to<br>19.25)                     | 0.23<br>(0.02 to<br>0.59)                | 0.07<br>(0.01 to<br>0.20)                | 0.04<br>(0.01 to<br>0.13)                | 0.07<br>(0.01 to<br>0.23)                |
| Chlamydial infection                                                    | 0.23<br>(0.19 to<br>0.29)                      | 0.14<br>(0.11 to<br>0.19)                      | 0.12<br>(0.09 to<br>0.16)                      | 0.14<br>(0.11 to<br>0.19)                      | 0.01<br>(0.01 to<br>0.01)                | 0.00<br>(0.00 to<br>0.01)                | 0.00<br>(0.00 to<br>0.01)                | 0.00<br>(0.00 to<br>0.01)                |
| Gonococcal infection                                                    | 0.62<br>(0.52 to<br>0.77)                      | 0.38<br>(0.29 to<br>0.50)                      | 0.32<br>(0.25 to<br>0.43)                      | 0.38<br>(0.29 to<br>0.51)                      | 0.02<br>(0.02 to<br>0.02)                | 0.01<br>(0.01 to<br>0.02)                | 0.01<br>(0.01 to<br>0.01)                | 0.01<br>(0.01 to<br>0.02)                |
| Other sexually transmitted infections                                   | 0.33<br>(0.27 to<br>0.41)                      | 0.20<br>(0.15 to<br>0.26)                      | 0.17<br>(0.12 to<br>0.22)                      | 0.20<br>(0.15 to<br>0.27)                      | 0.01<br>(0.01 to<br>0.01)                | 0.01<br>(0.00 to<br>0.01)                | 0.00<br>(0.01 to<br>0.01)                | 0.01<br>(0.00 to<br>0.01)                |
| Acute hepatitis                                                         | 4.35<br>(3.83 to<br>4.92)                      | 4.09<br>(3.21 to<br>5.17)                      | 2.42<br>(1.81 to<br>3.28)                      | 4.16<br>(3.26 to<br>5.16)                      | 0.14<br>(0.12 to<br>0.16)                | 0.15<br>(0.12 to<br>0.19)                | 0.09<br>(0.07 to<br>0.12)                | 0.15<br>(0.12 to<br>0.19)                |
| Acute hepatitis A                                                       | 0.55<br>(0.43 to<br>0.69)                      | 0.33<br>(0.21 to<br>0.52)                      | 0.25<br>(0.13 to<br>0.35)                      | 0.35<br>(0.22 to<br>0.55)                      | 0.01<br>(0.01 to<br>0.01)                | 0.01<br>(0.01 to<br>0.01)                | 0.01<br>(0.01 to<br>0.01)                | 0.01<br>(0.01 to<br>0.01)                |
| Acute hepatitis B                                                       | 3.17<br>(2.72 to<br>3.65)                      | 3.16<br>(2.39 to<br>4.09)                      | 1.83<br>(1.30 to<br>2.56)                      | 3.21<br>(2.44 to<br>4.10)                      | 0.11<br>(0.09 to<br>0.13)                | 0.12<br>(0.09 to<br>0.15)                | 0.07<br>(0.05 to<br>0.10)                | 0.12<br>(0.09 to<br>0.15)                |
| Acute hepatitis C                                                       | 0.24<br>(0.18 to<br>0.31)                      | 0.26<br>(0.18 to<br>0.37)                      | 0.16<br>(0.10 to<br>0.23)                      | 0.26<br>(0.18 to<br>0.37)                      | 0.01<br>(0.01 to<br>0.01)                | 0.01<br>(0.01 to<br>0.01)                | 0.01<br>(0.00 to<br>0.01)                | 0.01<br>(0.01 to<br>0.01)                |
| Acute hepatitis E                                                       | 0.38<br>(0.30 to<br>0.49)                      | 0.33<br>(0.21 to<br>0.49)                      | 0.20<br>(0.13 to<br>0.30)                      | 0.34<br>(0.22 to<br>0.49)                      | 0.01<br>(0.01 to<br>0.02)                | 0.02<br>(0.01 to<br>0.02)                | 0.01<br>(0.01 to<br>0.01)                | 0.01<br>(0.01 to<br>0.02)                |
| Other unspecified infectious diseases                                   | 8.68<br>(7.25 to<br>9.69)                      | 9.87<br>(7.95 to<br>12.04)                     | 9.00<br>(7.35 to<br>10.87)                     | 10.11<br>(8.06 to<br>12.46)                    | 0.30<br>(0.24 to<br>0.33)                | 0.38<br>(0.31 to<br>0.44)                | 0.37<br>(0.30 to<br>0.42)                | 0.37<br>(0.30 to<br>0.43)                |
| <b>Non-communicable diseases</b>                                        | <b>4,724.99<br/>(4,410.58 to<br/>5,045.92)</b> | <b>5,870.09<br/>(5,174.33 to<br/>6,660.15)</b> | <b>4,226.47<br/>(3,742.47 to<br/>4,763.28)</b> | <b>7,273.23<br/>(6,259.15 to<br/>8,422.78)</b> | <b>274.33<br/>(257.59 to<br/>290.86)</b> | <b>379.53<br/>(341.50 to<br/>416.19)</b> | <b>290.17<br/>(263.52 to<br/>318.09)</b> | <b>443.39<br/>(396.08 to<br/>491.51)</b> |

| Argentina                            |                                           |                                           |                                           |                                           |                                  |                                    |                                   |                                     |
|--------------------------------------|-------------------------------------------|-------------------------------------------|-------------------------------------------|-------------------------------------------|----------------------------------|------------------------------------|-----------------------------------|-------------------------------------|
| Cause                                | YLLs (in 1000s)                           |                                           |                                           |                                           | Deaths (in 1000s)                |                                    |                                   |                                     |
|                                      | 2016                                      | 2040 Forecast                             | 2040 Better Scenario                      | 2040 Worse Scenario                       | 2016                             | 2040 Forecast                      | 2040 Better Scenario              | 2040 Worse Scenario                 |
| <b>Neoplasms</b>                     | <b>1,512.94</b><br>(1,400.91 to 1,627.09) | <b>2,072.43</b><br>(1,815.19 to 2,367.49) | <b>1,659.36</b><br>(1,453.63 to 1,884.33) | <b>2,462.52</b><br>(2,110.66 to 2,857.08) | <b>73.12</b><br>(68.08 to 78.28) | <b>110.16</b><br>(97.62 to 124.97) | <b>92.28</b><br>(82.32 to 104.01) | <b>125.65</b><br>(108.66 to 145.45) |
| Lip and oral cavity cancer           | 16.53<br>(14.84 to 18.29)                 | 18.25<br>(10.79 to 30.62)                 | 11.61<br>(7.23 to 18.96)                  | 32.15<br>(17.23 to 57.62)                 | 0.76<br>(0.69 to 0.83)           | 0.88<br>(0.52 to 1.44)             | 0.58<br>(0.37 to 0.93)            | 1.47<br>(0.81 to 2.50)              |
| Nasopharynx cancer                   | 2.76<br>(2.48 to 3.08)                    | 3.54<br>(2.16 to 5.70)                    | 1.89<br>(1.16 to 2.97)                    | 6.32<br>(3.63 to 10.52)                   | 0.10<br>(0.09 to 0.11)           | 0.14<br>(0.08 to 0.21)             | 0.07<br>(0.05 to 0.12)            | 0.24<br>(0.14 to 0.39)              |
| Other pharynx cancer                 | 5.46<br>(4.79 to 6.19)                    | 6.95<br>(3.96 to 11.85)                   | 6.74<br>(3.93 to 11.21)                   | 9.04<br>(4.76 to 15.79)                   | 0.22<br>(0.19 to 0.24)           | 0.29<br>(0.17 to 0.49)             | 0.29<br>(0.18 to 0.47)            | 0.37<br>(0.20 to 0.64)              |
| Esophageal cancer                    | 47.01<br>(42.03 to 52.21)                 | 52.61<br>(32.83 to 83.14)                 | 41.72<br>(27.49 to 64.30)                 | 88.16<br>(50.17 to 149.55)                | 2.46<br>(2.22 to 2.70)           | 2.88<br>(1.84 to 4.46)             | 2.38<br>(1.62 to 3.54)            | 4.60<br>(2.66 to 7.71)              |
| Stomach cancer                       | 102.11<br>(92.37 to 111.73)               | 102.73<br>(81.61 to 128.54)               | 69.94<br>(55.20 to 87.39)                 | 112.24<br>(86.15 to 143.32)               | 5.28<br>(4.83 to 5.74)           | 5.77<br>(4.69 to 7.15)             | 4.11<br>(3.29 to 5.08)            | 6.08<br>(4.78 to 7.70)              |
| Colon and rectum cancer              | 164.19<br>(149.59 to 180.56)              | 264.41<br>(182.69 to 373.26)              | 195.27<br>(137.44 to 276.13)              | 294.33<br>(196.70 to 428.55)              | 9.09<br>(8.35 to 9.96)           | 16.11<br>(11.19 to 22.87)          | 12.45<br>(8.79 to 17.61)          | 17.27<br>(11.51 to 25.12)           |
| Liver cancer                         | 43.12<br>(38.70 to 48.00)                 | 66.83<br>(45.04 to 98.73)                 | 62.74<br>(43.94 to 89.65)                 | 87.46<br>(53.98 to 134.90)                | 2.21<br>(1.99 to 2.44)           | 3.69<br>(2.53 to 5.30)             | 3.62<br>(2.60 to 5.07)            | 4.58<br>(2.91 to 6.91)              |
| Liver cancer due to hepatitis B      | 6.12<br>(4.92 to 7.75)                    | 9.24<br>(5.83 to 14.76)                   | 8.91<br>(5.85 to 13.67)                   | 11.48<br>(6.55 to 19.63)                  | 0.26<br>(0.20 to 0.33)           | 0.42<br>(0.27 to 0.65)             | 0.42<br>(0.28 to 0.64)            | 0.51<br>(0.30 to 0.83)              |
| Liver cancer due to hepatitis C      | 18.88<br>(16.59 to 21.38)                 | 29.82<br>(20.13 to 42.98)                 | 28.98<br>(20.59 to 41.20)                 | 35.34<br>(22.55 to 53.59)                 | 1.06<br>(0.93 to 1.19)           | 1.78<br>(1.23 to 2.49)             | 1.81<br>(1.30 to 2.47)            | 2.02<br>(1.31 to 2.97)              |
| Liver cancer due to alcohol use      | 12.68<br>(10.36 to 15.23)                 | 19.33<br>(11.89 to 31.07)                 | 16.64<br>(10.52 to 25.98)                 | 30.19<br>(17.05 to 49.46)                 | 0.62<br>(0.51 to 0.75)           | 1.01<br>(0.64 to 1.57)             | 0.91<br>(0.59 to 1.39)            | 1.49<br>(0.87 to 2.42)              |
| Liver cancer due to other causes     | 5.44<br>(4.63 to 6.31)                    | 8.44<br>(5.34 to 12.97)                   | 8.21<br>(5.50 to 12.22)                   | 10.45<br>(5.99 to 17.08)                  | 0.28<br>(0.23 to 0.32)           | 0.47<br>(0.31 to 0.71)             | 0.48<br>(0.32 to 0.70)            | 0.56<br>(0.33 to 0.89)              |
| Gallbladder and biliary tract cancer | 53.23<br>(48.65 to 58.83)                 | 55.35<br>(49.62 to 61.73)                 | 52.94<br>(47.07 to 59.42)                 | 52.83<br>(47.46 to 58.93)                 | 2.85<br>(2.61 to 3.14)           | 3.18<br>(2.86 to 3.54)             | 3.16<br>(2.84 to 3.52)            | 2.96<br>(2.66 to 3.30)              |
| Pancreatic cancer                    | 89.87<br>(81.97 to 97.87)                 | 138.05<br>(114.18 to 167.96)              | 134.02<br>(111.51 to 160.42)              | 151.05<br>(121.32 to 189.16)              | 4.87<br>(4.45 to 5.28)           | 7.79<br>(6.46 to 9.56)             | 7.85<br>(6.58 to 9.51)            | 8.25<br>(6.68 to 10.43)             |
| Larynx cancer                        | 20.25<br>(17.92 to 22.72)                 | 21.54<br>(11.53 to 37.85)                 | 12.05<br>(6.76 to 20.85)                  | 39.20<br>(18.89 to 74.92)                 | 0.92<br>(0.82 to 1.02)           | 1.00<br>(0.55 to 1.72)             | 0.58<br>(0.33 to 0.99)            | 1.78<br>(0.89 to 3.28)              |
| Tracheal, bronchus, and lung cancer  | 239.19<br>(216.93 to 264.98)              | 296.57<br>(222.05 to 382.45)              | 192.73<br>(149.41 to 243.38)              | 517.14<br>(375.74 to 685.80)              | 11.34<br>(10.31 to 12.50)        | 14.62<br>(11.06 to 18.71)          | 9.91<br>(7.75 to 12.35)           | 24.75<br>(18.07 to 32.95)           |
| Malignant skin melanoma              | 14.17<br>(11.76 to 16.35)                 | 17.58<br>(14.68 to 20.65)                 | 22.61<br>(18.63 to 26.61)                 | 16.57<br>(13.84 to 19.33)                 | 0.60<br>(0.50 to 0.69)           | 0.82<br>(0.69 to 0.96)             | 1.10<br>(0.90 to 1.29)            | 0.75<br>(0.62 to 0.87)              |
| Non-melanoma skin cancer             | 8.84<br>(8.02 to 9.71)                    | 11.75<br>(10.41 to 13.12)                 | 8.71<br>(7.49 to 10.27)                   | 11.16<br>(10.02 to 12.47)                 | 0.53<br>(0.49 to 0.58)           | 0.77<br>(0.68 to 0.86)             | 0.60<br>(0.52 to 0.70)            | 0.70<br>(0.61 to 0.79)              |
| Breast cancer                        | 139.18<br>(121.77 to 156.94)              | 210.26<br>(156.57 to 281.28)              | 146.72<br>(111.15 to 192.67)              | 231.25<br>(171.19 to 313.82)              | 6.47<br>(5.72 to 7.24)           | 10.57<br>(7.83 to 14.28)           | 7.69<br>(5.83 to 10.23)           | 11.34<br>(8.34 to 15.56)            |
| Cervical cancer                      | 77.39<br>(67.58 to 87.82)                 | 76.11<br>(59.07 to 97.50)                 | 51.76<br>(39.54 to 66.27)                 | 81.40<br>(61.30 to 107.03)                | 2.91<br>(2.56 to 3.27)           | 3.14<br>(2.47 to 3.96)             | 2.21<br>(1.72 to 2.79)            | 3.28<br>(2.51 to 4.26)              |

|                                 |                                              |                                              |                                          |                                              |                                        |                                        |                                      |                                        |
|---------------------------------|----------------------------------------------|----------------------------------------------|------------------------------------------|----------------------------------------------|----------------------------------------|----------------------------------------|--------------------------------------|----------------------------------------|
| Uterine cancer                  | 15.57<br>(13.49 to<br>17.88)                 | 25.05<br>(21.09 to<br>29.69)                 | 20.11<br>(16.64 to<br>24.35)             | 24.94<br>(21.03 to<br>29.44)                 | 0.85<br>(0.74 to<br>0.97)              | 1.45<br>(1.23 to<br>1.70)              | 1.21<br>(1.00 to<br>1.43)            | 1.42<br>(1.21 to<br>1.65)              |
| Ovarian cancer                  | 31.13<br>(26.10 to<br>36.85)                 | 47.58<br>(35.44 to<br>63.35)                 | 39.88<br>(29.94 to<br>52.49)             | 47.99<br>(34.88 to<br>65.39)                 | 1.37<br>(1.15 to<br>1.63)              | 2.27<br>(1.69 to<br>3.05)              | 1.93<br>(1.46 to<br>2.59)            | 2.26<br>(1.65 to<br>3.10)              |
| Prostate cancer                 | 67.80<br>(58.25 to<br>83.35)                 | 126.54<br>(105.98 to<br>156.68)              | 112.07<br>(94.84 to<br>138.37)           | 117.05<br>(96.05 to<br>145.67)               | 4.94<br>(4.26 to<br>6.18)              | 9.81<br>(8.17 to<br>12.11)             | 9.07<br>(7.68 to<br>11.15)           | 8.74<br>(7.12 to<br>10.89)             |
| Testicular cancer               | 9.92<br>(8.02 to<br>11.96)                   | 8.44<br>(6.31 to<br>10.97)                   | 6.27<br>(4.57 to<br>8.33)                | 8.46<br>(6.29 to<br>11.11)                   | 0.21<br>(0.17 to<br>0.25)              | 0.20<br>(0.16 to<br>0.25)              | 0.15<br>(0.12 to<br>0.19)            | 0.19<br>(0.15 to<br>0.24)              |
| <b>Argentina</b>                |                                              |                                              |                                          |                                              |                                        |                                        |                                      |                                        |
| Cause                           | YLLs (in 1000s)                              |                                              |                                          |                                              | Deaths (in 1000s)                      |                                        |                                      |                                        |
|                                 | 2016                                         | 2040 Forecast                                | 2040 Better Scenario                     | 2040 Worse Scenario                          | 2016                                   | 2040 Forecast                          | 2040 Better Scenario                 | 2040 Worse Scenario                    |
| Kidney cancer                   | 47.60<br>(42.65 to<br>52.49)                 | 74.67<br>(60.91 to<br>90.13)                 | 75.36<br>(63.25 to<br>88.36)             | 79.24<br>(61.79 to<br>100.04)                | 2.19<br>(1.97 to<br>2.41)              | 3.64<br>(3.01 to<br>4.31)              | 3.83<br>(3.24 to<br>4.43)            | 3.74<br>(2.97 to<br>4.62)              |
| Bladder cancer                  | 26.88<br>(24.11 to<br>29.92)                 | 37.17<br>(28.92 to<br>48.03)                 | 31.58<br>(25.17 to<br>39.58)             | 42.76<br>(31.35 to<br>58.13)                 | 1.72<br>(1.55 to<br>1.90)              | 2.54<br>(2.00 to<br>3.23)              | 2.27<br>(1.81 to<br>2.80)            | 2.79<br>(2.06 to<br>3.74)              |
| Brain and nervous system cancer | 43.11<br>(38.07 to<br>48.15)                 | 63.30<br>(54.61 to<br>71.74)                 | 56.05<br>(48.20 to<br>63.65)             | 61.56<br>(53.43 to<br>69.53)                 | 1.43<br>(1.24 to<br>1.60)              | 2.43<br>(2.08 to<br>2.72)              | 2.24<br>(1.92 to<br>2.53)            | 2.30<br>(1.98 to<br>2.59)              |
| Thyroid cancer                  | 4.74<br>(4.24 to<br>5.26)                    | 6.83<br>(5.13 to<br>9.31)                    | 5.36<br>(4.05 to<br>7.18)                | 7.26<br>(5.29 to<br>10.06)                   | 0.24<br>(0.22 to<br>0.27)              | 0.37<br>(0.28 to<br>0.51)              | 0.31<br>(0.23 to<br>0.41)            | 0.39<br>(0.28 to<br>0.53)              |
| Mesothelioma                    | 4.96<br>(4.39 to<br>5.54)                    | 5.93<br>(5.07 to<br>6.76)                    | 6.09<br>(5.20 to<br>6.97)                | 5.71<br>(4.93 to<br>6.53)                    | 0.22<br>(0.20 to<br>0.31)              | 0.28<br>(0.25 to<br>0.31)              | 0.30<br>(0.26 to<br>0.33)            | 0.26<br>(0.23 to<br>0.29)              |
| Hodgkin lymphoma                | 6.33<br>(5.62 to<br>8.12)                    | 6.89<br>(5.82 to<br>8.81)                    | 4.43<br>(3.55 to<br>5.76)                | 6.94<br>(5.88 to<br>8.79)                    | 0.21<br>(0.18 to<br>0.25)              | 0.26<br>(0.22 to<br>0.31)              | 0.17<br>(0.14 to<br>0.22)            | 0.25<br>(0.22 to<br>0.31)              |
| Non-Hodgkin lymphoma            | 45.87<br>(41.19 to<br>51.76)                 | 68.91<br>(56.24 to<br>86.07)                 | 57.16<br>(47.15 to<br>71.26)             | 69.07<br>(56.23 to<br>88.42)                 | 1.89<br>(1.70 to<br>2.09)              | 3.23<br>(2.69 to<br>3.95)              | 2.79<br>(2.33 to<br>3.39)            | 3.14<br>(2.57 to<br>3.91)              |
| Multiple myeloma                | 15.88<br>(13.86 to<br>21.07)                 | 27.74<br>(21.87 to<br>38.21)                 | 25.08<br>(20.15 to<br>34.60)             | 27.64<br>(21.45 to<br>38.00)                 | 0.80<br>(0.70 to<br>1.06)              | 1.47<br>(1.17 to<br>2.00)              | 1.37<br>(1.11 to<br>1.88)            | 1.42<br>(1.12 to<br>1.94)              |
| Leukemia                        | 69.24<br>(63.79 to<br>74.74)                 | 87.18<br>(71.84 to<br>105.85)                | 70.59<br>(58.91 to<br>84.53)             | 94.80<br>(75.53 to<br>119.62)                | 2.45<br>(2.27 to<br>2.65)              | 3.87<br>(3.14 to<br>4.73)              | 3.28<br>(2.72 to<br>3.92)            | 4.08<br>(3.20 to<br>5.19)              |
| Acute lymphoid leukemia         | 16.57<br>(14.79 to<br>18.47)                 | 14.30<br>(11.68 to<br>17.44)                 | 10.71<br>(8.73 to<br>13.02)              | 15.28<br>(12.29 to<br>18.67)                 | 0.33<br>(0.29 to<br>0.36)              | 0.35<br>(0.29 to<br>0.42)              | 0.27<br>(0.22 to<br>0.33)            | 0.37<br>(0.30 to<br>0.46)              |
| Chronic lymphoid leukemia       | 3.55<br>(2.97 to<br>4.40)                    | 5.09<br>(3.73 to<br>6.83)                    | 4.63<br>(3.45 to<br>6.16)                | 5.43<br>(3.85 to<br>7.54)                    | 0.22<br>(0.19 to<br>0.28)              | 0.34<br>(0.25 to<br>0.47)              | 0.33<br>(0.25 to<br>0.44)            | 0.35<br>(0.25 to<br>0.49)              |
| Acute myeloid leukemia          | 20.50<br>(18.29 to<br>22.70)                 | 29.87<br>(24.54 to<br>36.56)                 | 27.50<br>(22.99 to<br>32.99)             | 32.40<br>(25.78 to<br>41.14)                 | 0.67<br>(0.59 to<br>0.74)              | 1.15<br>(0.94 to<br>1.42)              | 1.10<br>(0.92 to<br>1.33)            | 1.22<br>(0.96 to<br>1.56)              |
| Chronic myeloid leukemia        | 3.19<br>(2.82 to<br>3.58)                    | 3.53<br>(2.63 to<br>4.61)                    | 2.09<br>(1.53 to<br>2.83)                | 3.90<br>(2.82 to<br>5.34)                    | 0.15<br>(0.13 to<br>0.16)              | 0.18<br>(0.14 to<br>0.24)              | 0.11<br>(0.08 to<br>0.15)            | 0.19<br>(0.14 to<br>0.26)              |
| Other leukemia                  | 25.42<br>(23.03 to<br>28.09)                 | 34.40<br>(27.27 to<br>42.87)                 | 25.67<br>(20.43 to<br>31.92)             | 37.78<br>(28.72 to<br>49.19)                 | 1.09<br>(0.98 to<br>1.20)              | 1.85<br>(1.45 to<br>2.31)              | 1.46<br>(1.16 to<br>1.80)            | 1.95<br>(1.48 to<br>2.53)              |
| Other neoplasms                 | 100.60<br>(92.36 to<br>109.03)               | 143.67<br>(130.41 to<br>158.38)              | 137.89<br>(124.30 to<br>152.84)          | 138.80<br>(125.74 to<br>152.91)              | 4.01<br>(3.66 to<br>4.37)              | 6.70<br>(6.09 to<br>7.33)              | 6.78<br>(6.16 to<br>7.43)            | 6.25<br>(5.67 to<br>6.86)              |
| <b>Cardiovascular diseases</b>  | <b>1,654.05</b><br>(1,538.23 to<br>1,770.54) | <b>1,754.90</b><br>(1,340.52 to<br>2,284.88) | <b>971.39</b><br>(746.55 to<br>1,253.54) | <b>2,499.32</b><br>(1,802.70 to<br>3,442.06) | <b>112.83</b><br>(105.29 to<br>119.71) | <b>132.59</b><br>(104.07 to<br>168.98) | <b>80.94</b><br>(63.30 to<br>102.81) | <b>168.66</b><br>(127.44 to<br>221.71) |

|                                               |                                          |                                          |                                          |                                          |                                       |                                       |                                       |                                       |
|-----------------------------------------------|------------------------------------------|------------------------------------------|------------------------------------------|------------------------------------------|---------------------------------------|---------------------------------------|---------------------------------------|---------------------------------------|
| Rheumatic heart disease                       | 50.35<br>(45.51 to<br>55.90)             | 42.52<br>(35.08 to<br>51.98)             | 29.48<br>(23.83 to<br>37.87)             | 42.51<br>(34.72 to<br>53.73)             | 3.74<br>(3.37 to<br>4.13)             | 3.63<br>(3.00 to<br>4.57)             | 2.69<br>(2.19 to<br>3.43)             | 3.50<br>(2.89 to<br>4.55)             |
| Ischemic heart disease                        | 850.56<br>(780.19 to<br>916.26)          | 820.19<br>(532.89 to<br>1,233.82)        | 391.40<br>(248.01 to<br>595.68)          | 1,285.61<br>(793.17 to<br>2,005.80)      | 60.13<br>(55.61 to<br>64.28)          | 63.42<br>(41.93 to<br>92.10)          | 33.43<br>(21.74 to<br>48.42)          | 87.46<br>(55.82 to<br>131.05)         |
| Stroke                                        | 364.58<br>(330.70 to<br>396.11)          | 326.98<br>(216.32 to<br>487.53)          | 145.50<br>(98.75 to<br>213.78)           | 531.85<br>(325.50 to<br>839.63)          | 22.01<br>(20.00 to<br>23.93)          | 22.28<br>(15.57 to<br>32.94)          | 11.33<br>(7.65 to<br>16.93)           | 31.17<br>(20.43 to<br>48.35)          |
| Ischemic stroke                               | 139.79<br>(125.91 to<br>153.13)          | 136.65<br>(87.44 to<br>228.04)           | 70.46<br>(45.68 to<br>111.60)            | 191.71<br>(116.38 to<br>334.86)          | 11.46<br>(10.34 to<br>12.48)          | 12.08<br>(7.63 to<br>20.06)           | 6.81<br>(4.29 to<br>11.21)            | 15.14<br>(9.30 to<br>26.86)           |
| Intracerebral hemorrhage                      | 224.80<br>(202.77 to<br>246.09)          | 190.32<br>(116.57 to<br>305.37)          | 75.04<br>(46.32 to<br>115.47)            | 340.13<br>(185.92 to<br>578.97)          | 10.55<br>(9.54 to<br>11.57)           | 10.21<br>(6.61 to<br>15.30)           | 4.51<br>(2.92 to<br>6.61)             | 16.03<br>(9.47 to<br>26.32)           |
| Hypertensive heart disease                    | 86.77<br>(70.04 to<br>134.12)            | 127.72<br>(76.94 to<br>235.61)           | 94.16<br>(61.07 to<br>156.61)            | 174.50<br>(96.08 to<br>347.13)           | 7.03<br>(5.67 to<br>11.20)            | 11.40<br>(6.97 to<br>21.59)           | 8.93<br>(5.86 to<br>15.31)            | 14.63<br>(8.09 to<br>29.75)           |
| Cardiomyopathy and myocarditis                | 75.61<br>(66.42 to<br>93.25)             | 107.99<br>(80.57 to<br>146.00)           | 70.19<br>(51.37 to<br>96.77)             | 110.80<br>(82.23 to<br>155.20)           | 4.13<br>(3.66 to<br>4.77)             | 6.78<br>(4.81 to<br>9.48)             | 4.60<br>(3.17 to<br>6.71)             | 6.63<br>(4.69 to<br>9.37)             |
| Myocarditis                                   | 6.40<br>(5.29 to<br>8.72)                | 6.98<br>(5.48 to<br>9.10)                | 6.39<br>(5.12 to<br>8.14)                | 6.89<br>(5.42 to<br>9.14)                | 0.24<br>(0.19 to<br>0.29)             | 0.32<br>(0.24 to<br>0.40)             | 0.33<br>(0.24 to<br>0.41)             | 0.30<br>(0.23 to<br>0.38)             |
| <b>Argentina</b>                              |                                          |                                          |                                          |                                          |                                       |                                       |                                       |                                       |
| Cause                                         | YLLs (in 1000s)                          |                                          |                                          |                                          | Deaths (in 1000s)                     |                                       |                                       |                                       |
|                                               | 2016                                     | 2040 Forecast                            | 2040 Better Scenario                     | 2040 Worse Scenario                      | 2016                                  | 2040 Forecast                         | 2040 Better Scenario                  | 2040 Worse Scenario                   |
| Alcoholic cardiomyopathy                      | 4.00<br>(2.83 to<br>7.69)                | 6.36<br>(4.21 to<br>12.69)               | 6.04<br>(4.03 to<br>11.46)               | 7.77<br>(5.17 to<br>15.32)               | 0.15<br>(0.11 to<br>0.30)             | 0.26<br>(0.17 to<br>0.54)             | 0.26<br>(0.17 to<br>0.50)             | 0.31<br>(0.20 to<br>0.62)             |
| Other cardiomyopathy                          | 65.21<br>(57.33 to<br>79.61)             | 94.65<br>(67.55 to<br>128.62)            | 57.76<br>(39.39 to<br>83.27)             | 96.15<br>(68.52 to<br>136.31)            | 3.73<br>(3.28 to<br>4.31)             | 6.20<br>(4.24 to<br>8.89)             | 6.20<br>(2.61 to<br>6.06)             | 6.02<br>(4.08 to<br>8.84)             |
| Atrial fibrillation and flutter               | 22.82<br>(17.98 to<br>28.79)             | 37.13<br>(27.78 to<br>48.60)             | 33.45<br>(25.15 to<br>42.91)             | 38.48<br>(28.17 to<br>51.75)             | 2.54<br>(1.95 to<br>3.24)             | 4.20<br>(3.10 to<br>5.53)             | 3.95<br>(2.94 to<br>5.12)             | 4.16<br>(3.05 to<br>5.58)             |
| Aortic aneurysm                               | 44.18<br>(39.50 to<br>48.78)             | 59.71<br>(47.85 to<br>75.40)             | 49.84<br>(40.40 to<br>62.08)             | 62.95<br>(48.54 to<br>81.45)             | 2.91<br>(2.63 to<br>3.18)             | 4.22<br>(3.50 to<br>5.16)             | 3.82<br>(3.16 to<br>4.64)             | 4.16<br>(3.35 to<br>5.23)             |
| Peripheral artery disease                     | 2.52<br>(1.93 to<br>4.00)                | 5.56<br>(3.73 to<br>8.97)                | 5.51<br>(3.73 to<br>9.05)                | 5.91<br>(3.95 to<br>9.74)                | 0.22<br>(0.17 to<br>0.38)             | 0.52<br>(0.35 to<br>0.90)             | 0.55<br>(0.37 to<br>0.97)             | 0.52<br>(0.34 to<br>0.90)             |
| Endocarditis                                  | 27.66<br>(20.91 to<br>38.72)             | 39.58<br>(27.44 to<br>60.38)             | 36.38<br>(25.17 to<br>54.31)             | 40.65<br>(27.73 to<br>62.69)             | 1.71<br>(1.21 to<br>2.26)             | 2.73<br>(1.73 to<br>4.19)             | 2.67<br>(1.70 to<br>4.09)             | 2.69<br>(1.69 to<br>4.26)             |
| Other cardiovascular and circulatory diseases | 129.01<br>(117.32 to<br>141.75)          | 187.52<br>(151.02 to<br>235.15)          | 115.48<br>(90.87 to<br>148.45)           | 206.05<br>(160.55 to<br>265.01)          | 8.39<br>(7.63 to<br>9.23)             | 13.41<br>(11.06 to<br>16.42)          | 8.96<br>(7.16 to<br>11.35)            | 13.74<br>(11.00 to<br>17.08)          |
| <b>Chronic respiratory diseases</b>           | <b>290.31<br/>(267.88 to<br/>312.74)</b> | <b>311.48<br/>(257.37 to<br/>378.28)</b> | <b>230.94<br/>(197.47 to<br/>269.10)</b> | <b>461.01<br/>(363.62 to<br/>586.59)</b> | <b>20.47<br/>(18.94 to<br/>21.97)</b> | <b>23.97<br/>(18.86 to<br/>27.79)</b> | <b>18.08<br/>(15.52 to<br/>21.14)</b> | <b>32.48<br/>(25.38 to<br/>40.75)</b> |
| Chronic obstructive pulmonary disease         | 232.82<br>(211.95 to<br>253.78)          | 243.38<br>(187.50 to<br>309.39)          | 153.17<br>(118.13 to<br>191.88)          | 390.97<br>(294.40 to<br>515.23)          | 17.29<br>(15.88 to<br>18.69)          | 18.75<br>(14.57 to<br>23.30)          | 12.87<br>(10.26 to<br>15.96)          | 28.35<br>(21.25 to<br>36.71)          |
| Pneumoconiosis                                | 1.16<br>(0.99 to<br>1.36)                | 1.27<br>(1.03 to<br>1.57)                | 1.20<br>(0.94 to<br>1.52)                | 1.26<br>(1.00 to<br>1.56)                | 0.08<br>(0.07 to<br>0.09)             | 0.10<br>(0.08 to<br>0.13)             | 0.11<br>(0.08 to<br>0.14)             | 0.10<br>(0.07 to<br>0.13)             |
| Silicosis                                     | 0.42<br>(0.33 to<br>0.53)                | 0.37<br>(0.25 to<br>0.53)                | 0.22<br>(0.14 to<br>0.34)                | 0.36<br>(0.25 to<br>0.51)                | 0.03<br>(0.02 to<br>0.03)             | 0.03<br>(0.02 to<br>0.04)             | 0.02<br>(0.01 to<br>0.03)             | 0.02<br>(0.02 to<br>0.04)             |
| Asbestosis                                    | 0.36<br>(0.27 to<br>0.44)                | 0.45<br>(0.32 to<br>0.61)                | 0.57<br>(0.41 to<br>0.76)                | 0.43<br>(0.31 to<br>0.59)                | 0.03<br>(0.02 to<br>0.03)             | 0.04<br>(0.02 to<br>0.05)             | 0.05<br>(0.03 to<br>0.07)             | 0.03<br>(0.02 to<br>0.05)             |



|                                                                |                                        |                                        |                                        |                                        |                                  |                                    |                                   |                                    |
|----------------------------------------------------------------|----------------------------------------|----------------------------------------|----------------------------------------|----------------------------------------|----------------------------------|------------------------------------|-----------------------------------|------------------------------------|
| Coal workers pneumoconiosis                                    | 0.20<br>(0.13 to<br>0.28)              | 0.26<br>(0.14 to<br>0.43)              | 0.26<br>(0.13 to<br>0.44)              | 0.27<br>(0.15 to<br>0.46)              | 0.02<br>(0.01 to<br>0.02)        | 0.02<br>(0.01 to<br>0.04)          | 0.03<br>(0.01 to<br>0.05)         | 0.02<br>(0.01 to<br>0.04)          |
| Other pneumoconiosis                                           | 0.18<br>(0.15 to<br>0.23)              | 0.19<br>(0.14 to<br>0.26)              | 0.15<br>(0.10 to<br>0.22)              | 0.19<br>(0.14 to<br>0.27)              | 0.01<br>(0.01 to<br>0.01)        | 0.01<br>(0.01 to<br>0.02)          | 0.01<br>(0.01 to<br>0.02)         | 0.01<br>(0.01 to<br>0.02)          |
| Asthma                                                         | 12.43<br>(10.75 to<br>14.66)           | 9.23<br>(5.54 to<br>15.14)             | 4.45<br>(2.61 to<br>7.59)              | 11.60<br>(6.63 to<br>19.88)            | 0.59<br>(0.51 to<br>0.71)        | 0.50<br>(0.29 to<br>0.82)          | 0.26<br>(0.15 to<br>0.45)         | 0.59<br>(0.34 to<br>1.01)          |
| Interstitial lung disease and pulmonary sarcoidosis            | 22.02<br>(18.04 to<br>29.96)           | 30.14<br>(24.74 to<br>41.88)           | 45.32<br>(36.38 to<br>60.38)           | 28.10<br>(22.74 to<br>39.52)           | 1.37<br>(1.12 to<br>1.89)        | 1.98<br>(1.60 to<br>2.74)          | 3.11<br>(2.47 to<br>4.24)         | 1.80<br>(1.42 to<br>2.56)          |
| Other chronic respiratory diseases                             | 21.88<br>(15.55 to<br>30.58)           | 27.45<br>(18.12 to<br>39.14)           | 26.80<br>(17.91 to<br>37.18)           | 29.08<br>(18.95 to<br>42.76)           | 1.14<br>(0.76 to<br>1.60)        | 1.64<br>(1.01 to<br>2.36)          | 1.73<br>(1.07 to<br>2.40)         | 1.65<br>(0.99 to<br>2.42)          |
| <b>Cirrhosis and other chronic liver diseases</b>              | <b>181.80</b><br>(163.44 to<br>202.10) | <b>224.24</b><br>(198.02 to<br>252.75) | <b>166.08</b><br>(143.33 to<br>194.49) | <b>242.39</b><br>(214.13 to<br>272.77) | <b>7.58</b><br>(6.86 to<br>8.33) | <b>10.05</b><br>(9.04 to<br>11.06) | <b>7.68</b><br>(6.78 to<br>8.78)  | <b>10.54</b><br>(9.41 to<br>11.64) |
| Cirrhosis and other chronic liver diseases due to hepatitis B  | 30.64<br>(25.28 to<br>36.46)           | 40.43<br>(33.51 to<br>48.86)           | 31.52<br>(25.85 to<br>38.48)           | 39.58<br>(32.64 to<br>47.97)           | 1.31<br>(1.10 to<br>1.54)        | 1.83<br>(1.54 to<br>2.18)          | 1.47<br>(1.22 to<br>1.77)         | 1.74<br>(1.46 to<br>2.08)          |
| Cirrhosis and other chronic liver diseases due to hepatitis C  | 62.60<br>(53.81 to<br>71.79)           | 82.04<br>(69.16 to<br>97.09)           | 62.77<br>(52.04 to<br>75.90)           | 80.73<br>(67.90 to<br>96.29)           | 2.50<br>(2.17 to<br>2.86)        | 3.46<br>(2.98 to<br>4.01)          | 2.72<br>(2.31 to<br>3.23)         | 3.33<br>(2.86 to<br>3.90)          |
| Cirrhosis and other chronic liver diseases due to alcohol use  | 63.67<br>(55.07 to<br>73.17)           | 72.72<br>(62.02 to<br>86.56)           | 49.39<br>(40.90 to<br>60.02)           | 93.37<br>(79.87 to<br>109.28)          | 2.73<br>(2.39 to<br>3.10)        | 3.37<br>(2.94 to<br>3.91)          | 2.36<br>(2.03 to<br>2.78)         | 4.13<br>(3.61 to<br>4.73)          |
| Cirrhosis and other chronic liver diseases due to other causes | 24.89<br>(21.58 to<br>28.45)           | 29.05<br>(24.43 to<br>34.26)           | 22.40<br>(18.32 to<br>27.09)           | 28.70<br>(24.15 to<br>33.81)           | 1.03<br>(0.89 to<br>1.19)        | 1.39<br>(1.18 to<br>1.63)          | 1.12<br>(0.94 to<br>1.35)         | 1.33<br>(1.12 to<br>1.56)          |
| <b>Digestive diseases</b>                                      | <b>131.34</b><br>(117.54 to<br>154.21) | <b>174.68</b><br>(145.37 to<br>217.90) | <b>138.86</b><br>(117.64 to<br>169.27) | <b>180.56</b><br>(147.70 to<br>228.37) | <b>7.72</b><br>(6.95 to<br>8.97) | <b>11.60</b><br>(9.71 to<br>14.43) | <b>9.92</b><br>(8.48 to<br>11.98) | <b>11.44</b><br>(9.33 to<br>14.44) |
| Peptic ulcer disease                                           | 14.60<br>(12.54 to<br>17.15)           | 12.14<br>(9.41 to<br>15.41)            | 7.06<br>(5.27 to<br>9.69)              | 12.67<br>(9.89 to<br>16.61)            | 0.86<br>(0.75 to<br>1.00)        | 0.85<br>(0.63 to<br>1.04)          | 0.50<br>(0.38 to<br>0.67)         | 0.83<br>(0.64 to<br>1.06)          |

**Argentina**

| Cause                                      | YLLs (in 1000s)              |                              |                              |                              | Deaths (in 1000s)         |                           |                           |                           |
|--------------------------------------------|------------------------------|------------------------------|------------------------------|------------------------------|---------------------------|---------------------------|---------------------------|---------------------------|
|                                            | 2016                         | 2040 Forecast                | 2040 Better Scenario         | 2040 Worse Scenario          | 2016                      | 2040 Forecast             | 2040 Better Scenario      | 2040 Worse Scenario       |
| Gastritis and duodenitis                   | 1.55<br>(1.22 to<br>2.11)    | 2.74<br>(2.05 to<br>3.73)    | 1.96<br>(1.44 to<br>2.74)    | 2.65<br>(1.98 to<br>3.56)    | 0.10<br>(0.08 to<br>0.14) | 0.18<br>(0.13 to<br>0.25) | 0.14<br>(0.10 to<br>0.20) | 0.17<br>(0.13 to<br>0.24) |
| Appendicitis                               | 4.79<br>(3.76 to<br>6.47)    | 4.85<br>(3.76 to<br>6.81)    | 2.93<br>(2.16 to<br>4.15)    | 4.86<br>(3.78 to<br>6.57)    | 0.19<br>(0.15 to<br>0.25) | 0.23<br>(0.18 to<br>0.32) | 0.15<br>(0.11 to<br>0.21) | 0.22<br>(0.17 to<br>0.31) |
| Paralytic ileus and intestinal obstruction | 36.92<br>(28.19 to<br>43.09) | 48.24<br>(36.11 to<br>56.14) | 48.16<br>(37.02 to<br>56.11) | 45.81<br>(34.12 to<br>53.47) | 2.46<br>(1.89 to<br>2.84) | 3.68<br>(2.79 to<br>4.31) | 3.88<br>(3.02 to<br>4.53) | 3.37<br>(2.50 to<br>4.00) |
| Inguinal, femoral, and abdominal hernia    | 4.04<br>(2.77 to<br>5.05)    | 3.64<br>(2.51 to<br>4.55)    | 2.82<br>(1.94 to<br>3.59)    | 3.50<br>(2.39 to<br>4.36)    | 0.25<br>(0.18 to<br>0.33) | 0.25<br>(0.18 to<br>0.33) | 0.21<br>(0.15 to<br>0.28) | 0.23<br>(0.17 to<br>0.31) |
| Inflammatory bowel disease                 | 3.18<br>(2.62 to<br>3.78)    | 4.12<br>(3.36 to<br>4.96)    | 3.93<br>(3.23 to<br>4.76)    | 3.98<br>(3.23 to<br>4.77)    | 0.15<br>(0.12 to<br>0.18) | 0.22<br>(0.18 to<br>0.26) | 0.22<br>(0.18 to<br>0.27) | 0.20<br>(0.17 to<br>0.25) |
| Vascular intestinal disorders              | 13.46<br>(11.46 to<br>17.92) | 21.29<br>(17.74 to<br>29.14) | 18.46<br>(15.30 to<br>25.83) | 20.30<br>(17.01 to<br>27.64) | 0.89<br>(0.76 to<br>1.22) | 1.52<br>(1.25 to<br>2.12) | 1.39<br>(1.13 to<br>1.96) | 1.41<br>(1.15 to<br>1.96) |
| Gallbladder and biliary diseases           | 15.01<br>(13.26 to<br>17.94) | 25.01<br>(14.21 to<br>42.13) | 15.25<br>(8.91 to<br>25.73)  | 29.59<br>(16.75 to<br>50.54) | 0.98<br>(0.85 to<br>1.16) | 1.80<br>(1.01 to<br>3.12) | 1.17<br>(0.67 to<br>2.03) | 2.02<br>(1.13 to<br>3.49) |
| Pancreatitis                               | 20.85<br>(17.81 to<br>28.79) | 31.39<br>(18.80 to<br>54.25) | 20.26<br>(12.58 to<br>33.94) | 36.29<br>(20.24 to<br>66.09) | 0.88<br>(0.75 to<br>1.22) | 1.51<br>(0.93 to<br>2.59) | 1.01<br>(0.64 to<br>1.65) | 1.67<br>(0.96 to<br>2.95) |

|                                                            |                                                      |                                                      |                                                      |                                                        |                                                   |                                                   |                                                   |                                                   |
|------------------------------------------------------------|------------------------------------------------------|------------------------------------------------------|------------------------------------------------------|--------------------------------------------------------|---------------------------------------------------|---------------------------------------------------|---------------------------------------------------|---------------------------------------------------|
|                                                            | 16.95<br>(13.79 to<br>20.68)                         | 21.26<br>(16.78 to<br>26.51)                         | 18.02<br>(14.40 to<br>22.75)                         | 20.72<br>(16.25 to<br>26.14)                           | 0.98<br>(0.83 to<br>1.20)                         | 1.39<br>(1.13 to<br>1.79)                         | 1.26<br>(1.03 to<br>1.62)                         | 1.31<br>(1.05 to<br>1.66)                         |
| Other digestive diseases                                   |                                                      |                                                      |                                                      |                                                        |                                                   |                                                   |                                                   |                                                   |
| <b>Neurological disorders</b>                              | <b>198.04</b><br><b>(173.59 to</b><br><b>228.55)</b> | <b>317.14</b><br><b>(253.53 to</b><br><b>407.17)</b> | <b>325.33</b><br><b>(264.06 to</b><br><b>407.67)</b> | <b>318.02</b><br><b>(247.20 to</b><br><b>425.28)</b>   | <b>19.26</b><br><b>(16.54 to</b><br><b>22.61)</b> | <b>31.80</b><br><b>(24.32 to</b><br><b>42.29)</b> | <b>34.22</b><br><b>(26.78 to</b><br><b>44.33)</b> | <b>30.97</b><br><b>(22.77 to</b><br><b>43.48)</b> |
| Alzheimer's disease and other dementias                    | 129.90<br>(107.17 to<br>158.10)                      | 213.30<br>(152.01 to<br>301.87)                      | 215.37<br>(157.11 to<br>297.27)                      | 218.42<br>(148.39 to<br>326.35)                        | 15.41<br>(12.60 to<br>18.72)                      | 25.07<br>(17.79 to<br>35.50)                      | 26.48<br>(19.30 to<br>36.26)                      | 24.89<br>(16.93 to<br>36.97)                      |
| Parkinson's disease                                        | 31.36<br>(23.25 to<br>40.17)                         | 57.26<br>(42.11 to<br>74.13)                         | 66.74<br>(50.99 to<br>85.19)                         | 51.20<br>(37.48 to<br>67.26)                           | 2.80<br>(2.10 to<br>3.62)                         | 5.16<br>(3.78 to<br>6.81)                         | 6.21<br>(4.71 to<br>8.05)                         | 4.51<br>(3.26 to<br>6.03)                         |
| Epilepsy                                                   | 12.72<br>(11.60 to<br>14.09)                         | 13.57<br>(9.08 to<br>20.27)                          | 10.23<br>(6.99 to<br>14.97)                          | 16.07<br>(10.46 to<br>24.53)                           | 0.28<br>(0.26 to<br>0.31)                         | 0.35<br>(0.24 to<br>0.51)                         | 0.28<br>(0.19 to<br>0.39)                         | 0.41<br>(0.27 to<br>0.61)                         |
| Multiple sclerosis                                         | 3.39<br>(2.69 to<br>5.13)                            | 4.58<br>(3.52 to<br>6.96)                            | 4.72<br>(3.64 to<br>7.15)                            | 4.69<br>(3.57 to<br>7.15)                              | 0.11<br>(0.09 to<br>0.17)                         | 0.17<br>(0.13 to<br>0.25)                         | 0.18<br>(0.14 to<br>0.26)                         | 0.17<br>(0.13 to<br>0.25)                         |
| Motor neuron disease                                       | 6.96<br>(6.18 to<br>7.72)                            | 11.14<br>(9.76 to<br>12.51)                          | 11.05<br>(9.69 to<br>12.40)                          | 10.71<br>(9.35 to<br>12.04)                            | 0.28<br>(0.25 to<br>0.31)                         | 0.48<br>(0.42 to<br>0.54)                         | 0.48<br>(0.43 to<br>0.54)                         | 0.45<br>(0.40 to<br>0.51)                         |
| Other neurological disorders                               | 13.70<br>(12.43 to<br>14.98)                         | 17.28<br>(15.15 to<br>19.61)                         | 17.21<br>(15.15 to<br>19.56)                         | 16.93<br>(14.88 to<br>19.23)                           | 0.38<br>(0.35 to<br>0.41)                         | 0.57<br>(0.51 to<br>0.63)                         | 0.60<br>(0.54 to<br>0.66)                         | 0.54<br>(0.49 to<br>0.60)                         |
| <b>Mental disorders</b>                                    | <b>41.50</b><br><b>(37.34 to</b><br><b>46.43)</b>    | <b>73.42</b><br><b>(64.50 to</b><br><b>83.17)</b>    | <b>91.36</b><br><b>(78.52 to</b><br><b>105.41)</b>   | <b>1.63</b><br><b>(64.90 to</b><br><b>83.42)</b>       | <b>3.26</b><br><b>(1.47 to</b><br><b>1.81)</b>    | <b>4.48</b><br><b>(2.91 to</b><br><b>3.65)</b>    | <b>3.14</b><br><b>(3.82 to</b><br><b>5.20)</b>    | <b>3.50</b><br><b>(2.79 to</b><br><b>3.50)</b>    |
| Alcohol use disorders                                      | 21.61<br>(18.86 to<br>24.63)                         | 30.20<br>(25.15 to<br>35.58)                         | 32.47<br>(26.78 to<br>38.84)                         | 32.39<br>(27.12 to<br>38.16)                           | 0.74<br>(0.65 to<br>0.84)                         | 1.10<br>(0.92 to<br>1.29)                         | 1.21<br>(1.01 to<br>1.43)                         | 1.15<br>(0.97 to<br>1.35)                         |
| Drug use disorders                                         | 19.64<br>(17.18 to<br>22.01)                         | 42.84<br>(37.03 to<br>49.28)                         | 58.49<br>(48.63 to<br>68.54)                         | 41.15<br>(35.54 to<br>47.20)                           | 0.88<br>(0.78 to<br>0.98)                         | 2.16<br>(1.87 to<br>2.48)                         | 3.26<br>(2.67 to<br>3.88)                         | 1.98<br>(1.71 to<br>2.27)                         |
| Opioid use disorders                                       | 11.36<br>(9.64 to<br>13.37)                          | 18.07<br>(14.21 to<br>22.78)                         | 18.72<br>(15.54 to<br>25.38)                         | 17.71<br>(13.93 to<br>22.41)                           | 0.36<br>(0.29 to<br>0.41)                         | 0.65<br>(0.48 to<br>0.75)                         | 0.72<br>(0.53 to<br>0.87)                         | 0.60<br>(0.46 to<br>0.71)                         |
| Cocaine use disorders                                      | 1.11<br>(0.83 to<br>1.39)                            | 4.13<br>(2.97 to<br>5.52)                            | 5.65<br>(4.04 to<br>7.61)                            | 4.03<br>(2.93 to<br>5.43)                              | 0.04<br>(0.03 to<br>0.05)                         | 0.15<br>(0.11 to<br>0.20)                         | 0.22<br>(0.16 to<br>0.29)                         | 0.15<br>(0.11 to<br>0.19)                         |
| Amphetamine use disorders                                  | 0.66<br>(0.45 to<br>0.87)                            | 2.95<br>(2.02 to<br>4.13)                            | 4.83<br>(3.21 to<br>6.78)                            | 2.89<br>(1.97 to<br>3.93)                              | 0.02<br>(0.02 to<br>0.03)                         | 0.10<br>(0.07 to<br>0.13)                         | 0.16<br>(0.11 to<br>0.23)                         | 0.09<br>(0.07 to<br>0.12)                         |
| Other drug use disorders                                   | 6.51<br>(5.32 to<br>7.44)                            | 17.69<br>(14.44 to<br>21.04)                         | 28.28<br>(21.94 to<br>34.45)                         | 16.52<br>(13.46 to<br>19.53)                           | 0.46<br>(0.40 to<br>0.53)                         | 1.28<br>(1.05 to<br>1.53)                         | 2.16<br>(1.67 to<br>2.66)                         | 1.15<br>(0.93 to<br>1.39)                         |
| Eating disorders                                           | 0.25<br>(0.21 to<br>0.31)                            | 0.38<br>(0.29 to<br>0.51)                            | 0.40<br>(0.30 to<br>0.55)                            | 0.38<br>(0.29 to<br>0.51)                              | 0.00<br>(0.00 to<br>0.01)                         | 0.01<br>(0.01 to<br>0.01)                         | 0.01<br>(0.01 to<br>0.01)                         | 0.01<br>(0.01 to<br>0.01)                         |
| <b>Argentina</b>                                           |                                                      |                                                      |                                                      |                                                        |                                                   |                                                   |                                                   |                                                   |
| Cause                                                      | YLLs (in 1000s)                                      |                                                      |                                                      |                                                        | Deaths (in 1000s)                                 |                                                   |                                                   |                                                   |
|                                                            | 2016                                                 | 2040 Forecast                                        | 2040 Better Scenario                                 | 2040 Worse Scenario                                    | 2016                                              | 2040 Forecast                                     | 2040 Better Scenario                              | 2040 Worse Scenario                               |
| <b>Diabetes, urogenital, blood, and endocrine diseases</b> | <b>439.23</b><br><b>(407.58 to</b><br><b>472.98)</b> | <b>719.99</b><br><b>(588.31 to</b><br><b>887.84)</b> | <b>506.10</b><br><b>(412.48 to</b><br><b>628.58)</b> | <b>804.58</b><br><b>(642.97 to</b><br><b>1,025.72)</b> | <b>26.60</b><br><b>(24.83 to</b><br><b>28.42)</b> | <b>50.54</b><br><b>(42.11 to</b><br><b>61.53)</b> | <b>37.50</b><br><b>(31.12 to</b><br><b>45.64)</b> | <b>54.16</b><br><b>(44.26 to</b><br><b>67.70)</b> |
| Diabetes mellitus                                          | 167.37<br>(153.05 to<br>182.29)                      | 262.52<br>(174.57 to<br>387.05)                      | 164.07<br>(107.42 to<br>246.96)                      | 296.57<br>(188.28 to<br>454.41)                        | 9.80<br>(8.96 to<br>10.68)                        | 17.28<br>(11.95 to<br>24.48)                      | 11.37<br>(7.77 to<br>16.23)                       | 18.59<br>(12.12 to<br>27.64)                      |
| Acute glomerulonephritis                                   | 0.25<br>(0.23 to<br>0.27)                            | 0.26<br>(0.23 to<br>0.31)                            | 0.19<br>(0.16 to<br>0.23)                            | 0.27<br>(0.23 to<br>0.31)                              | 0.01<br>(0.00 to<br>0.01)                         | 0.01<br>(0.01 to<br>0.01)                         | 0.00<br>(0.00 to<br>0.01)                         | 0.01<br>(0.01 to<br>0.01)                         |
| Chronic kidney disease                                     | 174.30<br>(160.04 to<br>188.07)                      | 302.10<br>(194.65 to<br>463.29)                      | 209.10<br>(140.12 to<br>310.76)                      | 359.02<br>(218.98 to<br>582.32)                        | 11.02<br>(10.18 to<br>11.81)                      | 21.85<br>(13.96 to<br>33.53)                      | 15.93<br>(10.47 to<br>23.60)                      | 25.10<br>(15.25 to<br>39.89)                      |

|                                                            |                              |                                |                               |                                |                           |                            |                           |                            |
|------------------------------------------------------------|------------------------------|--------------------------------|-------------------------------|--------------------------------|---------------------------|----------------------------|---------------------------|----------------------------|
| Chronic kidney disease due to diabetes mellitus            | 61.20<br>(51.37 to<br>70.94) | 116.78<br>(73.27 to<br>184.84) | 80.71<br>(52.85 to<br>124.18) | 141.29<br>(84.33 to<br>234.26) | 3.43<br>(2.89 to<br>4.00) | 7.25<br>(4.47 to<br>11.35) | 5.21<br>(3.32 to<br>7.95) | 8.52<br>(5.00 to<br>14.15) |
| Chronic kidney disease due to hypertension                 | 33.66<br>(28.45 to<br>39.74) | 64.25<br>(38.42 to<br>102.91)  | 48.34<br>(29.84 to<br>73.84)  | 74.47<br>(42.06 to<br>126.18)  | 3.12<br>(2.63 to<br>3.69) | 6.48<br>(3.86 to<br>10.11) | 5.12<br>(3.22 to<br>7.86) | 7.22<br>(4.11 to<br>11.95) |
| Chronic kidney disease due to glomerulonephritis           | 22.96<br>(19.26 to<br>27.53) | 32.29<br>(19.79 to<br>52.46)   | 20.47<br>(13.03 to<br>32.21)  | 38.07<br>(22.26 to<br>64.86)   | 1.16<br>(0.93 to<br>1.45) | 1.98<br>(1.16 to<br>3.45)  | 1.31<br>(0.80 to<br>2.18) | 2.29<br>(1.28 to<br>4.12)  |
| Chronic kidney disease due to other and unspecified causes | 56.48<br>(47.97 to<br>65.63) | 88.78<br>(56.28 to<br>141.71)  | 59.58<br>(38.89 to<br>91.55)  | 105.20<br>(63.33 to<br>168.46) | 3.31<br>(2.71 to<br>3.95) | 6.14<br>(3.75 to<br>9.77)  | 4.31<br>(2.73 to<br>6.56) | 7.06<br>(4.11 to<br>11.52) |
| Urinary diseases and male infertility                      | 45.56<br>(41.86 to<br>49.54) | 85.23<br>(75.01 to<br>96.26)   | 67.81<br>(58.58 to<br>79.05)  | 80.18<br>(70.42 to<br>91.04)   | 3.53<br>(3.22 to<br>3.88) | 7.50<br>(6.33 to<br>8.81)  | 6.35<br>(5.36 to<br>7.50) | 6.82<br>(5.62 to<br>8.14)  |
| Urinary tract infections                                   | 42.71<br>(39.01 to<br>46.48) | 82.03<br>(71.91 to<br>92.96)   | 65.74<br>(56.66 to<br>76.34)  | 77.07<br>(67.21 to<br>87.56)   | 3.39<br>(3.06 to<br>3.73) | 7.31<br>(6.16 to<br>8.61)  | 6.22<br>(5.25 to<br>7.56) | 6.64<br>(5.48 to<br>7.95)  |
| Urolithiasis                                               | 0.41<br>(0.32 to<br>0.63)    | 0.57<br>(0.43 to<br>0.90)      | 0.37<br>(0.27 to<br>0.61)     | 0.56<br>(0.42 to<br>0.88)      | 0.02<br>(0.01 to<br>0.03) | 0.03<br>(0.02 to<br>0.05)  | 0.02<br>(0.01 to<br>0.04) | 0.03<br>(0.02 to<br>0.05)  |
| Other urinary diseases                                     | 2.44<br>(1.84 to<br>3.78)    | 2.63<br>(1.84 to<br>4.32)      | 1.70<br>(1.15 to<br>2.78)     | 2.56<br>(1.82 to<br>4.16)      | 0.13<br>(0.09 to<br>0.21) | 0.16<br>(0.11 to<br>0.28)  | 0.11<br>(0.07 to<br>0.20) | 0.15<br>(0.10 to<br>0.26)  |
| Gynecological diseases                                     | 0.58<br>(0.43 to<br>0.74)    | 0.69<br>(0.49 to<br>0.96)      | 0.34<br>(0.22 to<br>0.51)     | 0.71<br>(0.51 to<br>0.96)      | 0.02<br>(0.01 to<br>0.02) | 0.02<br>(0.02 to<br>0.03)  | 0.01<br>(0.02 to<br>0.02) | 0.02<br>(0.02 to<br>0.03)  |
| Uterine fibroids                                           | 0.12<br>(0.08 to<br>0.17)    | 0.11<br>(0.07 to<br>0.17)      | 0.06<br>(0.04 to<br>0.10)     | 0.12<br>(0.08 to<br>0.18)      | 0.00<br>(0.00 to<br>0.00) | 0.00<br>(0.00 to<br>0.00)  | 0.00<br>(0.00 to<br>0.00) | 0.00<br>(0.00 to<br>0.00)  |
| Polycystic ovarian syndrome                                | 0.02<br>(0.01 to<br>0.03)    | 0.01<br>(0.01 to<br>0.02)      | 0.00<br>(0.00 to<br>0.01)     | 0.01<br>(0.01 to<br>0.02)      | 0.00<br>(0.00 to<br>0.00) | 0.00<br>(0.00 to<br>0.00)  | 0.00<br>(0.00 to<br>0.00) | 0.00<br>(0.00 to<br>0.00)  |
| Endometriosis                                              | 0.00<br>(0.00 to<br>0.00)    | 0.00<br>(0.00 to<br>0.00)      | 0.00<br>(0.00 to<br>0.00)     | 0.00<br>(0.00 to<br>0.00)      | 0.00<br>(0.00 to<br>0.00) | 0.00<br>(0.00 to<br>0.00)  | 0.00<br>(0.00 to<br>0.00) | 0.00<br>(0.00 to<br>0.00)  |
| Genital prolapse                                           | 0.02<br>(0.00 to<br>0.02)    | 0.01<br>(0.00 to<br>0.02)      | 0.01<br>(0.00 to<br>0.01)     | 0.01<br>(0.00 to<br>0.02)      | 0.00<br>(0.00 to<br>0.00) | 0.00<br>(0.00 to<br>0.00)  | 0.00<br>(0.00 to<br>0.00) | 0.00<br>(0.00 to<br>0.00)  |
| Other gynecological diseases                               | 0.43<br>(0.31 to<br>0.55)    | 0.55<br>(0.38 to<br>0.77)      | 0.26<br>(0.17 to<br>0.41)     | 0.57<br>(0.40 to<br>0.80)      | 0.01<br>(0.01 to<br>0.02) | 0.02<br>(0.01 to<br>0.02)  | 0.01<br>(0.01 to<br>0.01) | 0.02<br>(0.01 to<br>0.02)  |
| Hemoglobinopathies and hemolytic anemias                   | 18.05<br>(15.26 to<br>22.26) | 19.01<br>(15.17 to<br>23.28)   | 13.15<br>(10.58 to<br>16.74)  | 18.73<br>(15.08 to<br>22.87)   | 0.97<br>(0.76 to<br>1.21) | 1.30<br>(1.00 to<br>1.63)  | 0.97<br>(0.74 to<br>1.24) | 1.23<br>(0.94 to<br>1.56)  |
| Thalassemias                                               | 2.13<br>(1.75 to<br>2.64)    | 0.78<br>(0.59 to<br>1.05)      | 0.69<br>(0.53 to<br>0.92)     | 0.79<br>(0.61 to<br>1.07)      | 0.03<br>(0.02 to<br>0.03) | 0.01<br>(0.01 to<br>0.01)  | 0.01<br>(0.01 to<br>0.01) | 0.01<br>(0.01 to<br>0.01)  |
| Sickle cell disorders                                      | 1.62<br>(1.38 to<br>2.04)    | 1.84<br>(1.46 to<br>2.38)      | 1.14<br>(0.86 to<br>1.55)     | 1.86<br>(1.49 to<br>2.41)      | 0.03<br>(0.03 to<br>0.04) | 0.05<br>(0.04 to<br>0.06)  | 0.03<br>(0.02 to<br>0.04) | 0.05<br>(0.04 to<br>0.06)  |
| G6PD deficiency                                            | 2.73<br>(2.30 to<br>3.37)    | 3.96<br>(3.13 to<br>4.93)      | 2.38<br>(1.83 to<br>3.16)     | 4.03<br>(3.23 to<br>5.00)      | 0.07<br>(0.06 to<br>0.09) | 0.14<br>(0.11 to<br>0.17)  | 0.08<br>(0.07 to<br>0.11) | 0.14<br>(0.11 to<br>0.17)  |
| Other hemoglobinopathies and hemolytic anemias             | 11.57<br>(9.13 to<br>14.56)  | 12.43<br>(9.53 to<br>15.41)    | 8.93<br>(6.85 to<br>11.49)    | 12.04<br>(9.34 to<br>15.19)    | 0.84<br>(0.64 to<br>1.07) | 1.11<br>(0.83 to<br>1.40)  | 0.84<br>(0.63 to<br>1.09) | 1.04<br>(0.78 to<br>1.34)  |
| Endocrine, metabolic, blood, and immune disorders          | 33.12<br>(28.86 to<br>53.35) | 50.17<br>(43.14 to<br>78.26)   | 51.44<br>(44.31 to<br>78.45)  | 49.10<br>(42.11 to<br>76.59)   | 1.25<br>(1.09 to<br>2.03) | 2.58<br>(2.15 to<br>4.20)  | 2.86<br>(2.39 to<br>4.55) | 2.40<br>(1.98 to<br>3.93)  |

**Argentina**

| Cause | YLLs (in 1000s) |               |                      |                     | Deaths (in 1000s) |               |                      |                     |
|-------|-----------------|---------------|----------------------|---------------------|-------------------|---------------|----------------------|---------------------|
|       | 2016            | 2040 Forecast | 2040 Better Scenario | 2040 Worse Scenario | 2016              | 2040 Forecast | 2040 Better Scenario | 2040 Worse Scenario |

|                                               |                                            |                                            |                                          |                                            |                                       |                                       |                                       |                                       |
|-----------------------------------------------|--------------------------------------------|--------------------------------------------|------------------------------------------|--------------------------------------------|---------------------------------------|---------------------------------------|---------------------------------------|---------------------------------------|
|                                               | 20.39<br>(14.68 to<br>23.11)               | 29.19<br>(21.63 to<br>33.80)               | 24.35<br>(18.28 to<br>28.58)             | 28.62<br>(21.25 to<br>33.21)               | 0.72<br>(0.55 to<br>0.81)             | 1.26<br>(0.99 to<br>1.45)             | 1.08<br>(0.87 to<br>1.26)             | 1.20<br>(0.93 to<br>1.39)             |
| <b>Musculoskeletal disorders</b>              |                                            |                                            |                                          |                                            |                                       |                                       |                                       |                                       |
| Rheumatoid arthritis                          | 4.74<br>(3.43 to<br>6.67)                  | 5.47<br>(3.84 to<br>7.72)                  | 3.04<br>(2.05 to<br>4.63)                | 5.62<br>(3.91 to<br>7.85)                  | 0.22<br>(0.16 to<br>0.30)             | 0.29<br>(0.21 to<br>0.40)             | 0.17<br>(0.12 to<br>0.25)             | 0.29<br>(0.21 to<br>0.40)             |
| Other musculoskeletal disorders               | 15.65<br>(11.23 to<br>17.99)               | 23.73<br>(17.49 to<br>27.75)               | 21.31<br>(16.09 to<br>25.01)             | 23.00<br>(16.94 to<br>26.88)               | 0.51<br>(0.38 to<br>0.58)             | 0.97<br>(0.72 to<br>1.12)             | 0.91<br>(0.72 to<br>1.05)             | 0.91<br>(0.68 to<br>1.06)             |
| <b>Other non-communicable diseases</b>        | <b>255.37<br/>(199.16 to<br/>301.40)</b>   | <b>192.62<br/>(136.56 to<br/>239.74)</b>   | <b>112.72<br/>(73.46 to<br/>149.12)</b>  | <b>202.29<br/>(144.84 to<br/>249.91)</b>   | <b>4.39<br/>(3.02 to<br/>5.34)</b>    | <b>5.29<br/>(2.82 to<br/>6.91)</b>    | <b>3.99<br/>(1.86 to<br/>5.43)</b>    | <b>5.15<br/>(2.87 to<br/>6.67)</b>    |
| Congenital birth defects                      | 213.92<br>(165.68 to<br>253.08)            | 135.72<br>(101.52 to<br>169.64)            | 67.30<br>(47.99 to<br>90.94)             | 146.85<br>(109.84 to<br>181.87)            | 2.62<br>(2.03 to<br>3.08)             | 1.77<br>(1.35 to<br>2.18)             | 0.91<br>(0.66 to<br>1.20)             | 1.90<br>(1.46 to<br>2.33)             |
| Neural tube defects                           | 11.49<br>(8.06 to<br>15.67)                | 3.56<br>(2.11 to<br>5.79)                  | 1.45<br>(0.79 to<br>2.54)                | 3.97<br>(2.35 to<br>6.44)                  | 0.14<br>(0.10 to<br>0.19)             | 0.04<br>(0.03 to<br>0.07)             | 0.02<br>(0.01 to<br>0.03)             | 0.05<br>(0.03 to<br>0.08)             |
| Congenital heart anomalies                    | 90.00<br>(68.90 to<br>108.77)              | 57.54<br>(41.88 to<br>74.14)               | 23.68<br>(16.21 to<br>34.47)             | 62.16<br>(44.87 to<br>80.35)               | 1.11<br>(0.85 to<br>1.33)             | 0.75<br>(0.56 to<br>0.95)             | 0.31<br>(0.22 to<br>0.45)             | 0.81<br>(0.60 to<br>1.02)             |
| Orofacial clefts                              | 0.05<br>(0.02 to<br>0.08)                  | 0.02<br>(0.01 to<br>0.05)                  | 0.01<br>(0.00 to<br>0.02)                | 0.03<br>(0.01 to<br>0.05)                  | 0.00<br>(0.00 to<br>0.00)             | 0.00<br>(0.00 to<br>0.00)             | 0.00<br>(0.00 to<br>0.00)             | 0.00<br>(0.00 to<br>0.00)             |
| Down syndrome                                 | 9.90<br>(6.80 to<br>12.47)                 | 7.56<br>(5.54 to<br>9.62)                  | 7.18<br>(5.40 to<br>9.09)                | 14.30<br>(8.25 to<br>10.25)                | 0.14<br>(0.10 to<br>0.18)             | 0.13<br>(0.10 to<br>0.17)             | 0.13<br>(0.10 to<br>0.16)             | 0.14<br>(0.11 to<br>0.17)             |
| Other chromosomal abnormalities               | 16.28<br>(11.88 to<br>22.69)               | 13.21<br>(8.86 to<br>19.25)                | 8.79<br>(5.88 to<br>12.80)               | 14.30<br>(9.41 to<br>21.13)                | 0.20<br>(0.14 to<br>0.27)             | 0.17<br>(0.11 to<br>0.24)             | 0.11<br>(0.08 to<br>0.16)             | 0.18<br>(0.12 to<br>0.26)             |
| Congenital musculoskeletal and limb anomalies | 4.04<br>(2.91 to<br>5.19)                  | 2.51<br>(1.70 to<br>3.59)                  | 1.23<br>(0.78 to<br>1.85)                | 2.71<br>(1.81 to<br>3.82)                  | 0.05<br>(0.04 to<br>0.06)             | 0.03<br>(0.02 to<br>0.04)             | 0.02<br>(0.01 to<br>0.02)             | 0.03<br>(0.02 to<br>0.05)             |
| Urogenital congenital anomalies               | 8.62<br>(5.82 to<br>15.74)                 | 5.10<br>(3.24 to<br>9.38)                  | 2.78<br>(1.70 to<br>5.17)                | 5.48<br>(3.43 to<br>10.04)                 | 0.11<br>(0.08 to<br>0.20)             | 0.08<br>(0.05 to<br>0.13)             | 0.04<br>(0.03 to<br>0.07)             | 0.08<br>(0.05 to<br>0.14)             |
| Digestive congenital anomalies                | 22.03<br>(15.78 to<br>28.77)               | 14.59<br>(9.18 to<br>21.14)                | 6.54<br>(3.95 to<br>10.19)               | 15.99<br>(10.14 to<br>22.97)               | 0.26<br>(0.18 to<br>0.34)             | 0.17<br>(0.11 to<br>0.25)             | 0.08<br>(0.05 to<br>0.12)             | 0.19<br>(0.12 to<br>0.27)             |
| Other congenital birth defects                | 51.52<br>(32.35 to<br>65.90)               | 31.62<br>(20.41 to<br>43.47)               | 15.63<br>(9.43 to<br>23.11)              | 34.26<br>(21.80 to<br>47.47)               | 0.61<br>(0.39 to<br>0.78)             | 0.39<br>(0.26 to<br>0.53)             | 0.19<br>(0.12 to<br>0.28)             | 0.42<br>(0.27 to<br>0.57)             |
| Skin and subcutaneous diseases                | 22.16<br>(6.31 to<br>30.28)                | 46.13<br>(13.79 to<br>64.01)               | 39.23<br>(11.73 to<br>55.24)             | 43.72<br>(12.90 to<br>60.83)               | 1.55<br>(0.45 to<br>2.16)             | 3.40<br>(0.98 to<br>4.85)             | 3.01<br>(0.89 to<br>4.32)             | 3.11<br>(0.88 to<br>4.49)             |
| Cellulitis                                    | 3.96<br>(1.35 to<br>5.90)                  | 9.97<br>(3.59 to<br>15.02)                 | 9.48<br>(3.49 to<br>14.30)               | 9.45<br>(3.45 to<br>14.18)                 | 0.21<br>(0.07 to<br>0.31)             | 0.57<br>(0.21 to<br>0.88)             | 0.57<br>(0.21 to<br>0.86)             | 0.52<br>(0.19 to<br>0.80)             |
| Pyoderma                                      | 10.02<br>(1.97 to<br>15.04)                | 23.55<br>(4.48 to<br>35.99)                | 20.05<br>(3.89 to<br>31.22)              | 22.50<br>(4.35 to<br>34.43)                | 0.62<br>(0.11 to<br>0.97)             | 1.66<br>(0.31 to<br>2.65)             | 1.51<br>(0.29 to<br>2.41)             | 1.52<br>(0.29 to<br>2.47)             |
| Decubitus ulcer                               | 7.33<br>(2.35 to<br>9.91)                  | 11.26<br>(3.92 to<br>16.38)                | 8.58<br>(3.01 to<br>12.79)               | 10.48<br>(3.52 to<br>15.32)                | 0.68<br>(0.23 to<br>0.93)             | 1.10<br>(0.37 to<br>1.67)             | 0.87<br>(0.29 to<br>1.33)             | 0.99<br>(0.33 to<br>1.53)             |
| Other skin and subcutaneous diseases          | 0.84<br>(0.30 to<br>1.12)                  | 1.35<br>(0.50 to<br>1.82)                  | 1.12<br>(0.42 to<br>1.53)                | 1.30<br>(0.47 to<br>1.74)                  | 0.04<br>(0.02 to<br>0.06)             | 0.07<br>(0.03 to<br>0.10)             | 0.06<br>(0.02 to<br>0.09)             | 0.07<br>(0.02 to<br>0.09)             |
| Sudden infant death syndrome                  | 19.30<br>(14.47 to<br>25.63)               | 10.77<br>(6.42 to<br>17.05)                | 6.19<br>(3.74 to<br>9.85)                | 11.71<br>(7.06 to<br>18.42)                | 0.22<br>(0.17 to<br>0.30)             | 0.12<br>(0.07 to<br>0.20)             | 0.07<br>(0.04 to<br>0.11)             | 0.14<br>(0.08 to<br>0.21)             |
| <b>Injuries</b>                               | <b>939.39<br/>(864.39 to<br/>1,020.72)</b> | <b>823.52<br/>(627.69 to<br/>1,211.67)</b> | <b>498.90<br/>(373.49 to<br/>820.11)</b> | <b>976.37<br/>(725.56 to<br/>1,402.48)</b> | <b>22.71<br/>(20.93 to<br/>24.66)</b> | <b>24.18<br/>(19.78 to<br/>32.23)</b> | <b>16.06<br/>(13.10 to<br/>22.78)</b> | <b>27.05<br/>(21.53 to<br/>35.66)</b> |
| <b>Transport injuries</b>                     | <b>304.87<br/>(273.85 to<br/>335.67)</b>   | <b>238.08<br/>(151.97 to<br/>360.21)</b>   | <b>78.18<br/>(49.80 to<br/>120.58)</b>   | <b>351.74<br/>(216.53 to<br/>555.70)</b>   | <b>6.97<br/>(6.34 to<br/>7.60)</b>    | <b>6.30<br/>(4.29 to<br/>9.17)</b>    | <b>2.31<br/>(1.58 to<br/>3.38)</b>    | <b>8.79<br/>(5.69 to<br/>13.10)</b>   |

|                                      |                                                      |                                                      |                                                      |                                                      |                                                |                                                 |                                                |                                                 |
|--------------------------------------|------------------------------------------------------|------------------------------------------------------|------------------------------------------------------|------------------------------------------------------|------------------------------------------------|-------------------------------------------------|------------------------------------------------|-------------------------------------------------|
| Road injuries                        | 283.74<br>(255.24 to<br>312.04)                      | 205.24<br>(130.92 to<br>311.21)                      | 59.12<br>(37.51 to<br>91.17)                         | 315.21<br>(192.84 to<br>497.71)                      | 6.46<br>(5.88 to<br>7.06)                      | 5.40<br>(3.65 to<br>7.86)                       | 1.77<br>(1.22 to<br>2.55)                      | 7.80<br>(5.05 to<br>11.56)                      |
| Pedestrian road injuries             | 61.73<br>(52.27 to<br>80.40)                         | 47.24<br>(32.58 to<br>71.29)                         | 11.28<br>(7.61 to<br>17.07)                          | 67.47<br>(44.53 to<br>105.80)                        | 1.76<br>(1.52 to<br>2.26)                      | 1.68<br>(1.20 to<br>2.43)                       | 0.48<br>(0.34 to<br>0.71)                      | 2.22<br>(1.52 to<br>3.34)                       |
| <b>Argentina</b>                     |                                                      |                                                      |                                                      |                                                      |                                                |                                                 |                                                |                                                 |
| Cause                                | YLLs (in 1000s)                                      |                                                      |                                                      |                                                      | Deaths (in 1000s)                              |                                                 |                                                |                                                 |
|                                      | 2016                                                 | 2040 Forecast                                        | 2040 Better Scenario                                 | 2040 Worse Scenario                                  | 2016                                           | 2040 Forecast                                   | 2040 Better Scenario                           | 2040 Worse Scenario                             |
| Cyclist road injuries                | 8.88<br>(7.59 to<br>10.57)                           | 8.00<br>(5.25 to<br>12.06)                           | 3.12<br>(2.11 to<br>4.61)                            | 11.72<br>(7.49 to<br>18.08)                          | 0.23<br>(0.20 to<br>0.27)                      | 0.24<br>(0.16 to<br>0.36)                       | 0.12<br>(0.08 to<br>0.18)                      | 0.33<br>(0.21 to<br>0.50)                       |
| Motorcyclist road injuries           | 56.59<br>(45.19 to<br>65.84)                         | 58.42<br>(21.07 to<br>69.99)                         | 17.23<br>(9.49 to<br>30.67)                          | 54.13<br>(28.55 to<br>99.80)                         | 1.03<br>(0.82 to<br>1.20)                      | 0.74<br>(0.42 to<br>1.28)                       | 0.36<br>(0.21 to<br>0.62)                      | 1.01<br>(0.56 to<br>1.79)                       |
| Motor vehicle road injuries          | 153.83<br>(132.32 to<br>178.03)                      | 109.33<br>(69.10 to<br>167.90)                       | 26.88<br>(17.09 to<br>40.83)                         | 178.27<br>(107.64 to<br>279.62)                      | 3.38<br>(2.85 to<br>3.84)                      | 2.68<br>(1.77 to<br>3.91)                       | 0.78<br>(0.53 to<br>1.11)                      | 4.15<br>(2.65 to<br>6.21)                       |
| Other road injuries                  | 2.70<br>(2.13 to<br>3.75)                            | 2.25<br>(1.30 to<br>3.91)                            | 0.60<br>(0.35 to<br>1.03)                            | 3.61<br>(2.00 to<br>6.37)                            | 0.06<br>(0.05 to<br>0.08)                      | 0.06<br>(0.03 to<br>0.10)                       | 0.02<br>(0.01 to<br>0.03)                      | 0.09<br>(0.05 to<br>0.15)                       |
| Other transport injuries             | 21.14<br>(17.82 to<br>25.48)                         | 32.84<br>(21.24 to<br>51.02)                         | 19.07<br>(11.43 to<br>30.97)                         | 36.53<br>(22.12 to<br>57.91)                         | 0.51<br>(0.44 to<br>0.59)                      | 0.91<br>(0.60 to<br>1.37)                       | 0.54<br>(0.34 to<br>0.84)                      | 0.99<br>(0.61 to<br>1.55)                       |
| <b>Unintentional injuries</b>        | <b>279.60</b><br><b>(257.07 to</b><br><b>307.19)</b> | <b>248.20</b><br><b>(213.99 to</b><br><b>289.93)</b> | <b>183.21</b><br><b>(156.91 to</b><br><b>219.43)</b> | <b>251.35</b><br><b>(215.38 to</b><br><b>297.76)</b> | <b>8.12</b><br><b>(7.47 to</b><br><b>8.96)</b> | <b>9.64</b><br><b>(8.60 to</b><br><b>11.05)</b> | <b>7.78</b><br><b>(6.89 to</b><br><b>9.01)</b> | <b>9.29</b><br><b>(8.21 to</b><br><b>10.83)</b> |
| Falls                                | 33.57<br>(29.59 to<br>44.60)                         | 44.33<br>(38.51 to<br>58.38)                         | 35.95<br>(30.88 to<br>46.24)                         | 42.81<br>(37.14 to<br>57.05)                         | 1.73<br>(1.54 to<br>2.20)                      | 2.83<br>(2.44 to<br>3.64)                       | 2.41<br>(2.07 to<br>3.01)                      | 2.62<br>(2.22 to<br>3.43)                       |
| Drowning                             | 41.35<br>(36.98 to<br>46.55)                         | 30.40<br>(22.04 to<br>42.91)                         | 30.88<br>(15.13 to<br>29.63)                         | 32.80<br>(23.00 to<br>47.61)                         | 0.75<br>(0.68 to<br>0.84)                      | 0.66<br>(0.49 to<br>0.92)                       | 0.47<br>(0.35 to<br>0.66)                      | 0.70<br>(0.51 to<br>1.02)                       |
| Fire, heat, and hot substances       | 24.94<br>(21.10 to<br>28.10)                         | 19.05<br>(14.02 to<br>25.72)                         | 11.85<br>(8.57 to<br>16.61)                          | 20.16<br>(14.58 to<br>28.07)                         | 0.83<br>(0.64 to<br>0.92)                      | 0.83<br>(0.59 to<br>1.10)                       | 0.56<br>(0.39 to<br>0.76)                      | 0.83<br>(0.59 to<br>1.15)                       |
| Poisonings                           | 11.22<br>(9.51 to<br>13.57)                          | 5.70<br>(3.87 to<br>8.83)                            | 3.04<br>(2.01 to<br>4.80)                            | 6.23<br>(4.18 to<br>9.86)                            | 0.24<br>(0.21 to<br>0.30)                      | 0.16<br>(0.11 to<br>0.24)                       | 0.09<br>(0.06 to<br>0.14)                      | 0.16<br>(0.11 to<br>0.26)                       |
| Exposure to mechanical forces        | 42.53<br>(36.81 to<br>48.27)                         | 32.25<br>(26.62 to<br>40.36)                         | 21.50<br>(17.01 to<br>27.49)                         | 33.04<br>(26.82 to<br>40.59)                         | 0.88<br>(0.77 to<br>1.00)                      | 0.80<br>(0.67 to<br>0.95)                       | 0.55<br>(0.45 to<br>0.68)                      | 0.80<br>(0.67 to<br>0.94)                       |
| Unintentional firearm injuries       | 18.69<br>(14.48 to<br>22.09)                         | 12.87<br>(9.66 to<br>17.65)                          | 8.92<br>(6.60 to<br>12.20)                           | 13.16<br>(9.70 to<br>17.56)                          | 0.41<br>(0.32 to<br>0.47)                      | 0.33<br>(0.26 to<br>0.42)                       | 0.24<br>(0.19 to<br>0.31)                      | 0.33<br>(0.26 to<br>0.41)                       |
| Unintentional suffocation            | 8.85<br>(6.59 to<br>11.12)                           | 5.52<br>(3.97 to<br>7.41)                            | 3.75<br>(2.63 to<br>5.09)                            | 5.79<br>(4.10 to<br>7.71)                            | 0.13<br>(0.10 to<br>0.16)                      | 0.09<br>(0.07 to<br>0.12)                       | 0.06<br>(0.05 to<br>0.09)                      | 0.09<br>(0.07 to<br>0.12)                       |
| Other exposure to mechanical forces  | 14.98<br>(12.43 to<br>18.75)                         | 13.86<br>(10.90 to<br>17.52)                         | 8.84<br>(6.69 to<br>11.94)                           | 14.10<br>(11.25 to<br>18.04)                         | 0.34<br>(0.29 to<br>0.42)                      | 0.37<br>(0.30 to<br>0.46)                       | 0.25<br>(0.19 to<br>0.32)                      | 0.37<br>(0.30 to<br>0.45)                       |
| Adverse effects of medical treatment | 39.16<br>(31.26 to<br>50.80)                         | 43.18<br>(34.22 to<br>55.68)                         | 35.71<br>(28.49 to<br>46.27)                         | 42.43<br>(33.35 to<br>55.43)                         | 1.74<br>(1.36 to<br>2.19)                      | 2.30<br>(1.78 to<br>2.89)                       | 2.02<br>(1.56 to<br>2.50)                      | 2.17<br>(1.68 to<br>2.76)                       |
| Animal contact                       | 2.34<br>(1.70 to<br>2.92)                            | 2.42<br>(1.74 to<br>3.12)                            | 1.70<br>(1.21 to<br>2.17)                            | 2.50<br>(1.78 to<br>3.21)                            | 0.05<br>(0.04 to<br>0.06)                      | 0.06<br>(0.05 to<br>0.08)                       | 0.05<br>(0.03 to<br>0.06)                      | 0.06<br>(0.05 to<br>0.08)                       |
| Venomous animal contact              | 0.94<br>(0.59 to<br>1.30)                            | 0.99<br>(0.65 to<br>1.41)                            | 0.75<br>(0.50 to<br>1.06)                            | 1.01<br>(0.66 to<br>1.46)                            | 0.02<br>(0.02 to<br>0.03)                      | 0.03<br>(0.02 to<br>0.04)                       | 0.02<br>(0.02 to<br>0.03)                      | 0.03<br>(0.02 to<br>0.04)                       |
| Non-venomous animal contact          | 1.40<br>(0.97 to<br>1.81)                            | 1.43<br>(0.96 to<br>1.89)                            | 0.95<br>(0.61 to<br>1.27)                            | 1.48<br>(0.98 to<br>1.96)                            | 0.03<br>(0.02 to<br>0.04)                      | 0.03<br>(0.02 to<br>0.05)                       | 0.02<br>(0.02 to<br>0.03)                      | 0.03<br>(0.01 to<br>0.04)                       |

|                                                 |                                        |                                        |                                        |                                        |                                  |                                   |                                  |                                   |
|-------------------------------------------------|----------------------------------------|----------------------------------------|----------------------------------------|----------------------------------------|----------------------------------|-----------------------------------|----------------------------------|-----------------------------------|
| Foreign body                                    | 58.27<br>(49.25 to<br>68.43)           | 51.17<br>(42.60 to<br>61.82)           | 43.38<br>(36.37 to<br>51.94)           | 51.17<br>(42.47 to<br>62.00)           | 1.34<br>(1.18 to<br>1.65)        | 1.52<br>(1.33 to<br>1.90)         | 1.41<br>(1.23 to<br>1.75)        | 1.45<br>(1.25 to<br>1.83)         |
| Pulmonary aspiration and foreign body in airway | 55.12<br>(46.21 to<br>64.42)           | 48.39<br>(40.27 to<br>58.73)           | 40.49<br>(33.72 to<br>48.64)           | 48.37<br>(39.94 to<br>58.94)           | 1.27<br>(1.12 to<br>1.56)        | 1.45<br>(1.26 to<br>1.83)         | 1.32<br>(1.14 to<br>1.66)        | 1.38<br>(1.19 to<br>1.74)         |
| Foreign body in other body part                 | 3.16<br>(2.56 to<br>4.73)              | 2.78<br>(2.14 to<br>4.22)              | 2.89<br>(2.24 to<br>4.30)              | 2.80<br>(2.14 to<br>4.29)              | 0.07<br>(0.06 to<br>0.11)        | 0.08<br>(0.06 to<br>0.12)         | 0.09<br>(0.07 to<br>0.13)        | 0.08<br>(0.06 to<br>0.12)         |
| Environmental heat and cold exposure            | 3.90<br>(2.29 to<br>5.71)              | 4.02<br>(2.39 to<br>6.09)              | 2.44<br>(1.36 to<br>3.71)              | 4.14<br>(2.35 to<br>6.29)              | 0.10<br>(0.06 to<br>0.16)        | 0.12<br>(0.07 to<br>0.19)         | 0.08<br>(0.04 to<br>0.12)        | 0.12<br>(0.07 to<br>0.19)         |
| Other unintentional injuries                    | 22.32<br>(19.69 to<br>25.25)           | 15.68<br>(12.07 to<br>20.03)           | 6.76<br>(4.67 to<br>9.84)              | 16.07<br>(12.79 to<br>20.23)           | 0.44<br>(0.39 to<br>0.50)        | 0.35<br>(0.28 to<br>0.43)         | 0.16<br>(0.11 to<br>0.22)        | 0.36<br>(0.29 to<br>0.43)         |
| <b>Self-harm and interpersonal violence</b>     | <b>354.64</b><br>(293.34 to<br>406.33) | <b>310.60</b><br>(208.35 to<br>473.48) | <b>211.35</b><br>(142.04 to<br>315.16) | <b>346.68</b><br>(217.79 to<br>543.68) | <b>7.62</b><br>(6.43 to<br>8.74) | <b>7.68</b><br>(5.39 to<br>11.10) | <b>5.42</b><br>(3.80 to<br>7.79) | <b>8.42</b><br>(5.54 to<br>12.57) |

| Argentina                                                                           |                                  |                                     |                                     |                                     |                                  |                                  |                                  |                                  |
|-------------------------------------------------------------------------------------|----------------------------------|-------------------------------------|-------------------------------------|-------------------------------------|----------------------------------|----------------------------------|----------------------------------|----------------------------------|
| Cause                                                                               | YLLs (in 1000s)                  |                                     |                                     |                                     | Deaths (in 1000s)                |                                  |                                  |                                  |
|                                                                                     | 2016                             | 2040 Forecast                       | 2040 Better Scenario                | 2040 Worse Scenario                 | 2016                             | 2040 Forecast                    | 2040 Better Scenario             | 2040 Worse Scenario              |
| Self-harm                                                                           | 222.94<br>(176.35 to<br>256.75)  | 210.29<br>(128.30 to<br>351.95)     | 149.07<br>(92.30 to<br>236.95)      | 245.27<br>(136.09 to<br>421.74)     | 5.01<br>(4.13 to<br>5.78)        | 5.50<br>(3.50 to<br>8.36)        | 4.02<br>(2.64 to<br>6.03)        | 6.22<br>(3.65 to<br>10.22)       |
| Self-harm by firearm                                                                | 50.25<br>(36.06 to<br>67.66)     | 47.68<br>(25.65 to<br>88.13)        | 30.56<br>(16.33 to<br>54.89)        | 55.93<br>(27.53 to<br>104.61)       | 1.23<br>(0.93 to<br>1.69)        | 1.35<br>(0.79 to<br>2.30)        | 0.91<br>(0.53 to<br>1.55)        | 1.53<br>(0.82 to<br>2.72)        |
| Self-harm by other specified means                                                  | 172.69<br>(129.36 to<br>201.58)  | 162.61<br>(98.99 to<br>266.84)      | 118.51<br>(73.18 to<br>186.44)      | 189.35<br>(105.48 to<br>318.61)     | 3.77<br>(2.92 to<br>4.40)        | 4.14<br>(2.66 to<br>6.50)        | 3.12<br>(2.05 to<br>4.60)        | 4.69<br>(2.77 to<br>7.61)        |
| Interpersonal violence                                                              | 131.70<br>(84.03 to<br>178.16)   | 100.31<br>(62.48 to<br>148.26)      | 62.28<br>(38.05 to<br>92.98)        | 101.44<br>(63.60 to<br>149.87)      | 2.61<br>(1.67 to<br>3.53)        | 2.18<br>(1.34 to<br>3.16)        | 1.39<br>(0.85 to<br>2.02)        | 2.19<br>(1.33 to<br>3.19)        |
| Physical violence by firearm                                                        | 77.39<br>(44.85 to<br>113.38)    | 56.76<br>(31.33 to<br>90.00)        | 33.43<br>(18.44 to<br>53.42)        | 56.85<br>(31.22 to<br>91.01)        | 1.47<br>(0.86 to<br>2.19)        | 1.16<br>(0.64 to<br>1.86)        | 0.69<br>(0.38 to<br>1.09)        | 1.15<br>(0.63 to<br>1.88)        |
| Physical violence by sharp object                                                   | 37.04<br>(18.69 to<br>56.83)     | 30.60<br>(15.48 to<br>48.14)        | 19.27<br>(10.38 to<br>29.93)        | 30.38<br>(15.29 to<br>48.54)        | 0.74<br>(0.38 to<br>1.12)        | 0.66<br>(0.34 to<br>1.03)        | 0.43<br>(0.24 to<br>0.66)        | 0.65<br>(0.35 to<br>1.03)        |
| Physical violence by other means                                                    | 17.27<br>(8.44 to<br>23.67)      | 12.95<br>(5.89 to<br>19.93)         | 9.57<br>(4.41 to<br>14.83)          | 14.18<br>(6.32 to<br>22.82)         | 0.39<br>(0.18 to<br>0.54)        | 0.36<br>(0.16 to<br>0.55)        | 0.27<br>(0.12 to<br>0.42)        | 0.39<br>(0.17 to<br>0.61)        |
| <b>Forces of nature, conflict and terrorism, and executions and police conflict</b> | <b>0.28</b><br>(0.22 to<br>1.04) | <b>26.64</b><br>(0.00 to<br>348.36) | <b>26.16</b><br>(0.00 to<br>342.02) | <b>26.60</b><br>(0.00 to<br>348.06) | <b>0.01</b><br>(0.00 to<br>0.02) | <b>0.56</b><br>(0.00 to<br>7.27) | <b>0.56</b><br>(0.00 to<br>7.24) | <b>0.55</b><br>(0.00 to<br>7.21) |
| Exposure to forces of nature                                                        | 0.00<br>(0.00 to<br>0.00)        | 0.71<br>(0.00 to<br>3.09)           | 0.69<br>(0.00 to<br>3.01)           | 0.71<br>(0.00 to<br>3.09)           | 0.00<br>(0.00 to<br>0.00)        | 0.02<br>(0.00 to<br>0.07)        | 0.02<br>(0.00 to<br>0.07)        | 0.02<br>(0.00 to<br>0.07)        |
| Conflict and terrorism                                                              | 0.00<br>(0.00 to<br>0.00)        | 0.24<br>(0.00 to<br>2.31)           | 0.23<br>(0.00 to<br>2.25)           | 0.24<br>(0.00 to<br>2.32)           | 0.00<br>(0.00 to<br>0.00)        | 0.00<br>(0.00 to<br>0.05)        | 0.00<br>(0.00 to<br>0.05)        | 0.00<br>(0.00 to<br>0.05)        |
| Executions and police conflict                                                      | 0.28<br>(0.22 to<br>1.04)        | 25.69<br>(0.00 to<br>346.07)        | 25.23<br>(0.00 to<br>339.80)        | 25.65<br>(0.00 to<br>345.76)        | 0.01<br>(0.00 to<br>0.02)        | 0.53<br>(0.00 to<br>7.22)        | 0.53<br>(0.00 to<br>7.19)        | 0.53<br>(0.00 to<br>7.16)        |

| Chile             |                                                          |                                                          |                                                          |                                                          |                                                   |                                                    |                                                    |                                                    |
|-------------------|----------------------------------------------------------|----------------------------------------------------------|----------------------------------------------------------|----------------------------------------------------------|---------------------------------------------------|----------------------------------------------------|----------------------------------------------------|----------------------------------------------------|
| Cause             | YLLs (actual counts)                                     |                                                          |                                                          |                                                          | Deaths (actual counts)                            |                                                    |                                                    |                                                    |
|                   | 2016                                                     | 2040 Forecast                                            | 2040 Better Scenario                                     | 2040 Worse Scenario                                      | 2016                                              | 2040 Forecast                                      | 2040 Better Scenario                               | 2040 Worse Scenario                                |
| <b>All causes</b> | <b>2,097,328.47</b><br>(1,686,442.02 to<br>2,570,153.18) | <b>2,616,053.27</b><br>(1,963,981.59 to<br>3,476,186.97) | <b>1,870,338.53</b><br>(1,408,862.91 to<br>2,523,497.68) | <b>3,146,823.53</b><br>(2,339,510.99 to<br>4,217,531.33) | <b>108,411.99</b><br>(88,761.34 to<br>131,013.55) | <b>176,041.87</b><br>(141,027.62 to<br>215,684.74) | <b>134,556.74</b><br>(107,025.44 to<br>164,528.99) | <b>202,617.35</b><br>(161,879.86 to<br>248,378.01) |



| Measles                                        | 7.60<br>(5.41 to<br>10.33)                                 | 156.33<br>(0.33 to<br>1,432.11)                          | 78.66<br>(0.29 to<br>658.85)                             | 231.86<br>(0.35 to<br>2,126.58)                            | 0.10<br>(0.07 to<br>0.13)                         | 2.07<br>(0.01 to<br>17.45)                        | 1.12<br>(0.01 to<br>9.18)                         | 2.97<br>(0.01 to<br>26.22)                        |
|------------------------------------------------|------------------------------------------------------------|----------------------------------------------------------|----------------------------------------------------------|------------------------------------------------------------|---------------------------------------------------|---------------------------------------------------|---------------------------------------------------|---------------------------------------------------|
| <b>Chile</b>                                   |                                                            |                                                          |                                                          |                                                            |                                                   |                                                   |                                                   |                                                   |
| Cause                                          | YLLs (actual counts)                                       |                                                          |                                                          |                                                            | Deaths (actual counts)                            |                                                   |                                                   |                                                   |
|                                                | 2016                                                       | 2040 Forecast                                            | 2040 Better Scenario                                     | 2040 Worse Scenario                                        | 2016                                              | 2040 Forecast                                     | 2040 Better Scenario                              | 2040 Worse Scenario                               |
| Varicella and herpes zoster                    | 363.65<br>(210.00 to<br>679.58)                            | 193.03<br>(99.45 to<br>351.34)                           | 119.54<br>(61.26 to<br>212.38)                           | 213.97<br>(109.15 to<br>403.87)                            | 9.14<br>(4.98 to<br>15.69)                        | 7.58<br>(3.78 to<br>12.64)                        | 5.32<br>(2.63 to<br>8.77)                         | 7.74<br>(3.83 to<br>13.03)                        |
| <b>Neglected tropical diseases and malaria</b> | <b>1,363.89</b><br><b>(1,053.43 to</b><br><b>1,725.63)</b> | <b>950.50</b><br><b>(755.22 to</b><br><b>1,189.05)</b>   | <b>1,073.47</b><br><b>(843.75 to</b><br><b>1,371.84)</b> | <b>917.52</b><br><b>(737.82 to</b><br><b>1,137.59)</b>     | <b>68.39</b><br><b>(53.15 to</b><br><b>85.83)</b> | <b>57.16</b><br><b>(47.89 to</b><br><b>67.83)</b> | <b>67.56</b><br><b>(55.58 to</b><br><b>81.60)</b> | <b>53.76</b><br><b>(45.47 to</b><br><b>62.97)</b> |
| Malaria                                        | 0.00<br>(0.00 to<br>0.00)                                  | 0.00<br>(0.00 to<br>0.00)                                | 0.00<br>(0.00 to<br>0.00)                                | 0.00<br>(0.00 to<br>0.00)                                  | 0.00<br>(0.00 to<br>0.00)                         | 0.00<br>(0.00 to<br>0.00)                         | 0.00<br>(0.00 to<br>0.00)                         | 0.00<br>(0.00 to<br>0.00)                         |
| Chagas disease                                 | 1,142.64<br>(867.97 to<br>1,466.32)                        | 778.20<br>(607.41 to<br>993.06)                          | 921.87<br>(711.79 to<br>1,181.81)                        | 739.22<br>(583.24 to<br>929.38)                            | 61.87<br>(47.92 to<br>77.96)                      | 50.62<br>(41.50 to<br>61.22)                      | 61.88<br>(50.27 to<br>75.47)                      | 47.17<br>(39.11 to<br>55.97)                      |
| Leishmaniasis                                  | 0.00<br>(0.00 to<br>0.00)                                  | 0.00<br>(0.00 to<br>0.00)                                | 0.00<br>(0.00 to<br>0.00)                                | 0.00<br>(0.00 to<br>0.00)                                  | 0.00<br>(0.00 to<br>0.00)                         | 0.00<br>(0.00 to<br>0.00)                         | 0.00<br>(0.00 to<br>0.00)                         | 0.00<br>(0.00 to<br>0.00)                         |
| African trypanosomiasis                        | 0.00<br>(0.00 to<br>0.00)                                  | 0.00<br>(0.00 to<br>0.00)                                | 0.00<br>(0.00 to<br>0.00)                                | 0.00<br>(0.00 to<br>0.00)                                  | 0.00<br>(0.00 to<br>0.00)                         | 0.00<br>(0.00 to<br>0.00)                         | 0.00<br>(0.00 to<br>0.00)                         | 0.00<br>(0.00 to<br>0.00)                         |
| Schistosomiasis                                | 0.00<br>(0.00 to<br>0.00)                                  | 0.00<br>(0.00 to<br>0.00)                                | 0.00<br>(0.00 to<br>0.00)                                | 0.00<br>(0.00 to<br>0.00)                                  | 0.00<br>(0.00 to<br>0.00)                         | 0.00<br>(0.00 to<br>0.00)                         | 0.00<br>(0.00 to<br>0.00)                         | 0.00<br>(0.00 to<br>0.00)                         |
| Cysticercosis                                  | 14.94<br>(11.27 to<br>19.32)                               | 5.37<br>(4.01 to<br>7.11)                                | 4.92<br>(3.65 to<br>6.55)                                | 5.42<br>(4.06 to<br>7.11)                                  | 0.44<br>(0.34 to<br>0.57)                         | 0.19<br>(0.15 to<br>0.25)                         | 0.18<br>(0.14 to<br>0.23)                         | 0.19<br>(0.15 to<br>0.24)                         |
| Cystic echinococcosis                          | 85.27<br>(62.47 to<br>110.09)                              | 62.83<br>(45.08 to<br>84.41)                             | 40.31<br>(29.42 to<br>53.30)                             | 66.37<br>(49.16 to<br>86.61)                               | 3.37<br>(2.52 to<br>4.31)                         | 3.39<br>(2.60 to<br>4.28)                         | 2.27<br>(1.75 to<br>2.81)                         | 3.48<br>(2.75 to<br>4.31)                         |
| Dengue                                         | 0.00<br>(0.00 to<br>0.00)                                  | 0.00<br>(0.00 to<br>0.00)                                | 0.00<br>(0.00 to<br>0.00)                                | 0.00<br>(0.00 to<br>0.00)                                  | 0.00<br>(0.00 to<br>0.00)                         | 0.00<br>(0.00 to<br>0.00)                         | 0.00<br>(0.00 to<br>0.00)                         | 0.00<br>(0.00 to<br>0.00)                         |
| Yellow fever                                   | 0.00<br>(0.00 to<br>0.00)                                  | 0.00<br>(0.00 to<br>0.00)                                | 0.00<br>(0.00 to<br>0.00)                                | 0.00<br>(0.00 to<br>0.00)                                  | 0.00<br>(0.00 to<br>0.00)                         | 0.00<br>(0.00 to<br>0.00)                         | 0.00<br>(0.00 to<br>0.00)                         | 0.00<br>(0.00 to<br>0.00)                         |
| Rabies                                         | 0.63<br>(0.46 to<br>0.90)                                  | 0.42<br>(0.29 to<br>0.61)                                | 0.30<br>(0.21 to<br>0.43)                                | 0.45<br>(0.31 to<br>0.66)                                  | 0.02<br>(0.01 to<br>0.02)                         | 0.01<br>(0.01 to<br>0.02)                         | 0.01<br>(0.01 to<br>0.01)                         | 0.01<br>(0.01 to<br>0.02)                         |
| Intestinal nematode infections                 | 9.55<br>(3.50 to<br>19.29)                                 | 9.16<br>(3.86 to<br>17.41)                               | 8.69<br>(3.73 to<br>16.09)                               | 9.52<br>(3.92 to<br>18.54)                                 | 0.22<br>(0.10 to<br>0.36)                         | 0.28<br>(0.14 to<br>0.45)                         | 0.29<br>(0.14 to<br>0.46)                         | 0.28<br>(0.13 to<br>0.44)                         |
| Other neglected tropical diseases              | 110.87<br>(85.86 to<br>191.64)                             | 94.51<br>(70.62 to<br>159.38)                            | 97.37<br>(71.78 to<br>174.71)                            | 96.54<br>(72.45 to<br>160.42)                              | 2.47<br>(1.85 to<br>4.55)                         | 2.66<br>(1.98 to<br>5.14)                         | 2.93<br>(2.14 to<br>6.00)                         | 2.63<br>(1.97 to<br>4.99)                         |
| <b>Maternal disorders</b>                      | <b>2,755.22</b><br><b>(1,781.15 to</b><br><b>4,098.93)</b> | <b>1,541.99</b><br><b>(938.07 to</b><br><b>2,400.28)</b> | <b>1,043.87</b><br><b>(633.39 to</b><br><b>1,637.49)</b> | <b>1,662.60</b><br><b>(1,009.08 to</b><br><b>2,657.32)</b> | <b>49.59</b><br><b>(31.94 to</b><br><b>73.69)</b> | <b>27.96</b><br><b>(17.08 to</b><br><b>43.42)</b> | <b>18.97</b><br><b>(11.48 to</b><br><b>29.57)</b> | <b>30.12</b><br><b>(18.42 to</b><br><b>48.19)</b> |
| Maternal hemorrhage                            | 289.39<br>(166.13 to<br>471.61)                            | 156.77<br>(83.02 to<br>271.01)                           | 108.73<br>(57.23 to<br>190.87)                           | 167.63<br>(85.74 to<br>292.87)                             | 5.33<br>(3.03 to<br>8.68)                         | 2.90<br>(1.54 to<br>5.05)                         | 2.01<br>(1.04 to<br>3.60)                         | 3.10<br>(1.60 to<br>5.53)                         |
| Maternal sepsis and other maternal infections  | 391.23<br>(226.30 to<br>616.10)                            | 206.98<br>(110.44 to<br>357.37)                          | 140.37<br>(71.70 to<br>241.78)                           | 222.54<br>(114.82 to<br>389.45)                            | 7.23<br>(4.23 to<br>11.40)                        | 3.83<br>(2.06 to<br>6.58)                         | 2.60<br>(1.36 to<br>4.54)                         | 4.12<br>(2.15 to<br>7.10)                         |
| Maternal hypertensive disorders                | 628.93<br>(387.14 to<br>994.24)                            | 343.19<br>(182.46 to<br>573.12)                          | 229.09<br>(119.04 to<br>384.57)                          | 369.54<br>(190.62 to<br>629.85)                            | 11.11<br>(6.85 to<br>17.62)                       | 6.10<br>(3.26 to<br>10.32)                        | 4.08<br>(2.13 to<br>6.90)                         | 6.56<br>(3.40 to<br>11.21)                        |
| Maternal obstructed labor and uterine rupture  | 34.06<br>(12.52 to<br>65.24)                               | 22.80<br>(7.92 to<br>46.86)                              | 14.39<br>(5.01 to<br>30.54)                              | 24.69<br>(8.63 to<br>51.02)                                | 0.63<br>(0.23 to<br>1.22)                         | 0.43<br>(0.15 to<br>0.88)                         | 0.27<br>(0.10 to<br>0.56)                         | 0.46<br>(0.16 to<br>0.98)                         |



|                                                                         |                                                 |                                                 |                                                 |                                                 |                                        |                                        |                                            |                                        |
|-------------------------------------------------------------------------|-------------------------------------------------|-------------------------------------------------|-------------------------------------------------|-------------------------------------------------|----------------------------------------|----------------------------------------|--------------------------------------------|----------------------------------------|
| Maternal abortion, miscarriage, and ectopic pregnancy                   | 179.31<br>(96.36 to<br>295.06)                  | 184.83<br>(85.95 to<br>352.36)                  | 124.31<br>(58.50 to<br>234.72)                  | 199.33<br>(94.32 to<br>376.92)                  | 3.29<br>(1.78 to<br>5.34)              | 3.40<br>(1.62 to<br>6.46)              | 2.29<br>(1.08 to<br>4.27)                  | 3.66<br>(1.76 to<br>6.99)              |
| Indirect maternal deaths                                                | 607.43<br>(352.94 to<br>973.95)                 | 343.67<br>(179.84 to<br>595.61)                 | 226.68<br>(118.89 to<br>402.66)                 | 373.63<br>(198.06 to<br>658.52)                 | 10.75<br>(6.30 to<br>17.22)            | 6.11<br>(3.21 to<br>10.59)             | 4.04<br>(2.11 to<br>7.06)                  | 6.64<br>(3.48 to<br>11.67)             |
| Late maternal deaths                                                    | 288.07<br>(162.07 to<br>519.79)                 | 81.73<br>(39.86 to<br>160.78)                   | 53.92<br>(25.74 to<br>105.65)                   | 88.66<br>(42.04 to<br>177.14)                   | 5.08<br>(2.84 to<br>9.13)              | 1.45<br>(0.70 to<br>2.83)              | 0.96<br>(0.46 to<br>1.87)                  | 1.57<br>(0.75 to<br>3.11)              |
| Maternal deaths aggravated by HIV/AIDS                                  | 0.74<br>(0.28 to<br>1.52)                       | 2.95<br>(0.99 to<br>6.57)                       | 2.30<br>(0.76 to<br>5.14)                       | 3.19<br>(1.06 to<br>7.14)                       | 0.01<br>(0.01 to<br>0.03)              | 0.06<br>(0.02 to<br>0.13)              | 0.05<br>(0.02 to<br>0.10)                  | 0.06<br>(0.02 to<br>0.14)              |
| Other maternal disorders                                                | 336.07<br>(195.17 to<br>541.42)                 | 199.07<br>(106.04 to<br>354.78)                 | 144.09<br>(76.44 to<br>261.17)                  | 213.39<br>(113.33 to<br>389.10)                 | 6.16<br>(3.57 to<br>9.63)              | 3.68<br>(1.97 to<br>6.55)              | 2.67<br>(1.40 to<br>4.85)                  | 3.94<br>(2.07 to<br>7.17)              |
| <b>Chile</b>                                                            |                                                 |                                                 |                                                 |                                                 |                                        |                                        |                                            |                                        |
| Cause                                                                   | YLLs (actual counts)                            |                                                 |                                                 |                                                 | Deaths (actual counts)                 |                                        |                                            |                                        |
|                                                                         | 2016                                            | 2040 Forecast                                   | 2040 Better Scenario                            | 2040 Worse Scenario                             | 2016                                   | 2040 Forecast                          | 2040 Better Scenario                       | 2040 Worse Scenario                    |
| <b>Neonatal disorders</b>                                               | <b>63,320.15</b><br>(51,689.45 to<br>77,533.13) | <b>34,448.30</b><br>(22,770.78 to<br>52,141.24) | <b>18,371.49</b><br>(12,068.25 to<br>27,708.49) | <b>42,998.01</b><br>(28,442.30 to<br>64,640.51) | <b>731.64</b><br>(597.28 to<br>895.86) | <b>398.08</b><br>(263.12 to<br>602.45) | <b>212.31</b><br>(139.45 to<br>320.14)     | <b>496.86</b><br>(328.77 to<br>746.89) |
| Neonatal preterm birth                                                  | 39,065.90<br>(31,595.67 to<br>48,635.57)        | 19,725.70<br>(12,756.64 to<br>29,324.57)        | 8,750.49<br>(5,555.17 to<br>13,326.75)          | 25,532.13<br>(16,292.59 to<br>38,500.17)        | 451.33<br>(364.99 to<br>561.84)        | 227.91<br>(147.38 to<br>338.78)        | 101.11<br>(64.18 to<br>153.98)             | 294.98<br>(188.25 to<br>444.75)        |
| Neonatal encephalopathy due to birth asphyxia and trauma                | 8,583.78<br>(6,484.30 to<br>11,405.88)          | 4,657.79<br>(2,615.94 to<br>7,868.23)           | 2,389.98<br>(1,370.08 to<br>4,073.04)           | 5,674.62<br>(3,206.31 to<br>9,573.73)           | 99.24<br>(75.00 to<br>131.87)          | 53.87<br>(30.27 to<br>90.97)           | 27.64<br>(15.85 to<br>47.08)               | 65.62<br>(37.10 to<br>110.66)          |
| Neonatal sepsis and other neonatal infections                           | 5,571.47<br>(3,429.51 to<br>12,128.45)          | 4,489.43<br>(2,166.08 to<br>9,633.14)           | 2,673.46<br>(1,291.49 to<br>5,741.84)           | 5,373.82<br>(2,495.71 to<br>12,126.81)          | 64.36<br>(39.62 to<br>140.14)          | 51.87<br>(25.05 to<br>111.27)          | 30.89<br>(14.92 to<br>66.33)               | 62.09<br>(28.85 to<br>140.09)          |
| Hemolytic disease and other neonatal jaundice                           | 177.06<br>(98.06 to<br>421.05)                  | 79.36<br>(32.12 to<br>193.75)                   | 45.37<br>(18.79 to<br>111.30)                   | 95.75<br>(37.91 to<br>243.82)                   | 2.05<br>(1.13 to<br>4.86)              | 0.92<br>(0.37 to<br>2.24)              | 0.52<br>(0.29 to<br>1.29)                  | 1.11<br>(0.44 to<br>2.82)              |
| Other neonatal disorders                                                | 9,921.94<br>(7,474.82 to<br>12,974.82)          | 5,496.02<br>(3,100.09 to<br>9,458.97)           | 4,512.19<br>(2,589.03 to<br>7,595.28)           | 6,321.68<br>(3,544.97 to<br>10,884.59)          | 114.66<br>(86.37 to<br>149.96)         | 63.52<br>(35.83 to<br>109.51)          | 52.15<br>(29.93 to<br>87.77)               | 73.06<br>(40.96 to<br>125.76)          |
| <b>Nutritional deficiencies</b>                                         | <b>7,634.64</b><br>(6,102.41 to<br>9,524.62)    | <b>7,540.58</b><br>(6,089.54 to<br>9,047.12)    | <b>9,205.83</b><br>(7,378.55 to<br>11,208.50)   | <b>9,084.99</b><br>(5,768.01 to<br>8,379.77)    | <b>638.84</b><br>(518.89 to<br>777.22) | <b>799.78</b><br>(643.32 to<br>976.88) | <b>1,031.11</b><br>(844.35 to<br>1,239.86) | <b>731.25</b><br>(594.03 to<br>896.02) |
| Protein-energy malnutrition                                             | 7,110.45<br>(5,621.69 to<br>8,897.60)           | 6,768.49<br>(5,168.01 to<br>8,290.14)           | 8,541.12<br>(6,654.65 to<br>10,449.30)          | 6,319.47<br>(4,847.62 to<br>7,617.96)           | 604.33<br>(485.34 to<br>740.88)        | 730.15<br>(557.42 to<br>916.32)        | 968.84<br>(760.32 to<br>1,191.16)          | 664.23<br>(503.54 to<br>830.32)        |
| Iodine deficiency                                                       | 42.47<br>(3.12 to<br>144.59)                    | 183.72<br>(3.31 to<br>812.38)                   | 174.64<br>(1.94 to<br>881.47)                   | 179.77<br>(3.38 to<br>775.78)                   | 1.81<br>(0.10 to<br>8.34)              | 16.30<br>(0.13 to<br>92.23)            | 16.27<br>(0.09 to<br>100.64)               | 15.50<br>(0.13 to<br>85.43)            |
| Dietary iron deficiency                                                 | 89.21<br>(49.76 to<br>154.38)                   | 62.91<br>(34.99 to<br>103.60)                   | 66.59<br>(35.92 to<br>111.62)                   | 63.51<br>(35.64 to<br>101.70)                   | 2.18<br>(1.04 to<br>3.66)              | 1.83<br>(0.84 to<br>3.01)              | 2.04<br>(0.90 to<br>3.41)                  | 1.80<br>(0.85 to<br>2.87)              |
| Other nutritional deficiencies                                          | 392.51<br>(222.20 to<br>963.32)                 | 525.46<br>(310.48 to<br>1,294.24)               | 423.48<br>(241.78 to<br>1,115.88)               | 522.24<br>(300.95 to<br>1,233.06)               | 30.52<br>(17.81 to<br>87.39)           | 51.49<br>(29.13 to<br>147.35)          | 43.96<br>(23.96 to<br>130.22)              | 49.72<br>(27.93 to<br>141.01)          |
| <b>Other communicable, maternal, neonatal, and nutritional diseases</b> | <b>6,911.96</b><br>(4,884.11 to<br>9,553.89)    | <b>6,027.38</b><br>(4,457.97 to<br>7,935.46)    | <b>5,250.42</b><br>(3,819.03 to<br>6,895.82)    | <b>6,197.17</b><br>(4,474.74 to<br>8,272.30)    | <b>200.11</b><br>(154.41 to<br>255.05) | <b>232.79</b><br>(182.96 to<br>290.16) | <b>213.60</b><br>(165.74 to<br>271.32)     | <b>232.77</b><br>(181.00 to<br>292.81) |
| Sexually transmitted infections excluding HIV                           | 1,512.40<br>(325.76 to<br>3,660.10)             | 538.80<br>(178.69 to<br>1,443.55)               | 364.98<br>(142.38 to<br>915.19)                 | 601.55<br>(184.95 to<br>1,656.46)               | 26.58<br>(11.38 to<br>52.11)           | 13.62<br>(8.10 to<br>23.82)            | 10.61<br>(6.79 to<br>17.25)                | 14.32<br>(8.23 to<br>26.95)            |
| Syphilis                                                                | 1,285.76<br>(128.09 to<br>3,434.86)             | 389.76<br>(56.54 to<br>1,283.86)                | 234.07<br>(36.81 to<br>771.40)                  | 450.26<br>(59.54 to<br>1,512.74)                | 18.33<br>(4.35 to<br>44.06)            | 6.73<br>(2.48 to<br>17.19)             | 4.32<br>(1.77 to<br>10.67)                 | 7.48<br>(2.54 to<br>20.07)             |
| Chlamydial infection                                                    | 42.94<br>(28.41 to<br>62.01)                    | 28.44<br>(18.71 to<br>41.83)                    | 25.13<br>(16.33 to<br>37.30)                    | 28.83<br>(18.85 to<br>42.58)                    | 1.58<br>(1.06 to<br>2.22)              | 1.36<br>(0.96 to<br>1.84)              | 1.25<br>(0.87 to<br>1.74)                  | 1.34<br>(0.95 to<br>1.84)              |

|                                       |                                                          |                                                          |                                                          |                                                          |                                                  |                                                    |                                                   |                                                    |
|---------------------------------------|----------------------------------------------------------|----------------------------------------------------------|----------------------------------------------------------|----------------------------------------------------------|--------------------------------------------------|----------------------------------------------------|---------------------------------------------------|----------------------------------------------------|
|                                       | 123.20<br>(82.01 to<br>176.02)                           | 83.03<br>(53.99 to<br>123.07)                            | 73.20<br>(46.45 to<br>109.22)                            | 84.15<br>(53.82 to<br>123.32)                            | 4.69<br>(3.18 to<br>6.59)                        | 4.03<br>(2.76 to<br>5.55)                          | 3.70<br>(2.47 to<br>5.22)                         | 4.00<br>(2.73 to<br>5.47)                          |
| Gonococcal infection                  | 60.50<br>(40.50 to<br>86.82)                             | 37.58<br>(23.39 to<br>55.90)                             | 32.58<br>(20.37 to<br>48.73)                             | 38.32<br>(24.20 to<br>56.82)                             | 1.98<br>(1.34 to<br>2.77)                        | 1.50<br>(1.03 to<br>2.07)                          | 1.35<br>(0.90 to<br>1.89)                         | 1.50<br>(1.03 to<br>2.06)                          |
| Other sexually transmitted infections | 848.91<br>(662.79 to<br>1,071.64)                        | 697.18<br>(497.34 to<br>969.04)                          | 399.31<br>(280.67 to<br>557.98)                          | 749.47<br>(534.34 to<br>1,038.22)                        | 25.31<br>(19.21 to<br>32.11)                     | 28.20<br>(20.57 to<br>38.49)                       | 16.74<br>(11.93 to<br>22.97)                      | 29.63<br>(21.40 to<br>40.53)                       |
| Acute hepatitis                       | 76.05<br>(45.14 to<br>109.80)                            | 46.53<br>(28.30 to<br>72.81)                             | 30.38<br>(18.34 to<br>48.53)                             | 50.49<br>(30.11 to<br>78.72)                             | 1.47<br>(0.97 to<br>2.07)                        | 1.42<br>(0.85 to<br>2.24)                          | 0.97<br>(0.57 to<br>1.56)                         | 1.48<br>(0.89 to<br>2.37)                          |
| Acute hepatitis A                     | 518.51<br>(386.25 to<br>674.52)                          | 468.63<br>(313.89 to<br>678.35)                          | 263.14<br>(171.82 to<br>389.14)                          | 502.49<br>(331.50 to<br>734.82)                          | 16.83<br>(12.34 to<br>22.11)                     | 18.63<br>(12.30 to<br>26.72)                       | 10.70<br>(6.89 to<br>15.96)                       | 19.71<br>(12.77 to<br>28.67)                       |
| Acute hepatitis B                     | 29.52<br>(19.98 to<br>42.82)                             | 30.79<br>(18.93 to<br>49.02)                             | 17.95<br>(10.80 to<br>28.02)                             | 32.69<br>(20.15 to<br>51.71)                             | 1.11<br>(0.73 to<br>1.66)                        | 1.42<br>(0.88 to<br>2.19)                          | 0.85<br>(0.54 to<br>1.32)                         | 1.48<br>(0.93 to<br>2.29)                          |
| Acute hepatitis C                     | 224.84<br>(169.70 to<br>294.52)                          | 151.23<br>(100.81 to<br>216.32)                          | 87.87<br>(57.09 to<br>126.52)                            | 163.81<br>(106.87 to<br>240.64)                          | 5.89<br>(4.04 to<br>8.35)                        | 6.74<br>(4.27 to<br>10.08)                         | 4.22<br>(2.61 to<br>6.38)                         | 6.96<br>(4.37 to<br>10.45)                         |
| Acute hepatitis E                     | 4,550.65<br>(3,415.30 to<br>5,890.50)                    | 4,791.39<br>(3,503.68 to<br>6,249.27)                    | 4,486.13<br>(3,269.95 to<br>5,932.10)                    | 4,846.15<br>(3,529.47 to<br>6,320.50)                    | 148.23<br>(112.27 to<br>191.32)                  | 190.96<br>(146.66 to<br>242.73)                    | 186.25<br>(142.94 to<br>239.51)                   | 188.81<br>(145.25 to<br>238.49)                    |
| Other unspecified infectious diseases | <b>1,593,915.53</b><br>(1,274,816.83 to<br>1,967,748.36) | <b>2,120,976.05</b><br>(1,569,914.88 to<br>2,823,856.05) | <b>1,545,251.59</b><br>(1,147,999.79 to<br>2,046,254.01) | <b>2,548,231.27</b><br>(1,865,941.57 to<br>3,462,610.91) | <b>91,961.27</b><br>(74,619.40 to<br>111,489.84) | <b>150,835.86</b><br>(118,008.95 to<br>188,945.45) | <b>115,980.60</b><br>(90,940.60 to<br>144,539.30) | <b>174,363.78</b><br>(135,135.27 to<br>219,477.20) |
| Non-communicable diseases             |                                                          |                                                          |                                                          |                                                          |                                                  |                                                    |                                                   |                                                    |

Chile

| Cause                           | YLLs (actual counts)                        |                                               |                                             |                                               | Deaths (actual counts)                   |                                          |                                          |                                          |
|---------------------------------|---------------------------------------------|-----------------------------------------------|---------------------------------------------|-----------------------------------------------|------------------------------------------|------------------------------------------|------------------------------------------|------------------------------------------|
|                                 | 2016                                        | 2040 Forecast                                 | 2040 Better Scenario                        | 2040 Worse Scenario                           | 2016                                     | 2040 Forecast                            | 2040 Better Scenario                     | 2040 Worse Scenario                      |
| Neoplasms                       | 554,965.20<br>(438,988.76 to<br>690,170.35) | 736,437.65<br>(532,054.46 to<br>1,010,933.62) | 593,713.95<br>(428,999.53 to<br>811,455.06) | 847,128.98<br>(595,996.09 to<br>1,185,361.12) | 28,361.92<br>(22,628.10 to<br>34,795.36) | 45,123.33<br>(34,450.74 to<br>58,157.45) | 37,616.45<br>(28,253.90 to<br>48,460.13) | 50,636.27<br>(38,202.40 to<br>66,322.33) |
| Lip and oral cavity cancer      | 3,760.87<br>(2,933.54 to<br>4,802.69)       | 5,108.21<br>(2,537.16 to<br>9,356.75)         | 3,097.54<br>(1,649.57 to<br>5,385.00)       | 7,762.23<br>(3,618.58 to<br>14,934.18)        | 188.44<br>(150.49 to<br>234.93)          | 298.05<br>(156.75 to<br>524.75)          | 184.50<br>(104.99 to<br>307.50)          | 437.18<br>(211.22 to<br>792.42)          |
| Nasopharynx cancer              | 655.04<br>(495.66 to<br>862.18)             | 893.33<br>(450.97 to<br>1,666.63)             | 459.03<br>(241.95 to<br>814.93)             | 1,399.57<br>(659.55 to<br>2,663.92)           | 24.51<br>(18.80 to<br>31.80)             | 38.68<br>(20.08 to<br>67.36)             | 20.36<br>(11.16 to<br>34.06)             | 59.99<br>(29.52 to<br>109.50)            |
| Other pharynx cancer            | 1,799.80<br>(1,350.62 to<br>2,391.00)       | 2,616.11<br>(1,357.68 to<br>4,625.92)         | 2,285.74<br>(1,245.52 to<br>3,933.44)       | 3,023.08<br>(1,538.85 to<br>5,374.13)         | 81.00<br>(61.99 to<br>105.48)            | 135.61<br>(73.31 to<br>232.83)           | 121.65<br>(68.56 to<br>204.70)           | 153.29<br>(81.66 to<br>270.79)           |
| Esophageal cancer               | 14,502.95<br>(11,304.18 to<br>18,508.37)    | 23,408.28<br>(12,704.49 to<br>39,937.37)      | 17,798.84<br>(10,369.17 to<br>29,026.08)    | 33,769.86<br>(17,083.66 to<br>60,077.30)      | 894.03<br>(714.04 to<br>1,124.06)        | 1,584.48<br>(908.25 to<br>2,586.99)      | 1,228.08<br>(745.43 to<br>1,896.50)      | 2,220.45<br>(1,179.33 to<br>3,864.22)    |
| Stomach cancer                  | 74,500.96<br>(57,955.08 to<br>95,259.60)    | 78,765.17<br>(51,902.29 to<br>112,861.55)     | 53,651.32<br>(35,904.58 to<br>73,738.97)    | 87,227.81<br>(56,680.95 to<br>128,419.57)     | 4,041.10<br>(3,199.98 to<br>5,071.47)    | 4,973.54<br>(3,415.84 to<br>6,826.06)    | 3,488.98<br>(2,436.95 to<br>4,829.06)    | 5,406.62<br>(3,696.48 to<br>7,577.48)    |
| Colon and rectum cancer         | 45,141.05<br>(34,680.56 to<br>56,845.48)    | 69,411.24<br>(44,494.81 to<br>104,944.57)     | 49,147.11<br>(31,977.81 to<br>74,265.13)    | 80,634.96<br>(51,730.54 to<br>121,747.54)     | 2,544.42<br>(1,982.49 to<br>3,180.23)    | 4,725.93<br>(3,093.15 to<br>7,063.13)    | 3,476.46<br>(2,279.64 to<br>5,167.31)    | 5,361.94<br>(3,516.23 to<br>8,036.36)    |
| Liver cancer                    | 23,757.30<br>(18,199.49 to<br>29,938.83)    | 39,844.50<br>(23,940.21 to<br>64,957.46)      | 36,914.86<br>(23,179.39 to<br>58,239.16)    | 46,267.46<br>(26,681.55 to<br>77,406.24)      | 1,265.94<br>(990.94 to<br>1,575.28)      | 2,418.11<br>(1,502.88 to<br>3,803.63)    | 2,324.76<br>(1,486.43 to<br>3,522.28)    | 2,727.92<br>(1,646.92 to<br>4,347.72)    |
| Liver cancer due to hepatitis B | 3,524.90<br>(2,519.17 to<br>4,895.75)       | 5,544.32<br>(3,087.14 to<br>10,173.91)        | 5,366.21<br>(3,109.70 to<br>9,360.32)       | 6,228.47<br>(3,354.27 to<br>11,967.88)        | 156.63<br>(112.97 to<br>214.17)          | 284.67<br>(163.85 to<br>481.33)          | 284.41<br>(168.26 to<br>470.36)          | 312.96<br>(175.74 to<br>553.65)          |
| Liver cancer due to hepatitis C | 11,107.50<br>(8,465.60 to<br>14,251.09)     | 18,404.88<br>(10,836.08 to<br>29,547.91)      | 17,790.89<br>(10,991.09 to<br>27,889.92)    | 20,324.65<br>(11,469.68 to<br>33,360.22)      | 635.27<br>(490.20 to<br>800.12)          | 1,201.28<br>(736.17 to<br>1,887.74)      | 1,198.74<br>(758.84 to<br>1,835.07)      | 1,295.95<br>(773.49 to<br>2,052.62)      |
| Liver cancer due to alcohol use | 5,798.97<br>(4,374.92 to<br>7,635.37)       | 9,993.68<br>(5,667.35 to<br>17,102.70)        | 8,022.51<br>(4,703.78 to<br>13,139.15)      | 13,062.26<br>(7,091.02 to<br>22,938.64)       | 295.65<br>(223.87 to<br>380.71)          | 568.27<br>(332.68 to<br>951.75)          | 476.31<br>(287.91 to<br>758.26)          | 718.24<br>(405.86 to<br>1,221.55)        |

|                                      |                                          |                                           |                                          |                                            |                                       |                                       |                                       |                                        |
|--------------------------------------|------------------------------------------|-------------------------------------------|------------------------------------------|--------------------------------------------|---------------------------------------|---------------------------------------|---------------------------------------|----------------------------------------|
|                                      | 3,325.93<br>(2,562.17 to<br>4,258.00)    | 5,901.61<br>(3,313.42 to<br>10,029.77)    | 5,735.25<br>(3,336.60 to<br>9,476.79)    | 6,652.08<br>(3,584.68 to<br>11,530.84)     | 178.40<br>(137.74 to<br>228.97)       | 363.88<br>(213.41 to<br>587.22)       | 365.29<br>(219.89 to<br>570.31)       | 400.77<br>(224.72 to<br>668.38)        |
| Liver cancer due to other causes     |                                          |                                           |                                          |                                            |                                       |                                       |                                       |                                        |
|                                      | 46,240.35<br>(34,285.29 to<br>59,825.28) | 46,514.58<br>(33,263.56 to<br>62,303.60)  | 43,773.54<br>(30,810.37 to<br>58,930.85) | 45,493.98<br>(32,826.97 to<br>60,451.67)   | 2,397.53<br>(1,808.90 to<br>3,054.66) | 2,843.79<br>(2,156.37 to<br>3,569.85) | 2,759.48<br>(2,070.91 to<br>3,562.62) | 2,735.09<br>(2,092.21 to<br>3,411.88)  |
| Gallbladder and biliary tract cancer |                                          |                                           |                                          |                                            |                                       |                                       |                                       |                                        |
|                                      | 27,528.53<br>(21,506.27 to<br>34,881.34) | 40,686.91<br>(27,566.15 to<br>58,645.18)  | 39,758.29<br>(26,887.29 to<br>57,952.31) | 43,326.62<br>(29,004.69 to<br>63,734.32)   | 1,457.82<br>(1,142.97 to<br>1,827.81) | 2,459.49<br>(1,724.29 to<br>3,429.82) | 2,451.98<br>(1,729.01 to<br>3,407.59) | 2,578.93<br>(1,784.72 to<br>3,661.78)  |
| Pancreatic cancer                    |                                          |                                           |                                          |                                            |                                       |                                       |                                       |                                        |
|                                      | 3,156.04<br>(2,351.32 to<br>4,118.13)    | 3,853.86<br>(1,735.73 to<br>7,428.17)     | 2,129.29<br>(1,034.17 to<br>4,107.98)    | 6,506.32<br>(2,666.57 to<br>13,590.05)     | 163.97<br>(123.63 to<br>210.43)       | 225.24<br>(108.24 to<br>420.86)       | 128.60<br>(66.55 to<br>237.00)        | 369.32<br>(160.72 to<br>734.52)        |
| Larynx cancer                        |                                          |                                           |                                          |                                            |                                       |                                       |                                       |                                        |
|                                      | 65,618.92<br>(51,431.25 to<br>82,098.09) | 80,163.33<br>(47,460.00 to<br>129,162.47) | 52,600.69<br>(32,279.81 to<br>82,130.55) | 137,766.35<br>(77,414.78 to<br>231,801.50) | 3,430.44<br>(2,717.23 to<br>4,251.13) | 4,720.60<br>(2,933.42 to<br>7,374.09) | 3,199.56<br>(2,042.06 to<br>4,921.66) | 7,888.55<br>(4,693.63 to<br>12,709.29) |
| Tracheal, bronchus, and lung cancer  |                                          |                                           |                                          |                                            |                                       |                                       |                                       |                                        |
|                                      | 4,643.12<br>(3,355.42 to<br>6,192.88)    | 5,862.27<br>(4,224.00 to<br>8,038.09)     | 7,542.40<br>(5,379.21 to<br>10,558.83)   | 5,511.67<br>(4,023.75 to<br>7,374.04)      | 202.42<br>(148.49 to<br>263.16)       | 319.11<br>(243.68 to<br>405.26)       | 425.53<br>(322.73 to<br>546.75)       | 293.25<br>(226.07 to<br>366.53)        |
| Malignant skin melanoma              |                                          |                                           |                                          |                                            |                                       |                                       |                                       |                                        |
|                                      | 3,479.85<br>(2,698.69 to<br>4,410.57)    | 4,728.90<br>(3,774.90 to<br>5,841.20)     | 3,502.45<br>(2,712.21 to<br>4,427.93)    | 4,686.75<br>(3,763.46 to<br>5,671.02)      | 269.10<br>(218.81 to<br>327.27)       | 418.17<br>(356.51 to<br>485.17)       | 327.39<br>(270.98 to<br>383.64)       | 403.45<br>(345.62 to<br>462.91)        |
| Non-melanoma skin cancer             |                                          |                                           |                                          |                                            |                                       |                                       |                                       |                                        |
|                                      | 34,000.74<br>(23,039.35 to<br>47,968.84) | 43,696.81<br>(24,648.19 to<br>70,571.20)  | 29,059.45<br>(16,258.97 to<br>46,715.88) | 47,392.13<br>(25,962.66 to<br>77,650.43)   | 1,510.97<br>(1,055.02 to<br>2,072.65) | 2,419.40<br>(1,482.38 to<br>3,722.22) | 1,678.96<br>(1,032.82 to<br>2,577.14) | 2,579.15<br>(1,578.36 to<br>3,943.72)  |
| Breast cancer                        |                                          |                                           |                                          |                                            |                                       |                                       |                                       |                                        |
|                                      | 21,394.98<br>(14,382.46 to<br>30,479.00) | 22,550.57<br>(13,050.71 to<br>37,992.64)  | 15,329.04<br>(8,646.97 to<br>25,923.83)  | 24,276.21<br>(13,631.56 to<br>41,374.37)   | 904.28<br>(625.54 to<br>1,262.93)     | 1,145.88<br>(700.75 to<br>1,836.43)   | 799.24<br>(480.79 to<br>1,270.42)     | 1,216.97<br>(737.61 to<br>1,968.89)    |
| Cervical cancer                      |                                          |                                           |                                          |                                            |                                       |                                       |                                       |                                        |
|                                      | 4,823.27<br>(3,261.72 to<br>6,808.15)    | 6,338.32<br>(3,860.84 to<br>9,582.79)     | 5,080.44<br>(3,064.38 to<br>7,838.46)    | 6,380.80<br>(3,926.50 to<br>9,674.31)      | 262.93<br>(181.70 to<br>368.55)       | 416.36<br>(276.44 to<br>583.03)       | 343.60<br>(225.04 to<br>499.17)       | 412.90<br>(276.24 to<br>576.83)        |
| Uterine cancer                       |                                          |                                           |                                          |                                            |                                       |                                       |                                       |                                        |
|                                      | 11,209.13<br>(7,620.07 to<br>16,042.29)  | 13,926.66<br>(8,159.95 to<br>22,877.73)   | 11,503.60<br>(6,763.27 to<br>18,829.68)  | 14,479.63<br>(8,411.70 to<br>23,823.42)    | 469.39<br>(322.54 to<br>665.16)       | 701.48<br>(425.67 to<br>1,097.57)     | 591.66<br>(357.58 to<br>924.81)       | 721.91<br>(440.25 to<br>1,117.83)      |
| Ovarian cancer                       |                                          |                                           |                                          |                                            |                                       |                                       |                                       |                                        |
|                                      | 30,612.68<br>(20,903.26 to<br>41,047.25) | 62,536.39<br>(43,364.67 to<br>81,985.87)  | 54,388.73<br>(36,872.50 to<br>72,977.27) | 60,781.87<br>(42,502.21 to<br>78,044.17)   | 6,747.83<br>(4,639.42 to<br>8,856.24) | 5,832.50<br>(3,861.14 to<br>7,804.86) | 4,906.19<br>(3,435.27 to<br>6,084.17) | 5,166.30<br>(3,680.34 to<br>6,616.80)  |
| Prostate cancer                      |                                          |                                           |                                          |                                            |                                       |                                       |                                       |                                        |
|                                      | 4,697.93<br>(3,126.06 to<br>6,647.35)    | 3,672.58<br>(2,478.63 to<br>5,308.18)     | 2,707.40<br>(1,822.45 to<br>3,980.39)    | 3,800.15<br>(2,565.20 to<br>5,559.34)      | 100.51<br>(67.77 to<br>139.27)        | 94.25<br>(67.12 to<br>127.31)         | 71.80<br>(50.75 to<br>98.30)          | 95.48<br>(68.29 to<br>129.33)          |
| Testicular cancer                    |                                          |                                           |                                          |                                            |                                       |                                       |                                       |                                        |
| <b>Chile</b>                         |                                          |                                           |                                          |                                            |                                       |                                       |                                       |                                        |
| Cause                                | YLLs (actual counts)                     |                                           |                                          |                                            | Deaths (actual counts)                |                                       |                                       |                                        |
|                                      | 2016                                     | 2040 Forecast                             | 2040 Better Scenario                     | 2040 Worse Scenario                        | 2016                                  | 2040 Forecast                         | 2040 Better Scenario                  | 2040 Worse Scenario                    |
| Kidney cancer                        | 17,355.87<br>(13,407.20 to<br>22,029.50) | 28,195.09<br>(19,859.42 to<br>39,869.74)  | 28,835.76<br>(20,230.06 to<br>40,317.14) | 29,084.55<br>(20,341.56 to<br>41,806.17)   | 840.32<br>(663.07 to<br>1,056.69)     | 1,554.63<br>(1,159.18 to<br>2,059.40) | 1,642.64<br>(1,210.85 to<br>2,181.07) | 1,572.70<br>(1,166.44 to<br>2,107.57)  |
| Bladder cancer                       | 8,655.00<br>(6,732.55 to<br>11,092.45)   | 11,935.24<br>(8,327.63 to<br>17,189.15)   | 10,226.29<br>(7,243.44 to<br>14,596.96)  | 13,315.87<br>(9,055.05 to<br>19,229.66)    | 562.62<br>(445.32 to<br>704.43)       | 897.93<br>(653.61 to<br>1,198.38)     | 794.92<br>(585.52 to<br>1,078.74)     | 977.89<br>(693.33 to<br>1,362.15)      |
| Brain and nervous system cancer      | 14,488.51<br>(11,147.35 to<br>18,216.91) | 17,323.83<br>(12,810.73 to<br>22,555.42)  | 15,139.07<br>(11,110.13 to<br>20,059.38) | 17,393.18<br>(12,888.47 to<br>22,619.82)   | 467.58<br>(355.86 to<br>591.30)       | 696.33<br>(523.63 to<br>889.17)       | 629.08<br>(463.69 to<br>824.36)       | 683.69<br>(514.93 to<br>865.89)        |
| Thyroid cancer                       | 2,352.73<br>(1,772.15 to<br>3,003.68)    | 3,442.91<br>(2,219.79 to<br>5,269.87)     | 2,611.57<br>(1,714.64 to<br>3,930.76)    | 3,634.68<br>(2,326.15 to<br>5,550.15)      | 127.49<br>(97.00 to<br>162.57)        | 219.16<br>(146.95 to<br>318.85)       | 171.70<br>(117.29 to<br>246.62)       | 226.27<br>(152.08 to<br>324.45)        |
| Mesothelioma                         | 1,533.66<br>(1,141.64 to<br>1,998.40)    | 2,003.41<br>(1,454.56 to<br>2,655.78)     | 2,081.12<br>(1,493.58 to<br>2,835.12)    | 1,933.08<br>(1,423.49 to<br>2,530.52)      | 65.57<br>(49.72 to<br>84.49)          | 104.66<br>(81.19 to<br>131.56)        | 112.34<br>(85.37 to<br>144.57)        | 98.97<br>(77.77 to<br>121.42)          |
| Hodgkin lymphoma                     | 1,800.64<br>(1,379.93 to<br>2,341.86)    | 1,733.44<br>(1,278.68 to<br>2,354.07)     | 1,116.05<br>(814.63 to<br>1,510.26)      | 1,806.41<br>(1,328.04 to<br>2,408.49)      | 61.81<br>(48.36 to<br>79.02)          | 75.42<br>(57.34 to<br>95.74)          | 50.20<br>(37.85 to<br>65.08)          | 76.98<br>(59.01 to<br>97.46)           |
| Non-Hodgkin lymphoma                 | 18,360.81<br>(14,191.99 to<br>23,324.92) | 25,410.18<br>(17,901.63 to<br>34,594.31)  | 20,388.75<br>(14,491.49 to<br>27,574.82) | 26,050.76<br>(18,611.70 to<br>35,321.23)   | 793.01<br>(619.21 to<br>999.25)       | 1,369.22<br>(987.06 to<br>1,807.03)   | 1,139.44<br>(823.95 to<br>1,500.05)   | 1,372.61<br>(1,000.11 to<br>1,807.81)  |

|                                 |                                                                  |                                                                  |                                                                  |                                                                    |                                                               |                                                               |                                                               |                                                               |
|---------------------------------|------------------------------------------------------------------|------------------------------------------------------------------|------------------------------------------------------------------|--------------------------------------------------------------------|---------------------------------------------------------------|---------------------------------------------------------------|---------------------------------------------------------------|---------------------------------------------------------------|
|                                 | 10,020.91<br>(6,626.93 to<br>12,999.54)                          | 15,652.61<br>(9,494.77 to<br>22,541.52)                          | 13,653.84<br>(8,257.95 to<br>19,760.41)                          | 15,844.00<br>(9,635.77 to<br>22,762.48)                            | 510.18<br>(331.05 to<br>660.80)                               | 907.53<br>(549.21 to<br>1,261.79)                             | 815.82<br>(492.99 to<br>1,138.60)                             | 902.91<br>(550.75 to<br>1,257.99)                             |
| Multiple myeloma                | 24,226.29<br>(19,427.85 to<br>29,765.76)                         | 28,300.71<br>(20,612.58 to<br>38,679.34)                         | 22,819.87<br>(16,757.16 to<br>31,327.85)                         | 30,561.54<br>(22,295.03 to<br>42,228.85)                           | 849.48<br>(671.27 to<br>1,044.46)                             | 1,345.14<br>(989.10 to<br>1,786.96)                           | 1,123.80<br>(823.78 to<br>1,499.84)                           | 1,417.02<br>(1,045.89 to<br>1,917.25)                         |
| Leukemia                        | 6,713.82<br>(5,457.81 to<br>8,158.11)                            | 5,473.95<br>(4,108.29 to<br>7,281.99)                            | 4,060.72<br>(3,032.56 to<br>5,371.04)                            | 5,995.25<br>(4,419.58 to<br>8,028.61)                              | 143.15<br>(115.97 to<br>176.60)                               | 150.09<br>(110.16 to<br>204.32)                               | 113.83<br>(83.78 to<br>153.07)                                | 162.32<br>(118.43 to<br>225.01)                               |
| Acute lymphoid leukemia         | 1,141.01<br>(876.36 to<br>1,484.25)                              | 1,772.96<br>(1,190.40 to<br>2,547.46)                            | 1,597.07<br>(1,076.09 to<br>2,304.15)                            | 1,855.03<br>(1,247.84 to<br>2,729.48)                              | 76.21<br>(59.12 to<br>97.38)                                  | 135.49<br>(95.55 to<br>186.79)                                | 126.77<br>(89.02 to<br>175.01)                                | 138.12<br>(96.50 to<br>194.99)                                |
| Chronic lymphoid leukemia       | 8,299.61<br>(6,494.22 to<br>10,463.70)                           | 11,100.71<br>(7,937.43 to<br>15,242.24)                          | 10,055.86<br>(7,189.09 to<br>13,836.26)                          | 11,836.04<br>(8,364.48 to<br>16,528.44)                            | 276.16<br>(212.07 to<br>348.97)                               | 468.91<br>(334.03 to<br>642.74)                               | 439.89<br>(314.54 to<br>601.45)                               | 490.09<br>(350.00 to<br>676.88)                               |
| Acute myeloid leukemia          | 1,601.19<br>(1,221.77 to<br>2,041.59)                            | 1,548.85<br>(1,014.07 to<br>2,352.20)                            | 871.74<br>(573.83 to<br>1,298.75)                                | 1,747.50<br>(1,144.75 to<br>2,694.80)                              | 71.17<br>(54.89 to<br>89.30)                                  | 85.29<br>(58.79 to<br>122.02)                                 | 49.90<br>(34.00 to<br>71.26)                                  | 93.68<br>(64.83 to<br>138.69)                                 |
| Chronic myeloid leukemia        | 6,470.66<br>(5,104.00 to<br>8,064.96)                            | 8,404.25<br>(6,015.25 to<br>11,683.06)                           | 6,234.48<br>(4,437.25 to<br>8,697.04)                            | 9,127.73<br>(6,438.20 to<br>12,947.95)                             | 282.80<br>(223.30 to<br>352.35)                               | 505.36<br>(370.59 to<br>685.62)                               | 393.40<br>(285.93 to<br>534.24)                               | 532.81<br>(388.14 to<br>723.15)                               |
| Other leukemia                  | 34,647.29<br>(27,179.65 to<br>43,431.27)                         | 47,862.21<br>(36,872.16 to<br>60,625.47)                         | 46,111.89<br>(34,789.38 to<br>59,736.71)                         | 47,017.44<br>(36,542.74 to<br>59,024.07)                           | 1,447.23<br>(1,138.81 to<br>1,813.05)                         | 2,582.65<br>(2,078.79 to<br>3,131.08)                         | 2,607.72<br>(2,055.01 to<br>3,247.55)                         | 2,468.52<br>(2,021.83 to<br>2,969.87)                         |
| Other neoplasms                 | <b>446,895.51</b><br><b>(352,202.90 to</b><br><b>558,420.98)</b> | <b>522,406.87</b><br><b>(334,372.55 to</b><br><b>794,467.42)</b> | <b>274,127.41</b><br><b>(182,221.81 to</b><br><b>409,282.83)</b> | <b>743,519.61</b><br><b>(450,219.51 to</b><br><b>1,165,358.61)</b> | <b>29,882.78</b><br><b>(24,423.68 to</b><br><b>36,267.85)</b> | <b>43,161.90</b><br><b>(29,298.38 to</b><br><b>62,121.19)</b> | <b>25,375.07</b><br><b>(17,589.81 to</b><br><b>36,850.72)</b> | <b>56,265.09</b><br><b>(37,137.23 to</b><br><b>82,687.71)</b> |
| Cardiovascular diseases         | 7,403.40<br>(5,687.63 to<br>9,477.46)                            | 6,719.36<br>(4,753.86 to<br>9,436.80)                            | 4,572.91<br>(3,225.03 to<br>6,576.72)                            | 7,061.39<br>(5,018.11 to<br>10,222.09)                             | 408.19<br>(321.10 to<br>511.85)                               | 492.71<br>(377.31 to<br>666.08)                               | 355.41<br>(263.80 to<br>474.56)                               | 503.48<br>(381.22 to<br>688.27)                               |
| Rheumatic heart disease         | 197,735.00<br>(154,509.83 to<br>249,028.67)                      | 215,314.42<br>(114,892.50 to<br>363,539.60)                      | 97,043.60<br>(53,545.20 to<br>166,058.10)                        | 342,445.85<br>(178,158.72 to<br>601,187.24)                        | 12,978.68<br>(10,499.68 to<br>15,806.52)                      | 17,447.53<br>(10,163.90 to<br>27,922.98)                      | 8,867.38<br>(5,177.77 to<br>14,355.99)                        | 25,161.71<br>(14,014.26 to<br>40,948.70)                      |
| Ischemic heart disease          | 146,460.79<br>(115,203.25 to<br>183,163.96)                      | 146,245.72<br>(84,707.83 to<br>230,492.09)                       | 62,259.79<br>(37,175.39 to<br>96,518.79)                         | 216,889.39<br>(120,427.93 to<br>353,534.59)                        | 9,869.47<br>(7,957.05 to<br>12,096.02)                        | 11,715.36<br>(7,060.46 to<br>18,107.53)                       | 5,726.83<br>(3,492.98 to<br>8,863.24)                         | 15,662.75<br>(9,467.39 to<br>24,617.07)                       |
| Stroke                          | 62,559.74<br>(49,832.52 to<br>77,489.30)                         | 68,899.15<br>(37,847.65 to<br>115,536.04)                        | 33,828.86<br>(18,970.69 to<br>56,557.71)                         | 93,091.76<br>(49,748.91 to<br>165,943.05)                          | 5,481.45<br>(4,433.00 to<br>6,699.68)                         | 6,731.96<br>(3,738.01 to<br>11,687.99)                        | 3,636.60<br>(2,042.80 to<br>6,120.76)                         | 8,434.61<br>(4,672.84 to<br>15,007.92)                        |
| Ischemic stroke                 | 83,901.05<br>(65,064.34 to<br>106,652.64)                        | 77,346.58<br>(41,381.40 to<br>135,756.08)                        | 28,430.92<br>(16,532.42 to<br>46,888.60)                         | 123,797.83<br>(63,538.20 to<br>218,985.64)                         | 4,388.03<br>(3,500.50 to<br>5,453.33)                         | 4,983.40<br>(2,912.91 to<br>8,129.68)                         | 2,090.23<br>(1,300.02 to<br>3,205.97)                         | 7,228.14<br>(4,007.69 to<br>11,934.02)                        |
| Intracerebral hemorrhage        | 27,481.49<br>(15,485.74 to<br>37,651.69)                         | 54,314.27<br>(24,421.56 to<br>117,172.78)                        | 37,774.25<br>(17,942.31 to<br>73,993.02)                         | 68,068.43<br>(29,131.46 to<br>155,334.55)                          | 2,306.10<br>(1,226.27 to<br>3,201.68)                         | 5,488.01<br>(2,375.80 to<br>11,643.52)                        | 4,043.19<br>(1,839.85 to<br>7,844.47)                         | 6,577.57<br>(2,692.28 to<br>15,702.60)                        |
| Hypertensive heart disease      | 18,197.64<br>(13,824.24 to<br>24,219.66)                         | 23,236.72<br>(15,189.23 to<br>35,365.69)                         | 14,039.35<br>(9,269.53 to<br>21,385.97)                          | 25,537.06<br>(16,832.07 to<br>39,047.31)                           | 861.17<br>(649.02 to<br>1,187.88)                             | 1,419.18<br>(900.41 to<br>2,265.58)                           | 891.42<br>(569.06 to<br>1,444.42)                             | 1,512.10<br>(973.21 to<br>2,399.75)                           |
| Cardiomyopathy and myocarditis  | 757.12<br>(562.05 to<br>1,073.25)                                | 720.16<br>(520.44 to<br>1,069.57)                                | 679.17<br>(481.92 to<br>1,028.94)                                | 713.99<br>(518.18 to<br>1,063.33)                                  | 30.67<br>(22.32 to<br>47.05)                                  | 46.41<br>(33.61 to<br>74.39)                                  | 48.24<br>(34.24 to<br>79.88)                                  | 43.86<br>(31.82 to<br>69.91)                                  |
| Mycarditis                      | <b>Chile</b>                                                     |                                                                  |                                                                  |                                                                    |                                                               |                                                               |                                                               |                                                               |
| Cause                           | YLLs (actual counts)                                             |                                                                  |                                                                  |                                                                    | Deaths (actual counts)                                        |                                                               |                                                               |                                                               |
|                                 | 2016                                                             | 2040 Forecast                                                    | 2040 Better Scenario                                             | 2040 Worse Scenario                                                | 2016                                                          | 2040 Forecast                                                 | 2040 Better Scenario                                          | 2040 Worse Scenario                                           |
| Alcoholic cardiomyopathy        | 1,533.96<br>(991.98 to<br>2,394.79)                              | 1,899.39<br>(1,205.18 to<br>3,084.53)                            | 1,614.29<br>(992.93 to<br>2,612.13)                              | 2,190.47<br>(1,399.69 to<br>3,541.60)                              | 58.99<br>(38.36 to<br>93.55)                                  | 86.48<br>(56.97 to<br>143.40)                                 | 75.79<br>(48.52 to<br>127.23)                                 | 96.86<br>(65.29 to<br>159.43)                                 |
| Other cardiomyopathy            | 15,906.56<br>(12,055.55 to<br>21,018.12)                         | 20,617.18<br>(13,135.42 to<br>31,934.55)                         | 11,745.89<br>(7,466.39 to<br>18,613.46)                          | 22,632.60<br>(14,505.82 to<br>35,782.99)                           | 771.51<br>(583.77 to<br>1,067.72)                             | 1,286.29<br>(782.31 to<br>2,098.23)                           | 767.39<br>(459.58 to<br>1,291.38)                             | 1,371.38<br>(847.87 to<br>2,241.89)                           |
| Atrial fibrillation and flutter | 9,925.06<br>(7,222.43 to<br>13,067.47)                           | 19,700.71<br>(13,600.87 to<br>27,466.78)                         | 16,886.74<br>(11,692.90 to<br>23,233.76)                         | 20,675.35<br>(14,053.22 to<br>29,045.06)                           | 1,097.04<br>(790.02 to<br>1,447.19)                           | 2,309.13<br>(1,633.02 to<br>3,197.39)                         | 2,066.64<br>(1,458.62 to<br>2,873.27)                         | 2,342.92<br>(1,646.04 to<br>3,275.23)                         |

|                                                                |                                                     |                                                      |                                                     |                                                      |                                                |                                                 |                                                 |                                                  |
|----------------------------------------------------------------|-----------------------------------------------------|------------------------------------------------------|-----------------------------------------------------|------------------------------------------------------|------------------------------------------------|-------------------------------------------------|-------------------------------------------------|--------------------------------------------------|
| Aortic aneurysm                                                | 11,972.47<br>(9,232.90 to<br>15,108.89)             | 14,626.09<br>(10,356.74 to<br>20,900.89)             | 11,768.54<br>(8,419.28 to<br>16,624.89)             | 15,882.52<br>(11,044.55 to<br>22,540.03)             | 691.32<br>(550.82 to<br>859.71)                | 1,021.95<br>(777.11 to<br>1,371.06)             | 897.21<br>(673.60 to<br>1,214.96)               | 1,055.78<br>(791.58 to<br>1,417.85)              |
| Peripheral artery disease                                      | 3,204.43<br>(2,141.07 to<br>4,649.28)               | 8,020.08<br>(4,693.50 to<br>12,374.43)               | 7,596.78<br>(4,458.60 to<br>11,871.13)              | 8,568.75<br>(5,039.58 to<br>13,314.31)               | 297.15<br>(196.97 to<br>439.98)                | 827.16<br>(499.40 to<br>1,277.85)               | 832.57<br>(507.90 to<br>1,294.01)               | 843.95<br>(512.05 to<br>1,297.77)                |
| Endocarditis                                                   | 4,758.39<br>(3,319.91 to<br>6,671.72)               | 6,495.65<br>(4,028.40 to<br>9,933.49)                | 5,935.67<br>(3,714.63 to<br>9,095.15)               | 6,738.13<br>(4,091.99 to<br>10,554.69)               | 249.69<br>(179.69 to<br>364.27)                | 439.06<br>(280.21 to<br>731.65)                 | 419.70<br>(265.42 to<br>701.43)                 | 442.01<br>(278.60 to<br>739.83)                  |
| Other cardiovascular and circulatory diseases                  | 19,756.83<br>(15,400.32 to<br>25,177.04)            | 27,733.83<br>(19,630.15 to<br>39,389.95)             | 16,249.78<br>(11,565.39 to<br>22,875.70)            | 31,652.53<br>(21,944.66 to<br>45,405.49)             | 1,123.97<br>(885.56 to<br>1,406.05)            | 2,001.81<br>(1,483.28 to<br>2,718.31)           | 1,274.72<br>(935.07 to<br>1,731.05)             | 2,162.81<br>(1,600.39 to<br>2,925.21)            |
| <b>Chronic respiratory diseases</b>                            | <b>78,433.60<br/>(62,227.11 to<br/>98,019.67)</b>   | <b>108,387.92<br/>(77,163.83 to<br/>148,696.05)</b>  | <b>98,538.39<br/>(71,944.45 to<br/>132,027.77)</b>  | <b>142,450.19<br/>(96,898.44 to<br/>205,731.08)</b>  | <b>6,043.57<br/>(4,879.89 to<br/>7,347.26)</b> | <b>9,172.18<br/>(7,004.52 to<br/>11,933.63)</b> | <b>8,421.26<br/>(6,529.43 to<br/>10,671.33)</b> | <b>11,739.43<br/>(8,702.25 to<br/>15,741.16)</b> |
| Chronic obstructive pulmonary disease                          | 50,459.64<br>(39,790.84 to<br>64,808.04)            | 67,647.24<br>(43,699.47 to<br>104,882.98)            | 42,503.55<br>(26,970.77 to<br>66,191.34)            | 103,576.48<br>(63,296.09 to<br>160,500.63)           | 4,192.91<br>(3,382.61 to<br>5,277.09)          | 6,087.08<br>(4,124.40 to<br>8,824.61)           | 4,023.91<br>(2,728.92 to<br>5,913.77)           | 8,861.32<br>(5,964.56 to<br>12,767.69)           |
| Pneumoconiosis                                                 | 1,626.47<br>(1,149.16 to<br>2,232.86)               | 1,548.47<br>(1,043.14 to<br>2,209.16)                | 736.46<br>(480.99 to<br>1,100.49)                   | 1,636.62<br>(1,138.95 to<br>2,284.02)                | 114.41<br>(82.75 to<br>153.28)                 | 124.53<br>(88.85 to<br>174.46)                  | 62.61<br>(43.03 to<br>90.65)                    | 128.73<br>(94.34 to<br>170.54)                   |
| Silicosis                                                      | 1,471.19<br>(1,027.05 to<br>2,016.15)               | 1,296.92<br>(788.15 to<br>1,924.96)                  | 513.83<br>(295.35 to<br>821.70)                     | 1,388.99<br>(880.67 to<br>1,978.61)                  | 104.87<br>(75.00 to<br>141.95)                 | 104.39<br>(67.99 to<br>154.11)                  | 43.21<br>(25.89 to<br>68.18)                    | 109.42<br>(73.37 to<br>151.13)                   |
| Asbestosis                                                     | 58.12<br>(37.91 to<br>101.60)                       | 88.02<br>(54.97 to<br>158.11)                        | 109.20<br>(68.89 to<br>194.49)                      | 82.23<br>(51.82 to<br>144.96)                        | 3.32<br>(1.93 to<br>6.12)                      | 6.75<br>(3.93 to<br>12.31)                      | 8.78<br>(5.39 to<br>15.94)                      | 6.13<br>(3.61 to<br>11.20)                       |
| Coal workers pneumoconiosis                                    | 7.84<br>(4.80 to<br>13.22)                          | 16.97<br>(7.58 to<br>33.01)                          | 17.93<br>(7.23 to<br>36.74)                         | 16.64<br>(7.62 to<br>31.47)                          | 0.61<br>(0.37 to<br>1.03)                      | 1.59<br>(0.72 to<br>3.01)                       | 1.79<br>(0.74 to<br>3.52)                       | 1.52<br>(0.70 to<br>2.81)                        |
| Other pneumoconiosis                                           | 89.32<br>(55.80 to<br>220.28)                       | 146.56<br>(92.87 to<br>229.53)                       | 95.49<br>(58.80 to<br>195.45)                       | 148.76<br>(98.02 to<br>314.74)                       | 5.61<br>(3.48 to<br>16.54)                     | 11.81<br>(7.74 to<br>28.12)                     | 8.83<br>(5.49 to<br>18.15)                      | 11.66<br>(7.81 to<br>27.73)                      |
| Asthma                                                         | 3,885.30<br>(2,958.17 to<br>5,140.11)               | 3,107.17<br>(1,639.14 to<br>5,388.44)                | 1,433.82<br>(768.82 to<br>2,518.61)                 | 3,795.83<br>(2,001.19 to<br>6,652.10)                | 241.44<br>(185.35 to<br>311.92)                | 242.85<br>(131.42 to<br>418.88)                 | 122.39<br>(66.51 to<br>213.23)                  | 281.85<br>(154.22 to<br>477.75)                  |
| Interstitial lung disease and pulmonary sarcoidosis            | 21,042.61<br>(12,802.10 to<br>28,005.40)            | 34,115.28<br>(20,980.27 to<br>45,651.68)             | 51,865.49<br>(34,789.88 to<br>68,748.74)            | 31,405.43<br>(18,408.42 to<br>41,039.20)             | 1,422.02<br>(814.69 to<br>1,885.37)            | 2,589.49<br>(1,540.09 to<br>3,585.34)           | 4,073.80<br>(2,682.13 to<br>5,233.96)           | 2,339.75<br>(1,317.63 to<br>2,966.32)            |
| Other chronic respiratory diseases                             | 1,419.58<br>(965.96 to<br>2,346.99)                 | 1,969.76<br>(1,215.81 to<br>3,373.24)                | 1,999.07<br>(1,194.78 to<br>3,640.42)               | 2,035.83<br>(1,250.16 to<br>3,423.01)                | 72.80<br>(48.74 to<br>120.15)                  | 128.22<br>(80.68 to<br>216.03)                  | 138.55<br>(84.50 to<br>251.06)                  | 127.78<br>(80.42 to<br>211.02)                   |
| <b>Cirrhosis and other chronic liver diseases</b>              | <b>127,054.84<br/>(97,401.65 to<br/>163,581.54)</b> | <b>164,461.48<br/>(122,430.81 to<br/>219,082.21)</b> | <b>115,765.01<br/>(83,849.64 to<br/>156,772.41)</b> | <b>178,929.27<br/>(132,363.62 to<br/>236,129.70)</b> | <b>5,028.21<br/>(3,911.83 to<br/>6,396.19)</b> | <b>7,415.17<br/>(5,774.18 to<br/>9,429.57)</b>  | <b>5,339.46<br/>(4,092.76 to<br/>6,966.40)</b>  | <b>7,919.46<br/>(6,146.73 to<br/>10,022.70)</b>  |
| Cirrhosis and other chronic liver diseases due to hepatitis B  | 22,043.14<br>(15,812.10 to<br>29,837.88)            | 28,667.12<br>(20,200.59 to<br>39,218.48)             | 22,016.42<br>(15,499.12 to<br>30,720.03)            | 29,067.20<br>(20,631.11 to<br>40,104.26)             | 886.13<br>(653.97 to<br>1,179.71)              | 1,304.90<br>(962.46 to<br>1,737.09)             | 1,023.33<br>(748.58 to<br>1,382.62)             | 1,305.51<br>(966.06 to<br>1,720.20)              |
| Cirrhosis and other chronic liver diseases due to hepatitis C  | 43,587.54<br>(32,677.49 to<br>58,217.64)            | 55,984.53<br>(39,795.79 to<br>75,922.18)             | 42,199.13<br>(29,632.25 to<br>57,715.53)            | 57,008.20<br>(40,582.64 to<br>77,362.24)             | 1,654.20<br>(1,258.02 to<br>2,176.84)          | 2,390.56<br>(1,786.37 to<br>3,152.31)           | 1,835.75<br>(1,352.02 to<br>2,447.83)           | 2,405.10<br>(1,817.55 to<br>3,143.75)            |
| Cirrhosis and other chronic liver diseases due to alcohol use  | 45,950.04<br>(34,304.66 to<br>60,847.25)            | 60,837.77<br>(44,022.55 to<br>82,001.77)             | 37,023.18<br>(26,450.34 to<br>50,388.92)            | 73,551.46<br>(52,905.59 to<br>98,113.40)             | 1,838.97<br>(1,395.21 to<br>2,389.10)          | 2,782.17<br>(2,106.45 to<br>3,584.29)           | 1,743.52<br>(1,294.48 to<br>2,279.18)           | 3,269.62<br>(2,487.84 to<br>4,172.38)            |
| Cirrhosis and other chronic liver diseases due to other causes | 15,474.11<br>(11,724.59 to<br>20,452.60)            | 18,972.06<br>(13,677.33 to<br>25,755.31)             | 14,526.29<br>(10,349.61 to<br>19,790.41)            | 19,302.41<br>(13,809.00 to<br>26,077.27)             | 648.92<br>(491.20 to<br>846.48)                | 937.53<br>(697.10 to<br>1,224.70)               | 937.53<br>(541.47 to<br>972.77)                 | 939.23<br>(709.34 to<br>1,216.16)                |
| <b>Digestive diseases</b>                                      | <b>48,391.29<br/>(37,167.72 to<br/>61,980.76)</b>   | <b>71,058.77<br/>(52,239.60 to<br/>94,706.41)</b>    | <b>53,785.73<br/>(39,743.30 to<br/>70,773.00)</b>   | <b>74,538.56<br/>(54,866.19 to<br/>97,749.34)</b>    | <b>2,930.85<br/>(2,312.69 to<br/>3,659.24)</b> | <b>5,289.09<br/>(4,114.12 to<br/>6,756.56)</b>  | <b>4,279.71<br/>(3,333.66 to<br/>5,407.78)</b>  | <b>5,369.57<br/>(4,224.72 to<br/>6,795.77)</b>   |
| Peptic ulcer disease                                           | 4,775.84<br>(3,598.96 to<br>6,442.91)               | 4,690.97<br>(3,397.88 to<br>6,292.24)                | 2,643.84<br>(1,878.41 to<br>3,587.23)               | 5,129.23<br>(3,732.87 to<br>6,852.68)                | 278.62<br>(217.13 to<br>359.50)                | 344.10<br>(265.96 to<br>438.21)                 | 203.16<br>(152.28 to<br>261.78)                 | 362.79<br>(281.81 to<br>455.37)                  |
| <b>Chile</b>                                                   |                                                     |                                                      |                                                     |                                                      |                                                |                                                 |                                                 |                                                  |
| <b>YLLs (actual counts)</b>                                    |                                                     |                                                      |                                                     |                                                      | <b>Deaths (actual counts)</b>                  |                                                 |                                                 |                                                  |

| Cause                                      | 2016                                                           | 2040 Forecast                                                    | 2040 Better Scenario                                             | 2040 Worse Scenario                                              | 2016                                                        | 2040 Forecast                                                 | 2040 Better Scenario                                          | 2040 Worse Scenario                                           |
|--------------------------------------------|----------------------------------------------------------------|------------------------------------------------------------------|------------------------------------------------------------------|------------------------------------------------------------------|-------------------------------------------------------------|---------------------------------------------------------------|---------------------------------------------------------------|---------------------------------------------------------------|
| Gastritis and duodenitis                   | 699.84<br>(493.58 to<br>1,137.52)                              | 1,324.72<br>(906.90 to<br>2,240.06)                              | 929.27<br>(627.26 to<br>1,599.68)                                | 1,346.18<br>(943.82 to<br>2,220.53)                              | 39.90<br>(29.13 to<br>69.07)                                | 93.87<br>(66.97 to<br>171.94)                                 | 70.08<br>(48.87 to<br>127.10)                                 | 92.78<br>(67.41 to<br>165.94)                                 |
| Appendicitis                               | 1,638.54<br>(1,148.76 to<br>3,015.27)                          | 1,969.16<br>(1,336.98 to<br>3,653.36)                            | 1,175.25<br>(778.64 to<br>2,232.60)                              | 2,066.50<br>(1,413.10 to<br>3,851.38)                            | 64.53<br>(44.69 to<br>120.62)                               | 104.67<br>(72.73 to<br>199.44)                                | 65.24<br>(44.04 to<br>125.99)                                 | 107.15<br>(75.86 to<br>202.67)                                |
| Paralytic ileus and intestinal obstruction | 10,026.57<br>(7,274.79 to<br>13,128.61)                        | 14,114.98<br>(10,062.14 to<br>17,994.16)                         | 14,145.08<br>(10,058.84 to<br>18,404.38)                         | 13,609.63<br>(9,815.65 to<br>17,113.82)                          | 681.32<br>(502.93 to<br>876.50)                             | 1,199.29<br>(894.26 to<br>1,452.88)                           | 1,255.85<br>(931.75 to<br>1,553.07)                           | 1,128.28<br>(849.58 to<br>1,344.30)                           |
| Inguinal, femoral, and abdominal hernia    | 2,420.18<br>(1,667.68 to<br>3,325.33)                          | 2,378.15<br>(1,627.17 to<br>3,158.79)                            | 1,857.60<br>(1,202.34 to<br>2,536.58)                            | 2,368.96<br>(1,607.24 to<br>3,100.28)                            | 163.36<br>(109.43 to<br>224.26)                             | 194.05<br>(128.00 to<br>244.08)                               | 160.46<br>(104.33 to<br>206.74)                               | 188.51<br>(126.58 to<br>255.51)                               |
| Inflammatory bowel disease                 | 1,304.51<br>(967.56 to<br>1,800.16)                            | 1,662.10<br>(1,209.94 to<br>2,398.22)                            | 1,584.93<br>(1,136.97 to<br>2,277.56)                            | 1,630.43<br>(1,195.31 to<br>2,313.17)                            | 60.00<br>(45.17 to<br>83.65)                                | 98.77<br>(75.19 to<br>138.61)                                 | 98.41<br>(73.84 to<br>138.98)                                 | 94.62<br>(72.78 to<br>131.71)                                 |
| Vascular intestinal disorders              | 7,287.63<br>(5,483.06 to<br>9,355.13)                          | 11,757.59<br>(8,929.87 to<br>14,920.82)                          | 10,172.97<br>(7,704.42 to<br>13,178.73)                          | 11,545.87<br>(8,980.97 to<br>14,435.89)                          | 502.92<br>(387.64 to<br>636.17)                             | 953.14<br>(770.18 to<br>1,168.42)                             | 862.25<br>(679.16 to<br>1,088.14)                             | 917.50<br>(746.80 to<br>1,112.41)                             |
| Gallbladder and biliary diseases           | 7,190.56<br>(5,550.91 to<br>9,183.35)                          | 14,562.12<br>(7,578.40 to<br>25,753.73)                          | 8,348.39<br>(4,421.43 to<br>14,703.31)                           | 16,754.37<br>(8,868.93 to<br>29,779.47)                          | 489.41<br>(384.50 to<br>616.41)                             | 1,168.88<br>(616.97 to<br>2,075.57)                           | 712.26<br>(387.59 to<br>1,255.61)                             | 1,301.12<br>(689.84 to<br>2,268.68)                           |
| Pancreatitis                               | 8,090.37<br>(5,957.62 to<br>10,699.83)                         | 11,811.22<br>(6,358.33 to<br>21,155.55)                          | 7,065.23<br>(4,049.46 to<br>12,132.49)                           | 13,372.15<br>(7,066.25 to<br>24,345.68)                          | 348.43<br>(259.42 to<br>453.27)                             | 616.91<br>(348.99 to<br>1,106.72)                             | 383.61<br>(233.17 to<br>648.73)                               | 678.80<br>(374.07 to<br>1,245.89)                             |
| Other digestive diseases                   | 4,957.25<br>(3,714.56 to<br>6,573.12)                          | 6,787.76<br>(5,025.76 to<br>8,896.40)                            | 5,863.16<br>(4,259.58 to<br>7,811.23)                            | 6,715.23<br>(5,000.10 to<br>8,621.60)                            | 302.36<br>(232.22 to<br>387.03)                             | 515.42<br>(401.45 to<br>638.18)                               | 468.40<br>(360.55 to<br>588.21)                               | 498.00<br>(389.95 to<br>611.87)                               |
| <b>Neurological disorders</b>              | <b>88,107.63</b><br><b>(68,766.44 to</b><br><b>112,015.97)</b> | <b>162,128.47</b><br><b>(119,653.62 to</b><br><b>217,098.92)</b> | <b>157,797.47</b><br><b>(116,830.59 to</b><br><b>208,058.88)</b> | <b>164,270.07</b><br><b>(120,696.78 to</b><br><b>222,327.66)</b> | <b>8,196.55</b><br><b>(6,367.69 to</b><br><b>10,356.13)</b> | <b>17,119.09</b><br><b>(12,652.67 to</b><br><b>23,635.97)</b> | <b>17,437.32</b><br><b>(12,986.98 to</b><br><b>23,309.94)</b> | <b>16,939.13</b><br><b>(12,302.06 to</b><br><b>24,019.02)</b> |
| Alzheimer's disease and other dementias    | 55,101.25<br>(41,781.85 to<br>72,627.27)                       | 112,553.42<br>(76,047.71 to<br>164,787.47)                       | 108,052.00<br>(74,133.51 to<br>153,619.80)                       | 115,033.39<br>(75,672.61 to<br>171,164.21)                       | 6,508.38<br>(4,983.06 to<br>8,391.73)                       | 13,936.71<br>(9,602.54 to<br>20,433.58)                       | 13,956.28<br>(9,807.12 to<br>19,559.03)                       | 13,918.49<br>(9,501.29 to<br>20,909.98)                       |
| Parkinson's disease                        | 11,844.16<br>(8,267.85 to<br>16,063.74)                        | 24,062.25<br>(17,030.60 to<br>31,983.25)                         | 27,351.90<br>(19,315.60 to<br>37,131.01)                         | 22,409.40<br>(16,167.87 to<br>29,701.10)                         | 1,064.12<br>(756.12 to<br>1,436.91)                         | 2,240.04<br>(1,641.15 to<br>2,951.12)                         | 2,616.58<br>(1,904.44 to<br>3,500.87)                         | 2,056.39<br>(1,521.55 to<br>2,692.69)                         |
| Epilepsy                                   | 9,562.63<br>(7,443.32 to<br>12,222.80)                         | 11,095.17<br>(7,066.46 to<br>16,850.28)                          | 8,126.58<br>(5,288.04 to<br>12,152.95)                           | 12,503.01<br>(7,831.59 to<br>19,048.61)                          | 256.08<br>(198.14 to<br>326.87)                             | 377.75<br>(251.48 to<br>563.22)                               | 290.87<br>(199.43 to<br>426.46)                               | 414.06<br>(267.66 to<br>620.98)                               |
| Multiple sclerosis                         | 789.26<br>(536.91 to<br>1,148.60)                              | 889.30<br>(580.19 to<br>1,321.34)                                | 894.79<br>(585.49 to<br>1,334.32)                                | 907.89<br>(589.32 to<br>1,355.44)                                | 26.71<br>(18.66 to<br>37.78)                                | 35.04<br>(23.94 to<br>49.67)                                  | 36.29<br>(25.09 to<br>51.34)                                  | 35.15<br>(23.82 to<br>49.87)                                  |
| Motor neuron disease                       | 3,827.47<br>(2,893.22 to<br>4,918.57)                          | 5,921.34<br>(4,274.35 to<br>7,895.62)                            | 5,791.48<br>(4,137.40 to<br>7,813.20)                            | 5,812.72<br>(4,243.80 to<br>7,658.41)                            | 151.70<br>(115.89 to<br>192.46)                             | 268.52<br>(199.09 to<br>347.16)                               | 267.00<br>(195.30 to<br>348.96)                               | 260.88<br>(196.20 to<br>332.17)                               |
| Other neurological disorders               | 6,982.86<br>(5,523.28 to<br>8,768.94)                          | 7,607.01<br>(5,845.50 to<br>9,767.18)                            | 7,580.71<br>(5,792.17 to<br>9,819.26)                            | 7,603.66<br>(5,848.85 to<br>9,720.51)                            | 189.55<br>(148.57 to<br>237.47)                             | 261.03<br>(203.95 to<br>327.76)                               | 270.30<br>(208.19 to<br>344.52)                               | 254.15<br>(201.15 to<br>317.78)                               |
| <b>Mental disorders</b>                    | <b>18,355.56</b><br><b>(13,354.46 to</b><br><b>24,516.18)</b>  | <b>24,142.19</b><br><b>(17,020.65 to</b><br><b>33,415.19)</b>    | <b>27,421.00</b><br><b>(19,228.15 to</b><br><b>37,490.93)</b>    | <b>24,365.09</b><br><b>(17,204.70 to</b><br><b>33,128.58)</b>    | <b>555.70</b><br><b>(412.43 to</b><br><b>737.48)</b>        | <b>875.85</b><br><b>(645.04 to</b><br><b>1,159.40)</b>        | <b>1,026.89</b><br><b>(749.06 to</b><br><b>1,343.77)</b>      | <b>868.74</b><br><b>(640.35 to</b><br><b>1,133.20)</b>        |
| Alcohol use disorders                      | 13,873.06<br>(9,880.75 to<br>18,875.55)                        | 16,300.00<br>(10,879.85 to<br>23,218.30)                         | 17,215.04<br>(11,386.05 to<br>24,346.35)                         | 16,836.05<br>(11,392.27 to<br>23,633.03)                         | 436.26<br>(313.84 to<br>587.56)                             | 602.85<br>(419.93 to<br>828.27)                               | 651.45<br>(447.24 to<br>899.31)                               | 612.94<br>(435.70 to<br>829.10)                               |
| Drug use disorders                         | 4,351.39<br>(3,262.52 to<br>5,766.37)                          | 7,793.77<br>(5,728.43 to<br>10,653.16)                           | 10,147.11<br>(7,450.01 to<br>13,635.42)                          | 7,481.68<br>(5,567.88 to<br>10,096.45)                           | 118.83<br>(91.86 to<br>154.44)                              | 272.04<br>(209.20 to<br>349.17)                               | 374.26<br>(289.18 to<br>476.63)                               | 254.85<br>(198.27 to<br>321.01)                               |
| Opioid use disorders                       | 2,791.42<br>(2,081.76 to<br>3,813.21)                          | 4,158.55<br>(2,941.93 to<br>5,889.69)                            | 4,520.93<br>(3,144.00 to<br>6,611.05)                            | 4,082.39<br>(2,885.85 to<br>5,770.92)                            | 70.06<br>(52.97 to<br>94.29)                                | 128.85<br>(93.42 to<br>178.91)                                | 144.27<br>(101.89 to<br>208.27)                               | 124.31<br>(91.08 to<br>170.42)                                |
| Cocaine use disorders                      | 260.80<br>(142.95 to<br>378.90)                                | 749.78<br>(429.17 to<br>1,118.25)                                | 1,036.54<br>(615.68 to<br>1,538.74)                              | 714.10<br>(399.22 to<br>1,053.30)                                | 6.76<br>(3.84 to<br>9.56)                                   | 23.05<br>(13.53 to<br>33.32)                                  | 32.56<br>(20.21 to<br>47.05)                                  | 21.67<br>(12.60 to<br>30.77)                                  |



|                                                   |                                          |                                          |                                          |                                          |                                     |                                     |                                     |                                     |
|---------------------------------------------------|------------------------------------------|------------------------------------------|------------------------------------------|------------------------------------------|-------------------------------------|-------------------------------------|-------------------------------------|-------------------------------------|
|                                                   | 204.25<br>(125.57 to<br>320.89)          | 169.85<br>(98.06 to<br>272.93)           | 79.42<br>(44.07 to<br>131.40)            | 184.87<br>(106.12 to<br>299.28)          | 7.67<br>(4.76 to<br>11.54)          | 8.99<br>(5.48 to<br>13.63)          | 4.39<br>(2.56 to<br>6.79)           | 9.55<br>(5.51 to<br>14.13)          |
| Other gynecological diseases                      | 2,851.89<br>(2,165.30 to<br>3,790.52)    | 2,800.18<br>(2,110.24 to<br>3,666.93)    | 1,912.10<br>(1,395.32 to<br>2,583.39)    | 2,871.96<br>(2,172.83 to<br>3,782.81)    | 141.02<br>(106.48 to<br>191.97)     | 202.74<br>(158.31 to<br>260.45)     | 147.29<br>(112.71 to<br>196.24)     | 201.69<br>(161.54 to<br>259.60)     |
| Hemoglobinopathies and hemolytic anemias          | 289.89<br>(232.86 to<br>353.70)          | 102.72<br>(71.91 to<br>137.56)           | 92.29<br>(65.25 to<br>123.05)            | 108.94<br>(76.63 to<br>145.01)           | 3.79<br>(3.03 to<br>4.66)           | 1.38<br>(0.96 to<br>1.86)           | 1.24<br>(0.88 to<br>1.67)           | 1.46<br>(1.02 to<br>1.95)           |
| Thalassemias                                      | 269.75<br>(195.39 to<br>366.97)          | 240.71<br>(168.37 to<br>337.86)          | 147.29<br>(102.92 to<br>208.40)          | 255.84<br>(181.03 to<br>359.88)          | 5.66<br>(4.15 to<br>7.61)           | 6.82<br>(4.73 to<br>9.51)           | 4.26<br>(2.95 to<br>6.07)           | 7.17<br>(5.11 to<br>10.04)          |
| Sickle cell disorders                             | 476.81<br>(349.54 to<br>645.27)          | 534.18<br>(374.01 to<br>753.64)          | 318.17<br>(219.68 to<br>453.83)          | 566.20<br>(395.17 to<br>793.46)          | 12.55<br>(9.15 to<br>17.04)         | 19.24<br>(13.58 to<br>26.55)        | 11.72<br>(8.17 to<br>16.44)         | 20.10<br>(14.31 to<br>27.20)        |
| G6PD deficiency                                   | 1,815.42<br>(1,323.10 to<br>2,500.86)    | 1,922.58<br>(1,424.88 to<br>2,539.85)    | 1,354.36<br>(972.16 to<br>1,861.59)      | 1,940.99<br>(1,457.64 to<br>2,566.36)    | 119.02<br>(88.75 to<br>164.20)      | 175.30<br>(137.26 to<br>228.61)     | 130.05<br>(99.10 to<br>174.93)      | 172.97<br>(137.32 to<br>226.59)     |
| Other hemoglobinopathies and hemolytic anemias    | 12,450.20<br>(9,482.92 to<br>15,884.42)  | 16,354.77<br>(12,059.10 to<br>21,144.25) | 17,068.30<br>(12,529.45 to<br>22,303.72) | 16,055.36<br>(12,048.46 to<br>20,523.47) | 496.28<br>(376.94 to<br>636.75)     | 917.31<br>(704.05 to<br>1,159.84)   | 1,016.98<br>(779.12 to<br>1,296.17) | 868.63<br>(675.14 to<br>1,095.04)   |
| Endocrine, metabolic, blood, and immune disorders | <b>Chile</b>                             |                                          |                                          |                                          |                                     |                                     |                                     |                                     |
| Cause                                             | YLLs (actual counts)                     |                                          |                                          |                                          | Deaths (actual counts)              |                                     |                                     |                                     |
|                                                   | 2016                                     | 2040 Forecast                            | 2040 Better Scenario                     | 2040 Worse Scenario                      | 2016                                | 2040 Forecast                       | 2040 Better Scenario                | 2040 Worse Scenario                 |
| Musculoskeletal disorders                         | 8,843.20<br>(4,728.16 to<br>12,294.39)   | 11,904.66<br>(5,801.33 to<br>16,745.05)  | 9,382.74<br>(4,753.17 to<br>13,245.67)   | 12,135.72<br>(6,037.09 to<br>16,976.81)  | 363.10<br>(182.50 to<br>497.29)     | 638.72<br>(302.64 to<br>869.39)     | 505.25<br>(249.66 to<br>695.51)     | 641.49<br>(313.21 to<br>868.59)     |
| Rheumatoid arthritis                              | 2,618.83<br>(1,546.59 to<br>4,239.70)    | 3,098.95<br>(1,763.46 to<br>5,166.02)    | 1,678.85<br>(952.30 to<br>2,935.92)      | 3,337.12<br>(1,865.79 to<br>5,529.82)    | 143.28<br>(79.75 to<br>223.80)      | 211.40<br>(123.77 to<br>344.57)     | 118.86<br>(68.81 to<br>202.01)      | 222.57<br>(122.38 to<br>354.79)     |
| Other musculoskeletal disorders                   | 6,224.38<br>(2,954.42 to<br>8,728.37)    | 8,805.70<br>(3,863.74 to<br>12,540.45)   | 7,703.89<br>(3,609.66 to<br>10,954.46)   | 8,798.60<br>(3,892.17 to<br>12,569.48)   | 219.81<br>(92.48 to<br>308.81)      | 427.32<br>(177.08 to<br>601.50)     | 386.39<br>(172.80 to<br>540.11)     | 418.92<br>(170.04 to<br>584.47)     |
| Other non-communicable diseases                   | 76,728.08<br>(59,868.57 to<br>94,435.92) | 60,138.50<br>(43,125.54 to<br>79,241.95) | 36,060.36<br>(25,915.07 to<br>46,817.84) | 68,325.44<br>(49,004.55 to<br>88,747.90) | 1,218.46<br>(880.90 to<br>1,502.04) | 1,538.20<br>(912.68 to<br>2,018.95) | 1,131.43<br>(626.53 to<br>1,514.84) | 1,607.25<br>(984.21 to<br>2,060.69) |
| Congenital birth defects                          | 68,667.12<br>(53,095.73 to<br>85,002.36) | 47,163.00<br>(33,743.35 to<br>63,274.14) | 25,641.35<br>(18,407.10 to<br>34,434.80) | 55,088.02<br>(38,354.89 to<br>73,781.59) | 860.26<br>(668.64 to<br>1,056.08)   | 626.34<br>(453.04 to<br>831.24)     | 354.75<br>(259.58 to<br>462.01)     | 722.20<br>(514.64 to<br>955.52)     |
| Neural tube defects                               | 5,550.12<br>(3,441.33 to<br>8,037.85)    | 1,635.50<br>(821.61 to<br>3,010.59)      | 674.21<br>(329.94 to<br>1,328.34)        | 1,992.82<br>(984.51 to<br>3,792.89)      | 65.90<br>(41.53 to<br>94.44)        | 20.02<br>(10.34 to<br>36.56)        | 8.29<br>(4.24 to<br>15.98)          | 24.28<br>(12.49 to<br>45.19)        |
| Congenital heart anomalies                        | 22,926.15<br>(17,052.12 to<br>29,331.85) | 13,807.22<br>(9,220.85 to<br>19,449.93)  | 5,507.12<br>(3,723.36 to<br>7,909.69)    | 16,595.54<br>(10,961.22 to<br>23,567.59) | 290.29<br>(218.38 to<br>372.57)     | 185.73<br>(129.07 to<br>257.29)     | 75.18<br>(52.69 to<br>106.37)       | 220.77<br>(149.49 to<br>306.83)     |
| Orofacial clefts                                  | 14.85<br>(6.18 to<br>26.50)              | 7.66<br>(3.07 to<br>15.12)               | 2.46<br>(0.97 to<br>4.95)                | 9.71<br>(5.87 to<br>19.38)               | 0.17<br>(0.07 to<br>0.31)           | 0.09<br>(0.04 to<br>0.18)           | 0.03<br>(0.01 to<br>0.06)           | 0.11<br>(0.04 to<br>0.22)           |
| Down syndrome                                     | 4,790.76<br>(2,325.57 to<br>6,613.82)    | 3,932.84<br>(2,044.27 to<br>5,574.05)    | 3,947.42<br>(2,161.49 to<br>5,524.23)    | 4,093.92<br>(2,121.11 to<br>5,821.84)    | 76.37<br>(39.92 to<br>103.33)       | 75.15<br>(40.08 to<br>106.07)       | 77.01<br>(44.69 to<br>107.57)       | 76.68<br>(40.66 to<br>107.38)       |
| Other chromosomal abnormalities                   | 11,083.31<br>(6,871.35 to<br>15,091.59)  | 11,151.72<br>(6,496.62 to<br>17,038.49)  | 7,541.63<br>(4,590.68 to<br>11,341.99)   | 12,679.22<br>(7,372.91 to<br>19,876.80)  | 132.99<br>(82.19 to<br>179.73)      | 137.29<br>(81.68 to<br>208.27)      | 93.55<br>(58.31 to<br>138.42)       | 155.30<br>(92.65 to<br>241.14)      |
| Congenital musculoskeletal and limb anomalies     | 2,047.23<br>(1,461.95 to<br>2,771.22)    | 1,456.29<br>(905.61 to<br>2,294.79)      | 697.23<br>(431.53 to<br>1,068.26)        | 1,718.21<br>(1,023.15 to<br>2,598.19)    | 25.22<br>(18.20 to<br>33.87)        | 18.66<br>(11.96 to<br>28.74)        | 9.04<br>(5.73 to<br>13.68)          | 21.83<br>(13.48 to<br>32.20)        |
| Urogenital congenital anomalies                   | 2,664.47<br>(636.65 to<br>4,650.13)      | 1,719.88<br>(410.13 to<br>3,540.68)      | 903.06<br>(223.99 to<br>1,885.02)        | 2,023.50<br>(477.26 to<br>4,168.68)      | 32.07<br>(8.55 to<br>54.92)         | 21.46<br>(6.11 to<br>42.38)         | 11.39<br>(3.53 to<br>22.60)         | 25.05<br>(6.81 to<br>49.36)         |
| Digestive congenital anomalies                    | 6,992.28<br>(4,875.77 to<br>12,305.73)   | 4,999.66<br>(2,968.24 to<br>8,604.49)    | 2,206.68<br>(1,315.91 to<br>4,049.98)    | 6,016.24<br>(3,557.76 to<br>10,954.20)   | 82.83<br>(58.18 to<br>144.34)       | 60.33<br>(36.85 to<br>102.12)       | 26.76<br>(16.34 to<br>48.36)        | 72.32<br>(43.23 to<br>129.86)       |



|                                      |                                                                  |                                                                  |                                                                  |                                                                  |                                                             |                                                             |                                                             |                                                              |
|--------------------------------------|------------------------------------------------------------------|------------------------------------------------------------------|------------------------------------------------------------------|------------------------------------------------------------------|-------------------------------------------------------------|-------------------------------------------------------------|-------------------------------------------------------------|--------------------------------------------------------------|
| Other congenital birth defects       | 12,597.96<br>(9,465.22 to<br>16,917.64)                          | 8,452.21<br>(5,750.42 to<br>12,439.48)                           | 4,161.54<br>(2,805.27 to<br>6,358.20)                            | 9,958.85<br>(6,633.99 to<br>14,858.32)                           | 154.43<br>(116.86 to<br>204.18)                             | 107.61<br>(74.80 to<br>157.17)                              | 53.49<br>(36.61 to<br>80.53)                                | 125.85<br>(85.76 to<br>185.69)                               |
| Skin and subcutaneous diseases       | 4,174.20<br>(1,534.28 to<br>6,105.91)                            | 10,540.58<br>(3,829.16 to<br>15,328.45)                          | 8,975.05<br>(3,323.86 to<br>13,306.52)                           | 10,373.72<br>(3,787.75 to<br>14,802.22)                          | 313.09<br>(109.84 to<br>463.81)                             | 883.61<br>(301.88 to<br>1,250.31)                           | 759.93<br>(259.62 to<br>1,091.50)                           | 851.83<br>(299.39 to<br>1,186.68)                            |
| Cellulitis                           | 1,542.65<br>(595.34 to<br>2,339.36)                              | 4,510.53<br>(1,723.92 to<br>6,882.09)                            | 4,199.63<br>(1,596.17 to<br>6,437.10)                            | 4,422.77<br>(1,728.93 to<br>6,683.48)                            | 78.80<br>(29.97 to<br>118.72)                               | 279.19<br>(107.19 to<br>407.67)                             | 268.37<br>(102.71 to<br>395.91)                             | 268.34<br>(102.22 to<br>386.95)                              |
| Pyoderma                             | 770.18<br>(270.46 to<br>1,138.81)                                | 2,316.34<br>(728.91 to<br>3,457.20)                              | 1,975.40<br>(606.27 to<br>3,033.75)                              | 2,284.58<br>(698.10 to<br>3,511.82)                              | 49.06<br>(14.27 to<br>76.65)                                | 192.11<br>(53.05 to<br>290.63)                              | 174.28<br>(48.00 to<br>267.26)                              | 183.81<br>(51.17 to<br>277.20)                               |
| Decubitus ulcer                      | 1,598.68<br>(507.77 to<br>2,576.93)                              | 3,196.22<br>(964.69 to<br>4,973.72)                              | 2,375.06<br>(740.12 to<br>3,725.16)                              | 3,149.51<br>(968.81 to<br>4,801.71)                              | 172.06<br>(52.47 to<br>257.38)                              | 379.37<br>(116.74 to<br>589.25)                             | 289.23<br>(86.92 to<br>451.64)                              | 367.57<br>(110.77 to<br>561.23)                              |
| Other skin and subcutaneous diseases | 262.69<br>(93.57 to<br>396.26)                                   | 517.49<br>(187.30 to<br>806.18)                                  | 424.96<br>(152.62 to<br>661.42)                                  | 516.86<br>(185.18 to<br>785.90)                                  | 13.17<br>(4.76 to<br>20.11)                                 | 32.95<br>(11.97 to<br>50.86)                                | 28.05<br>(10.23 to<br>44.06)                                | 32.11<br>(11.74 to<br>49.12)                                 |
| Sudden infant death syndrome         | 3,886.76<br>(2,643.69 to<br>5,343.20)                            | 2,434.92<br>(1,167.87 to<br>4,297.19)                            | 1,443.95<br>(705.75 to<br>2,575.08)                              | 2,863.70<br>(1,396.74 to<br>5,057.09)                            | 45.11<br>(30.68 to<br>62.01)                                | 28.25<br>(13.55 to<br>49.85)                                | 16.75<br>(8.18 to<br>29.88)                                 | 33.22<br>(16.19 to<br>58.68)                                 |
| <b>Injuries</b>                      | <b>315,548.07</b><br><b>(239,716.32 to</b><br><b>414,622.17)</b> | <b>280,373.98</b><br><b>(177,358.54 to</b><br><b>491,035.34)</b> | <b>177,329.09</b><br><b>(108,823.88 to</b><br><b>397,027.10)</b> | <b>343,016.34</b><br><b>(214,581.87 to</b><br><b>554,264.94)</b> | <b>8,301.90</b><br><b>(6,394.25 to</b><br><b>10,789.77)</b> | <b>9,593.02</b><br><b>(6,923.15 to</b><br><b>15,176.42)</b> | <b>6,505.20</b><br><b>(4,676.19 to</b><br><b>12,644.71)</b> | <b>11,093.76</b><br><b>(7,718.95 to</b><br><b>16,592.97)</b> |
| <b>Transport injuries</b>            | <b>101,288.40</b><br><b>(77,279.53 to</b><br><b>133,236.90)</b>  | <b>62,299.29</b><br><b>(37,276.98 to</b><br><b>103,114.45)</b>   | <b>21,196.94</b><br><b>(12,915.35 to</b><br><b>34,655.35)</b>    | <b>104,914.34</b><br><b>(62,325.20 to</b><br><b>172,729.61)</b>  | <b>2,489.29</b><br><b>(1,907.85 to</b><br><b>3,254.94)</b>  | <b>1,923.50</b><br><b>(1,219.86 to</b><br><b>3,020.35)</b>  | <b>694.81</b><br><b>(448.83 to</b><br><b>1,067.28)</b>      | <b>3,050.08</b><br><b>(1,965.23 to</b><br><b>4,764.39)</b>   |
| Road injuries                        | 93,413.19<br>(71,594.98 to<br>122,784.36)                        | 52,278.49<br>(31,312.29 to<br>85,895.21)                         | 15,788.23<br>(9,676.99 to<br>25,487.31)                          | 93,451.41<br>(55,637.80 to<br>152,204.12)                        | 2,308.91<br>(1,773.53 to<br>3,007.75)                       | 1,652.87<br>(1,058.68 to<br>2,577.84)                       | 545.80<br>(358.81 to<br>817.85)                             | 2,744.96<br>(1,731.98 to<br>4,268.18)                        |
| Pedestrian road injuries             | 44,505.77<br>(33,224.03 to<br>58,332.80)                         | 26,411.44<br>(15,885.78 to<br>42,311.76)                         | 6,739.57<br>(4,264.43 to<br>10,461.17)                           | 45,031.05<br>(26,952.07 to<br>72,735.48)                         | 1,249.34<br>(932.94 to<br>1,627.29)                         | 992.58<br>(638.18 to<br>1,524.09)                           | 285.53<br>(190.89 to<br>414.69)                             | 1,583.44<br>(1,014.81 to<br>2,569.97)                        |

| Chile                          |                                                                |                                                                |                                                               |                                                                |                                                            |                                                            |                                                            |                                                            |
|--------------------------------|----------------------------------------------------------------|----------------------------------------------------------------|---------------------------------------------------------------|----------------------------------------------------------------|------------------------------------------------------------|------------------------------------------------------------|------------------------------------------------------------|------------------------------------------------------------|
| Cause                          | YLLs (actual counts)                                           |                                                                |                                                               |                                                                | Deaths (actual counts)                                     |                                                            |                                                            |                                                            |
|                                | 2016                                                           | 2040 Forecast                                                  | 2040 Better Scenario                                          | 2040 Worse Scenario                                            | 2016                                                       | 2040 Forecast                                              | 2040 Better Scenario                                       | 2040 Worse Scenario                                        |
| Cyclist road injuries          | 4,007.94<br>(2,800.70 to<br>5,672.15)                          | 2,389.27<br>(1,323.66 to<br>4,086.29)                          | 1,098.22<br>(621.51 to<br>1,844.34)                           | 3,915.25<br>(2,159.94 to<br>6,625.72)                          | 106.41<br>(73.29 to<br>151.54)                             | 77.13<br>(44.35 to<br>131.04)                              | 41.31<br>(24.29 to<br>67.91)                               | 114.97<br>(64.80 to<br>194.76)                             |
| Motorcyclist road injuries     | 7,373.12<br>(5,125.06 to<br>10,393.36)                         | 4,717.23<br>(2,372.44 to<br>9,096.94)                          | 2,431.97<br>(1,222.96 to<br>4,604.85)                         | 7,170.24<br>(3,570.57 to<br>13,616.98)                         | 138.36<br>(96.37 to<br>194.68)                             | 96.73<br>(50.72 to<br>182.38)                              | 54.08<br>(28.80 to<br>97.40)                               | 141.20<br>(72.63 to<br>263.53)                             |
| Motor vehicle road injuries    | 36,054.07<br>(25,039.54 to<br>48,239.62)                       | 17,762.79<br>(9,793.72 to<br>30,035.82)                        | 5,187.57<br>(2,938.67 to<br>8,619.92)                         | 35,437.26<br>(19,782.32 to<br>59,279.23)                       | 778.94<br>(552.81 to<br>1,049.02)                          | 456.01<br>(267.88 to<br>737.00)                            | 152.86<br>(93.60 to<br>238.85)                             | 852.33<br>(493.23 to<br>1,392.55)                          |
| Other road injuries            | 1,472.29<br>(988.81 to<br>2,136.18)                            | 997.77<br>(529.91 to<br>1,771.53)                              | 330.90<br>(176.55 to<br>573.97)                               | 1,897.60<br>(982.20 to<br>3,415.74)                            | 35.86<br>(23.63 to<br>51.64)                               | 30.43<br>(16.35 to<br>52.66)                               | 12.02<br>(6.80 to<br>20.69)                                | 53.02<br>(28.11 to<br>93.41)                               |
| Other transport injuries       | 7,875.21<br>(5,779.37 to<br>10,666.43)                         | 10,020.81<br>(5,795.37 to<br>17,233.82)                        | 5,408.71<br>(3,152.71 to<br>9,055.31)                         | 11,462.93<br>(6,472.36 to<br>19,463.78)                        | 180.38<br>(133.09 to<br>241.47)                            | 270.63<br>(160.34 to<br>459.55)                            | 149.01<br>(89.49 to<br>246.06)                             | 305.11<br>(177.78 to<br>517.14)                            |
| <b>Unintentional injuries</b>  | <b>82,418.50</b><br><b>(64,118.36 to</b><br><b>104,747.73)</b> | <b>78,098.69</b><br><b>(59,830.36 to</b><br><b>101,343.68)</b> | <b>56,767.86</b><br><b>(43,668.45 to</b><br><b>74,212.92)</b> | <b>81,568.61</b><br><b>(61,910.51 to</b><br><b>104,995.21)</b> | <b>2,864.31</b><br><b>(2,257.07 to</b><br><b>3,576.26)</b> | <b>4,008.66</b><br><b>(3,350.14 to</b><br><b>4,744.82)</b> | <b>3,149.92</b><br><b>(2,625.03 to</b><br><b>3,729.53)</b> | <b>4,010.82</b><br><b>(3,321.29 to</b><br><b>4,745.35)</b> |
| Falls                          | 21,429.29<br>(16,092.88 to<br>27,881.67)                       | 26,597.59<br>(20,411.71 to<br>33,182.49)                       | 21,278.37<br>(16,037.82 to<br>26,988.36)                      | 26,647.22<br>(20,320.70 to<br>33,416.22)                       | 1,189.75<br>(885.06 to<br>1,485.90)                        | 2,062.27<br>(1,546.11 to<br>2,441.19)                      | 1,705.27<br>(1,291.79 to<br>2,013.16)                      | 2,008.71<br>(1,525.76 to<br>2,352.09)                      |
| Drowning                       | 19,050.92<br>(14,447.59 to<br>24,671.27)                       | 13,704.22<br>(8,843.88 to<br>20,675.80)                        | 9,352.10<br>(6,173.52 to<br>13,873.64)                        | 14,974.96<br>(9,613.46 to<br>22,478.74)                        | 418.63<br>(311.37 to<br>549.95)                            | 377.51<br>(252.22 to<br>557.85)                            | 265.27<br>(178.40 to<br>388.15)                            | 404.56<br>(267.75 to<br>590.75)                            |
| Fire, heat, and hot substances | 11,163.51<br>(8,411.23 to<br>14,094.58)                        | 8,803.28<br>(6,006.33 to<br>12,665.78)                         | 5,296.25<br>(3,682.90 to<br>7,470.04)                         | 9,605.61<br>(6,492.06 to<br>13,724.93)                         | 361.04<br>(274.95 to<br>456.83)                            | 411.15<br>(304.16 to<br>569.03)                            | 263.42<br>(197.89 to<br>354.67)                            | 432.24<br>(315.29 to<br>593.87)                            |

|                                                 |                                            |                                            |                                           |                                            |                                       |                                       |                                       |                                       |
|-------------------------------------------------|--------------------------------------------|--------------------------------------------|-------------------------------------------|--------------------------------------------|---------------------------------------|---------------------------------------|---------------------------------------|---------------------------------------|
|                                                 | 1,470.69<br>(1,082.10 to<br>2,053.18)      | 849.66<br>(514.83 to<br>1,362.69)          | 442.24<br>(275.81 to<br>686.56)           | 957.30<br>(576.15 to<br>1,544.26)          | 36.22<br>(26.79 to<br>50.04)          | 27.37<br>(17.79 to<br>41.20)          | 15.02<br>(9.96 to<br>22.29)           | 29.94<br>(19.41 to<br>45.21)          |
| Poisonings                                      | 8,716.01<br>(6,339.92 to<br>11,786.31)     | 6,839.22<br>(4,788.92 to<br>9,426.91)      | 4,427.39<br>(3,101.04 to<br>6,205.05)     | 7,260.77<br>(5,062.82 to<br>10,178.07)     | 211.80<br>(152.42 to<br>286.84)       | 204.77<br>(147.28 to<br>271.14)       | 137.50<br>(98.87 to<br>184.61)        | 212.65<br>(153.05 to<br>284.61)       |
| Exposure to mechanical forces                   | 1,591.14<br>(1,129.89 to<br>2,438.88)      | 1,177.00<br>(828.10 to<br>1,871.49)        | 830.52<br>(591.89 to<br>1,300.52)         | 1,237.06<br>(865.31 to<br>1,965.15)        | 37.59<br>(27.08 to<br>56.81)          | 37.03<br>(28.04 to<br>55.07)          | 27.73<br>(21.33 to<br>40.65)          | 37.79<br>(28.71 to<br>56.10)          |
| Unintentional firearm injuries                  | 553.72<br>(401.18 to<br>942.30)            | 450.54<br>(309.80 to<br>738.64)            | 315.26<br>(220.85 to<br>501.70)           | 488.77<br>(330.20 to<br>815.56)            | 9.07<br>(6.58 to<br>14.59)            | 8.37<br>(5.89 to<br>13.00)            | 6.02<br>(4.27 to<br>9.12)             | 8.91<br>(6.21 to<br>14.13)            |
| Unintentional suffocation                       | 6,571.15<br>(4,293.31 to<br>9,139.15)      | 5,211.68<br>(3,206.68 to<br>7,386.45)      | 3,281.61<br>(1,967.01 to<br>4,781.43)     | 5,534.94<br>(3,342.78 to<br>7,923.65)      | 165.14<br>(106.86 to<br>230.09)       | 159.37<br>(102.56 to<br>217.56)       | 103.75<br>(65.39 to<br>144.50)        | 165.95<br>(104.51 to<br>228.79)       |
| Other exposure to mechanical forces             | 4,902.36<br>(3,450.95 to<br>7,531.91)      | 5,945.29<br>(4,171.93 to<br>9,213.36)      | 4,915.94<br>(3,422.10 to<br>7,583.95)     | 5,996.19<br>(4,183.86 to<br>9,327.29)      | 227.79<br>(160.32 to<br>355.27)       | 369.68<br>(275.55 to<br>562.04)       | 521.08<br>(369.21 to<br>679.13)       | 361.92<br>(269.21 to<br>590.07)       |
| Adverse effects of medical treatment            | 813.21<br>(537.14 to<br>1,614.13)          | 935.01<br>(612.69 to<br>1,803.14)          | 657.02<br>(426.94 to<br>1,227.65)         | 989.70<br>(633.46 to<br>1,938.37)          | 20.19<br>(13.69 to<br>38.71)          | 30.43<br>(21.54 to<br>56.04)          | 22.68<br>(16.02 to<br>40.06)          | 31.10<br>(21.68 to<br>56.66)          |
| Animal contact                                  | 303.86<br>(199.99 to<br>626.05)            | 354.16<br>(225.84 to<br>709.88)            | 276.74<br>(176.97 to<br>554.32)           | 368.58<br>(232.26 to<br>752.24)            | 8.02<br>(5.41 to<br>16.05)            | 12.29<br>(8.29 to<br>24.13)           | 10.09<br>(6.71 to<br>19.34)           | 12.40<br>(8.17 to<br>24.41)           |
| Venomous animal contact                         | 509.35<br>(328.97 to<br>1,065.51)          | 580.85<br>(363.73 to<br>1,171.38)          | 380.27<br>(239.64 to<br>754.15)           | 621.12<br>(386.18 to<br>1,268.88)          | 12.17<br>(7.99 to<br>25.16)           | 18.14<br>(12.47 to<br>35.46)          | 12.59<br>(8.58 to<br>24.21)           | 18.71<br>(12.59 to<br>36.89)          |
| Non-venomous animal contact                     | 8,765.53<br>(6,663.94 to<br>11,967.51)     | 9,263.73<br>(7,106.68 to<br>12,367.82)     | 7,892.32<br>(6,054.02 to<br>10,419.28)    | 9,457.07<br>(7,263.68 to<br>12,600.32)     | 252.65<br>(196.83 to<br>329.45)       | 371.78<br>(299.44 to<br>466.43)       | 340.78<br>(272.62 to<br>426.60)       | 364.42<br>(294.44 to<br>454.14)       |
| Foreign body                                    | 8,478.07<br>(6,460.25 to<br>11,573.30)     | 8,937.56<br>(6,804.74 to<br>11,965.92)     | 7,537.23<br>(5,757.74 to<br>9,958.59)     | 9,133.81<br>(6,999.50 to<br>12,241.36)     | 244.80<br>(190.22 to<br>320.80)       | 359.06<br>(286.40 to<br>453.52)       | 326.11<br>(259.12 to<br>411.16)       | 352.28<br>(284.52 to<br>440.26)       |
| Pulmonary aspiration and foreign body in airway | 287.46<br>(198.06 to<br>532.24)            | 326.17<br>(223.99 to<br>544.35)            | 355.09<br>(247.30 to<br>576.59)           | 323.25<br>(220.31 to<br>548.06)            | 7.86<br>(5.65 to<br>13.24)            | 12.71<br>(9.57 to<br>19.77)           | 14.67<br>(10.92 to<br>22.46)          | 14.67<br>(9.17 to<br>18.74)           |
| Foreign body in other body part                 | 1,930.01<br>(1,186.21 to<br>3,684.78)      | 1,956.97<br>(1,127.76 to<br>3,785.67)      | 1,194.19<br>(660.56 to<br>2,297.55)       | 2,086.54<br>(1,197.77 to<br>4,009.65)      | 54.01<br>(33.25 to<br>104.36)         | 67.13<br>(40.35 to<br>131.32)         | 42.47<br>(24.86 to<br>82.77)          | 69.95<br>(41.93 to<br>137.44)         |
| Environmental heat and cold exposure            | 4,176.99<br>(3,024.32 to<br>5,683.29)      | 3,203.72<br>(2,096.88 to<br>4,658.38)      | 1,311.94<br>(879.64 to<br>1,947.18)       | 3,593.25<br>(2,403.21 to<br>5,071.56)      | 92.23<br>(66.68 to<br>125.35)         | 86.57<br>(60.15 to<br>121.41)         | 36.44<br>(25.11 to<br>51.76)          | 95.33<br>(66.38 to<br>129.67)         |
| Other unintentional injuries                    | 131,749.92<br>(95,761.41 to<br>181,224.11) | 119,884.63<br>(68,192.29 to<br>187,952.85) | 79,418.82<br>(46,638.87 to<br>121,731.39) | 136,328.40<br>(73,474.82 to<br>216,927.25) | 2,946.52<br>(2,144.07 to<br>4,087.11) | 3,192.16<br>(1,877.93 to<br>4,897.79) | 2,186.33<br>(1,342.30 to<br>3,280.72) | 3,567.16<br>(1,985.33 to<br>5,612.49) |
| Self-harm and interpersonal violence            | <b>Chile</b>                               |                                            |                                           |                                            |                                       |                                       |                                       |                                       |
| Cause                                           | YLLs (actual counts)                       |                                            |                                           |                                            | Deaths (actual counts)                |                                       |                                       |                                       |
|                                                 | 2016                                       | 2040 Forecast                              | 2040 Better Scenario                      | 2040 Worse Scenario                        | 2016                                  | 2040 Forecast                         | 2040 Better Scenario                  | 2040 Worse Scenario                   |
| Self-harm                                       | 92,318.56<br>(66,314.92 to<br>127,049.47)  | 96,767.63<br>(51,083.98 to<br>158,633.34)  | 65,675.62<br>(36,007.56 to<br>102,894.16) | 111,355.71<br>(54,918.22 to<br>184,174.28) | 2,156.19<br>(1,552.77 to<br>3,043.88) | 2,666.01<br>(1,416.36 to<br>4,218.03) | 1,864.93<br>(1,070.00 to<br>2,859.67) | 3,004.27<br>(1,542.42 to<br>4,874.58) |
| Self-harm by firearm                            | 5,886.89<br>(3,577.92 to<br>9,144.38)      | 6,101.89<br>(2,747.38 to<br>11,338.11)     | 3,637.80<br>(1,706.98 to<br>6,622.97)     | 7,112.88<br>(3,078.75 to<br>13,717.98)     | 157.89<br>(100.12 to<br>253.60)       | 203.92<br>(99.69 to<br>355.55)        | 127.19<br>(65.48 to<br>228.29)        | 230.63<br>(108.86 to<br>443.81)       |
| Self-harm by other specified means              | 86,431.67<br>(61,916.57 to<br>119,080.83)  | 90,665.74<br>(47,781.33 to<br>148,816.99)  | 62,037.83<br>(33,986.68 to<br>98,133.04)  | 104,242.82<br>(51,932.37 to<br>173,452.28) | 1,998.31<br>(1,430.06 to<br>2,834.98) | 2,462.09<br>(1,315.13 to<br>3,911.53) | 1,737.74<br>(1,007.25 to<br>2,657.26) | 2,773.64<br>(1,432.27 to<br>4,503.60) |
| Interpersonal violence                          | 39,431.36<br>(23,495.12 to<br>62,247.86)   | 23,117.00<br>(13,163.04 to<br>38,545.46)   | 13,743.19<br>(8,077.71 to<br>22,632.87)   | 24,972.70<br>(14,369.37 to<br>41,946.29)   | 790.33<br>(480.43 to<br>1,264.16)     | 526.15<br>(305.20 to<br>894.11)       | 321.40<br>(192.92 to<br>540.48)       | 562.89<br>(336.01 to<br>952.64)       |
| Physical violence by firearm                    | 15,624.36<br>(8,027.58 to<br>26,230.57)    | 8,410.62<br>(4,126.30 to<br>14,581.94)     | 4,735.92<br>(2,311.75 to<br>8,173.42)     | 9,130.43<br>(4,317.18 to<br>15,816.20)     | 299.74<br>(154.61 to<br>507.18)       | 175.79<br>(88.03 to<br>304.22)        | 100.44<br>(51.05 to<br>180.13)        | 189.43<br>(91.81 to<br>345.89)        |

|                                                                                     |                                                    |                                                    |                                                    |                                                    |                                                 |                                                 |                                                 |                                                 |
|-------------------------------------------------------------------------------------|----------------------------------------------------|----------------------------------------------------|----------------------------------------------------|----------------------------------------------------|-------------------------------------------------|-------------------------------------------------|-------------------------------------------------|-------------------------------------------------|
| Physical violence by sharp object                                                   | 20,122.44<br>(10,730.52 to<br>32,053.27)           | 12,218.26<br>(6,374.11 to<br>20,348.27)            | 7,245.17<br>(3,947.24 to<br>11,684.08)             | 13,098.17<br>(6,832.05 to<br>21,806.06)            | 407.15<br>(223.62 to<br>644.87)                 | 277.27<br>(151.08 to<br>470.01)                 | 167.46<br>(95.46 to<br>268.01)                  | 294.49<br>(158.53 to<br>488.93)                 |
| Physical violence by other means                                                    | 3,684.56<br>(2,390.02 to<br>7,319.28)              | 2,488.12<br>(1,420.40 to<br>5,198.18)              | 1,762.10<br>(1,019.26 to<br>3,721.12)              | 2,744.09<br>(1,529.83 to<br>5,922.74)              | 83.44<br>(52.85 to<br>174.58)                   | 73.10<br>(41.26 to<br>163.35)                   | 53.50<br>(30.65 to<br>118.00)                   | 78.98<br>(43.18 to<br>177.71)                   |
| <b>Forces of nature, conflict and terrorism, and executions and police conflict</b> | <b>91.25</b><br>(75.61 to<br>109.46)               | <b>20,091.37</b><br>(0.00 to<br>264,449.95)        | <b>19,945.48</b><br>(0.00 to<br>262,556.69)        | <b>20,204.98</b><br>(0.00 to<br>266,156.91)        | <b>1.78</b><br>(1.44 to<br>2.18)                | <b>468.69</b><br>(0.00 to<br>7,030.00)          | <b>474.14</b><br>(0.00 to<br>7,223.70)          | <b>465.71</b><br>(0.00 to<br>6,887.59)          |
| Exposure to forces of nature                                                        | 0.00<br>(0.00 to<br>0.00)                          | 5,461.89<br>(0.00 to<br>39,786.07)                 | 5,415.58<br>(0.00 to<br>39,418.69)                 | 5,502.87<br>(0.00 to<br>40,018.21)                 | 0.00<br>(0.00 to<br>0.00)                       | 146.72<br>(0.00 to<br>1,062.95)                 | 150.25<br>(0.00 to<br>1,088.85)                 | 144.73<br>(0.00 to<br>1,047.25)                 |
| Conflict and terrorism                                                              | 0.00<br>(0.00 to<br>0.00)                          | 37.90<br>(0.00 to<br>282.67)                       | 37.40<br>(0.00 to<br>278.44)                       | 38.31<br>(0.00 to<br>285.69)                       | 0.00<br>(0.00 to<br>0.00)                       | 0.87<br>(0.00 to<br>6.46)                       | 0.89<br>(0.00 to<br>6.53)                       | 0.86<br>(0.00 to<br>6.41)                       |
| Executions and police conflict                                                      | 91.25<br>(75.61 to<br>109.46)                      | 14,591.58<br>(0.00 to<br>0.00)                     | 14,492.50<br>(0.00 to<br>0.00)                     | 14,663.81<br>(0.00 to<br>0.00)                     | 1.78<br>(1.44 to<br>2.18)                       | 321.10<br>(0.00 to<br>0.00)                     | 323.00<br>(0.00 to<br>0.00)                     | 320.11<br>(0.00 to<br>0.00)                     |
| <b>Uruguay</b>                                                                      |                                                    |                                                    |                                                    |                                                    |                                                 |                                                 |                                                 |                                                 |
| Cause                                                                               | YLLs (actual counts)                               |                                                    |                                                    |                                                    | Deaths (actual counts)                          |                                                 |                                                 |                                                 |
|                                                                                     | 2016                                               | 2040 Forecast                                      | 2040 Better Scenario                               | 2040 Worse Scenario                                | 2016                                            | 2040 Forecast                                   | 2040 Better Scenario                            | 2040 Worse Scenario                             |
| <b>All causes</b>                                                                   | <b>576,266.84</b><br>(541,465.19 to<br>609,109.58) | <b>561,822.91</b><br>(490,796.92 to<br>642,345.86) | <b>406,704.73</b><br>(354,735.73 to<br>462,265.57) | <b>688,685.23</b><br>(592,914.59 to<br>790,775.82) | <b>33,174.71</b><br>(31,453.73 to<br>34,749.35) | <b>36,179.88</b><br>(31,685.53 to<br>40,530.84) | <b>27,837.54</b><br>(24,324.19 to<br>31,221.18) | <b>41,735.61</b><br>(36,518.23 to<br>46,675.15) |
| <b>Communicable, maternal, neonatal, and nutritional diseases</b>                   | <b>51,491.64</b><br>(45,259.15 to<br>59,755.41)    | <b>37,816.43</b><br>(29,519.51 to<br>48,719.33)    | <b>27,206.26</b><br>(21,802.97 to<br>34,205.29)    | <b>46,842.43</b><br>(36,064.08 to<br>60,775.23)    | <b>2,372.72</b><br>(2,156.25 to<br>2,593.36)    | <b>2,357.00</b><br>(1,894.47 to<br>2,970.68)    | <b>1,943.04</b><br>(1,572.06 to<br>2,404.43)    | <b>2,644.02</b><br>(2,077.22 to<br>3,425.73)    |
| <b>HIV/AIDS and tuberculosis</b>                                                    | <b>8,137.34</b><br>(7,747.31 to<br>8,555.77)       | <b>3,340.30</b><br>(1,739.89 to<br>6,991.22)       | <b>2,433.11</b><br>(998.01 to<br>6,001.60)         | <b>5,038.53</b><br>(3,186.49 to<br>8,383.81)       | <b>223.50</b><br>(213.73 to<br>233.61)          | <b>97.06</b><br>(51.23 to<br>199.68)            | <b>67.09</b><br>(26.91 to<br>170.22)            | <b>140.74</b><br>(89.30 to<br>232.27)           |
| Tuberculosis                                                                        | 1,257.05<br>(1,149.39 to<br>1,381.93)              | 714.84<br>(460.97 to<br>1,067.70)                  | 263.52<br>(172.45 to<br>386.82)                    | 1,045.37<br>(661.19 to<br>1,596.20)                | 52.65<br>(48.19 to<br>57.63)                    | 35.17<br>(22.75 to<br>51.96)                    | 13.83<br>(9.30 to<br>20.48)                     | 48.40<br>(30.41 to<br>72.35)                    |
| HIV/AIDS                                                                            | 6,880.29<br>(6,489.93 to<br>7,288.48)              | 2,625.47<br>(1,067.36 to<br>6,340.46)              | 2,169.59<br>(741.16 to<br>5,716.58)                | 3,993.16<br>(2,197.80 to<br>7,261.49)              | 170.85<br>(162.00 to<br>180.67)                 | 61.90<br>(19.26 to<br>164.99)                   | 53.26<br>(14.25 to<br>155.50)                   | 92.35<br>(45.04 to<br>183.81)                   |
| <b>Diarrhea, lower respiratory, and other common infectious diseases</b>            | <b>25,961.86</b><br>(23,563.69 to<br>28,763.80)    | <b>25,676.28</b><br>(19,663.43 to<br>34,038.10)    | <b>19,191.88</b><br>(15,307.94 to<br>24,712.82)    | <b>31,791.15</b><br>(23,348.37 to<br>44,578.72)    | <b>1,805.59</b><br>(1,619.90 to<br>2,000.39)    | <b>2,653.31</b><br>(1,607.75 to<br>2,653.16)    | <b>1,700.04</b><br>(1,353.80 to<br>2,141.33)    | <b>2,286.94</b><br>(1,742.05 to<br>3,078.04)    |
| Diarrheal diseases                                                                  | 2,290.19<br>(1,985.17 to<br>2,698.74)              | 1,218.01<br>(639.77 to<br>2,482.47)                | 2,617.11<br>(1,390.16 to<br>5,136.58)              | 1,453.32<br>(675.36 to<br>3,253.58)                | 146.50<br>(129.18 to<br>164.96)                 | 104.07<br>(54.25 to<br>213.76)                  | 238.75<br>(125.18 to<br>463.61)                 | 115.94<br>(53.43 to<br>262.96)                  |
| Intestinal infectious diseases                                                      | 9.97<br>(3.50 to<br>22.97)                         | 8.11<br>(2.60 to<br>19.29)                         | 8.21<br>(2.61 to<br>19.84)                         | 8.37<br>(2.71 to<br>20.07)                         | 0.22<br>(0.08 to<br>0.50)                       | 0.19<br>(0.07 to<br>0.45)                       | 0.19<br>(0.07 to<br>0.44)                       | 0.19<br>(0.07 to<br>0.44)                       |
| Typhoid fever                                                                       | 5.16<br>(1.67 to<br>12.37)                         | 4.25<br>(1.30 to<br>10.73)                         | 5.79<br>(1.84 to<br>14.13)                         | 4.30<br>(1.34 to<br>10.92)                         | 0.10<br>(0.03 to<br>0.25)                       | 0.09<br>(0.03 to<br>0.21)                       | 0.12<br>(0.04 to<br>0.28)                       | 0.09<br>(0.03 to<br>0.20)                       |
| Paratyphoid fever                                                                   | 4.47<br>(1.34 to<br>11.37)                         | 3.71<br>(1.11 to<br>9.33)                          | 2.30<br>(0.64 to<br>5.82)                          | 3.92<br>(1.14 to<br>9.79)                          | 0.10<br>(0.03 to<br>0.26)                       | 0.09<br>(0.03 to<br>0.22)                       | 0.06<br>(0.02 to<br>0.15)                       | 0.10<br>(0.03 to<br>0.24)                       |
| Other intestinal infectious diseases                                                | 0.34<br>(0.14 to<br>0.72)                          | 0.15<br>(0.06 to<br>0.33)                          | 0.11<br>(0.04 to<br>0.25)                          | 0.15<br>(0.06 to<br>0.34)                          | 0.01<br>(0.01 to<br>0.03)                       | 0.01<br>(0.00 to<br>0.02)                       | 0.01<br>(0.00 to<br>0.02)                       | 0.01<br>(0.00 to<br>0.02)                       |
| Lower respiratory infections                                                        | 21,708.82<br>(19,550.32 to<br>24,078.09)           | 22,784.55<br>(17,124.32 to<br>30,957.27)           | 15,200.82<br>(11,472.40 to<br>20,393.99)           | 28,516.89<br>(20,331.39 to<br>40,412.88)           | 1,599.98<br>(1,418.29 to<br>1,793.50)           | 1,889.32<br>(1,459.34 to<br>2,475.76)           | 1,408.85<br>(1,092.12 to<br>1,836.05)           | 2,110.53<br>(1,595.26 to<br>2,867.00)           |
| Upper respiratory infections                                                        | 11.44<br>(6.38 to<br>18.89)                        | 9.89<br>(4.62 to<br>17.97)                         | 4.22<br>(1.94 to<br>7.69)                          | 10.98<br>(5.06 to<br>19.74)                        | 0.43<br>(0.23 to<br>0.73)                       | 0.45<br>(0.20 to<br>0.85)                       | 0.20<br>(0.09 to<br>0.42)                       | 0.48<br>(0.22 to<br>0.92)                       |
| Otitis media                                                                        | 1.27<br>(1.00 to<br>1.63)                          | 0.43<br>(0.25 to<br>0.76)                          | 0.44<br>(0.26 to<br>0.79)                          | 0.41<br>(0.24 to<br>0.74)                          | 0.04<br>(0.04 to<br>0.05)                       | 0.02<br>(0.01 to<br>0.04)                       | 0.02<br>(0.01 to<br>0.04)                       | 0.02<br>(0.01 to<br>0.03)                       |



|                                                       |                                            |                                            |                                            |                                            |                                        |                                      |                                      |                                      |
|-------------------------------------------------------|--------------------------------------------|--------------------------------------------|--------------------------------------------|--------------------------------------------|----------------------------------------|--------------------------------------|--------------------------------------|--------------------------------------|
| Yellow fever                                          | 0.00<br>(0.00 to 0.00)                     | 0.00<br>(0.00 to 0.00)                     | 0.00<br>(0.00 to 0.00)                     | 0.00<br>(0.00 to 0.00)                     | 0.00<br>(0.00 to 0.00)                 | 0.00<br>(0.00 to 0.00)               | 0.00<br>(0.00 to 0.00)               | 0.00<br>(0.00 to 0.00)               |
| Rabies                                                | 0.17<br>(0.13 to 0.22)                     | 0.09<br>(0.06 to 0.12)                     | 0.06<br>(0.05 to 0.08)                     | 0.10<br>(0.07 to 0.15)                     | 0.00<br>(0.00 to 0.01)                 | 0.00<br>(0.00 to 0.00)               | 0.00<br>(0.00 to 0.00)               | 0.00<br>(0.00 to 0.00)               |
| Intestinal nematode infections                        | 0.91<br>(0.36 to 1.80)                     | 0.85<br>(0.38 to 1.68)                     | 0.81<br>(0.38 to 1.52)                     | 0.85<br>(0.37 to 1.70)                     | 0.02<br>(0.01 to 0.04)                 | 0.02<br>(0.01 to 0.04)               | 0.03<br>(0.01 to 0.04)               | 0.02<br>(0.01 to 0.04)               |
| Other neglected tropical diseases                     | 32.79<br>(17.71 to 42.74)                  | 24.02<br>(13.81 to 30.55)                  | 25.81<br>(14.29 to 32.55)                  | 25.09<br>(14.72 to 32.43)                  | 0.77<br>(0.37 to 0.96)                 | 0.66<br>(0.32 to 0.81)               | 0.78<br>(0.34 to 0.97)               | 0.66<br>(0.33 to 0.81)               |
| <b>Maternal disorders</b>                             | <b>640.45</b><br><b>(531.60 to 772.03)</b> | <b>318.21</b><br><b>(230.48 to 435.60)</b> | <b>213.84</b><br><b>(151.85 to 293.65)</b> | <b>359.88</b><br><b>(251.99 to 499.66)</b> | <b>11.71</b><br><b>(9.77 to 14.07)</b> | <b>5.86</b><br><b>(4.26 to 7.98)</b> | <b>3.95</b><br><b>(2.84 to 5.42)</b> | <b>6.63</b><br><b>(4.74 to 9.25)</b> |
| Maternal hemorrhage                                   | 27.66<br>(16.30 to 43.22)                  | 15.08<br>(7.89 to 25.35)                   | 10.40<br>(5.33 to 17.66)                   | 16.97<br>(8.70 to 29.50)                   | 0.51<br>(0.30 to 0.79)                 | 0.28<br>(0.15 to 0.47)               | 0.19<br>(0.10 to 0.33)               | 0.31<br>(0.16 to 0.55)               |
| Maternal sepsis and other maternal infections         | 80.67<br>(56.45 to 112.45)                 | 38.08<br>(22.40 to 61.62)                  | 25.72<br>(15.01 to 41.30)                  | 42.97<br>(24.59 to 69.75)                  | 1.50<br>(1.05 to 2.09)                 | 0.71<br>(0.43 to 1.13)               | 0.48<br>(0.28 to 0.76)               | 0.80<br>(0.47 to 1.30)               |
| Maternal hypertensive disorders                       | 87.01<br>(60.70 to 120.86)                 | 40.85<br>(24.01 to 63.10)                  | 27.08<br>(15.69 to 42.49)                  | 46.15<br>(27.53 to 71.77)                  | 1.54<br>(1.08 to 2.13)                 | 0.72<br>(0.43 to 1.10)               | 0.48<br>(0.28 to 0.76)               | 0.82<br>(0.49 to 1.26)               |
| Maternal obstructed labor and uterine rupture         | 5.66<br>(2.20 to 11.02)                    | 3.62<br>(1.30 to 8.19)                     | 2.28<br>(0.84 to 4.89)                     | 4.11<br>(1.49 to 8.83)                     | 0.10<br>(0.04 to 0.21)                 | 0.07<br>(0.02 to 0.15)               | 0.04<br>(0.02 to 0.09)               | 0.08<br>(0.03 to 0.17)               |
| Maternal abortion, miscarriage, and ectopic pregnancy | 340.50<br>(267.84 to 432.79)               | 166.04<br>(103.40 to 244.43)               | 111.05<br>(70.66 to 167.20)                | 187.89<br>(116.69 to 287.90)               | 6.28<br>(4.96 to 7.94)                 | 3.09<br>(1.95 to 4.57)               | 2.08<br>(1.33 to 3.08)               | 3.50<br>(2.18 to 5.28)               |
| Indirect maternal deaths                              | 45.82<br>(28.97 to 66.34)                  | 25.16<br>(14.32 to 42.05)                  | 16.53<br>(9.19 to 28.45)                   | 28.60<br>(15.70 to 47.93)                  | 0.82<br>(0.52 to 1.18)                 | 0.45<br>(0.25 to 0.74)               | 0.30<br>(0.16 to 0.51)               | 0.51<br>(0.29 to 0.87)               |
| Late maternal deaths                                  | 10.58<br>(5.40 to 18.51)                   | 4.76<br>(2.17 to 9.27)                     | 3.11<br>(1.40 to 6.14)                     | 5.40<br>(2.35 to 10.69)                    | 0.19<br>(0.10 to 0.33)                 | 0.09<br>(0.04 to 0.16)               | 0.06<br>(0.02 to 0.11)               | 0.10<br>(0.04 to 0.18)               |
| Maternal deaths aggravated by HIV/AIDS                | 0.68<br>(0.30 to 1.19)                     | 1.13<br>(0.27 to 2.59)                     | 0.83<br>(0.15 to 1.99)                     | 1.42<br>(0.52 to 3.03)                     | 0.01<br>(0.01 to 0.02)                 | 0.02<br>(0.00 to 0.05)               | 0.02<br>(0.00 to 0.04)               | 0.03<br>(0.01 to 0.06)               |
| Other maternal disorders                              | 41.89<br>(27.23 to 62.41)                  | 23.49<br>(13.10 to 39.15)                  | 16.84<br>(9.42 to 28.28)                   | 26.36<br>(14.73 to 42.95)                  | 0.76<br>(0.49 to 1.13)                 | 0.43<br>(0.24 to 0.72)               | 0.31<br>(0.17 to 0.52)               | 0.48<br>(0.27 to 0.79)               |

**Uruguay**

| Cause                                                    | YLLs (actual counts)                               |                                                   |                                                  |                                                   | Deaths (actual counts)                     |                                          |                                         |                                          |
|----------------------------------------------------------|----------------------------------------------------|---------------------------------------------------|--------------------------------------------------|---------------------------------------------------|--------------------------------------------|------------------------------------------|-----------------------------------------|------------------------------------------|
|                                                          | 2016                                               | 2040 Forecast                                     | 2040 Better Scenario                             | 2040 Worse Scenario                               | 2016                                       | 2040 Forecast                            | 2040 Better Scenario                    | 2040 Worse Scenario                      |
| <b>Neonatal disorders</b>                                | <b>13,610.00</b><br><b>(8,954.85 to 19,763.27)</b> | <b>6,611.84</b><br><b>(3,325.47 to 11,843.13)</b> | <b>3,590.76</b><br><b>(1,785.00 to 6,455.00)</b> | <b>7,756.80</b><br><b>(3,902.07 to 13,917.47)</b> | <b>157.29</b><br><b>(103.49 to 228.40)</b> | <b>76.43</b><br><b>(38.44 to 136.85)</b> | <b>41.51</b><br><b>(20.64 to 74.58)</b> | <b>89.66</b><br><b>(45.11 to 160.85)</b> |
| Neonatal preterm birth                                   | 6,452.33<br>(4,243.55 to 9,447.32)                 | 2,857.01<br>(1,427.48 to 5,258.24)                | 1,212.85<br>(618.04 to 2,277.70)                 | 3,319.21<br>(1,640.40 to 6,034.50)                | 74.56<br>(49.04 to 109.16)                 | 33.02<br>(16.50 to 60.77)                | 14.02<br>(7.14 to 26.32)                | 38.36<br>(18.95 to 69.73)                |
| Neonatal encephalopathy due to birth asphyxia and trauma | 2,435.55<br>(1,561.15 to 3,594.06)                 | 1,157.85<br>(518.92 to 2,314.02)                  | 598.06<br>(277.01 to 1,191.41)                   | 1,370.44<br>(623.40 to 2,693.10)                  | 28.16<br>(18.05 to 41.54)                  | 13.39<br>(6.01 to 26.75)                 | 6.92<br>(3.21 to 13.78)                 | 15.85<br>(7.21 to 31.14)                 |
| Neonatal sepsis and other neonatal infections            | 2,485.10<br>(1,475.66 to 3,930.79)                 | 1,433.50<br>(616.44 to 2,710.26)                  | 853.24<br>(380.98 to 1,618.10)                   | 1,691.66<br>(721.37 to 3,191.93)                  | 28.71<br>(17.05 to 45.41)                  | 16.56<br>(7.13 to 31.32)                 | 9.86<br>(4.40 to 18.70)                 | 19.55<br>(8.33 to 36.89)                 |
| Hemolytic disease and other neonatal jaundice            | 43.10<br>(24.49 to 71.03)                          | 13.36<br>(4.94 to 31.48)                          | 7.62<br>(2.87 to 17.00)                          | 16.00<br>(5.84 to 37.67)                          | 0.50<br>(0.28 to 0.82)                     | 0.15<br>(0.06 to 0.36)                   | 0.09<br>(0.03 to 0.20)                  | 0.19<br>(0.07 to 0.44)                   |
| Other neonatal disorders                                 | 2,193.92<br>(1,366.09 to 3,455.07)                 | 1,150.13<br>(519.35 to 2,326.47)                  | 918.99<br>(409.62 to 1,809.25)                   | 1,359.49<br>(605.84 to 2,733.99)                  | 25.36<br>(15.79 to 39.94)                  | 13.30<br>(6.01 to 26.88)                 | 10.63<br>(4.74 to 20.91)                | 15.72<br>(7.01 to 31.59)                 |

|                                                                         |                                                    |                                                    |                                                    |                                                    |                                                 |                                                 |                                                 |                                                 |
|-------------------------------------------------------------------------|----------------------------------------------------|----------------------------------------------------|----------------------------------------------------|----------------------------------------------------|-------------------------------------------------|-------------------------------------------------|-------------------------------------------------|-------------------------------------------------|
|                                                                         | 2,090.13<br>(1,780.46 to<br>2,453.27)              | 1,132.04<br>(952.90 to<br>1,363.31)                | 1,151.52<br>(965.49 to<br>1,376.07)                | 1,138.25<br>(944.77 to<br>1,385.48)                | 138.32<br>(121.84 to<br>155.18)                 | 89.53<br>(74.50 to<br>107.83)                   | 98.13<br>(81.94 to<br>117.07)                   | 85.63<br>(70.18 to<br>104.94)                   |
| <b>Nutritional deficiencies</b>                                         |                                                    |                                                    |                                                    |                                                    |                                                 |                                                 |                                                 |                                                 |
| Protein-energy malnutrition                                             | 1,404.67<br>(1,022.58 to<br>1,780.21)              | 648.79<br>(412.92 to<br>893.42)                    | 758.11<br>(513.77 to<br>1,003.50)                  | 651.54<br>(415.78 to<br>895.53)                    | 83.41<br>(55.75 to<br>105.07)                   | 48.72<br>(29.41 to<br>66.88)                    | 62.39<br>(41.01 to<br>81.98)                    | 46.26<br>(28.39 to<br>64.03)                    |
| Iodine deficiency                                                       | 15.03<br>(0.76 to<br>48.92)                        | 35.10<br>(0.66 to<br>119.69)                       | 30.51<br>(0.46 to<br>116.87)                       | 36.38<br>(0.73 to<br>118.91)                       | 0.63<br>(0.03 to<br>2.51)                       | 2.38<br>(0.03 to<br>12.11)                      | 2.21<br>(0.02 to<br>12.37)                      | 2.37<br>(0.03 to<br>12.07)                      |
| Dietary iron deficiency                                                 | 15.36<br>(11.88 to<br>23.21)                       | 10.11<br>(7.42 to<br>14.27)                        | 10.24<br>(7.45 to<br>15.49)                        | 10.48<br>(7.63 to<br>14.98)                        | 0.32<br>(0.25 to<br>0.51)                       | 0.23<br>(0.17 to<br>0.33)                       | 0.24<br>(0.17 to<br>0.38)                       | 0.23<br>(0.17 to<br>0.34)                       |
| Other nutritional deficiencies                                          | 655.07<br>(460.03 to<br>951.37)                    | 438.04<br>(312.83 to<br>630.94)                    | 352.66<br>(240.15 to<br>555.48)                    | 439.86<br>(310.44 to<br>632.28)                    | 53.95<br>(35.85 to<br>82.02)                    | 38.20<br>(24.97 to<br>54.98)                    | 33.29<br>(20.84 to<br>52.22)                    | 36.77<br>(23.40 to<br>54.18)                    |
| <b>Other communicable, maternal, neonatal, and nutritional diseases</b> | <b>974.45</b><br>(727.28 to<br>1,377.77)           | <b>688.63</b><br>(578.04 to<br>828.78)             | <b>570.69</b><br>(481.01 to<br>670.13)             | <b>709.09</b><br>(590.92 to<br>863.37)             | <b>33.70</b><br>(29.07 to<br>39.34)             | <b>33.04</b><br>(28.25 to<br>37.65)             | <b>30.22</b><br>(25.49 to<br>34.61)             | <b>32.74</b><br>(27.78 to<br>37.45)             |
| Sexually transmitted infections excluding HIV                           | 387.05<br>(157.40 to<br>786.52)                    | 110.94<br>(60.19 to<br>214.24)                     | 78.01<br>(45.86 to<br>141.75)                      | 119.60<br>(62.98 to<br>236.28)                     | 8.03<br>(5.15 to<br>12.74)                      | 3.22<br>(2.41 to<br>4.57)                       | 2.62<br>(1.99 to<br>3.55)                       | 3.30<br>(2.42 to<br>4.81)                       |
| Syphilis                                                                | 299.28<br>(66.71 to<br>696.22)                     | 70.91<br>(21.66 to<br>175.87)                      | 42.94<br>(13.85 to<br>107.77)                      | 78.63<br>(22.89 to<br>196.61)                      | 4.49<br>(1.76 to<br>9.13)                       | 1.39<br>(0.77 to<br>2.66)                       | 0.93<br>(0.54 to<br>1.70)                       | 1.48<br>(0.78 to<br>2.87)                       |
| Chlamydial infection                                                    | 17.20<br>(14.55 to<br>20.04)                       | 7.82<br>(6.25 to<br>9.76)                          | 6.91<br>(5.49 to<br>8.68)                          | 7.99<br>(6.34 to<br>10.03)                         | 0.72<br>(0.61 to<br>0.84)                       | 0.37<br>(0.29 to<br>0.48)                       | 0.35<br>(0.27 to<br>0.46)                       | 0.37<br>(0.29 to<br>0.47)                       |
| Gonococcal infection                                                    | 47.24<br>(40.30 to<br>54.88)                       | 21.80<br>(17.12 to<br>27.37)                       | 19.17<br>(14.86 to<br>23.92)                       | 22.27<br>(17.27 to<br>27.85)                       | 2.01<br>(1.71 to<br>2.34)                       | 1.05<br>(0.82 to<br>1.32)                       | 0.98<br>(0.75 to<br>1.27)                       | 1.04<br>(0.80 to<br>1.33)                       |
| Other sexually transmitted infections                                   | 23.33<br>(19.85 to<br>27.45)                       | 10.41<br>(8.09 to<br>13.20)                        | 8.99<br>(6.90 to<br>11.39)                         | 10.70<br>(8.33 to<br>13.66)                        | 0.80<br>(0.69 to<br>0.92)                       | 0.40<br>(0.32 to<br>0.50)                       | 0.36<br>(0.28 to<br>0.46)                       | 0.40<br>(0.32 to<br>0.50)                       |
| Acute hepatitis                                                         | 232.76<br>(204.21 to<br>263.43)                    | 162.38<br>(126.83 to<br>204.32)                    | 97.24<br>(75.98 to<br>126.06)                      | 169.60<br>(134.82 to<br>213.27)                    | 7.92<br>(6.91 to<br>9.03)                       | 6.50<br>(5.11 to<br>8.19)                       | 4.03<br>(3.12 to<br>5.29)                       | 6.62<br>(5.21 to<br>8.18)                       |
| Acute hepatitis A                                                       | 25.10<br>(17.48 to<br>36.01)                       | 11.21<br>(7.20 to<br>16.84)                        | 7.54<br>(4.81 to<br>11.38)                         | 11.94<br>(7.66 to<br>18.37)                        | 0.53<br>(0.39 to<br>0.70)                       | 0.33<br>(0.21 to<br>0.48)                       | 0.23<br>(0.15 to<br>0.34)                       | 0.34<br>(0.22 to<br>0.49)                       |
| Acute hepatitis B                                                       | 176.09<br>(151.41 to<br>203.71)                    | 127.41<br>(95.25 to<br>164.78)                     | 75.05<br>(55.34 to<br>100.95)                      | 133.29<br>(101.08 to<br>173.40)                    | 6.12<br>(5.19 to<br>7.09)                       | 4.98<br>(3.70 to<br>6.50)                       | 3.02<br>(2.14 to<br>4.12)                       | 5.10<br>(3.78 to<br>6.66)                       |
| Acute hepatitis C                                                       | 10.94<br>(8.14 to<br>14.81)                        | 9.28<br>(6.38 to<br>13.60)                         | 5.66<br>(3.83 to<br>8.32)                          | 9.48<br>(6.52 to<br>13.87)                         | 0.42<br>(0.30 to<br>0.59)                       | 0.40<br>(0.27 to<br>0.60)                       | 0.25<br>(0.16 to<br>0.38)                       | 0.40<br>(0.27 to<br>0.59)                       |
| Acute hepatitis E                                                       | 20.63<br>(14.98 to<br>28.04)                       | 14.49<br>(9.36 to<br>20.55)                        | 8.99<br>(5.64 to<br>13.09)                         | 14.90<br>(9.86 to<br>21.23)                        | 0.85<br>(0.56 to<br>1.20)                       | 0.79<br>(0.47 to<br>1.21)                       | 0.53<br>(0.31 to<br>0.81)                       | 0.78<br>(0.47 to<br>1.20)                       |
| Other unspecified infectious diseases                                   | 354.64<br>(314.24 to<br>407.85)                    | 415.31<br>(355.78 to<br>478.97)                    | 395.44<br>(338.33 to<br>456.50)                    | 419.89<br>(353.92 to<br>489.46)                    | 17.76<br>(14.43 to<br>19.93)                    | 23.32<br>(19.02 to<br>26.91)                    | 23.57<br>(19.20 to<br>27.24)                    | 22.82<br>(18.49 to<br>26.70)                    |
| <b>Non-communicable diseases</b>                                        | <b>438,866.61</b><br>(413,042.52 to<br>463,263.79) | <b>463,399.79</b><br>(400,413.10 to<br>527,725.17) | <b>334,796.59</b><br>(289,727.72 to<br>379,915.74) | <b>562,852.43</b><br>(476,897.08 to<br>647,480.61) | <b>28,367.03</b><br>(26,920.84 to<br>29,795.80) | <b>31,814.20</b><br>(27,449.28 to<br>36,009.28) | <b>24,341.15</b><br>(21,009.46 to<br>27,610.15) | <b>36,701.64</b><br>(31,649.92 to<br>41,766.90) |
| <b>Uruguay</b>                                                          |                                                    |                                                    |                                                    |                                                    |                                                 |                                                 |                                                 |                                                 |
| Cause                                                                   | YLLs (actual counts)                               |                                                    |                                                    |                                                    | Deaths (actual counts)                          |                                                 |                                                 |                                                 |
|                                                                         | 2016                                               | 2040 Forecast                                      | 2040 Better Scenario                               | 2040 Worse Scenario                                | 2016                                            | 2040 Forecast                                   | 2040 Better Scenario                            | 2040 Worse Scenario                             |
| <b>Neoplasms</b>                                                        | 171,666.12<br>(161,404.20 to<br>182,149.40)        | 201,228.36<br>(174,267.64 to<br>229,113.16)        | 155,271.47<br>(136,077.57 to<br>174,570.97)        | 233,432.31<br>(200,744.93 to<br>267,202.87)        | 9,189.21<br>(8,650.99 to<br>9,711.66)           | 11,424.33<br>(10,039.85 to<br>12,922.39)        | 9,240.85<br>(8,155.26 to<br>10,391.73)          | 12,754.89<br>(11,129.78 to<br>14,510.84)        |
| Lip and oral cavity cancer                                              | 2,034.57<br>(1,827.62 to<br>2,236.88)              | 1,943.43<br>(1,158.48 to<br>3,068.45)              | 1,203.73<br>(744.51 to<br>1,871.35)                | 3,223.97<br>(1,745.18 to<br>5,290.25)              | 97.40<br>(88.52 to<br>106.18)                   | 96.04<br>(59.16 to<br>149.49)                   | 61.68<br>(39.93 to<br>91.88)                    | 152.02<br>(84.28 to<br>249.06)                  |



| Uruguay                         |                                                                  |                                                                 |                                                               |                                                                  |                                                              |                                                             |                                                            |                                                              |
|---------------------------------|------------------------------------------------------------------|-----------------------------------------------------------------|---------------------------------------------------------------|------------------------------------------------------------------|--------------------------------------------------------------|-------------------------------------------------------------|------------------------------------------------------------|--------------------------------------------------------------|
| Cause                           | YLLs (actual counts)                                             |                                                                 |                                                               |                                                                  | Deaths (actual counts)                                       |                                                             |                                                            |                                                              |
|                                 | 2016                                                             | 2040 Forecast                                                   | 2040 Better Scenario                                          | 2040 Worse Scenario                                              | 2016                                                         | 2040 Forecast                                               | 2040 Better Scenario                                       | 2040 Worse Scenario                                          |
| Kidney cancer                   | 5,682.50<br>(5,138.64 to<br>6,233.79)                            | 7,786.71<br>(6,094.39 to<br>9,938.06)                           | 7,454.01<br>(6,038.50 to<br>9,120.72)                         | 8,073.78<br>(6,114.43 to<br>10,534.16)                           | 276.05<br>(250.52 to<br>300.63)                              | 393.73<br>(313.54 to<br>488.95)                             | 393.87<br>(322.84 to<br>473.28)                            | 397.40<br>(307.62 to<br>508.78)                              |
| Bladder cancer                  | 3,804.19<br>(3,429.00 to<br>4,199.76)                            | 4,355.03<br>(3,241.91 to<br>5,768.52)                           | 3,444.09<br>(2,686.30 to<br>4,395.05)                         | 4,834.30<br>(3,467.37 to<br>6,543.51)                            | 263.99<br>(238.55 to<br>291.13)                              | 313.52<br>(236.78 to<br>408.08)                             | 261.27<br>(204.97 to<br>328.19)                            | 337.17<br>(243.81 to<br>447.79)                              |
| Brain and nervous system cancer | 4,077.34<br>(3,511.37 to<br>4,536.34)                            | 5,292.89<br>(4,479.79 to<br>6,088.06)                           | 4,671.79<br>(3,946.61 to<br>5,395.85)                         | 5,177.36<br>(4,431.88 to<br>5,925.69)                            | 144.21<br>(124.30 to<br>160.53)                              | 209.49<br>(177.71 to<br>235.03)                             | 191.41<br>(163.25 to<br>216.41)                            | 200.36<br>(170.57 to<br>223.99)                              |
| Thyroid cancer                  | 451.89<br>(410.34 to<br>497.04)                                  | 555.10<br>(389.65 to<br>755.05)                                 | 407.55<br>(309.83 to<br>555.48)                               | 558.08<br>(404.36 to<br>791.04)                                  | 24.20<br>(21.13 to<br>26.63)                                 | 30.25<br>(22.20 to<br>41.55)                                | 24.05<br>(18.35 to<br>32.79)                               | 30.69<br>(22.59 to<br>43.01)                                 |
| Mesothelioma                    | 277.71<br>(249.44 to<br>310.84)                                  | 309.84<br>(271.91 to<br>355.81)                                 | 321.50<br>(282.32 to<br>371.35)                               | 298.36<br>(263.67 to<br>339.05)                                  | 12.90<br>(11.69 to<br>14.23)                                 | 15.72<br>(14.02 to<br>17.74)                                | 17.13<br>(15.19 to<br>19.35)                               | 14.66<br>(13.12 to<br>16.41)                                 |
| Hodgkin lymphoma                | 616.63<br>(379.13 to<br>697.40)                                  | 475.44<br>(293.01 to<br>575.50)                                 | 309.29<br>(190.89 to<br>379.90)                               | 492.30<br>(296.97 to<br>592.35)                                  | 20.50<br>(12.66 to<br>23.07)                                 | 17.25<br>(10.89 to<br>20.42)                                | 11.52<br>(7.20 to<br>13.92)                                | 17.53<br>(10.79 to<br>20.54)                                 |
| Non-Hodgkin lymphoma            | 5,731.57<br>(5,158.41 to<br>6,252.26)                            | 7,498.90<br>(5,984.99 to<br>9,466.25)                           | 6,057.77<br>(4,879.74 to<br>7,435.47)                         | 7,443.08<br>(5,902.73 to<br>9,416.04)                            | 258.41<br>(229.10 to<br>284.36)                              | 367.20<br>(295.21 to<br>458.93)                             | 309.05<br>(250.31 to<br>378.90)                            | 355.17<br>(284.46 to<br>444.01)                              |
| Multiple myeloma                | 2,419.30<br>(1,855.75 to<br>2,781.25)                            | 3,429.73<br>(2,509.08 to<br>4,379.72)                           | 3,009.67<br>(2,190.84 to<br>3,758.03)                         | 3,370.93<br>(2,480.14 to<br>4,366.05)                            | 130.81<br>(99.92 to<br>150.03)                               | 191.15<br>(141.80 to<br>242.02)                             | 174.15<br>(127.44 to<br>215.78)                            | 183.77<br>(135.23 to<br>235.54)                              |
| Leukemia                        | 6,719.96<br>(6,233.98 to<br>7,245.36)                            | 8,283.94<br>(6,506.14 to<br>10,690.99)                          | 6,477.39<br>(5,224.60 to<br>8,092.29)                         | 8,861.93<br>(6,767.20 to<br>11,707.58)                           | 300.07<br>(279.42 to<br>324.18)                              | 415.88<br>(324.23 to<br>534.41)                             | 340.14<br>(271.27 to<br>422.93)                            | 432.23<br>(328.40 to<br>565.55)                              |
| Acute lymphoid leukemia         | 839.44<br>(722.53 to<br>977.37)                                  | 822.92<br>(634.40 to<br>1,069.56)                               | 608.14<br>(473.90 to<br>792.61)                               | 875.42<br>(675.03 to<br>1,131.58)                                | 17.19<br>(15.16 to<br>19.90)                                 | 19.61<br>(15.63 to<br>25.07)                                | 14.67<br>(11.79 to<br>18.63)                               | 20.79<br>(16.36 to<br>26.65)                                 |
| Chronic lymphoid leukemia       | 863.33<br>(718.95 to<br>1,013.37)                                | 1,046.47<br>(751.62 to<br>1,421.89)                             | 912.47<br>(671.61 to<br>1,208.11)                             | 1,083.63<br>(759.99 to<br>1,531.42)                              | 64.52<br>(53.57 to<br>75.79)                                 | 79.65<br>(57.70 to<br>106.34)                               | 72.80<br>(53.46 to<br>94.54)                               | 80.03<br>(56.08 to<br>110.19)                                |
| Acute myeloid leukemia          | 1,859.70<br>(1,674.51 to<br>2,095.58)                            | 2,748.54<br>(2,142.85 to<br>3,516.64)                           | 2,411.78<br>(1,936.02 to<br>2,996.21)                         | 2,903.75<br>(2,226.95 to<br>3,778.56)                            | 69.54<br>(61.84 to<br>78.01)                                 | 115.92<br>(90.00 to<br>147.58)                              | 105.46<br>(84.30 to<br>131.37)                             | 119.63<br>(91.35 to<br>154.87)                               |
| Chronic myeloid leukemia        | 448.52<br>(396.84 to<br>510.08)                                  | 423.81<br>(301.53 to<br>602.64)                                 | 235.60<br>(171.91 to<br>325.90)                               | 465.56<br>(324.91 to<br>670.61)                                  | 21.24<br>(18.91 to<br>24.06)                                 | 21.76<br>(15.79 to<br>30.03)                                | 12.76<br>(9.60 to<br>17.41)                                | 23.03<br>(16.55 to<br>32.26)                                 |
| Other leukemia                  | 2,708.98<br>(2,440.86 to<br>2,999.98)                            | 3,242.21<br>(2,443.28 to<br>4,307.56)                           | 2,309.40<br>(1,807.54 to<br>2,963.75)                         | 3,533.56<br>(2,611.66 to<br>4,776.66)                            | 127.57<br>(114.43 to<br>141.26)                              | 178.94<br>(136.32 to<br>238.37)                             | 134.45<br>(104.82 to<br>174.45)                            | 188.75<br>(139.37 to<br>256.45)                              |
| Other neoplasms                 | 8,490.43<br>(7,782.63 to<br>9,207.58)                            | 10,054.34<br>(9,045.60 to<br>11,126.64)                         | 9,713.07<br>(8,673.00 to<br>10,786.39)                        | 9,754.56<br>(8,754.40 to<br>10,785.81)                           | 400.41<br>(364.95 to<br>436.86)                              | 519.14<br>(465.89 to<br>577.98)                             | 528.99<br>(469.23 to<br>595.27)                            | 488.25<br>(439.40 to<br>541.04)                              |
| <b>Cardiovascular diseases</b>  | <b>135,478.52</b><br><b>(127,204.51 to</b><br><b>144,058.58)</b> | <b>115,410.22</b><br><b>(84,319.97 to</b><br><b>157,026.72)</b> | <b>65,591.38</b><br><b>(49,050.56 to</b><br><b>87,448.36)</b> | <b>167,992.15</b><br><b>(115,921.72 to</b><br><b>234,310.50)</b> | <b>10,277.74</b><br><b>(9,722.80 to</b><br><b>10,883.70)</b> | <b>9,437.13</b><br><b>(6,894.96 to</b><br><b>12,644.46)</b> | <b>5,863.78</b><br><b>(4,328.76 to</b><br><b>7,944.87)</b> | <b>12,308.88</b><br><b>(8,676.83 to</b><br><b>16,759.00)</b> |
| Rheumatic heart disease         | 2,182.43<br>(2,004.53 to<br>2,380.14)                            | 1,405.56<br>(1,146.80 to<br>1,783.52)                           | 983.60<br>(797.36 to<br>1,253.73)                             | 1,465.55<br>(1,185.66 to<br>1,884.47)                            | 161.41<br>(147.83 to<br>176.55)                              | 119.40<br>(96.01 to<br>156.03)                              | 89.43<br>(69.83 to<br>118.40)                              | 120.51<br>(96.97 to<br>162.18)                               |
| Ischemic heart disease          | 58,212.34<br>(54,205.03 to<br>62,114.98)                         | 46,171.35<br>(28,459.34 to<br>73,288.36)                        | 22,872.58<br>(14,055.49 to<br>35,162.71)                      | 75,959.83<br>(45,155.22 to<br>122,883.78)                        | 4,333.95<br>(4,073.99 to<br>4,613.29)                        | 3,697.31<br>(2,273.23 to<br>5,710.82)                       | 2,028.74<br>(1,240.03 to<br>3,108.99)                      | 5,369.78<br>(3,301.54 to<br>8,351.80)                        |
| Stroke                          | 44,609.34<br>(41,308.13 to<br>47,985.97)                         | 31,685.92<br>(19,930.44 to<br>48,135.89)                        | 15,387.08<br>(9,993.82 to<br>23,481.10)                       | 49,731.41<br>(30,828.14 to<br>76,224.42)                         | 3,477.56<br>(3,209.78 to<br>3,757.89)                        | 2,708.87<br>(1,698.99 to<br>4,192.31)                       | 1,479.69<br>(934.45 to<br>2,332.51)                        | 3,676.28<br>(2,295.02 to<br>5,672.07)                        |
| Ischemic stroke                 | 23,819.83<br>(21,876.65 to<br>25,847.66)                         | 17,317.34<br>(10,043.84 to<br>30,151.16)                        | 9,286.98<br>(5,500.32 to<br>15,480.17)                        | 24,145.72<br>(13,590.19 to<br>42,503.60)                         | 2,220.16<br>(2,032.56 to<br>2,425.12)                        | 1,742.74<br>(993.06 to<br>3,096.80)                         | 1,017.00<br>(587.72 to<br>1,802.07)                        | 2,195.33<br>(1,238.52 to<br>3,966.25)                        |



|                                                     |                                                               |                                                               |                                                               |                                                               |                                                            |                                                            |                                                            |                                                            |
|-----------------------------------------------------|---------------------------------------------------------------|---------------------------------------------------------------|---------------------------------------------------------------|---------------------------------------------------------------|------------------------------------------------------------|------------------------------------------------------------|------------------------------------------------------------|------------------------------------------------------------|
| Intracerebral hemorrhage                            | 20,789.50<br>(19,127.99 to<br>22,581.68)                      | 14,368.59<br>(8,632.80 to<br>22,673.27)                       | 6,100.10<br>(3,824.41 to<br>9,775.88)                         | 25,585.69<br>(14,240.87 to<br>42,907.77)                      | 1,257.39<br>(1,150.19 to<br>1,364.75)                      | 966.13<br>(611.14 to<br>1,463.48)                          | 462.69<br>(305.42 to<br>697.38)                            | 1,480.95<br>(891.75 to<br>2,327.28)                        |
| Hypertensive heart disease                          | 5,465.18<br>(3,602.27 to<br>7,199.54)                         | 6,449.40<br>(3,494.22 to<br>12,929.14)                        | 4,755.85<br>(2,716.55 to<br>8,743.20)                         | 8,774.67<br>(4,351.91 to<br>18,974.30)                        | 483.49<br>(310.62 to<br>630.87)                            | 618.21<br>(329.21 to<br>1,256.86)                          | 482.08<br>(269.18 to<br>934.13)                            | 793.36<br>(386.53 to<br>1,854.20)                          |
| Cardiomyopathy and myocarditis                      | 5,596.39<br>(4,737.29 to<br>7,501.24)                         | 7,197.61<br>(5,162.29 to<br>10,269.00)                        | 4,809.05<br>(3,538.46 to<br>6,931.53)                         | 7,597.58<br>(5,458.16 to<br>11,005.78)                        | 322.51<br>(273.34 to<br>423.67)                            | 450.89<br>(316.85 to<br>667.59)                            | 309.89<br>(217.05 to<br>453.14)                            | 456.42<br>(318.33 to<br>669.30)                            |
| Myocarditis                                         | 531.35<br>(424.19 to<br>681.85)                               | 482.74<br>(373.28 to<br>622.30)                               | 434.63<br>(335.18 to<br>565.30)                               | 481.43<br>(372.27 to<br>624.06)                               | 21.06<br>(17.07 to<br>29.12)                               | 21.44<br>(16.84 to<br>29.88)                               | 21.25<br>(16.63 to<br>30.42)                               | 20.39<br>(16.11 to<br>28.34)                               |
| <b>Uruguay</b>                                      |                                                               |                                                               |                                                               |                                                               |                                                            |                                                            |                                                            |                                                            |
| Cause                                               | YLLs (actual counts)                                          |                                                               |                                                               |                                                               | Deaths (actual counts)                                     |                                                            |                                                            |                                                            |
|                                                     | 2016                                                          | 2040 Forecast                                                 | 2040 Better Scenario                                          | 2040 Worse Scenario                                           | 2016                                                       | 2040 Forecast                                              | 2040 Better Scenario                                       | 2040 Worse Scenario                                        |
| Alcoholic cardiomyopathy                            | 1,007.41<br>(782.26 to<br>1,539.11)                           | 1,105.76<br>(803.26 to<br>1,682.63)                           | 1,036.72<br>(758.96 to<br>1,537.90)                           | 1,303.63<br>(954.49 to<br>1,987.52)                           | 50.72<br>(38.65 to<br>72.38)                               | 56.43<br>(41.09 to<br>78.70)                               | 54.16<br>(39.53 to<br>74.68)                               | 63.55<br>(46.41 to<br>88.95)                               |
| Other cardiomyopathy                                | 4,057.63<br>(3,401.52 to<br>5,563.08)                         | 5,609.11<br>(3,785.21 to<br>8,521.35)                         | 3,337.69<br>(2,174.88 to<br>5,055.20)                         | 5,812.52<br>(3,833.40 to<br>8,820.41)                         | 250.73<br>(210.58 to<br>340.41)                            | 373.02<br>(244.60 to<br>575.47)                            | 234.48<br>(145.31 to<br>362.65)                            | 372.47<br>(238.04 to<br>571.34)                            |
| Atrial fibrillation and flutter                     | 2,518.86<br>(1,963.02 to<br>3,136.73)                         | 3,188.30<br>(2,348.35 to<br>4,346.11)                         | 2,881.04<br>(2,122.42 to<br>3,956.22)                         | 3,322.96<br>(2,429.39 to<br>4,590.48)                         | 298.25<br>(229.64 to<br>381.89)                            | 375.95<br>(275.22 to<br>515.35)                            | 354.48<br>(259.35 to<br>486.53)                            | 376.24<br>(271.58 to<br>516.00)                            |
| Aortic aneurysm                                     | 4,641.86<br>(4,206.41 to<br>5,078.00)                         | 4,785.14<br>(3,755.38 to<br>6,141.71)                         | 3,900.33<br>(3,128.31 to<br>4,954.94)                         | 5,193.76<br>(3,936.16 to<br>6,746.24)                         | 283.77<br>(257.82 to<br>309.80)                            | 311.73<br>(251.37 to<br>393.19)                            | 273.78<br>(221.56 to<br>341.83)                            | 318.75<br>(251.17 to<br>406.97)                            |
| Peripheral artery disease                           | 73.62<br>(52.56 to<br>110.29)                                 | 138.36<br>(89.75 to<br>211.70)                                | 133.29<br>(85.15 to<br>206.33)                                | 141.38<br>(90.55 to<br>215.65)                                | 7.42<br>(5.06 to<br>11.24)                                 | 14.36<br>(8.64 to<br>22.44)                                | 14.80<br>(8.82 to<br>23.40)                                | 13.87<br>(8.45 to<br>21.72)                                |
| Endocarditis                                        | 2,534.48<br>(1,850.63 to<br>3,286.99)                         | 2,958.25<br>(1,976.32 to<br>4,213.74)                         | 2,713.88<br>(1,838.55 to<br>3,778.88)                         | 3,062.80<br>(1,999.03 to<br>4,381.55)                         | 163.57<br>(118.31 to<br>220.92)                            | 200.64<br>(128.26 to<br>311.42)                            | 192.70<br>(125.21 to<br>295.39)                            | 200.86<br>(125.97 to<br>309.24)                            |
| Other cardiovascular and circulatory diseases       | 9,644.02<br>(8,866.68 to<br>10,564.42)                        | 11,430.32<br>(9,051.75 to<br>14,737.21)                       | 7,154.70<br>(5,698.89 to<br>9,063.03)                         | 12,742.21<br>(9,839.48 to<br>16,346.41)                       | 745.81<br>(682.89 to<br>823.22)                            | 939.77<br>(747.08 to<br>1,196.74)                          | 637.19<br>(503.17 to<br>825.81)                            | 982.81<br>(777.08 to<br>1,250.27)                          |
| <b>Chronic respiratory diseases</b>                 | <b>28,600.92</b><br><b>(26,454.12 to</b><br><b>30,782.29)</b> | <b>26,312.56</b><br><b>(21,023.73 to</b><br><b>33,137.80)</b> | <b>17,029.47</b><br><b>(14,060.48 to</b><br><b>20,403.57)</b> | <b>35,944.00</b><br><b>(27,687.78 to</b><br><b>46,214.31)</b> | <b>2,089.02</b><br><b>(1,945.45 to</b><br><b>2,234.32)</b> | <b>1,982.52</b><br><b>(1,609.73 to</b><br><b>2,456.31)</b> | <b>1,349.63</b><br><b>(1,128.87 to</b><br><b>1,622.99)</b> | <b>2,596.04</b><br><b>(2,042.01 to</b><br><b>3,293.79)</b> |
| Chronic obstructive pulmonary disease               | 23,866.34<br>(22,011.21 to<br>25,732.73)                      | 22,027.01<br>(16,657.34 to<br>28,510.42)                      | 12,571.64<br>(9,727.67 to<br>16,055.20)                       | 31,471.30<br>(23,075.76 to<br>42,065.03)                      | 1,812.69<br>(1,681.78 to<br>1,938.70)                      | 1,711.57<br>(1,333.73 to<br>2,173.90)                      | 1,045.12<br>(828.83 to<br>1,315.89)                        | 2,325.16<br>(1,771.44 to<br>3,025.10)                      |
| Pneumoconiosis                                      | 60.81<br>(53.08 to<br>69.57)                                  | 41.24<br>(34.30 to<br>49.35)                                  | 34.83<br>(28.43 to<br>42.35)                                  | 40.96<br>(33.84 to<br>48.85)                                  | 3.52<br>(3.09 to<br>3.95)                                  | 2.91<br>(2.38 to<br>3.58)                                  | 2.66<br>(2.09 to<br>3.36)                                  | 2.82<br>(2.28 to<br>3.48)                                  |
| Silicosis                                           | 23.27<br>(16.39 to<br>28.43)                                  | 10.19<br>(6.54 to<br>14.13)                                   | 5.13<br>(3.23 to<br>7.51)                                     | 10.30<br>(6.86 to<br>14.22)                                   | 1.14<br>(0.92 to<br>1.41)                                  | 0.62<br>(0.41 to<br>0.87)                                  | 0.36<br>(0.23 to<br>0.54)                                  | 0.61<br>(0.41 to<br>0.85)                                  |
| Asbestosis                                          | 14.95<br>(12.20 to<br>23.26)                                  | 11.85<br>(9.30 to<br>16.32)                                   | 14.40<br>(11.35 to<br>19.36)                                  | 11.47<br>(9.01 to<br>15.80)                                   | 0.65<br>(0.51 to<br>0.95)                                  | 0.61<br>(0.45 to<br>0.90)                                  | 0.78<br>(0.58 to<br>1.09)                                  | 0.57<br>(0.42 to<br>0.84)                                  |
| Coal workers pneumoconiosis                         | 3.45<br>(2.47 to<br>4.60)                                     | 3.03<br>(1.79 to<br>4.85)                                     | 2.74<br>(1.48 to<br>4.63)                                     | 3.16<br>(1.84 to<br>5.12)                                     | 0.29<br>(0.20 to<br>0.40)                                  | 0.29<br>(0.16 to<br>0.50)                                  | 0.29<br>(0.15 to<br>0.53)                                  | 0.29<br>(0.16 to<br>0.50)                                  |
| Other pneumoconiosis                                | 19.15<br>(15.64 to<br>22.63)                                  | 16.16<br>(12.21 to<br>20.83)                                  | 12.56<br>(9.11 to<br>16.74)                                   | 16.03<br>(12.23 to<br>20.49)                                  | 1.43<br>(1.17 to<br>1.69)                                  | 1.40<br>(1.04 to<br>1.82)                                  | 1.22<br>(0.86 to<br>1.67)                                  | 1.35<br>(1.00 to<br>1.76)                                  |
| Asthma                                              | 1,952.58<br>(1,724.06 to<br>2,261.76)                         | 1,308.61<br>(757.15 to<br>2,174.66)                           | 605.45<br>(359.37 to<br>1,015.78)                             | 1,586.36<br>(927.97 to<br>2,671.02)                           | 107.17<br>(93.45 to<br>125.71)                             | 80.42<br>(45.60 to<br>135.08)                              | 40.81<br>(23.82 to<br>68.73)                               | 92.46<br>(53.12 to<br>154.85)                              |
| Interstitial lung disease and pulmonary sarcoidosis | 1,786.11<br>(1,268.04 to<br>2,153.60)                         | 1,909.71<br>(1,384.11 to<br>2,369.84)                         | 2,850.89<br>(2,118.11 to<br>3,453.84)                         | 1,760.44<br>(1,273.50 to<br>2,150.93)                         | 119.49<br>(86.03 to<br>146.24)                             | 130.15<br>(94.16 to<br>164.65)                             | 202.45<br>(152.74 to<br>247.30)                            | 117.22<br>(85.38 to<br>147.13)                             |

|                                                                |                                                               |                                                               |                                                               |                                                               |                                                            |                                                            |                                                            |                                                            |
|----------------------------------------------------------------|---------------------------------------------------------------|---------------------------------------------------------------|---------------------------------------------------------------|---------------------------------------------------------------|------------------------------------------------------------|------------------------------------------------------------|------------------------------------------------------------|------------------------------------------------------------|
| Other chronic respiratory diseases                             | 935.08<br>(714.16 to<br>1,460.25)                             | 1,025.99<br>(709.40 to<br>1,693.13)                           | 966.66<br>(676.03 to<br>1,567.96)                             | 1,084.95<br>(733.58 to<br>1,817.60)                           | 46.15<br>(34.28 to<br>78.41)                               | 57.46<br>(36.42 to<br>103.43)                              | 58.59<br>(37.91 to<br>103.08)                              | 58.38<br>(36.35 to<br>106.12)                              |
| <b>Cirrhosis and other chronic liver diseases</b>              | <b>11,237.40</b><br><b>(10,082.43 to</b><br><b>12,383.61)</b> | <b>12,560.83</b><br><b>(11,067.24 to</b><br><b>14,172.69)</b> | <b>9,573.88</b><br><b>(8,313.61 to</b><br><b>10,984.38)</b>   | <b>13,551.00</b><br><b>(12,043.63 to</b><br><b>15,262.49)</b> | <b>558.57</b><br><b>(510.38 to</b><br><b>607.75)</b>       | <b>658.93</b><br><b>(593.67 to</b><br><b>728.09)</b>       | <b>521.98</b><br><b>(462.13 to</b><br><b>583.77)</b>       | <b>686.91</b><br><b>(623.17 to</b><br><b>754.74)</b>       |
| Cirrhosis and other chronic liver diseases due to hepatitis B  | 1,931.13<br>(1,621.31 to<br>2,293.17)                         | 2,296.82<br>(1,891.27 to<br>2,776.62)                         | 1,815.58<br>(1,492.87 to<br>2,193.97)                         | 2,268.12<br>(1,884.58 to<br>2,746.10)                         | 97.39<br>(82.66 to<br>114.25)                              | 120.05<br>(100.90 to<br>143.15)                            | 98.51<br>(82.41 to<br>117.15)                              | 115.74<br>(97.52 to<br>137.38)                             |
| Cirrhosis and other chronic liver diseases due to hepatitis C  | 3,744.66<br>(3,250.17 to<br>4,271.95)                         | 4,444.70<br>(3,761.28 to<br>5,221.63)                         | 3,445.42<br>(2,867.18 to<br>4,084.31)                         | 4,413.97<br>(3,754.19 to<br>5,165.99)                         | 174.30<br>(153.53 to<br>195.93)                            | 215.26<br>(185.21 to<br>246.68)                            | 172.67<br>(148.62 to<br>200.79)                            | 208.97<br>(181.57 to<br>238.89)                            |
| Cirrhosis and other chronic liver diseases due to alcohol use  | 4,001.64<br>(3,444.87 to<br>4,558.66)                         | 4,150.34<br>(3,516.81 to<br>4,815.85)                         | 3,004.33<br>(2,532.63 to<br>3,532.69)                         | 5,201.18<br>(4,425.95 to<br>6,029.89)                         | 204.79<br>(179.46 to<br>230.92)                            | 226.60<br>(195.52 to<br>258.21)                            | 170.58<br>(145.85 to<br>196.63)                            | 268.15<br>(232.11 to<br>304.58)                            |
| Cirrhosis and other chronic liver diseases due to other causes | 1,559.97<br>(1,352.85 to<br>1,770.67)                         | 1,668.97<br>(1,412.33 to<br>1,974.97)                         | 1,308.55<br>(1,094.32 to<br>1,555.20)                         | 1,667.73<br>(1,399.38 to<br>1,959.33)                         | 82.09<br>(70.98 to<br>94.63)                               | 97.02<br>(81.35 to<br>113.25)                              | 80.20<br>(67.08 to<br>95.03)                               | 94.05<br>(79.40 to<br>110.18)                              |
| <b>Digestive diseases</b>                                      | <b>14,434.94</b><br><b>(12,908.74 to</b><br><b>16,321.86)</b> | <b>15,430.29</b><br><b>(12,936.12 to</b><br><b>18,603.87)</b> | <b>12,594.69</b><br><b>(10,637.83 to</b><br><b>15,027.48)</b> | <b>15,814.81</b><br><b>(13,218.71 to</b><br><b>19,384.05)</b> | <b>995.47</b><br><b>(882.22 to</b><br><b>1,105.84)</b>     | <b>1,159.10</b><br><b>(964.65 to</b><br><b>1,393.35)</b>   | <b>1,010.93</b><br><b>(839.99 to</b><br><b>1,203.77)</b>   | <b>1,140.83</b><br><b>(945.12 to</b><br><b>1,395.36)</b>   |
| Peptic ulcer disease                                           | 1,293.51<br>(1,102.44 to<br>1,535.72)                         | 903.67<br>(701.43 to<br>1,144.89)                             | 538.22<br>(418.15 to<br>691.86)                               | 979.86<br>(770.32 to<br>1,248.00)                             | 86.90<br>(74.38 to<br>100.55)                              | 68.09<br>(53.46 to<br>84.91)                               | 42.72<br>(33.11 to<br>53.93)                               | 70.45<br>(56.17 to<br>87.84)                               |
| <b>Uruguay</b>                                                 |                                                               |                                                               |                                                               |                                                               |                                                            |                                                            |                                                            |                                                            |
| Cause                                                          | YLLs (actual counts)                                          |                                                               |                                                               |                                                               | Deaths (actual counts)                                     |                                                            |                                                            |                                                            |
|                                                                | 2016                                                          | 2040 Forecast                                                 | 2040 Better Scenario                                          | 2040 Worse Scenario                                           | 2016                                                       | 2040 Forecast                                              | 2040 Better Scenario                                       | 2040 Worse Scenario                                        |
| Gastritis and duodenitis                                       | 111.30<br>(88.79 to<br>195.75)                                | 185.83<br>(141.59 to<br>332.66)                               | 136.60<br>(101.26 to<br>248.19)                               | 183.36<br>(140.76 to<br>325.52)                               | 8.02<br>(6.26 to<br>13.87)                                 | 14.27<br>(10.59 to<br>25.40)                               | 11.18<br>(8.06 to<br>20.12)                                | 13.61<br>(10.02 to<br>24.38)                               |
| Appendicitis                                                   | 457.82<br>(365.72 to<br>575.29)                               | 388.50<br>(296.06 to<br>484.19)                               | 239.60<br>(182.80 to<br>307.48)                               | 398.58<br>(312.11 to<br>505.05)                               | 20.81<br>(16.05 to<br>25.01)                               | 20.29<br>(15.20 to<br>25.04)                               | 13.14<br>(9.85 to<br>16.82)                                | 30.22<br>(15.36 to<br>25.00)                               |
| Paralytic ileus and intestinal obstruction                     | 3,426.40<br>(2,782.04 to<br>4,128.18)                         | 3,562.09<br>(2,860.37 to<br>4,324.17)                         | 3,589.79<br>(2,907.26 to<br>4,326.78)                         | 3,422.78<br>(2,749.77 to<br>4,228.31)                         | 250.85<br>(204.99 to<br>303.28)                            | 288.99<br>(233.79 to<br>351.03)                            | 307.14<br>(250.57 to<br>367.67)                            | 269.09<br>(216.03 to<br>329.71)                            |
| Inguinal, femoral, and abdominal hernia                        | 529.51<br>(385.73 to<br>684.80)                               | 384.62<br>(279.87 to<br>500.55)                               | 306.68<br>(222.76 to<br>401.02)                               | 376.92<br>(275.38 to<br>483.09)                               | 37.97<br>(27.45 to<br>49.34)                               | 29.62<br>(21.23 to<br>38.19)                               | 25.20<br>(17.78 to<br>32.74)                               | 28.09<br>(20.02 to<br>36.09)                               |
| Inflammatory bowel disease                                     | 444.87<br>(327.70 to<br>520.75)                               | 435.95<br>(307.44 to<br>529.37)                               | 419.97<br>(295.53 to<br>511.96)                               | 422.56<br>(298.99 to<br>509.22)                               | 22.77<br>(16.23 to<br>26.79)                               | 24.57<br>(16.84 to<br>29.85)                               | 24.76<br>(16.81 to<br>30.36)                               | 23.17<br>(15.90 to<br>28.08)                               |
| Vascular intestinal disorders                                  | 3,334.70<br>(2,647.66 to<br>3,877.54)                         | 4,057.87<br>(3,123.67 to<br>4,822.45)                         | 3,604.99<br>(2,762.63 to<br>4,318.30)                         | 3,910.52<br>(3,006.64 to<br>4,639.14)                         | 267.93<br>(204.21 to<br>313.45)                            | 340.23<br>(252.20 to<br>408.16)                            | 318.05<br>(226.97 to<br>383.55)                            | 320.03<br>(234.87 to<br>384.06)                            |
| Gallbladder and biliary diseases                               | 1,886.80<br>(1,623.91 to<br>2,172.39)                         | 2,321.05<br>(1,323.93 to<br>4,016.35)                         | 1,357.72<br>(784.88 to<br>2,378.43)                           | 2,606.20<br>(1,463.61 to<br>4,446.97)                         | 142.52<br>(121.12 to<br>164.49)                            | 187.75<br>(105.88 to<br>321.96)                            | 117.80<br>(67.50 to<br>203.71)                             | 203.13<br>(112.78 to<br>347.27)                            |
| Pancreatitis                                                   | 1,596.08<br>(1,357.85 to<br>1,926.77)                         | 1,797.99<br>(1,142.30 to<br>3,042.41)                         | 1,186.93<br>(779.81 to<br>1,953.69)                           | 2,133.69<br>(1,292.35 to<br>3,875.99)                         | 69.24<br>(58.33 to<br>84.02)                               | 84.94<br>(55.84 to<br>140.08)                              | 58.16<br>(39.24 to<br>90.06)                               | 96.58<br>(59.31 to<br>165.52)                              |
| Other digestive diseases                                       | 1,353.95<br>(1,105.77 to<br>1,657.54)                         | 1,392.72<br>(1,114.54 to<br>1,744.18)                         | 1,214.18<br>(959.60 to<br>1,514.40)                           | 1,380.34<br>(1,110.83 to<br>1,753.48)                         | 88.47<br>(71.72 to<br>104.13)                              | 100.34<br>(79.53 to<br>121.29)                             | 92.79<br>(72.85 to<br>113.59)                              | 96.45<br>(77.41 to<br>118.11)                              |
| <b>Neurological disorders</b>                                  | <b>23,255.91</b><br><b>(20,292.96 to</b><br><b>26,542.11)</b> | <b>30,332.66</b><br><b>(23,863.07 to</b><br><b>39,734.61)</b> | <b>30,041.21</b><br><b>(23,995.34 to</b><br><b>38,553.19)</b> | <b>30,037.32</b><br><b>(23,123.40 to</b><br><b>40,116.13)</b> | <b>2,372.21</b><br><b>(2,015.06 to</b><br><b>2,757.34)</b> | <b>3,118.75</b><br><b>(2,327.81 to</b><br><b>4,266.29)</b> | <b>3,225.86</b><br><b>(2,464.19 to</b><br><b>4,265.93)</b> | <b>3,004.95</b><br><b>(2,206.13 to</b><br><b>4,191.31)</b> |
| Alzheimer's disease and other dementias                        | 15,262.86<br>(12,542.04 to<br>18,520.24)                      | 20,206.50<br>(14,106.22 to<br>29,211.92)                      | 19,564.15<br>(13,995.50 to<br>27,374.02)                      | 20,153.52<br>(13,888.71 to<br>30,125.73)                      | 1,911.10<br>(1,569.16 to<br>2,289.17)                      | 2,479.98<br>(1,717.22 to<br>3,596.72)                      | 2,511.03<br>(1,795.83 to<br>3,526.91)                      | 2,414.30<br>(1,639.37 to<br>3,600.69)                      |
| Parkinson's disease                                            | 3,044.24<br>(2,306.24 to<br>3,984.60)                         | 4,395.36<br>(3,276.01 to<br>5,645.47)                         | 5,068.15<br>(3,842.43 to<br>6,516.48)                         | 3,955.94<br>(2,945.63 to<br>5,178.55)                         | 287.06<br>(215.56 to<br>375.33)                            | 407.70<br>(305.53 to<br>530.45)                            | 485.02<br>(365.87 to<br>630.33)                            | 360.80<br>(266.36 to<br>473.46)                            |

|                              |                                                            |                                                            |                                                            |                                                            |                                                      |                                                      |                                                      |                                                      |
|------------------------------|------------------------------------------------------------|------------------------------------------------------------|------------------------------------------------------------|------------------------------------------------------------|------------------------------------------------------|------------------------------------------------------|------------------------------------------------------|------------------------------------------------------|
| Epilepsy                     | 1,782.35<br>(1,612.08 to<br>1,975.12)                      | 1,626.41<br>(1,157.79 to<br>2,316.40)                      | 1,294.44<br>(929.92 to<br>1,834.77)                        | 1,937.89<br>(1,315.23 to<br>2,812.30)                      | 51.62<br>(47.15 to<br>56.37)                         | 55.28<br>(39.87 to<br>76.59)                         | 46.85<br>(34.21 to<br>63.90)                         | 63.23<br>(43.63 to<br>88.93)                         |
| Multiple sclerosis           | 500.67<br>(380.60 to<br>577.80)                            | 528.43<br>(394.76 to<br>651.76)                            | 536.88<br>(401.58 to<br>657.52)                            | 538.18<br>(395.66 to<br>670.16)                            | 16.74<br>(13.09 to<br>19.14)                         | 18.77<br>(14.57 to<br>22.47)                         | 19.45<br>(15.19 to<br>23.27)                         | 18.83<br>(14.17 to<br>22.98)                         |
| Motor neuron disease         | 1,051.78<br>(938.82 to<br>1,158.62)                        | 1,553.41<br>(1,358.79 to<br>1,744.75)                      | 1,535.06<br>(1,343.66 to<br>1,730.23)                      | 1,488.76<br>(1,307.19 to<br>1,673.61)                      | 46.55<br>(41.56 to<br>51.14)                         | 72.11<br>(63.38 to<br>80.99)                         | 72.68<br>(63.56 to<br>81.98)                         | 68.18<br>(60.00 to<br>76.73)                         |
| Other neurological disorders | 1,614.02<br>(1,450.65 to<br>1,790.37)                      | 2,022.54<br>(1,776.34 to<br>2,306.19)                      | 2,042.52<br>(1,791.72 to<br>2,324.06)                      | 1,963.03<br>(1,727.26 to<br>2,238.53)                      | 59.14<br>(54.24 to<br>64.42)                         | 84.92<br>(75.91 to<br>94.43)                         | 90.83<br>(80.88 to<br>102.13)                        | 79.61<br>(70.95 to<br>88.42)                         |
| <b>Mental disorders</b>      | <b>3,282.57</b><br><b>(2,935.07 to</b><br><b>3,653.84)</b> | <b>3,253.37</b><br><b>(2,800.08 to</b><br><b>3,729.73)</b> | <b>3,933.48</b><br><b>(3,396.41 to</b><br><b>4,497.83)</b> | <b>3,297.28</b><br><b>(2,863.88 to</b><br><b>3,757.38)</b> | <b>126.99</b><br><b>(114.71 to</b><br><b>140.48)</b> | <b>133.53</b><br><b>(118.20 to</b><br><b>148.91)</b> | <b>169.75</b><br><b>(149.47 to</b><br><b>191.44)</b> | <b>131.54</b><br><b>(116.96 to</b><br><b>146.51)</b> |
| Alcohol use disorders        | 2,266.02<br>(1,979.26 to<br>2,577.72)                      | 1,783.12<br>(1,475.60 to<br>2,099.42)                      | 1,980.37<br>(1,626.51 to<br>2,351.68)                      | 1,874.42<br>(1,559.50 to<br>2,207.14)                      | 89.94<br>(79.50 to<br>101.63)                        | 75.96<br>(64.28 to<br>88.14)                         | 86.93<br>(73.09 to<br>101.68)                        | 77.69<br>(66.26 to<br>90.22)                         |
| Drug use disorders           | 1,005.37<br>(875.91 to<br>1,123.51)                        | 1,457.49<br>(1,205.55 to<br>1,733.69)                      | 1,939.91<br>(1,617.63 to<br>2,293.68)                      | 1,410.12<br>(1,170.28 to<br>1,658.71)                      | 36.84<br>(32.46 to<br>40.57)                         | 57.32<br>(49.29 to<br>65.20)                         | 82.57<br>(70.28 to<br>94.35)                         | 53.60<br>(46.63 to<br>60.10)                         |
| Opioid use disorders         | 554.65<br>(464.24 to<br>674.06)                            | 654.56<br>(516.80 to<br>837.07)                            | 717.09<br>(563.97 to<br>933.43)                            | 642.51<br>(510.01 to<br>817.40)                            | 16.66<br>(14.22 to<br>20.98)                         | 20.92<br>(17.33 to<br>27.10)                         | 23.95<br>(19.66 to<br>32.23)                         | 20.06<br>(16.71 to<br>25.83)                         |
| Cocaine use disorders        | 77.74<br>(51.57 to<br>100.99)                              | 146.68<br>(94.87 to<br>196.69)                             | 198.82<br>(129.87 to<br>263.80)                            | 143.96<br>(92.88 to<br>193.87)                             | 2.01<br>(1.35 to<br>2.53)                            | 4.03<br>(2.77 to<br>5.22)                            | 5.59<br>(3.94 to<br>7.18)                            | 3.89<br>(2.63 to<br>5.05)                            |
| Amphetamine use disorders    | 37.83<br>(26.71 to<br>52.12)                               | 91.60<br>(63.32 to<br>128.33)                              | 151.12<br>(106.03 to<br>208.07)                            | 88.74<br>(61.80 to<br>123.28)                              | 1.06<br>(0.75 to<br>1.44)                            | 2.65<br>(1.89 to<br>3.65)                            | 4.48<br>(3.22 to<br>6.02)                            | 2.53<br>(1.80 to<br>3.35)                            |
| Other drug use disorders     | 335.14<br>(263.51 to<br>397.62)                            | 564.64<br>(428.84 to<br>722.35)                            | 872.88<br>(664.88 to<br>1,078.68)                          | 534.90<br>(411.77 to<br>664.29)                            | 17.11<br>(13.62 to<br>19.55)                         | 29.73<br>(23.27 to<br>35.30)                         | 48.54<br>(38.02 to<br>57.65)                         | 27.12<br>(21.59 to<br>31.91)                         |
| Eating disorders             | 11.19<br>(9.09 to<br>13.78)                                | 12.76<br>(8.88 to<br>18.34)                                | 13.20<br>(9.13 to<br>19.04)                                | 12.73<br>(8.84 to<br>18.19)                                | 0.22<br>(0.17 to<br>0.27)                            | 0.25<br>(0.18 to<br>0.35)                            | 0.26<br>(0.18 to<br>0.38)                            | 0.25<br>(0.18 to<br>0.35)                            |

**Uruguay**

| Cause                                                      | YLLs (actual counts)                                          |                                                               |                                                               |                                                               | Deaths (actual counts)                                     |                                                            |                                                            |                                                            |
|------------------------------------------------------------|---------------------------------------------------------------|---------------------------------------------------------------|---------------------------------------------------------------|---------------------------------------------------------------|------------------------------------------------------------|------------------------------------------------------------|------------------------------------------------------------|------------------------------------------------------------|
|                                                            | 2016                                                          | 2040 Forecast                                                 | 2040 Better Scenario                                          | 2040 Worse Scenario                                           | 2016                                                       | 2040 Forecast                                              | 2040 Better Scenario                                       | 2040 Worse Scenario                                        |
| <b>Diabetes, urogenital, blood, and endocrine diseases</b> | <b>32,463.28</b><br><b>(30,367.49 to</b><br><b>34,646.26)</b> | <b>41,066.06</b><br><b>(32,650.39 to</b><br><b>53,535.16)</b> | <b>29,332.63</b><br><b>(23,515.77 to</b><br><b>38,312.18)</b> | <b>45,257.77</b><br><b>(35,617.60 to</b><br><b>61,824.26)</b> | <b>2,270.12</b><br><b>(2,127.85 to</b><br><b>2,416.33)</b> | <b>3,187.53</b><br><b>(2,556.12 to</b><br><b>4,056.76)</b> | <b>2,393.18</b><br><b>(1,929.89 to</b><br><b>3,069.11)</b> | <b>3,387.30</b><br><b>(2,708.97 to</b><br><b>4,409.15)</b> |
| Diabetes mellitus                                          | 12,298.03<br>(11,325.60 to<br>13,439.04)                      | 14,558.07<br>(9,398.27 to<br>21,353.22)                       | 9,215.03<br>(6,036.28 to<br>13,689.75)                        | 16,906.62<br>(10,700.13 to<br>25,109.28)                      | 818.44<br>(752.41 to<br>891.82)                            | 1,059.34<br>(713.11 to<br>1,503.33)                        | 707.41<br>(487.19 to<br>1,005.66)                          | 1,174.77<br>(774.33 to<br>1,702.78)                        |
| Acute glomerulonephritis                                   | 19.65<br>(17.84 to<br>21.72)                                  | 17.22<br>(14.30 to<br>21.03)                                  | 12.60<br>(10.43 to<br>15.65)                                  | 18.00<br>(14.92 to<br>21.89)                                  | 0.68<br>(0.57 to<br>0.83)                                  | 0.43<br>(0.35 to<br>0.55)                                  | 0.33<br>(0.27 to<br>0.44)                                  | 0.44<br>(0.36 to<br>0.55)                                  |
| Chronic kidney disease                                     | 10,699.04<br>(9,864.70 to<br>11,522.83)                       | 15,310.57<br>(9,301.49 to<br>27,736.03)                       | 10,435.23<br>(6,714.85 to<br>18,431.53)                       | 17,456.35<br>(10,167.08 to<br>31,950.25)                      | 793.67<br>(730.37 to<br>854.22)                            | 1,236.23<br>(747.19 to<br>2,075.08)                        | 888.84<br>(565.00 to<br>1,450.01)                          | 1,374.70<br>(804.95 to<br>2,144.53)                        |
| Chronic kidney disease due to diabetes mellitus            | 3,985.43<br>(3,652.21 to<br>4,316.56)                         | 6,007.09<br>(3,685.64 to<br>11,148.69)                        | 4,035.34<br>(2,620.19 to<br>7,261.62)                         | 6,907.25<br>(4,073.86 to<br>13,583.06)                        | 249.17<br>(227.42 to<br>270.56)                            | 408.74<br>(251.63 to<br>764.97)                            | 286.13<br>(182.55 to<br>499.64)                            | 459.30<br>(269.82 to<br>881.50)                            |
| Chronic kidney disease due to hypertension                 | 2,634.19<br>(2,400.44 to<br>2,869.86)                         | 3,846.77<br>(2,241.82 to<br>6,652.89)                         | 2,842.22<br>(1,731.61 to<br>4,798.92)                         | 4,294.77<br>(2,380.15 to<br>7,695.25)                         | 274.51<br>(248.11 to<br>300.12)                            | 417.81<br>(248.50 to<br>693.58)                            | 323.79<br>(200.44 to<br>509.83)                            | 455.71<br>(261.00 to<br>772.55)                            |
| Chronic kidney disease due to glomerulonephritis           | 987.44<br>(886.73 to<br>1,087.95)                             | 1,267.49<br>(777.10 to<br>2,212.32)                           | 795.12<br>(511.03 to<br>1,400.92)                             | 1,456.55<br>(868.37 to<br>2,581.88)                           | 58.93<br>(52.06 to<br>66.02)                               | 88.20<br>(51.73 to<br>161.48)                              | 57.41<br>(35.18 to<br>99.19)                               | 99.62<br>(56.39 to<br>185.54)                              |
| Chronic kidney disease due to other and unspecified causes | 3,091.98<br>(2,837.56 to<br>3,366.02)                         | 4,189.23<br>(2,599.63 to<br>7,562.57)                         | 2,762.54<br>(1,774.81 to<br>4,788.76)                         | 4,797.79<br>(2,850.43 to<br>8,786.24)                         | 211.06<br>(190.85 to<br>232.52)                            | 321.47<br>(195.72 to<br>535.45)                            | 221.50<br>(139.21 to<br>371.11)                            | 360.07<br>(210.39 to<br>637.03)                            |

|                                                   |                                       |                                       |                                       |                                       |                                 |                                 |                                 |                                 |
|---------------------------------------------------|---------------------------------------|---------------------------------------|---------------------------------------|---------------------------------------|---------------------------------|---------------------------------|---------------------------------|---------------------------------|
| Urinary diseases and male infertility             | 5,152.82<br>(4,738.55 to<br>5,589.47) | 6,595.17<br>(5,697.75 to<br>7,499.13) | 5,237.88<br>(4,492.62 to<br>6,093.42) | 6,321.81<br>(5,524.18 to<br>7,143.61) | 442.72<br>(403.15 to<br>486.17) | 622.37<br>(528.78 to<br>723.26) | 522.56<br>(434.77 to<br>614.26) | 579.57<br>(490.79 to<br>671.61) |
| Urinary tract infections                          | 4,905.24<br>(4,492.14 to<br>5,329.29) | 6,365.77<br>(5,483.37 to<br>7,249.83) | 5,085.63<br>(4,351.67 to<br>5,922.09) | 6,094.12<br>(5,299.34 to<br>6,916.89) | 427.96<br>(388.11 to<br>471.50) | 607.02<br>(512.66 to<br>709.03) | 511.72<br>(426.27 to<br>603.18) | 564.91<br>(476.77 to<br>656.38) |
| Urolithiasis                                      | 66.91<br>(49.23 to<br>109.14)         | 72.52<br>(49.61 to<br>120.11)         | 48.16<br>(33.05 to<br>81.55)          | 71.32<br>(50.07 to<br>118.81)         | 3.99<br>(2.84 to<br>6.83)       | 4.61<br>(3.07 to<br>8.21)       | 3.25<br>(2.15 to<br>5.85)       | 4.38<br>(2.97 to<br>7.81)       |
| Other urinary diseases                            | 180.67<br>(123.06 to<br>328.77)       | 156.89<br>(99.83 to<br>300.19)        | 104.08<br>(64.16 to<br>205.97)        | 156.37<br>(98.17 to<br>296.97)        | 10.78<br>(6.96 to<br>20.64)     | 10.74<br>(6.34 to<br>21.68)     | 7.60<br>(4.46 to<br>16.11)      | 10.28<br>(6.11 to<br>20.83)     |
| Gynecological diseases                            | 29.37<br>(23.07 to<br>48.80)          | 31.51<br>(21.61 to<br>54.42)          | 15.68<br>(10.76 to<br>26.59)          | 33.65<br>(23.70 to<br>57.50)          | 1.01<br>(0.81 to<br>1.59)       | 1.25<br>(0.90 to<br>1.96)       | 0.65<br>(0.46 to<br>1.01)       | 1.29<br>(0.96 to<br>2.03)       |
| Uterine fibroids                                  | 9.89<br>(7.54 to<br>18.64)            | 7.06<br>(4.60 to<br>13.28)            | 4.12<br>(2.69 to<br>7.59)             | 7.58<br>(4.89 to<br>13.85)            | 0.28<br>(0.22 to<br>0.47)       | 0.20<br>(0.13 to<br>0.34)       | 0.12<br>(0.08 to<br>0.22)       | 0.21<br>(0.14 to<br>0.36)       |
| Polycystic ovarian syndrome                       | 2.04<br>(1.20 to<br>3.99)             | 1.44<br>(0.71 to<br>2.91)             | 0.45<br>(0.21 to<br>0.95)             | 1.64<br>(0.81 to<br>3.23)             | 0.05<br>(0.03 to<br>0.09)       | 0.03<br>(0.02 to<br>0.06)       | 0.01<br>(0.00 to<br>0.02)       | 0.04<br>(0.02 to<br>0.07)       |
| Endometriosis                                     | 0.20<br>(0.10 to<br>0.44)             | 0.33<br>(0.13 to<br>0.83)             | 0.17<br>(0.06 to<br>0.43)             | 0.36<br>(0.14 to<br>0.89)             | 0.00<br>(0.00 to<br>0.01)       | 0.01<br>(0.00 to<br>0.02)       | 0.00<br>(0.00 to<br>0.01)       | 0.01<br>(0.00 to<br>0.02)       |
| Genital prolapse                                  | 0.30<br>(0.21 to<br>0.68)             | 0.29<br>(0.17 to<br>0.69)             | 0.15<br>(0.08 to<br>0.36)             | 0.32<br>(0.19 to<br>0.73)             | 0.01<br>(0.01 to<br>0.04)       | 0.01<br>(0.01 to<br>0.04)       | 0.01<br>(0.00 to<br>0.03)       | 0.02<br>(0.01 to<br>0.05)       |
| Other gynecological diseases                      | 16.94<br>(13.01 to<br>27.18)          | 22.38<br>(14.39 to<br>35.72)          | 10.80<br>(6.69 to<br>18.28)           | 23.76<br>(15.01 to<br>38.79)          | 0.66<br>(0.52 to<br>1.02)       | 0.99<br>(0.69 to<br>1.52)       | 0.50<br>(0.35 to<br>0.79)       | 1.02<br>(0.73 to<br>1.56)       |
| Hemoglobinopathies and hemolytic anemias          | 1,060.02<br>(910.96 to<br>1,398.61)   | 944.03<br>(777.65 to<br>1,241.32)     | 657.45<br>(536.53 to<br>862.37)       | 955.29<br>(797.78 to<br>1,264.73)     | 64.34<br>(54.19 to<br>88.21)    | 67.98<br>(55.08 to<br>91.89)    | 50.86<br>(40.65 to<br>68.60)    | 66.58<br>(54.34 to<br>90.15)    |
| Thalassemias                                      | 77.73<br>(59.40 to<br>101.55)         | 33.30<br>(22.58 to<br>47.95)          | 29.74<br>(20.26 to<br>43.02)          | 33.55<br>(22.75 to<br>48.16)          | 1.03<br>(0.79 to<br>1.33)       | 0.45<br>(0.31 to<br>0.66)       | 0.41<br>(0.28 to<br>0.58)       | 0.46<br>(0.31 to<br>0.65)       |
| Sickle cell disorders                             | 93.03<br>(78.73 to<br>113.60)         | 93.37<br>(71.01 to<br>124.24)         | 57.94<br>(43.83 to<br>78.00)          | 96.86<br>(75.06 to<br>128.34)         | 1.92<br>(1.62 to<br>2.35)       | 2.41<br>(1.90 to<br>3.13)       | 1.53<br>(1.19 to<br>2.02)       | 2.48<br>(1.97 to<br>3.26)       |
| G6PD deficiency                                   | 160.81<br>(135.23 to<br>202.31)       | 194.53<br>(156.10 to<br>250.86)       | 118.48<br>(92.13 to<br>155.60)        | 203.80<br>(163.96 to<br>262.11)       | 4.40<br>(3.69 to<br>5.59)       | 6.82<br>(5.49 to<br>8.72)       | 4.28<br>(3.33 to<br>5.74)       | 7.02<br>(5.70 to<br>8.99)       |
| Other hemoglobinopathies and hemolytic anemias    | 728.46<br>(612.57 to<br>1,000.56)     | 622.83<br>(504.59 to<br>858.14)       | 451.28<br>(362.95 to<br>610.06)       | 621.08<br>(507.29 to<br>865.17)       | 57.00<br>(47.82 to<br>78.93)    | 58.28<br>(47.01 to<br>79.83)    | 44.65<br>(35.06 to<br>60.80)    | 56.63<br>(45.49 to<br>78.31)    |
| Endocrine, metabolic, blood, and immune disorders | 3,204.36<br>(2,755.04 to<br>3,918.53) | 3,609.48<br>(3,015.76 to<br>4,367.67) | 3,758.77<br>(3,126.75 to<br>4,558.31) | 3,566.03<br>(2,957.27 to<br>4,332.88) | 149.26<br>(127.09 to<br>184.79) | 199.95<br>(167.20 to<br>252.89) | 222.54<br>(184.23 to<br>284.52) | 189.95<br>(160.16 to<br>238.47) |

**Uruguay**

| Cause                                  | YLLs (actual counts)                                    |                                                         |                                                       |                                                         | Deaths (actual counts)                         |                                                |                                                |                                                |
|----------------------------------------|---------------------------------------------------------|---------------------------------------------------------|-------------------------------------------------------|---------------------------------------------------------|------------------------------------------------|------------------------------------------------|------------------------------------------------|------------------------------------------------|
|                                        | 2016                                                    | 2040 Forecast                                           | 2040 Better Scenario                                  | 2040 Worse Scenario                                     | 2016                                           | 2040 Forecast                                  | 2040 Better Scenario                           | 2040 Worse Scenario                            |
| <b>Musculoskeletal disorders</b>       | <b>1,610.57</b><br>(1,092.53 to<br><b>1,802.50</b> )    | <b>1,941.19</b><br>(1,263.89 to<br><b>2,276.20</b> )    | <b>1,544.94</b><br>(1,022.22 to<br><b>1,826.97</b> )  | <b>1,930.92</b><br>(1,248.06 to<br><b>2,251.50</b> )    | <b>68.39</b><br>(46.14 to<br><b>76.96</b> )    | <b>93.45</b><br>(60.83 to<br><b>110.67</b> )   | <b>74.88</b><br>(50.48 to<br><b>88.84</b> )    | <b>91.31</b><br>(58.81 to<br><b>107.44</b> )   |
| Rheumatoid arthritis                   | 582.90<br>(382.37 to<br>783.44)                         | 554.38<br>(369.95 to<br>792.83)                         | 310.67<br>(196.75 to<br>471.37)                       | 582.83<br>(369.61 to<br>833.51)                         | 31.64<br>(20.18 to<br>40.63)                   | 33.90<br>(22.44 to<br>47.96)                   | 19.68<br>(12.68 to<br>29.25)                   | 34.80<br>(22.40 to<br>48.73)                   |
| Other musculoskeletal disorders        | 1,027.67<br>(681.39 to<br>1,175.13)                     | 1,386.82<br>(879.37 to<br>1,647.96)                     | 1,234.26<br>(822.43 to<br>1,463.27)                   | 1,348.09<br>(852.55 to<br>1,600.41)                     | 36.75<br>(23.79 to<br>42.67)                   | 59.55<br>(37.53 to<br>71.37)                   | 55.21<br>(36.38 to<br>65.61)                   | 56.50<br>(34.60 to<br>67.22)                   |
| <b>Other non-communicable diseases</b> | <b>16,836.39</b><br>(12,736.59 to<br><b>23,020.14</b> ) | <b>14,864.23</b><br>(11,335.62 to<br><b>20,050.59</b> ) | <b>9,883.46</b><br>(7,626.98 to<br><b>13,336.39</b> ) | <b>15,594.87</b><br>(11,812.71 to<br><b>20,927.03</b> ) | <b>419.30</b><br>(309.92 to<br><b>588.39</b> ) | <b>618.94</b><br>(419.31 to<br><b>922.31</b> ) | <b>490.30</b><br>(317.74 to<br><b>737.60</b> ) | <b>598.99</b><br>(408.89 to<br><b>895.98</b> ) |

|                                               |                                                 |                                                 |                                                 |                                                  |                                              |                                              |                                              |                                              |
|-----------------------------------------------|-------------------------------------------------|-------------------------------------------------|-------------------------------------------------|--------------------------------------------------|----------------------------------------------|----------------------------------------------|----------------------------------------------|----------------------------------------------|
| Congenital birth defects                      | 13,189.81<br>(9,334.04 to<br>18,789.69)         | 8,516.77<br>(5,730.64 to<br>12,329.46)          | 4,732.39<br>(3,240.08 to<br>6,740.65)           | 9,432.81<br>(6,373.13 to<br>13,948.06)           | 171.55<br>(125.21 to<br>235.73)              | 123.88<br>(86.79 to<br>167.06)               | 74.28<br>(52.95 to<br>98.14)                 | 135.34<br>(96.97 to<br>186.74)               |
| Neural tube defects                           | 283.83<br>(175.90 to<br>444.54)                 | 108.53<br>(62.42 to<br>183.47)                  | 49.00<br>(28.55 to<br>82.70)                    | 125.34<br>(72.09 to<br>213.24)                   | 3.50<br>(2.21 to<br>5.45)                    | 1.46<br>(0.88 to<br>2.35)                    | 0.67<br>(0.41 to<br>1.08)                    | 1.67<br>(1.02 to<br>2.73)                    |
| Congenital heart anomalies                    | 6,022.92<br>(4,208.39 to<br>8,966.73)           | 3,548.10<br>(2,314.68 to<br>5,399.55)           | 1,493.04<br>(978.70 to<br>2,272.62)             | 3,963.73<br>(2,620.75 to<br>6,081.29)            | 77.44<br>(56.08 to<br>111.22)                | 49.85<br>(33.94 to<br>72.19)                 | 21.37<br>(14.77 to<br>31.06)                 | 55.13<br>(38.54 to<br>79.19)                 |
| Orofacial clefts                              | 2.44<br>(0.68 to<br>4.91)                       | 1.12<br>(0.27 to<br>2.54)                       | 0.37<br>(0.09 to<br>0.81)                       | 1.35<br>(0.33 to<br>3.08)                        | 0.03<br>(0.01 to<br>0.06)                    | 0.01<br>(0.00 to<br>0.03)                    | 0.00<br>(0.00 to<br>0.01)                    | 0.02<br>(0.00 to<br>0.04)                    |
| Down syndrome                                 | 1,300.77<br>(939.53 to<br>1,799.07)             | 1,294.30<br>(863.18 to<br>1,669.39)             | 1,306.44<br>(889.61 to<br>1,656.99)             | 1,356.53<br>(912.03 to<br>1,752.55)              | 22.65<br>(15.30 to<br>28.53)                 | 26.89<br>(16.84 to<br>33.23)                 | 27.77<br>(17.49 to<br>34.11)                 | 27.82<br>(17.34 to<br>34.46)                 |
| Other chromosomal abnormalities               | 927.50<br>(333.88 to<br>1,509.47)               | 671.07<br>(230.21 to<br>1,188.80)               | 455.41<br>(159.75 to<br>790.94)                 | 746.91<br>(259.03 to<br>1,320.09)                | 11.12<br>(4.06 to<br>17.85)                  | 8.38<br>(2.99 to<br>14.42)                   | 5.75<br>(2.07 to<br>9.69)                    | 9.28<br>(3.27 to<br>16.10)                   |
| Congenital musculoskeletal and limb anomalies | 221.28<br>(121.80 to<br>339.97)                 | 152.40<br>(82.22 to<br>243.73)                  | 75.21<br>(40.81 to<br>118.60)                   | 169.84<br>(94.63 to<br>267.53)                   | 2.67<br>(1.51 to<br>4.02)                    | 1.93<br>(1.07 to<br>2.97)                    | 0.96<br>(0.54 to<br>1.49)                    | 2.14<br>(1.23 to<br>3.27)                    |
| Urogenital congenital anomalies               | 311.25<br>(174.43 to<br>545.26)                 | 172.30<br>(91.38 to<br>313.22)                  | 95.53<br>(51.69 to<br>172.87)                   | 189.83<br>(100.78 to<br>346.30)                  | 4.17<br>(2.43 to<br>6.95)                    | 2.73<br>(1.49 to<br>4.61)                    | 1.57<br>(0.88 to<br>2.60)                    | 2.94<br>(1.64 to<br>4.94)                    |
| Digestive congenital anomalies                | 1,132.22<br>(434.77 to<br>1,894.56)             | 713.64<br>(307.65 to<br>1,243.84)               | 322.85<br>(138.64 to<br>578.54)                 | 813.20<br>(339.22 to<br>1,428.56)                | 13.26<br>(5.20 to<br>22.08)                  | 8.46<br>(3.72 to<br>14.60)                   | 3.84<br>(1.68 to<br>6.79)                    | 9.62<br>(4.07 to<br>16.79)                   |
| Other congenital birth defects                | 2,987.59<br>(1,927.27 to<br>4,676.56)           | 1,855.30<br>(1,147.21 to<br>2,994.15)           | 934.56<br>(564.22 to<br>1,547.00)               | 2,066.07<br>(1,275.74 to<br>3,468.35)            | 36.72<br>(24.41 to<br>56.29)                 | 24.18<br>(15.86 to<br>37.96)                 | 12.35<br>(7.96 to<br>19.44)                  | 26.73<br>(17.62 to<br>42.94)                 |
| Skin and subcutaneous diseases                | 2,816.62<br>(1,707.97 to<br>4,697.95)           | 5,916.08<br>(3,679.64 to<br>9,691.72)           | 4,901.20<br>(3,020.69 to<br>7,955.42)           | 5,678.88<br>(3,510.74 to<br>9,260.31)            | 238.12<br>(137.45 to<br>402.82)              | 490.05<br>(285.08 to<br>702.94)              | 413.12<br>(242.70 to<br>662.80)              | 458.04<br>(267.48 to<br>753.45)              |
| Cellulitis                                    | 389.61<br>(230.37 to<br>980.32)                 | 1,446.67<br>(898.90 to<br>3,480.25)             | 1,363.23<br>(868.04 to<br>3,243.79)             | 1,377.47<br>(858.30 to<br>3,341.77)              | 21.22<br>(12.86 to<br>52.09)                 | 81.78<br>(53.21 to<br>201.05)                | 83.11<br>(52.60 to<br>193.42)                | 78.68<br>(49.35 to<br>188.42)                |
| Pyoderma                                      | 751.46<br>(335.51 to<br>1,067.22)               | 1,788.17<br>(717.80 to<br>2,429.49)             | 1,522.41<br>(613.41 to<br>2,099.24)             | 1,747.22<br>(713.57 to<br>2,373.72)              | 44.43<br>(17.93 to<br>62.27)                 | 119.77<br>(47.70 to<br>168.10)               | 108.57<br>(42.38 to<br>152.75)               | 113.19<br>(45.79 to<br>157.19)               |
| Decubitus ulcer                               | 1,607.23<br>(934.53 to<br>2,879.33)             | 2,553.94<br>(1,441.17 to<br>4,462.84)           | 1,909.54<br>(1,078.72 to<br>3,305.32)           | 2,431.40<br>(1,366.58 to<br>4,403.61)            | 277.16<br>(96.01 to<br>293.24)               | 214.13<br>(145.04 to<br>485.25)              | 214.13<br>(114.60 to<br>373.23)              | 258.40<br>(133.35 to<br>463.50)              |
| Other skin and subcutaneous diseases          | 68.33<br>(42.26 to<br>129.86)                   | 127.30<br>(71.61 to<br>227.02)                  | 106.02<br>(57.11 to<br>190.75)                  | 122.78<br>(70.42 to<br>227.10)                   | 4.04<br>(2.07 to<br>7.01)                    | 8.34<br>(3.96 to<br>15.08)                   | 7.31<br>(3.36 to<br>12.90)                   | 7.78<br>(3.71 to<br>14.21)                   |
| Sudden infant death syndrome                  | 829.96<br>(494.61 to<br>1,327.08)               | 431.38<br>(197.52 to<br>846.66)                 | 249.87<br>(114.04 to<br>498.09)                 | 483.18<br>(222.62 to<br>966.83)                  | 9.63<br>(5.74 to<br>15.40)                   | 5.00<br>(2.29 to<br>9.82)                    | 2.90<br>(1.32 to<br>5.78)                    | 5.61<br>(2.58 to<br>11.22)                   |
| <b>Injuries</b>                               | <b>85,908.59</b><br>(78,259.27 to<br>92,609.44) | <b>61,606.69</b><br>(44,043.92 to<br>91,261.93) | <b>44,701.87</b><br>(32,145.32 to<br>67,015.78) | <b>78,990.37</b><br>(54,523.88 to<br>120,736.74) | <b>2,434.96</b><br>(1,573.12 to<br>2,637.50) | <b>2,008.67</b><br>(1,573.12 to<br>2,634.41) | <b>1,553.36</b><br>(1,234.64 to<br>2,044.26) | <b>2,389.95</b><br>(1,831.48 to<br>3,256.49) |
| <b>Transport injuries</b>                     | <b>26,068.43</b><br>(23,643.14 to<br>28,722.71) | <b>11,702.06</b><br>(7,088.34 to<br>19,666.13)  | <b>8,852.66</b><br>(5,410.36 to<br>14,579.93)   | <b>25,649.72</b><br>(15,261.07 to<br>43,327.84)  | <b>679.20</b><br>(624.12 to<br>738.75)       | <b>354.01</b><br>(239.01 to<br>527.22)       | <b>266.53</b><br>(180.60 to<br>396.00)       | <b>691.02</b><br>(445.01 to<br>1,085.45)     |
| Road injuries                                 | 23,931.23<br>(21,663.68 to<br>26,336.08)        | 8,859.60<br>(5,330.65 to<br>14,909.43)          | 7,233.70<br>(4,389.49 to<br>11,996.11)          | 22,565.33<br>(13,412.65 to<br>38,163.25)         | 622.92<br>(570.64 to<br>676.73)              | 272.78<br>(184.24 to<br>410.16)              | 218.66<br>(149.50 to<br>324.66)              | 604.29<br>(386.08 to<br>950.20)              |
| Pedestrian road injuries                      | 7,284.08<br>(6,280.35 to<br>8,774.61)           | 2,864.87<br>(1,955.92 to<br>4,365.91)           | 1,658.93<br>(1,127.71 to<br>2,508.23)           | 6,388.22<br>(4,102.42 to<br>10,171.93)           | 253.22<br>(224.02 to<br>292.08)              | 125.13<br>(89.74 to<br>173.10)               | 76.67<br>(55.14 to<br>107.88)                | 238.77<br>(165.62 to<br>347.12)              |
| <b>Uruguay</b>                                |                                                 |                                                 |                                                 |                                                  |                                              |                                              |                                              |                                              |
| Cause                                         | YLLs (actual counts)                            |                                                 |                                                 |                                                  | Deaths (actual counts)                       |                                              |                                              |                                              |
|                                               | 2016                                            | 2040 Forecast                                   | 2040 Better Scenario                            | 2040 Worse Scenario                              | 2016                                         | 2040 Forecast                                | 2040 Better Scenario                         | 2040 Worse Scenario                          |



|                                                                              |                                          |                                          |                                          |                                           |                                       |                                       |                                       |                                       |
|------------------------------------------------------------------------------|------------------------------------------|------------------------------------------|------------------------------------------|-------------------------------------------|---------------------------------------|---------------------------------------|---------------------------------------|---------------------------------------|
| Other unintentional injuries                                                 | 1,099.28<br>(936.87 to<br>1,317.86)      | 856.41<br>(596.43 to<br>1,223.14)        | 363.76<br>(246.17 to<br>537.98)          | 882.72<br>(639.66 to<br>1,237.40)         | 24.05<br>(20.74 to<br>28.61)          | 30.34<br>(15.05 to<br>27.23)          | 8.94<br>(6.52 to<br>12.28)            | 20.74<br>(6.52 to<br>27.07)           |
| Self-harm and interpersonal violence                                         | 33,306.59<br>(26,404.78 to<br>37,534.83) | 27,896.88<br>(17,358.93 to<br>44,910.33) | 19,298.40<br>(11,899.05 to<br>30,572.82) | 31,059.25<br>(17,906.78 to<br>52,474.25)  | 820.62<br>(643.07 to<br>919.40)       | 745.81<br>(487.70 to<br>1,125.11)     | 538.42<br>(362.44 to<br>798.79)       | 815.68<br>(506.79 to<br>1,290.20)     |
| <b>Uruguay</b>                                                               |                                          |                                          |                                          |                                           |                                       |                                       |                                       |                                       |
| Cause                                                                        | YLLs (actual counts)                     |                                          |                                          |                                           | Deaths (actual counts)                |                                       |                                       |                                       |
|                                                                              | 2016                                     | 2040 Forecast                            | 2040 Better Scenario                     | 2040 Worse Scenario                       | 2016                                  | 2040 Forecast                         | 2040 Better Scenario                  | 2040 Worse Scenario                   |
| Self-harm                                                                    | 24,605.21<br>(19,071.87 to<br>27,849.72) | 21,342.45<br>(12,571.94 to<br>35,525.23) | 15,317.67<br>(9,160.94 to<br>25,126.99)  | 24,517.92<br>(13,319.51 to<br>43,537.63)  | 642.38<br>(485.54 to<br>721.58)       | 604.53<br>(386.63 to<br>925.50)       | 450.02<br>(293.80 to<br>677.82)       | 675.17<br>(398.67 to<br>1,105.39)     |
| Self-harm by firearm                                                         | 5,842.55<br>(4,278.29 to<br>7,692.87)    | 5,166.08<br>(2,758.15 to<br>9,050.93)    | 3,357.48<br>(1,848.35 to<br>5,672.99)    | 5,980.21<br>(3,008.79 to<br>10,904.99)    | 167.53<br>(118.80 to<br>214.80)       | 159.78<br>(90.31 to<br>254.56)        | 109.12<br>(64.04 to<br>171.28)        | 178.66<br>(94.60 to<br>306.54)        |
| Self-harm by other specified means                                           | 18,762.66<br>(13,746.36 to<br>21,690.24) | 16,176.37<br>(9,513.27 to<br>27,294.08)  | 11,960.19<br>(7,115.36 to<br>19,681.73)  | 18,537.71<br>(10,056.26 to<br>32,952.24)  | 474.85<br>(346.31 to<br>544.32)       | 444.75<br>(279.68 to<br>687.09)       | 340.90<br>(220.39 to<br>517.15)       | 496.51<br>(288.78 to<br>820.16)       |
| Interpersonal violence                                                       | 8,701.38<br>(4,652.58 to<br>11,234.11)   | 6,554.43<br>(3,309.28 to<br>10,492.52)   | 3,980.73<br>(2,030.79 to<br>6,409.07)    | 6,541.34<br>(3,310.16 to<br>10,202.10)    | 178.24<br>(95.44 to<br>229.75)        | 141.27<br>(73.05 to<br>213.32)        | 88.40<br>(47.32 to<br>134.00)         | 140.51<br>(73.30 to<br>209.28)        |
| Physical violence by firearm                                                 | 5,210.38<br>(2,147.96 to<br>7,167.56)    | 3,783.34<br>(1,408.96 to<br>6,369.33)    | 2,188.22<br>(840.99 to<br>3,751.74)      | 3,764.30<br>(1,417.20 to<br>6,230.26)     | 101.06<br>(40.32 to<br>136.88)        | 75.57<br>(29.22 to<br>121.76)         | 44.42<br>(17.30 to<br>72.28)          | 75.04<br>(29.26 to<br>118.38)         |
| Physical violence by sharp object                                            | 2,729.97<br>(1,415.24 to<br>4,397.36)    | 2,249.96<br>(1,075.22 to<br>3,855.93)    | 1,405.64<br>(665.30 to<br>2,353.58)      | 2,211.85<br>(1,059.89 to<br>3,811.47)     | 58.96<br>(30.20 to<br>91.49)          | 51.17<br>(25.49 to<br>81.78)          | 32.73<br>(16.61 to<br>50.48)          | 50.02<br>(24.19 to<br>79.57)          |
| Physical violence by other means                                             | 761.02<br>(440.09 to<br>1,260.97)        | 521.12<br>(272.92 to<br>923.98)          | 386.87<br>(202.63 to<br>677.00)          | 565.19<br>(289.58 to<br>1,301.04)         | 18.21<br>(10.16 to<br>30.08)          | 14.53<br>(7.81 to<br>25.36)           | 11.24<br>(5.97 to<br>19.51)           | 15.46<br>(8.00 to<br>27.41)           |
| Forces of nature, conflict and terrorism, and executions and police conflict | 16.99<br>(15.42 to<br>18.96)             | 387.18<br>(0.00 to<br>145.47)            | 382.28<br>(0.00 to<br>143.33)            | 386.75<br>(0.00 to<br>145.73)             | 0.34<br>(0.31 to<br>0.37)             | 8.31<br>(0.00 to<br>3.62)             | 8.32<br>(0.00 to<br>3.69)             | 8.24<br>(0.00 to<br>3.55)             |
| Exposure to forces of nature                                                 | 0.00<br>(0.00 to<br>0.00)                | 4.55<br>(0.00 to<br>28.23)               | 4.51<br>(0.00 to<br>27.84)               | 4.54<br>(0.00 to<br>28.32)                | 0.00<br>(0.00 to<br>0.00)             | 0.12<br>(0.00 to<br>0.76)             | 0.13<br>(0.00 to<br>0.83)             | 0.12<br>(0.00 to<br>0.72)             |
| Conflict and terrorism                                                       | 0.00<br>(0.00 to<br>0.00)                | 1.99<br>(0.00 to<br>33.00)               | 1.96<br>(0.00 to<br>32.28)               | 2.00<br>(0.00 to<br>33.13)                | 0.00<br>(0.00 to<br>0.00)             | 0.04<br>(0.00 to<br>0.71)             | 0.04<br>(0.00 to<br>0.72)             | 0.04<br>(0.00 to<br>0.70)             |
| Executions and police conflict                                               | 16.99<br>(15.42 to<br>18.96)             | 380.63<br>(0.00 to<br>0.00)              | 375.81<br>(0.00 to<br>0.00)              | 380.22<br>(0.00 to<br>0.00)               | 0.34<br>(0.31 to<br>0.37)             | 8.14<br>(0.00 to<br>0.00)             | 8.15<br>(0.00 to<br>0.00)             | 8.07<br>(0.00 to<br>0.00)             |
| <b>High-income North America</b>                                             |                                          |                                          |                                          |                                           |                                       |                                       |                                       |                                       |
| Cause                                                                        | YLLs (in 1000s)                          |                                          |                                          |                                           | Deaths (in 1000s)                     |                                       |                                       |                                       |
|                                                                              | 2016                                     | 2040 Forecast                            | 2040 Better Scenario                     | 2040 Worse Scenario                       | 2016                                  | 2040 Forecast                         | 2040 Better Scenario                  | 2040 Worse Scenario                   |
| All causes                                                                   | 53,854.53<br>(53,060.92 to<br>54,667.92) | 64,669.55<br>(50,841.50 to<br>80,092.46) | 55,778.68<br>(44,161.88 to<br>68,334.19) | 80,159.41<br>(62,242.56 to<br>100,409.28) | 3,045.52<br>(3,005.67 to<br>3,088.17) | 4,436.97<br>(3,639.48 to<br>5,392.76) | 3,956.02<br>(3,290.66 to<br>4,812.38) | 5,212.24<br>(4,305.82 to<br>6,258.88) |
| Communicable, maternal, neonatal, and nutritional diseases                   | 3,402.11<br>(3,300.20 to<br>3,490.23)    | 3,830.67<br>(3,218.27 to<br>4,576.23)    | 3,356.96<br>(2,854.08 to<br>3,970.39)    | 4,381.44<br>(3,578.50 to<br>5,423.17)     | 152.33<br>(144.89 to<br>159.67)       | 258.34<br>(221.87 to<br>302.38)       | 250.97<br>(217.23 to<br>292.94)       | 267.13<br>(223.88 to<br>323.25)       |
| HIV/AIDS and tuberculosis                                                    | 307.02<br>(303.55 to<br>310.3)           | 95.87<br>(62.73 to<br>130.66)            | 59.92<br>(29.40 to<br>85.59)             | 188.10<br>(117.89 to<br>259.21)           | 8.50<br>(8.40 to<br>8.60)             | 2.51<br>(1.75 to<br>3.35)             | 1.61<br>(1.02 to<br>2.22)             | 4.34<br>(2.91 to<br>5.74)             |
| Tuberculosis                                                                 | 21.87<br>(20.94 to<br>22.93)             | 15.11<br>(9.15 to<br>23.89)              | 9.65<br>(6.03 to<br>14.53)               | 19.51<br>(11.11 to<br>31.47)              | 1.08<br>(1.03 to<br>1.14)             | 1.00<br>(0.61 to<br>1.57)             | 0.67<br>(0.43 to<br>1.00)             | 1.22<br>(0.70 to<br>1.94)             |
| HIV/AIDS                                                                     | 285.15<br>(281.89 to<br>288.48)          | 80.75<br>(47.80 to<br>115.70)            | 50.26<br>(19.04 to<br>76.89)             | 168.59<br>(93.90 to<br>240.31)            | 7.42<br>(7.33 to<br>7.51)             | 1.51<br>(0.86 to<br>2.19)             | 0.93<br>(0.32 to<br>1.45)             | 3.13<br>(1.74 to<br>4.51)             |

|                                                                          |                                           |                                           |                                           |                                           |                                     |                                     |                                     |                                     |
|--------------------------------------------------------------------------|-------------------------------------------|-------------------------------------------|-------------------------------------------|-------------------------------------------|-------------------------------------|-------------------------------------|-------------------------------------|-------------------------------------|
| <b>Diarrhea, lower respiratory, and other common infectious diseases</b> | <b>1,688.74</b><br>(1,617.02 to 1,758.45) | <b>2,486.03</b><br>(1,996.94 to 3,218.60) | <b>2,390.41</b><br>(1,873.22 to 2,860.21) | <b>2,827.61</b><br>(2,170.21 to 3,843.78) | <b>118.96</b><br>(111.78 to 126.33) | <b>224.08</b><br>(188.12 to 267.87) | <b>219.08</b><br>(186.16 to 259.86) | <b>231.46</b><br>(189.44 to 287.29) |
| Diarrheal diseases                                                       | 162.33<br>(156.85 to 168.18)              | 423.68<br>(303.32 to 608.23)              | 549.19<br>(414.57 to 741.34)              | 377.72<br>(262.45 to 562.26)              | 10.92<br>(10.51 to 11.34)           | 37.71<br>(26.63 to 55.27)           | 51.01<br>(37.59 to 69.48)           | 31.83<br>(21.82 to 47.92)           |
| Intestinal infectious diseases                                           | 0.92<br>(0.44 to 1.61)                    | 1.12<br>(0.53 to 1.97)                    | 1.12<br>(0.52 to 1.99)                    | 1.10<br>(0.52 to 1.93)                    | 0.03<br>(0.02 to 0.06)              | 0.04<br>(0.02 to 0.08)              | 0.04<br>(0.02 to 0.08)              | 0.04<br>(0.02 to 0.07)              |
| Typhoid fever                                                            | 0.33<br>(0.11 to 0.75)                    | 0.51<br>(0.19 to 1.11)                    | 0.57<br>(0.22 to 1.24)                    | 0.49<br>(0.18 to 1.06)                    | 0.01<br>(0.00 to 0.02)              | 0.01<br>(0.00 to 0.03)              | 0.01<br>(0.01 to 0.03)              | 0.02<br>(0.00 to 0.03)              |
| Paratyphoid fever                                                        | 0.17<br>(0.05 to 0.44)                    | 0.21<br>(0.07 to 0.55)                    | 0.18<br>(0.06 to 0.46)                    | 0.22<br>(0.07 to 0.56)                    | 0.00<br>(0.00 to 0.01)              | 0.01<br>(0.00 to 0.01)              | 0.00<br>(0.00 to 0.01)              | 0.01<br>(0.00 to 0.01)              |
| Other intestinal infectious diseases                                     | 0.42<br>(0.17 to 0.86)                    | 0.40<br>(0.15 to 0.86)                    | 0.37<br>(0.13 to 0.81)                    | 0.39<br>(0.14 to 0.86)                    | 0.02<br>(0.01 to 0.04)              | 0.02<br>(0.01 to 0.05)              | 0.02<br>(0.01 to 0.05)              | 0.02<br>(0.01 to 0.05)              |
| Lower respiratory infections                                             | 1,429.80<br>(1,360.39 to 1,498.17)        | 1,963.85<br>(1,490.25 to 2,666.39)        | 1,665.71<br>(1,267.19 to 2,222.16)        | 2,348.36<br>(1,709.72 to 3,362.69)        | 105.13<br>(98.11 to 112.33)         | 182.63<br>(146.22 to 229.51)        | 164.53<br>(131.76 to 206.84)        | 196.03<br>(151.81 to 253.80)        |
| Upper respiratory infections                                             | 0.65<br>(0.58 to 0.73)                    | 0.58<br>(0.38 to 0.87)                    | 0.44<br>(0.28 to 0.65)                    | 0.62<br>(0.40 to 0.91)                    | 0.02<br>(0.02 to 0.03)              | 0.03<br>(0.02 to 0.04)              | 0.02<br>(0.01 to 0.03)              | 0.03<br>(0.02 to 0.04)              |
| Otitis media                                                             | 0.83<br>(0.75 to 0.91)                    | 0.22<br>(0.14 to 0.36)                    | 0.23<br>(0.14 to 0.37)                    | 0.21<br>(0.14 to 0.34)                    | 0.03<br>(0.03 to 0.03)              | 0.01<br>(0.01 to 0.02)              | 0.01<br>(0.01 to 0.02)              | 0.01<br>(0.01 to 0.02)              |
| Meningitis                                                               | 58.84<br>(52.78 to 67.68)                 | 42.56<br>(31.26 to 57.48)                 | 33.88<br>(25.31 to 44.70)                 | 44.99<br>(32.66 to 61.31)                 | 1.53<br>(1.38 to 1.85)              | 1.29<br>(1.02 to 1.66)              | 1.13<br>(0.88 to 1.46)              | 1.28<br>(1.02 to 1.65)              |
| Pneumococcal meningitis                                                  | 11.70<br>(10.43 to 13.71)                 | 9.57<br>(7.29 to 12.30)                   | 9.33<br>(7.05 to 12.06)                   | 9.47<br>(7.29 to 12.08)                   | 0.33<br>(0.29 to 0.40)              | 0.35<br>(0.28 to 0.45)              | 0.36<br>(0.28 to 0.46)              | 0.33<br>(0.27 to 0.43)              |
| H influenzae type B meningitis                                           | 4.32<br>(4.79 to 6.05)                    | 12.38<br>(5.04 to 24.24)                  | 7.99<br>(4.25 to 13.72)                   | 13.89<br>(5.49 to 27.99)                  | 0.12<br>(0.11 to 0.15)              | 0.21<br>(0.13 to 0.36)              | 0.17<br>(0.12 to 0.24)              | 0.23<br>(0.13 to 0.39)              |
| Meningococcal meningitis                                                 | 17.93<br>(16.02 to 20.35)                 | 8.25<br>(5.89 to 11.24)                   | 6.67<br>(4.65 to 9.23)                    | 8.71<br>(6.17 to 12.01)                   | 0.40<br>(0.36 to 0.47)              | 0.24<br>(0.18 to 0.31)              | 0.20<br>(0.15 to 0.27)              | 0.24<br>(0.18 to 0.32)              |
| Other meningitis                                                         | 23.89<br>(21.36 to 27.63)                 | 12.35<br>(8.95 to 16.46)                  | 9.88<br>(7.09 to 13.32)                   | 12.91<br>(9.33 to 17.25)                  | 0.68<br>(0.61 to 0.83)              | 0.48<br>(0.37 to 0.64)              | 0.40<br>(0.30 to 0.54)              | 0.48<br>(0.37 to 0.64)              |
| Encephalitis                                                             | 26.84<br>(22.58 to 38.81)                 | 44.11<br>(33.61 to 64.17)                 | 43.23<br>(32.20 to 63.15)                 | 43.47<br>(33.47 to 63.51)                 | 0.91<br>(0.76 to 1.31)              | 1.92<br>(1.49 to 2.78)              | 1.95<br>(1.50 to 2.83)              | 1.80<br>(1.43 to 2.60)              |
| Diphtheria                                                               | 0.18<br>(0.16 to 0.20)                    | 0.05<br>(0.03 to 0.07)                    | 0.03<br>(0.03 to 0.05)                    | 0.05<br>(0.04 to 0.08)                    | 0.00<br>(0.00 to 0.00)              | 0.00<br>(0.00 to 0.00)              | 0.00<br>(0.00 to 0.00)              | 0.00<br>(0.00 to 0.00)              |
| Whooping cough                                                           | 1.91<br>(0.55 to 2.71)                    | 1.66<br>(0.29 to 4.17)                    | 0.26<br>(0.07 to 0.50)                    | 1.77<br>(0.31 to 4.40)                    | 0.02<br>(0.01 to 0.03)              | 0.02<br>(0.00 to 0.05)              | 0.00<br>(0.00 to 0.01)              | 0.02<br>(0.00 to 0.05)              |
| Tetanus                                                                  | 0.26<br>(0.20 to 0.31)                    | 0.04<br>(0.03 to 0.06)                    | 0.03<br>(0.02 to 0.05)                    | 0.04<br>(0.03 to 0.06)                    | 0.01<br>(0.01 to 0.01)              | 0.00<br>(0.00 to 0.00)              | 0.00<br>(0.00 to 0.00)              | 0.00<br>(0.00 to 0.00)              |
| Measles                                                                  | 0.18<br>(0.12 to 0.27)                    | 2.50<br>(0.01 to 21.45)                   | 1.32<br>(0.01 to 13.45)                   | 3.58<br>(0.01 to 34.24)                   | 0.00<br>(0.00 to 0.00)              | 0.03<br>(0.00 to 0.25)              | 0.02<br>(0.00 to 0.16)              | 0.04<br>(0.00 to 0.41)              |

**High-income North America**

| Cause                       | YLLs (in 1000s)         |                         |                        |                         | Deaths (in 1000s)      |                        |                        |                        |
|-----------------------------|-------------------------|-------------------------|------------------------|-------------------------|------------------------|------------------------|------------------------|------------------------|
|                             | 2016                    | 2040 Forecast           | 2040 Better Scenario   | 2040 Worse Scenario     | 2016                   | 2040 Forecast          | 2040 Better Scenario   | 2040 Worse Scenario    |
| Varicella and herpes zoster | 6.00<br>(3.53 to 11.04) | 5.66<br>(3.22 to 10.45) | 4.97<br>(2.82 to 9.05) | 5.71<br>(3.27 to 10.43) | 0.35<br>(0.18 to 0.63) | 0.39<br>(0.20 to 0.69) | 0.37<br>(0.19 to 0.65) | 0.37<br>(0.19 to 0.64) |



|                                                       |                                     |                                     |                                     |                                     |                                  |                                  |                                  |                                  |
|-------------------------------------------------------|-------------------------------------|-------------------------------------|-------------------------------------|-------------------------------------|----------------------------------|----------------------------------|----------------------------------|----------------------------------|
|                                                       | 6.08<br>(3.15 to<br>6.85)           | 8.76<br>(4.33 to<br>10.57)          | 9.02<br>(4.38 to<br>10.89)          | 8.58<br>(4.25 to<br>10.27)          | 0.20<br>(0.09 to<br>0.23)        | 0.37<br>(0.16 to<br>0.44)        | 0.40<br>(0.17 to<br>0.48)        | 0.34<br>(0.15 to<br>0.40)        |
| <b>Neglected tropical diseases and malaria</b>        |                                     |                                     |                                     |                                     |                                  |                                  |                                  |                                  |
|                                                       | 0.00<br>(0.00 to<br>0.00)           | 0.00<br>(0.00 to<br>0.00)           | 0.00<br>(0.00 to<br>0.00)           | 0.00<br>(0.00 to<br>0.00)           | 0.00<br>(0.00 to<br>0.00)        | 0.00<br>(0.00 to<br>0.00)        | 0.00<br>(0.00 to<br>0.00)        | 0.00<br>(0.00 to<br>0.00)        |
| Malaria                                               |                                     |                                     |                                     |                                     |                                  |                                  |                                  |                                  |
|                                                       | 0.00<br>(0.00 to<br>0.00)           | 0.00<br>(0.00 to<br>0.00)           | 0.00<br>(0.00 to<br>0.00)           | 0.00<br>(0.00 to<br>0.00)           | 0.00<br>(0.00 to<br>0.00)        | 0.00<br>(0.00 to<br>0.00)        | 0.00<br>(0.00 to<br>0.00)        | 0.00<br>(0.00 to<br>0.00)        |
| Chagas disease                                        |                                     |                                     |                                     |                                     |                                  |                                  |                                  |                                  |
|                                                       | 0.00<br>(0.00 to<br>0.00)           | 0.00<br>(0.00 to<br>0.00)           | 0.00<br>(0.00 to<br>0.00)           | 0.00<br>(0.00 to<br>0.00)           | 0.00<br>(0.00 to<br>0.00)        | 0.00<br>(0.00 to<br>0.00)        | 0.00<br>(0.00 to<br>0.00)        | 0.00<br>(0.00 to<br>0.00)        |
| Leishmaniasis                                         |                                     |                                     |                                     |                                     |                                  |                                  |                                  |                                  |
|                                                       | 0.00<br>(0.00 to<br>0.00)           | 0.00<br>(0.00 to<br>0.00)           | 0.00<br>(0.00 to<br>0.00)           | 0.00<br>(0.00 to<br>0.00)           | 0.00<br>(0.00 to<br>0.00)        | 0.00<br>(0.00 to<br>0.00)        | 0.00<br>(0.00 to<br>0.00)        | 0.00<br>(0.00 to<br>0.00)        |
| African trypanosomiasis                               |                                     |                                     |                                     |                                     |                                  |                                  |                                  |                                  |
|                                                       | 0.00<br>(0.00 to<br>0.00)           | 0.00<br>(0.00 to<br>0.00)           | 0.00<br>(0.00 to<br>0.00)           | 0.00<br>(0.00 to<br>0.00)           | 0.00<br>(0.00 to<br>0.00)        | 0.00<br>(0.00 to<br>0.00)        | 0.00<br>(0.00 to<br>0.00)        | 0.00<br>(0.00 to<br>0.00)        |
| Schistosomiasis                                       |                                     |                                     |                                     |                                     |                                  |                                  |                                  |                                  |
|                                                       | 0.00<br>(0.00 to<br>0.00)           | 0.00<br>(0.00 to<br>0.00)           | 0.00<br>(0.00 to<br>0.00)           | 0.00<br>(0.00 to<br>0.00)           | 0.00<br>(0.00 to<br>0.00)        | 0.00<br>(0.00 to<br>0.00)        | 0.00<br>(0.00 to<br>0.00)        | 0.00<br>(0.00 to<br>0.00)        |
| Cysticercosis                                         |                                     |                                     |                                     |                                     |                                  |                                  |                                  |                                  |
|                                                       | 0.29<br>(0.27 to<br>0.32)           | 0.13<br>(0.11 to<br>0.16)           | 0.13<br>(0.10 to<br>0.16)           | 0.13<br>(0.10 to<br>0.15)           | 0.01<br>(0.01 to<br>0.01)        | 0.00<br>(0.00 to<br>0.01)        | 0.00<br>(0.00 to<br>0.01)        | 0.00<br>(0.00 to<br>0.01)        |
| Cystic echinococcosis                                 |                                     |                                     |                                     |                                     |                                  |                                  |                                  |                                  |
|                                                       | 0.09<br>(0.08 to<br>0.10)           | 0.09<br>(0.07 to<br>0.10)           | 0.08<br>(0.06 to<br>0.09)           | 0.09<br>(0.07 to<br>0.11)           | 0.00<br>(0.00 to<br>0.00)        | 0.00<br>(0.00 to<br>0.00)        | 0.00<br>(0.00 to<br>0.00)        | 0.00<br>(0.00 to<br>0.00)        |
| Dengue                                                |                                     |                                     |                                     |                                     |                                  |                                  |                                  |                                  |
|                                                       | 0.04<br>(0.03 to<br>0.07)           | 0.17<br>(0.11 to<br>0.26)           | 0.16<br>(0.11 to<br>0.25)           | 0.17<br>(0.12 to<br>0.26)           | 0.00<br>(0.00 to<br>0.00)        | 0.00<br>(0.00 to<br>0.01)        | 0.00<br>(0.00 to<br>0.01)        | 0.00<br>(0.00 to<br>0.01)        |
| Yellow fever                                          |                                     |                                     |                                     |                                     |                                  |                                  |                                  |                                  |
|                                                       | 0.00<br>(0.00 to<br>0.00)           | 0.00<br>(0.00 to<br>0.00)           | 0.00<br>(0.00 to<br>0.00)           | 0.00<br>(0.00 to<br>0.00)           | 0.00<br>(0.00 to<br>0.00)        | 0.00<br>(0.00 to<br>0.00)        | 0.00<br>(0.00 to<br>0.00)        | 0.00<br>(0.00 to<br>0.00)        |
| Rabies                                                |                                     |                                     |                                     |                                     |                                  |                                  |                                  |                                  |
|                                                       | 0.23<br>(0.21 to<br>0.25)           | 0.26<br>(0.21 to<br>0.30)           | 0.23<br>(0.18 to<br>0.27)           | 0.27<br>(0.22 to<br>0.32)           | 0.00<br>(0.00 to<br>0.01)        | 0.01<br>(0.01 to<br>0.01)        | 0.01<br>(0.00 to<br>0.01)        | 0.01<br>(0.01 to<br>0.01)        |
| Intestinal nematode infections                        |                                     |                                     |                                     |                                     |                                  |                                  |                                  |                                  |
|                                                       | 0.00<br>(0.00 to<br>0.00)           | 0.00<br>(0.00 to<br>0.00)           | 0.00<br>(0.00 to<br>0.00)           | 0.00<br>(0.00 to<br>0.00)           | 0.00<br>(0.00 to<br>0.00)        | 0.00<br>(0.00 to<br>0.00)        | 0.00<br>(0.00 to<br>0.00)        | 0.00<br>(0.00 to<br>0.00)        |
| Other neglected tropical diseases                     |                                     |                                     |                                     |                                     |                                  |                                  |                                  |                                  |
|                                                       | 5.41<br>(2.49 to<br>6.18)           | 8.11<br>(3.65 to<br>9.82)           | 8.42<br>(3.76 to<br>10.19)          | 7.92<br>(3.58 to<br>9.53)           | 0.18<br>(0.07 to<br>0.21)        | 0.35<br>(0.14 to<br>0.42)        | 0.39<br>(0.15 to<br>0.47)        | 0.32<br>(0.13 to<br>0.38)        |
| <b>Maternal disorders</b>                             | <b>62.99</b><br>(57.95 to<br>67.68) | <b>54.79</b><br>(34.22 to<br>81.20) | <b>48.13</b><br>(30.09 to<br>72.40) | <b>56.88</b><br>(35.20 to<br>84.72) | <b>1.19</b><br>(1.10 to<br>1.28) | <b>1.05</b><br>(0.66 to<br>1.54) | <b>0.92</b><br>(0.58 to<br>1.37) | <b>1.09</b><br>(0.68 to<br>1.63) |
| Maternal hemorrhage                                   |                                     |                                     |                                     |                                     |                                  |                                  |                                  |                                  |
|                                                       | 3.85<br>(3.11 to<br>4.62)           | 3.69<br>(2.07 to<br>6.00)           | 3.25<br>(1.83 to<br>5.37)           | 3.80<br>(2.15 to<br>6.20)           | 0.07<br>(0.06 to<br>0.09)        | 0.07<br>(0.04 to<br>0.11)        | 0.06<br>(0.03 to<br>0.10)        | 0.07<br>(0.04 to<br>0.12)        |
| Maternal sepsis and other maternal infections         |                                     |                                     |                                     |                                     |                                  |                                  |                                  |                                  |
|                                                       | 2.59<br>(2.09 to<br>3.18)           | 1.94<br>(1.07 to<br>3.22)           | 1.70<br>(0.94 to<br>2.83)           | 2.00<br>(1.11 to<br>3.34)           | 0.05<br>(0.04 to<br>0.06)        | 0.04<br>(0.02 to<br>0.07)        | 0.03<br>(0.02 to<br>0.06)        | 0.04<br>(0.02 to<br>0.07)        |
| Maternal hypertensive disorders                       |                                     |                                     |                                     |                                     |                                  |                                  |                                  |                                  |
|                                                       | 5.95<br>(4.95 to<br>7.09)           | 5.46<br>(3.08 to<br>8.79)           | 4.75<br>(2.66 to<br>7.67)           | 5.67<br>(3.18 to<br>9.17)           | 0.11<br>(0.09 to<br>0.13)        | 0.10<br>(0.06 to<br>0.16)        | 0.09<br>(0.05 to<br>0.14)        | 0.10<br>(0.06 to<br>0.17)        |
| Maternal obstructed labor and uterine rupture         |                                     |                                     |                                     |                                     |                                  |                                  |                                  |                                  |
|                                                       | 0.61<br>(0.42 to<br>0.83)           | 0.51<br>(0.27 to<br>0.85)           | 0.44<br>(0.23 to<br>0.74)           | 0.53<br>(0.28 to<br>0.90)           | 0.01<br>(0.01 to<br>0.02)        | 0.01<br>(0.01 to<br>0.02)        | 0.01<br>(0.00 to<br>0.01)        | 0.01<br>(0.01 to<br>0.02)        |
| Maternal abortion, miscarriage, and ectopic pregnancy |                                     |                                     |                                     |                                     |                                  |                                  |                                  |                                  |
|                                                       | 8.49<br>(7.29 to<br>9.64)           | 9.54<br>(5.09 to<br>16.11)          | 8.33<br>(4.50 to<br>14.13)          | 9.86<br>(5.35 to<br>16.67)          | 0.17<br>(0.15 to<br>0.19)        | 0.20<br>(0.11 to<br>0.33)        | 0.17<br>(0.09 to<br>0.29)        | 0.20<br>(0.11 to<br>0.34)        |
| Indirect maternal deaths                              |                                     |                                     |                                     |                                     |                                  |                                  |                                  |                                  |
|                                                       | 10.32<br>(8.04 to<br>12.96)         | 7.26<br>(3.85 to<br>12.29)          | 6.27<br>(3.33 to<br>10.62)          | 7.60<br>(4.04 to<br>12.96)          | 0.20<br>(0.15 to<br>0.24)        | 0.14<br>(0.07 to<br>0.23)        | 0.12<br>(0.06 to<br>0.20)        | 0.14<br>(0.08 to<br>0.24)        |
| Late maternal deaths                                  |                                     |                                     |                                     |                                     |                                  |                                  |                                  |                                  |
|                                                       | 9.87<br>(8.11 to<br>11.88)          | 5.21<br>(2.84 to<br>9.03)           | 4.50<br>(2.43 to<br>7.79)           | 5.43<br>(2.91 to<br>9.48)           | 0.18<br>(0.15 to<br>0.22)        | 0.10<br>(0.05 to<br>0.17)        | 0.08<br>(0.05 to<br>0.14)        | 0.10<br>(0.06 to<br>0.17)        |
| Maternal deaths aggravated by HIV/AIDS                |                                     |                                     |                                     |                                     |                                  |                                  |                                  |                                  |
|                                                       | 0.06<br>(0.03 to<br>0.10)           | 0.43<br>(0.16 to<br>0.91)           | 0.38<br>(0.14 to<br>0.81)           | 0.48<br>(0.18 to<br>1.00)           | 0.00<br>(0.00 to<br>0.00)        | 0.01<br>(0.00 to<br>0.02)        | 0.01<br>(0.00 to<br>0.02)        | 0.01<br>(0.00 to<br>0.02)        |

|                                                                         |                                              |                                          |                                        |                                            |                                     |                                    |                                    |                                    |
|-------------------------------------------------------------------------|----------------------------------------------|------------------------------------------|----------------------------------------|--------------------------------------------|-------------------------------------|------------------------------------|------------------------------------|------------------------------------|
|                                                                         | 21.26<br>(18.46 to<br>24.42)                 | 20.74<br>(12.00 to<br>32.90)             | 18.51<br>(10.55 to<br>29.63)           | 21.51<br>(12.10 to<br>34.19)               | 0.40<br>(0.35 to<br>0.46)           | 0.39<br>(0.23 to<br>0.62)          | 0.35<br>(0.20 to<br>0.56)          | 0.41<br>(0.23 to<br>0.64)          |
| Other maternal disorders                                                |                                              |                                          |                                        |                                            |                                     |                                    |                                    |                                    |
| <b>High-income North America</b>                                        |                                              |                                          |                                        |                                            |                                     |                                    |                                    |                                    |
| Cause                                                                   | YLLs (in 1000s)                              |                                          |                                        |                                            | Deaths (in 1000s)                   |                                    |                                    |                                    |
|                                                                         | 2016                                         | 2040 Forecast                            | 2040 Better Scenario                   | 2040 Worse Scenario                        | 2016                                | 2040 Forecast                      | 2040 Better Scenario               | 2040 Worse Scenario                |
| <b>Neonatal disorders</b>                                               | <b>1,135.58</b><br>(1,077.00 to<br>1,177.61) | <b>882.16</b><br>(615.76 to<br>1,181.70) | <b>634.48</b><br>(445.75 to<br>852.37) | <b>1,009.17</b><br>(707.94 to<br>1,336.48) | <b>13.12</b><br>(12.44 to<br>13.61) | <b>10.20</b><br>(7.12 to<br>13.66) | <b>7.33</b><br>(5.16 to<br>9.85)   | <b>11.66</b><br>(8.18 to<br>15.44) |
| Neonatal preterm birth                                                  | 652.98<br>(613.84 to<br>684.16)              | 442.19<br>(299.57 to<br>601.63)          | 257.34<br>(171.18 to<br>353.90)        | 505.88<br>(338.19 to<br>695.14)            | 7.54<br>(7.09 to<br>7.91)           | 5.11<br>(3.46 to<br>6.95)          | 2.97<br>(1.98 to<br>4.09)          | 5.85<br>(3.91 to<br>8.03)          |
| Neonatal encephalopathy due to birth asphyxia and trauma                | 176.94<br>(158.86 to<br>191.98)              | 94.18<br>(62.39 to<br>131.80)            | 72.22<br>(48.15 to<br>101.38)          | 110.97<br>(72.68 to<br>156.10)             | 2.05<br>(1.84 to<br>2.22)           | 1.09<br>(0.72 to<br>1.52)          | 0.84<br>(0.56 to<br>1.17)          | 1.28<br>(0.84 to<br>1.80)          |
| Neonatal sepsis and other neonatal infections                           | 67.24<br>(57.85 to<br>97.90)                 | 70.12<br>(43.86 to<br>114.80)            | 56.43<br>(35.45 to<br>91.05)           | 81.27<br>(50.37 to<br>134.42)              | 0.78<br>(0.67 to<br>1.13)           | 0.81<br>(0.51 to<br>1.33)          | 0.65<br>(0.41 to<br>1.05)          | 0.94<br>(0.58 to<br>1.55)          |
| Hemolytic disease and other neonatal jaundice                           | 2.51<br>(2.01 to<br>3.00)                    | 1.12<br>(0.69 to<br>1.71)                | 0.89<br>(0.55 to<br>1.37)              | 1.29<br>(0.79 to<br>2.00)                  | 0.03<br>(0.02 to<br>0.03)           | 0.01<br>(0.01 to<br>0.02)          | 0.01<br>(0.01 to<br>0.02)          | 0.01<br>(0.01 to<br>0.02)          |
| Other neonatal disorders                                                | 235.91<br>(210.53 to<br>257.19)              | 274.56<br>(174.68 to<br>417.83)          | 247.59<br>(160.05 to<br>371.64)        | 309.76<br>(196.82 to<br>471.16)            | 2.73<br>(2.43 to<br>2.97)           | 3.17<br>(2.02 to<br>4.83)          | 2.86<br>(1.85 to<br>4.29)          | 3.58<br>(2.28 to<br>5.44)          |
| <b>Nutritional deficiencies</b>                                         | <b>58.27</b><br>(56.33 to<br>60.41)          | <b>91.66</b><br>(79.75 to<br>105.25)     | <b>101.46</b><br>(87.26 to<br>116.83)  | <b>82.72</b><br>(72.78 to<br>93.82)        | <b>4.96</b><br>(4.79 to<br>5.15)    | <b>10.30</b><br>(8.73 to<br>12.15) | <b>11.80</b><br>(9.97 to<br>13.95) | <b>8.94</b><br>(7.48 to<br>10.51)  |
| Protein-energy malnutrition                                             | 48.53<br>(41.82 to<br>52.83)                 | 76.78<br>(61.90 to<br>91.84)             | 86.89<br>(68.76 to<br>103.07)          | 68.66<br>(54.93 to<br>80.54)               | 4.29<br>(3.72 to<br>4.64)           | 8.88<br>(7.05 to<br>10.89)         | 10.37<br>(8.25 to<br>12.65)        | 7.65<br>(5.97 to<br>9.25)          |
| Iodine deficiency                                                       | 1.17<br>(0.70 to<br>1.79)                    | 4.50<br>(0.55 to<br>12.87)               | 4.52<br>(0.49 to<br>13.34)             | 4.18<br>(0.53 to<br>11.57)                 | 0.06<br>(0.03 to<br>0.09)           | 0.45<br>(0.03 to<br>1.55)          | 0.47<br>(0.03 to<br>1.70)          | 0.41<br>(0.03 to<br>1.35)          |
| Dietary iron deficiency                                                 | 1.32<br>(0.85 to<br>1.83)                    | 1.57<br>(0.96 to<br>2.12)                | 1.61<br>(0.97 to<br>2.23)              | 1.54<br>(0.96 to<br>2.06)                  | 0.04<br>(0.02 to<br>0.05)           | 0.05<br>(0.02 to<br>0.07)          | 0.06<br>(0.02 to<br>0.08)          | 0.05<br>(0.02 to<br>0.07)          |
| Other nutritional deficiencies                                          | 7.25<br>(4.03 to<br>13.33)                   | 8.81<br>(4.65 to<br>16.05)               | 8.44<br>(4.41 to<br>15.55)             | 8.33<br>(4.47 to<br>15.02)                 | 0.58<br>(0.29 to<br>1.07)           | 0.91<br>(0.45 to<br>1.71)          | 0.91<br>(0.44 to<br>1.72)          | 0.83<br>(0.41 to<br>1.55)          |
| <b>Other communicable, maternal, neonatal, and nutritional diseases</b> | <b>143.43</b><br>(134.65 to<br>162.50)       | <b>211.39</b><br>(174.87 to<br>252.36)   | <b>203.56</b><br>(168.06 to<br>243.71) | <b>208.38</b><br>(173.16 to<br>249.21)     | <b>5.40</b><br>(4.96 to<br>5.96)    | <b>9.83</b><br>(8.39 to<br>11.51)  | <b>9.82</b><br>(8.32 to<br>11.55)  | <b>9.30</b><br>(7.99 to<br>10.84)  |
| Sexually transmitted infections excluding HIV                           | 6.55<br>(5.76 to<br>7.63)                    | 3.81<br>(2.92 to<br>4.87)                | 3.59<br>(2.72 to<br>4.57)              | 3.81<br>(2.90 to<br>4.86)                  | 0.23<br>(0.21 to<br>0.25)           | 0.17<br>(0.14 to<br>0.21)          | 0.17<br>(0.14 to<br>0.21)          | 0.17<br>(0.14 to<br>0.20)          |
| Syphilis                                                                | 2.76<br>(2.09 to<br>3.75)                    | 1.07<br>(0.80 to<br>1.43)                | 0.93<br>(0.71 to<br>1.24)              | 1.11<br>(0.82 to<br>1.48)                  | 0.08<br>(0.07 to<br>0.10)           | 0.04<br>(0.04 to<br>0.05)          | 0.04<br>(0.03 to<br>0.05)          | 0.04<br>(0.03 to<br>0.05)          |
| Chlamydial infection                                                    | 0.72<br>(0.68 to<br>0.77)                    | 0.54<br>(0.39 to<br>0.70)                | 0.52<br>(0.38 to<br>0.68)              | 0.53<br>(0.38 to<br>0.69)                  | 0.03<br>(0.03 to<br>0.03)           | 0.03<br>(0.02 to<br>0.03)          | 0.03<br>(0.02 to<br>0.03)          | 0.03<br>(0.02 to<br>0.03)          |
| Gonococcal infection                                                    | 2.07<br>(1.94 to<br>2.21)                    | 1.51<br>(1.12 to<br>2.02)                | 1.47<br>(1.08 to<br>1.96)              | 1.48<br>(1.11 to<br>1.96)                  | 0.08<br>(0.08 to<br>0.09)           | 0.08<br>(0.06 to<br>0.10)          | 0.08<br>(0.06 to<br>0.10)          | 0.07<br>(0.06 to<br>0.09)          |
| Other sexually transmitted infections                                   | 1.00<br>(0.94 to<br>1.07)                    | 0.70<br>(0.48 to<br>0.94)                | 0.67<br>(0.46 to<br>0.91)              | 0.69<br>(0.48 to<br>0.92)                  | 0.03<br>(0.03 to<br>0.04)           | 0.03<br>(0.02 to<br>0.03)          | 0.03<br>(0.02 to<br>0.03)          | 0.03<br>(0.02 to<br>0.03)          |
| Acute hepatitis                                                         | 34.03<br>(32.36 to<br>35.97)                 | 35.14<br>(24.49 to<br>49.31)             | 29.17<br>(19.87 to<br>41.37)           | 36.00<br>(24.67 to<br>50.44)               | 1.21<br>(1.15 to<br>1.27)           | 1.42<br>(1.03 to<br>1.91)          | 1.20<br>(0.86 to<br>1.62)          | 1.42<br>(1.03 to<br>1.93)          |
| Acute hepatitis A                                                       | 2.33<br>(1.88 to<br>2.87)                    | 1.93<br>(1.26 to<br>2.84)                | 1.69<br>(1.10 to<br>2.56)              | 1.95<br>(1.26 to<br>2.96)                  | 0.07<br>(0.06 to<br>0.09)           | 0.07<br>(0.05 to<br>0.11)          | 0.07<br>(0.04 to<br>0.10)          | 0.07<br>(0.05 to<br>0.11)          |

|                                       |                                          |                                          |                                          |                                          |                                       |                                       |                                       |                                       |
|---------------------------------------|------------------------------------------|------------------------------------------|------------------------------------------|------------------------------------------|---------------------------------------|---------------------------------------|---------------------------------------|---------------------------------------|
|                                       | 27.00<br>(24.82 to<br>29.09)             | 28.28<br>(18.71 to<br>40.86)             | 23.31<br>(15.31 to<br>33.91)             | 29.08<br>(19.24 to<br>42.07)             | 0.94<br>(0.85 to<br>1.01)             | 1.08<br>(0.76 to<br>1.51)             | 0.90<br>(0.63 to<br>1.26)             | 1.09<br>(0.77 to<br>1.52)             |
| Acute hepatitis B                     | 1.51<br>(1.11 to<br>1.99)                | 1.51<br>(0.96 to<br>2.28)                | 1.27<br>(0.79 to<br>1.92)                | 1.54<br>(0.98 to<br>2.31)                | 0.06<br>(0.04 to<br>0.08)             | 0.07<br>(0.04 to<br>0.10)             | 0.06<br>(0.04 to<br>0.08)             | 0.07<br>(0.04 to<br>0.10)             |
| Acute hepatitis C                     | 3.18<br>(2.40 to<br>4.09)                | 3.42<br>(2.20 to<br>5.13)                | 2.90<br>(1.86 to<br>4.40)                | 3.43<br>(2.24 to<br>5.22)                | 0.14<br>(0.11 to<br>0.18)             | 0.20<br>(0.13 to<br>0.29)             | 0.17<br>(0.12 to<br>0.25)             | 0.19<br>(0.12 to<br>0.28)             |
| Acute hepatitis E                     | 102.86<br>(93.93 to<br>121.40)           | 172.43<br>(144.37 to<br>205.11)          | 170.79<br>(142.52 to<br>204.74)          | 168.58<br>(142.55 to<br>199.86)          | 3.96<br>(3.52 to<br>4.52)             | 8.24<br>(7.07 to<br>9.63)             | 8.45<br>(7.18 to<br>9.88)             | 7.71<br>(6.64 to<br>8.98)             |
| Other unspecified infectious diseases | 43,668.39<br>(42,953.98 to<br>44,410.45) | 54,275.40<br>(41,856.17 to<br>68,702.27) | 47,055.83<br>(36,896.02 to<br>58,794.20) | 68,495.08<br>(52,499.52 to<br>86,492.86) | 2,697.66<br>(2,657.64 to<br>2,737.53) | 3,939.83<br>(3,200.30 to<br>4,842.44) | 3,494.47<br>(2,877.28 to<br>4,290.31) | 4,698.79<br>(3,831.20 to<br>5,711.40) |
| Non-communicable diseases             |                                          |                                          |                                          |                                          |                                       |                                       |                                       |                                       |
| <b>High-income North America</b>      |                                          |                                          |                                          |                                          |                                       |                                       |                                       |                                       |
| Cause                                 | YLLs (in 1000s)                          |                                          |                                          |                                          | Deaths (in 1000s)                     |                                       |                                       |                                       |
|                                       | 2016                                     | 2040 Forecast                            | 2040 Better Scenario                     | 2040 Worse Scenario                      | 2016                                  | 2040 Forecast                         | 2040 Better Scenario                  | 2040 Worse Scenario                   |
| Neoplasms                             | 14,527.88<br>(14,248.73 to<br>14,884.44) | 18,056.75<br>(14,120.15 to<br>22,630.30) | 16,118.83<br>(12,526.40 to<br>20,218.61) | 23,868.97<br>(18,404.71 to<br>30,286.15) | 770.40<br>(756.46 to<br>788.56)       | 1,127.48<br>(918.38 to<br>1,397.49)   | 1,034.69<br>(844.74 to<br>1,282.84)   | 1,430.00<br>(1,145.10 to<br>1,776.33) |
| Lip and oral cavity cancer            | 155.34<br>(150.07 to<br>160.28)          | 164.19<br>(100.39 to<br>259.55)          | 116.73<br>(74.14 to<br>179.15)           | 297.93<br>(168.97 to<br>490.09)          | 7.73<br>(7.48 to<br>7.98)             | 9.10<br>(5.83 to<br>13.93)            | 6.75<br>(4.54 to<br>9.92)             | 16.00<br>(9.58 to<br>25.70)           |
| Nasopharynx cancer                    | 33.62<br>(32.44 to<br>34.94)             | 33.34<br>(19.60 to<br>51.50)             | 21.74<br>(13.18 to<br>32.61)             | 61.67<br>(33.78 to<br>100.70)            | 1.23<br>(1.19 to<br>1.28)             | 1.28<br>(0.79 to<br>1.91)             | 0.85<br>(0.54 to<br>1.24)             | 2.35<br>(1.36 to<br>3.69)             |
| Other pharynx cancer                  | 85.23<br>(82.32 to<br>88.62)             | 126.06<br>(73.61 to<br>201.02)           | 106.33<br>(65.06 to<br>162.79)           | 143.39<br>(80.36 to<br>232.62)           | 3.89<br>(3.77 to<br>4.04)             | 6.61<br>(4.07 to<br>10.21)            | 5.76<br>(3.72 to<br>8.59)             | 7.28<br>(4.33 to<br>11.54)            |
| Esophageal cancer                     | 416.44<br>(400.74 to<br>433.00)          | 467.30<br>(281.18 to<br>767.71)          | 355.17<br>(225.35 to<br>558.70)          | 797.43<br>(440.62 to<br>1,380.49)        | 20.42<br>(19.61 to<br>21.26)          | 25.30<br>(15.74 to<br>40.02)          | 19.79<br>(12.95 to<br>30.31)          | 42.07<br>(24.13 to<br>70.94)          |
| Stomach cancer                        | 382.52<br>(371.81 to<br>394.03)          | 314.76<br>(234.67 to<br>422.03)          | 263.69<br>(201.58 to<br>346.13)          | 356.23<br>(259.97 to<br>480.67)          | 21.55<br>(20.97 to<br>22.17)          | 21.65<br>(16.35 to<br>29.00)          | 18.56<br>(14.37 to<br>24.28)          | 23.80<br>(17.47 to<br>31.97)          |
| Colon and rectum cancer               | 1,599.48<br>(1,552.42 to<br>1,651.90)    | 2,096.78<br>(1,390.27 to<br>3,188.92)    | 1,749.61<br>(1,180.42 to<br>2,610.74)    | 2,546.47<br>(1,639.34 to<br>3,904.67)    | 89.20<br>(86.61 to<br>92.09)          | 143.95<br>(97.37 to<br>212.88)        | 123.88<br>(86.06 to<br>183.81)        | 168.64<br>(112.28 to<br>253.96)       |
| Liver cancer                          | 563.66<br>(543.94 to<br>583.32)          | 830.22<br>(509.20 to<br>1,355.16)        | 752.98<br>(474.13 to<br>1,175.90)        | 1,126.57<br>(628.72 to<br>1,897.52)      | 27.10<br>(26.21 to<br>28.00)          | 45.92<br>(29.70 to<br>71.03)          | 42.99<br>(28.70 to<br>64.34)          | 59.71<br>(35.81 to<br>95.48)          |
| Liver cancer due to hepatitis B       | 87.61<br>(65.69 to<br>117.32)            | 126.01<br>(70.13 to<br>221.72)           | 117.23<br>(67.17 to<br>198.91)           | 165.06<br>(87.54 to<br>308.00)           | 3.68<br>(2.74 to<br>4.87)             | 5.88<br>(3.44 to<br>9.74)             | 5.61<br>(3.33 to<br>9.02)             | 7.47<br>(4.13 to<br>13.21)            |
| Liver cancer due to hepatitis C       | 205.81<br>(189.05 to<br>223.69)          | 300.39<br>(186.49 to<br>477.41)          | 282.99<br>(181.46 to<br>440.22)          | 386.16<br>(222.00 to<br>647.75)          | 10.51<br>(9.74 to<br>11.35)           | 17.85<br>(11.77 to<br>26.89)          | 17.31<br>(11.64 to<br>25.66)          | 22.01<br>(13.47 to<br>34.68)          |
| Liver cancer due to alcohol use       | 125.64<br>(109.27 to<br>143.24)          | 184.38<br>(111.60 to<br>295.07)          | 148.31<br>(94.21 to<br>227.70)           | 281.36<br>(162.01 to<br>461.79)          | 6.01<br>(5.27 to<br>6.82)             | 9.99<br>(6.43 to<br>15.27)            | 8.40<br>(5.62 to<br>12.51)            | 14.46<br>(8.75 to<br>23.65)           |
| Liver cancer due to other causes      | 144.60<br>(132.42 to<br>157.47)          | 219.45<br>(122.75 to<br>376.08)          | 204.45<br>(119.02 to<br>340.12)          | 293.98<br>(148.39 to<br>526.81)          | 6.90<br>(6.34 to<br>7.49)             | 12.19<br>(7.28 to<br>20.09)           | 11.67<br>(7.16 to<br>18.63)           | 15.77<br>(8.52 to<br>27.27)           |
| Gallbladder and biliary tract cancer  | 99.47<br>(95.47 to<br>111.12)            | 101.49<br>(86.71 to<br>119.91)           | 102.12<br>(86.34 to<br>122.29)           | 96.56<br>(83.77 to<br>113.02)            | 5.84<br>(5.61 to<br>6.54)             | 7.09<br>(6.24 to<br>8.23)             | 7.30<br>(6.38 to<br>8.58)             | 6.55<br>(5.86 to<br>7.51)             |
| Pancreatic cancer                     | 933.51<br>(908.19 to<br>958.78)          | 1,291.81<br>(964.41 to<br>1,738.79)      | 1,273.29<br>(945.24 to<br>1,711.10)      | 1,541.50<br>(1,128.17 to<br>2,114.67)    | 51.61<br>(50.17 to<br>53.05)          | 81.61<br>(62.85 to<br>107.58)         | 81.87<br>(62.84 to<br>108.25)         | 95.10<br>(70.95 to<br>128.57)         |
| Larynx cancer                         | 114.76<br>(110.54 to<br>118.87)          | 86.70<br>(45.19 to<br>142.93)            | 63.15<br>(33.51 to<br>102.97)            | 161.59<br>(82.39 to<br>293.06)           | 5.53<br>(5.35 to<br>5.72)             | 4.64<br>(2.52 to<br>7.56)             | 3.49<br>(1.88 to<br>5.69)             | 8.44<br>(4.42 to<br>14.97)            |

|                                     |                                       |                                       |                                       |                                        |                                 |                                 |                                 |                                 |
|-------------------------------------|---------------------------------------|---------------------------------------|---------------------------------------|----------------------------------------|---------------------------------|---------------------------------|---------------------------------|---------------------------------|
| Tracheal, bronchus, and lung cancer | 3,986.84<br>(3,889.54 to<br>4,086.85) | 3,762.90<br>(2,672.67 to<br>5,090.92) | 2,956.64<br>(2,117.40 to<br>4,027.58) | 7,509.16<br>(5,264.10 to<br>10,461.81) | 213.06<br>(207.54 to<br>218.86) | 227.05<br>(164.41 to<br>304.90) | 182.50<br>(132.70 to<br>246.43) | 438.48<br>(313.46 to<br>601.57) |
| Malignant skin melanoma             | 254.59<br>(232.99 to<br>301.47)       | 431.83<br>(348.59 to<br>537.58)       | 484.88<br>(388.00 to<br>608.63)       | 400.33<br>(328.51 to<br>495.23)        | 11.61<br>(10.23 to<br>13.08)    | 22.71<br>(18.91 to<br>26.69)    | 26.12<br>(21.52 to<br>31.17)    | 20.33<br>(17.08 to<br>23.76)    |
| Non-melanoma skin cancer            | 66.92<br>(64.84 to<br>68.99)          | 91.84<br>(77.02 to<br>106.17)         | 84.26<br>(69.73 to<br>98.58)          | 88.62<br>(75.98 to<br>101.87)          | 4.16<br>(4.03 to<br>4.30)       | 6.71<br>(5.85 to<br>7.63)       | 6.35<br>(5.49 to<br>7.24)       | 6.22<br>(5.47 to<br>6.98)       |
| Breast cancer                       | 1,180.18<br>(1,135.53 to<br>1,227.85) | 1,466.88<br>(956.67 to<br>2,170.15)   | 1,256.91<br>(826.21 to<br>1,832.64)   | 1,742.78<br>(1,094.15 to<br>2,667.39)  | 55.42<br>(53.40 to<br>57.59)    | 80.39<br>(54.80 to<br>116.50)   | 70.83<br>(48.27 to<br>102.12)   | 92.33<br>(61.03 to<br>139.41)   |
| Cervical cancer                     | 200.80<br>(191.48 to<br>210.24)       | 159.19<br>(108.67 to<br>219.45)       | 137.77<br>(93.90 to<br>188.85)        | 182.05<br>(118.31 to<br>266.42)        | 7.77<br>(7.43 to<br>8.11)       | 6.99<br>(4.99 to<br>9.45)       | 6.15<br>(4.43 to<br>8.23)       | 7.86<br>(5.30 to<br>11.35)      |
| Uterine cancer                      | 160.61<br>(153.40 to<br>168.65)       | 219.09<br>(175.05 to<br>263.77)       | 206.19<br>(163.92 to<br>252.34)       | 215.20<br>(174.41 to<br>255.74)        | 8.62<br>(8.23 to<br>9.04)       | 14.01<br>(11.69 to<br>16.55)    | 13.42<br>(11.11 to<br>16.11)    | 13.45<br>(11.24 to<br>15.69)    |
| Ovarian cancer                      | 372.95<br>(356.81 to<br>388.79)       | 486.87<br>(332.96 to<br>698.64)       | 448.02<br>(305.42 to<br>637.74)       | 507.10<br>(343.77 to<br>746.89)        | 18.63<br>(17.83 to<br>19.42)    | 27.75<br>(19.66 to<br>39.72)    | 25.71<br>(18.23 to<br>36.40)    | 28.45<br>(19.76 to<br>41.96)    |
| Prostate cancer                     | 530.23<br>(492.99 to<br>728.33)       | 945.71<br>(768.81 to<br>1,362.80)     | 925.87<br>(749.81 to<br>1,306.81)     | 911.16<br>(750.90 to<br>1,303.24)      | 41.12<br>(38.20 to<br>55.84)    | 87.54<br>(71.70 to<br>123.41)   | 87.97<br>(72.17 to<br>124.99)   | 81.57<br>(65.72 to<br>116.37)   |
| Testicular cancer                   | 19.73<br>(18.17 to<br>21.35)          | 15.92<br>(11.41 to<br>21.25)          | 14.50<br>(10.12 to<br>19.70)          | 15.97<br>(11.49 to<br>21.33)           | 0.46<br>(0.43 to<br>0.50)       | 0.42<br>(0.33 to<br>0.53)       | 0.39<br>(0.30 to<br>0.50)       | 0.41<br>(0.32 to<br>0.52)       |

#### High-income North America

| Cause                           | YLLs (in 1000s)                 |                                   |                                   |                                     | Deaths (in 1000s)            |                              |                              |                              |
|---------------------------------|---------------------------------|-----------------------------------|-----------------------------------|-------------------------------------|------------------------------|------------------------------|------------------------------|------------------------------|
|                                 | 2016                            | 2040 Forecast                     | 2040 Better Scenario              | 2040 Worse Scenario                 | 2016                         | 2040 Forecast                | 2040 Better Scenario         | 2040 Worse Scenario          |
| Kidney cancer                   | 358.07<br>(346.81 to<br>369.64) | 526.02<br>(417.30 to<br>646.56)   | 530.69<br>(420.61 to<br>657.27)   | 587.59<br>(446.21 to<br>746.95)     | 18.45<br>(17.88 to<br>19.01) | 31.18<br>(25.46 to<br>37.48) | 32.19<br>(26.18 to<br>38.64) | 33.83<br>(26.74 to<br>42.23) |
| Bladder cancer                  | 299.21<br>(289.28 to<br>309.00) | 356.37<br>(261.38 to<br>491.66)   | 335.48<br>(245.99 to<br>460.27)   | 452.88<br>(312.96 to<br>645.64)     | 20.92<br>(20.23 to<br>21.65) | 29.78<br>(22.14 to<br>40.47) | 28.74<br>(21.41 to<br>39.28) | 36.74<br>(25.95 to<br>52.36) |
| Brain and nervous system cancer | 500.81<br>(448.03 to<br>545.41) | 724.95<br>(580.80 to<br>854.07)   | 704.02<br>(560.36 to<br>843.17)   | 708.57<br>(576.97 to<br>826.91)     | 18.88<br>(16.47 to<br>20.05) | 32.20<br>(26.26 to<br>37.17) | 31.88<br>(25.70 to<br>37.38) | 30.60<br>(25.62 to<br>34.96) |
| Thyroid cancer                  | 40.77<br>(39.17 to<br>42.40)    | 54.04<br>(37.68 to<br>77.15)      | 48.47<br>(34.15 to<br>67.64)      | 57.08<br>(38.87 to<br>83.40)        | 2.20<br>(2.11 to<br>2.30)    | 3.40<br>(2.49 to<br>4.67)    | 3.14<br>(2.33 to<br>4.27)    | 3.44<br>(2.45 to<br>4.86)    |
| Mesothelioma                    | 66.77<br>(62.78 to<br>70.22)    | 119.41<br>(100.37 to<br>140.51)   | 125.23<br>(103.49 to<br>150.57)   | 110.44<br>(95.22 to<br>125.74)      | 3.95<br>(3.70 to<br>4.14)    | 8.30<br>(7.22 to<br>9.55)    | 8.88<br>(7.61 to<br>10.37)   | 7.46<br>(6.57 to<br>8.37)    |
| Hodgkin lymphoma                | 41.43<br>(38.93 to<br>51.23)    | 40.56<br>(31.30 to<br>52.27)      | 35.25<br>(26.75 to<br>45.93)      | 40.83<br>(31.97 to<br>52.99)        | 1.46<br>(1.39 to<br>1.71)    | 1.72<br>(1.43 to<br>2.09)    | 1.53<br>(1.25 to<br>1.86)    | 1.67<br>(1.40 to<br>2.01)    |
| Non-Hodgkin lymphoma            | 545.68<br>(520.09 to<br>639.64) | 814.85<br>(630.27 to<br>1,057.18) | 760.83<br>(588.44 to<br>986.17)   | 818.26<br>(629.27 to<br>1,071.81)   | 30.27<br>(28.98 to<br>33.54) | 53.09<br>(43.13 to<br>66.02) | 50.89<br>(41.27 to<br>62.98) | 51.39<br>(41.68 to<br>64.26) |
| Multiple myeloma                | 274.59<br>(250.29 to<br>345.72) | 444.68<br>(341.50 to<br>592.89)   | 426.40<br>(327.68 to<br>567.53)   | 444.02<br>(342.39 to<br>604.44)     | 15.89<br>(14.06 to<br>19.36) | 29.53<br>(23.46 to<br>38.36) | 28.98<br>(22.92 to<br>37.59) | 28.53<br>(22.49 to<br>37.76) |
| Leukemia                        | 616.23<br>(599.45 to<br>633.72) | 902.58<br>(691.31 to<br>1,153.57) | 841.80<br>(647.10 to<br>1,080.01) | 1,012.80<br>(747.48 to<br>1,338.95) | 31.85<br>(31.02 to<br>32.69) | 57.15<br>(44.07 to<br>71.97) | 54.78<br>(42.48 to<br>68.61) | 62.07<br>(45.87 to<br>80.63) |
| Acute lymphoid leukemia         | 72.98<br>(66.61 to<br>77.01)    | 69.00<br>(51.73 to<br>88.35)      | 60.98<br>(45.87 to<br>78.11)      | 77.73<br>(57.73 to<br>102.23)       | 1.95<br>(1.83 to<br>2.08)    | 2.24<br>(1.72 to<br>2.89)    | 2.02<br>(1.55 to<br>2.58)    | 2.50<br>(1.85 to<br>3.34)    |
| Chronic lymphoid leukemia       | 92.72<br>(86.26 to<br>109.98)   | 135.38<br>(99.11 to<br>180.63)    | 129.82<br>(95.96 to<br>170.13)    | 150.63<br>(105.16 to<br>210.30)     | 6.68<br>(6.22 to<br>7.64)    | 11.16<br>(8.36 to<br>14.44)  | 10.99<br>(8.30 to<br>14.14)  | 11.94<br>(8.44 to<br>16.20)  |

|                                               |                                                     |                                                    |                                                   |                                                     |                                              |                                                |                                              |                                                |
|-----------------------------------------------|-----------------------------------------------------|----------------------------------------------------|---------------------------------------------------|-----------------------------------------------------|----------------------------------------------|------------------------------------------------|----------------------------------------------|------------------------------------------------|
| Acute myeloid leukemia                        | 270.61<br>(243.55 to 283.61)                        | 441.65<br>(334.18 to 561.65)                       | 423.16<br>(321.96 to 539.58)                      | 493.85<br>(365.16 to 650.10)                        | 12.97<br>(11.54 to 13.55)                    | 25.02<br>(19.40 to 31.65)                      | 24.60<br>(19.26 to 30.84)                    | 27.20<br>(20.45 to 35.40)                      |
| Chronic myeloid leukemia                      | 28.94<br>(27.33 to 31.55)                           | 22.41<br>(15.79 to 30.93)                          | 18.05<br>(12.98 to 24.67)                         | 26.42<br>(17.77 to 37.87)                           | 1.51<br>(1.43 to 1.63)                       | 1.35<br>(0.97 to 1.81)                         | 1.12<br>(0.82 to 1.48)                       | 1.53<br>(1.06 to 2.14)                         |
| Other leukemia                                | 150.98<br>(143.46 to 164.99)                        | 234.15<br>(175.69 to 306.81)                       | 209.79<br>(157.88 to 272.21)                      | 264.17<br>(188.71 to 363.31)                        | 8.74<br>(8.34 to 9.57)                       | 17.38<br>(12.98 to 22.65)                      | 16.06<br>(12.23 to 20.89)                    | 18.90<br>(13.55 to 25.44)                      |
| Other neoplasms                               | 627.46<br>(607.09 to 646.54)                        | 980.40<br>(829.30 to 1,128.07)                     | 990.81<br>(828.60 to 1,155.12)                    | 934.80<br>(801.35 to 1,056.48)                      | 31.55<br>(30.49 to 32.48)                    | 60.41<br>(53.43 to 67.59)                      | 63.00<br>(54.97 to 71.85)                    | 55.22<br>(49.57 to 61.20)                      |
| <b>Cardiovascular diseases</b>                | <b>13,683.69</b><br><b>(13,400.20 to 13,948.74)</b> | <b>13,260.27</b><br><b>(7,681.87 to 21,875.39)</b> | <b>9,036.83</b><br><b>(5,536.10 to 14,189.93)</b> | <b>18,982.77</b><br><b>(10,642.46 to 32,449.05)</b> | <b>982.86</b><br><b>(963.31 to 1,002.76)</b> | <b>1,152.10</b><br><b>(704.89 to 1,799.24)</b> | <b>848.83</b><br><b>(532.60 to 1,320.05)</b> | <b>1,463.87</b><br><b>(860.14 to 2,298.06)</b> |
| Rheumatic heart disease                       | 175.97<br>(169.17 to 182.71)                        | 155.45<br>(111.26 to 218.25)                       | 136.33<br>(96.59 to 189.92)                       | 151.67<br>(110.08 to 210.02)                        | 11.91<br>(11.49 to 12.36)                    | 13.30<br>(9.92 to 18.24)                       | 12.08<br>(8.86 to 16.78)                     | 12.45<br>(9.46 to 17.05)                       |
| Ischemic heart disease                        | 8,225.21<br>(8,025.27 to 8,429.22)                  | 6,894.97<br>(3,467.38 to 12,524.54)                | 4,080.52<br>(2,171.15 to 7,107.68)                | 11,237.58<br>(5,393.26 to 20,724.85)                | 594.51<br>(580.39 to 607.43)                 | 612.48<br>(319.63 to 1,073.01)                 | 400.91<br>(216.75 to 705.55)                 | 864.94<br>(445.50 to 1,548.70)                 |
| Stroke                                        | 2,486.50<br>(2,392.09 to 2,589.10)                  | 1,952.85<br>(1,072.77 to 3,474.07)                 | 1,248.47<br>(721.45 to 2,178.49)                  | 2,833.04<br>(1,527.57 to 5,121.51)                  | 195.66<br>(185.35 to 206.78)                 | 182.65<br>(106.21 to 330.32)                   | 131.57<br>(76.65 to 234.67)                  | 229.21<br>(130.57 to 410.19)                   |
| Ischemic stroke                               | 1,247.29<br>(1,187.40 to 1,308.52)                  | 1,018.45<br>(539.02 to 2,117.43)                   | 723.76<br>(382.23 to 1,431.50)                    | 1,323.47<br>(673.72 to 2,895.40)                    | 125.92<br>(118.28 to 134.09)                 | 119.09<br>(61.45 to 241.22)                    | 90.78<br>(47.89 to 180.83)                   | 141.19<br>(71.88 to 289.21)                    |
| Intracerebral hemorrhage                      | 1,239.21<br>(1,193.96 to 1,287.58)                  | 934.40<br>(456.36 to 1,716.36)                     | 524.70<br>(283.25 to 895.26)                      | 1,508.57<br>(696.70 to 2,880.79)                    | 69.74<br>(66.49 to 73.10)                    | 63.56<br>(35.44 to 107.30)                     | 40.79<br>(24.04 to 67.04)                    | 88.02<br>(46.63 to 155.96)                     |
| Hypertensive heart disease                    | 683.84<br>(409.52 to 780.90)                        | 1,153.73<br>(497.34 to 2,509.07)                   | 847.60<br>(406.75 to 1,721.12)                    | 1,494.48<br>(612.47 to 3,531.17)                    | 41.33<br>(26.22 to 49.16)                    | 88.52<br>(40.27 to 207.46)                     | 69.08<br>(34.86 to 141.67)                   | 106.00<br>(46.10 to 253.46)                    |
| Cardiomyopathy and myocarditis                | 662.43<br>(620.59 to 796.03)                        | 706.83<br>(467.00 to 1,022.28)                     | 588.47<br>(390.98 to 857.39)                      | 752.22<br>(504.41 to 1,109.43)                      | 32.36<br>(30.41 to 38.05)                    | 41.16<br>(28.25 to 58.50)                      | 35.31<br>(24.50 to 50.70)                    | 41.56<br>(28.99 to 58.65)                      |
| Myocarditis                                   | 47.94<br>(33.82 to 54.13)                           | 49.79<br>(33.36 to 68.76)                          | 49.13<br>(32.59 to 69.71)                         | 49.17<br>(32.89 to 67.67)                           | 1.37<br>(1.02 to 1.53)                       | 1.88<br>(1.38 to 2.43)                         | 1.94<br>(1.42 to 2.59)                       | 1.76<br>(1.30 to 2.24)                         |
| <b>High-income North America</b>              |                                                     |                                                    |                                                   |                                                     |                                              |                                                |                                              |                                                |
| Cause                                         | YLLs (in 1000s)                                     |                                                    |                                                   |                                                     | Deaths (in 1000s)                            |                                                |                                              |                                                |
|                                               | 2016                                                | 2040 Forecast                                      | 2040 Better Scenario                              | 2040 Worse Scenario                                 | 2016                                         | 2040 Forecast                                  | 2040 Better Scenario                         | 2040 Worse Scenario                            |
| Alcoholic cardiomyopathy                      | 146.62<br>(113.88 to 194.99)                        | 172.33<br>(120.21 to 243.45)                       | 149.58<br>(103.28 to 213.12)                      | 197.42<br>(139.75 to 272.54)                        | 6.18<br>(4.71 to 8.27)                       | 8.03<br>(5.90 to 11.16)                        | 7.25<br>(5.21 to 10.23)                      | 8.77<br>(6.49 to 12.09)                        |
| Other cardiomyopathy                          | 467.87<br>(432.90 to 580.10)                        | 484.72<br>(296.30 to 750.81)                       | 389.76<br>(238.72 to 602.49)                      | 505.63<br>(307.23 to 802.08)                        | 24.81<br>(23.16 to 29.41)                    | 31.24<br>(19.74 to 47.51)                      | 26.11<br>(16.52 to 39.51)                    | 31.03<br>(19.82 to 46.79)                      |
| Atrial fibrillation and flutter               | 221.87<br>(186.36 to 260.25)                        | 414.92<br>(282.39 to 574.36)                       | 388.82<br>(265.31 to 549.77)                      | 418.51<br>(286.99 to 570.90)                        | 24.37<br>(20.02 to 29.43)                    | 48.78<br>(34.04 to 67.25)                      | 47.28<br>(33.02 to 66.69)                    | 46.91<br>(32.65 to 63.20)                      |
| Aortic aneurysm                               | 246.97<br>(237.73 to 257.88)                        | 343.53<br>(239.78 to 492.40)                       | 316.60<br>(223.84 to 447.91)                      | 357.04<br>(248.84 to 506.02)                        | 15.54<br>(15.02 to 16.09)                    | 26.63<br>(19.38 to 36.98)                      | 25.64<br>(18.58 to 35.82)                    | 25.92<br>(19.01 to 35.35)                      |
| Peripheral artery disease                     | 128.77<br>(97.30 to 213.86)                         | 298.27<br>(179.89 to 530.90)                       | 288.95<br>(174.83 to 516.88)                      | 322.31<br>(193.74 to 573.75)                        | 11.16<br>(8.20 to 19.06)                     | 30.20<br>(18.22 to 54.73)                      | 30.55<br>(18.65 to 55.56)                    | 30.40<br>(18.55 to 55.66)                      |
| Endocarditis                                  | 164.57<br>(124.45 to 211.98)                        | 289.65<br>(180.01 to 446.26)                       | 276.70<br>(173.86 to 427.87)                      | 287.33<br>(178.50 to 440.78)                        | 9.78<br>(7.21 to 12.35)                      | 20.42<br>(12.62 to 31.28)                      | 20.24<br>(12.66 to 31.24)                    | 19.35<br>(12.00 to 29.57)                      |
| Other cardiovascular and circulatory diseases | 687.56<br>(664.80 to 711.78)                        | 1,050.05<br>(717.34 to 1,507.80)                   | 864.37<br>(602.24 to 1,233.29)                    | 1,129.60<br>(760.31 to 1,648.07)                    | 46.03<br>(44.59 to 47.41)                    | 87.95<br>(63.33 to 121.04)                     | 76.19<br>(54.22 to 106.23)                   | 87.13<br>(63.61 to 119.19)                     |

|                                                                |                                                      |                                                      |                                                      |                                                      |                                                |                                                |                                                |                                                |
|----------------------------------------------------------------|------------------------------------------------------|------------------------------------------------------|------------------------------------------------------|------------------------------------------------------|------------------------------------------------|------------------------------------------------|------------------------------------------------|------------------------------------------------|
| <b>Chronic respiratory diseases</b>                            | <b>3,019.32</b><br>(2,944.27 to<br><b>3,092.16</b> ) | <b>3,054.49</b><br>(2,378.89 to<br><b>3,834.02</b> ) | <b>2,818.36</b><br>(2,203.30 to<br><b>3,494.22</b> ) | <b>4,848.68</b><br>(3,651.62 to<br><b>6,269.29</b> ) | <b>206.01</b><br>(200.91 to<br><b>211.20</b> ) | <b>241.17</b><br>(191.09 to<br><b>304.29</b> ) | <b>227.66</b><br>(180.37 to<br><b>287.60</b> ) | <b>369.99</b><br>(285.72 to<br><b>482.39</b> ) |
| Chronic obstructive pulmonary disease                          | 2,500.48<br>(2,419.78 to<br>2,629.32)                | 2,154.18<br>(1,552.04 to<br>2,926.85)                | 1,781.90<br>(1,271.45 to<br>2,461.45)                | 4,005.18<br>(2,841.13 to<br>5,510.45)                | 176.67<br>(170.79 to<br>186.12)                | 176.70<br>(128.51 to<br>239.28)                | 150.99<br>(108.82 to<br>208.28)                | 312.03<br>(227.87 to<br>425.84)                |
| Pneumoconiosis                                                 | 15.18<br>(14.16 to<br>16.19)                         | 27.16<br>(21.28 to<br>34.18)                         | 29.66<br>(22.59 to<br>37.62)                         | 24.67<br>(19.99 to<br>30.17)                         | 1.15<br>(1.07 to<br>1.23)                      | 2.42<br>(1.90 to<br>3.08)                      | 2.69<br>(2.06 to<br>3.44)                      | 2.14<br>(1.71 to<br>2.66)                      |
| Silicosis                                                      | 1.82<br>(1.50 to<br>3.07)                            | 1.02<br>(0.65 to<br>2.09)                            | 0.85<br>(0.53 to<br>1.76)                            | 1.01<br>(0.66 to<br>1.99)                            | 0.12<br>(0.09 to<br>0.22)                      | 0.08<br>(0.05 to<br>0.19)                      | 0.07<br>(0.04 to<br>0.16)                      | 0.08<br>(0.05 to<br>0.17)                      |
| Asbestosis                                                     | 8.64<br>(7.03 to<br>10.75)                           | 21.14<br>(15.71 to<br>27.50)                         | 24.37<br>(18.11 to<br>31.76)                         | 18.63<br>(14.09 to<br>23.77)                         | 0.67<br>(0.52 to<br>0.81)                      | 1.87<br>(1.38 to<br>2.46)                      | 2.19<br>(1.63 to<br>2.85)                      | 1.60<br>(1.19 to<br>2.09)                      |
| Coal workers pneumoconiosis                                    | 3.60<br>(1.11 to<br>4.55)                            | 3.73<br>(1.31 to<br>7.50)                            | 3.14<br>(1.19 to<br>6.51)                            | 3.78<br>(1.29 to<br>7.14)                            | 0.28<br>(0.09 to<br>0.38)                      | 0.36<br>(0.13 to<br>0.76)                      | 0.31<br>(0.12 to<br>0.69)                      | 0.35<br>(0.13 to<br>0.72)                      |
| Other pneumoconiosis                                           | 1.13<br>(0.99 to<br>1.79)                            | 1.28<br>(0.96 to<br>1.96)                            | 1.30<br>(0.95 to<br>2.02)                            | 1.25<br>(0.95 to<br>1.87)                            | 0.08<br>(0.07 to<br>0.14)                      | 0.11<br>(0.08 to<br>0.18)                      | 0.11<br>(0.08 to<br>0.19)                      | 0.10<br>(0.08 to<br>0.17)                      |
| Asthma                                                         | 119.26<br>(109.24 to<br>130.50)                      | 57.22<br>(30.85 to<br>99.04)                         | 41.02<br>(22.37 to<br>71.71)                         | 72.95<br>(38.05 to<br>127.68)                        | 4.41<br>(4.11 to<br>5.10)                      | 2.80<br>(1.58 to<br>4.88)                      | 2.11<br>(1.22 to<br>3.58)                      | 3.35<br>(1.84 to<br>6.02)                      |
| Interstitial lung disease and pulmonary sarcoidosis            | 327.81<br>(209.29 to<br>365.51)                      | 744.44<br>(495.95 to<br>886.85)                      | 893.69<br>(601.45 to<br>1,081.94)                    | 667.58<br>(428.03 to<br>787.04)                      | 21.12<br>(13.22 to<br>23.61)                   | 55.11<br>(35.80 to<br>64.91)                   | 67.56<br>(44.63 to<br>80.70)                   | 48.04<br>(29.94 to<br>57.35)                   |
| Other chronic respiratory diseases                             | 56.59<br>(34.94 to<br>75.67)                         | 71.50<br>(42.81 to<br>98.25)                         | 72.10<br>(43.84 to<br>101.41)                        | 78.31<br>(45.39 to<br>109.75)                        | 2.66<br>(1.69 to<br>3.70)                      | 4.14<br>(2.52 to<br>6.04)                      | 4.31<br>(2.64 to<br>6.33)                      | 4.44<br>(2.65 to<br>6.44)                      |
| <b>Cirrhosis and other chronic liver diseases</b>              | <b>1,737.84</b><br>(1,684.78 to<br><b>1,792.88</b> ) | <b>1,925.60</b><br>(1,489.99 to<br><b>2,376.73</b> ) | <b>1,661.99</b><br>(1,271.57 to<br><b>2,085.25</b> ) | <b>2,085.95</b><br>(1,632.44 to<br><b>2,552.20</b> ) | <b>67.24</b><br>(65.26 to<br><b>69.24</b> )    | <b>82.50</b><br>(68.38 to<br><b>97.64</b> )    | <b>72.96</b><br>(59.77 to<br><b>87.61</b> )    | <b>86.61</b><br>(72.30 to<br><b>101.41</b> )   |
| Cirrhosis and other chronic liver diseases due to hepatitis B  | 117.18<br>(108.40 to<br>127.18)                      | 131.20<br>(99.94 to<br>165.22)                       | 121.07<br>(91.02 to<br>154.15)                       | 130.33<br>(101.20 to<br>163.04)                      | 4.56<br>(4.24 to<br>4.92)                      | 5.66<br>(4.59 to<br>6.88)                      | 5.30<br>(4.24 to<br>6.52)                      | 5.50<br>(4.52 to<br>6.62)                      |
| Cirrhosis and other chronic liver diseases due to hepatitis C  | 542.83<br>(505.99 to<br>581.62)                      | 616.84<br>(463.82 to<br>772.95)                      | 564.79<br>(419.47 to<br>720.20)                      | 615.74<br>(469.92 to<br>767.33)                      | 20.11<br>(18.83 to<br>21.48)                   | 24.82<br>(19.78 to<br>30.14)                   | 23.02<br>(18.33 to<br>28.25)                   | 24.30<br>(19.78 to<br>28.94)                   |
| Cirrhosis and other chronic liver diseases due to alcohol use  | 699.25<br>(649.34 to<br>749.34)                      | 752.73<br>(572.65 to<br>953.74)                      | 585.01<br>(442.38 to<br>749.48)                      | 916.91<br>(702.25 to<br>1,149.56)                    | 27.20<br>(25.37 to<br>29.06)                   | 32.38<br>(26.26 to<br>39.03)                   | 26.17<br>(21.13 to<br>31.90)                   | 37.75<br>(30.87 to<br>44.95)                   |
| Cirrhosis and other chronic liver diseases due to other causes | 378.57<br>(329.44 to<br>436.06)                      | 424.83<br>(317.75 to<br>547.75)                      | 391.12<br>(287.99 to<br>509.42)                      | 422.97<br>(318.40 to<br>542.39)                      | 15.36<br>(13.56 to<br>17.58)                   | 19.65<br>(16.08 to<br>24.07)                   | 18.46<br>(15.06 to<br>22.95)                   | 19.05<br>(15.66 to<br>23.22)                   |
| <b>Digestive diseases</b>                                      | <b>881.39</b><br>(837.28 to<br><b>1,013.00</b> )     | <b>1,264.97</b><br>(1,006.63 to<br><b>1,622.71</b> ) | <b>1,194.98</b><br>(944.40 to<br><b>1,531.26</b> )   | <b>1,252.19</b><br>(993.66 to<br><b>1,616.85</b> )   | <b>58.55</b><br>(55.78 to<br><b>68.15</b> )    | <b>104.09</b><br>(84.67 to<br><b>132.08</b> )  | <b>102.27</b><br>(82.80 to<br><b>130.77</b> )  | <b>98.31</b><br>(79.22 to<br><b>125.09</b> )   |
| Peptic ulcer disease                                           | 89.27<br>(80.39 to<br>103.53)                        | 72.02<br>(56.25 to<br>91.55)                         | 60.67<br>(46.42 to<br>77.15)                         | 75.45<br>(57.43 to<br>98.35)                         | 5.81<br>(5.26 to<br>6.68)                      | 6.14<br>(4.84 to<br>7.81)                      | 5.35<br>(4.24 to<br>6.82)                      | 6.09<br>(4.75 to<br>7.77)                      |

**High-income North America**

| Cause                                      | YLLs (in 1000s)                 |                                 |                                 |                                 | Deaths (in 1000s)           |                              |                              |                              |
|--------------------------------------------|---------------------------------|---------------------------------|---------------------------------|---------------------------------|-----------------------------|------------------------------|------------------------------|------------------------------|
|                                            | 2016                            | 2040 Forecast                   | 2040 Better Scenario            | 2040 Worse Scenario             | 2016                        | 2040 Forecast                | 2040 Better Scenario         | 2040 Worse Scenario          |
| Gastritis and duodenitis                   | 9.21<br>(7.82 to<br>16.36)      | 14.38<br>(10.22 to<br>27.50)    | 13.07<br>(9.17 to<br>24.88)     | 14.09<br>(10.09 to<br>26.16)    | 0.54<br>(0.45 to<br>1.04)   | 1.05<br>(0.76 to<br>2.05)    | 0.99<br>(0.71 to<br>1.99)    | 0.98<br>(0.71 to<br>1.86)    |
| Appendicitis                               | 19.15<br>(16.47 to<br>26.81)    | 18.13<br>(13.33 to<br>27.25)    | 15.49<br>(11.16 to<br>23.57)    | 18.11<br>(13.37 to<br>27.02)    | 0.92<br>(0.78 to<br>1.35)   | 1.13<br>(0.86 to<br>1.75)    | 1.00<br>(0.75 to<br>1.57)    | 1.08<br>(0.82 to<br>1.68)    |
| Paralytic ileus and intestinal obstruction | 153.34<br>(127.23 to<br>188.46) | 248.81<br>(195.66 to<br>318.80) | 256.59<br>(201.47 to<br>330.22) | 232.07<br>(183.12 to<br>295.98) | 11.06<br>(9.14 to<br>13.53) | 22.23<br>(17.38 to<br>28.27) | 23.73<br>(18.43 to<br>29.79) | 19.84<br>(15.43 to<br>25.27) |

|                                         |                                                            |                                                            |                                                            |                                                            |                                                      |                                                      |                                                      |                                                      |
|-----------------------------------------|------------------------------------------------------------|------------------------------------------------------------|------------------------------------------------------------|------------------------------------------------------------|------------------------------------------------------|------------------------------------------------------|------------------------------------------------------|------------------------------------------------------|
|                                         | 27.30<br>(20.11 to<br>35.85)                               | 23.63<br>(16.72 to<br>30.96)                               | 22.36<br>(15.47 to<br>29.57)                               | 22.58<br>(16.30 to<br>29.99)                               | 1.99<br>(1.46 to<br>2.64)                            | 2.08<br>(1.43 to<br>2.77)                            | 2.04<br>(1.42 to<br>2.70)                            | 1.91<br>(1.32 to<br>2.52)                            |
| Inguinal, femoral, and abdominal hernia |                                                            |                                                            |                                                            |                                                            |                                                      |                                                      |                                                      |                                                      |
|                                         | 85.06<br>(58.23 to<br>94.20)                               | 109.69<br>(72.31 to<br>138.33)                             | 111.42<br>(74.04 to<br>142.36)                             | 103.74<br>(69.23 to<br>129.64)                             | 5.18<br>(3.57 to<br>5.73)                            | 8.13<br>(5.50 to<br>10.20)                           | 8.52<br>(5.72 to<br>10.81)                           | 7.39<br>(4.95 to<br>9.22)                            |
| Inflammatory bowel disease              |                                                            |                                                            |                                                            |                                                            |                                                      |                                                      |                                                      |                                                      |
|                                         | 156.23<br>(141.56 to<br>184.82)                            | 256.42<br>(204.37 to<br>322.45)                            | 251.50<br>(196.93 to<br>318.72)                            | 243.26<br>(196.32 to<br>304.84)                            | 10.76<br>(9.77 to<br>12.87)                          | 21.12<br>(16.97 to<br>26.36)                         | 21.28<br>(16.90 to<br>26.80)                         | 19.39<br>(15.67 to<br>24.50)                         |
| Vascular intestinal disorders           |                                                            |                                                            |                                                            |                                                            |                                                      |                                                      |                                                      |                                                      |
|                                         | 80.58<br>(73.17 to<br>94.65)                               | 125.94<br>(65.16 to<br>232.59)                             | 98.78<br>(52.44 to<br>179.71)                              | 146.42<br>(74.64 to<br>270.38)                             | 6.08<br>(5.56 to<br>7.25)                            | 11.54<br>(5.92 to<br>21.68)                          | 9.47<br>(5.01 to<br>17.50)                           | 12.68<br>(6.52 to<br>23.80)                          |
| Gallbladder and biliary diseases        |                                                            |                                                            |                                                            |                                                            |                                                      |                                                      |                                                      |                                                      |
|                                         | 106.13<br>(94.34 to<br>129.15)                             | 137.28<br>(81.20 to<br>233.73)                             | 110.25<br>(67.77 to<br>180.71)                             | 152.31<br>(85.44 to<br>268.40)                             | 4.89<br>(4.37 to<br>5.91)                            | 7.58<br>(5.03 to<br>11.92)                           | 6.40<br>(4.36 to<br>9.77)                            | 7.99<br>(5.03 to<br>13.25)                           |
| Pancreatitis                            |                                                            |                                                            |                                                            |                                                            |                                                      |                                                      |                                                      |                                                      |
|                                         | 155.13<br>(133.71 to<br>190.42)                            | 258.67<br>(205.48 to<br>325.68)                            | 254.85<br>(202.76 to<br>323.21)                            | 244.16<br>(197.24 to<br>306.63)                            | 11.52<br>(10.02 to<br>13.95)                         | 23.08<br>(18.32 to<br>29.18)                         | 23.49<br>(18.55 to<br>29.77)                         | 20.95<br>(16.70 to<br>26.65)                         |
| Other digestive diseases                |                                                            |                                                            |                                                            |                                                            |                                                      |                                                      |                                                      |                                                      |
|                                         | <b>2,930.26</b><br><b>(2,723.10 to</b><br><b>3,157.78)</b> | <b>5,623.98</b><br><b>(4,405.22 to</b><br><b>7,560.49)</b> | <b>5,628.15</b><br><b>(4,467.00 to</b><br><b>7,386.96)</b> | <b>5,652.33</b><br><b>(4,308.63 to</b><br><b>7,899.66)</b> | <b>312.80</b><br><b>(286.29 to</b><br><b>340.82)</b> | <b>636.64</b><br><b>(492.18 to</b><br><b>864.35)</b> | <b>651.74</b><br><b>(511.58 to</b><br><b>863.38)</b> | <b>620.52</b><br><b>(468.11 to</b><br><b>880.84)</b> |
| Neurological disorders                  |                                                            |                                                            |                                                            |                                                            |                                                      |                                                      |                                                      |                                                      |
|                                         | 2,041.97<br>(1,832.20 to<br>2,264.90)                      | 4,141.43<br>(2,990.00 to<br>6,024.90)                      | 4,094.85<br>(3,019.16 to<br>5,792.89)                      | 4,238.23<br>(2,984.13 to<br>6,406.66)                      | 260.08<br>(233.17 to<br>288.59)                      | 530.93<br>(388.61 to<br>753.69)                      | 538.84<br>(405.34 to<br>743.40)                      | 524.89<br>(373.17 to<br>786.74)                      |
| Alzheimer's disease and other dementias |                                                            |                                                            |                                                            |                                                            |                                                      |                                                      |                                                      |                                                      |
|                                         | 321.72<br>(293.24 to<br>352.27)                            | 675.92<br>(601.68 to<br>752.47)                            | 731.97<br>(646.05 to<br>828.52)                            | 609.93<br>(543.83 to<br>683.66)                            | 30.46<br>(27.65 to<br>33.53)                         | 67.92<br>(59.99 to<br>76.44)                         | 74.93<br>(66.51 to<br>84.53)                         | 59.88<br>(51.80 to<br>68.11)                         |
| Parkinson's disease                     |                                                            |                                                            |                                                            |                                                            |                                                      |                                                      |                                                      |                                                      |
|                                         | 85.60<br>(82.44 to<br>88.72)                               | 121.36<br>(76.77 to<br>179.77)                             | 104.11<br>(67.72 to<br>152.61)                             | 135.36<br>(83.92 to<br>205.40)                             | 2.39<br>(2.31 to<br>2.47)                            | 4.14<br>(2.84 to<br>5.83)                            | 3.71<br>(2.60 to<br>5.13)                            | 4.45<br>(2.95 to<br>6.40)                            |
| Epilepsy                                |                                                            |                                                            |                                                            |                                                            |                                                      |                                                      |                                                      |                                                      |
|                                         | 113.97<br>(87.68 to<br>122.05)                             | 135.93<br>(95.39 to<br>172.22)                             | 139.34<br>(97.59 to<br>177.98)                             | 138.55<br>(97.99 to<br>175.65)                             | 4.37<br>(3.12 to<br>4.76)                            | 5.53<br>(3.66 to<br>6.88)                            | 5.73<br>(3.76 to<br>7.25)                            | 5.52<br>(3.67 to<br>6.86)                            |
| Multiple sclerosis                      |                                                            |                                                            |                                                            |                                                            |                                                      |                                                      |                                                      |                                                      |
|                                         | 189.14<br>(181.39 to<br>195.77)                            | 285.71<br>(238.85 to<br>333.21)                            | 288.82<br>(239.28 to<br>343.76)                            | 274.95<br>(232.62 to<br>315.50)                            | 8.59<br>(8.23 to<br>8.87)                            | 15.07<br>(13.20 to<br>17.11)                         | 15.46<br>(13.30 to<br>17.90)                         | 14.20<br>(12.58 to<br>15.77)                         |
| Motor neuron disease                    |                                                            |                                                            |                                                            |                                                            |                                                      |                                                      |                                                      |                                                      |
|                                         | 177.87<br>(170.70 to<br>185.15)                            | 263.63<br>(221.58 to<br>305.20)                            | 269.07<br>(223.81 to<br>314.28)                            | 255.30<br>(216.68 to<br>291.47)                            | 6.90<br>(6.66 to<br>7.16)                            | 12.44<br>(11.05 to<br>13.85)                         | 13.07<br>(11.49 to<br>14.77)                         | 11.58<br>(10.43 to<br>12.74)                         |
| Other neurological disorders            |                                                            |                                                            |                                                            |                                                            |                                                      |                                                      |                                                      |                                                      |
|                                         | <b>1,976.36</b><br><b>(1,888.41 to</b><br><b>2,052.03)</b> | <b>3,905.09</b><br><b>(2,817.38 to</b><br><b>4,959.46)</b> | <b>4,350.34</b><br><b>(3,125.23 to</b><br><b>5,585.78)</b> | <b>3,785.62</b><br><b>(2,753.70 to</b><br><b>4,763.58)</b> | <b>48.12</b><br><b>(46.28 to</b><br><b>49.79)</b>    | <b>96.98</b><br><b>(73.03 to</b><br><b>120.39)</b>   | <b>108.37</b><br><b>(80.56 to</b><br><b>135.96)</b>  | <b>92.49</b><br><b>(70.43 to</b><br><b>114.60)</b>   |
| Mental disorders                        |                                                            |                                                            |                                                            |                                                            |                                                      |                                                      |                                                      |                                                      |
|                                         | 422.50<br>(403.88 to<br>443.17)                            | 520.71<br>(392.10 to<br>659.85)                            | 515.38<br>(383.94 to<br>662.98)                            | 543.95<br>(415.93 to<br>681.52)                            | 12.72<br>(12.21 to<br>13.23)                         | 16.85<br>(13.24 to<br>20.76)                         | 16.93<br>(13.17 to<br>21.31)                         | 17.28<br>(13.68 to<br>21.09)                         |
| Alcohol use disorders                   |                                                            |                                                            |                                                            |                                                            |                                                      |                                                      |                                                      |                                                      |
|                                         | 1,550.22<br>(1,468.18 to<br>1,619.45)                      | 3,379.51<br>(2,395.87 to<br>4,347.95)                      | 3,829.74<br>(2,689.93 to<br>4,941.37)                      | 3,236.92<br>(2,301.20 to<br>4,166.30)                      | 35.34<br>(33.75 to<br>36.82)                         | 80.04<br>(59.10 to<br>100.56)                        | 91.34<br>(66.25 to<br>116.29)                        | 76.12<br>(55.76 to<br>94.48)                         |
| Drug use disorders                      |                                                            |                                                            |                                                            |                                                            |                                                      |                                                      |                                                      |                                                      |
|                                         | 870.17<br>(432.48 to<br>964.34)                            | 1,238.00<br>(469.25 to<br>1,730.70)                        | 1,293.29<br>(482.51 to<br>1,826.54)                        | 1,211.54<br>(466.29 to<br>1,682.67)                        | 19.15<br>(9.33 to<br>21.20)                          | 27.97<br>(10.75 to<br>40.87)                         | 29.33<br>(10.99 to<br>40.87)                         | 27.25<br>(10.56 to<br>36.78)                         |
| Opioid use disorders                    |                                                            |                                                            |                                                            |                                                            |                                                      |                                                      |                                                      |                                                      |
|                                         | 138.65<br>(102.34 to<br>227.57)                            | 440.48<br>(269.72 to<br>640.71)                            | 501.69<br>(305.76 to<br>735.75)                            | 420.73<br>(259.32 to<br>626.42)                            | 3.29<br>(2.34 to<br>5.36)                            | 10.29<br>(6.42 to<br>14.85)                          | 11.74<br>(7.22 to<br>17.05)                          | 9.81<br>(6.09 to<br>14.32)                           |
| Cocaine use disorders                   |                                                            |                                                            |                                                            |                                                            |                                                      |                                                      |                                                      |                                                      |
|                                         | 78.30<br>(63.12 to<br>127.47)                              | 375.42<br>(236.54 to<br>553.33)                            | 460.27<br>(292.20 to<br>676.03)                            | 352.25<br>(223.39 to<br>513.49)                            | 1.80<br>(1.42 to<br>2.90)                            | 8.54<br>(5.50 to<br>12.40)                           | 10.50<br>(6.62 to<br>15.01)                          | 8.00<br>(5.14 to<br>11.64)                           |
| Amphetamine use disorders               |                                                            |                                                            |                                                            |                                                            |                                                      |                                                      |                                                      |                                                      |
|                                         | 463.11<br>(406.79 to<br>770.14)                            | 1,325.60<br>(887.88 to<br>1,954.30)                        | 1,574.49<br>(1,050.43 to<br>2,290.08)                      | 1,252.40<br>(840.53 to<br>1,849.23)                        | 11.10<br>(9.82 to<br>17.94)                          | 33.24<br>(23.37 to<br>47.71)                         | 39.76<br>(27.98 to<br>56.02)                         | 31.06<br>(21.87 to<br>44.50)                         |
| Other drug use disorders                |                                                            |                                                            |                                                            |                                                            |                                                      |                                                      |                                                      |                                                      |
|                                         | 3.64<br>(3.27 to<br>4.00)                                  | 4.87<br>(3.14 to<br>6.99)                                  | 5.23<br>(3.30 to<br>7.60)                                  | 4.75<br>(3.08 to<br>6.63)                                  | 0.07<br>(0.06 to<br>0.08)                            | 0.10<br>(0.06 to<br>0.14)                            | 0.10<br>(0.06 to<br>0.15)                            | 0.09<br>(0.06 to<br>0.13)                            |
| Eating disorders                        |                                                            |                                                            |                                                            |                                                            |                                                      |                                                      |                                                      |                                                      |
| <b>High-income North America</b>        |                                                            |                                                            |                                                            |                                                            |                                                      |                                                      |                                                      |                                                      |
|                                         | <b>YLLs (in 1000s)</b>                                     |                                                            |                                                            |                                                            | <b>Deaths (in 1000s)</b>                             |                                                      |                                                      |                                                      |









|                                                 |                                              |                                              |                                              |                                              |                                     |                                      |                                     |                                      |
|-------------------------------------------------|----------------------------------------------|----------------------------------------------|----------------------------------------------|----------------------------------------------|-------------------------------------|--------------------------------------|-------------------------------------|--------------------------------------|
|                                                 | 110.18<br>(101.52 to<br>155.67)              | 95.26<br>(71.80 to<br>133.20)                | 81.55<br>(60.34 to<br>114.70)                | 97.89<br>(72.40 to<br>135.23)                | 3.35<br>(3.06 to<br>4.53)           | 3.59<br>(2.88 to<br>4.72)            | 3.18<br>(2.56 to<br>4.21)           | 3.53<br>(2.79 to<br>4.68)            |
| Other exposure to mechanical forces             |                                              |                                              |                                              |                                              |                                     |                                      |                                     |                                      |
|                                                 | 118.94<br>(99.84 to<br>160.57)               | 158.45<br>(121.15 to<br>224.76)              | 149.77<br>(114.95 to<br>211.63)              | 155.67<br>(120.37 to<br>218.80)              | 5.58<br>(4.85 to<br>7.96)           | 9.62<br>(7.59 to<br>14.16)           | 9.41<br>(7.34 to<br>13.98)          | 9.03<br>(7.16 to<br>13.26)           |
| Adverse effects of medical treatment            |                                              |                                              |                                              |                                              |                                     |                                      |                                     |                                      |
|                                                 | 10.82<br>(8.05 to<br>14.77)                  | 13.02<br>(9.01 to<br>17.96)                  | 11.55<br>(7.96 to<br>15.74)                  | 13.37<br>(9.39 to<br>18.13)                  | 0.32<br>(0.24 to<br>0.42)           | 0.46<br>(0.33 to<br>0.61)            | 0.42<br>(0.30 to<br>0.56)           | 0.45<br>(0.33 to<br>0.60)            |
| Animal contact                                  |                                              |                                              |                                              |                                              |                                     |                                      |                                     |                                      |
|                                                 | 4.15<br>(2.81 to<br>5.91)                    | 5.09<br>(3.07 to<br>7.51)                    | 4.69<br>(2.81 to<br>6.79)                    | 5.16<br>(3.15 to<br>7.52)                    | 0.12<br>(0.08 to<br>0.17)           | 0.17<br>(0.10 to<br>0.24)            | 0.16<br>(0.09 to<br>0.23)           | 0.17<br>(0.10 to<br>0.24)            |
| Venomous animal contact                         |                                              |                                              |                                              |                                              |                                     |                                      |                                     |                                      |
|                                                 | 6.67<br>(4.98 to<br>9.20)                    | 7.93<br>(5.46 to<br>10.97)                   | 6.86<br>(4.79 to<br>9.45)                    | 8.21<br>(5.67 to<br>11.27)                   | 0.20<br>(0.14 to<br>0.27)           | 0.29<br>(0.20 to<br>0.39)            | 0.26<br>(0.18 to<br>0.36)           | 0.28<br>(0.20 to<br>0.38)            |
| Non-venomous animal contact                     |                                              |                                              |                                              |                                              |                                     |                                      |                                     |                                      |
|                                                 | 163.56<br>(149.17 to<br>215.03)              | 194.55<br>(159.08 to<br>253.18)              | 187.46<br>(152.27 to<br>243.26)              | 192.31<br>(156.93 to<br>249.12)              | 7.07<br>(6.43 to<br>8.87)           | 10.98<br>(9.37 to<br>13.88)          | 11.16<br>(9.44 to<br>14.19)         | 10.17<br>(8.76 to<br>12.76)          |
| Foreign body                                    |                                              |                                              |                                              |                                              |                                     |                                      |                                     |                                      |
|                                                 | 159.75<br>(145.27 to<br>211.45)              | 189.63<br>(154.66 to<br>248.57)              | 182.39<br>(147.89 to<br>238.56)              | 187.47<br>(153.19 to<br>244.50)              | 6.95<br>(6.30 to<br>8.77)           | 10.78<br>(9.19 to<br>13.72)          | 10.95<br>(9.22 to<br>14.02)         | 9.98<br>(8.56 to<br>12.59)           |
| Pulmonary aspiration and foreign body in airway |                                              |                                              |                                              |                                              |                                     |                                      |                                     |                                      |
|                                                 | 3.81<br>(2.97 to<br>4.31)                    | 4.93<br>(3.44 to<br>6.28)                    | 5.08<br>(3.55 to<br>6.47)                    | 4.84<br>(3.40 to<br>6.15)                    | 0.12<br>(0.09 to<br>0.13)           | 0.20<br>(0.13 to<br>0.25)            | 0.22<br>(0.14 to<br>0.27)           | 0.19<br>(0.12 to<br>0.23)            |
| Foreign body in other body part                 |                                              |                                              |                                              |                                              |                                     |                                      |                                     |                                      |
|                                                 | 43.65<br>(31.38 to<br>77.99)                 | 50.09<br>(33.36 to<br>93.46)                 | 42.73<br>(28.24 to<br>81.23)                 | 50.92<br>(33.71 to<br>96.05)                 | 1.72<br>(1.34 to<br>3.31)           | 2.25<br>(1.77 to<br>5.08)            | 2.25<br>(1.54 to<br>4.57)           | 2.46<br>(1.69 to<br>4.86)            |
| Environmental heat and cold exposure            |                                              |                                              |                                              |                                              |                                     |                                      |                                     |                                      |
|                                                 | 26.59<br>(25.02 to<br>28.02)                 | 13.24<br>(9.53 to<br>17.71)                  | 9.67<br>(6.86 to<br>13.12)                   | 14.31<br>(10.18 to<br>19.38)                 | 0.65<br>(0.62 to<br>0.68)           | 0.41<br>(0.32 to<br>0.53)            | 0.31<br>(0.24 to<br>0.40)           | 0.43<br>(0.33 to<br>0.55)            |
| Other unintentional injuries                    |                                              |                                              |                                              |                                              |                                     |                                      |                                     |                                      |
|                                                 | <b>3,037.12</b><br>(2,606.04 to<br>3,357.68) | <b>2,518.84</b><br>(1,406.47 to<br>4,036.74) | <b>1,990.07</b><br>(1,146.40 to<br>3,101.26) | <b>2,819.35</b><br>(1,535.65 to<br>4,611.77) | <b>70.04</b><br>(60.43 to<br>78.05) | <b>64.86</b><br>(38.21 to<br>101.31) | <b>52.40</b><br>(31.78 to<br>79.97) | <b>71.14</b><br>(40.52 to<br>113.21) |
| Self-harm and interpersonal violence            |                                              |                                              |                                              |                                              |                                     |                                      |                                     |                                      |

#### High-income North America

| Cause                                                                        | YLLs (in 1000s)                       |                                     |                                     |                                       | Deaths (in 1000s)            |                              |                              |                              |
|------------------------------------------------------------------------------|---------------------------------------|-------------------------------------|-------------------------------------|---------------------------------------|------------------------------|------------------------------|------------------------------|------------------------------|
|                                                                              | 2016                                  | 2040 Forecast                       | 2040 Better Scenario                | 2040 Worse Scenario                   | 2016                         | 2040 Forecast                | 2040 Better Scenario         | 2040 Worse Scenario          |
| Self-harm                                                                    | 2,061.54<br>(1,744.64 to<br>2,270.34) | 1,873.32<br>(966.75 to<br>3,194.10) | 1,453.48<br>(786.21 to<br>2,423.37) | 2,133.37<br>(1,057.75 to<br>3,743.07) | 51.21<br>(43.43 to<br>57.01) | 51.29<br>(28.46 to<br>84.29) | 40.99<br>(23.86 to<br>65.00) | 56.86<br>(30.31 to<br>95.63) |
| Self-harm by firearm                                                         | 918.18<br>(718.90 to<br>1,092.96)     | 709.75<br>(336.92 to<br>1,271.39)   | 533.81<br>(265.15 to<br>922.43)     | 809.38<br>(364.91 to<br>1,500.60)     | 24.54<br>(19.05 to<br>28.99) | 21.77<br>(11.38 to<br>37.14) | 17.04<br>(9.34 to<br>27.91)  | 23.93<br>(12.13 to<br>41.94) |
| Self-harm by other specified means                                           | 1,143.37<br>(892.08 to<br>1,350.40)   | 1,163.57<br>(624.76 to<br>1,931.35) | 919.67<br>(507.26 to<br>1,496.69)   | 1,323.99<br>(683.94 to<br>2,288.78)   | 26.67<br>(20.95 to<br>31.92) | 29.53<br>(16.62 to<br>48.23) | 23.95<br>(14.01 to<br>37.87) | 32.92<br>(17.74 to<br>55.25) |
| Interpersonal violence                                                       | 975.58<br>(644.09 to<br>1,258.35)     | 645.52<br>(391.77 to<br>933.72)     | 536.59<br>(324.99 to<br>778.46)     | 685.98<br>(412.48 to<br>984.55)       | 18.82<br>(12.55 to<br>24.76) | 13.57<br>(8.45 to<br>19.32)  | 11.41<br>(7.15 to<br>16.04)  | 14.29<br>(8.80 to<br>20.49)  |
| Physical violence by firearm                                                 | 668.98<br>(359.15 to<br>816.41)       | 411.95<br>(210.25 to<br>613.38)     | 338.45<br>(171.25 to<br>507.89)     | 434.68<br>(211.61 to<br>656.28)       | 12.59<br>(6.84 to<br>11.95)  | 8.22<br>(4.26 to<br>11.95)   | 6.81<br>(3.57 to<br>9.96)    | 8.62<br>(4.33 to<br>12.80)   |
| Physical violence by sharp object                                            | 129.13<br>(81.44 to<br>242.75)        | 97.18<br>(57.08 to<br>180.62)       | 83.02<br>(49.79 to<br>148.95)       | 101.18<br>(60.18 to<br>186.24)        | 2.72<br>(1.75 to<br>5.03)    | 2.23<br>(1.37 to<br>3.98)    | 1.93<br>(1.21 to<br>3.30)    | 2.30<br>(1.44 to<br>4.05)    |
| Physical violence by other means                                             | 177.47<br>(126.56 to<br>323.60)       | 136.39<br>(82.83 to<br>247.52)      | 115.12<br>(70.41 to<br>208.21)      | 150.12<br>(89.49 to<br>273.09)        | 3.51<br>(2.50 to<br>6.71)    | 3.12<br>(1.87 to<br>5.82)    | 2.67<br>(1.63 to<br>4.89)    | 3.37<br>(1.99 to<br>6.34)    |
| Forces of nature, conflict and terrorism, and executions and police conflict | 26.33<br>(15.58 to<br>30.97)          | 47.59<br>(3.83 to<br>307.42)        | 47.23<br>(3.80 to<br>305.23)        | 47.80<br>(3.84 to<br>308.84)          | 0.52<br>(0.30 to<br>0.61)    | 1.01<br>(0.10 to<br>6.14)    | 1.02<br>(0.10 to<br>6.21)    | 1.00<br>(0.09 to<br>6.00)    |
| Exposure to forces of nature                                                 | 0.00<br>(0.00 to<br>0.00)             | 11.47<br>(2.33 to<br>36.22)         | 11.40<br>(2.32 to<br>35.99)         | 11.48<br>(2.34 to<br>36.29)           | 0.00<br>(0.00 to<br>0.00)    | 0.30<br>(0.06 to<br>0.93)    | 0.30<br>(0.06 to<br>0.95)    | 0.29<br>(0.06 to<br>0.91)    |

|                                                                   |                                              |                                              |                                              |                                              |                                        |                                        |                                        |                                        |
|-------------------------------------------------------------------|----------------------------------------------|----------------------------------------------|----------------------------------------------|----------------------------------------------|----------------------------------------|----------------------------------------|----------------------------------------|----------------------------------------|
| Conflict and terrorism                                            | 0.00<br>(0.00 to<br>0.00)                    | 36.13<br>(0.05 to<br>281.68)                 | 35.83<br>(0.05 to<br>279.64)                 | 36.32<br>(0.05 to<br>283.05)                 | 0.00<br>(0.00 to<br>0.00)              | 0.72<br>(0.00 to<br>5.71)              | 0.72<br>(0.00 to<br>5.81)              | 0.71<br>(0.00 to<br>5.57)              |
| Executions and police conflict                                    | 26.33<br>(15.58 to<br>30.97)                 | 0.00<br>(0.00 to<br>0.00)                    | 0.00<br>(0.00 to<br>0.00)                    | 0.00<br>(0.00 to<br>0.00)                    | 0.52<br>(0.30 to<br>0.61)              | 0.00<br>(0.00 to<br>0.00)              | 0.00<br>(0.00 to<br>0.00)              | 0.00<br>(0.00 to<br>0.00)              |
| <b>Canada</b>                                                     |                                              |                                              |                                              |                                              |                                        |                                        |                                        |                                        |
| Cause                                                             | YLLs (in 1000s)                              |                                              |                                              |                                              | Deaths (in 1000s)                      |                                        |                                        |                                        |
|                                                                   | 2016                                         | 2040 Forecast                                | 2040 Better Scenario                         | 2040 Worse Scenario                          | 2016                                   | 2040 Forecast                          | 2040 Better Scenario                   | 2040 Worse Scenario                    |
| <b>All causes</b>                                                 | <b>4,311.41</b><br>(4,168.53 to<br>4,453.27) | <b>5,573.88</b><br>(4,903.18 to<br>6,399.72) | <b>4,694.80</b><br>(4,134.26 to<br>5,378.12) | <b>6,778.02</b><br>(5,869.27 to<br>7,813.03) | <b>272.74</b><br>(264.14 to<br>280.49) | <b>446.07</b><br>(379.37 to<br>523.82) | <b>392.70</b><br>(333.14 to<br>463.83) | <b>519.18</b><br>(439.08 to<br>605.25) |
| Communicable, maternal, neonatal, and nutritional diseases        | 238.03<br>(218.83 to<br>260.99)              | 308.33<br>(260.11 to<br>368.30)              | 273.67<br>(232.88 to<br>323.24)              | 351.44<br>(293.34 to<br>428.79)              | 13.18<br>(11.92 to<br>14.57)           | 26.50<br>(21.33 to<br>32.76)           | 25.63<br>(21.00 to<br>31.08)           | 28.11<br>(22.12 to<br>35.93)           |
| HIV/AIDS and tuberculosis                                         | 14.11<br>(13.41 to<br>14.86)                 | 6.12<br>(2.98 to<br>9.59)                    | 3.57<br>(1.85 to<br>5.82)                    | 11.30<br>(5.79 to<br>16.67)                  | 0.43<br>(0.41 to<br>0.45)              | 0.24<br>(0.14 to<br>0.36)              | 0.15<br>(0.09 to<br>0.22)              | 0.37<br>(0.22 to<br>0.55)              |
| Tuberculosis                                                      | 1.99<br>(1.79 to<br>2.21)                    | 1.81<br>(1.05 to<br>2.94)                    | 1.18<br>(0.72 to<br>1.83)                    | 2.44<br>(1.35 to<br>4.14)                    | 0.12<br>(0.11 to<br>0.14)              | 0.15<br>(0.08 to<br>0.26)              | 0.10<br>(0.06 to<br>0.16)              | 0.20<br>(0.10 to<br>0.34)              |
| HIV/AIDS                                                          | 12.12<br>(11.44 to<br>12.84)                 | 4.30<br>(1.40 to<br>7.68)                    | 2.39<br>(0.84 to<br>4.58)                    | 8.86<br>(3.52 to<br>14.01)                   | 0.30<br>(0.29 to<br>0.32)              | 0.09<br>(0.03 to<br>0.16)              | 0.05<br>(0.01 to<br>0.09)              | 0.18<br>(0.06 to<br>0.29)              |
| Diarrhea, lower respiratory, and other common infectious diseases | 118.18<br>(108.12 to<br>128.83)              | 208.02<br>(168.95 to<br>258.27)              | 191.86<br>(159.60 to<br>233.15)              | 236.39<br>(187.93 to<br>303.83)              | 10.87<br>(9.62 to<br>12.24)            | 23.80<br>(18.73 to<br>30.20)           | 23.09<br>(18.49 to<br>28.62)           | 25.28<br>(19.36 to<br>32.95)           |
| Diarrheal diseases                                                | 16.30<br>(14.77 to<br>18.05)                 | 41.45<br>(27.67 to<br>63.24)                 | 52.93<br>(36.97 to<br>73.95)                 | 34.88<br>(21.58 to<br>56.35)                 | 1.51<br>(1.34 to<br>1.70)              | 4.67<br>(2.97 to<br>7.45)              | 6.16<br>(4.23 to<br>8.84)              | 3.80<br>(2.28 to<br>6.12)              |
| Intestinal infectious diseases                                    | 0.04<br>(0.02 to<br>0.07)                    | 0.03<br>(0.01 to<br>0.07)                    | 0.03<br>(0.01 to<br>0.06)                    | 0.03<br>(0.01 to<br>0.07)                    | 0.00<br>(0.00 to<br>0.00)              | 0.00<br>(0.00 to<br>0.01)              | 0.00<br>(0.00 to<br>0.01)              | 0.00<br>(0.00 to<br>0.01)              |
| Typhoid fever                                                     | 0.00<br>(0.00 to<br>0.00)                    | 0.00<br>(0.00 to<br>0.00)                    | 0.00<br>(0.00 to<br>0.00)                    | 0.00<br>(0.00 to<br>0.00)                    | 0.00<br>(0.00 to<br>0.00)              | 0.00<br>(0.00 to<br>0.00)              | 0.00<br>(0.00 to<br>0.00)              | 0.00<br>(0.00 to<br>0.00)              |
| Paratyphoid fever                                                 | 0.00<br>(0.00 to<br>0.00)                    | 0.00<br>(0.00 to<br>0.00)                    | 0.00<br>(0.00 to<br>0.00)                    | 0.00<br>(0.00 to<br>0.00)                    | 0.00<br>(0.00 to<br>0.00)              | 0.00<br>(0.00 to<br>0.00)              | 0.00<br>(0.00 to<br>0.00)              | 0.00<br>(0.00 to<br>0.00)              |
| Other intestinal infectious diseases                              | 0.03<br>(0.01 to<br>0.07)                    | 0.03<br>(0.01 to<br>0.07)                    | 0.03<br>(0.01 to<br>0.06)                    | 0.03<br>(0.01 to<br>0.07)                    | 0.00<br>(0.00 to<br>0.00)              | 0.00<br>(0.00 to<br>0.01)              | 0.00<br>(0.00 to<br>0.01)              | 0.00<br>(0.00 to<br>0.00)              |
| Lower respiratory infections                                      | 94.75<br>(85.27 to<br>105.28)                | 159.32<br>(118.79 to<br>211.65)              | 133.08<br>(98.62 to<br>177.10)               | 192.97<br>(142.69 to<br>261.29)              | 9.12<br>(7.93 to<br>10.48)             | 18.82<br>(13.63 to<br>25.32)           | 16.64<br>(11.90 to<br>22.56)           | 21.16<br>(15.20 to<br>29.08)           |
| Upper respiratory infections                                      | 0.05<br>(0.03 to<br>0.08)                    | 0.06<br>(0.02 to<br>0.11)                    | 0.04<br>(0.02 to<br>0.08)                    | 0.06<br>(0.03 to<br>0.12)                    | 0.00<br>(0.00 to<br>0.00)              | 0.00<br>(0.00 to<br>0.01)              | 0.00<br>(0.00 to<br>0.01)              | 0.00<br>(0.00 to<br>0.01)              |
| Otitis media                                                      | 0.08<br>(0.05 to<br>0.13)                    | 0.01<br>(0.01 to<br>0.03)                    | 0.02<br>(0.01 to<br>0.03)                    | 0.01<br>(0.01 to<br>0.03)                    | 0.00<br>(0.00 to<br>0.00)              | 0.00<br>(0.00 to<br>0.00)              | 0.00<br>(0.00 to<br>0.00)              | 0.00<br>(0.00 to<br>0.00)              |
| Meningitis                                                        | 4.17<br>(3.60 to<br>4.82)                    | 3.18<br>(1.98 to<br>4.99)                    | 2.13<br>(1.46 to<br>2.96)                    | 4.33<br>(2.42 to<br>7.29)                    | 0.11<br>(0.09 to<br>0.12)              | 0.09<br>(0.07 to<br>0.12)              | 0.08<br>(0.06 to<br>0.10)              | 0.11<br>(0.08 to<br>0.15)              |
| Pneumococcal meningitis                                           | 0.76<br>(0.66 to<br>0.88)                    | 0.48<br>(0.37 to<br>0.63)                    | 0.43<br>(0.34 to<br>0.56)                    | 0.53<br>(0.40 to<br>0.72)                    | 0.02<br>(0.02 to<br>0.03)              | 0.02<br>(0.02 to<br>0.03)              | 0.02<br>(0.02 to<br>0.02)              | 0.02<br>(0.02 to<br>0.03)              |
| H influenzae type B meningitis                                    | 0.40<br>(0.34 to<br>0.49)                    | 1.32<br>(0.38 to<br>3.05)                    | 0.58<br>(0.24 to<br>1.18)                    | 2.25<br>(0.59 to<br>5.26)                    | 0.01<br>(0.01 to<br>0.01)              | 0.02<br>(0.01 to<br>0.04)              | 0.01<br>(0.01 to<br>0.02)              | 0.03<br>(0.01 to<br>0.07)              |
| Meningococcal meningitis                                          | 1.38<br>(1.18 to<br>1.59)                    | 0.58<br>(0.39 to<br>0.81)                    | 0.47<br>(0.31 to<br>0.67)                    | 0.64<br>(0.41 to<br>0.93)                    | 0.03<br>(0.03 to<br>0.03)              | 0.02<br>(0.01 to<br>0.02)              | 0.02<br>(0.02 to<br>0.02)              | 0.02<br>(0.01 to<br>0.03)              |

|                                         |                               |                               |                               |                               |                               |                               |                               |                               |
|-----------------------------------------|-------------------------------|-------------------------------|-------------------------------|-------------------------------|-------------------------------|-------------------------------|-------------------------------|-------------------------------|
| Other meningitis                        | 1.63<br>(1.41 to 1.91)        | 0.80<br>(0.56 to 1.10)        | 0.65<br>(0.43 to 0.90)        | 0.90<br>(0.58 to 1.24)        | 0.05<br>(0.04 to 0.05)        | 0.04<br>(0.03 to 0.05)        | 0.03<br>(0.02 to 0.04)        | 0.04<br>(0.03 to 0.05)        |
| Encephalitis                            | 2.04<br>(1.50 to 2.51)        | 2.90<br>(2.05 to 3.71)        | 2.83<br>(2.02 to 3.66)        | 2.91<br>(2.06 to 3.69)        | 0.07<br>(0.05 to 0.09)        | 0.14<br>(0.10 to 0.17)        | 0.14<br>(0.10 to 0.18)        | 0.13<br>(0.09 to 0.16)        |
| Diphtheria                              | 0.02<br>(0.01 to 0.03)        | 0.01<br>(0.00 to 0.01)        | 0.00<br>(0.00 to 0.01)        | 0.01<br>(0.00 to 0.02)        | 0.00<br>(0.00 to 0.00)        | 0.00<br>(0.00 to 0.00)        | 0.00<br>(0.00 to 0.00)        | 0.00<br>(0.00 to 0.00)        |
| Whooping cough                          | 0.08<br>(0.01 to 0.18)        | 0.11<br>(0.01 to 0.33)        | 0.01<br>(0.00 to 0.04)        | 0.11<br>(0.01 to 0.35)        | 0.00<br>(0.00 to 0.00)        | 0.00<br>(0.00 to 0.00)        | 0.00<br>(0.00 to 0.00)        | 0.00<br>(0.00 to 0.00)        |
| Tetanus                                 | 0.02<br>(0.01 to 0.03)        | 0.00<br>(0.00 to 0.00)        | 0.00<br>(0.00 to 0.00)        | 0.00<br>(0.00 to 0.00)        | 0.00<br>(0.00 to 0.00)        | 0.00<br>(0.00 to 0.00)        | 0.00<br>(0.00 to 0.00)        | 0.00<br>(0.00 to 0.00)        |
| Measles                                 | 0.02<br>(0.02 to 0.03)        | 0.30<br>(0.00 to 2.51)        | 0.17<br>(0.00 to 1.24)        | 0.40<br>(0.00 to 3.66)        | 0.00<br>(0.00 to 0.00)        | 0.00<br>(0.00 to 0.03)        | 0.00<br>(0.00 to 0.02)        | 0.01<br>(0.00 to 0.04)        |
| <b>Canada</b>                           |                               |                               |                               |                               |                               |                               |                               |                               |
| Cause                                   | YLLs (in 1000s)               |                               |                               |                               | Deaths (in 1000s)             |                               |                               |                               |
|                                         | 2016                          | 2040 Forecast                 | 2040 Better Scenario          | 2040 Worse Scenario           | 2016                          | 2040 Forecast                 | 2040 Better Scenario          | 2040 Worse Scenario           |
| Varicella and herpes zoster             | 0.61<br>(0.26 to 0.82)        | 0.65<br>(0.25 to 0.99)        | 0.59<br>(0.22 to 0.92)        | 0.67<br>(0.26 to 1.03)        | 0.05<br>(0.02 to 0.07)        | 0.07<br>(0.02 to 0.11)        | 0.07<br>(0.02 to 0.11)        | 0.07<br>(0.02 to 0.11)        |
| Neglected tropical diseases and malaria | <b>0.23</b><br>(0.19 to 0.25) | <b>0.29</b><br>(0.22 to 0.33) | <b>0.29</b><br>(0.22 to 0.34) | <b>0.28</b><br>(0.22 to 0.33) | <b>0.01</b><br>(0.00 to 0.01) | <b>0.01</b><br>(0.01 to 0.01) | <b>0.01</b><br>(0.01 to 0.01) | <b>0.01</b><br>(0.01 to 0.01) |
| Malaria                                 | 0.00<br>(0.00 to 0.00)        | 0.00<br>(0.00 to 0.00)        | 0.00<br>(0.00 to 0.00)        | 0.00<br>(0.00 to 0.00)        | 0.00<br>(0.00 to 0.00)        | 0.00<br>(0.00 to 0.00)        | 0.00<br>(0.00 to 0.00)        | 0.00<br>(0.00 to 0.00)        |
| Chagas disease                          | 0.00<br>(0.00 to 0.00)        | 0.00<br>(0.00 to 0.00)        | 0.00<br>(0.00 to 0.00)        | 0.00<br>(0.00 to 0.00)        | 0.00<br>(0.00 to 0.00)        | 0.00<br>(0.00 to 0.00)        | 0.00<br>(0.00 to 0.00)        | 0.00<br>(0.00 to 0.00)        |
| Leishmaniasis                           | 0.00<br>(0.00 to 0.00)        | 0.00<br>(0.00 to 0.00)        | 0.00<br>(0.00 to 0.00)        | 0.00<br>(0.00 to 0.00)        | 0.00<br>(0.00 to 0.00)        | 0.00<br>(0.00 to 0.00)        | 0.00<br>(0.00 to 0.00)        | 0.00<br>(0.00 to 0.00)        |
| African trypanosomiasis                 | 0.00<br>(0.00 to 0.00)        | 0.00<br>(0.00 to 0.00)        | 0.00<br>(0.00 to 0.00)        | 0.00<br>(0.00 to 0.00)        | 0.00<br>(0.00 to 0.00)        | 0.00<br>(0.00 to 0.00)        | 0.00<br>(0.00 to 0.00)        | 0.00<br>(0.00 to 0.00)        |
| Schistosomiasis                         | 0.00<br>(0.00 to 0.00)        | 0.00<br>(0.00 to 0.00)        | 0.00<br>(0.00 to 0.00)        | 0.00<br>(0.00 to 0.00)        | 0.00<br>(0.00 to 0.00)        | 0.00<br>(0.00 to 0.00)        | 0.00<br>(0.00 to 0.00)        | 0.00<br>(0.00 to 0.00)        |
| Cysticercosis                           | 0.02<br>(0.02 to 0.02)        | 0.01<br>(0.01 to 0.01)        | 0.01<br>(0.01 to 0.01)        | 0.01<br>(0.01 to 0.01)        | 0.00<br>(0.00 to 0.00)        | 0.00<br>(0.00 to 0.00)        | 0.00<br>(0.00 to 0.00)        | 0.00<br>(0.00 to 0.00)        |
| Cystic echinococcosis                   | 0.00<br>(0.00 to 0.00)        | 0.00<br>(0.00 to 0.00)        | 0.00<br>(0.00 to 0.00)        | 0.00<br>(0.00 to 0.00)        | 0.00<br>(0.00 to 0.00)        | 0.00<br>(0.00 to 0.00)        | 0.00<br>(0.00 to 0.00)        | 0.00<br>(0.00 to 0.00)        |
| Dengue                                  | 0.00<br>(0.00 to 0.00)        | 0.00<br>(0.00 to 0.00)        | 0.00<br>(0.00 to 0.00)        | 0.00<br>(0.00 to 0.00)        | 0.00<br>(0.00 to 0.00)        | 0.00<br>(0.00 to 0.00)        | 0.00<br>(0.00 to 0.00)        | 0.00<br>(0.00 to 0.00)        |
| Yellow fever                            | 0.00<br>(0.00 to 0.00)        | 0.00<br>(0.00 to 0.00)        | 0.00<br>(0.00 to 0.00)        | 0.00<br>(0.00 to 0.00)        | 0.00<br>(0.00 to 0.00)        | 0.00<br>(0.00 to 0.00)        | 0.00<br>(0.00 to 0.00)        | 0.00<br>(0.00 to 0.00)        |
| Rabies                                  | 0.00<br>(0.00 to 0.00)        | 0.00<br>(0.00 to 0.00)        | 0.00<br>(0.00 to 0.00)        | 0.00<br>(0.00 to 0.00)        | 0.00<br>(0.00 to 0.00)        | 0.00<br>(0.00 to 0.00)        | 0.00<br>(0.00 to 0.00)        | 0.00<br>(0.00 to 0.00)        |
| Intestinal nematode infections          | 0.00<br>(0.00 to 0.00)        | 0.00<br>(0.00 to 0.00)        | 0.00<br>(0.00 to 0.00)        | 0.00<br>(0.00 to 0.00)        | 0.00<br>(0.00 to 0.00)        | 0.00<br>(0.00 to 0.00)        | 0.00<br>(0.00 to 0.00)        | 0.00<br>(0.00 to 0.00)        |
| Other neglected tropical diseases       | 0.21<br>(0.17 to 0.23)        | 0.28<br>(0.21 to 0.32)        | 0.29<br>(0.21 to 0.33)        | 0.27<br>(0.21 to 0.32)        | 0.01<br>(0.00 to 0.01)        | 0.01<br>(0.00 to 0.01)        | 0.01<br>(0.01 to 0.01)        | 0.01<br>(0.00 to 0.01)        |

|                                                          |                                   |                                   |                                  |                                   |                               |                               |                               |                               |
|----------------------------------------------------------|-----------------------------------|-----------------------------------|----------------------------------|-----------------------------------|-------------------------------|-------------------------------|-------------------------------|-------------------------------|
| <b>Maternal disorders</b>                                | <b>1.71</b><br>(1.47 to 1.94)     | <b>1.32</b><br>(0.86 to 1.87)     | <b>1.17</b><br>(0.74 to 1.68)    | <b>1.40</b><br>(0.89 to 2.06)     | <b>0.03</b><br>(0.03 to 0.04) | <b>0.03</b><br>(0.02 to 0.04) | <b>0.02</b><br>(0.01 to 0.03) | <b>0.03</b><br>(0.02 to 0.04) |
| Maternal hemorrhage                                      | 0.10<br>(0.06 to 0.15)            | 0.08<br>(0.04 to 0.15)            | 0.08<br>(0.04 to 0.13)           | 0.09<br>(0.04 to 0.16)            | 0.00<br>(0.00 to 0.00)        | 0.00<br>(0.00 to 0.00)        | 0.00<br>(0.00 to 0.00)        | 0.00<br>(0.00 to 0.00)        |
| Maternal sepsis and other maternal infections            | 0.03<br>(0.02 to 0.05)            | 0.03<br>(0.01 to 0.05)            | 0.02<br>(0.01 to 0.05)           | 0.03<br>(0.01 to 0.06)            | 0.00<br>(0.00 to 0.00)        | 0.00<br>(0.00 to 0.00)        | 0.00<br>(0.00 to 0.00)        | 0.00<br>(0.00 to 0.00)        |
| Maternal hypertensive disorders                          | 0.16<br>(0.11 to 0.23)            | 0.13<br>(0.07 to 0.22)            | 0.11<br>(0.06 to 0.20)           | 0.14<br>(0.07 to 0.24)            | 0.00<br>(0.00 to 0.00)        | 0.00<br>(0.00 to 0.00)        | 0.00<br>(0.00 to 0.00)        | 0.00<br>(0.00 to 0.00)        |
| Maternal obstructed labor and uterine rupture            | 0.02<br>(0.01 to 0.03)            | 0.02<br>(0.01 to 0.03)            | 0.01<br>(0.01 to 0.03)           | 0.02<br>(0.01 to 0.04)            | 0.00<br>(0.00 to 0.00)        | 0.00<br>(0.00 to 0.00)        | 0.00<br>(0.00 to 0.00)        | 0.00<br>(0.00 to 0.00)        |
| Maternal abortion, miscarriage, and ectopic pregnancy    | 0.33<br>(0.24 to 0.42)            | 0.22<br>(0.12 to 0.37)            | 0.19<br>(0.11 to 0.33)           | 0.23<br>(0.13 to 0.39)            | 0.01<br>(0.00 to 0.01)        | 0.00<br>(0.00 to 0.01)        | 0.00<br>(0.00 to 0.01)        | 0.00<br>(0.00 to 0.01)        |
| Indirect maternal deaths                                 | 0.27<br>(0.19 to 0.36)            | 0.23<br>(0.12 to 0.39)            | 0.20<br>(0.10 to 0.35)           | 0.24<br>(0.13 to 0.43)            | 0.01<br>(0.00 to 0.01)        | 0.00<br>(0.00 to 0.01)        | 0.00<br>(0.00 to 0.01)        | 0.00<br>(0.00 to 0.01)        |
| Late maternal deaths                                     | 0.25<br>(0.18 to 0.34)            | 0.17<br>(0.09 to 0.30)            | 0.15<br>(0.07 to 0.26)           | 0.18<br>(0.09 to 0.33)            | 0.00<br>(0.00 to 0.01)        | 0.00<br>(0.00 to 0.01)        | 0.00<br>(0.00 to 0.00)        | 0.00<br>(0.00 to 0.01)        |
| Maternal deaths aggravated by HIV/AIDS                   | 0.00<br>(0.00 to 0.00)            | 0.00<br>(0.00 to 0.01)            | 0.00<br>(0.00 to 0.01)           | 0.00<br>(0.00 to 0.01)            | 0.00<br>(0.00 to 0.00)        | 0.00<br>(0.00 to 0.00)        | 0.00<br>(0.00 to 0.00)        | 0.00<br>(0.00 to 0.00)        |
| Other maternal disorders                                 | 0.55<br>(0.42 to 0.71)            | 0.44<br>(0.25 to 0.70)            | 0.40<br>(0.23 to 0.64)           | 0.47<br>(0.26 to 0.75)            | 0.01<br>(0.01 to 0.01)        | 0.01<br>(0.00 to 0.01)        | 0.01<br>(0.00 to 0.01)        | 0.01<br>(0.00 to 0.01)        |
| <b>Canada</b>                                            |                                   |                                   |                                  |                                   |                               |                               |                               |                               |
| <b>Cause</b>                                             | <b>YLLs (in 1000s)</b>            |                                   |                                  |                                   | <b>Deaths (in 1000s)</b>      |                               |                               |                               |
|                                                          | <b>2016</b>                       | <b>2040 Forecast</b>              | <b>2040 Better Scenario</b>      | <b>2040 Worse Scenario</b>        | <b>2016</b>                   | <b>2040 Forecast</b>          | <b>2040 Better Scenario</b>   | <b>2040 Worse Scenario</b>    |
| <b>Neonatal disorders</b>                                | <b>89.25</b><br>(73.02 to 107.64) | <b>71.86</b><br>(44.12 to 109.21) | <b>55.87</b><br>(33.66 to 85.86) | <b>81.84</b><br>(49.04 to 125.90) | <b>1.03</b><br>(0.84 to 1.24) | <b>0.83</b><br>(0.51 to 1.26) | <b>0.65</b><br>(0.39 to 0.99) | <b>0.95</b><br>(0.57 to 1.45) |
| Neonatal preterm birth                                   | 43.96<br>(35.12 to 53.52)         | 31.43<br>(18.64 to 48.44)         | 20.07<br>(11.52 to 31.31)        | 36.35<br>(21.12 to 56.27)         | 0.51<br>(0.41 to 0.62)        | 0.36<br>(0.22 to 0.56)        | 0.23<br>(0.13 to 0.36)        | 0.42<br>(0.24 to 0.65)        |
| Neonatal encephalopathy due to birth asphyxia and trauma | 20.21<br>(15.44 to 25.78)         | 12.52<br>(7.05 to 20.92)          | 10.09<br>(5.60 to 16.76)         | 14.77<br>(8.17 to 25.56)          | 0.23<br>(0.18 to 0.30)        | 0.14<br>(0.08 to 0.24)        | 0.12<br>(0.06 to 0.19)        | 0.17<br>(0.09 to 0.30)        |
| Neonatal sepsis and other neonatal infections            | 4.06<br>(2.57 to 6.24)            | 4.81<br>(2.46 to 8.85)            | 4.08<br>(2.07 to 7.30)           | 5.51<br>(2.78 to 10.32)           | 0.05<br>(0.03 to 0.07)        | 0.06<br>(0.03 to 0.10)        | 0.05<br>(0.02 to 0.08)        | 0.06<br>(0.03 to 0.12)        |
| Hemolytic disease and other neonatal jaundice            | 0.17<br>(0.09 to 0.26)            | 0.11<br>(0.05 to 0.21)            | 0.09<br>(0.04 to 0.18)           | 0.12<br>(0.06 to 0.25)            | 0.00<br>(0.00 to 0.00)        | 0.00<br>(0.00 to 0.00)        | 0.00<br>(0.00 to 0.00)        | 0.00<br>(0.00 to 0.00)        |
| Other neonatal disorders                                 | 20.84<br>(15.62 to 27.39)         | 22.99<br>(12.33 to 37.68)         | 21.54<br>(11.72 to 34.82)        | 25.09<br>(13.50 to 41.14)         | 0.24<br>(0.18 to 0.32)        | 0.27<br>(0.14 to 0.44)        | 0.25<br>(0.14 to 0.40)        | 0.29<br>(0.16 to 0.48)        |
| <b>Nutritional deficiencies</b>                          | <b>3.53</b><br>(3.25 to 3.85)     | <b>6.52</b><br>(5.41 to 7.86)     | <b>7.16</b><br>(5.95 to 8.63)    | <b>5.96</b><br>(4.92 to 7.18)     | <b>0.37</b><br>(0.34 to 0.42) | <b>0.83</b><br>(0.65 to 1.05) | <b>0.95</b><br>(0.74 to 1.19) | <b>0.74</b><br>(0.57 to 0.93) |
| Protein-energy malnutrition                              | 2.73<br>(2.15 to 3.11)            | 5.09<br>(3.70 to 6.43)            | 5.74<br>(4.22 to 7.17)           | 4.58<br>(3.31 to 5.79)            | 0.30<br>(0.23 to 0.35)        | 0.67<br>(0.46 to 0.89)        | 0.78<br>(0.55 to 1.02)        | 0.58<br>(0.40 to 0.79)        |
| Iodine deficiency                                        | 0.07<br>(0.01 to 0.21)            | 0.25<br>(0.01 to 0.92)            | 0.26<br>(0.01 to 1.02)           | 0.24<br>(0.01 to 0.85)            | 0.00<br>(0.00 to 0.02)        | 0.03<br>(0.00 to 0.15)        | 0.03<br>(0.00 to 0.14)        | 0.02<br>(0.00 to 0.11)        |
| Dietary iron deficiency                                  | 0.11<br>(0.07 to 0.14)            | 0.13<br>(0.08 to 0.17)            | 0.13<br>(0.08 to 0.18)           | 0.12<br>(0.08 to 0.17)            | 0.00<br>(0.00 to 0.00)        | 0.01<br>(0.00 to 0.01)        | 0.01<br>(0.00 to 0.01)        | 0.01<br>(0.00 to 0.01)        |

|                                                                         |                                                            |                                                            |                                                            |                                                            |                                                      |                                                      |                                                      |                                                      |
|-------------------------------------------------------------------------|------------------------------------------------------------|------------------------------------------------------------|------------------------------------------------------------|------------------------------------------------------------|------------------------------------------------------|------------------------------------------------------|------------------------------------------------------|------------------------------------------------------|
| Other nutritional deficiencies                                          | 0.62<br>(0.36 to<br>1.16)                                  | 1.05<br>(0.59 to<br>1.97)                                  | 1.03<br>(0.55 to<br>1.96)                                  | 1.01<br>(0.56 to<br>1.88)                                  | 0.07<br>(0.04 to<br>0.14)                            | 0.13<br>(0.07 to<br>0.25)                            | 0.14<br>(0.07 to<br>0.26)                            | 0.13<br>(0.07 to<br>0.23)                            |
| <b>Other communicable, maternal, neonatal, and nutritional diseases</b> | <b>11.03</b><br><b>(9.94 to</b><br><b>12.06)</b>           | <b>14.21</b><br><b>(11.89 to</b><br><b>16.47)</b>          | <b>13.76</b><br><b>(11.42 to</b><br><b>15.99)</b>          | <b>14.26</b><br><b>(11.74 to</b><br><b>16.79)</b>          | <b>0.44</b><br><b>(0.39 to</b><br><b>0.47)</b>       | <b>0.76</b><br><b>(0.63 to</b><br><b>0.90)</b>       | <b>0.77</b><br><b>(0.63 to</b><br><b>0.90)</b>       | <b>0.74</b><br><b>(0.60 to</b><br><b>0.87)</b>       |
| Sexually transmitted infections excluding HIV                           | 0.71<br>(0.47 to<br>1.08)                                  | 0.31<br>(0.22 to<br>0.46)                                  | 0.29<br>(0.21 to<br>0.41)                                  | 0.32<br>(0.22 to<br>0.48)                                  | 0.02<br>(0.02 to<br>0.03)                            | 0.02<br>(0.01 to<br>0.02)                            | 0.02<br>(0.01 to<br>0.02)                            | 0.02<br>(0.01 to<br>0.02)                            |
| Syphilis                                                                | 0.49<br>(0.25 to<br>0.86)                                  | 0.15<br>(0.08 to<br>0.28)                                  | 0.13<br>(0.07 to<br>0.24)                                  | 0.16<br>(0.08 to<br>0.31)                                  | 0.01<br>(0.01 to<br>0.01)                            | 0.00<br>(0.00 to<br>0.01)                            | 0.00<br>(0.00 to<br>0.01)                            | 0.01<br>(0.00 to<br>0.01)                            |
| Chlamydial infection                                                    | 0.04<br>(0.04 to<br>0.05)                                  | 0.03<br>(0.02 to<br>0.04)                                  | 0.03<br>(0.02 to<br>0.04)                                  | 0.03<br>(0.02 to<br>0.04)                                  | 0.00<br>(0.00 to<br>0.00)                            | 0.00<br>(0.00 to<br>0.00)                            | 0.00<br>(0.00 to<br>0.00)                            | 0.00<br>(0.00 to<br>0.00)                            |
| Gonococcal infection                                                    | 0.12<br>(0.11 to<br>0.15)                                  | 0.09<br>(0.07 to<br>0.12)                                  | 0.09<br>(0.07 to<br>0.12)                                  | 0.09<br>(0.07 to<br>0.12)                                  | 0.01<br>(0.01 to<br>0.01)                            | 0.01<br>(0.00 to<br>0.01)                            | 0.01<br>(0.00 to<br>0.01)                            | 0.01<br>(0.00 to<br>0.01)                            |
| Other sexually transmitted infections                                   | 0.06<br>(0.05 to<br>0.07)                                  | 0.04<br>(0.03 to<br>0.05)                                  | 0.04<br>(0.03 to<br>0.05)                                  | 0.04<br>(0.03 to<br>0.05)                                  | 0.00<br>(0.00 to<br>0.00)                            | 0.00<br>(0.00 to<br>0.00)                            | 0.00<br>(0.00 to<br>0.00)                            | 0.00<br>(0.00 to<br>0.00)                            |
| Acute hepatitis                                                         | 3.40<br>(2.88 to<br>3.94)                                  | 2.81<br>(1.88 to<br>4.09)                                  | 2.38<br>(1.56 to<br>3.52)                                  | 3.02<br>(1.95 to<br>4.49)                                  | 0.13<br>(0.11 to<br>0.15)                            | 0.13<br>(0.09 to<br>0.19)                            | 0.11<br>(0.08 to<br>0.17)                            | 0.14<br>(0.09 to<br>0.20)                            |
| Acute hepatitis A                                                       | 0.16<br>(0.12 to<br>0.21)                                  | 0.11<br>(0.07 to<br>0.17)                                  | 0.10<br>(0.06 to<br>0.15)                                  | 0.11<br>(0.07 to<br>0.18)                                  | 0.00<br>(0.00 to<br>0.01)                            | 0.00<br>(0.00 to<br>0.01)                            | 0.00<br>(0.00 to<br>0.01)                            | 0.00<br>(0.00 to<br>0.01)                            |
| Acute hepatitis B                                                       | 2.91<br>(2.44 to<br>3.43)                                  | 2.38<br>(1.57 to<br>3.56)                                  | 2.00<br>(1.29 to<br>3.05)                                  | 2.57<br>(1.64 to<br>3.93)                                  | 0.11<br>(0.09 to<br>0.12)                            | 0.11<br>(0.07 to<br>0.16)                            | 0.09<br>(0.06 to<br>0.14)                            | 0.11<br>(0.07 to<br>0.17)                            |
| Acute hepatitis C                                                       | 0.09<br>(0.06 to<br>0.12)                                  | 0.08<br>(0.05 to<br>0.13)                                  | 0.07<br>(0.04 to<br>0.11)                                  | 0.08<br>(0.05 to<br>0.13)                                  | 0.00<br>(0.00 to<br>0.01)                            | 0.00<br>(0.00 to<br>0.01)                            | 0.00<br>(0.00 to<br>0.01)                            | 0.00<br>(0.00 to<br>0.01)                            |
| Acute hepatitis E                                                       | 0.25<br>(0.16 to<br>0.35)                                  | 0.24<br>(0.14 to<br>0.39)                                  | 0.21<br>(0.11 to<br>0.34)                                  | 0.25<br>(0.14 to<br>0.42)                                  | 0.01<br>(0.01 to<br>0.02)                            | 0.02<br>(0.01 to<br>0.03)                            | 0.02<br>(0.01 to<br>0.03)                            | 0.02<br>(0.01 to<br>0.03)                            |
| Other unspecified infectious diseases                                   | 6.91<br>(5.96 to<br>7.73)                                  | 11.09<br>(9.23 to<br>12.71)                                | 11.09<br>(9.23 to<br>12.70)                                | 10.92<br>(9.07 to<br>12.60)                                | 0.29<br>(0.24 to<br>0.32)                            | 0.61<br>(0.50 to<br>0.72)                            | 0.64<br>(0.51 to<br>0.75)                            | 0.58<br>(0.47 to<br>0.69)                            |
| <b>Non-communicable diseases</b>                                        | <b>3,601.54</b><br><b>(3,476.43 to</b><br><b>3,727.68)</b> | <b>4,787.64</b><br><b>(4,102.96 to</b><br><b>5,590.33)</b> | <b>4,057.28</b><br><b>(3,516.48 to</b><br><b>4,747.00)</b> | <b>5,896.24</b><br><b>(5,036.43 to</b><br><b>6,893.31)</b> | <b>243.55</b><br><b>(235.80 to</b><br><b>250.95)</b> | <b>397.51</b><br><b>(332.48 to</b><br><b>477.47)</b> | <b>347.83</b><br><b>(290.46 to</b><br><b>420.66)</b> | <b>468.38</b><br><b>(391.94 to</b><br><b>557.40)</b> |

| Canada                     |                                       |                                       |                                       |                                       |                              |                                 |                                 |                                 |
|----------------------------|---------------------------------------|---------------------------------------|---------------------------------------|---------------------------------------|------------------------------|---------------------------------|---------------------------------|---------------------------------|
| Cause                      | YLLs (in 1000s)                       |                                       |                                       |                                       | Deaths (in 1000s)            |                                 |                                 |                                 |
|                            | 2016                                  | 2040 Forecast                         | 2040 Better Scenario                  | 2040 Worse Scenario                   | 2016                         | 2040 Forecast                   | 2040 Better Scenario            | 2040 Worse Scenario             |
| Neoplasms                  | 1,530.98<br>(1,468.48 to<br>1,590.90) | 2,007.10<br>(1,745.18 to<br>2,307.27) | 1,679.71<br>(1,478.62 to<br>1,906.80) | 2,486.22<br>(2,106.79 to<br>2,921.67) | 85.10<br>(81.60 to<br>88.50) | 137.69<br>(117.89 to<br>161.29) | 118.99<br>(102.66 to<br>137.39) | 164.12<br>(137.15 to<br>194.24) |
| Lip and oral cavity cancer | 19.08<br>(17.45 to<br>20.98)          | 24.39<br>(15.07 to<br>38.52)          | 14.89<br>(9.93 to<br>22.02)           | 38.60<br>(22.52 to<br>62.18)          | 0.98<br>(0.90 to<br>1.07)    | 1.49<br>(0.91 to<br>2.37)       | 0.95<br>(0.62 to<br>1.43)       | 2.29<br>(1.31 to<br>3.73)       |
| Nasopharynx cancer         | 3.93<br>(3.57 to<br>4.33)             | 4.40<br>(2.84 to<br>6.73)             | 2.46<br>(1.67 to<br>3.63)             | 7.24<br>(4.47 to<br>11.51)            | 0.14<br>(0.13 to<br>0.16)    | 0.18<br>(0.12 to<br>0.28)       | 0.10<br>(0.07 to<br>0.15)       | 0.30<br>(0.18 to<br>0.47)       |
| Other pharynx cancer       | 7.89<br>(7.05 to<br>8.70)             | 11.08<br>(6.67 to<br>17.19)           | 9.17<br>(5.87 to<br>13.66)            | 12.55<br>(7.22 to<br>20.11)           | 0.35<br>(0.32 to<br>0.39)    | 0.59<br>(0.36 to<br>0.93)       | 0.50<br>(0.33 to<br>0.77)       | 0.66<br>(0.38 to<br>1.06)       |
| Esophageal cancer          | 43.43<br>(38.30 to<br>48.29)          | 54.89<br>(32.83 to<br>88.96)          | 36.24<br>(24.08 to<br>54.39)          | 79.87<br>(44.96 to<br>136.08)         | 2.27<br>(2.03 to<br>2.51)    | 3.40<br>(2.07 to<br>5.40)       | 2.32<br>(1.57 to<br>3.48)       | 4.84<br>(2.74 to<br>8.11)       |
| Stomach cancer             | 72.08<br>(67.43 to<br>77.09)          | 64.12<br>(49.96 to<br>81.25)          | 53.01<br>(43.30 to<br>65.33)          | 73.08<br>(54.99 to<br>95.96)          | 4.41<br>(4.14 to<br>4.73)    | 4.90<br>(3.73 to<br>6.53)       | 4.14<br>(3.30 to<br>5.33)       | 5.45<br>(4.02 to<br>7.49)       |

|                                      |                                 |                                 |                                 |                                 |                              |                              |                              |                              |
|--------------------------------------|---------------------------------|---------------------------------|---------------------------------|---------------------------------|------------------------------|------------------------------|------------------------------|------------------------------|
| Colon and rectum cancer              | 162.17<br>(149.95 to<br>176.96) | 227.46<br>(162.93 to<br>321.83) | 187.85<br>(137.73 to<br>259.09) | 274.88<br>(193.72 to<br>395.95) | 9.89<br>(9.12 to<br>10.81)   | 17.46<br>(12.10 to<br>24.72) | 14.85<br>(10.67 to<br>20.68) | 20.49<br>(13.88 to<br>29.24) |
| Liver cancer                         | 42.98<br>(38.66 to<br>47.22)    | 65.14<br>(43.13 to<br>99.20)    | 55.58<br>(39.00 to<br>81.32)    | 85.95<br>(52.36 to<br>136.92)   | 2.24<br>(2.01 to<br>2.44)    | 4.07<br>(2.72 to<br>6.03)    | 3.58<br>(2.53 to<br>5.08)    | 5.17<br>(3.22 to<br>8.00)    |
| Liver cancer due to hepatitis B      | 3.26<br>(2.46 to<br>4.37)       | 4.38<br>(2.65 to<br>7.36)       | 3.93<br>(2.51 to<br>6.24)       | 5.42<br>(3.05 to<br>9.44)       | 0.15<br>(0.11 to<br>0.19)    | 0.24<br>(0.14 to<br>0.38)    | 0.22<br>(0.14 to<br>0.33)    | 0.28<br>(0.16 to<br>0.48)    |
| Liver cancer due to hepatitis C      | 5.93<br>(4.80 to<br>7.16)       | 8.76<br>(5.67 to<br>13.33)      | 7.96<br>(5.43 to<br>11.74)      | 10.66<br>(6.46 to<br>17.01)     | 0.33<br>(0.28 to<br>0.40)    | 0.60<br>(0.39 to<br>0.88)    | 0.56<br>(0.38 to<br>0.80)    | 0.70<br>(0.44 to<br>1.10)    |
| Liver cancer due to alcohol use      | 14.98<br>(12.32 to<br>17.95)    | 23.05<br>(14.73 to<br>34.96)    | 17.74<br>(11.78 to<br>26.12)    | 33.57<br>(20.17 to<br>53.25)    | 0.78<br>(0.65 to<br>0.93)    | 1.42<br>(0.92 to<br>2.11)    | 1.14<br>(0.76 to<br>1.66)    | 1.98<br>(1.21 to<br>3.03)    |
| Liver cancer due to other causes     | 18.81<br>(15.82 to<br>21.93)    | 28.95<br>(17.49 to<br>47.23)    | 25.94<br>(16.79 to<br>40.41)    | 36.31<br>(20.83 to<br>62.77)    | 0.97<br>(0.81 to<br>1.13)    | 1.81<br>(1.12 to<br>2.88)    | 1.66<br>(1.09 to<br>2.52)    | 2.21<br>(1.26 to<br>3.72)    |
| Gallbladder and biliary tract cancer | 23.44<br>(21.56 to<br>28.12)    | 24.84<br>(22.06 to<br>31.13)    | 25.05<br>(22.20 to<br>31.65)    | 24.02<br>(21.30 to<br>29.67)    | 1.47<br>(1.36 to<br>1.78)    | 1.88<br>(1.62 to<br>2.32)    | 1.94<br>(1.69 to<br>2.44)    | 1.77<br>(1.53 to<br>2.14)    |
| Pancreatic cancer                    | 92.52<br>(85.41 to<br>100.26)   | 135.41<br>(110.52 to<br>168.80) | 126.03<br>(104.59 to<br>154.85) | 153.09<br>(121.82 to<br>195.99) | 5.55<br>(4.90 to<br>5.78)    | 9.30<br>(7.45 to<br>11.65)   | 8.82<br>(7.16 to<br>10.88)   | 10.31<br>(8.07 to<br>13.31)  |
| Larynx cancer                        | 9.41<br>(8.57 to<br>10.28)      | 9.53<br>(5.14 to<br>16.62)      | 5.77<br>(3.25 to<br>9.55)       | 14.64<br>(7.48 to<br>26.44)     | 0.48<br>(0.44 to<br>0.52)    | 0.54<br>(0.31 to<br>1.03)    | 0.36<br>(0.20 to<br>0.61)    | 0.86<br>(0.45 to<br>1.59)    |
| Tracheal, bronchus, and lung cancer  | 399.64<br>(375.59 to<br>423.55) | 465.07<br>(349.19 to<br>603.16) | 300.29<br>(229.74 to<br>385.90) | 749.58<br>(554.38 to<br>985.24) | 21.55<br>(20.16 to<br>23.01) | 29.52<br>(21.65 to<br>39.79) | 19.57<br>(14.67 to<br>26.01) | 45.97<br>(33.37 to<br>62.07) |
| Malignant skin melanoma              | 25.35<br>(21.92 to<br>30.02)    | 35.23<br>(29.85 to<br>41.44)    | 39.21<br>(33.03 to<br>46.31)    | 32.68<br>(27.50 to<br>38.67)    | 1.13<br>(0.97 to<br>1.31)    | 1.99<br>(1.67 to<br>2.54)    | 2.28<br>(1.90 to<br>2.69)    | 1.80<br>(1.49 to<br>2.12)    |
| Non-melanoma skin cancer             | 8.77<br>(7.97 to<br>9.66)       | 13.03<br>(11.20 to<br>15.01)    | 12.13<br>(10.28 to<br>14.10)    | 13.00<br>(10.95 to<br>15.24)    | 0.60<br>(0.55 to<br>0.66)    | 1.11<br>(0.91 to<br>1.30)    | 1.06<br>(0.88 to<br>1.26)    | 1.07<br>(0.86 to<br>1.29)    |
| Breast cancer                        | 123.23<br>(112.33 to<br>134.43) | 151.59<br>(110.18 to<br>204.48) | 125.12<br>(92.56 to<br>166.48)  | 179.99<br>(123.83 to<br>251.35) | 6.09<br>(5.58 to<br>6.65)    | 9.32<br>(6.64 to<br>12.74)   | 7.92<br>(5.72 to<br>10.69)   | 10.75<br>(7.42 to<br>15.02)  |
| Cervical cancer                      | 20.38<br>(18.56 to<br>22.73)    | 17.03<br>(12.79 to<br>22.60)    | 14.57<br>(11.07 to<br>18.94)    | 19.58<br>(13.68 to<br>27.63)    | 0.93<br>(0.85 to<br>1.04)    | 0.98<br>(0.72 to<br>1.33)    | 0.86<br>(0.64 to<br>1.13)    | 1.10<br>(0.76 to<br>1.58)    |
| Uterine cancer                       | 13.36<br>(11.73 to<br>15.18)    | 19.96<br>(16.48 to<br>23.49)    | 18.82<br>(15.56 to<br>22.30)    | 20.09<br>(16.61 to<br>23.78)    | 0.76<br>(0.67 to<br>0.86)    | 1.38<br>(1.13 to<br>1.65)    | 1.33<br>(1.08 to<br>1.60)    | 1.36<br>(1.10 to<br>1.64)    |
| Ovarian cancer                       | 38.96<br>(34.02 to<br>43.86)    | 47.20<br>(35.38 to<br>62.73)    | 43.22<br>(32.72 to<br>56.04)    | 49.61<br>(36.25 to<br>67.22)    | 1.95<br>(1.71 to<br>2.17)    | 2.83<br>(2.09 to<br>3.76)    | 2.61<br>(1.96 to<br>3.43)    | 2.93<br>(2.14 to<br>3.99)    |
| Prostate cancer                      | 69.74<br>(59.69 to<br>91.16)    | 134.05<br>(106.77 to<br>177.88) | 130.42<br>(104.76 to<br>172.89) | 132.36<br>(103.79 to<br>176.09) | 5.65<br>(4.83 to<br>7.16)    | 13.11<br>(10.04 to<br>17.39) | 13.08<br>(10.10 to<br>17.20) | 12.62<br>(9.45 to<br>16.86)  |
| Testicular cancer                    | 1.42<br>(1.20 to<br>1.65)       | 1.13<br>(0.92 to<br>1.37)       | 1.04<br>(0.83 to<br>1.27)       | 1.16<br>(0.93 to<br>1.42)       | 0.04<br>(0.03 to<br>0.04)    | 0.04<br>(0.03 to<br>0.05)    | 0.04<br>(0.03 to<br>0.04)    | 0.04<br>(0.03 to<br>0.04)    |

**Canada**

| Cause          | YLLs (in 1000s)              |                              |                              |                              | Deaths (in 1000s)         |                           |                           |                           |
|----------------|------------------------------|------------------------------|------------------------------|------------------------------|---------------------------|---------------------------|---------------------------|---------------------------|
|                | 2016                         | 2040 Forecast                | 2040 Better Scenario         | 2040 Worse Scenario          | 2016                      | 2040 Forecast             | 2040 Better Scenario      | 2040 Worse Scenario       |
| Kidney cancer  | 39.14<br>(35.94 to<br>42.34) | 59.78<br>(48.98 to<br>72.08) | 57.58<br>(48.50 to<br>67.85) | 63.72<br>(50.71 to<br>79.10) | 2.12<br>(1.94 to<br>2.29) | 4.00<br>(3.22 to<br>4.90) | 3.94<br>(3.26 to<br>4.70) | 4.16<br>(3.24 to<br>5.23) |
| Bladder cancer | 34.31<br>(31.34 to<br>37.42) | 48.14<br>(35.97 to<br>63.90) | 41.80<br>(32.26 to<br>54.01) | 56.88<br>(40.85 to<br>77.98) | 2.53<br>(2.28 to<br>2.78) | 4.36<br>(3.15 to<br>5.91) | 3.86<br>(2.89 to<br>5.09) | 5.01<br>(3.45 to<br>6.97) |





| Canada                                                        |                                                      |                                                      |                                                      |                                                      |                                                   |                                                   |                                                   |                                                   |
|---------------------------------------------------------------|------------------------------------------------------|------------------------------------------------------|------------------------------------------------------|------------------------------------------------------|---------------------------------------------------|---------------------------------------------------|---------------------------------------------------|---------------------------------------------------|
| Cause                                                         | YLLs (in 1000s)                                      |                                                      |                                                      |                                                      | Deaths (in 1000s)                                 |                                                   |                                                   |                                                   |
|                                                               | 2016                                                 | 2040 Forecast                                        | 2040 Better Scenario                                 | 2040 Worse Scenario                                  | 2016                                              | 2040 Forecast                                     | 2040 Better Scenario                              | 2040 Worse Scenario                               |
| Alcoholic cardiomyopathy                                      | 9.18<br>(6.69 to<br>13.97)                           | 9.80<br>(7.35 to<br>14.88)                           | 8.49<br>(6.41 to<br>12.92)                           | 11.15<br>(8.37 to<br>16.87)                          | 0.39<br>(0.31 to<br>0.62)                         | 0.50<br>(0.37 to<br>0.84)                         | 0.45<br>(0.33 to<br>0.77)                         | 0.55<br>(0.41 to<br>0.90)                         |
| Other cardiomyopathy                                          | 16.57<br>(13.66 to<br>24.72)                         | 17.02<br>(10.65 to<br>28.87)                         | 14.09<br>(8.87 to<br>23.89)                          | 18.77<br>(11.43 to<br>32.22)                         | 0.93<br>(0.76 to<br>1.41)                         | 1.25<br>(0.75 to<br>2.14)                         | 1.08<br>(0.65 to<br>1.84)                         | 1.33<br>(0.78 to<br>2.33)                         |
| Atrial fibrillation and flutter                               | 19.07<br>(14.82 to<br>23.98)                         | 37.72<br>(25.63 to<br>52.69)                         | 35.74<br>(24.88 to<br>49.40)                         | 39.58<br>(26.65 to<br>55.90)                         | 2.16<br>(1.65 to<br>2.79)                         | 4.61<br>(3.06 to<br>6.60)                         | 4.50<br>(3.01 to<br>6.40)                         | 4.66<br>(3.08 to<br>6.65)                         |
| Aortic aneurysm                                               | 27.68<br>(25.29 to<br>29.97)                         | 41.22<br>(30.87 to<br>54.45)                         | 38.94<br>(29.48 to<br>51.06)                         | 43.26<br>(32.14 to<br>58.18)                         | 2.04<br>(1.88 to<br>2.22)                         | 3.71<br>(2.74 to<br>4.91)                         | 3.63<br>(2.69 to<br>4.73)                         | 3.71<br>(2.76 to<br>4.89)                         |
| Peripheral artery disease                                     | 11.66<br>(8.91 to<br>18.33)                          | 28.68<br>(18.13 to<br>45.56)                         | 28.09<br>(18.04 to<br>44.41)                         | 30.59<br>(19.17 to<br>49.18)                         | 1.13<br>(0.82 to<br>1.74)                         | 3.23<br>(1.94 to<br>5.08)                         | 3.29<br>(1.98 to<br>5.16)                         | 3.26<br>(1.97 to<br>5.14)                         |
| Endocarditis                                                  | 9.93<br>(6.69 to<br>12.07)                           | 16.63<br>(9.83 to<br>24.52)                          | 16.21<br>(9.68 to<br>23.55)                          | 16.88<br>(9.94 to<br>24.99)                          | 0.65<br>(0.42 to<br>0.78)                         | 1.37<br>(0.75 to<br>2.11)                         | 1.38<br>(0.76 to<br>2.11)                         | 1.34<br>(0.72 to<br>2.10)                         |
| Other cardiovascular and circulatory diseases                 | 50.52<br>(46.63 to<br>54.86)                         | 84.11<br>(62.40 to<br>112.14)                        | 71.75<br>(53.60 to<br>94.47)                         | 93.90<br>(68.70 to<br>127.83)                        | 3.79<br>(3.46 to<br>4.16)                         | 9.90<br>(5.91 to<br>10.60)                        | 7.11<br>(5.26 to<br>9.41)                         | 8.39<br>(6.13 to<br>11.43)                        |
| <b>Chronic respiratory diseases</b>                           | <b>189.34</b><br><b>(178.04 to</b><br><b>201.31)</b> | <b>269.65</b><br><b>(210.06 to</b><br><b>347.72)</b> | <b>214.78</b><br><b>(172.41 to</b><br><b>268.36)</b> | <b>377.59</b><br><b>(284.98 to</b><br><b>503.81)</b> | <b>15.30</b><br><b>(14.39 to</b><br><b>16.25)</b> | <b>25.24</b><br><b>(18.91 to</b><br><b>33.58)</b> | <b>20.37</b><br><b>(15.94 to</b><br><b>26.31)</b> | <b>34.26</b><br><b>(25.30 to</b><br><b>46.54)</b> |
| Chronic obstructive pulmonary disease                         | 152.70<br>(140.98 to<br>168.97)                      | 204.82<br>(145.93 to<br>284.59)                      | 140.90<br>(98.83 to<br>199.97)                       | 317.27<br>(225.38 to<br>438.48)                      | 12.85<br>(11.85 to<br>14.20)                      | 19.92<br>(13.76 to<br>28.50)                      | 14.15<br>(9.86 to<br>20.55)                       | 29.45<br>(20.54 to<br>41.70)                      |
| Pneumoconiosis                                                | 1.36<br>(1.17 to<br>1.59)                            | 1.88<br>(1.39 to<br>2.52)                            | 2.03<br>(1.45 to<br>2.78)                            | 1.76<br>(1.31 to<br>2.32)                            | 0.10<br>(0.08 to<br>0.12)                         | 0.16<br>(0.11 to<br>0.22)                         | 0.18<br>(0.12 to<br>0.24)                         | 0.15<br>(0.11 to<br>0.19)                         |
| Silicosis                                                     | 0.38<br>(0.26 to<br>0.73)                            | 0.23<br>(0.11 to<br>0.64)                            | 0.19<br>(0.08 to<br>0.58)                            | 0.24<br>(0.11 to<br>0.64)                            | 0.02<br>(0.02 to<br>0.05)                         | 0.02<br>(0.01 to<br>0.06)                         | 0.02<br>(0.01 to<br>0.05)                         | 0.02<br>(0.01 to<br>0.06)                         |
| Asbestosis                                                    | 0.84<br>(0.44 to<br>1.05)                            | 1.50<br>(0.97 to<br>2.03)                            | 1.69<br>(1.18 to<br>2.29)                            | 1.36<br>(0.83 to<br>1.85)                            | 0.06<br>(0.03 to<br>0.08)                         | 0.13<br>(0.08 to<br>0.18)                         | 0.14<br>(0.10 to<br>0.20)                         | 0.11<br>(0.06 to<br>0.16)                         |
| Coal workers pneumoconiosis                                   | 0.05<br>(0.03 to<br>0.14)                            | 0.06<br>(0.02 to<br>0.23)                            | 0.06<br>(0.02 to<br>0.21)                            | 0.07<br>(0.02 to<br>0.23)                            | 0.00<br>(0.00 to<br>0.01)                         | 0.01<br>(0.00 to<br>0.02)                         | 0.01<br>(0.00 to<br>0.02)                         | 0.01<br>(0.00 to<br>0.02)                         |
| Other pneumoconiosis                                          | 0.10<br>(0.06 to<br>0.26)                            | 0.10<br>(0.05 to<br>0.27)                            | 0.09<br>(0.05 to<br>0.28)                            | 0.10<br>(0.06 to<br>0.26)                            | 0.01<br>(0.00 to<br>0.02)                         | 0.01<br>(0.00 to<br>0.05)                         | 0.01<br>(0.00 to<br>0.03)                         | 0.01<br>(0.00 to<br>0.03)                         |
| Asthma                                                        | 5.12<br>(4.55 to<br>6.60)                            | 3.09<br>(1.87 to<br>5.15)                            | 2.35<br>(1.44 to<br>3.89)                            | 4.08<br>(2.39 to<br>6.97)                            | 0.28<br>(0.25 to<br>0.34)                         | 0.24<br>(0.14 to<br>0.40)                         | 0.19<br>(0.11 to<br>0.32)                         | 0.30<br>(0.17 to<br>0.50)                         |
| Interstitial lung disease and pulmonary sarcoidosis           | 27.22<br>(16.05 to<br>32.53)                         | 55.89<br>(33.39 to<br>69.84)                         | 65.67<br>(41.45 to<br>81.32)                         | 50.25<br>(28.55 to<br>64.21)                         | 1.90<br>(1.06 to<br>2.31)                         | 4.63<br>(2.63 to<br>5.98)                         | 5.56<br>(3.33 to<br>7.03)                         | 4.06<br>(2.23 to<br>5.36)                         |
| Other chronic respiratory diseases                            | 2.94<br>(1.99 to<br>4.22)                            | 3.97<br>(2.59 to<br>5.63)                            | 3.83<br>(2.47 to<br>5.51)                            | 4.22<br>(2.73 to<br>5.93)                            | 0.16<br>(0.10 to<br>0.22)                         | 0.29<br>(0.17 to<br>0.43)                         | 0.28<br>(0.17 to<br>0.42)                         | 0.30<br>(0.17 to<br>0.45)                         |
| <b>Cirrhosis and other chronic liver diseases</b>             | <b>102.87</b><br><b>(94.75 to</b><br><b>111.25)</b>  | <b>111.82</b><br><b>(96.21 to</b><br><b>131.30)</b>  | <b>96.50</b><br><b>(81.69 to</b><br><b>114.91)</b>   | <b>123.97</b><br><b>(104.10 to</b><br><b>148.93)</b> | <b>4.59</b><br><b>(4.25 to</b><br><b>4.91)</b>    | <b>6.15</b><br><b>(5.30 to</b><br><b>7.15)</b>    | <b>5.49</b><br><b>(4.67 to</b><br><b>6.44)</b>    | <b>6.59</b><br><b>(5.57 to</b><br><b>7.80)</b>    |
| Cirrhosis and other chronic liver diseases due to hepatitis B | 7.35<br>(6.41 to<br>8.42)                            | 8.06<br>(6.72 to<br>9.74)                            | 7.51<br>(6.15 to<br>9.20)                            | 8.19<br>(6.67 to<br>10.10)                           | 0.33<br>(0.29 to<br>0.37)                         | 0.44<br>(0.37 to<br>0.53)                         | 0.42<br>(0.35 to<br>0.51)                         | 0.44<br>(0.36 to<br>0.54)                         |
| Cirrhosis and other chronic liver diseases due to hepatitis C | 29.34<br>(26.22 to<br>32.70)                         | 31.88<br>(26.79 to<br>38.26)                         | 29.41<br>(24.23 to<br>35.74)                         | 32.59<br>(26.85 to<br>39.60)                         | 1.24<br>(1.12 to<br>1.37)                         | 1.63<br>(1.38 to<br>1.93)                         | 1.53<br>(1.28 to<br>1.83)                         | 1.63<br>(1.36 to<br>1.95)                         |

|                                                                |                                                      |                                                      |                                                      |                                                      |                                                   |                                                   |                                                   |                                                   |
|----------------------------------------------------------------|------------------------------------------------------|------------------------------------------------------|------------------------------------------------------|------------------------------------------------------|---------------------------------------------------|---------------------------------------------------|---------------------------------------------------|---------------------------------------------------|
|                                                                | 43.47<br>(38.51 to<br>48.47)                         | 46.75<br>(39.01 to<br>55.78)                         | 36.22<br>(29.91 to<br>43.88)                         | 57.64<br>(47.45 to<br>70.30)                         | 1.93<br>(1.74 to<br>2.14)                         | 2.56<br>(2.16 to<br>3.02)                         | 2.08<br>(1.73 to<br>2.47)                         | 3.02<br>(2.51 to<br>3.62)                         |
| Cirrhosis and other chronic liver diseases due to alcohol use  |                                                      |                                                      |                                                      |                                                      |                                                   |                                                   |                                                   |                                                   |
|                                                                | 22.71<br>(20.29 to<br>25.60)                         | 25.13<br>(20.72 to<br>30.27)                         | 23.37<br>(19.12 to<br>28.51)                         | 25.54<br>(20.68 to<br>31.26)                         | 1.09<br>(0.98 to<br>1.20)                         | 1.52<br>(1.27 to<br>1.82)                         | 1.45<br>(1.19 to<br>1.76)                         | 1.50<br>(1.22 to<br>1.83)                         |
| Cirrhosis and other chronic liver diseases due to other causes |                                                      |                                                      |                                                      |                                                      |                                                   |                                                   |                                                   |                                                   |
| <b>Digestive diseases</b>                                      | <b>82.13</b><br><b>(71.32 to</b><br><b>90.88)</b>    | <b>127.16</b><br><b>(101.26 to</b><br><b>160.39)</b> | <b>121.42</b><br><b>(96.68 to</b><br><b>152.97)</b>  | <b>128.96</b><br><b>(100.76 to</b><br><b>166.23)</b> | <b>6.46</b><br><b>(5.46 to</b><br><b>7.16)</b>    | <b>12.36</b><br><b>(9.36 to</b><br><b>15.95)</b>  | <b>12.20</b><br><b>(9.26 to</b><br><b>15.62)</b>  | <b>12.11</b><br><b>(8.86 to</b><br><b>15.91)</b>  |
| Peptic ulcer disease                                           | 8.95<br>(7.68 to<br>10.18)                           | 8.33<br>(6.33 to<br>10.73)                           | 7.17<br>(5.37 to<br>9.47)                            | 9.11<br>(6.66 to<br>12.12)                           | 0.67<br>(0.58 to<br>0.77)                         | 0.82<br>(0.60 to<br>1.08)                         | 0.73<br>(0.52 to<br>0.98)                         | 0.86<br>(0.60 to<br>1.20)                         |
| <b>Canada</b>                                                  |                                                      |                                                      |                                                      |                                                      |                                                   |                                                   |                                                   |                                                   |
| <b>Cause</b>                                                   | <b>YLLs (in 1000s)</b>                               |                                                      |                                                      |                                                      | <b>Deaths (in 1000s)</b>                          |                                                   |                                                   |                                                   |
|                                                                | <b>2016</b>                                          | <b>2040 Forecast</b>                                 | <b>2040 Better Scenario</b>                          | <b>2040 Worse Scenario</b>                           | <b>2016</b>                                       | <b>2040 Forecast</b>                              | <b>2040 Better Scenario</b>                       | <b>2040 Worse Scenario</b>                        |
| Gastritis and duodenitis                                       | 1.33<br>(1.01 to<br>1.70)                            | 2.00<br>(1.39 to<br>2.78)                            | 1.84<br>(1.27 to<br>2.59)                            | 2.02<br>(1.38 to<br>2.83)                            | 0.09<br>(0.07 to<br>0.11)                         | 0.17<br>(0.11 to<br>0.25)                         | 0.17<br>(0.11 to<br>0.24)                         | 0.17<br>(0.11 to<br>0.25)                         |
| Appendicitis                                                   | 1.29<br>(1.01 to<br>1.69)                            | 1.35<br>(1.00 to<br>1.81)                            | 1.18<br>(0.84 to<br>1.61)                            | 1.40<br>(1.01 to<br>1.94)                            | 0.08<br>(0.06 to<br>0.10)                         | 0.11<br>(0.07 to<br>0.14)                         | 0.10<br>(0.07 to<br>0.13)                         | 0.11<br>(0.07 to<br>0.15)                         |
| Paralytic ileus and intestinal obstruction                     | 14.19<br>(9.99 to<br>16.86)                          | 24.22<br>(15.66 to<br>31.70)                         | 25.14<br>(16.35 to<br>33.05)                         | 22.86<br>(14.77 to<br>29.83)                         | 1.21<br>(0.78 to<br>1.53)                         | 2.28<br>(1.47 to<br>3.47)                         | 2.68<br>(1.58 to<br>3.67)                         | 2.29<br>(1.34 to<br>3.20)                         |
| Inguinal, femoral, and abdominal hernia                        | 3.16<br>(1.90 to<br>3.72)                            | 3.05<br>(1.70 to<br>3.96)                            | 2.91<br>(1.59 to<br>3.79)                            | 3.00<br>(1.67 to<br>3.91)                            | 0.27<br>(0.15 to<br>0.33)                         | 0.31<br>(0.16 to<br>0.42)                         | 0.31<br>(0.16 to<br>0.42)                         | 0.30<br>(0.15 to<br>0.41)                         |
| Inflammatory bowel disease                                     | 6.25<br>(5.23 to<br>7.79)                            | 9.71<br>(7.53 to<br>12.72)                           | 9.92<br>(7.74 to<br>13.05)                           | 9.29<br>(7.18 to<br>12.16)                           | 0.43<br>(0.36 to<br>0.52)                         | 0.86<br>(0.65 to<br>1.13)                         | 0.91<br>(0.68 to<br>1.19)                         | 0.80<br>(0.60 to<br>1.04)                         |
| Vascular intestinal disorders                                  | 15.46<br>(13.06 to<br>17.58)                         | 25.75<br>(20.04 to<br>31.43)                         | 25.36<br>(19.76 to<br>31.13)                         | 25.03<br>(19.44 to<br>30.94)                         | 1.20<br>(1.02 to<br>1.36)                         | 2.38<br>(1.80 to<br>2.97)                         | 2.41<br>(1.81 to<br>3.02)                         | 2.25<br>(1.69 to<br>2.81)                         |
| Gallbladder and biliary diseases                               | 7.80<br>(6.76 to<br>8.89)                            | 13.93<br>(7.48 to<br>25.63)                          | 11.46<br>(6.34 to<br>20.83)                          | 16.92<br>(8.94 to<br>31.25)                          | 0.71<br>(0.60 to<br>0.82)                         | 1.52<br>(0.78 to<br>2.87)                         | 1.30<br>(0.69 to<br>2.42)                         | 1.77<br>(0.87 to<br>3.34)                         |
| Pancreatitis                                                   | 8.51<br>(6.86 to<br>10.04)                           | 11.71<br>(7.44 to<br>18.51)                          | 9.52<br>(6.41 to<br>14.44)                           | 13.20<br>(7.94 to<br>22.03)                          | 0.47<br>(0.36 to<br>0.54)                         | 0.84<br>(0.52 to<br>1.37)                         | 0.71<br>(0.46 to<br>1.09)                         | 0.91<br>(0.52 to<br>1.57)                         |
| Other digestive diseases                                       | 15.20<br>(12.55 to<br>17.94)                         | 27.09<br>(20.84 to<br>34.06)                         | 26.91<br>(20.76 to<br>33.93)                         | 26.12<br>(19.87 to<br>32.88)                         | 1.33<br>(1.14 to<br>1.53)                         | 2.84<br>(2.14 to<br>3.62)                         | 2.91<br>(2.20 to<br>3.72)                         | 2.65<br>(1.95 to<br>3.40)                         |
| <b>Neurological disorders</b>                                  | <b>276.38</b><br><b>(249.97 to</b><br><b>304.87)</b> | <b>523.61</b><br><b>(423.21 to</b><br><b>668.08)</b> | <b>528.09</b><br><b>(432.79 to</b><br><b>662.24)</b> | <b>533.86</b><br><b>(420.76 to</b><br><b>711.30)</b> | <b>28.12</b><br><b>(24.83 to</b><br><b>31.22)</b> | <b>58.77</b><br><b>(45.22 to</b><br><b>77.22)</b> | <b>60.63</b><br><b>(47.97 to</b><br><b>78.17)</b> | <b>58.60</b><br><b>(43.33 to</b><br><b>80.07)</b> |
| Alzheimer's disease and other dementias                        | 166.11<br>(143.31 to<br>189.90)                      | 338.37<br>(249.54 to<br>475.42)                      | 336.67<br>(254.95 to<br>458.94)                      | 355.14<br>(249.62 to<br>524.75)                      | 21.18<br>(18.22 to<br>24.24)                      | 44.58<br>(32.24 to<br>62.72)                      | 45.46<br>(33.79 to<br>62.61)                      | 45.38<br>(31.31 to<br>66.50)                      |
| Parkinson's disease                                            | 46.82<br>(33.42 to<br>58.43)                         | 97.41<br>(70.11 to<br>123.65)                        | 104.60<br>(75.77 to<br>131.89)                       | 90.34<br>(64.36 to<br>116.39)                        | 4.34<br>(3.13 to<br>5.48)                         | 9.65<br>(6.82 to<br>12.37)                        | 10.53<br>(7.52 to<br>13.42)                       | 8.77<br>(6.12 to<br>11.39)                        |
| Epilepsy                                                       | 10.14<br>(9.32 to<br>11.12)                          | 14.98<br>(10.56 to<br>20.06)                         | 12.77<br>(9.31 to<br>16.88)                          | 16.76<br>(11.43 to<br>23.21)                         | 0.31<br>(0.29 to<br>0.35)                         | 0.63<br>(0.44 to<br>0.87)                         | 0.56<br>(0.41 to<br>0.75)                         | 0.68<br>(0.46 to<br>0.96)                         |
| Multiple sclerosis                                             | 13.26<br>(10.54 to<br>16.20)                         | 14.18<br>(10.97 to<br>17.49)                         | 14.49<br>(11.28 to<br>17.71)                         | 14.51<br>(11.21 to<br>18.07)                         | 0.51<br>(0.39 to<br>0.58)                         | 0.63<br>(0.47 to<br>0.74)                         | 0.66<br>(0.48 to<br>0.77)                         | 0.63<br>(0.47 to<br>0.75)                         |
| Motor neuron disease                                           | 19.97<br>(18.25 to<br>21.74)                         | 30.51<br>(26.88 to<br>34.27)                         | 30.82<br>(27.20 to<br>34.60)                         | 29.71<br>(26.11 to<br>33.43)                         | 0.96<br>(0.87 to<br>1.05)                         | 1.78<br>(1.55 to<br>2.01)                         | 1.82<br>(1.59 to<br>2.06)                         | 1.70<br>(1.47 to<br>1.93)                         |
| Other neurological disorders                                   | 20.08<br>(18.24 to<br>21.67)                         | 28.16<br>(25.15 to<br>31.13)                         | 28.74<br>(25.67 to<br>31.73)                         | 27.41<br>(24.41 to<br>30.36)                         | 0.82<br>(0.75 to<br>0.88)                         | 1.52<br>(1.32 to<br>1.72)                         | 1.60<br>(1.39 to<br>1.81)                         | 1.43<br>(1.24 to<br>1.63)                         |

|                                                            |                                     |                                       |                                     |                                       |                                  |                                   |                                  |                                   |
|------------------------------------------------------------|-------------------------------------|---------------------------------------|-------------------------------------|---------------------------------------|----------------------------------|-----------------------------------|----------------------------------|-----------------------------------|
| <b>Mental disorders</b>                                    | <b>100.07</b><br>(86.98 to 114.90)  | <b>151.09</b><br>(128.32 to 175.56)   | <b>163.26</b><br>(140.37 to 189.74) | <b>145.91</b><br>(122.95 to 170.74)   | <b>2.75</b><br>(2.43 to 3.12)    | <b>4.53</b><br>(3.90 to 5.22)     | <b>4.93</b><br>(4.27 to 5.66)    | <b>4.34</b><br>(3.69 to 5.03)     |
| Alcohol use disorders                                      | 32.64<br>(29.72 to 35.88)           | 35.56<br>(30.19 to 41.84)             | 34.96<br>(29.46 to 41.54)           | 36.72<br>(31.27 to 42.75)             | 1.12<br>(1.02 to 1.23)           | 1.47<br>(1.26 to 1.72)            | 1.49<br>(1.27 to 1.74)           | 1.48<br>(1.27 to 1.73)            |
| Drug use disorders                                         | 67.07<br>(54.30 to 82.30)           | 115.16<br>(93.66 to 138.92)           | 127.91<br>(105.48 to 153.23)        | 108.84<br>(88.15 to 131.93)           | 1.62<br>(1.31 to 1.98)           | 3.05<br>(2.48 to 3.67)            | 3.44<br>(2.82 to 4.10)           | 2.85<br>(2.29 to 3.45)            |
| Opioid use disorders                                       | 39.38<br>(31.03 to 50.25)           | 47.87<br>(36.58 to 65.05)             | 49.60<br>(38.05 to 68.47)           | 46.75<br>(35.21 to 62.52)             | 0.91<br>(0.71 to 1.14)           | 1.16<br>(0.88 to 1.52)            | 1.21<br>(0.92 to 1.60)           | 1.13<br>(0.86 to 1.49)            |
| Cocaine use disorders                                      | 5.56<br>(3.54 to 7.48)              | 14.16<br>(9.43 to 19.22)              | 15.87<br>(10.78 to 21.60)           | 13.30<br>(8.86 to 18.34)              | 0.13<br>(0.09 to 0.18)           | 0.35<br>(0.24 to 0.46)            | 0.39<br>(0.27 to 0.52)           | 0.32<br>(0.22 to 0.44)            |
| Amphetamine use disorders                                  | 2.68<br>(1.65 to 3.68)              | 10.55<br>(6.84 to 14.77)              | 12.67<br>(8.37 to 17.77)            | 9.61<br>(5.99 to 13.74)               | 0.06<br>(0.04 to 0.09)           | 0.25<br>(0.17 to 0.35)            | 0.30<br>(0.20 to 0.42)           | 0.23<br>(0.15 to 0.32)            |
| Other drug use disorders                                   | 19.45<br>(12.90 to 25.05)           | 42.58<br>(31.25 to 55.72)             | 49.77<br>(36.61 to 64.77)           | 39.17<br>(27.60 to 52.16)             | 0.52<br>(0.38 to 0.66)           | 1.29<br>(0.97 to 1.66)            | 1.54<br>(1.16 to 1.93)           | 1.17<br>(0.86 to 1.51)            |
| Eating disorders                                           | 0.36<br>(0.28 to 0.46)              | 0.36<br>(0.25 to 0.52)                | 0.39<br>(0.26 to 0.56)              | 0.35<br>(0.24 to 0.50)                | 0.01<br>(0.01 to 0.01)           | 0.01<br>(0.00 to 0.01)            | 0.01<br>(0.01 to 0.01)           | 0.01<br>(0.00 to 0.01)            |
| <b>Canada</b>                                              |                                     |                                       |                                     |                                       |                                  |                                   |                                  |                                   |
| <b>Cause</b>                                               | <b>YLLs (in 1000s)</b>              |                                       |                                     |                                       | <b>Deaths (in 1000s)</b>         |                                   |                                  |                                   |
|                                                            | <b>2016</b>                         | <b>2040 Forecast</b>                  | <b>2040 Better Scenario</b>         | <b>2040 Worse Scenario</b>            | <b>2016</b>                      | <b>2040 Forecast</b>              | <b>2040 Better Scenario</b>      | <b>2040 Worse Scenario</b>        |
| <b>Diabetes, urogenital, blood, and endocrine diseases</b> | <b>237.10</b><br>(224.58 to 250.41) | <b>465.24</b><br>(277.59 to 1,003.03) | <b>407.46</b><br>(244.78 to 881.15) | <b>533.22</b><br>(309.56 to 1,164.91) | <b>17.17</b><br>(16.33 to 18.03) | <b>44.44</b><br>(24.36 to 103.22) | <b>40.00</b><br>(22.27 to 94.34) | <b>49.37</b><br>(26.13 to 113.08) |
| Diabetes mellitus                                          | 105.81<br>(98.34 to 114.11)         | 138.62<br>(93.84 to 202.49)           | 113.26<br>(77.63 to 158.76)         | 164.12<br>(107.81 to 244.73)          | 7.19<br>(6.68 to 7.75)           | 12.02<br>(8.39 to 16.87)          | 10.30<br>(7.21 to 14.05)         | 13.45<br>(9.16 to 19.46)          |
| Acute glomerulonephritis                                   | 0.18<br>(0.17 to 0.19)              | 0.20<br>(0.17 to 0.23)                | 0.18<br>(0.15 to 0.22)              | 0.21<br>(0.18 to 0.25)                | 0.00<br>(0.00 to 0.00)           | 0.01<br>(0.00 to 0.01)            | 0.01<br>(0.00 to 0.01)           | 0.01<br>(0.00 to 0.01)            |
| Chronic kidney disease                                     | 65.45<br>(61.18 to 69.64)           | 220.01<br>(56.27 to 772.82)           | 187.44<br>(49.68 to 669.15)         | 265.43<br>(67.72 to 905.32)           | 5.81<br>(5.43 to 6.24)           | 23.71<br>(5.96 to 82.50)          | 20.79<br>(5.39 to 74.88)         | 27.72<br>(6.98 to 92.87)          |
| Chronic kidney disease due to diabetes mellitus            | 32.48<br>(28.87 to 36.40)           | 111.19<br>(28.85 to 403.12)           | 93.68<br>(25.05 to 346.71)          | 136.04<br>(34.76 to 462.66)           | 2.50<br>(2.12 to 2.91)           | 10.79<br>(2.58 to 38.24)          | 9.34<br>(2.32 to 33.50)          | 12.78<br>(3.17 to 43.29)          |
| Chronic kidney disease due to hypertension                 | 16.37<br>(13.82 to 19.26)           | 65.04<br>(15.41 to 235.21)            | 57.17<br>(13.96 to 208.80)          | 76.31<br>(17.97 to 260.32)            | 1.99<br>(1.66 to 2.36)           | 8.41<br>(2.11 to 30.55)           | 7.58<br>(1.94 to 28.63)          | 9.61<br>(2.36 to 34.61)           |
| Chronic kidney disease due to glomerulonephritis           | 5.92<br>(4.85 to 7.18)              | 13.98<br>(3.90 to 52.47)              | 11.52<br>(3.30 to 44.25)            | 17.06<br>(4.55 to 59.75)              | 0.43<br>(0.33 to 0.55)           | 1.37<br>(0.31 to 5.11)            | 1.15<br>(0.27 to 4.48)           | 1.63<br>(0.37 to 5.81)            |
| Chronic kidney disease due to other and unspecified causes | 10.68<br>(8.75 to 12.83)            | 29.79<br>(8.07 to 99.13)              | 25.08<br>(6.94 to 81.74)            | 36.02<br>(9.59 to 116.97)             | 0.88<br>(0.68 to 1.10)           | 3.14<br>(0.75 to 11.40)           | 2.71<br>(0.67 to 9.95)           | 3.70<br>(0.88 to 12.71)           |
| Urinary diseases and male infertility                      | 18.15<br>(16.73 to 19.66)           | 34.97<br>(28.20 to 42.77)             | 33.42<br>(26.84 to 40.73)           | 34.20<br>(27.43 to 41.40)             | 1.83<br>(1.66 to 2.01)           | 4.27<br>(3.28 to 5.34)            | 4.21<br>(3.18 to 5.29)           | 4.04<br>(3.07 to 5.08)            |
| Urinary tract infections                                   | 16.15<br>(14.90 to 17.54)           | 32.65<br>(26.13 to 40.03)             | 31.34<br>(24.85 to 38.65)           | 31.83<br>(25.45 to 39.06)             | 1.69<br>(1.53 to 1.86)           | 4.05<br>(3.10 to 5.11)            | 4.01<br>(3.03 to 5.06)           | 3.83<br>(2.89 to 4.85)            |
| Urolithiasis                                               | 0.81<br>(0.64 to 1.08)              | 0.94<br>(0.69 to 1.37)                | 0.84<br>(0.60 to 1.23)              | 0.96<br>(0.70 to 1.38)                | 0.06<br>(0.04 to 0.08)           | 0.08<br>(0.06 to 0.13)            | 0.08<br>(0.05 to 0.12)           | 0.08<br>(0.06 to 0.13)            |
| Other urinary diseases                                     | 1.20<br>(0.93 to 1.70)              | 1.38<br>(0.92 to 2.17)                | 1.24<br>(0.82 to 1.99)              | 1.40<br>(0.92 to 2.21)                | 0.08<br>(0.06 to 0.12)           | 0.13<br>(0.08 to 0.23)            | 0.12<br>(0.07 to 0.22)           | 0.13<br>(0.08 to 0.22)            |

|                                                   |                              |                              |                              |                              |                           |                           |                           |                           |
|---------------------------------------------------|------------------------------|------------------------------|------------------------------|------------------------------|---------------------------|---------------------------|---------------------------|---------------------------|
| Gynecological diseases                            | 0.32<br>(0.17 to<br>0.38)    | 0.22<br>(0.11 to<br>0.31)    | 0.18<br>(0.09 to<br>0.25)    | 0.24<br>(0.12 to<br>0.34)    | 0.02<br>(0.01 to<br>0.02) | 0.01<br>(0.01 to<br>0.02) | 0.01<br>(0.01 to<br>0.02) | 0.02<br>(0.01 to<br>0.02) |
| Uterine fibroids                                  | 0.08<br>(0.05 to<br>0.10)    | 0.04<br>(0.03 to<br>0.06)    | 0.04<br>(0.02 to<br>0.05)    | 0.05<br>(0.03 to<br>0.07)    | 0.00<br>(0.00 to<br>0.00) | 0.00<br>(0.00 to<br>0.00) | 0.00<br>(0.00 to<br>0.00) | 0.00<br>(0.00 to<br>0.00) |
| Polycystic ovarian syndrome                       | 0.01<br>(0.01 to<br>0.01)    | 0.00<br>(0.00 to<br>0.01)    | 0.00<br>(0.00 to<br>0.00)    | 0.00<br>(0.00 to<br>0.01)    | 0.00<br>(0.00 to<br>0.00) | 0.00<br>(0.00 to<br>0.00) | 0.00<br>(0.00 to<br>0.00) | 0.00<br>(0.00 to<br>0.00) |
| Endometriosis                                     | 0.02<br>(0.00 to<br>0.03)    | 0.01<br>(0.00 to<br>0.02)    | 0.01<br>(0.00 to<br>0.01)    | 0.01<br>(0.00 to<br>0.02)    | 0.00<br>(0.00 to<br>0.00) | 0.00<br>(0.00 to<br>0.00) | 0.00<br>(0.00 to<br>0.00) | 0.00<br>(0.00 to<br>0.00) |
| Genital prolapse                                  | 0.04<br>(0.01 to<br>0.05)    | 0.03<br>(0.01 to<br>0.05)    | 0.02<br>(0.01 to<br>0.04)    | 0.03<br>(0.01 to<br>0.05)    | 0.00<br>(0.00 to<br>0.00) | 0.00<br>(0.00 to<br>0.00) | 0.00<br>(0.00 to<br>0.00) | 0.00<br>(0.00 to<br>0.00) |
| Other gynecological diseases                      | 0.17<br>(0.09 to<br>0.21)    | 0.14<br>(0.07 to<br>0.20)    | 0.11<br>(0.05 to<br>0.17)    | 0.15<br>(0.07 to<br>0.23)    | 0.01<br>(0.00 to<br>0.01) | 0.01<br>(0.00 to<br>0.02) | 0.01<br>(0.00 to<br>0.01) | 0.01<br>(0.00 to<br>0.02) |
| Hemoglobinopathies and hemolytic anemias          | 3.97<br>(3.48 to<br>5.20)    | 4.61<br>(3.62 to<br>5.73)    | 4.17<br>(3.23 to<br>5.23)    | 4.70<br>(3.65 to<br>6.01)    | 0.24<br>(0.18 to<br>0.28) | 0.38<br>(0.26 to<br>0.48) | 0.36<br>(0.24 to<br>0.46) | 0.38<br>(0.25 to<br>0.48) |
| Thalassemias                                      | 0.37<br>(0.30 to<br>0.54)    | 0.18<br>(0.12 to<br>0.29)    | 0.17<br>(0.12 to<br>0.28)    | 0.18<br>(0.13 to<br>0.29)    | 0.01<br>(0.00 to<br>0.01) | 0.00<br>(0.00 to<br>0.00) | 0.00<br>(0.00 to<br>0.00) | 0.00<br>(0.00 to<br>0.00) |
| Sickle cell disorders                             | 0.51<br>(0.42 to<br>0.85)    | 0.59<br>(0.42 to<br>0.94)    | 0.51<br>(0.37 to<br>0.84)    | 0.62<br>(0.44 to<br>1.00)    | 0.01<br>(0.01 to<br>0.02) | 0.02<br>(0.02 to<br>0.03) | 0.02<br>(0.03 to<br>0.03) | 0.02<br>(0.02 to<br>0.03) |
| G6PD deficiency                                   | 0.72<br>(0.60 to<br>1.06)    | 0.93<br>(0.73 to<br>1.35)    | 0.80<br>(0.60 to<br>1.18)    | 0.99<br>(0.74 to<br>1.45)    | 0.02<br>(0.02 to<br>0.03) | 0.04<br>(0.03 to<br>0.05) | 0.03<br>(0.03 to<br>0.04) | 0.04<br>(0.03 to<br>0.05) |
| Other hemoglobinopathies and hemolytic anemias    | 2.36<br>(1.88 to<br>2.87)    | 2.91<br>(2.00 to<br>3.63)    | 2.69<br>(1.83 to<br>3.38)    | 2.91<br>(2.05 to<br>3.66)    | 0.20<br>(0.14 to<br>0.23) | 0.32<br>(0.20 to<br>0.41) | 0.31<br>(0.19 to<br>0.39) | 0.31<br>(0.20 to<br>0.41) |
| Endocrine, metabolic, blood, and immune disorders | 43.23<br>(32.36 to<br>48.80) | 66.63<br>(49.62 to<br>77.08) | 68.81<br>(51.41 to<br>79.52) | 64.32<br>(48.03 to<br>74.48) | 2.08<br>(1.47 to<br>2.34) | 4.04<br>(2.72 to<br>4.90) | 4.33<br>(2.92 to<br>5.27) | 3.76<br>(2.49 to<br>4.52) |

**Canada**

| Cause                                  | YLLs (in 1000s)              |                               |                               |                               | Deaths (in 1000s)         |                           |                           |                           |
|----------------------------------------|------------------------------|-------------------------------|-------------------------------|-------------------------------|---------------------------|---------------------------|---------------------------|---------------------------|
|                                        | 2016                         | 2040 Forecast                 | 2040 Better Scenario          | 2040 Worse Scenario           | 2016                      | 2040 Forecast             | 2040 Better Scenario      | 2040 Worse Scenario       |
| <b>Musculoskeletal disorders</b>       | 17.93<br>(13.75 to<br>19.77) | 31.12<br>(21.20 to<br>36.67)  | 29.23<br>(19.91 to<br>34.67)  | 31.46<br>(21.15 to<br>37.73)  | 1.17<br>(0.74 to<br>1.31) | 2.56<br>(1.43 to<br>3.12) | 2.46<br>(1.39 to<br>3.03) | 2.51<br>(1.40 to<br>3.12) |
| Rheumatoid arthritis                   | 4.86<br>(3.91 to<br>7.09)    | 9.78<br>(7.21 to<br>14.56)    | 8.25<br>(5.95 to<br>12.38)    | 10.52<br>(7.40 to<br>15.25)   | 0.35<br>(0.27 to<br>0.55) | 0.85<br>(0.59 to<br>1.30) | 0.74<br>(0.51 to<br>1.18) | 0.89<br>(0.59 to<br>1.36) |
| Other musculoskeletal disorders        | 13.08<br>(9.27 to<br>14.80)  | 21.33<br>(12.98 to<br>25.78)  | 20.98<br>(13.08 to<br>25.28)  | 20.93<br>(12.76 to<br>25.58)  | 0.82<br>(0.43 to<br>0.95) | 1.70<br>(0.77 to<br>2.16) | 1.73<br>(0.79 to<br>2.18) | 1.61<br>(0.72 to<br>2.07) |
| <b>Other non-communicable diseases</b> | 77.69<br>(66.05 to<br>91.55) | 87.47<br>(65.54 to<br>116.61) | 76.61<br>(56.69 to<br>101.67) | 94.35<br>(68.80 to<br>125.76) | 1.54<br>(1.24 to<br>1.79) | 2.80<br>(1.87 to<br>3.55) | 2.69<br>(1.75 to<br>3.43) | 2.79<br>(1.90 to<br>3.56) |
| Congenital birth defects               | 61.49<br>(51.45 to<br>74.60) | 60.02<br>(42.59 to<br>83.29)  | 50.78<br>(35.38 to<br>71.28)  | 66.38<br>(45.39 to<br>91.43)  | 0.89<br>(0.75 to<br>1.06) | 0.92<br>(0.68 to<br>1.23) | 0.80<br>(0.59 to<br>1.07) | 1.00<br>(0.72 to<br>1.34) |
| Neural tube defects                    | 2.34<br>(1.63 to<br>3.21)    | 0.94<br>(0.54 to<br>1.59)     | 0.71<br>(0.39 to<br>1.24)     | 1.10<br>(0.60 to<br>1.89)     | 0.03<br>(0.02 to<br>0.04) | 0.01<br>(0.01 to<br>0.02) | 0.01<br>(0.01 to<br>0.02) | 0.02<br>(0.01 to<br>0.03) |
| Congenital heart anomalies             | 20.29<br>(16.65 to<br>25.74) | 14.48<br>(9.34 to<br>21.90)   | 10.83<br>(6.44 to<br>16.85)   | 16.98<br>(10.17 to<br>26.25)  | 0.29<br>(0.24 to<br>0.37) | 0.22<br>(0.14 to<br>0.33) | 0.16<br>(0.10 to<br>0.25) | 0.25<br>(0.16 to<br>0.39) |
| Orofacial clefts                       | 0.03<br>(0.01 to<br>0.05)    | 0.01<br>(0.00 to<br>0.03)     | 0.01<br>(0.00 to<br>0.02)     | 0.02<br>(0.01 to<br>0.04)     | 0.00<br>(0.00 to<br>0.00) | 0.00<br>(0.00 to<br>0.00) | 0.00<br>(0.00 to<br>0.00) | 0.00<br>(0.00 to<br>0.00) |

|                                               |                                                      |                                                      |                                                      |                                                      |                                                   |                                                   |                                                   |                                                   |
|-----------------------------------------------|------------------------------------------------------|------------------------------------------------------|------------------------------------------------------|------------------------------------------------------|---------------------------------------------------|---------------------------------------------------|---------------------------------------------------|---------------------------------------------------|
| Down syndrome                                 | 6.69<br>(4.06 to<br>7.99)                            | 9.99<br>(6.22 to<br>12.42)                           | 10.18<br>(6.36 to<br>12.55)                          | 9.88<br>(6.12 to<br>12.30)                           | 0.15<br>(0.09 to<br>0.18)                         | 0.24<br>(0.15 to<br>0.29)                         | 0.25<br>(0.16 to<br>0.30)                         | 0.24<br>(0.16 to<br>0.28)                         |
| Other chromosomal abnormalities               | 10.89<br>(8.05 to<br>18.21)                          | 17.24<br>(10.99 to<br>27.68)                         | 15.23<br>(9.60 to<br>24.05)                          | 18.61<br>(11.57 to<br>29.82)                         | 0.14<br>(0.10 to<br>0.22)                         | 0.22<br>(0.15 to<br>0.35)                         | 0.20<br>(0.13 to<br>0.31)                         | 0.24<br>(0.15 to<br>0.37)                         |
| Congenital musculoskeletal and limb anomalies | 1.96<br>(1.35 to<br>2.53)                            | 1.58<br>(0.93 to<br>2.36)                            | 1.26<br>(0.72 to<br>1.94)                            | 1.80<br>(1.05 to<br>2.80)                            | 0.03<br>(0.02 to<br>0.03)                         | 0.02<br>(0.01 to<br>0.04)                         | 0.02<br>(0.01 to<br>0.03)                         | 0.03<br>(0.02 to<br>0.04)                         |
| Urogenital congenital anomalies               | 2.00<br>(1.15 to<br>2.90)                            | 1.69<br>(0.87 to<br>2.86)                            | 1.38<br>(0.69 to<br>2.40)                            | 1.90<br>(0.97 to<br>3.29)                            | 0.03<br>(0.02 to<br>0.04)                         | 0.02<br>(0.01 to<br>0.04)                         | 0.02<br>(0.01 to<br>0.03)                         | 0.03<br>(0.01 to<br>0.05)                         |
| Digestive congenital anomalies                | 3.83<br>(2.56 to<br>5.10)                            | 3.04<br>(1.70 to<br>5.11)                            | 2.34<br>(1.26 to<br>3.98)                            | 3.54<br>(1.90 to<br>5.90)                            | 0.05<br>(0.03 to<br>0.06)                         | 0.04<br>(0.02 to<br>0.06)                         | 0.03<br>(0.02 to<br>0.05)                         | 0.04<br>(0.02 to<br>0.07)                         |
| Other congenital birth defects                | 13.46<br>(10.49 to<br>18.35)                         | 11.05<br>(6.98 to<br>17.12)                          | 8.83<br>(5.30 to<br>13.81)                           | 12.56<br>(7.61 to<br>19.26)                          | 0.18<br>(0.14 to<br>0.23)                         | 0.15<br>(0.10 to<br>0.22)                         | 0.12<br>(0.07 to<br>0.18)                         | 0.17<br>(0.10 to<br>0.25)                         |
| Skin and subcutaneous diseases                | 6.96<br>(3.70 to<br>9.50)                            | 19.60<br>(9.95 to<br>26.10)                          | 19.31<br>(9.90 to<br>25.92)                          | 19.10<br>(9.67 to<br>26.06)                          | 0.54<br>(0.26 to<br>0.71)                         | 1.79<br>(0.83 to<br>2.37)                         | 1.82<br>(0.86 to<br>2.42)                         | 1.69<br>(0.78 to<br>2.26)                         |
| Cellulitis                                    | 3.07<br>(1.36 to<br>4.18)                            | 8.37<br>(3.66 to<br>11.50)                           | 8.41<br>(3.73 to<br>11.63)                           | 8.11<br>(3.56 to<br>11.19)                           | 0.21<br>(0.09 to<br>0.28)                         | 0.69<br>(0.28 to<br>0.98)                         | 0.71<br>(0.29 to<br>1.01)                         | 0.65<br>(0.26 to<br>0.91)                         |
| Pyoderma                                      | 2.72<br>(1.29 to<br>4.05)                            | 9.04<br>(4.08 to<br>12.76)                           | 8.83<br>(4.00 to<br>12.54)                           | 8.84<br>(3.96 to<br>12.49)                           | 0.21<br>(0.09 to<br>0.29)                         | 0.84<br>(0.35 to<br>1.18)                         | 0.86<br>(0.35 to<br>1.21)                         | 0.80<br>(0.33 to<br>1.13)                         |
| Decubitus ulcer                               | 0.69<br>(0.39 to<br>1.24)                            | 1.35<br>(0.71 to<br>2.72)                            | 1.26<br>(0.66 to<br>2.59)                            | 1.33<br>(0.68 to<br>2.65)                            | 0.08<br>(0.04 to<br>0.14)                         | 0.17<br>(0.08 to<br>0.34)                         | 0.16<br>(0.08 to<br>0.34)                         | 0.16<br>(0.08 to<br>0.33)                         |
| Other skin and subcutaneous diseases          | 0.48<br>(0.24 to<br>0.85)                            | 0.84<br>(0.40 to<br>1.55)                            | 0.81<br>(0.38 to<br>1.50)                            | 0.82<br>(0.39 to<br>1.52)                            | 0.04<br>(0.02 to<br>0.07)                         | 0.08<br>(0.05 to<br>0.16)                         | 0.08<br>(0.03 to<br>0.15)                         | 0.08<br>(0.03 to<br>0.15)                         |
| Sudden infant death syndrome                  | 9.24<br>(6.67 to<br>12.52)                           | 7.85<br>(3.90 to<br>13.14)                           | 6.52<br>(3.22 to<br>10.92)                           | 8.88<br>(4.25 to<br>15.31)                           | 0.11<br>(0.08 to<br>0.15)                         | 0.09<br>(0.05 to<br>0.15)                         | 0.08<br>(0.04 to<br>0.13)                         | 0.10<br>(0.05 to<br>0.18)                         |
| <b>Injuries</b>                               | <b>471.84</b><br><b>(432.12 to</b><br><b>499.43)</b> | <b>477.90</b><br><b>(389.13 to</b><br><b>581.50)</b> | <b>363.84</b><br><b>(299.36 to</b><br><b>434.67)</b> | <b>530.34</b><br><b>(421.66 to</b><br><b>664.60)</b> | <b>16.00</b><br><b>(13.70 to</b><br><b>17.16)</b> | <b>22.06</b><br><b>(17.49 to</b><br><b>25.74)</b> | <b>19.24</b><br><b>(14.92 to</b><br><b>22.11)</b> | <b>22.69</b><br><b>(17.77 to</b><br><b>26.97)</b> |
| <b>Transport injuries</b>                     | <b>135.52</b><br><b>(125.66 to</b><br><b>147.60)</b> | <b>137.21</b><br><b>(93.55 to</b><br><b>197.09)</b>  | <b>72.16</b><br><b>(49.65 to</b><br><b>102.67)</b>   | <b>160.64</b><br><b>(105.94 to</b><br><b>236.35)</b> | <b>3.29</b><br><b>(3.08 to</b><br><b>3.53)</b>    | <b>3.81</b><br><b>(2.57 to</b><br><b>5.42)</b>    | <b>2.22</b><br><b>(1.53 to</b><br><b>3.14)</b>    | <b>4.32</b><br><b>(2.84 to</b><br><b>6.27)</b>    |
| Road injuries                                 | 116.35<br>(107.90 to<br>129.02)                      | 118.66<br>(79.82 to<br>170.98)                       | 58.16<br>(39.62 to<br>83.74)                         | 139.08<br>(91.00 to<br>203.61)                       | 2.85<br>(2.67 to<br>3.12)                         | 3.35<br>(2.25 to<br>4.77)                         | 1.86<br>(1.28 to<br>2.66)                         | 3.80<br>(2.45 to<br>5.48)                         |
| Pedestrian road injuries                      | 22.56<br>(17.10 to<br>25.87)                         | 14.61<br>(9.57 to<br>21.16)                          | 7.34<br>(4.94 to<br>10.43)                           | 17.84<br>(11.22 to<br>26.26)                         | 0.67<br>(0.51 to<br>0.76)                         | 0.59<br>(0.39 to<br>0.86)                         | 0.33<br>(0.22 to<br>0.48)                         | 0.69<br>(0.43 to<br>1.03)                         |
| <b>Canada</b>                                 |                                                      |                                                      |                                                      |                                                      |                                                   |                                                   |                                                   |                                                   |
| Cause                                         | YLLs (in 1000s)                                      |                                                      |                                                      |                                                      | Deaths (in 1000s)                                 |                                                   |                                                   |                                                   |
|                                               | 2016                                                 | 2040 Forecast                                        | 2040 Better Scenario                                 | 2040 Worse Scenario                                  | 2016                                              | 2040 Forecast                                     | 2040 Better Scenario                              | 2040 Worse Scenario                               |
| Cyclist road injuries                         | 4.57<br>(3.44 to<br>5.29)                            | 5.04<br>(3.24 to<br>7.42)                            | 2.62<br>(1.70 to<br>3.86)                            | 5.81<br>(3.65 to<br>8.74)                            | 0.11<br>(0.08 to<br>0.13)                         | 0.13<br>(0.08 to<br>0.20)                         | 0.08<br>(0.05 to<br>0.12)                         | 0.15<br>(0.09 to<br>0.22)                         |
| Motorcyclist road injuries                    | 9.51<br>(6.89 to<br>11.27)                           | 11.14<br>(6.71 to<br>17.26)                          | 6.96<br>(4.25 to<br>10.91)                           | 12.56<br>(7.35 to<br>19.75)                          | 0.20<br>(0.14 to<br>0.23)                         | 0.24<br>(0.14 to<br>0.36)                         | 0.16<br>(0.10 to<br>0.24)                         | 0.26<br>(0.16 to<br>0.41)                         |
| Motor vehicle road injuries                   | 77.40<br>(69.98 to<br>93.19)                         | 84.70<br>(54.80 to<br>122.96)                        | 39.73<br>(25.95 to<br>58.47)                         | 99.18<br>(61.62 to<br>146.88)                        | 1.83<br>(1.67 to<br>2.19)                         | 2.31<br>(1.49 to<br>3.40)                         | 1.25<br>(0.82 to<br>1.83)                         | 2.61<br>(1.63 to<br>3.88)                         |
| Other road injuries                           | 2.31<br>(1.06 to<br>3.17)                            | 3.17<br>(1.42 to<br>5.36)                            | 1.51<br>(0.73 to<br>2.50)                            | 3.70<br>(1.61 to<br>6.44)                            | 0.05<br>(0.03 to<br>0.07)                         | 0.08<br>(0.04 to<br>0.15)                         | 0.04<br>(0.03 to<br>0.07)                         | 0.09<br>(0.05 to<br>0.15)                         |

|                                                 |                                                      |                                                      |                                                      |                                                      |                                                |                                                  |                                                  |                                                  |
|-------------------------------------------------|------------------------------------------------------|------------------------------------------------------|------------------------------------------------------|------------------------------------------------------|------------------------------------------------|--------------------------------------------------|--------------------------------------------------|--------------------------------------------------|
| Other transport injuries                        | 19.17<br>(15.99 to<br>21.95)                         | 18.55<br>(12.32 to<br>27.08)                         | 14.00<br>(9.41 to<br>20.26)                          | 21.56<br>(13.55 to<br>32.44)                         | 0.44<br>(0.37 to<br>0.49)                      | 0.46<br>(0.30 to<br>0.67)                        | 0.35<br>(0.24 to<br>0.52)                        | 0.53<br>(0.33 to<br>0.81)                        |
| <b>Unintentional injuries</b>                   | <b>123.64</b><br><b>(107.00 to</b><br><b>133.01)</b> | <b>148.20</b><br><b>(116.88 to</b><br><b>171.97)</b> | <b>138.08</b><br><b>(109.08 to</b><br><b>160.49)</b> | <b>149.41</b><br><b>(116.74 to</b><br><b>175.86)</b> | <b>7.58</b><br><b>(5.66 to</b><br><b>8.46)</b> | <b>13.10</b><br><b>(9.00 to</b><br><b>15.60)</b> | <b>12.81</b><br><b>(8.82 to</b><br><b>15.34)</b> | <b>12.58</b><br><b>(8.46 to</b><br><b>15.13)</b> |
| Falls                                           | 55.21<br>(37.03 to<br>62.47)                         | 84.99<br>(53.04 to<br>102.03)                        | 81.61<br>(51.04 to<br>98.35)                         | 83.22<br>(51.42 to<br>100.90)                        | 4.98<br>(2.89 to<br>5.85)                      | 9.57<br>(5.29 to<br>11.92)                       | 9.47<br>(5.28 to<br>11.82)                       | 9.08<br>(4.90 to<br>11.46)                       |
| Drowning                                        | 14.33<br>(13.11 to<br>15.71)                         | 9.97<br>(7.46 to<br>13.48)                           | 8.49<br>(6.48 to<br>11.33)                           | 10.88<br>(7.98 to<br>15.20)                          | 0.32<br>(0.30 to<br>0.35)                      | 0.28<br>(0.21 to<br>0.37)                        | 0.24<br>(0.19 to<br>0.32)                        | 0.30<br>(0.22 to<br>0.41)                        |
| Fire, heat, and hot substances                  | 11.22<br>(10.02 to<br>15.09)                         | 10.22<br>(7.67 to<br>14.81)                          | 8.62<br>(6.60 to<br>12.34)                           | 11.04<br>(8.14 to<br>16.29)                          | 0.54<br>(0.48 to<br>0.70)                      | 0.73<br>(0.56 to<br>1.01)                        | 0.65<br>(0.50 to<br>0.89)                        | 0.75<br>(0.55 to<br>1.05)                        |
| Poisonings                                      | 4.06<br>(3.27 to<br>5.46)                            | 2.12<br>(1.37 to<br>3.31)                            | 1.66<br>(1.10 to<br>2.53)                            | 2.41<br>(1.52 to<br>3.90)                            | 0.10<br>(0.08 to<br>0.14)                      | 0.07<br>(0.05 to<br>0.10)                        | 0.05<br>(0.04 to<br>0.08)                        | 0.07<br>(0.05 to<br>0.11)                        |
| Exposure to mechanical forces                   | 14.51<br>(12.33 to<br>16.53)                         | 12.44<br>(10.15 to<br>15.37)                         | 10.99<br>(8.79 to<br>13.60)                          | 13.04<br>(10.25 to<br>16.31)                         | 0.51<br>(0.43 to<br>0.59)                      | 0.62<br>(0.49 to<br>0.76)                        | 0.58<br>(0.46 to<br>0.71)                        | 0.62<br>(0.48 to<br>0.75)                        |
| Unintentional firearm injuries                  | 1.32<br>(1.13 to<br>2.08)                            | 1.05<br>(0.83 to<br>1.63)                            | 0.93<br>(0.74 to<br>1.45)                            | 1.10<br>(0.85 to<br>1.68)                            | 0.03<br>(0.03 to<br>0.05)                      | 0.04<br>(0.03 to<br>0.05)                        | 0.03<br>(0.03 to<br>0.04)                        | 0.04<br>(0.03 to<br>0.05)                        |
| Unintentional suffocation                       | 4.32<br>(3.28 to<br>5.51)                            | 3.96<br>(2.62 to<br>5.39)                            | 3.63<br>(2.40 to<br>4.94)                            | 4.05<br>(2.68 to<br>5.69)                            | 0.20<br>(0.14 to<br>0.24)                      | 0.27<br>(0.18 to<br>0.37)                        | 0.26<br>(0.18 to<br>0.36)                        | 0.26<br>(0.17 to<br>0.36)                        |
| Other exposure to mechanical forces             | 8.87<br>(6.78 to<br>10.30)                           | 7.43<br>(5.79 to<br>9.53)                            | 6.42<br>(4.97 to<br>8.16)                            | 7.89<br>(5.95 to<br>9.96)                            | 0.28<br>(0.22 to<br>0.33)                      | 0.31<br>(0.25 to<br>0.40)                        | 0.28<br>(0.23 to<br>0.36)                        | 0.32<br>(0.25 to<br>0.40)                        |
| Adverse effects of medical treatment            | 7.18<br>(6.05 to<br>9.94)                            | 9.84<br>(7.95 to<br>13.45)                           | 9.38<br>(7.54 to<br>12.92)                           | 9.82<br>(7.81 to<br>13.49)                           | 0.40<br>(0.33 to<br>0.54)                      | 0.72<br>(0.58 to<br>0.96)                        | 0.71<br>(0.58 to<br>0.95)                        | 0.69<br>(0.55 to<br>0.94)                        |
| Animal contact                                  | 0.65<br>(0.49 to<br>0.89)                            | 0.80<br>(0.60 to<br>1.16)                            | 0.71<br>(0.53 to<br>1.02)                            | 0.84<br>(0.61 to<br>1.22)                            | 0.02<br>(0.02 to<br>0.03)                      | 0.03<br>(0.02 to<br>0.04)                        | 0.03<br>(0.02 to<br>0.04)                        | 0.03<br>(0.02 to<br>0.04)                        |
| Venomous animal contact                         | 0.23<br>(0.16 to<br>0.30)                            | 0.25<br>(0.17 to<br>0.34)                            | 0.23<br>(0.16 to<br>0.31)                            | 0.26<br>(0.18 to<br>0.36)                            | 0.01<br>(0.00 to<br>0.01)                      | 0.01<br>(0.01 to<br>0.01)                        | 0.01<br>(0.00 to<br>0.01)                        | 0.01<br>(0.01 to<br>0.01)                        |
| Non-venomous animal contact                     | 0.42<br>(0.32 to<br>0.61)                            | 0.55<br>(0.41 to<br>0.85)                            | 0.48<br>(0.36 to<br>0.74)                            | 0.58<br>(0.42 to<br>0.91)                            | 0.01<br>(0.01 to<br>0.02)                      | 0.02<br>(0.02 to<br>0.03)                        | 0.02<br>(0.02 to<br>0.03)                        | 0.02<br>(0.02 to<br>0.03)                        |
| Foreign body                                    | 11.13<br>(9.70 to<br>15.03)                          | 12.94<br>(10.64 to<br>17.28)                         | 12.53<br>(10.32 to<br>16.69)                         | 12.90<br>(10.57 to<br>17.27)                         | 0.52<br>(0.46 to<br>0.66)                      | 0.82<br>(0.68 to<br>1.05)                        | 0.84<br>(0.70 to<br>1.07)                        | 0.78<br>(0.64 to<br>1.00)                        |
| Pulmonary aspiration and foreign body in airway | 10.85<br>(9.42 to<br>14.76)                          | 12.61<br>(10.33 to<br>16.97)                         | 12.19<br>(10.00 to<br>16.34)                         | 12.58<br>(10.27 to<br>17.00)                         | 0.51<br>(0.45 to<br>0.66)                      | 0.81<br>(0.66 to<br>1.04)                        | 0.83<br>(0.68 to<br>1.06)                        | 0.77<br>(0.62 to<br>0.99)                        |
| Foreign body in other body part                 | 0.28<br>(0.23 to<br>0.32)                            | 0.32<br>(0.25 to<br>0.39)                            | 0.33<br>(0.26 to<br>0.40)                            | 0.31<br>(0.24 to<br>0.38)                            | 0.01<br>(0.01 to<br>0.01)                      | 0.02<br>(0.01 to<br>0.02)                        | 0.02<br>(0.01 to<br>0.02)                        | 0.01<br>(0.01 to<br>0.02)                        |
| Environmental heat and cold exposure            | 3.50<br>(2.21 to<br>5.52)                            | 3.90<br>(2.59 to<br>6.58)                            | 3.36<br>(2.20 to<br>5.73)                            | 4.12<br>(2.63 to<br>7.06)                            | 0.14<br>(0.11 to<br>0.26)                      | 0.22<br>(0.15 to<br>0.43)                        | 0.19<br>(0.13 to<br>0.39)                        | 0.22<br>(0.15 to<br>0.42)                        |
| Other unintentional injuries                    | 1.86<br>(1.64 to<br>2.09)                            | 0.99<br>(0.77 to<br>1.26)                            | 0.74<br>(0.55 to<br>0.97)                            | 1.14<br>(0.83 to<br>1.52)                            | 0.05<br>(0.04 to<br>0.06)                      | 0.04<br>(0.03 to<br>0.05)                        | 0.03<br>(0.02 to<br>0.04)                        | 0.04<br>(0.03 to<br>0.05)                        |
| Self-harm and interpersonal violence            | 211.89<br>(174.63 to<br>236.31)                      | 191.85<br>(124.99 to<br>282.84)                      | 152.95<br>(104.77 to<br>211.50)                      | 219.65<br>(136.17 to<br>332.77)                      | 5.12<br>(4.31 to<br>5.76)                      | 5.14<br>(3.48 to<br>7.35)                        | 4.20<br>(3.01 to<br>5.84)                        | 5.77<br>(3.67 to<br>8.62)                        |

**Canada**

| Cause | YLLs (in 1000s) |               |                      |                     | Deaths (in 1000s) |               |                      |                     |
|-------|-----------------|---------------|----------------------|---------------------|-------------------|---------------|----------------------|---------------------|
|       | 2016            | 2040 Forecast | 2040 Better Scenario | 2040 Worse Scenario | 2016              | 2040 Forecast | 2040 Better Scenario | 2040 Worse Scenario |







|                                                       |                                                   |                                                  |                                                 |                                                  |                                                |                                                |                                                |                                                |
|-------------------------------------------------------|---------------------------------------------------|--------------------------------------------------|-------------------------------------------------|--------------------------------------------------|------------------------------------------------|------------------------------------------------|------------------------------------------------|------------------------------------------------|
| African trypanosomiasis                               | 0.00<br>(0.00 to<br>0.00)                         | 0.00<br>(0.00 to<br>0.00)                        | 0.00<br>(0.00 to<br>0.00)                       | 0.00<br>(0.00 to<br>0.00)                        | 0.00<br>(0.00 to<br>0.00)                      | 0.00<br>(0.00 to<br>0.00)                      | 0.00<br>(0.00 to<br>0.00)                      | 0.00<br>(0.00 to<br>0.00)                      |
| Schistosomiasis                                       | 0.00<br>(0.00 to<br>0.00)                         | 0.00<br>(0.00 to<br>0.00)                        | 0.00<br>(0.00 to<br>0.00)                       | 0.00<br>(0.00 to<br>0.00)                        | 0.00<br>(0.00 to<br>0.00)                      | 0.00<br>(0.00 to<br>0.00)                      | 0.00<br>(0.00 to<br>0.00)                      | 0.00<br>(0.00 to<br>0.00)                      |
| Cysticercosis                                         | 0.00<br>(0.00 to<br>0.00)                         | 0.00<br>(0.00 to<br>0.00)                        | 0.00<br>(0.00 to<br>0.00)                       | 0.00<br>(0.00 to<br>0.00)                        | 0.00<br>(0.00 to<br>0.00)                      | 0.00<br>(0.00 to<br>0.00)                      | 0.00<br>(0.00 to<br>0.00)                      | 0.00<br>(0.00 to<br>0.00)                      |
| Cystic echinococcosis                                 | 0.00<br>(0.00 to<br>0.00)                         | 0.00<br>(0.00 to<br>0.00)                        | 0.00<br>(0.00 to<br>0.00)                       | 0.00<br>(0.00 to<br>0.00)                        | 0.00<br>(0.00 to<br>0.00)                      | 0.00<br>(0.00 to<br>0.00)                      | 0.00<br>(0.00 to<br>0.00)                      | 0.00<br>(0.00 to<br>0.00)                      |
| Dengue                                                | 0.00<br>(0.00 to<br>0.00)                         | 0.00<br>(0.00 to<br>0.00)                        | 0.00<br>(0.00 to<br>0.00)                       | 0.00<br>(0.00 to<br>0.00)                        | 0.00<br>(0.00 to<br>0.00)                      | 0.00<br>(0.00 to<br>0.00)                      | 0.00<br>(0.00 to<br>0.00)                      | 0.00<br>(0.00 to<br>0.00)                      |
| Yellow fever                                          | 0.00<br>(0.00 to<br>0.00)                         | 0.00<br>(0.00 to<br>0.00)                        | 0.00<br>(0.00 to<br>0.00)                       | 0.00<br>(0.00 to<br>0.00)                        | 0.00<br>(0.00 to<br>0.00)                      | 0.00<br>(0.00 to<br>0.00)                      | 0.00<br>(0.00 to<br>0.00)                      | 0.00<br>(0.00 to<br>0.00)                      |
| Rabies                                                | 0.00<br>(0.00 to<br>0.00)                         | 0.00<br>(0.00 to<br>0.00)                        | 0.00<br>(0.00 to<br>0.00)                       | 0.00<br>(0.00 to<br>0.00)                        | 0.00<br>(0.00 to<br>0.00)                      | 0.00<br>(0.00 to<br>0.00)                      | 0.00<br>(0.00 to<br>0.00)                      | 0.00<br>(0.00 to<br>0.00)                      |
| Intestinal nematode infections                        | 0.00<br>(0.00 to<br>0.00)                         | 0.00<br>(0.00 to<br>0.00)                        | 0.00<br>(0.00 to<br>0.00)                       | 0.00<br>(0.00 to<br>0.00)                        | 0.00<br>(0.00 to<br>0.00)                      | 0.00<br>(0.00 to<br>0.00)                      | 0.00<br>(0.00 to<br>0.00)                      | 0.00<br>(0.00 to<br>0.00)                      |
| Other neglected tropical diseases                     | 0.36<br>(0.28 to<br>0.44)                         | 0.30<br>(0.21 to<br>0.46)                        | 0.29<br>(0.21 to<br>0.44)                       | 0.30<br>(0.21 to<br>0.46)                        | 0.01<br>(0.01 to<br>0.01)                      | 0.01<br>(0.01 to<br>0.01)                      | 0.01<br>(0.01 to<br>0.01)                      | 0.01<br>(0.01 to<br>0.01)                      |
| <b>Maternal disorders</b>                             | <b>19.78</b><br><b>(11.70 to</b><br><b>29.75)</b> | <b>12.84</b><br><b>(5.30 to</b><br><b>27.94)</b> | <b>8.96</b><br><b>(3.82 to</b><br><b>19.58)</b> | <b>13.21</b><br><b>(5.66 to</b><br><b>29.60)</b> | <b>0.31</b><br><b>(0.19 to</b><br><b>0.46)</b> | <b>0.20</b><br><b>(0.09 to</b><br><b>0.43)</b> | <b>0.14</b><br><b>(0.06 to</b><br><b>0.30)</b> | <b>0.21</b><br><b>(0.09 to</b><br><b>0.45)</b> |
| Maternal hemorrhage                                   | 0.94<br>(0.40 to<br>1.85)                         | 0.62<br>(0.18 to<br>1.52)                        | 0.43<br>(0.13 to<br>1.08)                       | 0.63<br>(0.18 to<br>1.56)                        | 0.01<br>(0.01 to<br>0.03)                      | 0.01<br>(0.00 to<br>0.02)                      | 0.01<br>(0.00 to<br>0.02)                      | 0.01<br>(0.00 to<br>0.02)                      |
| Maternal sepsis and other maternal infections         | 0.31<br>(0.10 to<br>0.69)                         | 0.20<br>(0.05 to<br>0.52)                        | 0.14<br>(0.04 to<br>0.36)                       | 0.20<br>(0.05 to<br>0.53)                        | 0.00<br>(0.00 to<br>0.01)                      | 0.00<br>(0.00 to<br>0.01)                      | 0.00<br>(0.00 to<br>0.01)                      | 0.00<br>(0.00 to<br>0.01)                      |
| Maternal hypertensive disorders                       | 1.59<br>(0.74 to<br>2.85)                         | 1.04<br>(0.33 to<br>2.64)                        | 0.71<br>(0.23 to<br>1.84)                       | 1.07<br>(0.34 to<br>2.75)                        | 0.02<br>(0.01 to<br>0.04)                      | 0.02<br>(0.01 to<br>0.04)                      | 0.01<br>(0.00 to<br>0.03)                      | 0.02<br>(0.01 to<br>0.04)                      |
| Maternal obstructed labor and uterine rupture         | 0.30<br>(0.10 to<br>0.65)                         | 0.22<br>(0.06 to<br>0.66)                        | 0.15<br>(0.04 to<br>0.44)                       | 0.23<br>(0.06 to<br>0.71)                        | 0.00<br>(0.00 to<br>0.01)                      | 0.00<br>(0.00 to<br>0.01)                      | 0.00<br>(0.00 to<br>0.01)                      | 0.00<br>(0.00 to<br>0.01)                      |
| Maternal abortion, miscarriage, and ectopic pregnancy | 1.80<br>(0.92 to<br>3.12)                         | 1.36<br>(0.47 to<br>3.25)                        | 0.95<br>(0.34 to<br>2.20)                       | 1.40<br>(0.49 to<br>3.25)                        | 0.03<br>(0.02 to<br>0.05)                      | 0.02<br>(0.01 to<br>0.05)                      | 0.02<br>(0.01 to<br>0.04)                      | 0.02<br>(0.01 to<br>0.05)                      |
| Indirect maternal deaths                              | 2.80<br>(1.37 to<br>5.02)                         | 2.01<br>(0.66 to<br>4.74)                        | 1.34<br>(0.46 to<br>3.19)                       | 2.07<br>(0.68 to<br>4.96)                        | 0.04<br>(0.02 to<br>0.08)                      | 0.03<br>(0.01 to<br>0.07)                      | 0.02<br>(0.01 to<br>0.05)                      | 0.03<br>(0.01 to<br>0.08)                      |
| Late maternal deaths                                  | 2.47<br>(1.19 to<br>4.68)                         | 1.34<br>(0.44 to<br>3.68)                        | 0.90<br>(0.30 to<br>2.53)                       | 1.38<br>(0.46 to<br>3.73)                        | 0.04<br>(0.02 to<br>0.07)                      | 0.02<br>(0.01 to<br>0.06)                      | 0.01<br>(0.00 to<br>0.04)                      | 0.02<br>(0.01 to<br>0.06)                      |
| Maternal deaths aggravated by HIV/AIDS                | 0.00<br>(0.00 to<br>0.00)                         | 0.01<br>(0.00 to<br>0.04)                        | 0.01<br>(0.00 to<br>0.03)                       | 0.02<br>(0.00 to<br>0.06)                        | 0.00<br>(0.00 to<br>0.00)                      | 0.00<br>(0.00 to<br>0.00)                      | 0.00<br>(0.00 to<br>0.00)                      | 0.00<br>(0.00 to<br>0.00)                      |
| Other maternal disorders                              | 9.57<br>(5.37 to<br>15.44)                        | 6.05<br>(2.39 to<br>14.06)                       | 4.33<br>(1.74 to<br>10.08)                      | 6.21<br>(2.46 to<br>14.42)                       | 0.15<br>(0.08 to<br>0.24)                      | 0.10<br>(0.04 to<br>0.21)                      | 0.07<br>(0.03 to<br>0.15)                      | 0.10<br>(0.04 to<br>0.22)                      |

**Greenland**

| Cause              | YLLs (actual counts)            |                                 |                                |                                 | Deaths (actual counts)    |                           |                           |                           |
|--------------------|---------------------------------|---------------------------------|--------------------------------|---------------------------------|---------------------------|---------------------------|---------------------------|---------------------------|
|                    | 2016                            | 2040 Forecast                   | 2040 Better Scenario           | 2040 Worse Scenario             | 2016                      | 2040 Forecast             | 2040 Better Scenario      | 2040 Worse Scenario       |
| Neonatal disorders | 437.16<br>(371.22 to<br>511.27) | 182.74<br>(114.31 to<br>278.88) | 113.11<br>(73.66 to<br>168.58) | 229.39<br>(147.94 to<br>344.09) | 5.05<br>(4.29 to<br>5.91) | 2.11<br>(1.32 to<br>3.25) | 1.31<br>(0.85 to<br>1.95) | 2.65<br>(1.71 to<br>3.98) |

|                                                                         |                                     |                                     |                                     |                                     |                                  |                                  |                                  |                                  |
|-------------------------------------------------------------------------|-------------------------------------|-------------------------------------|-------------------------------------|-------------------------------------|----------------------------------|----------------------------------|----------------------------------|----------------------------------|
| Neonatal preterm birth                                                  | 240.41<br>(180.64 to<br>293.25)     | 76.32<br>(45.77 to<br>119.76)       | 43.80<br>(26.87 to<br>68.74)        | 112.06<br>(68.93 to<br>173.34)      | 2.78<br>(2.09 to<br>3.39)        | 0.88<br>(0.53 to<br>1.38)        | 0.51<br>(0.31 to<br>0.79)        | 1.29<br>(0.80 to<br>2.00)        |
| Neonatal encephalopathy due to birth asphyxia and trauma                | 97.72<br>(73.48 to<br>132.06)       | 41.49<br>(24.46 to<br>66.40)        | 23.15<br>(14.04 to<br>36.86)        | 46.28<br>(27.08 to<br>74.60)        | 1.13<br>(0.85 to<br>1.53)        | 0.48<br>(0.28 to<br>0.77)        | 0.27<br>(0.16 to<br>0.43)        | 0.54<br>(0.31 to<br>0.86)        |
| Neonatal sepsis and other neonatal infections                           | 34.57<br>(21.90 to<br>62.19)        | 23.63<br>(11.86 to<br>44.78)        | 14.52<br>(7.54 to<br>27.56)         | 26.15<br>(12.92 to<br>52.24)        | 0.40<br>(0.25 to<br>0.72)        | 0.27<br>(0.14 to<br>0.52)        | 0.17<br>(0.09 to<br>0.32)        | 0.30<br>(0.15 to<br>0.60)        |
| Hemolytic disease and other neonatal jaundice                           | 1.25<br>(0.54 to<br>2.14)           | 0.52<br>(0.18 to<br>1.06)           | 0.31<br>(0.11 to<br>0.63)           | 0.57<br>(0.19 to<br>1.18)           | 0.01<br>(0.01 to<br>0.02)        | 0.01<br>(0.00 to<br>0.01)        | 0.00<br>(0.00 to<br>0.01)        | 0.01<br>(0.00 to<br>0.01)        |
| Other neonatal disorders                                                | 63.21<br>(46.13 to<br>84.53)        | 40.79<br>(21.86 to<br>76.58)        | 31.34<br>(17.27 to<br>55.68)        | 44.32<br>(23.52 to<br>82.21)        | 0.73<br>(0.53 to<br>0.98)        | 0.47<br>(0.25 to<br>0.89)        | 0.36<br>(0.20 to<br>0.64)        | 0.51<br>(0.27 to<br>0.95)        |
| <b>Nutritional deficiencies</b>                                         | <b>10.73</b><br>(8.52 to<br>13.26)  | <b>15.77</b><br>(12.39 to<br>20.75) | <b>19.18</b><br>(14.94 to<br>25.41) | <b>14.07</b><br>(10.82 to<br>18.62) | <b>0.60</b><br>(0.48 to<br>0.74) | <b>1.29</b><br>(0.91 to<br>1.82) | <b>1.65</b><br>(1.21 to<br>2.30) | <b>1.12</b><br>(0.76 to<br>1.60) |
| Protein-energy malnutrition                                             | 8.51<br>(6.53 to<br>11.59)          | 12.63<br>(9.13 to<br>18.30)         | 16.16<br>(11.79 to<br>23.14)        | 11.19<br>(7.94 to<br>16.32)         | 0.48<br>(0.37 to<br>0.67)        | 1.05<br>(0.71 to<br>1.59)        | 1.41<br>(0.98 to<br>2.11)        | 0.91<br>(0.59 to<br>1.44)        |
| Iodine deficiency                                                       | 0.28<br>(0.01 to<br>1.00)           | 0.78<br>(0.01 to<br>3.23)           | 0.82<br>(0.01 to<br>3.67)           | 0.71<br>(0.01 to<br>2.98)           | 0.01<br>(0.00 to<br>0.05)        | 0.06<br>(0.00 to<br>0.24)        | 0.06<br>(0.00 to<br>0.28)        | 0.05<br>(0.00 to<br>0.22)        |
| Dietary iron deficiency                                                 | 0.23<br>(0.18 to<br>0.30)           | 0.17<br>(0.11 to<br>0.25)           | 0.18<br>(0.12 to<br>0.28)           | 0.16<br>(0.11 to<br>0.24)           | 0.01<br>(0.00 to<br>0.01)        | 0.01<br>(0.00 to<br>0.01)        | 0.01<br>(0.00 to<br>0.01)        | 0.01<br>(0.00 to<br>0.01)        |
| Other nutritional deficiencies                                          | 1.71<br>(0.36 to<br>2.43)           | 2.19<br>(0.34 to<br>3.28)           | 2.03<br>(0.30 to<br>3.09)           | 2.01<br>(0.32 to<br>3.04)           | 0.10<br>(0.01 to<br>0.14)        | 0.17<br>(0.02 to<br>0.27)        | 0.17<br>(0.02 to<br>0.26)        | 0.15<br>(0.02 to<br>0.24)        |
| <b>Other communicable, maternal, neonatal, and nutritional diseases</b> | <b>15.02</b><br>(11.06 to<br>19.35) | <b>15.02</b><br>(9.70 to<br>20.96)  | <b>13.37</b><br>(8.68 to<br>18.61)  | <b>14.59</b><br>(9.55 to<br>20.13)  | <b>0.43</b><br>(0.29 to<br>0.54) | <b>0.66</b><br>(0.40 to<br>0.87) | <b>0.63</b><br>(0.38 to<br>0.83) | <b>0.62</b><br>(0.38 to<br>0.82) |
| Sexually transmitted infections excluding HIV                           | 3.88<br>(2.06 to<br>7.26)           | 1.46<br>(0.70 to<br>2.65)           | 1.12<br>(0.55 to<br>1.99)           | 1.49<br>(0.72 to<br>2.68)           | 0.06<br>(0.04 to<br>0.10)        | 0.03<br>(0.02 to<br>0.05)        | 0.03<br>(0.02 to<br>0.04)        | 0.03<br>(0.02 to<br>0.05)        |
| Syphilis                                                                | 2.78<br>(1.16 to<br>6.04)           | 0.71<br>(0.29 to<br>1.65)           | 0.48<br>(0.20 to<br>1.05)           | 0.75<br>(0.31 to<br>1.65)           | 0.04<br>(0.02 to<br>0.08)        | 0.01<br>(0.01 to<br>0.02)        | 0.01<br>(0.01 to<br>0.02)        | 0.01<br>(0.01 to<br>0.02)        |
| Chlamydial infection                                                    | 0.22<br>(0.08 to<br>0.34)           | 0.15<br>(0.06 to<br>0.27)           | 0.13<br>(0.05 to<br>0.24)           | 0.15<br>(0.05 to<br>0.27)           | 0.01<br>(0.00 to<br>0.01)        | 0.00<br>(0.00 to<br>0.01)        | 0.00<br>(0.00 to<br>0.01)        | 0.00<br>(0.00 to<br>0.01)        |
| Gonococcal infection                                                    | 0.56<br>(0.23 to<br>0.85)           | 0.39<br>(0.16 to<br>0.69)           | 0.34<br>(0.15 to<br>0.61)           | 0.39<br>(0.16 to<br>0.70)           | 0.01<br>(0.01 to<br>0.02)        | 0.01<br>(0.01 to<br>0.02)        | 0.01<br>(0.01 to<br>0.02)        | 0.01<br>(0.01 to<br>0.02)        |
| Other sexually transmitted infections                                   | 0.32<br>(0.12 to<br>0.51)           | 0.21<br>(0.07 to<br>0.40)           | 0.18<br>(0.07 to<br>0.34)           | 0.21<br>(0.07 to<br>0.41)           | 0.01<br>(0.00 to<br>0.01)        | 0.01<br>(0.00 to<br>0.01)        | 0.00<br>(0.00 to<br>0.01)        | 0.01<br>(0.00 to<br>0.01)        |
| Acute hepatitis                                                         | 2.71<br>(2.09 to<br>3.50)           | 2.71<br>(1.64 to<br>4.56)           | 1.84<br>(1.09 to<br>2.96)           | 2.74<br>(1.69 to<br>4.39)           | 0.08<br>(0.06 to<br>0.10)        | 0.10<br>(0.06 to<br>0.16)        | 0.07<br>(0.04 to<br>0.11)        | 0.10<br>(0.06 to<br>0.15)        |
| Acute hepatitis A                                                       | 0.18<br>(0.12 to<br>0.26)           | 0.10<br>(0.06 to<br>0.18)           | 0.08<br>(0.04 to<br>0.13)           | 0.11<br>(0.06 to<br>0.18)           | 0.00<br>(0.00 to<br>0.01)        | 0.00<br>(0.00 to<br>0.01)        | 0.00<br>(0.00 to<br>0.00)        | 0.00<br>(0.00 to<br>0.01)        |
| Acute hepatitis B                                                       | 2.26<br>(1.71 to<br>2.97)           | 2.30<br>(1.36 to<br>3.73)           | 1.54<br>(0.89 to<br>2.54)           | 2.32<br>(1.40 to<br>3.79)           | 0.07<br>(0.05 to<br>0.09)        | 0.09<br>(0.05 to<br>0.13)        | 0.06<br>(0.03 to<br>0.10)        | 0.08<br>(0.05 to<br>0.13)        |
| Acute hepatitis C                                                       | 0.10<br>(0.07 to<br>0.15)           | 0.12<br>(0.07 to<br>0.20)           | 0.08<br>(0.04 to<br>0.14)           | 0.12<br>(0.07 to<br>0.20)           | 0.00<br>(0.00 to<br>0.01)        | 0.00<br>(0.00 to<br>0.01)        | 0.00<br>(0.00 to<br>0.01)        | 0.00<br>(0.00 to<br>0.01)        |
| Acute hepatitis E                                                       | 0.17<br>(0.10 to<br>0.26)           | 0.19<br>(0.10 to<br>0.34)           | 0.14<br>(0.07 to<br>0.24)           | 0.19<br>(0.10 to<br>0.33)           | 0.01<br>(0.00 to<br>0.01)        | 0.01<br>(0.00 to<br>0.02)        | 0.01<br>(0.00 to<br>0.01)        | 0.01<br>(0.00 to<br>0.02)        |
| Other unspecified infectious diseases                                   | 8.43<br>(5.84 to<br>10.72)          | 10.85<br>(6.29 to<br>14.83)         | 10.41<br>(6.13 to<br>14.55)         | 10.36<br>(6.00 to<br>13.96)         | 0.28<br>(0.17 to<br>0.37)        | 0.52<br>(0.27 to<br>0.71)        | 0.53<br>(0.29 to<br>0.71)        | 0.49<br>(0.26 to<br>0.65)        |

|                                      | 7,239.72<br>(6,014.51 to<br>8,640.99)        | 10,132.42<br>(7,226.39 to<br>13,977.23)      | 8,575.11<br>(6,058.63 to<br>11,921.31)       | 11,684.32<br>(8,316.16 to<br>16,291.85)      | 308.80<br>(257.48 to<br>366.70)        | 610.09<br>(456.58 to<br>784.68)        | 541.55<br>(397.66 to<br>710.09)        | 672.91<br>(507.65 to<br>868.45)        |
|--------------------------------------|----------------------------------------------|----------------------------------------------|----------------------------------------------|----------------------------------------------|----------------------------------------|----------------------------------------|----------------------------------------|----------------------------------------|
| Greenland                            |                                              |                                              |                                              |                                              |                                        |                                        |                                        |                                        |
| Cause                                | YLLs (actual counts)                         |                                              |                                              |                                              | Deaths (actual counts)                 |                                        |                                        |                                        |
|                                      | 2016                                         | 2040 Forecast                                | 2040 Better Scenario                         | 2040 Worse Scenario                          | 2016                                   | 2040 Forecast                          | 2040 Better Scenario                   | 2040 Worse Scenario                    |
| <b>Neoplasms</b>                     | <b>3,162.18</b><br>(2,600.35 to<br>3,802.32) | <b>4,743.41</b><br>(3,394.39 to<br>6,485.30) | <b>4,292.75</b><br>(3,039.34 to<br>5,889.89) | <b>5,055.58</b><br>(3,597.30 to<br>6,901.17) | <b>133.72</b><br>(110.54 to<br>160.63) | <b>265.46</b><br>(204.67 to<br>330.44) | <b>252.81</b><br>(189.34 to<br>317.69) | <b>269.96</b><br>(206.75 to<br>337.31) |
| Lip and oral cavity cancer           | 51.73<br>(41.33 to<br>65.47)                 | 83.53<br>(41.41 to<br>159.13)                | 60.93<br>(31.75 to<br>109.51)                | 97.47<br>(46.39 to<br>190.74)                | 2.15<br>(1.74 to<br>2.69)              | 4.42<br>(2.36 to<br>8.17)              | 3.44<br>(1.92 to<br>5.96)              | 4.88<br>(2.50 to<br>9.23)              |
| Nasopharynx cancer                   | 93.69<br>(74.33 to<br>118.01)                | 144.85<br>(66.04 to<br>293.90)               | 89.17<br>(43.51 to<br>174.14)                | 179.46<br>(79.47 to<br>369.28)               | 3.50<br>(2.79 to<br>4.39)              | 6.69<br>(3.30 to<br>12.85)             | 4.45<br>(2.29 to<br>8.14)              | 7.74<br>(2.29 to<br>14.99)             |
| Other pharynx cancer                 | 46.71<br>(35.51 to<br>60.44)                 | 68.04<br>(34.50 to<br>123.95)                | 59.69<br>(32.24 to<br>103.53)                | 71.45<br>(35.17 to<br>134.26)                | 1.94<br>(1.50 to<br>2.48)              | 3.59<br>(1.90 to<br>6.48)              | 3.28<br>(1.88 to<br>5.60)              | 3.67<br>(1.91 to<br>6.83)              |
| Esophageal cancer                    | 168.53<br>(133.58 to<br>212.23)              | 247.45<br>(123.13 to<br>444.44)              | 212.10<br>(109.32 to<br>362.37)              | 283.43<br>(134.82 to<br>517.60)              | 7.20<br>(5.70 to<br>8.98)              | 13.35<br>(6.87 to<br>23.88)            | 12.12<br>(6.46 to<br>20.77)            | 14.51<br>(7.27 to<br>25.75)            |
| Stomach cancer                       | 161.60<br>(130.34 to<br>201.95)              | 168.07<br>(106.65 to<br>253.07)              | 129.35<br>(82.36 to<br>194.16)               | 170.47<br>(109.38 to<br>255.49)              | 6.83<br>(5.52 to<br>8.52)              | 9.59<br>(6.25 to<br>14.08)             | 7.72<br>(5.05 to<br>11.26)             | 9.33<br>(6.10 to<br>13.60)             |
| Colon and rectum cancer              | 332.94<br>(268.87 to<br>410.30)              | 566.64<br>(352.19 to<br>873.65)              | 449.42<br>(282.12 to<br>694.72)              | 614.70<br>(374.91 to<br>951.00)              | 14.68<br>(11.88 to<br>18.05)           | 34.39<br>(22.42 to<br>51.14)           | 28.60<br>(18.26 to<br>42.28)           | 35.95<br>(23.13 to<br>53.81)           |
| Liver cancer                         | 105.55<br>(82.09 to<br>133.55)               | 152.80<br>(81.47 to<br>268.38)               | 157.85<br>(84.33 to<br>273.25)               | 182.46<br>(91.86 to<br>333.93)               | 4.37<br>(3.43 to<br>5.47)              | 8.28<br>(4.60 to<br>13.58)             | 8.97<br>(4.95 to<br>14.30)             | 9.38<br>(5.03 to<br>16.04)             |
| Liver cancer due to hepatitis B      | 11.40<br>(7.86 to<br>16.17)                  | 13.73<br>(6.70 to<br>26.34)                  | 14.60<br>(7.10 to<br>27.93)                  | 16.26<br>(7.56 to<br>32.41)                  | 0.43<br>(0.29 to<br>0.61)              | 0.66<br>(0.34 to<br>1.18)              | 0.73<br>(0.37 to<br>1.32)              | 0.74<br>(0.37 to<br>1.41)              |
| Liver cancer due to hepatitis C      | 26.01<br>(18.91 to<br>34.98)                 | 38.03<br>(19.40 to<br>65.25)                 | 41.39<br>(20.91 to<br>70.20)                 | 43.12<br>(21.18 to<br>79.31)                 | 1.11<br>(0.81 to<br>1.49)              | 2.15<br>(1.14 to<br>3.45)              | 2.45<br>(1.28 to<br>3.97)              | 2.32<br>(1.20 to<br>3.89)              |
| Liver cancer due to alcohol use      | 31.08<br>(22.42 to<br>42.17)                 | 47.79<br>(25.04 to<br>84.91)                 | 43.83<br>(23.02 to<br>75.94)                 | 60.86<br>(29.92 to<br>113.04)                | 1.31<br>(0.95 to<br>1.76)              | 2.57<br>(1.40 to<br>4.20)              | 2.48<br>(1.32 to<br>4.09)              | 3.10<br>(1.62 to<br>5.28)              |
| Liver cancer due to other causes     | 37.06<br>(26.42 to<br>51.08)                 | 53.26<br>(26.62 to<br>99.14)                 | 58.03<br>(28.90 to<br>106.84)                | 62.23<br>(29.19 to<br>121.83)                | 1.53<br>(1.09 to<br>2.09)              | 2.90<br>(1.54 to<br>5.11)              | 3.31<br>(1.75 to<br>5.98)              | 3.23<br>(1.63 to<br>5.96)              |
| Gallbladder and biliary tract cancer | 34.29<br>(26.44 to<br>48.90)                 | 38.94<br>(28.88 to<br>52.57)                 | 39.55<br>(28.41 to<br>53.98)                 | 36.17<br>(27.44 to<br>48.14)                 | 1.58<br>(1.25 to<br>2.15)              | 2.37<br>(1.81 to<br>3.05)              | 2.50<br>(1.83 to<br>3.22)              | 2.15<br>(1.67 to<br>2.71)              |
| Pancreatic cancer                    | 233.28<br>(191.58 to<br>282.45)              | 388.07<br>(262.01 to<br>569.65)              | 398.57<br>(265.63 to<br>587.67)              | 385.06<br>(262.75 to<br>561.21)              | 10.23<br>(8.48 to<br>12.33)            | 22.17<br>(15.65 to<br>30.80)           | 23.68<br>(16.24 to<br>33.35)           | 21.20<br>(15.20 to<br>29.15)           |
| Larynx cancer                        | 21.52<br>(16.36 to<br>28.43)                 | 27.83<br>(12.16 to<br>56.89)                 | 20.61<br>(9.54 to<br>40.80)                  | 30.93<br>(13.02 to<br>61.82)                 | 0.93<br>(0.71 to<br>1.22)              | 1.57<br>(0.72 to<br>3.13)              | 1.24<br>(0.59 to<br>2.38)              | 1.64<br>(0.74 to<br>3.18)              |
| Tracheal, bronchus, and lung cancer  | 1,105.76<br>(897.30 to<br>1,356.05)          | 1,686.55<br>(1,147.24 to<br>2,295.32)        | 1,589.51<br>(1,071.61 to<br>2,195.99)        | 1,836.67<br>(1,261.06 to<br>2,483.45)        | 49.36<br>(40.23 to<br>60.21)           | 95.95<br>(70.98 to<br>121.67)          | 95.12<br>(68.80 to<br>123.84)          | 99.07<br>(74.53 to<br>125.20)          |
| Malignant skin melanoma              | 17.44<br>(13.30 to<br>24.52)                 | 23.39<br>(16.71 to<br>32.43)                 | 28.88<br>(20.73 to<br>40.08)                 | 21.76<br>(16.02 to<br>30.13)                 | 0.63<br>(0.50 to<br>0.84)              | 1.14<br>(0.88 to<br>1.45)              | 1.46<br>(1.10 to<br>1.92)              | 1.02<br>(0.82 to<br>1.29)              |
| Non-melanoma skin cancer             | 8.10<br>(6.29 to<br>10.49)                   | 13.52<br>(10.63 to<br>16.94)                 | 11.23<br>(8.42 to<br>14.23)                  | 12.78<br>(10.16 to<br>15.61)                 | 0.34<br>(0.27 to<br>0.44)              | 0.78<br>(0.66 to<br>0.92)              | 0.68<br>(0.56 to<br>0.81)              | 0.72<br>(0.60 to<br>0.84)              |
| Breast cancer                        | 138.37<br>(98.89 to<br>191.82)               | 194.62<br>(95.51 to<br>354.83)               | 149.73<br>(72.20 to<br>272.89)               | 212.70<br>(104.42 to<br>393.82)              | 5.18<br>(3.74 to<br>7.03)              | 9.63<br>(4.90 to<br>15.73)             | 7.74<br>(3.79 to<br>12.75)             | 10.14<br>(5.20 to<br>17.09)            |

|                                 |                                |                                 |                                 |                                 |                           |                            |                            |                           |
|---------------------------------|--------------------------------|---------------------------------|---------------------------------|---------------------------------|---------------------------|----------------------------|----------------------------|---------------------------|
| Cervical cancer                 | 75.82<br>(52.59 to<br>108.44)  | 79.63<br>(37.43 to<br>143.05)   | 60.99<br>(29.63 to<br>111.09)   | 81.64<br>(38.76 to<br>148.90)   | 2.48<br>(1.73 to<br>3.53) | 3.53<br>(1.87 to<br>5.96)  | 2.83<br>(1.46 to<br>4.89)  | 3.45<br>(1.84 to<br>5.88) |
| Uterine cancer                  | 8.56<br>(6.08 to<br>11.71)     | 14.16<br>(8.31 to<br>21.28)     | 12.45<br>(7.07 to<br>19.06)     | 13.62<br>(8.30 to<br>20.13)     | 0.35<br>(0.25 to<br>0.47) | 0.78<br>(0.48 to<br>1.10)  | 0.71<br>(0.42 to<br>1.02)  | 0.73<br>(0.47 to<br>0.99) |
| Ovarian cancer                  | 71.10<br>(47.58 to<br>96.04)   | 72.24<br>(36.56 to<br>131.98)   | 64.73<br>(32.12 to<br>120.35)   | 76.39<br>(38.75 to<br>141.26)   | 2.44<br>(1.74 to<br>3.26) | 2.98<br>(1.63 to<br>4.93)  | 2.72<br>(1.45 to<br>4.59)  | 3.11<br>(1.70 to<br>5.20) |
| Prostate cancer                 | 34.15<br>(21.75 to<br>46.82)   | 69.82<br>(42.31 to<br>93.51)    | 67.38<br>(40.04 to<br>91.45)    | 63.84<br>(38.85 to<br>86.52)    | 1.80<br>(1.14 to<br>2.46) | 4.93<br>(2.98 to<br>6.65)  | 4.96<br>(2.97 to<br>6.71)  | 4.38<br>(2.62 to<br>6.06) |
| Testicular cancer               | 2.23<br>(1.59 to<br>3.13)      | 1.94<br>(1.18 to<br>3.04)       | 1.57<br>(0.94 to<br>2.53)       | 1.95<br>(1.20 to<br>3.05)       | 0.05<br>(0.04 to<br>0.07) | 0.05<br>(0.03 to<br>0.08)  | 0.04<br>(0.03 to<br>0.06)  | 0.05<br>(0.03 to<br>0.07) |
| <b>Greenland</b>                |                                |                                 |                                 |                                 |                           |                            |                            |                           |
| Cause                           | YLLs (actual counts)           |                                 |                                 |                                 | Deaths (actual counts)    |                            |                            |                           |
|                                 | 2016                           | 2040 Forecast                   | 2040 Better Scenario            | 2040 Worse Scenario             | 2016                      | 2040 Forecast              | 2040 Better Scenario       | 2040 Worse Scenario       |
| Kidney cancer                   | 73.12<br>(58.28 to<br>90.76)   | 121.35<br>(77.58 to<br>173.43)  | 129.35<br>(82.42 to<br>184.29)  | 117.17<br>(75.13 to<br>168.40)  | 3.12<br>(2.49 to<br>3.85) | 6.93<br>(4.54 to<br>9.63)  | 7.72<br>(4.88 to<br>10.73) | 6.42<br>(4.18 to<br>8.94) |
| Bladder cancer                  | 34.00<br>(26.68 to<br>42.61)   | 61.45<br>(38.79 to<br>93.06)    | 59.45<br>(37.25 to<br>90.46)    | 60.01<br>(37.83 to<br>91.81)    | 1.69<br>(1.34 to<br>2.10) | 4.04<br>(2.60 to<br>6.07)  | 4.08<br>(2.60 to<br>6.11)  | 3.80<br>(2.41 to<br>5.77) |
| Brain and nervous system cancer | 66.94<br>(42.02 to<br>121.45)  | 92.36<br>(53.81 to<br>170.14)   | 85.29<br>(49.14 to<br>158.38)   | 89.49<br>(52.73 to<br>165.05)   | 2.05<br>(1.29 to<br>3.69) | 3.80<br>(2.39 to<br>6.62)  | 3.69<br>(2.26 to<br>6.30)  | 3.56<br>(2.25 to<br>6.11) |
| Thyroid cancer                  | 5.34<br>(4.25 to<br>6.77)      | 7.32<br>(4.85 to<br>10.52)      | 6.59<br>(4.23 to<br>9.53)       | 7.75<br>(5.05 to<br>11.35)      | 0.23<br>(0.18 to<br>0.28) | 0.44<br>(0.29 to<br>0.60)  | 0.41<br>(0.27 to<br>0.57)  | 0.44<br>(0.30 to<br>0.63) |
| Mesothelioma                    | 12.26<br>(9.04 to<br>15.96)    | 21.20<br>(15.23 to<br>26.31)    | 23.97<br>(16.78 to<br>30.04)    | 19.10<br>(13.70 to<br>23.56)    | 0.60<br>(0.43 to<br>0.78) | 1.41<br>(0.89 to<br>1.79)  | 1.66<br>(1.01 to<br>2.12)  | 1.24<br>(0.79 to<br>1.58) |
| Hodgkin lymphoma                | 3.45<br>(4.02 to<br>8.03)      | 5.74<br>(3.69 to<br>8.42)       | 4.31<br>(2.72 to<br>6.24)       | 5.62<br>(3.68 to<br>7.87)       | 0.18<br>(0.12 to<br>0.23) | 0.25<br>(0.15 to<br>0.33)  | 0.19<br>(0.12 to<br>0.26)  | 0.24<br>(0.14 to<br>0.31) |
| Non-Hodgkin lymphoma            | 55.46<br>(43.13 to<br>74.57)   | 86.85<br>(63.68 to<br>115.28)   | 80.35<br>(57.61 to<br>109.38)   | 86.42<br>(63.79 to<br>115.15)   | 2.24<br>(1.76 to<br>2.93) | 5.09<br>(3.77 to<br>6.32)  | 4.91<br>(3.53 to<br>6.24)  | 4.88<br>(3.69 to<br>6.09) |
| Multiple myeloma                | 22.18<br>(17.07 to<br>32.20)   | 40.56<br>(29.12 to<br>57.43)    | 40.05<br>(28.06 to<br>56.72)    | 40.28<br>(29.15 to<br>58.40)    | 1.00<br>(0.78 to<br>1.38) | 2.45<br>(1.82 to<br>3.30)  | 2.51<br>(1.80 to<br>3.45)  | 2.36<br>(1.76 to<br>3.23) |
| Leukemia                        | 71.74<br>(57.17 to<br>89.08)   | 102.06<br>(67.42 to<br>147.11)  | 93.39<br>(59.92 to<br>135.93)   | 105.31<br>(69.88 to<br>153.96)  | 2.57<br>(2.01 to<br>3.17) | 5.75<br>(3.71 to<br>8.27)  | 5.57<br>(3.49 to<br>8.11)  | 5.66<br>(3.63 to<br>8.23) |
| Acute lymphoid leukemia         | 15.51<br>(10.99 to<br>19.54)   | 13.58<br>(8.17 to<br>22.57)     | 11.13<br>(6.62 to<br>18.15)     | 14.51<br>(8.55 to<br>23.82)     | 0.37<br>(0.26 to<br>0.46) | 0.49<br>(0.28 to<br>0.74)  | 0.44<br>(0.24 to<br>0.67)  | 0.51<br>(0.29 to<br>0.76) |
| Chronic lymphoid leukemia       | 1.77<br>(1.27 to<br>2.42)      | 2.92<br>(1.72 to<br>4.90)       | 2.99<br>(1.73 to<br>5.13)       | 2.93<br>(1.72 to<br>4.92)       | 0.08<br>(0.06 to<br>0.11) | 0.19<br>(0.11 to<br>0.32)  | 0.21<br>(0.12 to<br>0.36)  | 0.18<br>(0.11 to<br>0.31) |
| Acute myeloid leukemia          | 23.82<br>(18.40 to<br>32.43)   | 39.16<br>(25.61 to<br>57.31)    | 39.33<br>(25.42 to<br>57.45)    | 40.44<br>(26.30 to<br>59.65)    | 0.87<br>(0.67 to<br>1.16) | 2.12<br>(1.39 to<br>3.01)  | 2.25<br>(1.42 to<br>3.25)  | 2.10<br>(1.38 to<br>3.04) |
| Chronic myeloid leukemia        | 10.91<br>(6.53 to<br>14.78)    | 9.60<br>(4.82 to<br>16.02)      | 7.12<br>(3.38 to<br>12.05)      | 10.13<br>(5.03 to<br>17.48)     | 0.43<br>(0.24 to<br>0.58) | 0.57<br>(0.26 to<br>0.96)  | 0.45<br>(0.19 to<br>0.76)  | 0.57<br>(0.27 to<br>0.95) |
| Other leukemia                  | 19.73<br>(15.02 to<br>25.66)   | 36.80<br>(22.74 to<br>56.09)    | 32.82<br>(19.40 to<br>50.11)    | 37.30<br>(22.66 to<br>55.53)    | 0.82<br>(0.61 to<br>1.07) | 2.38<br>(1.42 to<br>3.57)  | 2.24<br>(1.30 to<br>3.38)  | 2.31<br>(1.39 to<br>3.51) |
| Other neoplasms                 | 104.33<br>(84.04 to<br>128.36) | 162.41<br>(117.01 to<br>204.52) | 166.30<br>(116.81 to<br>214.49) | 151.47<br>(111.31 to<br>187.06) | 4.02<br>(3.07 to<br>4.98) | 9.12<br>(5.96 to<br>10.95) | 9.81<br>(6.34 to<br>12.07) | 8.22<br>(5.31 to<br>9.72) |

|                                |                                                      |                                                      |                                                    |                                                      |                                              |                                               |                                               |                                                |
|--------------------------------|------------------------------------------------------|------------------------------------------------------|----------------------------------------------------|------------------------------------------------------|----------------------------------------------|-----------------------------------------------|-----------------------------------------------|------------------------------------------------|
| <b>Cardiovascular diseases</b> | <b>2,070.00</b><br>(1,664.13 to<br><b>2,533.71</b> ) | <b>2,454.49</b><br>(1,373.52 to<br><b>4,590.13</b> ) | <b>1,566.43</b><br>(871.32 to<br><b>3,052.59</b> ) | <b>3,597.16</b><br>(1,957.69 to<br><b>6,497.69</b> ) | <b>97.42</b><br>(79.44 to<br><b>118.60</b> ) | <b>170.27</b><br>(97.37 to<br><b>325.44</b> ) | <b>117.66</b><br>(64.16 to<br><b>238.01</b> ) | <b>229.16</b><br>(130.46 to<br><b>420.45</b> ) |
| Rheumatic heart disease        | 24.50<br>(19.09 to<br>30.51)                         | 26.72<br>(17.46 to<br>40.87)                         | 21.28<br>(13.31 to<br>33.21)                       | 25.48<br>(17.00 to<br>37.33)                         | 1.11<br>(0.87 to<br>1.40)                    | 1.80<br>(1.20 to<br>2.72)                     | 1.51<br>(0.96 to<br>2.36)                     | 1.66<br>(1.15 to<br>2.40)                      |
| Ischemic heart disease         | 980.82<br>(763.62 to<br>1,253.72)                    | 950.71<br>(440.53 to<br>2,081.70)                    | 553.04<br>(253.10 to<br>1,307.92)                  | 1,628.97<br>(741.96 to<br>3,649.81)                  | 46.14<br>(36.20 to<br>58.52)                 | 65.37<br>(30.66 to<br>147.37)                 | 41.31<br>(18.17 to<br>101.89)                 | 102.18<br>(47.64 to<br>235.51)                 |
| Stroke                         | 663.58<br>(530.58 to<br>845.31)                      | 804.74<br>(378.58 to<br>2,001.46)                    | 473.97<br>(215.80 to<br>1,336.12)                  | 1,195.76<br>(547.05 to<br>2,765.56)                  | 32.52<br>(26.14 to<br>41.65)                 | 58.67<br>(27.42 to<br>146.14)                 | 38.25<br>(16.78 to<br>112.02)                 | 78.66<br>(37.81 to<br>202.72)                  |
| Ischemic stroke                | 198.95<br>(157.06 to<br>256.31)                      | 336.43<br>(129.28 to<br>1,200.54)                    | 229.46<br>(83.38 to<br>851.50)                     | 447.30<br>(173.13 to<br>1,573.44)                    | 12.17<br>(9.67 to<br>15.63)                  | 29.36<br>(11.27 to<br>105.28)                 | 21.38<br>(7.55 to<br>73.30)                   | 36.19<br>(14.13 to<br>133.44)                  |
| Intracerebral hemorrhage       | 464.63<br>(368.65 to<br>587.29)                      | 468.31<br>(223.01 to<br>909.30)                      | 244.52<br>(115.97 to<br>453.84)                    | 748.46<br>(330.25 to<br>1,584.56)                    | 20.35<br>(16.16 to<br>25.82)                 | 29.31<br>(14.36 to<br>51.75)                  | 16.88<br>(8.10 to<br>29.90)                   | 42.47<br>(20.28 to<br>79.55)                   |
| Hypertensive heart disease     | 55.21<br>(30.34 to<br>75.16)                         | 82.72<br>(31.49 to<br>212.39)                        | 60.37<br>(25.91 to<br>135.94)                      | 113.39<br>(40.04 to<br>296.39)                       | 2.30<br>(1.29 to<br>3.09)                    | 5.18<br>(2.06 to<br>11.55)                    | 4.12<br>(1.75 to<br>8.17)                     | 6.62<br>(2.36 to<br>16.21)                     |
| Cardiomyopathy and myocarditis | 127.72<br>(71.32 to<br>177.79)                       | 149.06<br>(71.19 to<br>236.73)                       | 108.57<br>(52.97 to<br>174.72)                     | 152.65<br>(70.99 to<br>245.90)                       | 4.95<br>(2.59 to<br>7.00)                    | 8.10<br>(3.80 to<br>12.91)                    | 6.14<br>(2.90 to<br>9.64)                     | 8.01<br>(3.70 to<br>12.58)                     |
| Myocarditis                    | 9.89<br>(5.78 to<br>13.83)                           | 12.14<br>(4.84 to<br>22.69)                          | 11.71<br>(4.51 to<br>22.55)                        | 11.69<br>(4.72 to<br>21.15)                          | 0.30<br>(0.13 to<br>0.48)                    | 0.56<br>(0.17 to<br>1.07)                     | 0.58<br>(0.17 to<br>1.11)                     | 0.52<br>(0.16 to<br>0.96)                      |

| Greenland                                     |                                                |                                                  |                                                  |                                                  |                                             |                                             |                                             |                                             |
|-----------------------------------------------|------------------------------------------------|--------------------------------------------------|--------------------------------------------------|--------------------------------------------------|---------------------------------------------|---------------------------------------------|---------------------------------------------|---------------------------------------------|
| Cause                                         | YLLs (actual counts)                           |                                                  |                                                  |                                                  | Deaths (actual counts)                      |                                             |                                             |                                             |
|                                               | 2016                                           | 2040 Forecast                                    | 2040 Better Scenario                             | 2040 Worse Scenario                              | 2016                                        | 2040 Forecast                               | 2040 Better Scenario                        | 2040 Worse Scenario                         |
| Alcoholic cardiomyopathy                      | 19.28<br>(10.22 to<br>29.10)                   | 16.80<br>(8.40 to<br>28.41)                      | 14.58<br>(7.29 to<br>24.99)                      | 17.51<br>(8.91 to<br>28.30)                      | 0.66<br>(0.36 to<br>1.00)                   | 0.71<br>(0.37 to<br>1.18)                   | 0.65<br>(0.33 to<br>1.08)                   | 0.72<br>(0.38 to<br>1.16)                   |
| Other cardiomyopathy                          | 98.56<br>(51.47 to<br>138.59)                  | 120.12<br>(53.19 to<br>197.96)                   | 82.28<br>(36.29 to<br>137.13)                    | 123.45<br>(52.69 to<br>205.17)                   | 3.99<br>(1.94 to<br>5.66)                   | 6.83<br>(2.90 to<br>11.24)                  | 4.92<br>(2.14 to<br>8.05)                   | 6.78<br>(2.86 to<br>11.06)                  |
| Atrial fibrillation and flutter               | 11.84<br>(8.32 to<br>16.79)                    | 28.68<br>(16.19 to<br>43.17)                     | 26.95<br>(14.52 to<br>40.93)                     | 29.98<br>(17.39 to<br>44.34)                     | 0.70<br>(0.49 to<br>1.01)                   | 2.47<br>(1.36 to<br>3.54)                   | 2.47<br>(1.30 to<br>3.67)                   | 2.43<br>(1.38 to<br>3.47)                   |
| Aortic aneurysm                               | 22.40<br>(17.59 to<br>28.27)                   | 35.18<br>(22.55 to<br>54.26)                     | 32.08<br>(19.90 to<br>50.24)                     | 37.66<br>(24.21 to<br>56.34)                     | 1.12<br>(0.88 to<br>1.42)                   | 2.37<br>(1.54 to<br>3.59)                   | 2.27<br>(1.43 to<br>3.59)                   | 2.41<br>(1.61 to<br>3.51)                   |
| Peripheral artery disease                     | 18.82<br>(12.35 to<br>24.49)                   | 50.98<br>(27.13 to<br>82.85)                     | 50.10<br>(26.33 to<br>82.35)                     | 57.10<br>(30.21 to<br>91.78)                     | 1.06<br>(0.65 to<br>1.38)                   | 3.84<br>(2.05 to<br>6.09)                   | 3.99<br>(2.18 to<br>6.44)                   | 4.08<br>(2.16 to<br>6.48)                   |
| Endocarditis                                  | 15.21<br>(11.33 to<br>19.57)                   | 28.17<br>(16.96 to<br>42.93)                     | 27.83<br>(16.27 to<br>43.02)                     | 27.65<br>(16.62 to<br>41.40)                     | 0.63<br>(0.45 to<br>0.82)                   | 1.74<br>(0.99 to<br>2.64)                   | 1.81<br>(1.02 to<br>2.75)                   | 1.64<br>(0.95 to<br>2.46)                   |
| Other cardiovascular and circulatory diseases | 149.89<br>(81.24 to<br>198.16)                 | 297.52<br>(142.46 to<br>489.36)                  | 212.24<br>(103.54 to<br>337.11)                  | 328.52<br>(153.01 to<br>527.22)                  | 6.90<br>(3.35 to<br>9.10)                   | 20.73<br>(9.21 to<br>31.67)                 | 15.79<br>(7.30 to<br>24.58)                 | 21.46<br>(9.38 to<br>32.74)                 |
| <b>Chronic respiratory diseases</b>           | <b>447.73</b><br>(320.66 to<br><b>561.80</b> ) | <b>819.43</b><br>(534.97 to<br><b>1,141.34</b> ) | <b>778.16</b><br>(501.46 to<br><b>1,090.57</b> ) | <b>836.30</b><br>(543.56 to<br><b>1,158.34</b> ) | <b>22.92</b><br>(16.26 to<br><b>28.63</b> ) | <b>55.03</b><br>(36.56 to<br><b>74.38</b> ) | <b>54.50</b><br>(35.41 to<br><b>74.52</b> ) | <b>53.83</b><br>(35.49 to<br><b>72.91</b> ) |
| Chronic obstructive pulmonary disease         | 374.10<br>(274.50 to<br>471.38)                | 702.89<br>(457.98 to<br>994.44)                  | 629.40<br>(411.05 to<br>914.67)                  | 722.15<br>(473.23 to<br>1,041.87)                | 19.70<br>(14.52 to<br>24.61)                | 47.67<br>(32.29 to<br>66.33)                | 44.62<br>(29.69 to<br>63.65)                | 46.95<br>(31.33 to<br>65.79)                |
| Pneumoconiosis                                | 1.29<br>(0.91 to<br>2.15)                      | 2.19<br>(1.44 to<br>3.82)                        | 2.28<br>(1.44 to<br>4.11)                        | 2.01<br>(1.34 to<br>3.41)                        | 0.07<br>(0.05 to<br>0.13)                   | 0.17<br>(0.11 to<br>0.29)                   | 0.18<br>(0.11 to<br>0.33)                   | 0.15<br>(0.10 to<br>0.26)                   |
| Silicosis                                     | 0.14<br>(0.07 to<br>0.24)                      | 0.14<br>(0.05 to<br>0.35)                        | 0.08<br>(0.03 to<br>0.23)                        | 0.14<br>(0.05 to<br>0.34)                        | 0.01<br>(0.00 to<br>0.01)                   | 0.01<br>(0.00 to<br>0.03)                   | 0.01<br>(0.00 to<br>0.02)                   | 0.01<br>(0.00 to<br>0.02)                   |



|                                                     |                                                      |                                                      |                                                      |                                                      |                                                  |                                                   |                                                   |                                                   |
|-----------------------------------------------------|------------------------------------------------------|------------------------------------------------------|------------------------------------------------------|------------------------------------------------------|--------------------------------------------------|---------------------------------------------------|---------------------------------------------------|---------------------------------------------------|
|                                                     | 16.50<br>(9.99 to<br>22.07)                          | 26.22<br>(11.22 to<br>61.59)                         | 18.33<br>(8.21 to<br>39.78)                          | 27.32<br>(11.36 to<br>67.27)                         | 0.60<br>(0.31 to<br>0.82)                        | 1.32<br>(0.51 to<br>2.95)                         | 0.98<br>(0.41 to<br>1.96)                         | 1.33<br>(0.50 to<br>3.18)                         |
| Pancreatitis                                        |                                                      |                                                      |                                                      |                                                      |                                                  |                                                   |                                                   |                                                   |
| Other digestive diseases                            | 31.42<br>(23.01 to<br>40.00)                         | 58.21<br>(40.84 to<br>75.26)                         | 56.10<br>(38.15 to<br>75.73)                         | 53.28<br>(38.17 to<br>67.55)                         | 1.51<br>(1.05 to<br>1.95)                        | 4.15<br>(2.93 to<br>5.52)                         | 4.19<br>(2.90 to<br>5.67)                         | 3.68<br>(2.52 to<br>4.82)                         |
| <b>Neurological disorders</b>                       | <b>222.97</b><br><b>(180.94 to</b><br><b>270.05)</b> | <b>443.91</b><br><b>(328.79 to</b><br><b>575.67)</b> | <b>466.76</b><br><b>(331.66 to</b><br><b>606.24)</b> | <b>455.54</b><br><b>(338.74 to</b><br><b>606.47)</b> | <b>10.44</b><br><b>(8.36 to</b><br><b>12.79)</b> | <b>32.17</b><br><b>(23.51 to</b><br><b>41.96)</b> | <b>36.28</b><br><b>(25.52 to</b><br><b>47.52)</b> | <b>31.92</b><br><b>(22.59 to</b><br><b>44.22)</b> |
| Alzheimer's disease and other dementias             | 79.06<br>(59.20 to<br>103.17)                        | 234.58<br>(149.73 to<br>335.78)                      | 257.73<br>(164.43 to<br>373.43)                      | 249.80<br>(160.03 to<br>380.35)                      | 5.28<br>(3.97 to<br>6.89)                        | 21.61<br>(13.57 to<br>30.60)                      | 24.88<br>(15.61 to<br>35.31)                      | 22.05<br>(13.22 to<br>33.01)                      |
| Parkinson's disease                                 | 18.92<br>(12.90 to<br>25.87)                         | 53.55<br>(37.70 to<br>72.83)                         | 63.46<br>(44.28 to<br>86.73)                         | 47.30<br>(33.27 to<br>64.37)                         | 1.14<br>(0.78 to<br>1.57)                        | 4.15<br>(2.92 to<br>5.74)                         | 5.08<br>(3.55 to<br>7.13)                         | 3.59<br>(2.43 to<br>4.96)                         |
| Epilepsy                                            | 53.86<br>(42.46 to<br>68.53)                         | 67.10<br>(57.37 to<br>121.91)                        | 52.90<br>(31.01 to<br>94.61)                         | 70.50<br>(38.41 to<br>127.88)                        | 1.51<br>(1.19 to<br>1.90)                        | 2.39<br>(1.47 to<br>3.86)                         | 1.97<br>(1.26 to<br>3.14)                         | 2.43<br>(1.45 to<br>4.06)                         |
| Multiple sclerosis                                  | 40.75<br>(28.11 to<br>62.25)                         | 42.13<br>(23.69 to<br>74.76)                         | 43.58<br>(24.26 to<br>77.54)                         | 44.24<br>(24.83 to<br>78.64)                         | 1.36<br>(0.92 to<br>2.14)                        | 1.68<br>(0.96 to<br>2.95)                         | 1.79<br>(1.01 to<br>3.22)                         | 1.72<br>(0.98 to<br>3.03)                         |
| Motor neuron disease                                | 9.64<br>(7.28 to<br>12.51)                           | 14.72<br>(11.03 to<br>18.41)                         | 15.39<br>(11.19 to<br>19.76)                         | 13.72<br>(10.51 to<br>16.94)                         | 0.40<br>(0.30 to<br>0.52)                        | 0.77<br>(0.60 to<br>0.93)                         | 0.82<br>(0.62 to<br>1.02)                         | 0.70<br>(0.56 to<br>0.84)                         |
| Other neurological disorders                        | 20.74<br>(16.95 to<br>25.11)                         | 31.83<br>(24.82 to<br>41.03)                         | 33.69<br>(25.58 to<br>44.33)                         | 29.98<br>(23.86 to<br>37.74)                         | 0.74<br>(0.60 to<br>0.90)                        | 1.57<br>(1.26 to<br>1.95)                         | 1.74<br>(1.35 to<br>2.23)                         | 1.44<br>(1.18 to<br>1.74)                         |
| <b>Mental disorders</b>                             | <b>366.47</b><br><b>(268.49 to</b><br><b>578.28)</b> | <b>359.05</b><br><b>(233.80 to</b><br><b>568.15)</b> | <b>391.51</b><br><b>(254.98 to</b><br><b>624.50)</b> | <b>359.69</b><br><b>(235.25 to</b><br><b>558.97)</b> | <b>10.76</b><br><b>(8.00 to</b><br><b>17.12)</b> | <b>12.03</b><br><b>(8.55 to</b><br><b>17.71)</b>  | <b>13.40</b><br><b>(9.49 to</b><br><b>19.87)</b>  | <b>11.83</b><br><b>(8.47 to</b><br><b>17.41)</b>  |
| Alcohol use disorders                               | 299.48<br>(215.20 to<br>513.04)                      | 268.32<br>(175.66 to<br>439.99)                      | 280.21<br>(181.60 to<br>454.04)                      | 271.50<br>(178.50 to<br>450.09)                      | 9.22<br>(6.71 to<br>15.43)                       | 9.69<br>(6.88 to<br>14.97)                        | 10.44<br>(7.34 to<br>15.86)                       | 9.58<br>(6.85 to<br>15.02)                        |
| Drug use disorders                                  | 66.43<br>(49.34 to<br>87.56)                         | 90.11<br>(56.79 to<br>147.32)                        | 110.60<br>(69.89 to<br>177.93)                       | 87.59<br>(55.22 to<br>139.95)                        | 1.53<br>(1.11 to<br>1.99)                        | 2.33<br>(1.48 to<br>3.72)                         | 2.95<br>(1.86 to<br>4.66)                         | 2.23<br>(1.41 to<br>3.49)                         |
| Opioid use disorders                                | 41.47<br>(29.00 to<br>55.92)                         | 39.59<br>(22.71 to<br>66.01)                         | 41.70<br>(23.89 to<br>71.00)                         | 39.13<br>(22.33 to<br>65.37)                         | 0.91<br>(0.63 to<br>1.21)                        | 0.93<br>(0.54 to<br>1.53)                         | 1.00<br>(0.57 to<br>1.67)                         | 0.91<br>(0.54 to<br>1.49)                         |
| Cocaine use disorders                               | 3.74<br>(2.18 to<br>5.64)                            | 7.14<br>(3.47 to<br>13.07)                           | 8.96<br>(4.28 to<br>16.25)                           | 6.95<br>(3.38 to<br>12.68)                           | 0.09<br>(0.05 to<br>0.13)                        | 0.17<br>(0.09 to<br>0.31)                         | 0.22<br>(0.11 to<br>0.40)                         | 0.17<br>(0.08 to<br>0.30)                         |
| Amphetamine use disorders                           | 3.04<br>(1.66 to<br>4.56)                            | 7.63<br>(3.66 to<br>13.22)                           | 11.03<br>(5.33 to<br>19.15)                          | 7.33<br>(3.55 to<br>12.62)                           | 0.07<br>(0.04 to<br>0.11)                        | 0.18<br>(0.09 to<br>0.33)                         | 0.27<br>(0.12 to<br>0.47)                         | 0.17<br>(0.08 to<br>0.30)                         |
| Other drug use disorders                            | 18.19<br>(12.87 to<br>26.31)                         | 35.75<br>(22.71 to<br>57.62)                         | 48.90<br>(30.87 to<br>77.43)                         | 34.18<br>(21.15 to<br>55.43)                         | 0.46<br>(0.32 to<br>0.63)                        | 1.05<br>(0.66 to<br>1.64)                         | 1.47<br>(0.93 to<br>2.23)                         | 0.98<br>(0.62 to<br>1.50)                         |
| Eating disorders                                    | 0.55<br>(0.26 to<br>1.14)                            | 0.62<br>(0.22 to<br>1.49)                            | 0.70<br>(0.24 to<br>1.71)                            | 0.61<br>(0.21 to<br>1.49)                            | 0.01<br>(0.00 to<br>0.02)                        | 0.01<br>(0.00 to<br>0.03)                         | 0.01<br>(0.00 to<br>0.03)                         | 0.01<br>(0.00 to<br>0.03)                         |
| <b>Greenland</b>                                    |                                                      |                                                      |                                                      |                                                      |                                                  |                                                   |                                                   |                                                   |
| Cause                                               | YLLs (actual counts)                                 |                                                      |                                                      |                                                      | Deaths (actual counts)                           |                                                   |                                                   |                                                   |
|                                                     | 2016                                                 | 2040 Forecast                                        | 2040 Better Scenario                                 | 2040 Worse Scenario                                  | 2016                                             | 2040 Forecast                                     | 2040 Better Scenario                              | 2040 Worse Scenario                               |
| Diabetes, urogenital, blood, and endocrine diseases | 303.82<br>(246.85 to<br>365.94)                      | 590.33<br>(359.27 to<br>1,203.85)                    | 502.48<br>(297.71 to<br>1,042.71)                    | 647.39<br>(385.29 to<br>1,272.46)                    | 12.99<br>(10.46 to<br>15.63)                     | 38.53<br>(22.68 to<br>83.57)                      | 34.24<br>(19.63 to<br>78.99)                      | 40.85<br>(23.54 to<br>82.81)                      |
| Diabetes mellitus                                   | 89.78<br>(72.22 to<br>112.61)                        | 136.81<br>(81.28 to<br>205.07)                       | 96.19<br>(58.24 to<br>143.76)                        | 157.43<br>(92.97 to<br>248.62)                       | 3.99<br>(3.22 to<br>5.01)                        | 8.57<br>(5.33 to<br>11.99)                        | 6.38<br>(3.98 to<br>8.91)                         | 9.34<br>(5.84 to<br>13.48)                        |
| Acute glomerulonephritis                            | 0.40<br>(0.30 to<br>0.58)                            | 0.41<br>(0.25 to<br>0.77)                            | 0.32<br>(0.20 to<br>0.60)                            | 0.41<br>(0.25 to<br>0.76)                            | 0.01<br>(0.01 to<br>0.01)                        | 0.01<br>(0.01 to<br>0.02)                         | 0.01<br>(0.01 to<br>0.02)                         | 0.01<br>(0.01 to<br>0.02)                         |



|                                                            |                               |                                |                                |                                |                               |                             |                             |                             |
|------------------------------------------------------------|-------------------------------|--------------------------------|--------------------------------|--------------------------------|-------------------------------|-----------------------------|-----------------------------|-----------------------------|
| Chronic kidney disease                                     | 69.99<br>(40.98 to<br>87.69)  | 200.89<br>(39.32 to<br>789.35) | 166.83<br>(31.27 to<br>682.90) | 254.26<br>(47.95 to<br>847.05) | 3.48<br>(1.90 to<br>4.35)     | 14.25<br>(2.22 to<br>58.87) | 12.42<br>(1.86 to<br>54.08) | 17.44<br>(1.86 to<br>58.37) |
| Chronic kidney disease due to diabetes mellitus            | 40.60<br>(22.68 to<br>52.55)  | 114.28<br>(22.73 to<br>438.29) | 93.45<br>(17.99 to<br>366.04)  | 146.45<br>(28.47 to<br>458.72) | 1.95<br>(1.05 to<br>2.52)     | 7.54<br>(1.20 to<br>29.87)  | 6.42<br>(1.02 to<br>26.22)  | 9.38<br>(1.57 to<br>30.34)  |
| Chronic kidney disease due to hypertension                 | 11.84<br>(6.67 to<br>15.97)   | 44.95<br>(6.70 to<br>191.50)   | 40.07<br>(5.79 to<br>176.82)   | 55.18<br>(8.42 to<br>190.45)   | 0.70<br>(0.38 to<br>0.95)     | 3.79<br>(0.51 to<br>15.56)  | 3.55<br>(0.46 to<br>15.50)  | 4.47<br>(0.64 to<br>15.66)  |
| Chronic kidney disease due to glomerulonephritis           | 6.41<br>(4.39 to<br>8.54)     | 14.21<br>(2.90 to<br>55.51)    | 11.05<br>(2.19 to<br>46.25)    | 17.99<br>(3.63 to<br>61.50)    | 0.29<br>(0.18 to<br>0.40)     | 0.97<br>(0.15 to<br>4.05)   | 0.79<br>(0.12 to<br>3.48)   | 1.19<br>(0.19 to<br>4.08)   |
| Chronic kidney disease due to other and unspecified causes | 11.14<br>(7.04 to<br>15.24)   | 27.45<br>(5.54 to<br>110.34)   | 22.26<br>(4.24 to<br>92.25)    | 34.65<br>(7.03 to<br>110.58)   | 0.54<br>(0.31 to<br>0.74)     | 1.95<br>(0.31 to<br>8.04)   | 1.66<br>(0.25 to<br>6.93)   | 2.39<br>(0.39 to<br>7.76)   |
| Urinary diseases and male infertility                      | 44.45<br>(35.39 to<br>54.99)  | 130.40<br>(98.96 to<br>172.50) | 114.77<br>(83.61 to<br>159.02) | 119.49<br>(93.30 to<br>157.19) | 2.39<br>(1.94 to<br>2.96)     | 9.98<br>(7.50 to<br>13.55)  | 9.21<br>(6.68 to<br>12.97)  | 8.86<br>(6.68 to<br>12.20)  |
| Urinary tract infections                                   | 37.51<br>(28.90 to<br>50.35)  | 119.72<br>(88.80 to<br>166.19) | 106.34<br>(76.20 to<br>153.09) | 109.57<br>(83.71 to<br>150.40) | 2.04<br>(1.58 to<br>2.76)     | 9.25<br>(6.85 to<br>13.13)  | 8.61<br>(6.10 to<br>12.51)  | 8.20<br>(6.03 to<br>11.83)  |
| Urolithiasis                                               | 0.45<br>(0.25 to<br>1.04)     | 1.01<br>(0.43 to<br>2.80)      | 0.78<br>(0.31 to<br>2.24)      | 0.97<br>(0.42 to<br>2.61)      | 0.02<br>(0.01 to<br>0.04)     | 0.06<br>(0.02 to<br>0.17)   | 0.05<br>(0.02 to<br>0.15)   | 0.05<br>(0.02 to<br>0.15)   |
| Other urinary diseases                                     | 6.50<br>(1.87 to<br>12.97)    | 9.68<br>(1.90 to<br>22.04)     | 7.64<br>(1.49 to<br>17.82)     | 8.95<br>(1.87 to<br>20.38)     | 0.33<br>(0.09 to<br>0.71)     | 0.67<br>(0.13 to<br>1.56)   | 0.55<br>(0.10 to<br>1.28)   | 0.61<br>(0.12 to<br>1.42)   |
| Gynecological diseases                                     | 0.17<br>(0.11 to<br>0.25)     | 0.24<br>(0.13 to<br>0.44)      | 0.15<br>(0.08 to<br>0.25)      | 0.24<br>(0.14 to<br>0.42)      | 0.01<br>(0.00 to<br>0.01)     | 0.01<br>(0.01 to<br>0.02)   | 0.01<br>(0.00 to<br>0.01)   | 0.01<br>(0.01 to<br>0.02)   |
| Uterine fibroids                                           | 0.03<br>(0.01 to<br>0.06)     | 0.03<br>(0.02 to<br>0.08)      | 0.02<br>(0.01 to<br>0.05)      | 0.03<br>(0.02 to<br>0.07)      | 0.00<br>(0.00 to<br>0.00)     | 0.00<br>(0.00 to<br>0.00)   | 0.00<br>(0.00 to<br>0.00)   | 0.00<br>(0.00 to<br>0.00)   |
| Polycystic ovarian syndrome                                | 0.03<br>(0.00 to<br>0.07)     | 0.02<br>(0.00 to<br>0.06)      | 0.01<br>(0.00 to<br>0.03)      | 0.02<br>(0.00 to<br>0.06)      | 0.00<br>(0.00 to<br>0.00)     | 0.00<br>(0.00 to<br>0.00)   | 0.00<br>(0.00 to<br>0.00)   | 0.00<br>(0.00 to<br>0.00)   |
| Endometriosis                                              | 0.03<br>(0.01 to<br>0.06)     | 0.04<br>(0.01 to<br>0.11)      | 0.02<br>(0.01 to<br>0.06)      | 0.04<br>(0.01 to<br>0.11)      | 0.00<br>(0.00 to<br>0.00)     | 0.00<br>(0.00 to<br>0.00)   | 0.00<br>(0.00 to<br>0.00)   | 0.00<br>(0.00 to<br>0.00)   |
| Genital prolapse                                           | 0.01<br>(0.00 to<br>0.02)     | 0.02<br>(0.01 to<br>0.04)      | 0.01<br>(0.00 to<br>0.02)      | 0.02<br>(0.01 to<br>0.04)      | 0.00<br>(0.00 to<br>0.00)     | 0.00<br>(0.00 to<br>0.00)   | 0.00<br>(0.00 to<br>0.00)   | 0.00<br>(0.00 to<br>0.00)   |
| Other gynecological diseases                               | 0.07<br>(0.04 to<br>0.12)     | 0.13<br>(0.07 to<br>0.24)      | 0.08<br>(0.04 to<br>0.14)      | 0.13<br>(0.07 to<br>0.22)      | 0.00<br>(0.00 to<br>0.00)     | 0.01<br>(0.00 to<br>0.01)   | 0.01<br>(0.01 to<br>0.01)   | 0.01<br>(0.00 to<br>0.01)   |
| Hemoglobinopathies and hemolytic anemias                   | 8.76<br>(6.44 to<br>11.11)    | 12.27<br>(6.37 to<br>17.55)    | 9.48<br>(4.69 to<br>13.91)     | 11.73<br>(6.36 to<br>16.26)    | 0.33<br>(0.19 to<br>0.46)     | 0.71<br>(0.29 to<br>1.09)   | 0.59<br>(0.23 to<br>0.92)   | 0.65<br>(0.28 to<br>0.97)   |
| Thalassemias                                               | 0.44<br>(0.28 to<br>0.80)     | 0.24<br>(0.11 to<br>0.54)      | 0.21<br>(0.10 to<br>0.49)      | 0.24<br>(0.12 to<br>0.55)      | 0.01<br>(0.00 to<br>0.01)     | 0.00<br>(0.00 to<br>0.01)   | 0.00<br>(0.00 to<br>0.01)   | 0.00<br>(0.00 to<br>0.01)   |
| Sickle cell disorders                                      | 2.64<br>(1.82 to<br>4.25)     | 3.26<br>(1.97 to<br>5.12)      | 2.35<br>(1.40 to<br>3.68)      | 3.27<br>(2.08 to<br>5.04)      | 0.06<br>(0.05 to<br>0.09)     | 0.11<br>(0.06 to<br>0.17)   | 0.08<br>(0.04 to<br>0.13)   | 0.11<br>(0.06 to<br>0.16)   |
| G6PD deficiency                                            | 1.59<br>(1.16 to<br>2.23)     | 2.36<br>(1.27 to<br>3.48)      | 1.66<br>(0.86 to<br>2.48)      | 2.32<br>(1.27 to<br>3.30)      | 0.05<br>(0.03 to<br>0.06)     | 0.10<br>(0.05 to<br>0.16)   | 0.08<br>(0.03 to<br>0.12)   | 0.10<br>(0.05 to<br>0.14)   |
| Other hemoglobinopathies and hemolytic anemias             | 4.08<br>(2.05 to<br>5.82)     | 6.42<br>(2.47 to<br>10.24)     | 5.26<br>(1.98 to<br>8.66)      | 5.90<br>(2.36 to<br>9.10)      | 0.22<br>(0.09 to<br>0.32)     | 0.50<br>(0.18 to<br>0.80)   | 0.42<br>(0.15 to<br>0.69)   | 0.44<br>(0.16 to<br>0.71)   |
| Endocrine, metabolic, blood, and immune disorders          | 90.27<br>(60.83 to<br>114.18) | 109.31<br>(66.81 to<br>146.85) | 114.75<br>(68.98 to<br>154.75) | 103.82<br>(64.34 to<br>137.81) | 2.78<br>(1.75 to<br>3.58)     | 4.99<br>(2.78 to<br>6.52)   | 5.63<br>(3.12 to<br>7.54)   | 4.53<br>(2.56 to<br>5.88)   |
| <b>Greenland</b>                                           |                               |                                |                                |                                |                               |                             |                             |                             |
| <b>YLLs (actual counts)</b>                                |                               |                                |                                |                                | <b>Deaths (actual counts)</b> |                             |                             |                             |

| Cause                                         | 2016                                      | 2040 Forecast                             | 2040 Better Scenario                      | 2040 Worse Scenario                       | 2016                             | 2040 Forecast                     | 2040 Better Scenario              | 2040 Worse Scenario               |
|-----------------------------------------------|-------------------------------------------|-------------------------------------------|-------------------------------------------|-------------------------------------------|----------------------------------|-----------------------------------|-----------------------------------|-----------------------------------|
| <b>Musculoskeletal disorders</b>              | <b>31.79</b><br>(20.62 to 40.93)          | <b>49.65</b><br>(29.31 to 64.98)          | <b>47.09</b><br>(27.46 to 62.98)          | <b>47.22</b><br>(27.94 to 60.56)          | <b>1.24</b><br>(0.74 to 1.59)    | <b>2.84</b><br>(1.57 to 3.60)     | <b>2.80</b><br>(1.55 to 3.65)     | <b>2.62</b><br>(1.45 to 3.27)     |
| Rheumatoid arthritis                          | 3.66<br>(2.63 to 5.93)                    | 9.11<br>(5.56 to 15.42)                   | 6.25<br>(3.77 to 11.22)                   | 9.18<br>(5.62 to 15.11)                   | 0.17<br>(0.12 to 0.28)           | 0.59<br>(0.36 to 1.00)            | 0.42<br>(0.25 to 0.77)            | 0.57<br>(0.35 to 0.96)            |
| Other musculoskeletal disorders               | 28.13<br>(17.47 to 36.79)                 | 40.54<br>(21.27 to 54.09)                 | 40.84<br>(22.08 to 55.09)                 | 38.03<br>(19.94 to 49.88)                 | 1.07<br>(0.59 to 1.41)           | 2.26<br>(1.08 to 2.95)            | 2.39<br>(1.19 to 3.17)            | 2.04<br>(0.97 to 2.63)            |
| <b>Other non-communicable diseases</b>        | <b>259.45</b><br>(211.85 to 317.11)       | <b>191.26</b><br>(129.78 to 280.11)       | <b>123.16</b><br>(81.75 to 173.90)        | <b>199.94</b><br>(137.48 to 289.05)       | <b>3.77</b><br>(3.05 to 4.57)    | <b>4.88</b><br>(2.93 to 6.67)     | <b>3.95</b><br>(2.17 to 5.44)     | <b>4.73</b><br>(2.91 to 6.34)     |
| Congenital birth defects                      | 164.35<br>(129.59 to 205.09)              | 105.24<br>(70.44 to 156.09)               | 56.86<br>(40.21 to 82.98)                 | 113.50<br>(78.47 to 163.66)               | 2.20<br>(1.76 to 2.71)           | 1.53<br>(1.05 to 2.25)            | 0.87<br>(0.62 to 1.25)            | 1.63<br>(1.14 to 2.33)            |
| Neural tube defects                           | 3.28<br>(2.13 to 5.66)                    | 1.23<br>(0.60 to 2.47)                    | 0.62<br>(0.31 to 1.23)                    | 1.33<br>(0.66 to 2.63)                    | 0.04<br>(0.03 to 0.07)           | 0.02<br>(0.01 to 0.03)            | 0.01<br>(0.00 to 0.02)            | 0.02<br>(0.01 to 0.04)            |
| Congenital heart anomalies                    | 72.84<br>(56.53 to 93.90)                 | 44.16<br>(28.87 to 67.64)                 | 21.29<br>(14.19 to 32.24)                 | 47.98<br>(31.41 to 73.92)                 | 1.01<br>(0.80 to 1.28)           | 0.67<br>(0.44 to 1.00)            | 0.33<br>(0.22 to 0.50)            | 0.72<br>(0.48 to 1.07)            |
| Orofacial clefts                              | 1.11<br>(0.42 to 2.57)                    | 0.63<br>(0.19 to 1.72)                    | 0.23<br>(0.08 to 0.56)                    | 0.70<br>(0.22 to 1.76)                    | 0.01<br>(0.00 to 0.03)           | 0.01<br>(0.00 to 0.02)            | 0.00<br>(0.01 to 0.01)            | 0.01<br>(0.00 to 0.02)            |
| Down syndrome                                 | 3.12<br>(2.10 to 4.23)                    | 3.36<br>(2.13 to 5.30)                    | 3.33<br>(2.09 to 5.31)                    | 3.37<br>(2.15 to 5.25)                    | 0.06<br>(0.04 to 0.08)           | 0.07<br>(0.04 to 0.12)            | 0.07<br>(0.04 to 0.13)            | 0.07<br>(0.04 to 0.12)            |
| Other chromosomal abnormalities               | 5.43<br>(1.22 to 8.12)                    | 7.65<br>(1.81 to 13.02)                   | 5.36<br>(1.28 to 8.95)                    | 8.02<br>(1.92 to 13.63)                   | 0.09<br>(0.01 to 0.13)           | 0.13<br>(0.02 to 0.22)            | 0.10<br>(0.02 to 0.16)            | 0.13<br>(0.02 to 0.22)            |
| Congenital musculoskeletal and limb anomalies | 16.02<br>(2.13 to 23.04)                  | 7.57<br>(1.12 to 13.23)                   | 4.05<br>(0.63 to 7.09)                    | 8.20<br>(1.18 to 13.98)                   | 0.20<br>(0.03 to 0.29)           | 0.11<br>(0.02 to 0.18)            | 0.06<br>(0.01 to 0.10)            | 0.12<br>(0.02 to 0.19)            |
| Urogenital congenital anomalies               | 7.60<br>(2.66 to 11.58)                   | 3.81<br>(1.32 to 6.76)                    | 2.23<br>(0.83 to 3.72)                    | 4.09<br>(1.46 to 7.09)                    | 0.10<br>(0.04 to 0.15)           | 0.06<br>(0.02 to 0.09)            | 0.04<br>(0.01 to 0.06)            | 0.06<br>(0.02 to 0.10)            |
| Digestive congenital anomalies                | 9.11<br>(2.71 to 13.03)                   | 8.42<br>(2.32 to 15.34)                   | 4.24<br>(1.26 to 7.64)                    | 9.18<br>(2.54 to 16.38)                   | 0.11<br>(0.03 to 0.15)           | 0.10<br>(0.03 to 0.18)            | 0.05<br>(0.02 to 0.09)            | 0.11<br>(0.03 to 0.19)            |
| Other congenital birth defects                | 45.84<br>(34.62 to 60.27)                 | 28.40<br>(18.16 to 44.33)                 | 15.51<br>(10.08 to 24.12)                 | 30.63<br>(19.86 to 47.30)                 | 0.58<br>(0.44 to 0.76)           | 0.37<br>(0.25 to 0.58)            | 0.21<br>(0.14 to 0.32)            | 0.40<br>(0.27 to 0.61)            |
| Skin and subcutaneous diseases                | 14.82<br>(6.52 to 20.98)                  | 45.78<br>(19.13 to 65.60)                 | 42.04<br>(17.60 to 61.61)                 | 42.71<br>(17.79 to 59.78)                 | 0.63<br>(0.26 to 0.91)           | 2.88<br>(1.10 to 4.21)            | 2.80<br>(1.13 to 4.13)            | 2.59<br>(1.08 to 3.76)            |
| Cellulitis                                    | 1.14<br>(0.25 to 2.03)                    | 4.49<br>(0.58 to 9.07)                    | 4.34<br>(0.55 to 8.94)                    | 4.20<br>(0.55 to 8.16)                    | 0.05<br>(0.01 to 0.10)           | 0.28<br>(0.03 to 0.57)            | 0.28<br>(0.03 to 0.58)            | 0.26<br>(0.03 to 0.51)            |
| Pyoderma                                      | 12.98<br>(5.74 to 18.73)                  | 40.07<br>(17.62 to 57.25)                 | 36.66<br>(16.22 to 52.84)                 | 37.35<br>(16.19 to 52.06)                 | 0.56<br>(0.23 to 0.80)           | 2.53<br>(1.02 to 3.67)            | 2.46<br>(0.99 to 3.57)            | 2.27<br>(0.92 to 3.25)            |
| Decubitus ulcer                               | 0.39<br>(0.22 to 0.61)                    | 0.66<br>(0.32 to 1.09)                    | 0.53<br>(0.25 to 0.86)                    | 0.62<br>(0.31 to 1.03)                    | 0.01<br>(0.01 to 0.02)           | 0.04<br>(0.02 to 0.07)            | 0.04<br>(0.02 to 0.06)            | 0.04<br>(0.02 to 0.06)            |
| Other skin and subcutaneous diseases          | 0.32<br>(0.20 to 0.52)                    | 0.57<br>(0.30 to 0.94)                    | 0.50<br>(0.26 to 0.81)                    | 0.55<br>(0.29 to 0.91)                    | 0.01<br>(0.01 to 0.02)           | 0.03<br>(0.01 to 0.05)            | 0.03<br>(0.01 to 0.05)            | 0.03<br>(0.01 to 0.04)            |
| Sudden infant death syndrome                  | 80.28<br>(49.72 to 117.20)                | 40.23<br>(13.91 to 88.62)                 | 24.27<br>(8.18 to 52.83)                  | 43.72<br>(14.59 to 96.03)                 | 0.93<br>(0.58 to 1.36)           | 0.47<br>(0.16 to 1.03)            | 0.28<br>(0.09 to 0.61)            | 0.51<br>(0.17 to 1.11)            |
| <b>Injuries</b>                               | <b>3,253.37</b><br>(2,634.70 to 4,016.25) | <b>2,971.01</b><br>(1,461.09 to 6,039.73) | <b>2,038.23</b><br>(1,064.77 to 4,065.63) | <b>3,180.30</b><br>(1,514.07 to 6,640.22) | <b>70.34</b><br>(57.00 to 86.75) | <b>81.17</b><br>(50.88 to 142.86) | <b>60.77</b><br>(39.40 to 101.19) | <b>83.07</b><br>(49.65 to 151.49) |

|                                      |                                     |                                     |                                     |                                     |                                  |                                  |                                  |                                  |
|--------------------------------------|-------------------------------------|-------------------------------------|-------------------------------------|-------------------------------------|----------------------------------|----------------------------------|----------------------------------|----------------------------------|
| <b>Transport injuries</b>            | <b>334.76</b><br>(266.24 to 443.42) | <b>351.51</b><br>(172.72 to 666.75) | <b>164.12</b><br>(85.15 to 300.35)  | <b>394.14</b><br>(196.46 to 763.37) | <b>7.12</b><br>(5.65 to 9.29)    | <b>9.03</b><br>(4.84 to 16.19)   | <b>4.53</b><br>(2.55 to 7.71)    | <b>9.84</b><br>(2.55 to 17.66)   |
| Road injuries                        | 160.65<br>(125.48 to 234.98)        | 135.31<br>(66.27 to 272.61)         | 31.91<br>(16.49 to 61.88)           | 163.29<br>(77.76 to 333.08)         | 3.27<br>(2.58 to 4.55)           | 3.47<br>(1.85 to 6.33)           | 1.00<br>(0.58 to 1.72)           | 4.01<br>(2.08 to 7.61)           |
| Pedestrian road injuries             | 44.13<br>(34.69 to 55.27)           | 30.05<br>(17.03 to 53.98)           | 7.14<br>(4.39 to 12.77)             | 35.53<br>(20.23 to 65.11)           | 0.94<br>(0.75 to 1.17)           | 0.93<br>(0.54 to 1.61)           | 0.25<br>(0.15 to 0.43)           | 1.05<br>(0.61 to 1.89)           |
| <b>Greenland</b>                     |                                     |                                     |                                     |                                     |                                  |                                  |                                  |                                  |
| <b>Cause</b>                         | <b>YLLs (actual counts)</b>         |                                     |                                     |                                     | <b>Deaths (actual counts)</b>    |                                  |                                  |                                  |
|                                      | <b>2016</b>                         | <b>2040 Forecast</b>                | <b>2040 Better Scenario</b>         | <b>2040 Worse Scenario</b>          | <b>2016</b>                      | <b>2040 Forecast</b>             | <b>2040 Better Scenario</b>      | <b>2040 Worse Scenario</b>       |
| Cyclist road injuries                | 7.84<br>(5.42 to 13.93)             | 7.87<br>(3.70 to 18.02)             | 2.03<br>(1.09 to 4.02)              | 9.47<br>(4.28 to 21.64)             | 0.17<br>(0.12 to 0.27)           | 0.22<br>(0.12 to 0.40)           | 0.08<br>(0.05 to 0.14)           | 0.25<br>(0.13 to 0.48)           |
| Motorcyclist road injuries           | 20.25<br>(13.58 to 30.52)           | 18.39<br>(7.23 to 40.99)            | 6.56<br>(2.81 to 14.33)             | 21.50<br>(8.36 to 48.07)            | 0.38<br>(0.26 to 0.56)           | 0.36<br>(0.16 to 0.75)           | 0.15<br>(0.07 to 0.29)           | 0.42<br>(0.17 to 0.87)           |
| Motor vehicle road injuries          | 86.01<br>(63.10 to 143.65)          | 75.70<br>(35.71 to 156.08)          | 15.26<br>(7.44 to 31.15)            | 92.92<br>(42.70 to 194.66)          | 1.72<br>(1.31 to 2.62)           | 1.84<br>(0.96 to 3.46)           | 0.47<br>(0.26 to 0.82)           | 2.17<br>(1.10 to 4.13)           |
| Other road injuries                  | 2.42<br>(1.69 to 3.87)              | 3.30<br>(1.76 to 6.37)              | 0.92<br>(0.50 to 1.72)              | 3.87<br>(2.08 to 7.47)              | 0.06<br>(0.04 to 0.09)           | 0.12<br>(0.06 to 0.23)           | 0.04<br>(0.02 to 0.08)           | 0.13<br>(0.07 to 0.26)           |
| Other transport injuries             | 174.11<br>(131.87 to 231.60)        | 216.20<br>(105.38 to 411.71)        | 132.22<br>(67.32 to 245.16)         | 230.85<br>(111.51 to 439.45)        | 3.85<br>(2.93 to 5.09)           | 5.57<br>(2.92 to 9.94)           | 3.53<br>(1.95 to 6.12)           | 5.83<br>(3.07 to 10.46)          |
| <b>Unintentional injuries</b>        | <b>637.56</b><br>(480.79 to 793.93) | <b>587.03</b><br>(387.74 to 822.27) | <b>473.44</b><br>(316.45 to 669.85) | <b>577.01</b><br>(379.69 to 824.26) | <b>17.46</b><br>(12.14 to 21.66) | <b>27.44</b><br>(18.11 to 36.25) | <b>24.29</b><br>(16.51 to 31.38) | <b>25.56</b><br>(16.66 to 33.94) |
| Falls                                | 169.95<br>(112.28 to 218.24)        | 244.50<br>(153.03 to 319.90)        | 217.19<br>(137.66 to 285.66)        | 230.31<br>(143.78 to 300.65)        | 6.42<br>(4.04 to 8.16)           | 6.42<br>(9.58 to 20.41)          | 15.58<br>(9.46 to 18.85)         | 14.59<br>(8.45 to 18.79)         |
| Drowning                             | 196.42<br>(137.03 to 260.96)        | 114.54<br>(64.64 to 198.59)         | 82.86<br>(46.81 to 144.05)          | 118.80<br>(66.18 to 207.26)         | 4.06<br>(2.42 to 5.39)           | 2.78<br>(1.54 to 4.48)           | 2.09<br>(1.16 to 3.39)           | 2.84<br>(1.58 to 4.61)           |
| Fire, heat, and hot substances       | 82.36<br>(68.01 to 100.73)          | 65.30<br>(41.06 to 110.39)          | 44.77<br>(28.89 to 73.92)           | 66.82<br>(42.72 to 114.95)          | 1.97<br>(1.60 to 2.38)           | 1.97<br>(1.74 to 3.75)           | 1.94<br>(1.36 to 2.78)           | 2.50<br>(1.68 to 3.70)           |
| Poisonings                           | 9.99<br>(5.77 to 13.40)             | 5.52<br>(2.27 to 11.32)             | 3.35<br>(1.40 to 7.03)              | 5.82<br>(2.44 to 12.05)             | 0.22<br>(0.12 to 0.29)           | 0.14<br>(0.06 to 0.26)           | 0.09<br>(0.04 to 0.16)           | 0.15<br>(0.06 to 0.27)           |
| Exposure to mechanical forces        | 54.10<br>(40.79 to 70.34)           | 36.53<br>(23.78 to 56.59)           | 26.51<br>(17.47 to 40.37)           | 36.84<br>(24.26 to 56.62)           | 1.17<br>(0.91 to 1.51)           | 1.13<br>(0.85 to 1.51)           | 0.89<br>(0.67 to 1.17)           | 1.10<br>(0.81 to 1.46)           |
| Unintentional firearm injuries       | 22.22<br>(13.94 to 30.68)           | 13.27<br>(6.79 to 23.27)            | 9.51<br>(5.04 to 16.01)             | 13.50<br>(7.07 to 23.32)            | 0.42<br>(0.27 to 0.57)           | 0.31<br>(0.18 to 0.47)           | 0.24<br>(0.14 to 0.35)           | 0.31<br>(0.17 to 0.47)           |
| Unintentional suffocation            | 3.37<br>(0.90 to 5.85)              | 1.37<br>(0.52 to 2.56)              | 1.03<br>(0.42 to 1.85)              | 1.39<br>(0.52 to 2.68)              | 0.05<br>(0.02 to 0.08)           | 0.04<br>(0.02 to 0.07)           | 0.04<br>(0.02 to 0.06)           | 0.04<br>(0.02 to 0.06)           |
| Other exposure to mechanical forces  | 28.51<br>(21.79 to 40.18)           | 21.89<br>(15.17 to 32.95)           | 15.98<br>(11.06 to 23.97)           | 21.95<br>(15.10 to 33.56)           | 0.70<br>(0.54 to 0.94)           | 0.78<br>(0.60 to 1.02)           | 0.61<br>(0.47 to 0.79)           | 0.75<br>(0.58 to 0.98)           |
| Adverse effects of medical treatment | 13.11<br>(9.60 to 16.23)            | 17.42<br>(11.10 to 24.13)           | 15.65<br>(9.80 to 21.97)            | 16.65<br>(10.65 to 22.82)           | 0.48<br>(0.31 to 0.61)           | 0.94<br>(0.57 to 1.28)           | 0.89<br>(0.53 to 1.21)           | 0.87<br>(0.53 to 1.19)           |
| Animal contact                       | 2.68<br>(1.75 to 3.66)              | 2.71<br>(1.54 to 4.66)              | 1.93<br>(1.10 to 3.18)              | 2.78<br>(1.58 to 4.70)              | 0.05<br>(0.03 to 0.07)           | 0.07<br>(0.04 to 0.11)           | 0.06<br>(0.03 to 0.09)           | 0.07<br>(0.04 to 0.11)           |
| Venomous animal contact              | 0.63<br>(0.45 to 0.86)              | 0.72<br>(0.42 to 1.17)              | 0.59<br>(0.35 to 0.94)              | 0.71<br>(0.42 to 1.20)              | 0.02<br>(0.01 to 0.02)           | 0.03<br>(0.01 to 0.04)           | 0.03<br>(0.01 to 0.04)           | 0.03<br>(0.01 to 0.04)           |



|                                                                   |                                          |                                          |                                          |                                          |                                       |                                       |                                       |                                       |
|-------------------------------------------------------------------|------------------------------------------|------------------------------------------|------------------------------------------|------------------------------------------|---------------------------------------|---------------------------------------|---------------------------------------|---------------------------------------|
| All causes                                                        | 49,531.72<br>(48,748.99 to<br>50,340.84) | 59,074.88<br>(45,987.43 to<br>73,968.51) | 51,066.11<br>(39,891.25 to<br>63,289.41) | 73,355.21<br>(56,036.35 to<br>92,578.24) | 2,772.39<br>(2,731.56 to<br>2,815.07) | 3,989.68<br>(3,250.87 to<br>4,903.51) | 3,563.25<br>(2,943.44 to<br>4,370.84) | 4,691.59<br>(3,853.98 to<br>5,657.11) |
| Communicable, maternal, neonatal, and nutritional diseases        | 3,163.17<br>(3,068.76 to<br>3,245.34)    | 3,521.17<br>(2,934.70 to<br>4,262.00)    | 3,082.28<br>(2,595.93 to<br>3,686.57)    | 4,028.64<br>(3,257.72 to<br>5,017.31)    | 139.12<br>(132.38 to<br>145.96)       | 231.78<br>(198.31 to<br>274.20)       | 225.28<br>(194.32 to<br>264.14)       | 238.95<br>(198.75 to<br>289.37)       |
| HIV/AIDS and tuberculosis                                         | 292.83<br>(289.48 to<br>296.04)          | 89.72<br>(57.73 to<br>124.00)            | 56.33<br>(25.44 to<br>81.56)             | 176.74<br>(105.81 to<br>247.48)          | 8.07<br>(7.98 to<br>8.17)             | 2.27<br>(1.54 to<br>3.12)             | 1.46<br>(0.87 to<br>2.05)             | 3.97<br>(2.56 to<br>5.35)             |
| Tuberculosis                                                      | 19.83<br>(18.99 to<br>20.73)             | 13.29<br>(7.68 to<br>21.33)              | 8.48<br>(5.07 to<br>13.20)               | 17.07<br>(9.39 to<br>28.75)              | 0.96<br>(0.91 to<br>1.00)             | 0.85<br>(0.51 to<br>1.37)             | 0.57<br>(0.35 to<br>0.89)             | 1.02<br>(0.56 to<br>1.68)             |
| HIV/AIDS                                                          | 273.00<br>(269.75 to<br>276.25)          | 76.42<br>(44.09 to<br>110.47)            | 47.85<br>(16.98 to<br>74.82)             | 159.67<br>(87.57 to<br>230.38)           | 7.12<br>(7.03 to<br>7.20)             | 1.42<br>(0.78 to<br>2.12)             | 0.89<br>(0.29 to<br>1.41)             | 2.95<br>(1.61 to<br>4.33)             |
| Diarrhea, lower respiratory, and other common infectious diseases | 1,570.22<br>(1,500.32 to<br>1,638.00)    | 2,277.27<br>(1,815.22 to<br>2,961.54)    | 2,107.88<br>(1,696.95 to<br>2,660.16)    | 2,590.35<br>(1,971.52 to<br>3,541.90)    | 108.07<br>(101.45 to<br>114.72)       | 200.22<br>(167.64 to<br>241.23)       | 195.94<br>(166.19 to<br>233.41)       | 206.12<br>(167.34 to<br>257.52)       |
| Diarrheal diseases                                                | 146.01<br>(140.96 to<br>151.56)          | 382.11<br>(271.20 to<br>547.78)          | 496.10<br>(370.36 to<br>682.68)          | 342.72<br>(236.71 to<br>513.21)          | 9.40<br>(9.06 to<br>9.75)             | 33.03<br>(23.09 to<br>48.22)          | 44.84<br>(32.58 to<br>61.53)          | 28.03<br>(18.90 to<br>43.10)          |
| Intestinal infectious diseases                                    | 0.88<br>(0.43 to<br>1.57)                | 1.08<br>(0.50 to<br>1.92)                | 1.09<br>(0.51 to<br>1.95)                | 1.07<br>(0.50 to<br>1.88)                | 0.03<br>(0.01 to<br>0.05)             | 0.04<br>(0.02 to<br>0.07)             | 0.04<br>(0.01 to<br>0.07)             | 0.04<br>(0.02 to<br>0.07)             |
| Typhoid fever                                                     | 0.33<br>(0.11 to<br>0.75)                | 0.50<br>(0.19 to<br>1.10)                | 0.57<br>(0.22 to<br>1.24)                | 0.49<br>(0.18 to<br>1.05)                | 0.01<br>(0.00 to<br>0.02)             | 0.01<br>(0.00 to<br>0.03)             | 0.02<br>(0.01 to<br>0.03)             | 0.01<br>(0.00 to<br>0.03)             |
| Paratyphoid fever                                                 | 0.17<br>(0.05 to<br>0.44)                | 0.21<br>(0.07 to<br>0.54)                | 0.18<br>(0.06 to<br>0.45)                | 0.22<br>(0.07 to<br>0.55)                | 0.00<br>(0.00 to<br>0.01)             | 0.01<br>(0.00 to<br>0.01)             | 0.00<br>(0.00 to<br>0.01)             | 0.01<br>(0.00 to<br>0.01)             |
| Other intestinal infectious diseases                              | 0.38<br>(0.15 to<br>0.79)                | 0.36<br>(0.13 to<br>0.79)                | 0.34<br>(0.12 to<br>0.75)                | 0.36<br>(0.13 to<br>0.79)                | 0.02<br>(0.01 to<br>0.03)             | 0.02<br>(0.01 to<br>0.05)             | 0.02<br>(0.01 to<br>0.05)             | 0.02<br>(0.01 to<br>0.04)             |
| Lower respiratory infections                                      | 1,334.80<br>(1,268.15 to<br>1,398.07)    | 1,803.95<br>(1,352.48 to<br>2,464.45)    | 1,532.14<br>(1,149.45 to<br>2,064.77)    | 2,154.67<br>(1,545.16 to<br>3,106.97)    | 95.99<br>(89.61 to<br>102.35)         | 163.77<br>(131.20 to<br>207.58)       | 147.85<br>(117.50 to<br>185.99)       | 174.82<br>(133.83 to<br>228.30)       |
| Upper respiratory infections                                      | 0.60<br>(0.53 to<br>0.67)                | 0.53<br>(0.33 to<br>0.80)                | 0.39<br>(0.24 to<br>0.59)                | 0.55<br>(0.35 to<br>0.84)                | 0.02<br>(0.02 to<br>0.03)             | 0.03<br>(0.02 to<br>0.04)             | 0.02<br>(0.01 to<br>0.03)             | 0.03<br>(0.02 to<br>0.04)             |
| Otitis media                                                      | 0.75<br>(0.68 to<br>0.82)                | 0.21<br>(0.13 to<br>0.34)                | 0.21<br>(0.13 to<br>0.36)                | 0.20<br>(0.12 to<br>0.33)                | 0.02<br>(0.02 to<br>0.03)             | 0.01<br>(0.01 to<br>0.02)             | 0.01<br>(0.01 to<br>0.02)             | 0.01<br>(0.01 to<br>0.02)             |
| Meningitis                                                        | 54.63<br>(49.08 to<br>63.06)             | 39.36<br>(28.82 to<br>53.36)             | 31.74<br>(23.43 to<br>42.25)             | 40.64<br>(29.94 to<br>55.47)             | 1.42<br>(1.28 to<br>1.73)             | 1.20<br>(0.94 to<br>1.55)             | 1.05<br>(0.81 to<br>1.37)             | 1.17<br>(0.92 to<br>1.52)             |
| Pneumococcal meningitis                                           | 10.91<br>(9.72 to<br>12.82)              | 9.09<br>(6.89 to<br>11.74)               | 8.89<br>(6.62 to<br>11.57)               | 8.93<br>(6.83 to<br>11.44)               | 0.31<br>(0.27 to<br>0.38)             | 0.33<br>(0.26 to<br>0.45)             | 0.34<br>(0.27 to<br>0.44)             | 0.31<br>(0.25 to<br>0.40)             |
| H influenzae type B meningitis                                    | 4.91<br>(4.43 to<br>5.61)                | 11.05<br>(4.63 to<br>21.45)              | 7.41<br>(3.98 to<br>12.66)               | 11.64<br>(4.61 to<br>23.16)              | 0.12<br>(0.10 to<br>0.14)             | 0.19<br>(0.12 to<br>0.32)             | 0.16<br>(0.11 to<br>0.22)             | 0.20<br>(0.11 to<br>0.33)             |
| Meningococcal meningitis                                          | 16.55<br>(14.75 to<br>18.89)             | 7.68<br>(5.35 to<br>10.61)               | 6.20<br>(4.27 to<br>8.70)                | 8.07<br>(5.65 to<br>11.28)               | 0.37<br>(0.33 to<br>0.44)             | 0.22<br>(0.16 to<br>0.30)             | 0.19<br>(0.13 to<br>0.25)             | 0.22<br>(0.17 to<br>0.30)             |
| Other meningitis                                                  | 22.25<br>(19.82 to<br>25.82)             | 11.54<br>(8.21 to<br>15.57)              | 9.23<br>(6.44 to<br>12.62)               | 12.01<br>(8.48 to<br>16.35)              | 0.63<br>(0.56 to<br>0.77)             | 0.45<br>(0.34 to<br>0.59)             | 0.37<br>(0.28 to<br>0.50)             | 0.44<br>(0.33 to<br>0.59)             |
| Encephalitis                                                      | 24.79<br>(21.05 to<br>36.40)             | 41.20<br>(30.92 to<br>60.82)             | 40.38<br>(29.65 to<br>59.92)             | 40.54<br>(30.76 to<br>59.89)             | 0.84<br>(0.70 to<br>1.22)             | 1.78<br>(1.39 to<br>2.61)             | 1.81<br>(1.38 to<br>2.66)             | 1.67<br>(1.32 to<br>2.44)             |
| Diphtheria                                                        | 0.16<br>(0.14 to<br>0.18)                | 0.04<br>(0.03 to<br>0.06)                | 0.03<br>(0.02 to<br>0.04)                | 0.04<br>(0.03 to<br>0.06)                | 0.00<br>(0.00 to<br>0.00)             | 0.00<br>(0.00 to<br>0.00)             | 0.00<br>(0.00 to<br>0.00)             | 0.00<br>(0.00 to<br>0.00)             |
| Whooping cough                                                    | 1.83<br>(0.55 to<br>2.59)                | 1.55<br>(0.29 to<br>4.03)                | 0.25<br>(0.06 to<br>0.48)                | 1.65<br>(0.31 to<br>4.33)                | 0.02<br>(0.01 to<br>0.03)             | 0.02<br>(0.00 to<br>0.05)             | 0.00<br>(0.01 to<br>0.01)             | 0.02<br>(0.00 to<br>0.05)             |

| Tetanus                                       | 0.24<br>(0.19 to<br>0.30)                   | 0.04<br>(0.03 to<br>0.06)                   | 0.03<br>(0.02 to<br>0.04)                   | 0.04<br>(0.03 to<br>0.06)                   | 0.01<br>(0.01 to<br>0.01)                | 0.00<br>(0.00 to<br>0.00)                | 0.00<br>(0.00 to<br>0.00)                | 0.00<br>(0.00 to<br>0.00)                |
|-----------------------------------------------|---------------------------------------------|---------------------------------------------|---------------------------------------------|---------------------------------------------|------------------------------------------|------------------------------------------|------------------------------------------|------------------------------------------|
| Measles                                       | 0.14<br>(0.09 to<br>0.23)                   | 2.20<br>(0.00 to<br>21.01)                  | 1.14<br>(0.00 to<br>11.47)                  | 3.18<br>(0.00 to<br>32.19)                  | 0.00<br>(0.00 to<br>0.00)                | 0.03<br>(0.00 to<br>0.24)                | 0.01<br>(0.00 to<br>0.13)                | 0.04<br>(0.00 to<br>0.38)                |
| <b>United States</b>                          |                                             |                                             |                                             |                                             |                                          |                                          |                                          |                                          |
| Cause                                         | YLLs (in 1000s)                             |                                             |                                             |                                             | Deaths (in 1000s)                        |                                          |                                          |                                          |
|                                               | 2016                                        | 2040 Forecast                               | 2040 Better Scenario                        | 2040 Worse Scenario                         | 2016                                     | 2040 Forecast                            | 2040 Better Scenario                     | 2040 Worse Scenario                      |
| Varicella and herpes zoster                   | 5.39<br>(3.26 to<br>10.29)                  | 5.01<br>(2.89 to<br>9.74)                   | 4.38<br>(2.54 to<br>8.37)                   | 5.04<br>(2.94 to<br>9.70)                   | 0.29<br>(0.17 to<br>0.58)                | 0.32<br>(0.18 to<br>0.63)                | 0.30<br>(0.17 to<br>0.58)                | 0.30<br>(0.17 to<br>0.58)                |
| Neglected tropical diseases and malaria       | <b>5.85</b><br>(2.95 to<br><b>6.61</b> )    | <b>8.47</b><br>(4.89 to<br><b>10.24</b> )   | <b>8.72</b><br>(4.13 to<br><b>10.58</b> )   | <b>8.30</b><br>(4.83 to<br><b>9.97</b> )    | <b>0.19</b><br>(0.09 to<br><b>0.22</b> ) | <b>0.36</b><br>(0.15 to<br><b>0.43</b> ) | <b>0.39</b><br>(0.16 to<br><b>0.47</b> ) | <b>0.33</b><br>(0.14 to<br><b>0.39</b> ) |
| Malaria                                       | 0.00<br>(0.00 to<br>0.00)                   | 0.00<br>(0.00 to<br>0.00)                   | 0.00<br>(0.00 to<br>0.00)                   | 0.00<br>(0.00 to<br>0.00)                   | 0.00<br>(0.00 to<br>0.00)                | 0.00<br>(0.00 to<br>0.00)                | 0.00<br>(0.00 to<br>0.00)                | 0.00<br>(0.00 to<br>0.00)                |
| Chagas disease                                | 0.00<br>(0.00 to<br>0.00)                   | 0.00<br>(0.00 to<br>0.00)                   | 0.00<br>(0.00 to<br>0.00)                   | 0.00<br>(0.00 to<br>0.00)                   | 0.00<br>(0.00 to<br>0.00)                | 0.00<br>(0.00 to<br>0.00)                | 0.00<br>(0.00 to<br>0.00)                | 0.00<br>(0.00 to<br>0.00)                |
| Leishmaniasis                                 | 0.00<br>(0.00 to<br>0.00)                   | 0.00<br>(0.00 to<br>0.00)                   | 0.00<br>(0.00 to<br>0.00)                   | 0.00<br>(0.00 to<br>0.00)                   | 0.00<br>(0.00 to<br>0.00)                | 0.00<br>(0.00 to<br>0.00)                | 0.00<br>(0.00 to<br>0.00)                | 0.00<br>(0.00 to<br>0.00)                |
| African trypanosomiasis                       | 0.00<br>(0.00 to<br>0.00)                   | 0.00<br>(0.00 to<br>0.00)                   | 0.00<br>(0.00 to<br>0.00)                   | 0.00<br>(0.00 to<br>0.00)                   | 0.00<br>(0.00 to<br>0.00)                | 0.00<br>(0.00 to<br>0.00)                | 0.00<br>(0.00 to<br>0.00)                | 0.00<br>(0.00 to<br>0.00)                |
| Schistosomiasis                               | 0.00<br>(0.00 to<br>0.00)                   | 0.00<br>(0.00 to<br>0.00)                   | 0.00<br>(0.00 to<br>0.00)                   | 0.00<br>(0.00 to<br>0.00)                   | 0.00<br>(0.00 to<br>0.00)                | 0.00<br>(0.00 to<br>0.00)                | 0.00<br>(0.00 to<br>0.00)                | 0.00<br>(0.00 to<br>0.00)                |
| Cysticercosis                                 | 0.27<br>(0.25 to<br>0.30)                   | 0.12<br>(0.10 to<br>0.15)                   | 0.12<br>(0.10 to<br>0.15)                   | 0.12<br>(0.10 to<br>0.15)                   | 0.01<br>(0.01 to<br>0.01)                | 0.00<br>(0.00 to<br>0.00)                | 0.00<br>(0.00 to<br>0.00)                | 0.00<br>(0.00 to<br>0.00)                |
| Cystic echinococcosis                         | 0.09<br>(0.08 to<br>0.10)                   | 0.09<br>(0.07 to<br>0.10)                   | 0.08<br>(0.06 to<br>0.09)                   | 0.09<br>(0.07 to<br>0.11)                   | 0.00<br>(0.00 to<br>0.00)                | 0.00<br>(0.00 to<br>0.00)                | 0.00<br>(0.00 to<br>0.00)                | 0.00<br>(0.00 to<br>0.00)                |
| Dengue                                        | 0.04<br>(0.03 to<br>0.07)                   | 0.17<br>(0.11 to<br>0.26)                   | 0.16<br>(0.11 to<br>0.25)                   | 0.17<br>(0.12 to<br>0.26)                   | 0.00<br>(0.00 to<br>0.00)                | 0.00<br>(0.00 to<br>0.01)                | 0.00<br>(0.00 to<br>0.01)                | 0.00<br>(0.00 to<br>0.01)                |
| Yellow fever                                  | 0.00<br>(0.00 to<br>0.00)                   | 0.00<br>(0.00 to<br>0.00)                   | 0.00<br>(0.00 to<br>0.00)                   | 0.00<br>(0.00 to<br>0.00)                   | 0.00<br>(0.00 to<br>0.00)                | 0.00<br>(0.00 to<br>0.00)                | 0.00<br>(0.00 to<br>0.00)                | 0.00<br>(0.00 to<br>0.00)                |
| Rabies                                        | 0.23<br>(0.21 to<br>0.25)                   | 0.26<br>(0.21 to<br>0.30)                   | 0.22<br>(0.18 to<br>0.27)                   | 0.27<br>(0.22 to<br>0.32)                   | 0.00<br>(0.00 to<br>0.00)                | 0.01<br>(0.01 to<br>0.01)                | 0.01<br>(0.00 to<br>0.01)                | 0.01<br>(0.01 to<br>0.01)                |
| Intestinal nematode infections                | 0.00<br>(0.00 to<br>0.00)                   | 0.00<br>(0.00 to<br>0.00)                   | 0.00<br>(0.00 to<br>0.00)                   | 0.00<br>(0.00 to<br>0.00)                   | 0.00<br>(0.00 to<br>0.00)                | 0.00<br>(0.00 to<br>0.00)                | 0.00<br>(0.00 to<br>0.00)                | 0.00<br>(0.00 to<br>0.00)                |
| Other neglected tropical diseases             | 5.20<br>(2.31 to<br>5.96)                   | 7.83<br>(3.43 to<br>9.52)                   | 8.13<br>(3.55 to<br>9.90)                   | 7.64<br>(3.37 to<br>9.24)                   | 0.17<br>(0.07 to<br>0.20)                | 0.34<br>(0.13 to<br>0.41)                | 0.38<br>(0.14 to<br>0.45)                | 0.31<br>(0.12 to<br>0.37)                |
| Maternal disorders                            | <b>61.26</b><br>(56.27 to<br><b>65.92</b> ) | <b>53.45</b><br>(33.21 to<br><b>79.81</b> ) | <b>46.94</b><br>(28.94 to<br><b>71.27</b> ) | <b>55.47</b><br>(33.86 to<br><b>83.08</b> ) | <b>1.16</b><br>(1.07 to<br><b>1.25</b> ) | <b>1.03</b><br>(0.63 to<br><b>1.51</b> ) | <b>0.90</b><br>(0.56 to<br><b>1.35</b> ) | <b>1.06</b><br>(0.66 to<br><b>1.59</b> ) |
| Maternal hemorrhage                           | 3.75<br>(3.03 to<br>4.48)                   | 3.60<br>(2.01 to<br>5.90)                   | 3.17<br>(1.79 to<br>5.27)                   | 3.71<br>(2.06 to<br>6.11)                   | 0.07<br>(0.06 to<br>0.08)                | 0.07<br>(0.04 to<br>0.11)                | 0.06<br>(0.03 to<br>0.10)                | 0.07<br>(0.04 to<br>0.12)                |
| Maternal sepsis and other maternal infections | 2.55<br>(2.07 to<br>3.14)                   | 1.91<br>(1.05 to<br>3.20)                   | 1.68<br>(0.92 to<br>2.79)                   | 1.97<br>(1.09 to<br>3.31)                   | 0.05<br>(0.04 to<br>0.06)                | 0.04<br>(0.02 to<br>0.06)                | 0.03<br>(0.02 to<br>0.06)                | 0.04<br>(0.02 to<br>0.07)                |
| Maternal hypertensive disorders               | 5.78<br>(4.81 to<br>6.90)                   | 5.33<br>(2.96 to<br>8.64)                   | 4.64<br>(2.57 to<br>7.50)                   | 5.53<br>(3.05 to<br>8.99)                   | 0.11<br>(0.09 to<br>0.13)                | 0.10<br>(0.06 to<br>0.16)                | 0.09<br>(0.05 to<br>0.14)                | 0.10<br>(0.06 to<br>0.17)                |

|                                                                         |                                                    |                                                  |                                                |                                                  |                                             |                                           |                                            |                                            |
|-------------------------------------------------------------------------|----------------------------------------------------|--------------------------------------------------|------------------------------------------------|--------------------------------------------------|---------------------------------------------|-------------------------------------------|--------------------------------------------|--------------------------------------------|
| Maternal obstructed labor and uterine rupture                           | 0.59<br>(0.41 to<br>0.80)                          | 0.49<br>(0.26 to<br>0.84)                        | 0.42<br>(0.22 to<br>0.72)                      | 0.51<br>(0.26 to<br>0.87)                        | 0.01<br>(0.01 to<br>0.02)                   | 0.01<br>(0.00 to<br>0.02)                 | 0.01<br>(0.00 to<br>0.01)                  | 0.01<br>(0.00 to<br>0.02)                  |
| Maternal abortion, miscarriage, and ectopic pregnancy                   | 8.16<br>(7.03 to<br>9.26)                          | 9.32<br>(4.91 to<br>15.87)                       | 8.14<br>(4.36 to<br>13.96)                     | 9.62<br>(5.14 to<br>16.35)                       | 0.16<br>(0.14 to<br>0.18)                   | 0.19<br>(0.10 to<br>0.32)                 | 0.17<br>(0.09 to<br>0.29)                  | 0.20<br>(0.11 to<br>0.34)                  |
| Indirect maternal deaths                                                | 10.05<br>(7.81 to<br>12.61)                        | 7.04<br>(3.68 to<br>12.04)                       | 6.07<br>(3.17 to<br>10.31)                     | 7.36<br>(3.81 to<br>12.66)                       | 0.19<br>(0.15 to<br>0.24)                   | 0.13<br>(0.07 to<br>0.22)                 | 0.11<br>(0.06 to<br>0.19)                  | 0.14<br>(0.07 to<br>0.24)                  |
| Late maternal deaths                                                    | 9.62<br>(7.88 to<br>11.64)                         | 5.04<br>(2.65 to<br>8.86)                        | 4.36<br>(2.30 to<br>7.64)                      | 5.25<br>(2.75 to<br>9.25)                        | 0.18<br>(0.15 to<br>0.21)                   | 0.09<br>(0.05 to<br>0.16)                 | 0.08<br>(0.04 to<br>0.14)                  | 0.10<br>(0.05 to<br>0.17)                  |
| Maternal deaths aggravated by HIV/AIDS                                  | 0.06<br>(0.03 to<br>0.10)                          | 0.43<br>(0.16 to<br>0.90)                        | 0.37<br>(0.14 to<br>0.80)                      | 0.47<br>(0.18 to<br>0.99)                        | 0.00<br>(0.00 to<br>0.00)                   | 0.01<br>(0.00 to<br>0.02)                 | 0.01<br>(0.00 to<br>0.02)                  | 0.01<br>(0.00 to<br>0.02)                  |
| Other maternal disorders                                                | 20.71<br>(17.92 to<br>23.77)                       | 20.29<br>(11.49 to<br>32.60)                     | 18.10<br>(10.19 to<br>29.25)                   | 21.04<br>(11.68 to<br>33.61)                     | 0.59<br>(0.34 to<br>0.45)                   | 0.38<br>(0.22 to<br>0.61)                 | 0.34<br>(0.19 to<br>0.55)                  | 0.40<br>(0.22 to<br>0.63)                  |
| <b>United States</b>                                                    |                                                    |                                                  |                                                |                                                  |                                             |                                           |                                            |                                            |
| Cause                                                                   | YLLs (in 1000s)                                    |                                                  |                                                |                                                  | Deaths (in 1000s)                           |                                           |                                            |                                            |
|                                                                         | 2016                                               | 2040 Forecast                                    | 2040 Better Scenario                           | 2040 Worse Scenario                              | 2016                                        | 2040 Forecast                             | 2040 Better Scenario                       | 2040 Worse Scenario                        |
| <b>Neonatal disorders</b>                                               | <b>1,045.89</b><br>(987.44 to<br><b>1,084.12</b> ) | <b>810.02</b><br>(557.23 to<br><b>1,093.96</b> ) | <b>578.41</b><br>(394.48 to<br><b>781.54</b> ) | <b>927.01</b><br>(633.26 to<br><b>1,246.73</b> ) | <b>12.08</b><br>(11.41 to<br><b>12.53</b> ) | <b>9.36</b><br>(6.44 to<br><b>12.64</b> ) | <b>6.69</b><br>(4.56 to<br><b>9.03</b> )   | <b>10.71</b><br>(7.32 to<br><b>14.41</b> ) |
| Neonatal preterm birth                                                  | 608.78<br>(572.30 to<br>637.98)                    | 410.62<br>(271.34 to<br>569.53)                  | 237.18<br>(155.71 to<br>332.05)                | 469.37<br>(303.99 to<br>654.04)                  | 7.03<br>(6.61 to<br>7.37)                   | 4.74<br>(3.14 to<br>6.58)                 | 2.74<br>(1.80 to<br>3.84)                  | 5.42<br>(3.51 to<br>7.56)                  |
| Neonatal encephalopathy due to birth asphyxia and trauma                | 156.64<br>(140.84 to<br>170.88)                    | 81.62<br>(53.62 to<br>114.85)                    | 62.11<br>(40.87 to<br>88.12)                   | 96.16<br>(62.06 to<br>136.15)                    | 1.81<br>(1.63 to<br>1.98)                   | 0.94<br>(0.62 to<br>1.33)                 | 0.72<br>(0.47 to<br>1.02)                  | 1.11<br>(0.72 to<br>1.57)                  |
| Neonatal sepsis and other neonatal infections                           | 63.14<br>(54.13 to<br>90.96)                       | 65.29<br>(40.11 to<br>108.54)                    | 52.34<br>(32.27 to<br>85.96)                   | 75.74<br>(46.61 to<br>126.44)                    | 0.73<br>(0.63 to<br>1.05)                   | 0.75<br>(0.46 to<br>1.25)                 | 0.60<br>(0.37 to<br>0.99)                  | 0.88<br>(0.54 to<br>1.46)                  |
| Hemolytic disease and other neonatal jaundice                           | 2.34<br>(1.90 to<br>2.82)                          | 1.01<br>(0.61 to<br>1.58)                        | 0.80<br>(0.48 to<br>1.25)                      | 1.17<br>(0.70 to<br>1.81)                        | 0.03<br>(0.02 to<br>0.03)                   | 0.01<br>(0.01 to<br>0.02)                 | 0.01<br>(0.01 to<br>0.01)                  | 0.01<br>(0.01 to<br>0.02)                  |
| Other neonatal disorders                                                | 215.00<br>(191.54 to<br>235.32)                    | 251.48<br>(157.60 to<br>384.92)                  | 225.98<br>(142.32 to<br>340.36)                | 284.57<br>(177.80 to<br>438.10)                  | 2.48<br>(2.21 to<br>2.72)                   | 2.91<br>(1.82 to<br>4.45)                 | 2.61<br>(1.65 to<br>3.93)                  | 3.29<br>(2.05 to<br>5.06)                  |
| <b>Nutritional deficiencies</b>                                         | <b>54.73</b><br>(52.81 to<br><b>56.88</b> )        | <b>85.12</b><br>(73.68 to<br><b>98.17</b> )      | <b>94.27</b><br>(80.40 to<br><b>109.31</b> )   | <b>76.74</b><br>(66.65 to<br><b>87.64</b> )      | <b>4.58</b><br>(4.42 to<br><b>4.77</b> )    | <b>9.47</b><br>(7.91 to<br><b>11.27</b> ) | <b>10.86</b><br>(9.05 to<br><b>12.97</b> ) | <b>8.20</b><br>(6.71 to<br><b>9.76</b> )   |
| Protein-energy malnutrition                                             | 45.79<br>(39.30 to<br>49.87)                       | 71.68<br>(56.68 to<br>86.23)                     | 81.12<br>(63.78 to<br>97.40)                   | 64.06<br>(50.90 to<br>76.05)                     | 3.99<br>(3.49 to<br>4.31)                   | 8.21<br>(6.35 to<br>10.12)                | 9.59<br>(7.46 to<br>11.84)                 | 7.07<br>(5.40 to<br>8.68)                  |
| Iodine deficiency                                                       | 1.10<br>(0.63 to<br>1.68)                          | 4.24<br>(0.40 to<br>12.53)                       | 4.25<br>(0.34 to<br>13.21)                     | 3.94<br>(0.38 to<br>11.43)                       | 0.05<br>(0.03 to<br>0.09)                   | 0.43<br>(0.02 to<br>1.50)                 | 0.44<br>(0.02 to<br>1.68)                  | 0.38<br>(0.02 to<br>1.31)                  |
| Dietary iron deficiency                                                 | 1.21<br>(0.78 to<br>1.70)                          | 1.44<br>(0.87 to<br>1.96)                        | 1.48<br>(0.88 to<br>2.07)                      | 1.42<br>(0.88 to<br>1.92)                        | 0.03<br>(0.02 to<br>0.05)                   | 0.05<br>(0.02 to<br>0.07)                 | 0.05<br>(0.02 to<br>0.07)                  | 0.04<br>(0.02 to<br>0.06)                  |
| Other nutritional deficiencies                                          | 6.63<br>(3.67 to<br>12.16)                         | 7.76<br>(4.02 to<br>14.04)                       | 7.41<br>(3.74 to<br>13.79)                     | 7.31<br>(3.74 to<br>13.19)                       | 0.51<br>(0.25 to<br>0.94)                   | 0.78<br>(0.36 to<br>1.44)                 | 0.77<br>(0.36 to<br>1.45)                  | 0.70<br>(0.33 to<br>1.28)                  |
| <b>Other communicable, maternal, neonatal, and nutritional diseases</b> | <b>132.39</b><br>(124.63 to<br><b>151.11</b> )     | <b>197.11</b><br>(160.80 to<br><b>238.35</b> )   | <b>189.73</b><br>(153.88 to<br><b>230.10</b> ) | <b>194.05</b><br>(159.45 to<br><b>234.52</b> )   | <b>4.96</b><br>(4.58 to<br><b>5.52</b> )    | <b>9.07</b><br>(7.67 to<br><b>10.77</b> ) | <b>9.05</b><br>(7.59 to<br><b>10.74</b> )  | <b>8.56</b><br>(7.31 to<br><b>10.12</b> )  |
| Sexually transmitted infections excluding HIV                           | 5.84<br>(5.22 to<br>6.61)                          | 3.51<br>(2.62 to<br>4.54)                        | 3.31<br>(2.45 to<br>4.25)                      | 3.49<br>(2.61 to<br>4.53)                        | 0.21<br>(0.19 to<br>0.22)                   | 0.16<br>(0.13 to<br>0.20)                 | 0.15<br>(0.13 to<br>0.19)                  | 0.15<br>(0.12 to<br>0.18)                  |
| Syphilis                                                                | 2.27<br>(1.79 to<br>2.93)                          | 0.92<br>(0.69 to<br>1.23)                        | 0.80<br>(0.60 to<br>1.06)                      | 0.94<br>(0.70 to<br>1.26)                        | 0.07<br>(0.06 to<br>0.08)                   | 0.04<br>(0.03 to<br>0.05)                 | 0.04<br>(0.03 to<br>0.05)                  | 0.04<br>(0.03 to<br>0.05)                  |

|                                       |                                                               |                                                               |                                                               |                                                               |                                                            |                                                            |                                                            |                                                            |
|---------------------------------------|---------------------------------------------------------------|---------------------------------------------------------------|---------------------------------------------------------------|---------------------------------------------------------------|------------------------------------------------------------|------------------------------------------------------------|------------------------------------------------------------|------------------------------------------------------------|
| Chlamydial infection                  | 0.68<br>(0.64 to<br>0.73)                                     | 0.50<br>(0.36 to<br>0.67)                                     | 0.49<br>(0.35 to<br>0.65)                                     | 0.49<br>(0.35 to<br>0.65)                                     | 0.03<br>(0.02 to<br>0.03)                                  | 0.02<br>(0.02 to<br>0.03)                                  | 0.02<br>(0.02 to<br>0.03)                                  | 0.02<br>(0.02 to<br>0.03)                                  |
| Gonococcal infection                  | 1.94<br>(1.82 to<br>2.09)                                     | 1.42<br>(1.03 to<br>1.92)                                     | 1.38<br>(1.00 to<br>1.87)                                     | 1.39<br>(1.01 to<br>1.86)                                     | 0.08<br>(0.07 to<br>0.08)                                  | 0.07<br>(0.05 to<br>0.09)                                  | 0.07<br>(0.05 to<br>0.09)                                  | 0.07<br>(0.05 to<br>0.08)                                  |
| Other sexually transmitted infections | 0.95<br>(0.89 to<br>1.01)                                     | 0.66<br>(0.45 to<br>0.90)                                     | 0.64<br>(0.43 to<br>0.87)                                     | 0.65<br>(0.44 to<br>0.88)                                     | 0.03<br>(0.03 to<br>0.03)                                  | 0.03<br>(0.02 to<br>0.03)                                  | 0.03<br>(0.02 to<br>0.03)                                  | 0.02<br>(0.02 to<br>0.03)                                  |
| Acute hepatitis                       | 30.62<br>(29.04 to<br>32.43)                                  | 32.31<br>(21.39 to<br>46.83)                                  | 26.78<br>(17.60 to<br>39.07)                                  | 32.96<br>(21.66 to<br>47.38)                                  | 1.08<br>(1.03 to<br>1.14)                                  | 1.29<br>(0.90 to<br>1.77)                                  | 1.08<br>(0.74 to<br>1.50)                                  | 1.28<br>(0.90 to<br>1.79)                                  |
| Acute hepatitis A                     | 2.17<br>(1.74 to<br>2.68)                                     | 1.82<br>(1.15 to<br>2.72)                                     | 1.60<br>(1.01 to<br>2.42)                                     | 1.83<br>(1.16 to<br>2.81)                                     | 0.07<br>(0.05 to<br>0.09)                                  | 0.07<br>(0.10 to<br>0.10)                                  | 0.06<br>(0.04 to<br>0.09)                                  | 0.07<br>(0.04 to<br>0.10)                                  |
| Acute hepatitis B                     | 24.09<br>(22.00 to<br>26.12)                                  | 25.89<br>(16.18 to<br>38.57)                                  | 21.30<br>(13.26 to<br>31.80)                                  | 26.50<br>(16.45 to<br>39.41)                                  | 0.83<br>(0.75 to<br>0.90)                                  | 0.97<br>(0.65 to<br>1.40)                                  | 0.81<br>(0.53 to<br>1.16)                                  | 0.98<br>(0.66 to<br>1.41)                                  |
| Acute hepatitis C                     | 1.42<br>(1.04 to<br>1.89)                                     | 1.43<br>(0.89 to<br>2.18)                                     | 1.20<br>(0.74 to<br>1.85)                                     | 1.45<br>(0.90 to<br>2.22)                                     | 0.05<br>(0.04 to<br>0.07)                                  | 0.06<br>(0.04 to<br>0.09)                                  | 0.05<br>(0.03 to<br>0.08)                                  | 0.06<br>(0.04 to<br>0.09)                                  |
| Acute hepatitis E                     | 2.93<br>(2.23 to<br>3.77)                                     | 3.18<br>(2.02 to<br>4.83)                                     | 2.69<br>(1.72 to<br>4.14)                                     | 3.18<br>(2.03 to<br>4.89)                                     | 0.13<br>(0.10 to<br>0.17)                                  | 0.18<br>(0.12 to<br>0.26)                                  | 0.16<br>(0.10 to<br>0.23)                                  | 0.17<br>(0.11 to<br>0.25)                                  |
| Other unspecified infectious diseases | 95.94<br>(87.91 to<br>113.89)                                 | 161.29<br>(133.80 to<br>194.02)                               | 159.64<br>(131.45 to<br>192.96)                               | 157.60<br>(131.59 to<br>188.99)                               | 3.67<br>(3.28 to<br>4.24)                                  | 7.63<br>(6.48 to<br>9.02)                                  | 7.81<br>(6.60 to<br>9.26)                                  | 7.12<br>(6.12 to<br>8.41)                                  |
| <b>Non-communicable diseases</b>      | <b>40,059.61</b><br><b>(39,356.25 to</b><br><b>40,790.69)</b> | <b>49,470.37</b><br><b>(37,515.33 to</b><br><b>63,350.53)</b> | <b>42,983.60</b><br><b>(33,135.72 to</b><br><b>54,115.33)</b> | <b>62,576.51</b><br><b>(47,177.79 to</b><br><b>80,030.16)</b> | <b>2,453.80</b><br><b>(2,414.14 to</b><br><b>2,492.89)</b> | <b>3,541.24</b><br><b>(2,841.82 to</b><br><b>4,406.70)</b> | <b>3,145.70</b><br><b>(2,569.99 to</b><br><b>3,904.84)</b> | <b>4,229.08</b><br><b>(3,420.66 to</b><br><b>5,179.85)</b> |

**United States**

| Cause                           | YLLs (in 1000s)                                               |                                                               |                                                               |                                                               | Deaths (in 1000s)                                    |                                                        |                                                        |                                                          |
|---------------------------------|---------------------------------------------------------------|---------------------------------------------------------------|---------------------------------------------------------------|---------------------------------------------------------------|------------------------------------------------------|--------------------------------------------------------|--------------------------------------------------------|----------------------------------------------------------|
|                                 | 2016                                                          | 2040 Forecast                                                 | 2040 Better Scenario                                          | 2040 Worse Scenario                                           | 2016                                                 | 2040 Forecast                                          | 2040 Better Scenario                                   | 2040 Worse Scenario                                      |
| <b>Neoplasms</b>                | <b>12,993.74</b><br><b>(12,718.52 to</b><br><b>13,343.76)</b> | <b>16,043.65</b><br><b>(12,280.79 to</b><br><b>20,399.15)</b> | <b>14,433.80</b><br><b>(10,974.58 to</b><br><b>18,414.46)</b> | <b>21,374.73</b><br><b>(16,144.73 to</b><br><b>27,557.78)</b> | <b>685.16</b><br><b>(671.79 to</b><br><b>702.33)</b> | <b>989.45</b><br><b>(796.30 to</b><br><b>1,232.46)</b> | <b>915.39</b><br><b>(737.09 to</b><br><b>1,145.35)</b> | <b>1,265.45</b><br><b>(999.10 to</b><br><b>1,597.44)</b> |
| Lip and oral cavity cancer      | 136.21<br>(131.43 to<br>140.99)                               | 139.74<br>(81.26 to<br>227.45)                                | 101.79<br>(62.01 to<br>159.15)                                | 259.23<br>(143.09 to<br>434.70)                               | 6.75<br>(6.53 to<br>6.97)                            | 7.61<br>(4.79 to<br>11.94)                             | 5.80<br>(3.85 to<br>8.69)                              | 13.70<br>(7.98 to<br>22.25)                              |
| Nasopharynx cancer              | 29.60<br>(28.46 to<br>30.73)                                  | 28.93<br>(16.38 to<br>46.12)                                  | 19.27<br>(11.34 to<br>29.97)                                  | 54.41<br>(29.01 to<br>91.45)                                  | 1.08<br>(1.04 to<br>1.13)                            | 1.09<br>(0.65 to<br>1.71)                              | 0.75<br>(0.46 to<br>1.12)                              | 2.06<br>(1.16 to<br>3.33)                                |
| Other pharynx cancer            | 77.29<br>(74.49 to<br>80.37)                                  | 114.94<br>(65.88 to<br>187.24)                                | 97.12<br>(58.22 to<br>151.64)                                 | 130.79<br>(70.84 to<br>216.04)                                | 3.54<br>(3.42 to<br>3.67)                            | 6.02<br>(3.62 to<br>9.58)                              | 5.25<br>(3.35 to<br>8.05)                              | 6.62<br>(3.80 to<br>10.66)                               |
| Esophageal cancer               | 372.83<br>(358.74 to<br>387.64)                               | 412.25<br>(243.73 to<br>683.65)                               | 318.81<br>(200.33 to<br>508.29)                               | 717.27<br>(390.73 to<br>1,260.92)                             | 18.14<br>(17.43 to<br>18.88)                         | 21.88<br>(13.29 to<br>34.90)                           | 17.47<br>(11.20 to<br>27.16)                           | 37.21<br>(20.86 to<br>63.26)                             |
| Stomach cancer                  | 310.28<br>(301.01 to<br>320.46)                               | 250.54<br>(181.66 to<br>341.22)                               | 210.59<br>(156.88 to<br>283.37)                               | 283.04<br>(201.93 to<br>387.97)                               | 17.13<br>(16.63 to<br>17.66)                         | 16.75<br>(12.43 to<br>22.55)                           | 14.41<br>(11.01 to<br>19.06)                           | 18.34<br>(13.34 to<br>24.60)                             |
| Colon and rectum cancer         | 1,436.98<br>(1,393.54 to<br>1,482.41)                         | 1,868.63<br>(1,217.87 to<br>2,839.51)                         | 1,561.19<br>(1,033.59 to<br>2,351.10)                         | 2,270.75<br>(1,433.82 to<br>3,544.13)                         | 79.30<br>(76.97 to<br>81.82)                         | 126.45<br>(83.54 to<br>187.84)                         | 108.99<br>(74.20 to<br>161.10)                         | 148.11<br>(97.64 to<br>223.54)                           |
| Liver cancer                    | 520.57<br>(500.85 to<br>538.89)                               | 764.79<br>(462.09 to<br>1,253.74)                             | 697.14<br>(431.67 to<br>1,092.47)                             | 1,040.22<br>(569.85 to<br>1,756.67)                           | 24.86<br>(23.98 to<br>25.69)                         | 41.83<br>(26.90 to<br>64.93)                           | 39.40<br>(26.09 to<br>59.37)                           | 54.52<br>(32.69 to<br>87.81)                             |
| Liver cancer due to hepatitis B | 84.34<br>(63.39 to<br>113.33)                                 | 121.58<br>(67.19 to<br>214.06)                                | 113.26<br>(64.58 to<br>192.63)                                | 159.58<br>(83.94 to<br>297.46)                                | 3.53<br>(2.62 to<br>4.68)                            | 5.65<br>(3.27 to<br>9.36)                              | 5.39<br>(3.20 to<br>8.66)                              | 7.18<br>(3.94 to<br>12.75)                               |
| Liver cancer due to hepatitis C | 199.86<br>(183.27 to<br>217.36)                               | 291.53<br>(180.30 to<br>465.23)                               | 274.93<br>(175.78 to<br>430.23)                               | 375.37<br>(213.95 to<br>632.34)                               | 10.17<br>(9.43 to<br>10.98)                          | 17.25<br>(11.55 to<br>26.14)                           | 16.74<br>(11.26 to<br>24.94)                           | 21.30<br>(13.03 to<br>33.45)                             |



|                                      |                                    |                                    |                                    |                                    |                              |                              |                              |                              |
|--------------------------------------|------------------------------------|------------------------------------|------------------------------------|------------------------------------|------------------------------|------------------------------|------------------------------|------------------------------|
| Liver cancer due to alcohol use      | 110.63<br>(96.29 to 126.32)        | 161.26<br>(96.18 to 259.52)        | 130.52<br>(81.39 to 203.26)        | 247.69<br>(139.32 to 411.04)       | 5.23<br>(4.58 to 5.95)       | 8.57<br>(5.45 to 13.18)      | 7.26<br>(4.74 to 11.01)      | 12.47<br>(4.74 to 20.79)     |
| Liver cancer due to other causes     | 125.75<br>(115.06 to 137.19)       | 190.42<br>(104.58 to 333.33)       | 178.43<br>(103.49 to 302.61)       | 257.57<br>(127.13 to 466.97)       | 5.93<br>(5.47 to 6.43)       | 10.37<br>(6.12 to 17.35)     | 10.00<br>(6.00 to 16.19)     | 13.56<br>(7.12 to 23.81)     |
| Gallbladder and biliary tract cancer | 75.99<br>(73.03 to 82.66)          | 76.61<br>(63.25 to 91.61)          | 77.04<br>(62.82 to 93.75)          | 72.51<br>(61.07 to 85.38)          | 4.36<br>(4.20 to 4.75)       | 5.21<br>(4.49 to 6.06)       | 5.35<br>(4.56 to 6.30)       | 4.78<br>(4.19 to 5.52)       |
| Pancreatic cancer                    | 840.76<br>(816.10 to 865.09)       | 1,155.96<br>(844.08 to 1,576.16)   | 1,146.83<br>(827.29 to 1,557.51)   | 1,387.89<br>(994.47 to 1,926.21)   | 46.25<br>(44.93 to 47.62)    | 72.28<br>(55.03 to 96.47)    | 73.03<br>(55.15 to 98.33)    | 84.76<br>(62.59 to 115.74)   |
| Larynx cancer                        | 105.33<br>(101.25 to 109.33)       | 77.14<br>(39.76 to 126.99)         | 57.35<br>(29.71 to 94.36)          | 146.89<br>(73.83 to 265.82)        | 5.05<br>(4.87 to 5.23)       | 4.06<br>(2.18 to 6.71)       | 3.13<br>(1.67 to 5.14)       | 7.58<br>(3.92 to 13.36)      |
| Tracheal, bronchus, and lung cancer  | 3,586.09<br>(3,493.41 to 3,681.91) | 3,296.56<br>(2,312.27 to 4,552.99) | 2,655.36<br>(1,863.76 to 3,666.09) | 6,757.03<br>(4,657.96 to 9,554.87) | 191.46<br>(186.50 to 196.82) | 197.47<br>(140.85 to 269.65) | 162.87<br>(116.71 to 222.54) | 392.37<br>(276.42 to 545.49) |
| Malignant skin melanoma              | 229.22<br>(210.12 to 269.11)       | 396.45<br>(315.87 to 496.84)       | 445.51<br>(351.18 to 562.18)       | 367.50<br>(296.62 to 457.70)       | 10.48<br>(9.22 to 11.81)     | 20.71<br>(17.10 to 24.56)    | 23.83<br>(19.42 to 28.72)    | 18.52<br>(15.47 to 21.54)    |
| Non-melanoma skin cancer             | 58.14<br>(56.26 to 59.88)          | 78.79<br>(64.48 to 92.48)          | 72.11<br>(58.28 to 85.96)          | 75.59<br>(62.93 to 88.27)          | 3.56<br>(3.45 to 3.67)       | 5.60<br>(4.83 to 6.42)       | 5.28<br>(4.50 to 6.14)       | 5.15<br>(4.48 to 5.86)       |
| Breast cancer                        | 1,056.81<br>(1,014.54 to 1,104.48) | 1,314.80<br>(842.64 to 1,974.27)   | 1,131.36<br>(722.86 to 1,676.75)   | 1,562.20<br>(958.40 to 2,411.13)   | 49.33<br>(47.36 to 51.50)    | 71.04<br>(47.61 to 104.17)   | 62.89<br>(42.21 to 91.89)    | 81.54<br>(52.88 to 124.98)   |
| Cervical cancer                      | 180.35<br>(171.50 to 189.34)       | 142.11<br>(94.47 to 198.13)        | 123.16<br>(81.90 to 172.72)        | 162.41<br>(102.56 to 240.92)       | 6.84<br>(6.54 to 7.17)       | 6.01<br>(4.23 to 8.22)       | 5.29<br>(3.75 to 7.22)       | 6.76<br>(4.44 to 9.91)       |
| Uterine cancer                       | 147.24<br>(140.38 to 155.02)       | 199.06<br>(156.19 to 244.07)       | 187.30<br>(146.03 to 231.15)       | 195.04<br>(155.86 to 234.77)       | 7.86<br>(7.49 to 8.26)       | 12.62<br>(10.34 to 15.11)    | 12.09<br>(9.85 to 14.75)     | 12.08<br>(10.06 to 14.22)    |
| Ovarian cancer                       | 333.92<br>(317.56 to 349.51)       | 439.51<br>(295.61 to 636.27)       | 404.65<br>(270.30 to 581.21)       | 457.32<br>(304.14 to 683.47)       | 16.68<br>(15.90 to 17.43)    | 24.91<br>(17.37 to 36.17)    | 23.09<br>(16.19 to 33.14)    | 25.51<br>(17.47 to 38.07)    |
| Prostate cancer                      | 460.45<br>(428.30 to 638.46)       | 811.39<br>(649.12 to 1,181.34)     | 795.18<br>(631.92 to 1,124.04)     | 778.54<br>(633.25 to 1,124.85)     | 35.47<br>(32.98 to 48.66)    | 74.41<br>(60.33 to 105.98)   | 74.87<br>(60.59 to 107.98)   | 68.93<br>(55.40 to 100.09)   |
| Testicular cancer                    | 18.31<br>(16.82 to 19.90)          | 14.78<br>(10.29 to 20.12)          | 13.46<br>(9.19 to 18.55)           | 14.81<br>(10.30 to 20.04)          | 0.43<br>(0.39 to 0.46)       | 0.39<br>(0.29 to 0.49)       | 0.36<br>(0.27 to 0.47)       | 0.38<br>(0.28 to 0.48)       |

**United States**

| Cause                           | YLLs (in 1000s)              |                              |                              |                              | Deaths (in 1000s)         |                           |                           |                           |
|---------------------------------|------------------------------|------------------------------|------------------------------|------------------------------|---------------------------|---------------------------|---------------------------|---------------------------|
|                                 | 2016                         | 2040 Forecast                | 2040 Better Scenario         | 2040 Worse Scenario          | 2016                      | 2040 Forecast             | 2040 Better Scenario      | 2040 Worse Scenario       |
| Kidney cancer                   | 318.86<br>(308.12 to 330.28) | 466.06<br>(365.59 to 580.08) | 472.92<br>(366.89 to 593.83) | 523.67<br>(392.73 to 671.29) | 16.32<br>(15.82 to 16.85) | 27.17<br>(21.97 to 32.92) | 28.24<br>(22.77 to 34.39) | 29.66<br>(23.20 to 37.29) |
| Bladder cancer                  | 264.87<br>(254.92 to 274.40) | 308.12<br>(224.16 to 428.85) | 293.58<br>(212.03 to 406.43) | 395.87<br>(271.42 to 572.21) | 18.39<br>(17.75 to 19.05) | 25.42<br>(18.83 to 34.99) | 24.87<br>(18.22 to 34.32) | 31.72<br>(22.11 to 45.64) |
| Brain and nervous system cancer | 445.49<br>(404.22 to 484.02) | 651.26<br>(515.56 to 777.44) | 632.25<br>(494.08 to 764.96) | 635.26<br>(510.73 to 747.28) | 16.78<br>(14.74 to 17.76) | 28.70<br>(23.04 to 33.46) | 28.41<br>(22.65 to 33.73) | 27.19<br>(22.37 to 31.22) |
| Thyroid cancer                  | 36.98<br>(35.51 to 38.45)    | 48.78<br>(33.17 to 70.19)    | 43.66<br>(30.18 to 61.25)    | 51.36<br>(34.25 to 75.50)    | 1.99<br>(1.90 to 2.08)    | 3.03<br>(2.20 to 4.17)    | 2.79<br>(2.05 to 3.83)    | 3.06<br>(2.17 to 4.35)    |
| Mesothelioma                    | 55.38<br>(52.36 to 58.43)    | 100.56<br>(82.32 to 120.49)  | 105.45<br>(85.06 to 128.69)  | 92.64<br>(78.09 to 107.94)   | 3.28<br>(3.09 to 3.46)    | 6.95<br>(5.94 to 8.11)    | 7.43<br>(6.22 to 8.92)    | 6.21<br>(5.43 to 7.04)    |
| Hodgkin lymphoma                | 37.65<br>(35.23 to 47.17)    | 37.03<br>(27.98 to 48.79)    | 32.14<br>(23.88 to 42.50)    | 37.14<br>(28.38 to 48.89)    | 1.33<br>(1.26 to 1.56)    | 1.54<br>(1.26 to 1.89)    | 1.37<br>(1.11 to 1.69)    | 1.50<br>(1.23 to 1.82)    |

|                                |                                                     |                                                    |                                                   |                                                    |                                            |                                                |                                              |                                                |
|--------------------------------|-----------------------------------------------------|----------------------------------------------------|---------------------------------------------------|----------------------------------------------------|--------------------------------------------|------------------------------------------------|----------------------------------------------|------------------------------------------------|
| Non-Hodgkin lymphoma           | 482.25<br>(459.79 to 564.92)                        | 728.13<br>(555.11 to 952.14)                       | 679.03<br>(519.42 to 881.82)                      | 728.36<br>(553.41 to 966.23)                       | 26.82<br>(25.69 to 29.62)                  | 47.27<br>(38.08 to 59.66)                      | 45.26<br>(36.20 to 56.67)                    | 45.53<br>(36.63 to 57.32)                      |
| Multiple myeloma               | 246.33<br>(224.61 to 309.68)                        | 399.73<br>(305.62 to 537.41)                       | 382.79<br>(291.01 to 512.72)                      | 398.02<br>(301.86 to 539.24)                       | 14.21<br>(12.52 to 17.32)                  | 26.31<br>(20.73 to 34.46)                      | 25.79<br>(20.21 to 33.60)                    | 25.33<br>(19.81 to 33.54)                      |
| Leukemia                       | 558.94<br>(543.03 to 576.98)                        | 821.72<br>(623.92 to 1,053.51)                     | 768.11<br>(584.38 to 992.70)                      | 922.75<br>(679.32 to 1,224.11)                     | 28.85<br>(28.10 to 29.66)                  | 51.72<br>(39.81 to 65.44)                      | 49.72<br>(38.63 to 62.46)                    | 56.19<br>(41.11 to 73.42)                      |
| Acute lymphoid leukemia        | 67.13<br>(61.21 to 71.17)                           | 63.71<br>(47.14 to 82.61)                          | 56.29<br>(41.45 to 73.13)                         | 71.78<br>(52.62 to 95.72)                          | 1.79<br>(1.67 to 1.90)                     | 2.05<br>(1.57 to 2.66)                         | 1.85<br>(1.40 to 2.39)                       | 2.29<br>(1.69 to 3.08)                         |
| Chronic lymphoid leukemia      | 82.34<br>(76.78 to 98.71)                           | 120.41<br>(87.33 to 161.28)                        | 115.88<br>(85.03 to 152.95)                       | 134.20<br>(92.29 to 188.28)                        | 5.94<br>(5.55 to 6.88)                     | 9.91<br>(7.36 to 12.92)                        | 9.79<br>(7.36 to 12.70)                      | 10.60<br>(7.49 to 14.41)                       |
| Acute myeloid leukemia         | 247.60<br>(223.31 to 269.09)                        | 407.94<br>(304.23 to 522.54)                       | 391.56<br>(294.41 to 505.44)                      | 456.62<br>(333.10 to 604.16)                       | 11.89<br>(10.60 to 12.42)                  | 23.08<br>(17.85 to 29.38)                      | 22.74<br>(17.73 to 28.66)                    | 25.11<br>(18.78 to 32.82)                      |
| Chronic myeloid leukemia       | 26.23<br>(24.71 to 28.65)                           | 20.30<br>(14.20 to 28.06)                          | 16.37<br>(11.52 to 22.65)                         | 23.91<br>(15.90 to 34.52)                          | 1.36<br>(1.30 to 1.48)                     | 1.21<br>(0.87 to 1.62)                         | 1.00<br>(0.74 to 1.34)                       | 1.37<br>(0.94 to 1.93)                         |
| Other leukemia                 | 135.64<br>(128.69 to 148.33)                        | 209.38<br>(156.70 to 276.25)                       | 188.01<br>(140.50 to 245.48)                      | 236.25<br>(168.26 to 324.07)                       | 7.86<br>(7.48 to 8.60)                     | 15.47<br>(11.58 to 20.27)                      | 14.34<br>(10.82 to 18.72)                    | 16.82<br>(11.98 to 22.76)                      |
| Other neoplasms                | 570.62<br>(551.57 to 588.72)                        | 899.27<br>(750.72 to 1,044.99)                     | 908.64<br>(750.19 to 1,074.16)                    | 856.23<br>(725.63 to 978.36)                       | 28.63<br>(27.68 to 29.49)                  | 55.00<br>(48.42 to 62.09)                      | 57.35<br>(49.49 to 65.96)                    | 50.15<br>(44.60 to 55.83)                      |
| <b>Cardiovascular diseases</b> | <b>12,694.57</b><br><b>(12,418.79 to 12,952.98)</b> | <b>12,242.78</b><br><b>(7,022.96 to 20,513.24)</b> | <b>8,293.89</b><br><b>(5,007.82 to 13,209.10)</b> | <b>17,535.95</b><br><b>(9,722.99 to 29,948.68)</b> | <b>901.41</b><br><b>(883.05 to 920.92)</b> | <b>1,048.84</b><br><b>(635.97 to 1,650.72)</b> | <b>768.56</b><br><b>(479.10 to 1,211.99)</b> | <b>1,329.77</b><br><b>(780.60 to 2,105.45)</b> |
| Rheumatic heart disease        | 162.86<br>(156.67 to 169.29)                        | 141.89<br>(100.23 to 202.24)                       | 124.14<br>(87.14 to 175.13)                       | 137.80<br>(98.89 to 192.10)                        | 10.93<br>(10.54 to 11.35)                  | 11.98<br>(8.88 to 16.49)                       | 10.85<br>(7.90 to 15.19)                     | 11.14<br>(8.57 to 15.31)                       |
| Ischemic heart disease         | 7,605.28<br>(7,409.58 to 7,802.40)                  | 6,340.08<br>(3,115.53 to 11,675.21)                | 3,716.99<br>(1,919.58 to 6,497.37)                | 10,354.62<br>(4,895.80 to 19,084.77)               | 544.83<br>(531.69 to 557.48)               | 556.95<br>(286.46 to 991.00)                   | 361.74<br>(192.29 to 641.70)                 | 785.26<br>(396.28 to 1,392.72)                 |
| Stroke                         | 2,292.34<br>(2,202.10 to 2,387.64)                  | 1,769.34<br>(977.27 to 3,145.27)                   | 1,119.13<br>(639.61 to 1,946.30)                  | 2,574.95<br>(1,371.61 to 4,703.36)                 | 177.20<br>(167.72 to 187.49)               | 161.93<br>(92.98 to 284.97)                    | 115.67<br>(67.00 to 205.35)                  | 203.07<br>(114.82 to 364.50)                   |
| Ischemic stroke                | 1,139.81<br>(1,085.25 to 1,194.34)                  | 908.91<br>(474.71 to 1,831.41)                     | 640.60<br>(338.61 to 1,247.84)                    | 1,181.90<br>(590.57 to 2,515.48)                   | 113.28<br>(106.42 to 120.43)               | 104.74<br>(54.01 to 211.84)                    | 79.29<br>(41.45 to 156.36)                   | 123.81<br>(62.61 to 256.87)                    |
| Intracerebral hemorrhage       | 1,152.53<br>(1,109.52 to 1,199.23)                  | 860.42<br>(408.67 to 1,604.22)                     | 478.53<br>(251.94 to 824.89)                      | 1,393.05<br>(624.28 to 2,694.11)                   | 63.92<br>(61.08 to 67.10)                  | 57.20<br>(31.50 to 97.47)                      | 36.38<br>(21.23 to 59.35)                    | 79.25<br>(41.12 to 140.29)                     |
| Hypertensive heart disease     | 669.86<br>(397.51 to 765.34)                        | 1,127.15<br>(482.15 to 2,466.48)                   | 826.64<br>(393.11 to 1,679.90)                    | 1,459.52<br>(592.95 to 3,466.93)                   | 40.20<br>(25.47 to 47.78)                  | 85.71<br>(38.67 to 198.11)                     | 66.75<br>(33.84 to 136.22)                   | 102.47<br>(44.53 to 246.51)                    |
| Cardiomyopathy and myocarditis | 633.57<br>(593.41 to 759.57)                        | 676.98<br>(445.15 to 988.25)                       | 562.91<br>(370.85 to 827.71)                      | 719.26<br>(478.57 to 1,070.37)                     | 30.94<br>(28.93 to 36.11)                  | 39.25<br>(26.82 to 56.14)                      | 33.62<br>(23.13 to 48.74)                    | 39.54<br>(27.40 to 56.16)                      |
| Myocarditis                    | 44.95<br>(31.74 to 50.81)                           | 46.96<br>(31.16 to 65.34)                          | 46.32<br>(30.32 to 66.38)                         | 46.37<br>(30.94 to 64.27)                          | 1.27<br>(0.95 to 1.41)                     | 1.74<br>(1.26 to 2.28)                         | 1.80<br>(1.30 to 2.39)                       | 1.63<br>(1.19 to 2.09)                         |
| <b>United States</b>           |                                                     |                                                    |                                                   |                                                    |                                            |                                                |                                              |                                                |
| Cause                          | YLLs (in 1000s)                                     |                                                    |                                                   |                                                    | Deaths (in 1000s)                          |                                                |                                              |                                                |
|                                | 2016                                                | 2040 Forecast                                      | 2040 Better Scenario                              | 2040 Worse Scenario                                | 2016                                       | 2040 Forecast                                  | 2040 Better Scenario                         | 2040 Worse Scenario                            |
| Alcoholic cardiomyopathy       | 137.42<br>(107.11 to 183.01)                        | 162.48<br>(111.14 to 229.77)                       | 141.04<br>(95.00 to 202.69)                       | 186.20<br>(129.60 to 258.93)                       | 5.78<br>(4.38 to 7.64)                     | 7.53<br>(5.40 to 10.41)                        | 6.80<br>(4.80 to 9.47)                       | 8.21<br>(6.02 to 11.29)                        |
| Other cardiomyopathy           | 451.20<br>(418.04 to 556.79)                        | 467.54<br>(282.73 to 728.14)                       | 375.54<br>(228.73 to 582.45)                      | 486.69<br>(294.98 to 771.93)                       | 23.88<br>(22.18 to 28.13)                  | 29.98<br>(19.00 to 45.68)                      | 25.02<br>(15.68 to 38.12)                    | 29.70<br>(18.84 to 44.83)                      |

|                                                                |                                              |                                              |                                              |                                              |                                        |                                        |                                        |                                        |
|----------------------------------------------------------------|----------------------------------------------|----------------------------------------------|----------------------------------------------|----------------------------------------------|----------------------------------------|----------------------------------------|----------------------------------------|----------------------------------------|
| Atrial fibrillation and flutter                                | 202.79<br>(170.47 to<br>237.53)              | 377.09<br>(255.98 to<br>523.38)              | 352.98<br>(238.92 to<br>501.32)              | 378.81<br>(256.74 to<br>518.44)              | 22.41<br>(18.31 to<br>26.88)           | 44.16<br>(30.79 to<br>60.87)           | 42.77<br>(29.82 to<br>60.44)           | 42.23<br>(29.35 to<br>57.23)           |
| Aortic aneurysm                                                | 219.27<br>(210.40 to<br>229.98)              | 302.20<br>(206.71 to<br>437.32)              | 277.57<br>(191.60 to<br>399.33)              | 313.66<br>(213.58 to<br>449.89)              | 13.50<br>(13.02 to<br>14.03)           | 22.92<br>(16.52 to<br>32.31)           | 22.01<br>(15.82 to<br>31.44)           | 22.21<br>(16.20 to<br>30.48)           |
| Peripheral artery disease                                      | 117.09<br>(87.65 to<br>196.53)               | 269.50<br>(162.67 to<br>491.73)              | 260.77<br>(156.02 to<br>473.86)              | 291.62<br>(173.79 to<br>523.73)              | 10.04<br>(7.34 to<br>17.32)            | 26.96<br>(15.82 to<br>49.46)           | 27.25<br>(16.04 to<br>50.45)           | 27.14<br>(16.23 to<br>50.24)           |
| Endocarditis                                                   | 154.62<br>(116.93 to<br>199.70)              | 272.93<br>(169.45 to<br>427.57)              | 260.40<br>(164.02 to<br>407.17)              | 270.36<br>(168.52 to<br>417.10)              | 9.13<br>(6.84 to<br>11.60)             | 19.04<br>(11.82 to<br>29.28)           | 18.85<br>(11.78 to<br>29.16)           | 18.00<br>(11.24 to<br>27.30)           |
| Other cardiovascular and circulatory diseases                  | 636.89<br>(615.22 to<br>661.06)              | 965.62<br>(650.87 to<br>1,401.93)            | 792.36<br>(541.39 to<br>1,142.69)            | 1,035.34<br>(685.60 to<br>1,525.70)          | 42.23<br>(40.90 to<br>43.54)           | 79.93<br>(57.18 to<br>110.79)          | 69.05<br>(48.92 to<br>96.82)           | 78.71<br>(57.03 to<br>107.88)          |
| <b>Chronic respiratory diseases</b>                            | <b>2,829.53</b><br>(2,757.84 to<br>2,901.61) | <b>2,783.89</b><br>(2,150.87 to<br>3,584.99) | <b>2,602.71</b><br>(2,022.65 to<br>3,251.31) | <b>4,469.57</b><br>(3,349.12 to<br>5,807.68) | <b>190.69</b><br>(185.79 to<br>195.56) | <b>215.87</b><br>(170.74 to<br>271.71) | <b>207.24</b><br>(162.65 to<br>262.13) | <b>335.63</b><br>(258.93 to<br>435.38) |
| Chronic obstructive pulmonary disease                          | 2,347.40<br>(2,267.81 to<br>2,463.47)        | 1,948.69<br>(1,390.07 to<br>2,672.56)        | 1,640.45<br>(1,159.91 to<br>2,264.25)        | 3,686.66<br>(2,608.88 to<br>5,082.40)        | 163.79<br>(158.23 to<br>172.06)        | 156.73<br>(113.49 to<br>211.68)        | 136.80<br>(97.71 to<br>188.01)         | 282.49<br>(206.72 to<br>383.85)        |
| Pneumoconiosis                                                 | 13.82<br>(12.80 to<br>14.77)                 | 25.27<br>(19.38 to<br>32.09)                 | 27.62<br>(20.84 to<br>35.47)                 | 22.90<br>(18.33 to<br>28.22)                 | 1.06<br>(0.97 to<br>1.13)              | 2.26<br>(1.75 to<br>2.91)              | 2.51<br>(1.91 to<br>3.24)              | 1.99<br>(1.57 to<br>2.50)              |
| Silicosis                                                      | 1.44<br>(1.15 to<br>2.47)                    | 0.79<br>(0.49 to<br>1.51)                    | 0.66<br>(0.40 to<br>1.23)                    | 0.77<br>(0.49 to<br>1.46)                    | 0.09<br>(0.08 to<br>0.18)              | 0.06<br>(0.04 to<br>0.13)              | 0.05<br>(0.03 to<br>0.11)              | 0.06<br>(0.04 to<br>0.12)              |
| Asbestosis                                                     | 7.81<br>(6.64 to<br>9.88)                    | 19.64<br>(14.49 to<br>25.90)                 | 22.68<br>(16.64 to<br>29.89)                 | 17.27<br>(13.00 to<br>22.33)                 | 0.61<br>(0.49 to<br>0.76)              | 1.74<br>(1.27 to<br>2.32)              | 2.05<br>(1.49 to<br>2.70)              | 1.49<br>(1.10 to<br>1.97)              |
| Coal workers pneumoconiosis                                    | 3.55<br>(1.06 to<br>4.45)                    | 3.66<br>(1.26 to<br>7.17)                    | 3.08<br>(1.15 to<br>6.28)                    | 3.71<br>(1.20 to<br>7.01)                    | 0.28<br>(0.09 to<br>0.36)              | 0.35<br>(0.13 to<br>0.72)              | 0.30<br>(0.11 to<br>0.60)              | 0.34<br>(0.12 to<br>0.60)              |
| Other pneumoconiosis                                           | 1.03<br>(0.89 to<br>1.53)                    | 1.18<br>(0.88 to<br>1.76)                    | 1.20<br>(0.87 to<br>1.81)                    | 1.15<br>(0.87 to<br>1.67)                    | 0.07<br>(0.06 to<br>0.12)              | 0.10<br>(0.07 to<br>0.17)              | 0.11<br>(0.07 to<br>0.17)              | 0.10<br>(0.07 to<br>0.15)              |
| Asthma                                                         | 114.12<br>(104.23 to<br>124.68)              | 54.11<br>(28.86 to<br>94.02)                 | 38.66<br>(20.80 to<br>67.22)                 | 68.84<br>(35.30 to<br>121.21)                | 4.13<br>(3.85 to<br>4.77)              | 2.56<br>(1.41 to<br>4.49)              | 1.92<br>(1.10 to<br>3.28)              | 3.05<br>(1.63 to<br>5.46)              |
| Interstitial lung disease and pulmonary sarcoidosis            | 300.55<br>(193.72 to<br>336.53)              | 688.31<br>(462.33 to<br>826.39)              | 827.73<br>(559.46 to<br>1,011.06)            | 617.11<br>(398.94 to<br>734.02)              | 19.21<br>(12.14 to<br>21.46)           | 50.47<br>(33.09 to<br>59.94)           | 61.98<br>(41.35 to<br>74.52)           | 43.96<br>(27.86 to<br>52.52)           |
| Other chronic respiratory diseases                             | 53.64<br>(32.80 to<br>71.31)                 | 67.50<br>(40.04 to<br>93.72)                 | 68.25<br>(40.94 to<br>95.85)                 | 74.06<br>(42.83 to<br>104.08)                | 2.50<br>(1.58 to<br>3.48)              | 3.85<br>(2.36 to<br>5.58)              | 4.03<br>(2.47 to<br>5.95)              | 4.14<br>(2.47 to<br>6.00)              |
| <b>Cirrhosis and other chronic liver diseases</b>              | <b>1,634.83</b><br>(1,582.00 to<br>1,687.57) | <b>1,813.08</b><br>(1,375.64 to<br>2,253.55) | <b>1,564.88</b><br>(1,178.37 to<br>1,983.98) | <b>1,961.22</b><br>(1,512.45 to<br>2,422.38) | <b>62.64</b><br>(60.74 to<br>64.57)    | <b>76.32</b><br>(62.26 to<br>91.36)    | <b>67.44</b><br>(54.36 to<br>81.92)    | <b>79.99</b><br>(65.82 to<br>95.08)    |
| Cirrhosis and other chronic liver diseases due to hepatitis B  | 109.82<br>(101.46 to<br>119.12)              | 123.09<br>(92.20 to<br>155.94)               | 113.53<br>(83.52 to<br>145.72)               | 122.10<br>(93.05 to<br>153.83)               | 4.23<br>(3.92 to<br>4.57)              | 5.21<br>(4.16 to<br>6.41)              | 4.88<br>(3.82 to<br>6.06)              | 5.06<br>(4.10 to<br>6.14)              |
| Cirrhosis and other chronic liver diseases due to hepatitis C  | 513.45<br>(477.54 to<br>551.56)              | 584.73<br>(434.16 to<br>742.07)              | 525.17<br>(390.28 to<br>687.95)              | 582.92<br>(435.87 to<br>734.75)              | 18.87<br>(17.65 to<br>20.17)           | 23.18<br>(18.17 to<br>28.42)           | 21.48<br>(16.88 to<br>26.63)           | 22.67<br>(18.10 to<br>27.40)           |
| Cirrhosis and other chronic liver diseases due to alcohol use  | 655.72<br>(606.64 to<br>703.47)              | 705.70<br>(527.29 to<br>904.81)              | 548.57<br>(406.30 to<br>713.98)              | 858.93<br>(647.30 to<br>1,091.51)            | 25.27<br>(23.52 to<br>27.03)           | 29.80<br>(23.70 to<br>36.36)           | 24.08<br>(18.98 to<br>29.85)           | 34.72<br>(27.91 to<br>41.88)           |
| Cirrhosis and other chronic liver diseases due to other causes | 355.83<br>(308.59 to<br>411.97)              | 399.56<br>(295.22 to<br>522.74)              | 367.61<br>(266.00 to<br>486.47)              | 397.28<br>(295.70 to<br>517.03)              | 14.28<br>(12.55 to<br>16.39)           | 18.12<br>(14.58 to<br>22.47)           | 17.00<br>(13.60 to<br>21.37)           | 17.54<br>(14.19 to<br>21.66)           |
| <b>Digestive diseases</b>                                      | <b>799.02</b><br>(759.67 to<br>923.20)       | <b>1,137.41</b><br>(894.28 to<br>1,471.18)   | <b>1,073.20</b><br>(834.44 to<br>1,382.67)   | <b>1,122.83</b><br>(884.03 to<br>1,466.53)   | <b>52.08</b><br>(49.74 to<br>61.46)    | <b>91.70</b><br>(74.17 to<br>117.89)   | <b>90.04</b><br>(72.34 to<br>116.07)   | <b>86.17</b><br>(68.82 to<br>111.67)   |
| Peptic ulcer disease                                           | 80.24<br>(71.99 to<br>93.57)                 | 63.67<br>(49.07 to<br>82.76)                 | 53.48<br>(40.63 to<br>69.65)                 | 66.31<br>(49.57 to<br>87.35)                 | 5.14<br>(4.64 to<br>5.95)              | 5.32<br>(4.09 to<br>6.86)              | 4.62<br>(3.55 to<br>6.00)              | 5.23<br>(4.03 to<br>6.81)              |

| United States                              |                                    |                                    |                                    |                                    |                              |                              |                              |                              |
|--------------------------------------------|------------------------------------|------------------------------------|------------------------------------|------------------------------------|------------------------------|------------------------------|------------------------------|------------------------------|
| Cause                                      | YLLs (in 1000s)                    |                                    |                                    |                                    | Deaths (in 1000s)            |                              |                              |                              |
|                                            | 2016                               | 2040 Forecast                      | 2040 Better Scenario               | 2040 Worse Scenario                | 2016                         | 2040 Forecast                | 2040 Better Scenario         | 2040 Worse Scenario          |
| Gastritis and duodenitis                   | 7.87<br>(6.66 to 14.50)            | 12.38<br>(8.42 to 25.13)           | 11.23<br>(7.55 to 22.65)           | 12.06<br>(8.30 to 24.22)           | 0.45<br>(0.37 to 0.94)       | 0.87<br>(0.61 to 1.86)       | 0.82<br>(0.56 to 1.79)       | 0.81<br>(0.56 to 1.70)       |
| Appendicitis                               | 17.85<br>(15.32 to 25.22)          | 16.77<br>(12.09 to 25.19)          | 14.31<br>(10.16 to 22.12)          | 16.70<br>(12.13 to 25.29)          | 0.84<br>(0.71 to 1.26)       | 1.67<br>(0.77 to 1.62)       | 0.91<br>(0.67 to 1.45)       | 0.98<br>(0.73 to 1.56)       |
| Paralytic ileus and intestinal obstruction | 139.12<br>(116.83 to 173.71)       | 224.51<br>(178.34 to 296.06)       | 231.37<br>(181.89 to 303.57)       | 209.14<br>(168.15 to 273.50)       | 9.85<br>(8.30 to 12.43)      | 19.72<br>(15.61 to 25.90)    | 21.04<br>(16.56 to 27.31)    | 17.55<br>(13.87 to 23.14)    |
| Inguinal, femoral, and abdominal hernia    | 24.13<br>(18.27 to 32.48)          | 20.57<br>(14.77 to 27.75)          | 19.44<br>(13.80 to 26.62)          | 19.57<br>(14.19 to 26.90)          | 1.73<br>(1.29 to 2.37)       | 1.77<br>(1.27 to 2.43)       | 1.73<br>(1.23 to 2.35)       | 1.61<br>(1.14 to 2.23)       |
| Inflammatory bowel disease                 | 78.80<br>(52.83 to 87.42)          | 99.94<br>(64.28 to 127.29)         | 101.46<br>(65.09 to 131.20)        | 94.41<br>(61.13 to 118.68)         | 4.75<br>(3.19 to 5.28)       | 7.27<br>(4.69 to 9.27)       | 7.62<br>(4.95 to 9.81)       | 6.60<br>(4.28 to 8.36)       |
| Vascular intestinal disorders              | 140.74<br>(127.75 to 169.21)       | 230.58<br>(180.85 to 292.15)       | 226.06<br>(174.08 to 289.95)       | 218.15<br>(172.99 to 275.17)       | 9.56<br>(8.62 to 11.68)      | 18.73<br>(14.78 to 23.76)    | 18.87<br>(14.61 to 24.04)    | 17.13<br>(13.62 to 22.05)    |
| Gallbladder and biliary diseases           | 72.77<br>(65.97 to 86.70)          | 111.97<br>(56.83 to 208.90)        | 87.29<br>(45.22 to 159.33)         | 129.45<br>(64.48 to 241.82)        | 5.37<br>(4.85 to 6.50)       | 10.01<br>(5.05 to 19.04)     | 8.17<br>(4.23 to 15.24)      | 10.90<br>(5.44 to 20.78)     |
| Pancreatitis                               | 97.60<br>(87.22 to 119.33)         | 125.52<br>(72.08 to 217.31)        | 100.69<br>(59.75 to 169.79)        | 139.06<br>(75.59 to 250.89)        | 4.41<br>(3.96 to 5.44)       | 6.75<br>(4.37 to 11.05)      | 5.69<br>(3.82 to 9.07)       | 7.08<br>(4.33 to 12.11)      |
| Other digestive diseases                   | 139.90<br>(120.72 to 173.78)       | 231.50<br>(182.40 to 293.98)       | 227.86<br>(177.89 to 293.54)       | 217.97<br>(174.47 to 277.26)       | 9.99<br>(8.82 to 12.50)      | 20.23<br>(15.94 to 25.93)    | 20.58<br>(16.08 to 26.41)    | 18.29<br>(14.45 to 23.70)    |
| Neurological disorders                     | 2,653.66<br>(2,466.70 to 2,860.17) | 5,098.80<br>(3,965.68 to 6,898.79) | 5,098.51<br>(4,028.32 to 6,735.55) | 5,116.87<br>(3,886.13 to 7,183.08) | 284.67<br>(260.85 to 310.24) | 577.11<br>(443.05 to 787.79) | 590.96<br>(460.57 to 788.54) | 561.77<br>(419.28 to 807.03) |
| Alzheimer's disease and other dementias    | 1,875.78<br>(1,690.23 to 2,076.64) | 3,801.96<br>(2,744.04 to 5,549.69) | 3,757.10<br>(2,748.24 to 5,327.01) | 3,881.94<br>(2,726.64 to 5,872.60) | 238.90<br>(214.34 to 264.77) | 486.22<br>(354.27 to 694.07) | 493.25<br>(367.77 to 682.83) | 479.38<br>(338.09 to 722.75) |
| Parkinson's disease                        | 274.88<br>(254.13 to 297.61)       | 578.32<br>(518.22 to 643.10)       | 627.17<br>(556.97 to 711.60)       | 519.43<br>(466.06 to 574.36)       | 26.12<br>(24.06 to 28.47)    | 58.27<br>(52.27 to 65.15)    | 64.38<br>(57.39 to 72.48)    | 51.09<br>(44.81 to 57.81)    |
| Epilepsy                                   | 75.40<br>(72.54 to 78.51)          | 106.34<br>(63.87 to 163.15)        | 91.31<br>(56.18 to 138.56)         | 118.56<br>(69.62 to 185.09)        | 2.08<br>(2.00 to 2.15)       | 3.51<br>(2.28 to 5.06)       | 3.14<br>(2.12 to 4.49)       | 3.77<br>(2.40 to 5.56)       |
| Multiple sclerosis                         | 100.67<br>(77.10 to 108.53)        | 121.70<br>(84.40 to 156.64)        | 124.80<br>(85.73 to 162.40)        | 123.99<br>(85.88 to 160.15)        | 3.86<br>(2.74 to 4.23)       | 4.89<br>(3.17 to 6.18)       | 5.08<br>(3.25 to 6.54)       | 4.88<br>(3.21 to 6.18)       |
| Motor neuron disease                       | 169.16<br>(162.64 to 175.40)       | 255.10<br>(209.92 to 302.54)       | 257.91<br>(209.19 to 311.14)       | 245.15<br>(204.38 to 284.17)       | 7.63<br>(7.31 to 7.90)       | 13.29<br>(11.38 to 15.30)    | 13.63<br>(11.52 to 16.04)    | 12.49<br>(10.89 to 14.03)    |
| Other neurological disorders               | 157.76<br>(151.67 to 164.47)       | 235.38<br>(195.27 to 275.43)       | 240.23<br>(196.15 to 284.13)       | 227.80<br>(190.24 to 262.64)       | 6.09<br>(5.87 to 6.32)       | 10.92<br>(9.61 to 12.28)     | 11.47<br>(9.94 to 13.14)     | 10.15<br>(9.03 to 11.28)     |
| Mental disorders                           | 1,875.92<br>(1,790.96 to 1,949.51) | 3,752.61<br>(2,675.87 to 4,808.55) | 4,185.54<br>(2,962.98 to 5,404.07) | 3,638.37<br>(2,613.97 to 4,618.84) | 45.36<br>(43.61 to 46.96)    | 92.42<br>(68.76 to 115.28)   | 103.40<br>(76.02 to 130.70)  | 89.12<br>(66.39 to 110.12)   |
| Alcohol use disorders                      | 389.56<br>(370.31 to 410.11)       | 484.95<br>(357.96 to 623.58)       | 480.22<br>(349.94 to 625.77)       | 507.03<br>(381.04 to 642.21)       | 11.59<br>(11.07 to 12.11)    | 15.37<br>(11.75 to 19.20)    | 15.44<br>(11.68 to 19.73)    | 15.79<br>(12.22 to 19.50)    |
| Drug use disorders                         | 1,483.08<br>(1,401.54 to 1,549.83) | 3,263.15<br>(2,289.22 to 4,220.84) | 3,700.48<br>(2,570.65 to 4,805.97) | 3,126.94<br>(2,193.52 to 4,044.27) | 33.71<br>(32.15 to 35.08)    | 76.96<br>(55.96 to 97.17)    | 87.87<br>(63.07 to 112.51)   | 73.25<br>(53.05 to 91.49)    |
| Opioid use disorders                       | 830.74<br>(393.34 to 924.58)       | 1,189.69<br>(420.08 to 1,681.85)   | 1,243.23<br>(427.04 to 1,772.24)   | 1,164.35<br>(409.31 to 1,631.86)   | 18.24<br>(8.50 to 20.26)     | 26.79<br>(9.63 to 37.00)     | 28.11<br>(9.77 to 39.39)     | 26.12<br>(9.46 to 35.57)     |

|                                                            |                                       |                                       |                                       |                                       |                                 |                                 |                                 |                                 |
|------------------------------------------------------------|---------------------------------------|---------------------------------------|---------------------------------------|---------------------------------------|---------------------------------|---------------------------------|---------------------------------|---------------------------------|
| Cocaine use disorders                                      | 133.08<br>(96.30 to<br>222.71)        | 426.17<br>(254.40 to<br>629.79)       | 485.64<br>(291.36 to<br>718.86)       | 407.28<br>(246.98 to<br>612.96)       | 3.16<br>(2.23 to<br>5.23)       | 9.94<br>(6.13 to<br>14.55)      | 11.35<br>(6.86 to<br>16.68)     | 9.48<br>(5.83 to<br>14.00)      |
| Amphetamine use disorders                                  | 75.62<br>(60.37 to<br>124.55)         | 364.74<br>(224.94 to<br>540.44)       | 447.43<br>(281.96 to<br>657.86)       | 342.52<br>(212.96 to<br>503.72)       | 1.73<br>(1.36 to<br>2.83)       | 8.29<br>(5.24 to<br>12.16)      | 10.19<br>(6.42 to<br>14.71)     | 7.77<br>(4.94 to<br>11.38)      |
| Other drug use disorders                                   | 443.64<br>(387.50 to<br>750.22)       | 1,282.55<br>(847.38 to<br>1,911.47)   | 1,524.17<br>(1,004.79 to<br>2,247.59) | 1,212.78<br>(799.68 to<br>1,799.35)   | 10.58<br>(9.32 to<br>17.41)     | 31.93<br>(22.03 to<br>46.11)    | 38.21<br>(26.51 to<br>54.47)    | 29.88<br>(20.68 to<br>43.21)    |
| Eating disorders                                           | 3.28<br>(2.92 to<br>3.64)             | 4.51<br>(2.84 to<br>6.58)             | 4.84<br>(2.98 to<br>7.23)             | 4.40<br>(2.77 to<br>6.29)             | 0.06<br>(0.06 to<br>0.07)       | 0.09<br>(0.06 to<br>0.13)       | 0.10<br>(0.06 to<br>0.14)       | 0.09<br>(0.05 to<br>0.12)       |
| <b>United States</b>                                       |                                       |                                       |                                       |                                       |                                 |                                 |                                 |                                 |
| Cause                                                      | YLLs (in 1000s)                       |                                       |                                       |                                       | Deaths (in 1000s)               |                                 |                                 |                                 |
|                                                            | 2016                                  | 2040 Forecast                         | 2040 Better Scenario                  | 2040 Worse Scenario                   | 2016                            | 2040 Forecast                   | 2040 Better Scenario            | 2040 Worse Scenario             |
| Diabetes, urogenital, blood, and endocrine diseases        | 3,418.16<br>(3,273.75 to<br>3,595.23) | 5,234.08<br>(3,409.56 to<br>7,467.37) | 4,534.18<br>(2,992.20 to<br>6,494.17) | 5,935.34<br>(3,866.74 to<br>8,550.39) | 202.94<br>(195.54 to<br>207.95) | 396.94<br>(261.84 to<br>578.15) | 352.55<br>(234.54 to<br>513.59) | 430.58<br>(283.81 to<br>642.80) |
| Diabetes mellitus                                          | 1,305.74<br>(1,264.10 to<br>1,345.49) | 1,500.45<br>(920.04 to<br>2,373.76)   | 1,201.70<br>(747.92 to<br>1,871.79)   | 1,826.55<br>(1,096.47 to<br>2,958.11) | 71.45<br>(69.16 to<br>73.69)    | 103.00<br>(68.87 to<br>148.77)  | 86.60<br>(58.23 to<br>124.56)   | 115.59<br>(75.16 to<br>172.87)  |
| Acute glomerulonephritis                                   | 3.25<br>(3.11 to<br>3.40)             | 3.36<br>(2.58 to<br>4.32)             | 3.10<br>(2.31 to<br>4.05)             | 3.32<br>(2.58 to<br>4.23)             | 0.18<br>(0.17 to<br>0.19)       | 0.19<br>(0.13 to<br>0.28)       | 0.18<br>(0.12 to<br>0.27)       | 0.17<br>(0.12 to<br>0.25)       |
| Chronic kidney disease                                     | 1,212.51<br>(1,179.97 to<br>1,243.85) | 2,157.59<br>(1,008.67 to<br>3,864.57) | 1,756.85<br>(869.37 to<br>3,130.24)   | 2,606.50<br>(1,213.35 to<br>4,714.43) | 82.54<br>(80.30 to<br>84.65)    | 185.45<br>(84.52 to<br>338.82)  | 155.44<br>(73.79 to<br>280.94)  | 216.02<br>(98.08 to<br>394.11)  |
| Chronic kidney disease due to diabetes mellitus            | 677.65<br>(620.78 to<br>727.66)       | 1,214.79<br>(576.19 to<br>2,279.42)   | 980.05<br>(479.54 to<br>1,765.05)     | 1,485.59<br>(678.20 to<br>2,763.40)   | 40.54<br>(36.28 to<br>44.99)    | 91.70<br>(41.09 to<br>172.73)   | 75.76<br>(35.04 to<br>141.82)   | 108.55<br>(47.92 to<br>202.56)  |
| Chronic kidney disease due to hypertension                 | 259.66<br>(224.30 to<br>302.16)       | 547.32<br>(244.92 to<br>1,051.12)     | 460.07<br>(208.18 to<br>871.88)       | 643.81<br>(277.00 to<br>1,229.13)     | 25.05<br>(21.35 to<br>29.07)    | 62.14<br>(27.53 to<br>117.44)   | 53.78<br>(24.70 to<br>101.06)   | 70.45<br>(31.15 to<br>135.11)   |
| Chronic kidney disease due to glomerulonephritis           | 102.88<br>(84.07 to<br>122.45)        | 137.27<br>(65.69 to<br>264.23)        | 108.65<br>(53.88 to<br>204.11)        | 166.04<br>(76.03 to<br>331.89)        | 5.80<br>(4.65 to<br>7.18)       | 10.10<br>(4.51 to<br>19.79)     | 8.15<br>(3.72 to<br>15.94)      | 11.92<br>(5.20 to<br>23.89)     |
| Chronic kidney disease due to other and unspecified causes | 172.51<br>(144.40 to<br>203.64)       | 258.20<br>(124.48 to<br>476.00)       | 208.08<br>(104.78 to<br>376.39)       | 311.05<br>(148.18 to<br>575.82)       | 11.14<br>(8.90 to<br>13.67)     | 21.51<br>(9.80 to<br>41.12)     | 17.76<br>(8.41 to<br>33.67)     | 25.12<br>(11.34 to<br>47.87)    |
| Urinary diseases and male infertility                      | 237.45<br>(230.62 to<br>245.00)       | 495.11<br>(384.69 to<br>625.96)       | 468.73<br>(355.82 to<br>605.83)       | 465.65<br>(372.00 to<br>581.89)       | 19.37<br>(18.79 to<br>20.02)    | 51.56<br>(40.09 to<br>65.61)    | 50.34<br>(38.88 to<br>65.42)    | 46.69<br>(36.43 to<br>58.90)    |
| Urinary tract infections                                   | 215.18<br>(205.38 to<br>223.35)       | 470.04<br>(365.24 to<br>596.44)       | 446.53<br>(338.74 to<br>581.71)       | 441.37<br>(352.31 to<br>553.11)       | 18.07<br>(17.40 to<br>18.76)    | 49.56<br>(38.44 to<br>63.26)    | 48.51<br>(37.51 to<br>63.51)    | 44.85<br>(34.98 to<br>57.11)    |
| Urolithiasis                                               | 7.64<br>(6.21 to<br>9.92)             | 9.27<br>(6.60 to<br>13.21)            | 8.25<br>(5.76 to<br>11.96)            | 9.05<br>(6.60 to<br>12.76)            | 0.46<br>(0.35 to<br>0.60)       | 0.70<br>(0.48 to<br>0.97)       | 0.64<br>(0.44 to<br>0.91)       | 0.65<br>(0.46 to<br>0.90)       |
| Other urinary diseases                                     | 14.64<br>(11.43 to<br>21.66)          | 15.80<br>(10.63 to<br>23.00)          | 13.97<br>(9.29 to<br>20.63)           | 15.23<br>(10.31 to<br>22.11)          | 0.84<br>(0.61 to<br>1.23)       | 1.30<br>(0.82 to<br>1.94)       | 1.20<br>(0.74 to<br>1.80)       | 1.19<br>(0.75 to<br>1.78)       |
| Gynecological diseases                                     | 3.61<br>(1.87 to<br>4.04)             | 2.48<br>(1.26 to<br>3.63)             | 1.97<br>(1.00 to<br>2.95)             | 2.55<br>(1.31 to<br>3.68)             | 0.15<br>(0.08 to<br>0.17)       | 0.12<br>(0.06 to<br>0.16)       | 0.10<br>(0.05 to<br>0.14)       | 0.12<br>(0.06 to<br>0.16)       |
| Uterine fibroids                                           | 0.94<br>(0.47 to<br>1.09)             | 0.64<br>(0.32 to<br>0.99)             | 0.53<br>(0.26 to<br>0.85)             | 0.65<br>(0.33 to<br>1.01)             | 0.03<br>(0.01 to<br>0.03)       | 0.02<br>(0.01 to<br>0.03)       | 0.02<br>(0.01 to<br>0.03)       | 0.02<br>(0.01 to<br>0.03)       |
| Polycystic ovarian syndrome                                | 0.08<br>(0.05 to<br>0.10)             | 0.03<br>(0.01 to<br>0.05)             | 0.02<br>(0.01 to<br>0.04)             | 0.03<br>(0.01 to<br>0.06)             | 0.00<br>(0.00 to<br>0.00)       | 0.00<br>(0.00 to<br>0.00)       | 0.00<br>(0.00 to<br>0.00)       | 0.00<br>(0.00 to<br>0.00)       |
| Endometriosis                                              | 0.16<br>(0.04 to<br>0.22)             | 0.17<br>(0.03 to<br>0.35)             | 0.14<br>(0.02 to<br>0.29)             | 0.18<br>(0.03 to<br>0.36)             | 0.00<br>(0.00 to<br>0.00)       | 0.00<br>(0.00 to<br>0.01)       | 0.00<br>(0.00 to<br>0.01)       | 0.00<br>(0.00 to<br>0.01)       |

|                                                   |                                          |                                            |                                          |                                            |                                     |                                     |                                     |                                     |
|---------------------------------------------------|------------------------------------------|--------------------------------------------|------------------------------------------|--------------------------------------------|-------------------------------------|-------------------------------------|-------------------------------------|-------------------------------------|
| Genital prolapse                                  | 0.19<br>(0.09 to<br>0.23)                | 0.13<br>(0.06 to<br>0.20)                  | 0.10<br>(0.04 to<br>0.16)                | 0.13<br>(0.06 to<br>0.20)                  | 0.02<br>(0.01 to<br>0.02)           | 0.01<br>(0.00 to<br>0.02)           | 0.01<br>(0.00 to<br>0.01)           | 0.01<br>(0.00 to<br>0.02)           |
| Other gynecological diseases                      | 2.24<br>(1.17 to<br>2.51)                | 1.51<br>(0.76 to<br>2.29)                  | 1.18<br>(0.58 to<br>1.83)                | 1.55<br>(0.77 to<br>2.36)                  | 0.11<br>(0.06 to<br>0.12)           | 0.08<br>(0.04 to<br>0.12)           | 0.07<br>(0.04 to<br>0.10)           | 0.08<br>(0.04 to<br>0.12)           |
| Hemoglobinopathies and hemolytic anemias          | 67.92<br>(60.12 to<br>87.38)             | 87.98<br>(63.60 to<br>124.44)              | 78.22<br>(54.95 to<br>112.49)            | 87.08<br>(62.62 to<br>122.76)              | 2.99<br>(2.68 to<br>4.14)           | 5.02<br>(3.71 to<br>7.41)           | 4.61<br>(3.33 to<br>6.93)           | 4.75<br>(3.58 to<br>7.02)           |
| Thalassemias                                      | 7.62<br>(6.80 to<br>9.78)                | 4.83<br>(3.25 to<br>7.12)                  | 4.75<br>(3.17 to<br>7.13)                | 4.87<br>(3.33 to<br>7.07)                  | 0.12<br>(0.11 to<br>0.16)           | 0.09<br>(0.06 to<br>0.13)           | 0.09<br>(0.05 to<br>0.13)           | 0.09<br>(0.06 to<br>0.13)           |
| Sickle cell disorders                             | 29.28<br>(24.91 to<br>37.09)             | 41.77<br>(27.89 to<br>60.18)               | 36.38<br>(23.94 to<br>54.40)             | 42.24<br>(28.74 to<br>60.78)               | 0.74<br>(0.63 to<br>0.98)           | 1.45<br>(0.99 to<br>2.15)           | 1.28<br>(0.86 to<br>1.91)           | 1.45<br>(1.00 to<br>2.09)           |
| G6PD deficiency                                   | 9.39<br>(8.29 to<br>11.27)               | 13.32<br>(9.35 to<br>18.93)                | 11.30<br>(7.75 to<br>16.20)              | 13.48<br>(9.51 to<br>18.74)                | 0.27<br>(0.24 to<br>0.33)           | 0.51<br>(0.37 to<br>0.72)           | 0.44<br>(0.31 to<br>0.64)           | 0.50<br>(0.37 to<br>0.71)           |
| Other hemoglobinopathies and hemolytic anemias    | 21.62<br>(19.32 to<br>30.60)             | 28.06<br>(20.52 to<br>43.09)               | 25.78<br>(18.45 to<br>40.62)             | 26.50<br>(19.99 to<br>41.32)               | 1.85<br>(1.65 to<br>2.70)           | 2.97<br>(2.20 to<br>4.59)           | 2.81<br>(2.04 to<br>4.39)           | 2.71<br>(1.99 to<br>4.16)           |
| Endocrine, metabolic, blood, and immune disorders | 587.69<br>(435.99 to<br>623.64)          | 987.12<br>(654.31 to<br>1,245.90)          | 1,023.61<br>(674.18 to<br>1,304.07)      | 943.70<br>(633.28 to<br>1,166.51)          | 26.25<br>(17.83 to<br>27.98)        | 51.61<br>(32.74 to<br>63.99)        | 55.28<br>(35.09 to<br>69.83)        | 47.23<br>(30.23 to<br>57.66)        |
| <b>United States</b>                              |                                          |                                            |                                          |                                            |                                     |                                     |                                     |                                     |
| Cause                                             | YLLs (in 1000s)                          |                                            |                                          |                                            | Deaths (in 1000s)                   |                                     |                                     |                                     |
|                                                   | 2016                                     | 2040 Forecast                              | 2040 Better Scenario                     | 2040 Worse Scenario                        | 2016                                | 2040 Forecast                       | 2040 Better Scenario                | 2040 Worse Scenario                 |
| <b>Musculoskeletal disorders</b>                  | <b>199.29</b><br>(187.50 to<br>263.35)   | <b>321.63</b><br>(260.32 to<br>421.98)     | <b>303.37</b><br>(242.07 to<br>403.40)   | <b>315.24</b><br>(257.33 to<br>415.95)     | <b>10.15</b><br>(9.58 to<br>13.06)  | <b>19.94</b><br>(17.02 to<br>25.76) | <b>19.21</b><br>(16.20 to<br>25.11) | <b>18.86</b><br>(16.07 to<br>24.65) |
| Rheumatoid arthritis                              | 42.49<br>(29.19 to<br>49.68)             | 65.70<br>(44.45 to<br>84.82)               | 54.33<br>(36.68 to<br>70.77)             | 66.75<br>(45.89 to<br>88.09)               | 2.75<br>(1.91 to<br>3.17)           | 5.07<br>(3.56 to<br>6.57)           | 4.28<br>(2.85 to<br>5.57)           | 4.99<br>(3.39 to<br>6.54)           |
| Other musculoskeletal disorders                   | 156.80<br>(145.07 to<br>216.75)          | 255.93<br>(202.04 to<br>358.86)            | 249.04<br>(194.71 to<br>348.30)          | 248.48<br>(198.96 to<br>350.37)            | 7.41<br>(6.85 to<br>9.96)           | 14.87<br>(12.46 to<br>20.22)        | 14.93<br>(12.41 to<br>20.31)        | 13.87<br>(11.69 to<br>18.96)        |
| <b>Other non-communicable diseases</b>            | <b>960.88</b><br>(904.82 to<br>1,099.93) | <b>1,042.42</b><br>(799.38 to<br>1,353.48) | <b>893.51</b><br>(683.91 to<br>1,164.69) | <b>1,106.39</b><br>(845.44 to<br>1,453.56) | <b>18.70</b><br>(16.26 to<br>24.63) | <b>32.66</b><br>(25.01 to<br>49.02) | <b>30.91</b><br>(23.22 to<br>47.86) | <b>31.75</b><br>(24.36 to<br>47.70) |
| Congenital birth defects                          | 692.14<br>(651.13 to<br>829.97)          | 634.13<br>(466.37 to<br>842.22)            | 516.55<br>(384.53 to<br>688.54)          | 695.67<br>(515.57 to<br>932.33)            | 9.83<br>(9.28 to<br>11.52)          | 9.76<br>(7.32 to<br>12.75)          | 8.23<br>(6.18 to<br>10.83)          | 10.49<br>(7.93 to<br>13.72)         |
| Neural tube defects                               | 35.38<br>(29.18 to<br>40.00)             | 11.48<br>(6.85 to<br>18.30)                | 8.33<br>(4.94 to<br>13.31)               | 12.97<br>(7.69 to<br>20.75)                | 0.45<br>(0.38 to<br>0.51)           | 0.16<br>(0.10 to<br>0.24)           | 0.12<br>(0.07 to<br>0.19)           | 0.18<br>(0.11 to<br>0.28)           |
| Congenital heart anomalies                        | 248.90<br>(224.19 to<br>336.23)          | 167.61<br>(110.10 to<br>261.63)            | 120.79<br>(78.89 to<br>192.41)           | 188.47<br>(121.04 to<br>294.49)            | 3.62<br>(3.25 to<br>4.91)           | 2.61<br>(1.75 to<br>4.06)           | 1.91<br>(1.25 to<br>3.08)           | 2.89<br>(1.90 to<br>4.53)           |
| Orofacial clefts                                  | 0.47<br>(0.27 to<br>0.79)                | 0.24<br>(0.11 to<br>0.47)                  | 0.15<br>(0.07 to<br>0.31)                | 0.28<br>(0.13 to<br>0.56)                  | 0.01<br>(0.00 to<br>0.01)           | 0.00<br>(0.00 to<br>0.01)           | 0.00<br>(0.00 to<br>0.00)           | 0.00<br>(0.00 to<br>0.01)           |
| Down syndrome                                     | 45.99<br>(33.46 to<br>51.47)             | 90.61<br>(63.36 to<br>116.31)              | 93.38<br>(66.04 to<br>122.17)            | 90.06<br>(63.69 to<br>114.35)              | 1.11<br>(0.74 to<br>1.24)           | 2.23<br>(1.45 to<br>2.88)           | 2.33<br>(1.53 to<br>3.03)           | 2.19<br>(1.43 to<br>2.77)           |
| Other chromosomal abnormalities                   | 114.67<br>(86.24 to<br>134.51)           | 183.99<br>(120.16 to<br>250.58)            | 156.70<br>(102.62 to<br>215.81)          | 201.63<br>(130.85 to<br>276.00)            | 1.42<br>(1.05 to<br>1.64)           | 2.30<br>(1.52 to<br>3.12)           | 1.97<br>(1.30 to<br>2.69)           | 2.51<br>(1.67 to<br>3.41)           |
| Congenital musculoskeletal and limb anomalies     | 22.62<br>(14.73 to<br>25.55)             | 15.18<br>(9.05 to<br>21.29)                | 11.56<br>(6.96 to<br>16.30)              | 16.94<br>(10.08 to<br>24.06)               | 0.31<br>(0.21 to<br>0.34)           | 0.22<br>(0.14 to<br>0.31)           | 0.17<br>(0.11 to<br>0.25)           | 0.25<br>(0.16 to<br>0.35)           |
| Urogenital congenital anomalies                   | 30.36<br>(18.63 to<br>39.42)             | 24.69<br>(13.14 to<br>38.78)               | 19.39<br>(10.59 to<br>30.49)             | 27.47<br>(14.70 to<br>43.02)               | 0.43<br>(0.27 to<br>0.56)           | 0.37<br>(0.21 to<br>0.55)           | 0.29<br>(0.17 to<br>0.44)           | 0.40<br>(0.23 to<br>0.60)           |



|                                                 |                                                            |                                                            |                                                            |                                                            |                                                   |                                                   |                                                   |                                                    |
|-------------------------------------------------|------------------------------------------------------------|------------------------------------------------------------|------------------------------------------------------------|------------------------------------------------------------|---------------------------------------------------|---------------------------------------------------|---------------------------------------------------|----------------------------------------------------|
| Fire, heat, and hot substances                  | 138.54<br>(128.61 to<br>180.52)                            | 117.49<br>(84.76 to<br>169.76)                             | 97.70<br>(71.20 to<br>138.06)                              | 123.45<br>(86.96 to<br>181.12)                             | 5.56<br>(5.20 to<br>7.03)                         | 6.61<br>(5.14 to<br>8.05)                         | 5.82<br>(4.58 to<br>8.05)                         | 6.49<br>(4.95 to<br>9.18)                          |
| Poisonings                                      | 76.81<br>(67.40 to<br>98.70)                               | 34.23<br>(20.94 to<br>56.80)                               | 26.47<br>(16.88 to<br>43.19)                               | 37.61<br>(22.72 to<br>62.02)                               | 1.80<br>(1.60 to<br>2.36)                         | 0.95<br>(0.63 to<br>1.47)                         | 0.76<br>(0.52 to<br>1.15)                         | 1.01<br>(0.66 to<br>1.60)                          |
| Exposure to mechanical forces                   | 223.44<br>(184.96 to<br>247.55)                            | 177.76<br>(132.54 to<br>227.58)                            | 154.33<br>(113.88 to<br>199.57)                            | 182.85<br>(134.54 to<br>235.66)                            | 6.44<br>(5.47 to<br>7.28)                         | 7.06<br>(5.42 to<br>8.55)                         | 6.51<br>(4.93 to<br>7.92)                         | 6.75<br>(5.19 to<br>8.25)                          |
| Unintentional firearm injuries                  | 40.92<br>(37.02 to<br>58.17)                               | 31.23<br>(22.73 to<br>44.33)                               | 27.37<br>(19.89 to<br>38.88)                               | 32.30<br>(23.57 to<br>47.08)                               | 0.91<br>(0.83 to<br>1.23)                         | 0.82<br>(0.64 to<br>1.12)                         | 0.75<br>(0.58 to<br>1.02)                         | 0.82<br>(0.64 to<br>1.13)                          |
| Unintentional suffocation                       | 81.23<br>(41.87 to<br>97.58)                               | 58.73<br>(30.21 to<br>86.20)                               | 51.86<br>(27.23 to<br>75.70)                               | 60.58<br>(29.95 to<br>90.92)                               | 2.46<br>(1.52 to<br>2.81)                         | 2.97<br>(1.78 to<br>3.94)                         | 2.87<br>(1.73 to<br>3.78)                         | 2.71<br>(1.60 to<br>3.66)                          |
| Other exposure to mechanical forces             | 101.28<br>(92.98 to<br>145.53)                             | 87.80<br>(64.79 to<br>123.00)                              | 75.09<br>(54.37 to<br>106.45)                              | 89.97<br>(64.84 to<br>125.83)                              | 3.07<br>(2.81 to<br>4.19)                         | 3.27<br>(2.59 to<br>4.30)                         | 2.89<br>(2.28 to<br>3.86)                         | 3.21<br>(2.49 to<br>4.26)                          |
| Adverse effects of medical treatment            | 111.75<br>(93.68 to<br>150.90)                             | 148.55<br>(112.41 to<br>210.69)                            | 140.35<br>(106.26 to<br>198.16)                            | 145.80<br>(111.73 to<br>207.14)                            | 5.18<br>(4.47 to<br>7.44)                         | 5.18<br>(6.91 to<br>13.16)                        | 8.70<br>(6.73 to<br>12.96)                        | 8.33<br>(6.51 to<br>12.36)                         |
| Animal contact                                  | 10.17<br>(7.56 to<br>13.88)                                | 12.22<br>(8.38 to<br>16.85)                                | 10.84<br>(7.46 to<br>14.77)                                | 12.52<br>(8.68 to<br>17.09)                                | 0.30<br>(0.22 to<br>0.39)                         | 0.43<br>(0.30 to<br>0.56)                         | 0.39<br>(0.28 to<br>0.53)                         | 0.42<br>(0.30 to<br>0.56)                          |
| Venomous animal contact                         | 3.92<br>(2.62 to<br>5.61)                                  | 4.84<br>(2.88 to<br>7.18)                                  | 4.46<br>(2.65 to<br>6.49)                                  | 4.89<br>(2.94 to<br>7.17)                                  | 0.12<br>(0.07 to<br>0.16)                         | 0.16<br>(0.09 to<br>0.23)                         | 0.15<br>(0.09 to<br>0.22)                         | 0.16<br>(0.09 to<br>0.23)                          |
| Non-venomous animal contact                     | 6.25<br>(4.63 to<br>8.56)                                  | 7.38<br>(4.99 to<br>10.10)                                 | 6.38<br>(4.36 to<br>8.82)                                  | 7.63<br>(5.18 to<br>10.45)                                 | 0.18<br>(0.13 to<br>0.25)                         | 0.27<br>(0.18 to<br>0.36)                         | 0.24<br>(0.17 to<br>0.33)                         | 0.26<br>(0.18 to<br>0.36)                          |
| Foreign body                                    | 152.39<br>(138.72 to<br>199.85)                            | 181.55<br>(146.74 to<br>236.14)                            | 174.87<br>(140.60 to<br>228.14)                            | 179.35<br>(145.06 to<br>232.54)                            | 6.55<br>(5.96 to<br>8.22)                         | 10.16<br>(8.62 to<br>12.93)                       | 10.32<br>(8.67 to<br>13.17)                       | 9.38<br>(8.02 to<br>11.74)                         |
| Pulmonary aspiration and foreign body in airway | 148.86<br>(135.06 to<br>196.67)                            | 176.95<br>(142.65 to<br>231.54)                            | 170.13<br>(136.38 to<br>223.42)                            | 174.83<br>(140.99 to<br>228.90)                            | 6.44<br>(5.84 to<br>8.13)                         | 9.97<br>(8.45 to<br>12.76)                        | 10.12<br>(8.49 to<br>13.01)                       | 9.21<br>(7.85 to<br>11.62)                         |
| Foreign body in other body part                 | 3.53<br>(2.73 to<br>4.00)                                  | 4.60<br>(3.19 to<br>5.92)                                  | 4.74<br>(3.30 to<br>6.10)                                  | 4.53<br>(3.16 to<br>5.80)                                  | 0.11<br>(0.08 to<br>0.12)                         | 0.19<br>(0.12 to<br>0.23)                         | 0.20<br>(0.13 to<br>0.25)                         | 0.17<br>(0.11 to<br>0.22)                          |
| Environmental heat and cold exposure            | 40.10<br>(29.08 to<br>72.06)                               | 46.17<br>(30.32 to<br>86.84)                               | 39.36<br>(25.34 to<br>75.79)                               | 46.79<br>(30.51 to<br>88.21)                               | 1.58<br>(1.24 to<br>3.06)                         | 2.33<br>(1.58 to<br>4.70)                         | 2.06<br>(1.38 to<br>4.23)                         | 2.24<br>(1.52 to<br>4.49)                          |
| Other unintentional injuries                    | 24.72<br>(23.18 to<br>26.08)                               | 12.24<br>(8.63 to<br>16.66)                                | 8.93<br>(6.16 to<br>12.31)                                 | 13.17<br>(9.16 to<br>18.18)                                | 0.60<br>(0.57 to<br>0.63)                         | 0.38<br>(0.29 to<br>0.49)                         | 0.28<br>(0.21 to<br>0.37)                         | 0.39<br>(0.29 to<br>0.51)                          |
| <b>Self-harm and interpersonal violence</b>     | <b>2,822.95</b><br><b>(2,422.91 to</b><br><b>3,129.60)</b> | <b>2,326.12</b><br><b>(1,268.84 to</b><br><b>3,809.08)</b> | <b>1,836.42</b><br><b>(1,021.17 to</b><br><b>2,928.52)</b> | <b>2,598.71</b><br><b>(1,356.41 to</b><br><b>4,321.04)</b> | <b>64.88</b><br><b>(55.89 to</b><br><b>72.14)</b> | <b>59.71</b><br><b>(34.22 to</b><br><b>94.24)</b> | <b>48.19</b><br><b>(28.56 to</b><br><b>74.53)</b> | <b>65.35</b><br><b>(35.97 to</b><br><b>106.08)</b> |
| <b>United States</b>                            |                                                            |                                                            |                                                            |                                                            |                                                   |                                                   |                                                   |                                                    |
| Cause                                           | YLLs (in 1000s)                                            |                                                            |                                                            |                                                            | Deaths (in 1000s)                                 |                                                   |                                                   |                                                    |
|                                                 | 2016                                                       | 2040 Forecast                                              | 2040 Better Scenario                                       | 2040 Worse Scenario                                        | 2016                                              | 2040 Forecast                                     | 2040 Better Scenario                              | 2040 Worse Scenario                                |
| Self-harm                                       | 1,874.34<br>(1,597.34 to<br>2,069.74)                      | 1,697.73<br>(827.23 to<br>2,973.14)                        | 1,314.24<br>(681.24 to<br>2,245.57)                        | 1,931.50<br>(900.74 to<br>3,446.12)                        | 46.61<br>(39.30 to<br>52.04)                      | 46.53<br>(25.02 to<br>77.95)                      | 37.11<br>(20.78 to<br>59.81)                      | 51.49<br>(26.44 to<br>87.17)                       |
| Self-harm by firearm                            | 892.96<br>(700.73 to<br>1,062.32)                          | 688.75<br>(322.49 to<br>1,245.45)                          | 517.75<br>(255.15 to<br>902.32)                            | 784.95<br>(351.40 to<br>1,465.41)                          | 23.85<br>(18.48 to<br>27.87)                      | 21.09<br>(10.96 to<br>35.69)                      | 16.50<br>(8.93 to<br>27.22)                       | 23.17<br>(11.54 to<br>40.62)                       |
| Self-harm by other specified means              | 981.38<br>(771.25 to<br>1,176.58)                          | 1,008.98<br>(500.15 to<br>1,746.04)                        | 796.48<br>(407.10 to<br>1,331.62)                          | 1,146.55<br>(542.53 to<br>2,037.97)                        | 22.76<br>(17.75 to<br>27.56)                      | 25.44<br>(13.50 to<br>42.32)                      | 20.61<br>(11.33 to<br>33.28)                      | 28.32<br>(14.38 to<br>48.78)                       |
| Interpersonal violence                          | 948.61<br>(623.41 to<br>1,220.68)                          | 628.38<br>(378.18 to<br>912.16)                            | 522.18<br>(315.16 to<br>762.62)                            | 667.21<br>(397.80 to<br>966.06)                            | 18.27<br>(12.13 to<br>24.00)                      | 13.18<br>(8.15 to<br>18.80)                       | 11.08<br>(6.90 to<br>15.58)                       | 13.86<br>(8.50 to<br>19.89)                        |



|                                                                              |                                 |                                 |                                 |                                 |                             |                            |                           |                            |
|------------------------------------------------------------------------------|---------------------------------|---------------------------------|---------------------------------|---------------------------------|-----------------------------|----------------------------|---------------------------|----------------------------|
| Physical violence by firearm                                                 | 659.75<br>(354.17 to<br>800.63) | 406.78<br>(206.61 to<br>609.23) | 334.17<br>(168.36 to<br>503.02) | 429.02<br>(207.07 to<br>650.42) | 12.42<br>(6.72 to<br>15.15) | 8.12<br>(4.19 to<br>11.81) | 6.72<br>(3.53 to<br>9.87) | 8.50<br>(4.26 to<br>12.68) |
| Physical violence by sharp object                                            | 120.44<br>(75.43 to<br>230.42)  | 91.68<br>(52.45 to<br>172.25)   | 78.33<br>(45.86 to<br>141.87)   | 95.25<br>(55.96 to<br>178.32)   | 2.55<br>(1.62 to<br>4.78)   | 2.11<br>(1.28 to<br>3.77)  | 1.82<br>(1.13 to<br>3.16) | 2.16<br>(1.33 to<br>3.86)  |
| Physical violence by other means                                             | 168.42<br>(120.61 to<br>308.50) | 129.93<br>(78.68 to<br>236.71)  | 109.69<br>(66.73 to<br>201.23)  | 142.94<br>(84.91 to<br>262.08)  | 3.31<br>(2.35 to<br>6.42)   | 2.95<br>(1.76 to<br>5.59)  | 2.53<br>(1.54 to<br>4.69) | 3.19<br>(1.85 to<br>6.08)  |
| Forces of nature, conflict and terrorism, and executions and police conflict | 25.55<br>(15.15 to<br>30.06)    | 46.93<br>(3.29 to<br>305.07)    | 46.57<br>(3.27 to<br>302.89)    | 47.14<br>(3.31 to<br>306.48)    | 0.51<br>(0.30 to<br>0.59)   | 1.00<br>(0.08 to<br>6.12)  | 1.00<br>(0.08 to<br>6.19) | 0.98<br>(0.08 to<br>5.98)  |
| Exposure to forces of nature                                                 | 0.00<br>(0.00 to<br>0.00)       | 11.08<br>(2.33 to<br>36.21)     | 11.02<br>(2.32 to<br>35.98)     | 11.10<br>(2.34 to<br>36.28)     | 0.00<br>(0.00 to<br>0.00)   | 0.29<br>(0.06 to<br>0.95)  | 0.29<br>(0.06 to<br>0.95) | 0.28<br>(0.06 to<br>0.91)  |
| Conflict and terrorism                                                       | 0.00<br>(0.00 to<br>0.00)       | 35.85<br>(0.00 to<br>279.34)    | 35.55<br>(0.00 to<br>277.30)    | 36.04<br>(0.00 to<br>280.71)    | 0.00<br>(0.00 to<br>0.00)   | 0.71<br>(0.00 to<br>5.69)  | 0.71<br>(0.00 to<br>5.79) | 0.70<br>(0.00 to<br>5.56)  |
| Executions and police conflict                                               | 25.55<br>(15.15 to<br>30.06)    | 0.00<br>(0.00 to<br>0.00)       | 0.00<br>(0.00 to<br>0.00)       | 0.00<br>(0.00 to<br>0.00)       | 0.51<br>(0.30 to<br>0.59)   | 0.00<br>(0.00 to<br>0.00)  | 0.00<br>(0.00 to<br>0.00) | 0.00<br>(0.00 to<br>0.00)  |

#### Latin America and Caribbean

| Cause                                                             | YLLs (in 1000s)                                 |                                                   |                                                 |                                                    | Deaths (in 1000s)                            |                                              |                                              |                                              |
|-------------------------------------------------------------------|-------------------------------------------------|---------------------------------------------------|-------------------------------------------------|----------------------------------------------------|----------------------------------------------|----------------------------------------------|----------------------------------------------|----------------------------------------------|
|                                                                   | 2016                                            | 2040 Forecast                                     | 2040 Better Scenario                            | 2040 Worse Scenario                                | 2016                                         | 2040 Forecast                                | 2040 Better Scenario                         | 2040 Worse Scenario                          |
| <b>All causes</b>                                                 | <b>88,320.86</b><br>(86,630.30 to<br>90,147.42) | <b>102,077.88</b><br>(87,735.00 to<br>118,618.12) | <b>76,307.57</b><br>(65,852.34 to<br>87,387.98) | <b>129,753.47</b><br>(110,427.41 to<br>150,146.76) | <b>3,229.83</b><br>(3,172.77 to<br>3,287.67) | <b>5,380.64</b><br>(4,603.83 to<br>6,161.16) | <b>4,269.89</b><br>(3,656.53 to<br>4,851.63) | <b>6,436.83</b><br>(5,505.92 to<br>7,364.28) |
| Communicable, maternal, neonatal, and nutritional diseases        | 17,250.33<br>(16,521.50 to<br>18,168.16)        | 11,666.12<br>(9,917.69 to<br>14,040.08)           | 8,192.69<br>(7,048.77 to<br>9,752.47)           | 16,390.40<br>(13,738.74 to<br>20,197.18)           | 386.11<br>(372.76 to<br>400.47)              | 453.19<br>(384.10 to<br>546.38)              | 372.28<br>(316.39 to<br>446.07)              | 574.78<br>(477.90 to<br>709.51)              |
| HIV/AIDS and tuberculosis                                         | 2,385.10<br>(2,294.91 to<br>2,502.04)           | 1,699.82<br>(1,303.68 to<br>2,014.81)             | 1,187.07<br>(802.45 to<br>1,454.19)             | 2,325.50<br>(2,255.36 to<br>3,436.35)              | 56.28<br>(54.35 to<br>58.61)                 | 44.94<br>(33.06 to<br>54.90)                 | 30.93<br>(19.76 to<br>39.19)                 | 71.18<br>(55.05 to<br>87.38)                 |
| Tuberculosis                                                      | 526.79<br>(495.34 to<br>568.43)                 | 391.39<br>(279.40 to<br>562.30)                   | 180.84<br>(132.61 to<br>258.22)                 | 589.79<br>(409.49 to<br>885.25)                    | 16.12<br>(15.26 to<br>17.29)                 | 15.17<br>(10.97 to<br>21.58)                 | 7.37<br>(5.50 to<br>10.29)                   | 22.00<br>(15.22 to<br>32.31)                 |
| HIV/AIDS                                                          | 1,858.31<br>(1,772.87 to<br>1,977.43)           | 1,308.44<br>(941.74 to<br>1,570.61)               | 1,006.23<br>(634.93 to<br>1,268.18)             | 2,235.71<br>(1,734.59 to<br>2,812.42)              | 40.16<br>(38.54 to<br>42.41)                 | 29.78<br>(19.24 to<br>36.91)                 | 23.56<br>(12.74 to<br>30.93)                 | 49.18<br>(36.28 to<br>62.22)                 |
| Diarrhea, lower respiratory, and other common infectious diseases | 6,423.02<br>(6,069.34 to<br>6,859.88)           | 5,450.12<br>(4,172.02 to<br>7,400.09)             | 3,895.93<br>(3,054.85 to<br>5,183.88)           | 7,958.09<br>(5,773.93 to<br>11,279.42)             | 197.60<br>(187.12 to<br>208.62)              | 302.08<br>(240.23 to<br>392.36)              | 248.53<br>(197.62 to<br>319.24)              | 387.48<br>(298.24 to<br>519.15)              |
| Diarrheal diseases                                                | 1,111.16<br>(983.54 to<br>1,286.64)             | 503.22<br>(189.28 to<br>1,211.42)                 | 480.93<br>(207.69 to<br>1,077.33)               | 752.08<br>(239.89 to<br>2,061.41)                  | 24.03<br>(21.72 to<br>27.91)                 | 25.57<br>(10.13 to<br>59.63)                 | 30.82<br>(13.63 to<br>68.29)                 | 32.87<br>(11.34 to<br>86.26)                 |
| Intestinal infectious diseases                                    | 11.00<br>(5.85 to<br>18.21)                     | 8.16<br>(4.11 to<br>14.46)                        | 7.84<br>(3.95 to<br>13.79)                      | 8.50<br>(4.29 to<br>15.01)                         | 0.24<br>(0.13 to<br>0.39)                    | 0.22<br>(0.12 to<br>0.38)                    | 0.23<br>(0.12 to<br>0.39)                    | 0.22<br>(0.12 to<br>0.38)                    |
| Typhoid fever                                                     | 9.71<br>(4.90 to<br>16.71)                      | 7.51<br>(3.67 to<br>13.42)                        | 7.34<br>(3.59 to<br>13.20)                      | 7.76<br>(3.77 to<br>13.83)                         | 0.21<br>(0.11 to<br>0.36)                    | 0.20<br>(0.10 to<br>0.35)                    | 0.21<br>(0.11 to<br>0.37)                    | 0.20<br>(0.10 to<br>0.35)                    |
| Paratyphoid fever                                                 | 0.25<br>(0.10 to<br>0.49)                       | 0.20<br>(0.09 to<br>0.41)                         | 0.15<br>(0.06 to<br>0.31)                       | 0.22<br>(0.09 to<br>0.44)                          | 0.01<br>(0.00 to<br>0.01)                    | 0.01<br>(0.00 to<br>0.01)                    | 0.00<br>(0.00 to<br>0.01)                    | 0.01<br>(0.00 to<br>0.01)                    |
| Other intestinal infectious diseases                              | 1.04<br>(0.41 to<br>2.29)                       | 0.45<br>(0.17 to<br>1.00)                         | 0.35<br>(0.13 to<br>0.78)                       | 0.52<br>(0.20 to<br>1.13)                          | 0.02<br>(0.01 to<br>0.04)                    | 0.02<br>(0.01 to<br>0.04)                    | 0.01<br>(0.01 to<br>0.03)                    | 0.02<br>(0.01 to<br>0.04)                    |
| Lower respiratory infections                                      | 4,530.04<br>(4,327.94 to<br>4,770.60)           | 4,091.56<br>(3,081.36 to<br>5,619.57)             | 2,866.72<br>(2,235.40 to<br>3,779.08)           | 5,920.56<br>(4,250.29 to<br>8,467.11)              | 160.84<br>(150.91 to<br>170.36)              | 259.83<br>(207.92 to<br>332.70)              | 205.74<br>(167.45 to<br>257.63)              | 331.94<br>(255.94 to<br>439.54)              |
| Upper respiratory infections                                      | 3.84<br>(3.21 to<br>4.75)                       | 2.48<br>(1.84 to<br>3.31)                         | 1.38<br>(1.04 to<br>1.85)                       | 3.10<br>(2.27 to<br>4.20)                          | 0.08<br>(0.07 to<br>0.10)                    | 0.09<br>(0.07 to<br>0.11)                    | 0.05<br>(0.04 to<br>0.06)                    | 0.10<br>(0.08 to<br>0.13)                    |

|                                                |                                      |                                      |                                      |                                      |                                   |                                   |                                   |                                   |
|------------------------------------------------|--------------------------------------|--------------------------------------|--------------------------------------|--------------------------------------|-----------------------------------|-----------------------------------|-----------------------------------|-----------------------------------|
| Otitis media                                   | 1.96<br>(1.67 to 2.41)               | 0.36<br>(0.24 to 0.54)               | 0.37<br>(0.25 to 0.55)               | 0.36<br>(0.24 to 0.54)               | 0.04<br>(0.04 to 0.05)            | 0.01<br>(0.01 to 0.02)            | 0.01<br>(0.01 to 0.02)            | 0.01<br>(0.01 to 0.02)            |
| Meningitis                                     | 441.06<br>(387.76 to 532.17)         | 195.98<br>(135.07 to 270.65)         | 141.64<br>(103.01 to 186.32)         | 258.96<br>(162.69 to 390.79)         | 7.21<br>(6.49 to 8.31)            | 4.60<br>(3.72 to 5.70)            | 3.65<br>(3.02 to 4.40)            | 5.38<br>(4.11 to 7.02)            |
| Pneumococcal meningitis                        | 59.21<br>(50.19 to 73.15)            | 24.39<br>(18.65 to 31.44)            | 22.90<br>(17.96 to 28.65)            | 26.98<br>(19.83 to 36.11)            | 1.08<br>(0.96 to 1.26)            | 0.72<br>(0.60 to 0.87)            | 0.72<br>(0.61 to 0.86)            | 0.74<br>(0.62 to 0.91)            |
| H influenzae type B meningitis                 | 44.55<br>(36.46 to 57.81)            | 42.49<br>(14.85 to 97.99)            | 26.53<br>(11.63 to 52.05)            | 84.59<br>(23.70 to 207.83)           | 0.67<br>(0.56 to 0.82)            | 0.65<br>(0.31 to 1.31)            | 0.47<br>(0.29 to 0.77)            | 1.13<br>(0.41 to 2.57)            |
| Meningococcal meningitis                       | 160.82<br>(138.11 to 196.14)         | 55.10<br>(39.84 to 73.93)            | 38.70<br>(28.47 to 50.90)            | 64.14<br>(45.54 to 86.19)            | 2.53<br>(2.24 to 2.99)            | 1.32<br>(1.08 to 1.63)            | 0.99<br>(0.81 to 1.20)            | 1.46<br>(1.19 to 1.81)            |
| Other meningitis                               | 176.49<br>(152.10 to 217.29)         | 74.00<br>(54.57 to 96.61)            | 53.50<br>(40.28 to 69.76)            | 83.24<br>(60.48 to 111.20)           | 2.93<br>(2.60 to 3.44)            | 1.91<br>(1.58 to 2.30)            | 1.47<br>(1.23 to 1.73)            | 2.05<br>(1.71 to 2.47)            |
| Encephalitis                                   | 172.46<br>(147.74 to 237.09)         | 118.57<br>(82.25 to 171.83)          | 95.72<br>(68.57 to 134.27)           | 128.59<br>(88.39 to 187.93)          | 2.95<br>(2.58 to 3.85)            | 2.96<br>(2.24 to 3.77)            | 2.60<br>(1.99 to 3.24)            | 3.08<br>(2.35 to 3.95)            |
| Diphtheria                                     | 0.96<br>(0.83 to 1.14)               | 0.19<br>(0.11 to 0.30)               | 0.12<br>(0.09 to 0.17)               | 0.36<br>(0.16 to 0.66)               | 0.01<br>(0.01 to 0.02)            | 0.00<br>(0.00 to 0.00)            | 0.00<br>(0.00 to 0.00)            | 0.01<br>(0.00 to 0.01)            |
| Whooping cough                                 | 97.89<br>(47.70 to 200.03)           | 59.03<br>(13.34 to 151.21)           | 14.14<br>(3.76 to 38.42)             | 104.80<br>(25.75 to 242.81)          | 1.16<br>(0.57 to 2.37)            | 0.70<br>(0.16 to 1.80)            | 0.17<br>(0.05 to 0.46)            | 1.24<br>(0.31 to 2.87)            |
| Tetanus                                        | 15.62<br>(10.77 to 24.30)            | 2.72<br>(1.70 to 4.74)               | 1.93<br>(1.29 to 3.06)               | 3.46<br>(2.13 to 6.01)               | 0.33<br>(0.24 to 0.51)            | 0.07<br>(0.05 to 0.11)            | 0.06<br>(0.04 to 0.10)            | 0.07<br>(0.05 to 0.12)            |
| Measles                                        | 0.96<br>(0.80 to 1.10)               | 453.14<br>(130.16 to 1,118.67)       | 275.64<br>(88.91 to 641.87)          | 759.81<br>(196.81 to 1,928.63)       | 0.01<br>(0.01 to 0.01)            | 7.53<br>(2.39 to 16.48)           | 4.83<br>(1.64 to 10.00)           | 12.02<br>(3.61 to 27.25)          |
| <b>Latin America and Caribbean</b>             |                                      |                                      |                                      |                                      |                                   |                                   |                                   |                                   |
| Cause                                          | YLLs (in 1000s)                      |                                      |                                      |                                      | Deaths (in 1000s)                 |                                   |                                   |                                   |
|                                                | 2016                                 | 2040 Forecast                        | 2040 Better Scenario                 | 2040 Worse Scenario                  | 2016                              | 2040 Forecast                     | 2040 Better Scenario              | 2040 Worse Scenario               |
| Varicella and herpes zoster                    | 36.06<br>(23.26 to 56.18)            | 14.71<br>(8.17 to 22.15)             | 9.51<br>(5.40 to 14.13)              | 17.51<br>(9.55 to 27.00)             | 0.69<br>(0.44 to 1.02)            | 0.49<br>(0.31 to 0.70)            | 0.36<br>(0.23 to 0.51)            | 0.53<br>(0.34 to 0.76)            |
| <b>Neglected tropical diseases and malaria</b> | <b>372.97<br/>(329.83 to 415.63)</b> | <b>399.77<br/>(341.26 to 457.34)</b> | <b>400.98<br/>(350.89 to 454.05)</b> | <b>401.54<br/>(339.73 to 463.30)</b> | <b>11.45<br/>(10.46 to 12.39)</b> | <b>15.06<br/>(13.43 to 16.53)</b> | <b>16.53<br/>(14.86 to 18.17)</b> | <b>14.12<br/>(12.56 to 15.61)</b> |
| Malaria                                        | 12.98<br>(9.26 to 28.57)             | 5.99<br>(3.43 to 16.97)              | 5.59<br>(3.22 to 15.89)              | 6.23<br>(3.56 to 17.70)              | 0.26<br>(0.19 to 0.60)            | 0.16<br>(0.09 to 0.44)            | 0.15<br>(0.09 to 0.43)            | 0.16<br>(0.09 to 0.44)            |
| Chagas disease                                 | 145.28<br>(133.69 to 157.15)         | 90.11<br>(76.93 to 110.87)           | 110.41<br>(94.80 to 133.53)          | 79.19<br>(67.24 to 98.99)            | 6.66<br>(6.25 to 7.23)            | 5.23<br>(4.52 to 6.36)            | 6.55<br>(5.66 to 7.53)            | 4.30<br>(3.87 to 5.56)            |
| Leishmaniasis                                  | 39.84<br>(22.62 to 65.64)            | 8.34<br>(4.84 to 19.25)              | 6.22<br>(3.57 to 13.97)              | 10.26<br>(6.06 to 24.84)             | 0.62<br>(0.36 to 1.00)            | 0.17<br>(0.10 to 0.31)            | 0.13<br>(0.07 to 0.23)            | 0.20<br>(0.11 to 0.38)            |
| African trypanosomiasis                        | 0.00<br>(0.00 to 0.00)               | 0.00<br>(0.00 to 0.00)               | 0.00<br>(0.00 to 0.00)               | 0.00<br>(0.00 to 0.00)               | 0.00<br>(0.00 to 0.00)            | 0.00<br>(0.00 to 0.00)            | 0.00<br>(0.00 to 0.00)            | 0.00<br>(0.00 to 0.00)            |
| Schistosomiasis                                | 18.85<br>(16.24 to 21.74)            | 8.27<br>(6.71 to 10.32)              | 7.80<br>(6.32 to 9.81)               | 8.35<br>(6.73 to 10.62)              | 0.63<br>(0.55 to 0.73)            | 0.38<br>(0.31 to 0.48)            | 0.37<br>(0.30 to 0.46)            | 0.37<br>(0.30 to 0.47)            |
| Cysticercosis                                  | 8.39<br>(7.70 to 9.32)               | 2.06<br>(1.70 to 2.61)               | 1.93<br>(1.60 to 2.41)               | 2.10<br>(1.74 to 2.67)               | 0.20<br>(0.19 to 0.22)            | 0.06<br>(0.05 to 0.08)            | 0.06<br>(0.05 to 0.07)            | 0.06<br>(0.05 to 0.08)            |
| Cystic echinococcosis                          | 0.60<br>(0.52 to 0.69)               | 0.25<br>(0.20 to 0.32)               | 0.17<br>(0.14 to 0.21)               | 0.31<br>(0.24 to 0.39)               | 0.02<br>(0.01 to 0.02)            | 0.01<br>(0.01 to 0.01)            | 0.01<br>(0.01 to 0.01)            | 0.01<br>(0.01 to 0.02)            |

|                                                          |                                              |                                              |                                              |                                              |                                     |                                     |                                     |                                     |
|----------------------------------------------------------|----------------------------------------------|----------------------------------------------|----------------------------------------------|----------------------------------------------|-------------------------------------|-------------------------------------|-------------------------------------|-------------------------------------|
| Dengue                                                   | 111.67<br>(75.10 to<br>141.07)               | 267.32<br>(202.42 to<br>325.05)              | 254.43<br>(194.68 to<br>303.77)              | 275.21<br>(205.10 to<br>337.06)              | 2.46<br>(1.65 to<br>3.10)           | 8.66<br>(6.50 to<br>10.29)          | 8.90<br>(6.79 to<br>10.57)          | 8.39<br>(6.29 to<br>9.96)           |
| Yellow fever                                             | 5.29<br>(1.19 to<br>15.42)                   | 1.49<br>(0.21 to<br>5.45)                    | 1.05<br>(0.15 to<br>3.99)                    | 1.81<br>(0.27 to<br>6.52)                    | 0.09<br>(0.02 to<br>0.26)           | 0.03<br>(0.00 to<br>0.10)           | 0.02<br>(0.00 to<br>0.07)           | 0.03<br>(0.01 to<br>0.12)           |
| Rabies                                                   | 0.19<br>(0.15 to<br>0.26)                    | 0.07<br>(0.04 to<br>0.11)                    | 0.04<br>(0.03 to<br>0.06)                    | 0.09<br>(0.06 to<br>0.16)                    | 0.00<br>(0.00 to<br>0.00)           | 0.00<br>(0.00 to<br>0.00)           | 0.00<br>(0.00 to<br>0.00)           | 0.00<br>(0.00 to<br>0.00)           |
| Intestinal nematode infections                           | 6.38<br>(5.44 to<br>7.44)                    | 4.44<br>(3.40 to<br>5.96)                    | 3.82<br>(2.97 to<br>5.18)                    | 4.82<br>(3.70 to<br>6.46)                    | 0.09<br>(0.08 to<br>0.11)           | 0.08<br>(0.07 to<br>0.11)           | 0.08<br>(0.06 to<br>0.10)           | 0.08<br>(0.07 to<br>0.11)           |
| Other neglected tropical diseases                        | 22.56<br>(16.35 to<br>31.44)                 | 11.43<br>(8.65 to<br>17.93)                  | 9.51<br>(6.90 to<br>14.25)                   | 13.09<br>(9.72 to<br>20.75)                  | 0.39<br>(0.30 to<br>0.56)           | 0.28<br>(0.22 to<br>0.47)           | 0.26<br>(0.20 to<br>0.42)           | 0.30<br>(0.24 to<br>0.50)           |
| <b>Maternal disorders</b>                                | <b>418.06</b><br>(386.27 to<br>462.39)       | <b>251.16</b><br>(204.95 to<br>311.79)       | <b>158.85</b><br>(128.36 to<br>195.76)       | <b>313.85</b><br>(256.34 to<br>383.84)       | <b>7.45</b><br>(6.85 to<br>8.25)    | <b>4.59</b><br>(3.74 to<br>5.66)    | <b>2.90</b><br>(2.36 to<br>3.55)    | <b>5.72</b><br>(4.64 to<br>7.01)    |
| Maternal hemorrhage                                      | 83.46<br>(68.13 to<br>100.53)                | 51.29<br>(39.88 to<br>65.76)                 | 32.74<br>(25.09 to<br>42.22)                 | 63.95<br>(49.26 to<br>82.16)                 | 1.51<br>(1.24 to<br>1.82)           | 0.94<br>(0.73 to<br>1.21)           | 0.60<br>(0.47 to<br>0.78)           | 1.18<br>(0.91 to<br>1.51)           |
| Maternal sepsis and other maternal infections            | 38.47<br>(30.64 to<br>47.56)                 | 20.62<br>(14.69 to<br>27.92)                 | 13.52<br>(9.61 to<br>18.37)                  | 25.90<br>(18.46 to<br>35.20)                 | 0.69<br>(0.55 to<br>0.85)           | 0.38<br>(0.27 to<br>0.52)           | 0.25<br>(0.18 to<br>0.34)           | 0.47<br>(0.34 to<br>0.64)           |
| Maternal hypertensive disorders                          | 96.75<br>(80.84 to<br>115.05)                | 57.10<br>(43.59 to<br>73.86)                 | 35.64<br>(27.62 to<br>45.95)                 | 70.74<br>(54.08 to<br>91.30)                 | 1.69<br>(1.42 to<br>2.02)           | 1.02<br>(0.78 to<br>1.30)           | 0.63<br>(0.49 to<br>0.81)           | 1.26<br>(0.96 to<br>1.61)           |
| Maternal obstructed labor and uterine rupture            | 9.75<br>(6.82 to<br>13.38)                   | 5.99<br>(3.98 to<br>8.79)                    | 3.51<br>(2.35 to<br>5.14)                    | 7.45<br>(4.89 to<br>10.79)                   | 0.18<br>(0.12 to<br>0.24)           | 0.11<br>(0.07 to<br>0.16)           | 0.07<br>(0.04 to<br>0.10)           | 0.14<br>(0.09 to<br>0.20)           |
| Maternal abortion, miscarriage, and ectopic pregnancy    | 46.49<br>(37.50 to<br>56.85)                 | 31.48<br>(20.61 to<br>49.25)                 | 20.19<br>(13.29 to<br>31.61)                 | 39.06<br>(25.11 to<br>61.29)                 | 0.86<br>(0.70 to<br>1.06)           | 0.60<br>(0.39 to<br>0.92)           | 0.38<br>(0.25 to<br>0.59)           | 0.74<br>(0.48 to<br>1.16)           |
| Indirect maternal deaths                                 | 69.61<br>(55.58 to<br>86.86)                 | 37.72<br>(26.55 to<br>51.57)                 | 23.82<br>(16.61 to<br>32.55)                 | 46.60<br>(32.82 to<br>64.64)                 | 1.20<br>(0.96 to<br>1.50)           | 0.67<br>(0.47 to<br>0.91)           | 0.42<br>(0.30 to<br>0.57)           | 0.82<br>(0.58 to<br>1.14)           |
| Late maternal deaths                                     | 15.29<br>(12.08 to<br>19.40)                 | 5.87<br>(4.08 to<br>8.39)                    | 3.57<br>(2.47 to<br>5.01)                    | 7.23<br>(5.04 to<br>10.38)                   | 0.27<br>(0.21 to<br>0.34)           | 0.11<br>(0.07 to<br>0.15)           | 0.06<br>(0.05 to<br>0.09)           | 0.13<br>(0.09 to<br>0.19)           |
| Maternal deaths aggravated by HIV/AIDS                   | 1.10<br>(0.58 to<br>1.74)                    | 5.34<br>(1.46 to<br>11.32)                   | 2.82<br>(0.83 to<br>6.06)                    | 9.31<br>(3.72 to<br>17.11)                   | 0.02<br>(0.01 to<br>0.03)           | 0.11<br>(0.03 to<br>0.22)           | 0.06<br>(0.02 to<br>0.12)           | 0.19<br>(0.07 to<br>0.35)           |
| Other maternal disorders                                 | 57.13<br>(45.56 to<br>70.46)                 | 35.74<br>(26.07 to<br>47.79)                 | 23.03<br>(16.77 to<br>30.86)                 | 43.61<br>(31.24 to<br>58.90)                 | 1.03<br>(0.82 to<br>1.28)           | 0.66<br>(0.48 to<br>0.89)           | 0.42<br>(0.31 to<br>0.57)           | 0.80<br>(0.58 to<br>1.11)           |
| <b>Latin America and Caribbean</b>                       |                                              |                                              |                                              |                                              |                                     |                                     |                                     |                                     |
| Cause                                                    | YLLs (in 1000s)                              |                                              |                                              |                                              | Deaths (in 1000s)                   |                                     |                                     |                                     |
|                                                          | 2016                                         | 2040 Forecast                                | 2040 Better Scenario                         | 2040 Worse Scenario                          | 2016                                | 2040 Forecast                       | 2040 Better Scenario                | 2040 Worse Scenario                 |
| <b>Neonatal disorders</b>                                | <b>6,447.23</b><br>(6,084.40 to<br>6,914.61) | <b>2,962.63</b><br>(2,345.95 to<br>3,704.10) | <b>1,740.67</b><br>(1,402.35 to<br>2,184.41) | <b>3,936.95</b><br>(3,105.74 to<br>4,909.52) | <b>74.51</b><br>(70.32 to<br>79.91) | <b>34.24</b><br>(27.12 to<br>42.81) | <b>20.12</b><br>(16.21 to<br>25.25) | <b>45.50</b><br>(35.90 to<br>56.74) |
| Neonatal preterm birth                                   | 2,741.43<br>(2,554.14 to<br>2,927.29)        | 1,158.90<br>(957.83 to<br>1,376.61)          | 599.09<br>(508.85 to<br>700.08)              | 1,612.04<br>(1,330.10 to<br>1,908.70)        | 31.67<br>(29.51 to<br>33.82)        | 13.39<br>(11.07 to<br>15.91)        | 6.92<br>(5.88 to<br>8.09)           | 18.63<br>(15.37 to<br>22.05)        |
| Neonatal encephalopathy due to birth asphyxia and trauma | 1,504.31<br>(1,360.55 to<br>1,669.66)        | 624.92<br>(444.15 to<br>881.11)              | 376.43<br>(271.32 to<br>528.91)              | 816.06<br>(572.43 to<br>1,152.60)            | 17.39<br>(15.73 to<br>19.30)        | 7.23<br>(5.14 to<br>10.18)          | 4.35<br>(3.14 to<br>6.11)           | 9.44<br>(6.62 to<br>13.32)          |
| Neonatal sepsis and other neonatal infections            | 1,252.59<br>(1,107.77 to<br>1,594.08)        | 751.66<br>(560.62 to<br>1,014.07)            | 468.40<br>(356.74 to<br>609.39)              | 960.69<br>(706.30 to<br>1,303.34)            | 14.48<br>(12.80 to<br>18.42)        | 8.69<br>(6.48 to<br>11.72)          | 5.41<br>(4.12 to<br>7.04)           | 11.10<br>(8.16 to<br>15.06)         |
| Hemolytic disease and other neonatal jaundice            | 50.66<br>(41.77 to<br>64.91)                 | 17.21<br>(11.21 to<br>27.93)                 | 10.15<br>(6.70 to<br>16.55)                  | 22.92<br>(14.65 to<br>36.98)                 | 0.59<br>(0.48 to<br>0.75)           | 0.20<br>(0.13 to<br>0.32)           | 0.12<br>(0.08 to<br>0.19)           | 0.26<br>(0.17 to<br>0.43)           |

|                                                                         |                                                               |                                                               |                                                               |                                                                |                                                            |                                                            |                                                            |                                                            |
|-------------------------------------------------------------------------|---------------------------------------------------------------|---------------------------------------------------------------|---------------------------------------------------------------|----------------------------------------------------------------|------------------------------------------------------------|------------------------------------------------------------|------------------------------------------------------------|------------------------------------------------------------|
| Other neonatal disorders                                                | 898.25<br>(800.49 to<br>1,019.00)                             | 409.95<br>(299.81 to<br>555.47)                               | 286.60<br>(216.55 to<br>379.98)                               | 525.24<br>(380.20 to<br>725.10)                                | 10.38<br>(9.25 to<br>11.78)                                | 4.74<br>(3.47 to<br>6.42)                                  | 3.31<br>(2.50 to<br>4.39)                                  | 6.07<br>(4.40 to<br>8.38)                                  |
| <b>Nutritional deficiencies</b>                                         | <b>800.83</b><br><b>(747.73 to</b><br><b>871.65)</b>          | <b>636.35</b><br><b>(574.24 to</b><br><b>702.88)</b>          | <b>597.43</b><br><b>(539.81 to</b><br><b>657.59)</b>          | <b>661.29</b><br><b>(595.75 to</b><br><b>734.02)</b>           | <b>30.48</b><br><b>(28.85 to</b><br><b>32.41)</b>          | <b>43.55</b><br><b>(39.08 to</b><br><b>48.21)</b>          | <b>45.89</b><br><b>(41.15 to</b><br><b>50.52)</b>          | <b>41.60</b><br><b>(36.93 to</b><br><b>46.33)</b>          |
| Protein-energy malnutrition                                             | 729.33<br>(669.60 to<br>796.56)                               | 543.03<br>(475.91 to<br>605.76)                               | 523.03<br>(457.65 to<br>583.29)                               | 561.49<br>(491.59 to<br>629.06)                                | 27.73<br>(25.41 to<br>29.62)                               | 38.28<br>(33.04 to<br>43.03)                               | 41.33<br>(35.71 to<br>46.12)                               | 36.32<br>(31.39 to<br>41.05)                               |
| Iodine deficiency                                                       | 3.49<br>(1.95 to<br>6.28)                                     | 13.20<br>(4.41 to<br>29.03)                                   | 10.33<br>(3.16 to<br>26.49)                                   | 14.60<br>(5.14 to<br>31.25)                                    | 0.08<br>(0.05 to<br>0.14)                                  | 0.82<br>(0.20 to<br>2.21)                                  | 0.71<br>(0.16 to<br>2.29)                                  | 0.84<br>(0.22 to<br>2.17)                                  |
| Dietary iron deficiency                                                 | 4.15<br>(2.26 to<br>5.45)                                     | 3.28<br>(1.69 to<br>4.04)                                     | 3.08<br>(1.50 to<br>5.78)                                     | 3.40<br>(1.83 to<br>4.17)                                      | 0.11<br>(0.04 to<br>0.13)                                  | 0.12<br>(0.04 to<br>0.15)                                  | 0.12<br>(0.04 to<br>0.16)                                  | 0.12<br>(0.04 to<br>0.15)                                  |
| Other nutritional deficiencies                                          | 63.86<br>(42.47 to<br>93.40)                                  | 76.84<br>(47.43 to<br>120.17)                                 | 61.00<br>(37.10 to<br>98.53)                                  | 81.79<br>(51.55 to<br>124.99)                                  | 2.55<br>(1.50 to<br>4.21)                                  | 4.33<br>(2.34 to<br>7.47)                                  | 3.73<br>(2.05 to<br>6.58)                                  | 4.33<br>(2.37 to<br>7.53)                                  |
| <b>Other communicable, maternal, neonatal, and nutritional diseases</b> | <b>403.11</b><br><b>(332.13 to</b><br><b>507.04)</b>          | <b>266.26</b><br><b>(237.68 to</b><br><b>303.07)</b>          | <b>211.76</b><br><b>(188.57 to</b><br><b>239.89)</b>          | <b>293.18</b><br><b>(259.68 to</b><br><b>334.47)</b>           | <b>8.34</b><br><b>(7.47 to</b><br><b>9.61)</b>             | <b>8.74</b><br><b>(7.96 to</b><br><b>9.51)</b>             | <b>7.38</b><br><b>(6.71 to</b><br><b>8.08)</b>             | <b>9.16</b><br><b>(8.32 to</b><br><b>9.96)</b>             |
| Sexually transmitted infections excluding HIV                           | 159.63<br>(93.20 to<br>261.20)                                | 36.24<br>(22.93 to<br>58.75)                                  | 26.86<br>(17.71 to<br>42.37)                                  | 43.48<br>(26.64 to<br>71.88)                                   | 2.21<br>(1.43 to<br>3.39)                                  | 0.70<br>(0.53 to<br>0.96)                                  | 0.56<br>(0.44 to<br>0.76)                                  | 0.79<br>(0.58 to<br>1.13)                                  |
| Syphilis                                                                | 144.10<br>(77.54 to<br>245.63)                                | 26.87<br>(13.65 to<br>49.55)                                  | 18.64<br>(9.49 to<br>34.36)                                   | 33.67<br>(16.61 to<br>62.32)                                   | 1.80<br>(1.02 to<br>2.99)                                  | 0.39<br>(0.24 to<br>0.66)                                  | 0.28<br>(0.17 to<br>0.47)                                  | 0.47<br>(0.27 to<br>0.81)                                  |
| Chlamydia infection                                                     | 3.01<br>(2.83 to<br>3.23)                                     | 1.82<br>(1.57 to<br>2.10)                                     | 1.59<br>(1.37 to<br>1.86)                                     | 1.90<br>(1.64 to<br>2.19)                                      | 0.08<br>(0.07 to<br>0.08)                                  | 0.06<br>(0.05 to<br>0.07)                                  | 0.05<br>(0.05 to<br>0.06)                                  | 0.06<br>(0.05 to<br>0.07)                                  |
| Gonococcal infection                                                    | 8.17<br>(7.69 to<br>8.76)                                     | 5.02<br>(4.33 to<br>5.76)                                     | 4.42<br>(3.81 to<br>5.11)                                     | 5.24<br>(4.52 to<br>6.05)                                      | 0.23<br>(0.21 to<br>0.24)                                  | 0.17<br>(0.15 to<br>0.19)                                  | 0.16<br>(0.14 to<br>0.18)                                  | 0.17<br>(0.15 to<br>0.20)                                  |
| Other sexually transmitted infections                                   | 4.36<br>(4.10 to<br>4.68)                                     | 2.54<br>(2.18 to<br>2.95)                                     | 2.21<br>(1.87 to<br>2.56)                                     | 2.67<br>(2.28 to<br>3.10)                                      | 0.11<br>(0.10 to<br>0.12)                                  | 0.07<br>(0.06 to<br>0.08)                                  | 0.07<br>(0.06 to<br>0.08)                                  | 0.08<br>(0.07 to<br>0.09)                                  |
| Acute hepatitis                                                         | 91.65<br>(87.83 to<br>96.18)                                  | 79.93<br>(70.34 to<br>90.53)                                  | 56.17<br>(48.99 to<br>64.74)                                  | 88.47<br>(78.48 to<br>99.25)                                   | 2.50<br>(2.40 to<br>2.60)                                  | 2.91<br>(2.57 to<br>3.28)                                  | 2.11<br>(1.85 to<br>2.41)                                  | 3.14<br>(2.81 to<br>3.49)                                  |
| Acute hepatitis A                                                       | 5.03<br>(4.01 to<br>6.13)                                     | 2.25<br>(1.67 to<br>2.98)                                     | 1.56<br>(1.17 to<br>2.05)                                     | 2.52<br>(1.90 to<br>3.31)                                      | 0.08<br>(0.06 to<br>0.09)                                  | 0.05<br>(0.04 to<br>0.07)                                  | 0.04<br>(0.03 to<br>0.05)                                  | 0.06<br>(0.04 to<br>0.08)                                  |
| Acute hepatitis B                                                       | 66.02<br>(61.90 to<br>70.38)                                  | 60.85<br>(52.03 to<br>71.16)                                  | 42.22<br>(35.95 to<br>50.07)                                  | 67.92<br>(58.39 to<br>77.95)                                   | 1.94<br>(1.81 to<br>2.06)                                  | 2.21<br>(1.89 to<br>2.59)                                  | 1.57<br>(1.32 to<br>1.87)                                  | 2.43<br>(2.10 to<br>2.78)                                  |
| Acute hepatitis C                                                       | 3.49<br>(2.75 to<br>4.37)                                     | 4.27<br>(3.18 to<br>5.63)                                     | 3.27<br>(2.43 to<br>4.37)                                     | 4.49<br>(3.34 to<br>5.93)                                      | 0.11<br>(0.08 to<br>0.14)                                  | 0.16<br>(0.12 to<br>0.22)                                  | 0.13<br>(0.10 to<br>0.17)                                  | 0.17<br>(0.13 to<br>0.22)                                  |
| Acute hepatitis E                                                       | 17.11<br>(14.93 to<br>19.33)                                  | 12.56<br>(9.92 to<br>15.37)                                   | 9.12<br>(7.13 to<br>11.31)                                    | 13.54<br>(10.76 to<br>16.48)                                   | 0.38<br>(0.31 to<br>0.45)                                  | 0.48<br>(0.36 to<br>0.61)                                  | 0.38<br>(0.28 to<br>0.47)                                  | 0.49<br>(0.38 to<br>0.61)                                  |
| Other unspecified infectious diseases                                   | 151.83<br>(131.48 to<br>176.36)                               | 150.09<br>(131.97 to<br>169.21)                               | 128.72<br>(113.25 to<br>144.11)                               | 161.24<br>(140.48 to<br>183.12)                                | 3.64<br>(3.07 to<br>4.03)                                  | 5.13<br>(4.36 to<br>5.59)                                  | 4.71<br>(4.01 to<br>5.15)                                  | 5.24<br>(4.44 to<br>5.75)                                  |
| <b>Non-communicable diseases</b>                                        | <b>52,373.05</b><br><b>(51,095.03 to</b><br><b>53,686.70)</b> | <b>75,814.81</b><br><b>(63,004.36 to</b><br><b>90,105.81)</b> | <b>57,090.28</b><br><b>(48,234.02 to</b><br><b>66,609.93)</b> | <b>94,465.21</b><br><b>(77,631.43 to</b><br><b>112,949.50)</b> | <b>2,452.51</b><br><b>(2,403.28 to</b><br><b>2,500.43)</b> | <b>4,541.60</b><br><b>(3,772.58 to</b><br><b>5,312.69)</b> | <b>3,591.85</b><br><b>(3,018.85 to</b><br><b>4,180.88)</b> | <b>5,385.40</b><br><b>(4,453.27 to</b><br><b>6,287.56)</b> |

**Latin America and Caribbean**

| Cause | YLLs (in 1000s) |                                          |                                          |                                          | Deaths (in 1000s)                        |                                 |                                     |                                   |
|-------|-----------------|------------------------------------------|------------------------------------------|------------------------------------------|------------------------------------------|---------------------------------|-------------------------------------|-----------------------------------|
|       | 2016            | 2040 Forecast                            | 2040 Better Scenario                     | 2040 Worse Scenario                      | 2016                                     | 2040 Forecast                   | 2040 Better Scenario                | 2040 Worse Scenario               |
|       | Neoplasms       | 12,877.37<br>(12,533.36 to<br>13,255.43) | 20,187.78<br>(17,815.85 to<br>22,777.88) | 17,847.30<br>(15,733.44 to<br>20,175.18) | 23,126.66<br>(20,332.81 to<br>26,024.62) | 539.25<br>(526.34 to<br>553.47) | 1,044.92<br>(926.18 to<br>1,174.43) | 957.96<br>(842.97 to<br>1,079.74) |

|                                      |                                       |                                       |                                       |                                       |                              |                                 |                                 |                                 |
|--------------------------------------|---------------------------------------|---------------------------------------|---------------------------------------|---------------------------------------|------------------------------|---------------------------------|---------------------------------|---------------------------------|
| Lip and oral cavity cancer           | 204.57<br>(196.18 to<br>212.75)       | 286.20<br>(201.33 to<br>402.57)       | 198.13<br>(146.67 to<br>267.35)       | 450.70<br>(298.85 to<br>659.62)       | 8.64<br>(8.33 to<br>8.95)    | 13.71<br>(9.76 to<br>18.78)     | 9.99<br>(7.44 to<br>13.12)      | 21.00<br>(14.16 to<br>30.15)    |
| Nasopharynx cancer                   | 44.61<br>(42.69 to<br>46.65)          | 61.97<br>(49.38 to<br>78.19)          | 39.82<br>(32.38 to<br>49.78)          | 96.58<br>(72.34 to<br>127.25)         | 1.51<br>(1.45 to<br>1.57)    | 2.43<br>(1.90 to<br>3.10)       | 1.63<br>(1.32 to<br>2.06)       | 3.73<br>(2.79 to<br>5.01)       |
| Other pharynx cancer                 | 131.85<br>(125.76 to<br>138.18)       | 205.74<br>(132.13 to<br>309.02)       | 175.90<br>(118.50 to<br>255.63)       | 238.37<br>(151.12 to<br>363.26)       | 5.13<br>(4.91 to<br>5.36)    | 9.20<br>(6.02 to<br>13.74)      | 8.14<br>(5.59 to<br>11.79)      | 10.40<br>(6.48 to<br>15.83)     |
| Esophageal cancer                    | 368.45<br>(351.90 to<br>384.05)       | 501.13<br>(347.89 to<br>712.67)       | 405.40<br>(297.03 to<br>554.48)       | 739.65<br>(475.29 to<br>1,134.32)     | 16.05<br>(15.45 to<br>16.68) | 24.43<br>(17.43 to<br>34.42)    | 20.53<br>(15.34 to<br>27.83)    | 35.26<br>(23.31 to<br>52.22)    |
| Stomach cancer                       | 1,145.04<br>(1,104.22 to<br>1,183.93) | 1,437.74<br>(1,153.32 to<br>1,816.34) | 1,154.93<br>(950.85 to<br>1,425.02)   | 1,552.13<br>(1,245.86 to<br>1,959.36) | 53.31<br>(51.59 to<br>55.01) | 80.28<br>(64.62 to<br>102.91)   | 66.21<br>(54.70 to<br>82.51)    | 84.50<br>(68.05 to<br>107.75)   |
| Colon and rectum cancer              | 986.86<br>(941.41 to<br>1,030.50)     | 1,797.97<br>(1,306.63 to<br>2,444.71) | 1,492.85<br>(1,097.59 to<br>2,027.44) | 2,012.07<br>(1,446.37 to<br>2,762.70) | 46.75<br>(44.73 to<br>48.75) | 104.74<br>(76.48 to<br>144.19)  | 90.09<br>(66.49 to<br>123.92)   | 113.37<br>(82.19 to<br>157.27)  |
| Liver cancer                         | 657.19<br>(633.37 to<br>681.79)       | 1,295.37<br>(923.36 to<br>1,843.39)   | 1,184.66<br>(888.92 to<br>1,620.91)   | 1,492.76<br>(1,018.49 to<br>2,204.04) | 30.18<br>(29.14 to<br>31.22) | 68.76<br>(49.99 to<br>96.36)    | 65.18<br>(49.20 to<br>88.60)    | 76.94<br>(53.71 to<br>111.50)   |
| Liver cancer due to hepatitis B      | 197.28<br>(162.84 to<br>237.37)       | 354.84<br>(242.40 to<br>527.50)       | 332.43<br>(234.34 to<br>476.14)       | 396.94<br>(258.51 to<br>611.50)       | 7.98<br>(6.44 to<br>9.73)    | 16.66<br>(11.19 to<br>24.28)    | 16.11<br>(11.16 to<br>22.79)    | 18.22<br>(11.91 to<br>27.47)    |
| Liver cancer due to hepatitis C      | 195.24<br>(172.23 to<br>217.04)       | 408.48<br>(288.91 to<br>582.81)       | 389.46<br>(287.24 to<br>532.29)       | 446.90<br>(307.03 to<br>658.18)       | 23.91<br>(8.97 to<br>11.07)  | 23.62<br>(17.22 to<br>33.32)    | 25.43<br>(17.50 to<br>31.83)    | 25.43<br>(17.64 to<br>36.34)    |
| Liver cancer due to alcohol use      | 145.71<br>(127.06 to<br>166.63)       | 307.07<br>(208.15 to<br>465.66)       | 253.98<br>(177.92 to<br>368.81)       | 395.17<br>(257.69 to<br>613.95)       | 6.96<br>(6.12 to<br>7.84)    | 16.58<br>(11.27 to<br>24.58)    | 14.30<br>(10.02 to<br>20.38)    | 20.54<br>(13.46 to<br>31.37)    |
| Liver cancer due to other causes     | 118.95<br>(106.38 to<br>131.13)       | 224.98<br>(148.55 to<br>345.60)       | 208.79<br>(144.05 to<br>305.86)       | 253.75<br>(161.54 to<br>404.67)       | 5.18<br>(4.62 to<br>5.73)    | 11.60<br>(7.66 to<br>17.65)     | 11.15<br>(7.60 to<br>16.02)     | 12.75<br>(8.18 to<br>20.17)     |
| Gallbladder and biliary tract cancer | 243.85<br>(233.78 to<br>259.94)       | 337.45<br>(303.89 to<br>373.84)       | 335.97<br>(298.26 to<br>380.22)       | 326.77<br>(297.08 to<br>357.02)       | 11.84<br>(11.35 to<br>12.71) | 19.12<br>(17.44 to<br>20.96)    | 19.53<br>(17.40 to<br>21.83)    | 18.10<br>(16.76 to<br>19.61)    |
| Pancreatic cancer                    | 527.02<br>(511.21 to<br>542.91)       | 1,059.31<br>(884.72 to<br>1,289.90)   | 1,065.94<br>(892.55 to<br>1,289.84)   | 1,099.12<br>(913.51 to<br>1,354.76)   | 25.28<br>(24.56 to<br>26.00) | 57.77<br>(48.16 to<br>71.17)    | 59.45<br>(49.35 to<br>72.33)    | 58.79<br>(49.09 to<br>72.86)    |
| Larynx cancer                        | 202.46<br>(194.17 to<br>210.78)       | 223.30<br>(143.15 to<br>336.77)       | 143.23<br>(97.58 to<br>212.38)        | 398.18<br>(230.52 to<br>628.61)       | 8.84<br>(8.53 to<br>9.18)    | 10.80<br>(7.04 to<br>16.53)     | 7.29<br>(4.93 to<br>10.83)      | 18.92<br>(10.99 to<br>29.98)    |
| Tracheal, bronchus, and lung cancer  | 1,393.60<br>(1,343.51 to<br>1,445.42) | 1,975.66<br>(1,606.53 to<br>2,432.39) | 1,526.26<br>(1,262.33 to<br>1,828.47) | 3,407.82<br>(2,699.08 to<br>4,335.61) | 65.56<br>(63.36 to<br>67.90) | 103.31<br>(84.03 to<br>127.30)  | 83.19<br>(68.81 to<br>99.98)    | 175.11<br>(138.31 to<br>222.79) |
| Malignant skin melanoma              | 105.56<br>(92.98 to<br>128.84)        | 169.42<br>(145.82 to<br>206.94)       | 203.15<br>(174.93 to<br>246.13)       | 154.70<br>(134.67 to<br>188.55)       | 4.17<br>(3.67 to<br>5.03)    | 8.31<br>(7.22 to<br>10.05)      | 10.27<br>(8.82 to<br>12.47)     | 7.37<br>(6.49 to<br>8.92)       |
| Non-melanoma skin cancer             | 110.54<br>(106.07 to<br>114.59)       | 217.20<br>(199.48 to<br>233.92)       | 184.81<br>(166.85 to<br>203.96)       | 219.38<br>(205.01 to<br>232.77)       | 6.16<br>(5.92 to<br>6.36)    | 14.48<br>(13.34 to<br>15.61)    | 12.86<br>(11.65 to<br>14.08)    | 14.09<br>(13.12 to<br>15.01)    |
| Breast cancer                        | 1,063.05<br>(995.01 to<br>1,123.39)   | 1,653.87<br>(1,305.47 to<br>2,121.97) | 1,381.14<br>(1,095.93 to<br>1,748.55) | 1,822.48<br>(1,404.31 to<br>2,383.87) | 39.07<br>(36.62 to<br>41.28) | 74.38<br>(58.84 to<br>95.84)    | 63.65<br>(50.60 to<br>81.30)    | 80.10<br>(62.40 to<br>104.44)   |
| Cervical cancer                      | 758.97<br>(717.59 to<br>800.38)       | 930.32<br>(786.12 to<br>1,100.07)     | 762.23<br>(639.75 to<br>903.39)       | 1,011.91<br>(836.28 to<br>1,219.16)   | 26.41<br>(25.01 to<br>27.90) | 38.91<br>(32.99 to<br>45.82)    | 32.53<br>(27.41 to<br>38.60)    | 41.55<br>(34.58 to<br>49.91)    |
| Uterine cancer                       | 146.01<br>(139.52 to<br>153.59)       | 264.82<br>(236.36 to<br>294.89)       | 228.97<br>(202.31 to<br>259.14)       | 272.99<br>(246.13 to<br>301.16)       | 6.74<br>(6.44 to<br>7.08)    | 14.53<br>(13.14 to<br>15.88)    | 12.85<br>(11.38 to<br>14.33)    | 14.68<br>(13.38 to<br>15.85)    |
| Ovarian cancer                       | 295.43<br>(279.49 to<br>310.67)       | 483.02<br>(345.81 to<br>671.27)       | 453.67<br>(330.36 to<br>613.10)       | 493.38<br>(346.10 to<br>701.97)       | 21.51<br>(10.37 to<br>11.51) | 20.44<br>(15.22 to<br>30.51)    | 20.44<br>(14.74 to<br>28.20)    | 21.75<br>(15.13 to<br>31.40)    |
| Prostate cancer                      | 696.86<br>(650.63 to<br>818.93)       | 1,793.63<br>(1,630.38 to<br>2,083.78) | 1,757.11<br>(1,553.96 to<br>2,005.52) | 1,716.13<br>(1,567.91 to<br>1,987.07) | 49.07<br>(45.74 to<br>56.57) | 140.01<br>(126.32 to<br>160.01) | 141.83<br>(125.39 to<br>161.68) | 130.09<br>(116.35 to<br>149.27) |

|                                    |                                                               |                                                               |                                                              |                                                               |                                                      |                                                          |                                                        |                                                            |
|------------------------------------|---------------------------------------------------------------|---------------------------------------------------------------|--------------------------------------------------------------|---------------------------------------------------------------|------------------------------------------------------|----------------------------------------------------------|--------------------------------------------------------|------------------------------------------------------------|
| Testicular cancer                  | 59.87<br>(54.73 to<br>68.02)                                  | 49.68<br>(39.55 to<br>63.16)                                  | 42.57<br>(33.83 to<br>54.46)                                 | 51.29<br>(41.13 to<br>64.98)                                  | 1.26<br>(1.16 to<br>1.40)                            | 1.32<br>(1.13 to<br>1.56)                                | 1.17<br>(0.99 to<br>1.39)                              | 1.33<br>(1.14 to<br>1.56)                                  |
| <b>Latin America and Caribbean</b> |                                                               |                                                               |                                                              |                                                               |                                                      |                                                          |                                                        |                                                            |
| Cause                              | YLLs (in 1000s)                                               |                                                               |                                                              |                                                               | Deaths (in 1000s)                                    |                                                          |                                                        |                                                            |
|                                    | 2016                                                          | 2040 Forecast                                                 | 2040 Better Scenario                                         | 2040 Worse Scenario                                           | 2016                                                 | 2040 Forecast                                            | 2040 Better Scenario                                   | 2040 Worse Scenario                                        |
| Kidney cancer                      | 240.26<br>(232.08 to<br>248.93)                               | 416.53<br>(371.70 to<br>462.77)                               | 440.25<br>(389.94 to<br>491.05)                              | 417.36<br>(366.42 to<br>470.00)                               | 9.35<br>(9.03 to<br>9.67)                            | 19.52<br>(17.44 to<br>21.71)                             | 21.27<br>(18.78 to<br>23.66)                           | 19.13<br>(16.73 to<br>21.61)                               |
| Bladder cancer                     | 158.34<br>(153.18 to<br>163.63)                               | 267.07<br>(217.37 to<br>332.74)                               | 244.58<br>(200.67 to<br>301.24)                              | 295.71<br>(237.27 to<br>377.39)                               | 9.34<br>(9.02 to<br>9.65)                            | 18.14<br>(14.63 to<br>22.79)                             | 17.17<br>(13.94 to<br>21.33)                           | 19.59<br>(15.63 to<br>25.11)                               |
| Brain and nervous system cancer    | 622.82<br>(504.05 to<br>672.76)                               | 902.67<br>(712.29 to<br>1,012.72)                             | 848.63<br>(664.73 to<br>965.80)                              | 903.23<br>(714.04 to<br>1,005.97)                             | 17.82<br>(13.73 to<br>19.27)                         | 33.68<br>(25.20 to<br>37.73)                             | 52.72<br>(24.22 to<br>37.27)                           | 32.74<br>(24.71 to<br>36.30)                               |
| Thyroid cancer                     | 67.50<br>(64.96 to<br>70.49)                                  | 116.27<br>(84.58 to<br>164.75)                                | 97.01<br>(72.25 to<br>133.16)                                | 125.89<br>(89.26 to<br>181.57)                                | 3.09<br>(2.98 to<br>3.22)                            | 6.29<br>(4.64 to<br>8.82)                                | 5.41<br>(4.08 to<br>7.38)                              | 6.62<br>(4.79 to<br>9.45)                                  |
| Mesothelioma                       | 40.94<br>(38.27 to<br>42.90)                                  | 64.02<br>(56.86 to<br>70.58)                                  | 64.97<br>(56.85 to<br>72.41)                                 | 62.35<br>(55.76 to<br>68.07)                                  | 1.53<br>(1.44 to<br>1.60)                            | 3.03<br>(2.72 to<br>3.31)                                | 3.18<br>(2.80 to<br>3.55)                              | 2.87<br>(2.60 to<br>3.11)                                  |
| Hodgkin lymphoma                   | 78.52<br>(73.76 to<br>85.98)                                  | 79.40<br>(70.48 to<br>91.01)                                  | 60.02<br>(52.41 to<br>69.18)                                 | 85.76<br>(76.90 to<br>97.86)                                  | 2.23<br>(2.10 to<br>2.39)                            | 2.92<br>(2.63 to<br>3.24)                                | 2.29<br>(2.03 to<br>2.57)                              | 3.07<br>(2.79 to<br>3.39)                                  |
| Non-Hodgkin lymphoma               | 458.20<br>(437.67 to<br>509.40)                               | 739.43<br>(610.91 to<br>908.35)                               | 674.91<br>(563.99 to<br>823.55)                              | 753.57<br>(620.65 to<br>929.07)                               | 15.80<br>(15.03 to<br>16.89)                         | 32.73<br>(27.04 to<br>39.98)                             | 30.80<br>(25.66 to<br>37.41)                           | 32.44<br>(26.82 to<br>40.10)                               |
| Multiple myeloma                   | 174.06<br>(154.28 to<br>209.80)                               | 345.30<br>(268.83 to<br>443.10)                               | 329.94<br>(259.61 to<br>418.33)                              | 346.14<br>(265.71 to<br>451.82)                               | 7.62<br>(6.61 to<br>8.87)                            | 17.25<br>(13.49 to<br>22.06)                             | 16.85<br>(13.21 to<br>21.32)                           | 16.92<br>(13.15 to<br>21.80)                               |
| Leukemia                           | 958.06<br>(917.95 to<br>1,002.78)                             | 1,134.43<br>(958.68 to<br>1,344.86)                           | 999.70<br>(856.73 to<br>1,174.83)                            | 1,221.20<br>(1,014.26 to<br>1,462.01)                         | 24.75<br>(23.75 to<br>25.66)                         | 42.09<br>(35.70 to<br>49.83)                             | 38.56<br>(33.01 to<br>45.18)                           | 44.12<br>(36.84 to<br>53.24)                               |
| Acute lymphoid leukemia            | 362.05<br>(337.92 to<br>384.05)                               | 321.30<br>(270.60 to<br>381.53)                               | 278.42<br>(235.36 to<br>333.77)                              | 344.53<br>(287.64 to<br>410.23)                               | 6.90<br>(6.33 to<br>7.28)                            | 8.55<br>(7.18 to<br>10.14)                               | 7.80<br>(6.57 to<br>9.20)                              | 9.00<br>(7.51 to<br>10.79)                                 |
| Chronic lymphoid leukemia          | 36.66<br>(32.55 to<br>40.71)                                  | 63.94<br>(48.63 to<br>82.83)                                  | 60.45<br>(46.40 to<br>76.62)                                 | 67.03<br>(50.08 to<br>88.09)                                  | 1.88<br>(1.65 to<br>2.06)                            | 3.84<br>(2.92 to<br>4.95)                                | 3.75<br>(2.89 to<br>4.76)                              | 3.90<br>(2.92 to<br>5.09)                                  |
| Acute myeloid leukemia             | 255.35<br>(236.56 to<br>275.04)                               | 383.74<br>(319.41 to<br>460.18)                               | 365.26<br>(309.71 to<br>435.44)                              | 402.95<br>(331.86 to<br>493.40)                               | 6.76<br>(6.19 to<br>7.21)                            | 13.82<br>(11.56 to<br>16.73)                             | 13.59<br>(11.45 to<br>16.19)                           | 14.15<br>(11.62 to<br>17.37)                               |
| Chronic myeloid leukemia           | 50.67<br>(47.55 to<br>54.19)                                  | 56.10<br>(43.31 to<br>71.93)                                  | 44.15<br>(34.85 to<br>56.39)                                 | 62.60<br>(47.37 to<br>81.83)                                  | 1.84<br>(1.73 to<br>1.95)                            | 2.53<br>(1.97 to<br>3.22)                                | 2.04<br>(1.61 to<br>2.60)                              | 2.75<br>(2.10 to<br>3.60)                                  |
| Other leukemia                     | 253.34<br>(237.12 to<br>272.33)                               | 309.35<br>(263.56 to<br>363.03)                               | 251.42<br>(216.76 to<br>295.12)                              | 344.08<br>(290.64 to<br>409.18)                               | 7.37<br>(6.97 to<br>7.86)                            | 13.34<br>(11.44 to<br>15.61)                             | 11.38<br>(9.90 to<br>13.29)                            | 14.32<br>(12.18 to<br>17.00)                               |
| Other neoplasms                    | 936.88<br>(902.77 to<br>986.02)                               | 1,378.84<br>(1,271.18 to<br>1,495.67)                         | 1,350.58<br>(1,228.33 to<br>1,490.41)                        | 1,359.05<br>(1,262.96 to<br>1,463.69)                         | 30.81<br>(29.70 to<br>32.15)                         | 61.28<br>(56.98 to<br>65.28)                             | 62.87<br>(57.12 to<br>68.36)                           | 58.19<br>(54.68 to<br>61.61)                               |
| <b>Cardiovascular diseases</b>     | <b>16,068.04</b><br><b>(15,633.13 to</b><br><b>16,496.03)</b> | <b>20,120.25</b><br><b>(13,835.05 to</b><br><b>28,528.84)</b> | <b>11,344.82</b><br><b>(8,185.96 to</b><br><b>15,802.31)</b> | <b>30,196.46</b><br><b>(20,274.61 to</b><br><b>43,160.91)</b> | <b>879.15</b><br><b>(857.74 to</b><br><b>899.86)</b> | <b>1,379.39</b><br><b>(953.03 to</b><br><b>1,951.60)</b> | <b>855.58</b><br><b>(615.09 to</b><br><b>1,193.26)</b> | <b>1,864.46</b><br><b>(1,282.80 to</b><br><b>2,663.23)</b> |
| Rheumatic heart disease            | 206.94<br>(195.11 to<br>220.01)                               | 147.63<br>(120.71 to<br>187.15)                               | 106.88<br>(86.82 to<br>133.71)                               | 162.32<br>(133.77 to<br>206.02)                               | 7.11<br>(6.73 to<br>7.52)                            | 6.94<br>(5.71 to<br>8.66)                                | 5.29<br>(4.37 to<br>6.63)                              | 7.34<br>(6.11 to<br>9.28)                                  |
| Ischemic heart disease             | 8,475.89<br>(8,193.51 to<br>8,745.32)                         | 9,865.69<br>(5,822.85 to<br>16,719.49)                        | 4,954.61<br>(3,052.51 to<br>8,074.92)                        | 15,994.38<br>(9,347.88 to<br>26,596.68)                       | 486.73<br>(470.15 to<br>500.41)                      | 688.39<br>(411.01 to<br>1,083.74)                        | 384.41<br>(231.07 to<br>601.83)                        | 997.21<br>(596.12 to<br>1,589.32)                          |
| Stroke                             | 4,287.68<br>(4,107.80 to<br>4,442.33)                         | 4,640.76<br>(2,986.33 to<br>7,426.17)                         | 2,214.26<br>(1,523.52 to<br>3,400.38)                        | 7,666.23<br>(4,782.77 to<br>12,267.73)                        | 220.87<br>(209.07 to<br>230.68)                      | 300.66<br>(195.47 to<br>494.49)                          | 164.38<br>(107.95 to<br>263.37)                        | 436.21<br>(281.64 to<br>723.59)                            |

|                                               |                                                            |                                                            |                                                            |                                                            |                                                      |                                                      |                                                      |                                                      |
|-----------------------------------------------|------------------------------------------------------------|------------------------------------------------------------|------------------------------------------------------------|------------------------------------------------------------|------------------------------------------------------|------------------------------------------------------|------------------------------------------------------|------------------------------------------------------|
| Ischemic stroke                               | 1,675.81<br>(1,594.83 to<br>1,752.71)                      | 2,075.13<br>(1,192.51 to<br>3,861.16)                      | 1,119.47<br>(667.21 to<br>2,023.01)                        | 3,089.30<br>(1,713.74 to<br>5,838.11)                      | 115.31<br>(108.36 to<br>121.22)                      | 169.43<br>(95.88 to<br>319.86)                       | 101.19<br>(58.68 to<br>186.92)                       | 225.48<br>(127.30 to<br>441.51)                      |
| Intracerebral hemorrhage                      | 2,611.87<br>(2,506.63 to<br>2,702.04)                      | 2,565.63<br>(1,563.32 to<br>4,153.38)                      | 1,094.79<br>(739.96 to<br>1,675.99)                        | 4,606.93<br>(2,700.81 to<br>7,766.45)                      | 105.57<br>(100.39 to<br>109.75)                      | 131.24<br>(84.67 to<br>203.01)                       | 63.19<br>(43.77 to<br>93.68)                         | 210.73<br>(130.63 to<br>337.46)                      |
| Hypertensive heart disease                    | 917.81<br>(744.19 to<br>1,246.15)                          | 1,948.53<br>(1,175.49 to<br>3,632.03)                      | 1,337.47<br>(912.03 to<br>2,177.21)                        | 2,446.74<br>(1,439.34 to<br>4,697.68)                      | 59.17<br>(47.60 to<br>79.80)                         | 155.14<br>(92.62 to<br>310.06)                       | 112.17<br>(75.13 to<br>190.88)                       | 183.30<br>(107.31 to<br>362.68)                      |
| Cardiomyopathy and myocarditis                | 640.16<br>(553.85 to<br>725.79)                            | 911.16<br>(661.28 to<br>1,224.45)                          | 643.37<br>(483.75 to<br>844.82)                            | 1,020.83<br>(758.08 to<br>1,380.04)                        | 25.65<br>(22.43 to<br>29.45)                         | 49.66<br>(34.60 to<br>70.33)                         | 36.16<br>(25.95 to<br>50.45)                         | 53.47<br>(38.59 to<br>75.14)                         |
| Myocarditis                                   | 53.17<br>(47.25 to<br>71.18)                               | 54.45<br>(46.28 to<br>74.01)                               | 51.02<br>(42.95 to<br>69.18)                               | 55.02<br>(46.99 to<br>75.45)                               | 1.74<br>(1.55 to<br>2.36)                            | 2.64<br>(2.26 to<br>3.70)                            | 2.69<br>(2.25 to<br>3.78)                            | 2.51<br>(2.16 to<br>3.50)                            |
| <b>Latin America and Caribbean</b>            |                                                            |                                                            |                                                            |                                                            |                                                      |                                                      |                                                      |                                                      |
| Cause                                         | YLLs (in 1000s)                                            |                                                            |                                                            |                                                            | Deaths (in 1000s)                                    |                                                      |                                                      |                                                      |
|                                               | 2016                                                       | 2040 Forecast                                              | 2040 Better Scenario                                       | 2040 Worse Scenario                                        | 2016                                                 | 2040 Forecast                                        | 2040 Better Scenario                                 | 2040 Worse Scenario                                  |
| Alcoholic cardiomyopathy                      | 73.45<br>(61.44 to<br>110.08)                              | 108.44<br>(87.86 to<br>167.17)                             | 91.97<br>(73.51 to<br>137.70)                              | 126.54<br>(103.39 to<br>198.55)                            | 2.49<br>(2.11 to<br>3.81)                            | 4.22<br>(3.45 to<br>6.74)                            | 3.75<br>(2.98 to<br>5.83)                            | 4.73<br>(3.89 to<br>7.41)                            |
| Other cardiomyopathy                          | 513.54<br>(429.27 to<br>559.06)                            | 748.27<br>(505.16 to<br>1,044.91)                          | 500.37<br>(343.25 to<br>700.48)                            | 839.27<br>(579.14 to<br>1,176.99)                          | 21.42<br>(18.20 to<br>23.81)                         | 29.72<br>(28.01 to<br>63.87)                         | 21.42<br>(19.51 to<br>43.60)                         | 46.23<br>(31.53 to<br>68.35)                         |
| Atrial fibrillation and flutter               | 162.13<br>(131.69 to<br>195.94)                            | 371.01<br>(281.53 to<br>487.56)                            | 340.69<br>(259.09 to<br>436.81)                            | 387.38<br>(292.44 to<br>512.15)                            | 15.66<br>(12.49 to<br>19.50)                         | 37.93<br>(28.44 to<br>49.70)                         | 36.46<br>(27.59 to<br>47.43)                         | 37.77<br>(28.35 to<br>49.55)                         |
| Aortic aneurysm                               | 302.14<br>(288.64 to<br>315.89)                            | 442.42<br>(353.45 to<br>565.52)                            | 387.75<br>(314.44 to<br>486.40)                            | 481.75<br>(377.90 to<br>618.74)                            | 15.69<br>(15.05 to<br>16.35)                         | 27.94<br>(22.78 to<br>35.06)                         | 25.72<br>(21.10 to<br>32.00)                         | 28.68<br>(23.31 to<br>35.96)                         |
| Peripheral artery disease                     | 60.34<br>(41.67 to<br>98.95)                               | 188.05<br>(119.16 to<br>319.43)                            | 180.01<br>(115.22 to<br>312.86)                            | 193.45<br>(121.53 to<br>326.10)                            | 4.62<br>(3.33 to<br>8.01)                            | 16.57<br>(10.69 to<br>29.36)                         | 16.80<br>(10.68 to<br>30.09)                         | 16.09<br>(10.32 to<br>29.10)                         |
| Endocarditis                                  | 180.79<br>(149.06 to<br>227.61)                            | 252.36<br>(185.26 to<br>338.25)                            | 224.13<br>(165.46 to<br>298.49)                            | 260.89<br>(192.27 to<br>349.83)                            | 5.97<br>(4.65 to<br>7.22)                            | 11.46<br>(7.76 to<br>15.93)                          | 10.74<br>(7.38 to<br>14.75)                          | 11.32<br>(7.67 to<br>15.74)                          |
| Other cardiovascular and circulatory diseases | 834.16<br>(788.92 to<br>870.29)                            | 1,352.62<br>(1,063.89 to<br>1,761.59)                      | 955.65<br>(769.46 to<br>1,216.73)                          | 1,582.50<br>(1,240.75 to<br>2,053.06)                      | 37.66<br>(35.52 to<br>39.25)                         | 84.69<br>(67.49 to<br>108.72)                        | 63.44<br>(50.95 to<br>80.31)                         | 93.08<br>(73.91 to<br>119.31)                        |
| <b>Chronic respiratory diseases</b>           | <b>2,588.42</b><br><b>(2,518.46 to</b><br><b>2,664.78)</b> | <b>3,253.88</b><br><b>(2,663.10 to</b><br><b>3,990.83)</b> | <b>2,583.37</b><br><b>(2,153.42 to</b><br><b>3,064.35)</b> | <b>4,975.02</b><br><b>(3,863.16 to</b><br><b>6,466.19)</b> | <b>159.70</b><br><b>(155.71 to</b><br><b>163.90)</b> | <b>232.13</b><br><b>(191.89 to</b><br><b>281.33)</b> | <b>193.64</b><br><b>(162.45 to</b><br><b>229.71)</b> | <b>344.31</b><br><b>(270.88 to</b><br><b>437.36)</b> |
| Chronic obstructive pulmonary disease         | 2,018.97<br>(1,955.48 to<br>2,104.81)                      | 2,555.69<br>(1,981.52 to<br>3,288.50)                      | 1,839.54<br>(1,457.36 to<br>2,297.47)                      | 4,266.37<br>(3,177.18 to<br>5,796.39)                      | 135.22<br>(131.33 to<br>140.38)                      | 191.21<br>(151.47 to<br>240.95)                      | 147.11<br>(117.79 to<br>183.10)                      | 304.81<br>(230.26 to<br>400.70)                      |
| Pneumoconiosis                                | 18.08<br>(16.71 to<br>19.86)                               | 19.07<br>(16.67 to<br>21.87)                               | 16.33<br>(13.94 to<br>19.11)                               | 20.21<br>(17.33 to<br>22.93)                               | 0.85<br>(0.78 to<br>0.92)                            | 1.24<br>(1.07 to<br>1.44)                            | 1.14<br>(0.95 to<br>1.38)                            | 1.26<br>(1.10 to<br>1.45)                            |
| Silicosis                                     | 8.12<br>(6.26 to<br>9.44)                                  | 5.97<br>(4.07 to<br>7.63)                                  | 3.93<br>(2.66 to<br>5.10)                                  | 6.69<br>(4.80 to<br>8.25)                                  | 0.35<br>(0.27 to<br>0.40)                            | 0.34<br>(0.24 to<br>0.44)                            | 0.24<br>(0.17 to<br>0.32)                            | 0.37<br>(0.26 to<br>0.46)                            |
| Asbestosis                                    | 2.71<br>(2.26 to<br>4.66)                                  | 4.15<br>(3.31 to<br>6.39)                                  | 4.75<br>(3.84 to<br>6.54)                                  | 3.89<br>(3.16 to<br>6.20)                                  | 0.12<br>(0.09 to<br>0.20)                            | 0.25<br>(0.19 to<br>0.37)                            | 0.31<br>(0.24 to<br>0.42)                            | 0.23<br>(0.17 to<br>0.35)                            |
| Coal workers pneumoconiosis                   | 1.79<br>(1.14 to<br>2.08)                                  | 2.08<br>(1.43 to<br>2.72)                                  | 1.64<br>(1.09 to<br>2.26)                                  | 2.32<br>(1.57 to<br>3.00)                                  | 0.09<br>(0.06 to<br>0.11)                            | 0.15<br>(0.10 to<br>0.21)                            | 0.13<br>(0.08 to<br>0.19)                            | 0.16<br>(0.11 to<br>0.21)                            |
| Other pneumoconiosis                          | 5.46<br>(4.96 to<br>6.51)                                  | 6.87<br>(5.73 to<br>8.45)                                  | 6.01<br>(4.82 to<br>7.63)                                  | 7.31<br>(6.18 to<br>8.85)                                  | 0.29<br>(0.26 to<br>0.34)                            | 0.51<br>(0.40 to<br>0.63)                            | 0.47<br>(0.36 to<br>0.62)                            | 0.51<br>(0.42 to<br>0.63)                            |
| Asthma                                        | 225.03<br>(206.05 to<br>262.07)                            | 161.93<br>(107.84 to<br>252.42)                            | 103.21<br>(70.91 to<br>157.29)                             | 205.39<br>(133.73 to<br>325.65)                            | 8.40<br>(7.81 to<br>10.35)                           | 8.71<br>(5.68 to<br>13.77)                           | 5.86<br>(3.99 to<br>9.28)                            | 10.50<br>(6.71 to<br>17.16)                          |

|                                                                |                                                            |                                                            |                                                            |                                                            |                                                      |                                                      |                                                      |                                                      |
|----------------------------------------------------------------|------------------------------------------------------------|------------------------------------------------------------|------------------------------------------------------------|------------------------------------------------------------|------------------------------------------------------|------------------------------------------------------|------------------------------------------------------|------------------------------------------------------|
| Interstitial lung disease and pulmonary sarcoidosis            | 231.81<br>(170.26 to<br>264.08)                            | 416.77<br>(296.53 to<br>482.13)                            | 531.30<br>(390.75 to<br>627.24)                            | 376.63<br>(265.82 to<br>430.96)                            | 12.48<br>(8.85 to<br>14.03)                          | 26.81<br>(18.72 to<br>30.90)                         | 35.37<br>(25.14 to<br>41.35)                         | 23.51<br>(16.32 to<br>26.67)                         |
| Other chronic respiratory diseases                             | 94.52<br>(74.01 to<br>121.28)                              | 100.42<br>(76.01 to<br>126.09)                             | 92.98<br>(69.60 to<br>116.42)                              | 106.41<br>(80.25 to<br>134.33)                             | 2.76<br>(2.05 to<br>3.47)                            | 4.15<br>(3.03 to<br>5.17)                            | 4.15<br>(2.97 to<br>5.21)                            | 4.23<br>(3.06 to<br>5.24)                            |
| <b>Cirrhosis and other chronic liver diseases</b>              | <b>3,253.73</b><br><b>(3,074.40 to</b><br><b>3,424.15)</b> | <b>4,674.24</b><br><b>(4,222.12 to</b><br><b>5,121.42)</b> | <b>3,819.02</b><br><b>(3,398.54 to</b><br><b>4,271.53)</b> | <b>5,202.33</b><br><b>(4,761.21 to</b><br><b>5,645.19)</b> | <b>114.88</b><br><b>(108.91 to</b><br><b>119.88)</b> | <b>191.14</b><br><b>(176.02 to</b><br><b>206.07)</b> | <b>160.35</b><br><b>(143.70 to</b><br><b>175.96)</b> | <b>207.24</b><br><b>(192.68 to</b><br><b>220.45)</b> |
| Cirrhosis and other chronic liver diseases due to hepatitis B  | 302.90<br>(272.89 to<br>335.86)                            | 427.74<br>(371.13 to<br>486.94)                            | 365.56<br>(314.93 to<br>421.39)                            | 442.77<br>(388.61 to<br>501.22)                            | 10.99<br>(9.91 to<br>12.18)                          | 18.13<br>(15.84 to<br>20.57)                         | 15.87<br>(13.78 to<br>18.23)                         | 18.38<br>(16.22 to<br>20.66)                         |
| Cirrhosis and other chronic liver diseases due to hepatitis C  | 1,305.50<br>(1,214.00 to<br>1,400.43)                      | 1,980.63<br>(1,767.90 to<br>2,197.15)                      | 1,703.40<br>(1,496.69 to<br>1,911.28)                      | 2,027.02<br>(1,826.79 to<br>2,233.72)                      | 44.72<br>(41.69 to<br>47.51)                         | 76.78<br>(69.55 to<br>84.03)                         | 67.25<br>(59.79 to<br>74.44)                         | 77.29<br>(70.61 to<br>83.75)                         |
| Cirrhosis and other chronic liver diseases due to alcohol use  | 1,152.68<br>(1,074.10 to<br>1,230.86)                      | 1,597.37<br>(1,434.26 to<br>1,764.98)                      | 1,172.42<br>(1,029.55 to<br>1,324.46)                      | 2,046.40<br>(1,849.69 to<br>2,255.91)                      | 42.60<br>(39.77 to<br>45.38)                         | 68.13<br>(61.72 to<br>74.55)                         | 52.20<br>(46.46 to<br>58.15)                         | 83.46<br>(76.63 to<br>90.70)                         |
| Cirrhosis and other chronic liver diseases due to other causes | 492.65<br>(439.50 to<br>550.35)                            | 668.49<br>(574.08 to<br>772.94)                            | 577.63<br>(495.21 to<br>678.85)                            | 686.15<br>(593.08 to<br>789.86)                            | 16.56<br>(14.75 to<br>18.52)                         | 28.10<br>(24.38 to<br>32.24)                         | 25.04<br>(21.53 to<br>29.23)                         | 28.12<br>(24.47 to<br>32.11)                         |
| <b>Digestive diseases</b>                                      | <b>2,041.44</b><br><b>(1,921.00 to</b><br><b>2,250.30)</b> | <b>2,639.24</b><br><b>(2,221.75 to</b><br><b>3,149.48)</b> | <b>2,130.07</b><br><b>(1,810.01 to</b><br><b>2,509.11)</b> | <b>2,897.89</b><br><b>(2,446.28 to</b><br><b>3,502.24)</b> | <b>87.93</b><br><b>(82.11 to</b><br><b>94.06)</b>    | <b>153.64</b><br><b>(130.37 to</b><br><b>181.51)</b> | <b>131.15</b><br><b>(112.05 to</b><br><b>153.29)</b> | <b>160.61</b><br><b>(136.89 to</b><br><b>192.34)</b> |
| Peptic ulcer disease                                           | 313.63<br>(291.12 to<br>348.56)                            | 306.98<br>(260.79 to<br>356.27)                            | 219.64<br>(186.20 to<br>258.77)                            | 349.43<br>(295.97 to<br>405.22)                            | 15.51<br>(14.45 to<br>17.12)                         | 19.59<br>(17.00 to<br>22.46)                         | 14.59<br>(12.49 to<br>17.01)                         | 21.38<br>(18.45 to<br>24.74)                         |
| <b>Latin America and Caribbean</b>                             |                                                            |                                                            |                                                            |                                                            |                                                      |                                                      |                                                      |                                                      |
| Cause                                                          | YLLs (in 1000s)                                            |                                                            |                                                            |                                                            | Deaths (in 1000s)                                    |                                                      |                                                      |                                                      |
|                                                                | 2016                                                       | 2040 Forecast                                              | 2040 Better Scenario                                       | 2040 Worse Scenario                                        | 2016                                                 | 2040 Forecast                                        | 2040 Better Scenario                                 | 2040 Worse Scenario                                  |
| Gastritis and duodenitis                                       | 69.71<br>(62.69 to<br>85.66)                               | 123.79<br>(103.80 to<br>154.73)                            | 103.72<br>(86.85 to<br>132.38)                             | 126.05<br>(108.22 to<br>156.57)                            | 3.64<br>(3.27 to<br>4.46)                            | 7.91<br>(6.73 to<br>9.65)                            | 6.93<br>(5.83 to<br>8.80)                            | 7.76<br>(6.65 to<br>9.60)                            |
| Appendicitis                                                   | 150.89<br>(133.54 to<br>180.48)                            | 134.11<br>(114.25 to<br>164.24)                            | 99.09<br>(83.98 to<br>120.60)                              | 147.24<br>(127.06 to<br>179.86)                            | 4.34<br>(3.76 to<br>5.25)                            | 5.51<br>(4.68 to<br>6.71)                            | 4.25<br>(3.61 to<br>5.22)                            | 5.80<br>(4.90 to<br>7.04)                            |
| Paralytic ileus and intestinal obstruction                     | 438.19<br>(371.01 to<br>500.92)                            | 514.80<br>(417.17 to<br>588.90)                            | 490.04<br>(393.66 to<br>568.29)                            | 515.55<br>(419.49 to<br>584.70)                            | 15.83<br>(12.91 to<br>17.91)                         | 29.54<br>(23.45 to<br>33.63)                         | 30.11<br>(23.86 to<br>34.72)                         | 28.05<br>(22.30 to<br>31.82)                         |
| Inguinal, femoral, and abdominal hernia                        | 91.27<br>(70.13 to<br>108.16)                              | 94.54<br>(72.32 to<br>114.98)                              | 81.50<br>(61.40 to<br>100.09)                              | 96.36<br>(73.39 to<br>116.94)                              | 4.61<br>(3.51 to<br>5.57)                            | 5.97<br>(4.54 to<br>7.41)                            | 5.39<br>(4.07 to<br>6.77)                            | 5.85<br>(4.42 to<br>7.27)                            |
| Inflammatory bowel disease                                     | 56.46<br>(43.76 to<br>62.22)                               | 68.51<br>(52.55 to<br>78.08)                               | 66.41<br>(50.65 to<br>76.99)                               | 67.69<br>(52.25 to<br>76.46)                               | 2.03<br>(1.58 to<br>2.21)                            | 3.36<br>(2.57 to<br>3.77)                            | 3.40<br>(2.60 to<br>3.90)                            | 3.19<br>(2.46 to<br>3.55)                            |
| Vascular intestinal disorders                                  | 154.93<br>(129.17 to<br>170.98)                            | 292.91<br>(244.56 to<br>327.63)                            | 268.40<br>(224.23 to<br>306.09)                            | 290.49<br>(242.56 to<br>321.52)                            | 8.85<br>(7.34 to<br>9.65)                            | 20.42<br>(17.19 to<br>22.77)                         | 19.45<br>(16.32 to<br>22.08)                         | 19.63<br>(16.42 to<br>21.80)                         |
| Gallbladder and biliary diseases                               | 256.43<br>(240.78 to<br>289.55)                            | 403.72<br>(229.88 to<br>702.47)                            | 264.90<br>(159.39 to<br>458.33)                            | 493.86<br>(278.22 to<br>867.07)                            | 13.17<br>(12.33 to<br>14.82)                         | 26.29<br>(15.20 to<br>44.88)                         | 18.11<br>(10.97 to<br>30.88)                         | 30.68<br>(17.54 to<br>52.58)                         |
| Pancreatitis                                                   | 288.38<br>(238.83 to<br>316.26)                            | 408.09<br>(269.76 to<br>650.18)                            | 280.98<br>(194.21 to<br>426.09)                            | 512.49<br>(328.70 to<br>879.28)                            | 9.75<br>(8.00 to<br>10.54)                           | 17.11<br>(11.64 to<br>25.91)                         | 12.36<br>(8.70 to<br>18.24)                          | 20.60<br>(13.41 to<br>33.45)                         |
| Other digestive diseases                                       | 221.54<br>(190.53 to<br>261.88)                            | 291.80<br>(248.86 to<br>339.11)                            | 255.40<br>(216.35 to<br>299.56)                            | 298.74<br>(255.58 to<br>350.16)                            | 10.20<br>(8.86 to<br>11.87)                          | 17.95<br>(15.28 to<br>20.64)                         | 16.55<br>(14.02 to<br>19.06)                         | 17.65<br>(15.11 to<br>20.29)                         |
| <b>Neurological disorders</b>                                  | <b>2,486.48</b><br><b>(2,219.30 to</b><br><b>2,820.43)</b> | <b>5,505.46</b><br><b>(4,210.15 to</b><br><b>7,355.38)</b> | <b>5,307.40</b><br><b>(4,146.81 to</b><br><b>6,783.14)</b> | <b>5,565.52</b><br><b>(4,203.65 to</b><br><b>7,614.89)</b> | <b>201.74</b><br><b>(175.59 to</b><br><b>233.42)</b> | <b>516.74</b><br><b>(383.04 to</b><br><b>708.38)</b> | <b>521.37</b><br><b>(399.13 to</b><br><b>679.73)</b> | <b>501.87</b><br><b>(366.73 to</b><br><b>711.61)</b> |
| Alzheimer's disease and other dementias                        | 1,728.92<br>(1,476.97 to<br>2,058.39)                      | 4,395.23<br>(3,163.18 to<br>6,222.22)                      | 4,237.13<br>(3,115.71 to<br>5,698.00)                      | 4,423.98<br>(3,081.80 to<br>6,449.07)                      | 175.64<br>(149.19 to<br>207.59)                      | 462.81<br>(333.27 to<br>651.18)                      | 463.83<br>(344.32 to<br>621.56)                      | 450.43<br>(316.83 to<br>658.19)                      |



|                              |                                        |                                              |                                              |                                              |                                     |                                     |                                     |                                     |
|------------------------------|----------------------------------------|----------------------------------------------|----------------------------------------------|----------------------------------------------|-------------------------------------|-------------------------------------|-------------------------------------|-------------------------------------|
| Parkinson's disease          | 131.44<br>(100.17 to<br>167.71)        | 344.19<br>(261.50 to<br>441.68)              | 393.80<br>(298.73 to<br>508.20)              | 310.14<br>(234.39 to<br>398.76)              | 10.70<br>(8.14 to<br>13.76)         | 29.46<br>(22.40 to<br>38.28)        | 34.59<br>(26.15 to<br>45.03)        | 25.97<br>(19.83 to<br>33.70)        |
| Epilepsy                     | 360.75<br>(340.58 to<br>388.10)        | 405.84<br>(313.23 to<br>525.42)              | 309.07<br>(241.73 to<br>394.31)              | 478.34<br>(357.32 to<br>632.11)              | 7.85<br>(7.45 to<br>8.33)           | 11.11<br>(8.67 to<br>14.35)         | 8.85<br>(7.03 to<br>11.21)          | 12.75<br>(9.69 to<br>16.79)         |
| Multiple sclerosis           | 31.80<br>(25.42 to<br>36.29)           | 40.69<br>(31.42 to<br>48.89)                 | 42.52<br>(32.79 to<br>51.37)                 | 40.64<br>(31.48 to<br>49.32)                 | 1.01<br>(0.81 to<br>1.16)           | 1.59<br>(1.25 to<br>1.93)           | 1.71<br>(1.34 to<br>2.08)           | 1.55<br>(1.23 to<br>1.87)           |
| Motor neuron disease         | 62.87<br>(58.12 to<br>65.90)           | 101.34<br>(91.48 to<br>111.69)               | 102.92<br>(92.04 to<br>115.35)               | 98.19<br>(89.33 to<br>107.24)                | 2.21<br>(2.05 to<br>2.31)           | 4.26<br>(3.86 to<br>4.67)           | 4.40<br>(3.94 to<br>4.88)           | 4.06<br>(3.71 to<br>4.41)           |
| Other neurological disorders | 170.70<br>(162.92 to<br>181.48)        | 218.18<br>(197.68 to<br>240.77)              | 221.97<br>(200.46 to<br>246.11)              | 214.24<br>(194.82 to<br>236.24)              | 4.33<br>(4.16 to<br>4.54)           | 7.51<br>(6.96 to<br>8.04)           | 7.99<br>(7.34 to<br>8.64)           | 7.11<br>(6.65 to<br>7.58)           |
| <b>Mental disorders</b>      | <b>870.82</b><br>(807.86 to<br>962.93) | <b>1,210.60</b><br>(1,073.18 to<br>1,377.31) | <b>1,245.63</b><br>(1,098.54 to<br>1,423.58) | <b>1,243.72</b><br>(1,102.82 to<br>1,407.54) | <b>23.50</b><br>(22.02 to<br>25.59) | <b>37.89</b><br>(34.27 to<br>42.19) | <b>40.44</b><br>(36.41 to<br>45.12) | <b>38.03</b><br>(34.53 to<br>42.13) |
| Alcohol use disorders        | 667.43<br>(619.84 to<br>733.40)        | 844.26<br>(742.90 to<br>958.45)              | 834.35<br>(731.75 to<br>950.76)              | 889.01<br>(785.68 to<br>1,004.56)            | 18.66<br>(17.42 to<br>20.26)        | 26.65<br>(23.82 to<br>29.82)        | 27.00<br>(23.97 to<br>30.22)        | 27.54<br>(24.71 to<br>30.65)        |
| Drug use disorders           | 199.32<br>(171.47 to<br>228.90)        | 361.09<br>(300.24 to<br>432.11)              | 406.07<br>(340.07 to<br>485.67)              | 349.42<br>(290.88 to<br>416.37)              | 4.77<br>(4.19 to<br>5.36)           | 11.14<br>(9.72 to<br>12.76)         | 13.34<br>(11.66 to<br>15.24)        | 10.39<br>(9.10 to<br>11.71)         |
| Opioid use disorders         | 127.31<br>(110.52 to<br>158.37)        | 179.16<br>(147.10 to<br>233.17)              | 183.68<br>(151.02 to<br>241.77)              | 177.81<br>(145.41 to<br>229.82)              | 2.82<br>(2.48 to<br>3.46)           | 4.68<br>(4.00 to<br>5.95)           | 4.95<br>(4.23 to<br>6.43)           | 4.54<br>(3.88 to<br>5.74)           |
| Cocaine use disorders        | 13.62<br>(6.58 to<br>16.44)            | 28.04<br>(16.85 to<br>34.36)                 | 32.73<br>(18.56 to<br>40.22)                 | 27.03<br>(16.52 to<br>33.18)                 | 0.32<br>(0.17 to<br>0.38)           | 0.81<br>(0.49 to<br>0.97)           | 0.96<br>(0.57 to<br>1.15)           | 0.76<br>(0.48 to<br>0.91)           |
| Amphetamine use disorders    | 5.69<br>(4.20 to<br>7.86)              | 16.59<br>(12.52 to<br>23.20)                 | 20.48<br>(15.25 to<br>27.77)                 | 15.99<br>(11.88 to<br>22.18)                 | 0.13<br>(0.10 to<br>0.18)           | 0.45<br>(0.33 to<br>0.61)           | 0.57<br>(0.43 to<br>0.77)           | 0.42<br>(0.32 to<br>0.57)           |
| Other drug use disorders     | 52.70<br>(36.65 to<br>62.93)           | 137.29<br>(106.19 to<br>171.83)              | 169.18<br>(130.53 to<br>207.62)              | 128.59<br>(98.38 to<br>158.78)               | 1.50<br>(1.14 to<br>1.71)           | 5.21<br>(4.29 to<br>6.06)           | 6.86<br>(5.52 to<br>8.03)           | 4.67<br>(3.85 to<br>5.43)           |
| Eating disorders             | 4.08<br>(3.72 to<br>4.48)              | 5.25<br>(4.46 to<br>6.22)                    | 5.21<br>(4.39 to<br>6.20)                    | 5.29<br>(4.51 to<br>6.32)                    | 0.07<br>(0.07 to<br>0.08)           | 0.10<br>(0.08 to<br>0.12)           | 0.10<br>(0.08 to<br>0.12)           | 0.10<br>(0.08 to<br>0.12)           |

**Latin America and Caribbean**

| Cause                                                      | YLLs (in 1000s)                              |                                                 |                                                |                                                 | Deaths (in 1000s)                      |                                          |                                        |                                            |
|------------------------------------------------------------|----------------------------------------------|-------------------------------------------------|------------------------------------------------|-------------------------------------------------|----------------------------------------|------------------------------------------|----------------------------------------|--------------------------------------------|
|                                                            | 2016                                         | 2040 Forecast                                   | 2040 Better Scenario                           | 2040 Worse Scenario                             | 2016                                   | 2040 Forecast                            | 2040 Better Scenario                   | 2040 Worse Scenario                        |
| <b>Diabetes, urogenital, blood, and endocrine diseases</b> | <b>8,119.90</b><br>(7,914.53 to<br>8,329.12) | <b>14,965.04</b><br>(10,349.53 to<br>22,396.74) | <b>10,420.37</b><br>(7,360.96 to<br>15,498.39) | <b>17,608.10</b><br>(12,117.02 to<br>25,847.84) | <b>381.12</b><br>(372.00 to<br>389.75) | <b>888.83</b><br>(625.65 to<br>1,294.01) | <b>647.97</b><br>(462.52 to<br>952.98) | <b>1,006.86</b><br>(701.75 to<br>1,422.40) |
| Diabetes mellitus                                          | 3,504.87<br>(3,409.03 to<br>3,604.01)        | 6,143.52<br>(4,564.20 to<br>8,486.08)           | 4,155.22<br>(3,152.36 to<br>5,582.21)          | 7,411.09<br>(5,398.60 to<br>10,319.68)          | 176.50<br>(172.24 to<br>181.11)        | 367.06<br>(283.42 to<br>484.37)          | 261.01<br>(203.12 to<br>337.32)        | 423.85<br>(321.43 to<br>562.77)            |
| Acute glomerulonephritis                                   | 7.57<br>(7.15 to<br>8.05)                    | 8.89<br>(7.74 to<br>10.15)                      | 7.11<br>(6.15 to<br>8.12)                      | 9.77<br>(8.50 to<br>11.19)                      | 0.22<br>(0.21 to<br>0.23)              | 0.30<br>(0.26 to<br>0.34)                | 0.26<br>(0.22 to<br>0.30)              | 0.30<br>(0.27 to<br>0.35)                  |
| Chronic kidney disease                                     | 3,290.90<br>(3,194.36 to<br>3,376.22)        | 6,815.51<br>(3,133.86 to<br>13,517.96)          | 4,466.85<br>(2,188.87 to<br>9,082.45)          | 8,165.94<br>(3,707.64 to<br>15,709.33)          | 150.13<br>(145.98 to<br>153.75)        | 400.61<br>(180.66 to<br>787.02)          | 273.61<br>(129.99 to<br>564.48)        | 465.68<br>(206.40 to<br>879.69)            |
| Chronic kidney disease due to diabetes mellitus            | 1,195.93<br>(1,055.04 to<br>1,331.33)        | 2,870.84<br>(1,257.98 to<br>5,972.29)           | 1,872.80<br>(864.29 to<br>4,029.83)            | 3,446.57<br>(1,478.34 to<br>6,985.74)           | 54.51<br>(47.81 to<br>60.53)           | 156.73<br>(66.27 to<br>324.49)           | 105.87<br>(47.50 to<br>230.34)         | 183.33<br>(76.69 to<br>364.66)             |
| Chronic kidney disease due to hypertension                 | 393.64<br>(331.29 to<br>453.82)              | 708.26<br>(452.63 to<br>2,067.47)               | 708.26<br>(333.22 to<br>1,480.13)              | 1,197.49<br>(523.08 to<br>2,301.92)             | 26.52<br>(22.81 to<br>30.50)           | 83.04<br>(38.03 to<br>166.29)            | 60.32<br>(28.65 to<br>126.90)          | 93.39<br>(42.51 to<br>179.84)              |
| Chronic kidney disease due to glomerulonephritis           | 973.53<br>(847.61 to<br>1,099.00)            | 1,592.64<br>(774.53 to<br>3,096.39)             | 1,020.15<br>(525.17 to<br>2,070.70)            | 1,928.49<br>(911.97 to<br>3,631.16)             | 37.90<br>(32.47 to<br>43.31)           | 83.72<br>(37.56 to<br>166.28)            | 55.16<br>(25.75 to<br>114.50)          | 99.03<br>(43.52 to<br>189.19)              |

|                                                            |                              |                                  |                                |                                  |                           |                            |                            |                            |
|------------------------------------------------------------|------------------------------|----------------------------------|--------------------------------|----------------------------------|---------------------------|----------------------------|----------------------------|----------------------------|
| Chronic kidney disease due to other and unspecified causes | 727.80<br>(625.20 to 847.04) | 1,326.71<br>(633.81 to 2,563.94) | 865.64<br>(434.82 to 1,691.07) | 1,593.39<br>(747.19 to 2,986.14) | 31.20<br>(26.49 to 36.41) | 77.12<br>(35.89 to 152.21) | 52.26<br>(25.09 to 108.56) | 89.94<br>(41.09 to 172.92) |
| Urinary diseases and male infertility                      | 554.02<br>(534.51 to 579.33) | 1,063.40<br>(968.24 to 1,163.41) | 923.90<br>(824.39 to 1,032.37) | 1,068.01<br>(990.11 to 1,147.46) | 30.72<br>(29.68 to 31.93) | 80.55<br>(72.87 to 88.58)  | 73.36<br>(65.07 to 82.22)  | 77.62<br>(71.27 to 84.12)  |
| Urinary tract infections                                   | 485.72<br>(458.28 to 507.13) | 968.81<br>(872.55 to 1,065.38)   | 849.12<br>(753.24 to 948.40)   | 969.89<br>(894.58 to 1,048.21)   | 27.56<br>(26.04 to 28.78) | 74.87<br>(67.50 to 82.57)  | 68.67<br>(60.82 to 77.33)  | 71.96<br>(65.81 to 78.25)  |
| Urolithiasis                                               | 27.57<br>(23.60 to 40.13)    | 44.11<br>(34.53 to 66.75)        | 35.98<br>(27.68 to 55.72)      | 45.27<br>(35.88 to 68.55)        | 1.17<br>(0.98 to 1.77)    | 2.23<br>(1.72 to 3.56)     | 1.88<br>(1.42 to 3.01)     | 2.22<br>(1.73 to 3.53)     |
| Other urinary diseases                                     | 40.73<br>(33.68 to 57.50)    | 50.49<br>(39.81 to 74.48)        | 38.80<br>(30.29 to 57.15)      | 52.85<br>(41.77 to 78.08)        | 1.99<br>(1.66 to 2.86)    | 3.44<br>(2.68 to 5.27)     | 2.80<br>(2.18 to 4.31)     | 3.44<br>(2.66 to 5.24)     |
| Gynecological diseases                                     | 14.19<br>(9.78 to 16.09)     | 15.06<br>(11.56 to 18.79)        | 10.35<br>(7.85 to 12.95)       | 16.76<br>(12.67 to 20.89)        | 0.43<br>(0.30 to 0.49)    | 0.54<br>(0.41 to 0.66)     | 0.38<br>(0.30 to 0.47)     | 0.58<br>(0.45 to 0.71)     |
| Uterine fibroids                                           | 4.87<br>(3.09 to 5.65)       | 4.13<br>(2.85 to 5.51)           | 2.85<br>(1.96 to 3.79)         | 4.60<br>(3.09 to 6.11)           | 0.14<br>(0.09 to 0.16)    | 0.14<br>(0.09 to 0.18)     | 0.09<br>(0.07 to 0.13)     | 0.15<br>(0.10 to 0.19)     |
| Polycystic ovarian syndrome                                | 0.46<br>(0.35 to 0.70)       | 0.30<br>(0.20 to 0.50)           | 0.18<br>(0.11 to 0.31)         | 0.36<br>(0.24 to 0.59)           | 0.01<br>(0.01 to 0.02)    | 0.01<br>(0.00 to 0.01)     | 0.00<br>(0.00 to 0.01)     | 0.01<br>(0.01 to 0.01)     |
| Endometriosis                                              | 0.34<br>(0.05 to 0.47)       | 0.31<br>(0.07 to 0.53)           | 0.19<br>(0.05 to 0.32)         | 0.38<br>(0.08 to 0.62)           | 0.01<br>(0.00 to 0.01)    | 0.01<br>(0.00 to 0.01)     | 0.00<br>(0.00 to 0.01)     | 0.01<br>(0.00 to 0.01)     |
| Genital prolapse                                           | 0.90<br>(0.55 to 1.11)       | 1.18<br>(0.77 to 1.67)           | 0.78<br>(0.50 to 1.14)         | 1.31<br>(0.83 to 1.85)           | 0.05<br>(0.03 to 0.07)    | 0.07<br>(0.04 to 0.10)     | 0.05<br>(0.03 to 0.07)     | 0.07<br>(0.05 to 0.11)     |
| Other gynecological diseases                               | 7.61<br>(5.30 to 8.67)       | 9.13<br>(6.71 to 11.68)          | 6.35<br>(4.69 to 8.22)         | 10.12<br>(7.35 to 12.89)         | 0.23<br>(0.15 to 0.26)    | 0.32<br>(0.24 to 0.40)     | 0.23<br>(0.17 to 0.29)     | 0.35<br>(0.25 to 0.43)     |
| Hemoglobinopathies and hemolytic anemias                   | 186.53<br>(164.02 to 208.60) | 185.86<br>(157.73 to 218.53)     | 141.83<br>(119.43 to 166.51)   | 201.73<br>(171.49 to 234.93)     | 4.98<br>(4.38 to 5.66)    | 7.30<br>(6.23 to 8.54)     | 5.76<br>(4.86 to 6.81)     | 7.64<br>(6.53 to 8.88)     |
| Thalassemias                                               | 16.25<br>(13.99 to 18.51)    | 5.45<br>(4.35 to 6.77)           | 4.88<br>(3.91 to 6.06)         | 5.67<br>(4.51 to 7.09)           | 0.20<br>(0.17 to 0.23)    | 0.07<br>(0.05 to 0.08)     | 0.06<br>(0.05 to 0.08)     | 0.07<br>(0.06 to 0.09)     |
| Sickle cell disorders                                      | 92.91<br>(81.40 to 105.83)   | 85.41<br>(71.15 to 102.81)       | 65.64<br>(53.97 to 79.28)      | 93.57<br>(78.47 to 111.56)       | 1.63<br>(1.43 to 1.86)    | 1.86<br>(1.56 to 2.23)     | 1.45<br>(1.19 to 1.75)     | 2.01<br>(1.68 to 2.38)     |
| G6PD deficiency                                            | 35.26<br>(29.36 to 39.98)    | 43.69<br>(35.44 to 52.74)        | 30.86<br>(24.77 to 37.45)      | 49.01<br>(39.59 to 58.03)        | 0.85<br>(0.71 to 0.97)    | 1.48<br>(1.20 to 1.79)     | 1.07<br>(0.86 to 1.29)     | 1.63<br>(1.32 to 1.92)     |
| Other hemoglobinopathies and hemolytic anemias             | 42.11<br>(36.98 to 48.40)    | 51.31<br>(43.75 to 60.78)        | 40.45<br>(33.73 to 48.14)      | 53.48<br>(46.07 to 62.96)        | 2.30<br>(2.00 to 2.68)    | 3.89<br>(3.32 to 4.64)     | 3.18<br>(2.67 to 3.83)     | 3.93<br>(3.36 to 4.69)     |
| Endocrine, metabolic, blood, and immune disorders          | 561.83<br>(451.37 to 617.91) | 732.80<br>(567.98 to 831.78)     | 715.11<br>(560.00 to 812.53)   | 734.80<br>(577.08 to 833.59)     | 18.15<br>(14.06 to 19.58) | 32.48<br>(25.62 to 36.51)  | 33.60<br>(26.05 to 38.26)  | 31.18<br>(24.78 to 35.02)  |
| <b>Latin America and Caribbean</b>                         |                              |                                  |                                |                                  |                           |                            |                            |                            |
| Cause                                                      | YLLs (in 1000s)              |                                  |                                |                                  | Deaths (in 1000s)         |                            |                            |                            |
|                                                            | 2016                         | 2040 Forecast                    | 2040 Better Scenario           | 2040 Worse Scenario              | 2016                      | 2040 Forecast              | 2040 Better Scenario       | 2040 Worse Scenario        |
| Musculoskeletal disorders                                  | 310.74<br>(249.63 to 328.01) | 502.91<br>(415.42 to 564.88)     | 458.18<br>(378.72 to 524.30)   | 505.38<br>(415.69 to 565.96)     | 9.85<br>(8.45 to 10.36)   | 22.41<br>(19.51 to 25.19)  | 20.59<br>(17.82 to 23.73)  | 22.00<br>(19.40 to 24.68)  |
| Rheumatoid arthritis                                       | 58.63<br>(43.83 to 72.39)    | 141.30<br>(111.61 to 176.35)     | 106.82<br>(81.90 to 136.22)    | 148.96<br>(118.09 to 185.78)     | 2.93<br>(2.30 to 3.49)    | 8.80<br>(7.13 to 10.84)    | 6.90<br>(5.42 to 8.62)     | 9.00<br>(7.25 to 11.01)    |
| Other musculoskeletal disorders                            | 252.12<br>(204.72 to 269.24) | 361.61<br>(291.97 to 408.45)     | 351.35<br>(284.38 to 399.33)   | 356.41<br>(288.23 to 399.77)     | 6.92<br>(5.88 to 7.34)    | 13.61<br>(11.56 to 15.30)  | 13.69<br>(11.64 to 15.55)  | 13.00<br>(10.98 to 14.47)  |

|                                               |                                          |                                          |                                         |                                          |                                 |                                 |                                 |                                 |
|-----------------------------------------------|------------------------------------------|------------------------------------------|-----------------------------------------|------------------------------------------|---------------------------------|---------------------------------|---------------------------------|---------------------------------|
|                                               | 3,756.11<br>(3,208.51 to<br>4,075.12)    | 2,755.41<br>(2,236.38 to<br>3,218.36)    | 1,934.12<br>(1,565.86 to<br>2,253.00)   | 3,144.12<br>(2,581.57 to<br>3,653.98)    | 55.38<br>(46.84 to<br>61.84)    | 74.51<br>(53.77 to<br>96.27)    | 62.79<br>(43.86 to<br>83.97)    | 77.23<br>(57.19 to<br>98.41)    |
| <b>Other non-communicable diseases</b>        | 3,402.76<br>(2,742.06 to<br>3,718.37)    | 1,959.23<br>(1,539.69 to<br>2,344.05)    | 1,221.25<br>(946.27 to<br>1,456.87)     | 2,339.67<br>(1,843.27 to<br>2,782.19)    | 41.66<br>(33.51 to<br>45.52)    | 25.74<br>(20.32 to<br>30.57)    | 16.44<br>(12.65 to<br>19.46)    | 30.41<br>(24.19 to<br>35.80)    |
| Congenital birth defects                      | 197.95<br>(167.12 to<br>246.32)          | 47.69<br>(36.12 to<br>63.24)             | 25.82<br>(19.89 to<br>33.60)            | 61.85<br>(46.90 to<br>80.99)             | 2.34<br>(1.98 to<br>2.92)       | 0.60<br>(0.46 to<br>0.79)       | 0.33<br>(0.26 to<br>0.43)       | 0.77<br>(0.59 to<br>1.00)       |
| Neural tube defects                           | 1,624.28<br>(1,319.92 to<br>1,787.95)    | 937.31<br>(708.27 to<br>1,143.68)        | 555.55<br>(422.66 to<br>675.28)         | 1,123.37<br>(866.35 to<br>1,357.03)      | 19.99<br>(16.30 to<br>21.94)    | 12.36<br>(9.39 to<br>14.93)     | 7.46<br>(5.72 to<br>9.08)       | 14.68<br>(11.38 to<br>17.57)    |
| Congenital heart anomalies                    | 8.87<br>(5.18 to<br>14.85)               | 5.15<br>(2.92 to<br>9.04)                | 2.30<br>(1.31 to<br>3.95)               | 6.43<br>(3.65 to<br>10.81)               | 0.10<br>(0.06 to<br>0.17)       | 0.06<br>(0.03 to<br>0.10)       | 0.03<br>(0.02 to<br>0.05)       | 0.07<br>(0.04 to<br>0.13)       |
| Orofacial clefts                              | 137.26<br>(99.90 to<br>158.35)           | 115.64<br>(83.33 to<br>140.49)           | 97.70<br>(69.71 to<br>117.05)           | 128.03<br>(92.48 to<br>155.81)           | 1.91<br>(1.37 to<br>2.26)       | 1.87<br>(1.29 to<br>2.24)       | 1.64<br>(1.13 to<br>1.95)       | 2.02<br>(1.39 to<br>2.43)       |
| Down syndrome                                 | 122.66<br>(69.06 to<br>149.37)           | 92.39<br>(57.08 to<br>115.85)            | 66.45<br>(39.48 to<br>83.37)            | 109.89<br>(67.26 to<br>138.94)           | 1.49<br>(0.82 to<br>1.82)       | 1.18<br>(0.71 to<br>1.49)       | 0.86<br>(0.50 to<br>1.09)       | 1.39<br>(0.85 to<br>1.75)       |
| Other chromosomal abnormalities               | 49.53<br>(40.25 to<br>62.90)             | 34.91<br>(26.89 to<br>45.09)             | 22.35<br>(17.35 to<br>29.03)            | 41.06<br>(32.22 to<br>52.20)             | 0.63<br>(0.51 to<br>0.79)       | 0.50<br>(0.39 to<br>0.64)       | 0.33<br>(0.26 to<br>0.43)       | 0.58<br>(0.45 to<br>0.74)       |
| Congenital musculoskeletal and limb anomalies | 91.05<br>(56.92 to<br>114.97)            | 60.42<br>(37.85 to<br>80.65)             | 40.96<br>(26.21 to<br>53.67)            | 69.39<br>(43.70 to<br>92.18)             | 1.21<br>(0.77 to<br>1.52)       | 0.93<br>(0.60 to<br>1.22)       | 0.66<br>(0.43 to<br>0.86)       | 1.05<br>(0.68 to<br>1.37)       |
| Urogenital congenital anomalies               | 380.80<br>(282.10 to<br>452.71)          | 226.07<br>(165.09 to<br>290.17)          | 133.47<br>(97.75 to<br>169.31)          | 276.20<br>(205.19 to<br>351.33)          | 4.50<br>(3.34 to<br>5.35)       | 2.74<br>(2.01 to<br>3.51)       | 1.63<br>(1.21 to<br>2.06)       | 3.33<br>(2.50 to<br>4.22)       |
| Digestive congenital anomalies                | 790.37<br>(602.28 to<br>872.69)          | 439.64<br>(327.22 to<br>535.04)          | 276.64<br>(209.36 to<br>334.87)         | 523.45<br>(393.75 to<br>635.18)          | 9.49<br>(7.20 to<br>10.45)      | 5.51<br>(4.11 to<br>6.65)       | 3.51<br>(2.65 to<br>4.22)       | 6.51<br>(4.94 to<br>7.83)       |
| Other congenital birth defects                | 260.48<br>(164.23 to<br>408.21)          | 748.32<br>(458.44 to<br>1,122.10)        | 681.21<br>(421.26 to<br>1,003.13)       | 748.35<br>(455.98 to<br>1,124.81)        | 12.64<br>(7.47 to<br>19.27)     | 48.21<br>(28.28 to<br>71.53)    | 45.98<br>(27.02 to<br>67.26)    | 46.17<br>(26.79 to<br>68.91)    |
| Skin and subcutaneous diseases                | 53.84<br>(31.00 to<br>108.35)            | 174.93<br>(101.93 to<br>315.89)          | 173.23<br>(101.37 to<br>304.39)         | 170.10<br>(99.08 to<br>313.57)           | 2.12<br>(1.18 to<br>3.95)       | 9.21<br>(5.10 to<br>15.78)      | 9.49<br>(5.28 to<br>16.17)      | 8.63<br>(4.73 to<br>14.98)      |
| Cellulitis                                    | 144.04<br>(84.35 to<br>229.35)           | 427.01<br>(233.25 to<br>620.04)          | 379.09<br>(204.85 to<br>555.65)         | 432.92<br>(238.54 to<br>635.32)          | 6.57<br>(3.58 to<br>10.01)      | 27.56<br>(14.73 to<br>40.25)    | 26.05<br>(13.77 to<br>38.84)    | 26.58<br>(14.37 to<br>38.39)    |
| Pyoderma                                      | 48.77<br>(28.88 to<br>81.12)             | 120.04<br>(70.29 to<br>210.10)           | 105.35<br>(64.75 to<br>176.66)          | 118.67<br>(69.57 to<br>207.36)           | 3.46<br>(2.06 to<br>5.84)       | 10.25<br>(6.05 to<br>18.41)     | 9.33<br>(5.61 to<br>16.28)      | 9.80<br>(5.72 to<br>17.56)      |
| Decubitus ulcer                               | 13.83<br>(7.91 to<br>24.74)              | 26.35<br>(15.26 to<br>45.16)             | 23.55<br>(13.79 to<br>39.04)            | 26.66<br>(15.51 to<br>46.26)             | 0.49<br>(0.28 to<br>0.88)       | 1.19<br>(0.68 to<br>2.11)       | 1.12<br>(0.64 to<br>1.90)       | 1.15<br>(0.66 to<br>2.08)       |
| Other skin and subcutaneous diseases          | 92.86<br>(81.38 to<br>109.24)            | 47.86<br>(35.15 to<br>64.38)             | 31.66<br>(23.47 to<br>42.12)            | 56.10<br>(41.34 to<br>74.74)             | 1.08<br>(0.94 to<br>1.27)       | 0.56<br>(0.41 to<br>0.75)       | 0.37<br>(0.27 to<br>0.49)       | 0.65<br>(0.48 to<br>0.87)       |
| Sudden infant death syndrome                  | 18,697.48<br>(17,586.43 to<br>19,564.60) | 14,596.96<br>(11,594.61 to<br>20,117.05) | 11,624.60<br>(8,818.09 to<br>14,741.27) | 18,897.86<br>(14,704.12 to<br>25,567.22) | 391.21<br>(367.38 to<br>410.63) | 385.85<br>(322.29 to<br>496.57) | 305.76<br>(258.55 to<br>382.69) | 476.66<br>(393.01 to<br>602.62) |
| <b>Injuries</b>                               | 5,525.54<br>(5,171.31 to<br>6,174.82)    | 3,303.18<br>(2,283.65 to<br>4,867.75)    | 1,959.62<br>(1,381.97 to<br>2,852.57)   | 6,676.62<br>(4,432.00 to<br>9,859.58)    | 115.83<br>(109.16 to<br>126.99) | 83.80<br>(59.95 to<br>120.21)   | 52.12<br>(38.50 to<br>72.07)    | 159.93<br>(112.52 to<br>236.69) |
| <b>Transport injuries</b>                     | 5,250.74<br>(4,906.53 to<br>5,856.53)    | 2,944.65<br>(2,039.17 to<br>4,313.29)    | 1,709.09<br>(1,210.93 to<br>2,465.51)   | 6,260.12<br>(4,178.02 to<br>9,237.79)    | 110.04<br>(103.59 to<br>120.42) | 74.95<br>(53.85 to<br>106.35)   | 45.79<br>(33.99 to<br>63.32)    | 149.81<br>(105.27 to<br>216.00) |
| Road injuries                                 | 1,734.14<br>(1,568.67 to<br>2,139.38)    | 1,036.77<br>(749.31 to<br>1,502.32)      | 516.38<br>(389.19 to<br>717.28)         | 2,061.55<br>(1,454.46 to<br>3,042.34)    | 40.71<br>(36.96 to<br>48.38)    | 32.07<br>(23.97 to<br>44.38)    | 17.39<br>(13.55 to<br>22.86)    | 60.14<br>(43.99 to<br>86.18)    |
| Pedestrian road injuries                      | <b>Latin America and Caribbean</b>       |                                          |                                         |                                          |                                 |                                 |                                 |                                 |
|                                               | <b>YLLs (in 1000s)</b>                   |                                          |                                         |                                          | <b>Deaths (in 1000s)</b>        |                                 |                                 |                                 |

| Cause                                           | 2016                                                       | 2040 Forecast                                              | 2040 Better Scenario                                       | 2040 Worse Scenario                                        | 2016                                                | 2040 Forecast                                        | 2040 Better Scenario                                 | 2040 Worse Scenario                                  |
|-------------------------------------------------|------------------------------------------------------------|------------------------------------------------------------|------------------------------------------------------------|------------------------------------------------------------|-----------------------------------------------------|------------------------------------------------------|------------------------------------------------------|------------------------------------------------------|
| Cyclist road injuries                           | 195.42<br>(173.86 to<br>233.92)                            | 114.72<br>(75.64 to<br>179.55)                             | 73.21<br>(49.42 to<br>111.41)                              | 237.84<br>(152.35 to<br>375.15)                            | 4.31<br>(3.84 to<br>5.10)                           | 3.12<br>(2.13 to<br>4.73)                            | 2.19<br>(1.54 to<br>3.24)                            | 5.80<br>(3.79 to<br>8.99)                            |
| Motorcyclist road injuries                      | 1,327.78<br>(1,113.19 to<br>1,574.90)                      | 780.08<br>(467.79 to<br>1,289.56)                          | 583.15<br>(361.35 to<br>940.68)                            | 1,492.12<br>(881.27 to<br>2,458.17)                        | 24.71<br>(20.89 to<br>28.84)                        | 15.90<br>(9.89 to<br>25.73)                          | 12.29<br>(7.91 to<br>19.14)                          | 28.91<br>(17.69 to<br>46.83)                         |
| Motor vehicle road injuries                     | 1,904.19<br>(1,610.09 to<br>2,261.81)                      | 965.11<br>(669.70 to<br>1,376.58)                          | 511.38<br>(368.18 to<br>723.71)                            | 2,354.56<br>(1,558.31 to<br>3,446.76)                      | 38.37<br>(32.42 to<br>45.28)                        | 22.52<br>(16.10 to<br>31.49)                         | 13.11<br>(9.71 to<br>17.95)                          | 52.09<br>(35.51 to<br>75.22)                         |
| Other road injuries                             | 89.20<br>(74.36 to<br>120.93)                              | 47.96<br>(31.38 to<br>75.55)                               | 24.97<br>(17.07 to<br>37.93)                               | 114.07<br>(72.33 to<br>186.89)                             | 1.94<br>(1.62 to<br>2.63)                           | 1.34<br>(0.91 to<br>2.05)                            | 0.80<br>(0.56 to<br>1.20)                            | 2.87<br>(1.88 to<br>4.53)                            |
| Other transport injuries                        | 274.80<br>(241.80 to<br>320.75)                            | 358.53<br>(225.69 to<br>557.52)                            | 250.52<br>(169.53 to<br>386.87)                            | 416.50<br>(276.90 to<br>644.07)                            | 5.79<br>(5.14 to<br>6.65)                           | 8.85<br>(6.11 to<br>13.16)                           | 6.33<br>(4.51 to<br>9.41)                            | 10.12<br>(7.05 to<br>15.04)                          |
| <b>Unintentional injuries</b>                   | <b>4,054.89</b><br><b>(3,848.93 to</b><br><b>4,407.76)</b> | <b>3,668.88</b><br><b>(3,205.46 to</b><br><b>4,280.05)</b> | <b>2,985.24</b><br><b>(2,627.29 to</b><br><b>3,500.86)</b> | <b>3,915.31</b><br><b>(3,453.93 to</b><br><b>4,546.29)</b> | <b>100.08</b><br><b>(95.97 to</b><br><b>107.07)</b> | <b>138.25</b><br><b>(126.04 to</b><br><b>152.79)</b> | <b>120.79</b><br><b>(110.06 to</b><br><b>134.11)</b> | <b>139.93</b><br><b>(127.64 to</b><br><b>154.42)</b> |
| Falls                                           | 771.82<br>(688.57 to<br>848.66)                            | 1,100.66<br>(960.07 to<br>1,226.35)                        | 972.70<br>(859.19 to<br>1,086.96)                          | 1,110.62<br>(962.38 to<br>1,222.73)                        | 33.00<br>(27.51 to<br>35.08)                        | 65.93<br>(54.66 to<br>72.24)                         | 60.38<br>(50.89 to<br>65.99)                         | 64.16<br>(52.44 to<br>69.74)                         |
| Drowning                                        | 996.26<br>(940.90 to<br>1,087.64)                          | 706.36<br>(547.28 to<br>935.88)                            | 542.78<br>(422.23 to<br>722.85)                            | 789.98<br>(605.55 to<br>1,061.71)                          | 18.06<br>(17.14 to<br>19.55)                        | 15.86<br>(12.61 to<br>20.73)                         | 12.58<br>(10.05 to<br>16.13)                         | 17.37<br>(13.60 to<br>22.88)                         |
| Fire, heat, and hot substances                  | 223.98<br>(204.92 to<br>265.38)                            | 175.97<br>(139.70 to<br>223.35)                            | 128.94<br>(103.53 to<br>164.36)                            | 197.19<br>(155.98 to<br>253.38)                            | 5.69<br>(5.26 to<br>6.68)                           | 6.84<br>(5.64 to<br>8.66)                            | 5.37<br>(4.49 to<br>6.69)                            | 7.27<br>(5.92 to<br>9.34)                            |
| Poisonings                                      | 109.02<br>(94.31 to<br>140.82)                             | 60.26<br>(44.79 to<br>84.61)                               | 40.57<br>(30.33 to<br>57.42)                               | 70.43<br>(52.21 to<br>100.16)                              | 2.08<br>(1.82 to<br>2.69)                           | 1.48<br>(1.14 to<br>2.05)                            | 1.04<br>(0.82 to<br>1.45)                            | 1.68<br>(1.28 to<br>2.34)                            |
| Exposure to mechanical forces                   | 536.77<br>(470.19 to<br>627.68)                            | 404.15<br>(331.72 to<br>501.86)                            | 307.03<br>(250.16 to<br>391.34)                            | 441.73<br>(368.32 to<br>540.81)                            | 10.58<br>(9.35 to<br>12.12)                         | 10.58<br>(8.53 to<br>11.82)                          | 7.85<br>(6.67 to<br>9.54)                            | 10.58<br>(9.11 to<br>12.43)                          |
| Unintentional firearm injuries                  | 227.81<br>(157.59 to<br>283.06)                            | 145.09<br>(99.12 to<br>201.37)                             | 111.45<br>(76.51 to<br>160.61)                             | 157.94<br>(108.12 to<br>216.16)                            | 4.37<br>(3.12 to<br>5.30)                           | 3.29<br>(2.41 to<br>4.23)                            | 2.62<br>(1.90 to<br>3.47)                            | 3.51<br>(2.53 to<br>4.47)                            |
| Unintentional suffocation                       | 77.31<br>(68.15 to<br>99.01)                               | 47.66<br>(38.41 to<br>59.88)                               | 33.96<br>(27.45 to<br>42.81)                               | 55.21<br>(44.23 to<br>69.60)                               | 1.05<br>(0.93 to<br>1.30)                           | 0.71<br>(0.59 to<br>0.88)                            | 0.52<br>(0.43 to<br>0.65)                            | 0.81<br>(0.66 to<br>1.00)                            |
| Other exposure to mechanical forces             | 231.65<br>(206.27 to<br>295.70)                            | 211.40<br>(176.63 to<br>268.02)                            | 161.63<br>(133.93 to<br>207.31)                            | 228.58<br>(192.55 to<br>289.22)                            | 5.16<br>(4.64 to<br>6.55)                           | 5.94<br>(5.14 to<br>7.43)                            | 4.71<br>(4.06 to<br>5.94)                            | 6.25<br>(5.44 to<br>7.86)                            |
| Adverse effects of medical treatment            | 288.55<br>(259.54 to<br>373.14)                            | 292.86<br>(250.20 to<br>394.33)                            | 246.42<br>(208.96 to<br>355.52)                            | 309.46<br>(265.18 to<br>414.03)                            | 8.46<br>(7.58 to<br>11.25)                          | 12.72<br>(10.93 to<br>17.32)                         | 11.43<br>(9.73 to<br>15.68)                          | 12.76<br>(10.98 to<br>17.20)                         |
| Animal contact                                  | 78.04<br>(68.45 to<br>119.43)                              | 87.36<br>(72.11 to<br>134.61)                              | 66.52<br>(55.31 to<br>103.27)                              | 94.78<br>(78.61 to<br>143.26)                              | 1.88<br>(1.64 to<br>2.78)                           | 2.85<br>(2.42 to<br>4.20)                            | 2.34<br>(1.99 to<br>3.48)                            | 2.96<br>(2.54 to<br>4.34)                            |
| Venomous animal contact                         | 51.99<br>(43.11 to<br>83.11)                               | 56.99<br>(45.59 to<br>90.31)                               | 44.02<br>(34.83 to<br>69.85)                               | 61.64<br>(49.58 to<br>96.34)                               | 1.25<br>(1.01 to<br>1.94)                           | 1.84<br>(1.47 to<br>2.86)                            | 1.54<br>(1.21 to<br>2.38)                            | 1.90<br>(1.53 to<br>2.94)                            |
| Non-venomous animal contact                     | 26.05<br>(18.60 to<br>40.56)                               | 30.36<br>(21.29 to<br>46.15)                               | 22.51<br>(15.88 to<br>34.69)                               | 33.14<br>(23.60 to<br>50.01)                               | 0.63<br>(0.45 to<br>1.01)                           | 1.01<br>(0.72 to<br>1.54)                            | 0.80<br>(0.57 to<br>1.23)                            | 1.05<br>(0.76 to<br>1.62)                            |
| Foreign body                                    | 721.05<br>(650.22 to<br>812.84)                            | 598.08<br>(513.00 to<br>714.80)                            | 517.73<br>(448.55 to<br>614.46)                            | 624.85<br>(534.32 to<br>746.77)                            | 13.21<br>(11.75 to<br>14.62)                        | 16.01<br>(13.73 to<br>18.16)                         | 15.25<br>(12.96 to<br>17.31)                         | 15.81<br>(13.50 to<br>17.87)                         |
| Pulmonary aspiration and foreign body in airway | 684.60<br>(614.03 to<br>776.19)                            | 564.01<br>(481.41 to<br>678.15)                            | 485.13<br>(418.43 to<br>579.50)                            | 589.83<br>(500.33 to<br>708.34)                            | 12.36<br>(10.97 to<br>13.78)                        | 14.90<br>(12.70 to<br>17.09)                         | 14.09<br>(11.86 to<br>16.18)                         | 14.73<br>(12.47 to<br>16.88)                         |
| Foreign body in other body part                 | 36.45<br>(31.53 to<br>49.20)                               | 34.07<br>(27.85 to<br>44.93)                               | 32.60<br>(26.52 to<br>42.64)                               | 35.02<br>(28.38 to<br>47.12)                               | 0.85<br>(0.69 to<br>1.06)                           | 1.11<br>(0.83 to<br>1.31)                            | 1.17<br>(0.85 to<br>1.36)                            | 1.08<br>(0.81 to<br>1.26)                            |

|                                                                                     |                                                            |                                                            |                                                            |                                                             |                                                      |                                                      |                                                     |                                                      |
|-------------------------------------------------------------------------------------|------------------------------------------------------------|------------------------------------------------------------|------------------------------------------------------------|-------------------------------------------------------------|------------------------------------------------------|------------------------------------------------------|-----------------------------------------------------|------------------------------------------------------|
| Environmental heat and cold exposure                                                | 46.68<br>(35.30 to<br>73.89)                               | 52.07<br>(37.87 to<br>85.32)                               | 36.95<br>(26.65 to<br>61.75)                               | 57.96<br>(42.17 to<br>95.11)                                | 1.26<br>(0.96 to<br>2.05)                            | 1.84<br>(1.39 to<br>3.15)                            | 1.36<br>(1.02 to<br>2.31)                           | 1.98<br>(1.47 to<br>3.30)                            |
| Other unintentional injuries                                                        | 282.73<br>(263.70 to<br>314.45)                            | 191.13<br>(158.74 to<br>234.09)                            | 125.59<br>(104.40 to<br>153.40)                            | 218.31<br>(187.46 to<br>252.77)                             | 5.86<br>(5.52 to<br>6.40)                            | 4.78<br>(4.09 to<br>5.65)                            | 3.17<br>(2.72 to<br>3.72)                           | 5.38<br>(4.75 to<br>6.05)                            |
| <b>Self-harm and interpersonal violence</b>                                         | <b>8,903.37</b><br><b>(6,996.45 to</b><br><b>9,827.61)</b> | <b>7,141.25</b><br><b>(5,126.15 to</b><br><b>9,446.22)</b> | <b>5,616.85</b><br><b>(4,115.77 to</b><br><b>7,399.15)</b> | <b>7,810.63</b><br><b>(5,513.73 to</b><br><b>10,370.86)</b> | <b>171.43</b><br><b>(134.99 to</b><br><b>192.99)</b> | <b>153.72</b><br><b>(115.67 to</b><br><b>197.65)</b> | <b>122.82</b><br><b>(93.17 to</b><br><b>156.48)</b> | <b>166.71</b><br><b>(120.45 to</b><br><b>214.27)</b> |
| <b>Latin America and Caribbean</b>                                                  |                                                            |                                                            |                                                            |                                                             |                                                      |                                                      |                                                     |                                                      |
| <b>Cause</b>                                                                        | <b>YLLs (in 1000s)</b>                                     |                                                            |                                                            |                                                             | <b>Deaths (in 1000s)</b>                             |                                                      |                                                     |                                                      |
|                                                                                     | <b>2016</b>                                                | <b>2040 Forecast</b>                                       | <b>2040 Better Scenario</b>                                | <b>2040 Worse Scenario</b>                                  | <b>2016</b>                                          | <b>2040 Forecast</b>                                 | <b>2040 Better Scenario</b>                         | <b>2040 Worse Scenario</b>                           |
| Self-harm                                                                           | 1,781.42<br>(1,504.55 to<br>2,107.32)                      | 1,885.38<br>(1,258.81 to<br>2,783.60)                      | 1,481.01<br>(1,012.20 to<br>2,150.81)                      | 2,166.74<br>(1,393.57 to<br>3,274.42)                       | 37.87<br>(31.96 to<br>44.51)                         | 46.25<br>(32.07 to<br>65.22)                         | 56.99<br>(26.40 to<br>80.55)                        | 52.24<br>(34.77 to<br>75.16)                         |
| Self-harm by firearm                                                                | 230.79<br>(163.73 to<br>322.20)                            | 229.62<br>(126.32 to<br>397.40)                            | 170.38<br>(96.92 to<br>290.46)                             | 270.84<br>(145.06 to<br>473.68)                             | 4.95<br>(3.59 to<br>6.83)                            | 5.72<br>(3.37 to<br>9.25)                            | 4.33<br>(2.65 to<br>6.76)                           | 6.61<br>(3.78 to<br>11.01)                           |
| Self-harm by other specified means                                                  | 1,550.62<br>(1,302.27 to<br>1,852.82)                      | 1,655.76<br>(1,120.92 to<br>2,405.97)                      | 1,310.64<br>(913.29 to<br>1,859.53)                        | 1,895.89<br>(1,244.08 to<br>2,816.43)                       | 32.92<br>(27.57 to<br>38.99)                         | 40.53<br>(28.50 to<br>57.05)                         | 32.66<br>(23.68 to<br>44.20)                        | 45.62<br>(30.76 to<br>65.04)                         |
| Interpersonal violence                                                              | 7,121.96<br>(4,978.97 to<br>8,128.93)                      | 5,255.87<br>(3,443.66 to<br>6,877.73)                      | 4,135.84<br>(2,789.78 to<br>5,462.94)                      | 5,643.89<br>(3,634.32 to<br>7,370.32)                       | 133.56<br>(94.42 to<br>156.80)                       | 107.47<br>(72.63 to<br>140.83)                       | 85.83<br>(59.60 to<br>110.32)                       | 114.48<br>(75.21 to<br>148.77)                       |
| Physical violence by firearm                                                        | 5,091.51<br>(2,969.94 to<br>5,942.06)                      | 3,664.11<br>(2,035.92 to<br>5,101.89)                      | 2,855.80<br>(1,623.04 to<br>4,001.66)                      | 3,928.48<br>(2,095.86 to<br>5,411.33)                       | 93.48<br>(54.17 to<br>109.17)                        | 71.65<br>(41.32 to<br>96.53)                         | 56.53<br>(32.49 to<br>76.25)                        | 76.25<br>(41.12 to<br>101.65)                        |
| Physical violence by sharp object                                                   | 1,170.30<br>(772.81 to<br>2,128.95)                        | 931.83<br>(596.55 to<br>1,694.25)                          | 747.43<br>(487.93 to<br>1,327.85)                          | 983.00<br>(618.74 to<br>1,343.33)                           | 22.93<br>(15.16 to<br>37.28)                         | 20.29<br>(13.33 to<br>37.28)                         | 16.50<br>(11.04 to<br>28.90)                        | 21.21<br>(13.59 to<br>39.60)                         |
| Physical violence by other means                                                    | 860.15<br>(529.79 to<br>1,478.90)                          | 659.94<br>(373.34 to<br>1,141.27)                          | 532.60<br>(309.81 to<br>904.85)                            | 732.41<br>(396.00 to<br>1,279.83)                           | 17.15<br>(10.55 to<br>30.13)                         | 15.53<br>(8.88 to<br>27.21)                          | 12.81<br>(7.49 to<br>21.96)                         | 17.01<br>(9.30 to<br>30.24)                          |
| <b>Forces of nature, conflict and terrorism, and executions and police conflict</b> | <b>213.68</b><br><b>(137.38 to</b><br><b>282.38)</b>       | <b>483.64</b><br><b>(12.92 to</b><br><b>3,021.21)</b>      | <b>462.89</b><br><b>(12.94 to</b><br><b>2,823.32)</b>      | <b>495.31</b><br><b>(12.88 to</b><br><b>3,084.41)</b>       | <b>3.88</b><br><b>(2.47 to</b><br><b>5.19)</b>       | <b>10.09</b><br><b>(0.37 to</b><br><b>65.41)</b>     | <b>10.02</b><br><b>(0.38 to</b><br><b>63.52)</b>    | <b>10.08</b><br><b>(0.35 to</b><br><b>65.73)</b>     |
| Exposure to forces of nature                                                        | 152.78<br>(89.68 to<br>221.88)                             | 379.22<br>(2.69 to<br>2,987.26)                            | 359.74<br>(2.68 to<br>2,792.10)                            | 389.46<br>(2.69 to<br>3,049.66)                             | 2.86<br>(1.65 to<br>4.20)                            | 7.90<br>(0.07 to<br>64.81)                           | 7.84<br>(0.07 to<br>62.95)                          | 7.90<br>(0.06 to<br>65.11)                           |
| Conflict and terrorism                                                              | 0.00<br>(0.00 to<br>0.00)                                  | 34.32<br>(0.00 to<br>213.96)                               | 32.81<br>(0.00 to<br>202.51)                               | 35.04<br>(0.00 to<br>218.33)                                | 0.00<br>(0.00 to<br>0.00)                            | 0.68<br>(0.00 to<br>4.09)                            | 0.66<br>(0.00 to<br>3.96)                           | 0.68<br>(0.00 to<br>4.11)                            |
| Executions and police conflict                                                      | 60.90<br>(7.96 to<br>87.22)                                | 70.10<br>(0.00 to<br>1,058.98)                             | 70.33<br>(0.00 to<br>1,064.17)                             | 70.80<br>(0.00 to<br>1,067.99)                              | 1.01<br>(0.14 to<br>1.43)                            | 1.51<br>(0.00 to<br>22.91)                           | 1.53<br>(0.00 to<br>23.18)                          | 1.50<br>(0.00 to<br>22.74)                           |
| <b>Caribbean</b>                                                                    |                                                            |                                                            |                                                            |                                                             |                                                      |                                                      |                                                     |                                                      |
| <b>Cause</b>                                                                        | <b>YLLs (in 1000s)</b>                                     |                                                            |                                                            |                                                             | <b>Deaths (in 1000s)</b>                             |                                                      |                                                     |                                                      |
|                                                                                     | <b>2016</b>                                                | <b>2040 Forecast</b>                                       | <b>2040 Better Scenario</b>                                | <b>2040 Worse Scenario</b>                                  | <b>2016</b>                                          | <b>2040 Forecast</b>                                 | <b>2040 Better Scenario</b>                         | <b>2040 Worse Scenario</b>                           |
| All causes                                                                          | 9,218.41<br>(8,441.38 to<br>10,208.56)                     | 8,825.56<br>(7,460.84 to<br>10,485.12)                     | 6,296.94<br>(5,287.05 to<br>7,391.26)                      | 11,335.80<br>(9,540.85 to<br>13,771.92)                     | 335.30<br>(317.44 to<br>354.43)                      | 437.73<br>(383.02 to<br>523.07)                      | 336.74<br>(293.59 to<br>395.38)                     | 521.44<br>(453.98 to<br>616.84)                      |
| Communicable, maternal, neonatal, and nutritional diseases                          | 2,732.66<br>(2,240.27 to<br>3,423.87)                      | 1,325.56<br>(997.96 to<br>1,750.86)                        | 814.54<br>(614.52 to<br>1,045.75)                          | 2,180.46<br>(1,619.89 to<br>2,928.52)                       | 52.74<br>(46.26 to<br>60.78)                         | 38.65<br>(31.42 to<br>47.85)                         | 27.28<br>(22.70 to<br>33.36)                        | 56.05<br>(44.55 to<br>70.45)                         |
| HIV/AIDS and tuberculosis                                                           | 592.62<br>(518.54 to<br>677.69)                            | 238.89<br>(140.16 to<br>377.26)                            | 167.40<br>(84.68 to<br>286.69)                             | 666.79<br>(424.20 to<br>1,095.34)                           | 12.90<br>(11.47 to<br>14.54)                         | 5.86<br>(3.68 to<br>8.80)                            | 4.08<br>(2.22 to<br>6.63)                           | 15.04<br>(9.55 to<br>24.11)                          |
| Tuberculosis                                                                        | 69.10<br>(54.05 to<br>84.62)                               | 52.06<br>(33.41 to<br>76.17)                               | 22.33<br>(15.05 to<br>32.24)                               | 72.48<br>(45.69 to<br>108.13)                               | 1.92<br>(1.52 to<br>2.34)                            | 1.73<br>(1.13 to<br>2.46)                            | 0.80<br>(0.55 to<br>1.11)                           | 2.31<br>(1.48 to<br>3.36)                            |

|                                                                          |                                            |                                          |                                          |                                            |                                       |                                       |                                       |                                       |
|--------------------------------------------------------------------------|--------------------------------------------|------------------------------------------|------------------------------------------|--------------------------------------------|---------------------------------------|---------------------------------------|---------------------------------------|---------------------------------------|
| HIV/AIDS                                                                 | 523.51<br>(452.85 to<br>611.99)            | 186.83<br>(92.61 to<br>319.61)           | 145.07<br>(65.10 to<br>261.72)           | 594.31<br>(350.97 to<br>1,012.71)          | 10.98<br>(9.67 to<br>12.55)           | 4.13<br>(2.10 to<br>6.80)             | 3.28<br>(1.49 to<br>5.87)             | 12.74<br>(7.61 to<br>21.66)           |
| <b>Diarrhea, lower respiratory, and other common infectious diseases</b> | <b>993.27<br/>(770.19 to<br/>1,316.35)</b> | <b>528.81<br/>(351.76 to<br/>788.24)</b> | <b>306.17<br/>(218.70 to<br/>439.12)</b> | <b>773.96<br/>(485.53 to<br/>1,187.70)</b> | <b>24.72<br/>(21.42 to<br/>29.26)</b> | <b>23.95<br/>(18.28 to<br/>31.58)</b> | <b>17.23<br/>(13.74 to<br/>22.14)</b> | <b>29.98<br/>(22.16 to<br/>40.40)</b> |
| Diarrheal diseases                                                       | 302.65<br>(202.66 to<br>450.82)            | 94.92<br>(15.46 to<br>233.36)            | 47.17<br>(9.00 to<br>122.62)             | 128.24<br>(23.54 to<br>300.74)             | 5.13<br>(3.57 to<br>7.48)             | 3.20<br>(0.60 to<br>8.60)             | 1.94<br>(0.46 to<br>5.33)             | 4.12<br>(0.84 to<br>10.73)            |
| Intestinal infectious diseases                                           | 1.00<br>(0.55 to<br>1.62)                  | 0.43<br>(0.20 to<br>0.81)                | 0.35<br>(0.16 to<br>0.68)                | 0.46<br>(0.21 to<br>0.88)                  | 0.02<br>(0.01 to<br>0.03)             | 0.01<br>(0.00 to<br>0.02)             | 0.01<br>(0.00 to<br>0.02)             | 0.01<br>(0.01 to<br>0.02)             |
| Typhoid fever                                                            | 0.63<br>(0.31 to<br>1.09)                  | 0.29<br>(0.13 to<br>0.60)                | 0.25<br>(0.11 to<br>0.50)                | 0.31<br>(0.14 to<br>0.64)                  | 0.01<br>(0.01 to<br>0.02)             | 0.01<br>(0.00 to<br>0.01)             | 0.01<br>(0.00 to<br>0.01)             | 0.01<br>(0.00 to<br>0.01)             |
| Paratyphoid fever                                                        | 0.15<br>(0.06 to<br>0.29)                  | 0.09<br>(0.03 to<br>0.19)                | 0.07<br>(0.03 to<br>0.15)                | 0.10<br>(0.04 to<br>0.21)                  | 0.00<br>(0.00 to<br>0.01)             | 0.00<br>(0.00 to<br>0.00)             | 0.00<br>(0.00 to<br>0.00)             | 0.00<br>(0.00 to<br>0.01)             |
| Other intestinal infectious diseases                                     | 0.22<br>(0.08 to<br>0.52)                  | 0.04<br>(0.01 to<br>0.12)                | 0.03<br>(0.01 to<br>0.07)                | 0.05<br>(0.01 to<br>0.15)                  | 0.00<br>(0.00 to<br>0.01)             | 0.00<br>(0.00 to<br>0.00)             | 0.00<br>(0.00 to<br>0.00)             | 0.00<br>(0.00 to<br>0.00)             |
| Lower respiratory infections                                             | 503.07<br>(401.91 to<br>637.00)            | 288.58<br>(209.77 to<br>421.70)          | 186.25<br>(145.83 to<br>251.86)          | 424.02<br>(272.56 to<br>707.66)            | 16.89<br>(15.17 to<br>18.89)          | 18.35<br>(14.72 to<br>23.01)          | 13.88<br>(11.49 to<br>16.88)          | 22.51<br>(17.09 to<br>29.84)          |
| Upper respiratory infections                                             | 0.72<br>(0.37 to<br>1.42)                  | 0.40<br>(0.19 to<br>0.83)                | 0.21<br>(0.10 to<br>0.41)                | 0.48<br>(0.21 to<br>1.01)                  | 0.01<br>(0.01 to<br>0.02)             | 0.01<br>(0.01 to<br>0.02)             | 0.01<br>(0.00 to<br>0.01)             | 0.01<br>(0.01 to<br>0.02)             |
| Otitis media                                                             | 0.31<br>(0.14 to<br>0.64)                  | 0.11<br>(0.03 to<br>0.27)                | 0.11<br>(0.03 to<br>0.27)                | 0.11<br>(0.03 to<br>0.27)                  | 0.01<br>(0.00 to<br>0.01)             | 0.00<br>(0.00 to<br>0.01)             | 0.00<br>(0.00 to<br>0.01)             | 0.00<br>(0.00 to<br>0.01)             |
| Meningitis                                                               | 114.44<br>(73.03 to<br>194.47)             | 33.00<br>(12.62 to<br>64.54)             | 22.04<br>(9.39 to<br>40.04)              | 52.83<br>(16.36 to<br>112.39)              | 1.61<br>(1.12 to<br>2.56)             | 0.65<br>(0.37 to<br>1.06)             | 0.50<br>(0.31 to<br>0.77)             | 0.87<br>(0.41 to<br>1.59)             |
| Pneumococcal meningitis                                                  | 14.10<br>(7.98 to<br>25.93)                | 2.78<br>(1.44 to<br>5.34)                | 2.36<br>(1.32 to<br>4.10)                | 3.87<br>(1.67 to<br>8.63)                  | 0.22<br>(0.14 to<br>0.35)             | 0.08<br>(0.05 to<br>0.11)             | 0.07<br>(0.05 to<br>0.11)             | 0.09<br>(0.06 to<br>0.15)             |
| H influenzae type B meningitis                                           | 15.22<br>(9.27 to<br>26.01)                | 9.88<br>(1.96 to<br>29.60)               | 4.53<br>(1.29 to<br>11.70)               | 26.13<br>(3.82 to<br>80.00)                | 0.20<br>(0.13 to<br>0.33)             | 0.14<br>(0.05 to<br>0.37)             | 0.08<br>(0.04 to<br>0.17)             | 0.33<br>(0.07 to<br>0.96)             |
| Meningococcal meningitis                                                 | 42.27<br>(25.87 to<br>72.02)               | 9.74<br>(4.30 to<br>18.76)               | 7.18<br>(3.22 to<br>13.45)               | 10.93<br>(4.62 to<br>21.61)                | 0.59<br>(0.40 to<br>0.94)             | 0.21<br>(0.13 to<br>0.33)             | 0.17<br>(0.11 to<br>0.26)             | 0.22<br>(0.13 to<br>0.36)             |
| Other meningitis                                                         | 42.85<br>(25.11 to<br>75.90)               | 10.60<br>(4.31 to<br>20.67)              | 7.96<br>(3.26 to<br>15.01)               | 11.90<br>(4.65 to<br>24.44)                | 0.59<br>(0.38 to<br>0.97)             | 0.22<br>(0.13 to<br>0.36)             | 0.18<br>(0.11 to<br>0.28)             | 0.23<br>(0.13 to<br>0.38)             |
| Encephalitis                                                             | 17.92<br>(11.60 to<br>28.66)               | 10.39<br>(5.87 to<br>17.92)              | 7.94<br>(4.62 to<br>13.27)               | 11.36<br>(6.25 to<br>20.02)                | 0.30<br>(0.21 to<br>0.45)             | 0.25<br>(0.16 to<br>0.37)             | 0.21<br>(0.14 to<br>0.30)             | 0.26<br>(0.17 to<br>0.39)             |
| Diphtheria                                                               | 0.18<br>(0.11 to<br>0.29)                  | 0.04<br>(0.01 to<br>0.09)                | 0.02<br>(0.01 to<br>0.04)                | 0.08<br>(0.01 to<br>0.23)                  | 0.00<br>(0.00 to<br>0.00)             | 0.00<br>(0.00 to<br>0.00)             | 0.00<br>(0.00 to<br>0.00)             | 0.00<br>(0.00 to<br>0.00)             |
| Whooping cough                                                           | 39.20<br>(6.48 to<br>119.32)               | 26.91<br>(0.61 to<br>97.92)              | 6.67<br>(0.36 to<br>28.37)               | 32.36<br>(1.12 to<br>124.60)               | 0.46<br>(0.08 to<br>1.41)             | 0.32<br>(0.01 to<br>1.16)             | 0.08<br>(0.00 to<br>0.34)             | 0.38<br>(0.01 to<br>1.47)             |
| Tetanus                                                                  | 8.89<br>(4.28 to<br>16.70)                 | 1.54<br>(0.63 to<br>3.29)                | 0.89<br>(0.29 to<br>1.97)                | 1.90<br>(0.75 to<br>4.11)                  | 0.17<br>(0.08 to<br>0.32)             | 0.03<br>(0.01 to<br>0.07)             | 0.03<br>(0.01 to<br>0.06)             | 0.04<br>(0.01 to<br>0.07)             |
| Measles                                                                  | 0.08<br>(0.05 to<br>0.12)                  | 70.66<br>(2.34 to<br>262.62)             | 33.44<br>(1.66 to<br>115.52)             | 119.92<br>(3.12 to<br>446.20)              | 0.00<br>(0.00 to<br>0.00)             | 1.05<br>(0.05 to<br>3.54)             | 0.53<br>(0.03 to<br>1.70)             | 1.71<br>(0.06 to<br>5.87)             |
| <b>Caribbean</b>                                                         |                                            |                                          |                                          |                                            |                                       |                                       |                                       |                                       |
| Cause                                                                    | YLLs (in 1000s)                            |                                          |                                          |                                            | Deaths (in 1000s)                     |                                       |                                       |                                       |
|                                                                          | 2016                                       | 2040 Forecast                            | 2040 Better Scenario                     | 2040 Worse Scenario                        | 2016                                  | 2040 Forecast                         | 2040 Better Scenario                  | 2040 Worse Scenario                   |

|                                                       |                                                    |                                                   |                                                   |                                                    |                                                |                                                |                                                |                                                |
|-------------------------------------------------------|----------------------------------------------------|---------------------------------------------------|---------------------------------------------------|----------------------------------------------------|------------------------------------------------|------------------------------------------------|------------------------------------------------|------------------------------------------------|
| Varicella and herpes zoster                           | 4.81<br>(2.98 to<br>7.73)                          | 1.85<br>(0.87 to<br>3.38)                         | 1.08<br>(0.57 to<br>1.91)                         | 2.19<br>(0.96 to<br>4.23)                          | 0.10<br>(0.07 to<br>0.14)                      | 0.07<br>(0.05 to<br>0.10)                      | 0.05<br>(0.03 to<br>0.08)                      | 0.07<br>(0.05 to<br>0.11)                      |
| <b>Neglected tropical diseases and malaria</b>        | <b>20.97</b><br><b>(9.02 to</b><br><b>37.17)</b>   | <b>37.56</b><br><b>(16.90 to</b><br><b>62.79)</b> | <b>30.36</b><br><b>(15.16 to</b><br><b>48.79)</b> | <b>40.37</b><br><b>(17.40 to</b><br><b>68.63)</b>  | <b>0.38</b><br><b>(0.19 to</b><br><b>0.63)</b> | <b>0.91</b><br><b>(0.48 to</b><br><b>1.46)</b> | <b>0.81</b><br><b>(0.46 to</b><br><b>1.25)</b> | <b>0.93</b><br><b>(0.48 to</b><br><b>1.51)</b> |
| Malaria                                               | 1.35<br>(0.97 to<br>2.24)                          | 0.82<br>(0.42 to<br>1.98)                         | 0.75<br>(0.37 to<br>1.82)                         | 0.83<br>(0.43 to<br>1.97)                          | 0.03<br>(0.02 to<br>0.05)                      | 0.02<br>(0.01 to<br>0.05)                      | 0.02<br>(0.01 to<br>0.04)                      | 0.02<br>(0.01 to<br>0.04)                      |
| Chagas disease                                        | 0.03<br>(0.03 to<br>0.04)                          | 0.03<br>(0.02 to<br>0.04)                         | 0.04<br>(0.03 to<br>0.05)                         | 0.03<br>(0.02 to<br>0.03)                          | 0.00<br>(0.00 to<br>0.00)                      | 0.00<br>(0.00 to<br>0.00)                      | 0.00<br>(0.00 to<br>0.00)                      | 0.00<br>(0.00 to<br>0.00)                      |
| Leishmaniasis                                         | 0.00<br>(0.00 to<br>0.00)                          | 0.00<br>(0.00 to<br>0.00)                         | 0.00<br>(0.00 to<br>0.00)                         | 0.00<br>(0.00 to<br>0.00)                          | 0.00<br>(0.00 to<br>0.00)                      | 0.00<br>(0.00 to<br>0.00)                      | 0.00<br>(0.00 to<br>0.00)                      | 0.00<br>(0.00 to<br>0.00)                      |
| African trypanosomiasis                               | 0.00<br>(0.00 to<br>0.00)                          | 0.00<br>(0.00 to<br>0.00)                         | 0.00<br>(0.00 to<br>0.00)                         | 0.00<br>(0.00 to<br>0.00)                          | 0.00<br>(0.00 to<br>0.00)                      | 0.00<br>(0.00 to<br>0.00)                      | 0.00<br>(0.00 to<br>0.00)                      | 0.00<br>(0.00 to<br>0.00)                      |
| Schistosomiasis                                       | 0.57<br>(0.35 to<br>0.88)                          | 0.53<br>(0.23 to<br>1.24)                         | 0.46<br>(0.19 to<br>1.12)                         | 0.58<br>(0.25 to<br>1.32)                          | 0.02<br>(0.01 to<br>0.03)                      | 0.02<br>(0.01 to<br>0.05)                      | 0.02<br>(0.01 to<br>0.05)                      | 0.03<br>(0.01 to<br>0.05)                      |
| Cysticercosis                                         | 0.00<br>(0.00 to<br>0.00)                          | 0.00<br>(0.00 to<br>0.00)                         | 0.00<br>(0.00 to<br>0.00)                         | 0.00<br>(0.00 to<br>0.00)                          | 0.00<br>(0.00 to<br>0.00)                      | 0.00<br>(0.00 to<br>0.00)                      | 0.00<br>(0.00 to<br>0.00)                      | 0.00<br>(0.00 to<br>0.00)                      |
| Cystic echinococcosis                                 | 0.03<br>(0.02 to<br>0.04)                          | 0.02<br>(0.01 to<br>0.04)                         | 0.01<br>(0.00 to<br>0.02)                         | 0.03<br>(0.01 to<br>0.05)                          | 0.00<br>(0.00 to<br>0.00)                      | 0.00<br>(0.00 to<br>0.00)                      | 0.00<br>(0.00 to<br>0.00)                      | 0.00<br>(0.00 to<br>0.00)                      |
| Dengue                                                | 15.97<br>(3.66 to<br>32.09)                        | 34.36<br>(12.13 to<br>60.42)                      | 27.77<br>(10.87 to<br>46.46)                      | 36.86<br>(12.17 to<br>66.03)                       | 0.28<br>(0.08 to<br>0.52)                      | 0.82<br>(0.34 to<br>1.39)                      | 0.73<br>(0.33 to<br>1.20)                      | 0.84<br>(0.34 to<br>1.44)                      |
| Yellow fever                                          | 0.01<br>(0.00 to<br>0.03)                          | 0.00<br>(0.00 to<br>0.01)                         | 0.00<br>(0.00 to<br>0.01)                         | 0.00<br>(0.00 to<br>0.01)                          | 0.00<br>(0.00 to<br>0.00)                      | 0.00<br>(0.00 to<br>0.00)                      | 0.00<br>(0.00 to<br>0.00)                      | 0.00<br>(0.00 to<br>0.00)                      |
| Rabies                                                | 0.05<br>(0.02 to<br>0.11)                          | 0.03<br>(0.01 to<br>0.06)                         | 0.01<br>(0.00 to<br>0.02)                         | 0.03<br>(0.01 to<br>0.09)                          | 0.00<br>(0.00 to<br>0.00)                      | 0.00<br>(0.00 to<br>0.00)                      | 0.00<br>(0.00 to<br>0.00)                      | 0.00<br>(0.00 to<br>0.00)                      |
| Intestinal nematode infections                        | 0.75<br>(0.45 to<br>1.18)                          | 0.53<br>(0.26 to<br>0.98)                         | 0.48<br>(0.22 to<br>0.87)                         | 0.58<br>(0.28 to<br>1.06)                          | 0.01<br>(0.01 to<br>0.02)                      | 0.01<br>(0.01 to<br>0.02)                      | 0.01<br>(0.01 to<br>0.02)                      | 0.01<br>(0.01 to<br>0.02)                      |
| Other neglected tropical diseases                     | 1.77<br>(0.92 to<br>3.48)                          | 1.24<br>(0.57 to<br>2.85)                         | 0.84<br>(0.41 to<br>1.97)                         | 1.44<br>(0.65 to<br>3.26)                          | 0.03<br>(0.02 to<br>0.05)                      | 0.03<br>(0.02 to<br>0.07)                      | 0.03<br>(0.01 to<br>0.06)                      | 0.03<br>(0.02 to<br>0.07)                      |
| <b>Maternal disorders</b>                             | <b>77.94</b><br><b>(54.35 to</b><br><b>108.08)</b> | <b>55.91</b><br><b>(34.17 to</b><br><b>85.19)</b> | <b>27.87</b><br><b>(16.70 to</b><br><b>42.58)</b> | <b>72.11</b><br><b>(41.75 to</b><br><b>114.62)</b> | <b>1.44</b><br><b>(1.00 to</b><br><b>2.02)</b> | <b>1.06</b><br><b>(0.65 to</b><br><b>1.64)</b> | <b>0.53</b><br><b>(0.32 to</b><br><b>0.81)</b> | <b>1.37</b><br><b>(0.79 to</b><br><b>2.15)</b> |
| Maternal hemorrhage                                   | 13.28<br>(8.06 to<br>20.89)                        | 8.38<br>(4.47 to<br>14.38)                        | 4.12<br>(2.18 to<br>7.13)                         | 10.31<br>(5.25 to<br>17.89)                        | 0.25<br>(0.15 to<br>0.39)                      | 0.16<br>(0.08 to<br>0.28)                      | 0.08<br>(0.04 to<br>0.14)                      | 0.20<br>(0.10 to<br>0.35)                      |
| Maternal sepsis and other maternal infections         | 4.57<br>(2.60 to<br>7.67)                          | 2.66<br>(1.29 to<br>4.93)                         | 1.34<br>(0.66 to<br>2.44)                         | 3.29<br>(1.58 to<br>5.95)                          | 0.09<br>(0.05 to<br>0.14)                      | 0.05<br>(0.03 to<br>0.10)                      | 0.03<br>(0.01 to<br>0.05)                      | 0.06<br>(0.03 to<br>0.12)                      |
| Maternal hypertensive disorders                       | 18.84<br>(11.91 to<br>27.80)                       | 11.64<br>(6.11 to<br>19.59)                       | 5.66<br>(2.94 to<br>9.51)                         | 14.46<br>(7.44 to<br>24.47)                        | 0.34<br>(0.21 to<br>0.50)                      | 0.21<br>(0.11 to<br>0.36)                      | 0.10<br>(0.05 to<br>0.17)                      | 0.26<br>(0.13 to<br>0.44)                      |
| Maternal obstructed labor and uterine rupture         | 1.86<br>(0.87 to<br>3.38)                          | 1.37<br>(0.57 to<br>2.76)                         | 0.64<br>(0.26 to<br>1.28)                         | 1.71<br>(0.69 to<br>3.46)                          | 0.04<br>(0.02 to<br>0.06)                      | 0.03<br>(0.01 to<br>0.05)                      | 0.01<br>(0.01 to<br>0.02)                      | 0.03<br>(0.01 to<br>0.07)                      |
| Maternal abortion, miscarriage, and ectopic pregnancy | 6.41<br>(3.63 to<br>10.26)                         | 5.41<br>(2.38 to<br>10.84)                        | 2.70<br>(1.19 to<br>5.12)                         | 6.63<br>(2.84 to<br>13.27)                         | 0.12<br>(0.07 to<br>0.20)                      | 0.11<br>(0.05 to<br>0.20)                      | 0.05<br>(0.02 to<br>0.10)                      | 0.13<br>(0.06 to<br>0.26)                      |
| Indirect maternal deaths                              | 12.80<br>(8.23 to<br>19.07)                        | 8.87<br>(4.72 to<br>15.07)                        | 4.51<br>(2.34 to<br>7.85)                         | 11.24<br>(5.86 to<br>19.75)                        | 0.23<br>(0.14 to<br>0.34)                      | 0.16<br>(0.09 to<br>0.28)                      | 0.08<br>(0.04 to<br>0.14)                      | 0.20<br>(0.11 to<br>0.35)                      |
| Late maternal deaths                                  | 3.41<br>(1.95 to<br>5.59)                          | 1.88<br>(0.91 to<br>3.53)                         | 0.92<br>(0.43 to<br>1.69)                         | 2.36<br>(1.08 to<br>4.49)                          | 0.06<br>(0.04 to<br>0.10)                      | 0.04<br>(0.02 to<br>0.07)                      | 0.02<br>(0.01 to<br>0.03)                      | 0.04<br>(0.02 to<br>0.08)                      |

|                                                                         |                                          |                                        |                                        |                                        |                                    |                                  |                                  |                                   |
|-------------------------------------------------------------------------|------------------------------------------|----------------------------------------|----------------------------------------|----------------------------------------|------------------------------------|----------------------------------|----------------------------------|-----------------------------------|
| Maternal deaths aggravated by HIV/AIDS                                  | 0.74<br>(0.36 to<br>1.27)                | 4.28<br>(10.10)                        | 2.05<br>(0.18 to<br>5.29)              | 7.96<br>(2.84 to<br>15.42)             | 0.01<br>(0.01 to<br>0.03)          | 0.09<br>(0.01 to<br>0.20)        | 0.04<br>(0.00 to<br>0.10)        | 0.16<br>(0.06 to<br>0.31)         |
| Other maternal disorders                                                | 16.04<br>(9.86 to<br>24.71)              | 11.42<br>(6.06 to<br>19.52)            | 5.94<br>(3.11 to<br>10.24)             | 14.15<br>(7.35 to<br>25.52)            | 0.31<br>(0.18 to<br>0.47)          | 0.22<br>(0.12 to<br>0.38)        | 0.12<br>(0.06 to<br>0.20)        | 0.28<br>(0.14 to<br>0.50)         |
| <b>Caribbean</b>                                                        |                                          |                                        |                                        |                                        |                                    |                                  |                                  |                                   |
| Cause                                                                   | YLLs (in 1000s)                          |                                        |                                        |                                        | Deaths (in 1000s)                  |                                  |                                  |                                   |
|                                                                         | 2016                                     | 2040 Forecast                          | 2040 Better Scenario                   | 2040 Worse Scenario                    | 2016                               | 2040 Forecast                    | 2040 Better Scenario             | 2040 Worse Scenario               |
| <b>Neonatal disorders</b>                                               | <b>893.90</b><br>(668.62 to<br>1,216.16) | <b>398.38</b><br>(242.44 to<br>623.72) | <b>234.07</b><br>(140.38 to<br>358.28) | <b>552.17</b><br>(332.65 to<br>867.85) | <b>10.33</b><br>(7.72 to<br>14.05) | <b>4.60</b><br>(2.80 to<br>7.21) | <b>2.71</b><br>(1.62 to<br>4.14) | <b>6.38</b><br>(3.85 to<br>10.03) |
| Neonatal preterm birth                                                  | 282.68<br>(211.33 to<br>371.48)          | 95.32<br>(64.47 to<br>139.66)          | 55.08<br>(37.01 to<br>79.44)           | 153.77<br>(102.27 to<br>226.49)        | 3.27<br>(2.44 to<br>4.29)          | 1.10<br>(0.74 to<br>1.61)        | 0.64<br>(0.43 to<br>0.92)        | 1.78<br>(1.18 to<br>2.62)         |
| Neonatal encephalopathy due to birth asphyxia and trauma                | 262.58<br>(168.83 to<br>397.61)          | 112.09<br>(54.94 to<br>198.56)         | 68.78<br>(33.66 to<br>122.02)          | 146.48<br>(70.73 to<br>261.86)         | 3.03<br>(1.95 to<br>4.60)          | 1.30<br>(0.64 to<br>2.29)        | 0.80<br>(0.39 to<br>1.41)        | 1.69<br>(0.82 to<br>3.03)         |
| Neonatal sepsis and other neonatal infections                           | 170.21<br>(114.79 to<br>244.11)          | 104.46<br>(57.22 to<br>174.77)         | 61.63<br>(34.89 to<br>101.79)          | 134.19<br>(73.30 to<br>228.51)         | 1.97<br>(1.33 to<br>2.82)          | 1.21<br>(0.66 to<br>2.02)        | 0.71<br>(0.40 to<br>1.18)        | 1.55<br>(0.85 to<br>2.64)         |
| Hemolytic disease and other neonatal jaundice                           | 14.17<br>(7.52 to<br>26.59)              | 4.83<br>(2.04 to<br>10.60)             | 2.65<br>(1.13 to<br>5.67)              | 6.56<br>(2.71 to<br>14.63)             | 0.16<br>(0.09 to<br>0.31)          | 0.06<br>(0.02 to<br>0.12)        | 0.03<br>(0.01 to<br>0.07)        | 0.08<br>(0.03 to<br>0.17)         |
| Other neonatal disorders                                                | 164.25<br>(95.49 to<br>262.84)           | 81.68<br>(40.20 to<br>143.96)          | 45.94<br>(22.75 to<br>80.22)           | 111.18<br>(53.90 to<br>198.03)         | 1.90<br>(1.10 to<br>3.04)          | 0.94<br>(0.46 to<br>1.66)        | 0.53<br>(0.26 to<br>0.93)        | 1.29<br>(0.62 to<br>2.29)         |
| <b>Nutritional deficiencies</b>                                         | <b>76.43</b><br>(49.28 to<br>140.93)     | <b>34.35</b><br>(22.22 to<br>70.99)    | <b>25.14</b><br>(16.95 to<br>50.75)    | <b>39.64</b><br>(24.88 to<br>82.17)    | <b>1.65</b><br>(1.18 to<br>3.01)   | <b>1.39</b><br>(0.98 to<br>2.79) | <b>1.22</b><br>(0.90 to<br>2.33) | <b>1.42</b><br>(0.98 to<br>2.94)  |
| Protein-energy malnutrition                                             | 69.98<br>(44.22 to<br>127.47)            | 27.69<br>(17.80 to<br>55.36)           | 20.25<br>(13.76 to<br>39.57)           | 52.24<br>(20.11 to<br>64.40)           | 1.46<br>(1.04 to<br>2.59)          | 1.11<br>(0.79 to<br>2.20)        | 0.99<br>(0.74 to<br>1.86)        | 1.14<br>(0.80 to<br>2.31)         |
| Iodine deficiency                                                       | 0.65<br>(0.12 to<br>2.52)                | 1.24<br>(0.24 to<br>5.29)              | 0.81<br>(0.17 to<br>3.29)              | 1.48<br>(0.26 to<br>6.94)              | 0.01<br>(0.00 to<br>0.05)          | 0.05<br>(0.01 to<br>0.17)        | 0.04<br>(0.01 to<br>0.12)        | 0.05<br>(0.01 to<br>0.18)         |
| Dietary iron deficiency                                                 | 0.34<br>(0.25 to<br>0.62)                | 0.23<br>(0.15 to<br>0.48)              | 0.18<br>(0.12 to<br>0.36)              | 0.25<br>(0.16 to<br>0.53)              | 0.01<br>(0.00 to<br>0.01)          | 0.01<br>(0.00 to<br>0.01)        | 0.00<br>(0.00 to<br>0.01)        | 0.01<br>(0.00 to<br>0.01)         |
| Other nutritional deficiencies                                          | 5.46<br>(3.33 to<br>11.40)               | 5.20<br>(2.80 to<br>14.82)             | 3.89<br>(2.13 to<br>10.83)             | 5.58<br>(2.95 to<br>16.02)             | 0.18<br>(0.11 to<br>0.41)          | 0.22<br>(0.12 to<br>0.66)        | 0.19<br>(0.10 to<br>0.54)        | 0.23<br>(0.12 to<br>0.68)         |
| <b>Other communicable, maternal, neonatal, and nutritional diseases</b> | <b>77.54</b><br>(49.05 to<br>126.71)     | <b>31.66</b><br>(24.48 to<br>41.76)    | <b>23.52</b><br>(18.52 to<br>30.33)    | <b>35.42</b><br>(27.05 to<br>47.90)    | <b>1.32</b><br>(0.98 to<br>1.91)   | <b>0.87</b><br>(0.72 to<br>1.03) | <b>0.70</b><br>(0.59 to<br>0.83) | <b>0.92</b><br>(0.76 to<br>1.11)  |
| Sexually transmitted infections excluding HIV                           | 48.40<br>(21.53 to<br>92.60)             | 7.92<br>(3.59 to<br>15.56)             | 5.54<br>(2.63 to<br>10.64)             | 9.62<br>(4.22 to<br>18.79)             | 0.61<br>(0.29 to<br>1.13)          | 0.12<br>(0.07 to<br>0.21)        | 0.09<br>(0.05 to<br>0.15)        | 0.14<br>(0.08 to<br>0.25)         |
| Syphilis                                                                | 46.48<br>(19.54 to<br>90.62)             | 6.89<br>(2.62 to<br>14.39)             | 4.69<br>(1.87 to<br>9.64)              | 8.55<br>(3.19 to<br>17.82)             | 0.56<br>(0.25 to<br>1.09)          | 0.09<br>(0.04 to<br>0.18)        | 0.06<br>(0.03 to<br>0.12)        | 0.11<br>(0.05 to<br>0.22)         |
| Chlamydial infection                                                    | 0.36<br>(0.28 to<br>0.47)                | 0.20<br>(0.14 to<br>0.28)              | 0.16<br>(0.12 to<br>0.23)              | 0.21<br>(0.14 to<br>0.29)              | 0.01<br>(0.01 to<br>0.01)          | 0.01<br>(0.00 to<br>0.01)        | 0.00<br>(0.00 to<br>0.01)        | 0.01<br>(0.00 to<br>0.01)         |
| Gonococcal infection                                                    | 1.01<br>(0.78 to<br>1.29)                | 0.55<br>(0.39 to<br>0.75)              | 0.45<br>(0.33 to<br>0.62)              | 0.57<br>(0.41 to<br>0.79)              | 0.03<br>(0.02 to<br>0.03)          | 0.02<br>(0.01 to<br>0.02)        | 0.01<br>(0.01 to<br>0.02)        | 0.02<br>(0.01 to<br>0.02)         |
| Other sexually transmitted infections                                   | 0.54<br>(0.42 to<br>0.70)                | 0.29<br>(0.20 to<br>0.41)              | 0.23<br>(0.17 to<br>0.33)              | 0.30<br>(0.21 to<br>0.43)              | 0.01<br>(0.01 to<br>0.02)          | 0.01<br>(0.01 to<br>0.01)        | 0.01<br>(0.00 to<br>0.01)        | 0.01<br>(0.01 to<br>0.01)         |
| Acute hepatitis                                                         | 8.80<br>(7.64 to<br>10.18)               | 6.44<br>(5.30 to<br>7.94)              | 4.89<br>(3.91 to<br>6.14)              | 6.95<br>(5.66 to<br>8.53)              | 0.22<br>(0.19 to<br>0.25)          | 0.21<br>(0.17 to<br>0.25)        | 0.17<br>(0.13 to<br>0.20)        | 0.22<br>(0.18 to<br>0.26)         |



|                                       |                                                            |                                                            |                                                            |                                                            |                                                      |                                                      |                                                      |                                                      |
|---------------------------------------|------------------------------------------------------------|------------------------------------------------------------|------------------------------------------------------------|------------------------------------------------------------|------------------------------------------------------|------------------------------------------------------|------------------------------------------------------|------------------------------------------------------|
| Acute hepatitis A                     | 0.47<br>(0.21 to<br>0.81)                                  | 0.19<br>(0.10 to<br>0.30)                                  | 0.13<br>(0.08 to<br>0.21)                                  | 0.21<br>(0.11 to<br>0.36)                                  | 0.01<br>(0.00 to<br>0.01)                            | 0.00<br>(0.00 to<br>0.01)                            | 0.00<br>(0.00 to<br>0.01)                            | 0.00<br>(0.00 to<br>0.01)                            |
| Acute hepatitis B                     | 5.42<br>(4.54 to<br>6.47)                                  | 4.42<br>(3.48 to<br>5.63)                                  | 3.33<br>(2.56 to<br>4.30)                                  | 4.77<br>(3.75 to<br>6.11)                                  | 0.15<br>(0.12 to<br>0.17)                            | 0.14<br>(0.11 to<br>0.18)                            | 0.11<br>(0.09 to<br>0.14)                            | 0.15<br>(0.12 to<br>0.19)                            |
| Acute hepatitis C                     | 0.33<br>(0.25 to<br>0.42)                                  | 0.31<br>(0.22 to<br>0.41)                                  | 0.26<br>(0.19 to<br>0.35)                                  | 0.32<br>(0.23 to<br>0.42)                                  | 0.01<br>(0.01 to<br>0.01)                            | 0.01<br>(0.01 to<br>0.01)                            | 0.01<br>(0.01 to<br>0.01)                            | 0.01<br>(0.01 to<br>0.01)                            |
| Acute hepatitis E                     | 2.59<br>(2.04 to<br>3.23)                                  | 1.53<br>(1.08 to<br>2.03)                                  | 1.17<br>(0.81 to<br>1.55)                                  | 1.65<br>(1.17 to<br>2.19)                                  | 0.05<br>(0.04 to<br>0.07)                            | 0.05<br>(0.03 to<br>0.07)                            | 0.04<br>(0.03 to<br>0.06)                            | 0.05<br>(0.04 to<br>0.07)                            |
| Other unspecified infectious diseases | 20.35<br>(13.64 to<br>37.11)                               | 17.29<br>(12.50 to<br>23.65)                               | 13.09<br>(9.57 to<br>17.51)                                | 18.84<br>(13.41 to<br>25.99)                               | 0.50<br>(0.35 to<br>0.71)                            | 0.54<br>(0.40 to<br>0.66)                            | 0.44<br>(0.33 to<br>0.54)                            | 0.56<br>(0.41 to<br>0.70)                            |
| <b>Non-communicable diseases</b>      | <b>5,212.33</b><br><b>(4,867.31 to</b><br><b>5,590.45)</b> | <b>6,298.85</b><br><b>(5,242.46 to</b><br><b>7,516.67)</b> | <b>4,522.56</b><br><b>(3,842.46 to</b><br><b>5,302.27)</b> | <b>7,799.54</b><br><b>(6,395.85 to</b><br><b>9,393.71)</b> | <b>253.89</b><br><b>(240.82 to</b><br><b>267.71)</b> | <b>366.03</b><br><b>(315.53 to</b><br><b>423.69)</b> | <b>281.81</b><br><b>(244.37 to</b><br><b>324.06)</b> | <b>429.94</b><br><b>(368.66 to</b><br><b>502.36)</b> |

| Caribbean                            |                                                            |                                                            |                                                            |                                                            |                                                   |                                                    |                                                   |                                                     |
|--------------------------------------|------------------------------------------------------------|------------------------------------------------------------|------------------------------------------------------------|------------------------------------------------------------|---------------------------------------------------|----------------------------------------------------|---------------------------------------------------|-----------------------------------------------------|
| Cause                                | YLLs (in 1000s)                                            |                                                            |                                                            |                                                            | Deaths (in 1000s)                                 |                                                    |                                                   |                                                     |
|                                      | 2016                                                       | 2040 Forecast                                              | 2040 Better Scenario                                       | 2040 Worse Scenario                                        | 2016                                              | 2040 Forecast                                      | 2040 Better Scenario                              | 2040 Worse Scenario                                 |
| <b>Neoplasms</b>                     | <b>1,301.24</b><br><b>(1,212.33 to</b><br><b>1,393.71)</b> | <b>1,747.23</b><br><b>(1,524.48 to</b><br><b>2,000.00)</b> | <b>1,531.81</b><br><b>(1,340.68 to</b><br><b>1,737.08)</b> | <b>1,977.35</b><br><b>(1,709.50 to</b><br><b>2,303.03)</b> | <b>59.79</b><br><b>(56.34 to</b><br><b>63.22)</b> | <b>94.46</b><br><b>(84.00 to</b><br><b>106.77)</b> | <b>87.10</b><br><b>(77.92 to</b><br><b>97.27)</b> | <b>104.13</b><br><b>(91.36 to</b><br><b>120.10)</b> |
| Lip and oral cavity cancer           | 22.02<br>(20.43 to<br>23.80)                               | 31.16<br>(20.58 to<br>46.24)                               | 18.72<br>(13.38 to<br>26.19)                               | 44.35<br>(28.23 to<br>66.70)                               | 1.03<br>(0.96 to<br>1.10)                         | 1.58<br>(1.07 to<br>2.28)                          | 1.03<br>(0.75 to<br>1.39)                         | 2.23<br>(1.45 to<br>3.29)                           |
| Nasopharynx cancer                   | 6.84<br>(6.22 to<br>7.56)                                  | 9.46<br>(6.53 to<br>13.50)                                 | 5.23<br>(3.82 to<br>6.99)                                  | 13.38<br>(8.82 to<br>19.57)                                | 0.25<br>(0.23 to<br>0.27)                         | 0.37<br>(0.26 to<br>0.52)                          | 0.22<br>(0.16 to<br>0.29)                         | 0.53<br>(0.35 to<br>0.75)                           |
| Other pharynx cancer                 | 10.75<br>(9.73 to<br>12.29)                                | 15.19<br>(9.73 to<br>22.81)                                | 12.14<br>(8.29 to<br>17.36)                                | 16.23<br>(10.20 to<br>25.14)                               | 0.46<br>(0.42 to<br>0.52)                         | 0.75<br>(0.49 to<br>1.12)                          | 0.63<br>(0.44 to<br>0.89)                         | 0.78<br>(0.49 to<br>1.18)                           |
| Esophageal cancer                    | 32.15<br>(29.57 to<br>35.03)                               | 37.14<br>(24.35 to<br>55.64)                               | 24.93<br>(17.70 to<br>35.27)                               | 51.34<br>(31.97 to<br>80.44)                               | 1.47<br>(1.36 to<br>1.58)                         | 1.82<br>(1.23 to<br>2.66)                          | 1.32<br>(0.96 to<br>1.81)                         | 2.50<br>(1.60 to<br>3.81)                           |
| Stomach cancer                       | 70.62<br>(64.47 to<br>77.64)                               | 75.63<br>(62.08 to<br>94.03)                               | 62.18<br>(51.65 to<br>75.28)                               | 79.09<br>(63.59 to<br>99.34)                               | 3.42<br>(3.17 to<br>3.69)                         | 4.03<br>(3.35 to<br>4.99)                          | 3.44<br>(2.90 to<br>4.15)                         | 4.11<br>(3.34 to<br>5.13)                           |
| Colon and rectum cancer              | 116.18<br>(106.97 to<br>126.14)                            | 175.90<br>(128.58 to<br>247.01)                            | 155.19<br>(113.85 to<br>216.26)                            | 184.80<br>(132.73 to<br>260.78)                            | 6.17<br>(5.74 to<br>6.62)                         | 10.84<br>(7.91 to<br>15.20)                        | 9.85<br>(7.17 to<br>13.82)                        | 11.11<br>(7.95 to<br>15.59)                         |
| Liver cancer                         | 53.67<br>(49.54 to<br>58.68)                               | 85.77<br>(62.55 to<br>117.72)                              | 77.88<br>(59.25 to<br>102.15)                              | 99.35<br>(68.44 to<br>140.72)                              | 2.55<br>(2.37 to<br>2.76)                         | 4.60<br>(3.46 to<br>6.15)                          | 4.39<br>(3.40 to<br>5.67)                         | 5.19<br>(3.70 to<br>7.21)                           |
| Liver cancer due to hepatitis B      | 20.19<br>(17.38 to<br>23.56)                               | 30.11<br>(21.64 to<br>42.97)                               | 27.78<br>(20.51 to<br>37.98)                               | 34.51<br>(23.36 to<br>50.80)                               | 0.84<br>(0.72 to<br>0.99)                         | 1.41<br>(1.01 to<br>1.97)                          | 1.36<br>(1.01 to<br>1.83)                         | 1.58<br>(1.08 to<br>2.30)                           |
| Liver cancer due to hepatitis C      | 13.57<br>(11.66 to<br>15.53)                               | 23.09<br>(16.68 to<br>31.24)                               | 22.07<br>(16.54 to<br>29.00)                               | 25.92<br>(18.02 to<br>36.51)                               | 0.76<br>(0.67 to<br>0.87)                         | 1.45<br>(1.06 to<br>1.93)                          | 1.45<br>(1.10 to<br>1.88)                         | 1.59<br>(1.11 to<br>2.19)                           |
| Liver cancer due to alcohol use      | 9.78<br>(8.36 to<br>11.61)                                 | 16.44<br>(11.30 to<br>23.59)                               | 13.24<br>(9.50 to<br>18.35)                                | 20.26<br>(13.22 to<br>30.04)                               | 0.48<br>(0.41 to<br>0.56)                         | 0.88<br>(0.61 to<br>1.24)                          | 0.75<br>(0.55 to<br>1.02)                         | 1.05<br>(0.69 to<br>1.53)                           |
| Liver cancer due to other causes     | 10.14<br>(8.82 to<br>11.64)                                | 16.13<br>(11.44 to<br>23.11)                               | 14.80<br>(10.88 to<br>20.44)                               | 18.67<br>(12.54 to<br>27.44)                               | 0.47<br>(0.41 to<br>0.53)                         | 0.86<br>(0.61 to<br>1.24)                          | 0.83<br>(0.61 to<br>1.15)                         | 0.97<br>(0.65 to<br>1.43)                           |
| Gallbladder and biliary tract cancer | 12.38<br>(10.20 to<br>16.04)                               | 14.80<br>(11.95 to<br>19.96)                               | 15.30<br>(12.20 to<br>20.85)                               | 14.02<br>(11.31 to<br>18.79)                               | 0.60<br>(0.51 to<br>0.77)                         | 0.81<br>(0.67 to<br>1.07)                          | 0.86<br>(0.71 to<br>1.15)                         | 0.75<br>(0.62 to<br>0.98)                           |
| Pancreatic cancer                    | 44.94<br>(42.22 to<br>47.82)                               | 67.14<br>(55.48 to<br>82.82)                               | 67.08<br>(56.09 to<br>81.90)                               | 71.27<br>(58.23 to<br>88.90)                               | 2.28<br>(2.15 to<br>2.41)                         | 3.74<br>(3.11 to<br>4.57)                          | 3.87<br>(3.25 to<br>4.71)                         | 3.91<br>(3.19 to<br>4.92)                           |

|                                     |                                 |                                 |                                 |                                 |                            |                              |                              |                              |
|-------------------------------------|---------------------------------|---------------------------------|---------------------------------|---------------------------------|----------------------------|------------------------------|------------------------------|------------------------------|
| Larynx cancer                       | 28.50<br>(25.85 to<br>31.29)    | 30.59<br>(17.32 to<br>50.76)    | 16.84<br>(10.27 to<br>26.84)    | 46.32<br>(25.11 to<br>79.27)    | 1.32<br>(1.20 to<br>1.43)  | 1.52<br>(0.88 to<br>2.51)    | 0.90<br>(0.56 to<br>1.42)    | 2.31<br>(1.29 to<br>3.85)    |
| Tracheal, bronchus, and lung cancer | 198.52<br>(184.09 to<br>215.12) | 245.32<br>(186.97 to<br>319.90) | 166.64<br>(133.46 to<br>208.49) | 397.65<br>(299.58 to<br>522.40) | 9.66<br>(8.97 to<br>10.38) | 12.86<br>(10.06 to<br>16.57) | 9.44<br>(7.64 to<br>11.80)   | 20.94<br>(15.84 to<br>27.45) |
| Malignant skin melanoma             | 5.77<br>(5.04 to<br>7.41)       | 6.95<br>(5.90 to<br>9.14)       | 8.30<br>(6.99 to<br>10.93)      | 6.49<br>(5.54 to<br>8.48)       | 0.24<br>(0.21 to<br>0.31)  | 0.35<br>(0.31 to<br>0.45)    | 0.44<br>(0.38 to<br>0.57)    | 0.32<br>(0.28 to<br>0.41)    |
| Non-melanoma skin cancer            | 10.53<br>(9.73 to<br>11.28)     | 17.46<br>(15.90 to<br>18.92)    | 15.13<br>(13.43 to<br>16.90)    | 16.83<br>(15.36 to<br>18.18)    | 0.63<br>(0.59 to<br>0.67)  | 1.22<br>(1.11 to<br>1.34)    | 1.09<br>(0.98 to<br>1.22)    | 1.14<br>(1.03 to<br>1.24)    |
| Breast cancer                       | 119.85<br>(101.85 to<br>143.54) | 156.60<br>(116.49 to<br>210.29) | 138.34<br>(103.45 to<br>185.16) | 164.33<br>(119.96 to<br>222.70) | 4.71<br>(4.12 to<br>5.47)  | 7.28<br>(5.58 to<br>9.54)    | 6.58<br>(5.04 to<br>8.60)    | 7.44<br>(5.60 to<br>9.97)    |
| Cervical cancer                     | 76.49<br>(62.79 to<br>92.64)    | 84.12<br>(62.20 to<br>110.74)   | 69.96<br>(52.10 to<br>91.63)    | 89.58<br>(63.65 to<br>122.45)   | 2.74<br>(2.30 to<br>3.25)  | 3.39<br>(2.61 to<br>4.33)    | 2.91<br>(2.26 to<br>3.70)    | 3.52<br>(2.65 to<br>4.63)    |
| Uterine cancer                      | 24.72<br>(22.12 to<br>27.48)    | 34.84<br>(30.47 to<br>39.78)    | 29.89<br>(25.93 to<br>34.51)    | 34.59<br>(30.42 to<br>39.40)    | 1.17<br>(1.06 to<br>1.29)  | 1.92<br>(1.69 to<br>2.15)    | 1.69<br>(1.48 to<br>1.92)    | 1.87<br>(1.65 to<br>2.10)    |
| Ovarian cancer                      | 23.59<br>(21.34 to<br>25.85)    | 29.54<br>(21.37 to<br>41.58)    | 29.67<br>(21.86 to<br>40.78)    | 29.24<br>(20.82 to<br>41.99)    | 0.95<br>(0.87 to<br>1.04)  | 1.38<br>(1.01 to<br>1.96)    | 1.41<br>(1.04 to<br>1.96)    | 1.34<br>(0.97 to<br>1.94)    |
| Prostate cancer                     | 114.65<br>(95.50 to<br>127.21)  | 237.62<br>(196.06 to<br>266.49) | 244.56<br>(201.64 to<br>274.51) | 221.45<br>(181.88 to<br>249.89) | 8.46<br>(6.99 to<br>9.30)  | 18.66<br>(15.35 to<br>21.06) | 19.80<br>(16.17 to<br>22.01) | 16.99<br>(13.62 to<br>19.44) |
| Testicular cancer                   | 1.68<br>(1.43 to<br>2.00)       | 1.38<br>(1.12 to<br>1.73)       | 1.20<br>(0.97 to<br>1.51)       | 1.38<br>(1.12 to<br>1.73)       | 0.04<br>(0.04 to<br>0.05)  | 0.04<br>(0.04 to<br>0.05)    | 0.04<br>(0.03 to<br>0.05)    | 0.04<br>(0.04 to<br>0.05)    |

**Caribbean**

| Cause                           | YLLs (in 1000s)              |                              |                              |                               | Deaths (in 1000s)         |                           |                           |                           |
|---------------------------------|------------------------------|------------------------------|------------------------------|-------------------------------|---------------------------|---------------------------|---------------------------|---------------------------|
|                                 | 2016                         | 2040 Forecast                | 2040 Better Scenario         | 2040 Worse Scenario           | 2016                      | 2040 Forecast             | 2040 Better Scenario      | 2040 Worse Scenario       |
| Kidney cancer                   | 16.01<br>(15.03 to<br>17.23) | 22.01<br>(18.76 to<br>26.10) | 23.08<br>(19.82 to<br>27.12) | 22.53<br>(18.73 to<br>27.25)  | 0.64<br>(0.60 to<br>0.68) | 1.04<br>(0.88 to<br>1.22) | 1.13<br>(0.97 to<br>1.32) | 1.04<br>(0.86 to<br>1.26) |
| Bladder cancer                  | 19.18<br>(17.73 to<br>20.78) | 24.55<br>(19.18 to<br>31.79) | 21.80<br>(17.60 to<br>27.54) | 27.89<br>(20.96 to<br>37.31)  | 1.20<br>(1.12 to<br>1.29) | 1.67<br>(1.33 to<br>2.14) | 1.55<br>(1.25 to<br>1.96) | 1.87<br>(1.42 to<br>2.50) |
| Brain and nervous system cancer | 43.01<br>(38.23 to<br>46.63) | 52.55<br>(45.88 to<br>58.63) | 50.97<br>(43.84 to<br>57.40) | 51.26<br>(44.77 to<br>57.22)  | 1.27<br>(1.09 to<br>1.38) | 1.97<br>(1.67 to<br>2.19) | 1.98<br>(1.67 to<br>2.22) | 1.87<br>(1.59 to<br>2.07) |
| Thyroid cancer                  | 4.88<br>(4.40 to<br>5.45)    | 6.14<br>(4.64 to<br>8.41)    | 5.30<br>(4.09 to<br>7.03)    | 6.44<br>(4.72 to<br>8.96)     | 0.22<br>(0.21 to<br>0.25) | 0.32<br>(0.25 to<br>0.44) | 0.29<br>(0.23 to<br>0.38) | 0.33<br>(0.25 to<br>0.46) |
| Mesothelioma                    | 2.03<br>(1.81 to<br>2.37)    | 2.50<br>(2.14 to<br>3.05)    | 2.49<br>(2.11 to<br>2.99)    | 2.44<br>(2.10 to<br>2.98)     | 0.08<br>(0.07 to<br>0.09) | 0.11<br>(0.09 to<br>0.13) | 0.11<br>(0.10 to<br>0.12) | 0.10<br>(0.09 to<br>0.12) |
| Hodgkin lymphoma                | 9.04<br>(6.36 to<br>10.72)   | 6.96<br>(5.20 to<br>8.76)    | 5.20<br>(3.91 to<br>6.64)    | 7.28<br>(5.51 to<br>9.18)     | 0.26<br>(0.16 to<br>0.30) | 0.23<br>(0.16 to<br>0.28) | 0.18<br>(0.12 to<br>0.22) | 0.23<br>(0.16 to<br>0.29) |
| Non-Hodgkin lymphoma            | 45.69<br>(41.77 to<br>51.48) | 56.58<br>(47.77 to<br>68.07) | 54.76<br>(45.91 to<br>65.75) | 56.18<br>(46.91 to<br>68.40)  | 1.58<br>(1.46 to<br>1.74) | 2.33<br>(2.00 to<br>2.78) | 2.31<br>(1.99 to<br>2.74) | 2.26<br>(1.93 to<br>2.73) |
| Multiple myeloma                | 21.41<br>(18.29 to<br>23.35) | 31.46<br>(25.69 to<br>38.97) | 31.89<br>(26.07 to<br>39.02) | 30.85<br>(24.69 to<br>38.94)  | 0.99<br>(0.84 to<br>1.07) | 1.62<br>(1.34 to<br>1.98) | 1.68<br>(1.40 to<br>2.04) | 1.56<br>(1.26 to<br>1.96) |
| Leukemia                        | 78.35<br>(67.48 to<br>91.59) | 78.32<br>(62.68 to<br>97.00) | 68.04<br>(55.49 to<br>82.31) | 84.20<br>(66.05 to<br>107.19) | 2.33<br>(2.08 to<br>2.60) | 3.10<br>(2.57 to<br>3.75) | 2.82<br>(2.35 to<br>3.35) | 3.25<br>(2.62 to<br>4.03) |
| Acute lymphoid leukemia         | 16.46<br>(13.82 to<br>21.94) | 11.90<br>(9.35 to<br>15.99)  | 10.38<br>(8.24 to<br>13.88)  | 12.61<br>(9.78 to<br>17.29)   | 0.30<br>(0.26 to<br>0.37) | 0.29<br>(0.24 to<br>0.35) | 0.26<br>(0.22 to<br>0.31) | 0.30<br>(0.24 to<br>0.38) |

|                                 |                                              |                                              |                                            |                                              |                                        |                                        |                                      |                                        |
|---------------------------------|----------------------------------------------|----------------------------------------------|--------------------------------------------|----------------------------------------------|----------------------------------------|----------------------------------------|--------------------------------------|----------------------------------------|
| Chronic lymphoid leukemia       | 3.51<br>(3.08 to<br>4.16)                    | 4.45<br>(3.34 to<br>5.93)                    | 4.23<br>(3.22 to<br>5.52)                  | 4.74<br>(3.38 to<br>6.60)                    | 0.19<br>(0.17 to<br>0.22)              | 0.27<br>(0.21 to<br>0.36)              | 0.27<br>(0.21 to<br>0.35)            | 0.28<br>(0.21 to<br>0.39)              |
| Acute myeloid leukemia          | 16.58<br>(14.58 to<br>18.85)                 | 18.54<br>(15.31 to<br>22.46)                 | 18.11<br>(15.11 to<br>21.92)               | 19.54<br>(15.85 to<br>24.33)                 | 0.46<br>(0.42 to<br>0.51)              | 0.68<br>(0.57 to<br>0.83)              | 0.69<br>(0.59 to<br>0.82)            | 0.71<br>(0.58 to<br>0.88)              |
| Chronic myeloid leukemia        | 5.61<br>(4.74 to<br>6.54)                    | 4.82<br>(3.61 to<br>6.41)                    | 3.82<br>(2.84 to<br>4.97)                  | 5.20<br>(3.78 to<br>7.13)                    | 0.21<br>(0.19 to<br>0.24)              | 0.23<br>(0.17 to<br>0.29)              | 0.18<br>(0.14 to<br>0.23)            | 0.24<br>(0.18 to<br>0.32)              |
| Other leukemia                  | 36.19<br>(28.81 to<br>45.67)                 | 38.61<br>(29.53 to<br>49.85)                 | 31.52<br>(24.34 to<br>39.68)               | 42.12<br>(31.45 to<br>55.43)                 | 1.16<br>(0.99 to<br>1.36)              | 1.63<br>(1.32 to<br>2.01)              | 1.42<br>(1.15 to<br>1.71)            | 1.72<br>(1.35 to<br>2.16)              |
| Other neoplasms                 | 87.78<br>(81.42 to<br>94.84)                 | 109.56<br>(99.78 to<br>120.55)               | 109.11<br>(98.48 to<br>120.75)             | 106.58<br>(97.47 to<br>116.78)               | 3.08<br>(2.89 to<br>3.28)              | 4.91<br>(4.54 to<br>5.27)              | 5.14<br>(4.72 to<br>5.61)            | 4.60<br>(4.26 to<br>4.93)              |
| <b>Cardiovascular diseases</b>  | <b>2,007.37</b><br>(1,855.90 to<br>2,165.35) | <b>2,296.35</b><br>(1,624.80 to<br>3,262.98) | <b>1,257.87</b><br>(919.61 to<br>1,756.55) | <b>3,276.09</b><br>(2,263.01 to<br>4,709.35) | <b>113.17</b><br>(106.59 to<br>120.00) | <b>148.56</b><br>(109.19 to<br>204.59) | <b>91.35</b><br>(68.33 to<br>126.99) | <b>192.27</b><br>(146.02 to<br>266.14) |
| Rheumatic heart disease         | 46.89<br>(38.56 to<br>57.38)                 | 27.92<br>(21.57 to<br>36.32)                 | 19.58<br>(15.35 to<br>25.15)               | 30.17<br>(23.40 to<br>40.48)                 | 1.50<br>(1.27 to<br>1.78)              | 1.22<br>(1.02 to<br>1.51)              | 0.94<br>(0.78 to<br>1.15)            | 1.24<br>(1.02 to<br>1.56)              |
| Ischemic heart disease          | 1,000.90<br>(927.10 to<br>1,085.11)          | 1,129.52<br>(664.85 to<br>1,924.70)          | 564.80<br>(336.55 to<br>955.73)            | 1,721.95<br>(989.62 to<br>2,906.80)          | 59.85<br>(56.20 to<br>63.80)           | 75.42<br>(46.81 to<br>120.18)          | 42.51<br>(25.86 to<br>67.64)         | 103.31<br>(64.12 to<br>162.97)         |
| Stroke                          | 613.78<br>(555.83 to<br>672.30)              | 651.54<br>(429.30 to<br>1,037.21)            | 296.50<br>(203.65 to<br>481.94)            | 982.29<br>(633.23 to<br>1,544.03)            | 33.30<br>(30.84 to<br>35.83)           | 39.75<br>(27.23 to<br>64.76)           | 21.25<br>(14.68 to<br>35.23)         | 53.73<br>(35.97 to<br>84.66)           |
| Ischemic stroke                 | 237.33<br>(217.52 to<br>259.50)              | 262.59<br>(151.15 to<br>559.12)              | 140.44<br>(84.68 to<br>284.73)             | 360.44<br>(204.74 to<br>741.72)              | 16.39<br>(15.13 to<br>17.64)           | 19.69<br>(11.61 to<br>41.32)           | 11.91<br>(7.11 to<br>24.21)          | 24.60<br>(13.93 to<br>50.90)           |
| Intracerebral hemorrhage        | 376.44<br>(336.55 to<br>419.06)              | 388.95<br>(239.44 to<br>630.45)              | 156.06<br>(105.08 to<br>238.99)            | 621.85<br>(367.77 to<br>1,048.73)            | 16.90<br>(15.43 to<br>18.37)           | 20.06<br>(13.34 to<br>31.25)           | 9.34<br>(6.59 to<br>14.03)           | 29.14<br>(18.56 to<br>47.30)           |
| Hypertensive heart disease      | 119.70<br>(98.18 to<br>137.46)               | 193.12<br>(127.78 to<br>341.90)              | 130.74<br>(94.79 to<br>197.99)             | 232.43<br>(146.81 to<br>426.56)              | 7.24<br>(5.89 to<br>8.17)              | 7.24<br>(8.92 to<br>25.09)             | 9.90<br>(7.13 to<br>15.25)           | 15.52<br>(9.91 to<br>29.31)            |
| Cardiomyopathy and myocarditis  | 61.66<br>(54.06 to<br>70.53)                 | 65.83<br>(51.27 to<br>85.18)                 | 56.74<br>(43.86 to<br>73.43)               | 66.49<br>(51.81 to<br>86.80)                 | 2.38<br>(2.17 to<br>2.68)              | 3.18<br>(2.50 to<br>4.12)              | 2.87<br>(2.27 to<br>3.73)            | 3.07<br>(2.42 to<br>3.99)              |
| Myocarditis                     | 11.24<br>(9.21 to<br>14.27)                  | 11.17<br>(9.02 to<br>14.06)                  | 10.51<br>(8.40 to<br>13.11)                | 11.13<br>(9.04 to<br>14.09)                  | 0.49<br>(0.42 to<br>0.61)              | 0.66<br>(0.55 to<br>0.82)              | 0.68<br>(0.55 to<br>0.84)            | 0.62<br>(0.52 to<br>0.77)              |
| <b>Caribbean</b>                |                                              |                                              |                                            |                                              |                                        |                                        |                                      |                                        |
| Cause                           | YLLs (in 1000s)                              |                                              |                                            |                                              | Deaths (in 1000s)                      |                                        |                                      |                                        |
|                                 | 2016                                         | 2040 Forecast                                | 2040 Better Scenario                       | 2040 Worse Scenario                          | 2016                                   | 2040 Forecast                          | 2040 Better Scenario                 | 2040 Worse Scenario                    |
| Alcoholic cardiomyopathy        | 13.15<br>(9.12 to<br>15.35)                  | 12.72<br>(9.02 to<br>15.51)                  | 10.87<br>(7.96 to<br>13.37)                | 13.21<br>(9.34 to<br>16.02)                  | 0.49<br>(0.37 to<br>0.57)              | 0.55<br>(0.43 to<br>0.65)              | 0.49<br>(0.40 to<br>0.59)            | 0.55<br>(0.43 to<br>0.66)              |
| Other cardiomyopathy            | 37.28<br>(32.24 to<br>43.60)                 | 41.94<br>(29.92 to<br>59.42)                 | 35.36<br>(25.21 to<br>49.10)               | 42.16<br>(29.81 to<br>59.94)                 | 1.40<br>(1.26 to<br>1.61)              | 1.97<br>(1.38 to<br>2.80)              | 1.71<br>(1.20 to<br>2.41)            | 1.90<br>(1.32 to<br>2.72)              |
| Atrial fibrillation and flutter | 15.94<br>(12.60 to<br>19.58)                 | 27.86<br>(20.95 to<br>36.49)                 | 26.30<br>(19.81 to<br>33.92)               | 27.83<br>(20.89 to<br>36.40)                 | 1.63<br>(1.27 to<br>2.03)              | 2.94<br>(2.20 to<br>3.85)              | 2.89<br>(2.17 to<br>3.73)            | 2.82<br>(2.12 to<br>3.68)              |
| Aortic aneurysm                 | 24.94<br>(22.79 to<br>27.49)                 | 33.86<br>(28.15 to<br>42.20)                 | 30.95<br>(25.94 to<br>37.25)               | 34.87<br>(28.64 to<br>43.81)                 | 1.48<br>(1.37 to<br>1.61)              | 2.29<br>(1.94 to<br>2.77)              | 2.18<br>(1.87 to<br>2.60)            | 2.26<br>(1.89 to<br>2.76)              |
| Peripheral artery disease       | 9.52<br>(7.47 to<br>14.25)                   | 20.77<br>(14.69 to<br>33.48)                 | 20.79<br>(14.90 to<br>33.15)               | 21.25<br>(14.96 to<br>33.36)                 | 0.86<br>(0.66 to<br>1.49)              | 2.13<br>(1.40 to<br>3.89)              | 2.25<br>(1.48 to<br>4.02)            | 2.07<br>(1.38 to<br>3.77)              |
| Endocarditis                    | 17.92<br>(15.44 to<br>21.26)                 | 21.79<br>(16.39 to<br>29.17)                 | 19.60<br>(14.81 to<br>25.75)               | 22.16<br>(16.74 to<br>29.79)                 | 0.68<br>(0.59 to<br>0.83)              | 1.06<br>(0.80 to<br>1.41)              | 1.02<br>(0.78 to<br>1.38)            | 1.03<br>(0.78 to<br>1.38)              |

|                                                                |                                                      |                                                      |                                                      |                                                      |                                                   |                                                  |                                                |                                                   |
|----------------------------------------------------------------|------------------------------------------------------|------------------------------------------------------|------------------------------------------------------|------------------------------------------------------|---------------------------------------------------|--------------------------------------------------|------------------------------------------------|---------------------------------------------------|
| Other cardiovascular and circulatory diseases                  | 96.11<br>(80.67 to<br>113.93)                        | 124.16<br>(97.11 to<br>159.16)                       | 91.86<br>(72.13 to<br>115.13)                        | 136.64<br>(105.23 to<br>177.13)                      | 4.24<br>(3.63 to<br>4.80)                         | 6.96<br>(5.54 to<br>8.70)                        | 5.52<br>(4.41 to<br>6.75)                      | 7.21<br>(4.41 to<br>9.02)                         |
| <b>Chronic respiratory diseases</b>                            | <b>229.04</b><br><b>(199.24 to</b><br><b>261.17)</b> | <b>195.13</b><br><b>(152.58 to</b><br><b>251.54)</b> | <b>129.86</b><br><b>(106.52 to</b><br><b>157.82)</b> | <b>292.48</b><br><b>(218.08 to</b><br><b>390.45)</b> | <b>11.92</b><br><b>(10.83 to</b><br><b>13.04)</b> | <b>11.48</b><br><b>(9.23 to</b><br><b>14.32)</b> | <b>8.31</b><br><b>(7.03 to</b><br><b>9.90)</b> | <b>17.09</b><br><b>(13.07 to</b><br><b>22.02)</b> |
| Chronic obstructive pulmonary disease                          | 144.39<br>(127.25 to<br>160.75)                      | 136.16<br>(98.64 to<br>188.07)                       | 80.06<br>(62.07 to<br>102.80)                        | 225.94<br>(156.77 to<br>320.85)                      | 9.04<br>(8.27 to<br>9.89)                         | 8.79<br>(6.66 to<br>11.63)                       | 5.80<br>(4.63 to<br>7.23)                      | 14.20<br>(10.28 to<br>19.17)                      |
| Pneumoconiosis                                                 | 0.46<br>(0.38 to<br>0.58)                            | 0.50<br>(0.41 to<br>0.64)                            | 0.44<br>(0.35 to<br>0.56)                            | 0.51<br>(0.41 to<br>0.65)                            | 0.02<br>(0.02 to<br>0.03)                         | 0.03<br>(0.03 to<br>0.04)                        | 0.03<br>(0.02 to<br>0.04)                      | 0.03<br>(0.02 to<br>0.04)                         |
| Silicosis                                                      | 0.08<br>(0.06 to<br>0.12)                            | 0.08<br>(0.05 to<br>0.12)                            | 0.06<br>(0.04 to<br>0.10)                            | 0.08<br>(0.05 to<br>0.12)                            | 0.00<br>(0.00 to<br>0.01)                         | 0.01<br>(0.00 to<br>0.01)                        | 0.00<br>(0.00 to<br>0.01)                      | 0.00<br>(0.00 to<br>0.01)                         |
| Asbestosis                                                     | 0.11<br>(0.09 to<br>0.15)                            | 0.12<br>(0.09 to<br>0.15)                            | 0.12<br>(0.10 to<br>0.15)                            | 0.12<br>(0.09 to<br>0.15)                            | 0.00<br>(0.00 to<br>0.00)                         | 0.01<br>(0.00 to<br>0.01)                        | 0.01<br>(0.00 to<br>0.01)                      | 0.00<br>(0.00 to<br>0.01)                         |
| Coal workers pneumoconiosis                                    | 0.04<br>(0.03 to<br>0.07)                            | 0.05<br>(0.03 to<br>0.08)                            | 0.04<br>(0.02 to<br>0.06)                            | 0.06<br>(0.03 to<br>0.09)                            | 0.00<br>(0.00 to<br>0.00)                         | 0.00<br>(0.00 to<br>0.00)                        | 0.00<br>(0.00 to<br>0.00)                      | 0.00<br>(0.00 to<br>0.00)                         |
| Other pneumoconiosis                                           | 0.22<br>(0.18 to<br>0.29)                            | 0.25<br>(0.20 to<br>0.33)                            | 0.22<br>(0.17 to<br>0.29)                            | 0.25<br>(0.20 to<br>0.33)                            | 0.01<br>(0.01 to<br>0.02)                         | 0.02<br>(0.01 to<br>0.02)                        | 0.02<br>(0.01 to<br>0.02)                      | 0.02<br>(0.01 to<br>0.02)                         |
| Asthma                                                         | 61.71<br>(46.39 to<br>79.67)                         | 32.57<br>(21.90 to<br>46.80)                         | 22.63<br>(15.18 to<br>32.29)                         | 39.79<br>(25.83 to<br>59.42)                         | 1.87<br>(1.54 to<br>2.30)                         | 1.31<br>(0.92 to<br>1.88)                        | 0.98<br>(0.70 to<br>1.39)                      | 1.53<br>(1.03 to<br>2.27)                         |
| Interstitial lung disease and pulmonary sarcoidosis            | 9.40<br>(6.79 to<br>12.22)                           | 9.99<br>(7.35 to<br>13.59)                           | 12.33<br>(9.29 to<br>16.35)                          | 9.37<br>(6.90 to<br>12.83)                           | 0.43<br>(0.31 to<br>0.52)                         | 0.49<br>(0.38 to<br>0.63)                        | 0.64<br>(0.51 to<br>0.81)                      | 0.44<br>(0.34 to<br>0.57)                         |
| Other chronic respiratory diseases                             | 13.08<br>(9.53 to<br>18.57)                          | 15.91<br>(11.68 to<br>21.78)                         | 14.41<br>(10.81 to<br>19.00)                         | 16.87<br>(12.09 to<br>23.47)                         | 0.56<br>(0.42 to<br>0.75)                         | 0.86<br>(0.65 to<br>1.14)                        | 0.86<br>(0.64 to<br>1.12)                      | 0.88<br>(0.63 to<br>1.19)                         |
| <b>Cirrhosis and other chronic liver diseases</b>              | <b>180.25</b><br><b>(163.27 to</b><br><b>206.55)</b> | <b>188.08</b><br><b>(198.38 to</b><br><b>270.91)</b> | <b>188.08</b><br><b>(161.84 to</b><br><b>225.02)</b> | <b>238.94</b><br><b>(208.66 to</b><br><b>283.33)</b> | <b>6.68</b><br><b>(6.13 to</b><br><b>7.50)</b>    | <b>9.79</b><br><b>(8.83 to</b><br><b>11.18)</b>  | <b>8.39</b><br><b>(7.46 to</b><br><b>9.71)</b> | <b>9.96</b><br><b>(8.97 to</b><br><b>11.36)</b>   |
| Cirrhosis and other chronic liver diseases due to hepatitis B  | 20.85<br>(16.83 to<br>25.53)                         | 27.02<br>(21.71 to<br>33.74)                         | 24.35<br>(19.28 to<br>30.86)                         | 26.84<br>(21.58 to<br>33.73)                         | 0.81<br>(0.68 to<br>0.99)                         | 1.20<br>(0.98 to<br>1.49)                        | 1.11<br>(0.90 to<br>1.38)                      | 1.17<br>(0.95 to<br>1.46)                         |
| Cirrhosis and other chronic liver diseases due to hepatitis C  | 59.09<br>(51.55 to<br>68.67)                         | 76.78<br>(64.57 to<br>91.66)                         | 68.44<br>(57.01 to<br>82.79)                         | 76.66<br>(64.49 to<br>92.56)                         | 2.18<br>(1.93 to<br>2.49)                         | 3.21<br>(2.77 to<br>3.76)                        | 2.93<br>(2.51 to<br>3.44)                      | 3.14<br>(2.72 to<br>3.66)                         |
| Cirrhosis and other chronic liver diseases due to alcohol use  | 66.46<br>(58.65 to<br>76.46)                         | 87.19<br>(74.52 to<br>105.66)                        | 63.29<br>(53.72 to<br>77.44)                         | 97.86<br>(84.12 to<br>119.40)                        | 2.61<br>(2.33 to<br>2.96)                         | 3.86<br>(3.40 to<br>4.48)                        | 2.97<br>(2.58 to<br>3.47)                      | 4.17<br>(3.65 to<br>4.89)                         |
| Cirrhosis and other chronic liver diseases due to other causes | 33.85<br>(29.43 to<br>38.93)                         | 36.93<br>(31.21 to<br>43.50)                         | 31.99<br>(26.95 to<br>37.82)                         | 37.59<br>(31.85 to<br>44.79)                         | 1.08<br>(0.96 to<br>1.24)                         | 1.51<br>(1.32 to<br>1.76)                        | 1.37<br>(1.18 to<br>1.61)                      | 1.48<br>(1.29 to<br>1.73)                         |
| <b>Digestive diseases</b>                                      | <b>182.51</b><br><b>(159.60 to</b><br><b>215.08)</b> | <b>175.83</b><br><b>(152.65 to</b><br><b>206.39)</b> | <b>141.15</b><br><b>(121.85 to</b><br><b>164.02)</b> | <b>185.48</b><br><b>(159.80 to</b><br><b>218.98)</b> | <b>7.10</b><br><b>(6.47 to</b><br><b>7.92)</b>    | <b>8.97</b><br><b>(7.84 to</b><br><b>10.33)</b>  | <b>7.74</b><br><b>(6.80 to</b><br><b>8.87)</b> | <b>8.98</b><br><b>(7.81 to</b><br><b>10.43)</b>   |
| Peptic ulcer disease                                           | 44.05<br>(36.41 to<br>52.97)                         | 35.42<br>(28.69 to<br>43.93)                         | 25.10<br>(19.98 to<br>31.55)                         | 38.74<br>(30.70 to<br>48.32)                         | 1.88<br>(1.63 to<br>2.19)                         | 1.84<br>(1.53 to<br>2.23)                        | 1.37<br>(1.13 to<br>1.66)                      | 1.93<br>(1.57 to<br>2.35)                         |
| <b>Caribbean</b>                                               |                                                      |                                                      |                                                      |                                                      |                                                   |                                                  |                                                |                                                   |
| Cause                                                          | YLLs (in 1000s)                                      |                                                      |                                                      |                                                      | Deaths (in 1000s)                                 |                                                  |                                                |                                                   |
|                                                                | 2016                                                 | 2040 Forecast                                        | 2040 Better Scenario                                 | 2040 Worse Scenario                                  | 2016                                              | 2040 Forecast                                    | 2040 Better Scenario                           | 2040 Worse Scenario                               |
| Gastritis and duodenitis                                       | 6.39<br>(5.23 to<br>8.30)                            | 9.33<br>(7.63 to<br>11.81)                           | 7.81<br>(6.32 to<br>9.91)                            | 9.25<br>(7.63 to<br>11.71)                           | 0.29<br>(0.25 to<br>0.36)                         | 0.52<br>(0.44 to<br>0.64)                        | 0.45<br>(0.38 to<br>0.56)                      | 0.49<br>(0.41 to<br>0.61)                         |
| Appendicitis                                                   | 15.10<br>(11.03 to<br>20.98)                         | 11.07<br>(8.69 to<br>14.28)                          | 8.01<br>(6.25 to<br>10.33)                           | 11.86<br>(9.12 to<br>15.48)                          | 0.37<br>(0.30 to<br>0.46)                         | 0.38<br>(0.32 to<br>0.47)                        | 0.29<br>(0.24 to<br>0.36)                      | 0.38<br>(0.32 to<br>0.47)                         |

|                                            |                                                      |                                                      |                                                      |                                                      |                                                   |                                                   |                                                   |                                                   |
|--------------------------------------------|------------------------------------------------------|------------------------------------------------------|------------------------------------------------------|------------------------------------------------------|---------------------------------------------------|---------------------------------------------------|---------------------------------------------------|---------------------------------------------------|
| Paralytic ileus and intestinal obstruction | 42.97<br>(32.97 to<br>63.20)                         | 37.76<br>(31.23 to<br>48.28)                         | 34.74<br>(29.15 to<br>43.12)                         | 38.44<br>(31.21 to<br>50.72)                         | 1.40<br>(1.18 to<br>2.22)                         | 1.89<br>(1.59 to<br>2.22)                         | 1.92<br>(1.61 to<br>2.23)                         | 1.80<br>(1.51 to<br>2.13)                         |
| Inguinal, femoral, and abdominal hernia    | 9.41<br>(7.17 to<br>12.24)                           | 7.46<br>(5.61 to<br>9.49)                            | 6.24<br>(4.72 to<br>7.95)                            | 7.53<br>(5.73 to<br>9.62)                            | 0.37<br>(0.28 to<br>0.45)                         | 0.38<br>(0.29 to<br>0.46)                         | 0.34<br>(0.26 to<br>0.42)                         | 0.36<br>(0.27 to<br>0.45)                         |
| Inflammatory bowel disease                 | 5.91<br>(4.77 to<br>8.78)                            | 5.42<br>(4.46 to<br>6.92)                            | 5.27<br>(4.37 to<br>6.59)                            | 5.32<br>(4.36 to<br>6.91)                            | 0.20<br>(0.17 to<br>0.24)                         | 0.24<br>(0.21 to<br>0.27)                         | 0.25<br>(0.22 to<br>0.28)                         | 0.22<br>(0.19 to<br>0.26)                         |
| Vascular intestinal disorders              | 9.92<br>(8.21 to<br>11.11)                           | 13.81<br>(11.07 to<br>15.60)                         | 12.61<br>(10.07 to<br>14.33)                         | 13.34<br>(10.76 to<br>15.02)                         | 0.57<br>(0.47 to<br>0.64)                         | 0.95<br>(0.76 to<br>1.08)                         | 0.90<br>(0.73 to<br>1.03)                         | 0.89<br>(0.70 to<br>1.01)                         |
| Gallbladder and biliary diseases           | 11.83<br>(10.13 to<br>14.99)                         | 14.74<br>(9.16 to<br>24.17)                          | 10.29<br>(6.58 to<br>16.58)                          | 17.77<br>(10.63 to<br>29.90)                         | 0.56<br>(0.50 to<br>0.70)                         | 0.85<br>(0.54 to<br>1.38)                         | 0.63<br>(0.41 to<br>0.98)                         | 0.98<br>(0.60 to<br>1.62)                         |
| Pancreatitis                               | 16.17<br>(13.58 to<br>19.24)                         | 19.55<br>(12.67 to<br>31.28)                         | 13.14<br>(8.92 to<br>19.88)                          | 21.69<br>(13.71 to<br>35.11)                         | 0.55<br>(0.46 to<br>0.64)                         | 0.75<br>(0.50 to<br>1.16)                         | 0.53<br>(0.38 to<br>0.77)                         | 0.80<br>(0.52 to<br>1.27)                         |
| Other digestive diseases                   | 20.76<br>(17.02 to<br>26.30)                         | 21.27<br>(17.77 to<br>25.97)                         | 17.94<br>(14.87 to<br>21.76)                         | 21.55<br>(17.95 to<br>26.61)                         | 0.89<br>(0.78 to<br>1.05)                         | 1.16<br>(0.99 to<br>1.40)                         | 1.06<br>(0.91 to<br>1.27)                         | 1.12<br>(0.95 to<br>1.35)                         |
| <b>Neurological disorders</b>              | <b>198.47</b><br><b>(176.56 to</b><br><b>225.52)</b> | <b>315.14</b><br><b>(259.11 to</b><br><b>400.88)</b> | <b>314.18</b><br><b>(258.36 to</b><br><b>386.34)</b> | <b>320.14</b><br><b>(257.39 to</b><br><b>420.72)</b> | <b>16.27</b><br><b>(14.07 to</b><br><b>18.88)</b> | <b>28.94</b><br><b>(22.76 to</b><br><b>37.80)</b> | <b>30.81</b><br><b>(24.61 to</b><br><b>38.69)</b> | <b>28.35</b><br><b>(21.66 to</b><br><b>38.35)</b> |
| Alzheimer's disease and other dementias    | 125.60<br>(106.23 to<br>151.97)                      | 223.15<br>(169.04 to<br>307.23)                      | 228.69<br>(177.70 to<br>302.42)                      | 226.11<br>(164.77 to<br>322.68)                      | 13.62<br>(11.49 to<br>16.28)                      | 24.63<br>(18.44 to<br>33.55)                      | 26.21<br>(20.22 to<br>34.21)                      | 24.26<br>(17.70 to<br>34.48)                      |
| Parkinson's disease                        | 13.54<br>(10.23 to<br>17.53)                         | 26.67<br>(20.16 to<br>34.25)                         | 31.51<br>(23.82 to<br>40.35)                         | 23.92<br>(18.03 to<br>30.82)                         | 1.17<br>(0.88 to<br>1.52)                         | 2.35<br>(1.78 to<br>3.05)                         | 2.84<br>(2.19 to<br>3.68)                         | 2.07<br>(1.54 to<br>2.69)                         |
| Epilepsy                                   | 35.13<br>(28.92 to<br>42.46)                         | 39.85<br>(29.30 to<br>53.83)                         | 27.61<br>(20.69 to<br>36.38)                         | 45.26<br>(32.99 to<br>61.46)                         | 0.77<br>(0.66 to<br>0.90)                         | 1.05<br>(0.81 to<br>1.38)                         | 0.77<br>(0.61 to<br>0.99)                         | 1.15<br>(0.87 to<br>1.52)                         |
| Multiple sclerosis                         | 3.33<br>(2.81 to<br>4.00)                            | 3.07<br>(2.52 to<br>4.03)                            | 3.22<br>(2.62 to<br>4.28)                            | 3.08<br>(2.52 to<br>4.07)                            | 0.10<br>(0.08 to<br>0.12)                         | 0.10<br>(0.09 to<br>0.13)                         | 0.11<br>(0.09 to<br>0.14)                         | 0.10<br>(0.09 to<br>0.13)                         |
| Motor neuron disease                       | 5.41<br>(4.78 to<br>6.01)                            | 6.93<br>(6.10 to<br>7.83)                            | 7.20<br>(6.28 to<br>8.22)                            | 6.65<br>(5.87 to<br>7.49)                            | 0.19<br>(0.17 to<br>0.20)                         | 0.29<br>(0.26 to<br>0.33)                         | 0.31<br>(0.28 to<br>0.35)                         | 0.28<br>(0.25 to<br>0.31)                         |
| Other neurological disorders               | 15.46<br>(14.32 to<br>16.62)                         | 15.46<br>(13.83 to<br>17.15)                         | 15.96<br>(14.19 to<br>17.80)                         | 15.11<br>(13.57 to<br>16.70)                         | 0.42<br>(0.39 to<br>0.44)                         | 0.51<br>(0.47 to<br>0.56)                         | 0.55<br>(0.51 to<br>0.60)                         | 0.49<br>(0.45 to<br>0.53)                         |
| <b>Mental disorders</b>                    | <b>55.16</b><br><b>(47.68 to</b><br><b>65.20)</b>    | <b>51.19</b><br><b>(41.81 to</b><br><b>67.28)</b>    | <b>50.14</b><br><b>(41.13 to</b><br><b>65.07)</b>    | <b>51.70</b><br><b>(42.36 to</b><br><b>68.21)</b>    | <b>1.66</b><br><b>(1.47 to</b><br><b>1.93)</b>    | <b>1.79</b><br><b>(1.54 to</b><br><b>2.26)</b>    | <b>1.85</b><br><b>(1.58 to</b><br><b>2.30)</b>    | <b>1.76</b><br><b>(1.51 to</b><br><b>2.23)</b>    |
| Alcohol use disorders                      | 38.31<br>(32.79 to<br>47.03)                         | 34.29<br>(27.45 to<br>46.48)                         | 32.39<br>(25.93 to<br>44.08)                         | 35.06<br>(28.13 to<br>48.33)                         | 1.22<br>(1.07 to<br>1.47)                         | 1.24<br>(1.04 to<br>1.63)                         | 1.23<br>(1.03 to<br>1.61)                         | 1.23<br>(1.03 to<br>1.63)                         |
| Drug use disorders                         | 16.74<br>(13.80 to<br>21.36)                         | 16.77<br>(13.47 to<br>22.14)                         | 17.61<br>(14.29 to<br>23.31)                         | 16.50<br>(13.25 to<br>22.03)                         | 0.43<br>(0.37 to<br>0.53)                         | 0.55<br>(0.47 to<br>0.68)                         | 0.61<br>(0.53 to<br>0.75)                         | 0.52<br>(0.44 to<br>0.65)                         |
| Opioid use disorders                       | 9.54<br>(7.85 to<br>12.37)                           | 9.80<br>(7.50 to<br>13.87)                           | 9.93<br>(7.65 to<br>13.92)                           | 9.64<br>(7.36 to<br>13.80)                           | 0.24<br>(0.21 to<br>0.31)                         | 0.32<br>(0.26 to<br>0.41)                         | 0.34<br>(0.28 to<br>0.44)                         | 0.30<br>(0.25 to<br>0.40)                         |
| Cocaine use disorders                      | 1.25<br>(0.87 to<br>1.71)                            | 1.46<br>(0.97 to<br>2.15)                            | 1.44<br>(0.97 to<br>2.09)                            | 1.47<br>(0.97 to<br>2.16)                            | 0.03<br>(0.02 to<br>0.04)                         | 0.04<br>(0.03 to<br>0.05)                         | 0.04<br>(0.03 to<br>0.05)                         | 0.04<br>(0.03 to<br>0.05)                         |
| Amphetamine use disorders                  | 0.52<br>(0.36 to<br>0.73)                            | 0.83<br>(0.53 to<br>1.25)                            | 0.82<br>(0.55 to<br>1.20)                            | 0.84<br>(0.54 to<br>1.28)                            | 0.01<br>(0.01 to<br>0.02)                         | 0.02<br>(0.01 to<br>0.03)                         | 0.02<br>(0.02 to<br>0.03)                         | 0.02<br>(0.01 to<br>0.03)                         |
| Other drug use disorders                   | 5.43<br>(4.22 to<br>7.16)                            | 4.69<br>(3.52 to<br>6.76)                            | 5.41<br>(4.12 to<br>7.57)                            | 4.54<br>(3.41 to<br>6.56)                            | 0.15<br>(0.12 to<br>0.19)                         | 0.17<br>(0.14 to<br>0.22)                         | 0.22<br>(0.18 to<br>0.27)                         | 0.16<br>(0.13 to<br>0.21)                         |
| Eating disorders                           | 0.11<br>(0.09 to<br>0.15)                            | 0.14<br>(0.10 to<br>0.19)                            | 0.14<br>(0.10 to<br>0.19)                            | 0.14<br>(0.10 to<br>0.19)                            | 0.00<br>(0.00 to<br>0.00)                         | 0.00<br>(0.00 to<br>0.00)                         | 0.00<br>(0.00 to<br>0.00)                         | 0.00<br>(0.00 to<br>0.00)                         |

| Caribbean                                                  |                                     |                                         |                                       |                                        |                                  |                                  |                                  |                                  |
|------------------------------------------------------------|-------------------------------------|-----------------------------------------|---------------------------------------|----------------------------------------|----------------------------------|----------------------------------|----------------------------------|----------------------------------|
| Cause                                                      | YLLs (in 1000s)                     |                                         |                                       |                                        | Deaths (in 1000s)                |                                  |                                  |                                  |
|                                                            | 2016                                | 2040 Forecast                           | 2040 Better Scenario                  | 2040 Worse Scenario                    | 2016                             | 2040 Forecast                    | 2040 Better Scenario             | 2040 Worse Scenario              |
| <b>Diabetes, urogenital, blood, and endocrine diseases</b> | <b>690.16</b><br>(640.49 to 743.44) | <b>1,041.35</b><br>(750.74 to 1,545.69) | <b>723.88</b><br>(523.13 to 1,112.33) | <b>1,180.91</b><br>(40.92 to 1,749.84) | <b>31.48</b><br>(29.61 to 33.47) | <b>56.22</b><br>(40.92 to 83.10) | <b>41.29</b><br>(30.18 to 63.89) | <b>61.43</b><br>(43.44 to 89.69) |
| Diabetes mellitus                                          | 343.18<br>(316.57 to 371.90)        | 528.63<br>(398.30 to 706.26)            | 354.84<br>(268.22 to 468.62)          | 589.15<br>(435.63 to 794.07)           | 17.69<br>(16.47 to 18.90)        | 29.95<br>(23.40 to 38.01)        | 21.43<br>(16.86 to 27.44)        | 32.06<br>(24.41 to 41.43)        |
| Acute glomerulonephritis                                   | 0.32<br>(0.30 to 0.37)              | 0.30<br>(0.25 to 0.37)                  | 0.24<br>(0.20 to 0.29)                | 0.32<br>(0.26 to 0.39)                 | 0.01<br>(0.01 to 0.01)           | 0.01<br>(0.01 to 0.01)           | 0.01<br>(0.01 to 0.01)           | 0.01<br>(0.01 to 0.01)           |
| Chronic kidney disease                                     | 222.20<br>(201.91 to 245.97)        | 384.86<br>(170.34 to 876.90)            | 258.61<br>(119.07 to 609.69)          | 461.55<br>(197.88 to 1,016.82)         | 9.75<br>(9.02 to 10.61)          | 20.75<br>(8.56 to 47.41)         | 14.70<br>(6.39 to 34.84)         | 24.06<br>(9.80 to 52.52)         |
| Chronic kidney disease due to diabetes mellitus            | 75.91<br>(65.57 to 86.62)           | 152.32<br>(62.59 to 357.18)             | 102.74<br>(44.23 to 252.99)           | 182.97<br>(73.30 to 416.49)            | 3.46<br>(3.01 to 3.96)           | 7.94<br>(3.11 to 18.60)          | 5.59<br>(2.26 to 13.92)          | 9.26<br>(3.59 to 20.37)          |
| Chronic kidney disease due to hypertension                 | 25.05<br>(20.63 to 29.87)           | 53.84<br>(21.14 to 127.30)              | 38.43<br>(15.72 to 93.72)             | 63.01<br>(24.09 to 141.47)             | 1.70<br>(1.43 to 2.00)           | 4.06<br>(1.70 to 9.00)           | 3.08<br>(1.32 to 7.31)           | 4.57<br>(1.85 to 9.51)           |
| Chronic kidney disease due to glomerulonephritis           | 69.15<br>(59.09 to 80.94)           | 99.24<br>(46.05 to 222.03)              | 64.71<br>(31.23 to 149.48)            | 120.03<br>(53.25 to 256.58)            | 2.53<br>(2.13 to 3.01)           | 4.65<br>(1.92 to 10.80)          | 3.16<br>(1.34 to 7.84)           | 5.47<br>(2.21 to 11.76)          |
| Chronic kidney disease due to other and unspecified causes | 52.08<br>(44.02 to 62.08)           | 79.46<br>(37.51 to 174.38)              | 52.74<br>(25.50 to 121.62)            | 95.55<br>(43.16 to 199.36)             | 2.06<br>(1.74 to 2.44)           | 4.10<br>(1.76 to 9.54)           | 2.87<br>(1.27 to 7.02)           | 4.76<br>(2.02 to 10.25)          |
| Urinary diseases and male infertility                      | 27.92<br>(25.95 to 30.50)           | 34.38<br>(31.55 to 37.44)               | 30.67<br>(27.60 to 33.96)             | 33.33<br>(30.53 to 36.29)              | 1.46<br>(1.38 to 1.54)           | 2.27<br>(2.04 to 2.47)           | 2.15<br>(1.94 to 2.35)           | 2.21<br>(1.86 to 2.30)           |
| Urinary tract infections                                   | 21.62<br>(19.85 to 23.48)           | 28.31<br>(25.75 to 31.18)               | 25.83<br>(23.10 to 28.82)             | 27.23<br>(24.85 to 30.04)              | 1.18<br>(1.11 to 1.26)           | 1.92<br>(1.72 to 2.11)           | 1.85<br>(1.66 to 2.06)           | 1.77<br>(1.56 to 1.95)           |
| Urolithiasis                                               | 1.28<br>(0.96 to 1.55)              | 1.24<br>(0.88 to 1.52)                  | 1.03<br>(0.71 to 1.30)                | 1.20<br>(0.86 to 1.48)                 | 0.05<br>(0.04 to 0.07)           | 0.06<br>(0.04 to 0.08)           | 0.05<br>(0.04 to 0.07)           | 0.06<br>(0.04 to 0.07)           |
| Other urinary diseases                                     | 5.03<br>(3.94 to 6.51)              | 4.84<br>(3.84 to 6.18)                  | 3.81<br>(2.98 to 4.92)                | 4.90<br>(3.86 to 6.30)                 | 0.22<br>(0.18 to 0.28)           | 0.29<br>(0.23 to 0.37)           | 0.24<br>(0.19 to 0.31)           | 0.27<br>(0.22 to 0.35)           |
| Gynecological diseases                                     | 1.45<br>(1.10 to 1.73)              | 1.24<br>(0.94 to 1.61)                  | 0.81<br>(0.60 to 1.09)                | 1.29<br>(0.99 to 1.70)                 | 0.04<br>(0.04 to 0.05)           | 0.05<br>(0.04 to 0.06)           | 0.03<br>(0.02 to 0.04)           | 0.05<br>(0.04 to 0.06)           |
| Uterine fibroids                                           | 0.59<br>(0.35 to 0.74)              | 0.36<br>(0.23 to 0.53)                  | 0.23<br>(0.15 to 0.35)                | 0.37<br>(0.24 to 0.54)                 | 0.02<br>(0.01 to 0.02)           | 0.01<br>(0.01 to 0.02)           | 0.01<br>(0.01 to 0.01)           | 0.01<br>(0.01 to 0.02)           |
| Polycystic ovarian syndrome                                | 0.24<br>(0.16 to 0.37)              | 0.14<br>(0.07 to 0.26)                  | 0.07<br>(0.03 to 0.14)                | 0.15<br>(0.07 to 0.28)                 | 0.01<br>(0.01 to 0.01)           | 0.00<br>(0.00 to 0.01)           | 0.00<br>(0.00 to 0.01)           | 0.00<br>(0.00 to 0.01)           |
| Endometriosis                                              | 0.00<br>(0.00 to 0.01)              | 0.01<br>(0.00 to 0.01)                  | 0.00<br>(0.00 to 0.01)                | 0.01<br>(0.00 to 0.01)                 | 0.00<br>(0.00 to 0.00)           | 0.00<br>(0.00 to 0.00)           | 0.00<br>(0.00 to 0.00)           | 0.00<br>(0.00 to 0.00)           |
| Genital prolapse                                           | 0.06<br>(0.04 to 0.09)              | 0.07<br>(0.04 to 0.11)                  | 0.04<br>(0.02 to 0.07)                | 0.07<br>(0.04 to 0.11)                 | 0.00<br>(0.00 to 0.01)           | 0.00<br>(0.00 to 0.01)           | 0.00<br>(0.00 to 0.00)           | 0.00<br>(0.00 to 0.01)           |
| Other gynecological diseases                               | 0.56<br>(0.41 to 0.69)              | 0.67<br>(0.49 to 0.92)                  | 0.47<br>(0.33 to 0.65)                | 0.70<br>(0.51 to 0.96)                 | 0.02<br>(0.01 to 0.02)           | 0.03<br>(0.02 to 0.04)           | 0.02<br>(0.01 to 0.03)           | 0.03<br>(0.02 to 0.04)           |
| Hemoglobinopathies and hemolytic anemias                   | 43.16<br>(35.14 to 52.31)           | 42.42<br>(34.48 to 51.93)               | 33.37<br>(27.00 to 41.30)             | 44.52<br>(36.18 to 54.41)              | 1.00<br>(0.86 to 1.18)           | 1.32<br>(1.13 to 1.56)           | 1.07<br>(0.91 to 1.31)           | 1.33<br>(1.14 to 1.58)           |
| Thalassemias                                               | 1.86<br>(0.96 to 2.98)              | 0.54<br>(0.28 to 0.92)                  | 0.52<br>(0.26 to 0.89)                | 0.56<br>(0.28 to 0.96)                 | 0.02<br>(0.01 to 0.04)           | 0.01<br>(0.00 to 0.01)           | 0.01<br>(0.00 to 0.01)           | 0.01<br>(0.00 to 0.01)           |

|                                                   |                                                      |                                                      |                                                      |                                                      |                                                |                                                |                                                |                                                |
|---------------------------------------------------|------------------------------------------------------|------------------------------------------------------|------------------------------------------------------|------------------------------------------------------|------------------------------------------------|------------------------------------------------|------------------------------------------------|------------------------------------------------|
| Sickle cell disorders                             | 33.68<br>(26.94 to<br>41.47)                         | 31.09<br>(24.31 to<br>39.14)                         | 24.35<br>(18.89 to<br>30.94)                         | 33.11<br>(25.70 to<br>41.85)                         | 0.56<br>(0.46 to<br>0.68)                      | 0.63<br>(0.50 to<br>0.80)                      | 0.51<br>(0.40 to<br>0.64)                      | 0.67<br>(0.53 to<br>0.83)                      |
| G6PD deficiency                                   | 3.20<br>(2.60 to<br>3.98)                            | 5.09<br>(4.05 to<br>6.49)                            | 3.81<br>(2.94 to<br>4.89)                            | 5.28<br>(4.23 to<br>6.73)                            | 0.09<br>(0.07 to<br>0.11)                      | 0.20<br>(0.16 to<br>0.25)                      | 0.15<br>(0.12 to<br>0.20)                      | 0.20<br>(0.16 to<br>0.26)                      |
| Other hemoglobinopathies and hemolytic anemias    | 4.43<br>(3.86 to<br>5.28)                            | 5.70<br>(4.91 to<br>7.00)                            | 4.69<br>(3.97 to<br>5.78)                            | 5.58<br>(4.75 to<br>6.90)                            | 0.32<br>(0.28 to<br>0.38)                      | 0.48<br>(0.41 to<br>0.58)                      | 0.41<br>(0.35 to<br>0.50)                      | 0.45<br>(0.38 to<br>0.56)                      |
| Endocrine, metabolic, blood, and immune disorders | 51.91<br>(44.48 to<br>67.74)                         | 49.52<br>(41.86 to<br>66.84)                         | 45.34<br>(38.44 to<br>61.01)                         | 50.75<br>(42.71 to<br>68.69)                         | 1.54<br>(1.38 to<br>2.04)                      | 1.89<br>(1.63 to<br>2.69)                      | 1.90<br>(1.64 to<br>2.69)                      | 1.83<br>(1.59 to<br>2.62)                      |
| <b>Caribbean</b>                                  |                                                      |                                                      |                                                      |                                                      |                                                |                                                |                                                |                                                |
| Cause                                             | YLLs (in 1000s)                                      |                                                      |                                                      |                                                      | Deaths (in 1000s)                              |                                                |                                                |                                                |
|                                                   | 2016                                                 | 2040 Forecast                                        | 2040 Better Scenario                                 | 2040 Worse Scenario                                  | 2016                                           | 2040 Forecast                                  | 2040 Better Scenario                           | 2040 Worse Scenario                            |
| <b>Musculoskeletal disorders</b>                  | <b>27.32</b><br><b>(22.49 to</b><br><b>31.90)</b>    | <b>34.52</b><br><b>(27.36 to</b><br><b>40.95)</b>    | <b>33.16</b><br><b>(26.16 to</b><br><b>40.02)</b>    | <b>33.77</b><br><b>(26.86 to</b><br><b>40.08)</b>    | <b>0.78</b><br><b>(0.65 to</b><br><b>0.88)</b> | <b>1.28</b><br><b>(1.02 to</b><br><b>1.46)</b> | <b>1.22</b><br><b>(0.96 to</b><br><b>1.41)</b> | <b>1.22</b><br><b>(0.99 to</b><br><b>1.39)</b> |
| Rheumatoid arthritis                              | 3.44<br>(2.87 to<br>4.26)                            | 6.21<br>(5.01 to<br>7.67)                            | 4.54<br>(3.57 to<br>5.77)                            | 6.31<br>(5.02 to<br>7.87)                            | 0.17<br>(0.14 to<br>0.20)                      | 0.38<br>(0.31 to<br>0.47)                      | 0.29<br>(0.23 to<br>0.37)                      | 0.38<br>(0.30 to<br>0.47)                      |
| Other musculoskeletal disorders                   | 23.87<br>(19.12 to<br>28.40)                         | 28.31<br>(21.53 to<br>34.70)                         | 28.62<br>(21.52 to<br>35.17)                         | 27.46<br>(20.82 to<br>33.48)                         | 0.61<br>(0.49 to<br>0.71)                      | 0.90<br>(0.68 to<br>1.05)                      | 0.93<br>(0.70 to<br>1.11)                      | 0.85<br>(0.64 to<br>0.99)                      |
| <b>Other non-communicable diseases</b>            | <b>340.82</b><br><b>(245.50 to</b><br><b>479.04)</b> | <b>214.19</b><br><b>(153.11 to</b><br><b>312.59)</b> | <b>152.42</b><br><b>(110.45 to</b><br><b>222.53)</b> | <b>242.67</b><br><b>(169.93 to</b><br><b>353.58)</b> | <b>5.04</b><br><b>(3.85 to</b><br><b>6.78)</b> | <b>4.54</b><br><b>(3.41 to</b><br><b>6.03)</b> | <b>3.75</b><br><b>(2.73 to</b><br><b>4.94)</b> | <b>4.74</b><br><b>(3.59 to</b><br><b>6.43)</b> |
| Congenital birth defects                          | 309.37<br>(218.62 to<br>443.88)                      | 177.65<br>(120.50 to<br>270.92)                      | 119.87<br>(81.05 to<br>187.55)                       | 205.75<br>(137.41 to<br>315.93)                      | 3.83<br>(2.73 to<br>5.48)                      | 2.39<br>(1.66 to<br>3.73)                      | 1.66<br>(1.13 to<br>2.65)                      | 2.73<br>(1.85 to<br>4.28)                      |
| Neural tube defects                               | 27.22<br>(13.01 to<br>52.38)                         | 6.69<br>(3.10 to<br>13.68)                           | 3.81<br>(1.72 to<br>7.57)                            | 8.61<br>(3.91 to<br>17.93)                           | 0.32<br>(0.15 to<br>0.62)                      | 0.08<br>(0.04 to<br>0.17)                      | 0.05<br>(0.02 to<br>0.09)                      | 0.10<br>(0.05 to<br>0.22)                      |
| Congenital heart anomalies                        | 139.99<br>(92.83 to<br>231.95)                       | 80.69<br>(51.02 to<br>146.13)                        | 54.53<br>(33.58 to<br>102.23)                        | 92.38<br>(57.71 to<br>167.84)                        | 1.75<br>(1.17 to<br>2.90)                      | 1.10<br>(0.70 to<br>2.03)                      | 0.76<br>(0.47 to<br>1.47)                      | 1.24<br>(0.78 to<br>2.31)                      |
| Orofacial clefts                                  | 0.42<br>(0.18 to<br>0.90)                            | 0.20<br>(0.08 to<br>0.52)                            | 0.10<br>(0.04 to<br>0.26)                            | 0.26<br>(0.10 to<br>0.72)                            | 0.00<br>(0.00 to<br>0.01)                      | 0.00<br>(0.00 to<br>0.01)                      | 0.00<br>(0.00 to<br>0.00)                      | 0.00<br>(0.00 to<br>0.01)                      |
| Down syndrome                                     | 14.95<br>(8.71 to<br>25.33)                          | 12.74<br>(7.24 to<br>20.31)                          | 9.72<br>(5.80 to<br>15.11)                           | 14.39<br>(8.00 to<br>23.67)                          | 0.22<br>(0.14 to<br>0.35)                      | 0.23<br>(0.14 to<br>0.35)                      | 0.18<br>(0.12 to<br>0.28)                      | 0.25<br>(0.15 to<br>0.39)                      |
| Other chromosomal abnormalities                   | 10.18<br>(5.36 to<br>18.66)                          | 9.44<br>(4.08 to<br>19.04)                           | 6.48<br>(2.77 to<br>13.01)                           | 11.29<br>(4.62 to<br>23.47)                          | 0.12<br>(0.06 to<br>0.22)                      | 0.12<br>(0.05 to<br>0.25)                      | 0.08<br>(0.03 to<br>0.16)                      | 0.14<br>(0.06 to<br>0.28)                      |
| Congenital musculoskeletal and limb anomalies     | 5.21<br>(2.98 to<br>11.47)                           | 3.38<br>(1.89 to<br>7.24)                            | 2.40<br>(1.28 to<br>5.30)                            | 3.91<br>(2.10 to<br>8.72)                            | 0.06<br>(0.04 to<br>0.14)                      | 0.04<br>(0.00 to<br>0.09)                      | 0.03<br>(0.02 to<br>0.07)                      | 0.05<br>(0.03 to<br>0.11)                      |
| Urogenital congenital anomalies                   | 5.71<br>(3.66 to<br>8.72)                            | 3.45<br>(2.10 to<br>5.49)                            | 2.49<br>(1.51 to<br>4.03)                            | 3.88<br>(2.35 to<br>6.20)                            | 0.08<br>(0.05 to<br>0.12)                      | 0.05<br>(0.03 to<br>0.09)                      | 0.04<br>(0.03 to<br>0.07)                      | 0.06<br>(0.04 to<br>0.10)                      |
| Digestive congenital anomalies                    | 34.09<br>(19.19 to<br>61.24)                         | 19.49<br>(10.92 to<br>33.45)                         | 12.20<br>(6.87 to<br>21.23)                          | 22.87<br>(12.69 to<br>40.13)                         | 0.40<br>(0.23 to<br>0.72)                      | 0.23<br>(0.13 to<br>0.39)                      | 0.15<br>(0.08 to<br>0.25)                      | 0.27<br>(0.15 to<br>0.47)                      |
| Other congenital birth defects                    | 71.59<br>(50.07 to<br>104.50)                        | 41.57<br>(27.72 to<br>62.85)                         | 28.13<br>(18.48 to<br>43.09)                         | 48.14<br>(31.37 to<br>74.20)                         | 0.88<br>(0.62 to<br>1.27)                      | 0.54<br>(0.37 to<br>0.81)                      | 0.37<br>(0.25 to<br>0.54)                      | 0.62<br>(0.41 to<br>0.94)                      |
| Skin and subcutaneous diseases                    | 17.12<br>(9.99 to<br>20.29)                          | 29.71<br>(17.68 to<br>35.95)                         | 27.69<br>(16.65 to<br>33.94)                         | 28.63<br>(16.93 to<br>34.83)                         | 1.04<br>(0.63 to<br>1.30)                      | 2.07<br>(1.24 to<br>2.63)                      | 2.04<br>(1.24 to<br>2.50)                      | 1.92<br>(1.13 to<br>2.44)                      |
| Cellulitis                                        | 2.51<br>(1.25 to<br>3.53)                            | 4.65<br>(2.63 to<br>6.46)                            | 4.72<br>(2.67 to<br>6.46)                            | 4.42<br>(2.48 to<br>6.12)                            | 0.13<br>(0.07 to<br>0.20)                      | 0.30<br>(0.17 to<br>0.45)                      | 0.32<br>(0.19 to<br>0.46)                      | 0.27<br>(0.16 to<br>0.41)                      |





|                                                 |                                 |                                 |                                 |                                 |                            |                            |                           |                            |
|-------------------------------------------------|---------------------------------|---------------------------------|---------------------------------|---------------------------------|----------------------------|----------------------------|---------------------------|----------------------------|
| Unintentional suffocation                       | 8.44<br>(5.17 to<br>14.54)      | 4.39<br>(2.85 to<br>7.19)       | 3.06<br>(2.02 to<br>4.88)       | 5.11<br>(3.19 to<br>8.42)       | 0.11<br>(0.07 to<br>0.18)  | 0.06<br>(0.04 to<br>0.10)  | 0.05<br>(0.03 to<br>0.07) | 0.07<br>(0.05 to<br>0.11)  |
| Other exposure to mechanical forces             | 19.09<br>(15.65 to<br>24.11)    | 15.07<br>(11.87 to<br>19.42)    | 11.50<br>(8.95 to<br>14.74)     | 16.00<br>(12.42 to<br>20.74)    | 0.42<br>(0.35 to<br>0.51)  | 0.42<br>(0.34 to<br>0.52)  | 0.35<br>(0.28 to<br>0.42) | 0.44<br>(0.35 to<br>0.53)  |
| Adverse effects of medical treatment            | 42.99<br>(36.37 to<br>52.37)    | 37.14<br>(31.55 to<br>43.89)    | 31.25<br>(26.61 to<br>36.93)    | 38.57<br>(32.56 to<br>45.88)    | 1.27<br>(1.11 to<br>1.46)  | 1.53<br>(1.33 to<br>1.79)  | 1.40<br>(1.22 to<br>1.65) | 1.49<br>(1.29 to<br>1.75)  |
| Animal contact                                  | 6.58<br>(5.35 to<br>8.09)       | 7.14<br>(5.41 to<br>9.05)       | 5.44<br>(4.11 to<br>6.87)       | 7.54<br>(5.74 to<br>9.71)       | 0.22<br>(0.15 to<br>0.26)  | 0.33<br>(0.20 to<br>0.40)  | 0.27<br>(0.16 to<br>0.33) | 0.32<br>(0.20 to<br>0.39)  |
| Venomous animal contact                         | 3.93<br>(3.03 to<br>5.09)       | 4.12<br>(2.92 to<br>5.49)       | 3.16<br>(2.21 to<br>4.12)       | 4.38<br>(3.12 to<br>5.89)       | 0.14<br>(0.08 to<br>0.17)  | 0.19<br>(0.10 to<br>0.25)  | 0.16<br>(0.08 to<br>0.21) | 0.19<br>(0.10 to<br>0.25)  |
| Non-venomous animal contact                     | 2.65<br>(2.07 to<br>3.50)       | 3.02<br>(2.26 to<br>3.96)       | 2.28<br>(1.70 to<br>2.97)       | 3.17<br>(2.40 to<br>4.19)       | 0.08<br>(0.06 to<br>0.11)  | 0.13<br>(0.09 to<br>0.17)  | 0.11<br>(0.07 to<br>0.15) | 0.13<br>(0.09 to<br>0.17)  |
| Foreign body                                    | 37.47<br>(27.27 to<br>50.78)    | 27.53<br>(21.41 to<br>35.07)    | 24.72<br>(19.64 to<br>30.75)    | 28.38<br>(21.54 to<br>37.22)    | 0.87<br>(0.66 to<br>1.06)  | 0.94<br>(0.75 to<br>1.10)  | 0.95<br>(0.77 to<br>1.09) | 0.90<br>(0.71 to<br>1.07)  |
| Pulmonary aspiration and foreign body in airway | 33.43<br>(23.56 to<br>46.61)    | 23.60<br>(17.87 to<br>30.86)    | 21.08<br>(16.49 to<br>26.85)    | 24.38<br>(18.06 to<br>33.03)    | 0.73<br>(0.55 to<br>0.90)  | 0.74<br>(0.61 to<br>0.85)  | 0.74<br>(0.62 to<br>0.84) | 0.71<br>(0.58 to<br>0.83)  |
| Foreign body in other body part                 | 4.03<br>(3.22 to<br>5.00)       | 3.93<br>(2.88 to<br>4.89)       | 3.64<br>(2.61 to<br>4.51)       | 4.00<br>(2.94 to<br>5.01)       | 0.14<br>(0.09 to<br>0.18)  | 0.20<br>(0.11 to<br>0.27)  | 0.21<br>(0.11 to<br>0.29) | 0.19<br>(0.11 to<br>0.25)  |
| Environmental heat and cold exposure            | 9.21<br>(6.44 to<br>15.33)      | 9.03<br>(5.92 to<br>14.89)      | 6.20<br>(4.08 to<br>10.33)      | 9.98<br>(6.54 to<br>16.45)      | 0.23<br>(0.16 to<br>0.34)  | 0.28<br>(0.19 to<br>0.42)  | 0.21<br>(0.14 to<br>0.31) | 0.29<br>(0.20 to<br>0.44)  |
| Other unintentional injuries                    | 27.85<br>(23.49 to<br>32.38)    | 17.34<br>(13.87 to<br>21.60)    | 13.06<br>(9.99 to<br>16.51)     | 18.51<br>(14.84 to<br>23.12)    | 0.53<br>(0.45 to<br>0.61)  | 0.39<br>(0.32 to<br>0.47)  | 0.30<br>(0.24 to<br>0.37) | 0.41<br>(0.33 to<br>0.50)  |
| Self-harm and interpersonal violence            | 429.48<br>(363.42 to<br>479.20) | 364.35<br>(278.71 to<br>486.03) | 299.03<br>(234.15 to<br>387.96) | 378.38<br>(281.87 to<br>515.18) | 9.24<br>(7.86 to<br>10.24) | 9.17<br>(6.96 to<br>11.97) | 7.62<br>(5.97 to<br>9.62) | 9.34<br>(6.98 to<br>12.38) |

### Caribbean

| Cause                                                                        | YLLs (in 1000s)                 |                                 |                                 |                                 | Deaths (in 1000s)         |                            |                            |                            |
|------------------------------------------------------------------------------|---------------------------------|---------------------------------|---------------------------------|---------------------------------|---------------------------|----------------------------|----------------------------|----------------------------|
|                                                                              | 2016                            | 2040 Forecast                   | 2040 Better Scenario            | 2040 Worse Scenario             | 2016                      | 2040 Forecast              | 2040 Better Scenario       | 2040 Worse Scenario        |
| Self-harm                                                                    | 174.20<br>(152.75 to<br>199.44) | 193.79<br>(131.76 to<br>283.70) | 152.07<br>(108.96 to<br>211.64) | 206.05<br>(136.67 to<br>310.84) | 4.32<br>(3.80 to<br>4.86) | 5.54<br>(3.91 to<br>7.76)  | 4.47<br>(3.32 to<br>5.93)  | 5.71<br>(3.91 to<br>8.27)  |
| Self-harm by firearm                                                         | 11.71<br>(8.91 to<br>15.96)     | 10.81<br>(5.75 to<br>18.87)     | 8.30<br>(4.59 to<br>13.66)      | 11.75<br>(6.10 to<br>21.21)     | 0.30<br>(0.24 to<br>0.39) | 0.31<br>(0.19 to<br>0.50)  | 0.25<br>(0.15 to<br>0.39)  | 0.33<br>(0.19 to<br>0.53)  |
| Self-harm by other specified means                                           | 162.49<br>(142.39 to<br>186.33) | 182.98<br>(125.50 to<br>266.82) | 143.77<br>(103.75 to<br>199.57) | 194.30<br>(130.43 to<br>291.14) | 4.03<br>(3.50 to<br>4.55) | 5.23<br>(3.67 to<br>7.28)  | 4.22<br>(3.11 to<br>5.59)  | 5.39<br>(3.69 to<br>7.73)  |
| Interpersonal violence                                                       | 255.28<br>(194.83 to<br>297.05) | 170.56<br>(120.11 to<br>212.89) | 146.96<br>(104.95 to<br>182.56) | 172.34<br>(118.74 to<br>216.84) | 4.92<br>(3.76 to<br>5.70) | 3.62<br>(2.57 to<br>4.46)  | 3.16<br>(2.28 to<br>3.89)  | 3.63<br>(2.51 to<br>4.51)  |
| Physical violence by firearm                                                 | 153.20<br>(111.04 to<br>183.35) | 95.44<br>(62.73 to<br>123.95)   | 82.59<br>(54.72 to<br>107.65)   | 96.00<br>(61.69 to<br>125.66)   | 2.87<br>(2.04 to<br>3.44) | 1.91<br>(1.22 to<br>2.45)  | 1.67<br>(1.07 to<br>2.15)  | 1.91<br>(1.18 to<br>2.46)  |
| Physical violence by sharp object                                            | 63.38<br>(42.12 to<br>78.71)    | 48.60<br>(30.73 to<br>64.54)    | 42.85<br>(27.19 to<br>57.28)    | 48.29<br>(30.15 to<br>64.14)    | 1.27<br>(0.84 to<br>1.59) | 1.07<br>(0.69 to<br>1.40)  | 0.95<br>(0.62 to<br>1.23)  | 1.05<br>(0.67 to<br>1.36)  |
| Physical violence by other means                                             | 38.70<br>(28.55 to<br>47.92)    | 26.52<br>(18.25 to<br>36.37)    | 21.52<br>(15.02 to<br>29.58)    | 28.05<br>(19.05 to<br>39.03)    | 0.78<br>(0.57 to<br>1.02) | 0.64<br>(0.45 to<br>0.88)  | 0.54<br>(0.39 to<br>0.73)  | 0.66<br>(0.46 to<br>0.92)  |
| Forces of nature, conflict and terrorism, and executions and police conflict | 76.68<br>(51.84 to<br>101.22)   | 208.39<br>(69.82 to<br>659.82)  | 198.35<br>(62.72 to<br>627.72)  | 214.84<br>(67.80 to<br>678.80)  | 1.37<br>(0.93 to<br>1.82) | 4.16<br>(0.00 to<br>13.33) | 4.16<br>(0.00 to<br>13.42) | 4.15<br>(0.00 to<br>13.34) |

|                                                                   |                                          |                                          |                                         |                                          |                                 |                                   |                                 |                                     |
|-------------------------------------------------------------------|------------------------------------------|------------------------------------------|-----------------------------------------|------------------------------------------|---------------------------------|-----------------------------------|---------------------------------|-------------------------------------|
| Exposure to forces of nature                                      | 74.80<br>(49.91 to<br>99.64)             | 206.08<br>(0.00 to<br>659.82)            | 196.13<br>(0.00 to<br>627.72)           | 212.51<br>(0.00 to<br>678.80)            | 1.34<br>(0.90 to<br>1.79)       | 4.11<br>(0.00 to<br>13.33)        | 4.11<br>(0.00 to<br>13.42)      | 4.10<br>(0.00 to<br>13.34)          |
| Conflict and terrorism                                            | 0.00<br>(0.00 to<br>0.00)                | 2.15<br>(0.00 to<br>10.26)               | 2.06<br>(0.00 to<br>10.23)              | 2.17<br>(0.00 to<br>10.27)               | 0.00<br>(0.00 to<br>0.00)       | 0.05<br>(0.00 to<br>0.28)         | 0.05<br>(0.00 to<br>0.29)       | 0.05<br>(0.00 to<br>0.27)           |
| Executions and police conflict                                    | 1.88<br>(1.14 to<br>2.97)                | 0.16<br>(0.00 to<br>4.08)                | 0.15<br>(0.00 to<br>4.02)               | 0.16<br>(0.00 to<br>4.10)                | 0.03<br>(0.02 to<br>0.05)       | 0.00<br>(0.00 to<br>0.08)         | 0.00<br>(0.00 to<br>0.08)       | 0.00<br>(0.00 to<br>0.08)           |
| <b>Antigua and Barbuda</b>                                        |                                          |                                          |                                         |                                          |                                 |                                   |                                 |                                     |
| Cause                                                             | YLLs (actual counts)                     |                                          |                                         |                                          | Deaths (actual counts)          |                                   |                                 |                                     |
|                                                                   | 2016                                     | 2040 Forecast                            | 2040 Better Scenario                    | 2040 Worse Scenario                      | 2016                            | 2040 Forecast                     | 2040 Better Scenario            | 2040 Worse Scenario                 |
| All causes                                                        | 11,851.67<br>(10,596.80 to<br>13,175.82) | 16,044.14<br>(12,250.00 to<br>20,698.76) | 11,554.49<br>(8,920.09 to<br>14,977.94) | 19,204.28<br>(14,556.72 to<br>24,906.02) | 500.69<br>(454.06 to<br>551.19) | 929.34<br>(742.35 to<br>1,139.31) | 710.34<br>(566.07 to<br>878.88) | 1,066.80<br>(850.83 to<br>1,304.74) |
| Communicable, maternal, neonatal, and nutritional diseases        | 1,700.99<br>(1,394.64 to<br>2,120.01)    | 1,306.12<br>(989.19 to<br>1,781.97)      | 927.98<br>(720.59 to<br>1,230.46)       | 1,781.92<br>(1,349.52 to<br>2,411.23)    | 46.96<br>(41.77 to<br>53.17)    | 63.62<br>(50.72 to<br>78.59)      | 50.06<br>(40.66 to<br>60.82)    | 75.12<br>(59.52 to<br>93.52)        |
| HIV/AIDS and tuberculosis                                         | 380.62<br>(363.44 to<br>397.61)          | 101.26<br>(72.97 to<br>134.20)           | 78.67<br>(55.07 to<br>108.37)           | 369.82<br>(264.26 to<br>477.49)          | 8.84<br>(8.44 to<br>9.24)       | 2.63<br>(1.65 to<br>3.74)         | 1.98<br>(1.16 to<br>3.00)       | 9.12<br>(6.35 to<br>11.67)          |
| Tuberculosis                                                      | 13.84<br>(11.83 to<br>16.30)             | 12.22<br>(6.72 to<br>21.52)              | 4.56<br>(2.67 to<br>7.58)               | 15.43<br>(8.24 to<br>27.60)              | 0.48<br>(0.41 to<br>0.55)       | 0.55<br>(0.33 to<br>0.86)         | 0.22<br>(0.14 to<br>0.34)       | 0.67<br>(0.39 to<br>1.07)           |
| HIV/AIDS                                                          | 366.78<br>(349.33 to<br>383.77)          | 89.04<br>(62.47 to<br>121.33)            | 74.10<br>(50.15 to<br>104.03)           | 354.39<br>(246.65 to<br>460.99)          | 8.37<br>(7.97 to<br>8.76)       | 2.08<br>(1.18 to<br>3.14)         | 1.76<br>(0.95 to<br>2.77)       | 8.45<br>(5.62 to<br>11.02)          |
| Diarrhea, lower respiratory, and other common infectious diseases | 680.18<br>(576.86 to<br>794.39)          | 810.01<br>(597.51 to<br>1,134.64)        | 562.80<br>(427.73 to<br>754.84)         | 944.75<br>(668.12 to<br>1,370.34)        | 27.86<br>(24.61 to<br>31.61)    | 51.55<br>(39.91 to<br>65.20)      | 39.29<br>(31.00 to<br>49.01)    | 55.76<br>(42.03 to<br>72.36)        |
| Diarrheal diseases                                                | 46.54<br>(34.62 to<br>62.00)             | 31.27<br>(7.79 to<br>97.65)              | 37.97<br>(12.31 to<br>106.61)           | 39.86<br>(8.96 to<br>126.91)             | 1.26<br>(1.07 to<br>1.49)       | 1.82<br>(0.47 to<br>5.14)         | 2.46<br>(0.82 to<br>6.26)       | 2.17<br>(0.52 to<br>6.50)           |
| Intestinal infectious diseases                                    | 0.32<br>(0.12 to<br>0.74)                | 0.24<br>(0.07 to<br>0.58)                | 0.31<br>(0.10 to<br>0.76)               | 0.24<br>(0.07 to<br>0.60)                | 0.01<br>(0.00 to<br>0.02)       | 0.01<br>(0.00 to<br>0.02)         | 0.01<br>(0.00 to<br>0.02)       | 0.01<br>(0.00 to<br>0.02)           |
| Typhoid fever                                                     | 0.29<br>(0.10 to<br>0.69)                | 0.22<br>(0.07 to<br>0.55)                | 0.30<br>(0.09 to<br>0.74)               | 0.23<br>(0.07 to<br>0.56)                | 0.01<br>(0.00 to<br>0.02)       | 0.01<br>(0.00 to<br>0.02)         | 0.01<br>(0.00 to<br>0.02)       | 0.01<br>(0.00 to<br>0.02)           |
| Paratyphoid fever                                                 | 0.02<br>(0.01 to<br>0.05)                | 0.01<br>(0.00 to<br>0.03)                | 0.01<br>(0.00 to<br>0.02)               | 0.01<br>(0.00 to<br>0.04)                | 0.00<br>(0.00 to<br>0.00)       | 0.00<br>(0.00 to<br>0.00)         | 0.00<br>(0.00 to<br>0.00)       | 0.00<br>(0.00 to<br>0.00)           |
| Other intestinal infectious diseases                              | 0.01<br>(0.00 to<br>0.02)                | 0.01<br>(0.00 to<br>0.01)                | 0.00<br>(0.00 to<br>0.01)               | 0.01<br>(0.00 to<br>0.01)                | 0.00<br>(0.00 to<br>0.00)       | 0.00<br>(0.00 to<br>0.00)         | 0.00<br>(0.00 to<br>0.00)       | 0.00<br>(0.00 to<br>0.00)           |
| Lower respiratory infections                                      | 563.33<br>(483.48 to<br>654.82)          | 697.91<br>(516.14 to<br>979.34)          | 468.60<br>(360.19 to<br>626.55)         | 811.21<br>(574.80 to<br>1,181.30)        | 25.00<br>(21.94 to<br>28.50)    | 47.54<br>(36.76 to<br>60.20)      | 35.23<br>(27.69 to<br>43.97)    | 51.21<br>(38.00 to<br>66.10)        |
| Upper respiratory infections                                      | 0.27<br>(0.14 to<br>0.45)                | 0.27<br>(0.11 to<br>0.57)                | 0.12<br>(0.05 to<br>0.27)               | 0.31<br>(0.13 to<br>0.65)                | 0.01<br>(0.00 to<br>0.01)       | 0.01<br>(0.00 to<br>0.02)         | 0.01<br>(0.00 to<br>0.01)       | 0.01<br>(0.00 to<br>0.03)           |
| Otitis media                                                      | 0.14<br>(0.10 to<br>0.20)                | 0.04<br>(0.02 to<br>0.07)                | 0.04<br>(0.02 to<br>0.07)               | 0.04<br>(0.02 to<br>0.07)                | 0.00<br>(0.00 to<br>0.01)       | 0.00<br>(0.00 to<br>0.00)         | 0.00<br>(0.00 to<br>0.00)       | 0.00<br>(0.00 to<br>0.00)           |
| Meningitis                                                        | 49.20<br>(38.71 to<br>63.27)             | 29.53<br>(20.01 to<br>44.14)             | 19.38<br>(13.14 to<br>28.15)            | 30.89<br>(20.78 to<br>46.23)             | 1.13<br>(0.92 to<br>1.46)       | 1.02<br>(0.79 to<br>1.37)         | 0.70<br>(0.54 to<br>0.93)       | 1.02<br>(0.79 to<br>1.39)           |
| Pneumococcal meningitis                                           | 5.96<br>(4.23 to<br>8.11)                | 2.83<br>(1.79 to<br>4.18)                | 2.79<br>(1.80 to<br>4.03)               | 2.82<br>(1.79 to<br>4.14)                | 0.16<br>(0.11 to<br>0.21)       | 0.12<br>(0.07 to<br>0.17)         | 0.12<br>(0.08 to<br>0.18)       | 0.11<br>(0.07 to<br>0.17)           |
| H influenzae type B meningitis                                    | 4.28<br>(3.17 to<br>5.84)                | 3.80<br>(1.81 to<br>7.10)                | 3.47<br>(1.73 to<br>6.24)               | 4.24<br>(1.88 to<br>8.09)                | 0.09<br>(0.07 to<br>0.12)       | 0.09<br>(0.06 to<br>0.13)         | 0.09<br>(0.06 to<br>0.13)       | 0.09<br>(0.06 to<br>0.14)           |

|                          |                              |                              |                             |                              |                           |                           |                           |                           |
|--------------------------|------------------------------|------------------------------|-----------------------------|------------------------------|---------------------------|---------------------------|---------------------------|---------------------------|
| Meningococcal meningitis | 23.29<br>(17.89 to<br>31.00) | 13.11<br>(8.87 to<br>19.68)  | 7.67<br>(5.12 to<br>11.43)  | 13.65<br>(9.07 to<br>20.87)  | 0.53<br>(0.42 to<br>0.69) | 0.46<br>(0.35 to<br>0.65) | 0.29<br>(0.21 to<br>0.40) | 0.47<br>(0.35 to<br>0.66) |
| Other meningitis         | 15.66<br>(12.05 to<br>20.55) | 9.79<br>(6.83 to<br>14.36)   | 5.45<br>(3.71 to<br>8.02)   | 10.18<br>(7.08 to<br>15.16)  | 0.36<br>(0.29 to<br>0.46) | 0.35<br>(0.27 to<br>0.48) | 0.21<br>(0.15 to<br>0.28) | 0.36<br>(0.27 to<br>0.49) |
| Encephalitis             | 16.84<br>(12.82 to<br>24.51) | 14.01<br>(8.65 to<br>23.83)  | 12.37<br>(7.68 to<br>20.55) | 14.84<br>(8.98 to<br>25.08)  | 0.33<br>(0.26 to<br>0.47) | 0.39<br>(0.28 to<br>0.59) | 0.37<br>(0.26 to<br>0.54) | 0.40<br>(0.29 to<br>0.61) |
| Diphtheria               | 0.05<br>(0.03 to<br>0.08)    | 0.01<br>(0.00 to<br>0.02)    | 0.01<br>(0.00 to<br>0.02)   | 0.01<br>(0.00 to<br>0.03)    | 0.00<br>(0.00 to<br>0.00) | 0.00<br>(0.00 to<br>0.00) | 0.00<br>(0.00 to<br>0.00) | 0.00<br>(0.00 to<br>0.00) |
| Whooping cough           | 1.13<br>(0.21 to<br>2.34)    | 0.39<br>(0.03 to<br>1.20)    | 0.33<br>(0.03 to<br>1.04)   | 1.40<br>(0.06 to<br>5.06)    | 0.01<br>(0.00 to<br>0.03) | 0.00<br>(0.00 to<br>0.02) | 0.00<br>(0.00 to<br>0.01) | 0.02<br>(0.00 to<br>0.06) |
| Tetanus                  | 0.45<br>(0.31 to<br>1.18)    | 0.11<br>(0.06 to<br>0.28)    | 0.11<br>(0.06 to<br>0.28)   | 0.12<br>(0.07 to<br>0.29)    | 0.01<br>(0.01 to<br>0.04) | 0.00<br>(0.00 to<br>0.01) | 0.00<br>(0.00 to<br>0.01) | 0.00<br>(0.00 to<br>0.01) |
| Measles                  | 0.18<br>(0.12 to<br>0.28)    | 35.16<br>(2.25 to<br>111.67) | 22.81<br>(1.60 to<br>65.25) | 44.63<br>(2.98 to<br>149.53) | 0.00<br>(0.00 to<br>0.00) | 0.67<br>(0.04 to<br>1.95) | 0.44<br>(0.03 to<br>1.32) | 0.83<br>(0.04 to<br>2.52) |

**Antigua and Barbuda**

| Cause                                          | YLLs (actual counts)                             |                                                   |                                                   |                                                   | Deaths (actual counts)                         |                                                |                                                |                                                |
|------------------------------------------------|--------------------------------------------------|---------------------------------------------------|---------------------------------------------------|---------------------------------------------------|------------------------------------------------|------------------------------------------------|------------------------------------------------|------------------------------------------------|
|                                                | 2016                                             | 2040 Forecast                                     | 2040 Better Scenario                              | 2040 Worse Scenario                               | 2016                                           | 2040 Forecast                                  | 2040 Better Scenario                           | 2040 Worse Scenario                            |
| Varicella and herpes zoster                    | 1.72<br>(0.68 to<br>2.90)                        | 1.08<br>(0.35 to<br>2.08)                         | 0.75<br>(0.25 to<br>1.47)                         | 1.18<br>(0.40 to<br>2.25)                         | 0.07<br>(0.03 to<br>0.13)                      | 0.08<br>(0.02 to<br>0.14)                      | 0.06<br>(0.02 to<br>0.11)                      | 0.08<br>(0.02 to<br>0.15)                      |
| <b>Neglected tropical diseases and malaria</b> | <b>14.58</b><br><b>(9.20 to</b><br><b>20.65)</b> | <b>44.18</b><br><b>(28.55 to</b><br><b>67.15)</b> | <b>43.19</b><br><b>(28.10 to</b><br><b>65.25)</b> | <b>44.39</b><br><b>(28.87 to</b><br><b>68.87)</b> | <b>0.37</b><br><b>(0.25 to</b><br><b>0.52)</b> | <b>1.44</b><br><b>(0.98 to</b><br><b>1.96)</b> | <b>1.48</b><br><b>(1.01 to</b><br><b>2.01)</b> | <b>1.40</b><br><b>(0.96 to</b><br><b>1.92)</b> |
| Malaria                                        | 0.00<br>(0.00 to<br>0.00)                        | 0.00<br>(0.00 to<br>0.00)                         | 0.00<br>(0.00 to<br>0.00)                         | 0.00<br>(0.00 to<br>0.00)                         | 0.00<br>(0.00 to<br>0.00)                      | 0.00<br>(0.00 to<br>0.00)                      | 0.00<br>(0.00 to<br>0.00)                      | 0.00<br>(0.00 to<br>0.00)                      |
| Chagas disease                                 | 0.00<br>(0.00 to<br>0.00)                        | 0.00<br>(0.00 to<br>0.00)                         | 0.00<br>(0.00 to<br>0.00)                         | 0.00<br>(0.00 to<br>0.00)                         | 0.00<br>(0.00 to<br>0.00)                      | 0.00<br>(0.00 to<br>0.00)                      | 0.00<br>(0.00 to<br>0.00)                      | 0.00<br>(0.00 to<br>0.00)                      |
| Leishmaniasis                                  | 0.00<br>(0.00 to<br>0.00)                        | 0.00<br>(0.00 to<br>0.00)                         | 0.00<br>(0.00 to<br>0.00)                         | 0.00<br>(0.00 to<br>0.00)                         | 0.00<br>(0.00 to<br>0.00)                      | 0.00<br>(0.00 to<br>0.00)                      | 0.00<br>(0.00 to<br>0.00)                      | 0.00<br>(0.00 to<br>0.00)                      |
| African trypanosomiasis                        | 0.00<br>(0.00 to<br>0.00)                        | 0.00<br>(0.00 to<br>0.00)                         | 0.00<br>(0.00 to<br>0.00)                         | 0.00<br>(0.00 to<br>0.00)                         | 0.00<br>(0.00 to<br>0.00)                      | 0.00<br>(0.00 to<br>0.00)                      | 0.00<br>(0.00 to<br>0.00)                      | 0.00<br>(0.00 to<br>0.00)                      |
| Schistosomiasis                                | 1.14<br>(0.45 to<br>2.19)                        | 1.02<br>(0.34 to<br>2.27)                         | 0.90<br>(0.30 to<br>2.03)                         | 1.06<br>(0.35 to<br>2.37)                         | 0.04<br>(0.02 to<br>0.08)                      | 0.05<br>(0.01 to<br>0.11)                      | 0.04<br>(0.01 to<br>0.10)                      | 0.05<br>(0.01 to<br>0.11)                      |
| Cysticercosis                                  | 0.00<br>(0.00 to<br>0.00)                        | 0.00<br>(0.00 to<br>0.00)                         | 0.00<br>(0.00 to<br>0.00)                         | 0.00<br>(0.00 to<br>0.00)                         | 0.00<br>(0.00 to<br>0.00)                      | 0.00<br>(0.00 to<br>0.00)                      | 0.00<br>(0.00 to<br>0.00)                      | 0.00<br>(0.00 to<br>0.00)                      |
| Cystic echinococcosis                          | 0.01<br>(0.01 to<br>0.01)                        | 0.01<br>(0.01 to<br>0.01)                         | 0.01<br>(0.01 to<br>0.01)                         | 0.01<br>(0.01 to<br>0.01)                         | 0.00<br>(0.00 to<br>0.00)                      | 0.00<br>(0.00 to<br>0.00)                      | 0.00<br>(0.00 to<br>0.00)                      | 0.00<br>(0.00 to<br>0.00)                      |
| Dengue                                         | 10.09<br>(6.35 to<br>14.24)                      | 41.65<br>(26.31 to<br>63.87)                      | 40.76<br>(25.88 to<br>61.96)                      | 41.70<br>(26.54 to<br>64.87)                      | 0.25<br>(0.16 to<br>0.35)                      | 1.33<br>(0.88 to<br>1.84)                      | 1.38<br>(0.90 to<br>1.90)                      | 1.29<br>(0.85 to<br>1.80)                      |
| Yellow fever                                   | 0.00<br>(0.00 to<br>0.00)                        | 0.00<br>(0.00 to<br>0.00)                         | 0.00<br>(0.00 to<br>0.00)                         | 0.00<br>(0.00 to<br>0.00)                         | 0.00<br>(0.00 to<br>0.00)                      | 0.00<br>(0.00 to<br>0.00)                      | 0.00<br>(0.00 to<br>0.00)                      | 0.00<br>(0.00 to<br>0.00)                      |
| Rabies                                         | 0.06<br>(0.04 to<br>0.10)                        | 0.03<br>(0.02 to<br>0.08)                         | 0.02<br>(0.01 to<br>0.06)                         | 0.04<br>(0.02 to<br>0.10)                         | 0.00<br>(0.00 to<br>0.00)                      | 0.00<br>(0.00 to<br>0.00)                      | 0.00<br>(0.00 to<br>0.00)                      | 0.00<br>(0.00 to<br>0.00)                      |
| Intestinal nematode infections                 | 0.06<br>(0.02 to<br>0.13)                        | 0.06<br>(0.02 to<br>0.16)                         | 0.06<br>(0.02 to<br>0.15)                         | 0.06<br>(0.02 to<br>0.17)                         | 0.00<br>(0.00 to<br>0.00)                      | 0.00<br>(0.00 to<br>0.00)                      | 0.00<br>(0.00 to<br>0.00)                      | 0.00<br>(0.00 to<br>0.00)                      |

|                                                       |                                                   |                                                  |                                                  |                                                  |                                                |                                                |                                                |                                                |
|-------------------------------------------------------|---------------------------------------------------|--------------------------------------------------|--------------------------------------------------|--------------------------------------------------|------------------------------------------------|------------------------------------------------|------------------------------------------------|------------------------------------------------|
| Other neglected tropical diseases                     | 1.43<br>(0.77 to<br>2.05)                         | 1.41<br>(0.56 to<br>2.19)                        | 1.45<br>(0.60 to<br>2.23)                        | 1.52<br>(0.62 to<br>2.39)                        | 0.04<br>(0.02 to<br>0.05)                      | 0.06<br>(0.02 to<br>0.08)                      | 0.06<br>(0.02 to<br>0.09)                      | 0.06<br>(0.02 to<br>0.08)                      |
| <b>Maternal disorders</b>                             | <b>23.81</b><br><b>(18.49 to</b><br><b>30.59)</b> | <b>15.54</b><br><b>(6.38 to</b><br><b>32.86)</b> | <b>10.91</b><br><b>(4.31 to</b><br><b>24.29)</b> | <b>18.17</b><br><b>(7.18 to</b><br><b>39.90)</b> | <b>0.46</b><br><b>(0.36 to</b><br><b>0.59)</b> | <b>0.30</b><br><b>(0.13 to</b><br><b>0.62)</b> | <b>0.21</b><br><b>(0.09 to</b><br><b>0.45)</b> | <b>0.35</b><br><b>(0.14 to</b><br><b>0.75)</b> |
| Maternal hemorrhage                                   | 4.62<br>(2.88 to<br>6.84)                         | 2.77<br>(1.05 to<br>6.73)                        | 1.96<br>(0.71 to<br>4.95)                        | 3.22<br>(1.18 to<br>8.04)                        | 0.09<br>(0.06 to<br>0.13)                      | 0.05<br>(0.02 to<br>0.13)                      | 0.04<br>(0.01 to<br>0.09)                      | 0.06<br>(0.02 to<br>0.15)                      |
| Maternal sepsis and other maternal infections         | 0.78<br>(0.37 to<br>1.36)                         | 0.46<br>(0.14 to<br>1.18)                        | 0.32<br>(0.10 to<br>0.82)                        | 0.53<br>(0.16 to<br>1.34)                        | 0.02<br>(0.01 to<br>0.03)                      | 0.01<br>(0.00 to<br>0.02)                      | 0.01<br>(0.00 to<br>0.02)                      | 0.01<br>(0.00 to<br>0.03)                      |
| Maternal hypertensive disorders                       | 6.02<br>(4.22 to<br>8.59)                         | 3.68<br>(1.29 to<br>8.47)                        | 2.52<br>(0.86 to<br>6.04)                        | 4.31<br>(1.50 to<br>10.54)                       | 0.11<br>(0.08 to<br>0.16)                      | 0.07<br>(0.02 to<br>0.15)                      | 0.05<br>(0.02 to<br>0.11)                      | 0.08<br>(0.03 to<br>0.19)                      |
| Maternal obstructed labor and uterine rupture         | 0.65<br>(0.27 to<br>1.29)                         | 0.46<br>(0.12 to<br>1.21)                        | 0.30<br>(0.07 to<br>0.81)                        | 0.54<br>(0.14 to<br>1.46)                        | 0.01<br>(0.01 to<br>0.03)                      | 0.01<br>(0.00 to<br>0.02)                      | 0.01<br>(0.00 to<br>0.02)                      | 0.01<br>(0.00 to<br>0.03)                      |
| Maternal abortion, miscarriage, and ectopic pregnancy | 1.64<br>(0.90 to<br>2.72)                         | 1.32<br>(0.44 to<br>3.36)                        | 0.91<br>(0.29 to<br>2.50)                        | 1.54<br>(0.49 to<br>3.98)                        | 0.03<br>(0.02 to<br>0.05)                      | 0.03<br>(0.01 to<br>0.06)                      | 0.02<br>(0.01 to<br>0.05)                      | 0.03<br>(0.01 to<br>0.08)                      |
| Indirect maternal deaths                              | 3.30<br>(2.08 to<br>4.82)                         | 2.46<br>(0.83 to<br>6.01)                        | 1.68<br>(0.55 to<br>4.22)                        | 2.88<br>(0.94 to<br>7.09)                        | 0.06<br>(0.04 to<br>0.09)                      | 0.05<br>(0.02 to<br>0.11)                      | 0.03<br>(0.01 to<br>0.08)                      | 0.05<br>(0.02 to<br>0.13)                      |
| Late maternal deaths                                  | 0.99<br>(0.52 to<br>1.72)                         | 0.54<br>(0.16 to<br>1.55)                        | 0.37<br>(0.11 to<br>1.04)                        | 0.63<br>(0.18 to<br>1.81)                        | 0.02<br>(0.01 to<br>0.03)                      | 0.01<br>(0.00 to<br>0.03)                      | 0.01<br>(0.00 to<br>0.02)                      | 0.01<br>(0.00 to<br>0.03)                      |
| Maternal deaths aggravated by HIV/AIDS                | 0.01<br>(0.01 to<br>0.03)                         | 0.05<br>(0.01 to<br>0.18)                        | 0.04<br>(0.01 to<br>0.12)                        | 0.11<br>(0.03 to<br>0.29)                        | 0.00<br>(0.00 to<br>0.00)                      | 0.00<br>(0.00 to<br>0.00)                      | 0.00<br>(0.00 to<br>0.00)                      | 0.00<br>(0.00 to<br>0.01)                      |
| Other maternal disorders                              | 5.80<br>(3.81 to<br>8.29)                         | 3.81<br>(1.43 to<br>8.66)                        | 2.82<br>(1.01 to<br>6.55)                        | 4.41<br>(1.62 to<br>10.07)                       | 0.12<br>(0.08 to<br>0.17)                      | 0.08<br>(0.05 to<br>0.17)                      | 0.06<br>(0.02 to<br>0.13)                      | 0.09<br>(0.03 to<br>0.20)                      |

| Antigua and Barbuda                                      |                                                      |                                                      |                                                     |                                                      |                                                |                                                |                                                |                                                |
|----------------------------------------------------------|------------------------------------------------------|------------------------------------------------------|-----------------------------------------------------|------------------------------------------------------|------------------------------------------------|------------------------------------------------|------------------------------------------------|------------------------------------------------|
| Cause                                                    | YLLs (actual counts)                                 |                                                      |                                                     |                                                      | Deaths (actual counts)                         |                                                |                                                |                                                |
|                                                          | 2016                                                 | 2040 Forecast                                        | 2040 Better Scenario                                | 2040 Worse Scenario                                  | 2016                                           | 2040 Forecast                                  | 2040 Better Scenario                           | 2040 Worse Scenario                            |
| <b>Neonatal disorders</b>                                | <b>486.92</b><br><b>(272.54 to</b><br><b>802.82)</b> | <b>240.02</b><br><b>(108.15 to</b><br><b>445.94)</b> | <b>137.90</b><br><b>(63.61 to</b><br><b>253.95)</b> | <b>304.89</b><br><b>(137.78 to</b><br><b>558.92)</b> | <b>5.63</b><br><b>(3.15 to</b><br><b>9.28)</b> | <b>2.78</b><br><b>(1.25 to</b><br><b>5.16)</b> | <b>1.60</b><br><b>(0.74 to</b><br><b>2.94)</b> | <b>3.53</b><br><b>(1.59 to</b><br><b>6.47)</b> |
| Neonatal preterm birth                                   | 270.26<br>(146.32 to<br>460.76)                      | 119.93<br>(54.54 to<br>220.74)                       | 59.53<br>(27.15 to<br>109.11)                       | 162.66<br>(74.42 to<br>300.69)                       | 3.12<br>(1.69 to<br>5.32)                      | 1.39<br>(0.63 to<br>2.55)                      | 0.69<br>(0.31 to<br>1.26)                      | 1.88<br>(0.86 to<br>3.48)                      |
| Neonatal encephalopathy due to birth asphyxia and trauma | 84.37<br>(44.23 to<br>141.13)                        | 38.26<br>(15.52 to<br>77.20)                         | 20.29<br>(8.29 to<br>40.02)                         | 45.09<br>(18.60 to<br>90.01)                         | 0.98<br>(0.51 to<br>1.63)                      | 0.44<br>(0.18 to<br>0.89)                      | 0.23<br>(0.10 to<br>0.46)                      | 0.52<br>(0.22 to<br>1.04)                      |
| Neonatal sepsis and other neonatal infections            | 52.99<br>(27.07 to<br>109.56)                        | 39.01<br>(14.45 to<br>88.56)                         | 24.04<br>(9.02 to<br>53.93)                         | 46.02<br>(16.91 to<br>105.55)                        | 0.61<br>(0.31 to<br>1.27)                      | 0.45<br>(0.17 to<br>1.02)                      | 0.28<br>(0.10 to<br>0.62)                      | 0.53<br>(0.20 to<br>1.22)                      |
| Hemolytic disease and other neonatal jaundice            | 9.24<br>(4.68 to<br>16.19)                           | 3.90<br>(1.29 to<br>9.07)                            | 2.32<br>(0.77 to<br>5.32)                           | 4.68<br>(1.57 to<br>10.99)                           | 0.11<br>(0.05 to<br>0.19)                      | 0.05<br>(0.01 to<br>0.10)                      | 0.03<br>(0.01 to<br>0.06)                      | 0.05<br>(0.02 to<br>0.13)                      |
| Other neonatal disorders                                 | 70.07<br>(38.43 to<br>117.98)                        | 38.91<br>(16.46 to<br>79.06)                         | 31.72<br>(13.62 to<br>64.20)                        | 46.44<br>(19.59 to<br>94.56)                         | 0.81<br>(0.44 to<br>1.37)                      | 0.45<br>(0.19 to<br>0.91)                      | 0.37<br>(0.16 to<br>0.74)                      | 0.54<br>(0.23 to<br>1.09)                      |
| <b>Nutritional deficiencies</b>                          | <b>58.04</b><br><b>(45.91 to</b><br><b>74.71)</b>    | <b>47.50</b><br><b>(37.86 to</b><br><b>59.07)</b>    | <b>53.76</b><br><b>(42.88 to</b><br><b>66.65)</b>   | <b>49.22</b><br><b>(38.96 to</b><br><b>62.85)</b>    | <b>2.31</b><br><b>(2.00 to</b><br><b>2.66)</b> | <b>3.29</b><br><b>(2.66 to</b><br><b>4.00)</b> | <b>4.03</b><br><b>(3.20 to</b><br><b>4.94)</b> | <b>3.26</b><br><b>(2.59 to</b><br><b>4.05)</b> |
| Protein-energy malnutrition                              | 55.38<br>(43.48 to<br>71.36)                         | 43.74<br>(34.73 to<br>55.48)                         | 50.48<br>(39.69 to<br>63.02)                        | 45.26<br>(35.31 to<br>57.99)                         | 2.22<br>(1.93 to<br>2.55)                      | 3.08<br>(2.43 to<br>3.81)                      | 3.84<br>(3.02 to<br>4.73)                      | 3.05<br>(2.37 to<br>3.82)                      |
| Iodine deficiency                                        | 0.39<br>(0.02 to<br>1.38)                            | 1.42<br>(0.02 to<br>5.34)                            | 1.32<br>(0.02 to<br>5.50)                           | 1.51<br>(0.03 to<br>5.56)                            | 0.01<br>(0.00 to<br>0.04)                      | 0.09<br>(0.00 to<br>0.40)                      | 0.09<br>(0.00 to<br>0.45)                      | 0.09<br>(0.00 to<br>0.41)                      |

|                                                                         |                                                            |                                                               |                                                             |                                                               |                                                      |                                                        |                                                      |                                                        |
|-------------------------------------------------------------------------|------------------------------------------------------------|---------------------------------------------------------------|-------------------------------------------------------------|---------------------------------------------------------------|------------------------------------------------------|--------------------------------------------------------|------------------------------------------------------|--------------------------------------------------------|
| Dietary iron deficiency                                                 | 0.64<br>(0.29 to<br>1.05)                                  | 0.51<br>(0.23 to<br>0.95)                                     | 0.52<br>(0.23 to<br>0.99)                                   | 0.54<br>(0.25 to<br>0.99)                                     | 0.01<br>(0.01 to<br>0.02)                            | 0.01<br>(0.00 to<br>0.02)                              | 0.01<br>(0.00 to<br>0.02)                            | 0.01<br>(0.00 to<br>0.02)                              |
| Other nutritional deficiencies                                          | 1.63<br>(0.77 to<br>2.85)                                  | 1.83<br>(0.79 to<br>3.30)                                     | 1.43<br>(0.60 to<br>2.69)                                   | 1.91<br>(0.83 to<br>3.46)                                     | 0.07<br>(0.03 to<br>0.12)                            | 0.11<br>(0.04 to<br>0.21)                              | 0.09<br>(0.03 to<br>0.18)                            | 0.11<br>(0.04 to<br>0.22)                              |
| <b>Other communicable, maternal, neonatal, and nutritional diseases</b> | <b>56.83</b><br><b>(47.20 to</b><br><b>67.29)</b>          | <b>47.60</b><br><b>(35.18 to</b><br><b>63.82)</b>             | <b>40.75</b><br><b>(29.66 to</b><br><b>55.39)</b>           | <b>50.68</b><br><b>(37.12 to</b><br><b>68.58)</b>             | <b>1.48</b><br><b>(1.24 to</b><br><b>1.73)</b>       | <b>1.63</b><br><b>(1.29 to</b><br><b>2.02)</b>         | <b>1.47</b><br><b>(1.15 to</b><br><b>1.81)</b>       | <b>1.69</b><br><b>(1.34 to</b><br><b>2.09)</b>         |
| Sexually transmitted infections excluding HIV                           | 4.77<br>(3.22 to<br>7.32)                                  | 2.28<br>(1.51 to<br>3.42)                                     | 1.73<br>(1.16 to<br>2.60)                                   | 2.40<br>(1.57 to<br>3.69)                                     | 0.12<br>(0.09 to<br>0.15)                            | 0.08<br>(0.06 to<br>0.10)                              | 0.06<br>(0.05 to<br>0.08)                            | 0.08<br>(0.06 to<br>0.10)                              |
| Syphilis                                                                | 3.02<br>(1.56 to<br>5.42)                                  | 1.04<br>(0.59 to<br>1.90)                                     | 0.65<br>(0.37 to<br>1.15)                                   | 1.12<br>(0.62 to<br>2.06)                                     | 0.07<br>(0.04 to<br>0.10)                            | 0.03<br>(0.02 to<br>0.04)                              | 0.02<br>(0.01 to<br>0.03)                            | 0.03<br>(0.02 to<br>0.05)                              |
| Chlamydial infection                                                    | 0.32<br>(0.25 to<br>0.42)                                  | 0.23<br>(0.15 to<br>0.36)                                     | 0.20<br>(0.13 to<br>0.33)                                   | 0.24<br>(0.16 to<br>0.37)                                     | 0.01<br>(0.01 to<br>0.01)                            | 0.01<br>(0.01 to<br>0.01)                              | 0.01<br>(0.01 to<br>0.01)                            | 0.01<br>(0.01 to<br>0.01)                              |
| Gonococcal infection                                                    | 0.93<br>(0.74 to<br>1.19)                                  | 0.68<br>(0.46 to<br>1.01)                                     | 0.60<br>(0.40 to<br>0.90)                                   | 0.70<br>(0.47 to<br>1.06)                                     | 0.03<br>(0.02 to<br>0.03)                            | 0.03<br>(0.02 to<br>0.04)                              | 0.02<br>(0.02 to<br>0.03)                            | 0.03<br>(0.02 to<br>0.04)                              |
| Other sexually transmitted infections                                   | 0.50<br>(0.39 to<br>0.63)                                  | 0.33<br>(0.21 to<br>0.50)                                     | 0.29<br>(0.18 to<br>0.45)                                   | 0.34<br>(0.22 to<br>0.53)                                     | 0.01<br>(0.01 to<br>0.02)                            | 0.01<br>(0.01 to<br>0.01)                              | 0.01<br>(0.01 to<br>0.01)                            | 0.01<br>(0.01 to<br>0.02)                              |
| Acute hepatitis                                                         | 6.29<br>(5.23 to<br>7.43)                                  | 5.68<br>(4.08 to<br>8.11)                                     | 3.43<br>(2.41 to<br>4.98)                                   | 6.03<br>(4.28 to<br>8.74)                                     | 0.17<br>(0.14 to<br>0.20)                            | 0.20<br>(0.16 to<br>0.27)                              | 0.13<br>(0.09 to<br>0.17)                            | 0.21<br>(0.16 to<br>0.28)                              |
| Acute hepatitis A                                                       | 0.18<br>(0.08 to<br>0.30)                                  | 0.12<br>(0.05 to<br>0.23)                                     | 0.08<br>(0.04 to<br>0.16)                                   | 0.13<br>(0.06 to<br>0.25)                                     | 0.00<br>(0.00 to<br>0.01)                            | 0.00<br>(0.00 to<br>0.01)                              | 0.00<br>(0.00 to<br>0.00)                            | 0.00<br>(0.00 to<br>0.01)                              |
| Acute hepatitis B                                                       | 4.37<br>(3.52 to<br>5.37)                                  | 4.12<br>(2.84 to<br>5.94)                                     | 2.46<br>(1.64 to<br>3.64)                                   | 4.40<br>(3.02 to<br>6.26)                                     | 0.12<br>(0.10 to<br>0.15)                            | 0.14<br>(0.10 to<br>0.20)                              | 0.09<br>(0.06 to<br>0.12)                            | 0.15<br>(0.11 to<br>0.20)                              |
| Acute hepatitis C                                                       | 0.28<br>(0.21 to<br>0.39)                                  | 0.29<br>(0.19 to<br>0.44)                                     | 0.18<br>(0.11 to<br>0.27)                                   | 0.30<br>(0.20 to<br>0.45)                                     | 0.01<br>(0.01 to<br>0.01)                            | 0.01<br>(0.01 to<br>0.02)                              | 0.01<br>(0.01 to<br>0.01)                            | 0.01<br>(0.01 to<br>0.02)                              |
| Acute hepatitis E                                                       | 1.46<br>(1.05 to<br>1.90)                                  | 1.15<br>(0.69 to<br>1.87)                                     | 0.71<br>(0.43 to<br>1.15)                                   | 1.21<br>(0.74 to<br>2.00)                                     | 0.04<br>(0.03 to<br>0.05)                            | 0.04<br>(0.03 to<br>0.07)                              | 0.03<br>(0.02 to<br>0.04)                            | 0.05<br>(0.03 to<br>0.07)                              |
| Other unspecified infectious diseases                                   | 45.77<br>(37.73 to<br>54.93)                               | 39.65<br>(28.98 to<br>53.22)                                  | 35.59<br>(25.78 to<br>48.39)                                | 42.25<br>(30.67 to<br>57.27)                                  | 1.20<br>(0.98 to<br>1.42)                            | 1.35<br>(1.04 to<br>1.67)                              | 1.28<br>(0.98 to<br>1.58)                            | 1.40<br>(1.09 to<br>1.76)                              |
| <b>Non-communicable diseases</b>                                        | <b>8,686.30</b><br><b>(7,776.77 to</b><br><b>9,701.75)</b> | <b>13,458.81</b><br><b>(10,046.07 to</b><br><b>17,523.05)</b> | <b>9,870.50</b><br><b>(7,424.32 to</b><br><b>12,946.30)</b> | <b>16,024.88</b><br><b>(11,732.92 to</b><br><b>21,353.16)</b> | <b>420.19</b><br><b>(381.76 to</b><br><b>465.25)</b> | <b>827.84</b><br><b>(652.36 to</b><br><b>1,033.82)</b> | <b>635.66</b><br><b>(499.67 to</b><br><b>796.80)</b> | <b>951.73</b><br><b>(746.77 to</b><br><b>1,196.03)</b> |

**Antigua and Barbuda**

| Cause                      | YLLs (actual counts)                                       |                                                            |                                                            |                                                            | Deaths (actual counts)                              |                                                      |                                                      |                                                      |
|----------------------------|------------------------------------------------------------|------------------------------------------------------------|------------------------------------------------------------|------------------------------------------------------------|-----------------------------------------------------|------------------------------------------------------|------------------------------------------------------|------------------------------------------------------|
|                            | 2016                                                       | 2040 Forecast                                              | 2040 Better Scenario                                       | 2040 Worse Scenario                                        | 2016                                                | 2040 Forecast                                        | 2040 Better Scenario                                 | 2040 Worse Scenario                                  |
| <b>Neoplasms</b>           | <b>2,335.71</b><br><b>(2,063.84 to</b><br><b>2,614.93)</b> | <b>3,883.17</b><br><b>(3,094.42 to</b><br><b>4,683.78)</b> | <b>3,265.72</b><br><b>(2,602.98 to</b><br><b>3,939.37)</b> | <b>4,085.35</b><br><b>(3,218.49 to</b><br><b>5,023.89)</b> | <b>103.05</b><br><b>(90.70 to</b><br><b>114.89)</b> | <b>218.82</b><br><b>(184.39 to</b><br><b>256.46)</b> | <b>191.09</b><br><b>(159.07 to</b><br><b>223.75)</b> | <b>222.81</b><br><b>(183.23 to</b><br><b>264.26)</b> |
| Lip and oral cavity cancer | 32.84<br>(27.64 to<br>38.63)                               | 56.60<br>(32.31 to<br>98.87)                               | 36.76<br>(23.42 to<br>58.26)                               | 69.56<br>(37.28 to<br>123.18)                              | 1.33<br>(1.13 to<br>1.54)                           | 2.67<br>(1.61 to<br>4.42)                            | 1.86<br>(1.28 to<br>2.76)                            | 3.15<br>(1.80 to<br>5.39)                            |
| Nasopharynx cancer         | 11.39<br>(9.70 to<br>13.12)                                | 15.47<br>(8.59 to<br>26.94)                                | 8.43<br>(5.17 to<br>13.68)                                 | 19.63<br>(10.39 to<br>34.73)                               | 0.36<br>(0.31 to<br>0.41)                           | 0.57<br>(0.34 to<br>0.92)                            | 0.32<br>(0.21 to<br>0.49)                            | 0.70<br>(0.39 to<br>1.16)                            |
| Other pharynx cancer       | 21.39<br>(17.60 to<br>25.82)                               | 34.97<br>(18.94 to<br>60.09)                               | 29.87<br>(17.95 to<br>47.47)                               | 36.42<br>(19.19 to<br>63.66)                               | 0.81<br>(0.68 to<br>0.96)                           | 1.60<br>(0.93 to<br>2.65)                            | 1.43<br>(0.91 to<br>2.20)                            | 1.63<br>(0.92 to<br>2.75)                            |
| Esophageal cancer          | 38.33<br>(32.93 to<br>44.41)                               | 69.05<br>(41.59 to<br>107.07)                              | 54.97<br>(36.68 to<br>79.70)                               | 82.08<br>(47.10 to<br>131.13)                              | 1.75<br>(1.52 to<br>1.99)                           | 3.70<br>(2.34 to<br>5.67)                            | 3.09<br>(2.13 to<br>4.46)                            | 4.25<br>(2.59 to<br>6.63)                            |

|                                      |                                 |                                 |                                 |                                 |                              |                              |                              |                              |
|--------------------------------------|---------------------------------|---------------------------------|---------------------------------|---------------------------------|------------------------------|------------------------------|------------------------------|------------------------------|
| Stomach cancer                       | 143.51<br>(124.88 to<br>165.19) | 189.98<br>(145.12 to<br>246.66) | 135.07<br>(101.33 to<br>171.99) | 194.37<br>(148.50 to<br>254.06) | 6.87<br>(6.07 to<br>7.79)    | 11.12<br>(8.81 to<br>14.36)  | 8.13<br>(6.31 to<br>10.18)   | 11.13<br>(8.81 to<br>14.45)  |
| Colon and rectum cancer              | 206.63<br>(178.50 to<br>234.58) | 362.85<br>(237.39 to<br>546.61) | 283.93<br>(188.03 to<br>425.25) | 382.11<br>(247.73 to<br>584.30) | 10.08<br>(8.76 to<br>11.32)  | 21.92<br>(14.56 to<br>32.86) | 17.77<br>(12.01 to<br>26.32) | 22.62<br>(14.92 to<br>34.76) |
| Liver cancer                         | 97.10<br>(84.42 to<br>109.87)   | 189.82<br>(128.27 to<br>281.94) | 186.79<br>(130.67 to<br>271.04) | 215.93<br>(140.96 to<br>337.44) | 4.23<br>(3.70 to<br>4.75)    | 10.17<br>(7.16 to<br>14.61)  | 10.35<br>(7.44 to<br>14.47)  | 11.20<br>(7.55 to<br>16.74)  |
| Liver cancer due to hepatitis B      | 38.23<br>(31.10 to<br>45.72)    | 67.06<br>(44.07 to<br>98.97)    | 66.51<br>(44.74 to<br>94.71)    | 76.26<br>(48.24 to<br>118.38)   | 1.46<br>(1.18 to<br>1.74)    | 3.15<br>(2.11 to<br>4.65)    | 3.22<br>(2.21 to<br>4.62)    | 3.48<br>(2.24 to<br>5.31)    |
| Liver cancer due to hepatitis C      | 23.44<br>(19.45 to<br>27.78)    | 51.70<br>(34.74 to<br>74.78)    | 52.08<br>(36.26 to<br>74.00)    | 57.05<br>(36.59 to<br>84.94)    | 1.22<br>(1.02 to<br>1.43)    | 3.21<br>(2.21 to<br>4.65)    | 3.34<br>(2.36 to<br>4.70)    | 3.44<br>(2.31 to<br>5.09)    |
| Liver cancer due to alcohol use      | 16.79<br>(13.70 to<br>20.32)    | 34.03<br>(22.19 to<br>52.87)    | 31.07<br>(20.87 to<br>46.45)    | 39.69<br>(24.79 to<br>64.41)    | 0.76<br>(0.63 to<br>0.91)    | 1.84<br>(1.23 to<br>2.79)    | 1.75<br>(1.20 to<br>2.58)    | 2.08<br>(1.34 to<br>3.26)    |
| Liver cancer due to other causes     | 18.64<br>(15.44 to<br>22.18)    | 37.03<br>(23.58 to<br>59.62)    | 37.14<br>(23.80 to<br>57.86)    | 42.93<br>(25.97 to<br>72.32)    | 0.79<br>(0.65 to<br>0.92)    | 1.96<br>(1.28 to<br>3.07)    | 2.04<br>(1.35 to<br>3.10)    | 2.21<br>(1.35 to<br>3.63)    |
| Gallbladder and biliary tract cancer | 28.12<br>(23.98 to<br>35.46)    | 36.85<br>(29.58 to<br>48.03)    | 35.17<br>(27.85 to<br>46.07)    | 35.63<br>(29.01 to<br>46.41)    | 1.31<br>(1.12 to<br>1.65)    | 2.09<br>(1.76 to<br>2.69)    | 2.05<br>(1.69 to<br>2.64)    | 1.99<br>(1.68 to<br>2.55)    |
| Pancreatic cancer                    | 82.49<br>(71.55 to<br>93.40)    | 157.85<br>(117.48 to<br>205.05) | 158.76<br>(117.45 to<br>206.89) | 160.50<br>(118.21 to<br>215.65) | 3.93<br>(3.44 to<br>4.42)    | 8.97<br>(6.87 to<br>11.57)   | 8.93<br>(7.06 to<br>11.96)   | 8.93<br>(6.73 to<br>11.92)   |
| Larynx cancer                        | 30.74<br>(25.69 to<br>36.78)    | 41.71<br>(24.50 to<br>70.28)    | 23.67<br>(15.51 to<br>35.69)    | 55.68<br>(29.94 to<br>99.32)    | 1.30<br>(1.10 to<br>1.54)    | 2.08<br>(1.31 to<br>3.27)    | 1.26<br>(0.88 to<br>1.82)    | 2.66<br>(1.54 to<br>4.43)    |
| Tracheal, bronchus, and lung cancer  | 165.38<br>(142.31 to<br>189.71) | 254.54<br>(173.35 to<br>353.04) | 186.55<br>(133.92 to<br>246.31) | 363.91<br>(233.55 to<br>529.58) | 7.07<br>(6.12 to<br>8.03)    | 13.16<br>(9.24 to<br>17.96)  | 10.22<br>(7.55 to<br>13.47)  | 17.91<br>(11.79 to<br>26.34) |
| Malignant skin melanoma              | 20.22<br>(16.31 to<br>27.15)    | 29.31<br>(22.39 to<br>40.58)    | 35.38<br>(26.88 to<br>48.36)    | 27.69<br>(21.36 to<br>38.22)    | 0.82<br>(0.67 to<br>1.10)    | 1.53<br>(1.22 to<br>2.03)    | 1.91<br>(1.50 to<br>2.51)    | 1.42<br>(1.14 to<br>1.89)    |
| Non-melanoma skin cancer             | 19.17<br>(16.57 to<br>21.95)    | 32.80<br>(26.66 to<br>39.19)    | 24.73<br>(19.54 to<br>30.17)    | 32.59<br>(26.72 to<br>38.86)    | 0.90<br>(0.80 to<br>1.02)    | 1.97<br>(1.66 to<br>2.32)    | 1.55<br>(1.27 to<br>1.83)    | 1.91<br>(1.60 to<br>2.24)    |
| Breast cancer                        | 299.17<br>(237.23 to<br>366.06) | 430.43<br>(290.46 to<br>629.11) | 329.36<br>(222.66 to<br>478.77) | 455.16<br>(299.67 to<br>678.88) | 11.16<br>(9.01 to<br>13.42)  | 20.81<br>(14.74 to<br>29.70) | 16.50<br>(11.66 to<br>23.11) | 21.52<br>(14.82 to<br>31.21) |
| Cervical cancer                      | 99.45<br>(79.36 to<br>122.72)   | 119.44<br>(87.23 to<br>160.46)  | 86.56<br>(62.20 to<br>118.01)   | 123.20<br>(88.80 to<br>166.83)  | 3.93<br>(3.21 to<br>4.80)    | 6.02<br>(4.59 to<br>7.65)    | 4.48<br>(3.33 to<br>5.75)    | 6.09<br>(4.60 to<br>7.83)    |
| Uterine cancer                       | 26.43<br>(21.52 to<br>31.75)    | 59.99<br>(45.51 to<br>76.24)    | 49.51<br>(37.00 to<br>64.34)    | 60.93<br>(46.13 to<br>77.52)    | 1.45<br>(1.20 to<br>1.72)    | 3.75<br>(2.96 to<br>4.68)    | 3.17<br>(2.46 to<br>3.99)    | 3.75<br>(2.96 to<br>4.67)    |
| Ovarian cancer                       | 66.90<br>(53.71 to<br>82.08)    | 112.63<br>(72.67 to<br>170.29)  | 97.41<br>(62.87 to<br>145.53)   | 115.09<br>(71.69 to<br>178.05)  | 2.55<br>(2.07 to<br>3.11)    | 5.37<br>(3.53 to<br>8.07)    | 4.73<br>(3.13 to<br>7.00)    | 5.42<br>(3.44 to<br>8.48)    |
| Prostate cancer                      | 320.25<br>(256.53 to<br>380.28) | 810.75<br>(658.27 to<br>956.93) | 719.02<br>(578.87 to<br>847.50) | 763.28<br>(614.16 to<br>913.45) | 21.94<br>(17.75 to<br>26.02) | 61.26<br>(49.20 to<br>71.92) | 55.88<br>(45.48 to<br>65.93) | 56.71<br>(43.18 to<br>67.32) |
| Testicular cancer                    | 2.35<br>(1.88 to<br>2.95)       | 2.39<br>(1.57 to<br>4.12)       | 1.86<br>(1.21 to<br>3.13)       | 2.42<br>(1.60 to<br>4.13)       | 0.06<br>(0.05 to<br>0.07)    | 0.08<br>(0.06 to<br>0.11)    | 0.07<br>(0.05 to<br>0.09)    | 0.08<br>(0.06 to<br>0.11)    |

**Antigua and Barbuda**

| Cause         | YLLs (actual counts)         |                              |                              |                              | Deaths (actual counts)    |                           |                           |                           |
|---------------|------------------------------|------------------------------|------------------------------|------------------------------|---------------------------|---------------------------|---------------------------|---------------------------|
|               | 2016                         | 2040 Forecast                | 2040 Better Scenario         | 2040 Worse Scenario          | 2016                      | 2040 Forecast             | 2040 Better Scenario      | 2040 Worse Scenario       |
| Kidney cancer | 27.38<br>(23.94 to<br>31.20) | 48.64<br>(38.05 to<br>58.90) | 50.42<br>(39.47 to<br>60.77) | 47.44<br>(37.43 to<br>57.51) | 1.02<br>(0.90 to<br>1.15) | 2.32<br>(1.91 to<br>2.70) | 2.49<br>(2.04 to<br>2.91) | 2.21<br>(1.83 to<br>2.61) |



|                                                               |                                                      |                                                      |                                                      |                                                      |                                                   |                                                   |                                                   |                                                   |
|---------------------------------------------------------------|------------------------------------------------------|------------------------------------------------------|------------------------------------------------------|------------------------------------------------------|---------------------------------------------------|---------------------------------------------------|---------------------------------------------------|---------------------------------------------------|
| Mycarditis                                                    | 34.97<br>(26.12 to<br>42.38)                         | 44.71<br>(31.51 to<br>58.49)                         | 44.01<br>(29.97 to<br>57.77)                         | 44.47<br>(31.56 to<br>58.09)                         | 1.68<br>(1.24 to<br>2.04)                         | 2.82<br>(2.02 to<br>3.60)                         | 2.98<br>(2.08 to<br>3.81)                         | 2.72<br>(1.94 to<br>3.46)                         |
| <b>Antigua and Barbuda</b>                                    |                                                      |                                                      |                                                      |                                                      |                                                   |                                                   |                                                   |                                                   |
| Cause                                                         | YLLs (actual counts)                                 |                                                      |                                                      |                                                      | Deaths (actual counts)                            |                                                   |                                                   |                                                   |
|                                                               | 2016                                                 | 2040 Forecast                                        | 2040 Better Scenario                                 | 2040 Worse Scenario                                  | 2016                                              | 2040 Forecast                                     | 2040 Better Scenario                              | 2040 Worse Scenario                               |
| Alcoholic cardiomyopathy                                      | 8.68<br>(6.03 to<br>11.11)                           | 10.32<br>(6.68 to<br>14.24)                          | 9.00<br>(5.78 to<br>12.57)                           | 10.34<br>(6.89 to<br>14.18)                          | 0.34<br>(0.24 to<br>0.43)                         | 0.48<br>(0.32 to<br>0.64)                         | 0.43<br>(0.29 to<br>0.58)                         | 0.47<br>(0.32 to<br>0.63)                         |
| Other cardiomyopathy                                          | 87.29<br>(63.61 to<br>103.80)                        | 112.42<br>(67.40 to<br>171.28)                       | 68.51<br>(40.60 to<br>106.14)                        | 114.96<br>(68.25 to<br>174.51)                       | 3.52<br>(2.56 to<br>4.18)                         | 5.88<br>(3.58 to<br>8.98)                         | 3.74<br>(2.21 to<br>5.70)                         | 5.86<br>(3.62 to<br>8.91)                         |
| Atrial fibrillation and flutter                               | 27.38<br>(21.33 to<br>34.54)                         | 65.60<br>(47.70 to<br>88.78)                         | 59.09<br>(42.65 to<br>78.36)                         | 63.82<br>(46.58 to<br>86.43)                         | 2.72<br>(2.09 to<br>3.48)                         | 6.63<br>(4.72 to<br>8.95)                         | 6.22<br>(4.49 to<br>8.36)                         | 6.30<br>(4.44 to<br>8.66)                         |
| Aortic aneurysm                                               | 35.89<br>(30.82 to<br>41.26)                         | 57.08<br>(42.69 to<br>74.17)                         | 48.40<br>(36.29 to<br>60.83)                         | 56.19<br>(42.64 to<br>73.17)                         | 1.96<br>(1.70 to<br>2.23)                         | 3.68<br>(2.85 to<br>4.64)                         | 3.28<br>(2.55 to<br>4.07)                         | 3.53<br>(2.77 to<br>4.48)                         |
| Peripheral artery disease                                     | 11.48<br>(8.30 to<br>17.38)                          | 36.35<br>(23.31 to<br>55.44)                         | 36.23<br>(23.34 to<br>54.79)                         | 36.89<br>(23.57 to<br>56.21)                         | 1.11<br>(0.78 to<br>1.68)                         | 3.76<br>(2.26 to<br>5.84)                         | 3.94<br>(2.39 to<br>6.17)                         | 3.67<br>(2.21 to<br>5.74)                         |
| Endocarditis                                                  | 39.98<br>(30.35 to<br>51.60)                         | 61.49<br>(39.51 to<br>89.80)                         | 55.72<br>(35.99 to<br>78.40)                         | 62.92<br>(40.62 to<br>92.17)                         | 1.64<br>(1.21 to<br>2.11)                         | 3.27<br>(2.16 to<br>4.70)                         | 3.10<br>(2.03 to<br>4.42)                         | 3.25<br>(2.15 to<br>4.71)                         |
| Other cardiovascular and circulatory diseases                 | 339.29<br>(294.40 to<br>384.50)                      | 548.09<br>(398.96 to<br>739.68)                      | 347.60<br>(253.38 to<br>459.02)                      | 577.17<br>(428.20 to<br>775.32)                      | 15.81<br>(13.76 to<br>17.79)                      | 33.14<br>(25.37 to<br>42.84)                      | 22.24<br>(16.92 to<br>28.54)                      | 33.81<br>(26.17 to<br>44.10)                      |
| <b>Chronic respiratory diseases</b>                           | <b>168.98</b><br><b>(148.80 to</b><br><b>189.51)</b> | <b>237.59</b><br><b>(185.12 to</b><br><b>306.42)</b> | <b>189.97</b><br><b>(149.64 to</b><br><b>237.10)</b> | <b>293.14</b><br><b>(217.98 to</b><br><b>394.19)</b> | <b>8.52</b><br><b>(7.60 to</b><br><b>9.53)</b>    | <b>15.14</b><br><b>(12.23 to</b><br><b>18.76)</b> | <b>12.73</b><br><b>(10.53 to</b><br><b>15.34)</b> | <b>17.85</b><br><b>(13.68 to</b><br><b>22.99)</b> |
| Chronic obstructive pulmonary disease                         | 88.55<br>(75.34 to<br>101.49)                        | 140.95<br>(101.87 to<br>195.02)                      | 98.75<br>(73.29 to<br>133.39)                        | 190.34<br>(127.04 to<br>274.01)                      | 5.28<br>(4.56 to<br>5.99)                         | 9.85<br>(7.33 to<br>12.92)                        | 7.46<br>(5.67 to<br>9.52)                         | 12.45<br>(8.81 to<br>17.00)                       |
| Pneumoconiosis                                                | 1.15<br>(0.91 to<br>1.40)                            | 1.51<br>(1.13 to<br>1.97)                            | 1.21<br>(0.88 to<br>1.64)                            | 1.52<br>(1.16 to<br>1.96)                            | 0.05<br>(0.04 to<br>0.06)                         | 0.09<br>(0.07 to<br>0.12)                         | 0.08<br>(0.06 to<br>0.11)                         | 0.09<br>(0.07 to<br>0.12)                         |
| Silicosis                                                     | 0.06<br>(0.04 to<br>0.08)                            | 0.08<br>(0.05 to<br>0.14)                            | 0.06<br>(0.03 to<br>0.10)                            | 0.09<br>(0.05 to<br>0.15)                            | 0.00<br>(0.00 to<br>0.00)                         | 0.01<br>(0.00 to<br>0.01)                         | 0.00<br>(0.00 to<br>0.01)                         | 0.01<br>(0.00 to<br>0.01)                         |
| Asbestosis                                                    | 0.39<br>(0.29 to<br>0.48)                            | 0.44<br>(0.30 to<br>0.64)                            | 0.52<br>(0.35 to<br>0.77)                            | 0.43<br>(0.30 to<br>0.63)                            | 0.01<br>(0.01 to<br>0.02)                         | 0.02<br>(0.01 to<br>0.04)                         | 0.03<br>(0.02 to<br>0.04)                         | 0.02<br>(0.01 to<br>0.03)                         |
| Coal workers pneumoconiosis                                   | 0.05<br>(0.03 to<br>0.07)                            | 0.06<br>(0.03 to<br>0.11)                            | 0.05<br>(0.02 to<br>0.10)                            | 0.07<br>(0.03 to<br>0.12)                            | 0.00<br>(0.00 to<br>0.00)                         | 0.00<br>(0.00 to<br>0.01)                         | 0.00<br>(0.00 to<br>0.01)                         | 0.00<br>(0.00 to<br>0.01)                         |
| Other pneumoconiosis                                          | 0.66<br>(0.51 to<br>0.82)                            | 0.92<br>(0.66 to<br>1.24)                            | 0.58<br>(0.39 to<br>0.82)                            | 0.93<br>(0.68 to<br>1.24)                            | 0.03<br>(0.03 to<br>0.04)                         | 0.06<br>(0.04 to<br>0.08)                         | 0.04<br>(0.03 to<br>0.06)                         | 0.06<br>(0.04 to<br>0.08)                         |
| Asthma                                                        | 35.21<br>(28.85 to<br>42.91)                         | 28.57<br>(16.50 to<br>46.73)                         | 14.67<br>(8.57 to<br>24.13)                          | 35.04<br>(19.85 to<br>58.54)                         | 1.28<br>(1.07 to<br>1.57)                         | 1.45<br>(0.87 to<br>2.34)                         | 0.79<br>(0.47 to<br>1.29)                         | 1.72<br>(1.02 to<br>2.82)                         |
| Interstitial lung disease and pulmonary sarcoidosis           | 13.98<br>(10.31 to<br>17.37)                         | 20.05<br>(14.37 to<br>26.00)                         | 28.53<br>(20.69 to<br>36.59)                         | 18.95<br>(13.61 to<br>24.25)                         | 0.57<br>(0.42 to<br>0.71)                         | 1.06<br>(0.77 to<br>1.33)                         | 1.56<br>(1.15 to<br>1.97)                         | 0.99<br>(0.72 to<br>1.24)                         |
| Other chronic respiratory diseases                            | 30.09<br>(22.29 to<br>45.47)                         | 46.52<br>(32.66 to<br>68.52)                         | 46.81<br>(33.89 to<br>66.38)                         | 47.29<br>(32.73 to<br>72.20)                         | 1.34<br>(0.99 to<br>2.03)                         | 2.67<br>(1.91 to<br>4.00)                         | 2.84<br>(2.07 to<br>4.06)                         | 2.63<br>(1.82 to<br>4.03)                         |
| <b>Cirrhosis and other chronic liver diseases</b>             | <b>342.12</b><br><b>(293.76 to</b><br><b>393.26)</b> | <b>435.41</b><br><b>(340.22 to</b><br><b>542.55)</b> | <b>328.42</b><br><b>(252.14 to</b><br><b>417.16)</b> | <b>449.69</b><br><b>(351.91 to</b><br><b>561.10)</b> | <b>11.97</b><br><b>(10.35 to</b><br><b>13.65)</b> | <b>18.75</b><br><b>(15.64 to</b><br><b>22.41)</b> | <b>14.61</b><br><b>(11.95 to</b><br><b>17.64)</b> | <b>19.00</b><br><b>(15.96 to</b><br><b>22.80)</b> |
| Cirrhosis and other chronic liver diseases due to hepatitis B | 39.67<br>(30.61 to<br>49.82)                         | 52.36<br>(38.85 to<br>69.50)                         | 41.57<br>(30.32 to<br>55.52)                         | 52.73<br>(39.32 to<br>69.22)                         | 1.45<br>(1.14 to<br>1.80)                         | 2.32<br>(1.80 to<br>2.94)                         | 1.89<br>(1.44 to<br>2.42)                         | 2.30<br>(1.78 to<br>2.91)                         |



|                                                                |                                                      |                                                        |                                                      |                                                        |                                                   |                                                   |                                                   |                                                   |
|----------------------------------------------------------------|------------------------------------------------------|--------------------------------------------------------|------------------------------------------------------|--------------------------------------------------------|---------------------------------------------------|---------------------------------------------------|---------------------------------------------------|---------------------------------------------------|
|                                                                | 115.05<br>(96.27 to<br>137.04)                       | 151.52<br>(116.45 to<br>191.99)                        | 118.04<br>(89.88 to<br>151.45)                       | 153.25<br>(118.71 to<br>193.13)                        | 3.98<br>(3.37 to<br>4.66)                         | 6.32<br>(5.11 to<br>7.71)                         | 5.03<br>(3.98 to<br>6.26)                         | 6.30<br>(5.09 to<br>7.66)                         |
| Cirrhosis and other chronic liver diseases due to hepatitis C  |                                                      |                                                        |                                                      |                                                        |                                                   |                                                   |                                                   |                                                   |
|                                                                | 126.35<br>(105.24 to<br>148.81)                      | 162.70<br>(123.95 to<br>204.04)                        | 114.94<br>(86.49 to<br>146.41)                       | 173.49<br>(133.30 to<br>216.46)                        | 4.62<br>(3.90 to<br>5.36)                         | 7.19<br>(5.85 to<br>8.67)                         | 5.32<br>(4.26 to<br>6.50)                         | 7.49<br>(6.13 to<br>9.04)                         |
| Cirrhosis and other chronic liver diseases due to alcohol use  |                                                      |                                                        |                                                      |                                                        |                                                   |                                                   |                                                   |                                                   |
|                                                                | 61.05<br>(51.63 to<br>71.71)                         | 68.82<br>(52.20 to<br>94.11)                           | 53.87<br>(40.53 to<br>74.63)                         | 70.22<br>(53.32 to<br>95.81)                           | 1.93<br>(1.63 to<br>2.27)                         | 2.92<br>(2.37 to<br>3.68)                         | 2.37<br>(1.90 to<br>3.02)                         | 2.91<br>(2.35 to<br>3.70)                         |
| Cirrhosis and other chronic liver diseases due to other causes |                                                      |                                                        |                                                      |                                                        |                                                   |                                                   |                                                   |                                                   |
| <b>Digestive diseases</b>                                      | <b>207.92</b><br><b>(179.73 to</b><br><b>253.84)</b> | <b>273.83</b><br><b>(212.77 to</b><br><b>364.69)</b>   | <b>215.77</b><br><b>(167.69 to</b><br><b>284.06)</b> | <b>286.99</b><br><b>(222.10 to</b><br><b>384.61)</b>   | <b>8.69</b><br><b>(7.56 to</b><br><b>10.47)</b>   | <b>15.42</b><br><b>(12.58 to</b><br><b>19.26)</b> | <b>15.69</b><br><b>(10.56 to</b><br><b>16.01)</b> | <b>15.69</b><br><b>(12.70 to</b><br><b>19.75)</b> |
| Peptic ulcer disease                                           | 29.29<br>(24.42 to<br>37.12)                         | 27.81<br>(21.89 to<br>36.16)                           | 17.17<br>(12.86 to<br>22.79)                         | 29.43<br>(22.99 to<br>37.99)                           | 1.29<br>(1.09 to<br>1.61)                         | 1.64<br>(1.29 to<br>2.10)                         | 1.04<br>(0.81 to<br>1.37)                         | 1.70<br>(1.35 to<br>2.15)                         |
| <b>Antigua and Barbuda</b>                                     |                                                      |                                                        |                                                      |                                                        |                                                   |                                                   |                                                   |                                                   |
| Cause                                                          | YLLs (actual counts)                                 |                                                        |                                                      |                                                        | Deaths (actual counts)                            |                                                   |                                                   |                                                   |
|                                                                | 2016                                                 | 2040 Forecast                                          | 2040 Better Scenario                                 | 2040 Worse Scenario                                    | 2016                                              | 2040 Forecast                                     | 2040 Better Scenario                              | 2040 Worse Scenario                               |
| Gastritis and duodenitis                                       | 12.19<br>(9.49 to<br>16.86)                          | 18.24<br>(13.19 to<br>26.11)                           | 13.10<br>(9.25 to<br>18.41)                          | 18.41<br>(13.25 to<br>26.01)                           | 0.50<br>(0.40 to<br>0.71)                         | 0.98<br>(0.73 to<br>1.39)                         | 0.73<br>(0.53 to<br>1.03)                         | 0.96<br>(0.72 to<br>1.38)                         |
| Appendicitis                                                   | 15.07<br>(11.35 to<br>18.46)                         | 14.85<br>(10.13 to<br>21.54)                           | 9.39<br>(6.30 to<br>13.67)                           | 15.64<br>(10.52 to<br>22.90)                           | 0.47<br>(0.35 to<br>0.58)                         | 0.64<br>(0.47 to<br>0.88)                         | 0.44<br>(0.30 to<br>0.60)                         | 0.69<br>(0.48 to<br>0.91)                         |
| Paralytic ileus and intestinal obstruction                     | 42.81<br>(34.20 to<br>55.28)                         | 59.06<br>(46.59 to<br>77.04)                           | 57.77<br>(45.28 to<br>75.82)                         | 58.57<br>(46.04 to<br>77.27)                           | 1.78<br>(1.44 to<br>2.30)                         | 3.51<br>(2.83 to<br>4.52)                         | 3.60<br>(2.89 to<br>4.58)                         | 3.38<br>(2.71 to<br>4.36)                         |
| Inguinal, femoral, and abdominal hernia                        | 7.00<br>(5.18 to<br>9.66)                            | 6.72<br>(4.75 to<br>9.48)                              | 5.17<br>(3.57 to<br>7.26)                            | 6.81<br>(4.77 to<br>9.64)                              | 0.30<br>(0.22 to<br>0.42)                         | 0.38<br>(0.28 to<br>0.53)                         | 0.31<br>(0.23 to<br>0.44)                         | 0.38<br>(0.28 to<br>0.52)                         |
| Inflammatory bowel disease                                     | 14.77<br>(10.56 to<br>17.77)                         | 16.20<br>(11.49 to<br>21.16)                           | 15.39<br>(10.83 to<br>20.34)                         | 15.92<br>(11.26 to<br>20.64)                           | 0.55<br>(0.40 to<br>0.65)                         | 0.84<br>(0.60 to<br>1.05)                         | 0.84<br>(0.59 to<br>1.05)                         | 0.80<br>(0.58 to<br>1.00)                         |
| Vascular intestinal disorders                                  | 8.77<br>(7.25 to<br>11.16)                           | 16.82<br>(13.34 to<br>21.75)                           | 14.81<br>(11.52 to<br>19.08)                         | 16.63<br>(13.17 to<br>21.50)                           | 0.48<br>(0.40 to<br>0.62)                         | 1.15<br>(0.93 to<br>1.47)                         | 1.05<br>(0.84 to<br>1.34)                         | 1.11<br>(0.90 to<br>1.44)                         |
| Gallbladder and biliary diseases                               | 19.66<br>(16.60 to<br>23.81)                         | 31.39<br>(16.82 to<br>57.23)                           | 19.75<br>(10.76 to<br>35.10)                         | 39.61<br>(20.51 to<br>71.92)                           | 0.89<br>(0.75 to<br>1.07)                         | 1.85<br>(1.00 to<br>3.30)                         | 1.22<br>(0.69 to<br>2.18)                         | 2.25<br>(1.20 to<br>4.05)                         |
| Pancreatitis                                                   | 25.39<br>(20.36 to<br>34.93)                         | 37.26<br>(20.73 to<br>79.60)                           | 23.52<br>(13.82 to<br>45.85)                         | 39.88<br>(21.41 to<br>86.07)                           | 0.78<br>(0.63 to<br>1.07)                         | 1.38<br>(0.85 to<br>2.70)                         | 0.91<br>(0.59 to<br>1.56)                         | 1.44<br>(0.87 to<br>2.96)                         |
| Other digestive diseases                                       | 32.97<br>(26.89 to<br>40.12)                         | 45.49<br>(34.55 to<br>57.60)                           | 39.72<br>(30.15 to<br>51.17)                         | 46.10<br>(35.24 to<br>58.45)                           | 1.64<br>(1.36 to<br>2.00)                         | 3.02<br>(2.40 to<br>3.78)                         | 2.76<br>(2.16 to<br>3.49)                         | 2.98<br>(2.34 to<br>3.77)                         |
| <b>Neurological disorders</b>                                  | <b>386.84</b><br><b>(333.50 to</b><br><b>445.93)</b> | <b>774.21</b><br><b>(594.53 to</b><br><b>1,016.19)</b> | <b>738.56</b><br><b>(568.30 to</b><br><b>957.96)</b> | <b>808.86</b><br><b>(607.94 to</b><br><b>1,093.37)</b> | <b>27.02</b><br><b>(22.82 to</b><br><b>31.84)</b> | <b>63.55</b><br><b>(47.29 to</b><br><b>86.62)</b> | <b>64.98</b><br><b>(48.72 to</b><br><b>86.02)</b> | <b>64.79</b><br><b>(46.79 to</b><br><b>92.46)</b> |
| Alzheimer's disease and other dementias                        | 197.19<br>(160.90 to<br>240.54)                      | 485.80<br>(343.17 to<br>696.42)                        | 481.95<br>(342.85 to<br>669.37)                      | 513.86<br>(350.21 to<br>771.20)                        | 20.82<br>(16.96 to<br>25.17)                      | 50.86<br>(35.04 to<br>73.23)                      | 52.43<br>(37.14 to<br>73.57)                      | 52.45<br>(34.67 to<br>79.40)                      |
| Parkinson's disease                                            | 23.99<br>(17.87 to<br>31.43)                         | 63.85<br>(47.40 to<br>82.68)                           | 71.56<br>(53.46 to<br>92.17)                         | 58.51<br>(43.05 to<br>75.88)                           | 1.98<br>(1.47 to<br>2.61)                         | 5.41<br>(4.00 to<br>7.05)                         | 6.22<br>(4.63 to<br>8.11)                         | 4.89<br>(3.64 to<br>6.36)                         |
| Epilepsy                                                       | 121.36<br>(104.53 to<br>140.66)                      | 163.05<br>(90.89 to<br>303.64)                         | 122.68<br>(72.60 to<br>216.55)                       | 176.67<br>(96.31 to<br>337.71)                         | 2.98<br>(2.58 to<br>3.42)                         | 5.09<br>(3.24 to<br>8.26)                         | 4.05<br>(2.72 to<br>6.26)                         | 5.37<br>(3.34 to<br>8.95)                         |
| Multiple sclerosis                                             | 8.33<br>(6.11 to<br>13.04)                           | 10.82<br>(6.95 to<br>18.21)                            | 11.45<br>(7.35 to<br>19.23)                          | 10.61<br>(6.84 to<br>17.92)                            | 0.23<br>(0.17 to<br>0.36)                         | 0.34<br>(0.23 to<br>0.56)                         | 0.36<br>(0.25 to<br>0.59)                         | 0.33<br>(0.22 to<br>0.54)                         |
| Motor neuron disease                                           | 6.45<br>(5.41 to<br>7.61)                            | 10.50<br>(8.30 to<br>12.97)                            | 10.32<br>(8.08 to<br>12.83)                          | 10.09<br>(8.03 to<br>12.43)                            | 0.22<br>(0.18 to<br>0.26)                         | 0.44<br>(0.35 to<br>0.53)                         | 0.44<br>(0.35 to<br>0.53)                         | 0.41<br>(0.34 to<br>0.50)                         |

|                              |                                                      |                                                      |                                                      |                                                      |                                                |                                                |                                                 |                                                |
|------------------------------|------------------------------------------------------|------------------------------------------------------|------------------------------------------------------|------------------------------------------------------|------------------------------------------------|------------------------------------------------|-------------------------------------------------|------------------------------------------------|
| Other neurological disorders | 29.54<br>(25.38 to<br>34.22)                         | 40.19<br>(30.63 to<br>53.75)                         | 40.60<br>(30.94 to<br>54.15)                         | 39.12<br>(30.13 to<br>52.03)                         | 0.80<br>(0.69 to<br>0.91)                      | 1.41<br>(1.17 to<br>1.68)                      | 1.48<br>(1.22 to<br>1.76)                       | 1.34<br>(1.11 to<br>1.57)                      |
| <b>Mental disorders</b>      | <b>167.47</b><br><b>(140.23 to</b><br><b>202.71)</b> | <b>217.75</b><br><b>(161.11 to</b><br><b>293.27)</b> | <b>247.44</b><br><b>(182.52 to</b><br><b>332.12)</b> | <b>217.34</b><br><b>(162.07 to</b><br><b>291.57)</b> | <b>4.98</b><br><b>(4.21 to</b><br><b>5.90)</b> | <b>7.81</b><br><b>(6.19 to</b><br><b>9.66)</b> | <b>9.18</b><br><b>(7.21 to</b><br><b>11.36)</b> | <b>7.66</b><br><b>(6.13 to</b><br><b>9.42)</b> |
| Alcohol use disorders        | 133.50<br>(110.63 to<br>159.12)                      | 153.12<br>(111.52 to<br>203.55)                      | 162.97<br>(118.47 to<br>218.65)                      | 154.06<br>(113.87 to<br>203.87)                      | 4.03<br>(3.36 to<br>4.76)                      | 5.54<br>(4.26 to<br>6.90)                      | 6.07<br>(4.66 to<br>7.60)                       | 5.48<br>(4.28 to<br>6.80)                      |
| Drug use disorders           | 33.68<br>(25.59 to<br>42.92)                         | 64.22<br>(45.31 to<br>94.01)                         | 84.07<br>(59.65 to<br>119.71)                        | 62.87<br>(44.87 to<br>91.91)                         | 0.95<br>(0.75 to<br>1.18)                      | 2.26<br>(1.74 to<br>2.90)                      | 3.10<br>(2.38 to<br>3.94)                       | 2.17<br>(1.67 to<br>2.76)                      |
| Opioid use disorders         | 18.87<br>(14.17 to<br>26.39)                         | 28.27<br>(18.90 to<br>46.27)                         | 30.62<br>(20.27 to<br>50.50)                         | 27.93<br>(18.71 to<br>45.50)                         | 0.49<br>(0.37 to<br>0.68)                      | 0.91<br>(0.66 to<br>1.36)                      | 1.02<br>(0.74 to<br>1.57)                       | 0.88<br>(0.64 to<br>1.32)                      |
| Cocaine use disorders        | 3.66<br>(2.29 to<br>5.11)                            | 8.86<br>(5.34 to<br>13.52)                           | 11.79<br>(7.16 to<br>17.86)                          | 8.84<br>(5.35 to<br>13.53)                           | 0.10<br>(0.06 to<br>0.13)                      | 0.26<br>(0.16 to<br>0.38)                      | 0.35<br>(0.22 to<br>0.50)                       | 0.26<br>(0.16 to<br>0.37)                      |
| Amphetamine use disorders    | 1.39<br>(0.88 to<br>1.98)                            | 4.83<br>(2.89 to<br>7.73)                            | 7.68<br>(4.76 to<br>12.33)                           | 4.76<br>(2.89 to<br>7.64)                            | 0.04<br>(0.02 to<br>0.05)                      | 0.15<br>(0.10 to<br>0.22)                      | 0.25<br>(0.17 to<br>0.37)                       | 0.15<br>(0.10 to<br>0.21)                      |
| Other drug use disorders     | 9.75<br>(5.95 to<br>13.19)                           | 22.26<br>(13.72 to<br>31.83)                         | 33.98<br>(21.69 to<br>49.20)                         | 21.33<br>(13.40 to<br>30.02)                         | 0.32<br>(0.21 to<br>0.42)                      | 0.94<br>(0.63 to<br>1.23)                      | 1.48<br>(1.01 to<br>1.94)                       | 0.88<br>(0.59 to<br>1.14)                      |
| Eating disorders             | 0.29<br>(0.23 to<br>0.36)                            | 0.40<br>(0.24 to<br>0.65)                            | 0.41<br>(0.23 to<br>0.63)                            | 0.41<br>(0.25 to<br>0.65)                            | 0.01<br>(0.00 to<br>0.01)                      | 0.01<br>(0.00 to<br>0.01)                      | 0.01<br>(0.00 to<br>0.01)                       | 0.01<br>(0.00 to<br>0.01)                      |

| Antigua and Barbuda                                        |                                                            |                                                            |                                                            |                                                            |                                                   |                                                      |                                                     |                                                      |
|------------------------------------------------------------|------------------------------------------------------------|------------------------------------------------------------|------------------------------------------------------------|------------------------------------------------------------|---------------------------------------------------|------------------------------------------------------|-----------------------------------------------------|------------------------------------------------------|
| Cause                                                      | YLLs (actual counts)                                       |                                                            |                                                            |                                                            | Deaths (actual counts)                            |                                                      |                                                     |                                                      |
|                                                            | 2016                                                       | 2040 Forecast                                              | 2040 Better Scenario                                       | 2040 Worse Scenario                                        | 2016                                              | 2040 Forecast                                        | 2040 Better Scenario                                | 2040 Worse Scenario                                  |
| <b>Diabetes, urogenital, blood, and endocrine diseases</b> | <b>1,666.59</b><br><b>(1,475.13 to</b><br><b>1,875.00)</b> | <b>3,105.58</b><br><b>(1,940.15 to</b><br><b>5,733.55)</b> | <b>2,219.13</b><br><b>(1,338.00 to</b><br><b>4,275.32)</b> | <b>3,742.00</b><br><b>(2,296.29 to</b><br><b>7,021.83)</b> | <b>77.89</b><br><b>(69.67 to</b><br><b>86.95)</b> | <b>190.47</b><br><b>(120.86 to</b><br><b>337.28)</b> | <b>140.55</b><br><b>(86.90 to</b><br><b>261.56)</b> | <b>223.07</b><br><b>(139.37 to</b><br><b>394.46)</b> |
| Diabetes mellitus                                          | 892.75<br>(781.74 to<br>1,007.98)                          | 1,491.62<br>(1,061.72 to<br>2,069.19)                      | 972.77<br>(689.21 to<br>1,346.03)                          | 1,723.14<br>(1,207.94 to<br>2,451.80)                      | 45.44<br>(40.07 to<br>51.02)                      | 95.23<br>(70.87 to<br>125.47)                        | 64.66<br>(47.46 to<br>84.49)                        | 106.12<br>(77.23 to<br>140.51)                       |
| Acute glomerulonephritis                                   | 0.49<br>(0.43 to<br>0.56)                                  | 0.57<br>(0.35 to<br>0.96)                                  | 0.43<br>(0.26 to<br>0.71)                                  | 0.60<br>(0.37 to<br>1.03)                                  | 0.01<br>(0.01 to<br>0.01)                         | 0.01<br>(0.01 to<br>0.02)                            | 0.01<br>(0.01 to<br>0.01)                           | 0.01<br>(0.01 to<br>0.02)                            |
| Chronic kidney disease                                     | 494.89<br>(435.67 to<br>559.94)                            | 1,190.95<br>(321.79 to<br>3,827.84)                        | 874.45<br>(238.36 to<br>2,954.01)                          | 1,593.66<br>(424.12 to<br>4,546.34)                        | 21.99<br>(19.60 to<br>24.58)                      | 72.86<br>(18.84 to<br>222.49)                        | 55.38<br>(14.25 to<br>173.21)                       | 95.20<br>(24.34 to<br>267.78)                        |
| Chronic kidney disease due to diabetes mellitus            | 179.18<br>(148.50 to<br>212.87)                            | 500.00<br>(124.89 to<br>1,787.44)                          | 371.60<br>(92.65 to<br>1,388.25)                           | 676.85<br>(165.66 to<br>2,065.88)                          | 7.98<br>(6.73 to<br>9.38)                         | 28.81<br>(6.76 to<br>94.80)                          | 21.98<br>(5.22 to<br>76.96)                         | 38.09<br>(8.69 to<br>112.04)                         |
| Chronic kidney disease due to hypertension                 | 56.09<br>(45.48 to<br>67.08)                               | 186.62<br>(44.14 to<br>610.51)                             | 148.07<br>(35.49 to<br>487.43)                             | 245.17<br>(56.96 to<br>705.91)                             | 3.83<br>(3.13 to<br>4.53)                         | 14.92<br>(4.00 to<br>45.63)                          | 12.27<br>(3.27 to<br>38.36)                         | 18.98<br>(5.02 to<br>53.50)                          |
| Chronic kidney disease due to glomerulonephritis           | 149.56<br>(122.78 to<br>180.08)                            | 274.26<br>(83.14 to<br>838.50)                             | 188.43<br>(56.70 to<br>583.06)                             | 365.22<br>(108.80 to<br>1,009.66)                          | 5.61<br>(4.56 to<br>6.72)                         | 15.23<br>(3.95 to<br>46.63)                          | 10.76<br>(2.81 to<br>32.84)                         | 20.00<br>(5.14 to<br>55.36)                          |
| Chronic kidney disease due to other and unspecified causes | 110.05<br>(89.44 to<br>131.93)                             | 230.07<br>(66.80 to<br>709.12)                             | 166.35<br>(47.59 to<br>523.22)                             | 306.43<br>(86.20 to<br>868.26)                             | 4.56<br>(3.72 to<br>5.48)                         | 13.89<br>(3.65 to<br>43.09)                          | 10.37<br>(2.70 to<br>33.86)                         | 18.13<br>(4.67 to<br>51.96)                          |
| Urinary diseases and male infertility                      | 67.59<br>(59.45 to<br>76.38)                               | 121.15<br>(102.37 to<br>142.00)                            | 94.97<br>(78.18 to<br>112.95)                              | 118.11<br>(100.75 to<br>138.25)                            | 3.86<br>(3.41 to<br>4.35)                         | 9.00<br>(7.59 to<br>10.50)                           | 7.38<br>(6.20 to<br>8.66)                           | 8.53<br>(7.11 to<br>9.97)                            |
| Urinary tract infections                                   | 56.97<br>(49.32 to<br>65.54)                               | 107.31<br>(89.15 to<br>127.20)                             | 85.45<br>(69.97 to<br>101.77)                              | 104.26<br>(87.58 to<br>123.49)                             | 3.26<br>(2.80 to<br>3.72)                         | 8.01<br>(6.69 to<br>9.41)                            | 6.67<br>(5.54 to<br>7.90)                           | 7.57<br>(6.28 to<br>8.92)                            |
| Urolithiasis                                               | 2.67<br>(2.06 to<br>4.04)                                  | 3.40<br>(2.39 to<br>5.46)                                  | 2.37<br>(1.67 to<br>3.86)                                  | 3.34<br>(2.37 to<br>5.31)                                  | 0.12<br>(0.09 to<br>0.19)                         | 0.19<br>(0.13 to<br>0.31)                            | 0.14<br>(0.10 to<br>0.24)                           | 0.18<br>(0.13 to<br>0.30)                            |

|                                                   |                                 |                                 |                                 |                                 |                           |                            |                             |                            |
|---------------------------------------------------|---------------------------------|---------------------------------|---------------------------------|---------------------------------|---------------------------|----------------------------|-----------------------------|----------------------------|
| Other urinary diseases                            | 7.96<br>(5.72 to<br>11.92)      | 10.44<br>(6.90 to<br>16.92)     | 7.14<br>(4.58 to<br>11.87)      | 10.51<br>(6.94 to<br>16.61)     | 0.48<br>(0.33 to<br>0.74) | 0.80<br>(0.51 to<br>1.29)  | 0.57<br>(0.36 to<br>0.95)   | 0.78<br>(0.49 to<br>1.26)  |
| Gynecological diseases                            | 2.76<br>(0.81 to<br>3.98)       | 3.04<br>(0.83 to<br>7.39)       | 1.47<br>(0.40 to<br>3.64)       | 3.32<br>(0.90 to<br>7.87)       | 0.07<br>(0.02 to<br>0.09) | 0.08<br>(0.03 to<br>0.17)  | 0.04<br>(0.02 to<br>0.08)   | 0.08<br>(0.04 to<br>0.17)  |
| Uterine fibroids                                  | 0.60<br>(0.16 to<br>1.00)       | 0.63<br>(0.13 to<br>1.52)       | 0.38<br>(0.09 to<br>0.89)       | 0.69<br>(0.15 to<br>1.67)       | 0.02<br>(0.01 to<br>0.03) | 0.02<br>(0.01 to<br>0.04)  | 0.01<br>(0.00 to<br>0.02)   | 0.02<br>(0.01 to<br>0.04)  |
| Polycystic ovarian syndrome                       | 1.22<br>(0.27 to<br>1.90)       | 0.83<br>(0.13 to<br>1.96)       | 0.29<br>(0.04 to<br>0.71)       | 0.95<br>(0.15 to<br>2.20)       | 0.00<br>(0.01 to<br>0.04) | 0.02<br>(0.00 to<br>0.04)  | 0.01<br>(0.00 to<br>0.01)   | 0.02<br>(0.00 to<br>0.05)  |
| Endometriosis                                     | 0.04<br>(0.01 to<br>0.12)       | 0.09<br>(0.01 to<br>0.39)       | 0.05<br>(0.01 to<br>0.20)       | 0.10<br>(0.01 to<br>0.42)       | 0.00<br>(0.00 to<br>0.00) | 0.00<br>(0.00 to<br>0.01)  | 0.00<br>(0.00 to<br>0.00)   | 0.00<br>(0.00 to<br>0.01)  |
| Genital prolapse                                  | 0.05<br>(0.01 to<br>0.12)       | 0.08<br>(0.01 to<br>0.28)       | 0.04<br>(0.01 to<br>0.15)       | 0.09<br>(0.02 to<br>0.31)       | 0.00<br>(0.00 to<br>0.00) | 0.00<br>(0.00 to<br>0.01)  | 0.00<br>(0.00 to<br>0.00)   | 0.00<br>(0.00 to<br>0.01)  |
| Other gynecological diseases                      | 0.84<br>(0.31 to<br>1.28)       | 1.41<br>(0.42 to<br>4.17)       | 0.71<br>(0.20 to<br>2.10)       | 1.50<br>(0.43 to<br>4.47)       | 0.02<br>(0.01 to<br>0.03) | 0.04<br>(0.02 to<br>0.09)  | 0.01<br>(0.01 to<br>0.05)   | 0.04<br>(0.02 to<br>0.10)  |
| Hemoglobinopathies and hemolytic anemias          | 73.00<br>(60.68 to<br>89.27)    | 89.91<br>(63.69 to<br>128.69)   | 61.06<br>(42.09 to<br>90.09)    | 93.38<br>(65.96 to<br>136.94)   | 2.05<br>(1.70 to<br>2.57) | 3.52<br>(2.70 to<br>4.74)  | 2.51<br>(1.89 to<br>3.42)   | 3.59<br>(2.78 to<br>4.87)  |
| Thalassemias                                      | 2.03<br>(0.69 to<br>3.37)       | 0.63<br>(0.21 to<br>1.28)       | 0.55<br>(0.19 to<br>1.11)       | 0.63<br>(0.21 to<br>1.29)       | 0.02<br>(0.01 to<br>0.04) | 0.01<br>(0.00 to<br>0.02)  | 0.01<br>(0.01 to<br>0.01)   | 0.01<br>(0.00 to<br>0.02)  |
| Sickle cell disorders                             | 53.73<br>(43.21 to<br>65.89)    | 58.61<br>(37.76 to<br>90.73)    | 39.38<br>(24.68 to<br>61.57)    | 61.23<br>(39.66 to<br>95.72)    | 1.06<br>(0.85 to<br>1.32) | 1.47<br>(0.98 to<br>2.15)  | 1.01<br>(0.67 to<br>1.51)   | 1.53<br>(1.03 to<br>2.25)  |
| G6PD deficiency                                   | 7.56<br>(5.58 to<br>9.98)       | 13.68<br>(9.41 to<br>18.67)     | 8.57<br>(5.66 to<br>12.04)      | 14.31<br>(9.78 to<br>20.04)     | 0.22<br>(0.16 to<br>0.29) | 0.58<br>(0.41 to<br>0.77)  | 0.37<br>(0.25 to<br>0.51)   | 0.60<br>(0.42 to<br>0.81)  |
| Other hemoglobinopathies and hemolytic anemias    | 9.68<br>(7.85 to<br>12.80)      | 17.00<br>(13.10 to<br>23.29)    | 12.56<br>(9.61 to<br>17.68)     | 17.20<br>(13.48 to<br>23.84)    | 0.74<br>(0.61 to<br>0.99) | 1.47<br>(1.14 to<br>2.04)  | 1.13<br>(0.88 to<br>1.60)   | 1.46<br>(1.15 to<br>2.03)  |
| Endocrine, metabolic, blood, and immune disorders | 135.11<br>(111.34 to<br>204.61) | 208.34<br>(153.82 to<br>318.23) | 213.98<br>(157.37 to<br>320.83) | 209.78<br>(153.97 to<br>324.71) | 4.58<br>(3.80 to<br>6.63) | 9.77<br>(7.64 to<br>14.25) | 10.56<br>(8.15 to<br>15.34) | 9.53<br>(7.43 to<br>14.12) |

**Antigua and Barbuda**

| Cause                                  | YLLs (actual counts)                   |                                        |                                       |                                        | Deaths (actual counts)            |                                    |                                   |                                    |
|----------------------------------------|----------------------------------------|----------------------------------------|---------------------------------------|----------------------------------------|-----------------------------------|------------------------------------|-----------------------------------|------------------------------------|
|                                        | 2016                                   | 2040 Forecast                          | 2040 Better Scenario                  | 2040 Worse Scenario                    | 2016                              | 2040 Forecast                      | 2040 Better Scenario              | 2040 Worse Scenario                |
| <b>Musculoskeletal disorders</b>       | <b>63.50</b><br>(46.73 to<br>75.78)    | <b>72.24</b><br>(48.89 to<br>107.00)   | <b>60.61</b><br>(40.32 to<br>89.38)   | <b>71.11</b><br>(48.05 to<br>105.24)   | <b>1.65</b><br>(1.27 to<br>1.97)  | <b>2.50</b><br>(1.89 to<br>3.25)   | <b>2.07</b><br>(1.55 to<br>2.71)  | <b>2.43</b><br>(1.84 to<br>3.11)   |
| Rheumatoid arthritis                   | 6.19<br>(4.59 to<br>8.21)              | 10.16<br>(7.06 to<br>13.37)            | 6.08<br>(4.08 to<br>8.58)             | 10.44<br>(7.30 to<br>13.74)            | 0.29<br>(0.21 to<br>0.37)         | 0.64<br>(0.45 to<br>0.83)          | 0.40<br>(0.26 to<br>0.53)         | 0.64<br>(0.46 to<br>0.83)          |
| Other musculoskeletal disorders        | 57.31<br>(41.32 to<br>69.09)           | 62.08<br>(40.57 to<br>94.46)           | 54.52<br>(35.72 to<br>82.52)          | 60.67<br>(39.85 to<br>91.68)           | 1.36<br>(1.02 to<br>1.64)         | 1.86<br>(1.34 to<br>2.52)          | 1.68<br>(1.22 to<br>2.27)         | 1.79<br>(1.29 to<br>2.43)          |
| <b>Other non-communicable diseases</b> | <b>345.16</b><br>(209.81 to<br>494.82) | <b>323.86</b><br>(164.51 to<br>487.77) | <b>202.70</b><br>(99.00 to<br>301.71) | <b>341.60</b><br>(175.90 to<br>525.46) | <b>7.32</b><br>(3.91 to<br>10.03) | <b>12.11</b><br>(4.90 to<br>17.63) | <b>9.25</b><br>(3.38 to<br>13.67) | <b>11.84</b><br>(4.88 to<br>17.24) |
| Congenital birth defects               | 275.11<br>(170.29 to<br>412.40)        | 193.45<br>(103.56 to<br>321.56)        | 99.30<br>(54.02 to<br>159.80)         | 214.12<br>(113.32 to<br>353.39)        | 3.60<br>(2.29 to<br>5.21)         | 2.76<br>(1.57 to<br>4.30)          | 1.46<br>(0.84 to<br>2.24)         | 3.02<br>(1.72 to<br>4.74)          |
| Neural tube defects                    | 5.27<br>(2.69 to<br>9.25)              | 1.47<br>(0.69 to<br>2.69)              | 0.74<br>(0.34 to<br>1.37)             | 1.72<br>(0.80 to<br>3.14)              | 0.06<br>(0.03 to<br>0.11)         | 0.02<br>(0.01 to<br>0.04)          | 0.01<br>(0.01 to<br>0.02)         | 0.02<br>(0.01 to<br>0.04)          |
| Congenital heart anomalies             | 166.40<br>(106.09 to<br>242.84)        | 116.42<br>(64.67 to<br>193.49)         | 52.91<br>(28.88 to<br>86.94)          | 128.74<br>(69.89 to<br>212.61)         | 2.22<br>(1.45 to<br>3.10)         | 1.68<br>(0.97 to<br>2.61)          | 0.78<br>(0.45 to<br>1.21)         | 1.84<br>(1.06 to<br>2.88)          |

|                                               |                                              |                                            |                                          |                                            |                                     |                                     |                                     |                                     |
|-----------------------------------------------|----------------------------------------------|--------------------------------------------|------------------------------------------|--------------------------------------------|-------------------------------------|-------------------------------------|-------------------------------------|-------------------------------------|
| Orofacial clefts                              | 2.15<br>(0.49 to<br>4.84)                    | 1.06<br>(0.18 to<br>3.02)                  | 0.35<br>(0.06 to<br>1.04)                | 1.29<br>(0.22 to<br>3.61)                  | 0.02<br>(0.01 to<br>0.06)           | 0.01<br>(0.00 to<br>0.04)           | 0.00<br>(0.00 to<br>0.01)           | 0.01<br>(0.00 to<br>0.04)           |
| Down syndrome                                 | 6.40<br>(4.05 to<br>8.96)                    | 7.78<br>(4.55 to<br>12.01)                 | 7.90<br>(4.66 to<br>12.11)               | 8.29<br>(4.81 to<br>12.81)                 | 0.11<br>(0.07 to<br>0.15)           | 0.16<br>(0.10 to<br>0.23)           | 0.17<br>(0.10 to<br>0.24)           | 0.17<br>(0.10 to<br>0.25)           |
| Other chromosomal abnormalities               | 11.74<br>(5.32 to<br>20.63)                  | 12.79<br>(5.25 to<br>24.32)                | 8.95<br>(3.66 to<br>16.96)               | 14.31<br>(5.92 to<br>27.05)                | 0.14<br>(0.06 to<br>0.24)           | 0.16<br>(0.07 to<br>0.29)           | 0.11<br>(0.04 to<br>0.21)           | 0.18<br>(0.07 to<br>0.33)           |
| Congenital musculoskeletal and limb anomalies | 10.88<br>(5.88 to<br>18.05)                  | 7.70<br>(3.56 to<br>14.28)                 | 4.07<br>(1.83 to<br>7.45)                | 8.45<br>(3.88 to<br>15.83)                 | 0.14<br>(0.08 to<br>0.22)           | 0.10<br>(0.05 to<br>0.18)           | 0.05<br>(0.03 to<br>0.09)           | 0.11<br>(0.05 to<br>0.20)           |
| Urogenital congenital anomalies               | 4.09<br>(2.16 to<br>6.85)                    | 3.20<br>(1.59 to<br>5.72)                  | 1.91<br>(0.95 to<br>3.34)                | 3.45<br>(1.69 to<br>6.24)                  | 0.06<br>(0.03 to<br>0.09)           | 0.06<br>(0.03 to<br>0.09)           | 0.03<br>(0.02 to<br>0.05)           | 0.06<br>(0.03 to<br>0.10)           |
| Digestive congenital anomalies                | 19.12<br>(10.29 to<br>32.52)                 | 11.02<br>(5.00 to<br>20.65)                | 5.34<br>(2.37 to<br>9.82)                | 12.45<br>(5.62 to<br>23.11)                | 0.23<br>(0.12 to<br>0.38)           | 0.14<br>(0.06 to<br>0.25)           | 0.07<br>(0.03 to<br>0.12)           | 0.15<br>(0.07 to<br>0.28)           |
| Other congenital birth defects                | 49.07<br>(27.10 to<br>77.15)                 | 32.01<br>(15.98 to<br>55.25)               | 17.12<br>(8.62 to<br>29.74)              | 35.42<br>(17.45 to<br>61.51)               | 0.61<br>(0.35 to<br>0.95)           | 0.43<br>(0.23 to<br>0.72)           | 0.24<br>(0.13 to<br>0.39)           | 0.47<br>(0.25 to<br>0.79)           |
| Skin and subcutaneous diseases                | 58.17<br>(16.38 to<br>81.86)                 | 122.76<br>(33.20 to<br>180.31)             | 99.25<br>(27.09 to<br>147.34)            | 118.85<br>(32.20 to<br>174.88)             | 3.58<br>(0.93 to<br>5.19)           | 9.27<br>(2.38 to<br>14.24)          | 7.74<br>(2.08 to<br>11.72)          | 8.73<br>(2.19 to<br>13.30)          |
| Cellulitis                                    | 5.98<br>(1.79 to<br>9.54)                    | 16.53<br>(5.12 to<br>25.97)                | 15.85<br>(4.97 to<br>24.38)              | 15.67<br>(4.89 to<br>24.45)                | 0.28<br>(0.08 to<br>0.43)           | 1.02<br>(0.30 to<br>1.55)           | 1.03<br>(0.30 to<br>1.58)           | 0.94<br>(0.28 to<br>1.44)           |
| Pyoderma                                      | 14.63<br>(2.48 to<br>22.76)                  | 35.95<br>(5.30 to<br>59.23)                | 30.29<br>(4.64 to<br>50.39)              | 35.43<br>(5.23 to<br>58.44)                | 0.70<br>(0.10 to<br>1.12)           | 2.41<br>(0.33 to<br>4.04)           | 2.15<br>(0.30 to<br>3.65)           | 2.30<br>(0.32 to<br>3.87)           |
| Decubitus ulcer                               | 36.38<br>(10.02 to<br>51.35)                 | 68.25<br>(18.87 to<br>103.30)              | 51.41<br>(14.18 to<br>78.98)             | 65.76<br>(17.59 to<br>99.67)               | 2.56<br>(0.67 to<br>3.74)           | 5.75<br>(1.52 to<br>9.15)           | 4.48<br>(1.22 to<br>7.16)           | 5.40<br>(1.39 to<br>8.62)           |
| Other skin and subcutaneous diseases          | 1.18<br>(0.40 to<br>1.69)                    | 2.03<br>(0.63 to<br>3.23)                  | 1.70<br>(0.51 to<br>2.66)                | 1.99<br>(0.61 to<br>3.18)                  | 0.04<br>(0.01 to<br>0.05)           | 0.09<br>(0.02 to<br>0.15)           | 0.08<br>(0.02 to<br>0.12)           | 0.08<br>(0.02 to<br>0.12)           |
| Sudden infant death syndrome                  | 11.87<br>(6.17 to<br>20.58)                  | 7.65<br>(2.68 to<br>18.34)                 | 4.15<br>(1.49 to<br>9.67)                | 8.64<br>(2.98 to<br>21.69)                 | 0.14<br>(0.07 to<br>0.24)           | 0.09<br>(0.03 to<br>0.21)           | 0.05<br>(0.02 to<br>0.11)           | 0.10<br>(0.03 to<br>0.25)           |
| <b>Injuries</b>                               | <b>1,464.39</b><br>(1,252.10 to<br>1,702.66) | <b>1,279.22</b><br>(837.50 to<br>2,162.35) | <b>756.00</b><br>(504.42 to<br>1,254.08) | <b>1,397.48</b><br>(907.44 to<br>2,399.55) | <b>33.53</b><br>(29.00 to<br>38.58) | <b>37.89</b><br>(28.52 to<br>54.87) | <b>24.63</b><br>(18.98 to<br>34.22) | <b>39.95</b><br>(29.86 to<br>59.82) |
| <b>Transport injuries</b>                     | <b>387.37</b><br>(317.29 to<br>474.41)       | <b>382.87</b><br>(215.66 to<br>778.40)     | <b>109.49</b><br>(64.92 to<br>212.40)    | <b>462.00</b><br>(257.08 to<br>953.58)     | <b>8.76</b><br>(7.23 to<br>10.59)   | <b>10.58</b><br>(6.91 to<br>17.88)  | <b>3.65</b><br>(2.46 to<br>5.75)    | <b>12.22</b><br>(7.89 to<br>21.11)  |
| Road injuries                                 | 347.88<br>(283.35 to<br>425.92)              | 332.52<br>(183.31 to<br>690.46)            | 80.28<br>(46.22 to<br>159.42)            | 408.41<br>(222.78 to<br>860.79)            | 7.71<br>(6.39 to<br>9.39)           | 8.78<br>(5.63 to<br>15.37)          | 2.55<br>(1.69 to<br>4.11)           | 10.35<br>(6.52 to<br>18.84)         |
| Pedestrian road injuries                      | 46.99<br>(35.24 to<br>59.69)                 | 41.65<br>(25.09 to<br>68.34)               | 8.72<br>(5.43 to<br>13.63)               | 49.45<br>(29.77 to<br>82.60)               | 1.29<br>(0.99 to<br>1.61)           | 1.60<br>(1.10 to<br>2.32)           | 0.40<br>(0.28 to<br>0.57)           | 1.82<br>(1.23 to<br>2.67)           |

**Antigua and Barbuda**

| Cause                       | YLLs (actual counts)            |                                 |                              |                                 | Deaths (actual counts)    |                           |                           |                            |
|-----------------------------|---------------------------------|---------------------------------|------------------------------|---------------------------------|---------------------------|---------------------------|---------------------------|----------------------------|
|                             | 2016                            | 2040 Forecast                   | 2040 Better Scenario         | 2040 Worse Scenario             | 2016                      | 2040 Forecast             | 2040 Better Scenario      | 2040 Worse Scenario        |
| Cyclist road injuries       | 20.43<br>(15.26 to<br>26.73)    | 18.25<br>(10.05 to<br>34.67)    | 5.37<br>(3.22 to<br>9.64)    | 21.95<br>(11.96 to<br>42.62)    | 0.48<br>(0.37 to<br>0.63) | 0.54<br>(0.33 to<br>0.92) | 0.21<br>(0.14 to<br>0.35) | 0.61<br>(0.37 to<br>1.05)  |
| Motorcyclist road injuries  | 75.67<br>(55.90 to<br>101.93)   | 75.26<br>(33.77 to<br>176.95)   | 29.70<br>(14.18 to<br>68.59) | 86.99<br>(38.79 to<br>203.42)   | 1.46<br>(1.09 to<br>1.96) | 1.56<br>(0.79 to<br>3.34) | 0.70<br>(0.38 to<br>1.38) | 1.77<br>(0.88 to<br>3.83)  |
| Motor vehicle road injuries | 201.99<br>(159.16 to<br>255.42) | 193.72<br>(106.34 to<br>392.40) | 35.47<br>(20.57 to<br>69.28) | 245.65<br>(134.28 to<br>501.55) | 4.40<br>(3.52 to<br>5.51) | 4.93<br>(3.14 to<br>8.73) | 1.18<br>(0.82 to<br>1.87) | 6.00<br>(3.74 to<br>10.79) |

|                                                 |                                                      |                                                      |                                                      |                                                      |                                                   |                                                   |                                                   |                                                   |
|-------------------------------------------------|------------------------------------------------------|------------------------------------------------------|------------------------------------------------------|------------------------------------------------------|---------------------------------------------------|---------------------------------------------------|---------------------------------------------------|---------------------------------------------------|
| Other road injuries                             | 2.81<br>(1.96 to<br>4.63)                            | 3.64<br>(2.11 to<br>6.87)                            | 1.02<br>(0.60 to<br>1.80)                            | 4.37<br>(2.49 to<br>8.41)                            | 0.08<br>(0.06 to<br>0.13)                         | 0.14<br>(0.09 to<br>0.24)                         | 0.06<br>(0.04 to<br>0.10)                         | 0.16<br>(0.10 to<br>0.27)                         |
| Other transport injuries                        | 39.48<br>(30.43 to<br>50.67)                         | 50.34<br>(30.67 to<br>88.70)                         | 29.21<br>(17.67 to<br>52.31)                         | 53.59<br>(32.62 to<br>98.76)                         | 1.05<br>(0.82 to<br>1.32)                         | 1.81<br>(1.25 to<br>2.78)                         | 1.10<br>(0.76 to<br>1.70)                         | 1.87<br>(1.28 to<br>2.97)                         |
| <b>Unintentional injuries</b>                   | <b>732.09</b><br><b>(627.69 to</b><br><b>843.65)</b> | <b>581.37</b><br><b>(416.94 to</b><br><b>901.98)</b> | <b>429.53</b><br><b>(310.77 to</b><br><b>650.66)</b> | <b>608.41</b><br><b>(434.93 to</b><br><b>946.64)</b> | <b>17.77</b><br><b>(15.58 to</b><br><b>20.27)</b> | <b>20.21</b><br><b>(16.13 to</b><br><b>26.33)</b> | <b>15.95</b><br><b>(12.76 to</b><br><b>20.63)</b> | <b>20.43</b><br><b>(16.35 to</b><br><b>26.96)</b> |
| Falls                                           | 41.69<br>(35.32 to<br>49.74)                         | 53.87<br>(43.66 to<br>69.10)                         | 44.63<br>(35.85 to<br>57.57)                         | 53.62<br>(43.86 to<br>68.72)                         | 1.70<br>(1.47 to<br>2.00)                         | 3.19<br>(2.65 to<br>3.88)                         | 2.74<br>(2.28 to<br>3.35)                         | 3.09<br>(2.55 to<br>3.75)                         |
| Drowning                                        | 221.51<br>(186.01 to<br>262.22)                      | 150.28<br>(95.88 to<br>271.23)                       | 106.62<br>(67.32 to<br>191.96)                       | 158.93<br>(99.53 to<br>286.89)                       | 4.42<br>(3.73 to<br>5.18)                         | 3.67<br>(2.56 to<br>5.78)                         | 2.67<br>(1.87 to<br>4.18)                         | 3.82<br>(2.65 to<br>6.06)                         |
| Fire, heat, and hot substances                  | 70.18<br>(57.82 to<br>85.25)                         | 59.31<br>(42.77 to<br>84.11)                         | 38.64<br>(27.91 to<br>54.64)                         | 62.61<br>(44.87 to<br>90.56)                         | 2.17<br>(1.81 to<br>2.55)                         | 2.83<br>(2.17 to<br>3.62)                         | 1.99<br>(1.52 to<br>2.55)                         | 2.87<br>(2.20 to<br>3.74)                         |
| Poisonings                                      | 15.71<br>(12.42 to<br>24.96)                         | 9.79<br>(6.03 to<br>17.97)                           | 5.68<br>(3.47 to<br>10.34)                           | 10.79<br>(6.49 to<br>20.07)                          | 0.34<br>(0.27 to<br>0.54)                         | 0.28<br>(0.19 to<br>0.48)                         | 0.17<br>(0.11 to<br>0.28)                         | 0.30<br>(0.20 to<br>0.52)                         |
| Exposure to mechanical forces                   | 226.83<br>(165.40 to<br>277.50)                      | 149.05<br>(92.53 to<br>258.64)                       | 104.04<br>(64.34 to<br>174.15)                       | 158.73<br>(97.62 to<br>271.81)                       | 4.68<br>(3.44 to<br>5.67)                         | 3.71<br>(2.56 to<br>5.65)                         | 2.67<br>(1.84 to<br>3.98)                         | 3.88<br>(2.65 to<br>5.91)                         |
| Unintentional firearm injuries                  | 146.09<br>(93.43 to<br>184.40)                       | 86.01<br>(45.84 to<br>161.40)                        | 61.25<br>(32.17 to<br>114.78)                        | 91.93<br>(48.21 to<br>167.32)                        | 2.91<br>(1.88 to<br>3.65)                         | 1.92<br>(1.14 to<br>3.24)                         | 1.40<br>(0.82 to<br>2.29)                         | 2.03<br>(1.18 to<br>3.32)                         |
| Unintentional suffocation                       | 16.29<br>(12.34 to<br>22.53)                         | 10.23<br>(6.01 to<br>18.62)                          | 7.37<br>(4.36 to<br>13.12)                           | 11.15<br>(6.49 to<br>20.41)                          | 0.26<br>(0.20 to<br>0.34)                         | 0.17<br>(0.11 to<br>0.29)                         | 0.13<br>(0.08 to<br>0.21)                         | 0.19<br>(0.12 to<br>0.32)                         |
| Other exposure to mechanical forces             | 64.45<br>(48.17 to<br>79.42)                         | 52.81<br>(34.41 to<br>81.59)                         | 35.41<br>(23.37 to<br>54.16)                         | 55.65<br>(36.04 to<br>84.39)                         | 1.51<br>(1.13 to<br>1.84)                         | 1.62<br>(1.15 to<br>2.18)                         | 1.14<br>(0.82 to<br>1.55)                         | 1.67<br>(1.17 to<br>2.28)                         |
| Adverse effects of medical treatment            | 60.08<br>(45.70 to<br>75.62)                         | 64.20<br>(46.05 to<br>89.92)                         | 53.85<br>(39.42 to<br>75.42)                         | 65.74<br>(46.93 to<br>92.39)                         | 2.10<br>(1.62 to<br>2.64)                         | 3.20<br>(2.37 to<br>4.21)                         | 2.82<br>(2.10 to<br>3.72)                         | 3.17<br>(2.35 to<br>4.15)                         |
| Animal contact                                  | 12.68<br>(9.20 to<br>15.58)                          | 13.85<br>(9.34 to<br>20.40)                          | 10.63<br>(7.24 to<br>15.76)                          | 14.68<br>(9.88 to<br>22.07)                          | 0.36<br>(0.27 to<br>0.43)                         | 0.54<br>(0.39 to<br>0.71)                         | 0.44<br>(0.32 to<br>0.59)                         | 0.56<br>(0.40 to<br>0.75)                         |
| Venomous animal contact                         | 6.86<br>(4.23 to<br>8.71)                            | 7.06<br>(4.16 to<br>10.84)                           | 5.66<br>(3.35 to<br>8.65)                            | 7.52<br>(4.51 to<br>11.69)                           | 0.19<br>(0.12 to<br>0.24)                         | 0.27<br>(0.17 to<br>0.37)                         | 0.22<br>(0.15 to<br>0.31)                         | 0.28<br>(0.18 to<br>0.39)                         |
| Non-venomous animal contact                     | 5.82<br>(3.85 to<br>7.64)                            | 6.79<br>(4.35 to<br>11.05)                           | 4.97<br>(3.25 to<br>8.12)                            | 7.16<br>(4.65 to<br>11.51)                           | 0.17<br>(0.11 to<br>0.22)                         | 0.27<br>(0.19 to<br>0.38)                         | 0.21<br>(0.15 to<br>0.30)                         | 0.28<br>(0.19 to<br>0.40)                         |
| Foreign body                                    | 60.07<br>(47.73 to<br>76.63)                         | 59.39<br>(43.08 to<br>82.84)                         | 53.35<br>(39.07 to<br>75.21)                         | 60.11<br>(43.31 to<br>84.62)                         | 1.45<br>(1.22 to<br>1.84)                         | 2.10<br>(1.70 to<br>2.74)                         | 2.04<br>(1.65 to<br>2.69)                         | 2.40<br>(1.64 to<br>2.66)                         |
| Pulmonary aspiration and foreign body in airway | 51.49<br>(40.29 to<br>66.79)                         | 49.45<br>(35.77 to<br>69.65)                         | 42.66<br>(30.88 to<br>60.13)                         | 49.97<br>(35.79 to<br>71.29)                         | 1.21<br>(1.01 to<br>1.52)                         | 1.72<br>(1.40 to<br>2.21)                         | 1.61<br>(1.30 to<br>2.10)                         | 1.66<br>(1.33 to<br>2.14)                         |
| Foreign body in other body part                 | 8.57<br>(6.65 to<br>13.53)                           | 9.94<br>(6.88 to<br>15.99)                           | 10.69<br>(7.42 to<br>17.32)                          | 10.14<br>(6.96 to<br>16.42)                          | 0.24<br>(0.19 to<br>0.38)                         | 0.38<br>(0.28 to<br>0.60)                         | 0.43<br>(0.32 to<br>0.67)                         | 0.38<br>(0.28 to<br>0.60)                         |
| Environmental heat and cold exposure            | 9.73<br>(6.83 to<br>18.21)                           | 11.31<br>(6.59 to<br>23.16)                          | 7.31<br>(4.21 to<br>15.27)                           | 12.24<br>(7.00 to<br>25.74)                          | 0.27<br>(0.19 to<br>0.50)                         | 0.41<br>(0.26 to<br>0.80)                         | 0.27<br>(0.17 to<br>0.53)                         | 0.43<br>(0.27 to<br>0.82)                         |
| Other unintentional injuries                    | 13.65<br>(11.29 to<br>16.31)                         | 10.32<br>(6.85 to<br>16.69)                          | 4.78<br>(3.01 to<br>7.82)                            | 10.95<br>(7.19 to<br>18.44)                          | 0.29<br>(0.24 to<br>0.34)                         | 0.27<br>(0.20 to<br>0.38)                         | 0.13<br>(0.09 to<br>0.19)                         | 0.29<br>(0.21 to<br>0.40)                         |
| <b>Self-harm and interpersonal violence</b>     | <b>343.60</b><br><b>(223.26 to</b><br><b>444.62)</b> | <b>310.27</b><br><b>(156.38 to</b><br><b>612.96)</b> | <b>212.33</b><br><b>(111.83 to</b><br><b>416.69)</b> | <b>322.35</b><br><b>(160.76 to</b><br><b>641.17)</b> | <b>6.98</b><br><b>(4.59 to</b><br><b>8.95)</b>    | <b>6.98</b><br><b>(3.87 to</b><br><b>12.18)</b>   | <b>4.91</b><br><b>(2.82 to</b><br><b>8.43)</b>    | <b>7.19</b><br><b>(3.98 to</b><br><b>12.53)</b>   |
| <b>Antigua and Barbuda</b>                      |                                                      |                                                      |                                                      |                                                      |                                                   |                                                   |                                                   |                                                   |
| <b>YLLs (actual counts)</b>                     |                                                      |                                                      |                                                      |                                                      | <b>Deaths (actual counts)</b>                     |                                                   |                                                   |                                                   |

| Cause                                                                        | 2016                                     | 2040 Forecast                             | 2040 Better Scenario                     | 2040 Worse Scenario                        | 2016                                  | 2040 Forecast                         | 2040 Better Scenario                  | 2040 Worse Scenario                   |
|------------------------------------------------------------------------------|------------------------------------------|-------------------------------------------|------------------------------------------|--------------------------------------------|---------------------------------------|---------------------------------------|---------------------------------------|---------------------------------------|
|                                                                              | Self-harm                                | 97.12<br>(73.24 to<br>122.64)             | 115.97<br>(55.33 to<br>245.01)           | 82.23<br>(42.48 to<br>160.25)              | 122.79<br>(56.82 to<br>266.97)        | 2.13<br>(1.63 to<br>2.65)             | 2.79<br>(1.52 to<br>5.43)             | 2.03<br>(1.20 to<br>3.64)             |
| Self-harm by firearm                                                         | 5.73<br>(4.07 to<br>7.87)                | 5.30<br>(2.23 to<br>12.77)                | 3.35<br>(1.52 to<br>8.03)                | 5.67<br>(2.30 to<br>14.05)                 | 0.14<br>(0.10 to<br>0.18)             | 0.14<br>(0.07 to<br>0.29)             | 0.09<br>(0.05 to<br>0.18)             | 0.15<br>(0.07 to<br>0.32)             |
| Self-harm by other specified means                                           | 91.40<br>(68.00 to<br>115.96)            | 110.67<br>(53.07 to<br>234.19)            | 78.88<br>(40.83 to<br>153.42)            | 117.12<br>(54.48 to<br>255.28)             | 1.99<br>(1.51 to<br>2.49)             | 2.65<br>(1.44 to<br>5.12)             | 1.93<br>(1.14 to<br>3.46)             | 2.76<br>(1.48 to<br>5.42)             |
| Interpersonal violence                                                       | 246.48<br>(137.84 to<br>335.41)          | 194.30<br>(89.58 to<br>377.17)            | 130.10<br>(61.33 to<br>250.53)           | 199.56<br>(91.65 to<br>381.98)             | 4.85<br>(2.66 to<br>6.56)             | 4.19<br>(2.00 to<br>7.45)             | 2.89<br>(1.42 to<br>5.05)             | 4.28<br>(2.03 to<br>7.65)             |
| Physical violence by firearm                                                 | 116.32<br>(48.49 to<br>167.78)           | 87.72<br>(30.04 to<br>184.06)             | 54.76<br>(19.32 to<br>112.54)            | 89.74<br>(30.61 to<br>186.98)              | 2.15<br>(0.88 to<br>3.08)             | 1.69<br>(0.58 to<br>3.34)             | 1.06<br>(0.38 to<br>2.08)             | 1.72<br>(0.58 to<br>3.42)             |
| Physical violence by sharp object                                            | 47.39<br>(23.02 to<br>75.59)             | 38.83<br>(16.21 to<br>79.97)              | 25.21<br>(10.91 to<br>51.87)             | 39.19<br>(16.27 to<br>81.48)               | 0.92<br>(0.44 to<br>1.41)             | 0.81<br>(0.36 to<br>1.53)             | 0.54<br>(0.24 to<br>1.02)             | 0.81<br>(0.36 to<br>1.56)             |
| Physical violence by other means                                             | 82.77<br>(44.64 to<br>121.05)            | 67.74<br>(29.34 to<br>134.83)             | 50.13<br>(22.61 to<br>97.45)             | 70.63<br>(30.19 to<br>144.32)              | 1.78<br>(0.96 to<br>2.53)             | 1.69<br>(0.76 to<br>3.00)             | 1.28<br>(0.61 to<br>2.24)             | 1.74<br>(0.77 to<br>3.17)             |
| Forces of nature, conflict and terrorism, and executions and police conflict | 1.33<br>(0.87 to<br>2.46)                | 4.71<br>(0.00 to<br>58.75)                | 4.66<br>(0.00 to<br>57.92)               | 4.72<br>(0.00 to<br>59.06)                 | 0.02<br>(0.02 to<br>0.04)             | 0.12<br>(0.00 to<br>1.34)             | 0.12<br>(0.00 to<br>1.36)             | 0.11<br>(0.00 to<br>1.33)             |
| Exposure to forces of nature                                                 | 0.00<br>(0.00 to<br>0.00)                | 3.84<br>(0.00 to<br>51.46)                | 3.80<br>(0.00 to<br>50.95)               | 3.85<br>(0.00 to<br>51.40)                 | 0.00<br>(0.00 to<br>0.00)             | 0.10<br>(0.00 to<br>1.32)             | 0.10<br>(0.00 to<br>1.34)             | 0.10<br>(0.00 to<br>1.29)             |
| Conflict and terrorism                                                       | 0.00<br>(0.00 to<br>0.00)                | 0.87<br>(0.00 to<br>0.26)                 | 0.86<br>(0.00 to<br>0.26)                | 0.88<br>(0.00 to<br>0.26)                  | 0.00<br>(0.00 to<br>0.00)             | 0.02<br>(0.00 to<br>0.01)             | 0.02<br>(0.00 to<br>0.01)             | 0.02<br>(0.00 to<br>0.01)             |
| Executions and police conflict                                               | 1.33<br>(0.87 to<br>2.46)                | 0.00<br>(0.00 to<br>0.00)                 | 0.00<br>(0.00 to<br>0.00)                | 0.00<br>(0.00 to<br>0.00)                  | 0.02<br>(0.02 to<br>0.04)             | 0.00<br>(0.00 to<br>0.00)             | 0.00<br>(0.00 to<br>0.00)             | 0.00<br>(0.00 to<br>0.00)             |
| <b>The Bahamas</b>                                                           |                                          |                                           |                                          |                                            |                                       |                                       |                                       |                                       |
| Cause                                                                        | YLLs (actual counts)                     |                                           |                                          |                                            | Deaths (actual counts)                |                                       |                                       |                                       |
|                                                                              | 2016                                     | 2040 Forecast                             | 2040 Better Scenario                     | 2040 Worse Scenario                        | 2016                                  | 2040 Forecast                         | 2040 Better Scenario                  | 2040 Worse Scenario                   |
| All causes                                                                   | 74,861.47<br>(67,269.31 to<br>83,938.65) | 91,449.28<br>(71,065.10 to<br>116,928.74) | 64,556.78<br>(50,583.72 to<br>81,235.29) | 109,743.15<br>(84,151.91 to<br>140,211.46) | 2,896.79<br>(2,631.54 to<br>3,192.94) | 4,956.74<br>(4,186.54 to<br>5,862.03) | 3,779.50<br>(3,203.91 to<br>4,406.44) | 5,640.18<br>(4,736.39 to<br>6,662.20) |
| Communicable, maternal, neonatal, and nutritional diseases                   | 12,221.00<br>(9,963.51 to<br>16,590.70)  | 8,567.50<br>(6,293.49 to<br>11,806.85)    | 6,222.08<br>(4,482.85 to<br>8,427.34)    | 11,213.50<br>(8,438.67 to<br>15,364.40)    | 308.32<br>(274.99 to<br>357.00)       | 361.79<br>(281.17 to<br>460.51)       | 283.05<br>(219.94 to<br>359.19)       | 423.76<br>(325.29 to<br>544.91)       |
| HIV/AIDS and tuberculosis                                                    | 5,196.99<br>(4,966.55 to<br>5,442.73)    | 2,221.42<br>(994.10 to<br>3,383.55)       | 1,901.85<br>(726.19 to<br>3,074.75)      | 3,749.12<br>(2,599.32 to<br>5,051.57)      | 121.30<br>(115.86 to<br>127.04)       | 54.03<br>(86.24 to<br>76.84)          | 44.99<br>(14.69 to<br>76.84)          | 86.39<br>(56.56 to<br>121.95)         |
| Tuberculosis                                                                 | 307.34<br>(255.15 to<br>376.08)          | 199.06<br>(109.12 to<br>357.46)           | 67.50<br>(37.53 to<br>119.42)            | 292.66<br>(144.64 to<br>532.30)            | 9.83<br>(8.33 to<br>11.78)            | 8.53<br>(5.05 to<br>13.74)            | 3.12<br>(1.92 to<br>5.01)             | 11.76<br>(6.53 to<br>19.92)           |
| HIV/AIDS                                                                     | 4,889.65<br>(4,674.50 to<br>5,122.14)    | 2,022.36<br>(784.33 to<br>3,201.50)       | 1,834.05<br>(663.93 to<br>3,003.82)      | 3,456.45<br>(2,344.28 to<br>4,771.14)      | 111.46<br>(106.52 to<br>116.55)       | 45.50<br>(14.29 to<br>78.11)          | 41.87<br>(11.92 to<br>73.30)          | 74.63<br>(44.51 to<br>110.40)         |
| Diarrhea, lower respiratory, and other common infectious diseases            | 3,589.05<br>(2,939.01 to<br>4,612.96)    | 4,280.38<br>(3,096.79 to<br>6,198.65)     | 2,916.96<br>(2,154.15 to<br>4,165.18)    | 5,188.21<br>(3,601.26 to<br>7,831.91)      | 137.50<br>(119.63 to<br>158.12)       | 266.67<br>(200.09 to<br>353.61)       | 203.06<br>(154.40 to<br>264.35)       | 294.83<br>(213.70 to<br>410.48)       |
| Diarrheal diseases                                                           | 187.19<br>(121.99 to<br>325.13)          | 173.70<br>(44.46 to<br>532.14)            | 261.59<br>(96.15 to<br>680.21)           | 170.28<br>(43.15 to<br>518.78)             | 4.68<br>(3.76 to<br>6.22)             | 9.74<br>(2.51 to<br>27.64)            | 16.69<br>(6.01 to<br>42.36)           | 8.98<br>(2.29 to<br>27.05)            |
| Intestinal infectious diseases                                               | 1.56<br>(0.54 to<br>3.58)                | 1.23<br>(0.39 to<br>2.98)                 | 1.62<br>(0.51 to<br>3.88)                | 1.22<br>(0.39 to<br>2.90)                  | 0.04<br>(0.01 to<br>0.08)             | 0.04<br>(0.01 to<br>0.08)             | 0.05<br>(0.02 to<br>0.11)             | 0.04<br>(0.01 to<br>0.08)             |



|                                                       |                                            |                                           |                                          |                                           |                                      |                                      |                                      |                                      |
|-------------------------------------------------------|--------------------------------------------|-------------------------------------------|------------------------------------------|-------------------------------------------|--------------------------------------|--------------------------------------|--------------------------------------|--------------------------------------|
| Leishmaniasis                                         | 0.00<br>(0.00 to 0.00)                     | 0.00<br>(0.00 to 0.00)                    | 0.00<br>(0.00 to 0.00)                   | 0.00<br>(0.00 to 0.00)                    | 0.00<br>(0.00 to 0.00)               | 0.00<br>(0.00 to 0.00)               | 0.00<br>(0.00 to 0.00)               | 0.00<br>(0.00 to 0.00)               |
| African trypanosomiasis                               | 0.00<br>(0.00 to 0.00)                     | 0.00<br>(0.00 to 0.00)                    | 0.00<br>(0.00 to 0.00)                   | 0.00<br>(0.00 to 0.00)                    | 0.00<br>(0.00 to 0.00)               | 0.00<br>(0.00 to 0.00)               | 0.00<br>(0.00 to 0.00)               | 0.00<br>(0.00 to 0.00)               |
| Schistosomiasis                                       | 0.00<br>(0.00 to 0.00)                     | 0.00<br>(0.00 to 0.00)                    | 0.00<br>(0.00 to 0.00)                   | 0.00<br>(0.00 to 0.00)                    | 0.00<br>(0.00 to 0.00)               | 0.00<br>(0.00 to 0.00)               | 0.00<br>(0.00 to 0.00)               | 0.00<br>(0.00 to 0.00)               |
| Cysticercosis                                         | 0.00<br>(0.00 to 0.00)                     | 0.00<br>(0.00 to 0.00)                    | 0.00<br>(0.00 to 0.00)                   | 0.00<br>(0.00 to 0.00)                    | 0.00<br>(0.00 to 0.00)               | 0.00<br>(0.00 to 0.00)               | 0.00<br>(0.00 to 0.00)               | 0.00<br>(0.00 to 0.00)               |
| Cystic echinococcosis                                 | 0.00<br>(0.00 to 0.00)                     | 0.00<br>(0.00 to 0.00)                    | 0.00<br>(0.00 to 0.00)                   | 0.00<br>(0.00 to 0.00)                    | 0.00<br>(0.00 to 0.00)               | 0.00<br>(0.00 to 0.00)               | 0.00<br>(0.00 to 0.00)               | 0.00<br>(0.00 to 0.00)               |
| Dengue                                                | 41.76<br>(18.98 to 67.16)                  | 143.32<br>(66.46 to 234.31)               | 136.12<br>(65.65 to 219.63)              | 143.59<br>(65.77 to 235.48)               | 1.01<br>(0.47 to 1.58)               | 4.45<br>(2.16 to 7.06)               | 4.48<br>(2.25 to 6.96)               | 4.34<br>(2.10 to 6.93)               |
| Yellow fever                                          | 0.00<br>(0.00 to 0.00)                     | 0.00<br>(0.00 to 0.00)                    | 0.00<br>(0.00 to 0.00)                   | 0.00<br>(0.00 to 0.00)                    | 0.00<br>(0.00 to 0.00)               | 0.00<br>(0.00 to 0.00)               | 0.00<br>(0.00 to 0.00)               | 0.00<br>(0.00 to 0.00)               |
| Rabies                                                | 0.08<br>(0.05 to 0.14)                     | 0.06<br>(0.03 to 0.11)                    | 0.04<br>(0.02 to 0.07)                   | 0.06<br>(0.03 to 0.11)                    | 0.00<br>(0.00 to 0.00)               | 0.00<br>(0.00 to 0.00)               | 0.00<br>(0.00 to 0.00)               | 0.00<br>(0.00 to 0.00)               |
| Intestinal nematode infections                        | 0.21<br>(0.07 to 0.54)                     | 0.16<br>(0.06 to 0.43)                    | 0.16<br>(0.06 to 0.41)                   | 0.17<br>(0.06 to 0.44)                    | 0.00<br>(0.00 to 0.01)               | 0.00<br>(0.00 to 0.01)               | 0.00<br>(0.00 to 0.01)               | 0.00<br>(0.00 to 0.01)               |
| Other neglected tropical diseases                     | 7.43<br>(5.10 to 11.99)                    | 6.49<br>(3.95 to 10.80)                   | 7.69<br>(4.56 to 12.83)                  | 6.38<br>(3.89 to 10.70)                   | 0.20<br>(0.14 to 0.30)               | 0.26<br>(0.15 to 0.40)               | 0.33<br>(0.19 to 0.53)               | 0.25<br>(0.14 to 0.37)               |
| <b>Maternal disorders</b>                             | <b>220.66</b><br><b>(175.94 to 275.79)</b> | <b>144.47</b><br><b>(73.69 to 243.56)</b> | <b>93.72</b><br><b>(47.26 to 162.67)</b> | <b>151.35</b><br><b>(76.11 to 262.46)</b> | <b>4.17</b><br><b>(3.53 to 5.17)</b> | <b>2.78</b><br><b>(1.47 to 4.66)</b> | <b>1.80</b><br><b>(0.95 to 3.07)</b> | <b>2.91</b><br><b>(1.52 to 5.02)</b> |
| Maternal hemorrhage                                   | 15.01<br>(9.35 to 22.75)                   | 10.83<br>(4.94 to 20.01)                  | 7.07<br>(3.06 to 13.12)                  | 11.23<br>(4.85 to 21.29)                  | 0.28<br>(0.18 to 0.42)               | 0.21<br>(0.09 to 0.37)               | 0.14<br>(0.06 to 0.25)               | 0.21<br>(0.09 to 0.40)               |
| Maternal sepsis and other maternal infections         | 2.24<br>(0.98 to 4.08)                     | 1.79<br>(0.65 to 3.97)                    | 1.15<br>(0.40 to 2.64)                   | 1.87<br>(0.68 to 4.15)                    | 0.04<br>(0.02 to 0.08)               | 0.03<br>(0.01 to 0.08)               | 0.02<br>(0.01 to 0.05)               | 0.04<br>(0.01 to 0.08)               |
| Maternal hypertensive disorders                       | 20.92<br>(14.13 to 30.77)                  | 15.89<br>(6.93 to 30.78)                  | 9.96<br>(4.28 to 20.02)                  | 16.55<br>(7.10 to 32.33)                  | 0.38<br>(0.26 to 0.56)               | 0.29<br>(0.13 to 0.56)               | 0.18<br>(0.08 to 0.36)               | 0.30<br>(0.13 to 0.60)               |
| Maternal obstructed labor and uterine rupture         | 2.01<br>(0.81 to 3.88)                     | 1.79<br>(0.61 to 4.01)                    | 1.05<br>(0.35 to 2.35)                   | 1.87<br>(0.61 to 4.65)                    | 0.04<br>(0.02 to 0.07)               | 0.03<br>(0.01 to 0.08)               | 0.02<br>(0.01 to 0.05)               | 0.04<br>(0.01 to 0.09)               |
| Maternal abortion, miscarriage, and ectopic pregnancy | 96.20<br>(71.75 to 126.13)                 | 41.29<br>(18.86 to 80.11)                 | 26.09<br>(11.86 to 52.03)                | 43.16<br>(19.25 to 87.20)                 | 1.85<br>(1.39 to 2.40)               | 0.82<br>(0.38 to 1.60)               | 0.52<br>(0.24 to 1.01)               | 0.86<br>(0.39 to 1.71)               |
| Indirect maternal deaths                              | 33.83<br>(22.42 to 48.72)                  | 28.13<br>(12.56 to 56.47)                 | 17.49<br>(7.65 to 35.28)                 | 29.64<br>(12.93 to 59.25)                 | 0.62<br>(0.41 to 0.88)               | 0.52<br>(0.23 to 1.02)               | 0.32<br>(0.14 to 0.64)               | 0.54<br>(0.24 to 1.06)               |
| Late maternal deaths                                  | 7.40<br>(4.47 to 12.29)                    | 4.75<br>(1.95 to 9.65)                    | 2.95<br>(1.18 to 6.23)                   | 4.99<br>(2.01 to 10.15)                   | 0.14<br>(0.08 to 0.23)               | 0.09<br>(0.04 to 0.18)               | 0.06<br>(0.02 to 0.11)               | 0.09<br>(0.04 to 0.19)               |
| Maternal deaths aggravated by HIV/AIDS                | 1.42<br>(0.66 to 2.51)                     | 5.85<br>(2.10 to 13.13)                   | 4.34<br>(1.52 to 9.68)                   | 6.40<br>(2.31 to 14.20)                   | 0.03<br>(0.01 to 0.05)               | 0.12<br>(0.04 to 0.26)               | 0.09<br>(0.03 to 0.19)               | 0.13<br>(0.05 to 0.28)               |
| Other maternal disorders                              | 41.63<br>(28.71 to 58.60)                  | 34.16<br>(16.30 to 60.32)                 | 23.61<br>(10.90 to 43.23)                | 35.63<br>(16.51 to 63.63)                 | 0.80<br>(0.55 to 1.11)               | 0.67<br>(0.32 to 1.19)               | 0.46<br>(0.22 to 0.82)               | 0.69<br>(0.33 to 1.23)               |
| <b>The Bahamas</b>                                    |                                            |                                           |                                          |                                           |                                      |                                      |                                      |                                      |
| Cause                                                 | YLLs (actual counts)                       |                                           |                                          |                                           | Deaths (actual counts)               |                                      |                                      |                                      |
|                                                       | 2016                                       | 2040 Forecast                             | 2040 Better Scenario                     | 2040 Worse Scenario                       | 2016                                 | 2040 Forecast                        | 2040 Better Scenario                 | 2040 Worse Scenario                  |



|                                                                         |                                                      |                                                      |                                                      |                                                      |                                                |                                                  |                                                  |                                                 |
|-------------------------------------------------------------------------|------------------------------------------------------|------------------------------------------------------|------------------------------------------------------|------------------------------------------------------|------------------------------------------------|--------------------------------------------------|--------------------------------------------------|-------------------------------------------------|
|                                                                         | 2,675.43<br>(1,168.06 to<br>5,623.68)                | 1,379.30<br>(544.89 to<br>3,217.28)                  | 801.96<br>(323.42 to<br>1,817.59)                    | 1,585.50<br>(620.19 to<br>3,673.94)                  | 30.93<br>(13.51 to<br>65.01)                   | 15.96<br>(6.30 to<br>37.20)                      | 9.28<br>(3.74 to<br>21.03)                       | 18.34<br>(3.74 to<br>42.48)                     |
| <b>Neonatal disorders</b>                                               |                                                      |                                                      |                                                      |                                                      |                                                |                                                  |                                                  |                                                 |
| Neonatal preterm birth                                                  | 892.87<br>(366.00 to<br>1,868.39)                    | 347.00<br>(135.47 to<br>771.01)                      | 146.35<br>(56.39 to<br>319.00)                       | 430.13<br>(160.27 to<br>965.02)                      | 10.32<br>(4.23 to<br>21.59)                    | 4.01<br>(1.57 to<br>8.91)                        | 1.69<br>(0.65 to<br>3.69)                        | 4.97<br>(1.85 to<br>11.15)                      |
| Neonatal encephalopathy due to birth asphyxia and trauma                | 591.94<br>(245.63 to<br>1,278.28)                    | 261.25<br>(90.06 to<br>629.53)                       | 128.27<br>(45.95 to<br>311.61)                       | 296.81<br>(102.53 to<br>717.79)                      | 6.84<br>(2.84 to<br>14.78)                     | 3.02<br>(1.04 to<br>7.28)                        | 1.48<br>(0.53 to<br>3.61)                        | 3.43<br>(1.19 to<br>8.31)                       |
| Neonatal sepsis and other neonatal infections                           | 622.63<br>(249.54 to<br>1,373.90)                    | 426.17<br>(156.70 to<br>1,045.31)                    | 246.65<br>(91.51 to<br>605.69)                       | 478.53<br>(171.52 to<br>1,172.06)                    | 7.20<br>(2.88 to<br>15.88)                     | 4.93<br>(1.81 to<br>12.09)                       | 2.85<br>(1.06 to<br>7.00)                        | 5.53<br>(1.98 to<br>13.55)                      |
| Hemolytic disease and other neonatal jaundice                           | 8.70<br>(3.21 to<br>19.33)                           | 3.32<br>(0.94 to<br>8.49)                            | 1.80<br>(0.54 to<br>4.66)                            | 3.73<br>(1.05 to<br>9.82)                            | 0.10<br>(0.04 to<br>0.22)                      | 0.04<br>(0.01 to<br>0.10)                        | 0.02<br>(0.01 to<br>0.05)                        | 0.04<br>(0.01 to<br>0.11)                       |
| Other neonatal disorders                                                | 559.28<br>(221.54 to<br>1,211.97)                    | 341.55<br>(122.91 to<br>810.81)                      | 278.90<br>(102.95 to<br>649.85)                      | 376.50<br>(135.02 to<br>888.43)                      | 6.47<br>(2.56 to<br>14.02)                     | 3.95<br>(1.42 to<br>9.38)                        | 3.23<br>(1.19 to<br>7.52)                        | 4.36<br>(1.56 to<br>10.29)                      |
| <b>Nutritional deficiencies</b>                                         | <b>169.68</b><br><b>(124.95 to</b><br><b>257.55)</b> | <b>155.15</b><br><b>(126.45 to</b><br><b>195.47)</b> | <b>167.34</b><br><b>(137.64 to</b><br><b>207.81)</b> | <b>149.97</b><br><b>(122.15 to</b><br><b>191.51)</b> | <b>6.18</b><br><b>(5.35 to</b><br><b>7.39)</b> | <b>10.13</b><br><b>(8.01 to</b><br><b>12.10)</b> | <b>12.33</b><br><b>(9.88 to</b><br><b>14.68)</b> | <b>9.32</b><br><b>(7.10 to</b><br><b>11.27)</b> |
| Protein-energy malnutrition                                             | 123.89<br>(83.21 to<br>198.43)                       | 98.61<br>(72.45 to<br>132.44)                        | 123.09<br>(95.06 to<br>158.43)                       | 94.30<br>(69.99 to<br>127.86)                        | 4.29<br>(3.49 to<br>5.49)                      | 6.70<br>(4.75 to<br>8.78)                        | 9.40<br>(7.01 to<br>11.72)                       | 6.09<br>(4.32 to<br>8.02)                       |
| Iodine deficiency                                                       | 1.83<br>(0.12 to<br>6.00)                            | 5.73<br>(0.16 to<br>18.04)                           | 5.05<br>(0.10 to<br>17.74)                           | 5.63<br>(0.16 to<br>17.43)                           | 0.06<br>(0.00 to<br>0.18)                      | 0.33<br>(0.01 to<br>1.35)                        | 0.32<br>(0.00 to<br>1.48)                        | 0.32<br>(0.01 to<br>1.26)                       |
| Dietary iron deficiency                                                 | 2.22<br>(1.20 to<br>3.24)                            | 1.90<br>(1.01 to<br>3.00)                            | 1.98<br>(0.99 to<br>3.15)                            | 1.91<br>(1.02 to<br>3.01)                            | 0.04<br>(0.02 to<br>0.06)                      | 0.05<br>(0.02 to<br>0.07)                        | 0.05<br>(0.02 to<br>0.07)                        | 0.04<br>(0.02 to<br>0.06)                       |
| Other nutritional deficiencies                                          | 41.73<br>(23.11 to<br>58.00)                         | 48.91<br>(24.71 to<br>68.42)                         | 37.22<br>(17.97 to<br>54.80)                         | 48.14<br>(24.17 to<br>67.96)                         | 1.78<br>(0.89 to<br>2.44)                      | 3.05<br>(1.41 to<br>4.31)                        | 2.56<br>(1.13 to<br>3.89)                        | 2.87<br>(1.37 to<br>4.02)                       |
| <b>Other communicable, maternal, neonatal, and nutritional diseases</b> | <b>319.29</b><br><b>(227.08 to</b><br><b>475.45)</b> | <b>236.76</b><br><b>(173.75 to</b><br><b>329.77)</b> | <b>196.53</b><br><b>(143.87 to</b><br><b>269.34)</b> | <b>239.15</b><br><b>(175.26 to</b><br><b>332.34)</b> | <b>7.02</b><br><b>(5.51 to</b><br><b>9.02)</b> | <b>7.51</b><br><b>(5.85 to</b><br><b>9.40)</b>   | <b>6.78</b><br><b>(5.17 to</b><br><b>8.32)</b>   | <b>7.38</b><br><b>(5.69 to</b><br><b>9.24)</b>  |
| Sexually transmitted infections excluding HIV                           | 101.58<br>(35.97 to<br>239.31)                       | 27.67<br>(14.98 to<br>54.08)                         | 18.53<br>(11.04 to<br>33.58)                         | 29.04<br>(15.46 to<br>56.93)                         | 1.50<br>(0.73 to<br>3.12)                      | 0.66<br>(0.46 to<br>0.99)                        | 0.52<br>(0.37 to<br>0.75)                        | 0.67<br>(0.46 to<br>1.02)                       |
| Syphilis                                                                | 87.63<br>(21.85 to<br>227.25)                        | 16.91<br>(5.30 to<br>42.58)                          | 9.27<br>(3.08 to<br>23.53)                           | 18.26<br>(5.69 to<br>45.58)                          | 1.11<br>(0.34 to<br>2.74)                      | 0.29<br>(0.14 to<br>0.59)                        | 0.18<br>(0.10 to<br>0.34)                        | 0.30<br>(0.15 to<br>0.63)                       |
| Chlamydial infection                                                    | 2.64<br>(2.13 to<br>3.34)                            | 2.04<br>(1.42 to<br>3.01)                            | 1.76<br>(1.21 to<br>2.68)                            | 2.04<br>(1.42 to<br>3.02)                            | 0.07<br>(0.06 to<br>0.09)                      | 0.07<br>(0.05 to<br>0.10)                        | 0.07<br>(0.05 to<br>0.09)                        | 0.07<br>(0.05 to<br>0.09)                       |
| Gonococcal infection                                                    | 7.46<br>(5.96 to<br>9.39)                            | 5.88<br>(4.06 to<br>8.43)                            | 5.09<br>(3.42 to<br>7.55)                            | 5.88<br>(4.03 to<br>8.46)                            | 0.21<br>(0.17 to<br>0.26)                      | 0.21<br>(0.16 to<br>0.28)                        | 0.20<br>(0.14 to<br>0.27)                        | 0.21<br>(0.15 to<br>0.28)                       |
| Other sexually transmitted infections                                   | 3.85<br>(3.07 to<br>4.91)                            | 2.84<br>(1.94 to<br>4.25)                            | 2.42<br>(1.63 to<br>3.71)                            | 2.86<br>(1.96 to<br>4.29)                            | 0.10<br>(0.08 to<br>0.12)                      | 0.09<br>(0.06 to<br>0.12)                        | 0.08<br>(0.06 to<br>0.11)                        | 0.09<br>(0.06 to<br>0.12)                       |
| Acute hepatitis                                                         | 38.13<br>(31.81 to<br>45.35)                         | 31.91<br>(22.40 to<br>45.54)                         | 16.70<br>(11.72 to<br>23.88)                         | 32.80<br>(22.88 to<br>46.77)                         | 1.00<br>(0.84 to<br>1.17)                      | 1.08<br>(0.80 to<br>1.43)                        | 0.59<br>(0.43 to<br>0.79)                        | 1.09<br>(0.81 to<br>1.44)                       |
| Acute hepatitis A                                                       | 1.07<br>(0.49 to<br>2.03)                            | 0.70<br>(0.27 to<br>1.46)                            | 0.43<br>(0.17 to<br>0.90)                            | 0.73<br>(0.29 to<br>1.51)                            | 0.02<br>(0.01 to<br>0.03)                      | 0.02<br>(0.01 to<br>0.04)                        | 0.01<br>(0.00 to<br>0.03)                        | 0.02<br>(0.01 to<br>0.04)                       |
| Acute hepatitis B                                                       | 27.83<br>(22.73 to<br>33.85)                         | 23.92<br>(16.33 to<br>34.38)                         | 12.30<br>(8.27 to<br>17.94)                          | 24.60<br>(16.73 to<br>34.99)                         | 0.74<br>(0.61 to<br>0.89)                      | 0.78<br>(0.55 to<br>1.09)                        | 0.42<br>(0.29 to<br>0.58)                        | 0.79<br>(0.56 to<br>1.09)                       |
| Acute hepatitis C                                                       | 1.67<br>(1.20 to<br>2.28)                            | 1.58<br>(1.01 to<br>2.38)                            | 0.85<br>(0.53 to<br>1.28)                            | 1.62<br>(1.01 to<br>2.49)                            | 0.05<br>(0.03 to<br>0.07)                      | 0.06<br>(0.04 to<br>0.08)                        | 0.03<br>(0.02 to<br>0.05)                        | 0.06<br>(0.04 to<br>0.08)                       |
| Acute hepatitis E                                                       | 7.55<br>(5.23 to<br>10.51)                           | 5.70<br>(3.51 to<br>8.68)                            | 3.11<br>(1.88 to<br>4.84)                            | 5.85<br>(3.56 to<br>9.04)                            | 0.19<br>(0.13 to<br>0.26)                      | 0.22<br>(0.14 to<br>0.33)                        | 0.13<br>(0.08 to<br>0.20)                        | 0.22<br>(0.13 to<br>0.33)                       |

|                                       |                                          |                                          |                                          |                                           |                                       |                                       |                                       |                                       |
|---------------------------------------|------------------------------------------|------------------------------------------|------------------------------------------|-------------------------------------------|---------------------------------------|---------------------------------------|---------------------------------------|---------------------------------------|
|                                       | 179.88<br>(129.50 to<br>233.07)          | 177.19<br>(124.59 to<br>252.53)          | 161.30<br>(113.91 to<br>219.78)          | 177.32<br>(124.20 to<br>251.19)           | 4.53<br>(3.36 to<br>5.61)             | 5.77<br>(4.24 to<br>7.43)             | 5.68<br>(4.17 to<br>7.05)             | 5.63<br>(4.06 to<br>7.25)             |
| Other unspecified infectious diseases |                                          |                                          |                                          |                                           |                                       |                                       |                                       |                                       |
| Non-communicable diseases             | 50,964.48<br>(45,855.68 to<br>56,788.53) | 73,101.56<br>(55,539.18 to<br>94,298.18) | 52,949.69<br>(40,864.89 to<br>68,314.86) | 87,118.62<br>(65,399.57 to<br>114,624.65) | 2,328.74<br>(2,108.95 to<br>2,571.19) | 4,320.07<br>(3,599.30 to<br>5,187.69) | 3,327.89<br>(2,794.52 to<br>3,975.94) | 4,909.80<br>(4,088.50 to<br>5,865.64) |
| <b>The Bahamas</b>                    |                                          |                                          |                                          |                                           |                                       |                                       |                                       |                                       |
| Cause                                 | YLLs (actual counts)                     |                                          |                                          |                                           | Deaths (actual counts)                |                                       |                                       |                                       |
|                                       | 2016                                     | 2040 Forecast                            | 2040 Better Scenario                     | 2040 Worse Scenario                       | 2016                                  | 2040 Forecast                         | 2040 Better Scenario                  | 2040 Worse Scenario                   |
| Neoplasms                             | 14,126.31<br>(12,699.48 to<br>15,777.21) | 21,070.66<br>(16,695.59 to<br>25,895.47) | 17,401.27<br>(13,827.08 to<br>21,359.81) | 24,200.73<br>(18,891.96 to<br>30,662.89)  | 598.16<br>(539.36 to<br>663.30)       | 1,128.19<br>(951.09 to<br>1,322.72)   | 978.90<br>(823.91 to<br>1,151.01)     | 1,238.75<br>(1,031.41 to<br>1,484.56) |
| Lip and oral cavity cancer            | 251.54<br>(218.24 to<br>285.95)          | 320.28<br>(183.47 to<br>521.53)          | 328.93<br>(140.10 to<br>384.51)          | 569.49<br>(287.63 to<br>1,010.06)         | 9.90<br>(8.69 to<br>11.10)            | 14.76<br>(9.23 to<br>22.54)           | 11.67<br>(7.50 to<br>17.78)           | 24.63<br>(13.50 to<br>40.74)          |
| Nasopharynx cancer                    | 65.44<br>(56.77 to<br>75.34)             | 62.27<br>(33.88 to<br>104.43)            | 37.49<br>(20.99 to<br>63.46)             | 114.58<br>(56.24 to<br>202.39)            | 2.00<br>(1.76 to<br>2.30)             | 2.18<br>(1.30 to<br>3.44)             | 1.36<br>(0.84 to<br>2.12)             | 3.87<br>(2.08 to<br>6.47)             |
| Other pharynx cancer                  | 143.53<br>(119.88 to<br>170.46)          | 177.01<br>(95.92 to<br>293.69)           | 195.09<br>(105.54 to<br>325.13)          | 239.88<br>(118.63 to<br>416.11)           | 5.31<br>(4.49 to<br>6.18)             | 7.87<br>(4.59 to<br>12.37)            | 9.00<br>(5.25 to<br>14.25)            | 10.27<br>(5.37 to<br>17.20)           |
| Esophageal cancer                     | 374.90<br>(325.28 to<br>431.12)          | 551.30<br>(347.11 to<br>840.37)          | 519.04<br>(332.43 to<br>767.00)          | 843.82<br>(482.45 to<br>1,378.03)         | 16.29<br>(14.29 to<br>18.62)          | 27.81<br>(19.12 to<br>39.80)          | 25.53<br>(18.99 to<br>38.74)          | 40.37<br>(25.09 to<br>63.65)          |
| Stomach cancer                        | 690.01<br>(610.95 to<br>772.25)          | 876.64<br>(658.35 to<br>1,151.92)        | 566.39<br>(428.33 to<br>719.36)          | 910.24<br>(679.79 to<br>1,188.11)         | 32.16<br>(28.49 to<br>35.66)          | 49.46<br>(38.90 to<br>63.47)          | 33.52<br>(26.95 to<br>41.62)          | 49.86<br>(39.12 to<br>63.58)          |
| Colon and rectum cancer               | 1,446.60<br>(1,274.37 to<br>1,629.96)    | 2,174.40<br>(1,500.40 to<br>3,221.55)    | 1,658.62<br>(1,132.56 to<br>2,417.72)    | 2,578.38<br>(1,712.82 to<br>3,349.59)     | 66.99<br>(58.85 to<br>75.37)          | 125.56<br>(87.17 to<br>181.24)        | 100.56<br>(70.28 to<br>143.53)        | 143.38<br>(97.63 to<br>208.09)        |
| Liver cancer                          | 492.17<br>(436.82 to<br>560.65)          | 867.94<br>(602.31 to<br>1,249.61)        | 952.69<br>(660.25 to<br>1,351.27)        | 1,095.43<br>(712.40 to<br>1,678.78)       | 20.62<br>(18.30 to<br>23.22)          | 43.95<br>(32.30 to<br>60.51)          | 30.46<br>(37.34 to<br>68.53)          | 52.75<br>(36.27 to<br>77.67)          |
| Liver cancer due to hepatitis B       | 196.62<br>(162.43 to<br>235.20)          | 326.80<br>(218.24 to<br>497.07)          | 356.06<br>(239.62 to<br>532.76)          | 399.14<br>(250.25 to<br>645.41)           | 7.16<br>(5.91 to<br>8.47)             | 14.26<br>(10.07 to<br>20.54)          | 16.21<br>(11.35 to<br>22.95)          | 16.69<br>(11.00 to<br>25.58)          |
| Liver cancer due to hepatitis C       | 108.17<br>(90.47 to<br>128.01)           | 216.25<br>(155.64 to<br>303.92)          | 240.89<br>(172.78 to<br>332.55)          | 251.57<br>(169.80 to<br>378.07)           | 5.48<br>(4.61 to<br>6.48)             | 13.00<br>(9.50 to<br>17.99)           | 15.14<br>(11.13 to<br>20.66)          | 14.48<br>(9.94 to<br>20.98)           |
| Liver cancer due to alcohol use       | 101.49<br>(83.83 to<br>119.75)           | 173.51<br>(115.84 to<br>256.96)          | 188.34<br>(127.42 to<br>273.09)          | 258.97<br>(159.96 to<br>422.02)           | 4.51<br>(3.78 to<br>5.35)             | 9.17<br>(6.37 to<br>13.28)            | 10.39<br>(7.21 to<br>14.78)           | 12.73<br>(8.28 to<br>19.62)           |
| Liver cancer due to other causes      | 85.89<br>(72.28 to<br>102.02)            | 151.38<br>(98.59 to<br>232.94)           | 167.39<br>(109.15 to<br>251.61)          | 185.74<br>(112.95 to<br>301.63)           | 3.46<br>(2.93 to<br>4.05)             | 7.52<br>(5.08 to<br>11.33)            | 8.72<br>(5.96 to<br>12.91)            | 8.85<br>(5.50 to<br>14.12)            |
| Gallbladder and biliary tract cancer  | 183.71<br>(159.44 to<br>231.64)          | 230.38<br>(189.40 to<br>296.99)          | 218.80<br>(176.83 to<br>284.13)          | 221.98<br>(184.62 to<br>290.06)           | 8.36<br>(7.24 to<br>10.58)            | 12.42<br>(10.66 to<br>15.99)          | 12.30<br>(10.44 to<br>15.87)          | 11.73<br>(10.13 to<br>15.22)          |
| Pancreatic cancer                     | 415.91<br>(365.65 to<br>466.72)          | 753.24<br>(574.63 to<br>970.64)          | 754.82<br>(574.31 to<br>972.85)          | 804.21<br>(599.43 to<br>1,062.74)         | 19.36<br>(17.11 to<br>21.74)          | 41.14<br>(32.58 to<br>52.17)          | 43.09<br>(33.92 to<br>54.51)          | 42.62<br>(32.79 to<br>55.37)          |
| Larynx cancer                         | 241.48<br>(206.07 to<br>278.18)          | 256.17<br>(137.47 to<br>446.41)          | 149.73<br>(86.03 to<br>252.06)           | 461.35<br>(226.37 to<br>857.24)           | 9.84<br>(8.47 to<br>11.28)            | 12.11<br>(6.93 to<br>20.43)           | 7.49<br>(4.58 to<br>12.25)            | 20.96<br>(10.65 to<br>37.73)          |
| Tracheal, bronchus, and lung cancer   | 1,320.13<br>(1,149.99 to<br>1,485.28)    | 1,833.43<br>(1,227.71 to<br>2,604.32)    | 1,288.63<br>(895.69 to<br>1,777.78)      | 3,036.62<br>(1,955.60 to<br>4,509.26)     | 54.82<br>(48.10 to<br>61.50)          | 88.27<br>(62.63 to<br>117.95)         | 65.90<br>(48.09 to<br>86.39)          | 141.71<br>(95.59 to<br>200.54)        |
| Malignant skin melanoma               | 109.07<br>(92.84 to<br>131.73)           | 152.19<br>(120.94 to<br>194.61)          | 200.73<br>(157.57 to<br>260.59)          | 144.20<br>(116.01 to<br>183.49)           | 4.22<br>(3.55 to<br>5.12)             | 7.41<br>(6.06 to<br>9.03)             | 10.22<br>(8.41 to<br>12.73)           | 6.86<br>(5.62 to<br>8.50)             |
| Non-melanoma skin cancer              | 76.93<br>(66.60 to<br>87.90)             | 142.94<br>(117.07 to<br>172.20)          | 99.02<br>(79.28 to<br>121.47)            | 139.28<br>(115.50 to<br>167.64)           | 3.29<br>(2.90 to<br>3.68)             | 7.90<br>(6.66 to<br>9.13)             | 5.83<br>(4.95 to<br>6.81)             | 7.49<br>(6.31 to<br>8.73)             |

|                   |                                       |                                       |                                       |                                       |                               |                                 |                                 |                                 |
|-------------------|---------------------------------------|---------------------------------------|---------------------------------------|---------------------------------------|-------------------------------|---------------------------------|---------------------------------|---------------------------------|
| Breast cancer     | 2,192.82<br>(1,840.21 to<br>2,601.38) | 2,699.86<br>(1,876.14 to<br>3,805.09) | 2,007.39<br>(1,408.50 to<br>2,818.92) | 3,058.67<br>(2,124.72 to<br>4,446.07) | 81.01<br>(68.42 to<br>95.76)  | 125.30<br>(91.21 to<br>171.98)  | 97.69<br>(72.19 to<br>134.72)   | 137.64<br>(99.17 to<br>194.20)  |
| Cervical cancer   | 734.82<br>(606.34 to<br>875.78)       | 811.95<br>(583.94 to<br>1,123.46)     | 532.81<br>(382.91 to<br>733.61)       | 840.49<br>(598.25 to<br>1,194.04)     | 28.52<br>(23.54 to<br>33.69)  | 37.89<br>(28.32 to<br>50.14)    | 25.99<br>(19.74 to<br>34.23)    | 38.37<br>(28.59 to<br>51.46)    |
| Uterine cancer    | 288.70<br>(236.37 to<br>345.69)       | 400.90<br>(309.63 to<br>508.88)       | 317.35<br>(239.89 to<br>412.04)       | 394.74<br>(305.14 to<br>496.77)       | 14.57<br>(11.88 to<br>17.42)  | 23.11<br>(18.34 to<br>28.64)    | 18.96<br>(14.90 to<br>23.67)    | 22.43<br>(18.02 to<br>27.44)    |
| Ovarian cancer    | 381.17<br>(307.41 to<br>468.35)       | 638.88<br>(421.54 to<br>963.49)       | 544.43<br>(354.63 to<br>830.38)       | 670.40<br>(426.93 to<br>1,038.53)     | 17.13<br>(13.76 to<br>21.18)  | 33.96<br>(22.63 to<br>50.59)    | 29.86<br>(19.82 to<br>45.20)    | 35.14<br>(22.69 to<br>54.19)    |
| Prostate cancer   | 1,382.28<br>(1,144.84 to<br>1,649.75) | 3,519.78<br>(2,924.42 to<br>4,198.59) | 3,024.56<br>(2,484.65 to<br>3,596.19) | 3,339.14<br>(2,629.36 to<br>4,011.08) | 91.17<br>(75.94 to<br>107.80) | 266.56<br>(202.15 to<br>315.19) | 239.66<br>(192.62 to<br>279.66) | 247.38<br>(179.00 to<br>293.91) |
| Testicular cancer | 4.64<br>(3.63 to<br>5.96)             | 5.01<br>(3.22 to<br>8.07)             | 3.58<br>(2.28 to<br>5.76)             | 5.01<br>(3.23 to<br>8.03)             | 0.10<br>(0.08 to<br>0.13)     | 0.13<br>(0.10 to<br>0.19)       | 0.10<br>(0.07 to<br>0.14)       | 0.13<br>(0.09 to<br>0.19)       |

**The Bahamas**

| Cause                           | YLLs (actual counts)            |                                   |                                 |                                   | Deaths (actual counts)       |                              |                              |                              |
|---------------------------------|---------------------------------|-----------------------------------|---------------------------------|-----------------------------------|------------------------------|------------------------------|------------------------------|------------------------------|
|                                 | 2016                            | 2040 Forecast                     | 2040 Better Scenario            | 2040 Worse Scenario               | 2016                         | 2040 Forecast                | 2040 Better Scenario         | 2040 Worse Scenario          |
| Kidney cancer                   | 193.08<br>(169.36 to<br>221.01) | 322.08<br>(251.34 to<br>408.38)   | 334.37<br>(260.50 to<br>419.52) | 332.42<br>(258.18 to<br>427.75)   | 7.01<br>(6.17 to<br>7.91)    | 14.52<br>(11.96 to<br>17.34) | 15.83<br>(12.95 to<br>18.94) | 14.56<br>(11.78 to<br>17.80) |
| Bladder cancer                  | 120.58<br>(107.27 to<br>136.44) | 196.44<br>(149.88 to<br>258.52)   | 169.62<br>(128.96 to<br>220.91) | 216.07<br>(159.22 to<br>294.66)   | 6.53<br>(5.81 to<br>7.31)    | 12.75<br>(10.05 to<br>16.52) | 11.66<br>(9.26 to<br>14.92)  | 13.55<br>(10.17 to<br>18.15) |
| Brain and nervous system cancer | 337.46<br>(291.19 to<br>396.48) | 518.83<br>(414.63 to<br>652.50)   | 450.11<br>(358.94 to<br>572.71) | 512.67<br>(415.32 to<br>649.36)   | 9.65<br>(8.45 to<br>11.40)   | 18.98<br>(15.89 to<br>22.91) | 17.17<br>(14.18 to<br>20.91) | 18.37<br>(15.61 to<br>22.05) |
| Thyroid cancer                  | 45.68<br>(39.82 to<br>51.95)    | 65.39<br>(46.68 to<br>92.64)      | 53.30<br>(37.65 to<br>75.28)    | 71.39<br>(48.98 to<br>106.28)     | 1.89<br>(1.64 to<br>2.16)    | 3.26<br>(2.40 to<br>4.50)    | 2.74<br>(2.04 to<br>3.74)    | 3.46<br>(2.42 to<br>5.00)    |
| Mesothelioma                    | 25.38<br>(22.05 to<br>29.54)    | 39.24<br>(31.25 to<br>49.78)      | 41.10<br>(32.07 to<br>52.18)    | 37.65<br>(30.24 to<br>47.57)      | 0.91<br>(0.81 to<br>1.06)    | 1.78<br>(1.48 to<br>2.16)    | 1.96<br>(1.61 to<br>2.39)    | 1.67<br>(1.39 to<br>2.01)    |
| Hodgkin lymphoma                | 55.36<br>(46.45 to<br>66.16)    | 53.50<br>(38.04 to<br>75.10)      | 32.26<br>(22.91 to<br>45.73)    | 54.05<br>(38.68 to<br>75.09)      | 1.46<br>(1.23 to<br>1.73)    | 1.79<br>(1.39 to<br>2.30)    | 1.12<br>(0.86 to<br>1.45)    | 1.77<br>(1.36 to<br>2.31)    |
| Non-Hodgkin lymphoma            | 513.88<br>(446.84 to<br>593.25) | 681.02<br>(513.90 to<br>897.83)   | 549.57<br>(409.29 to<br>725.37) | 709.20<br>(525.86 to<br>957.39)   | 15.79<br>(13.85 to<br>18.15) | 26.28<br>(20.84 to<br>32.83) | 22.05<br>(17.60 to<br>27.66) | 26.75<br>(20.90 to<br>34.20) |
| Multiple myeloma                | 429.14<br>(324.48 to<br>500.04) | 676.71<br>(479.04 to<br>878.87)   | 614.19<br>(431.72 to<br>792.46) | 698.70<br>(491.87 to<br>927.27)   | 18.26<br>(13.97 to<br>21.21) | 33.64<br>(24.39 to<br>42.71) | 31.63<br>(22.75 to<br>40.29) | 33.99<br>(24.54 to<br>44.24) |
| Leukemia                        | 728.51<br>(637.53 to<br>845.49) | 825.25<br>(622.64 to<br>1,082.57) | 672.39<br>(513.28 to<br>889.11) | 915.81<br>(670.31 to<br>1,241.17) | 21.83<br>(19.40 to<br>24.83) | 34.02<br>(27.25 to<br>42.22) | 29.06<br>(23.47 to<br>35.94) | 36.48<br>(28.66 to<br>46.96) |
| Acute lymphoid leukemia         | 95.83<br>(73.20 to<br>127.86)   | 71.44<br>(47.08 to<br>106.04)     | 54.33<br>(36.33 to<br>81.41)    | 78.60<br>(52.35 to<br>117.58)     | 1.79<br>(1.46 to<br>2.25)    | 1.74<br>(1.29 to<br>2.39)    | 1.38<br>(1.02 to<br>1.88)    | 1.91<br>(1.39 to<br>2.63)    |
| Chronic lymphoid leukemia       | 55.08<br>(45.55 to<br>66.05)    | 62.38<br>(44.63 to<br>85.21)      | 56.60<br>(40.46 to<br>77.64)    | 67.56<br>(46.36 to<br>96.24)      | 2.57<br>(2.12 to<br>3.09)    | 3.58<br>(2.57 to<br>4.89)    | 3.40<br>(2.47 to<br>4.63)    | 3.74<br>(2.59 to<br>5.27)    |
| Acute myeloid leukemia          | 215.48<br>(183.94 to<br>256.72) | 280.87<br>(204.72 to<br>380.27)   | 265.58<br>(196.49 to<br>359.93) | 310.66<br>(219.76 to<br>426.41)   | 5.80<br>(5.01 to<br>6.74)    | 10.19<br>(7.94 to<br>12.98)  | 10.13<br>(7.97 to<br>12.76)  | 10.94<br>(8.25 to<br>14.23)  |
| Chronic myeloid leukemia        | 67.67<br>(54.73 to<br>83.98)    | 48.99<br>(32.20 to<br>74.66)      | 27.09<br>(17.96 to<br>40.65)    | 56.31<br>(35.26 to<br>86.94)      | 2.24<br>(1.84 to<br>2.72)    | 2.09<br>(1.48 to<br>3.00)    | 1.21<br>(0.85 to<br>1.70)    | 2.31<br>(1.56 to<br>3.33)    |
| Other leukemia                  | 294.44<br>(256.98 to<br>341.76) | 361.55<br>(279.59 to<br>471.56)   | 268.80<br>(208.23 to<br>349.86) | 402.68<br>(302.72 to<br>536.84)   | 9.43<br>(8.28 to<br>10.78)   | 16.42<br>(13.39 to<br>20.16) | 12.94<br>(10.62 to<br>15.74) | 17.58<br>(14.04 to<br>22.18) |

|                                |                                                   |                                                   |                                                   |                                                   |                                              |                                                |                                              |                                                |
|--------------------------------|---------------------------------------------------|---------------------------------------------------|---------------------------------------------------|---------------------------------------------------|----------------------------------------------|------------------------------------------------|----------------------------------------------|------------------------------------------------|
| Other neoplasms                | 881.39<br>(774.64 to<br>1,011.26)                 | 1,217.64<br>(988.26 to<br>1,506.76)               | 1,174.25<br>(938.94 to<br>1,460.05)               | 1,184.88<br>(963.33 to<br>1,457.12)               | 29.17<br>(25.75 to<br>33.15)                 | 53.38<br>(46.17 to<br>61.81)                   | 54.50<br>(46.52 to<br>63.21)                 | 50.57<br>(43.97 to<br>58.17)                   |
| <b>Cardiovascular diseases</b> | <b>19,440.61<br/>(17,470.52 to<br/>21,570.33)</b> | <b>24,801.24<br/>(16,631.04 to<br/>36,905.92)</b> | <b>14,233.53<br/>(10,075.96 to<br/>20,008.85)</b> | <b>32,500.20<br/>(21,088.51 to<br/>49,077.18)</b> | <b>1,004.89<br/>(905.31 to<br/>1,113.19)</b> | <b>1,624.35<br/>(1,194.29 to<br/>2,241.27)</b> | <b>1,035.12<br/>(792.25 to<br/>1,388.39)</b> | <b>1,974.40<br/>(1,427.12 to<br/>2,781.58)</b> |
| Rheumatic heart disease        | 212.26<br>(179.57 to<br>250.99)                   | 159.75<br>(112.94 to<br>225.49)                   | 104.06<br>(73.36 to<br>145.70)                    | 159.78<br>(113.67 to<br>229.31)                   | 7.70<br>(6.38 to<br>9.21)                    | 8.81<br>(6.34 to<br>11.59)                     | 6.30<br>(4.53 to<br>8.28)                    | 8.51<br>(6.11 to<br>11.35)                     |
| Ischemic heart disease         | 7,802.57<br>(6,820.98 to<br>8,777.09)             | 8,532.72<br>(4,676.26 to<br>15,247.95)            | 3,904.29<br>(2,086.44 to<br>6,882.87)             | 12,478.72<br>(6,513.84 to<br>22,589.81)           | 409.85<br>(360.02 to<br>459.86)              | 548.83<br>(320.72 to<br>874.59)                | 282.66<br>(164.23 to<br>463.45)              | 733.03<br>(426.07 to<br>1,219.73)              |
| Stroke                         | 4,665.34<br>(4,044.91 to<br>5,252.78)             | 4,772.94<br>(2,816.71 to<br>7,801.66)             | 2,108.09<br>(1,293.84 to<br>3,333.52)             | 7,114.20<br>(4,034.25 to<br>12,093.65)            | 245.99<br>(210.47 to<br>276.98)              | 312.23<br>(199.19 to<br>487.00)                | 155.70<br>(100.23 to<br>243.93)              | 418.79<br>(260.16 to<br>667.99)                |
| Ischemic stroke                | 1,644.13<br>(1,406.55 to<br>1,873.29)             | 1,860.75<br>(1,022.46 to<br>3,418.05)             | 926.66<br>(516.97 to<br>1,746.22)                 | 2,543.58<br>(1,339.05 to<br>5,060.16)             | 106.42<br>(89.86 to<br>121.88)               | 144.23<br>(79.72 to<br>281.03)                 | 79.30<br>(44.74 to<br>159.81)                | 180.87<br>(97.76 to<br>386.58)                 |
| Intracerebral hemorrhage       | 3,021.21<br>(2,616.24 to<br>3,402.40)             | 2,912.20<br>(1,628.08 to<br>4,933.51)             | 1,181.43<br>(720.03 to<br>1,885.43)               | 4,570.62<br>(2,457.32 to<br>7,821.18)             | 139.56<br>(120.14 to<br>157.44)              | 168.01<br>(104.89 to<br>257.86)                | 76.40<br>(49.93 to<br>113.75)                | 237.92<br>(141.23 to<br>377.00)                |
| Hypertensive heart disease     | 3,450.37<br>(2,821.96 to<br>4,848.24)             | 6,532.44<br>(4,211.58 to<br>11,148.74)            | 4,848.77<br>(3,389.78 to<br>7,186.73)             | 7,772.80<br>(4,791.89 to<br>13,817.56)            | 196.20<br>(159.71 to<br>266.36)              | 470.41<br>(315.52 to<br>824.44)                | 373.41<br>(273.19 to<br>553.09)              | 532.05<br>(343.51 to<br>942.23)                |
| Cardiomyopathy and myocarditis | 1,090.97<br>(874.17 to<br>1,270.39)               | 1,284.85<br>(847.96 to<br>1,893.57)               | 796.40<br>(534.32 to<br>1,163.32)                 | 1,354.73<br>(893.38 to<br>1,999.57)               | 39.91<br>(32.79 to<br>46.27)                 | 61.42<br>(42.12 to<br>86.29)                   | 40.97<br>(28.88 to<br>56.08)                 | 62.31<br>(43.34 to<br>87.98)                   |
| Myocarditis                    | 79.58<br>(55.59 to<br>98.97)                      | 97.61<br>(64.54 to<br>129.85)                     | 97.02<br>(63.10 to<br>131.70)                     | 94.19<br>(63.05 to<br>124.20)                     | 3.43<br>(2.40 to<br>4.38)                    | 5.88<br>(3.87 to<br>7.83)                      | 6.54<br>(4.27 to<br>8.67)                    | 5.47<br>(3.62 to<br>7.35)                      |

**The Bahamas**

| Cause                                         | YLLs (actual counts)                           |                                                |                                                |                                                | Deaths (actual counts)                |                                        |                                       |                                         |
|-----------------------------------------------|------------------------------------------------|------------------------------------------------|------------------------------------------------|------------------------------------------------|---------------------------------------|----------------------------------------|---------------------------------------|-----------------------------------------|
|                                               | 2016                                           | 2040 Forecast                                  | 2040 Better Scenario                           | 2040 Worse Scenario                            | 2016                                  | 2040 Forecast                          | 2040 Better Scenario                  | 2040 Worse Scenario                     |
| Alcoholic cardiomyopathy                      | 177.55<br>(133.34 to<br>236.10)                | 179.43<br>(124.72 to<br>250.33)                | 175.99<br>(121.96 to<br>243.84)                | 226.03<br>(157.83 to<br>308.87)                | 6.23<br>(4.79 to<br>8.19)             | 7.64<br>(5.58 to<br>10.20)             | 7.75<br>(5.56 to<br>10.19)            | 9.14<br>(6.78 to<br>11.94)              |
| Other cardiomyopathy                          | 833.84<br>(646.00 to<br>972.80)                | 1,007.81<br>(620.55 to<br>1,568.22)            | 523.39<br>(315.19 to<br>818.80)                | 1,034.51<br>(624.78 to<br>1,629.16)            | 30.24<br>(23.79 to<br>35.25)          | 47.90<br>(30.33 to<br>71.66)           | 26.68<br>(16.76 to<br>39.42)          | 47.70<br>(30.20 to<br>71.11)            |
| Atrial fibrillation and flutter               | 127.70<br>(100.07 to<br>163.84)                | 285.62<br>(204.37 to<br>380.22)                | 266.53<br>(193.55 to<br>352.87)                | 288.84<br>(204.50 to<br>388.90)                | 11.54<br>(8.74 to<br>14.85)           | 28.26<br>(19.17 to<br>37.92)           | 27.89<br>(19.26 to<br>37.05)          | 27.66<br>(18.41 to<br>37.46)            |
| Aortic aneurysm                               | 319.18<br>(275.50 to<br>362.64)                | 447.31<br>(334.74 to<br>596.27)                | 376.92<br>(280.79 to<br>499.42)                | 449.03<br>(337.70 to<br>603.48)                | 16.25<br>(13.96 to<br>18.55)          | 27.92<br>(21.99 to<br>35.86)           | 25.46<br>(19.85 to<br>32.25)          | 26.97<br>(21.19 to<br>34.66)            |
| Peripheral artery disease                     | 90.17<br>(65.01 to<br>135.58)                  | 270.78<br>(179.94 to<br>416.17)                | 278.43<br>(178.07 to<br>427.25)                | 281.47<br>(188.69 to<br>433.81)                | 7.89<br>(5.22 to<br>11.88)            | 27.20<br>(15.92 to<br>41.64)           | 30.05<br>(18.01 to<br>46.01)          | 27.08<br>(15.78 to<br>42.43)            |
| Endocarditis                                  | 252.68<br>(183.77 to<br>328.51)                | 379.73<br>(241.85 to<br>558.33)                | 339.55<br>(214.76 to<br>491.71)                | 376.97<br>(236.71 to<br>562.62)                | 9.86<br>(7.08 to<br>13.13)            | 19.59<br>(12.76 to<br>28.63)           | 18.75<br>(12.12 to<br>27.72)          | 18.86<br>(12.37 to<br>28.07)            |
| Other cardiovascular and circulatory diseases | 1,429.37<br>(1,247.95 to<br>1,638.30)          | 2,135.09<br>(1,531.34 to<br>2,977.53)          | 1,210.47<br>(893.04 to<br>1,658.13)            | 2,223.66<br>(1,615.94 to<br>3,145.95)          | 59.70<br>(51.97 to<br>68.21)          | 119.68<br>(89.61 to<br>154.80)         | 73.93<br>(55.77 to<br>94.46)          | 119.14<br>(90.69 to<br>156.41)          |
| <b>Chronic respiratory diseases</b>           | <b>1,221.20<br/>(1,092.85 to<br/>1,365.51)</b> | <b>1,579.79<br/>(1,218.04 to<br/>2,004.80)</b> | <b>1,330.08<br/>(1,052.58 to<br/>1,648.69)</b> | <b>2,113.26<br/>(1,549.33 to<br/>2,842.92)</b> | <b>56.72<br/>(50.84 to<br/>62.66)</b> | <b>93.60<br/>(74.43 to<br/>115.79)</b> | <b>82.67<br/>(68.83 to<br/>98.06)</b> | <b>120.89<br/>(91.15 to<br/>157.75)</b> |
| Chronic obstructive pulmonary disease         | 634.76<br>(557.20 to<br>717.06)                | 914.37<br>(639.20 to<br>1,258.77)              | 595.17<br>(427.06 to<br>801.51)                | 1,410.94<br>(938.68 to<br>2,080.91)            | 34.49<br>(30.37 to<br>38.64)          | 59.41<br>(43.12 to<br>78.97)           | 42.27<br>(31.25 to<br>54.83)          | 86.31<br>(58.33 to<br>120.35)           |
| Pneumoconiosis                                | 4.50<br>(3.76 to<br>5.36)                      | 6.22<br>(4.70 to<br>8.32)                      | 5.82<br>(4.11 to<br>8.28)                      | 6.21<br>(4.75 to<br>8.42)                      | 0.20<br>(0.17 to<br>0.24)             | 0.40<br>(0.29 to<br>0.55)              | 0.39<br>(0.27 to<br>0.59)             | 0.39<br>(0.28 to<br>0.54)               |



|                                                     |                                                            |                                                            |                                                            |                                                            |                                                     |                                                      |                                                      |                                                      |
|-----------------------------------------------------|------------------------------------------------------------|------------------------------------------------------------|------------------------------------------------------------|------------------------------------------------------------|-----------------------------------------------------|------------------------------------------------------|------------------------------------------------------|------------------------------------------------------|
| Gallbladder and biliary diseases                    | 146.77<br>(127.14 to<br>174.52)                            | 197.07<br>(116.18 to<br>337.98)                            | 126.63<br>(75.12 to<br>214.68)                             | 254.46<br>(139.05 to<br>447.66)                            | 6.41<br>(5.51 to<br>7.58)                           | 11.12<br>(6.65 to<br>18.86)                          | 7.63<br>(4.68 to<br>12.80)                           | 13.72<br>(7.63 to<br>23.40)                          |
| Pancreatitis                                        | 246.37<br>(197.54 to<br>305.38)                            | 281.39<br>(135.23 to<br>618.02)                            | 184.86<br>(88.58 to<br>398.93)                             | 379.80<br>(154.47 to<br>878.44)                            | 7.26<br>(6.04 to<br>8.86)                           | 10.32<br>(5.77 to<br>20.02)                          | 7.00<br>(3.97 to<br>13.14)                           | 13.12<br>(6.43 to<br>27.95)                          |
| Other digestive diseases                            | 236.62<br>(195.06 to<br>297.51)                            | 334.63<br>(265.97 to<br>422.25)                            | 284.90<br>(226.76 to<br>360.45)                            | 322.30<br>(258.52 to<br>410.77)                            | 11.12<br>(9.32 to<br>13.62)                         | 21.30<br>(16.89 to<br>26.23)                         | 19.51<br>(15.69 to<br>23.85)                         | 19.94<br>(15.78 to<br>24.76)                         |
| <b>Neurological disorders</b>                       | <b>1,554.79</b><br><b>(1,336.04 to</b><br><b>1,804.42)</b> | <b>2,972.69</b><br><b>(2,367.32 to</b><br><b>3,757.68)</b> | <b>3,153.84</b><br><b>(2,517.16 to</b><br><b>3,945.10)</b> | <b>3,138.92</b><br><b>(2,415.51 to</b><br><b>4,177.69)</b> | <b>110.72</b><br><b>(92.71 to</b><br><b>131.92)</b> | <b>256.27</b><br><b>(190.35 to</b><br><b>333.48)</b> | <b>291.74</b><br><b>(224.90 to</b><br><b>368.24)</b> | <b>261.94</b><br><b>(184.73 to</b><br><b>361.95)</b> |
| Alzheimer's disease and other dementias             | 916.07<br>(743.72 to<br>1,120.53)                          | 2,052.01<br>(1,476.11 to<br>2,808.15)                      | 2,230.93<br>(1,655.62 to<br>2,976.66)                      | 2,178.78<br>(1,482.90 to<br>3,160.82)                      | 88.08<br>(71.10 to<br>108.22)                       | 211.42<br>(143.81 to<br>286.49)                      | 242.10<br>(175.57 to<br>318.30)                      | 218.10<br>(141.37 to<br>318.38)                      |
| Parkinson's disease                                 | 113.91<br>(85.62 to<br>147.14)                             | 276.08<br>(203.25 to<br>358.92)                            | 326.10<br>(244.79 to<br>419.58)                            | 254.72<br>(185.24 to<br>335.47)                            | 8.89<br>(6.88 to<br>11.63)                          | 23.30<br>(16.48 to<br>30.75)                         | 28.61<br>(20.94 to<br>37.41)                         | 21.15<br>(14.57 to<br>28.53)                         |
| Epilepsy                                            | 265.67<br>(225.74 to<br>316.87)                            | 305.57<br>(179.45 to<br>507.92)                            | 253.26<br>(149.54 to<br>417.32)                            | 373.08<br>(206.29 to<br>643.82)                            | 6.36<br>(5.47 to<br>7.40)                           | 9.40<br>(6.16 to<br>14.35)                           | 8.26<br>(5.46 to<br>12.42)                           | 11.01<br>(6.73 to<br>17.53)                          |
| Multiple sclerosis                                  | 35.40<br>(29.41 to<br>45.52)                               | 42.58<br>(30.97 to<br>60.10)                               | 44.89<br>(32.37 to<br>63.95)                               | 42.24<br>(30.61 to<br>60.22)                               | 0.96<br>(0.81 to<br>1.26)                           | 1.32<br>(0.99 to<br>1.85)                            | 1.41<br>(1.06 to<br>1.98)                            | 1.29<br>(0.98 to<br>1.79)                            |
| Motor neuron disease                                | 56.22<br>(48.51 to<br>66.14)                               | 88.48<br>(70.82 to<br>110.38)                              | 86.81<br>(68.50 to<br>109.65)                              | 86.05<br>(69.29 to<br>106.41)                              | 1.90<br>(1.63 to<br>2.18)                           | 3.64<br>(3.04 to<br>4.38)                            | 3.67<br>(3.02 to<br>4.48)                            | 3.49<br>(2.91 to<br>4.15)                            |
| Other neurological disorders                        | 167.52<br>(145.64 to<br>195.51)                            | 207.98<br>(162.84 to<br>269.81)                            | 211.84<br>(164.73 to<br>276.85)                            | 204.06<br>(160.93 to<br>264.93)                            | 4.53<br>(3.97 to<br>5.20)                           | 7.20<br>(6.08 to<br>8.46)                            | 7.68<br>(6.41 to<br>9.09)                            | 6.90<br>(5.86 to<br>8.11)                            |
| <b>Mental disorders</b>                             | <b>635.77</b><br><b>(534.45 to</b><br><b>761.01)</b>       | <b>856.82</b><br><b>(637.25 to</b><br><b>1,156.63)</b>     | <b>1,129.04</b><br><b>(835.50 to</b><br><b>1,528.48)</b>   | <b>878.28</b><br><b>(661.54 to</b><br><b>1,176.34)</b>     | <b>17.81</b><br><b>(15.20 to</b><br><b>20.93)</b>   | <b>28.60</b><br><b>(22.99 to</b><br><b>35.70)</b>    | <b>39.29</b><br><b>(31.25 to</b><br><b>48.69)</b>    | <b>28.63</b><br><b>(23.34 to</b><br><b>35.27)</b>    |
| Alcohol use disorders                               | 462.16<br>(389.58 to<br>551.30)                            | 498.06<br>(367.08 to<br>666.58)                            | 579.82<br>(421.41 to<br>780.67)                            | 534.96<br>(397.15 to<br>706.88)                            | 13.18<br>(11.27 to<br>15.48)                        | 16.95<br>(13.33 to<br>21.18)                         | 20.37<br>(15.98 to<br>25.61)                         | 17.74<br>(14.13 to<br>21.93)                         |
| Drug use disorders                                  | 170.56<br>(125.55 to<br>226.93)                            | 354.92<br>(240.84 to<br>532.26)                            | 545.38<br>(377.80 to<br>793.26)                            | 339.51<br>(236.03 to<br>505.34)                            | 4.57<br>(3.36 to<br>5.96)                           | 11.57<br>(8.37 to<br>15.72)                          | 18.84<br>(14.07 to<br>24.91)                         | 10.81<br>(8.05 to<br>14.46)                          |
| Opioid use disorders                                | 75.52<br>(52.29 to<br>109.46)                              | 120.53<br>(76.77 to<br>194.51)                             | 133.79<br>(85.64 to<br>222.87)                             | 117.82<br>(75.08 to<br>191.54)                             | 1.78<br>(1.25 to<br>2.56)                           | 3.38<br>(2.30 to<br>5.26)                            | 3.89<br>(2.65 to<br>6.27)                            | 3.24<br>(2.21 to<br>5.01)                            |
| Cocaine use disorders                               | 6.02<br>(3.94 to<br>8.66)                                  | 17.90<br>(10.67 to<br>28.94)                               | 26.64<br>(16.14 to<br>42.05)                               | 17.21<br>(10.11 to<br>27.26)                               | 0.15<br>(0.10 to<br>0.21)                           | 0.49<br>(0.30 to<br>0.76)                            | 0.74<br>(0.46 to<br>1.12)                            | 0.47<br>(0.29 to<br>0.71)                            |
| Amphetamine use disorders                           | 4.74<br>(3.16 to<br>7.02)                                  | 20.59<br>(12.57 to<br>35.12)                               | 38.68<br>(23.64 to<br>65.59)                               | 19.53<br>(11.96 to<br>34.07)                               | 0.12<br>(0.08 to<br>0.17)                           | 0.58<br>(0.37 to<br>0.90)                            | 1.12<br>(0.73 to<br>1.76)                            | 0.54<br>(0.35 to<br>0.88)                            |
| Other drug use disorders                            | 84.28<br>(57.01 to<br>113.13)                              | 195.90<br>(127.74 to<br>292.71)                            | 346.27<br>(229.12 to<br>509.06)                            | 184.95<br>(121.71 to<br>270.85)                            | 2.52<br>(1.76 to<br>3.31)                           | 7.13<br>(4.86 to<br>9.76)                            | 13.09<br>(9.25 to<br>17.42)                          | 6.56<br>(4.53 to<br>8.87)                            |
| Eating disorders                                    | 3.04<br>(2.46 to<br>3.68)                                  | 3.83<br>(2.47 to<br>5.89)                                  | 3.84<br>(2.48 to<br>6.08)                                  | 3.81<br>(2.46 to<br>5.80)                                  | 0.06<br>(0.05 to<br>0.07)                           | 0.08<br>(0.05 to<br>0.12)                            | 0.08<br>(0.05 to<br>0.12)                            | 0.08<br>(0.05 to<br>0.12)                            |
| <b>The Bahamas</b>                                  |                                                            |                                                            |                                                            |                                                            |                                                     |                                                      |                                                      |                                                      |
| Cause                                               | YLLs (actual counts)                                       |                                                            |                                                            |                                                            | Deaths (actual counts)                              |                                                      |                                                      |                                                      |
|                                                     | 2016                                                       | 2040 Forecast                                              | 2040 Better Scenario                                       | 2040 Worse Scenario                                        | 2016                                                | 2040 Forecast                                        | 2040 Better Scenario                                 | 2040 Worse Scenario                                  |
| Diabetes, urogenital, blood, and endocrine diseases | 8,039.36<br>(7,183.81 to<br>9,071.78)                      | 14,893.49<br>(9,512.14 to<br>27,694.69)                    | 10,721.88<br>(6,937.56 to<br>21,160.80)                    | 16,929.79<br>(10,573.09 to<br>31,176.86)                   | 353.47<br>(316.70 to<br>397.80)                     | 868.15<br>(591.61 to<br>1,576.60)                    | 650.70<br>(443.08 to<br>1,224.59)                    | 959.98<br>(636.69 to<br>1,761.38)                    |
| Diabetes mellitus                                   | 3,556.77<br>(2,973.03 to<br>3,803.36)                      | 5,587.37<br>(3,865.21 to<br>7,781.17)                      | 3,408.64<br>(2,342.50 to<br>4,799.63)                      | 6,324.20<br>(4,217.71 to<br>9,265.97)                      | 167.10<br>(147.18 to<br>188.88)                     | 346.65<br>(257.25 to<br>460.94)                      | 223.84<br>(166.30 to<br>300.58)                      | 373.74<br>(267.50 to<br>506.92)                      |



| The Bahamas                                   |                                           |                                           |                                         |                                           |                                  |                                    |                                   |                                   |
|-----------------------------------------------|-------------------------------------------|-------------------------------------------|-----------------------------------------|-------------------------------------------|----------------------------------|------------------------------------|-----------------------------------|-----------------------------------|
| Cause                                         | YLLs (actual counts)                      |                                           |                                         |                                           | Deaths (actual counts)           |                                    |                                   |                                   |
|                                               | 2016                                      | 2040 Forecast                             | 2040 Better Scenario                    | 2040 Worse Scenario                       | 2016                             | 2040 Forecast                      | 2040 Better Scenario              | 2040 Worse Scenario               |
| <b>Musculoskeletal disorders</b>              | <b>486.73</b><br>(397.24 to 587.95)       | <b>683.88</b><br>(497.98 to 943.47)       | <b>544.33</b><br>(400.15 to 744.82)     | <b>683.66</b><br>(501.04 to 952.47)       | <b>12.41</b><br>(10.21 to 14.96) | <b>22.85</b><br>(18.04 to 29.18)   | <b>18.13</b><br>(14.33 to 23.15)  | <b>22.46</b><br>(17.79 to 28.95)  |
| Rheumatoid arthritis                          | 33.31<br>(23.53 to 45.13)                 | 73.68<br>(50.15 to 102.39)                | 37.59<br>(25.01 to 53.13)               | 74.19<br>(51.86 to 103.03)                | 1.61<br>(1.14 to 2.11)           | 4.68<br>(3.15 to 6.45)             | 2.52<br>(1.68 to 3.53)            | 4.60<br>(3.19 to 6.30)            |
| Other musculoskeletal disorders               | 453.42<br>(370.05 to 550.98)              | 610.20<br>(440.47 to 851.52)              | 506.74<br>(367.97 to 700.06)            | 609.46<br>(439.28 to 851.41)              | 10.80<br>(8.89 to 12.98)         | 18.17<br>(13.87 to 23.56)          | 15.60<br>(12.09 to 20.21)         | 17.86<br>(13.83 to 22.97)         |
| <b>Other non-communicable diseases</b>        | <b>1,987.92</b><br>(1,253.29 to 3,400.73) | <b>2,020.13</b><br>(1,360.69 to 3,004.40) | <b>1,265.45</b><br>(827.21 to 1,912.91) | <b>2,064.62</b><br>(1,387.21 to 3,118.27) | <b>49.40</b><br>(32.14 to 74.43) | <b>101.61</b><br>(55.99 to 171.79) | <b>74.13</b><br>(40.68 to 127.42) | <b>97.71</b><br>(54.68 to 172.59) |
| Congenital birth defects                      | 1,412.56<br>(749.62 to 2,275.86)          | 880.50<br>(503.85 to 1,524.03)            | 445.43<br>(266.99 to 745.88)            | 951.90<br>(534.71 to 1,676.36)            | 18.66<br>(10.87 to 33.86)        | 13.30<br>(8.28 to 21.30)           | 7.16<br>(4.57 to 10.95)           | 14.19<br>(8.74 to 22.82)          |
| Neural tube defects                           | 45.09<br>(20.55 to 97.10)                 | 10.72<br>(5.32 to 22.69)                  | 3.45<br>(1.73 to 6.81)                  | 11.94<br>(5.76 to 24.45)                  | 0.55<br>(0.27 to 1.16)           | 0.15<br>(0.08 to 0.29)             | 0.05<br>(0.03 to 0.09)            | 0.17<br>(0.09 to 0.32)            |
| Congenital heart anomalies                    | 673.83<br>(386.85 to 1,202.57)            | 405.39<br>(233.16 to 689.94)              | 148.96<br>(87.04 to 243.41)             | 443.07<br>(252.07 to 743.10)              | 9.04<br>(5.59 to 15.16)          | 6.13<br>(3.69 to 9.65)             | 2.30<br>(1.42 to 3.58)            | 6.63<br>(3.97 to 10.40)           |
| Orofacial clefts                              | 0.26<br>(0.09 to 0.61)                    | 0.12<br>(0.03 to 0.31)                    | 0.03<br>(0.01 to 0.09)                  | 0.13<br>(0.04 to 0.35)                    | 0.00<br>(0.00 to 0.01)           | 0.00<br>(0.00 to 0.00)             | 0.00<br>(0.00 to 0.00)            | 0.00<br>(0.00 to 0.00)            |
| Down syndrome                                 | 98.65<br>(63.38 to 163.23)                | 97.16<br>(63.29 to 145.32)                | 101.89<br>(66.43 to 149.37)             | 97.74<br>(63.55 to 146.97)                | 1.71<br>(1.19 to 2.51)           | 2.06<br>(1.42 to 2.92)             | 2.20<br>(1.54 to 3.02)            | 2.20<br>(1.43 to 2.90)            |
| Other chromosomal abnormalities               | 152.74<br>(64.78 to 324.37)               | 120.79<br>(53.66 to 262.77)               | 79.65<br>(34.99 to 166.83)              | 129.90<br>(56.50 to 286.38)               | 1.83<br>(0.81 to 3.81)           | 1.52<br>(0.70 to 3.17)             | 1.02<br>(0.47 to 2.06)            | 1.63<br>(0.74 to 3.42)            |
| Congenital musculoskeletal and limb anomalies | 41.72<br>(19.52 to 83.31)                 | 28.30<br>(13.69 to 58.42)                 | 12.61<br>(6.19 to 26.03)                | 31.00<br>(15.06 to 63.81)                 | 0.52<br>(0.26 to 1.01)           | 0.40<br>(0.21 to 0.75)             | 0.18<br>(0.10 to 0.34)            | 0.43<br>(0.23 to 0.81)            |
| Urogenital congenital anomalies               | 23.73<br>(11.09 to 48.57)                 | 15.06<br>(7.75 to 26.64)                  | 7.90<br>(4.05 to 14.18)                 | 16.03<br>(8.28 to 28.61)                  | 0.35<br>(0.18 to 0.65)           | 0.28<br>(0.16 to 0.45)             | 0.15<br>(0.08 to 0.24)            | 0.29<br>(0.16 to 0.46)            |
| Digestive congenital anomalies                | 68.24<br>(29.91 to 143.66)                | 34.89<br>(14.97 to 75.73)                 | 13.87<br>(6.06 to 28.98)                | 38.65<br>(17.38 to 82.15)                 | 0.82<br>(0.37 to 1.69)           | 0.44<br>(0.20 to 0.91)             | 0.17<br>(0.08 to 0.35)            | 0.48<br>(0.23 to 0.98)            |
| Other congenital birth defects                | 308.30<br>(146.85 to 614.70)              | 168.06<br>(85.20 to 327.46)               | 77.06<br>(39.11 to 150.24)              | 183.44<br>(91.79 to 353.54)               | 3.85<br>(1.93 to 7.42)           | 2.32<br>(1.31 to 4.25)             | 1.08<br>(0.61 to 1.94)            | 2.51<br>(1.41 to 4.54)            |
| Skin and subcutaneous diseases                | 476.67<br>(246.49 to 817.52)              | 1,098.90<br>(572.99 to 1,906.51)          | 795.35<br>(419.82 to 1,358.84)          | 1,068.04<br>(556.63 to 1,914.19)          | 29.59<br>(14.88 to 51.44)        | 87.84<br>(42.28 to 158.78)         | 66.68<br>(32.98 to 120.32)        | 83.01<br>(40.26 to 156.29)        |
| Cellulitis                                    | 21.06<br>(10.68 to 46.26)                 | 72.23<br>(35.59 to 154.46)                | 64.57<br>(31.95 to 134.66)              | 70.29<br>(33.93 to 154.06)                | 0.94<br>(0.43 to 2.04)           | 4.42<br>(2.00 to 9.32)             | 4.24<br>(1.94 to 8.67)            | 4.17<br>(1.88 to 8.92)            |
| Pyoderma                                      | 68.65<br>(25.32 to 105.92)                | 178.66<br>(61.77 to 263.28)               | 152.20<br>(54.22 to 222.43)             | 173.50<br>(60.63 to 254.71)               | 3.10<br>(1.07 to 4.59)           | 11.74<br>(3.65 to 17.34)           | 10.92<br>(3.42 to 16.21)          | 11.00<br>(3.38 to 16.46)          |
| Decubitus ulcer                               | 348.55<br>(183.31 to 608.97)              | 787.97<br>(415.90 to 1,400.91)            | 532.93<br>(284.66 to 972.05)            | 764.45<br>(408.49 to 1,457.81)            | 24.33<br>(12.50 to 43.45)        | 69.11<br>(33.50 to 128.62)         | 49.41<br>(24.21 to 93.62)         | 65.36<br>(31.49 to 129.02)        |
| Other skin and subcutaneous diseases          | 38.41<br>(18.94 to 65.22)                 | 60.04<br>(30.66 to 107.42)                | 45.65<br>(23.01 to 81.48)               | 59.79<br>(30.30 to 107.25)                | 1.23<br>(0.59 to 2.11)           | 2.57<br>(1.30 to 4.69)             | 2.11<br>(1.03 to 3.81)            | 2.47<br>(1.17 to 4.58)            |
| Sudden infant death syndrome                  | 98.69<br>(39.87 to 215.29)                | 40.74<br>(15.35 to 97.23)                 | 24.67<br>(8.87 to 57.78)                | 44.69<br>(16.99 to 106.41)                | 1.15<br>(0.46 to 2.50)           | 0.47<br>(0.18 to 1.13)             | 0.29<br>(0.10 to 0.67)            | 0.52<br>(0.20 to 1.23)            |



|                                      |                                         |                                        |                                       |                                         |                                 |                                 |                                 |                                 |
|--------------------------------------|-----------------------------------------|----------------------------------------|---------------------------------------|-----------------------------------------|---------------------------------|---------------------------------|---------------------------------|---------------------------------|
| Injuries                             | 11,675.99<br>(9,731.33 to<br>13,806.21) | 9,780.22<br>(6,318.98 to<br>16,053.83) | 5,385.01<br>(3,544.37 to<br>8,794.37) | 11,411.02<br>(7,111.86 to<br>19,763.16) | 259.73<br>(219.95 to<br>300.37) | 274.88<br>(201.87 to<br>396.64) | 168.56<br>(127.26 to<br>235.44) | 306.62<br>(218.66 to<br>468.52) |
| Transport injuries                   | 3,312.22<br>(2,801.61 to<br>3,932.75)   | 3,146.52<br>(1,715.30 to<br>5,915.14)  | 1,133.54<br>(617.88 to<br>2,147.98)   | 4,421.75<br>(2,271.54 to<br>8,654.89)   | 74.06<br>(63.08 to<br>86.29)    | 84.78<br>(54.47 to<br>141.09)   | 34.74<br>(22.43 to<br>55.94)    | 112.66<br>(67.18 to<br>197.66)  |
| Road injuries                        | 2,863.60<br>(2,413.40 to<br>3,411.32)   | 2,635.14<br>(1,393.76 to<br>4,972.13)  | 859.32<br>(454.56 to<br>1,661.66)     | 3,834.02<br>(1,919.92 to<br>7,604.69)   | 62.75<br>(53.22 to<br>73.49)    | 67.86<br>(41.82 to<br>115.39)   | 25.17<br>(15.70 to<br>41.89)    | 93.93<br>(54.29 to<br>168.22)   |
| Pedestrian road injuries             | 557.34<br>(435.21 to<br>717.40)         | 449.87<br>(266.49 to<br>747.72)        | 106.31<br>(64.71 to<br>177.56)        | 625.72<br>(346.85 to<br>1,107.24)       | 14.64<br>(11.74 to<br>18.23)    | 15.78<br>(10.39 to<br>23.59)    | 4.39<br>(2.95 to<br>6.53)       | 20.71<br>(13.17 to<br>32.99)    |
| <b>The Bahamas</b>                   |                                         |                                        |                                       |                                         |                                 |                                 |                                 |                                 |
| Cause                                | YLLs (actual counts)                    |                                        |                                       |                                         | Deaths (actual counts)          |                                 |                                 |                                 |
|                                      | 2016                                    | 2040 Forecast                          | 2040 Better Scenario                  | 2040 Worse Scenario                     | 2016                            | 2040 Forecast                   | 2040 Better Scenario            | 2040 Worse Scenario             |
| Cyclist road injuries                | 101.29<br>(77.14 to<br>129.60)          | 92.44<br>(47.61 to<br>179.13)          | 36.23<br>(19.23 to<br>69.19)          | 131.02<br>(63.00 to<br>263.37)          | 2.31<br>(1.78 to<br>2.86)       | 2.51<br>(1.47 to<br>4.40)       | 1.23<br>(0.73 to<br>2.04)       | 3.35<br>(1.83 to<br>6.16)       |
| Motorcyclist road injuries           | 552.11<br>(416.04 to<br>695.39)         | 511.58<br>(225.28 to<br>1,157.47)      | 268.82<br>(119.22 to<br>617.38)       | 683.92<br>(288.60 to<br>1,619.96)       | 10.50<br>(7.97 to<br>13.06)     | 10.31<br>(4.90 to<br>22.78)     | 5.84<br>(2.82 to<br>12.66)      | 13.50<br>(6.10 to<br>30.38)     |
| Motor vehicle road injuries          | 1,639.12<br>(1,352.23 to<br>2,025.27)   | 1,566.79<br>(824.17 to<br>2,955.36)    | 441.99<br>(239.62 to<br>812.02)       | 2,373.78<br>(1,195.52 to<br>4,747.51)   | 34.92<br>(29.10 to<br>42.10)    | 38.70<br>(23.49 to<br>64.67)    | 13.39<br>(8.67 to<br>20.92)     | 55.69<br>(31.58 to<br>100.37)   |
| Other road injuries                  | 13.73<br>(8.90 to<br>25.75)             | 14.46<br>(7.88 to<br>28.02)            | 5.96<br>(3.22 to<br>11.50)            | 19.59<br>(10.36 to<br>37.48)            | 0.39<br>(0.24 to<br>0.73)       | 0.55<br>(0.31 to<br>1.02)       | 0.32<br>(0.17 to<br>0.59)       | 0.68<br>(0.38 to<br>1.27)       |
| Other transport injuries             | 448.62<br>(337.97 to<br>558.50)         | 511.38<br>(298.29 to<br>897.02)        | 274.23<br>(155.44 to<br>501.02)       | 587.73<br>(321.90 to<br>1,078.66)       | 11.31<br>(8.77 to<br>13.78)     | 16.93<br>(11.19 to<br>26.42)    | 9.57<br>(6.31 to<br>15.03)      | 18.73<br>(11.68 to<br>30.90)    |
| Unintentional injuries               | 3,436.62<br>(2,927.08 to<br>4,140.55)   | 2,943.18<br>(2,182.57 to<br>4,054.63)  | 2,101.76<br>(1,566.90 to<br>2,949.19) | 3,038.06<br>(2,214.81 to<br>4,331.42)   | 88.28<br>(78.05 to<br>100.67)   | 110.33<br>(91.34 to<br>135.32)  | 85.61<br>(70.63 to<br>105.20)   | 169.05<br>(88.01 to<br>137.23)  |
| Falls                                | 353.90<br>(295.84 to<br>418.76)         | 463.11<br>(370.35 to<br>583.00)        | 361.57<br>(286.09 to<br>456.15)       | 453.07<br>(363.14 to<br>564.46)         | 13.87<br>(11.92 to<br>16.17)    | 26.88<br>(21.64 to<br>32.22)    | 22.19<br>(18.31 to<br>26.61)    | 25.40<br>(20.08 to<br>30.84)    |
| Drowning                             | 1,341.70<br>(1,111.81 to<br>1,637.18)   | 923.52<br>(576.19 to<br>1,533.17)      | 629.10<br>(393.96 to<br>1,065.00)     | 999.30<br>(610.42 to<br>1,729.44)       | 27.81<br>(23.67 to<br>32.81)    | 22.98<br>(15.84 to<br>35.33)    | 16.11<br>(11.08 to<br>24.97)    | 24.44<br>(16.20 to<br>38.69)    |
| Fire, heat, and hot substances       | 413.80<br>(328.32 to<br>535.27)         | 329.89<br>(230.49 to<br>468.69)        | 198.06<br>(138.57 to<br>284.61)       | 350.21<br>(235.95 to<br>511.52)         | 12.30<br>(9.90 to<br>14.61)     | 15.08<br>(11.41 to<br>19.35)    | 10.00<br>(7.58 to<br>13.19)     | 15.23<br>(11.13 to<br>20.55)    |
| Poisonings                           | 46.48<br>(36.61 to<br>71.11)            | 27.77<br>(17.21 to<br>46.09)           | 14.15<br>(8.69 to<br>23.55)           | 30.49<br>(18.09 to<br>51.56)            | 1.02<br>(0.82 to<br>1.56)       | 0.77<br>(0.52 to<br>1.21)       | 0.42<br>(0.28 to<br>0.65)       | 0.83<br>(0.53 to<br>1.29)       |
| Exposure to mechanical forces        | 227.76<br>(177.88 to<br>277.31)         | 182.99<br>(125.72 to<br>260.97)        | 116.04<br>(79.20 to<br>171.42)        | 186.73<br>(123.76 to<br>273.90)         | 5.04<br>(3.95 to<br>5.96)       | 5.23<br>(3.89 to<br>6.82)       | 3.52<br>(2.60 to<br>4.70)       | 5.21<br>(3.77 to<br>6.99)       |
| Unintentional firearm injuries       | 52.02<br>(39.72 to<br>63.39)            | 39.32<br>(25.18 to<br>59.60)           | 28.05<br>(18.28 to<br>43.80)          | 39.98<br>(25.77 to<br>61.02)            | 1.10<br>(0.84 to<br>1.32)       | 0.97<br>(0.69 to<br>1.38)       | 0.74<br>(0.52 to<br>1.07)       | 0.98<br>(0.69 to<br>1.39)       |
| Unintentional suffocation            | 19.36<br>(12.50 to<br>31.71)            | 12.12<br>(7.42 to<br>19.72)            | 8.18<br>(4.97 to<br>13.09)            | 12.67<br>(7.61 to<br>20.54)             | 0.31<br>(0.22 to<br>0.46)       | 0.22<br>(0.15 to<br>0.33)       | 0.15<br>(0.10 to<br>0.23)       | 0.23<br>(0.15 to<br>0.34)       |
| Other exposure to mechanical forces  | 156.38<br>(113.17 to<br>196.00)         | 131.55<br>(84.73 to<br>189.84)         | 79.81<br>(51.88 to<br>118.95)         | 134.08<br>(86.58 to<br>196.63)          | 3.63<br>(2.68 to<br>4.36)       | 4.04<br>(2.87 to<br>5.29)       | 2.63<br>(1.87 to<br>3.49)       | 4.00<br>(2.82 to<br>5.38)       |
| Adverse effects of medical treatment | 376.89<br>(285.30 to<br>473.82)         | 316.58<br>(285.48 to<br>525.24)        | 316.58<br>(226.86 to<br>435.80)       | 389.28<br>(277.07 to<br>523.37)         | 12.37<br>(9.49 to<br>15.17)     | 18.42<br>(13.85 to<br>23.29)    | 15.98<br>(12.17 to<br>20.17)    | 17.57<br>(13.15 to<br>22.21)    |
| Animal contact                       | 54.53<br>(31.38 to<br>72.46)            | 71.18<br>(39.75 to<br>101.92)          | 51.67<br>(29.32 to<br>75.23)          | 71.61<br>(39.07 to<br>103.11)           | 1.48<br>(0.88 to<br>1.92)       | 2.58<br>(1.52 to<br>3.39)       | 1.99<br>(1.21 to<br>2.66)       | 2.51<br>(1.50 to<br>3.35)       |

|                                                 |                                       |                                       |                                       |                                       |                               |                               |                              |                               |
|-------------------------------------------------|---------------------------------------|---------------------------------------|---------------------------------------|---------------------------------------|-------------------------------|-------------------------------|------------------------------|-------------------------------|
| Venomous animal contact                         | 30.83<br>(14.52 to<br>43.87)          | 34.96<br>(15.61 to<br>53.82)          | 27.03<br>(12.08 to<br>42.16)          | 35.04<br>(15.21 to<br>54.25)          | 0.81<br>(0.40 to<br>1.09)     | 1.17<br>(0.54 to<br>1.65)     | 0.95<br>(0.43 to<br>1.38)    | 1.14<br>(0.52 to<br>1.64)     |
| Non-venomous animal contact                     | 23.70<br>(14.02 to<br>31.96)          | 36.22<br>(21.81 to<br>51.72)          | 24.64<br>(15.09 to<br>35.91)          | 36.56<br>(21.38 to<br>52.43)          | 0.68<br>(0.41 to<br>0.88)     | 1.41<br>(0.85 to<br>1.87)     | 1.04<br>(0.64 to<br>1.39)    | 1.37<br>(0.82 to<br>1.84)     |
| Foreign body                                    | 457.78<br>(328.81 to<br>655.21)       | 398.19<br>(297.05 to<br>544.78)       | 338.71<br>(253.68 to<br>455.42)       | 399.45<br>(294.22 to<br>544.44)       | 10.59<br>(8.49 to<br>13.40)   | 13.82<br>(11.27 to<br>16.97)  | 12.99<br>(10.70 to<br>15.99) | 13.28<br>(10.78 to<br>16.37)  |
| Pulmonary aspiration and foreign body in airway | 430.07<br>(303.85 to<br>628.05)       | 371.21<br>(273.51 to<br>512.04)       | 308.20<br>(228.49 to<br>422.07)       | 373.11<br>(272.04 to<br>514.65)       | 9.88<br>(7.82 to<br>12.57)    | 12.89<br>(10.42 to<br>16.02)  | 11.87<br>(9.74 to<br>14.77)  | 12.40<br>(10.05 to<br>15.42)  |
| Foreign body in other body part                 | 27.71<br>(20.67 to<br>36.58)          | 26.98<br>(18.05 to<br>40.45)          | 30.51<br>(20.45 to<br>45.78)          | 26.34<br>(17.71 to<br>38.95)          | 0.72<br>(0.57 to<br>0.95)     | 0.93<br>(0.70 to<br>1.32)     | 1.11<br>(0.83 to<br>1.56)    | 0.88<br>(0.66 to<br>1.24)     |
| Environmental heat and cold exposure            | 80.14<br>(49.52 to<br>157.66)         | 96.04<br>(56.01 to<br>193.03)         | 55.12<br>(30.75 to<br>108.48)         | 97.77<br>(54.10 to<br>193.21)         | 2.03<br>(1.32 to<br>3.96)     | 3.08<br>(1.94 to<br>5.89)     | 1.86<br>(1.16 to<br>3.54)    | 3.05<br>(1.88 to<br>5.84)     |
| Other unintentional injuries                    | 83.66<br>(67.34 to<br>100.69)         | 57.17<br>(37.48 to<br>89.42)          | 20.75<br>(13.48 to<br>34.15)          | 60.15<br>(39.10 to<br>93.67)          | 1.76<br>(1.44 to<br>2.08)     | 1.48<br>(1.05 to<br>2.10)     | 0.56<br>(0.40 to<br>0.82)    | 1.53<br>(1.09 to<br>2.21)     |
| Self-harm and interpersonal violence            | 4,869.84<br>(2,838.02 to<br>6,419.58) | 3,665.47<br>(1,761.10 to<br>6,744.92) | 2,124.74<br>(1,040.17 to<br>3,941.26) | 3,926.21<br>(1,826.75 to<br>7,476.40) | 96.35<br>(56.54 to<br>126.55) | 79.15<br>(39.66 to<br>138.37) | 47.57<br>(24.62 to<br>82.95) | 84.30<br>(41.88 to<br>151.28) |

**The Bahamas**

| Cause                                                                        | YLLs (actual counts)                  |                                       |                                     |                                       | Deaths (actual counts)        |                               |                              |                               |
|------------------------------------------------------------------------------|---------------------------------------|---------------------------------------|-------------------------------------|---------------------------------------|-------------------------------|-------------------------------|------------------------------|-------------------------------|
|                                                                              | 2016                                  | 2040 Forecast                         | 2040 Better Scenario                | 2040 Worse Scenario                   | 2016                          | 2040 Forecast                 | 2040 Better Scenario         | 2040 Worse Scenario           |
| Self-harm                                                                    | 596.52<br>(444.70 to<br>757.42)       | 544.04<br>(275.28 to<br>1,045.02)     | 392.59<br>(200.09 to<br>742.10)     | 661.57<br>(303.75 to<br>1,320.04)     | 12.97<br>(9.96 to<br>16.02)   | 13.31<br>(7.53 to<br>23.04)   | 9.84<br>(5.55 to<br>16.80)   | 15.82<br>(8.12 to<br>29.13)   |
| Self-harm by firearm                                                         | 43.91<br>(24.74 to<br>67.10)          | 33.81<br>(13.12 to<br>78.86)          | 20.69<br>(7.82 to<br>47.70)         | 41.83<br>(15.09 to<br>102.43)         | 0.98<br>(0.58 to<br>1.42)     | 0.85<br>(0.37 to<br>1.79)     | 0.54<br>(0.24 to<br>1.10)    | 1.03<br>(0.42 to<br>2.28)     |
| Self-harm by other specified means                                           | 552.61<br>(416.38 to<br>704.28)       | 510.22<br>(260.29 to<br>976.51)       | 371.90<br>(190.22 to<br>700.81)     | 619.74<br>(286.46 to<br>1,236.47)     | 11.99<br>(9.26 to<br>14.93)   | 12.45<br>(7.05 to<br>21.46)   | 9.30<br>(5.28 to<br>15.92)   | 14.79<br>(7.62 to<br>27.01)   |
| Interpersonal violence                                                       | 4,273.32<br>(2,162.40 to<br>5,785.39) | 3,121.43<br>(1,315.07 to<br>5,869.81) | 1,732.15<br>(729.08 to<br>3,320.04) | 3,264.64<br>(1,352.38 to<br>6,280.14) | 83.39<br>(42.07 to<br>113.36) | 65.84<br>(28.98 to<br>119.46) | 37.73<br>(16.92 to<br>68.53) | 68.48<br>(29.55 to<br>125.46) |
| Physical violence by firearm                                                 | 2,968.83<br>(1,326.88 to<br>4,206.14) | 2,091.04<br>(753.97 to<br>4,159.48)   | 1,083.57<br>(392.00 to<br>2,253.07) | 2,174.39<br>(755.34 to<br>4,528.72)   | 55.99<br>(24.72 to<br>79.56)  | 41.12<br>(15.13 to<br>80.21)  | 21.53<br>(7.87 to<br>42.60)  | 42.59<br>(14.98 to<br>85.31)  |
| Physical violence by sharp object                                            | 887.71<br>(434.95 to<br>1,405.92)     | 710.47<br>(303.70 to<br>1,376.04)     | 411.51<br>(190.12 to<br>774.66)     | 730.57<br>(309.51 to<br>1,384.74)     | 18.06<br>(8.92 to<br>27.97)   | 15.93<br>(7.24 to<br>28.34)   | 9.46<br>(4.56 to<br>16.94)   | 16.23<br>(7.23 to<br>28.89)   |
| Physical violence by other means                                             | 416.77<br>(214.79 to<br>630.69)       | 319.91<br>(137.92 to<br>587.22)       | 257.07<br>(102.23 to<br>440.11)     | 359.68<br>(146.13 to<br>691.26)       | 9.34<br>(4.86 to<br>13.78)    | 8.79<br>(4.14 to<br>15.01)    | 6.74<br>(3.15 to<br>11.50)   | 9.65<br>(4.25 to<br>17.38)    |
| Forces of nature, conflict and terrorism, and executions and police conflict | 57.31<br>(32.17 to<br>100.92)         | 25.05<br>(0.00 to<br>279.32)          | 24.98<br>(0.00 to<br>278.05)        | 25.00<br>(0.00 to<br>278.33)          | 1.03<br>(0.61 to<br>1.76)     | 0.62<br>(0.00 to<br>6.92)     | 0.63<br>(0.00 to<br>7.12)    | 0.61<br>(0.00 to<br>6.81)     |
| Exposure to forces of nature                                                 | 0.00<br>(0.00 to<br>0.00)             | 24.80<br>(0.00 to<br>279.32)          | 24.73<br>(0.00 to<br>278.05)        | 24.75<br>(0.00 to<br>278.33)          | 0.00<br>(0.00 to<br>0.00)     | 0.61<br>(0.00 to<br>6.92)     | 0.63<br>(0.00 to<br>7.12)    | 0.60<br>(0.00 to<br>6.81)     |
| Conflict and terrorism                                                       | 0.00<br>(0.00 to<br>0.00)             | 0.25<br>(0.00 to<br>0.00)             | 0.25<br>(0.00 to<br>0.00)           | 0.25<br>(0.00 to<br>0.00)             | 0.00<br>(0.00 to<br>0.00)     | 0.01<br>(0.00 to<br>0.00)     | 0.01<br>(0.00 to<br>0.00)    | 0.01<br>(0.00 to<br>0.00)     |
| Executions and police conflict                                               | 57.31<br>(32.17 to<br>100.92)         | 0.00<br>(0.00 to<br>0.00)             | 0.00<br>(0.00 to<br>0.00)           | 1.03<br>(0.00 to<br>1.76)             | 0.00<br>(0.61 to<br>1.76)     | 0.00<br>(0.00 to<br>0.00)     | 0.00<br>(0.00 to<br>0.00)    | 0.00<br>(0.00 to<br>0.00)     |

**Barbados**

|  | YLLs (actual counts) |  |  |  | Deaths (actual counts) |  |  |  |
|--|----------------------|--|--|--|------------------------|--|--|--|
|--|----------------------|--|--|--|------------------------|--|--|--|

| Cause                                                             | 2016                                     | 2040 Forecast                            | 2040 Better Scenario                     | 2040 Worse Scenario                      | 2016                                  | 2040 Forecast                         | 2040 Better Scenario                  | 2040 Worse Scenario                   |
|-------------------------------------------------------------------|------------------------------------------|------------------------------------------|------------------------------------------|------------------------------------------|---------------------------------------|---------------------------------------|---------------------------------------|---------------------------------------|
| All causes                                                        | 50,799.86<br>(46,507.03 to<br>56,258.90) | 59,512.40<br>(47,945.63 to<br>72,705.58) | 41,852.19<br>(33,967.13 to<br>51,142.95) | 68,152.24<br>(55,347.32 to<br>82,203.52) | 2,689.24<br>(2,506.30 to<br>2,903.73) | 4,388.22<br>(3,656.34 to<br>5,228.83) | 3,335.25<br>(2,770.55 to<br>4,011.00) | 4,811.38<br>(4,002.42 to<br>5,706.62) |
| Communicable, maternal, neonatal, and nutritional diseases        | 6,619.97<br>(5,184.57 to<br>9,019.88)    | 6,191.60<br>(4,918.85 to<br>8,031.70)    | 4,326.85<br>(3,520.58 to<br>5,411.42)    | 7,337.56<br>(5,750.78 to<br>9,548.85)    | 256.98<br>(228.58 to<br>293.38)       | 403.71<br>(299.82 to<br>509.79)       | 315.51<br>(244.56 to<br>394.48)       | 438.05<br>(322.34 to<br>557.17)       |
| HIV/AIDS and tuberculosis                                         | 1,055.95<br>(1,013.61 to<br>1,101.98)    | 681.65<br>(515.14 to<br>819.25)          | 525.59<br>(362.44 to<br>630.62)          | 1,083.59<br>(875.76 to<br>1,230.18)      | 26.56<br>(25.53 to<br>27.72)          | 18.26<br>(12.63 to<br>21.55)          | 14.35<br>(8.69 to<br>17.08)           | 27.11<br>(20.97 to<br>30.80)          |
| Tuberculosis                                                      | 58.90<br>(52.02 to<br>67.77)             | 33.99<br>(21.06 to<br>53.31)             | 9.88<br>(6.49 to<br>14.93)               | 44.27<br>(27.07 to<br>71.59)             | 2.43<br>(2.18 to<br>2.76)             | 2.03<br>(1.24 to<br>3.05)             | 0.66<br>(0.44 to<br>0.96)             | 2.54<br>(1.55 to<br>3.91)             |
| HIV/AIDS                                                          | 997.04<br>(956.85 to<br>1,041.46)        | 647.66<br>(480.31 to<br>781.27)          | 515.71<br>(352.80 to<br>619.39)          | 1,039.33<br>(828.85 to<br>1,187.27)      | 24.13<br>(23.16 to<br>25.24)          | 16.23<br>(10.75 to<br>19.39)          | 13.69<br>(8.04 to<br>16.43)           | 24.58<br>(18.42 to<br>28.16)          |
| Diarrhea, lower respiratory, and other common infectious diseases | 2,866.93<br>(2,515.57 to<br>3,352.54)    | 3,621.58<br>(2,726.94 to<br>4,758.39)    | 2,418.32<br>(1,876.10 to<br>3,102.59)    | 4,146.73<br>(3,035.17 to<br>5,660.49)    | 182.34<br>(162.04 to<br>203.91)       | 330.34<br>(231.86 to<br>435.68)       | 248.12<br>(180.14 to<br>324.83)       | 354.48<br>(244.45 to<br>471.57)       |
| Diarrheal diseases                                                | 97.44<br>(72.59 to<br>139.85)            | 88.52<br>(25.26 to<br>241.80)            | 150.06<br>(54.64 to<br>381.49)           | 92.12<br>(25.13 to<br>276.28)            | 4.06<br>(3.55 to<br>4.74)             | 7.24<br>(2.08 to<br>21.03)            | 13.77<br>(4.95 to<br>35.58)           | 7.27<br>(2.00 to<br>21.42)            |
| Intestinal infectious diseases                                    | 1.47<br>(0.49 to<br>3.38)                | 0.84<br>(0.27 to<br>1.99)                | 1.24<br>(0.38 to<br>2.95)                | 0.82<br>(0.25 to<br>1.97)                | 0.04<br>(0.01 to<br>0.10)             | 0.03<br>(0.01 to<br>0.07)             | 0.05<br>(0.02 to<br>0.11)             | 0.03<br>(0.01 to<br>0.07)             |
| Typhoid fever                                                     | 1.36<br>(0.44 to<br>3.11)                | 0.79<br>(0.25 to<br>1.89)                | 1.21<br>(0.37 to<br>2.92)                | 0.77<br>(0.23 to<br>1.85)                | 0.04<br>(0.01 to<br>0.09)             | 0.03<br>(0.01 to<br>0.07)             | 0.05<br>(0.02 to<br>0.11)             | 0.03<br>(0.01 to<br>0.06)             |
| Paratyphoid fever                                                 | 0.09<br>(0.03 to<br>0.23)                | 0.04<br>(0.01 to<br>0.10)                | 0.02<br>(0.01 to<br>0.05)                | 0.04<br>(0.01 to<br>0.11)                | 0.00<br>(0.00 to<br>0.01)             | 0.00<br>(0.00 to<br>0.01)             | 0.00<br>(0.00 to<br>0.01)             | 0.00<br>(0.00 to<br>0.01)             |
| Other intestinal infectious diseases                              | 0.02<br>(0.01 to<br>0.05)                | 0.01<br>(0.00 to<br>0.03)                | 0.01<br>(0.00 to<br>0.02)                | 0.01<br>(0.00 to<br>0.03)                | 0.00<br>(0.00 to<br>0.00)             | 0.00<br>(0.00 to<br>0.00)             | 0.00<br>(0.00 to<br>0.00)             | 0.00<br>(0.00 to<br>0.00)             |
| Lower respiratory infections                                      | 2,501.41<br>(2,204.88 to<br>2,889.58)    | 3,280.92<br>(2,434.32 to<br>4,331.29)    | 2,099.12<br>(1,616.22 to<br>2,660.28)    | 3,762.77<br>(2,717.43 to<br>5,183.45)    | 170.63<br>(150.61 to<br>191.80)       | 314.29<br>(218.04 to<br>415.45)       | 227.89<br>(165.49 to<br>297.09)       | 337.78<br>(232.74 to<br>450.69)       |
| Upper respiratory infections                                      | 1.14<br>(0.61 to<br>1.84)                | 0.99<br>(0.43 to<br>1.87)                | 0.37<br>(0.15 to<br>0.72)                | 1.11<br>(0.48 to<br>2.18)                | 0.04<br>(0.02 to<br>0.07)             | 0.06<br>(0.02 to<br>0.12)             | 0.02<br>(0.01 to<br>0.05)             | 0.06<br>(0.02 to<br>0.14)             |
| Otitis media                                                      | 0.35<br>(0.27 to<br>0.46)                | 0.13<br>(0.08 to<br>0.21)                | 0.13<br>(0.08 to<br>0.22)                | 0.13<br>(0.08 to<br>0.20)                | 0.01<br>(0.01 to<br>0.02)             | 0.01<br>(0.01 to<br>0.02)             | 0.01<br>(0.01 to<br>0.02)             | 0.01<br>(0.01 to<br>0.01)             |
| Meningitis                                                        | 144.82<br>(114.87 to<br>190.34)          | 77.42<br>(58.28 to<br>105.74)            | 43.58<br>(32.79 to<br>58.66)             | 87.18<br>(63.46 to<br>122.16)            | 4.37<br>(3.69 to<br>5.64)             | 3.65<br>(2.92 to<br>4.84)             | 2.26<br>(1.80 to<br>2.92)             | 3.81<br>(3.02 to<br>4.95)             |
| Pneumococcal meningitis                                           | 12.99<br>(10.02 to<br>17.30)             | 6.67<br>(4.96 to<br>9.05)                | 6.46<br>(4.82 to<br>8.63)                | 7.13<br>(5.23 to<br>9.69)                | 0.44<br>(0.35 to<br>0.57)             | 0.35<br>(0.26 to<br>0.48)             | 0.37<br>(0.28 to<br>0.50)             | 0.36<br>(0.27 to<br>0.50)             |
| H influenzae type B meningitis                                    | 12.06<br>(8.79 to<br>16.89)              | 9.23<br>(4.59 to<br>18.80)               | 7.06<br>(4.18 to<br>12.45)               | 14.21<br>(5.27 to<br>34.76)              | 0.34<br>(0.27 to<br>0.45)             | 0.29<br>(0.20 to<br>0.43)             | 0.28<br>(0.20 to<br>0.39)             | 0.34<br>(0.20 to<br>0.59)             |
| Meningococcal meningitis                                          | 65.76<br>(51.39 to<br>87.85)             | 32.40<br>(23.83 to<br>45.11)             | 16.39<br>(12.04 to<br>23.06)             | 34.59<br>(25.37 to<br>47.63)             | 1.97<br>(1.61 to<br>2.54)             | 1.61<br>(1.18 to<br>2.22)             | 0.89<br>(0.66 to<br>1.26)             | 1.65<br>(1.25 to<br>2.26)             |
| Other meningitis                                                  | 54.01<br>(41.76 to<br>73.01)             | 29.12<br>(20.89 to<br>40.62)             | 13.67<br>(9.77 to<br>18.86)              | 31.25<br>(23.09 to<br>42.62)             | 1.62<br>(1.32 to<br>2.11)             | 1.40<br>(1.02 to<br>1.91)             | 0.72<br>(0.52 to<br>0.99)             | 1.46<br>(1.10 to<br>1.94)             |
| Encephalitis                                                      | 108.26<br>(77.44 to<br>176.73)           | 81.99<br>(54.61 to<br>135.70)            | 72.12<br>(48.36 to<br>115.27)            | 84.15<br>(54.88 to<br>138.87)            | 2.66<br>(2.06 to<br>4.08)             | 3.00<br>(2.28 to<br>4.58)             | 2.86<br>(2.19 to<br>4.31)             | 2.99<br>(2.27 to<br>4.66)             |
| Diphtheria                                                        | 0.18<br>(0.11 to<br>0.29)                | 0.03<br>(0.01 to<br>0.06)                | 0.02<br>(0.01 to<br>0.03)                | 0.05<br>(0.02 to<br>0.13)                | 0.00<br>(0.00 to<br>0.01)             | 0.00<br>(0.00 to<br>0.00)             | 0.00<br>(0.00 to<br>0.00)             | 0.00<br>(0.00 to<br>0.00)             |

|                                               |                                                     |                                                      |                                                      |                                                      |                                                |                                                   |                                                   |                                                   |
|-----------------------------------------------|-----------------------------------------------------|------------------------------------------------------|------------------------------------------------------|------------------------------------------------------|------------------------------------------------|---------------------------------------------------|---------------------------------------------------|---------------------------------------------------|
| Whooping cough                                | 1.05<br>(0.21 to<br>2.47)                           | 0.34<br>(0.02 to<br>1.23)                            | 0.09<br>(0.01 to<br>0.25)                            | 0.63<br>(0.03 to<br>2.12)                            | 0.01<br>(0.00 to<br>0.03)                      | 0.00<br>(0.00 to<br>0.01)                         | 0.00<br>(0.00 to<br>0.00)                         | 0.01<br>(0.00 to<br>0.02)                         |
| Tetanus                                       | 4.15<br>(3.25 to<br>6.73)                           | 0.51<br>(0.34 to<br>0.94)                            | 0.49<br>(0.33 to<br>0.93)                            | 0.54<br>(0.37 to<br>0.99)                            | 0.17<br>(0.13 to<br>0.27)                      | 0.03<br>(0.02 to<br>0.04)                         | 0.03<br>(0.02 to<br>0.05)                         | 0.02<br>(0.02 to<br>0.04)                         |
| Measles                                       | 0.18<br>(0.11 to<br>0.30)                           | 85.95<br>(2.78 to<br>297.70)                         | 48.49<br>(1.83 to<br>151.81)                         | 113.10<br>(3.19 to<br>409.83)                        | 0.00<br>(0.00 to<br>0.00)                      | 1.70<br>(0.04 to<br>5.64)                         | 0.98<br>(0.03 to<br>3.13)                         | 2.17<br>(0.05 to<br>7.25)                         |
| <b>Barbados</b>                               |                                                     |                                                      |                                                      |                                                      |                                                |                                                   |                                                   |                                                   |
| Cause                                         | YLLs (actual counts)                                |                                                      |                                                      |                                                      | Deaths (actual counts)                         |                                                   |                                                   |                                                   |
|                                               | 2016                                                | 2040 Forecast                                        | 2040 Better Scenario                                 | 2040 Worse Scenario                                  | 2016                                           | 2040 Forecast                                     | 2040 Better Scenario                              | 2040 Worse Scenario                               |
| Varicella and herpes zoster                   | 6.48<br>(3.28 to<br>10.09)                          | 3.94<br>(1.77 to<br>6.27)                            | 2.60<br>(1.12 to<br>4.22)                            | 4.13<br>(1.92 to<br>6.86)                            | 0.34<br>(0.16 to<br>0.50)                      | 0.34<br>(0.14 to<br>0.59)                         | 0.25<br>(0.10 to<br>0.44)                         | 0.34<br>(0.14 to<br>0.60)                         |
| Neglected tropical diseases and malaria       | <b>153.33</b><br><b>(90.08 to</b><br><b>220.47)</b> | <b>456.24</b><br><b>(280.39 to</b><br><b>638.46)</b> | <b>428.40</b><br><b>(274.30 to</b><br><b>591.61)</b> | <b>462.23</b><br><b>(280.83 to</b><br><b>657.76)</b> | <b>4.92</b><br><b>(2.96 to</b><br><b>7.01)</b> | <b>19.96</b><br><b>(12.16 to</b><br><b>28.57)</b> | <b>20.61</b><br><b>(12.80 to</b><br><b>29.29)</b> | <b>19.54</b><br><b>(11.72 to</b><br><b>28.14)</b> |
| Malaria                                       | 0.00<br>(0.00 to<br>0.00)                           | 0.00<br>(0.00 to<br>0.00)                            | 0.00<br>(0.00 to<br>0.00)                            | 0.00<br>(0.00 to<br>0.00)                            | 0.00<br>(0.00 to<br>0.00)                      | 0.00<br>(0.00 to<br>0.00)                         | 0.00<br>(0.00 to<br>0.00)                         | 0.00<br>(0.00 to<br>0.00)                         |
| Chagas disease                                | 0.00<br>(0.00 to<br>0.00)                           | 0.00<br>(0.00 to<br>0.00)                            | 0.00<br>(0.00 to<br>0.00)                            | 0.00<br>(0.00 to<br>0.00)                            | 0.00<br>(0.00 to<br>0.00)                      | 0.00<br>(0.00 to<br>0.00)                         | 0.00<br>(0.00 to<br>0.00)                         | 0.00<br>(0.00 to<br>0.00)                         |
| Leishmaniasis                                 | 0.00<br>(0.00 to<br>0.00)                           | 0.00<br>(0.00 to<br>0.00)                            | 0.00<br>(0.00 to<br>0.00)                            | 0.00<br>(0.00 to<br>0.00)                            | 0.00<br>(0.00 to<br>0.00)                      | 0.00<br>(0.00 to<br>0.00)                         | 0.00<br>(0.00 to<br>0.00)                         | 0.00<br>(0.00 to<br>0.00)                         |
| African trypanosomiasis                       | 0.00<br>(0.00 to<br>0.00)                           | 0.00<br>(0.00 to<br>0.00)                            | 0.00<br>(0.00 to<br>0.00)                            | 0.00<br>(0.00 to<br>0.00)                            | 0.00<br>(0.00 to<br>0.00)                      | 0.00<br>(0.00 to<br>0.00)                         | 0.00<br>(0.00 to<br>0.00)                         | 0.00<br>(0.00 to<br>0.00)                         |
| Schistosomiasis                               | 0.00<br>(0.00 to<br>0.00)                           | 0.00<br>(0.00 to<br>0.00)                            | 0.00<br>(0.00 to<br>0.00)                            | 0.00<br>(0.00 to<br>0.00)                            | 0.00<br>(0.00 to<br>0.00)                      | 0.00<br>(0.00 to<br>0.00)                         | 0.00<br>(0.00 to<br>0.00)                         | 0.00<br>(0.00 to<br>0.00)                         |
| Cysticercosis                                 | 0.00<br>(0.00 to<br>0.00)                           | 0.00<br>(0.00 to<br>0.00)                            | 0.00<br>(0.00 to<br>0.00)                            | 0.00<br>(0.00 to<br>0.00)                            | 0.00<br>(0.00 to<br>0.00)                      | 0.00<br>(0.00 to<br>0.00)                         | 0.00<br>(0.00 to<br>0.00)                         | 0.00<br>(0.00 to<br>0.00)                         |
| Cystic echinococcosis                         | 0.00<br>(0.00 to<br>0.00)                           | 0.00<br>(0.00 to<br>0.00)                            | 0.00<br>(0.00 to<br>0.00)                            | 0.00<br>(0.00 to<br>0.00)                            | 0.00<br>(0.00 to<br>0.00)                      | 0.00<br>(0.00 to<br>0.00)                         | 0.00<br>(0.00 to<br>0.00)                         | 0.00<br>(0.00 to<br>0.00)                         |
| Dengue                                        | 147.73<br>(83.85 to<br>210.94)                      | 450.88<br>(274.78 to<br>632.00)                      | 422.46<br>(267.66 to<br>584.52)                      | 456.86<br>(275.18 to<br>652.63)                      | 4.63<br>(2.68 to<br>6.58)                      | 19.63<br>(11.86 to<br>28.12)                      | 20.21<br>(12.36 to<br>28.80)                      | 19.22<br>(11.36 to<br>27.65)                      |
| Yellow fever                                  | 0.00<br>(0.00 to<br>0.00)                           | 0.00<br>(0.00 to<br>0.00)                            | 0.00<br>(0.00 to<br>0.00)                            | 0.00<br>(0.00 to<br>0.00)                            | 0.00<br>(0.00 to<br>0.00)                      | 0.00<br>(0.00 to<br>0.00)                         | 0.00<br>(0.00 to<br>0.00)                         | 0.00<br>(0.00 to<br>0.00)                         |
| Rabies                                        | 0.68<br>(0.40 to<br>1.19)                           | 0.35<br>(0.21 to<br>0.66)                            | 0.25<br>(0.16 to<br>0.45)                            | 0.38<br>(0.22 to<br>0.73)                            | 0.02<br>(0.02 to<br>0.03)                      | 0.02<br>(0.01 to<br>0.03)                         | 0.02<br>(0.01 to<br>0.02)                         | 0.02<br>(0.01 to<br>0.03)                         |
| Intestinal nematode infections                | 0.00<br>(0.00 to<br>0.00)                           | 0.00<br>(0.00 to<br>0.00)                            | 0.00<br>(0.00 to<br>0.00)                            | 0.00<br>(0.00 to<br>0.00)                            | 0.00<br>(0.00 to<br>0.00)                      | 0.00<br>(0.00 to<br>0.00)                         | 0.00<br>(0.00 to<br>0.00)                         | 0.00<br>(0.00 to<br>0.00)                         |
| Other neglected tropical diseases             | 5.71<br>(4.00 to<br>8.85)                           | 5.01<br>(3.15 to<br>8.09)                            | 5.69<br>(3.48 to<br>9.07)                            | 5.00<br>(3.09 to<br>8.05)                            | 0.24<br>(0.15 to<br>0.34)                      | 0.31<br>(0.17 to<br>0.46)                         | 0.39<br>(0.21 to<br>0.57)                         | 0.30<br>(0.16 to<br>0.45)                         |
| Maternal disorders                            | <b>90.18</b><br><b>(71.62 to</b><br><b>111.24)</b>  | <b>40.51</b><br><b>(20.01 to</b><br><b>73.64)</b>    | <b>25.63</b><br><b>(11.67 to</b><br><b>48.81)</b>    | <b>44.37</b><br><b>(21.01 to</b><br><b>83.05)</b>    | <b>1.68</b><br><b>(1.34 to</b><br><b>2.07)</b> | <b>0.76</b><br><b>(0.38 to</b><br><b>1.37)</b>    | <b>0.48</b><br><b>(0.22 to</b><br><b>0.89)</b>    | <b>0.83</b><br><b>(0.40 to</b><br><b>1.55)</b>    |
| Maternal hemorrhage                           | 21.19<br>(14.95 to<br>29.44)                        | 8.53<br>(3.81 to<br>17.30)                           | 5.50<br>(2.29 to<br>11.64)                           | 9.30<br>(3.90 to<br>19.49)                           | 0.40<br>(0.28 to<br>0.55)                      | 0.16<br>(0.07 to<br>0.31)                         | 0.10<br>(0.04 to<br>0.22)                         | 0.17<br>(0.08 to<br>0.37)                         |
| Maternal sepsis and other maternal infections | 2.26<br>(1.08 to<br>3.99)                           | 0.90<br>(0.32 to<br>2.04)                            | 0.57<br>(0.19 to<br>1.31)                            | 0.99<br>(0.33 to<br>2.30)                            | 0.04<br>(0.02 to<br>0.08)                      | 0.02<br>(0.01 to<br>0.04)                         | 0.01<br>(0.00 to<br>0.02)                         | 0.02<br>(0.01 to<br>0.04)                         |

|                                                                         |                                            |                                            |                                          |                                            |                                     |                                    |                                     |                                    |
|-------------------------------------------------------------------------|--------------------------------------------|--------------------------------------------|------------------------------------------|--------------------------------------------|-------------------------------------|------------------------------------|-------------------------------------|------------------------------------|
| Maternal hypertensive disorders                                         | 20.55<br>(15.04 to<br>28.10)               | 8.48<br>(3.64 to<br>17.06)                 | 5.23<br>(2.12 to<br>10.74)               | 9.30<br>(3.85 to<br>19.26)                 | 0.37<br>(0.27 to<br>0.51)           | 0.15<br>(0.07 to<br>0.30)          | 0.09<br>(0.04 to<br>0.19)           | 0.17<br>(0.07 to<br>0.34)          |
| Maternal obstructed labor and uterine rupture                           | 0.93<br>(0.40 to<br>1.72)                  | 0.44<br>(0.15 to<br>1.06)                  | 0.26<br>(0.08 to<br>0.64)                | 0.49<br>(0.16 to<br>1.20)                  | 0.02<br>(0.01 to<br>0.03)           | 0.01<br>(0.00 to<br>0.02)          | 0.00<br>(0.00 to<br>0.01)           | 0.01<br>(0.00 to<br>0.02)          |
| Maternal abortion, miscarriage, and ectopic pregnancy                   | 17.12<br>(12.00 to<br>23.08)               | 8.47<br>(3.58 to<br>16.88)                 | 5.26<br>(2.10 to<br>10.70)               | 9.26<br>(3.77 to<br>18.96)                 | 0.33<br>(0.24 to<br>0.45)           | 0.17<br>(0.07 to<br>0.32)          | 0.10<br>(0.04 to<br>0.21)           | 0.18<br>(0.08 to<br>0.36)          |
| Indirect maternal deaths                                                | 13.81<br>(9.43 to<br>19.35)                | 7.13<br>(2.97 to<br>15.08)                 | 4.38<br>(1.71 to<br>9.57)                | 7.87<br>(3.14 to<br>16.83)                 | 0.25<br>(0.17 to<br>0.35)           | 0.13<br>(0.05 to<br>0.27)          | 0.08<br>(0.03 to<br>0.17)           | 0.14<br>(0.06 to<br>0.30)          |
| Late maternal deaths                                                    | 1.47<br>(0.73 to<br>2.58)                  | 0.55<br>(0.19 to<br>1.26)                  | 0.34<br>(0.11 to<br>0.80)                | 0.61<br>(0.20 to<br>1.42)                  | 0.03<br>(0.01 to<br>0.05)           | 0.01<br>(0.00 to<br>0.02)          | 0.01<br>(0.00 to<br>0.01)           | 0.01<br>(0.00 to<br>0.03)          |
| Maternal deaths aggravated by HIV/AIDS                                  | 0.24<br>(0.10 to<br>0.45)                  | 0.60<br>(0.19 to<br>1.35)                  | 0.43<br>(0.13 to<br>0.95)                | 0.68<br>(0.22 to<br>1.55)                  | 0.00<br>(0.00 to<br>0.01)           | 0.01<br>(0.00 to<br>0.03)          | 0.01<br>(0.00 to<br>0.02)           | 0.01<br>(0.00 to<br>0.03)          |
| Other maternal disorders                                                | 12.61<br>(8.53 to<br>17.84)                | 5.41<br>(2.31 to<br>10.55)                 | 3.68<br>(1.54 to<br>7.31)                | 5.88<br>(2.43 to<br>12.14)                 | 0.24<br>(0.16 to<br>0.34)           | 0.10<br>(0.05 to<br>0.20)          | 0.07<br>(0.03 to<br>0.14)           | 0.11<br>(0.05 to<br>0.23)          |
| <b>Barbados</b>                                                         |                                            |                                            |                                          |                                            |                                     |                                    |                                     |                                    |
| Cause                                                                   | YLLs (actual counts)                       |                                            |                                          |                                            | Deaths (actual counts)              |                                    |                                     |                                    |
|                                                                         | 2016                                       | 2040 Forecast                              | 2040 Better Scenario                     | 2040 Worse Scenario                        | 2016                                | 2040 Forecast                      | 2040 Better Scenario                | 2040 Worse Scenario                |
| <b>Neonatal disorders</b>                                               | <b>1,973.74</b><br>(874.86 to<br>3,960.22) | <b>1,022.04</b><br>(392.67 to<br>2,149.56) | <b>576.26</b><br>(217.76 to<br>1,236.32) | <b>1,226.79</b><br>(466.62 to<br>2,655.82) | <b>22.81</b><br>(10.11 to<br>45.76) | <b>11.81</b><br>(4.54 to<br>24.84) | <b>6.66</b><br>(2.52 to<br>14.29)   | <b>14.18</b><br>(5.39 to<br>30.69) |
| Neonatal preterm birth                                                  | 690.19<br>(303.77 to<br>1,384.31)          | 315.91<br>(128.94 to<br>656.24)            | 139.12<br>(55.70 to<br>285.71)           | 408.91<br>(165.36 to<br>856.54)            | 7.97<br>(3.51 to<br>15.99)          | 3.65<br>(1.49 to<br>7.58)          | 1.61<br>(0.64 to<br>3.30)           | 4.72<br>(1.91 to<br>9.90)          |
| Neonatal encephalopathy due to birth asphyxia and trauma                | 604.23<br>(268.74 to<br>1,241.62)          | 284.14<br>(102.31 to<br>649.97)            | 143.55<br>(53.37 to<br>323.06)           | 335.20<br>(121.39 to<br>763.45)            | 6.98<br>(3.11 to<br>14.35)          | 3.28<br>(1.18 to<br>7.51)          | 1.66<br>(0.62 to<br>3.74)           | 3.87<br>(1.40 to<br>8.82)          |
| Neonatal sepsis and other neonatal infections                           | 401.91<br>(158.20 to<br>827.46)            | 261.69<br>(91.84 to<br>595.78)             | 157.60<br>(55.60 to<br>353.62)           | 301.89<br>(104.04 to<br>693.02)            | 4.64<br>(1.83 to<br>9.56)           | 3.03<br>(1.06 to<br>6.89)          | 1.82<br>(0.64 to<br>4.09)           | 3.49<br>(1.20 to<br>8.01)          |
| Hemolytic disease and other neonatal jaundice                           | 17.18<br>(5.77 to<br>40.64)                | 6.06<br>(1.57 to<br>17.17)                 | 3.42<br>(0.88 to<br>9.88)                | 7.09<br>(1.78 to<br>20.26)                 | 0.20<br>(0.07 to<br>0.47)           | 0.07<br>(0.02 to<br>0.20)          | 0.04<br>(0.01 to<br>0.11)           | 0.08<br>(0.02 to<br>0.23)          |
| Other neonatal disorders                                                | 260.23<br>(109.57 to<br>543.64)            | 154.24<br>(56.00 to<br>360.55)             | 132.57<br>(48.60 to<br>307.21)           | 173.71<br>(62.72 to<br>404.45)             | 3.01<br>(1.27 to<br>6.28)           | 1.78<br>(0.65 to<br>4.17)          | 1.53<br>(0.56 to<br>3.55)           | 2.01<br>(0.73 to<br>4.67)          |
| <b>Nutritional deficiencies</b>                                         | <b>128.69</b><br>(104.99 to<br>164.57)     | <b>121.84</b><br>(96.81 to<br>150.42)      | <b>140.83</b><br>(112.32 to<br>172.62)   | <b>118.88</b><br>(93.75 to<br>145.73)      | <b>7.76</b><br>(6.74 to<br>8.93)    | <b>11.63</b><br>(8.43 to<br>15.04) | <b>14.91</b><br>(10.94 to<br>19.06) | <b>11.00</b><br>(7.74 to<br>14.19) |
| Protein-energy malnutrition                                             | 98.83<br>(76.41 to<br>131.91)              | 88.70<br>(66.27 to<br>115.73)              | 114.08<br>(87.61 to<br>145.59)           | 85.41<br>(63.61 to<br>111.55)              | 5.96<br>(4.93 to<br>7.34)           | 8.78<br>(5.95 to<br>11.89)         | 12.43<br>(8.90 to<br>16.39)         | 8.20<br>(5.41 to<br>11.21)         |
| Iodine deficiency                                                       | 1.10<br>(0.09 to<br>3.38)                  | 4.09<br>(0.08 to<br>16.46)                 | 3.82<br>(0.05 to<br>16.78)               | 4.10<br>(0.09 to<br>16.03)                 | 0.04<br>(0.00 to<br>0.15)           | 0.24<br>(0.00 to<br>1.72)          | 0.34<br>(0.00 to<br>2.03)           | 0.33<br>(0.00 to<br>1.65)          |
| Dietary iron deficiency                                                 | 1.40<br>(0.65 to<br>1.93)                  | 0.94<br>(0.42 to<br>1.49)                  | 1.00<br>(0.41 to<br>1.62)                | 0.95<br>(0.43 to<br>1.52)                  | 0.04<br>(0.01 to<br>0.05)           | 0.03<br>(0.01 to<br>0.05)          | 0.03<br>(0.01 to<br>0.06)           | 0.03<br>(0.01 to<br>0.05)          |
| Other nutritional deficiencies                                          | 27.36<br>(12.45 to<br>37.41)               | 28.11<br>(12.36 to<br>39.91)               | 21.92<br>(8.74 to<br>32.16)              | 28.42<br>(12.33 to<br>40.40)               | 1.72<br>(0.74 to<br>2.45)           | 2.48<br>(1.01 to<br>3.76)          | 2.11<br>(0.76 to<br>3.27)           | 2.44<br>(0.97 to<br>3.68)          |
| <b>Other communicable, maternal, neonatal, and nutritional diseases</b> | <b>349.16</b><br>(295.14 to<br>402.86)     | <b>247.74</b><br>(197.87 to<br>298.33)     | <b>211.82</b><br>(164.01 to<br>259.23)   | <b>254.95</b><br>(199.76 to<br>312.54)     | <b>10.91</b><br>(9.13 to<br>12.46)  | <b>10.95</b><br>(8.74 to<br>12.85) | <b>10.37</b><br>(8.00 to<br>12.30)  | <b>10.91</b><br>(8.54 to<br>12.91) |
| Sexually transmitted infections excluding HIV                           | 17.36<br>(14.21 to<br>22.25)               | 8.61<br>(6.41 to<br>11.87)                 | 6.88<br>(4.97 to<br>9.83)                | 8.89<br>(6.70 to<br>12.20)                 | 0.57<br>(0.47 to<br>0.69)           | 0.40<br>(0.31 to<br>0.53)          | 0.35<br>(0.26 to<br>0.48)           | 0.41<br>(0.31 to<br>0.53)          |

|                                       |                                                               |                                                               |                                                               |                                                               |                                                            |                                                            |                                                            |                                                            |
|---------------------------------------|---------------------------------------------------------------|---------------------------------------------------------------|---------------------------------------------------------------|---------------------------------------------------------------|------------------------------------------------------------|------------------------------------------------------------|------------------------------------------------------------|------------------------------------------------------------|
| Syphilis                              | 7.00<br>(4.89 to<br>10.71)                                    | 2.57<br>(1.88 to<br>3.70)                                     | 1.67<br>(1.20 to<br>2.44)                                     | 2.72<br>(1.95 to<br>3.97)                                     | 0.22<br>(0.15 to<br>0.29)                                  | 0.12<br>(0.09 to<br>0.15)                                  | 0.08<br>(0.06 to<br>0.11)                                  | 0.12<br>(0.09 to<br>0.16)                                  |
| Chlamydial infection                  | 1.96<br>(1.60 to<br>2.45)                                     | 1.17<br>(0.84 to<br>1.64)                                     | 1.01<br>(0.71 to<br>1.44)                                     | 1.19<br>(0.85 to<br>1.66)                                     | 0.07<br>(0.06 to<br>0.08)                                  | 0.06<br>(0.04 to<br>0.08)                                  | 0.06<br>(0.04 to<br>0.08)                                  | 0.06<br>(0.04 to<br>0.08)                                  |
| Gonococcal infection                  | 5.58<br>(4.60 to<br>6.87)                                     | 3.35<br>(2.45 to<br>4.74)                                     | 2.91<br>(2.08 to<br>4.21)                                     | 3.42<br>(2.49 to<br>4.79)                                     | 0.20<br>(0.16 to<br>0.24)                                  | 0.17<br>(0.12 to<br>0.23)                                  | 0.16<br>(0.11 to<br>0.22)                                  | 0.17<br>(0.12 to<br>0.23)                                  |
| Other sexually transmitted infections | 2.82<br>(2.32 to<br>3.52)                                     | 1.52<br>(1.07 to<br>2.22)                                     | 1.29<br>(0.88 to<br>1.93)                                     | 1.56<br>(1.10 to<br>2.25)                                     | 0.09<br>(0.07 to<br>0.10)                                  | 0.06<br>(0.05 to<br>0.08)                                  | 0.06<br>(0.04 to<br>0.08)                                  | 0.06<br>(0.05 to<br>0.08)                                  |
| Acute hepatitis                       | 26.35<br>(22.59 to<br>30.59)                                  | 16.92<br>(13.05 to<br>21.41)                                  | 8.73<br>(6.51 to<br>11.66)                                    | 18.17<br>(13.98 to<br>23.52)                                  | 0.83<br>(0.72 to<br>0.96)                                  | 0.75<br>(0.59 to<br>0.94)                                  | 0.41<br>(0.31 to<br>0.54)                                  | 0.79<br>(0.61 to<br>0.99)                                  |
| Acute hepatitis A                     | 0.62<br>(0.30 to<br>1.06)                                     | 0.36<br>(0.15 to<br>0.67)                                     | 0.22<br>(0.09 to<br>0.42)                                     | 0.39<br>(0.16 to<br>0.72)                                     | 0.01<br>(0.01 to<br>0.02)                                  | 0.01<br>(0.00 to<br>0.05)                                  | 0.01<br>(0.00 to<br>0.02)                                  | 0.01<br>(0.01 to<br>0.03)                                  |
| Acute hepatitis B                     | 19.17<br>(16.07 to<br>22.75)                                  | 12.17<br>(9.06 to<br>15.85)                                   | 6.12<br>(4.39 to<br>8.43)                                     | 13.12<br>(9.69 to<br>17.41)                                   | 0.60<br>(0.50 to<br>0.72)                                  | 0.50<br>(0.37 to<br>0.66)                                  | 0.27<br>(0.19 to<br>0.37)                                  | 0.53<br>(0.39 to<br>0.69)                                  |
| Acute hepatitis C                     | 1.27<br>(0.90 to<br>1.74)                                     | 0.88<br>(0.56 to<br>1.27)                                     | 0.46<br>(0.29 to<br>0.69)                                     | 0.93<br>(0.60 to<br>1.36)                                     | 0.04<br>(0.03 to<br>0.06)                                  | 0.04<br>(0.02 to<br>0.05)                                  | 0.02<br>(0.01 to<br>0.03)                                  | 0.04<br>(0.03 to<br>0.06)                                  |
| Acute hepatitis E                     | 5.28<br>(3.79 to<br>7.07)                                     | 3.51<br>(2.29 to<br>5.14)                                     | 1.93<br>(1.21 to<br>2.90)                                     | 3.73<br>(2.41 to<br>5.69)                                     | 0.17<br>(0.12 to<br>0.24)                                  | 0.20<br>(0.12 to<br>0.30)                                  | 0.12<br>(0.07 to<br>0.19)                                  | 0.20<br>(0.13 to<br>0.31)                                  |
| Other unspecified infectious diseases | 305.45<br>(250.30 to<br>358.67)                               | 222.22<br>(172.15 to<br>270.39)                               | 196.21<br>(150.18 to<br>240.30)                               | 227.89<br>(175.64 to<br>279.35)                               | 9.51<br>(7.78 to<br>10.93)                                 | 9.79<br>(7.66 to<br>11.56)                                 | 9.60<br>(7.27 to<br>11.45)                                 | 9.72<br>(7.51 to<br>11.55)                                 |
| <b>Non-communicable diseases</b>      | <b>39,470.97</b><br><b>(36,479.63 to</b><br><b>43,154.84)</b> | <b>50,132.46</b><br><b>(39,304.78 to</b><br><b>62,541.93)</b> | <b>35,540.24</b><br><b>(28,185.19 to</b><br><b>44,541.41)</b> | <b>56,985.14</b><br><b>(45,007.53 to</b><br><b>70,314.18)</b> | <b>2,300.01</b><br><b>(2,143.77 to</b><br><b>2,478.70)</b> | <b>3,860.00</b><br><b>(3,169.25 to</b><br><b>4,718.83)</b> | <b>2,931.74</b><br><b>(2,384.67 to</b><br><b>3,647.42)</b> | <b>4,233.40</b><br><b>(3,487.49 to</b><br><b>5,168.57)</b> |

| Barbados                        |                                                               |                                                               |                                                               |                                                               |                                                      |                                                          |                                                        |                                                          |
|---------------------------------|---------------------------------------------------------------|---------------------------------------------------------------|---------------------------------------------------------------|---------------------------------------------------------------|------------------------------------------------------|----------------------------------------------------------|--------------------------------------------------------|----------------------------------------------------------|
| Cause                           | YLLs (actual counts)                                          |                                                               |                                                               |                                                               | Deaths (actual counts)                               |                                                          |                                                        |                                                          |
|                                 | 2016                                                          | 2040 Forecast                                                 | 2040 Better Scenario                                          | 2040 Worse Scenario                                           | 2016                                                 | 2040 Forecast                                            | 2040 Better Scenario                                   | 2040 Worse Scenario                                      |
| <b>Neoplasms</b>                | <b>12,599.66</b><br><b>(11,571.36 to</b><br><b>13,836.13)</b> | <b>15,536.38</b><br><b>(12,779.19 to</b><br><b>18,409.00)</b> | <b>12,639.26</b><br><b>(10,372.68 to</b><br><b>14,964.51)</b> | <b>16,695.24</b><br><b>(13,767.93 to</b><br><b>20,080.28)</b> | <b>639.75</b><br><b>(588.77 to</b><br><b>695.05)</b> | <b>1,031.25</b><br><b>(866.69 to</b><br><b>1,216.38)</b> | <b>887.87</b><br><b>(737.35 to</b><br><b>1,038.57)</b> | <b>1,070.28</b><br><b>(892.53 to</b><br><b>1,275.83)</b> |
| Lip and oral cavity cancer      | 159.36<br>(140.70 to<br>181.37)                               | 201.99<br>(124.90 to<br>316.46)                               | 123.82<br>(81.01 to<br>181.04)                                | 267.43<br>(156.34 to<br>438.48)                               | 7.38<br>(6.61 to<br>8.22)                            | 11.34<br>(7.13 to<br>17.11)                              | 7.62<br>(5.13 to<br>10.76)                             | 14.24<br>(8.58 to<br>22.29)                              |
| Nasopharynx cancer              | 65.99<br>(58.22 to<br>74.69)                                  | 66.35<br>(42.57 to<br>96.93)                                  | 32.34<br>(21.64 to<br>45.83)                                  | 92.21<br>(56.09 to<br>140.84)                                 | 2.36<br>(2.09 to<br>2.65)                            | 2.78<br>(1.79 to<br>3.98)                                | 1.45<br>(0.99 to<br>2.00)                              | 3.70<br>(2.28 to<br>5.51)                                |
| Other pharynx cancer            | 114.74<br>(99.97 to<br>134.25)                                | 132.13<br>(77.94 to<br>208.06)                                | 115.19<br>(72.50 to<br>175.20)                                | 146.16<br>(84.86 to<br>233.44)                                | 4.89<br>(4.28 to<br>5.61)                            | 7.15<br>(4.34 to<br>11.27)                               | 6.65<br>(4.26 to<br>9.94)                              | 7.72<br>(4.47 to<br>12.27)                               |
| Esophageal cancer               | 305.73<br>(269.90 to<br>344.47)                               | 399.27<br>(257.76 to<br>602.63)                               | 315.69<br>(216.28 to<br>447.89)                               | 483.95<br>(301.65 to<br>779.13)                               | 15.62<br>(13.95 to<br>17.59)                         | 24.52<br>(16.50 to<br>36.77)                             | 20.74<br>(14.76 to<br>28.62)                           | 28.45<br>(18.46 to<br>43.88)                             |
| Stomach cancer                  | 662.45<br>(597.05 to<br>736.86)                               | 654.97<br>(512.42 to<br>842.90)                               | 432.21<br>(342.93 to<br>542.06)                               | 679.68<br>(529.63 to<br>867.48)                               | 36.60<br>(33.22 to<br>40.50)                         | 46.01<br>(36.25 to<br>60.04)                             | 31.89<br>(25.59 to<br>40.37)                           | 46.71<br>(37.18 to<br>61.27)                             |
| Colon and rectum cancer         | 1,563.68<br>(1,407.87 to<br>1,739.15)                         | 1,998.57<br>(1,371.13 to<br>2,985.93)                         | 1,417.09<br>(965.70 to<br>2,083.34)                           | 2,168.42<br>(1,462.06 to<br>3,270.30)                         | 86.69<br>(78.14 to<br>96.17)                         | 143.32<br>(97.63 to<br>215.23)                           | 107.53<br>(73.79 to<br>157.89)                         | 151.77<br>(100.02 to<br>231.40)                          |
| Liver cancer                    | 383.79<br>(344.33 to<br>426.11)                               | 524.69<br>(379.11 to<br>736.04)                               | 570.75<br>(410.90 to<br>803.28)                               | 631.58<br>(426.48 to<br>936.57)                               | 19.12<br>(17.19 to<br>21.03)                         | 33.14<br>(24.17 to<br>45.77)                             | 37.88<br>(27.96 to<br>51.83)                           | 38.15<br>(26.04 to<br>55.65)                             |
| Liver cancer due to hepatitis B | 142.67<br>(119.69 to<br>167.72)                               | 174.26<br>(122.48 to<br>243.68)                               | 193.04<br>(136.10 to<br>271.11)                               | 208.05<br>(137.21 to<br>310.03)                               | 6.16<br>(5.10 to<br>7.26)                            | 9.53<br>(6.70 to<br>13.25)                               | 11.05<br>(7.93 to<br>15.28)                            | 10.89<br>(7.19 to<br>16.04)                              |

|                                      |                                       |                                       |                                       |                                       |                                 |                                 |                                 |                                 |
|--------------------------------------|---------------------------------------|---------------------------------------|---------------------------------------|---------------------------------------|---------------------------------|---------------------------------|---------------------------------|---------------------------------|
| Liver cancer due to hepatitis C      | 97.95<br>(82.87 to<br>114.66)         | 149.56<br>(105.12 to<br>212.26)       | 168.37<br>(117.34 to<br>239.16)       | 171.49<br>(114.27 to<br>256.28)       | 5.81<br>(4.99 to<br>6.74)       | 11.08<br>(7.80 to<br>15.45)     | 13.04<br>(9.16 to<br>18.44)     | 12.24<br>(8.16 to<br>17.83)     |
| Liver cancer due to alcohol use      | 75.34<br>(63.08 to<br>90.42)          | 105.12<br>(71.96 to<br>154.35)        | 101.84<br>(69.66 to<br>147.95)        | 136.79<br>(88.06 to<br>211.82)        | 3.81<br>(3.19 to<br>4.56)       | 6.48<br>(4.46 to<br>9.41)       | 6.69<br>(4.62 to<br>9.57)       | 8.02<br>(5.24 to<br>12.24)      |
| Liver cancer due to other causes     | 67.84<br>(58.28 to<br>78.48)          | 95.75<br>(62.88 to<br>145.75)         | 107.50<br>(70.34 to<br>162.42)        | 115.25<br>(70.77 to<br>185.54)        | 3.34<br>(2.86 to<br>3.85)       | 6.05<br>(4.03 to<br>9.09)       | 7.11<br>(4.71 to<br>10.72)      | 6.99<br>(4.34 to<br>11.17)      |
| Gallbladder and biliary tract cancer | 146.90<br>(128.85 to<br>186.16)       | 135.19<br>(113.34 to<br>178.56)       | 129.17<br>(105.83 to<br>171.00)       | 132.47<br>(111.74 to<br>174.34)       | 7.81<br>(6.89 to<br>9.92)       | 9.05<br>(7.56 to<br>11.82)      | 9.07<br>(7.44 to<br>11.80)      | 8.73<br>(7.38 to<br>11.36)      |
| Pancreatic cancer                    | 540.30<br>(487.65 to<br>598.38)       | 723.22<br>(547.11 to<br>959.40)       | 733.81<br>(551.00 to<br>969.65)       | 742.22<br>(557.25 to<br>1,000.44)     | 29.20<br>(26.43 to<br>32.30)    | 48.48<br>(37.18 to<br>64.44)    | 51.58<br>(39.68 to<br>67.89)    | 48.62<br>(36.63 to<br>65.98)    |
| Larynx cancer                        | 134.70<br>(116.96 to<br>154.97)       | 133.27<br>(77.99 to<br>217.37)        | 69.70<br>(45.06 to<br>108.88)         | 190.65<br>(103.06 to<br>324.67)       | 6.41<br>(5.57 to<br>7.34)       | 7.65<br>(4.70 to<br>12.12)      | 4.40<br>(2.90 to<br>6.84)       | 10.44<br>(5.90 to<br>17.45)     |
| Tracheal, bronchus, and lung cancer  | 822.80<br>(735.21 to<br>924.09)       | 937.19<br>(661.44 to<br>1,286.27)     | 653.62<br>(484.96 to<br>869.34)       | 1,333.06<br>(901.41 to<br>1,910.62)   | 39.07<br>(35.16 to<br>43.41)    | 54.11<br>(39.72 to<br>74.28)    | 41.12<br>(31.17 to<br>55.27)    | 72.97<br>(50.94 to<br>103.84)   |
| Malignant skin melanoma              | 51.00<br>(43.76 to<br>64.17)          | 55.10<br>(44.92 to<br>68.51)          | 72.81<br>(59.38 to<br>92.11)          | 52.11<br>(42.78 to<br>65.12)          | 2.44<br>(2.09 to<br>3.02)       | 3.52<br>(2.91 to<br>4.30)       | 4.89<br>(4.00 to<br>6.10)       | 3.26<br>(2.66 to<br>4.06)       |
| Non-melanoma skin cancer             | 41.44<br>(36.75 to<br>46.30)          | 61.53<br>(52.34 to<br>70.85)          | 43.93<br>(36.57 to<br>50.94)          | 61.75<br>(53.12 to<br>70.27)          | 2.43<br>(2.18 to<br>2.69)       | 4.86<br>(3.88 to<br>5.85)       | 3.72<br>(3.03 to<br>4.45)       | 4.77<br>(3.81 to<br>5.70)       |
| Breast cancer                        | 1,612.49<br>(1,382.18 to<br>1,869.85) | 1,726.40<br>(1,220.67 to<br>2,443.34) | 1,224.65<br>(870.58 to<br>1,706.33)   | 1,845.27<br>(1,294.00 to<br>2,634.81) | 69.34<br>(59.69 to<br>79.41)    | 98.20<br>(70.59 to<br>137.63)   | 74.19<br>(52.96 to<br>103.91)   | 102.78<br>(71.64 to<br>147.73)  |
| Cervical cancer                      | 518.53<br>(435.27 to<br>605.84)       | 483.16<br>(374.03 to<br>611.90)       | 324.51<br>(245.86 to<br>417.83)       | 506.20<br>(390.16 to<br>645.11)       | 23.11<br>(19.58 to<br>26.84)    | 27.64<br>(21.74 to<br>34.32)    | 19.63<br>(15.08 to<br>24.82)    | 28.41<br>(22.20 to<br>35.60)    |
| Uterine cancer                       | 320.16<br>(273.43 to<br>373.02)       | 358.59<br>(282.72 to<br>446.40)       | 284.12<br>(219.18 to<br>363.30)       | 364.18<br>(284.59 to<br>449.62)       | 16.81<br>(14.46 to<br>19.53)    | 22.99<br>(18.41 to<br>27.90)    | 18.93<br>(14.67 to<br>23.73)    | 23.10<br>(18.47 to<br>27.90)    |
| Ovarian cancer                       | 273.82<br>(221.34 to<br>337.46)       | 330.55<br>(205.33 to<br>520.32)       | 274.72<br>(171.65 to<br>424.95)       | 347.95<br>(211.63 to<br>556.58)       | 12.67<br>(10.31 to<br>15.48)    | 19.36<br>(12.06 to<br>30.80)    | 16.81<br>(10.68 to<br>26.07)    | 20.10<br>(12.42 to<br>32.38)    |
| Prostate cancer                      | 1,702.58<br>(1,393.54 to<br>1,981.91) | 3,135.81<br>(2,541.81 to<br>3,638.34) | 2,703.07<br>(2,123.96 to<br>3,175.55) | 3,031.75<br>(2,461.66 to<br>3,512.99) | 125.84<br>(103.65 to<br>146.57) | 275.53<br>(219.15 to<br>327.16) | 248.04<br>(199.30 to<br>291.99) | 261.79<br>(203.28 to<br>313.21) |
| Testicular cancer                    | 3.86<br>(3.15 to<br>4.65)             | 3.58<br>(2.78 to<br>4.55)             | 2.62<br>(2.03 to<br>3.33)             | 3.63<br>(2.85 to<br>4.60)             | 0.12<br>(0.10 to<br>0.14)       | 0.15<br>(0.12 to<br>0.19)       | 0.12<br>(0.10 to<br>0.15)       | 0.15<br>(0.12 to<br>0.19)       |

**Barbados**

| Cause                           | YLLs (actual counts)            |                                 |                                 |                                 | Deaths (actual counts)     |                              |                              |                              |
|---------------------------------|---------------------------------|---------------------------------|---------------------------------|---------------------------------|----------------------------|------------------------------|------------------------------|------------------------------|
|                                 | 2016                            | 2040 Forecast                   | 2040 Better Scenario            | 2040 Worse Scenario             | 2016                       | 2040 Forecast                | 2040 Better Scenario         | 2040 Worse Scenario          |
| Kidney cancer                   | 199.94<br>(179.38 to<br>225.10) | 260.52<br>(220.46 to<br>308.00) | 275.50<br>(231.41 to<br>328.39) | 259.39<br>(219.60 to<br>308.46) | 8.83<br>(7.95 to<br>9.85)  | 14.73<br>(12.66 to<br>17.28) | 16.41<br>(13.96 to<br>19.29) | 14.30<br>(12.17 to<br>16.84) |
| Bladder cancer                  | 137.67<br>(123.43 to<br>154.40) | 183.46<br>(139.98 to<br>247.86) | 162.42<br>(122.92 to<br>218.63) | 192.72<br>(143.68 to<br>264.68) | 8.91<br>(7.99 to<br>9.93)  | 14.89<br>(11.10 to<br>20.03) | 13.91<br>(10.49 to<br>18.45) | 15.23<br>(11.13 to<br>21.12) |
| Brain and nervous system cancer | 273.16<br>(240.48 to<br>342.65) | 332.43<br>(280.10 to<br>423.23) | 290.16<br>(243.07 to<br>370.43) | 331.87<br>(280.18 to<br>423.41) | 9.16<br>(8.12 to<br>11.58) | 14.37<br>(12.22 to<br>18.06) | 13.15<br>(11.08 to<br>16.53) | 14.09<br>(12.12 to<br>17.63) |
| Thyroid cancer                  | 54.50<br>(48.08 to<br>61.46)    | 54.49<br>(39.97 to<br>75.16)    | 43.61<br>(31.78 to<br>60.00)    | 61.87<br>(42.72 to<br>88.20)    | 2.71<br>(2.39 to<br>3.07)  | 3.40<br>(2.49 to<br>4.73)    | 2.83<br>(2.08 to<br>3.92)    | 3.76<br>(2.63 to<br>5.36)    |
| Mesothelioma                    | 17.70<br>(15.56 to<br>20.38)    | 20.70<br>(17.33 to<br>24.61)    | 21.86<br>(18.02 to<br>26.24)    | 20.09<br>(16.93 to<br>23.70)    | 0.77<br>(0.68 to<br>0.88)  | 1.20<br>(0.99 to<br>1.43)    | 1.33<br>(1.09 to<br>1.59)    | 1.14<br>(0.95 to<br>1.35)    |

|                                |                                                               |                                                              |                                                             |                                                               |                                                      |                                                          |                                                        |                                                          |
|--------------------------------|---------------------------------------------------------------|--------------------------------------------------------------|-------------------------------------------------------------|---------------------------------------------------------------|------------------------------------------------------|----------------------------------------------------------|--------------------------------------------------------|----------------------------------------------------------|
|                                | 37.65<br>(32.38 to<br>44.54)                                  | 28.05<br>(22.61 to<br>34.75)                                 | 17.09<br>(13.39 to<br>22.07)                                | 29.29<br>(23.47 to<br>37.18)                                  | 1.20<br>(1.04 to<br>1.41)                            | 1.16<br>(0.96 to<br>1.42)                                | 0.75<br>(0.60 to<br>0.94)                              | 1.19<br>(0.98 to<br>1.46)                                |
| Hodgkin lymphoma               |                                                               |                                                              |                                                             |                                                               |                                                      |                                                          |                                                        |                                                          |
|                                | 585.65<br>(518.45 to<br>679.37)                               | 613.90<br>(492.59 to<br>785.29)                              | 500.37<br>(397.78 to<br>640.97)                             | 653.95<br>(512.53 to<br>854.28)                               | 21.75<br>(19.34 to<br>25.11)                         | 29.58<br>(24.02 to<br>37.35)                             | 25.30<br>(20.30 to<br>31.94)                           | 30.80<br>(24.72 to<br>39.62)                             |
| Non-Hodgkin lymphoma           |                                                               |                                                              |                                                             |                                                               |                                                      |                                                          |                                                        |                                                          |
|                                | 451.86<br>(327.22 to<br>520.98)                               | 510.91<br>(352.73 to<br>657.90)                              | 467.16<br>(320.67 to<br>599.49)                             | 539.93<br>(370.90 to<br>712.60)                               | 21.79<br>(15.95 to<br>25.17)                         | 30.28<br>(21.07 to<br>38.39)                             | 28.82<br>(19.99 to<br>36.65)                           | 31.33<br>(21.53 to<br>40.90)                             |
| Multiple myeloma               |                                                               |                                                              |                                                             |                                                               |                                                      |                                                          |                                                        |                                                          |
|                                | 685.03<br>(610.04 to<br>770.44)                               | 654.31<br>(520.85 to<br>802.59)                              | 536.03<br>(428.75 to<br>658.88)                             | 723.84<br>(563.44 to<br>905.05)                               | 26.12<br>(23.37 to<br>28.85)                         | 35.30<br>(28.66 to<br>42.91)                             | 30.45<br>(24.67 to<br>36.97)                           | 37.83<br>(30.23 to<br>46.94)                             |
| Leukemia                       |                                                               |                                                              |                                                             |                                                               |                                                      |                                                          |                                                        |                                                          |
|                                | 58.35<br>(46.35 to<br>74.22)                                  | 40.36<br>(29.58 to<br>61.52)                                 | 30.54<br>(22.78 to<br>45.10)                                | 44.25<br>(35.11 to<br>65.11)                                  | 1.28<br>(1.09 to<br>1.52)                            | 1.15<br>(0.90 to<br>1.48)                                | 0.91<br>(0.71 to<br>1.15)                              | 1.25<br>(0.97 to<br>1.61)                                |
| Acute lymphoid leukemia        |                                                               |                                                              |                                                             |                                                               |                                                      |                                                          |                                                        |                                                          |
|                                | 37.20<br>(29.33 to<br>44.00)                                  | 33.20<br>(24.18 to<br>45.30)                                 | 31.41<br>(21.73 to<br>42.36)                                | 35.53<br>(24.24 to<br>49.63)                                  | 2.09<br>(1.63 to<br>2.50)                            | 2.35<br>(1.62 to<br>3.21)                                | 2.33<br>(1.59 to<br>3.17)                              | 2.44<br>(1.66 to<br>3.39)                                |
| Chronic lymphoid leukemia      |                                                               |                                                              |                                                             |                                                               |                                                      |                                                          |                                                        |                                                          |
|                                | 204.83<br>(178.02 to<br>236.52)                               | 201.94<br>(153.78 to<br>245.62)                              | 192.39<br>(147.34 to<br>245.96)                             | 221.42<br>(165.35 to<br>290.87)                               | 6.96<br>(6.08 to<br>7.94)                            | 9.37<br>(7.29 to<br>11.80)                               | 9.48<br>(7.37 to<br>11.82)                             | 9.96<br>(7.54 to<br>12.85)                               |
| Acute myeloid leukemia         |                                                               |                                                              |                                                             |                                                               |                                                      |                                                          |                                                        |                                                          |
|                                | 55.31<br>(46.20 to<br>65.44)                                  | 33.66<br>(23.43 to<br>45.91)                                 | 18.90<br>(13.32 to<br>25.35)                                | 38.82<br>(27.29 to<br>53.78)                                  | 2.28<br>(1.91 to<br>2.68)                            | 1.83<br>(1.29 to<br>2.47)                                | 1.07<br>(0.76 to<br>1.44)                              | 2.04<br>(1.45 to<br>2.78)                                |
| Chronic myeloid leukemia       |                                                               |                                                              |                                                             |                                                               |                                                      |                                                          |                                                        |                                                          |
|                                | 329.35<br>(292.10 to<br>371.61)                               | 345.14<br>(280.20 to<br>421.02)                              | 262.79<br>(210.87 to<br>321.09)                             | 383.83<br>(305.57 to<br>472.49)                               | 13.51<br>(12.02 to<br>15.14)                         | 20.61<br>(16.90 to<br>25.24)                             | 16.67<br>(13.63 to<br>20.39)                           | 22.14<br>(17.94 to<br>27.28)                             |
| Other leukemia                 |                                                               |                                                              |                                                             |                                                               |                                                      |                                                          |                                                        |                                                          |
|                                | 732.18<br>(657.02 to<br>827.49)                               | 816.04<br>(709.79 to<br>942.63)                              | 801.25<br>(680.87 to<br>928.89)                             | 801.64<br>(701.52 to<br>927.68)                               | 30.60<br>(27.44 to<br>34.33)                         | 46.55<br>(40.51 to<br>52.97)                             | 48.65<br>(41.66 to<br>55.88)                           | 44.75<br>(38.89 to<br>51.16)                             |
| Other neoplasms                |                                                               |                                                              |                                                             |                                                               |                                                      |                                                          |                                                        |                                                          |
|                                | <b>12,346.73</b><br><b>(11,333.31 to</b><br><b>13,507.78)</b> | <b>14,086.37</b><br><b>(9,319.77 to</b><br><b>21,189.85)</b> | <b>7,533.28</b><br><b>(5,123.19 to</b><br><b>11,239.98)</b> | <b>17,897.65</b><br><b>(11,539.07 to</b><br><b>26,974.71)</b> | <b>821.22</b><br><b>(761.05 to</b><br><b>888.58)</b> | <b>1,207.61</b><br><b>(834.59 to</b><br><b>1,805.34)</b> | <b>721.98</b><br><b>(506.12 to</b><br><b>1,079.64)</b> | <b>1,439.73</b><br><b>(985.11 to</b><br><b>2,135.22)</b> |
| Cardiovascular diseases        |                                                               |                                                              |                                                             |                                                               |                                                      |                                                          |                                                        |                                                          |
|                                | 157.60<br>(136.04 to<br>183.50)                               | 107.57<br>(80.73 to<br>141.80)                               | 72.99<br>(52.03 to<br>97.44)                                | 111.34<br>(82.60 to<br>149.63)                                | 8.30<br>(7.10 to<br>9.72)                            | 8.87<br>(6.15 to<br>11.99)                               | 6.57<br>(4.56 to<br>9.00)                              | 8.97<br>(6.16 to<br>12.09)                               |
| Rheumatic heart disease        |                                                               |                                                              |                                                             |                                                               |                                                      |                                                          |                                                        |                                                          |
|                                | 4,955.65<br>(4,418.12 to<br>5,457.18)                         | 5,274.80<br>(2,781.21 to<br>10,537.63)                       | 2,382.08<br>(1,221.51 to<br>4,895.11)                       | 7,283.10<br>(3,798.88 to<br>13,870.00)                        | 333.48<br>(300.50 to<br>364.23)                      | 446.46<br>(242.80 to<br>826.65)                          | 225.49<br>(116.07 to<br>433.19)                        | 573.55<br>(305.55 to<br>1,035.04)                        |
| Ischemic heart disease         |                                                               |                                                              |                                                             |                                                               |                                                      |                                                          |                                                        |                                                          |
|                                | 4,015.95<br>(3,638.82 to<br>4,445.06)                         | 3,897.22<br>(2,195.60 to<br>7,574.57)                        | 1,657.68<br>(934.49 to<br>3,348.98)                         | 5,421.83<br>(3,000.50 to<br>10,687.70)                        | 272.34<br>(245.24 to<br>299.22)                      | 336.92<br>(195.34 to<br>668.21)                          | 162.94<br>(91.81 to<br>323.22)                         | 429.34<br>(246.98 to<br>831.49)                          |
| Stroke                         |                                                               |                                                              |                                                             |                                                               |                                                      |                                                          |                                                        |                                                          |
|                                | 1,648.46<br>(1,471.75 to<br>1,833.43)                         | 1,784.13<br>(863.08 to<br>4,563.29)                          | 865.51<br>(400.92 to<br>2,306.09)                           | 2,326.11<br>(1,087.52 to<br>5,850.60)                         | 132.46<br>(118.26 to<br>146.75)                      | 174.88<br>(83.23 to<br>460.51)                           | 93.35<br>(43.84 to<br>229.50)                          | 212.90<br>(99.92 to<br>574.61)                           |
| Ischemic stroke                |                                                               |                                                              |                                                             |                                                               |                                                      |                                                          |                                                        |                                                          |
|                                | 2,367.49<br>(2,133.61 to<br>2,646.89)                         | 2,113.09<br>(1,215.78 to<br>3,609.64)                        | 792.17<br>(470.46 to<br>1,312.73)                           | 3,095.72<br>(1,690.65 to<br>5,387.37)                         | 139.88<br>(125.92 to<br>155.68)                      | 162.05<br>(97.12 to<br>263.24)                           | 69.60<br>(43.15 to<br>114.15)                          | 216.45<br>(125.33 to<br>373.86)                          |
| Intracerebral hemorrhage       |                                                               |                                                              |                                                             |                                                               |                                                      |                                                          |                                                        |                                                          |
|                                | 729.81<br>(574.76 to<br>1,171.24)                             | 1,253.97<br>(734.29 to<br>2,235.83)                          | 868.38<br>(570.14 to<br>1,420.36)                           | 1,382.19<br>(795.49 to<br>2,579.24)                           | 52.99<br>(42.04 to<br>83.41)                         | 115.01<br>(69.37 to<br>222.71)                           | 86.81<br>(56.73 to<br>140.02)                          | 125.90<br>(73.03 to<br>249.07)                           |
| Hypertensive heart disease     |                                                               |                                                              |                                                             |                                                               |                                                      |                                                          |                                                        |                                                          |
|                                | 628.93<br>(530.46 to<br>724.79)                               | 623.47<br>(451.59 to<br>838.73)                              | 399.96<br>(289.57 to<br>534.41)                             | 653.26<br>(475.11 to<br>886.36)                               | 30.42<br>(26.24 to<br>34.56)                         | 40.44<br>(28.65 to<br>57.14)                             | 28.69<br>(20.49 to<br>39.15)                           | 41.14<br>(29.10 to<br>57.29)                             |
| Cardiomyopathy and myocarditis |                                                               |                                                              |                                                             |                                                               |                                                      |                                                          |                                                        |                                                          |
|                                | 75.77<br>(58.34 to<br>91.26)                                  | 80.90<br>(60.21 to<br>107.53)                                | 84.08<br>(61.09 to<br>107.53)                               | 79.16<br>(58.89 to<br>100.02)                                 | 4.90<br>(3.78 to<br>6.07)                            | 7.01<br>(4.72 to<br>9.51)                                | 8.02<br>(5.61 to<br>10.90)                             | 6.71<br>(4.45 to<br>9.12)                                |
| Myocarditis                    |                                                               |                                                              |                                                             |                                                               |                                                      |                                                          |                                                        |                                                          |

**Barbados**

| Cause                    | YLLs (actual counts)           |                               |                               |                                | Deaths (actual counts)    |                           |                           |                           |
|--------------------------|--------------------------------|-------------------------------|-------------------------------|--------------------------------|---------------------------|---------------------------|---------------------------|---------------------------|
|                          | 2016                           | 2040 Forecast                 | 2040 Better Scenario          | 2040 Worse Scenario            | 2016                      | 2040 Forecast             | 2040 Better Scenario      | 2040 Worse Scenario       |
| Alcoholic cardiomyopathy | 104.67<br>(82.36 to<br>143.11) | 96.50<br>(72.87 to<br>132.46) | 80.22<br>(59.21 to<br>108.73) | 106.06<br>(80.51 to<br>144.86) | 4.46<br>(3.53 to<br>6.04) | 5.05<br>(3.78 to<br>7.07) | 4.50<br>(3.34 to<br>6.15) | 5.37<br>(4.07 to<br>7.41) |



|                                                                |                                              |                                              |                                            |                                              |                                       |                                       |                                       |                                        |
|----------------------------------------------------------------|----------------------------------------------|----------------------------------------------|--------------------------------------------|----------------------------------------------|---------------------------------------|---------------------------------------|---------------------------------------|----------------------------------------|
| Other cardiomyopathy                                           | 448.49<br>(358.67 to<br>522.01)              | 446.07<br>(294.37 to<br>645.32)              | 235.66<br>(151.15 to<br>350.16)            | 468.03<br>(302.96 to<br>687.33)              | 21.06<br>(17.09 to<br>24.36)          | 28.37<br>(17.86 to<br>44.24)          | 16.18<br>(9.83 to<br>24.84)           | 29.06<br>(18.19 to<br>45.05)           |
| Atrial fibrillation and flutter                                | 166.83<br>(130.74 to<br>210.18)              | 295.47<br>(208.06 to<br>397.34)              | 265.90<br>(188.40 to<br>354.72)            | 297.32<br>(210.18 to<br>401.53)              | 17.42<br>(13.48 to<br>22.05)          | 33.64<br>(23.47 to<br>46.32)          | 31.88<br>(22.67 to<br>42.80)          | 33.26<br>(22.53 to<br>46.05)           |
| Aortic aneurysm                                                | 200.32<br>(176.43 to<br>228.60)              | 231.80<br>(181.10 to<br>299.37)              | 190.14<br>(147.27 to<br>239.30)            | 232.73<br>(183.36 to<br>298.92)              | 12.20<br>(10.90 to<br>13.78)          | 17.93<br>(14.00 to<br>22.39)          | 15.90<br>(12.39 to<br>19.66)          | 17.54<br>(13.71 to<br>21.92)           |
| Peripheral artery disease                                      | 168.84<br>(120.59 to<br>266.17)              | 438.77<br>(270.42 to<br>703.38)              | 441.95<br>(281.27 to<br>702.06)            | 443.84<br>(272.51 to<br>723.23)              | 18.94<br>(12.48 to<br>30.11)          | 55.55<br>(30.15 to<br>92.94)          | 59.65<br>(34.81 to<br>96.07)          | 54.79<br>(28.94 to<br>93.08)           |
| Endocarditis                                                   | 227.24<br>(172.90 to<br>305.21)              | 283.39<br>(192.86 to<br>408.98)              | 256.78<br>(173.44 to<br>362.44)            | 283.24<br>(192.38 to<br>413.04)              | 11.70<br>(8.84 to<br>15.83)           | 19.45<br>(12.72 to<br>29.55)          | 18.96<br>(12.29 to<br>28.21)          | 18.99<br>(12.29 to<br>29.31)           |
| Other cardiovascular and circulatory diseases                  | 1,095.56<br>(978.39 to<br>1,228.55)          | 1,699.90<br>(1,292.63 to<br>2,241.11)        | 997.42<br>(744.55 to<br>1,290.18)          | 1,788.79<br>(1,377.31 to<br>2,333.23)        | 63.44<br>(56.69 to<br>70.96)          | 133.33<br>(100.59 to<br>171.84)       | 85.10<br>(64.86 to<br>110.73)         | 136.25<br>(104.09 to<br>175.68)        |
| <b>Chronic respiratory diseases</b>                            | <b>868.27<br/>(787.22 to<br/>959.54)</b>     | <b>949.27<br/>(765.15 to<br/>1,186.58)</b>   | <b>795.13<br/>(653.97 to<br/>959.51)</b>   | <b>1,145.12<br/>(894.96 to<br/>1,494.41)</b> | <b>53.35<br/>(48.53 to<br/>58.51)</b> | <b>75.72<br/>(59.57 to<br/>95.41)</b> | <b>67.24<br/>(54.78 to<br/>81.00)</b> | <b>86.94<br/>(65.40 to<br/>113.30)</b> |
| Chronic obstructive pulmonary disease                          | 441.30<br>(388.78 to<br>498.30)              | 590.38<br>(437.44 to<br>798.44)              | 410.58<br>(311.40 to<br>535.67)            | 756.33<br>(531.60 to<br>1,061.88)            | 31.51<br>(27.97 to<br>35.25)          | 50.62<br>(37.11 to<br>68.41)          | 38.83<br>(29.25 to<br>50.53)          | 60.75<br>(42.10 to<br>85.96)           |
| Pneumoconiosis                                                 | 2.32<br>(1.96 to<br>2.73)                    | 2.78<br>(2.15 to<br>3.52)                    | 2.49<br>(1.83 to<br>3.40)                  | 2.82<br>(2.18 to<br>3.59)                    | 0.16<br>(0.13 to<br>0.18)             | 0.23<br>(0.18 to<br>0.33)             | 0.23<br>(0.16 to<br>0.33)             | 0.24<br>(0.18 to<br>0.33)              |
| Silicosis                                                      | 0.29<br>(0.22 to<br>0.40)                    | 0.33<br>(0.20 to<br>0.51)                    | 0.20<br>(0.11 to<br>0.37)                  | 0.34<br>(0.22 to<br>0.52)                    | 0.02<br>(0.01 to<br>0.03)             | 0.03<br>(0.02 to<br>0.05)             | 0.02<br>(0.01 to<br>0.04)             | 0.03<br>(0.02 to<br>0.05)              |
| Asbestosis                                                     | 0.61<br>(0.50 to<br>0.74)                    | 0.64<br>(0.47 to<br>0.86)                    | 0.83<br>(0.62 to<br>1.09)                  | 0.61<br>(0.46 to<br>0.81)                    | 0.02<br>(0.02 to<br>0.03)             | 0.04<br>(0.05 to<br>0.06)             | 0.06<br>(0.04 to<br>0.08)             | 0.04<br>(0.02 to<br>0.05)              |
| Coal workers pneumoconiosis                                    | 0.13<br>(0.09 to<br>0.19)                    | 0.21<br>(0.12 to<br>0.39)                    | 0.20<br>(0.10 to<br>0.43)                  | 0.22<br>(0.13 to<br>0.40)                    | 0.01<br>(0.01 to<br>0.01)             | 0.02<br>(0.01 to<br>0.04)             | 0.02<br>(0.01 to<br>0.05)             | 0.02<br>(0.01 to<br>0.04)              |
| Other pneumoconiosis                                           | 1.29<br>(1.05 to<br>1.56)                    | 1.60<br>(1.13 to<br>2.16)                    | 1.26<br>(0.81 to<br>1.89)                  | 1.65<br>(1.15 to<br>2.23)                    | 0.10<br>(0.08 to<br>0.12)             | 0.16<br>(0.11 to<br>0.22)             | 0.13<br>(0.08 to<br>0.21)             | 0.16<br>(0.11 to<br>0.23)              |
| Asthma                                                         | 237.92<br>(201.85 to<br>276.07)              | 121.40<br>(76.74 to<br>196.65)               | 59.01<br>(35.99 to<br>100.15)              | 161.73<br>(97.43 to<br>259.15)               | 11.51<br>(9.78 to<br>13.41)           | 8.32<br>(5.27 to<br>13.54)            | 4.38<br>(2.64 to<br>7.21)             | 10.54<br>(6.31 to<br>17.09)            |
| Interstitial lung disease and pulmonary sarcoidosis            | 110.08<br>(86.50 to<br>136.15)               | 133.60<br>(101.76 to<br>167.83)              | 216.60<br>(172.06 to<br>268.62)            | 123.94<br>(97.57 to<br>155.36)               | 5.60<br>(4.47 to<br>7.03)             | 8.74<br>(6.79 to<br>11.14)            | 14.99<br>(11.83 to<br>18.55)          | 7.95<br>(6.23 to<br>10.03)             |
| Other chronic respiratory diseases                             | 76.75<br>(55.61 to<br>118.12)                | 101.12<br>(71.95 to<br>149.47)               | 106.45<br>(75.84 to<br>153.26)             | 100.30<br>(70.75 to<br>150.87)               | 4.57<br>(3.31 to<br>6.96)             | 7.80<br>(5.39 to<br>11.42)            | 8.82<br>(6.24 to<br>12.56)            | 7.46<br>(5.07 to<br>11.08)             |
| <b>Cirrhosis and other chronic liver diseases</b>              | <b>1,077.90<br/>(957.01 to<br/>1,215.54)</b> | <b>1,008.87<br/>(858.33 to<br/>1,179.39)</b> | <b>703.38<br/>(588.31 to<br/>829.48)</b>   | <b>1,081.19<br/>(927.04 to<br/>1,246.26)</b> | <b>42.94<br/>(38.51 to<br/>47.80)</b> | <b>50.74<br/>(44.01 to<br/>57.93)</b> | <b>37.62<br/>(32.13 to<br/>43.35)</b> | <b>52.99<br/>(46.07 to<br/>60.41)</b>  |
| Cirrhosis and other chronic liver diseases due to hepatitis B  | 129.53<br>(104.66 to<br>160.05)              | 124.01<br>(96.84 to<br>153.90)               | 93.17<br>(72.20 to<br>118.24)              | 125.37<br>(98.22 to<br>156.46)               | 5.29<br>(4.34 to<br>6.41)             | 6.34<br>(5.03 to<br>7.84)             | 4.98<br>(3.90 to<br>6.27)             | 6.30<br>(4.97 to<br>7.79)              |
| Cirrhosis and other chronic liver diseases due to hepatitis C  | 354.95<br>(301.73 to<br>412.57)              | 334.67<br>(274.44 to<br>396.86)              | 245.19<br>(197.41 to<br>295.06)            | 340.18<br>(280.88 to<br>404.94)              | 13.65<br>(11.77 to<br>15.70)          | 15.88<br>(13.24 to<br>18.65)          | 12.14<br>(10.01 to<br>14.32)          | 15.89<br>(13.29 to<br>18.78)           |
| Cirrhosis and other chronic liver diseases due to alcohol use  | 425.32<br>(367.05 to<br>486.40)              | 398.89<br>(332.18 to<br>470.96)              | 251.98<br>(206.67 to<br>303.15)            | 461.57<br>(389.99 to<br>542.87)              | 17.50<br>(15.37 to<br>19.84)          | 20.67<br>(17.56 to<br>24.03)          | 14.27<br>(11.96 to<br>16.88)          | 22.98<br>(19.88 to<br>26.88)           |
| Cirrhosis and other chronic liver diseases due to other causes | 168.10<br>(143.61 to<br>195.21)              | 151.30<br>(127.72 to<br>181.67)              | 113.04<br>(92.65 to<br>136.56)             | 154.07<br>(127.63 to<br>186.59)              | 6.51<br>(5.67 to<br>7.50)             | 7.84<br>(6.57 to<br>9.35)             | 6.23<br>(5.18 to<br>7.41)             | 7.83<br>(6.49 to<br>9.31)              |
| <b>Digestive diseases</b>                                      | <b>1,023.36<br/>(908.41 to<br/>1,306.16)</b> | <b>1,055.75<br/>(852.98 to<br/>1,380.41)</b> | <b>838.87<br/>(679.92 to<br/>1,085.73)</b> | <b>1,100.52<br/>(878.34 to<br/>1,471.71)</b> | <b>54.86<br/>(49.23 to<br/>67.85)</b> | <b>77.88<br/>(61.83 to<br/>99.91)</b> | <b>67.76<br/>(55.02 to<br/>85.62)</b> | <b>78.64<br/>(61.92 to<br/>101.45)</b> |

|                                            |                                                            |                                                            |                                                            |                                                            |                                                      |                                                      |                                                      |                                                      |
|--------------------------------------------|------------------------------------------------------------|------------------------------------------------------------|------------------------------------------------------------|------------------------------------------------------------|------------------------------------------------------|------------------------------------------------------|------------------------------------------------------|------------------------------------------------------|
| Peptic ulcer disease                       | 214.88<br>(183.68 to<br>265.36)                            | 154.83<br>(123.09 to<br>193.75)                            | 85.24<br>(65.49 to<br>109.43)                              | 162.60<br>(128.92 to<br>204.78)                            | 11.56<br>(9.97 to<br>13.97)                          | 11.67<br>(9.09 to<br>14.83)                          | 6.77<br>(5.20 to<br>8.85)                            | 12.01<br>(9.31 to<br>15.49)                          |
| <b>Barbados</b>                            |                                                            |                                                            |                                                            |                                                            |                                                      |                                                      |                                                      |                                                      |
| Cause                                      | YLLs (actual counts)                                       |                                                            |                                                            |                                                            | Deaths (actual counts)                               |                                                      |                                                      |                                                      |
|                                            | 2016                                                       | 2040 Forecast                                              | 2040 Better Scenario                                       | 2040 Worse Scenario                                        | 2016                                                 | 2040 Forecast                                        | 2040 Better Scenario                                 | 2040 Worse Scenario                                  |
| Gastritis and duodenitis                   | 20.98<br>(16.86 to<br>30.02)                               | 24.94<br>(18.61 to<br>37.36)                               | 17.44<br>(13.00 to<br>27.70)                               | 25.26<br>(19.37 to<br>38.92)                               | 1.20<br>(0.97 to<br>1.79)                            | 1.96<br>(1.40 to<br>2.90)                            | 1.48<br>(1.08 to<br>2.24)                            | 1.94<br>(1.36 to<br>2.87)                            |
| Appendicitis                               | 56.15<br>(44.14 to<br>75.05)                               | 48.01<br>(36.42 to<br>67.14)                               | 27.38<br>(19.92 to<br>38.48)                               | 50.16<br>(38.03 to<br>68.74)                               | 2.23<br>(1.72 to<br>2.87)                            | 2.77<br>(2.05 to<br>3.69)                            | 1.70<br>(1.24 to<br>2.28)                            | 2.82<br>(2.10 to<br>3.71)                            |
| Paralytic ileus and intestinal obstruction | 245.39<br>(201.96 to<br>342.18)                            | 292.35<br>(235.36 to<br>409.47)                            | 296.00<br>(236.44 to<br>408.97)                            | 284.98<br>(230.52 to<br>398.53)                            | 13.68<br>(11.50 to<br>18.39)                         | 22.60<br>(17.49 to<br>30.86)                         | 24.42<br>(19.42 to<br>31.91)                         | 21.56<br>(16.37 to<br>29.24)                         |
| Inguinal, femoral, and abdominal hernia    | 45.47<br>(34.09 to<br>62.49)                               | 34.35<br>(25.71 to<br>48.25)                               | 25.44<br>(18.67 to<br>34.95)                               | 34.51<br>(25.23 to<br>47.51)                               | 2.48<br>(1.90 to<br>3.44)                            | 2.57<br>(1.87 to<br>3.62)                            | 2.06<br>(1.53 to<br>2.92)                            | 2.52<br>(1.82 to<br>3.51)                            |
| Inflammatory bowel disease                 | 34.61<br>(26.94 to<br>40.41)                               | 31.99<br>(24.00 to<br>39.07)                               | 31.81<br>(23.51 to<br>39.33)                               | 31.29<br>(23.95 to<br>38.07)                               | 1.80<br>(1.34 to<br>2.11)                            | 2.36<br>(1.61 to<br>3.06)                            | 2.53<br>(1.72 to<br>3.32)                            | 2.25<br>(1.53 to<br>2.93)                            |
| Vascular intestinal disorders              | 47.06<br>(39.65 to<br>63.83)                               | 64.50<br>(51.96 to<br>88.81)                               | 56.34<br>(44.47 to<br>76.62)                               | 63.61<br>(52.13 to<br>87.55)                               | 2.92<br>(2.45 to<br>3.93)                            | 5.22<br>(4.18 to<br>6.97)                            | 4.84<br>(3.80 to<br>6.52)                            | 5.06<br>(4.04 to<br>6.71)                            |
| Gallbladder and biliary diseases           | 64.79<br>(55.83 to<br>80.95)                               | 67.83<br>(37.83 to<br>118.63)                              | 45.37<br>(25.37 to<br>82.43)                               | 92.62<br>(48.60 to<br>165.51)                              | 3.57<br>(3.05 to<br>4.35)                            | 5.13<br>(2.89 to<br>9.03)                            | 3.67<br>(2.02 to<br>6.56)                            | 6.70<br>(3.64 to<br>12.01)                           |
| Pancreatitis                               | 114.09<br>(94.04 to<br>154.54)                             | 124.76<br>(62.74 to<br>248.67)                             | 67.03<br>(37.40 to<br>125.97)                              | 145.56<br>(71.49 to<br>295.71)                             | 3.99<br>(3.34 to<br>5.41)                            | 5.45<br>(2.92 to<br>10.36)                           | 3.17<br>(1.91 to<br>5.70)                            | 6.17<br>(3.25 to<br>12.36)                           |
| Other digestive diseases                   | 179.94<br>(148.41 to<br>226.65)                            | 212.19<br>(168.52 to<br>269.11)                            | 186.84<br>(144.88 to<br>238.51)                            | 209.94<br>(166.90 to<br>268.45)                            | 11.42<br>(9.63 to<br>14.48)                          | 18.15<br>(14.05 to<br>23.36)                         | 17.12<br>(13.37 to<br>22.15)                         | 17.61<br>(13.43 to<br>22.85)                         |
| <b>Neurological disorders</b>              | <b>1,847.36</b><br><b>(1,595.77 to</b><br><b>2,153.23)</b> | <b>2,896.72</b><br><b>(2,227.03 to</b><br><b>3,797.98)</b> | <b>3,041.23</b><br><b>(2,356.86 to</b><br><b>3,986.53)</b> | <b>3,104.56</b><br><b>(2,293.10 to</b><br><b>4,333.53)</b> | <b>163.74</b><br><b>(138.07 to</b><br><b>192.80)</b> | <b>297.94</b><br><b>(212.08 to</b><br><b>405.62)</b> | <b>333.69</b><br><b>(244.96 to</b><br><b>444.99)</b> | <b>314.91</b><br><b>(214.16 to</b><br><b>449.81)</b> |
| Alzheimer's disease and other dementias    | 1,227.21<br>(1,010.86 to<br>1,498.69)                      | 2,117.81<br>(1,480.11 to<br>2,984.61)                      | 2,271.86<br>(1,611.09 to<br>3,185.87)                      | 2,323.20<br>(1,551.65 to<br>3,554.64)                      | 135.64<br>(110.77 to<br>164.07)                      | 251.05<br>(167.72 to<br>356.25)                      | 282.35<br>(197.05 to<br>392.34)                      | 269.60<br>(170.31 to<br>400.48)                      |
| Parkinson's disease                        | 143.82<br>(108.86 to<br>189.86)                            | 261.90<br>(194.89 to<br>350.42)                            | 307.14<br>(228.22 to<br>411.33)                            | 246.13<br>(181.84 to<br>332.24)                            | 12.50<br>(9.41 to<br>16.71)                          | 24.91<br>(18.43 to<br>33.66)                         | 30.30<br>(22.49 to<br>40.47)                         | 23.15<br>(16.84 to<br>31.29)                         |
| Epilepsy                                   | 213.03<br>(186.81 to<br>245.28)                            | 235.54<br>(162.95 to<br>339.49)                            | 176.02<br>(126.61 to<br>244.80)                            | 258.84<br>(176.31 to<br>378.36)                            | 6.33<br>(5.60 to<br>7.17)                            | 9.41<br>(6.75 to<br>12.69)                           | 7.68<br>(5.68 to<br>10.14)                           | 10.01<br>(7.11 to<br>13.86)                          |
| Multiple sclerosis                         | 37.86<br>(31.14 to<br>48.70)                               | 31.93<br>(25.13 to<br>42.13)                               | 34.13<br>(26.57 to<br>45.21)                               | 31.53<br>(24.74 to<br>41.74)                               | 1.13<br>(0.94 to<br>1.49)                            | 1.11<br>(0.89 to<br>1.49)                            | 1.22<br>(0.97 to<br>1.66)                            | 1.08<br>(0.87 to<br>1.46)                            |
| Motor neuron disease                       | 92.02<br>(81.03 to<br>103.54)                              | 107.92<br>(90.88 to<br>127.17)                             | 106.24<br>(87.64 to<br>127.23)                             | 105.86<br>(89.72 to<br>124.61)                             | 3.64<br>(3.24 to<br>4.09)                            | 5.26<br>(4.41 to<br>6.19)                            | 5.33<br>(4.36 to<br>6.34)                            | 5.10<br>(4.30 to<br>5.97)                            |
| Other neurological disorders               | 133.42<br>(118.12 to<br>151.67)                            | 141.63<br>(120.95 to<br>165.10)                            | 145.84<br>(123.18 to<br>170.38)                            | 139.01<br>(119.27 to<br>162.08)                            | 4.49<br>(4.02 to<br>5.04)                            | 6.22<br>(5.36 to<br>7.05)                            | 6.80<br>(5.83 to<br>7.80)                            | 5.96<br>(5.14 to<br>6.78)                            |
| <b>Mental disorders</b>                    | <b>190.62</b><br><b>(154.24 to</b><br><b>208.50)</b>       | <b>170.28</b><br><b>(141.51 to</b><br><b>200.61)</b>       | <b>203.25</b><br><b>(167.41 to</b><br><b>241.01)</b>       | <b>169.81</b><br><b>(142.04 to</b><br><b>198.82)</b>       | <b>6.08</b><br><b>(5.26 to</b><br><b>6.93)</b>       | <b>7.25</b><br><b>(6.11 to</b><br><b>8.40)</b>       | <b>9.34</b><br><b>(7.81 to</b><br><b>10.80)</b>      | <b>7.05</b><br><b>(6.03 to</b><br><b>8.03)</b>       |
| Alcohol use disorders                      | 143.24<br>(121.00 to<br>167.78)                            | 115.51<br>(92.66 to<br>138.28)                             | 125.07<br>(99.59 to<br>151.60)                             | 117.50<br>(95.85 to<br>141.02)                             | 4.76<br>(4.08 to<br>5.51)                            | 4.73<br>(3.91 to<br>5.57)                            | 5.39<br>(4.38 to<br>6.44)                            | 4.70<br>(3.94 to<br>5.50)                            |
| Drug use disorders                         | 35.92<br>(27.26 to<br>45.32)                               | 53.35<br>(39.96 to<br>69.30)                               | 76.69<br>(58.22 to<br>97.22)                               | 50.90<br>(38.43 to<br>65.06)                               | 1.29<br>(0.99 to<br>1.61)                            | 2.49<br>(1.88 to<br>3.21)                            | 3.92<br>(2.96 to<br>4.93)                            | 2.31<br>(1.75 to<br>2.95)                            |

|                                                            |                                       |                                         |                                        |                                         |                                 |                                   |                                   |                                   |
|------------------------------------------------------------|---------------------------------------|-----------------------------------------|----------------------------------------|-----------------------------------------|---------------------------------|-----------------------------------|-----------------------------------|-----------------------------------|
| Opioid use disorders                                       | 22.22<br>(16.55 to<br>29.80)          | 25.71<br>(18.51 to<br>36.01)            | 29.06<br>(20.91 to<br>41.62)           | 25.10<br>(18.10 to<br>35.48)            | 0.70<br>(0.53 to<br>0.94)       | 1.03<br>(0.76 to<br>1.40)         | 1.24<br>(0.92 to<br>1.75)         | 0.98<br>(0.72 to<br>1.33)         |
| Cocaine use disorders                                      | 2.16<br>(1.37 to<br>2.94)             | 4.42<br>(2.75 to<br>6.22)               | 6.49<br>(4.19 to<br>8.98)              | 4.23<br>(2.65 to<br>5.89)               | 0.06<br>(0.04 to<br>0.09)       | 0.14<br>(0.09 to<br>0.20)         | 0.22<br>(0.14 to<br>0.29)         | 0.14<br>(0.09 to<br>0.19)         |
| Amphetamine use disorders                                  | 1.58<br>(0.97 to<br>2.24)             | 5.28<br>(3.32 to<br>7.84)               | 9.87<br>(6.46 to<br>14.11)             | 4.93<br>(3.17 to<br>7.12)               | 0.05<br>(0.03 to<br>0.07)       | 0.20<br>(0.13 to<br>0.29)         | 0.40<br>(0.26 to<br>0.57)         | 0.18<br>(0.12 to<br>0.27)         |
| Other drug use disorders                                   | 9.86<br>(6.37 to<br>12.82)            | 17.94<br>(11.89 to<br>24.28)            | 31.28<br>(20.99 to<br>41.27)           | 16.65<br>(10.97 to<br>21.79)            | 0.47<br>(0.33 to<br>0.60)       | 1.12<br>(0.76 to<br>1.52)         | 2.06<br>(1.43 to<br>2.72)         | 1.02<br>(0.68 to<br>1.36)         |
| Eating disorders                                           | 1.46<br>(1.19 to<br>1.76)             | 1.41<br>(1.03 to<br>1.94)               | 1.50<br>(1.08 to<br>2.11)              | 1.41<br>(1.04 to<br>1.93)               | 0.03<br>(0.02 to<br>0.03)       | 0.03<br>(0.02 to<br>0.04)         | 0.03<br>(0.02 to<br>0.04)         | 0.03<br>(0.02 to<br>0.04)         |
| <b>Barbados</b>                                            |                                       |                                         |                                        |                                         |                                 |                                   |                                   |                                   |
| Cause                                                      | YLLs (actual counts)                  |                                         |                                        |                                         | Deaths (actual counts)          |                                   |                                   |                                   |
|                                                            | 2016                                  | 2040 Forecast                           | 2040 Better Scenario                   | 2040 Worse Scenario                     | 2016                            | 2040 Forecast                     | 2040 Better Scenario              | 2040 Worse Scenario               |
| Diabetes, urogenital, blood, and endocrine diseases        | 7,305.26<br>(6,703.97 to<br>7,992.61) | 11,612.86<br>(7,919.68 to<br>19,600.88) | 7,819.50<br>(5,257.01 to<br>14,145.68) | 12,894.33<br>(8,811.39 to<br>21,131.10) | 432.83<br>(396.91 to<br>468.59) | 921.35<br>(648.30 to<br>1,633.01) | 657.76<br>(456.62 to<br>1,230.37) | 994.87<br>(702.39 to<br>1,686.69) |
| Diabetes mellitus                                          | 4,124.05<br>(3,737.08 to<br>4,535.42) | 5,650.47<br>(4,101.02 to<br>7,519.66)   | 3,414.57<br>(2,416.34 to<br>4,597.25)  | 6,241.63<br>(4,496.80 to<br>8,395.27)   | 258.72<br>(234.88 to<br>284.48) | 459.73<br>(339.93 to<br>597.61)   | 297.82<br>(218.07 to<br>383.93)   | 492.68<br>(362.50 to<br>639.54)   |
| Acute glomerulonephritis                                   | 1.38<br>(1.18 to<br>1.63)             | 1.36<br>(1.01 to<br>1.97)               | 0.97<br>(0.72 to<br>1.41)              | 1.41<br>(1.05 to<br>2.06)               | 0.03<br>(0.03 to<br>0.04)       | 0.04<br>(0.03 to<br>0.05)         | 0.03<br>(0.02 to<br>0.04)         | 0.04<br>(0.03 to<br>0.05)         |
| Chronic kidney disease                                     | 1,652.71<br>(1,494.05 to<br>1,831.49) | 3,912.59<br>(1,081.78 to<br>11,471.36)  | 2,649.38<br>(719.26 to<br>8,616.83)    | 4,620.45<br>(1,306.85 to<br>12,572.93)  | 88.59<br>(79.77 to<br>97.62)    | 302.04<br>(81.69 to<br>956.61)    | 216.51<br>(59.24 to<br>752.88)    | 347.72<br>(98.81 to<br>997.93)    |
| Chronic kidney disease due to diabetes mellitus            | 634.03<br>(545.90 to<br>725.05)       | 1,620.26<br>(430.48 to<br>4,871.85)     | 1,106.97<br>(281.43 to<br>3,699.04)    | 1,941.39<br>(511.70 to<br>5,282.70)     | 32.63<br>(28.07 to<br>37.62)    | 115.14<br>(30.17 to<br>348.26)    | 82.65<br>(21.18 to<br>274.53)     | 134.48<br>(35.52 to<br>383.28)    |
| Chronic kidney disease due to hypertension                 | 218.97<br>(179.85 to<br>265.00)       | 719.47<br>(179.65 to<br>2,202.57)       | 541.25<br>(133.09 to<br>1,809.95)      | 827.63<br>(214.05 to<br>2,349.71)       | 17.44<br>(14.50 to<br>20.91)    | 70.55<br>(20.19 to<br>224.96)     | 55.75<br>(15.90 to<br>184.33)     | 79.34<br>(22.86 to<br>250.48)     |
| Chronic kidney disease due to glomerulonephritis           | 455.18<br>(379.71 to<br>542.41)       | 840.44<br>(248.20 to<br>2,581.43)       | 515.97<br>(149.21 to<br>1,705.66)      | 990.14<br>(298.26 to<br>2,809.34)       | 20.83<br>(16.98 to<br>24.84)    | 59.53<br>(15.87 to<br>192.96)     | 38.40<br>(9.89 to<br>133.73)      | 68.65<br>(18.16 to<br>208.02)     |
| Chronic kidney disease due to other and unspecified causes | 344.53<br>(283.59 to<br>412.19)       | 732.43<br>(211.15 to<br>2,187.32)       | 485.19<br>(137.87 to<br>1,663.13)      | 861.29<br>(249.99 to<br>2,351.19)       | 17.69<br>(14.45 to<br>21.64)    | 56.82<br>(14.96 to<br>182.91)     | 39.70<br>(10.42 to<br>136.85)     | 65.25<br>(17.88 to<br>187.92)     |
| Urinary diseases and male infertility                      | 734.27<br>(661.44 to<br>815.03)       | 1,086.78<br>(929.68 to<br>1,263.02)     | 819.86<br>(685.07 to<br>958.99)        | 1,076.59<br>(925.04 to<br>1,236.66)     | 52.06<br>(46.86 to<br>57.54)    | 102.45<br>(80.62 to<br>125.14)    | 82.33<br>(67.03 to<br>99.66)      | 99.44<br>(77.11 to<br>121.97)     |
| Urinary tract infections                                   | 673.88<br>(603.20 to<br>750.43)       | 1,024.59<br>(862.60 to<br>1,200.52)     | 780.99<br>(646.39 to<br>911.49)        | 1,014.02<br>(866.59 to<br>1,177.27)     | 47.99<br>(42.78 to<br>53.30)    | 96.67<br>(75.77 to<br>118.79)     | 78.46<br>(63.57 to<br>94.81)      | 93.78<br>(72.39 to<br>115.53)     |
| Urolithiasis                                               | 14.34<br>(11.24 to<br>20.27)          | 11.57<br>(8.38 to<br>17.33)             | 6.83<br>(4.89 to<br>10.29)             | 11.87<br>(8.58 to<br>17.67)             | 0.75<br>(0.58 to<br>1.10)       | 0.78<br>(0.53 to<br>1.23)         | 0.49<br>(0.34 to<br>0.78)         | 0.78<br>(0.54 to<br>1.26)         |
| Other urinary diseases                                     | 46.05<br>(32.43 to<br>73.94)          | 50.62<br>(31.89 to<br>88.32)            | 32.04<br>(20.05 to<br>55.05)           | 50.71<br>(32.69 to<br>87.16)            | 3.33<br>(2.26 to<br>5.56)       | 3.00<br>(2.82 to<br>9.38)         | 3.37<br>(1.92 to<br>6.20)         | 4.89<br>(2.68 to<br>9.22)         |
| Gynecological diseases                                     | 5.45<br>(2.09 to<br>7.08)             | 2.76<br>(1.06 to<br>4.11)               | 1.16<br>(0.40 to<br>1.78)              | 3.03<br>(1.10 to<br>4.44)               | 0.21<br>(0.08 to<br>0.27)       | 0.17<br>(0.06 to<br>0.26)         | 0.08<br>(0.03 to<br>0.12)         | 0.18<br>(0.06 to<br>0.27)         |
| Uterine fibroids                                           | 1.29<br>(0.43 to<br>1.74)             | 0.80<br>(0.24 to<br>1.35)               | 0.43<br>(0.14 to<br>0.73)              | 0.85<br>(0.25 to<br>1.48)               | 0.05<br>(0.02 to<br>0.07)       | 0.04<br>(0.01 to<br>0.08)         | 0.02<br>(0.01 to<br>0.04)         | 0.04<br>(0.01 to<br>0.08)         |
| Polycystic ovarian syndrome                                | 2.58<br>(1.04 to<br>3.59)             | 0.75<br>(0.31 to<br>1.33)               | 0.18<br>(0.06 to<br>0.35)              | 0.88<br>(0.36 to<br>1.59)               | 0.06<br>(0.02 to<br>0.08)       | 0.02<br>(0.01 to<br>0.03)         | 0.00<br>(0.00 to<br>0.01)         | 0.02<br>(0.01 to<br>0.04)         |

|                                                   |                                 |                                   |                                   |                                   |                              |                              |                              |                              |
|---------------------------------------------------|---------------------------------|-----------------------------------|-----------------------------------|-----------------------------------|------------------------------|------------------------------|------------------------------|------------------------------|
| Endometriosis                                     | 0.00<br>(0.00 to<br>0.01)       | 0.00<br>(0.00 to<br>0.01)         | 0.00<br>(0.00 to<br>0.00)         | 0.00<br>(0.00 to<br>0.01)         | 0.00<br>(0.00 to<br>0.00)    | 0.00<br>(0.00 to<br>0.00)    | 0.00<br>(0.00 to<br>0.00)    | 0.00<br>(0.00 to<br>0.00)    |
| Genital prolapse                                  | 0.11<br>(0.03 to<br>0.17)       | 0.07<br>(0.02 to<br>0.14)         | 0.03<br>(0.01 to<br>0.07)         | 0.07<br>(0.02 to<br>0.15)         | 0.01<br>(0.00 to<br>0.01)    | 0.00<br>(0.00 to<br>0.01)    | 0.00<br>(0.00 to<br>0.00)    | 0.00<br>(0.00 to<br>0.01)    |
| Other gynecological diseases                      | 1.46<br>(0.50 to<br>2.09)       | 1.14<br>(0.42 to<br>1.83)         | 0.51<br>(0.18 to<br>0.83)         | 1.22<br>(0.44 to<br>1.97)         | 0.09<br>(0.03 to<br>0.12)    | 0.10<br>(0.04 to<br>0.18)    | 0.05<br>(0.02 to<br>0.08)    | 0.11<br>(0.04 to<br>0.18)    |
| Hemoglobinopathies and hemolytic anemias          | 204.79<br>(172.36 to<br>249.94) | 221.88<br>(174.84 to<br>284.27)   | 138.05<br>(106.34 to<br>182.89)   | 230.66<br>(180.07 to<br>296.17)   | 7.59<br>(6.46 to<br>9.76)    | 11.33<br>(8.96 to<br>14.78)  | 7.68<br>(6.08 to<br>10.19)   | 11.49<br>(9.13 to<br>15.03)  |
| Thalassemias                                      | 3.20<br>(1.10 to<br>6.34)       | 0.93<br>(0.32 to<br>2.00)         | 0.82<br>(0.30 to<br>1.78)         | 0.96<br>(0.33 to<br>2.10)         | 0.04<br>(0.01 to<br>0.08)    | 0.01<br>(0.00 to<br>0.02)    | 0.01<br>(0.00 to<br>0.02)    | 0.01<br>(0.00 to<br>0.03)    |
| Sickle cell disorders                             | 131.50<br>(106.32 to<br>160.59) | 122.16<br>(90.26 to<br>163.50)    | 73.79<br>(53.31 to<br>102.65)     | 128.72<br>(96.55 to<br>170.83)    | 2.80<br>(2.28 to<br>3.47)    | 3.17<br>(2.34 to<br>4.24)    | 1.95<br>(1.42 to<br>2.66)    | 3.32<br>(2.49 to<br>4.43)    |
| G6PD deficiency                                   | 25.09<br>(18.61 to<br>32.87)    | 38.63<br>(28.21 to<br>51.02)      | 21.36<br>(14.74 to<br>29.48)      | 40.39<br>(29.10 to<br>54.28)      | 0.87<br>(0.66 to<br>1.14)    | 0.86<br>(1.37 to<br>2.47)    | 1.07<br>(0.73 to<br>1.48)    | 1.92<br>(1.40 to<br>2.59)    |
| Other hemoglobinopathies and hemolytic anemias    | 45.01<br>(37.32 to<br>57.96)    | 60.17<br>(47.00 to<br>80.04)      | 42.07<br>(32.21 to<br>56.54)      | 60.59<br>(47.47 to<br>79.67)      | 3.88<br>(3.24 to<br>5.19)    | 6.28<br>(4.69 to<br>8.64)    | 4.65<br>(3.50 to<br>6.45)    | 6.24<br>(4.50 to<br>8.49)    |
| Endocrine, metabolic, blood, and immune disorders | 582.60<br>(483.02 to<br>818.49) | 737.01<br>(589.78 to<br>1,047.37) | 795.51<br>(635.84 to<br>1,072.82) | 720.55<br>(580.55 to<br>1,021.94) | 25.63<br>(21.47 to<br>34.71) | 45.60<br>(35.46 to<br>61.96) | 53.32<br>(41.56 to<br>70.21) | 43.33<br>(33.52 to<br>59.27) |

**Barbados**

| Cause                                         | YLLs (actual counts)                  |                                       |                                       |                                       | Deaths (actual counts)        |                                |                                |                                |
|-----------------------------------------------|---------------------------------------|---------------------------------------|---------------------------------------|---------------------------------------|-------------------------------|--------------------------------|--------------------------------|--------------------------------|
|                                               | 2016                                  | 2040 Forecast                         | 2040 Better Scenario                  | 2040 Worse Scenario                   | 2016                          | 2040 Forecast                  | 2040 Better Scenario           | 2040 Worse Scenario            |
| <b>Musculoskeletal disorders</b>              | 394.96<br>(324.77 to<br>476.36)       | 468.89<br>(369.87 to<br>586.26)       | 367.48<br>(287.53 to<br>462.19)       | 475.50<br>(377.09 to<br>595.43)       | 11.83<br>(9.90 to<br>14.47)   | 19.65<br>(15.60 to<br>24.81)   | 15.40<br>(12.39 to<br>19.61)   | 19.70<br>(15.68 to<br>25.01)   |
| Rheumatoid arthritis                          | 38.47<br>(26.90 to<br>50.84)          | 70.41<br>(48.31 to<br>97.39)          | 36.82<br>(24.41 to<br>51.14)          | 73.81<br>(51.31 to<br>99.30)          | 2.26<br>(1.58 to<br>2.93)     | 5.65<br>(3.79 to<br>7.74)      | 3.14<br>(2.03 to<br>4.34)      | 5.82<br>(3.87 to<br>7.96)      |
| Other musculoskeletal disorders               | 356.49<br>(290.99 to<br>433.91)       | 398.47<br>(313.74 to<br>506.11)       | 330.66<br>(258.15 to<br>416.95)       | 401.70<br>(313.54 to<br>513.21)       | 9.57<br>(8.03 to<br>11.66)    | 14.00<br>(11.17 to<br>17.84)   | 12.26<br>(9.84 to<br>15.75)    | 13.89<br>(11.01 to<br>17.61)   |
| <b>Other non-communicable diseases</b>        | 1,826.74<br>(1,236.33 to<br>2,820.38) | 2,347.08<br>(1,634.57 to<br>3,605.55) | 1,598.87<br>(1,096.26 to<br>2,464.80) | 2,421.21<br>(1,685.08 to<br>3,660.56) | 73.42<br>(49.65 to<br>119.86) | 170.61<br>(99.07 to<br>292.67) | 133.07<br>(81.00 to<br>225.30) | 168.29<br>(98.00 to<br>283.26) |
| Congenital birth defects                      | 1,046.25<br>(546.36 to<br>1,887.16)   | 678.64<br>(359.86 to<br>1,201.32)     | 330.50<br>(178.94 to<br>581.72)       | 757.50<br>(394.18 to<br>1,379.93)     | 14.00<br>(8.07 to<br>24.00)   | 9.66<br>(5.75 to<br>15.86)     | 4.92<br>(2.95 to<br>7.97)      | 10.68<br>(6.36 to<br>17.94)    |
| Neural tube defects                           | 16.86<br>(7.42 to<br>34.38)           | 4.41<br>(1.91 to<br>9.25)             | 1.78<br>(0.75 to<br>3.70)             | 5.08<br>(2.13 to<br>10.84)            | 0.20<br>(0.09 to<br>0.41)     | 0.06<br>(0.03 to<br>0.11)      | 0.02<br>(0.01 to<br>0.05)      | 0.07<br>(0.01 to<br>0.13)      |
| Congenital heart anomalies                    | 534.72<br>(287.96 to<br>942.84)       | 336.94<br>(180.26 to<br>593.94)       | 125.67<br>(65.79 to<br>230.99)        | 382.56<br>(205.90 to<br>687.05)       | 7.17<br>(4.17 to<br>11.91)    | 4.79<br>(2.77 to<br>7.93)      | 1.81<br>(0.99 to<br>3.08)      | 5.40<br>(3.12 to<br>8.99)      |
| Orofacial clefts                              | 0.12<br>(0.04 to<br>0.25)             | 0.06<br>(0.02 to<br>0.15)             | 0.02<br>(0.01 to<br>0.05)             | 0.08<br>(0.02 to<br>0.18)             | 0.00<br>(0.00 to<br>0.00)     | 0.00<br>(0.00 to<br>0.00)      | 0.00<br>(0.00 to<br>0.00)      | 0.00<br>(0.00 to<br>0.00)      |
| Down syndrome                                 | 68.50<br>(45.29 to<br>104.51)         | 49.65<br>(33.16 to<br>77.77)          | 52.49<br>(34.13 to<br>79.48)          | 50.37<br>(33.42 to<br>78.84)          | 1.27<br>(0.92 to<br>1.82)     | 1.00<br>(0.71 to<br>1.46)      | 1.08<br>(0.75 to<br>1.51)      | 1.01<br>(0.71 to<br>1.46)      |
| Other chromosomal abnormalities               | 109.78<br>(46.47 to<br>216.94)        | 87.42<br>(35.22 to<br>181.09)         | 58.78<br>(24.09 to<br>120.29)         | 95.04<br>(38.42 to<br>199.90)         | 1.31<br>(0.57 to<br>2.55)     | 1.08<br>(0.47 to<br>2.18)      | 0.73<br>(0.31 to<br>1.46)      | 1.17<br>(0.50 to<br>2.43)      |
| Congenital musculoskeletal and limb anomalies | 23.68<br>(10.80 to<br>46.38)          | 17.02<br>(7.78 to<br>33.62)           | 7.76<br>(3.56 to<br>14.89)            | 19.06<br>(8.95 to<br>37.81)           | 0.30<br>(0.15 to<br>0.56)     | 0.22<br>(0.11 to<br>0.42)      | 0.10<br>(0.05 to<br>0.19)      | 0.25<br>(0.12 to<br>0.47)      |

|                                      |                                                            |                                                            |                                                            |                                                            |                                                      |                                                      |                                                    |                                                      |
|--------------------------------------|------------------------------------------------------------|------------------------------------------------------------|------------------------------------------------------------|------------------------------------------------------------|------------------------------------------------------|------------------------------------------------------|----------------------------------------------------|------------------------------------------------------|
| Urogenital congenital anomalies      | 39.71<br>(20.52 to<br>72.81)                               | 27.34<br>(14.23 to<br>49.06)                               | 14.40<br>(7.46 to<br>26.48)                                | 30.00<br>(15.47 to<br>55.27)                               | 0.63<br>(0.36 to<br>1.07)                            | 0.49<br>(0.28 to<br>0.79)                            | 0.26<br>(0.15 to<br>0.43)                          | 0.53<br>(0.31 to<br>0.87)                            |
| Digestive congenital anomalies       | 85.01<br>(36.93 to<br>170.55)                              | 50.42<br>(20.22 to<br>104.98)                              | 20.94<br>(8.62 to<br>44.44)                                | 57.43<br>(23.68 to<br>117.95)                              | 1.01<br>(0.45 to<br>2.00)                            | 0.61<br>(0.26 to<br>1.24)                            | 0.25<br>(0.11 to<br>0.53)                          | 0.69<br>(0.30 to<br>1.39)                            |
| Other congenital birth defects       | 167.86<br>(73.95 to<br>344.17)                             | 105.37<br>(46.67 to<br>212.23)                             | 48.66<br>(21.86 to<br>100.30)                              | 117.89<br>(52.30 to<br>237.58)                             | 2.11<br>(0.99 to<br>4.16)                            | 1.40<br>(0.69 to<br>2.69)                            | 0.66<br>(0.32 to<br>1.26)                          | 1.56<br>(0.74 to<br>2.98)                            |
| Skin and subcutaneous diseases       | 747.10<br>(483.18 to<br>1,327.79)                          | 1,649.16<br>(1,047.77 to<br>2,928.69)                      | 1,257.42<br>(793.70 to<br>2,186.54)                        | 1,642.18<br>(1,052.17 to<br>2,966.91)                      | 59.03<br>(35.85 to<br>106.57)                        | 160.72<br>(91.71 to<br>286.22)                       | 128.02<br>(75.46 to<br>222.03)                     | 157.36<br>(88.72 to<br>273.99)                       |
| Cellulitis                           | 61.66<br>(37.84 to<br>153.11)                              | 179.42<br>(110.81 to<br>425.20)                            | 171.46<br>(107.96 to<br>383.45)                            | 174.39<br>(108.15 to<br>412.46)                            | 3.55<br>(2.07 to<br>7.98)                            | 13.68<br>(7.98 to<br>30.35)                          | 14.08<br>(8.20 to<br>29.27)                        | 12.96<br>(7.49 to<br>29.40)                          |
| Pyoderma                             | 152.39<br>(62.36 to<br>205.56)                             | 392.05<br>(156.00 to<br>543.38)                            | 332.80<br>(129.21 to<br>460.18)                            | 387.84<br>(159.32 to<br>537.33)                            | 9.60<br>(3.46 to<br>13.31)                           | 33.56<br>(11.58 to<br>49.87)                         | 30.71<br>(10.41 to<br>44.98)                       | 32.40<br>(11.09 to<br>48.95)                         |
| Decubitus ulcer                      | 523.59<br>(342.54 to<br>1,018.49)                          | 1,062.05<br>(668.42 to<br>2,055.75)                        | 741.24<br>(467.80 to<br>1,489.31)                          | 1,064.10<br>(674.07 to<br>2,143.49)                        | 45.47<br>(28.03 to<br>87.10)                         | 112.65<br>(62.91 to<br>218.38)                       | 82.52<br>(47.38 to<br>161.63)                      | 111.19<br>(60.84 to<br>218.72)                       |
| Other skin and subcutaneous diseases | 9.46<br>(5.95 to<br>21.49)                                 | 15.63<br>(9.32 to<br>35.06)                                | 11.93<br>(7.21 to<br>26.62)                                | 15.85<br>(9.50 to<br>36.23)                                | 0.40<br>(0.25 to<br>0.87)                            | 0.84<br>(0.47 to<br>1.85)                            | 0.70<br>(0.41 to<br>1.57)                          | 0.82<br>(0.46 to<br>1.85)                            |
| Sudden infant death syndrome         | 33.40<br>(14.16 to<br>70.90)                               | 19.27<br>(6.30 to<br>47.69)                                | 10.95<br>(3.67 to<br>27.31)                                | 21.53<br>(7.02 to<br>51.79)                                | 0.39<br>(0.16 to<br>0.82)                            | 0.22<br>(0.07 to<br>0.55)                            | 0.13<br>(0.04 to<br>0.32)                          | 0.25<br>(0.08 to<br>0.60)                            |
| <b>Injuries</b>                      | <b>4,708.91</b><br><b>(4,036.40 to</b><br><b>5,427.72)</b> | <b>3,188.34</b><br><b>(2,420.87 to</b><br><b>4,293.87)</b> | <b>1,985.09</b><br><b>(1,535.02 to</b><br><b>2,776.31)</b> | <b>3,829.54</b><br><b>(2,892.75 to</b><br><b>5,111.86)</b> | <b>132.24</b><br><b>(115.69 to</b><br><b>149.31)</b> | <b>124.51</b><br><b>(100.82 to</b><br><b>151.81)</b> | <b>88.01</b><br><b>(72.51 to</b><br><b>109.79)</b> | <b>139.93</b><br><b>(111.25 to</b><br><b>172.27)</b> |
| <b>Transport injuries</b>            | <b>1,291.88</b><br><b>(1,115.09 to</b><br><b>1,512.86)</b> | <b>718.58</b><br><b>(472.53 to</b><br><b>1,136.34)</b>     | <b>300.43</b><br><b>(205.67 to</b><br><b>458.93)</b>       | <b>1,220.58</b><br><b>(800.18 to</b><br><b>1,960.47)</b>   | <b>35.38</b><br><b>(31.00 to</b><br><b>40.79)</b>    | <b>27.16</b><br><b>(19.43 to</b><br><b>37.75)</b>    | <b>13.68</b><br><b>(10.15 to</b><br><b>18.44)</b>  | <b>40.68</b><br><b>(28.74 to</b><br><b>57.91)</b>    |
| Road injuries                        | 1,214.66<br>(1,044.40 to<br>1,419.80)                      | 621.14<br>(405.82 to<br>981.41)                            | 250.15<br>(168.68 to<br>382.58)                            | 1,113.79<br>(725.52 to<br>1,807.81)                        | 32.68<br>(28.56 to<br>37.57)                         | 22.31<br>(15.98 to<br>31.30)                         | 10.94<br>(8.13 to<br>14.94)                        | 35.54<br>(25.03 to<br>51.21)                         |
| Pedestrian road injuries             | 205.61<br>(164.52 to<br>254.64)                            | 107.32<br>(71.03 to<br>161.44)                             | 30.96<br>(21.34 to<br>45.00)                               | 174.65<br>(114.08 to<br>263.10)                            | 7.14<br>(5.83 to<br>8.67)                            | 5.55<br>(3.77 to<br>7.74)                            | 1.93<br>(1.34 to<br>2.69)                          | 8.21<br>(5.54 to<br>11.65)                           |

**Barbados**

| Cause                         | YLLs (actual counts)                                       |                                                          |                                                        |                                                          | Deaths (actual counts)                            |                                                   |                                                   |                                                   |
|-------------------------------|------------------------------------------------------------|----------------------------------------------------------|--------------------------------------------------------|----------------------------------------------------------|---------------------------------------------------|---------------------------------------------------|---------------------------------------------------|---------------------------------------------------|
|                               | 2016                                                       | 2040 Forecast                                            | 2040 Better Scenario                                   | 2040 Worse Scenario                                      | 2016                                              | 2040 Forecast                                     | 2040 Better Scenario                              | 2040 Worse Scenario                               |
| Cyclist road injuries         | 53.55<br>(42.99 to<br>67.63)                               | 28.60<br>(17.59 to<br>45.97)                             | 14.70<br>(9.59 to<br>22.46)                            | 47.05<br>(28.95 to<br>76.15)                             | 1.53<br>(1.25 to<br>1.91)                         | 1.14<br>(0.76 to<br>1.75)                         | 0.76<br>(0.51 to<br>1.12)                         | 1.62<br>(1.06 to<br>2.48)                         |
| Motorcyclist road injuries    | 179.87<br>(139.90 to<br>225.67)                            | 109.86<br>(61.38 to<br>208.73)                           | 63.68<br>(37.65 to<br>113.20)                          | 159.65<br>(89.13 to<br>304.42)                           | 3.82<br>(3.02 to<br>4.75)                         | 2.64<br>(1.62 to<br>4.64)                         | 1.75<br>(1.14 to<br>2.90)                         | 3.59<br>(2.14 to<br>6.48)                         |
| Motor vehicle road injuries   | 769.10<br>(644.60 to<br>926.83)                            | 370.67<br>(241.58 to<br>589.50)                          | 138.28<br>(95.29 to<br>207.78)                         | 724.87<br>(463.78 to<br>1,189.85)                        | 19.94<br>(17.06 to<br>23.57)                      | 12.69<br>(9.03 to<br>18.11)                       | 6.29<br>(4.66 to<br>8.58)                         | 21.72<br>(14.92 to<br>31.55)                      |
| Other road injuries           | 6.54<br>(4.60 to<br>10.73)                                 | 4.68<br>(2.93 to<br>8.07)                                | 2.52<br>(1.57 to<br>4.29)                              | 7.58<br>(4.72 to<br>13.02)                               | 0.26<br>(0.18 to<br>0.41)                         | 0.29<br>(0.18 to<br>0.47)                         | 0.21<br>(0.13 to<br>0.35)                         | 0.39<br>(0.24 to<br>0.63)                         |
| Other transport injuries      | 77.21<br>(62.61 to<br>98.32)                               | 97.44<br>(64.89 to<br>149.23)                            | 50.28<br>(34.16 to<br>75.65)                           | 106.80<br>(70.76 to<br>165.76)                           | 2.70<br>(2.24 to<br>3.36)                         | 4.85<br>(3.25 to<br>6.85)                         | 2.74<br>(1.90 to<br>3.81)                         | 5.15<br>(3.51 to<br>7.30)                         |
| <b>Unintentional injuries</b> | <b>1,496.54</b><br><b>(1,319.92 to</b><br><b>1,708.12)</b> | <b>1,136.86</b><br><b>(950.23 to</b><br><b>1,373.82)</b> | <b>838.30</b><br><b>(700.69 to</b><br><b>1,008.28)</b> | <b>1,170.47</b><br><b>(969.35 to</b><br><b>1,432.82)</b> | <b>53.11</b><br><b>(48.30 to</b><br><b>59.27)</b> | <b>62.41</b><br><b>(50.59 to</b><br><b>72.69)</b> | <b>50.92</b><br><b>(42.10 to</b><br><b>58.49)</b> | <b>62.07</b><br><b>(49.58 to</b><br><b>73.27)</b> |
| Falls                         | 177.60<br>(155.01 to<br>203.20)                            | 206.54<br>(176.19 to<br>242.07)                          | 164.57<br>(140.54 to<br>192.24)                        | 205.97<br>(173.72 to<br>241.63)                          | 10.23<br>(9.01 to<br>11.69)                       | 17.52<br>(13.16 to<br>21.49)                      | 14.75<br>(11.42 to<br>17.78)                      | 17.12<br>(12.55 to<br>21.22)                      |

|                                                 |                                       |                                     |                                   |                                     |                              |                              |                              |                              |
|-------------------------------------------------|---------------------------------------|-------------------------------------|-----------------------------------|-------------------------------------|------------------------------|------------------------------|------------------------------|------------------------------|
| Drowning                                        | 502.44<br>(429.73 to<br>588.06)       | 287.70<br>(204.12 to<br>410.78)     | 190.65<br>(134.94 to<br>272.86)   | 305.81<br>(211.60 to<br>437.26)     | 11.79<br>(10.33 to<br>13.58) | 8.30<br>(6.23 to<br>11.12)   | 5.76<br>(4.40 to<br>7.52)    | 8.66<br>(6.38 to<br>11.68)   |
| Fire, heat, and hot substances                  | 146.58<br>(121.31 to<br>171.63)       | 113.35<br>(86.82 to<br>146.76)      | 69.30<br>(52.89 to<br>90.34)      | 119.38<br>(90.75 to<br>158.08)      | 6.59<br>(5.39 to<br>7.46)    | 7.71<br>(5.39 to<br>9.85)    | 5.21<br>(3.81 to<br>6.51)    | 7.85<br>(5.73 to<br>10.16)   |
| Poisonings                                      | 26.47<br>(20.61 to<br>48.78)          | 14.08<br>(9.26 to<br>26.11)         | 7.04<br>(4.71 to<br>12.88)        | 15.43<br>(9.77 to<br>28.26)         | 0.70<br>(0.56 to<br>1.27)    | 0.48<br>(0.34 to<br>0.87)    | 0.26<br>(0.18 to<br>0.46)    | 0.52<br>(0.36 to<br>0.90)    |
| Exposure to mechanical forces                   | 164.67<br>(132.06 to<br>196.64)       | 98.52<br>(75.75 to<br>127.83)       | 64.53<br>(49.78 to<br>82.86)      | 103.25<br>(79.08 to<br>134.00)      | 3.94<br>(3.19 to<br>4.53)    | 3.12<br>(2.48 to<br>3.75)    | 2.19<br>(1.76 to<br>2.63)    | 3.19<br>(2.51 to<br>3.87)    |
| Unintentional firearm injuries                  | 73.64<br>(47.65 to<br>89.82)          | 38.57<br>(24.89 to<br>52.60)        | 26.03<br>(16.82 to<br>35.75)      | 40.34<br>(25.26 to<br>55.22)        | 1.65<br>(1.10 to<br>1.98)    | 1.01<br>(0.72 to<br>1.28)    | 0.73<br>(0.53 to<br>0.93)    | 1.04<br>(0.71 to<br>1.34)    |
| Unintentional suffocation                       | 31.55<br>(22.19 to<br>48.65)          | 18.75<br>(12.44 to<br>28.76)        | 12.73<br>(8.59 to<br>19.82)       | 19.91<br>(13.27 to<br>30.84)        | 0.52<br>(0.40 to<br>0.74)    | 0.34<br>(0.24 to<br>0.49)    | 0.24<br>(0.17 to<br>0.34)    | 0.36<br>(0.26 to<br>0.51)    |
| Other exposure to mechanical forces             | 59.49<br>(45.40 to<br>70.12)          | 41.21<br>(31.06 to<br>52.40)        | 25.76<br>(19.88 to<br>33.28)      | 43.01<br>(32.53 to<br>55.50)        | 1.77<br>(1.37 to<br>2.05)    | 1.77<br>(1.36 to<br>2.14)    | 1.22<br>(0.94 to<br>1.49)    | 1.80<br>(1.36 to<br>2.19)    |
| Adverse effects of medical treatment            | 291.05<br>(216.95 to<br>360.52)       | 267.27<br>(201.87 to<br>341.02)     | 220.90<br>(170.02 to<br>279.09)   | 268.67<br>(200.77 to<br>342.70)     | 13.78<br>(10.43 to<br>17.08) | 18.10<br>(13.10 to<br>23.11) | 16.18<br>(12.09 to<br>20.51) | 17.71<br>(12.80 to<br>22.77) |
| Animal contact                                  | 12.47<br>(9.16 to<br>14.82)           | 11.61<br>(8.75 to<br>15.20)         | 8.67<br>(6.51 to<br>11.41)        | 11.95<br>(8.68 to<br>16.12)         | 0.46<br>(0.35 to<br>0.53)    | 0.59<br>(0.44 to<br>0.73)    | 0.48<br>(0.36 to<br>0.59)    | 0.59<br>(0.44 to<br>0.74)    |
| Venomous animal contact                         | 7.63<br>(5.12 to<br>9.34)             | 6.21<br>(4.12 to<br>8.46)           | 4.86<br>(3.24 to<br>6.73)         | 6.38<br>(4.06 to<br>8.92)           | 0.27<br>(0.19 to<br>0.33)    | 0.30<br>(0.20 to<br>0.39)    | 0.25<br>(0.17 to<br>0.34)    | 0.30<br>(0.20 to<br>0.40)    |
| Non-venomous animal contact                     | 4.84<br>(3.29 to<br>6.43)             | 5.40<br>(3.82 to<br>7.51)           | 3.81<br>(2.75 to<br>5.43)         | 5.57<br>(3.79 to<br>7.81)           | 0.18<br>(0.12 to<br>0.24)    | 0.29<br>(0.20 to<br>0.38)    | 0.23<br>(0.16 to<br>0.30)    | 0.29<br>(0.20 to<br>0.38)    |
| Foreign body                                    | 137.88<br>(109.17 to<br>179.56)       | 112.13<br>(91.02 to<br>144.02)      | 100.56<br>(81.90 to<br>127.51)    | 112.44<br>(90.62 to<br>145.12)      | 4.56<br>(3.96 to<br>5.50)    | 5.56<br>(4.41 to<br>6.85)    | 5.56<br>(4.48 to<br>6.83)    | 5.36<br>(4.23 to<br>6.63)    |
| Pulmonary aspiration and foreign body in airway | 121.70<br>(95.07 to<br>162.68)        | 98.99<br>(79.00 to<br>128.66)       | 85.52<br>(68.56 to<br>110.22)     | 99.59<br>(78.88 to<br>131.35)       | 4.00<br>(3.42 to<br>4.88)    | 4.91<br>(3.83 to<br>6.13)    | 4.77<br>(3.81 to<br>5.97)    | 4.75<br>(3.70 to<br>5.92)    |
| Foreign body in other body part                 | 16.18<br>(12.63 to<br>21.69)          | 13.14<br>(9.96 to<br>17.80)         | 15.04<br>(11.53 to<br>20.42)      | 12.85<br>(9.68 to<br>17.31)         | 0.56<br>(0.45 to<br>0.76)    | 0.64<br>(0.49 to<br>0.90)    | 0.79<br>(0.61 to<br>1.10)    | 0.61<br>(0.47 to<br>0.85)    |
| Environmental heat and cold exposure            | 12.96<br>(9.11 to<br>24.60)           | 11.82<br>(7.99 to<br>23.51)         | 6.93<br>(4.53 to<br>13.24)        | 12.42<br>(8.16 to<br>24.68)         | 0.46<br>(0.33 to<br>0.84)    | 0.56<br>(0.38 to<br>1.06)    | 0.36<br>(0.23 to<br>0.68)    | 0.57<br>(0.38 to<br>1.09)    |
| Other unintentional injuries                    | 24.42<br>(20.64 to<br>28.95)          | 13.84<br>(10.20 to<br>17.89)        | 5.13<br>(3.80 to<br>6.93)         | 15.15<br>(11.59 to<br>19.36)        | 0.61<br>(0.52 to<br>0.71)    | 0.46<br>(0.35 to<br>0.58)    | 0.18<br>(0.14 to<br>0.24)    | 0.49<br>(0.39 to<br>0.61)    |
| Self-harm and interpersonal violence            | 1,897.74<br>(1,272.61 to<br>2,377.28) | 1,301.01<br>(795.85 to<br>1,906.77) | 814.36<br>(496.87 to<br>1,177.81) | 1,406.64<br>(829.21 to<br>2,118.80) | 43.32<br>(29.35 to<br>53.86) | 34.07<br>(21.30 to<br>47.88) | 22.49<br>(14.16 to<br>31.27) | 36.33<br>(21.90 to<br>52.54) |

**Barbados**

| Cause                              | YLLs (actual counts)            |                                 |                                 |                                 | Deaths (actual counts)       |                             |                             |                              |
|------------------------------------|---------------------------------|---------------------------------|---------------------------------|---------------------------------|------------------------------|-----------------------------|-----------------------------|------------------------------|
|                                    | 2016                            | 2040 Forecast                   | 2040 Better Scenario            | 2040 Worse Scenario             | 2016                         | 2040 Forecast               | 2040 Better Scenario        | 2040 Worse Scenario          |
| Self-harm                          | 614.18<br>(489.80 to<br>736.26) | 527.52<br>(316.85 to<br>833.23) | 345.32<br>(219.69 to<br>527.57) | 584.51<br>(340.28 to<br>972.59) | 15.40<br>(12.21 to<br>18.40) | 15.23<br>(9.70 to<br>22.80) | 10.51<br>(7.07 to<br>15.13) | 16.51<br>(10.19 to<br>25.50) |
| Self-harm by firearm               | 38.94<br>(26.63 to<br>53.18)    | 24.80<br>(12.78 to<br>46.89)    | 14.06<br>(7.41 to<br>26.00)     | 27.86<br>(13.65 to<br>53.94)    | 1.09<br>(0.77 to<br>1.44)    | 0.84<br>(0.48 to<br>1.44)   | 0.52<br>(0.31 to<br>0.84)   | 0.91<br>(0.50 to<br>1.61)    |
| Self-harm by other specified means | 575.24<br>(453.87 to<br>696.58) | 502.72<br>(301.91 to<br>801.13) | 331.26<br>(212.20 to<br>506.74) | 556.65<br>(326.03 to<br>915.55) | 14.31<br>(11.35 to<br>17.23) | 14.39<br>(9.17 to<br>21.62) | 9.99<br>(6.76 to<br>14.32)  | 15.60<br>(9.61 to<br>24.04)  |

|                                                                              |                                          |                                           |                                          |                                            |                                       |                                       |                                       |                                       |
|------------------------------------------------------------------------------|------------------------------------------|-------------------------------------------|------------------------------------------|--------------------------------------------|---------------------------------------|---------------------------------------|---------------------------------------|---------------------------------------|
| Interpersonal violence                                                       | 1,283.55<br>(686.90 to<br>1,715.57)      | 773.49<br>(389.29 to<br>1,153.78)         | 469.04<br>(235.05 to<br>700.40)          | 822.13<br>(385.03 to<br>1,252.35)          | 27.92<br>(14.79 to<br>37.34)          | 18.84<br>(9.28 to<br>27.92)           | 11.98<br>(5.87 to<br>17.56)           | 19.82<br>(9.23 to<br>29.39)           |
| Physical violence by firearm                                                 | 510.82<br>(198.36 to<br>727.78)          | 279.07<br>(100.41 to<br>454.52)           | 147.19<br>(51.79 to<br>247.08)           | 298.28<br>(105.12 to<br>489.41)            | 10.08<br>(3.75 to<br>14.46)           | 5.68<br>(2.02 to<br>9.33)             | 3.03<br>(1.05 to<br>5.02)             | 6.05<br>(2.04 to<br>9.83)             |
| Physical violence by sharp object                                            | 450.63<br>(228.36 to<br>604.71)          | 285.17<br>(142.42 to<br>424.93)           | 174.62<br>(91.19 to<br>259.38)           | 299.07<br>(144.89 to<br>446.86)            | 9.79<br>(4.83 to<br>13.22)            | 6.85<br>(3.35 to<br>9.96)             | 4.31<br>(2.18 to<br>6.22)             | 7.12<br>(3.31 to<br>10.35)            |
| Physical violence by other means                                             | 322.10<br>(161.85 to<br>424.62)          | 209.25<br>(97.99 to<br>330.14)            | 147.24<br>(68.09 to<br>228.39)           | 224.78<br>(99.43 to<br>361.20)             | 8.06<br>(4.02 to<br>10.66)            | 6.30<br>(2.96 to<br>9.52)             | 4.64<br>(2.17 to<br>7.01)             | 6.65<br>(3.02 to<br>10.16)            |
| Forces of nature, conflict and terrorism, and executions and police conflict | 22.77<br>(13.78 to<br>36.24)             | 31.90<br>(0.00 to<br>738.65)              | 32.00<br>(0.00 to<br>741.27)             | 31.85<br>(0.00 to<br>737.82)               | 0.43<br>(0.27 to<br>0.64)             | 0.87<br>(0.00 to<br>18.95)            | 0.91<br>(0.00 to<br>19.91)            | 0.85<br>(0.00 to<br>18.53)            |
| Exposure to forces of nature                                                 | 0.00<br>(0.00 to<br>0.00)                | 16.62<br>(0.00 to<br>51.37)               | 16.72<br>(0.00 to<br>51.68)              | 16.57<br>(0.00 to<br>51.26)                | 0.00<br>(0.00 to<br>0.00)             | 0.48<br>(0.00 to<br>1.51)             | 0.51<br>(0.00 to<br>1.59)             | 0.47<br>(0.00 to<br>1.48)             |
| Conflict and terrorism                                                       | 0.00<br>(0.00 to<br>0.00)                | 15.28<br>(0.00 to<br>28.49)               | 15.28<br>(0.00 to<br>28.46)              | 15.28<br>(0.00 to<br>28.52)                | 0.00<br>(0.00 to<br>0.00)             | 0.39<br>(0.00 to<br>0.71)             | 0.41<br>(0.00 to<br>0.74)             | 0.38<br>(0.00 to<br>0.70)             |
| Executions and police conflict                                               | 22.77<br>(13.78 to<br>36.24)             | 0.00<br>(0.00 to<br>0.00)                 | 0.00<br>(0.00 to<br>0.00)                | 0.00<br>(0.00 to<br>0.00)                  | 0.43<br>(0.27 to<br>0.64)             | 0.00<br>(0.00 to<br>0.00)             | 0.00<br>(0.00 to<br>0.00)             | 0.00<br>(0.00 to<br>0.00)             |
| <b>Belize</b>                                                                |                                          |                                           |                                          |                                            |                                       |                                       |                                       |                                       |
| Cause                                                                        | YLLs (actual counts)                     |                                           |                                          |                                            | Deaths (actual counts)                |                                       |                                       |                                       |
|                                                                              | 2016                                     | 2040 Forecast                             | 2040 Better Scenario                     | 2040 Worse Scenario                        | 2016                                  | 2040 Forecast                         | 2040 Better Scenario                  | 2040 Worse Scenario                   |
| All causes                                                                   | 61,627.29<br>(51,523.37 to<br>75,911.69) | 91,181.45<br>(67,782.07 to<br>126,965.07) | 70,749.79<br>(52,653.71 to<br>99,403.26) | 115,133.31<br>(84,827.12 to<br>157,507.93) | 1,830.75<br>(1,626.82 to<br>2,066.66) | 3,693.31<br>(2,859.62 to<br>4,894.60) | 3,025.06<br>(2,339.69 to<br>4,000.12) | 4,435.45<br>(3,443.53 to<br>5,856.92) |
| Communicable, maternal, neonatal, and nutritional diseases                   | 15,964.06<br>(11,300.35 to<br>23,940.00) | 12,984.25<br>(9,508.80 to<br>16,936.23)   | 9,784.35<br>(6,916.25 to<br>12,476.16)   | 18,239.01<br>(13,881.32 to<br>23,430.40)   | 316.47<br>(252.56 to<br>405.70)       | 316.47<br>(300.42 to<br>471.95)       | 316.97<br>(242.76 to<br>379.83)       | 497.41<br>(394.83 to<br>617.08)       |
| HIV/AIDS and tuberculosis                                                    | 4,433.86<br>(4,228.39 to<br>4,649.99)    | 4,981.45<br>(2,737.89 to<br>6,115.38)     | 4,101.99<br>(1,955.56 to<br>5,291.93)    | 7,769.92<br>(5,539.76 to<br>9,078.12)      | 93.66<br>(89.19 to<br>98.36)          | 112.94<br>(58.03 to<br>140.31)        | 93.04<br>(39.45 to<br>121.13)         | 168.66<br>(111.50 to<br>200.10)       |
| Tuberculosis                                                                 | 551.23<br>(448.30 to<br>669.58)          | 534.06<br>(289.69 to<br>1,006.01)         | 277.26<br>(157.26 to<br>499.13)          | 745.09<br>(399.98 to<br>1,481.27)          | 16.30<br>(13.57 to<br>19.50)          | 18.19<br>(10.94 to<br>31.64)          | 9.95<br>(6.19 to<br>16.58)            | 24.54<br>(14.18 to<br>44.76)          |
| HIV/AIDS                                                                     | 3,882.64<br>(3,706.13 to<br>4,065.46)    | 4,447.39<br>(2,295.10 to<br>5,558.83)     | 3,824.72<br>(1,677.26 to<br>4,999.40)    | 7,024.82<br>(4,804.40 to<br>8,187.45)      | 77.36<br>(73.93 to<br>81.05)          | 94.75<br>(40.41 to<br>120.42)         | 83.09<br>(29.79 to<br>111.00)         | 144.12<br>(87.56 to<br>169.76)        |
| Diarrhea, lower respiratory, and other common infectious diseases            | 4,464.12<br>(3,247.91 to<br>6,411.94)    | 4,656.48<br>(3,257.35 to<br>6,732.76)     | 3,471.88<br>(2,541.02 to<br>4,817.82)    | 6,330.03<br>(4,272.62 to<br>9,569.22)      | 126.30<br>(106.25 to<br>151.91)       | 215.27<br>(166.17 to<br>282.69)       | 181.52<br>(143.75 to<br>228.35)       | 263.00<br>(192.45 to<br>360.17)       |
| Diarrheal diseases                                                           | 506.26<br>(283.55 to<br>909.44)          | 245.47<br>(46.94 to<br>774.74)            | 107.41<br>(25.83 to<br>326.35)           | 337.82<br>(63.40 to<br>1,017.67)           | 9.08<br>(6.36 to<br>13.76)            | 9.49<br>(1.96 to<br>30.77)            | 4.73<br>(1.23 to<br>14.39)            | 12.24<br>(2.41 to<br>38.24)           |
| Intestinal infectious diseases                                               | 3.36<br>(1.72 to<br>6.06)                | 2.43<br>(1.10 to<br>4.75)                 | 2.05<br>(0.94 to<br>4.01)                | 2.54<br>(1.15 to<br>5.05)                  | 0.07<br>(0.03 to<br>0.12)             | 0.06<br>(0.03 to<br>0.11)             | 0.05<br>(0.03 to<br>0.10)             | 0.06<br>(0.03 to<br>0.12)             |
| Typhoid fever                                                                | 2.42<br>(1.11 to<br>4.49)                | 1.77<br>(0.76 to<br>3.65)                 | 1.52<br>(0.65 to<br>3.14)                | 1.83<br>(0.78 to<br>3.76)                  | 0.05<br>(0.02 to<br>0.09)             | 0.04<br>(0.02 to<br>0.08)             | 0.04<br>(0.02 to<br>0.07)             | 0.04<br>(0.02 to<br>0.09)             |
| Paratyphoid fever                                                            | 0.49<br>(0.18 to<br>1.10)                | 0.51<br>(0.19 to<br>1.13)                 | 0.42<br>(0.15 to<br>0.93)                | 0.53<br>(0.20 to<br>1.19)                  | 0.01<br>(0.00 to<br>0.02)             | 0.01<br>(0.00 to<br>0.03)             | 0.01<br>(0.00 to<br>0.02)             | 0.01<br>(0.00 to<br>0.03)             |
| Other intestinal infectious diseases                                         | 0.46<br>(0.16 to<br>1.09)                | 0.16<br>(0.05 to<br>0.38)                 | 0.11<br>(0.04 to<br>0.27)                | 0.17<br>(0.06 to<br>0.41)                  | 0.01<br>(0.00 to<br>0.02)             | 0.01<br>(0.00 to<br>0.01)             | 0.00<br>(0.00 to<br>0.01)             | 0.01<br>(0.00 to<br>0.01)             |
| Lower respiratory infections                                                 | 3,508.69<br>(2,652.74 to<br>4,874.98)    | 3,729.08<br>(2,612.87 to<br>5,372.04)     | 2,865.13<br>(2,097.99 to<br>3,939.25)    | 5,097.77<br>(3,351.14 to<br>7,770.47)      | 109.39<br>(93.17 to<br>128.21)        | 190.90<br>(145.81 to<br>247.17)       | 164.97<br>(130.11 to<br>206.37)       | 232.41<br>(169.12 to<br>313.40)       |





|                                                          |                                         |                                         |                                        |                                         |                                    |                                    |                                    |                                    |
|----------------------------------------------------------|-----------------------------------------|-----------------------------------------|----------------------------------------|-----------------------------------------|------------------------------------|------------------------------------|------------------------------------|------------------------------------|
| Cystic echinococcosis                                    | 0.13<br>(0.11 to<br>0.17)               | 0.12<br>(0.08 to<br>0.17)               | 0.07<br>(0.05 to<br>0.10)              | 0.14<br>(0.09 to<br>0.20)               | 0.00<br>(0.00 to<br>0.00)          | 0.00<br>(0.00 to<br>0.01)          | 0.00<br>(0.00 to<br>0.00)          | 0.00<br>(0.00 to<br>0.01)          |
| Dengue                                                   | 36.38<br>(20.83 to<br>55.35)            | 168.49<br>(106.19 to<br>255.34)         | 156.80<br>(99.76 to<br>234.94)         | 169.70<br>(105.03 to<br>255.59)         | 0.74<br>(0.42 to<br>1.06)          | 4.40<br>(2.86 to<br>6.44)          | 4.32<br>(2.84 to<br>6.19)          | 4.30<br>(2.77 to<br>6.29)          |
| Yellow fever                                             | 0.00<br>(0.00 to<br>0.00)               | 0.00<br>(0.00 to<br>0.00)               | 0.00<br>(0.00 to<br>0.00)              | 0.00<br>(0.00 to<br>0.00)               | 0.00<br>(0.00 to<br>0.00)          | 0.00<br>(0.00 to<br>0.00)          | 0.00<br>(0.00 to<br>0.00)          | 0.00<br>(0.00 to<br>0.00)          |
| Rabies                                                   | 1.14<br>(0.56 to<br>2.35)               | 0.80<br>(0.28 to<br>2.39)               | 0.31<br>(0.12 to<br>0.95)              | 1.05<br>(0.36 to<br>3.27)               | 0.02<br>(0.01 to<br>0.04)          | 0.02<br>(0.01 to<br>0.04)          | 0.01<br>(0.00 to<br>0.02)          | 0.02<br>(0.01 to<br>0.05)          |
| Intestinal nematode infections                           | 10.72<br>(2.44 to<br>28.95)             | 10.20<br>(3.47 to<br>24.47)             | 8.81<br>(3.30 to<br>20.45)             | 10.46<br>(3.41 to<br>25.34)             | 0.16<br>(0.06 to<br>0.37)          | 0.20<br>(0.09 to<br>0.39)          | 0.19<br>(0.09 to<br>0.34)          | 0.20<br>(0.09 to<br>0.39)          |
| Other neglected tropical diseases                        | 7.38<br>(3.76 to<br>12.24)              | 6.86<br>(3.15 to<br>10.75)              | 4.87<br>(2.23 to<br>7.37)              | 7.48<br>(3.44 to<br>11.83)              | 0.15<br>(0.07 to<br>0.21)          | 0.21<br>(0.09 to<br>0.31)          | 0.17<br>(0.07 to<br>0.24)          | 0.22<br>(0.09 to<br>0.32)          |
| <b>Maternal disorders</b>                                | <b>101.61<br/>(75.61 to<br/>135.00)</b> | <b>133.76<br/>(87.49 to<br/>282.53)</b> | <b>81.52<br/>(33.00 to<br/>175.26)</b> | <b>158.02<br/>(64.89 to<br/>329.45)</b> | <b>1.82<br/>(1.35 to<br/>2.43)</b> | <b>2.49<br/>(1.08 to<br/>5.15)</b> | <b>1.52<br/>(0.62 to<br/>3.19)</b> | <b>2.93<br/>(1.21 to<br/>6.19)</b> |
| Maternal hemorrhage                                      | 17.93<br>(11.81 to<br>27.45)            | 21.79<br>(7.94 to<br>50.67)             | 13.19<br>(4.81 to<br>31.84)            | 25.66<br>(9.16 to<br>59.92)             | 0.32<br>(0.21 to<br>0.49)          | 0.41<br>(0.15 to<br>0.96)          | 0.25<br>(0.09 to<br>0.59)          | 0.48<br>(0.17 to<br>1.10)          |
| Maternal sepsis and other maternal infections            | 8.12<br>(5.16 to<br>12.53)              | 9.68<br>(3.76 to<br>22.61)              | 5.85<br>(2.16 to<br>13.95)             | 11.43<br>(4.26 to<br>27.07)             | 0.15<br>(0.10 to<br>0.23)          | 0.18<br>(0.07 to<br>0.43)          | 0.11<br>(0.04 to<br>0.26)          | 0.22<br>(0.08 to<br>0.51)          |
| Maternal hypertensive disorders                          | 27.10<br>(17.90 to<br>38.28)            | 32.76<br>(12.99 to<br>69.91)            | 19.53<br>(7.20 to<br>42.43)            | 38.73<br>(14.38 to<br>85.18)            | 0.47<br>(0.31 to<br>0.66)          | 0.58<br>(0.24 to<br>1.29)          | 0.35<br>(0.13 to<br>0.76)          | 0.69<br>(0.26 to<br>1.49)          |
| Maternal obstructed labor and uterine rupture            | 3.12<br>(1.70 to<br>5.12)               | 4.31<br>(1.53 to<br>10.16)              | 2.52<br>(0.84 to<br>6.05)              | 5.15<br>(1.70 to<br>12.15)              | 0.06<br>(0.03 to<br>0.10)          | 0.08<br>(0.03 to<br>0.20)          | 0.05<br>(0.02 to<br>0.12)          | 0.10<br>(0.03 to<br>0.24)          |
| Maternal abortion, miscarriage, and ectopic pregnancy    | 13.18<br>(8.25 to<br>19.34)             | 20.27<br>(7.14 to<br>47.37)             | 12.32<br>(4.13 to<br>28.06)            | 24.03<br>(8.08 to<br>55.42)             | 0.24<br>(0.15 to<br>0.35)          | 0.39<br>(0.14 to<br>0.88)          | 0.24<br>(0.08 to<br>0.55)          | 0.46<br>(0.15 to<br>1.05)          |
| Indirect maternal deaths                                 | 6.43<br>(3.95 to<br>9.71)               | 9.09<br>(3.35 to<br>20.23)              | 5.55<br>(1.91 to<br>12.60)             | 10.81<br>(3.80 to<br>23.81)             | 0.11<br>(0.07 to<br>0.17)          | 0.16<br>(0.06 to<br>0.36)          | 0.10<br>(0.04 to<br>0.22)          | 0.19<br>(0.07 to<br>0.42)          |
| Late maternal deaths                                     | 4.40<br>(2.51 to<br>6.98)               | 4.40<br>(1.57 to<br>10.15)              | 2.64<br>(0.88 to<br>6.19)              | 5.22<br>(1.77 to<br>12.24)              | 0.08<br>(0.04 to<br>0.12)          | 0.08<br>(0.03 to<br>0.18)          | 0.05<br>(0.02 to<br>0.11)          | 0.09<br>(0.03 to<br>0.22)          |
| Maternal deaths aggravated by HIV/AIDS                   | 0.52<br>(0.24 to<br>0.91)               | 3.00<br>(0.96 to<br>7.65)               | 1.98<br>(0.60 to<br>5.14)              | 3.62<br>(1.12 to<br>9.30)               | 0.01<br>(0.00 to<br>0.02)          | 0.06<br>(0.02 to<br>0.15)          | 0.04<br>(0.01 to<br>0.10)          | 0.07<br>(0.01 to<br>0.18)          |
| Other maternal disorders                                 | 20.81<br>(13.57 to<br>29.44)            | 28.46<br>(11.46 to<br>61.83)            | 17.94<br>(6.81 to<br>39.67)            | 33.36<br>(12.82 to<br>71.78)            | 0.38<br>(0.25 to<br>0.54)          | 0.54<br>(0.22 to<br>1.17)          | 0.34<br>(0.13 to<br>0.77)          | 0.63<br>(0.24 to<br>1.39)          |
| <b>Belize</b>                                            |                                         |                                         |                                        |                                         |                                    |                                    |                                    |                                    |
| Cause                                                    | YLLs (actual counts)                    |                                         |                                        |                                         | Deaths (actual counts)             |                                    |                                    |                                    |
|                                                          | 2016                                    | 2040 Forecast                           | 2040 Better Scenario                   | 2040 Worse Scenario                     | 2016                               | 2040 Forecast                      | 2040 Better Scenario               | 2040 Worse Scenario                |
| Neonatal disorders                                       | 5,973.46<br>(2,737.21 to<br>11,512.47)  | 2,482.46<br>(1,027.15 to<br>4,930.71)   | 1,523.11<br>(640.96 to<br>3,006.96)    | 3,223.53<br>(1,338.48 to<br>6,420.84)   | 69.03<br>(31.63 to<br>133.04)      | 28.70<br>(11.87 to<br>56.99)       | 17.61<br>(7.41 to<br>34.76)        | 37.26<br>(15.47 to<br>74.21)       |
| Neonatal preterm birth                                   | 2,531.62<br>(1,109.47 to<br>4,943.82)   | 852.95<br>(347.79 to<br>1,782.41)       | 531.94<br>(217.72 to<br>1,087.96)      | 1,292.36<br>(532.37 to<br>2,635.64)     | 29.25<br>(12.82 to<br>57.12)       | 9.86<br>(4.02 to<br>20.60)         | 6.15<br>(2.52 to<br>12.57)         | 14.93<br>(6.15 to<br>30.45)        |
| Neonatal encephalopathy due to birth asphyxia and trauma | 1,538.58<br>(645.53 to<br>3,060.39)     | 625.23<br>(246.73 to<br>1,329.56)       | 390.82<br>(152.27 to<br>819.19)        | 735.94<br>(288.76 to<br>1,544.65)       | 17.78<br>(7.46 to<br>35.37)        | 7.23<br>(2.86 to<br>15.38)         | 4.52<br>(1.76 to<br>9.47)          | 8.51<br>(3.34 to<br>17.85)         |
| Neonatal sepsis and other neonatal infections            | 1,102.82<br>(446.48 to<br>2,380.75)     | 665.11<br>(252.43 to<br>1,423.75)       | 407.76<br>(159.63 to<br>872.57)        | 785.56<br>(291.47 to<br>1,677.83)       | 12.75<br>(5.16 to<br>27.50)        | 7.69<br>(2.92 to<br>16.46)         | 4.71<br>(1.85 to<br>10.09)         | 9.08<br>(3.37 to<br>19.40)         |

|                                                                         |                                                      |                                                      |                                                      |                                                      |                                                   |                                                   |                                                   |                                                   |
|-------------------------------------------------------------------------|------------------------------------------------------|------------------------------------------------------|------------------------------------------------------|------------------------------------------------------|---------------------------------------------------|---------------------------------------------------|---------------------------------------------------|---------------------------------------------------|
| Hemolytic disease and other neonatal jaundice                           | 119.83<br>(43.93 to<br>275.15)                       | 42.83<br>(12.54 to<br>110.58)                        | 24.78<br>(6.98 to<br>64.31)                          | 51.39<br>(14.65 to<br>129.93)                        | 1.38<br>(0.51 to<br>3.18)                         | 0.50<br>(0.15 to<br>1.28)                         | 0.29<br>(0.08 to<br>0.74)                         | 0.59<br>(0.17 to<br>1.50)                         |
| Other neonatal disorders                                                | 680.60<br>(288.65 to<br>1,384.21)                    | 296.32<br>(110.64 to<br>645.76)                      | 167.81<br>(63.10 to<br>360.33)                       | 358.28<br>(133.79 to<br>784.47)                      | 7.87<br>(3.34 to<br>16.01)                        | 3.43<br>(1.28 to<br>7.47)                         | 1.94<br>(0.73 to<br>4.17)                         | 4.14<br>(1.55 to<br>9.08)                         |
| <b>Nutritional deficiencies</b>                                         | <b>534.59</b><br><b>(340.51 to</b><br><b>876.86)</b> | <b>336.90</b><br><b>(262.96 to</b><br><b>441.40)</b> | <b>266.13</b><br><b>(207.10 to</b><br><b>343.30)</b> | <b>351.00</b><br><b>(268.71 to</b><br><b>476.62)</b> | <b>12.95</b><br><b>(10.25 to</b><br><b>17.27)</b> | <b>15.43</b><br><b>(12.62 to</b><br><b>18.30)</b> | <b>13.57</b><br><b>(11.07 to</b><br><b>16.13)</b> | <b>14.90</b><br><b>(11.91 to</b><br><b>18.05)</b> |
| Protein-energy malnutrition                                             | 471.82<br>(283.01 to<br>800.73)                      | 256.25<br>(189.13 to<br>349.64)                      | 201.40<br>(150.44 to<br>267.90)                      | 267.32<br>(198.02 to<br>375.39)                      | 11.08<br>(8.47 to<br>14.98)                       | 11.94<br>(9.06 to<br>14.61)                       | 10.53<br>(8.04 to<br>13.01)                       | 11.49<br>(8.46 to<br>14.36)                       |
| Iodine deficiency                                                       | 2.00<br>(0.09 to<br>7.44)                            | 8.84<br>(0.20 to<br>33.54)                           | 6.47<br>(0.13 to<br>25.89)                           | 9.45<br>(0.25 to<br>34.33)                           | 0.04<br>(0.00 to<br>0.15)                         | 0.38<br>(0.01 to<br>1.59)                         | 0.30<br>(0.00 to<br>1.40)                         | 0.38<br>(0.01 to<br>1.51)                         |
| Dietary iron deficiency                                                 | 2.28<br>(1.28 to<br>3.59)                            | 2.00<br>(1.12 to<br>3.13)                            | 1.59<br>(0.90 to<br>2.50)                            | 2.13<br>(1.21 to<br>3.35)                            | 0.04<br>(0.02 to<br>0.06)                         | 0.04<br>(0.02 to<br>0.06)                         | 0.03<br>(0.02 to<br>0.05)                         | 0.04<br>(0.02 to<br>0.06)                         |
| Other nutritional deficiencies                                          | 58.49<br>(34.79 to<br>88.66)                         | 69.81<br>(34.98 to<br>104.97)                        | 56.67<br>(27.65 to<br>87.33)                         | 72.10<br>(36.02 to<br>108.64)                        | 1.79<br>(0.93 to<br>2.78)                         | 3.07<br>(1.42 to<br>4.73)                         | 2.71<br>(1.25 to<br>4.31)                         | 2.99<br>(1.38 to<br>4.59)                         |
| <b>Other communicable, maternal, neonatal, and nutritional diseases</b> | <b>277.45</b><br><b>(171.98 to</b><br><b>466.26)</b> | <b>187.10</b><br><b>(127.65 to</b><br><b>265.29)</b> | <b>147.81</b><br><b>(98.82 to</b><br><b>206.26)</b>  | <b>198.91</b><br><b>(132.46 to</b><br><b>277.73)</b> | <b>5.00</b><br><b>(3.52 to</b><br><b>7.22)</b>    | <b>5.08</b><br><b>(3.62 to</b><br><b>6.76)</b>    | <b>4.19</b><br><b>(2.93 to</b><br><b>5.60)</b>    | <b>5.26</b><br><b>(3.71 to</b><br><b>7.00)</b>    |
| Sexually transmitted infections excluding HIV                           | 131.84<br>(41.55 to<br>312.93)                       | 26.16<br>(12.41 to<br>55.70)                         | 19.42<br>(9.95 to<br>39.75)                          | 28.52<br>(13.28 to<br>61.29)                         | 1.68<br>(0.62 to<br>3.76)                         | 0.48<br>(0.30 to<br>0.85)                         | 0.38<br>(0.25 to<br>0.63)                         | 0.51<br>(0.31 to<br>0.91)                         |
| Syphilis                                                                | 123.09<br>(33.97 to<br>304.50)                       | 17.65<br>(5.23 to<br>45.42)                          | 12.09<br>(3.84 to<br>31.20)                          | 19.67<br>(5.70 to<br>51.44)                          | 1.47<br>(0.43 to<br>3.59)                         | 0.25<br>(0.10 to<br>0.57)                         | 0.18<br>(0.08 to<br>0.41)                         | 0.27<br>(0.10 to<br>0.63)                         |
| Chlamydial infection                                                    | 1.70<br>(1.29 to<br>2.24)                            | 1.64<br>(1.01 to<br>2.65)                            | 1.41<br>(0.86 to<br>2.29)                            | 1.71<br>(1.04 to<br>2.74)                            | 0.04<br>(0.03 to<br>0.05)                         | 0.04<br>(0.03 to<br>0.07)                         | 0.04<br>(0.03 to<br>0.06)                         | 0.05<br>(0.03 to<br>0.07)                         |
| Gonococcal infection                                                    | 4.58<br>(3.43 to<br>6.02)                            | 4.53<br>(2.77 to<br>7.45)                            | 3.92<br>(2.39 to<br>6.45)                            | 4.70<br>(2.86 to<br>7.74)                            | 0.11<br>(0.08 to<br>0.14)                         | 0.13<br>(0.09 to<br>0.20)                         | 0.11<br>(0.08 to<br>0.17)                         | 0.13<br>(0.09 to<br>0.20)                         |
| Other sexually transmitted infections                                   | 2.48<br>(1.87 to<br>3.24)                            | 2.34<br>(1.41 to<br>4.06)                            | 2.00<br>(1.19 to<br>3.49)                            | 2.44<br>(1.46 to<br>4.17)                            | 0.06<br>(0.04 to<br>0.07)                         | 0.06<br>(0.04 to<br>0.10)                         | 0.05<br>(0.03 to<br>0.08)                         | 0.06<br>(0.04 to<br>0.10)                         |
| Acute hepatitis                                                         | 49.54<br>(40.31 to<br>60.69)                         | 56.31<br>(39.11 to<br>79.62)                         | 45.93<br>(31.43 to<br>66.33)                         | 59.21<br>(40.74 to<br>84.31)                         | 1.16<br>(0.95 to<br>1.41)                         | 1.65<br>(1.20 to<br>2.26)                         | 1.38<br>(0.99 to<br>1.91)                         | 1.70<br>(1.24 to<br>2.34)                         |
| Acute hepatitis A                                                       | 2.01<br>(0.79 to<br>4.13)                            | 1.38<br>(0.57 to<br>2.62)                            | 1.09<br>(0.45 to<br>2.10)                            | 1.46<br>(0.62 to<br>2.82)                            | 0.03<br>(0.02 to<br>0.06)                         | 0.03<br>(0.01 to<br>0.07)                         | 0.03<br>(0.01 to<br>0.06)                         | 0.04<br>(0.02 to<br>0.07)                         |
| Acute hepatitis B                                                       | 32.86<br>(25.89 to<br>41.62)                         | 41.28<br>(27.70 to<br>60.10)                         | 33.41<br>(22.11 to<br>48.93)                         | 43.56<br>(28.94 to<br>63.73)                         | 0.82<br>(0.66 to<br>1.02)                         | 1.21<br>(0.84 to<br>1.69)                         | 1.00<br>(0.68 to<br>1.42)                         | 1.26<br>(0.85 to<br>1.76)                         |
| Acute hepatitis C                                                       | 1.91<br>(1.37 to<br>2.62)                            | 2.74<br>(1.71 to<br>4.06)                            | 2.46<br>(1.53 to<br>3.64)                            | 2.79<br>(1.74 to<br>4.16)                            | 0.05<br>(0.04 to<br>0.07)                         | 0.09<br>(0.06 to<br>0.12)                         | 0.08<br>(0.05 to<br>0.11)                         | 0.09<br>(0.06 to<br>0.13)                         |
| Acute hepatitis E                                                       | 12.75<br>(9.13 to<br>17.19)                          | 10.91<br>(6.73 to<br>16.07)                          | 8.96<br>(5.53 to<br>13.33)                           | 11.39<br>(6.99 to<br>16.94)                          | 0.25<br>(0.18 to<br>0.34)                         | 0.32<br>(0.20 to<br>0.46)                         | 0.28<br>(0.18 to<br>0.41)                         | 0.32<br>(0.20 to<br>0.46)                         |
| Other unspecified infectious diseases                                   | 96.07<br>(53.11 to<br>125.02)                        | 104.63<br>(57.12 to<br>155.24)                       | 82.46<br>(43.38 to<br>120.46)                        | 111.18<br>(59.06 to<br>161.48)                       | 2.16<br>(1.20 to<br>2.72)                         | 2.95<br>(1.64 to<br>4.06)                         | 2.42<br>(1.33 to<br>3.34)                         | 3.05<br>(1.67 to<br>4.18)                         |
| Non-communicable diseases                                               | 32,531.31<br>(28,438.12 to<br>37,437.98)             | 62,836.75<br>(44,364.43 to<br>92,454.55)             | 49,229.98<br>(35,351.19 to<br>72,502.14)             | 78,774.69<br>(54,917.70 to<br>114,836.61)            | 1,255.23<br>(1,108.90 to<br>1,402.89)             | 2,946.42<br>(2,201.86 to<br>4,093.31)             | 2,419.97<br>(1,828.72 to<br>3,358.08)             | 3,525.37<br>(2,614.32 to<br>4,820.87)             |
| <b>Belize</b>                                                           |                                                      |                                                      |                                                      |                                                      |                                                   |                                                   |                                                   |                                                   |
| Cause                                                                   | YLLs (actual counts)                                 |                                                      |                                                      |                                                      | Deaths (actual counts)                            |                                                   |                                                   |                                                   |
|                                                                         | 2016                                                 | 2040 Forecast                                        | 2040 Better Scenario                                 | 2040 Worse Scenario                                  | 2016                                              | 2040 Forecast                                     | 2040 Better Scenario                              | 2040 Worse Scenario                               |

|                                      |                                                            |                                                               |                                                               |                                                               |                                                      |                                                      |                                                      |                                                      |
|--------------------------------------|------------------------------------------------------------|---------------------------------------------------------------|---------------------------------------------------------------|---------------------------------------------------------------|------------------------------------------------------|------------------------------------------------------|------------------------------------------------------|------------------------------------------------------|
| <b>Neoplasms</b>                     | <b>7,462.94</b><br><b>(6,489.45 to</b><br><b>8,573.47)</b> | <b>15,688.32</b><br><b>(11,663.64 to</b><br><b>20,704.09)</b> | <b>14,399.80</b><br><b>(10,680.44 to</b><br><b>19,026.96)</b> | <b>18,001.99</b><br><b>(13,152.10 to</b><br><b>24,196.42)</b> | <b>274.21</b><br><b>(240.29 to</b><br><b>310.69)</b> | <b>674.33</b><br><b>(532.88 to</b><br><b>829.49)</b> | <b>650.55</b><br><b>(512.76 to</b><br><b>800.73)</b> | <b>743.83</b><br><b>(579.97 to</b><br><b>929.01)</b> |
| Lip and oral cavity cancer           | 98.07<br>(82.04 to<br>113.57)                              | 252.79<br>(134.03 to<br>457.03)                               | 155.83<br>(88.10 to<br>259.58)                                | 382.50<br>(192.23 to<br>701.75)                               | 3.61<br>(3.09 to<br>4.13)                            | 9.82<br>(5.66 to<br>16.53)                           | 6.41<br>(3.92 to<br>10.33)                           | 14.40<br>(7.77 to<br>25.07)                          |
| Nasopharynx cancer                   | 35.23<br>(29.42 to<br>41.55)                               | 67.11<br>(35.82 to<br>113.42)                                 | 39.59<br>(22.04 to<br>66.15)                                  | 104.00<br>(51.84 to<br>182.41)                                | 0.98<br>(0.83 to<br>1.14)                            | 2.03<br>(1.11 to<br>3.40)                            | 1.23<br>(0.71 to<br>1.93)                            | 3.15<br>(1.66 to<br>5.45)                            |
| Other pharynx cancer                 | 46.08<br>(37.78 to<br>55.06)                               | 102.01<br>(55.41 to<br>177.85)                                | 81.18<br>(45.50 to<br>137.77)                                 | 118.62<br>(62.90 to<br>209.08)                                | 1.62<br>(1.35 to<br>1.90)                            | 3.92<br>(2.22 to<br>6.60)                            | 3.23<br>(1.90 to<br>5.23)                            | 4.44<br>(2.46 to<br>7.58)                            |
| Esophageal cancer                    | 114.77<br>(96.13 to<br>134.58)                             | 271.67<br>(150.79 to<br>461.20)                               | 181.01<br>(108.47 to<br>286.93)                               | 401.05<br>(211.95 to<br>717.49)                               | 4.73<br>(4.01 to<br>5.50)                            | 11.84<br>(6.99 to<br>19.42)                          | 8.29<br>(5.21 to<br>12.48)                           | 16.81<br>(9.35 to<br>28.75)                          |
| Stomach cancer                       | 499.68<br>(425.67 to<br>578.96)                            | 854.17<br>(610.69 to<br>1,147.02)                             | 763.59<br>(546.89 to<br>1,011.71)                             | 895.26<br>(640.01 to<br>1,217.39)                             | 21.21<br>(18.17 to<br>24.19)                         | 40.43<br>(30.82 to<br>52.27)                         | 57.47<br>(28.70 to<br>47.60)                         | 40.83<br>(31.06 to<br>53.08)                         |
| Colon and rectum cancer              | 508.65<br>(436.01 to<br>594.53)                            | 1,230.48<br>(804.89 to<br>1,857.80)                           | 1,185.77<br>(773.13 to<br>1,789.46)                           | 1,308.61<br>(840.06 to<br>2,021.02)                           | 21.45<br>(18.61 to<br>24.49)                         | 59.12<br>(40.58 to<br>87.94)                         | 59.49<br>(40.58 to<br>88.66)                         | 60.60<br>(41.07 to<br>91.68)                         |
| Liver cancer                         | 523.46<br>(441.15 to<br>609.61)                            | 1,397.46<br>(887.50 to<br>2,112.75)                           | 1,193.33<br>(768.31 to<br>1,763.25)                           | 1,720.32<br>(1,016.91 to<br>2,707.54)                         | 20.11<br>(17.22 to<br>23.22)                         | 60.05<br>(40.22 to<br>87.05)                         | 53.67<br>(36.76 to<br>75.90)                         | 70.77<br>(44.27 to<br>106.75)                        |
| Liver cancer due to hepatitis B      | 214.90<br>(172.51 to<br>263.61)                            | 538.44<br>(328.12 to<br>842.39)                               | 472.14<br>(296.08 to<br>713.66)                               | 651.29<br>(368.13 to<br>1,069.21)                             | 7.33<br>(5.95 to<br>8.86)                            | 20.40<br>(12.94 to<br>29.91)                         | 18.53<br>(12.17 to<br>26.67)                         | 23.81<br>(14.34 to<br>36.90)                         |
| Liver cancer due to hepatitis C      | 110.69<br>(90.26 to<br>135.55)                             | 319.42<br>(202.58 to<br>471.96)                               | 290.07<br>(187.64 to<br>422.35)                               | 370.24<br>(222.40 to<br>562.98)                               | 5.12<br>(4.26 to<br>6.13)                            | 16.27<br>(10.79 to<br>23.40)                         | 15.45<br>(10.49 to<br>21.95)                         | 18.00<br>(11.40 to<br>26.75)                         |
| Liver cancer due to alcohol use      | 102.75<br>(81.79 to<br>128.69)                             | 298.16<br>(176.40 to<br>466.94)                               | 220.24<br>(135.46 to<br>342.40)                               | 402.92<br>(227.42 to<br>658.68)                               | 4.22<br>(3.41 to<br>5.21)                            | 13.29<br>(8.43 to<br>20.25)                          | 10.47<br>(6.82 to<br>15.63)                          | 17.04<br>(10.22 to<br>26.71)                         |
| Liver cancer due to other causes     | 95.12<br>(77.96 to<br>115.45)                              | 241.45<br>(146.12 to<br>386.51)                               | 210.89<br>(131.27 to<br>328.34)                               | 295.88<br>(167.41 to<br>493.62)                               | 3.44<br>(2.85 to<br>4.13)                            | 10.10<br>(6.22 to<br>15.66)                          | 9.21<br>(5.79 to<br>13.86)                           | 11.92<br>(6.90 to<br>19.51)                          |
| Gallbladder and biliary tract cancer | 99.15<br>(82.65 to<br>124.39)                              | 181.43<br>(140.25 to<br>242.01)                               | 190.26<br>(143.77 to<br>262.81)                               | 172.91<br>(135.60 to<br>227.55)                               | 4.13<br>(3.49 to<br>5.11)                            | 8.38<br>(6.80 to<br>10.61)                           | 9.05<br>(7.22 to<br>11.76)                           | 7.79<br>(6.45 to<br>9.70)                            |
| Pancreatic cancer                    | 313.64<br>(268.30 to<br>362.88)                            | 905.75<br>(643.10 to<br>1,262.92)                             | 923.04<br>(649.85 to<br>1,310.29)                             | 966.07<br>(667.66 to<br>1,368.44)                             | 13.60<br>(11.76 to<br>15.51)                         | 42.70<br>(31.30 to<br>57.39)                         | 45.07<br>(33.21 to<br>61.34)                         | 44.09<br>(31.88 to<br>60.48)                         |
| Larynx cancer                        | 113.82<br>(93.82 to<br>136.33)                             | 211.20<br>(102.01 to<br>391.97)                               | 126.52<br>(66.70 to<br>227.28)                                | 358.79<br>(168.20 to<br>662.71)                               | 4.47<br>(3.73 to<br>5.25)                            | 8.69<br>(4.39 to<br>15.73)                           | 5.44<br>(2.99 to<br>9.37)                            | 14.43<br>(6.97 to<br>26.87)                          |
| Tracheal, bronchus, and lung cancer  | 876.12<br>(738.85 to<br>1,023.83)                          | 1,837.33<br>(1,139.11 to<br>2,821.39)                         | 1,305.41<br>(826.97 to<br>1,952.35)                           | 3,154.37<br>(1,854.93 to<br>4,886.51)                         | 34.30<br>(29.21 to<br>39.81)                         | 76.86<br>(49.30 to<br>112.48)                        | 56.88<br>(37.83 to<br>81.92)                         | 128.79<br>(79.72 to<br>193.36)                       |
| Malignant skin melanoma              | 35.17<br>(27.38 to<br>50.88)                               | 74.54<br>(54.21 to<br>109.59)                                 | 83.40<br>(60.36 to<br>123.05)                                 | 69.83<br>(51.72 to<br>101.97)                                 | 1.21<br>(0.96 to<br>1.72)                            | 2.97<br>(2.30 to<br>4.22)                            | 3.44<br>(2.65 to<br>4.88)                            | 2.69<br>(2.11 to<br>3.81)                            |
| Non-melanoma skin cancer             | 52.66<br>(44.41 to<br>61.71)                               | 129.46<br>(101.25 to<br>160.02)                               | 123.48<br>(95.09 to<br>155.48)                                | 125.98<br>(100.01 to<br>153.41)                               | 2.09<br>(1.79 to<br>2.39)                            | 5.84<br>(4.90 to<br>6.79)                            | 5.82<br>(4.80 to<br>6.82)                            | 5.46<br>(4.64 to<br>6.27)                            |
| Breast cancer                        | 487.92<br>(381.03 to<br>614.59)                            | 1,124.83<br>(686.95 to<br>1,849.12)                           | 1,049.27<br>(655.67 to<br>1,690.52)                           | 1,181.56<br>(699.77 to<br>1,938.94)                           | 16.13<br>(12.94 to<br>19.80)                         | 43.00<br>(28.36 to<br>63.88)                         | 41.66<br>(27.82 to<br>61.78)                         | 44.14<br>(28.60 to<br>66.67)                         |
| Cervical cancer                      | 796.00<br>(620.83 to<br>1,010.77)                          | 1,237.47<br>(750.11 to<br>2,027.85)                           | 1,098.79<br>(673.79 to<br>1,799.94)                           | 1,319.32<br>(778.76 to<br>2,247.06)                           | 24.52<br>(19.64 to<br>30.39)                         | 43.39<br>(29.36 to<br>62.85)                         | 39.66<br>(27.23 to<br>57.36)                         | 45.14<br>(30.21 to<br>67.55)                         |
| Uterine cancer                       | 129.25<br>(103.18 to<br>160.07)                            | 338.40<br>(238.92 to<br>475.55)                               | 303.95<br>(208.62 to<br>428.82)                               | 342.41<br>(240.74 to<br>470.49)                               | 4.98<br>(4.03 to<br>6.00)                            | 15.19<br>(11.27 to<br>19.86)                         | 14.02<br>(10.16 to<br>18.74)                         | 15.04<br>(11.17 to<br>19.30)                         |
| Ovarian cancer                       | 103.19<br>(80.07 to<br>130.60)                             | 241.86<br>(143.55 to<br>381.31)                               | 259.28<br>(153.85 to<br>403.16)                               | 244.68<br>(141.04 to<br>393.21)                               | 3.58<br>(2.81 to<br>4.47)                            | 9.81<br>(6.02 to<br>15.02)                           | 10.78<br>(6.73 to<br>16.88)                          | 9.74<br>(5.84 to<br>15.43)                           |

| Prostate cancer                 | 545.70<br>(427.27 to<br>663.91)                             | 1,587.62<br>(1,201.16 to<br>1,948.15)                         | 1,767.16<br>(1,305.16 to<br>2,175.42)                        | 1,434.36<br>(1,111.24 to<br>1,739.95)                         | 34.06<br>(27.09 to<br>41.17)                         | 103.17<br>(84.33 to<br>124.89)                         | 118.88<br>(94.56 to<br>141.39)                         | 89.95<br>(70.48 to<br>109.42)                            |
|---------------------------------|-------------------------------------------------------------|---------------------------------------------------------------|--------------------------------------------------------------|---------------------------------------------------------------|------------------------------------------------------|--------------------------------------------------------|--------------------------------------------------------|----------------------------------------------------------|
| Testicular cancer               | 8.97<br>(6.37 to<br>12.18)                                  | 11.29<br>(7.15 to<br>17.50)                                   | 10.53<br>(6.68 to<br>16.40)                                  | 11.28<br>(7.12 to<br>17.65)                                   | 0.20<br>(0.16 to<br>0.26)                            | 0.30<br>(0.21 to<br>0.41)                              | 0.29<br>(0.21 to<br>0.40)                              | 0.29<br>(0.21 to<br>0.40)                                |
| <b>Belize</b>                   |                                                             |                                                               |                                                              |                                                               |                                                      |                                                        |                                                        |                                                          |
| Cause                           | YLLs (actual counts)                                        |                                                               |                                                              |                                                               | Deaths (actual counts)                               |                                                        |                                                        |                                                          |
|                                 | 2016                                                        | 2040 Forecast                                                 | 2040 Better Scenario                                         | 2040 Worse Scenario                                           | 2016                                                 | 2040 Forecast                                          | 2040 Better Scenario                                   | 2040 Worse Scenario                                      |
| Kidney cancer                   | 112.67<br>(96.81 to<br>132.79)                              | 267.68<br>(197.97 to<br>353.67)                               | 283.35<br>(209.24 to<br>376.01)                              | 271.15<br>(200.15 to<br>363.48)                               | 3.53<br>(3.06 to<br>4.06)                            | 10.03<br>(7.83 to<br>12.66)                            | 11.05<br>(8.54 to<br>14.02)                            | 9.86<br>(7.66 to<br>12.66)                               |
| Bladder cancer                  | 81.57<br>(69.58 to<br>94.19)                                | 176.52<br>(125.01 to<br>247.01)                               | 166.50<br>(118.80 to<br>232.10)                              | 197.31<br>(134.96 to<br>289.70)                               | 4.08<br>(3.55 to<br>4.66)                            | 9.58<br>(7.17 to<br>12.88)                             | 9.48<br>(7.15 to<br>12.63)                             | 10.27<br>(7.38 to<br>14.34)                              |
| Brain and nervous system cancer | 279.23<br>(225.82 to<br>355.00)                             | 550.69<br>(412.73 to<br>725.05)                               | 554.43<br>(411.09 to<br>739.58)                              | 537.89<br>(402.62 to<br>701.82)                               | 6.53<br>(5.45 to<br>8.13)                            | 16.46<br>(12.90 to<br>20.93)                           | 17.33<br>(13.42 to<br>22.20)                           | 15.66<br>(12.50 to<br>19.79)                             |
| Thyroid cancer                  | 21.18<br>(17.61 to<br>24.71)                                | 38.47<br>(24.83 to<br>56.08)                                  | 34.40<br>(22.86 to<br>49.39)                                 | 41.52<br>(26.02 to<br>61.27)                                  | 0.79<br>(0.66 to<br>0.91)                            | 1.65<br>(1.11 to<br>2.36)                              | 1.52<br>(1.04 to<br>2.15)                              | 1.72<br>(1.14 to<br>2.55)                                |
| Mesothelioma                    | 36.29<br>(30.14 to<br>44.06)                                | 75.69<br>(56.12 to<br>101.18)                                 | 76.76<br>(56.37 to<br>104.86)                                | 72.63<br>(55.57 to<br>94.75)                                  | 1.25<br>(1.05 to<br>1.49)                            | 2.94<br>(2.33 to<br>3.68)                              | 3.08<br>(2.37 to<br>3.95)                              | 2.72<br>(2.17 to<br>3.37)                                |
| Hodgkin lymphoma                | 60.44<br>(49.16 to<br>74.37)                                | 67.70<br>(48.01 to<br>95.76)                                  | 55.89<br>(39.24 to<br>80.30)                                 | 70.50<br>(49.54 to<br>99.16)                                  | 1.41<br>(1.17 to<br>1.69)                            | 1.89<br>(1.41 to<br>2.52)                              | 1.61<br>(1.19 to<br>2.17)                              | 1.93<br>(1.44 to<br>2.52)                                |
| Non-Hodgkin lymphoma            | 232.68<br>(192.65 to<br>286.26)                             | 459.95<br>(334.38 to<br>647.69)                               | 470.74<br>(338.95 to<br>664.33)                              | 462.61<br>(334.90 to<br>653.26)                               | 6.32<br>(5.32 to<br>7.75)                            | 14.88<br>(11.26 to<br>20.53)                           | 15.72<br>(11.78 to<br>21.34)                           | 14.59<br>(11.01 to<br>19.82)                             |
| Multiple myeloma                | 83.98<br>(56.11 to<br>103.70)                               | 198.74<br>(125.07 to<br>279.27)                               | 211.16<br>(134.20 to<br>299.63)                              | 196.92<br>(124.54 to<br>278.35)                               | 3.28<br>(2.21 to<br>4.01)                            | 8.59<br>(5.52 to<br>11.65)                             | 9.36<br>(6.06 to<br>12.76)                             | 8.30<br>(5.37 to<br>11.35)                               |
| Leukemia                        | 548.66<br>(459.19 to<br>664.41)                             | 725.58<br>(533.81 to<br>970.11)                               | 635.62<br>(467.01 to<br>850.48)                              | 796.34<br>(568.85 to<br>1,089.07)                             | 13.24<br>(11.45 to<br>15.39)                         | 23.83<br>(18.21 to<br>30.52)                           | 21.83<br>(16.73 to<br>27.74)                           | 25.46<br>(19.02 to<br>33.07)                             |
| Acute lymphoid leukemia         | 119.64<br>(88.60 to<br>161.42)                              | 102.21<br>(69.78 to<br>150.79)                                | 91.06<br>(62.30 to<br>131.60)                                | 108.27<br>(73.82 to<br>160.61)                                | 1.88<br>(1.46 to<br>2.43)                            | 2.04<br>(1.48 to<br>2.81)                              | 1.91<br>(1.40 to<br>2.59)                              | 2.16<br>(1.54 to<br>2.97)                                |
| Chronic lymphoid leukemia       | 12.52<br>(9.69 to<br>15.71)                                 | 26.24<br>(17.16 to<br>38.61)                                  | 25.88<br>(17.06 to<br>37.33)                                 | 27.73<br>(17.60 to<br>41.64)                                  | 0.54<br>(0.42 to<br>0.67)                            | 1.25<br>(0.83 to<br>1.79)                              | 1.29<br>(0.86 to<br>1.82)                              | 1.27<br>(0.83 to<br>1.88)                                |
| Acute myeloid leukemia          | 54.88<br>(44.13 to<br>68.91)                                | 91.49<br>(63.81 to<br>129.90)                                 | 90.11<br>(62.95 to<br>128.28)                                | 97.10<br>(65.92 to<br>140.62)                                 | 1.20<br>(0.98 to<br>1.47)                            | 2.61<br>(1.90 to<br>3.55)                              | 2.68<br>(1.94 to<br>3.60)                              | 2.71<br>(1.93 to<br>3.79)                                |
| Chronic myeloid leukemia        | 20.49<br>(16.43 to<br>25.41)                                | 21.81<br>(14.04 to<br>32.45)                                  | 20.37<br>(13.40 to<br>30.08)                                 | 23.97<br>(14.72 to<br>37.02)                                  | 0.62<br>(0.51 to<br>0.75)                            | 0.77<br>(0.52 to<br>1.10)                              | 0.75<br>(0.51 to<br>1.05)                              | 0.82<br>(0.54 to<br>1.19)                                |
| Other leukemia                  | 341.12<br>(286.96 to<br>408.02)                             | 483.83<br>(348.83 to<br>649.27)                               | 408.20<br>(297.22 to<br>545.07)                              | 539.27<br>(384.93 to<br>740.95)                               | 9.01<br>(7.80 to<br>10.42)                           | 17.15<br>(13.25 to<br>21.94)                           | 15.21<br>(11.69 to<br>19.24)                           | 18.49<br>(13.89 to<br>24.17)                             |
| Other neoplasms                 | 618.72<br>(523.32 to<br>737.82)                             | 1,070.61<br>(821.42 to<br>1,368.55)                           | 1,069.56<br>(808.76 to<br>1,388.97)                          | 1,043.19<br>(806.12 to<br>1,319.90)                           | 16.80<br>(14.51 to<br>19.51)                         | 36.97<br>(30.34 to<br>44.04)                           | 38.78<br>(31.24 to<br>46.73)                           | 34.79<br>(28.81 to<br>41.14)                             |
| <b>Cardiovascular diseases</b>  | <b>9,721.16</b><br><b>(8,472.65 to</b><br><b>10,984.42)</b> | <b>18,452.28</b><br><b>(10,839.29 to</b><br><b>32,157.76)</b> | <b>11,574.04</b><br><b>(7,108.68 to</b><br><b>19,682.79)</b> | <b>27,650.70</b><br><b>(15,805.36 to</b><br><b>48,643.45)</b> | <b>458.85</b><br><b>(404.95 to</b><br><b>511.33)</b> | <b>989.29</b><br><b>(627.54 to</b><br><b>1,683.12)</b> | <b>671.69</b><br><b>(433.00 to</b><br><b>1,199.84)</b> | <b>1,322.95</b><br><b>(835.27 to</b><br><b>2,259.98)</b> |
| Rheumatic heart disease         | 217.69<br>(179.06 to<br>265.35)                             | 185.33<br>(128.67 to<br>271.02)                               | 142.46<br>(96.81 to<br>205.75)                               | 196.55<br>(136.44 to<br>289.24)                               | 6.41<br>(5.37 to<br>7.63)                            | 7.61<br>(5.70 to<br>10.14)                             | 6.24<br>(4.61 to<br>8.18)                              | 7.71<br>(5.88 to<br>10.38)                               |
| Ischemic heart disease          | 4,419.25<br>(3,803.93 to<br>5,037.38)                       | 8,832.16<br>(4,058.06 to<br>19,365.01)                        | 4,873.70<br>(2,273.50 to<br>10,858.48)                       | 14,768.30<br>(6,543.47 to<br>31,325.92)                       | 225.47<br>(198.13 to<br>252.82)                      | 486.54<br>(245.93 to<br>992.83)                        | 296.06<br>(148.25 to<br>646.49)                        | 729.33<br>(359.68 to<br>1,459.97)                        |

|                                               |                                                            |                                                            |                                                            |                                                            |                                                   |                                                     |                                                    |                                                      |
|-----------------------------------------------|------------------------------------------------------------|------------------------------------------------------------|------------------------------------------------------------|------------------------------------------------------------|---------------------------------------------------|-----------------------------------------------------|----------------------------------------------------|------------------------------------------------------|
| Stroke                                        | 2,492.05<br>(2,151.03 to<br>2,857.65)                      | 4,085.60<br>(2,188.47 to<br>8,192.60)                      | 2,179.86<br>(1,175.04 to<br>4,732.32)                      | 6,831.99<br>(3,409.80 to<br>13,150.96)                     | 118.07<br>(102.24 to<br>133.87)                   | 224.17<br>(124.10 to<br>522.83)                     | 136.37<br>(77.59 to<br>337.51)                     | 332.67<br>(181.80 to<br>713.35)                      |
| Ischemic stroke                               | 839.18<br>(713.95 to<br>969.02)                            | 1,526.70<br>(686.10 to<br>4,487.84)                        | 952.89<br>(440.60 to<br>3,022.53)                          | 2,281.31<br>(979.08 to<br>6,626.09)                        | 49.67<br>(42.90 to<br>56.83)                      | 101.23<br>(46.45 to<br>334.96)                      | 70.33<br>(32.21 to<br>216.41)                      | 135.24<br>(60.15 to<br>432.89)                       |
| Intracerebral hemorrhage                      | 1,652.88<br>(1,430.08 to<br>1,908.23)                      | 2,558.90<br>(1,239.73 to<br>5,086.24)                      | 1,226.96<br>(651.13 to<br>2,327.30)                        | 4,550.69<br>(2,007.90 to<br>9,435.96)                      | 68.40<br>(59.43 to<br>77.72)                      | 122.95<br>(63.93 to<br>233.66)                      | 66.03<br>(36.79 to<br>120.85)                      | 197.43<br>(95.96 to<br>389.76)                       |
| Hypertensive heart disease                    | 709.52<br>(540.80 to<br>1,139.67)                          | 1,816.19<br>(1,041.07 to<br>3,302.34)                      | 1,261.81<br>(780.45 to<br>2,170.44)                        | 2,176.60<br>(1,196.06 to<br>4,027.48)                      | 37.60<br>(29.32 to<br>59.33)                      | 106.36<br>(65.39 to<br>187.72)                      | 78.49<br>(52.09 to<br>128.55)                      | 120.37<br>(71.78 to<br>219.49)                       |
| Cardiomyopathy and myocarditis                | 593.42<br>(472.65 to<br>706.67)                            | 1,024.85<br>(671.66 to<br>1,493.27)                        | 978.84<br>(642.84 to<br>1,422.77)                          | 1,032.89<br>(687.56 to<br>1,494.98)                        | 19.88<br>(15.86 to<br>23.33)                      | 41.93<br>(29.22 to<br>57.64)                        | 41.83<br>(28.64 to<br>57.63)                       | 40.70<br>(28.86 to<br>55.91)                         |
| Myocarditis                                   | 112.10<br>(85.89 to<br>139.85)                             | 173.74<br>(122.95 to<br>235.74)                            | 162.49<br>(112.64 to<br>224.52)                            | 172.42<br>(121.84 to<br>233.59)                            | 4.05<br>(3.11 to<br>4.97)                         | 8.22<br>(6.05 to<br>10.45)                          | 8.16<br>(5.88 to<br>10.56)                         | 7.81<br>(5.74 to<br>9.91)                            |
| <b>Belize</b>                                 |                                                            |                                                            |                                                            |                                                            |                                                   |                                                     |                                                    |                                                      |
| Cause                                         | YLLs (actual counts)                                       |                                                            |                                                            |                                                            | Deaths (actual counts)                            |                                                     |                                                    |                                                      |
|                                               | 2016                                                       | 2040 Forecast                                              | 2040 Better Scenario                                       | 2040 Worse Scenario                                        | 2016                                              | 2040 Forecast                                       | 2040 Better Scenario                               | 2040 Worse Scenario                                  |
| Alcoholic cardiomyopathy                      | 36.12<br>(26.76 to<br>48.47)                               | 65.30<br>(44.78 to<br>93.63)                               | 55.85<br>(37.12 to<br>82.51)                               | 75.17<br>(52.06 to<br>107.17)                              | 1.26<br>(0.94 to<br>1.66)                         | 2.46<br>(1.72 to<br>3.47)                           | 2.22<br>(1.50 to<br>3.21)                          | 2.72<br>(1.94 to<br>3.80)                            |
| Other cardiomyopathy                          | 445.21<br>(347.83 to<br>532.09)                            | 785.82<br>(483.01 to<br>1,203.46)                          | 760.50<br>(474.07 to<br>1,152.41)                          | 785.30<br>(487.62 to<br>1,195.19)                          | 14.57<br>(11.16 to<br>17.15)                      | 31.24<br>(19.75 to<br>45.68)                        | 31.46<br>(20.02 to<br>45.65)                       | 30.17<br>(19.16 to<br>43.96)                         |
| Atrial fibrillation and flutter               | 58.61<br>(45.52 to<br>73.21)                               | 173.21<br>(128.37 to<br>232.04)                            | 170.26<br>(128.07 to<br>224.76)                            | 169.31<br>(121.09 to<br>231.77)                            | 5.12<br>(4.00 to<br>6.53)                         | 15.01<br>(10.69 to<br>20.34)                        | 15.60<br>(11.45 to<br>20.35)                       | 13.97<br>(9.55 to<br>19.23)                          |
| Aortic aneurysm                               | 100.99<br>(85.30 to<br>116.28)                             | 499.66<br>(145.44 to<br>267.18)                            | 199.66<br>(142.98 to<br>260.30)                            | 199.33<br>(147.07 to<br>267.51)                            | 4.82<br>(4.15 to<br>5.51)                         | 10.48<br>(8.18 to<br>13.35)                         | 10.84<br>(8.46 to<br>13.65)                        | 9.98<br>(7.94 to<br>12.62)                           |
| Peripheral artery disease                     | 13.19<br>(9.54 to<br>19.93)                                | 49.09<br>(31.31 to<br>74.72)                               | 56.59<br>(35.74 to<br>85.93)                               | 49.84<br>(32.50 to<br>76.74)                               | 1.07<br>(0.75 to<br>1.57)                         | 4.13<br>(2.51 to<br>6.24)                           | 5.09<br>(3.08 to<br>7.83)                          | 3.92<br>(2.39 to<br>6.10)                            |
| Endocarditis                                  | 103.42<br>(77.80 to<br>144.11)                             | 199.13<br>(131.51 to<br>304.35)                            | 181.93<br>(120.30 to<br>274.79)                            | 202.34<br>(132.72 to<br>309.02)                            | 3.38<br>(2.58 to<br>4.70)                         | 8.22<br>(5.61 to<br>12.49)                          | 7.90<br>(5.39 to<br>11.87)                         | 8.03<br>(5.45 to<br>12.12)                           |
| Other cardiovascular and circulatory diseases | 1,013.03<br>(863.15 to<br>1,183.77)                        | 1,887.06<br>(1,334.41 to<br>2,672.69)                      | 1,531.83<br>(1,098.88 to<br>2,102.18)                      | 2,023.54<br>(1,445.45 to<br>2,867.07)                      | 37.03<br>(32.09 to<br>42.63)                      | 84.85<br>(65.39 to<br>110.21)                       | 73.27<br>(56.63 to<br>92.69)                       | 86.26<br>(66.82 to<br>113.96)                        |
| <b>Chronic respiratory diseases</b>           | <b>1,471.14</b><br><b>(1,269.80 to</b><br><b>1,698.84)</b> | <b>2,327.43</b><br><b>(1,664.06 to</b><br><b>3,129.25)</b> | <b>1,847.98</b><br><b>(1,357.71 to</b><br><b>2,442.79)</b> | <b>3,292.66</b><br><b>(2,244.81 to</b><br><b>4,722.31)</b> | <b>60.44</b><br><b>(52.54 to</b><br><b>68.38)</b> | <b>109.40</b><br><b>(82.58 to</b><br><b>140.42)</b> | <b>89.82</b><br><b>(69.86 to</b><br><b>112.40)</b> | <b>150.39</b><br><b>(106.01 to</b><br><b>203.68)</b> |
| Chronic obstructive pulmonary disease         | 838.47<br>(716.21 to<br>939.21)                            | 1,354.85<br>(878.50 to<br>2,021.16)                        | 880.27<br>(587.79 to<br>1,277.57)                          | 2,295.78<br>(1,359.04 to<br>3,631.13)                      | 40.28<br>(34.87 to<br>46.19)                      | 70.81<br>(49.50 to<br>98.50)                        | 49.29<br>(35.60 to<br>65.72)                       | 112.67<br>(73.32 to<br>164.71)                       |
| Pneumoconiosis                                | 8.65<br>(6.68 to<br>11.10)                                 | 12.28<br>(8.61 to<br>17.35)                                | 10.10<br>(6.85 to<br>14.84)                                | 12.41<br>(8.82 to<br>17.47)                                | 0.30<br>(0.24 to<br>0.36)                         | 0.52<br>(0.39 to<br>0.67)                           | 0.44<br>(0.32 to<br>0.59)                          | 0.50<br>(0.38 to<br>0.66)                            |
| Silicosis                                     | 0.57<br>(0.38 to<br>0.85)                                  | 0.98<br>(0.56 to<br>1.67)                                  | 0.86<br>(0.50 to<br>1.47)                                  | 0.98<br>(0.56 to<br>1.68)                                  | 0.02<br>(0.01 to<br>0.03)                         | 0.04<br>(0.03 to<br>0.07)                           | 0.04<br>(0.02 to<br>0.06)                          | 0.04<br>(0.03 to<br>0.06)                            |
| Asbestosis                                    | 1.97<br>(1.32 to<br>2.99)                                  | 2.47<br>(1.50 to<br>4.11)                                  | 2.41<br>(1.47 to<br>3.99)                                  | 2.44<br>(1.49 to<br>4.04)                                  | 0.04<br>(0.03 to<br>0.06)                         | 0.07<br>(0.05 to<br>0.11)                           | 0.07<br>(0.05 to<br>0.11)                          | 0.07<br>(0.04 to<br>0.10)                            |
| Coal workers pneumoconiosis                   | 4.94<br>(3.55 to<br>6.33)                                  | 6.34<br>(3.88 to<br>9.50)                                  | 4.55<br>(2.61 to<br>7.17)                                  | 6.56<br>(4.14 to<br>9.61)                                  | 0.19<br>(0.14 to<br>0.24)                         | 0.27<br>(0.17 to<br>0.39)                           | 0.20<br>(0.12 to<br>0.30)                          | 0.27<br>(0.18 to<br>0.39)                            |
| Other pneumoconiosis                          | 1.17<br>(0.86 to<br>1.81)                                  | 2.49<br>(1.69 to<br>3.90)                                  | 2.28<br>(1.54 to<br>3.49)                                  | 2.44<br>(1.66 to<br>3.80)                                  | 0.05<br>(0.04 to<br>0.07)                         | 0.13<br>(0.09 to<br>0.18)                           | 0.13<br>(0.09 to<br>0.18)                          | 0.12<br>(0.08 to<br>0.17)                            |

|                                                                |                                                            |                                                            |                                                            |                                                            |                                                   |                                                     |                                                     |                                                      |
|----------------------------------------------------------------|------------------------------------------------------------|------------------------------------------------------------|------------------------------------------------------------|------------------------------------------------------------|---------------------------------------------------|-----------------------------------------------------|-----------------------------------------------------|------------------------------------------------------|
| Asthma                                                         | 219.09<br>(176.26 to<br>282.90)                            | 196.00<br>(110.96 to<br>332.86)                            | 145.39<br>(82.77 to<br>247.50)                             | 242.76<br>(133.31 to<br>416.58)                            | 5.91<br>(4.86 to<br>7.67)                         | 6.80<br>(4.03 to<br>11.27)                          | 5.36<br>(3.24 to<br>8.67)                           | 8.09<br>(4.64 to<br>13.62)                           |
| Interstitial lung disease and pulmonary sarcoidosis            | 277.23<br>(188.53 to<br>345.61)                            | 530.54<br>(353.35 to<br>704.27)                            | 601.96<br>(403.90 to<br>798.50)                            | 492.91<br>(322.14 to<br>652.17)                            | 9.59<br>(6.37 to<br>11.87)                        | 21.38<br>(13.96 to<br>27.28)                        | 25.24<br>(17.42 to<br>31.83)                        | 19.14<br>(12.64 to<br>24.29)                         |
| Other chronic respiratory diseases                             | 127.70<br>(89.67 to<br>205.60)                             | 233.77<br>(153.46 to<br>409.11)                            | 210.26<br>(138.16 to<br>368.49)                            | 248.80<br>(160.55 to<br>437.67)                            | 4.37<br>(3.07 to<br>7.27)                         | 9.90<br>(6.77 to<br>16.88)                          | 9.48<br>(6.51 to<br>16.19)                          | 9.99<br>(6.59 to<br>17.40)                           |
| <b>Cirrhosis and other chronic liver diseases</b>              | <b>1,911.62</b><br><b>(1,583.16 to</b><br><b>2,261.74)</b> | <b>3,467.68</b><br><b>(2,624.73 to</b><br><b>4,565.80)</b> | <b>2,927.31</b><br><b>(2,202.45 to</b><br><b>3,898.30)</b> | <b>3,785.22</b><br><b>(2,859.85 to</b><br><b>4,967.70)</b> | <b>60.05</b><br><b>(50.38 to</b><br><b>70.34)</b> | <b>121.65</b><br><b>(96.48 to</b><br><b>151.91)</b> | <b>106.18</b><br><b>(83.53 to</b><br><b>134.13)</b> | <b>129.06</b><br><b>(102.67 to</b><br><b>159.98)</b> |
| Cirrhosis and other chronic liver diseases due to hepatitis B  | 206.52<br>(159.34 to<br>266.94)                            | 393.80<br>(285.72 to<br>538.34)                            | 370.78<br>(265.76 to<br>526.40)                            | 390.24<br>(286.16 to<br>546.52)                            | 6.89<br>(5.44 to<br>8.70)                         | 14.30<br>(10.76 to<br>19.07)                        | 13.76<br>(10.22 to<br>18.58)                        | 13.86<br>(10.35 to<br>18.33)                         |
| Cirrhosis and other chronic liver diseases due to hepatitis C  | 549.02<br>(442.28 to<br>677.62)                            | 1,055.86<br>(769.32 to<br>1,438.64)                        | 986.72<br>(706.76 to<br>1,339.35)                          | 1,052.10<br>(766.98 to<br>1,420.48)                        | 17.53<br>(14.32 to<br>21.23)                      | 36.57<br>(27.87 to<br>47.33)                        | 34.84<br>(26.19 to<br>46.04)                        | 35.74<br>(27.58 to<br>45.51)                         |
| Cirrhosis and other chronic liver diseases due to alcohol use  | 760.35<br>(619.90 to<br>920.90)                            | 1,441.81<br>(1,071.75 to<br>1,915.66)                      | 1,050.03<br>(771.78 to<br>1,426.41)                        | 1,760.06<br>(1,317.70 to<br>2,353.44)                      | 25.27<br>(21.19 to<br>29.82)                      | 51.76<br>(40.51 to<br>65.73)                        | 39.73<br>(30.65 to<br>50.82)                        | 60.72<br>(48.06 to<br>76.89)                         |
| Cirrhosis and other chronic liver diseases due to other causes | 395.74<br>(326.28 to<br>473.19)                            | 576.20<br>(421.16 to<br>775.35)                            | 519.78<br>(380.33 to<br>712.12)                            | 582.81<br>(423.39 to<br>777.61)                            | 10.36<br>(8.61 to<br>12.34)                       | 19.03<br>(14.90 to<br>24.29)                        | 17.85<br>(13.75 to<br>23.00)                        | 18.73<br>(14.61 to<br>23.84)                         |
| <b>Digestive diseases</b>                                      | <b>1,071.98</b><br><b>(897.31 to</b><br><b>1,337.41)</b>   | <b>1,581.01</b><br><b>(1,124.14 to</b><br><b>2,182.20)</b> | <b>1,345.09</b><br><b>(968.56 to</b><br><b>1,854.04)</b>   | <b>1,686.23</b><br><b>(1,202.49 to</b><br><b>2,383.25)</b> | <b>35.30</b><br><b>(30.13 to</b><br><b>43.13)</b> | <b>66.86</b><br><b>(51.84 to</b><br><b>85.54)</b>   | <b>60.47</b><br><b>(46.88 to</b><br><b>76.40)</b>   | <b>67.92</b><br><b>(52.49 to</b><br><b>87.36)</b>    |
| Peptic ulcer disease                                           | 167.36<br>(134.45 to<br>214.41)                            | 174.07<br>(129.24 to<br>231.95)                            | 137.29<br>(100.61 to<br>186.90)                            | 186.05<br>(136.30 to<br>251.74)                            | 6.21<br>(5.12 to<br>7.74)                         | 7.89<br>(6.15 to<br>9.90)                           | 6.48<br>(4.99 to<br>8.18)                           | 8.11<br>(6.28 to<br>10.15)                           |

**Belize**

| Cause                                      | YLLs (actual counts)                                   |                                                            |                                                            |                                                            | Deaths (actual counts)                            |                                                      |                                                      |                                                     |
|--------------------------------------------|--------------------------------------------------------|------------------------------------------------------------|------------------------------------------------------------|------------------------------------------------------------|---------------------------------------------------|------------------------------------------------------|------------------------------------------------------|-----------------------------------------------------|
|                                            | 2016                                                   | 2040 Forecast                                              | 2040 Better Scenario                                       | 2040 Worse Scenario                                        | 2016                                              | 2040 Forecast                                        | 2040 Better Scenario                                 | 2040 Worse Scenario                                 |
| Gastritis and duodenitis                   | 50.30<br>(38.58 to<br>69.10)                           | 87.14<br>(59.81 to<br>124.66)                              | 78.76<br>(53.08 to<br>114.31)                              | 87.09<br>(59.88 to<br>125.24)                              | 1.82<br>(1.43 to<br>2.56)                         | 3.74<br>(2.74 to<br>5.32)                            | 3.52<br>(2.53 to<br>5.09)                            | 3.60<br>(2.62 to<br>5.04)                           |
| Appendicitis                               | 74.75<br>(56.44 to<br>99.69)                           | 79.81<br>(53.72 to<br>119.43)                              | 65.03<br>(43.68 to<br>98.86)                               | 83.24<br>(55.81 to<br>123.43)                              | 1.81<br>(1.39 to<br>2.35)                         | 2.59<br>(1.84 to<br>3.63)                            | 2.22<br>(1.55 to<br>3.15)                            | 2.61<br>(1.84 to<br>3.65)                           |
| Paralytic ileus and intestinal obstruction | 284.11<br>(214.90 to<br>383.77)                        | 407.88<br>(309.94 to<br>551.76)                            | 383.30<br>(290.42 to<br>519.98)                            | 401.18<br>(307.24 to<br>539.44)                            | 8.49<br>(6.78 to<br>11.23)                        | 18.01<br>(14.32 to<br>24.05)                         | 18.13<br>(14.26 to<br>24.12)                         | 16.87<br>(13.53 to<br>22.38)                        |
| Inguinal, femoral, and abdominal hernia    | 46.63<br>(33.84 to<br>63.71)                           | 53.78<br>(37.13 to<br>75.76)                               | 48.30<br>(33.35 to<br>69.09)                               | 53.70<br>(36.92 to<br>75.21)                               | 1.60<br>(1.17 to<br>2.23)                         | 2.26<br>(1.64 to<br>3.14)                            | 2.02<br>(1.54 to<br>3.02)                            | 2.16<br>(1.57 to<br>3.02)                           |
| Inflammatory bowel disease                 | 74.47<br>(54.53 to<br>95.19)                           | 97.81<br>(69.49 to<br>131.38)                              | 96.12<br>(67.76 to<br>131.97)                              | 95.36<br>(67.50 to<br>126.75)                              | 2.15<br>(1.64 to<br>2.62)                         | 3.72<br>(2.72 to<br>4.66)                            | 3.86<br>(2.78 to<br>4.89)                            | 3.48<br>(2.58 to<br>4.32)                           |
| Vascular intestinal disorders              | 25.74<br>(21.30 to<br>33.23)                           | 58.70<br>(44.57 to<br>78.19)                               | 56.09<br>(41.64 to<br>75.80)                               | 57.00<br>(44.03 to<br>75.46)                               | 1.12<br>(0.93 to<br>1.44)                         | 3.07<br>(2.45 to<br>3.89)                            | 3.07<br>(2.41 to<br>3.94)                            | 2.87<br>(2.31 to<br>3.60)                           |
| Gallbladder and biliary diseases           | 114.01<br>(93.70 to<br>140.38)                         | 201.61<br>(101.14 to<br>370.42)                            | 148.55<br>(76.48 to<br>273.80)                             | 253.41<br>(121.34 to<br>466.70)                            | 4.24<br>(3.54 to<br>5.20)                         | 9.01<br>(4.77 to<br>16.01)                           | 6.99<br>(3.85 to<br>12.28)                           | 10.80<br>(5.55 to<br>19.72)                         |
| Pancreatitis                               | 103.68<br>(80.86 to<br>146.02)                         | 224.69<br>(83.23 to<br>542.46)                             | 160.25<br>(64.87 to<br>370.47)                             | 273.50<br>(99.74 to<br>656.14)                             | 2.79<br>(2.21 to<br>3.93)                         | 6.81<br>(2.86 to<br>15.65)                           | 5.04<br>(2.30 to<br>10.67)                           | 8.07<br>(3.18 to<br>18.91)                          |
| Other digestive diseases                   | 130.93<br>(102.89 to<br>165.77)                        | 195.53<br>(142.49 to<br>260.27)                            | 171.41<br>(123.24 to<br>226.76)                            | 195.68<br>(144.53 to<br>258.64)                            | 5.05<br>(4.04 to<br>6.35)                         | 9.75<br>(7.69 to<br>12.14)                           | 9.02<br>(6.97 to<br>11.36)                           | 9.36<br>(7.34 to<br>11.77)                          |
| <b>Neurological disorders</b>              | <b>951.50</b><br><b>(814.47 to</b><br><b>1,099.30)</b> | <b>2,215.44</b><br><b>(1,696.17 to</b><br><b>2,874.36)</b> | <b>2,170.53</b><br><b>(1,682.35 to</b><br><b>2,791.31)</b> | <b>2,282.36</b><br><b>(1,720.27 to</b><br><b>3,057.21)</b> | <b>51.68</b><br><b>(43.91 to</b><br><b>60.65)</b> | <b>145.10</b><br><b>(108.71 to</b><br><b>193.37)</b> | <b>155.75</b><br><b>(119.83 to</b><br><b>203.65)</b> | <b>141.74</b><br><b>(99.75 to</b><br><b>199.44)</b> |

|                                         |                                          |                                          |                                          |                                            |                                      |                                       |                                       |                                       |
|-----------------------------------------|------------------------------------------|------------------------------------------|------------------------------------------|--------------------------------------------|--------------------------------------|---------------------------------------|---------------------------------------|---------------------------------------|
| Alzheimer's disease and other dementias | 403.28<br>(330.64 to<br>489.47)          | 1,228.44<br>(869.21 to<br>1,789.85)      | 1,283.21<br>(905.51 to<br>1,822.62)      | 1,247.75<br>(838.79 to<br>1,938.61)        | 37.05<br>(30.12 to<br>45.64)         | 110.82<br>(75.06 to<br>159.56)        | 121.08<br>(87.29 to<br>167.57)        | 108.15<br>(67.39 to<br>164.56)        |
| Parkinson's disease                     | 47.29<br>(35.39 to<br>60.46)             | 155.76<br>(116.70 to<br>202.60)          | 188.82<br>(139.90 to<br>246.38)          | 135.36<br>(100.27 to<br>173.94)            | 3.55<br>(2.67 to<br>4.58)            | 11.80<br>(8.69 to<br>15.31)           | 14.74<br>(11.04 to<br>19.31)          | 9.99<br>(7.16 to<br>13.20)            |
| Epilepsy                                | 336.52<br>(276.40 to<br>407.76)          | 536.15<br>(311.48 to<br>894.49)          | 389.16<br>(230.08 to<br>645.39)          | 614.10<br>(355.03 to<br>1,015.89)          | 7.10<br>(5.95 to<br>8.41)            | 13.75<br>(8.51 to<br>21.42)           | 10.42<br>(6.63 to<br>15.73)           | 15.37<br>(9.45 to<br>24.18)           |
| Multiple sclerosis                      | 11.78<br>(9.32 to<br>15.64)              | 21.60<br>(15.12 to<br>31.46)             | 22.45<br>(15.50 to<br>32.89)             | 21.29<br>(15.00 to<br>30.92)               | 0.32<br>(0.26 to<br>0.41)            | 0.63<br>(0.46 to<br>0.88)             | 0.66<br>(0.48 to<br>0.93)             | 0.61<br>(0.45 to<br>0.85)             |
| Motor neuron disease                    | 30.75<br>(23.24 to<br>40.65)             | 57.94<br>(42.26 to<br>78.97)             | 62.95<br>(45.13 to<br>86.99)             | 54.82<br>(40.44 to<br>73.01)               | 0.90<br>(0.70 to<br>1.12)            | 2.08<br>(1.55 to<br>2.72)             | 2.31<br>(1.71 to<br>3.07)             | 1.92<br>(1.46 to<br>2.44)             |
| Other neurological disorders            | 121.90<br>(99.61 to<br>149.16)           | 215.54<br>(162.10 to<br>292.89)          | 223.94<br>(166.58 to<br>303.06)          | 209.04<br>(156.79 to<br>278.61)            | 2.76<br>(2.35 to<br>3.27)            | 6.02<br>(4.79 to<br>7.59)             | 6.52<br>(5.12 to<br>8.25)             | 5.69<br>(4.57 to<br>7.15)             |
| <b>Mental disorders</b>                 | <b>376.64<br/>(298.94 to<br/>479.04)</b> | <b>707.57<br/>(517.43 to<br/>974.31)</b> | <b>668.99<br/>(485.50 to<br/>929.30)</b> | <b>734.87<br/>(540.04 to<br/>1,009.35)</b> | <b>10.14<br/>(8.14 to<br/>12.69)</b> | <b>20.98<br/>(16.28 to<br/>27.02)</b> | <b>20.31<br/>(15.64 to<br/>26.45)</b> | <b>21.33<br/>(16.56 to<br/>27.32)</b> |
| Alcohol use disorders                   | 286.34<br>(224.26 to<br>366.11)          | 470.53<br>(339.43 to<br>648.00)          | 432.07<br>(309.77 to<br>598.45)          | 501.65<br>(366.16 to<br>679.79)            | 7.97<br>(6.32 to<br>9.99)            | 14.39<br>(10.75 to<br>18.64)          | 13.52<br>(9.95 to<br>17.78)           | 15.00<br>(11.37 to<br>19.28)          |
| Drug use disorders                      | 89.64<br>(65.27 to<br>121.27)            | 235.70<br>(157.97 to<br>346.04)          | 235.60<br>(158.24 to<br>342.96)          | 231.90<br>(156.43 to<br>339.05)            | 2.16<br>(1.61 to<br>2.87)            | 6.57<br>(4.77 to<br>8.94)             | 6.76<br>(4.87 to<br>9.25)             | 6.30<br>(4.58 to<br>8.60)             |
| Opioid use disorders                    | 51.12<br>(35.96 to<br>71.94)             | 106.47<br>(68.11 to<br>167.33)           | 105.43<br>(67.88 to<br>163.78)           | 105.16<br>(67.34 to<br>165.96)             | 1.13<br>(0.82 to<br>1.56)            | 2.73<br>(1.86 to<br>3.98)             | 2.77<br>(1.87 to<br>4.02)             | 2.64<br>(1.79 to<br>3.84)             |
| Cocaine use disorders                   | 6.76<br>(4.33 to<br>9.76)                | 26.69<br>(16.11 to<br>41.90)             | 25.23<br>(15.26 to<br>39.93)             | 26.77<br>(16.20 to<br>41.84)               | 0.17<br>(0.11 to<br>0.24)            | 0.70<br>(0.43 to<br>1.06)             | 0.67<br>(0.41 to<br>1.01)             | 0.70<br>(0.43 to<br>1.05)             |
| Amphetamine use disorders               | 3.43<br>(2.13 to<br>5.38)                | 16.14<br>(9.32 to<br>27.67)              | 15.66<br>(9.18 to<br>26.38)              | 16.11<br>(9.24 to<br>27.32)                | 0.08<br>(0.05 to<br>0.12)            | 0.41<br>(0.26 to<br>0.68)             | 0.41<br>(0.26 to<br>0.64)             | 0.40<br>(0.25 to<br>0.66)             |
| Other drug use disorders                | 18.88<br>(13.94 to<br>23.94)             | 86.40<br>(53.80 to<br>129.00)            | 89.28<br>(55.25 to<br>135.39)            | 83.86<br>(51.91 to<br>124.77)              | 0.78<br>(0.54 to<br>1.06)            | 2.73<br>(1.87 to<br>3.79)             | 2.92<br>(2.00 to<br>4.05)             | 2.57<br>(1.76 to<br>3.57)             |
| Eating disorders                        | 0.66<br>(0.50 to<br>0.88)                | 1.33<br>(0.82 to<br>2.14)                | 1.32<br>(0.80 to<br>2.13)                | 1.33<br>(0.82 to<br>2.14)                  | 0.01<br>(0.01 to<br>0.02)            | 0.03<br>(0.02 to<br>0.04)             | 0.03<br>(0.02 to<br>0.04)             | 0.03<br>(0.02 to<br>0.04)             |

| Belize                                              |                                       |                                         |                                         |                                          |                                 |                                   |                                   |                                   |
|-----------------------------------------------------|---------------------------------------|-----------------------------------------|-----------------------------------------|------------------------------------------|---------------------------------|-----------------------------------|-----------------------------------|-----------------------------------|
| Cause                                               | YLLs (actual counts)                  |                                         |                                         |                                          | Deaths (actual counts)          |                                   |                                   |                                   |
|                                                     | 2016                                  | 2040 Forecast                           | 2040 Better Scenario                    | 2040 Worse Scenario                      | 2016                            | 2040 Forecast                     | 2040 Better Scenario              | 2040 Worse Scenario               |
| Diabetes, urogenital, blood, and endocrine diseases | 6,673.62<br>(5,772.18 to<br>7,677.44) | 15,846.56<br>(9,199.79 to<br>30,179.35) | 12,116.45<br>(6,951.20 to<br>24,089.95) | 18,686.90<br>(10,374.37 to<br>34,189.03) | 261.25<br>(228.47 to<br>294.33) | 754.19<br>(445.97 to<br>1,466.63) | 602.24<br>(349.88 to<br>1,232.16) | 855.19<br>(483.85 to<br>1,549.91) |
| Diabetes mellitus                                   | 3,157.65<br>(2,712.07 to<br>3,602.11) | 7,168.07<br>(4,760.41 to<br>10,784.41)  | 5,235.26<br>(3,469.84 to<br>7,748.14)   | 8,302.73<br>(5,369.94 to<br>12,748.72)   | 140.20<br>(121.70 to<br>158.38) | 361.67<br>(256.93 to<br>498.22)   | 277.38<br>(192.90 to<br>382.52)   | 400.18<br>(280.79 to<br>565.45)   |
| Acute glomerulonephritis                            | 5.01<br>(3.59 to<br>7.32)             | 13.53<br>(7.23 to<br>24.77)             | 11.48<br>(6.27 to<br>21.19)             | 14.06<br>(7.52 to<br>25.94)              | 0.10<br>(0.08 to<br>0.14)       | 0.31<br>(0.20 to<br>0.50)         | 0.28<br>(0.18 to<br>0.45)         | 0.32<br>(0.20 to<br>0.51)         |
| Chronic kidney disease                              | 2,211.92<br>(1,891.06 to<br>2,573.44) | 6,264.40<br>(1,596.54 to<br>20,334.93)  | 4,622.04<br>(1,175.39 to<br>15,936.39)  | 7,990.42<br>(1,976.37 to<br>21,880.34)   | 81.47<br>(70.60 to<br>93.22)    | 293.63<br>(60.81 to<br>971.44)    | 225.53<br>(46.65 to<br>811.87)    | 361.79<br>(73.72 to<br>1,002.00)  |
| Chronic kidney disease due to diabetes mellitus     | 721.08<br>(582.87 to<br>874.51)       | 2,499.30<br>(846.13 to<br>8,446.13)     | 1,854.31<br>(402.06 to<br>6,782.76)     | 3,229.79<br>(684.10 to<br>9,194.74)      | 28.42<br>(23.18 to<br>33.77)    | 113.81<br>(20.80 to<br>384.62)    | 87.20<br>(16.01 to<br>323.92)     | 142.29<br>(25.94 to<br>399.42)    |
| Chronic kidney disease due to hypertension          | 216.45<br>(174.00 to<br>266.03)       | 785.82<br>(148.24 to<br>2,719.36)       | 599.57<br>(111.68 to<br>2,248.73)       | 976.46<br>(186.51 to<br>2,883.39)        | 12.03<br>(9.82 to<br>14.52)     | 51.07<br>(9.46 to<br>170.80)      | 41.14<br>(7.68 to<br>148.33)      | 60.18<br>(11.09 to<br>169.11)     |

|                                                            |                                 |                                     |                                     |                                     |                              |                               |                               |                               |
|------------------------------------------------------------|---------------------------------|-------------------------------------|-------------------------------------|-------------------------------------|------------------------------|-------------------------------|-------------------------------|-------------------------------|
| Chronic kidney disease due to glomerulonephritis           | 740.53<br>(607.01 to<br>906.25) | 1,687.76<br>(517.07 to<br>4,954.39) | 1,224.61<br>(376.85 to<br>3,933.93) | 2,144.01<br>(628.46 to<br>5,891.25) | 23.12<br>(18.94 to<br>27.89) | 70.26<br>(15.88 to<br>234.00) | 52.66<br>(11.91 to<br>196.07) | 87.29<br>(19.44 to<br>247.27) |
| Chronic kidney disease due to other and unspecified causes | 533.85<br>(428.48 to<br>662.76) | 1,291.52<br>(378.04 to<br>3,884.49) | 943.54<br>(273.11 to<br>3,059.79)   | 1,640.16<br>(463.68 to<br>4,504.25) | 17.90<br>(14.54 to<br>22.04) | 58.50<br>(12.89 to<br>188.13) | 44.53<br>(9.79 to<br>157.97)  | 72.03<br>(16.01 to<br>200.73) |
| Urinary diseases and male infertility                      | 416.57<br>(358.34 to<br>493.77) | 883.60<br>(707.21 to<br>1,089.18)   | 889.67<br>(699.55 to<br>1,107.20)   | 841.54<br>(684.40 to<br>1,029.76)   | 17.93<br>(15.63 to<br>20.32) | 48.42<br>(39.80 to<br>56.15)  | 51.68<br>(41.90 to<br>60.52)  | 43.95<br>(35.90 to<br>51.46)  |
| Urinary tract infections                                   | 369.18<br>(316.76 to<br>439.41) | 816.24<br>(651.01 to<br>1,010.73)   | 828.59<br>(651.92 to<br>1,034.06)   | 775.43<br>(626.91 to<br>951.97)     | 15.91<br>(13.90 to<br>18.17) | 45.01<br>(37.01 to<br>52.55)  | 48.42<br>(39.20 to<br>57.05)  | 40.77<br>(32.86 to<br>48.06)  |
| Urolithiasis                                               | 8.91<br>(6.69 to<br>12.67)      | 16.15<br>(11.08 to<br>24.88)        | 16.39<br>(11.05 to<br>25.16)        | 15.61<br>(10.69 to<br>24.11)        | 0.33<br>(0.25 to<br>0.47)    | 0.66<br>(0.47 to<br>1.00)     | 0.70<br>(0.50 to<br>1.08)     | 0.62<br>(0.44 to<br>0.94)     |
| Other urinary diseases                                     | 38.48<br>(27.91 to<br>58.12)    | 51.22<br>(33.97 to<br>80.43)        | 44.69<br>(29.18 to<br>70.67)        | 50.50<br>(33.49 to<br>77.29)        | 1.69<br>(1.19 to<br>2.59)    | 2.75<br>(1.84 to<br>4.47)     | 2.56<br>(1.65 to<br>4.16)     | 2.56<br>(1.66 to<br>4.10)     |
| Gynecological diseases                                     | 1.99<br>(1.00 to<br>2.80)       | 1.95<br>(0.88 to<br>3.30)           | 1.54<br>(0.65 to<br>2.64)           | 2.06<br>(0.93 to<br>3.54)           | 0.06<br>(0.03 to<br>0.08)    | 0.09<br>(0.03 to<br>0.14)     | 0.07<br>(0.02 to<br>0.12)     | 0.09<br>(0.03 to<br>0.14)     |
| Uterine fibroids                                           | 0.30<br>(0.15 to<br>0.55)       | 0.36<br>(0.15 to<br>0.73)           | 0.29<br>(0.12 to<br>0.56)           | 0.39<br>(0.16 to<br>0.78)           | 0.01<br>(0.00 to<br>0.01)    | 0.01<br>(0.01 to<br>0.03)     | 0.01<br>(0.00 to<br>0.02)     | 0.01<br>(0.01 to<br>0.03)     |
| Polycystic ovarian syndrome                                | 1.20<br>(0.66 to<br>1.76)       | 0.70<br>(0.27 to<br>1.56)           | 0.48<br>(0.19 to<br>1.08)           | 0.79<br>(0.31 to<br>1.70)           | 0.02<br>(0.01 to<br>0.04)    | 0.01<br>(0.01 to<br>0.03)     | 0.01<br>(0.00 to<br>0.02)     | 0.02<br>(0.01 to<br>0.04)     |
| Endometriosis                                              | 0.00<br>(0.00 to<br>0.01)       | 0.00<br>(0.00 to<br>0.01)           | 0.00<br>(0.00 to<br>0.01)           | 0.00<br>(0.00 to<br>0.01)           | 0.00<br>(0.00 to<br>0.00)    | 0.00<br>(0.00 to<br>0.00)     | 0.00<br>(0.00 to<br>0.00)     | 0.00<br>(0.00 to<br>0.00)     |
| Genital prolapse                                           | 0.03<br>(0.01 to<br>0.05)       | 0.03<br>(0.01 to<br>0.06)           | 0.02<br>(0.01 to<br>0.05)           | 0.03<br>(0.01 to<br>0.06)           | 0.00<br>(0.00 to<br>0.00)    | 0.00<br>(0.00 to<br>0.00)     | 0.00<br>(0.00 to<br>0.00)     | 0.00<br>(0.00 to<br>0.00)     |
| Other gynecological diseases                               | 0.45<br>(0.14 to<br>0.70)       | 0.85<br>(0.24 to<br>1.49)           | 0.75<br>(0.21 to<br>1.32)           | 0.85<br>(0.25 to<br>1.46)           | 0.02<br>(0.01 to<br>0.03)    | 0.06<br>(0.01 to<br>0.10)     | 0.05<br>(0.01 to<br>0.09)     | 0.05<br>(0.01 to<br>0.09)     |
| Hemoglobinopathies and hemolytic anemias                   | 219.74<br>(166.03 to<br>277.37) | 322.23<br>(217.39 to<br>446.89)     | 278.07<br>(187.78 to<br>388.41)     | 331.06<br>(223.35 to<br>459.87)     | 4.83<br>(3.75 to<br>5.92)    | 9.50<br>(6.97 to<br>12.57)    | 8.42<br>(6.10 to<br>11.21)    | 9.53<br>(6.99 to<br>12.58)    |
| Thalassemias                                               | 6.93<br>(2.40 to<br>14.69)      | 2.16<br>(0.81 to<br>4.51)           | 1.98<br>(0.77 to<br>4.05)           | 2.17<br>(0.81 to<br>4.55)           | 0.08<br>(0.03 to<br>0.17)    | 0.03<br>(0.01 to<br>0.05)     | 0.02<br>(0.01 to<br>0.05)     | 0.03<br>(0.01 to<br>0.05)     |
| Sickle cell disorders                                      | 177.26<br>(133.36 to<br>224.97) | 244.76<br>(158.42 to<br>352.31)     | 211.23<br>(136.13 to<br>307.69)     | 253.46<br>(163.87 to<br>360.16)     | 3.15<br>(2.39 to<br>3.95)    | 5.53<br>(3.70 to<br>7.79)     | 4.84<br>(3.22 to<br>6.85)     | 5.68<br>(3.80 to<br>7.94)     |
| G6PD deficiency                                            | 18.29<br>(12.80 to<br>25.24)    | 41.73<br>(27.12 to<br>60.14)        | 34.95<br>(22.34 to<br>50.74)        | 42.67<br>(27.52 to<br>60.26)        | 0.50<br>(0.34 to<br>0.67)    | 1.51<br>(1.00 to<br>2.11)     | 1.30<br>(0.84 to<br>1.82)     | 1.51<br>(1.01 to<br>2.08)     |
| Other hemoglobinopathies and hemolytic anemias             | 17.26<br>(13.53 to<br>21.14)    | 33.58<br>(24.87 to<br>44.06)        | 29.91<br>(21.58 to<br>40.30)        | 32.76<br>(23.86 to<br>42.52)        | 1.10<br>(0.87 to<br>1.34)    | 2.44<br>(1.85 to<br>3.04)     | 2.25<br>(1.72 to<br>2.87)     | 2.31<br>(1.70 to<br>2.87)     |
| Endocrine, metabolic, blood, and immune disorders          | 660.74<br>(515.24 to<br>973.52) | 1,192.78<br>(859.23 to<br>1,709.77) | 1,078.38<br>(772.08 to<br>1,563.00) | 1,205.02<br>(870.12 to<br>1,742.88) | 16.65<br>(13.78 to<br>23.37) | 40.56<br>(31.61 to<br>53.46)  | 38.87<br>(29.66 to<br>52.61)  | 39.34<br>(30.65 to<br>52.80)  |

| Belize                    |                                 |                                 |                                 |                                 |                           |                             |                             |                             |
|---------------------------|---------------------------------|---------------------------------|---------------------------------|---------------------------------|---------------------------|-----------------------------|-----------------------------|-----------------------------|
| Cause                     | YLLs (actual counts)            |                                 |                                 |                                 | Deaths (actual counts)    |                             |                             |                             |
|                           | 2016                            | 2040 Forecast                   | 2040 Better Scenario            | 2040 Worse Scenario             | 2016                      | 2040 Forecast               | 2040 Better Scenario        | 2040 Worse Scenario         |
| Musculoskeletal disorders | 299.36<br>(225.63 to<br>381.62) | 500.17<br>(328.46 to<br>746.87) | 520.04<br>(338.32 to<br>777.07) | 488.87<br>(321.61 to<br>731.61) | 6.54<br>(5.04 to<br>8.25) | 13.12<br>(9.26 to<br>18.82) | 13.73<br>(9.61 to<br>19.61) | 12.68<br>(9.01 to<br>17.89) |
| Rheumatoid arthritis      | 26.26<br>(19.33 to<br>38.07)    | 54.11<br>(36.34 to<br>81.41)    | 47.31<br>(31.46 to<br>73.26)    | 55.12<br>(37.86 to<br>82.36)    | 0.97<br>(0.74 to<br>1.34) | 2.57<br>(1.83 to<br>3.50)   | 2.35<br>(1.63 to<br>3.29)   | 2.54<br>(1.82 to<br>3.49)   |



|                                               |                                                               |                                                              |                                                              |                                                               |                                                      |                                                      |                                                      |                                                      |
|-----------------------------------------------|---------------------------------------------------------------|--------------------------------------------------------------|--------------------------------------------------------------|---------------------------------------------------------------|------------------------------------------------------|------------------------------------------------------|------------------------------------------------------|------------------------------------------------------|
| Other musculoskeletal disorders               | 273.11<br>(204.99 to<br>350.51)                               | 446.06<br>(287.09 to<br>678.12)                              | 472.73<br>(300.75 to<br>725.10)                              | 433.75<br>(274.76 to<br>661.78)                               | 5.58<br>(4.25 to<br>7.08)                            | 10.54<br>(7.01 to<br>15.46)                          | 11.39<br>(7.59 to<br>16.91)                          | 10.14<br>(6.80 to<br>14.83)                          |
| <b>Other non-communicable diseases</b>        | <b>2,591.34</b><br><b>(1,349.74 to</b><br><b>4,768.11)</b>    | <b>2,050.29</b><br><b>(1,305.84 to</b><br><b>3,272.05)</b>   | <b>1,659.75</b><br><b>(1,109.57 to</b><br><b>2,524.66)</b>   | <b>2,164.90</b><br><b>(1,351.41 to</b><br><b>3,523.44)</b>    | <b>36.76</b><br><b>(22.26 to</b><br><b>62.65)</b>    | <b>51.51</b><br><b>(36.44 to</b><br><b>73.61)</b>    | <b>49.24</b><br><b>(34.85 to</b><br><b>70.01)</b>    | <b>50.30</b><br><b>(35.37 to</b><br><b>72.89)</b>    |
| Congenital birth defects                      | 2,234.06<br>(1,096.36 to<br>4,170.14)                         | 1,411.18<br>(760.92 to<br>2,498.29)                          | 1,032.57<br>(562.00 to<br>1,768.60)                          | 1,543.28<br>(814.05 to<br>2,741.94)                           | 27.56<br>(14.29 to<br>50.21)                         | 19.50<br>(11.17 to<br>32.36)                         | 14.73<br>(8.66 to<br>23.81)                          | 21.11<br>(11.97 to<br>35.51)                         |
| Neural tube defects                           | 85.37<br>(36.88 to<br>171.69)                                 | 25.18<br>(11.54 to<br>54.09)                                 | 15.49<br>(7.23 to<br>31.97)                                  | 29.13<br>(13.17 to<br>61.99)                                  | 1.01<br>(0.44 to<br>2.01)                            | 0.32<br>(0.15 to<br>0.66)                            | 0.20<br>(0.10 to<br>0.39)                            | 0.37<br>(0.18 to<br>0.75)                            |
| Congenital heart anomalies                    | 951.53<br>(498.66 to<br>1,744.96)                             | 619.08<br>(350.91 to<br>1,053.15)                            | 461.07<br>(260.69 to<br>758.54)                              | 673.01<br>(372.54 to<br>1,155.35)                             | 11.89<br>(6.52 to<br>21.21)                          | 8.66<br>(5.18 to<br>13.83)                           | 6.66<br>(3.98 to<br>10.31)                           | 9.33<br>(5.51 to<br>15.16)                           |
| Orofacial clefts                              | 3.09<br>(0.90 to<br>7.25)                                     | 1.12<br>(0.29 to<br>2.73)                                    | 0.65<br>(0.17 to<br>1.61)                                    | 1.33<br>(0.34 to<br>3.22)                                     | 0.04<br>(0.01 to<br>0.08)                            | 0.01<br>(0.00 to<br>0.05)                            | 0.01<br>(0.00 to<br>0.02)                            | 0.02<br>(0.00 to<br>0.04)                            |
| Down syndrome                                 | 129.72<br>(68.01 to<br>227.73)                                | 122.42<br>(70.24 to<br>188.29)                               | 95.17<br>(54.69 to<br>142.96)                                | 131.41<br>(74.37 to<br>202.67)                                | 1.91<br>(1.10 to<br>3.09)                            | 2.32<br>(1.37 to<br>3.34)                            | 1.87<br>(1.10 to<br>2.72)                            | 2.45<br>(1.42 to<br>3.55)                            |
| Other chromosomal abnormalities               | 62.68<br>(25.65 to<br>127.79)                                 | 63.54<br>(26.36 to<br>131.87)                                | 42.76<br>(17.76 to<br>86.32)                                 | 71.32<br>(29.14 to<br>147.58)                                 | 0.74<br>(0.30 to<br>1.50)                            | 0.77<br>(0.32 to<br>1.57)                            | 0.52<br>(0.22 to<br>1.03)                            | 0.86<br>(0.35 to<br>1.75)                            |
| Congenital musculoskeletal and limb anomalies | 61.55<br>(28.38 to<br>120.83)                                 | 43.38<br>(20.90 to<br>85.37)                                 | 32.28<br>(15.92 to<br>61.91)                                 | 47.17<br>(22.37 to<br>92.52)                                  | 0.74<br>(0.35 to<br>1.43)                            | 0.56<br>(0.29 to<br>1.05)                            | 0.43<br>(0.27)                                       | 0.60<br>(0.31 to<br>1.14)                            |
| Urogenital congenital anomalies               | 56.39<br>(25.37 to<br>110.09)                                 | 39.85<br>(20.11 to<br>72.18)                                 | 31.05<br>(15.99 to<br>56.29)                                 | 42.69<br>(21.63 to<br>77.41)                                  | 0.73<br>(0.36 to<br>1.38)                            | 0.63<br>(0.35 to<br>1.06)                            | 0.52<br>(0.29 to<br>0.85)                            | 0.66<br>(0.37 to<br>1.12)                            |
| Digestive congenital anomalies                | 282.55<br>(118.07 to<br>563.87)                               | 152.30<br>(60.91 to<br>303.26)                               | 104.05<br>(44.12 to<br>210.67)                               | 170.12<br>(68.18 to<br>339.65)                                | 3.31<br>(1.41 to<br>6.58)                            | 1.82<br>(0.77 to<br>3.58)                            | 1.26<br>(0.55 to<br>2.48)                            | 2.03<br>(0.85 to<br>4.01)                            |
| Other congenital birth defects                | 601.18<br>(266.31 to<br>1,190.39)                             | 344.31<br>(163.28 to<br>655.90)                              | 250.06<br>(124.39 to<br>471.93)                              | 377.09<br>(175.66 to<br>725.51)                               | 7.20<br>(3.30 to<br>14.06)                           | 4.41<br>(2.23 to<br>8.07)                            | 3.28<br>(1.73 to<br>5.83)                            | 4.79<br>(2.39 to<br>8.86)                            |
| Skin and subcutaneous diseases                | 144.29<br>(94.90 to<br>253.23)                                | 544.67<br>(350.96 to<br>913.93)                              | 561.02<br>(360.31 to<br>933.04)                              | 516.37<br>(333.36 to<br>877.07)                               | 6.73<br>(4.19 to<br>11.73)                           | 30.92<br>(19.07 to<br>51.40)                         | 33.74<br>(21.04 to<br>55.11)                         | 27.97<br>(16.78 to<br>47.17)                         |
| Cellulitis                                    | 22.97<br>(14.09 to<br>53.93)                                  | 122.06<br>(76.43 to<br>270.13)                               | 136.01<br>(84.90 to<br>294.63)                               | 113.26<br>(71.90 to<br>251.17)                                | 0.89<br>(0.56 to<br>2.12)                            | 6.02<br>(3.73 to<br>13.57)                           | 7.07<br>(4.47 to<br>15.51)                           | 5.34<br>(3.23 to<br>11.99)                           |
| Pyoderma                                      | 64.46<br>(32.95 to<br>101.77)                                 | 239.43<br>(113.25 to<br>349.98)                              | 232.57<br>(107.49 to<br>338.83)                              | 230.95<br>(111.78 to<br>344.05)                               | 2.62<br>(1.22 to<br>4.04)                            | 13.02<br>(5.94 to<br>18.89)                          | 13.46<br>(5.97 to<br>19.12)                          | 11.96<br>(5.53 to<br>17.50)                          |
| Decubitus ulcer                               | 45.78<br>(29.62 to<br>89.44)                                  | 151.55<br>(94.51 to<br>298.73)                               | 160.10<br>(97.82 to<br>306.27)                               | 141.34<br>(87.76 to<br>283.32)                                | 2.89<br>(1.76 to<br>5.58)                            | 10.74<br>(6.06 to<br>21.87)                          | 11.98<br>(6.88 to<br>23.92)                          | 9.61<br>(5.23 to<br>20.02)                           |
| Other skin and subcutaneous diseases          | 11.08<br>(6.22 to<br>25.56)                                   | 31.63<br>(16.84 to<br>68.92)                                 | 32.33<br>(17.30 to<br>69.08)                                 | 30.83<br>(16.49 to<br>67.72)                                  | 0.33<br>(0.18 to<br>0.74)                            | 1.14<br>(0.63 to<br>2.51)                            | 1.23<br>(0.69 to<br>2.69)                            | 1.06<br>(0.59 to<br>2.36)                            |
| Sudden infant death syndrome                  | 212.99<br>(86.41 to<br>447.58)                                | 94.44<br>(27.97 to<br>215.93)                                | 66.16<br>(19.90 to<br>151.82)                                | 105.25<br>(31.34 to<br>239.60)                                | 2.47<br>(1.00 to<br>5.19)                            | 1.10<br>(0.32 to<br>2.50)                            | 0.77<br>(0.23 to<br>1.76)                            | 1.22<br>(0.36 to<br>2.78)                            |
| <b>Injuries</b>                               | <b>13,231.93</b><br><b>(10,282.49 to</b><br><b>16,588.61)</b> | <b>15,360.46</b><br><b>(9,672.52 to</b><br><b>27,450.68)</b> | <b>11,735.46</b><br><b>(7,377.03 to</b><br><b>20,362.40)</b> | <b>18,119.60</b><br><b>(11,268.32 to</b><br><b>33,017.17)</b> | <b>265.05</b><br><b>(212.81 to</b><br><b>323.92)</b> | <b>361.43</b><br><b>(241.47 to</b><br><b>580.98)</b> | <b>288.13</b><br><b>(194.92 to</b><br><b>459.10)</b> | <b>412.67</b><br><b>(273.12 to</b><br><b>692.04)</b> |
| <b>Transport injuries</b>                     | <b>3,780.93</b><br><b>(2,936.83 to</b><br><b>4,811.28)</b>    | <b>4,663.88</b><br><b>(2,505.75 to</b><br><b>9,078.41)</b>   | <b>2,109.02</b><br><b>(1,122.29 to</b><br><b>4,125.74)</b>   | <b>6,948.43</b><br><b>(3,709.60 to</b><br><b>13,626.20)</b>   | <b>77.20</b><br><b>(62.59 to</b><br><b>96.01)</b>    | <b>109.73</b><br><b>(61.83 to</b><br><b>199.50)</b>  | <b>54.89</b><br><b>(32.16 to</b><br><b>96.69)</b>    | <b>155.61</b><br><b>(85.67 to</b><br><b>291.69)</b>  |
| Road injuries                                 | 3,422.46<br>(2,662.66 to<br>4,380.09)                         | 4,044.69<br>(2,162.64 to<br>7,996.85)                        | 1,606.43<br>(837.72 to<br>3,192.43)                          | 6,266.52<br>(3,334.53 to<br>12,368.58)                        | 69.36<br>(55.86 to<br>86.47)                         | 93.29<br>(52.37 to<br>170.22)                        | 40.98<br>(23.70 to<br>73.47)                         | 138.03<br>(75.34 to<br>259.53)                       |
| Pedestrian road injuries                      | 573.56<br>(428.33 to<br>750.73)                               | 574.84<br>(328.00 to<br>1,030.97)                            | 257.93<br>(152.36 to<br>454.33)                              | 816.00<br>(451.62 to<br>1,505.82)                             | 12.92<br>(9.95 to<br>16.28)                          | 16.57<br>(10.22 to<br>27.49)                         | 8.25<br>(5.33 to<br>13.48)                           | 22.35<br>(13.24 to<br>38.20)                         |

| Belize                                          |                                                  |                                                  |                                                  |                                                  |                                          |                                           |                                           |                                           |
|-------------------------------------------------|--------------------------------------------------|--------------------------------------------------|--------------------------------------------------|--------------------------------------------------|------------------------------------------|-------------------------------------------|-------------------------------------------|-------------------------------------------|
| Cause                                           | YLLs (actual counts)                             |                                                  |                                                  |                                                  | Deaths (actual counts)                   |                                           |                                           |                                           |
|                                                 | 2016                                             | 2040 Forecast                                    | 2040 Better Scenario                             | 2040 Worse Scenario                              | 2016                                     | 2040 Forecast                             | 2040 Better Scenario                      | 2040 Worse Scenario                       |
| Cyclist road injuries                           | 332.72<br>(237.33 to 441.93)                     | 368.69<br>(183.84 to 762.57)                     | 158.36<br>(78.92 to 317.24)                      | 555.75<br>(272.13 to 1,164.49)                   | 7.07<br>(5.16 to 9.10)                   | 9.04<br>(4.74 to 17.02)                   | 4.54<br>(2.48 to 8.35)                    | 12.75<br>(6.54 to 25.16)                  |
| Motorcyclist road injuries                      | 576.31<br>(392.49 to 798.73)                     | 780.99<br>(348.77 to 1,937.94)                   | 429.06<br>(186.52 to 1,036.03)                   | 1,067.34<br>(469.68 to 2,637.98)                 | 10.65<br>(7.46 to 14.42)                 | 15.40<br>(7.00 to 36.15)                  | 9.00<br>(4.22 to 20.01)                   | 20.49<br>(9.18 to 49.29)                  |
| Motor vehicle road injuries                     | 1,918.81<br>(1,455.56 to 2,541.06)               | 2,291.01<br>(1,210.16 to 4,395.65)               | 749.43<br>(393.04 to 1,440.85)                   | 3,783.95<br>(1,978.10 to 7,316.73)               | 38.25<br>(30.18 to 49.84)                | 51.44<br>(28.89 to 92.77)                 | 18.77<br>(10.80 to 33.02)                 | 81.29<br>(44.37 to 150.13)                |
| Other road injuries                             | 21.06<br>(14.47 to 35.45)                        | 29.17<br>(16.08 to 56.50)                        | 11.64<br>(6.42 to 23.50)                         | 43.47<br>(23.32 to 84.67)                        | 0.47<br>(0.33 to 0.77)                   | 0.84<br>(0.48 to 1.47)                    | 0.41<br>(0.24 to 0.73)                    | 1.14<br>(0.66 to 2.09)                    |
| Other transport injuries                        | 358.47<br>(273.42 to 461.34)                     | 619.19<br>(345.80 to 1,180.27)                   | 502.60<br>(282.78 to 943.01)                     | 681.91<br>(376.31 to 1,290.10)                   | 7.84<br>(6.12 to 9.65)                   | 16.44<br>(9.72 to 28.50)                  | 13.91<br>(8.28 to 23.64)                  | 17.58<br>(10.15 to 31.11)                 |
| <b>Unintentional injuries</b>                   | <b>4,218.97</b><br><b>(3,244.63 to 5,394.97)</b> | <b>4,147.63</b><br><b>(2,953.13 to 6,073.48)</b> | <b>3,547.05</b><br><b>(2,528.32 to 5,156.73)</b> | <b>4,323.26</b><br><b>(3,054.74 to 6,187.65)</b> | <b>87.56</b><br><b>(72.14 to 105.52)</b> | <b>113.64</b><br><b>(87.74 to 149.81)</b> | <b>103.41</b><br><b>(79.93 to 137.14)</b> | <b>113.77</b><br><b>(87.49 to 151.06)</b> |
| Falls                                           | 317.06<br>(256.57 to 403.08)                     | 474.08<br>(363.44 to 627.33)                     | 453.54<br>(339.98 to 611.39)                     | 465.27<br>(358.89 to 610.04)                     | 9.80<br>(8.22 to 12.03)                  | 19.55<br>(15.97 to 23.72)                 | 19.68<br>(16.05 to 24.24)                 | 18.33<br>(14.94 to 22.33)                 |
| Drowning                                        | 1,367.57<br>(1,037.62 to 1,764.53)               | 1,169.87<br>(724.60 to 1,931.57)                 | 962.94<br>(599.97 to 1,590.19)                   | 1,259.56<br>(762.62 to 2,110.25)                 | 25.28<br>(19.97 to 31.68)                | 25.74<br>(16.89 to 40.83)                 | 21.84<br>(14.49 to 34.14)                 | 27.25<br>(17.57 to 43.72)                 |
| Fire, heat, and hot substances                  | 225.02<br>(167.27 to 306.11)                     | 192.84<br>(128.71 to 289.03)                     | 155.21<br>(104.34 to 229.97)                     | 205.86<br>(135.05 to 313.53)                     | 5.02<br>(4.08 to 6.15)                   | 6.18<br>(4.58 to 8.52)                    | 5.39<br>(4.02 to 7.20)                    | 6.26<br>(4.49 to 8.74)                    |
| Poisonings                                      | 141.12<br>(101.77 to 241.52)                     | 103.47<br>(60.00 to 179.02)                      | 75.61<br>(43.25 to 134.74)                       | 115.31<br>(65.41 to 208.20)                      | 2.66<br>(2.00 to 4.51)                   | 2.35<br>(1.43 to 4.05)                    | 1.78<br>(1.09 to 3.12)                    | 2.57<br>(1.53 to 4.52)                    |
| Exposure to mechanical forces                   | 779.03<br>(577.07 to 1,013.04)                   | 710.37<br>(449.11 to 1,119.22)                   | 576.76<br>(355.04 to 927.80)                     | 749.96<br>(477.87 to 1,157.64)                   | 14.93<br>(11.27 to 19.18)                | 15.48<br>(10.34 to 22.87)                 | 12.90<br>(8.58 to 19.33)                  | 16.09<br>(10.86 to 23.56)                 |
| Unintentional firearm injuries                  | 528.09<br>(362.06 to 712.73)                     | 470.41<br>(273.42 to 780.79)                     | 379.21<br>(212.57 to 644.36)                     | 498.43<br>(291.00 to 813.40)                     | 10.11<br>(7.02 to 13.50)                 | 9.81<br>(5.99 to 15.44)                   | 10.11<br>(4.71 to 12.94)                  | 10.30<br>(6.13 to 15.98)                  |
| Unintentional suffocation                       | 48.51<br>(28.93 to 85.91)                        | 32.71<br>(20.64 to 53.91)                        | 24.71<br>(15.66 to 40.91)                        | 35.45<br>(22.12 to 58.95)                        | 0.68<br>(0.44 to 1.14)                   | 0.53<br>(0.35 to 0.83)                    | 0.42<br>(0.28 to 0.66)                    | 0.57<br>(0.37 to 0.88)                    |
| Other exposure to mechanical forces             | 202.42<br>(149.96 to 267.36)                     | 207.24<br>(138.87 to 309.22)                     | 172.84<br>(113.77 to 264.16)                     | 216.09<br>(143.34 to 317.38)                     | 4.15<br>(3.18 to 5.34)                   | 5.14<br>(3.59 to 7.11)                    | 4.45<br>(3.12 to 6.25)                    | 5.22<br>(3.64 to 7.21)                    |
| Adverse effects of medical treatment            | 575.39<br>(412.58 to 788.00)                     | 666.78<br>(450.83 to 991.20)                     | 583.80<br>(395.28 to 878.56)                     | 678.71<br>(464.36 to 996.63)                     | 14.48<br>(10.97 to 19.73)                | 22.87<br>(16.78 to 30.75)                 | 21.29<br>(15.37 to 29.06)                 | 22.22<br>(16.06 to 30.45)                 |
| Animal contact                                  | 119.70<br>(77.11 to 160.93)                      | 142.87<br>(85.32 to 208.39)                      | 113.79<br>(68.32 to 166.90)                      | 150.68<br>(89.48 to 216.96)                      | 2.71<br>(1.74 to 3.54)                   | 3.98<br>(2.46 to 5.48)                    | 3.34<br>(2.04 to 4.62)                    | 4.06<br>(2.52 to 5.55)                    |
| Venomous animal contact                         | 74.43<br>(40.68 to 103.75)                       | 83.52<br>(44.43 to 124.61)                       | 66.10<br>(35.39 to 100.40)                       | 88.31<br>(47.33 to 132.09)                       | 1.69<br>(0.93 to 2.28)                   | 2.29<br>(1.25 to 3.26)                    | 1.89<br>(1.06 to 2.72)                    | 2.34<br>(1.29 to 3.30)                    |
| Non-venomous animal contact                     | 45.27<br>(26.90 to 65.23)                        | 59.35<br>(34.48 to 88.23)                        | 47.69<br>(27.53 to 72.03)                        | 62.37<br>(35.76 to 92.35)                        | 1.02<br>(0.60 to 1.45)                   | 1.70<br>(1.01 to 2.45)                    | 1.44<br>(0.87 to 2.09)                    | 1.72<br>(1.00 to 2.48)                    |
| Foreign body                                    | 557.17<br>(364.53 to 888.37)                     | 542.34<br>(392.40 to 783.18)                     | 504.61<br>(368.16 to 722.05)                     | 546.50<br>(392.77 to 797.35)                     | 9.97<br>(7.38 to 14.28)                  | 14.10<br>(11.03 to 18.37)                 | 14.30<br>(11.14 to 18.63)                 | 13.53<br>(10.57 to 17.62)                 |
| Pulmonary aspiration and foreign body in airway | 543.72<br>(351.59 to 873.75)                     | 524.17<br>(379.53 to 757.59)                     | 488.71<br>(356.37 to 697.64)                     | 527.92<br>(378.10 to 772.12)                     | 9.68<br>(7.14 to 13.89)                  | 13.60<br>(10.61 to 17.65)                 | 13.84<br>(10.79 to 17.98)                 | 13.04<br>(10.20 to 17.03)                 |

|                                             |                                                            |                                                             |                                                            |                                                             |                                                     |                                                     |                                                     |                                                     |
|---------------------------------------------|------------------------------------------------------------|-------------------------------------------------------------|------------------------------------------------------------|-------------------------------------------------------------|-----------------------------------------------------|-----------------------------------------------------|-----------------------------------------------------|-----------------------------------------------------|
| Foreign body in other body part             | 13.44<br>(9.78 to<br>21.61)                                | 18.17<br>(12.18 to<br>31.41)                                | 15.91<br>(10.56 to<br>27.97)                               | 18.59<br>(12.51 to<br>31.19)                                | 0.30<br>(0.22 to<br>0.47)                           | 0.50<br>(0.36 to<br>0.79)                           | 0.46<br>(0.32 to<br>0.76)                           | 0.49<br>(0.35 to<br>0.78)                           |
| Environmental heat and cold exposure        | 28.45<br>(18.21 to<br>56.72)                               | 39.20<br>(22.21 to<br>79.30)                                | 29.84<br>(16.45 to<br>62.31)                               | 41.91<br>(23.67 to<br>85.28)                                | 0.65<br>(0.42 to<br>1.26)                           | 1.07<br>(0.63 to<br>2.09)                           | 0.85<br>(0.50 to<br>1.68)                           | 1.11<br>(0.66 to<br>2.19)                           |
| Other unintentional injuries                | 108.46<br>(79.54 to<br>142.99)                             | 105.81<br>(70.65 to<br>159.97)                              | 90.95<br>(58.97 to<br>142.44)                              | 109.50<br>(72.52 to<br>163.40)                              | 2.06<br>(1.59 to<br>2.63)                           | 2.31<br>(1.62 to<br>3.30)                           | 2.04<br>(1.42 to<br>3.00)                           | 2.34<br>(1.66 to<br>3.34)                           |
| <b>Self-harm and interpersonal violence</b> | <b>5,223.53</b><br><b>(3,278.82 to</b><br><b>7,083.68)</b> | <b>6,190.73</b><br><b>(3,234.39 to</b><br><b>10,750.96)</b> | <b>5,739.77</b><br><b>(3,106.99 to</b><br><b>9,889.46)</b> | <b>6,488.87</b><br><b>(3,311.35 to</b><br><b>11,398.34)</b> | <b>100.14</b><br><b>(63.19 to</b><br><b>134.12)</b> | <b>130.51</b><br><b>(70.11 to</b><br><b>217.26)</b> | <b>122.40</b><br><b>(68.30 to</b><br><b>201.50)</b> | <b>135.84</b><br><b>(71.13 to</b><br><b>228.22)</b> |

**Belize**

| Cause                                                                               | YLLs (actual counts)                            |                                                      |                                                      |                                                      | Deaths (actual counts)                         |                                                 |                                                 |                                                 |
|-------------------------------------------------------------------------------------|-------------------------------------------------|------------------------------------------------------|------------------------------------------------------|------------------------------------------------------|------------------------------------------------|-------------------------------------------------|-------------------------------------------------|-------------------------------------------------|
|                                                                                     | 2016                                            | 2040 Forecast                                        | 2040 Better Scenario                                 | 2040 Worse Scenario                                  | 2016                                           | 2040 Forecast                                   | 2040 Better Scenario                            | 2040 Worse Scenario                             |
| Self-harm                                                                           | 1,203.27<br>(875.11 to<br>1,599.24)             | 1,821.82<br>(898.09 to<br>3,298.89)                  | 1,542.79<br>(781.79 to<br>2,845.40)                  | 2,062.32<br>(967.52 to<br>3,815.71)                  | 24.78<br>(18.04 to<br>32.30)                   | 40.64<br>(20.98 to<br>70.47)                    | 35.14<br>(18.62 to<br>59.24)                    | 45.37<br>(22.44 to<br>81.23)                    |
| Self-harm by firearm                                                                | 134.25<br>(79.50 to<br>202.21)                  | 162.36<br>(63.73 to<br>338.40)                       | 134.37<br>(55.44 to<br>277.59)                       | 186.40<br>(70.40 to<br>394.89)                       | 2.86<br>(1.75 to<br>4.23)                      | 3.79<br>(1.58 to<br>7.72)                       | 3.20<br>(1.40 to<br>6.15)                       | 4.27<br>(1.69 to<br>8.69)                       |
| Self-harm by other specified means                                                  | 1,069.02<br>(768.27 to<br>1,433.07)             | 1,659.46<br>(824.41 to<br>3,029.24)                  | 1,408.42<br>(721.06 to<br>2,593.14)                  | 1,875.92<br>(876.55 to<br>3,466.72)                  | 21.91<br>(16.07 to<br>28.69)                   | 36.86<br>(19.26 to<br>63.35)                    | 31.94<br>(17.10 to<br>53.63)                    | 41.09<br>(20.55 to<br>72.88)                    |
| Interpersonal violence                                                              | 4,020.26<br>(2,157.12 to<br>5,710.37)           | 4,368.91<br>(2,070.71 to<br>7,542.15)                | 4,196.99<br>(2,090.43 to<br>7,239.75)                | 4,426.55<br>(2,009.25 to<br>7,605.21)                | 75.36<br>(39.57 to<br>105.69)                  | 89.86<br>(42.86 to<br>150.41)                   | 87.26<br>(42.68 to<br>145.64)                   | 90.48<br>(41.42 to<br>153.02)                   |
| Physical violence by firearm                                                        | 2,141.57<br>(866.34 to<br>3,218.24)             | 2,221.56<br>(784.61 to<br>4,083.45)                  | 2,140.29<br>(785.87 to<br>3,966.11)                  | 2,236.42<br>(758.30 to<br>4,116.56)                  | 39.08<br>(15.34 to<br>58.88)                   | 43.07<br>(14.77 to<br>77.27)                    | 41.81<br>(15.11 to<br>75.55)                    | 43.18<br>(14.19 to<br>78.43)                    |
| Physical violence by sharp object                                                   | 1,202.61<br>(621.18 to<br>1,789.67)             | 1,422.85<br>(676.41 to<br>2,558.16)                  | 1,423.58<br>(695.56 to<br>2,582.59)                  | 1,411.49<br>(653.90 to<br>2,556.96)                  | 22.93<br>(11.82 to<br>33.77)                   | 29.71<br>(14.25 to<br>50.88)                    | 30.11<br>(14.47 to<br>51.84)                    | 29.23<br>(13.57 to<br>50.04)                    |
| Physical violence by other means                                                    | 676.07<br>(342.24 to<br>988.72)                 | 724.50<br>(300.49 to<br>1,299.89)                    | 633.12<br>(272.15 to<br>1,109.02)                    | 778.64<br>(311.55 to<br>1,399.29)                    | 13.35<br>(6.58 to<br>19.29)                    | 17.08<br>(7.15 to<br>29.35)                     | 15.34<br>(6.67 to<br>25.93)                     | 18.07<br>(7.29 to<br>31.45)                     |
| <b>Forces of nature, conflict and terrorism, and executions and police conflict</b> | <b>8.50</b><br><b>(4.92 to</b><br><b>14.32)</b> | <b>358.21</b><br><b>(0.00 to</b><br><b>1,531.71)</b> | <b>339.61</b><br><b>(0.00 to</b><br><b>1,471.11)</b> | <b>359.06</b><br><b>(0.00 to</b><br><b>1,533.95)</b> | <b>0.15</b><br><b>(0.09 to</b><br><b>0.24)</b> | <b>7.56</b><br><b>(0.00 to</b><br><b>32.62)</b> | <b>7.43</b><br><b>(0.00 to</b><br><b>32.16)</b> | <b>7.45</b><br><b>(0.00 to</b><br><b>32.04)</b> |
| Exposure to forces of nature                                                        | 0.00<br>(0.00 to<br>0.00)                       | 348.42<br>(0.00 to<br>1,531.71)                      | 330.30<br>(0.00 to<br>1,471.11)                      | 349.22<br>(0.00 to<br>1,533.95)                      | 0.00<br>(0.00 to<br>0.00)                      | 7.37<br>(0.00 to<br>32.62)                      | 7.25<br>(0.00 to<br>32.16)                      | 7.26<br>(0.00 to<br>32.04)                      |
| Conflict and terrorism                                                              | 0.00<br>(0.00 to<br>0.00)                       | 9.79<br>(0.00 to<br>41.15)                           | 9.31<br>(0.00 to<br>38.72)                           | 9.84<br>(0.00 to<br>41.40)                           | 0.00<br>(0.00 to<br>0.00)                      | 0.18<br>(0.00 to<br>0.77)                       | 0.18<br>(0.00 to<br>0.74)                       | 0.18<br>(0.00 to<br>0.76)                       |
| Executions and police conflict                                                      | 8.50<br>(4.92 to<br>14.32)                      | 0.00<br>(0.00 to<br>0.00)                            | 0.00<br>(0.00 to<br>0.00)                            | 0.00<br>(0.00 to<br>0.00)                            | 0.15<br>(0.09 to<br>0.24)                      | 0.00<br>(0.00 to<br>0.00)                       | 0.00<br>(0.00 to<br>0.00)                       | 0.00<br>(0.00 to<br>0.00)                       |

**Bermuda**

| Cause                                                             | YLLs (actual counts)                                       |                                                             |                                                             |                                                              | Deaths (actual counts)                               |                                                      |                                                      |                                                      |
|-------------------------------------------------------------------|------------------------------------------------------------|-------------------------------------------------------------|-------------------------------------------------------------|--------------------------------------------------------------|------------------------------------------------------|------------------------------------------------------|------------------------------------------------------|------------------------------------------------------|
|                                                                   | 2016                                                       | 2040 Forecast                                               | 2040 Better Scenario                                        | 2040 Worse Scenario                                          | 2016                                                 | 2040 Forecast                                        | 2040 Better Scenario                                 | 2040 Worse Scenario                                  |
| <b>All causes</b>                                                 | <b>7,595.11</b><br><b>(6,750.26 to</b><br><b>8,519.96)</b> | <b>8,689.85</b><br><b>(5,616.57 to</b><br><b>13,226.31)</b> | <b>7,228.45</b><br><b>(4,761.85 to</b><br><b>11,017.89)</b> | <b>11,176.88</b><br><b>(7,316.65 to</b><br><b>16,783.44)</b> | <b>403.40</b><br><b>(357.05 to</b><br><b>450.58)</b> | <b>582.01</b><br><b>(420.20 to</b><br><b>803.01)</b> | <b>505.87</b><br><b>(364.04 to</b><br><b>696.75)</b> | <b>685.15</b><br><b>(493.57 to</b><br><b>942.03)</b> |
| <b>Communicable, maternal, neonatal, and nutritional diseases</b> | <b>748.30</b><br><b>(681.17 to</b><br><b>826.01)</b>       | <b>455.90</b><br><b>(259.72 to</b><br><b>1,042.48)</b>      | <b>349.80</b><br><b>(195.71 to</b><br><b>808.51)</b>        | <b>1,142.21</b><br><b>(689.75 to</b><br><b>1,936.77)</b>     | <b>26.07</b><br><b>(23.51 to</b><br><b>28.83)</b>    | <b>26.74</b><br><b>(18.60 to</b><br><b>39.48)</b>    | <b>22.51</b><br><b>(15.71 to</b><br><b>32.97)</b>    | <b>44.39</b><br><b>(30.97 to</b><br><b>63.53)</b>    |
| <b>HIV/AIDS and tuberculosis</b>                                  | <b>379.30</b><br><b>(359.28 to</b><br><b>399.46)</b>       | <b>34.27</b><br><b>(12.61 to</b><br><b>69.45)</b>           | <b>4.05</b><br><b>(0.66 to</b><br><b>13.15)</b>             | <b>637.80</b><br><b>(319.93 to</b><br><b>1,155.46)</b>       | <b>8.76</b><br><b>(8.30 to</b><br><b>9.22)</b>       | <b>0.93</b><br><b>(0.30 to</b><br><b>1.99)</b>       | <b>0.12</b><br><b>(0.05 to</b><br><b>0.26)</b>       | <b>15.59</b><br><b>(7.80 to</b><br><b>28.06)</b>     |

|                                                                          |                                          |                                          |                                          |                                          |                                       |                                       |                                       |                                       |
|--------------------------------------------------------------------------|------------------------------------------|------------------------------------------|------------------------------------------|------------------------------------------|---------------------------------------|---------------------------------------|---------------------------------------|---------------------------------------|
| Tuberculosis                                                             | 1.83<br>(1.57 to<br>2.13)                | 1.16<br>(0.57 to<br>2.30)                | 0.76<br>(0.40 to<br>1.41)                | 1.59<br>(0.78 to<br>3.29)                | 0.08<br>(0.07 to<br>0.10)             | 0.07<br>(0.04 to<br>0.13)             | 0.05<br>(0.03 to<br>0.08)             | 0.09<br>(0.05 to<br>0.17)             |
| HIV/AIDS                                                                 | 377.46<br>(357.44 to<br>397.57)          | 33.11<br>(11.69 to<br>68.17)             | 3.29<br>(0.04 to<br>12.25)               | 636.20<br>(318.83 to<br>1,153.97)        | 8.68<br>(8.22 to<br>9.13)             | 0.86<br>(0.22 to<br>1.90)             | 0.07<br>(0.01 to<br>0.22)             | 15.50<br>(7.69 to<br>27.97)           |
| <b>Diarrhea, lower respiratory, and other common infectious diseases</b> | <b>236.18<br/>(199.54 to<br/>274.85)</b> | <b>278.57<br/>(174.29 to<br/>441.98)</b> | <b>223.39<br/>(145.88 to<br/>344.98)</b> | <b>338.29<br/>(205.16 to<br/>557.13)</b> | <b>15.23<br/>(12.89 to<br/>17.78)</b> | <b>23.14<br/>(16.17 to<br/>33.65)</b> | <b>19.88<br/>(13.97 to<br/>28.06)</b> | <b>25.94<br/>(17.68 to<br/>38.95)</b> |
| Diarrheal diseases                                                       | 8.19<br>(6.58 to<br>10.32)               | 21.63<br>(5.68 to<br>66.96)              | 18.53<br>(6.43 to<br>50.29)              | 22.95<br>(5.49 to<br>75.26)              | 0.37<br>(0.32 to<br>0.43)             | 1.54<br>(0.43 to<br>4.17)             | 1.42<br>(0.53 to<br>3.50)             | 1.52<br>(0.40 to<br>4.33)             |
| Intestinal infectious diseases                                           | 0.46<br>(0.16 to<br>1.08)                | 0.39<br>(0.12 to<br>1.04)                | 0.45<br>(0.13 to<br>1.18)                | 0.39<br>(0.11 to<br>1.06)                | 0.01<br>(0.00 to<br>0.05)             | 0.01<br>(0.00 to<br>0.05)             | 0.01<br>(0.00 to<br>0.03)             | 0.01<br>(0.00 to<br>0.03)             |
| Typhoid fever                                                            | 0.26<br>(0.08 to<br>0.63)                | 0.33<br>(0.09 to<br>0.87)                | 0.39<br>(0.11 to<br>1.03)                | 0.33<br>(0.09 to<br>0.88)                | 0.01<br>(0.00 to<br>0.01)             | 0.01<br>(0.00 to<br>0.02)             | 0.01<br>(0.00 to<br>0.03)             | 0.01<br>(0.00 to<br>0.02)             |
| Paratyphoid fever                                                        | 0.19<br>(0.05 to<br>0.48)                | 0.05<br>(0.01 to<br>0.16)                | 0.05<br>(0.01 to<br>0.14)                | 0.05<br>(0.01 to<br>0.16)                | 0.01<br>(0.00 to<br>0.01)             | 0.00<br>(0.00 to<br>0.00)             | 0.00<br>(0.00 to<br>0.00)             | 0.00<br>(0.00 to<br>0.00)             |
| Other intestinal infectious diseases                                     | 0.01<br>(0.00 to<br>0.02)                | 0.01<br>(0.00 to<br>0.02)                | 0.01<br>(0.00 to<br>0.02)                | 0.01<br>(0.00 to<br>0.02)                | 0.00<br>(0.00 to<br>0.00)             | 0.00<br>(0.00 to<br>0.00)             | 0.00<br>(0.00 to<br>0.00)             | 0.00<br>(0.00 to<br>0.00)             |
| Lower respiratory infections                                             | 202.63<br>(172.45 to<br>234.65)          | 229.18<br>(145.06 to<br>353.94)          | 180.36<br>(119.74 to<br>264.47)          | 284.68<br>(170.86 to<br>460.19)          | 14.18<br>(11.92 to<br>16.64)          | 20.75<br>(14.60 to<br>30.01)          | 17.68<br>(12.49 to<br>24.84)          | 23.54<br>(15.71 to<br>35.37)          |
| Upper respiratory infections                                             | 0.08<br>(0.04 to<br>0.13)                | 0.07<br>(0.02 to<br>0.19)                | 0.05<br>(0.01 to<br>0.12)                | 0.07<br>(0.02 to<br>0.18)                | 0.00<br>(0.00 to<br>0.00)             | 0.00<br>(0.00 to<br>0.01)             | 0.00<br>(0.00 to<br>0.01)             | 0.00<br>(0.00 to<br>0.01)             |
| Otitis media                                                             | 0.02<br>(0.01 to<br>0.02)                | 0.01<br>(0.00 to<br>0.01)                | 0.01<br>(0.00 to<br>0.01)                | 0.01<br>(0.00 to<br>0.01)                | 0.00<br>(0.00 to<br>0.00)             | 0.00<br>(0.00 to<br>0.00)             | 0.00<br>(0.00 to<br>0.00)             | 0.00<br>(0.00 to<br>0.00)             |
| Meningitis                                                               | 9.74<br>(7.87 to<br>12.50)               | 5.04<br>(2.68 to<br>9.61)                | 4.30<br>(2.36 to<br>7.85)                | 5.10<br>(2.79 to<br>9.50)                | 0.32<br>(0.26 to<br>0.42)             | 0.24<br>(0.15 to<br>0.38)             | 0.21<br>(0.13 to<br>0.33)             | 0.23<br>(0.15 to<br>0.36)             |
| Pneumococcal meningitis                                                  | 1.70<br>(1.25 to<br>2.32)                | 0.89<br>(0.50 to<br>1.56)                | 0.90<br>(0.51 to<br>1.60)                | 0.88<br>(0.50 to<br>1.54)                | 0.06<br>(0.04 to<br>0.09)             | 0.05<br>(0.03 to<br>0.07)             | 0.05<br>(0.03 to<br>0.07)             | 0.04<br>(0.03 to<br>0.07)             |
| H influenzae type B meningitis                                           | 0.95<br>(0.72 to<br>1.28)                | 0.57<br>(0.31 to<br>1.18)                | 0.58<br>(0.32 to<br>1.20)                | 0.60<br>(0.31 to<br>1.35)                | 0.03<br>(0.02 to<br>0.04)             | 0.02<br>(0.02 to<br>0.04)             | 0.03<br>(0.02 to<br>0.04)             | 0.02<br>(0.02 to<br>0.04)             |
| Meningococcal meningitis                                                 | 2.76<br>(2.14 to<br>3.64)                | 1.33<br>(0.65 to<br>2.60)                | 1.07<br>(0.52 to<br>2.04)                | 1.35<br>(0.67 to<br>2.63)                | 0.09<br>(0.07 to<br>0.12)             | 0.06<br>(0.04 to<br>0.11)             | 0.05<br>(0.03 to<br>0.09)             | 0.06<br>(0.04 to<br>0.10)             |
| Other meningitis                                                         | 4.33<br>(3.46 to<br>5.65)                | 2.25<br>(1.11 to<br>4.49)                | 1.75<br>(0.89 to<br>3.37)                | 2.27<br>(1.18 to<br>4.43)                | 0.14<br>(0.11 to<br>0.19)             | 0.10<br>(0.06 to<br>0.18)             | 0.08<br>(0.05 to<br>0.14)             | 0.10<br>(0.06 to<br>0.17)             |
| Encephalitis                                                             | 14.93<br>(8.12 to<br>30.12)              | 13.76<br>(5.73 to<br>33.04)              | 13.18<br>(5.61 to<br>31.25)              | 14.23<br>(5.74 to<br>35.24)              | 0.34<br>(0.22 to<br>0.62)             | 0.43<br>(0.25 to<br>0.80)             | 0.42<br>(0.25 to<br>0.77)             | 0.42<br>(0.25 to<br>0.81)             |
| Diphtheria                                                               | 0.02<br>(0.01 to<br>0.03)                | 0.00<br>(0.00 to<br>0.01)                | 0.00<br>(0.00 to<br>0.01)                | 0.01<br>(0.00 to<br>0.02)                | 0.00<br>(0.00 to<br>0.00)             | 0.00<br>(0.00 to<br>0.00)             | 0.00<br>(0.00 to<br>0.00)             | 0.00<br>(0.00 to<br>0.00)             |
| Whooping cough                                                           | 0.04<br>(0.01 to<br>0.09)                | 0.02<br>(0.00 to<br>0.08)                | 0.01<br>(0.00 to<br>0.07)                | 0.07<br>(0.00 to<br>0.35)                | 0.00<br>(0.00 to<br>0.00)             | 0.00<br>(0.00 to<br>0.00)             | 0.00<br>(0.00 to<br>0.00)             | 0.00<br>(0.00 to<br>0.00)             |
| Tetanus                                                                  | 0.03<br>(0.02 to<br>0.04)                | 0.00<br>(0.00 to<br>0.01)                | 0.00<br>(0.00 to<br>0.01)                | 0.01<br>(0.00 to<br>0.02)                | 0.00<br>(0.00 to<br>0.00)             | 0.00<br>(0.00 to<br>0.00)             | 0.00<br>(0.00 to<br>0.00)             | 0.00<br>(0.00 to<br>0.00)             |
| Measles                                                                  | 0.01<br>(0.01 to<br>0.01)                | 8.44<br>(0.28 to<br>27.88)               | 6.46<br>(0.27 to<br>20.87)               | 10.76<br>(0.31 to<br>37.38)              | 0.00<br>(0.00 to<br>0.00)             | 0.17<br>(0.00 to<br>0.63)             | 0.13<br>(0.00 to<br>0.47)             | 0.22<br>(0.01 to<br>0.86)             |
| <b>Bermuda</b>                                                           |                                          |                                          |                                          |                                          |                                       |                                       |                                       |                                       |
| <b>YLLs (actual counts)</b>                                              |                                          |                                          |                                          |                                          | <b>Deaths (actual counts)</b>         |                                       |                                       |                                       |

| Cause                                                 | 2016                                           | 2040 Forecast                                  | 2040 Better Scenario                           | 2040 Worse Scenario                            | 2016                                           | 2040 Forecast                                  | 2040 Better Scenario                           | 2040 Worse Scenario                            |
|-------------------------------------------------------|------------------------------------------------|------------------------------------------------|------------------------------------------------|------------------------------------------------|------------------------------------------------|------------------------------------------------|------------------------------------------------|------------------------------------------------|
| Varicella and herpes zoster                           | 0.04<br>(0.02 to<br>0.07)                      | 0.03<br>(0.01 to<br>0.07)                      | 0.03<br>(0.01 to<br>0.06)                      | 0.03<br>(0.01 to<br>0.07)                      | 0.00<br>(0.00 to<br>0.00)                      | 0.00<br>(0.00 to<br>0.00)                      | 0.00<br>(0.00 to<br>0.00)                      | 0.00<br>(0.00 to<br>0.00)                      |
| <b>Neglected tropical diseases and malaria</b>        | <b>1.26</b><br><b>(1.03 to</b><br><b>1.49)</b> | <b>0.88</b><br><b>(0.52 to</b><br><b>1.56)</b> | <b>0.88</b><br><b>(0.51 to</b><br><b>1.54)</b> | <b>0.89</b><br><b>(0.52 to</b><br><b>1.59)</b> | <b>0.03</b><br><b>(0.03 to</b><br><b>0.04)</b> | <b>0.03</b><br><b>(0.02 to</b><br><b>0.04)</b> | <b>0.03</b><br><b>(0.02 to</b><br><b>0.04)</b> | <b>0.03</b><br><b>(0.02 to</b><br><b>0.04)</b> |
| Malaria                                               | 0.26<br>(0.10 to<br>0.37)                      | 0.14<br>(0.04 to<br>0.26)                      | 0.13<br>(0.04 to<br>0.25)                      | 0.13<br>(0.04 to<br>0.25)                      | 0.01<br>(0.00 to<br>0.01)                      | 0.00<br>(0.00 to<br>0.01)                      | 0.00<br>(0.00 to<br>0.01)                      | 0.00<br>(0.00 to<br>0.01)                      |
| Chagas disease                                        | 0.00<br>(0.00 to<br>0.00)                      | 0.00<br>(0.00 to<br>0.00)                      | 0.00<br>(0.00 to<br>0.00)                      | 0.00<br>(0.00 to<br>0.00)                      | 0.00<br>(0.00 to<br>0.00)                      | 0.00<br>(0.00 to<br>0.00)                      | 0.00<br>(0.00 to<br>0.00)                      | 0.00<br>(0.00 to<br>0.00)                      |
| Leishmaniasis                                         | 0.00<br>(0.00 to<br>0.00)                      | 0.00<br>(0.00 to<br>0.00)                      | 0.00<br>(0.00 to<br>0.00)                      | 0.00<br>(0.00 to<br>0.00)                      | 0.00<br>(0.00 to<br>0.00)                      | 0.00<br>(0.00 to<br>0.00)                      | 0.00<br>(0.00 to<br>0.00)                      | 0.00<br>(0.00 to<br>0.00)                      |
| African trypanosomiasis                               | 0.00<br>(0.00 to<br>0.00)                      | 0.00<br>(0.00 to<br>0.00)                      | 0.00<br>(0.00 to<br>0.00)                      | 0.00<br>(0.00 to<br>0.00)                      | 0.00<br>(0.00 to<br>0.00)                      | 0.00<br>(0.00 to<br>0.00)                      | 0.00<br>(0.00 to<br>0.00)                      | 0.00<br>(0.00 to<br>0.00)                      |
| Schistosomiasis                                       | 0.00<br>(0.00 to<br>0.00)                      | 0.00<br>(0.00 to<br>0.00)                      | 0.00<br>(0.00 to<br>0.00)                      | 0.00<br>(0.00 to<br>0.00)                      | 0.00<br>(0.00 to<br>0.00)                      | 0.00<br>(0.00 to<br>0.00)                      | 0.00<br>(0.00 to<br>0.00)                      | 0.00<br>(0.00 to<br>0.00)                      |
| Cysticercosis                                         | 0.58<br>(0.49 to<br>0.69)                      | 0.20<br>(0.13 to<br>0.31)                      | 0.20<br>(0.13 to<br>0.30)                      | 0.20<br>(0.13 to<br>0.30)                      | 0.02<br>(0.02 to<br>0.02)                      | 0.01<br>(0.01 to<br>0.01)                      | 0.01<br>(0.01 to<br>0.01)                      | 0.01<br>(0.01 to<br>0.01)                      |
| Cystic echinococcosis                                 | 0.00<br>(0.00 to<br>0.00)                      | 0.00<br>(0.00 to<br>0.00)                      | 0.00<br>(0.00 to<br>0.00)                      | 0.00<br>(0.00 to<br>0.00)                      | 0.00<br>(0.00 to<br>0.00)                      | 0.00<br>(0.00 to<br>0.00)                      | 0.00<br>(0.00 to<br>0.00)                      | 0.00<br>(0.00 to<br>0.00)                      |
| Dengue                                                | 0.05<br>(0.02 to<br>0.08)                      | 0.19<br>(0.09 to<br>0.35)                      | 0.19<br>(0.09 to<br>0.33)                      | 0.19<br>(0.09 to<br>0.35)                      | 0.00<br>(0.00 to<br>0.00)                      | 0.01<br>(0.00 to<br>0.01)                      | 0.01<br>(0.00 to<br>0.01)                      | 0.01<br>(0.00 to<br>0.01)                      |
| Yellow fever                                          | 0.00<br>(0.00 to<br>0.00)                      | 0.00<br>(0.00 to<br>0.00)                      | 0.00<br>(0.00 to<br>0.00)                      | 0.00<br>(0.00 to<br>0.00)                      | 0.00<br>(0.00 to<br>0.00)                      | 0.00<br>(0.00 to<br>0.00)                      | 0.00<br>(0.00 to<br>0.00)                      | 0.00<br>(0.00 to<br>0.00)                      |
| Rabies                                                | 0.00<br>(0.00 to<br>0.00)                      | 0.00<br>(0.00 to<br>0.00)                      | 0.00<br>(0.00 to<br>0.00)                      | 0.00<br>(0.00 to<br>0.00)                      | 0.00<br>(0.00 to<br>0.00)                      | 0.00<br>(0.00 to<br>0.00)                      | 0.00<br>(0.00 to<br>0.00)                      | 0.00<br>(0.00 to<br>0.00)                      |
| Intestinal nematode infections                        | 0.00<br>(0.00 to<br>0.00)                      | 0.00<br>(0.00 to<br>0.00)                      | 0.00<br>(0.00 to<br>0.00)                      | 0.00<br>(0.00 to<br>0.00)                      | 0.00<br>(0.00 to<br>0.00)                      | 0.00<br>(0.00 to<br>0.00)                      | 0.00<br>(0.00 to<br>0.00)                      | 0.00<br>(0.00 to<br>0.00)                      |
| Other neglected tropical diseases                     | 0.36<br>(0.31 to<br>0.43)                      | 0.35<br>(0.19 to<br>0.75)                      | 0.36<br>(0.19 to<br>0.75)                      | 0.36<br>(0.19 to<br>0.76)                      | 0.01<br>(0.01 to<br>0.01)                      | 0.01<br>(0.01 to<br>0.02)                      | 0.01<br>(0.01 to<br>0.02)                      | 0.01<br>(0.01 to<br>0.02)                      |
| <b>Maternal disorders</b>                             | <b>0.90</b><br><b>(0.68 to</b><br><b>1.24)</b> | <b>0.63</b><br><b>(0.18 to</b><br><b>1.63)</b> | <b>0.54</b><br><b>(0.16 to</b><br><b>1.36)</b> | <b>0.64</b><br><b>(0.19 to</b><br><b>1.63)</b> | <b>0.02</b><br><b>(0.01 to</b><br><b>0.02)</b> | <b>0.01</b><br><b>(0.00 to</b><br><b>0.03)</b> | <b>0.01</b><br><b>(0.00 to</b><br><b>0.02)</b> | <b>0.01</b><br><b>(0.00 to</b><br><b>0.03)</b> |
| Maternal hemorrhage                                   | 0.14<br>(0.09 to<br>0.22)                      | 0.09<br>(0.02 to<br>0.23)                      | 0.08<br>(0.02 to<br>0.20)                      | 0.09<br>(0.02 to<br>0.23)                      | 0.00<br>(0.00 to<br>0.00)                      | 0.00<br>(0.00 to<br>0.00)                      | 0.00<br>(0.00 to<br>0.00)                      | 0.00<br>(0.00 to<br>0.00)                      |
| Maternal sepsis and other maternal infections         | 0.02<br>(0.01 to<br>0.04)                      | 0.01<br>(0.00 to<br>0.04)                      | 0.01<br>(0.00 to<br>0.03)                      | 0.01<br>(0.00 to<br>0.04)                      | 0.00<br>(0.00 to<br>0.00)                      | 0.00<br>(0.00 to<br>0.00)                      | 0.00<br>(0.00 to<br>0.00)                      | 0.00<br>(0.00 to<br>0.00)                      |
| Maternal hypertensive disorders                       | 0.23<br>(0.15 to<br>0.34)                      | 0.13<br>(0.03 to<br>0.37)                      | 0.11<br>(0.03 to<br>0.31)                      | 0.14<br>(0.04 to<br>0.37)                      | 0.00<br>(0.00 to<br>0.01)                      | 0.00<br>(0.00 to<br>0.01)                      | 0.00<br>(0.00 to<br>0.01)                      | 0.00<br>(0.00 to<br>0.01)                      |
| Maternal obstructed labor and uterine rupture         | 0.02<br>(0.01 to<br>0.04)                      | 0.01<br>(0.00 to<br>0.04)                      | 0.01<br>(0.00 to<br>0.03)                      | 0.01<br>(0.00 to<br>0.04)                      | 0.00<br>(0.00 to<br>0.00)                      | 0.00<br>(0.00 to<br>0.00)                      | 0.00<br>(0.00 to<br>0.00)                      | 0.00<br>(0.00 to<br>0.00)                      |
| Maternal abortion, miscarriage, and ectopic pregnancy | 0.18<br>(0.12 to<br>0.27)                      | 0.15<br>(0.04 to<br>0.39)                      | 0.13<br>(0.03 to<br>0.32)                      | 0.15<br>(0.04 to<br>0.39)                      | 0.00<br>(0.00 to<br>0.00)                      | 0.00<br>(0.00 to<br>0.01)                      | 0.00<br>(0.00 to<br>0.01)                      | 0.00<br>(0.00 to<br>0.01)                      |
| Indirect maternal deaths                              | 0.12<br>(0.07 to<br>0.18)                      | 0.09<br>(0.02 to<br>0.26)                      | 0.08<br>(0.02 to<br>0.21)                      | 0.09<br>(0.02 to<br>0.26)                      | 0.00<br>(0.00 to<br>0.00)                      | 0.00<br>(0.00 to<br>0.00)                      | 0.00<br>(0.00 to<br>0.00)                      | 0.00<br>(0.00 to<br>0.00)                      |

|                                                                  |                                |                                |                                |                                |                           |                           |                           |                           |
|------------------------------------------------------------------|--------------------------------|--------------------------------|--------------------------------|--------------------------------|---------------------------|---------------------------|---------------------------|---------------------------|
| Late maternal deaths                                             | 0.03<br>(0.01 to<br>0.06)      | 0.02<br>(0.00 to<br>0.05)      | 0.01<br>(0.00 to<br>0.04)      | 0.02<br>(0.00 to<br>0.05)      | 0.00<br>(0.00 to<br>0.00) | 0.00<br>(0.00 to<br>0.00) | 0.00<br>(0.00 to<br>0.00) | 0.00<br>(0.00 to<br>0.00) |
| Maternal deaths aggravated by HIV/AIDS                           | 0.00<br>(0.00 to<br>0.00)      | 0.00<br>(0.00 to<br>0.00)      | 0.00<br>(0.00 to<br>0.00)      | 0.01<br>(0.00 to<br>0.02)      | 0.00<br>(0.00 to<br>0.00) | 0.00<br>(0.00 to<br>0.00) | 0.00<br>(0.00 to<br>0.00) | 0.00<br>(0.00 to<br>0.00) |
| Other maternal disorders                                         | 0.16<br>(0.10 to<br>0.25)      | 0.12<br>(0.03 to<br>0.33)      | 0.11<br>(0.03 to<br>0.28)      | 0.12<br>(0.03 to<br>0.34)      | 0.00<br>(0.00 to<br>0.00) | 0.00<br>(0.00 to<br>0.01) | 0.00<br>(0.00 to<br>0.01) | 0.00<br>(0.00 to<br>0.01) |
| <b>Bermuda</b>                                                   |                                |                                |                                |                                |                           |                           |                           |                           |
| Cause                                                            | YLLs (actual counts)           |                                |                                |                                | Deaths (actual counts)    |                           |                           |                           |
|                                                                  | 2016                           | 2040 Forecast                  | 2040 Better Scenario           | 2040 Worse Scenario            | 2016                      | 2040 Forecast             | 2040 Better Scenario      | 2040 Worse Scenario       |
| Neonatal disorders                                               | 113.55<br>(72.54 to<br>162.12) | 121.57<br>(14.86 to<br>542.46) | 100.90<br>(12.98 to<br>457.74) | 145.02<br>(17.49 to<br>662.00) | 1.31<br>(0.84 to<br>1.88) | 1.41<br>(0.17 to<br>6.27) | 1.17<br>(0.15 to<br>5.33) | 1.68<br>(0.21 to<br>7.65) |
| Neonatal preterm birth                                           | 24.21<br>(15.14 to<br>35.95)   | 16.23<br>(2.02 to<br>70.05)    | 11.15<br>(1.52 to<br>48.52)    | 21.72<br>(2.83 to<br>93.88)    | 0.28<br>(0.17 to<br>0.42) | 0.19<br>(0.02 to<br>0.81) | 0.13<br>(0.02 to<br>0.56) | 0.25<br>(0.03 to<br>1.08) |
| Neonatal encephalopathy due to birth asphyxia and trauma         | 34.89<br>(22.16 to<br>50.66)   | 26.70<br>(2.42 to<br>131.21)   | 19.57<br>(1.90 to<br>101.02)   | 31.24<br>(2.93 to<br>159.01)   | 0.40<br>(0.26 to<br>0.59) | 0.31<br>(0.03 to<br>1.52) | 0.23<br>(0.02 to<br>1.18) | 0.36<br>(0.03 to<br>1.84) |
| Neonatal sepsis and other neonatal infections                    | 7.97<br>(4.11 to<br>16.27)     | 10.05<br>(0.91 to<br>49.43)    | 8.14<br>(0.76 to<br>41.11)     | 11.84<br>(1.13 to<br>58.21)    | 0.09<br>(0.05 to<br>0.19) | 0.12<br>(0.01 to<br>0.57) | 0.09<br>(0.01 to<br>0.47) | 0.14<br>(0.01 to<br>0.67) |
| Hemolytic disease and other neonatal jaundice                    | 0.73<br>(0.41 to<br>1.20)      | 0.77<br>(0.06 to<br>4.33)      | 0.60<br>(0.05 to<br>3.45)      | 0.90<br>(0.08 to<br>5.10)      | 0.01<br>(0.00 to<br>0.01) | 0.01<br>(0.00 to<br>0.05) | 0.01<br>(0.00 to<br>0.04) | 0.01<br>(0.00 to<br>0.06) |
| Other neonatal disorders                                         | 45.74<br>(28.75 to<br>68.16)   | 67.82<br>(8.30 to<br>305.02)   | 61.45<br>(7.72 to<br>289.25)   | 79.32<br>(9.58 to<br>353.87)   | 0.53<br>(0.33 to<br>0.79) | 0.78<br>(0.10 to<br>3.52) | 0.71<br>(0.09 to<br>3.36) | 0.92<br>(0.11 to<br>4.09) |
| Nutritional deficiencies                                         | 5.34<br>(4.49 to<br>6.41)      | 7.22<br>(5.45 to<br>10.24)     | 7.68<br>(5.72 to<br>10.89)     | 6.91<br>(5.17 to<br>10.18)     | 0.34<br>(0.29 to<br>0.40) | 0.67<br>(0.54 to<br>0.84) | 0.75<br>(0.60 to<br>0.95) | 0.61<br>(0.48 to<br>0.77) |
| Protein-energy malnutrition                                      | 3.45<br>(2.69 to<br>4.50)      | 4.86<br>(3.46 to<br>7.17)      | 5.43<br>(3.83 to<br>7.97)      | 4.63<br>(3.27 to<br>7.11)      | 0.22<br>(0.18 to<br>0.29) | 0.48<br>(0.35 to<br>0.66) | 0.57<br>(0.41 to<br>0.75) | 0.44<br>(0.32 to<br>0.60) |
| Iodine deficiency                                                | 0.10<br>(0.01 to<br>0.32)      | 0.32<br>(0.01 to<br>1.01)      | 0.32<br>(0.01 to<br>1.02)      | 0.31<br>(0.01 to<br>0.97)      | 0.00<br>(0.00 to<br>0.02) | 0.03<br>(0.00 to<br>0.11) | 0.03<br>(0.00 to<br>0.12) | 0.02<br>(0.00 to<br>0.10) |
| Dietary iron deficiency                                          | 0.24<br>(0.12 to<br>0.32)      | 0.24<br>(0.09 to<br>0.53)      | 0.25<br>(0.09 to<br>0.56)      | 0.25<br>(0.09 to<br>0.56)      | 0.01<br>(0.00 to<br>0.01) | 0.01<br>(0.00 to<br>0.01) | 0.01<br>(0.00 to<br>0.01) | 0.01<br>(0.00 to<br>0.01) |
| Other nutritional deficiencies                                   | 1.55<br>(0.76 to<br>2.01)      | 1.79<br>(0.73 to<br>3.09)      | 1.68<br>(0.69 to<br>2.93)      | 1.72<br>(0.73 to<br>2.93)      | 0.11<br>(0.05 to<br>0.14) | 0.16<br>(0.06 to<br>0.26) | 0.15<br>(0.06 to<br>0.25) | 0.14<br>(0.06 to<br>0.23) |
| Other communicable, maternal, neonatal, and nutritional diseases | 11.77<br>(9.29 to<br>14.80)    | 12.76<br>(7.82 to<br>20.10)    | 12.36<br>(7.61 to<br>19.29)    | 12.65<br>(7.79 to<br>20.15)    | 0.37<br>(0.29 to<br>0.44) | 0.54<br>(0.37 to<br>0.75) | 0.55<br>(0.37 to<br>0.77) | 0.52<br>(0.36 to<br>0.72) |
| Sexually transmitted infections excluding HIV                    | 2.29<br>(1.05 to<br>4.69)      | 0.71<br>(0.28 to<br>1.95)      | 0.62<br>(0.26 to<br>1.66)      | 0.75<br>(0.29 to<br>2.17)      | 0.05<br>(0.03 to<br>0.08) | 0.02<br>(0.01 to<br>0.04) | 0.02<br>(0.01 to<br>0.04) | 0.02<br>(0.01 to<br>0.04) |
| Syphilis                                                         | 1.93<br>(0.68 to<br>4.29)      | 0.44<br>(0.10 to<br>1.62)      | 0.36<br>(0.08 to<br>1.33)      | 0.48<br>(0.10 to<br>1.81)      | 0.04<br>(0.02 to<br>0.06) | 0.04<br>(0.00 to<br>0.02) | 0.01<br>(0.00 to<br>0.02) | 0.01<br>(0.00 to<br>0.03) |
| Chlamydial infection                                             | 0.06<br>(0.05 to<br>0.08)      | 0.05<br>(0.03 to<br>0.09)      | 0.05<br>(0.03 to<br>0.09)      | 0.05<br>(0.03 to<br>0.09)      | 0.00<br>(0.00 to<br>0.00) | 0.00<br>(0.00 to<br>0.00) | 0.00<br>(0.00 to<br>0.00) | 0.00<br>(0.00 to<br>0.00) |
| Gonococcal infection                                             | 0.20<br>(0.15 to<br>0.25)      | 0.15<br>(0.08 to<br>0.26)      | 0.15<br>(0.08 to<br>0.25)      | 0.15<br>(0.08 to<br>0.26)      | 0.01<br>(0.01 to<br>0.01) | 0.01<br>(0.00 to<br>0.01) | 0.01<br>(0.00 to<br>0.01) | 0.01<br>(0.00 to<br>0.01) |
| Other sexually transmitted infections                            | 0.10<br>(0.08 to<br>0.13)      | 0.07<br>(0.04 to<br>0.12)      | 0.07<br>(0.04 to<br>0.12)      | 0.07<br>(0.04 to<br>0.12)      | 0.00<br>(0.00 to<br>0.00) | 0.00<br>(0.00 to<br>0.00) | 0.00<br>(0.00 to<br>0.00) | 0.00<br>(0.00 to<br>0.00) |

|                                       |                                              |                                               |                                              |                                               |                                        |                                        |                                        |                                        |
|---------------------------------------|----------------------------------------------|-----------------------------------------------|----------------------------------------------|-----------------------------------------------|----------------------------------------|----------------------------------------|----------------------------------------|----------------------------------------|
| Acute hepatitis                       | 0.71<br>(0.60 to<br>0.85)                    | 0.45<br>(0.22 to<br>0.88)                     | 0.36<br>(0.18 to<br>0.69)                    | 0.45<br>(0.23 to<br>0.86)                     | 0.02<br>(0.02 to<br>0.03)              | 0.02<br>(0.01 to<br>0.04)              | 0.02<br>(0.01 to<br>0.03)              | 0.02<br>(0.01 to<br>0.03)              |
| Acute hepatitis A                     | 0.02<br>(0.01 to<br>0.04)                    | 0.01<br>(0.00 to<br>0.03)                     | 0.01<br>(0.00 to<br>0.03)                    | 0.01<br>(0.00 to<br>0.04)                     | 0.00<br>(0.00 to<br>0.00)              | 0.00<br>(0.00 to<br>0.00)              | 0.00<br>(0.00 to<br>0.00)              | 0.00<br>(0.00 to<br>0.00)              |
| Acute hepatitis B                     | 0.45<br>(0.37 to<br>0.56)                    | 0.32<br>(0.15 to<br>0.62)                     | 0.25<br>(0.13 to<br>0.47)                    | 0.32<br>(0.16 to<br>0.59)                     | 0.01<br>(0.01 to<br>0.02)              | 0.01<br>(0.01 to<br>0.02)              | 0.01<br>(0.01 to<br>0.02)              | 0.01<br>(0.01 to<br>0.02)              |
| Acute hepatitis C                     | 0.03<br>(0.02 to<br>0.04)                    | 0.02<br>(0.01 to<br>0.05)                     | 0.02<br>(0.01 to<br>0.04)                    | 0.02<br>(0.01 to<br>0.04)                     | 0.00<br>(0.00 to<br>0.00)              | 0.00<br>(0.00 to<br>0.00)              | 0.00<br>(0.00 to<br>0.00)              | 0.00<br>(0.00 to<br>0.00)              |
| Acute hepatitis E                     | 0.20<br>(0.16 to<br>0.26)                    | 0.10<br>(0.04 to<br>0.22)                     | 0.08<br>(0.03 to<br>0.17)                    | 0.10<br>(0.04 to<br>0.22)                     | 0.01<br>(0.00 to<br>0.01)              | 0.01<br>(0.00 to<br>0.01)              | 0.00<br>(0.00 to<br>0.01)              | 0.00<br>(0.00 to<br>0.01)              |
| Other unspecified infectious diseases | 3.76<br>(6.87 to<br>10.71)                   | 11.59<br>(17.94 to<br>17.94)                  | 11.38<br>(7.01 to<br>17.75)                  | 11.45<br>(7.08 to<br>17.67)                   | 0.50<br>(0.22 to<br>0.35)              | 0.50<br>(0.34 to<br>0.69)              | 0.51<br>(0.35 to<br>0.71)              | 0.48<br>(0.33 to<br>0.65)              |
| <b>Non-communicable diseases</b>      | <b>6,080.54</b><br>(5,358.96 to<br>6,857.82) | <b>7,543.52</b><br>(4,802.75 to<br>11,533.49) | <b>6,272.10</b><br>(4,102.49 to<br>9,460.37) | <b>9,162.95</b><br>(5,785.67 to<br>13,903.43) | <b>355.30</b><br>(314.59 to<br>398.79) | <b>530.18</b><br>(372.72 to<br>735.00) | <b>460.26</b><br>(324.68 to<br>635.61) | <b>611.71</b><br>(429.03 to<br>849.14) |

**Bermuda**

| Cause                                | YLLs (actual counts)                         |                                              |                                              |                                              | Deaths (actual counts)                 |                                        |                                        |                                        |
|--------------------------------------|----------------------------------------------|----------------------------------------------|----------------------------------------------|----------------------------------------------|----------------------------------------|----------------------------------------|----------------------------------------|----------------------------------------|
|                                      | 2016                                         | 2040 Forecast                                | 2040 Better Scenario                         | 2040 Worse Scenario                          | 2016                                   | 2040 Forecast                          | 2040 Better Scenario                   | 2040 Worse Scenario                    |
| <b>Neoplasms</b>                     | <b>2,359.50</b><br>(2,053.24 to<br>2,684.52) | <b>2,978.18</b><br>(1,942.47 to<br>4,337.72) | <b>2,550.67</b><br>(1,691.54 to<br>3,721.72) | <b>3,518.63</b><br>(2,289.93 to<br>5,175.07) | <b>121.68</b><br>(106.00 to<br>137.26) | <b>183.65</b><br>(133.39 to<br>249.51) | <b>163.02</b><br>(117.26 to<br>224.97) | <b>208.92</b><br>(149.91 to<br>285.97) |
| Lip and oral cavity cancer           | 40.87<br>(34.90 to<br>47.77)                 | 44.80<br>(22.77 to<br>83.59)                 | 28.27<br>(15.27 to<br>50.35)                 | 75.31<br>(36.31 to<br>139.97)                | 1.95<br>(1.68 to<br>2.26)              | 2.34<br>(1.34 to<br>4.05)              | 1.54<br>(0.92 to<br>2.53)              | 3.90<br>(2.14 to<br>6.93)              |
| Nasopharynx cancer                   | 9.46<br>(7.95 to<br>11.27)                   | 8.86<br>(4.33 to<br>16.60)                   | 5.21<br>(2.67 to<br>9.51)                    | 14.79<br>(7.15 to<br>27.26)                  | 0.35<br>(0.30 to<br>0.41)              | 0.36<br>(0.20 to<br>0.64)              | 0.21<br>(0.12 to<br>0.37)              | 0.60<br>(0.32 to<br>1.06)              |
| Other pharynx cancer                 | 20.39<br>(16.69 to<br>25.46)                 | 29.38<br>(16.06 to<br>52.29)                 | 27.94<br>(15.16 to<br>49.55)                 | 38.47<br>(19.96 to<br>68.70)                 | 0.88<br>(0.74 to<br>1.08)              | 1.47<br>(0.87 to<br>2.52)              | 1.44<br>(0.86 to<br>2.44)              | 1.88<br>(1.06 to<br>3.27)              |
| Esophageal cancer                    | 58.44<br>(48.53 to<br>69.08)                 | 89.08<br>(42.81 to<br>171.63)                | 63.27<br>(33.02 to<br>114.46)                | 129.89<br>(59.28 to<br>252.02)               | 2.94<br>(2.46 to<br>3.47)              | 4.94<br>(2.65 to<br>8.73)              | 3.64<br>(2.07 to<br>6.06)              | 7.07<br>(3.56 to<br>12.92)             |
| Stomach cancer                       | 78.68<br>(67.92 to<br>91.79)                 | 81.35<br>(50.84 to<br>123.10)                | 64.97<br>(42.74 to<br>95.58)                 | 84.35<br>(53.41 to<br>126.60)                | 4.32<br>(3.77 to<br>4.97)              | 5.18<br>(3.50 to<br>7.46)              | 4.26<br>(2.99 to<br>5.96)              | 5.26<br>(3.56 to<br>7.46)              |
| Colon and rectum cancer              | 290.30<br>(244.80 to<br>339.64)              | 368.06<br>(215.05 to<br>601.48)              | 314.53<br>(182.74 to<br>516.38)              | 439.06<br>(249.07 to<br>735.46)              | 16.56<br>(14.06 to<br>19.39)           | 25.09<br>(15.79 to<br>39.75)           | 22.03<br>(13.70 to<br>35.41)           | 29.63<br>(17.61 to<br>46.57)           |
| Liver cancer                         | 63.03<br>(52.64 to<br>75.54)                 | 108.25<br>(59.01 to<br>183.18)               | 97.47<br>(54.50 to<br>162.55)                | 148.89<br>(76.42 to<br>262.29)               | 3.24<br>(2.71 to<br>3.88)              | 6.42<br>(3.72 to<br>10.34)             | 5.98<br>(3.59 to<br>9.50)              | 8.45<br>(4.63 to<br>14.09)             |
| Liver cancer due to hepatitis B      | 21.26<br>(16.82 to<br>27.00)                 | 35.32<br>(18.61 to<br>62.00)                 | 32.10<br>(17.58 to<br>55.93)                 | 44.17<br>(21.94 to<br>81.05)                 | 0.95<br>(0.75 to<br>1.20)              | 1.82<br>(1.05 to<br>3.01)              | 1.70<br>(1.02 to<br>2.84)              | 2.20<br>(1.18 to<br>3.78)              |
| Liver cancer due to hepatitis C      | 14.09<br>(11.14 to<br>17.50)                 | 26.08<br>(14.72 to<br>44.03)                 | 24.39<br>(14.14 to<br>40.33)                 | 31.66<br>(16.92 to<br>55.03)                 | 0.86<br>(0.69 to<br>1.07)              | 1.84<br>(1.10 to<br>2.95)              | 1.77<br>(1.09 to<br>2.88)              | 2.16<br>(1.22 to<br>3.51)              |
| Liver cancer due to alcohol use      | 19.31<br>(15.40 to<br>24.15)                 | 32.86<br>(17.34 to<br>57.29)                 | 28.14<br>(15.27 to<br>47.76)                 | 55.32<br>(27.36 to<br>104.62)                | 0.99<br>(0.80 to<br>1.24)              | 1.93<br>(1.07 to<br>3.23)              | 1.72<br>(0.98 to<br>2.81)              | 3.07<br>(1.60 to<br>5.36)              |
| Liver cancer due to other causes     | 8.37<br>(6.79 to<br>10.29)                   | 13.99<br>(7.65 to<br>24.56)                  | 12.85<br>(7.13 to<br>21.89)                  | 17.74<br>(8.97 to<br>32.97)                  | 0.43<br>(0.35 to<br>0.52)              | 0.83<br>(0.48 to<br>1.39)              | 0.79<br>(0.47 to<br>1.27)              | 1.02<br>(0.55 to<br>1.80)              |
| Gallbladder and biliary tract cancer | 17.24<br>(14.08 to<br>23.71)                 | 21.12<br>(13.91 to<br>33.09)                 | 21.04<br>(13.71 to<br>33.52)                 | 20.30<br>(13.58 to<br>31.25)                 | 0.94<br>(0.77 to<br>1.26)              | 1.36<br>(0.94 to<br>2.04)              | 1.38<br>(0.95 to<br>2.11)              | 1.28<br>(0.91 to<br>1.89)              |

|                                     |                                 |                                 |                                 |                                   |                              |                              |                              |                              |
|-------------------------------------|---------------------------------|---------------------------------|---------------------------------|-----------------------------------|------------------------------|------------------------------|------------------------------|------------------------------|
| Pancreatic cancer                   | 135.70<br>(112.97 to<br>160.17) | 170.66<br>(103.99 to<br>267.27) | 157.82<br>(97.26 to<br>246.43)  | 186.31<br>(111.70 to<br>298.40)   | 7.63<br>(6.33 to<br>8.93)    | 10.79<br>(7.07 to<br>16.24)  | 10.21<br>(6.63 to<br>15.50)  | 11.59<br>(7.45 to<br>17.80)  |
| Larynx cancer                       | 34.16<br>(28.78 to<br>40.88)    | 32.71<br>(14.48 to<br>67.38)    | 18.19<br>(8.85 to<br>35.44)     | 51.60<br>(22.54 to<br>107.75)     | 1.66<br>(1.41 to<br>1.97)    | 1.72<br>(0.84 to<br>3.17)    | 1.00<br>(0.53 to<br>1.75)    | 2.68<br>(1.25 to<br>5.09)    |
| Tracheal, bronchus, and lung cancer | 417.32<br>(361.64 to<br>484.30) | 435.56<br>(243.17 to<br>712.83) | 264.01<br>(148.79 to<br>427.72) | 690.91<br>(384.52 to<br>1,128.69) | 20.32<br>(17.69 to<br>23.27) | 23.71<br>(14.28 to<br>37.07) | 14.81<br>(8.93 to<br>23.15)  | 37.01<br>(21.88 to<br>57.74) |
| Malignant skin melanoma             | 30.18<br>(24.41 to<br>41.90)    | 49.56<br>(34.32 to<br>70.53)    | 56.06<br>(38.29 to<br>80.26)    | 47.06<br>(32.92 to<br>66.81)      | 1.47<br>(1.20 to<br>1.94)    | 2.96<br>(2.25 to<br>3.92)    | 3.42<br>(2.55 to<br>4.59)    | 2.74<br>(2.10 to<br>3.62)    |
| Non-melanoma skin cancer            | 11.36<br>(9.60 to<br>13.53)     | 14.63<br>(9.90 to<br>21.00)     | 13.23<br>(9.01 to<br>18.92)     | 13.94<br>(9.85 to<br>19.67)       | 0.66<br>(0.56 to<br>0.77)    | 1.02<br>(0.76 to<br>1.34)    | 0.96<br>(0.71 to<br>1.27)    | 0.95<br>(0.73 to<br>1.21)    |
| Breast cancer                       | 215.66<br>(163.04 to<br>268.87) | 241.45<br>(115.27 to<br>489.59) | 212.54<br>(102.25 to<br>426.68) | 279.82<br>(125.33 to<br>605.81)   | 10.02<br>(7.58 to<br>12.50)  | 14.10<br>(7.65 to<br>25.15)  | 12.68<br>(6.90 to<br>23.24)  | 15.79<br>(8.27 to<br>29.68)  |
| Cervical cancer                     | 46.06<br>(35.18 to<br>58.48)    | 37.84<br>(17.95 to<br>72.84)    | 31.56<br>(15.23 to<br>60.24)    | 39.71<br>(18.88 to<br>76.97)      | 2.16<br>(1.64 to<br>2.72)    | 2.20<br>(1.15 to<br>4.04)    | 1.86<br>(0.98 to<br>3.41)    | 2.29<br>(1.17 to<br>4.13)    |
| Uterine cancer                      | 35.02<br>(25.34 to<br>46.13)    | 43.46<br>(21.73 to<br>84.16)    | 40.06<br>(20.17 to<br>76.90)    | 42.54<br>(22.09 to<br>80.00)      | 1.98<br>(1.43 to<br>2.59)    | 2.91<br>(1.57 to<br>5.27)    | 2.73<br>(1.49 to<br>4.96)    | 2.80<br>(1.57 to<br>4.95)    |
| Ovarian cancer                      | 38.79<br>(26.89 to<br>51.74)    | 62.42<br>(27.87 to<br>124.73)   | 58.70<br>(26.20 to<br>117.97)   | 66.65<br>(29.56 to<br>133.85)     | 2.16<br>(1.48 to<br>2.87)    | 4.33<br>(2.10 to<br>8.10)    | 4.14<br>(1.97 to<br>7.89)    | 4.58<br>(2.16 to<br>8.57)    |
| Prostate cancer                     | 209.82<br>(165.20 to<br>255.68) | 372.45<br>(277.90 to<br>469.55) | 358.34<br>(267.42 to<br>454.30) | 353.16<br>(267.49 to<br>441.46)   | 15.88<br>(12.43 to<br>18.88) | 30.83<br>(24.26 to<br>36.56) | 30.57<br>(23.86 to<br>36.72) | 28.50<br>(22.49 to<br>33.69) |
| Testicular cancer                   | 0.63<br>(0.48 to<br>0.80)       | 0.57<br>(0.21 to<br>1.36)       | 0.51<br>(0.19 to<br>1.25)       | 0.56<br>(0.21 to<br>1.31)         | 0.01<br>(0.01 to<br>0.02)    | 0.02<br>(0.01 to<br>0.03)    | 0.01<br>(0.01 to<br>0.03)    | 0.01<br>(0.01 to<br>0.03)    |

**Bermuda**

| Cause                           | YLLs (actual counts)            |                                |                                |                                 | Deaths (actual counts)    |                            |                            |                            |
|---------------------------------|---------------------------------|--------------------------------|--------------------------------|---------------------------------|---------------------------|----------------------------|----------------------------|----------------------------|
|                                 | 2016                            | 2040 Forecast                  | 2040 Better Scenario           | 2040 Worse Scenario             | 2016                      | 2040 Forecast              | 2040 Better Scenario       | 2040 Worse Scenario        |
| Kidney cancer                   | 44.35<br>(37.41 to<br>52.01)    | 69.96<br>(44.82 to<br>101.89)  | 66.08<br>(43.05 to<br>97.61)   | 72.84<br>(46.26 to<br>105.78)   | 2.03<br>(1.74 to<br>2.38) | 3.79<br>(2.63 to<br>5.23)  | 3.68<br>(2.57 to<br>5.13)  | 3.87<br>(2.64 to<br>5.35)  |
| Bladder cancer                  | 54.39<br>(46.57 to<br>63.24)    | 72.86<br>(47.92 to<br>108.51)  | 61.59<br>(40.36 to<br>91.43)   | 81.50<br>(52.29 to<br>124.40)   | 3.55<br>(3.07 to<br>4.11) | 5.48<br>(3.88 to<br>7.73)  | 4.79<br>(3.41 to<br>6.71)  | 6.01<br>(4.15 to<br>8.66)  |
| Brain and nervous system cancer | 63.98<br>(33.25 to<br>79.06)    | 69.44<br>(30.88 to<br>120.03)  | 66.76<br>(29.69 to<br>115.19)  | 68.34<br>(30.53 to<br>116.67)   | 2.25<br>(1.15 to<br>2.81) | 3.03<br>(1.35 to<br>4.85)  | 2.97<br>(1.32 to<br>4.80)  | 2.91<br>(1.31 to<br>4.63)  |
| Thyroid cancer                  | 5.69<br>(4.62 to<br>6.88)       | 6.55<br>(3.66 to<br>11.50)     | 5.98<br>(3.37 to<br>10.31)     | 7.19<br>(4.02 to<br>12.55)      | 0.29<br>(0.23 to<br>0.35) | 0.39<br>(0.23 to<br>0.66)  | 0.37<br>(0.22 to<br>0.61)  | 0.42<br>(0.25 to<br>0.69)  |
| Mesothelioma                    | 9.11<br>(7.50 to<br>11.40)      | 15.51<br>(10.66 to<br>21.82)   | 16.20<br>(10.98 to<br>23.20)   | 14.76<br>(10.20 to<br>20.43)    | 0.42<br>(0.35 to<br>0.51) | 0.87<br>(0.66 to<br>1.10)  | 0.93<br>(0.69 to<br>1.22)  | 0.80<br>(0.61 to<br>1.01)  |
| Hodgkin lymphoma                | 8.53<br>(7.27 to<br>10.11)      | 8.07<br>(4.46 to<br>13.76)     | 6.84<br>(3.84 to<br>11.56)     | 7.94<br>(4.53 to<br>13.33)      | 0.29<br>(0.25 to<br>0.34) | 0.37<br>(0.22 to<br>0.58)  | 0.32<br>(0.20 to<br>0.50)  | 0.35<br>(0.22 to<br>0.54)  |
| Non-Hodgkin lymphoma            | 98.84<br>(80.41 to<br>120.84)   | 117.35<br>(71.17 to<br>186.04) | 108.96<br>(65.53 to<br>173.86) | 122.16<br>(73.75 to<br>190.74)  | 3.80<br>(3.16 to<br>4.53) | 5.49<br>(3.59 to<br>8.03)  | 5.21<br>(3.40 to<br>7.57)  | 5.56<br>(3.61 to<br>8.10)  |
| Multiple myeloma                | 54.41<br>(42.79 to<br>71.93)    | 77.30<br>(46.61 to<br>122.44)  | 74.62<br>(44.90 to<br>119.46)  | 80.29<br>(48.02 to<br>129.55)   | 2.67<br>(2.11 to<br>3.38) | 4.35<br>(2.81 to<br>6.65)  | 4.29<br>(2.75 to<br>6.64)  | 4.41<br>(2.80 to<br>6.79)  |
| Leukemia                        | 137.56<br>(116.61 to<br>159.53) | 158.21<br>(99.39 to<br>247.36) | 138.34<br>(88.63 to<br>217.93) | 175.29<br>(109.20 to<br>274.54) | 5.52<br>(4.70 to<br>6.41) | 8.46<br>(5.76 to<br>12.17) | 7.62<br>(5.24 to<br>10.90) | 9.08<br>(6.16 to<br>13.15) |



|                                 |                                                            |                                                            |                                                          |                                                            |                                                      |                                                      |                                                     |                                                      |
|---------------------------------|------------------------------------------------------------|------------------------------------------------------------|----------------------------------------------------------|------------------------------------------------------------|------------------------------------------------------|------------------------------------------------------|-----------------------------------------------------|------------------------------------------------------|
| Acute lymphoid leukemia         | 12.40<br>(9.74 to<br>15.52)                                | 8.52<br>(4.09 to<br>18.13)                                 | 7.33<br>(3.57 to<br>15.48)                               | 9.51<br>(4.70 to<br>20.24)                                 | 0.30<br>(0.25 to<br>0.36)                            | 0.29<br>(0.17 to<br>0.51)                            | 0.25<br>(0.15 to<br>0.44)                           | 0.32<br>(0.18 to<br>0.56)                            |
| Chronic lymphoid leukemia       | 9.92<br>(6.32 to<br>12.89)                                 | 12.01<br>(6.51 to<br>19.59)                                | 11.04<br>(6.07 to<br>17.95)                              | 13.01<br>(6.94 to<br>22.00)                                | 0.56<br>(0.35 to<br>0.73)                            | 0.77<br>(0.44 to<br>1.22)                            | 0.74<br>(0.42 to<br>1.14)                           | 0.81<br>(0.45 to<br>1.31)                            |
| Acute myeloid leukemia          | 36.66<br>(28.52 to<br>44.20)                               | 40.32<br>(22.77 to<br>66.18)                               | 37.56<br>(21.45 to<br>62.00)                             | 44.81<br>(25.02 to<br>73.61)                               | 1.33<br>(1.00 to<br>1.62)                            | 1.89<br>(1.15 to<br>2.80)                            | 1.81<br>(1.09 to<br>2.71)                           | 2.04<br>(1.22 to<br>3.12)                            |
| Chronic myeloid leukemia        | 9.32<br>(7.33 to<br>11.78)                                 | 5.20<br>(2.64 to<br>9.48)                                  | 3.92<br>(2.13 to<br>6.77)                                | 5.83<br>(2.99 to<br>10.69)                                 | 0.37<br>(0.30 to<br>0.47)                            | 0.25<br>(0.14 to<br>0.41)                            | 0.19<br>(0.12 to<br>0.31)                           | 0.27<br>(0.15 to<br>0.46)                            |
| Other leukemia                  | 69.25<br>(57.80 to<br>81.13)                               | 92.17<br>(58.83 to<br>139.00)                              | 78.49<br>(50.80 to<br>118.37)                            | 102.14<br>(64.37 to<br>155.81)                             | 2.95<br>(2.45 to<br>3.46)                            | 5.25<br>(3.58 to<br>7.47)                            | 4.62<br>(3.20 to<br>6.53)                           | 5.64<br>(3.84 to<br>8.00)                            |
| Other neoplasms                 | 129.53<br>(107.28 to<br>151.71)                            | 170.72<br>(110.60 to<br>255.82)                            | 171.57<br>(109.92 to<br>259.13)                          | 164.98<br>(109.14 to<br>247.62)                            | 5.74<br>(4.72 to<br>6.71)                            | 9.67<br>(7.90 to<br>13.15)                           | 10.00<br>(7.07 to<br>13.77)                         | 9.08<br>(6.64 to<br>12.01)                           |
| <b>Cardiovascular diseases</b>  | <b>2,111.61</b><br><b>(1,845.53 to</b><br><b>2,402.96)</b> | <b>2,246.74</b><br><b>(1,259.58 to</b><br><b>3,875.67)</b> | <b>1,600.83</b><br><b>(939.01 to</b><br><b>2,679.42)</b> | <b>3,075.64</b><br><b>(1,707.28 to</b><br><b>5,317.63)</b> | <b>140.95</b><br><b>(124.58 to</b><br><b>158.94)</b> | <b>180.46</b><br><b>(111.77 to</b><br><b>276.28)</b> | <b>139.33</b><br><b>(88.85 to</b><br><b>211.23)</b> | <b>225.08</b><br><b>(137.34 to</b><br><b>349.43)</b> |
| Rheumatic heart disease         | 14.25<br>(11.97 to<br>16.82)                               | 12.30<br>(6.95 to<br>20.96)                                | 10.59<br>(6.05 to<br>17.73)                              | 12.01<br>(7.11 to<br>20.21)                                | 0.76<br>(0.64 to<br>0.90)                            | 1.00<br>(0.58 to<br>1.53)                            | 0.89<br>(0.58 to<br>1.38)                           | 0.94<br>(0.63 to<br>1.42)                            |
| Ischemic heart disease          | 1,143.08<br>(988.05 to<br>1,312.23)                        | 1,129.79<br>(556.63 to<br>2,092.52)                        | 729.20<br>(372.42 to<br>1,338.55)                        | 1,721.88<br>(802.91 to<br>3,223.06)                        | 76.64<br>(67.29 to<br>87.26)                         | 89.36<br>(48.37 to<br>148.08)                        | 63.32<br>(35.06 to<br>105.31)                       | 121.89<br>(64.45 to<br>209.43)                       |
| Stroke                          | 444.85<br>(383.39 to<br>512.85)                            | 374.01<br>(198.08 to<br>679.25)                            | 245.08<br>(136.03 to<br>421.47)                          | 561.49<br>(295.70 to<br>1,028.87)                          | 30.69<br>(26.45 to<br>35.46)                         | 31.05<br>(17.94 to<br>53.58)                         | 22.34<br>(13.22 to<br>38.02)                        | 41.46<br>(23.34 to<br>70.77)                         |
| Ischemic stroke                 | 187.99<br>(162.08 to<br>217.88)                            | 161.80<br>(78.82 to<br>323.74)                             | 113.76<br>(58.47 to<br>212.52)                           | 221.50<br>(105.18 to<br>444.78)                            | 15.21<br>(13.07 to<br>17.67)                         | 15.41<br>(7.96 to<br>29.18)                          | 11.67<br>(6.08 to<br>22.10)                         | 19.23<br>(9.60 to<br>38.52)                          |
| Intracerebral hemorrhage        | 256.86<br>(220.02 to<br>297.60)                            | 212.31<br>(107.65 to<br>385.12)                            | 131.32<br>(71.74 to<br>220.17)                           | 339.99<br>(164.85 to<br>638.28)                            | 15.48<br>(13.30 to<br>17.79)                         | 15.64<br>(9.00 to<br>25.47)                          | 10.67<br>(6.43 to<br>16.62)                         | 22.22<br>(12.16 to<br>37.34)                         |
| Hypertensive heart disease      | 70.88<br>(54.05 to<br>114.40)                              | 139.03<br>(68.47 to<br>298.32)                             | 111.52<br>(60.45 to<br>209.86)                           | 175.62<br>(80.99 to<br>401.98)                             | 5.16<br>(3.88 to<br>8.03)                            | 12.27<br>(6.47 to<br>25.13)                          | 10.35<br>(5.94 to<br>18.60)                         | 14.86<br>(7.32 to<br>32.32)                          |
| Cardiomyopathy and myocarditis  | 88.00<br>(69.16 to<br>106.36)                              | 80.84<br>(44.67 to<br>134.07)                              | 67.08<br>(37.51 to<br>110.10)                            | 84.11<br>(47.33 to<br>137.05)                              | 4.43<br>(3.42 to<br>5.28)                            | 5.14<br>(3.05 to<br>7.97)                            | 4.46<br>(2.69 to<br>6.80)                           | 5.13<br>(3.13 to<br>7.85)                            |
| Myocarditis                     | 7.79<br>(5.90 to<br>10.12)                                 | 10.16<br>(6.06 to<br>15.60)                                | 10.19<br>(6.01 to<br>15.88)                              | 9.77<br>(5.97 to<br>14.92)                                 | 0.43<br>(0.31 to<br>0.56)                            | 0.75<br>(0.49 to<br>1.09)                            | 0.79<br>(0.50 to<br>1.18)                           | 0.70<br>(0.46 to<br>1.01)                            |
| <b>Bermuda</b>                  |                                                            |                                                            |                                                          |                                                            |                                                      |                                                      |                                                     |                                                      |
| Cause                           | YLLs (actual counts)                                       |                                                            |                                                          |                                                            | Deaths (actual counts)                               |                                                      |                                                     |                                                      |
|                                 | 2016                                                       | 2040 Forecast                                              | 2040 Better Scenario                                     | 2040 Worse Scenario                                        | 2016                                                 | 2040 Forecast                                        | 2040 Better Scenario                                | 2040 Worse Scenario                                  |
| Alcoholic cardiomyopathy        | 5.99<br>(4.16 to<br>7.98)                                  | 6.24<br>(3.48 to<br>9.96)                                  | 5.80<br>(3.19 to<br>9.47)                                | 8.43<br>(4.72 to<br>13.28)                                 | 0.27<br>(0.18 to<br>0.36)                            | 0.32<br>(0.17 to<br>0.49)                            | 0.31<br>(0.16 to<br>0.47)                           | 0.42<br>(0.24 to<br>0.62)                            |
| Other cardiomyopathy            | 74.22<br>(57.78 to<br>89.58)                               | 64.44<br>(33.54 to<br>111.74)                              | 51.09<br>(27.00 to<br>87.60)                             | 65.90<br>(34.67 to<br>114.64)                              | 3.72<br>(2.83 to<br>4.46)                            | 4.07<br>(2.26 to<br>6.62)                            | 3.35<br>(1.89 to<br>5.34)                           | 4.02<br>(2.27 to<br>6.45)                            |
| Atrial fibrillation and flutter | 22.62<br>(17.24 to<br>29.19)                               | 34.56<br>(22.60 to<br>50.04)                               | 32.63<br>(21.19 to<br>47.11)                             | 37.30<br>(24.26 to<br>54.66)                               | 2.37<br>(1.77 to<br>3.08)                            | 3.94<br>(2.67 to<br>5.61)                            | 3.86<br>(2.59 to<br>5.57)                           | 4.10<br>(2.80 to<br>5.98)                            |
| Aortic aneurysm                 | 91.45<br>(78.20 to<br>106.21)                              | 119.46<br>(78.88 to<br>177.38)                             | 106.82<br>(71.87 to<br>156.99)                           | 119.41<br>(80.37 to<br>173.84)                             | 5.77<br>(4.98 to<br>6.63)                            | 8.80<br>(6.34 to<br>12.01)                           | 8.30<br>(5.98 to<br>11.35)                          | 8.46<br>(6.17 to<br>11.39)                           |
| Peripheral artery disease       | 20.53<br>(13.77 to<br>30.65)                               | 48.91<br>(28.91 to<br>79.23)                               | 49.28<br>(28.63 to<br>80.66)                             | 51.01<br>(30.51 to<br>81.91)                               | 2.28<br>(1.38 to<br>3.37)                            | 6.07<br>(3.45 to<br>9.78)                            | 6.35<br>(3.61 to<br>10.30)                          | 6.06<br>(3.47 to<br>9.70)                            |

|                                                                |                                                      |                                                      |                                                      |                                                      |                                                 |                                                   |                                                   |                                                   |
|----------------------------------------------------------------|------------------------------------------------------|------------------------------------------------------|------------------------------------------------------|------------------------------------------------------|-------------------------------------------------|---------------------------------------------------|---------------------------------------------------|---------------------------------------------------|
| Endocarditis                                                   | 23.80<br>(17.06 to<br>31.45)                         | 32.22<br>(17.39 to<br>53.39)                         | 31.06<br>(17.03 to<br>50.57)                         | 32.43<br>(17.68 to<br>53.19)                         | 1.18<br>(0.78 to<br>1.51)                       | 2.01<br>(1.10 to<br>3.18)                         | 2.02<br>(1.11 to<br>3.11)                         | 1.95<br>(1.07 to<br>3.05)                         |
| Other cardiovascular and circulatory diseases                  | 192.14<br>(162.35 to<br>226.01)                      | 275.61<br>(164.19 to<br>455.01)                      | 217.58<br>(132.36 to<br>346.81)                      | 280.40<br>(169.30 to<br>459.11)                      | 11.67<br>(9.87 to<br>13.60)                     | 20.83<br>(13.94 to<br>31.23)                      | 17.44<br>(11.65 to<br>25.60)                      | 20.22<br>(13.89 to<br>29.76)                      |
| <b>Chronic respiratory diseases</b>                            | <b>155.64</b><br><b>(135.84 to</b><br><b>178.16)</b> | <b>243.63</b><br><b>(166.72 to</b><br><b>342.35)</b> | <b>215.01</b><br><b>(147.63 to</b><br><b>307.34)</b> | <b>288.96</b><br><b>(194.28 to</b><br><b>412.87)</b> | <b>9.88</b><br><b>(8.67 to</b><br><b>11.21)</b> | <b>17.52</b><br><b>(12.93 to</b><br><b>22.94)</b> | <b>15.50</b><br><b>(11.43 to</b><br><b>20.24)</b> | <b>20.39</b><br><b>(14.83 to</b><br><b>27.30)</b> |
| Chronic obstructive pulmonary disease                          | 81.97<br>(69.66 to<br>96.05)                         | 120.93<br>(70.45 to<br>194.01)                       | 75.50<br>(44.26 to<br>122.57)                        | 168.75<br>(98.89 to<br>274.96)                       | 5.97<br>(5.12 to<br>6.92)                       | 9.63<br>(6.28 to<br>14.05)                        | 6.29<br>(4.02 to<br>9.41)                         | 12.87<br>(8.41 to<br>18.81)                       |
| Pneumoconiosis                                                 | 0.50<br>(0.40 to<br>0.62)                            | 0.59<br>(0.35 to<br>0.94)                            | 0.55<br>(0.32 to<br>0.93)                            | 0.58<br>(0.37 to<br>0.89)                            | 0.03<br>(0.03 to<br>0.04)                       | 0.05<br>(0.03 to<br>0.07)                         | 0.04<br>(0.03 to<br>0.07)                         | 0.04<br>(0.03 to<br>0.06)                         |
| Silicosis                                                      | 0.27<br>(0.20 to<br>0.34)                            | 0.20<br>(0.09 to<br>0.40)                            | 0.15<br>(0.07 to<br>0.30)                            | 0.19<br>(0.10 to<br>0.36)                            | 0.02<br>(0.01 to<br>0.02)                       | 0.02<br>(0.01 to<br>0.05)                         | 0.01<br>(0.01 to<br>0.02)                         | 0.01<br>(0.01 to<br>0.02)                         |
| Asbestosis                                                     | 0.11<br>(0.08 to<br>0.15)                            | 0.18<br>(0.11 to<br>0.29)                            | 0.20<br>(0.12 to<br>0.34)                            | 0.17<br>(0.10 to<br>0.28)                            | 0.00<br>(0.00 to<br>0.01)                       | 0.00<br>(0.01 to<br>0.02)                         | 0.01<br>(0.01 to<br>0.02)                         | 0.01<br>(0.01 to<br>0.01)                         |
| Coal workers pneumoconiosis                                    | 0.01<br>(0.01 to<br>0.02)                            | 0.03<br>(0.01 to<br>0.07)                            | 0.03<br>(0.01 to<br>0.06)                            | 0.03<br>(0.01 to<br>0.07)                            | 0.00<br>(0.00 to<br>0.00)                       | 0.00<br>(0.00 to<br>0.01)                         | 0.00<br>(0.00 to<br>0.01)                         | 0.00<br>(0.00 to<br>0.01)                         |
| Other pneumoconiosis                                           | 0.11<br>(0.09 to<br>0.14)                            | 0.18<br>(0.10 to<br>0.29)                            | 0.17<br>(0.09 to<br>0.30)                            | 0.18<br>(0.10 to<br>0.30)                            | 0.01<br>(0.01 to<br>0.01)                       | 0.02<br>(0.01 to<br>0.03)                         | 0.02<br>(0.01 to<br>0.03)                         | 0.02<br>(0.01 to<br>0.03)                         |
| Asthma                                                         | 14.15<br>(11.32 to<br>18.10)                         | 8.67<br>(4.02 to<br>16.74)                           | 6.37<br>(2.95 to<br>12.25)                           | 10.86<br>(5.11 to<br>21.06)                          | 0.72<br>(0.58 to<br>0.90)                       | 0.58<br>(0.29 to<br>1.06)                         | 0.45<br>(0.23 to<br>0.82)                         | 0.69<br>(0.36 to<br>1.26)                         |
| Interstitial lung disease and pulmonary sarcoidosis            | 48.97<br>(37.57 to<br>60.28)                         | 95.89<br>(65.93 to<br>130.65)                        | 115.68<br>(80.30 to<br>159.11)                       | 90.85<br>(63.01 to<br>122.25)                        | 2.58<br>(1.98 to<br>3.19)                       | 6.03<br>(4.50 to<br>7.70)                         | 7.47<br>(5.52 to<br>9.75)                         | 5.56<br>(4.11 to<br>7.13)                         |
| Other chronic respiratory diseases                             | 10.05<br>(7.16 to<br>16.11)                          | 17.55<br>(10.53 to<br>29.14)                         | 16.91<br>(9.93 to<br>28.46)                          | 17.92<br>(10.64 to<br>30.23)                         | 0.58<br>(0.40 to<br>0.90)                       | 1.24<br>(0.80 to<br>1.95)                         | 1.25<br>(0.78 to<br>2.00)                         | 1.22<br>(0.78 to<br>1.93)                         |
| <b>Cirrhosis and other chronic liver diseases</b>              | <b>152.81</b><br><b>(128.34 to</b><br><b>183.49)</b> | <b>179.15</b><br><b>(106.64 to</b><br><b>274.92)</b> | <b>157.13</b><br><b>(94.62 to</b><br><b>238.72)</b>  | <b>209.67</b><br><b>(127.57 to</b><br><b>317.84)</b> | <b>6.24</b><br><b>(5.32 to</b><br><b>7.34)</b>  | <b>8.59</b><br><b>(5.72 to</b><br><b>12.25)</b>   | <b>7.75</b><br><b>(5.16 to</b><br><b>10.92)</b>   | <b>9.70</b><br><b>(6.59 to</b><br><b>13.57)</b>   |
| Cirrhosis and other chronic liver diseases due to hepatitis B  | 17.25<br>(13.11 to<br>22.40)                         | 22.33<br>(12.84 to<br>35.74)                         | 20.39<br>(11.82 to<br>32.53)                         | 21.84<br>(12.78 to<br>35.11)                         | 0.72<br>(0.56 to<br>0.91)                       | 1.06<br>(0.66 to<br>1.58)                         | 0.99<br>(0.62 to<br>1.48)                         | 1.01<br>(0.66 to<br>1.48)                         |
| Cirrhosis and other chronic liver diseases due to hepatitis C  | 39.93<br>(32.35 to<br>49.32)                         | 47.92<br>(28.11 to<br>76.14)                         | 43.32<br>(25.75 to<br>68.83)                         | 47.04<br>(28.25 to<br>72.65)                         | 1.56<br>(1.29 to<br>1.91)                       | 2.13<br>(1.38 to<br>3.17)                         | 1.96<br>(1.28 to<br>2.89)                         | 2.05<br>(1.36 to<br>2.96)                         |
| Cirrhosis and other chronic liver diseases due to alcohol use  | 72.10<br>(59.66 to<br>86.89)                         | 80.91<br>(48.73 to<br>123.89)                        | 68.00<br>(41.36 to<br>102.59)                        | 113.23<br>(69.33 to<br>170.91)                       | 3.02<br>(2.54 to<br>3.58)                       | 4.00<br>(2.67 to<br>5.61)                         | 3.49<br>(2.34 to<br>4.89)                         | 5.28<br>(3.59 to<br>7.39)                         |
| Cirrhosis and other chronic liver diseases due to other causes | 23.53<br>(19.22 to<br>28.57)                         | 27.99<br>(16.24 to<br>46.07)                         | 25.42<br>(14.90 to<br>41.36)                         | 27.56<br>(16.35 to<br>43.81)                         | 0.94<br>(0.77 to<br>1.13)                       | 1.41<br>(0.92 to<br>2.10)                         | 1.32<br>(0.85 to<br>1.94)                         | 1.36<br>(0.90 to<br>1.98)                         |
| <b>Digestive diseases</b>                                      | <b>160.16</b><br><b>(131.79 to</b><br><b>200.53)</b> | <b>191.24</b><br><b>(121.39 to</b><br><b>296.77)</b> | <b>173.92</b><br><b>(110.01 to</b><br><b>273.11)</b> | <b>200.27</b><br><b>(128.04 to</b><br><b>320.39)</b> | <b>8.73</b><br><b>(7.20 to</b><br><b>10.47)</b> | <b>13.60</b><br><b>(9.47 to</b><br><b>19.45)</b>  | <b>12.93</b><br><b>(8.93 to</b><br><b>18.69)</b>  | <b>13.55</b><br><b>(9.52 to</b><br><b>19.30)</b>  |
| Peptic ulcer disease                                           | 31.08<br>(25.75 to<br>41.74)                         | 26.61<br>(16.47 to<br>40.86)                         | 21.29<br>(13.50 to<br>32.46)                         | 26.55<br>(17.56 to<br>39.89)                         | 1.67<br>(1.41 to<br>2.13)                       | 1.81<br>(1.19 to<br>2.60)                         | 1.50<br>(1.00 to<br>2.15)                         | 1.75<br>(1.23 to<br>2.43)                         |

**Bermuda**

| Cause                    | YLLs (actual counts)      |                           |                           |                           | Deaths (actual counts)    |                           |                           |                           |
|--------------------------|---------------------------|---------------------------|---------------------------|---------------------------|---------------------------|---------------------------|---------------------------|---------------------------|
|                          | 2016                      | 2040 Forecast             | 2040 Better Scenario      | 2040 Worse Scenario       | 2016                      | 2040 Forecast             | 2040 Better Scenario      | 2040 Worse Scenario       |
| Gastritis and duodenitis | 4.47<br>(3.48 to<br>6.52) | 6.21<br>(3.72 to<br>9.92) | 5.48<br>(3.26 to<br>8.79) | 5.97<br>(3.66 to<br>9.35) | 0.24<br>(0.18 to<br>0.32) | 0.42<br>(0.27 to<br>0.62) | 0.38<br>(0.25 to<br>0.57) | 0.39<br>(0.26 to<br>0.56) |



|                                                            |                                          |                                              |                                            |                                              |                                       |                                        |                                       |                                        |
|------------------------------------------------------------|------------------------------------------|----------------------------------------------|--------------------------------------------|----------------------------------------------|---------------------------------------|----------------------------------------|---------------------------------------|----------------------------------------|
| Eating disorders                                           | 0.03<br>(0.02 to<br>0.03)                | 0.04<br>(0.02 to<br>0.07)                    | 0.04<br>(0.02 to<br>0.07)                  | 0.04<br>(0.02 to<br>0.07)                    | 0.00<br>(0.00 to<br>0.00)             | 0.00<br>(0.00 to<br>0.00)              | 0.00<br>(0.00 to<br>0.00)             | 0.00<br>(0.00 to<br>0.00)              |
| <b>Bermuda</b>                                             |                                          |                                              |                                            |                                              |                                       |                                        |                                       |                                        |
| Cause                                                      | YLLs (actual counts)                     |                                              |                                            |                                              | Deaths (actual counts)                |                                        |                                       |                                        |
|                                                            | 2016                                     | 2040 Forecast                                | 2040 Better Scenario                       | 2040 Worse Scenario                          | 2016                                  | 2040 Forecast                          | 2040 Better Scenario                  | 2040 Worse Scenario                    |
| <b>Diabetes, urogenital, blood, and endocrine diseases</b> | <b>653.25<br/>(568.08 to<br/>757.12)</b> | <b>1,009.36<br/>(612.76 to<br/>1,590.16)</b> | <b>873.61<br/>(535.42 to<br/>1,358.74)</b> | <b>1,143.59<br/>(692.48 to<br/>1,783.64)</b> | <b>36.51<br/>(31.89 to<br/>41.62)</b> | <b>70.76<br/>(46.83 to<br/>102.86)</b> | <b>63.30<br/>(42.22 to<br/>91.76)</b> | <b>77.17<br/>(51.22 to<br/>111.98)</b> |
| Diabetes mellitus                                          | 300.76<br>(259.62 to<br>347.07)          | 423.71<br>(242.80 to<br>699.81)              | 343.14<br>(200.23 to<br>553.92)            | 492.89<br>(283.14 to<br>814.72)              | 17.44<br>(15.06 to<br>19.99)          | 29.88<br>(18.40 to<br>44.58)           | 25.19<br>(15.77 to<br>37.26)          | 32.81<br>(20.54 to<br>49.25)           |
| Acute glomerulonephritis                                   | 0.35<br>(0.30 to<br>0.41)                | 0.30<br>(0.12 to<br>0.69)                    | 0.26<br>(0.11 to<br>0.60)                  | 0.31<br>(0.13 to<br>0.69)                    | 0.01<br>(0.01 to<br>0.01)             | 0.01<br>(0.00 to<br>0.01)              | 0.01<br>(0.00 to<br>0.01)             | 0.01<br>(0.00 to<br>0.01)              |
| Chronic kidney disease                                     | 216.14<br>(186.16 to<br>247.29)          | 356.64<br>(184.72 to<br>651.82)              | 302.53<br>(161.78 to<br>530.90)            | 429.67<br>(212.88 to<br>815.09)              | 12.23<br>(10.64 to<br>13.89)          | 25.81<br>(14.23 to<br>45.13)           | 22.62<br>(12.78 to<br>38.09)          | 30.34<br>(16.01 to<br>54.70)           |
| Chronic kidney disease due to diabetes mellitus            | 84.99<br>(69.97 to<br>99.59)             | 155.97<br>(77.95 to<br>288.68)               | 132.15<br>(67.79 to<br>235.05)             | 189.38<br>(92.39 to<br>363.67)               | 4.55<br>(3.75 to<br>5.36)             | 10.21<br>(5.53 to<br>17.79)            | 8.90<br>(4.94 to<br>14.80)            | 12.12<br>(6.21 to<br>22.14)            |
| Chronic kidney disease due to hypertension                 | 30.17<br>(24.26 to<br>37.33)             | 62.54<br>(31.66 to<br>111.40)                | 55.44<br>(28.97 to<br>95.45)               | 74.26<br>(36.25 to<br>135.67)                | 2.48<br>(2.01 to<br>3.03)             | 6.20<br>(3.35 to<br>10.61)             | 5.69<br>(3.15 to<br>9.55)             | 7.14<br>(3.71 to<br>12.56)             |
| Chronic kidney disease due to glomerulonephritis           | 56.76<br>(45.92 to<br>69.24)             | 72.15<br>(34.92 to<br>138.46)                | 59.31<br>(29.66 to<br>108.61)              | 86.86<br>(40.45 to<br>169.27)                | 2.77<br>(2.21 to<br>3.41)             | 4.65<br>(2.36 to<br>8.54)              | 3.92<br>(2.04 to<br>7.10)             | 5.51<br>(2.73 to<br>10.38)             |
| Chronic kidney disease due to other and unspecified causes | 44.22<br>(35.38 to<br>54.01)             | 65.97<br>(32.56 to<br>121.44)                | 55.62<br>(28.17 to<br>100.84)              | 79.17<br>(38.29 to<br>159.35)                | 2.42<br>(1.92 to<br>3.02)             | 4.74<br>(2.52 to<br>8.64)              | 4.12<br>(2.24 to<br>7.28)             | 5.57<br>(2.83 to<br>10.30)             |
| Urinary diseases and male infertility                      | 26.55<br>(22.63 to<br>30.75)             | 40.87<br>(26.03 to<br>61.03)                 | 37.60<br>(24.06 to<br>56.10)               | 38.84<br>(25.84 to<br>56.18)                 | 1.97<br>(1.68 to<br>2.28)             | 3.84<br>(2.66 to<br>5.47)              | 3.65<br>(2.48 to<br>5.25)             | 3.55<br>(2.55 to<br>4.98)              |
| Urinary tract infections                                   | 22.22<br>(18.87 to<br>26.01)             | 35.88<br>(22.96 to<br>54.10)                 | 33.24<br>(21.12 to<br>50.46)               | 34.13<br>(22.50 to<br>50.24)                 | 1.68<br>(1.41 to<br>1.97)             | 3.41<br>(2.36 to<br>4.94)              | 3.26<br>(2.21 to<br>4.79)             | 3.16<br>(2.27 to<br>4.46)              |
| Urolithiasis                                               | 1.26<br>(0.94 to<br>1.80)                | 1.31<br>(0.60 to<br>2.47)                    | 1.12<br>(0.53 to<br>2.13)                  | 1.28<br>(0.62 to<br>2.35)                    | 0.07<br>(0.05 to<br>0.10)             | 0.09<br>(0.04 to<br>0.17)              | 0.08<br>(0.04 to<br>0.15)             | 0.08<br>(0.04 to<br>0.16)              |
| Other urinary diseases                                     | 3.07<br>(2.24 to<br>4.52)                | 3.67<br>(2.04 to<br>6.18)                    | 3.25<br>(1.82 to<br>5.45)                  | 3.43<br>(2.01 to<br>5.79)                    | 0.22<br>(0.16 to<br>0.34)             | 0.34<br>(0.19 to<br>0.58)              | 0.31<br>(0.17 to<br>0.54)             | 0.30<br>(0.17 to<br>0.52)              |
| Gynecological diseases                                     | 0.04<br>(0.03 to<br>0.07)                | 0.03<br>(0.01 to<br>0.07)                    | 0.02<br>(0.01 to<br>0.05)                  | 0.03<br>(0.01 to<br>0.07)                    | 0.00<br>(0.00 to<br>0.00)             | 0.00<br>(0.00 to<br>0.00)              | 0.00<br>(0.00 to<br>0.00)             | 0.00<br>(0.00 to<br>0.00)              |
| Uterine fibroids                                           | 0.02<br>(0.01 to<br>0.03)                | 0.01<br>(0.00 to<br>0.03)                    | 0.01<br>(0.00 to<br>0.03)                  | 0.01<br>(0.00 to<br>0.03)                    | 0.00<br>(0.00 to<br>0.00)             | 0.00<br>(0.00 to<br>0.00)              | 0.00<br>(0.00 to<br>0.00)             | 0.00<br>(0.00 to<br>0.00)              |
| Polycystic ovarian syndrome                                | 0.02<br>(0.01 to<br>0.04)                | 0.01<br>(0.00 to<br>0.02)                    | 0.00<br>(0.00 to<br>0.01)                  | 0.01<br>(0.00 to<br>0.02)                    | 0.00<br>(0.00 to<br>0.00)             | 0.00<br>(0.00 to<br>0.00)              | 0.00<br>(0.00 to<br>0.00)             | 0.00<br>(0.00 to<br>0.00)              |
| Endometriosis                                              | 0.00<br>(0.00 to<br>0.00)                | 0.00<br>(0.00 to<br>0.00)                    | 0.00<br>(0.00 to<br>0.00)                  | 0.00<br>(0.00 to<br>0.00)                    | 0.00<br>(0.00 to<br>0.00)             | 0.00<br>(0.00 to<br>0.00)              | 0.00<br>(0.00 to<br>0.00)             | 0.00<br>(0.00 to<br>0.00)              |
| Genital prolapse                                           | 0.00<br>(0.00 to<br>0.00)                | 0.00<br>(0.00 to<br>0.00)                    | 0.00<br>(0.00 to<br>0.00)                  | 0.00<br>(0.00 to<br>0.00)                    | 0.00<br>(0.00 to<br>0.00)             | 0.00<br>(0.00 to<br>0.00)              | 0.00<br>(0.00 to<br>0.00)             | 0.00<br>(0.00 to<br>0.00)              |
| Other gynecological diseases                               | 0.00<br>(0.00 to<br>0.01)                | 0.01<br>(0.00 to<br>0.02)                    | 0.01<br>(0.00 to<br>0.01)                  | 0.01<br>(0.00 to<br>0.01)                    | 0.00<br>(0.00 to<br>0.00)             | 0.00<br>(0.00 to<br>0.00)              | 0.00<br>(0.00 to<br>0.00)             | 0.00<br>(0.00 to<br>0.00)              |
| Hemoglobinopathies and hemolytic anemias                   | 28.90<br>(23.39 to<br>37.17)             | 31.04<br>(17.16 to<br>54.59)                 | 26.41<br>(14.80 to<br>45.91)               | 30.50<br>(17.42 to<br>51.43)                 | 1.12<br>(0.90 to<br>1.49)             | 1.63<br>(1.04 to<br>2.54)              | 1.44<br>(0.92 to<br>2.23)             | 1.56<br>(1.01 to<br>2.38)              |

|                                                   |                                |                                 |                                 |                                |                           |                            |                             |                            |
|---------------------------------------------------|--------------------------------|---------------------------------|---------------------------------|--------------------------------|---------------------------|----------------------------|-----------------------------|----------------------------|
| Thalassemias                                      | 0.48<br>(0.15 to<br>0.88)      | 0.12<br>(0.02 to<br>0.40)       | 0.11<br>(0.02 to<br>0.39)       | 0.13<br>(0.02 to<br>0.45)      | 0.01<br>(0.00 to<br>0.01) | 0.00<br>(0.00 to<br>0.00)  | 0.00<br>(0.00 to<br>0.00)   | 0.00<br>(0.00 to<br>0.01)  |
| Sickle cell disorders                             | 18.19<br>(14.58 to<br>23.57)   | 16.63<br>(7.79 to<br>32.46)     | 13.91<br>(6.74 to<br>26.63)     | 16.65<br>(8.20 to<br>31.32)    | 0.40<br>(0.32 to<br>0.53) | 0.47<br>(0.23 to<br>0.88)  | 0.40<br>(0.20 to<br>0.75)   | 0.47<br>(0.24 to<br>0.87)  |
| G6PD deficiency                                   | 3.04<br>(2.22 to<br>3.98)      | 5.05<br>(2.66 to<br>8.67)       | 4.14<br>(2.21 to<br>6.98)       | 4.94<br>(2.79 to<br>8.28)      | 0.11<br>(0.08 to<br>0.14) | 0.24<br>(0.13 to<br>0.38)  | 0.20<br>(0.11 to<br>0.31)   | 0.23<br>(0.13 to<br>0.35)  |
| Other hemoglobinopathies and hemolytic anemias    | 7.19<br>(5.78 to<br>9.81)      | 9.24<br>(5.91 to<br>14.78)      | 8.25<br>(5.27 to<br>13.49)      | 8.77<br>(5.89 to<br>13.45)     | 0.60<br>(0.48 to<br>0.82) | 0.92<br>(0.63 to<br>1.38)  | 0.85<br>(0.57 to<br>1.29)   | 0.86<br>(0.61 to<br>1.23)  |
| Endocrine, metabolic, blood, and immune disorders | 80.52<br>(64.98 to<br>132.53)  | 156.78<br>(101.49 to<br>248.41) | 163.64<br>(104.67 to<br>262.08) | 151.35<br>(98.11 to<br>242.07) | 3.75<br>(3.05 to<br>5.42) | 9.59<br>(7.05 to<br>13.77) | 10.39<br>(7.43 to<br>15.10) | 8.91<br>(6.57 to<br>12.87) |
| <b>Bermuda</b>                                    |                                |                                 |                                 |                                |                           |                            |                             |                            |
| Cause                                             | YLLs (actual counts)           |                                 |                                 |                                | Deaths (actual counts)    |                            |                             |                            |
|                                                   | 2016                           | 2040 Forecast                   | 2040 Better Scenario            | 2040 Worse Scenario            | 2016                      | 2040 Forecast              | 2040 Better Scenario        | 2040 Worse Scenario        |
| Musculoskeletal disorders                         | 47.14<br>(36.34 to<br>60.44)   | 50.39<br>(27.82 to<br>87.29)    | 46.93<br>(26.16 to<br>80.10)    | 49.87<br>(28.34 to<br>85.01)   | 1.55<br>(1.20 to<br>1.93) | 2.25<br>(1.36 to<br>3.66)  | 2.12<br>(1.28 to<br>3.49)   | 2.18<br>(1.35 to<br>3.48)  |
| Rheumatoid arthritis                              | 5.52<br>(3.53 to<br>7.66)      | 5.36<br>(2.42 to<br>10.66)      | 4.22<br>(1.95 to<br>8.29)       | 5.29<br>(2.52 to<br>10.12)     | 0.34<br>(0.22 to<br>0.46) | 0.42<br>(0.21 to<br>0.79)  | 0.34<br>(0.17 to<br>0.63)   | 0.41<br>(0.20 to<br>0.74)  |
| Other musculoskeletal disorders                   | 41.62<br>(32.68 to<br>53.58)   | 45.04<br>(25.01 to<br>76.51)    | 42.71<br>(23.86 to<br>72.07)    | 44.57<br>(25.07 to<br>74.70)   | 1.22<br>(0.95 to<br>1.53) | 1.83<br>(1.12 to<br>2.92)  | 1.78<br>(1.08 to<br>2.87)   | 1.77<br>(1.10 to<br>2.82)  |
| Other non-communicable diseases                   | 114.86<br>(69.84 to<br>162.64) | 87.78<br>(30.44 to<br>207.84)   | 72.67<br>(25.13 to<br>165.86)   | 92.06<br>(31.77 to<br>225.07)  | 2.75<br>(1.54 to<br>3.83) | 3.46<br>(1.03 to<br>6.52)  | 3.15<br>(0.92 to<br>5.76)   | 3.34<br>(1.04 to<br>6.34)  |
| Congenital birth defects                          | 85.39<br>(51.92 to<br>127.22)  | 55.76<br>(16.63 to<br>165.05)   | 43.60<br>(13.78 to<br>121.68)   | 60.63<br>(18.23 to<br>176.97)  | 1.22<br>(0.77 to<br>1.73) | 0.91<br>(0.34 to<br>2.24)  | 0.74<br>(0.29 to<br>1.73)   | 0.97<br>(0.37 to<br>2.36)  |
| Neural tube defects                               | 2.02<br>(0.97 to<br>3.45)      | 0.76<br>(0.16 to<br>2.68)       | 0.50<br>(0.11 to<br>1.67)       | 0.83<br>(0.18 to<br>3.05)      | 0.03<br>(0.01 to<br>0.04) | 0.01<br>(0.00 to<br>0.04)  | 0.01<br>(0.00 to<br>0.02)   | 0.01<br>(0.00 to<br>0.04)  |
| Congenital heart anomalies                        | 47.17<br>(30.99 to<br>69.90)   | 23.76<br>(6.60 to<br>65.21)     | 16.58<br>(5.00 to<br>43.95)     | 25.78<br>(7.53 to<br>70.28)    | 0.68<br>(0.45 to<br>0.94) | 0.38<br>(0.13 to<br>0.95)  | 0.27<br>(0.09 to<br>0.64)   | 0.41<br>(0.14 to<br>1.00)  |
| Orofacial clefts                                  | 0.03<br>(0.01 to<br>0.05)      | 0.01<br>(0.00 to<br>0.07)       | 0.01<br>(0.00 to<br>0.04)       | 0.02<br>(0.00 to<br>0.08)      | 0.00<br>(0.00 to<br>0.00) | 0.00<br>(0.00 to<br>0.00)  | 0.00<br>(0.00 to<br>0.00)   | 0.00<br>(0.00 to<br>0.00)  |
| Down syndrome                                     | 4.40<br>(2.40 to<br>6.26)      | 7.96<br>(3.63 to<br>14.76)      | 8.13<br>(3.69 to<br>15.28)      | 8.09<br>(3.64 to<br>14.96)     | 0.09<br>(0.05 to<br>0.12) | 0.19<br>(0.09 to<br>0.31)  | 0.19<br>(0.09 to<br>0.33)   | 0.19<br>(0.09 to<br>0.32)  |
| Other chromosomal abnormalities                   | 5.90<br>(2.88 to<br>10.11)     | 7.40<br>(1.38 to<br>25.46)      | 6.38<br>(1.20 to<br>21.21)      | 8.31<br>(1.56 to<br>28.45)     | 0.07<br>(0.04 to<br>0.12) | 0.09<br>(0.02 to<br>0.30)  | 0.08<br>(0.02 to<br>0.25)   | 0.10<br>(0.02 to<br>0.34)  |
| Congenital musculoskeletal and limb anomalies     | 2.14<br>(0.53 to<br>3.61)      | 1.20<br>(0.14 to<br>4.71)       | 0.89<br>(0.11 to<br>3.41)       | 1.36<br>(0.16 to<br>5.16)      | 0.03<br>(0.01 to<br>0.04) | 0.02<br>(0.00 to<br>0.06)  | 0.01<br>(0.00 to<br>0.04)   | 0.02<br>(0.00 to<br>0.06)  |
| Urogenital congenital anomalies                   | 2.07<br>(1.02 to<br>3.43)      | 1.67<br>(0.52 to<br>4.93)       | 1.34<br>(0.43 to<br>3.83)       | 1.78<br>(0.56 to<br>5.20)      | 0.04<br>(0.02 to<br>0.06) | 0.04<br>(0.01 to<br>0.08)  | 0.03<br>(0.01 to<br>0.07)   | 0.04<br>(0.01 to<br>0.09)  |
| Digestive congenital anomalies                    | 1.52<br>(0.74 to<br>2.46)      | 1.23<br>(0.23 to<br>4.65)       | 0.88<br>(0.17 to<br>3.31)       | 1.36<br>(0.26 to<br>5.09)      | 0.02<br>(0.01 to<br>0.03) | 0.02<br>(0.00 to<br>0.06)  | 0.01<br>(0.00 to<br>0.04)   | 0.02<br>(0.00 to<br>0.06)  |
| Other congenital birth defects                    | 20.14<br>(11.16 to<br>31.58)   | 11.77<br>(2.50 to<br>39.84)     | 8.89<br>(1.95 to<br>30.51)      | 13.10<br>(2.96 to<br>43.67)    | 0.27<br>(0.15 to<br>0.41) | 0.17<br>(0.05 to<br>0.52)  | 0.13<br>(0.04 to<br>0.38)   | 0.18<br>(0.05 to<br>0.57)  |
| Skin and subcutaneous diseases                    | 17.75<br>(4.52 to<br>26.43)    | 26.93<br>(5.95 to<br>49.58)     | 24.94<br>(5.42 to<br>45.96)     | 25.62<br>(5.70 to<br>46.27)    | 1.40<br>(0.29 to<br>2.19) | 2.49<br>(0.51 to<br>4.42)  | 2.37<br>(0.47 to<br>4.25)   | 2.30<br>(0.47 to<br>3.99)  |

|                                      |                                        |                                          |                                          |                                          |                                     |                                     |                                     |                                     |
|--------------------------------------|----------------------------------------|------------------------------------------|------------------------------------------|------------------------------------------|-------------------------------------|-------------------------------------|-------------------------------------|-------------------------------------|
| Cellulitis                           | 0.52<br>(0.20 to<br>0.79)              | 1.01<br>(0.30 to<br>1.83)                | 1.01<br>(0.29 to<br>1.81)                | 0.98<br>(0.30 to<br>1.82)                | 0.02<br>(0.01 to<br>0.03)           | 0.06<br>(0.02 to<br>0.11)           | 0.07<br>(0.02 to<br>0.11)           | 0.06<br>(0.01 to<br>0.10)           |
| Pyoderma                             | 4.19<br>(0.89 to<br>6.65)              | 9.95<br>(1.59 to<br>18.66)               | 9.50<br>(1.52 to<br>17.87)               | 9.48<br>(1.56 to<br>17.43)               | 0.27<br>(0.04 to<br>0.46)           | 0.83<br>(0.11 to<br>1.49)           | 0.82<br>(0.11 to<br>1.51)           | 0.76<br>(0.11 to<br>1.35)           |
| Decubitus ulcer                      | 12.71<br>(3.14 to<br>19.00)            | 15.69<br>(3.37 to<br>29.62)              | 14.17<br>(3.10 to<br>26.66)              | 14.88<br>(3.35 to<br>27.30)              | 1.10<br>(0.24 to<br>1.72)           | 1.59<br>(0.33 to<br>2.94)           | 1.47<br>(0.31 to<br>2.70)           | 1.47<br>(0.31 to<br>2.65)           |
| Other skin and subcutaneous diseases | 0.33<br>(0.13 to<br>0.46)              | 0.27<br>(0.08 to<br>0.63)                | 0.25<br>(0.07 to<br>0.57)                | 0.28<br>(0.08 to<br>0.64)                | 0.01<br>(0.00 to<br>0.01)           | 0.01<br>(0.00 to<br>0.02)           | 0.01<br>(0.00 to<br>0.02)           | 0.01<br>(0.00 to<br>0.02)           |
| Sudden infant death syndrome         | 11.73<br>(6.47 to<br>19.56)            | 5.08<br>(0.53 to<br>20.61)               | 4.14<br>(0.44 to<br>16.36)               | 5.81<br>(0.63 to<br>22.98)               | 0.14<br>(0.07 to<br>0.23)           | 0.06<br>(0.01 to<br>0.24)           | 0.05<br>(0.01 to<br>0.19)           | 0.07<br>(0.01 to<br>0.27)           |
| <b>Injuries</b>                      | <b>766.27</b><br>(641.41 to<br>910.06) | <b>696.42</b><br>(310.96 to<br>1,581.22) | <b>606.55</b><br>(280.91 to<br>1,338.94) | <b>871.72</b><br>(366.87 to<br>2,079.14) | <b>22.03</b><br>(18.79 to<br>25.72) | <b>25.10</b><br>(15.49 to<br>41.87) | <b>23.11</b><br>(14.75 to<br>37.06) | <b>29.05</b><br>(17.04 to<br>52.84) |
| <b>Transport injuries</b>            | <b>330.80</b><br>(269.95 to<br>400.24) | <b>316.86</b><br>(107.75 to<br>852.73)   | <b>277.37</b><br>(97.40 to<br>729.08)    | <b>471.75</b><br>(146.45 to<br>1,383.45) | <b>9.17</b><br>(7.60 to<br>10.95)   | <b>10.09</b><br>(4.87 to<br>22.62)  | <b>9.19</b><br>(4.61 to<br>19.80)   | <b>13.88</b><br>(6.02 to<br>33.70)  |
| Road injuries                        | 309.37<br>(252.39 to<br>374.36)        | 294.81<br>(99.13 to<br>803.52)           | 260.00<br>(90.27 to<br>691.47)           | 446.86<br>(136.36 to<br>1,322.71)        | 8.45<br>(7.00 to<br>10.10)          | 9.16<br>(4.34 to<br>21.20)          | 8.42<br>(4.19 to<br>18.52)          | 12.88<br>(5.51 to<br>31.82)         |
| Pedestrian road injuries             | 17.10<br>(12.72 to<br>21.53)           | 10.13<br>(5.03 to<br>19.21)              | 7.33<br>(3.79 to<br>13.63)               | 16.00<br>(7.52 to<br>32.72)              | 0.73<br>(0.53 to<br>0.92)           | 0.60<br>(0.33 to<br>0.89)           | 0.43<br>(0.26 to<br>0.66)           | 0.81<br>(0.45 to<br>1.35)           |

**Bermuda**

| Cause                          | YLLs (actual counts)                   |                                        |                                        |                                        | Deaths (actual counts)           |                                    |                                   |                                   |
|--------------------------------|----------------------------------------|----------------------------------------|----------------------------------------|----------------------------------------|----------------------------------|------------------------------------|-----------------------------------|-----------------------------------|
|                                | 2016                                   | 2040 Forecast                          | 2040 Better Scenario                   | 2040 Worse Scenario                    | 2016                             | 2040 Forecast                      | 2040 Better Scenario              | 2040 Worse Scenario               |
| Cyclist road injuries          | 12.40<br>(9.78 to<br>15.37)            | 11.69<br>(5.47 to<br>23.99)            | 10.52<br>(5.15 to<br>21.09)            | 18.06<br>(7.61 to<br>39.66)            | 0.45<br>(0.35 to<br>0.56)        | 0.54<br>(0.30 to<br>0.95)          | 0.52<br>(0.29 to<br>0.86)         | 0.74<br>(0.37 to<br>1.41)         |
| Motorcyclist road injuries     | 232.00<br>(186.43 to<br>284.10)        | 237.19<br>(70.63 to<br>692.31)         | 212.09<br>(66.16 to<br>598.20)         | 344.78<br>(94.22 to<br>1,079.81)       | 5.75<br>(4.63 to<br>6.96)        | 6.54<br>(2.74 to<br>16.33)         | 6.10<br>(2.71 to<br>14.38)        | 8.86<br>(3.27 to<br>24.29)        |
| Motor vehicle road injuries    | 46.09<br>(35.80 to<br>59.51)           | 33.70<br>(14.79 to<br>81.60)           | 28.16<br>(12.89 to<br>65.96)           | 64.56<br>(25.15 to<br>174.98)          | 1.43<br>(1.15 to<br>1.76)        | 1.37<br>(0.79 to<br>2.50)          | 1.23<br>(0.73 to<br>2.19)         | 2.26<br>(1.17 to<br>4.58)         |
| Other road injuries            | 1.77<br>(1.32 to<br>2.34)              | 2.11<br>(1.15 to<br>3.81)              | 1.90<br>(1.05 to<br>3.34)              | 3.45<br>(1.71 to<br>6.65)              | 0.09<br>(0.06 to<br>0.12)        | 0.15<br>(0.09 to<br>0.23)          | 0.14<br>(0.09 to<br>0.22)         | 0.21<br>(0.12 to<br>0.35)         |
| Other transport injuries       | 21.43<br>(16.44 to<br>26.85)           | 22.04<br>(8.65 to<br>53.30)            | 17.37<br>(7.13 to<br>40.18)            | 24.89<br>(9.53 to<br>61.07)            | 0.72<br>(0.54 to<br>0.89)        | 0.93<br>(0.49 to<br>1.80)          | 0.77<br>(0.42 to<br>1.46)         | 1.01<br>(0.51 to<br>2.04)         |
| <b>Unintentional injuries</b>  | <b>212.52</b><br>(180.61 to<br>253.23) | <b>201.57</b><br>(117.74 to<br>355.78) | <b>182.40</b><br>(109.00 to<br>311.56) | <b>202.39</b><br>(118.90 to<br>355.82) | <b>7.54</b><br>(6.53 to<br>8.75) | <b>10.23</b><br>(7.50 to<br>14.24) | <b>9.74</b><br>(7.21 to<br>13.30) | <b>9.75</b><br>(7.13 to<br>13.56) |
| Falls                          | 46.75<br>(38.15 to<br>57.46)           | 59.52<br>(40.49 to<br>86.92)           | 56.21<br>(38.46 to<br>81.05)           | 57.03<br>(38.87 to<br>81.61)           | 2.49<br>(2.02 to<br>2.89)        | 4.25<br>(3.16 to<br>5.40)          | 4.15<br>(3.09 to<br>5.26)         | 3.93<br>(2.94 to<br>5.01)         |
| Drowning                       | 78.84<br>(65.97 to<br>93.85)           | 59.44<br>(26.92 to<br>130.10)          | 51.33<br>(24.20 to<br>109.94)          | 63.46<br>(28.60 to<br>139.69)          | 1.90<br>(1.59 to<br>2.24)        | 1.77<br>(1.00 to<br>3.24)          | 1.56<br>(0.91 to<br>2.83)         | 1.84<br>(1.02 to<br>3.43)         |
| Fire, heat, and hot substances | 5.73<br>(4.66 to<br>7.18)              | 4.66<br>(2.61 to<br>8.45)              | 3.91<br>(2.26 to<br>6.98)              | 4.83<br>(2.70 to<br>9.03)              | 0.25<br>(0.20 to<br>0.30)        | 0.30<br>(0.20 to<br>0.44)          | 0.26<br>(0.18 to<br>0.38)         | 0.29<br>(0.19 to<br>0.44)         |
| Poisonings                     | 4.98<br>(3.55 to<br>12.21)             | 3.08<br>(1.14 to<br>8.44)              | 2.36<br>(0.93 to<br>6.35)              | 3.31<br>(1.24 to<br>8.72)              | 0.13<br>(0.09 to<br>0.30)        | 0.10<br>(0.05 to<br>0.22)          | 0.08<br>(0.04 to<br>0.17)         | 0.10<br>(0.05 to<br>0.23)         |
| Exposure to mechanical forces  | 19.30<br>(15.64 to<br>24.49)           | 16.09<br>(7.91 to<br>33.74)            | 13.75<br>(7.00 to<br>28.32)            | 16.07<br>(8.14 to<br>32.69)            | 0.53<br>(0.44 to<br>0.65)        | 0.59<br>(0.37 to<br>0.94)          | 0.53<br>(0.34 to<br>0.82)         | 0.57<br>(0.37 to<br>0.91)         |

|                                                 |                                            |                                           |                                           |                                           |                                      |                                      |                                      |                                       |
|-------------------------------------------------|--------------------------------------------|-------------------------------------------|-------------------------------------------|-------------------------------------------|--------------------------------------|--------------------------------------|--------------------------------------|---------------------------------------|
| Unintentional firearm injuries                  | 3.60<br>(2.85 to 5.01)                     | 3.18<br>(1.38 to 7.09)                    | 2.79<br>(1.26 to 6.02)                    | 3.17<br>(1.42 to 7.05)                    | 0.09<br>(0.07 to 0.11)               | 0.09<br>(0.05 to 0.17)               | 0.08<br>(0.05 to 0.15)               | 0.09<br>(0.05 to 0.16)                |
| Unintentional suffocation                       | 2.54<br>(1.82 to 5.01)                     | 1.73<br>(0.59 to 4.76)                    | 1.49<br>(0.52 to 3.99)                    | 1.81<br>(0.63 to 5.06)                    | 0.04<br>(0.03 to 0.08)               | 0.03<br>(0.02 to 0.08)               | 0.03<br>(0.01 to 0.07)               | 0.03<br>(0.02 to 0.08)                |
| Other exposure to mechanical forces             | 13.16<br>(10.14 to 16.93)                  | 11.18<br>(5.73 to 22.47)                  | 9.47<br>(4.94 to 18.13)                   | 11.10<br>(5.81 to 21.78)                  | 0.40<br>(0.31 to 0.50)               | 0.46<br>(0.30 to 0.73)               | 0.41<br>(0.27 to 0.63)               | 0.44<br>(0.29 to 0.68)                |
| Adverse effects of medical treatment            | 26.89<br>(20.33 to 38.96)                  | 30.39<br>(19.18 to 50.34)                 | 28.85<br>(18.57 to 47.25)                 | 29.43<br>(18.50 to 48.74)                 | 1.25<br>(0.98 to 1.62)               | 1.91<br>(1.37 to 2.68)               | 1.89<br>(1.36 to 2.64)               | 1.78<br>(1.28 to 2.49)                |
| Animal contact                                  | 2.43<br>(1.85 to 3.70)                     | 3.14<br>(1.71 to 5.51)                    | 2.86<br>(1.58 to 4.89)                    | 3.09<br>(1.70 to 5.45)                    | 0.09<br>(0.06 to 0.12)               | 0.15<br>(0.10 to 0.23)               | 0.15<br>(0.09 to 0.22)               | 0.15<br>(0.10 to 0.22)                |
| Venomous animal contact                         | 1.54<br>(1.11 to 2.47)                     | 1.90<br>(1.01 to 3.55)                    | 1.77<br>(0.95 to 3.14)                    | 1.87<br>(1.01 to 3.27)                    | 0.05<br>(0.04 to 0.08)               | 0.08<br>(0.05 to 0.13)               | 0.08<br>(0.05 to 0.12)               | 0.08<br>(0.05 to 0.12)                |
| Non-venomous animal contact                     | 0.89<br>(0.63 to 1.46)                     | 1.24<br>(0.66 to 2.32)                    | 1.10<br>(0.59 to 2.00)                    | 1.22<br>(0.67 to 2.21)                    | 0.04<br>(0.02 to 0.05)               | 0.07<br>(0.04 to 0.11)               | 0.07<br>(0.04 to 0.10)               | 0.07<br>(0.04 to 0.10)                |
| Foreign body                                    | 20.72<br>(16.51 to 28.90)                  | 19.44<br>(11.25 to 34.97)                 | 18.54<br>(10.84 to 33.10)                 | 19.40<br>(11.13 to 34.89)                 | 0.71<br>(0.56 to 0.88)               | 0.94<br>(0.64 to 1.31)               | 0.94<br>(0.64 to 1.32)               | 0.88<br>(0.61 to 1.23)                |
| Pulmonary aspiration and foreign body in airway | 20.24<br>(16.04 to 28.40)                  | 18.82<br>(10.85 to 33.77)                 | 17.89<br>(10.40 to 32.26)                 | 18.79<br>(10.77 to 34.02)                 | 0.69<br>(0.55 to 0.86)               | 0.90<br>(0.61 to 1.27)               | 0.91<br>(0.61 to 1.27)               | 0.85<br>(0.58 to 1.20)                |
| Foreign body in other body part                 | 0.49<br>(0.40 to 0.69)                     | 0.62<br>(0.38 to 1.05)                    | 0.65<br>(0.40 to 1.12)                    | 0.61<br>(0.37 to 1.04)                    | 0.02<br>(0.01 to 0.02)               | 0.03<br>(0.02 to 0.05)               | 0.03<br>(0.02 to 0.05)               | 0.03<br>(0.02 to 0.04)                |
| Environmental heat and cold exposure            | 3.25<br>(2.26 to 6.59)                     | 3.63<br>(1.67 to 8.47)                    | 3.03<br>(1.43 to 7.04)                    | 3.58<br>(1.70 to 8.26)                    | 0.11<br>(0.07 to 0.20)               | 0.15<br>(0.08 to 0.35)               | 0.13<br>(0.07 to 0.27)               | 0.14<br>(0.08 to 0.30)                |
| Other unintentional injuries                    | 3.63<br>(2.91 to 4.46)                     | 2.20<br>(0.89 to 5.03)                    | 1.55<br>(0.67 to 3.41)                    | 2.20<br>(0.94 to 4.71)                    | 0.09<br>(0.07 to 0.11)               | 0.07<br>(0.04 to 0.13)               | 0.05<br>(0.03 to 0.09)               | 0.07<br>(0.04 to 0.12)                |
| <b>Self-harm and interpersonal violence</b>     | <b>222.60</b><br><b>(161.06 to 286.67)</b> | <b>164.01</b><br><b>(64.94 to 377.98)</b> | <b>138.82</b><br><b>(57.94 to 321.13)</b> | <b>189.53</b><br><b>(73.17 to 441.37)</b> | <b>5.31</b><br><b>(3.90 to 6.74)</b> | <b>4.60</b><br><b>(2.27 to 8.90)</b> | <b>3.99</b><br><b>(2.05 to 7.66)</b> | <b>5.24</b><br><b>(2.46 to 10.55)</b> |

**Bermuda**

| Cause                              | YLLs (actual counts)        |                             |                            |                             | Deaths (actual counts) |                        |                        |                        |
|------------------------------------|-----------------------------|-----------------------------|----------------------------|-----------------------------|------------------------|------------------------|------------------------|------------------------|
|                                    | 2016                        | 2040 Forecast               | 2040 Better Scenario       | 2040 Worse Scenario         | 2016                   | 2040 Forecast          | 2040 Better Scenario   | 2040 Worse Scenario    |
| Self-harm                          | 117.38<br>(91.08 to 177.92) | 109.94<br>(43.76 to 260.73) | 93.78<br>(38.16 to 221.64) | 133.08<br>(50.12 to 310.30) | 3.00<br>(2.37 to 4.22) | 3.23<br>(1.63 to 6.31) | 2.82<br>(1.45 to 5.25) | 3.81<br>(1.82 to 7.77) |
| Self-harm by firearm               | 2.68<br>(1.51 to 4.56)      | 1.96<br>(0.53 to 5.21)      | 1.56<br>(0.45 to 4.14)     | 2.38<br>(0.62 to 6.49)      | 0.07<br>(0.04 to 0.11) | 0.05<br>(0.02 to 0.12) | 0.04<br>(0.02 to 0.10) | 0.06<br>(0.02 to 0.15) |
| Self-harm by other specified means | 114.70<br>(88.85 to 173.33) | 107.98<br>(43.13 to 255.58) | 92.21<br>(37.77 to 217.77) | 130.70<br>(49.57 to 303.97) | 2.93<br>(2.31 to 4.13) | 3.17<br>(1.60 to 6.18) | 2.78<br>(1.44 to 5.16) | 3.75<br>(1.80 to 7.60) |
| Interpersonal violence             | 105.23<br>(52.81 to 145.38) | 54.07<br>(15.20 to 144.23)  | 45.05<br>(13.57 to 113.92) | 56.45<br>(15.93 to 146.39)  | 2.31<br>(1.15 to 3.26) | 1.37<br>(0.43 to 3.13) | 1.17<br>(0.39 to 2.63) | 1.42<br>(0.45 to 3.16) |
| Physical violence by firearm       | 50.39<br>(16.07 to 76.77)   | 22.91<br>(3.71 to 74.89)    | 18.06<br>(2.87 to 58.14)   | 23.11<br>(3.68 to 73.77)    | 1.01<br>(0.31 to 1.54) | 0.48<br>(0.08 to 1.48) | 0.38<br>(0.07 to 1.08) | 0.48<br>(0.08 to 1.42) |
| Physical violence by sharp object  | 26.78<br>(13.50 to 37.19)   | 14.47<br>(4.61 to 33.30)    | 12.30<br>(3.89 to 27.63)   | 14.62<br>(4.53 to 33.18)    | 0.60<br>(0.30 to 0.82) | 0.37<br>(0.13 to 0.75) | 0.32<br>(0.11 to 0.62) | 0.37<br>(0.12 to 0.73) |
| Physical violence by other means   | 28.06<br>(15.00 to 40.03)   | 16.69<br>(5.48 to 36.23)    | 14.69<br>(4.97 to 31.26)   | 18.71<br>(5.85 to 41.92)    | 0.71<br>(0.36 to 0.97) | 0.52<br>(0.19 to 1.01) | 0.47<br>(0.17 to 0.91) | 0.57<br>(0.20 to 1.13) |

|                                                                              | 0.34<br>(0.29 to<br>0.40)                         | 7.98<br>(0.00 to<br>113.19)                       | 7.96<br>(0.00 to<br>113.25)                       | 8.05<br>(0.00 to<br>112.99)                       | 0.01<br>(0.01 to<br>0.01)                 | 0.18<br>(0.00 to<br>2.36)                   | 0.18<br>(0.00 to<br>2.37)                          | 0.18<br>(0.00 to<br>2.35)                            |  |
|------------------------------------------------------------------------------|---------------------------------------------------|---------------------------------------------------|---------------------------------------------------|---------------------------------------------------|-------------------------------------------|---------------------------------------------|----------------------------------------------------|------------------------------------------------------|--|
| Forces of nature, conflict and terrorism, and executions and police conflict | 0.00<br>(0.00 to<br>0.00)                         | 1.65<br>(0.00 to<br>0.00)                         | 1.66<br>(0.00 to<br>0.00)                         | 1.64<br>(0.00 to<br>0.00)                         | 0.00<br>(0.00 to<br>0.00)                 | 0.04<br>(0.00 to<br>0.00)                   | 0.04<br>(0.00 to<br>0.00)                          | 0.04<br>(0.00 to<br>0.00)                            |  |
| Exposure to forces of nature                                                 | 0.00<br>(0.00 to<br>0.00)                         | 6.33<br>(0.00 to<br>5.75)                         | 6.30<br>(0.00 to<br>5.73)                         | 6.41<br>(0.00 to<br>5.83)                         | 0.00<br>(0.00 to<br>0.00)                 | 0.14<br>(0.00 to<br>0.13)                   | 0.15<br>(0.00 to<br>0.13)                          | 0.14<br>(0.00 to<br>0.13)                            |  |
| Conflict and terrorism                                                       | 0.34<br>(0.29 to<br>0.40)                         | 0.00<br>(0.00 to<br>0.00)                         | 0.00<br>(0.00 to<br>0.00)                         | 0.00<br>(0.00 to<br>0.00)                         | 0.01<br>(0.01 to<br>0.01)                 | 0.00<br>(0.00 to<br>0.00)                   | 0.00<br>(0.00 to<br>0.00)                          | 0.00<br>(0.00 to<br>0.00)                            |  |
| Executions and police conflict                                               | <b>Cuba</b>                                       |                                                   |                                                   |                                                   |                                           |                                             |                                                    |                                                      |  |
| Cause                                                                        | YLLs (actual counts)                              |                                                   |                                                   |                                                   | Deaths (actual counts)                    |                                             |                                                    |                                                      |  |
|                                                                              | 2016                                              | 2040 Forecast                                     | 2040 Better Scenario                              | 2040 Worse Scenario                               | 2016                                      | 2040 Forecast                               | 2040 Better Scenario                               | 2040 Worse Scenario                                  |  |
| All causes                                                                   | 1,717,169.64<br>(1,595,026.35 to<br>1,842,985.93) | 1,896,522.98<br>(1,617,054.89 to<br>2,227,295.04) | 1,371,388.46<br>(1,158,124.72 to<br>1,601,819.72) | 2,305,903.10<br>(1,953,493.82 to<br>2,713,459.37) | 96,443.71<br>(89,961.67 to<br>102,722.69) | 136,061.81<br>(113,572.82 to<br>159,816.85) | 103,994.95<br>(86,534.40 to<br>123,488.77)         | 157,522.08<br>(132,488.81 to<br>185,278.23)          |  |
| Communicable, maternal, neonatal, and nutritional diseases                   | 126,779.23<br>(116,367.04 to<br>137,113.73)       | 124,181.27<br>(103,997.50 to<br>153,111.46)       | 87,515.83<br>(72,124.81 to<br>107,879.99)         | 164,193.46<br>(134,369.58 to<br>206,434.89)       | 6,927.65<br>(6,285.04 to<br>7,658.30)     | 9,504.74<br>(7,722.30 to<br>11,945.70)      | 7,388.43<br>(5,935.98 to<br>9,267.65)              | 11,482.14<br>(9,154.20 to<br>14,712.27)              |  |
| HIV/AIDS and tuberculosis                                                    | 16,472.74<br>(15,722.84 to<br>17,268.27)          | 16,624.10<br>(10,952.55 to<br>20,929.58)          | 8,670.28<br>(3,037.87 to<br>13,026.28)            | 28,742.92<br>(20,360.59 to<br>39,463.46)          | 388.74<br>(371.87 to<br>406.83)           | 432.27<br>(286.27 to<br>541.08)             | 228.25<br>(77.03 to<br>333.11)                     | 732.09<br>(502.09 to<br>1,034.37)                    |  |
| Tuberculosis                                                                 | 886.02<br>(790.69 to<br>996.56)                   | 718.12<br>(464.76 to<br>1,097.92)                 | 264.58<br>(164.08 to<br>408.59)                   | 828.22<br>(527.35 to<br>1,278.71)                 | 40.56<br>(36.53 to<br>45.05)              | 44.38<br>(29.38 to<br>66.01)                | 17.43<br>(11.16 to<br>26.74)                       | 49.23<br>(31.10 to<br>76.21)                         |  |
| HIV/AIDS                                                                     | 15,586.72<br>(14,871.55 to<br>16,293.06)          | 15,905.98<br>(10,280.44 to<br>20,298.47)          | 8,405.70<br>(2,773.40 to<br>12,733.78)            | 27,914.70<br>(19,405.06 to<br>38,601.80)          | 348.19<br>(331.83 to<br>365.69)           | 387.89<br>(242.47 to<br>494.72)             | 210.82<br>(59.25 to<br>315.99)                     | 682.86<br>(453.26 to<br>973.21)                      |  |
| Diarrhea, lower respiratory, and other common infectious diseases            | 85,868.37<br>(78,354.16 to<br>94,171.16)          | 96,801.45<br>(78,064.93 to<br>123,908.60)         | 71,125.12<br>(57,478.39 to<br>89,517.93)          | 123,651.30<br>(96,061.39 to<br>164,699.94)        | 38,601.80<br>(5,481.75 to<br>6,838.55)    | 365.69<br>(7,019.14 to<br>11,154.04)        | 494.72<br>(8,795.11 to<br>5,492.20 to<br>8,765.72) | 315.99<br>(6,923.99 to<br>10,466.91 to<br>13,759.08) |  |
| Diarrheal diseases                                                           | 5,282.70<br>(4,732.45 to<br>5,945.90)             | 3,235.86<br>(1,166.07 to<br>7,983.26)             | 4,842.39<br>(1,726.57 to<br>12,267.78)            | 5,509.84<br>(1,490.65 to<br>15,214.46)            | 264.25<br>(234.79 to<br>296.88)           | 247.69<br>(90.95 to<br>609.38)              | 388.28<br>(135.49 to<br>980.60)                    | 408.69<br>(109.39 to<br>1,155.60)                    |  |
| Intestinal infectious diseases                                               | 26.28<br>(12.82 to<br>49.54)                      | 16.35<br>(7.51 to<br>31.59)                       | 13.89<br>(6.40 to<br>27.53)                       | 16.47<br>(7.56 to<br>32.24)                       | 0.74<br>(0.36 to<br>1.41)                 | 0.64<br>(0.31 to<br>1.20)                   | 0.57<br>(0.28 to<br>1.06)                          | 0.62<br>(0.31 to<br>1.19)                            |  |
| Typhoid fever                                                                | 8.35<br>(3.92 to<br>15.28)                        | 4.17<br>(1.93 to<br>7.90)                         | 5.26<br>(2.44 to<br>10.34)                        | 4.18<br>(1.94 to<br>7.85)                         | 0.21<br>(0.10 to<br>0.39)                 | 0.15<br>(0.07 to<br>0.30)                   | 0.20<br>(0.09 to<br>0.41)                          | 0.15<br>(0.07 to<br>0.30)                            |  |
| Paratyphoid fever                                                            | 16.40<br>(6.67 to<br>34.23)                       | 11.22<br>(4.42 to<br>23.10)                       | 7.89<br>(2.91 to<br>16.74)                        | 11.33<br>(4.57 to<br>23.48)                       | 0.46<br>(0.19 to<br>0.98)                 | 0.41<br>(0.17 to<br>0.87)                   | 0.30<br>(0.11 to<br>0.64)                          | 0.41<br>(0.16 to<br>0.86)                            |  |
| Other intestinal infectious diseases                                         | 1.52<br>(0.60 to<br>3.10)                         | 0.96<br>(0.36 to<br>2.11)                         | 0.74<br>(0.28 to<br>1.60)                         | 0.96<br>(0.36 to<br>2.07)                         | 0.06<br>(0.03 to<br>0.13)                 | 0.07<br>(0.03 to<br>0.16)                   | 0.06<br>(0.02 to<br>0.14)                          | 0.07<br>(0.02 to<br>0.15)                            |  |
| Lower respiratory infections                                                 | 74,586.13<br>(67,421.62 to<br>82,379.50)          | 88,994.17<br>(71,252.53 to<br>115,040.60)         | 62,765.26<br>(49,909.37 to<br>79,743.75)          | 112,874.51<br>(86,765.07 to<br>152,057.80)        | 5,697.00<br>(5,072.39 to<br>6,398.77)     | 8,385.07<br>(6,699.86 to<br>10,727.33)      | 6,404.07<br>(5,050.86 to<br>8,171.70)              | 9,887.30<br>(7,663.41 to<br>13,059.34)               |  |
| Upper respiratory infections                                                 | 38.89<br>(20.76 to<br>64.06)                      | 36.64<br>(15.97 to<br>70.86)                      | 18.23<br>(7.46 to<br>38.50)                       | 37.47<br>(16.53 to<br>71.79)                      | 1.54<br>(0.81 to<br>2.61)                 | 2.16<br>(0.82 to<br>4.57)                   | 1.12<br>(0.42 to<br>2.42)                          | 2.14<br>(0.83 to<br>4.30)                            |  |
| Otitis media                                                                 | 2.81<br>(2.08 to<br>3.81)                         | 0.38<br>(0.19 to<br>0.72)                         | 0.39<br>(0.20 to<br>0.75)                         | 0.36<br>(0.18 to<br>0.69)                         | 0.09<br>(0.06 to<br>0.13)                 | 0.02<br>(0.01 to<br>0.04)                   | 0.02<br>(0.01 to<br>0.04)                          | 0.02<br>(0.01 to<br>0.03)                            |  |
| Meningitis                                                                   | 3,607.50<br>(3,153.11 to<br>4,469.86)             | 1,836.59<br>(1,411.79 to<br>2,515.53)             | 1,417.97<br>(1,083.15 to<br>2,024.43)             | 2,027.46<br>(1,454.00 to<br>2,772.50)             | 98.16<br>(85.12 to<br>135.26)             | 78.45<br>(63.05 to<br>115.97)               | 63.56<br>(49.63 to<br>97.59)                       | 78.10<br>(62.66 to<br>114.26)                        |  |
| Pneumococcal meningitis                                                      | 1,118.65<br>(969.02 to<br>1,438.16)               | 452.99<br>(338.11 to<br>641.31)                   | 456.48<br>(349.81 to<br>650.20)                   | 465.60<br>(348.89 to<br>656.86)                   | 33.18<br>(28.25 to<br>45.85)              | 21.65<br>(16.25 to<br>32.71)                | 22.60<br>(17.15 to<br>34.54)                       | 21.50<br>(16.06 to<br>32.15)                         |  |



|                                         |                                    |                                  |                                  |                                  |                           |                           |                           |                           |
|-----------------------------------------|------------------------------------|----------------------------------|----------------------------------|----------------------------------|---------------------------|---------------------------|---------------------------|---------------------------|
| H influenzae type B meningitis          | 358.60<br>(304.25 to 443.75)       | 281.60<br>(133.31 to 481.51)     | 246.40<br>(129.86 to 391.20)     | 465.10<br>(154.15 to 914.62)     | 8.73<br>(7.43 to 11.82)   | 7.67<br>(5.30 to 11.18)   | 7.57<br>(5.46 to 11.02)   | 9.52<br>(5.54 to 15.01)   |
| Meningococcal meningitis                | 1,293.45<br>(1,114.71 to 1,604.76) | 631.64<br>(494.78 to 858.77)     | 415.62<br>(305.03 to 607.15)     | 629.90<br>(495.00 to 853.88)     | 33.63<br>(28.90 to 46.05) | 28.12<br>(22.37 to 42.71) | 19.43<br>(14.20 to 30.41) | 26.95<br>(21.62 to 40.19) |
| Other meningitis                        | 836.81<br>(723.42 to 1,059.06)     | 470.37<br>(364.09 to 600.95)     | 299.47<br>(217.12 to 452.98)     | 466.87<br>(361.23 to 651.72)     | 22.62<br>(19.34 to 31.33) | 21.02<br>(16.51 to 31.68) | 13.97<br>(10.10 to 22.57) | 20.14<br>(16.02 to 30.18) |
| Encephalitis                            | 1,989.99<br>(1,619.75 to 2,838.72) | 1,183.67<br>(836.59 to 1,855.37) | 1,046.63<br>(753.49 to 1,626.81) | 1,206.01<br>(852.78 to 1,857.21) | 44.51<br>(35.39 to 67.59) | 41.70<br>(29.39 to 70.00) | 38.61<br>(27.11 to 65.25) | 40.98<br>(29.27 to 67.49) |
| Diphtheria                              | 4.28<br>(2.74 to 6.30)             | 0.57<br>(0.31 to 0.97)           | 0.51<br>(0.28 to 0.86)           | 0.99<br>(0.38 to 2.16)           | 0.08<br>(0.05 to 0.13)    | 0.01<br>(0.01 to 0.02)    | 0.01<br>(0.01 to 0.02)    | 0.02<br>(0.01 to 0.03)    |
| Whooping cough                          | 8.34<br>(2.71 to 14.78)            | 1.41<br>(0.16 to 3.52)           | 0.55<br>(0.14 to 1.34)           | 8.13<br>(0.18 to 23.10)          | 0.10<br>(0.04 to 0.18)    | 0.02<br>(0.00 to 0.05)    | 0.01<br>(0.00 to 0.02)    | 0.10<br>(0.00 to 0.27)    |
| Tetanus                                 | 8.27<br>(5.15 to 11.13)            | 0.89<br>(0.56 to 1.33)           | 0.88<br>(0.54 to 1.29)           | 1.15<br>(0.70 to 1.78)           | 0.27<br>(0.18 to 0.36)    | 0.04<br>(0.02 to 0.05)    | 0.04<br>(0.03 to 0.06)    | 0.04<br>(0.03 to 0.06)    |
| Measles                                 | 7.42<br>(5.16 to 10.63)            | 1,346.70<br>(70.78 to 3,843.16)  | 916.62<br>(59.73 to 2,518.05)    | 1,818.15<br>(75.64 to 5,175.52)  | 0.09<br>(0.07 to 0.13)    | 29.13<br>(1.26 to 101.17) | 20.17<br>(1.07 to 64.28)  | 39.12<br>(1.45 to 140.02) |
| <b>Cuba</b>                             |                                    |                                  |                                  |                                  |                           |                           |                           |                           |
| Cause                                   | YLLs (actual counts)               |                                  |                                  |                                  | Deaths (actual counts)    |                           |                           |                           |
|                                         | 2016                               | 2040 Forecast                    | 2040 Better Scenario             | 2040 Worse Scenario              | 2016                      | 2040 Forecast             | 2040 Better Scenario      | 2040 Worse Scenario       |
| Varicella and herpes zoster             | 305.76<br>(166.04 to 509.04)       | 148.23<br>(86.58 to 303.07)      | 101.80<br>(58.56 to 216.34)      | 150.75<br>(89.53 to 309.65)      | 11.45<br>(7.56 to 26.08)  | 10.18<br>(4.72 to 28.79)  | 7.52<br>(3.36 to 21.82)   | 9.79<br>(4.66 to 27.54)   |
| Neglected tropical diseases and malaria | 141.24<br>(103.29 to 208.69)       | 174.51<br>(125.43 to 320.70)     | 170.53<br>(122.34 to 309.52)     | 173.19<br>(126.21 to 311.61)     | 3.95<br>(2.86 to 6.82)    | 8.56<br>(5.97 to 17.09)   | 8.75<br>(6.08 to 17.32)   | 8.17<br>(5.78 to 16.39)   |
| Malaria                                 | 0.00<br>(0.00 to 0.00)             | 0.00<br>(0.00 to 0.00)           | 0.00<br>(0.00 to 0.00)           | 0.00<br>(0.00 to 0.00)           | 0.00<br>(0.00 to 0.00)    | 0.00<br>(0.00 to 0.00)    | 0.00<br>(0.00 to 0.00)    | 0.00<br>(0.00 to 0.00)    |
| Chagas disease                          | 0.00<br>(0.00 to 0.00)             | 0.00<br>(0.00 to 0.00)           | 0.00<br>(0.00 to 0.00)           | 0.00<br>(0.00 to 0.00)           | 0.00<br>(0.00 to 0.00)    | 0.00<br>(0.00 to 0.00)    | 0.00<br>(0.00 to 0.00)    | 0.00<br>(0.00 to 0.00)    |
| Leishmaniasis                           | 0.00<br>(0.00 to 0.00)             | 0.00<br>(0.00 to 0.00)           | 0.00<br>(0.00 to 0.00)           | 0.00<br>(0.00 to 0.00)           | 0.00<br>(0.00 to 0.00)    | 0.00<br>(0.00 to 0.00)    | 0.00<br>(0.00 to 0.00)    | 0.00<br>(0.00 to 0.00)    |
| African trypanosomiasis                 | 0.00<br>(0.00 to 0.00)             | 0.00<br>(0.00 to 0.00)           | 0.00<br>(0.00 to 0.00)           | 0.00<br>(0.00 to 0.00)           | 0.00<br>(0.00 to 0.00)    | 0.00<br>(0.00 to 0.00)    | 0.00<br>(0.00 to 0.00)    | 0.00<br>(0.00 to 0.00)    |
| Schistosomiasis                         | 0.00<br>(0.00 to 0.00)             | 0.00<br>(0.00 to 0.00)           | 0.00<br>(0.00 to 0.00)           | 0.00<br>(0.00 to 0.00)           | 0.00<br>(0.00 to 0.00)    | 0.00<br>(0.00 to 0.00)    | 0.00<br>(0.00 to 0.00)    | 0.00<br>(0.00 to 0.00)    |
| Cysticercosis                           | 0.00<br>(0.00 to 0.00)             | 0.00<br>(0.00 to 0.00)           | 0.00<br>(0.00 to 0.00)           | 0.00<br>(0.00 to 0.00)           | 0.00<br>(0.00 to 0.00)    | 0.00<br>(0.00 to 0.00)    | 0.00<br>(0.00 to 0.00)    | 0.00<br>(0.00 to 0.00)    |
| Cystic echinococcosis                   | 0.00<br>(0.00 to 0.00)             | 0.00<br>(0.00 to 0.00)           | 0.00<br>(0.00 to 0.00)           | 0.00<br>(0.00 to 0.00)           | 0.00<br>(0.00 to 0.00)    | 0.00<br>(0.00 to 0.00)    | 0.00<br>(0.00 to 0.00)    | 0.00<br>(0.00 to 0.00)    |
| Dengue                                  | 14.13<br>(6.78 to 68.73)           | 70.32<br>(42.18 to 190.51)       | 69.80<br>(42.03 to 179.78)       | 68.00<br>(40.67 to 193.96)       | 0.61<br>(0.31 to 2.50)    | 3.95<br>(2.40 to 10.00)   | 4.03<br>(2.45 to 9.79)    | 3.74<br>(2.26 to 9.62)    |
| Yellow fever                            | 0.00<br>(0.00 to 0.00)             | 0.00<br>(0.00 to 0.00)           | 0.00<br>(0.00 to 0.00)           | 0.00<br>(0.00 to 0.00)           | 0.00<br>(0.00 to 0.00)    | 0.00<br>(0.00 to 0.00)    | 0.00<br>(0.00 to 0.00)    | 0.00<br>(0.00 to 0.00)    |
| Rabies                                  | 1.48<br>(1.07 to 2.10)             | 0.63<br>(0.41 to 0.96)           | 0.41<br>(0.28 to 0.60)           | 0.69<br>(0.45 to 1.05)           | 0.03<br>(0.03 to 0.04)    | 0.02<br>(0.01 to 0.03)    | 0.01<br>(0.01 to 0.02)    | 0.02<br>(0.01 to 0.03)    |

|                                                          |                                                               |                                                            |                                                            |                                                             |                                                      |                                                    |                                                   |                                                    |
|----------------------------------------------------------|---------------------------------------------------------------|------------------------------------------------------------|------------------------------------------------------------|-------------------------------------------------------------|------------------------------------------------------|----------------------------------------------------|---------------------------------------------------|----------------------------------------------------|
| Intestinal nematode infections                           | 53.21<br>(21.97 to<br>99.24)                                  | 49.36<br>(22.59 to<br>82.35)                               | 49.11<br>(22.82 to<br>81.61)                               | 49.13<br>(22.03 to<br>82.57)                                | 1.41<br>(0.72 to<br>2.22)                            | 2.15<br>(0.94 to<br>3.58)                          | 2.26<br>(0.99 to<br>3.77)                         | 2.04<br>(0.91 to<br>3.40)                          |
| Other neglected tropical diseases                        | 72.34<br>(61.14 to<br>104.79)                                 | 54.20<br>(39.40 to<br>115.70)                              | 51.21<br>(37.66 to<br>117.09)                              | 55.38<br>(40.79 to<br>152.93)                               | 1.90<br>(1.51 to<br>3.70)                            | 2.44<br>(1.52 to<br>7.08)                          | 2.45<br>(1.52 to<br>7.57)                         | 2.37<br>(1.52 to<br>6.72)                          |
| <b>Maternal disorders</b>                                | <b>2,625.83</b><br><b>(2,153.92 to</b><br><b>3,176.83)</b>    | <b>859.72</b><br><b>(522.16 to</b><br><b>1,326.09)</b>     | <b>562.33</b><br><b>(338.40 to</b><br><b>868.42)</b>       | <b>930.07</b><br><b>(564.86 to</b><br><b>1,415.81)</b>      | <b>46.71</b><br><b>(38.47 to</b><br><b>56.35)</b>    | <b>15.41</b><br><b>(9.50 to</b><br><b>23.72)</b>   | <b>10.10</b><br><b>(6.18 to</b><br><b>15.65)</b>  | <b>16.66</b><br><b>(10.26 to</b><br><b>25.34)</b>  |
| Maternal hemorrhage                                      | 251.18<br>(171.31 to<br>355.05)                               | 81.74<br>(43.84 to<br>146.08)                              | 54.12<br>(28.77 to<br>96.22)                               | 88.03<br>(46.09 to<br>152.47)                               | 4.51<br>(3.07 to<br>6.35)                            | 1.49<br>(0.81 to<br>2.67)                          | 0.99<br>(0.53 to<br>1.78)                         | 1.61<br>(0.84 to<br>2.81)                          |
| Maternal sepsis and other maternal infections            | 266.57<br>(184.11 to<br>365.60)                               | 74.54<br>(39.48 to<br>133.44)                              | 48.59<br>(24.77 to<br>85.69)                               | 80.52<br>(40.88 to<br>142.55)                               | 4.83<br>(3.40 to<br>6.61)                            | 1.36<br>(0.73 to<br>2.39)                          | 0.89<br>(0.46 to<br>1.56)                         | 1.47<br>(0.75 to<br>2.55)                          |
| Maternal hypertensive disorders                          | 309.68<br>(215.62 to<br>423.53)                               | 87.59<br>(46.18 to<br>152.30)                              | 56.18<br>(30.26 to<br>98.51)                               | 94.71<br>(50.91 to<br>161.56)                               | 5.35<br>(3.75 to<br>7.28)                            | 1.52<br>(0.81 to<br>2.62)                          | 0.98<br>(0.53 to<br>1.70)                         | 1.65<br>(0.89 to<br>2.80)                          |
| Maternal obstructed labor and uterine rupture            | 88.87<br>(54.11 to<br>135.00)                                 | 32.61<br>(15.72 to<br>60.82)                               | 20.06<br>(9.60 to<br>36.69)                                | 35.29<br>(17.16 to<br>66.44)                                | 1.65<br>(1.01 to<br>2.49)                            | 0.61<br>(0.29 to<br>1.10)                          | 0.37<br>(0.18 to<br>0.67)                         | 0.66<br>(0.32 to<br>1.21)                          |
| Maternal abortion, miscarriage, and ectopic pregnancy    | 413.11<br>(299.77 to<br>558.18)                               | 160.17<br>(74.49 to<br>294.58)                             | 104.18<br>(48.12 to<br>192.17)                             | 173.56<br>(80.09 to<br>322.15)                              | 7.54<br>(5.56 to<br>10.04)                           | 2.94<br>(1.41 to<br>5.29)                          | 1.91<br>(0.91 to<br>3.48)                         | 3.18<br>(1.52 to<br>5.79)                          |
| Indirect maternal deaths                                 | 687.51<br>(519.54 to<br>901.61)                               | 234.62<br>(118.62 to<br>402.33)                            | 151.81<br>(74.03 to<br>270.36)                             | 254.47<br>(131.28 to<br>441.13)                             | 11.92<br>(9.02 to<br>15.61)                          | 4.09<br>(2.04 to<br>6.92)                          | 2.65<br>(1.31 to<br>4.64)                         | 4.44<br>(2.31 to<br>7.61)                          |
| Late maternal deaths                                     | 170.10<br>(121.37 to<br>235.10)                               | 52.16<br>(25.93 to<br>92.35)                               | 33.29<br>(16.81 to<br>59.95)                               | 56.47<br>(27.34 to<br>99.84)                                | 2.94<br>(2.12 to<br>4.02)                            | 0.91<br>(0.46 to<br>1.59)                          | 0.58<br>(0.30 to<br>1.03)                         | 0.98<br>(0.48 to<br>1.73)                          |
| Maternal deaths aggravated by HIV/AIDS                   | 1.49<br>(0.59 to<br>2.86)                                     | 1.10<br>(0.09 to<br>2.91)                                  | 0.41<br>(0.01 to<br>1.60)                                  | 1.53<br>(0.37 to<br>3.55)                                   | 0.03<br>(0.01 to<br>0.05)                            | 0.02<br>(0.00 to<br>0.05)                          | 0.01<br>(0.00 to<br>0.03)                         | 0.03<br>(0.01 to<br>0.07)                          |
| Other maternal disorders                                 | 437.24<br>(311.60 to<br>583.55)                               | 135.19<br>(73.95 to<br>230.85)                             | 93.69<br>(50.62 to<br>162.71)                              | 145.50<br>(75.30 to<br>247.77)                              | 7.95<br>(5.69 to<br>10.44)                           | 2.48<br>(1.36 to<br>4.16)                          | 1.72<br>(0.94 to<br>2.90)                         | 2.66<br>(1.42 to<br>4.54)                          |
| <b>Cuba</b>                                              |                                                               |                                                            |                                                            |                                                             |                                                      |                                                    |                                                   |                                                    |
| Cause                                                    | YLLs (actual counts)                                          |                                                            |                                                            |                                                             | Deaths (actual counts)                               |                                                    |                                                   |                                                    |
|                                                          | 2016                                                          | 2040 Forecast                                              | 2040 Better Scenario                                       | 2040 Worse Scenario                                         | 2016                                                 | 2040 Forecast                                      | 2040 Better Scenario                              | 2040 Worse Scenario                                |
| <b>Neonatal disorders</b>                                | <b>16,294.42</b><br><b>(11,379.14 to</b><br><b>21,242.07)</b> | <b>6,138.37</b><br><b>(3,526.27 to</b><br><b>9,605.65)</b> | <b>3,840.52</b><br><b>(2,204.20 to</b><br><b>6,176.12)</b> | <b>7,096.93</b><br><b>(4,101.85 to</b><br><b>11,078.67)</b> | <b>188.36</b><br><b>(131.57 to</b><br><b>245.57)</b> | <b>70.96</b><br><b>(40.77 to</b><br><b>111.02)</b> | <b>44.40</b><br><b>(25.50 to</b><br><b>71.38)</b> | <b>82.04</b><br><b>(47.43 to</b><br><b>128.07)</b> |
| Neonatal preterm birth                                   | 4,542.07<br>(3,097.69 to<br>6,134.19)                         | 1,531.46<br>(907.40 to<br>2,301.88)                        | 806.72<br>(472.46 to<br>1,260.76)                          | 1,914.35<br>(1,145.48 to<br>2,909.61)                       | 52.50<br>(35.81 to<br>70.89)                         | 17.70<br>(10.49 to<br>26.61)                       | 9.33<br>(5.46 to<br>14.57)                        | 22.12<br>(13.24 to<br>33.62)                       |
| Neonatal encephalopathy due to birth asphyxia and trauma | 4,033.95<br>(2,759.04 to<br>5,441.93)                         | 1,638.88<br>(839.87 to<br>2,873.69)                        | 954.29<br>(496.18 to<br>1,655.43)                          | 1,832.99<br>(953.55 to<br>3,194.21)                         | 46.66<br>(31.92 to<br>62.93)                         | 18.96<br>(9.72 to<br>33.23)                        | 11.04<br>(5.75 to<br>19.14)                       | 21.21<br>(11.05 to<br>36.93)                       |
| Neonatal sepsis and other neonatal infections            | 2,414.55<br>(880.26 to<br>3,776.72)                           | 1,455.98<br>(510.22 to<br>2,588.81)                        | 929.05<br>(350.55 to<br>1,649.32)                          | 1,635.16<br>(589.43 to<br>2,895.09)                         | 27.89<br>(10.17 to<br>43.63)                         | 16.82<br>(5.90 to<br>29.91)                        | 10.73<br>(4.05 to<br>19.05)                       | 18.89<br>(6.81 to<br>33.45)                        |
| Hemolytic disease and other neonatal jaundice            | 218.57<br>(126.31 to<br>357.85)                               | 65.67<br>(26.64 to<br>142.32)                              | 39.79<br>(15.65 to<br>86.30)                               | 74.54<br>(30.44 to<br>163.79)                               | 2.53<br>(1.46 to<br>4.14)                            | 0.76<br>(0.31 to<br>1.64)                          | 0.46<br>(0.18 to<br>1.00)                         | 0.86<br>(0.35 to<br>1.89)                          |
| Other neonatal disorders                                 | 5,085.28<br>(3,482.42 to<br>6,784.41)                         | 1,446.38<br>(757.64 to<br>2,496.81)                        | 1,110.66<br>(594.60 to<br>1,872.86)                        | 1,639.89<br>(859.31 to<br>2,804.06)                         | 58.79<br>(40.27 to<br>78.42)                         | 16.72<br>(8.76 to<br>28.85)                        | 12.84<br>(6.88 to<br>21.64)                       | 18.96<br>(9.94 to<br>32.41)                        |
| <b>Nutritional deficiencies</b>                          | <b>1,413.55</b><br><b>(1,265.07 to</b><br><b>1,582.57)</b>    | <b>1,044.58</b><br><b>(905.08 to</b><br><b>1,196.89)</b>   | <b>1,013.80</b><br><b>(882.94 to</b><br><b>1,156.44)</b>   | <b>1,022.93</b><br><b>(887.45 to</b><br><b>1,172.74)</b>    | <b>71.05</b><br><b>(64.27 to</b><br><b>78.60)</b>    | <b>81.26</b><br><b>(68.79 to</b><br><b>94.92)</b>  | <b>84.28</b><br><b>(70.68 to</b><br><b>99.62)</b> | <b>76.41</b><br><b>(64.63 to</b><br><b>89.12)</b>  |
| Protein-energy malnutrition                              | 917.99<br>(672.24 to<br>1,083.82)                             | 630.72<br>(443.90 to<br>793.54)                            | 676.62<br>(483.63 to<br>837.15)                            | 614.11<br>(425.56 to<br>764.77)                             | 49.51<br>(37.07 to<br>59.01)                         | 53.72<br>(38.40 to<br>68.17)                       | 60.68<br>(44.09 to<br>75.71)                      | 50.36<br>(35.09 to<br>64.47)                       |

|                                                                         |                                                                        |                                                                        |                                                                      |                                                                        |                                                               |                                                                 |                                                                |                                                                  |
|-------------------------------------------------------------------------|------------------------------------------------------------------------|------------------------------------------------------------------------|----------------------------------------------------------------------|------------------------------------------------------------------------|---------------------------------------------------------------|-----------------------------------------------------------------|----------------------------------------------------------------|------------------------------------------------------------------|
| Iodine deficiency                                                       | 24.79<br>(2.36 to<br>72.30)                                            | 49.68<br>(2.27 to<br>154.10)                                           | 42.70<br>(1.49 to<br>145.47)                                         | 49.35<br>(2.33 to<br>152.45)                                           | 1.07<br>(0.07 to<br>3.49)                                     | 3.63<br>(0.08 to<br>13.65)                                      | 3.29<br>(0.05 to<br>13.46)                                     | 3.48<br>(0.08 to<br>13.38)                                       |
| Dietary iron deficiency                                                 | 47.90<br>(36.64 to<br>65.04)                                           | 24.84<br>(17.82 to<br>33.58)                                           | 24.36<br>(17.46 to<br>34.03)                                         | 25.42<br>(18.69 to<br>34.02)                                           | 1.09<br>(0.78 to<br>1.52)                                     | 1.09<br>(0.49 to<br>1.06)                                       | 0.76<br>(0.48 to<br>1.10)                                      | 0.74<br>(0.49 to<br>1.04)                                        |
| Other nutritional deficiencies                                          | 422.87<br>(283.84 to<br>620.67)                                        | 339.33<br>(212.05 to<br>524.82)                                        | 270.12<br>(163.52 to<br>446.81)                                      | 334.05<br>(214.26 to<br>502.90)                                        | 19.38<br>(11.39 to<br>32.38)                                  | 23.17<br>(12.23 to<br>37.90)                                    | 19.55<br>(10.07 to<br>34.17)                                   | 21.82<br>(11.96 to<br>35.42)                                     |
| <b>Other communicable, maternal, neonatal, and nutritional diseases</b> | <b>3,963.08</b><br><b>(3,342.48 to</b><br><b>4,448.39)</b>             | <b>2,538.55</b><br><b>(2,142.05 to</b><br><b>3,000.73)</b>             | <b>2,133.25</b><br><b>(1,797.35 to</b><br><b>2,490.27)</b>           | <b>2,576.13</b><br><b>(2,175.18 to</b><br><b>3,020.04)</b>             | <b>110.54</b><br><b>(97.40 to</b><br><b>124.07)</b>           | <b>101.17</b><br><b>(87.28 to</b><br><b>120.02)</b>             | <b>88.66</b><br><b>(76.18 to</b><br><b>104.43)</b>             | <b>99.86</b><br><b>(85.90 to</b><br><b>116.94)</b>               |
| Sexually transmitted infections excluding HIV                           | 806.14<br>(600.39 to<br>1,020.57)                                      | 191.16<br>(127.14 to<br>252.10)                                        | 156.38<br>(102.43 to<br>208.64)                                      | 195.69<br>(125.72 to<br>260.58)                                        | 18.78<br>(14.25 to<br>23.10)                                  | 5.64<br>(3.99 to<br>7.10)                                       | 4.77<br>(3.27 to<br>6.13)                                      | 5.66<br>(3.98 to<br>7.17)                                        |
| Syphilis                                                                | 242.41<br>(147.10 to<br>380.98)                                        | 51.77<br>(33.56 to<br>77.22)                                           | 37.01<br>(24.95 to<br>54.13)                                         | 54.03<br>(35.19 to<br>81.55)                                           | 4.59<br>(3.22 to<br>6.35)                                     | 1.40<br>(1.04 to<br>1.80)                                       | 1.05<br>(0.77 to<br>1.38)                                      | 1.41<br>(1.03 to<br>1.82)                                        |
| Chlamydial infection                                                    | 111.27<br>(85.31 to<br>136.25)                                         | 26.90<br>(16.97 to<br>37.11)                                           | 23.02<br>(14.89 to<br>32.04)                                         | 27.35<br>(17.69 to<br>37.97)                                           | 2.78<br>(2.15 to<br>3.40)                                     | 0.82<br>(0.57 to<br>1.07)                                       | 0.72<br>(0.51 to<br>0.96)                                      | 0.82<br>(0.57 to<br>1.07)                                        |
| Gonococcal infection                                                    | 296.15<br>(227.12 to<br>362.26)                                        | 74.66<br>(46.22 to<br>101.36)                                          | 64.16<br>(38.26 to<br>86.76)                                         | 75.76<br>(46.05 to<br>102.81)                                          | 7.62<br>(5.87 to<br>9.28)                                     | 2.37<br>(1.56 to<br>3.08)                                       | 2.08<br>(1.42 to<br>2.72)                                      | 2.37<br>(1.57 to<br>3.09)                                        |
| Other sexually transmitted infections                                   | 156.31<br>(118.67 to<br>190.96)                                        | 37.84<br>(24.24 to<br>52.15)                                           | 32.19<br>(19.96 to<br>44.53)                                         | 38.55<br>(24.73 to<br>52.85)                                           | 3.80<br>(2.93 to<br>4.63)                                     | 1.05<br>(0.72 to<br>1.38)                                       | 0.91<br>(0.62 to<br>1.21)                                      | 1.06<br>(0.72 to<br>1.39)                                        |
| Acute hepatitis                                                         | 468.78<br>(407.56 to<br>533.51)                                        | 316.73<br>(253.87 to<br>384.06)                                        | 203.69<br>(153.12 to<br>269.60)                                      | 320.87<br>(257.72 to<br>389.21)                                        | 12.45<br>(10.86 to<br>14.19)                                  | 11.70<br>(9.48 to<br>14.27)                                     | 7.74<br>(5.78 to<br>10.07)                                     | 11.57<br>(9.36 to<br>14.02)                                      |
| Acute hepatitis A                                                       | 18.82<br>(8.06 to<br>31.69)                                            | 7.80<br>(3.79 to<br>13.39)                                             | 5.42<br>(2.68 to<br>9.62)                                            | 8.12<br>(3.86 to<br>13.75)                                             | 0.32<br>(0.17 to<br>0.51)                                     | 0.21<br>(0.09 to<br>0.41)                                       | 0.16<br>(0.07 to<br>0.31)                                      | 0.22<br>(0.10 to<br>0.41)                                        |
| Acute hepatitis B                                                       | 307.00<br>(256.25 to<br>362.08)                                        | 225.42<br>(170.60 to<br>286.37)                                        | 143.08<br>(101.33 to<br>198.29)                                      | 228.05<br>(174.69 to<br>288.64)                                        | 8.81<br>(7.36 to<br>10.39)                                    | 8.34<br>(6.22 to<br>10.72)                                      | 5.39<br>(3.73 to<br>7.46)                                      | 8.29<br>(6.27 to<br>10.56)                                       |
| Acute hepatitis C                                                       | 20.39<br>(15.16 to<br>27.24)                                           | 16.26<br>(11.37 to<br>23.19)                                           | 10.95<br>(7.33 to<br>16.38)                                          | 16.21<br>(11.24 to<br>23.29)                                           | 0.61<br>(0.44 to<br>0.81)                                     | 0.62<br>(0.43 to<br>0.92)                                       | 0.43<br>(0.28 to<br>0.65)                                      | 0.61<br>(0.42 to<br>0.90)                                        |
| Acute hepatitis E                                                       | 122.57<br>(95.24 to<br>155.74)                                         | 67.25<br>(47.72 to<br>92.78)                                           | 44.24<br>(30.17 to<br>63.38)                                         | 68.49<br>(48.00 to<br>94.95)                                           | 2.71<br>(2.04 to<br>3.52)                                     | 2.52<br>(1.60 to<br>3.66)                                       | 1.76<br>(1.11 to<br>2.63)                                      | 2.45<br>(1.60 to<br>3.58)                                        |
| Other unspecified infectious diseases                                   | 2,688.17<br>(2,267.29 to<br>3,066.00)                                  | 2,030.65<br>(1,702.71 to<br>2,428.96)                                  | 1,773.18<br>(1,485.30 to<br>2,090.87)                                | 2,059.57<br>(1,723.00 to<br>2,438.56)                                  | 79.31<br>(69.37 to<br>91.11)                                  | 83.84<br>(71.10 to<br>101.87)                                   | 76.16<br>(65.07 to<br>92.35)                                   | 82.64<br>(70.11 to<br>98.73)                                     |
| <b>Non-communicable diseases</b>                                        | <b>1,400,632.34</b><br><b>(1,295,587.68 to</b><br><b>1,509,174.46)</b> | <b>1,592,664.75</b><br><b>(1,333,844.65 to</b><br><b>1,903,146.90)</b> | <b>1,153,915.58</b><br><b>(966,879.46 to</b><br><b>1,367,023.30)</b> | <b>1,960,322.35</b><br><b>(1,629,460.95 to</b><br><b>2,362,679.90)</b> | <b>82,616.76</b><br><b>(76,996.25 to</b><br><b>88,377.56)</b> | <b>117,227.95</b><br><b>(96,721.32 to</b><br><b>140,333.42)</b> | <b>89,147.73</b><br><b>(72,424.32 to</b><br><b>107,266.08)</b> | <b>137,073.41</b><br><b>(113,090.72 to</b><br><b>163,957.26)</b> |
| <b>Cuba</b>                                                             |                                                                        |                                                                        |                                                                      |                                                                        |                                                               |                                                                 |                                                                |                                                                  |
| Cause                                                                   | YLLs (actual counts)                                                   |                                                                        |                                                                      |                                                                        | Deaths (actual counts)                                        |                                                                 |                                                                |                                                                  |
|                                                                         | 2016                                                                   | 2040 Forecast                                                          | 2040 Better Scenario                                                 | 2040 Worse Scenario                                                    | 2016                                                          | 2040 Forecast                                                   | 2040 Better Scenario                                           | 2040 Worse Scenario                                              |
| Neoplasms                                                               | 499,547.70<br>(459,652.24 to<br>539,042.71)                            | 602,648.18<br>(516,665.07 to<br>708,441.21)                            | 493,451.85<br>(421,104.04 to<br>575,399.55)                          | 732,614.56<br>(614,471.86 to<br>877,311.50)                            | 25,124.06<br>(23,218.74 to<br>27,104.46)                      | 37,699.87<br>(32,708.13 to<br>43,987.54)                        | 32,275.26<br>(27,753.26 to<br>37,526.26)                       | 44,525.05<br>(37,927.64 to<br>52,859.35)                         |
| Lip and oral cavity cancer                                              | 10,719.00<br>(9,647.07 to<br>11,980.70)                                | 11,888.85<br>(7,257.05 to<br>19,538.15)                                | 6,738.87<br>(4,494.46 to<br>10,400.00)                               | 17,747.69<br>(10,480.79 to<br>29,270.97)                               | 513.84<br>(464.48 to<br>567.71)                               | 670.20<br>(423.11 to<br>1,066.15)                               | 410.48<br>(278.54 to<br>610.72)                                | 998.41<br>(610.77 to<br>1,611.91)                                |
| Nasopharynx cancer                                                      | 2,093.95<br>(1,842.22 to<br>2,371.85)                                  | 2,152.45<br>(1,328.72 to<br>3,324.51)                                  | 1,051.89<br>(689.11 to<br>1,577.10)                                  | 3,203.96<br>(1,906.75 to<br>5,075.90)                                  | 84.59<br>(74.99 to<br>94.81)                                  | 102.09<br>(64.95 to<br>155.15)                                  | 53.38<br>(35.92 to<br>78.87)                                   | 152.91<br>(91.41 to<br>239.67)                                   |
| Other pharynx cancer                                                    | 4,458.19<br>(3,941.11 to<br>5,123.00)                                  | 5,439.53<br>(3,254.74 to<br>9,029.38)                                  | 4,298.88<br>(2,787.12 to<br>6,760.93)                                | 5,568.53<br>(3,301.86 to<br>9,290.98)                                  | 194.28<br>(173.20 to<br>220.18)                               | 290.79<br>(176.25 to<br>473.45)                                 | 239.32<br>(157.12 to<br>364.14)                                | 291.25<br>(172.45 to<br>472.32)                                  |

|                                      |                                             |                                            |                                           |                                             |                                       |                                       |                                       |                                         |
|--------------------------------------|---------------------------------------------|--------------------------------------------|-------------------------------------------|---------------------------------------------|---------------------------------------|---------------------------------------|---------------------------------------|-----------------------------------------|
|                                      | 17,228.22<br>(15,171.19 to<br>19,583.99)    | 15,679.97<br>(9,421.65 to<br>25,137.22)    | 10,800.05<br>(6,912.39 to<br>16,425.17)   | 23,075.22<br>(13,078.92 to<br>38,194.64)    | 774.85<br>(689.43 to<br>870.99)       | 828.79<br>(515.96 to<br>1,302.91)     | 605.69<br>(403.73 to<br>902.74)       | 1,219.25<br>(713.27 to<br>1,995.34)     |
| Esophageal cancer                    | 18,419.47<br>(16,649.20 to<br>20,142.80)    | 16,438.65<br>(12,956.70 to<br>20,592.44)   | 11,952.56<br>(9,400.64 to<br>15,365.91)   | 17,769.60<br>(13,598.85 to<br>23,003.38)    | 967.50<br>(878.40 to<br>1,056.02)     | 1,058.05<br>(838.66 to<br>1,339.26)   | 793.81<br>(621.68 to<br>1,006.53)     | 1,122.42<br>(866.79 to<br>1,452.95)     |
| Stomach cancer                       | 46,077.57<br>(41,543.39 to<br>50,794.30)    | 71,516.49<br>(52,478.52 to<br>100,884.88)  | 56,702.24<br>(41,761.87 to<br>78,924.41)  | 76,146.84<br>(55,272.93 to<br>106,577.90)   | 2,688.24<br>(2,427.29 to<br>2,978.34) | 5,065.81<br>(3,691.72 to<br>7,058.90) | 4,163.23<br>(3,042.18 to<br>5,789.01) | 5,284.34<br>(3,806.24 to<br>7,345.14)   |
| Colon and rectum cancer              | 17,259.01<br>(15,473.02 to<br>19,207.43)    | 24,446.67<br>(17,508.61 to<br>33,030.90)   | 22,979.08<br>(16,880.06 to<br>30,403.94)  | 30,290.92<br>(20,178.65 to<br>43,391.24)    | 892.05<br>(802.35 to<br>991.58)       | 1,533.34<br>(1,104.23 to<br>2,062.25) | 1,494.36<br>(1,101.87 to<br>1,975.69) | 1,850.94<br>(1,231.76 to<br>2,626.99)   |
| Liver cancer                         | 6,280.34<br>(5,245.56 to<br>7,487.43)       | 7,869.75<br>(5,392.36 to<br>11,160.07)     | 7,578.07<br>(5,514.11 to<br>10,595.33)    | 9,738.81<br>(6,246.91 to<br>14,582.03)      | 286.59<br>(238.02 to<br>345.12)       | 443.48<br>(305.53 to<br>622.56)       | 441.23<br>(311.56 to<br>607.08)       | 536.09<br>(347.78 to<br>788.50)         |
| Liver cancer due to hepatitis B      | 4,719.87<br>(3,978.04 to<br>5,526.65)       | 7,334.30<br>(5,152.56 to<br>10,138.53)     | 7,159.72<br>(5,174.35 to<br>9,705.71)     | 8,859.00<br>(5,745.43 to<br>12,846.24)      | 280.32<br>(240.18 to<br>328.44)       | 517.66<br>(363.14 to<br>719.50)       | 521.41<br>(376.54 to<br>704.19)       | 609.10<br>(398.45 to<br>883.45)         |
| Liver cancer due to hepatitis C      | 3,018.40<br>(2,491.99 to<br>3,644.37)       | 4,544.59<br>(3,015.00 to<br>6,625.74)      | 3,721.53<br>(2,559.89 to<br>5,288.72)     | 5,837.61<br>(3,656.73 to<br>8,974.73)       | 155.77<br>(129.77 to<br>185.46)       | 273.86<br>(184.64 to<br>394.32)       | 235.39<br>(161.20 to<br>331.04)       | 342.69<br>(212.82 to<br>527.48)         |
| Liver cancer due to alcohol use      | 3,240.39<br>(2,743.33 to<br>3,778.71)       | 4,699.03<br>(3,203.07 to<br>6,684.22)      | 4,519.76<br>(3,151.31 to<br>6,267.58)     | 5,855.50<br>(3,696.33 to<br>8,853.17)       | 169.38<br>(144.39 to<br>195.28)       | 298.55<br>(205.08 to<br>420.70)       | 296.33<br>(208.46 to<br>415.00)       | 363.06<br>(230.81 to<br>548.09)         |
| Liver cancer due to other causes     | 3,728.27<br>(3,313.56 to<br>4,636.84)       | 4,356.65<br>(3,745.74 to<br>5,491.80)      | 4,266.08<br>(3,629.32 to<br>5,468.99)     | 4,147.92<br>(3,602.73 to<br>5,176.86)       | 199.37<br>(177.90 to<br>247.21)       | 281.40<br>(244.54 to<br>356.04)       | 282.28<br>(241.56 to<br>362.91)       | 262.78<br>(227.66 to<br>329.06)         |
| Gallbladder and biliary tract cancer | 18,621.49<br>(16,871.20 to<br>20,427.54)    | 25,097.72<br>(20,539.73 to<br>30,772.32)   | 24,195.03<br>(19,949.55 to<br>29,241.27)  | 28,273.74<br>(22,662.55 to<br>35,463.36)    | 965.87<br>(880.34 to<br>1,061.07)     | 1,557.22<br>(1,276.27 to<br>1,914.99) | 1,545.51<br>(1,273.40 to<br>1,872.44) | 1,729.08<br>(1,388.89 to<br>2,167.13)   |
| Pancreatic cancer                    | 18,588.82<br>(16,304.20 to<br>20,921.73)    | 15,957.15<br>(8,562.03 to<br>27,065.10)    | 8,793.48<br>(5,020.06 to<br>14,679.58)    | 25,039.68<br>(12,853.26 to<br>44,125.08)    | 871.62<br>(768.63 to<br>976.24)       | 858.30<br>(475.52 to<br>1,458.06)     | 505.97<br>(288.84 to<br>852.37)       | 1,355.33<br>(733.77 to<br>2,353.43)     |
| Larynx cancer                        | 116,452.49<br>(105,179.62 to<br>127,488.28) | 120,523.15<br>(89,432.31 to<br>158,044.03) | 84,634.08<br>(64,721.18 to<br>107,278.04) | 210,254.46<br>(152,308.36 to<br>279,640.40) | 5,853.19<br>(5,306.81 to<br>6,395.29) | 6,935.85<br>(5,175.15 to<br>9,011.91) | 5,190.83<br>(3,979.21 to<br>6,635.71) | 12,086.94<br>(8,770.77 to<br>16,042.40) |
| Tracheal, bronchus, and lung cancer  | 2,195.03<br>(1,845.37 to<br>2,714.76)       | 2,339.32<br>(1,928.01 to<br>3,037.16)      | 2,875.34<br>(2,326.92 to<br>3,789.29)     | 2,207.77<br>(1,829.55 to<br>2,824.85)       | 99.04<br>(82.92 to<br>127.78)         | 141.17<br>(115.84 to<br>189.65)       | 178.81<br>(145.34 to<br>242.24)       | 129.69<br>(107.65 to<br>171.44)         |
| Malignant skin melanoma              | 5,135.90<br>(4,658.02 to<br>5,645.15)       | 8,493.45<br>(7,592.60 to<br>9,514.57)      | 6,848.69<br>(5,778.56 to<br>8,040.40)     | 8,028.14<br>(7,174.89 to<br>8,949.89)       | 355.04<br>(322.65 to<br>388.21)       | 715.37<br>(628.87 to<br>817.02)       | 599.59<br>(506.41 to<br>711.54)       | 657.10<br>(579.99 to<br>749.09)         |
| Non-melanoma skin cancer             | 35,276.92<br>(30,308.82 to<br>40,624.84)    | 42,621.63<br>(31,798.48 to<br>55,554.69)   | 33,122.22<br>(24,690.76 to<br>43,446.52)  | 44,613.20<br>(32,613.50 to<br>59,444.73)    | 1,578.36<br>(1,367.08 to<br>1,806.62) | 2,506.82<br>(1,877.75 to<br>3,266.40) | 2,020.19<br>(1,899.33 to<br>2,630.57) | 2,569.39<br>(1,899.33 to<br>3,429.79)   |
| Breast cancer                        | 17,077.93<br>(14,617.49 to<br>19,674.23)    | 12,850.15<br>(9,275.54 to<br>17,626.06)    | 9,383.27<br>(6,719.02 to<br>12,998.28)    | 14,050.04<br>(9,561.27 to<br>20,221.85)     | 634.03<br>(549.85 to<br>730.14)       | 619.47<br>(450.19 to<br>833.89)       | 464.92<br>(336.27 to<br>636.52)       | 668.14<br>(460.53 to<br>964.21)         |
| Cervical cancer                      | 11,131.03<br>(9,459.19 to<br>12,971.76)     | 13,315.77<br>(10,820.37 to<br>16,214.40)   | 11,051.31<br>(8,896.65 to<br>13,673.17)   | 13,120.07<br>(10,682.70 to<br>15,889.08)    | 530.65<br>(451.73 to<br>617.74)       | 804.89<br>(661.97 to<br>974.57)       | 683.60<br>(555.14 to<br>839.27)       | 779.89<br>(642.44 to<br>931.30)         |
| Uterine cancer                       | 8,032.61<br>(6,654.57 to<br>9,477.98)       | 8,835.72<br>(6,140.86 to<br>12,716.83)     | 8,010.99<br>(5,615.90 to<br>11,478.11)    | 8,836.47<br>(6,055.55 to<br>12,869.29)      | 321.27<br>(265.79 to<br>379.14)       | 321.27<br>(319.36 to<br>655.12)       | 452.08<br>(295.21 to<br>590.30)       | 445.24<br>(310.27 to<br>646.96)         |
| Ovarian cancer                       | 40,063.11<br>(30,984.94 to<br>45,932.03)    | 76,775.21<br>(61,284.29 to<br>89,562.47)   | 70,929.81<br>(56,130.37 to<br>84,637.23)  | 73,226.89<br>(57,457.90 to<br>85,468.07)    | 3,068.06<br>(2,416.77 to<br>3,494.44) | 6,443.86<br>(5,237.44 to<br>7,474.17) | 6,127.03<br>(4,984.22 to<br>7,152.07) | 6,009.03<br>(4,714.75 to<br>7,012.13)   |
| Prostate cancer                      | 526.48<br>(431.56 to<br>634.08)             | 406.50<br>(320.67 to<br>515.71)            | 333.83<br>(259.36 to<br>437.97)           | 395.33<br>(313.12 to<br>502.87)             | 16.68<br>(13.98 to<br>19.94)          | 18.79<br>(14.83 to<br>23.48)          | 16.05<br>(12.61 to<br>20.41)          | 17.62<br>(14.08 to<br>22.24)            |
| Testicular cancer                    | <b>Cuba</b>                                 |                                            |                                           |                                             |                                       |                                       |                                       |                                         |
| Cause                                | YLLs (actual counts)                        |                                            |                                           |                                             | Deaths (actual counts)                |                                       |                                       |                                         |
|                                      | 2016                                        | 2040 Forecast                              | 2040 Better Scenario                      | 2040 Worse Scenario                         | 2016                                  | 2040 Forecast                         | 2040 Better Scenario                  | 2040 Worse Scenario                     |

|                                 |                                                      |                                                      |                                                      |                                                        |                                                   |                                                   |                                                   |                                                   |
|---------------------------------|------------------------------------------------------|------------------------------------------------------|------------------------------------------------------|--------------------------------------------------------|---------------------------------------------------|---------------------------------------------------|---------------------------------------------------|---------------------------------------------------|
| Kidney cancer                   | 6,594.54<br>(5,977.15 to<br>7,315.91)                | 8,660.50<br>(6,761.50 to<br>10,849.62)               | 8,817.11<br>(7,081.43 to<br>10,766.42)               | 9,325.16<br>(7,134.90 to<br>11,972.50)                 | 290.76<br>(263.14 to<br>321.61)                   | 472.41<br>(374.59 to<br>587.00)                   | 496.78<br>(398.82 to<br>613.32)                   | 501.47<br>(385.45 to<br>643.91)                   |
| Bladder cancer                  | 10,329.72<br>(9,217.01 to<br>11,483.50)              | 12,504.07<br>(9,456.63 to<br>16,606.52)              | 10,760.37<br>(8,287.24 to<br>14,117.11)              | 14,987.81<br>(10,708.06 to<br>20,979.48)               | 671.31<br>(603.97 to<br>743.92)                   | 937.83<br>(711.87 to<br>1,238.81)                 | 835.70<br>(647.80 to<br>1,077.36)                 | 1,106.14<br>(806.32 to<br>1,537.12)               |
| Brain and nervous system cancer | 18,379.79<br>(14,072.44 to<br>21,090.15)             | 19,681.07<br>(14,726.75 to<br>22,819.42)             | 18,442.39<br>(13,874.78 to<br>21,695.97)             | 19,041.52<br>(14,304.27 to<br>22,118.51)               | 631.65<br>(480.44 to<br>725.59)                   | 890.92<br>(683.37 to<br>1,030.30)                 | 854.23<br>(650.77 to<br>1,000.87)                 | 845.06<br>(643.71 to<br>971.28)                   |
| Thyroid cancer                  | 1,672.17<br>(1,495.01 to<br>1,864.58)                | 1,920.49<br>(1,421.64 to<br>2,619.25)                | 1,605.62<br>(1,199.88 to<br>2,181.48)                | 2,018.01<br>(1,448.21 to<br>2,872.84)                  | 83.82<br>(75.36 to<br>92.87)                      | 119.39<br>(90.13 to<br>160.46)                    | 102.41<br>(76.81 to<br>136.98)                    | 121.92<br>(89.90 to<br>170.63)                    |
| Mesothelioma                    | 552.91<br>(493.08 to<br>630.21)                      | 585.44<br>(504.21 to<br>697.58)                      | 595.97<br>(508.12 to<br>714.10)                      | 565.20<br>(489.92 to<br>679.39)                        | 21.51<br>(19.32 to<br>25.11)                      | 30.22<br>(26.05 to<br>37.20)                      | 31.72<br>(27.20 to<br>39.39)                      | 28.42<br>(24.55 to<br>34.53)                      |
| Hodgkin lymphoma                | 3,141.46<br>(941.59 to<br>3,653.35)                  | 1,684.90<br>(504.95 to<br>2,071.07)                  | 1,193.56<br>(364.33 to<br>1,529.29)                  | 1,672.97<br>(502.28 to<br>2,027.71)                    | 109.63<br>(32.76 to<br>127.70)                    | 109.63<br>(23.09 to<br>95.28)                     | 57.17<br>(17.11 to<br>72.16)                      | 76.61<br>(22.60 to<br>91.46)                      |
| Non-Hodgkin lymphoma            | 14,456.87<br>(12,977.42 to<br>16,751.14)             | 17,605.47<br>(14,724.18 to<br>21,643.91)             | 15,720.04<br>(13,125.74 to<br>19,271.36)             | 17,547.17<br>(14,580.63 to<br>21,890.52)               | 577.16<br>(517.50 to<br>652.42)                   | 916.97<br>(768.89 to<br>1,118.47)                 | 838.42<br>(700.35 to<br>1,016.51)                 | 893.61<br>(746.27 to<br>1,102.52)                 |
| Multiple myeloma                | 7,724.99<br>(6,513.38 to<br>9,047.54)                | 11,564.02<br>(9,246.21 to<br>14,675.88)              | 11,001.63<br>(8,833.24 to<br>13,887.86)              | 11,495.14<br>(9,070.56 to<br>14,835.52)                | 369.68<br>(317.49 to<br>441.20)                   | 661.12<br>(537.85 to<br>845.07)                   | 642.14<br>(521.67 to<br>806.72)                   | 644.14<br>(515.01 to<br>828.69)                   |
| Leukemia                        | 17,166.00<br>(15,686.90 to<br>18,770.24)             | 18,631.90<br>(15,121.00 to<br>22,838.79)             | 16,049.13<br>(13,186.53 to<br>19,615.27)             | 20,483.53<br>(16,027.37 to<br>26,087.05)               | 667.40<br>(610.28 to<br>730.82)                   | 989.59<br>(810.48 to<br>1,214.06)                 | 874.14<br>(718.33 to<br>1,073.51)                 | 1,067.85<br>(830.01 to<br>1,360.37)               |
| Acute lymphoid leukemia         | 3,376.67<br>(2,938.04 to<br>3,785.25)                | 2,491.32<br>(2,014.50 to<br>3,073.63)                | 2,066.97<br>(1,673.88 to<br>2,547.18)                | 2,699.49<br>(2,151.20 to<br>3,399.39)                  | 84.46<br>(72.68 to<br>94.20)                      | 94.19<br>(74.80 to<br>114.47)                     | 80.56<br>(63.93 to<br>99.02)                      | 101.09<br>(78.35 to<br>127.71)                    |
| Chronic lymphoid leukemia       | 1,736.46<br>(1,467.70 to<br>2,237.80)                | 2,367.04<br>(1,688.58 to<br>3,382.74)                | 2,188.09<br>(1,562.93 to<br>3,126.12)                | 2,594.59<br>(1,780.36 to<br>3,817.56)                  | 101.19<br>(85.28 to<br>130.82)                    | 159.34<br>(115.30 to<br>226.84)                   | 151.75<br>(109.60 to<br>215.06)                   | 170.77<br>(118.35 to<br>249.56)                   |
| Acute myeloid leukemia          | 5,776.50<br>(5,172.77 to<br>6,443.92)                | 6,778.69<br>(5,475.42 to<br>8,463.17)                | 6,887.00<br>(5,334.88 to<br>7,927.58)                | 7,422.21<br>(5,810.88 to<br>9,618.98)                  | 194.16<br>(173.07 to<br>223.93)                   | 310.30<br>(250.46 to<br>393.01)                   | 306.59<br>(253.02 to<br>385.29)                   | 334.48<br>(261.16 to<br>432.77)                   |
| Chronic myeloid leukemia        | 2,465.98<br>(2,151.77 to<br>2,777.91)                | 2,116.96<br>(1,589.98 to<br>2,814.72)                | 1,439.40<br>(1,038.87 to<br>1,988.33)                | 2,342.86<br>(1,676.93 to<br>3,234.86)                  | 111.06<br>(98.00 to<br>125.25)                    | 121.69<br>(92.11 to<br>159.08)                    | 85.32<br>(62.24 to<br>116.57)                     | 131.53<br>(95.79 to<br>179.58)                    |
| Other leukemia                  | 3,810.38<br>(3,328.85 to<br>4,286.42)                | 4,877.90<br>(3,941.38 to<br>6,002.13)                | 3,867.68<br>(3,117.71 to<br>4,786.95)                | 5,424.38<br>(4,228.30 to<br>6,907.04)                  | 176.53<br>(154.74 to<br>200.36)                   | 304.06<br>(247.33 to<br>373.12)                   | 249.92<br>(202.43 to<br>306.98)                   | 329.98<br>(258.17 to<br>420.86)                   |
| Other neoplasms                 | 26,443.79<br>(23,960.05 to<br>28,991.74)             | 30,675.28<br>(27,183.55 to<br>34,286.99)             | 30,298.34<br>(26,772.56 to<br>34,085.97)             | 29,481.60<br>(26,374.82 to<br>32,783.92)               | 1,090.62<br>(985.15 to<br>1,200.16)               | 1,718.33<br>(1,531.42 to<br>1,929.77)             | 1,750.14<br>(1,541.93 to<br>1,971.57)             | 1,610.11<br>(1,444.00 to<br>1,803.09)             |
| <b>Cardiovascular diseases</b>  | <b>540,592.02<br/>(499,489.11 to<br/>582,545.99)</b> | <b>558,623.02<br/>(518,094.17 to<br/>599,783.77)</b> | <b>512,720.31<br/>(474,419.68 to<br/>543,640.88)</b> | <b>744,512.87<br/>(689,922.00 to<br/>1,078,662.53)</b> | <b>36,446.09<br/>(33,942.97 to<br/>39,140.75)</b> | <b>46,585.92<br/>(42,653.51 to<br/>65,453.11)</b> | <b>28,136.22<br/>(24,144.16 to<br/>40,279.01)</b> | <b>56,706.35<br/>(51,221.68 to<br/>80,295.02)</b> |
| Rheumatic heart disease         | 6,791.55<br>(5,999.37 to<br>7,578.13)                | 3,868.28<br>(3,108.87 to<br>5,037.43)                | 2,730.37<br>(2,124.05 to<br>3,584.80)                | 3,888.56<br>(3,100.25 to<br>5,038.41)                  | 302.98<br>(269.48 to<br>336.58)                   | 258.29<br>(205.65 to<br>341.56)                   | 191.38<br>(144.02 to<br>257.68)                   | 251.59<br>(200.86 to<br>325.01)                   |
| Ischemic heart disease          | 302,334.68<br>(277,654.74 to<br>331,337.57)          | 311,593.64<br>(284,534.79 to<br>340,652.58)          | 159,687.22<br>(142,428.30 to<br>176,946.14)          | 436,625.76<br>(391,359.73 to<br>481,911.79)            | 20,879.90<br>(19,353.40 to<br>22,652.76)          | 26,479.65<br>(25,287.13 to<br>41,786.76)          | 14,644.72<br>(13,393.86 to<br>23,921.86)          | 33,650.90<br>(31,708.82 to<br>55,050.12)          |
| Stroke                          | 145,219.83<br>(132,192.35 to<br>159,112.24)          | 127,463.42<br>(114,685.76 to<br>140,241.08)          | 60,306.37<br>(54,980.80 to<br>65,631.94)             | 179,241.37<br>(163,461.51 to<br>195,021.23)            | 9,683.96<br>(8,800.70 to<br>10,585.46)            | 10,260.01<br>(9,383.85 to<br>11,148.77)           | 5,390.62<br>(4,853.53 to<br>5,927.51)             | 12,950.12<br>(12,248.65 to<br>13,651.59)          |
| Ischemic stroke                 | 72,392.76<br>(65,217.01 to<br>80,248.84)             | 65,473.37<br>(59,607.08 to<br>71,740.66)             | 34,493.47<br>(30,358.27 to<br>38,629.67)             | 85,774.21<br>(78,027.48 to<br>93,521.14)               | 5,826.07<br>(5,257.06 to<br>6,439.79)             | 6,147.10<br>(5,606.97 to<br>6,687.23)             | 3,499.63<br>(3,200.11 to<br>3,799.15)             | 7,372.58<br>(6,900.03 to<br>7,845.13)             |
| Intracerebral hemorrhage        | 72,827.07<br>(65,734.58 to<br>80,074.58)             | 61,990.05<br>(56,559.65 to<br>67,424.81)             | 25,812.90<br>(23,302.72 to<br>28,322.08)             | 93,467.15<br>(84,467.55 to<br>102,467.75)              | 3,857.88<br>(3,480.00 to<br>4,235.76)             | 4,112.91<br>(3,748.29 to<br>4,477.53)             | 1,890.99<br>(1,627.97 to<br>2,154.01)             | 5,577.54<br>(5,284.30 to<br>5,870.78)             |
| Hypertensive heart disease      | 23,520.32<br>(10,348.12 to<br>30,918.98)             | 31,911.54<br>(28,381.33 to<br>35,441.75)             | 21,430.71<br>(19,127.77 to<br>23,733.65)             | 37,948.05<br>(34,034.22 to<br>41,861.88)               | 1,551.20<br>(1,215.51 to<br>2,086.89)             | 2,629.73<br>(2,353.60 to<br>2,905.86)             | 1,857.87<br>(1,658.58 to<br>2,057.16)             | 2,968.23<br>(2,714.98 to<br>3,220.68)             |

| Cardiomyopathy and myocarditis                      | 17,414.81<br>(14,122.74 to<br>19,829.61)          | 17,428.49<br>(13,406.65 to<br>21,945.50)          | 13,566.38<br>(10,278.04 to<br>16,990.48)          | 17,278.15<br>(13,210.83 to<br>21,844.12)           | 821.22<br>(700.35 to<br>927.59)                | 1,067.90<br>(822.63 to<br>1,401.32)            | 870.82<br>(657.62 to<br>1,125.85)              | 1,026.37<br>(790.75 to<br>1,358.20)            |
|-----------------------------------------------------|---------------------------------------------------|---------------------------------------------------|---------------------------------------------------|----------------------------------------------------|------------------------------------------------|------------------------------------------------|------------------------------------------------|------------------------------------------------|
| Myocarditis                                         | 1,795.24<br>(1,351.57 to<br>2,772.15)             | 1,975.54<br>(1,396.49 to<br>3,221.23)             | 1,969.11<br>(1,396.98 to<br>3,156.67)             | 1,905.24<br>(1,557.36 to<br>3,061.60)              | 179.99<br>(90.42 to<br>192.23)                 | 179.99<br>(122.20 to<br>300.88)                | 188.98<br>(128.26 to<br>302.71)                | 168.40<br>(114.53 to<br>278.21)                |
| <b>Cuba</b>                                         |                                                   |                                                   |                                                   |                                                    |                                                |                                                |                                                |                                                |
| Cause                                               | YLLs (actual counts)                              |                                                   |                                                   |                                                    | Deaths (actual counts)                         |                                                |                                                |                                                |
|                                                     | 2016                                              | 2040 Forecast                                     | 2040 Better Scenario                              | 2040 Worse Scenario                                | 2016                                           | 2040 Forecast                                  | 2040 Better Scenario                           | 2040 Worse Scenario                            |
| Alcoholic cardiomyopathy                            | 8,636.47<br>(5,087.36 to<br>10,731.48)            | 7,487.67<br>(4,339.11 to<br>9,732.39)             | 6,160.73<br>(3,809.47 to<br>7,980.09)             | 7,510.31<br>(4,286.63 to<br>9,777.62)              | 324.36<br>(213.08 to<br>392.54)                | 335.47<br>(225.99 to<br>422.50)                | 288.04<br>(203.34 to<br>367.09)                | 329.34<br>(212.17 to<br>413.06)                |
| Other cardiomyopathy                                | 6,983.10<br>(5,738.52 to<br>8,964.26)             | 7,965.29<br>(5,294.09 to<br>11,611.97)            | 5,436.55<br>(3,516.94 to<br>8,030.83)             | 7,862.60<br>(5,172.79 to<br>11,475.11)             | 374.44<br>(306.00 to<br>461.25)                | 552.44<br>(368.36 to<br>823.69)                | 393.79<br>(249.97 to<br>611.65)                | 528.63<br>(351.79 to<br>784.38)                |
| Atrial fibrillation and flutter                     | 6,238.96<br>(4,899.50 to<br>7,893.65)             | 11,188.34<br>(8,263.76 to<br>14,896.71)           | 9,946.10<br>(7,305.16 to<br>13,318.46)            | 11,262.09<br>(8,276.29 to<br>14,876.24)            | 662.41<br>(511.60 to<br>845.06)                | 1,277.22<br>(936.63 to<br>1,701.66)            | 1,180.53<br>(855.76 to<br>1,586.36)            | 1,237.67<br>(905.59 to<br>1,646.11)            |
| Aortic aneurysm                                     | 11,555.92<br>(10,286.80 to<br>12,978.92)          | 15,725.30<br>(12,739.93 to<br>19,518.06)          | 13,548.56<br>(11,009.73 to<br>16,773.01)          | 16,483.65<br>(13,136.71 to<br>20,682.60)           | 760.20<br>(678.72 to<br>847.95)                | 1,194.14<br>(990.22 to<br>1,477.09)            | 1,069.64<br>(880.18 to<br>1,293.45)            | 1,197.70<br>(987.09 to<br>1,478.76)            |
| Peripheral artery disease                           | 6,429.50<br>(4,698.19 to<br>10,136.79)            | 14,431.61<br>(9,653.97 to<br>24,993.94)           | 14,031.42<br>(9,303.58 to<br>24,371.34)           | 14,945.95<br>(10,091.10 to<br>25,271.70)           | 559.06<br>(391.98 to<br>1,093.68)              | 1,491.55<br>(900.82 to<br>3,055.12)            | 1,524.18<br>(897.86 to<br>3,109.55)            | 1,465.25<br>(897.07 to<br>3,049.57)            |
| Endocarditis                                        | 2,776.86<br>(2,215.01 to<br>3,998.64)             | 3,288.46<br>(2,278.06 to<br>5,056.50)             | 2,966.82<br>(2,092.29 to<br>4,568.28)             | 3,279.39<br>(2,256.58 to<br>5,017.30)              | 137.12<br>(108.32 to<br>200.11)                | 222.51<br>(151.71 to<br>361.45)                | 209.15<br>(142.07 to<br>340.31)                | 214.85<br>(146.52 to<br>345.41)                |
| Other cardiovascular and circulatory diseases       | 18,309.59<br>(16,529.49 to<br>20,209.44)          | 21,723.95<br>(17,338.59 to<br>27,424.29)          | 14,506.36<br>(11,170.79 to<br>18,571.46)          | 23,559.91<br>(18,644.67 to<br>30,512.89)           | 1,088.06<br>(990.17 to<br>1,203.68)            | 1,704.94<br>(1,375.03 to<br>2,144.95)          | 1,197.31<br>(928.40 to<br>1,527.38)            | 1,743.67<br>(1,398.27 to<br>2,251.99)          |
| <b>Chronic respiratory diseases</b>                 | <b>64,561.53<br/>(59,054.13 to<br/>70,999.50)</b> | <b>53,311.78<br/>(41,420.49 to<br/>68,846.97)</b> | <b>35,932.90<br/>(28,345.20 to<br/>45,415.68)</b> | <b>91,974.21<br/>(66,827.35 to<br/>123,488.01)</b> | <b>4,077.52<br/>(3,740.23 to<br/>4,451.33)</b> | <b>3,905.13<br/>(3,054.41 to<br/>4,991.40)</b> | <b>2,811.86<br/>(2,211.57 to<br/>3,557.93)</b> | <b>6,582.39<br/>(4,882.33 to<br/>8,665.43)</b> |
| Chronic obstructive pulmonary disease               | 54,567.33<br>(49,742.10 to<br>59,770.48)          | 46,547.74<br>(34,604.00 to<br>61,424.14)          | 29,891.03<br>(22,736.21 to<br>38,742.29)          | 84,251.73<br>(59,935.61 to<br>116,484.53)          | 3,633.21<br>(3,335.18 to<br>3,977.13)          | 3,479.42<br>(2,652.55 to<br>4,521.01)          | 2,401.76<br>(1,838.94 to<br>3,125.94)          | 6,118.69<br>(4,484.32 to<br>8,224.51)          |
| Pneumoconiosis                                      | 76.97<br>(66.35 to<br>89.07)                      | 72.27<br>(58.30 to<br>88.21)                      | 56.60<br>(44.78 to<br>70.95)                      | 71.04<br>(57.66 to<br>86.81)                       | 5.21<br>(4.48 to<br>6.03)                      | 6.15<br>(4.92 to<br>7.73)                      | 4.84<br>(3.74 to<br>6.19)                      | 5.88<br>(4.68 to<br>7.46)                      |
| Silicosis                                           | 20.85<br>(8.59 to<br>26.60)                       | 15.17<br>(6.04 to<br>21.95)                       | 8.38<br>(3.40 to<br>13.46)                        | 14.30<br>(5.76 to<br>21.18)                        | 1.46<br>(0.61 to<br>1.87)                      | 1.28<br>(0.51 to<br>1.85)                      | 0.73<br>(0.30 to<br>1.15)                      | 1.17<br>(0.48 to<br>1.71)                      |
| Asbestosis                                          | 18.17<br>(15.40 to<br>22.35)                      | 15.79<br>(12.53 to<br>20.06)                      | 18.17<br>(14.11 to<br>22.82)                      | 15.38<br>(12.20 to<br>19.54)                       | 0.68<br>(0.58 to<br>0.86)                      | 0.81<br>(0.63 to<br>1.08)                      | 0.96<br>(0.74 to<br>1.26)                      | 0.77<br>(0.60 to<br>1.04)                      |
| Coal workers pneumoconiosis                         | 1.65<br>(1.10 to<br>2.24)                         | 1.61<br>(0.94 to<br>2.61)                         | 1.31<br>(0.68 to<br>2.29)                         | 1.70<br>(1.00 to<br>2.74)                          | 0.11<br>(0.07 to<br>0.15)                      | 0.15<br>(0.07 to<br>0.27)                      | 0.13<br>(0.06 to<br>0.26)                      | 0.15<br>(0.08 to<br>0.27)                      |
| Other pneumoconiosis                                | 36.30<br>(29.83 to<br>47.41)                      | 39.70<br>(29.13 to<br>52.61)                      | 28.74<br>(20.15 to<br>39.85)                      | 39.65<br>(29.26 to<br>53.01)                       | 2.96<br>(2.47 to<br>3.91)                      | 3.92<br>(2.86 to<br>5.21)                      | 3.01<br>(2.12 to<br>4.16)                      | 3.78<br>(2.76 to<br>5.10)                      |
| Asthma                                              | 6,626.12<br>(5,439.01 to<br>7,561.56)             | 2,808.20<br>(1,857.52 to<br>4,271.93)             | 1,590.93<br>(1,013.52 to<br>2,371.00)             | 3,638.36<br>(2,273.83 to<br>5,643.05)              | 251.55<br>(215.47 to<br>289.41)                | 135.78<br>(90.48 to<br>201.55)                 | 79.58<br>(51.32 to<br>118.88)                  | 169.55<br>(108.18 to<br>259.93)                |
| Interstitial lung disease and pulmonary sarcoidosis | 1,363.07<br>(1,080.07 to<br>2,208.80)             | 1,533.53<br>(1,136.86 to<br>2,657.39)             | 2,095.71<br>(1,524.32 to<br>3,662.31)             | 1,452.17<br>(1,084.82 to<br>2,546.90)              | 61.34<br>(45.84 to<br>113.49)                  | 91.24<br>(63.63 to<br>176.59)                  | 129.03<br>(87.30 to<br>251.88)                 | 84.02<br>(58.74 to<br>160.74)                  |
| Other chronic respiratory diseases                  | 1,928.04<br>(1,218.34 to<br>2,716.99)             | 2,356.03<br>(1,349.45 to<br>3,274.64)             | 2,298.62<br>(1,300.89 to<br>3,180.01)             | 2,560.90<br>(1,436.32 to<br>3,644.98)              | 126.21<br>(69.81 to<br>167.48)                 | 192.54<br>(99.40 to<br>268.41)                 | 196.65<br>(101.53 to<br>270.05)                | 200.45<br>(102.17 to<br>292.44)                |
| <b>Cirrhosis and other chronic liver diseases</b>   | <b>43,820.90<br/>(38,649.27 to<br/>49,158.22)</b> | <b>42,324.86<br/>(37,287.45 to<br/>47,714.30)</b> | <b>31,884.07<br/>(27,475.29 to<br/>37,001.42)</b> | <b>42,301.84<br/>(37,496.72 to<br/>47,501.05)</b>  | <b>1,730.86<br/>(1,549.59 to<br/>1,916.86)</b> | <b>2,137.45<br/>(1,922.84 to<br/>2,369.78)</b> | <b>1,664.09<br/>(1,448.03 to<br/>1,900.66)</b> | <b>2,091.74<br/>(1,877.88 to<br/>2,318.13)</b> |

|                                                                |                                                               |                                                                  |                                                                  |                                                                 |                                                            |                                                               |                                                               |                                                               |
|----------------------------------------------------------------|---------------------------------------------------------------|------------------------------------------------------------------|------------------------------------------------------------------|-----------------------------------------------------------------|------------------------------------------------------------|---------------------------------------------------------------|---------------------------------------------------------------|---------------------------------------------------------------|
|                                                                | 5,554.78<br>(4,423.23 to<br>6,903.77)                         | 5,288.00<br>(4,184.60 to<br>6,575.21)                            | 4,362.20<br>(3,416.68 to<br>5,484.13)                            | 5,152.34<br>(4,086.15 to<br>6,413.99)                           | 222.73<br>(180.65 to<br>270.99)                            | 269.08<br>(213.37 to<br>331.81)                               | 226.53<br>(180.61 to<br>285.61)                               | 257.39<br>(204.88 to<br>319.64)                               |
| Cirrhosis and other chronic liver diseases due to hepatitis B  | 15,759.63<br>(13,461.15 to<br>18,178.30)                      | 14,732.71<br>(12,519.79 to<br>17,336.22)                         | 11,964.54<br>(9,846.49 to<br>14,545.32)                          | 14,413.61<br>(12,259.63 to<br>16,907.14)                        | 601.31<br>(522.39 to<br>684.72)                            | 712.01<br>(607.45 to<br>825.70)                               | 589.27<br>(490.49 to<br>708.43)                               | 684.65<br>(582.45 to<br>790.71)                               |
| Cirrhosis and other chronic liver diseases due to hepatitis C  | 16,687.22<br>(14,308.87 to<br>19,151.27)                      | 16,705.63<br>(14,304.53 to<br>19,505.69)                         | 10,974.57<br>(9,162.06 to<br>13,050.99)                          | 17,252.25<br>(14,799.82 to<br>20,144.45)                        | 670.08<br>(586.81 to<br>756.57)                            | 849.94<br>(742.61 to<br>979.71)                               | 591.12<br>(499.98 to<br>687.88)                               | 855.74<br>(748.43 to<br>980.53)                               |
| Cirrhosis and other chronic liver diseases due to alcohol use  | 5,819.26<br>(5,015.74 to<br>6,734.24)                         | 5,598.52<br>(4,696.11 to<br>6,614.01)                            | 4,582.77<br>(3,731.79 to<br>5,463.36)                            | 5,483.64<br>(4,603.38 to<br>6,432.05)                           | 236.74<br>(204.71 to<br>274.02)                            | 306.42<br>(255.62 to<br>360.12)                               | 257.16<br>(211.41 to<br>306.23)                               | 293.96<br>(246.82 to<br>346.17)                               |
| Cirrhosis and other chronic liver diseases due to other causes | <b>37,688.17</b><br><b>(31,212.03 to</b><br><b>42,454.50)</b> | <b>42,518.30</b><br><b>(33,725.28 to</b><br><b>51,066.24)</b>    | <b>34,128.46</b><br><b>(26,476.91 to</b><br><b>40,883.66)</b>    | <b>43,010.00</b><br><b>(33,936.10 to</b><br><b>51,999.85)</b>   | <b>2,133.30</b><br><b>(1,741.15 to</b><br><b>2,394.36)</b> | <b>3,060.29</b><br><b>(2,418.09 to</b><br><b>3,597.38)</b>    | <b>2,573.72</b><br><b>(2,001.79 to</b><br><b>3,053.46)</b>    | <b>3,004.99</b><br><b>(2,378.40 to</b><br><b>3,577.09)</b>    |
| Digestive diseases                                             | 6,950.15<br>(5,959.72 to<br>8,272.99)                         | 5,512.79<br>(4,327.76 to<br>6,977.00)                            | 3,575.73<br>(2,679.67 to<br>4,712.20)                            | 5,916.15<br>(4,474.39 to<br>7,658.82)                           | 421.95<br>(361.40 to<br>494.59)                            | 422.01<br>(332.52 to<br>533.56)                               | 281.95<br>(207.42 to<br>372.01)                               | 456.40<br>(332.95 to<br>562.01)                               |
| Peptic ulcer disease                                           | <b>Cuba</b>                                                   |                                                                  |                                                                  |                                                                 |                                                            |                                                               |                                                               |                                                               |
| Cause                                                          | YLLs (actual counts)                                          |                                                                  |                                                                  |                                                                 | Deaths (actual counts)                                     |                                                               |                                                               |                                                               |
|                                                                | 2016                                                          | 2040 Forecast                                                    | 2040 Better Scenario                                             | 2040 Worse Scenario                                             | 2016                                                       | 2040 Forecast                                                 | 2040 Better Scenario                                          | 2040 Worse Scenario                                           |
| Gastritis and duodenitis                                       | 1,684.05<br>(1,261.53 to<br>2,137.74)                         | 2,400.64<br>(1,653.78 to<br>3,116.05)                            | 1,860.56<br>(1,267.46 to<br>2,517.91)                            | 2,303.31<br>(1,542.54 to<br>2,994.24)                           | 105.17<br>(73.88 to<br>129.81)                             | 186.10<br>(123.91 to<br>239.76)                               | 149.59<br>(98.22 to<br>196.71)                                | 173.79<br>(112.50 to<br>222.01)                               |
| Appendicitis                                                   | 2,107.02<br>(1,746.45 to<br>2,659.32)                         | 1,770.48<br>(1,400.62 to<br>2,202.13)                            | 1,202.75<br>(901.14 to<br>1,585.72)                              | 1,742.39<br>(1,374.84 to<br>2,169.21)                           | 90.84<br>(75.14 to<br>111.40)                              | 105.75<br>(81.64 to<br>130.02)                                | 74.31<br>(55.27 to<br>97.50)                                  | 101.21<br>(78.91 to<br>125.36)                                |
| Paralytic ileus and intestinal obstruction                     | 7,403.32<br>(5,238.29 to<br>8,950.59)                         | 9,037.74<br>(6,122.65 to<br>11,133.08)                           | 8,905.60<br>(6,021.05 to<br>11,005.08)                           | 8,639.45<br>(5,836.64 to<br>10,630.42)                          | 436.23<br>(303.41 to<br>527.57)                            | 689.67<br>(468.79 to<br>846.56)                               | 702.28<br>(479.75 to<br>876.10)                               | 642.59<br>(434.17 to<br>794.65)                               |
| Inguinal, femoral, and abdominal hernia                        | 2,127.36<br>(1,375.21 to<br>2,529.27)                         | 1,764.64<br>(1,075.15 to<br>2,164.50)                            | 1,447.95<br>(864.26 to<br>1,852.05)                              | 1,691.79<br>(1,020.13 to<br>2,076.43)                           | 132.18<br>(79.32 to<br>158.57)                             | 137.30<br>(80.63 to<br>170.86)                                | 117.10<br>(67.71 to<br>150.72)                                | 128.19<br>(74.33 to<br>159.67)                                |
| Inflammatory bowel disease                                     | 869.44<br>(551.49 to<br>1,037.58)                             | 953.11<br>(650.07 to<br>1,148.42)                                | 926.06<br>(644.55 to<br>1,117.24)                                | 916.86<br>(613.45 to<br>1,105.24)                               | 39.48<br>(28.28 to<br>45.89)                               | 57.23<br>(44.22 to<br>68.50)                                  | 57.44<br>(45.36 to<br>69.15)                                  | 53.67<br>(40.36 to<br>63.92)                                  |
| Vascular intestinal disorders                                  | 5,379.17<br>(3,778.47 to<br>6,269.95)                         | 7,448.61<br>(4,761.26 to<br>8,798.31)                            | 6,648.04<br>(4,565.12 to<br>7,978.84)                            | 7,122.40<br>(4,751.18 to<br>8,411.30)                           | 341.10<br>(239.96 to<br>396.49)                            | 571.57<br>(384.77 to<br>677.68)                               | 526.47<br>(361.98 to<br>632.07)                               | 534.61<br>(360.90 to<br>629.73)                               |
| Gallbladder and biliary diseases                               | 3,695.25<br>(3,191.51 to<br>4,357.61)                         | 4,987.85<br>(3,044.40 to<br>8,173.78)                            | 3,363.44<br>(2,048.81 to<br>5,405.40)                            | 5,999.73<br>(3,512.87 to<br>10,062.69)                          | 217.99<br>(187.87 to<br>255.74)                            | 374.45<br>(229.35 to<br>610.22)                               | 263.04<br>(163.04 to<br>422.58)                               | 432.56<br>(252.92 to<br>714.56)                               |
| Pancreatitis                                                   | 4,697.80<br>(3,167.25 to<br>5,557.67)                         | 5,131.06<br>(2,684.47 to<br>10,153.52)                           | 3,142.99<br>(1,753.50 to<br>5,682.18)                            | 5,276.20<br>(2,735.58 to<br>10,545.19)                          | 183.86<br>(121.25 to<br>216.51)                            | 253.28<br>(140.02 to<br>453.85)                               | 164.76<br>(97.43 to<br>271.39)                                | 253.51<br>(138.42 to<br>465.12)                               |
| Other digestive diseases                                       | 2,774.61<br>(2,340.09 to<br>3,645.81)                         | 3,511.37<br>(2,883.27 to<br>4,822.51)                            | 3,055.34<br>(2,472.60 to<br>4,198.98)                            | 3,401.73<br>(2,812.66 to<br>4,608.93)                           | 164.49<br>(138.75 to<br>216.70)                            | 262.93<br>(213.78 to<br>357.21)                               | 236.77<br>(188.85 to<br>324.05)                               | 248.47<br>(203.54 to<br>323.78)                               |
| Neurological disorders                                         | <b>73,627.06</b><br><b>(63,718.67 to</b><br><b>85,850.30)</b> | <b>126,453.39</b><br><b>(100,043.88 to</b><br><b>165,282.10)</b> | <b>127,104.81</b><br><b>(101,710.89 to</b><br><b>161,157.10)</b> | <b>129,383.75</b><br><b>(99,407.09 to</b><br><b>173,958.24)</b> | <b>7,057.74</b><br><b>(5,968.25 to</b><br><b>8,309.52)</b> | <b>13,675.70</b><br><b>(10,463.49 to</b><br><b>18,224.77)</b> | <b>14,225.03</b><br><b>(10,925.14 to</b><br><b>18,385.51)</b> | <b>13,669.83</b><br><b>(10,157.61 to</b><br><b>18,746.38)</b> |
| Alzheimer's disease and other dementias                        | 54,699.69<br>(45,319.82 to<br>66,205.27)                      | 102,019.25<br>(76,721.74 to<br>139,978.06)                       | 101,807.58<br>(78,220.19 to<br>135,348.58)                       | 106,013.36<br>(76,560.61 to<br>150,577.98)                      | 6,149.25<br>(5,117.57 to<br>7,369.81)                      | 12,090.46<br>(8,998.85 to<br>16,664.04)                       | 12,473.43<br>(9,306.91 to<br>16,580.82)                       | 12,207.57<br>(8,765.41 to<br>17,261.21)                       |
| Parkinson's disease                                            | 5,720.71<br>(4,316.09 to<br>7,392.00)                         | 11,541.65<br>(8,606.87 to<br>15,091.44)                          | 13,147.96<br>(9,845.28 to<br>17,032.18)                          | 10,550.97<br>(7,760.15 to<br>13,705.48)                         | 507.18<br>(380.76 to<br>661.94)                            | 1,065.46<br>(794.03 to<br>1,404.38)                           | 1,242.20<br>(936.54 to<br>1,632.80)                           | 957.67<br>(710.34 to<br>1,260.50)                             |
| Epilepsy                                                       | 3,622.10<br>(3,241.80 to<br>4,075.85)                         | 3,339.84<br>(2,250.56 to<br>4,884.66)                            | 2,366.47<br>(1,669.70 to<br>3,371.85)                            | 3,492.54<br>(2,392.10 to<br>5,213.94)                           | 94.97<br>(85.47 to<br>106.24)                              | 113.05<br>(81.34 to<br>157.71)                                | 83.83<br>(61.99 to<br>113.54)                                 | 115.39<br>(82.01 to<br>161.94)                                |
| Multiple sclerosis                                             | 1,376.59<br>(994.01 to<br>1,615.99)                           | 1,059.66<br>(741.01 to<br>1,318.95)                              | 1,105.20<br>(772.62 to<br>1,390.21)                              | 1,092.57<br>(753.14 to<br>1,374.84)                             | 44.63<br>(31.95 to<br>52.15)                               | 42.46<br>(29.48 to<br>52.12)                                  | 45.05<br>(30.99 to<br>55.44)                                  | 43.10<br>(29.75 to<br>53.94)                                  |

|                                                            |                                                                |                                                                 |                                                                |                                                                  |                                                            |                                                             |                                                            |                                                             |
|------------------------------------------------------------|----------------------------------------------------------------|-----------------------------------------------------------------|----------------------------------------------------------------|------------------------------------------------------------------|------------------------------------------------------------|-------------------------------------------------------------|------------------------------------------------------------|-------------------------------------------------------------|
| Motor neuron disease                                       | 2,393.81<br>(2,121.67 to<br>2,678.39)                          | 3,176.19<br>(2,703.50 to<br>3,647.96)                           | 3,209.69<br>(2,735.81 to<br>3,727.18)                          | 3,054.16<br>(2,622.79 to<br>3,511.26)                            | 91.26<br>(80.69 to<br>101.34)                              | 151.37<br>(129.10 to<br>173.40)                             | 155.55<br>(133.31 to<br>179.90)                            | 143.51<br>(123.15 to<br>163.49)                             |
| Other neurological disorders                               | 5,814.16<br>(5,243.32 to<br>6,393.70)                          | 5,316.78<br>(4,606.90 to<br>6,097.15)                           | 5,467.91<br>(4,760.88 to<br>6,247.06)                          | 5,180.15<br>(4,506.64 to<br>5,908.22)                            | 170.46<br>(154.48 to<br>186.48)                            | 212.89<br>(188.35 to<br>238.98)                             | 224.96<br>(197.78 to<br>253.46)                            | 202.58<br>(180.02 to<br>227.34)                             |
| <b>Mental disorders</b>                                    | <b>17,574.81</b><br><b>(15,161.78 to</b><br><b>20,263.15)</b>  | <b>12,147.23</b><br><b>(10,262.63 to</b><br><b>14,208.85)</b>   | <b>12,390.69</b><br><b>(10,386.39 to</b><br><b>14,540.04)</b>  | <b>12,008.94</b><br><b>(10,190.73 to</b><br><b>14,036.45)</b>    | <b>636.72</b><br><b>(559.25 to</b><br><b>719.58)</b>       | <b>565.27</b><br><b>(495.44 to</b><br><b>642.68)</b>        | <b>608.26</b><br><b>(524.49 to</b><br><b>698.67)</b>       | <b>543.29</b><br><b>(475.81 to</b><br><b>619.07)</b>        |
| Alcohol use disorders                                      | 16,019.15<br>(13,763.22 to<br>18,554.55)                       | 10,453.62<br>(8,753.26 to<br>12,422.97)                         | 10,405.13<br>(8,598.99 to<br>12,334.14)                        | 10,381.53<br>(8,722.46 to<br>12,317.39)                          | 572.68<br>(499.21 to<br>649.30)                            | 470.50<br>(405.15 to<br>545.85)                             | 492.42<br>(416.30 to<br>577.19)                            | 455.87<br>(392.31 to<br>527.86)                             |
| Drug use disorders                                         | 1,546.40<br>(1,302.93 to<br>1,772.69)                          | 1,686.85<br>(1,367.90 to<br>1,998.47)                           | 1,978.36<br>(1,584.77 to<br>2,409.35)                          | 1,620.66<br>(1,307.06 to<br>1,936.31)                            | 63.85<br>(53.27 to<br>73.36)                               | 94.63<br>(76.11 to<br>114.79)                               | 115.69<br>(92.47 to<br>142.48)                             | 87.29<br>(70.05 to<br>105.01)                               |
| Opioid use disorders                                       | 1,191.38<br>(1,011.05 to<br>1,393.51)                          | 1,166.81<br>(932.28 to<br>1,427.51)                             | 1,270.27<br>(996.34 to<br>1,575.62)                            | 1,117.75<br>(901.48 to<br>1,368.33)                              | 49.82<br>(40.77 to<br>58.19)                               | 67.24<br>(47.99 to<br>83.82)                                | 76.89<br>(50.97 to<br>98.21)                               | 61.70<br>(43.82 to<br>76.92)                                |
| Cocaine use disorders                                      | 61.91<br>(31.95 to<br>81.14)                                   | 81.54<br>(51.11 to<br>111.33)                                   | 100.14<br>(63.19 to<br>137.55)                                 | 80.64<br>(49.96 to<br>109.56)                                    | 1.74<br>(1.06 to<br>2.22)                                  | 2.73<br>(1.84 to<br>3.88)                                   | 3.40<br>(2.33 to<br>4.78)                                  | 2.66<br>(1.78 to<br>3.74)                                   |
| Amphetamine use disorders                                  | 39.07<br>(18.29 to<br>52.24)                                   | 57.99<br>(34.76 to<br>79.34)                                    | 82.79<br>(51.10 to<br>116.51)                                  | 57.27<br>(33.98 to<br>79.03)                                     | 1.12<br>(0.64 to<br>1.46)                                  | 1.98<br>(1.30 to<br>2.86)                                   | 2.88<br>(1.89 to<br>4.13)                                  | 1.92<br>(1.26 to<br>2.71)                                   |
| Other drug use disorders                                   | 254.05<br>(169.42 to<br>306.91)                                | 380.51<br>(287.63 to<br>500.59)                                 | 525.16<br>(379.43 to<br>710.42)                                | 365.01<br>(276.87 to<br>477.83)                                  | 11.17<br>(8.50 to<br>17.03)                                | 22.69<br>(16.05 to<br>39.10)                                | 32.53<br>(22.21 to<br>56.38)                               | 21.01<br>(15.02 to<br>35.68)                                |
| Eating disorders                                           | 9.25<br>(7.47 to<br>11.30)                                     | 6.76<br>(4.84 to<br>9.46)                                       | 7.20<br>(5.03 to<br>10.31)                                     | 6.75<br>(4.85 to<br>9.38)                                        | 0.19<br>(0.15 to<br>0.23)                                  | 0.14<br>(0.10 to<br>0.19)                                   | 0.15<br>(0.10 to<br>0.21)                                  | 0.14<br>(0.10 to<br>0.19)                                   |
| <b>Cuba</b>                                                |                                                                |                                                                 |                                                                |                                                                  |                                                            |                                                             |                                                            |                                                             |
| Cause                                                      | YLLs (actual counts)                                           |                                                                 |                                                                |                                                                  | Deaths (actual counts)                                     |                                                             |                                                            |                                                             |
|                                                            | 2016                                                           | 2040 Forecast                                                   | 2040 Better Scenario                                           | 2040 Worse Scenario                                              | 2016                                                       | 2040 Forecast                                               | 2040 Better Scenario                                       | 2040 Worse Scenario                                         |
| <b>Diabetes, urogenital, blood, and endocrine diseases</b> | <b>92,486.16</b><br><b>(84,700.08 to</b><br><b>100,358.41)</b> | <b>127,978.90</b><br><b>(96,696.66 to</b><br><b>172,283.15)</b> | <b>86,337.08</b><br><b>(64,215.76 to</b><br><b>116,758.79)</b> | <b>137,614.67</b><br><b>(101,881.47 to</b><br><b>186,255.54)</b> | <b>4,675.80</b><br><b>(4,264.41 to</b><br><b>5,103.65)</b> | <b>8,496.28</b><br><b>(6,410.91 to</b><br><b>11,393.80)</b> | <b>5,925.33</b><br><b>(4,388.91 to</b><br><b>8,180.50)</b> | <b>8,892.71</b><br><b>(6,629.18 to</b><br><b>12,007.62)</b> |
| Diabetes mellitus                                          | 33,032.06<br>(29,754.84 to<br>36,252.43)                       | 52,931.42<br>(36,668.94 to<br>74,029.26)                        | 33,502.90<br>(23,459.71 to<br>47,110.54)                       | 56,858.69<br>(38,477.01 to<br>80,533.68)                         | 1,835.66<br>(1,653.42 to<br>2,018.74)                      | 3,621.26<br>(2,566.43 to<br>4,930.52)                       | 2,391.12<br>(1,683.67 to<br>3,273.35)                      | 3,775.31<br>(2,620.67 to<br>5,181.25)                       |
| Acute glomerulonephritis                                   | 81.47<br>(69.70 to<br>98.28)                                   | 54.72<br>(44.02 to<br>69.91)                                    | 42.63<br>(33.87 to<br>55.72)                                   | 55.45<br>(44.30 to<br>71.76)                                     | 2.07<br>(1.77 to<br>2.43)                                  | 1.77<br>(1.41 to<br>2.26)                                   | 1.44<br>(1.12 to<br>1.88)                                  | 1.74<br>(1.38 to<br>2.21)                                   |
| Chronic kidney disease                                     | 43,380.51<br>(39,228.13 to<br>47,549.79)                       | 56,715.57<br>(34,761.00 to<br>90,862.57)                        | 37,139.96<br>(23,181.74 to<br>57,844.20)                       | 62,950.22<br>(37,411.45 to<br>105,010.40)                        | 2,141.14<br>(1,946.59 to<br>2,338.82)                      | 3,707.70<br>(2,249.16 to<br>6,007.94)                       | 2,502.01<br>(1,563.42 to<br>3,943.68)                      | 4,022.09<br>(2,379.05 to<br>6,522.02)                       |
| Chronic kidney disease due to diabetes mellitus            | 16,911.88<br>(14,514.99 to<br>19,633.79)                       | 24,110.81<br>(14,320.96 to<br>40,265.86)                        | 15,920.12<br>(9,737.93 to<br>25,269.58)                        | 26,892.33<br>(15,512.89 to<br>45,183.05)                         | 806.34<br>(691.17 to<br>931.59)                            | 1,460.37<br>(852.11 to<br>2,495.91)                         | 987.20<br>(592.38 to<br>1,606.01)                          | 1,595.64<br>(913.71 to<br>2,698.17)                         |
| Chronic kidney disease due to hypertension                 | 5,549.31<br>(4,517.55 to<br>6,692.04)                          | 9,170.13<br>(5,354.05 to<br>15,408.67)                          | 6,374.99<br>(3,895.85 to<br>10,261.90)                         | 10,022.98<br>(5,720.57 to<br>17,008.16)                          | 383.28<br>(313.67 to<br>458.38)                            | 791.43<br>(453.02 to<br>1,339.09)                           | 569.81<br>(341.53 to<br>912.38)                            | 842.35<br>(471.90 to<br>1,436.19)                           |
| Chronic kidney disease due to glomerulonephritis           | 11,928.42<br>(9,883.76 to<br>13,991.97)                        | 12,705.97<br>(7,568.04 to<br>20,936.22)                         | 7,904.16<br>(4,822.05 to<br>12,919.69)                         | 14,129.28<br>(8,281.11 to<br>23,765.59)                          | 522.05<br>(424.38 to<br>626.99)                            | 756.39<br>(441.87 to<br>1,291.58)                           | 480.43<br>(283.17 to<br>786.90)                            | 825.18<br>(470.79 to<br>1,418.86)                           |
| Chronic kidney disease due to other and unspecified causes | 8,990.91<br>(7,418.02 to<br>10,864.95)                         | 10,728.66<br>(6,312.28 to<br>17,676.91)                         | 6,940.70<br>(4,205.50 to<br>11,480.57)                         | 11,905.63<br>(6,901.73 to<br>20,182.04)                          | 429.57<br>(350.91 to<br>518.80)                            | 699.51<br>(407.57 to<br>1,177.47)                           | 464.58<br>(274.99 to<br>780.24)                            | 758.92<br>(434.90 to<br>1,288.68)                           |
| Urinary diseases and male infertility                      | 5,422.89<br>(4,916.52 to<br>5,976.81)                          | 7,742.17<br>(6,785.45 to<br>8,878.51)                           | 6,298.22<br>(5,222.26 to<br>7,554.75)                          | 7,357.49<br>(6,470.21 to<br>8,388.61)                            | 309.28<br>(278.96 to<br>340.79)                            | 592.88<br>(515.52 to<br>682.81)                             | 501.88<br>(414.03 to<br>602.20)                            | 547.26<br>(476.71 to<br>627.53)                             |
| Urinary tract infections                                   | 4,070.87<br>(3,624.46 to<br>4,557.04)                          | 6,441.24<br>(5,566.86 to<br>7,482.43)                           | 5,363.48<br>(4,409.76 to<br>6,428.12)                          | 6,103.40<br>(5,289.08 to<br>7,071.84)                            | 244.24<br>(216.95 to<br>273.84)                            | 507.86<br>(430.58 to<br>593.94)                             | 438.87<br>(358.81 to<br>530.01)                            | 467.63<br>(399.43 to<br>551.48)                             |



|                                                   |                                       |                                        |                                        |                                       |                                 |                                 |                                 |                                 |
|---------------------------------------------------|---------------------------------------|----------------------------------------|----------------------------------------|---------------------------------------|---------------------------------|---------------------------------|---------------------------------|---------------------------------|
| Urolithiasis                                      | 664.63<br>(414.01 to<br>835.36)       | 531.71<br>(295.69 to<br>725.96)        | 390.35<br>(202.28 to<br>565.19)        | 511.91<br>(285.02 to<br>695.39)       | 29.75<br>(18.70 to<br>37.45)    | 30.83<br>(17.51 to<br>42.11)    | 22.23<br>(12.46 to<br>33.38)    | 29.00<br>(16.32 to<br>39.77)    |
| Other urinary diseases                            | 687.39<br>(534.04 to<br>980.96)       | 769.21<br>(541.68 to<br>1,218.14)      | 544.40<br>(368.09 to<br>908.77)        | 742.18<br>(520.00 to<br>1,151.88)     | 35.29<br>(25.76 to<br>56.75)    | 54.19<br>(35.57 to<br>95.42)    | 39.78<br>(25.20 to<br>74.49)    | 50.63<br>(32.97 to<br>88.37)    |
| Gynecological diseases                            | 744.50<br>(426.69 to<br>951.91)       | 482.22<br>(307.79 to<br>672.48)        | 278.36<br>(163.91 to<br>425.16)        | 490.11<br>(306.25 to<br>686.73)       | 22.29<br>(15.83 to<br>28.94)    | 19.48<br>(13.77 to<br>32.42)    | 11.52<br>(7.58 to<br>20.31)     | 19.34<br>(13.69 to<br>32.48)    |
| Uterine fibroids                                  | 378.78<br>(170.89 to<br>523.84)       | 173.24<br>(76.32 to<br>300.20)         | 108.77<br>(45.90 to<br>189.41)         | 177.88<br>(79.33 to<br>308.48)        | 9.91<br>(5.01 to<br>13.60)      | 5.17<br>(2.77 to<br>8.33)       | 3.28<br>(1.69 to<br>5.55)       | 5.27<br>(2.76 to<br>8.71)       |
| Polycystic ovarian syndrome                       | 97.64<br>(51.58 to<br>169.20)         | 36.36<br>(13.17 to<br>79.97)           | 14.36<br>(4.50 to<br>34.00)            | 38.08<br>(14.19 to<br>81.42)          | 2.46<br>(1.31 to<br>4.30)       | 0.91<br>(0.31 to<br>2.08)       | 0.36<br>(0.11 to<br>0.89)       | 0.95<br>(0.34 to<br>2.14)       |
| Endometriosis                                     | 0.53<br>(0.24 to<br>0.96)             | 0.62<br>(0.18 to<br>1.85)              | 0.36<br>(0.10 to<br>1.14)              | 0.64<br>(0.18 to<br>1.92)             | 0.01<br>(0.00 to<br>0.02)       | 0.01<br>(0.00 to<br>0.04)       | 0.01<br>(0.00 to<br>0.03)       | 0.01<br>(0.00 to<br>0.04)       |
| Genital prolapse                                  | 51.00<br>(21.92 to<br>73.64)          | 50.24<br>(20.13 to<br>89.31)           | 28.81<br>(11.40 to<br>52.51)           | 50.36<br>(19.50 to<br>88.26)          | 3.00<br>(1.45 to<br>5.33)       | 3.20<br>(1.34 to<br>6.29)       | 1.87<br>(0.74 to<br>3.76)       | 3.15<br>(1.29 to<br>6.05)       |
| Other gynecological diseases                      | 216.55<br>(142.55 to<br>288.74)       | 221.76<br>(143.09 to<br>343.26)        | 126.07<br>(72.49 to<br>206.12)         | 223.15<br>(142.95 to<br>340.16)       | 6.91<br>(5.18 to<br>12.27)      | 10.18<br>(6.49 to<br>20.90)     | 6.00<br>(3.40 to<br>12.94)      | 9.95<br>(6.45 to<br>19.94)      |
| Hemoglobinopathies and hemolytic anemias          | 3,515.05<br>(3,013.60 to<br>4,550.97) | 3,489.21<br>(2,895.06 to<br>4,526.75)  | 2,511.71<br>(1,957.22 to<br>3,303.86)  | 3,444.56<br>(2,884.14 to<br>4,499.93) | 143.75<br>(122.62 to<br>189.73) | 206.03<br>(170.11 to<br>268.14) | 155.27<br>(119.88 to<br>203.35) | 196.92<br>(164.84 to<br>254.83) |
| Thalassemias                                      | 136.75<br>(107.70 to<br>173.83)       | 29.76<br>(20.36 to<br>41.19)           | 28.37<br>(19.53 to<br>39.06)           | 30.77<br>(20.99 to<br>42.85)          | 1.70<br>(1.34 to<br>2.15)       | 0.38<br>(0.26 to<br>0.52)       | 0.36<br>(0.25 to<br>0.50)       | 0.39<br>(0.27 to<br>0.54)       |
| Sickle cell disorders                             | 1,392.27<br>(1,160.99 to<br>1,915.02) | 1,103.85<br>(855.02 to<br>1,513.86)    | 786.68<br>(580.48 to<br>1,110.20)      | 1,116.26<br>(872.41 to<br>1,558.01)   | 30.89<br>(25.52 to<br>40.72)    | 29.94<br>(23.19 to<br>40.72)    | 21.59<br>(15.97 to<br>30.55)    | 30.11<br>(23.49 to<br>41.39)    |
| G6PD deficiency                                   | 745.21<br>(622.77 to<br>912.38)       | 807.94<br>(642.96 to<br>1,014.18)      | 534.82<br>(405.80 to<br>708.13)        | 809.02<br>(648.23 to<br>1,021.48)     | 21.21<br>(17.72 to<br>26.13)    | 33.56<br>(26.79 to<br>42.43)    | 22.73<br>(17.39 to<br>29.96)    | 33.00<br>(26.71 to<br>41.22)    |
| Other hemoglobinopathies and hemolytic anemias    | 1,240.82<br>(1,047.62 to<br>1,650.19) | 1,547.66<br>(1,262.69 to<br>2,045.66)  | 1,161.84<br>(900.51 to<br>1,543.78)    | 1,488.51<br>(1,227.53 to<br>1,973.84) | 89.94<br>(75.44 to<br>120.45)   | 142.15<br>(114.04 to<br>187.39) | 110.59<br>(83.98 to<br>145.58)  | 133.42<br>(108.81 to<br>175.88) |
| Endocrine, metabolic, blood, and immune disorders | 6,309.68<br>(5,394.57 to<br>8,206.26) | 6,563.59<br>(5,408.88 to<br>10,017.52) | 6,563.29<br>(5,369.68 to<br>10,113.78) | 6,458.14<br>(5,335.88 to<br>9,685.18) | 221.60<br>(185.14 to<br>376.88) | 347.16<br>(270.93 to<br>658.02) | 362.09<br>(278.45 to<br>687.35) | 330.06<br>(259.61 to<br>611.52) |

**Cuba**

| Cause                                  | YLLs (actual counts)                            |                                                 |                                                |                                                 | Deaths (actual counts)                 |                                        |                                        |                                        |
|----------------------------------------|-------------------------------------------------|-------------------------------------------------|------------------------------------------------|-------------------------------------------------|----------------------------------------|----------------------------------------|----------------------------------------|----------------------------------------|
|                                        | 2016                                            | 2040 Forecast                                   | 2040 Better Scenario                           | 2040 Worse Scenario                             | 2016                                   | 2040 Forecast                          | 2040 Better Scenario                   | 2040 Worse Scenario                    |
| <b>Musculoskeletal disorders</b>       | <b>6,426.58</b><br>(5,497.91 to<br>7,651.24)    | <b>7,906.17</b><br>(6,495.48 to<br>9,485.16)    | <b>6,622.96</b><br>(5,260.77 to<br>8,139.78)   | <b>7,769.74</b><br>(6,405.37 to<br>9,353.19)    | <b>230.28</b><br>(196.73 to<br>267.70) | <b>419.30</b><br>(340.19 to<br>501.86) | <b>352.59</b><br>(275.73 to<br>430.75) | <b>402.25</b><br>(325.13 to<br>477.14) |
| Rheumatoid arthritis                   | 1,160.36<br>(810.50 to<br>1,471.14)             | 2,409.65<br>(1,701.23 to<br>3,322.00)           | 1,546.25<br>(1,016.95 to<br>2,227.00)          | 2,439.61<br>(1,711.50 to<br>3,383.22)           | 61.43<br>(46.04 to<br>80.36)           | 169.21<br>(122.68 to<br>227.16)        | 111.95<br>(74.29 to<br>161.32)         | 166.79<br>(120.54 to<br>224.10)        |
| Other musculoskeletal disorders        | 5,266.22<br>(4,453.22 to<br>6,415.46)           | 5,496.51<br>(4,367.33 to<br>6,718.04)           | 5,076.71<br>(4,050.23 to<br>6,239.14)          | 5,330.13<br>(4,288.81 to<br>6,535.35)           | 168.86<br>(143.30 to<br>198.50)        | 250.09<br>(195.37 to<br>299.58)        | 240.65<br>(191.15 to<br>290.56)        | 235.46<br>(184.92 to<br>282.05)        |
| <b>Other non-communicable diseases</b> | <b>24,307.43</b><br>(19,300.14 to<br>32,150.61) | <b>18,746.92</b><br>(13,704.07 to<br>22,641.56) | <b>13,342.45</b><br>(9,272.59 to<br>17,047.86) | <b>19,131.77</b><br>(14,031.07 to<br>23,192.98) | <b>504.40</b><br>(369.75 to<br>597.61) | <b>682.75</b><br>(404.26 to<br>855.91) | <b>575.37</b><br>(320.62 to<br>761.03) | <b>654.82</b><br>(394.76 to<br>813.23) |
| Congenital birth defects               | 20,692.60<br>(16,830.99 to<br>30,063.18)        | 12,808.48<br>(10,117.94 to<br>17,489.17)        | 8,006.27<br>(6,047.71 to<br>11,267.05)         | 13,470.38<br>(10,622.45 to<br>18,402.23)        | 308.80<br>(257.97 to<br>431.57)        | 224.23<br>(183.65 to<br>289.26)        | 148.10<br>(115.61 to<br>200.39)        | 232.22<br>(189.80 to<br>303.75)        |
| Neural tube defects                    | 270.68<br>(184.53 to<br>363.90)                 | 64.33<br>(45.27 to<br>89.49)                    | 32.59<br>(20.98 to<br>49.16)                   | 68.80<br>(48.73 to<br>96.81)                    | 3.80<br>(2.77 to<br>5.03)              | 1.08<br>(0.80 to<br>1.47)              | 0.56<br>(0.37 to<br>0.84)              | 1.14<br>(0.83 to<br>1.58)              |

|                                               |                                             |                                             |                                            |                                             |                                       |                                        |                                       |                                        |
|-----------------------------------------------|---------------------------------------------|---------------------------------------------|--------------------------------------------|---------------------------------------------|---------------------------------------|----------------------------------------|---------------------------------------|----------------------------------------|
|                                               | 8,851.23<br>(6,747.50 to<br>10,800.65)      | 5,020.78<br>(3,896.14 to<br>6,401.18)       | 2,664.31<br>(1,837.48 to<br>3,875.52)      | 5,299.64<br>(4,129.15 to<br>6,806.99)       | 126.03<br>(100.82 to<br>154.87)       | 81.26<br>(65.33 to<br>104.03)          | 44.00<br>(30.94 to<br>64.28)          | 84.62<br>(68.40 to<br>107.99)          |
| Congenital heart anomalies                    | 6.64<br>(3.36 to<br>14.32)                  | 3.14<br>(1.32 to<br>7.47)                   | 1.31<br>(0.51 to<br>3.14)                  | 3.50<br>(1.48 to<br>8.37)                   | 0.08<br>(0.04 to<br>0.17)             | 0.04<br>(0.02 to<br>0.09)              | 0.02<br>(0.01 to<br>0.04)             | 0.02<br>(0.02 to<br>0.10)              |
| Orofacial clefts                              | 1,554.18<br>(1,161.99 to<br>2,013.37)       | 1,468.46<br>(1,055.16 to<br>1,897.40)       | 1,435.88<br>(1,071.61 to<br>1,840.07)      | 1,499.30<br>(1,082.49 to<br>1,910.35)       | 36.17<br>(26.29 to<br>44.13)          | 38.89<br>(27.10 to<br>50.45)           | 38.31<br>(28.18 to<br>49.26)          | 39.42<br>(27.32 to<br>51.38)           |
| Down syndrome                                 | 1,076.21<br>(657.83 to<br>1,976.57)         | 687.97<br>(427.05 to<br>1,244.55)           | 511.20<br>(323.46 to<br>935.24)            | 736.16<br>(460.10 to<br>1,340.22)           | 13.87<br>(8.89 to<br>24.44)           | 9.74<br>(6.16 to<br>17.65)             | 7.38<br>(4.71 to<br>14.25)            | 10.31<br>(6.54 to<br>19.18)            |
| Other chromosomal abnormalities               | 475.87<br>(319.80 to<br>705.06)             | 268.38<br>(190.58 to<br>393.24)             | 163.45<br>(107.99 to<br>249.95)            | 282.23<br>(202.57 to<br>408.69)             | 6.64<br>(4.71 to<br>9.50)             | 4.52<br>(3.29 to<br>6.39)              | 2.82<br>(1.93 to<br>4.29)             | 4.67<br>(3.42 to<br>6.61)              |
| Congenital musculoskeletal and limb anomalies | 240.46<br>(142.62 to<br>343.32)             | 164.26<br>(111.56 to<br>247.53)             | 110.02<br>(74.19 to<br>173.31)             | 170.01<br>(113.84 to<br>254.89)             | 4.04<br>(2.72 to<br>6.16)             | 3.56<br>(2.44 to<br>6.45)              | 2.47<br>(1.58 to<br>4.80)             | 3.61<br>(2.48 to<br>6.50)              |
| Urogenital congenital anomalies               | 2,274.02<br>(1,386.01 to<br>3,350.91)       | 1,335.60<br>(824.24 to<br>2,009.73)         | 737.24<br>(442.32 to<br>1,174.62)          | 1,443.78<br>(885.38 to<br>2,165.47)         | 28.08<br>(17.89 to<br>41.42)          | 17.72<br>(11.64 to<br>25.80)           | 9.92<br>(6.29 to<br>15.18)            | 18.98<br>(12.41 to<br>27.72)           |
| Digestive congenital anomalies                | 5,943.30<br>(4,226.09 to<br>12,231.13)      | 3,795.55<br>(2,772.21 to<br>6,501.24)       | 2,350.27<br>(1,612.97 to<br>3,975.12)      | 3,966.97<br>(2,860.92 to<br>6,928.97)       | 90.10<br>(68.62 to<br>164.73)         | 67.41<br>(52.26 to<br>102.59)          | 42.63<br>(30.61 to<br>66.73)          | 69.42<br>(53.62 to<br>107.71)          |
| Other congenital birth defects                | 3,294.85<br>(884.42 to<br>4,643.48)         | 5,833.96<br>(1,860.47 to<br>8,149.23)       | 5,266.98<br>(1,737.51 to<br>7,416.22)      | 5,548.39<br>(1,746.73 to<br>7,746.87)       | 191.88<br>(67.17 to<br>258.32)        | 457.31<br>(171.36 to<br>626.74)        | 426.47<br>(163.95 to<br>600.27)       | 421.28<br>(157.74 to<br>577.08)        |
| Skin and subcutaneous diseases                | 1,155.24<br>(429.40 to<br>1,647.49)         | 2,097.86<br>(910.49 to<br>3,239.89)         | 2,046.26<br>(907.52 to<br>3,077.29)        | 1,991.47<br>(847.87 to<br>3,066.04)         | 58.03<br>(28.86 to<br>94.90)          | 147.60<br>(79.57 to<br>255.14)         | 149.89<br>(82.34 to<br>250.00)        | 135.46<br>(72.09 to<br>233.20)         |
| Cellulitis                                    | 1,321.61<br>(183.70 to<br>2,117.74)         | 2,309.23<br>(389.46 to<br>3,724.15)         | 2,038.03<br>(349.17 to<br>3,336.82)        | 2,217.51<br>(370.45 to<br>3,583.74)         | 68.11<br>(13.49 to<br>105.18)         | 172.26<br>(38.51 to<br>272.70)         | 159.96<br>(34.45 to<br>258.74)        | 159.93<br>(35.55 to<br>255.49)         |
| Pyoderma                                      | 627.82<br>(179.38 to<br>900.92)             | 1,154.96<br>(334.21 to<br>1,819.49)         | 940.35<br>(270.96 to<br>1,520.11)          | 1,079.74<br>(309.48 to<br>1,700.34)         | 56.71<br>(17.53 to<br>80.89)          | 119.91<br>(35.57 to<br>192.16)         | 100.29<br>(30.38 to<br>166.61)        | 109.68<br>(32.32 to<br>175.09)         |
| Decubitus ulcer                               | 190.18<br>(50.80 to<br>269.75)              | 271.91<br>(76.74 to<br>405.69)              | 242.33<br>(67.03 to<br>362.87)             | 259.68<br>(73.62 to<br>385.38)              | 9.03<br>(2.80 to<br>12.80)            | 17.54<br>(5.70 to<br>26.14)            | 16.33<br>(5.34 to<br>24.75)           | 16.22<br>(5.20 to<br>24.01)            |
| Other skin and subcutaneous diseases          | 319.98<br>(233.26 to<br>428.09)             | 104.48<br>(58.80 to<br>168.44)              | 69.21<br>(37.80 to<br>114.42)              | 113.00<br>(64.37 to<br>182.35)              | 3.71<br>(2.71 to<br>4.97)             | 1.21<br>(0.68 to<br>1.95)              | 0.80<br>(0.44 to<br>1.33)             | 1.31<br>(0.75 to<br>2.12)              |
| Sudden infant death syndrome                  | 189,758.06<br>(169,387.71 to<br>209,177.04) | 179,676.96<br>(132,719.81 to<br>239,541.94) | 129,957.04<br>(95,464.72 to<br>170,377.76) | 181,387.29<br>(132,810.13 to<br>245,592.00) | 6,899.29<br>(5,349.40 to<br>7,740.95) | 9,329.13<br>(6,169.96 to<br>11,637.29) | 7,458.79<br>(4,842.59 to<br>9,286.20) | 8,966.53<br>(6,036.46 to<br>11,347.84) |
| Injuries                                      | 43,924.98<br>(39,092.04 to<br>48,944.68)    | 44,502.19<br>(28,226.38 to<br>70,479.35)    | 25,687.72<br>(17,053.19 to<br>39,396.70)   | 47,406.64<br>(29,648.72 to<br>75,517.22)    | 1,171.25<br>(1,057.66 to<br>1,298.48) | 1,441.84<br>(999.38 to<br>2,162.95)    | 876.22<br>(630.13 to<br>1,258.36)     | 1,485.22<br>(1,020.11 to<br>2,222.49)  |
| Transport injuries                            | 37,762.98<br>(31,528.29 to<br>44,650.02)    | 40,022.84<br>(25,501.78 to<br>63,962.83)    | 22,970.55<br>(15,326.41 to<br>35,439.73)   | 42,805.75<br>(26,945.15 to<br>68,414.91)    | 1,022.16<br>(877.74 to<br>1,181.63)   | 1,300.13<br>(894.91 to<br>1,959.36)    | 787.05<br>(565.15 to<br>1,133.77)     | 1,343.13<br>(914.02 to<br>2,024.20)    |
| Road injuries                                 | 11,379.73<br>(9,482.53 to<br>13,626.92)     | 11,153.28<br>(7,518.25 to<br>16,790.99)     | 5,284.58<br>(3,606.37 to<br>7,652.85)      | 11,669.49<br>(7,818.25 to<br>17,533.83)     | 392.00<br>(330.06 to<br>449.31)       | 515.54<br>(371.47 to<br>729.19)        | 266.89<br>(187.83 to<br>370.96)       | 518.21<br>(370.67 to<br>735.97)        |
| Pedestrian road injuries                      | <b>Cuba</b>                                 |                                             |                                            |                                             |                                       |                                        |                                       |                                        |
| Cause                                         | YLLs (actual counts)                        |                                             |                                            |                                             | Deaths (actual counts)                |                                        |                                       |                                        |
|                                               | 2016                                        | 2040 Forecast                               | 2040 Better Scenario                       | 2040 Worse Scenario                         | 2016                                  | 2040 Forecast                          | 2040 Better Scenario                  | 2040 Worse Scenario                    |
| Cyclist road injuries                         | 5,868.83<br>(4,670.12 to<br>7,327.00)       | 8,142.58<br>(4,854.16 to<br>14,022.61)      | 5,251.75<br>(3,276.88 to<br>8,556.41)      | 8,684.24<br>(5,126.72 to<br>14,887.77)      | 152.39<br>(124.44 to<br>190.42)       | 241.98<br>(152.05 to<br>399.29)        | 171.64<br>(115.17 to<br>269.41)       | 250.68<br>(155.43 to<br>414.89)        |
| Motorcyclist road injuries                    | 5,616.50<br>(4,311.24 to<br>7,133.93)       | 6,098.66<br>(3,317.49 to<br>11,189.15)      | 4,258.17<br>(2,438.33 to<br>7,475.80)      | 6,461.64<br>(3,499.62 to<br>11,949.61)      | 122.16<br>(94.93 to<br>153.51)        | 138.83<br>(80.13 to<br>241.88)         | 100.87<br>(61.84 to<br>169.91)        | 145.45<br>(83.56 to<br>255.97)         |

|                                                 |                                                    |                                                    |                                                   |                                                    |                                                |                                                |                                                |                                                |
|-------------------------------------------------|----------------------------------------------------|----------------------------------------------------|---------------------------------------------------|----------------------------------------------------|------------------------------------------------|------------------------------------------------|------------------------------------------------|------------------------------------------------|
| Motor vehicle road injuries                     | 13,213.33<br>(9,642.33 to<br>16,008.27)            | 12,971.29<br>(7,949.10 to<br>21,440.50)            | 7,194.96<br>(4,629.87 to<br>11,212.56)            | 14,210.08<br>(8,612.98 to<br>23,521.78)            | 308.28<br>(239.98 to<br>369.50)                | 346.72<br>(226.66 to<br>538.98)                | 209.97<br>(144.52 to<br>310.96)                | 369.80<br>(239.64 to<br>581.80)                |
| Other road injuries                             | 1,684.59<br>(684.15 to<br>2,375.90)                | 1,657.03<br>(696.57 to<br>2,975.28)                | 981.09<br>(445.22 to<br>1,693.83)                 | 1,780.30<br>(734.77 to<br>3,215.13)                | 47.33<br>(24.17 to<br>63.02)                   | 47.33<br>(33.17 to<br>93.99)                   | 37.68<br>(24.19 to<br>58.12)                   | 58.98<br>(32.85 to<br>96.30)                   |
| Other transport injuries                        | 6,161.99<br>(2,572.64 to<br>11,467.53)             | 4,479.35<br>(1,813.23 to<br>9,794.60)              | 2,717.17<br>(1,127.59 to<br>5,796.99)             | 4,600.89<br>(1,805.55 to<br>10,206.56)             | 149.09<br>(71.06 to<br>260.95)                 | 141.71<br>(72.73 to<br>265.09)                 | 89.17<br>(46.39 to<br>163.34)                  | 142.09<br>(71.63 to<br>266.63)                 |
| <b>Unintentional injuries</b>                   | <b>61,787.84<br/>(48,454.78 to<br/>69,649.85)</b>  | <b>61,338.46<br/>(39,270.87 to<br/>73,944.21)</b>  | <b>50,457.40<br/>(31,477.05 to<br/>61,934.99)</b> | <b>59,181.22<br/>(38,256.57 to<br/>71,276.72)</b>  | <b>3,347.20<br/>(2,051.61 to<br/>3,902.55)</b> | <b>5,167.66<br/>(2,723.10 to<br/>6,364.65)</b> | <b>4,509.97<br/>(2,374.05 to<br/>5,665.31)</b> | <b>4,797.24<br/>(2,524.15 to<br/>5,875.67)</b> |
| Falls                                           | 25,977.16<br>(13,800.19 to<br>30,898.33)           | 36,365.87<br>(15,412.61 to<br>45,390.57)           | 31,086.29<br>(13,231.87 to<br>39,844.06)          | 34,383.02<br>(14,595.89 to<br>43,031.38)           | 2,064.33<br>(842.16 to<br>2,527.74)            | 3,716.55<br>(1,342.55 to<br>4,778.19)          | 3,271.40<br>(1,202.31 to<br>4,281.40)          | 3,421.63<br>(1,236.46 to<br>4,412.89)          |
| Drowning                                        | 12,216.30<br>(10,829.77 to<br>13,729.00)           | 6,409.73<br>(4,517.46 to<br>9,002.72)              | 4,675.89<br>(3,343.28 to<br>6,497.52)             | 6,544.82<br>(4,590.65 to<br>9,330.19)              | 296.85<br>(267.77 to<br>329.30)                | 215.30<br>(165.37 to<br>283.46)                | 166.06<br>(127.02 to<br>215.23)                | 212.21<br>(163.21 to<br>278.74)                |
| Fire, heat, and hot substances                  | 2,354.44<br>(1,978.17 to<br>3,621.04)              | 2,227.90<br>(1,639.33 to<br>3,699.34)              | 1,558.26<br>(1,117.22 to<br>2,645.26)             | 2,205.29<br>(1,624.32 to<br>3,657.85)              | 113.86<br>(94.76 to<br>186.53)                 | 162.93<br>(120.26 to<br>285.52)                | 121.49<br>(85.97 to<br>218.40)                 | 154.63<br>(114.63 to<br>267.36)                |
| Poisonings                                      | 819.00<br>(681.04 to<br>1,111.45)                  | 447.78<br>(316.19 to<br>613.77)                    | 280.41<br>(190.35 to<br>394.40)                   | 456.63<br>(322.14 to<br>627.35)                    | 30.17<br>(20.05 to<br>35.44)                   | 25.44<br>(13.82 to<br>33.17)                   | 17.17<br>(8.91 to<br>23.21)                    | 24.86<br>(13.68 to<br>32.39)                   |
| Exposure to mechanical forces                   | 4,914.91<br>(3,597.68 to<br>5,622.73)              | 3,141.70<br>(2,138.91 to<br>3,860.04)              | 2,341.81<br>(1,593.90 to<br>2,985.99)             | 3,138.10<br>(2,180.84 to<br>3,881.30)              | 185.09<br>(107.92 to<br>215.07)                | 177.07<br>(92.68 to<br>220.15)                 | 145.33<br>(72.91 to<br>190.40)                 | 168.54<br>(89.61 to<br>209.08)                 |
| Unintentional firearm injuries                  | 1,453.40<br>(1,115.33 to<br>1,655.20)              | 796.65<br>(460.45 to<br>1,003.86)                  | 656.23<br>(352.30 to<br>840.11)                   | 790.58<br>(465.13 to<br>992.55)                    | 75.68<br>(28.43 to<br>90.49)                   | 63.00<br>(15.90 to<br>88.44)                   | 57.29<br>(12.83 to<br>81.25)                   | 59.48<br>(15.65 to<br>83.42)                   |
| Unintentional suffocation                       | 256.63<br>(131.95 to<br>380.40)                    | 113.22<br>(62.86 to<br>173.96)                     | 81.37<br>(45.36 to<br>123.45)                     | 120.91<br>(65.81 to<br>186.12)                     | 3.73<br>(2.21 to<br>5.10)                      | 1.92<br>(1.29 to<br>2.60)                      | 1.43<br>(0.95 to<br>1.93)                      | 2.00<br>(1.31 to<br>2.71)                      |
| Other exposure to mechanical forces             | 3,204.88<br>(2,191.02 to<br>3,765.75)              | 2,231.83<br>(1,515.31 to<br>2,780.96)              | 1,694.21<br>(1,073.94 to<br>2,108.49)             | 2,226.61<br>(1,539.94 to<br>2,787.21)              | 105.68<br>(71.60 to<br>124.34)                 | 112.15<br>(72.26 to<br>139.14)                 | 86.61<br>(54.11 to<br>112.95)                  | 107.06<br>(69.69 to<br>132.15)                 |
| Adverse effects of medical treatment            | 3,139.41<br>(2,110.59 to<br>5,423.55)              | 3,643.77<br>(2,462.72 to<br>6,215.40)              | 3,145.14<br>(2,104.33 to<br>5,371.23)             | 3,533.86<br>(2,389.39 to<br>6,069.43)              | 163.97<br>(114.58 to<br>275.96)                | 273.92<br>(189.01 to<br>465.78)                | 247.54<br>(166.70 to<br>429.22)                | 256.26<br>(176.02 to<br>433.35)                |
| Animal contact                                  | 1,732.37<br>(1,083.49 to<br>2,031.78)              | 1,796.83<br>(895.80 to<br>2,227.53)                | 1,420.48<br>(681.66 to<br>1,803.85)               | 1,761.95<br>(904.25 to<br>2,174.22)                | 107.52<br>(42.31 to<br>126.68)                 | 156.80<br>(49.62 to<br>201.07)                 | 133.11<br>(40.15 to<br>175.32)                 | 148.38<br>(47.73 to<br>189.48)                 |
| Venomous animal contact                         | 819.70<br>(435.35 to<br>985.32)                    | 819.55<br>(301.10 to<br>1,078.47)                  | 682.09<br>(246.07 to<br>907.97)                   | 798.47<br>(302.22 to<br>1,047.58)                  | 63.49<br>(17.44 to<br>79.36)                   | 88.65<br>(17.24 to<br>124.42)                  | 77.25<br>(14.91 to<br>109.41)                  | 83.65<br>(16.57 to<br>116.45)                  |
| Non-venomous animal contact                     | 912.66<br>(585.65 to<br>1,116.37)                  | 977.28<br>(573.33 to<br>1,241.41)                  | 738.39<br>(426.26 to<br>982.16)                   | 963.48<br>(561.27 to<br>1,224.71)                  | 44.03<br>(23.67 to<br>62.97)                   | 68.14<br>(32.03 to<br>104.41)                  | 55.87<br>(24.76 to<br>89.78)                   | 64.74<br>(30.41 to<br>97.40)                   |
| Foreign body                                    | 5,083.27<br>(4,319.14 to<br>5,758.65)              | 4,555.35<br>(3,495.86 to<br>5,376.17)              | 4,364.99<br>(3,295.25 to<br>5,216.26)             | 4,393.57<br>(3,391.91 to<br>5,159.67)              | 236.02<br>(167.14 to<br>280.04)                | 327.89<br>(218.89 to<br>417.71)                | 337.38<br>(214.60 to<br>439.31)                | 302.82<br>(194.05 to<br>381.87)                |
| Pulmonary aspiration and foreign body in airway | 4,114.39<br>(3,558.58 to<br>4,874.56)              | 3,621.70<br>(2,943.58 to<br>4,203.00)              | 3,366.89<br>(2,685.80 to<br>3,954.09)             | 3,502.16<br>(2,863.99 to<br>4,049.42)              | 169.14<br>(129.06 to<br>193.79)                | 233.78<br>(166.68 to<br>282.65)                | 232.52<br>(165.82 to<br>284.26)                | 215.93<br>(156.68 to<br>258.64)                |
| Foreign body in other body part                 | 968.88<br>(575.44 to<br>1,196.83)                  | 933.65<br>(383.06 to<br>1,333.97)                  | 998.10<br>(403.82 to<br>1,436.62)                 | 891.41<br>(377.53 to<br>1,255.84)                  | 66.88<br>(22.28 to<br>92.59)                   | 94.11<br>(22.69 to<br>149.11)                  | 104.86<br>(25.17 to<br>171.20)                 | 86.89<br>(21.26 to<br>137.64)                  |
| Environmental heat and cold exposure            | 931.30<br>(536.14 to<br>1,374.72)                  | 762.82<br>(395.37 to<br>1,062.46)                  | 521.09<br>(253.04 to<br>728.79)                   | 755.60<br>(387.25 to<br>1,044.95)                  | 42.21<br>(20.60 to<br>52.82)                   | 51.17<br>(21.44 to<br>71.20)                   | 36.95<br>(15.18 to<br>53.22)                   | 48.42<br>(20.64 to<br>66.58)                   |
| Other unintentional injuries                    | 4,619.68<br>(3,936.64 to<br>5,375.25)              | 1,986.72<br>(1,502.80 to<br>2,573.76)              | 1,063.05<br>(706.80 to<br>1,556.44)               | 2,008.38<br>(1,529.33 to<br>2,617.32)              | 107.18<br>(92.56 to<br>123.68)                 | 60.58<br>(49.52 to<br>73.82)                   | 33.54<br>(23.56 to<br>46.53)                   | 59.50<br>(48.57 to<br>72.89)                   |
| <b>Self-harm and interpersonal violence</b>     | <b>83,988.45<br/>(72,668.07 to<br/>101,349.96)</b> | <b>72,839.20<br/>(48,711.38 to<br/>108,775.51)</b> | <b>52,816.09<br/>(36,466.83 to<br/>77,223.98)</b> | <b>73,805.21<br/>(48,910.33 to<br/>111,873.50)</b> | <b>2,379.66<br/>(2,047.97 to<br/>2,820.95)</b> | <b>2,690.04<br/>(1,841.04 to<br/>3,844.83)</b> | <b>2,042.00<br/>(1,440.00 to<br/>2,808.42)</b> | <b>2,655.41<br/>(1,807.52 to<br/>3,531.45)</b> |

| Cuba                                                                         |                                          |                                          |                                          |                                          |                                       |                                       |                                       |                                       |
|------------------------------------------------------------------------------|------------------------------------------|------------------------------------------|------------------------------------------|------------------------------------------|---------------------------------------|---------------------------------------|---------------------------------------|---------------------------------------|
| Cause                                                                        | YLLs (actual counts)                     |                                          |                                          |                                          | Deaths (actual counts)                |                                       |                                       |                                       |
|                                                                              | 2016                                     | 2040 Forecast                            | 2040 Better Scenario                     | 2040 Worse Scenario                      | 2016                                  | 2040 Forecast                         | 2040 Better Scenario                  | 2040 Worse Scenario                   |
| Self-harm                                                                    | 55,615.09<br>(46,783.01 to<br>74,892.89) | 58,564.69<br>(37,487.54 to<br>91,493.13) | 42,346.24<br>(28,947.45 to<br>63,337.53) | 59,528.68<br>(37,271.84 to<br>95,370.80) | 1,753.98<br>(1,497.56 to<br>2,159.19) | 2,311.65<br>(1,540.73 to<br>3,392.39) | 1,757.74<br>(1,221.51 to<br>2,450.46) | 2,281.92<br>(1,511.76 to<br>3,397.25) |
| Self-harm by firearm                                                         | 1,688.36<br>(1,184.44 to<br>2,891.96)    | 1,406.31<br>(747.56 to<br>2,735.53)      | 932.14<br>(526.15 to<br>1,690.24)        | 1,430.67<br>(745.33 to<br>2,793.22)      | 67.16<br>(52.45 to<br>94.66)          | 73.55<br>(44.64 to<br>120.10)         | 54.65<br>(34.21 to<br>85.72)          | 71.27<br>(42.48 to<br>118.53)         |
| Self-harm by other specified means                                           | 53,926.73<br>(45,511.61 to<br>72,732.20) | 57,158.38<br>(36,632.45 to<br>89,185.01) | 41,414.11<br>(28,381.29 to<br>61,730.62) | 58,098.01<br>(36,490.49 to<br>92,774.14) | 1,686.82<br>(1,438.30 to<br>2,080.84) | 2,238.11<br>(1,493.70 to<br>3,281.63) | 1,703.09<br>(1,179.32 to<br>2,371.94) | 2,210.65<br>(1,465.17 to<br>3,277.54) |
| Interpersonal violence                                                       | 28,373.56<br>(17,342.12 to<br>37,238.82) | 14,274.51<br>(8,163.05 to<br>21,966.89)  | 10,469.85<br>(5,895.45 to<br>15,986.96)  | 14,276.53<br>(8,107.44 to<br>21,918.67)  | 625.68<br>(395.48 to<br>854.92)       | 378.39<br>(231.22 to<br>563.69)       | 284.26<br>(174.52 to<br>420.03)       | 373.49<br>(236.42 to<br>555.21)       |
| Physical violence by firearm                                                 | 2,833.87<br>(1,643.90 to<br>7,542.96)    | 1,388.09<br>(740.16 to<br>3,566.21)      | 963.14<br>(510.74 to<br>2,449.86)        | 1,382.94<br>(738.36 to<br>3,548.30)      | 62.02<br>(34.83 to<br>152.23)         | 37.67<br>(18.21 to<br>79.57)          | 26.81<br>(12.88 to<br>56.35)          | 37.03<br>(18.13 to<br>79.19)          |
| Physical violence by sharp object                                            | 19,086.97<br>(8,484.08 to<br>25,481.32)  | 9,308.85<br>(4,126.44 to<br>14,236.89)   | 6,789.43<br>(3,105.38 to<br>10,637.00)   | 9,270.73<br>(4,055.16 to<br>14,194.11)   | 400.12<br>(191.71 to<br>537.02)       | 221.35<br>(113.69 to<br>326.55)       | 163.81<br>(87.47 to<br>242.90)        | 218.18<br>(110.44 to<br>324.62)       |
| Physical violence by other means                                             | 6,462.52<br>(4,111.24 to<br>11,766.60)   | 3,577.57<br>(1,957.83 to<br>6,695.84)    | 2,717.28<br>(1,526.22 to<br>4,977.70)    | 3,622.86<br>(1,972.82 to<br>6,698.62)    | 163.55<br>(104.08 to<br>293.36)       | 119.37<br>(68.78 to<br>210.74)        | 93.64<br>(54.79 to<br>164.56)         | 118.28<br>(67.12 to<br>207.24)        |
| Forces of nature, conflict and terrorism, and executions and police conflict | 56.80<br>(51.53 to<br>65.89)             | 997.11<br>(0.00 to<br>9,866.82)          | 995.83<br>(0.00 to<br>9,807.89)          | 994.23<br>(0.00 to<br>9,862.11)          | 1.18<br>(0.00 to<br>1.34)             | 29.59<br>(0.00 to<br>264.82)          | 30.60<br>(0.00 to<br>270.99)          | 28.66<br>(0.00 to<br>258.00)          |
| Exposure to forces of nature                                                 | 0.00<br>(0.00 to<br>0.00)                | 441.08<br>(0.00 to<br>326.33)            | 442.39<br>(0.00 to<br>326.81)            | 438.13<br>(0.00 to<br>325.40)            | 0.00<br>(0.00 to<br>0.00)             | 14.65<br>(0.00 to<br>11.42)           | 15.21<br>(0.00 to<br>11.77)           | 14.12<br>(0.00 to<br>11.01)           |
| Conflict and terrorism                                                       | 0.00<br>(0.00 to<br>0.00)                | 556.04<br>(0.00 to<br>9,733.22)          | 553.45<br>(0.00 to<br>9,684.82)          | 556.09<br>(0.00 to<br>9,732.14)          | 0.00<br>(0.00 to<br>0.00)             | 14.94<br>(0.00 to<br>261.83)          | 15.39<br>(0.00 to<br>268.21)          | 14.54<br>(0.00 to<br>254.58)          |
| Executions and police conflict                                               | 56.80<br>(51.53 to<br>65.89)             | 0.00<br>(0.00 to<br>0.00)                | 0.00<br>(0.00 to<br>0.00)                | 0.00<br>(0.00 to<br>0.00)                | 1.18<br>(1.08 to<br>1.34)             | 0.00<br>(0.00 to<br>0.00)             | 0.00<br>(0.00 to<br>0.00)             | 0.00<br>(0.00 to<br>0.00)             |

  

| Dominica                                                          |                                          |                                          |                                          |                                          |                                 |                                   |                                 |                                   |
|-------------------------------------------------------------------|------------------------------------------|------------------------------------------|------------------------------------------|------------------------------------------|---------------------------------|-----------------------------------|---------------------------------|-----------------------------------|
| Cause                                                             | YLLs (actual counts)                     |                                          |                                          |                                          | Deaths (actual counts)          |                                   |                                 |                                   |
|                                                                   | 2016                                     | 2040 Forecast                            | 2040 Better Scenario                     | 2040 Worse Scenario                      | 2016                            | 2040 Forecast                     | 2040 Better Scenario            | 2040 Worse Scenario               |
| All causes                                                        | 14,494.95<br>(12,806.91 to<br>16,516.91) | 17,628.11<br>(13,611.68 to<br>22,556.65) | 13,203.92<br>(10,326.21 to<br>16,983.67) | 20,765.66<br>(15,895.65 to<br>26,625.60) | 623.22<br>(563.77 to<br>689.44) | 868.75<br>(724.10 to<br>1,024.07) | 691.58<br>(571.02 to<br>822.72) | 977.75<br>(815.92 to<br>1,153.17) |
| Communicable, maternal, neonatal, and nutritional diseases        | 2,595.50<br>(1,922.46 to<br>3,541.73)    | 2,241.28<br>(1,210.19 to<br>3,893.95)    | 1,490.13<br>(845.10 to<br>2,541.51)      | 2,922.49<br>(1,694.97 to<br>5,002.17)    | 58.63<br>(49.94 to<br>70.51)    | 59.89<br>(44.33 to<br>82.07)      | 45.36<br>(34.70 to<br>59.44)    | 73.81<br>(54.74 to<br>101.30)     |
| HIV/AIDS and tuberculosis                                         | 357.56<br>(334.63 to<br>380.36)          | 183.03<br>(141.98 to<br>229.82)          | 105.94<br>(76.21 to<br>136.86)           | 518.86<br>(405.74 to<br>617.11)          | 9.00<br>(8.37 to<br>9.65)       | 5.03<br>(3.78 to<br>6.53)         | 2.79<br>(1.88 to<br>3.73)       | 13.03<br>(10.18 to<br>15.56)      |
| Tuberculosis                                                      | 86.50<br>(72.15 to<br>103.40)            | 55.11<br>(32.37 to<br>92.88)             | 24.26<br>(14.15 to<br>41.24)             | 73.04<br>(41.20 to<br>126.85)            | 3.10<br>(2.62 to<br>3.66)       | 2.27<br>(1.42 to<br>3.51)         | 1.06<br>(0.67 to<br>1.66)       | 2.89<br>(1.74 to<br>4.72)         |
| HIV/AIDS                                                          | 271.07<br>(256.74 to<br>284.33)          | 127.92<br>(96.32 to<br>159.57)           | 81.67<br>(54.40 to<br>109.36)            | 445.82<br>(338.67 to<br>535.86)          | 5.90<br>(5.59 to<br>6.19)       | 2.76<br>(1.85 to<br>3.61)         | 1.73<br>(1.00 to<br>2.51)       | 10.14<br>(7.56 to<br>12.13)       |
| Diarrhea, lower respiratory, and other common infectious diseases | 706.42<br>(585.13 to<br>878.32)          | 648.73<br>(464.90 to<br>911.85)          | 471.96<br>(353.82 to<br>646.04)          | 780.08<br>(533.07 to<br>1,138.18)        | 29.07<br>(25.32 to<br>33.28)    | 34.87<br>(26.47 to<br>44.13)      | 28.44<br>(22.19 to<br>35.21)    | 38.45<br>(28.61 to<br>51.14)      |
| Diarrheal diseases                                                | 47.05<br>(33.17 to<br>67.54)             | 22.80<br>(4.85 to<br>72.81)              | 19.37<br>(5.25 to<br>56.64)              | 34.06<br>(6.48 to<br>109.62)             | 1.25<br>(1.03 to<br>1.53)       | 1.06<br>(0.25 to<br>3.38)         | 1.04<br>(0.30 to<br>2.99)       | 1.47<br>(0.31 to<br>4.76)         |



|                                                       |                                      |                                     |                                    |                                     |                                    |                                    |                                    |                                    |
|-------------------------------------------------------|--------------------------------------|-------------------------------------|------------------------------------|-------------------------------------|------------------------------------|------------------------------------|------------------------------------|------------------------------------|
| Chagas disease                                        | 0.00<br>(0.00 to<br>0.00)            | 0.00<br>(0.00 to<br>0.00)           | 0.00<br>(0.00 to<br>0.00)          | 0.00<br>(0.00 to<br>0.00)           | 0.00<br>(0.00 to<br>0.00)          | 0.00<br>(0.00 to<br>0.00)          | 0.00<br>(0.00 to<br>0.00)          | 0.00<br>(0.00 to<br>0.00)          |
| Leishmaniasis                                         | 0.00<br>(0.00 to<br>0.00)            | 0.00<br>(0.00 to<br>0.00)           | 0.00<br>(0.00 to<br>0.00)          | 0.00<br>(0.00 to<br>0.00)           | 0.00<br>(0.00 to<br>0.00)          | 0.00<br>(0.00 to<br>0.00)          | 0.00<br>(0.00 to<br>0.00)          | 0.00<br>(0.00 to<br>0.00)          |
| African trypanosomiasis                               | 0.00<br>(0.00 to<br>0.00)            | 0.00<br>(0.00 to<br>0.00)           | 0.00<br>(0.00 to<br>0.00)          | 0.00<br>(0.00 to<br>0.00)           | 0.00<br>(0.00 to<br>0.00)          | 0.00<br>(0.00 to<br>0.00)          | 0.00<br>(0.00 to<br>0.00)          | 0.00<br>(0.00 to<br>0.00)          |
| Schistosomiasis                                       | 0.00<br>(0.00 to<br>0.00)            | 0.00<br>(0.00 to<br>0.00)           | 0.00<br>(0.00 to<br>0.00)          | 0.00<br>(0.00 to<br>0.00)           | 0.00<br>(0.00 to<br>0.00)          | 0.00<br>(0.00 to<br>0.00)          | 0.00<br>(0.00 to<br>0.00)          | 0.00<br>(0.00 to<br>0.00)          |
| Cysticercosis                                         | 0.00<br>(0.00 to<br>0.00)            | 0.00<br>(0.00 to<br>0.00)           | 0.00<br>(0.00 to<br>0.00)          | 0.00<br>(0.00 to<br>0.00)           | 0.00<br>(0.00 to<br>0.00)          | 0.00<br>(0.00 to<br>0.00)          | 0.00<br>(0.00 to<br>0.00)          | 0.00<br>(0.00 to<br>0.00)          |
| Cystic echinococcosis                                 | 0.00<br>(0.00 to<br>0.00)            | 0.00<br>(0.00 to<br>0.00)           | 0.00<br>(0.00 to<br>0.00)          | 0.00<br>(0.00 to<br>0.00)           | 0.00<br>(0.00 to<br>0.00)          | 0.00<br>(0.00 to<br>0.00)          | 0.00<br>(0.00 to<br>0.00)          | 0.00<br>(0.00 to<br>0.00)          |
| Dengue                                                | 7.81<br>(2.46 to<br>14.88)           | 30.77<br>(11.89 to<br>58.56)        | 27.38<br>(10.85 to<br>50.95)       | 31.69<br>(11.85 to<br>61.63)        | 0.20<br>(0.07 to<br>0.37)          | 0.94<br>(0.40 to<br>1.64)          | 0.89<br>(0.39 to<br>1.51)          | 0.94<br>(0.39 to<br>1.64)          |
| Yellow fever                                          | 0.00<br>(0.00 to<br>0.00)            | 0.00<br>(0.00 to<br>0.00)           | 0.00<br>(0.00 to<br>0.00)          | 0.00<br>(0.00 to<br>0.00)           | 0.00<br>(0.00 to<br>0.00)          | 0.00<br>(0.00 to<br>0.00)          | 0.00<br>(0.00 to<br>0.00)          | 0.00<br>(0.00 to<br>0.00)          |
| Rabies                                                | 0.17<br>(0.10 to<br>0.32)            | 0.16<br>(0.05 to<br>0.43)           | 0.09<br>(0.03 to<br>0.26)          | 0.19<br>(0.06 to<br>0.51)           | 0.00<br>(0.00 to<br>0.01)          | 0.00<br>(0.00 to<br>0.01)          | 0.00<br>(0.00 to<br>0.01)          | 0.00<br>(0.00 to<br>0.01)          |
| Intestinal nematode infections                        | 0.15<br>(0.04 to<br>0.33)            | 0.20<br>(0.06 to<br>0.52)           | 0.19<br>(0.06 to<br>0.49)          | 0.21<br>(0.06 to<br>0.54)           | 0.00<br>(0.00 to<br>0.01)          | 0.00<br>(0.00 to<br>0.01)          | 0.00<br>(0.00 to<br>0.01)          | 0.00<br>(0.00 to<br>0.01)          |
| Other neglected tropical diseases                     | 7.07<br>(3.24 to<br>9.92)            | 7.85<br>(2.87 to<br>12.11)          | 7.26<br>(2.61 to<br>10.81)         | 8.20<br>(3.01 to<br>12.72)          | 0.21<br>(0.09 to<br>0.27)          | 0.28<br>(0.10 to<br>0.39)          | 0.27<br>(0.09 to<br>0.39)          | 0.27<br>(0.09 to<br>0.39)          |
| <b>Maternal disorders</b>                             | <b>10.98<br/>(8.41 to<br/>14.39)</b> | <b>6.85<br/>(3.21 to<br/>13.14)</b> | <b>4.54<br/>(2.11 to<br/>8.91)</b> | <b>7.55<br/>(3.61 to<br/>14.93)</b> | <b>0.20<br/>(0.16 to<br/>0.27)</b> | <b>0.13<br/>(0.06 to<br/>0.24)</b> | <b>0.09<br/>(0.04 to<br/>0.17)</b> | <b>0.14<br/>(0.07 to<br/>0.28)</b> |
| Maternal hemorrhage                                   | 4.29<br>(3.02 to<br>5.88)            | 2.59<br>(1.11 to<br>5.08)           | 1.72<br>(0.74 to<br>3.44)          | 2.84<br>(1.19 to<br>5.68)           | 0.08<br>(0.06 to<br>0.11)          | 0.05<br>(0.02 to<br>0.09)          | 0.03<br>(0.01 to<br>0.06)          | 0.05<br>(0.02 to<br>0.11)          |
| Maternal sepsis and other maternal infections         | 0.22<br>(0.11 to<br>0.38)            | 0.13<br>(0.04 to<br>0.29)           | 0.08<br>(0.03 to<br>0.19)          | 0.14<br>(0.05 to<br>0.31)           | 0.00<br>(0.00 to<br>0.01)          | 0.00<br>(0.00 to<br>0.01)          | 0.00<br>(0.00 to<br>0.00)          | 0.00<br>(0.00 to<br>0.01)          |
| Maternal hypertensive disorders                       | 2.32<br>(1.55 to<br>3.24)            | 1.34<br>(0.55 to<br>2.96)           | 0.87<br>(0.35 to<br>1.95)          | 1.48<br>(0.58 to<br>3.29)           | 0.04<br>(0.03 to<br>0.06)          | 0.02<br>(0.01 to<br>0.05)          | 0.02<br>(0.01 to<br>0.04)          | 0.03<br>(0.01 to<br>0.06)          |
| Maternal obstructed labor and uterine rupture         | 0.19<br>(0.08 to<br>0.37)            | 0.13<br>(0.04 to<br>0.31)           | 0.08<br>(0.02 to<br>0.21)          | 0.15<br>(0.04 to<br>0.36)           | 0.00<br>(0.00 to<br>0.01)          | 0.00<br>(0.00 to<br>0.01)          | 0.00<br>(0.00 to<br>0.00)          | 0.00<br>(0.00 to<br>0.01)          |
| Maternal abortion, miscarriage, and ectopic pregnancy | 0.95<br>(0.60 to<br>1.46)            | 0.75<br>(0.29 to<br>1.64)           | 0.49<br>(0.19 to<br>1.08)          | 0.83<br>(0.31 to<br>1.83)           | 0.02<br>(0.01 to<br>0.03)          | 0.02<br>(0.01 to<br>0.03)          | 0.01<br>(0.00 to<br>0.02)          | 0.02<br>(0.01 to<br>0.04)          |
| Indirect maternal deaths                              | 1.06<br>(0.66 to<br>1.60)            | 0.72<br>(0.27 to<br>1.55)           | 0.47<br>(0.18 to<br>1.05)          | 0.79<br>(0.30 to<br>1.79)           | 0.02<br>(0.01 to<br>0.03)          | 0.01<br>(0.01 to<br>0.03)          | 0.01<br>(0.00 to<br>0.02)          | 0.01<br>(0.01 to<br>0.03)          |
| Late maternal deaths                                  | 0.31<br>(0.15 to<br>0.56)            | 0.16<br>(0.05 to<br>0.40)           | 0.11<br>(0.03 to<br>0.28)          | 0.18<br>(0.06 to<br>0.46)           | 0.01<br>(0.00 to<br>0.01)          | 0.00<br>(0.00 to<br>0.01)          | 0.00<br>(0.00 to<br>0.01)          | 0.00<br>(0.00 to<br>0.01)          |
| Maternal deaths aggravated by HIV/AIDS                | 0.00<br>(0.00 to<br>0.01)            | 0.01<br>(0.00 to<br>0.03)           | 0.00<br>(0.00 to<br>0.01)          | 0.03<br>(0.01 to<br>0.08)           | 0.00<br>(0.00 to<br>0.00)          | 0.00<br>(0.00 to<br>0.00)          | 0.00<br>(0.00 to<br>0.00)          | 0.00<br>(0.00 to<br>0.00)          |
| Other maternal disorders                              | 1.65<br>(1.07 to<br>2.40)            | 1.02<br>(0.43 to<br>1.98)           | 0.71<br>(0.30 to<br>1.45)          | 1.11<br>(0.48 to<br>2.24)           | 0.03<br>(0.02 to<br>0.05)          | 0.02<br>(0.01 to<br>0.04)          | 0.01<br>(0.01 to<br>0.03)          | 0.02<br>(0.01 to<br>0.04)          |
| <b>Dominica</b>                                       |                                      |                                     |                                    |                                     |                                    |                                    |                                    |                                    |
|                                                       | <b>YLLs (actual counts)</b>          |                                     |                                    |                                     | <b>Deaths (actual counts)</b>      |                                    |                                    |                                    |

| Cause                                                                   | 2016                                    | 2040 Forecast                           | 2040 Better Scenario                  | 2040 Worse Scenario                     | 2016                            | 2040 Forecast                   | 2040 Better Scenario           | 2040 Worse Scenario             |
|-------------------------------------------------------------------------|-----------------------------------------|-----------------------------------------|---------------------------------------|-----------------------------------------|---------------------------------|---------------------------------|--------------------------------|---------------------------------|
| <b>Neonatal disorders</b>                                               | <b>1,387.23</b><br>(846.09 to 2,143.05) | <b>1,268.86</b><br>(347.11 to 2,810.52) | <b>790.75</b><br>(219.88 to 1,797.86) | <b>1,478.58</b><br>(409.77 to 3,282.13) | <b>16.03</b><br>(9.77 to 24.76) | <b>14.66</b><br>(4.01 to 32.46) | <b>9.14</b><br>(2.54 to 20.77) | <b>17.08</b><br>(4.74 to 37.91) |
| Neonatal preterm birth                                                  | 377.59<br>(228.56 to 616.57)            | 338.25<br>(91.31 to 730.39)             | 173.80<br>(46.41 to 375.60)           | 411.93<br>(112.31 to 885.59)            | 4.36<br>(2.64 to 7.12)          | 3.91<br>(1.06 to 8.44)          | 2.01<br>(0.54 to 4.34)         | 4.76<br>(1.30 to 10.23)         |
| Neonatal encephalopathy due to birth asphyxia and trauma                | 534.36<br>(305.18 to 854.31)            | 456.68<br>(99.52 to 1,150.54)           | 287.56<br>(60.17 to 724.41)           | 522.81<br>(112.50 to 1,309.60)          | 6.17<br>(3.53 to 9.87)          | 5.28<br>(1.15 to 13.29)         | 3.32<br>(0.70 to 8.37)         | 6.04<br>(1.30 to 15.13)         |
| Neonatal sepsis and other neonatal infections                           | 323.60<br>(179.21 to 533.41)            | 341.11<br>(95.38 to 803.72)             | 230.29<br>(64.07 to 559.43)           | 389.36<br>(110.19 to 926.38)            | 3.74<br>(2.07 to 6.16)          | 3.94<br>(1.10 to 9.29)          | 2.66<br>(0.74 to 6.46)         | 4.50<br>(1.27 to 10.70)         |
| Hemolytic disease and other neonatal jaundice                           | 25.41<br>(12.60 to 46.99)               | 17.07<br>(3.32 to 47.29)                | 10.88<br>(2.11 to 30.60)              | 19.86<br>(3.84 to 56.39)                | 0.29<br>(0.15 to 0.54)          | 0.20<br>(0.04 to 0.55)          | 0.13<br>(0.02 to 0.35)         | 0.25<br>(0.04 to 0.65)          |
| Other neonatal disorders                                                | 126.27<br>(71.50 to 214.63)             | 115.75<br>(27.57 to 290.32)             | 88.22<br>(20.81 to 222.71)            | 134.62<br>(31.16 to 343.20)             | 1.46<br>(0.83 to 2.48)          | 1.34<br>(0.32 to 3.35)          | 1.02<br>(0.24 to 2.57)         | 1.56<br>(0.36 to 3.97)          |
| <b>Nutritional deficiencies</b>                                         | <b>46.96</b><br>(36.22 to 62.83)        | <b>38.00</b><br>(28.89 to 50.75)        | <b>34.15</b><br>(26.53 to 44.41)      | <b>38.36</b><br>(28.79 to 51.14)        | <b>2.04</b><br>(1.77 to 2.34)   | <b>2.19</b><br>(1.68 to 2.64)   | <b>2.15</b><br>(1.71 to 2.56)  | <b>2.09</b><br>(1.59 to 2.56)   |
| Protein-energy malnutrition                                             | 29.29<br>(20.79 to 42.89)               | 18.93<br>(12.39 to 28.54)               | 18.62<br>(12.64 to 27.29)             | 19.21<br>(12.64 to 29.07)               | 1.20<br>(0.93 to 1.61)          | 1.13<br>(0.74 to 1.60)          | 1.22<br>(0.84 to 1.69)         | 1.08<br>(0.71 to 1.54)          |
| Iodine deficiency                                                       | 0.51<br>(0.03 to 1.85)                  | 1.40<br>(0.04 to 4.75)                  | 1.14<br>(0.03 to 4.05)                | 1.44<br>(0.04 to 5.11)                  | 0.02<br>(0.00 to 0.06)          | 0.07<br>(0.00 to 0.29)          | 0.07<br>(0.00 to 0.27)         | 0.07<br>(0.00 to 0.28)          |
| Dietary iron deficiency                                                 | 0.58<br>(0.37 to 0.79)                  | 0.47<br>(0.27 to 0.76)                  | 0.44<br>(0.25 to 0.70)                | 0.50<br>(0.27 to 0.80)                  | 0.01<br>(0.01 to 0.01)          | 0.01<br>(0.01 to 0.01)          | 0.01<br>(0.01 to 0.01)         | 0.01<br>(0.01 to 0.01)          |
| Other nutritional deficiencies                                          | 16.58<br>(10.05 to 21.70)               | 17.19<br>(10.53 to 23.06)               | 13.95<br>(8.04 to 19.08)              | 17.22<br>(10.43 to 23.07)               | 0.82<br>(0.46 to 1.08)          | 0.97<br>(0.55 to 1.34)          | 0.85<br>(0.47 to 1.21)         | 0.93<br>(0.53 to 1.28)          |
| <b>Other communicable, maternal, neonatal, and nutritional diseases</b> | <b>68.96</b><br>(42.05 to 88.25)        | <b>56.83</b><br>(31.57 to 77.81)        | <b>47.86</b><br>(26.56 to 65.67)      | <b>58.78</b><br>(32.01 to 81.59)        | <b>1.82</b><br>(1.11 to 2.22)   | <b>1.78</b><br>(1.03 to 2.29)   | <b>1.58</b><br>(0.91 to 2.01)  | <b>1.79</b><br>(1.02 to 2.30)   |
| Sexually transmitted infections excluding HIV                           | 11.33<br>(5.98 to 21.07)                | 3.96<br>(1.87 to 8.44)                  | 2.82<br>(1.36 to 6.03)                | 4.16<br>(1.91 to 8.96)                  | 0.25<br>(0.15 to 0.38)          | 0.09<br>(0.06 to 0.15)          | 0.07<br>(0.04 to 0.11)         | 0.09<br>(0.06 to 0.15)          |
| Syphilis                                                                | 10.09<br>(4.79 to 19.85)                | 3.27<br>(1.26 to 7.72)                  | 2.21<br>(0.85 to 5.33)                | 3.45<br>(1.30 to 8.28)                  | 0.21<br>(0.12 to 0.33)          | 0.06<br>(0.03 to 0.12)          | 0.05<br>(0.02 to 0.08)         | 0.07<br>(0.03 to 0.12)          |
| Chlamydial infection                                                    | 0.19<br>(0.15 to 0.24)                  | 0.12<br>(0.08 to 0.19)                  | 0.11<br>(0.07 to 0.17)                | 0.12<br>(0.08 to 0.19)                  | 0.01<br>(0.00 to 0.01)          | 0.00<br>(0.00 to 0.01)          | 0.00<br>(0.00 to 0.01)         | 0.00<br>(0.00 to 0.01)          |
| Gonococcal infection                                                    | 0.67<br>(0.53 to 0.81)                  | 0.38<br>(0.26 to 0.56)                  | 0.33<br>(0.22 to 0.50)                | 0.38<br>(0.27 to 0.56)                  | 0.02<br>(0.02 to 0.02)          | 0.01<br>(0.02 to 0.02)          | 0.01<br>(0.02 to 0.02)         | 0.01<br>(0.02 to 0.02)          |
| Other sexually transmitted infections                                   | 0.39<br>(0.30 to 0.47)                  | 0.20<br>(0.14 to 0.30)                  | 0.17<br>(0.11 to 0.25)                | 0.20<br>(0.14 to 0.30)                  | 0.01<br>(0.01 to 0.01)          | 0.01<br>(0.00 to 0.01)          | 0.01<br>(0.01 to 0.01)         | 0.01<br>(0.00 to 0.01)          |
| Acute hepatitis                                                         | 4.96<br>(4.18 to 5.89)                  | 4.37<br>(3.14 to 5.90)                  | 3.04<br>(2.14 to 4.39)                | 4.47<br>(3.19 to 6.03)                  | 0.14<br>(0.12 to 0.17)          | 0.15<br>(0.11 to 0.19)          | 0.11<br>(0.08 to 0.14)         | 0.15<br>(0.11 to 0.19)          |
| Acute hepatitis A                                                       | 0.17<br>(0.06 to 0.30)                  | 0.11<br>(0.04 to 0.24)                  | 0.08<br>(0.03 to 0.17)                | 0.12<br>(0.04 to 0.24)                  | 0.00<br>(0.00 to 0.00)          | 0.00<br>(0.00 to 0.01)          | 0.00<br>(0.00 to 0.00)         | 0.00<br>(0.00 to 0.01)          |
| Acute hepatitis B                                                       | 3.34<br>(2.74 to 4.05)                  | 3.11<br>(2.15 to 4.30)                  | 2.14<br>(1.42 to 3.14)                | 3.19<br>(2.18 to 4.41)                  | 0.10<br>(0.08 to 0.12)          | 0.11<br>(0.08 to 0.14)          | 0.07<br>(0.05 to 0.10)         | 0.11<br>(0.08 to 0.14)          |
| Acute hepatitis C                                                       | 0.22<br>(0.15 to 0.29)                  | 0.22<br>(0.14 to 0.32)                  | 0.16<br>(0.10 to 0.24)                | 0.22<br>(0.14 to 0.32)                  | 0.01<br>(0.00 to 0.01)          | 0.01<br>(0.01 to 0.01)          | 0.01<br>(0.01 to 0.01)         | 0.01<br>(0.01 to 0.01)          |

|                                       |                                      |                                       |                                      |                                       |                              |                              |                              |                                |
|---------------------------------------|--------------------------------------|---------------------------------------|--------------------------------------|---------------------------------------|------------------------------|------------------------------|------------------------------|--------------------------------|
| Acute hepatitis E                     | 1.24<br>(0.89 to 1.63)               | 0.93<br>(0.57 to 1.37)                | 0.66<br>(0.40 to 0.99)               | 0.94<br>(0.59 to 1.39)                | 0.03<br>(0.02 to 0.04)       | 0.03<br>(0.02 to 0.05)       | 0.03<br>(0.02 to 0.04)       | 0.03<br>(0.02 to 0.05)         |
| Other unspecified infectious diseases | 52.67<br>(28.02 to 66.94)            | 48.50<br>(24.52 to 67.20)             | 42.00<br>(21.57 to 57.86)            | 50.15<br>(24.95 to 69.91)             | 1.44<br>(0.76 to 1.77)       | 1.54<br>(0.82 to 2.00)       | 1.41<br>(0.75 to 1.78)       | 1.55<br>(0.81 to 2.00)         |
| Non-communicable diseases             | 10,143.22<br>(9,085.55 to 11,393.25) | 13,699.59<br>(10,473.50 to 17,956.31) | 10,399.84<br>(7,958.26 to 13,581.53) | 16,034.90<br>(12,148.61 to 20,905.89) | 523.53<br>(472.61 to 583.12) | 763.81<br>(626.64 to 919.61) | 609.61<br>(494.13 to 738.99) | 857.05<br>(703.35 to 1,031.81) |
| <b>Dominica</b>                       |                                      |                                       |                                      |                                       |                              |                              |                              |                                |
| Cause                                 | YLLs (actual counts)                 |                                       |                                      |                                       | Deaths (actual counts)       |                              |                              |                                |
|                                       | 2016                                 | 2040 Forecast                         | 2040 Better Scenario                 | 2040 Worse Scenario                   | 2016                         | 2040 Forecast                | 2040 Better Scenario         | 2040 Worse Scenario            |
| Neoplasms                             | 2,931.16<br>(2,586.75 to 3,317.34)   | 4,229.52<br>(3,375.55 to 5,189.98)    | 3,682.57<br>(2,936.24 to 4,498.22)   | 4,659.16<br>(3,638.19 to 5,866.86)    | 142.92<br>(126.62 to 160.12) | 221.23<br>(189.28 to 257.73) | 201.82<br>(172.30 to 234.63) | 233.53<br>(193.89 to 275.84)   |
| Lip and oral cavity cancer            | 48.57<br>(41.40 to 56.94)            | 74.51<br>(40.63 to 130.61)            | 46.22<br>(27.62 to 77.59)            | 115.39<br>(58.92 to 205.10)           | 2.15<br>(1.86 to 2.48)       | 3.27<br>(1.92 to 5.36)       | 2.15<br>(1.37 to 3.38)       | 4.89<br>(2.65 to 8.42)         |
| Nasopharynx cancer                    | 14.15<br>(12.12 to 16.47)            | 17.20<br>(9.38 to 30.00)              | 9.59<br>(5.57 to 16.01)              | 26.88<br>(13.91 to 48.60)             | 0.46<br>(0.39 to 0.53)       | 0.57<br>(0.32 to 0.97)       | 0.33<br>(0.20 to 0.53)       | 0.89<br>(0.48 to 1.55)         |
| Other pharynx cancer                  | 29.72<br>(24.62 to 35.67)            | 41.25<br>(22.21 to 71.26)             | 35.65<br>(20.01 to 59.89)            | 49.45<br>(26.34 to 84.23)             | 1.20<br>(1.01 to 1.43)       | 1.77<br>(1.00 to 2.92)       | 1.58<br>(0.93 to 2.56)       | 2.07<br>(1.13 to 3.47)         |
| Esophageal cancer                     | 54.71<br>(46.98 to 63.72)            | 81.65<br>(48.12 to 138.00)            | 57.70<br>(36.44 to 90.74)            | 118.06<br>(65.75 to 211.33)           | 2.68<br>(2.32 to 3.07)       | 3.97<br>(2.50 to 6.34)       | 2.94<br>(1.98 to 4.34)       | 5.55<br>(3.24 to 9.58)         |
| Stomach cancer                        | 241.97<br>(210.79 to 277.86)         | 272.66<br>(203.65 to 353.91)          | 211.18<br>(160.44 to 273.53)         | 281.48<br>(209.44 to 371.23)          | 12.56<br>(10.97 to 14.25)    | 14.95<br>(11.79 to 19.14)    | 12.00<br>(9.51 to 15.14)     | 15.00<br>(11.70 to 19.39)      |
| Colon and rectum cancer               | 197.45<br>(170.58 to 225.85)         | 299.06<br>(201.14 to 434.60)          | 251.48<br>(169.07 to 365.76)         | 324.92<br>(212.78 to 483.16)          | 10.40<br>(9.06 to 11.85)     | 16.87<br>(11.69 to 24.87)    | 14.75<br>(10.37 to 21.28)    | 17.78<br>(11.94 to 26.60)      |
| Liver cancer                          | 109.00<br>(94.89 to 124.82)          | 185.74<br>(124.43 to 271.92)          | 171.37<br>(118.80 to 238.78)         | 223.31<br>(142.00 to 346.37)          | 5.16<br>(4.54 to 5.87)       | 9.22<br>(6.50 to 12.66)      | 8.86<br>(6.46 to 11.86)      | 10.66<br>(7.11 to 15.31)       |
| Liver cancer due to hepatitis B       | 41.26<br>(34.39 to 49.49)            | 68.69<br>(43.98 to 102.26)            | 64.29<br>(42.55 to 91.66)            | 80.18<br>(48.32 to 126.10)            | 1.69<br>(1.41 to 2.03)       | 2.96<br>(2.02 to 4.22)       | 2.86<br>(1.99 to 3.98)       | 3.34<br>(2.17 to 5.00)         |
| Liver cancer due to hepatitis C       | 25.98<br>(21.33 to 31.08)            | 46.16<br>(30.97 to 65.96)             | 44.29<br>(30.40 to 61.90)            | 51.93<br>(33.55 to 78.24)             | 1.49<br>(1.26 to 1.77)       | 2.73<br>(1.91 to 3.81)       | 2.72<br>(1.94 to 3.74)       | 2.96<br>(1.98 to 4.26)         |
| Liver cancer due to alcohol use       | 22.42<br>(18.39 to 27.13)            | 38.24<br>(24.19 to 57.70)             | 32.11<br>(21.20 to 47.23)            | 52.61<br>(31.51 to 82.76)             | 1.11<br>(0.92 to 1.32)       | 1.96<br>(1.31 to 2.85)       | 1.74<br>(1.19 to 2.49)       | 2.56<br>(1.63 to 3.95)         |
| Liver cancer due to other causes      | 19.35<br>(16.06 to 22.95)            | 32.65<br>(20.92 to 49.82)             | 30.68<br>(20.37 to 45.94)            | 38.59<br>(23.22 to 62.55)             | 0.88<br>(0.73 to 1.04)       | 1.58<br>(1.05 to 2.38)       | 1.54<br>(1.05 to 2.26)       | 1.81<br>(1.13 to 2.88)         |
| Gallbladder and biliary tract cancer  | 34.84<br>(30.17 to 44.14)            | 40.69<br>(32.48 to 52.98)             | 40.67<br>(32.29 to 53.30)            | 38.98<br>(31.37 to 50.16)             | 1.77<br>(1.54 to 2.22)       | 2.18<br>(1.83 to 2.82)       | 2.25<br>(1.86 to 2.96)       | 2.05<br>(1.73 to 2.65)         |
| Pancreatic cancer                     | 111.79<br>(97.15 to 127.48)          | 187.14<br>(138.02 to 249.83)          | 184.56<br>(136.16 to 245.27)         | 199.76<br>(143.77 to 273.44)          | 5.80<br>(5.09 to 6.54)       | 9.89<br>(7.57 to 13.14)      | 10.09<br>(7.72 to 13.26)     | 10.26<br>(7.64 to 14.01)       |
| Larynx cancer                         | 41.12<br>(34.25 to 48.66)            | 50.23<br>(24.40 to 91.88)             | 27.00<br>(14.16 to 46.62)            | 80.43<br>(36.73 to 147.42)            | 1.85<br>(1.55 to 2.16)       | 2.24<br>(1.17 to 3.98)       | 1.26<br>(0.71 to 2.16)       | 3.51<br>(1.72 to 6.15)         |
| Tracheal, bronchus, and lung cancer   | 283.76<br>(243.72 to 329.59)         | 393.03<br>(255.99 to 579.95)          | 255.31<br>(172.92 to 359.03)         | 625.63<br>(395.45 to 930.78)          | 12.75<br>(11.06 to 14.65)    | 17.88<br>(12.41 to 25.06)    | 12.14<br>(8.71 to 16.40)     | 27.84<br>(18.54 to 40.04)      |
| Malignant skin melanoma               | 10.52<br>(8.70 to 14.12)             | 14.60<br>(11.45 to 19.74)             | 17.26<br>(13.34 to 23.60)            | 13.88<br>(10.89 to 18.85)             | 0.47<br>(0.39 to 0.62)       | 0.70<br>(0.57 to 0.93)       | 0.86<br>(0.70 to 1.14)       | 0.65<br>(0.54 to 0.87)         |



|                                 |                                 |                                   |                                   |                                 |                              |                              |                              |                              |
|---------------------------------|---------------------------------|-----------------------------------|-----------------------------------|---------------------------------|------------------------------|------------------------------|------------------------------|------------------------------|
| Non-melanoma skin cancer        | 14.75<br>(12.68 to<br>17.20)    | 24.47<br>(20.27 to<br>28.76)      | 20.46<br>(16.42 to<br>25.17)      | 23.67<br>(19.76 to<br>27.69)    | 0.75<br>(0.65 to<br>0.85)    | 1.31<br>(1.13 to<br>1.49)    | 1.15<br>(0.97 to<br>1.33)    | 1.23<br>(1.05 to<br>1.40)    |
| Breast cancer                   | 260.08<br>(214.40 to<br>314.57) | 360.46<br>(234.03 to<br>543.11)   | 304.92<br>(198.22 to<br>461.33)   | 390.28<br>(245.72 to<br>602.29) | 10.78<br>(9.05 to<br>12.90)  | 16.81<br>(11.46 to<br>23.84) | 14.77<br>(10.09 to<br>20.90) | 17.72<br>(11.80 to<br>25.60) |
| Cervical cancer                 | 113.95<br>(92.84 to<br>140.32)  | 136.58<br>(93.67 to<br>202.32)    | 107.29<br>(72.70 to<br>159.70)    | 141.00<br>(95.74 to<br>215.67)  | 4.55<br>(3.77 to<br>5.55)    | 5.93<br>(4.29 to<br>8.21)    | 4.81<br>(3.39 to<br>6.71)    | 6.00<br>(4.28 to<br>8.54)    |
| Uterine cancer                  | 33.40<br>(27.36 to<br>41.26)    | 37.22<br>(27.64 to<br>48.54)      | 31.94<br>(23.23 to<br>42.40)      | 37.03<br>(27.60 to<br>47.99)    | 1.60<br>(1.32 to<br>1.95)    | 1.94<br>(1.50 to<br>2.41)    | 1.71<br>(1.29 to<br>2.18)    | 1.90<br>(1.49 to<br>2.35)    |
| Ovarian cancer                  | 40.27<br>(31.22 to<br>50.74)    | 46.52<br>(26.57 to<br>78.30)      | 43.82<br>(25.57 to<br>71.98)      | 47.32<br>(26.38 to<br>81.05)    | 1.68<br>(1.32 to<br>2.13)    | 2.05<br>(1.21 to<br>3.35)    | 1.98<br>(1.19 to<br>3.21)    | 2.06<br>(1.17 to<br>3.43)    |
| Prostate cancer                 | 507.76<br>(375.03 to<br>609.13) | 905.05<br>(703.41 to<br>1,055.22) | 877.93<br>(686.98 to<br>1,025.40) | 845.19<br>(652.07 to<br>992.21) | 37.56<br>(27.31 to<br>44.62) | 65.54<br>(50.33 to<br>76.04) | 65.53<br>(50.87 to<br>75.57) | 59.79<br>(44.82 to<br>70.98) |
| Testicular cancer               | 0.84<br>(0.65 to<br>1.10)       | 0.97<br>(0.64 to<br>1.48)         | 0.81<br>(0.52 to<br>1.26)         | 0.97<br>(0.64 to<br>1.48)       | 0.02<br>(0.02 to<br>0.02)    | 0.02<br>(0.02 to<br>0.03)    | 0.02<br>(0.02 to<br>0.03)    | 0.02<br>(0.02 to<br>0.03)    |
| <b>Dominica</b>                 |                                 |                                   |                                   |                                 |                              |                              |                              |                              |
| Cause                           | YLLs (actual counts)            |                                   |                                   |                                 | Deaths (actual counts)       |                              |                              |                              |
|                                 | 2016                            | 2040 Forecast                     | 2040 Better Scenario              | 2040 Worse Scenario             | 2016                         | 2040 Forecast                | 2040 Better Scenario         | 2040 Worse Scenario          |
| Kidney cancer                   | 36.07<br>(31.00 to<br>42.11)    | 63.47<br>(49.11 to<br>82.51)      | 64.96<br>(50.75 to<br>82.66)      | 65.00<br>(49.80 to<br>86.05)    | 1.45<br>(1.26 to<br>1.68)    | 2.76<br>(2.24 to<br>3.43)    | 2.93<br>(2.40 to<br>3.58)    | 2.75<br>(2.18 to<br>3.49)    |
| Bladder cancer                  | 37.97<br>(33.21 to<br>43.02)    | 53.38<br>(38.91 to<br>72.07)      | 47.29<br>(35.04 to<br>63.03)      | 58.50<br>(40.76 to<br>83.03)    | 2.38<br>(2.08 to<br>2.67)    | 3.40<br>(2.56 to<br>4.55)    | 3.14<br>(2.42 to<br>4.11)    | 3.62<br>(2.62 to<br>5.03)    |
| Brain and nervous system cancer | 39.28<br>(33.35 to<br>48.05)    | 62.35<br>(48.70 to<br>80.92)      | 58.84<br>(45.57 to<br>76.99)      | 61.24<br>(47.95 to<br>79.31)    | 1.14<br>(0.98 to<br>1.37)    | 2.06<br>(1.71 to<br>2.52)    | 2.02<br>(1.65 to<br>2.47)    | 1.98<br>(1.66 to<br>2.39)    |
| Thyroid cancer                  | 5.22<br>(4.50 to<br>6.06)       | 7.21<br>(4.97 to<br>10.56)        | 6.25<br>(4.34 to<br>8.87)         | 7.58<br>(5.10 to<br>11.51)      | 0.23<br>(0.20 to<br>0.27)    | 0.34<br>(0.25 to<br>0.50)    | 0.31<br>(0.22 to<br>0.43)    | 0.35<br>(0.25 to<br>0.52)    |
| Mesothelioma                    | 4.15<br>(3.42 to<br>5.07)       | 5.90<br>(4.58 to<br>7.50)         | 6.10<br>(4.68 to<br>7.80)         | 5.68<br>(4.42 to<br>7.18)       | 0.17<br>(0.15 to<br>0.21)    | 0.27<br>(0.22 to<br>0.32)    | 0.28<br>(0.23 to<br>0.34)    | 0.25<br>(0.20 to<br>0.30)    |
| Hodgkin lymphoma                | 14.87<br>(12.37 to<br>17.98)    | 13.88<br>(10.18 to<br>18.91)      | 10.26<br>(7.26 to<br>14.63)       | 14.07<br>(10.32 to<br>19.13)    | 0.41<br>(0.35 to<br>0.49)    | 0.44<br>(0.34 to<br>0.56)    | 0.33<br>(0.25 to<br>0.44)    | 0.43<br>(0.34 to<br>0.55)    |
| Non-Hodgkin lymphoma            | 149.62<br>(125.96 to<br>180.70) | 215.18<br>(157.08 to<br>284.70)   | 196.46<br>(144.18 to<br>264.60)   | 216.22<br>(157.14 to<br>288.77) | 4.94<br>(4.20 to<br>5.80)    | 7.94<br>(6.15 to<br>10.11)   | 7.47<br>(5.74 to<br>9.54)    | 7.80<br>(6.00 to<br>10.08)   |
| Multiple myeloma                | 90.65<br>(62.55 to<br>110.44)   | 137.82<br>(89.58 to<br>183.17)    | 133.92<br>(86.44 to<br>183.69)    | 137.10<br>(89.07 to<br>185.69)  | 4.19<br>(2.84 to<br>5.06)    | 6.71<br>(4.37 to<br>8.72)    | 6.69<br>(4.38 to<br>8.59)    | 6.54<br>(4.27 to<br>8.61)    |
| Leukemia                        | 187.76<br>(162.18 to<br>216.31) | 211.54<br>(155.68 to<br>273.78)   | 178.19<br>(131.14 to<br>231.71)   | 227.31<br>(163.67 to<br>299.40) | 5.95<br>(5.23 to<br>6.77)    | 8.22<br>(6.46 to<br>10.28)   | 7.17<br>(5.74 to<br>8.88)    | 8.61<br>(6.66 to<br>11.01)   |
| Acute lymphoid leukemia         | 45.85<br>(36.40 to<br>57.46)    | 37.21<br>(24.67 to<br>55.37)      | 31.81<br>(20.96 to<br>47.25)      | 39.31<br>(25.79 to<br>58.81)    | 0.89<br>(0.74 to<br>1.07)    | 0.84<br>(0.61 to<br>1.14)    | 0.74<br>(0.53 to<br>1.00)    | 0.88<br>(0.63 to<br>1.21)    |
| Chronic lymphoid leukemia       | 5.35<br>(4.25 to<br>6.59)       | 7.38<br>(4.98 to<br>10.72)        | 6.95<br>(4.73 to<br>9.97)         | 7.74<br>(5.04 to<br>11.54)      | 0.29<br>(0.23 to<br>0.36)    | 0.42<br>(0.29 to<br>0.58)    | 0.41<br>(0.28 to<br>0.55)    | 0.42<br>(0.28 to<br>0.60)    |
| Acute myeloid leukemia          | 32.94<br>(27.84 to<br>39.73)    | 39.64<br>(27.68 to<br>55.95)      | 37.52<br>(26.83 to<br>52.48)      | 42.09<br>(29.12 to<br>59.90)    | 0.98<br>(0.84 to<br>1.16)    | 1.39<br>(1.02 to<br>1.89)    | 1.36<br>(1.01 to<br>1.81)    | 1.44<br>(1.04 to<br>1.99)    |
| Chronic myeloid leukemia        | 8.41<br>(6.64 to<br>10.70)      | 5.53<br>(3.56 to<br>8.17)         | 4.11<br>(2.63 to<br>6.14)         | 6.00<br>(3.71 to<br>9.38)       | 0.31<br>(0.25 to<br>0.39)    | 0.22<br>(0.15 to<br>0.31)    | 0.17<br>(0.24 to<br>0.24)    | 0.23<br>(0.15 to<br>0.34)    |

|                                               |                                                            |                                                            |                                                            |                                                            |                                                      |                                                      |                                                      |                                                      |
|-----------------------------------------------|------------------------------------------------------------|------------------------------------------------------------|------------------------------------------------------------|------------------------------------------------------------|------------------------------------------------------|------------------------------------------------------|------------------------------------------------------|------------------------------------------------------|
| Other leukemia                                | 95.20<br>(82.16 to<br>110.38)                              | 121.79<br>(90.85 to<br>156.20)                             | 97.79<br>(73.94 to<br>126.00)                              | 132.16<br>(97.84 to<br>173.11)                             | 3.46<br>(3.04 to<br>3.96)                            | 5.36<br>(4.32 to<br>6.60)                            | 4.49<br>(3.61 to<br>5.49)                            | 5.63<br>(4.45 to<br>7.09)                            |
| Other neoplasms                               | 216.92<br>(185.03 to<br>253.03)                            | 289.77<br>(232.97 to<br>358.47)                            | 285.17<br>(227.27 to<br>355.06)                            | 282.84<br>(228.34 to<br>350.24)                            | 7.86<br>(6.77 to<br>9.03)                            | 11.96<br>(10.26 to<br>13.81)                         | 12.32<br>(10.51 to<br>14.31)                         | 11.33<br>(9.77 to<br>13.04)                          |
| <b>Cardiovascular diseases</b>                | <b>3,329.92</b><br><b>(2,978.74 to</b><br><b>3,749.20)</b> | <b>3,979.21</b><br><b>(2,645.85 to</b><br><b>6,153.80)</b> | <b>2,467.01</b><br><b>(1,697.96 to</b><br><b>3,815.61)</b> | <b>5,213.22</b><br><b>(3,354.33 to</b><br><b>8,263.30)</b> | <b>202.49</b><br><b>(183.13 to</b><br><b>227.03)</b> | <b>254.05</b><br><b>(178.59 to</b><br><b>382.21)</b> | <b>170.06</b><br><b>(120.09 to</b><br><b>265.83)</b> | <b>310.53</b><br><b>(211.33 to</b><br><b>467.48)</b> |
| Rheumatic heart disease                       | 54.21<br>(46.10 to<br>64.41)                               | 36.51<br>(26.51 to<br>51.74)                               | 27.22<br>(19.52 to<br>38.17)                               | 37.14<br>(27.25 to<br>53.05)                               | 2.45<br>(2.10 to<br>2.92)                            | 2.07<br>(1.57 to<br>2.71)                            | 1.65<br>(1.22 to<br>2.11)                            | 2.03<br>(1.55 to<br>2.70)                            |
| Ischemic heart disease                        | 1,202.54<br>(1,037.55 to<br>1,383.25)                      | 1,382.93<br>(679.71 to<br>2,708.56)                        | 710.67<br>(353.75 to<br>1,533.97)                          | 2,079.84<br>(991.11 to<br>4,290.27)                        | 78.29<br>(67.91 to<br>89.33)                         | 91.77<br>(47.77 to<br>184.72)                        | 52.38<br>(26.92 to<br>113.34)                        | 125.30<br>(62.60 to<br>251.55)                       |
| Stroke                                        | 814.23<br>(701.06 to<br>937.48)                            | 766.11<br>(413.28 to<br>1,608.09)                          | 386.47<br>(205.85 to<br>879.86)                            | 1,167.77<br>(616.40 to<br>2,385.88)                        | 49.93<br>(43.33 to<br>57.59)                         | 50.29<br>(27.97 to<br>129.31)                        | 28.70<br>(15.80 to<br>73.61)                         | 68.69<br>(37.49 to<br>159.64)                        |
| Ischemic stroke                               | 321.68<br>(275.18 to<br>372.53)                            | 326.31<br>(145.63 to<br>1,051.56)                          | 186.36<br>(83.03 to<br>564.29)                             | 450.19<br>(199.30 to<br>1,466.33)                          | 23.81<br>(20.44 to<br>27.73)                         | 25.27<br>(11.19 to<br>80.70)                         | 15.94<br>(7.00 to<br>51.41)                          | 31.79<br>(13.90 to<br>107.96)                        |
| Intracerebral hemorrhage                      | 492.55<br>(422.28 to<br>570.06)                            | 439.80<br>(230.36 to<br>801.87)                            | 200.11<br>(111.13 to<br>386.08)                            | 717.58<br>(348.04 to<br>1,376.11)                          | 26.11<br>(22.45 to<br>29.98)                         | 25.01<br>(13.99 to<br>45.84)                         | 12.75<br>(7.35 to<br>24.34)                          | 36.90<br>(19.38 to<br>70.35)                         |
| Hypertensive heart disease                    | 435.22<br>(334.72 to<br>670.84)                            | 701.49<br>(406.16 to<br>1,270.89)                          | 496.15<br>(314.64 to<br>784.58)                            | 821.69<br>(461.93 to<br>1,522.13)                          | 29.31<br>(22.79 to<br>44.60)                         | 49.44<br>(30.30 to<br>89.02)                         | 36.98<br>(24.47 to<br>59.26)                         | 55.54<br>(32.46 to<br>101.57)                        |
| Cardiomyopathy and myocarditis                | 348.49<br>(272.32 to<br>412.85)                            | 443.14<br>(286.00 to<br>650.46)                            | 336.74<br>(217.86 to<br>494.38)                            | 448.47<br>(287.48 to<br>662.97)                            | 15.23<br>(11.85 to<br>17.79)                         | 20.69<br>(13.69 to<br>29.70)                         | 16.53<br>(11.02 to<br>23.57)                         | 20.24<br>(13.55 to<br>29.16)                         |
| Myocarditis                                   | 22.69<br>(15.96 to<br>28.72)                               | 25.81<br>(16.97 to<br>34.57)                               | 25.01<br>(16.23 to<br>34.06)                               | 25.22<br>(16.76 to<br>33.59)                               | 1.26<br>(0.85 to<br>1.63)                            | 1.52<br>(0.99 to<br>2.05)                            | 1.59<br>(1.03 to<br>2.14)                            | 1.43<br>(0.93 to<br>1.95)                            |
| <b>Dominica</b>                               |                                                            |                                                            |                                                            |                                                            |                                                      |                                                      |                                                      |                                                      |
| Cause                                         | YLLs (actual counts)                                       |                                                            |                                                            |                                                            | Deaths (actual counts)                               |                                                      |                                                      |                                                      |
|                                               | 2016                                                       | 2040 Forecast                                              | 2040 Better Scenario                                       | 2040 Worse Scenario                                        | 2016                                                 | 2040 Forecast                                        | 2040 Better Scenario                                 | 2040 Worse Scenario                                  |
| Alcoholic cardiomyopathy                      | 13.62<br>(9.47 to<br>18.09)                                | 16.47<br>(10.52 to<br>23.03)                               | 14.70<br>(9.26 to<br>20.49)                                | 19.39<br>(12.56 to<br>26.80)                               | 0.57<br>(0.40 to<br>0.75)                            | 0.71<br>(0.47 to<br>0.95)                            | 0.66<br>(0.43 to<br>0.89)                            | 0.80<br>(0.54 to<br>1.08)                            |
| Other cardiomyopathy                          | 312.18<br>(240.78 to<br>371.99)                            | 400.86<br>(251.25 to<br>601.39)                            | 297.02<br>(184.85 to<br>446.99)                            | 403.86<br>(252.03 to<br>613.16)                            | 13.40<br>(10.32 to<br>15.76)                         | 18.46<br>(12.02 to<br>27.44)                         | 14.28<br>(9.16 to<br>20.97)                          | 18.00<br>(11.61 to<br>26.79)                         |
| Atrial fibrillation and flutter               | 26.68<br>(20.45 to<br>33.73)                               | 40.95<br>(29.63 to<br>55.25)                               | 38.45<br>(27.95 to<br>51.60)                               | 40.85<br>(29.47 to<br>55.99)                               | 2.69<br>(2.04 to<br>3.44)                            | 3.87<br>(2.74 to<br>5.24)                            | 3.83<br>(2.69 to<br>5.12)                            | 3.73<br>(2.61 to<br>5.11)                            |
| Aortic aneurysm                               | 70.72<br>(60.14 to<br>81.07)                               | 89.53<br>(67.43 to<br>117.03)                              | 81.56<br>(61.24 to<br>105.52)                              | 87.83<br>(66.61 to<br>115.27)                              | 4.31<br>(3.68 to<br>4.94)                            | 5.60<br>(4.44 to<br>7.05)                            | 5.41<br>(4.24 to<br>6.71)                            | 5.31<br>(4.21 to<br>6.68)                            |
| Peripheral artery disease                     | 11.99<br>(8.42 to<br>16.96)                                | 25.56<br>(16.53 to<br>37.65)                               | 26.44<br>(16.88 to<br>39.46)                               | 25.72<br>(16.66 to<br>38.11)                               | 1.19<br>(0.79 to<br>1.66)                            | 2.43<br>(1.46 to<br>3.73)                            | 2.69<br>(1.62 to<br>4.11)                            | 2.34<br>(1.41 to<br>3.55)                            |
| Endocarditis                                  | 42.37<br>(30.54 to<br>55.65)                               | 59.39<br>(37.48 to<br>87.51)                               | 54.06<br>(34.15 to<br>77.89)                               | 59.93<br>(37.71 to<br>89.23)                               | 2.08<br>(1.43 to<br>2.69)                            | 3.07<br>(1.87 to<br>4.56)                            | 2.94<br>(1.81 to<br>4.29)                            | 2.99<br>(1.82 to<br>4.49)                            |
| Other cardiovascular and circulatory diseases | 323.47<br>(281.00 to<br>370.81)                            | 433.60<br>(322.92 to<br>590.46)                            | 309.25<br>(228.53 to<br>423.87)                            | 443.98<br>(327.87 to<br>606.49)                            | 17.03<br>(14.65 to<br>19.64)                         | 24.82<br>(19.17 to<br>32.22)                         | 18.96<br>(14.39 to<br>24.46)                         | 24.36<br>(18.80 to<br>31.97)                         |
| <b>Chronic respiratory diseases</b>           | <b>326.60</b><br><b>(284.52 to</b><br><b>375.60)</b>       | <b>336.03</b><br><b>(253.24 to</b><br><b>451.25)</b>       | <b>238.58</b><br><b>(185.06 to</b><br><b>309.31)</b>       | <b>456.77</b><br><b>(329.26 to</b><br><b>636.29)</b>       | <b>17.89</b><br><b>(15.69 to</b><br><b>20.20)</b>    | <b>18.97</b><br><b>(14.96 to</b><br><b>23.91)</b>    | <b>14.21</b><br><b>(11.63 to</b><br><b>17.30)</b>    | <b>25.02</b><br><b>(18.85 to</b><br><b>33.20)</b>    |
| Chronic obstructive pulmonary disease         | 194.75<br>(166.14 to<br>225.71)                            | 216.01<br>(148.94 to<br>312.68)                            | 134.69<br>(96.15 to<br>187.06)                             | 327.61<br>(217.72 to<br>494.75)                            | 12.29<br>(10.59 to<br>14.03)                         | 13.18<br>(9.68 to<br>17.84)                          | 8.87<br>(6.74 to<br>11.64)                           | 19.05<br>(13.41 to<br>26.89)                         |

|                                                                |                                                      |                                                      |                                                      |                                                      |                                                   |                                                   |                                                   |                                                   |
|----------------------------------------------------------------|------------------------------------------------------|------------------------------------------------------|------------------------------------------------------|------------------------------------------------------|---------------------------------------------------|---------------------------------------------------|---------------------------------------------------|---------------------------------------------------|
| Pneumoconiosis                                                 | 0.51<br>(0.41 to<br>0.62)                            | 0.55<br>(0.43 to<br>0.69)                            | 0.50<br>(0.37 to<br>0.63)                            | 0.54<br>(0.42 to<br>0.68)                            | 0.03<br>(0.02 to<br>0.03)                         | 0.03<br>(0.03 to<br>0.04)                         | 0.03<br>(0.02 to<br>0.04)                         | 0.03<br>(0.02 to<br>0.04)                         |
| Silicosis                                                      | 0.06<br>(0.04 to<br>0.09)                            | 0.06<br>(0.04 to<br>0.09)                            | 0.04<br>(0.02 to<br>0.06)                            | 0.06<br>(0.04 to<br>0.09)                            | 0.00<br>(0.00 to<br>0.00)                         | 0.00<br>(0.00 to<br>0.01)                         | 0.00<br>(0.00 to<br>0.00)                         | 0.00<br>(0.00 to<br>0.01)                         |
| Asbestosis                                                     | 0.19<br>(0.15 to<br>0.25)                            | 0.23<br>(0.17 to<br>0.31)                            | 0.26<br>(0.18 to<br>0.34)                            | 0.22<br>(0.16 to<br>0.30)                            | 0.01<br>(0.01 to<br>0.01)                         | 0.01<br>(0.01 to<br>0.02)                         | 0.01<br>(0.01 to<br>0.02)                         | 0.01<br>(0.01 to<br>0.01)                         |
| Coal workers pneumoconiosis                                    | 0.03<br>(0.02 to<br>0.04)                            | 0.03<br>(0.02 to<br>0.05)                            | 0.02<br>(0.01 to<br>0.03)                            | 0.03<br>(0.02 to<br>0.05)                            | 0.00<br>(0.00 to<br>0.00)                         | 0.00<br>(0.00 to<br>0.00)                         | 0.00<br>(0.00 to<br>0.00)                         | 0.00<br>(0.00 to<br>0.00)                         |
| Other pneumoconiosis                                           | 0.22<br>(0.17 to<br>0.28)                            | 0.23<br>(0.16 to<br>0.32)                            | 0.18<br>(0.12 to<br>0.25)                            | 0.23<br>(0.16 to<br>0.31)                            | 0.02<br>(0.01 to<br>0.02)                         | 0.02<br>(0.01 to<br>0.02)                         | 0.01<br>(0.01 to<br>0.02)                         | 0.02<br>(0.01 to<br>0.02)                         |
| Asthma                                                         | 78.72<br>(65.80 to<br>97.00)                         | 51.11<br>(32.58 to<br>79.23)                         | 30.66<br>(18.86 to<br>48.91)                         | 59.13<br>(36.52 to<br>95.27)                         | 3.06<br>(2.53 to<br>3.84)                         | 2.53<br>(1.53 to<br>3.57)                         | 1.49<br>(0.94 to<br>2.34)                         | 2.59<br>(1.64 to<br>4.13)                         |
| Interstitial lung disease and pulmonary sarcoidosis            | 19.55<br>(14.05 to<br>24.27)                         | 23.65<br>(16.40 to<br>30.46)                         | 30.61<br>(21.48 to<br>39.88)                         | 22.47<br>(16.01 to<br>29.24)                         | 0.87<br>(0.63 to<br>1.11)                         | 1.16<br>(0.83 to<br>1.46)                         | 1.55<br>(1.10 to<br>1.98)                         | 1.07<br>(0.77 to<br>1.37)                         |
| Other chronic respiratory diseases                             | 33.06<br>(23.91 to<br>51.53)                         | 44.71<br>(31.49 to<br>70.31)                         | 42.11<br>(30.04 to<br>64.71)                         | 47.02<br>(32.68 to<br>75.25)                         | 1.64<br>(1.17 to<br>2.53)                         | 2.27<br>(1.63 to<br>3.46)                         | 2.27<br>(1.66 to<br>3.38)                         | 2.29<br>(1.60 to<br>3.58)                         |
| <b>Cirrhosis and other chronic liver diseases</b>              | <b>304.34</b><br><b>(264.80 to</b><br><b>352.08)</b> | <b>361.58</b><br><b>(285.67 to</b><br><b>457.00)</b> | <b>289.48</b><br><b>(225.58 to</b><br><b>372.68)</b> | <b>393.05</b><br><b>(311.03 to</b><br><b>493.11)</b> | <b>11.20</b><br><b>(9.85 to</b><br><b>12.78)</b>  | <b>14.51</b><br><b>(12.14 to</b><br><b>17.20)</b> | <b>12.02</b><br><b>(9.93 to</b><br><b>14.47)</b>  | <b>15.32</b><br><b>(12.91 to</b><br><b>18.13)</b> |
| Cirrhosis and other chronic liver diseases due to hepatitis B  | 34.27<br>(26.75 to<br>42.96)                         | 43.83<br>(32.17 to<br>58.20)                         | 37.52<br>(27.59 to<br>50.89)                         | 43.19<br>(31.76 to<br>56.84)                         | 1.31<br>(1.05 to<br>1.61)                         | 1.79<br>(1.38 to<br>2.25)                         | 1.57<br>(1.20 to<br>2.00)                         | 1.73<br>(1.33 to<br>2.19)                         |
| Cirrhosis and other chronic liver diseases due to hepatitis C  | 93.11<br>(78.38 to<br>112.50)                        | 118.22<br>(90.34 to<br>153.16)                       | 99.83<br>(75.35 to<br>131.43)                        | 116.96<br>(90.23 to<br>150.56)                       | 3.36<br>(2.86 to<br>3.96)                         | 4.57<br>(3.68 to<br>5.57)                         | 3.94<br>(3.16 to<br>4.93)                         | 4.45<br>(3.60 to<br>5.38)                         |
| Cirrhosis and other chronic liver diseases due to alcohol use  | 119.86<br>(102.04 to<br>140.65)                      | 137.37<br>(106.92 to<br>173.55)                      | 100.02<br>(76.18 to<br>128.26)                       | 170.85<br>(133.71 to<br>216.60)                      | 4.62<br>(4.00 to<br>5.34)                         | 5.71<br>(4.67 to<br>6.84)                         | 4.38<br>(3.56 to<br>5.35)                         | 6.78<br>(5.61 to<br>8.12)                         |
| Cirrhosis and other chronic liver diseases due to other causes | 57.10<br>(48.84 to<br>66.86)                         | 62.16<br>(48.44 to<br>81.19)                         | 52.11<br>(40.04 to<br>69.48)                         | 62.06<br>(48.18 to<br>81.38)                         | 1.91<br>(1.65 to<br>2.23)                         | 2.44<br>(2.01 to<br>2.97)                         | 2.13<br>(1.72 to<br>2.63)                         | 2.37<br>(1.95 to<br>2.88)                         |
| <b>Digestive diseases</b>                                      | <b>273.26</b><br><b>(236.11 to</b><br><b>325.30)</b> | <b>314.49</b><br><b>(246.31 to</b><br><b>429.85)</b> | <b>262.22</b><br><b>(207.82 to</b><br><b>349.88)</b> | <b>324.82</b><br><b>(251.53 to</b><br><b>452.83)</b> | <b>12.37</b><br><b>(10.89 to</b><br><b>14.50)</b> | <b>16.00</b><br><b>(13.37 to</b><br><b>19.76)</b> | <b>14.20</b><br><b>(11.83 to</b><br><b>17.25)</b> | <b>15.82</b><br><b>(13.02 to</b><br><b>19.85)</b> |
| Peptic ulcer disease                                           | 48.81<br>(40.51 to<br>59.59)                         | 36.71<br>(29.15 to<br>46.49)                         | 25.44<br>(18.86 to<br>33.37)                         | 37.24<br>(29.29 to<br>47.20)                         | 2.26<br>(1.91 to<br>2.73)                         | 1.96<br>(1.58 to<br>2.39)                         | 1.41<br>(1.10 to<br>1.79)                         | 1.93<br>(1.56 to<br>2.36)                         |
| <b>Dominica</b>                                                |                                                      |                                                      |                                                      |                                                      |                                                   |                                                   |                                                   |                                                   |
| Cause                                                          | YLLs (actual counts)                                 |                                                      |                                                      |                                                      | Deaths (actual counts)                            |                                                   |                                                   |                                                   |
|                                                                | 2016                                                 | 2040 Forecast                                        | 2040 Better Scenario                                 | 2040 Worse Scenario                                  | 2016                                              | 2040 Forecast                                     | 2040 Better Scenario                              | 2040 Worse Scenario                               |
| Gastritis and duodenitis                                       | 14.37<br>(11.06 to<br>19.07)                         | 20.76<br>(14.83 to<br>29.52)                         | 16.65<br>(11.27 to<br>23.97)                         | 20.31<br>(14.67 to<br>28.50)                         | 0.64<br>(0.50 to<br>0.84)                         | 0.99<br>(0.73 to<br>1.31)                         | 0.83<br>(0.60 to<br>1.11)                         | 0.94<br>(0.69 to<br>1.26)                         |
| Appendicitis                                                   | 13.61<br>(10.90 to<br>17.43)                         | 12.39<br>(8.95 to<br>16.88)                          | 8.85<br>(6.11 to<br>12.60)                           | 12.53<br>(9.04 to<br>17.09)                          | 0.44<br>(0.34 to<br>0.55)                         | 0.49<br>(0.37 to<br>0.62)                         | 0.36<br>(0.26 to<br>0.49)                         | 0.48<br>(0.36 to<br>0.61)                         |
| Paralytic ileus and intestinal obstruction                     | 66.67<br>(54.55 to<br>87.17)                         | 81.84<br>(64.79 to<br>108.25)                        | 79.33<br>(62.58 to<br>104.16)                        | 80.10<br>(63.48 to<br>106.89)                        | 2.93<br>(2.42 to<br>3.73)                         | 4.19<br>(3.38 to<br>5.33)                         | 4.30<br>(3.50 to<br>5.38)                         | 3.95<br>(3.16 to<br>5.05)                         |
| Inguinal, femoral, and abdominal hernia                        | 9.89<br>(7.59 to<br>13.09)                           | 8.20<br>(6.02 to<br>11.08)                           | 6.81<br>(4.95 to<br>9.35)                            | 8.06<br>(5.96 to<br>10.88)                           | 0.47<br>(0.36 to<br>0.63)                         | 0.47<br>(0.31 to<br>0.56)                         | 0.37<br>(0.28 to<br>0.49)                         | 0.40<br>(0.30 to<br>0.53)                         |
| Inflammatory bowel disease                                     | 14.89<br>(10.41 to<br>18.47)                         | 15.57<br>(10.53 to<br>21.14)                         | 15.01<br>(10.07 to<br>20.40)                         | 15.09<br>(10.21 to<br>20.40)                         | 0.59<br>(0.41 to<br>0.75)                         | 0.69<br>(0.47 to<br>0.87)                         | 0.69<br>(0.46 to<br>0.89)                         | 0.64<br>(0.44 to<br>0.82)                         |

|                                         |                                                      |                                                      |                                                      |                                                      |                                                   |                                                   |                                                   |                                                   |
|-----------------------------------------|------------------------------------------------------|------------------------------------------------------|------------------------------------------------------|------------------------------------------------------|---------------------------------------------------|---------------------------------------------------|---------------------------------------------------|---------------------------------------------------|
| Vascular intestinal disorders           | 20.11<br>(17.08 to<br>24.85)                         | 27.83<br>(22.68 to<br>35.14)                         | 25.54<br>(20.39 to<br>32.80)                         | 27.01<br>(22.23 to<br>33.51)                         | 1.09<br>(0.92 to<br>1.36)                         | 1.68<br>(1.38 to<br>2.09)                         | 1.61<br>(1.30 to<br>2.01)                         | 1.59<br>(1.31 to<br>1.98)                         |
| Gallbladder and biliary diseases        | 14.87<br>(12.66 to<br>18.10)                         | 19.32<br>(10.54 to<br>34.96)                         | 13.21<br>(7.48 to<br>23.35)                          | 22.99<br>(12.10 to<br>41.81)                         | 0.74<br>(0.63 to<br>0.90)                         | 1.08<br>(0.61 to<br>1.93)                         | 0.78<br>(0.45 to<br>1.37)                         | 1.24<br>(0.68 to<br>2.26)                         |
| Pancreatitis                            | 32.23<br>(26.06 to<br>41.32)                         | 47.73<br>(21.17 to<br>111.31)                        | 31.91<br>(15.09 to<br>71.62)                         | 58.13<br>(24.26 to<br>140.71)                        | 1.02<br>(0.83 to<br>1.31)                         | 1.63<br>(0.81 to<br>3.48)                         | 1.14<br>(0.59 to<br>2.33)                         | 1.92<br>(0.88 to<br>4.34)                         |
| Other digestive diseases                | 37.82<br>(31.16 to<br>45.90)                         | 44.14<br>(35.01 to<br>55.24)                         | 39.47<br>(30.74 to<br>50.11)                         | 43.35<br>(34.63 to<br>53.91)                         | 2.20<br>(1.82 to<br>2.63)                         | 2.87<br>(2.26 to<br>3.54)                         | 2.71<br>(2.14 to<br>3.36)                         | 2.73<br>(2.14 to<br>3.40)                         |
| <b>Neurological disorders</b>           | <b>385.83</b><br><b>(329.88 to</b><br><b>450.23)</b> | <b>558.01</b><br><b>(437.74 to</b><br><b>724.06)</b> | <b>535.36</b><br><b>(422.98 to</b><br><b>681.78)</b> | <b>583.22</b><br><b>(448.42 to</b><br><b>776.60)</b> | <b>27.26</b><br><b>(23.18 to</b><br><b>32.53)</b> | <b>39.84</b><br><b>(29.80 to</b><br><b>53.23)</b> | <b>41.50</b><br><b>(31.74 to</b><br><b>54.35)</b> | <b>39.81</b><br><b>(28.51 to</b><br><b>55.16)</b> |
| Alzheimer's disease and other dementias | 193.76<br>(156.95 to<br>239.38)                      | 301.52<br>(212.89 to<br>443.65)                      | 306.15<br>(221.54 to<br>428.86)                      | 309.21<br>(206.32 to<br>471.69)                      | 20.78<br>(16.95 to<br>25.60)                      | 29.86<br>(20.33 to<br>43.42)                      | 31.64<br>(22.51 to<br>44.69)                      | 29.74<br>(18.67 to<br>45.59)                      |
| Parkinson's disease                     | 22.75<br>(16.90 to<br>29.54)                         | 39.97<br>(29.67 to<br>51.59)                         | 46.22<br>(34.73 to<br>59.67)                         | 36.47<br>(26.75 to<br>47.22)                         | 1.92<br>(1.42 to<br>2.55)                         | 3.22<br>(2.36 to<br>4.23)                         | 3.83<br>(2.86 to<br>5.06)                         | 2.89<br>(2.10 to<br>3.82)                         |
| Epilepsy                                | 120.95<br>(103.19 to<br>142.06)                      | 150.15<br>(93.54 to<br>258.56)                       | 115.00<br>(72.05 to<br>190.13)                       | 172.87<br>(105.90 to<br>294.54)                      | 3.05<br>(2.63 to<br>3.54)                         | 4.37<br>(2.96 to<br>6.82)                         | 3.50<br>(2.43 to<br>5.33)                         | 4.90<br>(3.25 to<br>7.79)                         |
| Multiple sclerosis                      | 2.56<br>(2.01 to<br>3.79)                            | 3.41<br>(2.41 to<br>5.23)                            | 3.54<br>(2.48 to<br>5.41)                            | 3.36<br>(2.38 to<br>5.17)                            | 0.08<br>(0.06 to<br>0.11)                         | 0.11<br>(0.08 to<br>0.16)                         | 0.11<br>(0.08 to<br>0.17)                         | 0.10<br>(0.08 to<br>0.15)                         |
| Motor neuron disease                    | 15.54<br>(13.15 to<br>18.16)                         | 22.56<br>(17.52 to<br>27.58)                         | 23.14<br>(17.96 to<br>28.57)                         | 21.74<br>(17.10 to<br>26.43)                         | 0.56<br>(0.48 to<br>0.64)                         | 0.94<br>(0.75 to<br>1.11)                         | 0.98<br>(0.79 to<br>1.17)                         | 0.89<br>(0.72 to<br>1.04)                         |
| Other neurological disorders            | 30.28<br>(25.98 to<br>35.21)                         | 40.40<br>(31.67 to<br>51.71)                         | 41.32<br>(32.30 to<br>52.92)                         | 39.57<br>(31.05 to<br>50.63)                         | 0.88<br>(0.77 to<br>1.01)                         | 1.35<br>(1.13 to<br>1.61)                         | 1.44<br>(1.20 to<br>1.71)                         | 1.29<br>(1.10 to<br>1.53)                         |
| <b>Mental disorders</b>                 | <b>116.20</b><br><b>(93.23 to</b><br><b>141.77)</b>  | <b>149.86</b><br><b>(118.59 to</b><br><b>216.35)</b> | <b>170.47</b><br><b>(123.57 to</b><br><b>231.25)</b> | <b>166.72</b><br><b>(123.60 to</b><br><b>224.58)</b> | <b>3.54</b><br><b>(2.88 to</b><br><b>4.22)</b>    | <b>5.27</b><br><b>(4.17 to</b><br><b>6.56)</b>    | <b>5.75</b><br><b>(4.51 to</b><br><b>7.23)</b>    | <b>5.35</b><br><b>(4.25 to</b><br><b>6.63)</b>    |
| Alcohol use disorders                   | 87.62<br>(71.20 to<br>107.84)                        | 102.45<br>(73.80 to<br>138.05)                       | 102.10<br>(72.17 to<br>138.72)                       | 109.04<br>(79.31 to<br>147.26)                       | 2.69<br>(2.22 to<br>3.27)                         | 3.42<br>(2.65 to<br>4.34)                         | 3.50<br>(2.67 to<br>4.49)                         | 3.56<br>(2.79 to<br>4.51)                         |
| Drug use disorders                      | 28.39<br>(20.58 to<br>37.71)                         | 58.09<br>(39.99 to<br>82.47)                         | 68.03<br>(46.30 to<br>96.17)                         | 57.36<br>(39.60 to<br>81.74)                         | 0.85<br>(0.63 to<br>1.10)                         | 1.85<br>(1.37 to<br>2.41)                         | 2.25<br>(1.64 to<br>2.96)                         | 1.78<br>(1.32 to<br>2.33)                         |
| Opioid use disorders                    | 12.51<br>(8.64 to<br>18.50)                          | 17.76<br>(11.43 to<br>28.62)                         | 18.49<br>(11.97 to<br>30.32)                         | 17.55<br>(11.23 to<br>28.34)                         | 0.32<br>(0.23 to<br>0.46)                         | 0.51<br>(0.35 to<br>0.76)                         | 0.54<br>(0.38 to<br>0.82)                         | 0.49<br>(0.34 to<br>0.74)                         |
| Cocaine use disorders                   | 6.41<br>(4.10 to<br>9.36)                            | 18.59<br>(11.38 to<br>28.80)                         | 21.43<br>(13.00 to<br>33.21)                         | 18.56<br>(11.41 to<br>28.67)                         | 0.17<br>(0.11 to<br>0.24)                         | 0.51<br>(0.33 to<br>0.76)                         | 0.60<br>(0.38 to<br>0.90)                         | 0.51<br>(0.32 to<br>0.76)                         |
| Amphetamine use disorders               | 1.22<br>(0.72 to<br>1.80)                            | 4.23<br>(2.46 to<br>6.76)                            | 5.42<br>(3.10 to<br>8.56)                            | 4.22<br>(2.42 to<br>6.80)                            | 0.03<br>(0.02 to<br>0.05)                         | 0.12<br>(0.08 to<br>0.18)                         | 0.16<br>(0.10 to<br>0.24)                         | 0.12<br>(0.07 to<br>0.18)                         |
| Other drug use disorders                | 8.24<br>(5.25 to<br>11.26)                           | 17.52<br>(10.97 to<br>25.41)                         | 22.70<br>(14.04 to<br>32.84)                         | 17.03<br>(10.69 to<br>24.69)                         | 0.32<br>(0.22 to<br>0.42)                         | 0.71<br>(0.50 to<br>0.93)                         | 0.95<br>(0.67 to<br>1.27)                         | 0.67<br>(0.46 to<br>0.88)                         |
| Eating disorders                        | 0.19<br>(0.14 to<br>0.25)                            | 0.32<br>(0.20 to<br>0.53)                            | 0.34<br>(0.21 to<br>0.56)                            | 0.32<br>(0.20 to<br>0.53)                            | 0.00<br>(0.00 to<br>0.00)                         | 0.01<br>(0.00 to<br>0.01)                         | 0.01<br>(0.00 to<br>0.01)                         | 0.01<br>(0.00 to<br>0.01)                         |

**Dominica**

| Cause                                               | YLLs (actual counts)                  |                                       |                                       |                                       | Deaths (actual counts)        |                                |                                |                                 |
|-----------------------------------------------------|---------------------------------------|---------------------------------------|---------------------------------------|---------------------------------------|-------------------------------|--------------------------------|--------------------------------|---------------------------------|
|                                                     | 2016                                  | 2040 Forecast                         | 2040 Better Scenario                  | 2040 Worse Scenario                   | 2016                          | 2040 Forecast                  | 2040 Better Scenario           | 2040 Worse Scenario             |
| Diabetes, urogenital, blood, and endocrine diseases | 1,767.44<br>(1,564.81 to<br>2,009.67) | 2,913.23<br>(1,690.49 to<br>5,569.21) | 2,117.21<br>(1,204.64 to<br>4,267.40) | 3,366.69<br>(1,885.65 to<br>6,273.17) | 89.45<br>(80.16 to<br>100.77) | 166.15<br>(99.18 to<br>316.00) | 125.80<br>(73.43 to<br>250.91) | 185.02<br>(106.80 to<br>329.81) |

|                                                            |                                   |                                     |                                   |                                       |                              |                               |                               |                               |
|------------------------------------------------------------|-----------------------------------|-------------------------------------|-----------------------------------|---------------------------------------|------------------------------|-------------------------------|-------------------------------|-------------------------------|
| Diabetes mellitus                                          | 899.32<br>(790.19 to<br>1,032.33) | 1,336.89<br>(948.33 to<br>1,858.68) | 920.45<br>(634.80 to<br>1,278.78) | 1,487.95<br>(1,041.16 to<br>2,073.77) | 50.14<br>(44.45 to<br>57.12) | 81.01<br>(60.72 to<br>105.24) | 58.54<br>(43.48 to<br>76.54)  | 86.50<br>(64.34 to<br>113.92) |
| Acute glomerulonephritis                                   | 0.42<br>(0.37 to<br>0.50)         | 0.57<br>(0.38 to<br>0.86)           | 0.45<br>(0.30 to<br>0.69)         | 0.59<br>(0.39 to<br>0.89)             | 0.01<br>(0.01 to<br>0.01)    | 0.01<br>(0.01 to<br>0.02)     | 0.01<br>(0.01 to<br>0.01)     | 0.01<br>(0.01 to<br>0.02)     |
| Chronic kidney disease                                     | 626.36<br>(552.50 to<br>712.51)   | 1,249.58<br>(316.55 to<br>3,757.57) | 905.32<br>(229.56 to<br>2,908.81) | 1,554.74<br>(383.53 to<br>4,368.77)   | 29.92<br>(26.64 to<br>33.85) | 70.56<br>(14.90 to<br>220.22) | 53.53<br>(11.06 to<br>180.99) | 84.62<br>(18.07 to<br>228.95) |
| Chronic kidney disease due to diabetes mellitus            | 238.43<br>(201.09 to<br>279.77)   | 548.76<br>(125.23 to<br>1,761.10)   | 400.58<br>(92.64 to<br>1,293.08)  | 692.89<br>(155.70 to<br>2,050.77)     | 11.43<br>(9.70 to<br>13.34)  | 29.25<br>(5.71 to<br>92.53)   | 22.16<br>(4.32 to<br>75.59)   | 35.64<br>(7.10 to<br>98.25)   |
| Chronic kidney disease due to hypertension                 | 72.64<br>(58.47 to<br>88.95)      | 172.47<br>(32.99 to<br>541.84)      | 133.19<br>(25.65 to<br>452.79)    | 209.02<br>(39.92 to<br>579.99)        | 5.37<br>(4.31 to<br>6.45)    | 13.58<br>(2.57 to<br>42.95)   | 11.06<br>(2.11 to<br>37.11)   | 15.72<br>(3.06 to<br>42.65)   |
| Chronic kidney disease due to glomerulonephritis           | 180.80<br>(152.43 to<br>214.04)   | 291.83<br>(83.70 to<br>878.70)      | 202.04<br>(59.57 to<br>625.21)    | 360.53<br>(100.23 to<br>960.04)       | 7.17<br>(5.94 to<br>8.64)    | 14.67<br>(3.27 to<br>45.16)   | 10.53<br>(2.29 to<br>36.10)   | 17.65<br>(4.03 to<br>48.37)   |
| Chronic kidney disease due to other and unspecified causes | 134.49<br>(111.20 to<br>161.82)   | 236.52<br>(67.99 to<br>706.99)      | 169.52<br>(47.83 to<br>536.28)    | 292.30<br>(81.58 to<br>775.63)        | 5.94<br>(4.84 to<br>7.22)    | 13.06<br>(2.88 to<br>41.08)   | 9.78<br>(2.14 to<br>32.27)    | 15.61<br>(3.49 to<br>42.97)   |
| Urinary diseases and male infertility                      | 47.35<br>(41.82 to<br>53.70)      | 64.50<br>(54.52 to<br>75.73)        | 56.04<br>(45.70 to<br>67.07)      | 61.56<br>(52.25 to<br>71.52)          | 2.94<br>(2.60 to<br>3.33)    | 4.39<br>(3.56 to<br>5.14)     | 4.02<br>(3.34 to<br>4.74)     | 4.04<br>(3.18 to<br>4.79)     |
| Urinary tract infections                                   | 36.36<br>(30.63 to<br>42.08)      | 54.35<br>(44.71 to<br>64.33)        | 48.25<br>(39.04 to<br>57.77)      | 51.76<br>(42.80 to<br>60.77)          | 2.26<br>(1.90 to<br>2.61)    | 3.72<br>(3.02 to<br>4.45)     | 3.49<br>(2.85 to<br>4.15)     | 3.43<br>(2.71 to<br>4.12)     |
| Urolithiasis                                               | 1.27<br>(0.99 to<br>1.80)         | 1.44<br>(1.02 to<br>2.18)           | 1.12<br>(0.76 to<br>1.74)         | 1.40<br>(0.99 to<br>2.09)             | 0.06<br>(0.04 to<br>0.08)    | 0.07<br>(0.05 to<br>0.10)     | 0.05<br>(0.04 to<br>0.08)     | 0.06<br>(0.04 to<br>0.10)     |
| Other urinary diseases                                     | 9.71<br>(7.17 to<br>14.70)        | 8.70<br>(6.12 to<br>13.92)          | 6.67<br>(4.47 to<br>11.00)        | 8.40<br>(5.89 to<br>13.31)            | 0.62<br>(0.45 to<br>0.96)    | 0.60<br>(0.40 to<br>1.01)     | 0.48<br>(0.32 to<br>0.84)     | 0.55<br>(0.37 to<br>0.94)     |
| Gynecological diseases                                     | 0.16<br>(0.11 to<br>0.22)         | 0.15<br>(0.08 to<br>0.23)           | 0.09<br>(0.05 to<br>0.14)         | 0.15<br>(0.09 to<br>0.23)             | 0.01<br>(0.00 to<br>0.01)    | 0.01<br>(0.00 to<br>0.01)     | 0.01<br>(0.00 to<br>0.01)     | 0.01<br>(0.00 to<br>0.01)     |
| Uterine fibroids                                           | 0.03<br>(0.02 to<br>0.05)         | 0.04<br>(0.02 to<br>0.06)           | 0.02<br>(0.01 to<br>0.04)         | 0.04<br>(0.02 to<br>0.07)             | 0.00<br>(0.00 to<br>0.00)    | 0.00<br>(0.00 to<br>0.00)     | 0.00<br>(0.00 to<br>0.00)     | 0.00<br>(0.00 to<br>0.00)     |
| Polycystic ovarian syndrome                                | 0.08<br>(0.05 to<br>0.13)         | 0.05<br>(0.02 to<br>0.09)           | 0.02<br>(0.01 to<br>0.05)         | 0.05<br>(0.03 to<br>0.10)             | 0.00<br>(0.00 to<br>0.00)    | 0.00<br>(0.00 to<br>0.00)     | 0.00<br>(0.00 to<br>0.00)     | 0.00<br>(0.00 to<br>0.00)     |
| Endometriosis                                              | 0.00<br>(0.00 to<br>0.00)         | 0.00<br>(0.00 to<br>0.00)           | 0.00<br>(0.00 to<br>0.00)         | 0.00<br>(0.00 to<br>0.00)             | 0.00<br>(0.00 to<br>0.00)    | 0.00<br>(0.00 to<br>0.00)     | 0.00<br>(0.00 to<br>0.00)     | 0.00<br>(0.00 to<br>0.00)     |
| Genital prolapse                                           | 0.00<br>(0.00 to<br>0.01)         | 0.00<br>(0.00 to<br>0.01)           | 0.00<br>(0.00 to<br>0.01)         | 0.00<br>(0.00 to<br>0.01)             | 0.00<br>(0.00 to<br>0.00)    | 0.00<br>(0.00 to<br>0.00)     | 0.00<br>(0.00 to<br>0.00)     | 0.00<br>(0.00 to<br>0.00)     |
| Other gynecological diseases                               | 0.04<br>(0.01 to<br>0.06)         | 0.06<br>(0.02 to<br>0.10)           | 0.04<br>(0.01 to<br>0.07)         | 0.06<br>(0.02 to<br>0.09)             | 0.00<br>(0.00 to<br>0.01)    | 0.01<br>(0.01 to<br>0.01)     | 0.00<br>(0.00 to<br>0.01)     | 0.01<br>(0.00 to<br>0.01)     |
| Hemoglobinopathies and hemolytic anemias                   | 81.90<br>(65.49 to<br>99.33)      | 98.94<br>(71.40 to<br>133.92)       | 74.97<br>(52.76 to<br>105.39)     | 99.85<br>(72.58 to<br>135.37)         | 2.44<br>(2.00 to<br>3.05)    | 3.54<br>(2.77 to<br>4.40)     | 2.79<br>(2.11 to<br>3.64)     | 3.48<br>(2.72 to<br>4.35)     |
| Thalassemias                                               | 1.99<br>(0.75 to<br>3.51)         | 0.82<br>(0.28 to<br>1.67)           | 0.78<br>(0.27 to<br>1.55)         | 0.84<br>(0.28 to<br>1.69)             | 0.02<br>(0.01 to<br>0.04)    | 0.01<br>(0.00 to<br>0.02)     | 0.01<br>(0.00 to<br>0.02)     | 0.01<br>(0.00 to<br>0.02)     |
| Sickle cell disorders                                      | 59.38<br>(46.77 to<br>72.77)      | 68.10<br>(46.71 to<br>99.15)        | 51.24<br>(34.42 to<br>75.06)      | 69.44<br>(47.66 to<br>100.42)         | 1.13<br>(0.90 to<br>1.40)    | 1.63<br>(1.14 to<br>2.24)     | 1.24<br>(0.85 to<br>1.77)     | 1.65<br>(1.15 to<br>2.29)     |
| G6PD deficiency                                            | 7.78<br>(5.62 to<br>10.54)        | 14.16<br>(9.60 to<br>19.79)         | 10.11<br>(6.49 to<br>14.70)       | 14.21<br>(9.63 to<br>19.96)           | 0.24<br>(0.18 to<br>0.32)    | 0.57<br>(0.40 to<br>0.78)     | 0.42<br>(0.28 to<br>0.59)     | 0.56<br>(0.40 to<br>0.77)     |
| Other hemoglobinopathies and hemolytic anemias             | 12.75<br>(10.47 to<br>16.67)      | 15.85<br>(12.19 to<br>20.39)        | 12.83<br>(9.65 to<br>17.24)       | 15.35<br>(11.75 to<br>19.95)          | 1.04<br>(0.87 to<br>1.37)    | 1.33<br>(1.02 to<br>1.74)     | 1.12<br>(0.86 to<br>1.50)     | 1.26<br>(0.94 to<br>1.64)     |

|                                                   |                                 |                                   |                                 |                                   |                              |                              |                              |                              |
|---------------------------------------------------|---------------------------------|-----------------------------------|---------------------------------|-----------------------------------|------------------------------|------------------------------|------------------------------|------------------------------|
|                                                   | 111.93<br>(93.07 to<br>154.60)  | 162.61<br>(125.45 to<br>229.95)   | 159.87<br>(122.69 to<br>224.22) | 161.85<br>(124.95 to<br>230.91)   | 3.99<br>(3.38 to<br>5.40)    | 6.64<br>(5.41 to<br>8.90)    | 6.90<br>(5.56 to<br>9.17)    | 6.36<br>(5.20 to<br>8.49)    |
| Endocrine, metabolic, blood, and immune disorders |                                 |                                   |                                 |                                   |                              |                              |                              |                              |
| <b>Dominica</b>                                   |                                 |                                   |                                 |                                   |                              |                              |                              |                              |
| Cause                                             | YLLs (actual counts)            |                                   |                                 |                                   | Deaths (actual counts)       |                              |                              |                              |
|                                                   | 2016                            | 2040 Forecast                     | 2040 Better Scenario            | 2040 Worse Scenario               | 2016                         | 2040 Forecast                | 2040 Better Scenario         | 2040 Worse Scenario          |
| Musculoskeletal disorders                         | 50.03<br>(40.36 to<br>59.49)    | 75.34<br>(55.50 to<br>101.75)     | 68.98<br>(50.56 to<br>94.46)    | 74.02<br>(54.71 to<br>100.24)     | 1.33<br>(1.11 to<br>1.60)    | 2.40<br>(1.93 to<br>3.04)    | 2.18<br>(1.72 to<br>2.78)    | 2.32<br>(1.87 to<br>2.90)    |
| Rheumatoid arthritis                              | 6.84<br>(5.47 to<br>8.80)       | 14.01<br>(10.56 to<br>18.22)      | 10.00<br>(7.06 to<br>13.72)     | 13.86<br>(10.55 to<br>18.21)      | 0.32<br>(0.26 to<br>0.41)    | 0.77<br>(0.59 to<br>0.97)    | 0.57<br>(0.42 to<br>0.76)    | 0.74<br>(0.58 to<br>0.93)    |
| Other musculoskeletal disorders                   | 43.19<br>(34.68 to<br>51.74)    | 61.33<br>(43.26 to<br>85.46)      | 58.98<br>(41.56 to<br>82.24)    | 60.16<br>(42.75 to<br>84.16)      | 1.01<br>(0.83 to<br>1.21)    | 1.63<br>(1.23 to<br>2.17)    | 1.60<br>(1.21 to<br>2.13)    | 1.58<br>(1.19 to<br>2.12)    |
| Other non-communicable diseases                   | 658.45<br>(429.41 to<br>954.89) | 771.30<br>(477.03 to<br>1,167.41) | 567.97<br>(364.23 to<br>870.73) | 797.23<br>(488.14 to<br>1,221.50) | 15.08<br>(10.37 to<br>20.67) | 25.39<br>(16.12 to<br>37.12) | 22.07<br>(13.62 to<br>32.45) | 24.33<br>(15.53 to<br>35.50) |
| Congenital birth defects                          | 478.80<br>(264.74 to<br>743.64) | 449.78<br>(207.83 to<br>808.34)   | 288.05<br>(128.81 to<br>527.22) | 483.94<br>(222.81 to<br>882.04)   | 5.97<br>(3.42 to<br>9.05)    | 5.80<br>(2.94 to<br>10.00)   | 3.76<br>(1.82 to<br>6.60)    | 6.20<br>(3.06 to<br>10.87)   |
| Neural tube defects                               | 23.12<br>(12.19 to<br>39.70)    | 7.19<br>(2.60 to<br>16.22)        | 4.03<br>(1.47 to<br>9.49)       | 8.00<br>(2.84 to<br>18.31)        | 0.27<br>(0.14 to<br>0.46)    | 0.09<br>(0.03 to<br>0.19)    | 0.05<br>(0.02 to<br>0.11)    | 0.10<br>(0.04 to<br>0.22)    |
| Congenital heart anomalies                        | 243.65<br>(127.07 to<br>378.38) | 205.92<br>(98.97 to<br>365.19)    | 121.38<br>(54.81 to<br>221.02)  | 220.39<br>(103.94 to<br>396.38)   | 3.10<br>(1.68 to<br>4.70)    | 2.73<br>(1.37 to<br>4.59)    | 1.63<br>(0.78 to<br>2.80)    | 2.91<br>(1.45 to<br>4.98)    |
| Orofacial clefts                                  | 1.63<br>(0.44 to<br>3.60)       | 0.81<br>(0.19 to<br>2.18)         | 0.37<br>(0.08 to<br>1.01)       | 0.91<br>(0.21 to<br>2.41)         | 0.02<br>(0.01 to<br>0.04)    | 0.01<br>(0.00 to<br>0.05)    | 0.00<br>(0.00 to<br>0.01)    | 0.01<br>(0.00 to<br>0.03)    |
| Down syndrome                                     | 11.35<br>(6.48 to<br>16.32)     | 13.50<br>(7.08 to<br>21.39)       | 12.62<br>(6.57 to<br>20.03)     | 14.19<br>(7.29 to<br>22.79)       | 0.19<br>(0.12 to<br>0.25)    | 0.25<br>(0.14 to<br>0.36)    | 0.24<br>(0.14 to<br>0.34)    | 0.26<br>(0.15 to<br>0.38)    |
| Other chromosomal abnormalities                   | 36.14<br>(18.80 to<br>62.21)    | 72.27<br>(27.34 to<br>146.79)     | 53.45<br>(19.53 to<br>111.76)   | 78.59<br>(29.11 to<br>160.81)     | 0.43<br>(0.22 to<br>0.73)    | 0.86<br>(0.34 to<br>1.72)    | 0.64<br>(0.24 to<br>1.32)    | 0.93<br>(0.35 to<br>1.89)    |
| Congenital musculoskeletal and limb anomalies     | 26.50<br>(14.69 to<br>43.86)    | 29.29<br>(11.52 to<br>59.07)      | 18.96<br>(7.38 to<br>38.51)     | 31.41<br>(12.01 to<br>63.91)      | 0.32<br>(0.18 to<br>0.53)    | 0.36<br>(0.15 to<br>0.71)    | 0.24<br>(0.10 to<br>0.47)    | 0.39<br>(0.16 to<br>0.76)    |
| Urogenital congenital anomalies                   | 2.85<br>(1.58 to<br>4.78)       | 2.82<br>(1.37 to<br>5.24)         | 1.94<br>(0.92 to<br>3.66)       | 3.01<br>(1.44 to<br>5.69)         | 0.04<br>(0.02 to<br>0.06)    | 0.04<br>(0.02 to<br>0.07)    | 0.03<br>(0.02 to<br>0.05)    | 0.04<br>(0.02 to<br>0.08)    |
| Digestive congenital anomalies                    | 35.31<br>(18.79 to<br>60.95)    | 28.40<br>(11.09 to<br>56.80)      | 17.21<br>(6.57 to<br>34.31)     | 30.84<br>(11.84 to<br>61.99)      | 0.42<br>(0.22 to<br>0.71)    | 0.34<br>(0.14 to<br>0.67)    | 0.20<br>(0.08 to<br>0.40)    | 0.37<br>(0.14 to<br>0.73)    |
| Other congenital birth defects                    | 98.24<br>(44.64 to<br>159.63)   | 89.58<br>(34.03 to<br>175.03)     | 58.09<br>(21.08 to<br>115.09)   | 96.61<br>(35.09 to<br>187.23)     | 1.19<br>(0.57 to<br>1.91)    | 1.11<br>(0.45 to<br>2.10)    | 0.73<br>(0.29 to<br>1.40)    | 1.19<br>(0.48 to<br>2.25)    |
| Skin and subcutaneous diseases                    | 117.59<br>(72.01 to<br>203.25)  | 271.09<br>(170.14 to<br>446.75)   | 244.30<br>(153.55 to<br>393.57) | 258.61<br>(160.42 to<br>434.82)   | 8.39<br>(4.58 to<br>14.00)   | 19.01<br>(10.58 to<br>30.37) | 17.90<br>(10.19 to<br>28.13) | 17.50<br>(9.62 to<br>28.10)  |
| Cellulitis                                        | 12.65<br>(7.75 to<br>27.67)     | 39.75<br>(24.12 to<br>86.06)      | 40.07<br>(24.63 to<br>83.33)    | 37.88<br>(22.91 to<br>83.36)      | 0.66<br>(0.36 to<br>1.26)    | 2.17<br>(1.17 to<br>4.22)    | 2.30<br>(1.24 to<br>4.33)    | 1.99<br>(1.08 to<br>3.94)    |
| Pyoderma                                          | 28.71<br>(12.13 to<br>40.53)    | 78.64<br>(33.48 to<br>108.85)     | 71.05<br>(29.59 to<br>100.17)   | 76.05<br>(32.31 to<br>104.56)     | 1.64<br>(0.60 to<br>2.29)    | 4.84<br>(1.88 to<br>6.91)    | 4.65<br>(1.78 to<br>6.62)    | 4.50<br>(1.75 to<br>6.40)    |
| Decubitus ulcer                                   | 68.99<br>(40.94 to<br>125.81)   | 137.86<br>(81.62 to<br>252.22)    | 119.78<br>(72.02 to<br>215.23)  | 130.21<br>(77.59 to<br>240.87)    | 5.79<br>(3.28 to<br>10.47)   | 11.38<br>(6.14 to<br>20.70)  | 10.34<br>(5.79 to<br>18.58)  | 10.43<br>(5.58 to<br>19.03)  |
| Other skin and subcutaneous diseases              | 7.24<br>(4.42 to<br>15.98)      | 14.83<br>(8.91 to<br>31.34)       | 13.40<br>(8.18 to<br>28.51)     | 14.48<br>(8.75 to<br>31.23)       | 0.30<br>(0.18 to<br>0.62)    | 0.63<br>(0.39 to<br>1.24)    | 0.60<br>(0.37 to<br>1.19)    | 0.59<br>(0.36 to<br>1.17)    |

|                                      |                                                            |                                                            |                                                          |                                                            |                                                   |                                                   |                                                   |                                                   |
|--------------------------------------|------------------------------------------------------------|------------------------------------------------------------|----------------------------------------------------------|------------------------------------------------------------|---------------------------------------------------|---------------------------------------------------|---------------------------------------------------|---------------------------------------------------|
| Sudden infant death syndrome         | 62.06<br>(34.66 to<br>99.88)                               | 50.43<br>(17.87 to<br>103.11)                              | 35.62<br>(11.70 to<br>76.65)                             | 54.67<br>(19.52 to<br>112.57)                              | 0.72<br>(0.40 to<br>1.16)                         | 0.58<br>(0.21 to<br>1.20)                         | 0.41<br>(0.14 to<br>0.89)                         | 0.63<br>(0.23 to<br>1.30)                         |
| <b>Injuries</b>                      | <b>1,756.23</b><br><b>(1,480.50 to</b><br><b>2,090.26)</b> | <b>1,687.24</b><br><b>(1,135.85 to</b><br><b>2,594.41)</b> | <b>1,313.95</b><br><b>(895.50 to</b><br><b>1,999.47)</b> | <b>1,808.27</b><br><b>(1,194.42 to</b><br><b>2,801.46)</b> | <b>41.06</b><br><b>(35.20 to</b><br><b>48.20)</b> | <b>45.04</b><br><b>(33.35 to</b><br><b>63.88)</b> | <b>36.61</b><br><b>(27.58 to</b><br><b>50.85)</b> | <b>46.90</b><br><b>(33.82 to</b><br><b>67.03)</b> |
| <b>Transport injuries</b>            | <b>601.94</b><br><b>(500.72 to</b><br><b>717.29)</b>       | <b>692.11</b><br><b>(399.95 to</b><br><b>1,267.11)</b>     | <b>528.73</b><br><b>(313.21 to</b><br><b>930.12)</b>     | <b>773.73</b><br><b>(428.11 to</b><br><b>1,409.92)</b>     | <b>13.83</b><br><b>(11.73 to</b><br><b>16.34)</b> | <b>17.51</b><br><b>(10.98 to</b><br><b>29.20)</b> | <b>13.80</b><br><b>(8.90 to</b><br><b>22.05)</b>  | <b>19.08</b><br><b>(11.54 to</b><br><b>32.59)</b> |
| Road injuries                        | 568.07<br>(472.41 to<br>679.56)                            | 645.40<br>(370.67 to<br>1,184.03)                          | 496.76<br>(292.08 to<br>880.21)                          | 723.12<br>(399.55 to<br>1,324.97)                          | 12.89<br>(10.88 to<br>15.23)                      | 15.99<br>(9.98 to<br>26.75)                       | 12.71<br>(8.14 to<br>20.43)                       | 17.49<br>(10.51 to<br>30.05)                      |
| Pedestrian road injuries             | 114.30<br>(89.13 to<br>139.05)                             | 109.22<br>(68.84 to<br>177.06)                             | 69.67<br>(43.07 to<br>115.89)                            | 119.97<br>(72.61 to<br>199.25)                             | 3.20<br>(2.57 to<br>3.83)                         | 3.70<br>(2.50 to<br>5.49)                         | 2.51<br>(1.70 to<br>3.80)                         | 3.93<br>(2.54 to<br>5.93)                         |
| <b>Dominica</b>                      |                                                            |                                                            |                                                          |                                                            |                                                   |                                                   |                                                   |                                                   |
| Cause                                | YLLs (actual counts)                                       |                                                            |                                                          |                                                            | Deaths (actual counts)                            |                                                   |                                                   |                                                   |
|                                      | 2016                                                       | 2040 Forecast                                              | 2040 Better Scenario                                     | 2040 Worse Scenario                                        | 2016                                              | 2040 Forecast                                     | 2040 Better Scenario                              | 2040 Worse Scenario                               |
| Cyclist road injuries                | 29.32<br>(22.82 to<br>37.09)                               | 31.42<br>(17.29 to<br>57.50)                               | 25.48<br>(14.46 to<br>45.05)                             | 34.98<br>(18.44 to<br>64.82)                               | 0.70<br>(0.55 to<br>0.85)                         | 0.83<br>(0.48 to<br>1.41)                         | 0.71<br>(0.43 to<br>1.16)                         | 0.89<br>(0.50 to<br>1.56)                         |
| Motorcyclist road injuries           | 146.98<br>(111.40 to<br>190.43)                            | 160.47<br>(77.51 to<br>324.98)                             | 134.41<br>(66.76 to<br>266.58)                           | 178.85<br>(83.76 to<br>366.31)                             | 2.82<br>(2.14 to<br>3.63)                         | 3.23<br>(1.63 to<br>6.37)                         | 2.77<br>(1.45 to<br>5.27)                         | 3.57<br>(1.73 to<br>7.15)                         |
| Motor vehicle road injuries          | 274.11<br>(220.60 to<br>342.73)                            | 339.40<br>(196.24 to<br>604.03)                            | 263.15<br>(157.76 to<br>451.90)                          | 383.94<br>(215.96 to<br>691.64)                            | 6.07<br>(4.96 to<br>7.43)                         | 8.07<br>(4.97 to<br>13.46)                        | 6.57<br>(4.20 to<br>10.46)                        | 8.93<br>(5.25 to<br>15.20)                        |
| Other road injuries                  | 3.36<br>(2.43 to<br>5.67)                                  | 4.90<br>(2.91 to<br>9.40)                                  | 4.05<br>(2.48 to<br>7.65)                                | 5.38<br>(3.11 to<br>10.52)                                 | 0.10<br>(0.07 to<br>0.16)                         | 0.16<br>(0.10 to<br>0.29)                         | 0.15<br>(0.10 to<br>0.25)                         | 0.17<br>(0.11 to<br>0.31)                         |
| Other transport injuries             | 33.87<br>(27.53 to<br>41.42)                               | 46.70<br>(29.00 to<br>79.94)                               | 31.98<br>(19.88 to<br>55.81)                             | 50.61<br>(30.57 to<br>88.25)                               | 0.94<br>(0.80 to<br>1.11)                         | 0.94<br>(1.01 to<br>2.38)                         | 1.09<br>(0.74 to<br>1.71)                         | 1.59<br>(1.03 to<br>2.52)                         |
| <b>Unintentional injuries</b>        | <b>608.96</b><br><b>(516.16 to</b><br><b>723.46)</b>       | <b>488.09</b><br><b>(362.37 to</b><br><b>665.98)</b>       | <b>389.01</b><br><b>(286.51 to</b><br><b>532.61)</b>     | <b>500.79</b><br><b>(367.00 to</b><br><b>683.85)</b>       | <b>16.06</b><br><b>(13.97 to</b><br><b>18.66)</b> | <b>16.19</b><br><b>(13.13 to</b><br><b>20.06)</b> | <b>13.77</b><br><b>(11.25 to</b><br><b>16.98)</b> | <b>15.95</b><br><b>(12.88 to</b><br><b>20.02)</b> |
| Falls                                | 60.11<br>(49.74 to<br>72.00)                               | 68.31<br>(54.82 to<br>85.51)                               | 61.11<br>(48.77 to<br>77.55)                             | 66.57<br>(53.49 to<br>83.02)                               | 2.39<br>(2.03 to<br>2.80)                         | 3.26<br>(2.70 to<br>3.88)                         | 3.05<br>(2.58 to<br>3.62)                         | 3.06<br>(2.50 to<br>3.66)                         |
| Drowning                             | 218.55<br>(181.12 to<br>266.55)                            | 143.04<br>(89.98 to<br>226.89)                             | 110.03<br>(69.54 to<br>175.04)                           | 151.30<br>(93.47 to<br>243.29)                             | 4.43<br>(3.70 to<br>5.41)                         | 3.39<br>(2.26 to<br>5.06)                         | 2.67<br>(1.81 to<br>4.02)                         | 3.53<br>(2.30 to<br>5.40)                         |
| Fire, heat, and hot substances       | 54.75<br>(43.84 to<br>66.45)                               | 40.70<br>(28.87 to<br>57.67)                               | 29.67<br>(20.88 to<br>41.93)                             | 42.39<br>(29.26 to<br>60.78)                               | 1.84<br>(1.49 to<br>2.12)                         | 1.74<br>(1.28 to<br>2.28)                         | 1.37<br>(1.00 to<br>1.81)                         | 1.73<br>(1.25 to<br>2.31)                         |
| Poisonings                           | 46.80<br>(34.66 to<br>78.51)                               | 29.83<br>(17.73 to<br>54.15)                               | 19.10<br>(10.97 to<br>34.59)                             | 32.21<br>(18.81 to<br>57.89)                               | 1.03<br>(0.78 to<br>1.72)                         | 0.75<br>(0.48 to<br>1.31)                         | 0.50<br>(0.31 to<br>0.88)                         | 0.80<br>(0.50 to<br>1.26)                         |
| Exposure to mechanical forces        | 56.51<br>(44.41 to<br>68.83)                               | 41.30<br>(28.77 to<br>57.55)                               | 30.97<br>(21.05 to<br>44.09)                             | 42.46<br>(29.47 to<br>59.20)                               | 1.20<br>(0.95 to<br>1.44)                         | 1.04<br>(0.76 to<br>1.35)                         | 0.81<br>(0.59 to<br>1.07)                         | 1.04<br>(0.76 to<br>1.36)                         |
| Unintentional firearm injuries       | 20.84<br>(12.24 to<br>27.95)                               | 12.58<br>(6.90 to<br>19.12)                                | 9.55<br>(5.26 to<br>14.81)                               | 12.97<br>(7.13 to<br>19.76)                                | 0.42<br>(0.26 to<br>0.56)                         | 0.28<br>(0.16 to<br>0.41)                         | 0.22<br>(0.13 to<br>0.32)                         | 0.29<br>(0.17 to<br>0.42)                         |
| Unintentional suffocation            | 9.09<br>(6.28 to<br>13.60)                                 | 6.21<br>(3.77 to<br>10.21)                                 | 4.67<br>(2.84 to<br>7.64)                                | 6.56<br>(3.92 to<br>10.67)                                 | 0.13<br>(0.10 to<br>0.19)                         | 0.10<br>(0.07 to<br>0.15)                         | 0.08<br>(0.05 to<br>0.12)                         | 0.10<br>(0.07 to<br>0.16)                         |
| Other exposure to mechanical forces  | 26.58<br>(19.66 to<br>32.65)                               | 22.52<br>(14.97 to<br>30.91)                               | 16.75<br>(10.95 to<br>23.40)                             | 22.94<br>(15.15 to<br>31.68)                               | 0.65<br>(0.48 to<br>0.79)                         | 0.65<br>(0.46 to<br>0.85)                         | 0.51<br>(0.35 to<br>0.66)                         | 0.65<br>(0.45 to<br>0.83)                         |
| Adverse effects of medical treatment | 93.96<br>(67.05 to<br>130.12)                              | 93.32<br>(66.19 to<br>133.36)                              | 80.58<br>(56.78 to<br>115.37)                            | 93.29<br>(65.54 to<br>131.89)                              | 3.26<br>(2.41 to<br>4.49)                         | 3.89<br>(2.89 to<br>5.43)                         | 3.56<br>(2.64 to<br>5.00)                         | 3.73<br>(2.74 to<br>5.25)                         |

|                                                 |                                        |                                        |                                        |                                        |                                    |                                    |                                   |                                    |
|-------------------------------------------------|----------------------------------------|----------------------------------------|----------------------------------------|----------------------------------------|------------------------------------|------------------------------------|-----------------------------------|------------------------------------|
| Animal contact                                  | 8.59<br>(5.30 to<br>11.17)             | 9.24<br>(5.80 to<br>12.94)             | 7.23<br>(4.55 to<br>10.41)             | 9.46<br>(5.92 to<br>13.37)             | 0.25<br>(0.16 to<br>0.32)          | 0.32<br>(0.21 to<br>0.42)          | 0.26<br>(0.17 to<br>0.35)         | 0.32<br>(0.21 to<br>0.41)          |
| Venomous animal contact                         | 4.24<br>(2.29 to<br>5.80)              | 4.18<br>(2.26 to<br>6.06)              | 3.37<br>(1.80 to<br>4.94)              | 4.29<br>(2.26 to<br>6.37)              | 0.12<br>(0.07 to<br>0.16)          | 0.14<br>(0.08 to<br>0.19)          | 0.12<br>(0.07 to<br>0.16)         | 0.14<br>(0.08 to<br>0.19)          |
| Non-venomous animal contact                     | 4.35<br>(2.55 to<br>5.92)              | 5.07<br>(3.09 to<br>7.18)              | 3.86<br>(2.37 to<br>5.58)              | 5.17<br>(3.13 to<br>7.39)              | 0.13<br>(0.07 to<br>0.17)          | 0.18<br>(0.11 to<br>0.24)          | 0.15<br>(0.09 to<br>0.20)         | 0.18<br>(0.11 to<br>0.24)          |
| Foreign body                                    | 40.11<br>(30.53 to<br>52.69)           | 37.46<br>(27.58 to<br>51.85)           | 34.08<br>(25.20 to<br>46.63)           | 37.64<br>(27.43 to<br>52.70)           | 0.97<br>(0.80 to<br>1.18)          | 1.11<br>(0.90 to<br>1.37)          | 1.08<br>(0.89 to<br>1.34)         | 1.07<br>(0.87 to<br>1.33)          |
| Pulmonary aspiration and foreign body in airway | 36.58<br>(27.56 to<br>48.66)           | 33.95<br>(24.44 to<br>47.71)           | 30.59<br>(22.34 to<br>42.39)           | 34.11<br>(24.46 to<br>48.26)           | 0.87<br>(0.71 to<br>1.07)          | 0.99<br>(0.79 to<br>1.25)          | 0.96<br>(0.78 to<br>1.19)         | 0.95<br>(0.75 to<br>1.19)          |
| Foreign body in other body part                 | 3.52<br>(2.75 to<br>4.93)              | 3.51<br>(2.46 to<br>5.26)              | 3.49<br>(2.51 to<br>5.25)              | 3.53<br>(2.56 to<br>5.23)              | 0.10<br>(0.08 to<br>0.15)          | 0.12<br>(0.09 to<br>0.18)          | 0.12<br>(0.09 to<br>0.19)         | 0.12<br>(0.09 to<br>0.17)          |
| Environmental heat and cold exposure            | 11.08<br>(7.27 to<br>22.42)            | 11.96<br>(6.93 to<br>24.40)            | 8.35<br>(4.69 to<br>17.57)             | 12.32<br>(7.13 to<br>24.54)            | 0.31<br>(0.21 to<br>0.63)          | 0.38<br>(0.24 to<br>0.76)          | 0.27<br>(0.17 to<br>0.57)         | 0.38<br>(0.24 to<br>0.76)          |
| Other unintentional injuries                    | 18.51<br>(14.82 to<br>23.33)           | 12.94<br>(9.07 to<br>18.62)            | 7.88<br>(5.15 to<br>12.11)             | 13.14<br>(9.18 to<br>18.87)            | 0.39<br>(0.32 to<br>0.49)          | 0.31<br>(0.24 to<br>0.42)          | 0.20<br>(0.14 to<br>0.28)         | 0.31<br>(0.24 to<br>0.42)          |
| <b>Self-harm and interpersonal violence</b>     | <b>541.64</b><br>(335.88 to<br>709.75) | <b>492.37</b><br>(258.90 to<br>813.17) | <b>381.75</b><br>(197.11 to<br>623.20) | <b>519.06</b><br>(270.38 to<br>859.84) | <b>11.11</b><br>(6.86 to<br>14.33) | <b>11.00</b><br>(5.84 to<br>17.54) | <b>8.68</b><br>(4.56 to<br>13.68) | <b>11.52</b><br>(6.03 to<br>18.56) |

| Dominica                                                                            |                                  |                                    |                                    |                                    |                                  |                                  |                                  |                                  |
|-------------------------------------------------------------------------------------|----------------------------------|------------------------------------|------------------------------------|------------------------------------|----------------------------------|----------------------------------|----------------------------------|----------------------------------|
| Cause                                                                               | YLLs (actual counts)             |                                    |                                    |                                    | Deaths (actual counts)           |                                  |                                  |                                  |
|                                                                                     | 2016                             | 2040 Forecast                      | 2040 Better Scenario               | 2040 Worse Scenario                | 2016                             | 2040 Forecast                    | 2040 Better Scenario             | 2040 Worse Scenario              |
| Self-harm                                                                           | 157.57<br>(105.49 to<br>200.76)  | 169.01<br>(85.00 to<br>313.35)     | 130.72<br>(69.00 to<br>237.75)     | 191.08<br>(92.71 to<br>362.98)     | 3.51<br>(2.38 to<br>4.40)        | 4.07<br>(2.18 to<br>7.14)        | 3.22<br>(1.80 to<br>5.56)        | 4.53<br>(2.31 to<br>8.20)        |
| Self-harm by firearm                                                                | 3.39<br>(3.29 to<br>8.17)        | 4.57<br>(1.88 to<br>9.92)          | 3.26<br>(1.39 to<br>6.96)          | 5.19<br>(2.05 to<br>11.47)         | 0.13<br>(0.08 to<br>0.19)        | 0.12<br>(0.06 to<br>0.24)        | 0.09<br>(0.04 to<br>0.17)        | 0.13<br>(0.06 to<br>0.28)        |
| Self-harm by other specified means                                                  | 152.18<br>(101.39 to<br>194.19)  | 164.44<br>(83.07 to<br>303.22)     | 127.47<br>(66.81 to<br>230.52)     | 185.89<br>(89.68 to<br>353.10)     | 3.38<br>(2.29 to<br>4.23)        | 3.95<br>(2.11 to<br>6.95)        | 3.13<br>(1.74 to<br>5.40)        | 4.40<br>(2.25 to<br>7.92)        |
| Interpersonal violence                                                              | 384.07<br>(196.77 to<br>533.44)  | 323.37<br>(145.01 to<br>532.77)    | 251.02<br>(112.30 to<br>415.62)    | 327.98<br>(143.03 to<br>543.60)    | 7.60<br>(3.81 to<br>10.56)       | 6.93<br>(3.04 to<br>11.10)       | 5.46<br>(2.38 to<br>8.77)        | 6.99<br>(3.00 to<br>11.29)       |
| Physical violence by firearm                                                        | 141.71<br>(52.94 to<br>203.92)   | 110.32<br>(35.30 to<br>192.72)     | 82.78<br>(27.83 to<br>146.50)      | 110.64<br>(34.87 to<br>193.38)     | 2.64<br>(0.96 to<br>3.79)        | 2.16<br>(0.68 to<br>3.75)        | 1.63<br>(0.55 to<br>2.84)        | 2.16<br>(0.68 to<br>3.72)        |
| Physical violence by sharp object                                                   | 165.40<br>(74.17 to<br>236.82)   | 144.09<br>(59.43 to<br>230.56)     | 112.39<br>(46.55 to<br>184.75)     | 143.16<br>(57.74 to<br>230.87)     | 3.27<br>(1.44 to<br>4.68)        | 3.07<br>(1.26 to<br>4.89)        | 2.42<br>(0.97 to<br>3.86)        | 3.03<br>(1.22 to<br>4.83)        |
| Physical violence by other means                                                    | 76.97<br>(32.44 to<br>112.52)    | 68.96<br>(24.87 to<br>129.89)      | 55.85<br>(19.91 to<br>103.24)      | 74.18<br>(26.14 to<br>145.74)      | 1.69<br>(0.69 to<br>2.48)        | 1.69<br>(0.62 to<br>3.13)        | 1.40<br>(0.52 to<br>2.52)        | 1.80<br>(0.64 to<br>3.35)        |
| <b>Forces of nature, conflict and terrorism, and executions and police conflict</b> | <b>3.68</b><br>(2.22 to<br>6.22) | <b>14.67</b><br>(0.00 to<br>74.94) | <b>14.47</b><br>(0.00 to<br>73.68) | <b>14.69</b><br>(0.00 to<br>75.38) | <b>0.07</b><br>(0.04 to<br>0.11) | <b>0.35</b><br>(0.00 to<br>1.77) | <b>0.35</b><br>(0.00 to<br>1.82) | <b>0.34</b><br>(0.00 to<br>1.74) |
| Exposure to forces of nature                                                        | 0.00<br>(0.00 to<br>0.00)        | 13.51<br>(0.00 to<br>74.94)        | 13.32<br>(0.00 to<br>73.68)        | 13.53<br>(0.00 to<br>75.38)        | 0.00<br>(0.00 to<br>0.00)        | 0.32<br>(0.00 to<br>1.77)        | 0.33<br>(0.00 to<br>1.82)        | 0.32<br>(0.00 to<br>1.74)        |
| Conflict and terrorism                                                              | 0.00<br>(0.00 to<br>0.00)        | 1.16<br>(0.00 to<br>19.64)         | 1.15<br>(0.00 to<br>19.70)         | 1.16<br>(0.00 to<br>19.58)         | 0.00<br>(0.00 to<br>0.00)        | 0.02<br>(0.00 to<br>0.36)        | 0.02<br>(0.00 to<br>0.36)        | 0.02<br>(0.00 to<br>0.36)        |
| Executions and police conflict                                                      | 3.68<br>(2.22 to<br>6.22)        | 0.00<br>(0.00 to<br>0.00)          | 0.00<br>(0.00 to<br>0.00)          | 0.00<br>(0.00 to<br>0.00)          | 0.07<br>(0.04 to<br>0.11)        | 0.00<br>(0.00 to<br>0.00)        | 0.00<br>(0.00 to<br>0.00)        | 0.00<br>(0.00 to<br>0.00)        |



| Dominican Republic                                                |                                                |                                                |                                              |                                                |                                       |                                        |                                       |                                         |
|-------------------------------------------------------------------|------------------------------------------------|------------------------------------------------|----------------------------------------------|------------------------------------------------|---------------------------------------|----------------------------------------|---------------------------------------|-----------------------------------------|
| Cause                                                             | YLLs (actual counts)                           |                                                |                                              |                                                | Deaths (actual counts)                |                                        |                                       |                                         |
|                                                                   | 2016                                           | 2040 Forecast                                  | 2040 Better Scenario                         | 2040 Worse Scenario                            | 2016                                  | 2040 Forecast                          | 2040 Better Scenario                  | 2040 Worse Scenario                     |
| All causes                                                        | 1,630,075.25<br>(1,423,197.12 to 1,833,099.73) | 1,604,976.45<br>(1,303,772.45 to 1,992,170.50) | 1,228,561.74<br>(987,061.16 to 1,516,618.74) | 2,187,437.80<br>(1,781,148.15 to 2,725,313.72) | 56,874.59<br>(50,021.05 to 62,739.05) | 85,101.42<br>(71,734.07 to 103,164.33) | 70,631.12<br>(59,092.29 to 85,432.22) | 105,764.98<br>(88,979.28 to 129,364.78) |
| Communicable, maternal, neonatal, and nutritional diseases        | 574,912.49<br>(467,379.09 to 703,590.89)       | 270,474.60<br>(181,436.37 to 395,938.44)       | 167,346.48<br>(111,358.15 to 256,798.84)     | 479,093.30<br>(350,116.98 to 645,896.47)       | 10,638.02<br>(9,106.42 to 12,306.70)  | 6,661.49<br>(4,866.48 to 9,056.46)     | 4,837.47<br>(3,534.76 to 6,591.17)    | 11,136.29<br>(8,774.77 to 14,057.76)    |
| HIV/AIDS and tuberculosis                                         | 194,032.37<br>(150,914.94 to 253,267.28)       | 51,191.72<br>(15,653.14 to 130,433.60)         | 37,390.79<br>(8,779.83 to 107,736.65)        | 181,805.24<br>(117,615.48 to 261,632.28)       | 4,481.22<br>(3,662.37 to 5,633.11)    | 1,267.94<br>(429.53 to 2,860.43)       | 912.37<br>(235.95 to 2,393.35)        | 4,236.37<br>(2,832.34 to 5,890.73)      |
| Tuberculosis                                                      | 13,077.80<br>(10,829.62 to 15,420.84)          | 8,184.62<br>(4,982.73 to 12,835.81)            | 4,206.92<br>(2,440.26 to 6,647.00)           | 12,068.14<br>(7,042.09 to 19,617.08)           | 378.64<br>(315.72 to 442.27)          | 305.96<br>(194.00 to 465.88)           | 167.47<br>(101.93 to 251.19)          | 456.23<br>(263.89 to 667.25)            |
| HIV/AIDS                                                          | 180,954.57<br>(136,769.95 to 239,957.38)       | 43,007.10<br>(8,224.85 to 123,685.82)          | 33,183.87<br>(4,805.68 to 103,744.90)        | 169,737.11<br>(102,686.93 to 248,027.09)       | 4,102.57<br>(3,250.73 to 5,251.22)    | 961.99<br>(146.61 to 2,588.49)         | 744.90<br>(85.22 to 2,279.05)         | 3,800.14<br>(2,399.43 to 5,472.60)      |
| Diarrhea, lower respiratory, and other common infectious diseases | 118,915.23<br>(92,724.66 to 151,669.07)        | 73,188.25<br>(45,723.79 to 119,944.77)         | 42,404.41<br>(28,488.02 to 63,594.79)        | 102,138.26<br>(61,463.26 to 168,470.81)        | 2,843.72<br>(2,296.03 to 3,377.96)    | 3,188.79<br>(2,190.73 to 4,454.61)     | 2,434.44<br>(1,736.48 to 3,277.61)    | 4,115.66<br>(2,740.84 to 5,870.14)      |
| Diarrheal diseases                                                | 23,969.56<br>(16,506.09 to 34,173.28)          | 8,274.78<br>(1,142.01 to 26,514.37)            | 4,144.01<br>(675.59 to 14,113.60)            | 12,521.81<br>(1,787.31 to 39,053.85)           | 465.02<br>(319.12 to 743.07)          | 379.93<br>(61.08 to 1,212.26)          | 235.22<br>(43.17 to 736.33)           | 549.30<br>(84.21 to 1,755.74)           |
| Intestinal infectious diseases                                    | 330.98<br>(171.51 to 571.20)                   | 133.07<br>(51.72 to 282.58)                    | 114.59<br>(44.12 to 238.44)                  | 144.48<br>(54.49 to 305.94)                    | 7.08<br>(3.69 to 12.24)               | 3.86<br>(1.78 to 7.46)                 | 3.51<br>(1.61 to 6.70)                | 4.08<br>(1.85 to 7.93)                  |
| Typhoid fever                                                     | 238.02<br>(109.68 to 440.67)                   | 98.87<br>(35.67 to 214.64)                     | 88.04<br>(32.04 to 189.97)                   | 106.05<br>(37.55 to 227.18)                    | 5.19<br>(2.48 to 9.53)                | 2.78<br>(1.19 to 5.59)                 | 2.61<br>(1.11 to 5.29)                | 2.91<br>(1.21 to 5.94)                  |
| Paratyphoid fever                                                 | 48.03<br>(18.37 to 101.20)                     | 25.87<br>(8.18 to 61.83)                       | 20.98<br>(6.70 to 50.06)                     | 28.39<br>(8.78 to 68.56)                       | 1.08<br>(0.42 to 2.30)                | 0.73<br>(0.24 to 1.63)                 | 0.63<br>(0.21 to 1.43)                | 0.78<br>(0.26 to 1.76)                  |
| Other intestinal infectious diseases                              | 44.93<br>(16.42 to 104.67)                     | 8.33<br>(2.24 to 21.66)                        | 5.56<br>(1.62 to 14.50)                      | 10.04<br>(2.63 to 26.36)                       | 0.82<br>(0.32 to 1.79)                | 0.34<br>(0.11 to 0.79)                 | 0.27<br>(0.09 to 0.64)                | 0.38<br>(0.13 to 0.87)                  |
| Lower respiratory infections                                      | 69,046.58<br>(51,823.50 to 91,401.98)          | 41,371.62<br>(24,990.44 to 66,115.05)          | 27,884.99<br>(17,935.53 to 40,360.56)        | 58,130.79<br>(33,486.32 to 95,735.44)          | 1,979.20<br>(1,472.94 to 2,361.66)    | 2,392.25<br>(1,662.46 to 3,172.22)     | 1,949.92<br>(1,381.58 to 2,522.81)    | 3,047.40<br>(2,072.88 to 4,170.28)      |
| Upper respiratory infections                                      | 56.18<br>(26.39 to 110.86)                     | 31.81<br>(12.09 to 66.32)                      | 19.95<br>(7.46 to 41.94)                     | 40.32<br>(14.54 to 87.42)                      | 1.21<br>(0.64 to 2.02)                | 1.21<br>(0.48 to 2.46)                 | 0.84<br>(0.32 to 1.80)                | 1.45<br>(0.58 to 3.10)                  |
| Otitis media                                                      | 0.62<br>(0.31 to 1.26)                         | 0.09<br>(0.04 to 0.20)                         | 0.09<br>(0.04 to 0.19)                       | 0.09<br>(0.04 to 0.19)                         | 0.01<br>(0.01 to 0.02)                | 0.01<br>(0.00 to 0.01)                 | 0.01<br>(0.00 to 0.01)                | 0.01<br>(0.00 to 0.01)                  |
| Meningitis                                                        | 15,563.19<br>(11,026.52 to 22,517.30)          | 6,034.87<br>(2,298.25 to 12,663.57)            | 3,706.02<br>(1,713.69 to 6,767.57)           | 8,371.56<br>(2,788.11 to 18,774.92)            | 243.84<br>(182.60 to 350.92)          | 145.21<br>(86.51 to 246.54)            | 116.62<br>(74.20 to 186.39)           | 169.80<br>(88.44 to 314.28)             |
| Pneumococcal meningitis                                           | 1,503.51<br>(984.15 to 2,348.06)               | 398.29<br>(191.92 to 736.24)                   | 315.97<br>(167.48 to 548.97)                 | 471.00<br>(212.28 to 906.14)                   | 25.70<br>(18.28 to 37.84)             | 13.60<br>(8.38 to 22.49)               | 12.72<br>(8.11 to 20.42)              | 14.52<br>(8.85 to 24.56)                |
| H influenzae type B meningitis                                    | 3,336.03<br>(2,238.98 to 5,028.43)             | 2,423.88<br>(525.30 to 7,229.70)               | 964.50<br>(327.71 to 2,383.87)               | 4,431.91<br>(770.09 to 13,471.95)              | 48.83<br>(34.53 to 71.79)             | 39.46<br>(14.94 to 97.03)              | 23.28<br>(12.98 to 42.98)             | 61.96<br>(17.79 to 170.34)              |
| Meningococcal meningitis                                          | 6,131.76<br>(4,438.68 to 9,121.76)             | 1,714.93<br>(775.60 to 3,156.04)               | 1,284.21<br>(621.12 to 2,341.60)             | 1,859.90<br>(828.29 to 3,473.57)               | 96.53<br>(72.71 to 138.45)            | 49.18<br>(31.59 to 79.02)              | 42.85<br>(27.00 to 70.21)             | 49.97<br>(30.87 to 81.08)               |
| Other meningitis                                                  | 4,591.89<br>(3,186.61 to 6,848.95)             | 1,497.76<br>(693.09 to 2,811.36)               | 1,141.34<br>(563.26 to 2,108.32)             | 1,608.75<br>(719.42 to 3,036.64)               | 72.77<br>(53.49 to 106.62)            | 42.97<br>(27.73 to 71.94)              | 37.78<br>(23.31 to 64.49)             | 43.35<br>(27.00 to 73.95)               |
| Encephalitis                                                      | 2,527.79<br>(1,664.61 to 3,996.37)             | 1,540.45<br>(688.88 to 2,991.32)               | 1,177.76<br>(554.15 to 2,239.51)             | 1,710.00<br>(752.16 to 3,318.63)               | 43.04<br>(30.43 to 64.35)             | 40.16<br>(24.70 to 65.99)              | 34.16<br>(21.61 to 55.37)             | 42.84<br>(25.72 to 72.25)               |

|                                                |                                                             |                                                              |                                                              |                                                              |                                                     |                                                      |                                                      |                                                      |
|------------------------------------------------|-------------------------------------------------------------|--------------------------------------------------------------|--------------------------------------------------------------|--------------------------------------------------------------|-----------------------------------------------------|------------------------------------------------------|------------------------------------------------------|------------------------------------------------------|
| Diphtheria                                     | 40.18<br>(21.85 to<br>67.98)                                | 6.39<br>(1.32 to<br>15.97)                                   | 3.52<br>(1.13 to<br>7.55)                                    | 10.48<br>(1.42 to<br>29.75)                                  | 0.55<br>(0.32 to<br>0.90)                           | 0.10<br>(0.03 to<br>0.23)                            | 0.07<br>(0.02 to<br>0.14)                            | 0.15<br>(0.03 to<br>0.40)                            |
| Whooping cough                                 | 6,122.92<br>(551.57 to<br>19,294.99)                        | 5,026.51<br>(21.98 to<br>18,772.29)                          | 627.11<br>(12.92 to<br>2,878.11)                             | 5,572.74<br>(21.22 to<br>22,005.07)                          | 72.58<br>(6.53 to<br>228.67)                        | 59.66<br>(0.33 to<br>222.69)                         | 7.74<br>(0.19 to<br>35.59)                           | 66.10<br>(0.32 to<br>261.15)                         |
| Tetanus                                        | 822.76<br>(277.81 to<br>1,342.91)                           | 112.85<br>(36.29 to<br>224.88)                               | 86.06<br>(27.54 to<br>170.22)                                | 123.49<br>(41.60 to<br>253.07)                               | 20.01<br>(7.74 to<br>29.19)                         | 3.22<br>(1.23 to<br>5.36)                            | 3.01<br>(1.15 to<br>5.02)                            | 3.23<br>(1.24 to<br>5.41)                            |
| Measles                                        | 0.01<br>(0.00 to<br>0.04)                                   | 10,478.79<br>(0.00 to<br>43,548.80)                          | 4,524.10<br>(0.00 to<br>17,160.71)                           | 15,300.31<br>(0.00 to<br>63,526.98)                          | 0.00<br>(0.00 to<br>0.00)                           | 153.09<br>(0.00 to<br>598.84)                        | 75.28<br>(0.00 to<br>275.31)                         | 220.27<br>(0.00 to<br>841.05)                        |
| <b>Dominican Republic</b>                      |                                                             |                                                              |                                                              |                                                              |                                                     |                                                      |                                                      |                                                      |
| Cause                                          | YLLs (actual counts)                                        |                                                              |                                                              |                                                              | Deaths (actual counts)                              |                                                      |                                                      |                                                      |
|                                                | 2016                                                        | 2040 Forecast                                                | 2040 Better Scenario                                         | 2040 Worse Scenario                                          | 2016                                                | 2040 Forecast                                        | 2040 Better Scenario                                 | 2040 Worse Scenario                                  |
| Varicella and herpes zoster                    | 434.47<br>(259.07 to<br>697.70)                             | 177.04<br>(83.06 to<br>334.33)                               | 116.21<br>(58.53 to<br>202.53)                               | 212.20<br>(91.13 to<br>414.32)                               | 11.17<br>(7.75 to<br>15.67)                         | 10.09<br>(5.49 to<br>16.27)                          | 8.06<br>(4.27 to<br>13.29)                           | 11.03<br>(5.99 to<br>18.32)                          |
| <b>Neglected tropical diseases and malaria</b> | <b>9,171.85</b><br><b>(1,410.60 to</b><br><b>18,402.06)</b> | <b>16,613.03</b><br><b>(4,355.28 to</b><br><b>28,246.79)</b> | <b>12,806.49</b><br><b>(3,867.14 to</b><br><b>20,456.27)</b> | <b>18,074.32</b><br><b>(4,419.67 to</b><br><b>31,545.15)</b> | <b>151.35</b><br><b>(38.13 to</b><br><b>278.03)</b> | <b>358.14</b><br><b>(135.96 to</b><br><b>565.94)</b> | <b>310.15</b><br><b>(129.26 to</b><br><b>472.59)</b> | <b>373.49</b><br><b>(136.02 to</b><br><b>589.92)</b> |
| Malaria                                        | 91.89<br>(50.68 to<br>251.38)                               | 66.13<br>(24.39 to<br>283.61)                                | 61.98<br>(22.20 to<br>269.88)                                | 67.76<br>(25.11 to<br>281.74)                                | 2.10<br>(1.21 to<br>5.60)                           | 1.83<br>(0.72 to<br>7.22)                            | 1.76<br>(0.68 to<br>6.96)                            | 1.84<br>(0.74 to<br>7.25)                            |
| Chagas disease                                 | 0.00<br>(0.00 to<br>0.00)                                   | 0.00<br>(0.00 to<br>0.00)                                    | 0.00<br>(0.00 to<br>0.00)                                    | 0.00<br>(0.00 to<br>0.00)                                    | 0.00<br>(0.00 to<br>0.00)                           | 0.00<br>(0.00 to<br>0.00)                            | 0.00<br>(0.00 to<br>0.00)                            | 0.00<br>(0.00 to<br>0.00)                            |
| Leishmaniasis                                  | 0.00<br>(0.00 to<br>0.00)                                   | 0.00<br>(0.00 to<br>0.00)                                    | 0.00<br>(0.00 to<br>0.00)                                    | 0.00<br>(0.00 to<br>0.00)                                    | 0.00<br>(0.00 to<br>0.00)                           | 0.00<br>(0.00 to<br>0.00)                            | 0.00<br>(0.00 to<br>0.00)                            | 0.00<br>(0.00 to<br>0.00)                            |
| African trypanosomiasis                        | 0.00<br>(0.00 to<br>0.00)                                   | 0.00<br>(0.00 to<br>0.00)                                    | 0.00<br>(0.00 to<br>0.00)                                    | 0.00<br>(0.00 to<br>0.00)                                    | 0.00<br>(0.00 to<br>0.00)                           | 0.00<br>(0.00 to<br>0.00)                            | 0.00<br>(0.00 to<br>0.00)                            | 0.00<br>(0.00 to<br>0.00)                            |
| Schistosomiasis                                | 533.84<br>(312.19 to<br>847.64)                             | 476.04<br>(190.43 to<br>1,153.27)                            | 411.93<br>(158.14 to<br>1,040.86)                            | 515.17<br>(211.24 to<br>1,222.89)                            | 18.94<br>(11.44 to<br>29.89)                        | 21.30<br>(8.44 to<br>48.29)                          | 19.12<br>(7.25 to<br>44.21)                          | 22.36<br>(8.92 to<br>49.31)                          |
| Cysticercosis                                  | 0.00<br>(0.00 to<br>0.00)                                   | 0.00<br>(0.00 to<br>0.00)                                    | 0.00<br>(0.00 to<br>0.00)                                    | 0.00<br>(0.00 to<br>0.00)                                    | 0.00<br>(0.00 to<br>0.00)                           | 0.00<br>(0.00 to<br>0.00)                            | 0.00<br>(0.00 to<br>0.00)                            | 0.00<br>(0.00 to<br>0.00)                            |
| Cystic echinococcosis                          | 2.27<br>(1.81 to<br>2.75)                                   | 1.04<br>(0.60 to<br>2.30)                                    | 0.65<br>(0.38 to<br>1.44)                                    | 1.38<br>(0.80 to<br>2.88)                                    | 0.07<br>(0.05 to<br>0.08)                           | 0.05<br>(0.03 to<br>0.09)                            | 0.03<br>(0.02 to<br>0.06)                            | 0.06<br>(0.03 to<br>0.11)                            |
| Dengue                                         | 8,399.56<br>(504.60 to<br>17,684.59)                        | 15,974.20<br>(2,998.38 to<br>27,770.32)                      | 12,262.62<br>(2,760.47 to<br>20,227.51)                      | 17,378.53<br>(2,985.80 to<br>30,942.33)                      | 127.48<br>(10.56 to<br>253.37)                      | 332.43<br>(83.14 to<br>536.84)                       | 287.20<br>(82.62 to<br>451.49)                       | 346.39<br>(81.94 to<br>569.17)                       |
| Yellow fever                                   | 0.00<br>(0.00 to<br>0.00)                                   | 0.00<br>(0.00 to<br>0.00)                                    | 0.00<br>(0.00 to<br>0.00)                                    | 0.00<br>(0.00 to<br>0.00)                                    | 0.00<br>(0.00 to<br>0.00)                           | 0.00<br>(0.00 to<br>0.00)                            | 0.00<br>(0.00 to<br>0.00)                            | 0.00<br>(0.00 to<br>0.00)                            |
| Rabies                                         | 2.44<br>(1.19 to<br>6.06)                                   | 0.79<br>(0.31 to<br>2.14)                                    | 0.42<br>(0.16 to<br>1.14)                                    | 1.13<br>(0.44 to<br>3.03)                                    | 0.04<br>(0.02 to<br>0.09)                           | 0.02<br>(0.01 to<br>0.05)                            | 0.01<br>(0.00 to<br>0.03)                            | 0.02<br>(0.01 to<br>0.06)                            |
| Intestinal nematode infections                 | 19.74<br>(3.56 to<br>46.29)                                 | 17.54<br>(3.44 to<br>46.76)                                  | 13.39<br>(3.03 to<br>37.24)                                  | 18.29<br>(3.46 to<br>48.93)                                  | 0.28<br>(0.08 to<br>0.60)                           | 0.30<br>(0.09 to<br>0.71)                            | 0.25<br>(0.09 to<br>0.62)                            | 0.30<br>(0.09 to<br>0.70)                            |
| Other neglected tropical diseases              | 114.67<br>(82.87 to<br>194.35)                              | 77.30<br>(43.64 to<br>186.12)                                | 55.49<br>(31.02 to<br>138.65)                                | 92.07<br>(53.29 to<br>209.38)                                | 2.30<br>(1.74 to<br>3.79)                           | 2.22<br>(1.30 to<br>5.46)                            | 1.77<br>(1.01 to<br>4.57)                            | 2.53<br>(1.51 to<br>5.66)                            |
| <b>Maternal disorders</b>                      | <b>7,131.11</b><br><b>(5,148.27 to</b><br><b>9,509.32)</b>  | <b>2,716.81</b><br><b>(1,390.80 to</b><br><b>4,711.28)</b>   | <b>1,744.22</b><br><b>(848.03 to</b><br><b>3,094.00)</b>     | <b>3,684.32</b><br><b>(1,796.15 to</b><br><b>6,469.54)</b>   | <b>122.25</b><br><b>(89.01 to</b><br><b>162.99)</b> | <b>47.60</b><br><b>(24.56 to</b><br><b>80.50)</b>    | <b>30.73</b><br><b>(15.08 to</b><br><b>54.09)</b>    | <b>64.53</b><br><b>(31.59 to</b><br><b>111.62)</b>   |
| Maternal hemorrhage                            | 1,046.93<br>(625.46 to<br>1,591.21)                         | 351.00<br>(156.97 to<br>660.70)                              | 228.52<br>(96.16 to<br>444.18)                               | 468.08<br>(205.11 to<br>910.32)                              | 18.38<br>(11.24 to<br>27.80)                        | 6.32<br>(2.88 to<br>11.80)                           | 4.13<br>(1.78 to<br>8.12)                            | 8.42<br>(3.65 to<br>16.56)                           |

|                                                       |                                       |                                   |                                 |                                   |                              |                             |                            |                             |
|-------------------------------------------------------|---------------------------------------|-----------------------------------|---------------------------------|-----------------------------------|------------------------------|-----------------------------|----------------------------|-----------------------------|
| Maternal sepsis and other maternal infections         | 755.80<br>(458.52 to<br>1,167.36)     | 215.94<br>(97.90 to<br>416.57)    | 139.07<br>(60.41 to<br>273.44)  | 289.21<br>(125.31 to<br>572.90)   | 13.32<br>(8.14 to<br>20.63)  | 3.88<br>(1.76 to<br>7.49)   | 2.51<br>(1.10 to<br>4.90)  | 5.18<br>(2.27 to<br>10.14)  |
| Maternal hypertensive disorders                       | 2,158.75<br>(1,428.72 to<br>3,025.09) | 720.43<br>(332.91 to<br>1,284.56) | 459.03<br>(201.82 to<br>856.55) | 968.87<br>(443.32 to<br>1,818.92) | 36.16<br>(24.10 to<br>50.24) | 12.29<br>(5.78 to<br>21.63) | 7.87<br>(3.51 to<br>14.59) | 16.50<br>(7.63 to<br>30.46) |
| Maternal obstructed labor and uterine rupture         | 101.13<br>(41.85 to<br>195.09)        | 38.93<br>(11.92 to<br>92.85)      | 24.39<br>(7.38 to<br>59.33)     | 53.21<br>(16.11 to<br>128.73)     | 1.78<br>(0.73 to<br>3.44)    | 0.70<br>(0.21 to<br>1.68)   | 0.44<br>(0.13 to<br>1.08)  | 0.95<br>(0.28 to<br>2.33)   |
| Maternal abortion, miscarriage, and ectopic pregnancy | 130.87<br>(49.48 to<br>268.23)        | 248.73<br>(80.82 to<br>591.78)    | 160.45<br>(50.72 to<br>386.31)  | 332.99<br>(100.49 to<br>849.80)   | 2.32<br>(0.88 to<br>4.65)    | 4.47<br>(1.49 to<br>10.69)  | 2.90<br>(0.72 to<br>6.77)  | 5.98<br>(1.86 to<br>14.18)  |
| Indirect maternal deaths                              | 1,942.06<br>(1,270.86 to<br>2,900.01) | 746.12<br>(308.57 to<br>1,431.22) | 474.59<br>(193.05 to<br>964.80) | 998.04<br>(401.84 to<br>1,976.03) | 32.79<br>(21.69 to<br>48.11) | 12.79<br>(5.45 to<br>24.33) | 8.19<br>(3.38 to<br>16.53) | 17.08<br>(6.96 to<br>33.49) |
| Late maternal deaths                                  | 123.04<br>(60.08 to<br>227.90)        | 34.18<br>(12.03 to<br>77.42)      | 21.66<br>(7.65 to<br>48.40)     | 45.86<br>(15.96 to<br>102.17)     | 2.12<br>(1.05 to<br>3.83)    | 0.60<br>(0.22 to<br>1.33)   | 0.38<br>(0.14 to<br>0.84)  | 0.80<br>(0.30 to<br>1.77)   |
| Maternal deaths aggravated by HIV/AIDS                | 35.12<br>(17.09 to<br>59.21)          | 61.48<br>(1.10 to<br>202.88)      | 37.83<br>(0.53 to<br>133.87)    | 134.19<br>(44.89 to<br>295.40)    | 0.64<br>(0.31 to<br>1.08)    | 1.14<br>(0.02 to<br>3.69)   | 0.70<br>(0.01 to<br>2.45)  | 2.51<br>(0.86 to<br>5.45)   |
| Other maternal disorders                              | 837.41<br>(511.03 to<br>1,274.17)     | 300.01<br>(137.02 to<br>574.68)   | 198.69<br>(84.68 to<br>384.03)  | 393.88<br>(171.83 to<br>764.51)   | 14.75<br>(9.11 to<br>22.56)  | 5.42<br>(2.53 to<br>10.15)  | 3.61<br>(1.58 to<br>6.87)  | 7.10<br>(3.18 to<br>13.71)  |

**Dominican Republic**

| Cause                                                                   | YLLs (actual counts)                               |                                                   |                                                  |                                                   | Deaths (actual counts)                       |                                            |                                          |                                            |
|-------------------------------------------------------------------------|----------------------------------------------------|---------------------------------------------------|--------------------------------------------------|---------------------------------------------------|----------------------------------------------|--------------------------------------------|------------------------------------------|--------------------------------------------|
|                                                                         | 2016                                               | 2040 Forecast                                     | 2040 Better Scenario                             | 2040 Worse Scenario                               | 2016                                         | 2040 Forecast                              | 2040 Better Scenario                     | 2040 Worse Scenario                        |
| <b>Neonatal disorders</b>                                               | <b>231,248.09</b><br>(164,913.98 to<br>312,628.27) | <b>117,276.58</b><br>(59,576.39 to<br>206,040.47) | <b>65,574.63</b><br>(34,591.82 to<br>113,913.06) | <b>162,755.05</b><br>(82,416.64 to<br>279,114.42) | <b>2,671.13</b><br>(1,904.80 to<br>3,611.02) | <b>1,354.81</b><br>(688.36 to<br>2,380.19) | <b>757.53</b><br>(399.60 to<br>1,315.93) | <b>1,880.13</b><br>(952.26 to<br>3,224.05) |
| Neonatal preterm birth                                                  | 109,654.71<br>(73,376.63 to<br>154,841.04)         | 40,669.72<br>(20,510.09 to<br>70,574.91)          | 22,990.83<br>(11,696.53 to<br>40,075.29)         | 66,684.16<br>(33,225.26 to<br>115,905.15)         | 1,266.52<br>(835.97 to<br>1,788.36)          | 469.80<br>(236.93 to<br>815.24)            | 265.58<br>(135.14 to<br>462.90)          | 770.27<br>(383.84 to<br>1,338.78)          |
| Neonatal encephalopathy due to birth asphyxia and trauma                | 35,323.37<br>(20,379.79 to<br>55,802.10)           | 20,051.24<br>(7,780.25 to<br>42,689.63)           | 11,234.90<br>(4,421.42 to<br>23,699.54)          | 24,796.88<br>(9,423.83 to<br>53,394.87)           | 408.02<br>(235.46 to<br>644.52)              | 231.63<br>(89.90 to<br>493.13)             | 129.79<br>(51.08 to<br>273.78)           | 286.45<br>(108.91 to<br>616.70)            |
| Neonatal sepsis and other neonatal infections                           | 67,093.03<br>(42,043.38 to<br>98,377.49)           | 43,178.43<br>(20,244.79 to<br>80,737.39)          | 24,141.54<br>(11,720.28 to<br>43,992.66)         | 53,846.52<br>(25,324.96 to<br>101,589.03)         | 775.06<br>(485.72 to<br>1,136.47)            | 498.84<br>(233.95 to<br>932.74)            | 278.91<br>(135.42 to<br>508.26)          | 622.08<br>(292.60 to<br>1,173.67)          |
| Hemolytic disease and other neonatal jaundice                           | 1,405.60<br>(815.87 to<br>2,280.07)                | 631.40<br>(214.72 to<br>1,505.09)                 | 335.33<br>(111.72 to<br>781.98)                  | 812.76<br>(273.55 to<br>1,936.71)                 | 16.24<br>(9.42 to<br>26.34)                  | 7.29<br>(2.48 to<br>17.39)                 | 3.87<br>(1.29 to<br>9.03)                | 9.39<br>(3.16 to<br>22.37)                 |
| Other neonatal disorders                                                | 17,771.38<br>(10,739.92 to<br>28,920.89)           | 12,745.79<br>(5,206.68 to<br>26,833.93)           | 6,872.02<br>(2,892.14 to<br>13,843.13)           | 16,614.73<br>(6,719.10 to<br>34,265.07)           | 205.30<br>(124.09 to<br>334.14)              | 147.25<br>(60.17 to<br>310.01)             | 79.39<br>(33.42 to<br>159.91)            | 191.94<br>(77.66 to<br>395.79)             |
| <b>Nutritional deficiencies</b>                                         | <b>8,199.16</b><br>(5,903.92 to<br>11,408.11)      | <b>4,460.64</b><br>(3,250.58 to<br>6,060.79)      | <b>3,331.87</b><br>(2,504.24 to<br>4,392.99)     | <b>5,087.71</b><br>(3,662.56 to<br>6,873.00)      | <b>200.88</b><br>(163.60 to<br>240.33)       | <b>231.85</b><br>(191.96 to<br>282.55)     | <b>208.00</b><br>(170.52 to<br>250.40)   | <b>241.06</b><br>(197.85 to<br>294.67)     |
| Protein-energy malnutrition                                             | 7,679.56<br>(5,471.32 to<br>10,709.11)             | 3,919.05<br>(2,824.09 to<br>5,440.28)             | 2,908.64<br>(2,147.54 to<br>3,878.82)            | 4,478.36<br>(3,172.69 to<br>6,179.79)             | 185.05<br>(150.15 to<br>223.76)              | 206.74<br>(165.73 to<br>257.44)            | 186.34<br>(149.47 to<br>226.22)          | 214.42<br>(170.40 to<br>266.81)            |
| Iodine deficiency                                                       | 83.93<br>(3.86 to<br>409.39)                       | 153.83<br>(4.54 to<br>645.14)                     | 107.96<br>(2.75 to<br>423.16)                    | 183.09<br>(5.00 to<br>789.46)                     | 1.84<br>(0.11 to<br>6.33)                    | 7.62<br>(0.13 to<br>31.22)                 | 6.29<br>(0.08 to<br>27.57)               | 8.35<br>(0.16 to<br>33.60)                 |
| Dietary iron deficiency                                                 | 73.07<br>(55.76 to<br>95.85)                       | 52.31<br>(36.69 to<br>74.53)                      | 42.47<br>(29.86 to<br>60.07)                     | 57.32<br>(40.38 to<br>80.16)                      | 1.49<br>(1.10 to<br>2.00)                    | 1.57<br>(0.97 to<br>2.67)                  | 1.40<br>(0.83 to<br>2.44)                | 1.65<br>(1.04 to<br>2.76)                  |
| Other nutritional deficiencies                                          | 362.60<br>(265.14 to<br>495.62)                    | 335.45<br>(234.27 to<br>475.81)                   | 272.80<br>(186.65 to<br>391.89)                  | 368.94<br>(260.37 to<br>519.70)                   | 12.50<br>(9.42 to<br>16.80)                  | 15.91<br>(11.23 to<br>24.03)               | 13.97<br>(9.46 to<br>21.14)              | 16.64<br>(11.71 to<br>24.74)               |
| <b>Other communicable, maternal, neonatal, and nutritional diseases</b> | <b>6,214.67</b><br>(5,005.83 to<br>7,588.38)       | <b>5,027.58</b><br>(3,969.09 to<br>6,143.48)      | <b>4,094.07</b><br>(3,170.96 to<br>5,167.17)     | <b>5,548.39</b><br>(4,382.48 to<br>6,855.94)      | <b>167.48</b><br>(134.89 to<br>196.09)       | <b>212.36</b><br>(163.52 to<br>255.78)     | <b>184.24</b><br>(137.46 to<br>226.19)   | <b>225.05</b><br>(173.71 to<br>272.39)     |

|                                               |                                             |                                                 |                                               |                                                   |                                          |                                          |                                          |                                           |
|-----------------------------------------------|---------------------------------------------|-------------------------------------------------|-----------------------------------------------|---------------------------------------------------|------------------------------------------|------------------------------------------|------------------------------------------|-------------------------------------------|
| Sexually transmitted infections excluding HIV | 1,229.72<br>(682.01 to<br>2,149.04)         | 340.17<br>(210.95 to<br>585.80)                 | 254.61<br>(159.27 to<br>425.58)               | 378.19<br>(227.55 to<br>659.69)                   | 20.37<br>(13.03 to<br>33.86)             | 8.53<br>(5.97 to<br>15.35)               | 7.23<br>(5.07 to<br>12.95)               | 9.02<br>(6.20 to<br>15.67)                |
| Syphilis                                      | 1,067.77<br>(529.53 to<br>1,961.69)         | 237.07<br>(124.99 to<br>444.49)                 | 164.70<br>(91.86 to<br>305.19)                | 267.41<br>(139.10 to<br>508.86)                   | 16.05<br>(9.25 to<br>28.39)              | 4.80<br>(2.99 to<br>8.57)                | 3.77<br>(2.39 to<br>7.31)                | 5.18<br>(3.18 to<br>9.26)                 |
| Chlamydial infection                          | 28.24<br>(19.15 to<br>54.60)                | 18.79<br>(11.83 to<br>37.43)                    | 16.29<br>(10.07 to<br>32.46)                  | 20.32<br>(12.58 to<br>40.20)                      | 0.76<br>(0.54 to<br>1.44)                | 0.71<br>(0.50 to<br>1.29)                | 0.66<br>(0.45 to<br>1.17)                | 0.73<br>(0.51 to<br>1.32)                 |
| Gonococcal infection                          | 86.96<br>(62.47 to<br>148.80)               | 56.24<br>(36.47 to<br>109.81)                   | 49.33<br>(31.41 to<br>97.37)                  | 60.19<br>(38.35 to<br>118.38)                     | 2.41<br>(1.77 to<br>4.28)                | 2.15<br>(1.52 to<br>3.90)                | 2.00<br>(1.40 to<br>3.62)                | 2.20<br>(1.54 to<br>4.07)                 |
| Other sexually transmitted infections         | 46.74<br>(32.75 to<br>81.56)                | 28.07<br>(17.77 to<br>56.22)                    | 24.29<br>(14.93 to<br>47.99)                  | 30.28<br>(19.03 to<br>61.23)                      | 1.15<br>(0.83 to<br>2.16)                | 0.87<br>(0.61 to<br>1.76)                | 0.80<br>(0.55 to<br>1.57)                | 0.91<br>(0.62 to<br>1.79)                 |
| Acute hepatitis                               | 2,450.38<br>(2,014.52 to<br>2,945.61)       | 2,327.26<br>(1,702.44 to<br>3,024.27)           | 1,916.08<br>(1,367.51 to<br>2,583.19)         | 2,538.91<br>(1,859.63 to<br>3,336.20)             | 72.61<br>(58.31 to<br>86.87)             | 96.34<br>(73.66 to<br>123.73)            | 82.97<br>(61.42 to<br>108.04)            | 101.76<br>(77.63 to<br>131.13)            |
| Acute hepatitis A                             | 125.74<br>(40.53 to<br>234.07)              | 62.22<br>(27.36 to<br>114.35)                   | 46.41<br>(20.60 to<br>87.69)                  | 70.11<br>(30.61 to<br>130.48)                     | 2.09<br>(0.96 to<br>3.46)                | 1.89<br>(0.75 to<br>3.94)                | 1.57<br>(0.58 to<br>3.40)                | 2.04<br>(0.81 to<br>4.32)                 |
| Acute hepatitis B                             | 1,476.04<br>(1,138.87 to<br>1,851.28)       | 1,573.85<br>(1,109.24 to<br>2,124.77)           | 1,295.37<br>(880.57 to<br>1,823.57)           | 1,733.48<br>(1,204.77 to<br>2,383.77)             | 47.95<br>(36.62 to<br>59.96)             | 63.82<br>(44.61 to<br>85.91)             | 53.75<br>(37.11 to<br>74.41)             | 68.74<br>(48.40 to<br>93.51)              |
| Acute hepatitis C                             | 100.33<br>(72.56 to<br>135.73)              | 126.34<br>(81.62 to<br>182.48)                  | 112.39<br>(72.34 to<br>164.70)                | 131.16<br>(86.41 to<br>191.18)                    | 3.38<br>(2.36 to<br>4.63)                | 5.33<br>(3.51 to<br>7.68)                | 4.88<br>(3.17 to<br>7.12)                | 5.41<br>(3.57 to<br>7.84)                 |
| Acute hepatitis E                             | 748.28<br>(562.10 to<br>966.84)             | 564.86<br>(365.13 to<br>828.83)                 | 461.91<br>(289.11 to<br>691.32)               | 604.15<br>(388.19 to<br>887.29)                   | 19.19<br>(13.92 to<br>26.23)             | 25.30<br>(16.03 to<br>37.33)             | 22.77<br>(13.88 to<br>34.42)             | 25.58<br>(16.15 to<br>37.47)              |
| Other unspecified infectious diseases         | 2,534.57<br>(1,973.60 to<br>3,103.51)       | 2,360.15<br>(1,668.65 to<br>2,932.77)           | 1,923.38<br>(1,357.26 to<br>2,415.49)         | 2,631.29<br>(1,918.65 to<br>3,294.63)             | 74.51<br>(47.36 to<br>91.29)             | 107.49<br>(60.43 to<br>134.38)           | 94.04<br>(51.18 to<br>118.66)            | 114.27<br>(64.91 to<br>142.75)            |
| Non-communicable diseases                     | 798,216.18<br>(681,164.83 to<br>907,119.89) | 1,152,431.24<br>(901,398.74 to<br>1,513,702.33) | 915,956.67<br>(713,692.54 to<br>1,170,055.44) | 1,447,249.12<br>(1,109,966.65 to<br>1,935,736.57) | 40,811.14<br>(35,108.87 to<br>45,609.83) | 73,392.01<br>(60,561.37 to<br>90,980.12) | 61,542.23<br>(50,988.56 to<br>75,597.94) | 87,866.95<br>(71,333.84 to<br>110,527.76) |

**Dominican Republic**

| Cause                      | YLLs (actual counts)                        |                                             |                                             |                                             | Deaths (actual counts)                |                                          |                                          |                                          |
|----------------------------|---------------------------------------------|---------------------------------------------|---------------------------------------------|---------------------------------------------|---------------------------------------|------------------------------------------|------------------------------------------|------------------------------------------|
|                            | 2016                                        | 2040 Forecast                               | 2040 Better Scenario                        | 2040 Worse Scenario                         | 2016                                  | 2040 Forecast                            | 2040 Better Scenario                     | 2040 Worse Scenario                      |
| <b>Neoplasms</b>           | 173,267.46<br>(145,736.49 to<br>199,627.72) | 331,824.74<br>(261,508.63 to<br>411,217.34) | 315,863.50<br>(247,884.54 to<br>390,705.66) | 358,349.01<br>(278,338.70 to<br>449,581.91) | 8,173.95<br>(6,969.76 to<br>9,206.24) | 19,089.40<br>(15,833.08 to<br>22,439.17) | 19,027.63<br>(15,780.73 to<br>22,562.29) | 20,000.97<br>(16,332.35 to<br>23,826.19) |
| Lip and oral cavity cancer | 3,324.44<br>(2,696.27 to<br>3,896.77)       | 6,486.28<br>(3,933.41 to<br>10,096.70)      | 4,754.44<br>(3,067.71 to<br>7,089.85)       | 8,899.41<br>(5,155.22 to<br>14,460.36)      | 179.52<br>(149.00 to<br>206.17)       | 376.92<br>(239.09 to<br>568.38)          | 289.15<br>(194.84 to<br>421.00)          | 515.62<br>(308.56 to<br>794.39)          |
| Nasopharynx cancer         | 1,462.73<br>(1,181.16 to<br>1,741.50)       | 2,277.89<br>(1,411.46 to<br>3,357.71)       | 1,579.65<br>(1,023.81 to<br>2,360.19)       | 3,174.21<br>(1,922.94 to<br>4,910.35)       | 61.74<br>(51.03 to<br>72.70)          | 108.40<br>(69.41 to<br>154.45)           | 78.52<br>(53.28 to<br>109.55)            | 151.86<br>(93.82 to<br>226.50)           |
| Other pharynx cancer       | 2,075.71<br>(1,623.83 to<br>2,523.89)       | 3,932.08<br>(2,367.04 to<br>6,373.58)       | 3,189.68<br>(2,025.45 to<br>4,965.69)       | 4,256.09<br>(2,472.36 to<br>7,026.45)       | 103.07<br>(83.48 to<br>120.02)        | 222.00<br>(138.33 to<br>356.24)          | 187.82<br>(125.20 to<br>285.34)          | 232.74<br>(139.71 to<br>374.57)          |
| Esophageal cancer          | 2,793.27<br>(2,268.93 to<br>3,269.53)       | 4,553.63<br>(2,980.60 to<br>6,557.68)       | 3,621.89<br>(2,437.37 to<br>5,099.29)       | 6,081.48<br>(3,818.98 to<br>9,316.50)       | 135.27<br>(112.51 to<br>155.88)       | 236.37<br>(161.07 to<br>330.31)          | 194.29<br>(139.45 to<br>264.99)          | 315.10<br>(200.94 to<br>474.21)          |
| Stomach cancer             | 10,081.20<br>(8,328.78 to<br>11,762.05)     | 13,335.45<br>(9,887.51 to<br>18,079.27)     | 12,063.26<br>(8,876.49 to<br>15,937.23)     | 13,939.20<br>(10,312.58 to<br>18,766.54)    | 495.77<br>(416.09 to<br>568.73)       | 765.34<br>(584.99 to<br>1,007.87)        | 709.90<br>(540.85 to<br>913.26)          | 782.66<br>(598.00 to<br>1,025.98)        |
| Colon and rectum cancer    | 12,907.64<br>(10,517.81 to<br>15,176.79)    | 29,578.51<br>(19,874.83 to<br>44,687.94)    | 28,654.25<br>(19,261.69 to<br>43,051.26)    | 30,434.85<br>(20,125.23 to<br>45,685.48)    | 687.99<br>(569.07 to<br>796.03)       | 1,857.71<br>(1,297.41 to<br>2,758.09)    | 1,864.51<br>(1,289.92 to<br>2,775.28)    | 1,858.70<br>(1,285.37 to<br>2,791.77)    |
| Liver cancer               | 12,451.33<br>(9,937.50 to<br>14,979.64)     | 27,837.37<br>(19,105.01 to<br>41,814.19)    | 24,771.55<br>(17,618.94 to<br>35,553.91)    | 30,670.83<br>(20,414.24 to<br>47,313.88)    | 592.64<br>(484.91 to<br>697.96)       | 1,510.17<br>(1,068.55 to<br>2,169.42)    | 1,398.44<br>(1,014.95 to<br>1,933.10)    | 1,620.87<br>(1,116.76 to<br>2,386.28)    |

|                                      |                                          |                                          |                                          |                                          |                                       |                                       |                                       |                                       |
|--------------------------------------|------------------------------------------|------------------------------------------|------------------------------------------|------------------------------------------|---------------------------------------|---------------------------------------|---------------------------------------|---------------------------------------|
| Liver cancer due to hepatitis B      | 4,644.14<br>(3,555.53 to<br>5,889.15)    | 9,691.79<br>(6,303.42 to<br>15,352.35)   | 8,820.41<br>(5,902.53 to<br>13,259.04)   | 10,534.75<br>(6,761.04 to<br>17,071.97)  | 191.33<br>(148.42 to<br>240.16)       | 456.06<br>(307.31 to<br>695.54)       | 430.27<br>(298.62 to<br>627.45)       | 485.40<br>(316.91 to<br>746.63)       |
| Liver cancer due to hepatitis C      | 3,039.82<br>(2,361.03 to<br>3,783.90)    | 7,319.75<br>(4,866.80 to<br>10,832.39)   | 6,845.89<br>(4,666.04 to<br>9,857.70)    | 7,795.26<br>(5,106.23 to<br>11,741.91)   | 175.05<br>(137.59 to<br>213.56)       | 468.19<br>(326.18 to<br>655.69)       | 454.35<br>(321.26 to<br>617.79)       | 486.18<br>(331.87 to<br>700.94)       |
| Liver cancer due to alcohol use      | 2,382.16<br>(1,813.71 to<br>2,997.39)    | 5,688.43<br>(3,496.06 to<br>8,922.79)    | 4,483.23<br>(2,876.38 to<br>6,791.81)    | 6,697.04<br>(4,002.96 to<br>10,951.35)   | 117.84<br>(91.35 to<br>147.56)        | 311.47<br>(199.84 to<br>469.98)       | 257.87<br>(171.99 to<br>376.73)       | 355.42<br>(221.12 to<br>545.32)       |
| Liver cancer due to other causes     | 2,385.21<br>(1,910.56 to<br>2,899.54)    | 5,137.39<br>(3,390.77 to<br>8,034.95)    | 4,622.02<br>(3,162.09 to<br>6,758.91)    | 5,643.78<br>(3,611.70 to<br>8,926.88)    | 108.42<br>(87.27 to<br>130.75)        | 273.56<br>(184.78 to<br>404.83)       | 255.95<br>(178.87 to<br>367.38)       | 293.86<br>(191.96 to<br>444.66)       |
| Gallbladder and biliary tract cancer | 1,412.77<br>(992.18 to<br>2,385.62)      | 2,365.88<br>(1,598.49 to<br>4,004.49)    | 2,464.88<br>(1,643.38 to<br>4,135.72)    | 2,234.12<br>(1,525.53 to<br>3,745.40)    | 71.92<br>(51.79 to<br>119.94)         | 137.73<br>(97.60 to<br>230.61)        | 147.24<br>(103.60 to<br>245.81)       | 126.60<br>(91.04 to<br>211.33)        |
| Pancreatic cancer                    | 6,464.12<br>(5,246.66 to<br>7,567.59)    | 14,248.40<br>(10,566.01 to<br>18,677.44) | 14,783.13<br>(11,035.82 to<br>19,438.74) | 14,313.64<br>(10,457.05 to<br>18,895.56) | 525.87<br>(271.28 to<br>775.74)       | 791.47<br>(603.19 to<br>1,022.33)     | 838.73<br>(637.69 to<br>1,080.53)     | 784.04<br>(594.55 to<br>1,016.76)     |
| Larynx cancer                        | 2,116.76<br>(1,708.05 to<br>2,497.39)    | 3,254.31<br>(1,842.33 to<br>5,811.76)    | 2,338.68<br>(1,390.90 to<br>3,894.65)    | 5,130.09<br>(2,638.58 to<br>9,245.87)    | 106.46<br>(87.43 to<br>122.63)        | 174.22<br>(100.18 to<br>319.89)       | 130.59<br>(79.82 to<br>231.74)        | 276.89<br>(147.29 to<br>487.63)       |
| Tracheal, bronchus, and lung cancer  | 18,757.19<br>(15,484.09 to<br>22,075.44) | 35,299.32<br>(23,590.52 to<br>50,505.01) | 30,336.87<br>(21,041.31 to<br>42,203.82) | 54,696.86<br>(34,405.72 to<br>81,544.17) | 973.67<br>(814.13 to<br>1,132.47)     | 1,961.75<br>(1,353.20 to<br>2,732.55) | 1,754.97<br>(1,259.06 to<br>2,410.85) | 3,047.59<br>(1,977.91 to<br>4,389.40) |
| Malignant skin melanoma              | 573.59<br>(444.03 to<br>883.82)          | 1,136.15<br>(863.48 to<br>1,661.64)      | 1,271.16<br>(955.60 to<br>1,831.38)      | 1,037.04<br>(797.16 to<br>1,522.05)      | 62.66<br>(19.74 to<br>35.70)          | 24.91<br>(50.20 to<br>85.19)          | 72.66<br>(57.99 to<br>97.49)          | 55.17<br>(44.52 to<br>74.72)          |
| Non-melanoma skin cancer             | 1,855.37<br>(1,518.90 to<br>2,178.75)    | 3,717.77<br>(3,051.13 to<br>4,347.09)    | 3,534.24<br>(2,816.44 to<br>4,262.81)    | 3,682.87<br>(3,038.79 to<br>4,284.81)    | 99.73<br>(84.48 to<br>114.56)         | 236.52<br>(202.24 to<br>271.57)       | 233.45<br>(194.04 to<br>273.34)       | 225.40<br>(193.25 to<br>258.67)       |
| Breast cancer                        | 14,717.55<br>(10,620.23 to<br>19,077.99) | 25,007.30<br>(15,899.53 to<br>36,761.19) | 23,240.85<br>(14,799.70 to<br>34,116.01) | 25,964.23<br>(16,480.78 to<br>38,365.05) | 560.12<br>(411.53 to<br>708.51)       | 1,198.54<br>(813.68 to<br>1,692.80)   | 1,151.98<br>(777.87 to<br>1,635.50)   | 1,210.49<br>(824.29 to<br>1,720.11)   |
| Cervical cancer                      | 9,650.41<br>(6,953.10 to<br>12,793.40)   | 12,919.54<br>(8,144.40 to<br>20,014.93)  | 11,681.91<br>(7,205.54 to<br>18,138.92)  | 13,787.21<br>(8,598.17 to<br>21,509.25)  | 383.00<br>(274.99 to<br>497.99)       | 618.80<br>(405.51 to<br>931.79)       | 574.45<br>(369.31 to<br>865.21)       | 646.52<br>(416.07 to<br>964.72)       |
| Uterine cancer                       | 2,043.65<br>(1,508.84 to<br>2,686.82)    | 4,787.39<br>(3,206.30 to<br>6,850.51)    | 4,371.54<br>(2,866.95 to<br>6,323.89)    | 4,964.94<br>(3,345.41 to<br>7,068.35)    | 96.10<br>(71.28 to<br>123.34)         | 273.07<br>(199.07 to<br>368.27)       | 256.33<br>(180.85 to<br>358.20)       | 275.83<br>(201.60 to<br>369.78)       |
| Ovarian cancer                       | 2,303.68<br>(1,679.71 to<br>3,019.46)    | 4,708.64<br>(2,824.20 to<br>7,500.89)    | 4,905.44<br>(2,953.60 to<br>7,634.55)    | 4,499.92<br>(2,712.91 to<br>7,111.50)    | 89.52<br>(67.12 to<br>114.32)         | 221.93<br>(139.93 to<br>340.23)       | 236.79<br>(150.39 to<br>361.42)       | 207.77<br>(129.78 to<br>326.29)       |
| Prostate cancer                      | 21,261.74<br>(15,272.77 to<br>26,011.15) | 60,188.15<br>(44,746.83 to<br>72,699.66) | 64,477.45<br>(48,066.15 to<br>78,060.06) | 55,145.50<br>(40,821.14 to<br>66,791.16) | 1,664.76<br>(1,155.15 to<br>2,007.70) | 4,937.76<br>(3,564.89 to<br>5,874.43) | 5,432.65<br>(3,959.42 to<br>6,366.30) | 4,402.69<br>(3,087.61 to<br>5,384.25) |
| Testicular cancer                    | 117.85<br>(84.25 to<br>157.59)           | 155.93<br>(110.86 to<br>212.93)          | 145.20<br>(100.33 to<br>200.50)          | 158.34<br>(113.70 to<br>218.91)          | 2.93<br>(2.14 to<br>3.76)             | 5.04<br>(3.77 to<br>6.56)             | 4.83<br>(3.57 to<br>6.32)             | 4.97<br>(3.74 to<br>6.52)             |
| <b>Dominican Republic</b>            |                                          |                                          |                                          |                                          |                                       |                                       |                                       |                                       |
| Cause                                | YLLs (actual counts)                     |                                          |                                          |                                          | Deaths (actual counts)                |                                       |                                       |                                       |
|                                      | 2016                                     | 2040 Forecast                            | 2040 Better Scenario                     | 2040 Worse Scenario                      | 2016                                  | 2040 Forecast                         | 2040 Better Scenario                  | 2040 Worse Scenario                   |
| Kidney cancer                        | 1,656.57<br>(1,375.03 to<br>2,211.69)    | 3,625.30<br>(2,747.92 to<br>5,049.57)    | 3,849.73<br>(2,909.31 to<br>5,413.01)    | 3,476.16<br>(2,652.65 to<br>4,912.11)    | 60.03<br>(48.77 to<br>82.82)          | 168.39<br>(131.11 to<br>236.78)       | 187.21<br>(143.94 to<br>265.86)       | 157.91<br>(122.46 to<br>224.78)       |
| Bladder cancer                       | 1,322.93<br>(1,075.76 to<br>1,552.81)    | 2,594.62<br>(1,975.67 to<br>3,389.46)    | 2,546.77<br>(1,940.30 to<br>3,311.09)    | 2,770.35<br>(2,050.20 to<br>3,683.04)    | 85.36<br>(70.84 to<br>99.02)          | 182.79<br>(141.88 to<br>233.07)       | 184.54<br>(144.19 to<br>235.13)       | 192.76<br>(145.71 to<br>252.08)       |
| Brain and nervous system cancer      | 7,567.79<br>(6,011.53 to<br>10,809.25)   | 12,338.26<br>(9,581.30 to<br>16,010.70)  | 12,028.34<br>(9,290.92 to<br>15,547.98)  | 11,955.00<br>(9,280.20 to<br>15,683.72)  | 196.78<br>(159.19 to<br>247.42)       | 442.15<br>(351.25 to<br>540.44)       | 458.26<br>(361.00 to<br>570.17)       | 414.37<br>(334.16 to<br>504.88)       |
| Thyroid cancer                       | 647.34<br>(520.68 to<br>769.71)          | 1,164.56<br>(797.99 to<br>1,710.48)      | 1,038.13<br>(716.45 to<br>1,500.18)      | 1,215.40<br>(824.17 to<br>1,824.55)      | 31.04<br>(25.12 to<br>36.51)          | 63.61<br>(45.44 to<br>89.67)          | 58.74<br>(42.26 to<br>82.13)          | 64.35<br>(45.50 to<br>93.00)          |

|                                |                                          |                                          |                                          |                                          |                                       |                                       |                                       |                                       |  |
|--------------------------------|------------------------------------------|------------------------------------------|------------------------------------------|------------------------------------------|---------------------------------------|---------------------------------------|---------------------------------------|---------------------------------------|--|
|                                | 190.56<br>(151.56 to 240.11)             | 317.72<br>(243.49 to 414.34)             | 317.42<br>(240.58 to 418.48)             | 311.97<br>(241.30 to 404.20)             | 6.92<br>(5.55 to 8.1)                 | 14.29<br>(11.46 to 18.65)             | 14.75<br>(11.67 to 19.08)             | 13.58<br>(10.86 to 17.75)             |  |
| Mesothelioma                   | 565.21<br>(309.82 to 744.33)             | 563.21<br>(279.75 to 786.40)             | 467.85<br>(223.00 to 675.33)             | 610.74<br>(306.43 to 867.26)             | 16.04<br>(7.92 to 21.42)              | 21.45<br>(9.45 to 30.79)              | 18.55<br>(7.90 to 27.34)              | 22.62<br>(10.26 to 32.37)             |  |
| Hodgkin lymphoma               | 4,414.48<br>(3,562.96 to 5,982.69)       | 7,758.56<br>(5,774.69 to 10,453.17)      | 7,620.33<br>(5,679.34 to 10,280.76)      | 7,521.97<br>(5,595.48 to 10,239.79)      | 141.91<br>(113.88 to 186.72)          | 326.70<br>(250.62 to 421.88)          | 335.95<br>(260.61 to 438.40)          | 306.92<br>(236.06 to 400.92)          |  |
| Non-Hodgkin lymphoma           | 2,285.65<br>(1,795.40 to 2,901.54)       | 5,563.40<br>(3,909.59 to 7,596.43)       | 5,732.60<br>(4,082.04 to 7,753.48)       | 5,283.87<br>(3,777.53 to 7,377.34)       | 106.01<br>(83.76 to 132.59)           | 293.56<br>(218.82 to 398.07)          | 310.44<br>(232.72 to 416.90)          | 272.00<br>(205.25 to 371.87)          |  |
| Multiple myeloma               | 12,829.47<br>(10,740.72 to 16,157.15)    | 16,346.18<br>(12,800.67 to 20,913.82)    | 14,592.20<br>(11,332.61 to 18,521.30)    | 17,094.16<br>(13,274.91 to 22,018.23)    | 350.37<br>(293.62 to 421.22)          | 671.44<br>(526.03 to 836.80)          | 635.30<br>(493.98 to 785.17)          | 685.94<br>(533.75 to 870.40)          |  |
| Leukemia                       | 3,286.76<br>(2,561.98 to 4,597.39)       | 2,746.51<br>(1,977.07 to 3,885.79)       | 2,367.99<br>(1,756.68 to 3,271.52)       | 2,791.55<br>(2,027.16 to 3,983.12)       | 54.39<br>(43.90 to 71.36)             | 63.39<br>(48.43 to 81.10)             | 59.45<br>(45.27 to 75.15)             | 63.15<br>(48.23 to 81.80)             |  |
| Acute lymphoid leukemia        | 283.42<br>(204.61 to 355.32)             | 489.58<br>(330.89 to 688.49)             | 481.04<br>(328.83 to 666.65)             | 494.07<br>(328.09 to 702.06)             | 15.19<br>(11.14 to 18.60)             | 30.11<br>(20.91 to 41.17)             | 30.74<br>(21.61 to 41.54)             | 29.53<br>(20.09 to 41.08)             |  |
| Chronic lymphoid leukemia      | 2,685.04<br>(2,107.05 to 3,311.34)       | 3,721.95<br>(2,725.13 to 4,838.65)       | 3,593.87<br>(2,666.65 to 4,673.72)       | 3,704.40<br>(2,712.45 to 4,898.16)       | 63.16<br>(50.04 to 76.80)             | 124.03<br>(90.42 to 160.57)           | 127.43<br>(93.99 to 163.94)           | 120.33<br>(88.68 to 157.62)           |  |
| Acute myeloid leukemia         | 350.86<br>(248.14 to 446.62)             | 390.48<br>(249.71 to 545.66)             | 361.98<br>(231.65 to 509.39)             | 403.31<br>(258.30 to 578.13)             | 18.60<br>(9.38 to 17.18)              | 18.31<br>(11.64 to 25.58)             | 17.91<br>(11.27 to 24.63)             | 18.61<br>(11.49 to 26.11)             |  |
| Chronic myeloid leukemia       | 6,223.39<br>(5,075.58 to 8,224.26)       | 8,997.66<br>(7,007.44 to 11,600.04)      | 7,787.32<br>(6,007.85 to 10,060.82)      | 9,700.83<br>(7,435.61 to 12,762.94)      | 203.78<br>(168.50 to 251.53)          | 435.30<br>(340.15 to 542.23)          | 399.77<br>(313.67 to 499.57)          | 454.32<br>(359.53 to 575.73)          |  |
| Other leukemia                 | 15,416.47<br>(12,847.23 to 18,319.23)    | 25,762.94<br>(20,727.87 to 31,490.67)    | 25,484.06<br>(20,265.35 to 31,457.99)    | 25,038.57<br>(20,331.26 to 30,495.71)    | 524.49<br>(435.69 to 619.56)          | 1,208.65<br>(1,006.29 to 1,444.86)    | 1,266.58<br>(1,034.14 to 1,524.45)    | 1,129.03<br>(942.64 to 1,342.27)      |  |
| Other neoplasms                | 340,637.91<br>(285,479.05 to 389,785.05) | 485,838.22<br>(272,063.13 to 619,457.55) | 258,401.52<br>(176,770.98 to 384,127.45) | 617,513.75<br>(395,608.20 to 899,842.58) | 20,803.85<br>(17,751.79 to 23,269.45) | 29,647.32<br>(21,411.05 to 42,849.64) | 20,522.44<br>(14,637.23 to 28,653.47) | 40,838.15<br>(28,747.65 to 59,603.72) |  |
| Cardiovascular diseases        | 4,178.84<br>(3,510.13 to 4,862.19)       | 3,067.64<br>(2,250.04 to 4,264.95)       | 2,469.28<br>(1,768.25 to 3,410.72)       | 3,392.22<br>(2,492.19 to 4,675.75)       | 187.78<br>(153.05 to 221.85)          | 219.19<br>(165.18 to 300.98)          | 188.81<br>(139.71 to 258.57)          | 230.37<br>(175.16 to 316.88)          |  |
| Rheumatic heart disease        | 193,134.01<br>(160,435.00 to 222,476.04) | 212,807.24<br>(123,149.10 to 355,922.08) | 125,687.27<br>(72,479.35 to 211,610.68)  | 349,023.76<br>(195,503.46 to 610,467.07) | 12,218.56<br>(10,442.65 to 13,721.08) | 15,538.55<br>(9,570.50 to 24,593.26)  | 10,030.68<br>(6,132.40 to 15,654.15)  | 22,938.20<br>(14,130.39 to 36,964.38) |  |
| Ischemic heart disease         | 93,609.06<br>(78,698.33 to 108,338.80)   | 98,410.34<br>(61,395.44 to 157,053.92)   | 57,860.89<br>(36,738.96 to 88,644.58)    | 158,830.95<br>(97,525.52 to 263,043.17)  | 5,395.35<br>(4,587.70 to 6,190.75)    | 6,826.67<br>(4,509.14 to 10,095.95)   | 4,449.50<br>(2,883.14 to 6,567.81)    | 9,842.41<br>(6,438.01 to 14,808.80)   |  |
| Stroke                         | 34,642.09<br>(28,822.02 to 40,219.92)    | 40,829.57<br>(24,045.16 to 69,692.00)    | 26,642.83<br>(15,521.01 to 44,815.55)    | 59,809.09<br>(34,548.07 to 102,472.42)   | 2,489.82<br>(2,100.84 to 2,856.05)    | 3,344.61<br>(1,980.78 to 5,929.29)    | 2,371.67<br>(1,402.97 to 4,128.87)    | 4,448.83<br>(2,579.95 to 7,937.58)    |  |
| Ischemic stroke                | 58,966.96<br>(49,284.56 to 68,524.79)    | 57,580.77<br>(34,293.13 to 94,437.91)    | 31,218.07<br>(19,985.67 to 49,922.73)    | 99,021.86<br>(56,057.27 to 171,327.94)   | 2,905.53<br>(2,427.82 to 3,363.29)    | 3,482.05<br>(2,250.06 to 5,450.82)    | 2,077.84<br>(1,386.53 to 3,025.68)    | 5,393.57<br>(3,355.72 to 8,711.70)    |  |
| Intracerebral hemorrhage       | 20,346.70<br>(16,110.56 to 27,397.65)    | 42,967.63<br>(26,502.84 to 84,045.43)    | 29,737.29<br>(19,980.54 to 48,412.11)    | 53,938.98<br>(31,645.97 to 106,030.68)   | 1,472.82<br>(1,168.92 to 1,860.95)    | 3,634.51<br>(2,280.92 to 7,251.39)    | 2,634.91<br>(1,784.43 to 4,434.89)    | 4,332.70<br>(2,588.72 to 8,970.11)    |  |
| Hypertensive heart disease     | 5,437.26<br>(4,486.07 to 6,593.04)       | 7,684.47<br>(5,510.15 to 10,543.94)      | 7,075.23<br>(5,002.24 to 9,871.28)       | 7,683.26<br>(5,593.38 to 10,575.54)      | 232.87<br>(186.54 to 276.09)          | 456.64<br>(319.51 to 622.99)          | 447.07<br>(310.84 to 610.32)          | 437.48<br>(312.30 to 591.88)          |  |
| Cardiomyopathy and myocarditis | 1,532.04<br>(1,182.63 to 2,043.54)       | 2,193.26<br>(1,592.36 to 2,965.46)       | 2,097.91<br>(1,486.74 to 2,877.54)       | 2,197.54<br>(1,627.49 to 2,894.51)       | 83.60<br>(60.12 to 109.12)            | 161.59<br>(110.62 to 218.87)          | 163.90<br>(110.65 to 228.56)          | 154.83<br>(105.07 to 207.45)          |  |
| Mycocarditis                   | <b>Dominican Republic</b>                |                                          |                                          |                                          |                                       |                                       |                                       |                                       |  |
| Cause                          | YLLs (actual counts)                     |                                          |                                          |                                          | Deaths (actual counts)                |                                       |                                       |                                       |  |
|                                | 2016                                     | 2040 Forecast                            | 2040 Better Scenario                     | 2040 Worse Scenario                      | 2016                                  | 2040 Forecast                         | 2040 Better Scenario                  | 2040 Worse Scenario                   |  |



|                                            |                                                               |                                                               |                                                               |                                                               |                                                            |                                                            |                                                            |                                                            |
|--------------------------------------------|---------------------------------------------------------------|---------------------------------------------------------------|---------------------------------------------------------------|---------------------------------------------------------------|------------------------------------------------------------|------------------------------------------------------------|------------------------------------------------------------|------------------------------------------------------------|
|                                            | 20,453.56<br>(16,513.47 to<br>27,019.48)                      | 23,543.71<br>(18,081.94 to<br>32,074.27)                      | 20,642.70<br>(15,409.03 to<br>27,197.37)                      | 25,340.05<br>(19,542.07 to<br>34,425.01)                      | 798.65<br>(647.11 to<br>1,063.54)                          | 1,295.71<br>(1,049.07 to<br>1,720.57)                      | 1,182.83<br>(947.87 to<br>1,583.38)                        | 1,334.16<br>(1,082.47 to<br>1,796.80)                      |
| Digestive diseases                         | 5,387.64<br>(4,236.43 to<br>7,219.61)                         | 4,784.89<br>(3,609.74 to<br>6,397.62)                         | 3,823.15<br>(2,790.80 to<br>5,262.69)                         | 5,579.91<br>(4,205.75 to<br>7,416.00)                         | 269.21<br>(218.36 to<br>355.90)                            | 294.77<br>(232.12 to<br>386.46)                            | 244.09<br>(185.42 to<br>329.67)                            | 332.82<br>(255.31 to<br>442.82)                            |
| Peptic ulcer disease                       |                                                               |                                                               |                                                               |                                                               |                                                            |                                                            |                                                            |                                                            |
| <b>Dominican Republic</b>                  |                                                               |                                                               |                                                               |                                                               |                                                            |                                                            |                                                            |                                                            |
| Cause                                      | YLLs (actual counts)                                          |                                                               |                                                               |                                                               | Deaths (actual counts)                                     |                                                            |                                                            |                                                            |
|                                            | 2016                                                          | 2040 Forecast                                                 | 2040 Better Scenario                                          | 2040 Worse Scenario                                           | 2016                                                       | 2040 Forecast                                              | 2040 Better Scenario                                       | 2040 Worse Scenario                                        |
| Gastritis and duodenitis                   | 605.47<br>(464.89 to<br>827.44)                               | 1,187.59<br>(884.26 to<br>1,611.54)                           | 1,088.17<br>(792.56 to<br>1,502.07)                           | 1,206.00<br>(895.91 to<br>1,646.56)                           | 30.42<br>(23.71 to<br>40.55)                               | 73.83<br>(56.39 to<br>100.87)                              | 70.59<br>(53.27 to<br>97.16)                               | 71.94<br>(54.51 to<br>97.47)                               |
| Appendicitis                               | 1,684.49<br>(1,253.87 to<br>2,536.42)                         | 1,325.89<br>(967.40 to<br>2,037.60)                           | 1,040.11<br>(730.56 to<br>1,612.74)                           | 1,462.86<br>(1,051.39 to<br>2,282.05)                         | 36.69<br>(28.42 to<br>57.77)                               | 44.81<br>(33.84 to<br>74.37)                               | 38.05<br>(27.52 to<br>64.24)                               | 47.36<br>(35.70 to<br>77.80)                               |
| Paralytic ileus and intestinal obstruction | 6,612.67<br>(4,581.64 to<br>9,425.11)                         | 6,867.87<br>(5,086.21 to<br>9,672.16)                         | 6,133.03<br>(4,589.01 to<br>8,754.57)                         | 7,025.78<br>(5,151.41 to<br>9,997.41)                         | 191.53<br>(147.69 to<br>269.44)                            | 341.54<br>(265.86 to<br>495.00)                            | 340.62<br>(262.53 to<br>498.98)                            | 328.47<br>(254.97 to<br>479.97)                            |
| Inguinal, femoral, and abdominal hernia    | 641.14<br>(460.47 to<br>1,011.35)                             | 613.35<br>(442.74 to<br>1,012.44)                             | 537.46<br>(388.73 to<br>904.61)                               | 639.37<br>(462.92 to<br>1,067.63)                             | 23.94<br>(17.97 to<br>39.05)                               | 32.81<br>(24.13 to<br>55.48)                               | 30.95<br>(22.78 to<br>52.25)                               | 32.45<br>(23.63 to<br>54.92)                               |
| Inflammatory bowel disease                 | 503.56<br>(387.75 to<br>696.06)                               | 690.06<br>(531.39 to<br>908.44)                               | 677.50<br>(515.98 to<br>892.82)                               | 676.62<br>(518.48 to<br>894.42)                               | 18.18<br>(14.61 to<br>23.23)                               | 36.04<br>(28.69 to<br>45.41)                               | 37.43<br>(29.88 to<br>47.21)                               | 33.80<br>(27.00 to<br>42.46)                               |
| Vascular intestinal disorders              | 1,043.07<br>(840.59 to<br>1,312.89)                           | 1,883.66<br>(1,486.37 to<br>2,326.00)                         | 1,812.20<br>(1,392.71 to<br>2,297.79)                         | 1,867.80<br>(1,485.32 to<br>2,305.22)                         | 60.43<br>(48.90 to<br>74.51)                               | 131.62<br>(106.50 to<br>161.76)                            | 131.25<br>(103.64 to<br>161.90)                            | 126.13<br>(102.01 to<br>154.53)                            |
| Gallbladder and biliary diseases           | 715.65<br>(474.67 to<br>1,555.13)                             | 1,480.72<br>(733.44 to<br>3,416.30)                           | 1,090.62<br>(568.63 to<br>2,471.30)                           | 1,744.67<br>(825.05 to<br>4,161.22)                           | 38.10<br>(26.58 to<br>74.47)                               | 93.49<br>(50.09 to<br>197.80)                              | 73.41<br>(42.10 to<br>150.74)                              | 104.86<br>(54.08 to<br>229.05)                             |
| Pancreatitis                               | 1,600.77<br>(1,194.29 to<br>2,387.05)                         | 2,715.14<br>(1,539.01 to<br>4,705.49)                         | 2,082.05<br>(1,262.02 to<br>3,409.12)                         | 3,044.69<br>(1,683.45 to<br>5,430.50)                         | 58.27<br>(43.68 to<br>75.87)                               | 120.10<br>(70.96 to<br>193.13)                             | 97.61<br>(60.42 to<br>152.96)                              | 129.53<br>(74.81 to<br>215.08)                             |
| Other digestive diseases                   | 1,659.10<br>(1,280.81 to<br>2,405.31)                         | 1,994.53<br>(1,544.41 to<br>2,768.11)                         | 1,758.43<br>(1,346.10 to<br>2,421.73)                         | 2,092.35<br>(1,609.49 to<br>2,894.67)                         | 71.89<br>(55.76 to<br>97.60)                               | 126.69<br>(97.40 to<br>171.18)                             | 118.83<br>(91.23 to<br>161.17)                             | 126.81<br>(96.42 to<br>172.51)                             |
| <b>Neurological disorders</b>              | <b>29,989.84</b><br><b>(24,937.89 to</b><br><b>35,660.70)</b> | <b>69,900.35</b><br><b>(55,109.47 to</b><br><b>89,371.91)</b> | <b>69,475.51</b><br><b>(55,134.70 to</b><br><b>86,641.96)</b> | <b>69,073.40</b><br><b>(53,630.25 to</b><br><b>90,565.34)</b> | <b>2,599.49</b><br><b>(2,131.41 to</b><br><b>3,118.87)</b> | <b>6,672.76</b><br><b>(5,215.10 to</b><br><b>8,598.81)</b> | <b>6,970.40</b><br><b>(5,603.35 to</b><br><b>8,690.42)</b> | <b>6,322.07</b><br><b>(4,802.10 to</b><br><b>8,474.60)</b> |
| Alzheimer's disease and other dementias    | 20,784.87<br>(16,582.82 to<br>25,837.06)                      | 53,341.36<br>(39,548.15 to<br>72,573.48)                      | 53,299.38<br>(40,761.79 to<br>69,759.11)                      | 52,648.15<br>(38,802.87 to<br>74,184.96)                      | 2,233.28<br>(1,796.10 to<br>2,742.78)                      | 5,748.08<br>(4,266.59 to<br>7,640.27)                      | 5,963.96<br>(4,655.28 to<br>7,605.39)                      | 5,475.72<br>(3,961.09 to<br>7,602.86)                      |
| Parkinson's disease                        | 2,357.48<br>(1,753.86 to<br>3,057.74)                         | 7,086.10<br>(5,302.13 to<br>9,243.16)                         | 8,168.65<br>(6,114.67 to<br>10,664.84)                        | 6,200.39<br>(4,615.49 to<br>7,989.21)                         | 201.51<br>(148.80 to<br>263.72)                            | 617.50<br>(468.54 to<br>807.68)                            | 728.38<br>(555.01 to<br>950.31)                            | 527.70<br>(399.80 to<br>688.16)                            |
| Epilepsy                                   | 4,563.05<br>(3,754.58 to<br>5,577.39)                         | 5,721.54<br>(3,894.83 to<br>8,226.15)                         | 4,185.41<br>(2,890.46 to<br>6,062.19)                         | 6,627.56<br>(4,455.74 to<br>9,682.04)                         | 101.36<br>(83.97 to<br>123.01)                             | 173.78<br>(121.69 to<br>242.61)                            | 135.79<br>(97.97 to<br>189.61)                             | 194.21<br>(133.93 to<br>276.87)                            |
| Multiple sclerosis                         | 351.06<br>(274.64 to<br>455.58)                               | 497.21<br>(361.13 to<br>667.05)                               | 512.65<br>(369.75 to<br>690.58)                               | 492.62<br>(359.94 to<br>654.54)                               | 10.80<br>(8.52 to<br>13.31)                                | 17.73<br>(12.65 to<br>22.70)                               | 18.58<br>(13.23 to<br>23.97)                               | 17.31<br>(12.61 to<br>22.03)                               |
| Motor neuron disease                       | 464.69<br>(365.44 to<br>564.69)                               | 1,013.34<br>(761.15 to<br>1,283.58)                           | 1,071.62<br>(795.55 to<br>1,386.91)                           | 953.36<br>(719.31 to<br>1,190.48)                             | 16.41<br>(12.88 to<br>19.68)                               | 41.39<br>(31.94 to<br>50.98)                               | 44.59<br>(33.87 to<br>56.31)                               | 38.30<br>(29.46 to<br>46.92)                               |
| Other neurological disorders               | 1,468.69<br>(1,226.65 to<br>1,710.37)                         | 2,240.80<br>(1,798.38 to<br>2,717.58)                         | 2,237.81<br>(1,799.71 to<br>2,748.91)                         | 2,151.33<br>(1,737.18 to<br>2,608.99)                         | 36.12<br>(30.04 to<br>41.93)                               | 74.29<br>(61.51 to<br>87.65)                               | 79.10<br>(64.98 to<br>93.75)                               | 68.83<br>(57.74 to<br>80.31)                               |
| <b>Mental disorders</b>                    | <b>6,061.73</b><br><b>(4,240.06 to</b><br><b>11,054.31)</b>   | <b>10,384.48</b><br><b>(7,253.80 to</b><br><b>18,868.97)</b>  | <b>10,003.43</b><br><b>(6,917.97 to</b><br><b>17,901.06)</b>  | <b>10,514.53</b><br><b>(7,298.21 to</b><br><b>19,185.03)</b>  | <b>182.12</b><br><b>(131.36 to</b><br><b>314.50)</b>       | <b>380.30</b><br><b>(281.93 to</b><br><b>639.54)</b>       | <b>379.76</b><br><b>(281.68 to</b><br><b>629.87)</b>       | <b>373.30</b><br><b>(276.09 to</b><br><b>636.77)</b>       |
| Alcohol use disorders                      | 4,233.56<br>(2,900.54 to<br>7,872.95)                         | 6,115.83<br>(4,085.46 to<br>12,207.31)                        | 5,677.69<br>(3,754.66 to<br>11,371.39)                        | 6,321.94<br>(4,225.68 to<br>12,712.64)                        | 129.75<br>(91.14 to<br>237.76)                             | 227.73<br>(161.11 to<br>430.07)                            | 219.09<br>(153.44 to<br>412.33)                            | 228.49<br>(161.47 to<br>433.81)                            |



|                                                            |                                                  |                                                    |                                                   |                                                    |                                              |                                               |                                               |                                                |
|------------------------------------------------------------|--------------------------------------------------|----------------------------------------------------|---------------------------------------------------|----------------------------------------------------|----------------------------------------------|-----------------------------------------------|-----------------------------------------------|------------------------------------------------|
| Drug use disorders                                         | 1,802.59<br>(1,195.26 to<br>3,760.87)            | 4,226.33<br>(2,847.31 to<br>7,920.68)              | 4,284.81<br>(2,885.41 to<br>7,930.50)             | 4,150.76<br>(2,787.14 to<br>7,943.26)              | 51.92<br>(36.90 to<br>96.23)                 | 151.81<br>(111.77 to<br>247.67)               | 159.92<br>(117.84 to<br>255.89)               | 144.07<br>(105.54 to<br>240.51)                |
| Opioid use disorders                                       | 1,449.47<br>(916.07 to<br>3,301.06)              | 3,163.01<br>(1,976.52 to<br>6,564.48)              | 3,177.93<br>(1,989.28 to<br>6,463.63)             | 3,110.09<br>(1,939.26 to<br>6,608.12)              | 39.53<br>(26.36 to<br>81.64)                 | 104.95<br>(71.44 to<br>197.12)                | 109.06<br>(73.95 to<br>202.86)                | 99.96<br>(67.18 to<br>192.93)                  |
| Cocaine use disorders                                      | 33.87<br>(20.94 to<br>69.56)                     | 115.14<br>(72.18 to<br>231.11)                     | 113.49<br>(70.53 to<br>224.73)                    | 116.89<br>(72.56 to<br>237.10)                     | 0.92<br>(0.60 to<br>1.74)                    | 3.82<br>(2.38 to<br>6.62)                     | 3.83<br>(2.36 to<br>6.61)                     | 3.81<br>(2.39 to<br>6.76)                      |
| Amphetamine use disorders                                  | 21.52<br>(10.94 to<br>32.03)                     | 86.04<br>(43.04 to<br>130.77)                      | 86.53<br>(43.01 to<br>134.24)                     | 87.33<br>(43.44 to<br>134.32)                      | 0.56<br>(0.28 to<br>0.80)                    | 2.62<br>(1.33 to<br>3.81)                     | 2.68<br>(1.36 to<br>4.05)                     | 2.62<br>(1.32 to<br>3.88)                      |
| Other drug use disorders                                   | 297.73<br>(214.68 to<br>432.61)                  | 862.14<br>(621.38 to<br>1,184.32)                  | 906.86<br>(650.21 to<br>1,257.92)                 | 836.44<br>(605.76 to<br>1,158.91)                  | 10.91<br>(8.17 to<br>14.43)                  | 40.43<br>(30.64 to<br>51.80)                  | 44.35<br>(33.12 to<br>58.79)                  | 37.67<br>(28.53 to<br>48.02)                   |
| Eating disorders                                           | 25.58<br>(17.57 to<br>47.80)                     | 42.33<br>(25.39 to<br>75.99)                       | 40.93<br>(24.46 to<br>73.38)                      | 41.84<br>(25.08 to<br>75.09)                       | 0.45<br>(0.31 to<br>0.87)                    | 0.75<br>(0.46 to<br>1.36)                     | 0.74<br>(0.44 to<br>1.36)                     | 0.74<br>(0.46 to<br>1.34)                      |
| <b>Dominican Republic</b>                                  |                                                  |                                                    |                                                   |                                                    |                                              |                                               |                                               |                                                |
| Cause                                                      | YLLs (actual counts)                             |                                                    |                                                   |                                                    | Deaths (actual counts)                       |                                               |                                               |                                                |
|                                                            | 2016                                             | 2040 Forecast                                      | 2040 Better Scenario                              | 2040 Worse Scenario                                | 2016                                         | 2040 Forecast                                 | 2040 Better Scenario                          | 2040 Worse Scenario                            |
| <b>Diabetes, urogenital, blood, and endocrine diseases</b> | <b>90,990.24</b><br>(76,598.79 to<br>105,270.50) | <b>158,022.48</b><br>(112,372.51 to<br>242,761.84) | <b>121,323.03</b><br>(85,535.89 to<br>186,742.15) | <b>189,921.71</b><br>(131,552.58 to<br>290,653.27) | <b>4,210.20</b><br>(3,550.26 to<br>4,786.63) | <b>9,694.27</b><br>(7,088.62 to<br>14,778.56) | <b>7,729.53</b><br>(5,568.92 to<br>11,895.45) | <b>11,270.46</b><br>(8,159.12 to<br>18,067.83) |
| Diabetes mellitus                                          | 39,044.51<br>(32,302.80 to<br>45,936.10)         | 75,222.19<br>(51,272.40 to<br>104,957.14)          | 57,644.47<br>(38,670.17 to<br>81,547.75)          | 89,902.88<br>(59,869.69 to<br>129,027.48)          | 2,045.48<br>(1,706.33 to<br>2,367.33)        | 4,828.20<br>(3,455.62 to<br>6,500.66)         | 3,861.61<br>(2,732.33 to<br>5,230.04)         | 5,528.19<br>(3,962.86 to<br>7,504.19)          |
| Acute glomerulonephritis                                   | 63.15<br>(54.50 to<br>71.97)                     | 69.50<br>(52.12 to<br>89.23)                       | 55.86<br>(41.54 to<br>72.17)                      | 75.08<br>(57.48 to<br>96.54)                       | 1.14<br>(0.98 to<br>1.29)                    | 1.53<br>(1.19 to<br>1.94)                     | 1.32<br>(1.00 to<br>1.70)                     | 1.60<br>(1.25 to<br>2.00)                      |
| Chronic kidney disease                                     | 28,353.12<br>(30,669.70 to<br>44,928.77)         | 65,395.51<br>(35,849.72 to<br>152,008.85)          | 48,417.15<br>(27,622.74 to<br>108,621.47)         | 81,972.76<br>(43,515.82 to<br>182,971.49)          | 1,790.46<br>(1,441.28 to<br>2,064.61)        | 4,081.52<br>(2,251.52 to<br>9,773.04)         | 3,114.89<br>(1,811.53 to<br>7,431.22)         | 4,972.31<br>(2,645.33 to<br>12,197.66)         |
| Chronic kidney disease due to diabetes mellitus            | 12,488.34<br>(9,299.63 to<br>15,606.14)          | 24,721.47<br>(12,458.03 to<br>57,742.43)           | 18,423.43<br>(9,582.06 to<br>41,747.85)           | 31,197.39<br>(15,545.43 to<br>74,353.84)           | 596.98<br>(456.01 to<br>735.85)              | 1,444.40<br>(751.36 to<br>3,584.55)           | 1,100.49<br>(576.82 to<br>2,747.27)           | 1,777.08<br>(883.02 to<br>4,524.34)            |
| Chronic kidney disease due to hypertension                 | 4,638.39<br>(3,542.60 to<br>5,731.69)            | 10,619.50<br>(5,613.78 to<br>24,096.60)            | 8,076.07<br>(4,401.14 to<br>18,733.37)            | 13,059.85<br>(6,631.43 to<br>30,663.08)            | 344.48<br>(269.42 to<br>425.78)              | 918.69<br>(503.86 to<br>2,042.80)             | 724.18<br>(417.10 to<br>1,585.86)             | 1,087.64<br>(569.90 to<br>2,498.67)            |
| Chronic kidney disease due to glomerulonephritis           | 11,950.37<br>(9,424.57 to<br>14,565.76)          | 16,345.86<br>(8,975.99 to<br>33,139.46)            | 11,878.38<br>(6,764.28 to<br>23,963.53)           | 20,533.13<br>(11,018.79 to<br>42,178.32)           | 459.94<br>(354.74 to<br>560.84)              | 893.30<br>(472.15 to<br>1,931.93)             | 665.70<br>(374.03 to<br>1,413.45)             | 1,099.93<br>(562.96 to<br>2,452.39)            |
| Chronic kidney disease due to other and unspecified causes | 9,276.02<br>(7,283.33 to<br>11,312.24)           | 13,708.68<br>(7,790.52 to<br>29,620.60)            | 10,039.27<br>(5,846.93 to<br>21,396.18)           | 17,182.38<br>(9,363.10 to<br>36,594.86)            | 389.06<br>(302.17 to<br>480.21)              | 825.13<br>(461.62 to<br>1,946.36)             | 624.51<br>(352.87 to<br>1,382.77)             | 1,007.66<br>(536.39 to<br>2,333.32)            |
| Urinary diseases and male infertility                      | 2,461.57<br>(2,069.32 to<br>2,920.07)            | 4,283.40<br>(3,529.12 to<br>5,151.15)              | 4,018.49<br>(3,179.72 to<br>4,935.11)             | 4,221.45<br>(3,496.16 to<br>5,039.55)              | 97.45<br>(83.28 to<br>111.20)                | 269.65<br>(227.27 to<br>313.52)               | 274.70<br>(223.05 to<br>328.50)               | 251.13<br>(211.63 to<br>292.67)                |
| Urinary tract infections                                   | 2,014.78<br>(1,633.12 to<br>2,492.64)            | 3,630.41<br>(2,903.81 to<br>4,457.80)              | 3,435.54<br>(2,642.76 to<br>4,287.46)             | 3,557.30<br>(2,843.20 to<br>4,358.11)              | 74.77<br>(59.68 to<br>92.35)                 | 225.29<br>(180.25 to<br>275.31)               | 272.92<br>(183.35 to<br>287.35)               | 208.03<br>(165.62 to<br>255.03)                |
| Urolithiasis                                               | 98.62<br>(77.73 to<br>121.32)                    | 191.87<br>(119.25 to<br>266.66)                    | 178.33<br>(106.32 to<br>260.78)                   | 189.66<br>(120.27 to<br>260.70)                    | 3.12<br>(1.99 to<br>4.18)                    | 8.36<br>(4.29 to<br>13.03)                    | 8.26<br>(4.06 to<br>13.12)                    | 7.96<br>(4.17 to<br>12.08)                     |
| Other urinary diseases                                     | 348.17<br>(230.21 to<br>447.00)                  | 461.11<br>(222.84 to<br>677.18)                    | 404.82<br>(181.59 to<br>623.62)                   | 474.49<br>(239.68 to<br>695.63)                    | 19.56<br>(10.11 to<br>28.12)                 | 36.00<br>(15.45 to<br>57.46)                  | 33.52<br>(13.68 to<br>55.00)                  | 35.13<br>(15.55 to<br>55.96)                   |
| Gynecological diseases                                     | 78.10<br>(55.99 to<br>137.62)                    | 130.37<br>(81.81 to<br>224.55)                     | 107.79<br>(60.91 to<br>182.30)                    | 142.02<br>(88.22 to<br>230.33)                     | 2.82<br>(2.01 to<br>4.13)                    | 6.33<br>(4.14 to<br>9.85)                     | 5.52<br>(3.39 to<br>8.75)                     | 6.57<br>(4.34 to<br>10.79)                     |
| Uterine fibroids                                           | 3.24<br>(1.21 to<br>24.38)                       | 11.40<br>(4.03 to<br>57.31)                        | 9.40<br>(3.23 to<br>51.71)                        | 12.55<br>(4.41 to<br>64.09)                        | 0.15<br>(0.06 to<br>1.00)                    | 0.78<br>(0.27 to<br>3.46)                     | 0.68<br>(0.23 to<br>3.02)                     | 0.82<br>(0.30 to<br>3.71)                      |

|                                                   |                                           |                                          |                                          |                                          |                                   |                                   |                                 |                                   |
|---------------------------------------------------|-------------------------------------------|------------------------------------------|------------------------------------------|------------------------------------------|-----------------------------------|-----------------------------------|---------------------------------|-----------------------------------|
|                                                   | 6.60<br>(2.37 to<br>22.00)                | 5.86<br>(1.73 to<br>19.32)               | 4.10<br>(1.11 to<br>14.98)               | 7.15<br>(2.11 to<br>24.76)               | 0.14<br>(0.05 to<br>0.49)         | 0.12<br>(0.04 to<br>0.44)         | 0.09<br>(0.02 to<br>0.33)       | 0.15<br>(0.05 to<br>0.54)         |
| Polycystic ovarian syndrome                       | 0.34<br>(0.18 to<br>0.55)                 | 0.54<br>(0.21 to<br>1.15)                | 0.42<br>(0.15 to<br>0.90)                | 0.62<br>(0.24 to<br>1.32)                | 0.01<br>(0.00 to<br>0.01)         | 0.01<br>(0.00 to<br>0.02)         | 0.01<br>(0.00 to<br>0.02)       | 0.01<br>(0.00 to<br>0.03)         |
| Endometriosis                                     | 0.78<br>(0.46 to<br>1.25)                 | 1.56<br>(0.65 to<br>3.27)                | 1.20<br>(0.48 to<br>2.54)                | 1.78<br>(0.75 to<br>3.73)                | 0.03<br>(0.02 to<br>0.05)         | 0.08<br>(0.03 to<br>0.17)         | 0.06<br>(0.02 to<br>0.13)       | 0.09<br>(0.03 to<br>0.19)         |
| Genital prolapse                                  | 67.15<br>(48.90 to<br>91.78)              | 111.02<br>(70.15 to<br>175.97)           | 92.67<br>(52.92 to<br>150.32)            | 119.93<br>(75.90 to<br>193.01)           | 2.50<br>(1.81 to<br>3.26)         | 5.33<br>(3.50 to<br>8.08)         | 4.68<br>(2.88 to<br>7.18)       | 5.50<br>(3.67 to<br>8.24)         |
| Other gynecological diseases                      | 6,278.15<br>(5,019.91 to<br>8,249.54)     | 6,852.01<br>(5,313.41 to<br>9,078.29)    | 5,721.55<br>(4,274.77 to<br>7,699.30)    | 7,279.67<br>(5,603.08 to<br>9,776.36)    | 148.14<br>(121.99 to<br>189.20)   | 254.22<br>(203.77 to<br>320.86)   | 225.30<br>(170.74 to<br>291.50) | 261.61<br>(210.44 to<br>333.14)   |
| Hemoglobinopathies and hemolytic anemias          | 517.40<br>(322.61 to<br>856.10)           | 204.02<br>(108.74 to<br>369.89)          | 165.57<br>(89.88 to<br>295.49)           | 197.55<br>(105.30 to<br>368.89)          | 6.18<br>(3.87 to<br>10.16)        | 2.46<br>(1.31 to<br>4.42)         | 1.99<br>(1.10 to<br>3.55)       | 2.38<br>(1.26 to<br>4.42)         |
| Thalassemias                                      | 4,632.60<br>(3,668.79 to<br>6,144.33)     | 4,656.54<br>(3,458.50 to<br>6,457.13)    | 3,834.71<br>(2,795.08 to<br>5,352.02)    | 4,992.40<br>(3,677.23 to<br>6,920.75)    | 76.82<br>(61.19 to<br>102.33)     | 106.31<br>(78.29 to<br>148.15)    | 90.99<br>(64.81 to<br>127.95)   | 112.62<br>(82.64 to<br>155.89)    |
| Sickle cell disorders                             | 509.59<br>(371.52 to<br>716.22)           | 880.67<br>(619.40 to<br>1,232.94)        | 723.41<br>(488.20 to<br>1,030.49)        | 953.14<br>(672.45 to<br>1,338.22)        | 13.09<br>(9.71 to<br>18.00)       | 37.04<br>(25.40 to<br>50.57)      | 31.69<br>(21.28 to<br>44.32)    | 39.08<br>(27.17 to<br>53.27)      |
| G6PD deficiency                                   | 618.56<br>(487.25 to<br>772.61)           | 1,110.77<br>(846.93 to<br>1,451.13)      | 998.06<br>(729.87 to<br>1,309.43)        | 1,136.58<br>(878.90 to<br>1,475.18)      | 52.05<br>(40.02 to<br>64.04)      | 108.41<br>(82.34 to<br>134.92)    | 100.62<br>(74.99 to<br>128.37)  | 107.54<br>(81.65 to<br>135.11)    |
| Other hemoglobinopathies and hemolytic anemias    | 4,711.64<br>(3,089.30 to<br>10,601.62)    | 6,069.51<br>(3,846.97 to<br>13,081.42)   | 5,357.72<br>(3,399.21 to<br>11,592.39)   | 6,327.85<br>(3,976.76 to<br>13,853.53)   | 124.70<br>(83.81 to<br>277.34)    | 252.83<br>(163.72 to<br>562.86)   | 246.21<br>(157.85 to<br>525.12) | 249.06<br>(162.13 to<br>552.89)   |
| Endocrine, metabolic, blood, and immune disorders | <b>Dominican Republic</b>                 |                                          |                                          |                                          |                                   |                                   |                                 |                                   |
| Cause                                             | YLLs (actual counts)                      |                                          |                                          |                                          | Deaths (actual counts)            |                                   |                                 |                                   |
|                                                   | 2016                                      | 2040 Forecast                            | 2040 Better Scenario                     | 2040 Worse Scenario                      | 2016                              | 2040 Forecast                     | 2040 Better Scenario            | 2040 Worse Scenario               |
| Musculoskeletal disorders                         | 2,575.68<br>(1,420.37 to<br>3,261.04)     | 4,233.90<br>(1,976.40 to<br>5,696.20)    | 4,297.04<br>(1,990.57 to<br>5,871.16)    | 4,057.93<br>(1,926.11 to<br>5,345.35)    | 78.86<br>(36.38 to<br>101.04)     | 194.51<br>(73.43 to<br>260.58)    | 203.58<br>(75.60 to<br>279.86)  | 181.81<br>(70.03 to<br>239.45)    |
| Rheumatoid arthritis                              | 235.81<br>(128.28 to<br>428.61)           | 623.65<br>(311.45 to<br>1,234.11)        | 551.45<br>(271.59 to<br>1,131.39)        | 654.50<br>(325.00 to<br>1,239.84)        | 14.55<br>(7.11 to<br>28.92)       | 48.66<br>(22.70 to<br>99.36)      | 44.77<br>(20.54 to<br>97.10)    | 49.26<br>(22.63 to<br>98.17)      |
| Other musculoskeletal disorders                   | 2,339.88<br>(1,283.55 to<br>2,978.81)     | 3,610.25<br>(1,613.82 to<br>4,905.16)    | 3,745.59<br>(1,655.37 to<br>5,161.05)    | 3,403.42<br>(1,547.05 to<br>4,569.56)    | 64.31<br>(29.25 to<br>84.10)      | 145.85<br>(47.78 to<br>203.95)    | 158.81<br>(51.92 to<br>223.75)  | 132.55<br>(44.24 to<br>183.70)    |
| Other non-communicable diseases                   | 74,331.24<br>(48,155.62 to<br>104,036.07) | 49,382.06<br>(30,828.29 to<br>76,479.18) | 32,376.32<br>(20,279.04 to<br>47,194.99) | 55,416.45<br>(33,752.36 to<br>85,744.57) | 926.10<br>(618.03 to<br>1,274.51) | 806.47<br>(565.13 to<br>1,110.40) | 610.49<br>(439.88 to<br>819.91) | 864.54<br>(600.85 to<br>1,210.18) |
| Congenital birth defects                          | 72,164.26<br>(46,687.36 to<br>101,326.66) | 44,994.68<br>(26,839.06 to<br>70,371.71) | 28,470.66<br>(17,022.90 to<br>43,051.70) | 50,975.90<br>(29,775.33 to<br>80,349.37) | 866.92<br>(561.61 to<br>1,207.46) | 564.70<br>(344.38 to<br>868.09)   | 366.87<br>(224.33 to<br>545.77) | 656.51<br>(382.98 to<br>983.91)   |
| Neural tube defects                               | 2,743.06<br>(1,576.65 to<br>4,625.68)     | 793.72<br>(366.94 to<br>1,515.27)        | 429.06<br>(193.29 to<br>811.98)          | 982.09<br>(451.26 to<br>1,876.55)        | 32.08<br>(18.55 to<br>53.81)      | 9.44<br>(4.51 to<br>17.77)        | 5.16<br>(2.43 to<br>9.65)       | 11.66<br>(5.49 to<br>21.92)       |
| Congenital heart anomalies                        | 33,806.27<br>(20,760.55 to<br>48,756.60)  | 20,512.88<br>(12,015.24 to<br>32,150.44) | 13,017.77<br>(7,532.47 to<br>19,971.07)  | 23,147.99<br>(13,457.80 to<br>36,616.74) | 409.06<br>(255.75 to<br>582.18)   | 260.23<br>(159.00 to<br>398.81)   | 169.61<br>(101.56 to<br>253.97) | 292.07<br>(175.32 to<br>448.30)   |
| Orofacial clefts                                  | 31.85<br>(15.76 to<br>59.63)              | 16.33<br>(6.31 to<br>37.71)              | 8.47<br>(3.20 to<br>19.43)               | 20.52<br>(7.75 to<br>47.84)              | 0.37<br>(0.18 to<br>0.69)         | 0.19<br>(0.07 to<br>0.44)         | 0.10<br>(0.04 to<br>0.23)       | 0.24<br>(0.09 to<br>0.55)         |
| Down syndrome                                     | 4,187.50<br>(2,076.67 to<br>6,361.60)     | 2,971.74<br>(1,435.41 to<br>4,794.50)    | 2,102.93<br>(1,073.04 to<br>3,281.45)    | 3,375.87<br>(1,670.60 to<br>5,220.84)    | 54.35<br>(28.33 to<br>80.57)      | 44.09<br>(24.67 to<br>66.83)      | 32.89<br>(19.35 to<br>47.36)    | 49.52<br>(27.48 to<br>75.15)      |
| Other chromosomal abnormalities                   | 861.82<br>(484.12 to<br>1,448.83)         | 984.73<br>(482.45 to<br>1,949.58)        | 614.38<br>(310.69 to<br>1,192.99)        | 1,136.79<br>(557.29 to<br>2,294.90)      | 10.15<br>(5.75 to<br>16.93)       | 11.75<br>(5.91 to<br>22.90)       | 7.41<br>(3.85 to<br>14.08)      | 13.54<br>(6.77 to<br>26.98)       |



|                                                 |                                           |                                           |                                           |                                           |                                       |                                       |                                       |                                       |
|-------------------------------------------------|-------------------------------------------|-------------------------------------------|-------------------------------------------|-------------------------------------------|---------------------------------------|---------------------------------------|---------------------------------------|---------------------------------------|
|                                                 | 3,660.00<br>(2,944.00 to<br>4,679.22)     | 5,073.78<br>(4,119.48 to<br>6,230.07)     | 4,802.46<br>(3,870.66 to<br>6,017.79)     | 5,042.25<br>(4,082.74 to<br>6,183.39)     | 147.68<br>(120.66 to<br>177.00)       | 299.43<br>(249.25 to<br>358.23)       | 298.69<br>(248.08 to<br>362.22)       | 285.01<br>(238.56 to<br>341.12)       |
| Falls                                           | 10,295.26<br>(8,190.12 to<br>15,326.20)   | 7,144.85<br>(5,008.86 to<br>10,600.58)    | 5,622.47<br>(3,807.44 to<br>8,553.24)     | 7,775.49<br>(5,360.29 to<br>11,428.42)    | 185.43<br>(149.95 to<br>263.28)       | 175.07<br>(130.75 to<br>237.85)       | 148.19<br>(107.38 to<br>200.68)       | 184.52<br>(133.80 to<br>255.04)       |
| Drowning                                        | 5,009.13<br>(3,904.20 to<br>6,150.48)     | 3,160.29<br>(2,309.29 to<br>4,380.43)     | 2,423.54<br>(1,717.85 to<br>3,398.20)     | 3,484.62<br>(2,471.95 to<br>4,856.67)     | 112.97<br>(93.56 to<br>139.85)        | 118.83<br>(89.63 to<br>167.88)        | 102.12<br>(74.93 to<br>145.99)        | 123.49<br>(92.40 to<br>173.54)        |
| Fire, heat, and hot substances                  | 1,462.44<br>(908.71 to<br>2,633.01)       | 735.25<br>(400.32 to<br>1,507.55)         | 506.96<br>(275.65 to<br>1,106.01)         | 858.16<br>(465.10 to<br>1,766.11)         | 25.61<br>(17.11 to<br>47.81)          | 18.57<br>(11.53 to<br>36.66)          | 14.19<br>(8.60 to<br>28.40)           | 20.80<br>(12.78 to<br>41.54)          |
| Poisonings                                      | 9,223.59<br>(6,824.63 to<br>11,506.44)    | 5,868.91<br>(4,024.76 to<br>7,739.18)     | 4,688.24<br>(3,125.55 to<br>6,281.76)     | 6,458.42<br>(4,374.50 to<br>8,652.52)     | 180.48<br>(133.92 to<br>222.72)       | 154.17<br>(110.50 to<br>194.19)       | 132.18<br>(93.33 to<br>168.96)        | 163.62<br>(115.56 to<br>208.41)       |
| Exposure to mechanical forces                   | 5,489.34<br>(3,118.26 to<br>7,522.26)     | 3,186.06<br>(1,583.54 to<br>4,666.08)     | 2,595.77<br>(1,266.27 to<br>3,899.80)     | 3,521.46<br>(1,785.84 to<br>5,232.14)     | 112.27<br>(64.07 to<br>150.54)        | 83.71<br>(45.46 to<br>115.72)         | 71.87<br>(38.82 to<br>100.28)         | 89.71<br>(47.86 to<br>123.77)         |
| Unintentional firearm injuries                  | 1,698.64<br>(1,088.53 to<br>2,582.19)     | 863.94<br>(530.75 to<br>1,351.35)         | 596.10<br>(372.56 to<br>887.25)           | 975.46<br>(586.78 to<br>1,530.04)         | 22.53<br>(15.06 to<br>33.20)          | 12.76<br>(8.21 to<br>18.54)           | 9.26<br>(6.17 to<br>13.07)            | 14.22<br>(9.06 to<br>21.18)           |
| Unintentional suffocation                       | 2,035.61<br>(1,557.02 to<br>3,232.64)     | 1,818.92<br>(1,364.54 to<br>2,551.29)     | 1,496.36<br>(1,083.95 to<br>2,086.27)     | 1,961.50<br>(1,450.24 to<br>2,693.58)     | 45.68<br>(36.17 to<br>66.29)          | 57.70<br>(46.16 to<br>72.51)          | 51.05<br>(40.06 to<br>65.26)          | 59.69<br>(47.51 to<br>75.19)          |
| Other exposure to mechanical forces             | 10,600.25<br>(8,236.88 to<br>12,743.30)   | 9,239.68<br>(6,913.66 to<br>11,468.24)    | 8,010.79<br>(5,861.94 to<br>10,130.79)    | 9,708.04<br>(7,155.71 to<br>12,176.71)    | 319.19<br>(247.81 to<br>377.71)       | 414.98<br>(313.46 to<br>501.88)       | 389.35<br>(291.41 to<br>476.92)       | 415.16<br>(306.54 to<br>504.30)       |
| Adverse effects of medical treatment            | 1,085.43<br>(848.29 to<br>1,459.63)       | 1,254.50<br>(937.76 to<br>1,705.40)       | 1,006.23<br>(751.25 to<br>1,356.24)       | 1,389.11<br>(998.09 to<br>1,887.47)       | 29.93<br>(23.20 to<br>37.38)          | 52.08<br>(37.16 to<br>65.83)          | 45.80<br>(32.32 to<br>58.50)          | 54.60<br>(37.91 to<br>69.03)          |
| Animal contact                                  | 779.62<br>(606.02 to<br>1,104.15)         | 876.67<br>(650.90 to<br>1,256.79)         | 701.91<br>(514.44 to<br>978.91)           | 975.64<br>(703.64 to<br>1,372.54)         | 22.02<br>(16.62 to<br>28.06)          | 36.14<br>(25.05 to<br>46.72)          | 31.44<br>(21.54 to<br>40.93)          | 38.20<br>(25.91 to<br>49.75)          |
| Venomous animal contact                         | 305.81<br>(208.13 to<br>486.88)           | 377.83<br>(246.99 to<br>590.14)           | 304.32<br>(198.68 to<br>465.79)           | 413.47<br>(269.72 to<br>636.69)           | 7.91<br>(5.10 to<br>12.09)            | 13.94<br>(9.70 to<br>23.44)           | 14.36<br>(8.55 to<br>21.55)           | 16.39<br>(9.84 to<br>24.44)           |
| Non-venomous animal contact                     | 10,783.42<br>(6,117.62 to<br>16,244.54)   | 7,673.40<br>(5,041.98 to<br>11,118.72)    | 6,374.93<br>(4,540.08 to<br>8,707.31)     | 7,925.13<br>(4,926.96 to<br>11,902.75)    | 195.77<br>(131.32 to<br>259.90)       | 219.75<br>(167.82 to<br>268.62)       | 211.32<br>(163.90 to<br>252.16)       | 213.46<br>(159.63 to<br>265.80)       |
| Foreign body                                    | 9,428.05<br>(4,788.30 to<br>14,711.56)    | 6,340.33<br>(3,836.21 to<br>9,750.53)     | 5,180.30<br>(3,393.41 to<br>7,423.79)     | 6,537.04<br>(3,745.20 to<br>10,308.11)    | 157.68<br>(98.76 to<br>220.76)        | 163.05<br>(118.87 to<br>208.81)       | 156.08<br>(118.40 to<br>189.04)       | 157.44<br>(111.01 to<br>206.34)       |
| Pulmonary aspiration and foreign body in airway | 1,355.37<br>(1,031.28 to<br>1,983.85)     | 1,333.06<br>(991.24 to<br>1,925.70)       | 1,194.64<br>(875.63 to<br>1,744.17)       | 1,388.08<br>(1,016.61 to<br>1,996.04)     | 38.09<br>(29.32 to<br>50.89)          | 56.69<br>(39.92 to<br>73.92)          | 55.24<br>(37.90 to<br>72.71)          | 56.02<br>(39.73 to<br>73.03)          |
| Foreign body in other body part                 | 1,557.78<br>(1,174.98 to<br>2,275.20)     | 1,464.23<br>(1,015.47 to<br>2,078.27)     | 1,124.36<br>(749.15 to<br>1,584.91)       | 1,663.36<br>(1,135.02 to<br>2,356.88)     | 42.72<br>(30.95 to<br>55.73)          | 54.96<br>(36.13 to<br>72.52)          | 45.12<br>(29.93 to<br>60.40)          | 59.73<br>(40.17 to<br>80.35)          |
| Environmental heat and cold exposure            | 10,136.18<br>(6,432.97 to<br>12,599.41)   | 6,260.21<br>(3,841.31 to<br>8,278.06)     | 4,997.75<br>(2,922.84 to<br>7,080.25)     | 6,725.48<br>(4,120.38 to<br>8,900.51)     | 188.89<br>(119.73 to<br>230.92)       | 145.80<br>(95.48 to<br>186.83)        | 122.05<br>(75.51 to<br>165.02)        | 153.12<br>(95.47 to<br>195.54)        |
| Other unintentional injuries                    | 98,533.27<br>(71,630.97 to<br>123,745.90) | 91,412.10<br>(62,889.75 to<br>123,487.04) | 81,248.77<br>(56,187.76 to<br>108,646.64) | 94,366.46<br>(62,042.61 to<br>130,899.24) | 1,990.22<br>(1,430.98 to<br>2,492.88) | 2,172.79<br>(1,483.52 to<br>2,894.76) | 1,972.84<br>(1,385.49 to<br>2,595.11) | 2,217.12<br>(1,447.00 to<br>3,022.31) |
| Self-harm and interpersonal violence            | <b>Dominican Republic</b>                 |                                           |                                           |                                           |                                       |                                       |                                       |                                       |
| Cause                                           | YLLs (actual counts)                      |                                           |                                           |                                           | Deaths (actual counts)                |                                       |                                       |                                       |
|                                                 | 2016                                      | 2040 Forecast                             | 2040 Better Scenario                      | 2040 Worse Scenario                       | 2016                                  | 2040 Forecast                         | 2040 Better Scenario                  | 2040 Worse Scenario                   |
| Self-harm                                       | 23,459.65<br>(18,174.32 to<br>29,841.94)  | 30,790.41<br>(18,945.26 to<br>48,503.38)  | 25,775.81<br>(16,342.95 to<br>39,056.88)  | 33,159.42<br>(19,552.73 to<br>54,028.65)  | 570.33<br>(435.28 to<br>719.35)       | 883.30<br>(564.46 to<br>1,338.86)     | 769.42<br>(505.02 to<br>1,110.24)     | 926.69<br>(564.21 to<br>1,465.83)     |
| Self-harm by firearm                            | 3,758.33<br>(2,556.19 to<br>5,250.74)     | 3,808.43<br>(1,907.94 to<br>6,711.44)     | 3,084.75<br>(1,616.94 to<br>5,443.95)     | 4,174.95<br>(1,989.22 to<br>7,587.09)     | 89.46<br>(58.14 to<br>120.02)         | 108.84<br>(55.70 to<br>182.51)        | 92.14<br>(50.41 to<br>150.24)         | 115.84<br>(57.12 to<br>200.34)        |

|                                                                              |                                          |                                          |                                          |                                          |                                     |                                     |                                     |                                     |
|------------------------------------------------------------------------------|------------------------------------------|------------------------------------------|------------------------------------------|------------------------------------------|-------------------------------------|-------------------------------------|-------------------------------------|-------------------------------------|
| Self-harm by other specified means                                           | 19,701.32<br>(15,301.61 to<br>25,099.96) | 26,981.99<br>(16,835.58 to<br>42,128.98) | 22,691.06<br>(14,375.17 to<br>33,985.01) | 28,984.47<br>(17,571.92 to<br>46,831.76) | 480.87<br>(365.09 to<br>606.20)     | 774.46<br>(498.81 to<br>1,161.18)   | 677.27<br>(448.13 to<br>965.70)     | 810.85<br>(496.01 to<br>1,271.53)   |
| Interpersonal violence                                                       | 75,063.62<br>(49,688.10 to<br>95,300.90) | 60,621.69<br>(38,337.66 to<br>80,375.72) | 55,472.96<br>(35,659.50 to<br>74,129.77) | 61,207.04<br>(36,917.02 to<br>82,119.40) | 1,419.89<br>(920.18 to<br>1,806.47) | 1,289.49<br>(808.35 to<br>1,671.56) | 1,203.42<br>(767.69 to<br>1,587.05) | 1,290.44<br>(777.20 to<br>1,707.38) |
| Physical violence by firearm                                                 | 47,675.72<br>(29,592.71 to<br>62,591.39) | 37,962.11<br>(22,018.95 to<br>52,255.81) | 35,106.58<br>(20,188.86 to<br>48,983.66) | 38,182.04<br>(21,422.14 to<br>52,948.26) | 908.07<br>(541.73 to<br>1,194.40)   | 784.88<br>(435.41 to<br>1,073.17)   | 735.25<br>(400.63 to<br>1,010.05)   | 784.63<br>(417.36 to<br>1,085.47)   |
| Physical violence by sharp object                                            | 15,310.17<br>(8,601.05 to<br>22,075.11)  | 14,326.13<br>(7,788.78 to<br>21,061.84)  | 13,672.06<br>(7,398.77 to<br>20,666.96)  | 14,124.78<br>(7,533.90 to<br>20,818.33)  | 303.06<br>(167.38 to<br>442.70)     | 320.37<br>(178.98 to<br>451.35)     | 311.48<br>(169.44 to<br>452.11)     | 312.63<br>(170.54 to<br>447.98)     |
| Physical violence by other means                                             | 12,077.73<br>(6,625.77 to<br>15,745.60)  | 8,333.45<br>(4,550.89 to<br>12,001.56)   | 6,694.32<br>(3,833.62 to<br>9,496.78)    | 8,900.22<br>(4,601.81 to<br>13,154.90)   | 208.75<br>(120.20 to<br>269.19)     | 184.25<br>(109.13 to<br>264.41)     | 156.69<br>(95.87 to<br>225.39)      | 193.17<br>(109.26 to<br>278.02)     |
| Forces of nature, conflict and terrorism, and executions and police conflict | 62.37<br>(53.68 to<br>70.50)             | 2,474.30<br>(0.00 to<br>43,472.59)       | 2,328.10<br>(0.00 to<br>40,782.98)       | 2,482.84<br>(0.00 to<br>43,561.07)       | 1.08<br>(0.92 to<br>1.22)           | 52.96<br>(0.90 to<br>1,008.79)      | 51.74<br>(0.00 to<br>988.83)        | 52.28<br>(0.00 to<br>991.67)        |
| Exposure to forces of nature                                                 | 0.00<br>(0.00 to<br>0.00)                | 1,354.96<br>(0.00 to<br>18,445.00)       | 1,273.50<br>(0.00 to<br>17,421.84)       | 1,358.14<br>(0.00 to<br>18,536.40)       | 0.00<br>(0.00 to<br>0.00)           | 31.14<br>(0.00 to<br>414.53)        | 30.56<br>(0.00 to<br>407.10)        | 30.62<br>(0.00 to<br>408.27)        |
| Conflict and terrorism                                                       | 0.00<br>(0.00 to<br>0.00)                | 1,119.34<br>(0.00 to<br>84.17)           | 1,054.60<br>(0.00 to<br>82.27)           | 1,124.70<br>(0.00 to<br>84.14)           | 0.00<br>(0.00 to<br>0.00)           | 21.81<br>(0.00 to<br>1.39)          | 21.18<br>(0.00 to<br>1.36)          | 21.65<br>(0.00 to<br>1.39)          |
| Executions and police conflict                                               | 62.37<br>(53.68 to<br>70.50)             | 0.00<br>(0.00 to<br>0.00)                | 0.00<br>(0.00 to<br>0.00)                | 0.00<br>(0.00 to<br>0.00)                | 1.08<br>(0.92 to<br>1.22)           | 0.00<br>(0.00 to<br>0.00)           | 0.00<br>(0.00 to<br>0.00)           | 0.00<br>(0.00 to<br>0.00)           |

**Grenada**

| Cause                                                                    | YLLs (actual counts)                     |                                          |                                          |                                          | Deaths (actual counts)          |                                     |                                   |                                       |
|--------------------------------------------------------------------------|------------------------------------------|------------------------------------------|------------------------------------------|------------------------------------------|---------------------------------|-------------------------------------|-----------------------------------|---------------------------------------|
|                                                                          | 2016                                     | 2040 Forecast                            | 2040 Better Scenario                     | 2040 Worse Scenario                      | 2016                            | 2040 Forecast                       | 2040 Better Scenario              | 2040 Worse Scenario                   |
| <b>All causes</b>                                                        | 20,893.25<br>(18,182.76 to<br>23,877.89) | 23,288.53<br>(19,029.24 to<br>28,470.46) | 18,272.28<br>(15,039.28 to<br>22,205.92) | 29,023.78<br>(23,450.64 to<br>35,777.13) | 865.57<br>(773.43 to<br>958.02) | 1,117.54<br>(995.42 to<br>1,253.70) | 926.65<br>(823.87 to<br>1,049.31) | 1,311.56<br>(1,159.45 to<br>1,485.28) |
| <b>Communicable, maternal, neonatal, and nutritional diseases</b>        | 3,323.58<br>(2,553.96 to<br>4,621.94)    | 2,347.06<br>(1,677.22 to<br>3,369.83)    | 1,709.56<br>(1,259.78 to<br>2,439.07)    | 3,321.30<br>(2,371.64 to<br>4,772.35)    | 93.93<br>(81.98 to<br>111.76)   | 90.59<br>(73.44 to<br>109.75)       | 75.23<br>(62.25 to<br>89.33)      | 112.18<br>(90.27 to<br>139.22)        |
| <b>HIV/AIDS and tuberculosis</b>                                         | 396.81<br>(377.58 to<br>415.55)          | 135.59<br>(87.14 to<br>195.68)           | 65.14<br>(41.27 to<br>99.04)             | 536.37<br>(365.69 to<br>678.63)          | 8.70<br>(8.30 to<br>9.08)       | 3.15<br>(1.77 to<br>4.76)           | 1.52<br>(0.87 to<br>2.54)         | 12.49<br>(8.25 to<br>15.81)           |
| <b>Tuberculosis</b>                                                      | 27.13<br>(22.42 to<br>32.42)             | 12.60<br>(7.84 to<br>20.38)              | 6.94<br>(4.44 to<br>11.22)               | 19.85<br>(11.57 to<br>32.99)             | 0.87<br>(0.74 to<br>1.01)       | 0.47<br>(0.31 to<br>0.72)           | 0.27<br>(0.18 to<br>0.42)         | 0.71<br>(0.44 to<br>1.13)             |
| <b>HIV/AIDS</b>                                                          | 369.68<br>(350.79 to<br>387.09)          | 122.99<br>(75.57 to<br>185.80)           | 58.20<br>(34.69 to<br>92.37)             | 516.52<br>(351.28 to<br>661.34)          | 7.83<br>(7.44 to<br>8.20)       | 2.68<br>(1.34 to<br>4.32)           | 1.24<br>(0.62 to<br>2.28)         | 11.78<br>(7.61 to<br>15.10)           |
| <b>Diarrhea, lower respiratory, and other common infectious diseases</b> | 1,489.86<br>(1,247.76 to<br>1,821.51)    | 1,355.39<br>(1,046.49 to<br>1,776.00)    | 1,046.36<br>(833.76 to<br>1,320.18)      | 1,706.08<br>(1,239.66 to<br>2,358.06)    | 64.58<br>(56.94 to<br>72.75)    | 73.43<br>(59.22 to<br>89.30)        | 62.83<br>(51.81 to<br>74.36)      | 83.07<br>(64.15 to<br>106.46)         |
| <b>Diarrheal diseases</b>                                                | 58.68<br>(42.26 to<br>86.41)             | 19.34<br>(5.57 to<br>52.16)              | 16.20<br>(5.21 to<br>42.77)              | 34.05<br>(8.05 to<br>96.66)              | 1.61<br>(1.37 to<br>1.96)       | 0.95<br>(0.27 to<br>2.45)           | 0.86<br>(0.28 to<br>2.25)         | 1.50<br>(0.36 to<br>4.29)             |
| <b>Intestinal infectious diseases</b>                                    | 0.49<br>(0.23 to<br>0.89)                | 0.32<br>(0.14 to<br>0.62)                | 0.31<br>(0.14 to<br>0.60)                | 0.34<br>(0.15 to<br>0.67)                | 0.01<br>(0.01 to<br>0.02)       | 0.01<br>(0.00 to<br>0.02)           | 0.01<br>(0.00 to<br>0.02)         | 0.01<br>(0.00 to<br>0.02)             |
| <b>Typhoid fever</b>                                                     | 0.39<br>(0.17 to<br>0.73)                | 0.24<br>(0.10 to<br>0.46)                | 0.25<br>(0.11 to<br>0.48)                | 0.25<br>(0.11 to<br>0.49)                | 0.01<br>(0.00 to<br>0.02)       | 0.01<br>(0.00 to<br>0.01)           | 0.01<br>(0.00 to<br>0.01)         | 0.01<br>(0.00 to<br>0.01)             |
| <b>Paratyphoid fever</b>                                                 | 0.08<br>(0.03 to<br>0.17)                | 0.07<br>(0.03 to<br>0.16)                | 0.06<br>(0.02 to<br>0.13)                | 0.08<br>(0.03 to<br>0.17)                | 0.00<br>(0.00 to<br>0.00)       | 0.00<br>(0.00 to<br>0.00)           | 0.00<br>(0.00 to<br>0.00)         | 0.00<br>(0.00 to<br>0.00)             |
| <b>Other intestinal infectious diseases</b>                              | 0.03<br>(0.01 to<br>0.05)                | 0.01<br>(0.00 to<br>0.03)                | 0.01<br>(0.00 to<br>0.02)                | 0.01<br>(0.00 to<br>0.03)                | 0.00<br>(0.00 to<br>0.00)       | 0.00<br>(0.00 to<br>0.00)           | 0.00<br>(0.00 to<br>0.00)         | 0.00<br>(0.00 to<br>0.00)             |



|                                                          |                                   |                                  |                                  |                                  |                                |                                |                                |                                |
|----------------------------------------------------------|-----------------------------------|----------------------------------|----------------------------------|----------------------------------|--------------------------------|--------------------------------|--------------------------------|--------------------------------|
| Cysticercosis                                            | 0.00<br>(0.00 to 0.00)            | 0.00<br>(0.00 to 0.00)           | 0.00<br>(0.00 to 0.00)           | 0.00<br>(0.00 to 0.00)           | 0.00<br>(0.00 to 0.00)         | 0.00<br>(0.00 to 0.00)         | 0.00<br>(0.00 to 0.00)         | 0.00<br>(0.00 to 0.00)         |
| Cystic echinococcosis                                    | 0.00<br>(0.00 to 0.00)            | 0.00<br>(0.00 to 0.00)           | 0.00<br>(0.00 to 0.00)           | 0.00<br>(0.00 to 0.00)           | 0.00<br>(0.00 to 0.00)         | 0.00<br>(0.00 to 0.00)         | 0.00<br>(0.00 to 0.00)         | 0.00<br>(0.00 to 0.00)         |
| Dengue                                                   | 1.71<br>(1.02 to 2.54)            | 8.20<br>(5.69 to 10.94)          | 8.07<br>(5.60 to 10.75)          | 8.17<br>(5.62 to 10.96)          | 0.05<br>(0.03 to 0.07)         | 0.26<br>(0.18 to 0.34)         | 0.27<br>(0.19 to 0.35)         | 0.25<br>(0.18 to 0.33)         |
| Yellow fever                                             | 0.00<br>(0.00 to 0.00)            | 0.00<br>(0.00 to 0.00)           | 0.00<br>(0.00 to 0.00)           | 0.00<br>(0.00 to 0.00)           | 0.00<br>(0.00 to 0.00)         | 0.00<br>(0.00 to 0.00)         | 0.00<br>(0.00 to 0.00)         | 0.00<br>(0.00 to 0.00)         |
| Rabies                                                   | 0.23<br>(0.14 to 0.41)            | 0.12<br>(0.06 to 0.25)           | 0.07<br>(0.04 to 0.15)           | 0.17<br>(0.09 to 0.35)           | 0.01<br>(0.01 to 0.01)         | 0.00<br>(0.00 to 0.01)         | 0.00<br>(0.00 to 0.00)         | 0.00<br>(0.00 to 0.01)         |
| Intestinal nematode infections                           | 0.60<br>(0.20 to 1.34)            | 0.70<br>(0.25 to 1.67)           | 0.67<br>(0.25 to 1.56)           | 0.72<br>(0.25 to 1.73)           | 0.01<br>(0.01 to 0.02)         | 0.01<br>(0.01 to 0.05)         | 0.01<br>(0.01 to 0.03)         | 0.01<br>(0.01 to 0.03)         |
| Other neglected tropical diseases                        | 16.73<br>(7.16 to 25.65)          | 15.48<br>(5.37 to 23.45)         | 13.66<br>(4.80 to 20.24)         | 17.24<br>(6.26 to 25.99)         | 0.49<br>(0.20 to 0.65)         | 0.54<br>(0.17 to 0.74)         | 0.50<br>(0.16 to 0.68)         | 0.57<br>(0.19 to 0.78)         |
| <b>Maternal disorders</b>                                | <b>31.54<br/>(22.91 to 42.32)</b> | <b>15.27<br/>(6.57 to 30.52)</b> | <b>10.74<br/>(4.50 to 21.11)</b> | <b>18.95<br/>(8.08 to 37.16)</b> | <b>0.58<br/>(0.42 to 0.78)</b> | <b>0.29<br/>(0.13 to 0.58)</b> | <b>0.20<br/>(0.09 to 0.41)</b> | <b>0.36<br/>(0.16 to 0.70)</b> |
| Maternal hemorrhage                                      | 4.24<br>(2.52 to 6.76)            | 2.03<br>(0.82 to 4.14)           | 1.44<br>(0.59 to 2.92)           | 2.51<br>(0.98 to 5.15)           | 0.08<br>(0.05 to 0.13)         | 0.04<br>(0.02 to 0.08)         | 0.03<br>(0.01 to 0.06)         | 0.05<br>(0.02 to 0.10)         |
| Maternal sepsis and other maternal infections            | 0.56<br>(0.24 to 1.06)            | 0.26<br>(0.08 to 0.58)           | 0.18<br>(0.06 to 0.41)           | 0.32<br>(0.10 to 0.71)           | 0.01<br>(0.00 to 0.02)         | 0.01<br>(0.00 to 0.01)         | 0.00<br>(0.00 to 0.01)         | 0.01<br>(0.00 to 0.01)         |
| Maternal hypertensive disorders                          | 16.30<br>(11.26 to 23.13)         | 6.98<br>(2.77 to 13.98)          | 4.86<br>(1.98 to 9.71)           | 8.67<br>(3.55 to 17.66)          | 0.29<br>(0.20 to 0.41)         | 0.13<br>(0.05 to 0.26)         | 0.09<br>(0.04 to 0.18)         | 0.16<br>(0.07 to 0.32)         |
| Maternal obstructed labor and uterine rupture            | 0.50<br>(0.19 to 1.04)            | 0.28<br>(0.08 to 0.75)           | 0.19<br>(0.05 to 0.49)           | 0.35<br>(0.10 to 0.90)           | 0.01<br>(0.00 to 0.02)         | 0.01<br>(0.00 to 0.01)         | 0.00<br>(0.00 to 0.01)         | 0.01<br>(0.00 to 0.02)         |
| Maternal abortion, miscarriage, and ectopic pregnancy    | 2.36<br>(1.30 to 3.61)            | 1.54<br>(0.52 to 3.46)           | 1.08<br>(0.35 to 2.48)           | 1.90<br>(0.64 to 4.33)           | 0.05<br>(0.03 to 0.07)         | 0.03<br>(0.01 to 0.07)         | 0.02<br>(0.01 to 0.05)         | 0.04<br>(0.01 to 0.08)         |
| Indirect maternal deaths                                 | 2.85<br>(1.71 to 4.38)            | 1.61<br>(0.59 to 3.54)           | 1.13<br>(0.43 to 2.47)           | 2.00<br>(0.73 to 4.45)           | 0.05<br>(0.03 to 0.08)         | 0.03<br>(0.01 to 0.06)         | 0.02<br>(0.01 to 0.05)         | 0.04<br>(0.01 to 0.08)         |
| Late maternal deaths                                     | 0.76<br>(0.36 to 1.37)            | 0.32<br>(0.10 to 0.76)           | 0.23<br>(0.07 to 0.52)           | 0.40<br>(0.13 to 0.95)           | 0.01<br>(0.01 to 0.03)         | 0.01<br>(0.00 to 0.01)         | 0.00<br>(0.00 to 0.01)         | 0.01<br>(0.00 to 0.02)         |
| Maternal deaths aggravated by HIV/AIDS                   | 0.02<br>(0.01 to 0.04)            | 0.06<br>(0.01 to 0.16)           | 0.02<br>(0.00 to 0.07)           | 0.11<br>(0.03 to 0.29)           | 0.00<br>(0.00 to 0.00)         | 0.00<br>(0.00 to 0.00)         | 0.00<br>(0.00 to 0.00)         | 0.00<br>(0.00 to 0.01)         |
| Other maternal disorders                                 | 3.97<br>(2.40 to 6.03)            | 2.19<br>(0.90 to 4.61)           | 1.60<br>(0.66 to 3.33)           | 2.68<br>(1.06 to 5.72)           | 0.08<br>(0.05 to 0.12)         | 0.04<br>(0.02 to 0.09)         | 0.03<br>(0.01 to 0.06)         | 0.05<br>(0.02 to 0.11)         |
| <b>Grenada</b>                                           |                                   |                                  |                                  |                                  |                                |                                |                                |                                |
| Cause                                                    | YLLs (actual counts)              |                                  |                                  |                                  | Deaths (actual counts)         |                                |                                |                                |
|                                                          | 2016                              | 2040 Forecast                    | 2040 Better Scenario             | 2040 Worse Scenario              | 2016                           | 2040 Forecast                  | 2040 Better Scenario           | 2040 Worse Scenario            |
| Neonatal disorders                                       | 1,187.64<br>(644.24 to 2,107.33)  | 677.62<br>(215.39 to 1,470.69)   | 442.96<br>(141.86 to 977.96)     | 883.49<br>(281.72 to 1,918.52)   | 13.72<br>(7.44 to 24.35)       | 7.83<br>(2.49 to 17.00)        | 5.12<br>(1.64 to 11.30)        | 10.21<br>(3.26 to 22.17)       |
| Neonatal preterm birth                                   | 457.40<br>(235.37 to 810.12)      | 243.25<br>(75.50 to 524.16)      | 140.87<br>(44.37 to 297.92)      | 335.78<br>(106.89 to 716.76)     | 5.28<br>(2.72 to 9.36)         | 2.81<br>(0.87 to 6.06)         | 1.63<br>(0.51 to 3.44)         | 3.88<br>(1.24 to 8.28)         |
| Neonatal encephalopathy due to birth asphyxia and trauma | 413.42<br>(215.88 to 732.93)      | 229.30<br>(61.64 to 537.03)      | 155.56<br>(43.00 to 355.67)      | 286.87<br>(76.91 to 661.55)      | 4.78<br>(2.49 to 8.47)         | 2.65<br>(0.71 to 6.21)         | 1.80<br>(0.50 to 4.11)         | 3.32<br>(0.89 to 7.65)         |

|                                                                         |                                                               |                                                               |                                                               |                                                               |                                                      |                                                        |                                                      |                                                          |
|-------------------------------------------------------------------------|---------------------------------------------------------------|---------------------------------------------------------------|---------------------------------------------------------------|---------------------------------------------------------------|------------------------------------------------------|--------------------------------------------------------|------------------------------------------------------|----------------------------------------------------------|
|                                                                         | 190.39<br>(92.79 to<br>351.14)                                | 131.16<br>(46.33 to<br>302.61)                                | 92.16<br>(32.13 to<br>207.97)                                 | 164.75<br>(57.73 to<br>379.91)                                | 2.20<br>(1.07 to<br>4.06)                            | 1.52<br>(0.54 to<br>3.50)                              | 1.07<br>(0.37 to<br>2.40)                            | 1.90<br>(0.67 to<br>4.39)                                |
| Neonatal sepsis and other neonatal infections                           |                                                               |                                                               |                                                               |                                                               |                                                      |                                                        |                                                      |                                                          |
|                                                                         | 3.99<br>(1.68 to<br>8.50)                                     | 1.75<br>(0.35 to<br>4.96)                                     | 1.16<br>(0.24 to<br>3.25)                                     | 2.33<br>(0.46 to<br>6.67)                                     | 0.05<br>(0.02 to<br>0.10)                            | 0.02<br>(0.00 to<br>0.06)                              | 0.01<br>(0.00 to<br>0.04)                            | 0.03<br>(0.01 to<br>0.08)                                |
| Hemolytic disease and other neonatal jaundice                           |                                                               |                                                               |                                                               |                                                               |                                                      |                                                        |                                                      |                                                          |
|                                                                         | 122.43<br>(62.03 to<br>224.84)                                | 72.16<br>(22.15 to<br>170.82)                                 | 53.21<br>(16.78 to<br>125.35)                                 | 93.76<br>(28.45 to<br>221.08)                                 | 1.42<br>(0.72 to<br>2.60)                            | 0.83<br>(0.26 to<br>1.97)                              | 0.62<br>(0.19 to<br>1.45)                            | 1.08<br>(0.33 to<br>2.56)                                |
| Other neonatal disorders                                                |                                                               |                                                               |                                                               |                                                               |                                                      |                                                        |                                                      |                                                          |
| <b>Nutritional deficiencies</b>                                         | <b>65.59</b><br><b>(50.99 to</b><br><b>87.83)</b>             | <b>39.74</b><br><b>(31.12 to</b><br><b>51.48)</b>             | <b>29.56</b><br><b>(29.56 to</b><br><b>47.66)</b>             | <b>42.08</b><br><b>(32.79 to</b><br><b>55.19)</b>             | <b>2.57</b><br><b>(2.23 to</b><br><b>2.94)</b>       | <b>2.17</b><br><b>(1.70 to</b><br><b>2.67)</b>         | <b>2.20</b><br><b>(1.73 to</b><br><b>2.67)</b>       | <b>2.15</b><br><b>(1.62 to</b><br><b>2.68)</b>           |
|                                                                         | 54.47<br>(41.05 to<br>75.32)                                  | 29.63<br>(21.69 to<br>39.13)                                  | 28.43<br>(21.14 to<br>36.96)                                  | 31.37<br>(23.05 to<br>41.94)                                  | 2.08<br>(1.72 to<br>2.47)                            | 1.65<br>(1.18 to<br>2.09)                              | 1.72<br>(1.29 to<br>2.16)                            | 1.63<br>(1.17 to<br>2.10)                                |
| Protein-energy malnutrition                                             |                                                               |                                                               |                                                               |                                                               |                                                      |                                                        |                                                      |                                                          |
|                                                                         | 0.62<br>(0.05 to<br>1.96)                                     | 1.38<br>(0.05 to<br>4.72)                                     | 1.20<br>(0.03 to<br>4.42)                                     | 1.50<br>(0.05 to<br>4.85)                                     | 0.02<br>(0.00 to<br>0.06)                            | 0.07<br>(0.00 to<br>0.29)                              | 0.07<br>(0.00 to<br>0.28)                            | 0.07<br>(0.00 to<br>0.30)                                |
| Iodine deficiency                                                       |                                                               |                                                               |                                                               |                                                               |                                                      |                                                        |                                                      |                                                          |
|                                                                         | 0.76<br>(0.41 to<br>1.21)                                     | 0.51<br>(0.27 to<br>0.80)                                     | 0.47<br>(0.25 to<br>0.73)                                     | 0.56<br>(0.30 to<br>0.87)                                     | 0.01<br>(0.01 to<br>0.02)                            | 0.01<br>(0.01 to<br>0.02)                              | 0.01<br>(0.00 to<br>0.01)                            | 0.01<br>(0.01 to<br>0.02)                                |
| Dietary iron deficiency                                                 |                                                               |                                                               |                                                               |                                                               |                                                      |                                                        |                                                      |                                                          |
|                                                                         | 9.74<br>(4.99 to<br>13.97)                                    | 8.22<br>(3.79 to<br>12.88)                                    | 7.07<br>(3.27 to<br>11.17)                                    | 8.64<br>(4.02 to<br>13.49)                                    | 0.45<br>(0.21 to<br>0.67)                            | 0.43<br>(0.19 to<br>0.69)                              | 0.40<br>(0.18 to<br>0.63)                            | 0.43<br>(0.19 to<br>0.67)                                |
| Other nutritional deficiencies                                          |                                                               |                                                               |                                                               |                                                               |                                                      |                                                        |                                                      |                                                          |
| <b>Other communicable, maternal, neonatal, and nutritional diseases</b> | <b>131.44</b><br><b>(92.27 to</b><br><b>165.43)</b>           | <b>98.96</b><br><b>(63.10 to</b><br><b>138.32)</b>            | <b>84.74</b><br><b>(54.64 to</b><br><b>117.86)</b>            | <b>108.03</b><br><b>(70.24 to</b><br><b>149.98)</b>           | <b>3.19</b><br><b>(2.22 to</b><br><b>3.91)</b>       | <b>2.89</b><br><b>(1.88 to</b><br><b>3.88)</b>         | <b>2.87</b><br><b>(1.69 to</b><br><b>3.39)</b>       | <b>3.06</b><br><b>(1.99 to</b><br><b>4.07)</b>           |
|                                                                         | 21.73<br>(11.63 to<br>40.67)                                  | 6.67<br>(3.80 to<br>12.01)                                    | 5.32<br>(3.15 to<br>9.46)                                     | 7.35<br>(4.08 to<br>13.80)                                    | 0.42<br>(0.28 to<br>0.65)                            | 0.15<br>(0.11 to<br>0.23)                              | 0.13<br>(0.09 to<br>0.19)                            | 0.16<br>(0.11 to<br>0.24)                                |
| Sexually transmitted infections excluding HIV                           |                                                               |                                                               |                                                               |                                                               |                                                      |                                                        |                                                      |                                                          |
|                                                                         | 16.90<br>(6.90 to<br>35.63)                                   | 4.14<br>(1.60 to<br>9.23)                                     | 3.05<br>(1.22 to<br>6.74)                                     | 4.69<br>(1.75 to<br>10.64)                                    | 0.28<br>(0.15 to<br>0.50)                            | 0.08<br>(0.04 to<br>0.14)                              | 0.06<br>(0.03 to<br>0.10)                            | 0.08<br>(0.04 to<br>0.15)                                |
| Syphilis                                                                |                                                               |                                                               |                                                               |                                                               |                                                      |                                                        |                                                      |                                                          |
|                                                                         | 0.88<br>(0.67 to<br>1.16)                                     | 0.48<br>(0.31 to<br>0.70)                                     | 0.43<br>(0.28 to<br>0.63)                                     | 0.51<br>(0.33 to<br>0.74)                                     | 0.02<br>(0.02 to<br>0.03)                            | 0.02<br>(0.01 to<br>0.02)                              | 0.01<br>(0.01 to<br>0.02)                            | 0.02<br>(0.01 to<br>0.02)                                |
| Chlamydial infection                                                    |                                                               |                                                               |                                                               |                                                               |                                                      |                                                        |                                                      |                                                          |
|                                                                         | 2.57<br>(1.94 to<br>3.36)                                     | 1.35<br>(0.90 to<br>1.91)                                     | 1.22<br>(0.81 to<br>1.74)                                     | 1.42<br>(0.95 to<br>2.01)                                     | 0.07<br>(0.06 to<br>0.10)                            | 0.04<br>(0.03 to<br>0.06)                              | 0.04<br>(0.03 to<br>0.06)                            | 0.04<br>(0.03 to<br>0.06)                                |
| Gonococcal infection                                                    |                                                               |                                                               |                                                               |                                                               |                                                      |                                                        |                                                      |                                                          |
|                                                                         | 1.38<br>(1.04 to<br>1.80)                                     | 0.69<br>(0.46 to<br>1.01)                                     | 0.62<br>(0.41 to<br>0.91)                                     | 0.73<br>(0.49 to<br>1.06)                                     | 0.04<br>(0.03 to<br>0.05)                            | 0.02<br>(0.01 to<br>0.03)                              | 0.02<br>(0.01 to<br>0.03)                            | 0.02<br>(0.01 to<br>0.03)                                |
| Other sexually transmitted infections                                   |                                                               |                                                               |                                                               |                                                               |                                                      |                                                        |                                                      |                                                          |
|                                                                         | 9.17<br>(7.45 to<br>11.22)                                    | 8.46<br>(5.73 to<br>12.37)                                    | 6.61<br>(4.37 to<br>9.73)                                     | 9.06<br>(6.10 to<br>13.30)                                    | 0.24<br>(0.20 to<br>0.29)                            | 0.27<br>(0.19 to<br>0.38)                              | 0.22<br>(0.15 to<br>0.31)                            | 0.28<br>(0.20 to<br>0.39)                                |
| Acute hepatitis                                                         |                                                               |                                                               |                                                               |                                                               |                                                      |                                                        |                                                      |                                                          |
|                                                                         | 0.23<br>(0.11 to<br>0.42)                                     | 0.16<br>(0.06 to<br>0.36)                                     | 0.13<br>(0.05 to<br>0.29)                                     | 0.18<br>(0.07 to<br>0.39)                                     | 0.00<br>(0.00 to<br>0.01)                            | 0.00<br>(0.00 to<br>0.01)                              | 0.00<br>(0.00 to<br>0.01)                            | 0.00<br>(0.00 to<br>0.01)                                |
| Acute hepatitis A                                                       |                                                               |                                                               |                                                               |                                                               |                                                      |                                                        |                                                      |                                                          |
|                                                                         | 6.38<br>(4.95 to<br>8.00)                                     | 6.22<br>(3.97 to<br>9.27)                                     | 4.82<br>(3.01 to<br>7.31)                                     | 6.70<br>(4.23 to<br>9.98)                                     | 0.17<br>(0.13 to<br>0.21)                            | 0.19<br>(0.13 to<br>0.28)                              | 0.15<br>(0.10 to<br>0.23)                            | 0.21<br>(0.14 to<br>0.30)                                |
| Acute hepatitis B                                                       |                                                               |                                                               |                                                               |                                                               |                                                      |                                                        |                                                      |                                                          |
|                                                                         | 0.40<br>(0.29 to<br>0.55)                                     | 0.45<br>(0.28 to<br>0.70)                                     | 0.37<br>(0.23 to<br>0.58)                                     | 0.47<br>(0.29 to<br>0.72)                                     | 0.01<br>(0.01 to<br>0.02)                            | 0.02<br>(0.01 to<br>0.02)                              | 0.01<br>(0.01 to<br>0.02)                            | 0.02<br>(0.01 to<br>0.02)                                |
| Acute hepatitis C                                                       |                                                               |                                                               |                                                               |                                                               |                                                      |                                                        |                                                      |                                                          |
|                                                                         | 2.16<br>(1.55 to<br>2.93)                                     | 1.62<br>(1.01 to<br>2.54)                                     | 1.29<br>(0.79 to<br>1.99)                                     | 1.72<br>(1.08 to<br>2.70)                                     | 0.05<br>(0.04 to<br>0.07)                            | 0.05<br>(0.03 to<br>0.08)                              | 0.05<br>(0.03 to<br>0.07)                            | 0.05<br>(0.03 to<br>0.08)                                |
| Acute hepatitis E                                                       |                                                               |                                                               |                                                               |                                                               |                                                      |                                                        |                                                      |                                                          |
|                                                                         | 100.55<br>(64.22 to<br>128.07)                                | 83.83<br>(49.80 to<br>118.85)                                 | 72.80<br>(44.08 to<br>102.41)                                 | 91.61<br>(55.15 to<br>129.34)                                 | 2.54<br>(1.60 to<br>3.13)                            | 2.47<br>(1.50 to<br>3.34)                              | 2.22<br>(1.39 to<br>2.97)                            | 2.62<br>(1.61 to<br>3.51)                                |
| Other unspecified infectious diseases                                   |                                                               |                                                               |                                                               |                                                               |                                                      |                                                        |                                                      |                                                          |
| <b>Non-communicable diseases</b>                                        | <b>14,564.39</b><br><b>(12,758.30 to</b><br><b>16,469.83)</b> | <b>18,620.69</b><br><b>(15,068.50 to</b><br><b>23,005.12)</b> | <b>14,700.29</b><br><b>(11,979.13 to</b><br><b>17,918.44)</b> | <b>23,073.32</b><br><b>(18,438.08 to</b><br><b>28,835.05)</b> | <b>704.53</b><br><b>(629.87 to</b><br><b>780.81)</b> | <b>964.82</b><br><b>(849.48 to</b><br><b>1,098.61)</b> | <b>798.88</b><br><b>(703.66 to</b><br><b>919.94)</b> | <b>1,131.94</b><br><b>(984.87 to</b><br><b>1,296.62)</b> |
| <b>Grenada</b>                                                          |                                                               |                                                               |                                                               |                                                               |                                                      |                                                        |                                                      |                                                          |
| <b>YLLs (actual counts)</b>                                             |                                                               |                                                               |                                                               |                                                               | <b>Deaths (actual counts)</b>                        |                                                        |                                                      |                                                          |



| Cause                                | 2016                                      | 2040 Forecast                             | 2040 Better Scenario                      | 2040 Worse Scenario                       | 2016                                | 2040 Forecast                       | 2040 Better Scenario                | 2040 Worse Scenario                 |
|--------------------------------------|-------------------------------------------|-------------------------------------------|-------------------------------------------|-------------------------------------------|-------------------------------------|-------------------------------------|-------------------------------------|-------------------------------------|
| <b>Neoplasms</b>                     | <b>3,973.88</b><br>(3,453.72 to 4,538.69) | <b>5,816.14</b><br>(4,785.77 to 6,955.30) | <b>5,211.06</b><br>(4,369.00 to 6,200.12) | <b>6,339.20</b><br>(5,102.10 to 7,813.56) | <b>172.13</b><br>(152.11 to 192.70) | <b>275.67</b><br>(234.86 to 323.14) | <b>258.47</b><br>(223.28 to 298.53) | <b>286.81</b><br>(238.67 to 341.93) |
| Lip and oral cavity cancer           | 63.77<br>(52.78 to 75.68)                 | 93.51<br>(52.51 to 159.45)                | 59.14<br>(36.43 to 94.01)                 | 148.07<br>(78.87 to 257.53)               | 2.57<br>(2.18 to 2.98)              | 3.81<br>(2.29 to 6.13)              | 2.55<br>(1.66 to 3.85)              | 5.76<br>(3.24 to 9.58)              |
| Nasopharynx cancer                   | 23.09<br>(19.48 to 26.92)                 | 28.34<br>(17.37 to 45.92)                 | 17.25<br>(11.16 to 26.40)                 | 46.23<br>(26.94 to 77.26)                 | 0.69<br>(0.59 to 0.78)              | 0.93<br>(0.58 to 1.44)              | 0.58<br>(0.39 to 0.85)              | 1.47<br>(0.88 to 2.42)              |
| Other pharynx cancer                 | 28.93<br>(23.75 to 34.86)                 | 39.71<br>(23.40 to 63.27)                 | 36.29<br>(22.11 to 56.82)                 | 50.99<br>(28.89 to 84.82)                 | 1.10<br>(0.92 to 1.29)              | 1.59<br>(0.96 to 2.51)              | 1.50<br>(0.94 to 2.30)              | 1.98<br>(1.15 to 3.22)              |
| Esophageal cancer                    | 100.24<br>(83.34 to 118.15)               | 164.84<br>(93.91 to 266.72)               | 114.22<br>(72.64 to 169.65)               | 235.62<br>(128.07 to 399.58)              | 4.46<br>(3.79 to 5.15)              | 7.40<br>(4.47 to 11.43)             | 5.42<br>(3.62 to 7.77)              | 10.12<br>(5.82 to 16.52)            |
| Stomach cancer                       | 175.88<br>(151.01 to 200.07)              | 201.52<br>(156.95 to 254.71)              | 167.66<br>(134.31 to 209.07)              | 207.89<br>(161.66 to 263.53)              | 8.62<br>(7.56 to 9.67)              | 10.32<br>(8.19 to 12.71)            | 8.91<br>(7.29 to 10.86)             | 10.27<br>(8.09 to 12.84)            |
| Colon and rectum cancer              | 321.85<br>(277.55 to 371.24)              | 489.69<br>(338.79 to 712.97)              | 448.11<br>(312.59 to 653.63)              | 529.38<br>(354.20 to 779.23)              | 15.80<br>(13.80 to 17.99)           | 25.65<br>(17.83 to 37.94)           | 24.35<br>(16.80 to 35.36)           | 26.62<br>(18.00 to 39.59)           |
| Liver cancer                         | 169.30<br>(145.03 to 195.32)              | 279.43<br>(194.60 to 393.93)              | 246.08<br>(179.85 to 330.05)              | 327.84<br>(217.40 to 482.04)              | 7.43<br>(6.43 to 8.54)              | 12.98<br>(9.20 to 18.00)            | 11.96<br>(8.97 to 15.78)            | 14.55<br>(9.84 to 20.83)            |
| Liver cancer due to hepatitis B      | 66.75<br>(53.54 to 81.29)                 | 107.22<br>(70.18 to 156.59)               | 94.35<br>(65.57 to 132.65)                | 121.05<br>(75.40 to 183.06)               | 2.50<br>(2.03 to 3.01)              | 4.33<br>(2.93 to 6.16)              | 3.96<br>(2.80 to 5.39)              | 4.71<br>(3.06 to 6.95)              |
| Liver cancer due to hepatitis C      | 38.96<br>(32.13 to 46.75)                 | 68.71<br>(48.37 to 97.94)                 | 62.64<br>(45.83 to 85.47)                 | 74.71<br>(50.35 to 109.17)                | 2.12<br>(1.76 to 2.51)              | 3.79<br>(2.63 to 5.26)              | 3.62<br>(2.63 to 4.88)              | 3.95<br>(2.61 to 5.66)              |
| Liver cancer due to alcohol use      | 32.92<br>(26.81 to 40.51)                 | 55.26<br>(36.44 to 81.55)                 | 46.46<br>(32.10 to 65.76)                 | 76.87<br>(48.46 to 118.65)                | 1.54<br>(1.27 to 1.87)              | 2.69<br>(1.80 to 3.90)              | 2.38<br>(1.67 to 3.31)              | 3.49<br>(2.26 to 5.24)              |
| Liver cancer due to other causes     | 30.67<br>(25.37 to 36.92)                 | 48.24<br>(31.48 to 71.26)                 | 42.63<br>(29.00 to 60.44)                 | 55.20<br>(34.41 to 84.32)                 | 1.26<br>(1.06 to 1.49)              | 2.18<br>(1.43 to 3.27)              | 2.01<br>(1.39 to 2.91)              | 2.40<br>(1.50 to 3.74)              |
| Gallbladder and biliary tract cancer | 42.54<br>(35.83 to 52.85)                 | 53.37<br>(45.12 to 67.76)                 | 54.27<br>(45.66 to 69.15)                 | 50.62<br>(42.82 to 64.10)                 | 2.07<br>(1.76 to 2.55)              | 2.66<br>(2.27 to 3.28)              | 2.78<br>(2.38 to 3.46)              | 3.45<br>(2.08 to 3.02)              |
| Pancreatic cancer                    | 169.59<br>(146.25 to 193.61)              | 318.14<br>(241.98 to 417.48)              | 309.02<br>(239.28 to 401.18)              | 327.82<br>(240.76 to 444.89)              | 8.38<br>(7.33 to 9.52)              | 15.68<br>(12.06 to 20.48)           | 15.84<br>(12.47 to 20.43)           | 15.61<br>(11.52 to 20.94)           |
| Larynx cancer                        | 44.82<br>(37.43 to 53.55)                 | 60.30<br>(30.87 to 109.69)                | 32.63<br>(18.49 to 54.31)                 | 92.09<br>(44.35 to 167.54)                | 1.89<br>(1.62 to 2.21)              | 2.60<br>(1.40 to 4.50)              | 1.48<br>(0.88 to 2.48)              | 3.84<br>(1.94 to 6.65)              |
| Tracheal, bronchus, and lung cancer  | 320.76<br>(269.31 to 371.40)              | 541.80<br>(355.35 to 785.27)              | 332.95<br>(231.59 to 463.57)              | 792.70<br>(406.34 to 1,171.76)            | 13.69<br>(11.69 to 15.59)           | 23.66<br>(15.96 to 33.53)           | 15.31<br>(11.10 to 20.44)           | 33.50<br>(21.72 to 48.38)           |
| Malignant skin melanoma              | 25.92<br>(20.43 to 36.54)                 | 35.17<br>(27.77 to 49.28)                 | 39.69<br>(31.10 to 55.12)                 | 32.59<br>(25.81 to 45.06)                 | 1.05<br>(0.84 to 1.48)              | 1.56<br>(1.23 to 2.16)              | 1.82<br>(1.45 to 2.52)              | 1.40<br>(1.11 to 1.96)              |
| Non-melanoma skin cancer             | 20.71<br>(17.38 to 24.34)                 | 37.56<br>(31.03 to 45.01)                 | 33.90<br>(27.48 to 41.91)                 | 36.94<br>(30.42 to 44.02)                 | 0.91<br>(0.78 to 1.03)              | 1.76<br>(1.45 to 2.05)              | 1.64<br>(1.35 to 1.96)              | 1.67<br>(1.37 to 1.97)              |
| Breast cancer                        | 378.43<br>(297.02 to 474.62)              | 512.43<br>(356.37 to 727.46)              | 468.25<br>(322.40 to 665.40)              | 567.61<br>(379.62 to 836.33)              | 14.83<br>(11.99 to 18.01)           | 21.91<br>(15.91 to 30.68)           | 20.66<br>(14.84 to 28.85)           | 23.40<br>(16.34 to 33.89)           |
| Cervical cancer                      | 235.81<br>(187.53 to 296.17)              | 240.23<br>(167.37 to 325.27)              | 204.15<br>(142.27 to 279.26)              | 254.92<br>(175.06 to 355.37)              | 9.61<br>(7.80 to 11.72)             | 10.22<br>(7.72 to 13.26)            | 8.94<br>(6.67 to 11.75)             | 10.52<br>(7.75 to 14.00)            |
| Uterine cancer                       | 79.75<br>(63.46 to 98.25)                 | 113.32<br>(86.07 to 147.33)               | 102.67<br>(75.92 to 134.57)               | 114.63<br>(87.63 to 147.82)               | 4.40<br>(3.52 to 5.37)              | 6.30<br>(4.93 to 7.97)              | 5.85<br>(4.52 to 7.41)              | 6.22<br>(4.87 to 7.85)              |

|                                 |                                                            |                                                            |                                                            |                                                             |                                                      |                                                      |                                                      |                                                      |
|---------------------------------|------------------------------------------------------------|------------------------------------------------------------|------------------------------------------------------------|-------------------------------------------------------------|------------------------------------------------------|------------------------------------------------------|------------------------------------------------------|------------------------------------------------------|
| Ovarian cancer                  | 73.89<br>(56.75 to<br>94.68)                               | 117.58<br>(75.95 to<br>184.41)                             | 115.16<br>(74.07 to<br>180.37)                             | 118.88<br>(74.75 to<br>192.97)                              | 3.14<br>(2.45 to<br>3.94)                            | 5.25<br>(3.40 to<br>8.32)                            | 5.26<br>(3.41 to<br>8.34)                            | 5.22<br>(3.41 to<br>8.50)                            |
| Prostate cancer                 | 444.42<br>(361.18 to<br>530.28)                            | 859.37<br>(684.17 to<br>1,019.18)                          | 879.26<br>(713.45 to<br>1,036.55)                          | 776.73<br>(603.62 to<br>934.81)                             | 30.96<br>(25.22 to<br>36.35)                         | 59.21<br>(45.06 to<br>70.63)                         | 62.48<br>(49.27 to<br>73.56)                         | 52.00<br>(38.29 to<br>63.73)                         |
| Testicular cancer               | 3.14<br>(2.29 to<br>4.17)                                  | 3.18<br>(2.14 to<br>4.62)                                  | 2.85<br>(1.93 to<br>4.16)                                  | 3.21<br>(2.16 to<br>4.66)                                   | 0.07<br>(0.05 to<br>0.09)                            | 0.09<br>(0.07 to<br>0.12)                            | 0.09<br>(0.06 to<br>0.11)                            | 0.09<br>(0.07 to<br>0.12)                            |
| <b>Grenada</b>                  |                                                            |                                                            |                                                            |                                                             |                                                      |                                                      |                                                      |                                                      |
| Cause                           | YLLs (actual counts)                                       |                                                            |                                                            |                                                             | Deaths (actual counts)                               |                                                      |                                                      |                                                      |
|                                 | 2016                                                       | 2040 Forecast                                              | 2040 Better Scenario                                       | 2040 Worse Scenario                                         | 2016                                                 | 2040 Forecast                                        | 2040 Better Scenario                                 | 2040 Worse Scenario                                  |
| Kidney cancer                   | 34.67<br>(29.45 to<br>40.39)                               | 61.00<br>(48.15 to<br>75.95)                               | 61.33<br>(49.44 to<br>74.52)                               | 59.65<br>(46.43 to<br>76.10)                                | 1.25<br>(1.08 to<br>1.44)                            | 2.48<br>(1.99 to<br>3.01)                            | 2.59<br>(2.14 to<br>3.05)                            | 2.34<br>(1.85 to<br>2.91)                            |
| Bladder cancer                  | 41.30<br>(35.65 to<br>47.43)                               | 61.97<br>(45.79 to<br>84.98)                               | 55.14<br>(42.09 to<br>73.11)                               | 65.58<br>(46.60 to<br>92.99)                                | 2.38<br>(2.07 to<br>2.70)                            | 3.60<br>(2.67 to<br>4.84)                            | 3.37<br>(2.57 to<br>4.39)                            | 3.65<br>(2.58 to<br>5.15)                            |
| Brain and nervous system cancer | 118.90<br>(98.05 to<br>142.68)                             | 170.03<br>(139.05 to<br>203.92)                            | 166.13<br>(136.06 to<br>200.09)                            | 165.44<br>(136.02 to<br>198.19)                             | 3.21<br>(2.70 to<br>3.77)                            | 5.53<br>(4.71 to<br>6.37)                            | 5.58<br>(4.74 to<br>6.42)                            | 5.23<br>(4.44 to<br>5.99)                            |
| Thyroid cancer                  | 29.10<br>(24.58 to<br>33.93)                               | 42.65<br>(29.84 to<br>61.99)                               | 37.73<br>(27.30 to<br>52.33)                               | 44.99<br>(30.42 to<br>66.98)                                | 1.21<br>(1.04 to<br>1.39)                            | 1.92<br>(1.38 to<br>2.69)                            | 1.74<br>(1.29 to<br>2.37)                            | 1.97<br>(1.38 to<br>2.85)                            |
| Mesothelioma                    | 10.55<br>(8.86 to<br>12.55)                                | 17.88<br>(14.38 to<br>22.48)                               | 17.94<br>(14.27 to<br>22.64)                               | 17.62<br>(14.21 to<br>22.17)                                | 0.39<br>(0.33 to<br>0.45)                            | 0.71<br>(0.59 to<br>0.86)                            | 0.73<br>(0.60 to<br>0.89)                            | 0.67<br>(0.55 to<br>0.82)                            |
| Hodgkin lymphoma                | 12.57<br>(10.09 to<br>17.85)                               | 12.94<br>(9.33 to<br>19.28)                                | 10.52<br>(7.54 to<br>15.62)                                | 13.74<br>(9.93 to<br>20.34)                                 | 0.32<br>(0.26 to<br>0.45)                            | 0.39<br>(0.30 to<br>0.55)                            | 0.32<br>(0.25 to<br>0.40)                            | 0.40<br>(0.31 to<br>0.57)                            |
| Non-Hodgkin lymphoma            | 336.62<br>(274.20 to<br>410.16)                            | 467.01<br>(364.51 to<br>589.61)                            | 443.73<br>(348.24 to<br>557.98)                            | 460.94<br>(354.23 to<br>591.27)                             | 10.05<br>(8.42 to<br>11.95)                          | 16.34<br>(13.07 to<br>20.40)                         | 15.96<br>(12.96 to<br>19.69)                         | 15.70<br>(12.44 to<br>19.90)                         |
| Multiple myeloma                | 72.50<br>(57.85 to<br>93.80)                               | 131.01<br>(99.25 to<br>177.53)                             | 129.53<br>(99.29 to<br>171.74)                             | 127.04<br>(95.41 to<br>172.24)                              | 3.21<br>(2.59 to<br>4.13)                            | 6.01<br>(4.65 to<br>8.01)                            | 6.09<br>(4.79 to<br>8.05)                            | 5.88<br>(4.30 to<br>7.62)                            |
| Leukemia                        | 264.68<br>(218.78 to<br>311.73)                            | 263.78<br>(204.51 to<br>335.91)                            | 227.91<br>(179.08 to<br>286.90)                            | 281.92<br>(215.32 to<br>363.42)                             | 7.72<br>(6.65 to<br>8.89)                            | 9.68<br>(7.84 to<br>11.98)                           | 8.65<br>(7.15 to<br>10.53)                           | 9.98<br>(7.92 to<br>12.62)                           |
| Acute lymphoid leukemia         | 46.99<br>(35.92 to<br>60.40)                               | 35.59<br>(25.66 to<br>48.01)                               | 30.96<br>(22.18 to<br>41.94)                               | 37.46<br>(26.59 to<br>50.51)                                | 0.84<br>(0.67 to<br>1.04)                            | 0.79<br>(0.60 to<br>1.00)                            | 0.70<br>(0.54 to<br>0.89)                            | 0.81<br>(0.62 to<br>1.04)                            |
| Chronic lymphoid leukemia       | 18.89<br>(14.35 to<br>24.02)                               | 17.95<br>(11.83 to<br>27.25)                               | 16.15<br>(10.92 to<br>23.73)                               | 18.81<br>(12.11 to<br>29.00)                                | 0.89<br>(0.68 to<br>1.12)                            | 0.93<br>(0.62 to<br>1.36)                            | 0.87<br>(0.59 to<br>1.25)                            | 0.94<br>(0.61 to<br>1.41)                            |
| Acute myeloid leukemia          | 54.01<br>(42.70 to<br>65.59)                               | 52.72<br>(38.76 to<br>68.76)                               | 50.30<br>(37.76 to<br>64.46)                               | 54.00<br>(38.99 to<br>71.69)                                | 1.40<br>(1.13 to<br>1.67)                            | 1.68<br>(1.26 to<br>2.12)                            | 1.66<br>(1.28 to<br>2.04)                            | 1.67<br>(1.23 to<br>2.16)                            |
| Chronic myeloid leukemia        | 16.74<br>(13.62 to<br>20.38)                               | 13.08<br>(9.02 to<br>18.40)                                | 10.51<br>(7.45 to<br>14.99)                                | 13.86<br>(9.34 to<br>19.94)                                 | 0.56<br>(0.46 to<br>0.67)                            | 0.51<br>(0.37 to<br>0.70)                            | 0.42<br>(0.31 to<br>0.58)                            | 0.52<br>(0.36 to<br>0.74)                            |
| Other leukemia                  | 128.05<br>(106.25 to<br>152.43)                            | 144.44<br>(111.89 to<br>184.62)                            | 120.00<br>(95.20 to<br>151.16)                             | 157.79<br>(120.59 to<br>205.20)                             | 4.04<br>(3.46 to<br>4.76)                            | 5.77<br>(4.67 to<br>7.06)                            | 5.01<br>(4.12 to<br>6.02)                            | 6.04<br>(4.80 to<br>7.58)                            |
| Other neoplasms                 | 330.17<br>(276.88 to<br>387.41)                            | 398.38<br>(330.54 to<br>469.80)                            | 397.54<br>(328.87 to<br>471.62)                            | 387.54<br>(323.53 to<br>457.84)                             | 10.73<br>(9.20 to<br>12.37)                          | 15.45<br>(13.45 to<br>17.60)                         | 16.04<br>(13.92 to<br>18.30)                         | 14.48<br>(12.37 to<br>16.59)                         |
| <b>Cardiovascular diseases</b>  | <b>5,071.87</b><br><b>(4,448.17 to</b><br><b>5,703.27)</b> | <b>5,581.64</b><br><b>(3,821.79 to</b><br><b>8,522.25)</b> | <b>3,537.44</b><br><b>(2,534.74 to</b><br><b>5,318.60)</b> | <b>8,373.22</b><br><b>(5,548.03 to</b><br><b>12,639.96)</b> | <b>287.61</b><br><b>(256.75 to</b><br><b>319.12)</b> | <b>322.85</b><br><b>(232.96 to</b><br><b>483.07)</b> | <b>223.42</b><br><b>(164.91 to</b><br><b>340.02)</b> | <b>440.50</b><br><b>(313.92 to</b><br><b>637.59)</b> |
| Rheumatic heart disease         | 123.94<br>(102.99 to<br>145.74)                            | 68.78<br>(49.89 to<br>96.37)                               | 54.75<br>(39.69 to<br>75.04)                               | 74.55<br>(53.34 to<br>104.52)                               | 4.82<br>(4.06 to<br>5.56)                            | 3.35<br>(2.59 to<br>4.32)                            | 2.83<br>(2.19 to<br>3.60)                            | 3.46<br>(2.64 to<br>4.46)                            |

|                                |                                       |                                       |                                     |                                       |                                 |                                |                               |                                 |
|--------------------------------|---------------------------------------|---------------------------------------|-------------------------------------|---------------------------------------|---------------------------------|--------------------------------|-------------------------------|---------------------------------|
| Ischemic heart disease         | 2,070.95<br>(1,805.82 to<br>2,344.76) | 2,304.86<br>(1,215.68 to<br>4,319.43) | 1,262.68<br>(688.80 to<br>2,475.80) | 3,847.42<br>(1,984.64 to<br>7,263.90) | 122.60<br>(109.06 to<br>136.37) | 133.12<br>(74.04 to<br>253.41) | 81.26<br>(46.18 to<br>161.34) | 199.84<br>(109.72 to<br>366.83) |
| Stroke                         | 1,585.55<br>(1,374.96 to<br>1,811.88) | 1,481.47<br>(858.11 to<br>2,906.20)   | 818.88<br>(486.15 to<br>1,687.48)   | 2,555.17<br>(1,408.12 to<br>4,526.58) | 92.04<br>(80.57 to<br>103.74)   | 89.40<br>(52.74 to<br>194.86)  | 55.92<br>(32.64 to<br>124.65) | 135.28<br>(78.71 to<br>267.72)  |
| Ischemic stroke                | 619.91<br>(540.39 to<br>708.91)       | 639.58<br>(299.56 to<br>1,921.80)     | 392.67<br>(187.10 to<br>1,181.08)   | 966.69<br>(455.73 to<br>2,788.49)     | 43.73<br>(38.31 to<br>49.18)    | 45.47<br>(21.26 to<br>142.84)  | 30.98<br>(14.81 to<br>97.70)  | 61.52<br>(28.39 to<br>186.72)   |
| Intracerebral hemorrhage       | 965.64<br>(833.08 to<br>1,102.55)     | 841.89<br>(461.50 to<br>1,570.57)     | 426.20<br>(253.48 to<br>782.95)     | 1,588.48<br>(828.80 to<br>2,968.58)   | 48.32<br>(42.01 to<br>54.49)    | 43.92<br>(25.85 to<br>75.68)   | 24.94<br>(15.53 to<br>43.62)  | 73.76<br>(40.86 to<br>133.46)   |
| Hypertensive heart disease     | 323.12<br>(249.36 to<br>510.28)       | 480.46<br>(301.37 to<br>844.93)       | 350.22<br>(239.59 to<br>557.40)     | 601.73<br>(363.33 to<br>1,075.78)     | 21.44<br>(16.69 to<br>32.32)    | 31.96<br>(20.16 to<br>55.69)   | 24.64<br>(17.19 to<br>38.81)  | 37.78<br>(22.75 to<br>68.82)    |
| Cardiomyopathy and myocarditis | 308.89<br>(249.08 to<br>366.11)       | 380.56<br>(276.11 to<br>504.08)       | 330.00<br>(238.05 to<br>434.69)     | 389.26<br>(278.31 to<br>520.91)       | 12.76<br>(10.50 to<br>14.99)    | 17.03<br>(12.57 to<br>22.14)   | 15.46<br>(11.41 to<br>19.93)  | 16.69<br>(12.27 to<br>21.62)    |
| Myocarditis                    | 58.00<br>(41.27 to<br>76.70)          | 60.54<br>(41.78 to<br>81.55)          | 58.88<br>(40.83 to<br>78.80)        | 60.22<br>(41.34 to<br>81.35)          | 2.92<br>(2.18 to<br>3.95)       | 3.29<br>(2.35 to<br>4.49)      | 3.39<br>(2.42 to<br>4.55)     | 3.12<br>(2.21 to<br>4.27)       |

**Grenada**

| Cause                                         | YLLs (actual counts)                   |                                        |                                        |                                        | Deaths (actual counts)              |                                     |                                     |                                     |
|-----------------------------------------------|----------------------------------------|----------------------------------------|----------------------------------------|----------------------------------------|-------------------------------------|-------------------------------------|-------------------------------------|-------------------------------------|
|                                               | 2016                                   | 2040 Forecast                          | 2040 Better Scenario                   | 2040 Worse Scenario                    | 2016                                | 2040 Forecast                       | 2040 Better Scenario                | 2040 Worse Scenario                 |
|                                               | Alcoholic cardiomyopathy               | 33.97<br>(23.50 to<br>47.95)           | 42.21<br>(27.98 to<br>59.80)           | 40.66<br>(27.06 to<br>58.19)           | 51.08<br>(34.57 to<br>71.97)        | 1.28<br>(0.93 to<br>1.77)           | 1.67<br>(1.16 to<br>2.33)           | 1.65<br>(1.16 to<br>2.28)           |
| Other cardiomyopathy                          | 216.92<br>(175.18 to<br>258.38)        | 277.80<br>(184.43 to<br>394.06)        | 230.46<br>(152.41 to<br>326.09)        | 277.96<br>(183.59 to<br>402.60)        | 8.56<br>(7.09 to<br>10.03)          | 12.08<br>(8.38 to<br>17.03)         | 10.42<br>(6.96 to<br>14.53)         | 11.64<br>(8.01 to<br>16.45)         |
| Atrial fibrillation and flutter               | 32.90<br>(25.42 to<br>41.61)           | 51.95<br>(37.68 to<br>69.51)           | 50.58<br>(37.52 to<br>65.75)           | 51.49<br>(36.62 to<br>69.62)           | 3.43<br>(2.63 to<br>4.44)           | 4.96<br>(3.33 to<br>6.74)           | 5.06<br>(3.51 to<br>6.78)           | 4.71<br>(3.08 to<br>6.46)           |
| Aortic aneurysm                               | 102.51<br>(87.64 to<br>117.82)         | 137.76<br>(110.53 to<br>176.36)        | 123.21<br>(100.24 to<br>151.70)        | 135.95<br>(107.79 to<br>173.99)        | 5.48<br>(4.81 to<br>6.21)           | 7.46<br>(6.06 to<br>9.20)           | 7.10<br>(5.89 to<br>8.51)           | 7.06<br>(5.62 to<br>8.74)           |
| Peripheral artery disease                     | 21.85<br>(14.89 to<br>33.53)           | 48.52<br>(30.87 to<br>75.63)           | 51.31<br>(32.42 to<br>79.08)           | 47.49<br>(30.81 to<br>74.38)           | 2.25<br>(1.40 to<br>3.39)           | 4.56<br>(2.64 to<br>7.29)           | 5.13<br>(2.95 to<br>7.97)           | 4.20<br>(2.46 to<br>6.73)           |
| Endocarditis                                  | 96.27<br>(65.51 to<br>121.96)          | 125.32<br>(81.38 to<br>176.76)         | 115.32<br>(75.38 to<br>161.42)         | 127.77<br>(82.04 to<br>181.90)         | 4.14<br>(2.81 to<br>5.34)           | 5.91<br>(3.84 to<br>8.77)           | 5.69<br>(3.72 to<br>8.32)           | 5.77<br>(3.72 to<br>8.59)           |
| Other cardiovascular and circulatory diseases | 405.87<br>(349.74 to<br>464.91)        | 501.96<br>(386.34 to<br>661.09)        | 380.50<br>(295.26 to<br>487.42)        | 542.38<br>(417.34 to<br>714.61)        | 18.64<br>(16.34 to<br>21.16)        | 25.09<br>(19.83 to<br>32.03)        | 20.35<br>(16.07 to<br>25.60)        | 25.72<br>(20.24 to<br>33.25)        |
| <b>Chronic respiratory diseases</b>           | <b>433.50</b><br>(372.10 to<br>493.55) | <b>532.96</b><br>(402.38 to<br>696.93) | <b>394.97</b><br>(315.42 to<br>487.30) | <b>697.63</b><br>(504.70 to<br>955.71) | <b>21.09</b><br>(18.67 to<br>23.51) | <b>27.68</b><br>(21.41 to<br>34.56) | <b>21.45</b><br>(17.61 to<br>25.70) | <b>34.71</b><br>(25.47 to<br>45.45) |
| Chronic obstructive pulmonary disease         | 249.23<br>(211.58 to<br>285.30)        | 336.35<br>(234.07 to<br>473.13)        | 208.77<br>(151.33 to<br>277.95)        | 492.86<br>(327.22 to<br>725.22)        | 14.19<br>(12.34 to<br>15.97)        | 19.06<br>(13.61 to<br>25.29)        | 12.84<br>(9.66 to<br>16.42)         | 26.16<br>(17.95 to<br>36.31)        |
| Pneumoconiosis                                | 4.69<br>(3.61 to<br>5.87)              | 4.26<br>(2.95 to<br>6.05)              | 3.31<br>(2.21 to<br>4.82)              | 4.52<br>(3.14 to<br>6.38)              | 0.18<br>(0.15 to<br>0.21)           | 0.20<br>(0.14 to<br>0.27)           | 0.16<br>(0.11 to<br>0.22)           | 0.20<br>(0.14 to<br>0.28)           |
| Silicosis                                     | 0.26<br>(0.16 to<br>0.35)              | 0.22<br>(0.12 to<br>0.38)              | 0.17<br>(0.09 to<br>0.29)              | 0.23<br>(0.13 to<br>0.39)              | 0.01<br>(0.01 to<br>0.01)           | 0.01<br>(0.01 to<br>0.02)           | 0.01<br>(0.00 to<br>0.02)           | 0.01<br>(0.00 to<br>0.02)           |
| Asbestosis                                    | 1.29<br>(0.85 to<br>1.75)              | 0.85<br>(0.52 to<br>1.24)              | 0.88<br>(0.55 to<br>1.30)              | 0.84<br>(0.52 to<br>1.23)              | 0.03<br>(0.02 to<br>0.04)           | 0.03<br>(0.02 to<br>0.04)           | 0.03<br>(0.02 to<br>0.04)           | 0.03<br>(0.02 to<br>0.04)           |
| Coal workers pneumoconiosis                   | 2.27<br>(1.67 to<br>2.99)              | 2.41<br>(1.48 to<br>3.74)              | 1.58<br>(0.91 to<br>2.54)              | 2.63<br>(1.68 to<br>3.98)              | 0.09<br>(0.07 to<br>0.12)           | 0.11<br>(0.07 to<br>0.16)           | 0.07<br>(0.04 to<br>0.11)           | 0.11<br>(0.07 to<br>0.17)           |

|                                                                |                                                      |                                                      |                                                      |                                                      |                                                   |                                                   |                                                   |                                                   |
|----------------------------------------------------------------|------------------------------------------------------|------------------------------------------------------|------------------------------------------------------|------------------------------------------------------|---------------------------------------------------|---------------------------------------------------|---------------------------------------------------|---------------------------------------------------|
| Other pneumoconiosis                                           | 0.88<br>(0.53 to<br>1.12)                            | 0.79<br>(0.46 to<br>1.14)                            | 0.68<br>(0.42 to<br>1.04)                            | 0.82<br>(0.50 to<br>1.22)                            | 0.05<br>(0.00 to<br>0.06)                         | 0.05<br>(0.03 to<br>0.07)                         | 0.04<br>(0.03 to<br>0.07)                         | 0.05<br>(0.03 to<br>0.07)                         |
| Asthma                                                         | 68.30<br>(54.98 to<br>82.80)                         | 41.88<br>(25.43 to<br>64.11)                         | 27.65<br>(17.12 to<br>42.64)                         | 50.25<br>(29.55 to<br>78.87)                         | 2.26<br>(1.87 to<br>2.68)                         | 1.66<br>(1.05 to<br>2.53)                         | 1.16<br>(0.75 to<br>1.75)                         | 1.90<br>(1.17 to<br>2.97)                         |
| Interstitial lung disease and pulmonary sarcoidosis            | 47.55<br>(34.07 to<br>60.62)                         | 61.11<br>(43.45 to<br>78.06)                         | 72.62<br>(51.20 to<br>91.73)                         | 56.57<br>(40.18 to<br>72.18)                         | 1.82<br>(1.31 to<br>2.35)                         | 2.63<br>(1.87 to<br>3.44)                         | 3.23<br>(2.32 to<br>4.17)                         | 2.35<br>(1.68 to<br>3.11)                         |
| Other chronic respiratory diseases                             | 63.72<br>(46.23 to<br>90.97)                         | 89.37<br>(63.23 to<br>132.97)                        | 82.62<br>(59.58 to<br>119.63)                        | 93.43<br>(64.02 to<br>141.28)                        | 2.64<br>(1.96 to<br>3.86)                         | 4.14<br>(2.85 to<br>6.24)                         | 4.06<br>(2.95 to<br>5.94)                         | 4.10<br>(2.75 to<br>6.33)                         |
| <b>Cirrhosis and other chronic liver diseases</b>              | <b>500.93</b><br><b>(417.93 to</b><br><b>591.78)</b> | <b>604.44</b><br><b>(482.13 to</b><br><b>762.24)</b> | <b>527.66</b><br><b>(414.61 to</b><br><b>669.05)</b> | <b>683.14</b><br><b>(541.55 to</b><br><b>857.60)</b> | <b>16.93</b><br><b>(14.46 to</b><br><b>19.57)</b> | <b>22.18</b><br><b>(18.28 to</b><br><b>27.03)</b> | <b>19.87</b><br><b>(16.25 to</b><br><b>24.25)</b> | <b>24.30</b><br><b>(19.83 to</b><br><b>29.52)</b> |
| Cirrhosis and other chronic liver diseases due to hepatitis B  | 58.14<br>(44.64 to<br>74.89)                         | 78.68<br>(57.96 to<br>105.22)                        | 71.78<br>(52.38 to<br>96.85)                         | 78.66<br>(58.31 to<br>104.83)                        | 2.04<br>(1.61 to<br>2.57)                         | 2.94<br>(2.24 to<br>3.76)                         | 2.73<br>(2.08 to<br>3.53)                         | 2.87<br>(2.19 to<br>3.70)                         |
| Cirrhosis and other chronic liver diseases due to hepatitis C  | 159.72<br>(128.26 to<br>195.45)                      | 211.14<br>(163.91 to<br>277.13)                      | 190.74<br>(145.11 to<br>250.26)                      | 212.31<br>(162.80 to<br>278.16)                      | 5.32<br>(4.41 to<br>6.38)                         | 7.50<br>(5.99 to<br>9.44)                         | 6.90<br>(5.43 to<br>8.73)                         | 7.40<br>(5.87 to<br>9.32)                         |
| Cirrhosis and other chronic liver diseases due to alcohol use  | 193.67<br>(160.12 to<br>233.36)                      | 218.95<br>(167.41 to<br>283.07)                      | 179.81<br>(138.09 to<br>232.66)                      | 294.67<br>(227.19 to<br>380.36)                      | 6.88<br>(5.80 to<br>8.13)                         | 8.34<br>(6.69 to<br>10.31)                        | 7.10<br>(5.69 to<br>8.78)                         | 10.66<br>(8.54 to<br>13.09)                       |
| Cirrhosis and other chronic liver diseases due to other causes | 89.40<br>(73.98 to<br>106.84)                        | 95.67<br>(72.61 to<br>125.38)                        | 85.33<br>(64.50 to<br>112.51)                        | 97.49<br>(73.71 to<br>127.20)                        | 2.70<br>(2.26 to<br>3.16)                         | 3.41<br>(2.70 to<br>4.26)                         | 3.14<br>(2.47 to<br>3.93)                         | 3.37<br>(2.64 to<br>4.26)                         |
| <b>Digestive diseases</b>                                      | <b>478.50</b><br><b>(403.05 to</b><br><b>561.82)</b> | <b>485.96</b><br><b>(389.39 to</b><br><b>617.05)</b> | <b>428.00</b><br><b>(340.41 to</b><br><b>536.81)</b> | <b>513.38</b><br><b>(407.24 to</b><br><b>662.60)</b> | <b>19.24</b><br><b>(16.58 to</b><br><b>22.12)</b> | <b>22.80</b><br><b>(18.70 to</b><br><b>27.69)</b> | <b>21.12</b><br><b>(17.41 to</b><br><b>25.53)</b> | <b>22.91</b><br><b>(18.35 to</b><br><b>28.14)</b> |
| Peptic ulcer disease                                           | 87.55<br>(70.92 to<br>106.17)                        | 57.85<br>(43.86 to<br>75.81)                         | 43.64<br>(32.80 to<br>57.54)                         | 62.51<br>(47.11 to<br>82.29)                         | 3.55<br>(2.98 to<br>4.18)                         | 2.74<br>(2.09 to<br>3.52)                         | 2.15<br>(1.65 to<br>2.78)                         | 2.86<br>(2.16 to<br>3.69)                         |

**Grenada**

| Cause                                      | YLLs (actual counts)           |                                 |                                 |                                 | Deaths (actual counts)    |                           |                           |                           |
|--------------------------------------------|--------------------------------|---------------------------------|---------------------------------|---------------------------------|---------------------------|---------------------------|---------------------------|---------------------------|
|                                            | 2016                           | 2040 Forecast                   | 2040 Better Scenario            | 2040 Worse Scenario             | 2016                      | 2040 Forecast             | 2040 Better Scenario      | 2040 Worse Scenario       |
| Gastritis and duodenitis                   | 27.48<br>(20.68 to<br>35.96)   | 38.50<br>(27.56 to<br>53.50)    | 33.61<br>(23.61 to<br>47.29)    | 38.70<br>(27.76 to<br>53.62)    | 1.03<br>(0.80 to<br>1.36) | 1.61<br>(1.19 to<br>2.23) | 1.46<br>(1.07 to<br>2.07) | 1.57<br>(1.14 to<br>2.17) |
| Appendicitis                               | 26.23<br>(18.75 to<br>32.32)   | 18.55<br>(12.43 to<br>25.63)    | 14.73<br>(9.59 to<br>20.67)     | 19.70<br>(13.21 to<br>26.97)    | 0.77<br>(0.55 to<br>0.94) | 0.67<br>(0.45 to<br>0.88) | 0.55<br>(0.36 to<br>0.74) | 0.69<br>(0.45 to<br>0.90) |
| Paralytic ileus and intestinal obstruction | 117.94<br>(93.90 to<br>147.36) | 136.89<br>(107.65 to<br>171.96) | 134.07<br>(105.95 to<br>167.73) | 135.37<br>(106.50 to<br>170.78) | 4.92<br>(4.08 to<br>6.15) | 6.80<br>(5.35 to<br>8.52) | 7.00<br>(5.58 to<br>8.75) | 6.41<br>(4.96 to<br>8.06) |
| Inguinal, femoral, and abdominal hernia    | 21.50<br>(14.52 to<br>26.96)   | 14.83<br>(9.82 to<br>19.58)     | 13.10<br>(8.66 to<br>17.39)     | 15.03<br>(9.81 to<br>19.56)     | 0.88<br>(0.63 to<br>1.10) | 0.68<br>(0.47 to<br>0.89) | 0.63<br>(0.44 to<br>0.82) | 0.66<br>(0.44 to<br>0.86) |
| Inflammatory bowel disease                 | 37.66<br>(27.86 to<br>46.07)   | 34.65<br>(25.36 to<br>42.79)    | 34.17<br>(24.84 to<br>42.21)    | 33.88<br>(24.74 to<br>41.93)    | 1.33<br>(1.01 to<br>1.58) | 1.48<br>(1.10 to<br>1.77) | 1.53<br>(1.14 to<br>1.83) | 1.39<br>(1.02 to<br>1.67) |
| Vascular intestinal disorders              | 12.43<br>(10.20 to<br>15.09)   | 16.57<br>(13.27 to<br>20.30)    | 15.80<br>(12.42 to<br>19.52)    | 16.26<br>(13.15 to<br>19.89)    | 0.66<br>(0.55 to<br>0.80) | 0.97<br>(0.75 to<br>1.19) | 0.96<br>(0.75 to<br>1.19) | 0.92<br>(0.70 to<br>1.15) |
| Gallbladder and biliary diseases           | 26.62<br>(21.81 to<br>33.54)   | 42.33<br>(24.92 to<br>71.93)    | 30.39<br>(18.90 to<br>50.27)    | 50.31<br>(27.91 to<br>87.31)    | 1.16<br>(0.97 to<br>1.48) | 2.01<br>(1.18 to<br>3.32) | 1.51<br>(0.94 to<br>2.46) | 2.29<br>(1.31 to<br>3.90) |
| Pancreatitis                               | 41.35<br>(31.00 to<br>51.92)   | 43.97<br>(21.73 to<br>89.21)    | 34.07<br>(17.31 to<br>68.59)    | 58.38<br>(27.03 to<br>123.10)   | 1.18<br>(0.93 to<br>1.44) | 1.44<br>(0.78 to<br>2.75) | 1.15<br>(0.64 to<br>2.14) | 1.83<br>(0.90 to<br>3.70) |
| Other digestive diseases                   | 79.75<br>(63.33 to<br>99.19)   | 81.83<br>(62.04 to<br>105.32)   | 74.42<br>(56.31 to<br>95.49)    | 83.22<br>(62.39 to<br>106.48)   | 3.75<br>(3.09 to<br>4.62) | 4.39<br>(3.39 to<br>5.61) | 4.18<br>(3.21 to<br>5.34) | 4.29<br>(3.31 to<br>5.51) |

|                                                     |                                       |                                       |                                       |                                       |                                 |                                 |                                 |                                 |
|-----------------------------------------------------|---------------------------------------|---------------------------------------|---------------------------------------|---------------------------------------|---------------------------------|---------------------------------|---------------------------------|---------------------------------|
|                                                     | 472.72<br>(403.73 to<br>546.20)       | 681.67<br>(541.61 to<br>874.27)       | 674.93<br>(547.73 to<br>841.81)       | 695.57<br>(534.57 to<br>916.51)       | 34.65<br>(29.11 to<br>40.88)    | 51.86<br>(36.76 to<br>70.35)    | 54.16<br>(39.99 to<br>69.96)    | 49.89<br>(34.24 to<br>69.89)    |
| <b>Neurological disorders</b>                       |                                       |                                       |                                       |                                       |                                 |                                 |                                 |                                 |
| Alzheimer's disease and other dementias             | 252.70<br>(205.13 to<br>308.37)       | 417.39<br>(293.64 to<br>604.45)       | 419.99<br>(307.70 to<br>575.89)       | 412.76<br>(273.29 to<br>634.54)       | 27.57<br>(22.60 to<br>33.59)    | 41.22<br>(26.66 to<br>58.95)    | 43.04<br>(29.76 to<br>59.40)    | 39.42<br>(24.62 to<br>59.14)    |
| Parkinson's disease                                 | 26.83<br>(20.29 to<br>35.09)          | 52.88<br>(38.57 to<br>69.06)          | 61.11<br>(45.61 to<br>79.40)          | 45.79<br>(32.73 to<br>60.54)          | 2.31<br>(1.75 to<br>3.04)       | 4.33<br>(2.96 to<br>5.83)       | 5.12<br>(3.70 to<br>6.77)       | 3.67<br>(2.43 to<br>5.06)       |
| Epilepsy                                            | 129.73<br>(105.99 to<br>156.73)       | 120.01<br>(79.82 to<br>184.84)        | 99.05<br>(66.43 to<br>149.98)         | 149.61<br>(97.63 to<br>232.38)        | 3.00<br>(2.49 to<br>3.57)       | 3.38<br>(2.41 to<br>4.83)       | 2.90<br>(2.08 to<br>4.13)       | 4.08<br>(2.79 to<br>5.99)       |
| Multiple sclerosis                                  | 12.76<br>(9.08 to<br>21.11)           | 21.39<br>(15.08 to<br>34.50)          | 21.99<br>(15.51 to<br>35.58)          | 20.84<br>(14.64 to<br>33.89)          | 0.35<br>(0.26 to<br>0.57)       | 0.63<br>(0.46 to<br>1.00)       | 0.65<br>(0.48 to<br>1.05)       | 0.60<br>(0.44 to<br>0.97)       |
| Motor neuron disease                                | 15.18<br>(12.25 to<br>18.47)          | 24.08<br>(19.72 to<br>29.09)          | 25.26<br>(20.47 to<br>30.61)          | 22.51<br>(18.39 to<br>27.23)          | 0.50<br>(0.41 to<br>0.60)       | 0.89<br>(0.75 to<br>1.05)       | 0.95<br>(0.79 to<br>1.12)       | 0.82<br>(0.69 to<br>0.97)       |
| Other neurological disorders                        | 35.52<br>(29.37 to<br>42.12)          | 45.93<br>(37.76 to<br>54.82)          | 47.52<br>(38.99 to<br>57.15)          | 44.06<br>(36.23 to<br>52.33)          | 0.92<br>(0.78 to<br>1.06)       | 1.40<br>(1.21 to<br>1.61)       | 1.50<br>(1.29 to<br>1.71)       | 1.31<br>(1.12 to<br>1.50)       |
| <b>Mental disorders</b>                             | 147.71<br>(116.57 to<br>185.32)       | 196.37<br>(152.42 to<br>256.59)       | 205.49<br>(159.09 to<br>269.53)       | 203.48<br>(157.85 to<br>266.56)       | 4.02<br>(3.25 to<br>4.89)       | 6.03<br>(4.94 to<br>7.38)       | 6.47<br>(5.26 to<br>7.99)       | 6.10<br>(4.98 to<br>7.50)       |
| Alcohol use disorders                               | 86.65<br>(68.17 to<br>108.81)         | 96.73<br>(73.11 to<br>126.15)         | 96.44<br>(72.19 to<br>127.06)         | 105.10<br>(80.13 to<br>136.26)        | 2.43<br>(1.95 to<br>2.99)       | 3.06<br>(2.39 to<br>3.82)       | 3.12<br>(2.41 to<br>3.90)       | 3.25<br>(2.55 to<br>4.07)       |
| Drug use disorders                                  | 60.91<br>(44.80 to<br>81.43)          | 99.38<br>(72.23 to<br>135.29)         | 108.79<br>(78.00 to<br>148.74)        | 98.13<br>(71.12 to<br>134.07)         | 1.58<br>(1.21 to<br>2.05)       | 2.96<br>(2.27 to<br>3.81)       | 3.35<br>(2.54 to<br>4.29)       | 2.85<br>(2.16 to<br>3.67)       |
| Opioid use disorders                                | 30.55<br>(21.48 to<br>43.02)          | 35.71<br>(24.45 to<br>54.02)          | 36.53<br>(24.95 to<br>55.72)          | 35.33<br>(24.16 to<br>53.75)          | 0.69<br>(0.50 to<br>0.95)       | 0.95<br>(0.68 to<br>1.41)       | 1.00<br>(0.72 to<br>1.50)       | 0.92<br>(0.65 to<br>1.36)       |
| Cocaine use disorders                               | 8.25<br>(4.85 to<br>12.03)            | 18.48<br>(10.82 to<br>28.76)          | 19.78<br>(11.64 to<br>30.94)          | 18.77<br>(10.91 to<br>29.18)          | 0.20<br>(0.12 to<br>0.29)       | 0.49<br>(0.29 to<br>0.74)       | 0.53<br>(0.32 to<br>0.82)       | 0.49<br>(0.29 to<br>0.75)       |
| Amphetamine use disorders                           | 2.39<br>(1.45 to<br>3.63)             | 6.00<br>(3.69 to<br>9.62)             | 6.78<br>(4.07 to<br>10.68)            | 6.10<br>(3.66 to<br>9.86)             | 0.06<br>(0.04 to<br>0.08)       | 0.16<br>(0.10 to<br>0.24)       | 0.18<br>(0.12 to<br>0.29)       | 0.16<br>(0.10 to<br>0.24)       |
| Other drug use disorders                            | 19.72<br>(13.54 to<br>26.94)          | 39.19<br>(27.80 to<br>53.40)          | 45.71<br>(31.94 to<br>63.36)          | 37.93<br>(26.86 to<br>51.85)          | 0.63<br>(0.47 to<br>0.82)       | 1.36<br>(1.00 to<br>1.75)       | 1.64<br>(1.21 to<br>2.13)       | 1.27<br>(0.93 to<br>1.66)       |
| Eating disorders                                    | 0.15<br>(0.11 to<br>0.20)             | 0.25<br>(0.17 to<br>0.36)             | 0.26<br>(0.18 to<br>0.37)             | 0.25<br>(0.17 to<br>0.35)             | 0.00<br>(0.00 to<br>0.00)       | 0.00<br>(0.00 to<br>0.01)       | 0.01<br>(0.00 to<br>0.01)       | 0.00<br>(0.00 to<br>0.01)       |
| <b>Grenada</b>                                      |                                       |                                       |                                       |                                       |                                 |                                 |                                 |                                 |
| Cause                                               | YLLs (actual counts)                  |                                       |                                       |                                       | Deaths (actual counts)          |                                 |                                 |                                 |
|                                                     | 2016                                  | 2040 Forecast                         | 2040 Better Scenario                  | 2040 Worse Scenario                   | 2016                            | 2040 Forecast                   | 2040 Better Scenario            | 2040 Worse Scenario             |
| Diabetes, urogenital, blood, and endocrine diseases | 2,730.13<br>(2,369.91 to<br>3,096.37) | 4,025.27<br>(2,596.01 to<br>6,927.12) | 3,131.35<br>(2,052.71 to<br>5,587.70) | 4,845.05<br>(3,029.99 to<br>7,895.90) | 130.87<br>(115.32 to<br>145.96) | 213.09<br>(137.68 to<br>358.30) | 172.43<br>(111.71 to<br>300.98) | 245.06<br>(152.50 to<br>391.45) |
| Diabetes mellitus                                   | 1,355.51<br>(1,179.61 to<br>1,537.17) | 1,811.31<br>(1,338.88 to<br>2,423.23) | 1,357.42<br>(999.77 to<br>1,835.67)   | 2,157.93<br>(1,527.67 to<br>2,969.73) | 73.96<br>(64.79 to<br>83.10)    | 103.70<br>(78.54 to<br>133.15)  | 81.32<br>(62.02 to<br>103.63)   | 117.26<br>(84.11 to<br>154.07)  |
| Acute glomerulonephritis                            | 0.65<br>(0.52 to<br>0.78)             | 0.66<br>(0.45 to<br>0.92)             | 0.55<br>(0.38 to<br>0.77)             | 0.71<br>(0.49 to<br>0.99)             | 0.01<br>(0.01 to<br>0.01)       | 0.01<br>(0.01 to<br>0.02)       | 0.01<br>(0.01 to<br>0.02)       | 0.01<br>(0.01 to<br>0.02)       |
| Chronic kidney disease                              | 876.11<br>(757.43 to<br>1,002.48)     | 1,594.46<br>(434.98 to<br>4,421.68)   | 1,202.72<br>(338.88 to<br>3,636.39)   | 2,064.83<br>(559.01 to<br>5,080.86)   | 38.14<br>(33.72 to<br>42.66)    | 81.57<br>(18.87 to<br>229.10)   | 64.09<br>(14.78 to<br>196.40)   | 101.22<br>(23.92 to<br>246.67)  |
| Chronic kidney disease due to diabetes mellitus     | 298.17<br>(248.88 to<br>353.04)       | 678.96<br>(164.11 to<br>2,037.72)     | 512.73<br>(131.82 to<br>1,638.35)     | 887.13<br>(212.59 to<br>2,284.57)     | 13.30<br>(11.32 to<br>15.99)    | 32.88<br>(7.13 to<br>94.77)     | 25.69<br>(5.67 to<br>82.64)     | 41.30<br>(9.04 to<br>101.07)    |

|                                                            |                                 |                                   |                                 |                                   |                             |                             |                             |                             |
|------------------------------------------------------------|---------------------------------|-----------------------------------|---------------------------------|-----------------------------------|-----------------------------|-----------------------------|-----------------------------|-----------------------------|
| Chronic kidney disease due to hypertension                 | 97.21<br>(79.58 to<br>116.69)   | 210.01<br>(45.27 to<br>603.19)    | 166.45<br>(36.99 to<br>529.69)  | 263.02<br>(58.38 to<br>662.29)    | 6.71<br>(5.48 to<br>8.05)   | 15.11<br>(3.25 to<br>43.52) | 12.57<br>(2.74 to<br>39.60) | 17.94<br>(3.96 to<br>47.06) |
| Chronic kidney disease due to glomerulonephritis           | 279.32<br>(226.04 to<br>337.34) | 392.37<br>(128.76 to<br>1,067.46) | 288.75<br>(97.34 to<br>817.42)  | 509.46<br>(160.89 to<br>1,206.81) | 10.06<br>(8.26 to<br>12.08) | 17.92<br>(4.51 to<br>50.17) | 13.62<br>(3.37 to<br>41.83) | 22.52<br>(5.65 to<br>56.60) |
| Chronic kidney disease due to other and unspecified causes | 201.40<br>(164.11 to<br>246.01) | 313.11<br>(95.39 to<br>843.17)    | 234.79<br>(72.23 to<br>667.78)  | 405.22<br>(118.64 to<br>962.48)   | 8.08<br>(6.52 to<br>9.77)   | 15.66<br>(3.82 to<br>44.03) | 12.22<br>(2.96 to<br>37.99) | 19.46<br>(4.73 to<br>48.20) |
| Urinary diseases and male infertility                      | 140.33<br>(122.46 to<br>160.11) | 192.77<br>(165.78 to<br>221.14)   | 180.93<br>(152.93 to<br>212.15) | 184.25<br>(157.11 to<br>213.51)   | 7.96<br>(6.98 to<br>8.98)   | 12.22<br>(9.78 to<br>14.42) | 12.04<br>(9.94 to<br>14.22) | 11.16<br>(8.58 to<br>13.41) |
| Urinary tract infections                                   | 114.14<br>(97.79 to<br>131.63)  | 169.57<br>(144.93 to<br>195.20)   | 161.26<br>(135.85 to<br>189.00) | 160.97<br>(135.37 to<br>187.19)   | 6.58<br>(5.68 to<br>7.52)   | 10.89<br>(8.67 to<br>13.00) | 10.86<br>(8.98 to<br>12.91) | 9.88<br>(7.59 to<br>12.01)  |
| Urolithiasis                                               | 5.51<br>(4.07 to<br>8.17)       | 5.04<br>(3.28 to<br>8.25)         | 4.28<br>(2.74 to<br>7.14)       | 4.98<br>(3.22 to<br>8.12)         | 0.24<br>(0.18 to<br>0.35)   | 0.22<br>(0.15 to<br>0.36)   | 0.19<br>(0.13 to<br>0.32)   | 0.21<br>(0.14 to<br>0.34)   |
| Other urinary diseases                                     | 20.69<br>(15.55 to<br>30.19)    | 18.16<br>(12.49 to<br>24.96)      | 15.39<br>(10.41 to<br>24.96)    | 18.30<br>(12.44 to<br>29.58)      | 1.14<br>(0.85 to<br>1.68)   | 1.11<br>(0.71 to<br>1.77)   | 0.99<br>(0.63 to<br>1.62)   | 1.06<br>(0.67 to<br>1.70)   |
| Gynecological diseases                                     | 0.38<br>(0.24 to<br>0.52)       | 0.27<br>(0.16 to<br>0.44)         | 0.19<br>(0.11 to<br>0.31)       | 0.30<br>(0.18 to<br>0.48)         | 0.01<br>(0.01 to<br>0.02)   | 0.01<br>(0.01 to<br>0.02)   | 0.01<br>(0.00 to<br>0.01)   | 0.01<br>(0.01 to<br>0.02)   |
| Uterine fibroids                                           | 0.07<br>(0.04 to<br>0.10)       | 0.04<br>(0.02 to<br>0.08)         | 0.03<br>(0.01 to<br>0.06)       | 0.05<br>(0.02 to<br>0.09)         | 0.00<br>(0.00 to<br>0.00)   | 0.00<br>(0.00 to<br>0.00)   | 0.00<br>(0.00 to<br>0.00)   | 0.00<br>(0.00 to<br>0.00)   |
| Polycystic ovarian syndrome                                | 0.18<br>(0.11 to<br>0.27)       | 0.09<br>(0.04 to<br>0.18)         | 0.06<br>(0.02 to<br>0.11)       | 0.11<br>(0.05 to<br>0.21)         | 0.00<br>(0.00 to<br>0.01)   | 0.00<br>(0.00 to<br>0.00)   | 0.00<br>(0.00 to<br>0.00)   | 0.00<br>(0.00 to<br>0.00)   |
| Endometriosis                                              | 0.00<br>(0.00 to<br>0.00)       | 0.00<br>(0.00 to<br>0.00)         | 0.00<br>(0.00 to<br>0.00)       | 0.00<br>(0.00 to<br>0.00)         | 0.00<br>(0.00 to<br>0.00)   | 0.00<br>(0.00 to<br>0.00)   | 0.00<br>(0.00 to<br>0.00)   | 0.00<br>(0.00 to<br>0.00)   |
| Genital prolapse                                           | 0.01<br>(0.00 to<br>0.01)       | 0.00<br>(0.00 to<br>0.01)         | 0.00<br>(0.00 to<br>0.01)       | 0.00<br>(0.00 to<br>0.01)         | 0.00<br>(0.00 to<br>0.00)   | 0.00<br>(0.00 to<br>0.00)   | 0.00<br>(0.00 to<br>0.00)   | 0.00<br>(0.00 to<br>0.00)   |
| Other gynecological diseases                               | 0.13<br>(0.05 to<br>0.18)       | 0.13<br>(0.07 to<br>0.21)         | 0.10<br>(0.05 to<br>0.16)       | 0.14<br>(0.07 to<br>0.22)         | 0.01<br>(0.00 to<br>0.01)   | 0.01<br>(0.00 to<br>0.01)   | 0.01<br>(0.00 to<br>0.01)   | 0.01<br>(0.00 to<br>0.01)   |
| Hemoglobinopathies and hemolytic anemias                   | 162.44<br>(125.87 to<br>202.28) | 176.29<br>(128.97 to<br>233.09)   | 146.27<br>(106.86 to<br>193.62) | 183.69<br>(136.17 to<br>241.68)   | 4.36<br>(3.43 to<br>5.33)   | 5.82<br>(4.60 to<br>7.26)   | 4.98<br>(3.90 to<br>6.29)   | 5.91<br>(4.64 to<br>7.48)   |
| Thalassemias                                               | 2.33<br>(0.91 to<br>4.62)       | 0.73<br>(0.28 to<br>1.53)         | 0.69<br>(0.27 to<br>1.46)       | 0.74<br>(0.28 to<br>1.55)         | 0.03<br>(0.01 to<br>0.06)   | 0.01<br>(0.00 to<br>0.02)   | 0.01<br>(0.00 to<br>0.02)   | 0.01<br>(0.00 to<br>0.02)   |
| Sickle cell disorders                                      | 130.22<br>(99.47 to<br>163.39)  | 134.03<br>(96.51 to<br>184.29)    | 110.65<br>(77.85 to<br>151.74)  | 140.67<br>(100.21 to<br>193.15)   | 2.46<br>(1.90 to<br>3.09)   | 3.26<br>(2.40 to<br>4.34)   | 2.72<br>(1.98 to<br>3.66)   | 3.39<br>(2.50 to<br>4.52)   |
| G6PD deficiency                                            | 11.83<br>(8.14 to<br>16.53)     | 20.76<br>(13.76 to<br>28.66)      | 16.69<br>(10.81 to<br>23.25)    | 21.67<br>(14.45 to<br>29.87)      | 0.37<br>(0.26 to<br>0.50)   | 0.83<br>(0.57 to<br>1.13)   | 0.68<br>(0.47 to<br>0.94)   | 0.85<br>(0.59 to<br>1.17)   |
| Other hemoglobinopathies and hemolytic anemias             | 18.05<br>(14.51 to<br>22.58)    | 20.77<br>(15.81 to<br>25.96)      | 18.24<br>(13.96 to<br>23.02)    | 20.61<br>(15.35 to<br>26.02)      | 1.50<br>(1.22 to<br>1.88)   | 1.73<br>(1.26 to<br>2.19)   | 1.57<br>(1.18 to<br>1.99)   | 1.67<br>(1.18 to<br>2.14)   |
| Endocrine, metabolic, blood, and immune disorders          | 194.71<br>(157.56 to<br>272.22) | 249.50<br>(189.92 to<br>358.86)   | 243.27<br>(186.62 to<br>345.85) | 253.35<br>(191.23 to<br>366.27)   | 6.43<br>(5.27 to<br>8.63)   | 9.76<br>(7.77 to<br>13.63)  | 9.98<br>(7.96 to<br>13.96)  | 9.48<br>(7.41 to<br>13.27)  |

**Grenada**

| Cause                     | YLLs (actual counts)           |                                |                                |                                | Deaths (actual counts)    |                           |                           |                           |
|---------------------------|--------------------------------|--------------------------------|--------------------------------|--------------------------------|---------------------------|---------------------------|---------------------------|---------------------------|
|                           | 2016                           | 2040 Forecast                  | 2040 Better Scenario           | 2040 Worse Scenario            | 2016                      | 2040 Forecast             | 2040 Better Scenario      | 2040 Worse Scenario       |
| Musculoskeletal disorders | 161.34<br>(98.89 to<br>203.19) | 150.82<br>(93.86 to<br>192.66) | 148.33<br>(94.22 to<br>191.55) | 145.28<br>(89.71 to<br>184.42) | 3.94<br>(2.53 to<br>4.84) | 4.45<br>(2.89 to<br>5.39) | 4.46<br>(2.94 to<br>5.43) | 4.19<br>(2.73 to<br>5.07) |

|                                               |                                                            |                                                            |                                                            |                                                            |                                                   |                                                   |                                                   |                                                   |
|-----------------------------------------------|------------------------------------------------------------|------------------------------------------------------------|------------------------------------------------------------|------------------------------------------------------------|---------------------------------------------------|---------------------------------------------------|---------------------------------------------------|---------------------------------------------------|
| Rheumatoid arthritis                          | 6.54<br>(4.11 to<br>9.64)                                  | 6.21<br>(3.86 to<br>9.12)                                  | 4.99<br>(3.05 to<br>7.38)                                  | 6.34<br>(3.92 to<br>9.29)                                  | 0.35<br>(0.22 to<br>0.48)                         | 0.35<br>(0.22 to<br>0.51)                         | 0.30<br>(0.18 to<br>0.44)                         | 0.35<br>(0.22 to<br>0.50)                         |
| Other musculoskeletal disorders               | 154.80<br>(95.08 to<br>195.47)                             | 144.61<br>(89.13 to<br>187.18)                             | 143.34<br>(90.17 to<br>186.29)                             | 138.94<br>(85.30 to<br>178.67)                             | 3.60<br>(2.33 to<br>4.45)                         | 4.09<br>(2.66 to<br>5.03)                         | 4.16<br>(2.72 to<br>5.12)                         | 3.84<br>(2.50 to<br>4.73)                         |
| <b>Other non-communicable diseases</b>        | <b>593.81</b><br><b>(357.36 to</b><br><b>915.39)</b>       | <b>545.42</b><br><b>(285.85 to</b><br><b>859.90)</b>       | <b>441.04</b><br><b>(225.77 to</b><br><b>674.70)</b>       | <b>577.36</b><br><b>(305.66 to</b><br><b>929.76)</b>       | <b>14.06</b><br><b>(7.30 to</b><br><b>19.69)</b>  | <b>18.21</b><br><b>(7.86 to</b><br><b>26.42)</b>  | <b>17.03</b><br><b>(6.95 to</b><br><b>24.40)</b>  | <b>17.46</b><br><b>(7.80 to</b><br><b>25.63)</b>  |
| Congenital birth defects                      | 452.21<br>(277.13 to<br>739.10)                            | 327.03<br>(165.27 to<br>576.59)                            | 232.46<br>(123.70 to<br>411.31)                            | 368.24<br>(187.57 to<br>664.65)                            | 5.93<br>(3.81 to<br>9.31)                         | 4.70<br>(2.65 to<br>7.68)                         | 3.42<br>(1.95 to<br>5.64)                         | 5.21<br>(2.90 to<br>8.70)                         |
| Neural tube defects                           | 21.64<br>(10.09 to<br>41.54)                               | 5.84<br>(2.10 to<br>13.76)                                 | 3.67<br>(1.34 to<br>8.58)                                  | 7.12<br>(2.51 to<br>16.84)                                 | 0.26<br>(0.12 to<br>0.49)                         | 0.07<br>(0.03 to<br>0.17)                         | 0.05<br>(0.02 to<br>0.11)                         | 0.09<br>(0.04 to<br>0.20)                         |
| Congenital heart anomalies                    | 289.51<br>(185.41 to<br>464.63)                            | 205.82<br>(108.95 to<br>352.32)                            | 142.08<br>(77.01 to<br>249.57)                             | 230.20<br>(122.78 to<br>400.29)                            | 3.85<br>(2.56 to<br>5.91)                         | 2.97<br>(1.70 to<br>4.80)                         | 2.09<br>(1.21 to<br>3.41)                         | 3.27<br>(1.87 to<br>5.39)                         |
| Orofacial clefts                              | 0.17<br>(0.07 to<br>0.35)                                  | 0.11<br>(0.03 to<br>0.29)                                  | 0.06<br>(0.02 to<br>0.18)                                  | 0.13<br>(0.03 to<br>0.37)                                  | 0.00<br>(0.00 to<br>0.00)                         | 0.00<br>(0.00 to<br>0.00)                         | 0.00<br>(0.00 to<br>0.00)                         | 0.00<br>(0.00 to<br>0.00)                         |
| Down syndrome                                 | 14.71<br>(8.95 to<br>22.09)                                | 18.67<br>(10.36 to<br>30.20)                               | 16.57<br>(9.29 to<br>26.53)                                | 20.69<br>(11.40 to<br>33.35)                               | 0.25<br>(0.16 to<br>0.36)                         | 0.40<br>(0.23 to<br>0.60)                         | 0.36<br>(0.21 to<br>0.54)                         | 0.43<br>(0.26 to<br>0.65)                         |
| Other chromosomal abnormalities               | 16.16<br>(8.56 to<br>31.64)                                | 24.18<br>(9.56 to<br>51.07)                                | 18.40<br>(7.52 to<br>38.78)                                | 28.06<br>(11.06 to<br>59.31)                               | 0.19<br>(0.10 to<br>0.37)                         | 0.30<br>(0.12 to<br>0.61)                         | 0.23<br>(0.10 to<br>0.47)                         | 0.34<br>(0.14 to<br>0.70)                         |
| Congenital musculoskeletal and limb anomalies | 11.01<br>(6.02 to<br>19.83)                                | 10.25<br>(4.22 to<br>21.57)                                | 7.43<br>(3.11 to<br>15.53)                                 | 11.46<br>(4.68 to<br>24.48)                                | 0.14<br>(0.08 to<br>0.24)                         | 0.13<br>(0.06 to<br>0.27)                         | 0.10<br>(0.05 to<br>0.20)                         | 0.15<br>(0.07 to<br>0.30)                         |
| Urogenital congenital anomalies               | 5.85<br>(3.37 to<br>10.73)                                 | 4.95<br>(2.46 to<br>9.58)                                  | 3.77<br>(1.95 to<br>7.14)                                  | 5.48<br>(2.71 to<br>10.77)                                 | 0.09<br>(0.05 to<br>0.15)                         | 0.09<br>(0.05 to<br>0.15)                         | 0.07<br>(0.04 to<br>0.12)                         | 0.09<br>(0.05 to<br>0.17)                         |
| Digestive congenital anomalies                | 30.22<br>(11.90 to<br>58.88)                               | 15.75<br>(5.00 to<br>35.92)                                | 10.63<br>(3.30 to<br>24.54)                                | 18.29<br>(5.84 to<br>42.11)                                | 0.36<br>(0.14 to<br>0.69)                         | 0.19<br>(0.06 to<br>0.43)                         | 0.13<br>(0.04 to<br>0.29)                         | 0.22<br>(0.07 to<br>0.50)                         |
| Other congenital birth defects                | 62.95<br>(33.74 to<br>110.98)                              | 41.46<br>(17.94 to<br>84.19)                               | 29.86<br>(13.48 to<br>59.51)                               | 46.79<br>(20.39 to<br>96.03)                               | 0.78<br>(0.43 to<br>1.34)                         | 0.55<br>(0.27 to<br>1.06)                         | 0.40<br>(0.20 to<br>0.76)                         | 0.61<br>(0.29 to<br>1.20)                         |
| Skin and subcutaneous diseases                | 123.01<br>(36.48 to<br>174.62)                             | 208.08<br>(62.61 to<br>298.42)                             | 201.11<br>(62.56 to<br>288.52)                             | 197.23<br>(59.06 to<br>283.82)                             | 7.91<br>(2.29 to<br>11.44)                        | 13.39<br>(3.85 to<br>20.11)                       | 13.52<br>(3.96 to<br>20.06)                       | 12.11<br>(3.43 to<br>18.60)                       |
| Cellulitis                                    | 13.52<br>(4.08 to<br>21.46)                                | 32.29<br>(9.19 to<br>51.59)                                | 34.00<br>(9.85 to<br>54.52)                                | 29.69<br>(8.66 to<br>47.31)                                | 0.65<br>(0.19 to<br>0.97)                         | 1.71<br>(0.46 to<br>2.78)                         | 1.88<br>(0.52 to<br>3.05)                         | 1.50<br>(0.41 to<br>2.43)                         |
| Pyoderma                                      | 45.57<br>(11.02 to<br>67.27)                               | 92.42<br>(22.18 to<br>143.67)                              | 87.75<br>(21.03 to<br>136.96)                              | 89.95<br>(21.95 to<br>139.77)                              | 2.36<br>(0.53 to<br>3.54)                         | 5.42<br>(1.26 to<br>8.66)                         | 5.43<br>(1.28 to<br>8.63)                         | 5.03<br>(1.13 to<br>8.09)                         |
| Decubitus ulcer                               | 62.50<br>(17.90 to<br>89.31)                               | 80.25<br>(22.98 to<br>119.89)                              | 76.31<br>(22.68 to<br>115.31)                              | 74.61<br>(20.96 to<br>112.27)                              | 4.85<br>(1.37 to<br>7.12)                         | 6.14<br>(1.61 to<br>9.90)                         | 6.08<br>(1.62 to<br>9.67)                         | 5.48<br>(1.40 to<br>8.89)                         |
| Other skin and subcutaneous diseases          | 1.43<br>(0.51 to<br>2.35)                                  | 3.11<br>(0.99 to<br>5.39)                                  | 3.06<br>(0.98 to<br>5.34)                                  | 2.98<br>(0.96 to<br>5.28)                                  | 0.05<br>(0.02 to<br>0.08)                         | 0.12<br>(0.04 to<br>0.20)                         | 0.13<br>(0.04 to<br>0.21)                         | 0.11<br>(0.03 to<br>0.18)                         |
| Sudden infant death syndrome                  | 18.58<br>(8.65 to<br>35.86)                                | 10.32<br>(3.36 to<br>24.22)                                | 7.46<br>(2.43 to<br>16.80)                                 | 11.89<br>(3.88 to<br>27.73)                                | 0.22<br>(0.10 to<br>0.42)                         | 0.12<br>(0.04 to<br>0.28)                         | 0.09<br>(0.03 to<br>0.19)                         | 0.14<br>(0.04 to<br>0.32)                         |
| <b>Injuries</b>                               | <b>3,005.28</b><br><b>(2,400.13 to</b><br><b>3,694.05)</b> | <b>2,320.78</b><br><b>(1,653.90 to</b><br><b>3,304.52)</b> | <b>1,862.43</b><br><b>(1,327.17 to</b><br><b>2,635.85)</b> | <b>2,629.16</b><br><b>(1,813.28 to</b><br><b>3,817.45)</b> | <b>67.11</b><br><b>(55.65 to</b><br><b>80.33)</b> | <b>62.13</b><br><b>(48.38 to</b><br><b>82.29)</b> | <b>52.55</b><br><b>(40.88 to</b><br><b>68.29)</b> | <b>67.44</b><br><b>(51.11 to</b><br><b>91.11)</b> |
| <b>Transport injuries</b>                     | <b>883.63</b><br><b>(690.44 to</b><br><b>1,102.67)</b>     | <b>736.71</b><br><b>(462.61 to</b><br><b>1,169.15)</b>     | <b>498.77</b><br><b>(315.44 to</b><br><b>788.68)</b>       | <b>908.67</b><br><b>(552.86 to</b><br><b>1,527.30)</b>     | <b>18.80</b><br><b>(15.13 to</b><br><b>22.81)</b> | <b>18.07</b><br><b>(11.89 to</b><br><b>27.89)</b> | <b>12.93</b><br><b>(8.57 to</b><br><b>19.45)</b>  | <b>21.52</b><br><b>(13.53 to</b><br><b>34.46)</b> |
| Road injuries                                 | 790.31<br>(613.29 to<br>984.99)                            | 648.42<br>(402.23 to<br>1,032.78)                          | 429.34<br>(269.94 to<br>681.91)                            | 807.93<br>(488.93 to<br>1,364.93)                          | 16.48<br>(13.18 to<br>20.11)                      | 15.43<br>(10.06 to<br>24.00)                      | 10.78<br>(7.16 to<br>16.35)                       | 18.62<br>(11.71 to<br>29.81)                      |

|                                      |                                                            |                                                        |                                                        |                                                          |                                                   |                                                   |                                                   |                                                   |
|--------------------------------------|------------------------------------------------------------|--------------------------------------------------------|--------------------------------------------------------|----------------------------------------------------------|---------------------------------------------------|---------------------------------------------------|---------------------------------------------------|---------------------------------------------------|
| Pedestrian road injuries             | 100.88<br>(73.41 to<br>129.24)                             | 80.74<br>(50.70 to<br>122.58)                          | 50.46<br>(31.96 to<br>76.62)                           | 97.41<br>(58.93 to<br>153.53)                            | 2.59<br>(1.99 to<br>3.20)                         | 2.55<br>(1.75 to<br>3.64)                         | 1.70<br>(1.15 to<br>2.43)                         | 2.95<br>(1.92 to<br>4.42)                         |
| <b>Grenada</b>                       |                                                            |                                                        |                                                        |                                                          |                                                   |                                                   |                                                   |                                                   |
| Cause                                | YLLs (actual counts)                                       |                                                        |                                                        |                                                          | Deaths (actual counts)                            |                                                   |                                                   |                                                   |
|                                      | 2016                                                       | 2040 Forecast                                          | 2040 Better Scenario                                   | 2040 Worse Scenario                                      | 2016                                              | 2040 Forecast                                     | 2040 Better Scenario                              | 2040 Worse Scenario                               |
| Cyclist road injuries                | 55.19<br>(39.79 to<br>74.41)                               | 48.29<br>(28.03 to<br>82.13)                           | 33.60<br>(20.13 to<br>56.84)                           | 59.30<br>(33.01 to<br>105.05)                            | 1.21<br>(0.91 to<br>1.59)                         | 1.23<br>(0.76 to<br>1.97)                         | 0.93<br>(0.59 to<br>1.44)                         | 1.45<br>(0.85 to<br>2.44)                         |
| Motorcyclist road injuries           | 173.60<br>(122.88 to<br>235.11)                            | 133.23<br>(69.58 to<br>239.93)                         | 101.90<br>(53.82 to<br>187.45)                         | 159.91<br>(80.49 to<br>306.54)                           | 3.20<br>(2.29 to<br>4.27)                         | 2.66<br>(1.46 to<br>4.74)                         | 2.10<br>(1.16 to<br>3.72)                         | 3.14<br>(1.64 to<br>5.89)                         |
| Motor vehicle road injuries          | 455.05<br>(343.36 to<br>586.53)                            | 379.62<br>(233.89 to<br>604.08)                        | 238.85<br>(149.73 to<br>374.48)                        | 483.37<br>(286.59 to<br>802.03)                          | 9.52<br>(7.31 to<br>11.79)                        | 8.78<br>(5.67 to<br>13.51)                        | 5.88<br>(3.90 to<br>8.89)                         | 10.84<br>(6.66 to<br>17.14)                       |
| Other road injuries                  | 5.59<br>(3.97 to<br>9.04)                                  | 6.54<br>(4.08 to<br>10.87)                             | 4.53<br>(2.86 to<br>7.59)                              | 7.94<br>(4.74 to<br>13.66)                               | 0.16<br>(0.11 to<br>0.24)                         | 0.21<br>(0.14 to<br>0.34)                         | 0.17<br>(0.11 to<br>0.26)                         | 0.24<br>(0.15 to<br>0.39)                         |
| Other transport injuries             | 93.32<br>(68.87 to<br>117.86)                              | 88.29<br>(54.16 to<br>137.35)                          | 69.42<br>(42.51 to<br>108.71)                          | 100.74<br>(59.65 to<br>163.74)                           | 2.31<br>(1.79 to<br>2.82)                         | 2.64<br>(1.75 to<br>3.91)                         | 2.16<br>(1.42 to<br>3.15)                         | 2.91<br>(1.85 to<br>4.48)                         |
| <b>Unintentional injuries</b>        | <b>1,344.49</b><br><b>(1,093.58 to</b><br><b>1,636.92)</b> | <b>973.52</b><br><b>(721.87 to</b><br><b>1,313.31)</b> | <b>838.02</b><br><b>(625.01 to</b><br><b>1,117.54)</b> | <b>1,029.34</b><br><b>(764.56 to</b><br><b>1,402.79)</b> | <b>32.96</b><br><b>(27.88 to</b><br><b>38.63)</b> | <b>30.35</b><br><b>(24.83 to</b><br><b>37.11)</b> | <b>27.60</b><br><b>(22.41 to</b><br><b>33.80)</b> | <b>30.60</b><br><b>(24.53 to</b><br><b>38.14)</b> |
| Falls                                | 154.95<br>(117.35 to<br>190.81)                            | 153.88<br>(116.79 to<br>192.39)                        | 144.18<br>(108.14 to<br>180.09)                        | 151.54<br>(114.34 to<br>189.88)                          | 5.64<br>(4.53 to<br>6.58)                         | 6.85<br>(5.46 to<br>8.14)                         | 6.69<br>(5.30 to<br>7.89)                         | 6.46<br>(4.97 to<br>7.74)                         |
| Drowning                             | 480.77<br>(371.55 to<br>603.35)                            | 281.75<br>(182.55 to<br>429.99)                        | 234.82<br>(153.43 to<br>354.06)                        | 311.24<br>(197.00 to<br>485.60)                          | 9.29<br>(7.36 to<br>11.47)                        | 6.47<br>(4.53 to<br>9.29)                         | 5.51<br>(3.87 to<br>7.93)                         | 7.02<br>(4.78 to<br>10.59)                        |
| Fire, heat, and hot substances       | 99.54<br>(78.65 to<br>123.49)                              | 65.41<br>(46.08 to<br>92.89)                           | 52.74<br>(36.98 to<br>72.91)                           | 71.56<br>(49.23 to<br>103.46)                            | 2.97<br>(2.48 to<br>3.49)                         | 2.51<br>(1.89 to<br>3.27)                         | 2.16<br>(1.63 to<br>2.79)                         | 2.59<br>(1.91 to<br>3.43)                         |
| Poisonings                           | 27.40<br>(19.73 to<br>45.26)                               | 15.96<br>(9.44 to<br>28.35)                            | 11.72<br>(6.84 to<br>21.03)                            | 18.52<br>(10.68 to<br>34.01)                             | 0.58<br>(0.43 to<br>0.96)                         | 0.40<br>(0.25 to<br>0.69)                         | 0.30<br>(0.19 to<br>0.52)                         | 0.45<br>(0.27 to<br>0.79)                         |
| Exposure to mechanical forces        | 228.76<br>(174.90 to<br>290.07)                            | 153.96<br>(99.28 to<br>227.70)                         | 125.05<br>(81.48 to<br>182.07)                         | 165.40<br>(106.31 to<br>241.30)                          | 4.66<br>(3.69 to<br>5.74)                         | 3.73<br>(2.61 to<br>5.13)                         | 3.13<br>(2.17 to<br>4.32)                         | 3.90<br>(2.72 to<br>5.40)                         |
| Unintentional firearm injuries       | 73.45<br>(53.25 to<br>96.93)                               | 47.84<br>(28.65 to<br>75.56)                           | 38.79<br>(23.06 to<br>59.81)                           | 51.89<br>(31.80 to<br>80.44)                             | 1.41<br>(1.05 to<br>1.83)                         | 1.02<br>(0.65 to<br>1.55)                         | 0.84<br>(0.53 to<br>1.26)                         | 1.10<br>(0.71 to<br>1.66)                         |
| Unintentional suffocation            | 35.26<br>(24.76 to<br>50.62)                               | 20.35<br>(11.88 to<br>32.81)                           | 16.30<br>(9.64 to<br>25.34)                            | 22.56<br>(13.00 to<br>36.33)                             | 0.54<br>(0.40 to<br>0.74)                         | 0.35<br>(0.21 to<br>0.53)                         | 0.28<br>(0.18 to<br>0.42)                         | 0.38<br>(0.23 to<br>0.58)                         |
| Other exposure to mechanical forces  | 120.05<br>(87.22 to<br>153.66)                             | 85.77<br>(54.76 to<br>125.57)                          | 69.97<br>(44.08 to<br>101.25)                          | 90.96<br>(57.76 to<br>133.19)                            | 2.71<br>(2.05 to<br>3.36)                         | 2.36<br>(1.59 to<br>3.21)                         | 2.00<br>(1.36 to<br>2.72)                         | 2.42<br>(1.63 to<br>3.27)                         |
| Adverse effects of medical treatment | 175.28<br>(119.90 to<br>236.20)                            | 152.07<br>(101.37 to<br>218.91)                        | 137.02<br>(92.08 to<br>194.33)                         | 156.23<br>(103.79 to<br>223.73)                          | 5.61<br>(4.09 to<br>7.37)                         | 5.93<br>(4.28 to<br>8.29)                         | 5.62<br>(4.06 to<br>7.91)                         | 5.81<br>(4.19 to<br>8.03)                         |
| Animal contact                       | 18.44<br>(11.99 to<br>24.95)                               | 18.84<br>(11.28 to<br>29.58)                           | 15.41<br>(9.28 to<br>23.67)                            | 20.26<br>(11.99 to<br>31.93)                             | 0.48<br>(0.32 to<br>0.63)                         | 0.59<br>(0.38 to<br>0.87)                         | 0.50<br>(0.33 to<br>0.72)                         | 0.61<br>(0.39 to<br>0.89)                         |
| Venomous animal contact              | 4.75<br>(2.71 to<br>7.35)                                  | 4.22<br>(2.24 to<br>6.91)                              | 3.56<br>(1.88 to<br>5.91)                              | 4.58<br>(2.39 to<br>7.47)                                | 0.12<br>(0.07 to<br>0.19)                         | 0.13<br>(0.07 to<br>0.21)                         | 0.11<br>(0.06 to<br>0.18)                         | 0.13<br>(0.07 to<br>0.21)                         |
| Non-venomous animal contact          | 13.68<br>(8.53 to<br>19.15)                                | 14.62<br>(8.44 to<br>23.28)                            | 11.85<br>(6.96 to<br>18.36)                            | 15.68<br>(9.15 to<br>24.89)                              | 0.36<br>(0.23 to<br>0.48)                         | 0.46<br>(0.29 to<br>0.69)                         | 0.39<br>(0.25 to<br>0.57)                         | 0.47<br>(0.30 to<br>0.70)                         |
| Foreign body                         | 120.25<br>(89.85 to<br>161.21)                             | 97.29<br>(71.79 to<br>129.42)                          | 91.43<br>(68.24 to<br>119.43)                          | 97.82<br>(71.59 to<br>131.93)                            | 2.87<br>(2.30 to<br>3.46)                         | 2.99<br>(2.44 to<br>3.56)                         | 3.00<br>(2.49 to<br>3.57)                         | 2.84<br>(2.27 to<br>3.43)                         |



|                                                                                     |                                                                  |                                                                  |                                                                  |                                                                  |                                                            |                                                             |                                                            |                                                              |
|-------------------------------------------------------------------------------------|------------------------------------------------------------------|------------------------------------------------------------------|------------------------------------------------------------------|------------------------------------------------------------------|------------------------------------------------------------|-------------------------------------------------------------|------------------------------------------------------------|--------------------------------------------------------------|
| Pulmonary aspiration and foreign body in airway                                     | 116.32<br>(86.24 to<br>156.88)                                   | 93.14<br>(68.27 to<br>124.03)                                    | 87.39<br>(64.59 to<br>115.15)                                    | 93.52<br>(68.02 to<br>126.22)                                    | 2.76<br>(2.19 to<br>3.34)                                  | 2.85<br>(2.30 to<br>3.40)                                   | 2.86<br>(2.36 to<br>3.39)                                  | 2.70<br>(2.15 to<br>3.25)                                    |
| Foreign body in other body part                                                     | 3.93<br>(2.92 to<br>6.10)                                        | 4.16<br>(2.78 to<br>6.89)                                        | 4.03<br>(2.71 to<br>6.65)                                        | 4.30<br>(2.86 to<br>7.13)                                        | 0.11<br>(0.08 to<br>0.18)                                  | 0.14<br>(0.10 to<br>0.23)                                   | 0.14<br>(0.10 to<br>0.23)                                  | 0.14<br>(0.10 to<br>0.23)                                    |
| Environmental heat and cold exposure                                                | 14.44<br>(7.86 to<br>25.23)                                      | 12.69<br>(6.56 to<br>23.89)                                      | 9.79<br>(5.13 to<br>18.95)                                       | 13.98<br>(7.28 to<br>26.58)                                      | 0.37<br>(0.22 to<br>0.63)                                  | 0.38<br>(0.22 to<br>0.70)                                   | 0.30<br>(0.17 to<br>0.56)                                  | 0.41<br>(0.23 to<br>0.75)                                    |
| Other unintentional injuries                                                        | 24.65<br>(18.85 to<br>30.96)                                     | 21.67<br>(15.18 to<br>30.50)                                     | 15.87<br>(10.56 to<br>22.93)                                     | 22.79<br>(15.77 to<br>32.15)                                     | 0.50<br>(0.40 to<br>0.62)                                  | 0.51<br>(0.38 to<br>0.69)                                   | 0.38<br>(0.27 to<br>0.53)                                  | 0.52<br>(0.39 to<br>0.70)                                    |
| <b>Self-harm and interpersonal violence</b>                                         | <b>776.52</b><br><b>(548.27 to</b><br><b>1,020.90)</b>           | <b>605.14</b><br><b>(372.17 to</b><br><b>936.54)</b>             | <b>520.22</b><br><b>(318.94 to</b><br><b>807.19)</b>             | <b>685.81</b><br><b>(407.68 to</b><br><b>1,080.78)</b>           | <b>15.33</b><br><b>(11.01 to</b><br><b>19.75)</b>          | <b>13.55</b><br><b>(8.67 to</b><br><b>20.22)</b>            | <b>11.84</b><br><b>(7.66 to</b><br><b>17.96)</b>           | <b>15.17</b><br><b>(9.34 to</b><br><b>23.32)</b>             |
| <b>Grenada</b>                                                                      |                                                                  |                                                                  |                                                                  |                                                                  |                                                            |                                                             |                                                            |                                                              |
| Cause                                                                               | YLLs (actual counts)                                             |                                                                  |                                                                  |                                                                  | Deaths (actual counts)                                     |                                                             |                                                            |                                                              |
|                                                                                     | 2016                                                             | 2040 Forecast                                                    | 2040 Better Scenario                                             | 2040 Worse Scenario                                              | 2016                                                       | 2040 Forecast                                               | 2040 Better Scenario                                       | 2040 Worse Scenario                                          |
| Self-harm                                                                           | 369.57<br>(269.53 to<br>481.85)                                  | 335.14<br>(189.02 to<br>550.51)                                  | 285.69<br>(165.42 to<br>464.63)                                  | 394.87<br>(211.49 to<br>672.90)                                  | 7.64<br>(5.69 to<br>9.74)                                  | 7.84<br>(4.70 to<br>12.36)                                  | 6.82<br>(4.12 to<br>10.60)                                 | 9.06<br>(5.12 to<br>14.82)                                   |
| Self-harm by firearm                                                                | 5.60<br>(3.34 to<br>9.17)                                        | 4.03<br>(1.84 to<br>7.94)                                        | 3.26<br>(1.55 to<br>6.35)                                        | 4.80<br>(2.09 to<br>9.51)                                        | 0.13<br>(0.08 to<br>0.20)                                  | 0.10<br>(0.05 to<br>0.19)                                   | 0.09<br>(0.04 to<br>0.16)                                  | 0.12<br>(0.06 to<br>0.23)                                    |
| Self-harm by other specified means                                                  | 363.97<br>(264.67 to<br>474.26)                                  | 331.11<br>(187.38 to<br>544.37)                                  | 282.42<br>(163.87 to<br>459.22)                                  | 390.07<br>(209.42 to<br>664.82)                                  | 7.51<br>(5.59 to<br>9.59)                                  | 7.74<br>(4.65 to<br>12.22)                                  | 6.73<br>(4.08 to<br>10.47)                                 | 8.95<br>(5.06 to<br>14.61)                                   |
| Interpersonal violence                                                              | 406.95<br>(229.74 to<br>569.13)                                  | 270.00<br>(131.63 to<br>439.78)                                  | 234.53<br>(117.17 to<br>381.31)                                  | 290.93<br>(138.03 to<br>482.26)                                  | 7.69<br>(4.35 to<br>10.71)                                 | 5.71<br>(2.83 to<br>8.98)                                   | 5.03<br>(2.53 to<br>7.94)                                  | 6.10<br>(2.95 to<br>9.73)                                    |
| Physical violence by firearm                                                        | 81.22<br>(34.54 to<br>143.29)                                    | 48.76<br>(19.47 to<br>89.34)                                     | 41.13<br>(16.65 to<br>73.23)                                     | 49.27<br>(19.36 to<br>90.63)                                     | 1.43<br>(0.61 to<br>2.50)                                  | 0.91<br>(0.37 to<br>1.61)                                   | 0.77<br>(0.32 to<br>1.37)                                  | 0.91<br>(0.37 to<br>1.64)                                    |
| Physical violence by sharp object                                                   | 61.76<br>(34.89 to<br>102.01)                                    | 43.58<br>(22.81 to<br>72.44)                                     | 38.16<br>(20.36 to<br>65.26)                                     | 43.48<br>(22.61 to<br>72.67)                                     | 1.13<br>(0.63 to<br>1.81)                                  | 0.87<br>(0.46 to<br>1.41)                                   | 0.77<br>(0.41 to<br>1.25)                                  | 0.86<br>(0.45 to<br>1.41)                                    |
| Physical violence by other means                                                    | 263.97<br>(133.55 to<br>376.07)                                  | 177.66<br>(75.78 to<br>305.28)                                   | 155.23<br>(67.75 to<br>263.95)                                   | 198.18<br>(83.57 to<br>347.24)                                   | 5.14<br>(2.61 to<br>7.25)                                  | 3.94<br>(1.77 to<br>6.58)                                   | 3.49<br>(1.59 to<br>5.73)                                  | 4.33<br>(1.91 to<br>7.34)                                    |
| <b>Forces of nature, conflict and terrorism, and executions and police conflict</b> | <b>0.64</b><br><b>(0.51 to</b><br><b>0.79)</b>                   | <b>5.41</b><br><b>(0.00 to</b><br><b>83.48)</b>                  | <b>5.42</b><br><b>(0.00 to</b><br><b>82.26)</b>                  | <b>5.35</b><br><b>(0.00 to</b><br><b>83.90)</b>                  | <b>0.01</b><br><b>(0.01 to</b><br><b>0.01)</b>             | <b>0.16</b><br><b>(0.00 to</b><br><b>1.97)</b>              | <b>0.17</b><br><b>(0.00 to</b><br><b>2.00)</b>             | <b>0.15</b><br><b>(0.00 to</b><br><b>1.93)</b>               |
| Exposure to forces of nature                                                        | 0.00<br>(0.00 to<br>0.00)                                        | 4.83<br>(0.00 to<br>83.48)                                       | 4.85<br>(0.00 to<br>82.26)                                       | 4.76<br>(0.00 to<br>83.90)                                       | 0.00<br>(0.00 to<br>0.00)                                  | 0.15<br>(0.00 to<br>1.97)                                   | 0.15<br>(0.00 to<br>2.00)                                  | 0.14<br>(0.00 to<br>1.93)                                    |
| Conflict and terrorism                                                              | 0.00<br>(0.00 to<br>0.00)                                        | 0.58<br>(0.00 to<br>0.01)                                        | 0.57<br>(0.00 to<br>0.01)                                        | 0.59<br>(0.00 to<br>0.01)                                        | 0.00<br>(0.00 to<br>0.00)                                  | 0.01<br>(0.00 to<br>0.00)                                   | 0.01<br>(0.00 to<br>0.00)                                  | 0.01<br>(0.00 to<br>0.00)                                    |
| Executions and police conflict                                                      | 0.64<br>(0.51 to<br>0.79)                                        | 0.00<br>(0.00 to<br>0.00)                                        | 0.00<br>(0.00 to<br>0.00)                                        | 0.00<br>(0.00 to<br>0.00)                                        | 0.01<br>(0.01 to<br>0.01)                                  | 0.00<br>(0.00 to<br>0.00)                                   | 0.00<br>(0.00 to<br>0.00)                                  | 0.00<br>(0.00 to<br>0.00)                                    |
| <b>Guyana</b>                                                                       |                                                                  |                                                                  |                                                                  |                                                                  |                                                            |                                                             |                                                            |                                                              |
| Cause                                                                               | YLLs (actual counts)                                             |                                                                  |                                                                  |                                                                  | Deaths (actual counts)                                     |                                                             |                                                            |                                                              |
|                                                                                     | 2016                                                             | 2040 Forecast                                                    | 2040 Better Scenario                                             | 2040 Worse Scenario                                              | 2016                                                       | 2040 Forecast                                               | 2040 Better Scenario                                       | 2040 Worse Scenario                                          |
| <b>All causes</b>                                                                   | <b>194,265.39</b><br><b>(174,709.53 to</b><br><b>214,220.05)</b> | <b>195,738.81</b><br><b>(144,610.50 to</b><br><b>261,769.86)</b> | <b>146,248.61</b><br><b>(108,082.24 to</b><br><b>200,201.04)</b> | <b>238,292.84</b><br><b>(176,502.04 to</b><br><b>316,160.34)</b> | <b>5,908.61</b><br><b>(5,355.48 to</b><br><b>6,475.41)</b> | <b>8,822.96</b><br><b>(6,680.21 to</b><br><b>11,355.11)</b> | <b>7,147.75</b><br><b>(5,254.80 to</b><br><b>9,566.31)</b> | <b>10,160.11</b><br><b>(7,811.32 to</b><br><b>12,583.47)</b> |
| <b>Communicable, maternal, neonatal, and nutritional diseases</b>                   | <b>44,177.48</b><br><b>(37,794.40 to</b><br><b>51,458.14)</b>    | <b>24,018.55</b><br><b>(16,682.04 to</b><br><b>33,568.78)</b>    | <b>15,737.42</b><br><b>(11,181.48 to</b><br><b>21,424.65)</b>    | <b>33,562.24</b><br><b>(22,884.70 to</b><br><b>46,525.10)</b>    | <b>865.84</b><br><b>(771.34 to</b><br><b>960.84)</b>       | <b>779.47</b><br><b>(553.11 to</b><br><b>1,066.15)</b>      | <b>617.88</b><br><b>(448.08 to</b><br><b>841.37)</b>       | <b>978.92</b><br><b>(670.52 to</b><br><b>1,362.45)</b>       |

|                                                                          |                                                 |                                                |                                               |                                                |                                        |                                        |                                        |                                        |
|--------------------------------------------------------------------------|-------------------------------------------------|------------------------------------------------|-----------------------------------------------|------------------------------------------------|----------------------------------------|----------------------------------------|----------------------------------------|----------------------------------------|
| <b>HIV/AIDS and tuberculosis</b>                                         | <b>11,276.58</b><br>(10,706.37 to<br>11,821.58) | <b>4,112.90</b><br>(2,263.00 to<br>7,589.74)   | <b>2,763.94</b><br>(1,333.33 to<br>5,555.50)  | <b>9,281.57</b><br>(4,761.12 to<br>15,969.18)  | <b>258.21</b><br>(244.21 to<br>272.96) | <b>103.41</b><br>(55.18 to<br>185.62)  | <b>71.23</b><br>(32.82 to<br>140.15)   | <b>201.87</b><br>(99.75 to<br>350.32)  |
| Tuberculosis                                                             | 2,453.39<br>(2,072.82 to<br>2,914.89)           | 1,220.31<br>(704.77 to<br>2,149.77)            | 607.74<br>(364.85 to<br>1,042.54)             | 1,634.39<br>(918.80 to<br>3,043.86)            | 69.75<br>(59.16 to<br>82.09)           | 42.28<br>(26.46 to<br>68.39)           | 22.54<br>(14.42 to<br>34.84)           | 54.05<br>(31.90 to<br>90.71)           |
| HIV/AIDS                                                                 | 8,817.19<br>(8,405.03 to<br>9,214.00)           | 2,892.59<br>(1,196.47 to<br>6,483.93)          | 2,156.19<br>(809.55 to<br>5,009.56)           | 7,647.18<br>(3,442.68 to<br>14,346.45)         | 188.46<br>(179.58 to<br>196.67)        | 61.12<br>(20.02 to<br>143.98)          | 48.69<br>(14.59 to<br>116.51)          | 147.82<br>(54.85 to<br>292.57)         |
| <b>Diarrhea, lower respiratory, and other common infectious diseases</b> | <b>11,268.99</b><br>(9,634.63 to<br>13,080.62)  | <b>10,134.89</b><br>(6,557.11 to<br>16,004.51) | <b>7,448.59</b><br>(5,062.54 to<br>11,230.80) | <b>13,085.32</b><br>(8,132.00 to<br>20,972.18) | <b>308.83</b><br>(269.88 to<br>348.17) | <b>494.81</b><br>(321.95 to<br>737.56) | <b>421.85</b><br>(289.15 to<br>611.19) | <b>583.63</b><br>(355.33 to<br>888.23) |
| Diarrheal diseases                                                       | 2,581.09<br>(1,884.55 to<br>3,459.17)           | 1,030.67<br>(151.33 to<br>3,298.01)            | 541.90<br>(99.17 to<br>1,726.81)              | 1,550.69<br>(221.13 to<br>4,914.20)            | 51.23<br>(38.91 to<br>66.37)           | 42.04<br>(6.99 to<br>150.68)           | 26.50<br>(5.30 to<br>91.97)            | 61.51<br>(9.70 to<br>221.24)           |
| Intestinal infectious diseases                                           | 16.73<br>(8.99 to<br>28.24)                     | 7.96<br>(3.81 to<br>15.07)                     | 6.41<br>(3.12 to<br>12.44)                    | 8.01<br>(3.84 to<br>15.19)                     | 0.36<br>(0.20 to<br>0.61)              | 0.21<br>(0.11 to<br>0.37)              | 0.18<br>(0.09 to<br>0.32)              | 0.21<br>(0.10 to<br>0.36)              |
| Typhoid fever                                                            | 12.12<br>(5.87 to<br>22.20)                     | 5.78<br>(2.55 to<br>11.39)                     | 4.79<br>(2.13 to<br>9.55)                     | 5.80<br>(2.56 to<br>11.53)                     | 0.26<br>(0.13 to<br>0.46)              | 0.15<br>(0.07 to<br>0.27)              | 0.13<br>(0.06 to<br>0.24)              | 0.14<br>(0.07 to<br>0.26)              |
| Paratyphoid fever                                                        | 2.47<br>(0.97 to<br>5.17)                       | 1.58<br>(0.62 to<br>3.40)                      | 1.23<br>(0.47 to<br>2.67)                     | 1.60<br>(0.62 to<br>3.45)                      | 0.05<br>(0.02 to<br>0.11)              | 0.04<br>(0.02 to<br>0.08)              | 0.03<br>(0.01 to<br>0.07)              | 0.04<br>(0.02 to<br>0.08)              |
| Other intestinal infectious diseases                                     | 2.14<br>(0.85 to<br>4.63)                       | 0.61<br>(0.21 to<br>1.46)                      | 0.39<br>(0.13 to<br>0.96)                     | 0.62<br>(0.21 to<br>1.55)                      | 0.04<br>(0.02 to<br>0.09)              | 0.01<br>(0.01 to<br>0.05)              | 0.02<br>(0.01 to<br>0.04)              | 0.02<br>(0.01 to<br>0.05)              |
| Lower respiratory infections                                             | 7,542.76<br>(6,518.79 to<br>8,639.83)           | 7,675.99<br>(5,168.70 to<br>11,473.05)         | 5,892.52<br>(4,107.37 to<br>8,510.26)         | 9,751.53<br>(6,232.45 to<br>15,102.04)         | 236.08<br>(204.64 to<br>267.60)        | 421.37<br>(280.37 to<br>596.96)        | 370.67<br>(262.05 to<br>513.27)        | 485.45<br>(310.37 to<br>716.07)        |
| Upper respiratory infections                                             | 9.32<br>(4.94 to<br>15.63)                      | 7.32<br>(3.02 to<br>14.71)                     | 4.32<br>(1.80 to<br>8.92)                     | 7.72<br>(3.22 to<br>15.54)                     | 0.22<br>(0.12 to<br>0.36)              | 0.25<br>(0.11 to<br>0.49)              | 0.16<br>(0.06 to<br>0.32)              | 0.25<br>(0.11 to<br>0.50)              |
| Otitis media                                                             | 2.21<br>(1.60 to<br>3.11)                       | 0.96<br>(0.49 to<br>1.80)                      | 1.00<br>(0.51 to<br>1.89)                     | 0.91<br>(0.47 to<br>1.73)                      | 0.06<br>(0.04 to<br>0.08)              | 0.04<br>(0.02 to<br>0.06)              | 0.04<br>(0.02 to<br>0.07)              | 0.03<br>(0.02 to<br>0.06)              |
| Meningitis                                                               | 493.53<br>(403.62 to<br>635.27)                 | 277.46<br>(179.36 to<br>431.03)                | 237.25<br>(156.48 to<br>365.40)               | 314.84<br>(193.69 to<br>503.83)                | 9.78<br>(8.10 to<br>12.84)             | 7.66<br>(5.46 to<br>11.03)             | 7.30<br>(5.20 to<br>10.52)             | 7.83<br>(5.44 to<br>11.16)             |
| Pneumococcal meningitis                                                  | 95.98<br>(73.73 to<br>136.15)                   | 54.33<br>(34.34 to<br>84.87)                   | 52.70<br>(33.55 to<br>85.54)                  | 59.03<br>(37.32 to<br>94.80)                   | 2.07<br>(1.62 to<br>2.98)              | 1.66<br>(1.13 to<br>2.57)              | 1.76<br>(1.20 to<br>2.74)              | 1.70<br>(1.15 to<br>2.61)              |
| H influenzae type B meningitis                                           | 49.81<br>(38.84 to<br>64.91)                    | 36.44<br>(16.30 to<br>77.49)                   | 27.26<br>(14.40 to<br>49.56)                  | 71.12<br>(20.30 to<br>193.21)                  | 0.92<br>(0.73 to<br>1.20)              | 0.75<br>(0.45 to<br>1.28)              | 0.68<br>(0.45 to<br>1.04)              | 1.13<br>(0.49 to<br>2.53)              |
| Meningococcal meningitis                                                 | 108.02<br>(86.27 to<br>137.70)                  | 51.19<br>(33.05 to<br>79.85)                   | 41.62<br>(26.71 to<br>64.75)                  | 50.96<br>(32.56 to<br>79.43)                   | 2.06<br>(1.68 to<br>2.64)              | 1.40<br>(0.97 to<br>2.05)              | 1.26<br>(0.87 to<br>1.85)              | 1.35<br>(0.93 to<br>1.96)              |
| Other meningitis                                                         | 239.72<br>(194.16 to<br>307.94)                 | 135.51<br>(88.06 to<br>209.28)                 | 115.67<br>(75.61 to<br>205.14)                | 133.73<br>(86.61 to<br>205.14)                 | 4.73<br>(3.88 to<br>6.22)              | 3.84<br>(2.74 to<br>5.54)              | 3.60<br>(2.47 to<br>5.28)              | 3.65<br>(2.60 to<br>5.27)              |
| Encephalitis                                                             | 585.77<br>(446.42 to<br>844.64)                 | 379.97<br>(234.35 to<br>610.78)                | 281.88<br>(179.87 to<br>435.80)               | 383.62<br>(236.98 to<br>612.87)                | 10.40<br>(8.04 to<br>14.91)            | 8.99<br>(6.14 to<br>13.78)             | 7.39<br>(5.09 to<br>11.08)             | 8.82<br>(6.01 to<br>13.48)             |
| Diphtheria                                                               | 1.10<br>(0.71 to<br>1.64)                       | 0.20<br>(0.10 to<br>0.38)                      | 0.17<br>(0.08 to<br>0.30)                     | 0.44<br>(0.12 to<br>1.21)                      | 0.02<br>(0.01 to<br>0.03)              | 0.00<br>(0.00 to<br>0.01)              | 0.00<br>(0.00 to<br>0.01)              | 0.01<br>(0.00 to<br>0.02)              |
| Whooping cough                                                           | 6.61<br>(1.79 to<br>12.62)                      | 1.18<br>(0.12 to<br>4.14)                      | 0.54<br>(0.08 to<br>1.45)                     | 3.47<br>(0.13 to<br>13.21)                     | 0.08<br>(0.02 to<br>0.15)              | 0.02<br>(0.00 to<br>0.05)              | 0.01<br>(0.00 to<br>0.02)              | 0.04<br>(0.00 to<br>0.16)              |
| Tetanus                                                                  | 7.68<br>(5.85 to<br>12.67)                      | 1.28<br>(0.80 to<br>2.32)                      | 1.27<br>(0.79 to<br>2.36)                     | 1.42<br>(0.89 to<br>2.49)                      | 0.22<br>(0.17 to<br>0.36)              | 0.04<br>(0.03 to<br>0.08)              | 0.04<br>(0.03 to<br>0.09)              | 0.04<br>(0.03 to<br>0.07)              |
| Measles                                                                  | 8.88<br>(6.30 to<br>12.47)                      | 746.40<br>(86.71 to<br>2,226.41)               | 478.01<br>(61.89 to<br>1,285.72)              | 1,056.98<br>(114.74 to<br>3,133.12)            | 0.12<br>(0.09 to<br>0.16)              | 14.02<br>(1.31 to<br>39.27)            | 9.42<br>(0.97 to<br>23.87)             | 19.26<br>(1.70 to<br>55.43)            |

| Guyana                                                |                                            |                                            |                                            |                                            |                                       |                                       |                                       |                                       |
|-------------------------------------------------------|--------------------------------------------|--------------------------------------------|--------------------------------------------|--------------------------------------------|---------------------------------------|---------------------------------------|---------------------------------------|---------------------------------------|
| Cause                                                 | YLLs (actual counts)                       |                                            |                                            |                                            | Deaths (actual counts)                |                                       |                                       |                                       |
|                                                       | 2016                                       | 2040 Forecast                              | 2040 Better Scenario                       | 2040 Worse Scenario                        | 2016                                  | 2040 Forecast                         | 2040 Better Scenario                  | 2040 Worse Scenario                   |
| Varicella and herpes zoster                           | 13.30<br>(6.24 to<br>19.12)                | 5.49<br>(2.26 to<br>9.81)                  | 3.32<br>(1.33 to<br>5.84)                  | 5.69<br>(2.33 to<br>9.96)                  | 0.28<br>(0.14 to<br>0.40)             | 0.19<br>(0.08 to<br>0.32)             | 0.14<br>(0.06 to<br>0.23)             | 0.19<br>(0.08 to<br>0.32)             |
| <b>Neglected tropical diseases and malaria</b>        | <b>954.97<br/>(710.93 to<br/>1,394.87)</b> | <b>916.59<br/>(622.21 to<br/>1,368.49)</b> | <b>812.27<br/>(552.56 to<br/>1,230.41)</b> | <b>910.82<br/>(614.40 to<br/>1,352.08)</b> | <b>19.83<br/>(14.78 to<br/>29.15)</b> | <b>23.62<br/>(17.01 to<br/>35.65)</b> | <b>22.54<br/>(16.37 to<br/>34.48)</b> | <b>22.75<br/>(16.40 to<br/>34.49)</b> |
| Malaria                                               | 607.30<br>(410.90 to<br>977.27)            | 256.71<br>(145.64 to<br>513.86)            | 224.95<br>(127.97 to<br>458.68)            | 257.91<br>(144.98 to<br>526.11)            | 12.14<br>(8.44 to<br>20.97)           | 5.81<br>(3.46 to<br>12.59)            | 5.32<br>(3.15 to<br>11.97)            | 5.73<br>(3.40 to<br>12.50)            |
| Chagas disease                                        | 18.73<br>(15.90 to<br>22.08)               | 12.01<br>(8.76 to<br>16.43)                | 16.10<br>(11.71 to<br>22.01)               | 10.64<br>(7.64 to<br>14.42)                | 0.80<br>(0.68 to<br>0.95)             | 0.67<br>(0.48 to<br>0.95)             | 0.92<br>(0.66 to<br>1.25)             | 0.59<br>(0.41 to<br>0.80)             |
| Leishmaniasis                                         | 0.00<br>(0.00 to<br>0.00)                  | 0.00<br>(0.00 to<br>0.00)                  | 0.00<br>(0.00 to<br>0.00)                  | 0.00<br>(0.00 to<br>0.00)                  | 0.00<br>(0.00 to<br>0.00)             | 0.00<br>(0.00 to<br>0.00)             | 0.00<br>(0.00 to<br>0.00)             | 0.00<br>(0.00 to<br>0.00)             |
| African trypanosomiasis                               | 0.00<br>(0.00 to<br>0.00)                  | 0.00<br>(0.00 to<br>0.00)                  | 0.00<br>(0.00 to<br>0.00)                  | 0.00<br>(0.00 to<br>0.00)                  | 0.00<br>(0.00 to<br>0.00)             | 0.00<br>(0.00 to<br>0.00)             | 0.00<br>(0.00 to<br>0.00)             | 0.00<br>(0.00 to<br>0.00)             |
| Schistosomiasis                                       | 0.00<br>(0.00 to<br>0.00)                  | 0.00<br>(0.00 to<br>0.00)                  | 0.00<br>(0.00 to<br>0.00)                  | 0.00<br>(0.00 to<br>0.00)                  | 0.00<br>(0.00 to<br>0.00)             | 0.00<br>(0.00 to<br>0.00)             | 0.00<br>(0.00 to<br>0.00)             | 0.00<br>(0.00 to<br>0.00)             |
| Cysticercosis                                         | 0.00<br>(0.00 to<br>0.00)                  | 0.00<br>(0.00 to<br>0.00)                  | 0.00<br>(0.00 to<br>0.00)                  | 0.00<br>(0.00 to<br>0.00)                  | 0.00<br>(0.00 to<br>0.00)             | 0.00<br>(0.00 to<br>0.00)             | 0.00<br>(0.00 to<br>0.00)             | 0.00<br>(0.00 to<br>0.00)             |
| Cystic echinococcosis                                 | 0.50<br>(0.41 to<br>0.61)                  | 0.20<br>(0.13 to<br>0.30)                  | 0.10<br>(0.07 to<br>0.15)                  | 0.22<br>(0.14 to<br>0.33)                  | 0.01<br>(0.01 to<br>0.02)             | 0.01<br>(0.00 to<br>0.01)             | 0.00<br>(0.00 to<br>0.01)             | 0.01<br>(0.00 to<br>0.01)             |
| Dengue                                                | 216.96<br>(132.52 to<br>311.17)            | 578.75<br>(377.66 to<br>836.69)            | 523.14<br>(343.42 to<br>754.41)            | 572.19<br>(369.20 to<br>830.05)            | 4.57<br>(2.80 to<br>6.39)             | 15.00<br>(10.18 to<br>21.09)          | 14.61<br>(9.92 to<br>20.53)           | 14.37<br>(9.79 to<br>20.07)           |
| Yellow fever                                          | 4.13<br>(0.87 to<br>12.21)                 | 0.96<br>(0.19 to<br>2.98)                  | 0.56<br>(0.11 to<br>1.73)                  | 1.02<br>(0.20 to<br>3.14)                  | 0.07<br>(0.01 to<br>0.20)             | 0.02<br>(0.00 to<br>0.05)             | 0.01<br>(0.00 to<br>0.03)             | 0.02<br>(0.00 to<br>0.05)             |
| Rabies                                                | 0.07<br>(0.04 to<br>0.13)                  | 0.03<br>(0.01 to<br>0.07)                  | 0.01<br>(0.00 to<br>0.02)                  | 0.03<br>(0.01 to<br>0.08)                  | 0.00<br>(0.00 to<br>0.00)             | 0.00<br>(0.00 to<br>0.00)             | 0.00<br>(0.00 to<br>0.00)             | 0.00<br>(0.00 to<br>0.00)             |
| Intestinal nematode infections                        | 13.43<br>(4.51 to<br>26.51)                | 10.29<br>(3.51 to<br>23.30)                | 8.09<br>(3.18 to<br>16.59)                 | 10.14<br>(3.42 to<br>22.86)                | 0.22<br>(0.10 to<br>0.39)             | 0.21<br>(0.09 to<br>0.37)             | 0.19<br>(0.09 to<br>0.33)             | 0.20<br>(0.09 to<br>0.35)             |
| Other neglected tropical diseases                     | 93.57<br>(64.41 to<br>159.98)              | 57.64<br>(36.91 to<br>103.85)              | 39.32<br>(25.77 to<br>72.13)               | 58.66<br>(36.58 to<br>102.88)              | 2.01<br>(1.42 to<br>3.35)             | 1.90<br>(1.25 to<br>3.34)             | 1.48<br>(0.96 to<br>2.66)             | 1.84<br>(1.18 to<br>3.22)             |
| <b>Maternal disorders</b>                             | <b>878.95<br/>(671.56 to<br/>1,111.03)</b> | <b>590.15<br/>(247.51 to<br/>1,274.17)</b> | <b>318.67<br/>(126.74 to<br/>702.23)</b>   | <b>664.16<br/>(286.83 to<br/>1,407.28)</b> | <b>15.40<br/>(11.79 to<br/>19.39)</b> | <b>10.71<br/>(4.53 to<br/>22.52)</b>  | <b>5.81<br/>(2.40 to<br/>12.49)</b>   | <b>12.06<br/>(5.28 to<br/>25.46)</b>  |
| Maternal hemorrhage                                   | 165.46<br>(111.78 to<br>229.64)            | 108.61<br>(40.68 to<br>254.17)             | 58.97<br>(21.46 to<br>137.14)              | 120.44<br>(45.18 to<br>275.14)             | 2.91<br>(1.98 to<br>4.05)             | 1.97<br>(0.74 to<br>4.48)             | 1.07<br>(0.39 to<br>2.43)             | 2.18<br>(0.81 to<br>5.00)             |
| Maternal sepsis and other maternal infections         | 78.89<br>(50.55 to<br>114.24)              | 42.22<br>(16.63 to<br>92.27)               | 22.68<br>(8.17 to<br>53.83)                | 46.96<br>(17.80 to<br>106.72)              | 1.40<br>(0.92 to<br>1.98)             | 0.77<br>(0.31 to<br>1.68)             | 0.42<br>(0.15 to<br>0.96)             | 0.86<br>(0.33 to<br>1.90)             |
| Maternal hypertensive disorders                       | 126.12<br>(83.89 to<br>180.56)             | 73.74<br>(29.59 to<br>151.92)              | 39.22<br>(14.32 to<br>85.52)               | 81.95<br>(31.19 to<br>163.78)              | 2.11<br>(1.43 to<br>3.05)             | 1.29<br>(0.53 to<br>2.64)             | 0.69<br>(0.26 to<br>1.48)             | 1.44<br>(0.55 to<br>2.87)             |
| Maternal obstructed labor and uterine rupture         | 22.38<br>(12.56 to<br>35.09)               | 17.84<br>(6.15 to<br>40.77)                | 9.25<br>(3.10 to<br>21.58)                 | 19.88<br>(7.04 to<br>47.17)                | 0.41<br>(0.23 to<br>0.64)             | 0.34<br>(0.12 to<br>0.75)             | 0.17<br>(0.06 to<br>0.40)             | 0.37<br>(0.13 to<br>0.87)             |
| Maternal abortion, miscarriage, and ectopic pregnancy | 241.39<br>(167.22 to<br>331.03)            | 166.09<br>(59.95 to<br>396.47)             | 90.00<br>(31.50 to<br>218.25)              | 186.17<br>(66.31 to<br>467.15)             | 4.30<br>(3.00 to<br>5.83)             | 3.04<br>(1.13 to<br>7.14)             | 1.66<br>(0.59 to<br>3.80)             | 3.41<br>(1.27 to<br>8.49)             |

|                                                                  |                                          |                                        |                                       |                                        |                                 |                               |                              |                               |
|------------------------------------------------------------------|------------------------------------------|----------------------------------------|---------------------------------------|----------------------------------------|---------------------------------|-------------------------------|------------------------------|-------------------------------|
| Indirect maternal deaths                                         | 68.06<br>(42.23 to<br>100.79)            | 49.77<br>(18.18 to<br>117.41)          | 26.35<br>(8.63 to<br>64.23)           | 55.41<br>(19.10 to<br>132.57)          | 1.15<br>(0.72 to<br>1.69)       | 0.87<br>(0.32 to<br>2.06)     | 0.46<br>(0.16 to<br>1.12)    | 0.97<br>(0.33 to<br>2.31)     |
| Late maternal deaths                                             | 30.34<br>(17.70 to<br>48.15)             | 15.33<br>(5.43 to<br>34.20)            | 8.04<br>(2.72 to<br>18.40)            | 17.11<br>(5.88 to<br>38.53)            | 0.52<br>(0.31 to<br>0.81)       | 0.27<br>(0.10 to<br>0.59)     | 0.14<br>(0.05 to<br>0.32)    | 0.30<br>(0.11 to<br>0.68)     |
| Maternal deaths aggravated by HIV/AIDS                           | 9.38<br>(4.33 to<br>15.90)               | 22.81<br>(2.42 to<br>62.32)            | 11.95<br>(1.16 to<br>35.62)           | 32.61<br>(6.08 to<br>80.88)            | 0.18<br>(0.08 to<br>0.29)       | 0.43<br>(0.04 to<br>1.18)     | 0.23<br>(0.02 to<br>0.68)    | 0.62<br>(0.11 to<br>1.54)     |
| Other maternal disorders                                         | 136.92<br>(91.25 to<br>192.35)           | 93.74<br>(40.60 to<br>200.73)          | 52.21<br>(21.33 to<br>117.11)         | 103.62<br>(42.59 to<br>227.19)         | 2.44<br>(1.61 to<br>3.40)       | 1.72<br>(0.76 to<br>3.62)     | 0.97<br>(0.40 to<br>2.10)    | 1.90<br>(0.80 to<br>4.09)     |
| <b>Guyana</b>                                                    |                                          |                                        |                                       |                                        |                                 |                               |                              |                               |
| Cause                                                            | YLLs (actual counts)                     |                                        |                                       |                                        | Deaths (actual counts)          |                               |                              |                               |
|                                                                  | 2016                                     | 2040 Forecast                          | 2040 Better Scenario                  | 2040 Worse Scenario                    | 2016                            | 2040 Forecast                 | 2040 Better Scenario         | 2040 Worse Scenario           |
| Neonatal disorders                                               | 17,077.69<br>(12,436.48 to<br>22,574.94) | 6,571.13<br>(2,794.51 to<br>11,518.72) | 3,111.67<br>(1,393.85 to<br>5,225.94) | 7,928.41<br>(3,303.10 to<br>13,919.34) | 197.30<br>(143.69 to<br>260.81) | 75.94<br>(32.30 to<br>133.09) | 35.96<br>(16.12 to<br>60.37) | 91.61<br>(38.17 to<br>160.82) |
| Neonatal preterm birth                                           | 6,885.98<br>(4,935.45 to<br>9,281.00)    | 2,043.37<br>(843.77 to<br>3,447.63)    | 1,015.06<br>(434.67 to<br>1,654.43)   | 3,007.36<br>(1,242.62 to<br>5,125.83)  | 79.54<br>(57.01 to<br>107.20)   | 23.61<br>(9.75 to<br>39.82)   | 11.73<br>(5.02 to<br>19.12)  | 34.74<br>(14.36 to<br>59.21)  |
| Neonatal encephalopathy due to birth asphyxia and trauma         | 4,405.13<br>(2,999.06 to<br>6,085.12)    | 1,738.62<br>(611.35 to<br>3,287.33)    | 833.59<br>(301.33 to<br>1,532.70)     | 1,880.81<br>(653.45 to<br>3,551.76)    | 50.89<br>(34.65 to<br>70.29)    | 20.09<br>(7.07 to<br>37.98)   | 9.63<br>(3.48 to<br>17.71)   | 21.73<br>(7.56 to<br>41.03)   |
| Neonatal sepsis and other neonatal infections                    | 3,344.63<br>(2,168.25 to<br>5,198.34)    | 1,714.13<br>(768.27 to<br>3,268.57)    | 804.00<br>(369.76 to<br>1,533.21)     | 1,855.03<br>(797.96 to<br>3,579.11)    | 38.65<br>(25.05 to<br>60.06)    | 19.81<br>(8.88 to<br>37.77)   | 9.29<br>(4.27 to<br>17.71)   | 21.44<br>(9.23 to<br>41.36)   |
| Hemolytic disease and other neonatal jaundice                    | 179.28<br>(100.02 to<br>310.54)          | 73.66<br>(21.70 to<br>178.66)          | 32.46<br>(10.13 to<br>80.69)          | 80.59<br>(23.22 to<br>198.44)          | 2.07<br>(1.16 to<br>3.59)       | 0.85<br>(0.25 to<br>2.06)     | 0.38<br>(0.12 to<br>0.93)    | 0.93<br>(0.27 to<br>2.29)     |
| Other neonatal disorders                                         | 2,262.67<br>(1,471.49 to<br>3,285.05)    | 1,091.35<br>(362.85 to<br>1,958.23)    | 426.56<br>(156.51 to<br>838.14)       | 1,104.63<br>(384.22 to<br>2,253.17)    | 26.15<br>(17.01 to<br>37.97)    | 11.58<br>(4.20 to<br>22.63)   | 4.93<br>(1.81 to<br>9.69)    | 12.77<br>(4.44 to<br>26.03)   |
| Nutritional deficiencies                                         | 1,860.43<br>(1,490.91 to<br>2,317.07)    | 1,064.95<br>(813.86 to<br>1,391.30)    | 806.43<br>(631.89 to<br>1,014.20)     | 1,050.96<br>(790.92 to<br>1,382.29)    | 46.73<br>(39.88 to<br>54.48)    | 53.60<br>(39.56 to<br>69.17)  | 46.53<br>(35.30 to<br>58.77) | 49.72<br>(35.09 to<br>65.65)  |
| Protein-energy malnutrition                                      | 1,602.48<br>(1,238.60 to<br>2,057.75)    | 809.98<br>(583.38 to<br>1,097.06)      | 610.57<br>(454.97 to<br>799.03)       | 799.21<br>(569.11 to<br>1,093.93)      | 39.36<br>(32.58 to<br>47.74)    | 42.05<br>(29.02 to<br>55.89)  | 36.63<br>(26.90 to<br>48.13) | 38.90<br>(25.82 to<br>53.91)  |
| Iodine deficiency                                                | 11.41<br>(0.52 to<br>40.91)              | 32.37<br>(0.58 to<br>114.20)           | 22.35<br>(0.35 to<br>82.86)           | 32.47<br>(0.61 to<br>112.56)           | 0.27<br>(0.01 to<br>0.83)       | 1.55<br>(0.02 to<br>7.28)     | 1.19<br>(0.01 to<br>6.11)    | 1.48<br>(0.02 to<br>6.73)     |
| Dietary iron deficiency                                          | 5.50<br>(3.12 to<br>8.88)                | 3.80<br>(1.98 to<br>6.22)              | 2.81<br>(1.38 to<br>4.60)             | 3.87<br>(2.02 to<br>6.38)              | 0.10<br>(0.05 to<br>0.16)       | 0.08<br>(0.03 to<br>0.15)     | 0.07<br>(0.03 to<br>0.11)    | 0.08<br>(0.04 to<br>0.13)     |
| Other nutritional deficiencies                                   | 241.04<br>(132.91 to<br>375.12)          | 218.80<br>(103.07 to<br>328.73)        | 170.70<br>(77.76 to<br>260.21)        | 215.42<br>(102.99 to<br>328.75)        | 7.01<br>(3.32 to<br>10.75)      | 9.92<br>(4.17 to<br>15.49)    | 8.64<br>(3.45 to<br>13.57)   | 9.25<br>(4.03 to<br>14.25)    |
| Other communicable, maternal, neonatal, and nutritional diseases | 865.87<br>(680.95 to<br>1,033.57)        | 627.95<br>(435.19 to<br>853.17)        | 475.86<br>(327.51 to<br>656.82)       | 640.99<br>(445.37 to<br>881.64)        | 19.53<br>(15.24 to<br>22.76)    | 17.39<br>(12.70 to<br>22.13)  | 13.97<br>(10.18 to<br>17.90) | 17.27<br>(12.61 to<br>22.02)  |
| Sexually transmitted infections excluding HIV                    | 159.82<br>(100.59 to<br>255.71)          | 62.25<br>(40.34 to<br>98.09)           | 47.27<br>(31.17 to<br>72.16)          | 63.24<br>(40.60 to<br>98.82)           | 2.96<br>(2.15 to<br>4.17)       | 1.55<br>(1.13 to<br>2.15)     | 1.29<br>(0.95 to<br>1.75)    | 1.54<br>(1.11 to<br>2.13)     |
| Syphilis                                                         | 107.28<br>(50.53 to<br>203.85)           | 27.59<br>(14.15 to<br>53.55)           | 18.30<br>(10.46 to<br>31.92)          | 28.03<br>(14.30 to<br>54.06)           | 1.68<br>(0.98 to<br>2.83)       | 0.58<br>(0.37 to<br>0.92)     | 0.45<br>(0.30 to<br>0.65)    | 0.57<br>(0.37 to<br>0.90)     |
| Chlamydia infection                                              | 10.34<br>(7.92 to<br>13.26)              | 6.72<br>(4.25 to<br>10.36)             | 5.59<br>(3.56 to<br>8.55)             | 6.83<br>(4.35 to<br>10.42)             | 0.24<br>(0.19 to<br>0.31)       | 0.19<br>(0.13 to<br>0.26)     | 0.16<br>(0.11 to<br>0.23)    | 0.18<br>(0.13 to<br>0.26)     |
| Gonococcal infection                                             | 27.25<br>(21.11 to<br>34.86)             | 18.40<br>(12.24 to<br>28.14)           | 15.47<br>(10.20 to<br>23.84)          | 18.65<br>(12.20 to<br>29.10)           | 0.68<br>(0.54 to<br>0.86)       | 0.54<br>(0.39 to<br>0.77)     | 0.47<br>(0.34 to<br>0.68)    | 0.53<br>(0.38 to<br>0.75)     |

|                                       |                                             |                                            |                                            |                                             |                                       |                                       |                                       |                                        |
|---------------------------------------|---------------------------------------------|--------------------------------------------|--------------------------------------------|---------------------------------------------|---------------------------------------|---------------------------------------|---------------------------------------|----------------------------------------|
| Other sexually transmitted infections | 14.96<br>(11.58 to<br>19.16)                | 9.55<br>(6.06 to<br>15.11)                 | 7.91<br>(4.99 to<br>12.37)                 | 9.73<br>(6.19 to<br>15.17)                  | 0.35<br>(0.28 to<br>0.44)             | 0.25<br>(0.17 to<br>0.36)             | 0.21<br>(0.14 to<br>0.31)             | 0.25<br>(0.17 to<br>0.36)              |
| Acute hepatitis                       | 251.48<br>(210.60 to<br>296.06)             | 178.76<br>(130.97 to<br>253.40)            | 141.03<br>(102.54 to<br>200.01)            | 181.14<br>(131.35 to<br>255.73)             | 6.05<br>(5.07 to<br>7.17)             | 5.19<br>(3.94 to<br>6.93)             | 4.28<br>(3.18 to<br>5.69)             | 5.12<br>(3.93 to<br>6.76)              |
| Acute hepatitis A                     | 6.69<br>(2.99 to<br>11.78)                  | 3.70<br>(1.43 to<br>7.08)                  | 2.74<br>(1.04 to<br>5.40)                  | 3.76<br>(1.45 to<br>7.21)                   | 0.12<br>(0.06 to<br>0.19)             | 0.09<br>(0.04 to<br>0.18)             | 0.07<br>(0.03 to<br>0.15)             | 0.09<br>(0.03 to<br>0.18)              |
| Acute hepatitis B                     | 174.07<br>(140.57 to<br>211.50)             | 129.50<br>(90.69 to<br>188.21)             | 101.78<br>(70.18 to<br>149.27)             | 131.69<br>(92.73 to<br>191.31)              | 4.45<br>(3.61 to<br>5.41)             | 3.79<br>(2.76 to<br>5.22)             | 3.06<br>(2.16 to<br>4.25)             | 3.77<br>(2.77 to<br>5.18)              |
| Acute hepatitis C                     | 10.48<br>(7.47 to<br>14.36)                 | 8.27<br>(5.39 to<br>12.18)                 | 7.34<br>(4.77 to<br>11.01)                 | 8.19<br>(5.31 to<br>12.24)                  | 0.28<br>(0.20 to<br>0.39)             | 0.26<br>(0.17 to<br>0.38)             | 0.24<br>(0.16 to<br>0.35)             | 0.25<br>(0.17 to<br>0.37)              |
| Acute hepatitis E                     | 60.25<br>(44.73 to<br>80.69)                | 37.29<br>(23.46 to<br>55.73)               | 29.17<br>(18.43 to<br>43.31)               | 37.50<br>(23.74 to<br>56.80)                | 1.20<br>(0.86 to<br>1.61)             | 1.05<br>(0.67 to<br>1.51)             | 0.91<br>(0.58 to<br>1.33)             | 1.01<br>(0.65 to<br>1.49)              |
| Other unspecified infectious diseases | 454.57<br>(274.47 to<br>552.59)             | 386.93<br>(221.72 to<br>542.08)            | 287.56<br>(158.66 to<br>412.49)            | 396.61<br>(224.15 to<br>552.05)             | 10.52<br>(6.40 to<br>12.67)           | 10.65<br>(6.42 to<br>13.95)           | 8.39<br>(5.02 to<br>11.15)            | 10.62<br>(6.33 to<br>13.85)            |
| Non-communicable diseases             | 112,525.93<br>(100,744.43 to<br>125,063.01) | 138,456.13<br>(95,911.50 to<br>192,856.96) | 105,120.32<br>(72,634.71 to<br>150,735.72) | 168,087.30<br>(118,143.56 to<br>225,962.80) | 4,267.87<br>(3,849.75 to<br>4,717.14) | 7,249.97<br>(5,074.94 to<br>9,760.60) | 5,883.84<br>(4,026.19 to<br>8,264.94) | 8,335.82<br>(5,958.16 to<br>10,967.32) |
| <b>Guyana</b>                         |                                             |                                            |                                            |                                             |                                       |                                       |                                       |                                        |
| Cause                                 | YLLs (actual counts)                        |                                            |                                            |                                             | Deaths (actual counts)                |                                       |                                       |                                        |
|                                       | 2016                                        | 2040 Forecast                              | 2040 Better Scenario                       | 2040 Worse Scenario                         | 2016                                  | 2040 Forecast                         | 2040 Better Scenario                  | 2040 Worse Scenario                    |
| Neoplasms                             | 18,033.53<br>(15,954.40 to<br>20,113.65)    | 24,356.42<br>(19,028.77 to<br>29,584.76)   | 24,681.72<br>(18,853.06 to<br>30,874.42)   | 24,794.27<br>(19,559.13 to<br>30,509.39)    | 644.09<br>(573.63 to<br>715.54)       | 1,178.83<br>(948.81 to<br>1,402.97)   | 1,276.07<br>(976.18 to<br>1,566.75)   | 1,141.10<br>(920.53 to<br>1,368.23)    |
| Lip and oral cavity cancer            | 251.63<br>(215.73 to<br>291.76)             | 298.19<br>(193.05 to<br>452.76)            | 233.47<br>(153.45 to<br>344.35)            | 389.23<br>(241.85 to<br>625.21)             | 8.82<br>(7.66 to<br>10.16)            | 12.87<br>(8.57 to<br>19.09)           | 10.78<br>(7.27 to<br>15.55)           | 15.69<br>(10.27 to<br>24.14)           |
| Nasopharynx cancer                    | 73.13<br>(63.37 to<br>82.90)                | 67.22<br>(41.29 to<br>102.33)              | 47.69<br>(30.62 to<br>70.23)               | 92.66<br>(55.01 to<br>146.63)               | 2.02<br>(1.75 to<br>2.30)             | 2.12<br>(1.38 to<br>3.04)             | 1.59<br>(1.07 to<br>2.24)             | 2.81<br>(1.78 to<br>4.19)              |
| Other pharynx cancer                  | 104.32<br>(88.18 to<br>123.46)              | 102.22<br>(61.93 to<br>164.64)             | 90.89<br>(56.73 to<br>141.42)              | 120.16<br>(73.26 to<br>191.84)              | 3.51<br>(2.99 to<br>4.11)             | 4.23<br>(2.67 to<br>6.67)             | 3.94<br>(2.53 to<br>6.02)             | 4.79<br>(2.96 to<br>7.69)              |
| Esophageal cancer                     | 244.19<br>(208.95 to<br>280.72)             | 306.11<br>(194.70 to<br>499.09)            | 250.63<br>(157.45 to<br>395.85)            | 381.22<br>(234.85 to<br>628.99)             | 9.45<br>(8.12 to<br>10.77)            | 14.80<br>(9.52 to<br>23.43)           | 12.80<br>(8.09 to<br>19.95)           | 17.31<br>(11.01 to<br>27.73)           |
| Stomach cancer                        | 972.31<br>(852.29 to<br>1,099.57)           | 1,115.48<br>(840.00 to<br>1,449.50)        | 1,035.13<br>(770.59 to<br>1,342.11)        | 1,073.55<br>(832.17 to<br>1,357.50)         | 38.57<br>(34.19 to<br>43.16)          | 57.84<br>(43.48 to<br>75.02)          | 56.09<br>(40.93 to<br>72.87)          | 53.52<br>(41.70 to<br>67.96)           |
| Colon and rectum cancer               | 1,561.62<br>(1,334.59 to<br>1,808.85)       | 2,425.00<br>(1,574.84 to<br>3,581.11)      | 2,586.39<br>(1,627.74 to<br>3,782.22)      | 2,536.06<br>(1,628.19 to<br>3,817.15)       | 61.23<br>(52.87 to<br>70.30)          | 127.58<br>(84.00 to<br>191.22)        | 143.09<br>(90.98 to<br>218.73)        | 127.97<br>(82.45 to<br>193.97)         |
| Liver cancer                          | 853.05<br>(737.30 to<br>977.20)             | 1,365.40<br>(920.72 to<br>2,004.07)        | 1,278.04<br>(868.89 to<br>1,814.03)        | 1,502.89<br>(978.16 to<br>2,279.86)         | 31.02<br>(27.01 to<br>35.36)          | 63.64<br>(44.07 to<br>90.48)          | 62.69<br>(42.90 to<br>87.99)          | 66.68<br>(44.64 to<br>99.89)           |
| Liver cancer due to hepatitis B       | 350.48<br>(288.02 to<br>424.22)             | 523.08<br>(347.98 to<br>792.80)            | 490.36<br>(331.59 to<br>727.87)            | 569.98<br>(361.07 to<br>896.01)             | 11.61<br>(9.57 to<br>14.02)           | 21.05<br>(14.26 to<br>30.85)          | 20.66<br>(13.91 to<br>30.26)          | 21.90<br>(14.16 to<br>33.37)           |
| Liver cancer due to hepatitis C       | 189.52<br>(153.27 to<br>228.44)             | 337.34<br>(227.74 to<br>493.84)            | 328.55<br>(222.27 to<br>470.95)            | 349.85<br>(225.92 to<br>531.49)             | 7.99<br>(6.62 to<br>9.63)             | 18.83<br>(12.80 to<br>27.25)          | 19.22<br>(12.80 to<br>27.10)          | 18.70<br>(12.39 to<br>27.57)           |
| Liver cancer due to alcohol use       | 148.80<br>(117.45 to<br>185.50)             | 253.35<br>(159.60 to<br>388.85)            | 223.57<br>(141.44 to<br>339.38)            | 306.43<br>(191.06 to<br>489.10)             | 5.80<br>(4.71 to<br>7.12)             | 12.57<br>(8.13 to<br>19.12)           | 11.71<br>(7.41 to<br>17.53)           | 14.30<br>(9.11 to<br>22.77)            |
| Liver cancer due to other causes      | 164.25<br>(136.07 to<br>195.63)             | 251.63<br>(162.04 to<br>376.57)            | 235.55<br>(150.69 to<br>349.32)            | 276.64<br>(170.16 to<br>435.60)             | 5.62<br>(4.68 to<br>6.70)             | 11.20<br>(7.12 to<br>17.16)           | 11.10<br>(7.05 to<br>16.52)           | 11.77<br>(7.31 to<br>18.71)            |

|                                      |                                       |                                       |                                       |                                       |                               |                                 |                                 |                                 |  |
|--------------------------------------|---------------------------------------|---------------------------------------|---------------------------------------|---------------------------------------|-------------------------------|---------------------------------|---------------------------------|---------------------------------|--|
|                                      | 231.37<br>(198.29 to<br>286.37)       | 259.57<br>(202.04 to<br>334.44)       | 282.03<br>(210.51 to<br>372.56)       | 241.39<br>(194.56 to<br>308.82)       | 9.07<br>(7.79 to<br>11.30)    | 13.10<br>(10.04 to<br>16.91)    | 14.81<br>(10.82 to<br>19.82)    | 11.84<br>(9.49 to<br>15.11)     |  |
| Gallbladder and biliary tract cancer | 617.44<br>(539.55 to<br>702.28)       | 966.72<br>(696.19 to<br>1,274.15)     | 1,068.40<br>(745.66 to<br>1,465.16)   | 951.52<br>(694.84 to<br>1,265.42)     | 24.77<br>(21.85 to<br>27.97)  | 49.63<br>(36.05 to<br>65.11)    | 57.18<br>(39.51 to<br>77.62)    | 47.18<br>(34.47 to<br>63.75)    |  |
| Pancreatic cancer                    | 191.78<br>(162.11 to<br>225.73)       | 205.71<br>(121.16 to<br>343.46)       | 147.22<br>(93.34 to<br>229.80)        | 289.95<br>(153.18 to<br>518.25)       | 7.12<br>(6.10 to<br>8.28)     | 9.40<br>(5.86 to<br>15.46)      | 7.22<br>(4.75 to<br>10.99)      | 12.30<br>(7.05 to<br>21.29)     |  |
| Larynx cancer                        | 1,131.80<br>(971.93 to<br>1,309.24)   | 1,542.52<br>(1,034.66 to<br>2,219.93) | 1,345.43<br>(914.57 to<br>1,902.06)   | 2,160.51<br>(1,329.15 to<br>3,290.09) | 42.48<br>(36.62 to<br>48.63)  | 72.86<br>(49.11 to<br>102.91)   | 68.21<br>(45.49 to<br>94.89)    | 95.14<br>(61.15 to<br>141.00)   |  |
| Tracheal, bronchus, and lung cancer  | 114.73<br>(91.49 to<br>141.13)        | 135.92<br>(101.35 to<br>176.76)       | 158.00<br>(115.19 to<br>209.44)       | 126.49<br>(95.93 to<br>162.21)        | 3.81<br>(3.04 to<br>4.65)     | 5.86<br>(4.51 to<br>7.41)       | 7.18<br>(5.24 to<br>9.33)       | 5.26<br>(4.14 to<br>6.64)       |  |
| Malignant skin melanoma              | 99.95<br>(86.27 to<br>113.69)         | 119.74<br>(99.30 to<br>138.40)        | 116.04<br>(92.91 to<br>138.43)        | 112.30<br>(94.98 to<br>129.91)        | 3.63<br>(3.17 to<br>4.09)     | 6.08<br>(5.10 to<br>6.96)       | 6.26<br>(5.08 to<br>7.33)       | 5.46<br>(4.50 to<br>6.29)       |  |
| Non-melanoma skin cancer             | 1,905.71<br>(1,535.12 to<br>2,320.74) | 2,344.51<br>(1,512.53 to<br>3,409.52) | 2,334.38<br>(1,484.34 to<br>3,387.48) | 2,410.89<br>(1,543.64 to<br>3,509.46) | 63.14<br>(51.43 to<br>76.26)  | 100.46<br>(66.69 to<br>144.03)  | 105.35<br>(68.10 to<br>152.37)  | 100.09<br>(65.97 to<br>144.30)  |  |
| Breast cancer                        | 1,878.84<br>(1,550.87 to<br>2,258.09) | 1,852.76<br>(1,297.20 to<br>2,663.47) | 1,652.98<br>(1,135.81 to<br>2,353.85) | 1,866.12<br>(1,306.10 to<br>2,746.18) | 61.94<br>(51.10 to<br>73.65)  | 74.83<br>(55.32 to<br>98.58)    | 69.78<br>(48.94 to<br>92.79)    | 72.94<br>(54.45 to<br>96.83)    |  |
| Cervical cancer                      | 396.64<br>(328.80 to<br>475.05)       | 614.83<br>(447.63 to<br>782.61)       | 552.43<br>(381.90 to<br>716.61)       | 598.19<br>(435.86 to<br>753.54)       | 15.86<br>(13.25 to<br>18.90)  | 32.71<br>(24.16 to<br>40.61)    | 30.66<br>(21.49 to<br>38.48)    | 39.98<br>(23.45 to<br>56.51)    |  |
| Uterine cancer                       | 704.00<br>(577.78 to<br>844.83)       | 706.04<br>(439.24 to<br>1,060.92)     | 777.45<br>(480.04 to<br>1,177.32)     | 718.34<br>(433.92 to<br>1,097.83)     | 22.37<br>(18.61 to<br>26.65)  | 28.86<br>(17.74 to<br>43.89)    | 32.94<br>(19.85 to<br>50.58)    | 28.91<br>(17.77 to<br>45.08)    |  |
| Ovarian cancer                       | 1,656.29<br>(1,373.82 to<br>2,075.43) | 4,078.98<br>(3,279.25 to<br>5,059.96) | 4,871.33<br>(3,766.70 to<br>6,260.18) | 3,503.29<br>(2,756.61 to<br>4,253.66) | 94.83<br>(79.06 to<br>118.86) | 285.53<br>(222.07 to<br>344.97) | 353.41<br>(276.25 to<br>442.58) | 238.51<br>(166.32 to<br>295.01) |  |
| Prostate cancer                      | 38.98<br>(29.96 to<br>48.88)          | 26.88<br>(17.92 to<br>39.33)          | 24.77<br>(16.31 to<br>36.01)          | 26.38<br>(17.67 to<br>38.40)          | 0.87<br>(0.67 to<br>1.08)     | 0.73<br>(0.53 to<br>0.97)       | 0.71<br>(0.51 to<br>0.95)       | 0.68<br>(0.50 to<br>0.91)       |  |
| Testicular cancer                    | <b>Guyana</b>                         |                                       |                                       |                                       |                               |                                 |                                 |                                 |  |

| Cause                           | YLLs (actual counts)            |                                   |                                   |                                   | Deaths (actual counts)          |                              |                              |                              |
|---------------------------------|---------------------------------|-----------------------------------|-----------------------------------|-----------------------------------|---------------------------------|------------------------------|------------------------------|------------------------------|
|                                 | 2016                            | 2040 Forecast                     | 2040 Better Scenario              | 2040 Worse Scenario               | 2016                            | 2040 Forecast                | 2040 Better Scenario         | 2040 Worse Scenario          |
|                                 | Kidney cancer                   | 296.45<br>(257.63 to<br>338.00)   | 450.24<br>(361.51 to<br>547.74)   | 509.84<br>(401.31 to<br>625.78)   | 428.79<br>(348.20 to<br>522.29) | 9.31<br>(8.08 to<br>10.58)   | 18.00<br>(14.74 to<br>21.36) | 21.66<br>(17.05 to<br>26.66) |
| Bladder cancer                  | 166.47<br>(144.91 to<br>189.92) | 247.91<br>(183.04 to<br>335.42)   | 257.25<br>(183.29 to<br>353.58)   | 243.47<br>(179.22 to<br>337.61)   | 7.46<br>(6.54 to<br>8.44)       | 14.45<br>(10.81 to<br>19.45) | 15.75<br>(11.42 to<br>21.66) | 13.58<br>(9.96 to<br>19.00)  |
| Brain and nervous system cancer | 368.48<br>(302.64 to<br>437.59) | 481.25<br>(372.80 to<br>601.91)   | 488.60<br>(373.37 to<br>619.57)   | 459.85<br>(361.22 to<br>573.57)   | 9.45<br>(7.85 to<br>11.20)      | 15.63<br>(12.27 to<br>18.70) | 17.07<br>(13.02 to<br>21.07) | 14.46<br>(11.70 to<br>16.90) |
| Thyroid cancer                  | 95.01<br>(79.26 to<br>111.05)   | 96.37<br>(66.67 to<br>140.91)     | 88.03<br>(61.38 to<br>126.75)     | 98.78<br>(66.96 to<br>146.25)     | 3.37<br>(2.84 to<br>3.93)       | 4.49<br>(3.10 to<br>6.49)    | 4.26<br>(2.93 to<br>6.05)    | 4.44<br>(3.04 to<br>6.50)    |
| Mesothelioma                    | 72.36<br>(62.44 to<br>83.74)    | 90.17<br>(69.90 to<br>115.98)     | 87.75<br>(66.79 to<br>115.12)     | 86.85<br>(68.46 to<br>110.22)     | 2.24<br>(1.94 to<br>2.59)       | 3.49<br>(2.81 to<br>4.21)    | 3.59<br>(2.77 to<br>4.51)    | 3.23<br>(2.61 to<br>3.86)    |
| Hodgkin lymphoma                | 147.10<br>(125.41 to<br>172.59) | 103.17<br>(74.85 to<br>141.31)    | 81.54<br>(58.57 to<br>113.70)     | 104.09<br>(75.96 to<br>140.58)    | 3.47<br>(2.98 to<br>4.04)       | 2.91<br>(2.24 to<br>3.72)    | 2.41<br>(1.81 to<br>3.11)    | 2.85<br>(2.22 to<br>3.58)    |
| Non-Hodgkin lymphoma            | 615.33<br>(529.70 to<br>710.32) | 771.06<br>(571.45 to<br>1,019.87) | 803.14<br>(586.83 to<br>1,076.47) | 760.33<br>(563.18 to<br>1,013.54) | 16.89<br>(14.57 to<br>19.50)    | 26.13<br>(19.75 to<br>33.26) | 28.68<br>(21.21 to<br>37.59) | 24.95<br>(18.95 to<br>32.10) |
| Multiple myeloma                | 243.10<br>(170.40 to<br>288.32) | 332.27<br>(223.39 to<br>441.02)   | 365.41<br>(244.73 to<br>481.18)   | 322.08<br>(216.57 to<br>434.27)   | 9.12<br>(6.59 to<br>10.76)      | 15.87<br>(10.91 to<br>20.96) | 18.08<br>(12.52 to<br>23.70) | 14.96<br>(10.27 to<br>19.91) |

|                                 |                                                               |                                                                |                                                               |                                                                |                                                            |                                                            |                                                            |                                                            |
|---------------------------------|---------------------------------------------------------------|----------------------------------------------------------------|---------------------------------------------------------------|----------------------------------------------------------------|------------------------------------------------------------|------------------------------------------------------------|------------------------------------------------------------|------------------------------------------------------------|
| Leukemia                        | 1,242.09<br>(1,094.68 to<br>1,398.28)                         | 1,174.00<br>(893.54 to<br>1,568.86)                            | 1,065.46<br>(801.13 to<br>1,402.08)                           | 1,202.67<br>(912.15 to<br>1,630.55)                            | 30.64<br>(26.99 to<br>34.34)                               | 39.57<br>(31.08 to<br>49.61)                               | 38.51<br>(29.63 to<br>48.93)                               | 39.04<br>(30.35 to<br>49.44)                               |
| Acute lymphoid leukemia         | 384.41<br>(324.03 to<br>448.85)                               | 294.69<br>(212.51 to<br>419.28)                                | 264.14<br>(194.47 to<br>364.20)                               | 297.42<br>(215.80 to<br>422.88)                                | 6.60<br>(5.60 to<br>7.59)                                  | 6.08<br>(4.59 to<br>8.03)                                  | 5.93<br>(4.57 to<br>7.69)                                  | 6.05<br>(4.60 to<br>7.96)                                  |
| Chronic lymphoid leukemia       | 45.00<br>(36.76 to<br>54.09)                                  | 58.44<br>(40.47 to<br>83.23)                                   | 59.68<br>(41.50 to<br>84.75)                                  | 57.73<br>(39.97 to<br>82.52)                                   | 1.78<br>(1.46 to<br>2.11)                                  | 3.02<br>(2.16 to<br>4.14)                                  | 3.24<br>(2.25 to<br>4.48)                                  | 2.86<br>(2.05 to<br>3.97)                                  |
| Acute myeloid leukemia          | 118.44<br>(98.70 to<br>142.52)                                | 161.98<br>(117.51 to<br>223.55)                                | 167.42<br>(122.42 to<br>230.57)                               | 164.06<br>(118.14 to<br>230.23)                                | 2.78<br>(2.36 to<br>3.35)                                  | 4.98<br>(3.75 to<br>6.54)                                  | 5.53<br>(4.13 to<br>7.29)                                  | 4.86<br>(3.67 to<br>6.49)                                  |
| Chronic myeloid leukemia        | 116.92<br>(98.67 to<br>138.68)                                | 94.58<br>(67.02 to<br>135.80)                                  | 92.49<br>(64.85 to<br>131.55)                                 | 97.18<br>(67.13 to<br>140.08)                                  | 3.55<br>(3.00 to<br>4.16)                                  | 3.61<br>(2.66 to<br>4.87)                                  | 3.70<br>(2.71 to<br>5.00)                                  | 3.54<br>(2.57 to<br>4.83)                                  |
| Other leukemia                  | 577.32<br>(492.88 to<br>667.36)                               | 564.31<br>(426.89 to<br>766.46)                                | 481.73<br>(355.10 to<br>635.75)                               | 586.28<br>(439.04 to<br>787.07)                                | 15.93<br>(13.71 to<br>18.23)                               | 21.89<br>(17.01 to<br>27.30)                               | 20.10<br>(15.31 to<br>25.49)                               | 21.73<br>(16.83 to<br>27.33)                               |
| Other neoplasms                 | 1,759.35<br>(1,532.20 to<br>1,999.03)                         | 2,076.16<br>(1,661.67 to<br>2,601.12)                          | 2,082.02<br>(1,623.34 to<br>2,627.82)                         | 1,986.18<br>(1,610.40 to<br>2,463.38)                          | 47.65<br>(42.07 to<br>53.78)                               | 75.18<br>(60.84 to<br>88.41)                               | 81.38<br>(63.08 to<br>98.73)                               | 69.10<br>(57.43 to<br>79.92)                               |
| <b>Cardiovascular diseases</b>  | <b>50,682.69</b><br><b>(45,153.98 to</b><br><b>56,638.59)</b> | <b>59,305.81</b><br><b>(34,010.11 to</b><br><b>104,787.20)</b> | <b>36,252.02</b><br><b>(20,969.67 to</b><br><b>68,656.52)</b> | <b>84,316.66</b><br><b>(49,287.53 to</b><br><b>138,388.18)</b> | <b>2,150.11</b><br><b>(1,935.48 to</b><br><b>2,373.97)</b> | <b>3,408.60</b><br><b>(2,026.22 to</b><br><b>6,109.72)</b> | <b>2,294.92</b><br><b>(1,324.63 to</b><br><b>4,545.50)</b> | <b>4,444.68</b><br><b>(2,701.37 to</b><br><b>7,277.82)</b> |
| Rheumatic heart disease         | 747.36<br>(631.19 to<br>885.96)                               | 445.85<br>(295.84 to<br>658.01)                                | 328.02<br>(212.16 to<br>494.61)                               | 452.21<br>(304.39 to<br>671.55)                                | 21.06<br>(17.76 to<br>25.14)                               | 19.37<br>(13.74 to<br>27.16)                               | 15.54<br>(10.23 to<br>22.06)                               | 18.72<br>(13.36 to<br>25.91)                               |
| Ischemic heart disease          | 23,306.43<br>(20,666.40 to<br>26,128.47)                      | 25,641.28<br>(12,178.88 to<br>55,464.33)                       | 14,061.58<br>(6,421.62 to<br>31,193.02)                       | 39,714.97<br>(19,161.95 to<br>80,195.80)                       | 1,019.22<br>(908.12 to<br>1,131.37)                        | 1,481.93<br>(729.56 to<br>3,180.87)                        | 912.11<br>(424.05 to<br>2,185.94)                          | 2,084.61<br>(1,018.57 to<br>4,315.28)                      |
| Stroke                          | 15,956.70<br>(14,076.63 to<br>17,820.21)                      | 17,874.74<br>(8,699.89 to<br>41,480.58)                        | 9,888.74<br>(4,706.93 to<br>24,882.30)                        | 27,851.32<br>(13,876.40 to<br>59,341.55)                       | 687.62<br>(608.39 to<br>765.63)                            | 1,032.89<br>(511.74 to<br>2,475.15)                        | 641.84<br>(297.27 to<br>1,798.00)                          | 1,455.01<br>(746.73 to<br>3,411.71)                        |
| Ischemic stroke                 | 5,203.40<br>(4,558.13 to<br>5,872.26)                         | 7,288.92<br>(2,781.81 to<br>25,231.33)                         | 4,662.67<br>(1,707.49 to<br>17,309.25)                        | 10,282.43<br>(4,068.27 to<br>35,440.73)                        | 263.73<br>(231.86 to<br>294.95)                            | 484.18<br>(194.86 to<br>1,211.04)                          | 339.52<br>(128.10 to<br>1,178.06)                          | 627.35<br>(254.20 to<br>2,251.30)                          |
| Intracerebral hemorrhage        | 10,753.30<br>(9,478.74 to<br>12,057.84)                       | 10,585.82<br>(5,086.24 to<br>20,500.30)                        | 5,226.07<br>(2,557.96 to<br>10,427.57)                        | 17,568.89<br>(8,008.13 to<br>34,843.42)                        | 423.89<br>(374.76 to<br>474.01)                            | 548.72<br>(275.72 to<br>1,016.42)                          | 302.32<br>(148.61 to<br>567.27)                            | 827.67<br>(408.93 to<br>1,591.80)                          |
| Hypertensive heart disease      | 4,799.15<br>(3,715.40 to<br>7,452.12)                         | 7,982.99<br>(4,579.10 to<br>15,196.76)                         | 5,458.62<br>(3,343.02 to<br>9,007.37)                         | 8,953.37<br>(5,098.17 to<br>17,036.23)                         | 216.95<br>(168.50 to<br>337.64)                            | 510.42<br>(300.61 to<br>962.27)                            | 373.67<br>(229.78 to<br>613.14)                            | 541.67<br>(311.18 to<br>1,022.88)                          |
| Cardiomyopathy and myocarditis  | 2,128.92<br>(1,728.88 to<br>2,490.57)                         | 2,386.78<br>(1,606.22 to<br>3,376.81)                          | 2,298.48<br>(1,522.83 to<br>3,217.35)                         | 2,358.71<br>(1,615.26 to<br>3,324.22)                          | 68.03<br>(55.79 to<br>79.51)                               | 103.24<br>(70.29 to<br>143.49)                             | 105.78<br>(70.56 to<br>145.68)                             | 97.45<br>(68.71 to<br>134.39)                              |
| Myocarditis                     | 569.05<br>(415.93 to<br>717.12)                               | 566.55<br>(370.41 to<br>775.05)                                | 532.77<br>(335.90 to<br>742.54)                               | 545.42<br>(363.47 to<br>737.97)                                | 18.57<br>(13.60 to<br>23.24)                               | 27.85<br>(18.44 to<br>36.38)                               | 28.22<br>(17.41 to<br>38.25)                               | 25.60<br>(17.22 to<br>33.25)                               |
| <b>Guyana</b>                   |                                                               |                                                                |                                                               |                                                                |                                                            |                                                            |                                                            |                                                            |
| Cause                           | YLLs (actual counts)                                          |                                                                |                                                               |                                                                | Deaths (actual counts)                                     |                                                            |                                                            |                                                            |
|                                 | 2016                                                          | 2040 Forecast                                                  | 2040 Better Scenario                                          | 2040 Worse Scenario                                            | 2016                                                       | 2040 Forecast                                              | 2040 Better Scenario                                       | 2040 Worse Scenario                                        |
| Alcoholic cardiomyopathy        | 220.84<br>(155.07 to<br>297.69)                               | 228.16<br>(148.88 to<br>316.32)                                | 228.96<br>(148.32 to<br>322.57)                               | 261.29<br>(169.31 to<br>357.62)                                | 7.41<br>(5.25 to<br>9.77)                                  | 9.14<br>(6.18 to<br>12.35)                                 | 9.65<br>(6.50 to<br>13.26)                                 | 9.90<br>(6.67 to<br>13.39)                                 |
| Other cardiomyopathy            | 1,339.03<br>(1,084.86 to<br>1,587.01)                         | 1,592.07<br>(1,009.44 to<br>2,411.40)                          | 1,536.75<br>(960.31 to<br>2,280.52)                           | 1,552.00<br>(982.72 to<br>2,355.06)                            | 42.05<br>(33.63 to<br>49.42)                               | 66.25<br>(41.99 to<br>99.07)                               | 67.91<br>(42.37 to<br>99.38)                               | 61.95<br>(40.05 to<br>92.15)                               |
| Atrial fibrillation and flutter | 141.60<br>(110.51 to<br>177.42)                               | 388.91<br>(267.95 to<br>536.39)                                | 407.05<br>(269.62 to<br>565.20)                               | 363.71<br>(251.44 to<br>498.76)                                | 10.87<br>(8.39 to<br>13.86)                                | 36.04<br>(23.59 to<br>50.67)                               | 39.86<br>(26.41 to<br>55.28)                               | 32.52<br>(20.29 to<br>46.00)                               |
| Aortic aneurysm                 | 450.25<br>(388.65 to<br>518.07)                               | 538.63<br>(390.68 to<br>719.86)                                | 522.71<br>(372.71 to<br>693.44)                               | 520.01<br>(386.27 to<br>691.75)                                | 18.81<br>(16.38 to<br>21.49)                               | 29.18<br>(21.89 to<br>37.71)                               | 30.46<br>(22.03 to<br>39.71)                               | 26.87<br>(20.53 to<br>34.31)                               |

|                                                                |                                                            |                                                            |                                                            |                                                             |                                                      |                                                      |                                                      |                                                      |
|----------------------------------------------------------------|------------------------------------------------------------|------------------------------------------------------------|------------------------------------------------------------|-------------------------------------------------------------|------------------------------------------------------|------------------------------------------------------|------------------------------------------------------|------------------------------------------------------|
| Peripheral artery disease                                      | 46.16<br>(30.91 to<br>66.98)                               | 144.47<br>(83.29 to<br>213.93)                             | 176.11<br>(96.55 to<br>266.63)                             | 143.48<br>(84.58 to<br>208.21)                              | 3.05<br>(1.99 to<br>4.37)                            | 12.56<br>(6.79 to<br>19.48)                          | 16.53<br>(8.74 to<br>25.79)                          | 11.85<br>(6.46 to<br>18.30)                          |
| Endocarditis                                                   | 701.21<br>(514.30 to<br>958.71)                            | 869.71<br>(550.37 to<br>1,338.21)                          | 788.62<br>(493.68 to<br>1,227.46)                          | 855.05<br>(549.56 to<br>1,297.61)                           | 22.20<br>(16.55 to<br>31.93)                         | 39.13<br>(25.35 to<br>64.97)                         | 38.24<br>(24.22 to<br>63.72)                         | 36.79<br>(24.33 to<br>60.80)                         |
| Other cardiovascular and circulatory diseases                  | 2,404.91<br>(2,096.08 to<br>2,751.96)                      | 3,032.45<br>(2,125.97 to<br>4,262.31)                      | 2,322.08<br>(1,595.06 to<br>3,237.97)                      | 3,103.82<br>(2,182.40 to<br>4,357.33)                       | 82.30<br>(71.59 to<br>94.17)                         | 143.83<br>(105.31 to<br>190.85)                      | 120.90<br>(84.85 to<br>158.84)                       | 139.19<br>(102.86 to<br>186.77)                      |
| <b>Chronic respiratory diseases</b>                            | <b>2,864.23</b><br><b>(2,534.89 to</b><br><b>3,231.22)</b> | <b>3,119.39</b><br><b>(2,426.42 to</b><br><b>3,952.34)</b> | <b>2,520.98</b><br><b>(1,944.22 to</b><br><b>3,188.30)</b> | <b>3,623.99</b><br><b>(2,715.97 to</b><br><b>4,784.41)</b>  | <b>108.58</b><br><b>(97.20 to</b><br><b>121.71)</b>  | <b>163.58</b><br><b>(129.54 to</b><br><b>206.32)</b> | <b>142.98</b><br><b>(113.02 to</b><br><b>174.92)</b> | <b>177.38</b><br><b>(137.79 to</b><br><b>233.83)</b> |
| Chronic obstructive pulmonary disease                          | 1,442.60<br>(1,240.06 to<br>1,659.70)                      | 1,831.54<br>(1,278.22 to<br>2,541.67)                      | 1,361.54<br>(959.22 to<br>1,849.54)                        | 2,298.38<br>(1,538.60 to<br>3,317.65)                       | 64.14<br>(55.38 to<br>72.92)                         | 106.91<br>(78.17 to<br>142.42)                       | 87.49<br>(62.39 to<br>113.75)                        | 122.42<br>(85.53 to<br>170.06)                       |
| Pneumoconiosis                                                 | 5.62<br>(4.56 to<br>6.92)                                  | 5.30<br>(3.97 to<br>6.65)                                  | 5.21<br>(3.70 to<br>6.70)                                  | 5.02<br>(3.85 to<br>6.27)                                   | 0.21<br>(0.17 to<br>0.26)                            | 0.29<br>(0.21 to<br>0.37)                            | 0.30<br>(0.21 to<br>0.39)                            | 0.26<br>(0.19 to<br>0.35)                            |
| Silicosis                                                      | 1.67<br>(1.19 to<br>2.25)                                  | 1.28<br>(0.79 to<br>1.91)                                  | 1.23<br>(0.71 to<br>1.90)                                  | 1.17<br>(0.73 to<br>1.73)                                   | 0.07<br>(0.05 to<br>0.09)                            | 0.07<br>(0.04 to<br>0.11)                            | 0.07<br>(0.04 to<br>0.12)                            | 0.06<br>(0.04 to<br>0.10)                            |
| Asbestosis                                                     | 2.08<br>(1.62 to<br>2.75)                                  | 1.68<br>(1.17 to<br>2.31)                                  | 1.69<br>(1.16 to<br>2.37)                                  | 1.62<br>(1.14 to<br>2.21)                                   | 0.05<br>(0.04 to<br>0.07)                            | 0.06<br>(0.04 to<br>0.08)                            | 0.06<br>(0.04 to<br>0.09)                            | 0.05<br>(0.04 to<br>0.07)                            |
| Coal workers pneumoconiosis                                    | 0.27<br>(0.14 to<br>0.40)                                  | 0.23<br>(0.12 to<br>0.39)                                  | 0.16<br>(0.08 to<br>0.29)                                  | 0.24<br>(0.13 to<br>0.39)                                   | 0.01<br>(0.01 to<br>0.01)                            | 0.01<br>(0.01 to<br>0.03)                            | 0.01<br>(0.00 to<br>0.02)                            | 0.01<br>(0.01 to<br>0.03)                            |
| Other pneumoconiosis                                           | 1.59<br>(1.23 to<br>2.12)                                  | 2.10<br>(1.43 to<br>2.85)                                  | 2.12<br>(1.39 to<br>2.95)                                  | 1.98<br>(1.40 to<br>2.66)                                   | 0.08<br>(0.06 to<br>0.10)                            | 0.14<br>(0.09 to<br>0.20)                            | 0.15<br>(0.10 to<br>0.21)                            | 0.13<br>(0.08 to<br>0.19)                            |
| Asthma                                                         | 844.74<br>(716.49 to<br>1,008.58)                          | 502.65<br>(309.39 to<br>807.93)                            | 358.48<br>(221.84 to<br>563.88)                            | 577.74<br>(346.02 to<br>952.45)                             | 24.28<br>(20.37 to<br>29.07)                         | 19.82<br>(12.24 to<br>32.30)                         | 15.37<br>(9.47 to<br>23.96)                          | 21.71<br>(12.94 to<br>35.37)                         |
| Interstitial lung disease and pulmonary sarcoidosis            | 180.48<br>(133.62 to<br>239.42)                            | 238.04<br>(165.57 to<br>325.69)                            | 282.66<br>(197.36 to<br>393.69)                            | 219.11<br>(153.37 to<br>296.21)                             | 6.08<br>(4.48 to<br>8.14)                            | 10.55<br>(7.42 to<br>14.09)                          | 13.24<br>(9.09 to<br>18.12)                          | 9.34<br>(6.74 to<br>12.46)                           |
| Other chronic respiratory diseases                             | 390.80<br>(273.96 to<br>575.28)                            | 541.86<br>(389.67 to<br>809.38)                            | 513.09<br>(364.49 to<br>758.44)                            | 523.75<br>(368.14 to<br>800.96)                             | 13.87<br>(10.04 to<br>21.18)                         | 17.87<br>(18.56 to<br>42.27)                         | 26.59<br>(19.10 to<br>41.89)                         | 23.64<br>(16.16 to<br>38.72)                         |
| <b>Cirrhosis and other chronic liver diseases</b>              | <b>7,576.87</b><br><b>(6,276.58 to</b><br><b>9,020.16)</b> | <b>7,567.69</b><br><b>(5,757.11 to</b><br><b>9,476.94)</b> | <b>6,672.61</b><br><b>(5,045.60 to</b><br><b>8,445.67)</b> | <b>8,088.52</b><br><b>(6,227.99 to</b><br><b>10,180.73)</b> | <b>230.18</b><br><b>(191.39 to</b><br><b>272.34)</b> | <b>265.94</b><br><b>(212.58 to</b><br><b>318.56)</b> | <b>244.67</b><br><b>(190.74 to</b><br><b>298.55)</b> | <b>273.88</b><br><b>(220.72 to</b><br><b>324.52)</b> |
| Cirrhosis and other chronic liver diseases due to hepatitis B  | 899.54<br>(671.57 to<br>1,167.86)                          | 989.65<br>(727.42 to<br>1,314.85)                          | 932.75<br>(678.98 to<br>1,238.69)                          | 959.95<br>(704.16 to<br>1,255.48)                           | 28.51<br>(21.54 to<br>36.87)                         | 35.74<br>(27.08 to<br>45.30)                         | 34.87<br>(25.98 to<br>45.36)                         | 33.67<br>(25.75 to<br>42.50)                         |
| Cirrhosis and other chronic liver diseases due to hepatitis C  | 2,630.20<br>(2,104.62 to<br>3,274.78)                      | 2,753.70<br>(2,063.87 to<br>3,555.98)                      | 2,564.89<br>(1,873.78 to<br>3,328.54)                      | 2,689.27<br>(2,016.11 to<br>3,467.53)                       | 80.63<br>(65.36 to<br>99.25)                         | 94.25<br>(73.47 to<br>115.97)                        | 90.56<br>(68.95 to<br>112.97)                        | 89.66<br>(70.81 to<br>109.91)                        |
| Cirrhosis and other chronic liver diseases due to alcohol use  | 2,793.86<br>(2,237.34 to<br>3,422.10)                      | 2,611.55<br>(1,960.98 to<br>3,377.80)                      | 2,098.05<br>(1,551.08 to<br>2,729.63)                      | 3,244.66<br>(2,452.47 to<br>4,173.32)                       | 88.11<br>(71.55 to<br>106.24)                        | 96.22<br>(75.06 to<br>118.41)                        | 81.77<br>(62.90 to<br>101.85)                        | 112.69<br>(88.62 to<br>138.31)                       |
| Cirrhosis and other chronic liver diseases due to other causes | 1,253.27<br>(1,019.44 to<br>1,498.41)                      | 1,212.80<br>(918.00 to<br>1,589.29)                        | 1,076.91<br>(798.42 to<br>1,430.98)                        | 1,194.65<br>(908.99 to<br>1,544.36)                         | 32.94<br>(26.96 to<br>39.60)                         | 39.72<br>(31.42 to<br>49.15)                         | 37.48<br>(29.01 to<br>47.43)                         | 37.86<br>(30.00 to<br>46.12)                         |
| <b>Digestive diseases</b>                                      | <b>4,095.90</b><br><b>(3,507.21 to</b><br><b>4,898.55)</b> | <b>3,816.92</b><br><b>(2,903.33 to</b><br><b>5,033.08)</b> | <b>3,206.38</b><br><b>(2,399.33 to</b><br><b>4,246.89)</b> | <b>3,896.45</b><br><b>(2,981.45 to</b><br><b>5,245.14)</b>  | <b>130.97</b><br><b>(113.06 to</b><br><b>158.54)</b> | <b>172.68</b><br><b>(139.84 to</b><br><b>220.75)</b> | <b>156.78</b><br><b>(122.58 to</b><br><b>200.60)</b> | <b>167.09</b><br><b>(134.58 to</b><br><b>214.58)</b> |
| Peptic ulcer disease                                           | 997.82<br>(842.56 to<br>1,234.47)                          | 677.08<br>(498.01 to<br>890.78)                            | 502.57<br>(368.31 to<br>674.38)                            | 681.60<br>(521.31 to<br>886.08)                             | 35.17<br>(29.49 to<br>43.40)                         | 32.70<br>(24.51 to<br>42.08)                         | 25.76<br>(18.96 to<br>33.24)                         | 31.58<br>(24.16 to<br>40.04)                         |
| <b>Guyana</b>                                                  |                                                            |                                                            |                                                            |                                                             |                                                      |                                                      |                                                      |                                                      |
| Cause                                                          | YLLs (actual counts)                                       |                                                            |                                                            |                                                             | Deaths (actual counts)                               |                                                      |                                                      |                                                      |
|                                                                | 2016                                                       | 2040 Forecast                                              | 2040 Better Scenario                                       | 2040 Worse Scenario                                         | 2016                                                 | 2040 Forecast                                        | 2040 Better Scenario                                 | 2040 Worse Scenario                                  |







|                                                   |                                       |                                       |                                       |                                       |                              |                               |                              |                              |
|---------------------------------------------------|---------------------------------------|---------------------------------------|---------------------------------------|---------------------------------------|------------------------------|-------------------------------|------------------------------|------------------------------|
| Hemoglobinopathies and hemolytic anemias          | 1,025.52<br>(842.19 to<br>1,206.48)   | 1,092.43<br>(774.71 to<br>1,514.41)   | 906.46<br>(627.46 to<br>1,283.25)     | 1,089.38<br>(773.54 to<br>1,510.47)   | 22.77<br>(18.48 to<br>26.81) | 32.93<br>(24.28 to<br>42.11)  | 28.61<br>(20.51 to<br>37.18) | 31.81<br>(23.58 to<br>40.41) |
| Thalassemias                                      | 19.09<br>(8.31 to<br>30.45)           | 6.01<br>(2.38 to<br>11.81)            | 4.85<br>(2.00 to<br>9.21)             | 5.77<br>(2.30 to<br>11.01)            | 0.23<br>(0.10 to<br>0.36)    | 0.07<br>(0.03 to<br>0.14)     | 0.06<br>(0.02 to<br>0.11)    | 0.07<br>(0.03 to<br>0.13)    |
| Sickle cell disorders                             | 817.88<br>(664.95 to<br>968.60)       | 786.62<br>(531.83 to<br>1,158.18)     | 647.11<br>(429.04 to<br>975.05)       | 796.53<br>(542.65 to<br>1,155.22)     | 14.90<br>(12.02 to<br>17.82) | 16.47<br>(11.38 to<br>23.46)  | 13.87<br>(9.39 to<br>20.09)  | 16.59<br>(11.55 to<br>23.13) |
| G6PD deficiency                                   | 107.50<br>(76.48 to<br>142.99)        | 169.73<br>(114.19 to<br>233.06)       | 138.79<br>(90.70 to<br>190.68)        | 166.27<br>(114.42 to<br>223.84)       | 3.08<br>(2.23 to<br>4.03)    | 6.56<br>(4.48 to<br>8.65)     | 5.58<br>(3.71 to<br>7.61)    | 6.23<br>(4.38 to<br>8.22)    |
| Other hemoglobinopathies and hemolytic anemias    | 81.05<br>(63.31 to<br>97.76)          | 130.06<br>(90.44 to<br>170.22)        | 115.71<br>(77.34 to<br>155.22)        | 120.81<br>(84.91 to<br>157.55)        | 4.56<br>(3.60 to<br>5.47)    | 9.83<br>(7.03 to<br>12.81)    | 9.10<br>(6.28 to<br>12.07)   | 8.92<br>(6.14 to<br>11.63)   |
| Endocrine, metabolic, blood, and immune disorders | 1,403.78<br>(1,122.95 to<br>2,000.59) | 1,932.13<br>(1,368.96 to<br>2,871.02) | 1,728.57<br>(1,214.04 to<br>2,560.09) | 1,890.81<br>(1,358.93 to<br>2,771.58) | 36.62<br>(29.53 to<br>52.47) | 69.81<br>(52.63 to<br>100.58) | 67.96<br>(49.84 to<br>99.42) | 65.36<br>(49.83 to<br>92.15) |

**Guyana**

| Cause                                         | YLLs (actual counts)                         |                                              |                                              |                                              | Deaths (actual counts)              |                                     |                                     |                                     |
|-----------------------------------------------|----------------------------------------------|----------------------------------------------|----------------------------------------------|----------------------------------------------|-------------------------------------|-------------------------------------|-------------------------------------|-------------------------------------|
|                                               | 2016                                         | 2040 Forecast                                | 2040 Better Scenario                         | 2040 Worse Scenario                          | 2016                                | 2040 Forecast                       | 2040 Better Scenario                | 2040 Worse Scenario                 |
| <b>Musculoskeletal disorders</b>              | <b>364.97</b><br>(179.28 to<br>457.96)       | <b>342.10</b><br>(172.85 to<br>518.54)       | <b>359.14</b><br>(185.73 to<br>544.01)       | <b>332.31</b><br>(169.84 to<br>497.45)       | <b>8.11</b><br>(4.24 to<br>10.07)   | <b>9.07</b><br>(4.98 to<br>12.43)   | <b>9.72</b><br>(5.50 to<br>13.45)   | <b>8.63</b><br>(4.68 to<br>11.87)   |
| Rheumatoid arthritis                          | 31.02<br>(18.59 to<br>49.82)                 | 32.28<br>(19.70 to<br>48.59)                 | 27.64<br>(16.29 to<br>41.80)                 | 31.53<br>(19.32 to<br>46.88)                 | 1.10<br>(0.65 to<br>1.65)           | 1.66<br>(0.99 to<br>2.34)           | 1.51<br>(0.89 to<br>2.22)           | 1.57<br>(0.93 to<br>2.22)           |
| Other musculoskeletal disorders               | 333.95<br>(161.38 to<br>423.60)              | 309.82<br>(154.13 to<br>485.83)              | 331.50<br>(167.80 to<br>514.26)              | 300.78<br>(149.47 to<br>462.45)              | 7.01<br>(3.57 to<br>8.30)           | 7.41<br>(3.95 to<br>10.59)          | 8.21<br>(4.56 to<br>11.68)          | 7.07<br>(3.72 to<br>10.01)          |
| <b>Other non-communicable diseases</b>        | <b>4,073.24</b><br>(2,858.18 to<br>5,467.51) | <b>2,775.31</b><br>(1,721.72 to<br>4,153.42) | <b>1,853.08</b><br>(1,197.41 to<br>2,777.91) | <b>2,777.55</b><br>(1,685.91 to<br>4,181.53) | <b>58.91</b><br>(41.37 to<br>76.84) | <b>63.21</b><br>(37.04 to<br>86.20) | <b>56.57</b><br>(31.34 to<br>76.43) | <b>60.01</b><br>(35.25 to<br>83.14) |
| Congenital birth defects                      | 3,770.13<br>(2,651.87 to<br>5,127.78)        | 2,237.80<br>(1,297.56 to<br>3,507.31)        | 1,401.38<br>(843.12 to<br>2,121.27)          | 2,279.14<br>(1,315.83 to<br>3,574.95)        | 48.03<br>(34.28 to<br>63.94)        | 31.05<br>(18.68 to<br>47.15)        | 20.61<br>(13.12 to<br>30.20)        | 31.55<br>(19.19 to<br>47.51)        |
| Neural tube defects                           | 168.93<br>(100.65 to<br>272.33)              | 39.43<br>(16.31 to<br>79.26)                 | 19.08<br>(8.50 to<br>35.93)                  | 41.58<br>(17.35 to<br>84.02)                 | 2.01<br>(1.22 to<br>3.22)           | 0.51<br>(0.23 to<br>0.98)           | 0.26<br>(0.13 to<br>0.46)           | 0.54<br>(0.25 to<br>1.03)           |
| Congenital heart anomalies                    | 1,868.45<br>(1,377.12 to<br>2,522.16)        | 1,197.98<br>(720.72 to<br>1,849.96)          | 780.86<br>(487.31 to<br>1,169.31)            | 1,220.17<br>(721.08 to<br>1,868.03)          | 24.46<br>(18.18 to<br>32.28)        | 17.20<br>(10.80 to<br>25.51)        | 11.86<br>(7.78 to<br>17.27)         | 17.48<br>(10.91 to<br>25.92)        |
| Orofacial clefts                              | 10.08<br>(4.70 to<br>18.91)                  | 4.78<br>(1.23 to<br>11.91)                   | 2.12<br>(0.54 to<br>5.30)                    | 5.04<br>(1.22 to<br>12.66)                   | 0.12<br>(0.05 to<br>0.22)           | 0.06<br>(0.01 to<br>0.14)           | 0.02<br>(0.01 to<br>0.06)           | 0.06<br>(0.01 to<br>0.15)           |
| Down syndrome                                 | 53.18<br>(32.17 to<br>74.56)                 | 59.06<br>(33.70 to<br>87.99)                 | 42.73<br>(24.48 to<br>63.48)                 | 60.43<br>(34.30 to<br>90.25)                 | 0.92<br>(0.57 to<br>1.28)           | 1.15<br>(0.67 to<br>1.68)           | 0.88<br>(0.51 to<br>1.30)           | 1.17<br>(0.70 to<br>1.68)           |
| Other chromosomal abnormalities               | 25.64<br>(12.51 to<br>41.83)                 | 23.11<br>(8.65 to<br>45.41)                  | 12.81<br>(5.09 to<br>23.98)                  | 23.66<br>(8.72 to<br>45.77)                  | 0.30<br>(0.15 to<br>0.50)           | 0.28<br>(0.11 to<br>0.52)           | 0.16<br>(0.06 to<br>0.29)           | 0.29<br>(0.11 to<br>0.56)           |
| Congenital musculoskeletal and limb anomalies | 61.26<br>(39.50 to<br>91.36)                 | 40.05<br>(19.79 to<br>70.85)                 | 24.67<br>(12.92 to<br>41.04)                 | 40.53<br>(19.82 to<br>70.41)                 | 0.76<br>(0.49 to<br>1.11)           | 0.54<br>(0.28 to<br>0.89)           | 0.34<br>(0.19 to<br>0.54)           | 0.53<br>(0.28 to<br>0.90)           |
| Urogenital congenital anomalies               | 123.92<br>(73.57 to<br>192.71)               | 84.46<br>(44.66 to<br>140.80)                | 57.13<br>(31.35 to<br>91.99)                 | 85.11<br>(45.46 to<br>143.75)                | 1.77<br>(1.06 to<br>2.67)           | 1.36<br>(0.78 to<br>2.13)           | 1.01<br>(0.58 to<br>1.55)           | 1.36<br>(0.79 to<br>2.15)           |
| Digestive congenital anomalies                | 479.65<br>(283.50 to<br>725.80)              | 236.14<br>(105.23 to<br>433.36)              | 128.49<br>(59.37 to<br>231.99)               | 242.00<br>(107.53 to<br>447.50)              | 5.68<br>(3.36 to<br>8.57)           | 2.84<br>(1.31 to<br>5.15)           | 1.58<br>(0.75 to<br>2.78)           | 2.91<br>(1.36 to<br>5.31)           |
| Other congenital birth defects                | 979.02<br>(608.72 to<br>1,411.72)            | 552.79<br>(286.78 to<br>936.41)              | 333.48<br>(181.76 to<br>534.21)              | 560.61<br>(288.21 to<br>943.70)              | 12.00<br>(7.46 to<br>17.03)         | 7.13<br>(3.91 to<br>11.69)          | 4.50<br>(2.60 to<br>6.93)           | 7.21<br>(3.88 to<br>11.72)          |

|                                      |                                                     |                                                     |                                                     |                                                     |                                            |                                              |                                            |                                              |
|--------------------------------------|-----------------------------------------------------|-----------------------------------------------------|-----------------------------------------------------|-----------------------------------------------------|--------------------------------------------|----------------------------------------------|--------------------------------------------|----------------------------------------------|
| Skin and subcutaneous diseases       | 249.48<br>(84.67 to 340.13)                         | 517.90<br>(183.36 to 731.17)                        | 540.89<br>(195.95 to 783.61)                        | 478.46<br>(167.17 to 671.41)                        | 10.26<br>(3.70 to 13.80)                   | 31.93<br>(11.60 to 44.90)                    | 35.84<br>(13.65 to 50.60)                  | 28.22<br>(10.07 to 40.45)                    |
| Cellulitis                           | 27.17<br>(10.45 to 48.33)                           | 66.75<br>(26.42 to 117.17)                          | 77.60<br>(30.14 to 137.22)                          | 60.95<br>(23.52 to 105.51)                          | 1.01<br>(0.42 to 1.87)                     | 3.70<br>(1.55 to 6.60)                       | 4.59<br>(1.96 to 8.34)                     | 3.23<br>(1.34 to 5.78)                       |
| Pyoderma                             | 137.25<br>(36.21 to 201.56)                         | 268.06<br>(70.85 to 412.59)                         | 264.68<br>(68.73 to 415.39)                         | 249.87<br>(67.41 to 383.19)                         | 5.27<br>(1.43 to 7.62)                     | 16.01<br>(4.26 to 24.38)                     | 17.08<br>(4.53 to 26.23)                   | 14.26<br>(3.82 to 22.04)                     |
| Decubitus ulcer                      | 66.16<br>(25.39 to 87.33)                           | 151.78<br>(60.19 to 222.18)                         | 165.99<br>(67.89 to 246.54)                         | 137.75<br>(53.54 to 197.41)                         | 3.41<br>(1.36 to 4.54)                     | 10.96<br>(4.39 to 16.78)                     | 12.73<br>(5.21 to 19.10)                   | 9.58<br>(3.64 to 14.54)                      |
| Other skin and subcutaneous diseases | 18.90<br>(7.46 to 26.27)                            | 31.31<br>(11.33 to 52.01)                           | 32.62<br>(11.93 to 55.07)                           | 29.88<br>(10.61 to 49.22)                           | 0.57<br>(0.23 to 0.80)                     | 1.26<br>(0.46 to 1.99)                       | 1.43<br>(0.53 to 2.52)                     | 1.15<br>(0.42 to 1.79)                       |
| Sudden infant death syndrome         | 53.63<br>(33.08 to 82.11)                           | 19.61<br>(2.32 to 50.28)                            | 10.81<br>(2.32 to 27.38)                            | 19.95<br>(2.43 to 49.32)                            | 0.62<br>(0.38 to 0.95)                     | 0.23<br>(0.03 to 0.58)                       | 0.13<br>(0.01 to 0.32)                     | 0.23<br>(0.03 to 0.57)                       |
| <b>Injuries</b>                      | <b>37,561.97</b><br><b>(32,951.24 to 42,023.13)</b> | <b>33,264.13</b><br><b>(21,680.64 to 53,705.43)</b> | <b>25,390.87</b><br><b>(16,551.59 to 40,426.49)</b> | <b>36,643.31</b><br><b>(23,046.28 to 60,651.28)</b> | <b>774.90</b><br><b>(678.47 to 870.89)</b> | <b>793.52</b><br><b>(555.17 to 1,177.83)</b> | <b>646.03</b><br><b>(461.68 to 941.34)</b> | <b>845.38</b><br><b>(572.10 to 1,304.95)</b> |
| <b>Transport injuries</b>            | <b>8,524.38</b><br><b>(7,289.45 to 9,903.31)</b>    | <b>7,988.07</b><br><b>(4,531.27 to 14,774.31)</b>   | <b>3,340.72</b><br><b>(1,896.43 to 6,235.16)</b>    | <b>9,840.33</b><br><b>(5,402.73 to 18,710.49)</b>   | <b>174.30</b><br><b>(149.15 to 202.00)</b> | <b>181.66</b><br><b>(111.89 to 319.15)</b>   | <b>86.24</b><br><b>(54.83 to 147.52)</b>   | <b>216.50</b><br><b>(126.91 to 389.46)</b>   |
| Road injuries                        | 7,745.36<br>(6,586.10 to 8,996.16)                  | 7,204.16<br>(4,024.08 to 13,489.13)                 | 2,715.25<br>(1,522.99 to 5,131.59)                  | 8,991.28<br>(4,872.69 to 17,185.33)                 | 157.10<br>(133.96 to 182.07)               | 160.61<br>(97.71 to 287.55)                  | 68.34<br>(42.77 to 118.89)                 | 194.42<br>(112.96 to 354.70)                 |
| Pedestrian road injuries             | 1,400.06<br>(1,087.79 to 1,715.78)                  | 1,183.58<br>(721.84 to 2,042.16)                    | 504.53<br>(312.89 to 849.34)                        | 1,408.94<br>(825.85 to 2,535.84)                    | 32.13<br>(25.18 to 39.05)                  | 33.72<br>(22.01 to 54.53)                    | 16.53<br>(11.20 to 24.94)                  | 38.50<br>(24.25 to 64.15)                    |
| <b>Guyana</b>                        |                                                     |                                                     |                                                     |                                                     |                                            |                                              |                                            |                                              |
| Cause                                | YLLs (actual counts)                                |                                                     |                                                     |                                                     | Deaths (actual counts)                     |                                              |                                            |                                              |
|                                      | 2016                                                | 2040 Forecast                                       | 2040 Better Scenario                                | 2040 Worse Scenario                                 | 2016                                       | 2040 Forecast                                | 2040 Better Scenario                       | 2040 Worse Scenario                          |
| Cyclist road injuries                | 579.82<br>(451.74 to 727.09)                        | 478.48<br>(250.07 to 935.69)                        | 187.82<br>(100.70 to 364.35)                        | 592.06<br>(297.14 to 1,214.33)                      | 12.25<br>(9.63 to 15.25)                   | 11.16<br>(6.15 to 20.73)                     | 5.33<br>(3.06 to 9.52)                     | 13.27<br>(6.97 to 25.97)                     |
| Motorcyclist road injuries           | 1,470.94<br>(1,132.16 to 1,817.95)                  | 1,488.35<br>(664.98 to 3,297.97)                    | 789.04<br>(350.75 to 1,769.20)                      | 1,789.92<br>(771.37 to 4,030.84)                    | 27.44<br>(21.13 to 33.86)                  | 28.53<br>(13.42 to 60.72)                    | 16.15<br>(7.68 to 34.48)                   | 33.87<br>(15.31 to 74.95)                    |
| Motor vehicle road injuries          | 4,248.10<br>(3,523.49 to 5,109.51)                  | 4,004.64<br>(2,241.63 to 7,382.82)                  | 1,215.16<br>(679.06 to 2,220.31)                    | 5,141.73<br>(2,792.30 to 9,819.40)                  | 84.25<br>(70.09 to 100.81)                 | 85.80<br>(50.55 to 149.85)                   | 29.63<br>(18.16 to 49.77)                  | 107.21<br>(61.46 to 196.75)                  |
| Other road injuries                  | 46.44<br>(31.64 to 72.36)                           | 49.10<br>(27.92 to 80.32)                           | 18.70<br>(10.72 to 31.24)                           | 58.63<br>(33.31 to 99.64)                           | 1.04<br>(0.71 to 1.57)                     | 1.40<br>(0.85 to 2.19)                       | 0.70<br>(0.42 to 1.12)                     | 1.57<br>(0.94 to 2.53)                       |
| Other transport injuries             | 779.03<br>(598.64 to 944.87)                        | 783.91<br>(464.59 to 1,396.85)                      | 625.47<br>(365.21 to 1,112.28)                      | 849.05<br>(485.56 to 1,559.62)                      | 17.20<br>(13.44 to 20.68)                  | 21.05<br>(13.40 to 34.43)                    | 17.90<br>(11.32 to 28.77)                  | 22.08<br>(13.64 to 37.77)                    |
| <b>Unintentional injuries</b>        | <b>10,909.20</b><br><b>(9,571.73 to 12,365.43)</b>  | <b>8,545.49</b><br><b>(6,303.60 to 11,550.61)</b>   | <b>7,149.02</b><br><b>(5,231.24 to 9,895.39)</b>    | <b>8,610.87</b><br><b>(6,311.40 to 12,020.00)</b>   | <b>238.47</b><br><b>(209.98 to 270.04)</b> | <b>255.47</b><br><b>(201.07 to 319.07)</b>   | <b>234.30</b><br><b>(183.55 to 296.10)</b> | <b>246.14</b><br><b>(189.63 to 311.00)</b>   |
| Falls                                | 1,273.04<br>(1,077.15 to 1,551.13)                  | 1,505.68<br>(1,157.30 to 1,968.29)                  | 1,437.93<br>(1,084.15 to 1,925.18)                  | 1,441.99<br>(1,116.12 to 1,873.61)                  | 37.76<br>(32.08 to 46.36)                  | 37.76<br>(51.33 to 85.20)                    | 66.32<br>(52.33 to 86.35)                  | 67.72<br>(46.20 to 77.91)                    |
| Drowning                             | 3,371.33<br>(2,898.86 to 3,970.86)                  | 2,091.35<br>(1,300.99 to 3,409.00)                  | 1,673.45<br>(1,033.45 to 2,733.70)                  | 2,205.28<br>(1,351.57 to 3,644.86)                  | 64.56<br>(55.59 to 75.74)                  | 45.45<br>(29.84 to 69.73)                    | 38.00<br>(24.50 to 58.16)                  | 47.15<br>(30.07 to 74.47)                    |
| Fire, heat, and hot substances       | 808.98<br>(642.35 to 938.27)                        | 561.16<br>(379.27 to 820.27)                        | 435.98<br>(294.76 to 635.16)                        | 576.99<br>(386.46 to 857.68)                        | 18.75<br>(14.96 to 21.64)                  | 19.43<br>(14.06 to 26.34)                    | 16.88<br>(12.11 to 22.67)                  | 18.94<br>(13.33 to 26.56)                    |
| Poisonings                           | 223.00<br>(177.02 to 338.11)                        | 126.09<br>(76.72 to 213.87)                         | 86.54<br>(53.60 to 150.75)                          | 134.75<br>(81.47 to 237.25)                         | 4.39<br>(3.51 to 6.67)                     | 2.92<br>(1.88 to 4.81)                       | 2.13<br>(1.40 to 3.51)                     | 3.05<br>(1.96 to 5.14)                       |

|                                                 |                                                               |                                                              |                                                              |                                                              |                                                      |                                                      |                                                      |                                                      |
|-------------------------------------------------|---------------------------------------------------------------|--------------------------------------------------------------|--------------------------------------------------------------|--------------------------------------------------------------|------------------------------------------------------|------------------------------------------------------|------------------------------------------------------|------------------------------------------------------|
| Exposure to mechanical forces                   | 1,192.90<br>(978.44 to<br>1,390.36)                           | 890.62<br>(617.92 to<br>1,267.44)                            | 695.30<br>(474.74 to<br>1,005.58)                            | 905.92<br>(625.46 to<br>1,286.25)                            | 23.88<br>(19.35 to<br>27.57)                         | 20.95<br>(15.15 to<br>27.85)                         | 17.36<br>(12.43 to<br>23.57)                         | 20.81<br>(15.03 to<br>28.03)                         |
| Unintentional firearm injuries                  | 358.01<br>(275.57 to<br>436.58)                               | 237.56<br>(148.24 to<br>355.97)                              | 181.36<br>(112.15 to<br>274.82)                              | 244.58<br>(155.03 to<br>368.83)                              | 6.95<br>(5.27 to<br>8.41)                            | 5.07<br>(3.34 to<br>7.20)                            | 4.01<br>(2.59 to<br>5.85)                            | 5.16<br>(3.36 to<br>7.50)                            |
| Unintentional suffocation                       | 87.37<br>(64.29 to<br>132.62)                                 | 58.89<br>(35.09 to<br>94.98)                                 | 40.40<br>(25.15 to<br>64.08)                                 | 60.45<br>(36.22 to<br>97.30)                                 | 1.30<br>(0.98 to<br>1.90)                            | 0.95<br>(0.60 to<br>1.46)                            | 0.69<br>(0.45 to<br>1.04)                            | 0.97<br>(0.61 to<br>1.51)                            |
| Other exposure to mechanical forces             | 747.52<br>(586.18 to<br>894.47)                               | 594.17<br>(387.68 to<br>853.81)                              | 473.55<br>(316.76 to<br>691.18)                              | 600.89<br>(390.57 to<br>869.73)                              | 15.64<br>(11.92 to<br>18.66)                         | 14.93<br>(10.50 to<br>19.85)                         | 12.66<br>(9.05 to<br>16.99)                          | 14.68<br>(10.29 to<br>19.70)                         |
| Adverse effects of medical treatment            | 1,195.62<br>(900.86 to<br>1,540.55)                           | 1,074.09<br>(756.19 to<br>1,497.90)                          | 920.41<br>(654.13 to<br>1,302.48)                            | 1,055.67<br>(734.77 to<br>1,471.00)                          | 30.31<br>(23.65 to<br>39.56)                         | 38.70<br>(29.15 to<br>52.40)                         | 36.18<br>(27.11 to<br>49.13)                         | 36.27<br>(27.16 to<br>49.89)                         |
| Animal contact                                  | 529.29<br>(364.42 to<br>654.39)                               | 454.35<br>(293.44 to<br>655.43)                              | 340.16<br>(220.37 to<br>493.74)                              | 461.50<br>(298.75 to<br>661.11)                              | 12.16<br>(8.52 to<br>14.96)                          | 13.08<br>(8.98 to<br>17.70)                          | 10.62<br>(7.42 to<br>14.37)                          | 12.81<br>(8.79 to<br>17.02)                          |
| Venomous animal contact                         | 444.54<br>(292.07 to<br>552.81)                               | 363.95<br>(216.21 to<br>527.40)                              | 271.21<br>(161.39 to<br>401.09)                              | 370.13<br>(220.56 to<br>535.99)                              | 10.29<br>(6.83 to<br>14.01)                          | 10.36<br>(6.63 to<br>14.01)                          | 8.33<br>(5.37 to<br>11.46)                           | 10.17<br>(6.51 to<br>13.76)                          |
| Non-venomous animal contact                     | 84.75<br>(55.29 to<br>130.46)                                 | 90.40<br>(56.62 to<br>148.38)                                | 68.95<br>(43.17 to<br>109.66)                                | 91.37<br>(56.10 to<br>146.56)                                | 1.87<br>(1.24 to<br>2.93)                            | 2.72<br>(1.80 to<br>4.23)                            | 2.28<br>(1.52 to<br>3.55)                            | 2.64<br>(1.77 to<br>4.00)                            |
| Foreign body                                    | 1,384.57<br>(1,055.51 to<br>1,720.85)                         | 1,067.33<br>(754.26 to<br>1,453.70)                          | 963.24<br>(699.54 to<br>1,308.66)                            | 1,040.29<br>(737.42 to<br>1,410.24)                          | 27.27<br>(22.16 to<br>32.57)                         | 29.56<br>(23.30 to<br>37.67)                         | 30.08<br>(23.77 to<br>38.64)                         | 27.65<br>(21.41 to<br>35.47)                         |
| Pulmonary aspiration and foreign body in airway | 1,188.78<br>(859.65 to<br>1,514.92)                           | 897.46<br>(624.02 to<br>1,236.03)                            | 818.88<br>(584.36 to<br>1,110.61)                            | 871.57<br>(594.41 to<br>1,195.78)                            | 22.84<br>(17.61 to<br>27.62)                         | 24.71<br>(19.17 to<br>31.62)                         | 25.61<br>(20.05 to<br>32.91)                         | 23.00<br>(17.68 to<br>29.36)                         |
| Foreign body in other body part                 | 195.79<br>(155.53 to<br>257.23)                               | 169.87<br>(113.86 to<br>250.28)                              | 144.36<br>(97.65 to<br>215.13)                               | 168.71<br>(114.24 to<br>247.70)                              | 4.43<br>(3.53 to<br>5.99)                            | 4.86<br>(3.54 to<br>7.00)                            | 4.47<br>(3.21 to<br>6.55)                            | 4.65<br>(3.33 to<br>6.71)                            |
| Environmental heat and cold exposure            | 362.26<br>(224.93 to<br>671.53)                               | 356.14<br>(197.96 to<br>673.67)                              | 255.35<br>(136.28 to<br>490.70)                              | 365.53<br>(207.38 to<br>702.16)                              | 8.40<br>(5.40 to<br>15.64)                           | 9.81<br>(5.99 to<br>18.34)                           | 7.45<br>(4.34 to<br>13.97)                           | 9.74<br>(5.86 to<br>18.77)                           |
| Other unintentional injuries                    | 568.21<br>(472.99 to<br>661.58)                               | 418.69<br>(288.56 to<br>620.00)                              | 340.67<br>(222.80 to<br>516.83)                              | 422.95<br>(285.74 to<br>621.16)                              | 11.01<br>(9.27 to<br>12.78)                          | 9.26<br>(6.68 to<br>12.96)                           | 7.87<br>(5.53 to<br>11.23)                           | 9.16<br>(6.54 to<br>12.73)                           |
| <b>Self-harm and interpersonal violence</b>     | <b>18,084.11</b><br><b>(14,271.93 to</b><br><b>21,151.56)</b> | <b>16,710.40</b><br><b>(9,235.85 to</b><br><b>29,639.69)</b> | <b>14,882.43</b><br><b>(8,407.93 to</b><br><b>26,188.03)</b> | <b>18,172.19</b><br><b>(9,729.00 to</b><br><b>33,466.73)</b> | <b>361.36</b><br><b>(284.24 to</b><br><b>423.06)</b> | <b>355.96</b><br><b>(208.81 to</b><br><b>601.00)</b> | <b>325.09</b><br><b>(192.93 to</b><br><b>542.78)</b> | <b>382.33</b><br><b>(214.82 to</b><br><b>664.53)</b> |

**Guyana**

| Cause                              | YLLs (actual counts)                    |                                         |                                        |                                         | Deaths (actual counts)          |                                 |                                 |                                 |
|------------------------------------|-----------------------------------------|-----------------------------------------|----------------------------------------|-----------------------------------------|---------------------------------|---------------------------------|---------------------------------|---------------------------------|
|                                    | 2016                                    | 2040 Forecast                           | 2040 Better Scenario                   | 2040 Worse Scenario                     | 2016                            | 2040 Forecast                   | 2040 Better Scenario            | 2040 Worse Scenario             |
| Self-harm                          | 10,719.83<br>(7,829.22 to<br>12,854.80) | 10,663.69<br>(5,198.47 to<br>20,732.01) | 9,154.68<br>(4,669.94 to<br>17,613.95) | 12,085.92<br>(5,627.06 to<br>24,184.55) | 220.07<br>(163.26 to<br>261.69) | 233.33<br>(123.47 to<br>423.13) | 206.85<br>(113.82 to<br>368.56) | 259.77<br>(129.92 to<br>500.06) |
| Self-harm by firearm               | 195.67<br>(110.00 to<br>252.37)         | 155.76<br>(60.35 to<br>347.13)          | 129.90<br>(53.70 to<br>275.52)         | 179.10<br>(66.19 to<br>413.92)          | 4.26<br>(2.51 to<br>5.44)       | 3.65<br>(1.63 to<br>7.47)       | 3.15<br>(1.48 to<br>6.24)       | 4.09<br>(1.73 to<br>8.91)       |
| Self-harm by other specified means | 10,524.16<br>(7,695.83 to<br>12,615.83) | 10,507.92<br>(5,137.61 to<br>20,416.83) | 9,024.79<br>(4,615.49 to<br>17,369.91) | 11,906.82<br>(5,566.04 to<br>23,769.27) | 215.81<br>(160.29 to<br>256.59) | 229.68<br>(121.61 to<br>416.13) | 203.69<br>(112.12 to<br>362.09) | 255.67<br>(128.22 to<br>491.62) |
| Interpersonal violence             | 7,364.28<br>(4,600.71 to<br>9,828.03)   | 6,046.71<br>(3,176.12 to<br>10,354.76)  | 5,727.75<br>(3,055.50 to<br>9,644.27)  | 6,086.27<br>(3,141.66 to<br>10,611.10)  | 141.29<br>(88.65 to<br>187.54)  | 122.63<br>(64.69 to<br>206.30)  | 118.24<br>(63.73 to<br>193.53)  | 122.56<br>(63.88 to<br>207.20)  |
| Physical violence by firearm       | 3,617.20<br>(1,908.91 to<br>5,097.87)   | 2,904.39<br>(1,266.41 to<br>5,260.22)   | 2,772.99<br>(1,204.67 to<br>5,077.59)  | 2,889.89<br>(1,237.24 to<br>5,359.86)   | 67.66<br>(33.67 to<br>93.15)    | 55.74<br>(23.45 to<br>100.43)   | 53.81<br>(23.09 to<br>95.82)    | 55.24<br>(23.02 to<br>99.12)    |
| Physical violence by sharp object  | 2,092.66<br>(1,163.36 to<br>3,028.84)   | 1,870.70<br>(894.36 to<br>3,323.70)     | 1,846.16<br>(896.40 to<br>3,237.06)    | 1,846.82<br>(879.63 to<br>3,245.71)     | 39.93<br>(22.19 to<br>56.76)    | 37.64<br>(18.30 to<br>65.27)    | 37.82<br>(18.37 to<br>64.38)    | 36.86<br>(18.00 to<br>64.04)    |

|                                                                              |                                                   |                                                   |                                                   |                                                   |                                           |                                            |                                          |                                             |
|------------------------------------------------------------------------------|---------------------------------------------------|---------------------------------------------------|---------------------------------------------------|---------------------------------------------------|-------------------------------------------|--------------------------------------------|------------------------------------------|---------------------------------------------|
| Physical violence by other means                                             | 1,654.42<br>(962.20 to<br>2,780.34)               | 1,271.62<br>(591.79 to<br>2,422.32)               | 1,108.60<br>(523.00 to<br>2,111.08)               | 1,349.56<br>(611.54 to<br>2,625.15)               | 33.70<br>(19.51 to<br>56.10)              | 29.24<br>(14.26 to<br>51.79)               | 26.61<br>(13.18 to<br>46.81)             | 30.46<br>(14.56 to<br>55.09)                |
| Forces of nature, conflict and terrorism, and executions and police conflict | 44.29<br>(23.33 to<br>75.27)                      | 20.17<br>(0.00 to<br>570.97)                      | 18.70<br>(0.00 to<br>534.19)                      | 19.92<br>(0.00 to<br>565.49)                      | 0.77<br>(0.41 to<br>1.27)                 | 0.42<br>(0.00 to<br>11.07)                 | 0.41<br>(0.00 to<br>10.83)               | 0.41<br>(0.00 to<br>10.79)                  |
| Exposure to forces of nature                                                 | 0.00<br>(0.00 to<br>0.00)                         | 8.85<br>(0.00 to<br>0.00)                         | 8.19<br>(0.00 to<br>0.00)                         | 8.71<br>(0.00 to<br>0.00)                         | 0.00<br>(0.00 to<br>0.00)                 | 0.20<br>(0.00 to<br>0.00)                  | 0.20<br>(0.00 to<br>0.00)                | 0.19<br>(0.00 to<br>0.00)                   |
| Conflict and terrorism                                                       | 0.00<br>(0.00 to<br>0.00)                         | 11.32<br>(0.00 to<br>69.27)                       | 10.51<br>(0.00 to<br>63.96)                       | 11.21<br>(0.00 to<br>68.54)                       | 0.00<br>(0.00 to<br>0.00)                 | 0.22<br>(0.00 to<br>1.34)                  | 0.21<br>(0.00 to<br>1.31)                | 0.22<br>(0.00 to<br>1.31)                   |
| Executions and police conflict                                               | 44.29<br>(23.33 to<br>75.27)                      | 0.00<br>(0.00 to<br>0.00)                         | 0.00<br>(0.00 to<br>0.00)                         | 0.00<br>(0.00 to<br>0.00)                         | 0.77<br>(0.41 to<br>1.27)                 | 0.00<br>(0.00 to<br>0.00)                  | 0.00<br>(0.00 to<br>0.00)                | 0.00<br>(0.00 to<br>0.00)                   |
| <b>Haiti</b>                                                                 |                                                   |                                                   |                                                   |                                                   |                                           |                                            |                                          |                                             |
| Cause                                                                        | YLLs (actual counts)                              |                                                   |                                                   |                                                   | Deaths (actual counts)                    |                                            |                                          |                                             |
|                                                                              | 2016                                              | 2040 Forecast                                     | 2040 Better Scenario                              | 2040 Worse Scenario                               | 2016                                      | 2040 Forecast                              | 2040 Better Scenario                     | 2040 Worse Scenario                         |
| All causes                                                                   | 3,914,898.60<br>(3,192,617.47 to<br>4,861,373.70) | 3,408,194.69<br>(2,635,776.91 to<br>4,199,382.87) | 2,333,039.76<br>(1,769,910.72 to<br>2,771,510.30) | 4,538,216.03<br>(3,526,928.78 to<br>5,733,404.13) | 95,831.39<br>(81,645.32 to<br>111,799.84) | 114,682.98<br>(96,936.02 to<br>131,139.02) | 84,052.99<br>(70,568.86 to<br>93,859.58) | 142,312.81<br>(119,875.12 to<br>167,621.22) |
| Communicable, maternal, neonatal, and nutritional diseases                   | 1,720,583.49<br>(1,256,518.06 to<br>2,407,758.98) | 729,427.01<br>(474,520.17 to<br>1,074,399.99)     | 425,644.10<br>(275,113.72 to<br>607,725.47)       | 1,255,681.44<br>(815,661.77 to<br>1,896,274.74)   | 27,257.67<br>(21,254.96 to<br>35,433.09)  | 15,415.75<br>(10,622.17 to<br>21,121.63)   | 9,636.04<br>(6,824.62 to<br>13,270.80)   | 24,067.66<br>(16,704.58 to<br>35,267.26)    |
| HIV/AIDS and tuberculosis                                                    | 322,978.25<br>(267,533.35 to<br>389,854.89)       | 137,640.81<br>(57,171.99 to<br>240,472.21)        | 96,727.21<br>(32,256.73 to<br>190,212.83)         | 385,559.07<br>(162,336.04 to<br>803,691.16)       | 6,657.64<br>(5,590.45 to<br>7,784.75)     | 3,329.39<br>(1,590.78 to<br>5,688.09)      | 2,332.32<br>(892.13 to<br>4,381.25)      | 8,452.20<br>(3,659.97 to<br>17,123.33)      |
| Tuberculosis                                                                 | 49,500.91<br>(34,472.48 to<br>65,364.59)          | 37,620.24<br>(21,999.41 to<br>58,364.25)          | 15,439.89<br>(9,324.52 to<br>23,889.56)           | 52,247.06<br>(29,409.55 to<br>82,938.37)          | 1,322.08<br>(920.01 to<br>1,741.28)       | 1,166.27<br>(680.64 to<br>1,784.55)        | 517.54<br>(317.19 to<br>774.78)          | 1,558.36<br>(886.49 to<br>2,410.23)         |
| HIV/AIDS                                                                     | 273,477.34<br>(221,229.54 to<br>339,077.46)       | 100,020.58<br>(34,257.55 to<br>203,411.62)        | 81,287.33<br>(16,973.90 to<br>172,544.83)         | 333,312.01<br>(115,007.70 to<br>751,686.98)       | 5,335.57<br>(4,410.39 to<br>6,410.38)     | 2,163.12<br>(514.58 to<br>4,396.71)        | 1,814.79<br>(396.83 to<br>3,837.36)      | 6,893.84<br>(2,161.19 to<br>15,379.96)      |
| Diarrhea, lower respiratory, and other common infectious diseases            | 691,683.67<br>(478,458.87 to<br>1,016,084.83)     | 276,900.77<br>(146,149.49 to<br>480,489.90)       | 137,351.37<br>(75,301.73 to<br>238,030.58)        | 440,173.11<br>(230,270.71 to<br>790,872.17)       | 11,448.12<br>(8,630.24 to<br>15,369.94)   | 7,305.83<br>(4,135.45 to<br>11,785.12)     | 4,241.92<br>(2,625.62 to<br>6,605.75)    | 9,942.83<br>(5,749.51 to<br>15,899.54)      |
| Diarrheal diseases                                                           | 262,617.00<br>(166,611.26 to<br>408,376.25)       | 75,594.65<br>(10,141.82 to<br>186,613.20)         | 33,326.24<br>(4,390.26 to<br>87,739.70)           | 99,527.10<br>(14,752.86 to<br>236,418.98)         | 4,116.98<br>(2,647.68 to<br>6,387.84)     | 2,217.43<br>(335.65 to<br>6,024.22)        | 1,042.84<br>(165.77 to<br>3,001.65)      | 2,704.01<br>(501.82 to<br>7,097.69)         |
| Intestinal infectious diseases                                               | 575.65<br>(308.16 to<br>1,003.30)                 | 236.05<br>(87.74 to<br>503.40)                    | 180.21<br>(65.59 to<br>386.24)                    | 257.95<br>(53.79 to<br>541.55)                    | 10.53<br>(5.74 to<br>17.71)               | 5.39<br>(2.34 to<br>10.90)                 | 4.39<br>(1.92 to<br>8.88)                | 5.67<br>(2.40 to<br>11.26)                  |
| Typhoid fever                                                                | 338.63<br>(164.73 to<br>605.43)                   | 159.35<br>(51.24 to<br>352.12)                    | 128.51<br>(42.86 to<br>283.74)                    | 169.98<br>(53.79 to<br>367.26)                    | 6.74<br>(3.24 to<br>11.94)                | 3.68<br>(1.45 to<br>7.66)                  | 3.13<br>(1.29 to<br>6.44)                | 3.81<br>(1.49 to<br>7.90)                   |
| Paratyphoid fever                                                            | 68.08<br>(25.98 to<br>141.18)                     | 45.29<br>(13.80 to<br>104.79)                     | 34.22<br>(10.32 to<br>80.37)                      | 49.28<br>(14.90 to<br>117.31)                     | 1.39<br>(0.53 to<br>2.82)                 | 1.05<br>(0.37 to<br>2.34)                  | 0.84<br>(0.31 to<br>1.82)                | 1.11<br>(0.40 to<br>2.47)                   |
| Other intestinal infectious diseases                                         | 168.94<br>(55.76 to<br>412.32)                    | 31.41<br>(5.64 to<br>96.94)                       | 17.47<br>(3.33 to<br>49.52)                       | 38.68<br>(6.28 to<br>119.65)                      | 2.40<br>(0.83 to<br>5.59)                 | 0.65<br>(0.19 to<br>1.59)                  | 0.42<br>(0.12 to<br>1.04)                | 0.75<br>(0.20 to<br>1.93)                   |
| Lower respiratory infections                                                 | 284,504.50<br>(191,413.05 to<br>419,681.06)       | 97,699.13<br>(47,400.25 to<br>188,843.80)         | 53,889.73<br>(29,539.96 to<br>98,249.29)          | 174,879.34<br>(67,575.75 to<br>393,048.41)        | 5,420.78<br>(4,148.74 to<br>7,076.43)     | 3,567.49<br>(2,179.45 to<br>5,600.52)      | 2,384.37<br>(1,651.23 to<br>3,432.46)    | 4,942.72<br>(2,685.79 to<br>8,743.97)       |
| Upper respiratory infections                                                 | 567.14<br>(215.20 to<br>1,300.37)                 | 272.93<br>(76.58 to<br>673.67)                    | 138.72<br>(38.85 to<br>329.74)                    | 338.85<br>(90.07 to<br>886.37)                    | 9.52<br>(4.44 to<br>18.01)                | 6.75<br>(2.64 to<br>13.87)                 | 3.75<br>(1.47 to<br>7.44)                | 7.92<br>(2.93 to<br>16.28)                  |
| Otitis media                                                                 | 300.17<br>(125.61 to<br>623.99)                   | 101.27<br>(26.56 to<br>254.49)                    | 102.27<br>(27.49 to<br>254.25)                    | 100.47<br>(25.80 to<br>252.10)                    | 6.90<br>(3.21 to<br>13.45)                | 3.36<br>(1.09 to<br>7.95)                  | 3.69<br>(1.25 to<br>8.23)                | 3.17<br>(0.99 to<br>7.62)                   |
| Meningitis                                                                   | 89,223.77<br>(48,945.97 to<br>167,638.14)         | 21,564.11<br>(4,931.02 to<br>49,865.69)           | 14,327.86<br>(3,707.39 to<br>30,899.22)           | 37,754.99<br>(7,088.52 to<br>91,845.81)           | 1,138.78<br>(670.90 to<br>2,042.92)       | 326.55<br>(112.68 to<br>673.63)            | 241.10<br>(98.52 to<br>438.34)           | 514.14<br>(137.57 to<br>1,152.29)           |







|                                                                         |                                                            |                                                            |                                                            |                                                            |                                                   |                                                   |                                                   |                                                     |
|-------------------------------------------------------------------------|------------------------------------------------------------|------------------------------------------------------------|------------------------------------------------------------|------------------------------------------------------------|---------------------------------------------------|---------------------------------------------------|---------------------------------------------------|-----------------------------------------------------|
| Protein-energy malnutrition                                             | 53,118.96<br>(27,442.78 to<br>110,957.34)                  | 18,183.44<br>(8,947.57 to<br>45,095.28)                    | 12,337.38<br>(6,150.07 to<br>31,123.93)                    | 22,131.88<br>(10,514.20 to<br>53,491.21)                   | 912.52<br>(491.86 to<br>2,060.58)                 | 567.19<br>(285.72 to<br>1,620.74)                 | 455.51<br>(233.84 to<br>1,303.69)                 | 603.19<br>(298.89 to<br>1,722.70)                   |
| Iodine deficiency                                                       | 480.92<br>(14.48 to<br>2,410.10)                           | 842.76<br>(14.74 to<br>4,952.84)                           | 514.11<br>(7.82 to<br>2,978.21)                            | 1,039.33<br>(17.24 to<br>6,293.83)                         | 8.73<br>(0.46 to<br>41.00)                        | 34.83<br>(0.46 to<br>133.85)                      | 17.32<br>(0.26 to<br>94.45)                       | 27.46<br>(0.49 to<br>147.04)                        |
| Dietary iron deficiency                                                 | 150.77<br>(68.46 to<br>437.15)                             | 107.82<br>(43.37 to<br>351.50)                             | 80.24<br>(33.06 to<br>253.63)                              | 119.67<br>(48.24 to<br>391.73)                             | 2.55<br>(1.17 to<br>7.30)                         | 2.07<br>(0.88 to<br>6.44)                         | 1.62<br>(0.71 to<br>4.98)                         | 2.24<br>(0.94 to<br>7.15)                           |
| Other nutritional deficiencies                                          | 3,874.72<br>(1,837.86 to<br>9,871.46)                      | 3,654.42<br>(1,452.82 to<br>12,959.38)                     | 2,672.36<br>(1,069.36 to<br>9,387.91)                      | 3,999.73<br>(48.24 to<br>13,978.79)                        | 108.51<br>(48.51 to<br>346.90)                    | 140.56<br>(48.12 to<br>567.76)                    | 114.68<br>(41.00 to<br>453.77)                    | 143.78<br>(48.97 to<br>587.15)                      |
| <b>Other communicable, maternal, neonatal, and nutritional diseases</b> | <b>58,221.33<br/>(30,050.90 to<br/>106,355.92)</b>         | <b>17,996.28<br/>(11,867.61 to<br/>27,422.22)</b>          | <b>12,559.78<br/>(8,360.68 to<br/>18,793.69)</b>           | <b>20,932.01<br/>(13,710.39 to<br/>32,466.56)</b>          | <b>805.28<br/>(464.39 to<br/>1,382.30)</b>        | <b>365.19<br/>(261.75 to<br/>494.74)</b>          | <b>269.41<br/>(192.73 to<br/>364.83)</b>          | <b>404.27<br/>(286.83 to<br/>563.68)</b>            |
| Sexually transmitted infections excluding HIV                           | 44,962.17<br>(18,498.40 to<br>88,462.34)                   | 6,813.68<br>(2,727.23 to<br>14,206.59)                     | 4,710.37<br>(1,973.28 to<br>9,590.84)                      | 8,409.10<br>(3,311.10 to<br>17,193.74)                     | 547.26<br>(238.87 to<br>1,060.91)                 | 93.22<br>(43.68 to<br>179.24)                     | 66.93<br>(32.61 to<br>125.80)                     | 111.87<br>(50.76 to<br>220.57)                      |
| Syphilis                                                                | 44,055.32<br>(17,734.39 to<br>87,730.75)                   | 6,208.55<br>(2,235.55 to<br>13,314.81)                     | 4,227.16<br>(1,558.96 to<br>8,970.68)                      | 7,773.47<br>(2,721.91 to<br>16,741.07)                     | 525.92<br>(215.69 to<br>1,042.40)                 | 78.20<br>(30.06 to<br>163.37)                     | 54.37<br>(22.05 to<br>113.67)                     | 96.48<br>(36.31 to<br>201.85)                       |
| Chlamydia infection                                                     | 171.19<br>(91.58 to<br>267.58)                             | 115.75<br>(60.80 to<br>186.28)                             | 91.72<br>(49.63 to<br>150.87)                              | 121.91<br>(64.30 to<br>196.72)                             | 3.93<br>(2.16 to<br>5.99)                         | 2.82<br>(1.57 to<br>4.36)                         | 2.35<br>(1.36 to<br>3.66)                         | 2.89<br>(1.58 to<br>4.51)                           |
| Gonococcal infection                                                    | 473.93<br>(254.45 to<br>753.60)                            | 317.12<br>(173.10 to<br>518.02)                            | 254.74<br>(141.28 to<br>410.40)                            | 332.17<br>(180.98 to<br>536.27)                            | 11.46<br>(6.43 to<br>17.71)                       | 8.11<br>(4.59 to<br>12.69)                        | 6.85<br>(3.97 to<br>10.42)                        | 8.27<br>(4.58 to<br>12.97)                          |
| Other sexually transmitted infections                                   | 261.73<br>(139.95 to<br>418.41)                            | 172.25<br>(90.36 to<br>282.26)                             | 136.74<br>(73.73 to<br>225.23)                             | 181.55<br>(97.26 to<br>296.32)                             | 5.95<br>(3.26 to<br>9.32)                         | 4.08<br>(2.26 to<br>6.53)                         | 3.37<br>(1.87 to<br>5.29)                         | 4.22<br>(2.34 to<br>6.63)                           |
| Acute hepatitis                                                         | 4,248.38<br>(3,231.34 to<br>5,456.04)                      | 2,855.97<br>(2,027.01 to<br>3,905.03)                      | 2,093.63<br>(1,467.36 to<br>2,872.36)                      | 3,119.21<br>(2,214.12 to<br>4,252.73)                      | 84.78<br>(64.84 to<br>108.47)                     | 69.16<br>(49.91 to<br>93.03)                      | 52.63<br>(37.17 to<br>71.81)                      | 73.61<br>(53.09 to<br>99.53)                        |
| Acute hepatitis A                                                       | 379.51<br>(61.51 to<br>601.56)                             | 92.51<br>(32.34 to<br>187.42)                              | 63.54<br>(22.88 to<br>125.79)                              | 110.46<br>(35.56 to<br>229.06)                             | 3.65<br>(1.10 to<br>7.44)                         | 1.58<br>(0.64 to<br>3.05)                         | 1.15<br>(0.47 to<br>2.18)                         | 1.81<br>(0.70 to<br>3.52)                           |
| Acute hepatitis B                                                       | 2,460.28<br>(1,767.02 to<br>3,339.94)                      | 1,944.08<br>(1,304.22 to<br>2,761.25)                      | 1,412.70<br>(916.80 to<br>1,992.63)                        | 2,107.51<br>(1,407.10 to<br>2,976.12)                      | 55.61<br>(40.67 to<br>74.32)                      | 49.94<br>(34.41 to<br>69.02)                      | 37.23<br>(25.00 to<br>52.44)                      | 53.18<br>(36.99 to<br>74.10)                        |
| Acute hepatitis C                                                       | 129.22<br>(88.97 to<br>179.99)                             | 117.78<br>(74.56 to<br>178.59)                             | 99.65<br>(63.39 to<br>150.74)                              | 122.03<br>(78.15 to<br>181.12)                             | 3.09<br>(2.14 to<br>4.42)                         | 3.21<br>(2.06 to<br>4.80)                         | 3.21<br>(1.78 to<br>4.24)                         | 3.26<br>(2.07 to<br>4.87)                           |
| Acute hepatitis E                                                       | 1,379.38<br>(966.94 to<br>1,898.24)                        | 701.59<br>(439.17 to<br>1,034.65)                          | 517.74<br>(323.68 to<br>757.39)                            | 779.21<br>(483.94 to<br>1,145.10)                          | 22.43<br>(16.20 to<br>30.04)                      | 14.43<br>(9.37 to<br>20.75)                       | 11.45<br>(7.38 to<br>16.54)                       | 15.36<br>(10.00 to<br>22.09)                        |
| Other unspecified infectious diseases                                   | 9,010.78<br>(4,561.84 to<br>25,566.00)                     | 8,326.64<br>(5,214.81 to<br>13,857.84)                     | 5,755.78<br>(3,551.48 to<br>9,446.00)                      | 9,403.70<br>(5,680.90 to<br>16,185.75)                     | 173.24<br>(99.82 to<br>379.11)                    | 202.81<br>(135.43 to<br>297.17)                   | 149.85<br>(100.83 to<br>219.84)                   | 218.80<br>(142.17 to<br>328.03)                     |
| <b>Non-communicable diseases</b>                                        | <b>1,661,009.59<br/>(1,367,761.96 to<br/>1,966,328.11)</b> | <b>2,047,189.33<br/>(1,639,944.38 to<br/>2,515,474.38)</b> | <b>1,376,136.55<br/>(1,131,768.57 to<br/>1,660,068.43)</b> | <b>2,602,982.80<br/>(2,048,679.32 to<br/>3,251,271.77)</b> | <b>58,970.55<br/>(49,455.08 to<br/>69,503.29)</b> | <b>86,268.80<br/>(74,866.39 to<br/>99,677.08)</b> | <b>62,937.87<br/>(55,239.86 to<br/>71,899.36)</b> | <b>104,126.29<br/>(88,446.95 to<br/>120,874.97)</b> |
| <b>Haiti</b>                                                            |                                                            |                                                            |                                                            |                                                            |                                                   |                                                   |                                                   |                                                     |
| Cause                                                                   | YLLs (actual counts)                                       |                                                            |                                                            |                                                            | Deaths (actual counts)                            |                                                   |                                                   |                                                     |
|                                                                         | 2016                                                       | 2040 Forecast                                              | 2040 Better Scenario                                       | 2040 Worse Scenario                                        | 2016                                              | 2040 Forecast                                     | 2040 Better Scenario                              | 2040 Worse Scenario                                 |
| Neoplasms                                                               | 292,073.88<br>(227,513.34 to<br>361,437.99)                | 420,072.89<br>(318,367.42 to<br>551,359.15)                | 383,296.94<br>(300,170.15 to<br>483,219.66)                | 458,787.67<br>(341,173.60 to<br>616,609.12)                | 10,555.35<br>(8,444.47 to<br>12,857.33)           | 16,858.67<br>(13,340.79 to<br>21,325.37)          | 16,761.20<br>(13,819.63 to<br>20,276.44)          | 17,680.20<br>(13,469.15 to<br>22,994.17)            |
| Lip and oral cavity cancer                                              | 3,506.81<br>(2,659.76 to<br>4,665.39)                      | 7,192.09<br>(3,456.04 to<br>14,017.37)                     | 3,859.39<br>(2,200.40 to<br>6,550.39)                      | 10,020.40<br>(4,624.20 to<br>19,217.35)                    | 132.18<br>(102.62 to<br>173.36)                   | 264.78<br>(138.27 to<br>488.70)                   | 157.81<br>(98.11 to<br>256.49)                    | 360.49<br>(181.55 to<br>690.39)                     |
| Nasopharynx cancer                                                      | 1,648.22<br>(1,092.89 to<br>2,406.22)                      | 3,143.16<br>(1,479.95 to<br>6,077.23)                      | 1,623.03<br>(848.93 to<br>2,867.08)                        | 4,430.79<br>(2,059.62 to<br>8,711.76)                      | 45.65<br>(31.35 to<br>64.34)                      | 92.77<br>(45.65 to<br>179.35)                     | 49.69<br>(27.47 to<br>85.24)                      | 130.05<br>(63.32 to<br>253.34)                      |

|                                      |                                          |                                          |                                          |                                           |                                     |                                       |                                       |                                       |
|--------------------------------------|------------------------------------------|------------------------------------------|------------------------------------------|-------------------------------------------|-------------------------------------|---------------------------------------|---------------------------------------|---------------------------------------|
|                                      | 1,874.64<br>(1,196.58 to<br>3,266.51)    | 3,231.70<br>(1,565.63 to<br>6,512.51)    | 2,499.36<br>(1,264.72 to<br>4,872.33)    | 3,542.20<br>(1,715.20 to<br>7,228.14)     | 67.38<br>(43.61 to<br>115.65)       | 121.39<br>(60.95 to<br>241.93)        | 99.09<br>(51.69 to<br>194.88)         | 129.30<br>(63.76 to<br>258.32)        |
| Other pharynx cancer                 |                                          |                                          |                                          |                                           |                                     |                                       |                                       |                                       |
|                                      | 5,111.60<br>(3,968.13 to<br>6,561.91)    | 9,180.24<br>(4,606.56 to<br>17,141.48)   | 5,290.25<br>(3,084.27 to<br>8,871.94)    | 12,160.64<br>(5,898.99 to<br>23,150.99)   | 211.11<br>(165.25 to<br>266.55)     | 370.55<br>(202.40 to<br>648.19)       | 355.73<br>(147.06 to<br>373.20)       | 477.03<br>(243.62 to<br>860.80)       |
| Esophageal cancer                    |                                          |                                          |                                          |                                           |                                     |                                       |                                       |                                       |
|                                      | 24,617.53<br>(19,104.18 to<br>30,783.75) | 28,564.75<br>(20,612.08 to<br>38,487.52) | 24,671.38<br>(18,222.72 to<br>32,261.41) | 29,756.67<br>(21,370.54 to<br>40,477.78)  | 1,026.06<br>(808.19 to<br>1,262.62) | 1,243.85<br>(933.80 to<br>1,615.73)   | 1,151.56<br>(880.71 to<br>1,447.03)   | 1,246.77<br>(928.25 to<br>1,655.07)   |
| Stomach cancer                       |                                          |                                          |                                          |                                           |                                     |                                       |                                       |                                       |
|                                      | 20,911.07<br>(15,127.34 to<br>30,483.53) | 34,392.55<br>(22,175.89 to<br>55,169.25) | 35,161.14<br>(23,369.81 to<br>55,250.88) | 35,668.89<br>(22,366.19 to<br>58,510.13)  | 878.58<br>(660.47 to<br>1,264.26)   | 1,532.88<br>(1,006.34 to<br>2,419.91) | 1,687.86<br>(1,149.75 to<br>2,569.65) | 1,523.92<br>(957.82 to<br>2,418.66)   |
| Colon and rectum cancer              |                                          |                                          |                                          |                                           |                                     |                                       |                                       |                                       |
|                                      | 9,457.73<br>(6,945.82 to<br>14,683.51)   | 15,674.73<br>(10,013.39 to<br>24,823.96) | 14,009.81<br>(9,539.47 to<br>21,888.75)  | 17,800.12<br>(10,832.83 to<br>28,598.21)  | 374.25<br>(279.34 to<br>577.34)     | 651.93<br>(437.81 to<br>1,009.78)     | 628.65<br>(444.04 to<br>963.42)       | 710.28<br>(453.14 to<br>1,104.55)     |
| Liver cancer                         |                                          |                                          |                                          |                                           |                                     |                                       |                                       |                                       |
|                                      | 3,760.03<br>(2,629.66 to<br>5,794.05)    | 6,080.31<br>(3,782.02 to<br>9,736.56)    | 5,457.31<br>(3,532.23 to<br>8,401.78)    | 6,839.79<br>(4,050.40 to<br>11,086.03)    | 131.17<br>(93.74 to<br>196.98)      | 224.14<br>(144.09 to<br>339.71)       | 214.13<br>(143.27 to<br>318.02)       | 244.01<br>(150.29 to<br>388.23)       |
| Liver cancer due to hepatitis B      |                                          |                                          |                                          |                                           |                                     |                                       |                                       |                                       |
|                                      | 2,241.93<br>(1,607.89 to<br>3,610.05)    | 3,831.00<br>(2,436.78 to<br>6,253.23)    | 3,660.32<br>(2,466.64 to<br>5,833.76)    | 4,150.10<br>(2,535.62 to<br>6,831.42)     | 106.31<br>(75.64 to<br>169.81)      | 187.08<br>(125.18 to<br>295.58)       | 192.59<br>(134.36 to<br>299.62)       | 193.40<br>(122.34 to<br>312.17)       |
| Liver cancer due to hepatitis C      |                                          |                                          |                                          |                                           |                                     |                                       |                                       |                                       |
|                                      | 1,646.00<br>(1,136.53 to<br>2,682.51)    | 2,868.81<br>(1,760.38 to<br>4,888.46)    | 2,318.83<br>(1,521.84 to<br>3,870.39)    | 3,534.91<br>(2,035.92 to<br>6,187.30)     | 70.36<br>(49.27 to<br>112.35)       | 124.47<br>(78.97 to<br>202.83)        | 109.28<br>(88.20 to<br>177.39)        | 145.98<br>(88.20 to<br>249.67)        |
| Liver cancer due to alcohol use      |                                          |                                          |                                          |                                           |                                     |                                       |                                       |                                       |
|                                      | 1,809.77<br>(1,300.51 to<br>2,644.56)    | 2,894.62<br>(1,836.70 to<br>4,704.66)    | 2,573.36<br>(1,722.64 to<br>4,089.32)    | 3,275.31<br>(1,967.20 to<br>5,371.30)     | 66.41<br>(49.10 to<br>97.47)        | 116.24<br>(75.45 to<br>183.36)        | 111.65<br>(76.22 to<br>172.13)        | 126.89<br>(77.97 to<br>206.32)        |
| Liver cancer due to other causes     |                                          |                                          |                                          |                                           |                                     |                                       |                                       |                                       |
|                                      | 3,915.12<br>(2,307.73 to<br>6,109.65)    | 4,635.03<br>(2,766.20 to<br>6,957.21)    | 5,056.04<br>(3,021.24 to<br>7,551.20)    | 4,336.23<br>(2,561.83 to<br>6,488.81)     | 165.53<br>(101.71 to<br>247.19)     | 201.23<br>(124.67 to<br>290.22)       | 231.46<br>(146.68 to<br>330.83)       | 182.32<br>(110.79 to<br>263.90)       |
| Gallbladder and biliary tract cancer |                                          |                                          |                                          |                                           |                                     |                                       |                                       |                                       |
|                                      | 6,480.22<br>(5,038.55 to<br>8,213.77)    | 11,691.00<br>(8,416.02 to<br>15,815.66)  | 12,108.97<br>(8,881.75 to<br>15,985.75)  | 12,034.10<br>(8,410.53 to<br>16,652.40)   | 285.86<br>(229.65 to<br>354.08)     | 515.80<br>(382.76 to<br>687.42)       | 574.12<br>(436.25 to<br>742.78)       | 512.12<br>(366.98 to<br>692.35)       |
| Pancreatic cancer                    |                                          |                                          |                                          |                                           |                                     |                                       |                                       |                                       |
|                                      | 3,583.70<br>(2,624.61 to<br>4,712.10)    | 6,473.53<br>(2,818.66 to<br>13,352.97)   | 3,183.93<br>(1,596.71 to<br>5,981.12)    | 9,149.70<br>(3,898.08 to<br>18,809.20)    | 140.31<br>(105.16 to<br>180.91)     | 245.84<br>(116.99 to<br>487.60)       | 133.40<br>(72.53 to<br>240.16)        | 346.22<br>(159.34 to<br>695.73)       |
| Larynx cancer                        |                                          |                                          |                                          |                                           |                                     |                                       |                                       |                                       |
|                                      | 25,991.46<br>(19,021.46 to<br>34,993.63) | 42,285.58<br>(21,527.32 to<br>82,406.76) | 22,103.22<br>(12,845.51 to<br>38,527.47) | 63,344.07<br>(31,519.91 to<br>118,375.08) | 1,022.68<br>(782.09 to<br>1,358.71) | 1,652.03<br>(895.21 to<br>3,067.04)   | 947.26<br>(585.76 to<br>1,594.48)     | 2,465.18<br>(1,319.69 to<br>4,573.35) |
| Tracheal, bronchus, and lung cancer  |                                          |                                          |                                          |                                           |                                     |                                       |                                       |                                       |
|                                      | 1,279.58<br>(793.60 to<br>2,283.82)      | 1,895.18<br>(1,192.71 to<br>3,258.89)    | 2,242.12<br>(1,392.53 to<br>3,811.54)    | 1,750.78<br>(1,100.85 to<br>2,996.20)     | 44.51<br>(28.40 to<br>75.93)        | 70.72<br>(46.52 to<br>114.16)         | 89.36<br>(58.98 to<br>142.84)         | 62.83<br>(40.77 to<br>103.06)         |
| Malignant skin melanoma              |                                          |                                          |                                          |                                           |                                     |                                       |                                       |                                       |
|                                      | 1,751.26<br>(1,218.00 to<br>2,305.98)    | 3,005.51<br>(2,172.69 to<br>3,792.40)    | 2,835.17<br>(2,041.69 to<br>3,635.49)    | 2,954.80<br>(2,119.09 to<br>3,740.34)     | 69.90<br>(50.86 to<br>88.63)        | 131.13<br>(97.77 to<br>162.08)        | 133.74<br>(100.11 to<br>163.34)       | 123.45<br>(90.63 to<br>153.63)        |
| Non-melanoma skin cancer             |                                          |                                          |                                          |                                           |                                     |                                       |                                       |                                       |
|                                      | 33,771.50<br>(18,666.92 to<br>56,888.93) | 49,504.16<br>(26,574.77 to<br>84,584.48) | 48,648.46<br>(26,977.73 to<br>80,701.55) | 52,239.30<br>(27,412.61 to<br>90,535.39)  | 1,113.78<br>(653.06 to<br>1,835.31) | 1,731.41<br>(988.08 to<br>2,885.18)   | 1,789.85<br>(1,061.70 to<br>2,925.73) | 1,769.64<br>(990.41 to<br>3,024.23)   |
| Breast cancer                        |                                          |                                          |                                          |                                           |                                     |                                       |                                       |                                       |
|                                      | 31,831.43<br>(17,729.51 to<br>46,595.16) | 38,523.77<br>(21,596.50 to<br>59,041.06) | 33,020.57<br>(18,864.28 to<br>49,525.08) | 41,269.34<br>(22,241.19 to<br>66,343.56)  | 1,038.17<br>(601.96 to<br>1,476.46) | 1,296.00<br>(750.68 to<br>1,918.45)   | 1,164.55<br>(704.98 to<br>1,687.46)   | 1,345.26<br>(761.93 to<br>2,067.86)   |
| Cervical cancer                      |                                          |                                          |                                          |                                           |                                     |                                       |                                       |                                       |
|                                      | 5,586.26<br>(3,715.96 to<br>7,743.29)    | 8,707.95<br>(5,950.40 to<br>11,973.76)   | 7,680.35<br>(5,351.57 to<br>10,463.24)   | 8,576.37<br>(5,714.28 to<br>11,880.84)    | 242.85<br>(167.41 to<br>328.83)     | 389.36<br>(272.20 to<br>524.02)       | 360.73<br>(259.41 to<br>480.32)       | 371.76<br>(254.13 to<br>505.60)       |
| Uterine cancer                       |                                          |                                          |                                          |                                           |                                     |                                       |                                       |                                       |
|                                      | 4,437.13<br>(3,063.67 to<br>6,223.28)    | 6,639.54<br>(4,233.47 to<br>10,347.90)   | 7,681.25<br>(4,881.38 to<br>11,931.29)   | 6,402.05<br>(3,973.93 to<br>10,088.59)    | 165.13<br>(118.25 to<br>225.26)     | 257.25<br>(168.56 to<br>395.15)       | 311.78<br>(207.98 to<br>467.42)       | 241.69<br>(151.62 to<br>374.88)       |
| Ovarian cancer                       |                                          |                                          |                                          |                                           |                                     |                                       |                                       |                                       |
|                                      | 20,117.41<br>(14,348.12 to<br>27,440.26) | 41,900.98<br>(30,025.81 to<br>55,924.96) | 49,746.38<br>(37,030.69 to<br>64,598.10) | 38,187.63<br>(26,654.99 to<br>51,687.83)  | 1,273.72<br>(917.41 to<br>1,694.19) | 2,798.46<br>(1,927.69 to<br>3,705.48) | 3,530.80<br>(2,589.81 to<br>4,436.32) | 2,471.50<br>(1,640.34 to<br>3,389.94) |
| Prostate cancer                      |                                          |                                          |                                          |                                           |                                     |                                       |                                       |                                       |
|                                      | 578.95<br>(364.84 to<br>878.83)          | 557.55<br>(343.61 to<br>853.60)          | 499.98<br>(304.11 to<br>767.91)          | 571.99<br>(351.66 to<br>878.49)           | 11.51<br>(7.46 to<br>17.03)         | 12.20<br>(7.98 to<br>17.60)           | 11.36<br>(7.40 to<br>16.48)           | 12.27<br>(8.06 to<br>17.82)           |
| Testicular cancer                    |                                          |                                          |                                          |                                           |                                     |                                       |                                       |                                       |
| <b>Haiti</b>                         |                                          |                                          |                                          |                                           |                                     |                                       |                                       |                                       |
| <b>YLLs (actual counts)</b>          |                                          |                                          |                                          |                                           | <b>Deaths (actual counts)</b>       |                                       |                                       |                                       |

| Cause                           | 2016                                                   | 2040 Forecast                                            | 2040 Better Scenario                                   | 2040 Worse Scenario                                        | 2016                                                | 2040 Forecast                                       | 2040 Better Scenario                                | 2040 Worse Scenario                                 |
|---------------------------------|--------------------------------------------------------|----------------------------------------------------------|--------------------------------------------------------|------------------------------------------------------------|-----------------------------------------------------|-----------------------------------------------------|-----------------------------------------------------|-----------------------------------------------------|
| Kidney cancer                   | 2,920.31<br>(2,294.82 to 3,702.86)                     | 4,395.20<br>(3,172.88 to 6,144.96)                       | 4,801.26<br>(3,477.09 to 6,611.52)                     | 4,374.15<br>(3,117.43 to 6,182.98)                         | 86.58<br>(66.97 to 111.10)                          | 152.86<br>(106.95 to 214.75)                        | 179.45<br>(125.70 to 247.40)                        | 146.53<br>(100.85 to 210.49)                        |
| Bladder cancer                  | 2,894.56<br>(2,059.36 to 4,389.60)                     | 4,531.87<br>(2,886.63 to 7,518.48)                       | 4,202.91<br>(2,813.52 to 6,616.80)                     | 4,891.68<br>(2,966.04 to 8,262.94)                         | 144.85<br>(106.56 to 212.91)                        | 231.92<br>(152.51 to 373.91)                        | 236.28<br>(164.09 to 370.07)                        | 239.96<br>(150.63 to 401.55)                        |
| Brain and nervous system cancer | 8,615.36<br>(6,220.56 to 10,942.65)                    | 11,071.47<br>(7,327.11 to 14,629.66)                     | 11,409.22<br>(7,452.29 to 15,105.21)                   | 10,983.77<br>(7,344.61 to 14,441.97)                       | 191.05<br>(129.84 to 249.31)                        | 303.17<br>(190.49 to 407.04)                        | 332.50<br>(205.27 to 445.94)                        | 288.24<br>(184.68 to 385.85)                        |
| Thyroid cancer                  | 1,234.21<br>(848.07 to 1,757.41)                       | 1,582.11<br>(1,031.29 to 2,352.92)                       | 1,416.78<br>(942.42 to 2,085.73)                       | 1,645.81<br>(1,026.27 to 2,504.12)                         | 47.51<br>(33.36 to 67.37)                           | 64.91<br>(43.79 to 95.05)                           | 61.35<br>(42.97 to 88.63)                           | 65.06<br>(41.90 to 98.34)                           |
| Mesothelioma                    | 594.14<br>(402.55 to 902.13)                           | 912.56<br>(620.62 to 1,376.22)                           | 879.86<br>(587.97 to 1,301.90)                         | 898.44<br>(615.03 to 1,369.97)                             | 19.63<br>(13.42 to 29.50)                           | 32.32<br>(22.02 to 48.23)                           | 52.96<br>(22.28 to 48.38)                           | 30.83<br>(21.04 to 46.74)                           |
| Hodgkin lymphoma                | 3,851.98<br>(2,776.93 to 5,381.49)                     | 3,671.05<br>(2,573.70 to 5,396.39)                       | 2,772.86<br>(1,909.89 to 4,127.70)                     | 3,938.37<br>(2,731.09 to 5,794.83)                         | 87.26<br>(62.53 to 124.47)                          | 94.48<br>(66.71 to 139.28)                          | 74.57<br>(51.90 to 111.88)                          | 98.61<br>(68.72 to 144.31)                          |
| Non-Hodgkin lymphoma            | 11,617.24<br>(8,541.46 to 15,781.37)                   | 15,897.95<br>(11,289.42 to 21,674.32)                    | 17,094.22<br>(12,144.97 to 23,176.72)                  | 15,630.59<br>(11,088.50 to 21,404.91)                      | 313.11<br>(226.20 to 422.63)                        | 492.48<br>(354.29 to 654.54)                        | 588.89<br>(398.43 to 734.94)                        | 468.27<br>(333.01 to 631.66)                        |
| Multiple myeloma                | 3,502.20<br>(2,384.36 to 4,735.25)                     | 6,145.89<br>(4,226.48 to 8,688.18)                       | 7,036.04<br>(4,840.83 to 9,964.96)                     | 5,850.97<br>(4,028.93 to 8,338.65)                         | 139.47<br>(95.93 to 188.45)                         | 253.91<br>(176.51 to 356.09)                        | 303.91<br>(211.49 to 425.09)                        | 234.89<br>(158.56 to 330.73)                        |
| Leukemia                        | 28,233.20<br>(18,193.24 to 40,459.92)                  | 26,195.32<br>(16,801.27 to 38,356.04)                    | 22,949.60<br>(14,939.91 to 32,913.13)                  | 28,332.68<br>(17,916.26 to 42,022.14)                      | 621.62<br>(415.39 to 858.80)                        | 744.01<br>(489.98 to 1,059.86)                      | 696.90<br>(468.20 to 973.40)                        | 773.69<br>(490.85 to 1,115.68)                      |
| Acute lymphoid leukemia         | 6,375.13<br>(4,048.68 to 11,459.50)                    | 4,355.27<br>(2,627.79 to 7,846.95)                       | 3,993.67<br>(2,452.94 to 6,879.54)                     | 4,702.57<br>(2,824.57 to 8,591.64)                         | 94.66<br>(62.63 to 162.95)                          | 76.34<br>(48.24 to 128.90)                          | 73.08<br>(46.63 to 118.62)                          | 80.74<br>(50.99 to 138.78)                          |
| Chronic lymphoid leukemia       | 618.23<br>(389.41 to 994.75)                           | 814.65<br>(489.15 to 1,261.19)                           | 817.78<br>(499.40 to 1,358.58)                         | 828.49<br>(479.33 to 1,408.95)                             | 25.92<br>(16.77 to 40.46)                           | 36.80<br>(22.77 to 58.98)                           | 39.87<br>(25.13 to 62.85)                           | 35.90<br>(21.57 to 58.57)                           |
| Acute myeloid leukemia          | 3,745.55<br>(2,528.85 to 5,822.72)                     | 4,145.21<br>(2,680.07 to 6,271.26)                       | 4,251.30<br>(2,795.09 to 6,249.02)                     | 4,284.48<br>(2,757.28 to 6,660.16)                         | 74.70<br>(49.61 to 112.66)                          | 103.83<br>(65.94 to 157.88)                         | 113.45<br>(71.90 to 166.29)                         | 103.98<br>(65.06 to 159.26)                         |
| Chronic myeloid leukemia        | 1,656.15<br>(993.34 to 2,487.59)                       | 1,438.87<br>(808.05 to 2,349.59)                         | 1,353.36<br>(781.31 to 2,149.61)                       | 1,513.74<br>(826.14 to 2,498.31)                           | 48.11<br>(29.90 to 70.80)                           | 46.92<br>(27.52 to 72.28)                           | 46.75<br>(28.33 to 70.77)                           | 47.81<br>(27.48 to 76.29)                           |
| Other leukemia                  | 15,838.14<br>(8,399.25 to 25,301.27)                   | 15,441.33<br>(8,523.83 to 24,816.13)                     | 12,533.49<br>(6,962.10 to 19,781.13)                   | 17,003.40<br>(9,238.19 to 27,310.55)                       | 378.23<br>(221.39 to 578.59)                        | 480.13<br>(287.14 to 737.20)                        | 423.75<br>(260.18 to 639.16)                        | 505.26<br>(293.78 to 789.34)                        |
| Other neoplasms                 | 22,559.03<br>(17,596.45 to 28,163.06)                  | 28,470.48<br>(22,880.83 to 35,496.67)                    | 28,813.41<br>(22,942.50 to 35,989.16)                  | 28,044.94<br>(22,536.39 to 35,054.95)                      | 595.10<br>(474.43 to 736.04)                        | 909.01<br>(724.82 to 1,121.47)                      | 995.58<br>(790.70 to 1,229.06)                      | 852.04<br>(680.95 to 1,053.25)                      |
| <b>Cardiovascular diseases</b>  | <b>673,843.79</b><br><b>(548,092.00 to 804,449.58)</b> | <b>828,500.41</b><br><b>(576,017.93 to 1,172,423.36)</b> | <b>408,298.86</b><br><b>(295,259.37 to 567,342.73)</b> | <b>1,222,104.91</b><br><b>(831,177.48 to 1,735,863.16)</b> | <b>28,742.65</b><br><b>(23,840.23 to 33,867.25)</b> | <b>39,245.29</b><br><b>(29,403.76 to 51,619.95)</b> | <b>22,211.94</b><br><b>(17,173.87 to 29,262.31)</b> | <b>53,137.08</b><br><b>(39,033.95 to 74,356.42)</b> |
| Rheumatic heart disease         | 29,928.00<br>(21,300.33 to 40,044.83)                  | 16,847.10<br>(11,371.30 to 23,890.56)                    | 11,446.60<br>(7,798.51 to 16,087.26)                   | 18,621.15<br>(12,241.10 to 26,666.94)                      | 766.03<br>(518.62 to 1,045.20)                      | 533.73<br>(352.20 to 734.28)                        | 401.58<br>(269.06 to 541.14)                        | 554.98<br>(360.48 to 780.68)                        |
| Ischemic heart disease          | 292,008.97<br>(232,517.18 to 358,285.64)               | 389,850.95<br>(222,248.29 to 645,038.91)                 | 173,326.08<br>(100,487.67 to 297,938.77)               | 613,828.17<br>(346,653.60 to 1,039,153.64)                 | 13,723.24<br>(11,271.01 to 16,477.03)               | 19,200.67<br>(11,821.99 to 31,062.69)               | 9,938.67<br>(6,193.40 to 15,933.04)                 | 27,483.29<br>(16,710.84 to 45,587.45)               |
| Stroke                          | 240,007.56<br>(186,991.04 to 295,545.35)               | 271,665.23<br>(164,943.44 to 446,852.45)                 | 107,129.27<br>(67,126.37 to 179,149.68)                | 419,125.06<br>(244,952.73 to 705,287.80)                   | 9,944.31<br>(7,863.82 to 12,109.97)                 | 12,630.15<br>(7,999.62 to 20,954.28)                | 6,039.42<br>(3,919.38 to 9,983.36)                  | 17,748.10<br>(11,048.15 to 28,104.41)               |
| Ischemic stroke                 | 79,800.84<br>(62,536.85 to 99,596.13)                  | 94,371.60<br>(50,355.69 to 196,674.02)                   | 45,749.02<br>(25,676.86 to 95,679.19)                  | 131,559.44<br>(67,336.51 to 267,679.87)                    | 4,302.33<br>(3,426.92 to 5,239.90)                  | 5,433.02<br>(2,947.12 to 11,225.14)                 | 3,139.27<br>(1,785.93 to 6,509.95)                  | 6,904.70<br>(3,636.91 to 14,536.85)                 |
| Intracerebral hemorrhage        | 160,206.72<br>(123,152.49 to 201,570.94)               | 177,293.63<br>(98,225.94 to 305,050.35)                  | 61,380.25<br>(37,319.35 to 99,802.64)                  | 287,565.62<br>(150,085.92 to 517,816.16)                   | 5,641.98<br>(4,411.56 to 7,014.20)                  | 7,197.13<br>(4,255.84 to 11,652.85)                 | 2,900.15<br>(1,867.07 to 4,641.44)                  | 10,843.40<br>(6,055.92 to 18,640.15)                |







|                                                   |                                            |                                            |                                           |                                            |                                       |                                     |                                     |                                     |
|---------------------------------------------------|--------------------------------------------|--------------------------------------------|-------------------------------------------|--------------------------------------------|---------------------------------------|-------------------------------------|-------------------------------------|-------------------------------------|
| Urinary tract infections                          | 4,418.11<br>(3,159.97 to<br>6,179.25)      | 5,022.36<br>(3,728.86 to<br>6,668.96)      | 5,048.58<br>(3,808.88 to<br>6,650.14)     | 4,944.91<br>(3,643.60 to<br>6,568.04)      | 136.94<br>(100.43 to<br>180.52)       | 219.95<br>(159.28 to<br>286.62)     | 249.56<br>(185.91 to<br>326.53)     | 199.68<br>(141.69 to<br>263.25)     |
| Urolithiasis                                      | 155.84<br>(96.74 to<br>227.99)             | 191.66<br>(119.75 to<br>276.90)            | 191.31<br>(118.73 to<br>277.37)           | 187.22<br>(116.18 to<br>271.91)            | 5.65<br>(3.55 to<br>8.43)             | 7.43<br>(4.55 to<br>10.72)          | 8.01<br>(5.09 to<br>11.64)          | 6.94<br>(4.19 to<br>10.13)          |
| Other urinary diseases                            | 2,847.64<br>(1,749.48 to<br>4,021.96)      | 2,338.86<br>(1,377.58 to<br>3,325.09)      | 1,876.19<br>(1,066.17 to<br>2,707.25)     | 2,449.24<br>(1,434.56 to<br>3,479.11)      | 95.07<br>(61.85 to<br>127.75)         | 105.33<br>(59.93 to<br>153.43)      | 94.74<br>(52.43 to<br>144.08)       | 102.87<br>(58.80 to<br>148.15)      |
| Gynecological diseases                            | 287.33<br>(150.31 to<br>443.24)            | 362.85<br>(175.64 to<br>594.35)            | 262.47<br>(126.34 to<br>438.61)           | 391.95<br>(190.98 to<br>654.96)            | 7.13<br>(3.89 to<br>10.73)            | 9.32<br>(4.86 to<br>14.80)          | 7.07<br>(3.74 to<br>11.10)          | 9.80<br>(4.95 to<br>15.74)          |
| Uterine fibroids                                  | 45.83<br>(10.21 to<br>95.97)               | 57.06<br>(11.09 to<br>131.07)              | 40.50<br>(7.65 to<br>95.75)               | 61.34<br>(11.73 to<br>142.72)              | 1.41<br>(0.32 to<br>2.87)             | 1.76<br>(0.36 to<br>3.97)           | 1.30<br>(0.26 to<br>2.97)           | 1.85<br>(0.39 to<br>4.25)           |
| Polycystic ovarian syndrome                       | 67.22<br>(12.39 to<br>160.01)              | 58.51<br>(7.93 to<br>158.34)               | 34.72<br>(4.26 to<br>98.06)               | 67.41<br>(9.92 to<br>176.52)               | 1.38<br>(0.26 to<br>3.34)             | 1.23<br>(0.17 to<br>3.27)           | 0.73<br>(0.09 to<br>2.05)           | 1.41<br>(0.21 to<br>3.66)           |
| Endometriosis                                     | 1.48<br>(0.43 to<br>3.85)                  | 3.16<br>(0.72 to<br>10.50)                 | 2.27<br>(0.51 to<br>7.71)                 | 3.42<br>(0.79 to<br>11.39)                 | 0.03<br>(0.01 to<br>0.09)             | 0.07<br>(0.02 to<br>0.24)           | 0.05<br>(0.01 to<br>0.18)           | 0.08<br>(0.02 to<br>0.27)           |
| Genital prolapse                                  | 9.40<br>(2.12 to<br>17.97)                 | 11.22<br>(2.63 to<br>23.31)                | 7.99<br>(1.76 to<br>16.20)                | 11.71<br>(2.81 to<br>23.67)                | 0.45<br>(0.09 to<br>0.86)             | 0.51<br>(0.10 to<br>1.08)           | 0.39<br>(0.07 to<br>0.85)           | 0.52<br>(0.11 to<br>1.08)           |
| Other gynecological diseases                      | 163.41<br>(69.60 to<br>273.17)             | 232.89<br>(94.53 to<br>419.26)             | 177.00<br>(73.48 to<br>312.97)            | 248.07<br>(100.81 to<br>446.91)            | 3.86<br>(1.66 to<br>6.25)             | 5.74<br>(2.62 to<br>9.74)           | 4.60<br>(2.15 to<br>7.68)           | 5.94<br>(2.55 to<br>10.24)          |
| Hemoglobinopathies and hemolytic anemias          | 25,508.98<br>(18,125.05 to<br>33,032.95)   | 23,096.62<br>(16,884.17 to<br>30,545.86)   | 18,380.76<br>(13,411.68 to<br>24,334.96)  | 24,716.72<br>(17,839.29 to<br>32,744.73)   | 473.56<br>(354.25 to<br>608.71)       | 532.42<br>(405.19 to<br>681.57)     | 440.92<br>(329.11 to<br>568.06)     | 550.75<br>(412.09 to<br>711.41)     |
| Thalassemias                                      | 1,068.31<br>(308.58 to<br>2,148.86)        | 256.79<br>(67.24 to<br>533.84)             | 279.31<br>(74.66 to<br>609.14)            | 281.10<br>(71.21 to<br>596.82)             | 12.58<br>(3.65 to<br>25.32)           | 3.04<br>(0.81 to<br>6.26)           | 3.31<br>(0.89 to<br>7.14)           | 3.33<br>(0.85 to<br>7.05)           |
| Sickle cell disorders                             | 21,768.66<br>(15,634.71 to<br>28,424.74)   | 19,031.56<br>(13,432.80 to<br>25,980.80)   | 15,630.77<br>(10,583.53 to<br>20,398.96)  | 20,554.64<br>(14,452.15 to<br>28,074.16)   | 342.34<br>(250.40 to<br>443.82)       | 347.97<br>(244.09 to<br>469.81)     | 279.59<br>(196.19 to<br>377.87)     | 371.07<br>(260.86 to<br>505.30)     |
| G6PD deficiency                                   | 1,193.76<br>(829.42 to<br>1,665.05)        | 2,120.19<br>(1,498.94 to<br>3,016.81)      | 1,628.78<br>(1,133.34 to<br>2,343.08)     | 2,235.14<br>(1,586.83 to<br>3,240.18)      | 32.42<br>(22.80 to<br>45.39)          | 73.35<br>(52.67 to<br>103.18)       | 58.37<br>(41.43 to<br>83.26)        | 73.36<br>(53.93 to<br>107.70)       |
| Other hemoglobinopathies and hemolytic anemias    | 1,478.25<br>(1,096.58 to<br>1,966.09)      | 1,688.07<br>(1,232.18 to<br>2,321.16)      | 1,441.91<br>(1,080.01 to<br>1,920.12)     | 1,645.85<br>(1,178.45 to<br>2,244.24)      | 86.22<br>(64.21 to<br>114.43)         | 108.06<br>(78.16 to<br>146.38)      | 99.66<br>(74.34 to<br>134.90)       | 100.99<br>(68.98 to<br>138.52)      |
| Endocrine, metabolic, blood, and immune disorders | 20,257.03<br>(14,457.07 to<br>29,219.80)   | 19,617.87<br>(14,729.91 to<br>26,111.65)   | 16,706.29<br>(12,399.84 to<br>21,573.61)  | 20,858.48<br>(15,477.15 to<br>28,208.38)   | 416.08<br>(323.11 to<br>540.74)       | 533.25<br>(405.35 to<br>680.13)     | 499.39<br>(377.78 to<br>641.68)     | 531.10<br>(396.99 to<br>682.82)     |
| <b>Haiti</b>                                      |                                            |                                            |                                           |                                            |                                       |                                     |                                     |                                     |
| Cause                                             | YLLs (actual counts)                       |                                            |                                           |                                            | Deaths (actual counts)                |                                     |                                     |                                     |
|                                                   | 2016                                       | 2040 Forecast                              | 2040 Better Scenario                      | 2040 Worse Scenario                        | 2016                                  | 2040 Forecast                       | 2040 Better Scenario                | 2040 Worse Scenario                 |
| Musculoskeletal disorders                         | 8,766.62<br>(5,859.65 to<br>12,946.84)     | 11,764.37<br>(8,136.14 to<br>16,925.39)    | 12,389.05<br>(8,617.46 to<br>17,837.02)   | 11,491.53<br>(7,958.82 to<br>16,420.95)    | 191.53<br>(131.95 to<br>280.09)       | 297.68<br>(214.42 to<br>418.98)     | 318.55<br>(228.42 to<br>444.18)     | 285.14<br>(204.63 to<br>401.79)     |
| Rheumatoid arthritis                              | 1,076.03<br>(716.70 to<br>1,641.04)        | 1,772.15<br>(1,189.81 to<br>2,623.66)      | 1,483.94<br>(982.41 to<br>2,222.43)       | 1,818.18<br>(1,213.27 to<br>2,708.95)      | 38.15<br>(26.67 to<br>55.58)          | 74.76<br>(52.38 to<br>107.77)       | 67.71<br>(46.46 to<br>97.90)        | 73.19<br>(50.57 to<br>105.06)       |
| Other musculoskeletal disorders                   | 7,690.58<br>(5,025.09 to<br>11,646.85)     | 9,992.22<br>(6,551.72 to<br>14,847.92)     | 10,905.11<br>(7,263.70 to<br>15,969.14)   | 9,673.35<br>(6,320.15 to<br>14,505.05)     | 153.38<br>(101.74 to<br>230.19)       | 222.92<br>(150.78 to<br>326.05)     | 250.84<br>(171.25 to<br>361.49)     | 211.95<br>(140.89 to<br>312.83)     |
| Other non-communicable diseases                   | 181,439.75<br>(98,380.84 to<br>312,920.57) | 100,977.02<br>(54,598.48 to<br>184,355.71) | 74,705.35<br>(40,164.18 to<br>135,819.43) | 120,978.27<br>(63,494.37 to<br>222,184.29) | 2,295.24<br>(1,270.45 to<br>3,921.85) | 1,544.55<br>(910.97 to<br>2,740.63) | 1,261.83<br>(767.22 to<br>2,219.86) | 1,754.88<br>(998.83 to<br>3,162.60) |
| Congenital birth defects                          | 167,301.89<br>(87,501.91 to<br>296,108.05) | 90,294.14<br>(45,635.46 to<br>169,802.73)  | 65,159.89<br>(32,574.55 to<br>126,482.78) | 109,280.60<br>(54,292.26 to<br>206,823.19) | 2,032.68<br>(1,063.55 to<br>3,639.83) | 1,201.95<br>(611.79 to<br>2,366.57) | 884.33<br>(436.36 to<br>1,804.72)   | 1,429.72<br>(708.18 to<br>2,799.73) |

|                                               |                                                    |                                                      |                                                    |                                                      |                                               |                                                |                                                |                                                |
|-----------------------------------------------|----------------------------------------------------|------------------------------------------------------|----------------------------------------------------|------------------------------------------------------|-----------------------------------------------|------------------------------------------------|------------------------------------------------|------------------------------------------------|
| Neural tube defects                           | 22,251.92<br>(8,181.06 to<br>46,680.07)            | 5,183.67<br>(1,863.17 to<br>11,889.10)               | 2,999.65<br>(1,066.06 to<br>6,750.44)              | 6,808.04<br>(2,393.45 to<br>15,801.92)               | 260.39<br>(95.89 to<br>544.52)                | 63.24<br>(22.87 to<br>144.32)                  | 36.87<br>(12.93 to<br>82.36)                   | 82.43<br>(28.73 to<br>190.06)                  |
| Congenital heart anomalies                    | 74,401.09<br>(30,239.59 to<br>163,914.91)          | 41,160.85<br>(16,327.06 to<br>100,770.59)            | 30,607.26<br>(12,246.96 to<br>76,196.94)           | 48,851.61<br>(18,876.94 to<br>120,374.30)            | 919.26<br>(368.78 to<br>2,070.22)             | 563.21<br>(218.54 to<br>1,419.19)              | 427.51<br>(168.05 to<br>1,107.18)              | 656.36<br>(254.90 to<br>1,672.41)              |
| Orofacial clefts                              | 284.17<br>(64.27 to<br>768.13)                     | 136.25<br>(26.79 to<br>431.16)                       | 73.08<br>(14.93 to<br>217.69)                      | 185.24<br>(36.50 to<br>603.93)                       | 3.29<br>(0.75 to<br>8.91)                     | 1.58<br>(0.31 to<br>5.00)                      | 0.85<br>(0.17 to<br>2.53)                      | 2.15<br>(0.42 to<br>7.00)                      |
| Down syndrome                                 | 6,834.91<br>(2,220.99 to<br>16,993.87)             | 6,539.96<br>(2,366.14 to<br>13,460.56)               | 4,686.73<br>(1,670.52 to<br>9,380.70)              | 7,655.80<br>(2,654.45 to<br>16,566.89)               | 93.09<br>(31.24 to<br>208.92)                 | 109.98<br>(42.64 to<br>214.39)                 | 82.01<br>(30.80 to<br>160.86)                  | 124.59<br>(46.72 to<br>247.43)                 |
| Other chromosomal abnormalities               | 5,587.60<br>(992.53 to<br>13,942.91)               | 6,081.45<br>(1,060.24 to<br>15,127.94)               | 4,213.77<br>(704.06 to<br>10,737.39)               | 7,570.72<br>(1,304.85 to<br>19,117.38)               | 65.73<br>(11.60 to<br>162.98)                 | 73.16<br>(12.61 to<br>180.30)                  | 50.88<br>(8.42 to<br>127.64)                   | 90.68<br>(15.53 to<br>226.42)                  |
| Congenital musculoskeletal and limb anomalies | 3,128.17<br>(986.89 to<br>9,428.33)                | 1,936.83<br>(628.01 to<br>5,518.72)                  | 1,478.84<br>(496.16 to<br>4,124.12)                | 2,343.45<br>(759.67 to<br>6,841.62)                  | 37.14<br>(11.93 to<br>110.34)                 | 23.83<br>(7.76 to<br>66.56)                    | 18.57<br>(6.08 to<br>49.29)                    | 28.58<br>(9.33 to<br>81.74)                    |
| Urogenital congenital anomalies               | 2,870.82<br>(1,281.23 to<br>5,785.18)              | 1,712.71<br>(770.31 to<br>3,537.47)                  | 1,310.43<br>(579.38 to<br>2,711.71)                | 2,016.52<br>(897.18 to<br>4,189.58)                  | 36.92<br>(16.59 to<br>74.03)                  | 26.55<br>(11.90 to<br>58.50)                   | 20.94<br>(9.15 to<br>47.31)                    | 30.22<br>(13.53 to<br>64.42)                   |
| Digestive congenital anomalies                | 13,656.17<br>(5,125.19 to<br>36,087.74)            | 6,835.13<br>(2,444.07 to<br>17,706.34)               | 4,748.16<br>(1,690.48 to<br>12,205.60)             | 8,565.42<br>(3,012.91 to<br>22,377.43)               | 159.70<br>(60.01 to<br>420.95)                | 81.06<br>(29.07 to<br>208.69)                  | 56.53<br>(20.26 to<br>143.41)                  | 101.24<br>(35.61 to<br>261.88)                 |
| Other congenital birth defects                | 38,287.04<br>(18,780.27 to<br>70,179.82)           | 20,707.29<br>(9,786.42 to<br>40,658.10)              | 15,041.97<br>(7,177.13 to<br>28,586.11)            | 25,283.81<br>(11,773.89 to<br>48,842.02)             | 457.15<br>(226.48 to<br>837.42)               | 259.35<br>(125.29 to<br>499.98)                | 190.38<br>(94.28 to<br>354.72)                 | 313.47<br>(150.46 to<br>590.45)                |
| Skin and subcutaneous diseases                | 3,135.82<br>(1,705.77 to<br>4,670.83)              | 5,643.37<br>(3,003.14 to<br>8,231.39)                | 5,844.05<br>(3,120.01 to<br>8,459.70)              | 5,423.66<br>(2,858.67 to<br>8,018.78)                | 134.87<br>(72.11 to<br>193.45)                | 284.12<br>(146.72 to<br>415.46)                | 334.55<br>(174.19 to<br>485.68)                | 252.36<br>(128.31 to<br>369.74)                |
| Cellulitis                                    | 138.07<br>(57.51 to<br>234.16)                     | 303.81<br>(123.79 to<br>519.13)                      | 343.58<br>(140.77 to<br>600.12)                    | 291.96<br>(118.07 to<br>504.38)                      | 3.76<br>(1.60 to<br>6.52)                     | 11.90<br>(4.85 to<br>21.44)                    | 15.34<br>(6.21 to<br>27.32)                    | 10.53<br>(4.21 to<br>18.55)                    |
| Pyoderma                                      | 1,258.99<br>(560.34 to<br>2,179.13)                | 2,444.42<br>(1,056.54 to<br>4,142.20)                | 2,326.94<br>(992.14 to<br>3,974.79)                | 2,436.82<br>(1,070.89 to<br>4,117.80)                | 40.58<br>(16.40 to<br>71.59)                  | 108.45<br>(44.92 to<br>183.59)                 | 117.03<br>(48.13 to<br>195.44)                 | 100.07<br>(41.77 to<br>170.47)                 |
| Decubitus ulcer                               | 1,608.33<br>(900.76 to<br>2,417.04)                | 2,712.37<br>(1,440.45 to<br>4,122.64)                | 2,984.56<br>(1,613.14 to<br>4,470.91)              | 2,511.33<br>(1,329.29 to<br>3,874.21)                | 87.45<br>(48.93 to<br>129.84)                 | 158.59<br>(82.64 to<br>250.39)                 | 196.17<br>(104.66 to<br>298.63)                | 136.92<br>(70.79 to<br>215.42)                 |
| Other skin and subcutaneous diseases          | 131.35<br>(67.49 to<br>222.43)                     | 182.77<br>(97.15 to<br>291.29)                       | 188.96<br>(101.34 to<br>297.87)                    | 183.55<br>(96.46 to<br>300.25)                       | 3.08<br>(1.57 to<br>4.89)                     | 5.18<br>(2.74 to<br>7.96)                      | 6.01<br>(3.12 to<br>9.36)                      | 4.84<br>(2.57 to<br>7.46)                      |
| Sudden infant death syndrome                  | 11,002.03<br>(4,029.16 to<br>25,983.09)            | 5,039.50<br>(1,679.25 to<br>13,194.79)               | 3,701.42<br>(1,270.06 to<br>9,470.04)              | 6,274.01<br>(2,023.39 to<br>16,346.12)               | 127.69<br>(46.76 to<br>301.60)                | 58.48<br>(19.48 to<br>153.14)                  | 42.95<br>(14.73 to<br>109.89)                  | 72.80<br>(23.47 to<br>189.72)                  |
| <b>Injuries</b>                               | <b>533,305.52</b><br>(433,778.48 to<br>643,385.51) | <b>631,578.35</b><br>(325,893.76 to<br>1,002,003.63) | <b>531,259.11</b><br>(259,738.50 to<br>883,482.24) | <b>679,551.80</b><br>(356,966.69 to<br>1,061,280.13) | <b>9,603.17</b><br>(7,833.89 to<br>11,437.61) | <b>12,998.43</b><br>(7,092.78 to<br>20,326.53) | <b>11,479.09</b><br>(5,981.96 to<br>18,710.63) | <b>13,578.86</b><br>(7,481.53 to<br>20,977.08) |
| <b>Transport injuries</b>                     | <b>167,539.27</b><br>(130,733.63 to<br>217,228.12) | <b>199,328.08</b><br>(131,695.97 to<br>295,471.68)   | <b>152,330.22</b><br>(102,908.52 to<br>221,703.55) | <b>221,758.96</b><br>(144,982.16 to<br>331,572.18)   | <b>2,992.88</b><br>(2,326.76 to<br>3,913.77)  | <b>3,969.34</b><br>(2,665.07 to<br>5,893.90)   | <b>3,164.89</b><br>(2,198.57 to<br>4,608.44)   | <b>4,316.82</b><br>(2,874.26 to<br>6,486.89)   |
| Road injuries                                 | 161,249.03<br>(125,517.96 to<br>210,355.06)        | 191,806.04<br>(126,908.70 to<br>285,082.59)          | 146,665.95<br>(98,920.15 to<br>213,944.79)         | 213,381.84<br>(140,114.60 to<br>317,830.61)          | 2,879.15<br>(2,234.55 to<br>3,775.13)         | 3,803.08<br>(2,547.48 to<br>5,656.52)          | 3,032.47<br>(2,097.16 to<br>4,421.58)          | 4,137.92<br>(2,734.50 to<br>6,244.56)          |
| Pedestrian road injuries                      | 39,685.94<br>(28,463.34 to<br>58,353.49)           | 34,878.28<br>(22,453.46 to<br>56,931.27)             | 26,651.65<br>(17,400.76 to<br>43,674.96)           | 38,759.58<br>(24,869.05 to<br>63,351.89)             | 725.08<br>(533.47 to<br>1,107.15)             | 803.81<br>(527.03 to<br>1,303.83)              | 654.60<br>(434.46 to<br>1,068.80)              | 861.20<br>(558.98 to<br>1,398.71)              |
| <b>Haiti</b>                                  |                                                    |                                                      |                                                    |                                                      |                                               |                                                |                                                |                                                |
| Cause                                         | YLLs (actual counts)                               |                                                      |                                                    |                                                      | Deaths (actual counts)                        |                                                |                                                |                                                |
|                                               | 2016                                               | 2040 Forecast                                        | 2040 Better Scenario                               | 2040 Worse Scenario                                  | 2016                                          | 2040 Forecast                                  | 2040 Better Scenario                           | 2040 Worse Scenario                            |
| Cyclist road injuries                         | 8,575.10<br>(4,443.68 to<br>15,251.73)             | 10,959.53<br>(5,402.56 to<br>21,546.59)              | 8,405.35<br>(4,205.89 to<br>16,544.09)             | 12,175.72<br>(5,910.70 to<br>24,042.10)              | 159.46<br>(81.89 to<br>287.65)                | 224.27<br>(109.05 to<br>446.44)                | 181.85<br>(88.67 to<br>361.33)                 | 242.71<br>(117.74 to<br>483.24)                |





|                                                                              |                                             |                                             |                                             |                                             |                                          |                                          |                                          |                                          |
|------------------------------------------------------------------------------|---------------------------------------------|---------------------------------------------|---------------------------------------------|---------------------------------------------|------------------------------------------|------------------------------------------|------------------------------------------|------------------------------------------|
| Self-harm and interpersonal violence                                         | 94,919.24<br>(70,521.88 to<br>125,211.04)   | 99,899.24<br>(65,524.82 to<br>142,859.09)   | 85,957.46<br>(58,393.09 to<br>120,585.47)   | 106,232.48<br>(68,557.73 to<br>154,009.75)  | 1,763.68<br>(1,318.48 to<br>2,332.69)    | 2,008.13<br>(1,350.85 to<br>2,839.15)    | 1,756.35<br>(1,235.81 to<br>2,440.35)    | 2,114.46<br>(1,399.42 to<br>3,051.08)    |
| <b>Haiti</b>                                                                 |                                             |                                             |                                             |                                             |                                          |                                          |                                          |                                          |
| Cause                                                                        | YLLs (actual counts)                        |                                             |                                             |                                             | Deaths (actual counts)                   |                                          |                                          |                                          |
|                                                                              | 2016                                        | 2040 Forecast                               | 2040 Better Scenario                        | 2040 Worse Scenario                         | 2016                                     | 2040 Forecast                            | 2040 Better Scenario                     | 2040 Worse Scenario                      |
| Self-harm                                                                    | 49,757.27<br>(33,745.49 to<br>68,745.52)    | 63,073.68<br>(35,729.94 to<br>99,601.99)    | 51,261.74<br>(30,696.56 to<br>78,146.44)    | 68,579.11<br>(38,139.34 to<br>108,162.76)   | 971.48<br>(673.35 to<br>1,326.83)        | 1,319.03<br>(787.42 to<br>2,061.17)      | 1,100.06<br>(687.51 to<br>1,609.17)      | 1,414.89<br>(816.03 to<br>2,212.05)      |
| Self-harm by firearm                                                         | 3,327.85<br>(1,379.97 to<br>6,504.18)       | 4,128.02<br>(1,377.62 to<br>9,586.92)       | 3,192.29<br>(1,118.09 to<br>7,151.12)       | 4,533.83<br>(1,486.32 to<br>10,450.35)      | 66.90<br>(28.86 to<br>127.82)            | 88.08<br>(31.76 to<br>196.96)            | 70.05<br>(27.13 to<br>152.27)            | 95.42<br>(33.24 to<br>217.79)            |
| Self-harm by other specified means                                           | 46,429.43<br>(31,645.89 to<br>63,952.58)    | 58,945.66<br>(33,382.69 to<br>92,243.17)    | 48,069.45<br>(28,891.28 to<br>72,866.60)    | 64,045.28<br>(35,872.02 to<br>100,711.65)   | 904.58<br>(629.52 to<br>1,240.12)        | 1,230.95<br>(741.05 to<br>1,908.56)      | 1,030.01<br>(646.74 to<br>1,551.83)      | 1,319.47<br>(770.90 to<br>2,055.63)      |
| Interpersonal violence                                                       | 45,161.97<br>(31,199.28 to<br>62,264.64)    | 36,825.56<br>(24,422.20 to<br>52,968.58)    | 34,695.72<br>(23,273.68 to<br>49,379.64)    | 37,653.37<br>(24,805.88 to<br>54,014.67)    | 792.20<br>(550.26 to<br>1,087.13)        | 689.10<br>(466.47 to<br>969.78)          | 656.29<br>(449.71 to<br>918.74)          | 699.57<br>(469.42 to<br>984.92)          |
| Physical violence by firearm                                                 | 24,991.68<br>(14,812.58 to<br>39,148.64)    | 20,073.07<br>(11,112.48 to<br>32,082.86)    | 19,132.89<br>(10,495.15 to<br>30,353.96)    | 20,340.43<br>(11,257.46 to<br>32,752.43)    | 434.21<br>(256.93 to<br>679.65)          | 361.26<br>(201.01 to<br>580.36)          | 346.87<br>(191.70 to<br>555.69)          | 364.54<br>(203.06 to<br>587.82)          |
| Physical violence by sharp object                                            | 10,521.15<br>(5,757.64 to<br>17,135.31)     | 9,681.37<br>(5,190.59 to<br>15,793.36)      | 9,599.45<br>(5,157.71 to<br>15,650.02)      | 9,695.63<br>(5,198.45 to<br>15,981.18)      | 188.29<br>(104.08 to<br>305.37)          | 184.02<br>(100.27 to<br>294.41)          | 184.73<br>(101.21 to<br>293.08)          | 182.90<br>(99.39 to<br>293.13)           |
| Physical violence by other means                                             | 9,649.14<br>(6,380.41 to<br>14,164.71)      | 7,071.12<br>(4,104.03 to<br>11,293.92)      | 5,963.38<br>(3,473.36 to<br>9,406.38)       | 7,617.32<br>(4,420.24 to<br>12,287.96)      | 169.71<br>(111.41 to<br>244.46)          | 143.82<br>(84.45 to<br>227.60)           | 124.69<br>(74.13 to<br>196.87)           | 152.12<br>(89.07 to<br>242.60)           |
| Forces of nature, conflict and terrorism, and executions and police conflict | 75,546.48<br>(50,772.03 to<br>100,385.81)   | 197,032.23<br>(0.00 to<br>583,457.38)       | 187,427.35<br>(0.00 to<br>553,908.56)       | 203,306.46<br>(0.00 to<br>602,043.84)       | 1,354.52<br>(909.91 to<br>1,800.56)      | 3,900.67<br>(0.00 to<br>11,295.99)       | 3,904.71<br>(0.00 to<br>11,336.01)       | 3,899.26<br>(0.00 to<br>11,345.46)       |
| Exposure to forces of nature                                                 | 74,800.55<br>(49,905.77 to<br>99,636.21)    | 196,688.84<br>(0.00 to<br>583,457.38)       | 187,099.17<br>(0.00 to<br>553,908.56)       | 202,953.30<br>(0.00 to<br>602,043.84)       | 1,341.79<br>(895.22 to<br>1,787.20)      | 3,894.48<br>(0.00 to<br>11,295.99)       | 3,896.61<br>(0.00 to<br>11,336.01)       | 3,893.12<br>(0.00 to<br>11,345.46)       |
| Conflict and terrorism                                                       | 0.00<br>(0.00 to<br>0.00)                   | 343.39<br>(0.00 to<br>3,909.68)             | 328.18<br>(0.00 to<br>3,761.28)             | 353.16<br>(0.00 to<br>4,021.53)             | 0.00<br>(0.00 to<br>0.00)                | 6.19<br>(0.00 to<br>71.02)               | 6.10<br>(0.00 to<br>70.11)               | 6.24<br>(0.00 to<br>71.59)               |
| Executions and police conflict                                               | 745.93<br>(278.19 to<br>1,758.48)           | 0.00<br>(0.00 to<br>0.00)                   | 0.00<br>(0.00 to<br>0.00)                   | 0.00<br>(0.00 to<br>0.00)                   | 12.74<br>(4.86 to<br>29.40)              | 0.00<br>(0.00 to<br>0.00)                | 0.00<br>(0.00 to<br>0.00)                | 0.00<br>(0.00 to<br>0.00)                |
| <b>Jamaica</b>                                                               |                                             |                                             |                                             |                                             |                                          |                                          |                                          |                                          |
| Cause                                                                        | YLLs (actual counts)                        |                                             |                                             |                                             | Deaths (actual counts)                   |                                          |                                          |                                          |
|                                                                              | 2016                                        | 2040 Forecast                               | 2040 Better Scenario                        | 2040 Worse Scenario                         | 2016                                     | 2040 Forecast                            | 2040 Better Scenario                     | 2040 Worse Scenario                      |
| All causes                                                                   | 496,116.01<br>(412,947.86 to<br>584,465.88) | 539,461.30<br>(425,307.09 to<br>690,048.12) | 363,306.80<br>(287,941.38 to<br>459,823.21) | 619,108.39<br>(487,374.17 to<br>785,978.17) | 22,034.34<br>(19,276.68 to<br>24,893.64) | 29,769.91<br>(25,592.08 to<br>34,841.73) | 21,735.24<br>(18,633.23 to<br>25,785.06) | 32,713.00<br>(28,079.60 to<br>37,984.28) |
| Communicable, maternal, neonatal, and nutritional diseases                   | 91,608.28<br>(61,348.14 to<br>135,493.88)   | 43,238.99<br>(30,981.80 to<br>60,798.12)    | 27,324.81<br>(19,770.09 to<br>38,764.23)    | 58,780.46<br>(43,454.20 to<br>81,331.71)    | 1,863.08<br>(1,433.82 to<br>2,430.37)    | 1,432.80<br>(1,096.27 to<br>1,842.86)    | 1,078.65<br>(835.31 to<br>1,378.19)      | 1,795.62<br>(1,383.82 to<br>2,317.21)    |
| HIV/AIDS and tuberculosis                                                    | 8,233.33<br>(6,133.48 to<br>13,867.77)      | 4,430.48<br>(2,512.97 to<br>10,210.84)      | 2,663.76<br>(1,190.87 to<br>7,772.35)       | 11,582.60<br>(7,245.62 to<br>18,134.33)     | 179.15<br>(130.74 to<br>309.14)          | 109.40<br>(58.26 to<br>250.44)           | 67.92<br>(27.98 to<br>190.55)            | 255.26<br>(155.35 to<br>414.73)          |
| Tuberculosis                                                                 | 464.21<br>(373.38 to<br>568.68)             | 428.94<br>(242.25 to<br>741.23)             | 137.48<br>(81.35 to<br>224.45)              | 493.32<br>(279.42 to<br>877.02)             | 15.40<br>(12.66 to<br>18.66)             | 16.28<br>(9.97 to<br>25.97)              | 5.62<br>(3.57 to<br>8.53)                | 18.32<br>(11.23 to<br>29.98)             |
| HIV/AIDS                                                                     | 7,769.13<br>(5,660.31 to<br>13,439.63)      | 4,001.53<br>(2,091.94 to<br>9,723.27)       | 2,526.28<br>(1,044.16 to<br>7,597.50)       | 11,089.28<br>(6,729.09 to<br>17,683.18)     | 163.75<br>(116.03 to<br>293.97)          | 93.12<br>(42.75 to<br>232.58)            | 62.31<br>(22.47 to<br>183.64)            | 236.94<br>(134.81 to<br>396.78)          |
| Diarrhea, lower respiratory, and other common infectious diseases            | 22,903.18<br>(16,424.32 to<br>31,726.05)    | 16,397.36<br>(11,284.78 to<br>23,741.69)    | 11,248.25<br>(7,965.13 to<br>15,931.44)     | 22,060.99<br>(14,854.44 to<br>33,190.36)    | 865.93<br>(686.93 to<br>1,121.97)        | 942.15<br>(655.94 to<br>1,300.97)        | 735.91<br>(530.11 to<br>1,015.84)        | 1,131.59<br>(773.15 to<br>1,591.70)      |

|                                         |                                          |                                         |                                        |                                         |                                 |                                   |                                 |                                   |
|-----------------------------------------|------------------------------------------|-----------------------------------------|----------------------------------------|-----------------------------------------|---------------------------------|-----------------------------------|---------------------------------|-----------------------------------|
|                                         | 2,854.29<br>(1,605.89 to<br>4,972.65)    | 1,389.95<br>(238.00 to<br>4,665.16)     | 947.46<br>(201.46 to<br>3,069.73)      | 1,764.80<br>(282.91 to<br>5,832.37)     | 72.79<br>(40.22 to<br>148.40)   | 73.50<br>(251.69)                 | 56.67<br>(11.25 to<br>186.96)   | 87.14<br>(11.25 to<br>307.21)     |
| Diarrheal diseases                      | 15.81<br>(7.50 to<br>28.12)              | 8.99<br>(3.91 to<br>17.47)              | 8.89<br>(3.84 to<br>17.01)             | 9.12<br>(3.97 to<br>17.72)              | 0.36<br>(0.18 to<br>0.63)       | 0.25<br>(0.12 to<br>0.47)         | 0.26<br>(0.13 to<br>0.48)       | 0.25<br>(0.12 to<br>0.47)         |
| Intestinal infectious diseases          | 11.93<br>(5.39 to<br>21.87)              | 6.54<br>(2.58 to<br>12.84)              | 7.22<br>(2.94 to<br>14.44)             | 6.63<br>(2.60 to<br>13.18)              | 0.27<br>(0.13 to<br>0.49)       | 0.18<br>(0.08 to<br>0.34)         | 0.21<br>(0.09 to<br>0.38)       | 0.18<br>(0.08 to<br>0.33)         |
| Typhoid fever                           | 2.46<br>(0.87 to<br>5.34)                | 2.04<br>(0.73 to<br>4.71)               | 1.38<br>(0.48 to<br>3.31)              | 2.07<br>(0.73 to<br>4.76)               | 0.06<br>(0.02 to<br>0.12)       | 0.06<br>(0.02 to<br>0.12)         | 0.04<br>(0.01 to<br>0.09)       | 0.06<br>(0.02 to<br>0.12)         |
| Paratyphoid fever                       | 1.42<br>(0.51 to<br>3.12)                | 0.41<br>(0.13 to<br>0.95)               | 0.28<br>(0.08 to<br>0.66)              | 0.42<br>(0.13 to<br>0.97)               | 0.03<br>(0.01 to<br>0.07)       | 0.02<br>(0.01 to<br>0.04)         | 0.01<br>(0.00 to<br>0.03)       | 0.02<br>(0.00 to<br>0.04)         |
| Other intestinal infectious diseases    | 15,423.00<br>(11,509.87 to<br>21,127.41) | 11,783.40<br>(8,012.58 to<br>16,958.09) | 8,009.26<br>(5,726.31 to<br>11,249.05) | 15,409.70<br>(9,955.14 to<br>23,207.76) | 706.70<br>(569.34 to<br>913.69) | 790.57<br>(550.40 to<br>1,094.01) | 619.65<br>(446.08 to<br>859.58) | 946.25<br>(637.62 to<br>1,310.99) |
| Lower respiratory infections            | 22.66<br>(10.94 to<br>45.43)             | 17.59<br>(7.70 to<br>35.08)             | 8.05<br>(3.41 to<br>16.37)             | 18.12<br>(7.80 to<br>37.20)             | 0.58<br>(0.30 to<br>0.97)       | 0.69<br>(0.30 to<br>1.37)         | 0.34<br>(0.14 to<br>0.68)       | 0.69<br>(0.30 to<br>1.39)         |
| Upper respiratory infections            | 0.75<br>(0.46 to<br>1.34)                | 0.13<br>(0.07 to<br>0.29)               | 0.13<br>(0.07 to<br>0.30)              | 0.13<br>(0.07 to<br>0.28)               | 0.02<br>(0.01 to<br>0.03)       | 0.01<br>(0.00 to<br>0.01)         | 0.01<br>(0.00 to<br>0.01)       | 0.01<br>(0.00 to<br>0.01)         |
| Otitis media                            | 2,587.95<br>(1,546.48 to<br>4,525.85)    | 959.72<br>(492.31 to<br>1,875.96)       | 697.62<br>(360.95 to<br>1,359.89)      | 1,214.24<br>(560.44 to<br>2,411.22)     | 49.95<br>(33.28 to<br>83.92)    | 28.99<br>(17.76 to<br>52.64)      | 22.83<br>(14.13 to<br>42.51)    | 31.58<br>(18.57 to<br>58.28)      |
| Meningitis                              | 382.69<br>(222.11 to<br>676.52)          | 106.97<br>(59.48 to<br>194.35)          | 105.50<br>(59.02 to<br>192.34)         | 126.96<br>(68.18 to<br>237.31)          | 7.95<br>(5.30 to<br>13.00)      | 3.83<br>(2.40 to<br>6.68)         | 4.07<br>(2.55 to<br>7.18)       | 4.25<br>(2.59 to<br>7.38)         |
| Pneumococcal meningitis                 | 259.07<br>(144.69 to<br>469.84)          | 135.81<br>(46.36 to<br>322.32)          | 119.22<br>(43.52 to<br>269.55)         | 362.24<br>(77.39 to<br>1,073.30)        | 4.62<br>(2.88 to<br>8.21)       | 2.84<br>(1.37 to<br>5.69)         | 2.79<br>(1.41 to<br>5.46)       | 5.43<br>(1.78 to<br>13.73)        |
| H influenzae type B meningitis          | 892.14<br>(534.92 to<br>1,609.32)        | 289.80<br>(152.15 to<br>555.62)         | 191.01<br>(99.37 to<br>365.13)         | 294.05<br>(152.27 to<br>574.80)         | 16.70<br>(11.13 to<br>27.16)    | 8.89<br>(5.61 to<br>16.13)        | 6.40<br>(3.91 to<br>11.78)      | 8.73<br>(5.46 to<br>15.86)        |
| Meningococcal meningitis                | 1,054.04<br>(623.73 to<br>1,838.85)      | 427.14<br>(221.78 to<br>864.13)         | 281.89<br>(144.81 to<br>578.38)        | 430.99<br>(224.31 to<br>852.71)         | 20.69<br>(13.52 to<br>35.85)    | 13.43<br>(7.98 to<br>26.19)       | 9.56<br>(5.62 to<br>18.82)      | 13.17<br>(7.77 to<br>25.73)       |
| Other meningitis                        | 1,469.87<br>(1,028.52 to<br>2,080.54)    | 885.12<br>(492.37 to<br>1,408.41)       | 720.59<br>(411.02 to<br>1,141.04)      | 904.54<br>(494.17 to<br>1,454.86)       | 26.51<br>(20.36 to<br>35.41)    | 22.96<br>(16.11 to<br>31.82)      | 19.98<br>(14.16 to<br>27.57)    | 22.95<br>(16.01 to<br>31.82)      |
| Encephalitis                            | 3.10<br>(1.58 to<br>5.91)                | 0.40<br>(0.13 to<br>0.84)               | 0.34<br>(0.12 to<br>0.68)              | 2.02<br>(0.15 to<br>6.97)               | 0.05<br>(0.02 to<br>0.08)       | 0.01<br>(0.00 to<br>0.01)         | 0.01<br>(0.00 to<br>0.01)       | 0.03<br>(0.00 to<br>0.09)         |
| Diphtheria                              | 381.23<br>(25.42 to<br>1,358.60)         | 163.41<br>(2.35 to<br>696.93)           | 98.04<br>(1.87 to<br>414.74)           | 835.42<br>(3.00 to<br>2,956.13)         | 4.51<br>(0.30 to<br>16.04)      | 1.95<br>(0.03 to<br>8.34)         | 1.18<br>(0.03 to<br>4.94)       | 9.88<br>(0.04 to<br>34.92)        |
| Whooping cough                          | 28.29<br>(21.78 to<br>42.55)             | 2.73<br>(1.45 to<br>5.52)               | 2.66<br>(1.40 to<br>5.47)              | 4.30<br>(2.00 to<br>8.55)               | 0.73<br>(0.53 to<br>1.30)       | 0.08<br>(0.05 to<br>0.19)         | 0.09<br>(0.05 to<br>0.20)       | 0.10<br>(0.05 to<br>0.21)         |
| Tetanus                                 | 0.00<br>(0.00 to<br>0.00)                | 1,131.92<br>(0.00 to<br>4,329.06)       | 721.91<br>(0.00 to<br>2,681.99)        | 1,843.57<br>(0.00 to<br>7,363.55)       | 0.00<br>(0.00 to<br>0.00)       | 19.84<br>(0.00 to<br>74.77)       | 12.80<br>(0.00 to<br>47.15)     | 29.92<br>(0.00 to<br>114.91)      |
| Measles                                 | <b>Jamaica</b>                           |                                         |                                        |                                         |                                 |                                   |                                 |                                   |
| Cause                                   | YLLs (actual counts)                     |                                         |                                        |                                         | Deaths (actual counts)          |                                   |                                 |                                   |
|                                         | 2016                                     | 2040 Forecast                           | 2040 Better Scenario                   | 2040 Worse Scenario                     | 2016                            | 2040 Forecast                     | 2040 Better Scenario            | 2040 Worse Scenario               |
| Varicella and herpes zoster             | 116.24<br>(67.11 to<br>209.87)           | 54.00<br>(27.03 to<br>101.04)           | 33.30<br>(17.36 to<br>57.47)           | 55.04<br>(26.38 to<br>106.06)           | 3.74<br>(2.45 to<br>5.51)       | 2.90<br>(1.62 to<br>4.58)         | 2.10<br>(1.19 to<br>3.40)       | 2.81<br>(1.56 to<br>4.51)         |
| Neglected tropical diseases and malaria | 138.81<br>(76.17 to<br>240.56)           | 193.21<br>(106.53 to<br>324.39)         | 182.38<br>(98.65 to<br>300.98)         | 193.70<br>(105.60 to<br>324.05)         | 2.89<br>(1.71 to<br>4.58)       | 6.89<br>(3.54 to<br>12.01)        | 6.98<br>(3.56 to<br>12.18)      | 6.73<br>(3.45 to<br>11.79)        |

|                                                       |                                                  |                                              |                                            |                                              |                                         |                                        |                                       |                                        |
|-------------------------------------------------------|--------------------------------------------------|----------------------------------------------|--------------------------------------------|----------------------------------------------|-----------------------------------------|----------------------------------------|---------------------------------------|----------------------------------------|
| Malaria                                               | 0.00<br>(0.00 to 0.00)                           | 0.00<br>(0.00 to 0.00)                       | 0.00<br>(0.00 to 0.00)                     | 0.00<br>(0.00 to 0.00)                       | 0.00<br>(0.00 to 0.00)                  | 0.00<br>(0.00 to 0.00)                 | 0.00<br>(0.00 to 0.00)                | 0.00<br>(0.00 to 0.00)                 |
| Chagas disease                                        | 0.00<br>(0.00 to 0.00)                           | 0.00<br>(0.00 to 0.00)                       | 0.00<br>(0.00 to 0.00)                     | 0.00<br>(0.00 to 0.00)                       | 0.00<br>(0.00 to 0.00)                  | 0.00<br>(0.00 to 0.00)                 | 0.00<br>(0.00 to 0.00)                | 0.00<br>(0.00 to 0.00)                 |
| Leishmaniasis                                         | 0.00<br>(0.00 to 0.00)                           | 0.00<br>(0.00 to 0.00)                       | 0.00<br>(0.00 to 0.00)                     | 0.00<br>(0.00 to 0.00)                       | 0.00<br>(0.00 to 0.00)                  | 0.00<br>(0.00 to 0.00)                 | 0.00<br>(0.00 to 0.00)                | 0.00<br>(0.00 to 0.00)                 |
| African trypanosomiasis                               | 0.00<br>(0.00 to 0.00)                           | 0.00<br>(0.00 to 0.00)                       | 0.00<br>(0.00 to 0.00)                     | 0.00<br>(0.00 to 0.00)                       | 0.00<br>(0.00 to 0.00)                  | 0.00<br>(0.00 to 0.00)                 | 0.00<br>(0.00 to 0.00)                | 0.00<br>(0.00 to 0.00)                 |
| Schistosomiasis                                       | 0.00<br>(0.00 to 0.00)                           | 0.00<br>(0.00 to 0.00)                       | 0.00<br>(0.00 to 0.00)                     | 0.00<br>(0.00 to 0.00)                       | 0.00<br>(0.00 to 0.00)                  | 0.00<br>(0.00 to 0.00)                 | 0.00<br>(0.00 to 0.00)                | 0.00<br>(0.00 to 0.00)                 |
| Cysticercosis                                         | 0.00<br>(0.00 to 0.00)                           | 0.00<br>(0.00 to 0.00)                       | 0.00<br>(0.00 to 0.00)                     | 0.00<br>(0.00 to 0.00)                       | 0.00<br>(0.00 to 0.00)                  | 0.00<br>(0.00 to 0.00)                 | 0.00<br>(0.00 to 0.00)                | 0.00<br>(0.00 to 0.00)                 |
| Cystic echinococcosis                                 | 0.00<br>(0.00 to 0.00)                           | 0.00<br>(0.00 to 0.00)                       | 0.00<br>(0.00 to 0.00)                     | 0.00<br>(0.00 to 0.00)                       | 0.00<br>(0.00 to 0.00)                  | 0.00<br>(0.00 to 0.00)                 | 0.00<br>(0.00 to 0.00)                | 0.00<br>(0.00 to 0.00)                 |
| Dengue                                                | 31.11<br>(7.99 to 77.66)                         | 124.17<br>(34.39 to 249.70)                  | 122.99<br>(34.87 to 245.18)                | 122.52<br>(34.46 to 246.74)                  | 1.10<br>(0.22 to 2.32)                  | 5.43<br>(1.43 to 10.84)                | 5.63<br>(1.40 to 11.00)               | 5.27<br>(1.39 to 10.49)                |
| Yellow fever                                          | 0.00<br>(0.00 to 0.00)                           | 0.00<br>(0.00 to 0.00)                       | 0.00<br>(0.00 to 0.00)                     | 0.00<br>(0.00 to 0.00)                       | 0.00<br>(0.00 to 0.00)                  | 0.00<br>(0.00 to 0.00)                 | 0.00<br>(0.00 to 0.00)                | 0.00<br>(0.00 to 0.00)                 |
| Rabies                                                | 0.24<br>(0.11 to 0.53)                           | 0.13<br>(0.05 to 0.25)                       | 0.06<br>(0.03 to 0.11)                     | 0.14<br>(0.05 to 0.27)                       | 0.01<br>(0.01)                          | 0.00<br>(0.00 to 0.01)                 | 0.00<br>(0.00 to 0.00)                | 0.00<br>(0.00 to 0.01)                 |
| Intestinal nematode infections                        | 43.88<br>(9.87 to 112.25)                        | 33.93<br>(8.98 to 87.58)                     | 31.12<br>(9.15 to 79.41)                   | 34.67<br>(9.16 to 85.86)                     | 0.69<br>(0.25 to 1.47)                  | 0.64<br>(0.27 to 1.29)                 | 0.63<br>(0.27 to 1.20)                | 0.64<br>(0.26 to 1.28)                 |
| Other neglected tropical diseases                     | 56.72<br>(30.56 to 97.94)                        | 34.98<br>(19.97 to 58.77)                    | 28.20<br>(16.10 to 47.29)                  | 36.37<br>(20.45 to 60.47)                    | 0.97<br>(0.64 to 1.47)                  | 0.81<br>(0.54 to 1.45)                 | 0.72<br>(0.47 to 1.35)                | 0.82<br>(0.54 to 1.41)                 |
| <b>Maternal disorders</b>                             | <b>1,506.01</b><br><b>(1,001.76 to 2,180.53)</b> | <b>819.95</b><br><b>(437.88 to 1,419.14)</b> | <b>462.06</b><br><b>(233.63 to 813.40)</b> | <b>865.14</b><br><b>(442.79 to 1,505.96)</b> | <b>26.45</b><br><b>(17.55 to 38.48)</b> | <b>14.83</b><br><b>(7.97 to 25.27)</b> | <b>8.38</b><br><b>(4.27 to 14.54)</b> | <b>15.64</b><br><b>(8.03 to 26.96)</b> |
| Maternal hemorrhage                                   | 261.16<br>(157.93 to 413.03)                     | 127.33<br>(61.61 to 239.23)                  | 71.85<br>(33.71 to 139.72)                 | 133.81<br>(62.02 to 261.40)                  | 4.66<br>(2.86 to 7.26)                  | 1.32<br>(1.12 to 4.36)                 | 1.32<br>(0.61 to 2.55)                | 2.45<br>(1.15 to 4.65)                 |
| Maternal sepsis and other maternal infections         | 101.90<br>(59.58 to 166.97)                      | 46.25<br>(21.56 to 87.65)                    | 25.72<br>(11.62 to 49.49)                  | 48.65<br>(21.90 to 92.76)                    | 1.82<br>(1.06 to 2.97)                  | 0.86<br>(0.41 to 1.66)                 | 0.48<br>(0.22 to 0.93)                | 0.90<br>(0.41 to 1.74)                 |
| Maternal hypertensive disorders                       | 409.23<br>(255.04 to 636.98)                     | 193.55<br>(90.50 to 350.99)                  | 106.15<br>(48.95 to 195.95)                | 203.73<br>(95.56 to 373.94)                  | 6.98<br>(4.39 to 10.92)                 | 3.38<br>(1.62 to 6.12)                 | 1.86<br>(0.87 to 3.50)                | 3.56<br>(1.69 to 6.57)                 |
| Maternal obstructed labor and uterine rupture         | 9.49<br>(3.60 to 19.65)                          | 6.02<br>(1.98 to 14.27)                      | 3.13<br>(1.00 to 7.34)                     | 6.34<br>(2.02 to 15.24)                      | 0.17<br>(0.06 to 0.35)                  | 0.11<br>(0.04 to 0.25)                 | 0.06<br>(0.02 to 0.14)                | 0.12<br>(0.04 to 0.28)                 |
| Maternal abortion, miscarriage, and ectopic pregnancy | 232.71<br>(137.86 to 364.78)                     | 141.44<br>(61.94 to 272.80)                  | 78.92<br>(32.86 to 156.63)                 | 149.20<br>(63.38 to 292.79)                  | 4.19<br>(2.49 to 6.72)                  | 2.63<br>(1.18 to 5.03)                 | 1.47<br>(0.63 to 2.92)                | 2.77<br>(1.20 to 5.46)                 |
| Indirect maternal deaths                              | 199.74<br>(118.16 to 317.69)                     | 124.95<br>(55.53 to 238.30)                  | 69.60<br>(29.87 to 134.48)                 | 132.21<br>(57.98 to 253.64)                  | 3.42<br>(2.05 to 5.47)                  | 2.19<br>(0.98 to 4.18)                 | 1.22<br>(0.53 to 2.33)                | 2.31<br>(1.03 to 4.38)                 |
| Late maternal deaths                                  | 46.04<br>(24.48 to 82.03)                        | 27.06<br>(12.00 to 55.51)                    | 14.82<br>(6.36 to 31.52)                   | 28.61<br>(12.22 to 59.94)                    | 0.79<br>(0.43 to 1.39)                  | 0.47<br>(0.21 to 0.95)                 | 0.26<br>(0.11 to 0.55)                | 0.50<br>(0.22 to 1.05)                 |
| Maternal deaths aggravated by HIV/AIDS                | 5.52<br>(2.17 to 10.24)                          | 14.10<br>(4.43 to 35.14)                     | 8.58<br>(2.42 to 21.87)                    | 15.93<br>(5.11 to 38.96)                     | 0.10<br>(0.04 to 0.19)                  | 0.27<br>(0.08 to 0.66)                 | 0.16<br>(0.04 to 0.41)                | 0.30<br>(0.10 to 0.72)                 |
| Other maternal disorders                              | 240.21<br>(143.40 to 375.31)                     | 139.26<br>(67.70 to 253.19)                  | 83.28<br>(40.53 to 154.44)                 | 146.67<br>(70.83 to 268.80)                  | 4.32<br>(2.61 to 6.67)                  | 2.59<br>(1.26 to 4.66)                 | 1.55<br>(0.76 to 2.87)                | 2.73<br>(1.33 to 4.98)                 |

| Jamaica                                                                 |                                              |                                             |                                            |                                              |                                       |                                     |                                    |                                     |
|-------------------------------------------------------------------------|----------------------------------------------|---------------------------------------------|--------------------------------------------|----------------------------------------------|---------------------------------------|-------------------------------------|------------------------------------|-------------------------------------|
| Cause                                                                   | YLLs (actual counts)                         |                                             |                                            |                                              | Deaths (actual counts)                |                                     |                                    |                                     |
|                                                                         | 2016                                         | 2040 Forecast                               | 2040 Better Scenario                       | 2040 Worse Scenario                          | 2016                                  | 2040 Forecast                       | 2040 Better Scenario               | 2040 Worse Scenario                 |
| <b>Neonatal disorders</b>                                               | <b>52,236.54</b><br>(28,367.04 to 87,229.94) | <b>17,805.82</b><br>(9,322.93 to 31,167.89) | <b>9,757.44</b><br>(5,069.31 to 17,144.89) | <b>20,435.47</b><br>(10,813.42 to 35,188.73) | <b>603.96</b><br>(327.96 to 1,008.43) | <b>206.09</b><br>(107.86 to 360.61) | <b>112.97</b><br>(58.69 to 198.53) | <b>236.49</b><br>(125.09 to 407.08) |
| Neonatal preterm birth                                                  | 29,378.86<br>(16,014.24 to 49,205.12)        | 9,105.92<br>(4,738.87 to 15,903.58)         | 4,433.34<br>(2,269.09 to 7,935.73)         | 10,764.75<br>(5,565.60 to 18,903.53)         | 339.47<br>(185.07 to 568.71)          | 105.26<br>(54.78 to 183.83)         | 51.26<br>(26.24 to 91.78)          | 124.42<br>(64.33 to 218.55)         |
| Neonatal encephalopathy due to birth asphyxia and trauma                | 10,090.32<br>(5,334.87 to 17,265.10)         | 3,163.91<br>(1,450.89 to 6,244.53)          | 1,817.22<br>(830.11 to 3,557.60)           | 3,525.46<br>(1,615.80 to 6,866.83)           | 116.72<br>(61.70 to 199.70)           | 36.64<br>(16.82 to 72.29)           | 21.05<br>(9.61 to 41.16)           | 40.83<br>(18.73 to 79.68)           |
| Neonatal sepsis and other neonatal infections                           | 8,391.17<br>(4,030.70 to 15,615.33)          | 3,649.64<br>(1,692.14 to 7,148.06)          | 2,236.61<br>(1,028.70 to 4,336.19)         | 4,047.83<br>(1,851.47 to 7,946.09)           | 97.06<br>(46.63 to 180.77)            | 42.28<br>(19.59 to 82.63)           | 25.91<br>(11.94 to 50.15)          | 46.89<br>(21.41 to 91.86)           |
| Hemolytic disease and other neonatal jaundice                           | 595.95<br>(276.05 to 1,135.83)               | 177.87<br>(67.18 to 381.20)                 | 101.62<br>(37.41 to 219.90)                | 198.05<br>(75.62 to 419.00)                  | 6.90<br>(3.20 to 13.15)               | 2.06<br>(0.78 to 4.41)              | 1.18<br>(0.43 to 2.56)             | 2.30<br>(0.88 to 4.86)              |
| Other neonatal disorders                                                | 3,780.24<br>(1,958.20 to 6,632.74)           | 1,708.48<br>(797.45 to 3,102.23)            | 1,168.66<br>(545.42 to 2,081.29)           | 1,899.37<br>(893.55 to 3,467.93)             | 43.82<br>(22.69 to 76.83)             | 19.85<br>(9.25 to 35.95)            | 13.58<br>(6.34 to 24.20)           | 22.06<br>(10.36 to 40.27)           |
| <b>Nutritional deficiencies</b>                                         | <b>3,780.35</b><br>(2,507.79 to 5,724.09)    | <b>1,833.49</b><br>(1,440.07 to 2,362.17)   | <b>1,669.27</b><br>(1,327.57 to 2,107.45)  | <b>1,847.63</b><br>(1,438.04 to 2,395.51)    | <b>120.91</b><br>(98.36 to 149.22)    | <b>101.64</b><br>(78.65 to 123.26)  | <b>104.77</b><br>(85.02 to 125.97) | <b>97.94</b><br>(74.82 to 120.95)   |
| Protein-energy malnutrition                                             | 3,572.22<br>(2,333.62 to 5,488.95)           | 1,612.45<br>(1,232.01 to 2,107.90)          | 1,499.77<br>(1,172.04 to 1,902.74)         | 1,626.03<br>(1,241.61 to 2,128.89)           | 112.23<br>(90.74 to 139.13)           | 90.32<br>(69.02 to 111.42)          | 95.36<br>(74.22 to 115.40)         | 86.96<br>(65.88 to 108.34)          |
| Iodine deficiency                                                       | 17.08<br>(0.96 to 78.59)                     | 53.01<br>(1.07 to 190.84)                   | 40.56<br>(0.57 to 163.54)                  | 53.69<br>(1.15 to 191.96)                    | 0.45<br>(0.03 to 1.77)                | 2.74<br>(0.03 to 12.85)             | 2.32<br>(0.02 to 12.21)            | 2.67<br>(0.03 to 12.12)             |
| Dietary iron deficiency                                                 | 20.84<br>(14.48 to 28.73)                    | 12.92<br>(8.84 to 18.38)                    | 11.37<br>(7.83 to 16.27)                   | 13.25<br>(9.18 to 18.76)                     | 0.36<br>(0.27 to 0.48)                | 0.26<br>(0.19 to 0.34)              | 0.23<br>(0.17 to 0.31)             | 0.26<br>(0.19 to 0.34)              |
| Other nutritional deficiencies                                          | 170.22<br>(104.18 to 228.04)                 | 155.11<br>(89.05 to 207.04)                 | 117.56<br>(66.35 to 160.28)                | 154.65<br>(87.81 to 207.37)                  | 7.87<br>(4.80 to 10.04)               | 8.32<br>(4.76 to 11.26)             | 6.85<br>(4.03 to 9.43)             | 8.05<br>(4.57 to 10.81)             |
| <b>Other communicable, maternal, neonatal, and nutritional diseases</b> | <b>2,810.06</b><br>(1,428.23 to 3,831.81)    | <b>1,758.68</b><br>(816.51 to 2,504.73)     | <b>1,341.66</b><br>(635.48 to 1,901.88)    | <b>1,794.93</b><br>(804.31 to 2,568.68)      | <b>63.79</b><br>(32.87 to 82.03)      | <b>51.80</b><br>(25.84 to 69.39)    | <b>41.73</b><br>(21.55 to 55.60)   | <b>51.96</b><br>(25.16 to 69.97)    |
| Sexually transmitted infections excluding HIV                           | 650.35<br>(262.21 to 1,394.37)               | 129.69<br>(67.05 to 250.08)                 | 89.92<br>(48.40 to 170.46)                 | 133.54<br>(68.47 to 257.69)                  | 9.67<br>(4.89 to 18.33)               | 2.92<br>(1.97 to 4.64)              | 2.27<br>(1.56 to 3.63)             | 2.93<br>(1.97 to 4.69)              |
| Syphilis                                                                | 587.76<br>(208.02 to 1,307.31)               | 88.60<br>(31.45 to 205.51)                  | 55.31<br>(20.21 to 130.27)                 | 92.39<br>(32.78 to 215.23)                   | 7.75<br>(3.15 to 16.32)               | 1.46<br>(0.76 to 2.79)              | 0.97<br>(0.53 to 1.87)             | 1.50<br>(0.78 to 2.92)              |
| Chlamydial infection                                                    | 11.72<br>(7.97 to 20.01)                     | 7.86<br>(5.23 to 13.38)                     | 6.65<br>(4.41 to 11.30)                    | 7.87<br>(5.28 to 13.47)                      | 0.37<br>(0.26 to 0.59)                | 0.28<br>(0.21 to 0.45)              | 0.26<br>(0.19 to 0.41)             | 0.28<br>(0.20 to 0.43)              |
| Gonococcal infection                                                    | 33.28<br>(23.11 to 54.48)                    | 22.23<br>(14.66 to 37.67)                   | 18.83<br>(12.26 to 32.43)                  | 22.24<br>(14.62 to 37.55)                    | 1.07<br>(0.79 to 1.66)                | 0.83<br>(0.59 to 1.30)              | 0.74<br>(0.52 to 1.20)             | 0.81<br>(0.58 to 1.27)              |
| Other sexually transmitted infections                                   | 17.59<br>(12.21 to 28.03)                    | 10.99<br>(7.09 to 18.10)                    | 9.14<br>(5.83 to 15.72)                    | 11.04<br>(7.10 to 18.16)                     | 0.49<br>(0.35 to 0.75)                | 0.35<br>(0.25 to 0.56)              | 0.30<br>(0.21 to 0.48)             | 0.34<br>(0.24 to 0.54)              |
| Acute hepatitis                                                         | 277.59<br>(220.48 to 345.51)                 | 191.59<br>(138.32 to 261.64)                | 123.72<br>(85.41 to 173.88)                | 193.39<br>(139.18 to 260.98)                 | 7.43<br>(5.85 to 9.16)                | 6.39<br>(4.76 to 8.48)              | 4.26<br>(3.03 to 5.78)             | 6.37<br>(4.71 to 8.50)              |
| Acute hepatitis A                                                       | 11.61<br>(3.68 to 24.28)                     | 5.18<br>(2.09 to 10.43)                     | 3.56<br>(1.47 to 7.40)                     | 5.28<br>(2.15 to 10.55)                      | 0.19<br>(0.08 to 0.35)                | 0.14<br>(0.06 to 0.29)              | 0.10<br>(0.04 to 0.21)             | 0.14<br>(0.06 to 0.29)              |
| Acute hepatitis B                                                       | 178.63<br>(136.45 to 233.16)                 | 137.59<br>(92.76 to 196.95)                 | 87.33<br>(57.06 to 127.13)                 | 138.79<br>(92.08 to 198.03)                  | 5.22<br>(4.04 to 6.75)                | 4.65<br>(3.23 to 6.42)              | 3.01<br>(2.04 to 4.31)             | 4.65<br>(3.21 to 6.49)              |

|                                       |                                                                  |                                                                  |                                                                  |                                                                  |                                                               |                                                               |                                                               |                                                               |
|---------------------------------------|------------------------------------------------------------------|------------------------------------------------------------------|------------------------------------------------------------------|------------------------------------------------------------------|---------------------------------------------------------------|---------------------------------------------------------------|---------------------------------------------------------------|---------------------------------------------------------------|
| Acute hepatitis C                     | 11.26<br>(7.73 to<br>16.46)                                      | 9.68<br>(6.03 to<br>15.53)                                       | 6.78<br>(4.18 to<br>11.02)                                       | 9.68<br>(6.06 to<br>15.55)                                       | 0.34<br>(0.23 to<br>0.48)                                     | 0.34<br>(0.21 to<br>0.52)                                     | 0.24<br>(0.15 to<br>0.38)                                     | 0.33<br>(0.21 to<br>0.51)                                     |
| Acute hepatitis E                     | 76.10<br>(55.21 to<br>100.77)                                    | 39.14<br>(25.24 to<br>57.36)                                     | 26.05<br>(16.33 to<br>38.88)                                     | 39.64<br>(25.72 to<br>57.94)                                     | 1.68<br>(1.18 to<br>2.27)                                     | 1.27<br>(0.81 to<br>1.91)                                     | 0.91<br>(0.55 to<br>1.39)                                     | 1.25<br>(0.79 to<br>1.87)                                     |
| Other unspecified infectious diseases | 1,882.12<br>(647.61 to<br>2,578.05)                              | 1,437.40<br>(493.76 to<br>2,132.24)                              | 1,128.02<br>(408.83 to<br>1,646.37)                              | 1,468.00<br>(482.48 to<br>2,168.65)                              | 46.69<br>(17.28 to<br>62.26)                                  | 42.49<br>(16.48 to<br>59.23)                                  | 35.20<br>(14.55 to<br>48.11)                                  | 42.66<br>(16.16 to<br>59.56)                                  |
| <b>Non-communicable diseases</b>      | <b>340,999.87</b><br><b>(291,051.26 to</b><br><b>390,466.39)</b> | <b>450,476.66</b><br><b>(349,392.11 to</b><br><b>590,899.43)</b> | <b>303,802.02</b><br><b>(238,555.26 to</b><br><b>393,967.82)</b> | <b>511,444.99</b><br><b>(393,237.15 to</b><br><b>663,282.27)</b> | <b>18,758.96</b><br><b>(16,396.77 to</b><br><b>21,184.50)</b> | <b>27,144.08</b><br><b>(23,079.51 to</b><br><b>32,228.29)</b> | <b>19,766.48</b><br><b>(16,802.51 to</b><br><b>23,803.78)</b> | <b>29,669.41</b><br><b>(25,026.09 to</b><br><b>34,921.33)</b> |
| <b>Jamaica</b>                        |                                                                  |                                                                  |                                                                  |                                                                  |                                                               |                                                               |                                                               |                                                               |
| Cause                                 | YLLs (actual counts)                                             |                                                                  |                                                                  |                                                                  | Deaths (actual counts)                                        |                                                               |                                                               |                                                               |
|                                       | 2016                                                             | 2040 Forecast                                                    | 2040 Better Scenario                                             | 2040 Worse Scenario                                              | 2016                                                          | 2040 Forecast                                                 | 2040 Better Scenario                                          | 2040 Worse Scenario                                           |
| <b>Neoplasms</b>                      | <b>93,499.87</b><br><b>(78,617.51 to</b><br><b>108,995.21)</b>   | <b>132,060.54</b><br><b>(101,186.36 to</b><br><b>169,561.46)</b> | <b>106,387.89</b><br><b>(83,611.35 to</b><br><b>134,537.12)</b>  | <b>141,749.75</b><br><b>(107,409.27 to</b><br><b>184,855.35)</b> | <b>4,366.28</b><br><b>(3,716.18 to</b><br><b>5,057.79)</b>    | <b>6,773.13</b><br><b>(5,445.86 to</b><br><b>8,276.75)</b>    | <b>5,847.59</b><br><b>(4,852.49 to</b><br><b>7,043.31)</b>    | <b>7,084.00</b><br><b>(5,650.42 to</b><br><b>8,759.27)</b>    |
| Lip and oral cavity cancer            | 749.02<br>(602.56 to<br>913.56)                                  | 1,494.84<br>(811.29 to<br>2,639.59)                              | 739.99<br>(447.83 to<br>1,179.04)                                | 1,851.59<br>(1,000.47 to<br>3,349.66)                            | 33.96<br>(27.94 to<br>40.62)                                  | 68.20<br>(39.74 to<br>112.70)                                 | 37.31<br>(24.48 to<br>55.94)                                  | 83.12<br>(46.48 to<br>142.06)                                 |
| Nasopharynx cancer                    | 488.10<br>(389.00 to<br>589.76)                                  | 678.66<br>(359.69 to<br>1,165.58)                                | 294.34<br>(174.93 to<br>469.17)                                  | 843.97<br>(445.18 to<br>1,450.53)                                | 14.54<br>(11.70 to<br>17.47)                                  | 22.47<br>(12.31 to<br>37.70)                                  | 10.03<br>(6.14 to<br>15.29)                                   | 27.82<br>(15.11 to<br>46.67)                                  |
| Other pharynx cancer                  | 451.87<br>(356.22 to<br>565.13)                                  | 637.62<br>(358.75 to<br>1,020.12)                                | 508.00<br>(297.16 to<br>790.88)                                  | 692.27<br>(383.04 to<br>1,106.62)                                | 19.03<br>(15.30 to<br>23.79)                                  | 28.60<br>(16.60 to<br>44.67)                                  | 24.17<br>(15.00 to<br>36.34)                                  | 30.47<br>(17.55 to<br>48.33)                                  |
| Esophageal cancer                     | 1,733.55<br>(1,372.27 to<br>2,115.17)                            | 2,951.94<br>(1,564.72 to<br>5,481.39)                            | 1,685.10<br>(1,028.62 to<br>2,738.78)                            | 3,480.73<br>(1,797.47 to<br>6,728.27)                            | 87.44<br>(71.09 to<br>105.51)                                 | 148.69<br>(85.28 to<br>263.62)                                | 92.22<br>(59.70 to<br>141.83)                                 | 172.71<br>(96.75 to<br>306.56)                                |
| Stomach cancer                        | 5,899.05<br>(4,826.44 to<br>6,940.99)                            | 6,434.74<br>(4,716.67 to<br>8,805.81)                            | 4,658.56<br>(3,477.56 to<br>6,124.16)                            | 6,522.44<br>(4,715.12 to<br>9,036.41)                            | 312.91<br>(261.80 to<br>363.38)                               | 358.07<br>(276.41 to<br>457.08)                               | 275.57<br>(217.98 to<br>345.04)                               | 356.33<br>(273.38 to<br>460.52)                               |
| Colon and rectum cancer               | 8,242.55<br>(6,847.19 to<br>9,720.55)                            | 13,327.65<br>(8,851.49 to<br>20,209.08)                          | 10,798.07<br>(7,341.47 to<br>15,878.75)                          | 13,737.84<br>(9,034.49 to<br>21,094.41)                          | 444.82<br>(375.54 to<br>515.45)                               | 770.61<br>(519.55 to<br>1,165.36)                             | 663.10<br>(456.83 to<br>963.86)                               | 777.04<br>(521.06 to<br>1,174.10)                             |
| Liver cancer                          | 2,743.61<br>(2,210.80 to<br>3,353.45)                            | 4,891.95<br>(3,118.95 to<br>7,591.06)                            | 4,219.86<br>(2,827.92 to<br>6,180.28)                            | 5,605.16<br>(3,422.66 to<br>9,025.76)                            | 126.84<br>(103.13 to<br>153.84)                               | 239.43<br>(159.85 to<br>356.68)                               | 221.43<br>(155.41 to<br>309.81)                               | 266.97<br>(171.84 to<br>410.81)                               |
| Liver cancer due to hepatitis B       | 1,075.90<br>(825.38 to<br>1,366.75)                              | 1,818.48<br>(1,099.50 to<br>2,980.39)                            | 1,585.23<br>(1,021.61 to<br>2,417.14)                            | 2,068.67<br>(1,190.59 to<br>3,505.31)                            | 42.90<br>(33.29 to<br>55.37)                                  | 77.58<br>(49.50 to<br>120.12)                                 | 71.83<br>(49.01 to<br>104.62)                                 | 86.31<br>(53.10 to<br>137.88)                                 |
| Liver cancer due to hepatitis C       | 673.16<br>(527.08 to<br>844.08)                                  | 1,233.25<br>(795.61 to<br>1,813.27)                              | 1,142.61<br>(771.97 to<br>1,629.67)                              | 1,376.85<br>(857.37 to<br>2,107.19)                              | 37.94<br>(30.28 to<br>47.78)                                  | 71.46<br>(48.49 to<br>104.61)                                 | 70.81<br>(50.46 to<br>99.12)                                  | 77.55<br>(49.94 to<br>115.40)                                 |
| Liver cancer due to alcohol use       | 442.83<br>(340.20 to<br>574.70)                                  | 837.10<br>(507.22 to<br>1,328.55)                                | 638.34<br>(409.09 to<br>960.78)                                  | 1,031.24<br>(593.12 to<br>1,726.32)                              | 21.40<br>(16.42 to<br>27.45)                                  | 41.58<br>(26.30 to<br>64.18)                                  | 34.48<br>(23.01 to<br>50.84)                                  | 49.47<br>(29.97 to<br>79.32)                                  |
| Liver cancer due to other causes      | 551.72<br>(430.67 to<br>689.52)                                  | 1,003.11<br>(587.01 to<br>1,654.84)                              | 853.68<br>(536.31 to<br>1,326.79)                                | 1,128.41<br>(627.93 to<br>1,927.86)                              | 24.60<br>(19.37 to<br>30.55)                                  | 48.82<br>(29.78 to<br>79.36)                                  | 44.31<br>(28.57 to<br>67.41)                                  | 53.63<br>(31.33 to<br>90.36)                                  |
| Gallbladder and biliary tract cancer  | 1,031.16<br>(783.89 to<br>1,502.00)                              | 1,084.10<br>(810.99 to<br>1,623.17)                              | 1,098.30<br>(804.97 to<br>1,672.75)                              | 1,050.95<br>(792.87 to<br>1,558.46)                              | 51.48<br>(39.16 to<br>76.77)                                  | 57.07<br>(43.90 to<br>84.72)                                  | 60.32<br>(45.95 to<br>92.19)                                  | 54.49<br>(42.16 to<br>80.08)                                  |
| Pancreatic cancer                     | 2,603.19<br>(2,160.07 to<br>3,070.86)                            | 4,530.20<br>(3,111.42 to<br>6,336.49)                            | 4,242.88<br>(3,014.38 to<br>5,815.53)                            | 4,626.34<br>(3,159.90 to<br>6,524.94)                            | 136.37<br>(113.99 to<br>160.33)                               | 239.98<br>(173.12 to<br>332.14)                               | 238.48<br>(177.51 to<br>321.67)                               | 240.64<br>(172.84 to<br>336.13)                               |
| Larynx cancer                         | 1,130.42<br>(872.62 to<br>1,437.07)                              | 1,624.86<br>(738.62 to<br>3,141.30)                              | 649.00<br>(337.54 to<br>1,170.56)                                | 2,009.76<br>(880.91 to<br>3,897.41)                              | 53.42<br>(42.24 to<br>66.48)                                  | 77.40<br>(38.05 to<br>141.00)                                 | 33.63<br>(19.06 to<br>57.44)                                  | 95.46<br>(45.71 to<br>174.66)                                 |
| Tracheal, bronchus, and lung cancer   | 12,357.99<br>(9,960.43 to<br>15,177.97)                          | 20,299.94<br>(11,750.82 to<br>32,501.44)                         | 10,642.70<br>(6,700.75 to<br>15,893.59)                          | 26,835.77<br>(15,631.63 to<br>42,189.14)                         | 566.44<br>(465.15 to<br>687.19)                               | 948.32<br>(584.19 to<br>1,469.09)                             | 529.82<br>(355.96 to<br>765.10)                               | 1,237.42<br>(760.90 to<br>1,939.76)                           |

|                          |                                         |                                         |                                         |                                         |                                   |                                     |                                     |                                     |
|--------------------------|-----------------------------------------|-----------------------------------------|-----------------------------------------|-----------------------------------------|-----------------------------------|-------------------------------------|-------------------------------------|-------------------------------------|
| Malignant skin melanoma  | 345.97<br>(276.35 to<br>459.01)         | 446.38<br>(354.93 to<br>581.55)         | 557.02<br>(437.51 to<br>751.62)         | 431.14<br>(344.92 to<br>558.97)         | 15.51<br>(12.64 to<br>19.66)      | 22.21<br>(18.33 to<br>28.24)        | 29.16<br>(24.04 to<br>37.73)        | 21.04<br>(17.31 to<br>26.64)        |
| Non-melanoma skin cancer | 317.63<br>(252.36 to<br>391.11)         | 468.85<br>(374.49 to<br>574.30)         | 584.66<br>(299.85 to<br>481.99)         | 457.00<br>(370.42 to<br>552.66)         | 16.80<br>(13.75 to<br>20.05)      | 26.61<br>(21.80 to<br>31.44)        | 33.32<br>(19.12 to<br>28.20)        | 25.38<br>(20.86 to<br>29.81)        |
| Breast cancer            | 10,153.08<br>(7,431.72 to<br>13,183.96) | 14,157.26<br>(9,394.26 to<br>21,781.99) | 11,571.14<br>(7,802.00 to<br>17,391.75) | 14,643.24<br>(9,629.65 to<br>22,363.98) | 409.75<br>(311.26 to<br>520.19)   | 641.61<br>(442.65 to<br>967.17)     | 549.32<br>(386.82 to<br>802.98)     | 649.50<br>(442.04 to<br>984.49)     |
| Cervical cancer          | 6,287.65<br>(4,458.68 to<br>8,487.45)   | 6,741.67<br>(4,498.18 to<br>10,100.22)  | 5,112.43<br>(3,377.20 to<br>7,616.20)   | 6,915.98<br>(4,553.59 to<br>10,566.42)  | 240.96<br>(177.22 to<br>322.92)   | 283.67<br>(199.85 to<br>401.49)     | 223.39<br>(157.51 to<br>314.60)     | 285.96<br>(199.32 to<br>412.04)     |
| Uterine cancer           | 1,891.33<br>(1,403.58 to<br>2,458.06)   | 2,630.39<br>(1,890.44 to<br>3,449.39)   | 2,175.22<br>(1,551.65 to<br>2,868.11)   | 2,583.04<br>(1,869.42 to<br>3,370.54)   | 100.79<br>(76.57 to<br>129.14)    | 147.00<br>(110.99 to<br>185.88)     | 126.01<br>(94.60 to<br>159.64)      | 142.45<br>(107.60 to<br>178.74)     |
| Ovarian cancer           | 2,184.39<br>(1,625.49 to<br>2,849.98)   | 3,037.06<br>(1,872.03 to<br>4,919.69)   | 2,895.60<br>(1,829.15 to<br>4,481.25)   | 3,067.93<br>(1,851.88 to<br>4,933.18)   | 90.30<br>(69.15 to<br>114.96)     | 140.49<br>(87.02 to<br>230.24)      | 138.42<br>(87.31 to<br>218.71)      | 139.77<br>(85.75 to<br>230.17)      |
| Prostate cancer          | 10,286.74<br>(5,390.79 to<br>14,319.74) | 17,568.29<br>(9,567.51 to<br>23,505.60) | 17,409.09<br>(9,747.77 to<br>23,077.11) | 16,844.53<br>(9,018.91 to<br>22,579.45) | 794.15<br>(416.33 to<br>1,086.64) | 1,335.88<br>(732.03 to<br>1,754.27) | 1,393.64<br>(788.80 to<br>1,782.27) | 1,262.38<br>(680.08 to<br>1,677.81) |
| Testicular cancer        | 82.66<br>(58.64 to<br>117.13)           | 72.05<br>(46.80 to<br>112.92)           | 59.10<br>(38.06 to<br>92.83)            | 71.60<br>(46.44 to<br>112.41)           | 2.10<br>(1.54 to<br>2.85)         | 2.17<br>(1.52 to<br>3.01)           | 1.86<br>(1.30 to<br>2.63)           | 2.12<br>(1.51 to<br>2.95)           |

**Jamaica**

| Cause                           | YLLs (actual counts)                  |                                       |                                       |                                       | Deaths (actual counts)          |                                 |                                 |                                 |
|---------------------------------|---------------------------------------|---------------------------------------|---------------------------------------|---------------------------------------|---------------------------------|---------------------------------|---------------------------------|---------------------------------|
|                                 | 2016                                  | 2040 Forecast                         | 2040 Better Scenario                  | 2040 Worse Scenario                   | 2016                            | 2040 Forecast                   | 2040 Better Scenario            | 2040 Worse Scenario             |
| Kidney cancer                   | 978.10<br>(805.24 to<br>1,206.97)     | 1,510.21<br>(1,115.64 to<br>2,049.76) | 1,539.70<br>(1,158.81 to<br>2,040.50) | 1,521.73<br>(1,110.92 to<br>2,081.69) | 37.21<br>(30.93 to<br>46.18)    | 66.58<br>(51.89 to<br>85.30)    | 72.12<br>(57.40 to<br>91.41)    | 65.92<br>(51.00 to<br>86.23)    |
| Bladder cancer                  | 1,162.47<br>(958.45 to<br>1,383.28)   | 1,769.06<br>(1,188.46 to<br>2,604.64) | 1,423.45<br>(1,018.08 to<br>1,977.76) | 1,829.14<br>(1,219.16 to<br>2,724.80) | 73.60<br>(61.61 to<br>86.03)    | 113.97<br>(79.93 to<br>162.99)  | 99.00<br>(73.09 to<br>134.75)   | 115.70<br>(79.89 to<br>167.60)  |
| Brain and nervous system cancer | 2,150.31<br>(1,597.23 to<br>2,738.66) | 2,530.43<br>(1,945.73 to<br>3,226.91) | 2,404.42<br>(1,852.13 to<br>3,059.95) | 2,505.05<br>(1,936.41 to<br>3,176.26) | 55.80<br>(44.23 to<br>69.30)    | 83.99<br>(67.56 to<br>104.86)   | 83.72<br>(65.94 to<br>105.04)   | 81.62<br>(65.84 to<br>101.29)   |
| Thyroid cancer                  | 397.83<br>(324.27 to<br>481.43)       | 480.17<br>(339.80 to<br>678.75)       | 391.59<br>(282.09 to<br>540.26)       | 512.56<br>(355.01 to<br>741.85)       | 18.71<br>(15.26 to<br>22.54)    | 24.53<br>(17.49 to<br>33.76)    | 20.78<br>(15.29 to<br>28.45)    | 25.63<br>(18.01 to<br>36.10)    |
| Mesothelioma                    | 133.27<br>(103.72 to<br>171.38)       | 199.73<br>(153.55 to<br>258.82)       | 205.88<br>(154.02 to<br>270.99)       | 195.10<br>(151.20 to<br>251.30)       | 5.46<br>(4.36 to<br>6.93)       | 9.07<br>(7.36 to<br>11.34)      | 9.79<br>(7.72 to<br>12.51)      | 8.71<br>(7.12 to<br>10.85)      |
| Hodgkin lymphoma                | 249.11<br>(156.13 to<br>324.53)       | 211.81<br>(131.18 to<br>288.76)       | 145.77<br>(90.67 to<br>201.40)        | 212.60<br>(130.36 to<br>291.26)       | 6.69<br>(4.36 to<br>8.50)       | 6.82<br>(4.50 to<br>8.89)       | 4.85<br>(3.23 to<br>6.42)       | 6.75<br>(4.46 to<br>8.79)       |
| Non-Hodgkin lymphoma            | 4,680.13<br>(3,657.65 to<br>5,696.45) | 5,987.67<br>(4,447.62 to<br>7,877.63) | 5,539.81<br>(4,099.42 to<br>7,259.12) | 6,111.87<br>(4,509.03 to<br>8,256.04) | 152.33<br>(119.58 to<br>182.53) | 226.57<br>(175.80 to<br>287.57) | 218.23<br>(171.11 to<br>273.35) | 227.50<br>(175.74 to<br>293.56) |
| Multiple myeloma                | 1,838.65<br>(1,255.12 to<br>2,302.83) | 2,492.81<br>(1,612.73 to<br>3,403.34) | 2,488.84<br>(1,663.78 to<br>3,335.54) | 2,538.34<br>(1,628.37 to<br>3,503.01) | 83.79<br>(59.28 to<br>104.01)   | 120.09<br>(81.88 to<br>157.15)  | 124.57<br>(87.01 to<br>162.23)  | 120.24<br>(79.76 to<br>159.57)  |
| Leukemia                        | 6,217.23<br>(4,194.48 to<br>7,629.91) | 5,928.58<br>(3,870.71 to<br>8,162.82) | 4,728.05<br>(3,122.89 to<br>6,252.12) | 6,323.37<br>(4,071.45 to<br>8,863.37) | 182.55<br>(124.29 to<br>219.49) | 229.77<br>(159.21 to<br>304.75) | 192.28<br>(136.22 to<br>247.09) | 240.55<br>(164.66 to<br>325.24) |
| Acute lymphoid leukemia         | 1,169.02<br>(830.29 to<br>1,590.39)   | 780.70<br>(524.89 to<br>1,078.75)     | 646.55<br>(441.14 to<br>875.82)       | 821.56<br>(547.43 to<br>1,141.42)     | 19.32<br>(14.09 to<br>24.98)    | 17.17<br>(11.97 to<br>23.49)    | 14.55<br>(10.51 to<br>19.54)    | 18.05<br>(12.48 to<br>25.16)    |
| Chronic lymphoid leukemia       | 203.92<br>(139.72 to<br>255.90)       | 178.58<br>(125.79 to<br>278.88)       | 178.58<br>(118.88 to<br>249.11)       | 203.31<br>(129.41 to<br>295.26)       | 11.50<br>(8.08 to<br>14.37)     | 11.44<br>(7.73 to<br>16.02)     | 11.11<br>(7.75 to<br>15.05)     | 11.73<br>(7.67 to<br>16.58)     |
| Acute myeloid leukemia          | 957.92<br>(634.30 to<br>1,218.60)     | 1,033.02<br>(635.66 to<br>1,467.86)   | 984.34<br>(618.60 to<br>1,374.59)     | 1,099.75<br>(663.89 to<br>1,600.01)   | 25.49<br>(16.86 to<br>31.67)    | 35.81<br>(23.15 to<br>49.98)    | 35.64<br>(24.27 to<br>48.31)    | 37.57<br>(23.67 to<br>53.05)    |

|                                               |                                                     |                                                     |                                                    |                                                      |                                                |                                                 |                                                |                                                  |
|-----------------------------------------------|-----------------------------------------------------|-----------------------------------------------------|----------------------------------------------------|------------------------------------------------------|------------------------------------------------|-------------------------------------------------|------------------------------------------------|--------------------------------------------------|
| Chronic myeloid leukemia                      | 361.88<br>(198.80 to<br>472.19)                     | 236.55<br>(124.81 to<br>376.32)                     | 162.15<br>(88.05 to<br>245.44)                     | 253.42<br>(131.90 to<br>411.46)                      | 12.64<br>(7.39 to<br>16.44)                    | 9.55<br>(5.57 to<br>14.53)                      | 6.85<br>(4.12 to<br>10.01)                     | 10.03<br>(5.70 to<br>15.63)                      |
| Other leukemia                                | 3,524.49<br>(2,242.88 to<br>4,361.08)               | 3,684.35<br>(2,311.78 to<br>5,143.09)               | 2,756.44<br>(1,784.96 to<br>3,677.10)              | 3,945.34<br>(2,459.94 to<br>5,563.86)                | 113.60<br>(74.99 to<br>137.69)                 | 155.81<br>(106.33 to<br>205.00)                 | 124.13<br>(86.97 to<br>157.55)                 | 163.16<br>(109.65 to<br>219.16)                  |
| Other neoplasms                               | 6,712.78<br>(5,474.82 to<br>8,017.58)               | 7,871.61<br>(6,393.47 to<br>9,580.72)               | 7,819.32<br>(6,292.38 to<br>9,573.94)              | 7,728.72<br>(6,299.89 to<br>9,368.24)                | 232.52<br>(193.24 to<br>276.71)                | 333.26<br>(280.84 to<br>390.67)                 | 351.04<br>(296.56 to<br>417.52)                | 320.30<br>(269.28 to<br>373.68)                  |
| <b>Cardiovascular diseases</b>                | <b>105,825.13<br/>(90,515.85 to<br/>121,020.42)</b> | <b>130,583.54<br/>(87,081.76 to<br/>217,674.08)</b> | <b>65,529.41<br/>(45,448.67 to<br/>111,503.72)</b> | <b>168,175.89<br/>(110,240.88 to<br/>268,538.38)</b> | <b>7,155.99<br/>(6,265.55 to<br/>8,082.73)</b> | <b>9,023.16<br/>(6,329.12 to<br/>15,344.10)</b> | <b>5,197.50<br/>(3,657.94 to<br/>9,296.52)</b> | <b>10,731.04<br/>(7,398.36 to<br/>17,157.53)</b> |
| Rheumatic heart disease                       | 1,937.11<br>(1,595.60 to<br>2,555.85)               | 1,110.06<br>(834.54 to<br>1,493.52)                 | 747.20<br>(562.10 to<br>1,009.73)                  | 1,119.15<br>(834.87 to<br>1,502.41)                  | 67.76<br>(56.94 to<br>81.02)                   | 53.81<br>(42.39 to<br>69.36)                    | 39.87<br>(31.31 to<br>49.85)                   | 52.51<br>(40.95 to<br>67.78)                     |
| Ischemic heart disease                        | 36,611.71<br>(31,062.52 to<br>42,421.89)            | 43,796.41<br>(22,416.85 to<br>89,442.98)            | 18,553.41<br>(9,479.98 to<br>40,115.82)            | 59,719.63<br>(30,306.92 to<br>119,227.89)            | 2,625.14<br>(2,291.25 to<br>2,985.34)          | 3,088.49<br>(1,599.19 to<br>6,837.12)           | 1,525.80<br>(767.76 to<br>3,476.68)            | 3,848.00<br>(1,980.42 to<br>8,347.88)            |
| Stroke                                        | 44,836.32<br>(38,058.50 to<br>51,936.15)            | 52,260.36<br>(29,276.53 to<br>108,868.18)           | 21,631.09<br>(12,367.24 to<br>53,246.92)           | 71,715.30<br>(39,341.74 to<br>145,662.74)            | 3,020.97<br>(2,599.36 to<br>3,462.24)          | 3,561.23<br>(2,064.59 to<br>8,864.89)           | 1,755.86<br>(995.99 to<br>4,466.91)            | 4,437.73<br>(2,572.41 to<br>10,097.25)           |
| Ischemic stroke                               | 18,011.40<br>(15,164.11 to<br>20,981.36)            | 21,007.97<br>(9,511.60 to<br>71,859.28)             | 10,397.04<br>(4,838.81 to<br>34,726.86)            | 26,856.23<br>(12,286.57 to<br>87,196.39)             | 1,460.15<br>(1,249.44 to<br>1,680.85)          | 1,681.92<br>(761.20 to<br>6,054.70)             | 955.66<br>(429.88 to<br>3,296.06)              | 1,984.43<br>(897.74 to<br>6,578.79)              |
| Intracerebral hemorrhage                      | 26,824.92<br>(22,569.82 to<br>31,217.30)            | 31,252.39<br>(17,010.30 to<br>60,683.34)            | 11,234.05<br>(6,609.24 to<br>20,454.75)            | 44,859.07<br>(23,116.17 to<br>88,247.69)             | 1,560.82<br>(1,330.08 to<br>1,808.17)          | 1,879.31<br>(1,080.83 to<br>3,528.23)           | 800.20<br>(477.01 to<br>1,457.82)              | 2,453.30<br>(1,386.43 to<br>4,697.14)            |
| Hypertensive heart disease                    | 8,162.95<br>(6,015.11 to<br>9,943.47)               | 13,636.76<br>(8,543.30 to<br>24,961.41)             | 8,921.13<br>(6,108.51 to<br>13,839.63)             | 15,424.58<br>(9,256.33 to<br>29,504.17)              | 610.12<br>(430.05 to<br>744.12)                | 1,043.57<br>(623.52 to<br>1,943.64)             | 742.00<br>(484.83 to<br>1,167.31)              | 1,135.57<br>(657.87 to<br>2,201.54)              |
| Cardiomyopathy and myocarditis                | 3,854.79<br>(3,111.19 to<br>5,037.71)               | 4,597.85<br>(3,234.11 to<br>6,680.56)               | 3,529.14<br>(2,488.74 to<br>5,146.23)              | 4,625.82<br>(3,240.27 to<br>6,713.77)                | 162.46<br>(130.46 to<br>218.12)                | 220.11<br>(158.36 to<br>310.12)                 | 182.90<br>(130.23 to<br>261.31)                | 215.68<br>(154.64 to<br>301.48)                  |
| Myocarditis                                   | 550.27<br>(405.01 to<br>804.68)                     | 533.99<br>(385.36 to<br>820.26)                     | 510.64<br>(368.23 to<br>790.14)                    | 522.62<br>(377.93 to<br>797.35)                      | 28.54<br>(19.91 to<br>45.34)                   | 33.03<br>(21.61 to<br>54.57)                    | 34.82<br>(23.50 to<br>56.17)                   | 31.30<br>(20.24 to<br>51.24)                     |
| <b>Jamaica</b>                                |                                                     |                                                     |                                                    |                                                      |                                                |                                                 |                                                |                                                  |
| Cause                                         | YLLs (actual counts)                                |                                                     |                                                    |                                                      | Deaths (actual counts)                         |                                                 |                                                |                                                  |
|                                               | 2016                                                | 2040 Forecast                                       | 2040 Better Scenario                               | 2040 Worse Scenario                                  | 2016                                           | 2040 Forecast                                   | 2040 Better Scenario                           | 2040 Worse Scenario                              |
| Alcoholic cardiomyopathy                      | 440.51<br>(312.93 to<br>637.87)                     | 514.77<br>(354.58 to<br>788.26)                     | 450.47<br>(308.17 to<br>690.68)                    | 549.79<br>(382.65 to<br>834.76)                      | 18.44<br>(13.52 to<br>26.53)                   | 22.48<br>(16.55 to<br>33.55)                    | 20.89<br>(15.02 to<br>32.08)                   | 23.42<br>(17.22 to<br>34.44)                     |
| Other cardiomyopathy                          | 2,864.01<br>(2,295.45 to<br>3,681.23)               | 3,549.08<br>(2,337.21 to<br>5,435.48)               | 2,568.03<br>(1,665.51 to<br>3,915.23)              | 3,553.41<br>(2,317.45 to<br>5,453.86)                | 115.48<br>(92.24 to<br>151.07)                 | 164.60<br>(112.04 to<br>239.74)                 | 127.19<br>(84.58 to<br>190.50)                 | 160.97<br>(109.30 to<br>233.09)                  |
| Atrial fibrillation and flutter               | 1,221.92<br>(915.14 to<br>1,565.64)                 | 1,888.34<br>(1,368.34 to<br>2,510.60)               | 1,787.21<br>(1,334.53 to<br>2,328.05)              | 1,899.13<br>(1,379.96 to<br>2,557.89)                | 133.39<br>(100.16 to<br>172.08)                | 189.90<br>(127.08 to<br>257.63)                 | 191.87<br>(136.03 to<br>254.75)                | 185.75<br>(123.14 to<br>256.64)                  |
| Aortic aneurysm                               | 1,368.28<br>(1,115.39 to<br>1,652.30)               | 1,564.72<br>(1,224.40 to<br>2,031.46)               | 1,408.76<br>(1,117.75 to<br>1,792.88)              | 1,601.51<br>(1,242.49 to<br>2,089.37)                | 83.53<br>(69.32 to<br>99.29)                   | 98.88<br>(79.17 to<br>123.16)                   | 96.79<br>(79.10 to<br>119.48)                  | 97.83<br>(78.09 to<br>121.45)                    |
| Peripheral artery disease                     | 868.60<br>(681.38 to<br>1,101.70)                   | 1,990.13<br>(1,396.07 to<br>2,738.59)               | 2,060.68<br>(1,470.45 to<br>2,819.98)              | 1,955.72<br>(1,364.07 to<br>2,692.02)                | 97.08<br>(76.09 to<br>121.81)                  | 203.11<br>(126.27 to<br>289.33)                 | 229.23<br>(150.82 to<br>321.50)                | 193.64<br>(119.98 to<br>277.21)                  |
| Endocarditis                                  | 1,444.80<br>(1,109.47 to<br>1,767.74)               | 1,885.18<br>(1,322.09 to<br>2,604.68)               | 1,682.94<br>(1,183.74 to<br>2,289.55)              | 1,890.65<br>(1,324.52 to<br>2,653.97)                | 62.92<br>(50.29 to<br>76.29)                   | 92.81<br>(66.02 to<br>127.24)                   | 89.00<br>(64.30 to<br>118.64)                  | 90.68<br>(64.44 to<br>125.34)                    |
| Other cardiovascular and circulatory diseases | 5,518.65<br>(4,056.61 to<br>6,889.56)               | 7,853.74<br>(5,608.10 to<br>10,634.63)              | 5,207.83<br>(3,693.02 to<br>6,900.64)              | 8,224.42<br>(5,737.26 to<br>11,317.45)               | 292.63<br>(207.51 to<br>358.32)                | 471.24<br>(329.98 to<br>615.50)                 | 344.19<br>(242.54 to<br>446.14)                | 473.65<br>(327.74 to<br>619.35)                  |
| <b>Chronic respiratory diseases</b>           | <b>13,402.98<br/>(11,120.61 to<br/>15,962.92)</b>   | <b>14,253.94<br/>(9,892.05 to<br/>20,470.24)</b>    | <b>8,319.98<br/>(6,221.68 to<br/>10,907.93)</b>    | <b>18,324.14<br/>(12,201.09 to<br/>26,967.12)</b>    | <b>786.14<br/>(670.37 to<br/>919.56)</b>       | <b>879.57<br/>(647.08 to<br/>1,217.82)</b>      | <b>558.77<br/>(437.32 to<br/>711.45)</b>       | <b>1,194.25<br/>(778.13 to<br/>1,573.13)</b>     |



|                                                                |                                                             |                                                             |                                                            |                                                             |                                                      |                                                      |                                                      |                                                      |
|----------------------------------------------------------------|-------------------------------------------------------------|-------------------------------------------------------------|------------------------------------------------------------|-------------------------------------------------------------|------------------------------------------------------|------------------------------------------------------|------------------------------------------------------|------------------------------------------------------|
| Chronic obstructive pulmonary disease                          | 9,194.02<br>(7,549.42 to<br>11,060.40)                      | 11,098.97<br>(7,076.51 to<br>16,895.69)                     | 5,675.75<br>(3,960.88 to<br>8,004.96)                      | 14,886.71<br>(9,200.57 to<br>23,057.02)                     | 614.83<br>(519.40 to<br>726.81)                      | 721.32<br>(500.94 to<br>1,033.53)                    | 412.81<br>(308.46 to<br>554.95)                      | 937.30<br>(630.24 to<br>1,379.55)                    |
| Pneumoconiosis                                                 | 32.56<br>(25.82 to<br>41.86)                                | 49.97<br>(36.80 to<br>70.72)                                | 44.58<br>(32.36 to<br>64.61)                               | 51.37<br>(37.55 to<br>73.04)                                | 2.12<br>(1.69 to<br>2.67)                            | 3.59<br>(2.47 to<br>5.20)                            | 3.36<br>(2.29 to<br>5.04)                            | 3.64<br>(2.44 to<br>5.35)                            |
| Silicosis                                                      | 3.78<br>(2.68 to<br>5.47)                                   | 6.59<br>(3.93 to<br>10.76)                                  | 4.68<br>(2.60 to<br>8.09)                                  | 6.50<br>(3.86 to<br>10.60)                                  | 0.26<br>(0.19 to<br>0.37)                            | 0.48<br>(0.27 to<br>0.82)                            | 0.36<br>(0.19 to<br>0.64)                            | 0.46<br>(0.26 to<br>0.79)                            |
| Asbestosis                                                     | 7.01<br>(5.20 to<br>9.86)                                   | 11.96<br>(8.25 to<br>18.19)                                 | 13.33<br>(9.24 to<br>20.11)                                | 11.71<br>(8.07 to<br>17.87)                                 | 0.32<br>(0.22 to<br>0.51)                            | 0.71<br>(0.45 to<br>1.20)                            | 0.85<br>(0.55 to<br>1.40)                            | 0.68<br>(0.43 to<br>1.15)                            |
| Coal workers pneumoconiosis                                    | 1.54<br>(1.06 to<br>2.81)                                   | 3.44<br>(1.98 to<br>6.24)                                   | 2.58<br>(1.38 to<br>4.90)                                  | 3.62<br>(2.10 to<br>6.48)                                   | 0.11<br>(0.07 to<br>0.17)                            | 0.26<br>(0.14 to<br>0.50)                            | 0.21<br>(0.11 to<br>0.43)                            | 0.27<br>(0.14 to<br>0.51)                            |
| Other pneumoconiosis                                           | 20.23<br>(15.62 to<br>26.07)                                | 27.97<br>(18.61 to<br>41.12)                                | 23.99<br>(15.40 to<br>36.66)                               | 29.55<br>(19.50 to<br>43.42)                                | 1.43<br>(1.12 to<br>1.80)                            | 2.14<br>(1.33 to<br>3.37)                            | 1.95<br>(1.17 to<br>3.15)                            | 2.23<br>(1.36 to<br>3.57)                            |
| Asthma                                                         | 2,694.28<br>(2,137.72 to<br>3,450.80)                       | 1,422.79<br>(902.47 to<br>2,170.09)                         | 798.38<br>(507.04 to<br>1,223.63)                          | 1,705.21<br>(1,042.60 to<br>2,662.23)                       | 101.08<br>(80.80 to<br>127.03)                       | 65.91<br>(43.21 to<br>100.93)                        | 40.31<br>(26.48 to<br>63.21)                         | 76.56<br>(48.51 to<br>121.60)                        |
| Interstitial lung disease and pulmonary sarcoidosis            | 584.72<br>(429.62 to<br>751.79)                             | 660.18<br>(487.92 to<br>844.41)                             | 902.58<br>(666.61 to<br>1,141.54)                          | 639.49<br>(470.45 to<br>815.35)                             | 26.71<br>(19.38 to<br>33.61)                         | 33.72<br>(24.70 to<br>41.66)                         | 48.79<br>(36.07 to<br>60.70)                         | 32.03<br>(23.54 to<br>39.85)                         |
| Other chronic respiratory diseases                             | 897.40<br>(628.94 to<br>1,315.20)                           | 1,022.03<br>(667.55 to<br>1,676.21)                         | 898.70<br>(607.02 to<br>1,409.59)                          | 1,041.36<br>(668.01 to<br>1,738.19)                         | 55.03<br>(29.35 to<br>65.06)                         | 55.03<br>(36.33 to<br>91.52)                         | 53.50<br>(36.81 to<br>86.63)                         | 54.72<br>(35.63 to<br>92.50)                         |
| <b>Cirrhosis and other chronic liver diseases</b>              | <b>5,981.76</b><br><b>(4,761.60 to</b><br><b>8,553.84)</b>  | <b>7,461.21</b><br><b>(5,784.62 to</b><br><b>11,073.28)</b> | <b>5,714.85</b><br><b>(4,379.14 to</b><br><b>8,503.96)</b> | <b>7,668.60</b><br><b>(5,927.53 to</b><br><b>11,252.77)</b> | <b>232.27</b><br><b>(187.31 to</b><br><b>318.02)</b> | <b>318.20</b><br><b>(262.94 to</b><br><b>440.67)</b> | <b>257.30</b><br><b>(211.06 to</b><br><b>351.13)</b> | <b>320.30</b><br><b>(265.35 to</b><br><b>440.79)</b> |
| Cirrhosis and other chronic liver diseases due to hepatitis B  | 678.70<br>(488.15 to<br>1,006.55)                           | 893.37<br>(638.63 to<br>1,351.49)                           | 750.07<br>(531.90 to<br>1,136.34)                          | 878.97<br>(631.28 to<br>1,329.47)                           | 28.43<br>(20.98 to<br>39.93)                         | 39.55<br>(29.64 to<br>55.70)                         | 34.58<br>(25.68 to<br>48.59)                         | 38.33<br>(28.72 to<br>54.25)                         |
| Cirrhosis and other chronic liver diseases due to hepatitis C  | 1,919.53<br>(1,457.10 to<br>2,796.09)                       | 2,556.04<br>(1,887.97 to<br>3,791.70)                       | 2,106.88<br>(1,535.99 to<br>3,179.92)                      | 2,522.49<br>(1,875.94 to<br>3,765.51)                       | 75.04<br>(58.80 to<br>103.85)                        | 106.10<br>(84.52 to<br>149.01)                       | 90.75<br>(71.35 to<br>128.24)                        | 103.25<br>(82.80 to<br>144.26)                       |
| Cirrhosis and other chronic liver diseases due to alcohol use  | 2,061.87<br>(1,583.79 to<br>3,090.58)                       | 2,806.42<br>(2,107.25 to<br>4,261.03)                       | 1,883.49<br>(1,405.24 to<br>2,778.57)                      | 3,068.26<br>(2,319.19 to<br>4,706.17)                       | 88.13<br>(69.67 to<br>120.91)                        | 124.24<br>(99.79 to<br>172.59)                       | 90.40<br>(72.84 to<br>123.13)                        | 131.76<br>(105.53 to<br>181.99)                      |
| Cirrhosis and other chronic liver diseases due to other causes | 1,321.66<br>(1,060.80 to<br>1,684.22)                       | 1,205.37<br>(935.47 to<br>1,615.05)                         | 974.41<br>(749.24 to<br>1,321.46)                          | 1,198.89<br>(934.68 to<br>1,607.43)                         | 40.67<br>(33.22 to<br>51.25)                         | 48.32<br>(39.36 to<br>60.69)                         | 41.57<br>(33.67 to<br>52.56)                         | 46.96<br>(38.14 to<br>58.97)                         |
| <b>Digestive diseases</b>                                      | <b>8,691.55</b><br><b>(6,777.15 to</b><br><b>12,846.63)</b> | <b>8,420.32</b><br><b>(6,465.89 to</b><br><b>12,649.78)</b> | <b>6,533.73</b><br><b>(5,008.51 to</b><br><b>9,843.98)</b> | <b>8,601.50</b><br><b>(6,579.88 to</b><br><b>12,768.35)</b> | <b>384.47</b><br><b>(304.30 to</b><br><b>572.89)</b> | <b>442.51</b><br><b>(342.49 to</b><br><b>636.18)</b> | <b>371.46</b><br><b>(291.20 to</b><br><b>537.01)</b> | <b>439.29</b><br><b>(336.18 to</b><br><b>628.66)</b> |
| Peptic ulcer disease                                           | 2,370.90<br>(1,841.95 to<br>3,458.47)                       | 1,840.73<br>(1,407.11 to<br>2,651.01)                       | 1,141.96<br>(849.12 to<br>1,658.44)                        | 1,897.90<br>(1,427.84 to<br>2,716.79)                       | 115.02<br>(91.61 to<br>164.64)                       | 99.44<br>(78.06 to<br>135.09)                        | 65.39<br>(50.46 to<br>90.23)                         | 100.06<br>(78.58 to<br>137.52)                       |
| <b>Jamaica</b>                                                 |                                                             |                                                             |                                                            |                                                             |                                                      |                                                      |                                                      |                                                      |
| Cause                                                          | YLLs (actual counts)                                        |                                                             |                                                            |                                                             | Deaths (actual counts)                               |                                                      |                                                      |                                                      |
|                                                                | 2016                                                        | 2040 Forecast                                               | 2040 Better Scenario                                       | 2040 Worse Scenario                                         | 2016                                                 | 2040 Forecast                                        | 2040 Better Scenario                                 | 2040 Worse Scenario                                  |
| Gastritis and duodenitis                                       | 214.49<br>(158.95 to<br>321.94)                             | 276.56<br>(210.21 to<br>395.10)                             | 221.78<br>(166.00 to<br>323.15)                            | 268.27<br>(202.80 to<br>379.36)                             | 15.12<br>(11.64 to<br>21.71)                         | 20.12<br>(14.24 to<br>28.59)                         | 17.37<br>(12.65 to<br>24.40)                         | 19.05<br>(13.42 to<br>26.98)                         |
| Appendicitis                                                   | 536.04<br>(389.76 to<br>908.63)                             | 430.74<br>(304.69 to<br>706.38)                             | 283.25<br>(194.71 to<br>478.08)                            | 432.45<br>(305.96 to<br>700.94)                             | 15.33<br>(11.36 to<br>25.43)                         | 16.16<br>(12.03 to<br>27.19)                         | 11.38<br>(8.42 to<br>19.40)                          | 15.83<br>(11.89 to<br>26.54)                         |
| Paralytic ileus and intestinal obstruction                     | 2,128.90<br>(1,569.51 to<br>3,353.98)                       | 1,923.43<br>(1,437.14 to<br>3,155.30)                       | 1,821.68<br>(1,351.85 to<br>3,011.70)                      | 1,894.86<br>(1,420.75 to<br>3,098.05)                       | 77.37<br>(56.31 to<br>130.54)                        | 96.65<br>(70.79 to<br>167.26)                        | 99.33<br>(73.08 to<br>168.30)                        | 92.44<br>(67.79 to<br>158.94)                        |
| Inguinal, femoral, and abdominal hernia                        | 396.02<br>(276.37 to<br>589.89)                             | 284.61<br>(200.48 to<br>423.57)                             | 222.46<br>(154.60 to<br>339.60)                            | 281.04<br>(195.82 to<br>420.54)                             | 16.87<br>(12.23 to<br>26.69)                         | 13.96<br>(10.33 to<br>22.13)                         | 11.79<br>(8.66 to<br>19.06)                          | 13.45<br>(9.97 to<br>21.28)                          |

|                                         |                                                               |                                                               |                                                               |                                                               |                                                          |                                                            |                                                            |                                                            |
|-----------------------------------------|---------------------------------------------------------------|---------------------------------------------------------------|---------------------------------------------------------------|---------------------------------------------------------------|----------------------------------------------------------|------------------------------------------------------------|------------------------------------------------------------|------------------------------------------------------------|
| Inflammatory bowel disease              | 571.09<br>(443.60 to<br>735.96)                               | 455.67<br>(348.04 to<br>620.52)                               | 437.35<br>(329.96 to<br>606.24)                               | 448.13<br>(341.44 to<br>605.01)                               | 19.63<br>(15.79 to<br>26.73)                             | 20.18<br>(15.68 to<br>28.35)                               | 20.99<br>(16.12 to<br>29.64)                               | 19.31<br>(15.08 to<br>27.04)                               |
| Vascular intestinal disorders           | 357.33<br>(281.47 to<br>454.72)                               | 496.44<br>(395.37 to<br>619.76)                               | 447.24<br>(352.13 to<br>565.69)                               | 481.70<br>(385.87 to<br>595.18)                               | 21.58<br>(17.09 to<br>27.33)                             | 31.44<br>(25.29 to<br>39.04)                               | 29.97<br>(23.95 to<br>37.68)                               | 29.95<br>(23.86 to<br>37.09)                               |
| Gallbladder and biliary diseases        | 461.01<br>(324.10 to<br>860.03)                               | 612.87<br>(312.84 to<br>1,317.84)                             | 398.58<br>(207.63 to<br>877.33)                               | 743.26<br>(371.61 to<br>1,615.38)                             | 23.28<br>(16.24 to<br>43.22)                             | 34.02<br>(18.19 to<br>73.56)                               | 23.87<br>(13.08 to<br>49.20)                               | 39.79<br>(20.28 to<br>85.25)                               |
| Pancreatitis                            | 560.90<br>(401.50 to<br>944.06)                               | 855.69<br>(371.44 to<br>1,843.02)                             | 508.94<br>(247.89 to<br>1,026.52)                             | 935.59<br>(400.83 to<br>2,014.71)                             | 19.90<br>(14.77 to<br>30.56)                             | 33.10<br>(17.18 to<br>66.45)                               | 21.28<br>(12.11 to<br>39.48)                               | 35.26<br>(17.46 to<br>72.80)                               |
| Other digestive diseases                | 1,094.86<br>(820.31 to<br>1,684.32)                           | 1,243.58<br>(951.12 to<br>1,819.17)                           | 1,050.47<br>(800.05 to<br>1,531.28)                           | 1,218.30<br>(940.43 to<br>1,772.00)                           | 60.38<br>(45.97 to<br>88.31)                             | 77.44<br>(58.50 to<br>108.12)                              | 70.09<br>(54.41 to<br>97.70)                               | 74.16<br>(55.78 to<br>102.86)                              |
| <b>Neurological disorders</b>           | <b>12,715.00</b><br><b>(10,608.40 to</b><br><b>15,203.28)</b> | <b>18,632.42</b><br><b>(14,395.24 to</b><br><b>24,966.21)</b> | <b>18,748.48</b><br><b>(15,017.95 to</b><br><b>24,250.53)</b> | <b>19,130.39</b><br><b>(14,463.11 to</b><br><b>26,068.52)</b> | <b>1,122.11</b><br><b>(931.16 to</b><br><b>1,355.07)</b> | <b>1,621.97</b><br><b>(1,112.52 to</b><br><b>2,230.44)</b> | <b>1,774.01</b><br><b>(1,340.91 to</b><br><b>2,317.68)</b> | <b>1,628.44</b><br><b>(1,083.49 to</b><br><b>2,314.31)</b> |
| Alzheimer's disease and other dementias | 8,261.75<br>(6,644.36 to<br>10,295.76)                        | 13,043.46<br>(8,969.44 to<br>19,048.58)                       | 13,476.84<br>(9,881.18 to<br>18,610.00)                       | 13,483.60<br>(8,926.85 to<br>20,255.93)                       | 950.81<br>(773.04 to<br>1,165.87)                        | 1,359.61<br>(857.23 to<br>1,942.40)                        | 1,486.98<br>(1,057.69 to<br>2,018.95)                      | 1,373.93<br>(816.83 to<br>2,055.94)                        |
| Parkinson's disease                     | 896.52<br>(655.02 to<br>1,188.05)                             | 1,570.05<br>(1,150.08 to<br>2,028.80)                         | 1,950.86<br>(1,452.96 to<br>2,499.72)                         | 1,472.94<br>(1,068.22 to<br>1,928.35)                         | 80.73<br>(60.21 to<br>106.63)                            | 133.84<br>(97.06 to<br>177.40)                             | 172.89<br>(128.35 to<br>224.05)                            | 124.05<br>(86.09 to<br>165.09)                             |
| Epilepsy                                | 2,136.73<br>(1,684.18 to<br>2,768.81)                         | 2,523.69<br>(1,652.30 to<br>3,994.30)                         | 1,768.01<br>(1,187.07 to<br>2,705.13)                         | 2,696.48<br>(1,737.81 to<br>4,281.02)                         | 51.94<br>(42.21 to<br>65.70)                             | 76.49<br>(52.68 to<br>113.87)                              | 57.37<br>(40.71 to<br>81.73)                               | 80.00<br>(54.46 to<br>119.73)                              |
| Multiple sclerosis                      | 120.94<br>(91.16 to<br>180.73)                                | 139.98<br>(99.82 to<br>215.21)                                | 145.85<br>(103.61 to<br>228.55)                               | 140.89<br>(99.92 to<br>216.35)                                | 3.63<br>(2.82 to<br>5.30)                                | 4.59<br>(3.46 to<br>6.67)                                  | 4.89<br>(3.68 to<br>7.25)                                  | 4.58<br>(3.43 to<br>6.65)                                  |
| Motor neuron disease                    | 404.40<br>(295.70 to<br>545.30)                               | 455.73<br>(341.01 to<br>591.86)                               | 473.87<br>(352.71 to<br>620.69)                               | 446.92<br>(335.64 to<br>575.11)                               | 11.36<br>(8.83 to<br>13.79)                              | 16.66<br>(13.05 to<br>20.62)                               | 17.80<br>(13.72 to<br>22.31)                               | 16.14<br>(12.60 to<br>19.86)                               |
| Other neurological disorders            | 894.65<br>(703.16 to<br>1,116.47)                             | 899.52<br>(713.55 to<br>1,108.47)                             | 923.05<br>(741.23 to<br>1,150.97)                             | 889.55<br>(711.40 to<br>1,087.89)                             | 23.65<br>(19.64 to<br>28.06)                             | 30.78<br>(25.97 to<br>36.00)                               | 34.07<br>(28.75 to<br>40.37)                               | 29.74<br>(25.11 to<br>34.60)                               |
| <b>Mental disorders</b>                 | <b>797.10</b><br><b>(609.95 to</b><br><b>1,091.59)</b>        | <b>1,182.02</b><br><b>(866.77 to</b><br><b>1,686.49)</b>      | <b>1,316.52</b><br><b>(948.32 to</b><br><b>1,889.88)</b>      | <b>1,179.41</b><br><b>(864.81 to</b><br><b>1,684.46)</b>      | <b>24.71</b><br><b>(19.66 to</b><br><b>32.44)</b>        | <b>41.76</b><br><b>(33.35 to</b><br><b>55.19)</b>          | <b>49.48</b><br><b>(39.60 to</b><br><b>65.24)</b>          | <b>40.89</b><br><b>(32.65 to</b><br><b>54.56)</b>          |
| Alcohol use disorders                   | 405.60<br>(292.85 to<br>567.17)                               | 412.98<br>(275.77 to<br>611.55)                               | 406.60<br>(266.11 to<br>611.54)                               | 422.44<br>(283.84 to<br>621.88)                               | 12.48<br>(9.09 to<br>17.25)                              | 14.21<br>(9.87 to<br>19.75)                                | 14.57<br>(9.94 to<br>20.79)                                | 14.32<br>(9.93 to<br>20.06)                                |
| Drug use disorders                      | 381.06<br>(272.57 to<br>591.53)                               | 756.23<br>(536.92 to<br>1,136.16)                             | 895.93<br>(628.76 to<br>1,344.33)                             | 744.17<br>(530.22 to<br>1,122.38)                             | 12.04<br>(9.24 to<br>17.07)                              | 27.30<br>(21.36 to<br>36.72)                               | 34.63<br>(26.94 to<br>46.63)                               | 26.32<br>(20.63 to<br>35.40)                               |
| Opioid use disorders                    | 229.95<br>(159.79 to<br>388.05)                               | 387.09<br>(259.26 to<br>630.03)                               | 410.82<br>(274.57 to<br>677.86)                               | 382.05<br>(255.64 to<br>620.02)                               | 6.47<br>(4.70 to<br>10.25)                               | 12.61<br>(9.27 to<br>18.96)                                | 14.11<br>(10.39 to<br>21.55)                               | 12.23<br>(9.03 to<br>18.50)                                |
| Cocaine use disorders                   | 21.26<br>(13.10 to<br>38.87)                                  | 57.96<br>(32.90 to<br>113.65)                                 | 66.47<br>(37.78 to<br>128.75)                                 | 57.62<br>(32.73 to<br>112.90)                                 | 0.54<br>(0.34 to<br>1.00)                                | 1.67<br>(1.00 to<br>3.15)                                  | 1.96<br>(1.17 to<br>3.88)                                  | 1.64<br>(0.99 to<br>3.08)                                  |
| Amphetamine use disorders               | 10.75<br>(7.07 to<br>16.37)                                   | 40.60<br>(25.02 to<br>63.73)                                  | 51.14<br>(31.00 to<br>80.07)                                  | 40.46<br>(25.00 to<br>62.63)                                  | 0.28<br>(0.19 to<br>0.41)                                | 1.16<br>(0.76 to<br>1.72)                                  | 1.51<br>(0.97 to<br>2.30)                                  | 1.15<br>(0.76 to<br>1.70)                                  |
| Other drug use disorders                | 119.10<br>(86.02 to<br>176.14)                                | 270.58<br>(193.06 to<br>390.58)                               | 367.49<br>(259.74 to<br>527.56)                               | 264.04<br>(188.72 to<br>379.83)                               | 4.75<br>(3.67 to<br>6.30)                                | 11.86<br>(9.08 to<br>15.23)                                | 17.06<br>(12.84 to<br>22.51)                               | 11.30<br>(8.71 to<br>14.59)                                |
| Eating disorders                        | 10.44<br>(7.16 to<br>16.82)                                   | 12.81<br>(7.95 to<br>20.50)                                   | 13.99<br>(8.50 to<br>23.33)                                   | 12.80<br>(7.97 to<br>20.57)                                   | 0.19<br>(0.13 to<br>0.32)                                | 0.25<br>(0.15 to<br>0.41)                                  | 0.28<br>(0.16 to<br>0.47)                                  | 0.25<br>(0.15 to<br>0.41)                                  |
| <b>Jamaica</b>                          |                                                               |                                                               |                                                               |                                                               |                                                          |                                                            |                                                            |                                                            |
| Cause                                   | YLLs (actual counts)                                          |                                                               |                                                               |                                                               | Deaths (actual counts)                                   |                                                            |                                                            |                                                            |
|                                         | 2016                                                          | 2040 Forecast                                                 | 2040 Better Scenario                                          | 2040 Worse Scenario                                           | 2016                                                     | 2040 Forecast                                              | 2040 Better Scenario                                       | 2040 Worse Scenario                                        |

|                                                            |                                          |                                            |                                           |                                            |                                       |                                        |                                       |                                        |
|------------------------------------------------------------|------------------------------------------|--------------------------------------------|-------------------------------------------|--------------------------------------------|---------------------------------------|----------------------------------------|---------------------------------------|----------------------------------------|
|                                                            | 72,964.03<br>(61,310.18 to<br>84,339.19) | 118,249.16<br>(74,612.73 to<br>201,110.46) | 76,315.90<br>(47,855.04 to<br>140,022.77) | 126,771.03<br>(78,789.09 to<br>208,602.83) | 4,137.82<br>(3,554.58 to<br>4,735.00) | 7,336.93<br>(4,773.29 to<br>11,834.27) | 5,075.25<br>(3,253.45 to<br>8,866.38) | 7,640.36<br>(4,888.27 to<br>11,952.18) |
| <b>Diabetes, urogenital, blood, and endocrine diseases</b> |                                          |                                            |                                           |                                            |                                       |                                        |                                       |                                        |
| Diabetes mellitus                                          | 45,482.34<br>(37,929.66 to<br>52,702.38) | 66,632.57<br>(48,620.27 to<br>88,541.06)   | 42,129.89<br>(31,002.25 to<br>55,835.88)  | 71,256.69<br>(51,630.96 to<br>95,611.03)   | 2,855.16<br>(2,432.79 to<br>3,300.49) | 4,356.47<br>(3,326.98 to<br>5,499.01)  | 2,941.75<br>(2,236.54 to<br>3,707.18) | 4,513.90<br>(3,401.89 to<br>5,770.35)  |
| Acute glomerulonephritis                                   | 17.44<br>(14.10 to<br>21.69)             | 15.99<br>(11.71 to<br>22.29)               | 12.04<br>(8.67 to<br>17.05)               | 16.27<br>(11.92 to<br>22.74)               | 0.32<br>(0.26 to<br>0.39)             | 0.33<br>(0.25 to<br>0.44)              | 0.25<br>(0.19 to<br>0.34)             | 0.33<br>(0.25 to<br>0.44)              |
| Chronic kidney disease                                     | 17,408.33<br>(14,203.87 to<br>22,640.90) | 40,393.38<br>(9,353.86 to<br>114,263.44)   | 24,525.98<br>(5,675.07 to<br>82,564.21)   | 44,497.15<br>(10,392.32 to<br>120,103.23)  | 854.43<br>(704.93 to<br>1,104.74)     | 2,348.19<br>(443.68 to<br>6,616.48)    | 1,540.29<br>(280.68 to<br>5,205.65)   | 2,524.46<br>(482.52 to<br>6,565.95)    |
| Chronic kidney disease due to diabetes mellitus            | 6,169.47<br>(4,725.43 to<br>8,064.81)    | 17,060.55<br>(3,477.81 to<br>49,709.93)    | 10,333.04<br>(2,174.08 to<br>35,659.15)   | 18,872.71<br>(3,919.25 to<br>51,807.26)    | 300.94<br>(232.75 to<br>399.54)       | 922.30<br>(158.51 to<br>2,660.01)      | 597.18<br>(104.10 to<br>1,983.79)     | 997.54<br>(178.14 to<br>2,653.32)      |
| Chronic kidney disease due to hypertension                 | 2,125.18<br>(1,667.55 to<br>2,852.30)    | 5,876.76<br>(1,070.00 to<br>17,653.24)     | 3,910.20<br>(679.57 to<br>13,774.48)      | 6,560.62<br>(1,187.55 to<br>17,446.19)     | 166.18<br>(130.83 to<br>219.90)       | 479.26<br>(79.69 to<br>1,387.25)       | 346.18<br>(57.07 to<br>1,171.55)      | 505.00<br>(84.96 to<br>1,354.53)       |
| Chronic kidney disease due to glomerulonephritis           | 5,183.37<br>(4,072.41 to<br>6,947.84)    | 9,569.44<br>(2,588.59 to<br>27,202.79)     | 5,542.55<br>(1,540.28 to<br>17,913.22)    | 10,583.16<br>(2,857.06 to<br>28,156.87)    | 209.46<br>(165.16 to<br>273.30)       | 495.14<br>(98.34 to<br>1,451.10)       | 305.04<br>(59.62 to<br>1,036.44)      | 536.58<br>(112.20 to<br>1,435.75)      |
| Chronic kidney disease due to other and unspecified causes | 3,930.31<br>(3,065.03 to<br>5,293.00)    | 7,886.63<br>(2,078.81 to<br>22,509.08)     | 4,740.19<br>(1,286.79 to<br>15,347.68)    | 8,680.66<br>(2,305.26 to<br>23,508.00)     | 177.85<br>(140.68 to<br>238.23)       | 451.50<br>(93.22 to<br>1,336.09)       | 291.89<br>(57.97 to<br>988.82)        | 485.34<br>(101.81 to<br>1,315.15)      |
| Urinary diseases and male infertility                      | 3,102.20<br>(2,596.94 to<br>3,648.67)    | 4,575.24<br>(3,772.49 to<br>5,406.38)      | 4,036.15<br>(3,258.87 to<br>4,841.52)     | 4,395.58<br>(3,615.01 to<br>5,220.05)      | 216.97<br>(184.57 to<br>255.71)       | 359.49<br>(260.48 to<br>440.27)        | 341.20<br>(265.28 to<br>411.09)       | 337.27<br>(238.72 to<br>416.82)        |
| Urinary tract infections                                   | 2,725.25<br>(2,244.39 to<br>3,233.21)    | 4,159.78<br>(3,400.33 to<br>4,963.26)      | 3,726.50<br>(3,024.52 to<br>4,493.06)     | 3,992.40<br>(3,271.13 to<br>4,767.45)      | 189.56<br>(157.89 to<br>224.66)       | 327.61<br>(237.87 to<br>401.19)        | 315.52<br>(245.49 to<br>382.99)       | 307.07<br>(219.33 to<br>379.95)        |
| Urolithiasis                                               | 46.11<br>(32.73 to<br>66.98)             | 54.69<br>(36.58 to<br>83.60)               | 42.01<br>(27.99 to<br>64.36)              | 53.36<br>(35.56 to<br>81.52)               | 2.33<br>(1.55 to<br>3.65)             | 2.96<br>(1.85 to<br>4.77)              | 2.44<br>(1.55 to<br>3.93)             | 2.82<br>(1.74 to<br>4.56)              |
| Other urinary diseases                                     | 330.84<br>(222.24 to<br>529.73)          | 360.77<br>(236.36 to<br>604.44)            | 267.64<br>(167.58 to<br>458.93)           | 349.82<br>(227.31 to<br>585.09)            | 25.09<br>(16.29 to<br>42.34)          | 28.92<br>(17.02 to<br>53.43)           | 23.24<br>(13.67 to<br>43.58)          | 27.37<br>(15.91 to<br>51.10)           |
| Gynecological diseases                                     | 157.00<br>(101.84 to<br>218.24)          | 95.22<br>(55.63 to<br>139.02)              | 57.68<br>(32.15 to<br>87.70)              | 95.98<br>(56.20 to<br>141.41)              | 4.90<br>(3.30 to<br>6.50)             | 3.34<br>(2.12 to<br>4.63)              | 2.15<br>(1.34 to<br>3.00)             | 3.31<br>(2.09 to<br>4.58)              |
| Uterine fibroids                                           | 113.31<br>(69.69 to<br>158.62)           | 66.50<br>(34.85 to<br>105.21)              | 41.29<br>(22.24 to<br>65.21)              | 67.09<br>(35.69 to<br>105.63)              | 3.82<br>(2.53 to<br>5.12)             | 2.40<br>(1.39 to<br>3.60)              | 1.55<br>(0.87 to<br>2.31)             | 2.38<br>(1.36 to<br>3.59)              |
| Polycystic ovarian syndrome                                | 3.62<br>(1.27 to<br>8.17)                | 1.56<br>(0.45 to<br>3.96)                  | 0.62<br>(0.17 to<br>1.74)                 | 1.60<br>(0.45 to<br>4.14)                  | 0.07<br>(0.03 to<br>0.15)             | 0.03<br>(0.01 to<br>0.08)              | 0.01<br>(0.00 to<br>0.03)             | 0.03<br>(0.01 to<br>0.08)              |
| Endometriosis                                              | 0.56<br>(0.26 to<br>1.34)                | 0.41<br>(0.14 to<br>1.12)                  | 0.23<br>(0.07 to<br>0.64)                 | 0.42<br>(0.14 to<br>1.16)                  | 0.01<br>(0.00 to<br>0.02)             | 0.01<br>(0.00 to<br>0.02)              | 0.00<br>(0.00 to<br>0.01)             | 0.01<br>(0.00 to<br>0.02)              |
| Genital prolapse                                           | 0.80<br>(0.45 to<br>1.56)                | 0.49<br>(0.23 to<br>0.95)                  | 0.28<br>(0.12 to<br>0.56)                 | 0.49<br>(0.22 to<br>0.97)                  | 0.04<br>(0.02 to<br>0.06)             | 0.03<br>(0.01 to<br>0.06)              | 0.02<br>(0.01 to<br>0.03)             | 0.03<br>(0.01 to<br>0.05)              |
| Other gynecological diseases                               | 38.71<br>(22.91 to<br>58.52)             | 26.26<br>(13.96 to<br>45.89)               | 15.26<br>(7.85 to<br>26.54)               | 26.39<br>(13.95 to<br>45.98)               | 0.97<br>(0.62 to<br>1.39)             | 0.88<br>(0.52 to<br>1.34)              | 0.56<br>(0.33 to<br>0.87)             | 0.86<br>(0.51 to<br>1.30)              |
| Hemoglobinopathies and hemolytic anemias                   | 3,063.22<br>(2,355.57 to<br>3,844.27)    | 2,950.00<br>(2,190.77 to<br>3,806.63)      | 2,098.08<br>(1,540.78 to<br>2,767.95)     | 2,950.92<br>(2,208.88 to<br>3,802.82)      | 80.92<br>(64.60 to<br>98.61)          | 106.95<br>(84.06 to<br>134.43)         | 80.03<br>(61.82 to<br>101.75)         | 104.85<br>(82.25 to<br>131.95)         |
| Thalassemias                                               | 37.46<br>(22.27 to<br>62.13)             | 7.46<br>(4.14 to<br>12.34)                 | 7.40<br>(4.09 to<br>12.38)                | 7.63<br>(4.24 to<br>12.85)                 | 0.46<br>(0.28 to<br>0.76)             | 0.09<br>(0.05 to<br>0.15)              | 0.09<br>(0.05 to<br>0.15)             | 0.10<br>(0.05 to<br>0.16)              |
| Sickle cell disorders                                      | 2,451.12<br>(1,851.23 to<br>3,120.12)    | 2,156.63<br>(1,538.60 to<br>2,897.65)      | 1,524.19<br>(1,066.60 to<br>2,081.36)     | 2,174.47<br>(1,553.09 to<br>2,879.83)      | 43.82<br>(33.04 to<br>55.05)          | 54.33<br>(39.22 to<br>71.37)           | 39.21<br>(27.97 to<br>52.29)          | 54.40<br>(39.38 to<br>70.67)           |
| G6PD deficiency                                            | 256.19<br>(187.09 to<br>338.19)          | 378.24<br>(266.46 to<br>524.30)            | 251.32<br>(173.56 to<br>357.74)           | 376.07<br>(266.07 to<br>523.80)            | 8.12<br>(5.93 to<br>10.75)            | 16.24<br>(11.98 to<br>22.21)           | 11.18<br>(8.02 to<br>15.59)           | 15.93<br>(11.68 to<br>22.08)           |

|                                                   |                                          |                                          |                                         |                                          |                                 |                                 |                                 |                                 |
|---------------------------------------------------|------------------------------------------|------------------------------------------|-----------------------------------------|------------------------------------------|---------------------------------|---------------------------------|---------------------------------|---------------------------------|
|                                                   | 318.46<br>(256.85 to<br>413.58)          | 407.68<br>(316.00 to<br>539.03)          | 315.18<br>(240.69 to<br>415.63)         | 392.75<br>(301.23 to<br>514.37)          | 28.51<br>(23.16 to<br>37.88)    | 36.28<br>(26.17 to<br>48.90)    | 29.55<br>(22.18 to<br>40.03)    | 34.42<br>(24.13 to<br>46.05)    |
| Other hemoglobinopathies and hemolytic anemias    | 3,733.49<br>(2,683.60 to<br>4,950.43)    | 3,586.77<br>(2,589.92 to<br>4,485.23)    | 3,456.08<br>(2,517.71 to<br>4,346.93)   | 3,558.44<br>(2,570.38 to<br>4,441.76)    | 125.11<br>(89.66 to<br>151.86)  | 162.16<br>(111.07 to<br>200.33) | 169.59<br>(117.12 to<br>210.53) | 156.25<br>(105.26 to<br>193.11) |
| Endocrine, metabolic, blood, and immune disorders | <b>Jamaica</b>                           |                                          |                                         |                                          |                                 |                                 |                                 |                                 |
| Cause                                             | YLLs (actual counts)                     |                                          |                                         |                                          | Deaths (actual counts)          |                                 |                                 |                                 |
|                                                   | 2016                                     | 2040 Forecast                            | 2040 Better Scenario                    | 2040 Worse Scenario                      | 2016                            | 2040 Forecast                   | 2040 Better Scenario            | 2040 Worse Scenario             |
| Musculoskeletal disorders                         | 3,113.65<br>(2,225.23 to<br>4,092.34)    | 4,313.24<br>(3,003.75 to<br>5,858.99)    | 4,060.16<br>(2,812.72 to<br>5,516.02)   | 4,259.83<br>(3,001.21 to<br>5,771.74)    | 78.39<br>(58.09 to<br>104.76)   | 134.51<br>(101.23 to<br>193.43) | 128.32<br>(96.36 to<br>183.03)  | 131.12<br>(98.46 to<br>186.00)  |
| Rheumatoid arthritis                              | 163.87<br>(115.85 to<br>231.79)          | 327.22<br>(221.94 to<br>487.04)          | 218.39<br>(144.93 to<br>316.66)         | 325.95<br>(223.38 to<br>488.03)          | 8.57<br>(5.78 to<br>12.25)      | 20.12<br>(12.90 to<br>30.30)    | 14.35<br>(8.91 to<br>20.47)     | 19.59<br>(12.68 to<br>29.95)    |
| Other musculoskeletal disorders                   | 2,949.78<br>(2,084.04 to<br>3,902.87)    | 3,986.01<br>(2,729.82 to<br>5,449.24)    | 3,841.77<br>(2,636.43 to<br>5,228.22)   | 3,933.88<br>(2,706.61 to<br>5,362.00)    | 69.82<br>(51.70 to<br>92.52)    | 114.39<br>(84.19 to<br>163.52)  | 113.97<br>(83.17 to<br>163.09)  | 111.52<br>(82.30 to<br>156.44)  |
| Other non-communicable diseases                   | 24,008.82<br>(14,255.05 to<br>37,829.76) | 15,320.27<br>(10,516.88 to<br>21,763.29) | 10,875.11<br>(7,500.86 to<br>15,285.69) | 15,584.44<br>(10,553.67 to<br>22,140.37) | 470.78<br>(318.86 to<br>654.38) | 572.34<br>(379.98 to<br>799.86) | 506.80<br>(329.43 to<br>733.28) | 549.73<br>(363.36 to<br>765.42) |
| Congenital birth defects                          | 20,394.14<br>(11,202.71 to<br>34,067.47) | 9,044.50<br>(5,076.61 to<br>14,789.06)   | 5,300.84<br>(2,838.06 to<br>9,056.95)   | 9,525.12<br>(5,247.15 to<br>15,549.10)   | 248.91<br>(139.89 to<br>408.28) | 118.92<br>(69.68 to<br>188.06)  | 71.18<br>(40.13 to<br>115.52)   | 124.57<br>(71.54 to<br>194.77)  |
| Neural tube defects                               | 563.73<br>(264.71 to<br>1,047.68)        | 103.78<br>(50.72 to<br>203.22)           | 50.45<br>(23.67 to<br>102.86)           | 111.34<br>(52.88 to<br>216.99)           | 6.67<br>(3.20 to<br>12.28)      | 1.34<br>(0.71 to<br>2.46)       | 0.66<br>(0.34 to<br>1.26)       | 1.43<br>(0.74 to<br>2.65)       |
| Congenital heart anomalies                        | 9,548.97<br>(5,190.02 to<br>15,918.27)   | 4,160.27<br>(2,333.81 to<br>6,790.78)    | 2,249.88<br>(1,250.23 to<br>3,788.50)   | 4,367.91<br>(2,444.80 to<br>7,151.53)    | 117.81<br>(66.45 to<br>192.23)  | 55.32<br>(32.80 to<br>86.82)    | 30.32<br>(17.93 to<br>48.50)    | 57.79<br>(33.75 to<br>91.37)    |
| Orofacial clefts                                  | 60.70<br>(23.00 to<br>135.37)            | 21.64<br>(7.25 to<br>55.76)              | 9.09<br>(3.00 to<br>24.07)              | 23.37<br>(7.83 to<br>59.28)              | 0.70<br>(0.27 to<br>1.57)       | 0.25<br>(0.08 to<br>0.65)       | 0.11<br>(0.03 to<br>0.28)       | 0.27<br>(0.09 to<br>0.69)       |
| Down syndrome                                     | 749.64<br>(263.12 to<br>1,386.51)        | 445.17<br>(193.67 to<br>736.27)          | 386.64<br>(167.92 to<br>635.90)         | 462.28<br>(195.56 to<br>778.94)          | 10.50<br>(4.16 to<br>18.16)     | 7.89<br>(3.76 to<br>11.96)      | 7.01<br>(3.46 to<br>10.59)      | 8.10<br>(3.87 to<br>12.38)      |
| Other chromosomal abnormalities                   | 1,074.25<br>(267.16 to<br>2,022.51)      | 707.10<br>(170.37 to<br>1,398.57)        | 484.50<br>(119.10 to<br>951.69)         | 752.23<br>(181.54 to<br>1,493.49)        | 8.48<br>(3.13 to<br>23.65)      | 12.59<br>(2.07 to<br>16.65)     | 5.85<br>(1.42 to<br>11.31)      | 9.00<br>(2.15 to<br>17.70)      |
| Congenital musculoskeletal and limb anomalies     | 247.42<br>(119.93 to<br>437.23)          | 159.19<br>(78.48 to<br>287.09)           | 96.14<br>(45.31 to<br>176.56)           | 168.24<br>(81.89 to<br>307.61)           | 2.94<br>(1.46 to<br>5.14)       | 1.96<br>(0.98 to<br>3.46)       | 1.19<br>(0.59 to<br>2.12)       | 2.07<br>(1.02 to<br>3.69)       |
| Urogenital congenital anomalies                   | 483.42<br>(252.85 to<br>839.68)          | 256.44<br>(146.46 to<br>421.88)          | 171.33<br>(97.77 to<br>295.16)          | 266.41<br>(150.52 to<br>440.04)          | 6.43<br>(3.62 to<br>10.64)      | 4.16<br>(2.59 to<br>6.22)       | 2.87<br>(1.79 to<br>4.35)       | 4.26<br>(2.65 to<br>6.42)       |
| Digestive congenital anomalies                    | 3,215.16<br>(158.73 to<br>5,956.72)      | 1,304.85<br>(334.81 to<br>2,419.64)      | 717.97<br>(179.43 to<br>1,389.67)       | 1,385.80<br>(350.18 to<br>2,564.03)      | 37.56<br>(8.92 to<br>69.47)     | 15.35<br>(4.01 to<br>28.36)     | 8.46<br>(2.14 to<br>16.31)      | 16.30<br>(4.16 to<br>30.00)     |
| Other congenital birth defects                    | 4,450.84<br>(2,423.89 to<br>7,485.41)    | 1,886.06<br>(1,020.60 to<br>3,195.70)    | 1,134.84<br>(611.17 to<br>1,921.76)     | 1,987.53<br>(1,074.53 to<br>3,380.17)    | 53.70<br>(29.93 to<br>89.73)    | 24.16<br>(13.83 to<br>39.64)    | 14.72<br>(8.39 to<br>24.11)     | 25.35<br>(14.45 to<br>41.81)    |
| Skin and subcutaneous diseases                    | 3,065.54<br>(2,009.50 to<br>4,992.27)    | 6,063.99<br>(4,042.90 to<br>9,454.31)    | 5,454.55<br>(3,647.45 to<br>8,447.58)   | 5,834.49<br>(3,889.21 to<br>9,144.60)    | 215.50<br>(133.57 to<br>332.02) | 450.97<br>(273.59 to<br>690.84) | 434.23<br>(265.86 to<br>656.71) | 422.55<br>(256.95 to<br>642.83) |
| Cellulitis                                        | 159.60<br>(96.23 to<br>378.80)           | 535.92<br>(315.95 to<br>1,102.46)        | 565.79<br>(329.59 to<br>1,135.22)       | 515.83<br>(304.39 to<br>1,051.99)        | 8.60<br>(4.42 to<br>16.33)      | 34.87<br>(17.74 to<br>62.97)    | 40.16<br>(20.52 to<br>72.47)    | 32.61<br>(16.75 to<br>60.21)    |
| Pyoderma                                          | 658.29<br>(364.90 to<br>1,083.91)        | 1,439.97<br>(771.43 to<br>2,294.12)      | 1,280.69<br>(665.52 to<br>1,976.18)     | 1,405.25<br>(753.04 to<br>2,253.54)      | 31.64<br>(14.40 to<br>49.47)    | 91.36<br>(42.42 to<br>145.60)   | 89.34<br>(40.83 to<br>140.60)   | 86.37<br>(40.36 to<br>137.50)   |
| Decubitus ulcer                                   | 2,195.60<br>(1,428.56 to<br>3,676.20)    | 3,997.54<br>(2,557.00 to<br>6,494.19)    | 3,526.07<br>(2,263.68 to<br>5,687.17)   | 3,824.35<br>(2,434.76 to<br>6,262.54)    | 173.49<br>(106.92 to<br>274.58) | 320.82<br>(189.74 to<br>513.18) | 300.76<br>(183.30 to<br>469.61) | 299.85<br>(175.18 to<br>484.20) |

|                                      |                                                               |                                                               |                                                               |                                                               |                                                            |                                                          |                                                        |                                                          |
|--------------------------------------|---------------------------------------------------------------|---------------------------------------------------------------|---------------------------------------------------------------|---------------------------------------------------------------|------------------------------------------------------------|----------------------------------------------------------|--------------------------------------------------------|----------------------------------------------------------|
| Other skin and subcutaneous diseases | 52.04<br>(30.97 to<br>115.51)                                 | 90.55<br>(55.47 to<br>194.03)                                 | 82.00<br>(51.34 to<br>171.27)                                 | 89.06<br>(54.49 to<br>190.62)                                 | 1.77<br>(1.05 to<br>3.58)                                  | 3.92<br>(2.37 to<br>7.50)                                | 3.96<br>(2.50 to<br>7.31)                              | 3.72<br>(2.26 to<br>7.12)                                |
| Sudden infant death syndrome         | 549.14<br>(243.60 to<br>1,088.37)                             | 211.78<br>(81.27 to<br>457.51)                                | 119.72<br>(47.23 to<br>253.52)                                | 224.84<br>(86.70 to<br>488.36)                                | 6.37<br>(2.83 to<br>12.63)                                 | 2.46<br>(0.94 to<br>5.31)                                | 1.39<br>(0.55 to<br>2.94)                              | 2.61<br>(1.01 to<br>5.67)                                |
| <b>Injuries</b>                      | <b>63,507.85</b><br><b>(49,719.39 to</b><br><b>78,257.28)</b> | <b>45,745.65</b><br><b>(30,815.82 to</b><br><b>71,394.17)</b> | <b>32,179.98</b><br><b>(21,326.96 to</b><br><b>49,121.89)</b> | <b>48,882.94</b><br><b>(32,958.02 to</b><br><b>76,635.37)</b> | <b>1,412.30</b><br><b>(1,104.56 to</b><br><b>1,723.63)</b> | <b>1,193.02</b><br><b>(869.55 to</b><br><b>1,696.56)</b> | <b>890.11</b><br><b>(649.33 to</b><br><b>1,245.53)</b> | <b>1,247.98</b><br><b>(901.29 to</b><br><b>1,799.93)</b> |
| <b>Transport injuries</b>            | <b>12,874.11</b><br><b>(10,259.92 to</b><br><b>16,074.90)</b> | <b>8,460.13</b><br><b>(5,064.83 to</b><br><b>15,151.56)</b>   | <b>4,245.16</b><br><b>(2,565.15 to</b><br><b>7,352.06)</b>    | <b>11,368.61</b><br><b>(6,752.76 to</b><br><b>20,999.22)</b>  | <b>294.64</b><br><b>(239.25 to</b><br><b>358.39)</b>       | <b>229.86</b><br><b>(149.60 to</b><br><b>375.08)</b>     | <b>128.22</b><br><b>(86.31 to</b><br><b>198.71)</b>    | <b>292.75</b><br><b>(186.64 to</b><br><b>490.02)</b>     |
| Road injuries                        | 12,079.74<br>(9,635.73 to<br>15,023.90)                       | 7,610.01<br>(4,495.32 to<br>13,732.37)                        | 3,703.42<br>(2,218.24 to<br>6,468.52)                         | 10,491.68<br>(6,161.36 to<br>19,601.68)                       | 273.45<br>(221.55 to<br>332.74)                            | 201.09<br>(130.44 to<br>331.78)                          | 108.51<br>(72.78 to<br>169.70)                         | 263.82<br>(167.11 to<br>448.86)                          |
| Pedestrian road injuries             | 2,876.32<br>(2,225.01 to<br>3,678.66)                         | 1,445.77<br>(980.55 to<br>2,223.34)                           | 623.48<br>(416.24 to<br>936.50)                               | 1,856.74<br>(1,191.83 to<br>2,865.02)                         | 77.90<br>(62.09 to<br>95.27)                               | 53.16<br>(36.69 to<br>76.81)                             | 26.14<br>(18.53 to<br>36.77)                           | 64.87<br>(44.23 to<br>95.02)                             |
| <b>Jamaica</b>                       |                                                               |                                                               |                                                               |                                                               |                                                            |                                                          |                                                        |                                                          |
| Cause                                | YLLs (actual counts)                                          |                                                               |                                                               |                                                               | Deaths (actual counts)                                     |                                                          |                                                        |                                                          |
|                                      | 2016                                                          | 2040 Forecast                                                 | 2040 Better Scenario                                          | 2040 Worse Scenario                                           | 2016                                                       | 2040 Forecast                                            | 2040 Better Scenario                                   | 2040 Worse Scenario                                      |
| Cyclist road injuries                | 863.43<br>(644.83 to<br>1,202.17)                             | 541.57<br>(295.02 to<br>1,007.06)                             | 289.78<br>(164.78 to<br>519.43)                               | 735.68<br>(394.48 to<br>1,380.85)                             | 19.83<br>(15.03 to<br>26.92)                               | 14.73<br>(8.59 to<br>25.96)                              | 9.24<br>(5.72 to<br>15.26)                             | 18.79<br>(10.68 to<br>33.64)                             |
| Motorcyclist road injuries           | 2,190.12<br>(1,600.10 to<br>3,069.49)                         | 1,736.85<br>(806.13 to<br>3,784.42)                           | 1,086.64<br>(526.21 to<br>2,205.05)                           | 2,162.25<br>(1,004.94 to<br>4,880.23)                         | 41.75<br>(30.51 to<br>57.32)                               | 35.70<br>(17.34 to<br>72.11)                             | 23.69<br>(12.30 to<br>46.39)                           | 43.42<br>(20.90 to<br>90.25)                             |
| Motor vehicle road injuries          | 6,101.72<br>(4,811.78 to<br>7,778.90)                         | 3,847.89<br>(2,228.16 to<br>7,159.29)                         | 1,683.05<br>(1,000.65 to<br>2,991.82)                         | 5,685.33<br>(3,269.23 to<br>10,748.75)                        | 132.60<br>(104.10 to<br>164.77)                            | 96.12<br>(60.28 to<br>165.08)                            | 48.51<br>(32.47 to<br>75.84)                           | 135.04<br>(83.20 to<br>236.39)                           |
| Other road injuries                  | 48.15<br>(36.03 to<br>61.47)                                  | 37.93<br>(24.88 to<br>57.73)                                  | 20.46<br>(13.64 to<br>30.27)                                  | 51.68<br>(33.85 to<br>78.69)                                  | 1.37<br>(1.02 to<br>1.67)                                  | 1.37<br>(0.90 to<br>2.00)                                | 0.93<br>(0.62 to<br>1.31)                              | 1.71<br>(1.12 to<br>2.50)                                |
| Other transport injuries             | 794.38<br>(597.69 to<br>1,256.66)                             | 850.12<br>(514.72 to<br>1,508.69)                             | 541.75<br>(328.75 to<br>937.17)                               | 876.93<br>(524.57 to<br>1,532.45)                             | 21.19<br>(16.26 to<br>33.54)                               | 28.77<br>(18.78 to<br>47.04)                             | 19.71<br>(13.07 to<br>32.03)                           | 28.93<br>(18.68 to<br>47.78)                             |
| <b>Unintentional injuries</b>        | <b>12,993.66</b><br><b>(10,052.31 to</b><br><b>15,938.52)</b> | <b>8,888.97</b><br><b>(6,502.30 to</b><br><b>12,171.25)</b>   | <b>6,861.63</b><br><b>(5,012.98 to</b><br><b>9,277.44)</b>    | <b>8,908.35</b><br><b>(6,478.59 to</b><br><b>12,254.15)</b>   | <b>366.60</b><br><b>(288.26 to</b><br><b>440.15)</b>       | <b>335.43</b><br><b>(258.82 to</b><br><b>419.28)</b>     | <b>286.78</b><br><b>(223.24 to</b><br><b>353.46)</b>   | <b>325.85</b><br><b>(247.87 to</b><br><b>410.30)</b>     |
| Falls                                | 1,543.80<br>(1,182.36 to<br>1,860.32)                         | 1,488.65<br>(1,112.75 to<br>1,855.55)                         | 1,300.51<br>(979.01 to<br>1,622.38)                           | 1,451.36<br>(1,071.90 to<br>1,811.51)                         | 76.20<br>(55.94 to<br>90.51)                               | 89.52<br>(65.36 to<br>108.11)                            | 83.72<br>(62.07 to<br>100.34)                          | 84.83<br>(61.27 to<br>102.80)                            |
| Drowning                             | 1,825.57<br>(1,410.89 to<br>2,410.19)                         | 1,142.06<br>(718.92 to<br>1,860.48)                           | 827.71<br>(532.23 to<br>1,312.30)                             | 1,170.48<br>(736.24 to<br>1,905.40)                           | 34.85<br>(27.52 to<br>44.61)                               | 26.88<br>(18.02 to<br>41.10)                             | 20.15<br>(13.72 to<br>30.35)                           | 27.24<br>(18.12 to<br>42.05)                             |
| Fire, heat, and hot substances       | 1,420.99<br>(1,041.71 to<br>1,831.71)                         | 858.02<br>(599.23 to<br>1,199.93)                             | 587.74<br>(409.62 to<br>819.75)                               | 867.88<br>(606.98 to<br>1,221.29)                             | 45.88<br>(33.06 to<br>55.41)                               | 38.90<br>(27.49 to<br>51.19)                             | 29.61<br>(20.95 to<br>38.31)                           | 37.98<br>(26.88 to<br>50.01)                             |
| Poisonings                           | 451.10<br>(337.73 to<br>577.52)                               | 190.61<br>(125.02 to<br>295.13)                               | 111.41<br>(73.42 to<br>172.94)                                | 197.41<br>(128.68 to<br>309.86)                               | 8.73<br>(6.83 to<br>11.03)                                 | 4.75<br>(3.35 to<br>7.03)                                | 2.94<br>(2.05 to<br>4.29)                              | 4.84<br>(3.35 to<br>7.20)                                |
| Exposure to mechanical forces        | 3,278.98<br>(1,727.46 to<br>4,518.02)                         | 1,983.60<br>(941.50 to<br>3,235.03)                           | 1,387.15<br>(657.79 to<br>2,276.13)                           | 2,007.34<br>(943.68 to<br>3,259.75)                           | 66.60<br>(36.02 to<br>90.80)                               | 45.88<br>(24.26 to<br>70.62)                             | 33.05<br>(17.67 to<br>51.04)                           | 45.99<br>(23.54 to<br>71.17)                             |
| Unintentional firearm injuries       | 2,455.50<br>(953.72 to<br>3,551.18)                           | 1,447.66<br>(488.43 to<br>2,516.55)                           | 1,011.54<br>(345.15 to<br>1,787.04)                           | 1,466.62<br>(489.29 to<br>2,546.60)                           | 48.72<br>(19.25 to<br>69.99)                               | 30.97<br>(11.18 to<br>52.17)                             | 21.95<br>(8.11 to<br>37.17)                            | 31.25<br>(11.03 to<br>52.81)                             |
| Unintentional suffocation            | 179.24<br>(116.10 to<br>271.17)                               | 81.02<br>(53.99 to<br>119.80)                                 | 56.93<br>(38.22 to<br>85.27)                                  | 83.74<br>(55.27 to<br>123.71)                                 | 2.55<br>(1.77 to<br>3.65)                                  | 1.37<br>(0.97 to<br>1.89)                                | 0.99<br>(0.70 to<br>1.38)                              | 1.39<br>(0.98 to<br>1.95)                                |
| Other exposure to mechanical forces  | 644.24<br>(504.07 to<br>818.90)                               | 454.92<br>(327.34 to<br>629.06)                               | 318.68<br>(226.34 to<br>447.11)                               | 456.98<br>(330.33 to<br>633.25)                               | 15.33<br>(12.19 to<br>18.93)                               | 13.55<br>(10.53 to<br>17.28)                             | 10.11<br>(7.80 to<br>13.02)                            | 13.34<br>(10.36 to<br>17.06)                             |

|                                                                                     |                                                               |                                                               |                                                               |                                                               |                                                      |                                                      |                                                      |                                                      |
|-------------------------------------------------------------------------------------|---------------------------------------------------------------|---------------------------------------------------------------|---------------------------------------------------------------|---------------------------------------------------------------|------------------------------------------------------|------------------------------------------------------|------------------------------------------------------|------------------------------------------------------|
| Adverse effects of medical treatment                                                | 2,413.01<br>(1,432.77 to<br>3,196.04)                         | 1,752.80<br>(1,087.68 to<br>2,432.25)                         | 1,456.92<br>(911.84 to<br>2,026.28)                           | 1,740.78<br>(1,071.52 to<br>2,402.48)                         | 83.86<br>(52.72 to<br>105.69)                        | 80.26<br>(52.06 to<br>104.27)                        | 72.70<br>(47.37 to<br>94.15)                         | 77.24<br>(50.01 to<br>100.99)                        |
| Animal contact                                                                      | 136.10<br>(92.34 to<br>173.98)                                | 128.45<br>(84.33 to<br>183.32)                                | 91.91<br>(59.86 to<br>130.49)                                 | 129.91<br>(84.47 to<br>183.52)                                | 3.31<br>(2.43 to<br>4.05)                            | 3.98<br>(2.85 to<br>5.11)                            | 3.06<br>(2.19 to<br>3.96)                            | 3.93<br>(2.78 to<br>5.04)                            |
| Venomous animal contact                                                             | 45.46<br>(31.36 to<br>60.02)                                  | 40.06<br>(26.65 to<br>58.06)                                  | 29.65<br>(20.06 to<br>43.05)                                  | 40.60<br>(26.60 to<br>59.09)                                  | 1.13<br>(0.81 to<br>1.44)                            | 1.25<br>(0.87 to<br>1.68)                            | 1.00<br>(0.71 to<br>1.35)                            | 1.23<br>(0.85 to<br>1.65)                            |
| Non-venomous animal contact                                                         | 90.64<br>(60.68 to<br>115.74)                                 | 88.40<br>(56.57 to<br>124.35)                                 | 62.26<br>(38.93 to<br>88.52)                                  | 89.31<br>(56.82 to<br>127.25)                                 | 2.18<br>(1.54 to<br>2.68)                            | 2.74<br>(1.87 to<br>3.52)                            | 2.07<br>(1.40 to<br>2.70)                            | 2.70<br>(1.85 to<br>3.51)                            |
| Foreign body                                                                        | 1,337.01<br>(968.57 to<br>1,969.23)                           | 903.18<br>(676.08 to<br>1,180.46)                             | 834.96<br>(627.10 to<br>1,089.51)                             | 898.31<br>(670.57 to<br>1,171.18)                             | 33.50<br>(25.57 to<br>41.82)                         | 32.56<br>(24.86 to<br>38.92)                         | 33.50<br>(25.61 to<br>39.95)                         | 31.27<br>(23.80 to<br>37.57)                         |
| Pulmonary aspiration and foreign body in airway                                     | 1,250.18<br>(889.15 to<br>1,833.82)                           | 821.24<br>(593.47 to<br>1,094.13)                             | 755.64<br>(554.99 to<br>991.70)                               | 816.64<br>(585.00 to<br>1,084.72)                             | 31.02<br>(23.03 to<br>38.88)                         | 29.54<br>(21.55 to<br>35.73)                         | 30.55<br>(22.32 to<br>36.65)                         | 28.33<br>(20.52 to<br>34.57)                         |
| Foreign body in other body part                                                     | 86.84<br>(65.34 to<br>128.54)                                 | 81.94<br>(58.81 to<br>124.67)                                 | 79.32<br>(56.89 to<br>121.57)                                 | 81.67<br>(59.32 to<br>121.46)                                 | 2.48<br>(1.90 to<br>3.80)                            | 3.03<br>(2.31 to<br>4.57)                            | 3.16<br>(2.39 to<br>4.85)                            | 2.94<br>(2.25 to<br>4.42)                            |
| Environmental heat and cold exposure                                                | 228.01<br>(139.46 to<br>309.72)                               | 195.19<br>(119.19 to<br>291.10)                               | 123.41<br>(74.84 to<br>186.75)                                | 197.61<br>(116.76 to<br>292.59)                               | 5.89<br>(4.00 to<br>8.09)                            | 6.09<br>(4.12 to<br>8.55)                            | 4.10<br>(2.82 to<br>5.91)                            | 6.04<br>(4.02 to<br>8.53)                            |
| Other unintentional injuries                                                        | 359.09<br>(271.58 to<br>560.66)                               | 246.41<br>(162.82 to<br>389.17)                               | 139.91<br>(87.82 to<br>227.62)                                | 247.28<br>(164.05 to<br>384.44)                               | 7.79<br>(6.07 to<br>11.13)                           | 6.60<br>(4.86 to<br>9.32)                            | 3.95<br>(2.75 to<br>5.86)                            | 6.50<br>(4.81 to<br>9.10)                            |
| <b>Self-harm and interpersonal violence</b>                                         | <b>37,527.78</b><br><b>(26,533.54 to</b><br><b>47,770.87)</b> | <b>28,245.47</b><br><b>(16,922.56 to</b><br><b>44,613.05)</b> | <b>20,923.63</b><br><b>(12,725.05 to</b><br><b>33,224.30)</b> | <b>28,454.71</b><br><b>(16,831.50 to</b><br><b>44,923.25)</b> | <b>749.09</b><br><b>(522.62 to</b><br><b>951.68)</b> | <b>624.05</b><br><b>(383.39 to</b><br><b>945.58)</b> | <b>471.31</b><br><b>(292.09 to</b><br><b>714.20)</b> | <b>625.73</b><br><b>(379.78 to</b><br><b>942.18)</b> |
| <b>Jamaica</b>                                                                      |                                                               |                                                               |                                                               |                                                               |                                                      |                                                      |                                                      |                                                      |
| Cause                                                                               | YLLs (actual counts)                                          |                                                               |                                                               |                                                               | Deaths (actual counts)                               |                                                      |                                                      |                                                      |
|                                                                                     | 2016                                                          | 2040 Forecast                                                 | 2040 Better Scenario                                          | 2040 Worse Scenario                                           | 2016                                                 | 2040 Forecast                                        | 2040 Better Scenario                                 | 2040 Worse Scenario                                  |
| Self-harm                                                                           | 3,764.72<br>(2,774.41 to<br>4,895.80)                         | 3,594.76<br>(1,819.58 to<br>6,555.07)                         | 2,610.28<br>(1,402.76 to<br>4,529.92)                         | 3,841.89<br>(1,905.71 to<br>7,055.76)                         | 84.59<br>(62.90 to<br>107.64)                        | 88.71<br>(48.95 to<br>149.56)                        | 66.75<br>(38.63 to<br>106.82)                        | 93.58<br>(50.47 to<br>159.86)                        |
| Self-harm by firearm                                                                | 500.60<br>(213.75 to<br>702.96)                               | 319.06<br>(92.56 to<br>688.68)                                | 209.06<br>(67.55 to<br>426.68)                                | 343.05<br>(97.87 to<br>746.01)                                | 11.51<br>(5.16 to<br>15.77)                          | 8.02<br>(2.58 to<br>15.77)                           | 5.46<br>(1.96 to<br>10.20)                           | 8.51<br>(2.66 to<br>16.94)                           |
| Self-harm by other specified means                                                  | 3,264.11<br>(2,439.38 to<br>4,265.95)                         | 3,275.70<br>(1,688.93 to<br>5,951.57)                         | 2,401.22<br>(1,317.29 to<br>4,204.02)                         | 3,498.83<br>(1,755.19 to<br>6,392.45)                         | 73.07<br>(54.98 to<br>93.77)                         | 80.69<br>(44.93 to<br>133.90)                        | 61.29<br>(35.96 to<br>98.04)                         | 85.08<br>(46.13 to<br>143.08)                        |
| Interpersonal violence                                                              | 33,763.06<br>(23,353.25 to<br>43,136.27)                      | 24,650.71<br>(14,694.24 to<br>38,797.16)                      | 18,313.35<br>(11,183.44 to<br>29,345.28)                      | 24,612.82<br>(14,294.00 to<br>38,584.05)                      | 664.51<br>(449.34 to<br>849.46)                      | 535.33<br>(320.74 to<br>793.29)                      | 404.56<br>(250.41 to<br>610.75)                      | 532.14<br>(312.83 to<br>792.22)                      |
| Physical violence by firearm                                                        | 34,623.27<br>(15,389.53 to<br>32,500.88)                      | 17,527.99<br>(9,810.51 to<br>28,836.41)                       | 12,729.38<br>(7,198.19 to<br>21,382.14)                       | 17,490.42<br>(9,572.42 to<br>28,599.83)                       | 473.23<br>(289.00 to<br>624.72)                      | 363.15<br>(201.07 to<br>568.51)                      | 266.12<br>(150.38 to<br>423.37)                      | 361.33<br>(197.73 to<br>566.94)                      |
| Physical violence by sharp object                                                   | 7,414.97<br>(4,696.11 to<br>11,210.38)                        | 5,876.42<br>(3,399.87 to<br>9,740.48)                         | 4,611.74<br>(2,731.41 to<br>7,541.17)                         | 5,838.51<br>(3,347.85 to<br>9,686.07)                         | 153.62<br>(94.29 to<br>234.27)                       | 138.15<br>(79.48 to<br>214.14)                       | 110.87<br>(67.15 to<br>172.42)                       | 136.22<br>(76.97 to<br>210.56)                       |
| Physical violence by other means                                                    | 1,724.83<br>(1,131.36 to<br>2,580.62)                         | 1,246.31<br>(672.00 to<br>2,032.98)                           | 972.23<br>(525.74 to<br>1,536.06)                             | 1,283.89<br>(667.92 to<br>2,110.07)                           | 37.66<br>(23.05 to<br>55.99)                         | 34.03<br>(17.89 to<br>53.65)                         | 27.57<br>(15.29 to<br>42.02)                         | 34.59<br>(17.57 to<br>55.64)                         |
| <b>Forces of nature, conflict and terrorism, and executions and police conflict</b> | <b>112.30</b><br><b>(27.02 to</b><br><b>236.66)</b>           | <b>151.09</b><br><b>(0.00 to</b><br><b>1,029.27)</b>          | <b>149.55</b><br><b>(0.00 to</b><br><b>1,022.09)</b>          | <b>151.28</b><br><b>(0.00 to</b><br><b>1,030.37)</b>          | <b>1.96</b><br><b>(0.47 to</b><br><b>3.93)</b>       | <b>3.69</b><br><b>(0.00 to</b><br><b>25.55)</b>      | <b>3.79</b><br><b>(0.00 to</b><br><b>26.38)</b>      | <b>3.65</b><br><b>(0.00 to</b><br><b>25.21)</b>      |
| Exposure to forces of nature                                                        | 0.00<br>(0.00 to<br>0.00)                                     | 144.95<br>(0.00 to<br>999.26)                                 | 143.51<br>(0.00 to<br>992.43)                                 | 145.13<br>(0.00 to<br>1,000.27)                               | 0.00<br>(0.00 to<br>0.00)                            | 3.56<br>(0.00 to<br>24.90)                           | 3.66<br>(0.00 to<br>25.72)                           | 3.52<br>(0.00 to<br>24.56)                           |
| Conflict and terrorism                                                              | 0.00<br>(0.00 to<br>0.00)                                     | 6.13<br>(0.00 to<br>91.40)                                    | 6.04<br>(0.00 to<br>90.27)                                    | 6.15<br>(0.00 to<br>91.64)                                    | 0.00<br>(0.00 to<br>0.00)                            | 0.13<br>(0.00 to<br>1.96)                            | 0.13<br>(0.00 to<br>2.00)                            | 0.13<br>(0.00 to<br>1.94)                            |

|                                                                          |                                             |                                             |                                             |                                             |                                          |                                          |                                          |                                          |
|--------------------------------------------------------------------------|---------------------------------------------|---------------------------------------------|---------------------------------------------|---------------------------------------------|------------------------------------------|------------------------------------------|------------------------------------------|------------------------------------------|
|                                                                          | 112.30<br>(27.02 to<br>236.66)              | 0.00<br>(0.00 to<br>0.00)                   | 0.00<br>(0.00 to<br>0.00)                   | 0.00<br>(0.00 to<br>0.00)                   | 1.96<br>(0.47 to<br>3.93)                | 0.00<br>(0.00 to<br>0.00)                | 0.00<br>(0.00 to<br>0.00)                | 0.00<br>(0.00 to<br>0.00)                |
| Executions and police conflict                                           |                                             |                                             |                                             |                                             |                                          |                                          |                                          |                                          |
| <b>Puerto Rico</b>                                                       |                                             |                                             |                                             |                                             |                                          |                                          |                                          |                                          |
| Cause                                                                    | YLLs (actual counts)                        |                                             |                                             |                                             | Deaths (actual counts)                   |                                          |                                          |                                          |
|                                                                          | 2016                                        | 2040 Forecast                               | 2040 Better Scenario                        | 2040 Worse Scenario                         | 2016                                     | 2040 Forecast                            | 2040 Better Scenario                     | 2040 Worse Scenario                      |
| <b>All causes</b>                                                        | 557,055.63<br>(513,905.85 to<br>604,836.52) | 518,277.68<br>(418,324.42 to<br>636,256.40) | 412,122.93<br>(338,654.94 to<br>505,622.09) | 622,419.18<br>(501,582.21 to<br>760,232.66) | 30,043.06<br>(27,869.29 to<br>32,473.48) | 35,477.45<br>(29,123.41 to<br>42,751.79) | 29,743.95<br>(24,122.79 to<br>36,284.43) | 40,118.73<br>(32,722.44 to<br>47,571.88) |
| <b>Communicable, maternal, neonatal, and nutritional diseases</b>        | 56,530.95<br>(51,908.72 to<br>62,027.98)    | 38,858.50<br>(29,455.83 to<br>52,144.35)    | 29,392.73<br>(23,178.28 to<br>38,086.21)    | 64,289.61<br>(45,315.88 to<br>90,184.35)    | 2,446.90<br>(2,199.88 to<br>2,715.96)    | 2,757.53<br>(2,118.97 to<br>3,617.10)    | 2,307.59<br>(1,800.21 to<br>2,940.46)    | 3,446.94<br>(2,600.75 to<br>4,505.85)    |
| <b>HIV/AIDS and tuberculosis</b>                                         | 11,892.33<br>(11,392.34 to<br>12,502.36)    | 524.69<br>(202.36 to<br>1,330.59)           | 124.33<br>(72.13 to<br>200.43)              | 21,194.01<br>(7,382.24 to<br>42,919.10)     | 501.99<br>(287.23 to<br>317.04)          | 23.36<br>(11.49 to<br>47.36)             | 7.99<br>(4.90 to<br>12.07)               | 546.10<br>(195.69 to<br>1,087.61)        |
| Tuberculosis                                                             | 489.49<br>(418.65 to<br>588.28)             | 281.42<br>(159.84 to<br>489.65)             | 120.72<br>(72.10 to<br>196.20)              | 347.91<br>(186.83 to<br>633.31)             | 22.97<br>(19.80 to<br>27.10)             | 16.58<br>(9.92 to<br>26.80)              | 7.78<br>(4.90 to<br>11.82)               | 19.62<br>(11.14 to<br>33.35)             |
| HIV/AIDS                                                                 | 11,402.83<br>(10,816.48 to<br>12,013.37)    | 243.28<br>(0.00 to<br>1,041.66)             | 3.61<br>(0.00 to<br>2.47)                   | 20,846.10<br>(7,021.97 to<br>42,708.37)     | 279.02<br>(264.94 to<br>293.14)          | 6.78<br>(0.00 to<br>31.05)               | 0.22<br>(0.00 to<br>0.04)                | 526.48<br>(176.76 to<br>1,067.08)        |
| <b>Diarrhea, lower respiratory, and other common infectious diseases</b> | 28,167.60<br>(24,968.39 to<br>31,846.45)    | 30,422.10<br>(21,913.43 to<br>43,705.49)    | 22,515.68<br>(16,778.45 to<br>30,507.27)    | 34,602.99<br>(24,226.60 to<br>51,306.39)    | 1,824.60<br>(1,593.57 to<br>2,090.68)    | 2,443.90<br>(1,819.02 to<br>3,284.33)    | 1,995.98<br>(1,513.56 to<br>2,614.41)    | 2,615.86<br>(1,935.15 to<br>3,591.36)    |
| <b>Diarrheal diseases</b>                                                | 1,460.96<br>(1,282.00 to<br>1,665.90)       | 2,584.85<br>(832.66 to<br>6,745.27)         | 3,062.76<br>(1,344.75 to<br>6,589.67)       | 2,393.01<br>(743.09 to<br>6,796.08)         | 71.68<br>(63.73 to<br>80.65)             | 205.62<br>(64.89 to<br>547.55)           | 259.44<br>(110.64 to<br>569.40)          | 184.73<br>(57.87 to<br>309.31)           |
| <b>Intestinal infectious diseases</b>                                    | 18.05<br>(6.40 to<br>40.76)                 | 11.82<br>(4.04 to<br>27.96)                 | 12.73<br>(4.39 to<br>29.97)                 | 11.69<br>(4.05 to<br>27.52)                 | 0.53<br>(0.19 to<br>1.21)                | 0.51<br>(0.16 to<br>1.01)                | 0.51<br>(0.18 to<br>1.14)                | 0.43<br>(0.16 to<br>0.98)                |
| Typhoid fever                                                            | 10.81<br>(3.62 to<br>25.21)                 | 7.25<br>(2.36 to<br>16.49)                  | 9.41<br>(3.16 to<br>21.97)                  | 6.96<br>(2.24 to<br>15.96)                  | 0.31<br>(0.10 to<br>0.72)                | 0.28<br>(0.09 to<br>0.61)                | 0.37<br>(0.13 to<br>0.85)                | 0.26<br>(0.08 to<br>0.59)                |
| Paratyphoid fever                                                        | 6.91<br>(2.07 to<br>17.29)                  | 4.40<br>(1.28 to<br>11.35)                  | 3.18<br>(0.85 to<br>8.37)                   | 4.57<br>(1.31 to<br>11.61)                  | 0.20<br>(0.06 to<br>0.51)                | 0.16<br>(0.05 to<br>0.41)                | 0.12<br>(0.03 to<br>0.31)                | 0.16<br>(0.05 to<br>0.40)                |
| Other intestinal infectious diseases                                     | 0.32<br>(0.13 to<br>0.67)                   | 0.16<br>(0.06 to<br>0.35)                   | 0.14<br>(0.05 to<br>0.29)                   | 0.16<br>(0.06 to<br>0.34)                   | 0.01<br>(0.01 to<br>0.03)                | 0.01<br>(0.00 to<br>0.03)                | 0.01<br>(0.00 to<br>0.02)                | 0.01<br>(0.00 to<br>0.03)                |
| <b>Lower respiratory infections</b>                                      | 25,344.35<br>(22,311.94 to<br>28,642.57)    | 26,266.09<br>(18,442.64 to<br>38,131.54)    | 18,266.93<br>(13,384.21 to<br>25,184.51)    | 30,389.34<br>(20,650.85 to<br>46,390.08)    | 1,715.87<br>(1,483.45 to<br>1,989.67)    | 2,190.21<br>(1,617.75 to<br>2,946.86)    | 1,697.64<br>(1,266.20 to<br>2,225.18)    | 2,378.86<br>(1,727.88 to<br>3,242.58)    |
| Upper respiratory infections                                             | 8.14<br>(4.45 to<br>13.79)                  | 5.32<br>(2.06 to<br>11.37)                  | 2.86<br>(1.12 to<br>5.92)                   | 5.66<br>(2.05 to<br>11.47)                  | 0.30<br>(0.16 to<br>0.50)                | 0.28<br>(0.11 to<br>0.60)                | 0.16<br>(0.06 to<br>0.34)                | 0.29<br>(0.11 to<br>0.60)                |
| Otitis media                                                             | 2.31<br>(1.63 to<br>3.53)                   | 0.35<br>(0.21 to<br>0.62)                   | 0.37<br>(0.22 to<br>0.65)                   | 0.34<br>(0.20 to<br>0.60)                   | 0.10<br>(0.07 to<br>0.14)                | 0.02<br>(0.01 to<br>0.04)                | 0.03<br>(0.02 to<br>0.05)                | 0.02<br>(0.01 to<br>0.04)                |
| Meningitis                                                               | 696.78<br>(564.83 to<br>963.84)             | 266.17<br>(181.89 to<br>402.94)             | 186.64<br>(128.67 to<br>273.84)             | 318.24<br>(200.84 to<br>507.79)             | 19.29<br>(15.62 to<br>27.21)             | 10.29<br>(7.55 to<br>15.23)              | 7.76<br>(5.62 to<br>11.47)               | 10.89<br>(7.65 to<br>16.23)              |
| Pneumococcal meningitis                                                  | 35.34<br>(27.29 to<br>49.51)                | 17.89<br>(12.40 to<br>27.26)                | 17.74<br>(12.22 to<br>26.94)                | 18.83<br>(13.01 to<br>28.52)                | 1.10<br>(0.84 to<br>1.60)                | 0.81<br>(0.56 to<br>1.22)                | 0.84<br>(0.58 to<br>1.28)                | 0.82<br>(0.57 to<br>1.24)                |
| H influenzae type B meningitis                                           | 81.33<br>(63.83 to<br>113.09)               | 67.40<br>(34.48 to<br>121.57)               | 53.53<br>(31.23 to<br>86.03)                | 109.75<br>(43.70 to<br>234.56)              | 2.09<br>(1.64 to<br>3.04)                | 1.72<br>(1.17 to<br>2.68)                | 1.65<br>(1.16 to<br>2.47)                | 2.17<br>(1.25 to<br>3.70)                |
| Meningococcal meningitis                                                 | 220.94<br>(178.10 to<br>303.40)             | 67.01<br>(44.93 to<br>103.50)               | 43.98<br>(29.25 to<br>68.37)                | 70.04<br>(45.50 to<br>110.63)               | 6.16<br>(4.97 to<br>8.59)                | 2.93<br>(2.04 to<br>4.51)                | 2.06<br>(1.41 to<br>3.18)                | 2.97<br>(2.01 to<br>4.55)                |
| Other meningitis                                                         | 359.17<br>(287.72 to<br>497.31)             | 113.86<br>(76.67 to<br>182.70)              | 71.38<br>(47.86 to<br>111.27)               | 119.62<br>(76.94 to<br>190.72)              | 9.93<br>(7.95 to<br>14.07)               | 4.82<br>(3.35 to<br>7.42)                | 3.21<br>(2.22 to<br>4.87)                | 4.92<br>(3.32 to<br>7.60)                |

|                                                |                                          |                                            |                                            |                                            |                                    |                                     |                                     |                                     |
|------------------------------------------------|------------------------------------------|--------------------------------------------|--------------------------------------------|--------------------------------------------|------------------------------------|-------------------------------------|-------------------------------------|-------------------------------------|
| Encephalitis                                   | 539.89<br>(284.44 to<br>1,115.92)        | 411.03<br>(219.68 to<br>837.97)            | 382.39<br>(207.07 to<br>778.41)            | 412.30<br>(217.87 to<br>851.20)            | 13.11<br>(7.71 to<br>25.70)        | 15.66<br>(9.78 to<br>29.73)         | 15.40<br>(9.63 to<br>28.48)         | 15.33<br>(9.39 to<br>28.95)         |
| Diphtheria                                     | 1.56<br>(0.99 to<br>2.30)                | 0.28<br>(0.15 to<br>0.48)                  | 0.25<br>(0.13 to<br>0.44)                  | 0.35<br>(0.17 to<br>0.62)                  | 0.03<br>(0.02 to<br>0.05)          | 0.01<br>(0.00 to<br>0.01)           | 0.01<br>(0.00 to<br>0.01)           | 0.01<br>(0.00 to<br>0.01)           |
| Whooping cough                                 | 22.20<br>(4.32 to<br>42.73)              | 3.20<br>(0.25 to<br>9.51)                  | 1.24<br>(0.17 to<br>2.80)                  | 7.15<br>(0.28 to<br>21.78)                 | 0.29<br>(0.06 to<br>0.54)          | 0.04<br>(0.00 to<br>0.12)           | 0.02<br>(0.00 to<br>0.05)           | 0.09<br>(0.01 to<br>0.26)           |
| Tetanus                                        | 9.11<br>(4.51 to<br>14.06)               | 0.92<br>(0.37 to<br>1.57)                  | 0.94<br>(0.36 to<br>1.61)                  | 0.96<br>(0.41 to<br>1.60)                  | 0.42<br>(0.20 to<br>0.65)          | 0.05<br>(0.02 to<br>0.08)           | 0.05<br>(0.02 to<br>0.08)           | 0.04<br>(0.02 to<br>0.08)           |
| Measles                                        | 10.74<br>(7.48 to<br>15.39)              | 838.98<br>(71.83 to<br>2,402.80)           | 573.34<br>(55.44 to<br>1,569.12)           | 1,030.37<br>(79.04 to<br>2,982.89)         | 0.15<br>(0.11 to<br>0.21)          | 18.75<br>(1.19 to<br>61.71)         | 12.90<br>(0.90 to<br>40.55)         | 22.69<br>(1.31 to<br>73.31)         |
| <b>Puerto Rico</b>                             |                                          |                                            |                                            |                                            |                                    |                                     |                                     |                                     |
| Cause                                          | YLLs (actual counts)                     |                                            |                                            |                                            | Deaths (actual counts)             |                                     |                                     |                                     |
|                                                | 2016                                     | 2040 Forecast                              | 2040 Better Scenario                       | 2040 Worse Scenario                        | 2016                               | 2040 Forecast                       | 2040 Better Scenario                | 2040 Worse Scenario                 |
| Varicella and herpes zoster                    | 53.49<br>(31.90 to<br>114.71)            | 33.09<br>(18.27 to<br>77.00)               | 25.25<br>(13.96 to<br>58.66)               | 33.57<br>(18.39 to<br>77.21)               | 2.81<br>(1.60 to<br>7.92)          | 2.53<br>(1.15 to<br>7.73)           | 2.08<br>(0.93 to<br>6.41)           | 2.48<br>(1.13 to<br>7.31)           |
| <b>Neglected tropical diseases and malaria</b> | <b>622.89</b><br>(345.21 to<br>1,219.45) | <b>1,146.57</b><br>(702.20 to<br>1,625.71) | <b>1,123.19</b><br>(702.53 to<br>1,576.84) | <b>1,140.13</b><br>(689.30 to<br>1,637.52) | <b>16.11</b><br>(9.20 to<br>28.40) | <b>44.39</b><br>(26.35 to<br>65.59) | <b>44.72</b><br>(26.92 to<br>65.94) | <b>43.42</b><br>(25.69 to<br>64.64) |
| Malaria                                        | 16.63<br>(6.96 to<br>22.83)              | 7.41<br>(2.71 to<br>11.31)                 | 7.21<br>(2.64 to<br>11.07)                 | 7.37<br>(2.72 to<br>11.25)                 | 0.45<br>(0.18 to<br>0.62)          | 0.26<br>(0.10 to<br>0.38)           | 0.25<br>(0.10 to<br>0.38)           | 0.25<br>(0.09 to<br>0.37)           |
| Chagas disease                                 | 0.00<br>(0.00 to<br>0.00)                | 0.00<br>(0.00 to<br>0.00)                  | 0.00<br>(0.00 to<br>0.00)                  | 0.00<br>(0.00 to<br>0.00)                  | 0.00<br>(0.00 to<br>0.00)          | 0.00<br>(0.00 to<br>0.00)           | 0.00<br>(0.00 to<br>0.00)           | 0.00<br>(0.00 to<br>0.00)           |
| Leishmaniasis                                  | 0.00<br>(0.00 to<br>0.00)                | 0.00<br>(0.00 to<br>0.00)                  | 0.00<br>(0.00 to<br>0.00)                  | 0.00<br>(0.00 to<br>0.00)                  | 0.00<br>(0.00 to<br>0.00)          | 0.00<br>(0.00 to<br>0.00)           | 0.00<br>(0.00 to<br>0.00)           | 0.00<br>(0.00 to<br>0.00)           |
| African trypanosomiasis                        | 0.00<br>(0.00 to<br>0.00)                | 0.00<br>(0.00 to<br>0.00)                  | 0.00<br>(0.00 to<br>0.00)                  | 0.00<br>(0.00 to<br>0.00)                  | 0.00<br>(0.00 to<br>0.00)          | 0.00<br>(0.00 to<br>0.00)           | 0.00<br>(0.00 to<br>0.00)           | 0.00<br>(0.00 to<br>0.00)           |
| Schistosomiasis                                | 0.00<br>(0.00 to<br>0.00)                | 0.00<br>(0.00 to<br>0.00)                  | 0.00<br>(0.00 to<br>0.00)                  | 0.00<br>(0.00 to<br>0.00)                  | 0.00<br>(0.00 to<br>0.00)          | 0.00<br>(0.00 to<br>0.00)           | 0.00<br>(0.00 to<br>0.00)           | 0.00<br>(0.00 to<br>0.00)           |
| Cysticercosis                                  | 0.00<br>(0.00 to<br>0.00)                | 0.00<br>(0.00 to<br>0.00)                  | 0.00<br>(0.00 to<br>0.00)                  | 0.00<br>(0.00 to<br>0.00)                  | 0.00<br>(0.00 to<br>0.00)          | 0.00<br>(0.00 to<br>0.00)           | 0.00<br>(0.00 to<br>0.00)           | 0.00<br>(0.00 to<br>0.00)           |
| Cystic echinococcosis                          | 0.00<br>(0.00 to<br>0.00)                | 0.00<br>(0.00 to<br>0.00)                  | 0.00<br>(0.00 to<br>0.00)                  | 0.00<br>(0.00 to<br>0.00)                  | 0.00<br>(0.00 to<br>0.00)          | 0.00<br>(0.00 to<br>0.00)           | 0.00<br>(0.00 to<br>0.00)           | 0.00<br>(0.00 to<br>0.00)           |
| Dengue                                         | 361.49<br>(205.05 to<br>517.89)          | 1,122.65<br>(676.39 to<br>1,604.17)        | 1,099.26<br>(678.27 to<br>1,551.90)        | 1,116.31<br>(664.68 to<br>1,615.42)        | 10.55<br>(5.96 to<br>15.93)        | 43.59<br>(25.56 to<br>64.86)        | 43.89<br>(26.08 to<br>65.18)        | 42.64<br>(24.94 to<br>63.73)        |
| Yellow fever                                   | 0.00<br>(0.00 to<br>0.00)                | 0.00<br>(0.00 to<br>0.00)                  | 0.00<br>(0.00 to<br>0.00)                  | 0.00<br>(0.00 to<br>0.00)                  | 0.00<br>(0.00 to<br>0.00)          | 0.00<br>(0.00 to<br>0.00)           | 0.00<br>(0.00 to<br>0.00)           | 0.00<br>(0.00 to<br>0.00)           |
| Rabies                                         | 1.38<br>(0.92 to<br>2.13)                | 0.65<br>(0.44 to<br>0.99)                  | 0.52<br>(0.35 to<br>0.79)                  | 0.66<br>(0.45 to<br>1.00)                  | 0.03<br>(0.02 to<br>0.04)          | 0.02<br>(0.01 to<br>0.02)           | 0.02<br>(0.01 to<br>0.02)           | 0.02<br>(0.01 to<br>0.02)           |
| Intestinal nematode infections                 | 0.00<br>(0.00 to<br>0.00)                | 0.00<br>(0.00 to<br>0.00)                  | 0.00<br>(0.00 to<br>0.00)                  | 0.00<br>(0.00 to<br>0.00)                  | 0.00<br>(0.00 to<br>0.00)          | 0.00<br>(0.00 to<br>0.00)           | 0.00<br>(0.00 to<br>0.00)           | 0.00<br>(0.00 to<br>0.00)           |
| Other neglected tropical diseases              | 21.16<br>(18.40 to<br>25.26)             | 15.86<br>(12.24 to<br>21.32)               | 16.20<br>(12.52 to<br>21.91)               | 15.78<br>(12.21 to<br>21.32)               | 0.51<br>(0.42 to<br>0.72)          | 0.53<br>(0.40 to<br>0.95)           | 0.56<br>(0.42 to<br>1.03)           | 0.51<br>(0.39 to<br>0.89)           |
| <b>Maternal disorders</b>                      | <b>375.70</b><br>(298.80 to<br>460.40)   | <b>201.98</b><br>(121.69 to<br>311.74)     | <b>153.07</b><br>(90.76 to<br>232.57)      | <b>211.83</b><br>(125.44 to<br>327.52)     | <b>7.04</b><br>(5.64 to<br>8.56)   | <b>3.94</b><br>(2.44 to<br>5.97)    | <b>2.99</b><br>(1.79 to<br>4.51)    | <b>4.13</b><br>(2.48 to<br>6.34)    |



|                                                       |                               |                              |                              |                              |                           |                           |                           |                           |
|-------------------------------------------------------|-------------------------------|------------------------------|------------------------------|------------------------------|---------------------------|---------------------------|---------------------------|---------------------------|
|                                                       | 54.49<br>(37.87 to<br>77.53)  | 24.90<br>(13.31 to<br>42.77) | 19.07<br>(10.10 to<br>33.07) | 25.85<br>(13.55 to<br>45.75) | 1.02<br>(0.71 to<br>1.43) | 0.48<br>(0.26 to<br>0.82) | 0.37<br>(0.20 to<br>0.64) | 0.50<br>(0.26 to<br>0.88) |
| Maternal hemorrhage                                   |                               |                              |                              |                              |                           |                           |                           |                           |
|                                                       | 28.25<br>(19.47 to<br>39.79)  | 13.11<br>(7.08 to<br>22.47)  | 9.90<br>(5.25 to<br>17.34)   | 13.63<br>(7.20 to<br>23.78)  | 0.54<br>(0.37 to<br>0.76) | 0.26<br>(0.14 to<br>0.44) | 0.20<br>(0.11 to<br>0.34) | 0.27<br>(0.14 to<br>0.47) |
| Maternal sepsis and other maternal infections         |                               |                              |                              |                              |                           |                           |                           |                           |
|                                                       | 89.56<br>(63.81 to<br>121.19) | 43.51<br>(22.63 to<br>73.90) | 32.39<br>(16.86 to<br>56.56) | 45.39<br>(23.25 to<br>79.83) | 1.60<br>(1.14 to<br>2.15) | 0.80<br>(0.42 to<br>1.34) | 0.59<br>(0.31 to<br>1.01) | 0.83<br>(0.43 to<br>1.42) |
| Maternal hypertensive disorders                       |                               |                              |                              |                              |                           |                           |                           |                           |
|                                                       | 8.78<br>(5.20 to<br>12.91)    | 4.22<br>(1.95 to<br>7.86)    | 3.03<br>(1.42 to<br>5.73)    | 4.42<br>(2.00 to<br>8.14)    | 0.17<br>(0.10 to<br>0.26) | 0.09<br>(0.04 to<br>0.16) | 0.06<br>(0.03 to<br>0.12) | 0.09<br>(0.04 to<br>0.17) |
| Maternal obstructed labor and uterine rupture         |                               |                              |                              |                              |                           |                           |                           |                           |
|                                                       | 77.99<br>(56.73 to<br>104.34) | 50.10<br>(25.92 to<br>88.21) | 37.62<br>(19.23 to<br>67.95) | 52.11<br>(26.43 to<br>93.87) | 1.52<br>(1.11 to<br>2.03) | 1.03<br>(0.53 to<br>1.85) | 0.78<br>(0.40 to<br>1.39) | 1.07<br>(0.55 to<br>1.95) |
| Maternal abortion, miscarriage, and ectopic pregnancy |                               |                              |                              |                              |                           |                           |                           |                           |
|                                                       | 44.24<br>(30.66 to<br>60.62)  | 23.23<br>(11.28 to<br>40.69) | 17.17<br>(8.27 to<br>30.15)  | 24.35<br>(11.82 to<br>43.57) | 0.79<br>(0.55 to<br>1.09) | 0.43<br>(0.21 to<br>0.74) | 0.32<br>(0.16 to<br>0.55) | 0.45<br>(0.22 to<br>0.80) |
| Indirect maternal deaths                              |                               |                              |                              |                              |                           |                           |                           |                           |
|                                                       | 3.84<br>(2.04 to<br>6.89)     | 1.60<br>(0.68 to<br>3.03)    | 1.18<br>(0.50 to<br>2.28)    | 1.67<br>(0.72 to<br>3.27)    | 0.07<br>(0.04 to<br>0.13) | 0.03<br>(0.01 to<br>0.06) | 0.02<br>(0.01 to<br>0.04) | 0.03<br>(0.01 to<br>0.06) |
| Late maternal deaths                                  |                               |                              |                              |                              |                           |                           |                           |                           |
|                                                       | 0.13<br>(0.05 to<br>0.27)     | 0.04<br>(0.00 to<br>0.22)    | 0.00<br>(0.00 to<br>0.01)    | 1.67<br>(0.58 to<br>4.01)    | 0.00<br>(0.00 to<br>0.01) | 0.00<br>(0.00 to<br>0.00) | 0.00<br>(0.00 to<br>0.00) | 0.03<br>(0.01 to<br>0.08) |
| Maternal deaths aggravated by HIV/AIDS                |                               |                              |                              |                              |                           |                           |                           |                           |
|                                                       | 68.41<br>(47.86 to<br>92.70)  | 41.27<br>(22.02 to<br>67.21) | 32.71<br>(17.09 to<br>53.71) | 42.75<br>(22.53 to<br>70.85) | 1.32<br>(0.93 to<br>1.78) | 0.65<br>(0.44 to<br>1.34) | 0.85<br>(0.34 to<br>1.08) | 1.41<br>(0.45 to<br>1.41) |

**Puerto Rico**

| Cause                                                    | YLLs (actual counts)                    |                                       |                                       |                                       | Deaths (actual counts)          |                                |                                 |                                |
|----------------------------------------------------------|-----------------------------------------|---------------------------------------|---------------------------------------|---------------------------------------|---------------------------------|--------------------------------|---------------------------------|--------------------------------|
|                                                          | 2016                                    | 2040 Forecast                         | 2040 Better Scenario                  | 2040 Worse Scenario                   | 2016                            | 2040 Forecast                  | 2040 Better Scenario            | 2040 Worse Scenario            |
| <b>Neonatal disorders</b>                                | 12,306.06<br>(9,895.48 to<br>15,144.25) | 3,689.79<br>(2,136.83 to<br>6,344.05) | 2,589.09<br>(1,515.91 to<br>4,569.16) | 4,329.59<br>(2,497.36 to<br>7,503.39) | 142.18<br>(114.33 to<br>174.97) | 42.63<br>(24.69 to<br>73.29)   | 29.92<br>(17.52 to<br>52.79)    | 50.03<br>(28.85 to<br>86.69)   |
| Neonatal preterm birth                                   | 6,406.34<br>(4,935.57 to<br>8,227.29)   | 1,218.76<br>(721.25 to<br>1,956.49)   | 713.48<br>(417.95 to<br>1,166.43)     | 1,651.37<br>(943.96 to<br>2,743.49)   | 74.01<br>(57.02 to<br>95.06)    | 14.08<br>(8.34 to<br>22.61)    | 8.25<br>(4.83 to<br>13.48)      | 19.08<br>(10.91 to<br>31.70)   |
| Neonatal encephalopathy due to birth asphyxia and trauma | 1,270.32<br>(918.46 to<br>1,715.51)     | 336.04<br>(165.14 to<br>683.97)       | 204.01<br>(102.62 to<br>405.91)       | 374.08<br>(188.59 to<br>755.41)       | 14.68<br>(10.62 to<br>19.82)    | 3.88<br>(1.91 to<br>7.90)      | 2.36<br>(1.19 to<br>4.69)       | 4.32<br>(2.18 to<br>8.73)      |
| Neonatal sepsis and other neonatal infections            | 2,114.22<br>(633.86 to<br>2,960.71)     | 819.76<br>(228.84 to<br>1,590.85)     | 555.52<br>(153.07 to<br>1,049.95)     | 899.86<br>(248.08 to<br>1,725.03)     | 24.42<br>(7.32 to<br>34.20)     | 9.47<br>(2.64 to<br>18.38)     | 6.42<br>(1.77 to<br>12.13)      | 10.40<br>(2.87 to<br>19.93)    |
| Hemolytic disease and other neonatal jaundice            | 10.41<br>(6.33 to<br>16.33)             | 2.80<br>(1.14 to<br>6.29)             | 1.84<br>(0.76 to<br>4.07)             | 3.08<br>(1.23 to<br>7.02)             | 0.12<br>(0.07 to<br>0.19)       | 0.03<br>(0.01 to<br>0.07)      | 0.02<br>(0.01 to<br>0.05)       | 0.04<br>(0.01 to<br>0.08)      |
| Other neonatal disorders                                 | 2,504.77<br>(1,853.52 to<br>3,371.62)   | 1,312.42<br>(650.71 to<br>2,573.36)   | 1,114.24<br>(568.66 to<br>2,194.70)   | 1,401.19<br>(693.97 to<br>2,811.83)   | 28.94<br>(21.42 to<br>38.95)    | 15.16<br>(7.52 to<br>29.73)    | 12.87<br>(6.57 to<br>25.35)     | 16.19<br>(8.02 to<br>32.48)    |
| <b>Nutritional deficiencies</b>                          | 1,031.69<br>(927.32 to<br>1,153.48)     | 1,171.09<br>(1,001.83 to<br>1,356.05) | 1,370.05<br>(1,178.33 to<br>1,578.59) | 1,103.93<br>(946.41 to<br>1,267.52)   | 82.43<br>(73.09 to<br>93.26)    | 122.77<br>(97.36 to<br>147.70) | 152.55<br>(123.27 to<br>183.25) | 112.72<br>(90.03 to<br>137.81) |
| Protein-energy malnutrition                              | 885.47<br>(709.69 to<br>1,017.01)       | 995.82<br>(758.08 to<br>1,183.89)     | 1,210.25<br>(963.81 to<br>1,424.41)   | 932.45<br>(706.37 to<br>1,104.50)     | 73.07<br>(60.61 to<br>84.44)    | 107.82<br>(78.47 to<br>134.47) | 138.24<br>(105.70 to<br>170.22) | 98.48<br>(72.61 to<br>124.65)  |
| Iodine deficiency                                        | 10.74<br>(0.60 to<br>33.64)             | 37.16<br>(0.50 to<br>139.53)          | 37.10<br>(0.37 to<br>154.76)          | 35.85<br>(0.49 to<br>130.86)          | 0.45<br>(0.02 to<br>1.80)       | 3.35<br>(0.02 to<br>16.42)     | 3.52<br>(0.02 to<br>18.73)      | 3.15<br>(0.02 to<br>15.36)     |
| Dietary iron deficiency                                  | 18.31<br>(11.79 to<br>31.54)            | 12.85<br>(8.00 to<br>22.23)           | 13.60<br>(8.32 to<br>25.15)           | 12.71<br>(7.98 to<br>22.23)           | 0.44<br>(0.26 to<br>0.78)       | 0.43<br>(0.24 to<br>0.74)      | 0.48<br>(0.25 to<br>0.86)       | 0.41<br>(0.23 to<br>0.72)      |
| Other nutritional deficiencies                           | 117.17<br>(73.27 to<br>259.00)          | 125.27<br>(71.37 to<br>269.31)        | 109.10<br>(63.08 to<br>246.83)        | 122.92<br>(70.46 to<br>258.94)        | 8.47<br>(5.25 to<br>19.71)      | 11.17<br>(6.19 to<br>25.65)    | 10.32<br>(5.61 to<br>24.59)     | 10.67<br>(5.85 to<br>23.61)    |

|                                                                         |                                                 |                                                 |                                                 |                                                 |                                              |                                              |                                              |                                              |
|-------------------------------------------------------------------------|-------------------------------------------------|-------------------------------------------------|-------------------------------------------------|-------------------------------------------------|----------------------------------------------|----------------------------------------------|----------------------------------------------|----------------------------------------------|
| <b>Other communicable, maternal, neonatal, and nutritional diseases</b> | <b>2,134.68</b><br>(1,818.14 to 2,451.28)       | <b>1,702.27</b><br>(1,369.38 to 2,027.00)       | <b>1,517.32</b><br>(1,229.77 to 1,809.88)       | <b>1,707.14</b><br>(1,375.11 to 2,055.88)       | <b>72.56</b><br>(61.32 to 81.99)             | <b>76.54</b><br>(60.82 to 88.15)             | <b>73.43</b><br>(58.06 to 85.04)             | <b>74.69</b><br>(59.40 to 86.90)             |
| Sexually transmitted infections excluding HIV                           | 155.32<br>(96.99 to 253.30)                     | 46.07<br>(33.29 to 63.51)                       | 39.64<br>(28.66 to 54.07)                       | 46.80<br>(33.70 to 65.21)                       | 4.34<br>(3.29 to 5.63)                       | 1.99<br>(1.54 to 2.48)                       | 1.83<br>(1.39 to 2.32)                       | 1.97<br>(1.52 to 2.47)                       |
| Syphilis                                                                | 92.09<br>(37.49 to 186.59)                      | 15.19<br>(8.74 to 29.36)                        | 11.27<br>(6.79 to 20.84)                        | 15.87<br>(9.07 to 30.38)                        | 2.04<br>(1.22 to 3.25)                       | 0.55<br>(0.40 to 0.76)                       | 0.45<br>(0.32 to 0.61)                       | 0.56<br>(0.40 to 0.79)                       |
| Chlamydial infection                                                    | 12.05<br>(9.95 to 14.42)                        | 5.97<br>(4.42 to 7.88)                          | 5.50<br>(4.05 to 7.36)                          | 5.98<br>(4.45 to 7.84)                          | 0.44<br>(0.37 to 0.53)                       | 0.29<br>(0.22 to 0.37)                       | 0.28<br>(0.21 to 0.36)                       | 0.29<br>(0.22 to 0.36)                       |
| Gonococcal infection                                                    | 34.23<br>(28.40 to 40.77)                       | 17.07<br>(12.49 to 22.31)                       | 15.74<br>(11.14 to 21.16)                       | 17.08<br>(12.62 to 22.28)                       | 1.30<br>(1.08 to 1.54)                       | 0.84<br>(0.63 to 1.07)                       | 0.81<br>(0.60 to 1.06)                       | 0.82<br>(0.62 to 1.04)                       |
| Other sexually transmitted infections                                   | 16.95<br>(14.02 to 20.25)                       | 7.84<br>(5.74 to 10.49)                         | 7.12<br>(5.10 to 9.68)                          | 7.88<br>(5.70 to 10.45)                         | 0.55<br>(0.45 to 0.64)                       | 0.31<br>(0.24 to 0.40)                       | 0.29<br>(0.22 to 0.38)                       | 0.30<br>(0.23 to 0.39)                       |
| Acute hepatitis                                                         | 695.80<br>(575.03 to 833.08)                    | 403.71<br>(286.23 to 546.34)                    | 269.86<br>(186.98 to 367.96)                    | 420.15<br>(292.00 to 578.36)                    | 22.15<br>(18.74 to 26.12)                    | 15.03<br>(10.85 to 20.08)                    | 10.33<br>(7.34 to 13.76)                     | 15.44<br>(10.88 to 20.51)                    |
| Acute hepatitis A                                                       | 12.51<br>(5.93 to 21.67)                        | 8.00<br>(2.63 to 18.91)                         | 5.99<br>(1.96 to 13.72)                         | 8.24<br>(2.71 to 19.41)                         | 0.33<br>(0.16 to 0.59)                       | 0.28<br>(0.09 to 0.65)                       | 0.21<br>(0.07 to 0.48)                       | 0.28<br>(0.09 to 0.66)                       |
| Acute hepatitis B                                                       | 535.87<br>(427.76 to 667.46)                    | 309.90<br>(211.26 to 435.71)                    | 204.71<br>(137.92 to 285.11)                    | 323.23<br>(217.44 to 459.75)                    | 16.67<br>(13.55 to 20.33)                    | 10.90<br>(7.39 to 15.00)                     | 7.34<br>(4.96 to 10.21)                      | 11.26<br>(7.67 to 15.75)                     |
| Acute hepatitis C                                                       | 35.87<br>(25.21 to 50.48)                       | 21.91<br>(13.69 to 33.31)                       | 14.87<br>(9.15 to 22.61)                        | 22.75<br>(13.72 to 34.60)                       | 1.19<br>(0.85 to 1.66)                       | 0.82<br>(0.52 to 1.19)                       | 0.56<br>(0.35 to 0.84)                       | 0.84<br>(0.51 to 1.24)                       |
| Acute hepatitis E                                                       | 111.55<br>(75.48 to 163.08)                     | 63.90<br>(37.58 to 102.64)                      | 44.28<br>(25.27 to 71.01)                       | 65.93<br>(37.13 to 107.61)                      | 3.96<br>(2.65 to 4.90)                       | 3.04<br>(1.82 to 4.90)                       | 2.21<br>(1.28 to 3.58)                       | 3.06<br>(1.73 to 4.91)                       |
| Other unspecified infectious diseases                                   | 1,283.56<br>(1,039.25 to 1,502.68)              | 1,252.50<br>(999.01 to 1,481.92)                | 1,207.82<br>(970.65 to 1,437.20)                | 1,240.18<br>(985.39 to 1,479.26)                | 46.08<br>(36.05 to 52.81)                    | 59.51<br>(45.70 to 68.75)                    | 61.27<br>(46.69 to 70.70)                    | 57.28<br>(43.64 to 66.10)                    |
| <b>Non-communicable diseases</b>                                        | <b>418,342.45</b><br>(384,651.34 to 455,745.44) | <b>440,601.04</b><br>(354,523.36 to 548,521.11) | <b>353,329.93</b><br>(287,900.90 to 436,993.87) | <b>510,870.80</b><br>(407,342.90 to 636,943.42) | <b>25,506.90</b><br>(23,648.54 to 27,528.54) | <b>31,361.36</b><br>(25,513.04 to 38,450.22) | <b>26,319.25</b><br>(21,216.25 to 32,651.86) | <b>35,129.30</b><br>(28,353.42 to 42,805.63) |

**Puerto Rico**

| Cause                      | YLLs (actual counts)                  |                                                |                                                |                                               | Deaths (actual counts)                          |                                           |                                           |                                           |
|----------------------------|---------------------------------------|------------------------------------------------|------------------------------------------------|-----------------------------------------------|-------------------------------------------------|-------------------------------------------|-------------------------------------------|-------------------------------------------|
|                            | 2016                                  | 2040 Forecast                                  | 2040 Better Scenario                           | 2040 Worse Scenario                           | 2016                                            | 2040 Forecast                             | 2040 Better Scenario                      | 2040 Worse Scenario                       |
|                            | <b>Neoplasms</b>                      | <b>108,378.75</b><br>(98,781.11 to 117,956.47) | <b>115,128.88</b><br>(93,111.65 to 140,226.04) | <b>98,009.38</b><br>(80,272.50 to 118,701.23) | <b>131,161.76</b><br>(105,191.88 to 163,569.32) | <b>5,799.83</b><br>(5,316.66 to 6,282.83) | <b>7,175.95</b><br>(5,915.85 to 8,577.21) | <b>6,395.72</b><br>(5,272.67 to 7,640.57) |
| Lip and oral cavity cancer | 1,777.47<br>(1,575.89 to 1,992.99)    | 2,152.21<br>(1,191.33 to 3,647.70)             | 1,329.76<br>(793.69 to 2,135.05)               | 2,999.54<br>(1,567.37 to 5,346.15)            | 88.36<br>(79.20 to 97.87)                       | 115.96<br>(67.43 to 188.09)               | 76.69<br>(48.82 to 116.13)                | 158.35<br>(89.37 to 271.69)               |
| Nasopharynx cancer         | 452.09<br>(400.52 to 511.74)          | 489.08<br>(270.93 to 805.40)                   | 266.48<br>(155.44 to 415.69)                   | 696.84<br>(365.96 to 1,168.39)                | 19.72<br>(17.70 to 21.95)                       | 23.11<br>(13.43 to 36.65)                 | 13.32<br>(8.34 to 19.78)                  | 32.49<br>(18.01 to 52.76)                 |
| Other pharynx cancer       | 867.23<br>(750.57 to 997.34)          | 1,236.64<br>(665.48 to 2,039.55)               | 1,041.10<br>(590.39 to 1,653.97)               | 1,365.23<br>(706.48 to 2,310.83)              | 39.92<br>(35.08 to 45.40)                       | 63.82<br>(36.13 to 102.30)                | 56.43<br>(33.72 to 88.06)                 | 69.00<br>(37.23 to 116.39)                |
| Esophageal cancer          | 3,020.29<br>(2,638.22 to 3,449.77)    | 3,858.07<br>(2,440.76 to 6,003.58)             | 3,054.95<br>(2,050.51 to 4,493.83)             | 5,326.40<br>(3,149.17 to 8,948.06)            | 159.99<br>(141.01 to 181.07)                    | 219.63<br>(141.28 to 326.23)              | 182.70<br>(124.66 to 260.51)              | 297.86<br>(180.56 to 475.74)              |
| Stomach cancer             | 5,160.52<br>(4,639.52 to 5,730.09)    | 3,733.76<br>(2,855.32 to 4,819.38)             | 2,839.48<br>(2,256.72 to 3,519.32)             | 3,880.48<br>(2,948.26 to 5,078.48)            | 314.03<br>(283.10 to 346.17)                    | 262.71<br>(200.78 to 344.74)              | 207.64<br>(163.89 to 259.50)              | 267.97<br>(203.66 to 353.68)              |
| Colon and rectum cancer    | 14,709.59<br>(13,062.83 to 16,419.10) | 14,567.42<br>(9,835.04 to 21,263.83)           | 11,233.07<br>(7,658.43 to 16,154.09)           | 16,286.62<br>(10,675.01 to 24,504.14)         | 830.75<br>(744.59 to 917.85)                    | 957.26<br>(641.67 to 1,383.46)            | 774.08<br>(525.57 to 1,125.12)            | 1,044.59<br>(686.23 to 1,566.52)          |

|                                      |                                          |                                         |                                         |                                          |                                 |                                   |                                   |                                     |
|--------------------------------------|------------------------------------------|-----------------------------------------|-----------------------------------------|------------------------------------------|---------------------------------|-----------------------------------|-----------------------------------|-------------------------------------|
| Liver cancer                         | 6,543.98<br>(5,805.59 to<br>7,406.96)    | 9,713.45<br>(6,730.81 to<br>14,397.73)  | 9,317.17<br>(6,692.76 to<br>13,166.84)  | 11,293.62<br>(7,417.61 to<br>17,391.02)  | 345.88<br>(308.22 to<br>387.62) | 571.29<br>(405.19 to<br>834.92)   | 571.77<br>(419.61 to<br>803.12)   | 644.30<br>(435.44 to<br>967.45)     |
| Liver cancer due to hepatitis B      | 2,368.83<br>(1,940.45 to<br>2,881.75)    | 3,319.07<br>(2,207.65 to<br>5,017.01)   | 3,268.07<br>(2,281.76 to<br>4,732.27)   | 3,795.49<br>(2,379.76 to<br>6,128.89)    | 110.86<br>(90.81 to<br>135.08)  | 171.85<br>(116.76 to<br>251.17)   | 175.27<br>(124.18 to<br>245.81)   | 191.51<br>(123.80 to<br>294.21)     |
| Liver cancer due to hepatitis C      | 1,675.71<br>(1,394.13 to<br>1,986.20)    | 2,572.45<br>(1,798.96 to<br>3,770.29)   | 2,580.26<br>(1,874.41 to<br>3,662.32)   | 2,870.46<br>(1,911.52 to<br>4,384.77)    | 102.47<br>(85.53 to<br>120.75)  | 176.22<br>(123.62 to<br>253.68)   | 183.37<br>(132.60 to<br>256.98)   | 191.24<br>(128.84 to<br>283.49)     |
| Liver cancer due to alcohol use      | 1,322.30<br>(1,084.57 to<br>1,620.58)    | 2,056.68<br>(1,354.56 to<br>3,167.72)   | 1,713.77<br>(1,166.82 to<br>2,543.48)   | 2,555.01<br>(1,592.11 to<br>4,140.12)    | 70.22<br>(58.06 to<br>84.39)    | 118.75<br>(80.31 to<br>179.55)    | 105.15<br>(72.97 to<br>152.79)    | 142.20<br>(91.85 to<br>223.10)      |
| Liver cancer due to other causes     | 1,177.14<br>(988.02 to<br>1,399.26)      | 1,765.25<br>(1,122.72 to<br>2,846.35)   | 1,755.07<br>(1,155.56 to<br>2,744.13)   | 2,072.66<br>(1,229.04 to<br>3,613.61)    | 62.34<br>(52.95 to<br>73.82)    | 104.47<br>(67.63 to<br>167.77)    | 107.99<br>(72.04 to<br>168.72)    | 119.34<br>(72.07 to<br>206.41)      |
| Gallbladder and biliary tract cancer | 809.12<br>(718.13 to<br>902.38)          | 673.62<br>(584.19 to<br>774.83)         | 661.08<br>(567.25 to<br>762.57)         | 656.60<br>(568.60 to<br>752.44)          | 46.39<br>(41.48 to<br>51.85)    | 44.10<br>(37.72 to<br>51.12)      | 44.79<br>(38.10 to<br>52.11)      | 42.27<br>(36.00 to<br>48.63)        |
| Pancreatic cancer                    | 5,274.41<br>(4,698.64 to<br>5,852.41)    | 6,494.13<br>(5,004.88 to<br>8,556.16)   | 6,472.91<br>(4,967.14 to<br>8,493.90)   | 6,894.85<br>(5,191.79 to<br>9,316.98)    | 298.88<br>(267.07 to<br>330.72) | 408.36<br>(317.72 to<br>532.06)   | 418.77<br>(323.23 to<br>545.66)   | 427.51<br>(325.31 to<br>571.94)     |
| Larynx cancer                        | 1,447.06<br>(1,268.02 to<br>1,652.40)    | 1,308.33<br>(723.48 to<br>2,227.97)     | 712.07<br>(445.56 to<br>1,123.78)       | 2,008.39<br>(1,043.66 to<br>3,566.19)    | 73.83<br>(65.01 to<br>83.99)    | 72.78<br>(41.01 to<br>120.07)     | 42.03<br>(26.28 to<br>65.46)      | 110.22<br>(57.58 to<br>188.94)      |
| Tracheal, bronchus, and lung cancer  | 12,997.30<br>(11,579.47 to<br>14,443.32) | 13,193.02<br>(9,398.82 to<br>18,427.75) | 9,183.23<br>(6,833.98 to<br>12,438.94)  | 20,766.95<br>(14,022.91 to<br>29,945.64) | 712.49<br>(636.35 to<br>790.85) | 791.64<br>(568.00 to<br>1,084.11) | 575.30<br>(422.30 to<br>779.22)   | 1,226.25<br>(836.63 to<br>1,729.67) |
| Malignant skin melanoma              | 667.51<br>(563.01 to<br>843.98)          | 814.67<br>(668.96 to<br>1,056.78)       | 985.84<br>(807.05 to<br>1,281.07)       | 775.23<br>(634.11 to<br>1,006.27)        | 31.36<br>(26.70 to<br>41.09)    | 46.22<br>(37.93 to<br>62.04)      | 57.86<br>(47.80 to<br>77.47)      | 43.12<br>(35.17 to<br>57.46)        |
| Non-melanoma skin cancer             | 852.16<br>(755.02 to<br>956.69)          | 836.85<br>(695.50 to<br>986.81)         | 688.91<br>(567.00 to<br>807.59)         | 822.62<br>(683.66 to<br>981.50)          | 57.63<br>(51.89 to<br>63.56)    | 67.39<br>(54.98 to<br>81.28)      | 58.62<br>(47.13 to<br>69.93)      | 64.58<br>(51.63 to<br>78.54)        |
| Breast cancer                        | 11,018.36<br>(9,512.37 to<br>12,722.74)  | 10,210.66<br>(7,327.05 to<br>14,474.19) | 8,081.98<br>(5,855.18 to<br>11,260.09)  | 11,008.02<br>(7,710.09 to<br>15,787.19)  | 482.57<br>(419.17 to<br>553.20) | 519.46<br>(377.17 to<br>718.07)   | 427.07<br>(311.80 to<br>581.20)   | 550.93<br>(390.68 to<br>769.65)     |
| Cervical cancer                      | 2,843.01<br>(2,384.29 to<br>3,337.14)    | 1,854.47<br>(1,352.72 to<br>2,455.38)   | 1,418.46<br>(1,049.59 to<br>1,861.08)   | 1,932.80<br>(1,405.89 to<br>2,584.27)    | 120.75<br>(101.68 to<br>139.83) | 95.32<br>(70.97 to<br>123.72)     | 75.14<br>(56.67 to<br>96.90)      | 98.08<br>(72.44 to<br>128.99)       |
| Uterine cancer                       | 1,469.38<br>(1,237.50 to<br>1,733.53)    | 1,572.00<br>(1,235.69 to<br>1,967.55)   | 1,356.31<br>(1,059.24 to<br>1,702.67)   | 1,574.65<br>(1,234.36 to<br>1,981.90)    | 74.86<br>(63.06 to<br>87.57)    | 94.82<br>(75.08 to<br>115.52)     | 84.32<br>(66.47 to<br>104.92)     | 93.63<br>(74.49 to<br>116.17)       |
| Ovarian cancer                       | 2,609.07<br>(2,188.72 to<br>3,040.86)    | 2,412.49<br>(1,606.02 to<br>3,578.79)   | 2,145.41<br>(1,443.84 to<br>3,117.21)   | 2,547.85<br>(1,632.06 to<br>3,896.06)    | 124.58<br>(106.18 to<br>144.73) | 134.21<br>(89.71 to<br>198.54)    | 122.89<br>(82.28 to<br>182.77)    | 139.72<br>(89.97 to<br>215.66)      |
| Prostate cancer                      | 8,085.10<br>(6,868.16 to<br>10,331.60)   | 10,936.98<br>(8,755.07 to<br>13,784.06) | 10,233.56<br>(8,291.04 to<br>12,777.95) | 10,575.01<br>(8,419.17 to<br>13,703.71)  | 653.11<br>(562.83 to<br>809.88) | 992.85<br>(732.32 to<br>1,260.94) | 969.54<br>(730.03 to<br>1,231.33) | 940.21<br>(682.63 to<br>1,220.86)   |
| Testicular cancer                    | 213.62<br>(158.96 to<br>303.74)          | 102.63<br>(69.19 to<br>150.57)          | 84.61<br>(55.96 to<br>126.27)           | 103.56<br>(68.04 to<br>158.28)           | 4.95<br>(3.92 to<br>6.48)       | 3.11<br>(2.28 to<br>4.13)         | 2.69<br>(1.98 to<br>3.66)         | 3.05<br>(2.19 to<br>4.13)           |
| <b>Puerto Rico</b>                   |                                          |                                         |                                         |                                          |                                 |                                   |                                   |                                     |
| Cause                                | YLLs (actual counts)                     |                                         |                                         |                                          | Deaths (actual counts)          |                                   |                                   |                                     |
|                                      | 2016                                     | 2040 Forecast                           | 2040 Better Scenario                    | 2040 Worse Scenario                      | 2016                            | 2040 Forecast                     | 2040 Better Scenario              | 2040 Worse Scenario                 |
| Kidney cancer                        | 1,810.72<br>(1,613.46 to<br>2,024.28)    | 2,228.63<br>(1,850.83 to<br>2,628.38)   | 2,288.93<br>(1,914.54 to<br>2,704.28)   | 2,266.75<br>(1,864.26 to<br>2,715.87)    | 88.24<br>(78.95 to<br>97.94)    | 124.44<br>(104.40 to<br>146.18)   | 132.83<br>(111.06 to<br>155.41)   | 124.32<br>(102.84 to<br>147.14)     |
| Bladder cancer                       | 2,021.90<br>(1,816.51 to<br>2,252.76)    | 2,029.33<br>(1,509.25 to<br>2,737.32)   | 1,844.68<br>(1,385.31 to<br>2,456.82)   | 2,225.47<br>(1,602.66 to<br>3,093.89)    | 143.65<br>(129.10 to<br>159.67) | 166.40<br>(122.76 to<br>221.80)   | 157.54<br>(116.20 to<br>208.86)   | 179.23<br>(125.74 to<br>247.72)     |
| Brain and nervous system cancer      | 2,616.60<br>(2,241.32 to<br>2,948.63)    | 2,791.47<br>(2,275.29 to<br>3,292.96)   | 2,593.57<br>(2,110.56 to<br>3,081.03)   | 2,761.19<br>(2,260.15 to<br>3,258.97)    | 96.94<br>(78.29 to<br>110.44)   | 127.00<br>(98.83 to<br>149.26)    | 121.65<br>(93.78 to<br>144.97)    | 123.68<br>(96.66 to<br>145.32)      |

|                                |                                                                  |                                                                |                                                               |                                                                 |                                                            |                                                             |                                                            |                                                             |
|--------------------------------|------------------------------------------------------------------|----------------------------------------------------------------|---------------------------------------------------------------|-----------------------------------------------------------------|------------------------------------------------------------|-------------------------------------------------------------|------------------------------------------------------------|-------------------------------------------------------------|
|                                | 362.95<br>(321.37 to<br>408.44)                                  | 390.80<br>(271.16 to<br>568.70)                                | 332.97<br>(236.84 to<br>475.87)                               | 417.28<br>(278.75 to<br>631.86)                                 | 19.50<br>(17.32 to<br>21.80)                               | 24.17<br>(17.17 to<br>34.83)                                | 21.35<br>(15.23 to<br>29.90)                               | 25.12<br>(17.27 to<br>36.78)                                |
| Thyroid cancer                 |                                                                  |                                                                |                                                               |                                                                 |                                                            |                                                             |                                                            |                                                             |
|                                | 249.27<br>(214.48 to<br>288.83)                                  | 281.88<br>(231.78 to<br>338.29)                                | 295.63<br>(238.46 to<br>358.17)                               | 272.06<br>(225.27 to<br>322.52)                                 | 11.11<br>(9.65 to<br>12.70)                                | 14.63<br>(11.98 to<br>17.41)                                | 15.96<br>(12.95 to<br>19.07)                               | 13.82<br>(11.33 to<br>16.31)                                |
| Mesothelioma                   |                                                                  |                                                                |                                                               |                                                                 |                                                            |                                                             |                                                            |                                                             |
|                                | 538.56<br>(438.56 to<br>645.05)                                  | 347.28<br>(262.22 to<br>441.48)                                | 257.25<br>(191.11 to<br>324.29)                               | 353.11<br>(258.74 to<br>446.91)                                 | 18.10<br>(14.07 to<br>21.16)                               | 14.85<br>(10.91 to<br>18.44)                                | 11.34<br>(8.34 to<br>14.08)                                | 14.85<br>(10.75 to<br>18.60)                                |
| Hodgkin lymphoma               |                                                                  |                                                                |                                                               |                                                                 |                                                            |                                                             |                                                            |                                                             |
|                                | 4,793.07<br>(4,207.01 to<br>5,393.27)                            | 4,696.51<br>(3,653.46 to<br>5,966.62)                          | 4,090.77<br>(3,220.38 to<br>5,195.55)                         | 4,838.72<br>(3,753.39 to<br>6,279.27)                           | 215.89<br>(173.66 to<br>243.46)                            | 255.28<br>(189.97 to<br>322.02)                             | 230.60<br>(169.26 to<br>294.25)                            | 257.34<br>(188.98 to<br>328.48)                             |
| Non-Hodgkin lymphoma           |                                                                  |                                                                |                                                               |                                                                 |                                                            |                                                             |                                                            |                                                             |
|                                | 2,924.46<br>(2,418.92 to<br>3,413.00)                            | 3,376.10<br>(2,537.97 to<br>4,421.76)                          | 3,130.68<br>(2,354.74 to<br>4,026.49)                         | 3,458.15<br>(2,610.95 to<br>4,591.27)                           | 155.63<br>(120.06 to<br>176.77)                            | 199.86<br>(146.78 to<br>257.29)                             | 191.39<br>(138.37 to<br>242.83)                            | 200.84<br>(147.75 to<br>262.88)                             |
| Multiple myeloma               |                                                                  |                                                                |                                                               |                                                                 |                                                            |                                                             |                                                            |                                                             |
|                                | 6,016.26<br>(5,424.56 to<br>6,679.86)                            | 5,796.27<br>(4,582.72 to<br>7,236.34)                          | 5,028.53<br>(4,055.52 to<br>6,165.64)                         | 6,208.27<br>(4,822.93 to<br>7,836.65)                           | 273.46<br>(249.01 to<br>300.87)                            | 338.97<br>(272.15 to<br>413.72)                             | 304.72<br>(247.27 to<br>367.83)                            | 353.95<br>(279.42 to<br>442.26)                             |
| Leukemia                       |                                                                  |                                                                |                                                               |                                                                 |                                                            |                                                             |                                                            |                                                             |
|                                | 805.99<br>(676.16 to<br>963.45)                                  | 480.19<br>(354.50 to<br>627.64)                                | 397.41<br>(293.17 to<br>515.37)                               | 522.20<br>(379.16 to<br>685.75)                                 | 20.35<br>(17.50 to<br>23.40)                               | 16.00<br>(12.34 to<br>20.11)                                | 13.61<br>(10.64 to<br>16.86)                               | 17.20<br>(13.04 to<br>21.85)                                |
| Acute lymphoid leukemia        |                                                                  |                                                                |                                                               |                                                                 |                                                            |                                                             |                                                            |                                                             |
|                                | 323.88<br>(259.26 to<br>376.09)                                  | 364.05<br>(255.44 to<br>500.16)                                | 343.38<br>(243.88 to<br>465.79)                               | 382.74<br>(264.10 to<br>535.35)                                 | 21.12<br>(16.52 to<br>24.49)                               | 27.23<br>(19.06 to<br>37.16)                                | 26.83<br>(18.88 to<br>35.95)                               | 27.90<br>(19.14 to<br>38.66)                                |
| Chronic lymphoid leukemia      |                                                                  |                                                                |                                                               |                                                                 |                                                            |                                                             |                                                            |                                                             |
|                                | 1,559.15<br>(1,284.40 to<br>1,782.03)                            | 1,768.72<br>(1,316.71 to<br>2,296.81)                          | 1,670.36<br>(1,258.65 to<br>2,129.45)                         | 1,891.28<br>(1,384.05 to<br>2,503.77)                           | 55.94<br>(45.38 to<br>63.85)                               | 79.35<br>(60.35 to<br>101.88)                               | 77.67<br>(59.72 to<br>97.61)                               | 83.13<br>(62.71 to<br>108.23)                               |
| Acute myeloid leukemia         |                                                                  |                                                                |                                                               |                                                                 |                                                            |                                                             |                                                            |                                                             |
|                                | 223.43<br>(186.94 to<br>272.48)                                  | 143.84<br>(98.01 to<br>208.69)                                 | 96.73<br>(67.39 to<br>139.13)                                 | 160.14<br>(103.91 to<br>237.21)                                 | 10.13<br>(8.41 to<br>13.34)                                | 8.19<br>(5.61 to<br>12.29)                                  | 5.76<br>(4.00 to<br>8.54)                                  | 8.86<br>(5.84 to<br>13.58)                                  |
| Chronic myeloid leukemia       |                                                                  |                                                                |                                                               |                                                                 |                                                            |                                                             |                                                            |                                                             |
|                                | 3,103.82<br>(2,764.05 to<br>3,476.13)                            | 3,039.47<br>(2,416.17 to<br>3,746.20)                          | 2,520.66<br>(2,024.26 to<br>3,091.49)                         | 3,251.90<br>(2,559.85 to<br>4,052.91)                           | 165.91<br>(148.28 to<br>186.92)                            | 208.20<br>(166.33 to<br>258.65)                             | 180.84<br>(146.36 to<br>221.01)                            | 216.86<br>(171.84 to<br>271.56)                             |
| Other leukemia                 |                                                                  |                                                                |                                                               |                                                                 |                                                            |                                                             |                                                            |                                                             |
|                                | 6,227.69<br>(5,591.96 to<br>6,936.33)                            | 7,030.14<br>(6,101.04 to<br>7,984.55)                          | 7,040.01<br>(6,057.39 to<br>8,061.88)                         | 6,845.46<br>(5,996.23 to<br>7,765.92)                           | 297.26<br>(268.07 to<br>330.51)                            | 426.31<br>(370.20 to<br>483.54)                             | 446.67<br>(382.95 to<br>510.18)                            | 406.15<br>(353.42 to<br>459.00)                             |
| Other neoplasms                |                                                                  |                                                                |                                                               |                                                                 |                                                            |                                                             |                                                            |                                                             |
|                                | <b>122,812.56</b><br><b>(112,607.20 to</b><br><b>133,939.29)</b> | <b>97,335.77</b><br><b>(64,687.88 to</b><br><b>145,009.74)</b> | <b>59,268.47</b><br><b>(41,875.28 to</b><br><b>84,182.01)</b> | <b>129,113.75</b><br><b>(83,041.42 to</b><br><b>194,290.58)</b> | <b>8,430.27</b><br><b>(5,295.60 to</b><br><b>9,100.54)</b> | <b>7,846.14</b><br><b>(5,295.60 to</b><br><b>11,645.20)</b> | <b>5,328.78</b><br><b>(3,715.13 to</b><br><b>7,622.45)</b> | <b>9,577.21</b><br><b>(6,422.87 to</b><br><b>14,276.08)</b> |
| Cardiovascular diseases        |                                                                  |                                                                |                                                               |                                                                 |                                                            |                                                             |                                                            |                                                             |
|                                | 1,149.21<br>(975.73 to<br>1,356.56)                              | 731.81<br>(552.17 to<br>989.01)                                | 575.85<br>(428.76 to<br>771.92)                               | 732.04<br>(545.38 to<br>1,001.82)                               | 74.76<br>(63.66 to<br>89.34)                               | 65.65<br>(47.87 to<br>88.38)                                | 54.61<br>(39.20 to<br>75.40)                               | 64.11<br>(46.32 to<br>89.19)                                |
| Rheumatic heart disease        |                                                                  |                                                                |                                                               |                                                                 |                                                            |                                                             |                                                            |                                                             |
|                                | 70,055.22<br>(63,761.64 to<br>77,608.57)                         | 51,541.13<br>(28,562.64 to<br>90,148.87)                       | 26,809.21<br>(15,477.18 to<br>47,675.03)                      | 73,715.37<br>(40,172.99 to<br>129,042.03)                       | 4,731.39<br>(4,355.03 to<br>5,139.63)                      | 3,979.87<br>(2,212.11 to<br>7,096.15)                       | 2,337.79<br>(1,299.61 to<br>4,182.93)                      | 5,208.18<br>(2,945.96 to<br>9,120.57)                       |
| Ischemic heart disease         |                                                                  |                                                                |                                                               |                                                                 |                                                            |                                                             |                                                            |                                                             |
|                                | 26,121.42<br>(23,442.63 to<br>28,978.11)                         | 14,824.81<br>(8,735.06 to<br>24,610.86)                        | 8,092.24<br>(5,090.06 to<br>13,831.66)                        | 21,991.35<br>(12,434.68 to<br>37,796.35)                        | 1,916.65<br>(1,710.77 to<br>2,134.92)                      | 1,298.91<br>(784.42 to<br>2,144.67)                         | 800.69<br>(474.17 to<br>1,376.85)                          | 1,697.65<br>(999.27 to<br>2,993.84)                         |
| Stroke                         |                                                                  |                                                                |                                                               |                                                                 |                                                            |                                                             |                                                            |                                                             |
|                                | 9,687.89<br>(8,553.13 to<br>10,912.42)                           | 5,837.60<br>(3,064.71 to<br>12,420.16)                         | 3,608.08<br>(1,967.25 to<br>7,962.99)                         | 7,936.11<br>(3,966.36 to<br>17,617.66)                          | 875.73<br>(770.64 to<br>987.78)                            | 617.60<br>(319.06 to<br>1,280.27)                           | 415.04<br>(215.17 to<br>901.38)                            | 766.00<br>(386.85 to<br>1,695.53)                           |
| Ischemic stroke                |                                                                  |                                                                |                                                               |                                                                 |                                                            |                                                             |                                                            |                                                             |
|                                | 16,433.53<br>(14,667.95 to<br>18,265.18)                         | 8,987.21<br>(5,216.03 to<br>15,418.89)                         | 4,484.16<br>(2,807.74 to<br>6,965.59)                         | 14,055.24<br>(7,497.21 to<br>25,454.00)                         | 1,040.92<br>(932.78 to<br>1,157.97)                        | 681.32<br>(415.80 to<br>1,101.90)                           | 385.65<br>(241.07 to<br>588.66)                            | 921.65<br>(544.78 to<br>1,656.31)                           |
| Intracerebral hemorrhage       |                                                                  |                                                                |                                                               |                                                                 |                                                            |                                                             |                                                            |                                                             |
|                                | 9,348.99<br>(5,399.87 to<br>11,809.06)                           | 12,628.22<br>(6,519.95 to<br>22,437.03)                        | 9,370.96<br>(5,277.84 to<br>14,446.56)                        | 14,501.14<br>(7,302.09 to<br>26,284.27)                         | 617.62<br>(389.31 to<br>771.44)                            | 1,014.84<br>(558.73 to<br>1,821.41)                         | 819.36<br>(483.76 to<br>1,265.42)                          | 1,126.55<br>(609.41 to<br>2,077.23)                         |
| Hypertensive heart disease     |                                                                  |                                                                |                                                               |                                                                 |                                                            |                                                             |                                                            |                                                             |
|                                | 3,940.94<br>(3,167.03 to<br>5,788.79)                            | 3,320.52<br>(2,311.89 to<br>5,014.54)                          | 2,572.10<br>(1,798.83 to<br>3,842.80)                         | 3,460.23<br>(2,371.46 to<br>5,347.14)                           | 211.00<br>(177.68 to<br>281.41)                            | 222.77<br>(160.59 to<br>318.58)                             | 186.78<br>(133.79 to<br>262.23)                            | 224.15<br>(157.18 to<br>325.69)                             |
| Cardiomyopathy and myocarditis |                                                                  |                                                                |                                                               |                                                                 |                                                            |                                                             |                                                            |                                                             |
|                                | 771.34<br>(574.22 to<br>1,274.87)                                | 766.32<br>(545.94 to<br>1,212.90)                              | 782.27<br>(560.22 to<br>1,208.28)                             | 743.79<br>(533.01 to<br>1,183.55)                               | 50.06<br>(38.58 to<br>73.76)                               | 65.41<br>(46.66 to<br>94.30)                                | 71.46<br>(50.54 to<br>102.23)                              | 61.77<br>(44.54 to<br>88.93)                                |
| Myocarditis                    |                                                                  |                                                                |                                                               |                                                                 |                                                            |                                                             |                                                            |                                                             |
| <b>Puerto Rico</b>             |                                                                  |                                                                |                                                               |                                                                 |                                                            |                                                             |                                                            |                                                             |
|                                | <b>YLLs (actual counts)</b>                                      |                                                                |                                                               |                                                                 | <b>Deaths (actual counts)</b>                              |                                                             |                                                            |                                                             |

| Cause                                                         | 2016                                                          | 2040 Forecast                                                 | 2040 Better Scenario                                          | 2040 Worse Scenario                                           | 2016                                                       | 2040 Forecast                                              | 2040 Better Scenario                                       | 2040 Worse Scenario                                        |
|---------------------------------------------------------------|---------------------------------------------------------------|---------------------------------------------------------------|---------------------------------------------------------------|---------------------------------------------------------------|------------------------------------------------------------|------------------------------------------------------------|------------------------------------------------------------|------------------------------------------------------------|
| Alcoholic cardiomyopathy                                      | 654.92<br>(488.12 to<br>1,078.61)                             | 569.33<br>(415.17 to<br>918.07)                               | 456.96<br>(332.92 to<br>725.60)                               | 622.59<br>(457.52 to<br>1,002.91)                             | 28.03<br>(20.88 to<br>41.35)                               | 26.76<br>(19.71 to<br>39.27)                               | 22.82<br>(16.74 to<br>33.00)                               | 28.39<br>(20.91 to<br>41.91)                               |
| Other cardiomyopathy                                          | 2,514.67<br>(2,001.24 to<br>3,831.96)                         | 1,984.87<br>(1,224.54 to<br>3,373.75)                         | 1,332.86<br>(812.55 to<br>2,252.15)                           | 2,093.86<br>(1,259.52 to<br>3,584.37)                         | 132.92<br>(110.84 to<br>181.86)                            | 130.60<br>(82.78 to<br>204.47)                             | 92.50<br>(57.59 to<br>143.81)                              | 133.99<br>(80.69 to<br>211.46)                             |
| Atrial fibrillation and flutter                               | 2,113.19<br>(1,658.41 to<br>2,625.36)                         | 2,944.19<br>(2,132.26 to<br>3,956.29)                         | 2,708.94<br>(1,977.70 to<br>3,560.98)                         | 2,926.23<br>(2,115.57 to<br>3,909.04)                         | 236.08<br>(181.82 to<br>299.21)                            | 348.75<br>(247.24 to<br>469.36)                            | 335.41<br>(238.76 to<br>448.03)                            | 338.73<br>(241.18 to<br>461.88)                            |
| Aortic aneurysm                                               | 1,195.55<br>(1,060.35 to<br>1,347.18)                         | 1,266.40<br>(1,017.97 to<br>1,594.04)                         | 1,115.46<br>(897.47 to<br>1,364.47)                           | 1,271.60<br>(1,018.56 to<br>1,625.03)                         | 82.64<br>(74.18 to<br>92.43)                               | 101.20<br>(79.87 to<br>126.42)                             | 95.12<br>(75.61 to<br>117.78)                              | 98.34<br>(77.86 to<br>123.65)                              |
| Peripheral artery disease                                     | 1,006.44<br>(757.31 to<br>1,685.75)                           | 1,779.46<br>(1,151.47 to<br>3,246.25)                         | 1,770.62<br>(1,143.16 to<br>3,247.71)                         | 1,916.71<br>(1,250.81 to<br>3,416.12)                         | 96.99<br>(66.07 to<br>190.20)                              | 196.97<br>(113.34 to<br>416.69)                            | 207.80<br>(118.38 to<br>443.89)                            | 202.81<br>(117.32 to<br>425.48)                            |
| Endocarditis                                                  | 1,812.19<br>(1,369.21 to<br>2,371.20)                         | 1,901.19<br>(1,276.04 to<br>2,767.30)                         | 1,786.01<br>(1,220.55 to<br>2,544.82)                         | 1,931.25<br>(1,274.85 to<br>2,859.31)                         | 86.81<br>(67.22 to<br>120.54)                              | 116.06<br>(78.30 to<br>178.15)                             | 115.01<br>(78.02 to<br>170.38)                             | 114.45<br>(76.98 to<br>174.66)                             |
| Other cardiovascular and circulatory diseases                 | 6,069.40<br>(5,407.81 to<br>6,804.01)                         | 6,398.04<br>(4,950.56 to<br>8,423.25)                         | 4,467.08<br>(3,481.54 to<br>5,562.94)                         | 6,667.80<br>(4,983.48 to<br>8,948.26)                         | 376.32<br>(338.65 to<br>419.18)                            | 501.12<br>(384.28 to<br>662.93)                            | 376.21<br>(289.09 to<br>479.76)                            | 502.24<br>(384.10 to<br>665.50)                            |
| <b>Chronic respiratory diseases</b>                           | <b>21,041.15</b><br><b>(19,092.26 to</b><br><b>23,299.67)</b> | <b>20,759.11</b><br><b>(16,104.23 to</b><br><b>26,949.34)</b> | <b>16,908.39</b><br><b>(13,806.12 to</b><br><b>20,944.35)</b> | <b>26,864.63</b><br><b>(20,076.09 to</b><br><b>36,209.38)</b> | <b>1,572.08</b><br><b>(1,438.82 to</b><br><b>1,731.03)</b> | <b>1,760.33</b><br><b>(1,355.68 to</b><br><b>2,271.68)</b> | <b>1,475.76</b><br><b>(1,177.63 to</b><br><b>1,831.37)</b> | <b>2,259.30</b><br><b>(1,669.08 to</b><br><b>3,009.05)</b> |
| Chronic obstructive pulmonary disease                         | 15,796.21<br>(14,239.94 to<br>17,646.58)                      | 15,302.16<br>(11,149.21 to<br>21,158.81)                      | 10,466.01<br>(7,784.06 to<br>14,320.17)                       | 21,421.57<br>(15,131.54 to<br>30,359.44)                      | 1,288.44<br>(1,169.66 to<br>1,424.94)                      | 1,388.45<br>(989.68 to<br>1,922.52)                        | 1,012.22<br>(742.06 to<br>1,379.87)                        | 1,899.28<br>(1,321.45 to<br>2,664.46)                      |
| Pneumoconiosis                                                | 37.60<br>(32.92 to<br>42.72)                                  | 35.14<br>(27.96 to<br>44.36)                                  | 39.03<br>(30.25 to<br>50.02)                                  | 34.09<br>(27.01 to<br>43.12)                                  | 2.51<br>(2.19 to<br>2.88)                                  | 2.94<br>(2.13 to<br>3.90)                                  | 3.43<br>(2.44 to<br>4.60)                                  | 2.77<br>(2.04 to<br>3.71)                                  |
| Silicosis                                                     | 2.63<br>(2.34 to<br>4.73)                                     | 2.35<br>(1.26 to<br>3.96)                                     | 1.97<br>(1.00 to<br>3.48)                                     | 2.34<br>(1.26 to<br>3.90)                                     | 0.24<br>(0.17 to<br>0.32)                                  | 0.19<br>(0.11 to<br>0.32)                                  | 0.17<br>(0.09 to<br>0.32)                                  | 0.19<br>(0.10 to<br>0.34)                                  |
| Asbestosis                                                    | 12.48<br>(10.28 to<br>15.31)                                  | 16.64<br>(12.50 to<br>21.28)                                  | 20.77<br>(15.53 to<br>26.53)                                  | 15.58<br>(11.86 to<br>19.93)                                  | 0.76<br>(0.48 to<br>0.96)                                  | 1.37<br>(0.80 to<br>2.01)                                  | 1.83<br>(1.16 to<br>2.61)                                  | 1.24<br>(0.74 to<br>1.82)                                  |
| Coal workers pneumoconiosis                                   | 2.98<br>(1.93 to<br>4.02)                                     | 2.57<br>(1.32 to<br>4.36)                                     | 2.76<br>(1.37 to<br>4.78)                                     | 2.54<br>(1.32 to<br>4.25)                                     | 0.17<br>(0.11 to<br>0.23)                                  | 0.21<br>(0.10 to<br>0.39)                                  | 0.24<br>(0.11 to<br>0.45)                                  | 0.21<br>(0.09 to<br>0.37)                                  |
| Other pneumoconiosis                                          | 18.52<br>(15.14 to<br>21.78)                                  | 13.58<br>(9.40 to<br>19.39)                                   | 13.52<br>(8.86 to<br>20.44)                                   | 13.63<br>(9.64 to<br>19.22)                                   | 1.35<br>(1.12 to<br>1.71)                                  | 1.16<br>(0.73 to<br>1.85)                                  | 1.18<br>(0.71 to<br>2.03)                                  | 1.14<br>(0.72 to<br>1.78)                                  |
| Asthma                                                        | 1,921.13<br>(1,665.21 to<br>2,447.63)                         | 818.70<br>(455.83 to<br>1,386.14)                             | 473.41<br>(271.53 to<br>811.48)                               | 1,009.61<br>(558.17 to<br>1,796.97)                           | 87.94<br>(75.76 to<br>114.58)                              | 48.05<br>(27.32 to<br>80.18)                               | 29.77<br>(17.13 to<br>50.44)                               | 56.65<br>(31.46 to<br>99.35)                               |
| Interstitial lung disease and pulmonary sarcoidosis           | 2,334.97<br>(1,393.70 to<br>2,846.30)                         | 3,485.07<br>(1,934.95 to<br>4,419.34)                         | 4,778.13<br>(2,888.56 to<br>5,909.82)                         | 3,267.80<br>(1,783.51 to<br>4,190.10)                         | 138.67<br>(71.63 to<br>175.13)                             | 243.11<br>(116.82 to<br>323.31)                            | 345.50<br>(182.36 to<br>442.91)                            | 223.94<br>(106.63 to<br>300.23)                            |
| Other chronic respiratory diseases                            | 951.24<br>(703.62 to<br>1,536.96)                             | 1,118.04<br>(789.23 to<br>1,825.55)                           | 1,151.82<br>(805.85 to<br>1,880.25)                           | 1,131.56<br>(787.13 to<br>1,885.13)                           | 54.52<br>(39.74 to<br>91.36)                               | 77.78<br>(51.40 to<br>132.80)                              | 84.85<br>(57.44 to<br>146.62)                              | 76.65<br>(50.34 to<br>133.63)                              |
| <b>Cirrhosis and other chronic liver diseases</b>             | <b>22,297.94</b><br><b>(19,836.67 to</b><br><b>25,064.74)</b> | <b>22,125.85</b><br><b>(18,046.83 to</b><br><b>26,478.95)</b> | <b>16,958.44</b><br><b>(13,758.45 to</b><br><b>20,422.30)</b> | <b>23,335.97</b><br><b>(18,694.41 to</b><br><b>27,952.94)</b> | <b>955.35</b><br><b>(860.35 to</b><br><b>1,055.94)</b>     | <b>1,028.30</b><br><b>(872.42 to</b><br><b>1,195.96)</b>   | <b>822.40</b><br><b>(685.81 to</b><br><b>968.66)</b>       | <b>1,060.85</b><br><b>(889.19 to</b><br><b>1,242.47)</b>   |
| Cirrhosis and other chronic liver diseases due to hepatitis B | 2,783.72<br>(2,198.40 to<br>3,483.50)                         | 2,741.23<br>(2,065.34 to<br>3,551.59)                         | 2,304.05<br>(1,725.22 to<br>3,012.35)                         | 2,737.85<br>(2,012.35 to<br>3,585.08)                         | 119.84<br>(96.13 to<br>147.84)                             | 127.04<br>(97.66 to<br>163.14)                             | 109.55<br>(83.50 to<br>140.00)                             | 125.11<br>(95.14 to<br>160.06)                             |
| Cirrhosis and other chronic liver diseases due to hepatitis C | 7,290.38<br>(6,257.10 to<br>8,458.48)                         | 7,189.20<br>(5,710.26 to<br>8,848.66)                         | 5,951.31<br>(4,696.61 to<br>7,331.24)                         | 7,208.64<br>(5,631.13 to<br>8,906.41)                         | 297.97<br>(259.34 to<br>341.52)                            | 315.01<br>(255.49 to<br>374.61)                            | 266.78<br>(216.40 to<br>318.88)                            | 311.88<br>(252.28 to<br>373.46)                            |
| Cirrhosis and other chronic liver diseases due to alcohol use | 9,182.94<br>(8,015.87 to<br>10,514.96)                        | 9,339.73<br>(7,543.79 to<br>11,353.68)                        | 6,303.21<br>(5,083.09 to<br>7,671.52)                         | 10,531.80<br>(8,386.08 to<br>12,768.20)                       | 399.99<br>(354.27 to<br>451.64)                            | 437.52<br>(367.73 to<br>518.27)                            | 317.10<br>(261.87 to<br>378.89)                            | 477.38<br>(392.50 to<br>566.07)                            |

|                                                                |                                                               |                                                               |                                                               |                                                               |                                                            |                                                            |                                                            |                                                            |
|----------------------------------------------------------------|---------------------------------------------------------------|---------------------------------------------------------------|---------------------------------------------------------------|---------------------------------------------------------------|------------------------------------------------------------|------------------------------------------------------------|------------------------------------------------------------|------------------------------------------------------------|
|                                                                | 3,040.91<br>(2,610.47 to<br>3,567.44)                         | 2,855.68<br>(2,320.96 to<br>3,528.28)                         | 2,399.87<br>(1,927.86 to<br>2,978.32)                         | 2,857.68<br>(2,270.18 to<br>3,571.60)                         | 137.55<br>(119.63 to<br>158.41)                            | 148.73<br>(123.04 to<br>181.08)                            | 128.97<br>(104.93 to<br>158.90)                            | 146.48<br>(118.45 to<br>178.79)                            |
| Cirrhosis and other chronic liver diseases due to other causes |                                                               |                                                               |                                                               |                                                               |                                                            |                                                            |                                                            |                                                            |
| <b>Digestive diseases</b>                                      | <b>9,518.22</b><br><b>(8,383.95 to</b><br><b>12,070.84)</b>   | <b>9,779.51</b><br><b>(7,430.01 to</b><br><b>13,548.13)</b>   | <b>8,211.27</b><br><b>(6,393.04 to</b><br><b>10,854.06)</b>   | <b>10,076.73</b><br><b>(7,435.39 to</b><br><b>14,292.50)</b>  | <b>553.37</b><br><b>(492.78 to</b><br><b>659.13)</b>       | <b>704.94</b><br><b>(549.11 to</b><br><b>902.64)</b>       | <b>635.15</b><br><b>(497.79 to</b><br><b>795.28)</b>       | <b>703.25</b><br><b>(537.90 to</b><br><b>905.86)</b>       |
| Peptic ulcer disease                                           | 785.69<br>(673.60 to<br>1,002.20)                             | 512.88<br>(394.27 to<br>658.31)                               | 351.31<br>(275.57 to<br>442.13)                               | 530.34<br>(406.18 to<br>689.40)                               | 49.30<br>(42.32 to<br>61.37)                               | 39.73<br>(30.53 to<br>51.16)                               | 28.46<br>(21.85 to<br>37.05)                               | 39.98<br>(29.73 to<br>52.16)                               |
| <b>Puerto Rico</b>                                             |                                                               |                                                               |                                                               |                                                               |                                                            |                                                            |                                                            |                                                            |
| <b>Cause</b>                                                   | <b>YLLs (actual counts)</b>                                   |                                                               |                                                               |                                                               | <b>Deaths (actual counts)</b>                              |                                                            |                                                            |                                                            |
|                                                                | <b>2016</b>                                                   | <b>2040 Forecast</b>                                          | <b>2040 Better Scenario</b>                                   | <b>2040 Worse Scenario</b>                                    | <b>2016</b>                                                | <b>2040 Forecast</b>                                       | <b>2040 Better Scenario</b>                                | <b>2040 Worse Scenario</b>                                 |
|                                                                | 86.81<br>(69.85 to<br>134.30)                                 | 99.22<br>(73.33 to<br>151.00)                                 | 80.10<br>(57.24 to<br>121.14)                                 | 98.60<br>(71.36 to<br>150.80)                                 | 5.75<br>(4.46 to<br>8.23)                                  | 7.94<br>(5.62 to<br>11.32)                                 | 6.77<br>(4.67 to<br>10.00)                                 | 7.71<br>(5.42 to<br>11.46)                                 |
| Gastritis and duodenitis                                       | 372.24<br>(296.82 to<br>560.75)                               | 215.54<br>(157.38 to<br>326.15)                               | 151.78<br>(110.60 to<br>228.39)                               | 219.80<br>(158.33 to<br>334.48)                               | 15.09<br>(12.34 to<br>22.19)                               | 11.90<br>(8.78 to<br>17.53)                                | 8.85<br>(6.54 to<br>13.21)                                 | 11.83<br>(8.63 to<br>18.08)                                |
| Appendicitis                                                   | 2,005.64<br>(1,580.51 to<br>2,512.89)                         | 2,052.03<br>(1,604.45 to<br>2,599.46)                         | 2,092.57<br>(1,635.36 to<br>2,650.02)                         | 1,981.08<br>(1,553.00 to<br>2,486.31)                         | 115.78<br>(92.59 to<br>140.36)                             | 154.30<br>(120.57 to<br>193.70)                            | 164.80<br>(128.32 to<br>206.73)                            | 145.55<br>(113.11 to<br>183.41)                            |
| Paralytic ileus and intestinal obstruction                     | 271.23<br>(195.01 to<br>379.54)                               | 179.04<br>(125.91 to<br>244.26)                               | 152.53<br>(105.98 to<br>208.39)                               | 176.90<br>(123.90 to<br>246.87)                               | 16.48<br>(11.92 to<br>22.29)                               | 13.25<br>(9.38 to<br>17.97)                                | 11.98<br>(8.15 to<br>15.99)                                | 12.77<br>(8.75 to<br>17.58)                                |
| Inguinal, femoral, and abdominal hernia                        | 540.42<br>(421.17 to<br>870.70)                               | 600.57<br>(446.66 to<br>958.62)                               | 594.55<br>(438.22 to<br>951.75)                               | 584.84<br>(435.37 to<br>922.31)                               | 26.70<br>(20.95 to<br>43.71)                               | 37.59<br>(27.84 to<br>61.70)                               | 39.12<br>(28.51 to<br>64.33)                               | 35.73<br>(26.47 to<br>58.42)                               |
| Inflammatory bowel disease                                     | 676.47<br>(564.05 to<br>923.86)                               | 827.18<br>(669.75 to<br>1,144.09)                             | 765.11<br>(613.37 to<br>1,009.36)                             | 806.97<br>(654.34 to<br>1,118.04)                             | 45.41<br>(38.20 to<br>60.46)                               | 65.17<br>(52.17 to<br>88.78)                               | 63.10<br>(49.75 to<br>84.57)                               | 62.31<br>(49.56 to<br>84.43)                               |
| Vascular intestinal disorders                                  | 1,063.93<br>(913.33 to<br>1,324.28)                           | 1,155.24<br>(925.13 to<br>2,022.37)                           | 790.45<br>(440.82 to<br>1,358.55)                             | 1,374.51<br>(717.41 to<br>2,424.51)                           | 66.38<br>(57.26 to<br>80.67)                               | 86.94<br>(48.22 to<br>149.70)                              | 63.42<br>(36.20 to<br>107.75)                              | 99.62<br>(52.53 to<br>175.48)                              |
| Gallbladder and biliary diseases                               | 1,955.81<br>(1,603.89 to<br>2,572.41)                         | 2,129.46<br>(915.56 to<br>4,841.49)                           | 1,358.00<br>(670.87 to<br>2,785.50)                           | 2,348.51<br>(986.14 to<br>5,445.46)                           | 91.46<br>(67.84 to<br>107.46)                              | 118.70<br>(59.75 to<br>236.74)                             | 82.31<br>(43.87 to<br>156.36)                              | 126.34<br>(59.76 to<br>268.59)                             |
| Pancreatitis                                                   | 1,759.97<br>(1,400.20 to<br>2,171.67)                         | 2,008.33<br>(1,610.97 to<br>2,477.11)                         | 1,874.88<br>(1,494.58 to<br>2,300.40)                         | 1,955.19<br>(1,574.10 to<br>2,396.06)                         | 121.02<br>(99.73 to<br>144.46)                             | 169.41<br>(131.67 to<br>206.26)                            | 166.34<br>(128.90 to<br>202.90)                            | 161.40<br>(125.24 to<br>195.93)                            |
| Other digestive diseases                                       | <b>24,716.21</b><br><b>(21,098.08 to</b><br><b>29,129.38)</b> | <b>34,781.02</b><br><b>(26,208.16 to</b><br><b>47,534.06)</b> | <b>35,055.57</b><br><b>(26,714.42 to</b><br><b>46,826.79)</b> | <b>36,249.78</b><br><b>(26,712.86 to</b><br><b>51,863.49)</b> | <b>2,422.86</b><br><b>(2,031.32 to</b><br><b>2,870.60)</b> | <b>3,749.68</b><br><b>(2,692.11 to</b><br><b>5,240.76)</b> | <b>3,959.95</b><br><b>(2,894.91 to</b><br><b>5,405.19)</b> | <b>3,840.29</b><br><b>(2,660.21 to</b><br><b>5,665.46)</b> |
| <b>Neurological disorders</b>                                  |                                                               |                                                               |                                                               |                                                               |                                                            |                                                            |                                                            |                                                            |
| Alzheimer's disease and other dementias                        | 17,887.32<br>(14,706.28 to<br>22,179.10)                      | 26,543.61<br>(18,459.13 to<br>39,192.36)                      | 26,908.98<br>(18,858.31 to<br>38,665.94)                      | 28,070.79<br>(19,151.93 to<br>43,064.96)                      | 2,080.76<br>(1,685.79 to<br>2,534.60)                      | 3,253.37<br>(2,228.26 to<br>4,769.73)                      | 3,426.74<br>(2,398.62 to<br>4,915.69)                      | 3,364.69<br>(2,196.66 to<br>5,171.18)                      |
| Parkinson's disease                                            | 1,979.09<br>(1,481.97 to<br>2,558.94)                         | 2,949.95<br>(2,206.96 to<br>3,856.37)                         | 3,325.22<br>(2,507.25 to<br>4,318.58)                         | 2,776.32<br>(2,085.17 to<br>3,632.04)                         | 180.80<br>(135.78 to<br>235.19)                            | 285.39<br>(213.60 to<br>374.89)                            | 330.92<br>(247.69 to<br>434.17)                            | 264.98<br>(197.65 to<br>349.13)                            |
| Epilepsy                                                       | 1,916.22<br>(1,669.27 to<br>2,208.31)                         | 2,447.35<br>(1,494.10 to<br>3,948.86)                         | 1,932.95<br>(1,225.64 to<br>2,997.96)                         | 2,608.93<br>(1,590.43 to<br>4,242.79)                         | 59.36<br>(52.63 to<br>67.31)                               | 92.49<br>(61.44 to<br>136.24)                              | 78.11<br>(53.58 to<br>110.80)                              | 96.07<br>(62.42 to<br>143.70)                              |
| Multiple sclerosis                                             | 502.86<br>(308.58 to<br>609.56)                               | 418.10<br>(243.08 to<br>541.09)                               | 427.50<br>(245.91 to<br>555.72)                               | 418.72<br>(245.40 to<br>541.64)                               | 15.53<br>(9.65 to<br>18.71)                                | 14.43<br>(8.67 to<br>18.16)                                | 15.05<br>(8.94 to<br>18.91)                                | 14.29<br>(8.52 to<br>17.98)                                |
| Motor neuron disease                                           | 602.45<br>(523.76 to<br>674.29)                               | 717.54<br>(595.92 to<br>857.36)                               | 713.15<br>(587.07 to<br>852.83)                               | 703.64<br>(584.27 to<br>838.53)                               | 24.21<br>(21.08 to<br>27.27)                               | 31.90<br>(26.78 to<br>37.46)                               | 32.26<br>(26.92 to<br>38.03)                               | 30.99<br>(26.11 to<br>36.11)                               |
| Other neurological disorders                                   | 1,828.28<br>(1,592.10 to<br>2,130.99)                         | 1,704.49<br>(1,430.55 to<br>2,000.15)                         | 1,747.77<br>(1,452.34 to<br>2,069.76)                         | 1,671.38<br>(1,402.72 to<br>1,963.16)                         | 62.21<br>(56.08 to<br>69.67)                               | 72.09<br>(62.24 to<br>82.12)                               | 76.87<br>(66.12 to<br>87.70)                               | 69.26<br>(60.41 to<br>78.62)                               |
| <b>Mental disorders</b>                                        | <b>11,661.70</b><br><b>(9,147.73 to</b><br><b>14,777.20)</b>  | <b>19,298.60</b><br><b>(14,593.23 to</b><br><b>24,630.43)</b> | <b>23,900.84</b><br><b>(18,268.30 to</b><br><b>30,197.65)</b> | <b>18,747.47</b><br><b>(14,378.56 to</b><br><b>23,906.59)</b> | <b>311.26</b><br><b>(254.84 to</b><br><b>377.93)</b>       | <b>542.80</b><br><b>(431.83 to</b><br><b>661.72)</b>       | <b>675.83</b><br><b>(538.83 to</b><br><b>815.15)</b>       | <b>523.21</b><br><b>(418.97 to</b><br><b>637.79)</b>       |

|                           |                                        |                                          |                                          |                                          |                                 |                                 |                                 |                                 |
|---------------------------|----------------------------------------|------------------------------------------|------------------------------------------|------------------------------------------|---------------------------------|---------------------------------|---------------------------------|---------------------------------|
| Alcohol use disorders     | 3,807.41<br>(3,244.05 to<br>4,390.14)  | 4,428.07<br>(3,486.49 to<br>5,452.69)    | 4,484.94<br>(3,488.73 to<br>5,606.13)    | 4,485.41<br>(3,591.19 to<br>5,464.58)    | 127.68<br>(109.89 to<br>145.57) | 165.16<br>(134.92 to<br>198.61) | 172.81<br>(139.25 to<br>209.96) | 164.65<br>(134.45 to<br>196.85) |
| Drug use disorders        | 7,842.31<br>(5,581.46 to<br>10,603.72) | 14,858.25<br>(10,581.55 to<br>20,085.68) | 19,402.54<br>(14,019.02 to<br>25,611.51) | 14,249.94<br>(10,216.69 to<br>19,208.38) | 183.35<br>(133.22 to<br>242.85) | 377.38<br>(272.94 to<br>490.21) | 502.73<br>(380.92 to<br>642.21) | 358.31<br>(266.01 to<br>467.93) |
| Opioid use disorders      | 3,604.51<br>(2,240.88 to<br>5,102.50)  | 4,515.75<br>(2,675.87 to<br>6,425.86)    | 4,823.08<br>(2,889.66 to<br>6,913.65)    | 4,436.08<br>(2,631.33 to<br>6,355.28)    | 80.31<br>(55.29 to<br>110.90)   | 108.30<br>(74.22 to<br>155.69)  | 117.94<br>(82.34 to<br>177.68)  | 105.52<br>(71.95 to<br>152.08)  |
| Cocaine use disorders     | 627.05<br>(374.62 to<br>941.77)        | 1,853.40<br>(1,109.54 to<br>2,796.13)    | 2,382.55<br>(1,479.93 to<br>3,517.28)    | 1,780.26<br>(1,078.51 to<br>2,621.41)    | 13.56<br>(8.67 to<br>19.79)     | 42.25<br>(26.52 to<br>61.89)    | 54.46<br>(35.05 to<br>78.69)    | 40.48<br>(25.79 to<br>59.04)    |
| Amphetamine use disorders | 265.98<br>(144.20 to<br>407.74)        | 1,169.03<br>(649.92 to<br>1,829.99)      | 1,731.54<br>(1,012.39 to<br>2,572.92)    | 1,103.62<br>(615.31 to<br>1,716.85)      | 5.72<br>(3.33 to<br>8.68)       | 26.37<br>(15.16 to<br>39.80)    | 39.25<br>(24.37 to<br>57.06)    | 24.82<br>(14.65 to<br>37.64)    |
| Other drug use disorders  | 5,344.76<br>(2,244.52 to<br>4,749.35)  | 7,320.07<br>(4,859.48 to<br>10,565.08)   | 10,465.37<br>(7,286.50 to<br>14,469.81)  | 6,929.98<br>(4,553.92 to<br>9,982.25)    | 83.76<br>(57.54 to<br>113.57)   | 200.46<br>(136.64 to<br>271.28) | 291.07<br>(207.48 to<br>383.22) | 187.48<br>(128.32 to<br>257.17) |
| Eating disorders          | 11.99<br>(9.36 to<br>15.66)            | 12.29<br>(8.31 to<br>17.63)              | 13.35<br>(8.75 to<br>19.47)              | 12.11<br>(8.11 to<br>17.33)              | 0.24<br>(0.19 to<br>0.32)       | 0.26<br>(0.17 to<br>0.37)       | 0.28<br>(0.18 to<br>0.41)       | 0.25<br>(0.17 to<br>0.36)       |

**Puerto Rico**

| Cause                                                      | YLLs (actual counts)                            |                                                   |                                                  |                                                   | Deaths (actual counts)                       |                                               |                                               |                                               |
|------------------------------------------------------------|-------------------------------------------------|---------------------------------------------------|--------------------------------------------------|---------------------------------------------------|----------------------------------------------|-----------------------------------------------|-----------------------------------------------|-----------------------------------------------|
|                                                            | 2016                                            | 2040 Forecast                                     | 2040 Better Scenario                             | 2040 Worse Scenario                               | 2016                                         | 2040 Forecast                                 | 2040 Better Scenario                          | 2040 Worse Scenario                           |
| <b>Diabetes, urogenital, blood, and endocrine diseases</b> | <b>85,528.23</b><br>(77,872.84 to<br>94,279.24) | <b>109,757.59</b><br>(70,453.26 to<br>201,002.14) | <b>84,901.70</b><br>(55,772.52 to<br>154,488.27) | <b>123,683.78</b><br>(79,070.11 to<br>211,352.21) | <b>5,038.90</b><br>(4,604.23 to<br>5,475.73) | <b>7,805.75</b><br>(5,126.35 to<br>13,701.90) | <b>6,324.16</b><br>(4,192.37 to<br>11,141.94) | <b>8,491.12</b><br>(5,623.19 to<br>14,126.50) |
| Diabetes mellitus                                          | 49,519.26<br>(44,841.32 to<br>54,597.09)        | 42,614.22<br>(30,548.71 to<br>58,572.92)          | 30,600.97<br>(22,061.24 to<br>41,216.86)         | 48,726.18<br>(33,834.29 to<br>67,841.71)          | 2,950.43<br>(2,686.79 to<br>3,248.03)        | 3,033.17<br>(2,229.30 to<br>4,038.59)         | 3,294.14<br>(1,660.97 to<br>3,013.66)         | 3,316.84<br>(2,378.34 to<br>4,472.78)         |
| Acute glomerulonephritis                                   | 33.81<br>(29.42 to<br>39.03)                    | 18.95<br>(14.25 to<br>24.27)                      | 15.79<br>(11.62 to<br>20.59)                     | 19.11<br>(14.06 to<br>24.83)                      | 1.47<br>(1.21 to<br>1.76)                    | 0.87<br>(0.62 to<br>1.21)                     | 0.77<br>(0.54 to<br>1.09)                     | 0.85<br>(0.60 to<br>1.18)                     |
| Chronic kidney disease                                     | 22,758.86<br>(20,350.06 to<br>25,123.94)        | 50,376.61<br>(16,461.88 to<br>145,264.01)         | 37,816.07<br>(12,398.89 to<br>109,749.06)        | 58,607.38<br>(18,838.75 to<br>152,801.73)         | 1,366.02<br>(1,232.25 to<br>1,502.12)        | 3,606.34<br>(1,238.57 to<br>10,085.83)        | 2,851.32<br>(960.66 to<br>7,694.48)           | 4,062.73<br>(1,408.42 to<br>9,935.29)         |
| Chronic kidney disease due to diabetes mellitus            | 9,334.01<br>(7,980.19 to<br>10,727.28)          | 23,369.75<br>(7,030.67 to<br>67,556.19)           | 17,530.39<br>(5,337.79 to<br>53,749.06)          | 27,355.29<br>(8,167.22 to<br>70,934.57)           | 523.66<br>(445.03 to<br>606.03)              | 1,519.53<br>(464.99 to<br>4,107.13)           | 1,193.39<br>(368.41 to<br>3,350.75)           | 1,724.28<br>(546.03 to<br>4,245.00)           |
| Chronic kidney disease due to hypertension                 | 3,303.72<br>(2,718.58 to<br>3,997.63)           | 8,861.47<br>(2,911.12 to<br>24,514.71)            | 7,176.85<br>(2,387.02 to<br>21,010.64)           | 10,030.01<br>(3,430.71 to<br>26,174.11)           | 278.57<br>(229.87 to<br>336.31)              | 835.57<br>(297.70 to<br>2,362.28)             | 710.44<br>(253.16 to<br>2,073.91)             | 918.04<br>(334.78 to<br>2,331.27)             |
| Chronic kidney disease due to glomerulonephritis           | 5,647.84<br>(4,651.55 to<br>6,706.69)           | 9,360.89<br>(3,178.22 to<br>26,548.56)            | 6,609.42<br>(2,298.53 to<br>19,919.02)           | 11,001.28<br>(3,649.86 to<br>28,458.84)           | 299.97<br>(242.91 to<br>362.89)              | 616.25<br>(209.30 to<br>1,627.56)             | 454.36<br>(159.61 to<br>1,284.16)             | 704.23<br>(239.15 to<br>1,726.68)             |
| Chronic kidney disease due to other and unspecified causes | 4,473.29<br>(3,617.83 to<br>5,421.55)           | 8,784.50<br>(2,899.40 to<br>23,908.22)            | 6,499.40<br>(2,148.79 to<br>18,690.24)           | 10,220.80<br>(3,344.97 to<br>25,793.47)           | 263.82<br>(212.99 to<br>320.76)              | 635.00<br>(218.48 to<br>1,357.41)             | 493.12<br>(168.39 to<br>1,356.65)             | 716.18<br>(251.59 to<br>1,759.98)             |
| Urinary diseases and male infertility                      | 3,868.86<br>(3,496.11 to<br>4,279.26)           | 4,941.88<br>(4,092.37 to<br>5,841.99)             | 4,223.91<br>(3,462.77 to<br>5,020.57)            | 4,851.44<br>(3,986.88 to<br>5,724.39)             | 293.77<br>(262.96 to<br>325.05)              | 480.69<br>(386.79 to<br>575.26)               | 431.51<br>(339.06 to<br>526.19)               | 461.69<br>(366.97 to<br>560.93)               |
| Urinary tract infections                                   | 3,603.09<br>(3,236.32 to<br>3,996.50)           | 4,726.46<br>(3,901.64 to<br>5,585.51)             | 4,061.57<br>(3,332.29 to<br>4,837.87)            | 4,636.41<br>(3,811.51 to<br>5,470.46)             | 279.12<br>(247.70 to<br>310.37)              | 464.43<br>(373.14 to<br>559.99)               | 418.55<br>(330.02 to<br>513.08)               | 445.91<br>(355.04 to<br>542.48)               |
| Urolithiasis                                               | 39.56<br>(29.47 to<br>61.98)                    | 31.57<br>(20.77 to<br>53.27)                      | 23.77<br>(15.43 to<br>40.35)                     | 31.89<br>(20.44 to<br>55.32)                      | 2.10<br>(1.53 to<br>3.45)                    | 2.22<br>(1.45 to<br>3.92)                     | 1.77<br>(1.12 to<br>3.26)                     | 2.18<br>(1.41 to<br>3.98)                     |
| Other urinary diseases                                     | 226.20<br>(149.84 to<br>386.52)                 | 183.85<br>(109.69 to<br>350.29)                   | 138.57<br>(80.30 to<br>269.10)                   | 183.14<br>(106.93 to<br>348.07)                   | 12.56<br>(7.71 to<br>24.27)                  | 14.04<br>(7.48 to<br>30.66)                   | 11.19<br>(5.94 to<br>24.67)                   | 13.60<br>(7.37 to<br>29.15)                   |
| Gynecological diseases                                     | 56.61<br>(27.77 to<br>74.31)                    | 22.54<br>(10.88 to<br>35.22)                      | 13.18<br>(5.94 to<br>21.21)                      | 23.80<br>(10.68 to<br>38.47)                      | 2.16<br>(1.10 to<br>2.79)                    | 1.22<br>(0.61 to<br>1.85)                     | 0.75<br>(0.37 to<br>1.16)                     | 1.26<br>(0.62 to<br>2.01)                     |

|                                                   |                                        |                                         |                                         |                                         |                                 |                                 |                                 |                                 |
|---------------------------------------------------|----------------------------------------|-----------------------------------------|-----------------------------------------|-----------------------------------------|---------------------------------|---------------------------------|---------------------------------|---------------------------------|
| Uterine fibroids                                  | 7.13<br>(3.76 to<br>9.84)              | 3.29<br>(1.51 to<br>5.72)               | 2.21<br>(1.03 to<br>3.84)               | 3.43<br>(1.59 to<br>6.08)               | 0.18<br>(0.10 to<br>0.25)       | 0.11<br>(0.05 to<br>0.18)       | 0.08<br>(0.04 to<br>0.13)       | 0.11<br>(0.06 to<br>0.18)       |
| Polycystic ovarian syndrome                       | 10.33<br>(6.18 to<br>16.83)            | 2.12<br>(0.81 to<br>4.56)               | 0.89<br>(0.33 to<br>2.01)               | 2.37<br>(0.86 to<br>5.32)               | 0.24<br>(0.14 to<br>0.39)       | 0.05<br>(0.02 to<br>0.11)       | 0.02<br>(0.01 to<br>0.05)       | 0.06<br>(0.02 to<br>0.13)       |
| Endometriosis                                     | 0.08<br>(0.04 to<br>0.14)              | 0.06<br>(0.02 to<br>0.15)               | 0.04<br>(0.01 to<br>0.09)               | 0.06<br>(0.02 to<br>0.15)               | 0.00<br>(0.00 to<br>0.00)       | 0.00<br>(0.00 to<br>0.00)       | 0.00<br>(0.00 to<br>0.00)       | 0.00<br>(0.00 to<br>0.00)       |
| Genital prolapse                                  | 0.33<br>(0.15 to<br>0.57)              | 0.29<br>(0.11 to<br>0.59)               | 0.17<br>(0.07 to<br>0.36)               | 0.30<br>(0.11 to<br>0.62)               | 0.02<br>(0.01 to<br>0.03)       | 0.02<br>(0.01 to<br>0.04)       | 0.01<br>(0.00 to<br>0.02)       | 0.02<br>(0.01 to<br>0.04)       |
| Other gynecological diseases                      | 38.73<br>(16.52 to<br>52.93)           | 16.79<br>(6.47 to<br>27.36)             | 9.88<br>(3.80 to<br>16.06)              | 17.64<br>(6.73 to<br>29.12)             | 1.72<br>(0.80 to<br>2.27)       | 1.04<br>(0.49 to<br>1.61)       | 0.64<br>(0.30 to<br>1.02)       | 1.07<br>(0.49 to<br>1.72)       |
| Hemoglobinopathies and hemolytic anemias          | 874.73<br>(737.19 to<br>1,097.20)      | 871.57<br>(642.55 to<br>1,111.29)       | 664.15<br>(488.27 to<br>838.75)         | 879.27<br>(647.71 to<br>1,135.50)       | 45.54<br>(32.59 to<br>53.72)    | 55.37<br>(35.14 to<br>69.44)    | 44.77<br>(28.28 to<br>56.81)    | 54.47<br>(34.68 to<br>68.77)    |
| Thalassemias                                      | 6.10<br>(1.71 to<br>10.15)             | 1.21<br>(0.38 to<br>2.20)               | 1.09<br>(0.36 to<br>1.98)               | 1.25<br>(0.39 to<br>2.28)               | 0.07<br>(0.02 to<br>0.12)       | 0.02<br>(0.01 to<br>0.03)       | 0.01<br>(0.00 to<br>0.03)       | 0.02<br>(0.01 to<br>0.03)       |
| Sickle cell disorders                             | 432.86<br>(340.95 to<br>670.07)        | 399.05<br>(287.47 to<br>587.05)         | 295.95<br>(208.40 to<br>429.29)         | 409.97<br>(290.80 to<br>617.99)         | 10.59<br>(8.51 to<br>15.28)     | 12.42<br>(8.90 to<br>17.23)     | 9.32<br>(6.55 to<br>12.68)      | 12.71<br>(9.00 to<br>17.58)     |
| G6PD deficiency                                   | 112.89<br>(83.45 to<br>149.93)         | 150.37<br>(99.20 to<br>211.05)          | 105.59<br>(70.00 to<br>146.59)          | 152.77<br>(99.80 to<br>215.14)          | 4.72<br>(3.26 to<br>6.33)       | 7.72<br>(4.81 to<br>10.94)      | 5.77<br>(3.41 to<br>7.70)       | 7.75<br>(4.69 to<br>10.91)      |
| Other hemoglobinopathies and hemolytic anemias    | 322.88<br>(208.47 to<br>387.36)        | 320.94<br>(190.42 to<br>403.87)         | 261.52<br>(156.29 to<br>332.34)         | 315.28<br>(184.46 to<br>400.96)         | 30.15<br>(17.90 to<br>36.23)    | 35.21<br>(19.33 to<br>45.18)    | 29.87<br>(16.49 to<br>39.24)    | 34.00<br>(18.83 to<br>43.83)    |
| Endocrine, metabolic, blood, and immune disorders | 8,416.10<br>(7,272.77 to<br>10,621.58) | 10,911.83<br>(8,858.59 to<br>13,741.85) | 11,567.63<br>(9,303.50 to<br>14,632.42) | 10,576.61<br>(8,578.32 to<br>13,178.45) | 379.51<br>(326.56 to<br>468.87) | 628.09<br>(512.19 to<br>794.54) | 700.90<br>(569.07 to<br>901.95) | 593.28<br>(486.28 to<br>737.10) |

**Puerto Rico**

| Cause                                  | YLLs (actual counts)                           |                                               |                                               |                                               | Deaths (actual counts)                 |                                          |                                          |                                          |
|----------------------------------------|------------------------------------------------|-----------------------------------------------|-----------------------------------------------|-----------------------------------------------|----------------------------------------|------------------------------------------|------------------------------------------|------------------------------------------|
|                                        | 2016                                           | 2040 Forecast                                 | 2040 Better Scenario                          | 2040 Worse Scenario                           | 2016                                   | 2040 Forecast                            | 2040 Better Scenario                     | 2040 Worse Scenario                      |
| <b>Musculoskeletal disorders</b>       | <b>2,276.49</b><br>(1,258.06 to<br>2,657.52)   | <b>2,002.46</b><br>(1,006.72 to<br>2,510.30)  | <b>1,759.82</b><br>(921.96 to<br>2,199.46)    | <b>2,004.68</b><br>(1,014.11 to<br>2,516.93)  | <b>89.14</b><br>(40.67 to<br>104.87)   | <b>101.51</b><br>(44.98 to<br>125.93)    | <b>90.99</b><br>(41.48 to<br>113.52)     | <b>99.91</b><br>(43.79 to<br>124.45)     |
| Rheumatoid arthritis                   | 412.14<br>(198.75 to<br>672.85)                | 311.31<br>(156.78 to<br>589.46)               | 205.89<br>(108.63 to<br>396.42)               | 321.81<br>(165.53 to<br>594.90)               | 24.10<br>(11.25 to<br>39.04)           | 22.49<br>(11.35 to<br>41.37)             | 15.46<br>(8.21 to<br>30.27)              | 22.82<br>(11.73 to<br>41.90)             |
| Other musculoskeletal disorders        | 1,864.36<br>(1,065.45 to<br>2,203.24)          | 1,691.16<br>(846.66 to<br>2,138.95)           | 1,553.92<br>(799.66 to<br>1,979.41)           | 1,682.86<br>(835.25 to<br>2,130.89)           | 65.04<br>(29.79 to<br>78.14)           | 55.97<br>(32.55 to<br>99.21)             | 75.53<br>(33.25 to<br>95.19)             | 77.09<br>(31.26 to<br>97.48)             |
| <b>Other non-communicable diseases</b> | <b>10,111.21</b><br>(8,073.69 to<br>12,514.07) | <b>9,632.24</b><br>(6,597.86 to<br>13,206.47) | <b>8,356.05</b><br>(5,493.60 to<br>11,725.24) | <b>9,632.27</b><br>(6,575.28 to<br>13,123.22) | <b>333.84</b><br>(233.39 to<br>489.34) | <b>645.97</b><br>(395.16 to<br>1,059.35) | <b>610.51</b><br>(379.05 to<br>1,007.13) | <b>620.72</b><br>(379.15 to<br>1,010.27) |
| Congenital birth defects               | 6,802.25<br>(5,304.37 to<br>8,714.88)          | 2,933.86<br>(2,118.59 to<br>4,060.78)         | 2,719.35<br>(1,587.70 to<br>3,001.08)         | 3,096.90<br>(2,185.38 to<br>4,310.93)         | 94.35<br>(75.65 to<br>117.81)          | 51.73<br>(37.99 to<br>68.30)             | 42.08<br>(30.54 to<br>54.27)             | 53.67<br>(38.90 to<br>71.07)             |
| Neural tube defects                    | 262.73<br>(176.73 to<br>412.17)                | 47.79<br>(26.70 to<br>83.33)                  | 26.40<br>(13.92 to<br>46.60)                  | 52.50<br>(26.82 to<br>92.91)                  | 3.46<br>(2.41 to<br>5.25)              | 0.77<br>(0.45 to<br>1.26)                | 0.43<br>(0.24 to<br>0.72)                | 0.83<br>(0.45 to<br>1.39)                |
| Congenital heart anomalies             | 2,757.50<br>(2,108.99 to<br>3,548.05)          | 731.15<br>(476.77 to<br>1,092.11)             | 388.19<br>(249.06 to<br>580.48)               | 806.21<br>(503.61 to<br>1,211.66)             | 36.59<br>(28.96 to<br>45.83)           | 11.17<br>(7.45 to<br>16.52)              | 6.04<br>(3.90 to<br>9.04)                | 12.21<br>(7.69 to<br>18.57)              |
| Orofacial clefts                       | 4.40<br>(1.91 to<br>8.57)                      | 0.64<br>(0.21 to<br>1.62)                     | 0.30<br>(0.09 to<br>0.74)                     | 0.73<br>(0.23 to<br>1.76)                     | 0.05<br>(0.02 to<br>0.10)              | 0.01<br>(0.00 to<br>0.02)                | 0.00<br>(0.00 to<br>0.01)                | 0.01<br>(0.00 to<br>0.02)                |
| Down syndrome                          | 748.29<br>(556.80 to<br>940.99)                | 904.68<br>(620.22 to<br>1,153.02)             | 956.19<br>(666.15 to<br>1,233.26)             | 894.19<br>(616.42 to<br>1,138.69)             | 15.12<br>(10.88 to<br>18.38)           | 21.66<br>(14.57 to<br>27.38)             | 23.13<br>(16.01 to<br>29.24)             | 21.29<br>(14.39 to<br>26.62)             |



|                                               |                                          |                                          |                                          |                                          |                                       |                                       |                                     |                                       |  |
|-----------------------------------------------|------------------------------------------|------------------------------------------|------------------------------------------|------------------------------------------|---------------------------------------|---------------------------------------|-------------------------------------|---------------------------------------|--|
|                                               | 883.48<br>(603.19 to<br>1,259.05)        | 539.08<br>(331.42 to<br>799.10)          | 414.06<br>(250.02 to<br>628.71)          | 571.01<br>(336.30 to<br>869.41)          | 10.80<br>(7.51 to<br>15.09)           | 6.97<br>(4.35 to<br>10.40)            | 5.41<br>(3.38 to<br>8.15)           | 7.35<br>(4.60 to<br>11.14)            |  |
| Other chromosomal abnormalities               | 185.02<br>(109.31 to<br>260.87)          | 52.06<br>(25.98 to<br>84.20)             | 31.06<br>(15.20 to<br>50.03)             | 56.91<br>(27.82 to<br>93.71)             | 2.37<br>(1.38 to<br>3.28)             | 0.76<br>(0.37 to<br>1.22)             | 0.46<br>(0.23 to<br>0.74)           | 0.82<br>(0.39 to<br>1.33)             |  |
| Congenital musculoskeletal and limb anomalies | 254.69<br>(126.84 to<br>393.70)          | 123.66<br>(61.20 to<br>201.32)           | 83.52<br>(41.14 to<br>137.01)            | 131.12<br>(62.98 to<br>219.40)           | 4.38<br>(2.14 to<br>6.33)             | 2.83<br>(1.32 to<br>4.28)             | 1.97<br>(0.96 to<br>2.96)           | 2.95<br>(1.40 to<br>4.48)             |  |
| Urogenital congenital anomalies               | 388.71<br>(207.11 to<br>637.28)          | 121.38<br>(58.41 to<br>222.19)           | 67.48<br>(32.40 to<br>125.21)            | 134.57<br>(64.65 to<br>253.51)           | 4.70<br>(2.57 to<br>7.58)             | 1.56<br>(0.79 to<br>2.76)             | 0.88<br>(0.45 to<br>1.56)           | 1.72<br>(0.86 to<br>3.10)             |  |
| Digestive congenital anomalies                | 1,317.45<br>(896.74 to<br>2,042.74)      | 413.43<br>(244.95 to<br>680.29)          | 252.16<br>(151.60 to<br>407.47)          | 449.66<br>(262.73 to<br>752.09)          | 16.87<br>(12.03 to<br>25.49)          | 6.02<br>(3.88 to<br>9.52)             | 3.75<br>(2.37 to<br>5.77)           | 6.49<br>(4.02 to<br>10.25)            |  |
| Other congenital birth defects                | 3,113.41<br>(1,854.53 to<br>4,825.07)    | 6,652.65<br>(3,873.97 to<br>10,314.89)   | 6,104.92<br>(3,546.21 to<br>9,488.44)    | 6,485.67<br>(3,683.99 to<br>9,936.72)    | 237.22<br>(136.82 to<br>401.12)       | 593.70<br>(345.42 to<br>1,008.99)     | 568.06<br>(338.46 to<br>974.15)     | 566.47<br>(330.51 to<br>966.12)       |  |
| Skin and subcutaneous diseases                | 494.12<br>(259.21 to<br>980.23)          | 1,273.22<br>(685.38 to<br>2,443.65)      | 1,249.68<br>(678.56 to<br>2,351.20)      | 1,236.71<br>(680.87 to<br>2,335.21)      | 30.62<br>(17.40 to<br>64.01)          | 92.11<br>(51.04 to<br>190.83)         | 94.43<br>(52.00 to<br>192.96)       | 87.44<br>(47.74 to<br>179.59)         |  |
| Cellulitis                                    | 1,801.02<br>(940.97 to<br>2,696.50)      | 4,161.31<br>(2,107.98 to<br>6,098.29)    | 3,850.85<br>(1,955.42 to<br>5,881.24)    | 4,050.74<br>(2,063.82 to<br>5,934.61)    | 130.46<br>(67.80 to<br>208.97)        | 370.60<br>(193.09 to<br>592.07)       | 362.09<br>(186.73 to<br>587.76)     | 352.46<br>(178.95 to<br>559.85)       |  |
| Pyoderma                                      | 736.40<br>(419.70 to<br>1,440.03)        | 1,119.02<br>(606.48 to<br>2,253.02)      | 916.20<br>(501.52 to<br>1,841.69)        | 1,100.46<br>(578.93 to<br>2,170.39)      | 71.32<br>(40.85 to<br>146.97)         | 124.05<br>(65.53 to<br>269.95)        | 105.05<br>(55.72 to<br>222.11)      | 119.88<br>(63.91 to<br>251.05)        |  |
| Decubitus ulcer                               | 81.86<br>(37.54 to<br>151.27)            | 99.10<br>(42.96 to<br>183.73)            | 88.19<br>(36.87 to<br>160.77)            | 97.77<br>(41.89 to<br>183.39)            | 4.82<br>(2.06 to<br>8.82)             | 6.95<br>(2.91 to<br>13.56)            | 6.48<br>(2.69 to<br>12.11)          | 6.69<br>(2.79 to<br>13.17)            |  |
| Other skin and subcutaneous diseases          | 195.55<br>(122.24 to<br>284.80)          | 45.73<br>(22.52 to<br>79.12)             | 31.78<br>(15.71 to<br>55.82)             | 49.70<br>(24.86 to<br>87.07)             | 2.27<br>(1.42 to<br>3.21)             | 0.53<br>(0.26 to<br>0.92)             | 0.37<br>(0.18 to<br>0.65)           | 0.58<br>(0.29 to<br>1.01)             |  |
| Sudden infant death syndrome                  | 82,182.24<br>(70,828.06 to<br>93,427.30) | 38,818.14<br>(27,089.70 to<br>57,260.53) | 29,400.27<br>(20,950.38 to<br>42,480.11) | 47,258.77<br>(32,107.58 to<br>71,880.57) | 2,089.26<br>(1,812.40 to<br>2,358.41) | 1,358.56<br>(1,036.74 to<br>1,450.59) | 1,117.12<br>(868.91 to<br>1,450.59) | 1,542.49<br>(1,175.48 to<br>2,135.59) |  |
| Injuries                                      | 20,869.66<br>(17,470.31 to<br>26,296.63) | 7,832.58<br>(4,407.26 to<br>15,170.05)   | 6,407.82<br>(3,826.51 to<br>11,661.91)   | 14,724.42<br>(8,182.82 to<br>28,168.08)  | 505.53<br>(435.64 to<br>601.70)       | 234.56<br>(148.76 to<br>401.42)       | 195.67<br>(129.02 to<br>316.86)     | 405.15<br>(250.41 to<br>707.63)       |  |
| Transport injuries                            | 19,721.25<br>(16,478.23 to<br>24,813.62) | 7,136.78<br>(4,022.40 to<br>13,776.62)   | 5,980.56<br>(3,562.67 to<br>10,912.11)   | 13,971.44<br>(7,783.30 to<br>26,807.84)  | 477.25<br>(411.25 to<br>568.97)       | 212.88<br>(135.27 to<br>361.78)       | 181.55<br>(119.18 to<br>294.97)     | 382.25<br>(235.72 to<br>668.23)       |  |
| Road injuries                                 | 5,583.38<br>(4,176.16 to<br>6,932.36)    | 1,717.03<br>(1,010.63 to<br>2,956.67)    | 1,091.49<br>(671.11 to<br>1,770.79)      | 3,107.63<br>(1,789.22 to<br>5,435.02)    | 174.55<br>(134.94 to<br>207.24)       | 69.94<br>(45.46 to<br>111.89)         | 46.78<br>(31.12 to<br>69.99)        | 116.50<br>(72.99 to<br>189.89)        |  |
| Pedestrian road injuries                      | <b>Puerto Rico</b>                       |                                          |                                          |                                          |                                       |                                       |                                     |                                       |  |

| Cause                       | YLLs (actual counts)                   |                                       |                                       |                                        | Deaths (actual counts)          |                               |                               |                                 |
|-----------------------------|----------------------------------------|---------------------------------------|---------------------------------------|----------------------------------------|---------------------------------|-------------------------------|-------------------------------|---------------------------------|
|                             | 2016                                   | 2040 Forecast                         | 2040 Better Scenario                  | 2040 Worse Scenario                    | 2016                            | 2040 Forecast                 | 2040 Better Scenario          | 2040 Worse Scenario             |
| Cyclist road injuries       | 801.45<br>(597.00 to<br>1,083.05)      | 338.09<br>(168.45 to<br>709.19)       | 306.27<br>(164.96 to<br>609.43)       | 635.75<br>(306.96 to<br>1,322.64)      | 18.01<br>(14.05 to<br>23.17)    | 9.57<br>(5.45 to<br>18.35)    | 8.99<br>(5.46 to<br>16.40)    | 16.09<br>(8.73 to<br>31.90)     |
| Motorcyclist road injuries  | 4,095.14<br>(3,003.26 to<br>5,788.18)  | 1,721.93<br>(780.58 to<br>3,863.00)   | 1,520.52<br>(748.44 to<br>3,208.00)   | 2,671.69<br>(1,215.31 to<br>5,975.07)  | 75.46<br>(55.76 to<br>103.64)   | 34.78<br>(16.79 to<br>75.78)  | 31.10<br>(16.30 to<br>63.22)  | 52.07<br>(24.95 to<br>112.05)   |
| Motor vehicle road injuries | 9,155.62<br>(7,375.13 to<br>12,214.78) | 3,325.57<br>(1,840.63 to<br>6,148.78) | 3,030.26<br>(1,797.56 to<br>5,359.45) | 7,486.11<br>(4,112.47 to<br>13,904.89) | 206.91<br>(169.57 to<br>274.24) | 97.16<br>(59.86 to<br>162.37) | 93.22<br>(60.96 to<br>148.37) | 195.26<br>(116.59 to<br>337.80) |
| Other road injuries         | 85.67<br>(48.72 to<br>122.04)          | 34.16<br>(18.65 to<br>64.31)          | 32.02<br>(18.60 to<br>56.39)          | 70.26<br>(36.01 to<br>141.55)          | 2.32<br>(1.62 to<br>3.25)       | 1.42<br>(0.85 to<br>2.53)     | 1.45<br>(0.89 to<br>2.44)     | 2.34<br>(1.39 to<br>4.18)       |
| Other transport injuries    | 1,148.41<br>(878.87 to<br>1,479.85)    | 695.81<br>(382.46 to<br>1,339.56)     | 427.26<br>(250.75 to<br>773.31)       | 752.98<br>(410.31 to<br>1,407.82)      | 28.28<br>(23.06 to<br>34.62)    | 21.68<br>(13.42 to<br>37.33)  | 14.13<br>(9.09 to<br>22.15)   | 22.89<br>(13.94 to<br>37.91)    |

|                                                 |                                                 |                                               |                                               |                                               |                                        |                                        |                                        |                                        |
|-------------------------------------------------|-------------------------------------------------|-----------------------------------------------|-----------------------------------------------|-----------------------------------------------|----------------------------------------|----------------------------------------|----------------------------------------|----------------------------------------|
| <b>Unintentional injuries</b>                   | <b>14,684.07</b><br>(12,821.50 to<br>17,227.28) | <b>9,951.24</b><br>(7,927.18 to<br>12,227.55) | <b>8,374.93</b><br>(6,641.72 to<br>10,184.51) | <b>9,958.31</b><br>(7,761.85 to<br>12,330.68) | <b>611.79</b><br>(505.62 to<br>688.25) | <b>601.31</b><br>(461.85 to<br>721.17) | <b>545.31</b><br>(422.77 to<br>652.84) | <b>582.43</b><br>(435.52 to<br>700.46) |
| Falls                                           | 4,407.06<br>(3,066.95 to<br>5,171.91)           | 3,813.01<br>(2,498.07 to<br>4,632.15)         | 3,339.55<br>(2,219.36 to<br>4,069.18)         | 3,756.70<br>(2,415.58 to<br>4,585.27)         | 244.55<br>(168.34 to<br>282.48)        | 274.82<br>(186.01 to<br>333.68)        | 250.63<br>(174.92 to<br>306.55)        | 264.34<br>(173.52 to<br>322.89)        |
| Drowning                                        | 2,088.03<br>(1,726.59 to<br>2,657.55)           | 1,085.29<br>(705.83 to<br>1,706.76)           | 808.89<br>(538.07 to<br>1,248.94)             | 1,134.37<br>(721.72 to<br>1,822.27)           | 45.42<br>(38.55 to<br>55.69)           | 28.02<br>(19.42 to<br>41.64)           | 21.47<br>(15.37 to<br>30.78)           | 28.93<br>(19.75 to<br>43.96)           |
| Fire, heat, and hot substances                  | 896.78<br>(764.00 to<br>1,104.27)               | 554.00<br>(408.89 to<br>750.95)               | 400.12<br>(298.74 to<br>528.51)               | 569.36<br>(407.75 to<br>806.94)               | 43.90<br>(36.32 to<br>50.44)           | 38.06<br>(29.18 to<br>49.44)           | 29.84<br>(22.45 to<br>38.27)           | 37.75<br>(27.38 to<br>49.91)           |
| Poisonings                                      | 366.42<br>(287.67 to<br>613.82)                 | 147.32<br>(86.58 to<br>258.28)                | 91.71<br>(56.47 to<br>161.92)                 | 157.41<br>(89.51 to<br>284.88)                | 8.93<br>(7.15 to<br>15.04)             | 4.39<br>(2.83 to<br>7.50)              | 2.90<br>(1.90 to<br>5.02)              | 4.59<br>(2.85 to<br>8.03)              |
| Exposure to mechanical forces                   | 2,092.66<br>(1,507.94 to<br>2,732.53)           | 820.09<br>(574.64 to<br>1,089.69)             | 616.11<br>(436.67 to<br>812.91)               | 840.03<br>(578.83 to<br>1,120.50)             | 47.45<br>(37.74 to<br>59.16)           | 25.83<br>(20.38 to<br>32.71)           | 20.46<br>(15.99 to<br>25.88)           | 25.87<br>(19.84 to<br>33.12)           |
| Unintentional firearm injuries                  | 1,212.61<br>(584.43 to<br>1,768.33)             | 343.86<br>(180.09 to<br>498.88)               | 264.76<br>(144.38 to<br>378.58)               | 352.18<br>(180.72 to<br>512.51)               | 23.45<br>(13.10 to<br>32.19)           | 8.46<br>(5.86 to<br>11.39)             | 6.88<br>(4.90 to<br>9.21)              | 8.53<br>(5.78 to<br>11.56)             |
| Unintentional suffocation                       | 88.82<br>(67.05 to<br>118.22)                   | 42.57<br>(30.04 to<br>58.42)                  | 33.44<br>(23.39 to<br>45.73)                  | 44.00<br>(30.42 to<br>60.40)                  | 1.59<br>(1.25 to<br>2.02)              | 0.94<br>(0.68 to<br>1.26)              | 0.75<br>(0.54 to<br>1.02)              | 0.96<br>(0.67 to<br>1.30)              |
| Other exposure to mechanical forces             | 791.22<br>(647.20 to<br>1,178.49)               | 433.66<br>(319.96 to<br>602.68)               | 317.90<br>(232.97 to<br>433.59)               | 443.85<br>(322.14 to<br>613.28)               | 22.41<br>(18.99 to<br>31.05)           | 16.44<br>(12.89 to<br>22.12)           | 12.83<br>(10.02 to<br>17.18)           | 16.39<br>(12.61 to<br>21.84)           |
| Adverse effects of medical treatment            | 2,198.30<br>(1,799.20 to<br>3,000.39)           | 1,905.75<br>(1,500.56 to<br>2,491.24)         | 1,710.59<br>(1,330.62 to<br>2,247.20)         | 1,876.85<br>(1,463.65 to<br>2,502.03)         | 116.23<br>(88.90 to<br>141.30)         | 133.43<br>(96.90 to<br>166.67)         | 126.65<br>(92.80 to<br>157.73)         | 127.88<br>(91.09 to<br>160.64)         |
| Animal contact                                  | 134.10<br>(105.40 to<br>219.80)                 | 108.13<br>(79.19 to<br>182.52)                | 87.34<br>(63.19 to<br>147.41)                 | 109.28<br>(78.40 to<br>188.11)                | 4.31<br>(3.42 to<br>7.48)              | 4.72<br>(3.48 to<br>8.42)              | 4.05<br>(2.97 to<br>7.20)              | 4.63<br>(3.34 to<br>8.26)              |
| Venomous animal contact                         | 52.18<br>(39.12 to<br>88.66)                    | 39.71<br>(27.35 to<br>71.17)                  | 33.99<br>(23.58 to<br>60.13)                  | 39.87<br>(27.27 to<br>72.24)                  | 1.60<br>(1.18 to<br>2.75)              | 1.65<br>(1.11 to<br>2.84)              | 1.50<br>(1.02 to<br>2.45)              | 1.60<br>(1.08 to<br>2.73)              |
| Non-venomous animal contact                     | 81.92<br>(63.22 to<br>139.04)                   | 68.42<br>(48.70 to<br>119.21)                 | 53.36<br>(37.18 to<br>92.78)                  | 69.41<br>(48.69 to<br>122.36)                 | 2.71<br>(2.07 to<br>5.06)              | 3.07<br>(2.16 to<br>6.04)              | 2.56<br>(1.75 to<br>5.10)              | 3.03<br>(2.07 to<br>5.95)              |
| Foreign body                                    | 1,614.98<br>(1,214.59 to<br>1,913.20)           | 1,160.33<br>(750.84 to<br>1,473.52)           | 1,098.94<br>(699.06 to<br>1,402.82)           | 1,141.11<br>(730.63 to<br>1,443.94)           | 78.04<br>(45.59 to<br>99.73)           | 78.67<br>(40.94 to<br>108.23)          | 80.19<br>(41.87 to<br>110.42)          | 74.90<br>(38.88 to<br>103.31)          |
| Pulmonary aspiration and foreign body in airway | 1,555.07<br>(1,163.20 to<br>1,843.59)           | 1,116.22<br>(711.81 to<br>1,423.36)           | 1,051.22<br>(654.56 to<br>1,345.78)           | 1,098.13<br>(689.82 to<br>1,397.25)           | 76.06<br>(43.85 to<br>97.81)           | 76.54<br>(38.96 to<br>105.97)          | 77.76<br>(39.63 to<br>107.77)          | 72.89<br>(37.16 to<br>100.93)          |
| Foreign body in other body part                 | 59.92<br>(42.12 to<br>72.99)                    | 44.11<br>(31.57 to<br>56.07)                  | 47.73<br>(34.72 to<br>60.39)                  | 42.98<br>(30.46 to<br>53.69)                  | 1.98<br>(1.46 to<br>2.52)              | 2.13<br>(1.53 to<br>2.88)              | 2.43<br>(1.77 to<br>3.31)              | 2.01<br>(1.46 to<br>2.73)              |
| Environmental heat and cold exposure            | 209.63<br>(131.70 to<br>526.60)                 | 169.58<br>(99.52 to<br>394.33)                | 122.01<br>(71.69 to<br>289.27)                | 172.58<br>(99.19 to<br>413.73)                | 7.61<br>(5.28 to<br>16.63)             | 8.12<br>(5.31 to<br>15.96)             | 6.23<br>(4.05 to<br>12.28)             | 8.01<br>(5.08 to<br>15.86)             |
| Other unintentional injuries                    | 676.12<br>(546.90 to<br>850.91)                 | 387.73<br>(128.19 to<br>266.23)               | 99.66<br>(68.20 to<br>138.02)                 | 200.62<br>(130.84 to<br>292.30)               | 15.36<br>(12.68 to<br>18.65)           | 5.25<br>(3.74 to<br>7.17)              | 2.88<br>(2.08 to<br>3.79)              | 5.52<br>(3.84 to<br>7.68)              |
| Self-harm and interpersonal violence            | 46,603.62<br>(32,030.96 to<br>56,997.38)        | 20,873.54<br>(12,031.87 to<br>33,453.83)      | 14,456.84<br>(8,435.34 to<br>22,956.55)       | 22,416.17<br>(12,486.16 to<br>36,584.37)      | 971.45<br>(700.04 to<br>1,188.09)      | 518.32<br>(319.40 to<br>801.03)        | 371.63<br>(238.59 to<br>560.89)        | 550.62<br>(331.12 to<br>879.67)        |

**Puerto Rico**

| Cause     | YLLs (actual counts)                    |                                        |                                        |                                         | Deaths (actual counts)          |                                 |                                 |                                 |
|-----------|-----------------------------------------|----------------------------------------|----------------------------------------|-----------------------------------------|---------------------------------|---------------------------------|---------------------------------|---------------------------------|
|           | 2016                                    | 2040 Forecast                          | 2040 Better Scenario                   | 2040 Worse Scenario                     | 2016                            | 2040 Forecast                   | 2040 Better Scenario            | 2040 Worse Scenario             |
| Self-harm | 12,348.81<br>(9,615.73 to<br>17,936.71) | 9,216.18<br>(4,789.42 to<br>16,309.77) | 6,545.52<br>(3,715.08 to<br>11,042.86) | 10,158.89<br>(5,122.61 to<br>18,316.48) | 313.72<br>(254.44 to<br>423.87) | 266.43<br>(150.83 to<br>436.09) | 196.57<br>(118.97 to<br>306.94) | 287.70<br>(157.43 to<br>489.63) |

|                                                                              |                                          |                                         |                                        |                                         |                                 |                                 |                                 |                                 |
|------------------------------------------------------------------------------|------------------------------------------|-----------------------------------------|----------------------------------------|-----------------------------------------|---------------------------------|---------------------------------|---------------------------------|---------------------------------|
| Self-harm by firearm                                                         | 1,485.48<br>(1,050.18 to<br>3,140.76)    | 884.01<br>(368.86 to<br>1,958.18)       | 567.36<br>(256.61 to<br>1,252.25)      | 986.63<br>(397.64 to<br>2,269.20)       | 38.83<br>(71.24)                | 27.47<br>(13.13 to<br>53.93)    | 18.53<br>(9.55 to<br>34.91)     | 29.86<br>(13.67 to<br>60.02)    |
| Self-harm by other specified means                                           | 10,863.33<br>(8,521.06 to<br>15,637.51)  | 8,332.17<br>(4,386.64 to<br>14,318.97)  | 5,978.16<br>(3,419.79 to<br>10,098.96) | 9,172.26<br>(4,719.21 to<br>16,314.84)  | 274.89<br>(222.67 to<br>374.34) | 238.97<br>(136.85 to<br>382.51) | 178.05<br>(109.52 to<br>275.09) | 257.84<br>(142.11 to<br>423.15) |
| Interpersonal violence                                                       | 34,254.81<br>(18,478.08 to<br>45,197.08) | 11,657.36<br>(5,162.93 to<br>19,581.89) | 7,911.33<br>(3,552.51 to<br>13,269.59) | 12,257.28<br>(5,353.57 to<br>20,659.77) | 657.73<br>(365.14 to<br>855.04) | 251.89<br>(121.46 to<br>409.48) | 175.05<br>(85.96 to<br>284.58)  | 262.92<br>(123.51 to<br>425.31) |
| Physical violence by firearm                                                 | 30,908.70<br>(16,018.19 to<br>41,667.64) | 9,976.44<br>(4,108.77 to<br>17,406.07)  | 6,636.03<br>(2,742.69 to<br>11,673.09) | 10,505.49<br>(4,125.50 to<br>18,393.82) | 574.87<br>(300.90 to<br>774.01) | 200.49<br>(86.86 to<br>339.49)  | 134.64<br>(59.02 to<br>228.95)  | 210.17<br>(87.63 to<br>355.89)  |
| Physical violence by sharp object                                            | 1,591.44<br>(810.77 to<br>4,387.31)      | 728.62<br>(386.98 to<br>1,759.24)       | 537.95<br>(291.28 to<br>1,249.87)      | 751.41<br>(383.95 to<br>1,824.10)       | 36.80<br>(20.12 to<br>93.69)    | 20.06<br>(11.52 to<br>45.57)    | 15.23<br>(9.09 to<br>32.98)     | 20.44<br>(11.55 to<br>46.93)    |
| Physical violence by other means                                             | 1,754.67<br>(1,002.08 to<br>3,325.50)    | 952.31<br>(456.14 to<br>1,943.58)       | 737.35<br>(365.92 to<br>1,423.30)      | 1,000.38<br>(460.32 to<br>2,004.40)     | 46.07<br>(26.36 to<br>91.74)    | 31.33<br>(16.82 to<br>62.41)    | 25.19<br>(13.82 to<br>48.70)    | 32.31<br>(16.49 to<br>63.11)    |
| Forces of nature, conflict and terrorism, and executions and police conflict | 24.89<br>(17.64 to<br>80.46)             | 160.78<br>(0.00 to<br>1,187.58)         | 160.68<br>(0.00 to<br>1,187.69)        | 159.88<br>(0.00 to<br>1,180.54)         | 0.48<br>(0.36 to<br>1.45)       | 4.38<br>(0.00 to<br>32.58)      | 4.50<br>(0.00 to<br>33.63)      | 4.29<br>(0.00 to<br>31.81)      |
| Exposure to forces of nature                                                 | 0.00<br>(0.00 to<br>0.00)                | 121.20<br>(0.00 to<br>927.63)           | 121.20<br>(0.00 to<br>928.35)          | 120.45<br>(0.00 to<br>921.72)           | 0.00<br>(0.00)                  | 3.36<br>(0.00 to<br>25.94)      | 3.45<br>(0.00 to<br>26.67)      | 3.29<br>(0.00 to<br>25.34)      |
| Conflict and terrorism                                                       | 0.00<br>(0.00 to<br>0.00)                | 39.58<br>(0.00 to<br>482.43)            | 39.48<br>(0.00 to<br>481.36)           | 39.43<br>(0.00 to<br>480.19)            | 0.00<br>(0.00)                  | 1.02<br>(0.00 to<br>12.44)      | 1.06<br>(0.00 to<br>13.01)      | 0.99<br>(0.00 to<br>12.24)      |
| Executions and police conflict                                               | 24.89<br>(17.64 to<br>80.46)             | 0.00<br>(0.00 to<br>0.00)               | 0.00<br>(0.00 to<br>0.00)              | 0.00<br>(0.00 to<br>0.00)               | 0.48<br>(0.36 to<br>1.45)       | 0.00<br>(0.00 to<br>0.00)       | 0.00<br>(0.00 to<br>0.00)       | 0.00<br>(0.00 to<br>0.00)       |

**Saint Lucia**

| Cause                                                                    | YLLs (actual counts)                     |                                          |                                          |                                          | Deaths (actual counts)                |                                       |                                       |                                       |
|--------------------------------------------------------------------------|------------------------------------------|------------------------------------------|------------------------------------------|------------------------------------------|---------------------------------------|---------------------------------------|---------------------------------------|---------------------------------------|
|                                                                          | 2016                                     | 2040 Forecast                            | 2040 Better Scenario                     | 2040 Worse Scenario                      | 2016                                  | 2040 Forecast                         | 2040 Better Scenario                  | 2040 Worse Scenario                   |
| <b>All causes</b>                                                        | 28,493.46<br>(26,245.70 to<br>31,172.77) | 34,766.36<br>(27,914.53 to<br>43,358.61) | 28,537.54<br>(22,833.42 to<br>35,821.24) | 42,881.62<br>(33,782.76 to<br>54,049.13) | 1,191.57<br>(1,129.62 to<br>1,256.92) | 1,953.29<br>(1,576.87 to<br>2,381.49) | 1,673.94<br>(1,337.39 to<br>2,057.91) | 2,279.16<br>(1,828.40 to<br>2,773.35) |
| <b>Communicable, maternal, neonatal, and nutritional diseases</b>        | 3,996.46<br>(2,940.11 to<br>5,707.65)    | 2,742.96<br>(1,950.71 to<br>3,870.83)    | 2,074.54<br>(1,492.75 to<br>2,890.97)    | 3,893.00<br>(2,751.55 to<br>5,417.43)    | 100.13<br>(85.95 to<br>120.74)        | 114.76<br>(89.71 to<br>144.32)        | 95.01<br>(74.54 to<br>118.05)         | 143.00<br>(111.35 to<br>184.44)       |
| <b>HIV/AIDS and tuberculosis</b>                                         | 540.42<br>(516.58 to<br>565.56)          | 241.83<br>(173.82 to<br>324.93)          | 134.20<br>(97.03 to<br>187.73)           | 754.68<br>(557.70 to<br>937.05)          | 13.74<br>(13.12 to<br>14.36)          | 7.36<br>(5.10 to<br>9.97)             | 4.25<br>(2.93 to<br>6.01)             | 20.25<br>(14.98 to<br>25.39)          |
| <b>Tuberculosis</b>                                                      | 147.36<br>(132.47 to<br>164.11)          | 90.60<br>(58.23 to<br>143.41)            | 54.93<br>(34.72 to<br>86.84)             | 137.43<br>(84.12 to<br>224.79)           | 5.03<br>(4.58 to<br>5.54)             | 3.91<br>(2.57 to<br>6.00)             | 2.46<br>(1.60 to<br>3.74)             | 5.67<br>(3.41 to<br>9.05)             |
| <b>HIV/AIDS</b>                                                          | 393.06<br>(376.33 to<br>412.53)          | 151.23<br>(93.51 to<br>213.78)           | 79.27<br>(50.08 to<br>123.05)            | 617.25<br>(426.24 to<br>775.77)          | 8.70<br>(8.33 to<br>9.12)             | 3.44<br>(1.78 to<br>5.18)             | 1.79<br>(0.92 to<br>3.07)             | 14.58<br>(9.75 to<br>18.29)           |
| <b>Diarrhea, lower respiratory, and other common infectious diseases</b> | 1,268.15<br>(1,087.83 to<br>1,528.71)    | 1,359.81<br>(1,025.72 to<br>1,856.71)    | 1,062.39<br>(823.28 to<br>1,401.28)      | 1,701.96<br>(1,225.45 to<br>2,451.53)    | 53.02<br>(47.41 to<br>58.85)          | 82.73<br>(63.85 to<br>108.90)         | 70.19<br>(53.74 to<br>90.12)          | 94.76<br>(69.83 to<br>129.31)         |
| <b>Diarrheal diseases</b>                                                | 93.70<br>(68.10 to<br>134.52)            | 53.50<br>(14.26 to<br>164.59)            | 33.50<br>(10.51 to<br>94.30)             | 80.17<br>(17.96 to<br>263.39)            | 2.90<br>(2.45 to<br>3.47)             | 3.17<br>(0.83 to<br>8.99)             | 2.13<br>(0.67 to<br>5.69)             | 4.46<br>(1.01 to<br>13.31)            |
| <b>Intestinal infectious diseases</b>                                    | 1.98<br>(0.97 to<br>3.58)                | 1.18<br>(0.56 to<br>2.13)                | 1.09<br>(0.51 to<br>1.96)                | 1.22<br>(0.58 to<br>2.20)                | 0.05<br>(0.02 to<br>0.08)             | 0.04<br>(0.02 to<br>0.06)             | 0.03<br>(0.02 to<br>0.06)             | 0.04<br>(0.02 to<br>0.06)             |
| <b>Typhoid fever</b>                                                     | 1.71<br>(0.81 to<br>3.14)                | 1.04<br>(0.48 to<br>1.89)                | 0.98<br>(0.45 to<br>1.79)                | 1.08<br>(0.49 to<br>1.97)                | 0.04<br>(0.02 to<br>0.07)             | 0.03<br>(0.01 to<br>0.06)             | 0.03<br>(0.01 to<br>0.05)             | 0.03<br>(0.01 to<br>0.06)             |
| <b>Paratyphoid fever</b>                                                 | 0.18<br>(0.07 to<br>0.38)                | 0.09<br>(0.03 to<br>0.20)                | 0.08<br>(0.03 to<br>0.17)                | 0.10<br>(0.04 to<br>0.21)                | 0.00<br>(0.00 to<br>0.01)             | 0.00<br>(0.00 to<br>0.01)             | 0.00<br>(0.00 to<br>0.01)             | 0.00<br>(0.00 to<br>0.01)             |



|                                                       |                                      |                                     |                                     |                                     |                                  |                                  |                                  |                                  |
|-------------------------------------------------------|--------------------------------------|-------------------------------------|-------------------------------------|-------------------------------------|----------------------------------|----------------------------------|----------------------------------|----------------------------------|
| Schistosomiasis                                       | 9.15<br>(3.53 to<br>17.34)           | 8.86<br>(2.50 to<br>20.29)          | 7.79<br>(2.20 to<br>18.20)          | 9.15<br>(2.56 to<br>21.53)          | 0.33<br>(0.13 to<br>0.61)        | 0.38<br>(0.11 to<br>0.86)        | 0.34<br>(0.09 to<br>0.77)        | 0.39<br>(0.11 to<br>0.87)        |
| Cysticercosis                                         | 0.00<br>(0.00 to<br>0.00)            | 0.00<br>(0.00 to<br>0.00)           | 0.00<br>(0.00 to<br>0.00)           | 0.00<br>(0.00 to<br>0.00)           | 0.00<br>(0.00 to<br>0.00)        | 0.00<br>(0.00 to<br>0.00)        | 0.00<br>(0.00 to<br>0.00)        | 0.00<br>(0.00 to<br>0.00)        |
| Cystic echinococcosis                                 | 0.00<br>(0.00 to<br>0.00)            | 0.00<br>(0.00 to<br>0.00)           | 0.00<br>(0.00 to<br>0.00)           | 0.00<br>(0.00 to<br>0.00)           | 0.00<br>(0.00 to<br>0.00)        | 0.00<br>(0.00 to<br>0.00)        | 0.00<br>(0.00 to<br>0.00)        | 0.00<br>(0.00 to<br>0.00)        |
| Dengue                                                | 21.47<br>(12.52 to<br>31.74)         | 74.21<br>(48.11 to<br>103.07)       | 70.80<br>(46.99 to<br>97.61)        | 75.43<br>(48.10 to<br>104.60)       | 0.55<br>(0.32 to<br>0.79)        | 2.48<br>(1.61 to<br>3.34)        | 2.44<br>(1.62 to<br>3.24)        | 2.45<br>(1.58 to<br>3.31)        |
| Yellow fever                                          | 0.00<br>(0.00 to<br>0.00)            | 0.00<br>(0.00 to<br>0.00)           | 0.00<br>(0.00 to<br>0.00)           | 0.00<br>(0.00 to<br>0.00)           | 0.00<br>(0.00 to<br>0.00)        | 0.00<br>(0.00 to<br>0.00)        | 0.00<br>(0.00 to<br>0.00)        | 0.00<br>(0.00 to<br>0.00)        |
| Rabies                                                | 0.23<br>(0.13 to<br>0.41)            | 0.11<br>(0.06 to<br>0.21)           | 0.06<br>(0.03 to<br>0.11)           | 0.14<br>(0.07 to<br>0.27)           | 0.01<br>(0.00 to<br>0.01)        | 0.00<br>(0.00 to<br>0.01)        | 0.00<br>(0.00 to<br>0.00)        | 0.01<br>(0.00 to<br>0.01)        |
| Intestinal nematode infections                        | 0.37<br>(0.14 to<br>0.81)            | 0.35<br>(0.14 to<br>0.79)           | 0.34<br>(0.14 to<br>0.74)           | 0.36<br>(0.14 to<br>0.83)           | 0.01<br>(0.00 to<br>0.01)        | 0.01<br>(0.00 to<br>0.02)        | 0.01<br>(0.00 to<br>0.02)        | 0.01<br>(0.00 to<br>0.02)        |
| Other neglected tropical diseases                     | 12.33<br>(5.07 to<br>17.82)          | 11.53<br>(3.55 to<br>18.34)         | 9.46<br>(2.82 to<br>14.79)          | 12.43<br>(3.78 to<br>20.12)         | 0.39<br>(0.15 to<br>0.51)        | 0.54<br>(0.14 to<br>0.84)        | 0.46<br>(0.12 to<br>0.72)        | 0.55<br>(0.15 to<br>0.85)        |
| <b>Maternal disorders</b>                             | <b>87.55</b><br>(73.07 to<br>103.57) | <b>45.35</b><br>(24.09 to<br>79.50) | <b>31.00</b><br>(15.74 to<br>54.79) | <b>52.58</b><br>(27.24 to<br>91.19) | <b>1.61</b><br>(1.35 to<br>1.90) | <b>0.86</b><br>(0.46 to<br>1.51) | <b>0.59</b><br>(0.31 to<br>1.03) | <b>1.00</b><br>(0.53 to<br>1.71) |
| Maternal hemorrhage                                   | 20.13<br>(14.22 to<br>26.85)         | 9.90<br>(4.34 to<br>18.32)          | 6.74<br>(2.88 to<br>12.77)          | 11.45<br>(4.94 to<br>21.24)         | 0.37<br>(0.26 to<br>0.49)        | 0.19<br>(0.08 to<br>0.34)        | 0.13<br>(0.06 to<br>0.24)        | 0.22<br>(0.10 to<br>0.40)        |
| Maternal sepsis and other maternal infections         | 0.93<br>(0.45 to<br>1.63)            | 0.47<br>(0.17 to<br>1.04)           | 0.32<br>(0.11 to<br>0.72)           | 0.55<br>(0.19 to<br>1.24)           | 0.02<br>(0.01 to<br>0.03)        | 0.01<br>(0.00 to<br>0.02)        | 0.01<br>(0.00 to<br>0.01)        | 0.01<br>(0.00 to<br>0.02)        |
| Maternal hypertensive disorders                       | 28.27<br>(21.46 to<br>36.91)         | 13.39<br>(6.44 to<br>25.43)         | 9.03<br>(4.11 to<br>17.96)          | 15.59<br>(7.27 to<br>30.31)         | 0.50<br>(0.38 to<br>0.65)        | 0.24<br>(0.12 to<br>0.46)        | 0.17<br>(0.08 to<br>0.33)        | 0.28<br>(0.13 to<br>0.55)        |
| Maternal obstructed labor and uterine rupture         | 2.97<br>(1.79 to<br>4.46)            | 1.67<br>(0.71 to<br>3.33)           | 1.10<br>(0.45 to<br>2.31)           | 1.95<br>(0.78 to<br>3.93)           | 0.06<br>(0.04 to<br>0.09)        | 0.03<br>(0.01 to<br>0.07)        | 0.02<br>(0.01 to<br>0.05)        | 0.04<br>(0.02 to<br>0.08)        |
| Maternal abortion, miscarriage, and ectopic pregnancy | 4.72<br>(3.10 to<br>6.77)            | 3.50<br>(1.54 to<br>6.87)           | 2.38<br>(0.98 to<br>4.78)           | 4.05<br>(1.71 to<br>8.10)           | 0.09<br>(0.06 to<br>0.13)        | 0.07<br>(0.03 to<br>0.14)        | 0.05<br>(0.02 to<br>0.09)        | 0.08<br>(0.03 to<br>0.16)        |
| Indirect maternal deaths                              | 4.61<br>(2.94 to<br>6.75)            | 2.74<br>(1.14 to<br>5.49)           | 1.87<br>(0.74 to<br>3.86)           | 3.18<br>(1.32 to<br>6.41)           | 0.08<br>(0.05 to<br>0.12)        | 0.05<br>(0.02 to<br>0.10)        | 0.03<br>(0.01 to<br>0.07)        | 0.06<br>(0.02 to<br>0.12)        |
| Late maternal deaths                                  | 3.34<br>(2.13 to<br>5.14)            | 1.37<br>(0.61 to<br>2.85)           | 0.93<br>(0.39 to<br>1.96)           | 1.59<br>(0.68 to<br>3.33)           | 0.06<br>(0.04 to<br>0.09)        | 0.03<br>(0.01 to<br>0.05)        | 0.02<br>(0.01 to<br>0.04)        | 0.03<br>(0.01 to<br>0.06)        |
| Maternal deaths aggravated by HIV/AIDS                | 0.03<br>(0.01 to<br>0.07)            | 0.15<br>(0.04 to<br>0.38)           | 0.08<br>(0.02 to<br>0.23)           | 0.22<br>(0.06 to<br>0.55)           | 0.00<br>(0.00 to<br>0.00)        | 0.00<br>(0.00 to<br>0.01)        | 0.00<br>(0.00 to<br>0.01)        | 0.00<br>(0.00 to<br>0.01)        |
| Other maternal disorders                              | 22.54<br>(16.70 to<br>29.26)         | 12.17<br>(5.97 to<br>22.42)         | 8.55<br>(4.09 to<br>16.12)          | 13.99<br>(6.55 to<br>25.80)         | 0.43<br>(0.32 to<br>0.55)        | 0.24<br>(0.12 to<br>0.44)        | 0.17<br>(0.08 to<br>0.32)        | 0.27<br>(0.13 to<br>0.51)        |
| <b>Saint Lucia</b>                                    |                                      |                                     |                                     |                                     |                                  |                                  |                                  |                                  |
| Cause                                                 | YLLs (actual counts)                 |                                     |                                     |                                     | Deaths (actual counts)           |                                  |                                  |                                  |
|                                                       | 2016                                 | 2040 Forecast                       | 2040 Better Scenario                | 2040 Worse Scenario                 | 2016                             | 2040 Forecast                    | 2040 Better Scenario             | 2040 Worse Scenario              |
| Neonatal disorders                                    | 1,748.88<br>(870.84 to<br>3,126.71)  | 757.31<br>(235.63 to<br>1,753.26)   | 550.87<br>(171.88 to<br>1,286.31)   | 1,031.04<br>(321.15 to<br>2,395.26) | 20.20<br>(10.06 to<br>36.12)     | 8.75<br>(2.72 to<br>20.26)       | 6.37<br>(1.99 to<br>14.87)       | 11.91<br>(3.71 to<br>27.68)      |
| Neonatal preterm birth                                | 841.31<br>(405.53 to<br>1,517.58)    | 302.51<br>(94.09 to<br>699.56)      | 215.77<br>(67.89 to<br>505.33)      | 466.86<br>(145.19 to<br>1,064.88)   | 9.72<br>(4.68 to<br>17.53)       | 3.50<br>(1.09 to<br>8.08)        | 2.49<br>(0.78 to<br>5.84)        | 5.39<br>(1.68 to<br>12.30)       |

|                                                                         |                                                               |                                                               |                                                               |                                                               |                                                        |                                                            |                                                            |                                                            |
|-------------------------------------------------------------------------|---------------------------------------------------------------|---------------------------------------------------------------|---------------------------------------------------------------|---------------------------------------------------------------|--------------------------------------------------------|------------------------------------------------------------|------------------------------------------------------------|------------------------------------------------------------|
| Neonatal encephalopathy due to birth asphyxia and trauma                | 443.54<br>(215.88 to<br>821.48)                               | 203.50<br>(51.65 to<br>525.29)                                | 151.61<br>(37.90 to<br>393.10)                                | 250.75<br>(62.63 to<br>653.27)                                | 5.12<br>(2.49 to<br>9.49)                              | 2.35<br>(0.60 to<br>6.07)                                  | 1.75<br>(0.44 to<br>4.54)                                  | 2.90<br>(0.72 to<br>7.55)                                  |
| Neonatal sepsis and other neonatal infections                           | 209.58<br>(97.77 to<br>405.29)                                | 131.77<br>(43.05 to<br>304.88)                                | 97.97<br>(31.70 to<br>225.99)                                 | 162.34<br>(52.69 to<br>376.67)                                | 2.42<br>(1.13 to<br>4.68)                              | 1.52<br>(0.50 to<br>3.52)                                  | 1.13<br>(0.37 to<br>2.61)                                  | 1.88<br>(0.61 to<br>4.36)                                  |
| Hemolytic disease and other neonatal jaundice                           | 5.13<br>(2.00 to<br>11.02)                                    | 1.95<br>(0.34 to<br>6.37)                                     | 1.39<br>(0.24 to<br>4.52)                                     | 2.44<br>(0.43 to<br>7.97)                                     | 0.06<br>(0.02 to<br>0.13)                              | 0.02<br>(0.00 to<br>0.07)                                  | 0.02<br>(0.00 to<br>0.05)                                  | 0.03<br>(0.01 to<br>0.09)                                  |
| Other neonatal disorders                                                | 249.32<br>(116.81 to<br>459.24)                               | 117.58<br>(30.90 to<br>299.81)                                | 84.13<br>(22.24 to<br>213.14)                                 | 148.66<br>(39.73 to<br>391.46)                                | 2.88<br>(1.35 to<br>5.31)                              | 1.36<br>(0.36 to<br>3.46)                                  | 0.97<br>(0.26 to<br>2.46)                                  | 1.72<br>(0.46 to<br>4.52)                                  |
| <b>Nutritional deficiencies</b>                                         | <b>117.66</b><br><b>(95.36 to</b><br><b>152.83)</b>           | <b>96.47</b><br><b>(80.65 to</b><br><b>115.54)</b>            | <b>84.11</b><br><b>(69.86 to</b><br><b>100.50)</b>            | <b>99.43</b><br><b>(82.45 to</b><br><b>120.42)</b>            | <b>5.41</b><br><b>(4.83 to</b><br><b>6.07)</b>         | <b>6.85</b><br><b>(5.42 to</b><br><b>8.34)</b>             | <b>6.24</b><br><b>(4.97 to</b><br><b>7.59)</b>             | <b>6.73</b><br><b>(5.22 to</b><br><b>8.32)</b>             |
| Protein-energy malnutrition                                             | 102.78<br>(80.38 to<br>136.47)                                | 79.25<br>(64.19 to<br>98.07)                                  | 69.52<br>(56.15 to<br>85.85)                                  | 81.55<br>(65.12 to<br>101.45)                                 | 4.71<br>(4.08 to<br>5.45)                              | 5.75<br>(4.34 to<br>7.16)                                  | 5.27<br>(3.99 to<br>6.55)                                  | 5.63<br>(4.16 to<br>7.13)                                  |
| Iodine deficiency                                                       | 0.83<br>(0.04 to<br>2.48)                                     | 3.10<br>(0.06 to<br>10.30)                                    | 2.51<br>(0.04 to<br>8.41)                                     | 3.29<br>(0.06 to<br>10.76)                                    | 0.03<br>(0.00 to<br>0.09)                              | 0.19<br>(0.00 to<br>0.84)                                  | 0.16<br>(0.00 to<br>0.74)                                  | 0.20<br>(0.00 to<br>0.84)                                  |
| Dietary iron deficiency                                                 | 1.14<br>(0.53 to<br>1.64)                                     | 0.75<br>(0.33 to<br>1.14)                                     | 0.66<br>(0.29 to<br>1.01)                                     | 0.79<br>(0.36 to<br>1.21)                                     | 0.03<br>(0.01 to<br>0.04)                              | 0.02<br>(0.01 to<br>0.03)                                  | 0.02<br>(0.01 to<br>0.03)                                  | 0.02<br>(0.01 to<br>0.03)                                  |
| Other nutritional deficiencies                                          | 12.91<br>(5.75 to<br>18.89)                                   | 13.38<br>(5.70 to<br>19.79)                                   | 11.41<br>(4.69 to<br>17.16)                                   | 13.79<br>(5.94 to<br>20.31)                                   | 0.64<br>(0.25 to<br>0.98)                              | 0.39<br>(0.30 to<br>1.42)                                  | 0.79<br>(0.26 to<br>1.28)                                  | 0.88<br>(0.30 to<br>1.44)                                  |
| <b>Other communicable, maternal, neonatal, and nutritional diseases</b> | <b>188.44</b><br><b>(161.52 to</b><br><b>219.80)</b>          | <b>147.13</b><br><b>(120.78 to</b><br><b>179.98)</b>          | <b>123.52</b><br><b>(99.35 to</b><br><b>152.15)</b>           | <b>155.79</b><br><b>(125.16 to</b><br><b>192.17)</b>          | <b>4.83</b><br><b>(4.24 to</b><br><b>5.43)</b>         | <b>4.79</b><br><b>(3.96 to</b><br><b>5.63)</b>             | <b>4.12</b><br><b>(3.39 to</b><br><b>4.84)</b>             | <b>4.94</b><br><b>(4.08 to</b><br><b>5.77)</b>             |
| Sexually transmitted infections excluding HIV                           | 25.12<br>(16.18 to<br>39.90)                                  | 10.58<br>(7.42 to<br>14.99)                                   | 9.12<br>(6.35 to<br>12.80)                                    | 11.22<br>(7.78 to<br>16.19)                                   | 0.56<br>(0.43 to<br>0.75)                              | 0.33<br>(0.25 to<br>0.41)                                  | 0.29<br>(0.22 to<br>0.37)                                  | 0.34<br>(0.26 to<br>0.43)                                  |
| Syphilis                                                                | 16.40<br>(7.92 to<br>30.64)                                   | 4.86<br>(2.66 to<br>8.69)                                     | 4.01<br>(2.28 to<br>7.25)                                     | 5.31<br>(2.86 to<br>9.76)                                     | 0.31<br>(0.19 to<br>0.49)                              | 0.12<br>(0.09 to<br>0.18)                                  | 0.11<br>(0.07 to<br>0.15)                                  | 0.13<br>(0.09 to<br>0.19)                                  |
| Chlamydial infection                                                    | 1.64<br>(1.37 to<br>2.01)                                     | 1.08<br>(0.79 to<br>1.45)                                     | 0.96<br>(0.69 to<br>1.29)                                     | 1.11<br>(0.80 to<br>1.51)                                     | 0.05<br>(0.04 to<br>0.06)                              | 0.04<br>(0.03 to<br>0.05)                                  | 0.04<br>(0.03 to<br>0.05)                                  | 0.04<br>(0.03 to<br>0.05)                                  |
| Gonococcal infection                                                    | 4.64<br>(3.89 to<br>5.60)                                     | 3.12<br>(2.28 to<br>4.23)                                     | 2.79<br>(2.00 to<br>3.81)                                     | 3.22<br>(2.34 to<br>4.37)                                     | 0.14<br>(0.12 to<br>0.16)                              | 0.12<br>(0.09 to<br>0.15)                                  | 0.11<br>(0.08 to<br>0.14)                                  | 0.12<br>(0.09 to<br>0.15)                                  |
| Other sexually transmitted infections                                   | 2.44<br>(2.03 to<br>2.97)                                     | 1.52<br>(1.12 to<br>2.10)                                     | 1.36<br>(0.97 to<br>1.87)                                     | 1.58<br>(1.15 to<br>2.16)                                     | 0.07<br>(0.06 to<br>0.08)                              | 0.05<br>(0.04 to<br>0.06)                                  | 0.04<br>(0.03 to<br>0.06)                                  | 0.05<br>(0.04 to<br>0.06)                                  |
| Acute hepatitis                                                         | 11.06<br>(9.40 to<br>13.02)                                   | 10.02<br>(7.61 to<br>13.24)                                   | 8.49<br>(6.22 to<br>11.40)                                    | 10.42<br>(7.80 to<br>13.82)                                   | 0.29<br>(0.25 to<br>0.34)                              | 0.33<br>(0.26 to<br>0.43)                                  | 0.29<br>(0.21 to<br>0.38)                                  | 0.34<br>(0.26 to<br>0.44)                                  |
| Acute hepatitis A                                                       | 0.22<br>(0.10 to<br>0.41)                                     | 0.17<br>(0.07 to<br>0.37)                                     | 0.15<br>(0.06 to<br>0.31)                                     | 0.18<br>(0.07 to<br>0.39)                                     | 0.00<br>(0.00 to<br>0.01)                              | 0.00<br>(0.00 to<br>0.01)                                  | 0.00<br>(0.00 to<br>0.01)                                  | 0.01<br>(0.00 to<br>0.01)                                  |
| Acute hepatitis B                                                       | 8.06<br>(6.68 to<br>9.66)                                     | 7.56<br>(5.42 to<br>10.31)                                    | 6.33<br>(4.43 to<br>8.74)                                     | 7.88<br>(5.65 to<br>10.68)                                    | 0.27<br>(0.18 to<br>0.36)                              | 0.24<br>(0.18 to<br>0.33)                                  | 0.21<br>(0.15 to<br>0.28)                                  | 0.25<br>(0.18 to<br>0.34)                                  |
| Acute hepatitis C                                                       | 0.48<br>(0.34 to<br>0.66)                                     | 0.50<br>(0.33 to<br>0.74)                                     | 0.46<br>(0.29 to<br>0.69)                                     | 0.51<br>(0.33 to<br>0.76)                                     | 0.01<br>(0.01 to<br>0.02)                              | 0.02<br>(0.01 to<br>0.03)                                  | 0.02<br>(0.01 to<br>0.02)                                  | 0.02<br>(0.01 to<br>0.03)                                  |
| Acute hepatitis E                                                       | 2.31<br>(1.64 to<br>3.12)                                     | 1.78<br>(1.14 to<br>2.60)                                     | 1.55<br>(0.98 to<br>2.25)                                     | 1.84<br>(1.17 to<br>2.70)                                     | 0.06<br>(0.04 to<br>0.08)                              | 0.07<br>(0.04 to<br>0.09)                                  | 0.06<br>(0.04 to<br>0.09)                                  | 0.06<br>(0.04 to<br>0.09)                                  |
| Other unspecified infectious diseases                                   | 152.26<br>(132.02 to<br>178.01)                               | 126.53<br>(103.00 to<br>155.63)                               | 105.90<br>(84.42 to<br>131.49)                                | 134.15<br>(107.79 to<br>166.87)                               | 3.97<br>(3.48 to<br>4.53)                              | 4.13<br>(3.41 to<br>4.87)                                  | 3.54<br>(2.90 to<br>4.20)                                  | 4.27<br>(3.48 to<br>5.04)                                  |
| <b>Non-communicable diseases</b>                                        | <b>19,784.26</b><br><b>(18,614.05 to</b><br><b>21,074.43)</b> | <b>28,622.56</b><br><b>(22,153.95 to</b><br><b>36,923.37)</b> | <b>23,723.55</b><br><b>(18,605.68 to</b><br><b>31,048.20)</b> | <b>34,906.64</b><br><b>(26,627.69 to</b><br><b>45,713.84)</b> | <b>983.88</b><br><b>(934.56 to</b><br><b>1,039.20)</b> | <b>1,739.36</b><br><b>(1,375.74 to</b><br><b>2,171.88)</b> | <b>1,496.21</b><br><b>(1,178.60 to</b><br><b>1,887.75)</b> | <b>2,022.31</b><br><b>(1,584.85 to</b><br><b>2,510.76)</b> |

| Saint Lucia                          |                                           |                                           |                                           |                                            |                                     |                                     |                                     |                                     |
|--------------------------------------|-------------------------------------------|-------------------------------------------|-------------------------------------------|--------------------------------------------|-------------------------------------|-------------------------------------|-------------------------------------|-------------------------------------|
| Cause                                | YLLs (actual counts)                      |                                           |                                           |                                            | Deaths (actual counts)              |                                     |                                     |                                     |
|                                      | 2016                                      | 2040 Forecast                             | 2040 Better Scenario                      | 2040 Worse Scenario                        | 2016                                | 2040 Forecast                       | 2040 Better Scenario                | 2040 Worse Scenario                 |
| <b>Neoplasms</b>                     | <b>5,313.27</b><br>(4,956.32 to 5,713.82) | <b>8,137.39</b><br>(6,713.47 to 9,541.08) | <b>7,730.39</b><br>(6,354.50 to 9,161.93) | <b>8,868.31</b><br>(7,285.31 to 10,516.19) | <b>234.37</b><br>(219.54 to 252.93) | <b>437.64</b><br>(368.21 to 506.53) | <b>430.88</b><br>(358.93 to 500.05) | <b>455.82</b><br>(382.57 to 532.21) |
| Lip and oral cavity cancer           | 103.96<br>(92.82 to 115.76)               | 143.87<br>(88.85 to 226.49)               | 104.02<br>(67.08 to 159.04)               | 227.09<br>(131.79 to 376.76)               | 4.23<br>(3.82 to 4.67)              | 6.65<br>(4.25 to 10.22)             | 5.11<br>(3.37 to 7.59)              | 9.91<br>(5.89 to 15.87)             |
| Nasopharynx cancer                   | 44.03<br>(39.72 to 48.47)                 | 42.97<br>(26.36 to 64.48)                 | 29.43<br>(19.17 to 42.38)                 | 69.79<br>(40.60 to 108.01)                 | 1.37<br>(1.25 to 1.50)              | 1.55<br>(0.97 to 2.27)              | 1.10<br>(0.73 to 1.57)              | 2.42<br>(1.45 to 3.67)              |
| Other pharynx cancer                 | 43.07<br>(38.40 to 48.96)                 | 54.35<br>(31.83 to 86.11)                 | 49.88<br>(29.93 to 77.88)                 | 72.06<br>(40.78 to 119.34)                 | 1.64<br>(1.48 to 1.85)              | 2.41<br>(1.47 to 3.80)              | 2.25<br>(1.40 to 3.49)              | 3.11<br>(1.79 to 5.11)              |
| Esophageal cancer                    | 119.18<br>(107.34 to 132.82)              | 185.19<br>(116.03 to 290.08)              | 137.60<br>(91.94 to 200.30)               | 259.27<br>(154.63 to 425.64)               | 5.37<br>(4.85 to 5.96)              | 9.28<br>(6.00 to 14.13)             | 7.25<br>(4.90 to 10.33)             | 12.37<br>(7.62 to 19.46)            |
| Stomach cancer                       | 349.47<br>(321.37 to 379.93)              | 443.83<br>(352.63 to 568.84)              | 393.65<br>(312.97 to 497.88)              | 450.52<br>(358.62 to 582.15)               | 16.79<br>(15.53 to 18.11)           | 24.67<br>(19.73 to 31.77)           | 22.42<br>(17.98 to 28.40)           | 24.36<br>(19.61 to 31.29)           |
| Colon and rectum cancer              | 379.14<br>(344.66 to 418.15)              | 619.99<br>(418.59 to 907.30)              | 603.38<br>(413.72 to 893.03)              | 678.83<br>(452.22 to 1,004.78)             | 18.48<br>(16.83 to 20.25)           | 35.94<br>(24.71 to 51.84)           | 35.81<br>(24.79 to 52.87)           | 38.06<br>(25.48 to 55.98)           |
| Liver cancer                         | 166.79<br>(153.09 to 182.61)              | 293.28<br>(205.65 to 414.62)              | 271.32<br>(194.79 to 374.69)              | 365.24<br>(240.45 to 542.41)               | 7.22<br>(6.66 to 7.86)              | 14.87<br>(10.57 to 20.63)           | 14.20<br>(10.26 to 19.55)           | 17.67<br>(11.90 to 25.79)           |
| Liver cancer due to hepatitis B      | 66.14<br>(56.42 to 76.61)                 | 109.92<br>(74.56 to 164.87)               | 101.81<br>(70.73 to 147.25)               | 130.90<br>(82.69 to 205.84)                | 2.49<br>(2.11 to 2.93)              | 4.85<br>(3.38 to 7.05)              | 4.62<br>(3.27 to 6.55)              | 5.55<br>(3.63 to 8.49)              |
| Liver cancer due to hepatitis C      | 37.44<br>(32.05 to 43.27)                 | 73.50<br>(52.38 to 103.05)                | 69.74<br>(50.16 to 96.71)                 | 84.10<br>(56.94 to 125.51)                 | 1.96<br>(1.70 to 2.26)              | 4.39<br>(3.13 to 6.15)              | 4.29<br>(3.08 to 5.93)              | 4.82<br>(3.28 to 6.92)              |
| Liver cancer due to alcohol use      | 33.17<br>(28.09 to 38.95)                 | 59.59<br>(39.67 to 90.40)                 | 53.02<br>(35.70 to 79.18)                 | 89.42<br>(56.43 to 140.80)                 | 1.50<br>(1.28 to 1.74)              | 3.12<br>(2.08 to 4.68)              | 2.87<br>(1.93 to 4.25)              | 4.38<br>(2.82 to 6.73)              |
| Liver cancer due to other causes     | 30.04<br>(26.00 to 34.90)                 | 50.27<br>(33.34 to 75.19)                 | 46.76<br>(31.80 to 69.15)                 | 60.82<br>(37.39 to 98.81)                  | 1.26<br>(1.10 to 1.45)              | 2.52<br>(1.66 to 3.77)              | 2.42<br>(1.60 to 3.58)              | 2.93<br>(1.81 to 4.69)              |
| Gallbladder and biliary tract cancer | 47.80<br>(42.88 to 63.02)                 | 62.55<br>(51.47 to 83.93)                 | 64.39<br>(52.45 to 87.63)                 | 59.89<br>(49.91 to 79.97)                  | 2.25<br>(2.04 to 3.00)              | 3.39<br>(2.83 to 4.51)              | 3.55<br>(2.92 to 4.77)              | 3.18<br>(2.69 to 4.19)              |
| Pancreatic cancer                    | 223.40<br>(206.24 to 242.52)              | 415.44<br>(324.32 to 534.71)              | 419.72<br>(324.65 to 542.24)              | 426.14<br>(326.93 to 557.19)               | 10.82<br>(10.01 to 11.69)           | 22.61<br>(17.87 to 28.97)           | 23.48<br>(18.39 to 30.49)           | 22.56<br>(17.55 to 29.56)           |
| Larynx cancer                        | 87.30<br>(77.88 to 98.15)                 | 108.24<br>(64.01 to 178.47)               | 68.69<br>(43.56 to 104.65)                | 166.25<br>(88.75 to 287.31)                | 3.73<br>(3.35 to 4.17)              | 5.17<br>(3.19 to 8.25)              | 3.50<br>(2.35 to 5.16)              | 7.57<br>(4.27 to 12.76)             |
| Tracheal, bronchus, and lung cancer  | 475.95<br>(435.44 to 524.27)              | 698.30<br>(499.18 to 950.08)              | 499.87<br>(373.42 to 652.35)              | 1,006.07<br>(695.36 to 1,401.70)           | 20.25<br>(18.65 to 22.13)           | 33.89<br>(25.05 to 44.49)           | 25.96<br>(20.04 to 32.97)           | 46.31<br>(33.13 to 62.90)           |
| Malignant skin melanoma              | 33.32<br>(27.66 to 48.01)                 | 47.89<br>(38.21 to 71.02)                 | 52.58<br>(41.64 to 77.73)                 | 45.22<br>(35.96 to 67.61)                  | 1.37<br>(1.14 to 1.99)              | 2.42<br>(1.93 to 3.63)              | 2.71<br>(2.15 to 4.06)              | 2.23<br>(1.78 to 3.33)              |
| Non-melanoma skin cancer             | 23.79<br>(21.59 to 26.03)                 | 40.43<br>(34.43 to 46.31)                 | 38.19<br>(31.64 to 44.52)                 | 39.53<br>(34.06 to 44.79)                  | 1.11<br>(1.02 to 1.21)              | 2.31<br>(1.98 to 2.64)              | 2.23<br>(1.84 to 2.63)              | 2.19<br>(1.88 to 2.51)              |
| Breast cancer                        | 541.21<br>(469.12 to 615.38)              | 734.16<br>(530.03 to 1,004.45)            | 713.74<br>(513.26 to 981.64)              | 817.65<br>(573.27 to 1,151.12)             | 20.45<br>(17.88 to 23.01)           | 34.53<br>(25.02 to 47.12)           | 34.33<br>(24.72 to 47.32)           | 37.26<br>(26.63 to 52.76)           |
| Cervical cancer                      | 314.65<br>(277.20 to 358.37)              | 384.34<br>(286.13 to 511.84)              | 342.98<br>(254.50 to 456.13)              | 398.41<br>(294.64 to 537.71)               | 11.41<br>(10.10 to 12.94)           | 16.24<br>(12.43 to 20.63)           | 14.77<br>(11.14 to 18.89)           | 16.47<br>(12.58 to 21.03)           |

|                                 |                                                            |                                                             |                                                            |                                                              |                                                      |                                                      |                                                      |                                                        |
|---------------------------------|------------------------------------------------------------|-------------------------------------------------------------|------------------------------------------------------------|--------------------------------------------------------------|------------------------------------------------------|------------------------------------------------------|------------------------------------------------------|--------------------------------------------------------|
| Uterine cancer                  | 74.51<br>(65.50 to<br>83.53)                               | 117.05<br>(88.73 to<br>146.60)                              | 106.48<br>(79.24 to<br>134.43)                             | 117.49<br>(89.68 to<br>146.89)                               | 3.79<br>(3.35 to<br>4.23)                            | 6.91<br>(5.34 to<br>8.41)                            | 6.38<br>(4.84 to<br>7.94)                            | 6.82<br>(5.29 to<br>8.36)                              |
| Ovarian cancer                  | 110.83<br>(93.85 to<br>131.31)                             | 189.90<br>(120.00 to<br>286.41)                             | 197.99<br>(124.87 to<br>298.07)                            | 194.79<br>(118.66 to<br>304.97)                              | 4.68<br>(3.97 to<br>5.54)                            | 9.58<br>(6.06 to<br>14.70)                           | 10.14<br>(6.45 to<br>15.70)                          | 9.66<br>(6.00 to<br>15.19)                             |
| Prostate cancer                 | 651.57<br>(570.45 to<br>786.55)                            | 1,519.02<br>(1,283.33 to<br>1,864.47)                       | 1,603.14<br>(1,343.83 to<br>1,953.04)                      | 1,406.96<br>(1,200.95 to<br>1,757.05)                        | 46.20<br>(40.54 to<br>56.70)                         | 114.25<br>(94.23 to<br>141.44)                       | 122.89<br>(99.84 to<br>151.20)                       | 103.70<br>(84.27 to<br>128.91)                         |
| Testicular cancer               | 12.24<br>(9.50 to<br>14.78)                                | 9.10<br>(6.84 to<br>11.94)                                  | 8.58<br>(6.48 to<br>11.48)                                 | 9.07<br>(6.80 to<br>11.85)                                   | 0.32<br>(0.26 to<br>0.38)                            | 0.33<br>(0.25 to<br>0.41)                            | 0.32<br>(0.24 to<br>0.40)                            | 0.32<br>(0.25 to<br>0.39)                              |
| <b>Saint Lucia</b>              |                                                            |                                                             |                                                            |                                                              |                                                      |                                                      |                                                      |                                                        |
| Cause                           | YLLs (actual counts)                                       |                                                             |                                                            |                                                              | Deaths (actual counts)                               |                                                      |                                                      |                                                        |
|                                 | 2016                                                       | 2040 Forecast                                               | 2040 Better Scenario                                       | 2040 Worse Scenario                                          | 2016                                                 | 2040 Forecast                                        | 2040 Better Scenario                                 | 2040 Worse Scenario                                    |
| Kidney cancer                   | 61.43<br>(55.88 to<br>67.81)                               | 113.65<br>(93.82 to<br>135.99)                              | 119.17<br>(99.77 to<br>141.21)                             | 111.44<br>(92.00 to<br>134.09)                               | 2.33<br>(2.13 to<br>2.58)                            | 5.22<br>(4.43 to<br>6.10)                            | 5.63<br>(4.75 to<br>6.57)                            | 4.97<br>(4.24 to<br>5.86)                              |
| Bladder cancer                  | 82.91<br>(75.53 to<br>90.34)                               | 136.99<br>(106.72 to<br>176.49)                             | 130.03<br>(100.89 to<br>169.27)                            | 143.12<br>(108.23 to<br>192.35)                              | 4.77<br>(4.36 to<br>5.20)                            | 8.95<br>(6.92 to<br>11.73)                           | 8.80<br>(6.83 to<br>11.58)                           | 9.04<br>(6.81 to<br>12.16)                             |
| Brain and nervous system cancer | 120.79<br>(106.59 to<br>141.67)                            | 173.43<br>(145.19 to<br>209.64)                             | 176.94<br>(146.94 to<br>215.53)                            | 169.21<br>(143.10 to<br>204.50)                              | 3.52<br>(3.15 to<br>4.16)                            | 6.46<br>(5.49 to<br>7.87)                            | 6.72<br>(5.62 to<br>8.21)                            | 6.16<br>(5.29 to<br>7.44)                              |
| Thyroid cancer                  | 31.48<br>(27.98 to<br>35.24)                               | 36.21<br>(24.95 to<br>52.09)                                | 32.51<br>(22.61 to<br>47.00)                               | 40.13<br>(27.00 to<br>58.17)                                 | 1.40<br>(1.25 to<br>1.57)                            | 1.92<br>(1.34 to<br>2.75)                            | 1.75<br>(1.22 to<br>2.51)                            | 2.07<br>(1.42 to<br>2.98)                              |
| Mesothelioma                    | 9.01<br>(8.20 to<br>10.04)                                 | 10.92<br>(8.89 to<br>13.07)                                 | 10.69<br>(8.66 to<br>12.87)                                | 10.76<br>(8.86 to<br>12.88)                                  | 0.32<br>(0.30 to<br>0.36)                            | 0.78<br>(0.40 to<br>0.57)                            | 0.48<br>(0.40 to<br>0.58)                            | 0.47<br>(0.39 to<br>0.55)                              |
| Hodgkin lymphoma                | 31.75<br>(27.80 to<br>36.38)                               | 25.47<br>(20.46 to<br>31.78)                                | 21.78<br>(17.24 to<br>27.44)                               | 26.30<br>(21.31 to<br>32.63)                                 | 0.86<br>(0.76 to<br>0.97)                            | 0.86<br>(0.70 to<br>1.02)                            | 0.74<br>(0.59 to<br>0.91)                            | 0.87<br>(0.71 to<br>1.03)                              |
| Non-Hodgkin lymphoma            | 294.84<br>(264.74 to<br>338.98)                            | 402.16<br>(320.34 to<br>513.34)                             | 409.43<br>(324.14 to<br>527.05)                            | 410.29<br>(320.30 to<br>531.13)                              | 9.29<br>(8.39 to<br>11.03)                           | 15.86<br>(12.68 to<br>20.24)                         | 16.43<br>(13.02 to<br>21.06)                         | 15.81<br>(12.48 to<br>20.56)                           |
| Multiple myeloma                | 161.56<br>(124.34 to<br>185.24)                            | 259.67<br>(191.86 to<br>337.80)                             | 271.03<br>(200.69 to<br>350.08)                            | 262.19<br>(192.11 to<br>346.78)                              | 6.98<br>(5.60 to<br>7.97)                            | 12.88<br>(9.85 to<br>16.88)                          | 13.64<br>(10.40 to<br>17.79)                         | 12.74<br>(9.59 to<br>16.81)                            |
| Leukemia                        | 323.32<br>(291.23 to<br>361.30)                            | 353.55<br>(284.84 to<br>432.66)                             | 331.81<br>(270.89 to<br>404.23)                            | 382.56<br>(303.93 to<br>478.03)                              | 9.97<br>(9.21 to<br>10.81)                           | 15.01<br>(12.39 to<br>18.15)                         | 14.42<br>(11.87 to<br>17.35)                         | 15.72<br>(12.61 to<br>19.52)                           |
| Acute lymphoid leukemia         | 57.20<br>(45.44 to<br>73.96)                               | 42.27<br>(31.87 to<br>55.61)                                | 40.97<br>(31.38 to<br>53.94)                               | 45.20<br>(33.83 to<br>60.26)                                 | 1.09<br>(0.92 to<br>1.31)                            | 1.07<br>(0.85 to<br>1.34)                            | 1.06<br>(0.85 to<br>1.33)                            | 1.13<br>(0.88 to<br>1.41)                              |
| Chronic lymphoid leukemia       | 22.83<br>(18.60 to<br>27.06)                               | 33.10<br>(23.38 to<br>46.00)                                | 32.69<br>(23.54 to<br>45.52)                               | 34.56<br>(24.14 to<br>49.02)                                 | 1.13<br>(0.93 to<br>1.34)                            | 1.89<br>(1.37 to<br>2.57)                            | 1.91<br>(1.39 to<br>2.60)                            | 1.91<br>(1.35 to<br>2.66)                              |
| Acute myeloid leukemia          | 68.80<br>(60.33 to<br>79.98)                               | 84.57<br>(66.81 to<br>106.90)                               | 85.72<br>(68.54 to<br>106.96)                              | 89.78<br>(69.57 to<br>116.04)                                | 1.90<br>(1.70 to<br>2.18)                            | 3.17<br>(2.55 to<br>3.94)                            | 3.30<br>(2.68 to<br>4.08)                            | 3.27<br>(2.57 to<br>4.13)                              |
| Chronic myeloid leukemia        | 23.38<br>(20.46 to<br>27.08)                               | 19.55<br>(14.14 to<br>26.92)                                | 18.07<br>(13.00 to<br>24.69)                               | 21.20<br>(14.83 to<br>29.83)                                 | 0.82<br>(0.72 to<br>0.95)                            | 0.86<br>(0.64 to<br>1.19)                            | 0.82<br>(0.59 to<br>1.11)                            | 0.91<br>(0.65 to<br>1.28)                              |
| Other leukemia                  | 151.11<br>(135.34 to<br>168.46)                            | 174.06<br>(141.91 to<br>210.90)                             | 154.36<br>(125.80 to<br>186.04)                            | 191.83<br>(154.29 to<br>236.67)                              | 5.02<br>(4.58 to<br>5.48)                            | 8.01<br>(6.60 to<br>9.58)                            | 7.32<br>(6.00 to<br>8.74)                            | 8.51<br>(6.89 to<br>10.39)                             |
| Other neoplasms                 | 393.96<br>(357.12 to<br>435.86)                            | 515.46<br>(437.23 to<br>596.07)                             | 521.35<br>(436.59 to<br>606.80)                            | 502.03<br>(429.14 to<br>576.36)                              | 13.44<br>(12.32 to<br>14.65)                         | 23.01<br>(19.97 to<br>26.06)                         | 23.85<br>(20.36 to<br>27.23)                         | 21.80<br>(19.13 to<br>24.47)                           |
| <b>Cardiovascular diseases</b>  | <b>6,721.99</b><br><b>(6,302.75 to</b><br><b>7,137.17)</b> | <b>8,605.80</b><br><b>(5,757.72 to</b><br><b>13,257.93)</b> | <b>5,885.82</b><br><b>(4,096.13 to</b><br><b>8,567.40)</b> | <b>12,195.47</b><br><b>(7,805.92 to</b><br><b>19,137.11)</b> | <b>384.48</b><br><b>(363.64 to</b><br><b>405.59)</b> | <b>579.11</b><br><b>(401.90 to</b><br><b>849.12)</b> | <b>426.16</b><br><b>(296.76 to</b><br><b>608.88)</b> | <b>758.36</b><br><b>(512.98 to</b><br><b>1,141.94)</b> |



|                                |                                       |                                       |                                     |                                       |                                 |                                 |                                |                                 |
|--------------------------------|---------------------------------------|---------------------------------------|-------------------------------------|---------------------------------------|---------------------------------|---------------------------------|--------------------------------|---------------------------------|
| Rheumatic heart disease        | 132.85<br>(119.12 to<br>147.62)       | 96.03<br>(70.46 to<br>131.45)         | 78.17<br>(56.53 to<br>108.37)       | 100.42<br>(74.17 to<br>137.62)        | 5.72<br>(5.06 to<br>6.34)       | 6.14<br>(4.46 to<br>8.59)       | 5.17<br>(3.66 to<br>7.19)      | 6.19<br>(4.45 to<br>8.62)       |
| Ischemic heart disease         | 2,321.65<br>(2,142.05 to<br>2,509.77) | 2,818.06<br>(1,491.52 to<br>5,274.24) | 1,631.01<br>(861.00 to<br>3,193.50) | 4,527.73<br>(2,316.17 to<br>8,667.82) | 139.30<br>(127.53 to<br>149.21) | 191.84<br>(107.85 to<br>365.95) | 122.54<br>(66.38 to<br>238.66) | 280.21<br>(153.68 to<br>541.07) |
| Stroke                         | 2,149.90<br>(1,945.85 to<br>2,331.39) | 2,314.03<br>(1,309.18 to<br>4,280.29) | 1,364.68<br>(789.41 to<br>2,534.72) | 3,863.11<br>(2,078.68 to<br>7,078.43) | 123.61<br>(111.27 to<br>134.16) | 154.38<br>(90.77 to<br>279.00)  | 101.13<br>(59.93 to<br>192.11) | 230.98<br>(132.29 to<br>421.63) |
| Ischemic stroke                | 794.24<br>(706.82 to<br>869.47)       | 957.08<br>(470.20 to<br>2,177.80)     | 626.23<br>(317.63 to<br>1,495.26)   | 1,439.13<br>(667.58 to<br>3,565.05)   | 55.29<br>(49.16 to<br>60.50)    | 74.11<br>(37.86 to<br>175.54)   | 52.73<br>(27.18 to<br>128.80)  | 101.69<br>(49.69 to<br>261.42)  |
| Intracerebral hemorrhage       | 1,355.66<br>(1,233.39 to<br>1,472.73) | 1,356.95<br>(752.89 to<br>2,304.96)   | 738.45<br>(425.72 to<br>1,248.33)   | 2,423.98<br>(1,231.44 to<br>4,519.22) | 68.32<br>(61.46 to<br>74.34)    | 80.28<br>(48.00 to<br>131.11)   | 48.40<br>(29.28 to<br>76.63)   | 129.29<br>(71.62 to<br>224.73)  |
| Hypertensive heart disease     | 532.54<br>(424.10 to<br>867.06)       | 977.48<br>(558.53 to<br>1,783.27)     | 701.41<br>(429.58 to<br>1,168.85)   | 1,226.55<br>(669.83 to<br>2,299.48)   | 34.87<br>(27.83 to<br>57.39)    | 74.94<br>(42.58 to<br>142.13)   | 56.17<br>(34.53 to<br>94.93)   | 90.21<br>(49.16 to<br>180.77)   |
| Cardiomyopathy and myocarditis | 486.31<br>(384.25 to<br>550.30)       | 604.34<br>(406.62 to<br>836.03)       | 571.58<br>(383.47 to<br>787.60)     | 629.32<br>(422.81 to<br>863.51)       | 20.38<br>(16.42 to<br>22.92)    | 31.45<br>(22.19 to<br>43.91)    | 30.52<br>(21.37 to<br>42.42)   | 31.48<br>(22.30 to<br>43.85)    |
| Myocarditis                    | 65.70<br>(51.23 to<br>78.79)          | 79.91<br>(57.09 to<br>102.37)         | 76.69<br>(54.42 to<br>100.72)       | 78.60<br>(56.90 to<br>100.72)         | 3.41<br>(2.72 to<br>4.33)       | 5.38<br>(3.81 to<br>7.34)       | 5.31<br>(3.73 to<br>7.34)      | 5.12<br>(3.66 to<br>6.93)       |

**Saint Lucia**

| Cause                                         | YLLs (actual counts)                     |                                              |                                          |                                                | Deaths (actual counts)                |                                       |                                       |                                       |
|-----------------------------------------------|------------------------------------------|----------------------------------------------|------------------------------------------|------------------------------------------------|---------------------------------------|---------------------------------------|---------------------------------------|---------------------------------------|
|                                               | 2016                                     | 2040 Forecast                                | 2040 Better Scenario                     | 2040 Worse Scenario                            | 2016                                  | 2040 Forecast                         | 2040 Better Scenario                  | 2040 Worse Scenario                   |
| Alcoholic cardiomyopathy                      | 88.12<br>(60.34 to<br>110.31)            | 93.38<br>(59.25 to<br>121.76)                | 94.08<br>(59.51 to<br>124.48)            | 117.28<br>(75.88 to<br>150.93)                 | 3.44<br>(2.38 to<br>4.25)             | 4.19<br>(2.73 to<br>5.44)             | 4.31<br>(2.77 to<br>5.65)             | 5.02<br>(3.33 to<br>6.35)             |
| Other cardiomyopathy                          | 332.49<br>(251.99 to<br>379.14)          | 431.05<br>(259.85 to<br>641.28)              | 400.80<br>(242.66 to<br>595.31)          | 433.44<br>(259.42 to<br>647.60)                | 13.53<br>(10.28 to<br>15.37)          | 21.88<br>(13.91 to<br>33.27)          | 20.90<br>(13.23 to<br>31.59)          | 21.34<br>(13.34 to<br>32.17)          |
| Atrial fibrillation and flutter               | 75.12<br>(58.70 to<br>94.55)             | 150.41<br>(108.13 to<br>206.83)              | 144.95<br>(103.58 to<br>197.34)          | 153.24<br>(110.97 to<br>211.84)                | 7.83<br>(5.98 to<br>10.04)            | 15.97<br>(10.77 to<br>22.65)          | 15.91<br>(10.83 to<br>22.11)          | 15.81<br>(10.58 to<br>22.40)          |
| Aortic aneurysm                               | 180.47<br>(162.50 to<br>197.75)          | 271.85<br>(209.35 to<br>353.77)              | 251.09<br>(193.18 to<br>317.52)          | 267.58<br>(206.81 to<br>348.35)                | 10.25<br>(9.21 to<br>11.17)           | 17.30<br>(13.40 to<br>22.26)          | 16.81<br>(12.92 to<br>21.22)          | 16.54<br>(13.06 to<br>21.23)          |
| Peripheral artery disease                     | 39.32<br>(28.66 to<br>60.22)             | 115.01<br>(72.83 to<br>180.48)               | 123.76<br>(78.09 to<br>193.80)           | 116.41<br>(74.01 to<br>183.55)                 | 4.00<br>(2.75 to<br>6.19)             | 12.49<br>(7.34 to<br>20.30)           | 14.13<br>(8.16 to<br>23.10)           | 12.08<br>(7.11 to<br>20.10)           |
| Endocarditis                                  | 143.05<br>(111.17 to<br>195.47)          | 213.94<br>(141.32 to<br>317.63)              | 197.75<br>(134.77 to<br>287.98)          | 217.32<br>(143.87 to<br>328.14)                | 6.53<br>(5.06 to<br>9.28)             | 12.15<br>(8.12 to<br>18.76)           | 11.56<br>(7.70 to<br>17.86)           | 11.94<br>(7.97 to<br>18.42)           |
| Other cardiovascular and circulatory diseases | 660.79<br>(604.76 to<br>721.03)          | 1,044.63<br>(777.54 to<br>1,410.46)          | 821.42<br>(613.47 to<br>1,079.09)        | 1,093.80<br>(819.76 to<br>1,476.35)            | 31.97<br>(29.07 to<br>34.84)          | 62.44<br>(47.81 to<br>81.75)          | 52.22<br>(39.43 to<br>68.09)          | 62.91<br>(48.57 to<br>82.58)          |
| <b>Chronic respiratory diseases</b>           | <b>840.57<br/>(775.85 to<br/>925.24)</b> | <b>1,021.69<br/>(813.21 to<br/>1,279.96)</b> | <b>782.40<br/>(643.73 to<br/>949.75)</b> | <b>1,323.20<br/>(1,000.68 to<br/>1,726.64)</b> | <b>42.43<br/>(39.36 to<br/>46.26)</b> | <b>62.31<br/>(50.31 to<br/>75.94)</b> | <b>50.41<br/>(41.63 to<br/>60.17)</b> | <b>75.82<br/>(59.06 to<br/>96.99)</b> |
| Chronic obstructive pulmonary disease         | 551.31<br>(499.51 to<br>610.13)          | 730.54<br>(539.35 to<br>970.02)              | 506.95<br>(389.90 to<br>648.54)          | 1,010.99<br>(710.32 to<br>1,413.07)            | 31.22<br>(28.18 to<br>34.23)          | 47.36<br>(36.61 to<br>60.95)          | 35.75<br>(28.26 to<br>44.37)          | 60.48<br>(45.18 to<br>81.69)          |
| Pneumoconiosis                                | 1.64<br>(1.45 to<br>1.85)                | 2.58<br>(1.91 to<br>3.41)                    | 2.33<br>(1.72 to<br>3.07)                | 2.74<br>(2.01 to<br>3.73)                      | 0.09<br>(0.08 to<br>0.10)             | 0.17<br>(0.12 to<br>0.24)             | 0.16<br>(0.11 to<br>0.22)             | 0.18<br>(0.13 to<br>0.25)             |
| Silicosis                                     | 0.24<br>(0.18 to<br>0.31)                | 0.39<br>(0.23 to<br>0.63)                    | 0.32<br>(0.19 to<br>0.55)                | 0.40<br>(0.24 to<br>0.67)                      | 0.01<br>(0.01 to<br>0.02)             | 0.03<br>(0.01 to<br>0.04)             | 0.02<br>(0.01 to<br>0.04)             | 0.03<br>(0.01 to<br>0.04)             |
| Asbestosis                                    | 0.57<br>(0.47 to<br>0.71)                | 0.71<br>(0.51 to<br>1.00)                    | 0.70<br>(0.51 to<br>0.99)                | 0.70<br>(0.51 to<br>1.01)                      | 0.02<br>(0.02 to<br>0.03)             | 0.04<br>(0.03 to<br>0.06)             | 0.04<br>(0.03 to<br>0.06)             | 0.04<br>(0.03 to<br>0.06)             |

|                                                                |                                                      |                                                          |                                                        |                                                          |                                                   |                                                   |                                                   |                                                   |
|----------------------------------------------------------------|------------------------------------------------------|----------------------------------------------------------|--------------------------------------------------------|----------------------------------------------------------|---------------------------------------------------|---------------------------------------------------|---------------------------------------------------|---------------------------------------------------|
| Coal workers pneumoconiosis                                    | 0.15<br>(0.09 to<br>0.20)                            | 0.24<br>(0.12 to<br>0.41)                                | 0.19<br>(0.09 to<br>0.32)                              | 0.28<br>(0.14 to<br>0.46)                                | 0.01<br>(0.00 to<br>0.01)                         | 0.02<br>(0.01 to<br>0.03)                         | 0.01<br>(0.01 to<br>0.02)                         | 0.02<br>(0.01 to<br>0.03)                         |
| Other pneumoconiosis                                           | 0.68<br>(0.56 to<br>0.79)                            | 1.24<br>(0.84 to<br>1.82)                                | 1.12<br>(0.75 to<br>1.63)                              | 1.36<br>(0.92 to<br>2.00)                                | 0.05<br>(0.04 to<br>0.05)                         | 0.09<br>(0.06 to<br>0.14)                         | 0.09<br>(0.06 to<br>0.13)                         | 0.10<br>(0.06 to<br>0.15)                         |
| Asthma                                                         | 149.36<br>(128.60 to<br>192.56)                      | 98.42<br>(64.44 to<br>153.14)                            | 75.46<br>(48.29 to<br>117.61)                          | 123.87<br>(76.12 to<br>200.64)                           | 5.25<br>(4.56 to<br>6.71)                         | 4.68<br>(3.04 to<br>7.33)                         | 3.74<br>(2.38 to<br>5.84)                         | 5.61<br>(3.49 to<br>9.05)                         |
| Interstitial lung disease and pulmonary sarcoidosis            | 81.97<br>(60.96 to<br>102.71)                        | 108.05<br>(79.25 to<br>136.06)                           | 121.07<br>(87.92 to<br>152.14)                         | 101.97<br>(74.68 to<br>128.76)                           | 3.32<br>(2.50 to<br>4.20)                         | 5.42<br>(4.03 to<br>6.88)                         | 6.21<br>(4.54 to<br>7.77)                         | 4.99<br>(3.66 to<br>6.38)                         |
| Other chronic respiratory diseases                             | 56.29<br>(42.53 to<br>93.82)                         | 82.10<br>(58.99 to<br>139.43)                            | 76.59<br>(54.99 to<br>128.40)                          | 83.62<br>(58.89 to<br>144.44)                            | 2.55<br>(1.87 to<br>4.39)                         | 4.68<br>(3.27 to<br>8.14)                         | 4.55<br>(3.22 to<br>7.87)                         | 4.56<br>(3.15 to<br>8.05)                         |
| <b>Cirrhosis and other chronic liver diseases</b>              | <b>840.80</b><br><b>(748.76 to</b><br><b>935.07)</b> | <b>1,022.11</b><br><b>(842.64 to</b><br><b>1,210.01)</b> | <b>925.92</b><br><b>(746.84 to</b><br><b>1,116.30)</b> | <b>1,159.99</b><br><b>(958.82 to</b><br><b>1,371.44)</b> | <b>29.45</b><br><b>(26.52 to</b><br><b>32.46)</b> | <b>42.41</b><br><b>(36.08 to</b><br><b>49.13)</b> | <b>39.13</b><br><b>(32.62 to</b><br><b>46.03)</b> | <b>46.62</b><br><b>(39.65 to</b><br><b>54.17)</b> |
| Cirrhosis and other chronic liver diseases due to hepatitis B  | 95.22<br>(76.18 to<br>117.98)                        | 130.56<br>(101.21 to<br>169.31)                          | 122.46<br>(93.40 to<br>159.74)                         | 130.02<br>(100.42 to<br>168.47)                          | 3.46<br>(2.85 to<br>4.25)                         | 5.44<br>(4.28 to<br>6.91)                         | 5.17<br>(4.03 to<br>6.64)                         | 5.32<br>(4.19 to<br>6.76)                         |
| Cirrhosis and other chronic liver diseases due to hepatitis C  | 263.03<br>(223.40 to<br>302.57)                      | 346.30<br>(276.40 to<br>421.62)                          | 322.83<br>(252.64 to<br>398.33)                        | 346.35<br>(276.87 to<br>422.65)                          | 9.05<br>(7.87 to<br>10.21)                        | 13.63<br>(11.12 to<br>16.18)                      | 12.88<br>(10.33 to<br>15.52)                      | 13.42<br>(10.95 to<br>15.90)                      |
| Cirrhosis and other chronic liver diseases due to alcohol use  | 330.56<br>(284.68 to<br>375.34)                      | 369.18<br>(293.70 to<br>453.50)                          | 318.55<br>(249.26 to<br>397.11)                        | 505.96<br>(404.06 to<br>619.02)                          | 12.04<br>(10.56 to<br>13.49)                      | 15.96<br>(12.97 to<br>19.02)                      | 14.15<br>(11.35 to<br>17.19)                      | 20.61<br>(16.97 to<br>24.66)                      |
| Cirrhosis and other chronic liver diseases due to other causes | 151.99<br>(131.95 to<br>171.72)                      | 176.07<br>(141.18 to<br>213.49)                          | 162.08<br>(128.38 to<br>200.10)                        | 177.66<br>(141.09 to<br>215.75)                          | 4.90<br>(4.30 to<br>5.53)                         | 7.37<br>(6.00 to<br>8.84)                         | 6.93<br>(5.54 to<br>8.38)                         | 7.26<br>(5.90 to<br>8.69)                         |
| <b>Digestive diseases</b>                                      | <b>458.82</b><br><b>(400.48 to</b><br><b>517.69)</b> | <b>543.73</b><br><b>(444.28 to</b><br><b>668.21)</b>     | <b>483.54</b><br><b>(387.00 to</b><br><b>596.46)</b>   | <b>571.72</b><br><b>(459.15 to</b><br><b>720.09)</b>     | <b>19.37</b><br><b>(17.36 to</b><br><b>22.03)</b> | <b>30.07</b><br><b>(24.89 to</b><br><b>36.22)</b> | <b>27.66</b><br><b>(22.33 to</b><br><b>33.53)</b> | <b>30.37</b><br><b>(25.06 to</b><br><b>36.90)</b> |
| Peptic ulcer disease                                           | 91.71<br>(76.09 to<br>106.77)                        | 78.60<br>(59.07 to<br>100.10)                            | 60.77<br>(45.79 to<br>77.56)                           | 81.73<br>(62.30 to<br>103.52)                            | 3.80<br>(3.23 to<br>4.38)                         | 4.17<br>(3.22 to<br>5.21)                         | 3.33<br>(2.52 to<br>4.20)                         | 4.22<br>(3.24 to<br>5.28)                         |

**Saint Lucia**

| Cause                                      | YLLs (actual counts)          |                                |                                |                                | Deaths (actual counts)    |                           |                           |                           |
|--------------------------------------------|-------------------------------|--------------------------------|--------------------------------|--------------------------------|---------------------------|---------------------------|---------------------------|---------------------------|
|                                            | 2016                          | 2040 Forecast                  | 2040 Better Scenario           | 2040 Worse Scenario            | 2016                      | 2040 Forecast             | 2040 Better Scenario      | 2040 Worse Scenario       |
| Gastritis and duodenitis                   | 20.84<br>(16.76 to<br>25.30)  | 30.27<br>(22.36 to<br>40.06)   | 27.61<br>(20.13 to<br>36.54)   | 30.17<br>(22.32 to<br>39.57)   | 0.86<br>(0.71 to<br>1.09) | 1.55<br>(1.16 to<br>2.02) | 1.44<br>(1.05 to<br>1.89) | 1.50<br>(1.12 to<br>1.97) |
| Appendicitis                               | 38.41<br>(30.80 to<br>47.04)  | 36.01<br>(27.05 to<br>47.31)   | 30.43<br>(22.25 to<br>40.95)   | 37.25<br>(27.79 to<br>48.95)   | 1.22<br>(0.98 to<br>1.51) | 1.58<br>(1.19 to<br>2.10) | 1.36<br>(0.99 to<br>1.81) | 1.58<br>(1.19 to<br>2.12) |
| Paralytic ileus and intestinal obstruction | 86.78<br>(71.25 to<br>114.12) | 115.15<br>(91.89 to<br>153.27) | 111.16<br>(87.77 to<br>148.52) | 113.27<br>(90.33 to<br>151.25) | 3.78<br>(3.18 to<br>5.10) | 6.76<br>(5.28 to<br>9.31) | 6.74<br>(5.22 to<br>9.20) | 6.43<br>(5.06 to<br>8.94) |
| Inguinal, femoral, and abdominal hernia    | 17.14<br>(12.07 to<br>22.16)  | 15.74<br>(10.87 to<br>20.83)   | 14.13<br>(9.67 to<br>18.71)    | 15.76<br>(10.78 to<br>20.71)   | 0.72<br>(0.53 to<br>0.94) | 0.83<br>(0.61 to<br>1.10) | 0.77<br>(0.55 to<br>1.03) | 0.81<br>(0.58 to<br>1.06) |
| Inflammatory bowel disease                 | 30.10<br>(20.32 to<br>35.43)  | 31.55<br>(20.76 to<br>39.26)   | 31.30<br>(20.44 to<br>39.39)   | 30.81<br>(20.19 to<br>38.05)   | 1.15<br>(0.79 to<br>1.33) | 1.65<br>(1.07 to<br>2.04) | 1.69<br>(1.08 to<br>2.12) | 1.56<br>(1.01 to<br>1.93) |
| Vascular intestinal disorders              | 28.10<br>(24.11 to<br>35.03)  | 48.49<br>(38.37 to<br>62.99)   | 46.15<br>(35.99 to<br>59.68)   | 47.48<br>(37.99 to<br>60.89)   | 1.41<br>(1.21 to<br>1.86) | 3.01<br>(2.40 to<br>3.98) | 2.93<br>(2.29 to<br>3.84) | 2.87<br>(2.32 to<br>3.78) |
| Gallbladder and biliary diseases           | 33.74<br>(29.07 to<br>39.74)  | 47.19<br>(27.50 to<br>79.34)   | 38.04<br>(22.41 to<br>63.56)   | 60.54<br>(33.15 to<br>104.86)  | 1.48<br>(1.28 to<br>1.74) | 2.57<br>(1.51 to<br>4.23) | 2.13<br>(1.25 to<br>3.53) | 3.15<br>(1.77 to<br>5.33) |
| Pancreatitis                               | 32.25<br>(26.33 to<br>44.39)  | 39.77<br>(19.59 to<br>80.20)   | 33.20<br>(16.71 to<br>66.01)   | 53.46<br>(24.15 to<br>113.96)  | 1.01<br>(0.85 to<br>1.34) | 1.56<br>(0.87 to<br>2.96) | 1.34<br>(0.76 to<br>2.48) | 1.99<br>(1.00 to<br>4.13) |

|                                                     |                                                        |                                                            |                                                            |                                                            |                                                   |                                                      |                                                      |                                                      |
|-----------------------------------------------------|--------------------------------------------------------|------------------------------------------------------------|------------------------------------------------------------|------------------------------------------------------------|---------------------------------------------------|------------------------------------------------------|------------------------------------------------------|------------------------------------------------------|
|                                                     | 79.75<br>(63.70 to<br>94.73)                           | 100.97<br>(76.71 to<br>123.86)                             | 90.74<br>(67.74 to<br>112.98)                              | 101.24<br>(76.50 to<br>124.26)                             | 3.95<br>(3.26 to<br>4.65)                         | 6.41<br>(4.95 to<br>7.84)                            | 5.92<br>(4.49 to<br>7.29)                            | 6.25<br>(4.83 to<br>7.68)                            |
| Other digestive diseases                            |                                                        |                                                            |                                                            |                                                            |                                                   |                                                      |                                                      |                                                      |
| <b>Neurological disorders</b>                       | <b>897.09</b><br><b>(795.95 to</b><br><b>1,017.42)</b> | <b>1,552.23</b><br><b>(1,199.12 to</b><br><b>2,043.63)</b> | <b>1,555.95</b><br><b>(1,205.43 to</b><br><b>2,036.90)</b> | <b>1,659.13</b><br><b>(1,259.78 to</b><br><b>2,284.93)</b> | <b>70.34</b><br><b>(60.33 to</b><br><b>82.25)</b> | <b>140.55</b><br><b>(102.23 to</b><br><b>195.01)</b> | <b>146.13</b><br><b>(106.79 to</b><br><b>200.74)</b> | <b>144.80</b><br><b>(101.21 to</b><br><b>209.68)</b> |
| Alzheimer's disease and other dementias             | 526.57<br>(438.16 to<br>638.45)                        | 1,068.69<br>(749.43 to<br>1,540.66)                        | 1,083.63<br>(767.68 to<br>1,538.92)                        | 1,138.70<br>(759.79 to<br>1,713.05)                        | 57.05<br>(47.25 to<br>68.94)                      | 117.04<br>(80.16 to<br>170.71)                       | 121.53<br>(84.52 to<br>175.49)                       | 121.36<br>(78.52 to<br>185.25)                       |
| Parkinson's disease                                 | 57.89<br>(43.42 to<br>74.84)                           | 130.99<br>(97.38 to<br>170.86)                             | 148.59<br>(110.88 to<br>192.91)                            | 118.55<br>(88.14 to<br>154.80)                             | 4.99<br>(3.78 to<br>6.52)                         | 11.45<br>(8.51 to<br>15.04)                          | 13.18<br>(9.83 to<br>17.32)                          | 10.21<br>(7.58 to<br>13.59)                          |
| Epilepsy                                            | 214.20<br>(192.62 to<br>239.01)                        | 218.15<br>(153.14 to<br>316.95)                            | 182.87<br>(128.18 to<br>265.87)                            | 271.73<br>(185.30 to<br>413.29)                            | 5.32<br>(4.86 to<br>5.84)                         | 7.08<br>(5.21 to<br>9.86)                            | 6.10<br>(4.48 to<br>8.47)                            | 8.51<br>(6.02 to<br>12.30)                           |
| Multiple sclerosis                                  | 9.66<br>(7.86 to<br>14.02)                             | 11.58<br>(8.73 to<br>17.40)                                | 11.64<br>(8.72 to<br>17.29)                                | 11.35<br>(8.58 to<br>17.03)                                | 0.28<br>(0.23 to<br>0.40)                         | 0.38<br>(0.30 to<br>0.57)                            | 0.39<br>(0.30 to<br>0.57)                            | 0.37<br>(0.29 to<br>0.55)                            |
| Motor neuron disease                                | 31.89<br>(28.13 to<br>35.46)                           | 46.58<br>(38.65 to<br>55.33)                               | 49.11<br>(40.43 to<br>59.23)                               | 44.68<br>(37.38 to<br>52.44)                               | 1.12<br>(1.00 to<br>1.25)                         | 1.94<br>(1.63 to<br>2.27)                            | 2.06<br>(1.71 to<br>2.46)                            | 1.83<br>(1.55 to<br>2.14)                            |
| Other neurological disorders                        | 56.87<br>(51.03 to<br>63.56)                           | 76.24<br>(64.77 to<br>88.73)                               | 80.12<br>(68.02 to<br>93.75)                               | 74.12<br>(63.71 to<br>86.41)                               | 1.57<br>(1.43 to<br>1.72)                         | 2.67<br>(2.30 to<br>3.04)                            | 2.86<br>(2.45 to<br>3.30)                            | 2.52<br>(2.21 to<br>2.87)                            |
| <b>Mental disorders</b>                             | <b>227.54</b><br><b>(196.67 to</b><br><b>265.20)</b>   | <b>291.06</b><br><b>(240.44 to</b><br><b>352.52)</b>       | <b>289.45</b><br><b>(235.87 to</b><br><b>353.33)</b>       | <b>308.14</b><br><b>(255.02 to</b><br><b>371.13)</b>       | <b>6.53</b><br><b>(5.74 to</b><br><b>7.50)</b>    | <b>9.94</b><br><b>(8.45 to</b><br><b>11.74)</b>      | <b>10.04</b><br><b>(8.53 to</b><br><b>11.98)</b>     | <b>10.29</b><br><b>(8.82 to</b><br><b>12.17)</b>     |
| Alcohol use disorders                               | 162.13<br>(142.35 to<br>186.38)                        | 176.62<br>(142.06 to<br>216.82)                            | 171.01<br>(135.92 to<br>213.01)                            | 195.51<br>(158.62 to<br>238.86)                            | 4.81<br>(4.27 to<br>5.48)                         | 6.22<br>(5.13 to<br>7.47)                            | 6.12<br>(4.98 to<br>7.45)                            | 6.71<br>(5.60 to<br>8.02)                            |
| Drug use disorders                                  | 64.30<br>(47.23 to<br>85.49)                           | 112.98<br>(83.61 to<br>150.79)                             | 116.91<br>(85.96 to<br>154.83)                             | 111.18<br>(82.15 to<br>148.07)                             | 1.70<br>(1.28 to<br>2.20)                         | 3.68<br>(2.85 to<br>4.69)                            | 3.89<br>(3.00 to<br>4.97)                            | 3.54<br>(2.72 to<br>4.51)                            |
| Opioid use disorders                                | 35.32<br>(25.47 to<br>49.06)                           | 48.86<br>(33.93 to<br>73.09)                               | 49.31<br>(34.58 to<br>73.82)                               | 48.32<br>(33.08 to<br>72.00)                               | 0.84<br>(0.62 to<br>1.17)                         | 1.44<br>(1.05 to<br>2.09)                            | 1.47<br>(1.06 to<br>2.15)                            | 1.39<br>(0.99 to<br>2.04)                            |
| Cocaine use disorders                               | 3.13<br>(1.91 to<br>4.47)                              | 7.73<br>(4.69 to<br>11.10)                                 | 7.58<br>(4.64 to<br>10.92)                                 | 7.79<br>(4.72 to<br>11.30)                                 | 0.08<br>(0.05 to<br>0.11)                         | 0.22<br>(0.14 to<br>0.31)                            | 0.22<br>(0.14 to<br>0.30)                            | 0.22<br>(0.14 to<br>0.31)                            |
| Amphetamine use disorders                           | 2.48<br>(1.52 to<br>3.76)                              | 7.08<br>(4.46 to<br>10.81)                                 | 6.97<br>(4.37 to<br>10.76)                                 | 7.17<br>(4.48 to<br>10.92)                                 | 0.06<br>(0.04 to<br>0.09)                         | 0.21<br>(0.13 to<br>0.32)                            | 0.21<br>(0.14 to<br>0.32)                            | 0.21<br>(0.13 to<br>0.31)                            |
| Other drug use disorders                            | 23.37<br>(14.34 to<br>32.87)                           | 49.31<br>(31.80 to<br>68.79)                               | 53.06<br>(34.25 to<br>73.92)                               | 47.90<br>(30.72 to<br>67.28)                               | 0.71<br>(0.46 to<br>0.96)                         | 1.82<br>(1.24 to<br>2.41)                            | 1.99<br>(1.37 to<br>2.65)                            | 1.73<br>(1.18 to<br>2.30)                            |
| Eating disorders                                    | 1.10<br>(0.86 to<br>1.41)                              | 1.46<br>(0.98 to<br>2.26)                                  | 1.52<br>(1.02 to<br>2.37)                                  | 1.45<br>(0.98 to<br>2.24)                                  | 0.02<br>(0.02 to<br>0.03)                         | 0.03<br>(0.02 to<br>0.05)                            | 0.03<br>(0.02 to<br>0.05)                            | 0.03<br>(0.02 to<br>0.04)                            |
| <b>Saint Lucia</b>                                  |                                                        |                                                            |                                                            |                                                            |                                                   |                                                      |                                                      |                                                      |
| Cause                                               | YLLs (actual counts)                                   |                                                            |                                                            |                                                            | Deaths (actual counts)                            |                                                      |                                                      |                                                      |
|                                                     | 2016                                                   | 2040 Forecast                                              | 2040 Better Scenario                                       | 2040 Worse Scenario                                        | 2016                                              | 2040 Forecast                                        | 2040 Better Scenario                                 | 2040 Worse Scenario                                  |
| Diabetes, urogenital, blood, and endocrine diseases | 3,600.67<br>(3,368.87 to<br>3,856.48)                  | 6,606.53<br>(4,320.42 to<br>12,195.55)                     | 5,294.06<br>(3,371.44 to<br>9,964.24)                      | 7,950.57<br>(4,975.62 to<br>13,816.86)                     | 176.23<br>(165.30 to<br>188.12)                   | 403.55<br>(270.30 to<br>709.29)                      | 332.13<br>(217.52 to<br>601.31)                      | 467.81<br>(305.28 to<br>793.34)                      |
| Diabetes mellitus                                   | 1,972.35<br>(1,819.05 to<br>2,122.57)                  | 3,673.89<br>(2,614.24 to<br>5,135.41)                      | 2,784.05<br>(1,920.24 to<br>3,809.97)                      | 4,234.86<br>(2,925.36 to<br>6,014.28)                      | 105.72<br>(97.55 to<br>114.07)                    | 233.06<br>(173.07 to<br>308.69)                      | 182.80<br>(131.47 to<br>240.85)                      | 257.13<br>(186.44 to<br>351.28)                      |
| Acute glomerulonephritis                            | 0.93<br>(0.81 to<br>1.09)                              | 0.88<br>(0.68 to<br>1.17)                                  | 0.77<br>(0.59 to<br>1.02)                                  | 0.92<br>(0.71 to<br>1.23)                                  | 0.02<br>(0.02 to<br>0.02)                         | 0.02<br>(0.02 to<br>0.03)                            | 0.02<br>(0.02 to<br>0.02)                            | 0.02<br>(0.02 to<br>0.03)                            |
| Chronic kidney disease                              | 1,083.58<br>(998.83 to<br>1,177.00)                    | 2,154.13<br>(654.28 to<br>7,633.65)                        | 1,779.58<br>(539.97 to<br>6,364.46)                        | 2,944.19<br>(837.33 to<br>8,857.32)                        | 48.32<br>(44.80 to<br>51.67)                      | 127.79<br>(36.03 to<br>444.52)                       | 107.76<br>(30.90 to<br>388.17)                       | 169.96<br>(46.72 to<br>512.08)                       |

|                                                            |                                 |                                   |                                   |                                     |                              |                               |                               |                               |
|------------------------------------------------------------|---------------------------------|-----------------------------------|-----------------------------------|-------------------------------------|------------------------------|-------------------------------|-------------------------------|-------------------------------|
| Chronic kidney disease due to diabetes mellitus            | 387.46<br>(330.77 to<br>442.51) | 901.21<br>(251.76 to<br>3,281.52) | 749.62<br>(209.34 to<br>2,838.00) | 1,246.33<br>(327.89 to<br>3,906.79) | 17.23<br>(14.82 to<br>19.51) | 50.17<br>(12.80 to<br>180.65) | 42.46<br>(10.63 to<br>154.84) | 67.51<br>(16.64 to<br>213.44) |
| Chronic kidney disease due to hypertension                 | 125.33<br>(102.79 to<br>148.42) | 329.12<br>(85.12 to<br>1,213.08)  | 277.93<br>(72.42 to<br>1,031.99)  | 441.35<br>(111.23 to<br>1,369.88)   | 8.57<br>(7.06 to<br>10.09)   | 25.80<br>(7.93 to<br>83.20)   | 22.25<br>(6.96 to<br>75.21)   | 33.40<br>(9.91 to<br>98.26)   |
| Chronic kidney disease due to glomerulonephritis           | 329.55<br>(281.53 to<br>381.55) | 505.27<br>(172.06 to<br>1,725.64) | 409.66<br>(137.78 to<br>1,416.58) | 686.63<br>(222.59 to<br>1,971.29)   | 12.42<br>(10.45 to<br>14.57) | 27.28<br>(7.85 to<br>95.90)   | 22.55<br>(6.38 to<br>84.68)   | 36.43<br>(10.05 to<br>109.34) |
| Chronic kidney disease due to other and unspecified causes | 241.24<br>(201.56 to<br>285.82) | 418.54<br>(135.84 to<br>1,376.62) | 342.38<br>(109.51 to<br>1,134.71) | 569.90<br>(174.41 to<br>1,640.23)   | 10.10<br>(8.43 to<br>12.07)  | 24.53<br>(7.09 to<br>80.78)   | 20.50<br>(6.06 to<br>69.06)   | 32.61<br>(9.16 to<br>97.39)   |
| Urinary diseases and male infertility                      | 174.74<br>(160.28 to<br>190.51) | 285.50<br>(242.73 to<br>325.23)   | 278.27<br>(230.41 to<br>325.31)   | 273.45<br>(233.75 to<br>308.92)     | 10.34<br>(9.44 to<br>11.26)  | 21.11<br>(17.32 to<br>24.73)  | 21.20<br>(17.11 to<br>25.11)  | 19.60<br>(15.91 to<br>23.08)  |
| Urinary tract infections                                   | 143.41<br>(129.47 to<br>162.35) | 245.31<br>(205.83 to<br>282.49)   | 241.68<br>(98.86 to<br>284.13)    | 234.08<br>(197.38 to<br>268.74)     | 8.49<br>(7.64 to<br>9.60)    | 18.20<br>(14.69 to<br>21.72)  | 18.49<br>(14.69 to<br>22.15)  | 16.84<br>(13.52 to<br>20.05)  |
| Urolithiasis                                               | 5.05<br>(2.48 to<br>6.83)       | 7.92<br>(3.58 to<br>11.21)        | 8.04<br>(3.57 to<br>11.51)        | 7.58<br>(3.48 to<br>10.72)          | 0.24<br>(0.12 to<br>0.32)    | 0.44<br>(0.21 to<br>0.64)     | 0.47<br>(0.22 to<br>0.68)     | 0.41<br>(0.20 to<br>0.59)     |
| Other urinary diseases                                     | 26.28<br>(17.95 to<br>35.42)    | 32.28<br>(19.98 to<br>45.29)      | 28.55<br>(17.60 to<br>39.83)      | 31.79<br>(20.14 to<br>44.52)        | 1.62<br>(1.05 to<br>2.16)    | 2.46<br>(1.46 to<br>3.53)     | 2.25<br>(1.29 to<br>3.28)     | 2.34<br>(1.38 to<br>3.40)     |
| Gynecological diseases                                     | 1.14<br>(0.34 to<br>1.50)       | 0.58<br>(0.20 to<br>0.90)         | 0.46<br>(0.16 to<br>0.73)         | 0.60<br>(0.22 to<br>0.94)           | 0.04<br>(0.01 to<br>0.05)    | 0.03<br>(0.01 to<br>0.05)     | 0.03<br>(0.01 to<br>0.04)     | 0.03<br>(0.01 to<br>0.05)     |
| Uterine fibroids                                           | 0.20<br>(0.07 to<br>0.30)       | 0.12<br>(0.04 to<br>0.21)         | 0.10<br>(0.03 to<br>0.17)         | 0.12<br>(0.04 to<br>0.22)           | 0.01<br>(0.00 to<br>0.01)    | 0.01<br>(0.00 to<br>0.01)     | 0.00<br>(0.00 to<br>0.01)     | 0.01<br>(0.00 to<br>0.01)     |
| Polycystic ovarian syndrome                                | 0.51<br>(0.18 to<br>0.73)       | 0.15<br>(0.06 to<br>0.28)         | 0.10<br>(0.04 to<br>0.39)         | 0.16<br>(0.07 to<br>0.30)           | 0.01<br>(0.00 to<br>0.01)    | 0.00<br>(0.00 to<br>0.01)     | 0.00<br>(0.00 to<br>0.01)     | 0.00<br>(0.00 to<br>0.01)     |
| Endometriosis                                              | 0.00<br>(0.00 to<br>0.00)       | 0.00<br>(0.00 to<br>0.00)         | 0.00<br>(0.00 to<br>0.00)         | 0.00<br>(0.00 to<br>0.00)           | 0.00<br>(0.00 to<br>0.00)    | 0.00<br>(0.00 to<br>0.00)     | 0.00<br>(0.00 to<br>0.00)     | 0.00<br>(0.00 to<br>0.00)     |
| Genital prolapse                                           | 0.01<br>(0.00 to<br>0.02)       | 0.01<br>(0.00 to<br>0.02)         | 0.01<br>(0.00 to<br>0.01)         | 0.01<br>(0.00 to<br>0.02)           | 0.00<br>(0.00 to<br>0.00)    | 0.00<br>(0.00 to<br>0.00)     | 0.00<br>(0.00 to<br>0.00)     | 0.00<br>(0.00 to<br>0.00)     |
| Other gynecological diseases                               | 0.42<br>(0.09 to<br>0.69)       | 0.30<br>(0.08 to<br>0.51)         | 0.26<br>(0.07 to<br>0.43)         | 0.31<br>(0.09 to<br>0.52)           | 0.02<br>(0.00 to<br>0.02)    | 0.02<br>(0.01 to<br>0.04)     | 0.02<br>(0.00 to<br>0.03)     | 0.02<br>(0.01 to<br>0.04)     |
| Hemoglobinopathies and hemolytic anemias                   | 179.61<br>(150.38 to<br>216.37) | 206.10<br>(162.35 to<br>267.40)   | 181.07<br>(136.78 to<br>238.88)   | 210.62<br>(165.25 to<br>275.77)     | 5.12<br>(4.39 to<br>6.54)    | 8.05<br>(6.49 to<br>10.90)    | 7.15<br>(5.55 to<br>9.70)     | 8.02<br>(6.46 to<br>10.91)    |
| Thalassemias                                               | 3.23<br>(1.16 to<br>6.13)       | 0.94<br>(0.32 to<br>1.94)         | 0.96<br>(0.34 to<br>1.94)         | 0.98<br>(0.33 to<br>2.02)           | 0.04<br>(0.01 to<br>0.07)    | 0.01<br>(0.00 to<br>0.02)     | 0.01<br>(0.00 to<br>0.02)     | 0.01<br>(0.00 to<br>0.02)     |
| Sickle cell disorders                                      | 132.36<br>(107.03 to<br>158.70) | 132.77<br>(100.66 to<br>175.61)   | 117.45<br>(85.91 to<br>155.22)    | 136.94<br>(103.07 to<br>182.19)     | 2.60<br>(2.11 to<br>3.18)    | 3.35<br>(2.52 to<br>4.46)     | 2.98<br>(2.17 to<br>3.96)     | 3.43<br>(2.58 to<br>4.56)     |
| G6PD deficiency                                            | 19.52<br>(14.52 to<br>25.37)    | 35.94<br>(25.63 to<br>47.84)      | 30.54<br>(21.30 to<br>41.29)      | 36.73<br>(26.12 to<br>48.58)        | 0.59<br>(0.45 to<br>0.76)    | 0.59<br>(0.45 to<br>1.93)     | 1.48<br>(0.89 to<br>1.70)     | 1.48<br>(1.07 to<br>1.97)     |
| Other hemoglobinopathies and hemolytic anemias             | 24.50<br>(20.81 to<br>33.17)    | 36.46<br>(28.47 to<br>52.39)      | 32.12<br>(24.57 to<br>45.95)      | 35.97<br>(28.33 to<br>51.26)        | 1.90<br>(1.62 to<br>2.66)    | 3.21<br>(2.51 to<br>4.65)     | 2.89<br>(2.20 to<br>4.26)     | 3.10<br>(2.42 to<br>4.55)     |
| Endocrine, metabolic, blood, and immune disorders          | 188.32<br>(161.06 to<br>274.95) | 285.45<br>(223.56 to<br>409.40)   | 269.84<br>(210.08 to<br>389.75)   | 285.92<br>(226.20 to<br>414.93)     | 6.67<br>(5.77 to<br>9.57)    | 13.50<br>(10.77 to<br>18.85)  | 13.17<br>(10.43 to<br>18.15)  | 13.05<br>(10.47 to<br>18.12)  |

**Saint Lucia**

| Cause | YLLs (actual counts) |               |                      |                     | Deaths (actual counts) |               |                      |                     |
|-------|----------------------|---------------|----------------------|---------------------|------------------------|---------------|----------------------|---------------------|
|       | 2016                 | 2040 Forecast | 2040 Better Scenario | 2040 Worse Scenario | 2016                   | 2040 Forecast | 2040 Better Scenario | 2040 Worse Scenario |

|                                               |                                                |                                                |                                                |                                                |                                         |                                        |                                        |                                         |
|-----------------------------------------------|------------------------------------------------|------------------------------------------------|------------------------------------------------|------------------------------------------------|-----------------------------------------|----------------------------------------|----------------------------------------|-----------------------------------------|
|                                               | 143.37<br>(111.79 to<br>162.49)                | 158.92<br>(122.13 to<br>193.55)                | 161.79<br>(123.51 to<br>198.54)                | 155.38<br>(119.29 to<br>187.89)                | 3.69<br>(3.00 to<br>4.12)               | 5.45<br>(4.41 to<br>6.39)              | 5.54<br>(4.42 to<br>6.56)              | 5.25<br>(4.24 to<br>6.17)               |
| <b>Musculoskeletal disorders</b>              |                                                |                                                |                                                |                                                |                                         |                                        |                                        |                                         |
| Rheumatoid arthritis                          | 15.80<br>(11.95 to<br>20.68)                   | 23.78<br>(17.28 to<br>31.75)                   | 20.61<br>(14.46 to<br>28.16)                   | 23.99<br>(17.45 to<br>31.55)                   | 0.73<br>(0.56 to<br>0.91)               | 1.45<br>(1.04 to<br>1.89)              | 1.29<br>(0.90 to<br>1.70)              | 1.42<br>(1.02 to<br>1.85)               |
| Other musculoskeletal disorders               | 127.57<br>(98.10 to<br>145.57)                 | 135.14<br>(101.79 to<br>166.82)                | 141.18<br>(105.79 to<br>174.71)                | 131.39<br>(99.83 to<br>161.74)                 | 2.97<br>(2.37 to<br>3.35)               | 4.01<br>(3.19 to<br>4.82)              | 4.25<br>(3.36 to<br>5.13)              | 3.83<br>(3.04 to<br>4.60)               |
| <b>Other non-communicable diseases</b>        | <b>740.14<br/>(441.29 to<br/>1,178.69)</b>     | <b>683.12<br/>(381.52 to<br/>1,047.03)</b>     | <b>614.24<br/>(341.60 to<br/>930.89)</b>       | <b>714.74<br/>(399.01 to<br/>1,126.67)</b>     | <b>16.99<br/>(9.23 to<br/>23.35)</b>    | <b>28.32<br/>(12.73 to<br/>39.40)</b>  | <b>28.14<br/>(12.13 to<br/>39.80)</b>  | <b>27.17<br/>(12.34 to<br/>37.97)</b>   |
| Congenital birth defects                      | 563.95<br>(308.26 to<br>960.59)                | 369.40<br>(197.88 to<br>652.48)                | 302.44<br>(163.03 to<br>527.36)                | 411.55<br>(215.84 to<br>731.51)                | 7.42<br>(4.37 to<br>12.06)              | 5.42<br>(3.19 to<br>8.80)              | 4.51<br>(2.69 to<br>7.24)              | 5.94<br>(3.46 to<br>9.78)               |
| Neural tube defects                           | 28.97<br>(13.18 to<br>54.65)                   | 7.56<br>(2.59 to<br>17.39)                     | 5.37<br>(1.84 to<br>12.39)                     | 9.01<br>(2.98 to<br>21.22)                     | 0.35<br>(0.16 to<br>0.64)               | 0.10<br>(0.04 to<br>0.21)              | 0.07<br>(0.03 to<br>0.15)              | 0.12<br>(0.05 to<br>0.26)               |
| Congenital heart anomalies                    | 242.78<br>(145.16 to<br>397.13)                | 162.60<br>(94.89 to<br>267.52)                 | 132.62<br>(77.35 to<br>216.29)                 | 179.77<br>(103.87 to<br>300.69)                | 3.28<br>(2.06 to<br>5.09)               | 2.42<br>(1.51 to<br>3.68)              | 2.00<br>(1.26 to<br>3.01)              | 2.63<br>(1.62 to<br>4.08)               |
| Orofacial clefts                              | 0.29<br>(0.09 to<br>0.64)                      | 0.13<br>(0.03 to<br>0.37)                      | 0.09<br>(0.02 to<br>0.24)                      | 0.16<br>(0.04 to<br>0.44)                      | 0.00<br>(0.00 to<br>0.01)               | 0.00<br>(0.00 to<br>0.00)              | 0.00<br>(0.00 to<br>0.00)              | 0.00<br>(0.00 to<br>0.01)               |
| Down syndrome                                 | 25.72<br>(14.64 to<br>37.68)                   | 25.04<br>(14.88 to<br>34.84)                   | 21.46<br>(12.92 to<br>29.86)                   | 26.97<br>(15.99 to<br>38.35)                   | 0.46<br>(0.27 to<br>0.62)               | 0.57<br>(0.33 to<br>0.72)              | 0.47<br>(0.29 to<br>0.63)              | 0.57<br>(0.35 to<br>0.77)               |
| Other chromosomal abnormalities               | 9.90<br>(4.59 to<br>19.06)                     | 10.28<br>(3.85 to<br>22.34)                    | 8.19<br>(3.09 to<br>17.65)                     | 11.85<br>(4.40 to<br>25.88)                    | 0.12<br>(0.06 to<br>0.22)               | 0.12<br>(0.05 to<br>0.27)              | 0.10<br>(0.04 to<br>0.21)              | 0.14<br>(0.05 to<br>0.31)               |
| Congenital musculoskeletal and limb anomalies | 20.59<br>(10.21 to<br>38.44)                   | 14.27<br>(5.92 to<br>29.02)                    | 12.00<br>(5.04 to<br>24.45)                    | 15.84<br>(6.40 to<br>32.52)                    | 0.26<br>(0.13 to<br>0.47)               | 0.19<br>(0.09 to<br>0.36)              | 0.16<br>(0.08 to<br>0.31)              | 0.21<br>(0.09 to<br>0.40)               |
| Urogenital congenital anomalies               | 22.40<br>(12.06 to<br>41.51)                   | 17.12<br>(8.96 to<br>31.64)                    | 14.76<br>(7.74 to<br>27.01)                    | 18.62<br>(9.56 to<br>34.75)                    | 0.33<br>(0.19 to<br>0.57)               | 0.31<br>(0.18 to<br>0.51)              | 0.27<br>(0.16 to<br>0.45)              | 0.32<br>(0.19 to<br>0.55)               |
| Digestive congenital anomalies                | 44.03<br>(21.00 to<br>84.91)                   | 25.30<br>(9.96 to<br>53.80)                    | 20.12<br>(7.86 to<br>41.31)                    | 28.89<br>(11.31 to<br>61.91)                   | 0.52<br>(0.26 to<br>1.00)               | 0.31<br>(0.13 to<br>0.64)              | 0.25<br>(0.10 to<br>0.50)              | 0.35<br>(0.15 to<br>0.73)               |
| Other congenital birth defects                | 169.27<br>(81.59 to<br>313.73)                 | 107.10<br>(46.30 to<br>214.89)                 | 87.83<br>(38.57 to<br>174.53)                  | 120.43<br>(51.05 to<br>244.32)                 | 2.10<br>(1.06 to<br>3.78)               | 1.43<br>(0.68 to<br>2.71)              | 1.19<br>(0.58 to<br>2.20)              | 1.58<br>(0.74 to<br>3.05)               |
| Skin and subcutaneous diseases                | 141.57<br>(45.32 to<br>188.74)                 | 293.60<br>(94.06 to<br>406.97)                 | 295.33<br>(96.07 to<br>415.89)                 | 280.19<br>(89.95 to<br>388.39)                 | 9.17<br>(2.97 to<br>12.46)              | 22.67<br>(7.38 to<br>32.90)            | 23.43<br>(7.61 to<br>34.36)            | 20.97<br>(6.75 to<br>30.53)             |
| Cellulitis                                    | 18.96<br>(6.42 to<br>29.75)                    | 55.03<br>(18.54 to<br>82.87)                   | 58.67<br>(19.88 to<br>88.60)                   | 51.87<br>(17.46 to<br>78.18)                   | 1.02<br>(0.33 to<br>1.59)               | 3.69<br>(1.25 to<br>5.55)              | 4.05<br>(1.35 to<br>6.12)              | 3.37<br>(1.13 to<br>5.11)               |
| Pyoderma                                      | 41.73<br>(8.93 to<br>61.02)                    | 97.40<br>(20.37 to<br>148.19)                  | 94.26<br>(19.74 to<br>146.46)                  | 94.64<br>(19.99 to<br>143.33)                  | 2.28<br>(0.47 to<br>3.38)               | 6.89<br>(1.42 to<br>10.88)             | 6.88<br>(1.42 to<br>10.92)             | 6.47<br>(1.34 to<br>10.18)              |
| Decubitus ulcer                               | 76.33<br>(24.23 to<br>101.66)                  | 134.70<br>(45.10 to<br>195.58)                 | 135.76<br>(45.35 to<br>200.99)                 | 127.42<br>(42.44 to<br>183.33)                 | 5.69<br>(1.83 to<br>7.75)               | 11.76<br>(3.82 to<br>17.82)            | 12.15<br>(3.93 to<br>18.93)            | 10.82<br>(3.48 to<br>16.41)             |
| Other skin and subcutaneous diseases          | 4.55<br>(1.55 to<br>6.31)                      | 6.47<br>(2.25 to<br>9.08)                      | 6.64<br>(2.28 to<br>9.34)                      | 6.25<br>(2.18 to<br>8.75)                      | 0.18<br>(0.06 to<br>0.25)               | 0.33<br>(0.11 to<br>0.47)              | 0.35<br>(0.12 to<br>0.51)              | 0.30<br>(0.10 to<br>0.44)               |
| Sudden infant death syndrome                  | 34.62<br>(16.49 to<br>63.55)                   | 20.12<br>(7.52 to<br>40.90)                    | 16.47<br>(6.13 to<br>33.06)                    | 23.00<br>(8.50 to<br>46.54)                    | 0.40<br>(0.19 to<br>0.74)               | 0.23<br>(0.09 to<br>0.38)              | 0.19<br>(0.07 to<br>0.38)              | 0.27<br>(0.10 to<br>0.54)               |
| <b>Injuries</b>                               | <b>4,712.74<br/>(4,199.12 to<br/>5,193.55)</b> | <b>3,400.84<br/>(2,583.16 to<br/>4,636.45)</b> | <b>2,739.45<br/>(2,074.09 to<br/>3,687.49)</b> | <b>4,081.98<br/>(3,019.10 to<br/>5,681.51)</b> | <b>107.57<br/>(96.79 to<br/>118.05)</b> | <b>99.17<br/>(78.75 to<br/>126.70)</b> | <b>82.72<br/>(65.99 to<br/>104.26)</b> | <b>113.85<br/>(88.31 to<br/>149.39)</b> |
| <b>Transport injuries</b>                     | <b>1,373.31<br/>(1,162.29 to<br/>1,640.57)</b> | <b>924.37<br/>(580.56 to<br/>1,446.51)</b>     | <b>452.59<br/>(283.77 to<br/>715.19)</b>       | <b>1,441.77<br/>(877.53 to<br/>2,305.37)</b>   | <b>31.70<br/>(27.22 to<br/>37.04)</b>   | <b>27.16<br/>(18.42 to<br/>40.07)</b>  | <b>15.04<br/>(10.14 to<br/>21.99)</b>  | <b>39.27<br/>(25.56 to<br/>59.82)</b>   |

|                                      |                                                            |                                                        |                                                        |                                                          |                                                   |                                                   |                                                   |                                                   |
|--------------------------------------|------------------------------------------------------------|--------------------------------------------------------|--------------------------------------------------------|----------------------------------------------------------|---------------------------------------------------|---------------------------------------------------|---------------------------------------------------|---------------------------------------------------|
| Road injuries                        | 1,241.85<br>(1,052.24 to<br>1,472.70)                      | 802.08<br>(496.04 to<br>1,250.99)                      | 347.44<br>(213.41 to<br>552.96)                        | 1,302.81<br>(784.53 to<br>2,083.77)                      | 28.23<br>(24.29 to<br>32.80)                      | 22.82<br>(15.19 to<br>33.76)                      | 11.21<br>(7.51 to<br>16.28)                       | 34.53<br>(22.33 to<br>52.81)                      |
| Pedestrian road injuries             | 189.86<br>(145.17 to<br>238.56)                            | 127.34<br>(83.72 to<br>187.96)                         | 60.74<br>(39.77 to<br>90.10)                           | 188.44<br>(118.70 to<br>287.64)                          | 5.32<br>(4.21 to<br>6.56)                         | 4.95<br>(3.42 to<br>7.09)                         | 2.65<br>(1.85 to<br>3.80)                         | 6.82<br>(4.57 to<br>10.03)                        |
| <b>Saint Lucia</b>                   |                                                            |                                                        |                                                        |                                                          |                                                   |                                                   |                                                   |                                                   |
| Cause                                | YLLs (actual counts)                                       |                                                        |                                                        |                                                          | Deaths (actual counts)                            |                                                   |                                                   |                                                   |
|                                      | 2016                                                       | 2040 Forecast                                          | 2040 Better Scenario                                   | 2040 Worse Scenario                                      | 2016                                              | 2040 Forecast                                     | 2040 Better Scenario                              | 2040 Worse Scenario                               |
| Cyclist road injuries                | 80.02<br>(60.85 to<br>105.55)                              | 50.00<br>(29.01 to<br>81.74)                           | 23.96<br>(14.07 to<br>40.53)                           | 77.92<br>(43.86 to<br>129.64)                            | 1.90<br>(1.47 to<br>2.46)                         | 1.52<br>(0.94 to<br>2.44)                         | 0.86<br>(0.53 to<br>1.38)                         | 2.17<br>(1.31 to<br>3.58)                         |
| Motorcyclist road injuries           | 223.51<br>(171.04 to<br>293.86)                            | 157.01<br>(83.04 to<br>281.67)                         | 94.03<br>(49.16 to<br>169.67)                          | 222.22<br>(112.78 to<br>409.48)                          | 4.35<br>(3.39 to<br>5.63)                         | 3.40<br>(1.91 to<br>5.85)                         | 2.18<br>(1.20 to<br>3.75)                         | 4.65<br>(2.49 to<br>8.18)                         |
| Motor vehicle road injuries          | 739.22<br>(604.86 to<br>917.46)                            | 459.52<br>(274.42 to<br>720.36)                        | 164.90<br>(98.66 to<br>260.05)                         | 801.51<br>(468.06 to<br>1,290.26)                        | 16.39<br>(13.54 to<br>19.94)                      | 12.60<br>(8.30 to<br>18.66)                       | 5.31<br>(3.52 to<br>7.73)                         | 20.41<br>(12.85 to<br>30.90)                      |
| Other road injuries                  | 9.23<br>(6.68 to<br>15.08)                                 | 8.21<br>(5.05 to<br>14.17)                             | 3.81<br>(2.36 to<br>6.55)                              | 12.72<br>(7.72 to<br>21.87)                              | 0.28<br>(0.20 to<br>0.44)                         | 0.35<br>(0.22 to<br>0.60)                         | 0.21<br>(0.12 to<br>0.35)                         | 0.48<br>(0.29 to<br>0.81)                         |
| Other transport injuries             | 131.47<br>(93.08 to<br>176.44)                             | 122.29<br>(73.58 to<br>192.83)                         | 105.15<br>(63.31 to<br>166.69)                         | 138.96<br>(81.13 to<br>230.36)                           | 3.47<br>(2.53 to<br>4.49)                         | 3.83<br>(2.79 to<br>6.41)                         | 3.83<br>(2.47 to<br>5.67)                         | 4.75<br>(2.95 to<br>7.32)                         |
| <b>Unintentional injuries</b>        | <b>1,224.61</b><br><b>(1,094.63 to</b><br><b>1,393.18)</b> | <b>964.52</b><br><b>(779.48 to</b><br><b>1,209.83)</b> | <b>867.95</b><br><b>(690.22 to</b><br><b>1,105.99)</b> | <b>1,007.87</b><br><b>(802.50 to</b><br><b>1,277.27)</b> | <b>32.39</b><br><b>(29.66 to</b><br><b>36.09)</b> | <b>36.36</b><br><b>(30.47 to</b><br><b>43.87)</b> | <b>33.90</b><br><b>(28.06 to</b><br><b>41.21)</b> | <b>36.39</b><br><b>(30.30 to</b><br><b>44.23)</b> |
| Falls                                | 124.35<br>(109.29 to<br>144.60)                            | 151.63<br>(127.93 to<br>180.54)                        | 145.88<br>(121.83 to<br>176.73)                        | 148.91<br>(125.14 to<br>176.80)                          | 5.01<br>(4.47 to<br>6.02)                         | 8.48<br>(7.11 to<br>10.47)                        | 8.34<br>(6.93 to<br>10.26)                        | 8.06<br>(6.68 to<br>9.98)                         |
| Drowning                             | 483.55<br>(422.86 to<br>561.31)                            | 300.40<br>(210.08 to<br>426.97)                        | 264.67<br>(187.51 to<br>385.33)                        | 328.70<br>(224.21 to<br>488.58)                          | 10.01<br>(8.94 to<br>11.35)                       | 7.65<br>(5.61 to<br>10.46)                        | 6.83<br>(5.03 to<br>9.41)                         | 8.19<br>(5.84 to<br>11.55)                        |
| Fire, heat, and hot substances       | 111.56<br>(91.14 to<br>133.45)                             | 87.00<br>(63.14 to<br>116.02)                          | 75.01<br>(54.50 to<br>100.23)                          | 93.56<br>(64.99 to<br>128.79)                            | 3.67<br>(3.04 to<br>4.16)                         | 4.20<br>(3.16 to<br>5.40)                         | 3.77<br>(2.81 to<br>4.91)                         | 4.30<br>(3.13 to<br>5.67)                         |
| Poisonings                           | 13.78<br>(10.84 to<br>22.69)                               | 7.83<br>(5.18 to<br>13.76)                             | 6.25<br>(4.11 to<br>10.55)                             | 8.80<br>(5.67 to<br>15.51)                               | 0.32<br>(0.26 to<br>0.52)                         | 0.24<br>(0.17 to<br>0.38)                         | 0.19<br>(0.13 to<br>0.31)                         | 0.26<br>(0.18 to<br>0.42)                         |
| Exposure to mechanical forces        | 179.09<br>(136.41 to<br>208.48)                            | 119.54<br>(81.79 to<br>153.00)                         | 102.30<br>(71.17 to<br>134.50)                         | 125.13<br>(86.05 to<br>161.70)                           | 3.92<br>(2.99 to<br>4.47)                         | 3.30<br>(2.34 to<br>4.07)                         | 2.90<br>(2.04 to<br>3.63)                         | 3.37<br>(2.42 to<br>4.21)                         |
| Unintentional firearm injuries       | 89.74<br>(52.95 to<br>108.57)                              | 51.50<br>(28.76 to<br>70.59)                           | 43.51<br>(24.12 to<br>62.27)                           | 54.30<br>(30.15 to<br>74.60)                             | 1.84<br>(1.12 to<br>2.19)                         | 1.22<br>(0.72 to<br>1.65)                         | 1.05<br>(0.62 to<br>1.45)                         | 1.27<br>(0.76 to<br>1.70)                         |
| Unintentional suffocation            | 9.61<br>(6.93 to<br>14.88)                                 | 6.01<br>(4.03 to<br>9.13)                              | 5.05<br>(3.32 to<br>7.73)                              | 6.53<br>(4.30 to<br>9.99)                                | 0.16<br>(0.12 to<br>0.22)                         | 0.11<br>(0.08 to<br>0.16)                         | 0.09<br>(0.07 to<br>0.13)                         | 0.12<br>(0.08 to<br>0.17)                         |
| Other exposure to mechanical forces  | 79.74<br>(59.13 to<br>93.17)                               | 62.03<br>(42.50 to<br>79.30)                           | 53.74<br>(38.21 to<br>69.58)                           | 64.30<br>(44.14 to<br>82.20)                             | 1.93<br>(1.43 to<br>2.21)                         | 1.97<br>(1.41 to<br>2.44)                         | 1.76<br>(1.28 to<br>2.18)                         | 1.98<br>(1.42 to<br>2.46)                         |
| Adverse effects of medical treatment | 155.74<br>(117.38 to<br>202.93)                            | 153.90<br>(116.62 to<br>207.25)                        | 140.32<br>(107.24 to<br>191.13)                        | 155.74<br>(117.49 to<br>212.38)                          | 5.52<br>(4.35 to<br>7.22)                         | 7.52<br>(5.83 to<br>9.96)                         | 7.08<br>(5.45 to<br>9.37)                         | 7.33<br>(5.68 to<br>9.77)                         |
| Animal contact                       | 16.65<br>(9.41 to<br>20.64)                                | 15.95<br>(9.68 to<br>20.74)                            | 13.60<br>(8.20 to<br>17.93)                            | 16.64<br>(10.03 to<br>22.04)                             | 0.47<br>(0.29 to<br>0.57)                         | 0.60<br>(0.38 to<br>0.76)                         | 0.52<br>(0.34 to<br>0.67)                         | 0.60<br>(0.39 to<br>0.76)                         |
| Venomous animal contact              | 11.09<br>(5.52 to<br>14.30)                                | 9.80<br>(5.02 to<br>13.34)                             | 8.35<br>(4.32 to<br>11.48)                             | 10.24<br>(5.28 to<br>13.97)                              | 0.31<br>(0.16 to<br>0.39)                         | 0.35<br>(0.19 to<br>0.46)                         | 0.30<br>(0.16 to<br>0.41)                         | 0.35<br>(0.19 to<br>0.47)                         |
| Non-venomous animal contact          | 5.57<br>(3.32 to<br>8.18)                                  | 6.15<br>(3.73 to<br>8.79)                              | 5.25<br>(3.24 to<br>7.61)                              | 6.40<br>(3.89 to<br>9.24)                                | 0.16<br>(0.10 to<br>0.23)                         | 0.25<br>(0.16 to<br>0.33)                         | 0.22<br>(0.14 to<br>0.30)                         | 0.25<br>(0.16 to<br>0.34)                         |

|                                                 |                                                            |                                                          |                                                          |                                                          |                                                   |                                                   |                                                   |                                                   |
|-------------------------------------------------|------------------------------------------------------------|----------------------------------------------------------|----------------------------------------------------------|----------------------------------------------------------|---------------------------------------------------|---------------------------------------------------|---------------------------------------------------|---------------------------------------------------|
| Foreign body                                    | 90.96<br>(71.98 to<br>121.08)                              | 87.99<br>(69.54 to<br>117.17)                            | 86.18<br>(68.38 to<br>116.11)                            | 88.37<br>(69.45 to<br>118.44)                            | 2.33<br>(1.96 to<br>3.05)                         | 3.19<br>(2.57 to<br>4.31)                         | 3.26<br>(2.62 to<br>4.45)                         | 3.05<br>(2.49 to<br>4.11)                         |
| Pulmonary aspiration and foreign body in airway | 85.10<br>(66.75 to<br>113.80)                              | 81.57<br>(64.02 to<br>109.92)                            | 80.19<br>(63.30 to<br>108.35)                            | 81.84<br>(63.51 to<br>111.07)                            | 2.16<br>(1.81 to<br>2.87)                         | 2.95<br>(2.37 to<br>4.04)                         | 3.03<br>(2.43 to<br>4.18)                         | 2.82<br>(2.27 to<br>3.84)                         |
| Foreign body in other body part                 | 5.86<br>(4.79 to<br>9.06)                                  | 6.42<br>(4.84 to<br>10.11)                               | 5.99<br>(4.47 to<br>9.54)                                | 6.53<br>(4.89 to<br>10.04)                               | 0.17<br>(0.14 to<br>0.27)                         | 0.24<br>(0.18 to<br>0.38)                         | 0.23<br>(0.17 to<br>0.37)                         | 0.24<br>(0.18 to<br>0.37)                         |
| Environmental heat and cold exposure            | 15.63<br>(10.35 to<br>31.80)                               | 16.88<br>(10.80 to<br>34.18)                             | 13.60<br>(8.52 to<br>27.91)                              | 17.89<br>(11.15 to<br>36.10)                             | 0.43<br>(0.30 to<br>0.85)                         | 0.59<br>(0.39 to<br>1.23)                         | 0.48<br>(0.31 to<br>1.03)                         | 0.60<br>(0.39 to<br>1.24)                         |
| Other unintentional injuries                    | 33.29<br>(28.47 to<br>38.83)                               | 23.41<br>(18.21 to<br>29.74)                             | 20.15<br>(14.86 to<br>26.72)                             | 24.14<br>(18.80 to<br>30.73)                             | 0.71<br>(0.62 to<br>0.81)                         | 0.61<br>(0.50 to<br>0.76)                         | 0.54<br>(0.42 to<br>0.67)                         | 0.62<br>(0.50 to<br>0.75)                         |
| <b>Self-harm and interpersonal violence</b>     | <b>2,098.95</b><br><b>(1,463.42 to</b><br><b>2,509.40)</b> | <b>1,503.00</b><br><b>(905.35 to</b><br><b>2,228.76)</b> | <b>1,410.04</b><br><b>(893.21 to</b><br><b>2,082.20)</b> | <b>1,623.35</b><br><b>(928.85 to</b><br><b>2,506.78)</b> | <b>43.19</b><br><b>(30.10 to</b><br><b>51.60)</b> | <b>35.42</b><br><b>(21.88 to</b><br><b>51.36)</b> | <b>33.53</b><br><b>(21.81 to</b><br><b>47.42)</b> | <b>37.96</b><br><b>(22.37 to</b><br><b>56.26)</b> |

#### Saint Lucia

| Cause                                                                               | YLLs (actual counts)                              |                                                 |                                                 |                                                 | Deaths (actual counts)                         |                                                |                                                |                                                |
|-------------------------------------------------------------------------------------|---------------------------------------------------|-------------------------------------------------|-------------------------------------------------|-------------------------------------------------|------------------------------------------------|------------------------------------------------|------------------------------------------------|------------------------------------------------|
|                                                                                     | 2016                                              | 2040 Forecast                                   | 2040 Better Scenario                            | 2040 Worse Scenario                             | 2016                                           | 2040 Forecast                                  | 2040 Better Scenario                           | 2040 Worse Scenario                            |
| Self-harm                                                                           | 618.39<br>(443.21 to<br>797.29)                   | 529.41<br>(285.17 to<br>862.93)                 | 482.03<br>(267.35 to<br>770.04)                 | 631.61<br>(316.75 to<br>1,086.23)               | 13.70<br>(10.03 to<br>17.36)                   | 13.54<br>(7.85 to<br>20.89)                    | 12.52<br>(7.44 to<br>19.25)                    | 15.81<br>(8.52 to<br>25.68)                    |
| Self-harm by firearm                                                                | 19.53<br>(10.76 to<br>30.04)                      | 13.97<br>(5.99 to<br>29.36)                     | 12.31<br>(5.39 to<br>25.19)                     | 16.87<br>(6.78 to<br>37.34)                     | 0.45<br>(0.27 to<br>0.67)                      | 0.37<br>(0.18 to<br>0.74)                      | 0.34<br>(0.16 to<br>0.65)                      | 0.44<br>(0.20 to<br>0.91)                      |
| Self-harm by other specified means                                                  | 598.86<br>(427.09 to<br>773.12)                   | 515.44<br>(278.86 to<br>836.07)                 | 469.72<br>(261.37 to<br>747.63)                 | 614.73<br>(308.19 to<br>1,046.38)               | 13.25<br>(9.49 to<br>16.82)                    | 13.17<br>(7.62 to<br>20.23)                    | 12.18<br>(7.27 to<br>18.68)                    | 15.37<br>(8.33 to<br>24.97)                    |
| Interpersonal violence                                                              | 1,480.56<br>(831.90 to<br>1,886.46)               | 973.58<br>(513.34 to<br>1,462.39)               | 928.01<br>(495.31 to<br>1,397.16)               | 991.74<br>(499.28 to<br>1,497.52)               | 29.49<br>(16.56 to<br>37.57)                   | 21.88<br>(11.46 to<br>31.80)                   | 21.02<br>(11.24 to<br>30.74)                   | 22.14<br>(11.16 to<br>32.54)                   |
| Physical violence by firearm                                                        | 824.40<br>(344.99 to<br>1,108.33)                 | 505.69<br>(190.04 to<br>804.44)                 | 477.63<br>(189.07 to<br>765.52)                 | 510.42<br>(185.57 to<br>822.56)                 | 15.69<br>(6.47 to<br>21.10)                    | 10.40<br>(3.86 to<br>16.31)                    | 9.87<br>(3.76 to<br>15.46)                     | 10.44<br>(3.78 to<br>16.51)                    |
| Physical violence by sharp object                                                   | 468.23<br>(236.22 to<br>653.34)                   | 335.81<br>(160.39 to<br>515.13)                 | 328.55<br>(162.99 to<br>506.54)                 | 333.84<br>(148.14 to<br>513.21)                 | 9.52<br>(4.81 to<br>12.91)                     | 7.73<br>(3.68 to<br>11.42)                     | 7.63<br>(3.82 to<br>11.30)                     | 7.61<br>(3.43 to<br>11.33)                     |
| Physical violence by other means                                                    | 187.93<br>(104.92 to<br>263.12)                   | 132.08<br>(67.42 to<br>218.49)                  | 121.82<br>(62.79 to<br>196.92)                  | 147.48<br>(71.25 to<br>247.34)                  | 4.28<br>(2.34 to<br>5.87)                      | 3.75<br>(1.94 to<br>5.89)                      | 3.52<br>(1.87 to<br>5.45)                      | 4.09<br>(2.00 to<br>6.56)                      |
| <b>Forces of nature, conflict and terrorism, and executions and police conflict</b> | <b>15.87</b><br><b>(10.06 to</b><br><b>26.55)</b> | <b>8.94</b><br><b>(0.00 to</b><br><b>81.83)</b> | <b>8.88</b><br><b>(0.00 to</b><br><b>81.06)</b> | <b>9.00</b><br><b>(0.00 to</b><br><b>83.06)</b> | <b>0.29</b><br><b>(0.19 to</b><br><b>0.47)</b> | <b>0.24</b><br><b>(0.00 to</b><br><b>2.27)</b> | <b>0.24</b><br><b>(0.00 to</b><br><b>2.28)</b> | <b>0.23</b><br><b>(0.00 to</b><br><b>2.25)</b> |
| Exposure to forces of nature                                                        | 0.00<br>(0.00 to<br>0.00)                         | 8.78<br>(0.00 to<br>81.83)                      | 8.72<br>(0.00 to<br>81.06)                      | 8.84<br>(0.00 to<br>83.06)                      | 0.00<br>(0.00 to<br>0.00)                      | 0.23<br>(0.00 to<br>2.27)                      | 0.24<br>(0.00 to<br>2.28)                      | 0.23<br>(0.00 to<br>2.25)                      |
| Conflict and terrorism                                                              | 0.00<br>(0.00 to<br>0.00)                         | 0.16<br>(0.00 to<br>0.00)                       | 0.16<br>(0.00 to<br>0.00)                       | 0.16<br>(0.00 to<br>0.00)                       | 0.00<br>(0.00 to<br>0.00)                      | 0.00<br>(0.00 to<br>0.00)                      | 0.00<br>(0.00 to<br>0.00)                      | 0.00<br>(0.00 to<br>0.00)                      |
| Executions and police conflict                                                      | 15.87<br>(10.06 to<br>26.55)                      | 0.00<br>(0.00 to<br>0.00)                       | 0.00<br>(0.00 to<br>0.00)                       | 0.29<br>(0.00 to<br>0.00)                       | 0.29<br>(0.19 to<br>0.47)                      | 0.00<br>(0.00 to<br>0.00)                      | 0.00<br>(0.00 to<br>0.00)                      | 0.00<br>(0.00 to<br>0.00)                      |

#### Saint Vincent and the Grenadines

| Cause             | YLLs (actual counts)                                          |                                                               |                                                               |                                                               | Deaths (actual counts)                               |                                                            |                                                          |                                                            |
|-------------------|---------------------------------------------------------------|---------------------------------------------------------------|---------------------------------------------------------------|---------------------------------------------------------------|------------------------------------------------------|------------------------------------------------------------|----------------------------------------------------------|------------------------------------------------------------|
|                   | 2016                                                          | 2040 Forecast                                                 | 2040 Better Scenario                                          | 2040 Worse Scenario                                           | 2016                                                 | 2040 Forecast                                              | 2040 Better Scenario                                     | 2040 Worse Scenario                                        |
| <b>All causes</b> | <b>22,750.59</b><br><b>(20,806.51 to</b><br><b>24,925.67)</b> | <b>25,514.91</b><br><b>(21,324.66 to</b><br><b>30,440.71)</b> | <b>20,429.26</b><br><b>(17,305.21 to</b><br><b>24,226.14)</b> | <b>31,090.41</b><br><b>(26,062.15 to</b><br><b>36,937.64)</b> | <b>907.46</b><br><b>(845.11 to</b><br><b>973.34)</b> | <b>1,300.67</b><br><b>(1,162.10 to</b><br><b>1,451.83)</b> | <b>1,103.67</b><br><b>(991.70 to</b><br><b>1,232.39)</b> | <b>1,491.06</b><br><b>(1,331.30 to</b><br><b>1,657.70)</b> |





|                                                |                                       |                                       |                                       |                                       |                                    |                                    |                                    |                                    |
|------------------------------------------------|---------------------------------------|---------------------------------------|---------------------------------------|---------------------------------------|------------------------------------|------------------------------------|------------------------------------|------------------------------------|
| Measles                                        | 0.36<br>(0.24 to<br>0.54)             | 53.67<br>(3.62 to<br>164.70)          | 38.64<br>(3.02 to<br>105.13)          | 70.40<br>(4.43 to<br>224.78)          | 0.00<br>(0.00 to<br>0.01)          | 1.07<br>(0.06 to<br>3.34)          | 0.80<br>(0.05 to<br>2.39)          | 1.37<br>(0.07 to<br>4.24)          |
| <b>Saint Vincent and the Grenadines</b>        |                                       |                                       |                                       |                                       |                                    |                                    |                                    |                                    |
| Cause                                          | YLLs (actual counts)                  |                                       |                                       |                                       | Deaths (actual counts)             |                                    |                                    |                                    |
|                                                | 2016                                  | 2040 Forecast                         | 2040 Better Scenario                  | 2040 Worse Scenario                   | 2016                               | 2040 Forecast                      | 2040 Better Scenario               | 2040 Worse Scenario                |
| Varicella and herpes zoster                    | 2.37<br>(1.33 to<br>4.19)             | 1.16<br>(0.53 to<br>2.35)             | 0.84<br>(0.40 to<br>1.63)             | 1.26<br>(0.58 to<br>2.50)             | 0.08<br>(0.04 to<br>0.13)          | 0.05<br>(0.02 to<br>0.10)          | 0.04<br>(0.02 to<br>0.08)          | 0.05<br>(0.02 to<br>0.10)          |
| <b>Neglected tropical diseases and malaria</b> | <b>15.73<br/>(9.84 to<br/>26.87)</b>  | <b>25.14<br/>(17.92 to<br/>32.35)</b> | <b>22.31<br/>(15.92 to<br/>28.48)</b> | <b>26.03<br/>(18.49 to<br/>33.78)</b> | <b>0.41<br/>(0.26 to<br/>0.62)</b> | <b>0.85<br/>(0.58 to<br/>1.08)</b> | <b>0.80<br/>(0.53 to<br/>0.99)</b> | <b>0.85<br/>(0.57 to<br/>1.07)</b> |
| Malaria                                        | 0.00<br>(0.00 to<br>0.00)             | 0.00<br>(0.00 to<br>0.00)             | 0.00<br>(0.00 to<br>0.00)             | 0.00<br>(0.00 to<br>0.00)             | 0.00<br>(0.00 to<br>0.00)          | 0.00<br>(0.00 to<br>0.00)          | 0.00<br>(0.00 to<br>0.00)          | 0.00<br>(0.00 to<br>0.00)          |
| Chagas disease                                 | 0.00<br>(0.00 to<br>0.00)             | 0.00<br>(0.00 to<br>0.00)             | 0.00<br>(0.00 to<br>0.00)             | 0.00<br>(0.00 to<br>0.00)             | 0.00<br>(0.00 to<br>0.00)          | 0.00<br>(0.00 to<br>0.00)          | 0.00<br>(0.00 to<br>0.00)          | 0.00<br>(0.00 to<br>0.00)          |
| Leishmaniasis                                  | 0.00<br>(0.00 to<br>0.00)             | 0.00<br>(0.00 to<br>0.00)             | 0.00<br>(0.00 to<br>0.00)             | 0.00<br>(0.00 to<br>0.00)             | 0.00<br>(0.00 to<br>0.00)          | 0.00<br>(0.00 to<br>0.00)          | 0.00<br>(0.00 to<br>0.00)          | 0.00<br>(0.00 to<br>0.00)          |
| African trypanosomiasis                        | 0.00<br>(0.00 to<br>0.00)             | 0.00<br>(0.00 to<br>0.00)             | 0.00<br>(0.00 to<br>0.00)             | 0.00<br>(0.00 to<br>0.00)             | 0.00<br>(0.00 to<br>0.00)          | 0.00<br>(0.00 to<br>0.00)          | 0.00<br>(0.00 to<br>0.00)          | 0.00<br>(0.00 to<br>0.00)          |
| Schistosomiasis                                | 0.00<br>(0.00 to<br>0.00)             | 0.00<br>(0.00 to<br>0.00)             | 0.00<br>(0.00 to<br>0.00)             | 0.00<br>(0.00 to<br>0.00)             | 0.00<br>(0.00 to<br>0.00)          | 0.00<br>(0.00 to<br>0.00)          | 0.00<br>(0.00 to<br>0.00)          | 0.00<br>(0.00 to<br>0.00)          |
| Cysticercosis                                  | 0.00<br>(0.00 to<br>0.00)             | 0.00<br>(0.00 to<br>0.00)             | 0.00<br>(0.00 to<br>0.00)             | 0.00<br>(0.00 to<br>0.00)             | 0.00<br>(0.00 to<br>0.00)          | 0.00<br>(0.00 to<br>0.00)          | 0.00<br>(0.00 to<br>0.00)          | 0.00<br>(0.00 to<br>0.00)          |
| Cystic echinococcosis                          | 0.00<br>(0.00 to<br>0.00)             | 0.00<br>(0.00 to<br>0.00)             | 0.00<br>(0.00 to<br>0.00)             | 0.00<br>(0.00 to<br>0.00)             | 0.00<br>(0.00 to<br>0.00)          | 0.00<br>(0.00 to<br>0.00)          | 0.00<br>(0.00 to<br>0.00)          | 0.00<br>(0.00 to<br>0.00)          |
| Dengue                                         | 4.00<br>(2.07 to<br>6.34)             | 16.00<br>(10.05 to<br>22.20)          | 15.09<br>(9.86 to<br>20.64)           | 16.17<br>(10.05 to<br>22.71)          | 0.10<br>(0.06 to<br>0.16)          | 0.51<br>(0.32 to<br>0.70)          | 0.51<br>(0.33 to<br>0.68)          | 0.50<br>(0.32 to<br>0.68)          |
| Yellow fever                                   | 0.00<br>(0.00 to<br>0.00)             | 0.00<br>(0.00 to<br>0.00)             | 0.00<br>(0.00 to<br>0.00)             | 0.00<br>(0.00 to<br>0.00)             | 0.00<br>(0.00 to<br>0.00)          | 0.00<br>(0.00 to<br>0.00)          | 0.00<br>(0.00 to<br>0.00)          | 0.00<br>(0.00 to<br>0.00)          |
| Rabies                                         | 0.24<br>(0.15 to<br>0.42)             | 0.15<br>(0.07 to<br>0.28)             | 0.07<br>(0.03 to<br>0.13)             | 0.19<br>(0.09 to<br>0.37)             | 0.01<br>(0.00 to<br>0.01)          | 0.00<br>(0.00 to<br>0.01)          | 0.00<br>(0.00 to<br>0.00)          | 0.00<br>(0.00 to<br>0.01)          |
| Intestinal nematode infections                 | 0.63<br>(0.22 to<br>1.39)             | 0.61<br>(0.26 to<br>1.20)             | 0.59<br>(0.25 to<br>1.14)             | 0.63<br>(0.26 to<br>1.25)             | 0.01<br>(0.01 to<br>0.02)          | 0.01<br>(0.01 to<br>0.02)          | 0.01<br>(0.01 to<br>0.03)          | 0.01<br>(0.01 to<br>0.02)          |
| Other neglected tropical diseases              | 8.91<br>(4.39 to<br>12.80)            | 8.38<br>(3.23 to<br>11.98)            | 6.56<br>(2.53 to<br>9.66)             | 9.03<br>(3.43 to<br>12.98)            | 0.25<br>(0.12 to<br>0.32)          | 0.32<br>(0.11 to<br>0.47)          | 0.27<br>(0.09 to<br>0.40)          | 0.33<br>(0.11 to<br>0.47)          |
| <b>Maternal disorders</b>                      | <b>43.26<br/>(34.55 to<br/>54.22)</b> | <b>17.57<br/>(7.78 to<br/>36.58)</b>  | <b>10.82<br/>(4.94 to<br/>22.59)</b>  | <b>20.29<br/>(9.21 to<br/>39.47)</b>  | <b>0.80<br/>(0.64 to<br/>1.00)</b> | <b>0.33<br/>(0.15 to<br/>0.70)</b> | <b>0.21<br/>(0.09 to<br/>0.42)</b> | <b>0.38<br/>(0.18 to<br/>0.74)</b> |
| Maternal hemorrhage                            | 2.08<br>(1.25 to<br>3.16)             | 0.77<br>(0.30 to<br>1.62)             | 0.47<br>(0.20 to<br>0.95)             | 0.88<br>(0.37 to<br>1.79)             | 0.04<br>(0.02 to<br>0.06)          | 0.01<br>(0.01 to<br>0.03)          | 0.01<br>(0.00 to<br>0.02)          | 0.02<br>(0.01 to<br>0.03)          |
| Maternal sepsis and other maternal infections  | 0.36<br>(0.16 to<br>0.67)             | 0.12<br>(0.04 to<br>0.29)             | 0.08<br>(0.03 to<br>0.17)             | 0.14<br>(0.05 to<br>0.33)             | 0.01<br>(0.00 to<br>0.01)          | 0.00<br>(0.00 to<br>0.01)          | 0.00<br>(0.00 to<br>0.00)          | 0.00<br>(0.00 to<br>0.01)          |
| Maternal hypertensive disorders                | 9.22<br>(6.38 to<br>12.81)            | 3.42<br>(1.54 to<br>7.42)             | 2.08<br>(0.97 to<br>4.23)             | 3.95<br>(1.92 to<br>7.96)             | 0.16<br>(0.11 to<br>0.22)          | 0.06<br>(0.03 to<br>0.15)          | 0.04<br>(0.02 to<br>0.07)          | 0.07<br>(0.03 to<br>0.14)          |
| Maternal obstructed labor and uterine rupture  | 0.45<br>(0.21 to<br>0.79)             | 0.22<br>(0.07 to<br>0.54)             | 0.13<br>(0.04 to<br>0.31)             | 0.25<br>(0.09 to<br>0.61)             | 0.01<br>(0.00 to<br>0.01)          | 0.00<br>(0.00 to<br>0.01)          | 0.00<br>(0.00 to<br>0.01)          | 0.00<br>(0.00 to<br>0.01)          |

|                                                                  |                                     |                                 |                                 |                                   |                             |                           |                           |                            |
|------------------------------------------------------------------|-------------------------------------|---------------------------------|---------------------------------|-----------------------------------|-----------------------------|---------------------------|---------------------------|----------------------------|
| Maternal abortion, miscarriage, and ectopic pregnancy            | 25.16<br>(19.16 to<br>32.56)        | 10.49<br>(4.15 to<br>22.90)     | 6.48<br>(2.64 to<br>13.45)      | 12.06<br>(5.01 to<br>24.70)       | 0.47<br>(0.36 to<br>0.61)   | 0.20<br>(0.08 to<br>0.45) | 0.13<br>(0.05 to<br>0.26) | 0.23<br>(0.10 to<br>0.48)  |
| Indirect maternal deaths                                         | 2.67<br>(1.75 to<br>4.01)           | 1.14<br>(0.44 to<br>2.50)       | 0.71<br>(0.29 to<br>1.54)       | 1.32<br>(0.56 to<br>2.86)         | 0.05<br>(0.03 to<br>0.07)   | 0.02<br>(0.01 to<br>0.04) | 0.01<br>(0.01 to<br>0.03) | 0.02<br>(0.01 to<br>0.05)  |
| Late maternal deaths                                             | 0.49<br>(0.24 to<br>0.88)           | 0.16<br>(0.05 to<br>0.42)       | 0.10<br>(0.03 to<br>0.25)       | 0.19<br>(0.07 to<br>0.46)         | 0.01<br>(0.00 to<br>0.02)   | 0.00<br>(0.00 to<br>0.01) | 0.00<br>(0.00 to<br>0.00) | 0.00<br>(0.00 to<br>0.01)  |
| Maternal deaths aggravated by HIV/AIDS                           | 0.06<br>(0.03 to<br>0.12)           | 0.19<br>(0.05 to<br>0.52)       | 0.09<br>(0.02 to<br>0.27)       | 0.28<br>(0.08 to<br>0.72)         | 0.00<br>(0.00 to<br>0.00)   | 0.00<br>(0.00 to<br>0.01) | 0.00<br>(0.00 to<br>0.01) | 0.01<br>(0.00 to<br>0.01)  |
| Other maternal disorders                                         | 2.78<br>(1.75 to<br>4.14)           | 1.05<br>(0.43 to<br>2.20)       | 0.68<br>(0.28 to<br>1.33)       | 1.21<br>(0.52 to<br>2.36)         | 0.05<br>(0.03 to<br>0.08)   | 0.02<br>(0.01 to<br>0.04) | 0.01<br>(0.01 to<br>0.03) | 0.02<br>(0.01 to<br>0.04)  |
| <b>Saint Vincent and the Grenadines</b>                          |                                     |                                 |                                 |                                   |                             |                           |                           |                            |
| Cause                                                            | YLLs (actual counts)                |                                 |                                 |                                   | Deaths (actual counts)      |                           |                           |                            |
|                                                                  | 2016                                | 2040 Forecast                   | 2040 Better Scenario            | 2040 Worse Scenario               | 2016                        | 2040 Forecast             | 2040 Better Scenario      | 2040 Worse Scenario        |
| Neonatal disorders                                               | 1,375.26<br>(842.97 to<br>2,174.97) | 451.19<br>(176.32 to<br>834.99) | 307.45<br>(121.97 to<br>560.18) | 606.69<br>(235.41 to<br>1,117.35) | 15.89<br>(9.74 to<br>25.13) | 5.22<br>(2.04 to<br>9.65) | 3.55<br>(1.41 to<br>6.48) | 7.01<br>(2.72 to<br>12.92) |
| Neonatal preterm birth                                           | 626.45<br>(382.26 to<br>1,005.94)   | 181.72<br>(67.46 to<br>333.75)  | 125.38<br>(47.66 to<br>229.60)  | 279.08<br>(103.46 to<br>510.56)   | 7.24<br>(4.42 to<br>11.62)  | 2.10<br>(0.78 to<br>3.86) | 1.45<br>(0.55 to<br>2.65) | 3.23<br>(1.20 to<br>5.90)  |
| Neonatal encephalopathy due to birth asphyxia and trauma         | 254.97<br>(151.42 to<br>409.64)     | 93.27<br>(31.92 to<br>186.80)   | 64.84<br>(22.52 to<br>130.78)   | 112.65<br>(38.99 to<br>229.20)    | 2.95<br>(1.75 to<br>4.73)   | 1.08<br>(0.37 to<br>2.16) | 0.75<br>(0.26 to<br>1.51) | 1.30<br>(0.45 to<br>2.65)  |
| Neonatal sepsis and other neonatal infections                    | 294.08<br>(155.34 to<br>527.82)     | 113.78<br>(44.23 to<br>220.29)  | 77.82<br>(31.21 to<br>151.61)   | 137.54<br>(53.03 to<br>268.14)    | 3.40<br>(1.80 to<br>6.10)   | 1.32<br>(0.51 to<br>2.55) | 0.90<br>(0.36 to<br>1.75) | 1.59<br>(0.61 to<br>3.10)  |
| Hemolytic disease and other neonatal jaundice                    | 14.93<br>(7.60 to<br>28.50)         | 4.97<br>(1.30 to<br>11.89)      | 3.12<br>(0.82 to<br>7.21)       | 6.15<br>(1.61 to<br>14.38)        | 0.17<br>(0.09 to<br>0.33)   | 0.06<br>(0.02 to<br>0.14) | 0.04<br>(0.01 to<br>0.08) | 0.07<br>(0.02 to<br>0.17)  |
| Other neonatal disorders                                         | 184.83<br>(108.41 to<br>304.81)     | 57.46<br>(20.13 to<br>115.24)   | 36.29<br>(13.11 to<br>73.40)    | 71.28<br>(25.32 to<br>144.88)     | 2.14<br>(1.25 to<br>3.52)   | 0.66<br>(0.23 to<br>1.33) | 0.42<br>(0.15 to<br>0.85) | 0.82<br>(0.29 to<br>1.67)  |
| Nutritional deficiencies                                         | 179.39<br>(144.39 to<br>238.33)     | 115.84<br>(90.10 to<br>146.70)  | 97.48<br>(77.73 to<br>119.31)   | 119.14<br>(92.63 to<br>150.43)    | 6.65<br>(5.94 to<br>7.60)   | 6.61<br>(5.01 to<br>8.25) | 6.05<br>(4.77 to<br>7.48) | 6.37<br>(4.73 to<br>8.08)  |
| Protein-energy malnutrition                                      | 152.34<br>(116.62 to<br>206.12)     | 90.47<br>(67.93 to<br>118.24)   | 75.90<br>(57.82 to<br>95.33)    | 93.21<br>(70.22 to<br>120.16)     | 5.57<br>(4.69 to<br>6.57)   | 5.30<br>(3.85 to<br>6.81) | 4.85<br>(3.65 to<br>6.10) | 5.10<br>(3.62 to<br>6.54)  |
| Iodine deficiency                                                | 0.85<br>(0.05 to<br>2.86)           | 3.06<br>(0.04 to<br>11.64)      | 2.36<br>(0.02 to<br>9.35)       | 3.23<br>(0.04 to<br>11.91)        | 0.02<br>(0.00 to<br>0.07)   | 0.16<br>(0.00 to<br>0.76) | 0.13<br>(0.00 to<br>0.66) | 0.16<br>(0.00 to<br>0.74)  |
| Dietary iron deficiency                                          | 0.78<br>(0.38 to<br>1.23)           | 0.49<br>(0.25 to<br>0.74)       | 0.41<br>(0.20 to<br>0.62)       | 0.53<br>(0.26 to<br>0.79)         | 0.01<br>(0.01 to<br>0.02)   | 0.01<br>(0.00 to<br>0.02) | 0.01<br>(0.00 to<br>0.02) | 0.01<br>(0.01 to<br>0.02)  |
| Other nutritional deficiencies                                   | 25.42<br>(11.58 to<br>39.88)        | 21.82<br>(8.71 to<br>37.00)     | 18.82<br>(7.12 to<br>31.83)     | 22.17<br>(8.85 to<br>36.78)       | 1.05<br>(0.41 to<br>1.78)   | 1.14<br>(0.41 to<br>1.95) | 1.05<br>(0.39 to<br>1.81) | 1.11<br>(0.40 to<br>1.88)  |
| Other communicable, maternal, neonatal, and nutritional diseases | 159.21<br>(136.30 to<br>184.88)     | 125.42<br>(90.55 to<br>171.58)  | 101.50<br>(75.37 to<br>136.21)  | 132.55<br>(97.52 to<br>177.89)    | 4.10<br>(3.56 to<br>4.64)   | 3.86<br>(2.91 to<br>4.95) | 3.25<br>(2.48 to<br>4.09) | 3.96<br>(3.03 to<br>4.97)  |
| Sexually transmitted infections excluding HIV                    | 17.72<br>(11.69 to<br>26.55)        | 5.03<br>(3.26 to<br>7.72)       | 4.36<br>(2.87 to<br>6.36)       | 5.27<br>(3.39 to<br>8.19)         | 0.46<br>(0.27 to<br>0.59)   | 0.15<br>(0.10 to<br>0.20) | 0.14<br>(0.10 to<br>0.18) | 0.15<br>(0.10 to<br>0.20)  |
| Syphilis                                                         | 14.21<br>(8.15 to<br>22.69)         | 3.12<br>(1.70 to<br>5.46)       | 2.67<br>(1.49 to<br>4.50)       | 3.31<br>(1.77 to<br>5.94)         | 0.36<br>(0.18 to<br>0.48)   | 0.09<br>(0.05 to<br>0.15) | 0.08<br>(0.04 to<br>0.11) | 0.09<br>(0.05 to<br>0.13)  |
| Chlamydial infection                                             | 0.54<br>(0.44 to<br>0.67)           | 0.34<br>(0.24 to<br>0.50)       | 0.30<br>(0.20 to<br>0.43)       | 0.35<br>(0.24 to<br>0.51)         | 0.02<br>(0.01 to<br>0.02)   | 0.01<br>(0.01 to<br>0.02) | 0.01<br>(0.01 to<br>0.01) | 0.01<br>(0.01 to<br>0.02)  |

|                                       |                                                               |                                                               |                                                               |                                                               |                                                      |                                                            |                                                        |                                                            |
|---------------------------------------|---------------------------------------------------------------|---------------------------------------------------------------|---------------------------------------------------------------|---------------------------------------------------------------|------------------------------------------------------|------------------------------------------------------------|--------------------------------------------------------|------------------------------------------------------------|
| Gonococcal infection                  | 1.87<br>(1.53 to<br>2.22)                                     | 1.03<br>(0.74 to<br>1.45)                                     | 0.92<br>(0.66 to<br>1.27)                                     | 1.06<br>(0.76 to<br>1.46)                                     | 0.06<br>(0.05 to<br>0.07)                            | 0.04<br>(0.03 to<br>0.05)                                  | 0.03<br>(0.02 to<br>0.04)                              | 0.04<br>(0.03 to<br>0.05)                                  |
| Other sexually transmitted infections | 1.09<br>(0.87 to<br>1.29)                                     | 0.53<br>(0.38 to<br>0.75)                                     | 0.47<br>(0.33 to<br>0.66)                                     | 0.55<br>(0.39 to<br>0.76)                                     | 0.03<br>(0.02 to<br>0.04)                            | 0.02<br>(0.01 to<br>0.02)                                  | 0.01<br>(0.01 to<br>0.02)                              | 0.02<br>(0.01 to<br>0.02)                                  |
| Acute hepatitis                       | 3.94<br>(3.40 to<br>4.54)                                     | 3.40<br>(2.23 to<br>5.10)                                     | 2.85<br>(1.91 to<br>4.22)                                     | 3.54<br>(2.39 to<br>5.17)                                     | 0.11<br>(0.09 to<br>0.12)                            | 0.12<br>(0.08 to<br>0.17)                                  | 0.10<br>(0.07 to<br>0.14)                              | 0.12<br>(0.08 to<br>0.17)                                  |
| Acute hepatitis A                     | 0.12<br>(0.05 to<br>0.22)                                     | 0.07<br>(0.03 to<br>0.17)                                     | 0.06<br>(0.02 to<br>0.13)                                     | 0.08<br>(0.03 to<br>0.18)                                     | 0.00<br>(0.00 to<br>0.00)                            | 0.00<br>(0.00 to<br>0.00)                                  | 0.00<br>(0.00 to<br>0.00)                              | 0.00<br>(0.00 to<br>0.00)                                  |
| Acute hepatitis B                     | 2.77<br>(2.34 to<br>3.25)                                     | 2.51<br>(1.59 to<br>3.83)                                     | 2.07<br>(1.34 to<br>3.11)                                     | 2.62<br>(1.70 to<br>3.88)                                     | 0.08<br>(0.07 to<br>0.09)                            | 0.08<br>(0.05 to<br>0.15)                                  | 0.07<br>(0.05 to<br>0.10)                              | 0.09<br>(0.06 to<br>0.13)                                  |
| Acute hepatitis C                     | 0.17<br>(0.12 to<br>0.23)                                     | 0.17<br>(0.11 to<br>0.27)                                     | 0.16<br>(0.10 to<br>0.25)                                     | 0.18<br>(0.11 to<br>0.27)                                     | 0.01<br>(0.00 to<br>0.01)                            | 0.01<br>(0.00 to<br>0.01)                                  | 0.01<br>(0.00 to<br>0.01)                              | 0.01<br>(0.00 to<br>0.01)                                  |
| Acute hepatitis E                     | 0.89<br>(0.66 to<br>1.16)                                     | 0.65<br>(0.38 to<br>1.02)                                     | 0.56<br>(0.33 to<br>0.87)                                     | 0.67<br>(0.40 to<br>1.05)                                     | 0.02<br>(0.02 to<br>0.03)                            | 0.02<br>(0.01 to<br>0.04)                                  | 0.02<br>(0.01 to<br>0.04)                              | 0.02<br>(0.01 to<br>0.04)                                  |
| Other unspecified infectious diseases | 137.54<br>(117.33 to<br>159.16)                               | 116.99<br>(84.93 to<br>160.79)                                | 94.29<br>(69.22 to<br>126.92)                                 | 123.75<br>(91.49 to<br>166.19)                                | 3.53<br>(3.07 to<br>4.03)                            | 3.59<br>(2.72 to<br>4.60)                                  | 3.01<br>(2.31 to<br>3.79)                              | 3.69<br>(2.80 to<br>4.62)                                  |
| <b>Non-communicable diseases</b>      | <b>15,552.51</b><br><b>(14,364.06 to</b><br><b>16,845.95)</b> | <b>20,662.34</b><br><b>(17,152.84 to</b><br><b>24,944.21)</b> | <b>16,676.27</b><br><b>(14,099.20 to</b><br><b>19,826.40)</b> | <b>24,628.46</b><br><b>(20,219.11 to</b><br><b>29,940.87)</b> | <b>738.57</b><br><b>(688.36 to</b><br><b>794.31)</b> | <b>1,148.10</b><br><b>(1,019.13 to</b><br><b>1,298.97)</b> | <b>975.43</b><br><b>(871.64 to</b><br><b>1,103.51)</b> | <b>1,304.12</b><br><b>(1,155.04 to</b><br><b>1,469.50)</b> |

**Saint Vincent and the Grenadines**

| Cause                           | YLLs (actual counts)                                       |                                                            |                                                            |                                                            | Deaths (actual counts)                               |                                                      |                                                      |                                                      |
|---------------------------------|------------------------------------------------------------|------------------------------------------------------------|------------------------------------------------------------|------------------------------------------------------------|------------------------------------------------------|------------------------------------------------------|------------------------------------------------------|------------------------------------------------------|
|                                 | 2016                                                       | 2040 Forecast                                              | 2040 Better Scenario                                       | 2040 Worse Scenario                                        | 2016                                                 | 2040 Forecast                                        | 2040 Better Scenario                                 | 2040 Worse Scenario                                  |
| <b>Neoplasms</b>                | <b>4,019.31</b><br><b>(3,695.41 to</b><br><b>4,367.72)</b> | <b>5,780.65</b><br><b>(4,992.27 to</b><br><b>6,686.72)</b> | <b>5,569.31</b><br><b>(4,862.01 to</b><br><b>6,387.31)</b> | <b>6,141.38</b><br><b>(5,169.48 to</b><br><b>7,242.60)</b> | <b>171.35</b><br><b>(157.76 to</b><br><b>186.30)</b> | <b>289.75</b><br><b>(246.43 to</b><br><b>331.71)</b> | <b>295.26</b><br><b>(255.93 to</b><br><b>333.75)</b> | <b>294.52</b><br><b>(241.55 to</b><br><b>344.40)</b> |
| Lip and oral cavity cancer      | 101.43<br>(89.71 to<br>116.03)                             | 166.31<br>(99.57 to<br>266.84)                             | 105.27<br>(70.49 to<br>157.02)                             | 227.00<br>(127.81 to<br>372.94)                            | 4.04<br>(3.64 to<br>4.56)                            | 7.07<br>(4.46 to<br>10.87)                           | 4.85<br>(3.36 to<br>7.02)                            | 9.22<br>(5.51 to<br>14.81)                           |
| Nasopharynx cancer              | 19.43<br>(17.55 to<br>21.74)                               | 29.34<br>(18.30 to<br>46.69)                               | 17.78<br>(12.11 to<br>26.39)                               | 40.90<br>(24.30 to<br>66.84)                               | 0.60<br>(0.54 to<br>0.67)                            | 1.00<br>(0.65 to<br>1.52)                            | 0.64<br>(0.45 to<br>0.90)                            | 1.35<br>(0.83 to<br>2.13)                            |
| Other pharynx cancer            | 37.51<br>(32.67 to<br>43.01)                               | 58.26<br>(34.11 to<br>94.58)                               | 45.73<br>(28.49 to<br>72.13)                               | 63.24<br>(36.26 to<br>103.51)                              | 1.42<br>(1.25 to<br>1.61)                            | 2.46<br>(1.49 to<br>3.95)                            | 2.01<br>(1.30 to<br>3.11)                            | 2.61<br>(1.53 to<br>4.24)                            |
| Esophageal cancer               | 47.12<br>(41.13 to<br>54.32)                               | 79.46<br>(48.75 to<br>128.41)                              | 55.02<br>(37.39 to<br>80.08)                               | 103.21<br>(59.67 to<br>178.29)                             | 2.06<br>(1.82 to<br>2.36)                            | 3.72<br>(2.36 to<br>5.76)                            | 2.75<br>(1.90 to<br>3.95)                            | 4.63<br>(2.74 to<br>7.69)                            |
| Stomach cancer                  | 226.92<br>(206.19 to<br>250.54)                            | 258.12<br>(210.48 to<br>321.03)                            | 238.05<br>(198.15 to<br>286.86)                            | 261.25<br>(209.97 to<br>327.14)                            | 10.59<br>(9.68 to<br>11.62)                          | 13.70<br>(11.18 to<br>17.14)                         | 13.11<br>(11.04 to<br>15.70)                         | 13.42<br>(10.70 to<br>16.64)                         |
| Colon and rectum cancer         | 311.54<br>(282.93 to<br>341.11)                            | 496.82<br>(342.10 to<br>732.69)                            | 491.86<br>(343.59 to<br>715.06)                            | 515.33<br>(345.48 to<br>769.62)                            | 14.69<br>(13.34 to<br>16.06)                         | 27.09<br>(18.31 to<br>40.07)                         | 28.00<br>(19.44 to<br>40.83)                         | 27.22<br>(17.95 to<br>41.02)                         |
| Liver cancer                    | 155.00<br>(140.26 to<br>172.04)                            | 280.25<br>(181.29 to<br>429.85)                            | 234.52<br>(162.18 to<br>348.83)                            | 318.29<br>(195.70 to<br>500.54)                            | 6.51<br>(5.93 to<br>7.20)                            | 13.28<br>(8.77 to<br>20.00)                          | 11.71<br>(8.25 to<br>16.91)                          | 14.46<br>(9.14 to<br>22.30)                          |
| Liver cancer due to hepatitis B | 62.48<br>(52.96 to<br>74.51)                               | 105.03<br>(65.17 to<br>166.73)                             | 89.21<br>(60.20 to<br>134.95)                              | 118.45<br>(69.26 to<br>195.09)                             | 2.32<br>(1.96 to<br>2.75)                            | 4.40<br>(2.78 to<br>6.83)                            | 3.91<br>(2.64 to<br>5.74)                            | 4.78<br>(2.84 to<br>7.64)                            |
| Liver cancer due to hepatitis C | 34.68<br>(29.40 to<br>40.49)                               | 66.91<br>(44.07 to<br>101.47)                              | 59.39<br>(41.36 to<br>86.75)                               | 72.55<br>(45.62 to<br>113.01)                              | 1.74<br>(1.49 to<br>2.01)                            | 3.70<br>(2.45 to<br>5.54)                            | 3.45<br>(2.42 to<br>5.01)                            | 3.84<br>(2.45 to<br>5.90)                            |
| Liver cancer due to alcohol use | 26.80<br>(22.31 to<br>32.04)                               | 52.92<br>(32.24 to<br>85.96)                               | 39.16<br>(25.60 to<br>60.17)                               | 64.28<br>(37.54 to<br>105.34)                              | 1.19<br>(1.00 to<br>1.41)                            | 2.58<br>(1.63 to<br>4.09)                            | 2.04<br>(1.35 to<br>3.05)                            | 2.99<br>(1.81 to<br>4.89)                            |

|                                      |                                 |                                     |                                     |                                   |                              |                              |                              |                              |
|--------------------------------------|---------------------------------|-------------------------------------|-------------------------------------|-----------------------------------|------------------------------|------------------------------|------------------------------|------------------------------|
| Liver cancer due to other causes     | 31.03<br>(26.54 to<br>36.20)    | 55.38<br>(33.19 to<br>91.72)        | 46.76<br>(30.07 to<br>74.05)        | 63.01<br>(35.85 to<br>107.29)     | 1.26<br>(1.09 to<br>1.46)    | 2.59<br>(1.58 to<br>4.24)    | 2.30<br>(1.49 to<br>3.62)    | 2.84<br>(1.49 to<br>4.85)    |
| Gallbladder and biliary tract cancer | 35.59<br>(31.63 to<br>44.96)    | 43.19<br>(37.76 to<br>56.34)        | 45.98<br>(40.25 to<br>60.08)        | 40.82<br>(35.62 to<br>52.60)      | 1.64<br>(1.46 to<br>2.08)    | 2.25<br>(1.91 to<br>2.90)    | 2.47<br>(2.13 to<br>3.21)    | 3.07<br>(1.73 to<br>2.62)    |
| Pancreatic cancer                    | 137.21<br>(125.26 to<br>151.65) | 236.22<br>(184.02 to<br>310.68)     | 245.08<br>(192.39 to<br>318.73)     | 241.95<br>(182.36 to<br>326.10)   | 6.50<br>(5.93 to<br>7.18)    | 12.24<br>(9.40 to<br>16.28)  | 13.21<br>(10.39 to<br>17.37) | 12.15<br>(8.98 to<br>16.57)  |
| Larynx cancer                        | 79.69<br>(70.58 to<br>91.30)    | 100.65<br>(58.10 to<br>170.17)      | 61.73<br>(40.52 to<br>94.40)        | 146.48<br>(78.17 to<br>260.10)    | 3.29<br>(2.94 to<br>3.76)    | 4.44<br>(2.77 to<br>7.05)    | 2.95<br>(2.05 to<br>4.29)    | 6.23<br>(3.58 to<br>10.48)   |
| Tracheal, bronchus, and lung cancer  | 287.73<br>(259.73 to<br>323.84) | 392.35<br>(280.03 to<br>540.18)     | 295.10<br>(223.35 to<br>391.66)     | 597.03<br>(405.66 to<br>849.39)   | 11.97<br>(10.87 to<br>13.55) | 17.96<br>(13.16 to<br>24.20) | 14.54<br>(11.16 to<br>18.99) | 26.32<br>(18.20 to<br>37.08) |
| Malignant skin melanoma              | 23.83<br>(19.28 to<br>33.87)    | 30.83<br>(24.32 to<br>44.06)        | 34.25<br>(27.27 to<br>48.65)        | 28.94<br>(22.96 to<br>41.34)      | 0.97<br>(0.79 to<br>1.38)    | 1.50<br>(1.12 to<br>2.15)    | 1.74<br>(1.36 to<br>2.45)    | 1.36<br>(1.06 to<br>1.93)    |
| Non-melanoma skin cancer             | 33.46<br>(29.97 to<br>37.25)    | 47.90<br>(40.21 to<br>57.38)        | 46.88<br>(39.43 to<br>55.86)        | 46.31<br>(38.94 to<br>55.12)      | 1.53<br>(1.39 to<br>1.68)    | 2.55<br>(2.09 to<br>3.01)    | 2.61<br>(2.18 to<br>3.07)    | 2.38<br>(1.90 to<br>2.85)    |
| Breast cancer                        | 422.09<br>(367.01 to<br>483.33) | 575.81<br>(434.56 to<br>774.95)     | 557.88<br>(425.30 to<br>740.04)     | 610.92<br>(450.12 to<br>850.42)   | 15.89<br>(13.86 to<br>17.88) | 25.91<br>(19.44 to<br>35.34) | 26.16<br>(19.69 to<br>34.99) | 26.65<br>(19.19 to<br>37.49) |
| Cervical cancer                      | 317.18<br>(274.17 to<br>364.28) | 322.38<br>(252.03 to<br>407.76)     | 291.65<br>(229.88 to<br>365.66)     | 334.62<br>(259.63 to<br>430.77)   | 11.46<br>(9.97 to<br>12.95)  | 13.31<br>(10.62 to<br>16.68) | 12.40<br>(9.91 to<br>15.40)  | 13.47<br>(10.58 to<br>17.22) |
| Uterine cancer                       | 84.33<br>(72.77 to<br>95.61)    | 102.10<br>(78.47 to<br>131.58)      | 93.63<br>(72.09 to<br>119.85)       | 101.40<br>(78.47 to<br>129.85)    | 4.16<br>(3.57 to<br>4.71)    | 5.64<br>(4.36 to<br>7.13)    | 5.32<br>(4.14 to<br>6.68)    | 5.48<br>(4.23 to<br>6.93)    |
| Ovarian cancer                       | 90.27<br>(74.35 to<br>108.73)   | 125.13<br>(82.70 to<br>188.30)      | 133.81<br>(90.43 to<br>198.52)      | 125.94<br>(80.64 to<br>196.69)    | 3.42<br>(2.83 to<br>4.09)    | 5.56<br>(3.59 to<br>8.58)    | 6.09<br>(4.03 to<br>9.27)    | 5.50<br>(3.43 to<br>8.88)    |
| Prostate cancer                      | 518.88<br>(424.64 to<br>611.77) | 1,050.36<br>(845.22 to<br>1,241.10) | 1,188.27<br>(990.40 to<br>1,367.10) | 956.44<br>(738.86 to<br>1,151.22) | 4.09<br>(2.85 to<br>4.72)    | 73.07<br>(55.87 to<br>87.09) | 85.32<br>(68.83 to<br>99.16) | 64.93<br>(48.40 to<br>79.97) |
| Testicular cancer                    | 2.12<br>(1.66 to<br>2.63)       | 2.62<br>(1.76 to<br>3.77)           | 2.49<br>(1.69 to<br>3.59)           | 2.61<br>(1.74 to<br>3.78)         | 0.05<br>(0.04 to<br>0.06)    | 0.08<br>(0.06 to<br>0.10)    | 0.08<br>(0.06 to<br>0.10)    | 0.08<br>(0.06 to<br>0.10)    |

**Saint Vincent and the Grenadines**

| Cause                           | YLLs (actual counts)            |                                 |                                 |                                 | Deaths (actual counts)    |                              |                              |                             |
|---------------------------------|---------------------------------|---------------------------------|---------------------------------|---------------------------------|---------------------------|------------------------------|------------------------------|-----------------------------|
|                                 | 2016                            | 2040 Forecast                   | 2040 Better Scenario            | 2040 Worse Scenario             | 2016                      | 2040 Forecast                | 2040 Better Scenario         | 2040 Worse Scenario         |
| Kidney cancer                   | 39.70<br>(35.63 to<br>44.44)    | 63.82<br>(54.47 to<br>74.57)    | 69.29<br>(59.73 to<br>80.52)    | 62.50<br>(53.23 to<br>74.88)    | 1.46<br>(1.32 to<br>1.63) | 2.80<br>(2.36 to<br>3.30)    | 3.16<br>(3.16 to<br>3.68)    | 2.65<br>(2.22 to<br>3.13)   |
| Bladder cancer                  | 45.89<br>(41.19 to<br>51.40)    | 67.56<br>(50.35 to<br>90.68)    | 66.12<br>(50.50 to<br>87.49)    | 70.73<br>(50.91 to<br>98.84)    | 2.52<br>(2.27 to<br>2.83) | 4.07<br>(2.98 to<br>5.54)    | 4.18<br>(3.17 to<br>5.55)    | 4.09<br>(2.89 to<br>5.80)   |
| Brain and nervous system cancer | 98.69<br>(86.25 to<br>112.92)   | 124.85<br>(107.91 to<br>144.21) | 129.96<br>(112.23 to<br>150.88) | 121.34<br>(105.19 to<br>139.82) | 2.72<br>(2.43 to<br>3.05) | 4.32<br>(3.83 to<br>4.87)    | 4.67<br>(4.16 to<br>5.26)    | 4.08<br>(3.58 to<br>4.58)   |
| Thyroid cancer                  | 14.96<br>(13.25 to<br>16.79)    | 23.61<br>(16.27 to<br>33.62)    | 20.42<br>(14.65 to<br>28.28)    | 24.69<br>(16.73 to<br>35.96)    | 0.64<br>(0.57 to<br>0.72) | 1.19<br>(0.83 to<br>1.66)    | 1.06<br>(0.76 to<br>1.46)    | 1.21<br>(0.83 to<br>1.73)   |
| Mesothelioma                    | 4.72<br>(4.16 to<br>5.45)       | 7.30<br>(6.08 to<br>8.85)       | 7.38<br>(6.12 to<br>8.93)       | 7.06<br>(5.85 to<br>8.54)       | 0.18<br>(0.16 to<br>0.20) | 0.32<br>(0.27 to<br>0.38)    | 0.33<br>(0.28 to<br>0.40)    | 0.30<br>(0.25 to<br>0.36)   |
| Hodgkin lymphoma                | 20.45<br>(17.60 to<br>26.98)    | 18.02<br>(12.98 to<br>25.70)    | 15.35<br>(11.30 to<br>21.68)    | 18.57<br>(13.60 to<br>25.94)    | 0.55<br>(0.48 to<br>0.73) | 0.59<br>(0.45 to<br>0.81)    | 0.52<br>(0.70 to<br>0.70)    | 0.59<br>(0.45 to<br>0.80)   |
| Non-Hodgkin lymphoma            | 239.86<br>(209.65 to<br>279.64) | 338.69<br>(264.26 to<br>435.44) | 344.48<br>(270.85 to<br>439.92) | 335.62<br>(259.20 to<br>431.97) | 7.42<br>(6.59 to<br>8.60) | 12.69<br>(10.07 to<br>16.36) | 13.35<br>(10.75 to<br>16.95) | 12.23<br>(9.54 to<br>15.72) |



|                                                                |                                                      |                                                      |                                                      |                                                      |                                                   |                                                   |                                                   |                                                   |
|----------------------------------------------------------------|------------------------------------------------------|------------------------------------------------------|------------------------------------------------------|------------------------------------------------------|---------------------------------------------------|---------------------------------------------------|---------------------------------------------------|---------------------------------------------------|
| Aortic aneurysm                                                | 73.14<br>(65.47 to<br>82.03)                         | 100.09<br>(80.35 to<br>126.25)                       | 98.59<br>(79.91 to<br>121.67)                        | 99.36<br>(79.59 to<br>126.32)                        | 3.83<br>(3.43 to<br>4.28)                         | 5.83<br>(4.76 to<br>7.21)                         | 6.07<br>(5.04 to<br>7.31)                         | 5.55<br>(4.51 to<br>6.91)                         |
| Peripheral artery disease                                      | 13.86<br>(9.69 to<br>20.66)                          | 33.86<br>(20.94 to<br>51.58)                         | 39.04<br>(23.88 to<br>60.49)                         | 33.33<br>(20.16 to<br>51.41)                         | 1.29<br>(0.85 to<br>1.92)                         | 3.16<br>(1.74 to<br>4.86)                         | 3.90<br>(2.20 to<br>6.10)                         | 2.95<br>(1.58 to<br>4.64)                         |
| Endocarditis                                                   | 51.20<br>(36.66 to<br>64.10)                         | 65.78<br>(44.34 to<br>93.38)                         | 61.56<br>(41.01 to<br>86.78)                         | 66.32<br>(44.62 to<br>94.16)                         | 2.05<br>(1.44 to<br>2.65)                         | 3.23<br>(2.10 to<br>4.68)                         | 3.18<br>(2.06 to<br>4.55)                         | 3.12<br>(2.04 to<br>4.62)                         |
| Other cardiovascular and circulatory diseases                  | 472.19<br>(426.33 to<br>521.83)                      | 605.35<br>(463.03 to<br>796.06)                      | 498.80<br>(396.24 to<br>636.05)                      | 642.04<br>(491.68 to<br>854.41)                      | 20.73<br>(18.72 to<br>22.83)                      | 32.18<br>(25.13 to<br>40.56)                      | 28.41<br>(22.87 to<br>35.13)                      | 32.41<br>(25.09 to<br>41.28)                      |
| <b>Chronic respiratory diseases</b>                            | <b>345.54</b><br><b>(314.37 to</b><br><b>380.08)</b> | <b>368.02</b><br><b>(289.39 to</b><br><b>463.10)</b> | <b>285.01</b><br><b>(233.86 to</b><br><b>345.18)</b> | <b>473.64</b><br><b>(355.88 to</b><br><b>624.52)</b> | <b>16.59</b><br><b>(15.24 to</b><br><b>18.33)</b> | <b>20.14</b><br><b>(15.76 to</b><br><b>24.79)</b> | <b>16.73</b><br><b>(13.59 to</b><br><b>19.85)</b> | <b>24.65</b><br><b>(18.13 to</b><br><b>32.21)</b> |
| Chronic obstructive pulmonary disease                          | 195.07<br>(172.61 to<br>218.96)                      | 228.10<br>(165.93 to<br>309.16)                      | 159.46<br>(121.01 to<br>204.85)                      | 325.75<br>(224.18 to<br>463.98)                      | 10.79<br>(9.66 to<br>12.02)                       | 13.44<br>(9.77 to<br>17.60)                       | 10.33<br>(7.90 to<br>12.91)                       | 17.90<br>(12.36 to<br>24.72)                      |
| Pneumoconiosis                                                 | 2.35<br>(1.98 to<br>2.78)                            | 2.53<br>(1.92 to<br>3.23)                            | 2.41<br>(1.81 to<br>3.13)                            | 2.43<br>(1.83 to<br>3.12)                            | 0.10<br>(0.08 to<br>0.11)                         | 0.14<br>(0.10 to<br>0.18)                         | 0.14<br>(0.10 to<br>0.18)                         | 0.13<br>(0.09 to<br>0.17)                         |
| Silicosis                                                      | 0.21<br>(0.16 to<br>0.28)                            | 0.24<br>(0.14 to<br>0.40)                            | 0.23<br>(0.13 to<br>0.37)                            | 0.24<br>(0.14 to<br>0.38)                            | 0.01<br>(0.01 to<br>0.01)                         | 0.01<br>(0.01 to<br>0.02)                         | 0.01<br>(0.01 to<br>0.02)                         | 0.01<br>(0.01 to<br>0.02)                         |
| Asbestosis                                                     | 0.54<br>(0.44 to<br>0.74)                            | 0.60<br>(0.43 to<br>0.84)                            | 0.61<br>(0.44 to<br>0.87)                            | 0.58<br>(0.42 to<br>0.80)                            | 0.02<br>(0.01 to<br>0.02)                         | 0.02<br>(0.02 to<br>0.04)                         | 0.03<br>(0.02 to<br>0.04)                         | 0.02<br>(0.02 to<br>0.04)                         |
| Coal workers pneumoconiosis                                    | 0.09<br>(0.06 to<br>0.15)                            | 0.14<br>(0.06 to<br>0.28)                            | 0.10<br>(0.05 to<br>0.20)                            | 0.15<br>(0.07 to<br>0.28)                            | 0.00<br>(0.00 to<br>0.01)                         | 0.01<br>(0.00 to<br>0.01)                         | 0.00<br>(0.00 to<br>0.01)                         | 0.01<br>(0.00 to<br>0.01)                         |
| Other pneumoconiosis                                           | 1.51<br>(1.20 to<br>1.81)                            | 1.54<br>(1.09 to<br>2.08)                            | 1.47<br>(1.01 to<br>2.00)                            | 1.46<br>(1.02 to<br>1.99)                            | 0.07<br>(0.06 to<br>0.08)                         | 0.09<br>(0.06 to<br>0.12)                         | 0.09<br>(0.06 to<br>0.12)                         | 0.08<br>(0.06 to<br>0.11)                         |
| Asthma                                                         | 84.33<br>(73.49 to<br>97.60)                         | 57.17<br>(33.82 to<br>92.22)                         | 40.86<br>(24.85 to<br>64.90)                         | 66.52<br>(38.67 to<br>108.39)                        | 3.00<br>(2.63 to<br>3.47)                         | 3.86<br>(1.50 to<br>4.13)                         | 1.95<br>(1.20 to<br>3.10)                         | 2.84<br>(1.66 to<br>4.58)                         |
| Interstitial lung disease and pulmonary sarcoidosis            | 31.17<br>(21.59 to<br>37.77)                         | 34.37<br>(23.70 to<br>42.50)                         | 39.18<br>(27.43 to<br>48.11)                         | 32.01<br>(22.29 to<br>39.87)                         | 1.25<br>(0.86 to<br>1.51)                         | 1.65<br>(1.11 to<br>2.07)                         | 1.95<br>(1.34 to<br>2.40)                         | 1.49<br>(1.02 to<br>1.87)                         |
| Other chronic respiratory diseases                             | 32.62<br>(23.10 to<br>50.08)                         | 45.85<br>(31.81 to<br>70.39)                         | 43.10<br>(30.88 to<br>63.98)                         | 46.94<br>(31.79 to<br>72.87)                         | 1.45<br>(1.04 to<br>2.24)                         | 2.05<br>(1.58 to<br>3.70)                         | 2.36<br>(1.62 to<br>3.60)                         | 2.29<br>(1.49 to<br>3.64)                         |
| <b>Cirrhosis and other chronic liver diseases</b>              | <b>477.65</b><br><b>(424.60 to</b><br><b>534.97)</b> | <b>586.60</b><br><b>(470.36 to</b><br><b>730.57)</b> | <b>514.08</b><br><b>(411.98 to</b><br><b>639.72)</b> | <b>609.54</b><br><b>(493.33 to</b><br><b>756.51)</b> | <b>16.20</b><br><b>(14.53 to</b><br><b>18.02)</b> | <b>22.57</b><br><b>(18.61 to</b><br><b>27.14)</b> | <b>20.48</b><br><b>(16.88 to</b><br><b>24.43)</b> | <b>22.86</b><br><b>(18.78 to</b><br><b>27.42)</b> |
| Cirrhosis and other chronic liver diseases due to hepatitis B  | 58.06<br>(46.84 to<br>71.93)                         | 72.81<br>(53.98 to<br>96.97)                         | 70.01<br>(52.32 to<br>93.36)                         | 71.72<br>(53.56 to<br>95.38)                         | 2.04<br>(1.68 to<br>2.51)                         | 2.88<br>(2.21 to<br>3.71)                         | 2.84<br>(2.20 to<br>3.67)                         | 2.78<br>(2.12 to<br>3.60)                         |
| Cirrhosis and other chronic liver diseases due to hepatitis C  | 163.08<br>(139.86 to<br>187.13)                      | 202.43<br>(157.94 to<br>258.67)                      | 192.93<br>(150.11 to<br>243.87)                      | 200.44<br>(156.80 to<br>252.44)                      | 5.47<br>(4.78 to<br>6.22)                         | 7.60<br>(6.11 to<br>9.27)                         | 7.41<br>(5.96 to<br>9.04)                         | 7.38<br>(5.93 to<br>9.01)                         |
| Cirrhosis and other chronic liver diseases due to alcohol use  | 183.11<br>(157.73 to<br>209.58)                      | 233.06<br>(181.01 to<br>295.98)                      | 178.07<br>(138.59 to<br>224.79)                      | 259.05<br>(204.61 to<br>326.91)                      | 6.44<br>(5.64 to<br>7.31)                         | 9.13<br>(7.32 to<br>11.08)                        | 7.36<br>(5.92 to<br>8.93)                         | 9.82<br>(7.78 to<br>11.98)                        |
| Cirrhosis and other chronic liver diseases due to other causes | 73.40<br>(63.69 to<br>84.43)                         | 78.30<br>(62.00 to<br>99.91)                         | 73.06<br>(57.90 to<br>92.90)                         | 78.34<br>(61.99 to<br>99.69)                         | 2.25<br>(1.96 to<br>2.59)                         | 2.96<br>(2.38 to<br>3.72)                         | 2.87<br>(2.31 to<br>3.58)                         | 2.88<br>(2.31 to<br>3.60)                         |
| <b>Digestive diseases</b>                                      | <b>499.79</b><br><b>(441.09 to</b><br><b>585.38)</b> | <b>513.07</b><br><b>(409.37 to</b><br><b>675.37)</b> | <b>445.14</b><br><b>(363.44 to</b><br><b>576.43)</b> | <b>528.01</b><br><b>(416.49 to</b><br><b>695.89)</b> | <b>19.79</b><br><b>(17.75 to</b><br><b>23.36)</b> | <b>25.20</b><br><b>(20.25 to</b><br><b>31.32)</b> | <b>23.18</b><br><b>(19.15 to</b><br><b>28.65)</b> | <b>24.86</b><br><b>(19.67 to</b><br><b>31.24)</b> |
| Peptic ulcer disease                                           | 129.15<br>(110.95 to<br>159.04)                      | 84.84<br>(65.13 to<br>112.12)                        | 68.34<br>(53.28 to<br>88.76)                         | 89.26<br>(68.30 to<br>116.17)                        | 5.24<br>(4.55 to<br>6.43)                         | 4.25<br>(3.25 to<br>5.47)                         | 3.57<br>(2.79 to<br>4.52)                         | 4.31<br>(3.26 to<br>5.56)                         |
| <b>Saint Vincent and the Grenadines</b>                        |                                                      |                                                      |                                                      |                                                      |                                                   |                                                   |                                                   |                                                   |
| <b>YLLs (actual counts)</b>                                    |                                                      |                                                      |                                                      |                                                      | <b>Deaths (actual counts)</b>                     |                                                   |                                                   |                                                   |

| Cause                                      | 2016                                                 | 2040 Forecast                                          | 2040 Better Scenario                                   | 2040 Worse Scenario                                    | 2016                                              | 2040 Forecast                                     | 2040 Better Scenario                              | 2040 Worse Scenario                               |
|--------------------------------------------|------------------------------------------------------|--------------------------------------------------------|--------------------------------------------------------|--------------------------------------------------------|---------------------------------------------------|---------------------------------------------------|---------------------------------------------------|---------------------------------------------------|
| Gastritis and duodenitis                   | 40.09<br>(32.86 to<br>54.19)                         | 55.27<br>(40.26 to<br>83.26)                           | 51.83<br>(37.94 to<br>77.44)                           | 54.54<br>(39.84 to<br>80.80)                           | 1.62<br>(1.36 to<br>2.28)                         | 2.63<br>(1.92 to<br>3.84)                         | 2.57<br>(1.89 to<br>3.78)                         | 2.51<br>(1.82 to<br>3.61)                         |
| Appendicitis                               | 30.02<br>(23.62 to<br>35.57)                         | 21.71<br>(15.55 to<br>28.96)                           | 18.43<br>(13.29 to<br>24.23)                           | 22.39<br>(16.41 to<br>29.46)                           | 0.89<br>(0.68 to<br>1.04)                         | 0.85<br>(0.61 to<br>1.09)                         | 0.76<br>(0.56 to<br>0.95)                         | 0.84<br>(0.62 to<br>1.07)                         |
| Paralytic ileus and intestinal obstruction | 66.90<br>(53.57 to<br>87.80)                         | 72.73<br>(57.56 to<br>97.45)                           | 70.53<br>(56.26 to<br>94.66)                           | 71.30<br>(55.86 to<br>96.58)                           | 2.54<br>(2.09 to<br>3.35)                         | 3.83<br>(2.94 to<br>5.14)                         | 3.96<br>(3.10 to<br>5.27)                         | 3.57<br>(2.67 to<br>4.85)                         |
| Inguinal, femoral, and abdominal hernia    | 23.29<br>(16.79 to<br>29.54)                         | 16.98<br>(11.80 to<br>22.99)                           | 15.66<br>(11.02 to<br>20.87)                           | 16.85<br>(11.65 to<br>22.85)                           | 0.96<br>(0.70 to<br>1.24)                         | 0.85<br>(0.59 to<br>1.14)                         | 0.83<br>(0.57 to<br>1.11)                         | 0.81<br>(0.55 to<br>1.09)                         |
| Inflammatory bowel disease                 | 33.65<br>(23.89 to<br>40.38)                         | 35.87<br>(22.65 to<br>45.81)                           | 36.20<br>(22.89 to<br>46.45)                           | 34.69<br>(21.91 to<br>44.47)                           | 1.24<br>(0.86 to<br>1.47)                         | 1.67<br>(1.02 to<br>2.12)                         | 1.76<br>(1.08 to<br>2.22)                         | 1.57<br>(0.93 to<br>2.00)                         |
| Vascular intestinal disorders              | 9.11<br>(7.86 to<br>11.45)                           | 13.85<br>(11.29 to<br>17.20)                           | 13.67<br>(11.18 to<br>17.02)                           | 13.26<br>(10.60 to<br>16.53)                           | 0.51<br>(0.44 to<br>0.62)                         | 0.89<br>(0.68 to<br>1.11)                         | 0.92<br>(0.72 to<br>1.13)                         | 0.83<br>(0.61 to<br>1.05)                         |
| Gallbladder and biliary diseases           | 24.79<br>(21.38 to<br>31.12)                         | 44.42<br>(23.34 to<br>78.66)                           | 31.35<br>(17.08 to<br>55.06)                           | 51.04<br>(26.49 to<br>90.46)                           | 1.11<br>(0.96 to<br>1.38)                         | 2.32<br>(1.24 to<br>4.07)                         | 1.73<br>(0.93 to<br>2.99)                         | 2.55<br>(1.36 to<br>4.48)                         |
| Pancreatitis                               | 57.70<br>(47.19 to<br>69.42)                         | 74.95<br>(37.26 to<br>154.22)                          | 55.32<br>(31.08 to<br>105.21)                          | 83.14<br>(40.37 to<br>177.72)                          | 1.73<br>(1.44 to<br>2.10)                         | 2.57<br>(1.44 to<br>4.94)                         | 2.00<br>(1.33 to<br>3.53)                         | 2.76<br>(1.49 to<br>5.40)                         |
| Other digestive diseases                   | 85.08<br>(69.82 to<br>105.50)                        | 92.46<br>(72.58 to<br>119.05)                          | 83.80<br>(64.94 to<br>107.02)                          | 91.54<br>(71.05 to<br>117.72)                          | 3.96<br>(3.29 to<br>4.92)                         | 5.34<br>(4.01 to<br>6.91)                         | 5.08<br>(3.92 to<br>6.48)                         | 5.10<br>(3.74 to<br>6.62)                         |
| <b>Neurological disorders</b>              | <b>500.34</b><br><b>(446.63 to</b><br><b>565.17)</b> | <b>834.01</b><br><b>(639.93 to</b><br><b>1,115.24)</b> | <b>812.10</b><br><b>(646.06 to</b><br><b>1,085.74)</b> | <b>838.15</b><br><b>(632.04 to</b><br><b>1,151.93)</b> | <b>32.48</b><br><b>(28.06 to</b><br><b>37.87)</b> | <b>62.04</b><br><b>(42.31 to</b><br><b>87.01)</b> | <b>64.91</b><br><b>(46.75 to</b><br><b>87.58)</b> | <b>59.63</b><br><b>(39.16 to</b><br><b>88.10)</b> |
| Alzheimer's disease and other dementias    | 241.36<br>(200.26 to<br>292.62)                      | 509.77<br>(341.23 to<br>775.34)                        | 511.29<br>(359.25 to<br>736.85)                        | 506.32<br>(321.58 to<br>805.49)                        | 24.36<br>(20.12 to<br>29.43)                      | 48.77<br>(30.39 to<br>73.54)                      | 51.16<br>(33.64 to<br>73.88)                      | 46.89<br>(27.81 to<br>75.06)                      |
| Parkinson's disease                        | 27.16<br>(20.73 to<br>34.99)                         | 61.53<br>(44.29 to<br>81.49)                           | 74.67<br>(54.68 to<br>97.34)                           | 54.21<br>(37.94 to<br>71.75)                           | 2.21<br>(1.67 to<br>2.85)                         | 4.96<br>(3.45 to<br>6.70)                         | 6.19<br>(4.50 to<br>8.23)                         | 4.28<br>(2.86 to<br>5.86)                         |
| Epilepsy                                   | 155.05<br>(133.39 to<br>179.04)                      | 171.16<br>(106.22 to<br>261.10)                        | 127.47<br>(82.71 to<br>189.49)                         | 189.67<br>(118.49 to<br>289.46)                        | 3.74<br>(3.29 to<br>4.21)                         | 5.12<br>(3.37 to<br>7.33)                         | 4.01<br>(2.75 to<br>5.64)                         | 5.50<br>(3.61 to<br>8.01)                         |
| Multiple sclerosis                         | 4.45<br>(3.50 to<br>7.11)                            | 5.69<br>(4.34 to<br>8.98)                              | 5.92<br>(4.48 to<br>9.39)                              | 5.59<br>(4.24 to<br>8.83)                              | 0.13<br>(0.10 to<br>0.20)                         | 0.18<br>(0.14 to<br>0.28)                         | 0.19<br>(0.15 to<br>0.29)                         | 0.17<br>(0.14 to<br>0.27)                         |
| Motor neuron disease                       | 18.31<br>(16.09 to<br>20.71)                         | 25.34<br>(21.35 to<br>29.54)                           | 27.90<br>(23.51 to<br>32.64)                           | 23.94<br>(20.45 to<br>27.88)                           | 0.62<br>(0.55 to<br>0.70)                         | 1.02<br>(0.86 to<br>1.17)                         | 1.14<br>(0.97 to<br>1.31)                         | 0.94<br>(0.80 to<br>1.09)                         |
| Other neurological disorders               | 54.02<br>(47.34 to<br>62.53)                         | 60.53<br>(52.07 to<br>70.60)                           | 64.85<br>(55.54 to<br>76.24)                           | 58.42<br>(50.44 to<br>68.26)                           | 1.43<br>(1.29 to<br>1.61)                         | 1.98<br>(1.74 to<br>2.23)                         | 2.21<br>(1.95 to<br>2.49)                         | 1.85<br>(1.62 to<br>2.09)                         |
| <b>Mental disorders</b>                    | <b>250.33</b><br><b>(215.22 to</b><br><b>295.12)</b> | <b>305.27</b><br><b>(242.30 to</b><br><b>386.73)</b>   | <b>290.11</b><br><b>(230.57 to</b><br><b>368.99)</b>   | <b>307.59</b><br><b>(244.91 to</b><br><b>387.42)</b>   | <b>7.18</b><br><b>(6.26 to</b><br><b>8.37)</b>    | <b>9.89</b><br><b>(8.27 to</b><br><b>11.87)</b>   | <b>9.67</b><br><b>(8.05 to</b><br><b>11.62)</b>   | <b>9.77</b><br><b>(8.16 to</b><br><b>11.75)</b>   |
| Alcohol use disorders                      | 201.10<br>(171.21 to<br>237.94)                      | 223.76<br>(175.23 to<br>282.67)                        | 207.16<br>(161.61 to<br>263.41)                        | 227.73<br>(178.92 to<br>285.60)                        | 5.90<br>(5.10 to<br>6.90)                         | 7.45<br>(6.08 to<br>9.06)                         | 7.09<br>(5.78 to<br>8.65)                         | 7.43<br>(6.09 to<br>9.05)                         |
| Drug use disorders                         | 49.08<br>(38.02 to<br>63.27)                         | 81.26<br>(58.53 to<br>111.41)                          | 82.70<br>(59.55 to<br>113.29)                          | 79.61<br>(57.27 to<br>109.32)                          | 1.28<br>(1.02 to<br>1.62)                         | 2.44<br>(1.85 to<br>3.18)                         | 2.58<br>(1.97 to<br>3.37)                         | 2.33<br>(1.76 to<br>3.02)                         |
| Opioid use disorders                       | 25.37<br>(18.66 to<br>35.72)                         | 40.85<br>(28.04 to<br>59.62)                           | 41.17<br>(28.32 to<br>60.17)                           | 40.18<br>(27.60 to<br>58.68)                           | 0.61<br>(0.46 to<br>0.86)                         | 1.18<br>(0.84 to<br>1.68)                         | 1.23<br>(0.88 to<br>1.76)                         | 1.14<br>(0.80 to<br>1.63)                         |
| Cocaine use disorders                      | 6.64<br>(4.12 to<br>9.08)                            | 10.37<br>(5.89 to<br>16.58)                            | 9.79<br>(5.56 to<br>15.47)                             | 10.41<br>(5.92 to<br>16.49)                            | 0.17<br>(0.11 to<br>0.24)                         | 0.29<br>(0.16 to<br>0.43)                         | 0.27<br>(0.16 to<br>0.41)                         | 0.28<br>(0.16 to<br>0.43)                         |

|                                                            |                                         |                                       |                                       |                                       |                                 |                                 |                                 |                                 |
|------------------------------------------------------------|-----------------------------------------|---------------------------------------|---------------------------------------|---------------------------------------|---------------------------------|---------------------------------|---------------------------------|---------------------------------|
|                                                            | 1.33<br>(0.86 to<br>1.84)               | 2.98<br>(1.85 to<br>4.83)             | 2.83<br>(1.79 to<br>4.49)             | 3.00<br>(1.84 to<br>4.82)             | 0.03<br>(0.02 to<br>0.05)       | 0.09<br>(0.06 to<br>0.13)       | 0.09<br>(0.06 to<br>0.13)       | 0.08<br>(0.06 to<br>0.13)       |
| Amphetamine use disorders                                  | 15.74<br>(9.92 to<br>21.23)             | 27.05<br>(16.10 to<br>38.64)          | 28.91<br>(17.28 to<br>42.20)          | 26.02<br>(15.64 to<br>37.51)          | 0.46<br>(0.31 to<br>0.61)       | 0.89<br>(0.58 to<br>1.20)       | 0.98<br>(0.64 to<br>1.33)       | 0.83<br>(0.54 to<br>1.12)       |
| Other drug use disorders                                   | 0.15<br>(0.12 to<br>0.19)               | 0.25<br>(0.18 to<br>0.34)             | 0.25<br>(0.18 to<br>0.34)             | 0.25<br>(0.18 to<br>0.34)             | 0.00<br>(0.00 to<br>0.00)       | 0.01<br>(0.00 to<br>0.01)       | 0.01<br>(0.00 to<br>0.01)       | 0.01<br>(0.00 to<br>0.01)       |
| Eating disorders                                           | <b>Saint Vincent and the Grenadines</b> |                                       |                                       |                                       |                                 |                                 |                                 |                                 |
| Cause                                                      | YLLs (actual counts)                    |                                       |                                       |                                       | Deaths (actual counts)          |                                 |                                 |                                 |
|                                                            | 2016                                    | 2040 Forecast                         | 2040 Better Scenario                  | 2040 Worse Scenario                   | 2016                            | 2040 Forecast                   | 2040 Better Scenario            | 2040 Worse Scenario             |
|                                                            | 3,073.24<br>(2,818.02 to<br>3,338.12)   | 5,014.82<br>(3,408.86 to<br>7,829.10) | 3,913.62<br>(2,682.70 to<br>6,186.35) | 5,695.40<br>(3,794.23 to<br>8,591.33) | 141.04<br>(129.17 to<br>152.07) | 278.12<br>(191.29 to<br>428.86) | 227.64<br>(158.32 to<br>306.56) | 303.46<br>(203.06 to<br>449.87) |
| Diabetes, urogenital, blood, and endocrine diseases        | 1,809.58<br>(1,647.74 to<br>1,967.97)   | 2,941.39<br>(2,183.68 to<br>3,895.72) | 2,217.39<br>(1,679.81 to<br>2,896.06) | 3,280.78<br>(2,390.35 to<br>4,351.95) | 90.12<br>(81.85 to<br>97.82)    | 170.45<br>(129.89 to<br>215.91) | 135.11<br>(105.86 to<br>167.19) | 182.64<br>(134.58 to<br>235.26) |
| Diabetes mellitus                                          | 0.89<br>(0.72 to<br>1.15)               | 1.45<br>(0.99 to<br>2.23)             | 1.27<br>(0.87 to<br>1.90)             | 1.51<br>(1.03 to<br>2.26)             | 0.02<br>(0.02 to<br>0.02)       | 0.04<br>(0.03 to<br>0.06)       | 0.04<br>(0.03 to<br>0.05)       | 0.04<br>(0.03 to<br>0.06)       |
| Acute glomerulonephritis                                   | 746.56<br>(678.56 to<br>816.54)         | 1,393.01<br>(345.56 to<br>3,901.08)   | 1,044.75<br>(259.11 to<br>3,266.62)   | 1,743.59<br>(436.41 to<br>4,166.78)   | 31.76<br>(29.01 to<br>34.49)    | 74.99<br>(44.82 to<br>221.32)   | 59.13<br>(11.22 to<br>190.09)   | 90.09<br>(18.57 to<br>227.29)   |
| Chronic kidney disease                                     | 267.11<br>(227.48 to<br>308.45)         | 587.34<br>(127.19 to<br>1,662.14)     | 439.52<br>(93.42 to<br>1,383.27)      | 740.31<br>(161.88 to<br>1,844.17)     | 11.52<br>(9.88 to<br>13.27)     | 29.88<br>(5.55 to<br>88.53)     | 23.34<br>(4.30 to<br>75.28)     | 36.26<br>(6.92 to<br>91.75)     |
| Chronic kidney disease due to diabetes mellitus            | 82.71<br>(67.94 to<br>98.68)            | 193.50<br>(37.20 to<br>598.15)        | 151.22<br>(28.83 to<br>503.27)        | 234.81<br>(46.79 to<br>611.33)        | 5.32<br>(4.42 to<br>6.33)       | 14.30<br>(2.57 to<br>43.38)     | 11.84<br>(2.10 to<br>39.30)     | 16.52<br>(3.09 to<br>44.96)     |
| Chronic kidney disease due to hypertension                 | 229.30<br>(191.27 to<br>266.53)         | 339.51<br>(99.54 to<br>929.30)        | 251.05<br>(75.48 to<br>759.17)        | 427.38<br>(123.90 to<br>1,056.27)     | 8.29<br>(6.96 to<br>9.69)       | 8.29<br>(3.60 to<br>49.21)      | 16.41<br>(2.75 to<br>41.52)     | 12.67<br>(4.46 to<br>50.80)     |
| Chronic kidney disease due to glomerulonephritis           | 167.45<br>(138.42 to<br>199.51)         | 272.67<br>(75.22 to<br>751.83)        | 202.96<br>(55.44 to<br>618.26)        | 341.08<br>(92.08 to<br>831.46)        | 6.64<br>(5.43 to<br>7.93)       | 14.40<br>(3.08 to<br>42.74)     | 11.28<br>(2.31 to<br>36.33)     | 17.32<br>(3.75 to<br>45.21)     |
| Chronic kidney disease due to other and unspecified causes | 138.83<br>(125.29 to<br>153.02)         | 214.50<br>(181.60 to<br>248.16)       | 221.60<br>(188.47 to<br>255.92)       | 202.81<br>(167.45 to<br>235.70)       | 7.52<br>(6.80 to<br>8.28)       | 14.07<br>(10.71 to<br>16.89)    | 15.32<br>(12.14 to<br>18.01)    | 12.78<br>(9.47 to<br>15.73)     |
| Urinary diseases and male infertility                      | 124.30<br>(111.50 to<br>137.29)         | 200.35<br>(169.63 to<br>231.55)       | 208.45<br>(177.94 to<br>241.05)       | 188.95<br>(156.56 to<br>221.00)       | 6.77<br>(6.06 to<br>7.45)       | 13.24<br>(10.08 to<br>15.94)    | 14.52<br>(11.52 to<br>17.16)    | 12.00<br>(8.92 to<br>14.82)     |
| Urinary tract infections                                   | 4.02<br>(3.07 to<br>5.90)               | 4.44<br>(2.93 to<br>7.11)             | 4.29<br>(2.87 to<br>6.88)             | 4.34<br>(2.83 to<br>7.02)             | 0.16<br>(0.13 to<br>0.24)       | 0.20<br>(0.13 to<br>0.35)       | 0.20<br>(0.13 to<br>0.33)       | 0.19<br>(0.12 to<br>0.31)       |
| Urolithiasis                                               | 10.51<br>(7.92 to<br>16.17)             | 9.71<br>(6.21 to<br>16.48)            | 8.85<br>(5.66 to<br>14.84)            | 9.51<br>(6.06 to<br>15.99)            | 0.58<br>(0.42 to<br>0.91)       | 0.63<br>(0.38 to<br>1.09)       | 0.61<br>(0.36 to<br>1.03)       | 0.59<br>(0.35 to<br>1.04)       |
| Other urinary diseases                                     | 0.51<br>(0.23 to<br>0.67)               | 0.31<br>(0.15 to<br>0.53)             | 0.33<br>(0.11 to<br>0.39)             | 0.32<br>(0.16 to<br>0.55)             | 0.01<br>(0.01 to<br>0.02)       | 0.01<br>(0.01 to<br>0.02)       | 0.01<br>(0.01 to<br>0.02)       | 0.01<br>(0.01 to<br>0.02)       |
| Gynecological diseases                                     | 0.05<br>(0.03 to<br>0.09)               | 0.04<br>(0.02 to<br>0.09)             | 0.03<br>(0.02 to<br>0.07)             | 0.04<br>(0.02 to<br>0.09)             | 0.00<br>(0.00 to<br>0.00)       | 0.00<br>(0.00 to<br>0.00)       | 0.00<br>(0.00 to<br>0.00)       | 0.00<br>(0.00 to<br>0.00)       |
| Uterine fibroids                                           | 0.39<br>(0.14 to<br>0.54)               | 0.17<br>(0.05 to<br>0.35)             | 0.12<br>(0.04 to<br>0.23)             | 0.19<br>(0.06 to<br>0.36)             | 0.01<br>(0.00 to<br>0.01)       | 0.00<br>(0.00 to<br>0.01)       | 0.00<br>(0.00 to<br>0.01)       | 0.00<br>(0.00 to<br>0.01)       |
| Polycystic ovarian syndrome                                | 0.00<br>(0.00 to<br>0.00)               | 0.00<br>(0.00 to<br>0.00)             | 0.00<br>(0.00 to<br>0.00)             | 0.00<br>(0.00 to<br>0.00)             | 0.00<br>(0.00 to<br>0.00)       | 0.00<br>(0.00 to<br>0.00)       | 0.00<br>(0.00 to<br>0.00)       | 0.00<br>(0.00 to<br>0.00)       |
| Endometriosis                                              | 0.00<br>(0.00 to<br>0.00)               | 0.00<br>(0.00 to<br>0.00)             | 0.00<br>(0.00 to<br>0.00)             | 0.00<br>(0.00 to<br>0.00)             | 0.00<br>(0.00 to<br>0.00)       | 0.00<br>(0.00 to<br>0.00)       | 0.00<br>(0.00 to<br>0.00)       | 0.00<br>(0.00 to<br>0.00)       |
| Genital prolapse                                           | 0.00<br>(0.00 to<br>0.01)               | 0.00<br>(0.00 to<br>0.01)             | 0.00<br>(0.00 to<br>0.01)             | 0.00<br>(0.00 to<br>0.01)             | 0.00<br>(0.00 to<br>0.00)       | 0.00<br>(0.00 to<br>0.00)       | 0.00<br>(0.00 to<br>0.00)       | 0.00<br>(0.00 to<br>0.00)       |



|                                                   |                                 |                                 |                                 |                                 |                            |                              |                              |                             |
|---------------------------------------------------|---------------------------------|---------------------------------|---------------------------------|---------------------------------|----------------------------|------------------------------|------------------------------|-----------------------------|
| Other gynecological diseases                      | 0.07<br>(0.04 to<br>0.14)       | 0.09<br>(0.05 to<br>0.16)       | 0.08<br>(0.04 to<br>0.14)       | 0.09<br>(0.05 to<br>0.16)       | 0.00<br>(0.00 to<br>0.01)  | 0.01<br>(0.00 to<br>0.01)    | 0.01<br>(0.00 to<br>0.01)    | 0.01<br>(0.00 to<br>0.01)   |
| Hemoglobinopathies and hemolytic anemias          | 121.71<br>(99.09 to<br>147.52)  | 131.66<br>(99.02 to<br>175.87)  | 116.45<br>(88.63 to<br>154.74)  | 134.31<br>(101.23 to<br>177.48) | 3.33<br>(2.81 to<br>4.29)  | 4.72<br>(3.59 to<br>6.25)    | 4.29<br>(3.28 to<br>5.70)    | 4.67<br>(3.55 to<br>6.26)   |
| Thalassemias                                      | 2.70<br>(0.94 to<br>4.96)       | 0.71<br>(0.27 to<br>1.30)       | 0.71<br>(0.28 to<br>1.28)       | 0.74<br>(0.28 to<br>1.35)       | 0.03<br>(0.01 to<br>0.06)  | 0.01<br>(0.00 to<br>0.02)    | 0.01<br>(0.00 to<br>0.02)    | 0.01<br>(0.00 to<br>0.02)   |
| Sickle cell disorders                             | 89.96<br>(70.60 to<br>109.37)   | 87.22<br>(63.24 to<br>120.96)   | 77.02<br>(55.83 to<br>106.03)   | 90.08<br>(65.65 to<br>122.85)   | 1.73<br>(1.37 to<br>2.13)  | 2.11<br>(1.57 to<br>2.85)    | 1.88<br>(1.40 to<br>2.53)    | 2.16<br>(1.61 to<br>2.88)   |
| G6PD deficiency                                   | 13.08<br>(9.42 to<br>16.99)     | 22.46<br>(15.11 to<br>31.93)    | 19.35<br>(13.27 to<br>27.10)    | 22.86<br>(15.74 to<br>32.19)    | 0.40<br>(0.30 to<br>0.51)  | 0.90<br>(0.63 to<br>1.27)    | 0.80<br>(0.56 to<br>1.10)    | 0.90<br>(0.63 to<br>1.25)   |
| Other hemoglobinopathies and hemolytic anemias    | 15.97<br>(13.41 to<br>22.00)    | 21.27<br>(15.77 to<br>29.95)    | 19.37<br>(14.73 to<br>26.99)    | 20.63<br>(14.87 to<br>29.29)    | 1.17<br>(0.99 to<br>1.71)  | 1.69<br>(1.19 to<br>2.50)    | 1.60<br>(1.18 to<br>2.32)    | 1.60<br>(1.05 to<br>2.33)   |
| Endocrine, metabolic, blood, and immune disorders | 255.16<br>(213.76 to<br>375.54) | 332.49<br>(244.81 to<br>489.72) | 311.92<br>(231.17 to<br>456.77) | 332.07<br>(244.42 to<br>489.87) | 8.28<br>(7.04 to<br>11.79) | 13.84<br>(10.41 to<br>19.86) | 13.74<br>(10.35 to<br>19.43) | 13.23<br>(9.86 to<br>19.09) |

**Saint Vincent and the Grenadines**

| Cause                                         | YLLs (actual counts)                   |                                        |                                        |                                        | Deaths (actual counts)             |                                     |                                     |                                     |
|-----------------------------------------------|----------------------------------------|----------------------------------------|----------------------------------------|----------------------------------------|------------------------------------|-------------------------------------|-------------------------------------|-------------------------------------|
|                                               | 2016                                   | 2040 Forecast                          | 2040 Better Scenario                   | 2040 Worse Scenario                    | 2016                               | 2040 Forecast                       | 2040 Better Scenario                | 2040 Worse Scenario                 |
| <b>Musculoskeletal disorders</b>              | <b>76.56</b><br>(59.28 to<br>89.67)    | <b>84.84</b><br>(65.53 to<br>101.23)   | <b>90.06</b><br>(70.27 to<br>107.45)   | <b>82.19</b><br>(63.65 to<br>98.53)    | <b>1.93</b><br>(1.55 to<br>2.24)   | <b>2.73</b><br>(2.22 to<br>3.17)    | <b>2.97</b><br>(2.42 to<br>3.44)    | <b>2.58</b><br>(2.09 to<br>3.02)    |
| Rheumatoid arthritis                          | 4.30<br>(3.06 to<br>5.73)              | 5.65<br>(3.77 to<br>8.13)              | 5.11<br>(3.38 to<br>7.37)              | 5.64<br>(3.80 to<br>8.01)              | 0.20<br>(0.14 to<br>0.26)          | 0.33<br>(0.22 to<br>0.46)           | 0.31<br>(0.20 to<br>0.44)           | 0.32<br>(0.21 to<br>0.45)           |
| Other musculoskeletal disorders               | 72.26<br>(56.07 to<br>85.09)           | 79.18<br>(60.78 to<br>95.45)           | 84.95<br>(65.97 to<br>102.04)          | 76.55<br>(58.31 to<br>92.54)           | 1.73<br>(1.39 to<br>2.01)          | 2.40<br>(1.88 to<br>2.82)           | 2.66<br>(2.13 to<br>3.13)           | 2.26<br>(1.82 to<br>2.68)           |
| <b>Other non-communicable diseases</b>        | <b>634.70</b><br>(441.66 to<br>905.25) | <b>537.93</b><br>(370.21 to<br>754.76) | <b>492.65</b><br>(340.69 to<br>674.10) | <b>556.30</b><br>(378.84 to<br>793.01) | <b>13.77</b><br>(9.66 to<br>18.46) | <b>20.59</b><br>(12.80 to<br>28.87) | <b>21.62</b><br>(13.15 to<br>30.60) | <b>19.39</b><br>(12.33 to<br>26.79) |
| Congenital birth defects                      | 499.98<br>(316.71 to<br>756.59)        | 284.16<br>(159.45 to<br>461.31)        | 227.74<br>(130.64 to<br>359.86)        | 315.74<br>(176.19 to<br>508.50)        | 6.46<br>(4.25 to<br>9.47)          | 4.15<br>(2.53 to<br>6.35)           | 3.41<br>(2.10 to<br>5.11)           | 4.54<br>(2.74 to<br>6.97)           |
| Neural tube defects                           | 27.62<br>(14.99 to<br>45.14)           | 6.12<br>(2.39 to<br>12.36)             | 4.10<br>(1.67 to<br>7.88)              | 7.23<br>(2.79 to<br>14.28)             | 0.33<br>(0.18 to<br>0.53)          | 0.08<br>(0.03 to<br>0.15)           | 0.05<br>(0.02 to<br>0.10)           | 0.09<br>(0.04 to<br>0.18)           |
| Congenital heart anomalies                    | 264.79<br>(173.69 to<br>392.79)        | 161.74<br>(94.36 to<br>253.20)         | 130.76<br>(78.04 to<br>202.65)         | 178.78<br>(104.39 to<br>279.74)        | 3.48<br>(2.39 to<br>5.00)          | 2.36<br>(1.46 to<br>3.52)           | 1.95<br>(1.22 to<br>2.87)           | 2.57<br>(1.59 to<br>3.83)           |
| Orofacial clefts                              | 0.53<br>(0.20 to<br>1.41)              | 0.64<br>(0.12 to<br>2.10)              | 0.44<br>(0.08 to<br>1.39)              | 0.76<br>(0.15 to<br>2.37)              | 0.01<br>(0.00 to<br>0.02)          | 0.01<br>(0.00 to<br>0.02)           | 0.01<br>(0.00 to<br>0.02)           | 0.01<br>(0.00 to<br>0.03)           |
| Down syndrome                                 | 15.73<br>(10.63 to<br>22.29)           | 16.41<br>(9.85 to<br>25.96)            | 13.11<br>(7.87 to<br>20.45)            | 17.68<br>(10.59 to<br>28.02)           | 0.28<br>(0.19 to<br>0.37)          | 0.35<br>(0.22 to<br>0.54)           | 0.29<br>(0.18 to<br>0.44)           | 0.37<br>(0.24 to<br>0.56)           |
| Other chromosomal abnormalities               | 7.40<br>(4.03 to<br>12.27)             | 7.14<br>(3.07 to<br>13.80)             | 5.46<br>(2.38 to<br>10.54)             | 8.13<br>(3.52 to<br>15.56)             | 0.09<br>(0.05 to<br>0.14)          | 0.09<br>(0.04 to<br>0.17)           | 0.07<br>(0.03 to<br>0.13)           | 0.10<br>(0.04 to<br>0.19)           |
| Congenital musculoskeletal and limb anomalies | 12.94<br>(7.61 to<br>21.31)            | 8.45<br>(4.13 to<br>14.98)             | 6.87<br>(3.41 to<br>12.11)             | 9.43<br>(4.55 to<br>16.86)             | 0.16<br>(0.10 to<br>0.26)          | 0.11<br>(0.06 to<br>0.19)           | 0.09<br>(0.05 to<br>0.16)           | 0.12<br>(0.06 to<br>0.21)           |
| Urogenital congenital anomalies               | 16.39<br>(9.80 to<br>30.42)            | 11.61<br>(6.53 to<br>22.08)            | 9.83<br>(5.64 to<br>18.24)             | 12.60<br>(7.12 to<br>23.94)            | 0.24<br>(0.15 to<br>0.42)          | 0.21<br>(0.13 to<br>0.37)           | 0.18<br>(0.12 to<br>0.32)           | 0.22<br>(0.14 to<br>0.39)           |
| Digestive congenital anomalies                | 43.02<br>(21.66 to<br>72.96)           | 18.02<br>(7.48 to<br>34.88)            | 13.59<br>(5.84 to<br>25.92)            | 20.69<br>(8.69 to<br>39.98)            | 0.51<br>(0.26 to<br>0.86)          | 0.22<br>(0.09 to<br>0.42)           | 0.17<br>(0.07 to<br>0.31)           | 0.25<br>(0.11 to<br>0.48)           |

|                                      |                                                            |                                                            |                                                            |                                                            |                                                   |                                                    |                                                   |                                                    |
|--------------------------------------|------------------------------------------------------------|------------------------------------------------------------|------------------------------------------------------------|------------------------------------------------------------|---------------------------------------------------|----------------------------------------------------|---------------------------------------------------|----------------------------------------------------|
| Other congenital birth defects       | 111.57<br>(59.64 to<br>182.52)                             | 54.04<br>(25.78 to<br>93.84)                               | 43.59<br>(21.17 to<br>74.62)                               | 60.44<br>(28.37 to<br>106.85)                              | 1.38<br>(0.75 to<br>2.20)                         | 0.72<br>(0.37 to<br>1.21)                          | 0.60<br>(0.32 to<br>0.97)                         | 0.80<br>(0.41 to<br>1.35)                          |
| Skin and subcutaneous diseases       | 120.60<br>(74.17 to<br>183.78)                             | 247.05<br>(148.45 to<br>375.94)                            | 259.52<br>(154.71 to<br>386.93)                            | 232.94<br>(138.82 to<br>358.01)                            | 7.14<br>(4.02 to<br>10.68)                        | 16.36<br>(8.91 to<br>24.36)                        | 18.15<br>(10.03 to<br>26.67)                      | 14.77<br>(7.83 to<br>22.21)                        |
| Cellulitis                           | 11.26<br>(6.04 to<br>23.03)                                | 31.28<br>(16.33 to<br>62.13)                               | 34.53<br>(18.66 to<br>67.88)                               | 29.32<br>(15.22 to<br>58.63)                               | 0.53<br>(0.27 to<br>1.00)                         | 1.76<br>(0.86 to<br>3.46)                          | 2.04<br>(1.03 to<br>3.97)                         | 1.58<br>(0.76 to<br>3.12)                          |
| Pyoderma                             | 34.27<br>(16.25 to<br>49.34)                               | 80.78<br>(36.73 to<br>114.93)                              | 79.88<br>(35.54 to<br>113.81)                              | 78.15<br>(36.00 to<br>112.63)                              | 1.61<br>(0.69 to<br>2.18)                         | 4.79<br>(2.01 to<br>6.80)                          | 5.02<br>(2.07 to<br>7.11)                         | 4.42<br>(1.89 to<br>6.40)                          |
| Decubitus ulcer                      | 74.19<br>(44.03 to<br>117.13)                              | 133.85<br>(78.37 to<br>215.58)                             | 143.96<br>(84.67 to<br>225.24)                             | 124.33<br>(73.84 to<br>200.40)                             | 4.98<br>(2.80 to<br>7.76)                         | 9.79<br>(5.30 to<br>15.94)                         | 11.05<br>(6.12 to<br>17.64)                       | 8.74<br>(4.68 to<br>14.24)                         |
| Other skin and subcutaneous diseases | 0.89<br>(0.56 to<br>1.59)                                  | 1.14<br>(0.73 to<br>2.03)                                  | 1.15<br>(0.75 to<br>2.00)                                  | 1.13<br>(0.72 to<br>2.04)                                  | 0.02<br>(0.01 to<br>0.04)                         | 0.03<br>(0.02 to<br>0.06)                          | 0.04<br>(0.02 to<br>0.06)                         | 0.03<br>(0.02 to<br>0.06)                          |
| Sudden infant death syndrome         | 14.11<br>(7.69 to<br>23.82)                                | 6.72<br>(2.86 to<br>13.05)                                 | 5.39<br>(2.25 to<br>10.52)                                 | 7.61<br>(3.23 to<br>14.61)                                 | 0.16<br>(0.09 to<br>0.28)                         | 0.08<br>(0.03 to<br>0.15)                          | 0.06<br>(0.03 to<br>0.12)                         | 0.09<br>(0.04 to<br>0.17)                          |
| <b>Injuries</b>                      | <b>3,900.04</b><br><b>(2,761.54 to</b><br><b>3,784.11)</b> | <b>2,714.25</b><br><b>(1,913.01 to</b><br><b>4,236.36)</b> | <b>2,205.15</b><br><b>(1,587.52 to</b><br><b>3,353.51)</b> | <b>2,924.28</b><br><b>(2,049.85 to</b><br><b>4,608.22)</b> | <b>73.51</b><br><b>(63.48 to</b><br><b>82.43)</b> | <b>72.08</b><br><b>(55.51 to</b><br><b>101.62)</b> | <b>61.38</b><br><b>(47.89 to</b><br><b>84.42)</b> | <b>75.12</b><br><b>(56.91 to</b><br><b>106.89)</b> |
| <b>Transport injuries</b>            | <b>666.02</b><br><b>(559.04 to</b><br><b>778.36)</b>       | <b>534.31</b><br><b>(336.47 to</b><br><b>884.03)</b>       | <b>203.78</b><br><b>(134.86 to</b><br><b>329.18)</b>       | <b>684.77</b><br><b>(425.28 to</b><br><b>1,147.79)</b>     | <b>14.82</b><br><b>(12.95 to</b><br><b>16.76)</b> | <b>14.66</b><br><b>(9.75 to</b><br><b>21.74)</b>   | <b>6.28</b><br><b>(4.56 to</b><br><b>9.11)</b>    | <b>17.12</b><br><b>(11.64 to</b><br><b>26.95)</b>  |
| Road injuries                        | 608.98<br>(511.50 to<br>711.94)                            | 467.89<br>(293.88 to<br>773.16)                            | 148.33<br>(96.85 to<br>245.45)                             | 614.49<br>(380.60 to<br>1,039.70)                          | 13.36<br>(11.64 to<br>15.21)                      | 11.96<br>(8.25 to<br>18.70)                        | 4.44<br>(3.17 to<br>6.55)                         | 14.98<br>(10.08 to<br>23.86)                       |
| Pedestrian road injuries             | 149.88<br>(123.31 to<br>182.99)                            | 108.24<br>(73.16 to<br>166.65)                             | 39.53<br>(28.23 to<br>58.87)                               | 135.17<br>(89.46 to<br>207.49)                             | 3.87<br>(3.26 to<br>4.62)                         | 3.59<br>(2.58 to<br>5.13)                          | 1.52<br>(1.15 to<br>2.11)                         | 4.26<br>(2.99 to<br>6.21)                          |

**Saint Vincent and the Grenadines**

| Cause                          | YLLs (actual counts)                                     |                                                        |                                                        |                                                        | Deaths (actual counts)                            |                                                   |                                                   |                                                   |
|--------------------------------|----------------------------------------------------------|--------------------------------------------------------|--------------------------------------------------------|--------------------------------------------------------|---------------------------------------------------|---------------------------------------------------|---------------------------------------------------|---------------------------------------------------|
|                                | 2016                                                     | 2040 Forecast                                          | 2040 Better Scenario                                   | 2040 Worse Scenario                                    | 2016                                              | 2040 Forecast                                     | 2040 Better Scenario                              | 2040 Worse Scenario                               |
| Cyclist road injuries          | 47.76<br>(37.19 to<br>62.55)                             | 38.78<br>(23.47 to<br>67.25)                           | 13.54<br>(8.51 to<br>22.69)                            | 49.91<br>(29.47 to<br>86.93)                           | 1.07<br>(0.87 to<br>1.37)                         | 1.03<br>(0.66 to<br>1.67)                         | 0.45<br>(0.30 to<br>0.69)                         | 1.24<br>(0.78 to<br>2.06)                         |
| Motorcyclist road injuries     | 106.27<br>(79.30 to<br>138.60)                           | 88.28<br>(45.09 to<br>170.37)                          | 40.87<br>(21.76 to<br>77.28)                           | 107.00<br>(54.64 to<br>205.58)                         | 2.01<br>(1.56 to<br>2.54)                         | 1.77<br>(0.97 to<br>3.28)                         | 0.90<br>(0.53 to<br>1.61)                         | 2.10<br>(1.13 to<br>3.93)                         |
| Motor vehicle road injuries    | 301.49<br>(244.47 to<br>366.12)                          | 228.62<br>(140.07 to<br>380.61)                        | 53.10<br>(33.85 to<br>87.41)                           | 317.25<br>(192.25 to<br>543.94)                        | 6.32<br>(5.26 to<br>7.53)                         | 5.43<br>(3.57 to<br>8.25)                         | 1.51<br>(1.04 to<br>2.24)                         | 7.21<br>(4.64 to<br>11.40)                        |
| Other road injuries            | 3.57<br>(2.59 to<br>6.20)                                | 3.97<br>(2.51 to<br>6.89)                              | 1.30<br>(0.82 to<br>2.26)                              | 5.16<br>(3.21 to<br>9.10)                              | 0.10<br>(0.07 to<br>0.16)                         | 0.14<br>(0.09 to<br>0.23)                         | 0.06<br>(0.04 to<br>0.10)                         | 0.16<br>(0.11 to<br>0.28)                         |
| Other transport injuries       | 57.05<br>(47.05 to<br>68.55)                             | 66.42<br>(42.45 to<br>107.98)                          | 55.45<br>(36.54 to<br>87.69)                           | 70.29<br>(44.32 to<br>113.07)                          | 1.46<br>(1.24 to<br>1.68)                         | 2.10<br>(1.45 to<br>3.11)                         | 1.84<br>(1.33 to<br>2.66)                         | 2.15<br>(1.46 to<br>3.18)                         |
| <b>Unintentional injuries</b>  | <b>1,088.96</b><br><b>(939.77 to</b><br><b>1,247.45)</b> | <b>842.55</b><br><b>(632.33 to</b><br><b>1,149.60)</b> | <b>754.47</b><br><b>(567.51 to</b><br><b>1,024.97)</b> | <b>863.98</b><br><b>(649.44 to</b><br><b>1,170.04)</b> | <b>27.46</b><br><b>(24.75 to</b><br><b>30.31)</b> | <b>27.94</b><br><b>(22.59 to</b><br><b>34.86)</b> | <b>26.66</b><br><b>(21.64 to</b><br><b>32.88)</b> | <b>27.41</b><br><b>(21.91 to</b><br><b>34.36)</b> |
| Falls                          | 174.15<br>(141.97 to<br>201.21)                          | 174.20<br>(139.02 to<br>212.95)                        | 173.12<br>(138.97 to<br>211.23)                        | 169.68<br>(133.91 to<br>207.48)                        | 6.08<br>(5.14 to<br>6.86)                         | 7.93<br>(6.46 to<br>9.35)                         | 8.29<br>(6.91 to<br>9.77)                         | 7.41<br>(5.94 to<br>8.87)                         |
| Drowning                       | 374.97<br>(307.61 to<br>450.22)                          | 236.37<br>(154.71 to<br>365.36)                        | 200.75<br>(133.41 to<br>307.48)                        | 249.07<br>(163.13 to<br>382.58)                        | 7.60<br>(6.47 to<br>8.79)                         | 5.66<br>(3.97 to<br>8.13)                         | 4.95<br>(3.54 to<br>7.02)                         | 5.85<br>(4.07 to<br>8.50)                         |
| Fire, heat, and hot substances | 83.23<br>(68.75 to<br>100.16)                            | 60.73<br>(43.90 to<br>85.00)                           | 51.50<br>(38.04 to<br>70.42)                           | 63.27<br>(45.15 to<br>88.87)                           | 2.52<br>(2.10 to<br>2.82)                         | 2.55<br>(1.90 to<br>3.30)                         | 2.32<br>(1.76 to<br>2.96)                         | 2.51<br>(1.85 to<br>3.28)                         |

|                                                 |                                                            |                                                          |                                                          |                                                          |                                                   |                                                   |                                                   |                                                   |
|-------------------------------------------------|------------------------------------------------------------|----------------------------------------------------------|----------------------------------------------------------|----------------------------------------------------------|---------------------------------------------------|---------------------------------------------------|---------------------------------------------------|---------------------------------------------------|
| Poisonings                                      | 10.51<br>(8.17 to<br>17.99)                                | 6.41<br>(3.73 to<br>12.09)                               | 4.89<br>(2.91 to<br>9.19)                                | 6.98<br>(4.18 to<br>13.03)                               | 0.23<br>(0.19 to<br>0.39)                         | 0.17<br>(0.11 to<br>0.31)                         | 0.14<br>(0.09 to<br>0.24)                         | 0.18<br>(0.11 to<br>0.32)                         |
| Exposure to mechanical forces                   | 160.92<br>(133.67 to<br>199.69)                            | 115.36<br>(75.77 to<br>172.36)                           | 96.99<br>(63.28 to<br>144.80)                            | 121.00<br>(80.55 to<br>179.11)                           | 3.39<br>(2.90 to<br>4.06)                         | 2.89<br>(2.07 to<br>4.10)                         | 2.53<br>(1.82 to<br>3.53)                         | 2.95<br>(2.12 to<br>4.12)                         |
| Unintentional firearm injuries                  | 71.88<br>(57.42 to<br>94.14)                               | 52.32<br>(31.88 to<br>84.35)                             | 43.19<br>(26.33 to<br>69.76)                             | 55.12<br>(34.20 to<br>87.80)                             | 1.45<br>(1.19 to<br>1.87)                         | 1.17<br>(0.76 to<br>1.83)                         | 0.99<br>(0.64 to<br>1.53)                         | 1.22<br>(0.80 to<br>1.88)                         |
| Unintentional suffocation                       | 17.66<br>(13.20 to<br>25.43)                               | 9.62<br>(5.76 to<br>15.68)                               | 7.69<br>(4.73 to<br>12.25)                               | 10.52<br>(6.35 to<br>17.07)                              | 0.27<br>(0.21 to<br>0.37)                         | 0.16<br>(0.10 to<br>0.25)                         | 0.13<br>(0.09 to<br>0.20)                         | 0.18<br>(0.11 to<br>0.27)                         |
| Other exposure to mechanical forces             | 71.38<br>(57.88 to<br>89.39)                               | 53.42<br>(36.28 to<br>78.28)                             | 46.10<br>(31.75 to<br>66.76)                             | 55.35<br>(37.73 to<br>79.66)                             | 1.67<br>(1.38 to<br>2.03)                         | 1.56<br>(1.14 to<br>2.12)                         | 1.41<br>(1.05 to<br>1.90)                         | 1.56<br>(1.14 to<br>2.10)                         |
| Adverse effects of medical treatment            | 99.65<br>(71.85 to<br>130.34)                              | 89.19<br>(61.10 to<br>127.59)                            | 81.62<br>(55.75 to<br>116.79)                            | 89.77<br>(61.80 to<br>129.06)                            | 3.19<br>(2.37 to<br>4.11)                         | 3.73<br>(2.70 to<br>5.09)                         | 3.62<br>(2.62 to<br>4.92)                         | 3.59<br>(2.57 to<br>4.95)                         |
| Animal contact                                  | 25.96<br>(20.19 to<br>35.92)                               | 28.30<br>(19.59 to<br>41.63)                             | 23.66<br>(16.72 to<br>34.24)                             | 29.51<br>(20.46 to<br>42.26)                             | 0.71<br>(0.56 to<br>0.96)                         | 0.99<br>(0.72 to<br>1.36)                         | 0.87<br>(0.64 to<br>1.18)                         | 0.99<br>(0.73 to<br>1.35)                         |
| Venomous animal contact                         | 10.63<br>(7.15 to<br>16.40)                                | 10.70<br>(6.69 to<br>17.35)                              | 8.78<br>(5.57 to<br>14.02)                               | 11.23<br>(7.11 to<br>17.92)                              | 0.29<br>(0.19 to<br>0.43)                         | 0.35<br>(0.23 to<br>0.57)                         | 0.30<br>(0.20 to<br>0.49)                         | 0.36<br>(0.23 to<br>0.57)                         |
| Non-venomous animal contact                     | 15.33<br>(10.86 to<br>21.71)                               | 17.60<br>(11.85 to<br>26.21)                             | 14.88<br>(10.37 to<br>21.72)                             | 18.28<br>(12.57 to<br>26.78)                             | 0.43<br>(0.31 to<br>0.59)                         | 0.63<br>(0.45 to<br>0.90)                         | 0.57<br>(0.41 to<br>0.79)                         | 0.63<br>(0.45 to<br>0.89)                         |
| Foreign body                                    | 107.21<br>(81.93 to<br>138.93)                             | 82.29<br>(63.25 to<br>106.97)                            | 80.84<br>(62.13 to<br>104.27)                            | 82.63<br>(62.58 to<br>107.50)                            | 2.47<br>(1.98 to<br>2.95)                         | 2.59<br>(2.12 to<br>3.06)                         | 2.73<br>(2.22 to<br>3.24)                         | 2.47<br>(1.99 to<br>2.94)                         |
| Pulmonary aspiration and foreign body in airway | 101.91<br>(76.16 to<br>132.90)                             | 75.09<br>(56.32 to<br>97.54)                             | 74.27<br>(56.38 to<br>96.00)                             | 75.32<br>(56.01 to<br>99.38)                             | 2.33<br>(1.82 to<br>2.79)                         | 2.35<br>(1.86 to<br>2.76)                         | 2.50<br>(2.00 to<br>2.95)                         | 2.23<br>(1.74 to<br>2.67)                         |
| Foreign body in other body part                 | 5.30<br>(4.05 to<br>10.45)                                 | 7.20<br>(4.44 to<br>14.19)                               | 6.57<br>(4.02 to<br>13.17)                               | 7.31<br>(4.55 to<br>14.18)                               | 0.15<br>(0.11 to<br>0.29)                         | 0.24<br>(0.16 to<br>0.47)                         | 0.23<br>(0.15 to<br>0.46)                         | 0.24<br>(0.16 to<br>0.45)                         |
| Environmental heat and cold exposure            | 31.40<br>(20.94 to<br>60.60)                               | 30.22<br>(16.03 to<br>62.43)                             | 23.88<br>(12.88 to<br>50.10)                             | 31.96<br>(17.30 to<br>65.24)                             | 0.82<br>(0.56 to<br>1.61)                         | 0.95<br>(0.55 to<br>1.96)                         | 0.79<br>(0.46 to<br>1.61)                         | 0.98<br>(0.57 to<br>1.99)                         |
| Other unintentional injuries                    | 20.96<br>(17.26 to<br>25.03)                               | 19.48<br>(13.11 to<br>28.24)                             | 17.24<br>(11.61 to<br>25.05)                             | 20.10<br>(13.70 to<br>28.61)                             | 0.44<br>(0.38 to<br>0.51)                         | 0.48<br>(0.34 to<br>0.65)                         | 0.43<br>(0.32 to<br>0.59)                         | 0.48<br>(0.35 to<br>0.64)                         |
| <b>Self-harm and interpersonal violence</b>     | <b>1,538.13</b><br><b>(1,055.48 to</b><br><b>1,879.75)</b> | <b>1,293.55</b><br><b>(783.55 to</b><br><b>2,061.51)</b> | <b>1,203.89</b><br><b>(765.41 to</b><br><b>1,843.67)</b> | <b>1,331.38</b><br><b>(788.35 to</b><br><b>2,160.05)</b> | <b>31.11</b><br><b>(21.50 to</b><br><b>37.68)</b> | <b>29.05</b><br><b>(17.72 to</b><br><b>44.45)</b> | <b>27.39</b><br><b>(17.59 to</b><br><b>40.50)</b> | <b>29.57</b><br><b>(17.65 to</b><br><b>46.06)</b> |

**Saint Vincent and the Grenadines**

| Cause                              | YLLs (actual counts)                |                                   |                                   |                                   | Deaths (actual counts)       |                             |                              |                             |
|------------------------------------|-------------------------------------|-----------------------------------|-----------------------------------|-----------------------------------|------------------------------|-----------------------------|------------------------------|-----------------------------|
|                                    | 2016                                | 2040 Forecast                     | 2040 Better Scenario              | 2040 Worse Scenario               | 2016                         | 2040 Forecast               | 2040 Better Scenario         | 2040 Worse Scenario         |
| Self-harm                          | 388.66<br>(285.75 to<br>481.68)     | 432.75<br>(229.69 to<br>763.88)   | 366.15<br>(204.11 to<br>621.10)   | 464.16<br>(240.96 to<br>834.58)   | 8.49<br>(6.51 to<br>10.27)   | 10.43<br>(6.02 to<br>17.28) | 9.08<br>(5.61 to<br>14.38)   | 10.99<br>(6.19 to<br>18.60) |
| Self-harm by firearm               | 10.89<br>(7.06 to<br>16.66)         | 10.22<br>(4.31 to<br>22.66)       | 8.44<br>(3.81 to<br>17.21)        | 11.03<br>(4.52 to<br>23.98)       | 0.26<br>(0.17 to<br>0.38)    | 0.27<br>(0.13 to<br>0.52)   | 0.23<br>(0.12 to<br>0.42)    | 0.28<br>(0.13 to<br>0.56)   |
| Self-harm by other specified means | 377.76<br>(277.39 to<br>469.77)     | 422.53<br>(224.98 to<br>744.42)   | 357.71<br>(200.08 to<br>605.53)   | 453.13<br>(235.12 to<br>811.61)   | 8.23<br>(6.32 to<br>10.00)   | 10.17<br>(5.89 to<br>16.75) | 8.85<br>(5.47 to<br>13.99)   | 10.71<br>(6.04 to<br>18.13) |
| Interpersonal violence             | 1,149.47<br>(680.72 to<br>1,478.00) | 860.80<br>(446.07 to<br>1,377.20) | 837.74<br>(459.66 to<br>1,322.89) | 867.21<br>(438.77 to<br>1,394.55) | 22.62<br>(13.03 to<br>28.89) | 18.61<br>(9.70 to<br>28.45) | 18.32<br>(10.07 to<br>27.78) | 18.58<br>(9.44 to<br>28.73) |
| Physical violence by firearm       | 544.55<br>(231.24 to<br>750.90)     | 384.71<br>(143.53 to<br>666.36)   | 375.57<br>(150.29 to<br>653.68)   | 386.58<br>(139.88 to<br>678.76)   | 10.18<br>(4.28 to<br>14.04)  | 7.56<br>(2.84 to<br>12.87)  | 7.43<br>(2.93 to<br>12.61)   | 7.56<br>(2.78 to<br>13.00)  |

|                                                                                     |                                                                  |                                                                  |                                                                |                                                                  |                                                            |                                                            |                                                            |                                                            |
|-------------------------------------------------------------------------------------|------------------------------------------------------------------|------------------------------------------------------------------|----------------------------------------------------------------|------------------------------------------------------------------|------------------------------------------------------------|------------------------------------------------------------|------------------------------------------------------------|------------------------------------------------------------|
| Physical violence by sharp object                                                   | 410.36<br>(214.79 to<br>539.42)                                  | 325.70<br>(164.29 to<br>500.63)                                  | 328.88<br>(173.97 to<br>505.38)                                | 323.24<br>(158.71 to<br>497.89)                                  | 8.18<br>(4.24 to<br>10.56)                                 | 7.13<br>(3.52 to<br>10.66)                                 | 7.30<br>(3.79 to<br>10.80)                                 | 7.00<br>(3.41 to<br>10.50)                                 |
| Physical violence by other means                                                    | 194.56<br>(101.13 to<br>266.32)                                  | 150.39<br>(68.86 to<br>251.04)                                   | 133.29<br>(62.13 to<br>219.58)                                 | 157.39<br>(71.14 to<br>262.42)                                   | 4.26<br>(2.16 to<br>5.79)                                  | 3.93<br>(1.81 to<br>6.21)                                  | 3.59<br>(1.71 to<br>5.60)                                  | 4.02<br>(1.83 to<br>6.39)                                  |
| <b>Forces of nature, conflict and terrorism, and executions and police conflict</b> | <b>6.92</b><br><b>(4.01 to</b><br><b>22.16)</b>                  | <b>43.83</b><br><b>(0.00 to</b><br><b>153.18)</b>                | <b>43.01</b><br><b>(0.00 to</b><br><b>150.23)</b>              | <b>44.15</b><br><b>(0.00 to</b><br><b>154.29)</b>                | <b>0.13</b><br><b>(0.00 to</b><br><b>0.40)</b>             | <b>1.03</b><br><b>(0.00 to</b><br><b>3.61)</b>             | <b>1.05</b><br><b>(0.00 to</b><br><b>3.66)</b>             | <b>1.02</b><br><b>(0.00 to</b><br><b>3.54)</b>             |
| Exposure to forces of nature                                                        | 0.00<br>(0.00 to<br>0.00)                                        | 43.83<br>(0.00 to<br>153.18)                                     | 43.01<br>(0.00 to<br>150.23)                                   | 44.15<br>(0.00 to<br>154.29)                                     | 0.00<br>(0.00 to<br>0.00)                                  | 1.03<br>(0.00 to<br>3.61)                                  | 1.05<br>(0.00 to<br>3.66)                                  | 1.02<br>(0.00 to<br>3.54)                                  |
| Conflict and terrorism                                                              | 0.00<br>(0.00 to<br>0.00)                                        | 0.00<br>(0.00 to<br>0.00)                                        | 0.00<br>(0.00 to<br>0.00)                                      | 0.00<br>(0.00 to<br>0.00)                                        | 0.00<br>(0.00 to<br>0.00)                                  | 0.00<br>(0.00 to<br>0.00)                                  | 0.00<br>(0.00 to<br>0.00)                                  | 0.00<br>(0.00 to<br>0.00)                                  |
| Executions and police conflict                                                      | 6.92<br>(4.01 to<br>22.16)                                       | 0.00<br>(0.00 to<br>0.00)                                        | 0.00<br>(0.00 to<br>0.00)                                      | 0.00<br>(0.00 to<br>0.00)                                        | 0.13<br>(0.00 to<br>0.40)                                  | 0.00<br>(0.00 to<br>0.00)                                  | 0.00<br>(0.00 to<br>0.00)                                  | 0.00<br>(0.00 to<br>0.00)                                  |
| <b>Suriname</b>                                                                     |                                                                  |                                                                  |                                                                |                                                                  |                                                            |                                                            |                                                            |                                                            |
| <b>Cause</b>                                                                        | <b>YLLs (actual counts)</b>                                      |                                                                  |                                                                |                                                                  | <b>Deaths (actual counts)</b>                              |                                                            |                                                            |                                                            |
|                                                                                     | <b>2016</b>                                                      | <b>2040 Forecast</b>                                             | <b>2040 Better Scenario</b>                                    | <b>2040 Worse Scenario</b>                                       | <b>2016</b>                                                | <b>2040 Forecast</b>                                       | <b>2040 Better Scenario</b>                                | <b>2040 Worse Scenario</b>                                 |
| <b>All causes</b>                                                                   | <b>116,852.87</b><br><b>(103,980.88 to</b><br><b>135,536.46)</b> | <b>134,345.58</b><br><b>(108,748.30 to</b><br><b>161,924.09)</b> | <b>95,199.89</b><br><b>(79,548.27 to</b><br><b>115,436.58)</b> | <b>162,291.32</b><br><b>(132,704.33 to</b><br><b>195,442.70)</b> | <b>3,985.86</b><br><b>(3,723.33 to</b><br><b>4,293.49)</b> | <b>6,452.81</b><br><b>(5,521.30 to</b><br><b>7,424.27)</b> | <b>4,926.99</b><br><b>(4,260.95 to</b><br><b>5,767.03)</b> | <b>7,320.07</b><br><b>(6,307.69 to</b><br><b>8,352.77)</b> |
| <b>Communicable, maternal, neonatal, and nutritional diseases</b>                   | <b>28,135.00</b><br><b>(19,723.78 to</b><br><b>40,100.60)</b>    | <b>18,850.72</b><br><b>(12,965.53 to</b><br><b>27,403.35)</b>    | <b>13,204.85</b><br><b>(9,335.27 to</b><br><b>19,114.58)</b>   | <b>25,768.32</b><br><b>(17,496.64 to</b><br><b>37,424.90)</b>    | <b>533.32</b><br><b>(418.20 to</b><br><b>679.62)</b>       | <b>530.42</b><br><b>(407.83 to</b><br><b>683.75)</b>       | <b>418.10</b><br><b>(325.98 to</b><br><b>534.79)</b>       | <b>659.42</b><br><b>(496.37 to</b><br><b>867.53)</b>       |
| <b>HIV/AIDS and tuberculosis</b>                                                    | <b>3,122.09</b><br><b>(1,542.41 to</b><br><b>6,433.23)</b>       | <b>2,174.23</b><br><b>(792.32 to</b><br><b>5,956.66)</b>         | <b>1,671.36</b><br><b>(495.61 to</b><br><b>5,399.83)</b>       | <b>3,417.43</b><br><b>(1,615.53 to</b><br><b>7,200.12)</b>       | <b>71.39</b><br><b>(34.91 to</b><br><b>148.62)</b>         | <b>51.89</b><br><b>(18.42 to</b><br><b>144.92)</b>         | <b>39.28</b><br><b>(10.79 to</b><br><b>132.74)</b>         | <b>75.76</b><br><b>(33.12 to</b><br><b>170.41)</b>         |
| Tuberculosis                                                                        | 313.42<br>(272.91 to<br>360.84)                                  | 313.14<br>(186.53 to<br>541.98)                                  | 127.59<br>(76.97 to<br>213.75)                                 | 374.96<br>(219.97 to<br>657.47)                                  | 10.22<br>(8.93 to<br>11.73)                                | 12.47<br>(7.60 to<br>20.24)                                | 5.51<br>(3.34 to<br>8.59)                                  | 14.50<br>(8.53 to<br>23.63)                                |
| HIV/AIDS                                                                            | 2,808.67<br>(1,224.67 to<br>6,155.20)                            | 1,861.09<br>(512.20 to<br>5,699.93)                              | 1,543.77<br>(370.50 to<br>5,286.19)                            | 3,042.47<br>(1,260.59 to<br>7,009.71)                            | 61.16<br>(24.85 to<br>139.14)                              | 39.42<br>(7.81 to<br>133.44)                               | 33.77<br>(5.74 to<br>127.11)                               | 61.26<br>(20.39 to<br>158.53)                              |
| <b>Diarrhea, lower respiratory, and other common infectious diseases</b>            | <b>8,304.62</b><br><b>(6,370.57 to</b><br><b>11,096.02)</b>      | <b>6,212.49</b><br><b>(4,276.29 to</b><br><b>9,116.64)</b>       | <b>4,327.74</b><br><b>(3,092.57 to</b><br><b>6,029.98)</b>     | <b>8,811.25</b><br><b>(5,749.15 to</b><br><b>13,399.05)</b>      | <b>241.63</b><br><b>(204.39 to</b><br><b>288.30)</b>       | <b>307.56</b><br><b>(215.82 to</b><br><b>420.44)</b>       | <b>247.37</b><br><b>(176.74 to</b><br><b>325.08)</b>       | <b>378.80</b><br><b>(254.66 to</b><br><b>533.14)</b>       |
| Diarrheal diseases                                                                  | 1,888.04<br>(1,147.88 to<br>3,031.21)                            | 627.51<br>(125.14 to<br>1,902.87)                                | 422.84<br>(93.91 to<br>1,252.68)                               | 1,110.36<br>(192.45 to<br>3,121.88)                              | 38.29<br>(25.03 to<br>60.03)                               | 27.92<br>(6.06 to<br>78.63)                                | 22.05<br>(5.25 to<br>63.13)                                | 44.02<br>(8.21 to<br>130.32)                               |
| Intestinal infectious diseases                                                      | 2.75<br>(1.40 to<br>4.78)                                        | 1.82<br>(0.77 to<br>3.64)                                        | 1.59<br>(0.68 to<br>3.15)                                      | 1.87<br>(0.80 to<br>3.74)                                        | 0.06<br>(0.03 to<br>0.11)                                  | 0.05<br>(0.02 to<br>0.10)                                  | 0.05<br>(0.02 to<br>0.09)                                  | 0.05<br>(0.02 to<br>0.09)                                  |
| Typhoid fever                                                                       | 1.99<br>(0.90 to<br>3.59)                                        | 1.29<br>(0.52 to<br>2.55)                                        | 1.18<br>(0.48 to<br>2.33)                                      | 1.32<br>(0.53 to<br>2.59)                                        | 0.05<br>(0.02 to<br>0.08)                                  | 0.03<br>(0.01 to<br>0.07)                                  | 0.03<br>(0.01 to<br>0.07)                                  | 0.03<br>(0.01 to<br>0.07)                                  |
| Paratyphoid fever                                                                   | 0.41<br>(0.16 to<br>0.91)                                        | 0.41<br>(0.14 to<br>0.94)                                        | 0.32<br>(0.11 to<br>0.75)                                      | 0.42<br>(0.15 to<br>0.96)                                        | 0.01<br>(0.00 to<br>0.02)                                  | 0.01<br>(0.00 to<br>0.02)                                  | 0.01<br>(0.00 to<br>0.02)                                  | 0.01<br>(0.00 to<br>0.02)                                  |
| Other intestinal infectious diseases                                                | 0.34<br>(0.12 to<br>0.79)                                        | 0.13<br>(0.03 to<br>0.33)                                        | 0.08<br>(0.02 to<br>0.22)                                      | 0.14<br>(0.03 to<br>0.36)                                        | 0.01<br>(0.00 to<br>0.01)                                  | 0.00<br>(0.00 to<br>0.01)                                  | 0.00<br>(0.00 to<br>0.01)                                  | 0.00<br>(0.00 to<br>0.01)                                  |
| Lower respiratory infections                                                        | 5,266.53<br>(4,104.21 to<br>6,886.78)                            | 4,428.51<br>(3,032.43 to<br>6,400.71)                            | 3,084.09<br>(2,169.32 to<br>4,245.30)                          | 5,904.08<br>(3,821.99 to<br>9,202.34)                            | 182.55<br>(151.59 to<br>212.31)                            | 254.69<br>(178.84 to<br>344.25)                            | 205.64<br>(149.11 to<br>268.29)                            | 301.81<br>(205.84 to<br>420.57)                            |
| Upper respiratory infections                                                        | 3.88<br>(1.78 to<br>8.19)                                        | 3.34<br>(1.28 to<br>6.73)                                        | 1.89<br>(0.73 to<br>3.85)                                      | 3.65<br>(1.36 to<br>7.76)                                        | 0.09<br>(0.05 to<br>0.14)                                  | 0.11<br>(0.05 to<br>0.23)                                  | 0.07<br>(0.15 to<br>0.15)                                  | 0.12<br>(0.05 to<br>0.23)                                  |
| Otitis media                                                                        | 1.13<br>(0.67 to<br>1.73)                                        | 0.30<br>(0.13 to<br>0.60)                                        | 0.31<br>(0.14 to<br>0.64)                                      | 0.29<br>(0.13 to<br>0.59)                                        | 0.03<br>(0.02 to<br>0.05)                                  | 0.01<br>(0.01 to<br>0.02)                                  | 0.01<br>(0.01 to<br>0.03)                                  | 0.01<br>(0.01 to<br>0.02)                                  |

|                                                |                                                  |                                                    |                                                    |                                                    |                                            |                                             |                                             |                                             |
|------------------------------------------------|--------------------------------------------------|----------------------------------------------------|----------------------------------------------------|----------------------------------------------------|--------------------------------------------|---------------------------------------------|---------------------------------------------|---------------------------------------------|
| Meningitis                                     | 676.30<br>(445.14 to<br>1,055.47)                | 315.36<br>(153.75 to<br>564.09)                    | 261.61<br>(136.31 to<br>463.02)                    | 466.69<br>(185.70 to<br>903.54)                    | 12.52<br>(9.12 to<br>19.57)                | 8.40<br>(5.36 to<br>14.12)                  | 7.77<br>(5.06 to<br>13.30)                  | 9.97<br>(5.50 to<br>17.63)                  |
| Pneumococcal meningitis                        | 83.57<br>(54.74 to<br>131.02)                    | 26.54<br>(14.99 to<br>47.23)                       | 26.27<br>(15.13 to<br>46.16)                       | 31.99<br>(17.13 to<br>56.35)                       | 1.71<br>(1.22 to<br>2.62)                  | 0.89<br>(0.57 to<br>1.53)                   | 0.96<br>(0.62 to<br>1.64)                   | 0.99<br>(0.60 to<br>1.71)                   |
| H influenzae type B meningitis                 | 119.65<br>(73.52 to<br>189.21)                   | 80.70<br>(26.43 to<br>178.24)                      | 65.23<br>(25.04 to<br>133.60)                      | 217.07<br>(42.66 to<br>563.67)                     | 2.09<br>(1.39 to<br>3.40)                  | 1.59<br>(0.79 to<br>3.03)                   | 1.50<br>(0.82 to<br>2.75)                   | 3.14<br>(1.95 to<br>7.23)                   |
| Meningococcal meningitis                       | 284.07<br>(185.10 to<br>447.53)                  | 120.42<br>(62.95 to<br>215.21)                     | 98.57<br>(52.20 to<br>178.62)                      | 125.71<br>(63.85 to<br>227.77)                     | 5.23<br>(3.78 to<br>8.04)                  | 3.41<br>(2.21 to<br>5.80)                   | 3.07<br>(1.95 to<br>5.37)                   | 3.37<br>(2.14 to<br>5.87)                   |
| Other meningitis                               | 189.01<br>(121.31 to<br>306.92)                  | 87.70<br>(46.36 to<br>158.70)                      | 71.54<br>(37.34 to<br>127.26)                      | 91.93<br>(47.37 to<br>171.84)                      | 3.48<br>(2.48 to<br>5.39)                  | 2.50<br>(1.61 to<br>4.12)                   | 2.24<br>(1.39 to<br>3.77)                   | 2.48<br>(1.57 to<br>4.16)                   |
| Encephalitis                                   | 358.34<br>(268.32 to<br>490.83)                  | 257.43<br>(129.64 to<br>399.09)                    | 204.27<br>(106.56 to<br>311.61)                    | 274.21<br>(134.80 to<br>431.38)                    | 6.17<br>(4.97 to<br>7.84)                  | 6.02<br>(3.98 to<br>8.36)                   | 5.15<br>(3.47 to<br>7.14)                   | 6.14<br>(3.98 to<br>8.71)                   |
| Diphtheria                                     | 0.86<br>(0.46 to<br>1.60)                        | 0.15<br>(0.05 to<br>0.34)                          | 0.11<br>(0.04 to<br>0.20)                          | 0.62<br>(0.05 to<br>2.16)                          | 0.01<br>(0.01 to<br>0.02)                  | 0.00<br>(0.00 to<br>0.01)                   | 0.00<br>(0.00 to<br>0.00)                   | 0.01<br>(0.00 to<br>0.03)                   |
| Whooping cough                                 | 66.46<br>(4.92 to<br>227.11)                     | 47.54<br>(0.59 to<br>187.17)                       | 17.86<br>(0.45 to<br>69.97)                        | 158.77<br>(0.66 to<br>570.12)                      | 0.79<br>(0.06 to<br>2.69)                  | 0.57<br>(0.01 to<br>2.22)                   | 0.22<br>(0.01 to<br>0.85)                   | 1.88<br>(0.01 to<br>6.72)                   |
| Tetanus                                        | 9.31<br>(5.99 to<br>24.37)                       | 1.74<br>(0.86 to<br>5.15)                          | 1.70<br>(0.86 to<br>4.95)                          | 2.27<br>(1.08 to<br>6.46)                          | 0.28<br>(0.18 to<br>0.73)                  | 0.06<br>(0.03 to<br>0.17)                   | 0.06<br>(0.03 to<br>0.18)                   | 0.06<br>(0.03 to<br>0.18)                   |
| Measles                                        | 0.00<br>(0.00 to<br>0.00)                        | 508.79<br>(0.00 to<br>2,081.53)                    | 318.52<br>(0.00 to<br>1,277.88)                    | 866.76<br>(0.00 to<br>3,865.05)                    | 0.00<br>(0.00 to<br>0.00)                  | 8.79<br>(0.00 to<br>32.22)                  | 5.61<br>(0.00 to<br>20.78)                  | 13.80<br>(0.00 to<br>54.75)                 |
| <b>Suriname</b>                                |                                                  |                                                    |                                                    |                                                    |                                            |                                             |                                             |                                             |
| Cause                                          | YLLs (actual counts)                             |                                                    |                                                    |                                                    | Deaths (actual counts)                     |                                             |                                             |                                             |
|                                                | 2016                                             | 2040 Forecast                                      | 2040 Better Scenario                               | 2040 Worse Scenario                                | 2016                                       | 2040 Forecast                               | 2040 Better Scenario                        | 2040 Worse Scenario                         |
| Varicella and herpes zoster                    | 31.02<br>(18.43 to<br>50.13)                     | 20.00<br>(8.79 to<br>36.84)                        | 12.96<br>(6.16 to<br>23.62)                        | 21.69<br>(8.84 to<br>43.04)                        | 0.84<br>(0.57 to<br>1.19)                  | 0.94<br>(0.51 to<br>1.55)                   | 0.73<br>(0.39 to<br>1.24)                   | 0.93<br>(0.47 to<br>1.56)                   |
| <b>Neglected tropical diseases and malaria</b> | <b>726.29</b><br>(428.74 to<br><b>1,224.49</b> ) | <b>1,301.19</b><br>(835.27 to<br><b>2,032.33</b> ) | <b>1,201.25</b><br>(792.44 to<br><b>1,840.23</b> ) | <b>1,333.26</b><br>(845.87 to<br><b>2,116.50</b> ) | <b>15.90</b><br>(9.46 to<br><b>25.58</b> ) | <b>39.08</b><br>(25.37 to<br><b>61.01</b> ) | <b>38.95</b><br>(26.02 to<br><b>58.86</b> ) | <b>38.48</b><br>(24.85 to<br><b>60.28</b> ) |
| Malaria                                        | 92.32<br>(56.22 to<br>221.17)                    | 56.41<br>(27.98 to<br>184.42)                      | 52.68<br>(25.70 to<br>170.01)                      | 56.81<br>(27.94 to<br>183.46)                      | 1.97<br>(1.24 to<br>4.92)                  | 1.49<br>(0.76 to<br>4.97)                   | 1.45<br>(0.73 to<br>4.79)                   | 1.47<br>(0.75 to<br>4.90)                   |
| Chagas disease                                 | 8.66<br>(7.54 to<br>9.79)                        | 7.87<br>(5.25 to<br>12.45)                         | 10.66<br>(6.84 to<br>17.23)                        | 7.22<br>(4.82 to<br>11.09)                         | 0.44<br>(0.39 to<br>0.50)                  | 0.47<br>(0.31 to<br>0.72)                   | 0.65<br>(0.42 to<br>1.00)                   | 0.42<br>(0.28 to<br>0.63)                   |
| Leishmaniasis                                  | 0.00<br>(0.00 to<br>0.00)                        | 0.00<br>(0.00 to<br>0.00)                          | 0.00<br>(0.00 to<br>0.00)                          | 0.00<br>(0.00 to<br>0.00)                          | 0.00<br>(0.00 to<br>0.00)                  | 0.00<br>(0.00 to<br>0.00)                   | 0.00<br>(0.00 to<br>0.00)                   | 0.00<br>(0.00 to<br>0.00)                   |
| African trypanosomiasis                        | 0.00<br>(0.00 to<br>0.00)                        | 0.00<br>(0.00 to<br>0.00)                          | 0.00<br>(0.00 to<br>0.00)                          | 0.00<br>(0.00 to<br>0.00)                          | 0.00<br>(0.00 to<br>0.00)                  | 0.00<br>(0.00 to<br>0.00)                   | 0.00<br>(0.00 to<br>0.00)                   | 0.00<br>(0.00 to<br>0.00)                   |
| Schistosomiasis                                | 27.05<br>(11.44 to<br>51.35)                     | 24.89<br>(7.36 to<br>58.49)                        | 21.00<br>(6.19 to<br>49.84)                        | 25.05<br>(7.28 to<br>59.67)                        | 0.95<br>(0.40 to<br>1.78)                  | 1.08<br>(0.30 to<br>2.52)                   | 0.96<br>(0.27 to<br>2.24)                   | 1.07<br>(0.30 to<br>2.47)                   |
| Cysticercosis                                  | 0.00<br>(0.00 to<br>0.00)                        | 0.00<br>(0.00 to<br>0.00)                          | 0.00<br>(0.00 to<br>0.00)                          | 0.00<br>(0.00 to<br>0.00)                          | 0.00<br>(0.00 to<br>0.00)                  | 0.00<br>(0.00 to<br>0.00)                   | 0.00<br>(0.00 to<br>0.00)                   | 0.00<br>(0.00 to<br>0.00)                   |
| Cystic echinococcosis                          | 0.00<br>(0.00 to<br>0.00)                        | 0.00<br>(0.00 to<br>0.00)                          | 0.00<br>(0.00 to<br>0.00)                          | 0.00<br>(0.00 to<br>0.00)                          | 0.00<br>(0.00 to<br>0.00)                  | 0.00<br>(0.00 to<br>0.00)                   | 0.00<br>(0.00 to<br>0.00)                   | 0.00<br>(0.00 to<br>0.00)                   |
| Dengue                                         | 363.51<br>(120.80 to<br>692.80)                  | 1,149.05<br>(627.21 to<br>1,886.88)                | 1,071.05<br>(617.72 to<br>1,708.89)                | 1,175.84<br>(630.82 to<br>1,975.28)                | 7.92<br>(2.83 to<br>14.94)                 | 34.11<br>(18.96 to<br>56.30)                | 34.32<br>(19.94 to<br>54.93)                | 33.57<br>(18.46 to<br>56.65)                |

|                                                       |                                                      |                                                      |                                                     |                                                      |                                                |                                                |                                                |                                                |
|-------------------------------------------------------|------------------------------------------------------|------------------------------------------------------|-----------------------------------------------------|------------------------------------------------------|------------------------------------------------|------------------------------------------------|------------------------------------------------|------------------------------------------------|
| Yellow fever                                          | 3.91<br>(0.77 to<br>12.01)                           | 1.44<br>(0.25 to<br>4.64)                            | 0.94<br>(0.16 to<br>3.02)                           | 1.56<br>(0.27 to<br>4.87)                            | 0.07<br>(0.01 to<br>0.21)                      | 0.03<br>(0.00 to<br>0.09)                      | 0.02<br>(0.00 to<br>0.06)                      | 0.03<br>(0.01 to<br>0.09)                      |
| Rabies                                                | 6.83<br>(0.37 to<br>14.88)                           | 3.77<br>(0.19 to<br>8.70)                            | 1.56<br>(0.08 to<br>3.71)                           | 4.52<br>(0.23 to<br>10.65)                           | 0.12<br>(0.01 to<br>0.23)                      | 0.08<br>(0.01 to<br>0.17)                      | 0.04<br>(0.00 to<br>0.08)                      | 0.09<br>(0.01 to<br>0.19)                      |
| Intestinal nematode infections                        | 5.45<br>(1.12 to<br>12.33)                           | 5.30<br>(1.28 to<br>13.13)                           | 4.91<br>(1.26 to<br>11.84)                          | 5.64<br>(1.28 to<br>13.93)                           | 0.08<br>(0.03 to<br>0.17)                      | 0.10<br>(0.04 to<br>0.20)                      | 0.10<br>(0.04 to<br>0.20)                      | 0.10<br>(0.04 to<br>0.21)                      |
| Other neglected tropical diseases                     | 59.41<br>(33.13 to<br>87.10)                         | 52.47<br>(25.52 to<br>82.11)                         | 38.45<br>(18.51 to<br>59.74)                        | 56.62<br>(27.87 to<br>88.60)                         | 1.29<br>(0.74 to<br>1.68)                      | 1.72<br>(0.85 to<br>2.58)                      | 1.42<br>(0.69 to<br>2.15)                      | 1.73<br>(0.88 to<br>2.56)                      |
| <b>Maternal disorders</b>                             | <b>319.28</b><br><b>(239.17 to</b><br><b>409.36)</b> | <b>211.08</b><br><b>(115.80 to</b><br><b>333.54)</b> | <b>118.16</b><br><b>(62.57 to</b><br><b>201.52)</b> | <b>234.72</b><br><b>(126.71 to</b><br><b>396.92)</b> | <b>5.73</b><br><b>(4.25 to</b><br><b>7.38)</b> | <b>3.86</b><br><b>(2.14 to</b><br><b>6.05)</b> | <b>2.17</b><br><b>(1.15 to</b><br><b>3.65)</b> | <b>4.28</b><br><b>(2.35 to</b><br><b>7.25)</b> |
| Maternal hemorrhage                                   | 53.87<br>(35.72 to<br>77.65)                         | 33.49<br>(15.84 to<br>59.85)                         | 18.70<br>(8.69 to<br>35.34)                         | 37.04<br>(17.52 to<br>68.75)                         | 0.98<br>(0.65 to<br>1.41)                      | 0.62<br>(0.29 to<br>1.10)                      | 0.35<br>(0.16 to<br>0.66)                      | 0.68<br>(0.32 to<br>1.27)                      |
| Maternal sepsis and other maternal infections         | 35.56<br>(22.83 to<br>50.46)                         | 19.82<br>(9.65 to<br>35.49)                          | 10.97<br>(5.19 to<br>20.51)                         | 21.98<br>(10.57 to<br>40.53)                         | 0.65<br>(0.42 to<br>0.93)                      | 0.37<br>(0.18 to<br>0.66)                      | 0.21<br>(0.09 to<br>0.38)                      | 0.41<br>(0.20 to<br>0.76)                      |
| Maternal hypertensive disorders                       | 55.55<br>(38.08 to<br>79.57)                         | 35.94<br>(17.97 to<br>61.66)                         | 19.53<br>(9.30 to<br>36.32)                         | 39.91<br>(19.85 to<br>74.50)                         | 0.95<br>(0.65 to<br>1.36)                      | 0.62<br>(0.32 to<br>1.07)                      | 0.34<br>(0.16 to<br>0.63)                      | 0.69<br>(0.35 to<br>1.27)                      |
| Maternal obstructed labor and uterine rupture         | 10.61<br>(6.11 to<br>16.25)                          | 7.08<br>(2.96 to<br>13.61)                           | 3.75<br>(1.47 to<br>7.72)                           | 7.88<br>(3.32 to<br>15.98)                           | 0.20<br>(0.11 to<br>0.30)                      | 0.14<br>(0.06 to<br>0.26)                      | 0.07<br>(0.03 to<br>0.15)                      | 0.15<br>(0.06 to<br>0.30)                      |
| Maternal abortion, miscarriage, and ectopic pregnancy | 30.38<br>(19.06 to<br>45.31)                         | 24.71<br>(10.93 to<br>47.29)                         | 13.77<br>(5.83 to<br>26.94)                         | 27.40<br>(11.92 to<br>53.79)                         | 0.56<br>(0.35 to<br>0.83)                      | 0.47<br>(0.21 to<br>0.88)                      | 0.26<br>(0.11 to<br>0.50)                      | 0.52<br>(0.23 to<br>1.00)                      |
| Indirect maternal deaths                              | 51.41<br>(35.60 to<br>73.85)                         | 35.45<br>(17.11 to<br>61.60)                         | 19.78<br>(8.92 to<br>36.77)                         | 39.58<br>(18.25 to<br>69.94)                         | 0.89<br>(0.61 to<br>1.27)                      | 0.62<br>(0.30 to<br>1.08)                      | 0.35<br>(0.16 to<br>0.64)                      | 0.69<br>(0.32 to<br>1.24)                      |
| Late maternal deaths                                  | 13.82<br>(7.97 to<br>21.83)                          | 7.48<br>(3.26 to<br>13.84)                           | 4.10<br>(1.77 to<br>8.01)                           | 8.34<br>(3.60 to<br>16.05)                           | 0.24<br>(0.15 to<br>0.39)                      | 0.13<br>(0.06 to<br>0.25)                      | 0.07<br>(0.03 to<br>0.14)                      | 0.15<br>(0.06 to<br>0.28)                      |
| Maternal deaths aggravated by HIV/AIDS                | 1.48<br>(0.76 to<br>2.35)                            | 4.08<br>(0.61 to<br>10.46)                           | 2.41<br>(0.28 to<br>6.85)                           | 4.97<br>(1.20 to<br>12.21)                           | 0.03<br>(0.01 to<br>0.04)                      | 0.08<br>(0.01 to<br>0.20)                      | 0.05<br>(0.00 to<br>0.12)                      | 0.09<br>(0.02 to<br>0.23)                      |
| Other maternal disorders                              | 66.60<br>(45.67 to<br>93.20)                         | 43.03<br>(21.95 to<br>72.48)                         | 25.16<br>(12.10 to<br>44.82)                        | 47.60<br>(23.21 to<br>84.39)                         | 1.23<br>(0.84 to<br>1.71)                      | 0.81<br>(0.41 to<br>1.40)                      | 0.47<br>(0.23 to<br>0.84)                      | 0.89<br>(0.44 to<br>1.57)                      |

**Suriname**

| Cause                                                    | YLLs (actual counts)                                         |                                                             |                                                            |                                                              | Deaths (actual counts)                              |                                                    |                                                    |                                                     |
|----------------------------------------------------------|--------------------------------------------------------------|-------------------------------------------------------------|------------------------------------------------------------|--------------------------------------------------------------|-----------------------------------------------------|----------------------------------------------------|----------------------------------------------------|-----------------------------------------------------|
|                                                          | 2016                                                         | 2040 Forecast                                               | 2040 Better Scenario                                       | 2040 Worse Scenario                                          | 2016                                                | 2040 Forecast                                      | 2040 Better Scenario                               | 2040 Worse Scenario                                 |
| <b>Neonatal disorders</b>                                | <b>14,335.84</b><br><b>(8,278.51 to</b><br><b>22,873.06)</b> | <b>7,945.76</b><br><b>(3,655.24 to</b><br><b>14,256.57)</b> | <b>5,101.29</b><br><b>(2,425.73 to</b><br><b>9,220.88)</b> | <b>10,914.98</b><br><b>(5,060.36 to</b><br><b>19,476.84)</b> | <b>165.66</b><br><b>(95.67 to</b><br><b>264.30)</b> | <b>91.85</b><br><b>(42.25 to</b><br><b>164.75)</b> | <b>58.97</b><br><b>(28.85 to</b><br><b>106.56)</b> | <b>126.16</b><br><b>(58.51 to</b><br><b>225.20)</b> |
| Neonatal preterm birth                                   | 7,114.49<br>(3,982.05 to<br>11,629.78)                       | 3,020.52<br>(1,459.61 to<br>5,475.22)                       | 1,961.31<br>(943.13 to<br>3,564.88)                        | 4,881.96<br>(2,279.44 to<br>8,770.89)                        | 82.20<br>(46.01 to<br>134.36)                       | 34.91<br>(16.87 to<br>63.26)                       | 22.67<br>(10.90 to<br>41.20)                       | 56.41<br>(26.34 to<br>101.38)                       |
| Neonatal encephalopathy due to birth asphyxia and trauma | 3,470.57<br>(1,781.85 to<br>5,959.99)                        | 2,103.32<br>(802.62 to<br>4,264.79)                         | 1,349.47<br>(512.52 to<br>2,627.03)                        | 2,574.82<br>(977.23 to<br>5,219.90)                          | 40.11<br>(20.59 to<br>68.89)                        | 24.32<br>(9.28 to<br>49.28)                        | 15.60<br>(5.93 to<br>30.36)                        | 29.76<br>(11.31 to<br>60.32)                        |
| Neonatal sepsis and other neonatal infections            | 2,780.94<br>(1,452.48 to<br>5,038.68)                        | 2,164.25<br>(987.59 to<br>4,202.05)                         | 1,386.98<br>(640.79 to<br>2,704.67)                        | 2,642.10<br>(1,203.88 to<br>5,196.14)                        | 32.14<br>(16.79 to<br>58.24)                        | 25.02<br>(11.42 to<br>48.58)                       | 16.04<br>(7.41 to<br>31.25)                        | 30.54<br>(13.93 to<br>60.06)                        |
| Hemolytic disease and other neonatal jaundice            | 108.42<br>(55.99 to<br>192.51)                               | 49.24<br>(17.37 to<br>111.61)                               | 28.89<br>(10.37 to<br>66.32)                               | 61.17<br>(22.41 to<br>139.76)                                | 1.25<br>(0.65 to<br>2.22)                           | 0.57<br>(0.20 to<br>1.29)                          | 0.33<br>(0.12 to<br>0.77)                          | 0.71<br>(0.26 to<br>1.62)                           |
| Other neonatal disorders                                 | 861.42<br>(446.47 to<br>1,519.50)                            | 608.44<br>(255.98 to<br>1,246.05)                           | 374.64<br>(160.49 to<br>767.38)                            | 754.93<br>(317.95 to<br>1,531.52)                            | 9.96<br>(5.16 to<br>17.57)                          | 7.04<br>(2.96 to<br>14.41)                         | 4.33<br>(1.86 to<br>8.87)                          | 8.73<br>(3.68 to<br>17.71)                          |

|                                                                         |                                          |                                            |                                          |                                            |                                       |                                       |                                       |                                       |
|-------------------------------------------------------------------------|------------------------------------------|--------------------------------------------|------------------------------------------|--------------------------------------------|---------------------------------------|---------------------------------------|---------------------------------------|---------------------------------------|
|                                                                         | 584.51<br>(391.87 to<br>861.99)          | 339.60<br>(259.36 to<br>466.09)            | 269.73<br>(210.51 to<br>352.80)          | 363.10<br>(269.87 to<br>507.29)            | 15.05<br>(12.46 to<br>18.55)          | 16.11<br>(12.02 to<br>20.19)          | 14.82<br>(11.48 to<br>18.27)          | 15.70<br>(11.51 to<br>19.98)          |
| <b>Nutritional deficiencies</b>                                         |                                          |                                            |                                          |                                            |                                       |                                       |                                       |                                       |
| Protein-energy malnutrition                                             | 533.86<br>(348.11 to<br>801.80)          | 285.13<br>(209.61 to<br>402.36)            | 227.25<br>(173.16 to<br>307.70)          | 306.55<br>(217.97 to<br>444.70)            | 13.36<br>(10.98 to<br>16.68)          | 13.51<br>(9.80 to<br>17.20)           | 12.56<br>(9.36 to<br>15.67)           | 13.17<br>(9.43 to<br>17.24)           |
| Iodine deficiency                                                       | 4.35<br>(0.22 to<br>20.28)               | 11.91<br>(0.22 to<br>51.31)                | 8.56<br>(0.13 to<br>34.63)               | 12.76<br>(0.23 to<br>58.00)                | 0.10<br>(0.01 to<br>0.34)             | 0.54<br>(0.01 to<br>2.12)             | 0.44<br>(0.00 to<br>1.92)             | 0.54<br>(0.01 to<br>2.10)             |
| Dietary iron deficiency                                                 | 3.34<br>(2.72 to<br>4.05)                | 2.43<br>(1.86 to<br>3.16)                  | 1.99<br>(1.52 to<br>2.57)                | 2.56<br>(1.93 to<br>3.33)                  | 0.06<br>(0.05 to<br>0.07)             | 0.05<br>(0.04 to<br>0.06)             | 0.04<br>(0.03 to<br>0.05)             | 0.05<br>(0.04 to<br>0.06)             |
| Other nutritional deficiencies                                          | 42.97<br>(29.84 to<br>59.52)             | 40.14<br>(27.17 to<br>54.37)               | 31.93<br>(21.66 to<br>42.96)             | 41.23<br>(27.72 to<br>57.19)               | 1.53<br>(1.14 to<br>1.89)             | 2.00<br>(1.32 to<br>2.82)             | 1.78<br>(1.16 to<br>2.52)             | 1.94<br>(1.24 to<br>2.75)             |
| <b>Other communicable, maternal, neonatal, and nutritional diseases</b> | 742.37<br>(457.22 to<br>921.50)          | 666.36<br>(396.61 to<br>835.31)            | 515.32<br>(385.38 to<br>650.41)          | 693.58<br>(411.65 to<br>868.54)            | 17.95<br>(11.74 to<br>21.22)          | 20.07<br>(12.91 to<br>24.23)          | 16.54<br>(10.60 to<br>20.33)          | 20.24<br>(12.86 to<br>24.67)          |
| Sexually transmitted infections excluding HIV                           | 40.36<br>(27.22 to<br>63.58)             | 20.05<br>(14.78 to<br>28.59)               | 16.12<br>(11.62 to<br>22.79)             | 20.89<br>(15.11 to<br>30.30)               | 0.92<br>(0.72 to<br>1.24)             | 0.60<br>(0.47 to<br>0.80)             | 0.52<br>(0.40 to<br>0.69)             | 0.60<br>(0.47 to<br>0.80)             |
| Syphilis                                                                | 25.60<br>(13.59 to<br>48.15)             | 8.83<br>(5.31 to<br>16.50)                 | 6.61<br>(3.99 to<br>11.93)               | 9.51<br>(5.47 to<br>18.38)                 | 0.50<br>(0.33 to<br>0.77)             | 0.22<br>(0.16 to<br>0.33)             | 0.18<br>(0.13 to<br>0.25)             | 0.23<br>(0.16 to<br>0.34)             |
| Chlamydial infection                                                    | 2.76<br>(2.16 to<br>3.80)                | 2.13<br>(1.57 to<br>2.99)                  | 1.81<br>(1.30 to<br>2.55)                | 2.07<br>(1.61 to<br>3.03)                  | 0.08<br>(0.06 to<br>0.11)             | 0.07<br>(0.06 to<br>0.10)             | 0.07<br>(0.05 to<br>0.09)             | 0.07<br>(0.05 to<br>0.10)             |
| Gonococcal infection                                                    | 7.86<br>(6.20 to<br>10.66)               | 6.07<br>(4.50 to<br>8.49)                  | 5.18<br>(3.72 to<br>7.25)                | 6.14<br>(4.56 to<br>8.63)                  | 0.24<br>(0.19 to<br>0.31)             | 0.22<br>(0.16 to<br>0.30)             | 0.20<br>(0.14 to<br>0.27)             | 0.21<br>(0.16 to<br>0.30)             |
| Other sexually transmitted infections                                   | 4.13<br>(3.23 to<br>5.59)                | 3.01<br>(2.18 to<br>4.22)                  | 2.53<br>(1.78 to<br>3.59)                | 3.06<br>(2.25 to<br>4.35)                  | 0.11<br>(0.09 to<br>0.15)             | 0.09<br>(0.07 to<br>0.13)             | 0.08<br>(0.06 to<br>0.11)             | 0.09<br>(0.07 to<br>0.13)             |
| Acute hepatitis                                                         | 75.39<br>(64.19 to<br>87.85)             | 67.46<br>(53.08 to<br>84.23)               | 52.17<br>(37.96 to<br>67.69)             | 68.98<br>(53.90 to<br>87.13)               | 1.92<br>(1.64 to<br>2.21)             | 1.92<br>(1.70 to<br>2.68)             | 1.73<br>(1.28 to<br>2.25)             | 2.15<br>(1.67 to<br>2.72)             |
| Acute hepatitis A                                                       | 4.05<br>(1.26 to<br>8.10)                | 2.00<br>(0.87 to<br>3.81)                  | 1.46<br>(0.64 to<br>2.73)                | 2.16<br>(0.92 to<br>4.18)                  | 0.06<br>(0.03 to<br>0.11)             | 0.04<br>(0.02 to<br>0.08)             | 0.03<br>(0.01 to<br>0.06)             | 0.04<br>(0.02 to<br>0.08)             |
| Acute hepatitis B                                                       | 49.50<br>(41.00 to<br>59.71)             | 48.26<br>(35.76 to<br>63.01)               | 36.91<br>(25.46 to<br>50.09)             | 49.20<br>(36.37 to<br>64.27)               | 1.36<br>(1.13 to<br>1.62)             | 1.55<br>(1.16 to<br>2.01)             | 1.22<br>(0.86 to<br>1.65)             | 1.56<br>(1.17 to<br>2.03)             |
| Acute hepatitis C                                                       | 3.08<br>(2.25 to<br>4.11)                | 3.20<br>(2.19 to<br>4.53)                  | 2.75<br>(1.84 to<br>4.00)                | 3.20<br>(2.19 to<br>4.55)                  | 0.09<br>(0.06 to<br>0.12)             | 0.11<br>(0.07 to<br>0.15)             | 0.10<br>(0.06 to<br>0.14)             | 0.11<br>(0.07 to<br>0.15)             |
| Acute hepatitis E                                                       | 18.76<br>(14.13 to<br>24.44)             | 14.00<br>(9.70 to<br>19.35)                | 11.06<br>(7.46 to<br>15.92)              | 14.42<br>(9.97 to<br>20.31)                | 0.41<br>(0.30 to<br>0.55)             | 0.44<br>(0.29 to<br>0.65)             | 0.38<br>(0.25 to<br>0.57)             | 0.44<br>(0.29 to<br>0.65)             |
| Other unspecified infectious diseases                                   | 626.62<br>(344.28 to<br>789.06)          | 578.85<br>(308.93 to<br>737.41)            | 447.03<br>(238.73 to<br>570.57)          | 603.71<br>(322.83 to<br>769.19)            | 15.11<br>(8.95 to<br>18.19)           | 17.32<br>(10.27 to<br>21.27)          | 14.28<br>(8.44 to<br>17.71)           | 17.49<br>(10.33 to<br>21.54)          |
| <b>Non-communicable diseases</b>                                        | 68,893.41<br>(63,239.64 to<br>75,143.93) | 100,162.67<br>(78,211.27 to<br>124,737.94) | 69,672.92<br>(55,798.29 to<br>87,460.67) | 117,618.55<br>(91,095.60 to<br>145,124.74) | 3,015.72<br>(2,804.14 to<br>3,231.76) | 5,505.17<br>(4,582.94 to<br>6,552.78) | 4,150.39<br>(3,495.47 to<br>5,036.26) | 6,172.80<br>(5,156.01 to<br>7,241.92) |

| Suriname                   |                                          |                                          |                                          |                                          |                                 |                                     |                                     |                                     |
|----------------------------|------------------------------------------|------------------------------------------|------------------------------------------|------------------------------------------|---------------------------------|-------------------------------------|-------------------------------------|-------------------------------------|
| Cause                      | YLLs (actual counts)                     |                                          |                                          |                                          | Deaths (actual counts)          |                                     |                                     |                                     |
|                            | 2016                                     | 2040 Forecast                            | 2040 Better Scenario                     | 2040 Worse Scenario                      | 2016                            | 2040 Forecast                       | 2040 Better Scenario                | 2040 Worse Scenario                 |
| <b>Neoplasms</b>           | 14,606.00<br>(13,430.80 to<br>15,707.28) | 21,137.06<br>(17,948.69 to<br>24,752.10) | 19,260.84<br>(16,332.09 to<br>22,315.92) | 22,863.62<br>(19,270.25 to<br>27,177.73) | 602.86<br>(555.35 to<br>649.44) | 1,063.76<br>(884.03 to<br>1,261.61) | 1,037.25<br>(886.80 to<br>1,208.82) | 1,112.21<br>(911.08 to<br>1,337.56) |
| Lip and oral cavity cancer | 167.80<br>(149.92 to<br>187.47)          | 301.62<br>(177.37 to<br>469.96)          | 169.36<br>(110.27 to<br>245.07)          | 405.74<br>(227.37 to<br>642.29)          | 6.82<br>(6.11 to<br>7.55)       | 13.74<br>(8.30 to<br>20.92)         | 8.31<br>(5.55 to<br>11.89)          | 17.92<br>(10.41 to<br>28.28)        |

|                                      |                                       |                                       |                                       |                                       |                               |                                 |                                 |                                 |
|--------------------------------------|---------------------------------------|---------------------------------------|---------------------------------------|---------------------------------------|-------------------------------|---------------------------------|---------------------------------|---------------------------------|
| Nasopharynx cancer                   | 148.06<br>(130.09 to<br>166.84)       | 201.36<br>(125.08 to<br>305.25)       | 105.34<br>(71.23 to<br>151.29)        | 274.12<br>(167.20 to<br>422.03)       | 4.51<br>(3.96 to<br>5.06)     | 7.02<br>(4.42 to<br>10.63)      | 3.80<br>(2.59 to<br>5.34)       | 9.41<br>(5.75 to<br>14.30)      |
| Other pharynx cancer                 | 69.73<br>(59.90 to<br>81.16)          | 99.98<br>(56.55 to<br>159.60)         | 79.19<br>(48.39 to<br>125.04)         | 112.77<br>(61.83 to<br>184.30)        | 2.64<br>(2.27 to<br>3.06)     | 4.42<br>(2.55 to<br>7.04)       | 3.70<br>(2.27 to<br>5.82)       | 4.87<br>(2.76 to<br>7.90)       |
| Esophageal cancer                    | 130.75<br>(115.45 to<br>146.74)       | 210.55<br>(133.64 to<br>333.67)       | 136.52<br>(94.90 to<br>199.41)        | 279.85<br>(166.05 to<br>464.63)       | 5.86<br>(5.19 to<br>6.57)     | 10.57<br>(6.72 to<br>16.63)     | 7.31<br>(5.10 to<br>10.47)      | 13.63<br>(8.19 to<br>22.55)     |
| Stomach cancer                       | 650.86<br>(585.77 to<br>716.41)       | 770.07<br>(623.15 to<br>974.07)       | 662.48<br>(531.65 to<br>821.61)       | 779.51<br>(628.60 to<br>989.09)       | 112.77<br>(27.67 to<br>33.82) | 2.64<br>(34.21 to<br>53.65)     | 4.42<br>(31.13 to<br>47.94)     | 4.87<br>(33.26 to<br>53.58)     |
| Colon and rectum cancer              | 1,578.56<br>(1,412.91 to<br>1,749.74) | 2,469.64<br>(1,650.82 to<br>3,671.18) | 2,387.35<br>(1,649.78 to<br>3,482.44) | 2,580.54<br>(1,719.62 to<br>3,804.61) | 75.00<br>(67.09 to<br>83.05)  | 139.61<br>(92.67 to<br>207.56)  | 143.16<br>(97.49 to<br>209.39)  | 141.74<br>(92.41 to<br>209.84)  |
| Liver cancer                         | 832.52<br>(726.11 to<br>1,003.63)     | 1,548.28<br>(1,063.30 to<br>2,287.63) | 1,290.50<br>(944.88 to<br>1,800.66)   | 1,726.35<br>(1,155.92 to<br>2,633.06) | 35.68<br>(31.07 to<br>43.73)  | 77.04<br>(53.16 to<br>111.84)   | 68.45<br>(50.34 to<br>96.32)    | 83.11<br>(55.76 to<br>122.97)   |
| Liver cancer due to hepatitis B      | 326.23<br>(269.77 to<br>403.13)       | 553.40<br>(368.12 to<br>839.01)       | 472.08<br>(332.26 to<br>668.59)       | 607.65<br>(391.41 to<br>941.00)       | 12.28<br>(10.03 to<br>15.57)  | 24.15<br>(16.18 to<br>36.07)    | 21.79<br>(15.42 to<br>30.97)    | 25.76<br>(16.63 to<br>39.03)    |
| Liver cancer due to hepatitis C      | 192.38<br>(158.36 to<br>245.92)       | 385.64<br>(262.29 to<br>567.70)       | 345.89<br>(247.31 to<br>489.72)       | 411.84<br>(271.73 to<br>620.81)       | 9.87<br>(8.16 to<br>12.73)    | 22.49<br>(15.11 to<br>33.57)    | 21.45<br>(15.05 to<br>30.89)    | 23.29<br>(15.17 to<br>35.32)    |
| Liver cancer due to alcohol use      | 160.07<br>(129.69 to<br>203.87)       | 316.93<br>(204.40 to<br>493.37)       | 227.79<br>(156.07 to<br>338.52)       | 388.01<br>(241.52 to<br>619.27)       | 7.24<br>(5.90 to<br>9.27)     | 16.09<br>(10.54 to<br>24.80)    | 12.48<br>(8.56 to<br>18.70)     | 18.92<br>(12.00 to<br>29.64)    |
| Liver cancer due to other causes     | 153.85<br>(128.62 to<br>185.09)       | 292.30<br>(191.50 to<br>460.15)       | 244.73<br>(167.91 to<br>364.06)       | 318.85<br>(202.21 to<br>510.73)       | 6.29<br>(5.28 to<br>7.55)     | 14.31<br>(9.20 to<br>22.80)     | 12.73<br>(8.64 to<br>19.13)     | 15.15<br>(9.52 to<br>24.41)     |
| Gallbladder and biliary tract cancer | 167.15<br>(139.53 to<br>233.60)       | 186.18<br>(152.10 to<br>258.55)       | 199.20<br>(160.65 to<br>282.86)       | 178.14<br>(144.82 to<br>215.05)       | 7.68<br>(6.44 to<br>10.71)    | 9.90<br>(7.78 to<br>13.93)      | 11.08<br>(8.81 to<br>15.70)     | 9.27<br>(7.24 to<br>13.00)      |
| Pancreatic cancer                    | 613.76<br>(556.27 to<br>674.15)       | 1,048.34<br>(810.77 to<br>1,370.87)   | 1,050.98<br>(827.74 to<br>1,335.66)   | 1,065.56<br>(811.10 to<br>1,404.51)   | 28.90<br>(26.24 to<br>31.89)  | 56.26<br>(43.27 to<br>73.38)    | 59.36<br>(47.42 to<br>75.18)    | 55.70<br>(42.05 to<br>73.84)    |
| Larynx cancer                        | 123.41<br>(108.24 to<br>139.78)       | 184.08<br>(99.13 to<br>320.12)        | 92.16<br>(55.81 to<br>146.79)         | 250.58<br>(131.36 to<br>439.37)       | 5.16<br>(4.54 to<br>5.84)     | 8.74<br>(4.78 to<br>14.78)      | 4.66<br>(2.91 to<br>7.46)       | 11.59<br>(6.09 to<br>20.13)     |
| Tracheal, bronchus, and lung cancer  | 1,704.35<br>(1,513.87 to<br>1,888.70) | 2,561.79<br>(1,793.26 to<br>3,545.97) | 1,638.81<br>(1,178.59 to<br>2,163.47) | 3,695.27<br>(2,490.71 to<br>5,184.06) | 72.90<br>(64.87 to<br>80.75)  | 126.17<br>(88.74 to<br>174.02)  | 85.17<br>(62.00 to<br>111.89)   | 176.17<br>(120.57 to<br>246.21) |
| Malignant skin melanoma              | 70.90<br>(60.72 to<br>87.41)          | 92.18<br>(78.27 to<br>113.45)         | 109.54<br>(91.67 to<br>135.49)        | 87.60<br>(73.76 to<br>107.14)         | 2.83<br>(2.46 to<br>3.44)     | 4.47<br>(3.71 to<br>5.55)       | 5.60<br>(4.64 to<br>6.96)       | 4.13<br>(3.41 to<br>5.13)       |
| Non-melanoma skin cancer             | 61.31<br>(54.89 to<br>68.02)          | 101.97<br>(88.95 to<br>115.85)        | 95.73<br>(80.40 to<br>110.52)         | 98.91<br>(86.55 to<br>112.12)         | 2.81<br>(2.54 to<br>3.11)     | 5.71<br>(4.58 to<br>6.75)       | 5.75<br>(4.68 to<br>6.81)       | 5.36<br>(4.29 to<br>6.39)       |
| Breast cancer                        | 1,238.76<br>(1,035.39 to<br>1,444.22) | 1,789.02<br>(1,311.92 to<br>2,517.93) | 1,616.35<br>(1,185.14 to<br>2,194.71) | 1,854.99<br>(1,329.28 to<br>2,670.62) | 47.92<br>(40.27 to<br>55.29)  | 83.08<br>(59.64 to<br>117.59)   | 79.07<br>(58.27 to<br>107.32)   | 83.80<br>(59.20 to<br>120.24)   |
| Cervical cancer                      | 1,129.60<br>(895.93 to<br>1,358.00)   | 1,215.28<br>(882.28 to<br>1,600.92)   | 1,027.13<br>(742.67 to<br>1,334.64)   | 1,251.45<br>(893.63 to<br>1,703.81)   | 43.02<br>(34.42 to<br>51.55)  | 54.61<br>(39.16 to<br>71.65)    | 48.32<br>(34.94 to<br>62.90)    | 54.81<br>(38.52 to<br>74.09)    |
| Uterine cancer                       | 123.93<br>(104.19 to<br>146.44)       | 200.94<br>(158.16 to<br>249.99)       | 176.13<br>(138.62 to<br>220.79)       | 198.71<br>(157.13 to<br>248.29)       | 5.87<br>(4.98 to<br>6.90)     | 11.00<br>(8.66 to<br>13.65)     | 10.04<br>(7.97 to<br>12.59)     | 10.66<br>(8.40 to<br>13.22)     |
| Ovarian cancer                       | 374.73<br>(317.59 to<br>433.48)       | 571.13<br>(381.83 to<br>853.80)       | 603.76<br>(414.70 to<br>869.51)       | 565.12<br>(370.48 to<br>849.93)       | 16.80<br>(13.60 to<br>19.44)  | 30.30<br>(19.13 to<br>45.55)    | 33.38<br>(21.63 to<br>48.68)    | 29.36<br>(18.11 to<br>44.58)    |
| Prostate cancer                      | 1,048.57<br>(724.12 to<br>1,250.60)   | 2,198.40<br>(1,475.18 to<br>2,716.00) | 2,523.37<br>(1,769.70 to<br>3,085.19) | 2,044.13<br>(1,357.39 to<br>2,572.98) | 72.27<br>(49.37 to<br>87.17)  | 162.79<br>(104.44 to<br>209.11) | 196.34<br>(132.83 to<br>243.61) | 148.40<br>(92.85 to<br>193.97)  |
| Testicular cancer                    | 23.01<br>(17.85 to<br>28.77)          | 22.27<br>(16.55 to<br>29.05)          | 20.34<br>(14.97 to<br>26.39)          | 22.13<br>(16.41 to<br>28.79)          | 0.59<br>(0.46 to<br>0.71)     | 0.72<br>(0.54 to<br>0.92)       | 0.71<br>(0.52 to<br>0.92)       | 0.69<br>(0.52 to<br>0.90)       |



| Suriname                        |                                                     |                                                     |                                                     |                                                     |                                                  |                                                  |                                                |                                                  |
|---------------------------------|-----------------------------------------------------|-----------------------------------------------------|-----------------------------------------------------|-----------------------------------------------------|--------------------------------------------------|--------------------------------------------------|------------------------------------------------|--------------------------------------------------|
| Cause                           | YLLs (actual counts)                                |                                                     |                                                     |                                                     | Deaths (actual counts)                           |                                                  |                                                |                                                  |
|                                 | 2016                                                | 2040 Forecast                                       | 2040 Better Scenario                                | 2040 Worse Scenario                                 | 2016                                             | 2040 Forecast                                    | 2040 Better Scenario                           | 2040 Worse Scenario                              |
| Kidney cancer                   | 201.44<br>(179.06 to 232.49)                        | 301.07<br>(247.60 to 371.21)                        | 325.69<br>(271.32 to 395.39)                        | 301.57<br>(244.87 to 367.86)                        | 7.09<br>(6.27 to 8.22)                           | 13.08<br>(10.62 to 16.30)                        | 14.99<br>(12.34 to 18.25)                      | 12.72<br>(10.24 to 15.81)                        |
| Bladder cancer                  | 137.59<br>(121.65 to 155.17)                        | 223.09<br>(165.90 to 309.80)                        | 202.42<br>(155.07 to 267.64)                        | 230.91<br>(168.01 to 327.76)                        | 7.55<br>(6.68 to 8.52)                           | 14.00<br>(9.99 to 19.56)                         | 13.51<br>(10.30 to 17.97)                      | 14.08<br>(9.84 to 19.91)                         |
| Brain and nervous system cancer | 817.33<br>(685.11 to 983.92)                        | 1,056.89<br>(882.20 to 1,261.89)                    | 1,064.97<br>(895.03 to 1,282.10)                    | 1,053.71<br>(878.75 to 1,261.97)                    | 20.98<br>(18.04 to 25.13)                        | 34.77<br>(29.66 to 42.40)                        | 37.22<br>(31.31 to 45.74)                      | 33.51<br>(28.31 to 40.72)                        |
| Thyroid cancer                  | 71.88<br>(59.54 to 83.33)                           | 86.58<br>(60.31 to 119.19)                          | 72.96<br>(52.39 to 99.69)                           | 89.74<br>(69.76 to 127.08)                          | 3.17<br>(2.64 to 3.68)                           | 4.46<br>(3.12 to 6.25)                           | 3.92<br>(2.82 to 5.35)                         | 4.51<br>(3.07 to 6.37)                           |
| Mesothelioma                    | 26.02<br>(22.27 to 29.69)                           | 31.76<br>(26.18 to 37.55)                           | 31.60<br>(25.93 to 37.37)                           | 31.08<br>(25.77 to 36.69)                           | 0.94<br>(0.81 to 1.08)                           | 1.39<br>(1.14 to 1.66)                           | 1.47<br>(1.19 to 1.76)                         | 1.33<br>(1.08 to 1.58)                           |
| Hodgkin lymphoma                | 103.12<br>(78.59 to 125.55)                         | 92.08<br>(71.47 to 116.35)                          | 71.65<br>(53.75 to 94.07)                           | 94.08<br>(72.66 to 121.75)                          | 2.73<br>(2.15 to 3.39)                           | 2.98<br>(2.37 to 3.78)                           | 2.43<br>(1.86 to 3.20)                         | 2.97<br>(2.35 to 3.77)                           |
| Non-Hodgkin lymphoma            | 626.75<br>(551.95 to 726.57)                        | 818.24<br>(672.42 to 1,011.65)                      | 822.72<br>(675.23 to 1,012.18)                      | 816.19<br>(664.43 to 1,015.53)                      | 19.21<br>(17.05 to 22.65)                        | 32.80<br>(25.44 to 38.99)                        | 32.80<br>(26.99 to 40.50)                      | 30.16<br>(24.60 to 38.12)                        |
| Multiple myeloma                | 294.82<br>(211.91 to 344.00)                        | 432.10<br>(291.43 to 560.34)                        | 460.48<br>(318.10 to 587.42)                        | 423.62<br>(290.68 to 556.68)                        | 12.47<br>(9.08 to 14.45)                         | 21.04<br>(14.47 to 27.21)                        | 23.38<br>(16.34 to 29.63)                      | 20.22<br>(13.96 to 26.61)                        |
| Leukemia                        | 932.08<br>(767.64 to 1,071.92)                      | 944.21<br>(751.17 to 1,151.57)                      | 825.21<br>(670.36 to 995.43)                        | 994.07<br>(776.60 to 1,225.07)                      | 25.18<br>(21.11 to 28.11)                        | 36.01<br>(28.49 to 44.96)                        | 33.26<br>(26.90 to 40.25)                      | 36.69<br>(28.79 to 46.13)                        |
| Acute lymphoid leukemia         | 163.59<br>(119.63 to 212.13)                        | 108.88<br>(79.69 to 143.60)                         | 97.50<br>(72.31 to 127.06)                          | 116.04<br>(83.36 to 154.98)                         | 2.59<br>(1.99 to 3.19)                           | 2.19<br>(1.67 to 2.71)                           | 2.04<br>(1.59 to 2.53)                         | 2.28<br>(1.74 to 2.85)                           |
| Chronic lymphoid leukemia       | 29.25<br>(22.91 to 34.47)                           | 33.16<br>(23.18 to 46.38)                           | 31.89<br>(22.92 to 42.92)                           | 33.76<br>(23.05 to 48.12)                           | 1.40<br>(1.11 to 1.66)                           | 1.85<br>(1.26 to 2.55)                           | 1.88<br>(1.37 to 2.51)                         | 1.84<br>(1.22 to 2.59)                           |
| Acute myeloid leukemia          | 185.19<br>(152.50 to 221.71)                        | 216.80<br>(169.80 to 270.85)                        | 215.84<br>(171.46 to 265.43)                        | 225.00<br>(174.26 to 287.31)                        | 4.51<br>(3.75 to 5.25)                           | 7.15<br>(5.57 to 9.11)                           | 7.56<br>(5.98 to 9.37)                         | 7.21<br>(5.56 to 9.25)                           |
| Chronic myeloid leukemia        | 49.34<br>(35.59 to 59.07)                           | 37.41<br>(24.36 to 53.24)                           | 32.36<br>(21.45 to 45.12)                           | 39.04<br>(25.37 to 56.67)                           | 1.73<br>(1.23 to 2.06)                           | 1.62<br>(1.01 to 2.31)                           | 1.47<br>(0.95 to 2.08)                         | 1.64<br>(1.02 to 2.36)                           |
| Other leukemia                  | 504.71<br>(415.82 to 577.88)                        | 547.98<br>(435.39 to 672.77)                        | 447.61<br>(358.13 to 546.93)                        | 580.22<br>(454.41 to 720.59)                        | 14.94<br>(12.62 to 16.84)                        | 23.20<br>(18.42 to 28.59)                        | 20.31<br>(16.29 to 24.66)                      | 23.72<br>(18.43 to 29.50)                        |
| Other neoplasms                 | 1,137.21<br>(1,008.97 to 1,279.34)                  | 1,377.94<br>(1,209.41 to 1,565.84)                  | 1,398.93<br>(1,220.46 to 1,588.64)                  | 1,357.18<br>(1,187.54 to 1,540.49)                  | 35.54<br>(32.06 to 39.58)                        | 56.22<br>(48.12 to 64.66)                        | 61.38<br>(53.05 to 70.30)                      | 53.35<br>(45.42 to 60.94)                        |
| <b>Cardiovascular diseases</b>  | <b>25,789.70</b><br><b>(23,894.36 to 27,734.20)</b> | <b>36,672.86</b><br><b>(24,472.22 to 55,410.32)</b> | <b>18,496.07</b><br><b>(12,869.44 to 27,600.86)</b> | <b>49,484.39</b><br><b>(32,634.79 to 73,248.92)</b> | <b>1,314.15</b><br><b>(1,222.95 to 1,411.74)</b> | <b>2,180.13</b><br><b>(1,545.75 to 3,096.13)</b> | <b>1,262.53</b><br><b>(921.96 to 1,830.81)</b> | <b>2,732.11</b><br><b>(1,944.25 to 3,809.94)</b> |
| Rheumatic heart disease         | 317.85<br>(279.07 to 360.04)                        | 215.22<br>(172.43 to 276.42)                        | 158.67<br>(126.29 to 201.60)                        | 220.81<br>(175.45 to 284.30)                        | 11.57<br>(10.21 to 13.14)                        | 11.47<br>(8.63 to 14.67)                         | 9.26<br>(7.02 to 11.89)                        | 11.24<br>(8.36 to 14.68)                         |
| Ischemic heart disease          | 11,471.42<br>(10,512.80 to 12,443.48)               | 16,489.27<br>(8,862.79 to 30,797.08)                | 7,389.08<br>(4,054.79 to 13,763.59)                 | 23,124.31<br>(12,346.75 to 42,045.48)               | 597.34<br>(548.92 to 647.08)                     | 971.57<br>(560.70 to 1,702.30)                   | 505.35<br>(292.25 to 887.15)                   | 1,262.58<br>(732.52 to 2,230.67)                 |
| Stroke                          | 9,538.05<br>(8,679.47 to 10,388.37)                 | 12,703.18<br>(7,389.52 to 21,942.62)                | 5,471.25<br>(3,384.90 to 9,373.20)                  | 18,241.43<br>(10,282.70 to 30,268.36)               | 481.60<br>(437.15 to 526.46)                     | 745.68<br>(460.77 to 1,331.54)                   | 375.89<br>(236.28 to 687.53)                   | 982.57<br>(596.35 to 1,685.97)                   |
| Ischemic stroke                 | 3,002.87<br>(2,692.57 to 3,325.53)                  | 4,338.21<br>(2,158.66 to 10,235.48)                 | 2,244.44<br>(1,184.76 to 5,326.93)                  | 5,703.37<br>(2,792.71 to 13,214.51)                 | 188.95<br>(169.67 to 208.11)                     | 301.50<br>(156.67 to 764.35)                     | 177.65<br>(95.06 to 435.36)                    | 368.13<br>(185.63 to 904.51)                     |

|                                                     |                                              |                                              |                                              |                                              |                                      |                                        |                                       |                                        |
|-----------------------------------------------------|----------------------------------------------|----------------------------------------------|----------------------------------------------|----------------------------------------------|--------------------------------------|----------------------------------------|---------------------------------------|----------------------------------------|
| Intracerebral hemorrhage                            | 6,535.18<br>(5,926.21 to<br>7,158.79)        | 8,364.97<br>(4,752.39 to<br>14,786.37)       | 3,226.80<br>(2,032.44 to<br>5,273.40)        | 12,538.06<br>(6,744.24 to<br>22,343.59)      | 292.65<br>(265.47 to<br>321.30)      | 444.18<br>(267.04 to<br>758.51)        | 198.24<br>(126.23 to<br>314.87)       | 614.44<br>(357.38 to<br>1,049.50)      |
| Hypertensive heart disease                          | 1,656.25<br>(1,340.61 to<br>2,458.01)        | 3,254.81<br>(1,971.76 to<br>5,752.86)        | 2,140.73<br>(1,449.00 to<br>3,495.10)        | 3,813.68<br>(2,249.84 to<br>7,098.79)        | 99.57<br>(80.95 to<br>147.37)        | 225.98<br>(137.08 to<br>412.23)        | 164.11<br>(111.41 to<br>260.09)       | 255.72<br>(150.42 to<br>478.89)        |
| Cardiomyopathy and myocarditis                      | 921.64<br>(776.16 to<br>1,066.48)            | 1,042.13<br>(784.02 to<br>1,362.15)          | 960.43<br>(709.25 to<br>1,272.33)            | 1,055.31<br>(793.92 to<br>1,394.20)          | 34.90<br>(29.64 to<br>39.84)         | 51.01<br>(37.88 to<br>68.25)           | 50.58<br>(37.77 to<br>68.57)          | 49.67<br>(36.53 to<br>66.53)           |
| Myocarditis                                         | 170.47<br>(132.72 to<br>229.03)              | 184.70<br>(142.45 to<br>241.85)              | 175.07<br>(133.60 to<br>226.37)              | 181.73<br>(140.83 to<br>239.53)              | 7.64<br>(6.04 to<br>9.84)            | 11.09<br>(7.95 to<br>15.05)            | 11.44<br>(8.26 to<br>15.29)           | 10.42<br>(7.35 to<br>14.30)            |
| <b>Suriname</b>                                     |                                              |                                              |                                              |                                              |                                      |                                        |                                       |                                        |
| Cause                                               | YLLs (actual counts)                         |                                              |                                              |                                              | Deaths (actual counts)               |                                        |                                       |                                        |
|                                                     | 2016                                         | 2040 Forecast                                | 2040 Better Scenario                         | 2040 Worse Scenario                          | 2016                                 | 2040 Forecast                          | 2040 Better Scenario                  | 2040 Worse Scenario                    |
| Alcoholic cardiomyopathy                            | 57.27<br>(43.96 to<br>76.68)                 | 68.66<br>(50.97 to<br>93.57)                 | 59.10<br>(42.01 to<br>83.39)                 | 76.76<br>(57.80 to<br>103.16)                | 2.18<br>(1.71 to<br>2.87)            | 2.95<br>(2.23 to<br>3.94)              | 2.71<br>(1.94 to<br>3.75)             | 3.19<br>(2.41 to<br>4.21)              |
| Other cardiomyopathy                                | 693.90<br>(570.85 to<br>800.22)              | 788.76<br>(558.32 to<br>1,084.97)            | 726.25<br>(493.57 to<br>1,003.77)            | 796.81<br>(556.51 to<br>1,106.63)            | 25.08<br>(20.67 to<br>28.87)         | 36.97<br>(25.26 to<br>52.63)           | 36.43<br>(24.54 to<br>51.88)          | 36.07<br>(24.50 to<br>51.86)           |
| Atrial fibrillation and flutter                     | 155.42<br>(122.87 to<br>192.48)              | 330.71<br>(238.97 to<br>441.39)              | 323.67<br>(238.27 to<br>413.69)              | 324.42<br>(228.10 to<br>439.46)              | 14.73<br>(11.54 to<br>18.38)         | 31.86<br>(20.48 to<br>43.74)           | 33.59<br>(22.96 to<br>44.18)          | 30.29<br>(19.11 to<br>42.01)           |
| Aortic aneurysm                                     | 260.17<br>(227.78 to<br>295.40)              | 375.19<br>(291.85 to<br>486.69)              | 342.68<br>(271.39 to<br>429.12)              | 368.03<br>(284.68 to<br>481.52)              | 13.26<br>(11.71 to<br>15.00)         | 21.65<br>(16.84 to<br>27.08)           | 21.76<br>(17.16 to<br>26.54)          | 20.61<br>(15.83 to<br>26.04)           |
| Peripheral artery disease                           | 12.06<br>(9.66 to<br>16.17)                  | 33.37<br>(22.53 to<br>47.79)                 | 36.08<br>(25.22 to<br>51.90)                 | 32.05<br>(21.51 to<br>45.51)                 | 1.04<br>(0.83 to<br>1.37)            | 3.06<br>(1.95 to<br>4.44)              | 3.68<br>(2.40 to<br>5.32)             | 2.83<br>(1.76 to<br>4.12)              |
| Endocarditis                                        | 213.39<br>(172.65 to<br>252.10)              | 290.45<br>(215.37 to<br>384.14)              | 268.62<br>(201.03 to<br>349.98)              | 295.85<br>(219.78 to<br>387.88)              | 8.14<br>(6.77 to<br>9.60)            | 14.27<br>(10.33 to<br>19.42)           | 14.26<br>(10.48 to<br>19.30)          | 13.96<br>(10.08 to<br>18.92)           |
| Other cardiovascular and circulatory diseases       | 1,243.45<br>(798.91 to<br>1,475.79)          | 1,938.53<br>(1,162.36 to<br>2,619.01)        | 1,404.85<br>(861.39 to<br>1,863.20)          | 2,008.51<br>(1,219.90 to<br>2,737.64)        | 52.01<br>(33.74 to<br>61.15)         | 103.59<br>(62.67 to<br>138.18)         | 84.05<br>(52.29 to<br>110.07)         | 102.64<br>(63.22 to<br>138.87)         |
| <b>Chronic respiratory diseases</b>                 | <b>2,037.14</b><br>(1,835.71 to<br>2,351.88) | <b>2,668.06</b><br>(2,084.09 to<br>3,428.96) | <b>1,867.87</b><br>(1,530.52 to<br>2,315.13) | <b>3,376.92</b><br>(2,547.06 to<br>4,568.61) | <b>95.80</b><br>(85.59 to<br>112.21) | <b>154.53</b><br>(114.98 to<br>204.96) | <b>114.37</b><br>(90.35 to<br>143.39) | <b>189.25</b><br>(136.16 to<br>261.66) |
| Chronic obstructive pulmonary disease               | 1,190.78<br>(1,038.64 to<br>1,401.63)        | 1,714.02<br>(1,206.09 to<br>2,390.24)        | 992.22<br>(727.64 to<br>1,320.95)            | 2,390.18<br>(1,618.67 to<br>3,426.41)        | 65.45<br>(56.61 to<br>77.79)         | 108.42<br>(75.15 to<br>151.24)         | 68.20<br>(50.41 to<br>91.00)          | 143.47<br>(96.91 to<br>207.51)         |
| Pneumoconiosis                                      | 13.73<br>(10.99 to<br>16.98)                 | 21.17<br>(15.48 to<br>28.46)                 | 19.36<br>(14.13 to<br>25.73)                 | 21.25<br>(15.26 to<br>28.92)                 | 0.59<br>(0.47 to<br>0.72)            | 1.24<br>(0.84 to<br>1.82)              | 1.20<br>(0.83 to<br>1.71)             | 1.21<br>(0.82 to<br>1.77)              |
| Silicosis                                           | 1.70<br>(1.17 to<br>2.37)                    | 2.27<br>(1.32 to<br>3.70)                    | 1.81<br>(1.01 to<br>2.87)                    | 2.27<br>(1.33 to<br>3.67)                    | 0.08<br>(0.05 to<br>0.11)            | 0.13<br>(0.07 to<br>0.23)              | 0.11<br>(0.06 to<br>0.20)             | 0.13<br>(0.07 to<br>0.23)              |
| Asbestosis                                          | 4.88<br>(3.61 to<br>6.74)                    | 6.32<br>(4.39 to<br>9.14)                    | 6.77<br>(4.65 to<br>9.73)                    | 6.12<br>(4.29 to<br>8.93)                    | 0.18<br>(0.13 to<br>0.25)            | 0.32<br>(0.21 to<br>0.48)              | 0.37<br>(0.25 to<br>0.55)             | 0.30<br>(0.20 to<br>0.46)              |
| Coal workers pneumoconiosis                         | 0.91<br>(0.49 to<br>1.43)                    | 1.24<br>(0.60 to<br>2.15)                    | 0.86<br>(0.39 to<br>1.56)                    | 1.30<br>(0.63 to<br>2.33)                    | 0.04<br>(0.02 to<br>0.06)            | 0.07<br>(0.03 to<br>0.15)              | 0.05<br>(0.02 to<br>0.11)             | 0.07<br>(0.03 to<br>0.15)              |
| Other pneumoconiosis                                | 6.24<br>(4.73 to<br>7.80)                    | 11.34<br>(7.30 to<br>16.56)                  | 9.92<br>(6.38 to<br>14.21)                   | 11.56<br>(7.38 to<br>16.83)                  | 0.30<br>(0.22 to<br>0.37)            | 0.71<br>(0.41 to<br>1.14)              | 0.66<br>(0.39 to<br>1.05)             | 0.71<br>(0.41 to<br>1.15)              |
| Asthma                                              | 336.58<br>(276.67 to<br>410.02)              | 250.18<br>(160.76 to<br>401.96)              | 157.64<br>(100.04 to<br>242.43)              | 280.98<br>(177.97 to<br>454.26)              | 10.58<br>(8.76 to<br>12.82)          | 10.77<br>(6.85 to<br>17.69)            | 7.41<br>(4.69 to<br>11.45)            | 11.62<br>(7.20 to<br>18.90)            |
| Interstitial lung disease and pulmonary sarcoidosis | 186.96<br>(131.07 to<br>229.82)              | 232.83<br>(160.34 to<br>291.30)              | 286.43<br>(199.19 to<br>368.09)              | 221.60<br>(155.31 to<br>276.23)              | 7.26<br>(5.13 to<br>8.90)            | 11.23<br>(7.77 to<br>14.42)            | 14.67<br>(10.25 to<br>18.83)          | 10.39<br>(7.20 to<br>13.42)            |

|                                                                |                                                            |                                                            |                                                            |                                                            |                                                     |                                                      |                                                      |                                                      |
|----------------------------------------------------------------|------------------------------------------------------------|------------------------------------------------------------|------------------------------------------------------------|------------------------------------------------------------|-----------------------------------------------------|------------------------------------------------------|------------------------------------------------------|------------------------------------------------------|
| Other chronic respiratory diseases                             | 309.08<br>(230.73 to<br>444.96)                            | 449.87<br>(324.35 to<br>673.01)                            | 412.22<br>(305.27 to<br>604.71)                            | 462.91<br>(327.95 to<br>713.40)                            | 11.92<br>(8.76 to<br>17.80)                         | 22.88<br>(14.95 to<br>36.81)                         | 22.89<br>(15.67 to<br>35.50)                         | 22.57<br>(14.30 to<br>37.33)                         |
| <b>Cirrhosis and other chronic liver diseases</b>              | <b>2,767.90</b><br><b>(2,420.63 to</b><br><b>3,394.71)</b> | <b>3,429.58</b><br><b>(2,889.99 to</b><br><b>4,181.07)</b> | <b>2,814.33</b><br><b>(2,312.37 to</b><br><b>3,487.19)</b> | <b>3,623.04</b><br><b>(3,058.71 to</b><br><b>4,452.31)</b> | <b>97.03</b><br><b>(85.25 to</b><br><b>116.16)</b>  | <b>140.24</b><br><b>(119.70 to</b><br><b>169.72)</b> | <b>121.45</b><br><b>(100.44 to</b><br><b>148.23)</b> | <b>144.19</b><br><b>(121.76 to</b><br><b>173.15)</b> |
| Cirrhosis and other chronic liver diseases due to hepatitis B  | 318.41<br>(251.82 to<br>412.17)                            | 398.04<br>(309.34 to<br>521.71)                            | 366.77<br>(276.73 to<br>488.32)                            | 392.16<br>(302.13 to<br>510.08)                            | 11.71<br>(9.33 to<br>14.98)                         | 16.82<br>(13.13 to<br>21.99)                         | 16.15<br>(12.29 to<br>21.19)                         | 16.25<br>(12.55 to<br>21.26)                         |
| Cirrhosis and other chronic liver diseases due to hepatitis C  | 875.29<br>(738.86 to<br>1,106.58)                          | 1,108.38<br>(906.01 to<br>1,386.39)                        | 1,006.87<br>(803.90 to<br>1,251.33)                        | 1,096.98<br>(891.39 to<br>1,360.02)                        | 30.59<br>(26.12 to<br>37.69)                        | 44.23<br>(36.58 to<br>54.47)                         | 41.73<br>(33.60 to<br>51.05)                         | 42.99<br>(35.45 to<br>53.17)                         |
| Cirrhosis and other chronic liver diseases due to alcohol use  | 1,062.36<br>(901.43 to<br>1,331.75)                        | 1,389.79<br>(1,141.17 to<br>1,754.43)                      | 971.19<br>(779.59 to<br>1,236.36)                          | 1,598.49<br>(1,308.55 to<br>2,016.32)                      | 39.17<br>(33.51 to<br>48.27)                        | 58.26<br>(48.17 to<br>71.48)                         | 44.00<br>(35.71 to<br>54.75)                         | 64.60<br>(53.28 to<br>79.34)                         |
| Cirrhosis and other chronic liver diseases due to other causes | 511.84<br>(445.36 to<br>610.26)                            | 533.37<br>(448.67 to<br>652.55)                            | 469.51<br>(376.75 to<br>582.90)                            | 535.41<br>(448.38 to<br>654.72)                            | 15.57<br>(13.52 to<br>18.51)                        | 20.92<br>(17.40 to<br>25.47)                         | 19.57<br>(15.85 to<br>24.16)                         | 20.35<br>(16.86 to<br>25.00)                         |
| <b>Digestive diseases</b>                                      | <b>2,945.76</b><br><b>(2,486.20 to</b><br><b>3,573.00)</b> | <b>3,233.89</b><br><b>(2,579.76 to</b><br><b>4,138.09)</b> | <b>2,636.91</b><br><b>(2,102.06 to</b><br><b>3,372.05)</b> | <b>3,340.42</b><br><b>(2,626.52 to</b><br><b>4,309.11)</b> | <b>110.61</b><br><b>(95.16 to</b><br><b>135.04)</b> | <b>162.39</b><br><b>(125.39 to</b><br><b>207.98)</b> | <b>144.88</b><br><b>(113.68 to</b><br><b>183.03)</b> | <b>160.54</b><br><b>(122.36 to</b><br><b>207.01)</b> |
| Peptic ulcer disease                                           | 634.13<br>(526.54 to<br>782.46)                            | 541.65<br>(414.78 to<br>693.42)                            | 377.71<br>(283.50 to<br>500.97)                            | 551.99<br>(421.62 to<br>705.63)                            | 26.64<br>(22.43 to<br>32.51)                        | 29.17<br>(21.91 to<br>36.95)                         | 21.87<br>(16.21 to<br>28.43)                         | 28.86<br>(21.17 to<br>37.14)                         |

**Suriname**

| Cause                                      | YLLs (actual counts)                                       |                                                            |                                                            |                                                            | Deaths (actual counts)                               |                                                      |                                                      |                                                      |
|--------------------------------------------|------------------------------------------------------------|------------------------------------------------------------|------------------------------------------------------------|------------------------------------------------------------|------------------------------------------------------|------------------------------------------------------|------------------------------------------------------|------------------------------------------------------|
|                                            | 2016                                                       | 2040 Forecast                                              | 2040 Better Scenario                                       | 2040 Worse Scenario                                        | 2016                                                 | 2040 Forecast                                        | 2040 Better Scenario                                 | 2040 Worse Scenario                                  |
| Gastritis and duodenitis                   | 89.02<br>(71.89 to<br>110.08)                              | 118.40<br>(92.93 to<br>147.92)                             | 104.69<br>(78.64 to<br>134.37)                             | 116.75<br>(91.81 to<br>146.82)                             | 3.61<br>(2.96 to<br>4.39)                            | 5.97<br>(4.57 to<br>7.49)                            | 5.66<br>(4.31 to<br>7.27)                            | 5.69<br>(4.31 to<br>7.17)                            |
| Appendicitis                               | 150.25<br>(120.78 to<br>193.07)                            | 126.46<br>(98.51 to<br>162.61)                             | 97.45<br>(73.96 to<br>127.45)                              | 129.60<br>(99.72 to<br>166.38)                             | 4.11<br>(3.39 to<br>5.10)                            | 4.79<br>(3.73 to<br>6.01)                            | 3.98<br>(3.05 to<br>5.18)                            | 4.72<br>(3.65 to<br>6.01)                            |
| Paralytic ileus and intestinal obstruction | 874.23<br>(648.98 to<br>1,229.55)                          | 905.67<br>(727.05 to<br>1,244.22)                          | 858.01<br>(689.01 to<br>1,152.72)                          | 906.35<br>(716.16 to<br>1,246.90)                          | 28.22<br>(23.04 to<br>38.56)                         | 44.72<br>(33.84 to<br>62.92)                         | 46.89<br>(36.62 to<br>65.29)                         | 42.31<br>(31.89 to<br>60.06)                         |
| Inguinal, femoral, and abdominal hernia    | 144.90<br>(106.82 to<br>200.64)                            | 125.12<br>(92.52 to<br>179.98)                             | 111.15<br>(80.13 to<br>160.54)                             | 123.89<br>(92.55 to<br>180.73)                             | 5.80<br>(4.40 to<br>8.02)                            | 6.45<br>(4.52 to<br>9.36)                            | 6.24<br>(4.36 to<br>9.42)                            | 6.14<br>(4.30 to<br>8.88)                            |
| Inflammatory bowel disease                 | 135.17<br>(105.38 to<br>174.28)                            | 125.80<br>(99.44 to<br>154.25)                             | 125.88<br>(98.67 to<br>154.07)                             | 123.27<br>(97.25 to<br>152.51)                             | 4.70<br>(3.77 to<br>5.49)                            | 6.05<br>(4.57 to<br>7.53)                            | 6.58<br>(5.02 to<br>8.18)                            | 5.69<br>(4.31 to<br>7.09)                            |
| Vascular intestinal disorders              | 65.03<br>(55.12 to<br>86.20)                               | 102.25<br>(82.60 to<br>135.94)                             | 98.92<br>(79.38 to<br>132.34)                              | 98.50<br>(79.33 to<br>130.30)                              | 3.47<br>(2.94 to<br>4.51)                            | 6.64<br>(4.96 to<br>8.70)                            | 6.81<br>(5.26 to<br>8.99)                            | 6.22<br>(4.61 to<br>8.20)                            |
| Gallbladder and biliary diseases           | 230.36<br>(185.09 to<br>321.13)                            | 369.23<br>(203.12 to<br>660.81)                            | 245.22<br>(141.12 to<br>437.74)                            | 415.83<br>(221.32 to<br>752.04)                            | 10.15<br>(8.08 to<br>14.34)                          | 19.98<br>(10.74 to<br>35.89)                         | 14.32<br>(8.11 to<br>26.02)                          | 21.74<br>(11.40 to<br>40.24)                         |
| Pancreatitis                               | 303.07<br>(235.48 to<br>382.63)                            | 442.87<br>(193.80 to<br>935.41)                            | 288.43<br>(138.70 to<br>600.87)                            | 502.80<br>(213.17 to<br>1,076.28)                          | 9.04<br>(7.26 to<br>11.58)                           | 15.50<br>(7.19 to<br>32.78)                          | 10.77<br>(5.47 to<br>21.34)                          | 17.15<br>(7.68 to<br>37.26)                          |
| Other digestive diseases                   | 319.61<br>(267.04 to<br>399.55)                            | 376.43<br>(301.84 to<br>465.58)                            | 329.43<br>(260.27 to<br>412.38)                            | 371.43<br>(296.20 to<br>463.34)                            | 14.86<br>(12.49 to<br>17.96)                         | 23.13<br>(16.82 to<br>29.68)                         | 21.76<br>(16.19 to<br>27.91)                         | 22.02<br>(16.04 to<br>28.60)                         |
| <b>Neurological disorders</b>              | <b>2,316.20</b><br><b>(2,058.88 to</b><br><b>2,617.58)</b> | <b>4,114.69</b><br><b>(3,202.45 to</b><br><b>5,407.07)</b> | <b>4,053.91</b><br><b>(3,271.35 to</b><br><b>5,134.05)</b> | <b>4,114.76</b><br><b>(3,146.61 to</b><br><b>5,499.79)</b> | <b>152.11</b><br><b>(131.22 to</b><br><b>178.19)</b> | <b>320.91</b><br><b>(220.05 to</b><br><b>454.89)</b> | <b>348.39</b><br><b>(253.64 to</b><br><b>465.84)</b> | <b>307.93</b><br><b>(207.13 to</b><br><b>449.65)</b> |
| Alzheimer's disease and other dementias    | 1,183.04<br>(984.12 to<br>1,440.67)                        | 2,637.71<br>(1,815.05 to<br>3,894.15)                      | 2,706.16<br>(1,959.68 to<br>3,785.34)                      | 2,585.66<br>(1,732.07 to<br>3,939.96)                      | 117.59<br>(97.76 to<br>142.94)                       | 260.85<br>(165.28 to<br>389.89)                      | 284.36<br>(194.16 to<br>395.82)                      | 249.30<br>(153.36 to<br>388.64)                      |
| Parkinson's disease                        | 127.80<br>(95.85 to<br>166.30)                             | 290.91<br>(210.11 to<br>388.81)                            | 373.95<br>(277.31 to<br>489.40)                            | 264.07<br>(189.76 to<br>355.74)                            | 10.27<br>(7.84 to<br>13.39)                          | 24.04<br>(16.41 to<br>33.01)                         | 32.14<br>(23.12 to<br>42.78)                         | 21.46<br>(14.36 to<br>29.69)                         |

|                              |                                                      |                                                        |                                                        |                                                        |                                                   |                                                   |                                                   |                                                   |
|------------------------------|------------------------------------------------------|--------------------------------------------------------|--------------------------------------------------------|--------------------------------------------------------|---------------------------------------------------|---------------------------------------------------|---------------------------------------------------|---------------------------------------------------|
| Epilepsy                     | 669.49<br>(581.40 to<br>777.94)                      | 796.35<br>(549.14 to<br>1,153.64)                      | 558.74<br>(398.61 to<br>785.03)                        | 880.83<br>(600.58 to<br>1,287.13)                      | 15.45<br>(13.60 to<br>17.67)                      | 23.24<br>(16.43 to<br>33.02)                      | 17.46<br>(12.75 to<br>24.02)                      | 24.96<br>(17.16 to<br>35.78)                      |
| Multiple sclerosis           | 23.93<br>(19.64 to<br>35.06)                         | 28.10<br>(22.10 to<br>40.56)                           | 28.38<br>(22.53 to<br>41.21)                           | 27.73<br>(21.90 to<br>39.98)                           | 0.69<br>(0.58 to<br>1.01)                         | 0.92<br>(0.73 to<br>1.31)                         | 0.95<br>(0.76 to<br>1.38)                         | 0.89<br>(0.71 to<br>1.28)                         |
| Motor neuron disease         | 62.09<br>(53.40 to<br>72.20)                         | 79.39<br>(67.46 to<br>91.74)                           | 85.82<br>(72.39 to<br>99.48)                           | 77.07<br>(65.55 to<br>89.27)                           | 1.99<br>(1.76 to<br>2.23)                         | 3.23<br>(2.73 to<br>3.71)                         | 3.61<br>(3.03 to<br>4.20)                         | 3.07<br>(2.61 to<br>3.54)                         |
| Other neurological disorders | 249.83<br>(217.34 to<br>289.25)                      | 282.23<br>(239.68 to<br>327.76)                        | 300.86<br>(256.49 to<br>347.75)                        | 279.40<br>(238.07 to<br>325.07)                        | 6.12<br>(5.48 to<br>6.98)                         | 8.64<br>(7.50 to<br>9.88)                         | 9.86<br>(8.52 to<br>11.32)                        | 8.26<br>(7.11 to<br>9.52)                         |
| <b>Mental disorders</b>      | <b>634.15</b><br><b>(520.20 to</b><br><b>866.33)</b> | <b>840.79</b><br><b>(667.33 to</b><br><b>1,153.16)</b> | <b>826.74</b><br><b>(660.07 to</b><br><b>1,138.65)</b> | <b>852.07</b><br><b>(678.09 to</b><br><b>1,171.56)</b> | <b>18.18</b><br><b>(14.90 to</b><br><b>24.97)</b> | <b>27.56</b><br><b>(22.37 to</b><br><b>37.91)</b> | <b>28.46</b><br><b>(23.01 to</b><br><b>39.52)</b> | <b>27.35</b><br><b>(22.18 to</b><br><b>37.48)</b> |
| Alcohol use disorders        | 421.89<br>(323.55 to<br>643.28)                      | 452.79<br>(327.30 to<br>716.74)                        | 417.22<br>(297.90 to<br>664.63)                        | 469.39<br>(337.40 to<br>741.17)                        | 12.47<br>(9.71 to<br>18.80)                       | 15.39<br>(11.38 to<br>24.10)                      | 14.83<br>(10.80 to<br>23.64)                      | 15.64<br>(11.61 to<br>24.42)                      |
| Drug use disorders           | 210.40<br>(166.66 to<br>263.98)                      | 385.51<br>(304.88 to<br>486.36)                        | 406.96<br>(322.84 to<br>513.86)                        | 380.17<br>(300.69 to<br>478.68)                        | 5.67<br>(4.52 to<br>7.00)                         | 12.12<br>(9.65 to<br>15.39)                       | 13.57<br>(10.79 to<br>17.10)                      | 11.66<br>(9.27 to<br>14.89)                       |
| Opioid use disorders         | 108.87<br>(83.65 to<br>148.91)                       | 168.64<br>(126.13 to<br>243.36)                        | 171.20<br>(126.90 to<br>245.03)                        | 166.87<br>(124.67 to<br>240.78)                        | 2.68<br>(2.07 to<br>3.73)                         | 4.84<br>(3.68 to<br>7.01)                         | 5.16<br>(3.91 to<br>7.50)                         | 4.69<br>(3.56 to<br>6.82)                         |
| Cocaine use disorders        | 21.15<br>(12.92 to<br>29.59)                         | 43.15<br>(25.54 to<br>62.31)                           | 42.08<br>(24.77 to<br>60.63)                           | 43.20<br>(26.20 to<br>61.87)                           | 0.54<br>(0.33 to<br>0.76)                         | 1.21<br>(0.72 to<br>1.73)                         | 1.20<br>(0.71 to<br>1.73)                         | 1.20<br>(0.72 to<br>1.72)                         |
| Amphetamine use disorders    | 9.62<br>(6.85 to<br>13.41)                           | 31.37<br>(21.57 to<br>44.96)                           | 30.53<br>(21.15 to<br>44.92)                           | 31.61<br>(21.39 to<br>46.04)                           | 0.24<br>(0.18 to<br>0.33)                         | 0.88<br>(0.62 to<br>1.24)                         | 0.90<br>(0.63 to<br>1.30)                         | 0.87<br>(0.60 to<br>1.22)                         |
| Other drug use disorders     | 70.76<br>(51.57 to<br>92.75)                         | 142.35<br>(104.49 to<br>196.70)                        | 163.15<br>(119.23 to<br>227.61)                        | 138.49<br>(100.39 to<br>192.16)                        | 2.20<br>(1.65 to<br>2.79)                         | 5.19<br>(3.87 to<br>6.89)                         | 6.32<br>(4.73 to<br>8.40)                         | 4.90<br>(3.65 to<br>6.50)                         |
| Eating disorders             | 1.86<br>(1.33 to<br>3.47)                            | 2.49<br>(1.66 to<br>4.54)                              | 2.55<br>(1.68 to<br>4.71)                              | 2.51<br>(1.67 to<br>4.60)                              | 0.04<br>(0.03 to<br>0.06)                         | 0.05<br>(0.03 to<br>0.09)                         | 0.05<br>(0.03 to<br>0.09)                         | 0.05<br>(0.03 to<br>0.09)                         |

**Suriname**

| Cause                                               | YLLs (actual counts)                                          |                                                               |                                                              |                                                               | Deaths (actual counts)                               |                                                          |                                                        |                                                          |
|-----------------------------------------------------|---------------------------------------------------------------|---------------------------------------------------------------|--------------------------------------------------------------|---------------------------------------------------------------|------------------------------------------------------|----------------------------------------------------------|--------------------------------------------------------|----------------------------------------------------------|
|                                                     | 2016                                                          | 2040 Forecast                                                 | 2040 Better Scenario                                         | 2040 Worse Scenario                                           | 2016                                                 | 2040 Forecast                                            | 2040 Better Scenario                                   | 2040 Worse Scenario                                      |
|                                                     | <b>11,464.47</b><br><b>(10,536.06 to</b><br><b>12,492.91)</b> | <b>23,100.72</b><br><b>(13,178.69 to</b><br><b>42,464.27)</b> | <b>15,717.29</b><br><b>(9,213.56 to</b><br><b>31,385.18)</b> | <b>24,598.17</b><br><b>(14,148.82 to</b><br><b>43,721.60)</b> | <b>517.36</b><br><b>(475.00 to</b><br><b>560.54)</b> | <b>1,319.27</b><br><b>(771.91 to</b><br><b>1,928.77)</b> | <b>960.02</b><br><b>(578.50 to</b><br><b>1,928.77)</b> | <b>1,364.33</b><br><b>(807.50 to</b><br><b>2,471.62)</b> |
| Diabetes, urogenital, blood, and endocrine diseases | 5,034.18<br>(4,567.26 to<br>5,501.55)                         | 7,595.21<br>(5,331.06 to<br>10,247.77)                        | 5,183.42<br>(3,695.97 to<br>6,892.99)                        | 8,384.43<br>(5,758.98 to<br>11,451.92)                        | 249.59<br>(224.89 to<br>274.88)                      | 449.67<br>(322.32 to<br>584.03)                          | 329.04<br>(242.57 to<br>423.40)                        | 476.76<br>(337.67 to<br>627.32)                          |
| Diabetes mellitus                                   | 4.23<br>(3.51 to<br>5.28)                                     | 6.82<br>(5.11 to<br>9.75)                                     | 5.62<br>(4.17 to<br>7.99)                                    | 7.08<br>(5.25 to<br>10.22)                                    | 0.11<br>(0.09 to<br>0.13)                            | 0.20<br>(0.15 to<br>0.27)                                | 0.18<br>(0.13 to<br>0.25)                              | 0.19<br>(0.15 to<br>0.27)                                |
| Acute glomerulonephritis                            | 4,295.17<br>(3,854.04 to<br>4,829.12)                         | 12,814.04<br>(3,646.73 to<br>32,142.57)                       | 8,008.02<br>(2,360.08 to<br>23,527.52)                       | 13,554.13<br>(3,936.91 to<br>33,258.30)                       | 187.42<br>(168.09 to<br>208.90)                      | 727.84<br>(197.91 to<br>1,935.88)                        | 484.05<br>(136.47 to<br>1,481.02)                      | 754.24<br>(207.71 to<br>1,921.43)                        |
| Chronic kidney disease                              | 1,535.20<br>(1,298.19 to<br>1,810.84)                         | 5,483.17<br>(1,412.90 to<br>14,136.96)                        | 3,405.98<br>(892.88 to<br>10,828.29)                         | 5,784.37<br>(1,523.47 to<br>14,535.89)                        | 68.52<br>(57.81 to<br>80.51)                         | 296.06<br>(74.67 to<br>797.86)                           | 194.67<br>(49.64 to<br>614.80)                         | 306.83<br>(78.75 to<br>794.74)                           |
| Chronic kidney disease due to diabetes mellitus     | 483.97<br>(390.91 to<br>587.62)                               | 1,897.49<br>(473.12 to<br>5,460.70)                           | 1,258.02<br>(316.42 to<br>4,040.20)                          | 1,977.04<br>(502.88 to<br>5,509.33)                           | 31.90<br>(26.01 to<br>38.72)                         | 138.13<br>(39.99 to<br>383.82)                           | 98.04<br>(28.55 to<br>301.93)                          | 140.88<br>(41.03 to<br>377.50)                           |
| Chronic kidney disease due to hypertension          | 1,295.87<br>(1,088.73 to<br>1,534.25)                         | 2,966.17<br>(957.23 to<br>7,590.33)                           | 1,814.85<br>(596.22 to<br>5,408.38)                          | 3,171.82<br>(1,008.83 to<br>7,617.20)                         | 47.93<br>(39.71 to<br>57.39)                         | 185.83<br>(42.07 to<br>425.30)                           | 100.54<br>(27.46 to<br>318.68)                         | 163.33<br>(45.30 to<br>424.69)                           |
| Chronic kidney disease due to glomerulonephritis    | 980.12<br>(811.57 to<br>1,168.55)                             | 2,467.22<br>(783.09 to<br>6,253.77)                           | 1,529.17<br>(491.79 to<br>4,398.60)                          | 2,620.90<br>(843.92 to<br>6,379.47)                           | 39.07<br>(32.45 to<br>46.97)                         | 137.82<br>(40.19 to<br>360.44)                           | 90.80<br>(26.48 to<br>276.73)                          | 143.21<br>(42.59 to<br>362.36)                           |

|                                                   |                                   |                                       |                                       |                                       |                              |                               |                               |                               |
|---------------------------------------------------|-----------------------------------|---------------------------------------|---------------------------------------|---------------------------------------|------------------------------|-------------------------------|-------------------------------|-------------------------------|
| Urinary diseases and male infertility             | 957.26<br>(852.35 to<br>1,080.19) | 1,389.96<br>(1,203.28 to<br>1,588.62) | 1,385.79<br>(1,179.76 to<br>1,600.85) | 1,335.98<br>(1,149.45 to<br>1,529.41) | 48.36<br>(43.32 to<br>54.02) | 92.01<br>(71.50 to<br>110.50) | 99.59<br>(79.35 to<br>117.95) | 84.94<br>(64.73 to<br>103.23) |
| Urinary tract infections                          | 850.43<br>(746.24 to<br>968.24)   | 1,273.99<br>(1,095.28 to<br>1,457.02) | 1,283.64<br>(1,090.92 to<br>1,487.18) | 1,223.88<br>(1,044.84 to<br>1,402.90) | 43.01<br>(37.91 to<br>48.31) | 84.77<br>(65.19 to<br>102.04) | 92.68<br>(74.36 to<br>110.29) | 78.13<br>(59.15 to<br>95.56)  |
| Urolithiasis                                      | 33.12<br>(13.39 to<br>48.15)      | 34.68<br>(14.93 to<br>53.69)          | 32.01<br>(14.24 to<br>50.55)          | 33.78<br>(14.43 to<br>51.98)          | 1.46<br>(0.63 to<br>2.16)    | 1.72<br>(0.79 to<br>2.71)     | 1.70<br>(0.84 to<br>2.62)     | 1.63<br>(0.74 to<br>2.57)     |
| Other urinary diseases                            | 73.71<br>(55.22 to<br>112.09)     | 81.30<br>(56.56 to<br>125.99)         | 70.14<br>(46.69 to<br>110.17)         | 79.32<br>(55.24 to<br>124.14)         | 3.89<br>(2.80 to<br>6.00)    | 5.52<br>(3.41 to<br>8.90)     | 5.21<br>(3.20 to<br>8.45)     | 5.18<br>(3.13 to<br>8.37)     |
| Gynecological diseases                            | 2.59<br>(1.89 to<br>3.25)         | 2.68<br>(1.71 to<br>3.98)             | 1.92<br>(1.19 to<br>2.89)             | 2.77<br>(1.75 to<br>4.03)             | 0.06<br>(0.05 to<br>0.08)    | 0.08<br>(0.06 to<br>0.11)     | 0.06<br>(0.04 to<br>0.09)     | 0.08<br>(0.05 to<br>0.11)     |
| Uterine fibroids                                  | 0.05<br>(0.03 to<br>0.08)         | 0.07<br>(0.03 to<br>0.13)             | 0.05<br>(0.02 to<br>0.09)             | 0.07<br>(0.03 to<br>0.14)             | 0.00<br>(0.00 to<br>0.00)    | 0.00<br>(0.00 to<br>0.01)     | 0.00<br>(0.00 to<br>0.00)     | 0.00<br>(0.00 to<br>0.01)     |
| Polycystic ovarian syndrome                       | 0.53<br>(0.23 to<br>1.07)         | 0.35<br>(0.12 to<br>0.79)             | 0.21<br>(0.06 to<br>0.51)             | 0.38<br>(0.12 to<br>0.84)             | 0.01<br>(0.01 to<br>0.02)    | 0.01<br>(0.00 to<br>0.02)     | 0.00<br>(0.00 to<br>0.01)     | 0.00<br>(0.00 to<br>0.02)     |
| Endometriosis                                     | 0.02<br>(0.01 to<br>0.04)         | 0.02<br>(0.01 to<br>0.05)             | 0.01<br>(0.01 to<br>0.04)             | 0.02<br>(0.01 to<br>0.05)             | 0.00<br>(0.00 to<br>0.00)    | 0.00<br>(0.00 to<br>0.00)     | 0.00<br>(0.00 to<br>0.00)     | 0.00<br>(0.00 to<br>0.00)     |
| Genital prolapse                                  | 0.03<br>(0.02 to<br>0.05)         | 0.03<br>(0.02 to<br>0.06)             | 0.02<br>(0.01 to<br>0.04)             | 0.04<br>(0.02 to<br>0.06)             | 0.00<br>(0.00 to<br>0.00)    | 0.00<br>(0.00 to<br>0.00)     | 0.00<br>(0.00 to<br>0.00)     | 0.00<br>(0.00 to<br>0.00)     |
| Other gynecological diseases                      | 1.96<br>(1.06 to<br>2.63)         | 2.20<br>(1.27 to<br>3.34)             | 1.62<br>(0.96 to<br>2.51)             | 2.26<br>(1.27 to<br>3.44)             | 0.05<br>(0.03 to<br>0.06)    | 0.07<br>(0.05 to<br>0.10)     | 0.05<br>(0.03 to<br>0.08)     | 0.07<br>(0.04 to<br>0.09)     |
| Hemoglobinopathies and hemolytic anemias          | 426.61<br>(336.05 to<br>500.69)   | 453.98<br>(339.53 to<br>546.14)       | 367.88<br>(275.78 to<br>455.21)       | 462.66<br>(348.77 to<br>557.50)       | 10.64<br>(8.47 to<br>12.18)  | 16.09<br>(12.50 to<br>19.11)  | 13.69<br>(10.49 to<br>16.85)  | 15.88<br>(12.27 to<br>18.89)  |
| Thalassemias                                      | 21.98<br>(7.04 to<br>40.18)       | 5.94<br>(1.96 to<br>11.04)            | 6.03<br>(2.09 to<br>10.96)            | 6.42<br>(2.05 to<br>12.06)            | 0.26<br>(0.09 to<br>0.48)    | 0.07<br>(0.02 to<br>0.13)     | 0.07<br>(0.03 to<br>0.13)     | 0.08<br>(0.03 to<br>0.14)     |
| Sickle cell disorders                             | 308.43<br>(235.86 to<br>370.26)   | 289.75<br>(209.11 to<br>358.52)       | 232.82<br>(168.55 to<br>295.07)       | 299.19<br>(216.69 to<br>371.97)       | 5.60<br>(4.28 to<br>6.61)    | 6.78<br>(4.90 to<br>8.30)     | 5.55<br>(3.95 to<br>7.07)     | 6.92<br>(4.98 to<br>8.47)     |
| G6PD deficiency                                   | 48.42<br>(35.68 to<br>61.31)      | 90.42<br>(64.50 to<br>117.55)         | 70.43<br>(48.47 to<br>94.52)          | 91.51<br>(65.54 to<br>118.05)         | 1.35<br>(1.00 to<br>1.68)    | 3.58<br>(2.58 to<br>4.60)     | 2.92<br>(2.06 to<br>3.85)     | 3.54<br>(2.56 to<br>4.48)     |
| Other hemoglobinopathies and hemolytic anemias    | 47.78<br>(37.75 to<br>57.20)      | 67.86<br>(52.04 to<br>85.05)          | 58.60<br>(44.65 to<br>74.80)          | 65.53<br>(50.08 to<br>83.56)          | 3.44<br>(2.72 to<br>4.11)    | 5.66<br>(4.08 to<br>7.27)     | 5.14<br>(3.84 to<br>6.63)     | 5.34<br>(3.74 to<br>6.92)     |
| Endocrine, metabolic, blood, and immune disorders | 744.42<br>(581.37 to<br>1,087.11) | 838.02<br>(663.50 to<br>1,197.31)     | 764.64<br>(604.38 to<br>1,092.83)     | 851.13<br>(664.74 to<br>1,213.56)     | 21.18<br>(17.63 to<br>30.21) | 33.39<br>(26.11 to<br>46.64)  | 33.42<br>(26.24 to<br>46.02)  | 32.23<br>(25.08 to<br>45.18)  |

| Cause                           | Suriname                              |                                       |                                       |                                       | Suriname                      |                                |                                |                                |
|---------------------------------|---------------------------------------|---------------------------------------|---------------------------------------|---------------------------------------|-------------------------------|--------------------------------|--------------------------------|--------------------------------|
|                                 | YLLs (actual counts)                  |                                       |                                       |                                       | Deaths (actual counts)        |                                |                                |                                |
|                                 | 2016                                  | 2040 Forecast                         | 2040 Better Scenario                  | 2040 Worse Scenario                   | 2016                          | 2040 Forecast                  | 2040 Better Scenario           | 2040 Worse Scenario            |
| Musculoskeletal disorders       | 383.06<br>(249.89 to<br>453.49)       | 487.10<br>(323.25 to<br>588.65)       | 506.22<br>(334.22 to<br>616.21)       | 477.44<br>(314.68 to<br>577.61)       | 9.86<br>(6.69 to<br>11.43)    | 16.30<br>(11.61 to<br>19.60)   | 17.57<br>(12.53 to<br>21.13)   | 15.59<br>(10.75 to<br>18.69)   |
| Rheumatoid arthritis            | 18.88<br>(14.08 to<br>24.73)          | 36.89<br>(25.63 to<br>49.91)          | 30.20<br>(20.40 to<br>41.51)          | 36.51<br>(25.63 to<br>49.46)          | 0.84<br>(0.63 to<br>1.10)     | 2.20<br>(1.51 to<br>2.98)      | 1.93<br>(1.28 to<br>2.67)      | 2.11<br>(1.45 to<br>2.85)      |
| Other musculoskeletal disorders | 364.19<br>(232.65 to<br>432.00)       | 450.21<br>(292.68 to<br>550.50)       | 476.02<br>(310.26 to<br>583.94)       | 440.93<br>(282.42 to<br>540.44)       | 9.02<br>(5.95 to<br>10.53)    | 14.10<br>(9.61 to<br>17.11)    | 15.65<br>(10.84 to<br>19.06)   | 13.48<br>(9.19 to<br>16.32)    |
| Other non-communicable diseases | 5,949.02<br>(3,506.19 to<br>9,344.67) | 4,477.94<br>(2,533.41 to<br>6,744.65) | 3,492.74<br>(1,931.86 to<br>5,318.15) | 4,887.72<br>(2,775.97 to<br>7,526.80) | 97.76<br>(55.26 to<br>141.85) | 120.07<br>(54.25 to<br>183.63) | 115.47<br>(49.22 to<br>179.71) | 119.30<br>(55.58 to<br>183.42) |

|                                               |                                                 |                                                 |                                                |                                                 |                                        |                                        |                                        |                                        |
|-----------------------------------------------|-------------------------------------------------|-------------------------------------------------|------------------------------------------------|-------------------------------------------------|----------------------------------------|----------------------------------------|----------------------------------------|----------------------------------------|
| Congenital birth defects                      | 4,887.35<br>(2,815.82 to<br>7,843.38)           | 3,018.75<br>(1,743.40 to<br>5,045.92)           | 2,089.88<br>(1,179.75 to<br>3,514.60)          | 3,436.80<br>(1,964.34 to<br>5,755.41)           | 59.38<br>(35.65 to<br>93.79)           | 38.18<br>(23.07 to<br>61.92)           | 26.80<br>(15.91 to<br>43.23)           | 43.08<br>(25.61 to<br>70.39)           |
| Neural tube defects                           | 472.70<br>(231.15 to<br>872.46)                 | 154.36<br>(65.23 to<br>316.01)                  | 89.73<br>(35.09 to<br>189.05)                  | 182.53<br>(74.91 to<br>376.53)                  | 5.53<br>(2.74 to<br>10.17)             | 1.85<br>(0.81 to<br>3.72)              | 1.08<br>(0.45 to<br>2.23)              | 2.18<br>(0.95 to<br>4.44)              |
| Congenital heart anomalies                    | 2,133.15<br>(1,241.14 to<br>3,389.76)           | 1,398.67<br>(816.01 to<br>2,293.50)             | 973.49<br>(559.46 to<br>1,612.74)              | 1,578.48<br>(908.61 to<br>2,620.33)             | 26.46<br>(16.10 to<br>41.19)           | 18.14<br>(11.13 to<br>28.73)           | 12.82<br>(7.75 to<br>20.39)            | 20.27<br>(12.10 to<br>32.56)           |
| Orofacial clefts                              | 6.30<br>(2.13 to<br>14.73)                      | 3.09<br>(1.02 to<br>7.41)                       | 1.65<br>(0.56 to<br>3.99)                      | 3.69<br>(1.18 to<br>9.09)                       | 0.07<br>(0.02 to<br>0.17)              | 0.04<br>(0.01 to<br>0.09)              | 0.02<br>(0.01 to<br>0.05)              | 0.04<br>(0.01 to<br>0.11)              |
| Down syndrome                                 | 81.57<br>(50.28 to<br>126.64)                   | 63.30<br>(41.31 to<br>93.56)                    | 49.27<br>(32.82 to<br>72.13)                   | 69.30<br>(43.98 to<br>104.31)                   | 1.25<br>(0.83 to<br>1.78)              | 1.14<br>(0.78 to<br>1.55)              | 0.91<br>(0.65 to<br>1.22)              | 1.21<br>(0.83 to<br>1.69)              |
| Other chromosomal abnormalities               | 84.30<br>(31.81 to<br>175.45)                   | 70.99<br>(27.31 to<br>154.44)                   | 51.51<br>(20.08 to<br>111.45)                  | 81.37<br>(31.16 to<br>180.84)                   | 0.99<br>(0.38 to<br>2.06)              | 0.85<br>(0.33 to<br>1.82)              | 0.62<br>(0.24 to<br>1.32)              | 0.97<br>(0.38 to<br>2.13)              |
| Congenital musculoskeletal and limb anomalies | 62.90<br>(33.43 to<br>104.14)                   | 56.49<br>(27.04 to<br>102.30)                   | 41.09<br>(19.17 to<br>74.49)                   | 64.23<br>(30.48 to<br>115.15)                   | 0.75<br>(0.41 to<br>1.23)              | 0.69<br>(0.35 to<br>1.22)              | 0.51<br>(0.26 to<br>0.90)              | 0.78<br>(0.39 to<br>1.38)              |
| Urogenital congenital anomalies               | 100.71<br>(52.00 to<br>171.78)                  | 70.06<br>(37.49 to<br>120.93)                   | 52.47<br>(27.88 to<br>92.05)                   | 78.40<br>(41.33 to<br>136.32)                   | 1.33<br>(0.74 to<br>2.17)              | 1.03<br>(0.61 to<br>1.63)              | 0.79<br>(0.47 to<br>1.28)              | 1.13<br>(0.66 to<br>1.83)              |
| Digestive congenital anomalies                | 1,260.48<br>(557.89 to<br>2,271.12)             | 738.13<br>(312.86 to<br>1,378.21)               | 500.85<br>(208.61 to<br>956.20)                | 850.11<br>(366.61 to<br>1,614.54)               | 14.76<br>(6.59 to<br>26.51)            | 8.70<br>(3.74 to<br>16.13)             | 5.91<br>(2.49 to<br>11.20)             | 10.00<br>(4.35 to<br>18.86)            |
| Other congenital birth defects                | 685.23<br>(361.40 to<br>1,145.65)               | 463.66<br>(244.19 to<br>836.11)                 | 329.82<br>(171.50 to<br>584.16)                | 528.70<br>(271.60 to<br>943.29)                 | 8.23<br>(4.43 to<br>13.59)             | 5.74<br>(3.18 to<br>10.05)             | 4.13<br>(2.23 to<br>7.10)              | 6.50<br>(3.50 to<br>11.36)             |
| Skin and subcutaneous diseases                | 608.08<br>(164.10 to<br>957.62)                 | 1,212.52<br>(333.69 to<br>1,952.22)             | 1,224.56<br>(337.22 to<br>1,946.63)            | 1,167.65<br>(321.85 to<br>1,885.78)             | 33.11<br>(8.89 to<br>53.20)            | 79.03<br>(21.02 to<br>134.93)          | 86.61<br>(23.54 to<br>146.13)          | 72.93<br>(19.31 to<br>126.69)          |
| Cellulitis                                    | 40.38<br>(11.13 to<br>63.29)                    | 106.03<br>(32.05 to<br>162.86)                  | 120.81<br>(37.08 to<br>183.58)                 | 101.29<br>(30.70 to<br>156.42)                  | 1.76<br>(0.49 to<br>2.66)              | 5.83<br>(1.68 to<br>9.23)              | 7.25<br>(2.14 to<br>11.39)             | 5.34<br>(1.55 to<br>8.70)              |
| Pyoderma                                      | 243.11<br>(46.99 to<br>410.70)                  | 541.95<br>(115.83 to<br>912.80)                 | 517.72<br>(113.15 to<br>872.35)                | 531.96<br>(113.14 to<br>900.28)                 | 10.58<br>(2.03 to<br>17.68)            | 31.85<br>(6.48 to<br>56.22)            | 33.42<br>(6.98 to<br>58.11)            | 29.79<br>(5.96 to<br>52.92)            |
| Decubitus ulcer                               | 297.14<br>(82.63 to<br>470.55)                  | 527.80<br>(147.93 to<br>888.27)                 | 548.99<br>(157.39 to<br>931.96)                | 497.99<br>(139.41 to<br>840.32)                 | 19.84<br>(5.44 to<br>32.47)            | 39.88<br>(10.36 to<br>72.14)           | 44.29<br>(11.70 to<br>79.08)           | 36.41<br>(9.40 to<br>66.44)            |
| Other skin and subcutaneous diseases          | 27.45<br>(6.75 to<br>48.91)                     | 36.74<br>(9.76 to<br>64.43)                     | 37.04<br>(9.92 to<br>63.85)                    | 36.40<br>(9.64 to<br>64.95)                     | 0.94<br>(0.23 to<br>1.62)              | 1.48<br>(0.38 to<br>2.60)              | 1.64<br>(0.43 to<br>2.85)              | 1.40<br>(0.36 to<br>2.45)              |
| Sudden infant death syndrome                  | 453.59<br>(208.73 to<br>826.02)                 | 246.67<br>(102.35 to<br>495.12)                 | 178.30<br>(72.75 to<br>365.67)                 | 283.26<br>(119.14 to<br>581.71)                 | 5.26<br>(2.42 to<br>9.59)              | 2.86<br>(1.19 to<br>5.75)              | 2.07<br>(0.84 to<br>4.24)              | 3.29<br>(1.38 to<br>6.75)              |
| <b>Injuries</b>                               | <b>19,824.46</b><br>(17,635.59 to<br>22,171.44) | <b>15,332.19</b><br>(11,523.37 to<br>20,355.94) | <b>12,322.12</b><br>(9,538.69 to<br>16,560.50) | <b>18,904.45</b><br>(14,043.00 to<br>25,054.84) | <b>436.83</b><br>(392.09 to<br>477.69) | <b>417.22</b><br>(334.72 to<br>523.64) | <b>358.50</b><br>(291.56 to<br>451.85) | <b>487.84</b><br>(385.27 to<br>614.56) |
| <b>Transport injuries</b>                     | <b>5,488.37</b><br>(4,841.99 to<br>6,246.66)    | <b>2,239.87</b><br>(1,480.50 to<br>3,590.70)    | <b>1,536.63</b><br>(1,046.34 to<br>2,325.33)   | <b>5,138.96</b><br>(3,456.91 to<br>8,056.23)    | <b>117.52</b><br>(104.32 to<br>131.78) | <b>63.35</b><br>(44.01 to<br>94.74)    | <b>47.74</b><br>(34.07 to<br>67.70)    | <b>127.33</b><br>(88.39 to<br>192.21)  |
| Road injuries                                 | 5,188.58<br>(4,588.32 to<br>5,879.19)           | 1,892.13<br>(1,235.12 to<br>3,057.81)           | 1,275.60<br>(864.33 to<br>1,964.33)            | 4,772.65<br>(3,190.38 to<br>7,553.43)           | 110.40<br>(97.85 to<br>123.73)         | 52.63<br>(36.25 to<br>79.13)           | 39.06<br>(27.86 to<br>55.88)           | 116.39<br>(80.47 to<br>177.09)         |
| Pedestrian road injuries                      | 842.08<br>(688.16 to<br>1,007.32)               | 316.32<br>(226.67 to<br>454.55)                 | 208.19<br>(151.11 to<br>286.01)                | 655.46<br>(466.56 to<br>942.89)                 | 20.73<br>(17.29 to<br>24.12)           | 11.75<br>(8.29 to<br>16.89)            | 8.66<br>(6.18 to<br>11.83)             | 21.74<br>(15.20 to<br>31.44)           |
| <b>Suriname</b>                               |                                                 |                                                 |                                                |                                                 |                                        |                                        |                                        |                                        |
| Cause                                         | <b>YLLs (actual counts)</b>                     |                                                 |                                                |                                                 | <b>Deaths (actual counts)</b>          |                                        |                                        |                                        |
|                                               | <b>2016</b>                                     | <b>2040 Forecast</b>                            | <b>2040 Better Scenario</b>                    | <b>2040 Worse Scenario</b>                      | <b>2016</b>                            | <b>2040 Forecast</b>                   | <b>2040 Better Scenario</b>            | <b>2040 Worse Scenario</b>             |



|                                                                              |                                                            |                                                             |                                                            |                                                             |                                                      |                                                      |                                                      |                                                      |
|------------------------------------------------------------------------------|------------------------------------------------------------|-------------------------------------------------------------|------------------------------------------------------------|-------------------------------------------------------------|------------------------------------------------------|------------------------------------------------------|------------------------------------------------------|------------------------------------------------------|
| Other unintentional injuries                                                 | 128.40<br>(105.79 to<br>158.42)                            | 89.44<br>(69.61 to<br>114.22)                               | 68.08<br>(49.53 to<br>93.39)                               | 91.46<br>(71.04 to<br>117.74)                               | 2.53<br>(2.10 to<br>3.04)                            | 2.10<br>(1.69 to<br>2.57)                            | 1.68<br>(1.25 to<br>2.22)                            | 2.09<br>(1.68 to<br>2.59)                            |
| <b>Self-harm and interpersonal violence</b>                                  | <b>8,518.03</b><br><b>(6,653.20 to</b><br><b>9,704.97)</b> | <b>8,452.61</b><br><b>(5,566.31 to</b><br><b>12,455.94)</b> | <b>6,896.42</b><br><b>(4,684.23 to</b><br><b>9,609.99)</b> | <b>9,002.43</b><br><b>(5,730.31 to</b><br><b>13,698.29)</b> | <b>181.84</b><br><b>(144.69 to</b><br><b>206.49)</b> | <b>200.83</b><br><b>(136.18 to</b><br><b>290.62)</b> | <b>169.57</b><br><b>(118.69 to</b><br><b>231.05)</b> | <b>210.87</b><br><b>(136.89 to</b><br><b>313.08)</b> |
| <b>Suriname</b>                                                              |                                                            |                                                             |                                                            |                                                             |                                                      |                                                      |                                                      |                                                      |
| <b>Cause</b>                                                                 | <b>YLLs (actual counts)</b>                                |                                                             |                                                            |                                                             | <b>Deaths (actual counts)</b>                        |                                                      |                                                      |                                                      |
|                                                                              | <b>2016</b>                                                | <b>2040 Forecast</b>                                        | <b>2040 Better Scenario</b>                                | <b>2040 Worse Scenario</b>                                  | <b>2016</b>                                          | <b>2040 Forecast</b>                                 | <b>2040 Better Scenario</b>                          | <b>2040 Worse Scenario</b>                           |
| Self-harm                                                                    | 5,963.80<br>(4,699.13 to<br>6,809.45)                      | 6,496.89<br>(3,952.50 to<br>10,087.83)                      | 5,156.60<br>(3,316.50 to<br>7,499.77)                      | 7,017.49<br>(4,139.48 to<br>11,258.55)                      | 131.14<br>(104.77 to<br>149.84)                      | 157.47<br>(99.49 to<br>236.74)                       | 130.16<br>(85.92 to<br>184.40)                       | 167.29<br>(101.75 to<br>258.31)                      |
| Self-harm by firearm                                                         | 246.15<br>(152.47 to<br>342.09)                            | 224.44<br>(108.57 to<br>410.36)                             | 169.71<br>(86.88 to<br>300.31)                             | 243.43<br>(113.37 to<br>456.80)                             | 5.79<br>(3.69 to<br>8.10)                            | 5.85<br>(3.04 to<br>10.34)                           | 4.65<br>(2.56 to<br>8.02)                            | 6.22<br>(3.12 to<br>11.34)                           |
| Self-harm by other specified means                                           | 5,717.64<br>(4,498.24 to<br>6,527.69)                      | 6,272.45<br>(3,847.87 to<br>9,704.83)                       | 4,986.89<br>(3,228.80 to<br>7,231.56)                      | 6,774.06<br>(4,021.13 to<br>10,849.30)                      | 125.35<br>(98.91 to<br>143.43)                       | 151.62<br>(95.94 to<br>226.89)                       | 125.51<br>(83.30 to<br>177.35)                       | 161.07<br>(98.20 to<br>246.77)                       |
| Interpersonal violence                                                       | 2,554.23<br>(1,720.72 to<br>3,081.88)                      | 1,955.72<br>(1,252.09 to<br>2,617.21)                       | 1,739.82<br>(1,112.41 to<br>2,309.85)                      | 1,984.95<br>(1,213.07 to<br>2,665.30)                       | 50.70<br>(33.07 to<br>60.67)                         | 43.36<br>(25.95 to<br>57.49)                         | 39.41<br>(23.62 to<br>52.19)                         | 43.57<br>(25.64 to<br>58.48)                         |
| Physical violence by firearm                                                 | 915.97<br>(499.87 to<br>1,208.88)                          | 668.08<br>(356.09 to<br>943.69)                             | 600.97<br>(313.93 to<br>861.60)                            | 666.73<br>(354.52 to<br>945.79)                             | 17.32<br>(9.12 to<br>23.00)                          | 13.23<br>(6.79 to<br>18.59)                          | 12.03<br>(6.03 to<br>16.99)                          | 13.14<br>(6.75 to<br>18.26)                          |
| Physical violence by sharp object                                            | 708.72<br>(386.78 to<br>929.91)                            | 573.77<br>(300.99 to<br>782.93)                             | 540.82<br>(280.88 to<br>748.39)                            | 569.24<br>(292.49 to<br>781.67)                             | 14.11<br>(7.61 to<br>18.24)                          | 12.44<br>(6.33 to<br>16.60)                          | 11.96<br>(6.06 to<br>16.26)                          | 12.23<br>(6.23 to<br>16.44)                          |
| Physical violence by other means                                             | 929.54<br>(597.13 to<br>1,167.44)                          | 713.87<br>(404.33 to<br>1,104.48)                           | 598.04<br>(342.72 to<br>892.97)                            | 748.97<br>(417.36 to<br>1,178.69)                           | 19.27<br>(12.00 to<br>23.86)                         | 17.69<br>(9.65 to<br>27.05)                          | 15.43<br>(8.49 to<br>22.73)                          | 18.20<br>(9.73 to<br>28.19)                          |
| Forces of nature, conflict and terrorism, and executions and police conflict | 13.01<br>(8.58 to<br>20.11)                                | 157.41<br>(0.00 to<br>4,010.82)                             | 154.74<br>(0.00 to<br>3,943.76)                            | 158.32<br>(0.00 to<br>4,030.60)                             | 0.24<br>(0.16 to<br>0.36)                            | 3.16<br>(0.00 to<br>80.25)                           | 3.16<br>(0.00 to<br>80.43)                           | 3.15<br>(0.00 to<br>80.11)                           |
| Exposure to forces of nature                                                 | 0.00<br>(0.00 to<br>0.00)                                  | 2.00<br>(0.00 to<br>37.84)                                  | 1.97<br>(0.00 to<br>37.31)                                 | 2.01<br>(0.00 to<br>38.28)                                  | 0.00<br>(0.00 to<br>0.00)                            | 0.04<br>(0.00 to<br>0.90)                            | 0.05<br>(0.00 to<br>0.92)                            | 0.04<br>(0.00 to<br>0.89)                            |
| Conflict and terrorism                                                       | 0.00<br>(0.00 to<br>0.00)                                  | 4.27<br>(0.00 to<br>79.54)                                  | 4.14<br>(0.00 to<br>77.14)                                 | 4.34<br>(0.00 to<br>80.87)                                  | 0.00<br>(0.00 to<br>0.00)                            | 0.08<br>(0.00 to<br>1.55)                            | 0.08<br>(0.00 to<br>1.54)                            | 0.08<br>(0.00 to<br>1.55)                            |
| Executions and police conflict                                               | 13.01<br>(8.58 to<br>20.11)                                | 151.14<br>(0.00 to<br>3,948.75)                             | 148.63<br>(0.00 to<br>3,884.18)                            | 151.97<br>(0.00 to<br>3,968.60)                             | 0.24<br>(0.16 to<br>0.36)                            | 3.03<br>(0.00 to<br>79.36)                           | 3.03<br>(0.00 to<br>79.38)                           | 3.02<br>(0.00 to<br>79.00)                           |
| <b>Trinidad and Tobago</b>                                                   |                                                            |                                                             |                                                            |                                                             |                                                      |                                                      |                                                      |                                                      |
| <b>Cause</b>                                                                 | <b>YLLs (actual counts)</b>                                |                                                             |                                                            |                                                             | <b>Deaths (actual counts)</b>                        |                                                      |                                                      |                                                      |
|                                                                              | <b>2016</b>                                                | <b>2040 Forecast</b>                                        | <b>2040 Better Scenario</b>                                | <b>2040 Worse Scenario</b>                                  | <b>2016</b>                                          | <b>2040 Forecast</b>                                 | <b>2040 Better Scenario</b>                          | <b>2040 Worse Scenario</b>                           |
| All causes                                                                   | 274,062.96<br>(247,615.62 to<br>309,835.72)                | 305,070.82<br>(250,456.57 to<br>373,207.71)                 | 216,594.64<br>(180,873.40 to<br>262,308.73)                | 362,052.02<br>(294,936.96 to<br>445,013.07)                 | 10,987.22<br>(10,198.56 to<br>11,777.30)             | 17,273.08<br>(15,027.03 to<br>20,157.40)             | 13,366.50<br>(11,642.92 to<br>15,594.13)             | 19,426.58<br>(16,879.41 to<br>22,489.27)             |
| Communicable, maternal, neonatal, and nutritional diseases                   | 36,728.58<br>(26,051.69 to<br>57,445.55)                   | 29,712.95<br>(21,283.46 to<br>45,415.28)                    | 20,063.88<br>(14,973.15 to<br>28,223.76)                   | 35,170.13<br>(24,868.79 to<br>54,522.82)                    | 837.43<br>(702.38 to<br>1,083.00)                    | 1,141.14<br>(865.39 to<br>1,462.82)                  | 889.61<br>(697.95 to<br>1,102.93)                    | 1,244.82<br>(925.38 to<br>1,622.18)                  |
| HIV/AIDS and tuberculosis                                                    | 9,983.81<br>(9,540.47 to<br>10,417.72)                     | 4,922.71<br>(2,885.09 to<br>6,834.63)                       | 4,191.81<br>(2,265.13 to<br>6,121.00)                      | 6,687.20<br>(4,323.39 to<br>8,697.48)                       | 226.43<br>(217.10 to<br>236.07)                      | 115.08<br>(63.91 to<br>166.84)                       | 93.05<br>(44.64 to<br>144.49)                        | 150.71<br>(91.61 to<br>205.31)                       |
| Tuberculosis                                                                 | 605.85<br>(509.84 to<br>729.03)                            | 488.28<br>(299.99 to<br>793.11)                             | 163.33<br>(107.53 to<br>244.52)                            | 538.57<br>(330.51 to<br>869.28)                             | 21.11<br>(18.22 to<br>24.69)                         | 23.41<br>(14.55 to<br>37.01)                         | 8.85<br>(5.83 to<br>13.00)                           | 24.72<br>(14.99 to<br>38.27)                         |
| HIV/AIDS                                                                     | 9,377.95<br>(8,959.79 to<br>9,814.13)                      | 4,434.43<br>(2,414.20 to<br>6,364.93)                       | 4,028.48<br>(2,090.12 to<br>5,970.40)                      | 6,148.63<br>(3,863.54 to<br>8,209.42)                       | 205.32<br>(196.21 to<br>214.62)                      | 91.67<br>(41.84 to<br>141.89)                        | 84.20<br>(36.26 to<br>134.96)                        | 125.99<br>(67.28 to<br>180.19)                       |



|                                                                          |                                            |                                             |                                           |                                             |                                     |                                     |                                     |                                       |
|--------------------------------------------------------------------------|--------------------------------------------|---------------------------------------------|-------------------------------------------|---------------------------------------------|-------------------------------------|-------------------------------------|-------------------------------------|---------------------------------------|
| <b>Diarrhea, lower respiratory, and other common infectious diseases</b> | <b>8,987.34</b><br>(7,432.36 to 11,478.43) | <b>10,754.82</b><br>(7,610.20 to 15,209.77) | <b>7,022.18</b><br>(5,159.18 to 9,627.49) | <b>12,677.65</b><br>(8,579.71 to 19,025.08) | <b>350.36</b><br>(310.86 to 394.92) | <b>737.03</b><br>(512.49 to 991.89) | <b>563.02</b><br>(408.64 to 735.18) | <b>791.28</b><br>(533.44 to 1,100.34) |
| Diarrheal diseases                                                       | 792.98<br>(561.00 to 1,237.00)             | 521.43<br>(140.32 to 1,538.96)              | 469.50<br>(156.56 to 1,302.50)            | 625.10<br>(159.10 to 1,902.09)              | 24.62<br>(20.62 to 30.10)           | 35.42<br>(9.56 to 106.31)           | 36.83<br>(12.51 to 99.50)           | 39.76<br>(9.83 to 121.61)             |
| Intestinal infectious diseases                                           | 0.74<br>(0.34 to 1.37)                     | 0.36<br>(0.16 to 0.70)                      | 0.30<br>(0.13 to 0.58)                    | 0.37<br>(0.16 to 0.71)                      | 0.02<br>(0.01 to 0.03)              | 0.01<br>(0.01 to 0.03)              | 0.01<br>(0.01 to 0.02)              | 0.01<br>(0.01 to 0.03)                |
| Typhoid fever                                                            | 0.29<br>(0.09 to 0.65)                     | 0.12<br>(0.04 to 0.29)                      | 0.13<br>(0.05 to 0.30)                    | 0.12<br>(0.04 to 0.30)                      | 0.01<br>(0.00 to 0.02)              | 0.00<br>(0.00 to 0.01)              | 0.00<br>(0.00 to 0.01)              | 0.00<br>(0.00 to 0.01)                |
| Paratyphoid fever                                                        | 0.13<br>(0.04 to 0.35)                     | 0.10<br>(0.03 to 0.24)                      | 0.07<br>(0.02 to 0.16)                    | 0.10<br>(0.03 to 0.25)                      | 0.00<br>(0.00 to 0.01)              | 0.00<br>(0.00 to 0.01)              | 0.00<br>(0.00 to 0.01)              | 0.00<br>(0.00 to 0.01)                |
| Other intestinal infectious diseases                                     | 0.32<br>(0.12 to 0.69)                     | 0.14<br>(0.05 to 0.33)                      | 0.10<br>(0.03 to 0.23)                    | 0.14<br>(0.05 to 0.33)                      | 0.01<br>(0.00 to 0.02)              | 0.01<br>(0.00 to 0.02)              | 0.01<br>(0.00 to 0.01)              | 0.01<br>(0.00 to 0.02)                |
| Lower respiratory infections                                             | 7,112.16<br>(5,938.49 to 8,845.05)         | 9,111.26<br>(6,506.35 to 12,792.79)         | 5,845.67<br>(4,309.45 to 7,952.31)        | 10,758.40<br>(7,349.71 to 16,028.98)        | 301.45<br>(265.57 to 340.57)        | 670.89<br>(465.04 to 898.97)        | 504.16<br>(372.08 to 652.27)        | 718.57<br>(484.42 to 994.44)          |
| Upper respiratory infections                                             | 4.80<br>(2.56 to 8.35)                     | 4.53<br>(2.03 to 8.30)                      | 2.11<br>(0.93 to 3.93)                    | 4.66<br>(2.08 to 8.80)                      | 0.14<br>(0.07 to 0.24)              | 0.20<br>(0.08 to 0.37)              | 0.10<br>(0.04 to 0.20)              | 0.20<br>(0.08 to 0.38)                |
| Otitis media                                                             | 0.45<br>(0.31 to 0.67)                     | 0.18<br>(0.09 to 0.36)                      | 0.19<br>(0.09 to 0.36)                    | 0.18<br>(0.09 to 0.35)                      | 0.02<br>(0.01 to 0.03)              | 0.01<br>(0.01 to 0.02)              | 0.01<br>(0.01 to 0.03)              | 0.01<br>(0.01 to 0.02)                |
| Meningitis                                                               | 665.43<br>(500.94 to 1,007.33)             | 369.64<br>(252.08 to 620.42)                | 228.45<br>(162.85 to 376.15)              | 395.71<br>(261.33 to 664.75)                | 15.66<br>(12.34 to 24.07)           | 12.89<br>(9.68 to 20.85)            | 9.29<br>(7.03 to 14.88)             | 12.83<br>(9.49 to 21.11)              |
| Pneumococcal meningitis                                                  | 82.54<br>(59.12 to 128.33)                 | 42.03<br>(28.51 to 71.78)                   | 34.28<br>(23.49 to 57.89)                 | 45.86<br>(30.67 to 78.97)                   | 2.17<br>(1.60 to 3.44)              | 1.71<br>(1.13 to 2.88)              | 1.54<br>(1.05 to 2.32)              | 1.78<br>(1.17 to 3.03)                |
| H influenzae type B meningitis                                           | 61.39<br>(43.15 to 97.87)                  | 59.94<br>(21.77 to 149.82)                  | 28.81<br>(17.28 to 52.65)                 | 79.90<br>(24.25 to 213.95)                  | 1.40<br>(1.03 to 2.25)              | 1.32<br>(0.77 to 2.56)              | 1.01<br>(0.69 to 1.71)              | 1.52<br>(0.76 to 3.15)                |
| Meningococcal meningitis                                                 | 266.52<br>(200.32 to 407.74)               | 127.33<br>(89.79 to 208.69)                 | 79.65<br>(56.25 to 128.05)                | 128.51<br>(90.13 to 212.36)                 | 6.04<br>(4.76 to 9.22)              | 4.66<br>(3.45 to 7.50)              | 3.25<br>(2.39 to 5.19)              | 4.51<br>(3.32 to 7.37)                |
| Other meningitis                                                         | 254.98<br>(189.32 to 391.16)               | 140.34<br>(98.45 to 231.40)                 | 85.72<br>(58.98 to 137.29)                | 141.44<br>(98.60 to 237.01)                 | 6.06<br>(4.70 to 9.41)              | 5.20<br>(3.80 to 8.46)              | 3.50<br>(2.55 to 5.60)              | 5.03<br>(3.64 to 8.16)                |
| Encephalitis                                                             | 389.70<br>(237.65 to 736.52)               | 292.09<br>(157.06 to 571.05)                | 230.73<br>(125.26 to 442.34)              | 298.81<br>(157.95 to 591.14)                | 7.88<br>(4.99 to 14.64)             | 8.44<br>(4.83 to 16.10)             | 7.32<br>(4.25 to 13.88)             | 8.37<br>(4.82 to 15.89)               |
| Diphtheria                                                               | 6.40<br>(3.95 to 10.07)                    | 1.22<br>(0.52 to 2.45)                      | 0.74<br>(0.38 to 1.27)                    | 1.45<br>(0.56 to 3.32)                      | 0.11<br>(0.07 to 0.17)              | 0.02<br>(0.01 to 0.04)              | 0.02<br>(0.01 to 0.03)              | 0.03<br>(0.01 to 0.05)                |
| Whooping cough                                                           | 1.30<br>(0.29 to 3.32)                     | 0.88<br>(0.03 to 3.11)                      | 0.19<br>(0.03 to 0.58)                    | 0.90<br>(0.03 to 3.12)                      | 0.02<br>(0.00 to 0.04)              | 0.01<br>(0.00 to 0.04)              | 0.00<br>(0.00 to 0.04)              | 0.01<br>(0.00 to 0.04)                |
| Tetanus                                                                  | 1.56<br>(1.06 to 2.39)                     | 0.27<br>(0.16 to 0.46)                      | 0.23<br>(0.14 to 0.41)                    | 0.27<br>(0.16 to 0.47)                      | 0.05<br>(0.03 to 0.07)              | 0.01<br>(0.01 to 0.02)              | 0.01<br>(0.01 to 0.02)              | 0.01<br>(0.01 to 0.02)                |
| Measles                                                                  | 0.95<br>(0.53 to 1.79)                     | 446.61<br>(196.66 to 1,390.18)              | 240.00<br>(13.88 to 661.00)               | 585.40<br>(21.77 to 1,865.40)               | 0.01<br>(0.01 to 0.02)              | 8.68<br>(0.36 to 26.85)             | 4.94<br>(0.23 to 15.08)             | 11.07<br>(0.38 to 35.24)              |

**Trinidad and Tobago**

| Cause                       | YLLs (actual counts)     |                         |                        |                         | Deaths (actual counts) |                        |                        |                        |
|-----------------------------|--------------------------|-------------------------|------------------------|-------------------------|------------------------|------------------------|------------------------|------------------------|
|                             | 2016                     | 2040 Forecast           | 2040 Better Scenario   | 2040 Worse Scenario     | 2016                   | 2040 Forecast          | 2040 Better Scenario   | 2040 Worse Scenario    |
| Varicella and herpes zoster | 10.87<br>(3.03 to 17.65) | 6.35<br>(1.65 to 11.45) | 4.08<br>(1.03 to 7.36) | 6.41<br>(1.63 to 12.07) | 0.38<br>(0.10 to 0.60) | 0.44<br>(0.09 to 0.85) | 0.33<br>(0.07 to 0.64) | 0.42<br>(0.09 to 0.84) |

|                                                       |                                            |                                              |                                              |                                              |                                     |                                      |                                      |                                      |
|-------------------------------------------------------|--------------------------------------------|----------------------------------------------|----------------------------------------------|----------------------------------------------|-------------------------------------|--------------------------------------|--------------------------------------|--------------------------------------|
| <b>Neglected tropical diseases and malaria</b>        | <b>1,278.52</b><br>(690.49 to<br>1,874.98) | <b>3,072.50</b><br>(1,827.96 to<br>4,642.58) | <b>2,702.64</b><br>(1,645.87 to<br>3,988.24) | <b>3,136.69</b><br>(1,848.11 to<br>4,784.30) | <b>29.29</b><br>(16.15 to<br>43.05) | <b>98.16</b><br>(56.93 to<br>140.94) | <b>94.86</b><br>(57.12 to<br>134.73) | <b>96.38</b><br>(55.84 to<br>139.10) |
| Malaria                                               | 0.00<br>(0.00 to<br>0.00)                  | 0.00<br>(0.00 to<br>0.00)                    | 0.00<br>(0.00 to<br>0.00)                    | 0.00<br>(0.00 to<br>0.00)                    | 0.00<br>(0.00 to<br>0.00)           | 0.00<br>(0.00 to<br>0.00)            | 0.00<br>(0.00 to<br>0.00)            | 0.00<br>(0.00 to<br>0.00)            |
| Chagas disease                                        | 0.00<br>(0.00 to<br>0.00)                  | 0.00<br>(0.00 to<br>0.00)                    | 0.00<br>(0.00 to<br>0.00)                    | 0.00<br>(0.00 to<br>0.00)                    | 0.00<br>(0.00 to<br>0.00)           | 0.00<br>(0.00 to<br>0.00)            | 0.00<br>(0.00 to<br>0.00)            | 0.00<br>(0.00 to<br>0.00)            |
| Leishmaniasis                                         | 0.00<br>(0.00 to<br>0.00)                  | 0.00<br>(0.00 to<br>0.00)                    | 0.00<br>(0.00 to<br>0.00)                    | 0.00<br>(0.00 to<br>0.00)                    | 0.00<br>(0.00 to<br>0.00)           | 0.00<br>(0.00 to<br>0.00)            | 0.00<br>(0.00 to<br>0.00)            | 0.00<br>(0.00 to<br>0.00)            |
| African trypanosomiasis                               | 0.00<br>(0.00 to<br>0.00)                  | 0.00<br>(0.00 to<br>0.00)                    | 0.00<br>(0.00 to<br>0.00)                    | 0.00<br>(0.00 to<br>0.00)                    | 0.00<br>(0.00 to<br>0.00)           | 0.00<br>(0.00 to<br>0.00)            | 0.00<br>(0.00 to<br>0.00)            | 0.00<br>(0.00 to<br>0.00)            |
| Schistosomiasis                                       | 0.00<br>(0.00 to<br>0.00)                  | 0.00<br>(0.00 to<br>0.00)                    | 0.00<br>(0.00 to<br>0.00)                    | 0.00<br>(0.00 to<br>0.00)                    | 0.00<br>(0.00 to<br>0.00)           | 0.00<br>(0.00 to<br>0.00)            | 0.00<br>(0.00 to<br>0.00)            | 0.00<br>(0.00 to<br>0.00)            |
| Cysticercosis                                         | 0.00<br>(0.00 to<br>0.00)                  | 0.00<br>(0.00 to<br>0.00)                    | 0.00<br>(0.00 to<br>0.00)                    | 0.00<br>(0.00 to<br>0.00)                    | 0.00<br>(0.00 to<br>0.00)           | 0.00<br>(0.00 to<br>0.00)            | 0.00<br>(0.00 to<br>0.00)            | 0.00<br>(0.00 to<br>0.00)            |
| Cystic echinococcosis                                 | 0.00<br>(0.00 to<br>0.00)                  | 0.00<br>(0.00 to<br>0.00)                    | 0.00<br>(0.00 to<br>0.00)                    | 0.00<br>(0.00 to<br>0.00)                    | 0.00<br>(0.00 to<br>0.00)           | 0.00<br>(0.00 to<br>0.00)            | 0.00<br>(0.00 to<br>0.00)            | 0.00<br>(0.00 to<br>0.00)            |
| Dengue                                                | 1,243.03<br>(653.96 to<br>1,848.27)        | 3,048.72<br>(1,794.28 to<br>4,622.90)        | 2,684.14<br>(1,616.52 to<br>3,969.16)        | 3,112.21<br>(1,818.53 to<br>4,759.29)        | 28.52<br>(15.49 to<br>42.11)        | 97.42<br>(55.85 to<br>140.38)        | 94.20<br>(56.14 to<br>134.09)        | 95.65<br>(54.56 to<br>138.50)        |
| Yellow fever                                          | 1.89<br>(0.27 to<br>7.72)                  | 0.44<br>(0.06 to<br>1.65)                    | 0.28<br>(0.04 to<br>1.10)                    | 0.46<br>(0.07 to<br>1.85)                    | 0.03<br>(0.00 to<br>0.14)           | 0.01<br>(0.00 to<br>0.03)            | 0.01<br>(0.00 to<br>0.02)            | 0.01<br>(0.00 to<br>0.04)            |
| Rabies                                                | 0.58<br>(0.26 to<br>1.31)                  | 0.18<br>(0.10 to<br>0.35)                    | 0.09<br>(0.06 to<br>0.17)                    | 0.19<br>(0.10 to<br>0.35)                    | 0.01<br>(0.01 to<br>0.02)           | 0.01<br>(0.00 to<br>0.01)            | 0.00<br>(0.00 to<br>0.01)            | 0.01<br>(0.00 to<br>0.01)            |
| Intestinal nematode infections                        | 2.52<br>(1.12 to<br>8.20)                  | 2.86<br>(0.93 to<br>6.99)                    | 2.46<br>(0.86 to<br>5.83)                    | 2.92<br>(0.92 to<br>7.12)                    | 0.07<br>(0.03 to<br>0.13)           | 0.07<br>(0.03 to<br>0.13)            | 0.07<br>(0.03 to<br>0.13)            | 0.07<br>(0.03 to<br>0.13)            |
| Other neglected tropical diseases                     | 26.34<br>(10.82 to<br>41.06)               | 20.30<br>(6.97 to<br>34.90)                  | 15.67<br>(5.85 to<br>26.85)                  | 20.91<br>(7.14 to<br>36.24)                  | 0.60<br>(0.27 to<br>0.83)           | 0.65<br>(0.26 to<br>1.06)            | 0.57<br>(0.25 to<br>0.92)            | 0.65<br>(0.25 to<br>1.05)            |
| <b>Maternal disorders</b>                             | <b>464.90</b><br>(365.94 to<br>592.05)     | <b>262.51</b><br>(154.08 to<br>420.70)       | <b>161.86</b><br>(90.02 to<br>270.26)        | <b>276.68</b><br>(157.25 to<br>446.01)       | <b>8.57</b><br>(6.76 to<br>10.90)   | <b>4.87</b><br>(2.89 to<br>7.76)     | <b>3.01</b><br>(1.70 to<br>4.96)     | <b>5.13</b><br>(2.93 to<br>8.26)     |
| Maternal hemorrhage                                   | 48.39<br>(30.29 to<br>72.87)               | 27.24<br>(13.32 to<br>49.91)                 | 16.94<br>(7.87 to<br>31.84)                  | 28.55<br>(13.34 to<br>53.18)                 | 0.89<br>(0.57 to<br>1.34)           | 0.51<br>(0.25 to<br>0.93)            | 0.32<br>(0.15 to<br>0.60)            | 0.53<br>(0.25 to<br>0.97)            |
| Maternal sepsis and other maternal infections         | 58.86<br>(39.95 to<br>84.16)               | 25.46<br>(12.62 to<br>45.77)                 | 15.59<br>(7.46 to<br>29.59)                  | 26.77<br>(13.04 to<br>50.27)                 | 1.10<br>(0.75 to<br>1.56)           | 0.48<br>(0.24 to<br>0.87)            | 0.29<br>(0.14 to<br>0.55)            | 0.50<br>(0.25 to<br>0.96)            |
| Maternal hypertensive disorders                       | 82.61<br>(56.50 to<br>118.37)              | 45.35<br>(22.47 to<br>82.93)                 | 27.25<br>(12.89 to<br>51.43)                 | 47.51<br>(23.35 to<br>86.83)                 | 1.47<br>(1.00 to<br>2.10)           | 0.81<br>(0.40 to<br>1.48)            | 0.49<br>(0.23 to<br>0.92)            | 0.85<br>(0.42 to<br>1.57)            |
| Maternal obstructed labor and uterine rupture         | 17.98<br>(10.08 to<br>29.42)               | 10.70<br>(4.64 to<br>20.61)                  | 6.19<br>(2.54 to<br>12.40)                   | 11.26<br>(4.72 to<br>22.28)                  | 0.34<br>(0.19 to<br>0.56)           | 0.21<br>(0.09 to<br>0.39)            | 0.12<br>(0.05 to<br>0.24)            | 0.22<br>(0.09 to<br>0.43)            |
| Maternal abortion, miscarriage, and ectopic pregnancy | 100.01<br>(67.81 to<br>142.25)             | 63.31<br>(28.10 to<br>117.28)                | 38.62<br>(16.54 to<br>73.70)                 | 66.77<br>(29.14 to<br>126.81)                | 1.88<br>(1.28 to<br>2.66)           | 1.20<br>(0.54 to<br>2.20)            | 0.73<br>(0.32 to<br>1.38)            | 1.26<br>(0.56 to<br>2.37)            |
| Indirect maternal deaths                              | 52.12<br>(33.85 to<br>77.67)               | 30.91<br>(14.63 to<br>58.21)                 | 18.67<br>(8.33 to<br>35.96)                  | 32.77<br>(15.34 to<br>62.90)                 | 0.93<br>(0.61 to<br>1.39)           | 0.55<br>(0.26 to<br>1.02)            | 0.34<br>(0.15 to<br>0.64)            | 0.59<br>(0.28 to<br>1.14)            |
| Late maternal deaths                                  | 16.07<br>(9.33 to<br>26.57)                | 6.94<br>(3.13 to<br>13.32)                   | 4.15<br>(1.79 to<br>8.06)                    | 7.33<br>(3.16 to<br>14.67)                   | 0.29<br>(0.17 to<br>0.49)           | 0.13<br>(0.06 to<br>0.24)            | 0.08<br>(0.03 to<br>0.15)            | 0.13<br>(0.06 to<br>0.26)            |
| Maternal deaths aggravated by HIV/AIDS                | 2.41<br>(1.09 to<br>4.21)                  | 6.00<br>(2.15 to<br>12.80)                   | 4.17<br>(1.50 to<br>9.31)                    | 6.52<br>(2.38 to<br>14.25)                   | 0.04<br>(0.02 to<br>0.08)           | 0.11<br>(0.04 to<br>0.24)            | 0.08<br>(0.03 to<br>0.18)            | 0.12<br>(0.05 to<br>0.27)            |

|                                                                         |                                                |                                               |                                               |                                                |                                       |                                       |                                      |                                       |
|-------------------------------------------------------------------------|------------------------------------------------|-----------------------------------------------|-----------------------------------------------|------------------------------------------------|---------------------------------------|---------------------------------------|--------------------------------------|---------------------------------------|
| Other maternal disorders                                                | 86.45<br>(58.37 to<br>123.27)                  | 46.61<br>(21.87 to<br>82.91)                  | 30.28<br>(14.23 to<br>54.79)                  | 49.18<br>(23.67 to<br>87.70)                   | 1.62<br>(1.08 to<br>2.31)             | 0.87<br>(0.42 to<br>1.55)             | 0.57<br>(0.27 to<br>1.04)            | 0.92<br>(0.44 to<br>1.64)             |
| <b>Trinidad and Tobago</b>                                              |                                                |                                               |                                               |                                                |                                       |                                       |                                      |                                       |
| Cause                                                                   | YLLs (actual counts)                           |                                               |                                               |                                                | Deaths (actual counts)                |                                       |                                      |                                       |
|                                                                         | 2016                                           | 2040 Forecast                                 | 2040 Better Scenario                          | 2040 Worse Scenario                            | 2016                                  | 2040 Forecast                         | 2040 Better Scenario                 | 2040 Worse Scenario                   |
| <b>Neonatal disorders</b>                                               | <b>14,498.88</b><br>(5,295.09 to<br>32,345.60) | <b>9,437.13</b><br>(3,095.09 to<br>21,307.33) | <b>4,869.54</b><br>(1,619.95 to<br>11,345.17) | <b>11,136.32</b><br>(3,673.46 to<br>25,531.78) | <b>167.47</b><br>(61.16 to<br>373.62) | <b>109.03</b><br>(35.76 to<br>246.17) | <b>56.26</b><br>(18.72 to<br>131.08) | <b>128.65</b><br>(42.44 to<br>294.96) |
| Neonatal preterm birth                                                  | 5,994.44<br>(2,099.80 to<br>13,717.45)         | 3,513.72<br>(1,131.13 to<br>8,098.18)         | 1,580.47<br>(497.21 to<br>3,644.92)           | 4,503.42<br>(1,455.07 to<br>10,321.56)         | 69.23<br>(24.25 to<br>158.44)         | 40.59<br>(13.07 to<br>93.54)          | 18.26<br>(5.74 to<br>42.10)          | 52.02<br>(16.81 to<br>119.24)         |
| Neonatal encephalopathy due to birth asphyxia and trauma                | 3,604.10<br>(1,300.26 to<br>8,246.12)          | 2,441.61<br>(722.19 to<br>5,887.64)           | 1,218.68<br>(361.45 to<br>2,964.67)           | 2,729.34<br>(809.58 to<br>6,685.42)            | 41.63<br>(15.02 to<br>95.25)          | 28.21<br>(8.34 to<br>68.01)           | 14.08<br>(4.18 to<br>34.25)          | 31.54<br>(9.36 to<br>77.24)           |
| Neonatal sepsis and other neonatal infections                           | 1,197.58<br>(252.73 to<br>2,935.94)            | 1,281.46<br>(274.01 to<br>3,198.13)           | 696.77<br>(155.30 to<br>1,733.46)             | 1,427.66<br>(308.38 to<br>3,593.11)            | 13.83<br>(2.92 to<br>33.91)           | 14.81<br>(3.17 to<br>36.95)           | 8.05<br>(1.80 to<br>20.03)           | 16.50<br>(3.56 to<br>41.51)           |
| Hemolytic disease and other neonatal jaundice                           | 292.57<br>(80.47 to<br>751.23)                 | 118.21<br>(26.29 to<br>354.93)                | 60.41<br>(13.44 to<br>185.43)                 | 133.02<br>(28.96 to<br>397.75)                 | 3.38<br>(0.93 to<br>8.68)             | 1.37<br>(0.30 to<br>4.10)             | 0.70<br>(0.16 to<br>2.14)            | 1.54<br>(0.33 to<br>4.59)             |
| Other neonatal disorders                                                | 3,410.18<br>(1,187.26 to<br>7,832.06)          | 2,082.13<br>(611.68 to<br>5,244.78)           | 1,313.21<br>(387.10 to<br>3,196.72)           | 2,342.88<br>(676.64 to<br>5,790.60)            | 39.39<br>(13.71 to<br>90.47)          | 24.05<br>(7.07 to<br>60.59)           | 15.37<br>(4.47 to<br>36.93)          | 27.07<br>(7.82 to<br>66.89)           |
| <b>Nutritional deficiencies</b>                                         | <b>560.42</b><br>(472.49 to<br>684.12)         | <b>549.36</b><br>(429.79 to<br>662.99)        | <b>562.47</b><br>(449.81 to<br>675.56)        | <b>528.04</b><br>(410.59 to<br>642.61)         | <b>30.48</b><br>(26.84 to<br>33.91)   | <b>51.00</b><br>(36.52 to<br>64.47)   | <b>57.48</b><br>(43.19 to<br>71.66)  | <b>47.06</b><br>(33.01 to<br>61.11)   |
| Protein-energy malnutrition                                             | 515.36<br>(427.11 to<br>634.54)                | 491.63<br>(374.43 to<br>605.15)               | 514.70<br>(402.06 to<br>627.56)               | 471.66<br>(358.15 to<br>584.09)                | 28.87<br>(25.28 to<br>32.48)          | 46.93<br>(33.27 to<br>60.35)          | 53.81<br>(39.58 to<br>67.53)         | 43.26<br>(28.86 to<br>56.45)          |
| Iodine deficiency                                                       | 9.26<br>(0.78 to<br>25.64)                     | 20.72<br>(0.75 to<br>71.92)                   | 17.84<br>(0.45 to<br>66.57)                   | 20.27<br>(0.80 to<br>69.21)                    | 0.29<br>(0.03 to<br>0.92)             | 1.61<br>(0.02 to<br>7.92)             | 1.51<br>(0.01 to<br>7.95)            | 1.51<br>(0.02 to<br>7.21)             |
| Dietary iron deficiency                                                 | 11.63<br>(4.81 to<br>17.05)                    | 6.88<br>(3.24 to<br>10.65)                    | 6.06<br>(2.65 to<br>9.41)                     | 7.07<br>(3.31 to<br>10.91)                     | 0.22<br>(0.09 to<br>0.33)             | 0.15<br>(0.07 to<br>0.25)             | 0.14<br>(0.06 to<br>0.24)            | 0.15<br>(0.07 to<br>0.25)             |
| Other nutritional deficiencies                                          | 24.17<br>(9.06 to<br>39.68)                    | 30.12<br>(11.33 to<br>54.37)                  | 23.87<br>(8.35 to<br>45.23)                   | 29.04<br>(10.88 to<br>51.74)                   | 1.10<br>(0.41 to<br>2.13)             | 2.32<br>(0.87 to<br>4.88)             | 2.02<br>(0.75 to<br>4.37)            | 2.14<br>(0.80 to<br>4.48)             |
| <b>Other communicable, maternal, neonatal, and nutritional diseases</b> | <b>954.72</b><br>(796.54 to<br>1,107.33)       | <b>713.92</b><br>(554.08 to<br>870.63)        | <b>553.38</b><br>(423.56 to<br>680.84)        | <b>727.55</b><br>(565.37 to<br>907.83)         | <b>24.82</b><br>(20.99 to<br>28.10)   | <b>25.98</b><br>(21.14 to<br>30.55)   | <b>21.93</b><br>(17.52 to<br>25.88)  | <b>25.60</b><br>(20.75 to<br>30.30)   |
| Sexually transmitted infections excluding HIV                           | 44.25<br>(35.04 to<br>53.15)                   | 23.66<br>(17.61 to<br>30.13)                  | 19.63<br>(14.30 to<br>25.75)                  | 23.72<br>(17.79 to<br>30.21)                   | 1.27<br>(1.03 to<br>1.53)             | 0.99<br>(0.72 to<br>1.27)             | 0.87<br>(0.64 to<br>1.12)            | 0.96<br>(0.70 to<br>1.23)             |
| Syphilis                                                                | 9.81<br>(7.66 to<br>12.57)                     | 5.65<br>(4.16 to<br>7.51)                     | 4.21<br>(3.01 to<br>5.65)                     | 5.68<br>(4.16 to<br>7.50)                      | 0.29<br>(0.23 to<br>0.35)             | 0.24<br>(0.18 to<br>0.32)             | 0.20<br>(0.14 to<br>0.26)            | 0.24<br>(0.17 to<br>0.31)             |
| Chlamydial infection                                                    | 6.55<br>(5.28 to<br>7.88)                      | 3.44<br>(2.51 to<br>4.49)                     | 2.95<br>(2.13 to<br>3.94)                     | 3.44<br>(2.52 to<br>4.48)                      | 0.19<br>(0.15 to<br>0.23)             | 0.15<br>(0.11 to<br>0.19)             | 0.14<br>(0.10 to<br>0.18)            | 0.14<br>(0.10 to<br>0.19)             |
| Gonococcal infection                                                    | 18.53<br>(14.55 to<br>22.32)                   | 9.96<br>(7.24 to<br>13.16)                    | 8.57<br>(6.03 to<br>11.57)                    | 9.96<br>(7.13 to<br>13.22)                     | 0.55<br>(0.43 to<br>0.66)             | 0.43<br>(0.31 to<br>0.56)             | 0.39<br>(0.28 to<br>0.53)            | 0.42<br>(0.30 to<br>0.55)             |
| Other sexually transmitted infections                                   | 9.35<br>(7.41 to<br>11.32)                     | 4.62<br>(3.33 to<br>6.03)                     | 3.90<br>(2.76 to<br>5.20)                     | 4.64<br>(3.36 to<br>6.04)                      | 0.25<br>(0.20 to<br>0.30)             | 0.16<br>(0.12 to<br>0.21)             | 0.15<br>(0.11 to<br>0.19)            | 0.16<br>(0.12 to<br>0.21)             |
| Acute hepatitis                                                         | 161.60<br>(135.71 to<br>190.02)                | 107.71<br>(82.13 to<br>137.27)                | 68.06<br>(50.51 to<br>88.87)                  | 108.82<br>(82.53 to<br>140.10)                 | 4.41<br>(3.79 to<br>5.10)             | 4.10<br>(3.23 to<br>5.08)             | 2.74<br>(2.10 to<br>3.54)            | 4.04<br>(3.16 to<br>5.09)             |
| Acute hepatitis A                                                       | 3.56<br>(1.84 to<br>6.07)                      | 2.39<br>(1.06 to<br>4.54)                     | 1.61<br>(0.71 to<br>3.08)                     | 2.44<br>(1.08 to<br>4.64)                      | 0.08<br>(0.04 to<br>0.13)             | 0.08<br>(0.03 to<br>0.15)             | 0.05<br>(0.02 to<br>0.11)            | 0.08<br>(0.03 to<br>0.15)             |

|                                       |                                                                  |                                                                  |                                                                  |                                                                  |                                                            |                                                               |                                                               |                                                               |
|---------------------------------------|------------------------------------------------------------------|------------------------------------------------------------------|------------------------------------------------------------------|------------------------------------------------------------------|------------------------------------------------------------|---------------------------------------------------------------|---------------------------------------------------------------|---------------------------------------------------------------|
|                                       | 119.27<br>(98.47 to<br>144.17)                                   | 79.88<br>(58.86 to<br>106.34)                                    | 49.61<br>(34.86 to<br>66.84)                                     | 80.95<br>(59.28 to<br>106.78)                                    | 3.28<br>(2.72 to<br>3.92)                                  | 2.88<br>(2.15 to<br>3.74)                                     | 1.86<br>(1.34 to<br>2.50)                                     | 2.86<br>(2.13 to<br>3.71)                                     |
| Acute hepatitis B                     |                                                                  |                                                                  |                                                                  |                                                                  |                                                            |                                                               |                                                               |                                                               |
|                                       | 7.44<br>(5.36 to<br>10.07)                                       | 5.59<br>(3.75 to<br>8.07)                                        | 3.75<br>(2.48 to<br>5.56)                                        | 5.60<br>(3.80 to<br>8.06)                                        | 0.22<br>(0.16 to<br>0.29)                                  | 0.21<br>(0.14 to<br>0.31)                                     | 0.15<br>(0.10 to<br>0.22)                                     | 0.21<br>(0.14 to<br>0.30)                                     |
| Acute hepatitis C                     |                                                                  |                                                                  |                                                                  |                                                                  |                                                            |                                                               |                                                               |                                                               |
|                                       | 31.33<br>(22.39 to<br>42.31)                                     | 19.85<br>(12.80 to<br>29.20)                                     | 13.09<br>(8.15 to<br>19.18)                                      | 19.83<br>(12.79 to<br>29.33)                                     | 0.84<br>(0.58 to<br>1.14)                                  | 0.93<br>(0.58 to<br>1.40)                                     | 0.68<br>(0.43 to<br>1.03)                                     | 0.89<br>(0.55 to<br>1.36)                                     |
| Acute hepatitis E                     |                                                                  |                                                                  |                                                                  |                                                                  |                                                            |                                                               |                                                               |                                                               |
|                                       | 748.87<br>(609.99 to<br>882.39)                                  | 582.56<br>(441.71 to<br>723.31)                                  | 465.70<br>(347.43 to<br>582.86)                                  | 595.01<br>(452.60 to<br>754.04)                                  | 19.14<br>(15.71 to<br>21.87)                               | 20.89<br>(16.65 to<br>24.95)                                  | 18.32<br>(14.36 to<br>21.99)                                  | 20.60<br>(16.04 to<br>24.93)                                  |
| Other unspecified infectious diseases |                                                                  |                                                                  |                                                                  |                                                                  |                                                            |                                                               |                                                               |                                                               |
| <b>Non-communicable diseases</b>      | <b>194,313.67</b><br><b>(178,012.43 to</b><br><b>209,975.33)</b> | <b>244,038.36</b><br><b>(195,213.23 to</b><br><b>307,425.58)</b> | <b>175,194.41</b><br><b>(142,132.36 to</b><br><b>219,531.01)</b> | <b>291,203.62</b><br><b>(232,247.38 to</b><br><b>368,803.75)</b> | <b>9,204.60</b><br><b>(8,565.49 to</b><br><b>9,827.39)</b> | <b>15,267.45</b><br><b>(12,899.88 to</b><br><b>18,101.25)</b> | <b>11,837.48</b><br><b>(10,094.11 to</b><br><b>14,103.31)</b> | <b>17,237.66</b><br><b>(14,654.78 to</b><br><b>20,442.72)</b> |
| <b>Trinidad and Tobago</b>            |                                                                  |                                                                  |                                                                  |                                                                  |                                                            |                                                               |                                                               |                                                               |
| Cause                                 | YLLs (actual counts)                                             |                                                                  |                                                                  |                                                                  | Deaths (actual counts)                                     |                                                               |                                                               |                                                               |
|                                       | 2016                                                             | 2040 Forecast                                                    | 2040 Better Scenario                                             | 2040 Worse Scenario                                              | 2016                                                       | 2040 Forecast                                                 | 2040 Better Scenario                                          | 2040 Worse Scenario                                           |
| Neoplasms                             | 40,980.36<br>(37,757.92 to<br>44,436.93)                         | 52,567.37<br>(44,071.78 to<br>63,100.77)                         | 46,697.75<br>(39,120.10 to<br>55,497.06)                         | 55,694.05<br>(46,085.59 to<br>67,910.62)                         | 1,770.83<br>(1,630.52 to<br>1,918.45)                      | 3,004.73<br>(2,483.60 to<br>3,575.99)                         | 2,836.10<br>(2,383.26 to<br>3,343.76)                         | 3,047.20<br>(2,498.47 to<br>3,699.34)                         |
| Lip and oral cavity cancer            | 546.50<br>(485.61 to<br>604.30)                                  | 716.67<br>(461.75 to<br>1,079.21)                                | 460.41<br>(327.83 to<br>645.82)                                  | 925.04<br>(579.08 to<br>1,417.63)                                | 22.73<br>(20.33 to<br>25.06)                               | 35.30<br>(23.74 to<br>52.11)                                  | 24.48<br>(17.93 to<br>33.11)                                  | 43.12<br>(27.51 to<br>64.79)                                  |
| Nasopharynx cancer                    | 161.69<br>(143.53 to<br>180.81)                                  | 187.44<br>(126.97 to<br>278.29)                                  | 103.76<br>(74.07 to<br>146.61)                                   | 247.18<br>(157.80 to<br>386.90)                                  | 5.25<br>(4.64 to<br>5.84)                                  | 7.16<br>(4.98 to<br>10.41)                                    | 4.20<br>(3.10 to<br>5.70)                                     | 9.11<br>(5.91 to<br>13.76)                                    |
| Other pharynx cancer                  | 306.69<br>(265.62 to<br>351.09)                                  | 382.26<br>(234.49 to<br>600.01)                                  | 311.23<br>(208.61 to<br>455.96)                                  | 394.35<br>(237.16 to<br>626.03)                                  | 11.73<br>(10.32 to<br>13.36)                               | 17.62<br>(11.15 to<br>27.20)                                  | 15.39<br>(10.63 to<br>22.10)                                  | 17.68<br>(11.07 to<br>27.31)                                  |
| Esophageal cancer                     | 547.56<br>(483.19 to<br>618.39)                                  | 680.13<br>(430.03 to<br>1,051.42)                                | 516.87<br>(353.43 to<br>747.91)                                  | 894.72<br>(514.44 to<br>1,449.58)                                | 22.46<br>(20.84 to<br>26.27)                               | 34.53<br>(22.09 to<br>51.38)                                  | 27.88<br>(19.40 to<br>38.91)                                  | 42.94<br>(25.80 to<br>67.18)                                  |
| Stomach cancer                        | 1,448.93<br>(1,308.16 to<br>1,587.91)                            | 1,628.32<br>(1,339.52 to<br>2,038.97)                            | 1,275.40<br>(1,051.84 to<br>1,552.23)                            | 1,620.66<br>(1,323.65 to<br>2,028.81)                            | 71.93<br>(65.24 to<br>78.44)                               | 102.77<br>(83.73 to<br>128.25)                                | 84.27<br>(69.87 to<br>103.32)                                 | 99.16<br>(79.80 to<br>124.80)                                 |
| Colon and rectum cancer               | 4,210.50<br>(3,740.55 to<br>4,709.64)                            | 6,046.33<br>(4,037.40 to<br>9,464.05)                            | 5,092.97<br>(3,433.85 to<br>7,720.77)                            | 6,299.68<br>(4,109.76 to<br>9,954.33)                            | 196.54<br>(175.98 to<br>219.43)                            | 365.25<br>(240.93 to<br>575.17)                               | 325.58<br>(220.48 to<br>494.39)                               | 370.06<br>(240.97 to<br>590.14)                               |
| Liver cancer                          | 1,216.28<br>(1,076.80 to<br>1,360.49)                            | 1,892.83<br>(1,293.94 to<br>2,785.00)                            | 1,774.02<br>(1,275.52 to<br>2,528.12)                            | 2,113.22<br>(1,372.38 to<br>3,207.98)                            | 54.19<br>(48.31 to<br>60.34)                               | 105.38<br>(73.38 to<br>151.26)                                | 103.85<br>(75.97 to<br>143.79)                                | 112.88<br>(75.60 to<br>167.26)                                |
| Liver cancer due to hepatitis B       | 475.91<br>(395.87 to<br>561.47)                                  | 663.19<br>(444.12 to<br>984.99)                                  | 630.31<br>(440.54 to<br>891.35)                                  | 748.17<br>(482.63 to<br>1,155.41)                                | 18.73<br>(15.40 to<br>22.26)                               | 32.19<br>(21.82 to<br>47.45)                                  | 32.00<br>(22.60 to<br>45.65)                                  | 34.86<br>(22.76 to<br>53.48)                                  |
| Liver cancer due to hepatitis C       | 308.21<br>(259.69 to<br>360.09)                                  | 528.32<br>(367.99 to<br>766.44)                                  | 515.25<br>(374.86 to<br>722.98)                                  | 570.19<br>(376.57 to<br>846.11)                                  | 16.04<br>(13.64 to<br>18.53)                               | 34.40<br>(24.09 to<br>49.16)                                  | 35.13<br>(25.57 to<br>48.79)                                  | 35.77<br>(24.09 to<br>52.08)                                  |
| Liver cancer due to alcohol use       | 192.60<br>(158.07 to<br>231.15)                                  | 311.66<br>(206.10 to<br>475.97)                                  | 262.44<br>(181.28 to<br>380.10)                                  | 356.77<br>(223.71 to<br>553.89)                                  | 8.88<br>(7.35 to<br>10.61)                                 | 17.11<br>(11.20 to<br>25.74)                                  | 15.32<br>(10.55 to<br>22.50)                                  | 18.82<br>(11.93 to<br>29.04)                                  |
| Liver cancer due to other causes      | 239.55<br>(202.92 to<br>281.61)                                  | 389.65<br>(237.18 to<br>646.29)                                  | 366.02<br>(231.72 to<br>582.44)                                  | 438.09<br>(252.58 to<br>745.44)                                  | 10.54<br>(8.94 to<br>12.27)                                | 21.68<br>(13.14 to<br>36.31)                                  | 21.40<br>(13.43 to<br>33.68)                                  | 23.43<br>(13.53 to<br>40.00)                                  |
| Gallbladder and biliary tract cancer  | 383.31<br>(337.27 to<br>486.83)                                  | 410.49<br>(351.36 to<br>544.35)                                  | 410.83<br>(345.87 to<br>555.63)                                  | 393.20<br>(338.37 to<br>516.67)                                  | 17.78<br>(15.78 to<br>22.36)                               | 23.72<br>(20.30 to<br>30.77)                                  | 24.75<br>(21.18 to<br>32.80)                                  | 22.23<br>(19.05 to<br>28.37)                                  |
| Pancreatic cancer                     | 1,860.15<br>(1,682.60 to<br>2,059.65)                            | 2,594.03<br>(1,905.36 to<br>3,675.15)                            | 2,641.33<br>(1,949.73 to<br>3,697.55)                            | 2,664.21<br>(1,926.56 to<br>3,816.91)                            | 89.69<br>(81.22 to<br>99.02)                               | 150.10<br>(110.60 to<br>211.07)                               | 159.01<br>(119.56 to<br>219.79)                               | 149.54<br>(107.74 to<br>215.31)                               |
| Larynx cancer                         | 423.95<br>(368.32 to<br>479.10)                                  | 468.29<br>(292.04 to<br>769.66)                                  | 269.97<br>(186.12 to<br>407.65)                                  | 684.03<br>(385.37 to<br>1,194.06)                                | 18.64<br>(16.34 to<br>20.97)                               | 24.89<br>(15.88 to<br>40.27)                                  | 15.33<br>(10.77 to<br>22.41)                                  | 34.20<br>(19.58 to<br>58.58)                                  |

|                                     |                                       |                                         |                                         |                                        |                                 |                                 |                                   |                                 |
|-------------------------------------|---------------------------------------|-----------------------------------------|-----------------------------------------|----------------------------------------|---------------------------------|---------------------------------|-----------------------------------|---------------------------------|
| Tracheal, bronchus, and lung cancer | 3,784.36<br>(3,351.20 to<br>4,256.85) | 4,048.20<br>(2,780.12 to<br>6,181.27)   | 3,016.90<br>(2,179.41 to<br>4,328.09)   | 6,439.52<br>(4,247.96 to<br>10,140.26) | 161.55<br>(144.35 to<br>181.20) | 213.04<br>(147.79 to<br>317.26) | 167.29<br>(123.30 to<br>236.96)   | 316.73<br>(212.67 to<br>485.59) |
| Malignant skin melanoma             | 130.59<br>(105.76 to<br>166.84)       | 140.99<br>(111.71 to<br>184.07)         | 170.09<br>(134.63 to<br>222.47)         | 135.13<br>(108.11 to<br>175.33)        | 5.18<br>(4.18 to<br>6.60)       | 7.58<br>(6.00 to<br>9.66)       | 9.61<br>(7.61 to<br>12.15)        | 7.07<br>(5.58 to<br>8.95)       |
| Non-melanoma skin cancer            | 133.73<br>(117.85 to<br>149.92)       | 214.84<br>(186.97 to<br>243.72)         | 178.17<br>(153.73 to<br>205.48)         | 204.11<br>(179.39 to<br>232.08)        | 6.27<br>(5.61 to<br>6.94)       | 13.60<br>(11.32 to<br>15.56)    | 11.99<br>(10.12 to<br>13.82)      | 12.51<br>(10.28 to<br>14.46)    |
| Breast cancer                       | 4,837.46<br>(4,068.42 to<br>5,752.58) | 5,400.30<br>(3,790.05 to<br>7,867.05)   | 4,421.60<br>(3,119.26 to<br>6,439.32)   | 5,691.44<br>(3,917.69 to<br>8,456.89)  | 182.31<br>(154.75 to<br>213.53) | 266.42<br>(189.06 to<br>374.92) | 229.38<br>(163.71 to<br>323.93)   | 274.00<br>(188.47 to<br>400.95) |
| Cervical cancer                     | 2,461.78<br>(2,131.22 to<br>2,801.31) | 2,285.58<br>(1,831.18 to<br>2,818.89)   | 1,763.17<br>(1,393.16 to<br>2,195.59)   | 2,282.01<br>(1,824.60 to<br>2,832.63)  | 93.68<br>(81.57 to<br>106.89)   | 112.21<br>(92.11 to<br>133.99)  | 89.85<br>(72.68 to<br>108.15)     | 109.69<br>(89.84 to<br>131.63)  |
| Uterine cancer                      | 956.76<br>(809.27 to<br>1,126.63)     | 1,300.99<br>(1,026.54 to<br>1,635.50)   | 1,089.85<br>(842.39 to<br>1,394.10)     | 1,274.04<br>(1,007.56 to<br>1,585.96)  | 45.90<br>(39.13 to<br>53.88)    | 77.96<br>(63.20 to<br>95.28)    | 67.45<br>(53.64 to<br>83.87)      | 75.13<br>(60.51 to<br>91.69)    |
| Ovarian cancer                      | 1,622.89<br>(1,314.86 to<br>1,975.37) | 1,780.02<br>(1,116.91 to<br>2,815.12)   | 1,661.19<br>(1,047.78 to<br>2,611.79)   | 1,840.70<br>(1,116.67 to<br>2,993.56)  | 63.89<br>(51.98 to<br>77.36)    | 88.90<br>(55.19 to<br>143.45)   | 85.67<br>(63.65 to<br>137.96)     | 90.57<br>(54.73 to<br>152.05)   |
| Prostate cancer                     | 4,989.51<br>(3,454.51 to<br>5,810.17) | 10,259.88<br>(6,968.60 to<br>12,169.80) | 10,280.17<br>(7,130.40 to<br>11,999.38) | 9,435.10<br>(6,250.10 to<br>11,340.12) | 336.82<br>(225.00 to<br>391.90) | 819.92<br>(515.02 to<br>994.91) | 859.27<br>(559.87 to<br>1,024.56) | 736.30<br>(464.45 to<br>920.42) |
| Testicular cancer                   | 57.88<br>(43.53 to<br>78.00)          | 48.98<br>(28.83 to<br>86.36)            | 38.27<br>(22.59 to<br>66.16)            | 48.75<br>(28.34 to<br>86.28)           | 1.06<br>(0.82 to<br>1.39)       | 1.04<br>(0.68 to<br>1.60)       | 0.85<br>(0.57 to<br>1.30)         | 1.01<br>(0.67 to<br>1.60)       |

**Trinidad and Tobago**

| Cause                           | YLLs (actual counts)                  |                                       |                                       |                                       | Deaths (actual counts)       |                                |                               |                                |
|---------------------------------|---------------------------------------|---------------------------------------|---------------------------------------|---------------------------------------|------------------------------|--------------------------------|-------------------------------|--------------------------------|
|                                 | 2016                                  | 2040 Forecast                         | 2040 Better Scenario                  | 2040 Worse Scenario                   | 2016                         | 2040 Forecast                  | 2040 Better Scenario          | 2040 Worse Scenario            |
| Kidney cancer                   | 679.95<br>(612.51 to<br>760.30)       | 855.25<br>(724.92 to<br>1,006.35)     | 912.24<br>(774.10 to<br>1,073.96)     | 861.00<br>(726.44 to<br>1,023.15)     | 24.96<br>(22.62 to<br>27.65) | 40.61<br>(34.63 to<br>47.50)   | 45.54<br>(39.36 to<br>52.60)  | 39.63<br>(33.67 to<br>47.20)   |
| Bladder cancer                  | 449.88<br>(400.74 to<br>503.60)       | 567.99<br>(401.14 to<br>836.55)       | 513.34<br>(368.47 to<br>721.39)       | 593.75<br>(407.44 to<br>889.82)       | 23.43<br>(21.04 to<br>26.06) | 37.59<br>(25.65 to<br>55.48)   | 35.74<br>(25.48 to<br>50.86)  | 37.84<br>(25.17 to<br>56.21)   |
| Brain and nervous system cancer | 985.31<br>(831.65 to<br>1,151.10)     | 1,082.80<br>(896.59 to<br>1,281.97)   | 990.01<br>(816.00 to<br>1,183.27)     | 1,062.00<br>(884.14 to<br>1,252.79)   | 26.22<br>(22.63 to<br>30.45) | 36.71<br>(31.24 to<br>44.82)   | 35.64<br>(29.93 to<br>44.25)  | 35.20<br>(30.00 to<br>42.89)   |
| Thyroid cancer                  | 166.32<br>(144.90 to<br>187.11)       | 236.75<br>(164.52 to<br>336.03)       | 192.02<br>(134.72 to<br>267.63)       | 246.00<br>(166.63 to<br>358.80)       | 6.94<br>(6.12 to<br>7.83)    | 12.21<br>(8.67 to<br>17.17)    | 10.30<br>(7.49 to<br>14.05)   | 12.37<br>(8.56 to<br>17.71)    |
| Mesothelioma                    | 65.14<br>(55.33 to<br>73.64)          | 68.77<br>(56.60 to<br>80.47)          | 70.61<br>(57.37 to<br>83.22)          | 66.36<br>(54.70 to<br>77.52)          | 2.36<br>(2.00 to<br>2.67)    | 3.10<br>(2.57 to<br>3.61)      | 3.33<br>(2.73 to<br>3.92)     | 2.91<br>(2.41 to<br>3.41)      |
| Hodgkin lymphoma                | 187.45<br>(110.35 to<br>224.18)       | 130.15<br>(81.88 to<br>162.72)        | 91.35<br>(57.12 to<br>116.02)         | 129.19<br>(80.49 to<br>162.30)        | 4.86<br>(3.01 to<br>5.67)    | 4.19<br>(2.74 to<br>5.06)      | 3.05<br>(2.03 to<br>3.70)     | 4.08<br>(2.63 to<br>4.92)      |
| Non-Hodgkin lymphoma            | 1,756.72<br>(1,540.70 to<br>2,004.11) | 1,934.90<br>(1,551.29 to<br>2,463.29) | 1,715.54<br>(1,380.82 to<br>2,174.91) | 1,942.70<br>(1,539.92 to<br>2,494.82) | 54.01<br>(47.68 to<br>61.23) | 75.91<br>(61.64 to<br>97.95)   | 70.68<br>(57.94 to<br>89.78)  | 74.36<br>(59.60 to<br>96.03)   |
| Multiple myeloma                | 951.90<br>(729.27 to<br>1,110.63)     | 1,286.33<br>(920.56 to<br>1,708.67)   | 1,235.39<br>(891.04 to<br>1,623.00)   | 1,280.01<br>(903.15 to<br>1,715.76)   | 41.16<br>(31.37 to<br>47.61) | 66.77<br>(48.47 to<br>88.17)   | 66.69<br>(48.23 to<br>86.29)  | 64.92<br>(46.36 to<br>87.15)   |
| Leukemia                        | 2,189.45<br>(1,913.17 to<br>2,508.19) | 2,330.60<br>(1,864.24 to<br>2,892.09) | 1,996.03<br>(1,620.40 to<br>2,456.21) | 2,443.38<br>(1,929.97 to<br>3,061.27) | 64.64<br>(57.80 to<br>71.32) | 100.06<br>(82.22 to<br>121.32) | 91.36<br>(76.67 to<br>109.24) | 101.13<br>(80.49 to<br>125.01) |
| Acute lymphoid leukemia         | 397.65<br>(313.23 to<br>523.86)       | 325.77<br>(234.90 to<br>452.07)       | 255.24<br>(186.85 to<br>350.90)       | 340.53<br>(244.49 to<br>466.43)       | 7.23<br>(6.05 to<br>8.90)    | 7.40<br>(5.63 to<br>9.60)      | 6.08<br>(4.67 to<br>7.92)     | 7.69<br>(5.75 to<br>10.01)     |
| Chronic lymphoid leukemia       | 60.06<br>(43.19 to<br>74.65)          | 77.44<br>(52.15 to<br>108.18)         | 74.02<br>(51.15 to<br>100.58)         | 80.61<br>(53.60 to<br>114.19)         | 2.76<br>(2.14 to<br>3.36)    | 4.61<br>(3.18 to<br>6.44)      | 4.69<br>(3.31 to<br>6.50)     | 4.59<br>(3.08 to<br>6.58)      |

|                                               |                                                     |                                                      |                                                     |                                                       |                                                  |                                                  |                                                  |                                                   |
|-----------------------------------------------|-----------------------------------------------------|------------------------------------------------------|-----------------------------------------------------|-------------------------------------------------------|--------------------------------------------------|--------------------------------------------------|--------------------------------------------------|---------------------------------------------------|
| Acute myeloid leukemia                        | 733.13<br>(623.51 to 890.29)                        | 856.87<br>(662.73 to 1,122.23)                       | 824.60<br>(647.00 to 1,066.41)                      | 898.84<br>(681.26 to 1,198.05)                        | 19.57<br>(17.05 to 23.27)                        | 32.36<br>(25.80 to 40.89)                        | 33.69<br>(27.55 to 41.52)                        | 32.74<br>(25.74 to 41.97)                         |
| Chronic myeloid leukemia                      | 152.65<br>(129.57 to 179.28)                        | 124.64<br>(91.94 to 170.98)                          | 87.92<br>(65.25 to 119.86)                          | 132.57<br>(95.05 to 186.37)                           | 5.11<br>(4.43 to 5.88)                           | 5.47<br>(4.11 to 7.59)                           | 3.99<br>(3.01 to 5.46)                           | 5.62<br>(4.14 to 7.81)                            |
| Other leukemia                                | 845.96<br>(724.17 to 965.57)                        | 945.88<br>(762.26 to 1,171.33)                       | 754.25<br>(615.53 to 917.64)                        | 990.82<br>(785.12 to 1,246.74)                        | 29.97<br>(26.04 to 33.83)                        | 50.22<br>(40.84 to 60.92)                        | 42.91<br>(35.32 to 51.91)                        | 50.49<br>(39.67 to 63.31)                         |
| Other neoplasms                               | 3,467.73<br>(3,073.01 to 3,927.73)                  | 3,587.23<br>(3,104.35 to 4,116.35)                   | 3,505.02<br>(3,027.78 to 4,026.27)                  | 3,482.57<br>(3,034.66 to 3,985.86)                    | 113.61<br>(102.06 to 125.23)                     | 160.19<br>(141.12 to 178.75)                     | 167.69<br>(146.71 to 187.07)                     | 150.83<br>(132.07 to 168.43)                      |
| <b>Cardiovascular diseases</b>                | <b>71,808.26</b><br><b>(66,022.86 to 77,414.18)</b> | <b>81,787.74</b><br><b>(55,052.98 to 126,441.57)</b> | <b>46,786.06</b><br><b>(32,335.49 to 72,584.25)</b> | <b>115,600.42</b><br><b>(75,660.19 to 180,380.07)</b> | <b>3,834.52</b><br><b>(3,575.32 to 4,107.87)</b> | <b>5,692.51</b><br><b>(3,970.08 to 8,809.11)</b> | <b>3,666.74</b><br><b>(2,619.77 to 5,919.19)</b> | <b>7,269.42</b><br><b>(5,021.90 to 11,069.16)</b> |
| Rheumatic heart disease                       | 757.12<br>(664.91 to 870.04)                        | 469.66<br>(372.77 to 604.63)                         | 333.47<br>(262.86 to 422.02)                        | 464.94<br>(364.07 to 597.99)                          | 26.55<br>(23.30 to 30.25)                        | 27.47<br>(22.19 to 34.26)                        | 21.27<br>(17.15 to 26.18)                        | 26.19<br>(21.00 to 33.70)                         |
| Ischemic heart disease                        | 39,500.51<br>(36,227.12 to 42,961.47)               | 41,636.47<br>(23,212.63 to 79,679.11)                | 21,824.17<br>(12,187.89 to 43,214.30)               | 65,466.17<br>(34,664.17 to 122,258.55)                | 2,139.70<br>(1,974.42 to 2,311.42)               | 2,856.86<br>(1,630.59 to 5,537.37)               | 1,691.47<br>(958.48 to 3,538.72)                 | 4,015.01<br>(2,280.38 to 7,558.75)                |
| Stroke                                        | 18,301.07<br>(16,654.19 to 20,045.29)               | 20,287.24<br>(12,193.04 to 39,655.63)                | 10,160.09<br>(6,196.66 to 20,325.64)                | 29,602.14<br>(16,912.84 to 54,560.08)                 | 1,002.39<br>(916.06 to 1,097.17)                 | 1,446.30<br>(881.56 to 3,038.50)                 | 838.50<br>(502.46 to 1,961.51)                   | 1,873.00<br>(1,115.97 to 3,985.72)                |
| Ischemic stroke                               | 7,063.50<br>(6,380.27 to 7,831.05)                  | 8,436.42<br>(4,297.26 to 23,131.63)                  | 4,877.49<br>(2,486.77 to 13,639.91)                 | 11,447.74<br>(5,497.30 to 30,745.26)                  | 458.26<br>(415.49 to 505.65)                     | 708.26<br>(347.57 to 2,078.80)                   | 457.60<br>(223.04 to 1,329.90)                   | 872.48<br>(414.81 to 2,529.98)                    |
| Intracerebral hemorrhage                      | 11,237.57<br>(10,155.57 to 12,389.54)               | 11,850.82<br>(6,791.31 to 20,275.36)                 | 5,282.60<br>(3,272.48 to 8,714.49)                  | 18,154.41<br>(9,614.29 to 33,276.33)                  | 544.13<br>(494.02 to 599.26)                     | 738.05<br>(458.47 to 1,211.74)                   | 380.91<br>(247.32 to 649.35)                     | 1,000.52<br>(584.57 to 1,771.52)                  |
| Hypertensive heart disease                    | 4,796.78<br>(3,679.63 to 7,184.49)                  | 9,075.39<br>(5,996.41 to 15,492.74)                  | 6,306.32<br>(4,480.24 to 9,633.96)                  | 9,774.65<br>(6,195.95 to 17,023.21)                   | 276.71<br>(209.93 to 424.26)                     | 692.42<br>(457.29 to 1,207.25)                   | 524.31<br>(368.61 to 791.70)                     | 716.42<br>(452.91 to 1,281.32)                    |
| Cardiomyopathy and myocarditis                | 2,471.78<br>(2,087.79 to 3,144.61)                  | 2,494.49<br>(1,891.75 to 3,658.13)                   | 2,022.00<br>(1,481.92 to 2,801.42)                  | 2,579.78<br>(1,871.48 to 3,642.82)                    | 93.07<br>(79.07 to 118.68)                       | 136.26<br>(99.73 to 189.91)                      | 115.71<br>(84.89 to 161.45)                      | 129.77<br>(94.75 to 183.33)                       |
| Myocarditis                                   | 446.43<br>(357.49 to 628.84)                        | 457.32<br>(341.47 to 669.28)                         | 434.78<br>(323.45 to 639.72)                        | 444.00<br>(331.82 to 643.88)                          | 18.40<br>(14.22 to 27.37)                        | 28.57<br>(20.65 to 43.63)                        | 30.05<br>(21.86 to 45.97)                        | 26.71<br>(18.55 to 41.01)                         |
| <b>Trinidad and Tobago</b>                    |                                                     |                                                      |                                                     |                                                       |                                                  |                                                  |                                                  |                                                   |
| Cause                                         | YLLs (actual counts)                                |                                                      |                                                     |                                                       | Deaths (actual counts)                           |                                                  |                                                  |                                                   |
|                                               | 2016                                                | 2040 Forecast                                        | 2040 Better Scenario                                | 2040 Worse Scenario                                   | 2016                                             | 2040 Forecast                                    | 2040 Better Scenario                             | 2040 Worse Scenario                               |
| Alcoholic cardiomyopathy                      | 239.56<br>(177.53 to 398.97)                        | 262.33<br>(191.50 to 429.25)                         | 238.62<br>(173.19 to 378.77)                        | 258.71<br>(187.96 to 427.03)                          | 9.99<br>(7.62 to 15.43)                          | 13.17<br>(9.47 to 19.46)                         | 12.82<br>(8.56 to 18.53)                         | 12.59<br>(9.12 to 18.53)                          |
| Other cardiomyopathy                          | 1,785.79<br>(1,516.40 to 2,252.79)                  | 1,884.84<br>(1,272.78 to 2,788.70)                   | 1,348.60<br>(908.10 to 1,974.84)                    | 1,877.07<br>(1,277.92 to 2,804.41)                    | 64.68<br>(55.48 to 81.48)                        | 94.52<br>(64.08 to 144.57)                       | 72.84<br>(49.06 to 111.62)                       | 90.47<br>(61.77 to 139.00)                        |
| Atrial fibrillation and flutter               | 445.99<br>(349.06 to 553.02)                        | 890.48<br>(660.41 to 1,175.95)                       | 850.21<br>(638.25 to 1,108.48)                      | 845.14<br>(624.16 to 1,112.42)                        | 41.45<br>(32.08 to 52.04)                        | 95.85<br>(68.46 to 127.91)                       | 96.73<br>(71.02 to 126.41)                       | 88.62<br>(61.45 to 118.95)                        |
| Aortic aneurysm                               | 1,416.15<br>(1,264.05 to 1,590.00)                  | 1,771.93<br>(1,434.68 to 2,289.41)                   | 1,550.66<br>(1,275.82 to 1,923.66)                  | 1,755.64<br>(1,411.61 to 2,306.09)                    | 73.42<br>(66.02 to 81.73)                        | 114.74<br>(93.43 to 144.40)                      | 108.64<br>(89.95 to 132.77)                      | 109.17<br>(88.18 to 137.80)                       |
| Peripheral artery disease                     | 165.84<br>(93.89 to 213.45)                         | 485.25<br>(241.47 to 718.53)                         | 511.65<br>(247.70 to 758.97)                        | 479.36<br>(237.97 to 706.62)                          | 15.88<br>(7.83 to 21.06)                         | 54.99<br>(24.46 to 86.76)                        | 62.65<br>(28.21 to 97.41)                        | 52.64<br>(23.17 to 84.65)                         |
| Endocarditis                                  | 663.95<br>(522.56 to 903.80)                        | 811.25<br>(566.44 to 1,162.29)                       | 749.58<br>(525.71 to 1,061.70)                      | 806.83<br>(558.08 to 1,165.18)                        | 26.90<br>(20.58 to 36.80)                        | 45.83<br>(30.79 to 67.56)                        | 45.62<br>(30.89 to 66.54)                        | 43.77<br>(29.72 to 64.60)                         |
| Other cardiovascular and circulatory diseases | 3,289.07<br>(2,911.24 to 3,711.45)                  | 3,755.59<br>(2,958.73 to 4,874.60)                   | 2,477.92<br>(1,995.42 to 3,100.62)                  | 3,825.78<br>(2,965.46 to 5,053.77)                    | 138.44<br>(123.73 to 154.91)                     | 221.77<br>(178.31 to 281.10)                     | 161.83<br>(130.28 to 198.73)                     | 214.83<br>(169.30 to 273.75)                      |

|                                                                |                                              |                                              |                                              |                                              |                                        |                                        |                                        |                                        |
|----------------------------------------------------------------|----------------------------------------------|----------------------------------------------|----------------------------------------------|----------------------------------------------|----------------------------------------|----------------------------------------|----------------------------------------|----------------------------------------|
| <b>Chronic respiratory diseases</b>                            | 4,951.12<br>(4,448.98 to<br>5,429.06)        | 5,171.27<br>(4,106.42 to<br>6,399.83)        | 3,917.42<br>(3,236.14 to<br>4,654.87)        | 6,490.29<br>(4,930.84 to<br>8,375.36)        | 244.53<br>(222.10 to<br>266.35)        | 348.44<br>(269.27 to<br>435.32)        | 281.29<br>(229.51 to<br>334.16)        | 415.20<br>(311.28 to<br>546.23)        |
| Chronic obstructive pulmonary disease                          | 2,709.80<br>(2,383.17 to<br>3,046.38)        | 3,359.90<br>(2,465.73 to<br>4,495.47)        | 2,337.61<br>(1,802.83 to<br>3,007.40)        | 4,580.49<br>(3,147.22 to<br>6,447.60)        | 155.63<br>(138.82 to<br>173.75)        | 246.28<br>(180.17 to<br>327.55)        | 184.69<br>(140.79 to<br>238.54)        | 312.13<br>(213.34 to<br>432.14)        |
| Pneumoconiosis                                                 | 7.97<br>(6.75 to<br>9.30)                    | 8.79<br>(6.90 to<br>11.23)                   | 7.66<br>(5.99 to<br>9.75)                    | 8.47<br>(6.59 to<br>10.77)                   | 0.43<br>(0.37 to<br>0.51)              | 0.66<br>(0.49 to<br>0.89)              | 0.60<br>(0.45 to<br>0.81)              | 0.62<br>(0.45 to<br>0.83)              |
| Silicosis                                                      | 0.68<br>(0.48 to<br>0.91)                    | 0.75<br>(0.46 to<br>1.13)                    | 0.51<br>(0.30 to<br>0.79)                    | 0.71<br>(0.44 to<br>1.06)                    | 0.05<br>(0.03 to<br>0.06)              | 0.07<br>(0.04 to<br>0.11)              | 0.05<br>(0.03 to<br>0.08)              | 0.06<br>(0.03 to<br>0.10)              |
| Asbestosis                                                     | 2.77<br>(2.29 to<br>3.36)                    | 2.61<br>(2.04 to<br>3.53)                    | 2.96<br>(2.30 to<br>3.75)                    | 2.53<br>(1.97 to<br>3.24)                    | 0.09<br>(0.08 to<br>0.11)              | 0.12<br>(0.09 to<br>0.17)              | 0.15<br>(0.11 to<br>0.20)              | 0.12<br>(0.08 to<br>0.16)              |
| Coal workers pneumoconiosis                                    | 0.30<br>(0.21 to<br>0.48)                    | 0.48<br>(0.27 to<br>0.77)                    | 0.34<br>(0.18 to<br>0.58)                    | 0.47<br>(0.26 to<br>0.77)                    | 0.02<br>(0.01 to<br>0.03)              | 0.04<br>(0.02 to<br>0.07)              | 0.04<br>(0.02 to<br>0.07)              | 0.04<br>(0.02 to<br>0.07)              |
| Other pneumoconiosis                                           | 4.22<br>(3.47 to<br>5.15)                    | 4.96<br>(3.51 to<br>6.85)                    | 3.85<br>(2.68 to<br>5.46)                    | 4.76<br>(3.34 to<br>6.60)                    | 0.27<br>(0.22 to<br>0.33)              | 0.43<br>(0.29 to<br>0.61)              | 0.36<br>(0.24 to<br>0.54)              | 0.40<br>(0.26 to<br>0.57)              |
| Asthma                                                         | 1,489.27<br>(1,292.45 to<br>1,720.00)        | 953.75<br>(605.63 to<br>1,526.40)            | 513.70<br>(322.68 to<br>827.02)              | 1,076.93<br>(659.14 to<br>1,764.92)          | 55.54<br>(48.51 to<br>63.98)           | 51.64<br>(32.17 to<br>81.65)           | 30.62<br>(19.33 to<br>47.89)           | 55.61<br>(34.08 to<br>89.66)           |
| Interstitial lung disease and pulmonary sarcoidosis            | 548.54<br>(346.87 to<br>662.53)              | 595.82<br>(380.56 to<br>734.69)              | 804.23<br>(529.31 to<br>987.43)              | 570.71<br>(359.79 to<br>706.97)              | 23.57<br>(14.38 to<br>28.56)           | 33.02<br>(19.65 to<br>41.06)           | 47.00<br>(28.84 to<br>57.63)           | 30.80<br>(18.02 to<br>38.22)           |
| Other chronic respiratory diseases                             | 195.55<br>(133.38 to<br>296.98)              | 253.01<br>(164.82 to<br>374.64)              | 254.22<br>(164.85 to<br>367.95)              | 253.70<br>(165.54 to<br>377.37)              | 9.36<br>(5.82 to<br>13.12)             | 16.83<br>(9.41 to<br>24.48)            | 18.39<br>(10.59 to<br>26.25)           | 16.05<br>(8.96 to<br>23.79)            |
| <b>Cirrhosis and other chronic liver diseases</b>              | <b>5,396.79</b><br>(4,703.72 to<br>6,059.87) | <b>5,589.68</b><br>(4,802.13 to<br>6,451.24) | <b>4,347.21</b><br>(3,673.09 to<br>5,071.10) | <b>5,557.58</b><br>(4,783.74 to<br>6,369.51) | <b>185.39</b><br>(163.30 to<br>206.77) | <b>233.05</b><br>(205.09 to<br>262.54) | <b>190.29</b><br>(165.28 to<br>215.57) | <b>226.26</b><br>(198.81 to<br>254.43) |
| Cirrhosis and other chronic liver diseases due to hepatitis B  | 655.36<br>(518.85 to<br>816.53)              | 690.31<br>(538.18 to<br>876.77)              | 581.21<br>(452.53 to<br>742.21)              | 671.58<br>(527.71 to<br>848.39)              | 23.43<br>(18.80 to<br>29.27)           | 29.62<br>(23.80 to<br>36.86)           | 25.88<br>(20.71 to<br>32.09)           | 28.19<br>(22.74 to<br>34.90)           |
| Cirrhosis and other chronic liver diseases due to hepatitis C  | 1,932.20<br>(1,650.41 to<br>2,247.59)        | 2,014.08<br>(1,669.04 to<br>2,421.53)        | 1,665.82<br>(1,369.42 to<br>2,031.88)        | 1,968.62<br>(1,633.66 to<br>2,344.61)        | 65.78<br>(56.64 to<br>76.03)           | 81.29<br>(68.85 to<br>95.69)           | 69.51<br>(58.62 to<br>82.30)           | 77.91<br>(66.38 to<br>91.19)           |
| Cirrhosis and other chronic liver diseases due to alcohol use  | 1,949.17<br>(1,655.30 to<br>2,237.81)        | 2,098.76<br>(1,743.30 to<br>2,482.69)        | 1,459.93<br>(1,209.03 to<br>1,729.55)        | 2,144.13<br>(1,798.60 to<br>2,534.12)        | 69.48<br>(59.98 to<br>79.10)           | 89.70<br>(75.88 to<br>103.38)          | 66.96<br>(56.51 to<br>77.66)           | 89.07<br>(75.33 to<br>103.01)          |
| Cirrhosis and other chronic liver diseases due to other causes | 860.06<br>(731.30 to<br>993.86)              | 786.53<br>(649.79 to<br>949.57)              | 640.24<br>(522.55 to<br>779.75)              | 773.25<br>(647.07 to<br>931.83)              | 26.69<br>(22.89 to<br>30.88)           | 32.44<br>(27.36 to<br>38.49)           | 27.94<br>(23.43 to<br>33.30)           | 31.08<br>(26.31 to<br>36.62)           |
| <b>Digestive diseases</b>                                      | <b>6,049.16</b><br>(5,321.72 to<br>7,261.48) | <b>6,520.85</b><br>(5,489.58 to<br>7,983.01) | <b>5,128.53</b><br>(4,293.97 to<br>6,275.47) | <b>6,441.68</b><br>(5,386.68 to<br>7,931.22) | <b>267.35</b><br>(234.42 to<br>307.02) | <b>391.18</b><br>(325.83 to<br>465.58) | <b>331.46</b><br>(276.74 to<br>395.07) | <b>373.74</b><br>(304.84 to<br>453.15) |
| Peptic ulcer disease                                           | 1,565.62<br>(1,354.54 to<br>1,885.08)        | 1,328.99<br>(1,060.94 to<br>1,664.66)        | 858.05<br>(678.31 to<br>1,085.07)            | 1,322.44<br>(1,035.83 to<br>1,639.94)        | 75.00<br>(64.56 to<br>87.21)           | 86.84<br>(68.58 to<br>107.16)          | 59.39<br>(46.97 to<br>73.74)           | 83.57<br>(64.52 to<br>104.48)          |
| <b>Trinidad and Tobago</b>                                     |                                              |                                              |                                              |                                              |                                        |                                        |                                        |                                        |
| Cause                                                          | YLLs (actual counts)                         |                                              |                                              |                                              | Deaths (actual counts)                 |                                        |                                        |                                        |
|                                                                | 2016                                         | 2040 Forecast                                | 2040 Better Scenario                         | 2040 Worse Scenario                          | 2016                                   | 2040 Forecast                          | 2040 Better Scenario                   | 2040 Worse Scenario                    |
| Gastritis and duodenitis                                       | 708.05<br>(534.77 to<br>899.98)              | 896.44<br>(668.32 to<br>1,160.91)            | 696.13<br>(510.43 to<br>915.61)              | 869.23<br>(649.79 to<br>1,140.23)            | 27.56<br>(20.68 to<br>34.73)           | 45.22<br>(34.24 to<br>56.76)           | 37.20<br>(27.94 to<br>47.42)           | 42.56<br>(31.52 to<br>53.73)           |
| Appendicitis                                                   | 257.63<br>(208.21 to<br>358.73)              | 215.93<br>(169.71 to<br>313.52)              | 145.20<br>(112.50 to<br>211.59)              | 212.98<br>(165.77 to<br>310.16)              | 7.85<br>(6.27 to<br>10.58)             | 9.20<br>(7.24 to<br>12.81)             | 6.60<br>(5.12 to<br>9.28)              | 8.82<br>(6.76 to<br>11.75)             |
| Paralytic ileus and intestinal obstruction                     | 972.61<br>(784.33 to<br>1,360.18)            | 1,106.63<br>(885.91 to<br>1,496.81)          | 1,083.22<br>(871.50 to<br>1,438.83)          | 1,062.21<br>(855.07 to<br>1,455.79)          | 42.24<br>(34.95 to<br>55.68)           | 68.83<br>(54.28 to<br>90.50)           | 72.41<br>(58.34 to<br>93.91)           | 63.91<br>(50.02 to<br>84.54)           |

|                                         |                                                            |                                                              |                                                              |                                                              |                                                      |                                                        |                                                          |                                                        |
|-----------------------------------------|------------------------------------------------------------|--------------------------------------------------------------|--------------------------------------------------------------|--------------------------------------------------------------|------------------------------------------------------|--------------------------------------------------------|----------------------------------------------------------|--------------------------------------------------------|
|                                         | 328.62<br>(262.60 to<br>469.44)                            | 258.24<br>(199.36 to<br>366.30)                              | 208.61<br>(158.96 to<br>292.34)                              | 248.02<br>(189.42 to<br>352.84)                              | 14.46<br>(11.07 to<br>19.34)                         | 15.62<br>(11.38 to<br>21.07)                           | 13.67<br>(9.99 to<br>18.30)                              | 14.47<br>(10.31 to<br>19.61)                           |
| Inguinal, femoral, and abdominal hernia |                                                            |                                                              |                                                              |                                                              |                                                      |                                                        |                                                          |                                                        |
|                                         | 143.59<br>(93.17 to<br>175.95)                             | 138.07<br>(90.80 to<br>177.29)                               | 133.59<br>(87.87 to<br>172.68)                               | 133.78<br>(88.07 to<br>171.85)                               | 5.05<br>(3.37 to<br>6.12)                            | 6.36<br>(4.52 to<br>7.98)                              | 6.48<br>(4.81 to<br>8.10)                                | 6.01<br>(4.19 to<br>7.54)                              |
| Inflammatory bowel disease              |                                                            |                                                              |                                                              |                                                              |                                                      |                                                        |                                                          |                                                        |
|                                         | 234.86<br>(175.28 to<br>278.40)                            | 350.67<br>(242.78 to<br>424.85)                              | 321.14<br>(222.33 to<br>392.80)                              | 333.08<br>(232.90 to<br>403.47)                              | 12.33<br>(8.76 to<br>14.56)                          | 24.67<br>(16.20 to<br>30.40)                           | 23.86<br>(15.95 to<br>29.50)                             | 22.80<br>(15.03 to<br>28.22)                           |
| Vascular intestinal disorders           |                                                            |                                                              |                                                              |                                                              |                                                      |                                                        |                                                          |                                                        |
|                                         | 380.01<br>(324.86 to<br>452.63)                            | 543.25<br>(313.17 to<br>944.92)                              | 340.12<br>(201.49 to<br>586.60)                              | 613.38<br>(345.68 to<br>1,088.96)                            | 17.14<br>(14.42 to<br>19.99)                         | 32.79<br>(19.23 to<br>57.49)                           | 22.01<br>(13.24 to<br>37.57)                             | 35.60<br>(20.36 to<br>62.72)                           |
| Gallbladder and biliary diseases        |                                                            |                                                              |                                                              |                                                              |                                                      |                                                        |                                                          |                                                        |
|                                         | 517.27<br>(396.92 to<br>622.26)                            | 582.84<br>(352.98 to<br>1,029.24)                            | 372.37<br>(243.97 to<br>598.33)                              | 595.35<br>(358.54 to<br>1,049.18)                            | 15.92<br>(12.42 to<br>18.90)                         | 21.75<br>(14.53 to<br>35.29)                           | 14.91<br>(10.55 to<br>22.13)                             | 21.67<br>(14.23 to<br>35.21)                           |
| Pancreatitis                            |                                                            |                                                              |                                                              |                                                              |                                                      |                                                        |                                                          |                                                        |
|                                         | 940.91<br>(720.74 to<br>1,130.95)                          | 1,099.78<br>(810.01 to<br>1,322.79)                          | 970.09<br>(707.59 to<br>1,181.78)                            | 1,051.21<br>(771.06 to<br>1,279.38)                          | 49.81<br>(37.13 to<br>58.68)                         | 79.91<br>(55.37 to<br>98.43)                           | 74.92<br>(54.37 to<br>92.70)                             | 74.34<br>(52.83 to<br>92.69)                           |
| Other digestive diseases                |                                                            |                                                              |                                                              |                                                              |                                                      |                                                        |                                                          |                                                        |
|                                         | <b>6,443.44</b><br><b>(5,665.81 to</b><br><b>7,372.49)</b> | <b>11,125.40</b><br><b>(8,505.68 to</b><br><b>15,168.71)</b> | <b>10,771.56</b><br><b>(8,492.73 to</b><br><b>14,392.43)</b> | <b>11,164.40</b><br><b>(8,312.27 to</b><br><b>15,883.69)</b> | <b>436.91</b><br><b>(375.14 to</b><br><b>509.41)</b> | <b>983.18</b><br><b>(697.61 to</b><br><b>1,412.03)</b> | <b>1,034.17</b><br><b>(773.37 to</b><br><b>1,425.22)</b> | <b>964.29</b><br><b>(660.34 to</b><br><b>1,455.31)</b> |
| Neurological disorders                  |                                                            |                                                              |                                                              |                                                              |                                                      |                                                        |                                                          |                                                        |
|                                         | 3,475.85<br>(2,876.90 to<br>4,216.65)                      | 7,364.30<br>(4,929.01 to<br>11,242.37)                       | 7,396.40<br>(5,204.18 to<br>10,899.94)                       | 7,439.31<br>(4,798.49 to<br>11,636.54)                       | 339.67<br>(282.50 to<br>409.75)                      | 816.42<br>(538.80 to<br>1,232.39)                      | 861.40<br>(601.18 to<br>1,250.51)                        | 806.21<br>(515.54 to<br>1,264.98)                      |
| Alzheimer's disease and other dementias |                                                            |                                                              |                                                              |                                                              |                                                      |                                                        |                                                          |                                                        |
|                                         | 407.08<br>(306.19 to<br>521.09)                            | 802.42<br>(593.06 to<br>1,041.50)                            | 963.73<br>(728.27 to<br>1,240.05)                            | 735.71<br>(543.06 to<br>959.43)                              | 31.66<br>(23.91 to<br>40.60)                         | 71.45<br>(51.78 to<br>94.75)                           | 88.85<br>(66.23 to<br>115.37)                            | 64.46<br>(45.70 to<br>85.74)                           |
| Parkinson's disease                     |                                                            |                                                              |                                                              |                                                              |                                                      |                                                        |                                                          |                                                        |
|                                         | 1,611.82<br>(1,367.48 to<br>1,894.03)                      | 1,929.30<br>(1,308.24 to<br>2,837.16)                        | 1,364.61<br>(951.52 to<br>1,940.89)                          | 1,982.38<br>(1,312.17 to<br>3,005.44)                        | 39.20<br>(33.57 to<br>44.91)                         | 59.38<br>(42.49 to<br>82.60)                           | 45.58<br>(33.95 to<br>61.18)                             | 59.24<br>(41.83 to<br>83.97)                           |
| Epilepsy                                |                                                            |                                                              |                                                              |                                                              |                                                      |                                                        |                                                          |                                                        |
|                                         | 81.18<br>(61.94 to<br>96.04)                               | 70.50<br>(52.23 to<br>88.14)                                 | 71.76<br>(53.14 to<br>89.57)                                 | 70.43<br>(52.44 to<br>88.24)                                 | 2.30<br>(1.75 to<br>2.70)                            | 2.34<br>(1.76 to<br>2.92)                              | 2.44<br>(1.81 to<br>3.00)                                | 2.31<br>(1.73 to<br>2.87)                              |
| Multiple sclerosis                      |                                                            |                                                              |                                                              |                                                              |                                                      |                                                        |                                                          |                                                        |
|                                         | 187.60<br>(163.61 to<br>211.03)                            | 247.21<br>(209.32 to<br>287.73)                              | 254.70<br>(212.50 to<br>300.43)                              | 238.70<br>(200.99 to<br>276.49)                              | 6.59<br>(5.79 to<br>7.38)                            | 10.29<br>(8.78 to<br>11.83)                            | 10.90<br>(9.19 to<br>12.71)                              | 9.77<br>(8.38 to<br>11.20)                             |
| Motor neuron disease                    |                                                            |                                                              |                                                              |                                                              |                                                      |                                                        |                                                          |                                                        |
|                                         | 679.91<br>(594.29 to<br>776.36)                            | 711.67<br>(589.26 to<br>867.98)                              | 720.37<br>(599.75 to<br>871.43)                              | 697.87<br>(579.91 to<br>849.81)                              | 17.49<br>(15.62 to<br>19.40)                         | 23.30<br>(20.35 to<br>26.52)                           | 25.00<br>(21.89 to<br>28.48)                             | 22.31<br>(19.45 to<br>25.45)                           |
| Other neurological disorders            |                                                            |                                                              |                                                              |                                                              |                                                      |                                                        |                                                          |                                                        |
|                                         | <b>1,344.68</b><br><b>(1,128.72 to</b><br><b>1,572.06)</b> | <b>1,202.68</b><br><b>(986.86 to</b><br><b>1,476.88)</b>     | <b>1,312.13</b><br><b>(1,078.27 to</b><br><b>1,619.92)</b>   | <b>1,185.84</b><br><b>(979.79 to</b><br><b>1,449.55)</b>     | <b>38.90</b><br><b>(33.25 to</b><br><b>44.75)</b>    | <b>42.22</b><br><b>(36.06 to</b><br><b>49.84)</b>      | <b>48.65</b><br><b>(41.48 to</b><br><b>57.46)</b>        | <b>40.61</b><br><b>(34.86 to</b><br><b>47.76)</b>      |
| Mental disorders                        |                                                            |                                                              |                                                              |                                                              |                                                      |                                                        |                                                          |                                                        |
|                                         | 876.73<br>(742.86 to<br>1,012.00)                          | 659.75<br>(535.75 to<br>804.94)                              | 662.61<br>(532.90 to<br>820.22)                              | 653.71<br>(533.48 to<br>793.64)                              | 26.22<br>(22.55 to<br>30.03)                         | 23.56<br>(19.60 to<br>28.15)                           | 24.78<br>(20.43 to<br>29.92)                             | 22.82<br>(19.09 to<br>27.05)                           |
| Alcohol use disorders                   |                                                            |                                                              |                                                              |                                                              |                                                      |                                                        |                                                          |                                                        |
|                                         | 462.51<br>(343.16 to<br>620.20)                            | 536.75<br>(398.00 to<br>714.77)                              | 643.86<br>(482.17 to<br>843.14)                              | 525.96<br>(390.67 to<br>697.23)                              | 12.58<br>(9.44 to<br>16.76)                          | 18.55<br>(14.13 to<br>23.79)                           | 23.76<br>(18.22 to<br>30.11)                             | 17.66<br>(13.46 to<br>22.70)                           |
| Drug use disorders                      |                                                            |                                                              |                                                              |                                                              |                                                      |                                                        |                                                          |                                                        |
|                                         | 259.67<br>(172.07 to<br>328.85)                            | 224.20<br>(154.29 to<br>314.95)                              | 235.47<br>(163.28 to<br>333.36)                              | 219.89<br>(151.27 to<br>310.03)                              | 6.01<br>(4.38 to<br>8.17)                            | 7.13<br>(5.22 to<br>9.82)                              | 7.93<br>(5.80 to<br>10.99)                               | 6.80<br>(4.94 to<br>9.30)                              |
| Opioid use disorders                    |                                                            |                                                              |                                                              |                                                              |                                                      |                                                        |                                                          |                                                        |
|                                         | 79.06<br>(47.75 to<br>114.12)                              | 120.26<br>(72.79 to<br>183.05)                               | 142.67<br>(84.89 to<br>214.99)                               | 119.24<br>(72.48 to<br>181.82)                               | 2.05<br>(1.24 to<br>2.95)                            | 3.30<br>(1.96 to<br>4.98)                              | 3.95<br>(2.36 to<br>5.86)                                | 3.25<br>(1.93 to<br>4.87)                              |
| Cocaine use disorders                   |                                                            |                                                              |                                                              |                                                              |                                                      |                                                        |                                                          |                                                        |
|                                         | 10.14<br>(5.86 to<br>16.44)                                | 16.60<br>(10.50 to<br>26.22)                                 | 22.04<br>(13.93 to<br>34.69)                                 | 16.41<br>(10.24 to<br>26.16)                                 | 0.25<br>(0.15 to<br>0.38)                            | 0.50<br>(0.33 to<br>0.75)                              | 0.71<br>(0.48 to<br>1.05)                                | 0.48<br>(0.32 to<br>0.72)                              |
| Amphetamine use disorders               |                                                            |                                                              |                                                              |                                                              |                                                      |                                                        |                                                          |                                                        |
|                                         | 133.63<br>(95.87 to<br>188.80)                             | 175.70<br>(122.71 to<br>244.62)                              | 243.68<br>(173.38 to<br>336.35)                              | 170.42<br>(119.51 to<br>235.75)                              | 4.28<br>(3.16 to<br>5.81)                            | 7.62<br>(5.54 to<br>10.13)                             | 11.16<br>(8.19 to<br>14.66)                              | 7.13<br>(5.21 to<br>9.43)                              |
| Other drug use disorders                |                                                            |                                                              |                                                              |                                                              |                                                      |                                                        |                                                          |                                                        |
|                                         | 5.44<br>(4.38 to<br>6.65)                                  | 6.18<br>(4.33 to<br>8.66)                                    | 5.66<br>(4.02 to<br>7.91)                                    | 6.17<br>(4.32 to<br>8.68)                                    | 0.11<br>(0.09 to<br>0.13)                            | 0.12<br>(0.09 to<br>0.17)                              | 0.11<br>(0.08 to<br>0.15)                                | 0.12<br>(0.09 to<br>0.16)                              |
| Eating disorders                        |                                                            |                                                              |                                                              |                                                              |                                                      |                                                        |                                                          |                                                        |
| <b>Trinidad and Tobago</b>              |                                                            |                                                              |                                                              |                                                              |                                                      |                                                        |                                                          |                                                        |
| <b>YLLs (actual counts)</b>             |                                                            |                                                              |                                                              |                                                              | <b>Deaths (actual counts)</b>                        |                                                        |                                                          |                                                        |



| Cause                                                      | 2016                                         | 2040 Forecast                                 | 2040 Better Scenario                         | 2040 Worse Scenario                           | 2016                                      | 2040 Forecast                             | 2040 Better Scenario                      | 2040 Worse Scenario                       |
|------------------------------------------------------------|----------------------------------------------|-----------------------------------------------|----------------------------------------------|-----------------------------------------------|-------------------------------------------|-------------------------------------------|-------------------------------------------|-------------------------------------------|
| <b>Diabetes, urogenital, blood, and endocrine diseases</b> | <b>49,040.77</b><br>(44,535.88 to 53,340.49) | <b>72,052.24</b><br>(49,659.59 to 108,140.93) | <b>50,951.35</b><br>(34,843.95 to 81,385.87) | <b>80,889.77</b><br>(54,840.27 to 118,011.34) | <b>2,269.93</b><br>(2,076.72 to 2,456.30) | <b>4,348.42</b><br>(3,092.62 to 6,472.95) | <b>3,266.78</b><br>(2,332.07 to 5,070.53) | <b>4,684.25</b><br>(3,303.25 to 6,726.31) |
| Diabetes mellitus                                          | 34,123.82<br>(30,993.98 to 37,228.22)        | 46,412.65<br>(33,487.61 to 63,206.11)         | 30,947.84<br>(22,757.17 to 40,875.26)        | 51,540.05<br>(36,596.14 to 72,280.98)         | 1,667.30<br>(1,523.27 to 1,813.48)        | 2,845.96<br>(2,147.51 to 3,686.05)        | 2,020.32<br>(1,547.15 to 2,559.33)        | 3,026.51<br>(2,226.37 to 4,037.88)        |
| Acute glomerulonephritis                                   | 7.56<br>(6.54 to 9.04)                       | 7.20<br>(5.59 to 9.35)                        | 5.32<br>(4.16 to 6.80)                       | 7.24<br>(5.57 to 9.55)                        | 0.17<br>(0.15 to 0.19)                    | 0.17<br>(0.13 to 0.21)                    | 0.13<br>(0.10 to 0.17)                    | 0.16<br>(0.13 to 0.20)                    |
| Chronic kidney disease                                     | 9,692.78<br>(8,725.92 to 10,636.78)          | 18,573.06<br>(4,848.53 to 54,615.50)          | 13,656.25<br>(3,510.46 to 42,059.26)         | 22,511.16<br>(5,785.13 to 58,493.83)          | 407.55<br>(369.32 to 446.38)              | 1,118.90<br>(258.42 to 3,246.24)          | 875.98<br>(201.22 to 2,700.81)            | 1,301.27<br>(309.51 to 3,392.73)          |
| Chronic kidney disease due to diabetes mellitus            | 3,650.54<br>(3,097.89 to 4,222.97)           | 7,965.41<br>(1,842.32 to 24,521.89)           | 5,910.70<br>(1,412.21 to 19,288.09)          | 9,747.38<br>(2,258.01 to 26,752.22)           | 155.53<br>(133.10 to 177.57)              | 448.65<br>(100.87 to 1,320.51)            | 350.85<br>(79.02 to 1,082.65)             | 526.97<br>(122.86 to 1,381.71)            |
| Chronic kidney disease due to hypertension                 | 1,080.51<br>(872.29 to 1,315.16)             | 2,786.62<br>(602.37 to 8,232.39)              | 2,228.68<br>(490.96 to 6,955.00)             | 3,274.51<br>(734.46 to 8,583.27)              | 65.09<br>(52.99 to 78.55)                 | 231.31<br>(50.85 to 679.72)               | 196.33<br>(43.12 to 598.92)               | 260.76<br>(60.45 to 687.33)               |
| Chronic kidney disease due to glomerulonephritis           | 2,857.40<br>(2,402.55 to 3,347.22)           | 4,259.82<br>(1,218.21 to 12,282.81)           | 2,943.85<br>(838.11 to 8,765.28)             | 5,185.78<br>(1,422.74 to 13,427.92)           | 103.65<br>(86.61 to 122.44)               | 227.62<br>(51.90 to 674.51)               | 166.31<br>(37.43 to 521.93)               | 267.97<br>(64.01 to 707.52)               |
| Chronic kidney disease due to other and unspecified causes | 2,104.33<br>(1,717.26 to 2,503.38)           | 3,561.22<br>(1,004.08 to 10,358.98)           | 2,573.02<br>(713.00 to 7,769.53)             | 4,303.50<br>(1,231.41 to 10,829.24)           | 83.28<br>(67.81 to 100.73)                | 211.31<br>(50.24 to 619.74)               | 162.49<br>(38.58 to 503.48)               | 245.57<br>(60.09 to 648.63)               |
| Urinary diseases and male infertility                      | 1,477.33<br>(1,314.94 to 1,636.02)           | 2,276.96<br>(1,953.83 to 2,644.63)            | 1,957.54<br>(1,673.18 to 2,268.64)           | 2,141.75<br>(1,833.52 to 2,474.24)            | 77.17<br>(68.64 to 85.26)                 | 167.02<br>(132.00 to 202.59)              | 153.50<br>(125.13 to 185.26)              | 151.77<br>(118.02 to 186.39)              |
| Urinary tract infections                                   | 1,158.26<br>(1,011.75 to 1,300.92)           | 1,943.11<br>(1,638.63 to 2,271.99)            | 1,702.41<br>(1,431.02 to 2,003.19)           | 1,828.55<br>(1,535.51 to 2,138.30)            | 60.78<br>(52.10 to 68.87)                 | 142.49<br>(110.66 to 174.91)              | 133.41<br>(106.56 to 161.18)              | 129.61<br>(99.15 to 161.80)               |
| Urolithiasis                                               | 128.82<br>(99.46 to 173.11)                  | 80.59<br>(53.79 to 112.12)                    | 61.12<br>(38.72 to 85.03)                    | 77.73<br>(51.57 to 107.81)                    | 5.31<br>(4.11 to 7.10)                    | 4.18<br>(2.72 to 5.75)                    | 3.38<br>(2.08 to 4.66)                    | 3.92<br>(2.53 to 5.39)                    |
| Other urinary diseases                                     | 190.24<br>(128.52 to 298.30)                 | 253.27<br>(154.49 to 441.07)                  | 194.00<br>(115.07 to 344.07)                 | 235.47<br>(141.96 to 405.07)                  | 11.08<br>(6.78 to 17.84)                  | 20.35<br>(10.45 to 38.67)                 | 16.71<br>(8.67 to 32.15)                  | 18.23<br>(9.36 to 34.31)                  |
| Gynecological diseases                                     | 70.25<br>(52.93 to 97.83)                    | 58.74<br>(40.06 to 85.16)                     | 33.96<br>(22.47 to 49.90)                    | 58.63<br>(38.76 to 86.01)                     | 2.19<br>(1.68 to 3.00)                    | 2.78<br>(1.92 to 4.06)                    | 1.76<br>(1.17 to 2.55)                    | 2.69<br>(1.83 to 3.91)                    |
| Uterine fibroids                                           | 30.23<br>(20.10 to 45.38)                    | 23.57<br>(12.65 to 38.62)                     | 15.16<br>(7.99 to 24.89)                     | 23.58<br>(12.25 to 38.91)                     | 0.98<br>(0.65 to 1.38)                    | 1.01<br>(0.55 to 1.59)                    | 0.68<br>(0.37 to 1.06)                    | 0.99<br>(0.53 to 1.54)                    |
| Polycystic ovarian syndrome                                | 25.48<br>(15.44 to 39.00)                    | 12.40<br>(5.72 to 23.45)                      | 5.05<br>(2.13 to 9.91)                       | 12.69<br>(5.89 to 23.54)                      | 0.58<br>(0.37 to 0.87)                    | 0.29<br>(0.14 to 0.53)                    | 0.12<br>(0.05 to 0.22)                    | 0.29<br>(0.14 to 0.53)                    |
| Endometriosis                                              | 0.05<br>(0.03 to 0.10)                       | 0.05<br>(0.02 to 0.14)                        | 0.03<br>(0.01 to 0.08)                       | 0.05<br>(0.02 to 0.13)                        | 0.00<br>(0.00 to 0.00)                    | 0.00<br>(0.00 to 0.00)                    | 0.00<br>(0.00 to 0.00)                    | 0.00<br>(0.00 to 0.00)                    |
| Genital prolapse                                           | 0.20<br>(0.12 to 0.39)                       | 0.24<br>(0.12 to 0.49)                        | 0.14<br>(0.07 to 0.30)                       | 0.23<br>(0.12 to 0.48)                        | 0.01<br>(0.01 to 0.02)                    | 0.02<br>(0.01 to 0.05)                    | 0.01<br>(0.01 to 0.03)                    | 0.02<br>(0.01 to 0.04)                    |
| Other gynecological diseases                               | 14.30<br>(9.95 to 24.16)                     | 22.48<br>(14.50 to 35.96)                     | 13.57<br>(8.73 to 21.87)                     | 22.08<br>(14.11 to 35.29)                     | 0.62<br>(0.46 to 0.96)                    | 1.46<br>(0.89 to 2.37)                    | 0.95<br>(0.57 to 1.52)                    | 1.39<br>(0.85 to 2.24)                    |
| Hemoglobinopathies and hemolytic anemias                   | 991.07<br>(833.91 to 1,212.67)               | 1,129.96<br>(900.45 to 1,468.17)              | 807.07<br>(634.75 to 1,071.97)               | 1,114.62<br>(887.14 to 1,454.11)              | 27.59<br>(23.43 to 36.91)                 | 45.12<br>(36.92 to 62.97)                 | 34.42<br>(27.86 to 48.74)                 | 43.25<br>(34.97 to 60.09)                 |
| Thalassemias                                               | 17.26<br>(5.95 to 36.82)                     | 5.27<br>(1.68 to 11.11)                       | 4.36<br>(1.48 to 8.98)                       | 5.40<br>(1.71 to 11.47)                       | 0.21<br>(0.07 to 0.44)                    | 0.06<br>(0.02 to 0.15)                    | 0.05<br>(0.02 to 0.11)                    | 0.07<br>(0.02 to 0.14)                    |
| Sickle cell disorders                                      | 764.26<br>(621.73 to 936.94)                 | 756.76<br>(579.12 to 986.67)                  | 531.63<br>(396.48 to 707.80)                 | 757.35<br>(574.04 to 1,015.66)                | 15.33<br>(12.55 to 18.76)                 | 18.71<br>(14.33 to 25.23)                 | 13.47<br>(10.14 to 18.55)                 | 18.63<br>(14.21 to 25.08)                 |

|                                                   |                                               |                                               |                                              |                                               |                                       |                                       |                                       |                                       |
|---------------------------------------------------|-----------------------------------------------|-----------------------------------------------|----------------------------------------------|-----------------------------------------------|---------------------------------------|---------------------------------------|---------------------------------------|---------------------------------------|
| G6PD deficiency                                   | 87.36<br>(66.33 to<br>113.06)                 | 174.77<br>(131.98 to<br>228.93)               | 118.31<br>(87.30 to<br>158.52)               | 170.20<br>(129.04 to<br>225.45)               | 2.77<br>(2.20 to<br>3.61)             | 7.79<br>(6.00 to<br>10.18)            | 5.49<br>(4.18 to<br>7.27)             | 7.42<br>(5.70 to<br>9.88)             |
| Other hemoglobinopathies and hemolytic anemias    | 122.18<br>(100.74 to<br>181.55)               | 193.16<br>(149.50 to<br>292.27)               | 152.78<br>(117.79 to<br>229.39)              | 181.67<br>(137.77 to<br>272.50)               | 9.28<br>(7.67 to<br>14.18)            | 18.56<br>(14.02 to<br>28.43)          | 15.40<br>(11.74 to<br>23.38)          | 17.12<br>(12.47 to<br>27.04)          |
| Endocrine, metabolic, blood, and immune disorders | 2,677.96<br>(2,203.64 to<br>4,247.09)         | 3,593.66<br>(2,875.95 to<br>5,548.22)         | 3,543.38<br>(2,819.05 to<br>5,470.31)        | 3,516.31<br>(2,813.85 to<br>5,423.05)         | 87.97<br>(74.18 to<br>135.35)         | 168.48<br>(134.91 to<br>257.84)       | 180.67<br>(144.43 to<br>277.45)       | 158.61<br>(126.33 to<br>239.15)       |
| <b>Trinidad and Tobago</b>                        |                                               |                                               |                                              |                                               |                                       |                                       |                                       |                                       |
| Cause                                             | YLLs (actual counts)                          |                                               |                                              |                                               | Deaths (actual counts)                |                                       |                                       |                                       |
|                                                   | 2016                                          | 2040 Forecast                                 | 2040 Better Scenario                         | 2040 Worse Scenario                           | 2016                                  | 2040 Forecast                         | 2040 Better Scenario                  | 2040 Worse Scenario                   |
| <b>Musculoskeletal disorders</b>                  | <b>1,605.82</b><br>(1,363.54 to<br>1,995.78)  | <b>1,837.83</b><br>(1,507.53 to<br>2,322.95)  | <b>1,591.98</b><br>(1,296.23 to<br>2,028.83) | <b>1,801.14</b><br>(1,486.57 to<br>2,263.28)  | <b>44.88</b><br>(38.41 to<br>53.01)   | <b>76.33</b><br>(62.80 to<br>90.20)   | <b>66.68</b><br>(55.44 to<br>79.36)   | <b>72.89</b><br>(59.38 to<br>86.49)   |
| Rheumatoid arthritis                              | 194.98<br>(145.63 to<br>247.57)               | 445.60<br>(334.27 to<br>580.60)               | 297.08<br>(210.82 to<br>392.29)              | 433.79<br>(324.68 to<br>560.76)               | 9.75<br>(7.40 to<br>12.17)            | 30.30<br>(21.77 to<br>38.95)          | 21.31<br>(15.18 to<br>28.08)          | 28.75<br>(20.94 to<br>36.95)          |
| Other musculoskeletal disorders                   | 1,410.84<br>(1,192.88 to<br>1,773.27)         | 1,392.23<br>(1,122.78 to<br>1,800.78)         | 1,294.90<br>(1,049.46 to<br>1,671.90)        | 1,367.34<br>(1,114.79 to<br>1,758.00)         | 35.13<br>(30.20 to<br>42.98)          | 46.03<br>(38.24 to<br>56.56)          | 45.36<br>(37.66 to<br>55.18)          | 44.14<br>(36.83 to<br>53.88)          |
| <b>Other non-communicable diseases</b>            | <b>6,693.27</b><br>(3,195.06 to<br>12,823.73) | <b>6,183.31</b><br>(3,055.23 to<br>10,761.02) | <b>3,690.41</b><br>(1,837.03 to<br>6,249.32) | <b>6,378.46</b><br>(3,054.37 to<br>11,154.36) | <b>111.36</b><br>(55.00 to<br>189.28) | <b>147.40</b><br>(65.65 to<br>224.29) | <b>115.32</b><br>(46.70 to<br>170.64) | <b>143.79</b><br>(65.89 to<br>221.44) |
| Congenital birth defects                          | 6,081.27<br>(2,849.30 to<br>11,960.60)        | 5,159.66<br>(2,579.09 to<br>9,506.15)         | 2,743.18<br>(1,441.96 to<br>4,983.60)        | 5,404.57<br>(2,636.96 to<br>9,969.77)         | 80.08<br>(41.98 to<br>148.41)         | 71.85<br>(39.92 to<br>122.66)         | 40.27<br>(24.40 to<br>67.97)          | 74.65<br>(40.84 to<br>129.02)         |
| Neural tube defects                               | 219.34<br>(72.98 to<br>549.35)                | 77.40<br>(24.97 to<br>199.39)                 | 32.33<br>(10.65 to<br>81.43)                 | 82.89<br>(26.89 to<br>210.67)                 | 2.58<br>(0.89 to<br>6.40)             | 0.93<br>(0.33 to<br>2.30)             | 0.39<br>(0.14 to<br>0.90)             | 0.99<br>(0.35 to<br>2.47)             |
| Congenital heart anomalies                        | 3,104.40<br>(1,620.43 to<br>5,782.32)         | 2,533.23<br>(1,365.85 to<br>4,508.41)         | 1,238.97<br>(682.76 to<br>2,160.27)          | 2,641.71<br>(1,405.86 to<br>4,803.30)         | 41.72<br>(23.86 to<br>72.88)          | 35.97<br>(21.53 to<br>59.64)          | 18.09<br>(11.28 to<br>29.55)          | 37.21<br>(22.04 to<br>62.43)          |
| Orofacial clefts                                  | 7.97<br>(1.67 to<br>21.58)                    | 4.96<br>(0.98 to<br>14.46)                    | 1.89<br>(0.36 to<br>5.68)                    | 5.35<br>(1.05 to<br>15.35)                    | 0.09<br>(0.02 to<br>0.25)             | 0.06<br>(0.01 to<br>0.17)             | 0.02<br>(0.00 to<br>0.07)             | 0.06<br>(0.01 to<br>0.18)             |
| Down syndrome                                     | 353.40<br>(205.85 to<br>549.81)               | 403.03<br>(237.42 to<br>595.55)               | 352.40<br>(222.02 to<br>504.13)              | 411.54<br>(242.01 to<br>608.04)               | 6.40<br>(3.87 to<br>8.97)             | 8.12<br>(4.98 to<br>11.02)            | 7.36<br>(4.68 to<br>9.70)             | 8.22<br>(5.00 to<br>11.07)            |
| Other chromosomal abnormalities                   | 159.73<br>(28.58 to<br>395.21)                | 204.28<br>(36.54 to<br>492.77)                | 124.27<br>(22.91 to<br>295.80)               | 217.78<br>(39.41 to<br>523.79)                | 1.86<br>(0.34 to<br>4.59)             | 2.39<br>(0.45 to<br>5.75)             | 1.46<br>(0.28 to<br>3.45)             | 2.55<br>(0.48 to<br>6.08)             |
| Congenital musculoskeletal and limb anomalies     | 77.45<br>(19.35 to<br>177.36)                 | 63.33<br>(16.21 to<br>145.62)                 | 32.65<br>(8.63 to<br>75.52)                  | 67.05<br>(16.81 to<br>156.32)                 | 0.91<br>(0.25 to<br>2.07)             | 0.75<br>(0.21 to<br>1.71)             | 0.39<br>(0.12 to<br>0.89)             | 0.80<br>(0.22 to<br>1.83)             |
| Urogenital congenital anomalies                   | 171.50<br>(53.64 to<br>394.38)                | 150.01<br>(50.95 to<br>333.09)                | 88.08<br>(31.67 to<br>191.26)                | 156.55<br>(52.05 to<br>353.97)                | 2.38<br>(0.93 to<br>4.98)             | 2.26<br>(0.95 to<br>4.46)             | 1.40<br>(0.63 to<br>2.63)             | 2.32<br>(0.96 to<br>4.67)             |
| Digestive congenital anomalies                    | 559.17<br>(191.74 to<br>1,230.32)             | 472.39<br>(161.10 to<br>1,058.61)             | 227.56<br>(76.81 to<br>511.07)               | 501.29<br>(171.10 to<br>1,135.44)             | 6.62<br>(2.31 to<br>14.41)            | 5.66<br>(2.02 to<br>12.48)            | 2.75<br>(1.00 to<br>6.08)             | 6.00<br>(2.16 to<br>13.43)            |
| Other congenital birth defects                    | 1,428.31<br>(511.21 to<br>3,149.55)           | 1,251.03<br>(452.82 to<br>2,719.77)           | 655.03<br>(244.28 to<br>1,424.11)            | 1,320.42<br>(465.75 to<br>2,883.47)           | 17.50<br>(6.89 to<br>37.31)           | 15.72<br>(6.34 to<br>32.75)           | 8.41<br>(3.57 to<br>17.39)            | 16.51<br>(6.53 to<br>34.57)           |
| Skin and subcutaneous diseases                    | 535.37<br>(102.93 to<br>795.56)               | 972.92<br>(192.47 to<br>1,475.08)             | 918.56<br>(186.59 to<br>1,385.76)            | 919.92<br>(182.13 to<br>1,388.56)             | 30.39<br>(5.87 to<br>45.82)           | 74.96<br>(14.58 to<br>120.57)         | 74.72<br>(14.99 to<br>118.57)         | 68.51<br>(13.28 to<br>111.79)         |
| Cellulitis                                        | 202.91<br>(38.13 to<br>293.95)                | 376.92<br>(79.10 to<br>554.73)                | 387.35<br>(83.14 to<br>565.14)               | 357.72<br>(73.58 to<br>522.61)                | 9.05<br>(1.86 to<br>13.07)            | 23.47<br>(5.33 to<br>36.16)           | 26.05<br>(39.34)                      | 21.45<br>(4.85 to<br>33.18)           |
| Pyoderma                                          | 166.74<br>(17.54 to<br>273.20)                | 309.01<br>(32.08 to<br>525.74)                | 279.97<br>(29.27 to<br>475.26)               | 294.11<br>(30.47 to<br>498.30)                | 8.22<br>(0.81 to<br>13.69)            | 22.41<br>(2.25 to<br>40.03)           | 22.06<br>(2.17 to<br>39.37)           | 20.57<br>(2.07 to<br>36.90)           |

|                                      |                                                               |                                                               |                                                               |                                                               |                                                        |                                                        |                                                      |                                                        |
|--------------------------------------|---------------------------------------------------------------|---------------------------------------------------------------|---------------------------------------------------------------|---------------------------------------------------------------|--------------------------------------------------------|--------------------------------------------------------|------------------------------------------------------|--------------------------------------------------------|
| Decubitus ulcer                      | 146.87<br>(29.56 to<br>215.80)                                | 261.97<br>(49.37 to<br>421.62)                                | 228.91<br>(43.23 to<br>368.20)                                | 243.67<br>(46.67 to<br>397.36)                                | 12.50<br>(19.08)                                       | 28.02<br>(4.51 to<br>48.66)                            | 25.55<br>(4.23 to<br>43.87)                          | 25.50<br>(4.06 to<br>44.86)                            |
| Other skin and subcutaneous diseases | 18.84<br>(3.24 to<br>28.59)                                   | 25.02<br>(4.33 to<br>39.93)                                   | 22.33<br>(4.01 to<br>35.64)                                   | 24.42<br>(4.16 to<br>38.76)                                   | 0.61<br>(0.11 to<br>0.91)                              | 1.06<br>(0.21 to<br>1.68)                              | 1.05<br>(0.21 to<br>1.66)                            | 0.99<br>(0.19 to<br>1.57)                              |
| Sudden infant death syndrome         | 76.63<br>(24.68 to<br>179.14)                                 | 50.73<br>(14.14 to<br>131.71)                                 | 28.67<br>(8.08 to<br>74.06)                                   | 53.97<br>(14.93 to<br>137.69)                                 | 0.89<br>(0.29 to<br>2.08)                              | 0.59<br>(0.16 to<br>1.53)                              | 0.33<br>(0.09 to<br>0.86)                            | 0.63<br>(0.17 to<br>1.60)                              |
| <b>Injuries</b>                      | <b>43,020.71</b><br><b>(37,049.86 to</b><br><b>48,973.39)</b> | <b>31,319.51</b><br><b>(21,575.10 to</b><br><b>47,217.63)</b> | <b>21,336.35</b><br><b>(15,128.33 to</b><br><b>30,831.19)</b> | <b>35,678.27</b><br><b>(24,579.13 to</b><br><b>53,968.84)</b> | <b>945.19</b><br><b>(822.70 to</b><br><b>1,063.15)</b> | <b>864.48</b><br><b>(675.51 to</b><br><b>1,139.07)</b> | <b>639.41</b><br><b>(513.94 to</b><br><b>822.00)</b> | <b>944.10</b><br><b>(726.76 to</b><br><b>1,257.02)</b> |
| <b>Transport injuries</b>            | <b>11,249.27</b><br><b>(9,607.57 to</b><br><b>13,089.86)</b>  | <b>5,399.73</b><br><b>(3,296.39 to</b><br><b>9,324.03)</b>    | <b>2,251.34</b><br><b>(1,452.39 to</b><br><b>3,670.84)</b>    | <b>9,700.67</b><br><b>(5,907.52 to</b><br><b>16,695.46)</b>   | <b>248.49</b><br><b>(216.07 to</b><br><b>282.32)</b>   | <b>156.60</b><br><b>(108.64 to</b><br><b>238.99)</b>   | <b>76.05</b><br><b>(55.82 to</b><br><b>108.80)</b>   | <b>252.05</b><br><b>(171.71 to</b><br><b>385.15)</b>   |
| Road injuries                        | 10,805.80<br>(9,211.09 to<br>12,620.39)                       | 4,852.98<br>(2,936.35 to<br>8,504.02)                         | 1,902.89<br>(1,217.32 to<br>3,202.25)                         | 9,154.88<br>(5,526.79 to<br>15,841.64)                        | 236.83<br>(205.14 to<br>269.19)                        | 136.84<br>(94.00 to<br>211.74)                         | 62.45<br>(45.47 to<br>89.97)                         | 232.91<br>(156.55 to<br>360.21)                        |
| Pedestrian road injuries             | 2,442.92<br>(1,999.57 to<br>3,339.76)                         | 1,324.05<br>(898.52 to<br>2,080.44)                           | 485.86<br>(343.92 to<br>739.07)                               | 2,138.26<br>(1,443.35 to<br>3,405.31)                         | 63.52<br>(53.78 to<br>83.69)                           | 49.88<br>(36.35 to<br>71.67)                           | 21.38<br>(16.14 to<br>29.94)                         | 73.75<br>(53.22 to<br>105.81)                          |
| <b>Trinidad and Tobago</b>           |                                                               |                                                               |                                                               |                                                               |                                                        |                                                        |                                                      |                                                        |
| Cause                                | YLLs (actual counts)                                          |                                                               |                                                               |                                                               | Deaths (actual counts)                                 |                                                        |                                                      |                                                        |
|                                      | 2016                                                          | 2040 Forecast                                                 | 2040 Better Scenario                                          | 2040 Worse Scenario                                           | 2016                                                   | 2040 Forecast                                          | 2040 Better Scenario                                 | 2040 Worse Scenario                                    |
| Cyclist road injuries                | 413.66<br>(319.72 to<br>587.06)                               | 242.67<br>(131.24 to<br>477.00)                               | 115.87<br>(69.83 to<br>204.52)                                | 421.76<br>(222.46 to<br>822.77)                               | 9.22<br>(7.35 to<br>12.55)                             | 6.74<br>(4.21 to<br>11.44)                             | 3.90<br>(2.62 to<br>6.15)                            | 10.44<br>(6.41 to<br>18.08)                            |
| Motorcyclist road injuries           | 913.44<br>(684.83 to<br>1,380.41)                             | 522.64<br>(242.50 to<br>1,136.13)                             | 302.75<br>(150.55 to<br>610.56)                               | 755.24<br>(354.46 to<br>1,603.58)                             | 17.69<br>(13.54 to<br>26.10)                           | 11.12<br>(5.83 to<br>22.25)                            | 7.12<br>(4.07 to<br>13.07)                           | 15.28<br>(7.97 to<br>30.14)                            |
| Motor vehicle road injuries          | 7,013.81<br>(5,769.54 to<br>8,296.48)                         | 2,751.68<br>(1,586.78 to<br>4,919.17)                         | 992.16<br>(612.01 to<br>1,670.07)                             | 5,819.16<br>(3,400.15 to<br>10,368.73)                        | 145.74<br>(120.42 to<br>170.07)                        | 68.47<br>(45.17 to<br>108.26)                          | 29.60<br>(20.74 to<br>43.83)                         | 132.57<br>(84.84 to<br>214.59)                         |
| Other road injuries                  | 21.97<br>(13.60 to<br>34.60)                                  | 11.95<br>(6.95 to<br>17.95)                                   | 6.25<br>(3.49 to<br>9.33)                                     | 20.46<br>(12.21 to<br>31.44)                                  | 0.66<br>(0.39 to<br>0.91)                              | 0.63<br>(0.30 to<br>0.95)                              | 0.45<br>(0.19 to<br>0.70)                            | 0.87<br>(0.45 to<br>1.31)                              |
| Other transport injuries             | 443.48<br>(359.18 to<br>531.18)                               | 546.75<br>(359.37 to<br>851.33)                               | 348.45<br>(234.47 to<br>535.65)                               | 545.79<br>(359.72 to<br>838.59)                               | 11.67<br>(9.71 to<br>13.50)                            | 19.76<br>(13.95 to<br>28.32)                           | 13.60<br>(9.90 to<br>18.83)                          | 19.14<br>(13.45 to<br>27.25)                           |
| <b>Unintentional injuries</b>        | <b>8,681.49</b><br><b>(7,418.75 to</b><br><b>10,408.68)</b>   | <b>7,212.97</b><br><b>(5,666.37 to</b><br><b>9,550.78)</b>    | <b>5,640.67</b><br><b>(4,500.14 to</b><br><b>7,358.38)</b>    | <b>7,094.50</b><br><b>(5,614.93 to</b><br><b>9,207.36)</b>    | <b>228.43</b><br><b>(201.86 to</b><br><b>262.96)</b>   | <b>290.78</b><br><b>(238.58 to</b><br><b>353.01)</b>   | <b>253.22</b><br><b>(214.22 to</b><br><b>303.23)</b> | <b>274.85</b><br><b>(223.11 to</b><br><b>333.94)</b>   |
| Falls                                | 1,530.51<br>(1,276.30 to<br>1,859.23)                         | 1,645.37<br>(1,371.17 to<br>2,077.44)                         | 1,445.75<br>(1,201.90 to<br>1,814.65)                         | 1,579.35<br>(1,321.85 to<br>1,995.25)                         | 54.41<br>(46.63 to<br>69.50)                           | 94.50<br>(73.97 to<br>126.54)                          | 88.44<br>(70.91 to<br>117.56)                        | 87.43<br>(67.42 to<br>117.44)                          |
| Drowning                             | 2,651.61<br>(2,196.81 to<br>3,190.04)                         | 1,891.47<br>(1,210.00 to<br>3,094.43)                         | 1,348.12<br>(872.73 to<br>2,152.83)                           | 1,895.47<br>(1,235.99 to<br>3,110.53)                         | 51.31<br>(43.31 to<br>60.42)                           | 42.05<br>(29.57 to<br>64.19)                           | 31.29<br>(22.34 to<br>45.04)                         | 41.62<br>(29.40 to<br>62.40)                           |
| Fire, heat, and hot substances       | 859.09<br>(700.07 to<br>1,089.31)                             | 651.32<br>(493.36 to<br>869.97)                               | 448.04<br>(343.64 to<br>580.27)                               | 641.67<br>(489.03 to<br>867.87)                               | 26.01<br>(22.27 to<br>30.25)                           | 33.13<br>(25.27 to<br>42.08)                           | 25.63<br>(19.92 to<br>31.94)                         | 31.22<br>(23.29 to<br>39.73)                           |
| Poisonings                           | 139.38<br>(103.07 to<br>257.51)                               | 87.00<br>(56.16 to<br>171.95)                                 | 51.50<br>(33.85 to<br>102.77)                                 | 87.88<br>(56.69 to<br>176.25)                                 | 3.07<br>(2.37 to<br>5.61)                              | 2.53<br>(1.80 to<br>4.65)                              | 1.62<br>(1.18 to<br>2.91)                            | 2.49<br>(1.76 to<br>4.55)                              |
| Exposure to mechanical forces        | 832.53<br>(685.91 to<br>1,038.04)                             | 570.22<br>(431.74 to<br>788.13)                               | 399.08<br>(301.08 to<br>553.15)                               | 568.95<br>(430.26 to<br>773.13)                               | 17.18<br>(14.60 to<br>21.50)                           | 15.29<br>(12.48 to<br>19.75)                           | 11.53<br>(9.35 to<br>14.96)                          | 14.86<br>(12.03 to<br>19.32)                           |
| Unintentional firearm injuries       | 241.93<br>(186.50 to<br>362.86)                               | 136.56<br>(92.30 to<br>218.45)                                | 98.33<br>(65.74 to<br>159.39)                                 | 136.16<br>(92.25 to<br>219.04)                                | 4.90<br>(3.89 to<br>7.20)                              | 3.36<br>(2.52 to<br>4.98)                              | 2.59<br>(1.96 to<br>3.77)                            | 3.30<br>(2.46 to<br>4.83)                              |
| Unintentional suffocation            | 130.35<br>(46.87 to<br>241.59)                                | 72.17<br>(28.11 to<br>133.52)                                 | 46.94<br>(20.12 to<br>83.74)                                  | 74.70<br>(28.21 to<br>141.45)                                 | 1.89<br>(0.80 to<br>3.24)                              | 1.12<br>(0.52 to<br>1.86)                              | 0.76<br>(0.39 to<br>1.22)                            | 1.15<br>(0.52 to<br>1.95)                              |

|                                                 |                                                     |                                                     |                                                    |                                                     |                                            |                                            |                                            |                                            |
|-------------------------------------------------|-----------------------------------------------------|-----------------------------------------------------|----------------------------------------------------|-----------------------------------------------------|--------------------------------------------|--------------------------------------------|--------------------------------------------|--------------------------------------------|
| Other exposure to mechanical forces             | 460.24<br>(374.28 to 606.15)                        | 361.50<br>(270.06 to 511.30)                        | 253.81<br>(186.32 to 362.76)                       | 358.08<br>(267.47 to 495.16)                        | 10.38<br>(8.66 to 13.88)                   | 10.80<br>(8.74 to 14.60)                   | 8.18<br>(6.52 to 11.10)                    | 10.41<br>(8.31 to 13.82)                   |
| Adverse effects of medical treatment            | 1,175.68<br>(958.67 to 1,632.38)                    | 1,196.14<br>(927.16 to 1,676.35)                    | 1,022.51<br>(795.07 to 1,426.56)                   | 1,159.87<br>(898.92 to 1,612.53)                    | 41.82<br>(32.92 to 53.65)                  | 64.37<br>(46.75 to 80.70)                  | 59.61<br>(44.21 to 74.39)                  | 60.20<br>(43.26 to 76.66)                  |
| Animal contact                                  | 131.51<br>(87.19 to 162.52)                         | 107.13<br>(71.40 to 138.93)                         | 82.23<br>(55.08 to 106.98)                         | 106.16<br>(70.76 to 138.22)                         | 3.51<br>(2.40 to 4.26)                     | 3.96<br>(2.82 to 4.90)                     | 3.27<br>(2.31 to 4.06)                     | 3.81<br>(2.68 to 4.69)                     |
| Venomous animal contact                         | 89.90<br>(49.54 to 115.35)                          | 65.17<br>(33.90 to 89.81)                           | 51.26<br>(26.78 to 70.21)                          | 64.71<br>(33.33 to 89.26)                           | 2.32<br>(1.33 to 2.89)                     | 2.26<br>(1.30 to 2.98)                     | 1.90<br>(1.08 to 2.54)                     | 2.18<br>(1.25 to 2.83)                     |
| Non-venomous animal contact                     | 41.60<br>(29.82 to 60.77)                           | 41.96<br>(28.78 to 60.72)                           | 30.97<br>(21.57 to 45.20)                          | 41.46<br>(28.05 to 57.91)                           | 1.19<br>(0.86 to 1.68)                     | 1.70<br>(1.23 to 2.38)                     | 1.37<br>(0.98 to 1.93)                     | 1.63<br>(1.16 to 2.25)                     |
| Foreign body                                    | 925.64<br>(658.94 to 1,379.31)                      | 766.64<br>(567.27 to 1,099.13)                      | 667.65<br>(513.29 to 920.01)                       | 759.71<br>(554.40 to 1,084.26)                      | 21.78<br>(17.81 to 28.02)                  | 26.74<br>(21.33 to 33.79)                  | 26.60<br>(21.67 to 33.67)                  | 25.27<br>(20.09 to 31.87)                  |
| Pulmonary aspiration and foreign body in airway | 859.56<br>(599.96 to 1,311.14)                      | 721.82<br>(526.35 to 1,051.85)                      | 621.97<br>(468.79 to 874.62)                       | 715.94<br>(515.57 to 1,041.53)                      | 19.78<br>(15.88 to 25.97)                  | 24.84<br>(19.60 to 31.97)                  | 24.53<br>(19.61 to 31.70)                  | 23.47<br>(18.29 to 30.19)                  |
| Foreign body in other body part                 | 66.09<br>(37.62 to 82.73)                           | 44.82<br>(24.95 to 57.89)                           | 45.68<br>(24.76 to 59.31)                          | 43.77<br>(23.60 to 55.78)                           | 2.00<br>(1.06 to 2.41)                     | 1.90<br>(0.96 to 2.42)                     | 2.07<br>(1.04 to 2.63)                     | 1.80<br>(0.91 to 2.28)                     |
| Environmental heat and cold exposure            | 121.56<br>(78.85 to 244.82)                         | 116.15<br>(73.11 to 239.29)                         | 77.00<br>(46.82 to 157.04)                         | 115.06<br>(72.54 to 236.96)                         | 3.21<br>(2.16 to 6.37)                     | 4.01<br>(2.63 to 7.95)                     | 2.85<br>(1.85 to 5.70)                     | 3.85<br>(2.49 to 7.76)                     |
| Other unintentional injuries                    | 313.98<br>(257.14 to 387.48)                        | 181.52<br>(129.36 to 257.01)                        | 98.80<br>(68.59 to 143.70)                         | 180.37<br>(131.02 to 254.22)                        | 6.14<br>(5.09 to 7.44)                     | 4.19<br>(3.23 to 5.50)                     | 2.39<br>(1.80 to 3.18)                     | 4.10<br>(3.20 to 5.32)                     |
| <b>Self-harm and interpersonal violence</b>     | <b>22,397.59</b><br><b>(15,621.02 to 27,365.26)</b> | <b>18,682.19</b><br><b>(10,723.34 to 30,991.44)</b> | <b>13,420.40</b><br><b>(8,006.51 to 21,526.14)</b> | <b>18,858.70</b><br><b>(10,347.83 to 31,634.27)</b> | <b>456.04</b><br><b>(321.58 to 552.17)</b> | <b>416.48</b><br><b>(255.51 to 632.13)</b> | <b>309.51</b><br><b>(199.45 to 463.05)</b> | <b>416.60</b><br><b>(244.05 to 641.39)</b> |

**Trinidad and Tobago**

| Cause                                                                               | YLLs (actual counts)                        |                                         |                                         |                                         | Deaths (actual counts)                 |                                       |                                       |                                       |
|-------------------------------------------------------------------------------------|---------------------------------------------|-----------------------------------------|-----------------------------------------|-----------------------------------------|----------------------------------------|---------------------------------------|---------------------------------------|---------------------------------------|
|                                                                                     | 2016                                        | 2040 Forecast                           | 2040 Better Scenario                    | 2040 Worse Scenario                     | 2016                                   | 2040 Forecast                         | 2040 Better Scenario                  | 2040 Worse Scenario                   |
| Self-harm                                                                           | 8,144.69<br>(6,218.89 to 9,993.92)          | 9,022.70<br>(5,015.83 to 16,262.12)     | 6,531.58<br>(3,941.20 to 10,934.05)     | 9,221.06<br>(5,001.39 to 16,646.99)     | 176.72<br>(138.24 to 212.37)           | 214.86<br>(131.34 to 350.99)          | 161.62<br>(107.21 to 247.62)          | 216.69<br>(127.99 to 360.15)          |
| Self-harm by firearm                                                                | 165.48<br>(96.82 to 244.27)                 | 130.29<br>(57.20 to 277.00)             | 85.62<br>(41.61 to 170.13)              | 133.34<br>(56.71 to 291.47)             | 3.76<br>(2.29 to 5.32)                 | 3.46<br>(1.75 to 6.49)                | 2.42<br>(1.35 to 4.32)                | 3.46<br>(1.72 to 6.67)                |
| Self-harm by other specified means                                                  | 7,979.21<br>(6,115.49 to 9,763.61)          | 8,892.41<br>(4,951.69 to 16,036.38)     | 6,445.96<br>(3,894.96 to 10,795.96)     | 9,087.72<br>(4,939.46 to 16,397.53)     | 172.95<br>(135.36 to 207.42)           | 211.40<br>(129.61 to 346.11)          | 159.21<br>(105.76 to 243.53)          | 213.22<br>(126.31 to 353.48)          |
| Interpersonal violence                                                              | 14,252.90<br>(7,135.46 to 19,221.87)        | 9,659.48<br>(4,281.96 to 16,531.27)     | 6,888.83<br>(3,125.22 to 11,724.29)     | 9,637.65<br>(4,097.26 to 16,827.00)     | 279.32<br>(141.16 to 373.81)           | 201.62<br>(94.24 to 325.79)           | 147.88<br>(70.28 to 237.23)           | 199.92<br>(89.74 to 327.48)           |
| Physical violence by firearm                                                        | 9,368.53<br>(3,273.48 to 13,486.21)         | 6,147.04<br>(1,902.63 to 11,718.05)     | 4,243.25<br>(1,312.18 to 8,050.90)      | 6,135.17<br>(1,811.59 to 11,747.13)     | 174.47<br>(61.54 to 250.46)            | 116.20<br>(36.34 to 212.85)           | 81.08<br>(24.89 to 147.72)            | 115.72<br>(34.75 to 212.59)           |
| Physical violence by sharp object                                                   | 2,792.84<br>(1,479.65 to 4,594.00)          | 2,013.24<br>(973.88 to 3,585.65)        | 1,498.75<br>(748.49 to 2,593.15)        | 1,992.93<br>(932.74 to 3,522.51)        | 57.20<br>(30.49 to 90.11)              | 44.80<br>(22.54 to 71.80)             | 34.25<br>(17.70 to 53.66)             | 43.98<br>(21.49 to 70.71)             |
| Physical violence by other means                                                    | 2,091.53<br>(1,060.01 to 3,823.18)          | 1,499.20<br>(677.34 to 2,663.75)        | 1,146.82<br>(536.46 to 1,990.77)        | 1,509.54<br>(668.59 to 2,632.56)        | 47.65<br>(24.50 to 82.35)              | 40.61<br>(18.84 to 66.03)             | 32.55<br>(15.52 to 51.29)             | 40.21<br>(18.25 to 64.54)             |
| <b>Forces of nature, conflict and terrorism, and executions and police conflict</b> | <b>692.36</b><br><b>(59.82 to 1,240.21)</b> | <b>24.62</b><br><b>(0.00 to 462.68)</b> | <b>23.93</b><br><b>(0.00 to 444.14)</b> | <b>24.39</b><br><b>(0.00 to 460.29)</b> | <b>12.23</b><br><b>(1.07 to 21.66)</b> | <b>0.62</b><br><b>(0.00 to 10.42)</b> | <b>0.63</b><br><b>(0.00 to 10.48)</b> | <b>0.60</b><br><b>(0.00 to 10.21)</b> |
| Exposure to forces of nature                                                        | 0.00<br>(0.00 to 0.00)                      | 13.38<br>(0.00 to 85.86)                | 13.14<br>(0.00 to 88.24)                | 13.22<br>(0.00 to 83.78)                | 0.00<br>(0.00 to 0.00)                 | 0.37<br>(0.00 to 2.82)                | 0.38<br>(0.00 to 3.00)                | 0.35<br>(0.00 to 2.67)                |

|                                                                   |                                                 |                                                 |                                                 |                                                 |                                              |                                              |                                              |                                              |
|-------------------------------------------------------------------|-------------------------------------------------|-------------------------------------------------|-------------------------------------------------|-------------------------------------------------|----------------------------------------------|----------------------------------------------|----------------------------------------------|----------------------------------------------|
| Conflict and terrorism                                            | 0.00<br>(0.00 to<br>0.00)                       | 11.24<br>(0.00 to<br>46.61)                     | 10.79<br>(0.00 to<br>44.35)                     | 11.17<br>(0.00 to<br>46.28)                     | 0.00<br>(0.00 to<br>0.00)                    | 0.25<br>(0.00 to<br>1.04)                    | 0.25<br>(0.00 to<br>1.05)                    | 0.25<br>(0.00 to<br>1.02)                    |
| Executions and police conflict                                    | 692.36<br>(59.82 to<br>1,240.21)                | 0.00<br>(0.00 to<br>0.00)                       | 0.00<br>(0.00 to<br>0.00)                       | 0.00<br>(0.00 to<br>0.00)                       | 12.23<br>(1.07 to<br>21.66)                  | 0.00<br>(0.00 to<br>0.00)                    | 0.00<br>(0.00 to<br>0.00)                    | 0.00<br>(0.00 to<br>0.00)                    |
| <b>Virgin Islands, U.S.</b>                                       |                                                 |                                                 |                                                 |                                                 |                                              |                                              |                                              |                                              |
| Cause                                                             | YLLs (actual counts)                            |                                                 |                                                 |                                                 | Deaths (actual counts)                       |                                              |                                              |                                              |
|                                                                   | 2016                                            | 2040 Forecast                                   | 2040 Better Scenario                            | 2040 Worse Scenario                             | 2016                                         | 2040 Forecast                                | 2040 Better Scenario                         | 2040 Worse Scenario                          |
| <b>All causes</b>                                                 | <b>24,546.09</b><br>(21,447.81 to<br>27,185.72) | <b>18,032.91</b><br>(15,554.11 to<br>20,460.42) | <b>14,818.59</b><br>(13,107.85 to<br>16,511.53) | <b>21,213.75</b><br>(18,455.18 to<br>23,893.78) | <b>1,283.84</b><br>(1,151.60 to<br>1,396.28) | <b>1,342.98</b><br>(1,252.04 to<br>1,444.22) | <b>1,189.06</b><br>(1,123.88 to<br>1,253.89) | <b>1,479.36</b><br>(1,375.39 to<br>1,596.75) |
| Communicable, maternal, neonatal, and nutritional diseases        | 2,239.42<br>(1,547.67 to<br>3,713.04)           | 1,411.32<br>(920.77 to<br>2,654.09)             | 1,051.78<br>(743.11 to<br>2,006.11)             | 2,166.99<br>(1,359.81 to<br>3,508.77)           | 78.01<br>(59.90 to<br>112.58)                | 84.57<br>(61.75 to<br>116.98)                | 74.84<br>(57.19 to<br>97.79)                 | 103.01<br>(75.40 to<br>138.56)               |
| HIV/AIDS and tuberculosis                                         | 924.80<br>(203.87 to<br>2,512.61)               | 372.45<br>(9.96 to<br>1,647.88)                 | 196.34<br>(3.84 to<br>1,177.38)                 | 1,012.57<br>(267.57 to<br>2,341.04)             | 22.45<br>(5.45 to<br>88.42)                  | 8.60<br>(0.55 to<br>36.56)                   | 4.38<br>(0.27 to<br>27.22)                   | 24.28<br>(6.80 to<br>54.80)                  |
| Tuberculosis                                                      | 23.46<br>(19.11 to<br>27.80)                    | 7.63<br>(4.13 to<br>13.30)                      | 4.42<br>(2.68 to<br>7.17)                       | 9.85<br>(5.41 to<br>16.85)                      | 1.08<br>(0.91 to<br>1.25)                    | 0.52<br>(0.29 to<br>0.86)                    | 0.33<br>(0.20 to<br>0.50)                    | 0.64<br>(0.36 to<br>1.05)                    |
| HIV/AIDS                                                          | 901.34<br>(178.98 to<br>2,492.94)               | 364.81<br>(1.55 to<br>1,641.02)                 | 191.92<br>(0.00 to<br>1,174.84)                 | 1,002.72<br>(257.26 to<br>2,329.22)             | 21.37<br>(4.33 to<br>57.41)                  | 8.08<br>(0.04 to<br>36.19)                   | 4.05<br>(0.00 to<br>26.93)                   | 23.64<br>(6.30 to<br>54.21)                  |
| Diarrhea, lower respiratory, and other common infectious diseases | 708.52<br>(585.99 to<br>845.88)                 | 636.12<br>(457.77 to<br>866.30)                 | 508.70<br>(373.85 to<br>672.20)                 | 727.15<br>(515.31 to<br>1,007.23)               | 42.10<br>(35.04 to<br>50.62)                 | 58.65<br>(40.99 to<br>79.21)                 | 51.86<br>(37.39 to<br>68.72)                 | 62.30<br>(42.59 to<br>85.40)                 |
| Diarrheal diseases                                                | 25.79<br>(16.92 to<br>42.21)                    | 63.65<br>(16.71 to<br>170.23)                   | 56.24<br>(19.73 to<br>133.01)                   | 53.37<br>(13.97 to<br>147.59)                   | 1.27<br>(0.76 to<br>2.20)                    | 5.71<br>(1.38 to<br>15.43)                   | 5.43<br>(1.83 to<br>13.22)                   | 4.56<br>(1.11 to<br>12.88)                   |
| Intestinal infectious diseases                                    | 0.37<br>(0.13 to<br>0.83)                       | 0.25<br>(0.08 to<br>0.58)                       | 0.28<br>(0.10 to<br>0.64)                       | 0.23<br>(0.08 to<br>0.55)                       | 0.01<br>(0.00 to<br>0.02)                    | 0.01<br>(0.00 to<br>0.02)                    | 0.01<br>(0.00 to<br>0.03)                    | 0.01<br>(0.00 to<br>0.02)                    |
| Typhoid fever                                                     | 0.29<br>(0.09 to<br>0.67)                       | 0.21<br>(0.07 to<br>0.51)                       | 0.25<br>(0.08 to<br>0.59)                       | 0.20<br>(0.06 to<br>0.48)                       | 0.01<br>(0.00 to<br>0.02)                    | 0.01<br>(0.00 to<br>0.02)                    | 0.01<br>(0.00 to<br>0.02)                    | 0.01<br>(0.00 to<br>0.02)                    |
| Paratyphoid fever                                                 | 0.06<br>(0.02 to<br>0.16)                       | 0.03<br>(0.01 to<br>0.07)                       | 0.02<br>(0.01 to<br>0.06)                       | 0.03<br>(0.01 to<br>0.08)                       | 0.00<br>(0.00 to<br>0.01)                    | 0.00<br>(0.00 to<br>0.00)                    | 0.00<br>(0.00 to<br>0.00)                    | 0.00<br>(0.00 to<br>0.00)                    |
| Other intestinal infectious diseases                              | 0.02<br>(0.01 to<br>0.03)                       | 0.01<br>(0.00 to<br>0.02)                       | 0.01<br>(0.00 to<br>0.02)                       | 0.01<br>(0.00 to<br>0.02)                       | 0.00<br>(0.00 to<br>0.00)                    | 0.00<br>(0.00 to<br>0.00)                    | 0.00<br>(0.00 to<br>0.00)                    | 0.00<br>(0.00 to<br>0.00)                    |
| Lower respiratory infections                                      | 596.94<br>(486.06 to<br>716.96)                 | 528.82<br>(371.78 to<br>723.05)                 | 425.55<br>(304.93 to<br>576.66)                 | 625.04<br>(425.06 to<br>896.66)                 | 39.01<br>(32.10 to<br>46.91)                 | 51.66<br>(35.39 to<br>69.70)                 | 45.38<br>(31.95 to<br>60.37)                 | 56.40<br>(38.47 to<br>77.75)                 |
| Upper respiratory infections                                      | 0.28<br>(0.14 to<br>0.47)                       | 0.14<br>(0.05 to<br>0.32)                       | 0.10<br>(0.03 to<br>0.22)                       | 0.15<br>(0.05 to<br>0.34)                       | 0.01<br>(0.01 to<br>0.02)                    | 0.01<br>(0.00 to<br>0.02)                    | 0.01<br>(0.00 to<br>0.02)                    | 0.01<br>(0.00 to<br>0.02)                    |
| Otitis media                                                      | 0.44<br>(0.25 to<br>0.81)                       | 0.12<br>(0.05 to<br>0.27)                       | 0.13<br>(0.06 to<br>0.28)                       | 0.12<br>(0.05 to<br>0.26)                       | 0.02<br>(0.01 to<br>0.04)                    | 0.01<br>(0.00 to<br>0.02)                    | 0.01<br>(0.00 to<br>0.02)                    | 0.01<br>(0.00 to<br>0.02)                    |
| Meningitis                                                        | 19.70<br>(14.35 to<br>29.35)                    | 6.94<br>(4.53 to<br>11.26)                      | 5.45<br>(3.56 to<br>8.88)                       | 7.91<br>(5.04 to<br>13.07)                      | 0.71<br>(0.52 to<br>1.06)                    | 0.34<br>(0.23 to<br>0.55)                    | 0.31<br>(0.21 to<br>0.49)                    | 0.35<br>(0.24 to<br>0.56)                    |
| Pneumococcal meningitis                                           | 3.07<br>(2.02 to<br>4.82)                       | 1.45<br>(0.88 to<br>2.51)                       | 1.35<br>(0.82 to<br>2.35)                       | 1.54<br>(0.93 to<br>2.62)                       | 0.12<br>(0.08 to<br>0.19)                    | 0.08<br>(0.05 to<br>0.14)                    | 0.08<br>(0.05 to<br>0.13)                    | 0.08<br>(0.05 to<br>0.14)                    |
| H influenzae type B meningitis                                    | 1.77<br>(1.22 to<br>2.73)                       | 1.40<br>(0.64 to<br>3.01)                       | 0.84<br>(0.51 to<br>1.42)                       | 1.91<br>(0.72 to<br>4.49)                       | 0.06<br>(0.04 to<br>0.09)                    | 0.04<br>(0.03 to<br>0.07)                    | 0.04<br>(0.03 to<br>0.07)                    | 0.05<br>(0.03 to<br>0.08)                    |
| Meningococcal meningitis                                          | 7.48<br>(5.15 to<br>11.31)                      | 2.03<br>(1.18 to<br>3.67)                       | 1.63<br>(0.95 to<br>2.92)                       | 2.19<br>(1.28 to<br>3.91)                       | 0.26<br>(0.18 to<br>0.40)                    | 0.11<br>(0.06 to<br>0.19)                    | 0.09<br>(0.06 to<br>0.16)                    | 0.11<br>(0.07 to<br>0.19)                    |

|                                         |                                                   |                                                     |                                                     |                                                     |                                                |                                                 |                                                 |                                                 |
|-----------------------------------------|---------------------------------------------------|-----------------------------------------------------|-----------------------------------------------------|-----------------------------------------------------|------------------------------------------------|-------------------------------------------------|-------------------------------------------------|-------------------------------------------------|
| Other meningitis                        | 7.39<br>(5.22 to<br>11.07)                        | 2.07<br>(1.18 to<br>3.61)                           | 1.63<br>(0.96 to<br>2.83)                           | 2.26<br>(1.31 to<br>3.90)                           | 0.27<br>(0.19 to<br>0.40)                      | 0.11<br>(0.06 to<br>0.19)                       | 0.09<br>(0.06 to<br>0.15)                       | 0.11<br>(0.07 to<br>0.19)                       |
| Encephalitis                            | 12.76<br>(9.36 to<br>17.01)                       | 9.23<br>(6.68 to<br>12.84)                          | 8.87<br>(6.45 to<br>12.21)                          | 9.25<br>(6.69 to<br>12.79)                          | 0.37<br>(0.30 to<br>0.45)                      | 0.39<br>(0.31 to<br>0.50)                       | 0.41<br>(0.32 to<br>0.51)                       | 0.38<br>(0.30 to<br>0.47)                       |
| Diphtheria                              | 0.19<br>(0.11 to<br>0.29)                         | 0.03<br>(0.01 to<br>0.05)                           | 0.02<br>(0.01 to<br>0.04)                           | 0.03<br>(0.02 to<br>0.07)                           | 0.00<br>(0.00 to<br>0.01)                      | 0.00<br>(0.00 to<br>0.00)                       | 0.00<br>(0.00 to<br>0.00)                       | 0.00<br>(0.00 to<br>0.00)                       |
| Whooping cough                          | 12.72<br>(1.24 to<br>37.72)                       | 9.13<br>(0.12 to<br>27.34)                          | 1.95<br>(0.08 to<br>7.05)                           | 9.47<br>(0.12 to<br>29.04)                          | 0.15<br>(0.01 to<br>0.45)                      | 0.11<br>(0.00 to<br>0.33)                       | 0.02<br>(0.00 to<br>0.08)                       | 0.11<br>(0.00 to<br>0.35)                       |
| Tetanus                                 | 0.52<br>(0.40 to<br>0.64)                         | 0.03<br>(0.02 to<br>0.04)                           | 0.02<br>(0.01 to<br>0.03)                           | 0.03<br>(0.02 to<br>0.04)                           | 0.01<br>(0.01 to<br>0.02)                      | 0.00<br>(0.00 to<br>0.00)                       | 0.00<br>(0.00 to<br>0.00)                       | 0.00<br>(0.00 to<br>0.00)                       |
| Measles                                 | 37.26<br>(13.34 to<br>80.09)                      | 16.77<br>(1.22 to<br>54.04)                         | 9.18<br>(0.68 to<br>26.61)                          | 20.53<br>(1.38 to<br>64.53)                         | 0.45<br>(0.16 to<br>0.97)                      | 0.30<br>(0.02 to<br>0.97)                       | 0.18<br>(0.01 to<br>0.61)                       | 0.37<br>(0.02 to<br>1.23)                       |
| <b>Virgin Islands, U.S.</b>             |                                                   |                                                     |                                                     |                                                     |                                                |                                                 |                                                 |                                                 |
| Cause                                   | YLLs (actual counts)                              |                                                     |                                                     |                                                     | Deaths (actual counts)                         |                                                 |                                                 |                                                 |
|                                         | 2016                                              | 2040 Forecast                                       | 2040 Better Scenario                                | 2040 Worse Scenario                                 | 2016                                           | 2040 Forecast                                   | 2040 Better Scenario                            | 2040 Worse Scenario                             |
| Varicella and herpes zoster             | 1.54<br>(1.06 to<br>2.17)                         | 1.01<br>(0.54 to<br>1.74)                           | 0.91<br>(0.50 to<br>1.54)                           | 1.02<br>(0.53 to<br>1.70)                           | 0.08<br>(0.05 to<br>0.13)                      | 0.10<br>(0.05 to<br>0.19)                       | 0.10<br>(0.05 to<br>0.19)                       | 0.10<br>(0.05 to<br>0.18)                       |
| Neglected tropical diseases and malaria | <b>45.57</b><br><b>(12.35 to</b><br><b>87.75)</b> | <b>106.56</b><br><b>(37.69 to</b><br><b>178.50)</b> | <b>104.78</b><br><b>(37.87 to</b><br><b>172.52)</b> | <b>106.38</b><br><b>(36.60 to</b><br><b>179.35)</b> | <b>1.63</b><br><b>(0.46 to</b><br><b>2.98)</b> | <b>5.96</b><br><b>(1.81 to</b><br><b>11.13)</b> | <b>6.29</b><br><b>(1.94 to</b><br><b>11.57)</b> | <b>5.68</b><br><b>(1.70 to</b><br><b>10.54)</b> |
| Malaria                                 | 0.56<br>(0.23 to<br>0.78)                         | 0.21<br>(0.09 to<br>0.52)                           | 0.21<br>(0.09 to<br>0.32)                           | 0.21<br>(0.09 to<br>0.32)                           | 0.02<br>(0.01 to<br>0.02)                      | 0.01<br>(0.00 to<br>0.01)                       | 0.01<br>(0.00 to<br>0.01)                       | 0.01<br>(0.00 to<br>0.01)                       |
| Chagas disease                          | 0.00<br>(0.00 to<br>0.00)                         | 0.00<br>(0.00 to<br>0.00)                           | 0.00<br>(0.00 to<br>0.00)                           | 0.00<br>(0.00 to<br>0.00)                           | 0.00<br>(0.00 to<br>0.00)                      | 0.00<br>(0.00 to<br>0.00)                       | 0.00<br>(0.00 to<br>0.00)                       | 0.00<br>(0.00 to<br>0.00)                       |
| Leishmaniasis                           | 0.00<br>(0.00 to<br>0.00)                         | 0.00<br>(0.00 to<br>0.00)                           | 0.00<br>(0.00 to<br>0.00)                           | 0.00<br>(0.00 to<br>0.00)                           | 0.00<br>(0.00 to<br>0.00)                      | 0.00<br>(0.00 to<br>0.00)                       | 0.00<br>(0.00 to<br>0.00)                       | 0.00<br>(0.00 to<br>0.00)                       |
| African trypanosomiasis                 | 0.00<br>(0.00 to<br>0.00)                         | 0.00<br>(0.00 to<br>0.00)                           | 0.00<br>(0.00 to<br>0.00)                           | 0.00<br>(0.00 to<br>0.00)                           | 0.00<br>(0.00 to<br>0.00)                      | 0.00<br>(0.00 to<br>0.00)                       | 0.00<br>(0.00 to<br>0.00)                       | 0.00<br>(0.00 to<br>0.00)                       |
| Schistosomiasis                         | 0.00<br>(0.00 to<br>0.00)                         | 0.00<br>(0.00 to<br>0.00)                           | 0.00<br>(0.00 to<br>0.00)                           | 0.00<br>(0.00 to<br>0.00)                           | 0.00<br>(0.00 to<br>0.00)                      | 0.00<br>(0.00 to<br>0.00)                       | 0.00<br>(0.00 to<br>0.00)                       | 0.00<br>(0.00 to<br>0.00)                       |
| Cysticercosis                           | 0.00<br>(0.00 to<br>0.00)                         | 0.00<br>(0.00 to<br>0.00)                           | 0.00<br>(0.00 to<br>0.00)                           | 0.00<br>(0.00 to<br>0.00)                           | 0.00<br>(0.00 to<br>0.00)                      | 0.00<br>(0.00 to<br>0.00)                       | 0.00<br>(0.00 to<br>0.00)                       | 0.00<br>(0.00 to<br>0.00)                       |
| Cystic echinococcosis                   | 0.00<br>(0.00 to<br>0.00)                         | 0.00<br>(0.00 to<br>0.00)                           | 0.00<br>(0.00 to<br>0.00)                           | 0.00<br>(0.00 to<br>0.00)                           | 0.00<br>(0.00 to<br>0.00)                      | 0.00<br>(0.00 to<br>0.00)                       | 0.00<br>(0.00 to<br>0.00)                       | 0.00<br>(0.00 to<br>0.00)                       |
| Dengue                                  | 41.46<br>(10.21 to<br>79.37)                      | 105.35<br>(36.88 to<br>177.41)                      | 103.48<br>(37.05 to<br>171.19)                      | 105.24<br>(35.46 to<br>178.19)                      | 1.51<br>(0.40 to<br>2.81)                      | 5.89<br>(1.75 to<br>11.06)                      | 6.21<br>(1.89 to<br>11.49)                      | 5.62<br>(1.66 to<br>10.49)                      |
| Yellow fever                            | 0.00<br>(0.00 to<br>0.00)                         | 0.00<br>(0.00 to<br>0.00)                           | 0.00<br>(0.00 to<br>0.00)                           | 0.00<br>(0.00 to<br>0.00)                           | 0.00<br>(0.00 to<br>0.00)                      | 0.00<br>(0.00 to<br>0.00)                       | 0.00<br>(0.00 to<br>0.00)                       | 0.00<br>(0.00 to<br>0.00)                       |
| Rabies                                  | 0.01<br>(0.01 to<br>0.03)                         | 0.01<br>(0.00 to<br>0.01)                           | 0.01<br>(0.00 to<br>0.01)                           | 0.01<br>(0.00 to<br>0.01)                           | 0.00<br>(0.00 to<br>0.00)                      | 0.00<br>(0.00 to<br>0.00)                       | 0.00<br>(0.00 to<br>0.00)                       | 0.00<br>(0.00 to<br>0.00)                       |
| Intestinal nematode infections          | 0.00<br>(0.00 to<br>0.00)                         | 0.00<br>(0.00 to<br>0.00)                           | 0.00<br>(0.00 to<br>0.00)                           | 0.00<br>(0.00 to<br>0.00)                           | 0.00<br>(0.00 to<br>0.00)                      | 0.00<br>(0.00 to<br>0.00)                       | 0.00<br>(0.00 to<br>0.00)                       | 0.00<br>(0.00 to<br>0.00)                       |
| Other neglected tropical diseases       | 1.00<br>(0.74 to<br>1.30)                         | 0.98<br>(0.68 to<br>1.41)                           | 1.09<br>(0.75 to<br>1.56)                           | 0.92<br>(0.66 to<br>1.31)                           | 0.04<br>(0.03 to<br>0.05)                      | 0.06<br>(0.04 to<br>0.08)                       | 0.07<br>(0.04 to<br>0.10)                       | 0.05<br>(0.03 to<br>0.07)                       |

|                                                       |                            |                           |                           |                           |                           |                           |                           |                           |
|-------------------------------------------------------|----------------------------|---------------------------|---------------------------|---------------------------|---------------------------|---------------------------|---------------------------|---------------------------|
|                                                       | 8.00<br>(3.35 to<br>12.66) | 4.29<br>(1.53 to<br>8.44) | 3.60<br>(1.25 to<br>7.06) | 4.64<br>(1.62 to<br>9.02) | 0.16<br>(0.07 to<br>0.24) | 0.08<br>(0.03 to<br>0.16) | 0.07<br>(0.02 to<br>0.14) | 0.09<br>(0.02 to<br>0.18) |
| Maternal disorders                                    | 0.76<br>(0.28 to<br>1.35)  | 0.38<br>(0.11 to<br>0.82) | 0.32<br>(0.10 to<br>0.71) | 0.41<br>(0.12 to<br>0.88) | 0.01<br>(0.01 to<br>0.03) | 0.01<br>(0.00 to<br>0.02) | 0.01<br>(0.00 to<br>0.01) | 0.01<br>(0.00 to<br>0.02) |
| Maternal hemorrhage                                   | 0.20<br>(0.07 to<br>0.38)  | 0.09<br>(0.03 to<br>0.21) | 0.08<br>(0.02 to<br>0.17) | 0.10<br>(0.03 to<br>0.22) | 0.00<br>(0.00 to<br>0.01) | 0.00<br>(0.00 to<br>0.00) | 0.00<br>(0.00 to<br>0.00) | 0.00<br>(0.00 to<br>0.00) |
| Maternal sepsis and other maternal infections         | 1.05<br>(0.40 to<br>1.76)  | 0.51<br>(0.16 to<br>1.05) | 0.42<br>(0.13 to<br>0.88) | 0.55<br>(0.19 to<br>1.14) | 0.02<br>(0.01 to<br>0.03) | 0.01<br>(0.00 to<br>0.02) | 0.01<br>(0.00 to<br>0.02) | 0.01<br>(0.00 to<br>0.02) |
| Maternal hypertensive disorders                       | 0.10<br>(0.03 to<br>0.19)  | 0.05<br>(0.01 to<br>0.12) | 0.04<br>(0.01 to<br>0.10) | 0.05<br>(0.02 to<br>0.13) | 0.00<br>(0.00 to<br>0.00) | 0.00<br>(0.00 to<br>0.00) | 0.00<br>(0.00 to<br>0.00) | 0.00<br>(0.00 to<br>0.00) |
| Maternal obstructed labor and uterine rupture         | 4.22<br>(1.82 to<br>6.73)  | 2.36<br>(0.76 to<br>5.10) | 1.98<br>(0.64 to<br>4.23) | 2.55<br>(0.87 to<br>5.47) | 0.08<br>(0.04 to<br>0.13) | 0.05<br>(0.02 to<br>0.10) | 0.04<br>(0.01 to<br>0.09) | 0.05<br>(0.02 to<br>0.11) |
| Maternal abortion, miscarriage, and ectopic pregnancy | 0.57<br>(0.21 to<br>1.00)  | 0.31<br>(0.09 to<br>0.66) | 0.26<br>(0.08 to<br>0.56) | 0.34<br>(0.10 to<br>0.71) | 0.01<br>(0.00 to<br>0.02) | 0.01<br>(0.00 to<br>0.01) | 0.01<br>(0.00 to<br>0.01) | 0.01<br>(0.00 to<br>0.01) |
| Indirect maternal deaths                              | 0.15<br>(0.06 to<br>0.28)  | 0.06<br>(0.02 to<br>0.13) | 0.05<br>(0.01 to<br>0.11) | 0.07<br>(0.02 to<br>0.14) | 0.00<br>(0.00 to<br>0.01) | 0.00<br>(0.00 to<br>0.00) | 0.00<br>(0.00 to<br>0.00) | 0.00<br>(0.00 to<br>0.00) |
| Late maternal deaths                                  | 0.01<br>(0.00 to<br>0.02)  | 0.03<br>(0.00 to<br>0.15) | 0.02<br>(0.00 to<br>0.10) | 0.05<br>(0.00 to<br>0.17) | 0.00<br>(0.00 to<br>0.00) | 0.00<br>(0.00 to<br>0.00) | 0.00<br>(0.00 to<br>0.00) | 0.00<br>(0.00 to<br>0.00) |
| Maternal deaths aggravated by HIV/AIDS                | 0.94<br>(0.37 to<br>1.66)  | 0.50<br>(0.17 to<br>1.05) | 0.43<br>(0.14 to<br>0.90) | 0.53<br>(0.18 to<br>1.10) | 0.02<br>(0.01 to<br>0.03) | 0.01<br>(0.00 to<br>0.02) | 0.01<br>(0.00 to<br>0.02) | 0.01<br>(0.00 to<br>0.02) |
| Other maternal disorders                              |                            |                           |                           |                           |                           |                           |                           |                           |

Virgin Islands, U.S.

| Cause                                                    | YLLs (actual counts)            |                                 |                                |                                 | Deaths (actual counts)    |                           |                            |                           |
|----------------------------------------------------------|---------------------------------|---------------------------------|--------------------------------|---------------------------------|---------------------------|---------------------------|----------------------------|---------------------------|
|                                                          | 2016                            | 2040 Forecast                   | 2040 Better Scenario           | 2040 Worse Scenario             | 2016                      | 2040 Forecast             | 2040 Better Scenario       | 2040 Worse Scenario       |
|                                                          | 410.91<br>(318.92 to<br>518.22) | 178.20<br>(102.81 to<br>285.60) | 116.49<br>(68.50 to<br>179.85) | 208.24<br>(123.14 to<br>328.69) | 4.75<br>(3.68 to<br>5.99) | 2.06<br>(1.19 to<br>3.30) | 1.35<br>(0.79 to<br>2.08)  | 2.41<br>(1.42 to<br>3.80) |
| Neonatal disorders                                       | 192.72<br>(141.34 to<br>251.69) | 60.81<br>(34.18 to<br>100.26)   | 33.08<br>(18.78 to<br>53.29)   | 77.22<br>(44.79 to<br>126.01)   | 2.23<br>(1.63 to<br>2.91) | 0.70<br>(0.40 to<br>1.16) | 0.38<br>(0.22 to<br>0.62)  | 0.89<br>(0.52 to<br>1.46) |
| Neonatal preterm birth                                   | 91.56<br>(59.71 to<br>131.54)   | 30.67<br>(14.16 to<br>55.80)    | 19.41<br>(9.34 to<br>34.29)    | 35.95<br>(16.74 to<br>66.09)    | 1.06<br>(0.69 to<br>1.52) | 0.35<br>(0.16 to<br>0.65) | 0.22<br>(0.11 to<br>0.40)  | 0.42<br>(0.19 to<br>0.76) |
| Neonatal encephalopathy due to birth asphyxia and trauma | 53.68<br>(33.97 to<br>86.84)    | 29.79<br>(14.18 to<br>54.41)    | 20.31<br>(10.11 to<br>35.75)   | 33.77<br>(15.52 to<br>61.63)    | 0.62<br>(0.39 to<br>1.00) | 0.34<br>(0.16 to<br>0.63) | 0.23<br>(0.12 to<br>0.41)  | 0.39<br>(0.18 to<br>0.71) |
| Neonatal sepsis and other neonatal infections            | 0.20<br>(0.13 to<br>0.29)       | 0.06<br>(0.03 to<br>0.12)       | 0.04<br>(0.02 to<br>0.08)      | 0.07<br>(0.03 to<br>0.14)       | 0.00<br>(0.00 to<br>0.00) | 0.00<br>(0.00 to<br>0.00) | 0.00<br>(0.00 to<br>0.00)  | 0.00<br>(0.00 to<br>0.00) |
| Hemolytic disease and other neonatal jaundice            | 72.75<br>(46.97 to<br>105.62)   | 56.87<br>(29.94 to<br>100.28)   | 43.65<br>(24.12 to<br>74.70)   | 61.23<br>(32.18 to<br>110.01)   | 0.84<br>(0.54 to<br>1.22) | 0.66<br>(0.35 to<br>1.16) | 0.50<br>(0.28 to<br>0.86)  | 0.71<br>(0.37 to<br>1.27) |
| Other neonatal disorders                                 | 67.11<br>(57.26 to<br>77.74)    | 68.48<br>(54.72 to<br>82.47)    | 79.12<br>(64.24 to<br>93.91)   | 62.12<br>(49.35 to<br>75.08)    | 4.30<br>(3.73 to<br>4.97) | 7.04<br>(5.28 to<br>9.01) | 8.67<br>(6.77 to<br>10.64) | 6.13<br>(4.46 to<br>7.86) |
| Nutritional deficiencies                                 | 59.20<br>(50.53 to<br>68.79)    | 61.60<br>(47.78 to<br>76.49)    | 72.32<br>(58.05 to<br>86.72)   | 55.40<br>(43.05 to<br>68.42)    | 3.85<br>(3.32 to<br>4.49) | 6.46<br>(4.75 to<br>8.48) | 8.07<br>(6.16 to<br>10.08) | 5.59<br>(3.90 to<br>7.29) |
| Protein-energy malnutrition                              | 0.44<br>(0.03 to<br>1.73)       | 1.69<br>(0.02 to<br>8.13)       | 1.76<br>(0.02 to<br>9.02)      | 1.61<br>(0.02 to<br>7.61)       | 0.02<br>(0.00 to<br>0.08) | 0.15<br>(0.00 to<br>0.94) | 0.16<br>(0.00 to<br>1.03)  | 0.14<br>(0.00 to<br>0.83) |
| Iodine deficiency                                        | 0.45<br>(0.32 to<br>0.59)       | 0.29<br>(0.20 to<br>0.42)       | 0.29<br>(0.19 to<br>0.42)      | 0.29<br>(0.20 to<br>0.40)       | 0.01<br>(0.01 to<br>0.01) | 0.01<br>(0.01 to<br>0.01) | 0.01<br>(0.01 to<br>0.01)  | 0.01<br>(0.01 to<br>0.01) |
| Dietary iron deficiency                                  |                                 |                                 |                                |                                 |                           |                           |                            |                           |

|                                                                         |                                                               |                                                               |                                                               |                                                               |                                                            |                                                            |                                                            |                                                            |
|-------------------------------------------------------------------------|---------------------------------------------------------------|---------------------------------------------------------------|---------------------------------------------------------------|---------------------------------------------------------------|------------------------------------------------------------|------------------------------------------------------------|------------------------------------------------------------|------------------------------------------------------------|
| Other nutritional deficiencies                                          | 7.02<br>(4.89 to<br>9.27)                                     | 4.90<br>(3.18 to<br>7.02)                                     | 4.75<br>(3.05 to<br>6.80)                                     | 4.82<br>(3.14 to<br>6.88)                                     | 0.42<br>(0.29 to<br>0.56)                                  | 0.42<br>(0.25 to<br>0.63)                                  | 0.43<br>(0.26 to<br>0.64)                                  | 0.40<br>(0.24 to<br>0.61)                                  |
| <b>Other communicable, maternal, neonatal, and nutritional diseases</b> | <b>74.51</b><br><b>(57.51 to</b><br><b>90.58)</b>             | <b>45.22</b><br><b>(33.62 to</b><br><b>58.65)</b>             | <b>42.76</b><br><b>(31.31 to</b><br><b>55.19)</b>             | <b>45.88</b><br><b>(34.48 to</b><br><b>59.19)</b>             | <b>2.62</b><br><b>(2.01 to</b><br><b>3.10)</b>             | <b>2.18</b><br><b>(1.68 to</b><br><b>2.64)</b>             | <b>2.22</b><br><b>(1.72 to</b><br><b>2.69)</b>             | <b>2.12</b><br><b>(1.62 to</b><br><b>2.57)</b>             |
| Sexually transmitted infections excluding HIV                           | 13.83<br>(8.73 to<br>22.11)                                   | 3.17<br>(1.96 to<br>5.28)                                     | 2.73<br>(1.70 to<br>4.34)                                     | 3.34<br>(2.08 to<br>5.53)                                     | 0.42<br>(0.31 to<br>0.55)                                  | 0.15<br>(0.10 to<br>0.20)                                  | 0.14<br>(0.10 to<br>0.20)                                  | 0.14<br>(0.10 to<br>0.20)                                  |
| Syphilis                                                                | 10.34<br>(5.63 to<br>18.28)                                   | 1.63<br>(0.75 to<br>3.42)                                     | 1.23<br>(0.62 to<br>2.44)                                     | 1.79<br>(0.81 to<br>3.71)                                     | 0.28<br>(0.19 to<br>0.41)                                  | 0.05<br>(0.03 to<br>0.08)                                  | 0.05<br>(0.02 to<br>0.07)                                  | 0.06<br>(0.04 to<br>0.09)                                  |
| Chlamydial infection                                                    | 0.60<br>(0.39 to<br>0.82)                                     | 0.30<br>(0.19 to<br>0.44)                                     | 0.29<br>(0.18 to<br>0.44)                                     | 0.30<br>(0.19 to<br>0.44)                                     | 0.02<br>(0.02 to<br>0.03)                                  | 0.02<br>(0.01 to<br>0.03)                                  | 0.02<br>(0.01 to<br>0.03)                                  | 0.02<br>(0.01 to<br>0.03)                                  |
| Gonococcal infection                                                    | 1.93<br>(1.35 to<br>2.59)                                     | 0.88<br>(0.57 to<br>1.29)                                     | 0.85<br>(0.54 to<br>1.30)                                     | 0.88<br>(0.58 to<br>1.26)                                     | 0.08<br>(0.06 to<br>0.10)                                  | 0.05<br>(0.04 to<br>0.08)                                  | 0.06<br>(0.04 to<br>0.08)                                  | 0.05<br>(0.04 to<br>0.07)                                  |
| Other sexually transmitted infections                                   | 0.97<br>(0.66 to<br>1.29)                                     | 0.37<br>(0.23 to<br>0.57)                                     | 0.35<br>(0.22 to<br>0.55)                                     | 0.38<br>(0.24 to<br>0.57)                                     | 0.04<br>(0.03 to<br>0.04)                                  | 0.02<br>(0.01 to<br>0.03)                                  | 0.02<br>(0.01 to<br>0.03)                                  | 0.02<br>(0.01 to<br>0.03)                                  |
| Acute hepatitis                                                         | 21.26<br>(16.33 to<br>26.61)                                  | 8.23<br>(5.21 to<br>12.77)                                    | 6.72<br>(4.21 to<br>10.33)                                    | 8.88<br>(5.84 to<br>13.37)                                    | 0.80<br>(0.64 to<br>0.98)                                  | 0.42<br>(0.28 to<br>0.63)                                  | 0.36<br>(0.24 to<br>0.55)                                  | 0.44<br>(0.30 to<br>0.66)                                  |
| Acute hepatitis A                                                       | 0.38<br>(0.21 to<br>0.62)                                     | 0.18<br>(0.07 to<br>0.41)                                     | 0.16<br>(0.06 to<br>0.36)                                     | 0.20<br>(0.08 to<br>0.43)                                     | 0.01<br>(0.01 to<br>0.02)                                  | 0.01<br>(0.00 to<br>0.02)                                  | 0.01<br>(0.00 to<br>0.02)                                  | 0.01<br>(0.00 to<br>0.02)                                  |
| Acute hepatitis B                                                       | 15.42<br>(11.58 to<br>20.16)                                  | 5.72<br>(3.49 to<br>9.19)                                     | 4.63<br>(2.76 to<br>7.33)                                     | 6.22<br>(3.84 to<br>9.66)                                     | 0.57<br>(0.44 to<br>0.72)                                  | 0.27<br>(0.16 to<br>0.43)                                  | 0.23<br>(0.14 to<br>0.36)                                  | 0.29<br>(0.18 to<br>0.44)                                  |
| Acute hepatitis C                                                       | 1.18<br>(0.79 to<br>1.69)                                     | 0.44<br>(0.26 to<br>0.74)                                     | 0.36<br>(0.21 to<br>0.60)                                     | 0.48<br>(0.28 to<br>0.78)                                     | 0.04<br>(0.03 to<br>0.06)                                  | 0.02<br>(0.01 to<br>0.04)                                  | 0.02<br>(0.01 to<br>0.03)                                  | 0.02<br>(0.01 to<br>0.04)                                  |
| Acute hepatitis E                                                       | 4.27<br>(2.89 to<br>5.95)                                     | 1.88<br>(1.03 to<br>3.08)                                     | 1.57<br>(0.88 to<br>2.55)                                     | 1.99<br>(1.12 to<br>3.18)                                     | 0.17<br>(0.11 to<br>0.25)                                  | 0.13<br>(0.06 to<br>0.21)                                  | 0.11<br>(0.06 to<br>0.18)                                  | 0.13<br>(0.07 to<br>0.21)                                  |
| Other unspecified infectious diseases                                   | 39.42<br>(28.18 to<br>49.44)                                  | 33.82<br>(24.19 to<br>43.32)                                  | 33.31<br>(23.62 to<br>42.97)                                  | 33.66<br>(23.99 to<br>42.94)                                  | 1.39<br>(0.91 to<br>1.70)                                  | 1.61<br>(1.14 to<br>1.97)                                  | 1.72<br>(1.23 to<br>2.09)                                  | 1.53<br>(1.07 to<br>1.87)                                  |
| <b>Non-communicable diseases</b>                                        | <b>19,621.88</b><br><b>(17,053.72 to</b><br><b>21,805.15)</b> | <b>15,269.79</b><br><b>(13,165.35 to</b><br><b>17,636.21)</b> | <b>12,737.25</b><br><b>(11,223.59 to</b><br><b>14,409.65)</b> | <b>17,550.52</b><br><b>(15,148.59 to</b><br><b>20,087.23)</b> | <b>1,126.05</b><br><b>(1,007.98 to</b><br><b>1,224.67)</b> | <b>1,204.07</b><br><b>(1,113.85 to</b><br><b>1,307.97)</b> | <b>1,067.48</b><br><b>(1,004.55 to</b><br><b>1,138.56)</b> | <b>1,319.78</b><br><b>(1,216.70 to</b><br><b>1,432.33)</b> |

Virgin Islands, U.S.

| Cause                      | YLLs (actual counts)                  |                                       |                                       |                                       | Deaths (actual counts)          |                                 |                                 |                                 |
|----------------------------|---------------------------------------|---------------------------------------|---------------------------------------|---------------------------------------|---------------------------------|---------------------------------|---------------------------------|---------------------------------|
|                            | 2016                                  | 2040 Forecast                         | 2040 Better Scenario                  | 2040 Worse Scenario                   | 2016                            | 2040 Forecast                   | 2040 Better Scenario            | 2040 Worse Scenario             |
| Neoplasms                  | 5,735.34<br>(4,903.68 to<br>6,204.41) | 4,690.68<br>(3,952.29 to<br>5,513.30) | 4,138.12<br>(3,543.50 to<br>4,774.95) | 5,272.95<br>(4,343.18 to<br>6,357.46) | 299.40<br>(263.59 to<br>330.95) | 321.11<br>(265.15 to<br>377.90) | 300.14<br>(255.90 to<br>346.65) | 346.61<br>(281.36 to<br>415.47) |
| Lip and oral cavity cancer | 76.16<br>(61.12 to<br>91.65)          | 63.00<br>(34.71 to<br>106.88)         | 37.97<br>(22.96 to<br>60.38)          | 91.38<br>(49.05 to<br>158.89)         | 3.54<br>(2.93 to<br>4.18)       | 3.50<br>(2.12 to<br>5.71)       | 2.27<br>(1.49 to<br>3.51)       | 4.93<br>(2.81 to<br>8.20)       |
| Nasopharynx cancer         | 28.11<br>(22.71 to<br>34.27)          | 19.26<br>(10.84 to<br>32.55)          | 10.58<br>(6.34 to<br>17.04)           | 28.71<br>(15.62 to<br>49.43)          | 1.09<br>(0.90 to<br>1.31)       | 0.84<br>(0.50 to<br>1.36)       | 0.48<br>(0.31 to<br>0.73)       | 1.23<br>(0.71 to<br>2.02)       |
| Other pharynx cancer       | 55.09<br>(44.54 to<br>65.95)          | 47.81<br>(27.15 to<br>82.03)          | 40.54<br>(24.71 to<br>67.91)          | 52.55<br>(29.12 to<br>90.33)          | 2.47<br>(2.05 to<br>2.90)       | 2.79<br>(1.64 to<br>4.72)       | 2.48<br>(1.57 to<br>4.05)       | 2.95<br>(1.63 to<br>5.06)       |
| Esophageal cancer          | 129.00<br>(106.85 to<br>154.65)       | 118.51<br>(71.98 to<br>190.82)        | 85.12<br>(56.78 to<br>125.16)         | 155.62<br>(88.25 to<br>255.50)        | 6.50<br>(5.48 to<br>7.69)       | 7.07<br>(4.44 to<br>10.70)      | 5.40<br>(3.71 to<br>7.67)       | 9.04<br>(5.30 to<br>14.31)      |
| Stomach cancer             | 304.25<br>(256.33 to<br>353.05)       | 150.70<br>(115.25 to<br>193.85)       | 128.68<br>(103.07 to<br>156.15)       | 161.90<br>(122.70 to<br>207.45)       | 16.46<br>(14.28 to<br>18.68)    | 10.65<br>(8.26 to<br>13.72)     | 9.52<br>(7.61 to<br>11.49)      | 11.13<br>(8.39 to<br>14.21)     |



|                                      |                                   |                                   |                                   |                                   |                              |                              |                               |                              |
|--------------------------------------|-----------------------------------|-----------------------------------|-----------------------------------|-----------------------------------|------------------------------|------------------------------|-------------------------------|------------------------------|
| Colon and rectum cancer              | 757.83<br>(646.46 to<br>860.17)   | 611.62<br>(434.08 to<br>888.88)   | 507.84<br>(367.78 to<br>719.17)   | 683.92<br>(465.94 to<br>1,001.49) | 41.94<br>(36.61 to<br>47.09) | 45.65<br>(31.61 to<br>64.84) | 39.69<br>(28.44 to<br>55.00)  | 49.36<br>(32.93 to<br>70.36) |
| Liver cancer                         | 155.30<br>(125.23 to<br>186.21)   | 182.44<br>(125.71 to<br>262.60)   | 168.49<br>(121.26 to<br>235.71)   | 213.49<br>(137.64 to<br>326.69)   | 7.89<br>(6.57 to<br>9.33)    | 11.74<br>(8.14 to<br>16.92)  | 11.42<br>(8.30 to<br>15.82)   | 13.19<br>(8.78 to<br>19.55)  |
| Liver cancer due to hepatitis B      | 54.59<br>(41.19 to<br>70.51)      | 58.15<br>(38.45 to<br>87.25)      | 55.07<br>(37.93 to<br>79.61)      | 67.00<br>(41.72 to<br>108.92)     | 2.48<br>(1.90 to<br>3.17)    | 3.25<br>(2.18 to<br>4.75)    | 3.24<br>(2.27 to<br>4.66)     | 3.61<br>(2.29 to<br>5.57)    |
| Liver cancer due to hepatitis C      | 40.01<br>(31.77 to<br>49.59)      | 50.81<br>(34.86 to<br>74.12)      | 49.93<br>(35.80 to<br>70.83)      | 56.58<br>(36.92 to<br>85.59)      | 2.31<br>(1.87 to<br>2.83)    | 3.82<br>(2.61 to<br>5.56)    | 3.92<br>(2.79 to<br>5.50)     | 4.11<br>(2.66 to<br>6.26)    |
| Liver cancer due to alcohol use      | 34.22<br>(26.70 to<br>43.36)      | 41.72<br>(27.31 to<br>62.74)      | 33.19<br>(22.39 to<br>49.68)      | 53.25<br>(33.05 to<br>84.30)      | 1.76<br>(1.39 to<br>2.20)    | 2.65<br>(1.76 to<br>4.06)    | 2.23<br>(1.53 to<br>3.38)     | 3.22<br>(2.04 to<br>5.11)    |
| Liver cancer due to other causes     | 26.47<br>(20.18 to<br>32.95)      | 31.76<br>(20.02 to<br>49.30)      | 30.30<br>(20.16 to<br>45.15)      | 36.66<br>(21.98 to<br>59.55)      | 1.34<br>(1.05 to<br>1.65)    | 2.02<br>(1.28 to<br>3.08)    | 2.03<br>(1.36 to<br>3.00)     | 2.25<br>(1.36 to<br>3.62)    |
| Gallbladder and biliary tract cancer | 61.71<br>(49.83 to<br>85.01)      | 38.26<br>(31.19 to<br>52.15)      | 39.66<br>(32.32 to<br>54.60)      | 36.76<br>(29.80 to<br>49.75)      | 3.27<br>(2.69 to<br>4.46)    | 2.62<br>(2.09 to<br>3.60)    | 2.82<br>(2.29 to<br>3.84)     | 2.45<br>(1.96 to<br>3.36)    |
| Pancreatic cancer                    | 276.30<br>(235.51 to<br>314.87)   | 253.36<br>(198.09 to<br>326.22)   | 246.42<br>(196.86 to<br>311.14)   | 268.16<br>(203.44 to<br>357.15)   | 14.87<br>(12.91 to<br>16.70) | 17.25<br>(13.31 to<br>22.03) | 17.52<br>(14.02 to<br>21.87)  | 17.83<br>(13.61 to<br>23.32) |
| Larynx cancer                        | 87.39<br>(69.37 to<br>104.35)     | 50.32<br>(26.19 to<br>88.02)      | 27.96<br>(15.91 to<br>46.84)      | 75.49<br>(37.54 to<br>134.49)     | 4.19<br>(3.43 to<br>4.97)    | 2.84<br>(1.52 to<br>4.77)    | 1.69<br>(1.01 to<br>2.77)     | 4.15<br>(2.18 to<br>7.07)    |
| Tracheal, bronchus, and lung cancer  | 775.36<br>(645.38 to<br>899.16)   | 607.34<br>(415.71 to<br>875.83)   | 374.86<br>(270.17 to<br>522.59)   | 919.04<br>(611.53 to<br>1,369.87) | 37.72<br>(32.20 to<br>43.31) | 36.61<br>(25.95 to<br>52.78) | 23.93<br>(17.54 to<br>32.88)  | 54.18<br>(37.45 to<br>79.02) |
| Malignant skin melanoma              | 57.31<br>(45.35 to<br>70.28)      | 59.61<br>(45.87 to<br>74.30)      | 70.42<br>(55.04 to<br>87.56)      | 53.95<br>(41.55 to<br>66.72)      | 2.76<br>(2.20 to<br>3.33)    | 3.84<br>(2.88 to<br>4.86)    | 4.74<br>(3.64 to<br>5.82)     | 3.37<br>(2.53 to<br>4.27)    |
| Non-melanoma skin cancer             | 27.10<br>(22.44 to<br>31.61)      | 18.81<br>(15.27 to<br>22.97)      | 17.79<br>(14.72 to<br>21.27)      | 18.73<br>(15.18 to<br>22.89)      | 1.48<br>(1.27 to<br>1.68)    | 1.47<br>(1.12 to<br>1.81)    | 1.47<br>(1.16 to<br>1.80)     | 1.41<br>(1.04 to<br>1.77)    |
| Breast cancer                        | 516.86<br>(411.37 to<br>619.07)   | 402.26<br>(293.63 to<br>546.02)   | 336.13<br>(248.72 to<br>442.80)   | 439.29<br>(312.47 to<br>603.33)   | 24.15<br>(20.08 to<br>28.29) | 26.54<br>(19.87 to<br>35.67) | 23.30<br>(17.66 to<br>30.80)  | 28.09<br>(20.53 to<br>38.32) |
| Cervical cancer                      | 148.22<br>(104.25 to<br>190.94)   | 87.48<br>(57.77 to<br>125.73)     | 75.13<br>(51.03 to<br>102.24)     | 95.73<br>(61.37 to<br>139.63)     | 6.98<br>(5.01 to<br>8.77)    | 5.50<br>(3.62 to<br>7.82)    | 4.90<br>(3.36 to<br>6.64)     | 5.88<br>(3.75 to<br>8.37)    |
| Uterine cancer                       | 53.27<br>(42.32 to<br>64.67)      | 55.72<br>(41.60 to<br>70.71)      | 53.05<br>(40.19 to<br>67.17)      | 55.96<br>(41.36 to<br>71.33)      | 3.04<br>(2.45 to<br>3.64)    | 4.02<br>(3.05 to<br>5.05)    | 3.93<br>(3.01 to<br>4.96)     | 3.97<br>(2.97 to<br>5.03)    |
| Ovarian cancer                       | 146.94<br>(105.76 to<br>178.44)   | 124.47<br>(77.79 to<br>186.65)    | 116.54<br>(74.18 to<br>172.14)    | 132.95<br>(81.35 to<br>204.49)    | 7.40<br>(5.10 to<br>8.87)    | 8.00<br>(4.99 to<br>11.95)   | 7.64<br>(4.86 to<br>11.19)    | 8.41<br>(5.11 to<br>12.90)   |
| Prostate cancer                      | 861.40<br>(681.29 to<br>1,087.53) | 834.98<br>(635.42 to<br>1,073.85) | 858.59<br>(675.05 to<br>1,090.85) | 801.46<br>(590.37 to<br>1,054.65) | 58.97<br>(47.61 to<br>75.50) | 72.95<br>(49.83 to<br>97.97) | 78.21<br>(56.73 to<br>101.70) | 68.22<br>(44.91 to<br>93.50) |
| Testicular cancer                    | 0.92<br>(0.60 to<br>1.21)         | 0.54<br>(0.34 to<br>0.79)         | 0.49<br>(0.31 to<br>0.70)         | 0.55<br>(0.35 to<br>0.82)         | 0.03<br>(0.02 to<br>0.03)    | 0.02<br>(0.01 to<br>0.03)    | 0.02<br>(0.01 to<br>0.02)     | 0.02<br>(0.01 to<br>0.03)    |

**Virgin Islands, U.S.**

| Cause          | YLLs (actual counts)            |                                |                                |                                | Deaths (actual counts)    |                           |                           |                           |
|----------------|---------------------------------|--------------------------------|--------------------------------|--------------------------------|---------------------------|---------------------------|---------------------------|---------------------------|
|                | 2016                            | 2040 Forecast                  | 2040 Better Scenario           | 2040 Worse Scenario            | 2016                      | 2040 Forecast             | 2040 Better Scenario      | 2040 Worse Scenario       |
| Kidney cancer  | 123.21<br>(102.43 to<br>145.18) | 113.61<br>(89.57 to<br>143.49) | 113.55<br>(91.47 to<br>139.33) | 115.65<br>(89.10 to<br>149.80) | 5.73<br>(4.83 to<br>6.66) | 6.63<br>(5.24 to<br>8.20) | 6.98<br>(5.73 to<br>8.44) | 6.54<br>(5.05 to<br>8.31) |
| Bladder cancer | 65.93<br>(54.37 to<br>76.84)    | 51.22<br>(37.30 to<br>70.13)   | 47.05<br>(35.44 to<br>61.64)   | 56.19<br>(39.43 to<br>79.13)   | 3.99<br>(3.34 to<br>4.60) | 4.08<br>(2.86 to<br>5.54) | 3.96<br>(2.93 to<br>5.12) | 4.36<br>(2.98 to<br>6.04) |



| Virgin Islands, U.S.                                          |                                            |                                            |                                            |                                            |                                         |                                         |                                         |                                         |
|---------------------------------------------------------------|--------------------------------------------|--------------------------------------------|--------------------------------------------|--------------------------------------------|-----------------------------------------|-----------------------------------------|-----------------------------------------|-----------------------------------------|
| Cause                                                         | YLLs (actual counts)                       |                                            |                                            |                                            | Deaths (actual counts)                  |                                         |                                         |                                         |
|                                                               | 2016                                       | 2040 Forecast                              | 2040 Better Scenario                       | 2040 Worse Scenario                        | 2016                                    | 2040 Forecast                           | 2040 Better Scenario                    | 2040 Worse Scenario                     |
| Alcoholic cardiomyopathy                                      | 105.78<br>(74.13 to 142.15)                | 66.58<br>(48.03 to 86.59)                  | 57.60<br>(40.64 to 74.96)                  | 75.20<br>(54.01 to 97.54)                  | 4.77<br>(3.44 to 6.23)                  | 3.73<br>(2.69 to 4.78)                  | 3.39<br>(2.40 to 4.41)                  | 4.01<br>(2.91 to 5.20)                  |
| Other cardiomyopathy                                          | 223.96<br>(174.11 to 271.55)               | 118.70<br>(75.93 to 179.25)                | 97.62<br>(64.14 to 139.87)                 | 128.40<br>(81.64 to 191.02)                | 11.19<br>(8.92 to 13.38)                | 8.41<br>(5.08 to 12.97)                 | 7.36<br>(4.51 to 11.12)                 | 8.73<br>(5.24 to 13.91)                 |
| Atrial fibrillation and flutter                               | 59.49<br>(46.32 to 74.15)                  | 86.58<br>(62.04 to 113.68)                 | 85.93<br>(63.30 to 110.55)                 | 84.77<br>(60.10 to 113.13)                 | 5.67<br>(4.38 to 7.11)                  | 10.37<br>(7.09 to 13.74)                | 10.71<br>(7.69 to 14.07)                | 9.85<br>(6.64 to 13.25)                 |
| Aortic aneurysm                                               | 84.58<br>(71.11 to 98.75)                  | 66.04<br>(53.99 to 81.10)                  | 64.66<br>(53.95 to 76.86)                  | 65.61<br>(53.46 to 80.97)                  | 5.02<br>(4.33 to 5.78)                  | 5.37<br>(4.32 to 6.51)                  | 5.57<br>(4.64 to 6.62)                  | 5.12<br>(4.06 to 6.27)                  |
| Peripheral artery disease                                     | 42.56<br>(33.44 to 53.74)                  | 87.90<br>(58.69 to 122.58)                 | 92.48<br>(62.72 to 126.22)                 | 86.53<br>(57.83 to 118.42)                 | 4.24<br>(3.18 to 5.25)                  | 11.52<br>(7.13 to 16.46)                | 12.72<br>(8.04 to 17.58)                | 10.94<br>(6.75 to 15.57)                |
| Endocarditis                                                  | 87.60<br>(68.15 to 106.05)                 | 94.43<br>(67.66 to 125.51)                 | 93.94<br>(67.51 to 122.20)                 | 93.52<br>(67.11 to 125.37)                 | 4.74<br>(3.79 to 5.65)                  | 7.30<br>(4.99 to 10.11)                 | 7.69<br>(5.20 to 10.51)                 | 6.96<br>(4.66 to 9.85)                  |
| Other cardiovascular and circulatory diseases                 | 396.28<br>(282.87 to 481.46)               | 329.27<br>(220.12 to 431.95)               | 280.99<br>(194.25 to 355.30)               | 348.45<br>(233.90 to 466.73)               | 22.60<br>(16.28 to 26.65)               | 27.34<br>(17.83 to 35.44)               | 24.96<br>(16.56 to 31.18)               | 27.61<br>(17.80 to 36.26)               |
| <b>Chronic respiratory diseases</b>                           | <b>503.13</b><br><b>(425.95 to 582.61)</b> | <b>403.16</b><br><b>(311.81 to 520.58)</b> | <b>342.51</b><br><b>(275.11 to 425.34)</b> | <b>512.70</b><br><b>(380.56 to 690.62)</b> | <b>30.91</b><br><b>(26.77 to 35.57)</b> | <b>33.12</b><br><b>(24.98 to 42.68)</b> | <b>29.21</b><br><b>(23.24 to 36.77)</b> | <b>41.53</b><br><b>(29.60 to 56.23)</b> |
| Chronic obstructive pulmonary disease                         | 298.76<br>(250.91 to 350.33)               | 246.49<br>(169.30 to 351.24)               | 168.77<br>(120.97 to 235.01)               | 359.43<br>(240.32 to 526.49)               | 20.16<br>(17.25 to 23.66)               | 21.83<br>(15.01 to 30.84)               | 16.11<br>(11.31 to 22.68)               | 30.85<br>(20.56 to 44.55)               |
| Pneumoconiosis                                                | 2.30<br>(1.76 to 2.90)                     | 2.56<br>(1.79 to 3.73)                     | 2.88<br>(2.03 to 4.21)                     | 2.41<br>(1.70 to 3.53)                     | 0.13<br>(0.10 to 0.17)                  | 0.22<br>(0.15 to 0.35)                  | 0.26<br>(0.18 to 0.42)                  | 0.21<br>(0.13 to 0.32)                  |
| Silicosis                                                     | 0.25<br>(0.18 to 0.36)                     | 0.20<br>(0.09 to 0.41)                     | 0.19<br>(0.08 to 0.41)                     | 0.20<br>(0.09 to 0.40)                     | 0.02<br>(0.01 to 0.02)                  | 0.02<br>(0.01 to 0.04)                  | 0.02<br>(0.01 to 0.04)                  | 0.02<br>(0.01 to 0.04)                  |
| Asbestosis                                                    | 1.06<br>(0.73 to 1.44)                     | 1.25<br>(0.88 to 1.76)                     | 1.50<br>(1.06 to 2.08)                     | 1.12<br>(0.77 to 1.60)                     | 0.06<br>(0.04 to 0.08)                  | 0.10<br>(0.07 to 0.15)                  | 0.13<br>(0.08 to 0.18)                  | 0.09<br>(0.06 to 0.13)                  |
| Coal workers pneumoconiosis                                   | 0.17<br>(0.11 to 0.26)                     | 0.28<br>(0.12 to 0.58)                     | 0.30<br>(0.13 to 0.63)                     | 0.27<br>(0.12 to 0.57)                     | 0.01<br>(0.01 to 0.02)                  | 0.03<br>(0.01 to 0.06)                  | 0.03<br>(0.01 to 0.07)                  | 0.03<br>(0.01 to 0.06)                  |
| Other pneumoconiosis                                          | 0.81<br>(0.58 to 1.09)                     | 0.84<br>(0.48 to 1.52)                     | 0.89<br>(0.48 to 1.67)                     | 0.83<br>(0.48 to 1.49)                     | 0.05<br>(0.04 to 0.07)                  | 0.08<br>(0.04 to 0.16)                  | 0.09<br>(0.04 to 0.18)                  | 0.08<br>(0.04 to 0.15)                  |
| Asthma                                                        | 87.57<br>(68.62 to 107.61)                 | 24.87<br>(14.13 to 41.04)                  | 18.49<br>(10.92 to 30.11)                  | 31.84<br>(18.05 to 53.84)                  | 4.44<br>(3.56 to 5.42)                  | 1.85<br>(1.02 to 3.16)                  | 1.48<br>(0.86 to 2.47)                  | 2.25<br>(1.23 to 3.84)                  |
| Interstitial lung disease and pulmonary sarcoidosis           | 80.57<br>(58.01 to 101.25)                 | 93.52<br>(65.73 to 119.97)                 | 115.54<br>(88.50 to 142.41)                | 83.25<br>(59.39 to 108.59)                 | 4.23<br>(3.08 to 5.22)                  | 6.45<br>(4.32 to 8.50)                  | 8.31<br>(6.16 to 10.45)                 | 5.57<br>(3.89 to 7.47)                  |
| Other chronic respiratory diseases                            | 33.94<br>(22.77 to 49.73)                  | 35.72<br>(23.41 to 54.90)                  | 36.82<br>(24.53 to 54.97)                  | 35.77<br>(23.10 to 55.38)                  | 1.95<br>(1.30 to 2.87)                  | 2.75<br>(1.71 to 4.42)                  | 3.05<br>(1.94 to 4.64)                  | 2.65<br>(1.57 to 4.32)                  |
| <b>Cirrhosis and other chronic liver diseases</b>             | <b>768.15</b><br><b>(614.14 to 941.06)</b> | <b>467.63</b><br><b>(369.39 to 604.85)</b> | <b>402.40</b><br><b>(318.34 to 503.70)</b> | <b>507.42</b><br><b>(396.41 to 651.49)</b> | <b>32.45</b><br><b>(26.64 to 38.54)</b> | <b>24.96</b><br><b>(20.07 to 27.49)</b> | <b>22.56</b><br><b>(18.37 to 27.49)</b> | <b>26.03</b><br><b>(20.88 to 32.05)</b> |
| Cirrhosis and other chronic liver diseases due to hepatitis B | 95.51<br>(69.53 to 127.67)                 | 57.02<br>(40.90 to 77.89)                  | 53.65<br>(38.97 to 71.84)                  | 57.51<br>(41.25 to 76.67)                  | 4.10<br>(3.03 to 5.30)                  | 3.02<br>(2.24 to 4.07)                  | 2.96<br>(2.20 to 3.95)                  | 2.97<br>(2.19 to 4.00)                  |
| Cirrhosis and other chronic liver diseases due to hepatitis C | 253.52<br>(195.83 to 318.01)               | 150.06<br>(114.65 to 198.47)               | 139.20<br>(106.89 to 180.86)               | 152.52<br>(116.77 to 197.88)               | 10.37<br>(8.18 to 12.79)                | 7.44<br>(5.82 to 9.57)                  | 7.16<br>(5.66 to 9.01)                  | 7.37<br>(5.78 to 9.49)                  |

|                                                                |                                            |                                            |                                            |                                            |                                         |                                         |                                         |                                         |
|----------------------------------------------------------------|--------------------------------------------|--------------------------------------------|--------------------------------------------|--------------------------------------------|-----------------------------------------|-----------------------------------------|-----------------------------------------|-----------------------------------------|
| Cirrhosis and other chronic liver diseases due to alcohol use  | 310.16<br>(244.27 to 387.26)               | 192.56<br>(149.59 to 247.14)               | 146.23<br>(114.44 to 185.41)               | 228.48<br>(176.40 to 295.46)               | 13.36<br>(8.41 to 16.34)                | 10.56<br>(8.41 to 13.08)                | 8.59<br>(6.88 to 10.65)                 | 11.83<br>(9.33 to 14.71)                |
| Cirrhosis and other chronic liver diseases due to other causes | 108.96<br>(85.25 to 137.46)                | 67.98<br>(52.92 to 87.60)                  | 63.31<br>(49.79 to 81.83)                  | 68.90<br>(52.97 to 88.99)                  | 4.62<br>(3.76 to 5.67)                  | 3.93<br>(3.14 to 5.00)                  | 3.85<br>(3.07 to 4.83)                  | 3.86<br>(3.01 to 4.93)                  |
| <b>Digestive diseases</b>                                      | <b>433.66</b><br><b>(361.33 to 504.22)</b> | <b>331.61</b><br><b>(262.91 to 408.55)</b> | <b>315.89</b><br><b>(258.23 to 384.60)</b> | <b>342.80</b><br><b>(269.15 to 432.55)</b> | <b>23.40</b><br><b>(20.14 to 26.88)</b> | <b>26.14</b><br><b>(20.35 to 32.10)</b> | <b>26.54</b><br><b>(21.17 to 32.44)</b> | <b>25.82</b><br><b>(19.60 to 32.74)</b> |
| Peptic ulcer disease                                           | 58.75<br>(48.24 to 69.93)                  | 22.85<br>(17.23 to 30.48)                  | 19.23<br>(14.71 to 24.55)                  | 24.39<br>(18.47 to 32.08)                  | 3.15<br>(2.64 to 3.68)                  | 1.77<br>(1.31 to 2.39)                  | 1.56<br>(1.19 to 2.03)                  | 1.83<br>(1.34 to 2.43)                  |

**Virgin Islands, U.S.**

| Cause                                      | YLLs (actual counts)                       |                                                |                                                |                                                | Deaths (actual counts)                  |                                           |                                           |                                           |
|--------------------------------------------|--------------------------------------------|------------------------------------------------|------------------------------------------------|------------------------------------------------|-----------------------------------------|-------------------------------------------|-------------------------------------------|-------------------------------------------|
|                                            | 2016                                       | 2040 Forecast                                  | 2040 Better Scenario                           | 2040 Worse Scenario                            | 2016                                    | 2040 Forecast                             | 2040 Better Scenario                      | 2040 Worse Scenario                       |
| Gastritis and duodenitis                   | 5.37<br>(4.25 to 6.60)                     | 4.16<br>(3.04 to 5.62)                         | 3.85<br>(2.83 to 5.07)                         | 4.19<br>(3.09 to 5.67)                         | 0.29<br>(0.24 to 0.35)                  | 0.33<br>(0.23 to 0.44)                    | 0.32<br>(0.23 to 0.43)                    | 0.32<br>(0.22 to 0.43)                    |
| Appendicitis                               | 32.03<br>(25.03 to 39.95)                  | 15.45<br>(11.28 to 21.33)                      | 13.14<br>(9.72 to 17.35)                       | 16.25<br>(11.88 to 21.80)                      | 1.35<br>(1.08 to 1.66)                  | 0.91<br>(0.66 to 1.23)                    | 0.83<br>(0.62 to 1.06)                    | 0.92<br>(0.66 to 1.22)                    |
| Paralytic ileus and intestinal obstruction | 85.70<br>(63.37 to 103.38)                 | 82.57<br>(61.70 to 99.56)                      | 87.48<br>(66.30 to 105.04)                     | 78.26<br>(58.64 to 94.68)                      | 4.86<br>(3.58 to 5.81)                  | 6.86<br>(4.86 to 8.61)                    | 7.65<br>(5.55 to 9.45)                    | 6.28<br>(4.37 to 7.97)                    |
| Inguinal, femoral, and abdominal hernia    | 14.25<br>(10.59 to 21.75)                  | 8.18<br>(5.94 to 13.02)                        | 7.82<br>(5.64 to 12.57)                        | 8.13<br>(5.88 to 12.84)                        | 0.76<br>(0.58 to 1.17)                  | 0.63<br>(0.44 to 1.03)                    | 0.64<br>(0.45 to 1.05)                    | 0.60<br>(0.41 to 0.98)                    |
| Inflammatory bowel disease                 | 14.79<br>(11.59 to 18.86)                  | 13.96<br>(11.05 to 17.97)                      | 14.66<br>(11.58 to 18.89)                      | 13.33<br>(10.51 to 17.25)                      | 0.81<br>(0.67 to 1.02)                  | 1.17<br>(0.87 to 1.52)                    | 1.30<br>(0.98 to 1.69)                    | 1.08<br>(0.79 to 1.42)                    |
| Vascular intestinal disorders              | 27.61<br>(22.29 to 34.53)                  | 29.35<br>(23.51 to 37.86)                      | 29.73<br>(23.94 to 38.67)                      | 28.41<br>(22.64 to 36.72)                      | 1.67<br>(1.38 to 2.12)                  | 2.52<br>(1.97 to 3.34)                    | 2.67<br>(2.09 to 3.55)                    | 2.37<br>(1.83 to 3.13)                    |
| Gallbladder and biliary diseases           | 66.48<br>(53.53 to 85.87)                  | 51.89<br>(28.31 to 93.77)                      | 42.55<br>(23.81 to 76.22)                      | 64.45<br>(33.49 to 118.25)                     | 3.63<br>(2.97 to 4.72)                  | 3.98<br>(2.11 to 7.30)                    | 3.45<br>(1.87 to 6.22)                    | 4.73<br>(2.39 to 8.77)                    |
| Pancreatitis                               | 37.79<br>(28.52 to 49.07)                  | 26.47<br>(11.78 to 59.33)                      | 19.60<br>(9.62 to 41.64)                       | 31.50<br>(13.51 to 73.68)                      | 1.48<br>(1.16 to 1.91)                  | 1.31<br>(0.67 to 2.63)                    | 1.03<br>(0.58 to 1.92)                    | 1.47<br>(0.72 to 3.12)                    |
| Other digestive diseases                   | 90.88<br>(73.30 to 112.04)                 | 76.73<br>(61.55 to 94.52)                      | 77.83<br>(62.71 to 96.40)                      | 74.08<br>(59.29 to 91.52)                      | 5.40<br>(4.49 to 6.57)                  | 6.65<br>(5.06 to 8.41)                    | 7.09<br>(5.58 to 8.90)                    | 6.21<br>(4.68 to 7.91)                    |
| <b>Neurological disorders</b>              | <b>721.86</b><br><b>(609.99 to 847.28)</b> | <b>1,012.31</b><br><b>(766.27 to 1,337.77)</b> | <b>1,064.99</b><br><b>(835.06 to 1,357.05)</b> | <b>1,025.83</b><br><b>(765.50 to 1,404.46)</b> | <b>59.63</b><br><b>(50.32 to 70.83)</b> | <b>111.70</b><br><b>(80.31 to 150.80)</b> | <b>122.98</b><br><b>(93.08 to 160.65)</b> | <b>110.05</b><br><b>(75.66 to 155.81)</b> |
| Alzheimer's disease and other dementias    | 484.13<br>(391.68 to 600.23)               | 774.45<br>(543.52 to 1,098.53)                 | 820.35<br>(594.51 to 1,110.82)                 | 792.56<br>(533.11 to 1,163.57)                 | 48.05<br>(39.41 to 58.50)               | 95.93<br>(66.36 to 135.52)                | 105.56<br>(75.75 to 143.06)               | 95.34<br>(62.20 to 141.38)                |
| Parkinson's disease                        | 66.39<br>(49.18 to 87.15)                  | 93.95<br>(66.26 to 126.52)                     | 107.14<br>(77.72 to 144.53)                    | 85.44<br>(61.11 to 117.07)                     | 5.35<br>(3.96 to 7.09)                  | 9.15<br>(6.32 to 12.36)                   | 10.74<br>(7.66 to 14.40)                  | 8.16<br>(5.69 to 11.22)                   |
| Epilepsy                                   | 61.32<br>(45.87 to 75.46)                  | 55.61<br>(34.98 to 87.60)                      | 46.50<br>(30.14 to 70.83)                      | 61.77<br>(38.36 to 98.64)                      | 2.03<br>(1.62 to 2.42)                  | 2.42<br>(1.59 to 3.58)                    | 2.18<br>(1.50 to 3.15)                    | 2.55<br>(1.65 to 3.83)                    |
| Multiple sclerosis                         | 33.01<br>(23.21 to 42.79)                  | 23.76<br>(17.06 to 31.00)                      | 24.61<br>(17.87 to 31.79)                      | 23.39<br>(16.87 to 30.74)                      | 1.10<br>(0.83 to 1.37)                  | 0.95<br>(0.74 to 1.19)                    | 1.01<br>(0.80 to 1.28)                    | 0.91<br>(0.70 to 1.15)                    |
| Motor neuron disease                       | 37.72<br>(30.35 to 44.40)                  | 32.60<br>(26.35 to 38.96)                      | 33.33<br>(26.90 to 39.85)                      | 31.79<br>(25.70 to 37.96)                      | 1.65<br>(1.35 to 1.93)                  | 1.75<br>(1.41 to 2.09)                    | 1.83<br>(1.48 to 2.20)                    | 1.68<br>(1.35 to 2.02)                    |
| Other neurological disorders               | 39.28<br>(31.49 to 46.88)                  | 31.94<br>(26.30 to 37.89)                      | 33.06<br>(27.20 to 39.12)                      | 30.89<br>(25.24 to 36.65)                      | 1.44<br>(1.21 to 1.70)                  | 1.51<br>(1.26 to 1.76)                    | 1.65<br>(1.41 to 1.92)                    | 1.41<br>(1.17 to 1.65)                    |

|                                                            |                                           |                                           |                                           |                                           |                                     |                                     |                                     |                                     |
|------------------------------------------------------------|-------------------------------------------|-------------------------------------------|-------------------------------------------|-------------------------------------------|-------------------------------------|-------------------------------------|-------------------------------------|-------------------------------------|
| <b>Mental disorders</b>                                    | <b>369.99</b><br>(269.83 to 497.52)       | <b>394.26</b><br>(285.11 to 523.98)       | <b>440.96</b><br>(327.25 to 581.47)       | <b>376.49</b><br>(275.07 to 496.71)       | <b>13.41</b><br>(10.22 to 17.81)    | <b>17.73</b><br>(13.43 to 22.94)    | <b>21.06</b><br>(16.53 to 26.78)    | <b>16.25</b><br>(12.36 to 21.13)    |
| Alcohol use disorders                                      | 277.01<br>(194.26 to 398.26)              | 205.56<br>(140.86 to 295.79)              | 209.58<br>(143.57 to 306.15)              | 207.00<br>(142.58 to 299.35)              | 9.94<br>(7.23 to 14.02)             | 8.70<br>(6.35 to 12.00)             | 9.29<br>(6.79 to 13.19)             | 8.48<br>(6.16 to 11.74)             |
| Drug use disorders                                         | 92.81<br>(65.81 to 124.64)                | 188.50<br>(129.40 to 254.59)              | 231.18<br>(166.05 to 303.91)              | 169.29<br>(117.57 to 231.22)              | 3.46<br>(2.62 to 4.51)              | 9.02<br>(6.33 to 12.02)             | 11.77<br>(8.60 to 15.38)            | 7.77<br>(5.53 to 10.55)             |
| Opioid use disorders                                       | 31.72<br>(20.88 to 46.54)                 | 38.37<br>(25.69 to 57.17)                 | 41.06<br>(27.53 to 61.66)                 | 36.73<br>(24.79 to 55.18)                 | 1.05<br>(0.73 to 1.55)              | 1.57<br>(1.10 to 2.26)              | 1.77<br>(1.26 to 2.59)              | 1.44<br>(1.01 to 2.08)              |
| Cocaine use disorders                                      | 8.57<br>(4.23 to 12.67)                   | 16.40<br>(8.77 to 25.70)                  | 19.32<br>(10.06 to 29.74)                 | 15.05<br>(7.77 to 23.54)                  | 0.26<br>(0.13 to 0.38)              | 0.52<br>(0.28 to 0.79)              | 0.63<br>(0.34 to 0.95)              | 0.47<br>(0.25 to 0.72)              |
| Amphetamine use disorders                                  | 2.28<br>(1.49 to 3.25)                    | 9.92<br>(5.70 to 15.07)                   | 12.65<br>(7.70 to 18.70)                  | 8.76<br>(5.07 to 13.61)                   | 0.08<br>(0.05 to 0.11)              | 0.39<br>(0.23 to 0.61)              | 0.53<br>(0.33 to 0.79)              | 0.33<br>(0.19 to 0.52)              |
| Other drug use disorders                                   | 50.24<br>(35.49 to 68.44)                 | 123.81<br>(80.81 to 173.09)               | 158.16<br>(111.82 to 215.70)              | 108.75<br>(72.19 to 153.10)               | 2.08<br>(1.56 to 2.74)              | 6.55<br>(4.36 to 9.14)              | 8.84<br>(6.25 to 11.83)             | 5.52<br>(3.65 to 7.73)              |
| Eating disorders                                           | 0.17<br>(0.10 to 0.26)                    | 0.20<br>(0.11 to 0.31)                    | 0.20<br>(0.11 to 0.31)                    | 0.20<br>(0.11 to 0.30)                    | 0.00<br>(0.00 to 0.01)              | 0.00<br>(0.00 to 0.01)              | 0.00<br>(0.00 to 0.01)              | 0.00<br>(0.00 to 0.01)              |
| <b>Virgin Islands, U.S.</b>                                |                                           |                                           |                                           |                                           |                                     |                                     |                                     |                                     |
| <b>Cause</b>                                               | <b>YLLs (actual counts)</b>               |                                           |                                           |                                           | <b>Deaths (actual counts)</b>       |                                     |                                     |                                     |
|                                                            | <b>2016</b>                               | <b>2040 Forecast</b>                      | <b>2040 Better Scenario</b>               | <b>2040 Worse Scenario</b>                | <b>2016</b>                         | <b>2040 Forecast</b>                | <b>2040 Better Scenario</b>         | <b>2040 Worse Scenario</b>          |
| <b>Diabetes, urogenital, blood, and endocrine diseases</b> | <b>2,637.42</b><br>(2,264.70 to 2,979.92) | <b>2,657.63</b><br>(1,787.69 to 4,522.36) | <b>2,235.89</b><br>(1,550.74 to 3,831.43) | <b>2,895.47</b><br>(1,935.43 to 4,831.26) | <b>148.20</b><br>(130.73 to 164.24) | <b>207.86</b><br>(147.77 to 344.24) | <b>185.05</b><br>(135.80 to 307.34) | <b>218.16</b><br>(152.18 to 355.61) |
| Diabetes mellitus                                          | 1,425.17<br>(1,209.93 to 1,623.62)        | 992.53<br>(714.68 to 1,253.76)            | 836.08<br>(620.24 to 1,118.71)            | 1,128.86<br>(800.37 to 1,556.35)          | 81.11<br>(70.13 to 92.05)           | 78.63<br>(56.94 to 106.50)          | 69.62<br>(50.47 to 90.47)           | 85.04<br>(60.40 to 117.42)          |
| Acute glomerulonephritis                                   | 0.89<br>(0.67 to 1.16)                    | 0.70<br>(0.49 to 1.04)                    | 0.65<br>(0.45 to 0.96)                    | 0.71<br>(0.50 to 1.03)                    | 0.04<br>(0.03 to 0.05)              | 0.04<br>(0.03 to 0.07)              | 0.04<br>(0.03 to 0.07)              | 0.04<br>(0.03 to 0.06)              |
| Chronic kidney disease                                     | 811.92<br>(680.29 to 946.63)              | 1,209.64<br>(439.24 to 3,179.24)          | 936.23<br>(367.13 to 2,548.83)            | 1,325.57<br>(491.69 to 3,316.24)          | 44.45<br>(38.56 to 50.94)           | 91.31<br>(37.38 to 237.44)          | 74.87<br>(33.01 to 199.07)          | 97.66<br>(40.09 to 244.09)          |
| Chronic kidney disease due to diabetes mellitus            | 322.45<br>(257.77 to 394.61)              | 521.45<br>(170.83 to 1,441.64)            | 397.92<br>(139.76 to 1,158.04)            | 570.44<br>(187.50 to 1,479.76)            | 16.78<br>(13.45 to 20.36)           | 35.69<br>(12.86 to 97.47)           | 28.72<br>(11.08 to 83.84)           | 38.16<br>(13.67 to 101.76)          |
| Chronic kidney disease due to hypertension                 | 116.24<br>(90.98 to 143.40)               | 234.11<br>(88.55 to 619.66)               | 192.86<br>(75.96 to 520.94)               | 250.17<br>(92.00 to 650.45)               | 8.48<br>(6.82 to 10.35)             | 22.58<br>(9.94 to 56.63)            | 19.64<br>(8.98 to 50.75)            | 23.57<br>(9.97 to 57.85)            |
| Chronic kidney disease due to glomerulonephritis           | 208.74<br>(160.66 to 260.52)              | 232.19<br>(88.06 to 600.16)               | 174.32<br>(70.39 to 463.81)               | 260.44<br>(101.44 to 657.99)              | 10.34<br>(8.12 to 12.84)            | 16.20<br>(6.32 to 41.72)            | 12.79<br>(5.29 to 24.17)            | 17.80<br>(6.88 to 45.92)            |
| Chronic kidney disease due to other and unspecified causes | 164.49<br>(128.09 to 209.09)              | 221.89<br>(83.87 to 585.57)               | 171.12<br>(68.55 to 448.77)               | 244.53<br>(92.98 to 631.59)               | 8.84<br>(6.97 to 11.04)             | 16.84<br>(6.83 to 43.09)            | 13.73<br>(5.91 to 35.87)            | 18.13<br>(7.23 to 45.75)            |
| Urinary diseases and male infertility                      | 176.14<br>(149.18 to 200.39)              | 191.17<br>(154.46 to 235.17)              | 185.49<br>(151.18 to 223.21)              | 188.06<br>(151.01 to 227.98)              | 12.04<br>(10.48 to 13.57)           | 19.57<br>(15.32 to 24.67)           | 19.93<br>(15.92 to 24.39)           | 18.64<br>(14.17 to 23.38)           |
| Urinary tract infections                                   | 145.39<br>(122.92 to 166.68)              | 173.13<br>(139.35 to 211.97)              | 169.03<br>(137.27 to 204.04)              | 169.80<br>(135.48 to 206.18)              | 10.23<br>(8.88 to 11.63)            | 18.02<br>(14.09 to 22.66)           | 18.44<br>(14.63 to 22.67)           | 17.13<br>(13.01 to 21.63)           |
| Urolithiasis                                               | 18.00<br>(13.20 to 24.50)                 | 9.86<br>(6.51 to 15.09)                   | 8.84<br>(5.88 to 13.63)                   | 10.11<br>(6.68 to 15.37)                  | 0.99<br>(0.75 to 1.36)              | 0.77<br>(0.49 to 1.22)              | 0.72<br>(0.46 to 1.16)              | 0.76<br>(0.48 to 1.20)              |
| Other urinary diseases                                     | 12.75<br>(9.11 to 18.45)                  | 8.18<br>(5.25 to 12.98)                   | 7.62<br>(4.94 to 11.91)                   | 8.15<br>(5.28 to 13.13)                   | 0.82<br>(0.57 to 1.21)              | 0.78<br>(0.46 to 1.30)              | 0.77<br>(0.45 to 1.27)              | 0.75<br>(0.43 to 1.26)              |

|                                                   |                                 |                                 |                                 |                                 |                            |                            |                              |                              |
|---------------------------------------------------|---------------------------------|---------------------------------|---------------------------------|---------------------------------|----------------------------|----------------------------|------------------------------|------------------------------|
| Gynecological diseases                            | 0.30<br>(0.19 to<br>0.41)       | 0.16<br>(0.09 to<br>0.26)       | 0.12<br>(0.07 to<br>0.19)       | 0.17<br>(0.09 to<br>0.29)       | 0.01<br>(0.01 to<br>0.02)  | 0.01<br>(0.01 to<br>0.02)  | 0.01<br>(0.01 to<br>0.02)    | 0.01<br>(0.01 to<br>0.02)    |
| Uterine fibroids                                  | 0.02<br>(0.01 to<br>0.03)       | 0.01<br>(0.01 to<br>0.02)       | 0.01<br>(0.01 to<br>0.02)       | 0.01<br>(0.01 to<br>0.03)       | 0.00<br>(0.00 to<br>0.00)  | 0.00<br>(0.00 to<br>0.00)  | 0.00<br>(0.00 to<br>0.00)    | 0.00<br>(0.00 to<br>0.00)    |
| Polycystic ovarian syndrome                       | 0.04<br>(0.02 to<br>0.11)       | 0.01<br>(0.00 to<br>0.02)       | 0.00<br>(0.00 to<br>0.01)       | 0.01<br>(0.00 to<br>0.03)       | 0.00<br>(0.00 to<br>0.00)  | 0.00<br>(0.00 to<br>0.00)  | 0.00<br>(0.00 to<br>0.00)    | 0.00<br>(0.00 to<br>0.00)    |
| Endometriosis                                     | 0.01<br>(0.00 to<br>0.01)       | 0.00<br>(0.00 to<br>0.01)       | 0.00<br>(0.00 to<br>0.00)       | 0.00<br>(0.00 to<br>0.01)       | 0.00<br>(0.00 to<br>0.00)  | 0.00<br>(0.00 to<br>0.00)  | 0.00<br>(0.00 to<br>0.00)    | 0.00<br>(0.00 to<br>0.00)    |
| Genital prolapse                                  | 0.02<br>(0.01 to<br>0.04)       | 0.01<br>(0.00 to<br>0.02)       | 0.01<br>(0.00 to<br>0.01)       | 0.01<br>(0.00 to<br>0.02)       | 0.00<br>(0.00 to<br>0.00)  | 0.00<br>(0.00 to<br>0.00)  | 0.00<br>(0.00 to<br>0.00)    | 0.00<br>(0.00 to<br>0.00)    |
| Other gynecological diseases                      | 0.21<br>(0.11 to<br>0.29)       | 0.13<br>(0.06 to<br>0.21)       | 0.10<br>(0.05 to<br>0.16)       | 0.14<br>(0.07 to<br>0.24)       | 0.01<br>(0.01 to<br>0.01)  | 0.01<br>(0.01 to<br>0.02)  | 0.01<br>(0.00 to<br>0.02)    | 0.01<br>(0.01 to<br>0.02)    |
| Hemoglobinopathies and hemolytic anemias          | 42.71<br>(31.86 to<br>51.87)    | 29.64<br>(21.17 to<br>38.82)    | 25.94<br>(19.17 to<br>33.12)    | 30.88<br>(22.46 to<br>39.39)    | 1.75<br>(1.35 to<br>2.11)  | 1.76<br>(1.31 to<br>2.20)  | 1.65<br>(1.26 to<br>2.03)    | 1.76<br>(1.29 to<br>2.22)    |
| Thalassemias                                      | 0.47<br>(0.19 to<br>0.76)       | 0.11<br>(0.05 to<br>0.19)       | 0.09<br>(0.04 to<br>0.15)       | 0.11<br>(0.05 to<br>0.19)       | 0.01<br>(0.00 to<br>0.01)  | 0.00<br>(0.00 to<br>0.00)  | 0.00<br>(0.00 to<br>0.00)    | 0.00<br>(0.00 to<br>0.00)    |
| Sickle cell disorders                             | 23.04<br>(16.24 to<br>29.16)    | 14.26<br>(9.22 to<br>20.17)     | 11.89<br>(7.94 to<br>16.38)     | 15.30<br>(10.18 to<br>21.19)    | 0.54<br>(0.39 to<br>0.68)  | 0.41<br>(0.28 to<br>0.56)  | 0.35<br>(0.24 to<br>0.47)    | 0.44<br>(0.30 to<br>0.59)    |
| G6PD deficiency                                   | 6.18<br>(4.13 to<br>8.32)       | 4.91<br>(3.17 to<br>6.90)       | 4.13<br>(2.72 to<br>5.79)       | 5.18<br>(3.37 to<br>7.33)       | 0.24<br>(0.16 to<br>0.32)  | 0.24<br>(0.16 to<br>0.34)  | 0.21<br>(0.14 to<br>0.29)    | 0.25<br>(0.16 to<br>0.36)    |
| Other hemoglobinopathies and hemolytic anemias    | 12.52<br>(9.70 to<br>15.15)     | 10.37<br>(7.71 to<br>13.21)     | 9.83<br>(7.45 to<br>12.33)      | 10.28<br>(7.52 to<br>13.19)     | 0.96<br>(0.75 to<br>1.15)  | 1.10<br>(0.80 to<br>1.41)  | 1.09<br>(0.82 to<br>1.38)    | 1.07<br>(0.77 to<br>1.36)    |
| Endocrine, metabolic, blood, and immune disorders | 180.78<br>(144.44 to<br>246.70) | 233.79<br>(186.07 to<br>301.11) | 251.38<br>(202.32 to<br>320.43) | 221.20<br>(175.39 to<br>286.05) | 8.80<br>(7.21 to<br>11.52) | 8.80<br>(7.21 to<br>11.52) | 16.54<br>(15.02 to<br>23.82) | 18.92<br>(15.02 to<br>19.34) |

**Virgin Islands, U.S.**

| Cause                                  | YLLs (actual counts)                           |                                                |                                                |                                                | Deaths (actual counts)                     |                                            |                                            |                                            |
|----------------------------------------|------------------------------------------------|------------------------------------------------|------------------------------------------------|------------------------------------------------|--------------------------------------------|--------------------------------------------|--------------------------------------------|--------------------------------------------|
|                                        | 2016                                           | 2040 Forecast                                  | 2040 Better Scenario                           | 2040 Worse Scenario                            | 2016                                       | 2040 Forecast                              | 2040 Better Scenario                       | 2040 Worse Scenario                        |
| <b>Musculoskeletal disorders</b>       | <b>82.19</b><br>(48.63 to<br><b>106.84</b> )   | <b>58.92</b><br>(35.99 to<br><b>75.56</b> )    | <b>56.15</b><br>(34.72 to<br><b>71.65</b> )    | <b>59.46</b><br>(36.33 to<br><b>76.41</b> )    | <b>2.94</b><br>(1.85 to<br><b>3.65</b> )   | <b>3.02</b><br>(1.93 to<br><b>3.80</b> )   | <b>3.00</b><br>(1.94 to<br><b>3.75</b> )   | <b>2.95</b><br>(1.88 to<br><b>3.72</b> )   |
| Rheumatoid arthritis                   | 7.75<br>(5.05 to<br>10.55)                     | 5.38<br>(3.15 to<br>8.16)                      | 4.48<br>(2.66 to<br>6.66)                      | 5.71<br>(3.28 to<br>8.56)                      | 0.45<br>(0.29 to<br>0.62)                  | 0.45<br>(0.25 to<br>0.71)                  | 0.39<br>(0.22 to<br>0.59)                  | 0.46<br>(0.25 to<br>0.70)                  |
| Other musculoskeletal disorders        | 74.44<br>(42.72 to<br>97.86)                   | 53.54<br>(32.14 to<br>69.22)                   | 51.67<br>(31.65 to<br>66.85)                   | 53.75<br>(32.17 to<br>69.87)                   | 2.49<br>(1.55 to<br>3.15)                  | 2.57<br>(1.62 to<br>3.24)                  | 2.61<br>(1.66 to<br>3.26)                  | 2.50<br>(1.55 to<br>3.12)                  |
| <b>Other non-communicable diseases</b> | <b>411.98</b><br>(307.50 to<br><b>509.38</b> ) | <b>275.36</b><br>(167.60 to<br><b>379.47</b> ) | <b>241.11</b><br>(143.06 to<br><b>329.45</b> ) | <b>285.33</b><br>(177.38 to<br><b>394.76</b> ) | <b>12.72</b><br>(7.40 to<br><b>16.50</b> ) | <b>17.35</b><br>(8.17 to<br><b>26.07</b> ) | <b>17.54</b><br>(8.08 to<br><b>25.95</b> ) | <b>16.64</b><br>(7.87 to<br><b>25.33</b> ) |
| Congenital birth defects               | 225.71<br>(174.79 to<br>290.91)                | 95.12<br>(59.69 to<br>142.76)                  | 68.34<br>(45.61 to<br>98.03)                   | 106.81<br>(68.19 to<br>156.97)                 | 3.27<br>(2.58 to<br>4.15)                  | 1.49<br>(1.00 to<br>2.15)                  | 1.14<br>(0.80 to<br>1.57)                  | 1.65<br>(1.12 to<br>2.35)                  |
| Neural tube defects                    | 8.71<br>(5.34 to<br>13.81)                     | 1.75<br>(0.84 to<br>3.41)                      | 1.11<br>(0.54 to<br>2.06)                      | 2.04<br>(0.99 to<br>3.71)                      | 0.11<br>(0.07 to<br>0.17)                  | 0.02<br>(0.01 to<br>0.04)                  | 0.02<br>(0.01 to<br>0.03)                  | 0.03<br>(0.01 to<br>0.05)                  |
| Congenital heart anomalies             | 100.48<br>(75.32 to<br>137.21)                 | 31.91<br>(18.38 to<br>54.47)                   | 20.20<br>(11.82 to<br>31.76)                   | 37.67<br>(22.11 to<br>60.55)                   | 1.46<br>(1.11 to<br>2.00)                  | 0.49<br>(0.29 to<br>0.80)                  | 0.32<br>(0.19 to<br>0.51)                  | 0.57<br>(0.34 to<br>0.92)                  |
| Orofacial clefts                       | 0.32<br>(0.08 to<br>0.74)                      | 0.06<br>(0.01 to<br>0.19)                      | 0.03<br>(0.01 to<br>0.10)                      | 0.08<br>(0.02 to<br>0.23)                      | 0.00<br>(0.00 to<br>0.01)                  | 0.00<br>(0.00 to<br>0.00)                  | 0.00<br>(0.00 to<br>0.00)                  | 0.00<br>(0.00 to<br>0.00)                  |

|                                               |                                                            |                                                          |                                                          |                                                            |                                                   |                                                   |                                                   |                                                   |
|-----------------------------------------------|------------------------------------------------------------|----------------------------------------------------------|----------------------------------------------------------|------------------------------------------------------------|---------------------------------------------------|---------------------------------------------------|---------------------------------------------------|---------------------------------------------------|
| Down syndrome                                 | 13.85<br>(9.88 to<br>17.78)                                | 14.82<br>(10.45 to<br>19.06)                             | 14.68<br>(10.49 to<br>19.00)                             | 14.63<br>(10.32 to<br>19.02)                               | 0.30<br>(0.22 to<br>0.38)                         | 0.33<br>(0.24 to<br>0.42)                         | 0.34<br>(0.24 to<br>0.43)                         | 0.32<br>(0.24 to<br>0.41)                         |
| Other chromosomal abnormalities               | 18.75<br>(12.34 to<br>27.19)                               | 14.92<br>(8.39 to<br>24.78)                              | 11.12<br>(6.47 to<br>17.84)                              | 16.20<br>(9.29 to<br>26.40)                                | 0.23<br>(0.15 to<br>0.33)                         | 0.19<br>(0.11 to<br>0.30)                         | 0.14<br>(0.08 to<br>0.22)                         | 0.20<br>(0.12 to<br>0.32)                         |
| Congenital musculoskeletal and limb anomalies | 6.26<br>(4.21 to<br>9.02)                                  | 2.28<br>(1.23 to<br>3.96)                                | 1.50<br>(0.84 to<br>2.49)                                | 2.63<br>(1.45 to<br>4.44)                                  | 0.09<br>(0.06 to<br>0.12)                         | 0.03<br>(0.02 to<br>0.06)                         | 0.02<br>(0.01 to<br>0.04)                         | 0.04<br>(0.02 to<br>0.06)                         |
| Urogenital congenital anomalies               | 9.61<br>(6.92 to<br>14.99)                                 | 4.04<br>(2.38 to<br>6.82)                                | 2.99<br>(1.76 to<br>5.05)                                | 4.48<br>(2.68 to<br>7.61)                                  | 0.19<br>(0.14 to<br>0.27)                         | 0.08<br>(0.05 to<br>0.14)                         | 0.06<br>(0.04 to<br>0.11)                         | 0.09<br>(0.06 to<br>0.15)                         |
| Digestive congenital anomalies                | 19.50<br>(12.62 to<br>28.55)                               | 5.73<br>(2.79 to<br>10.13)                               | 3.59<br>(1.78 to<br>6.15)                                | 6.69<br>(3.21 to<br>11.42)                                 | 0.24<br>(0.16 to<br>0.35)                         | 0.07<br>(0.04 to<br>0.12)                         | 0.05<br>(0.02 to<br>0.08)                         | 0.08<br>(0.04 to<br>0.14)                         |
| Other congenital birth defects                | 48.23<br>(33.59 to<br>67.53)                               | 19.60<br>(10.88 to<br>32.79)                             | 13.12<br>(7.38 to<br>21.25)                              | 22.41<br>(12.58 to<br>36.70)                               | 0.65<br>(0.47 to<br>0.88)                         | 0.27<br>(0.16 to<br>0.44)                         | 0.19<br>(0.11 to<br>0.29)                         | 0.31<br>(0.19 to<br>0.49)                         |
| Skin and subcutaneous diseases                | 124.94<br>(54.68 to<br>170.93)                             | 161.75<br>(71.30 to<br>235.06)                           | 160.56<br>(70.65 to<br>232.97)                           | 157.32<br>(69.36 to<br>232.57)                             | 8.74<br>(3.75 to<br>12.28)                        | 15.64<br>(6.53 to<br>24.13)                       | 16.26<br>(6.82 to<br>24.72)                       | 14.75<br>(6.00 to<br>23.02)                       |
| Cellulitis                                    | 15.18<br>(4.96 to<br>24.11)                                | 26.12<br>(8.78 to<br>40.04)                              | 28.23<br>(9.29 to<br>43.52)                              | 24.47<br>(8.32 to<br>37.92)                                | 0.86<br>(0.28 to<br>1.36)                         | 2.09<br>(0.67 to<br>3.58)                         | 2.42<br>(0.77 to<br>3.95)                         | 1.87<br>(0.59 to<br>3.21)                         |
| Pyoderma                                      | 32.25<br>(12.32 to<br>46.83)                               | 58.25<br>(22.34 to<br>88.64)                             | 58.62<br>(22.02 to<br>87.83)                             | 56.32<br>(21.30 to<br>86.36)                               | 1.90<br>(0.68 to<br>2.87)                         | 5.23<br>(1.77 to<br>8.34)                         | 5.59<br>(1.92 to<br>8.95)                         | 4.87<br>(1.62 to<br>7.89)                         |
| Decubitus ulcer                               | 74.75<br>(32.54 to<br>104.97)                              | 74.81<br>(31.02 to<br>119.06)                            | 71.24<br>(30.13 to<br>113.30)                            | 73.97<br>(30.41 to<br>119.55)                              | 5.84<br>(2.47 to<br>8.33)                         | 8.13<br>(3.13 to<br>13.37)                        | 8.04<br>(3.23 to<br>13.11)                        | 7.83<br>(2.96 to<br>13.05)                        |
| Other skin and subcutaneous diseases          | 2.76<br>(1.35 to<br>4.23)                                  | 2.57<br>(1.29 to<br>4.02)                                | 2.47<br>(1.25 to<br>3.85)                                | 2.56<br>(1.25 to<br>4.07)                                  | 0.14<br>(0.06 to<br>0.22)                         | 0.19<br>(0.08 to<br>0.32)                         | 0.20<br>(0.09 to<br>0.32)                         | 0.18<br>(0.08 to<br>0.30)                         |
| Sudden infant death syndrome                  | 61.33<br>(39.68 to<br>92.98)                               | 18.48<br>(8.61 to<br>34.88)                              | 12.22<br>(5.84 to<br>22.14)                              | 21.20<br>(10.06 to<br>39.04)                               | 0.71<br>(0.46 to<br>1.08)                         | 0.21<br>(0.10 to<br>0.40)                         | 0.14<br>(0.07 to<br>0.26)                         | 0.25<br>(0.12 to<br>0.45)                         |
| <b>Injuries</b>                               | <b>2,684.79</b><br><b>(1,934.25 to</b><br><b>3,224.09)</b> | <b>1,351.80</b><br><b>(951.49 to</b><br><b>1,776.35)</b> | <b>1,029.55</b><br><b>(736.48 to</b><br><b>1,306.54)</b> | <b>1,496.24</b><br><b>(1,049.55 to</b><br><b>1,993.88)</b> | <b>79.78</b><br><b>(63.60 to</b><br><b>92.91)</b> | <b>54.34</b><br><b>(44.58 to</b><br><b>65.26)</b> | <b>46.73</b><br><b>(38.98 to</b><br><b>54.70)</b> | <b>56.57</b><br><b>(45.50 to</b><br><b>68.86)</b> |
| <b>Transport injuries</b>                     | <b>602.69</b><br><b>(455.62 to</b><br><b>727.00)</b>       | <b>412.69</b><br><b>(252.17 to</b><br><b>656.63)</b>     | <b>229.87</b><br><b>(147.18 to</b><br><b>357.14)</b>     | <b>488.98</b><br><b>(288.92 to</b><br><b>787.20)</b>       | <b>19.05</b><br><b>(15.53 to</b><br><b>22.29)</b> | <b>15.19</b><br><b>(10.88 to</b><br><b>21.79)</b> | <b>9.87</b><br><b>(7.33 to</b><br><b>13.63)</b>   | <b>16.99</b><br><b>(11.74 to</b><br><b>24.74)</b> |
| Road injuries                                 | 512.96<br>(385.83 to<br>624.94)                            | 360.09<br>(219.01 to<br>578.17)                          | 189.36<br>(120.25 to<br>292.99)                          | 429.48<br>(252.37 to<br>703.13)                            | 15.72<br>(12.76 to<br>18.53)                      | 12.57<br>(8.94 to<br>18.12)                       | 7.69<br>(5.68 to<br>10.67)                        | 14.18<br>(9.78 to<br>20.89)                       |
| Pedestrian road injuries                      | 167.35<br>(131.96 to<br>208.15)                            | 72.39<br>(47.28 to<br>108.33)                            | 36.58<br>(25.27 to<br>52.12)                             | 89.00<br>(58.13 to<br>135.67)                              | 6.22<br>(5.07 to<br>7.48)                         | 3.61<br>(2.56 to<br>5.05)                         | 2.10<br>(1.54 to<br>2.83)                         | 4.17<br>(2.92 to<br>5.90)                         |
| <b>Virgin Islands, U.S.</b>                   |                                                            |                                                          |                                                          |                                                            |                                                   |                                                   |                                                   |                                                   |
| Cause                                         | YLLs (actual counts)                                       |                                                          |                                                          |                                                            | Deaths (actual counts)                            |                                                   |                                                   |                                                   |
|                                               | 2016                                                       | 2040 Forecast                                            | 2040 Better Scenario                                     | 2040 Worse Scenario                                        | 2016                                              | 2040 Forecast                                     | 2040 Better Scenario                              | 2040 Worse Scenario                               |
| Cyclist road injuries                         | 22.21<br>(16.49 to<br>28.94)                               | 17.63<br>(10.16 to<br>29.79)                             | 10.35<br>(6.35 to<br>16.77)                              | 20.39<br>(11.35 to<br>35.14)                               | 0.68<br>(0.52 to<br>0.86)                         | 0.61<br>(0.40 to<br>0.96)                         | 0.43<br>(0.28 to<br>0.65)                         | 0.66<br>(0.42 to<br>1.07)                         |
| Motorcyclist road injuries                    | 75.32<br>(49.49 to<br>100.34)                              | 66.58<br>(33.14 to<br>122.44)                            | 42.95<br>(22.15 to<br>75.88)                             | 76.74<br>(37.26 to<br>144.17)                              | 1.70<br>(1.18 to<br>2.22)                         | 1.55<br>(0.86 to<br>2.63)                         | 1.08<br>(0.62 to<br>1.76)                         | 1.73<br>(0.93 to<br>3.03)                         |
| Motor vehicle road injuries                   | 241.96<br>(171.83 to<br>304.59)                            | 197.35<br>(116.11 to<br>312.03)                          | 95.90<br>(59.16 to<br>145.39)                            | 236.37<br>(135.24 to<br>388.81)                            | 6.88<br>(5.35 to<br>8.32)                         | 6.48<br>(4.44 to<br>9.40)                         | 3.84<br>(2.79 to<br>5.33)                         | 7.27<br>(4.85 to<br>10.79)                        |
| Other road injuries                           | 6.13<br>(4.72 to<br>7.91)                                  | 6.14<br>(4.01 to<br>9.43)                                | 3.58<br>(2.45 to<br>5.30)                                | 6.98<br>(4.42 to<br>11.09)                                 | 0.24<br>(0.19 to<br>0.30)                         | 0.32<br>(0.22 to<br>0.48)                         | 0.24<br>(0.17 to<br>0.34)                         | 0.34<br>(0.22 to<br>0.52)                         |

|                                                 |                                                      |                                                      |                                                      |                                                      |                                                   |                                                   |                                                   |                                                   |
|-------------------------------------------------|------------------------------------------------------|------------------------------------------------------|------------------------------------------------------|------------------------------------------------------|---------------------------------------------------|---------------------------------------------------|---------------------------------------------------|---------------------------------------------------|
| Other transport injuries                        | 89.73<br>(67.89 to<br>112.91)                        | 52.60<br>(32.24 to<br>82.91)                         | 40.51<br>(26.51 to<br>61.89)                         | 59.50<br>(36.54 to<br>95.14)                         | 3.33<br>(2.68 to<br>4.11)                         | 2.63<br>(1.78 to<br>3.79)                         | 2.18<br>(1.53 to<br>3.10)                         | 2.81<br>(1.87 to<br>4.13)                         |
| <b>Unintentional injuries</b>                   | <b>664.47</b><br><b>(522.46 to</b><br><b>774.53)</b> | <b>393.51</b><br><b>(316.64 to</b><br><b>487.35)</b> | <b>362.52</b><br><b>(291.54 to</b><br><b>426.41)</b> | <b>401.83</b><br><b>(316.92 to</b><br><b>496.88)</b> | <b>26.21</b><br><b>(22.16 to</b><br><b>29.70)</b> | <b>24.35</b><br><b>(20.50 to</b><br><b>28.48)</b> | <b>24.49</b><br><b>(21.26 to</b><br><b>27.68)</b> | <b>23.53</b><br><b>(19.55 to</b><br><b>27.51)</b> |
| Falls                                           | 141.71<br>(113.55 to<br>170.22)                      | 113.66<br>(94.39 to<br>136.14)                       | 111.24<br>(93.03 to<br>130.87)                       | 111.70<br>(92.10 to<br>133.76)                       | 7.65<br>(6.42 to<br>8.97)                         | 9.40<br>(7.44 to<br>11.44)                        | 9.72<br>(7.90 to<br>11.59)                        | 8.89<br>(6.91 to<br>10.96)                        |
| Drowning                                        | 198.67<br>(148.59 to<br>243.89)                      | 86.97<br>(57.56 to<br>128.92)                        | 73.16<br>(49.12 to<br>103.51)                        | 93.90<br>(60.31 to<br>138.91)                        | 5.31<br>(4.17 to<br>6.31)                         | 2.69<br>(1.98 to<br>3.77)                         | 2.39<br>(1.78 to<br>3.18)                         | 2.82<br>(2.02 to<br>4.01)                         |
| Fire, heat, and hot substances                  | 52.90<br>(41.86 to<br>63.70)                         | 26.27<br>(19.25 to<br>35.76)                         | 22.46<br>(17.09 to<br>29.14)                         | 27.69<br>(20.12 to<br>38.59)                         | 2.55<br>(1.98 to<br>2.97)                         | 1.97<br>(1.45 to<br>2.62)                         | 1.82<br>(1.37 to<br>2.53)                         | 1.97<br>(1.41 to<br>2.59)                         |
| Poisonings                                      | 15.61<br>(11.24 to<br>21.13)                         | 5.36<br>(3.39 to<br>8.46)                            | 4.10<br>(2.72 to<br>6.11)                            | 5.97<br>(3.76 to<br>9.39)                            | 0.48<br>(0.38 to<br>0.64)                         | 0.22<br>(0.15 to<br>0.33)                         | 0.18<br>(0.13 to<br>0.26)                         | 0.24<br>(0.16 to<br>0.35)                         |
| Exposure to mechanical forces                   | 70.42<br>(51.96 to<br>86.33)                         | 32.38<br>(22.72 to<br>43.38)                         | 28.03<br>(19.81 to<br>36.63)                         | 34.05<br>(23.56 to<br>45.68)                         | 2.01<br>(1.60 to<br>2.40)                         | 1.29<br>(1.02 to<br>1.59)                         | 1.21<br>(0.98 to<br>1.46)                         | 1.29<br>(1.03 to<br>1.60)                         |
| Unintentional firearm injuries                  | 28.53<br>(18.33 to<br>38.43)                         | 12.04<br>(7.56 to<br>17.54)                          | 10.62<br>(6.90 to<br>14.93)                          | 12.62<br>(7.91 to<br>18.16)                          | 0.72<br>(0.50 to<br>0.94)                         | 0.39<br>(0.29 to<br>0.51)                         | 0.37<br>(0.28 to<br>0.47)                         | 0.39<br>(0.28 to<br>0.51)                         |
| Unintentional suffocation                       | 7.30<br>(5.26 to<br>10.02)                           | 3.27<br>(2.13 to<br>4.76)                            | 2.67<br>(1.72 to<br>3.83)                            | 3.50<br>(2.26 to<br>5.13)                            | 0.13<br>(0.10 to<br>0.17)                         | 0.06<br>(0.04 to<br>0.09)                         | 0.06<br>(0.04 to<br>0.07)                         | 0.07<br>(0.05 to<br>0.09)                         |
| Other exposure to mechanical forces             | 34.59<br>(25.88 to<br>42.50)                         | 17.07<br>(12.01 to<br>22.65)                         | 14.74<br>(10.68 to<br>19.06)                         | 17.93<br>(12.84 to<br>23.87)                         | 1.16<br>(0.94 to<br>1.38)                         | 0.83<br>(0.65 to<br>1.05)                         | 0.79<br>(0.63 to<br>0.96)                         | 0.83<br>(0.65 to<br>1.04)                         |
| Adverse effects of medical treatment            | 83.74<br>(66.42 to<br>100.58)                        | 63.62<br>(50.18 to<br>77.13)                         | 62.11<br>(49.70 to<br>74.51)                         | 62.80<br>(49.85 to<br>75.95)                         | 4.21<br>(3.26 to<br>5.06)                         | 4.72<br>(3.65 to<br>5.78)                         | 4.92<br>(3.85 to<br>5.95)                         | 4.47<br>(3.42 to<br>5.53)                         |
| Animal contact                                  | 5.74<br>(4.33 to<br>7.20)                            | 4.63<br>(3.29 to<br>6.06)                            | 4.26<br>(2.93 to<br>5.49)                            | 4.72<br>(3.26 to<br>6.18)                            | 0.23<br>(0.17 to<br>0.29)                         | 0.28<br>(0.18 to<br>0.37)                         | 0.28<br>(0.18 to<br>0.37)                         | 0.27<br>(0.18 to<br>0.36)                         |
| Venomous animal contact                         | 1.90<br>(1.37 to<br>2.52)                            | 1.38<br>(0.95 to<br>1.90)                            | 1.29<br>(0.87 to<br>1.75)                            | 1.40<br>(0.95 to<br>1.88)                            | 0.07<br>(0.05 to<br>0.09)                         | 0.07<br>(0.04 to<br>0.10)                         | 0.07<br>(0.05 to<br>0.10)                         | 0.07<br>(0.04 to<br>0.10)                         |
| Non-venomous animal contact                     | 3.83<br>(2.81 to<br>4.96)                            | 3.25<br>(2.15 to<br>4.24)                            | 2.97<br>(1.97 to<br>3.90)                            | 3.32<br>(2.21 to<br>4.38)                            | 0.16<br>(0.12 to<br>0.21)                         | 0.21<br>(0.13 to<br>0.28)                         | 0.21<br>(0.13 to<br>0.28)                         | 0.20<br>(0.13 to<br>0.27)                         |
| Foreign body                                    | 63.50<br>(49.45 to<br>78.18)                         | 46.00<br>(36.83 to<br>55.39)                         | 45.23<br>(36.51 to<br>53.37)                         | 45.24<br>(36.23 to<br>54.57)                         | 2.67<br>(2.16 to<br>3.17)                         | 3.10<br>(2.46 to<br>3.81)                         | 3.36<br>(2.69 to<br>4.07)                         | 2.88<br>(2.28 to<br>3.58)                         |
| Pulmonary aspiration and foreign body in airway | 61.70<br>(47.99 to<br>76.24)                         | 44.25<br>(35.40 to<br>53.66)                         | 43.34<br>(34.83 to<br>51.62)                         | 43.58<br>(34.58 to<br>52.79)                         | 2.59<br>(2.08 to<br>3.08)                         | 2.98<br>(2.36 to<br>3.70)                         | 3.23<br>(2.58 to<br>3.94)                         | 2.77<br>(2.20 to<br>3.49)                         |
| Foreign body in other body part                 | 1.80<br>(1.32 to<br>2.38)                            | 1.76<br>(1.29 to<br>2.42)                            | 1.89<br>(1.39 to<br>2.63)                            | 1.67<br>(1.21 to<br>2.32)                            | 0.08<br>(0.06 to<br>0.11)                         | 0.12<br>(0.08 to<br>0.17)                         | 0.13<br>(0.09 to<br>0.17)                         | 0.11<br>(0.07 to<br>0.16)                         |
| Environmental heat and cold exposure            | 18.84<br>(14.00 to<br>27.19)                         | 11.19<br>(7.80 to<br>17.12)                          | 9.51<br>(6.69 to<br>14.49)                           | 11.82<br>(8.16 to<br>17.33)                          | 0.73<br>(0.56 to<br>1.04)                         | 0.57<br>(0.40 to<br>0.89)                         | 0.52<br>(0.37 to<br>0.78)                         | 0.58<br>(0.40 to<br>0.86)                         |
| Other unintentional injuries                    | 13.34<br>(9.54 to<br>16.93)                          | 3.43<br>(2.05 to<br>5.51)                            | 2.41<br>(1.52 to<br>3.46)                            | 3.95<br>(2.43 to<br>6.11)                            | 0.37<br>(0.28 to<br>0.45)                         | 0.09<br>(0.08 to<br>0.17)                         | 0.09<br>(0.06 to<br>0.12)                         | 0.13<br>(0.09 to<br>0.19)                         |
| Self-harm and interpersonal violence            | 1,407.21<br>(927.01 to<br>1,773.16)                  | 541.64<br>(329.18 to<br>777.35)                      | 433.29<br>(257.39 to<br>601.12)                      | 601.49<br>(355.50 to<br>871.53)                      | 34.29<br>(23.99 to<br>42.56)                      | 14.69<br>(9.86 to<br>20.02)                       | 12.27<br>(8.16 to<br>16.24)                       | 15.95<br>(10.53 to<br>22.40)                      |

Virgin Islands, U.S.

| Cause | YLLs (actual counts) |               |                      |                     | Deaths (actual counts) |               |                      |                     |
|-------|----------------------|---------------|----------------------|---------------------|------------------------|---------------|----------------------|---------------------|
|       | 2016                 | 2040 Forecast | 2040 Better Scenario | 2040 Worse Scenario | 2016                   | 2040 Forecast | 2040 Better Scenario | 2040 Worse Scenario |



|                                                                              |                                       |                                        |                                       |                                         |                                 |                                 |                                 |                                 |
|------------------------------------------------------------------------------|---------------------------------------|----------------------------------------|---------------------------------------|-----------------------------------------|---------------------------------|---------------------------------|---------------------------------|---------------------------------|
| Self-harm                                                                    | 261.88<br>(183.49 to<br>330.17)       | 152.03<br>(85.47 to<br>249.13)         | 121.38<br>(70.60 to<br>194.28)        | 174.34<br>(94.74 to<br>295.82)          | 7.44<br>(5.50 to<br>9.36)       | 4.71<br>(2.88 to<br>7.27)       | 3.97<br>(2.56 to<br>5.87)       | 5.21<br>(3.11 to<br>8.25)       |
| Self-harm by firearm                                                         | 75.60<br>(48.74 to<br>106.59)         | 33.52<br>(15.11 to<br>62.28)           | 25.69<br>(12.48 to<br>45.94)          | 39.70<br>(17.70 to<br>74.70)            | 2.16<br>(1.43 to<br>3.07)       | 1.05<br>(0.52 to<br>1.78)       | 0.85<br>(0.45 to<br>1.43)       | 1.20<br>(0.57 to<br>2.19)       |
| Self-harm by other specified means                                           | 186.28<br>(129.44 to<br>235.91)       | 118.51<br>(67.55 to<br>191.69)         | 95.69<br>(57.06 to<br>150.98)         | 134.64<br>(74.26 to<br>224.19)          | 5.27<br>(3.92 to<br>6.63)       | 3.66<br>(2.30 to<br>5.54)       | 3.12<br>(2.03 to<br>4.54)       | 4.01<br>(2.48 to<br>6.16)       |
| Interpersonal violence                                                       | 1,145.33<br>(719.44 to<br>1,468.27)   | 389.62<br>(218.68 to<br>568.22)        | 311.90<br>(178.42 to<br>435.86)       | 427.16<br>(243.46 to<br>621.62)         | 26.85<br>(17.82 to<br>34.15)    | 9.99<br>(6.15 to<br>13.91)      | 8.30<br>(5.13 to<br>11.05)      | 10.74<br>(6.52 to<br>14.86)     |
| Physical violence by firearm                                                 | 896.83<br>(541.60 to<br>1,174.10)     | 284.10<br>(146.69 to<br>438.74)        | 223.33<br>(114.86 to<br>329.52)       | 313.57<br>(161.88 to<br>480.29)         | 19.75<br>(12.36 to<br>25.73)    | 6.37<br>(3.59 to<br>9.57)       | 5.11<br>(2.84 to<br>7.58)       | 6.96<br>(3.77 to<br>10.42)      |
| Physical violence by sharp object                                            | 140.75<br>(74.31 to<br>238.07)        | 53.06<br>(27.25 to<br>88.12)           | 43.79<br>(22.67 to<br>71.67)          | 57.21<br>(29.13 to<br>95.67)            | 3.64<br>(1.89 to<br>5.82)       | 1.53<br>(0.79 to<br>2.39)       | 1.32<br>(0.70 to<br>1.94)       | 1.62<br>(0.83 to<br>2.51)       |
| Physical violence by other means                                             | 107.75<br>(68.39 to<br>168.19)        | 52.46<br>(30.90 to<br>82.07)           | 44.78<br>(26.36 to<br>69.62)          | 56.38<br>(33.31 to<br>88.84)            | 3.46<br>(2.20 to<br>5.07)       | 2.08<br>(1.27 to<br>3.00)       | 1.87<br>(1.16 to<br>2.65)       | 2.16<br>(1.31 to<br>3.19)       |
| Forces of nature, conflict and terrorism, and executions and police conflict | 10.42<br>(5.13 to<br>18.81)           | 3.95<br>(0.00 to<br>40.52)             | 3.88<br>(0.00 to<br>39.39)            | 3.93<br>(0.00 to<br>40.27)              | 0.23<br>(0.12 to<br>0.37)       | 0.10<br>(0.00 to<br>0.95)       | 0.10<br>(0.00 to<br>0.98)       | 0.10<br>(0.00 to<br>0.93)       |
| Exposure to forces of nature                                                 | 0.00<br>(0.00 to<br>0.00)             | 1.99<br>(0.00 to<br>30.40)             | 1.96<br>(0.00 to<br>29.83)            | 1.97<br>(0.00 to<br>30.15)              | 0.00<br>(0.00 to<br>0.00)       | 0.05<br>(0.00 to<br>0.80)       | 0.05<br>(0.00 to<br>0.83)       | 0.05<br>(0.00 to<br>0.78)       |
| Conflict and terrorism                                                       | 0.00<br>(0.00 to<br>0.00)             | 1.97<br>(0.00 to<br>27.60)             | 1.92<br>(0.00 to<br>27.14)            | 1.96<br>(0.00 to<br>27.63)              | 0.00<br>(0.00 to<br>0.00)       | 0.05<br>(0.00 to<br>0.66)       | 0.05<br>(0.00 to<br>0.69)       | 0.05<br>(0.00 to<br>0.64)       |
| Executions and police conflict                                               | 10.42<br>(5.13 to<br>18.81)           | 0.00<br>(0.00 to<br>0.00)              | 0.00<br>(0.00 to<br>0.00)             | 0.00<br>(0.00 to<br>0.00)               | 0.23<br>(0.12 to<br>0.37)       | 0.00<br>(0.00 to<br>0.00)       | 0.00<br>(0.00 to<br>0.00)       | 0.00<br>(0.00 to<br>0.00)       |
| <b>Andean Latin America</b>                                                  |                                       |                                        |                                       |                                         |                                 |                                 |                                 |                                 |
| Cause                                                                        | YLLs (in 1000s)                       |                                        |                                       |                                         | Deaths (in 1000s)               |                                 |                                 |                                 |
|                                                                              | 2016                                  | 2040 Forecast                          | 2040 Better Scenario                  | 2040 Worse Scenario                     | 2016                            | 2040 Forecast                   | 2040 Better Scenario            | 2040 Worse Scenario             |
| All causes                                                                   | 7,933.72<br>(7,335.93 to<br>8,571.82) | 8,905.01<br>(7,079.90 to<br>11,317.60) | 6,898.51<br>(5,545.13 to<br>8,839.63) | 11,108.36<br>(8,847.56 to<br>14,035.93) | 272.58<br>(250.61 to<br>296.28) | 471.86<br>(384.85 to<br>570.11) | 389.99<br>(319.06 to<br>469.40) | 552.64<br>(448.56 to<br>666.30) |
| Communicable, maternal, neonatal, and nutritional diseases                   | 2,349.14<br>(2,116.06 to<br>2,595.68) | 1,609.39<br>(1,308.84 to<br>2,030.11)  | 1,111.47<br>(918.05 to<br>1,383.49)   | 2,360.84<br>(1,862.80 to<br>3,043.87)   | 53.49<br>(48.39 to<br>59.13)    | 68.50<br>(56.90 to<br>82.16)    | 55.10<br>(45.32 to<br>66.32)    | 88.78<br>(72.08 to<br>108.95)   |
| HIV/AIDS and tuberculosis                                                    | 194.18<br>(162.40 to<br>275.25)       | 179.52<br>(126.64 to<br>303.33)        | 119.73<br>(78.74 to<br>233.91)        | 263.47<br>(188.59 to<br>403.32)         | 5.03<br>(4.26 to<br>6.74)       | 5.25<br>(3.69 to<br>8.11)       | 3.43<br>(2.31 to<br>5.79)       | 7.59<br>(5.32 to<br>11.11)      |
| Tuberculosis                                                                 | 105.63<br>(89.80 to<br>129.42)        | 78.35<br>(48.62 to<br>129.03)          | 42.23<br>(26.54 to<br>68.27)          | 120.87<br>(71.93 to<br>204.82)          | 3.21<br>(2.72 to<br>3.93)       | 3.08<br>(1.97 to<br>4.83)       | 1.73<br>(1.11 to<br>2.64)       | 4.58<br>(2.77 to<br>7.32)       |
| HIV/AIDS                                                                     | 88.54<br>(64.24 to<br>171.73)         | 101.16<br>(63.90 to<br>209.59)         | 77.50<br>(41.93 to<br>187.52)         | 142.60<br>(98.94 to<br>269.18)          | 1.82<br>(1.34 to<br>3.45)       | 2.17<br>(1.30 to<br>4.41)       | 1.70<br>(0.87 to<br>3.86)       | 3.01<br>(2.06 to<br>5.53)       |
| Diarrhea, lower respiratory, and other common infectious diseases            | 1,019.87<br>(901.58 to<br>1,189.21)   | 877.76<br>(663.06 to<br>1,189.82)      | 628.87<br>(486.78 to<br>821.33)       | 1,343.15<br>(963.90 to<br>1,926.81)     | 32.13<br>(27.62 to<br>36.36)    | 52.32<br>(41.29 to<br>64.34)    | 43.16<br>(34.05 to<br>52.35)    | 67.81<br>(52.13 to<br>86.23)    |
| Diarrheal diseases                                                           | 92.19<br>(71.92 to<br>123.60)         | 35.65<br>(13.55 to<br>90.57)           | 24.62<br>(9.60 to<br>60.09)           | 66.39<br>(19.73 to<br>195.24)           | 1.90<br>(1.39 to<br>2.87)       | 1.70<br>(0.65 to<br>4.14)       | 1.33<br>(0.52 to<br>3.19)       | 2.69<br>(0.85 to<br>7.41)       |
| Intestinal infectious diseases                                               | 0.56<br>(0.28 to<br>0.99)             | 0.41<br>(0.20 to<br>0.76)              | 0.38<br>(0.18 to<br>0.72)             | 0.45<br>(0.21 to<br>0.84)               | 0.01<br>(0.01 to<br>0.02)       | 0.01<br>(0.01 to<br>0.02)       | 0.01<br>(0.01 to<br>0.02)       | 0.01<br>(0.01 to<br>0.02)       |
| Typhoid fever                                                                | 0.54<br>(0.26 to<br>0.97)             | 0.40<br>(0.19 to<br>0.75)              | 0.37<br>(0.17 to<br>0.71)             | 0.44<br>(0.20 to<br>0.82)               | 0.01<br>(0.01 to<br>0.02)       | 0.01<br>(0.00 to<br>0.02)       | 0.01<br>(0.00 to<br>0.02)       | 0.01<br>(0.01 to<br>0.02)       |



|                                                       |                                         |                                         |                                         |                                         |                                      |                                      |                                      |                                      |
|-------------------------------------------------------|-----------------------------------------|-----------------------------------------|-----------------------------------------|-----------------------------------------|--------------------------------------|--------------------------------------|--------------------------------------|--------------------------------------|
| African trypanosomiasis                               | 0.00<br>(0.00 to 0.00)                  | 0.00<br>(0.00 to 0.00)                  | 0.00<br>(0.00 to 0.00)                  | 0.00<br>(0.00 to 0.00)                  | 0.00<br>(0.00 to 0.00)               | 0.00<br>(0.00 to 0.00)               | 0.00<br>(0.00 to 0.00)               | 0.00<br>(0.00 to 0.00)               |
| Schistosomiasis                                       | 0.00<br>(0.00 to 0.00)                  | 0.00<br>(0.00 to 0.00)                  | 0.00<br>(0.00 to 0.00)                  | 0.00<br>(0.00 to 0.00)                  | 0.00<br>(0.00 to 0.00)               | 0.00<br>(0.00 to 0.00)               | 0.00<br>(0.00 to 0.00)               | 0.00<br>(0.00 to 0.00)               |
| Cysticercosis                                         | 1.13<br>(0.97 to 1.30)                  | 0.36<br>(0.25 to 0.50)                  | 0.32<br>(0.22 to 0.46)                  | 0.39<br>(0.27 to 0.54)                  | 0.03<br>(0.02 to 0.03)               | 0.01<br>(0.01 to 0.01)               | 0.01<br>(0.01 to 0.01)               | 0.01<br>(0.01 to 0.01)               |
| Cystic echinococcosis                                 | 0.11<br>(0.10 to 0.14)                  | 0.05<br>(0.03 to 0.08)                  | 0.03<br>(0.02 to 0.05)                  | 0.07<br>(0.10 to 0.10)                  | 0.00<br>(0.00 to 0.00)               | 0.00<br>(0.00 to 0.00)               | 0.00<br>(0.00 to 0.00)               | 0.00<br>(0.00 to 0.00)               |
| Dengue                                                | 5.82<br>(3.60 to 8.48)                  | 12.55<br>(8.53 to 17.31)                | 10.98<br>(7.55 to 15.08)                | 13.23<br>(9.02 to 18.46)                | 0.11<br>(0.15 to 0.15)               | 0.33<br>(0.23 to 0.45)               | 0.31<br>(0.22 to 0.42)               | 0.33<br>(0.24 to 0.45)               |
| Yellow fever                                          | 3.95<br>(0.87 to 11.55)                 | 1.18<br>(0.14 to 4.70)                  | 0.82<br>(0.10 to 3.29)                  | 1.43<br>(0.19 to 5.35)                  | 0.07<br>(0.01 to 0.19)               | 0.02<br>(0.00 to 0.06)               | 0.02<br>(0.00 to 0.06)               | 0.03<br>(0.00 to 0.10)               |
| Rabies                                                | 0.02<br>(0.01 to 0.05)                  | 0.01<br>(0.00 to 0.02)                  | 0.00<br>(0.00 to 0.02)                  | 0.01<br>(0.00 to 0.04)                  | 0.00<br>(0.00 to 0.00)               | 0.00<br>(0.00 to 0.00)               | 0.00<br>(0.00 to 0.00)               | 0.00<br>(0.00 to 0.00)               |
| Intestinal nematode infections                        | 0.85<br>(0.49 to 1.28)                  | 0.63<br>(0.35 to 1.07)                  | 0.51<br>(0.29 to 0.87)                  | 0.70<br>(0.39 to 1.17)                  | 0.01<br>(0.01 to 0.02)               | 0.01<br>(0.01 to 0.02)               | 0.01<br>(0.01 to 0.01)               | 0.01<br>(0.01 to 0.02)               |
| Other neglected tropical diseases                     | 1.12<br>(0.77 to 2.47)                  | 0.67<br>(0.39 to 1.48)                  | 0.51<br>(0.30 to 1.10)                  | 0.83<br>(0.48 to 1.78)                  | 0.02<br>(0.02 to 0.05)               | 0.02<br>(0.01 to 0.04)               | 0.02<br>(0.01 to 0.04)               | 0.02<br>(0.01 to 0.05)               |
| <b>Maternal disorders</b>                             | <b>64.87</b><br><b>(52.69 to 78.86)</b> | <b>35.26</b><br><b>(23.49 to 50.79)</b> | <b>23.71</b><br><b>(15.74 to 34.44)</b> | <b>47.10</b><br><b>(31.34 to 68.60)</b> | <b>1.18</b><br><b>(0.96 to 1.44)</b> | <b>0.65</b><br><b>(0.43 to 0.95)</b> | <b>0.44</b><br><b>(0.29 to 0.64)</b> | <b>0.87</b><br><b>(0.58 to 1.26)</b> |
| Maternal hemorrhage                                   | 17.52<br>(13.02 to 22.87)               | 10.45<br>(6.36 to 15.91)                | 7.09<br>(4.34 to 10.81)                 | 13.91<br>(8.64 to 20.95)                | 0.32<br>(0.24 to 0.42)               | 0.19<br>(0.12 to 0.29)               | 0.13<br>(0.08 to 0.20)               | 0.26<br>(0.16 to 0.38)               |
| Maternal sepsis and other maternal infections         | 12.35<br>(9.05 to 16.67)                | 5.55<br>(3.20 to 9.06)                  | 3.74<br>(2.16 to 6.00)                  | 7.43<br>(4.29 to 11.92)                 | 0.23<br>(0.17 to 0.30)               | 0.10<br>(0.06 to 0.17)               | 0.07<br>(0.04 to 0.11)               | 0.14<br>(0.08 to 0.22)               |
| Maternal hypertensive disorders                       | 16.80<br>(12.84 to 21.37)               | 8.60<br>(5.66 to 12.35)                 | 5.71<br>(3.75 to 8.37)                  | 11.41<br>(7.47 to 16.49)                | 0.30<br>(0.23 to 0.38)               | 0.15<br>(0.10 to 0.22)               | 0.10<br>(0.07 to 0.15)               | 0.21<br>(0.14 to 0.30)               |
| Maternal obstructed labor and uterine rupture         | 1.60<br>(0.91 to 2.48)                  | 0.84<br>(0.43 to 1.45)                  | 0.55<br>(0.28 to 0.97)                  | 1.14<br>(0.59 to 2.04)                  | 0.03<br>(0.02 to 0.05)               | 0.02<br>(0.01 to 0.03)               | 0.01<br>(0.01 to 0.02)               | 0.02<br>(0.01 to 0.04)               |
| Maternal abortion, miscarriage, and ectopic pregnancy | 8.63<br>(6.11 to 11.80)                 | 5.54<br>(3.04 to 9.75)                  | 3.71<br>(2.02 to 6.44)                  | 7.45<br>(4.14 to 12.98)                 | 0.16<br>(0.11 to 0.22)               | 0.11<br>(0.06 to 0.18)               | 0.07<br>(0.04 to 0.12)               | 0.14<br>(0.08 to 0.25)               |
| Indirect maternal deaths                              | 2.65<br>(1.73 to 4.15)                  | 1.35<br>(0.76 to 2.24)                  | 0.89<br>(0.50 to 1.48)                  | 1.81<br>(0.99 to 2.98)                  | 0.05<br>(0.03 to 0.07)               | 0.02<br>(0.01 to 0.04)               | 0.02<br>(0.01 to 0.03)               | 0.03<br>(0.02 to 0.05)               |
| Late maternal deaths                                  | 0.52<br>(0.28 to 0.88)                  | 0.30<br>(0.15 to 0.52)                  | 0.20<br>(0.10 to 0.37)                  | 0.41<br>(0.20 to 0.74)                  | 0.01<br>(0.01 to 0.02)               | 0.01<br>(0.01 to 0.01)               | 0.00<br>(0.00 to 0.01)               | 0.01<br>(0.00 to 0.01)               |
| Maternal deaths aggravated by HIV/AIDS                | 0.04<br>(0.02 to 0.07)                  | 0.13<br>(0.04 to 0.36)                  | 0.09<br>(0.02 to 0.26)                  | 0.19<br>(0.06 to 0.52)                  | 0.00<br>(0.00 to 0.00)               | 0.00<br>(0.00 to 0.01)               | 0.00<br>(0.00 to 0.01)               | 0.00<br>(0.00 to 0.01)               |
| Other maternal disorders                              | 4.75<br>(3.27 to 6.67)                  | 2.50<br>(1.49 to 3.94)                  | 1.73<br>(1.04 to 2.74)                  | 3.34<br>(1.99 to 5.31)                  | 0.09<br>(0.06 to 0.12)               | 0.05<br>(0.03 to 0.07)               | 0.06<br>(0.02 to 0.05)               | 0.06<br>(0.04 to 0.10)               |

**Andean Latin America**

| Cause              | YLLs (in 1000s)                |                              |                              |                              | Deaths (in 1000s)        |                        |                        |                        |
|--------------------|--------------------------------|------------------------------|------------------------------|------------------------------|--------------------------|------------------------|------------------------|------------------------|
|                    | 2016                           | 2040 Forecast                | 2040 Better Scenario         | 2040 Worse Scenario          | 2016                     | 2040 Forecast          | 2040 Better Scenario   | 2040 Worse Scenario    |
| Neonatal disorders | 905.97<br>(782.11 to 1,052.92) | 411.92<br>(287.15 to 575.62) | 249.94<br>(177.90 to 341.65) | 589.46<br>(412.58 to 811.70) | 10.47<br>(9.04 to 12.16) | 4.76<br>(3.32 to 6.65) | 2.89<br>(2.06 to 3.95) | 6.81<br>(4.77 to 9.38) |

|                                                                         |                                      |                                     |                                     |                                     |                                  |                                  |                                  |                                  |
|-------------------------------------------------------------------------|--------------------------------------|-------------------------------------|-------------------------------------|-------------------------------------|----------------------------------|----------------------------------|----------------------------------|----------------------------------|
| Neonatal preterm birth                                                  | 417.90<br>(348.56 to<br>497.57)      | 155.48<br>(113.29 to<br>211.68)     | 91.93<br>(68.46 to<br>123.72)       | 243.73<br>(178.08 to<br>330.74)     | 4.83<br>(4.03 to<br>5.75)        | 1.80<br>(1.31 to<br>2.45)        | 1.06<br>(0.79 to<br>1.43)        | 2.82<br>(2.06 to<br>3.82)        |
| Neonatal encephalopathy due to birth asphyxia and trauma                | 236.36<br>(179.63 to<br>296.34)      | 104.32<br>(60.51 to<br>165.95)      | 64.24<br>(37.88 to<br>103.45)       | 140.24<br>(81.53 to<br>223.74)      | 2.73<br>(2.08 to<br>3.42)        | 1.21<br>(0.70 to<br>1.92)        | 0.74<br>(0.44 to<br>1.20)        | 1.62<br>(0.94 to<br>2.59)        |
| Neonatal sepsis and other neonatal infections                           | 191.40<br>(144.16 to<br>287.96)      | 116.69<br>(70.62 to<br>186.17)      | 71.78<br>(44.14 to<br>113.34)       | 155.81<br>(93.81 to<br>243.36)      | 2.21<br>(1.67 to<br>3.33)        | 1.35<br>(0.82 to<br>2.15)        | 0.83<br>(0.51 to<br>1.31)        | 1.80<br>(1.08 to<br>2.81)        |
| Hemolytic disease and other neonatal jaundice                           | 4.17<br>(3.04 to<br>5.60)            | 1.64<br>(0.85 to<br>3.01)           | 0.99<br>(0.53 to<br>1.79)           | 2.34<br>(1.23 to<br>4.18)           | 0.05<br>(0.04 to<br>0.06)        | 0.02<br>(0.01 to<br>0.03)        | 0.01<br>(0.01 to<br>0.02)        | 0.03<br>(0.01 to<br>0.05)        |
| Other neonatal disorders                                                | 56.14<br>(44.76 to<br>70.75)         | 33.79<br>(20.56 to<br>52.21)        | 21.01<br>(13.40 to<br>31.80)        | 47.34<br>(28.65 to<br>72.60)        | 0.65<br>(0.52 to<br>0.82)        | 0.39<br>(0.24 to<br>0.60)        | 0.24<br>(0.15 to<br>0.37)        | 0.55<br>(0.33 to<br>0.84)        |
| <b>Nutritional deficiencies</b>                                         | <b>93.74</b><br>(79.31 to<br>111.01) | <b>57.78</b><br>(48.58 to<br>68.22) | <b>48.66</b><br>(41.01 to<br>57.03) | <b>66.32</b><br>(55.52 to<br>79.03) | <b>3.17</b><br>(2.85 to<br>3.50) | <b>3.96</b><br>(3.47 to<br>4.47) | <b>3.70</b><br>(3.22 to<br>4.21) | <b>4.13</b><br>(3.60 to<br>4.67) |
| Protein-energy malnutrition                                             | 84.23<br>(70.77 to<br>100.11)        | 48.22<br>(40.34 to<br>57.32)        | 40.94<br>(34.33 to<br>48.40)        | 55.52<br>(45.53 to<br>67.07)        | 2.83<br>(2.53 to<br>3.14)        | 3.42<br>(2.95 to<br>3.91)        | 3.22<br>(2.77 to<br>3.71)        | 3.56<br>(3.03 to<br>4.07)        |
| Iodine deficiency                                                       | 0.36<br>(0.06 to<br>1.23)            | 1.31<br>(0.18 to<br>3.64)           | 1.00<br>(0.12 to<br>2.98)           | 1.58<br>(0.21 to<br>4.79)           | 0.01<br>(0.00 to<br>0.02)        | 0.07<br>(0.01 to<br>0.26)        | 0.06<br>(0.00 to<br>0.23)        | 0.08<br>(0.01 to<br>0.28)        |
| Dietary iron deficiency                                                 | 0.36<br>(0.30 to<br>0.42)            | 0.20<br>(0.15 to<br>0.26)           | 0.17<br>(0.13 to<br>0.22)           | 0.22<br>(0.17 to<br>0.29)           | 0.01<br>(0.01 to<br>0.01)        | 0.00<br>(0.00 to<br>0.01)        | 0.00<br>(0.00 to<br>0.00)        | 0.00<br>(0.00 to<br>0.01)        |
| Other nutritional deficiencies                                          | 8.79<br>(7.05 to<br>11.05)           | 8.05<br>(6.18 to<br>10.27)          | 6.56<br>(5.00 to<br>8.40)           | 9.00<br>(6.87 to<br>11.48)          | 0.33<br>(0.26 to<br>0.41)        | 0.47<br>(0.35 to<br>0.62)        | 0.41<br>(0.30 to<br>0.54)        | 0.49<br>(0.36 to<br>0.63)        |
| <b>Other communicable, maternal, neonatal, and nutritional diseases</b> | <b>48.38</b><br>(34.22 to<br>71.84)  | <b>23.36</b><br>(17.86 to<br>31.35) | <b>17.99</b><br>(13.83 to<br>23.85) | <b>27.45</b><br>(20.70 to<br>37.92) | <b>0.85</b><br>(0.66 to<br>1.13) | <b>0.74</b><br>(0.57 to<br>0.88) | <b>0.62</b><br>(0.47 to<br>0.74) | <b>0.81</b><br>(0.62 to<br>0.97) |
| Sexually transmitted infections excluding HIV                           | 27.59<br>(14.56 to<br>50.44)         | 6.34<br>(3.15 to<br>12.28)          | 4.55<br>(2.33 to<br>8.70)           | 8.04<br>(3.89 to<br>15.98)          | 0.35<br>(0.20 to<br>0.61)        | 0.10<br>(0.06 to<br>0.17)        | 0.08<br>(0.05 to<br>0.13)        | 0.12<br>(0.07 to<br>0.22)        |
| Syphilis                                                                | 26.54<br>(13.63 to<br>49.17)         | 5.59<br>(2.42 to<br>11.55)          | 3.89<br>(1.68 to<br>8.15)           | 7.23<br>(3.07 to<br>15.03)          | 0.32<br>(0.17 to<br>0.59)        | 0.07<br>(0.04 to<br>0.14)        | 0.05<br>(0.03 to<br>0.10)        | 0.09<br>(0.04 to<br>0.19)        |
| Chlamydial infection                                                    | 0.21<br>(0.16 to<br>0.26)            | 0.15<br>(0.11 to<br>0.20)           | 0.13<br>(0.09 to<br>0.18)           | 0.16<br>(0.11 to<br>0.22)           | 0.01<br>(0.00 to<br>0.01)        | 0.01<br>(0.00 to<br>0.01)        | 0.00<br>(0.00 to<br>0.01)        | 0.01<br>(0.00 to<br>0.01)        |
| Gonococcal infection                                                    | 0.55<br>(0.44 to<br>0.69)            | 0.40<br>(0.29 to<br>0.55)           | 0.35<br>(0.25 to<br>0.48)           | 0.43<br>(0.31 to<br>0.58)           | 0.02<br>(0.01 to<br>0.02)        | 0.02<br>(0.01 to<br>0.02)        | 0.01<br>(0.01 to<br>0.02)        | 0.02<br>(0.01 to<br>0.02)        |
| Other sexually transmitted infections                                   | 0.30<br>(0.24 to<br>0.37)            | 0.20<br>(0.14 to<br>0.28)           | 0.17<br>(0.12 to<br>0.24)           | 0.22<br>(0.15 to<br>0.30)           | 0.01<br>(0.01 to<br>0.01)        | 0.01<br>(0.00 to<br>0.01)        | 0.01<br>(0.00 to<br>0.01)        | 0.01<br>(0.00 to<br>0.01)        |
| Acute hepatitis                                                         | 6.97<br>(6.21 to<br>7.89)            | 6.40<br>(5.07 to<br>7.95)           | 5.04<br>(4.01 to<br>6.30)           | 7.11<br>(5.68 to<br>8.77)           | 0.18<br>(0.16 to<br>0.20)        | 0.23<br>(0.19 to<br>0.27)        | 0.19<br>(0.15 to<br>0.23)        | 0.24<br>(0.20 to<br>0.30)        |
| Acute hepatitis A                                                       | 0.35<br>(0.16 to<br>0.55)            | 0.15<br>(0.09 to<br>0.26)           | 0.11<br>(0.07 to<br>0.19)           | 0.19<br>(0.10 to<br>0.32)           | 0.00<br>(0.00 to<br>0.01)        | 0.00<br>(0.00 to<br>0.01)        | 0.00<br>(0.00 to<br>0.00)        | 0.00<br>(0.00 to<br>0.01)        |
| Acute hepatitis B                                                       | 4.05<br>(3.45 to<br>4.70)            | 4.25<br>(3.27 to<br>5.40)           | 3.37<br>(2.55 to<br>4.32)           | 4.71<br>(3.61 to<br>5.97)           | 0.12<br>(0.10 to<br>0.14)        | 0.16<br>(0.13 to<br>0.20)        | 0.13<br>(0.10 to<br>0.16)        | 0.17<br>(0.14 to<br>0.21)        |
| Acute hepatitis C                                                       | 0.20<br>(0.15 to<br>0.26)            | 0.26<br>(0.18 to<br>0.36)           | 0.22<br>(0.15 to<br>0.30)           | 0.27<br>(0.19 to<br>0.37)           | 0.01<br>(0.00 to<br>0.01)        | 0.01<br>(0.01 to<br>0.01)        | 0.01<br>(0.01 to<br>0.01)        | 0.01<br>(0.01 to<br>0.01)        |
| Acute hepatitis E                                                       | 2.37<br>(1.94 to<br>2.87)            | 1.74<br>(1.26 to<br>2.34)           | 1.34<br>(0.96 to<br>1.80)           | 1.95<br>(1.40 to<br>2.61)           | 0.05<br>(0.04 to<br>0.06)        | 0.06<br>(0.04 to<br>0.08)        | 0.05<br>(0.03 to<br>0.07)        | 0.06<br>(0.04 to<br>0.08)        |
| Other unspecified infectious diseases                                   | 13.82<br>(9.53 to<br>20.86)          | 10.62<br>(7.17 to<br>14.19)         | 8.41<br>(5.69 to<br>11.15)          | 12.30<br>(8.37 to<br>17.21)         | 0.33<br>(0.21 to<br>0.42)        | 0.41<br>(0.26 to<br>0.50)        | 0.36<br>(0.23 to<br>0.43)        | 0.44<br>(0.28 to<br>0.54)        |



|                                 |                                |                                 |                                 |                                 |                           |                              |                              |                              |
|---------------------------------|--------------------------------|---------------------------------|---------------------------------|---------------------------------|---------------------------|------------------------------|------------------------------|------------------------------|
| Cervical cancer                 | 84.54<br>(67.25 to<br>105.31)  | 106.05<br>(73.89 to<br>152.66)  | 92.70<br>(64.19 to<br>131.73)   | 113.16<br>(77.95 to<br>164.87)  | 3.12<br>(2.51 to<br>3.85) | 4.63<br>(3.32 to<br>6.32)    | 4.11<br>(2.96 to<br>5.66)    | 4.86<br>(3.48 to<br>6.76)    |
| Uterine cancer                  | 18.59<br>(15.77 to<br>22.02)   | 36.24<br>(27.62 to<br>46.18)    | 32.43<br>(24.19 to<br>41.90)    | 37.78<br>(28.72 to<br>48.00)    | 0.87<br>(0.74 to<br>1.02) | 2.01<br>(1.59 to<br>2.51)    | 1.83<br>(1.43 to<br>2.30)    | 2.05<br>(1.65 to<br>2.51)    |
| Ovarian cancer                  | 24.75<br>(20.14 to<br>29.91)   | 41.32<br>(26.40 to<br>61.54)    | 41.17<br>(26.70 to<br>60.74)    | 40.88<br>(25.94 to<br>61.68)    | 0.91<br>(0.75 to<br>1.10) | 1.84<br>(1.20 to<br>2.72)    | 1.85<br>(1.22 to<br>2.72)    | 1.80<br>(1.17 to<br>2.73)    |
| Prostate cancer                 | 56.44<br>(46.49 to<br>70.69)   | 156.99<br>(125.83 to<br>198.12) | 161.35<br>(129.05 to<br>205.07) | 146.89<br>(119.24 to<br>184.91) | 4.30<br>(3.57 to<br>5.39) | 13.24<br>(11.11 to<br>16.31) | 13.91<br>(11.72 to<br>17.14) | 12.13<br>(10.20 to<br>14.99) |
| Testicular cancer               | 4.93<br>(4.01 to<br>6.07)      | 5.88<br>(4.42 to<br>7.74)       | 5.41<br>(4.05 to<br>7.17)       | 6.01<br>(4.53 to<br>7.89)       | 0.12<br>(0.10 to<br>0.15) | 0.19<br>(0.15 to<br>0.24)    | 0.18<br>(0.14 to<br>0.22)    | 0.19<br>(0.15 to<br>0.23)    |
| <b>Andean Latin America</b>     |                                |                                 |                                 |                                 |                           |                              |                              |                              |
| Cause                           | YLLs (in 1000s)                |                                 |                                 |                                 | Deaths (in 1000s)         |                              |                              |                              |
|                                 | 2016                           | 2040 Forecast                   | 2040 Better Scenario            | 2040 Worse Scenario             | 2016                      | 2040 Forecast                | 2040 Better Scenario         | 2040 Worse Scenario          |
| Kidney cancer                   | 20.94<br>(18.37 to<br>23.69)   | 40.10<br>(30.75 to<br>51.72)    | 42.38<br>(32.14 to<br>54.61)    | 38.54<br>(29.77 to<br>49.48)    | 0.85<br>(0.75 to<br>0.96) | 1.99<br>(1.57 to<br>2.46)    | 2.16<br>(1.69 to<br>2.69)    | 1.87<br>(1.50 to<br>2.33)    |
| Bladder cancer                  | 9.82<br>(8.67 to<br>11.06)     | 19.23<br>(14.56 to<br>24.89)    | 18.03<br>(13.80 to<br>23.29)    | 19.90<br>(15.08 to<br>26.12)    | 0.62<br>(0.55 to<br>0.69) | 1.32<br>(1.08 to<br>1.76)    | 1.32<br>(1.04 to<br>1.65)    | 1.40<br>(1.10 to<br>1.81)    |
| Brain and nervous system cancer | 59.35<br>(44.88 to<br>70.39)   | 87.23<br>(60.99 to<br>113.04)   | 84.48<br>(59.24 to<br>110.18)   | 86.12<br>(60.53 to<br>110.86)   | 1.57<br>(1.19 to<br>1.87) | 3.09<br>(2.15 to<br>3.96)    | 3.12<br>(2.16 to<br>4.03)    | 2.96<br>(2.08 to<br>3.75)    |
| Thyroid cancer                  | 10.35<br>(9.09 to<br>12.00)    | 17.68<br>(11.68 to<br>25.72)    | 15.59<br>(10.42 to<br>22.56)    | 19.81<br>(12.81 to<br>29.62)    | 0.49<br>(0.43 to<br>0.56) | 0.97<br>(0.67 to<br>1.38)    | 0.87<br>(0.60 to<br>1.24)    | 1.05<br>(0.71 to<br>1.53)    |
| Mesothelioma                    | 2.63<br>(2.29 to<br>3.06)      | 5.28<br>(4.01 to<br>6.82)       | 5.24<br>(3.95 to<br>6.83)       | 5.27<br>(4.01 to<br>6.68)       | 0.11<br>(0.10 to<br>0.13) | 0.28<br>(0.22 to<br>0.34)    | 0.28<br>(0.22 to<br>0.35)    | 0.27<br>(0.22 to<br>0.33)    |
| Hodgkin lymphoma                | 3.75<br>(4.82 to<br>6.71)      | 6.58<br>(5.13 to<br>8.15)       | 5.38<br>(4.19 to<br>6.93)       | 7.18<br>(5.66 to<br>8.83)       | 0.18<br>(0.14 to<br>0.21) | 0.26<br>(0.20 to<br>0.32)    | 0.22<br>(0.17 to<br>0.28)    | 0.28<br>(0.21 to<br>0.34)    |
| Non-Hodgkin lymphoma            | 55.56<br>(49.40 to<br>61.84)   | 92.63<br>(70.79 to<br>120.89)   | 90.28<br>(68.82 to<br>117.50)   | 93.40<br>(70.85 to<br>123.40)   | 1.95<br>(1.73 to<br>2.18) | 4.21<br>(3.24 to<br>5.44)    | 4.23<br>(3.24 to<br>5.44)    | 4.13<br>(3.15 to<br>5.38)    |
| Multiple myeloma                | 15.15<br>(12.95 to<br>18.99)   | 33.41<br>(24.01 to<br>46.49)    | 33.79<br>(24.59 to<br>46.12)    | 33.41<br>(23.66 to<br>47.45)    | 0.69<br>(0.59 to<br>0.85) | 1.73<br>(1.29 to<br>2.33)    | 1.79<br>(1.32 to<br>2.38)    | 1.70<br>(1.25 to<br>2.32)    |
| Leukemia                        | 106.60<br>(81.59 to<br>121.41) | 112.42<br>(82.26 to<br>142.83)  | 100.44<br>(74.15 to<br>128.46)  | 121.61<br>(88.93 to<br>156.12)  | 2.48<br>(1.99 to<br>2.80) | 3.90<br>(2.99 to<br>4.91)    | 3.65<br>(2.82 to<br>4.58)    | 4.11<br>(3.16 to<br>5.16)    |
| Acute lymphoid leukemia         | 37.56<br>(27.43 to<br>43.24)   | 29.17<br>(20.49 to<br>37.59)    | 25.74<br>(18.35 to<br>32.96)    | 31.06<br>(21.85 to<br>40.21)    | 0.65<br>(0.49 to<br>0.75) | 0.68<br>(0.49 to<br>0.86)    | 0.63<br>(0.46 to<br>0.80)    | 0.71<br>(0.51 to<br>0.91)    |
| Chronic lymphoid leukemia       | 1.90<br>(1.48 to<br>2.27)      | 2.96<br>(2.04 to<br>4.14)       | 2.85<br>(1.97 to<br>4.00)       | 3.11<br>(2.12 to<br>4.38)       | 0.08<br>(0.07 to<br>0.09) | 0.16<br>(0.11 to<br>0.21)    | 0.15<br>(0.11 to<br>0.21)    | 0.16<br>(0.11 to<br>0.22)    |
| Acute myeloid leukemia          | 22.42<br>(16.32 to<br>25.83)   | 30.52<br>(21.44 to<br>39.58)    | 29.88<br>(21.11 to<br>38.57)    | 31.64<br>(22.27 to<br>41.73)    | 0.57<br>(0.44 to<br>0.65) | 1.08<br>(0.79 to<br>1.40)    | 1.11<br>(0.81 to<br>1.44)    | 1.10<br>(0.79 to<br>1.43)    |
| Chronic myeloid leukemia        | 3.66<br>(2.81 to<br>4.29)      | 3.53<br>(2.40 to<br>4.86)       | 3.15<br>(2.16 to<br>4.43)       | 3.79<br>(2.53 to<br>5.26)       | 0.12<br>(0.10 to<br>0.14) | 0.15<br>(0.11 to<br>0.20)    | 0.14<br>(0.10 to<br>0.19)    | 0.16<br>(0.11 to<br>0.21)    |
| Other leukemia                  | 41.06<br>(31.81 to<br>47.95)   | 46.24<br>(34.91 to<br>58.33)    | 38.80<br>(29.57 to<br>49.21)    | 52.00<br>(39.06 to<br>66.25)    | 1.05<br>(0.87 to<br>1.19) | 1.83<br>(1.45 to<br>2.25)    | 1.62<br>(1.27 to<br>2.01)    | 1.99<br>(1.58 to<br>2.48)    |
| Other neoplasms                 | 68.84<br>(61.66 to<br>79.31)   | 107.85<br>(88.06 to<br>131.64)  | 105.90<br>(86.03 to<br>130.36)  | 106.74<br>(87.83 to<br>128.93)  | 2.28<br>(2.05 to<br>2.57) | 4.94<br>(4.17 to<br>5.85)    | 5.08<br>(4.20 to<br>6.08)    | 4.72<br>(4.03 to<br>5.54)    |

|                                               |                                            |                                            |                                          |                                              |                                     |                                      |                                     |                                       |
|-----------------------------------------------|--------------------------------------------|--------------------------------------------|------------------------------------------|----------------------------------------------|-------------------------------------|--------------------------------------|-------------------------------------|---------------------------------------|
| <b>Cardiovascular diseases</b>                | <b>1,026.06</b><br>(930.44 to<br>1,135.35) | <b>1,342.69</b><br>(848.77 to<br>2,069.57) | <b>799.58</b><br>(541.75 to<br>1,162.88) | <b>1,981.45</b><br>(1,204.90 to<br>3,035.74) | <b>57.31</b><br>(52.34 to<br>62.82) | <b>97.02</b><br>(64.23 to<br>144.15) | <b>63.00</b><br>(43.95 to<br>89.06) | <b>129.39</b><br>(84.07 to<br>188.96) |
| Rheumatic heart disease                       | 19.36<br>(17.10 to<br>21.98)               | 14.58<br>(10.93 to<br>19.47)               | 11.39<br>(8.54 to<br>15.20)              | 16.22<br>(12.17 to<br>21.42)                 | 0.79<br>(0.71 to<br>0.90)           | 0.79<br>(0.70 to<br>1.18)            | 0.73<br>(0.57 to<br>0.96)           | 0.95<br>(0.75 to<br>1.24)             |
| Ischemic heart disease                        | 524.69<br>(470.52 to<br>585.39)            | 676.28<br>(373.89 to<br>1,155.98)          | 367.82<br>(212.04 to<br>597.55)          | 1,068.91<br>(572.46 to<br>1,806.02)          | 32.93<br>(30.03 to<br>36.23)        | 52.28<br>(30.62 to<br>86.09)         | 31.26<br>(18.57 to<br>49.16)        | 74.06<br>(42.48 to<br>117.20)         |
| Stroke                                        | 296.97<br>(266.46 to<br>333.20)            | 334.55<br>(203.58 to<br>540.37)            | 175.34<br>(115.79 to<br>268.92)          | 540.09<br>(317.31 to<br>887.07)              | 14.12<br>(12.68 to<br>15.70)        | 20.77<br>(13.37 to<br>31.93)         | 12.36<br>(8.34 to<br>19.02)         | 29.64<br>(18.59 to<br>46.10)          |
| Ischemic stroke                               | 98.33<br>(87.50 to<br>111.43)              | 134.83<br>(74.94 to<br>229.78)             | 79.59<br>(47.51 to<br>132.61)            | 192.60<br>(103.17 to<br>327.37)              | 6.58<br>(5.88 to<br>7.38)           | 10.87<br>(6.22 to<br>19.25)          | 7.09<br>(4.22 to<br>12.42)          | 14.07<br>(7.87 to<br>24.79)           |
| Intracerebral hemorrhage                      | 198.64<br>(177.95 to<br>223.98)            | 199.72<br>(113.02 to<br>338.92)            | 95.76<br>(60.29 to<br>150.64)            | 347.49<br>(186.05 to<br>603.08)              | 7.54<br>(6.73 to<br>8.44)           | 9.90<br>(6.90 to<br>15.56)           | 5.27<br>(3.49 to<br>7.39)           | 15.57<br>(9.10 to<br>25.32)           |
| Hypertensive heart disease                    | 54.36<br>(41.22 to<br>64.64)               | 112.83<br>(64.60 to<br>220.86)             | 74.45<br>(47.71 to<br>121.17)            | 137.53<br>(74.69 to<br>277.33)               | 3.58<br>(2.75 to<br>4.19)           | 9.54<br>(5.56 to<br>18.90)           | 6.54<br>(4.30 to<br>10.98)          | 11.02<br>(6.14 to<br>22.52)           |
| Cardiomyopathy and myocarditis                | 19.42<br>(17.13 to<br>22.97)               | 23.81<br>(17.68 to<br>32.26)               | 20.45<br>(15.41 to<br>27.49)             | 24.40<br>(18.33 to<br>33.04)                 | 0.61<br>(0.54 to<br>0.71)           | 1.14<br>(0.84 to<br>1.58)            | 1.03<br>(0.76 to<br>1.40)           | 1.11<br>(0.82 to<br>1.53)             |
| Myocarditis                                   | 3.10<br>(2.51 to<br>4.15)                  | 3.71<br>(2.87 to<br>5.02)                  | 3.46<br>(2.66 to<br>4.70)                | 3.81<br>(2.99 to<br>5.12)                    | 0.10<br>(0.08 to<br>0.13)           | 0.18<br>(0.14 to<br>0.23)            | 0.17<br>(0.14 to<br>0.22)           | 0.17<br>(0.14 to<br>0.22)             |
| <b>Andean Latin America</b>                   |                                            |                                            |                                          |                                              |                                     |                                      |                                     |                                       |
| Cause                                         | YLLs (in 1000s)                            |                                            |                                          |                                              | Deaths (in 1000s)                   |                                      |                                     |                                       |
|                                               | 2016                                       | 2040 Forecast                              | 2040 Better Scenario                     | 2040 Worse Scenario                          | 2016                                | 2040 Forecast                        | 2040 Better Scenario                | 2040 Worse Scenario                   |
| Alcoholic cardiomyopathy                      | 0.77<br>(0.59 to<br>0.93)                  | 0.96<br>(0.68 to<br>1.26)                  | 0.88<br>(0.61 to<br>1.16)                | 1.15<br>(0.83 to<br>1.51)                    | 0.03<br>(0.03 to<br>0.04)           | 0.05<br>(0.04 to<br>0.06)            | 0.05<br>(0.03 to<br>0.06)           | 0.06<br>(0.04 to<br>0.07)             |
| Other cardiomyopathy                          | 15.55<br>(13.62 to<br>18.06)               | 19.15<br>(13.79 to<br>26.64)               | 16.11<br>(11.85 to<br>22.17)             | 19.44<br>(14.10 to<br>26.87)                 | 0.48<br>(0.42 to<br>0.55)           | 0.92<br>(0.64 to<br>1.32)            | 0.81<br>(0.57 to<br>1.14)           | 0.89<br>(0.62 to<br>1.27)             |
| Atrial fibrillation and flutter               | 14.81<br>(11.57 to<br>18.40)               | 35.27<br>(25.10 to<br>47.98)               | 32.86<br>(23.73 to<br>44.38)             | 36.48<br>(25.84 to<br>50.01)                 | 1.49<br>(1.16 to<br>1.89)           | 3.80<br>(2.76 to<br>5.13)            | 3.68<br>(2.73 to<br>4.87)           | 3.79<br>(2.78 to<br>5.13)             |
| Aortic aneurysm                               | 12.81<br>(11.50 to<br>14.42)               | 21.96<br>(16.10 to<br>29.63)               | 20.25<br>(15.29 to<br>26.69)             | 22.20<br>(16.28 to<br>29.96)                 | 0.71<br>(0.64 to<br>0.79)           | 1.48<br>(1.14 to<br>1.90)            | 1.42<br>(1.12 to<br>1.81)           | 1.43<br>(1.11 to<br>1.84)             |
| Peripheral artery disease                     | 0.62<br>(0.51 to<br>0.75)                  | 2.30<br>(1.57 to<br>3.22)                  | 2.30<br>(1.59 to<br>3.24)                | 2.15<br>(1.48 to<br>2.99)                    | 0.06<br>(0.05 to<br>0.07)           | 0.24<br>(0.17 to<br>0.35)            | 0.25<br>(0.18 to<br>0.35)           | 0.22<br>(0.16 to<br>0.30)             |
| Endocarditis                                  | 19.84<br>(16.53 to<br>25.05)               | 25.66<br>(18.52 to<br>35.08)               | 22.25<br>(16.50 to<br>29.93)             | 26.79<br>(19.32 to<br>36.70)                 | 0.63<br>(0.53 to<br>0.75)           | 1.29<br>(0.91 to<br>1.82)            | 1.19<br>(0.85 to<br>1.64)           | 1.27<br>(0.90 to<br>1.78)             |
| Other cardiovascular and circulatory diseases | 63.17<br>(49.13 to<br>73.15)               | 95.46<br>(67.31 to<br>129.94)              | 72.47<br>(51.74 to<br>97.55)             | 106.68<br>(75.36 to<br>145.21)               | 2.40<br>(1.90 to<br>2.78)           | 5.59<br>(4.06 to<br>7.48)            | 4.52<br>(3.28 to<br>6.05)           | 5.90<br>(4.28 to<br>7.93)             |
| <b>Chronic respiratory diseases</b>           | <b>195.99</b><br>(172.34 to<br>220.79)     | <b>292.21</b><br>(229.82 to<br>366.59)     | <b>263.52</b><br>(205.93 to<br>329.54)   | <b>361.49</b><br>(280.06 to<br>465.02)       | <b>13.02</b><br>(11.45 to<br>14.57) | <b>22.60</b><br>(18.45 to<br>27.09)  | <b>21.01</b><br>(17.00 to<br>25.18) | <b>27.43</b><br>(21.95 to<br>33.86)   |
| Chronic obstructive pulmonary disease         | 111.87<br>(98.67 to<br>127.10)             | 149.78<br>(111.04 to<br>201.10)            | 103.39<br>(78.21 to<br>136.78)           | 224.76<br>(159.23 to<br>311.87)              | 8.13<br>(7.21 to<br>9.26)           | 12.24<br>(9.18 to<br>15.81)          | 8.79<br>(6.69 to<br>11.45)          | 17.88<br>(13.18 to<br>23.74)          |
| Pneumoconiosis                                | 2.15<br>(1.76 to<br>2.59)                  | 2.90<br>(2.05 to<br>3.85)                  | 2.44<br>(1.73 to<br>3.37)                | 3.10<br>(2.21 to<br>4.10)                    | 0.12<br>(0.10 to<br>0.14)           | 0.21<br>(0.15 to<br>0.28)            | 0.18<br>(0.13 to<br>0.25)           | 0.22<br>(0.16 to<br>0.29)             |
| Silicosis                                     | 0.40<br>(0.30 to<br>0.52)                  | 0.44<br>(0.29 to<br>0.61)                  | 0.36<br>(0.23 to<br>0.54)                | 0.45<br>(0.31 to<br>0.61)                    | 0.02<br>(0.02 to<br>0.02)           | 0.03<br>(0.02 to<br>0.04)            | 0.02<br>(0.01 to<br>0.03)           | 0.03<br>(0.02 to<br>0.04)             |

|                                                                |                                        |                                        |                                        |                                        |                                    |                                     |                                     |                                     |
|----------------------------------------------------------------|----------------------------------------|----------------------------------------|----------------------------------------|----------------------------------------|------------------------------------|-------------------------------------|-------------------------------------|-------------------------------------|
|                                                                | 0.23<br>(0.18 to<br>0.30)              | 0.33<br>(0.23 to<br>0.49)              | 0.34<br>(0.24 to<br>0.52)              | 0.33<br>(0.24 to<br>0.49)              | 0.01<br>(0.01 to<br>0.01)          | 0.02<br>(0.01 to<br>0.03)           | 0.02<br>(0.01 to<br>0.03)           | 0.02<br>(0.01 to<br>0.03)           |
| Asbestosis                                                     | 0.13<br>(0.09 to<br>0.17)              | 0.20<br>(0.13 to<br>0.29)              | 0.15<br>(0.09 to<br>0.21)              | 0.24<br>(0.15 to<br>0.34)              | 0.01<br>(0.01 to<br>0.01)          | 0.01<br>(0.01 to<br>0.02)           | 0.01<br>(0.01 to<br>0.01)           | 0.02<br>(0.01 to<br>0.02)           |
| Coal workers pneumoconiosis                                    | 1.40<br>(1.13 to<br>1.71)              | 1.93<br>(1.31 to<br>2.70)              | 1.60<br>(1.06 to<br>2.32)              | 2.09<br>(1.43 to<br>2.89)              | 0.08<br>(0.07 to<br>0.10)          | 0.15<br>(0.10 to<br>0.21)           | 0.12<br>(0.08 to<br>0.18)           | 0.16<br>(0.11 to<br>0.22)           |
| Other pneumoconiosis                                           | 11.20<br>(9.44 to<br>13.92)            | 8.78<br>(5.39 to<br>14.04)             | 6.35<br>(3.98 to<br>10.36)             | 11.29<br>(6.72 to<br>18.39)            | 0.43<br>(0.36 to<br>0.50)          | 0.50<br>(0.31 to<br>0.79)           | 0.39<br>(0.24 to<br>0.61)           | 0.61<br>(0.37 to<br>0.97)           |
| Asthma                                                         | 59.54<br>(44.92 to<br>70.70)           | 115.73<br>(83.37 to<br>144.22)         | 137.81<br>(97.89 to<br>178.31)         | 106.28<br>(75.90 to<br>130.71)         | 3.99<br>(2.84 to<br>4.79)          | 8.96<br>(6.37 to<br>10.73)          | 10.98<br>(8.04 to<br>13.73)         | 8.02<br>(5.61 to<br>9.66)           |
| Interstitial lung disease and pulmonary sarcoidosis            | 11.23<br>(8.80 to<br>15.57)            | 15.02<br>(11.11 to<br>21.90)           | 13.53<br>(9.94 to<br>19.65)            | 16.05<br>(11.88 to<br>23.13)           | 0.35<br>(0.28 to<br>0.52)          | 0.70<br>(0.53 to<br>1.07)           | 0.68<br>(0.51 to<br>1.06)           | 0.71<br>(0.54 to<br>1.08)           |
| Other chronic respiratory diseases                             | <b>252.10</b><br>(219.10 to<br>299.41) | <b>367.93</b><br>(291.36 to<br>449.31) | <b>319.32</b><br>(249.80 to<br>395.73) | <b>416.14</b><br>(332.70 to<br>505.12) | <b>10.23</b><br>(8.95 to<br>11.65) | <b>17.67</b><br>(14.56 to<br>20.84) | <b>15.71</b><br>(12.78 to<br>18.94) | <b>19.46</b><br>(16.05 to<br>22.62) |
| <b>Cirrhosis and other chronic liver diseases</b>              | 54.53<br>(44.86 to<br>65.99)           | 86.30<br>(65.91 to<br>111.04)          | 79.27<br>(59.70 to<br>103.53)          | 87.81<br>(66.70 to<br>112.83)          | 2.26<br>(1.88 to<br>2.70)          | 4.13<br>(3.25 to<br>5.13)           | 3.85<br>(3.01 to<br>4.86)           | 4.13<br>(3.27 to<br>5.08)           |
| Cirrhosis and other chronic liver diseases due to hepatitis B  | 44.04<br>(36.49 to<br>53.65)           | 67.92<br>(51.41 to<br>86.09)           | 62.03<br>(46.76 to<br>79.63)           | 69.40<br>(52.62 to<br>87.26)           | 1.73<br>(1.44 to<br>2.07)          | 3.06<br>(2.40 to<br>3.74)           | 2.83<br>(2.21 to<br>3.52)           | 3.08<br>(2.42 to<br>3.74)           |
| Cirrhosis and other chronic liver diseases due to hepatitis C  | 99.00<br>(84.72 to<br>114.53)          | 140.27<br>(110.28 to<br>173.15)        | 112.31<br>(87.64 to<br>139.86)         | 182.88<br>(143.85 to<br>226.00)        | 4.23<br>(3.64 to<br>4.88)          | 6.98<br>(5.71 to<br>8.31)           | 5.81<br>(4.68 to<br>6.97)           | 8.71<br>(7.12 to<br>10.33)          |
| Cirrhosis and other chronic liver diseases due to alcohol use  | 54.54<br>(47.55 to<br>62.90)           | 73.45<br>(58.32 to<br>90.92)           | 65.71<br>(51.55 to<br>82.46)           | 76.05<br>(60.73 to<br>93.27)           | 2.02<br>(1.75 to<br>2.32)          | 3.51<br>(2.86 to<br>4.19)           | 3.23<br>(2.60 to<br>3.93)           | 3.54<br>(2.93 to<br>4.21)           |
| Cirrhosis and other chronic liver diseases due to other causes | 213.17<br>(180.75 to<br>260.70)        | 271.66<br>(203.53 to<br>362.44)        | 228.54<br>(171.73 to<br>301.06)        | 307.71<br>(224.52 to<br>417.83)        | 8.53<br>(7.13 to<br>10.53)         | 15.48<br>(11.97 to<br>19.87)        | 13.90<br>(10.57 to<br>17.67)        | 16.70<br>(12.70 to<br>21.68)        |
| <b>Digestive diseases</b>                                      | 27.07<br>(22.00 to<br>32.02)           | 28.24<br>(22.16 to<br>35.06)           | 22.12<br>(16.98 to<br>27.97)           | 31.80<br>(24.87 to<br>39.25)           | 1.43<br>(1.18 to<br>1.68)          | 1.98<br>(1.62 to<br>2.35)           | 1.60<br>(1.28 to<br>1.93)           | 2.13<br>(1.74 to<br>2.54)           |
| Peptic ulcer disease                                           | <b>Andean Latin America</b>            |                                        |                                        |                                        |                                    |                                     |                                     |                                     |
| Cause                                                          | YLLs (in 1000s)                        |                                        |                                        |                                        | Deaths (in 1000s)                  |                                     |                                     |                                     |
|                                                                | 2016                                   | 2040 Forecast                          | 2040 Better Scenario                   | 2040 Worse Scenario                    | 2016                               | 2040 Forecast                       | 2040 Better Scenario                | 2040 Worse Scenario                 |
| Gastritis and duodenitis                                       | 10.84<br>(8.70 to<br>13.17)            | 14.05<br>(10.46 to<br>18.11)           | 12.30<br>(9.04 to<br>16.36)            | 14.53<br>(10.93 to<br>18.51)           | 0.61<br>(0.49 to<br>0.73)          | 1.02<br>(0.80 to<br>1.27)           | 0.92<br>(0.70 to<br>1.18)           | 1.02<br>(0.79 to<br>1.26)           |
| Appendicitis                                                   | 21.83<br>(17.59 to<br>29.34)           | 19.22<br>(14.42 to<br>26.61)           | 15.05<br>(11.27 to<br>20.81)           | 21.59<br>(16.33 to<br>29.51)           | 0.53<br>(0.43 to<br>0.72)          | 0.70<br>(0.55 to<br>0.95)           | 0.58<br>(0.45 to<br>0.80)           | 0.74<br>(0.58 to<br>1.01)           |
| Paralytic ileus and intestinal obstruction                     | 60.57<br>(48.65 to<br>80.72)           | 76.73<br>(58.80 to<br>105.03)          | 71.33<br>(54.28 to<br>98.85)           | 79.51<br>(61.06 to<br>108.71)          | 2.13<br>(1.73 to<br>2.90)          | 4.27<br>(3.43 to<br>5.82)           | 4.24<br>(3.34 to<br>5.77)           | 4.19<br>(3.38 to<br>5.76)           |
| Inguinal, femoral, and abdominal hernia                        | 8.24<br>(6.13 to<br>11.07)             | 7.20<br>(5.26 to<br>9.89)              | 6.29<br>(4.59 to<br>8.58)              | 7.62<br>(5.59 to<br>10.46)             | 0.29<br>(0.23 to<br>0.40)          | 0.38<br>(0.29 to<br>0.52)           | 0.35<br>(0.26 to<br>0.49)           | 0.38<br>(0.29 to<br>0.53)           |
| Inflammatory bowel disease                                     | 4.98<br>(3.85 to<br>6.51)              | 5.19<br>(3.92 to<br>6.84)              | 4.92<br>(3.70 to<br>6.53)              | 5.27<br>(3.98 to<br>6.98)              | 0.15<br>(0.12 to<br>0.19)          | 0.26<br>(0.20 to<br>0.32)           | 0.26<br>(0.20 to<br>0.33)           | 0.25<br>(0.20 to<br>0.31)           |
| Vascular intestinal disorders                                  | 7.26<br>(6.19 to<br>8.84)              | 13.02<br>(10.54 to<br>15.97)           | 12.28<br>(9.77 to<br>15.13)            | 13.05<br>(10.74 to<br>15.82)           | 0.42<br>(0.36 to<br>0.51)          | 0.96<br>(0.81 to<br>1.15)           | 0.94<br>(0.78 to<br>1.14)           | 0.94<br>(0.79 to<br>1.11)           |
| Gallbladder and biliary diseases                               | 22.44<br>(18.06 to<br>30.85)           | 37.19<br>(18.93 to<br>69.24)           | 28.02<br>(14.90 to<br>51.89)           | 48.76<br>(24.17 to<br>91.38)           | 1.18<br>(0.94 to<br>1.64)          | 2.50<br>(1.33 to<br>4.44)           | 1.96<br>(1.08 to<br>3.48)           | 3.12<br>(1.61 to<br>5.56)           |



|                                         |                                            |                                            |                                            |                                            |                                         |                                         |                                         |                                         |
|-----------------------------------------|--------------------------------------------|--------------------------------------------|--------------------------------------------|--------------------------------------------|-----------------------------------------|-----------------------------------------|-----------------------------------------|-----------------------------------------|
| Pancreatitis                            | 31.01<br>(26.09 to 39.82)                  | 49.92<br>(28.96 to 91.97)                  | 38.19<br>(22.87 to 66.22)                  | 63.06<br>(34.35 to 120.22)                 | 1.10<br>(0.91 to 1.44)                  | 2.22<br>(1.38 to 3.79)                  | 1.76<br>(1.13 to 2.88)                  | 2.71<br>(1.60 to 4.87)                  |
| Other digestive diseases                | 18.94<br>(15.29 to 23.36)                  | 20.90<br>(16.53 to 25.73)                  | 18.03<br>(14.20 to 22.36)                  | 22.51<br>(17.77 to 27.91)                  | 0.69<br>(0.58 to 0.82)                  | 1.19<br>(0.98 to 1.42)                  | 1.09<br>(0.89 to 1.32)                  | 1.22<br>(1.01 to 1.44)                  |
| <b>Neurological disorders</b>           | <b>163.45</b><br><b>(140.41 to 190.50)</b> | <b>355.73</b><br><b>(273.81 to 469.36)</b> | <b>348.82</b><br><b>(268.92 to 449.88)</b> | <b>368.74</b><br><b>(278.96 to 496.93)</b> | <b>13.60</b><br><b>(11.47 to 16.32)</b> | <b>35.28</b><br><b>(26.93 to 46.85)</b> | <b>36.04</b><br><b>(27.51 to 46.99)</b> | <b>35.20</b><br><b>(26.37 to 48.53)</b> |
| Alzheimer's disease and other dementias | 107.52<br>(88.14 to 132.68)                | 268.06<br>(192.67 to 375.60)               | 263.65<br>(191.93 to 361.41)               | 277.75<br>(194.47 to 402.05)               | 11.51<br>(9.50 to 14.16)                | 30.49<br>(22.29 to 41.89)               | 30.91<br>(23.00 to 42.02)               | 30.63<br>(22.02 to 43.60)               |
| Parkinson's disease                     | 13.08<br>(9.85 to 17.06)                   | 34.97<br>(25.93 to 46.01)                  | 39.43<br>(29.19 to 52.47)                  | 31.65<br>(23.59 to 41.77)                  | 1.09<br>(0.83 to 1.45)                  | 3.13<br>(2.34 to 4.15)                  | 3.60<br>(2.71 to 4.77)                  | 2.78<br>(2.08 to 3.68)                  |
| Epilepsy                                | 29.60<br>(26.31 to 34.77)                  | 52.98<br>(23.50 to 46.30)                  | 25.54<br>(18.53 to 35.26)                  | 40.18<br>(28.29 to 56.98)                  | 0.61<br>(0.54 to 0.70)                  | 0.87<br>(0.62 to 1.18)                  | 0.69<br>(0.51 to 0.95)                  | 1.03<br>(0.72 to 1.43)                  |
| Multiple sclerosis                      | 1.90<br>(1.58 to 2.27)                     | 2.53<br>(1.93 to 3.26)                     | 2.60<br>(1.97 to 3.35)                     | 2.49<br>(1.91 to 3.19)                     | 0.06<br>(0.05 to 0.07)                  | 0.10<br>(0.08 to 0.12)                  | 0.10<br>(0.08 to 0.13)                  | 0.09<br>(0.07 to 0.12)                  |
| Motor neuron disease                    | 3.27<br>(2.81 to 3.70)                     | 6.06<br>(4.75 to 7.43)                     | 6.30<br>(4.89 to 7.83)                     | 5.81<br>(4.59 to 7.10)                     | 0.11<br>(0.10 to 0.13)                  | 0.25<br>(0.20 to 0.30)                  | 0.27<br>(0.21 to 0.33)                  | 0.24<br>(0.19 to 0.29)                  |
| Other neurological disorders            | 8.08<br>(7.27 to 8.96)                     | 11.12<br>(9.28 to 13.27)                   | 11.30<br>(9.33 to 13.49)                   | 10.86<br>(9.13 to 12.91)                   | 0.21<br>(0.19 to 0.24)                  | 0.44<br>(0.38 to 0.51)                  | 0.47<br>(0.40 to 0.55)                  | 0.41<br>(0.36 to 0.47)                  |
| <b>Mental disorders</b>                 | <b>56.08</b><br><b>(46.48 to 78.70)</b>    | <b>82.55</b><br><b>(63.88 to 116.02)</b>   | <b>82.40</b><br><b>(62.64 to 116.60)</b>   | <b>85.63</b><br><b>(66.75 to 120.68)</b>   | <b>1.61</b><br><b>(1.36 to 2.25)</b>    | <b>2.94</b><br><b>(2.37 to 4.03)</b>    | <b>3.03</b><br><b>(2.42 to 4.13)</b>    | <b>2.98</b><br><b>(2.42 to 4.09)</b>    |
| Alcohol use disorders                   | 31.24<br>(24.83 to 51.36)                  | 40.00<br>(29.61 to 66.87)                  | 38.10<br>(27.99 to 64.57)                  | 43.20<br>(32.08 to 71.57)                  | 0.91<br>(0.73 to 1.47)                  | 1.36<br>(1.04 to 2.15)                  | 1.31<br>(1.00 to 2.11)                  | 1.44<br>(1.11 to 2.29)                  |
| Drug use disorders                      | 21.58<br>(20.22 to 30.57)                  | 42.18<br>(32.19 to 56.02)                  | 43.97<br>(33.15 to 59.16)                  | 42.06<br>(32.27 to 55.56)                  | 0.70<br>(0.59 to 0.87)                  | 1.57<br>(1.28 to 2.00)                  | 1.71<br>(1.36 to 2.23)                  | 1.53<br>(1.25 to 1.93)                  |
| Opioid use disorders                    | 15.94<br>(12.76 to 20.22)                  | 21.65<br>(16.36 to 29.70)                  | 21.85<br>(16.47 to 29.91)                  | 21.59<br>(16.33 to 29.59)                  | 0.42<br>(0.35 to 0.52)                  | 0.72<br>(0.57 to 0.92)                  | 0.74<br>(0.58 to 0.95)                  | 0.70<br>(0.56 to 0.90)                  |
| Cocaine use disorders                   | 1.29<br>(0.92 to 1.78)                     | 3.42<br>(2.35 to 5.02)                     | 3.53<br>(2.38 to 5.21)                     | 3.49<br>(2.42 to 5.10)                     | 0.04<br>(0.03 to 0.05)                  | 0.11<br>(0.08 to 0.17)                  | 0.12<br>(0.08 to 0.17)                  | 0.11<br>(0.08 to 0.16)                  |
| Amphetamine use disorders               | 0.79<br>(0.57 to 1.04)                     | 2.70<br>(1.84 to 3.90)                     | 2.90<br>(1.90 to 4.25)                     | 2.76<br>(1.88 to 3.97)                     | 0.02<br>(0.01 to 0.03)                  | 0.07<br>(0.05 to 0.11)                  | 0.08<br>(0.05 to 0.12)                  | 0.07<br>(0.05 to 0.11)                  |
| Other drug use disorders                | 6.56<br>(5.10 to 8.29)                     | 14.41<br>(10.87 to 19.24)                  | 15.68<br>(11.52 to 21.89)                  | 14.22<br>(10.81 to 19.01)                  | 0.22<br>(0.18 to 0.29)                  | 0.67<br>(0.54 to 0.89)                  | 0.77<br>(0.60 to 1.04)                  | 0.64<br>(0.52 to 0.84)                  |
| Eating disorders                        | 0.25<br>(0.21 to 0.32)                     | 0.36<br>(0.27 to 0.50)                     | 0.34<br>(0.26 to 0.46)                     | 0.38<br>(0.28 to 0.51)                     | 0.00<br>(0.01 to 0.01)                  | 0.01<br>(0.00 to 0.01)                  | 0.01<br>(0.00 to 0.01)                  | 0.01<br>(0.01 to 0.01)                  |

**Andean Latin America**

| Cause                                                      | YLLs (in 1000s)                            |                                                |                                              |                                                | Deaths (in 1000s)                       |                                         |                                         |                                          |
|------------------------------------------------------------|--------------------------------------------|------------------------------------------------|----------------------------------------------|------------------------------------------------|-----------------------------------------|-----------------------------------------|-----------------------------------------|------------------------------------------|
|                                                            | 2016                                       | 2040 Forecast                                  | 2040 Better Scenario                         | 2040 Worse Scenario                            | 2016                                    | 2040 Forecast                           | 2040 Better Scenario                    | 2040 Worse Scenario                      |
| <b>Diabetes, urogenital, blood, and endocrine diseases</b> | <b>560.76</b><br><b>(510.62 to 616.62)</b> | <b>1,049.78</b><br><b>(718.83 to 1,533.67)</b> | <b>771.81</b><br><b>(548.89 to 1,109.53)</b> | <b>1,231.58</b><br><b>(846.62 to 1,766.42)</b> | <b>27.68</b><br><b>(25.27 to 30.31)</b> | <b>68.64</b><br><b>(48.54 to 99.82)</b> | <b>52.12</b><br><b>(37.74 to 75.73)</b> | <b>77.56</b><br><b>(54.36 to 111.59)</b> |
| Diabetes mellitus                                          | 203.37<br>(183.38 to 223.60)               | 348.87<br>(247.42 to 489.15)                   | 255.70<br>(183.55 to 362.88)                 | 426.78<br>(294.92 to 616.31)                   | 10.65<br>(9.68 to 11.68)                | 21.76<br>(16.20 to 28.61)               | 16.60<br>(12.47 to 21.94)               | 25.44<br>(18.50 to 34.26)                |
| Acute glomerulonephritis                                   | 0.43<br>(0.38 to 0.50)                     | 0.40<br>(0.31 to 0.51)                         | 0.32<br>(0.26 to 0.41)                       | 0.43<br>(0.34 to 0.55)                         | 0.01<br>(0.01 to 0.01)                  | 0.01<br>(0.01 to 0.01)                  | 0.01<br>(0.01 to 0.01)                  | 0.01<br>(0.01 to 0.01)                   |

|                                                            |                                 |                                   |                                 |                                   |                              |                              |                              |                              |
|------------------------------------------------------------|---------------------------------|-----------------------------------|---------------------------------|-----------------------------------|------------------------------|------------------------------|------------------------------|------------------------------|
| Chronic kidney disease                                     | 276.77<br>(250.69 to<br>306.55) | 559.20<br>(315.25 to<br>1,011.79) | 386.34<br>(230.77 to<br>685.06) | 660.89<br>(368.57 to<br>1,176.69) | 13.85<br>(12.53 to<br>15.23) | 37.50<br>(20.96 to<br>68.59) | 26.39<br>(15.55 to<br>47.89) | 43.13<br>(23.55 to<br>77.01) |
| Chronic kidney disease due to diabetes mellitus            | 87.89<br>(74.17 to<br>103.26)   | 211.11<br>(115.45 to<br>414.85)   | 146.21<br>(84.95 to<br>285.70)  | 249.95<br>(132.29 to<br>487.90)   | 4.45<br>(3.72 to<br>5.22)    | 13.07<br>(7.01 to<br>25.65)  | 9.19<br>(5.17 to<br>17.98)   | 15.14<br>(7.93 to<br>29.26)  |
| Chronic kidney disease due to hypertension                 | 35.61<br>(29.36 to<br>42.44)    | 94.14<br>(48.40 to<br>176.37)     | 66.33<br>(36.31 to<br>125.48)   | 109.07<br>(54.57 to<br>205.99)    | 2.79<br>(2.30 to<br>3.34)    | 8.79<br>(4.68 to<br>16.34)   | 6.37<br>(3.67 to<br>11.84)   | 9.87<br>(5.19 to<br>18.11)   |
| Chronic kidney disease due to glomerulonephritis           | 86.19<br>(73.93 to<br>99.31)    | 138.00<br>(76.96 to<br>245.15)    | 94.13<br>(55.61 to<br>164.02)   | 164.25<br>(90.91 to<br>293.45)    | 3.57<br>(2.97 to<br>4.19)    | 8.09<br>(4.21 to<br>15.13)   | 5.56<br>(3.08 to<br>10.22)   | 9.41<br>(4.91 to<br>17.52)   |
| Chronic kidney disease due to other and unspecified causes | 67.08<br>(56.41 to<br>79.55)    | 115.95<br>(66.01 to<br>203.95)    | 79.67<br>(47.32 to<br>139.45)   | 137.62<br>(77.07 to<br>239.05)    | 3.04<br>(2.50 to<br>3.67)    | 7.55<br>(4.16 to<br>14.08)   | 5.27<br>(3.05 to<br>9.61)    | 8.71<br>(4.82 to<br>15.87)   |
| Urinary diseases and male infertility                      | 39.42<br>(34.74 to<br>44.50)    | 88.03<br>(71.53 to<br>104.67)     | 82.24<br>(65.74 to<br>102.98)   | 86.76<br>(71.37 to<br>102.02)     | 2.02<br>(1.78 to<br>2.29)    | 7.01<br>(5.94 to<br>8.14)    | 6.89<br>(5.67 to<br>8.53)    | 6.59<br>(5.66 to<br>7.60)    |
| Urinary tract infections                                   | 36.70<br>(32.06 to<br>41.76)    | 83.92<br>(68.12 to<br>100.74)     | 78.70<br>(62.67 to<br>98.70)    | 82.49<br>(67.74 to<br>97.43)      | 1.87<br>(1.65 to<br>2.13)    | 6.71<br>(5.65 to<br>7.84)    | 6.62<br>(5.43 to<br>8.06)    | 6.30<br>(5.39 to<br>7.29)    |
| Urolithiasis                                               | 0.64<br>(0.47 to<br>0.79)       | 1.10<br>(0.78 to<br>1.42)         | 1.02<br>(0.70 to<br>1.33)       | 1.08<br>(0.77 to<br>1.39)         | 0.03<br>(0.02 to<br>0.03)    | 0.06<br>(0.04 to<br>0.08)    | 0.06<br>(0.04 to<br>0.08)    | 0.06<br>(0.04 to<br>0.07)    |
| Other urinary diseases                                     | 2.09<br>(1.47 to<br>2.79)       | 3.02<br>(1.96 to<br>4.30)         | 2.52<br>(1.61 to<br>3.63)       | 3.19<br>(2.09 to<br>4.46)         | 0.12<br>(0.08 to<br>0.16)    | 0.20<br>(0.15 to<br>0.32)    | 0.20<br>(0.13 to<br>0.28)    | 0.24<br>(0.15 to<br>0.33)    |
| Gynecological diseases                                     | 0.98<br>(0.78 to<br>1.35)       | 1.22<br>(0.84 to<br>1.79)         | 0.95<br>(0.64 to<br>1.43)       | 1.35<br>(0.94 to<br>1.99)         | 0.03<br>(0.02 to<br>0.04)    | 0.04<br>(0.03 to<br>0.06)    | 0.03<br>(0.02 to<br>0.04)    | 0.04<br>(0.03 to<br>0.06)    |
| Uterine fibroids                                           | 0.21<br>(0.16 to<br>0.23)       | 0.21<br>(0.13 to<br>0.34)         | 0.16<br>(0.10 to<br>0.27)       | 0.23<br>(0.15 to<br>0.38)         | 0.01<br>(0.00 to<br>0.01)    | 0.01<br>(0.00 to<br>0.01)    | 0.01<br>(0.00 to<br>0.01)    | 0.01<br>(0.00 to<br>0.01)    |
| Polycystic ovarian syndrome                                | 0.09<br>(0.06 to<br>0.14)       | 0.07<br>(0.04 to<br>0.11)         | 0.05<br>(0.02 to<br>0.08)       | 0.08<br>(0.04 to<br>0.14)         | 0.00<br>(0.00 to<br>0.00)    | 0.00<br>(0.00 to<br>0.00)    | 0.00<br>(0.00 to<br>0.00)    | 0.00<br>(0.00 to<br>0.00)    |
| Endometriosis                                              | 0.00<br>(0.00 to<br>0.00)       | 0.00<br>(0.00 to<br>0.01)         | 0.00<br>(0.00 to<br>0.01)       | 0.00<br>(0.00 to<br>0.01)         | 0.00<br>(0.00 to<br>0.00)    | 0.00<br>(0.00 to<br>0.00)    | 0.00<br>(0.00 to<br>0.00)    | 0.00<br>(0.00 to<br>0.00)    |
| Genital prolapse                                           | 0.07<br>(0.05 to<br>0.11)       | 0.10<br>(0.06 to<br>0.18)         | 0.08<br>(0.05 to<br>0.14)       | 0.12<br>(0.07 to<br>0.20)         | 0.00<br>(0.00 to<br>0.01)    | 0.01<br>(0.00 to<br>0.01)    | 0.01<br>(0.00 to<br>0.01)    | 0.01<br>(0.00 to<br>0.01)    |
| Other gynecological diseases                               | 0.60<br>(0.46 to<br>0.85)       | 0.84<br>(0.54 to<br>1.28)         | 0.66<br>(0.42 to<br>1.05)       | 0.92<br>(0.59 to<br>1.40)         | 0.01<br>(0.01 to<br>0.02)    | 0.02<br>(0.02 to<br>0.04)    | 0.02<br>(0.01 to<br>0.03)    | 0.03<br>(0.02 to<br>0.04)    |
| Hemoglobinopathies and hemolytic anemias                   | 11.74<br>(10.05 to<br>14.00)    | 14.06<br>(11.08 to<br>17.56)      | 11.78<br>(9.20 to<br>15.09)     | 15.04<br>(12.02 to<br>18.66)      | 0.35<br>(0.29 to<br>0.42)    | 0.59<br>(0.48 to<br>0.75)    | 0.51<br>(0.41 to<br>0.64)    | 0.62<br>(0.50 to<br>0.76)    |
| Thalassemias                                               | 0.88<br>(0.66 to<br>1.24)       | 0.34<br>(0.22 to<br>0.51)         | 0.30<br>(0.20 to<br>0.43)       | 0.35<br>(0.23 to<br>0.53)         | 0.01<br>(0.01 to<br>0.01)    | 0.00<br>(0.00 to<br>0.01)    | 0.00<br>(0.00 to<br>0.01)    | 0.00<br>(0.00 to<br>0.01)    |
| Sickle cell disorders                                      | 6.63<br>(5.64 to<br>7.92)       | 7.03<br>(5.38 to<br>9.04)         | 5.89<br>(4.47 to<br>7.67)       | 7.57<br>(5.85 to<br>9.67)         | 0.12<br>(0.10 to<br>0.14)    | 0.15<br>(0.11 to<br>0.19)    | 0.13<br>(0.10 to<br>0.17)    | 0.16<br>(0.12 to<br>0.21)    |
| G6PD deficiency                                            | 1.45<br>(1.19 to<br>1.80)       | 2.48<br>(1.87 to<br>3.17)         | 1.99<br>(1.48 to<br>2.62)       | 2.71<br>(2.05 to<br>3.45)         | 0.04<br>(0.03 to<br>0.05)    | 0.09<br>(0.07 to<br>0.12)    | 0.08<br>(0.06 to<br>0.10)    | 0.10<br>(0.08 to<br>0.13)    |
| Other hemoglobinopathies and hemolytic anemias             | 2.78<br>(2.28 to<br>3.44)       | 4.21<br>(3.28 to<br>5.23)         | 3.61<br>(2.81 to<br>4.54)       | 4.40<br>(3.46 to<br>5.45)         | 0.18<br>(0.15 to<br>0.23)    | 0.35<br>(0.28 to<br>0.43)    | 0.30<br>(0.24 to<br>0.38)    | 0.35<br>(0.29 to<br>0.43)    |
| Endocrine, metabolic, blood, and immune disorders          | 28.03<br>(22.52 to<br>48.02)    | 38.00<br>(28.42 to<br>67.21)      | 34.47<br>(25.67 to<br>59.59)    | 40.33<br>(30.53 to<br>70.77)      | 0.78<br>(0.64 to<br>1.34)    | 1.73<br>(1.30 to<br>3.19)    | 1.70<br>(1.26 to<br>3.11)    | 1.73<br>(1.31 to<br>3.19)    |
| <b>Andean Latin America</b>                                |                                 |                                   |                                 |                                   |                              |                              |                              |                              |
| <b>YLLs (in 1000s)</b>                                     |                                 |                                   |                                 |                                   | <b>Deaths (in 1000s)</b>     |                              |                              |                              |

| Cause                                         | 2016                                      | 2040 Forecast                             | 2040 Better Scenario                    | 2040 Worse Scenario                       | 2016                             | 2040 Forecast                    | 2040 Better Scenario             | 2040 Worse Scenario              |
|-----------------------------------------------|-------------------------------------------|-------------------------------------------|-----------------------------------------|-------------------------------------------|----------------------------------|----------------------------------|----------------------------------|----------------------------------|
| <b>Musculoskeletal disorders</b>              | <b>16.25</b><br>(14.21 to 18.43)          | <b>27.78</b><br>(22.47 to 32.65)          | <b>26.30</b><br>(21.03 to 31.36)        | <b>27.71</b><br>(22.46 to 32.34)          | <b>0.55</b><br>(0.48 to 0.62)    | <b>1.37</b><br>(1.13 to 1.58)    | <b>1.30</b><br>(1.06 to 1.52)    | <b>1.34</b><br>(1.11 to 1.53)    |
| Rheumatoid arthritis                          | 3.66<br>(3.01 to 4.31)                    | 10.29<br>(8.02 to 12.56)                  | 8.55<br>(6.54 to 10.70)                 | 10.79<br>(8.47 to 13.09)                  | 0.21<br>(0.17 to 0.24)           | 0.73<br>(0.59 to 0.88)           | 0.62<br>(0.49 to 0.77)           | 0.74<br>(0.60 to 0.88)           |
| Other musculoskeletal disorders               | 12.60<br>(10.89 to 14.45)                 | 17.49<br>(13.85 to 21.21)                 | 17.75<br>(14.10 to 21.42)               | 16.91<br>(13.51 to 20.39)                 | 0.34<br>(0.30 to 0.39)           | 0.64<br>(0.51 to 0.76)           | 0.68<br>(0.53 to 0.80)           | 0.60<br>(0.48 to 0.71)           |
| <b>Other non-communicable diseases</b>        | <b>432.66</b><br>(351.64 to 507.53)       | <b>266.58</b><br>(200.66 to 344.77)       | <b>185.60</b><br>(141.26 to 237.50)     | <b>318.59</b><br>(239.53 to 411.61)       | <b>5.48</b><br>(4.44 to 6.40)    | <b>4.68</b><br>(3.43 to 5.90)    | <b>3.71</b><br>(2.60 to 4.66)    | <b>5.21</b><br>(3.87 to 6.50)    |
| Congenital birth defects                      | 415.57<br>(335.64 to 489.34)              | 234.90<br>(174.26 to 309.57)              | 157.20<br>(119.61 to 207.32)            | 285.75<br>(208.96 to 375.96)              | 4.98<br>(4.05 to 5.84)           | 2.94<br>(2.20 to 3.84)           | 2.00<br>(1.52 to 2.61)           | 3.55<br>(2.64 to 4.62)           |
| Neural tube defects                           | 22.17<br>(16.30 to 29.65)                 | 5.62<br>(3.51 to 8.63)                    | 3.37<br>(2.14 to 5.12)                  | 7.67<br>(4.74 to 11.74)                   | 0.26<br>(0.19 to 0.35)           | 0.07<br>(0.04 to 0.10)           | 0.04<br>(0.03 to 0.06)           | 0.09<br>(0.06 to 0.14)           |
| Congenital heart anomalies                    | 188.67<br>(130.51 to 230.98)              | 103.05<br>(66.55 to 141.34)               | 68.67<br>(44.69 to 92.35)               | 123.92<br>(77.78 to 171.14)               | 2.28<br>(1.58 to 2.78)           | 1.31<br>(0.84 to 1.78)           | 0.89<br>(0.58 to 1.17)           | 1.55<br>(0.99 to 2.12)           |
| Orofacial clefts                              | 0.41<br>(0.15 to 0.65)                    | 0.20<br>(0.07 to 0.37)                    | 0.11<br>(0.04 to 0.21)                  | 0.28<br>(0.09 to 0.51)                    | 0.00<br>(0.00 to 0.01)           | 0.00<br>(0.00 to 0.00)           | 0.00<br>(0.00 to 0.00)           | 0.00<br>(0.00 to 0.01)           |
| Down syndrome                                 | 15.09<br>(11.54 to 20.41)                 | 11.48<br>(8.18 to 16.69)                  | 8.48<br>(6.14 to 12.09)                 | 14.00<br>(9.74 to 20.03)                  | 0.19<br>(0.14 to 0.25)           | 0.15<br>(0.11 to 0.22)           | 0.12<br>(0.09 to 0.16)           | 0.18<br>(0.13 to 0.26)           |
| Other chromosomal abnormalities               | 12.53<br>(9.35 to 19.26)                  | 12.52<br>(8.34 to 18.91)                  | 8.52<br>(5.86 to 12.95)                 | 15.46<br>(10.24 to 23.78)                 | 0.15<br>(0.11 to 0.23)           | 0.15<br>(0.10 to 0.22)           | 0.10<br>(0.07 to 0.16)           | 0.19<br>(0.12 to 0.28)           |
| Congenital musculoskeletal and limb anomalies | 5.33<br>(4.18 to 6.73)                    | 3.66<br>(2.56 to 5.17)                    | 2.47<br>(1.77 to 3.48)                  | 4.36<br>(3.03 to 6.21)                    | 0.06<br>(0.05 to 0.08)           | 0.05<br>(0.03 to 0.06)           | 0.03<br>(0.02 to 0.04)           | 0.05<br>(0.04 to 0.08)           |
| Urogenital congenital anomalies               | 8.21<br>(6.34 to 10.70)                   | 5.70<br>(4.12 to 7.74)                    | 4.15<br>(3.02 to 5.57)                  | 6.65<br>(4.76 to 8.99)                    | 0.11<br>(0.09 to 0.15)           | 0.10<br>(0.07 to 0.13)           | 0.07<br>(0.05 to 0.10)           | 0.11<br>(0.08 to 0.14)           |
| Digestive congenital anomalies                | 48.57<br>(38.73 to 63.08)                 | 29.82<br>(20.73 to 42.07)                 | 19.29<br>(13.87 to 27.15)               | 37.09<br>(25.79 to 52.29)                 | 0.57<br>(0.46 to 0.74)           | 0.36<br>(0.25 to 0.50)           | 0.23<br>(0.17 to 0.32)           | 0.44<br>(0.31 to 0.62)           |
| Other congenital birth defects                | 114.60<br>(92.44 to 140.76)               | 62.83<br>(45.17 to 84.13)                 | 42.13<br>(30.95 to 56.60)               | 76.32<br>(54.36 to 101.46)                | 1.35<br>(1.09 to 1.66)           | 0.76<br>(0.56 to 1.02)           | 0.52<br>(0.38 to 0.69)           | 0.92<br>(0.66 to 1.22)           |
| Skin and subcutaneous diseases                | 10.73<br>(6.46 to 14.56)                  | 27.57<br>(15.50 to 37.04)                 | 25.51<br>(14.03 to 34.59)               | 27.73<br>(15.82 to 37.08)                 | 0.42<br>(0.23 to 0.55)           | 1.69<br>(0.86 to 2.28)           | 1.67<br>(0.84 to 2.27)           | 1.61<br>(0.83 to 2.13)           |
| Cellulitis                                    | 2.15<br>(1.41 to 4.24)                    | 7.22<br>(4.46 to 11.96)                   | 7.14<br>(4.45 to 11.65)                 | 6.99<br>(4.36 to 11.72)                   | 0.08<br>(0.05 to 0.14)           | 0.40<br>(0.23 to 0.60)           | 0.42<br>(0.24 to 0.62)           | 0.37<br>(0.22 to 0.56)           |
| Pyoderma                                      | 7.51<br>(3.98 to 9.94)                    | 17.08<br>(7.62 to 24.10)                  | 15.30<br>(6.57 to 21.95)                | 17.56<br>(7.93 to 24.46)                  | 0.29<br>(0.13 to 0.40)           | 1.04<br>(0.39 to 1.51)           | 1.01<br>(0.36 to 1.48)           | 1.01<br>(0.38 to 1.44)           |
| Decubitus ulcer                               | 0.62<br>(0.37 to 1.17)                    | 2.40<br>(1.17 to 4.88)                    | 2.24<br>(1.07 to 4.56)                  | 2.32<br>(1.14 to 4.75)                    | 0.04<br>(0.02 to 0.08)           | 0.21<br>(0.09 to 0.45)           | 0.21<br>(0.09 to 0.44)           | 0.20<br>(0.09 to 0.43)           |
| Other skin and subcutaneous diseases          | 0.45<br>(0.28 to 0.65)                    | 0.88<br>(0.51 to 1.24)                    | 0.83<br>(0.48 to 1.16)                  | 0.86<br>(0.50 to 1.22)                    | 0.01<br>(0.01 to 0.02)           | 0.04<br>(0.02 to 0.05)           | 0.04<br>(0.02 to 0.05)           | 0.03<br>(0.02 to 0.05)           |
| Sudden infant death syndrome                  | 6.37<br>(4.75 to 8.75)                    | 4.12<br>(2.59 to 6.56)                    | 2.90<br>(1.82 to 4.60)                  | 5.11<br>(3.19 to 8.29)                    | 0.07<br>(0.06 to 0.10)           | 0.05<br>(0.03 to 0.08)           | 0.03<br>(0.02 to 0.05)           | 0.06<br>(0.04 to 0.10)           |
| <b>Injuries</b>                               | <b>1,513.63</b><br>(1,371.85 to 1,658.37) | <b>1,351.26</b><br>(1,057.65 to 1,852.20) | <b>1,020.62</b><br>(790.38 to 1,343.69) | <b>1,603.93</b><br>(1,238.21 to 2,276.50) | <b>31.01</b><br>(27.97 to 34.02) | <b>35.46</b><br>(28.82 to 46.23) | <b>28.27</b><br>(22.69 to 35.78) | <b>40.57</b><br>(32.36 to 54.55) |

|                                      |                                        |                                        |                                        |                                        |                                     |                                     |                                     |                                     |
|--------------------------------------|----------------------------------------|----------------------------------------|----------------------------------------|----------------------------------------|-------------------------------------|-------------------------------------|-------------------------------------|-------------------------------------|
| Transport injuries                   | 506.05<br>(456.80 to<br>562.02)        | 470.98<br>(351.66 to<br>648.47)        | 270.69<br>(203.65 to<br>371.71)        | 647.74<br>(469.05 to<br>916.77)        | 10.89<br>(9.82 to<br>12.03)         | 12.46<br>(9.57 to<br>16.79)         | 7.71<br>(6.01 to<br>10.18)          | 16.41<br>(12.18 to<br>22.90)        |
| Road injuries                        | 474.36<br>(429.06 to<br>526.25)        | 436.78<br>(326.28 to<br>598.88)        | 243.66<br>(183.85 to<br>331.34)        | 608.37<br>(442.23 to<br>857.94)        | 10.21<br>(9.20 to<br>11.27)         | 11.56<br>(8.92 to<br>15.57)         | 6.99<br>(5.48 to<br>9.17)           | 15.40<br>(11.45 to<br>21.46)        |
| Pedestrian road injuries             | 204.67<br>(179.10 to<br>232.67)        | 176.35<br>(132.30 to<br>244.00)        | 101.44<br>(76.50 to<br>137.00)         | 234.75<br>(170.57 to<br>335.15)        | 4.70<br>(4.13 to<br>5.32)           | 5.36<br>(4.17 to<br>7.19)           | 3.32<br>(2.60 to<br>4.36)           | 6.88<br>(5.15 to<br>9.52)           |
| <b>Andean Latin America</b>          |                                        |                                        |                                        |                                        |                                     |                                     |                                     |                                     |
| Cause                                | YLLs (in 1000s)                        |                                        |                                        |                                        | Deaths (in 1000s)                   |                                     |                                     |                                     |
|                                      | 2016                                   | 2040 Forecast                          | 2040 Better Scenario                   | 2040 Worse Scenario                    | 2016                                | 2040 Forecast                       | 2040 Better Scenario                | 2040 Worse Scenario                 |
| Cyclist road injuries                | 13.74<br>(11.49 to<br>16.49)           | 12.07<br>(8.11 to<br>18.42)            | 7.19<br>(4.83 to<br>11.03)             | 17.08<br>(11.28 to<br>26.39)           | 0.30<br>(0.25 to<br>0.36)           | 0.30<br>(0.21 to<br>0.46)           | 0.20<br>(0.14 to<br>0.30)           | 0.41<br>(0.27 to<br>0.63)           |
| Motorcyclist road injuries           | 46.38<br>(39.49 to<br>55.56)           | 44.68<br>(30.58 to<br>66.78)           | 29.91<br>(20.44 to<br>44.75)           | 57.87<br>(38.91 to<br>89.12)           | 0.84<br>(0.72 to<br>1.00)           | 0.87<br>(0.59 to<br>1.28)           | 0.60<br>(0.41 to<br>0.89)           | 1.10<br>(0.73 to<br>1.68)           |
| Motor vehicle road injuries          | 203.24<br>(176.16 to<br>231.09)        | 198.32<br>(144.93 to<br>277.49)        | 102.21<br>(75.83 to<br>141.29)         | 290.93<br>(207.91 to<br>415.23)        | 4.23<br>(3.64 to<br>4.79)           | 4.89<br>(3.65 to<br>6.61)           | 2.77<br>(2.10 to<br>3.69)           | 6.82<br>(4.92 to<br>9.55)           |
| Other road injuries                  | 6.33<br>(5.04 to<br>7.50)              | 5.36<br>(3.83 to<br>7.66)              | 2.91<br>(2.09 to<br>4.13)              | 7.74<br>(5.36 to<br>11.29)             | 0.14<br>(0.11 to<br>0.16)           | 0.14<br>(0.10 to<br>0.20)           | 0.09<br>(0.06 to<br>0.12)           | 0.20<br>(0.13 to<br>0.28)           |
| Other transport injuries             | 31.69<br>(26.43 to<br>37.70)           | 34.21<br>(24.01 to<br>50.88)           | 27.03<br>(19.05 to<br>39.42)           | 39.37<br>(26.94 to<br>59.53)           | 0.68<br>(0.57 to<br>0.81)           | 0.89<br>(0.64 to<br>1.28)           | 0.72<br>(0.53 to<br>1.03)           | 1.01<br>(0.70 to<br>1.49)           |
| Unintentional injuries               | <b>588.76</b><br>(527.05 to<br>654.67) | <b>478.08</b><br>(391.82 to<br>587.41) | <b>393.70</b><br>(325.54 to<br>485.87) | <b>524.63</b><br>(431.10 to<br>645.36) | <b>11.88</b><br>(10.73 to<br>13.10) | <b>14.07</b><br>(12.08 to<br>16.31) | <b>12.50</b><br>(10.77 to<br>14.68) | <b>14.66</b><br>(12.66 to<br>17.00) |
| Falls                                | 68.30<br>(57.79 to<br>77.98)           | 88.23<br>(73.35 to<br>103.74)          | 81.38<br>(67.37 to<br>96.18)           | 89.81<br>(74.31 to<br>105.02)          | 2.48<br>(2.07 to<br>2.81)           | 4.55<br>(3.74 to<br>5.15)           | 4.35<br>(3.58 to<br>4.97)           | 4.47<br>(3.67 to<br>5.08)           |
| Drowning                             | 111.34<br>(98.18 to<br>126.11)         | 78.47<br>(60.10 to<br>102.94)          | 62.41<br>(48.31 to<br>81.72)           | 89.20<br>(67.23 to<br>116.12)          | 1.96<br>(1.74 to<br>2.21)           | 1.78<br>(1.37 to<br>2.30)           | 1.48<br>(1.15 to<br>1.90)           | 1.98<br>(1.51 to<br>2.58)           |
| Fire, heat, and hot substances       | 33.44<br>(29.11 to<br>38.89)           | 23.99<br>(18.62 to<br>30.84)           | 18.45<br>(14.27 to<br>23.86)           | 27.61<br>(21.22 to<br>35.51)           | 0.76<br>(0.65 to<br>0.86)           | 0.84<br>(0.65 to<br>1.06)           | 0.70<br>(0.53 to<br>0.89)           | 0.91<br>(0.71 to<br>1.17)           |
| Poisonings                           | 20.89<br>(17.26 to<br>26.47)           | 11.10<br>(7.98 to<br>15.72)            | 7.84<br>(5.65 to<br>11.14)             | 13.57<br>(9.67 to<br>19.28)            | 0.38<br>(0.32 to<br>0.47)           | 0.25<br>(0.18 to<br>0.36)           | 0.19<br>(0.14 to<br>0.26)           | 0.30<br>(0.21 to<br>0.42)           |
| Exposure to mechanical forces        | 68.39<br>(58.66 to<br>79.27)           | 51.53<br>(40.51 to<br>65.76)           | 40.38<br>(31.64 to<br>52.58)           | 58.12<br>(45.76 to<br>74.59)           | 1.29<br>(1.10 to<br>1.49)           | 1.22<br>(0.99 to<br>1.52)           | 1.00<br>(0.80 to<br>1.28)           | 1.33<br>(1.08 to<br>1.65)           |
| Unintentional firearm injuries       | 24.59<br>(16.26 to<br>31.97)           | 15.48<br>(9.58 to<br>22.80)            | 12.28<br>(7.59 to<br>18.65)            | 17.39<br>(10.69 to<br>25.93)           | 0.48<br>(0.31 to<br>0.62)           | 0.36<br>(0.23 to<br>0.51)           | 0.29<br>(0.19 to<br>0.42)           | 0.39<br>(0.25 to<br>0.56)           |
| Unintentional suffocation            | 18.34<br>(14.65 to<br>24.08)           | 10.96<br>(7.85 to<br>15.27)            | 7.66<br>(5.57 to<br>10.65)             | 13.30<br>(9.32 to<br>18.49)            | 0.24<br>(0.19 to<br>0.31)           | 0.15<br>(0.11 to<br>0.21)           | 0.11<br>(0.08 to<br>0.15)           | 0.18<br>(0.14 to<br>0.25)           |
| Other exposure to mechanical forces  | 25.47<br>(21.89 to<br>30.55)           | 25.10<br>(19.91 to<br>31.63)           | 20.44<br>(16.08 to<br>26.29)           | 27.43<br>(22.02 to<br>34.16)           | 0.58<br>(0.50 to<br>0.69)           | 0.71<br>(0.58 to<br>0.88)           | 0.60<br>(0.48 to<br>0.75)           | 0.76<br>(0.62 to<br>0.92)           |
| Adverse effects of medical treatment | 47.82<br>(39.41 to<br>62.54)           | 41.81<br>(32.21 to<br>57.30)           | 34.40<br>(26.55 to<br>46.99)           | 46.42<br>(35.81 to<br>63.31)           | 1.03<br>(0.85 to<br>1.34)           | 1.39<br>(1.11 to<br>1.88)           | 1.24<br>(0.99 to<br>1.71)           | 1.45<br>(1.17 to<br>1.93)           |
| Animal contact                       | 6.92<br>(5.21 to<br>8.02)              | 6.85<br>(4.99 to<br>8.73)              | 5.26<br>(3.94 to<br>6.60)              | 7.84<br>(5.79 to<br>9.85)              | 0.14<br>(0.11 to<br>0.16)           | 0.18<br>(0.14 to<br>0.22)           | 0.15<br>(0.11 to<br>0.18)           | 0.20<br>(0.15 to<br>0.24)           |
| Venomous animal contact              | 3.87<br>(2.84 to<br>4.60)              | 4.07<br>(2.98 to<br>5.10)              | 3.16<br>(2.29 to<br>3.93)              | 4.64<br>(3.38 to<br>5.74)              | 0.08<br>(0.06 to<br>0.10)           | 0.12<br>(0.08 to<br>0.14)           | 0.10<br>(0.07 to<br>0.12)           | 0.13<br>(0.09 to<br>0.15)           |



|                                                                   |                                                   |                                                   |                                                   |                                                   |                                          |                                           |                                          |                                            |
|-------------------------------------------------------------------|---------------------------------------------------|---------------------------------------------------|---------------------------------------------------|---------------------------------------------------|------------------------------------------|-------------------------------------------|------------------------------------------|--------------------------------------------|
| All causes                                                        | 2,148,561.61<br>(1,844,244.97 to<br>2,487,369.29) | 2,085,773.47<br>(1,702,955.62 to<br>2,567,376.09) | 1,643,048.75<br>(1,346,968.13 to<br>1,987,070.28) | 2,794,137.95<br>(2,235,145.99 to<br>3,429,966.64) | 68,415.28<br>(59,490.69 to<br>79,429.49) | 92,401.72<br>(80,387.82 to<br>108,202.70) | 77,988.76<br>(68,505.42 to<br>89,563.12) | 112,630.20<br>(96,420.37 to<br>131,255.24) |
| Communicable, maternal, neonatal, and nutritional diseases        | 784,432.15<br>(634,754.11 to<br>963,795.85)       | 428,962.24<br>(324,598.45 to<br>591,937.07)       | 316,532.75<br>(239,411.75 to<br>443,550.20)       | 713,049.78<br>(522,693.93 to<br>986,080.43)       | 15,214.10<br>(12,820.94 to<br>18,016.18) | 13,120.20<br>(10,224.52 to<br>17,069.40)  | 11,201.91<br>(8,702.13 to<br>14,446.16)  | 18,210.25<br>(14,000.19 to<br>23,563.77)   |
| HIV/AIDS and tuberculosis                                         | 60,697.46<br>(35,049.73 to<br>131,341.21)         | 52,985.96<br>(18,594.73 to<br>164,055.72)         | 37,802.09<br>(11,010.50 to<br>145,668.96)         | 78,226.98<br>(31,580.38 to<br>198,126.17)         | 1,580.70<br>(1,007.15 to<br>3,021.41)    | 1,457.43<br>(640.99 to<br>3,632.70)       | 1,020.25<br>(400.00 to<br>3,444.28)      | 2,133.00<br>(1,003.48 to<br>4,515.55)      |
| Tuberculosis                                                      | 37,453.09<br>(27,889.14 to<br>49,782.20)          | 25,315.47<br>(13,428.52 to<br>43,594.81)          | 14,880.35<br>(8,477.89 to<br>24,505.84)           | 39,673.65<br>(21,399.00 to<br>67,634.81)          | 1,125.04<br>(836.68 to<br>1,478.67)      | 896.83<br>(508.40 to<br>1,515.92)         | 555.97<br>(335.95 to<br>892.90)          | 1,346.79<br>(754.08 to<br>2,297.24)        |
| HIV/AIDS                                                          | 23,244.37<br>(1,530.40 to<br>100,005.37)          | 27,670.50<br>(593.51 to<br>138,522.84)            | 22,921.74<br>(133.98 to<br>130,713.20)            | 38,553.33<br>(1,800.91 to<br>156,866.92)          | 455.66<br>(33.14 to<br>1,985.53)         | 560.59<br>(9.75 to<br>2,731.13)           | 464.29<br>(2.25 to<br>2,511.57)          | 786.22<br>(29.87 to<br>3,063.73)           |
| Diarrhea, lower respiratory, and other common infectious diseases | 323,822.76<br>(257,347.78 to<br>402,620.51)       | 191,951.15<br>(146,313.04 to<br>272,925.66)       | 143,258.85<br>(107,527.65 to<br>195,937.20)       | 341,558.54<br>(228,736.24 to<br>533,096.32)       | 7,869.00<br>(6,428.92 to<br>9,546.22)    | 8,343.26<br>(5,998.24 to<br>11,080.77)    | 7,419.95<br>(5,388.36 to<br>9,684.36)    | 11,464.47<br>(8,118.17 to<br>15,794.75)    |
| Diarrheal diseases                                                | 37,328.78<br>(24,067.40 to<br>54,814.16)          | 9,125.20<br>(2,500.75 to<br>26,689.83)            | 6,999.63<br>(2,030.38 to<br>19,898.76)            | 22,065.97<br>(4,134.44 to<br>74,985.22)           | 715.57<br>(452.17 to<br>1,095.74)        | 373.85<br>(118.27 to<br>1,008.23)         | 329.35<br>(108.40 to<br>879.40)          | 742.54<br>(181.06 to<br>2,226.02)          |
| Intestinal infectious diseases                                    | 127.61<br>(62.07 to<br>223.34)                    | 78.65<br>(27.74 to<br>172.15)                     | 69.30<br>(24.86 to<br>152.68)                     | 90.53<br>(31.34 to<br>199.90)                     | 2.55<br>(1.26 to<br>4.48)                | 1.88<br>(0.81 to<br>3.84)                 | 1.73<br>(0.75 to<br>3.52)                | 2.08<br>(0.88 to<br>4.22)                  |
| Typhoid fever                                                     | 121.21<br>(55.72 to<br>216.24)                    | 76.62<br>(26.71 to<br>166.99)                     | 67.74<br>(23.95 to<br>150.03)                     | 87.74<br>(30.27 to<br>195.71)                     | 2.45<br>(1.16 to<br>4.39)                | 1.69<br>(0.78 to<br>3.75)                 | 1.69<br>(0.73 to<br>3.46)                | 2.02<br>(0.85 to<br>4.13)                  |
| Paratyphoid fever                                                 | 0.83<br>(0.29 to<br>1.75)                         | 0.67<br>(0.19 to<br>1.69)                         | 0.58<br>(0.16 to<br>1.42)                         | 0.80<br>(0.23 to<br>2.01)                         | 0.02<br>(0.01 to<br>0.03)                | 0.02<br>(0.01 to<br>0.04)                 | 0.01<br>(0.00 to<br>0.03)                | 0.02<br>(0.01 to<br>0.04)                  |
| Other intestinal infectious diseases                              | 5.57<br>(1.90 to<br>13.30)                        | 1.35<br>(0.22 to<br>4.27)                         | 0.97<br>(0.18 to<br>3.05)                         | 1.98<br>(0.28 to<br>6.64)                         | 0.08<br>(0.03 to<br>0.19)                | 0.03<br>(0.01 to<br>0.09)                 | 0.03<br>(0.01 to<br>0.07)                | 0.04<br>(0.01 to<br>0.12)                  |
| Lower respiratory infections                                      | 253,412.95<br>(199,720.28 to<br>318,017.64)       | 137,788.21<br>(83,168.00 to<br>212,599.45)        | 107,034.39<br>(68,610.29 to<br>155,935.55)        | 223,945.36<br>(115,226.92 to<br>385,733.70)       | 6,678.26<br>(5,374.10 to<br>8,271.99)    | 7,555.11<br>(5,030.29 to<br>9,831.83)     | 6,584.33<br>(4,629.27 to<br>8,786.81)    | 9,269.98<br>(6,262.69 to<br>13,426.10)     |
| Upper respiratory infections                                      | 184.00<br>(67.66 to<br>436.16)                    | 83.72<br>(21.87 to<br>223.51)                     | 59.81<br>(17.11 to<br>154.05)                     | 125.52<br>(31.80 to<br>346.94)                    | 3.25<br>(1.55 to<br>6.39)                | 2.35<br>(0.85 to<br>5.08)                 | 1.83<br>(0.68 to<br>3.92)                | 3.24<br>(1.19 to<br>7.31)                  |
| Otitis media                                                      | 6.64<br>(1.27 to<br>34.23)                        | 1.76<br>(0.36 to<br>7.59)                         | 1.60<br>(0.37 to<br>6.52)                         | 1.96<br>(0.37 to<br>8.63)                         | 0.10<br>(0.03 to<br>0.45)                | 0.05<br>(0.02 to<br>0.15)                 | 0.05<br>(0.02 to<br>0.14)                | 0.05<br>(0.02 to<br>0.16)                  |
| Meningitis                                                        | 15,519.19<br>(10,622.02 to<br>22,887.92)          | 6,817.69<br>(2,143.99 to<br>13,229.17)            | 5,252.30<br>(1,853.94 to<br>9,539.56)             | 12,327.10<br>(2,928.09 to<br>27,519.59)           | 227.15<br>(163.84 to<br>323.85)          | 124.66<br>(59.15 to<br>207.97)            | 106.49<br>(54.99 to<br>171.83)           | 189.08<br>(69.18 to<br>382.25)             |
| Pneumococcal meningitis                                           | 909.63<br>(593.59 to<br>1,368.48)                 | 291.56<br>(122.88 to<br>516.98)                   | 258.14<br>(115.36 to<br>439.90)                   | 390.83<br>(143.84 to<br>771.38)                   | 14.68<br>(10.29 to<br>20.82)             | 7.17<br>(4.02 to<br>11.34)                | 6.91<br>(4.01 to<br>10.64)               | 8.42<br>(4.38 to<br>13.67)                 |
| H influenzae type B meningitis                                    | 2,120.66<br>(1,348.75 to<br>3,305.42)             | 2,276.30<br>(334.69 to<br>6,525.24)               | 1,409.47<br>(259.23 to<br>3,897.53)               | 6,795.62<br>(691.40 to<br>20,072.95)              | 29.46<br>(19.77 to<br>43.73)             | 30.73<br>(7.30 to<br>81.43)               | 20.83<br>(6.55 to<br>50.62)              | 83.21<br>(11.36 to<br>239.40)              |
| Meningococcal meningitis                                          | 5,285.97<br>(3,623.97 to<br>7,878.51)             | 1,672.09<br>(601.78 to<br>3,074.83)               | 1,403.43<br>(523.83 to<br>2,519.25)               | 2,029.11<br>(683.48 to<br>3,974.27)               | 76.89<br>(55.95 to<br>109.68)            | 33.54<br>(17.08 to<br>55.47)              | 30.26<br>(16.15 to<br>49.09)             | 37.89<br>(18.40 to<br>66.20)               |
| Other meningitis                                                  | 7,202.94<br>(4,871.27 to<br>10,866.24)            | 2,577.75<br>(976.35 to<br>4,604.15)               | 2,181.25<br>(867.49 to<br>3,773.24)               | 3,111.53<br>(1,089.32 to<br>5,868.97)             | 106.12<br>(76.14 to<br>151.36)           | 53.21<br>(28.27 to<br>87.29)              | 48.48<br>(26.76 to<br>78.05)             | 59.55<br>(30.04 to<br>99.34)               |
| Encephalitis                                                      | 7,954.34<br>(5,694.45 to<br>10,743.85)            | 4,569.02<br>(1,663.80 to<br>7,675.86)             | 3,699.64<br>(1,430.58 to<br>6,073.33)             | 5,776.17<br>(2,001.29 to<br>9,966.50)             | 120.21<br>(90.84 to<br>155.13)           | 91.43<br>(48.02 to<br>137.89)             | 79.13<br>(43.34 to<br>117.15)            | 108.47<br>(53.64 to<br>167.70)             |
| Diphtheria                                                        | 40.84<br>(19.27 to<br>75.13)                      | 7.64<br>(1.31 to<br>18.56)                        | 4.36<br>(1.14 to<br>9.08)                         | 28.32<br>(1.49 to<br>93.25)                       | 0.53<br>(0.27 to<br>0.93)                | 0.11<br>(0.03 to<br>0.25)                 | 0.07<br>(0.02 to<br>0.14)                | 0.36<br>(0.03 to<br>1.12)                  |
| Whooping cough                                                    | 8,081.51<br>(653.50 to<br>25,032.81)              | 4,447.94<br>(34.09 to<br>17,005.32)               | 1,156.76<br>(26.76 to<br>4,504.05)                | 12,339.76<br>(39.75 to<br>45,178.90)              | 95.45<br>(7.72 to<br>295.17)             | 52.89<br>(0.48 to<br>201.20)              | 14.10<br>(0.38 to<br>55.25)              | 145.77<br>(0.58 to<br>534.62)              |

| Tetanus                                       | 398.78<br>(246.73 to<br>627.00)                 | 82.82<br>(34.07 to<br>164.98)                  | 70.68<br>(29.01 to<br>137.23)                  | 125.38<br>(51.40 to<br>279.53)                  | 9.01<br>(5.54 to<br>14.28)             | 2.13<br>(1.05 to<br>3.72)              | 2.04<br>(1.00 to<br>3.66)              | 2.57<br>(1.27 to<br>4.69)              |
|-----------------------------------------------|-------------------------------------------------|------------------------------------------------|------------------------------------------------|-------------------------------------------------|----------------------------------------|----------------------------------------|----------------------------------------|----------------------------------------|
| Measles                                       | 0.03<br>(0.00 to<br>0.16)                       | 28,629.31<br>(0.00 to<br>107,719.98)           | 18,674.78<br>(0.00 to<br>67,531.31)            | 64,274.33<br>(0.00 to<br>249,904.62)            | 0.00<br>(0.00 to<br>0.00)              | 425.94<br>(0.00 to<br>1,512.44)        | 289.71<br>(0.00 to<br>991.19)          | 884.68<br>(0.00 to<br>3,318.33)        |
| <b>Bolivia</b>                                |                                                 |                                                |                                                |                                                 |                                        |                                        |                                        |                                        |
| Cause                                         | YLLs (actual counts)                            |                                                |                                                |                                                 | Deaths (actual counts)                 |                                        |                                        |                                        |
|                                               | 2016                                            | 2040 Forecast                                  | 2040 Better Scenario                           | 2040 Worse Scenario                             | 2016                                   | 2040 Forecast                          | 2040 Better Scenario                   | 2040 Worse Scenario                    |
| Varicella and herpes zoster                   | 768.08<br>(425.96 to<br>1,316.51)               | 319.20<br>(109.01 to<br>630.77)                | 235.61<br>(91.39 to<br>445.54)                 | 458.14<br>(143.17 to<br>959.29)                 | 16.92<br>(11.11 to<br>24.78)           | 12.85<br>(6.84 to<br>21.60)            | 11.12<br>(6.04 to<br>18.75)            | 15.66<br>(8.20 to<br>26.42)            |
| Neglected tropical diseases and malaria       | <b>9,982.13</b><br>(7,739.70 to<br>13,284.44)   | <b>10,407.91</b><br>(8,024.12 to<br>14,338.43) | <b>11,059.32</b><br>(8,597.64 to<br>14,932.23) | <b>9,773.27</b><br>(7,495.33 to<br>13,421.37)   | <b>406.31</b><br>(319.59 to<br>563.80) | <b>456.14</b><br>(368.87 to<br>615.12) | <b>514.39</b><br>(417.23 to<br>688.24) | <b>395.82</b><br>(315.45 to<br>543.60) |
| Malaria                                       | 440.00<br>(245.38 to<br>886.68)                 | 216.78<br>(110.03 to<br>517.16)                | 198.80<br>(103.51 to<br>466.08)                | 239.14<br>(120.47 to<br>561.40)                 | 8.36<br>(5.28 to<br>16.17)             | 5.34<br>(3.16 to<br>11.74)             | 5.15<br>(3.08 to<br>11.40)             | 5.59<br>(3.29 to<br>12.24)             |
| Chagas disease                                | 7,213.13<br>(5,568.70 to<br>10,379.53)          | 7,260.12<br>(5,467.49 to<br>10,519.32)         | 8,243.42<br>(6,270.44 to<br>11,639.36)         | 6,177.99<br>(4,606.36 to<br>9,276.97)           | 355.72<br>(278.59 to<br>506.00)        | 377.98<br>(291.86 to<br>522.31)        | 439.24<br>(346.70 to<br>598.30)        | 313.14<br>(237.96 to<br>448.62)        |
| Leishmaniasis                                 | 0.45<br>(0.26 to<br>0.70)                       | 0.24<br>(0.12 to<br>0.41)                      | 0.19<br>(0.10 to<br>0.31)                      | 0.34<br>(0.17 to<br>0.58)                       | 0.01<br>(0.01 to<br>0.02)              | 0.01<br>(0.00 to<br>0.01)              | 0.01<br>(0.00 to<br>0.01)              | 0.01<br>(0.01 to<br>0.02)              |
| African trypanosomiasis                       | 0.00<br>(0.00 to<br>0.00)                       | 0.00<br>(0.00 to<br>0.00)                      | 0.00<br>(0.00 to<br>0.00)                      | 0.00<br>(0.00 to<br>0.00)                       | 0.00<br>(0.00 to<br>0.00)              | 0.00<br>(0.00 to<br>0.00)              | 0.00<br>(0.00 to<br>0.00)              | 0.00<br>(0.00 to<br>0.00)              |
| Schistosomiasis                               | 0.00<br>(0.00 to<br>0.00)                       | 0.00<br>(0.00 to<br>0.00)                      | 0.00<br>(0.00 to<br>0.00)                      | 0.00<br>(0.00 to<br>0.00)                       | 0.00<br>(0.00 to<br>0.00)              | 0.00<br>(0.00 to<br>0.00)              | 0.00<br>(0.00 to<br>0.00)              | 0.00<br>(0.00 to<br>0.00)              |
| Cysticercosis                                 | 387.81<br>(307.48 to<br>474.51)                 | 145.37<br>(94.50 to<br>209.67)                 | 134.35<br>(86.82 to<br>193.24)                 | 159.15<br>(103.39 to<br>228.88)                 | 8.91<br>(7.00 to<br>11.09)             | 3.98<br>(2.80 to<br>5.39)              | 3.77<br>(2.67 to<br>5.10)              | 4.23<br>(2.96 to<br>5.72)              |
| Cystic echinococcosis                         | 27.24<br>(21.61 to<br>33.37)                    | 10.75<br>(7.10 to<br>15.56)                    | 7.55<br>(5.15 to<br>10.86)                     | 16.78<br>(10.96 to<br>24.51)                    | 0.75<br>(0.60 to<br>0.93)              | 0.40<br>(0.29 to<br>0.56)              | 0.30<br>(0.22 to<br>0.39)              | 0.59<br>(0.42 to<br>0.81)              |
| Dengue                                        | 956.24<br>(108.25 to<br>2,453.42)               | 2,196.27<br>(519.47 to<br>4,580.97)            | 2,014.66<br>(470.80 to<br>4,205.21)            | 2,429.20<br>(563.26 to<br>5,082.30)             | 17.16<br>(1.98 to<br>42.22)            | 57.34<br>(12.41 to<br>121.87)          | 56.60<br>(12.07 to<br>122.50)          | 58.50<br>(12.42 to<br>123.03)          |
| Yellow fever                                  | 195.63<br>(40.78 to<br>577.94)                  | 63.12<br>(9.87 to<br>236.08)                   | 48.03<br>(7.31 to<br>181.78)                   | 86.97<br>(13.94 to<br>319.98)                   | 3.19<br>(0.67 to<br>9.81)              | 1.08<br>(0.18 to<br>3.86)              | 0.84<br>(0.14 to<br>3.04)              | 1.45<br>(0.25 to<br>5.26)              |
| Rabies                                        | 11.33<br>(4.54 to<br>35.24)                     | 4.49<br>(1.23 to<br>18.39)                     | 2.89<br>(0.78 to<br>11.81)                     | 7.69<br>(2.16 to<br>28.69)                      | 0.21<br>(0.09 to<br>0.62)              | 0.09<br>(0.03 to<br>0.34)              | 0.06<br>(0.02 to<br>0.21)              | 0.15<br>(0.05 to<br>0.54)              |
| Intestinal nematode infections                | 322.31<br>(112.50 to<br>619.52)                 | 253.86<br>(86.77 to<br>518.98)                 | 212.29<br>(75.23 to<br>435.11)                 | 301.37<br>(102.49 to<br>624.46)                 | 4.25<br>(1.73 to<br>7.68)              | 3.75<br>(1.69 to<br>6.97)              | 3.30<br>(1.56 to<br>5.98)              | 4.27<br>(1.82 to<br>8.12)              |
| Other neglected tropical diseases             | 426.20<br>(248.47 to<br>822.77)                 | 256.91<br>(123.89 to<br>534.40)                | 197.15<br>(98.62 to<br>407.13)                 | 354.65<br>(171.59 to<br>728.54)                 | 7.72<br>(4.68 to<br>14.02)             | 6.18<br>(3.39 to<br>11.80)             | 5.13<br>(2.90 to<br>9.91)              | 7.89<br>(4.27 to<br>15.24)             |
| Maternal disorders                            | <b>23,557.28</b><br>(15,577.36 to<br>33,733.30) | <b>12,513.03</b><br>(6,969.69 to<br>20,712.44) | <b>9,088.29</b><br>(4,938.35 to<br>14,897.98)  | <b>18,710.23</b><br>(10,818.93 to<br>30,515.80) | <b>437.67</b><br>(290.47 to<br>629.41) | <b>237.13</b><br>(132.03 to<br>390.99) | <b>172.61</b><br>(95.51 to<br>281.17)  | <b>353.82</b><br>(201.89 to<br>578.71) |
| Maternal hemorrhage                           | 7,146.83<br>(4,403.69 to<br>10,879.35)          | 3,604.62<br>(1,836.30 to<br>6,301.23)          | 2,633.57<br>(1,392.43 to<br>4,441.59)          | 5,355.96<br>(2,774.59 to<br>9,248.23)           | 133.20<br>(81.30 to<br>203.89)         | 68.40<br>(34.17 to<br>121.47)          | 50.06<br>(26.20 to<br>85.48)           | 101.51<br>(51.82 to<br>176.01)         |
| Maternal sepsis and other maternal infections | 3,704.36<br>(2,208.59 to<br>5,933.86)           | 1,701.49<br>(807.22 to<br>3,079.42)            | 1,237.72<br>(586.57 to<br>2,269.52)            | 2,551.67<br>(1,201.31 to<br>4,542.07)           | 69.43<br>(41.41 to<br>110.52)          | 32.58<br>(15.69 to<br>58.74)           | 23.76<br>(11.29 to<br>44.10)           | 48.76<br>(23.25 to<br>86.96)           |
| Maternal hypertensive disorders               | 5,976.48<br>(3,671.12 to<br>9,041.50)           | 3,058.08<br>(1,530.90 to<br>5,312.61)          | 2,221.15<br>(1,113.70 to<br>3,931.35)          | 4,575.73<br>(2,300.19 to<br>7,977.86)           | 108.50<br>(66.49 to<br>164.59)         | 56.37<br>(28.20 to<br>98.63)           | 41.04<br>(20.29 to<br>72.65)           | 84.19<br>(42.02 to<br>145.82)          |

|                                                                         |                                                 |                                                |                                               |                                                 |                                           |                                           |                                         |                                           |
|-------------------------------------------------------------------------|-------------------------------------------------|------------------------------------------------|-----------------------------------------------|-------------------------------------------------|-------------------------------------------|-------------------------------------------|-----------------------------------------|-------------------------------------------|
| Maternal obstructed labor and uterine rupture                           | 595.62<br>(274.38 to 1,096.96)                  | 327.11<br>(131.38 to 686.75)                   | 233.19<br>(91.74 to 479.01)                   | 500.38<br>(201.25 to 1,072.29)                  | 11.16<br>(5.20 to 20.86)                  | 6.24<br>(2.46 to 13.13)                   | 4.45<br>(1.72 to 9.19)                  | 9.52<br>(3.65 to 20.30)                   |
| Maternal abortion, miscarriage, and ectopic pregnancy                   | 3,251.37<br>(1,849.91 to 5,070.44)              | 2,117.92<br>(930.63 to 3,923.89)               | 1,511.63<br>(675.38 to 2,742.17)              | 3,155.15<br>(1,436.86 to 5,980.36)              | 62.15<br>(35.71 to 96.13)                 | 41.45<br>(18.27 to 75.51)                 | 29.65<br>(13.14 to 54.88)               | 61.60<br>(27.68 to 117.96)                |
| Indirect maternal deaths                                                | 818.21<br>(417.81 to 1,401.69)                  | 503.91<br>(209.20 to 996.86)                   | 366.80<br>(154.03 to 719.99)                  | 771.88<br>(323.31 to 1,524.19)                  | 14.94<br>(7.65 to 25.77)                  | 9.33<br>(3.95 to 18.37)                   | 6.82<br>(2.89 to 13.28)                 | 14.23<br>(6.04 to 27.75)                  |
| Late maternal deaths                                                    | 320.22<br>(126.76 to 654.59)                    | 149.92<br>(53.78 to 327.82)                    | 108.77<br>(39.45 to 242.10)                   | 228.56<br>(81.47 to 488.40)                     | 5.93<br>(2.37 to 11.85)                   | 2.83<br>(1.01 to 6.08)                    | 2.06<br>(0.74 to 4.59)                  | 4.30<br>(1.52 to 9.07)                    |
| Maternal deaths aggravated by HIV/AIDS                                  | 16.33<br>(3.43 to 39.48)                        | 66.73<br>(0.13 to 295.60)                      | 46.24<br>(0.04 to 208.51)                     | 106.98<br>(1.01 to 413.51)                      | 0.31<br>(0.06 to 0.72)                    | 1.29<br>(0.00 to 5.60)                    | 0.90<br>(4.05)                          | 2.07<br>(8.11)                            |
| Other maternal disorders                                                | 1,727.86<br>(922.32 to 2,840.34)                | 983.26<br>(456.49 to 1,860.89)                 | 729.22<br>(330.95 to 1,395.63)                | 1,463.93<br>(689.85 to 2,835.05)                | 32.05<br>(17.06 to 52.28)                 | 18.65<br>(8.69 to 35.30)                  | 13.88<br>(6.50 to 26.60)                | 27.64<br>(13.16 to 52.40)                 |
| <b>Bolivia</b>                                                          |                                                 |                                                |                                               |                                                 |                                           |                                           |                                         |                                           |
| Cause                                                                   | YLLs (actual counts)                            |                                                |                                               |                                                 | Deaths (actual counts)                    |                                           |                                         |                                           |
|                                                                         | 2016                                            | 2040 Forecast                                  | 2040 Better Scenario                          | 2040 Worse Scenario                             | 2016                                      | 2040 Forecast                             | 2040 Better Scenario                    | 2040 Worse Scenario                       |
| <b>Neonatal disorders</b>                                               | <b>304,875.63</b><br>(227,755.38 to 406,446.22) | <b>135,506.53</b><br>(89,472.29 to 201,489.98) | <b>94,562.85</b><br>(63,797.04 to 135,949.37) | <b>231,387.17</b><br>(154,809.70 to 335,256.42) | <b>3,522.54</b><br>(2,631.11 to 4,696.07) | <b>1,566.02</b><br>(1,033.95 to 2,328.83) | <b>1,092.86</b><br>(737.23 to 1,571.17) | <b>2,673.88</b><br>(1,788.95 to 3,874.04) |
| Neonatal preterm birth                                                  | 150,856.55<br>(105,124.12 to 212,893.65)        | 53,629.62<br>(33,429.32 to 82,217.99)          | 38,168.63<br>(24,294.62 to 57,059.42)         | 104,090.75<br>(66,912.63 to 156,515.27)         | 1,742.91<br>(1,214.60 to 2,459.68)        | 619.78<br>(386.27 to 949.99)              | 441.10<br>(280.72 to 659.53)            | 1,202.76<br>(773.07 to 1,808.66)          |
| Neonatal encephalopathy due to birth asphyxia and trauma                | 77,418.80<br>(48,761.27 to 116,039.78)          | 36,098.97<br>(18,532.94 to 59,790.02)          | 25,200.33<br>(13,059.92 to 41,502.08)         | 55,173.60<br>(27,667.07 to 92,987.49)           | 894.52<br>(563.53 to 1,340.60)            | 417.20<br>(214.23 to 691.01)              | 291.25<br>(151.03 to 479.50)            | 637.63<br>(319.75 to 1,074.31)            |
| Neonatal sepsis and other neonatal infections                           | 52,491.87<br>(32,929.32 to 80,781.12)           | 32,402.57<br>(17,835.76 to 54,675.59)          | 22,366.06<br>(12,298.90 to 37,997.35)         | 50,201.06<br>(27,098.00 to 83,237.07)           | 696.47<br>(380.41 to 933.33)              | 374.43<br>(206.09 to 632.17)              | 258.45<br>(143.25 to 439.09)            | 580.09<br>(313.09 to 962.04)              |
| Hemolytic disease and other neonatal jaundice                           | 2,012.60<br>(1,234.13 to 3,114.98)              | 728.19<br>(317.53 to 1,449.50)                 | 480.09<br>(205.42 to 938.93)                  | 1,193.79<br>(525.68 to 2,382.56)                | 23.25<br>(14.26 to 35.98)                 | 8.41<br>(3.67 to 16.74)                   | 5.55<br>(2.37 to 10.85)                 | 13.79<br>(6.07 to 27.52)                  |
| Other neonatal disorders                                                | 22,095.82<br>(13,274.08 to 33,852.65)           | 12,647.17<br>(6,421.24 to 22,538.48)           | 8,347.73<br>(4,388.93 to 14,816.29)           | 20,727.97<br>(10,226.17 to 36,330.96)           | 255.39<br>(153.42 to 391.37)              | 146.20<br>(74.23 to 260.47)               | 96.50<br>(50.77 to 171.24)              | 239.61<br>(118.22 to 419.79)              |
| <b>Nutritional deficiencies</b>                                         | <b>39,173.82</b><br>(27,263.58 to 55,644.87)    | <b>17,753.49</b><br>(12,981.96 to 24,317.52)   | <b>14,577.36</b><br>(10,877.72 to 19,292.70)  | <b>23,000.65</b><br>(16,041.11 to 32,712.12)    | <b>1,075.08</b><br>(867.38 to 1,317.88)   | <b>891.35</b><br>(628.45 to 1,127.80)     | <b>837.12</b><br>(609.04 to 1,055.51)   | <b>983.58</b><br>(681.37 to 1,280.80)     |
| Protein-energy malnutrition                                             | 35,872.30<br>(24,704.44 to 51,492.79)           | 14,819.92<br>(10,437.53 to 21,093.33)          | 12,103.63<br>(8,734.51 to 16,444.70)          | 19,349.01<br>(13,020.92 to 28,406.01)           | 964.81<br>(774.91 to 1,191.74)            | 756.71<br>(530.23 to 981.08)              | 712.00<br>(516.89 to 914.11)            | 833.95<br>(568.38 to 1,102.53)            |
| Iodine deficiency                                                       | 120.04<br>(4.73 to 633.24)                      | 391.52<br>(4.97 to 2,053.45)                   | 301.28<br>(3.60 to 1,462.65)                  | 548.95<br>(7.25 to 3,176.09)                    | 2.33<br>(0.15 to 9.76)                    | 16.17<br>(0.17 to 81.19)                  | 14.02<br>(76.05)                        | 19.73<br>(0.27 to 93.04)                  |
| Dietary iron deficiency                                                 | 73.66<br>(54.90 to 96.39)                       | 45.85<br>(32.44 to 63.88)                      | 38.87<br>(27.27 to 53.34)                     | 55.22<br>(39.37 to 76.34)                       | 1.27<br>(0.95 to 1.62)                    | 0.90<br>(0.66 to 1.20)                    | 0.79<br>(0.58 to 1.05)                  | 1.04<br>(0.78 to 1.40)                    |
| Other nutritional deficiencies                                          | 3,107.81<br>(2,032.62 to 4,765.64)              | 2,496.20<br>(1,640.44 to 3,601.94)             | 2,133.58<br>(1,424.41 to 3,055.44)            | 3,047.46<br>(1,960.07 to 4,480.57)              | 106.67<br>(73.27 to 146.43)               | 117.57<br>(73.85 to 167.04)               | 110.31<br>(70.07 to 156.84)             | 128.86<br>(81.05 to 183.50)               |
| <b>Other communicable, maternal, neonatal, and nutritional diseases</b> | <b>22,323.08</b><br>(12,854.01 to 39,724.69)    | <b>7,844.17</b><br>(4,859.34 to 13,688.99)     | <b>6,183.98</b><br>(4,008.75 to 10,399.68)    | <b>10,392.94</b><br>(6,242.28 to 18,552.81)     | <b>322.81</b><br>(208.81 to 530.56)       | <b>168.86</b><br>(123.57 to 242.86)       | <b>144.73</b><br>(108.56 to 198.34)     | <b>265.68</b><br>(147.49 to 304.05)       |
| Sexually transmitted infections excluding HIV                           | 16,108.63<br>(7,338.90 to 31,698.06)            | 3,426.67<br>(1,336.27 to 7,981.06)             | 2,560.49<br>(1,006.91 to 5,838.00)            | 4,775.83<br>(1,765.55 to 10,936.29)             | 194.20<br>(90.72 to 376.25)               | 44.61<br>(20.06 to 99.87)                 | 34.29<br>(16.12 to 73.12)               | 60.66<br>(25.60 to 134.63)                |
| Syphilis                                                                | 15,855.15<br>(7,163.01 to 31,482.52)            | 3,245.75<br>(1,130.84 to 7,760.29)             | 2,396.28<br>(845.70 to 5,649.19)              | 4,572.22<br>(1,556.71 to 10,775.09)             | 187.54<br>(85.22 to 370.50)               | 39.39<br>(14.82 to 93.04)                 | 29.38<br>(67.65)                        | 54.99<br>(19.71 to 127.56)                |



|                                       |                                                 |                                                   |                                                 |                                                   |                                          |                                          |                                          |                                           |
|---------------------------------------|-------------------------------------------------|---------------------------------------------------|-------------------------------------------------|---------------------------------------------------|------------------------------------------|------------------------------------------|------------------------------------------|-------------------------------------------|
| Chlamydial infection                  | 49.44<br>(31.81 to<br>71.11)                    | 35.34<br>(21.34 to<br>52.75)                      | 32.01<br>(19.25 to<br>47.77)                    | 39.85<br>(24.08 to<br>59.43)                      | 1.29<br>(0.84 to<br>1.83)                | 1.02<br>(0.65 to<br>1.42)                | 0.96<br>(0.61 to<br>1.36)                | 1.11<br>(0.70 to<br>1.54)                 |
| Gonococcal infection                  | 132.51<br>(85.61 to<br>187.54)                  | 95.41<br>(58.54 to<br>139.21)                     | 86.93<br>(53.51 to<br>126.83)                   | 106.93<br>(66.47 to<br>155.47)                    | 3.64<br>(2.38 to<br>5.15)                | 2.89<br>(1.77 to<br>4.06)                | 2.73<br>(1.72 to<br>3.91)                | 3.11<br>(1.93 to<br>4.40)                 |
| Other sexually transmitted infections | 71.54<br>(46.04 to<br>102.77)                   | 50.17<br>(30.10 to<br>75.55)                      | 45.27<br>(26.96 to<br>69.53)                    | 56.82<br>(34.11 to<br>86.67)                      | 1.73<br>(1.13 to<br>2.46)                | 1.31<br>(0.82 to<br>1.91)                | 1.22<br>(0.77 to<br>1.78)                | 1.45<br>(0.90 to<br>2.09)                 |
| Acute hepatitis                       | 2,526.71<br>(1,988.69 to<br>3,164.10)           | 1,835.01<br>(1,372.41 to<br>2,418.68)             | 1,584.87<br>(1,184.08 to<br>2,099.36)           | 2,185.75<br>(1,623.03 to<br>2,842.80)             | 59.15<br>(47.12 to<br>73.75)             | 55.67<br>(42.56 to<br>71.30)             | 50.39<br>(37.79 to<br>64.91)             | 63.19<br>(48.39 to<br>79.90)              |
| Acute hepatitis A                     | 174.08<br>(29.82 to<br>358.98)                  | 69.14<br>(22.18 to<br>156.04)                     | 53.65<br>(18.61 to<br>118.34)                   | 93.13<br>(27.27 to<br>210.15)                     | 2.35<br>(0.61 to<br>4.50)                | 1.30<br>(0.52 to<br>2.62)                | 1.09<br>(0.44 to<br>2.13)                | 1.63<br>(0.59 to<br>3.26)                 |
| Acute hepatitis B                     | 1,321.37<br>(987.35 to<br>1,749.89)             | 1,131.76<br>(781.67 to<br>1,554.26)               | 993.38<br>(687.71 to<br>1,361.90)               | 1,331.42<br>(919.91 to<br>1,827.27)               | 37.51<br>(28.70 to<br>48.41)             | 37.70<br>(26.87 to<br>50.44)             | 33.96<br>(24.07 to<br>45.71)             | 43.09<br>(30.78 to<br>57.14)              |
| Acute hepatitis C                     | 63.37<br>(44.19 to<br>87.69)                    | 69.80<br>(46.44 to<br>101.49)                     | 65.09<br>(43.38 to<br>95.91)                    | 75.78<br>(50.77 to<br>110.40)                     | 1.93<br>(1.33 to<br>2.71)                | 2.47<br>(1.66 to<br>3.58)                | 2.38<br>(1.60 to<br>3.48)                | 2.60<br>(1.73 to<br>3.83)                 |
| Acute hepatitis E                     | 967.88<br>(709.98 to<br>1,280.24)               | 564.32<br>(380.62 to<br>807.15)                   | 472.74<br>(321.13 to<br>673.86)                 | 685.42<br>(460.55 to<br>1,005.62)                 | 17.36<br>(12.82 to<br>22.98)             | 14.20<br>(9.75 to<br>20.09)              | 12.96<br>(8.97 to<br>18.32)              | 15.88<br>(10.84 to<br>22.63)              |
| Other unspecified infectious diseases | 3,687.74<br>(1,861.90 to<br>9,960.18)           | 2,582.48<br>(1,544.97 to<br>5,696.86)             | 2,038.63<br>(1,255.44 to<br>4,331.60)           | 3,431.36<br>(1,989.26 to<br>7,753.66)             | 69.45<br>(41.78 to<br>145.45)            | 68.58<br>(46.85 to<br>109.15)            | 60.05<br>(41.61 to<br>90.19)             | 81.82<br>(54.80 to<br>137.71)             |
| Non-communicable diseases             | 1,038,568.71<br>(875,053.15 to<br>1,223,766.80) | 1,339,922.51<br>(1,052,049.05 to<br>1,734,075.55) | 1,088,549.17<br>(863,384.64 to<br>1,372,265.64) | 1,701,572.18<br>(1,301,069.20 to<br>2,207,611.27) | 46,714.62<br>(39,629.76 to<br>55,120.69) | 71,565.52<br>(59,889.41 to<br>87,133.44) | 60,663.43<br>(51,843.47 to<br>72,588.68) | 85,637.55<br>(71,135.38 to<br>103,739.60) |

**Bolivia**

| Cause                           | YLLs (actual counts)                        |                                             |                                             |                                             | Deaths (actual counts)                  |                                          |                                          |                                          |
|---------------------------------|---------------------------------------------|---------------------------------------------|---------------------------------------------|---------------------------------------------|-----------------------------------------|------------------------------------------|------------------------------------------|------------------------------------------|
|                                 | 2016                                        | 2040 Forecast                               | 2040 Better Scenario                        | 2040 Worse Scenario                         | 2016                                    | 2040 Forecast                            | 2040 Better Scenario                     | 2040 Worse Scenario                      |
| Neoplasms                       | 262,586.76<br>(217,526.65 to<br>319,470.67) | 414,254.10<br>(320,557.47 to<br>527,253.16) | 387,099.05<br>(302,286.79 to<br>483,236.06) | 448,606.52<br>(343,258.65 to<br>575,605.49) | 11,500.63<br>(9,648.25 to<br>13,734.07) | 20,018.81<br>(16,244.07 to<br>24,538.14) | 19,378.62<br>(15,969.36 to<br>23,287.52) | 20,876.92<br>(16,626.98 to<br>25,893.07) |
| Lip and oral cavity cancer      | 2,087.69<br>(1,583.31 to<br>2,684.39)       | 3,905.67<br>(2,183.95 to<br>6,883.49)       | 2,632.59<br>(1,624.31 to<br>4,238.51)       | 5,238.59<br>(2,769.65 to<br>9,512.16)       | 98.76<br>(76.94 to<br>127.80)           | 183.78<br>(109.65 to<br>307.43)          | 130.67<br>(86.72 to<br>198.53)           | 237.60<br>(135.97 to<br>406.30)          |
| Nasopharynx cancer              | 456.35<br>(349.72 to<br>572.55)             | 834.89<br>(505.31 to<br>1,398.15)           | 542.38<br>(348.48 to<br>840.34)             | 1,166.35<br>(674.26 to<br>2,043.23)         | 15.51<br>(11.83 to<br>19.45)            | 29.92<br>(18.43 to<br>49.19)             | 19.97<br>(13.22 to<br>30.05)             | 41.02<br>(24.23 to<br>69.25)             |
| Other pharynx cancer            | 1,918.79<br>(1,403.34 to<br>2,563.70)       | 3,313.92<br>(1,813.27 to<br>5,793.78)       | 2,511.11<br>(1,497.41 to<br>3,996.41)       | 3,754.69<br>(1,963.82 to<br>6,589.61)       | 88.03<br>(63.94 to<br>117.70)           | 157.67<br>(91.04 to<br>261.68)           | 125.98<br>(79.27 to<br>195.61)           | 172.56<br>(96.64 to<br>292.02)           |
| Esophageal cancer               | 3,028.70<br>(2,384.20 to<br>3,754.44)       | 5,038.41<br>(2,965.81 to<br>8,196.78)       | 3,710.37<br>(2,336.98 to<br>5,692.54)       | 6,798.99<br>(3,719.36 to<br>11,594.58)      | 163.73<br>(133.01 to<br>197.85)         | 270.20<br>(168.37 to<br>417.20)          | 208.00<br>(139.57 to<br>302.27)          | 352.29<br>(205.58 to<br>573.89)          |
| Stomach cancer                  | 47,741.37<br>(38,248.33 to<br>59,438.93)    | 57,916.24<br>(40,638.92 to<br>78,601.19)    | 53,459.71<br>(38,906.14 to<br>70,955.26)    | 62,086.58<br>(43,633.35 to<br>85,474.09)    | 2,437.05<br>(1,986.70 to<br>2,969.15)   | 3,092.31<br>(2,285.05 to<br>4,087.77)    | 2,921.87<br>(2,236.53 to<br>3,764.37)    | 3,210.25<br>(2,367.10 to<br>4,274.50)    |
| Colon and rectum cancer         | 16,346.32<br>(12,744.79 to<br>20,928.85)    | 34,325.71<br>(22,839.19 to<br>50,898.82)    | 32,344.48<br>(21,982.04 to<br>47,820.55)    | 34,408.15<br>(22,984.86 to<br>51,042.36)    | 848.64<br>(660.53 to<br>1,073.25)       | 1,887.20<br>(1,258.97 to<br>2,759.59)    | 1,847.45<br>(1,263.44 to<br>2,676.82)    | 1,822.05<br>(1,205.36 to<br>2,682.59)    |
| Liver cancer                    | 12,274.68<br>(9,210.41 to<br>16,181.60)     | 22,551.00<br>(14,654.89 to<br>34,730.53)    | 20,002.70<br>(13,455.18 to<br>29,677.82)    | 25,836.64<br>(16,105.41 to<br>41,017.62)    | 608.03<br>(458.49 to<br>796.63)         | 1,174.87<br>(791.22 to<br>1,803.37)      | 1,077.36<br>(751.72 to<br>1,560.82)      | 1,294.33<br>(824.86 to<br>1,999.37)      |
| Liver cancer due to hepatitis B | 6,577.60<br>(4,846.92 to<br>8,646.53)       | 11,838.76<br>(7,440.43 to<br>18,430.25)     | 10,771.93<br>(7,020.46 to<br>16,451.68)     | 13,467.33<br>(8,157.50 to<br>21,548.25)     | 306.14<br>(225.51 to<br>405.26)         | 582.53<br>(377.77 to<br>877.12)          | 545.85<br>(369.23 to<br>800.53)          | 638.50<br>(398.28 to<br>989.39)          |
| Liver cancer due to hepatitis C | 1,526.53<br>(1,090.94 to<br>2,178.14)       | 2,874.18<br>(1,790.22 to<br>4,472.84)       | 2,654.72<br>(1,702.53 to<br>4,036.30)       | 3,183.78<br>(1,907.10 to<br>5,075.98)       | 92.77<br>(66.35 to<br>130.52)           | 179.16<br>(113.20 to<br>274.79)          | 171.03<br>(113.25 to<br>254.53)          | 190.50<br>(114.97 to<br>298.50)          |

|                                      |                                          |                                          |                                          |                                          |                                   |                                       |                                       |                                       |
|--------------------------------------|------------------------------------------|------------------------------------------|------------------------------------------|------------------------------------------|-----------------------------------|---------------------------------------|---------------------------------------|---------------------------------------|
| Liver cancer due to alcohol use      | 1,746.56<br>(1,219.09 to<br>2,412.46)    | 3,519.15<br>(2,115.79 to<br>5,660.46)    | 2,710.05<br>(1,693.73 to<br>4,212.84)    | 4,209.11<br>(2,447.31 to<br>6,934.49)    | 91.64<br>(65.17 to<br>127.67)     | 185.88<br>(115.41 to<br>291.67)       | 150.85<br>(97.03 to<br>229.68)        | 213.52<br>(128.22 to<br>344.05)       |
| Liver cancer due to other causes     | 2,423.98<br>(1,828.60 to<br>3,115.91)    | 4,318.91<br>(2,730.72 to<br>6,627.64)    | 3,866.00<br>(2,551.35 to<br>5,750.43)    | 4,976.43<br>(3,008.81 to<br>8,025.71)    | 117.48<br>(89.08 to<br>150.85)    | 227.30<br>(144.03 to<br>343.19)       | 209.63<br>(138.04 to<br>303.84)       | 251.80<br>(151.19 to<br>392.34)       |
| Gallbladder and biliary tract cancer | 8,341.69<br>(5,927.12 to<br>11,725.14)   | 10,829.25<br>(7,780.67 to<br>15,064.46)  | 11,280.97<br>(8,119.68 to<br>15,667.67)  | 10,301.17<br>(7,328.77 to<br>14,397.54)  | 424.95<br>(307.54 to<br>591.02)   | 568.90<br>(422.97 to<br>757.82)       | 607.76<br>(454.14 to<br>817.57)       | 525.24<br>(390.23 to<br>699.55)       |
| Pancreatic cancer                    | 8,641.71<br>(6,731.28 to<br>10,916.12)   | 18,030.12<br>(12,984.58 to<br>24,799.52) | 18,094.06<br>(13,202.70 to<br>24,419.57) | 17,822.91<br>(12,736.22 to<br>24,663.71) | 440.60<br>(347.62 to<br>555.79)   | 928.71<br>(690.54 to<br>1,215.60)     | 951.44<br>(717.16 to<br>1,224.86)     | 893.25<br>(660.34 to<br>1,180.32)     |
| Larynx cancer                        | 1,802.03<br>(1,398.53 to<br>2,243.39)    | 3,018.28<br>(1,414.35 to<br>6,091.44)    | 1,913.60<br>(1,015.58 to<br>3,626.52)    | 4,494.83<br>(1,973.27 to<br>8,550.31)    | 91.97<br>(73.91 to<br>111.44)     | 151.58<br>(77.13 to<br>297.10)        | 100.34<br>(57.94 to<br>185.94)        | 219.30<br>(103.44 to<br>391.73)       |
| Tracheal, bronchus, and lung cancer  | 18,817.76<br>(14,670.24 to<br>23,597.37) | 31,521.43<br>(18,925.69 to<br>51,606.33) | 23,124.75<br>(14,951.85 to<br>35,844.99) | 49,213.05<br>(27,484.18 to<br>83,832.01) | 939.92<br>(753.30 to<br>1,149.39) | 1,587.57<br>(1,015.51 to<br>2,421.30) | 1,199.47<br>(818.69 to<br>1,763.18)   | 2,404.48<br>(1,450.98 to<br>3,866.28) |
| Malignant skin melanoma              | 1,947.10<br>(1,474.86 to<br>2,675.01)    | 3,636.78<br>(2,763.28 to<br>4,852.96)    | 3,960.53<br>(3,000.70 to<br>5,239.48)    | 3,267.13<br>(2,519.15 to<br>4,411.03)    | 87.55<br>(68.45 to<br>119.13)     | 179.15<br>(141.62 to<br>233.16)       | 201.63<br>(159.57 to<br>263.35)       | 154.79<br>(122.18 to<br>202.29)       |
| Non-melanoma skin cancer             | 1,676.16<br>(1,342.80 to<br>2,049.16)    | 2,951.44<br>(2,361.72 to<br>3,585.31)    | 2,935.89<br>(2,342.70 to<br>3,563.63)    | 2,983.99<br>(2,368.31 to<br>3,603.77)    | 100.62<br>(82.16 to<br>122.59)    | 191.71<br>(146.20 to<br>234.52)       | 199.38<br>(154.85 to<br>240.69)       | 183.88<br>(138.44 to<br>225.33)       |
| Breast cancer                        | 16,220.81<br>(9,712.45 to<br>23,984.50)  | 31,031.59<br>(17,311.88 to<br>48,658.80) | 27,789.66<br>(15,766.94 to<br>43,235.46) | 32,021.19<br>(17,753.19 to<br>49,939.20) | 607.32<br>(361.84 to<br>897.35)   | 1,241.19<br>(710.04 to<br>1,884.78)   | 1,145.57<br>(668.03 to<br>1,712.46)   | 1,245.86<br>(708.05 to<br>1,913.82)   |
| Cervical cancer                      | 21,446.76<br>(13,878.39 to<br>31,558.49) | 28,216.78<br>(16,247.32 to<br>46,532.04) | 26,217.69<br>(15,512.50 to<br>41,799.20) | 31,001.54<br>(17,941.29 to<br>51,064.22) | 811.59<br>(516.23 to<br>1,178.68) | 1,115.36<br>(684.96 to<br>1,705.93)   | 1,058.30<br>(647.00 to<br>1,611.67)   | 1,196.15<br>(727.14 to<br>1,861.82)   |
| Uterine cancer                       | 5,031.85<br>(3,405.68 to<br>7,242.29)    | 8,442.96<br>(5,670.79 to<br>12,478.39)   | 8,020.72<br>(5,360.06 to<br>11,756.93)   | 9,054.87<br>(6,094.80 to<br>13,113.51)   | 238.79<br>(159.54 to<br>344.00)   | 420.92<br>(291.33 to<br>580.75)       | 409.97<br>(287.06 to<br>566.29)       | 438.57<br>(301.39 to<br>596.60)       |
| Ovarian cancer                       | 4,433.57<br>(3,056.40 to<br>6,377.33)    | 8,525.04<br>(4,994.94 to<br>13,538.89)   | 8,701.43<br>(5,145.86 to<br>13,918.71)   | 8,213.48<br>(4,807.70 to<br>13,137.41)   | 164.30<br>(112.86 to<br>240.32)   | 335.85<br>(205.60 to<br>532.26)       | 347.97<br>(212.97 to<br>540.66)       | 319.61<br>(194.91 to<br>512.25)       |
| Prostate cancer                      | 11,949.93<br>(8,476.38 to<br>15,560.49)  | 27,346.57<br>(20,067.20 to<br>34,193.90) | 29,539.40<br>(22,013.35 to<br>36,613.91) | 24,900.04<br>(18,039.60 to<br>31,576.33) | 919.63<br>(669.64 to<br>1,185.76) | 2,213.74<br>(1,570.94 to<br>2,807.75) | 2,456.55<br>(1,802.91 to<br>3,059.62) | 1,949.96<br>(1,338.71 to<br>2,521.45) |
| Testicular cancer                    | 1,427.11<br>(873.62 to<br>2,306.14)      | 1,741.47<br>(1,089.62 to<br>2,869.58)    | 1,678.47<br>(1,048.00 to<br>2,780.73)    | 1,823.06<br>(1,123.81 to<br>3,045.29)    | 35.07<br>(23.54 to<br>54.72)      | 48.28<br>(32.60 to<br>75.71)          | 47.92<br>(32.34 to<br>74.05)          | 48.88<br>(32.95 to<br>75.57)          |

**Bolivia**

| Cause                           | YLLs (actual counts)                    |                                          |                                          |                                          | Deaths (actual counts)          |                                 |                                 |                                 |
|---------------------------------|-----------------------------------------|------------------------------------------|------------------------------------------|------------------------------------------|---------------------------------|---------------------------------|---------------------------------|---------------------------------|
|                                 | 2016                                    | 2040 Forecast                            | 2040 Better Scenario                     | 2040 Worse Scenario                      | 2016                            | 2040 Forecast                   | 2040 Better Scenario            | 2040 Worse Scenario             |
| Kidney cancer                   | 3,687.42<br>(3,006.29 to<br>4,466.51)   | 6,793.61<br>(5,122.51 to<br>8,732.04)    | 7,120.20<br>(5,303.24 to<br>9,137.23)    | 6,470.08<br>(4,896.98 to<br>8,494.57)    | 147.27<br>(118.49 to<br>178.83) | 301.32<br>(233.53 to<br>378.43) | 325.60<br>(251.63 to<br>405.93) | 276.93<br>(212.90 to<br>354.92) |
| Bladder cancer                  | 2,366.68<br>(1,876.42 to<br>2,929.12)   | 3,991.97<br>(2,955.86 to<br>5,249.06)    | 3,841.14<br>(2,886.78 to<br>4,943.84)    | 4,224.25<br>(3,073.75 to<br>5,706.81)    | 147.75<br>(118.42 to<br>180.00) | 259.00<br>(195.64 to<br>333.48) | 255.81<br>(198.73 to<br>322.03) | 265.11<br>(195.84 to<br>349.55) |
| Brain and nervous system cancer | 11,562.81<br>(8,196.49 to<br>14,714.44) | 17,212.36<br>(12,083.16 to<br>22,488.54) | 17,186.59<br>(12,053.19 to<br>22,626.43) | 17,126.09<br>(11,984.70 to<br>22,287.87) | 293.85<br>(209.44 to<br>378.42) | 530.80<br>(379.98 to<br>683.51) | 552.14<br>(388.82 to<br>718.79) | 504.79<br>(362.13 to<br>643.33) |
| Thyroid cancer                  | 2,932.29<br>(2,102.92 to<br>3,977.34)   | 4,888.70<br>(2,998.62 to<br>7,325.43)    | 4,434.07<br>(2,758.56 to<br>6,508.34)    | 5,509.13<br>(3,314.04 to<br>8,393.81)    | 137.97<br>(97.21 to<br>190.81)  | 238.95<br>(151.58 to<br>353.50) | 223.00<br>(144.86 to<br>323.71) | 260.22<br>(160.36 to<br>391.40) |
| Mesothelioma                    | 602.95<br>(459.73 to<br>772.30)         | 990.76<br>(744.81 to<br>1,264.63)        | 990.76<br>(743.18 to<br>1,263.07)        | 1,008.85<br>(756.44 to<br>1,281.43)      | 25.86<br>(19.58 to<br>32.95)    | 45.80<br>(35.37 to<br>57.90)    | 46.75<br>(36.07 to<br>58.65)    | 44.92<br>(34.53 to<br>56.75)    |
| Hodgkin lymphoma                | 1,679.26<br>(1,195.77 to<br>2,203.23)   | 1,845.27<br>(1,280.77 to<br>2,531.49)    | 1,635.18<br>(1,125.25 to<br>2,210.94)    | 2,148.11<br>(1,509.96 to<br>2,913.22)    | 50.33<br>(34.84 to<br>65.03)    | 65.05<br>(42.58 to<br>87.24)    | 59.98<br>(39.49 to<br>79.05)    | 72.41<br>(47.11 to<br>95.17)    |

|                                |                                                                  |                                                                  |                                                                  |                                                                  |                                                               |                                                               |                                                              |                                                               |
|--------------------------------|------------------------------------------------------------------|------------------------------------------------------------------|------------------------------------------------------------------|------------------------------------------------------------------|---------------------------------------------------------------|---------------------------------------------------------------|--------------------------------------------------------------|---------------------------------------------------------------|
|                                | 12,088.20<br>(9,664.87 to<br>14,671.64)                          | 20,456.58<br>(15,431.94 to<br>27,026.80)                         | 20,549.11<br>(15,510.25 to<br>26,957.28)                         | 20,297.48<br>(15,322.81 to<br>27,094.26)                         | 412.45<br>(325.51 to<br>507.92)                               | 818.12<br>(622.02 to<br>1,071.41)                             | 852.01<br>(647.85 to<br>1,111.81)                            | 778.92<br>(586.61 to<br>1,026.41)                             |
| Non-Hodgkin lymphoma           | 3,299.45<br>(2,506.25 to<br>4,546.98)                            | 7,414.21<br>(5,210.51 to<br>10,528.32)                           | 7,597.64<br>(5,394.25 to<br>10,754.02)                           | 7,174.83<br>(4,996.73 to<br>10,368.96)                           | 150.80<br>(114.37 to<br>209.85)                               | 349.98<br>(252.84 to<br>487.53)                               | 367.26<br>(266.91 to<br>506.33)                              | 329.13<br>(233.87 to<br>470.93)                               |
| Multiple myeloma               | 24,033.38<br>(18,310.66 to<br>29,609.76)                         | 25,809.31<br>(19,179.95 to<br>33,553.21)                         | 23,718.44<br>(17,527.02 to<br>30,605.14)                         | 28,525.70<br>(21,145.35 to<br>37,499.28)                         | 547.89<br>(422.03 to<br>670.35)                               | 791.98<br>(612.04 to<br>1,033.04)                             | 759.58<br>(587.34 to<br>979.96)                              | 840.51<br>(637.86 to<br>1,119.50)                             |
| Leukemia                       | 8,134.56<br>(5,792.93 to<br>10,347.33)                           | 7,220.48<br>(5,059.61 to<br>9,594.19)                            | 6,638.69<br>(4,633.30 to<br>8,694.61)                            | 7,838.10<br>(5,482.23 to<br>10,513.90)                           | 137.76<br>(99.78 to<br>173.01)                                | 154.39<br>(108.72 to<br>202.37)                               | 147.23<br>(105.05 to<br>191.21)                              | 162.45<br>(112.33 to<br>214.92)                               |
| Acute lymphoid leukemia        | 371.88<br>(278.57 to<br>474.44)                                  | 571.92<br>(393.38 to<br>827.51)                                  | 556.00<br>(385.76 to<br>793.38)                                  | 597.54<br>(403.64 to<br>872.06)                                  | 16.70<br>(12.75 to<br>21.93)                                  | 28.01<br>(19.59 to<br>40.26)                                  | 28.15<br>(20.10 to<br>39.90)                                 | 28.15<br>(19.10 to<br>41.49)                                  |
| Chronic lymphoid leukemia      | 4,360.98<br>(3,170.09 to<br>5,526.43)                            | 6,449.11<br>(4,628.60 to<br>8,639.28)                            | 6,291.23<br>(4,565.77 to<br>8,306.11)                            | 6,612.47<br>(4,656.75 to<br>9,035.95)                            | 106.62<br>(78.41 to<br>134.13)                                | 202.66<br>(147.85 to<br>268.22)                               | 205.79<br>(150.96 to<br>270.33)                              | 199.56<br>(142.01 to<br>269.51)                               |
| Acute myeloid leukemia         | 922.87<br>(606.82 to<br>1,293.08)                                | 1,003.17<br>(609.70 to<br>1,553.25)                              | 954.85<br>(588.02 to<br>1,456.35)                                | 1,078.17<br>(633.96 to<br>1,719.73)                              | 31.22<br>(21.35 to<br>42.26)                                  | 38.13<br>(24.00 to<br>56.40)                                  | 37.38<br>(23.89 to<br>54.16)                                 | 39.57<br>(24.37 to<br>59.55)                                  |
| Chronic myeloid leukemia       | 10,243.09<br>(7,835.33 to<br>13,050.00)                          | 10,564.62<br>(7,774.97 to<br>14,026.48)                          | 9,277.66<br>(6,881.04 to<br>12,258.94)                           | 12,399.43<br>(9,038.21 to<br>16,516.37)                          | 255.59<br>(196.10 to<br>327.25)                               | 368.79<br>(277.22 to<br>488.10)                               | 341.02<br>(256.46 to<br>447.98)                              | 410.77<br>(298.83 to<br>550.78)                               |
| Other leukemia                 | 14,743.96<br>(12,070.77 to<br>17,822.43)                         | 21,667.80<br>(17,120.83 to<br>26,749.96)                         | 21,565.43<br>(16,869.80 to<br>26,762.69)                         | 21,734.74<br>(17,400.02 to<br>26,427.56)                         | 464.40<br>(372.50 to<br>571.09)                               | 838.92<br>(675.85 to<br>1,033.04)                             | 878.89<br>(702.46 to<br>1,077.15)                            | 793.90<br>(642.76 to<br>980.76)                               |
| Other neoplasms                | <b>286,999.63</b><br><b>(235,685.23 to</b><br><b>347,463.87)</b> | <b>300,197.34</b><br><b>(200,505.34 to</b><br><b>450,256.73)</b> | <b>185,263.45</b><br><b>(133,208.92 to</b><br><b>261,256.48)</b> | <b>493,873.69</b><br><b>(317,955.68 to</b><br><b>744,374.31)</b> | <b>15,811.04</b><br><b>(13,158.34 to</b><br><b>18,875.10)</b> | <b>18,749.12</b><br><b>(13,082.63 to</b><br><b>26,576.51)</b> | <b>12,796.19</b><br><b>(9,625.39 to</b><br><b>17,020.41)</b> | <b>27,295.95</b><br><b>(18,570.44 to</b><br><b>38,811.76)</b> |
| Cardiovascular diseases        | 5,881.70<br>(4,609.40 to<br>7,533.38)                            | 3,691.18<br>(2,650.06 to<br>5,173.22)                            | 3,145.38<br>(2,279.42 to<br>4,313.03)                            | 4,434.22<br>(3,168.08 to<br>6,200.83)                            | 236.47<br>(184.39 to<br>305.80)                               | 192.22<br>(140.86 to<br>269.55)                               | 173.04<br>(130.45 to<br>240.41)                              | 216.57<br>(157.73 to<br>303.50)                               |
| Rheumatic heart disease        | 148,240.60<br>(119,861.98 to<br>180,656.66)                      | 148,376.80<br>(88,183.35 to<br>246,906.06)                       | 84,325.49<br>(53,719.13 to<br>131,761.29)                        | 265,090.21<br>(152,091.98 to<br>444,474.89)                      | 9,347.31<br>(7,802.31 to<br>11,222.06)                        | 10,158.66<br>(6,470.81 to<br>15,915.20)                       | 6,463.71<br>(4,282.39 to<br>9,752.37)                        | 15,850.71<br>(9,947.80 to<br>25,033.14)                       |
| Ischemic heart disease         | 89,908.47<br>(71,980.90 to<br>112,598.40)                        | 86,727.54<br>(48,927.00 to<br>144,332.51)                        | 48,277.07<br>(30,604.13 to<br>76,554.17)                         | 153,141.02<br>(81,507.84 to<br>265,755.85)                       | 4,214.16<br>(3,423.23 to<br>5,167.82)                         | 4,672.72<br>(2,923.00 to<br>7,733.60)                         | 2,984.08<br>(2,024.44 to<br>4,516.02)                        | 7,238.18<br>(4,351.38 to<br>11,830.29)                        |
| Stroke                         | 29,450.96<br>(22,898.70 to<br>37,405.85)                         | 31,232.15<br>(17,211.24 to<br>57,139.95)                         | 19,715.88<br>(11,830.29 to<br>33,657.96)                         | 47,940.68<br>(25,363.51 to<br>87,034.92)                         | 1,934.94<br>(1,543.85 to<br>2,391.77)                         | 2,233.44<br>(1,287.82 to<br>4,217.86)                         | 1,584.72<br>(942.06 to<br>2,815.74)                          | 3,051.43<br>(1,692.11 to<br>5,707.28)                         |
| Ischemic stroke                | 60,457.51<br>(47,963.34 to<br>76,155.24)                         | 55,495.39<br>(28,765.27 to<br>98,195.15)                         | 28,561.18<br>(17,122.62 to<br>47,404.29)                         | 105,200.34<br>(52,031.33 to<br>196,527.23)                       | 2,279.21<br>(1,822.54 to<br>2,848.35)                         | 2,439.28<br>(1,407.34 to<br>4,103.73)                         | 1,399.36<br>(918.29 to<br>2,162.29)                          | 4,186.75<br>(2,281.22 to<br>7,400.26)                         |
| Intracerebral hemorrhage       | 12,031.56<br>(8,902.01 to<br>15,602.31)                          | 21,963.41<br>(12,205.32 to<br>41,733.37)                         | 14,687.33<br>(9,070.02 to<br>24,535.01)                          | 26,916.29<br>(14,362.86 to<br>53,093.27)                         | 780.56<br>(589.28 to<br>1,000.63)                             | 1,595.86<br>(834.25 to<br>3,226.65)                           | 1,134.09<br>(680.19 to<br>1,947.91)                          | 1,824.61<br>(906.45 to<br>3,821.77)                           |
| Hypertensive heart disease     | 5,380.33<br>(3,998.00 to<br>6,906.51)                            | 5,621.57<br>(3,926.69 to<br>7,677.02)                            | 5,138.68<br>(3,619.41 to<br>6,915.54)                            | 5,970.64<br>(4,159.51 to<br>8,148.24)                            | 145.42<br>(111.00 to<br>181.96)                               | 215.76<br>(151.43 to<br>295.51)                               | 210.62<br>(149.18 to<br>283.97)                              | 210.19<br>(147.72 to<br>288.61)                               |
| Cardiomyopathy and myocarditis | 794.11<br>(590.11 to<br>1,041.28)                                | 833.38<br>(602.80 to<br>1,107.83)                                | 790.00<br>(562.96 to<br>1,065.93)                                | 894.97<br>(646.52 to<br>1,174.93)                                | 23.71<br>(17.62 to<br>31.50)                                  | 32.77<br>(23.35 to<br>42.23)                                  | 32.66<br>(23.84 to<br>42.75)                                 | 32.11<br>(23.56 to<br>41.80)                                  |
| Myocarditis                    | <b>Bolivia</b>                                                   |                                                                  |                                                                  |                                                                  |                                                               |                                                               |                                                              |                                                               |
| Cause                          | YLLs (actual counts)                                             |                                                                  |                                                                  |                                                                  | Deaths (actual counts)                                        |                                                               |                                                              |                                                               |
|                                | 2016                                                             | 2040 Forecast                                                    | 2040 Better Scenario                                             | 2040 Worse Scenario                                              | 2016                                                          | 2040 Forecast                                                 | 2040 Better Scenario                                         | 2040 Worse Scenario                                           |
| Alcoholic cardiomyopathy       | 137.57<br>(92.86 to<br>192.28)                                   | 210.52<br>(130.54 to<br>302.05)                                  | 179.60<br>(107.67 to<br>259.94)                                  | 214.36<br>(137.69 to<br>305.94)                                  | 6.11<br>(4.07 to<br>8.76)                                     | 9.74<br>(6.15 to<br>13.84)                                    | 8.75<br>(5.33 to<br>12.55)                                   | 9.60<br>(6.20 to<br>13.65)                                    |
| Other cardiomyopathy           | 4,448.85<br>(3,253.37 to<br>5,779.25)                            | 4,577.67<br>(3,108.60 to<br>6,414.14)                            | 4,169.08<br>(2,871.21 to<br>5,785.28)                            | 4,861.30<br>(3,265.73 to<br>6,779.28)                            | 115.60<br>(85.72 to<br>144.69)                                | 173.75<br>(116.95 to<br>247.69)                               | 169.22<br>(115.91 to<br>236.11)                              | 168.48<br>(113.54 to<br>238.72)                               |



| Bolivia                                    |                                       |                                       |                                       |                                       |                                    |                                    |                                    |                                    |
|--------------------------------------------|---------------------------------------|---------------------------------------|---------------------------------------|---------------------------------------|------------------------------------|------------------------------------|------------------------------------|------------------------------------|
| Cause                                      | YLLs (actual counts)                  |                                       |                                       |                                       | Deaths (actual counts)             |                                    |                                    |                                    |
|                                            | 2016                                  | 2040 Forecast                         | 2040 Better Scenario                  | 2040 Worse Scenario                   | 2016                               | 2040 Forecast                      | 2040 Better Scenario               | 2040 Worse Scenario                |
| Gastritis and duodenitis                   | 1,866.36<br>(1,167.76 to 2,527.33)    | 2,447.56<br>(1,505.54 to 3,340.42)    | 2,324.17<br>(1,470.41 to 3,156.52)    | 2,627.87<br>(1,606.26 to 3,606.21)    | 97.18<br>(60.77 to 130.15)         | 146.56<br>(89.71 to 196.73)        | 146.13<br>(89.73 to 195.07)        | 148.46<br>(90.54 to 202.42)        |
| Appendicitis                               | 7,739.64<br>(5,085.68 to 11,142.81)   | 5,789.80<br>(3,675.00 to 8,307.69)    | 4,947.08<br>(3,115.87 to 7,132.56)    | 7,028.18<br>(4,478.83 to 10,234.33)   | 174.09<br>(112.29 to 232.09)       | 179.28<br>(112.12 to 249.74)       | 163.04<br>(102.34 to 225.19)       | 203.58<br>(127.94 to 281.66)       |
| Paralytic ileus and intestinal obstruction | 18,131.17<br>(12,442.56 to 26,921.89) | 17,056.81<br>(12,091.26 to 23,948.10) | 15,908.91<br>(11,378.94 to 21,926.07) | 18,705.69<br>(12,953.89 to 26,999.16) | 550.85<br>(406.24 to 752.85)       | 765.77<br>(565.46 to 1,042.40)     | 774.12<br>(572.53 to 1,046.64)     | 762.69<br>(557.88 to 1,043.31)     |
| Inguinal, femoral, and abdominal hernia    | 2,753.18<br>(1,601.60 to 4,421.29)    | 2,022.66<br>(1,253.91 to 3,067.69)    | 1,858.71<br>(1,159.17 to 2,805.11)    | 2,254.23<br>(1,362.49 to 3,431.67)    | 87.89<br>(54.89 to 131.64)         | 87.98<br>(56.27 to 128.20)         | 86.78<br>(55.62 to 126.29)         | 90.46<br>(57.54 to 132.48)         |
| Inflammatory bowel disease                 | 1,370.99<br>(830.13 to 2,338.54)      | 1,143.76<br>(778.81 to 1,660.39)      | 1,097.79<br>(756.63 to 1,577.34)      | 1,201.60<br>(790.64 to 1,783.52)      | 35.82<br>(25.04 to 50.18)          | 44.94<br>(32.58 to 60.42)          | 46.30<br>(33.82 to 62.12)          | 43.58<br>(31.46 to 58.75)          |
| Vascular intestinal disorders              | 1,955.18<br>(1,304.35 to 2,626.62)    | 2,850.86<br>(1,921.86 to 3,690.68)    | 2,809.71<br>(1,911.46 to 3,655.19)    | 2,917.21<br>(1,948.12 to 3,832.61)    | 108.75<br>(72.78 to 144.35)        | 183.46<br>(120.48 to 238.44)       | 188.48<br>(125.30 to 244.87)       | 178.55<br>(114.97 to 233.27)       |
| Gallbladder and biliary diseases           | 6,397.61<br>(3,910.88 to 9,117.54)    | 9,255.74<br>(4,137.79 to 17,867.06)   | 7,179.74<br>(3,339.64 to 13,639.88)   | 12,296.17<br>(5,226.82 to 24,168.45)  | 330.65<br>(196.45 to 462.97)       | 533.68<br>(241.38 to 970.52)       | 436.01<br>(206.00 to 779.20)       | 668.39<br>(289.12 to 1,242.67)     |
| Pancreatitis                               | 8,685.99<br>(6,088.17 to 11,706.91)   | 13,600.37<br>(7,441.25 to 25,328.83)  | 10,887.14<br>(6,365.42 to 18,776.37)  | 15,390.36<br>(8,326.33 to 28,421.99)  | 309.77<br>(208.39 to 420.94)       | 541.79<br>(300.77 to 942.67)       | 454.70<br>(267.58 to 729.38)       | 591.96<br>(323.55 to 1,067.26)     |
| Other digestive diseases                   | 6,476.54<br>(3,873.51 to 9,591.23)    | 5,851.35<br>(3,658.53 to 8,343.80)    | 5,238.06<br>(3,301.10 to 7,323.19)    | 6,744.49<br>(4,148.37 to 9,326.91)    | 211.90<br>(133.15 to 286.54)       | 275.67<br>(170.28 to 373.22)       | 264.97<br>(164.05 to 356.77)       | 292.75<br>(181.88 to 398.47)       |
| Neurological disorders                     | 35,985.09<br>(29,525.35 to 44,011.13) | 62,436.71<br>(48,534.73 to 82,548.42) | 60,796.97<br>(47,819.26 to 77,986.68) | 62,950.25<br>(48,056.45 to 84,548.99) | 2,744.83<br>(2,184.92 to 3,390.61) | 5,431.80<br>(3,771.78 to 7,375.18) | 5,620.66<br>(4,055.95 to 7,303.89) | 5,106.99<br>(3,398.15 to 7,175.17) |
| Alzheimer's disease and other dementias    | 21,853.14<br>(16,802.39 to 28,033.70) | 42,646.98<br>(30,140.51 to 61,617.60) | 42,429.51<br>(31,011.52 to 58,701.24) | 41,971.47<br>(28,470.29 to 62,191.06) | 2,385.03<br>(1,759.16 to 2,898.59) | 4,580.90<br>(2,943.93 to 6,561.74) | 4,734.01<br>(3,207.57 to 6,513.04) | 4,304.82<br>(2,606.20 to 6,372.12) |
| Parkinson's disease                        | 2,407.31<br>(1,753.58 to 3,164.76)    | 5,346.28<br>(3,875.73 to 6,973.99)    | 6,072.71<br>(4,494.45 to 7,864.91)    | 4,550.10<br>(3,241.47 to 5,959.67)    | 202.19<br>(146.84 to 269.28)       | 457.48<br>(327.57 to 609.07)       | 533.09<br>(390.26 to 700.35)       | 377.39<br>(260.53 to 507.15)       |
| Epilepsy                                   | 8,703.01<br>(7,054.19 to 10,607.47)   | 9,841.72<br>(6,169.82 to 15,324.81)   | 7,597.13<br>(4,989.70 to 11,354.60)   | 11,963.47<br>(7,673.16 to 18,319.94)  | 172.07<br>(138.37 to 211.79)       | 236.13<br>(151.04 to 351.63)       | 187.22<br>(124.97 to 271.80)       | 278.15<br>(178.56 to 416.15)       |
| Multiple sclerosis                         | 460.35<br>(344.61 to 594.82)          | 708.19<br>(516.08 to 966.89)          | 720.42<br>(522.32 to 980.51)          | 689.90<br>(505.36 to 931.10)          | 14.66<br>(11.13 to 18.84)          | 24.51<br>(18.66 to 32.19)          | 25.38<br>(19.24 to 33.19)          | 23.39<br>(17.80 to 30.72)          |
| Motor neuron disease                       | 751.68<br>(549.42 to 995.90)          | 1,402.79<br>(1,012.89 to 1,862.88)    | 1,465.72<br>(1,055.45 to 1,952.47)    | 1,326.45<br>(961.23 to 1,755.31)      | 25.69<br>(18.71 to 33.64)          | 53.71<br>(39.42 to 70.36)          | 57.10<br>(41.80 to 74.65)          | 49.73<br>(36.35 to 65.18)          |
| Other neurological disorders               | 1,809.60<br>(1,495.77 to 2,173.82)    | 2,490.75<br>(2,021.64 to 3,073.41)    | 2,511.48<br>(2,031.95 to 3,101.98)    | 2,448.86<br>(1,993.03 to 2,994.53)    | 45.20<br>(37.04 to 54.59)          | 79.08<br>(65.58 to 93.52)          | 83.86<br>(69.42 to 100.43)         | 73.50<br>(60.83 to 87.61)          |
| Mental disorders                           | 11,964.58<br>(8,309.53 to 18,801.88)  | 19,453.19<br>(13,521.47 to 30,104.74) | 18,607.14<br>(12,795.97 to 28,501.86) | 19,847.61<br>(13,772.79 to 30,649.70) | 345.52<br>(247.62 to 508.81)       | 622.43<br>(458.62 to 890.94)       | 611.42<br>(449.07 to 874.36)       | 618.20<br>(455.31 to 893.59)       |
| Alcohol use disorders                      | 7,270.77<br>(4,502.35 to 13,869.82)   | 10,216.55<br>(6,059.30 to 19,558.50)  | 9,407.65<br>(5,561.89 to 17,990.01)   | 10,582.94<br>(6,268.78 to 20,081.37)  | 215.57<br>(140.32 to 382.05)       | 327.61<br>(206.53 to 587.84)       | 307.24<br>(193.13 to 553.52)       | 333.74<br>(211.30 to 597.99)       |
| Drug use disorders                         | 4,624.49<br>(3,417.43 to 6,152.89)    | 9,126.76<br>(6,575.69 to 12,296.43)   | 9,096.24<br>(6,525.96 to 12,306.07)   | 9,147.39<br>(6,600.37 to 12,181.19)   | 128.77<br>(97.86 to 165.86)        | 292.91<br>(225.76 to 370.63)       | 302.35<br>(234.32 to 379.20)       | 282.44<br>(218.27 to 358.06)       |
| Opioid use disorders                       | 3,049.19<br>(2,180.10 to 4,261.29)    | 5,107.89<br>(3,499.22 to 7,237.85)    | 5,087.86<br>(3,482.07 to 7,199.98)    | 5,115.66<br>(3,527.09 to 7,252.19)    | 78.49<br>(58.02 to 104.23)         | 148.66<br>(108.36 to 197.53)       | 151.75<br>(111.01 to 201.98)       | 144.88<br>(105.37 to 192.51)       |

|                                                            |                                             |                                             |                                             |                                             |                                       |                                         |                                         |                                          |
|------------------------------------------------------------|---------------------------------------------|---------------------------------------------|---------------------------------------------|---------------------------------------------|---------------------------------------|-----------------------------------------|-----------------------------------------|------------------------------------------|
|                                                            | 221.66<br>(126.11 to<br>324.02)             | 675.92<br>(402.13 to<br>1,032.91)           | 658.43<br>(391.13 to<br>997.83)             | 698.05<br>(415.92 to<br>1,066.62)           | 6.23<br>(3.73 to<br>9.15)             | 20.66<br>(12.66 to<br>31.12)            | 20.40<br>(12.52 to<br>30.56)            | 21.02<br>(12.91 to<br>31.43)             |
| Cocaine use disorders                                      |                                             |                                             |                                             |                                             |                                       |                                         |                                         |                                          |
|                                                            | 127.72<br>(73.39 to<br>194.29)              | 523.64<br>(305.89 to<br>838.67)             | 508.71<br>(295.91 to<br>810.75)             | 543.15<br>(315.01 to<br>867.21)             | 3.15<br>(1.94 to<br>4.55)             | 13.60<br>(8.34 to<br>20.72)             | 13.31<br>(8.14 to<br>20.22)             | 14.02<br>(8.69 to<br>21.40)              |
| Amphetamine use disorders                                  |                                             |                                             |                                             |                                             |                                       |                                         |                                         |                                          |
|                                                            | 1,225.93<br>(809.87 to<br>1,702.70)         | 2,819.31<br>(1,949.12 to<br>3,903.27)       | 2,841.24<br>(1,961.85 to<br>3,894.07)       | 2,790.53<br>(1,920.06 to<br>3,907.19)       | 40.90<br>(29.19 to<br>54.58)          | 109.99<br>(81.09 to<br>142.89)          | 116.88<br>(85.86 to<br>151.45)          | 102.53<br>(75.67 to<br>133.32)           |
| Other drug use disorders                                   |                                             |                                             |                                             |                                             |                                       |                                         |                                         |                                          |
|                                                            | 69.32<br>(47.82 to<br>93.31)                | 109.87<br>(71.07 to<br>160.01)              | 103.25<br>(67.26 to<br>150.28)              | 117.28<br>(75.28 to<br>173.18)              | 1.18<br>(0.81 to<br>1.60)             | 1.92<br>(1.25 to<br>2.79)               | 1.83<br>(1.19 to<br>2.71)               | 2.01<br>(1.31 to<br>2.93)                |
| Eating disorders                                           |                                             |                                             |                                             |                                             |                                       |                                         |                                         |                                          |
| <b>Bolivia</b>                                             |                                             |                                             |                                             |                                             |                                       |                                         |                                         |                                          |
| Cause                                                      | YLLs (actual counts)                        |                                             |                                             |                                             | Deaths (actual counts)                |                                         |                                         |                                          |
|                                                            | 2016                                        | 2040 Forecast                               | 2040 Better Scenario                        | 2040 Worse Scenario                         | 2016                                  | 2040 Forecast                           | 2040 Better Scenario                    | 2040 Worse Scenario                      |
| Diabetes, urogenital, blood, and endocrine diseases        | 141,081.03<br>(115,772.97 to<br>172,591.85) | 247,483.42<br>(148,954.65 to<br>523,306.17) | 188,996.30<br>(118,414.46 to<br>401,686.70) | 309,445.40<br>(186,860.12 to<br>639,285.25) | 6,743.75<br>(5,497.96 to<br>8,199.95) | 14,347.34<br>(8,553.42 to<br>32,073.55) | 11,325.08<br>(7,048.51 to<br>25,280.51) | 17,098.93<br>(10,207.55 to<br>36,994.80) |
| Diabetes mellitus                                          | 50,795.06<br>(40,668.39 to<br>63,780.18)    | 76,627.41<br>(52,419.91 to<br>109,594.37)   | 60,067.77<br>(42,590.32 to<br>83,428.67)    | 101,833.36<br>(67,339.83 to<br>150,816.81)  | 2,674.81<br>(2,161.44 to<br>3,337.39) | 4,294.04<br>(3,086.41 to<br>5,777.70)   | 3,543.60<br>(2,653.13 to<br>4,704.97)   | 5,396.60<br>(3,759.80 to<br>7,525.00)    |
| Acute glomerulonephritis                                   | 84.63<br>(69.35 to<br>107.41)               | 78.85<br>(59.79 to<br>105.45)               | 69.11<br>(51.67 to<br>91.83)                | 91.93<br>(69.96 to<br>124.16)               | 1.73<br>(1.41 to<br>2.14)             | 1.88<br>(1.44 to<br>2.49)               | 1.75<br>(1.32 to<br>2.31)               | 2.06<br>(1.58 to<br>2.69)                |
| Chronic kidney disease                                     | 70,455.13<br>(54,133.30 to<br>88,252.43)    | 144,659.02<br>(57,085.14 to<br>425,254.81)  | 104,033.64<br>(44,357.57 to<br>311,727.31)  | 179,437.35<br>(69,815.42 to<br>512,706.28)  | 3,396.88<br>(2,639.85 to<br>4,228.97) | 8,769.94<br>(3,221.22 to<br>26,993.77)  | 6,449.56<br>(2,498.59 to<br>20,429.28)  | 10,459.52<br>(3,744.76 to<br>30,978.21)  |
| Chronic kidney disease due to diabetes mellitus            | 22,129.60<br>(16,048.53 to<br>28,603.77)    | 56,305.53<br>(20,772.38 to<br>177,662.62)   | 40,217.21<br>(15,776.73 to<br>128,326.31)   | 69,424.29<br>(25,360.05 to<br>217,720.88)   | 1,116.85<br>(828.13 to<br>1,430.73)   | 3,257.40<br>(1,142.51 to<br>10,679.24)  | 2,371.11<br>(874.54 to<br>7,921.42)     | 3,895.59<br>(1,356.53 to<br>12,414.11)   |
| Chronic kidney disease due to hypertension                 | 8,636.58<br>(6,427.72 to<br>11,337.70)      | 22,730.16<br>(7,429.05 to<br>71,372.13)     | 16,551.45<br>(5,804.07 to<br>53,288.27)     | 27,305.53<br>(9,069.17 to<br>82,684.90)     | 654.95<br>(486.45 to<br>850.69)       | 1,852.98<br>(665.41 to<br>5,685.21)     | 1,401.72<br>(522.47 to<br>4,628.50)     | 2,135.39<br>(755.23 to<br>6,513.76)      |
| Chronic kidney disease due to glomerulonephritis           | 22,223.47<br>(17,111.76 to<br>28,166.17)    | 36,031.63<br>(15,215.26 to<br>101,027.15)   | 25,940.19<br>(11,485.51 to<br>70,467.12)    | 45,536.51<br>(18,872.85 to<br>122,657.64)   | 883.11<br>(659.76 to<br>1,134.49)     | 1,933.83<br>(666.05 to<br>5,723.42)     | 1,408.14<br>(523.02 to<br>4,299.33)     | 2,354.99<br>(827.90 to<br>6,944.83)      |
| Chronic kidney disease due to other and unspecified causes | 17,465.47<br>(13,482.47 to<br>22,263.41)    | 29,591.70<br>(12,675.19 to<br>79,853.45)    | 21,324.80<br>(9,540.37 to<br>56,945.31)     | 37,171.01<br>(15,797.94 to<br>96,004.84)    | 741.97<br>(545.76 to<br>967.32)       | 1,725.72<br>(644.04 to<br>5,176.70)     | 1,268.58<br>(510.88 to<br>3,846.15)     | 2,073.55<br>(780.03 to<br>5,992.11)      |
| Urinary diseases and male infertility                      | 8,228.42<br>(6,695.35 to<br>10,323.90)      | 13,416.34<br>(10,957.76 to<br>16,989.68)    | 13,368.72<br>(10,803.50 to<br>16,987.04)    | 13,606.50<br>(11,039.20 to<br>17,464.00)    | 367.99<br>(300.52 to<br>471.95)       | 832.05<br>(615.12 to<br>1,058.22)       | 894.49<br>(691.78 to<br>1,136.14)       | 768.27<br>(555.56 to<br>990.64)          |
| Urinary tract infections                                   | 7,527.35<br>(6,053.26 to<br>9,537.05)       | 12,530.93<br>(10,140.56 to<br>15,929.29)    | 12,530.24<br>(10,053.08 to<br>16,062.00)    | 12,648.64<br>(10,137.12 to<br>16,063.69)    | 334.13<br>(268.50 to<br>431.21)       | 778.74<br>(567.83 to<br>1,001.30)       | 841.26<br>(647.42 to<br>1,071.34)       | 714.24<br>(517.51 to<br>924.52)          |
| Urolithiasis                                               | 155.90<br>(101.40 to<br>230.24)             | 271.04<br>(165.99 to<br>399.13)             | 275.75<br>(164.15 to<br>412.75)             | 266.23<br>(164.83 to<br>383.68)             | 6.90<br>(4.12 to<br>10.08)            | 13.32<br>(7.52 to<br>19.81)             | 14.27<br>(8.00 to<br>21.19)             | 12.34<br>(7.04 to<br>18.14)              |
| Other urinary diseases                                     | 545.17<br>(366.02 to<br>776.26)             | 614.38<br>(399.31 to<br>903.52)             | 562.73<br>(363.41 to<br>812.54)             | 691.63<br>(443.99 to<br>1,000.65)           | 26.97<br>(18.01 to<br>38.72)          | 39.98<br>(24.85 to<br>60.07)            | 38.95<br>(23.98 to<br>58.91)            | 41.69<br>(25.76 to<br>63.88)             |
| Gynecological diseases                                     | 303.64<br>(198.08 to<br>451.22)             | 372.24<br>(205.00 to<br>615.72)             | 327.07<br>(182.65 to<br>531.73)             | 439.74<br>(243.00 to<br>709.85)             | 8.51<br>(5.66 to<br>12.25)            | 10.48<br>(6.46 to<br>15.97)             | 9.44<br>(5.91 to<br>14.20)              | 12.07<br>(7.33 to<br>18.14)              |
| Uterine fibroids                                           | 39.84<br>(21.49 to<br>66.33)                | 49.70<br>(20.26 to<br>99.22)                | 43.11<br>(18.01 to<br>86.07)                | 59.80<br>(24.39 to<br>120.24)               | 1.24<br>(0.71 to<br>2.01)             | 1.55<br>(0.72 to<br>2.82)               | 1.38<br>(0.63 to<br>2.46)               | 1.82<br>(0.82 to<br>3.25)                |
| Polycystic ovarian syndrome                                | 42.47<br>(19.48 to<br>78.37)                | 31.49<br>(11.22 to<br>67.75)                | 25.20<br>(9.10 to<br>54.65)                 | 41.81<br>(15.28 to<br>87.54)                | 0.90<br>(0.42 to<br>1.65)             | 0.68<br>(0.25 to<br>1.44)               | 0.55<br>(0.20 to<br>1.18)               | 0.91<br>(0.33 to<br>1.89)                |
| Endometriosis                                              | 0.78<br>(0.39 to<br>1.70)                   | 1.33<br>(0.44 to<br>3.56)                   | 1.16<br>(0.39 to<br>3.04)                   | 1.59<br>(0.54 to<br>4.09)                   | 0.02<br>(0.01 to<br>0.04)             | 0.03<br>(0.01 to<br>0.08)               | 0.02<br>(0.01 to<br>0.07)               | 0.03<br>(0.01 to<br>0.09)                |

|                                                   |                                            |                                           |                                          |                                            |                                       |                                     |                                   |                                     |
|---------------------------------------------------|--------------------------------------------|-------------------------------------------|------------------------------------------|--------------------------------------------|---------------------------------------|-------------------------------------|-----------------------------------|-------------------------------------|
| Genital prolapse                                  | 29.48<br>(16.35 to<br>47.12)               | 27.17<br>(12.63 to<br>47.72)              | 23.75<br>(11.21 to<br>43.21)             | 32.48<br>(15.07 to<br>57.90)               | 1.80<br>(1.00 to<br>2.79)             | 1.53<br>(0.71 to<br>2.62)           | 1.38<br>(0.65 to<br>2.40)         | 1.76<br>(0.84 to<br>3.00)           |
| Other gynecological diseases                      | 191.07<br>(123.26 to<br>288.43)            | 262.55<br>(132.24 to<br>456.03)           | 233.86<br>(119.90 to<br>405.52)          | 304.05<br>(157.61 to<br>524.47)            | 4.57<br>(2.94 to<br>6.93)             | 6.69<br>(3.83 to<br>10.99)          | 6.10<br>(3.59 to<br>9.90)         | 7.55<br>(4.34 to<br>12.16)          |
| Hemoglobinopathies and hemolytic anemias          | 3,416.77<br>(2,703.81 to<br>4,235.68)      | 3,670.36<br>(2,684.58 to<br>4,830.63)     | 3,327.86<br>(2,427.01 to<br>4,383.51)    | 4,140.74<br>(3,071.56 to<br>5,431.98)      | 97.86<br>(75.79 to<br>123.64)         | 128.21<br>(93.89 to<br>166.67)      | 120.66<br>(89.05 to<br>154.99)    | 139.27<br>(103.42 to<br>180.03)     |
| Thalassemias                                      | 284.61<br>(151.80 to<br>436.97)            | 121.68<br>(65.41 to<br>195.56)            | 109.93<br>(61.50 to<br>174.48)           | 131.15<br>(69.58 to<br>216.24)             | 3.38<br>(1.83 to<br>5.17)             | 1.45<br>(0.78 to<br>2.33)           | 1.32<br>(0.74 to<br>2.07)         | 1.56<br>(0.83 to<br>2.57)           |
| Sickle cell disorders                             | 2,025.08<br>(1,571.57 to<br>2,539.82)      | 2,136.66<br>(1,507.60 to<br>2,922.10)     | 1,919.71<br>(1,363.08 to<br>2,623.55)    | 2,426.65<br>(1,746.04 to<br>3,285.35)      | 34.40<br>(26.72 to<br>43.29)          | 43.53<br>(30.21 to<br>59.70)        | 39.72<br>(27.67 to<br>54.88)      | 48.70<br>(34.41 to<br>66.69)        |
| G6PD deficiency                                   | 321.23<br>(236.09 to<br>431.65)            | 530.65<br>(365.56 to<br>749.87)           | 470.56<br>(322.00 to<br>656.24)          | 620.59<br>(428.47 to<br>859.23)            | 9.36<br>(6.78 to<br>12.57)            | 18.92<br>(13.11 to<br>25.99)        | 17.03<br>(11.69 to<br>23.39)      | 21.75<br>(15.14 to<br>29.93)        |
| Other hemoglobinopathies and hemolytic anemias    | 785.85<br>(581.47 to<br>1,033.82)          | 881.37<br>(634.93 to<br>1,159.67)         | 827.65<br>(604.44 to<br>1,093.96)        | 962.35<br>(694.22 to<br>1,270.67)          | 50.72<br>(37.58 to<br>66.21)          | 64.30<br>(44.86 to<br>83.05)        | 62.60<br>(45.23 to<br>80.45)      | 67.26<br>(47.18 to<br>88.31)        |
| Endocrine, metabolic, blood, and immune disorders | 7,797.37<br>(5,886.00 to<br>11,724.27)     | 8,659.19<br>(6,401.48 to<br>12,898.29)    | 7,802.13<br>(5,816.24 to<br>11,430.82)   | 9,895.79<br>(7,309.87 to<br>14,899.34)     | 195.95<br>(148.67 to<br>287.99)       | 310.74<br>(233.62 to<br>455.51)     | 305.59<br>(227.92 to<br>443.09)   | 321.14<br>(238.46 to<br>474.83)     |
| <b>Bolivia</b>                                    |                                            |                                           |                                          |                                            |                                       |                                     |                                   |                                     |
| Cause                                             | YLLs (actual counts)                       |                                           |                                          |                                            | Deaths (actual counts)                |                                     |                                   |                                     |
|                                                   | 2016                                       | 2040 Forecast                             | 2040 Better Scenario                     | 2040 Worse Scenario                        | 2016                                  | 2040 Forecast                       | 2040 Better Scenario              | 2040 Worse Scenario                 |
| Musculoskeletal disorders                         | 3,623.52<br>(2,687.15 to<br>4,730.13)      | 6,025.65<br>(4,282.56 to<br>7,945.26)     | 6,016.01<br>(4,263.80 to<br>7,952.95)    | 6,038.39<br>(4,316.72 to<br>7,949.45)      | 119.46<br>(87.00 to<br>157.39)        | 240.33<br>(175.24 to<br>309.81)     | 245.23<br>(179.64 to<br>314.77)   | 236.12<br>(171.35 to<br>303.30)     |
| Rheumatoid arthritis                              | 966.82<br>(651.11 to<br>1,371.30)          | 2,022.82<br>(1,359.76 to<br>2,851.14)     | 1,883.73<br>(1,264.09 to<br>2,648.65)    | 2,219.05<br>(1,499.63 to<br>3,140.58)      | 50.03<br>(34.30 to<br>69.48)          | 117.59<br>(83.15 to<br>162.84)      | 113.54<br>(79.80 to<br>156.34)    | 123.75<br>(86.49 to<br>168.77)      |
| Other musculoskeletal disorders                   | 2,656.70<br>(1,951.46 to<br>3,508.53)      | 4,002.83<br>(2,728.33 to<br>5,481.77)     | 4,132.28<br>(2,807.79 to<br>5,667.34)    | 3,819.34<br>(2,596.04 to<br>5,237.10)      | 69.43<br>(49.87 to<br>93.75)          | 122.74<br>(82.08 to<br>165.00)      | 131.69<br>(90.37 to<br>177.39)    | 112.38<br>(76.29 to<br>152.31)      |
| Other non-communicable diseases                   | 125,393.90<br>(86,549.28 to<br>173,149.16) | 78,909.86<br>(52,311.52 to<br>108,874.15) | 60,602.00<br>(41,643.89 to<br>82,236.95) | 107,000.61<br>(69,811.58 to<br>148,686.31) | 1,524.88<br>(1,058.88 to<br>2,077.68) | 1,094.90<br>(766.42 to<br>1,448.44) | 889.15<br>(635.24 to<br>1,152.37) | 1,414.66<br>(978.52 to<br>1,908.19) |
| Congenital birth defects                          | 120,995.19<br>(82,596.33 to<br>168,086.24) | 73,309.57<br>(47,371.97 to<br>102,554.37) | 55,592.53<br>(37,309.58 to<br>76,572.70) | 100,511.91<br>(64,599.20 to<br>140,897.97) | 1,435.95<br>(982.02 to<br>1,982.90)   | 894.48<br>(586.25 to<br>1,233.87)   | 685.43<br>(466.94 to<br>929.08)   | 1,214.70<br>(793.12 to<br>1,688.19) |
| Neural tube defects                               | 8,822.19<br>(4,964.81 to<br>14,509.06)     | 2,279.33<br>(1,127.66 to<br>4,262.28)     | 1,569.36<br>(792.99 to<br>2,863.03)      | 3,541.54<br>(1,767.56 to<br>6,425.48)      | 103.09<br>(58.39 to<br>168.82)        | 27.37<br>(13.95 to<br>50.13)        | 19.02<br>(9.84 to<br>33.87)       | 42.18<br>(21.20 to<br>75.33)        |
| Congenital heart anomalies                        | 53,472.14<br>(33,095.88 to<br>77,731.45)   | 31,846.39<br>(20,069.80 to<br>46,734.93)  | 24,390.00<br>(15,653.30 to<br>35,830.80) | 43,071.50<br>(26,394.97 to<br>64,199.55)   | 639.42<br>(397.23 to<br>920.90)       | 393.05<br>(250.98 to<br>569.52)     | 304.56<br>(199.15 to<br>437.48)   | 525.85<br>(329.59 to<br>773.82)     |
| Orofacial clefts                                  | 142.88<br>(37.89 to<br>336.74)             | 66.93<br>(15.10 to<br>165.84)             | 44.98<br>(10.29 to<br>109.02)            | 106.75<br>(22.93 to<br>263.73)             | 1.66<br>(0.44 to<br>3.91)             | 0.78<br>(0.18 to<br>1.92)           | 0.52<br>(0.12 to<br>1.26)         | 1.24<br>(0.27 to<br>3.06)           |
| Down syndrome                                     | 4,643.47<br>(2,861.18 to<br>7,523.58)      | 3,467.19<br>(2,041.06 to<br>5,637.89)     | 2,605.65<br>(1,563.66 to<br>4,173.03)    | 4,836.69<br>(2,823.83 to<br>7,911.25)      | 56.40<br>(35.20 to<br>90.15)          | 44.46<br>(27.23 to<br>69.95)        | 34.04<br>(21.04 to<br>53.10)      | 60.95<br>(36.36 to<br>97.86)        |
| Other chromosomal abnormalities                   | 3,522.68<br>(2,035.01 to<br>6,069.04)      | 3,473.92<br>(1,913.30 to<br>6,179.40)     | 2,578.62<br>(1,473.39 to<br>4,528.71)    | 4,886.75<br>(2,664.56 to<br>8,564.00)      | 41.29<br>(23.83 to<br>70.91)          | 41.17<br>(22.94 to<br>72.71)        | 30.70<br>(17.80 to<br>53.41)      | 57.66<br>(31.62 to<br>100.22)       |
| Congenital musculoskeletal and limb anomalies     | 1,394.62<br>(860.13 to<br>2,252.18)        | 1,041.68<br>(622.17 to<br>1,740.51)       | 807.14<br>(493.63 to<br>1,337.41)        | 1,385.74<br>(825.15 to<br>2,336.37)        | 16.47<br>(10.27 to<br>26.46)          | 12.53<br>(7.57 to<br>20.66)         | 9.78<br>(6.03 to<br>16.19)        | 16.55<br>(9.94 to<br>27.67)         |
| Urogenital congenital anomalies                   | 2,272.48<br>(1,540.94 to<br>3,373.73)      | 1,570.14<br>(1,035.57 to<br>2,373.56)     | 1,250.47<br>(839.97 to<br>1,838.73)      | 2,052.48<br>(1,319.77 to<br>3,097.47)      | 29.89<br>(20.70 to<br>42.82)          | 23.75<br>(16.22 to<br>33.84)        | 19.74<br>(13.59 to<br>27.76)      | 29.78<br>(19.89 to<br>43.09)        |

|                                      |                                             |                                             |                                             |                                             |                                       |                                       |                                       |                                        |
|--------------------------------------|---------------------------------------------|---------------------------------------------|---------------------------------------------|---------------------------------------------|---------------------------------------|---------------------------------------|---------------------------------------|----------------------------------------|
| Digestive congenital anomalies       | 15,312.25<br>(9,571.37 to<br>23,054.49)     | 9,808.74<br>(5,691.66 to<br>16,004.30)      | 7,292.50<br>(4,304.44 to<br>11,665.34)      | 13,755.24<br>(7,945.74 to<br>22,236.68)     | 178.55<br>(111.81 to<br>268.44)       | 115.27<br>(67.03 to<br>187.51)        | 85.99<br>(51.49 to<br>137.83)         | 161.16<br>(95.45 to<br>259.81)         |
| Other congenital birth defects       | 31,412.49<br>(19,479.95 to<br>46,591.34)    | 19,755.24<br>(11,892.00 to<br>30,478.00)    | 15,053.84<br>(9,452.65 to<br>22,796.22)     | 26,875.22<br>(16,132.00 to<br>41,469.31)    | 369.17<br>(230.00 to<br>544.98)       | 236.11<br>(143.43 to<br>361.07)       | 181.07<br>(115.13 to<br>271.05)       | 319.33<br>(192.26 to<br>490.88)        |
| Skin and subcutaneous diseases       | 1,658.46<br>(912.38 to<br>2,296.22)         | 3,674.99<br>(2,015.71 to<br>4,961.22)       | 3,543.04<br>(1,929.80 to<br>4,733.58)       | 3,871.38<br>(2,104.31 to<br>5,308.90)       | 57.14<br>(29.67 to<br>77.99)          | 178.09<br>(92.19 to<br>242.23)        | 186.71<br>(95.52 to<br>252.50)        | 169.60<br>(87.76 to<br>232.23)         |
| Cellulitis                           | 290.92<br>(145.78 to<br>515.85)             | 781.82<br>(397.49 to<br>1,300.26)           | 788.06<br>(404.04 to<br>1,286.98)           | 776.27<br>(395.59 to<br>1,330.09)           | 8.80<br>(4.16 to<br>14.69)            | 32.30<br>(15.51 to<br>52.59)          | 35.19<br>(16.80 to<br>56.05)          | 29.24<br>(14.05 to<br>47.92)           |
| Pyoderma                             | 1,154.27<br>(603.36 to<br>1,696.86)         | 2,463.84<br>(1,189.38 to<br>3,548.68)       | 2,318.70<br>(1,105.14 to<br>3,318.30)       | 2,674.73<br>(1,322.21 to<br>3,862.13)       | 38.26<br>(17.81 to<br>55.41)          | 120.53<br>(55.39 to<br>171.20)        | 123.96<br>(56.17 to<br>176.18)        | 117.60<br>(54.34 to<br>166.42)         |
| Decubitus ulcer                      | 125.14<br>(68.09 to<br>189.39)              | 261.60<br>(142.09 to<br>397.08)             | 269.06<br>(145.27 to<br>410.41)             | 253.07<br>(136.69 to<br>388.30)             | 7.37<br>(3.86 to<br>11.74)            | 19.10<br>(9.51 to<br>31.09)           | 20.99<br>(10.63 to<br>34.11)          | 17.09<br>(8.40 to<br>27.99)            |
| Other skin and subcutaneous diseases | 88.12<br>(49.21 to<br>127.68)               | 167.72<br>(90.42 to<br>237.57)              | 167.22<br>(89.50 to<br>240.06)              | 167.30<br>(91.14 to<br>237.87)              | 2.71<br>(1.43 to<br>3.90)             | 6.15<br>(3.15 to<br>8.89)             | 6.58<br>(3.35 to<br>9.56)             | 5.67<br>(2.95 to<br>8.21)              |
| Sudden infant death syndrome         | 2,740.25<br>(1,464.61 to<br>4,821.22)       | 1,925.30<br>(896.80 to<br>3,822.03)         | 1,466.42<br>(682.28 to<br>2,859.05)         | 2,617.33<br>(1,227.36 to<br>5,245.58)       | 31.80<br>(16.99 to<br>55.95)          | 22.34<br>(10.40 to<br>44.35)          | 17.01<br>(7.91 to<br>33.18)           | 30.36<br>(14.23 to<br>60.86)           |
| Injuries                             | 325,560.75<br>(266,647.78 to<br>391,138.49) | 316,888.72<br>(237,544.51 to<br>415,686.76) | 237,966.83<br>(180,496.29 to<br>305,972.22) | 379,515.98<br>(284,108.31 to<br>498,490.25) | 6,486.56<br>(5,305.57 to<br>7,785.44) | 7,716.00<br>(6,011.95 to<br>9,916.50) | 6,123.42<br>(4,803.22 to<br>7,693.79) | 8,782.39<br>(6,770.43 to<br>11,398.04) |
| Transport injuries                   | 108,361.05<br>(85,947.74 to<br>133,726.50)  | 125,548.39<br>(88,770.57 to<br>181,529.68)  | 70,177.74<br>(49,504.79 to<br>100,271.78)   | 162,177.38<br>(115,310.72 to<br>232,482.61) | 2,292.25<br>(1,804.50 to<br>2,829.89) | 3,126.10<br>(2,243.57 to<br>4,411.56) | 1,894.79<br>(1,381.94 to<br>2,611.94) | 3,827.95<br>(2,736.44 to<br>5,377.22)  |
| Road injuries                        | 100,948.96<br>(80,287.66 to<br>124,771.70)  | 116,084.24<br>(82,166.80 to<br>167,735.11)  | 62,263.69<br>(44,291.65 to<br>89,602.56)    | 151,355.61<br>(107,820.34 to<br>217,143.50) | 2,138.58<br>(1,708.46 to<br>2,639.03) | 2,894.37<br>(2,092.31 to<br>4,091.50) | 1,695.81<br>(1,247.49 to<br>2,328.01) | 3,570.27<br>(2,588.92 to<br>5,001.37)  |
| Pedestrian road injuries             | 34,001.98<br>(25,816.54 to<br>43,023.00)    | 33,985.66<br>(22,938.57 to<br>50,118.63)    | 20,114.97<br>(13,909.95 to<br>28,834.95)    | 42,670.28<br>(28,825.89 to<br>62,897.80)    | 741.49<br>(573.59 to<br>938.13)       | 915.28<br>(644.38 to<br>1,290.33)     | 580.39<br>(421.39 to<br>796.99)       | 1,096.23<br>(769.24 to<br>1,564.49)    |

**Bolivia**

| Cause                       | YLLs (actual counts)                        |                                            |                                           |                                             | Deaths (actual counts)                |                                       |                                       |                                       |
|-----------------------------|---------------------------------------------|--------------------------------------------|-------------------------------------------|---------------------------------------------|---------------------------------------|---------------------------------------|---------------------------------------|---------------------------------------|
|                             | 2016                                        | 2040 Forecast                              | 2040 Better Scenario                      | 2040 Worse Scenario                         | 2016                                  | 2040 Forecast                         | 2040 Better Scenario                  | 2040 Worse Scenario                   |
|                             | Cyclist road injuries                       | 1,121.53<br>(855.66 to<br>1,462.30)        | 1,449.74<br>(958.36 to<br>2,216.97)       | 796.98<br>(526.21 to<br>1,192.05)           | 1,874.82<br>(1,242.30 to<br>2,843.56) | 24.41<br>(18.89 to<br>32.01)          | 36.96<br>(24.77 to<br>54.96)          | 23.07<br>(15.77 to<br>33.80)          |
| Motorcyclist road injuries  | 7,675.62<br>(5,182.05 to<br>10,625.99)      | 10,954.12<br>(6,497.55 to<br>18,493.02)    | 6,963.25<br>(4,076.94 to<br>11,573.10)    | 13,292.74<br>(7,887.95 to<br>22,021.36)     | 143.92<br>(98.19 to<br>198.70)        | 222.81<br>(135.66 to<br>363.61)       | 147.91<br>(89.88 to<br>237.34)        | 262.32<br>(159.24 to<br>422.07)       |
| Motor vehicle road injuries | 57,077.10<br>(45,097.35 to<br>71,038.94)    | 68,343.14<br>(47,761.84 to<br>99,210.07)   | 33,684.47<br>(23,450.26 to<br>48,342.88)  | 91,739.48<br>(64,473.10 to<br>133,244.25)   | 1,205.84<br>(954.69 to<br>1,506.39)   | 1,685.03<br>(1,208.53 to<br>2,400.25) | 924.30<br>(682.27 to<br>1,279.44)     | 2,125.12<br>(1,515.61 to<br>3,045.22) |
| Other road injuries         | 1,072.73<br>(799.95 to<br>1,423.96)         | 1,351.58<br>(903.19 to<br>2,004.37)        | 704.02<br>(476.03 to<br>1,026.70)         | 1,778.28<br>(1,185.27 to<br>2,619.27)       | 22.91<br>(17.43 to<br>29.89)          | 34.29<br>(23.92 to<br>49.76)          | 20.14<br>(14.57 to<br>28.68)          | 42.10<br>(28.84 to<br>61.77)          |
| Other transport injuries    | 7,412.09<br>(4,855.19 to<br>10,005.66)      | 9,464.15<br>(5,614.53 to<br>14,501.14)     | 7,914.05<br>(4,680.11 to<br>11,922.07)    | 10,821.77<br>(6,427.10 to<br>16,602.91)     | 153.67<br>(100.71 to<br>205.29)       | 231.73<br>(142.62 to<br>347.44)       | 198.98<br>(124.06 to<br>291.39)       | 257.68<br>(156.11 to<br>384.97)       |
| Unintentional injuries      | 146,004.97<br>(117,892.15 to<br>176,570.20) | 112,512.66<br>(87,856.99 to<br>140,551.80) | 97,007.83<br>(76,333.06 to<br>120,571.73) | 132,713.92<br>(102,636.51 to<br>167,511.18) | 2,805.56<br>(2,294.53 to<br>3,315.57) | 2,892.05<br>(2,323.06 to<br>3,483.76) | 2,687.49<br>(2,183.63 to<br>3,220.88) | 3,158.61<br>(2,518.76 to<br>3,808.53) |
| Falls                       | 17,034.37<br>(12,218.48 to<br>22,346.42)    | 20,617.79<br>(14,660.80 to<br>26,584.80)   | 19,793.95<br>(14,079.62 to<br>25,594.65)  | 21,687.51<br>(15,401.86 to<br>27,869.48)    | 599.72<br>(442.61 to<br>760.47)       | 916.65<br>(658.76 to<br>1,145.29)     | 925.50<br>(679.11 to<br>1,160.40)     | 910.09<br>(649.98 to<br>1,138.61)     |
| Drowning                    | 31,107.75<br>(24,246.47 to<br>39,294.64)    | 20,189.73<br>(14,700.81 to<br>27,755.84)   | 16,675.90<br>(12,294.59 to<br>22,944.77)  | 24,249.91<br>(17,374.59 to<br>33,135.69)    | 516.89<br>(411.53 to<br>638.65)       | 418.77<br>(305.06 to<br>578.24)       | 360.15<br>(264.74 to<br>491.95)       | 482.16<br>(356.19 to<br>656.78)       |



|                                                 |                                          |                                           |                                          |                                           |                                       |                                       |                                       |                                       |
|-------------------------------------------------|------------------------------------------|-------------------------------------------|------------------------------------------|-------------------------------------------|---------------------------------------|---------------------------------------|---------------------------------------|---------------------------------------|
|                                                 | 9,779.91<br>(7,508.41 to<br>12,695.74)   | 6,186.85<br>(4,386.37 to<br>8,616.26)     | 5,053.97<br>(3,608.93 to<br>6,927.62)    | 7,610.98<br>(5,378.16 to<br>10,563.32)    | 203.72<br>(156.03 to<br>256.84)       | 179.68<br>(126.69 to<br>244.61)       | 158.99<br>(110.64 to<br>212.91)       | 203.21<br>(142.37 to<br>278.22)       |
| Fire, heat, and hot substances                  |                                          |                                           |                                          |                                           |                                       |                                       |                                       |                                       |
|                                                 | 6,292.06<br>(4,084.76 to<br>10,415.27)   | 3,184.50<br>(1,989.85 to<br>5,168.85)     | 2,435.91<br>(1,556.32 to<br>3,755.38)    | 4,235.14<br>(2,583.67 to<br>6,914.86)     | 106.63<br>(74.26 to<br>158.40)        | 64.80<br>(42.30 to<br>99.99)          | 51.73<br>(34.60 to<br>76.19)          | 82.32<br>(52.88 to<br>127.31)         |
| Poisonings                                      |                                          |                                           |                                          |                                           |                                       |                                       |                                       |                                       |
|                                                 | 16,351.01<br>(12,379.79 to<br>21,435.33) | 12,411.30<br>(9,040.06 to<br>16,585.60)   | 10,416.70<br>(7,618.51 to<br>13,938.20)  | 15,258.96<br>(11,082.68 to<br>20,306.35)  | 292.21<br>(226.97 to<br>369.08)       | 268.24<br>(205.44 to<br>351.88)       | 236.16<br>(179.50 to<br>305.60)       | 314.14<br>(239.17 to<br>403.00)       |
| Exposure to mechanical forces                   |                                          |                                           |                                          |                                           |                                       |                                       |                                       |                                       |
|                                                 | 4,385.19<br>(3,120.93 to<br>5,960.39)    | 3,004.43<br>(1,977.20 to<br>4,372.15)     | 2,544.94<br>(1,657.32 to<br>3,709.19)    | 3,657.24<br>(2,440.04 to<br>5,234.78)     | 81.22<br>(58.27 to<br>108.76)         | 63.30<br>(43.49 to<br>89.61)          | 55.42<br>(37.90 to<br>78.43)          | 74.61<br>(50.58 to<br>104.29)         |
| Unintentional firearm injuries                  |                                          |                                           |                                          |                                           |                                       |                                       |                                       |                                       |
|                                                 | 5,488.03<br>(3,262.96 to<br>9,196.48)    | 3,131.18<br>(1,859.85 to<br>5,414.54)     | 2,344.69<br>(1,433.89 to<br>3,884.79)    | 4,289.22<br>(2,521.93 to<br>7,528.66)     | 68.86<br>(42.23 to<br>112.35)         | 41.65<br>(26.03 to<br>69.05)          | 31.91<br>(20.35 to<br>50.26)          | 55.92<br>(34.46 to<br>93.64)          |
| Unintentional suffocation                       |                                          |                                           |                                          |                                           |                                       |                                       |                                       |                                       |
|                                                 | 6,477.79<br>(4,927.64 to<br>8,335.60)    | 6,275.69<br>(4,452.92 to<br>8,622.98)     | 5,527.06<br>(3,965.36 to<br>7,589.06)    | 7,312.50<br>(5,183.46 to<br>9,873.62)     | 142.13<br>(108.80 to<br>182.95)       | 163.30<br>(123.75 to<br>214.54)       | 148.84<br>(112.93 to<br>195.15)       | 183.61<br>(137.67 to<br>240.69)       |
| Other exposure to mechanical forces             |                                          |                                           |                                          |                                           |                                       |                                       |                                       |                                       |
|                                                 | 13,279.57<br>(9,747.45 to<br>18,172.59)  | 10,122.92<br>(7,332.65 to<br>14,248.35)   | 8,593.37<br>(6,268.68 to<br>12,139.65)   | 12,345.66<br>(8,814.19 to<br>17,457.93)   | 259.36<br>(196.31 to<br>349.97)       | 271.32<br>(199.98 to<br>383.36)       | 251.34<br>(186.31 to<br>352.45)       | 301.14<br>(222.03 to<br>427.60)       |
| Adverse effects of medical treatment            |                                          |                                           |                                          |                                           |                                       |                                       |                                       |                                       |
|                                                 | 1,780.17<br>(1,389.11 to<br>2,265.82)    | 1,588.73<br>(1,158.46 to<br>2,173.64)     | 1,299.70<br>(946.08 to<br>1,781.11)      | 2,011.06<br>(1,447.42 to<br>2,752.93)     | 34.83<br>(27.43 to<br>43.73)          | 38.18<br>(28.99 to<br>50.56)          | 33.15<br>(24.87 to<br>44.44)          | 45.58<br>(34.53 to<br>61.32)          |
| Animal contact                                  |                                          |                                           |                                          |                                           |                                       |                                       |                                       |                                       |
|                                                 | 1,009.48<br>(747.51 to<br>1,305.57)      | 919.39<br>(636.05 to<br>1,272.18)         | 750.24<br>(526.57 to<br>1,037.38)        | 1,167.69<br>(805.38 to<br>1,628.31)       | 20.76<br>(15.58 to<br>26.62)          | 23.18<br>(16.87 to<br>30.99)          | 20.18<br>(14.91 to<br>27.06)          | 27.60<br>(20.02 to<br>37.06)          |
| Venomous animal contact                         |                                          |                                           |                                          |                                           |                                       |                                       |                                       |                                       |
|                                                 | 770.69<br>(528.83 to<br>1,072.71)        | 669.35<br>(421.13 to<br>1,001.61)         | 549.45<br>(348.81 to<br>825.63)          | 843.36<br>(535.87 to<br>1,270.24)         | 14.07<br>(9.65 to<br>19.66)           | 15.00<br>(9.46 to<br>22.67)           | 12.96<br>(8.21 to<br>19.69)           | 17.97<br>(11.42 to<br>26.74)          |
| Non-venomous animal contact                     |                                          |                                           |                                          |                                           |                                       |                                       |                                       |                                       |
|                                                 | 42,359.01<br>(28,404.66 to<br>62,237.93) | 30,899.24<br>(21,234.14 to<br>44,209.07)  | 26,364.36<br>(18,661.80 to<br>36,537.28) | 36,662.45<br>(24,145.45 to<br>53,445.07)  | 621.67<br>(438.34 to<br>870.74)       | 553.59<br>(405.76 to<br>757.11)       | 508.38<br>(380.93 to<br>680.17)       | 612.02<br>(435.62 to<br>856.51)       |
| Foreign body                                    |                                          |                                           |                                          |                                           |                                       |                                       |                                       |                                       |
|                                                 | 40,292.26<br>(26,674.21 to<br>59,896.40) | 29,346.57<br>(19,731.11 to<br>42,397.14)  | 25,036.79<br>(17,583.75 to<br>35,222.27) | 34,806.88<br>(22,822.89 to<br>51,407.49)  | 584.88<br>(406.83 to<br>831.42)       | 519.12<br>(376.62 to<br>714.22)       | 476.99<br>(353.21 to<br>647.02)       | 573.33<br>(406.50 to<br>808.46)       |
| Pulmonary aspiration and foreign body in airway |                                          |                                           |                                          |                                           |                                       |                                       |                                       |                                       |
|                                                 | 2,066.74<br>(1,521.37 to<br>3,051.15)    | 1,552.68<br>(1,080.72 to<br>2,292.49)     | 1,327.57<br>(927.20 to<br>1,959.10)      | 1,855.56<br>(1,294.93 to<br>2,737.89)     | 36.78<br>(27.05 to<br>52.64)          | 34.46<br>(24.91 to<br>50.53)          | 31.38<br>(22.61 to<br>46.11)          | 38.69<br>(28.19 to<br>56.33)          |
| Foreign body in other body part                 |                                          |                                           |                                          |                                           |                                       |                                       |                                       |                                       |
|                                                 | 2,631.94<br>(1,726.67 to<br>3,752.24)    | 2,487.41<br>(1,523.28 to<br>3,962.05)     | 2,061.89<br>(1,242.03 to<br>3,183.61)    | 3,143.66<br>(1,916.35 to<br>4,755.16)     | 62.27<br>(39.46 to<br>88.85)          | 69.91<br>(41.82 to<br>106.44)         | 60.18<br>(35.66 to<br>89.78)          | 84.86<br>(51.04 to<br>126.60)         |
| Environmental heat and cold exposure            |                                          |                                           |                                          |                                           |                                       |                                       |                                       |                                       |
|                                                 | 5,389.18<br>(3,936.75 to<br>7,053.62)    | 4,824.17<br>(3,333.62 to<br>6,697.32)     | 4,312.07<br>(2,907.27 to<br>6,015.43)    | 5,508.58<br>(3,772.35 to<br>7,529.34)     | 108.27<br>(79.65 to<br>140.39)        | 110.90<br>(79.09 to<br>151.14)        | 101.91<br>(71.66 to<br>138.68)        | 123.10<br>(87.23 to<br>164.97)        |
| Other unintentional injuries                    |                                          |                                           |                                          |                                           |                                       |                                       |                                       |                                       |
|                                                 | 71,121.11<br>(51,012.04 to<br>91,283.62) | 77,898.16<br>(51,377.21 to<br>111,607.16) | 69,891.14<br>(47,375.03 to<br>98,081.07) | 83,653.09<br>(54,517.91 to<br>120,980.45) | 1,387.53<br>(1,009.22 to<br>1,780.12) | 1,678.91<br>(1,139.69 to<br>2,372.81) | 1,522.45<br>(1,048.91 to<br>2,088.88) | 1,776.63<br>(1,178.95 to<br>2,530.87) |
| Self-harm and interpersonal violence            |                                          |                                           |                                          |                                           |                                       |                                       |                                       |                                       |

| Bolivia                            |                                          |                                          |                                          |                                          |                                 |                                     |                                   |                                     |
|------------------------------------|------------------------------------------|------------------------------------------|------------------------------------------|------------------------------------------|---------------------------------|-------------------------------------|-----------------------------------|-------------------------------------|
| Cause                              | YLLs (actual counts)                     |                                          |                                          |                                          | Deaths (actual counts)          |                                     |                                   |                                     |
|                                    | 2016                                     | 2040 Forecast                            | 2040 Better Scenario                     | 2040 Worse Scenario                      | 2016                            | 2040 Forecast                       | 2040 Better Scenario              | 2040 Worse Scenario                 |
| Self-harm                          | 33,023.92<br>(24,463.48 to<br>43,007.37) | 44,401.00<br>(27,194.35 to<br>67,543.83) | 38,085.50<br>(24,371.30 to<br>55,675.44) | 48,716.51<br>(29,617.20 to<br>74,876.53) | 700.42<br>(524.35 to<br>893.88) | 1,027.44<br>(643.86 to<br>1,534.82) | 897.22<br>(585.52 to<br>1,276.59) | 1,105.15<br>(675.98 to<br>1,669.72) |
| Self-harm by firearm               | 1,830.89<br>(1,092.62 to<br>2,706.33)    | 2,435.47<br>(1,225.27 to<br>4,501.29)    | 2,047.89<br>(1,067.97 to<br>3,650.88)    | 2,721.94<br>(1,363.51 to<br>5,025.19)    | 41.38<br>(25.08 to<br>59.59)    | 60.11<br>(30.64 to<br>106.21)       | 51.73<br>(27.75 to<br>87.41)      | 65.65<br>(33.25 to<br>116.13)       |
| Self-harm by other specified means | 31,193.04<br>(23,298.76 to<br>40,810.73) | 41,965.53<br>(25,877.87 to<br>63,842.10) | 36,037.61<br>(23,133.70 to<br>52,996.50) | 45,994.57<br>(27,965.57 to<br>70,725.63) | 659.04<br>(496.32 to<br>842.20) | 967.33<br>(611.91 to<br>1,431.82)   | 845.50<br>(555.14 to<br>1,207.47) | 1,039.50<br>(637.16 to<br>1,551.19) |
| Interpersonal violence             | 38,097.19<br>(24,655.96 to<br>51,220.48) | 33,497.16<br>(20,875.06 to<br>48,240.93) | 31,805.64<br>(20,024.90 to<br>45,465.38) | 34,936.58<br>(21,605.66 to<br>50,265.86) | 687.11<br>(440.69 to<br>914.48) | 651.47<br>(415.78 to<br>927.70)     | 625.23<br>(405.35 to<br>887.03)   | 671.49<br>(428.81 to<br>954.11)     |

|                                                                              |                                                   |                                                   |                                                   |                                                   |                                          |                                             |                                            |                                             |
|------------------------------------------------------------------------------|---------------------------------------------------|---------------------------------------------------|---------------------------------------------------|---------------------------------------------------|------------------------------------------|---------------------------------------------|--------------------------------------------|---------------------------------------------|
| Physical violence by firearm                                                 | 22,581.21<br>(12,912.77 to<br>32,346.32)          | 19,906.96<br>(11,176.75 to<br>30,016.29)          | 19,218.87<br>(10,948.07 to<br>28,733.83)          | 20,561.44<br>(11,430.75 to<br>30,953.35)          | 412.80<br>(242.02 to<br>587.76)          | 383.96<br>(220.06 to<br>571.78)             | 373.65<br>(219.51 to<br>548.85)            | 393.47<br>(224.77 to<br>588.09)             |
| Physical violence by sharp object                                            | 7,681.43<br>(4,047.03 to<br>12,311.35)            | 7,673.05<br>(4,078.51 to<br>12,478.48)            | 7,537.78<br>(4,050.29 to<br>12,456.51)            | 7,753.41<br>(4,085.21 to<br>12,678.83)            | 140.84<br>(76.76 to<br>221.43)           | 151.14<br>(85.67 to<br>237.07)              | 150.07<br>(84.71 to<br>233.45)             | 151.12<br>(85.25 to<br>236.53)              |
| Physical violence by other means                                             | 7,834.54<br>(4,520.90 to<br>11,275.72)            | 5,917.14<br>(3,356.79 to<br>9,173.53)             | 5,048.99<br>(2,937.28 to<br>7,818.92)             | 6,621.73<br>(3,772.54 to<br>10,269.67)            | 133.47<br>(80.83 to<br>193.20)           | 116.38<br>(68.38 to<br>181.26)              | 101.51<br>(61.12 to<br>154.98)             | 126.90<br>(73.85 to<br>199.79)              |
| Forces of nature, conflict and terrorism, and executions and police conflict | 73.62<br>(61.93 to<br>85.98)                      | 929.51<br>(0.00 to<br>3,893.56)                   | 890.11<br>(0.00 to<br>3,721.12)                   | 971.60<br>(0.00 to<br>4,079.72)                   | 1.23<br>(1.03 to<br>1.44)                | 18.94<br>(0.00 to<br>83.22)                 | 18.69<br>(0.00 to<br>81.94)                | 19.20<br>(0.00 to<br>84.22)                 |
| Exposure to forces of nature                                                 | 0.00<br>(0.00 to<br>0.00)                         | 583.29<br>(0.00 to<br>2,751.10)                   | 558.19<br>(0.00 to<br>2,630.95)                   | 609.82<br>(0.00 to<br>2,871.88)                   | 0.00<br>(0.00 to<br>0.00)                | 12.46<br>(0.00 to<br>58.54)                 | 12.31<br>(0.00 to<br>57.87)                | 12.58<br>(0.00 to<br>59.20)                 |
| Conflict and terrorism                                                       | 0.00<br>(0.00 to<br>0.00)                         | 346.22<br>(0.00 to<br>134.26)                     | 331.92<br>(0.00 to<br>128.80)                     | 361.79<br>(0.00 to<br>139.87)                     | 0.00<br>(0.00 to<br>0.00)                | 6.49<br>(0.00 to<br>2.56)                   | 6.37<br>(0.00 to<br>2.52)                  | 6.62<br>(0.00 to<br>2.59)                   |
| Executions and police conflict                                               | 73.62<br>(61.93 to<br>85.98)                      | 0.00<br>(0.00 to<br>0.00)                         | 0.00<br>(0.00 to<br>0.00)                         | 1.23<br>(0.00 to<br>0.00)                         | 1.23<br>(1.03 to<br>1.44)                | 0.00<br>(0.00 to<br>0.00)                   | 0.00<br>(0.00 to<br>0.00)                  | 0.00<br>(0.00 to<br>0.00)                   |
| <b>Ecuador</b>                                                               |                                                   |                                                   |                                                   |                                                   |                                          |                                             |                                            |                                             |
| Cause                                                                        | YLLs (actual counts)                              |                                                   |                                                   |                                                   | Deaths (actual counts)                   |                                             |                                            |                                             |
|                                                                              | 2016                                              | 2040 Forecast                                     | 2040 Better Scenario                              | 2040 Worse Scenario                               | 2016                                     | 2040 Forecast                               | 2040 Better Scenario                       | 2040 Worse Scenario                         |
| All causes                                                                   | 2,263,769.45<br>(2,098,594.04 to<br>2,436,782.91) | 2,563,698.23<br>(2,175,884.39 to<br>2,992,556.15) | 1,982,233.78<br>(1,692,037.67 to<br>2,318,555.66) | 3,062,578.60<br>(2,573,655.68 to<br>3,606,454.16) | 75,259.47<br>(70,619.95 to<br>79,927.57) | 135,300.39<br>(112,561.05 to<br>158,225.49) | 110,548.59<br>(93,137.42 to<br>129,600.26) | 155,448.78<br>(129,247.46 to<br>181,304.33) |
| Communicable, maternal, neonatal, and nutritional diseases                   | 522,971.00<br>(456,798.43 to<br>595,901.52)       | 346,521.37<br>(282,315.25 to<br>431,513.76)       | 242,338.95<br>(202,038.41 to<br>292,580.60)       | 457,556.67<br>(368,782.55 to<br>566,338.08)       | 10,538.89<br>(9,655.81 to<br>11,494.29)  | 13,401.91<br>(11,995.07 to<br>15,627.56)    | 10,901.32<br>(9,247.59 to<br>12,809.00)    | 16,433.32<br>(13,646.10 to<br>19,686.16)    |
| HIV/AIDS and tuberculosis                                                    | 67,539.38<br>(64,298.58 to<br>71,223.15)          | 70,904.94<br>(55,007.98 to<br>90,985.70)          | 51,251.09<br>(35,268.04 to<br>65,587.76)          | 95,411.27<br>(79,140.22 to<br>123,855.62)         | 1,614.64<br>(1,535.99 to<br>1,707.17)    | 1,907.10<br>(1,449.79 to<br>2,531.55)       | 1,367.17<br>(899.06 to<br>1,782.88)        | 2,522.83<br>(2,006.55 to<br>3,484.05)       |
| Tuberculosis                                                                 | 19,678.76<br>(17,400.73 to<br>22,577.11)          | 16,996.85<br>(9,050.04 to<br>34,067.14)           | 8,634.35<br>(4,579.97 to<br>17,412.67)            | 23,945.80<br>(11,847.41 to<br>52,561.86)          | 603.94<br>(540.98 to<br>684.94)          | 692.48<br>(401.76 to<br>1,280.02)           | 368.97<br>(214.53 to<br>670.70)            | 940.72<br>(508.22 to<br>1,945.10)           |
| HIV/AIDS                                                                     | 47,860.62<br>(45,577.18 to<br>50,171.02)          | 53,908.09<br>(40,311.26 to<br>62,946.00)          | 43,116.75<br>(27,282.59 to<br>53,480.30)          | 71,465.47<br>(61,787.07 to<br>81,765.01)          | 1,010.69<br>(962.40 to<br>1,059.69)      | 1,214.61<br>(843.07 to<br>1,438.35)         | 998.20<br>(558.08 to<br>1,260.13)          | 1,582.11<br>(1,321.50 to<br>1,818.74)       |
| Diarrhea, lower respiratory, and other common infectious diseases            | 183,879.13<br>(156,797.61 to<br>217,488.29)       | 153,352.24<br>(119,906.37 to<br>206,747.46)       | 111,899.35<br>(89,898.24 to<br>143,823.82)        | 216,337.69<br>(160,030.84 to<br>305,889.61)       | 5,040.37<br>(4,531.99 to<br>5,563.89)    | 8,725.52<br>(7,063.64 to<br>10,682.41)      | 7,399.30<br>(6,029.24 to<br>9,079.87)      | 10,880.27<br>(8,556.81 to<br>13,924.84)     |
| Diarrheal diseases                                                           | 18,607.73<br>(14,431.71 to<br>24,077.96)          | 8,548.23<br>(3,277.88 to<br>21,250.15)            | 4,888.46<br>(2,064.77 to<br>11,904.00)            | 13,319.14<br>(4,051.60 to<br>37,934.36)           | 352.66<br>(298.33 to<br>417.66)          | 381.77<br>(162.91 to<br>878.58)             | 256.69<br>(117.07 to<br>608.04)            | 531.09<br>(187.06 to<br>1,379.61)           |
| Intestinal infectious diseases                                               | 152.22<br>(73.74 to<br>277.70)                    | 102.26<br>(46.54 to<br>190.73)                    | 89.88<br>(40.24 to<br>172.40)                     | 107.44<br>(48.46 to<br>204.21)                    | 3.14<br>(1.56 to<br>5.66)                | 2.68<br>(1.25 to<br>5.04)                   | 2.47<br>(1.17 to<br>4.67)                  | 2.76<br>(1.29 to<br>5.18)                   |
| Typhoid fever                                                                | 145.73<br>(68.30 to<br>268.99)                    | 99.48<br>(44.46 to<br>187.54)                     | 87.96<br>(39.00 to<br>168.48)                     | 104.37<br>(46.30 to<br>199.98)                    | 3.03<br>(1.46 to<br>5.56)                | 2.59<br>(1.19 to<br>4.92)                   | 2.41<br>(1.10 to<br>4.54)                  | 2.66<br>(1.22 to<br>5.03)                   |
| Paratyphoid fever                                                            | 0.99<br>(0.36 to<br>2.19)                         | 0.89<br>(0.33 to<br>2.00)                         | 0.68<br>(0.25 to<br>1.53)                         | 0.95<br>(0.35 to<br>2.14)                         | 0.02<br>(0.01 to<br>0.04)                | 0.02<br>(0.01 to<br>0.05)                   | 0.02<br>(0.01 to<br>0.04)                  | 0.02<br>(0.01 to<br>0.05)                   |
| Other intestinal infectious diseases                                         | 5.50<br>(2.00 to<br>12.67)                        | 1.89<br>(0.65 to<br>4.52)                         | 1.23<br>(0.43 to<br>2.89)                         | 2.13<br>(0.72 to<br>4.96)                         | 0.10<br>(0.04 to<br>0.20)                | 0.07<br>(0.02 to<br>0.15)                   | 0.05<br>(0.01 to<br>0.11)                  | 0.07<br>(0.02 to<br>0.15)                   |
| Lower respiratory infections                                                 | 148,216.93<br>(126,461.65 to<br>173,987.02)       | 122,250.55<br>(91,728.94 to<br>167,206.67)        | 91,911.24<br>(71,675.70 to<br>117,942.51)         | 170,126.24<br>(121,331.13 to<br>244,414.78)       | 4,402.49<br>(3,953.86 to<br>4,854.34)    | 7,908.75<br>(6,411.67 to<br>9,709.60)       | 6,819.08<br>(5,521.88 to<br>8,396.13)      | 9,778.90<br>(7,568.90 to<br>12,420.82)      |
| Upper respiratory infections                                                 | 96.82<br>(44.79 to<br>191.06)                     | 76.95<br>(32.64 to<br>154.78)                     | 45.42<br>(18.31 to<br>94.84)                      | 87.72<br>(36.33 to<br>178.69)                     | 2.00<br>(1.13 to<br>3.27)                | 2.66<br>(1.15 to<br>5.11)                   | 1.68<br>(0.71 to<br>3.32)                  | 2.92<br>(1.26 to<br>5.70)                   |

|                                                |                                                  |                                                   |                                                   |                                                    |                                           |                                            |                                            |                                            |
|------------------------------------------------|--------------------------------------------------|---------------------------------------------------|---------------------------------------------------|----------------------------------------------------|-------------------------------------------|--------------------------------------------|--------------------------------------------|--------------------------------------------|
| Otitis media                                   | 1.35<br>(0.85 to 2.09)                           | 0.28<br>(0.14 to 0.54)                            | 0.27<br>(0.14 to 0.54)                            | 0.28<br>(0.15 to 0.54)                             | 0.03<br>(0.02 to 0.04)                    | 0.01<br>(0.01 to 0.03)                     | 0.01<br>(0.03)                             | 0.01<br>(0.01 to 0.03)                     |
| Meningitis                                     | 8,540.23<br>(7,189.16 to 10,165.75)              | 4,982.62<br>(3,286.02 to 6,883.15)                | 3,779.52<br>(2,634.25 to 5,112.62)                | 6,976.75<br>(3,705.73 to 11,376.64)                | 144.21<br>(126.07 to 167.55)              | 120.61<br>(93.52 to 150.52)                | 100.83<br>(79.89 to 126.77)                | 143.11<br>(101.40 to 195.29)               |
| Pneumococcal meningitis                        | 435.89<br>(354.15 to 537.53)                     | 224.20<br>(163.22 to 296.53)                      | 205.43<br>(151.40 to 269.27)                      | 260.06<br>(184.30 to 359.02)                       | 8.33<br>(7.02 to 10.11)                   | 6.92<br>(5.33 to 8.84)                     | 6.80<br>(5.27 to 8.73)                     | 7.51<br>(5.71 to 9.62)                     |
| H influenzae type B meningitis                 | 1,111.59<br>(893.94 to 1,379.50)                 | 1,235.27<br>(400.68 to 2,762.19)                  | 837.98<br>(334.66 to 1,668.06)                    | 3,007.45<br>(628.45 to 7,478.67)                   | 17.67<br>(14.92 to 20.91)                 | 20.00<br>(9.93 to 37.55)                   | 15.57<br>(9.20 to 25.61)                   | 40.49<br>(12.47 to 93.58)                  |
| Meningococcal meningitis                       | 2,585.13<br>(2,159.33 to 3,113.99)               | 1,203.15<br>(869.52 to 1,608.80)                  | 927.17<br>(667.03 to 1,236.24)                    | 1,270.86<br>(897.18 to 1,693.88)                   | 42.81<br>(37.03 to 50.27)                 | 31.09<br>(24.76 to 38.57)                  | 25.91<br>(20.33 to 32.87)                  | 31.64<br>(25.15 to 39.56)                  |
| Other meningitis                               | 4,407.62<br>(3,692.29 to 5,262.71)               | 2,320.00<br>(1,686.90 to 3,039.05)                | 1,808.93<br>(1,310.58 to 2,386.37)                | 2,438.38<br>(1,742.00 to 3,310.25)                 | 75.40<br>(65.74 to 87.36)                 | 62.60<br>(49.73 to 77.47)                  | 52.55<br>(40.28 to 66.44)                  | 63.47<br>(50.34 to 79.42)                  |
| Encephalitis                                   | 6,290.99<br>(4,643.11 to 10,096.29)              | 4,270.92<br>(2,828.60 to 7,005.51)                | 3,287.93<br>(2,242.90 to 5,283.62)                | 4,595.93<br>(2,995.74 to 7,585.12)                 | 103.92<br>(81.94 to 158.47)               | 104.06<br>(77.75 to 156.98)                | 86.31<br>(64.84 to 129.19)                 | 108.48<br>(79.74 to 163.32)                |
| Diphtheria                                     | 21.55<br>(12.47 to 35.05)                        | 4.02<br>(1.89 to 7.88)                            | 2.65<br>(1.50 to 4.48)                            | 12.75<br>(2.35 to 34.30)                           | 0.30<br>(0.19 to 0.47)                    | 0.06<br>(0.03 to 0.12)                     | 0.05<br>(0.03 to 0.08)                     | 0.17<br>(0.05 to 0.42)                     |
| Whooping cough                                 | 1,223.87<br>(295.84 to 4,573.30)                 | 605.17<br>(45.75 to 2,578.12)                     | 178.99<br>(23.88 to 740.59)                       | 1,964.02<br>(79.38 to 7,799.06)                    | 14.54<br>(3.56 to 54.11)                  | 7.23<br>(0.61 to 30.60)                    | 2.21<br>(0.32 to 8.99)                     | 23.18<br>(1.03 to 91.59)                   |
| Tetanus                                        | 178.76<br>(127.63 to 238.94)                     | 36.72<br>(22.79 to 53.89)                         | 32.45<br>(19.94 to 47.90)                         | 52.16<br>(32.75 to 81.48)                          | 4.15<br>(2.76 to 5.68)                    | 1.05<br>(0.65 to 1.53)                     | 1.02<br>(0.61 to 1.46)                     | 1.21<br>(0.80 to 1.75)                     |
| Measles                                        | 19.35<br>(12.60 to 29.66)                        | 12,239.07<br>(1,316.95 to 44,134.26)              | 7,533.91<br>(999.26 to 22,644.39)                 | 18,830.56<br>(1,672.77 to 71,371.91)               | 0.24<br>(0.16 to 0.36)                    | 184.59<br>(20.94 to 593.51)                | 120.05<br>(15.46 to 321.75)                | 275.87<br>(25.02 to 916.33)                |
| <b>Ecuador</b>                                 |                                                  |                                                   |                                                   |                                                    |                                           |                                            |                                            |                                            |
| Cause                                          | YLLs (actual counts)                             |                                                   |                                                   |                                                    | Deaths (actual counts)                    |                                            |                                            |                                            |
|                                                | 2016                                             | 2040 Forecast                                     | 2040 Better Scenario                              | 2040 Worse Scenario                                | 2016                                      | 2040 Forecast                              | 2040 Better Scenario                       | 2040 Worse Scenario                        |
| Varicella and herpes zoster                    | 529.33<br>(281.37 to 888.14)                     | 235.45<br>(108.18 to 412.20)                      | 148.62<br>(69.01 to 262.72)                       | 264.71<br>(117.52 to 463.92)                       | 12.69<br>(6.53 to 20.62)                  | 12.04<br>(5.64 to 19.87)                   | 8.88<br>(4.25 to 15.63)                    | 12.57<br>(5.81 to 21.36)                   |
| <b>Neglected tropical diseases and malaria</b> | <b>6,389.92</b><br><b>(4,150.47 to 9,396.51)</b> | <b>9,844.47</b><br><b>(6,606.23 to 13,926.06)</b> | <b>8,524.14</b><br><b>(5,927.67 to 11,884.50)</b> | <b>10,246.48</b><br><b>(6,771.11 to 14,650.35)</b> | <b>130.21</b><br><b>(91.59 to 185.25)</b> | <b>264.86</b><br><b>(192.12 to 360.15)</b> | <b>251.76</b><br><b>(184.45 to 339.57)</b> | <b>264.89</b><br><b>(190.84 to 363.09)</b> |
| Malaria                                        | 453.85<br>(178.81 to 1,685.52)                   | 189.29<br>(66.15 to 819.82)                       | 170.13<br>(60.43 to 715.92)                       | 194.17<br>(67.16 to 841.87)                        | 9.22<br>(4.02 to 32.32)                   | 5.12<br>(1.89 to 21.20)                    | 4.79<br>(1.79 to 19.88)                    | 5.15<br>(1.90 to 21.44)                    |
| Chagas disease                                 | 413.81<br>(361.10 to 471.97)                     | 271.30<br>(198.45 to 377.71)                      | 329.40<br>(245.52 to 451.51)                      | 250.95<br>(184.77 to 350.33)                       | 20.84<br>(18.45 to 23.67)                 | 17.14<br>(12.53 to 24.39)                  | 21.17<br>(15.75 to 29.08)                  | 15.61<br>(11.49 to 22.09)                  |
| Leishmaniasis                                  | 0.00<br>(0.00 to 0.00)                           | 0.00<br>(0.00 to 0.00)                            | 0.00<br>(0.00 to 0.00)                            | 0.00<br>(0.00 to 0.00)                             | 0.00<br>(0.00 to 0.00)                    | 0.00<br>(0.00 to 0.00)                     | 0.00<br>(0.00 to 0.00)                     | 0.00<br>(0.00 to 0.00)                     |
| African trypanosomiasis                        | 0.00<br>(0.00 to 0.00)                           | 0.00<br>(0.00 to 0.00)                            | 0.00<br>(0.00 to 0.00)                            | 0.00<br>(0.00 to 0.00)                             | 0.00<br>(0.00 to 0.00)                    | 0.00<br>(0.00 to 0.00)                     | 0.00<br>(0.00 to 0.00)                     | 0.00<br>(0.00 to 0.00)                     |
| Schistosomiasis                                | 0.00<br>(0.00 to 0.00)                           | 0.00<br>(0.00 to 0.00)                            | 0.00<br>(0.00 to 0.00)                            | 0.00<br>(0.00 to 0.00)                             | 0.00<br>(0.00 to 0.00)                    | 0.00<br>(0.00 to 0.00)                     | 0.00<br>(0.00 to 0.00)                     | 0.00<br>(0.00 to 0.00)                     |
| Cysticercosis                                  | 270.84<br>(241.13 to 300.84)                     | 70.46<br>(53.65 to 99.31)                         | 61.48<br>(46.62 to 87.40)                         | 72.82<br>(55.44 to 102.96)                         | 6.09<br>(5.44 to 6.77)                    | 1.99<br>(1.51 to 2.75)                     | 1.79<br>(1.35 to 2.46)                     | 2.03<br>(1.54 to 2.83)                     |
| Cystic echinococcosis                          | 9.52<br>(8.14 to 11.07)                          | 3.94<br>(2.74 to 5.74)                            | 2.22<br>(1.58 to 3.16)                            | 4.59<br>(3.23 to 6.57)                             | 0.25<br>(0.22 to 0.29)                    | 0.16<br>(0.11 to 0.23)                     | 0.09<br>(0.07 to 0.13)                     | 0.18<br>(0.13 to 0.26)                     |

|                                                          |                                                 |                                              |                                              |                                               |                                        |                                       |                                      |                                        |
|----------------------------------------------------------|-------------------------------------------------|----------------------------------------------|----------------------------------------------|-----------------------------------------------|----------------------------------------|---------------------------------------|--------------------------------------|----------------------------------------|
| Dengue                                                   | 4,233.72<br>(2,361.55 to<br>6,311.17)           | 8,814.32<br>(5,627.39 to<br>12,439.23)       | 7,589.80<br>(4,971.37 to<br>10,478.67)       | 9,186.95<br>(5,791.05 to<br>12,960.95)        | 76.64<br>(44.66 to<br>109.57)          | 229.38<br>(153.73 to<br>310.63)       | 215.01<br>(146.48 to<br>290.53)      | 230.24<br>(153.79 to<br>314.56)        |
| Yellow fever                                             | 305.20<br>(62.41 to<br>884.10)                  | 71.75<br>(12.82 to<br>220.70)                | 46.52<br>(8.36 to<br>150.22)                 | 80.87<br>(14.88 to<br>258.87)                 | 5.15<br>(1.06 to<br>14.72)             | 1.32<br>(0.24 to<br>4.03)             | 0.88<br>(0.16 to<br>2.74)            | 1.47<br>(0.28 to<br>4.60)              |
| Rabies                                                   | 1.36<br>(0.97 to<br>2.01)                       | 0.49<br>(0.31 to<br>0.80)                    | 0.24<br>(0.16 to<br>0.39)                    | 0.60<br>(0.38 to<br>0.97)                     | 0.03<br>(0.02 to<br>0.04)              | 0.01<br>(0.01 to<br>0.02)             | 0.01<br>(0.00 to<br>0.01)            | 0.01<br>(0.01 to<br>0.02)              |
| Intestinal nematode infections                           | 328.98<br>(124.24 to<br>595.89)                 | 218.51<br>(81.15 to<br>452.10)               | 178.15<br>(68.94 to<br>366.75)               | 229.47<br>(85.36 to<br>460.91)                | 4.58<br>(2.12 to<br>7.87)              | 3.55<br>(1.70 to<br>6.52)             | 3.11<br>(1.54 to<br>5.53)            | 3.64<br>(1.71 to<br>6.69)              |
| Other neglected tropical diseases                        | 363.20<br>(220.25 to<br>1,070.90)               | 204.41<br>(113.50 to<br>637.72)              | 146.18<br>(84.48 to<br>449.09)               | 226.06<br>(125.36 to<br>698.41)               | 7.25<br>(4.92 to<br>20.75)             | 6.19<br>(3.68 to<br>18.13)            | 4.90<br>(3.00 to<br>14.61)           | 6.55<br>(3.90 to<br>19.42)             |
| <b>Maternal disorders</b>                                | <b>12,374.11</b><br>(10,470.17 to<br>14,583.45) | <b>7,169.28</b><br>(5,406.02 to<br>9,349.33) | <b>4,313.10</b><br>(3,154.39 to<br>5,783.34) | <b>8,356.31</b><br>(6,126.43 to<br>11,214.94) | <b>217.19</b><br>(183.80 to<br>255.33) | <b>128.49</b><br>(96.70 to<br>167.95) | <b>77.60</b><br>(56.15 to<br>103.71) | <b>149.63</b><br>(110.84 to<br>200.49) |
| Maternal hemorrhage                                      | 3,218.72<br>(2,462.12 to<br>3,983.92)           | 1,883.76<br>(1,239.33 to<br>2,684.68)        | 1,139.41<br>(713.75 to<br>1,620.66)          | 2,183.59<br>(1,391.24 to<br>3,173.36)         | 34.26<br>(44.05 to<br>71.12)           | 57.59<br>(22.49 to<br>48.26)          | 20.78<br>(13.01 to<br>29.36)         | 39.69<br>(24.97 to<br>57.34)           |
| Maternal sepsis and other maternal infections            | 1,155.78<br>(811.47 to<br>1,572.75)             | 679.00<br>(413.23 to<br>1,036.18)            | 406.18<br>(250.06 to<br>628.26)              | 790.67<br>(483.97 to<br>1,244.33)             | 20.33<br>(14.49 to<br>27.44)           | 12.14<br>(7.53 to<br>18.04)           | 7.29<br>(4.51 to<br>11.24)           | 14.12<br>(8.79 to<br>22.22)            |
| Maternal hypertensive disorders                          | 3,898.19<br>(3,032.51 to<br>4,794.37)           | 2,432.00<br>(1,645.60 to<br>3,458.84)        | 1,451.47<br>(951.25 to<br>2,115.17)          | 2,826.66<br>(1,858.82 to<br>4,136.45)         | 67.44<br>(52.43 to<br>82.90)           | 43.06<br>(29.06 to<br>60.88)          | 25.79<br>(16.75 to<br>37.41)         | 50.00<br>(33.52 to<br>72.56)           |
| Maternal obstructed labor and uterine rupture            | 284.75<br>(160.95 to<br>454.44)                 | 160.30<br>(80.31 to<br>285.89)               | 92.63<br>(45.97 to<br>165.95)                | 187.73<br>(93.15 to<br>337.28)                | 5.05<br>(2.90 to<br>7.92)              | 2.92<br>(1.49 to<br>5.24)             | 1.70<br>(0.86 to<br>3.03)            | 3.42<br>(1.73 to<br>6.12)              |
| Maternal abortion, miscarriage, and ectopic pregnancy    | 1,164.05<br>(780.08 to<br>1,660.10)             | 840.06<br>(480.20 to<br>1,424.91)            | 505.79<br>(287.86 to<br>873.61)              | 995.98<br>(549.34 to<br>1,725.13)             | 20.82<br>(14.20 to<br>29.51)           | 15.32<br>(8.81 to<br>26.05)           | 9.26<br>(5.27 to<br>15.83)           | 18.14<br>(10.14 to<br>30.74)           |
| Indirect maternal deaths                                 | 1,409.78<br>(899.59 to<br>2,647.71)             | 540.99<br>(289.24 to<br>1,169.72)            | 324.02<br>(167.81 to<br>683.73)              | 635.90<br>(331.72 to<br>1,357.79)             | 24.00<br>(15.32 to<br>44.63)           | 9.42<br>(5.05 to<br>19.95)            | 5.67<br>(2.96 to<br>11.87)           | 11.05<br>(5.80 to<br>23.56)            |
| Late maternal deaths                                     | 66.31<br>(35.52 to<br>110.14)                   | 40.39<br>(19.34 to<br>72.69)                 | 24.00<br>(11.15 to<br>44.48)                 | 47.31<br>(23.01 to<br>86.28)                  | 1.17<br>(0.64 to<br>1.91)              | 0.72<br>(0.35 to<br>1.31)             | 0.43<br>(0.20 to<br>0.81)            | 0.85<br>(0.41 to<br>1.57)              |
| Maternal deaths aggravated by HIV/AIDS                   | 12.11<br>(5.68 to<br>21.54)                     | 22.68<br>(8.96 to<br>48.92)                  | 14.81<br>(5.80 to<br>31.59)                  | 26.62<br>(10.53 to<br>57.29)                  | 0.22<br>(0.10 to<br>0.39)              | 0.42<br>(0.17 to<br>0.88)             | 0.28<br>(0.11 to<br>0.59)            | 0.50<br>(0.20 to<br>1.04)              |
| Other maternal disorders                                 | 1,164.41<br>(774.86 to<br>1,551.46)             | 570.09<br>(346.11 to<br>867.09)              | 354.77<br>(212.52 to<br>534.15)              | 661.84<br>(389.36 to<br>999.80)               | 20.56<br>(13.73 to<br>27.37)           | 10.23<br>(6.14 to<br>15.54)           | 6.40<br>(3.87 to<br>9.61)            | 11.86<br>(7.19 to<br>17.80)            |
| <b>Ecuador</b>                                           |                                                 |                                              |                                              |                                               |                                        |                                       |                                      |                                        |
| Cause                                                    | YLLs (actual counts)                            |                                              |                                              |                                               | Deaths (actual counts)                 |                                       |                                      |                                        |
|                                                          | 2016                                            | 2040 Forecast                                | 2040 Better Scenario                         | 2040 Worse Scenario                           | 2016                                   | 2040 Forecast                         | 2040 Better Scenario                 | 2040 Worse Scenario                    |
| Neonatal disorders                                       | 220,650.56<br>(183,493.41 to<br>260,307.75)     | 84,909.09<br>(53,055.57 to<br>126,236.54)    | 49,754.84<br>(32,537.00 to<br>73,203.40)     | 105,703.26<br>(66,257.84 to<br>159,070.62)    | 2,550.13<br>(2,120.36 to<br>3,008.30)  | 981.54<br>(613.39 to<br>1,459.14)     | 575.20<br>(376.29 to<br>846.14)      | 1,221.84<br>(765.84 to<br>1,838.42)    |
| Neonatal preterm birth                                   | 127,097.17<br>(102,931.50 to<br>150,755.95)     | 38,421.72<br>(24,160.23 to<br>56,380.46)     | 21,575.01<br>(13,536.11 to<br>30,914.54)     | 50,587.11<br>(31,582.26 to<br>74,229.71)      | 1,468.63<br>(1,189.20 to<br>1,741.99)  | 444.04<br>(279.39 to<br>651.67)       | 249.36<br>(156.49 to<br>357.34)      | 584.59<br>(365.02 to<br>857.67)        |
| Neonatal encephalopathy due to birth asphyxia and trauma | 39,101.60<br>(30,735.46 to<br>48,418.15)        | 15,231.32<br>(8,092.07 to<br>26,064.31)      | 9,294.07<br>(5,129.61 to<br>15,652.34)       | 17,925.99<br>(9,361.16 to<br>31,164.03)       | 452.01<br>(355.30 to<br>559.77)        | 176.12<br>(93.73 to<br>301.19)        | 107.47<br>(59.33 to<br>180.91)       | 207.27<br>(108.32 to<br>360.28)        |
| Neonatal sepsis and other neonatal infections            | 29,598.60<br>(20,039.72 to<br>55,915.28)        | 19,380.39<br>(10,487.47 to<br>37,196.36)     | 11,844.82<br>(6,550.85 to<br>22,219.60)      | 22,860.40<br>(12,169.43 to<br>44,402.48)      | 342.15<br>(231.66 to<br>623.12)        | 224.06<br>(121.33 to<br>430.04)       | 136.94<br>(75.76 to<br>256.82)       | 264.29<br>(140.67 to<br>513.22)        |
| Hemolytic disease and other neonatal jaundice            | 1,422.40<br>(810.38 to<br>2,357.47)             | 455.02<br>(174.77 to<br>979.62)              | 259.12<br>(102.52 to<br>559.54)              | 550.66<br>(209.92 to<br>1,185.50)             | 16.43<br>(9.36 to<br>27.23)            | 5.26<br>(2.02 to<br>11.32)            | 2.99<br>(1.18 to<br>6.46)            | 6.36<br>(2.43 to<br>13.70)             |

|                                                                         |                                                                        |                                                                        |                                                                        |                                                                        |                                                               |                                                                 |                                                                |                                                                  |
|-------------------------------------------------------------------------|------------------------------------------------------------------------|------------------------------------------------------------------------|------------------------------------------------------------------------|------------------------------------------------------------------------|---------------------------------------------------------------|-----------------------------------------------------------------|----------------------------------------------------------------|------------------------------------------------------------------|
| Other neonatal disorders                                                | 23,430.79<br>(17,667.39 to<br>30,221.69)                               | 11,420.65<br>(6,301.93 to<br>19,706.44)                                | 6,781.82<br>(3,857.76 to<br>11,148.72)                                 | 13,779.10<br>(7,587.33 to<br>23,415.21)                                | 270.90<br>(204.21 to<br>349.48)                               | 132.06<br>(72.93 to<br>228.01)                                  | 78.42<br>(44.61 to<br>128.91)                                  | 159.33<br>(87.75 to<br>270.73)                                   |
| <b>Nutritional deficiencies</b>                                         | <b>21,201.90</b><br><b>(16,851.31 to</b><br><b>26,435.45)</b>          | <b>14,893.87</b><br><b>(12,089.31 to</b><br><b>18,224.67)</b>          | <b>12,032.82</b><br><b>(9,836.04 to</b><br><b>14,477.21)</b>           | <b>15,641.70</b><br><b>(12,522.23 to</b><br><b>19,424.59)</b>          | <b>797.10</b><br><b>(712.07 to</b><br><b>890.51)</b>          | <b>1,215.52</b><br><b>(998.48 to</b><br><b>1,474.98)</b>        | <b>1,084.72</b><br><b>(875.97 to</b><br><b>1,322.37)</b>       | <b>1,209.00</b><br><b>(977.01 to</b><br><b>1,469.95)</b>         |
| Protein-energy malnutrition                                             | 18,572.35<br>(14,367.02 to<br>23,315.36)                               | 12,052.78<br>(9,371.34 to<br>15,628.06)                                | 9,810.44<br>(7,781.94 to<br>12,454.08)                                 | 12,661.70<br>(9,818.79 to<br>16,280.37)                                | 691.69<br>(600.72 to<br>790.02)                               | 1,025.80<br>(798.94 to<br>1,292.16)                             | 923.64<br>(720.86 to<br>1,158.55)                              | 1,019.21<br>(786.50 to<br>1,282.32)                              |
| Iodine deficiency                                                       | 85.50<br>(3.23 to<br>395.32)                                           | 323.70<br>(3.99 to<br>1,332.28)                                        | 228.99<br>(2.58 to<br>969.95)                                          | 352.90<br>(4.48 to<br>1,446.76)                                        | 1.81<br>(0.09 to<br>6.65)                                     | 19.62<br>(0.14 to<br>123.71)                                    | 15.34<br>(0.10 to<br>100.07)                                   | 20.29<br>(0.17 to<br>120.30)                                     |
| Dietary iron deficiency                                                 | 98.82<br>(48.88 to<br>135.37)                                          | 63.06<br>(31.09 to<br>88.06)                                           | 50.74<br>(24.54 to<br>70.54)                                           | 67.31<br>(32.88 to<br>94.40)                                           | 1.75<br>(0.80 to<br>2.34)                                     | 1.33<br>(0.60 to<br>1.86)                                       | 1.12<br>(0.49 to<br>1.58)                                      | 1.40<br>(0.63 to<br>1.95)                                        |
| Other nutritional deficiencies                                          | 2,445.23<br>(1,334.70 to<br>3,448.03)                                  | 2,454.32<br>(1,183.17 to<br>3,630.24)                                  | 1,942.65<br>(909.57 to<br>2,897.22)                                    | 2,559.80<br>(1,256.69 to<br>3,765.14)                                  | 101.85<br>(44.11 to<br>157.51)                                | 168.76<br>(70.21 to<br>282.04)                                  | 144.62<br>(58.87 to<br>242.45)                                 | 168.11<br>(70.06 to<br>275.14)                                   |
| <b>Other communicable, maternal, neonatal, and nutritional diseases</b> | <b>10,936.00</b><br><b>(7,274.50 to</b><br><b>16,867.96)</b>           | <b>5,447.48</b><br><b>(4,184.69 to</b><br><b>7,293.64)</b>             | <b>4,063.61</b><br><b>(3,138.95 to</b><br><b>5,311.25)</b>             | <b>5,859.96</b><br><b>(4,471.41 to</b><br><b>7,921.08)</b>             | <b>189.25</b><br><b>(144.77 to</b><br><b>260.10)</b>          | <b>178.89</b><br><b>(145.92 to</b><br><b>212.36)</b>            | <b>145.58</b><br><b>(116.88 to</b><br><b>172.84)</b>           | <b>154.86</b><br><b>(149.92 to</b><br><b>219.27)</b>             |
| Sexually transmitted infections excluding HIV                           | 6,507.12<br>(2,955.99 to<br>12,303.38)                                 | 1,376.91<br>(555.09 to<br>2,959.70)                                    | 925.23<br>(391.07 to<br>1,954.30)                                      | 1,529.54<br>(620.84 to<br>3,305.26)                                    | 80.19<br>(38.56 to<br>148.28)                                 | 20.03<br>(10.09 to<br>38.43)                                    | 14.24<br>(7.65 to<br>26.60)                                    | 21.88<br>(10.85 to<br>43.29)                                     |
| Syphilis                                                                | 6,305.32<br>(2,757.52 to<br>12,118.23)                                 | 1,226.36<br>(414.82 to<br>2,787.34)                                    | 798.50<br>(269.81 to<br>1,822.00)                                      | 1,372.35<br>(460.82 to<br>3,144.40)                                    | 75.26<br>(33.66 to<br>143.37)                                 | 15.64<br>(6.00 to<br>34.02)                                     | 10.42<br>(4.14 to<br>22.36)                                    | 17.37<br>(6.64 to<br>38.53)                                      |
| Chlamydia infection                                                     | 39.43<br>(32.86 to<br>47.61)                                           | 29.25<br>(22.42 to<br>37.56)                                           | 24.58<br>(18.63 to<br>31.52)                                           | 30.56<br>(23.45 to<br>39.41)                                           | 0.95<br>(0.81 to<br>1.12)                                     | 0.86<br>(0.67 to<br>1.06)                                       | 0.75<br>(0.59 to<br>0.93)                                      | 0.88<br>(0.69 to<br>1.09)                                        |
| Gonococcal infection                                                    | 104.78<br>(88.28 to<br>125.43)                                         | 79.51<br>(61.30 to<br>102.62)                                          | 67.21<br>(51.29 to<br>86.78)                                           | 82.89<br>(64.01 to<br>107.38)                                          | 2.66<br>(2.25 to<br>3.09)                                     | 2.44<br>(1.90 to<br>3.02)                                       | 2.13<br>(1.65 to<br>2.60)                                      | 2.50<br>(1.95 to<br>3.11)                                        |
| Other sexually transmitted infections                                   | 57.59<br>(47.70 to<br>70.07)                                           | 41.80<br>(32.64 to<br>53.39)                                           | 34.93<br>(26.99 to<br>44.95)                                           | 43.74<br>(33.62 to<br>56.18)                                           | 1.32<br>(1.12 to<br>1.57)                                     | 1.10<br>(0.87 to<br>1.36)                                       | 0.95<br>(0.75 to<br>1.18)                                      | 1.14<br>(0.90 to<br>1.41)                                        |
| Acute hepatitis                                                         | 1,569.71<br>(1,365.37 to<br>1,785.09)                                  | 1,364.14<br>(1,135.52 to<br>1,642.74)                                  | 1,047.34<br>(833.16 to<br>1,306.08)                                    | 1,435.36<br>(1,179.63 to<br>1,742.98)                                  | 39.83<br>(35.20 to<br>45.27)                                  | 50.55<br>(41.59 to<br>60.62)                                    | 40.64<br>(32.46 to<br>50.37)                                   | 51.82<br>(42.76 to<br>62.20)                                     |
| Acute hepatitis A                                                       | 80.51<br>(20.69 to<br>151.37)                                          | 32.60<br>(13.16 to<br>59.49)                                           | 23.23<br>(9.98 to<br>42.31)                                            | 35.59<br>(13.93 to<br>66.48)                                           | 1.14<br>(0.40 to<br>1.99)                                     | 0.77<br>(0.33 to<br>1.55)                                       | 0.60<br>(0.27 to<br>1.22)                                      | 0.81<br>(0.36 to<br>1.52)                                        |
| Acute hepatitis B                                                       | 940.01<br>(779.31 to<br>1,114.96)                                      | 949.92<br>(742.56 to<br>1,185.70)                                      | 729.16<br>(552.50 to<br>938.98)                                        | 999.57<br>(785.29 to<br>1,258.19)                                      | 26.94<br>(22.65 to<br>31.71)                                  | 35.26<br>(27.58 to<br>44.14)                                    | 27.77<br>(20.56 to<br>36.35)                                   | 36.45<br>(28.48 to<br>46.17)                                     |
| Acute hepatitis C                                                       | 46.30<br>(35.92 to<br>58.99)                                           | 54.44<br>(39.21 to<br>74.11)                                           | 45.78<br>(31.80 to<br>64.32)                                           | 55.59<br>(39.62 to<br>76.27)                                           | 1.40<br>(1.05 to<br>1.85)                                     | 1.56<br>(1.51 to<br>2.96)                                       | 1.88<br>(1.26 to<br>2.65)                                      | 2.16<br>(1.52 to<br>2.95)                                        |
| Acute hepatitis E                                                       | 502.89<br>(388.29 to<br>640.51)                                        | 327.18<br>(227.30 to<br>437.77)                                        | 249.17<br>(173.60 to<br>340.70)                                        | 344.62<br>(241.85 to<br>463.93)                                        | 10.35<br>(8.05 to<br>13.18)                                   | 12.35<br>(8.26 to<br>17.45)                                     | 10.39<br>(6.61 to<br>14.87)                                    | 12.39<br>(8.31 to<br>17.45)                                      |
| Other unspecified infectious diseases                                   | 2,859.18<br>(2,221.26 to<br>3,488.72)                                  | 2,706.43<br>(1,950.79 to<br>3,289.31)                                  | 2,091.05<br>(1,514.03 to<br>2,520.12)                                  | 2,895.06<br>(2,151.21 to<br>3,511.36)                                  | 69.23<br>(50.79 to<br>79.83)                                  | 108.31<br>(75.96 to<br>126.30)                                  | 90.70<br>(63.88 to<br>106.43)                                  | 111.17<br>(79.15 to<br>131.23)                                   |
| <b>Non-communicable diseases</b>                                        | <b>1,162,386.16</b><br><b>(1,083,444.04 to</b><br><b>1,244,534.90)</b> | <b>1,753,640.33</b><br><b>(1,416,938.89 to</b><br><b>2,109,421.51)</b> | <b>1,385,322.06</b><br><b>(1,142,512.40 to</b><br><b>1,643,058.42)</b> | <b>2,073,454.63</b><br><b>(1,654,970.61 to</b><br><b>2,532,436.83)</b> | <b>52,883.34</b><br><b>(49,638.52 to</b><br><b>56,220.89)</b> | <b>109,829.99</b><br><b>(89,213.56 to</b><br><b>129,990.70)</b> | <b>90,027.02</b><br><b>(74,210.61 to</b><br><b>107,580.91)</b> | <b>125,546.36</b><br><b>(101,539.26 to</b><br><b>150,305.10)</b> |
| <b>Ecuador</b>                                                          |                                                                        |                                                                        |                                                                        |                                                                        |                                                               |                                                                 |                                                                |                                                                  |
| Cause                                                                   | YLLs (actual counts)                                                   |                                                                        |                                                                        |                                                                        | Deaths (actual counts)                                        |                                                                 |                                                                |                                                                  |
|                                                                         | 2016                                                                   | 2040 Forecast                                                          | 2040 Better Scenario                                                   | 2040 Worse Scenario                                                    | 2016                                                          | 2040 Forecast                                                   | 2040 Better Scenario                                           | 2040 Worse Scenario                                              |
| Neoplasms                                                               | 306,695.35<br>(285,662.11 to<br>328,861.99)                            | 504,512.80<br>(431,030.75 to<br>581,877.40)                            | 476,018.99<br>(403,204.98 to<br>550,613.61)                            | 539,449.51<br>(460,019.66 to<br>629,174.06)                            | 13,040.79<br>(12,168.12 to<br>13,969.29)                      | 27,631.29<br>(23,511.35 to<br>31,849.58)                        | 26,939.74<br>(22,711.54 to<br>31,136.34)                       | 28,997.33<br>(24,723.22 to<br>33,620.24)                         |



|                                 |                                                      |                                                      |                                                      |                                                      |                                                   |                                                   |                                                   |                                                   |
|---------------------------------|------------------------------------------------------|------------------------------------------------------|------------------------------------------------------|------------------------------------------------------|---------------------------------------------------|---------------------------------------------------|---------------------------------------------------|---------------------------------------------------|
|                                 | 1,331.70<br>(1,075.66 to<br>1,644.06)                | 1,687.17<br>(1,309.08 to<br>2,140.22)                | 1,536.25<br>(1,178.19 to<br>1,958.38)                | 1,696.77<br>(1,310.48 to<br>2,144.33)                | 33.14<br>(27.72 to<br>39.25)                      | 54.87<br>(43.59 to<br>66.62)                      | 51.71<br>(40.41 to<br>63.55)                      | 53.63<br>(43.13 to<br>64.53)                      |
| Testicular cancer               |                                                      |                                                      |                                                      |                                                      |                                                   |                                                   |                                                   |                                                   |
| <b>Ecuador</b>                  |                                                      |                                                      |                                                      |                                                      |                                                   |                                                   |                                                   |                                                   |
| Cause                           | YLLs (actual counts)                                 |                                                      |                                                      |                                                      | Deaths (actual counts)                            |                                                   |                                                   |                                                   |
|                                 | 2016                                                 | 2040 Forecast                                        | 2040 Better Scenario                                 | 2040 Worse Scenario                                  | 2016                                              | 2040 Forecast                                     | 2040 Better Scenario                              | 2040 Worse Scenario                               |
| Kidney cancer                   | 5,394.86<br>(4,809.32 to<br>5,970.95)                | 9,336.41<br>(8,013.86 to<br>10,753.93)               | 10,085.08<br>(8,570.12 to<br>11,605.29)              | 9,108.83<br>(7,803.72 to<br>10,521.86)               | 202.97<br>(183.31 to<br>224.34)                   | 439.27<br>(377.95 to<br>505.27)                   | 489.12<br>(414.68 to<br>564.99)                   | 422.69<br>(363.83 to<br>488.71)                   |
| Bladder cancer                  | 2,292.94<br>(2,073.46 to<br>2,526.14)                | 4,591.76<br>(3,658.39 to<br>5,822.94)                | 4,403.01<br>(3,480.14 to<br>5,529.62)                | 4,722.30<br>(3,726.79 to<br>6,074.55)                | 141.85<br>(128.56 to<br>156.16)                   | 331.31<br>(265.23 to<br>423.15)                   | 325.42<br>(259.63 to<br>408.46)                   | 339.18<br>(268.73 to<br>436.19)                   |
| Brain and nervous system cancer | 15,929.15<br>(13,392.91 to<br>18,417.50)             | 23,324.34<br>(19,042.09 to<br>26,984.15)             | 22,920.14<br>(18,877.91 to<br>26,467.68)             | 23,036.52<br>(18,824.52 to<br>26,735.37)             | 415.40<br>(349.03 to<br>466.55)                   | 818.57<br>(663.79 to<br>929.62)                   | 839.49<br>(673.58 to<br>964.63)                   | 790.86<br>(647.89 to<br>894.84)                   |
| Thyroid cancer                  | 2,851.55<br>(2,529.11 to<br>3,229.90)                | 4,808.22<br>(3,382.47 to<br>6,927.37)                | 4,248.44<br>(3,019.22 to<br>5,982.04)                | 5,414.93<br>(3,720.14 to<br>8,002.56)                | 139.19<br>(124.24 to<br>156.13)                   | 275.29<br>(196.02 to<br>391.84)                   | 249.63<br>(177.14 to<br>349.90)                   | 301.66<br>(211.20 to<br>436.76)                   |
| Mesothelioma                    | 623.03<br>(555.69 to<br>691.55)                      | 909.28<br>(773.84 to<br>1,062.36)                    | 883.06<br>(740.95 to<br>1,038.62)                    | 903.19<br>(772.17 to<br>1,048.49)                    | 24.09<br>(21.66 to<br>26.59)                      | 44.10<br>(38.00 to<br>51.33)                      | 44.13<br>(37.45 to<br>52.40)                      | 42.84<br>(37.04 to<br>49.35)                      |
| Hodgkin lymphoma                | 2,160.75<br>(1,899.85 to<br>2,613.19)                | 2,339.60<br>(1,971.05 to<br>2,855.10)                | 1,846.78<br>(1,492.89 to<br>2,275.87)                | 2,445.55<br>(2,028.51 to<br>3,004.49)                | 63.61<br>(56.71 to<br>73.43)                      | 77.06<br>(78.80 to<br>109.73)                     | 77.06<br>(62.37 to<br>93.36)                      | 95.29<br>(79.79 to<br>111.84)                     |
| Non-Hodgkin lymphoma            | 15,307.94<br>(13,686.93 to<br>17,643.81)             | 23,707.25<br>(19,425.72 to<br>29,576.10)             | 23,544.72<br>(19,153.26 to<br>29,332.26)             | 24,445.99<br>(19,596.62 to<br>30,899.67)             | 512.11<br>(461.75 to<br>582.77)                   | 1,052.02<br>(854.20 to<br>1,320.65)               | 1,084.78<br>(868.44 to<br>1,356.34)               | 1,059.54<br>(842.02 to<br>1,354.64)               |
| Multiple myeloma                | 4,013.31<br>(3,386.73 to<br>5,779.74)                | 7,929.25<br>(5,891.05 to<br>12,069.06)               | 8,208.96<br>(6,131.50 to<br>12,378.83)               | 8,208.59<br>(5,954.79 to<br>12,540.90)               | 175.44<br>(149.01 to<br>252.84)                   | 403.69<br>(306.82 to<br>507.52)                   | 426.76<br>(323.74 to<br>532.07)                   | 409.03<br>(304.99 to<br>619.05)                   |
| Leukemia                        | 31,647.06<br>(28,155.09 to<br>35,314.83)             | 31,940.54<br>(26,571.18 to<br>37,999.55)             | 29,036.80<br>(23,955.53 to<br>34,615.89)             | 34,441.34<br>(28,153.18 to<br>41,650.66)             | 725.79<br>(660.70 to<br>796.02)                   | 1,112.89<br>(926.19 to<br>1,345.23)               | 1,061.48<br>(876.51 to<br>1,290.14)               | 1,181.33<br>(965.81 to<br>1,451.07)               |
| Acute lymphoid leukemia         | 13,724.49<br>(11,624.52 to<br>15,883.00)             | 9,331.22<br>(7,472.26 to<br>11,516.47)               | 8,369.69<br>(6,775.43 to<br>10,200.11)               | 9,922.93<br>(7,943.61 to<br>12,264.46)               | 237.26<br>(203.13 to<br>269.05)                   | 218.71<br>(177.40 to<br>264.39)                   | 207.09<br>(167.81 to<br>251.75)                   | 231.57<br>(186.07 to<br>285.47)                   |
| Chronic lymphoid leukemia       | 437.45<br>(364.22 to<br>526.09)                      | 710.22<br>(513.82 to<br>982.03)                      | 702.13<br>(509.94 to<br>968.12)                      | 754.50<br>(537.14 to<br>1,056.07)                    | 21.39<br>(17.60 to<br>25.86)                      | 41.96<br>(30.11 to<br>58.17)                      | 42.71<br>(30.85 to<br>58.90)                      | 43.51<br>(30.78 to<br>61.26)                      |
| Acute myeloid leukemia          | 6,860.50<br>(5,669.02 to<br>7,827.77)                | 8,660.12<br>(6,800.82 to<br>10,655.89)               | 8,704.85<br>(6,857.18 to<br>10,547.82)               | 9,176.66<br>(7,147.26 to<br>11,521.27)               | 173.41<br>(144.19 to<br>194.79)                   | 304.98<br>(240.52 to<br>380.41)                   | 320.82<br>(252.03 to<br>399.74)                   | 317.42<br>(247.67 to<br>403.41)                   |
| Chronic myeloid leukemia        | 1,197.34<br>(1,057.09 to<br>1,372.29)                | 990.59<br>(746.00 to<br>1,330.84)                    | 901.32<br>(662.27 to<br>1,226.74)                    | 1,076.45<br>(791.33 to<br>1,472.01)                  | 39.07<br>(34.91 to<br>44.17)                      | 42.00<br>(31.78 to<br>55.87)                      | 39.45<br>(29.27 to<br>53.66)                      | 44.47<br>(33.09 to<br>60.62)                      |
| Other leukemia                  | 9,427.29<br>(8,197.16 to<br>10,992.83)               | 12,248.40<br>(10,067.70 to<br>14,861.63)             | 10,358.82<br>(8,455.93 to<br>12,560.94)              | 13,510.79<br>(10,895.72 to<br>16,428.48)             | 254.67<br>(227.82 to<br>287.91)                   | 505.24<br>(420.07 to<br>608.04)                   | 451.41<br>(371.06 to<br>547.70)                   | 544.36<br>(444.05 to<br>663.56)                   |
| Other neoplasms                 | 23,337.03<br>(20,861.84 to<br>25,751.98)             | 32,858.09<br>(28,350.24 to<br>37,044.52)             | 32,327.81<br>(27,625.43 to<br>36,467.44)             | 32,436.88<br>(28,190.31 to<br>36,391.71)             | 757.40<br>(680.45 to<br>828.95)                   | 1,509.12<br>(1,298.55 to<br>1,676.35)             | 1,557.77<br>(1,316.51 to<br>1,741.13)             | 1,448.74<br>(1,261.18 to<br>1,602.22)             |
| <b>Cardiovascular diseases</b>  | <b>302,068.68<br/>(279,439.14 to<br/>324,779.76)</b> | <b>443,689.49<br/>(292,028.57 to<br/>659,331.83)</b> | <b>264,739.03<br/>(182,631.52 to<br/>375,805.71)</b> | <b>619,034.63<br/>(396,635.64 to<br/>926,252.06)</b> | <b>16,522.33<br/>(15,452.50 to<br/>17,612.98)</b> | <b>32,330.53<br/>(21,893.96 to<br/>46,531.62)</b> | <b>20,906.23<br/>(14,575.57 to<br/>28,910.06)</b> | <b>40,982.15<br/>(27,390.96 to<br/>59,741.29)</b> |
| Rheumatic heart disease         | 6,291.11<br>(5,565.53 to<br>7,077.16)                | 5,380.65<br>(4,175.19 to<br>6,928.27)                | 4,062.50<br>(3,129.91 to<br>5,300.76)                | 5,678.38<br>(4,390.30 to<br>7,329.71)                | 259.72<br>(231.39 to<br>289.71)                   | 348.87<br>(273.16 to<br>451.21)                   | 276.80<br>(214.67 to<br>359.33)                   | 356.66<br>(276.71 to<br>454.40)                   |
| Ischemic heart disease          | 143,009.64<br>(130,440.49 to<br>156,221.81)          | 207,206.48<br>(117,514.36 to<br>335,439.42)          | 111,877.95<br>(64,998.85 to<br>177,723.80)           | 311,741.24<br>(169,435.10 to<br>507,643.83)          | 8,469.43<br>(7,825.40 to<br>9,197.88)             | 15,766.78<br>(9,284.81 to<br>25,140.10)           | 9,298.76<br>(5,482.52 to<br>14,198.45)            | 21,256.79<br>(12,194.28 to<br>33,145.40)          |
| Stroke                          | 84,641.79<br>(77,125.05 to<br>92,714.67)             | 105,382.02<br>(64,804.36 to<br>164,262.20)           | 54,823.30<br>(35,651.55 to<br>80,230.86)             | 159,970.70<br>(96,915.42 to<br>258,187.10)           | 4,035.00<br>(3,680.91 to<br>4,439.78)             | 6,501.26<br>(4,133.44 to<br>9,825.02)             | 3,832.49<br>(2,456.88 to<br>5,585.23)             | 8,817.43<br>(5,574.84 to<br>13,252.31)            |

|                                               |                                                   |                                                   |                                                   |                                                    |                                                |                                                |                                                |                                                |
|-----------------------------------------------|---------------------------------------------------|---------------------------------------------------|---------------------------------------------------|----------------------------------------------------|------------------------------------------------|------------------------------------------------|------------------------------------------------|------------------------------------------------|
| Ischemic stroke                               | 28,706.40<br>(25,764.26 to<br>31,889.63)          | 41,716.31<br>(23,566.20 to<br>70,455.49)          | 24,643.60<br>(14,871.44 to<br>40,212.98)          | 57,221.29<br>(31,736.03 to<br>97,045.42)           | 1,856.16<br>(1,663.91 to<br>2,061.93)          | 3,334.16<br>(1,920.36 to<br>5,806.31)          | 2,169.38<br>(1,285.70 to<br>3,648.84)          | 4,164.24<br>(2,408.27 to<br>7,352.08)          |
| Intracerebral hemorrhage                      | 55,935.38<br>(50,709.36 to<br>61,337.87)          | 63,665.71<br>(36,421.19 to<br>105,535.94)         | 30,179.70<br>(19,212.37 to<br>45,945.88)          | 102,749.40<br>(56,211.93 to<br>176,080.08)         | 2,178.84<br>(1,986.68 to<br>2,392.17)          | 3,167.10<br>(1,956.22 to<br>4,870.60)          | 1,663.12<br>(1,085.97 to<br>2,464.84)          | 4,653.19<br>(2,788.77 to<br>7,422.23)          |
| Hypertensive heart disease                    | 30,244.18<br>(19,155.25 to<br>39,074.11)          | 63,624.85<br>(32,629.71 to<br>132,309.47)         | 41,712.81<br>(22,997.66 to<br>71,532.66)          | 76,212.20<br>(37,206.42 to<br>165,154.47)          | 2,022.40<br>(1,286.87 to<br>2,583.76)          | 5,587.06<br>(2,878.16 to<br>11,178.26)         | 3,795.77<br>(2,110.52 to<br>6,480.61)          | 6,359.03<br>(3,190.00 to<br>13,429.76)         |
| Cardiomyopathy and myocarditis                | 6,566.15<br>(5,639.11 to<br>7,558.43)             | 7,950.49<br>(6,026.95 to<br>10,399.85)            | 6,968.20<br>(5,315.18 to<br>9,097.96)             | 8,008.39<br>(6,057.56 to<br>10,505.53)             | 215.66<br>(187.57 to<br>242.55)                | 394.21<br>(290.58 to<br>530.44)                | 362.34<br>(267.13 to<br>480.30)                | 384.56<br>(284.48 to<br>518.57)                |
| Myocarditis                                   | 1,014.62<br>(776.07 to<br>1,444.21)               | 1,291.98<br>(973.11 to<br>1,835.14)               | 1,191.83<br>(896.63 to<br>1,692.52)               | 1,304.80<br>(987.13 to<br>1,848.94)                | 30.62<br>(24.07 to<br>42.69)                   | 56.43<br>(43.01 to<br>81.18)                   | 54.88<br>(41.89 to<br>79.10)                   | 55.07<br>(42.04 to<br>78.99)                   |
| <b>Ecuador</b>                                |                                                   |                                                   |                                                   |                                                    |                                                |                                                |                                                |                                                |
| Cause                                         | YLLs (actual counts)                              |                                                   |                                                   |                                                    | Deaths (actual counts)                         |                                                |                                                |                                                |
|                                               | 2016                                              | 2040 Forecast                                     | 2040 Better Scenario                              | 2040 Worse Scenario                                | 2016                                           | 2040 Forecast                                  | 2040 Better Scenario                           | 2040 Worse Scenario                            |
| Alcoholic cardiomyopathy                      | 283.44<br>(194.83 to<br>342.96)                   | 310.33<br>(209.06 to<br>395.62)                   | 288.93<br>(191.74 to<br>370.68)                   | 369.64<br>(248.38 to<br>467.51)                    | 12.23<br>(8.23 to<br>15.04)                    | 16.24<br>(10.59 to<br>20.65)                   | 15.67<br>(10.23 to<br>20.07)                   | 18.45<br>(12.10 to<br>23.55)                   |
| Other cardiomyopathy                          | 5,268.08<br>(4,320.23 to<br>6,063.88)             | 6,348.18<br>(4,531.80 to<br>8,789.76)             | 5,487.43<br>(3,900.91 to<br>7,422.71)             | 6,333.95<br>(4,527.00 to<br>8,711.88)              | 172.81<br>(143.65 to<br>196.17)                | 321.54<br>(222.35 to<br>457.93)                | 291.80<br>(198.92 to<br>402.14)                | 311.04<br>(214.32 to<br>444.28)                |
| Atrial fibrillation and flutter               | 4,151.22<br>(3,274.08 to<br>5,147.06)             | 10,097.05<br>(7,190.73 to<br>13,625.94)           | 9,421.02<br>(6,786.57 to<br>12,497.08)            | 10,682.28<br>(7,641.03 to<br>14,540.07)            | 412.64<br>(323.41 to<br>517.86)                | 1,098.69<br>(782.63 to<br>1,471.54)            | 1,065.48<br>(763.54 to<br>1,421.31)            | 1,122.11<br>(797.26 to<br>1,522.93)            |
| Aortic aneurysm                               | 4,809.26<br>(4,313.69 to<br>5,332.28)             | 7,651.96<br>(5,912.31 to<br>10,101.74)            | 7,183.36<br>(5,610.68 to<br>9,214.59)             | 7,857.37<br>(6,059.87 to<br>10,358.68)             | 256.48<br>(231.38 to<br>284.12)                | 504.58<br>(395.62 to<br>645.85)                | 493.20<br>(387.98 to<br>623.50)                | 499.66<br>(393.06 to<br>639.04)                |
| Peripheral artery disease                     | 187.03<br>(122.43 to<br>254.67)                   | 597.88<br>(346.88 to<br>877.34)                   | 621.71<br>(358.78 to<br>923.75)                   | 589.16<br>(344.28 to<br>870.92)                    | 16.46<br>(10.56 to<br>22.54)                   | 62.20<br>(35.86 to<br>92.92)                   | 68.09<br>(38.91 to<br>102.61)                  | 58.93<br>(33.46 to<br>87.43)                   |
| Endocarditis                                  | 4,628.69<br>(3,657.03 to<br>6,845.80)             | 6,442.06<br>(4,621.27 to<br>9,822.93)             | 5,586.87<br>(4,066.11 to<br>8,335.42)             | 6,558.19<br>(4,694.06 to<br>9,928.22)              | 141.95<br>(115.33 to<br>208.22)                | 308.88<br>(217.60 to<br>485.32)                | 284.16<br>(202.28 to<br>442.08)                | 303.27<br>(214.57 to<br>478.29)                |
| Other cardiovascular and circulatory diseases | 17,539.62<br>(15,774.91 to<br>19,626.00)          | 29,356.04<br>(22,607.83 to<br>38,443.76)          | 22,481.31<br>(17,334.27 to<br>29,175.30)          | 31,736.72<br>(24,517.92 to<br>41,539.85)           | 692.59<br>(628.47 to<br>761.03)                | 1,758.00<br>(1,349.79 to<br>2,274.54)          | 1,429.12<br>(1,090.83 to<br>1,874.58)          | 1,823.70<br>(1,400.09 to<br>2,379.87)          |
| <b>Chronic respiratory diseases</b>           | <b>38,671.71<br/>(35,774.47 to<br/>41,964.93)</b> | <b>62,221.62<br/>(51,998.43 to<br/>74,161.02)</b> | <b>53,027.12<br/>(44,309.43 to<br/>62,947.71)</b> | <b>80,139.85<br/>(63,554.71 to<br/>101,085.46)</b> | <b>2,679.04<br/>(2,477.58 to<br/>2,901.19)</b> | <b>5,100.70<br/>(4,203.86 to<br/>6,200.65)</b> | <b>4,439.89<br/>(3,701.84 to<br/>5,317.42)</b> | <b>6,697.20<br/>(5,217.62 to<br/>8,582.08)</b> |
| Chronic obstructive pulmonary disease         | 25,874.16<br>(23,529.40 to<br>28,866.31)          | 43,575.51<br>(34,004.24 to<br>55,271.45)          | 33,067.54<br>(25,706.06 to<br>42,273.49)          | 61,554.62<br>(45,879.92 to<br>82,134.94)           | 2,034.02<br>(1,861.81 to<br>2,252.87)          | 3,850.38<br>(3,007.32 to<br>4,906.93)          | 3,032.68<br>(2,368.30 to<br>3,909.80)          | 5,489.29<br>(4,089.86 to<br>7,310.06)          |
| Pneumoconiosis                                | 202.26<br>(172.48 to<br>238.47)                   | 258.49<br>(203.20 to<br>336.26)                   | 221.23<br>(169.37 to<br>293.95)                   | 268.24<br>(209.23 to<br>350.98)                    | 10.35<br>(8.97 to<br>11.95)                    | 17.89<br>(13.63 to<br>23.94)                   | 15.54<br>(11.78 to<br>21.23)                   | 18.29<br>(13.77 to<br>24.86)                   |
| Silicosis                                     | 64.34<br>(47.29 to<br>83.40)                      | 49.86<br>(33.12 to<br>71.01)                      | 41.18<br>(25.86 to<br>61.52)                      | 50.41<br>(33.91 to<br>72.11)                       | 3.32<br>(2.52 to<br>4.19)                      | 3.37<br>(2.30 to<br>4.76)                      | 2.86<br>(1.85 to<br>4.14)                      | 3.33<br>(2.25 to<br>4.67)                      |
| Asbestosis                                    | 45.97<br>(36.85 to<br>66.43)                      | 64.91<br>(47.58 to<br>95.98)                      | 64.88<br>(47.48 to<br>95.95)                      | 64.67<br>(47.48 to<br>94.10)                       | 1.69<br>(1.31 to<br>2.69)                      | 3.37<br>(2.34 to<br>5.47)                      | 3.43<br>(2.38 to<br>5.68)                      | 3.29<br>(2.30 to<br>5.38)                      |
| Coal workers pneumoconiosis                   | 21.12<br>(15.45 to<br>28.05)                      | 35.75<br>(19.85 to<br>60.76)                      | 25.05<br>(13.60 to<br>43.70)                      | 39.48<br>(22.53 to<br>67.29)                       | 1.14<br>(0.85 to<br>1.49)                      | 2.56<br>(1.44 to<br>4.36)                      | 1.87<br>(1.03 to<br>3.24)                      | 2.77<br>(1.55 to<br>4.72)                      |
| Other pneumoconiosis                          | 70.83<br>(58.39 to<br>86.47)                      | 107.97<br>(75.94 to<br>153.51)                    | 90.12<br>(62.58 to<br>130.42)                     | 113.68<br>(79.51 to<br>161.31)                     | 4.20<br>(3.50 to<br>4.99)                      | 8.60<br>(5.84 to<br>12.47)                     | 7.38<br>(5.01 to<br>10.77)                     | 8.90<br>(6.02 to<br>12.90)                     |
| Asthma                                        | 2,335.54<br>(1,968.66 to<br>2,923.95)             | 1,822.32<br>(1,134.86 to<br>2,926.45)             | 1,338.54<br>(820.06 to<br>2,188.03)               | 2,335.41<br>(1,405.59 to<br>3,849.37)              | 85.08<br>(73.45 to<br>105.50)                  | 110.36<br>(68.38 to<br>182.43)                 | 87.60<br>(53.47 to<br>145.15)                  | 135.70<br>(81.76 to<br>228.01)                 |



|                                                                |                                                               |                                                                 |                                                                 |                                                                 |                                                            |                                                             |                                                              |                                                              |
|----------------------------------------------------------------|---------------------------------------------------------------|-----------------------------------------------------------------|-----------------------------------------------------------------|-----------------------------------------------------------------|------------------------------------------------------------|-------------------------------------------------------------|--------------------------------------------------------------|--------------------------------------------------------------|
|                                                                | 7,920.81<br>(5,013.87 to<br>9,543.89)                         | 12,972.76<br>(7,945.06 to<br>15,650.77)                         | 15,104.92<br>(9,524.60 to<br>18,517.27)                         | 12,298.36<br>(7,348.92 to<br>14,922.92)                         | 464.62<br>(285.54 to<br>557.71)                            | 928.61<br>(558.44 to<br>1,133.88)                           | 1,115.63<br>(685.07 to<br>1,374.07)                          | 860.40<br>(505.47 to<br>1,057.46)                            |
| Interstitial lung disease and pulmonary sarcoidosis            | 2,338.95<br>(1,778.81 to<br>3,708.78)                         | 3,592.53<br>(2,635.24 to<br>5,910.68)                           | 3,294.89<br>(2,397.69 to<br>5,425.62)                           | 3,683.21<br>(2,711.77 to<br>6,027.77)                           | 84.98<br>(64.64 to<br>142.43)                              | 193.46<br>(139.85 to<br>333.08)                             | 188.44<br>(134.51 to<br>319.88)                              | 193.51<br>(139.52 to<br>332.33)                              |
| Other chronic respiratory diseases                             | <b>70,343.33</b><br><b>(63,253.09 to</b><br><b>77,583.68)</b> | <b>103,106.66</b><br><b>(90,181.78 to</b><br><b>115,088.58)</b> | <b>88,791.50</b><br><b>(75,518.61 to</b><br><b>101,376.24)</b>  | <b>114,080.39</b><br><b>(99,440.78 to</b><br><b>127,836.29)</b> | <b>2,821.45</b><br><b>(2,572.44 to</b><br><b>3,088.03)</b> | <b>4,882.16</b><br><b>(4,346.80 to</b><br><b>5,389.16)</b>  | <b>4,316.20</b><br><b>(3,732.36 to</b><br><b>4,885.04)</b>   | <b>5,259.19</b><br><b>(4,690.02 to</b><br><b>5,808.42)</b>   |
| Cirrhosis and other chronic liver diseases                     | 14,258.51<br>(11,982.79 to<br>16,836.59)                      | 22,699.79<br>(18,715.84 to<br>26,866.80)                        | 20,774.06<br>(16,898.67 to<br>25,160.08)                        | 22,745.12<br>(18,815.56 to<br>27,208.90)                        | 582.35<br>(496.14 to<br>677.79)                            | 1,061.90<br>(894.46 to<br>1,257.11)                         | 988.70<br>(814.19 to<br>1,195.05)                            | 1,048.30<br>(883.86 to<br>1,242.06)                          |
| Cirrhosis and other chronic liver diseases due to hepatitis B  | 10,482.39<br>(8,982.07 to<br>12,187.85)                       | 16,427.63<br>(13,537.77 to<br>19,392.87)                        | 14,931.39<br>(11,980.00 to<br>17,742.05)                        | 16,504.27<br>(13,609.97 to<br>19,469.80)                        | 405.69<br>(351.14 to<br>464.68)                            | 722.69<br>(611.56 to<br>833.02)                             | 667.19<br>(546.51 to<br>781.78)                              | 716.42<br>(605.10 to<br>825.90)                              |
| Cirrhosis and other chronic liver diseases due to hepatitis C  | 30,212.59<br>(26,839.93 to<br>33,890.23)                      | 43,595.99<br>(37,082.18 to<br>49,977.69)                        | 34,995.72<br>(29,294.54 to<br>41,083.46)                        | 54,146.39<br>(46,391.67 to<br>62,258.07)                        | 1,273.83<br>(1,142.35 to<br>1,414.70)                      | 2,136.87<br>(1,848.90 to<br>2,409.28)                       | 1,779.21<br>(1,510.31 to<br>2,056.90)                        | 2,538.82<br>(2,210.57 to<br>2,868.08)                        |
| Cirrhosis and other chronic liver diseases due to alcohol use  | 15,389.84<br>(13,585.78 to<br>17,258.23)                      | 20,383.24<br>(17,453.71 to<br>23,409.43)                        | 18,090.33<br>(15,296.46 to<br>21,295.94)                        | 20,684.62<br>(17,741.19 to<br>23,969.02)                        | 559.57<br>(494.68 to<br>626.38)                            | 960.69<br>(818.17 to<br>1,100.96)                           | 881.10<br>(741.98 to<br>1,034.58)                            | 955.66<br>(812.84 to<br>1,096.92)                            |
| Cirrhosis and other chronic liver diseases due to other causes | <b>54,862.76</b><br><b>(47,891.53 to</b><br><b>70,735.65)</b> | <b>74,585.24</b><br><b>(55,445.32 to</b><br><b>107,755.42)</b>  | <b>60,579.59</b><br><b>(45,075.46 to</b><br><b>86,022.80)</b>   | <b>85,731.41</b><br><b>(60,870.73 to</b><br><b>132,342.86)</b>  | <b>2,264.12</b><br><b>(2,042.42 to</b><br><b>2,724.39)</b> | <b>4,379.25</b><br><b>(3,425.10 to</b><br><b>5,788.50)</b>  | <b>3,751.23</b><br><b>(2,912.30 to</b><br><b>4,867.35)</b>   | <b>4,815.46</b><br><b>(3,637.03 to</b><br><b>6,667.66)</b>   |
| Digestive diseases                                             | 6,853.58<br>(5,787.03 to<br>8,094.32)                         | 8,165.98<br>(6,567.37 to<br>9,960.08)                           | 6,221.50<br>(4,817.17 to<br>7,912.29)                           | 8,757.15<br>(6,979.10 to<br>10,670.77)                          | 374.17<br>(322.61 to<br>426.73)                            | 621.90<br>(498.64 to<br>744.77)                             | 490.98<br>(384.56 to<br>608.84)                              | 647.00<br>(523.37 to<br>778.03)                              |
| Peptic ulcer disease                                           | <b>Ecuador</b>                                                |                                                                 |                                                                 |                                                                 |                                                            |                                                             |                                                              |                                                              |
| Cause                                                          | YLLs (actual counts)                                          |                                                                 |                                                                 |                                                                 | Deaths (actual counts)                                     |                                                             |                                                              |                                                              |
|                                                                | 2016                                                          | 2040 Forecast                                                   | 2040 Better Scenario                                            | 2040 Worse Scenario                                             | 2016                                                       | 2040 Forecast                                               | 2040 Better Scenario                                         | 2040 Worse Scenario                                          |
| Gastritis and duodenitis                                       | 1,308.70<br>(934.92 to<br>1,626.12)                           | 1,594.61<br>(982.35 to<br>1,921.53)                             | 1,207.13<br>(841.75 to<br>1,713.82)                             | 1,516.81<br>(1,003.54 to<br>1,918.89)                           | 66.83<br>(44.54 to<br>80.92)                               | 108.84<br>(68.24 to<br>139.13)                              | 98.71<br>(61.91 to<br>130.55)                                | 106.54<br>(66.52 to<br>136.08)                               |
| Appendicitis                                                   | 5,860.37<br>(4,531.22 to<br>9,738.72)                         | 5,425.19<br>(4,004.43 to<br>8,265.55)                           | 4,177.76<br>(2,944.92 to<br>6,424.05)                           | 5,717.43<br>(4,182.43 to<br>9,058.66)                           | 148.74<br>(118.06 to<br>228.34)                            | 213.62<br>(163.75 to<br>323.01)                             | 174.13<br>(127.34 to<br>264.86)                              | 218.11<br>(168.09 to<br>331.23)                              |
| Paralytic ileus and intestinal obstruction                     | 12,636.04<br>(10,371.99 to<br>16,736.95)                      | 16,116.83<br>(12,845.96 to<br>21,423.24)                        | 14,937.62<br>(11,846.76 to<br>19,767.80)                        | 16,196.21<br>(12,903.70 to<br>21,610.62)                        | 466.88<br>(380.45 to<br>594.32)                            | 944.31<br>(759.12 to<br>1,214.81)                           | 923.90<br>(741.00 to<br>1,192.42)                            | 918.39<br>(736.38 to<br>1,186.42)                            |
| Inguinal, femoral, and abdominal hernia                        | 2,123.06<br>(1,462.01 to<br>2,695.19)                         | 1,970.62<br>(1,346.72 to<br>2,529.19)                           | 1,713.80<br>(1,130.53 to<br>2,241.08)                           | 2,001.25<br>(1,367.84 to<br>2,594.95)                           | 84.23<br>(59.44 to<br>104.65)                              | 114.42<br>(79.44 to<br>146.11)                              | 105.34<br>(72.44 to<br>136.49)                               | 112.29<br>(77.48 to<br>142.21)                               |
| Inflammatory bowel disease                                     | 925.03<br>(683.45 to<br>1,218.52)                             | 986.40<br>(692.41 to<br>1,283.32)                               | 938.80<br>(659.74 to<br>1,216.54)                               | 985.19<br>(693.08 to<br>1,283.53)                               | 47.64<br>(21.82 to<br>35.18)                               | 47.64<br>(34.87 to<br>59.30)                                | 47.76<br>(34.62 to<br>59.57)                                 | 46.19<br>(33.79 to<br>57.65)                                 |
| Vascular intestinal disorders                                  | 2,762.52<br>(2,222.71 to<br>3,316.38)                         | 4,710.46<br>(3,618.27 to<br>5,787.18)                           | 4,388.31<br>(3,332.86 to<br>5,431.62)                           | 4,661.69<br>(3,591.11 to<br>5,735.47)                           | 158.58<br>(129.32 to<br>187.16)                            | 355.78<br>(279.96 to<br>430.76)                             | 342.88<br>(268.40 to<br>413.68)                              | 343.60<br>(268.78 to<br>412.30)                              |
| Gallbladder and biliary diseases                               | 6,581.85<br>(5,680.77 to<br>7,592.04)                         | 9,491.36<br>(5,191.68 to<br>16,416.06)                          | 7,307.48<br>(4,115.84 to<br>12,519.93)                          | 12,702.94<br>(6,751.73 to<br>22,362.45)                         | 352.04<br>(308.15 to<br>399.98)                            | 670.15<br>(372.25 to<br>1,151.51)                           | 538.09<br>(306.36 to<br>928.29)                              | 854.08<br>(468.26 to<br>1,481.41)                            |
| Pancreatitis                                                   | 9,845.30<br>(8,019.18 to<br>14,418.67)                        | 19,092.87<br>(8,435.73 to<br>44,646.07)                         | 13,572.50<br>(6,396.42 to<br>29,964.68)                         | 25,866.11<br>(10,431.23 to<br>64,435.64)                        | 352.54<br>(293.07 to<br>512.15)                            | 876.17<br>(432.99 to<br>1,910.44)                           | 649.30<br>(337.18 to<br>1,347.38)                            | 1,144.87<br>(515.58 to<br>2,602.82)                          |
| Other digestive diseases                                       | 5,966.29<br>(4,377.66 to<br>7,528.80)                         | 7,120.91<br>(5,168.31 to<br>8,873.32)                           | 6,014.69<br>(4,394.11 to<br>7,674.37)                           | 7,326.63<br>(5,330.73 to<br>9,249.21)                           | 231.24<br>(180.31 to<br>276.72)                            | 426.41<br>(328.92 to<br>521.56)                             | 380.14<br>(292.73 to<br>468.51)                              | 424.40<br>(328.32 to<br>519.13)                              |
| Neurological disorders                                         | <b>49,031.22</b><br><b>(43,364.57 to</b><br><b>55,649.55)</b> | <b>102,657.89</b><br><b>(80,681.35 to</b><br><b>133,068.48)</b> | <b>101,370.39</b><br><b>(79,981.40 to</b><br><b>129,004.09)</b> | <b>110,016.48</b><br><b>(84,444.65 to</b><br><b>146,705.72)</b> | <b>3,698.15</b><br><b>(3,142.13 to</b><br><b>4,296.02)</b> | <b>9,819.05</b><br><b>(7,466.83 to</b><br><b>12,933.43)</b> | <b>10,214.71</b><br><b>(7,905.53 to</b><br><b>13,234.14)</b> | <b>10,187.26</b><br><b>(7,598.84 to</b><br><b>13,971.44)</b> |
| Alzheimer's disease and other dementias                        | 28,493.44<br>(23,748.55 to<br>34,365.48)                      | 72,942.22<br>(52,533.03 to<br>102,400.37)                       | 73,387.58<br>(53,902.29 to<br>100,507.60)                       | 76,582.75<br>(54,285.89 to<br>114,184.70)                       | 3,023.25<br>(2,499.91 to<br>3,608.50)                      | 8,374.69<br>(6,054.43 to<br>11,404.78)                      | 8,684.82<br>(6,441.35 to<br>11,587.53)                       | 8,766.88<br>(6,164.85 to<br>12,560.44)                       |

|                              |                                                 |                                                 |                                                 |                                                 |                                        |                                            |                                            |                                            |
|------------------------------|-------------------------------------------------|-------------------------------------------------|-------------------------------------------------|-------------------------------------------------|----------------------------------------|--------------------------------------------|--------------------------------------------|--------------------------------------------|
| Parkinson's disease          | 3,563.82<br>(2,711.88 to<br>4,590.94)           | 9,585.32<br>(7,214.34 to<br>12,386.73)          | 11,002.05<br>(8,249.63 to<br>14,343.57)         | 8,886.94<br>(6,741.94 to<br>11,578.90)          | 294.87<br>(224.39 to<br>382.99)        | 857.16<br>(651.47 to<br>1,113.43)          | 1,004.74<br>(750.05 to<br>1,320.96)        | 782.48<br>(588.09 to<br>1,025.98)          |
| Epilepsy                     | 12,250.18<br>(10,870.33 to<br>13,920.53)        | 14,018.54<br>(9,093.28 to<br>21,525.37)         | 10,683.50<br>(7,088.94 to<br>16,044.95)         | 16,546.58<br>(10,119.69 to<br>26,512.02)        | 247.94<br>(222.33 to<br>277.03)        | 362.24<br>(239.61 to<br>542.60)            | 286.05<br>(194.34 to<br>419.80)            | 420.90<br>(261.65 to<br>664.74)            |
| Multiple sclerosis           | 552.08<br>(425.61 to<br>673.44)                 | 722.70<br>(530.25 to<br>891.51)                 | 749.61<br>(546.93 to<br>926.46)                 | 719.61<br>(529.71 to<br>892.39)                 | 17.17<br>(13.07 to<br>20.42)           | 26.45<br>(19.13 to<br>32.01)               | 27.82<br>(20.00 to<br>33.96)               | 26.05<br>(18.86 to<br>31.56)               |
| Motor neuron disease         | 1,140.19<br>(996.40 to<br>1,274.10)             | 1,797.43<br>(1,499.20 to<br>2,070.20)           | 1,885.74<br>(1,565.37 to<br>2,178.29)           | 1,746.98<br>(1,464.32 to<br>2,008.30)           | 39.14<br>(34.63 to<br>43.51)           | 72.99<br>(61.56 to<br>83.94)               | 77.57<br>(64.64 to<br>89.14)               | 70.25<br>(59.56 to<br>80.52)               |
| Other neurological disorders | 3,031.51<br>(2,667.59 to<br>3,591.02)           | 3,591.68<br>(3,111.06 to<br>4,101.18)           | 3,661.90<br>(3,167.43 to<br>4,169.13)           | 3,533.62<br>(3,067.89 to<br>4,047.71)           | 75.79<br>(68.13 to<br>83.74)           | 125.52<br>(110.36 to<br>140.82)            | 133.71<br>(116.83 to<br>151.53)            | 120.69<br>(106.55 to<br>135.49)            |
| <b>Mental disorders</b>      | <b>20,684.72</b><br>(17,992.84 to<br>23,759.43) | <b>28,994.66</b><br>(23,973.43 to<br>34,663.47) | <b>28,300.89</b><br>(23,290.56 to<br>34,199.20) | <b>30,369.56</b><br>(25,213.46 to<br>36,257.15) | <b>601.54</b><br>(532.00 to<br>679.44) | <b>1,028.31</b><br>(870.26 to<br>1,203.39) | <b>1,031.05</b><br>(868.08 to<br>1,216.81) | <b>1,053.68</b><br>(892.52 to<br>1,232.32) |
| Alcohol use disorders        | 14,600.99<br>(12,377.37 to<br>16,992.58)        | 18,548.20<br>(14,471.06 to<br>23,377.38)        | 17,627.64<br>(13,628.30 to<br>22,385.20)        | 20,007.68<br>(15,731.75 to<br>25,041.03)        | 414.37<br>(355.44 to<br>476.22)        | 609.24<br>(483.19 to<br>757.50)            | 587.29<br>(458.91 to<br>736.20)            | 647.67<br>(518.15 to<br>798.60)            |
| Drug use disorders           | 5,977.65<br>(5,065.50 to<br>6,850.74)           | 10,309.03<br>(8,626.33 to<br>12,038.02)         | 10,544.21<br>(8,805.08 to<br>12,469.36)         | 10,222.21<br>(8,542.70 to<br>11,947.25)         | 185.36<br>(158.16 to<br>209.65)        | 416.66<br>(353.14 to<br>477.45)            | 441.45<br>(367.48 to<br>517.01)            | 403.57<br>(343.35 to<br>461.58)            |
| Opioid use disorders         | 4,272.99<br>(3,533.34 to<br>5,106.48)           | 5,824.70<br>(4,609.17 to<br>7,196.57)           | 5,879.48<br>(4,657.26 to<br>7,284.30)           | 5,765.27<br>(4,588.61 to<br>7,154.05)           | 128.68<br>(106.20 to<br>149.85)        | 224.60<br>(170.07 to<br>268.68)            | 233.16<br>(173.24 to<br>281.76)            | 217.73<br>(165.71 to<br>260.80)            |
| Cocaine use disorders        | 209.78<br>(137.90 to<br>277.55)                 | 719.03<br>(530.83 to<br>947.64)                 | 721.30<br>(530.05 to<br>960.41)                 | 722.46<br>(532.77 to<br>951.59)                 | 6.16<br>(4.39 to<br>8.18)              | 24.36<br>(18.08 to<br>33.67)               | 24.76<br>(18.24 to<br>34.29)               | 24.23<br>(18.05 to<br>33.29)               |
| Amphetamine use disorders    | 137.78<br>(91.05 to<br>194.79)                  | 503.20<br>(354.86 to<br>729.77)                 | 522.83<br>(354.07 to<br>771.71)                 | 505.55<br>(353.56 to<br>726.11)                 | 3.60<br>(2.49 to<br>5.42)              | 14.37<br>(10.22 to<br>22.16)               | 15.07<br>(10.58 to<br>23.34)               | 14.34<br>(10.13 to<br>22.05)               |
| Other drug use disorders     | 1,357.10<br>(935.84 to<br>1,633.68)             | 3,262.11<br>(2,456.93 to<br>3,967.49)           | 3,420.60<br>(2,597.04 to<br>4,251.41)           | 3,228.93<br>(2,432.36 to<br>3,923.66)           | 46.92<br>(38.18 to<br>56.52)           | 153.34<br>(123.40 to<br>189.10)            | 168.46<br>(133.76 to<br>210.32)            | 147.28<br>(119.10 to<br>180.07)            |
| Eating disorders             | 106.08<br>(88.23 to<br>130.89)                  | 137.42<br>(104.27 to<br>186.61)                 | 129.04<br>(98.95 to<br>169.36)                  | 139.67<br>(105.32 to<br>189.87)                 | 1.81<br>(1.52 to<br>2.20)              | 2.41<br>(1.85 to<br>3.16)                  | 2.30<br>(1.78 to<br>2.99)                  | 2.44<br>(1.88 to<br>3.19)                  |

**Ecuador**

| Cause                                                      | YLLs (actual counts)                               |                                                    |                                                    |                                                    | Deaths (actual counts)                        |                                                 |                                                 |                                                 |
|------------------------------------------------------------|----------------------------------------------------|----------------------------------------------------|----------------------------------------------------|----------------------------------------------------|-----------------------------------------------|-------------------------------------------------|-------------------------------------------------|-------------------------------------------------|
|                                                            | 2016                                               | 2040 Forecast                                      | 2040 Better Scenario                               | 2040 Worse Scenario                                | 2016                                          | 2040 Forecast                                   | 2040 Better Scenario                            | 2040 Worse Scenario                             |
| <b>Diabetes, urogenital, blood, and endocrine diseases</b> | <b>197,697.64</b><br>(182,962.58 to<br>213,208.94) | <b>358,201.33</b><br>(266,765.50 to<br>475,041.57) | <b>257,112.78</b><br>(195,338.33 to<br>334,723.04) | <b>413,414.00</b><br>(304,031.64 to<br>553,241.35) | <b>9,579.92</b><br>(8,909.23 to<br>10,261.53) | <b>23,016.57</b><br>(17,142.57 to<br>31,478.42) | <b>17,045.71</b><br>(12,978.27 to<br>22,690.01) | <b>25,862.11</b><br>(19,340.89 to<br>35,334.41) |
| Diabetes mellitus                                          | 78,500.30<br>(71,621.87 to<br>85,511.55)           | 146,956.17<br>(108,471.26 to<br>199,430.11)        | 106,032.91<br>(77,752.36 to<br>142,907.16)         | 171,159.77<br>(121,783.65 to<br>234,886.01)        | 4,050.89<br>(3,724.67 to<br>4,389.67)         | 9,334.49<br>(7,146.64 to<br>12,190.49)          | 7,013.70<br>(5,236.67 to<br>9,064.98)           | 10,435.34<br>(7,843.26 to<br>13,720.31)         |
| Acute glomerulonephritis                                   | 105.45<br>(94.17 to<br>121.60)                     | 119.17<br>(97.54 to<br>151.09)                     | 95.87<br>(77.60 to<br>120.28)                      | 125.04<br>(101.80 to<br>162.08)                    | 2.17<br>(1.94 to<br>2.43)                     | 3.23<br>(2.60 to<br>4.05)                       | 2.80<br>(2.23 to<br>3.59)                       | 3.27<br>(2.66 to<br>4.08)                       |
| Chronic kidney disease                                     | 99,349.25<br>(91,406.41 to<br>107,584.35)          | 182,182.36<br>(114,123.39 to<br>292,149.29)        | 124,721.36<br>(83,220.62 to<br>189,993.26)         | 212,992.92<br>(129,872.64 to<br>341,360.62)        | 4,846.07<br>(4,480.20 to<br>5,225.57)         | 11,983.25<br>(7,257.52 to<br>20,161.95)         | 8,382.34<br>(5,380.69 to<br>13,235.64)          | 13,783.72<br>(8,133.40 to<br>22,806.53)         |
| Chronic kidney disease due to diabetes mellitus            | 34,560.09<br>(29,878.01 to<br>39,618.83)           | 71,412.18<br>(42,799.36 to<br>118,153.75)          | 49,182.51<br>(31,232.29 to<br>77,191.69)           | 83,973.56<br>(48,794.30 to<br>139,238.55)          | 1,678.94<br>(1,442.28 to<br>1,926.86)         | 4,333.95<br>(2,481.83 to<br>7,488.96)           | 3,035.54<br>(1,840.30 to<br>4,887.52)           | 5,021.59<br>(2,826.81 to<br>8,505.66)           |
| Chronic kidney disease due to hypertension                 | 12,349.43<br>(10,118.40 to<br>14,677.84)           | 29,136.85<br>(16,738.15 to<br>49,650.90)           | 20,359.82<br>(12,471.69 to<br>32,859.29)           | 33,752.89<br>(19,140.21 to<br>58,205.25)           | 919.30<br>(763.64 to<br>1,077.27)             | 2,743.58<br>(1,582.52 to<br>4,626.32)           | 1,977.87<br>(1,212.15 to<br>3,195.97)           | 3,103.15<br>(1,764.08 to<br>5,332.24)           |
| Chronic kidney disease due to glomerulonephritis           | 29,725.57<br>(25,240.85 to<br>34,461.95)           | 44,600.66<br>(27,680.83 to<br>70,696.75)           | 30,032.00<br>(19,701.36 to<br>45,695.30)           | 52,040.81<br>(31,266.20 to<br>84,269.73)           | 1,221.66<br>(1,011.83 to<br>1,440.63)         | 2,534.42<br>(1,467.15 to<br>4,294.56)           | 1,727.15<br>(1,052.74 to<br>2,866.52)           | 2,929.62<br>(1,653.70 to<br>4,995.94)           |

|                                                            |                                          |                                          |                                          |                                          |                                     |                                       |                                       |                                       |
|------------------------------------------------------------|------------------------------------------|------------------------------------------|------------------------------------------|------------------------------------------|-------------------------------------|---------------------------------------|---------------------------------------|---------------------------------------|
| Chronic kidney disease due to other and unspecified causes | 22,714.15<br>(18,799.11 to<br>26,780.00) | 37,032.67<br>(22,830.77 to<br>59,187.68) | 25,147.02<br>(16,092.82 to<br>39,415.83) | 43,225.65<br>(26,128.20 to<br>70,292.19) | 1,026.17<br>(855.63 to<br>1,216.89) | 2,371.31<br>(1,411.51 to<br>4,162.47) | 1,641.77<br>(1,011.59 to<br>2,708.12) | 2,729.35<br>(1,583.59 to<br>4,703.76) |
| Urinary diseases and male infertility                      | 5,240.14<br>(4,773.34 to<br>5,711.31)    | 11,130.67<br>(9,837.30 to<br>12,483.93)  | 10,599.77<br>(9,120.88 to<br>12,195.94)  | 10,893.57<br>(9,657.01 to<br>12,171.71)  | 255.39<br>(233.39 to<br>278.02)     | 873.22<br>(749.51 to<br>998.64)       | 878.87<br>(730.47 to<br>1,029.40)     | 825.45<br>(710.93 to<br>945.20)       |
| Urinary tract infections                                   | 4,671.86<br>(4,214.34 to<br>5,179.50)    | 10,235.64<br>(8,955.53 to<br>11,580.15)  | 9,830.37<br>(8,397.38 to<br>11,360.62)   | 9,996.39<br>(8,805.61 to<br>11,259.00)   | 228.86<br>(207.36 to<br>251.70)     | 810.43<br>(693.51 to<br>933.22)       | 822.65<br>(679.02 to<br>964.50)       | 764.66<br>(653.60 to<br>882.13)       |
| Urolithiasis                                               | 197.16<br>(134.05 to<br>241.39)          | 317.74<br>(208.42 to<br>410.49)          | 292.79<br>(187.33 to<br>389.32)          | 313.82<br>(205.69 to<br>408.40)          | 8.31<br>(5.80 to<br>10.26)          | 17.68<br>(11.87 to<br>23.65)          | 17.01<br>(11.40 to<br>23.07)          | 16.92<br>(11.54 to<br>22.56)          |
| Other urinary diseases                                     | 371.12<br>(235.36 to<br>470.99)          | 577.29<br>(368.35 to<br>789.98)          | 476.62<br>(296.57 to<br>670.96)          | 583.36<br>(373.42 to<br>798.52)          | 18.22<br>(11.87 to<br>23.96)        | 45.11<br>(28.45 to<br>65.37)          | 39.22<br>(23.63 to<br>57.96)          | 43.86<br>(28.15 to<br>63.14)          |
| Gynecological diseases                                     | 329.45<br>(253.29 to<br>519.46)          | 363.87<br>(242.36 to<br>611.23)          | 272.92<br>(176.11 to<br>446.54)          | 386.64<br>(254.84 to<br>638.30)          | 8.35<br>(6.45 to<br>13.04)          | 11.31<br>(7.74 to<br>17.63)           | 8.75<br>(5.91 to<br>14.03)            | 11.81<br>(8.18 to<br>18.63)           |
| Uterine fibroids                                           | 171.01<br>(123.07 to<br>288.82)          | 156.85<br>(90.03 to<br>275.28)           | 117.17<br>(65.01 to<br>207.62)           | 167.71<br>(93.82 to<br>291.37)           | 4.41<br>(3.29 to<br>7.27)           | 5.07<br>(3.09 to<br>8.65)             | 3.89<br>(2.32 to<br>6.61)             | 5.33<br>(3.22 to<br>9.01)             |
| Polycystic ovarian syndrome                                | 13.17<br>(7.45 to<br>25.32)              | 12.06<br>(5.41 to<br>24.30)              | 7.48<br>(3.11 to<br>16.17)               | 13.42<br>(5.93 to<br>27.75)              | 0.27<br>(0.16 to<br>0.52)           | 0.26<br>(0.12 to<br>0.53)             | 0.16<br>(0.07 to<br>0.34)             | 0.29<br>(0.13 to<br>0.59)             |
| Endometriosis                                              | 0.56<br>(0.37 to<br>0.90)                | 0.90<br>(0.41 to<br>1.92)                | 0.66<br>(0.29 to<br>1.43)                | 0.96<br>(0.44 to<br>2.04)                | 0.01<br>(0.01 to<br>0.02)           | 0.01<br>(0.01 to<br>0.04)             | 0.01<br>(0.01 to<br>0.03)             | 0.02<br>(0.01 to<br>0.04)             |
| Genital prolapse                                           | 16.28<br>(6.20 to<br>24.17)              | 11.05<br>(4.04 to<br>19.23)              | 8.04<br>(2.88 to<br>14.05)               | 11.78<br>(4.27 to<br>20.25)              | 0.84<br>(0.28 to<br>1.26)           | 0.62<br>(0.21 to<br>1.10)             | 0.46<br>(0.15 to<br>0.84)             | 0.65<br>(0.21 to<br>1.17)             |
| Other gynecological diseases                               | 128.43<br>(92.05 to<br>210.68)           | 183.01<br>(110.23 to<br>318.38)          | 139.56<br>(82.64 to<br>243.35)           | 192.77<br>(116.22 to<br>336.87)          | 2.81<br>(2.06 to<br>4.53)           | 5.34<br>(3.45 to<br>8.61)             | 4.22<br>(2.64 to<br>7.13)             | 5.52<br>(3.54 to<br>9.03)             |
| Hemoglobinopathies and hemolytic anemias                   | 4,061.05<br>(3,443.71 to<br>4,908.19)    | 5,065.67<br>(4,040.37 to<br>6,251.81)    | 4,160.52<br>(3,250.88 to<br>5,180.17)    | 5,232.61<br>(4,168.90 to<br>6,442.63)    | 117.67<br>(96.74 to<br>142.75)      | 217.45<br>(172.60 to<br>262.15)       | 184.23<br>(143.83 to<br>223.91)       | 219.46<br>(176.24 to<br>263.14)       |
| Thalassemias                                               | 241.09<br>(172.09 to<br>334.74)          | 75.10<br>(47.20 to<br>116.01)            | 68.18<br>(45.49 to<br>103.49)            | 76.49<br>(48.70 to<br>121.47)            | 2.92<br>(2.09 to<br>4.04)           | 0.93<br>(0.59 to<br>1.42)             | 0.84<br>(0.57 to<br>1.27)             | 0.94<br>(0.61 to<br>1.48)             |
| Sickle cell disorders                                      | 2,353.51<br>(1,950.18 to<br>2,880.29)    | 2,502.31<br>(1,970.32 to<br>3,189.15)    | 2,058.43<br>(1,568.85 to<br>2,647.10)    | 2,600.96<br>(2,041.84 to<br>3,321.99)    | 41.84<br>(34.76 to<br>51.84)        | 53.05<br>(41.51 to<br>66.12)          | 44.29<br>(33.86 to<br>56.73)          | 54.91<br>(42.67 to<br>69.09)          |
| G6PD deficiency                                            | 568.99<br>(460.48 to<br>716.01)          | 987.44<br>(752.52 to<br>1,269.78)        | 773.05<br>(581.17 to<br>1,018.53)        | 1,036.34<br>(796.59 to<br>1,350.12)      | 15.37<br>(12.40 to<br>19.16)        | 36.69<br>(27.92 to<br>46.61)          | 29.20<br>(21.83 to<br>37.76)          | 38.11<br>(29.33 to<br>48.57)          |
| Other hemoglobinopathies and hemolytic anemias             | 897.46<br>(725.46 to<br>1,081.24)        | 1,500.83<br>(1,167.88 to<br>1,852.76)    | 1,260.86<br>(961.67 to<br>1,575.64)      | 1,518.82<br>(1,177.90 to<br>1,845.69)    | 57.54<br>(46.17 to<br>68.90)        | 126.79<br>(98.89 to<br>153.91)        | 109.90<br>(84.48 to<br>135.12)        | 125.50<br>(96.40 to<br>151.02)        |
| Endocrine, metabolic, blood, and immune disorders          | 10,112.02<br>(8,553.28 to<br>15,129.71)  | 12,383.42<br>(10,287.01 to<br>16,724.30) | 11,239.41<br>(9,283.98 to<br>14,955.00)  | 12,623.46<br>(10,333.27 to<br>17,333.12) | 299.38<br>(262.91 to<br>397.21)     | 593.62<br>(489.19 to<br>769.82)       | 375.01<br>(467.74 to<br>739.59)       | 583.05<br>(478.58 to<br>762.83)       |

**Ecuador**

| Cause                            | YLLs (actual counts)                         |                                                 |                                                |                                                 | Deaths (actual counts)                 |                                        |                                        |                                        |
|----------------------------------|----------------------------------------------|-------------------------------------------------|------------------------------------------------|-------------------------------------------------|----------------------------------------|----------------------------------------|----------------------------------------|----------------------------------------|
|                                  | 2016                                         | 2040 Forecast                                   | 2040 Better Scenario                           | 2040 Worse Scenario                             | 2016                                   | 2040 Forecast                          | 2040 Better Scenario                   | 2040 Worse Scenario                    |
| <b>Musculoskeletal disorders</b> | <b>7,604.78</b><br>(6,288.31 to<br>8,733.44) | <b>12,787.07</b><br>(10,324.02 to<br>14,927.59) | <b>12,193.21</b><br>(9,611.07 to<br>14,389.60) | <b>12,703.90</b><br>(10,255.87 to<br>14,747.83) | <b>250.73</b><br>(209.08 to<br>282.97) | <b>625.27</b><br>(520.26 to<br>760.37) | <b>625.66</b><br>(498.69 to<br>746.59) | <b>638.44</b><br>(512.37 to<br>745.02) |
| Rheumatoid arthritis             | 1,601.62<br>(1,260.27 to<br>2,002.07)        | 4,494.17<br>(3,392.04 to<br>5,742.80)           | 3,731.05<br>(2,669.91 to<br>4,883.42)          | 4,594.46<br>(3,485.82 to<br>5,806.19)           | 95.63<br>(75.94 to<br>115.19)          | 349.98<br>(260.90 to<br>449.13)        | 300.58<br>(212.33 to<br>398.31)        | 349.66<br>(262.92 to<br>448.91)        |
| Other musculoskeletal disorders  | 6,003.16<br>(4,837.94 to<br>6,955.28)        | 8,292.91<br>(6,281.38 to<br>10,113.78)          | 8,462.16<br>(6,547.86 to<br>10,271.03)         | 8,109.44<br>(6,119.92 to<br>9,854.50)           | 155.10<br>(119.87 to<br>178.41)        | 303.29<br>(221.00 to<br>359.97)        | 325.07<br>(240.96 to<br>386.43)        | 288.78<br>(212.16 to<br>342.21)        |

|                                               |                                                    |                                                    |                                                    |                                                    |                                                 |                                                 |                                               |                                                 |
|-----------------------------------------------|----------------------------------------------------|----------------------------------------------------|----------------------------------------------------|----------------------------------------------------|-------------------------------------------------|-------------------------------------------------|-----------------------------------------------|-------------------------------------------------|
|                                               | 114,725.97<br>(83,180.26 to<br>147,949.60)         | 62,283.57<br>(42,155.53 to<br>84,451.90)           | 43,188.55<br>(28,631.52 to<br>57,154.75)           | 68,514.89<br>(45,830.48 to<br>92,818.38)           | 1,435.27<br>(1,031.17 to<br>1,819.60)           | 988.86<br>(653.19 to<br>1,277.94)               | 756.62<br>(482.10 to<br>976.70)               | 1,053.54<br>(703.13 to<br>1,371.83)             |
| <b>Other non-communicable diseases</b>        |                                                    |                                                    |                                                    |                                                    |                                                 |                                                 |                                               |                                                 |
| Congenital birth defects                      | 111,114.19<br>(80,856.16 to<br>144,069.77)         | 56,757.85<br>(38,649.32 to<br>77,934.05)           | 38,320.57<br>(25,279.70 to<br>51,274.31)           | 62,874.16<br>(42,151.69 to<br>86,135.88)           | 1,338.15<br>(964.77 to<br>1,723.01)             | 722.57<br>(489.22 to<br>973.39)                 | 497.30<br>(332.40 to<br>663.56)               | 795.64<br>(539.84 to<br>1,071.85)               |
| Neural tube defects                           | 4,323.48<br>(2,877.52 to<br>6,442.76)              | 800.07<br>(447.59 to<br>1,369.62)                  | 464.20<br>(262.00 to<br>799.84)                    | 928.69<br>(514.13 to<br>1,582.25)                  | 51.31<br>(34.67 to<br>76.11)                    | 10.38<br>(6.18 to<br>17.36)                     | 6.19<br>(3.72 to<br>10.26)                    | 11.94<br>(7.10 to<br>20.06)                     |
| Congenital heart anomalies                    | 56,224.76<br>(38,172.45 to<br>72,996.74)           | 29,071.94<br>(17,881.32 to<br>40,749.81)           | 19,488.37<br>(11,726.09 to<br>27,230.19)           | 32,046.42<br>(19,665.66 to<br>44,719.40)           | 682.93<br>(461.52 to<br>880.98)                 | 373.73<br>(228.33 to<br>512.94)                 | 255.27<br>(153.09 to<br>351.26)               | 409.52<br>(250.99 to<br>561.05)                 |
| Orofacial clefts                              | 64.99<br>(17.86 to<br>129.43)                      | 40.03<br>(9.00 to<br>93.02)                        | 21.21<br>(4.83 to<br>47.15)                        | 47.42<br>(10.49 to<br>112.03)                      | 0.75<br>(0.21 to<br>1.50)                       | 0.46<br>(0.10 to<br>1.08)                       | 0.25<br>(0.06 to<br>0.55)                     | 0.55<br>(0.12 to<br>1.30)                       |
| Down syndrome                                 | 5,843.03<br>(3,798.90 to<br>8,370.14)              | 4,080.68<br>(2,573.66 to<br>6,208.11)              | 2,977.29<br>(1,921.70 to<br>4,490.95)              | 4,530.85<br>(2,827.02 to<br>6,984.41)              | 72.52<br>(47.32 to<br>102.54)                   | 55.10<br>(35.80 to<br>82.50)                    | 41.27<br>(27.48 to<br>60.82)                  | 60.67<br>(38.65 to<br>92.30)                    |
| Other chromosomal abnormalities               | 3,348.95<br>(2,126.20 to<br>4,743.58)              | 2,535.02<br>(1,409.35 to<br>3,992.63)              | 1,727.96<br>(976.30 to<br>2,632.64)                | 2,847.52<br>(1,558.02 to<br>4,464.67)              | 39.71<br>(25.32 to<br>56.08)                    | 30.61<br>(16.87 to<br>47.76)                    | 21.07<br>(11.91 to<br>31.82)                  | 34.28<br>(18.85 to<br>53.19)                    |
| Congenital musculoskeletal and limb anomalies | 1,146.09<br>(780.39 to<br>1,561.51)                | 627.53<br>(397.44 to<br>967.55)                    | 438.05<br>(278.00 to<br>679.59)                    | 688.33<br>(431.97 to<br>1,069.88)                  | 13.82<br>(9.53 to<br>18.67)                     | 7.87<br>(5.14 to<br>11.92)                      | 5.59<br>(3.58 to<br>8.54)                     | 8.59<br>(5.46 to<br>13.07)                      |
| Urogenital congenital anomalies               | 2,327.00<br>(1,425.27 to<br>3,667.46)              | 1,516.18<br>(881.39 to<br>2,543.45)                | 1,114.59<br>(652.53 to<br>1,876.30)                | 1,642.86<br>(962.32 to<br>2,738.57)                | 31.70<br>(19.84 to<br>48.86)                    | 25.31<br>(15.12 to<br>40.02)                    | 19.66<br>(11.29 to<br>31.10)                  | 26.90<br>(15.90 to<br>42.54)                    |
| Digestive congenital anomalies                | 11,817.10<br>(7,635.74 to<br>16,875.90)            | 5,845.23<br>(3,330.36 to<br>9,280.81)              | 3,787.95<br>(2,186.57 to<br>5,944.72)              | 6,566.20<br>(3,746.80 to<br>10,995.30)             | 138.27<br>(89.81 to<br>197.01)                  | 69.50<br>(39.93 to<br>110.40)                   | 45.34<br>(26.33 to<br>70.59)                  | 77.91<br>(45.04 to<br>124.60)                   |
| Other congenital birth defects                | 26,018.79<br>(18,361.45 to<br>34,288.06)           | 12,241.18<br>(7,901.55 to<br>17,830.76)            | 8,300.96<br>(5,439.51 to<br>11,842.97)             | 13,575.87<br>(8,695.65 to<br>19,834.53)            | 307.35<br>(217.24 to<br>403.64)                 | 149.59<br>(98.11 to<br>215.64)                  | 102.66<br>(67.78 to<br>145.27)                | 165.27<br>(107.03 to<br>238.34)                 |
| Skin and subcutaneous diseases                | 1,878.52<br>(783.76 to<br>2,430.99)                | 4,433.30<br>(1,791.72 to<br>5,840.71)              | 4,126.68<br>(1,626.87 to<br>5,483.17)              | 4,420.84<br>(1,794.28 to<br>5,829.59)              | 67.01<br>(25.38 to<br>87.44)                    | 253.62<br>(94.37 to<br>343.84)                  | 250.72<br>(91.55 to<br>343.33)                | 243.75<br>(90.07 to<br>331.70)                  |
| Cellulitis                                    | 258.59<br>(120.55 to<br>449.95)                    | 701.18<br>(324.02 to<br>1,225.13)                  | 716.61<br>(328.13 to<br>1,238.43)                  | 684.31<br>(317.42 to<br>1,194.94)                  | 8.13<br>(3.56 to<br>14.16)                      | 33.37<br>(14.79 to<br>57.46)                    | 35.98<br>(15.80 to<br>62.12)                  | 31.55<br>(13.89 to<br>53.94)                    |
| Pyoderma                                      | 1,357.95<br>(511.16 to<br>1,825.17)                | 3,318.27<br>(1,156.83 to<br>4,622.51)              | 3,016.38<br>(1,031.04 to<br>4,230.49)              | 3,328.14<br>(1,167.17 to<br>4,596.66)              | 48.82<br>(16.75 to<br>65.97)                    | 197.50<br>(65.60 to<br>281.29)                  | 191.49<br>(62.58 to<br>275.18)                | 190.68<br>(63.27 to<br>271.80)                  |
| Decubitus ulcer                               | 128.77<br>(56.67 to<br>188.49)                     | 218.58<br>(96.19 to<br>336.34)                     | 204.60<br>(87.56 to<br>316.95)                     | 215.44<br>(95.08 to<br>333.48)                     | 5.95<br>(2.52 to<br>9.07)                       | 14.78<br>(5.98 to<br>23.10)                     | 14.96<br>(6.02 to<br>23.71)                   | 13.94<br>(5.63 to<br>21.66)                     |
| Other skin and subcutaneous diseases          | 133.21<br>(55.76 to<br>191.85)                     | 195.27<br>(80.80 to<br>281.72)                     | 189.08<br>(76.48 to<br>275.58)                     | 192.94<br>(80.61 to<br>280.60)                     | 4.11<br>(1.60 to<br>5.89)                       | 7.97<br>(3.01 to<br>12.14)                      | 8.29<br>(3.11 to<br>12.38)                    | 7.58<br>(2.91 to<br>11.62)                      |
| Sudden infant death syndrome                  | 1,733.26<br>(1,136.52 to<br>2,520.57)              | 1,092.41<br>(593.28 to<br>1,803.22)                | 741.30<br>(398.45 to<br>1,208.50)                  | 1,219.89<br>(666.80 to<br>2,004.52)                | 20.11<br>(13.19 to<br>29.26)                    | 12.67<br>(6.88 to<br>20.91)                     | 8.60<br>(4.62 to<br>14.02)                    | 14.15<br>(7.74 to<br>23.25)                     |
| <b>Injuries</b>                               | <b>578,412.29</b><br>(501,125.11 to<br>660,951.63) | <b>464,136.53</b><br>(380,053.09 to<br>574,460.66) | <b>354,572.77</b><br>(289,356.92 to<br>438,393.96) | <b>531,567.29</b><br>(421,936.18 to<br>677,282.99) | <b>11,837.24</b><br>(10,289.73 to<br>13,421.04) | <b>12,068.49</b><br>(10,108.61 to<br>14,584.50) | <b>9,620.25</b><br>(8,042.15 to<br>11,555.51) | <b>13,469.10</b><br>(11,022.98 to<br>16,720.80) |
| <b>Transport injuries</b>                     | <b>193,505.27</b><br>(173,706.14 to<br>215,169.24) | <b>180,504.65</b><br>(131,245.24 to<br>253,920.97) | <b>108,750.60</b><br>(79,461.82 to<br>149,070.70)  | <b>232,116.94</b><br>(162,511.06 to<br>336,948.99) | <b>4,044.51</b><br>(3,654.10 to<br>4,477.43)    | <b>4,643.69</b><br>(3,469.88 to<br>6,311.41)    | <b>2,972.49</b><br>(2,221.51 to<br>3,970.52)  | <b>5,795.82</b><br>(4,101.64 to<br>8,298.51)    |
| Road injuries                                 | 185,174.61<br>(166,502.02 to<br>206,238.56)        | 171,341.75<br>(124,480.32 to<br>239,669.74)        | 101,478.82<br>(74,473.76 to<br>138,266.91)         | 221,832.90<br>(154,636.04 to<br>322,342.26)        | 3,871.23<br>(3,493.02 to<br>4,285.31)           | 4,415.05<br>(3,300.18 to<br>5,974.22)           | 2,787.00<br>(2,088.47 to<br>3,727.84)         | 5,542.54<br>(3,919.16 to<br>7,939.30)           |
| Pedestrian road injuries                      | 86,773.93<br>(74,938.39 to<br>105,117.33)          | 82,137.88<br>(59,162.58 to<br>112,538.68)          | 49,071.90<br>(35,202.50 to<br>66,896.92)           | 103,676.50<br>(71,536.44 to<br>147,416.10)         | 1,954.64<br>(1,717.65 to<br>2,331.62)           | 2,455.42<br>(1,835.62 to<br>3,282.34)           | 1,575.30<br>(1,171.35 to<br>2,079.96)         | 2,999.43<br>(2,154.12 to<br>4,199.75)           |
| <b>Ecuador</b>                                |                                                    |                                                    |                                                    |                                                    |                                                 |                                                 |                                               |                                                 |
| <b>YLLs (actual counts)</b>                   |                                                    |                                                    |                                                    |                                                    | <b>Deaths (actual counts)</b>                   |                                                 |                                               |                                                 |

| Cause                                           | 2016                                                             | 2040 Forecast                                                    | 2040 Better Scenario                                           | 2040 Worse Scenario                                              | 2016                                                       | 2040 Forecast                                              | 2040 Better Scenario                                       | 2040 Worse Scenario                                        |
|-------------------------------------------------|------------------------------------------------------------------|------------------------------------------------------------------|----------------------------------------------------------------|------------------------------------------------------------------|------------------------------------------------------------|------------------------------------------------------------|------------------------------------------------------------|------------------------------------------------------------|
| Cyclist road injuries                           | 5,486.72<br>(4,509.58 to<br>7,120.68)                            | 5,228.77<br>(3,366.74 to<br>8,000.19)                            | 3,229.53<br>(2,083.65 to<br>4,914.48)                          | 6,793.02<br>(4,217.69 to<br>10,895.11)                           | 117.82<br>(96.63 to<br>152.03)                             | 126.82<br>(82.10 to<br>192.72)                             | 84.36<br>(55.17 to<br>128.46)                              | 160.13<br>(99.74 to<br>252.25)                             |
| Motorcyclist road injuries                      | 25,143.12<br>(20,661.25 to<br>31,029.57)                         | 21,308.66<br>(13,528.15 to<br>33,565.03)                         | 14,858.90<br>(9,503.80 to<br>23,036.91)                        | 26,428.18<br>(16,107.64 to<br>43,200.59)                         | 447.51<br>(371.55 to<br>550.93)                            | 401.13<br>(254.80 to<br>620.37)                            | 288.09<br>(185.26 to<br>439.52)                            | 492.47<br>(302.66 to<br>801.23)                            |
| Motor vehicle road injuries                     | 65,535.98<br>(46,237.88 to<br>77,806.27)                         | 60,692.28<br>(39,085.39 to<br>86,921.92)                         | 33,199.94<br>(21,794.87 to<br>47,069.83)                       | 82,295.10<br>(51,293.64 to<br>122,141.15)                        | 1,304.22<br>(914.29 to<br>1,537.40)                        | 1,382.23<br>(908.58 to<br>1,955.09)                        | 808.37<br>(544.01 to<br>1,119.00)                          | 1,826.85<br>(1,162.28 to<br>2,701.85)                      |
| Other road injuries                             | 2,234.86<br>(1,488.93 to<br>2,873.32)                            | 1,974.17<br>(1,191.28 to<br>2,978.42)                            | 1,118.55<br>(674.01 to<br>1,667.09)                            | 2,640.10<br>(1,555.88 to<br>4,121.21)                            | 47.03<br>(31.12 to<br>59.59)                               | 49.45<br>(29.82 to<br>74.14)                               | 30.88<br>(18.81 to<br>44.70)                               | 63.67<br>(37.51 to<br>99.58)                               |
| Other transport injuries                        | 8,330.67<br>(6,496.66 to<br>9,856.49)                            | 9,162.90<br>(6,372.12 to<br>13,295.57)                           | 7,271.78<br>(4,982.44 to<br>10,539.99)                         | 10,284.04<br>(6,802.33 to<br>15,524.68)                          | 173.28<br>(138.25 to<br>202.03)                            | 228.64<br>(159.74 to<br>323.18)                            | 185.49<br>(128.68 to<br>261.60)                            | 253.28<br>(169.64 to<br>375.64)                            |
| <b>Unintentional injuries</b>                   | <b>134,192.99</b><br><b>(119,611.60 to</b><br><b>150,948.58)</b> | <b>118,043.94</b><br><b>(101,160.06 to</b><br><b>138,764.25)</b> | <b>99,542.40</b><br><b>(84,166.19 to</b><br><b>117,117.38)</b> | <b>122,999.91</b><br><b>(104,765.28 to</b><br><b>145,515.81)</b> | <b>2,912.86</b><br><b>(2,648.79 to</b><br><b>3,218.90)</b> | <b>3,844.25</b><br><b>(3,395.10 to</b><br><b>4,369.33)</b> | <b>3,442.47</b><br><b>(2,992.26 to</b><br><b>3,965.41)</b> | <b>3,875.34</b><br><b>(3,401.55 to</b><br><b>4,447.14)</b> |
| Falls                                           | 25,040.61<br>(21,897.07 to<br>30,830.94)                         | 34,040.20<br>(29,381.24 to<br>40,606.64)                         | 31,320.28<br>(26,525.46 to<br>38,156.26)                       | 34,079.39<br>(29,476.85 to<br>40,742.57)                         | 828.81<br>(733.29 to<br>970.97)                            | 1,641.43<br>(1,437.57 to<br>1,883.04)                      | 1,560.31<br>(1,333.04 to<br>1,805.17)                      | 1,600.35<br>(1,393.58 to<br>1,834.42)                      |
| Drowning                                        | 33,133.42<br>(29,318.48 to<br>37,880.93)                         | 24,391.13<br>(18,657.11 to<br>32,444.93)                         | 19,560.51<br>(14,961.65 to<br>25,966.70)                       | 26,350.26<br>(19,608.65 to<br>36,464.64)                         | 588.24<br>(529.00 to<br>660.07)                            | 554.64<br>(429.85 to<br>735.50)                            | 460.85<br>(360.18 to<br>605.14)                            | 591.37<br>(450.17 to<br>820.23)                            |
| Fire, heat, and hot substances                  | 8,503.92<br>(7,287.29 to<br>10,416.35)                           | 6,809.98<br>(5,272.89 to<br>9,025.79)                            | 5,261.00<br>(4,027.84 to<br>6,947.07)                          | 7,357.41<br>(5,591.28 to<br>10,105.78)                           | 197.99<br>(173.33 to<br>233.00)                            | 243.62<br>(192.45 to<br>314.66)                            | 201.87<br>(156.70 to<br>260.29)                            | 253.55<br>(198.91 to<br>336.90)                            |
| Poisonings                                      | 4,346.15<br>(3,640.55 to<br>5,445.80)                            | 2,482.78<br>(1,770.51 to<br>3,597.64)                            | 1,750.90<br>(1,219.89 to<br>2,506.73)                          | 2,766.43<br>(1,934.05 to<br>4,106.71)                            | 83.28<br>(69.83 to<br>102.73)                              | 59.24<br>(42.79 to<br>84.77)                               | 43.30<br>(30.45 to<br>61.97)                               | 65.07<br>(46.02 to<br>95.48)                               |
| Exposure to mechanical forces                   | 13,125.86<br>(11,011.40 to<br>15,396.60)                         | 10,724.93<br>(8,524.14 to<br>13,125.11)                          | 8,417.83<br>(6,581.28 to<br>10,513.16)                         | 11,328.93<br>(8,891.26 to<br>13,999.00)                          | 255.59<br>(212.07 to<br>298.63)                            | 269.58<br>(214.52 to<br>325.11)                            | 220.15<br>(172.82 to<br>267.41)                            | 278.76<br>(219.12 to<br>339.27)                            |
| Unintentional firearm injuries                  | 3,048.50<br>(2,486.30 to<br>3,557.00)                            | 2,052.43<br>(1,508.17 to<br>2,624.41)                            | 1,584.81<br>(1,165.24 to<br>2,076.51)                          | 2,183.52<br>(1,609.39 to<br>2,788.57)                            | 57.25<br>(45.72 to<br>66.06)                               | 46.48<br>(34.73 to<br>57.60)                               | 37.32<br>(27.57 to<br>47.48)                               | 48.64<br>(36.63 to<br>59.97)                               |
| Unintentional suffocation                       | 3,083.46<br>(2,277.78 to<br>4,064.82)                            | 1,601.72<br>(1,092.49 to<br>2,254.60)                            | 1,126.36<br>(783.27 to<br>1,546.70)                            | 1,758.94<br>(1,199.59 to<br>2,461.77)                            | 40.67<br>(30.50 to<br>52.82)                               | 17.58<br>(16.70 to<br>31.78)                               | 17.04<br>(12.26 to<br>22.56)                               | 25.38<br>(17.80 to<br>34.31)                               |
| Other exposure to mechanical forces             | 6,993.91<br>(5,679.49 to<br>8,969.52)                            | 7,080.79<br>(5,481.70 to<br>9,114.75)                            | 5,706.67<br>(4,365.51 to<br>7,343.71)                          | 7,386.46<br>(5,585.70 to<br>9,515.18)                            | 157.66<br>(126.20 to<br>199.66)                            | 199.71<br>(155.46 to<br>253.08)                            | 165.79<br>(127.09 to<br>208.93)                            | 204.74<br>(156.43 to<br>257.62)                            |
| Adverse effects of medical treatment            | 9,388.17<br>(6,665.52 to<br>15,426.01)                           | 9,163.74<br>(6,480.72 to<br>15,163.06)                           | 7,662.52<br>(5,376.25 to<br>12,882.62)                         | 9,532.41<br>(6,762.14 to<br>15,831.94)                           | 222.85<br>(167.34 to<br>349.49)                            | 334.64<br>(249.24 to<br>528.55)                            | 298.61<br>(217.09 to<br>476.81)                            | 335.66<br>(249.17 to<br>531.55)                            |
| Animal contact                                  | 2,436.88<br>(1,131.65 to<br>3,117.62)                            | 2,258.20<br>(1,023.31 to<br>3,033.46)                            | 1,724.49<br>(770.48 to<br>2,327.10)                            | 2,411.31<br>(1,079.13 to<br>3,251.56)                            | 53.60<br>(24.93 to<br>66.93)                               | 66.01<br>(28.96 to<br>86.07)                               | 53.28<br>(23.51 to<br>70.01)                               | 68.64<br>(30.66 to<br>89.33)                               |
| Venomous animal contact                         | 1,714.35<br>(838.73 to<br>2,236.67)                              | 1,632.98<br>(771.64 to<br>2,194.25)                              | 1,249.82<br>(573.56 to<br>1,697.29)                            | 1,744.75<br>(820.87 to<br>2,365.24)                              | 38.74<br>(18.47 to<br>48.52)                               | 49.05<br>(22.60 to<br>64.42)                               | 39.73<br>(18.07 to<br>52.50)                               | 50.96<br>(24.07 to<br>66.66)                               |
| Non-venomous animal contact                     | 722.52<br>(265.99 to<br>988.43)                                  | 625.23<br>(220.86 to<br>889.36)                                  | 474.67<br>(168.03 to<br>685.16)                                | 666.56<br>(239.70 to<br>960.64)                                  | 14.86<br>(5.35 to<br>19.96)                                | 16.96<br>(5.92 to<br>23.75)                                | 13.55<br>(4.63 to<br>19.17)                                | 17.68<br>(6.19 to<br>24.65)                                |
| Foreign body                                    | 28,860.98<br>(22,179.58 to<br>35,909.49)                         | 19,634.94<br>(14,987.31 to<br>24,558.61)                         | 17,235.02<br>(13,298.00 to<br>21,148.50)                       | 20,258.54<br>(15,339.90 to<br>25,579.14)                         | 484.20<br>(382.24 to<br>581.05)                            | 457.75<br>(360.44 to<br>540.64)                            | 432.48<br>(341.96 to<br>509.06)                            | 457.40<br>(360.07 to<br>541.06)                            |
| Pulmonary aspiration and foreign body in airway | 27,099.54<br>(20,613.02 to<br>34,170.55)                         | 18,230.19<br>(13,564.18 to<br>23,145.19)                         | 16,037.50<br>(12,230.57 to<br>19,954.06)                       | 18,787.43<br>(13,880.22 to<br>23,951.38)                         | 450.76<br>(348.70 to<br>546.10)                            | 422.70<br>(325.50 to<br>504.42)                            | 400.89<br>(311.59 to<br>475.84)                            | 421.60<br>(321.55 to<br>503.98)                            |
| Foreign body in other body part                 | 1,761.44<br>(1,306.21 to<br>2,667.70)                            | 1,404.75<br>(995.19 to<br>2,097.37)                              | 1,197.52<br>(870.58 to<br>1,794.56)                            | 1,471.11<br>(1,044.29 to<br>2,187.15)                            | 33.45<br>(25.07 to<br>49.54)                               | 35.06<br>(25.57 to<br>51.23)                               | 31.59<br>(23.21 to<br>46.66)                               | 35.80<br>(26.24 to<br>52.62)                               |

|                                                                                     |                                                                  |                                                                  |                                                                  |                                                                  |                                                            |                                                            |                                                            |                                                            |
|-------------------------------------------------------------------------------------|------------------------------------------------------------------|------------------------------------------------------------------|------------------------------------------------------------------|------------------------------------------------------------------|------------------------------------------------------------|------------------------------------------------------------|------------------------------------------------------------|------------------------------------------------------------|
| Environmental heat and cold exposure                                                | 2,075.00<br>(1,138.66 to<br>3,152.87)                            | 2,327.18<br>(1,243.88 to<br>3,682.63)                            | 1,715.35<br>(894.60 to<br>2,723.75)                              | 2,493.68<br>(1,332.52 to<br>3,859.76)                            | 51.81<br>(28.22 to<br>78.45)                               | 72.41<br>(37.74 to<br>112.91)                              | 55.09<br>(28.26 to<br>86.14)                               | 76.05<br>(39.92 to<br>116.98)                              |
| Other unintentional injuries                                                        | 7,281.99<br>(6,243.14 to<br>8,367.36)                            | 6,200.84<br>(4,989.71 to<br>7,567.71)                            | 4,894.49<br>(3,717.57 to<br>6,243.45)                            | 6,421.54<br>(5,146.46 to<br>7,911.58)                            | 146.48<br>(126.59 to<br>167.69)                            | 144.93<br>(120.25 to<br>174.59)                            | 116.52<br>(90.29 to<br>145.69)                             | 148.49<br>(122.53 to<br>178.14)                            |
| <b>Self-harm and interpersonal violence</b>                                         | <b>179,868.29</b><br><b>(137,927.44 to</b><br><b>210,503.48)</b> | <b>162,523.56</b><br><b>(114,826.88 to</b><br><b>209,431.76)</b> | <b>143,363.19</b><br><b>(102,404.34 to</b><br><b>180,938.71)</b> | <b>173,359.10</b><br><b>(119,772.31 to</b><br><b>228,713.05)</b> | <b>3,499.63</b><br><b>(2,653.62 to</b><br><b>4,098.89)</b> | <b>3,511.44</b><br><b>(2,440.89 to</b><br><b>4,511.32)</b> | <b>3,137.30</b><br><b>(2,212.59 to</b><br><b>3,973.34)</b> | <b>3,729.17</b><br><b>(2,538.88 to</b><br><b>4,915.74)</b> |
| <b>Ecuador</b>                                                                      |                                                                  |                                                                  |                                                                  |                                                                  |                                                            |                                                            |                                                            |                                                            |
| <b>Cause</b>                                                                        | <b>YLLs (actual counts)</b>                                      |                                                                  |                                                                  |                                                                  | <b>Deaths (actual counts)</b>                              |                                                            |                                                            |                                                            |
|                                                                                     | <b>2016</b>                                                      | <b>2040 Forecast</b>                                             | <b>2040 Better Scenario</b>                                      | <b>2040 Worse Scenario</b>                                       | <b>2016</b>                                                | <b>2040 Forecast</b>                                       | <b>2040 Better Scenario</b>                                | <b>2040 Worse Scenario</b>                                 |
| Self-harm                                                                           | 64,381.55<br>(47,200.59 to<br>74,948.58)                         | 64,510.30<br>(40,917.60 to<br>92,112.68)                         | 54,149.20<br>(34,912.63 to<br>74,804.38)                         | 74,094.25<br>(45,078.04 to<br>108,876.90)                        | 1,265.95<br>(915.62 to<br>1,479.70)                        | 1,436.22<br>(889.24 to<br>2,019.08)                        | 1,228.81<br>(765.07 to<br>1,696.05)                        | 1,635.94<br>(986.86 to<br>2,376.29)                        |
| Self-harm by firearm                                                                | 3,923.20<br>(2,332.69 to<br>5,602.26)                            | 4,515.19<br>(2,223.71 to<br>8,034.93)                            | 3,649.74<br>(1,791.83 to<br>6,427.15)                            | 5,290.53<br>(2,466.35 to<br>9,759.61)                            | 82.34<br>(48.46 to<br>115.97)                              | 107.45<br>(52.92 to<br>188.15)                             | 88.71<br>(43.91 to<br>150.67)                              | 124.11<br>(59.07 to<br>222.89)                             |
| Self-harm by other specified means                                                  | 60,458.35<br>(44,133.61 to<br>70,671.61)                         | 59,995.11<br>(38,801.91 to<br>85,361.56)                         | 50,499.47<br>(32,422.93 to<br>69,772.17)                         | 68,803.72<br>(42,337.66 to<br>100,990.21)                        | 1,183.61<br>(854.36 to<br>1,384.21)                        | 1,328.78<br>(827.64 to<br>1,856.44)                        | 1,140.10<br>(721.28 to<br>1,568.07)                        | 1,511.83<br>(916.76 to<br>2,198.19)                        |
| Interpersonal violence                                                              | 115,486.74<br>(73,660.50 to<br>147,091.23)                       | 98,013.26<br>(59,177.41 to<br>133,697.46)                        | 89,213.99<br>(55,986.22 to<br>121,897.34)                        | 99,264.85<br>(58,042.63 to<br>138,439.15)                        | 2,233.68<br>(1,416.06 to<br>2,890.41)                      | 2,075.21<br>(1,235.63 to<br>2,880.15)                      | 1,908.49<br>(1,181.74 to<br>2,629.90)                      | 2,093.22<br>(1,209.45 to<br>2,959.71)                      |
| Physical violence by firearm                                                        | 72,058.55<br>(42,778.67 to<br>98,078.28)                         | 60,010.56<br>(33,233.68 to<br>85,793.36)                         | 54,372.23<br>(30,473.34 to<br>78,069.06)                         | 60,293.07<br>(32,433.24 to<br>87,048.06)                         | 1,381.54<br>(806.69 to<br>1,892.59)                        | 1,225.21<br>(669.01 to<br>1,748.44)                        | 1,118.03<br>(618.08 to<br>1,603.01)                        | 1,226.90<br>(646.93 to<br>1,780.58)                        |
| Physical violence by sharp object                                                   | 26,625.70<br>(14,150.83 to<br>42,938.14)                         | 25,109.45<br>(13,092.56 to<br>41,462.63)                         | 23,676.84<br>(12,288.49 to<br>38,036.32)                         | 24,957.02<br>(12,487.77 to<br>42,104.12)                         | 526.47<br>(283.04 to<br>854.74)                            | 547.26<br>(288.76 to<br>913.42)                            | 521.25<br>(273.90 to<br>860.08)                            | 540.94<br>(281.25 to<br>910.70)                            |
| Physical violence by other means                                                    | 16,802.49<br>(8,037.32 to<br>24,997.21)                          | 12,893.24<br>(5,587.23 to<br>21,725.58)                          | 11,164.92<br>(4,896.70 to<br>18,555.07)                          | 14,014.76<br>(5,969.04 to<br>24,725.83)                          | 325.67<br>(154.83 to<br>508.11)                            | 302.74<br>(133.30 to<br>510.83)                            | 299.20<br>(120.54 to<br>439.89)                            | 325.39<br>(138.50 to<br>560.77)                            |
| <b>Forces of nature, conflict and terrorism, and executions and police conflict</b> | <b>70,845.74</b><br><b>(11,320.90 to</b><br><b>135,697.59)</b>   | <b>3,064.39</b><br><b>(0.00 to</b><br><b>14,127.87)</b>          | <b>2,916.58</b><br><b>(0.00 to</b><br><b>13,373.87)</b>          | <b>3,091.34</b><br><b>(0.00 to</b><br><b>14,262.69)</b>          | <b>1,380.25</b><br><b>(220.40 to</b><br><b>2,643.91)</b>   | <b>69.11</b><br><b>(0.00 to</b><br><b>322.69)</b>          | <b>68.00</b><br><b>(0.00 to</b><br><b>318.07)</b>          | <b>68.77</b><br><b>(0.00 to</b><br><b>320.55)</b>          |
| Exposure to forces of nature                                                        | 70,749.29<br>(11,225.53 to<br>135,599.68)                        | 2,993.02<br>(0.00 to<br>14,116.94)                               | 2,848.38<br>(0.00 to<br>13,363.48)                               | 3,019.30<br>(0.00 to<br>14,251.64)                               | 1,378.58<br>(218.73 to<br>2,642.22)                        | 67.67<br>(0.00 to<br>322.47)                               | 66.59<br>(0.00 to<br>317.85)                               | 67.33<br>(0.00 to<br>320.33)                               |
| Conflict and terrorism                                                              | 0.00<br>(0.00 to<br>0.00)                                        | 71.37<br>(0.00 to<br>304.62)                                     | 68.20<br>(0.00 to<br>291.69)                                     | 72.05<br>(0.00 to<br>307.00)                                     | 0.00<br>(0.00 to<br>0.00)                                  | 1.44<br>(0.00 to<br>6.30)                                  | 1.41<br>(0.00 to<br>6.19)                                  | 1.44<br>(0.00 to<br>6.26)                                  |
| Executions and police conflict                                                      | 96.46<br>(88.22 to<br>106.28)                                    | 0.00<br>(0.00 to<br>0.00)                                        | 0.00<br>(0.00 to<br>0.00)                                        | 0.00<br>(0.00 to<br>0.00)                                        | 1.67<br>(1.54 to<br>1.82)                                  | 0.00<br>(0.00 to<br>0.00)                                  | 0.00<br>(0.00 to<br>0.00)                                  | 0.00<br>(0.00 to<br>0.00)                                  |
| <b>Peru</b>                                                                         |                                                                  |                                                                  |                                                                  |                                                                  |                                                            |                                                            |                                                            |                                                            |
| <b>Cause</b>                                                                        | <b>YLLs (in 1000s)</b>                                           |                                                                  |                                                                  |                                                                  | <b>Deaths (in 1000s)</b>                                   |                                                            |                                                            |                                                            |
|                                                                                     | <b>2016</b>                                                      | <b>2040 Forecast</b>                                             | <b>2040 Better Scenario</b>                                      | <b>2040 Worse Scenario</b>                                       | <b>2016</b>                                                | <b>2040 Forecast</b>                                       | <b>2040 Better Scenario</b>                                | <b>2040 Worse Scenario</b>                                 |
| All causes                                                                          | 3,521.39<br>(2,998.12 to<br>4,091.73)                            | 4,255.54<br>(2,943.98 to<br>6,218.58)                            | 3,273.23<br>(2,277.22 to<br>4,827.42)                            | 5,251.65<br>(3,635.20 to<br>7,564.42)                            | 128.90<br>(110.86 to<br>149.64)                            | 244.16<br>(183.85 to<br>318.50)                            | 201.46<br>(151.49 to<br>262.77)                            | 284.56<br>(212.86 to<br>366.20)                            |
| Communicable, maternal, neonatal, and nutritional diseases                          | 1,041.74<br>(869.81 to<br>1,240.76)                              | 833.90<br>(616.06 to<br>1,133.10)                                | 552.60<br>(404.94 to<br>744.29)                                  | 1,190.23<br>(858.44 to<br>1,662.46)                              | 27.73<br>(23.12 to<br>32.39)                               | 41.98<br>(32.06 to<br>53.07)                               | 33.00<br>(25.01 to<br>41.67)                               | 54.14<br>(40.27 to<br>70.57)                               |
| HIV/AIDS and tuberculosis                                                           | 65.94<br>(54.96 to<br>82.86)                                     | 55.62<br>(34.05 to<br>89.26)                                     | 30.18<br>(17.75 to<br>51.24)                                     | 89.83<br>(55.87 to<br>142.09)                                    | 1.83<br>(1.50 to<br>2.30)                                  | 1.88<br>(1.13 to<br>3.09)                                  | 1.04<br>(0.59 to<br>1.73)                                  | 2.93<br>(1.69 to<br>4.77)                                  |
| Tuberculosis                                                                        | 48.50<br>(38.79 to<br>62.56)                                     | 36.04<br>(17.26 to<br>68.61)                                     | 18.72<br>(8.69 to<br>36.77)                                      | 57.25<br>(25.47 to<br>110.88)                                    | 1.48<br>(1.18 to<br>1.90)                                  | 1.49<br>(0.75 to<br>2.69)                                  | 0.81<br>(0.40 to<br>1.46)                                  | 2.29<br>(1.06 to<br>4.22)                                  |

|                                                                          |                                          |                                          |                                          |                                            |                                       |                                       |                                       |                                       |
|--------------------------------------------------------------------------|------------------------------------------|------------------------------------------|------------------------------------------|--------------------------------------------|---------------------------------------|---------------------------------------|---------------------------------------|---------------------------------------|
| HIV/AIDS                                                                 | 17.44<br>(13.22 to<br>27.48)             | 19.58<br>(11.72 to<br>33.58)             | 11.46<br>(5.24 to<br>23.68)              | 32.58<br>(24.72 to<br>47.11)               | 0.35<br>(0.26 to<br>0.58)             | 0.39<br>(0.22 to<br>0.72)             | 0.23<br>(0.10 to<br>0.54)             | 0.64<br>(0.45 to<br>1.01)             |
| <b>Diarrhea, lower respiratory, and other common infectious diseases</b> | <b>512.17<br/>(421.25 to<br/>613.93)</b> | <b>532.46<br/>(368.24 to<br/>751.21)</b> | <b>373.71<br/>(257.13 to<br/>519.86)</b> | <b>785.25<br/>(515.67 to<br/>1,179.99)</b> | <b>19.22<br/>(15.00 to<br/>23.07)</b> | <b>35.25<br/>(25.53 to<br/>45.38)</b> | <b>28.34<br/>(20.13 to<br/>36.48)</b> | <b>45.46<br/>(31.99 to<br/>60.58)</b> |
| Diarrheal diseases                                                       | 36.25<br>(25.21 to<br>55.93)             | 17.98<br>(5.89 to<br>52.65)              | 12.73<br>(4.25 to<br>34.88)              | 31.01<br>(8.50 to<br>99.78)                | 0.83<br>(0.55 to<br>1.41)             | 0.94<br>(0.31 to<br>2.55)             | 0.74<br>(0.24 to<br>1.99)             | 1.41<br>(0.39 to<br>4.41)             |
| Intestinal infectious diseases                                           | 0.28<br>(0.13 to<br>0.50)                | 0.23<br>(0.10 to<br>0.46)                | 0.22<br>(0.10 to<br>0.44)                | 0.25<br>(0.11 to<br>0.49)                  | 0.01<br>(0.00 to<br>0.01)             | 0.01<br>(0.00 to<br>0.01)             | 0.01<br>(0.00 to<br>0.01)             | 0.01<br>(0.00 to<br>0.01)             |
| Typhoid fever                                                            | 0.27<br>(0.13 to<br>0.49)                | 0.23<br>(0.10 to<br>0.45)                | 0.22<br>(0.10 to<br>0.43)                | 0.24<br>(0.11 to<br>0.48)                  | 0.01<br>(0.00 to<br>0.01)             | 0.01<br>(0.00 to<br>0.01)             | 0.01<br>(0.00 to<br>0.01)             | 0.01<br>(0.00 to<br>0.01)             |
| Paratyphoid fever                                                        | 0.00<br>(0.00 to<br>0.00)                | 0.00<br>(0.00 to<br>0.01)                | 0.00<br>(0.00 to<br>0.00)                | 0.00<br>(0.00 to<br>0.01)                  | 0.00<br>(0.00 to<br>0.00)             | 0.00<br>(0.00 to<br>0.00)             | 0.00<br>(0.00 to<br>0.00)             | 0.00<br>(0.00 to<br>0.00)             |
| Other intestinal infectious diseases                                     | 0.01<br>(0.00 to<br>0.02)                | 0.00<br>(0.00 to<br>0.01)                | 0.00<br>(0.00 to<br>0.01)                | 0.00<br>(0.00 to<br>0.01)                  | 0.00<br>(0.00 to<br>0.00)             | 0.00<br>(0.00 to<br>0.00)             | 0.00<br>(0.00 to<br>0.00)             | 0.00<br>(0.00 to<br>0.00)             |
| Lower respiratory infections                                             | 422.37<br>(342.81 to<br>506.44)          | 461.09<br>(312.67 to<br>670.40)          | 329.36<br>(223.03 to<br>461.61)          | 666.94<br>(434.63 to<br>1,016.30)          | 17.57<br>(13.52 to<br>21.03)          | 33.34<br>(23.78 to<br>42.85)          | 26.93<br>(18.99 to<br>34.67)          | 42.65<br>(29.30 to<br>57.21)          |
| Upper respiratory infections                                             | 0.16<br>(0.07 to<br>0.35)                | 0.12<br>(0.05 to<br>0.26)                | 0.07<br>(0.03 to<br>0.14)                | 0.15<br>(0.06 to<br>0.31)                  | 0.00<br>(0.00 to<br>0.01)             | 0.00<br>(0.00 to<br>0.01)             | 0.00<br>(0.00 to<br>0.01)             | 0.01<br>(0.00 to<br>0.01)             |
| Otitis media                                                             | 0.01<br>(0.00 to<br>0.02)                | 0.00<br>(0.00 to<br>0.00)                | 0.00<br>(0.00 to<br>0.00)                | 0.00<br>(0.00 to<br>0.00)                  | 0.00<br>(0.00 to<br>0.00)             | 0.00<br>(0.00 to<br>0.00)             | 0.00<br>(0.00 to<br>0.00)             | 0.00<br>(0.00 to<br>0.00)             |
| Meningitis                                                               | 21.84<br>(12.57 to<br>34.02)             | 10.45<br>(5.41 to<br>17.74)              | 7.26<br>(4.05 to<br>12.17)               | 16.27<br>(6.61 to<br>31.28)                | 0.34<br>(0.21 to<br>0.51)             | 0.23<br>(0.15 to<br>0.35)             | 0.18<br>(0.11 to<br>0.27)             | 0.30<br>(0.17 to<br>0.50)             |
| Pneumococcal meningitis                                                  | 1.48<br>(0.86 to<br>2.44)                | 0.60<br>(0.35 to<br>0.99)                | 0.52<br>(0.31 to<br>0.83)                | 0.80<br>(0.42 to<br>1.43)                  | 0.03<br>(0.02 to<br>0.04)             | 0.02<br>(0.01 to<br>0.02)             | 0.02<br>(0.01 to<br>0.02)             | 0.02<br>(0.01 to<br>0.03)             |
| H influenzae type B meningitis                                           | 2.80<br>(1.59 to<br>4.60)                | 2.57<br>(0.62 to<br>6.68)                | 1.55<br>(0.53 to<br>3.61)                | 7.61<br>(1.11 to<br>20.66)                 | 0.04<br>(0.03 to<br>0.06)             | 0.04<br>(0.02 to<br>0.09)             | 0.03<br>(0.01 to<br>0.05)             | 0.10<br>(0.02 to<br>0.26)             |
| Meningococcal meningitis                                                 | 8.57<br>(4.94 to<br>13.51)               | 3.34<br>(1.84 to<br>5.68)                | 2.38<br>(1.32 to<br>4.06)                | 3.62<br>(1.94 to<br>6.40)                  | 0.13<br>(0.08 to<br>0.20)             | 0.08<br>(0.05 to<br>0.12)             | 0.06<br>(0.04 to<br>0.10)             | 0.08<br>(0.05 to<br>0.13)             |
| Other meningitis                                                         | 3.99<br>(5.20 to<br>14.05)               | 3.94<br>(2.23 to<br>6.73)                | 2.81<br>(1.60 to<br>4.79)                | 4.24<br>(2.31 to<br>7.39)                  | 0.14<br>(0.09 to<br>0.22)             | 0.10<br>(0.06 to<br>0.15)             | 0.07<br>(0.05 to<br>0.12)             | 0.10<br>(0.06 to<br>0.16)             |
| Encephalitis                                                             | 18.52<br>(11.69 to<br>29.30)             | 14.27<br>(7.88 to<br>23.97)              | 11.14<br>(6.62 to<br>18.19)              | 15.93<br>(8.58 to<br>27.12)                | 0.30<br>(0.20 to<br>0.45)             | 0.32<br>(0.21 to<br>0.47)             | 0.27<br>(0.18 to<br>0.39)             | 0.34<br>(0.22 to<br>0.52)             |
| Diphtheria                                                               | 0.05<br>(0.02 to<br>0.09)                | 0.01<br>(0.00 to<br>0.02)                | 0.01<br>(0.00 to<br>0.01)                | 0.04<br>(0.00 to<br>0.12)                  | 0.00<br>(0.00 to<br>0.00)             | 0.00<br>(0.00 to<br>0.00)             | 0.00<br>(0.00 to<br>0.00)             | 0.00<br>(0.00 to<br>0.00)             |
| Whooping cough                                                           | 11.51<br>(1.09 to<br>37.19)              | 8.61<br>(0.35 to<br>28.47)               | 2.39<br>(0.16 to<br>8.21)                | 17.07<br>(0.47 to<br>56.27)                | 0.14<br>(0.01 to<br>0.44)             | 0.10<br>(0.00 to<br>0.34)             | 0.03<br>(0.00 to<br>0.10)             | 0.20<br>(0.01 to<br>0.67)             |
| Tetanus                                                                  | 0.41<br>(0.25 to<br>0.59)                | 0.07<br>(0.03 to<br>0.13)                | 0.06<br>(0.03 to<br>0.11)                | 0.10<br>(0.04 to<br>0.18)                  | 0.01<br>(0.01 to<br>0.01)             | 0.00<br>(0.00 to<br>0.00)             | 0.00<br>(0.00 to<br>0.00)             | 0.00<br>(0.00 to<br>0.00)             |
| Measles                                                                  | 0.00<br>(0.00 to<br>0.00)                | 19.09<br>(0.00 to<br>89.44)              | 10.12<br>(0.00 to<br>44.26)              | 36.86<br>(0.00 to<br>185.21)               | 0.00<br>(0.00 to<br>0.00)             | 0.28<br>(0.00 to<br>1.13)             | 0.16<br>(0.00 to<br>0.61)             | 0.51<br>(0.00 to<br>2.33)             |
| <b>Peru</b>                                                              |                                          |                                          |                                          |                                            |                                       |                                       |                                       |                                       |
| Cause                                                                    | YLLs (in 1000s)                          |                                          |                                          |                                            | Deaths (in 1000s)                     |                                       |                                       |                                       |
|                                                                          | 2016                                     | 2040 Forecast                            | 2040 Better Scenario                     | 2040 Worse Scenario                        | 2016                                  | 2040 Forecast                         | 2040 Better Scenario                  | 2040 Worse Scenario                   |

|                                                       |                                                   |                                                  |                                                  |                                                  |                                                |                                                |                                                |                                                |
|-------------------------------------------------------|---------------------------------------------------|--------------------------------------------------|--------------------------------------------------|--------------------------------------------------|------------------------------------------------|------------------------------------------------|------------------------------------------------|------------------------------------------------|
| Varicella and herpes zoster                           | 0.76<br>(0.44 to<br>1.23)                         | 0.53<br>(0.27 to<br>0.92)                        | 0.35<br>(0.19 to<br>0.58)                        | 0.64<br>(0.32 to<br>1.12)                        | 0.02<br>(0.01 to<br>0.03)                      | 0.03<br>(0.02 to<br>0.04)                      | 0.02<br>(0.01 to<br>0.03)                      | 0.03<br>(0.02 to<br>0.05)                      |
| <b>Neglected tropical diseases and malaria</b>        | <b>5.77</b><br><b>(2.88 to</b><br><b>12.73)</b>   | <b>3.53</b><br><b>(1.74 to</b><br><b>7.89)</b>   | <b>2.97</b><br><b>(1.51 to</b><br><b>6.46)</b>   | <b>3.88</b><br><b>(1.88 to</b><br><b>8.71)</b>   | <b>0.12</b><br><b>(0.07 to</b><br><b>0.24)</b> | <b>0.10</b><br><b>(0.06 to</b><br><b>0.19)</b> | <b>0.09</b><br><b>(0.06 to</b><br><b>0.17)</b> | <b>0.11</b><br><b>(0.06 to</b><br><b>0.20)</b> |
| Malaria                                               | 0.37<br>(0.21 to<br>0.92)                         | 0.17<br>(0.08 to<br>0.48)                        | 0.16<br>(0.07 to<br>0.43)                        | 0.18<br>(0.09 to<br>0.49)                        | 0.01<br>(0.01 to<br>0.02)                      | 0.01<br>(0.00 to<br>0.01)                      | 0.01<br>(0.00 to<br>0.01)                      | 0.01<br>(0.00 to<br>0.01)                      |
| Chagas disease                                        | 0.24<br>(0.19 to<br>0.30)                         | 0.23<br>(0.16 to<br>0.33)                        | 0.27<br>(0.18 to<br>0.39)                        | 0.21<br>(0.14 to<br>0.30)                        | 0.01<br>(0.01 to<br>0.02)                      | 0.02<br>(0.01 to<br>0.02)                      | 0.02<br>(0.01 to<br>0.03)                      | 0.02<br>(0.01 to<br>0.02)                      |
| Leishmaniasis                                         | 0.00<br>(0.00 to<br>0.00)                         | 0.00<br>(0.00 to<br>0.00)                        | 0.00<br>(0.00 to<br>0.00)                        | 0.00<br>(0.00 to<br>0.00)                        | 0.00<br>(0.00 to<br>0.00)                      | 0.00<br>(0.00 to<br>0.00)                      | 0.00<br>(0.00 to<br>0.00)                      | 0.00<br>(0.00 to<br>0.00)                      |
| African trypanosomiasis                               | 0.00<br>(0.00 to<br>0.00)                         | 0.00<br>(0.00 to<br>0.00)                        | 0.00<br>(0.00 to<br>0.00)                        | 0.00<br>(0.00 to<br>0.00)                        | 0.00<br>(0.00 to<br>0.00)                      | 0.00<br>(0.00 to<br>0.00)                      | 0.00<br>(0.00 to<br>0.00)                      | 0.00<br>(0.00 to<br>0.00)                      |
| Schistosomiasis                                       | 0.00<br>(0.00 to<br>0.00)                         | 0.00<br>(0.00 to<br>0.00)                        | 0.00<br>(0.00 to<br>0.00)                        | 0.00<br>(0.00 to<br>0.00)                        | 0.00<br>(0.00 to<br>0.00)                      | 0.00<br>(0.00 to<br>0.00)                      | 0.00<br>(0.00 to<br>0.00)                      | 0.00<br>(0.00 to<br>0.00)                      |
| Cysticercosis                                         | 0.47<br>(0.38 to<br>0.58)                         | 0.14<br>(0.08 to<br>0.23)                        | 0.13<br>(0.07 to<br>0.22)                        | 0.15<br>(0.09 to<br>0.25)                        | 0.01<br>(0.01 to<br>0.01)                      | 0.00<br>(0.00 to<br>0.01)                      | 0.00<br>(0.00 to<br>0.01)                      | 0.00<br>(0.00 to<br>0.01)                      |
| Cystic echinococcosis                                 | 0.08<br>(0.06 to<br>0.10)                         | 0.03<br>(0.02 to<br>0.06)                        | 0.02<br>(0.01 to<br>0.04)                        | 0.05<br>(0.03 to<br>0.07)                        | 0.00<br>(0.00 to<br>0.00)                      | 0.00<br>(0.00 to<br>0.00)                      | 0.00<br>(0.00 to<br>0.00)                      | 0.00<br>(0.00 to<br>0.00)                      |
| Dengue                                                | 0.63<br>(0.16 to<br>1.19)                         | 1.53<br>(0.57 to<br>2.95)                        | 1.37<br>(0.52 to<br>2.67)                        | 1.61<br>(0.60 to<br>3.06)                        | 0.01<br>(0.00 to<br>0.02)                      | 0.04<br>(0.00 to<br>0.08)                      | 0.04<br>(0.02 to<br>0.08)                      | 0.05<br>(0.02 to<br>0.08)                      |
| Yellow fever                                          | 3.45<br>(0.75 to<br>9.89)                         | 1.04<br>(0.12 to<br>4.18)                        | 0.73<br>(0.08 to<br>2.99)                        | 1.26<br>(0.15 to<br>4.77)                        | 0.06<br>(0.01 to<br>0.17)                      | 0.02<br>(0.00 to<br>0.07)                      | 0.01<br>(0.00 to<br>0.06)                      | 0.02<br>(0.00 to<br>0.09)                      |
| Rabies                                                | 0.01<br>(0.00 to<br>0.02)                         | 0.00<br>(0.00 to<br>0.01)                        | 0.00<br>(0.00 to<br>0.00)                        | 0.00<br>(0.00 to<br>0.01)                        | 0.00<br>(0.00 to<br>0.00)                      | 0.00<br>(0.00 to<br>0.00)                      | 0.00<br>(0.00 to<br>0.00)                      | 0.00<br>(0.00 to<br>0.00)                      |
| Intestinal nematode infections                        | 0.20<br>(0.05 to<br>0.39)                         | 0.15<br>(0.04 to<br>0.35)                        | 0.12<br>(0.04 to<br>0.27)                        | 0.16<br>(0.04 to<br>0.37)                        | 0.00<br>(0.00 to<br>0.01)                      | 0.00<br>(0.00 to<br>0.01)                      | 0.00<br>(0.00 to<br>0.00)                      | 0.00<br>(0.00 to<br>0.01)                      |
| Other neglected tropical diseases                     | 0.33<br>(0.21 to<br>0.89)                         | 0.21<br>(0.10 to<br>0.57)                        | 0.17<br>(0.08 to<br>0.44)                        | 0.25<br>(0.11 to<br>0.68)                        | 0.01<br>(0.00 to<br>0.02)                      | 0.01<br>(0.00 to<br>0.02)                      | 0.01<br>(0.00 to<br>0.01)                      | 0.01<br>(0.00 to<br>0.02)                      |
| <b>Maternal disorders</b>                             | <b>28.94</b><br><b>(20.47 to</b><br><b>38.68)</b> | <b>15.58</b><br><b>(7.55 to</b><br><b>27.62)</b> | <b>10.31</b><br><b>(4.92 to</b><br><b>18.10)</b> | <b>20.03</b><br><b>(9.31 to</b><br><b>36.00)</b> | <b>0.53</b><br><b>(0.37 to</b><br><b>0.71)</b> | <b>0.29</b><br><b>(0.14 to</b><br><b>0.51)</b> | <b>0.19</b><br><b>(0.09 to</b><br><b>0.34)</b> | <b>0.37</b><br><b>(0.17 to</b><br><b>0.66)</b> |
| Maternal hemorrhage                                   | 7.15<br>(4.81 to<br>10.04)                        | 4.96<br>(2.20 to<br>9.01)                        | 3.32<br>(1.47 to<br>6.08)                        | 6.37<br>(2.73 to<br>11.79)                       | 0.13<br>(0.09 to<br>0.18)                      | 0.09<br>(0.04 to<br>0.17)                      | 0.06<br>(0.03 to<br>0.11)                      | 0.12<br>(0.05 to<br>0.22)                      |
| Maternal sepsis and other maternal infections         | 7.49<br>(4.90 to<br>10.66)                        | 3.17<br>(1.43 to<br>6.03)                        | 2.10<br>(0.94 to<br>3.98)                        | 4.09<br>(1.75 to<br>7.88)                        | 0.14<br>(0.09 to<br>0.19)                      | 0.06<br>(0.03 to<br>0.11)                      | 0.04<br>(0.02 to<br>0.07)                      | 0.08<br>(0.03 to<br>0.14)                      |
| Maternal hypertensive disorders                       | 6.92<br>(4.70 to<br>9.46)                         | 3.11<br>(1.35 to<br>5.61)                        | 2.04<br>(0.87 to<br>3.71)                        | 4.01<br>(1.73 to<br>7.35)                        | 0.12<br>(0.08 to<br>0.17)                      | 0.06<br>(0.02 to<br>0.10)                      | 0.04<br>(0.02 to<br>0.07)                      | 0.07<br>(0.03 to<br>0.13)                      |
| Maternal obstructed labor and uterine rupture         | 0.72<br>(0.40 to<br>1.13)                         | 0.35<br>(0.13 to<br>0.71)                        | 0.22<br>(0.09 to<br>0.45)                        | 0.45<br>(0.18 to<br>0.93)                        | 0.01<br>(0.01 to<br>0.02)                      | 0.01<br>(0.00 to<br>0.01)                      | 0.00<br>(0.00 to<br>0.01)                      | 0.01<br>(0.00 to<br>0.02)                      |
| Maternal abortion, miscarriage, and ectopic pregnancy | 4.22<br>(2.69 to<br>6.33)                         | 2.58<br>(1.04 to<br>5.59)                        | 1.69<br>(0.69 to<br>3.59)                        | 3.30<br>(1.28 to<br>6.85)                        | 0.08<br>(0.05 to<br>0.12)                      | 0.05<br>(0.02 to<br>0.11)                      | 0.03<br>(0.01 to<br>0.07)                      | 0.06<br>(0.03 to<br>0.13)                      |
| Indirect maternal deaths                              | 0.43<br>(0.21 to<br>0.72)                         | 0.31<br>(0.11 to<br>0.69)                        | 0.20<br>(0.07 to<br>0.45)                        | 0.40<br>(0.14 to<br>0.87)                        | 0.01<br>(0.00 to<br>0.01)                      | 0.01<br>(0.00 to<br>0.01)                      | 0.00<br>(0.00 to<br>0.01)                      | 0.01<br>(0.00 to<br>0.02)                      |
| Late maternal deaths                                  | 0.13<br>(0.07 to<br>0.23)                         | 0.11<br>(0.04 to<br>0.22)                        | 0.07<br>(0.02 to<br>0.15)                        | 0.14<br>(0.05 to<br>0.29)                        | 0.00<br>(0.00 to<br>0.00)                      | 0.00<br>(0.00 to<br>0.00)                      | 0.00<br>(0.00 to<br>0.00)                      | 0.00<br>(0.00 to<br>0.01)                      |



|                                                                         |                                                      |                                                      |                                                     |                                                      |                                                |                                                |                                                |                                                |
|-------------------------------------------------------------------------|------------------------------------------------------|------------------------------------------------------|-----------------------------------------------------|------------------------------------------------------|------------------------------------------------|------------------------------------------------|------------------------------------------------|------------------------------------------------|
| Maternal deaths aggravated by HIV/AIDS                                  | 0.01<br>(0.01 to<br>0.03)                            | 0.04<br>(0.01 to<br>0.11)                            | 0.03<br>(0.01 to<br>0.08)                           | 0.06<br>(0.02 to<br>0.15)                            | 0.00<br>(0.00 to<br>0.00)                      | 0.00<br>(0.00 to<br>0.00)                      | 0.00<br>(0.00 to<br>0.00)                      | 0.00<br>(0.00 to<br>0.00)                      |
| Other maternal disorders                                                | 1.86<br>(1.18 to<br>2.70)                            | 0.95<br>(0.41 to<br>1.81)                            | 0.65<br>(0.28 to<br>1.22)                           | 1.21<br>(0.52 to<br>2.35)                            | 0.03<br>(0.02 to<br>0.05)                      | 0.02<br>(0.01 to<br>0.03)                      | 0.01<br>(0.01 to<br>0.02)                      | 0.02<br>(0.01 to<br>0.04)                      |
| <b>Peru</b>                                                             |                                                      |                                                      |                                                     |                                                      |                                                |                                                |                                                |                                                |
| Cause                                                                   | YLLs (in 1000s)                                      |                                                      |                                                     |                                                      | Deaths (in 1000s)                              |                                                |                                                |                                                |
|                                                                         | 2016                                                 | 2040 Forecast                                        | 2040 Better Scenario                                | 2040 Worse Scenario                                  | 2016                                           | 2040 Forecast                                  | 2040 Better Scenario                           | 2040 Worse Scenario                            |
| <b>Neonatal disorders</b>                                               | <b>380.44</b><br><b>(291.48 to</b><br><b>487.68)</b> | <b>191.50</b><br><b>(108.98 to</b><br><b>307.59)</b> | <b>105.63</b><br><b>(59.53 to</b><br><b>169.95)</b> | <b>252.37</b><br><b>(141.59 to</b><br><b>404.17)</b> | <b>4.39</b><br><b>(3.37 to</b><br><b>5.63)</b> | <b>2.21</b><br><b>(1.26 to</b><br><b>3.55)</b> | <b>1.22</b><br><b>(0.69 to</b><br><b>1.96)</b> | <b>2.92</b><br><b>(1.64 to</b><br><b>4.67)</b> |
| Neonatal preterm birth                                                  | 139.95<br>(95.84 to<br>189.30)                       | 63.43<br>(35.74 to<br>104.83)                        | 32.19<br>(17.99 to<br>54.29)                        | 89.05<br>(50.03 to<br>146.32)                        | 1.62<br>(1.11 to<br>2.19)                      | 0.73<br>(0.41 to<br>1.21)                      | 0.37<br>(0.21 to<br>0.63)                      | 1.03<br>(0.58 to<br>1.69)                      |
| Neonatal encephalopathy due to birth asphyxia and trauma                | 119.84<br>(78.71 to<br>168.09)                       | 52.98<br>(24.16 to<br>98.15)                         | 29.74<br>(13.57 to<br>56.29)                        | 67.14<br>(30.47 to<br>126.20)                        | 1.38<br>(0.91 to<br>1.94)                      | 0.61<br>(0.28 to<br>1.13)                      | 0.34<br>(0.16 to<br>0.65)                      | 0.78<br>(0.35 to<br>1.46)                      |
| Neonatal sepsis and other neonatal infections                           | 109.31<br>(73.32 to<br>171.38)                       | 64.91<br>(31.80 to<br>116.15)                        | 37.57<br>(18.85 to<br>67.50)                        | 82.75<br>(39.86 to<br>146.24)                        | 1.26<br>(0.85 to<br>1.98)                      | 0.75<br>(0.37 to<br>1.34)                      | 0.43<br>(0.22 to<br>0.78)                      | 0.96<br>(0.46 to<br>1.69)                      |
| Hemolytic disease and other neonatal jaundice                           | 0.74<br>(0.44 to<br>1.17)                            | 0.45<br>(0.18 to<br>0.99)                            | 0.25<br>(0.10 to<br>0.54)                           | 0.60<br>(0.25 to<br>1.28)                            | 0.01<br>(0.01 to<br>0.01)                      | 0.01<br>(0.00 to<br>0.01)                      | 0.00<br>(0.00 to<br>0.01)                      | 0.01<br>(0.00 to<br>0.01)                      |
| Other neonatal disorders                                                | 10.61<br>(6.97 to<br>15.45)                          | 9.73<br>(4.60 to<br>18.13)                           | 5.88<br>(2.90 to<br>10.56)                          | 12.84<br>(6.05 to<br>23.74)                          | 0.12<br>(0.08 to<br>0.18)                      | 0.11<br>(0.05 to<br>0.21)                      | 0.07<br>(0.03 to<br>0.12)                      | 0.15<br>(0.07 to<br>0.27)                      |
| <b>Nutritional deficiencies</b>                                         | <b>33.36</b><br><b>(26.61 to</b><br><b>41.40)</b>    | <b>25.14</b><br><b>(19.61 to</b><br><b>31.78)</b>    | <b>22.05</b><br><b>(17.13 to</b><br><b>27.58)</b>   | <b>27.68</b><br><b>(21.28 to</b><br><b>34.81)</b>    | <b>1.30</b><br><b>(1.08 to</b><br><b>1.53)</b> | <b>1.86</b><br><b>(1.52 to</b><br><b>2.23)</b> | <b>1.77</b><br><b>(1.44 to</b><br><b>2.17)</b> | <b>1.94</b><br><b>(1.58 to</b><br><b>2.34)</b> |
| Protein-energy malnutrition                                             | 29.78<br>(23.53 to<br>37.23)                         | 21.35<br>(16.49 to<br>26.76)                         | 19.03<br>(14.88 to<br>24.03)                        | 23.50<br>(18.08 to<br>29.60)                         | 1.17<br>(0.97 to<br>1.38)                      | 1.63<br>(1.30 to<br>2.01)                      | 1.58<br>(1.26 to<br>1.96)                      | 1.70<br>(1.35 to<br>2.11)                      |
| Iodine deficiency                                                       | 0.16<br>(0.01 to<br>0.86)                            | 0.59<br>(0.00 to<br>2.37)                            | 0.47<br>(0.00 to<br>1.98)                           | 0.68<br>(0.00 to<br>2.56)                            | 0.00<br>(0.00 to<br>0.01)                      | 0.04<br>(0.00 to<br>0.20)                      | 0.03<br>(0.00 to<br>0.18)                      | 0.04<br>(0.00 to<br>0.21)                      |
| Dietary iron deficiency                                                 | 0.19<br>(0.14 to<br>0.24)                            | 0.09<br>(0.06 to<br>0.14)                            | 0.08<br>(0.05 to<br>0.12)                           | 0.10<br>(0.07 to<br>0.15)                            | 0.00<br>(0.00 to<br>0.00)                      | 0.00<br>(0.00 to<br>0.00)                      | 0.00<br>(0.00 to<br>0.00)                      | 0.00<br>(0.00 to<br>0.00)                      |
| Other nutritional deficiencies                                          | 3.24<br>(2.43 to<br>4.50)                            | 3.10<br>(2.13 to<br>4.55)                            | 2.48<br>(1.71 to<br>3.62)                           | 3.39<br>(2.36 to<br>4.85)                            | 0.12<br>(0.09 to<br>0.17)                      | 0.18<br>(0.13 to<br>0.28)                      | 0.16<br>(0.11 to<br>0.24)                      | 0.19<br>(0.14 to<br>0.28)                      |
| <b>Other communicable, maternal, neonatal, and nutritional diseases</b> | <b>15.12</b><br><b>(11.51 to</b><br><b>19.78)</b>    | <b>10.07</b><br><b>(7.07 to</b><br><b>13.84)</b>     | <b>7.75</b><br><b>(5.29 to</b><br><b>10.76)</b>     | <b>11.19</b><br><b>(7.69 to</b><br><b>15.70)</b>     | <b>0.34</b><br><b>(0.26 to</b><br><b>0.42)</b> | <b>0.39</b><br><b>(0.27 to</b><br><b>0.49)</b> | <b>0.33</b><br><b>(0.22 to</b><br><b>0.42)</b> | <b>0.42</b><br><b>(0.29 to</b><br><b>0.52)</b> |
| Sexually transmitted infections excluding HIV                           | 4.98<br>(2.56 to<br>8.79)                            | 1.54<br>(0.78 to<br>2.81)                            | 1.06<br>(0.56 to<br>1.96)                           | 1.73<br>(0.85 to<br>3.26)                            | 0.07<br>(0.04 to<br>0.12)                      | 0.04<br>(0.02 to<br>0.05)                      | 0.03<br>(0.02 to<br>0.04)                      | 0.04<br>(0.03 to<br>0.06)                      |
| Syphilis                                                                | 4.38<br>(2.03 to<br>8.22)                            | 1.12<br>(0.45 to<br>2.37)                            | 0.70<br>(0.29 to<br>1.48)                           | 1.29<br>(0.50 to<br>2.79)                            | 0.06<br>(0.03 to<br>0.10)                      | 0.02<br>(0.01 to<br>0.03)                      | 0.01<br>(0.01 to<br>0.02)                      | 0.02<br>(0.01 to<br>0.04)                      |
| Chlamydial infection                                                    | 0.12<br>(0.08 to<br>0.17)                            | 0.08<br>(0.05 to<br>0.13)                            | 0.07<br>(0.04 to<br>0.11)                           | 0.09<br>(0.05 to<br>0.14)                            | 0.00<br>(0.00 to<br>0.00)                      | 0.00<br>(0.00 to<br>0.01)                      | 0.00<br>(0.00 to<br>0.00)                      | 0.00<br>(0.00 to<br>0.00)                      |
| Gonococcal infection                                                    | 0.31<br>(0.22 to<br>0.44)                            | 0.23<br>(0.13 to<br>0.35)                            | 0.20<br>(0.12 to<br>0.31)                           | 0.24<br>(0.14 to<br>0.37)                            | 0.01<br>(0.01 to<br>0.01)                      | 0.01<br>(0.01 to<br>0.01)                      | 0.01<br>(0.01 to<br>0.01)                      | 0.01<br>(0.01 to<br>0.01)                      |
| Other sexually transmitted infections                                   | 0.17<br>(0.11 to<br>0.24)                            | 0.11<br>(0.06 to<br>0.18)                            | 0.09<br>(0.05 to<br>0.15)                           | 0.12<br>(0.07 to<br>0.19)                            | 0.00<br>(0.00 to<br>0.01)                      | 0.00<br>(0.00 to<br>0.01)                      | 0.00<br>(0.00 to<br>0.00)                      | 0.00<br>(0.00 to<br>0.01)                      |
| Acute hepatitis                                                         | 2.87<br>(2.30 to<br>3.56)                            | 3.20<br>(2.16 to<br>4.54)                            | 2.41<br>(1.58 to<br>3.54)                           | 3.49<br>(2.36 to<br>4.87)                            | 0.08<br>(0.06 to<br>0.10)                      | 0.12<br>(0.09 to<br>0.16)                      | 0.09<br>(0.07 to<br>0.13)                      | 0.13<br>(0.09 to<br>0.17)                      |

|                                       |                                              |                                              |                                              |                                              |                                      |                                        |                                        |                                        |
|---------------------------------------|----------------------------------------------|----------------------------------------------|----------------------------------------------|----------------------------------------------|--------------------------------------|----------------------------------------|----------------------------------------|----------------------------------------|
| Acute hepatitis A                     | 0.09<br>(0.02 to<br>0.19)                    | 0.05<br>(0.02 to<br>0.11)                    | 0.04<br>(0.01 to<br>0.08)                    | 0.06<br>(0.02 to<br>0.12)                    | 0.00<br>(0.00 to<br>0.00)            | 0.00<br>(0.00 to<br>0.00)              | 0.00<br>(0.00 to<br>0.00)              | 0.00<br>(0.00 to<br>0.00)              |
| Acute hepatitis B                     | 1.79<br>(1.40 to<br>2.28)                    | 2.17<br>(1.39 to<br>3.18)                    | 1.64<br>(1.02 to<br>2.49)                    | 2.38<br>(1.56 to<br>3.46)                    | 0.05<br>(0.04 to<br>0.07)            | 0.08<br>(0.06 to<br>0.12)              | 0.07<br>(0.04 to<br>0.10)              | 0.09<br>(0.06 to<br>0.13)              |
| Acute hepatitis C                     | 0.09<br>(0.06 to<br>0.12)                    | 0.13<br>(0.08 to<br>0.20)                    | 0.11<br>(0.06 to<br>0.17)                    | 0.14<br>(0.09 to<br>0.21)                    | 0.00<br>(0.00 to<br>0.00)            | 0.01<br>(0.00 to<br>0.01)              | 0.00<br>(0.00 to<br>0.01)              | 0.01<br>(0.00 to<br>0.01)              |
| Acute hepatitis E                     | 0.90<br>(0.68 to<br>1.16)                    | 0.84<br>(0.52 to<br>1.25)                    | 0.62<br>(0.36 to<br>0.95)                    | 0.92<br>(0.56 to<br>1.35)                    | 0.02<br>(0.01 to<br>0.03)            | 0.03<br>(0.02 to<br>0.04)              | 0.02<br>(0.01 to<br>0.04)              | 0.03<br>(0.02 to<br>0.05)              |
| Other unspecified infectious diseases | 7.27<br>(4.66 to<br>9.22)                    | 5.33<br>(3.09 to<br>7.55)                    | 4.28<br>(2.49 to<br>5.93)                    | 5.98<br>(3.40 to<br>8.19)                    | 0.19<br>(0.11 to<br>0.24)            | 0.23<br>(0.13 to<br>0.30)              | 0.21<br>(0.11 to<br>0.26)              | 0.25<br>(0.13 to<br>0.32)              |
| <b>Non-communicable diseases</b>      | <b>1,870.00</b><br>(1,573.04 to<br>2,201.93) | <b>2,851.40</b><br>(1,898.32 to<br>3,943.05) | <b>2,292.55</b><br>(1,551.83 to<br>3,195.17) | <b>3,368.57</b><br>(2,193.11 to<br>4,692.88) | <b>88.48</b><br>(74.69 to<br>104.10) | <b>186.50</b><br>(134.38 to<br>246.47) | <b>155.94</b><br>(112.72 to<br>208.03) | <b>212.10</b><br>(151.39 to<br>279.53) |
| <b>Peru</b>                           |                                              |                                              |                                              |                                              |                                      |                                        |                                        |                                        |
| Cause                                 | YLLs (in 1000s)                              |                                              |                                              |                                              | Deaths (in 1000s)                    |                                        |                                        |                                        |
|                                       | 2016                                         | 2040 Forecast                                | 2040 Better Scenario                         | 2040 Worse Scenario                          | 2016                                 | 2040 Forecast                          | 2040 Better Scenario                   | 2040 Worse Scenario                    |
| <b>Neoplasms</b>                      | <b>585.15</b><br>(484.17 to<br>704.10)       | <b>968.68</b><br>(633.94 to<br>1,361.56)     | <b>877.40</b><br>(575.32 to<br>1,231.66)     | <b>1,056.50</b><br>(678.98 to<br>1,473.79)   | <b>25.53</b><br>(21.23 to<br>30.48)  | <b>54.58</b><br>(39.15 to<br>71.36)    | <b>50.69</b><br>(35.96 to<br>67.47)    | <b>58.14</b><br>(41.26 to<br>76.09)    |
| Lip and oral cavity cancer            | 5.78<br>(4.64 to<br>7.14)                    | 8.66<br>(4.17 to<br>15.80)                   | 6.65<br>(3.31 to<br>11.73)                   | 13.40<br>(5.92 to<br>26.19)                  | 0.26<br>(0.21 to<br>0.32)            | 0.47<br>(0.25 to<br>0.81)              | 0.37<br>(0.20 to<br>0.62)              | 0.70<br>(0.36 to<br>1.31)              |
| Nasopharynx cancer                    | 1.13<br>(0.89 to<br>1.40)                    | 1.46<br>(0.73 to<br>2.69)                    | 1.04<br>(0.53 to<br>1.87)                    | 2.26<br>(1.09 to<br>4.34)                    | 0.04<br>(0.03 to<br>0.05)            | 0.06<br>(0.05 to<br>0.11)              | 0.04<br>(0.02 to<br>0.07)              | 0.09<br>(0.05 to<br>0.17)              |
| Other pharynx cancer                  | 3.37<br>(2.62 to<br>4.30)                    | 5.84<br>(2.74 to<br>10.68)                   | 5.16<br>(2.53 to<br>9.22)                    | 8.96<br>(3.57 to<br>15.05)                   | 0.15<br>(0.12 to<br>0.19)            | 0.33<br>(0.17 to<br>0.56)              | 0.30<br>(0.16 to<br>0.50)              | 0.44<br>(0.21 to<br>0.78)              |
| Esophageal cancer                     | 6.22<br>(4.95 to<br>7.67)                    | 9.89<br>(5.01 to<br>17.75)                   | 8.01<br>(4.16 to<br>13.99)                   | 14.11<br>(6.68 to<br>25.68)                  | 0.33<br>(0.26 to<br>0.40)            | 0.60<br>(0.33 to<br>1.02)              | 0.49<br>(0.28 to<br>0.80)              | 0.84<br>(0.43 to<br>1.46)              |
| Stomach cancer                        | 82.10<br>(67.64 to<br>100.69)                | 111.41<br>(68.06 to<br>169.17)               | 92.12<br>(56.51 to<br>137.89)                | 116.06<br>(70.36 to<br>174.70)               | 4.11<br>(3.45 to<br>4.97)            | 6.83<br>(4.52 to<br>9.97)              | 5.73<br>(3.82 to<br>8.33)              | 7.00<br>(4.67 to<br>10.11)             |
| Colon and rectum cancer               | 36.86<br>(30.03 to<br>45.35)                 | 75.93<br>(45.53 to<br>116.40)                | 69.36<br>(41.77 to<br>105.96)                | 82.36<br>(48.90 to<br>127.52)                | 1.95<br>(1.60 to<br>2.35)            | 4.99<br>(3.19 to<br>7.41)              | 4.66<br>(2.97 to<br>6.95)              | 5.25<br>(3.36 to<br>7.79)              |
| Liver cancer                          | 40.47<br>(32.15 to<br>50.17)                 | 74.35<br>(42.54 to<br>117.87)                | 69.07<br>(40.29 to<br>106.56)                | 89.93<br>(49.47 to<br>145.36)                | 1.87<br>(1.49 to<br>2.32)            | 4.24<br>(2.61 to<br>6.39)              | 4.02<br>(2.51 to<br>5.98)              | 4.97<br>(2.94 to<br>7.73)              |
| Liver cancer due to hepatitis B       | 21.18<br>(16.26 to<br>26.56)                 | 37.57<br>(20.95 to<br>61.09)                 | 35.45<br>(20.11 to<br>55.57)                 | 42.89<br>(23.14 to<br>71.84)                 | 0.92<br>(0.70 to<br>1.15)            | 2.01<br>(1.21 to<br>3.11)              | 1.94<br>(1.17 to<br>2.92)              | 2.25<br>(1.31 to<br>3.58)              |
| Liver cancer due to hepatitis C       | 4.43<br>(3.32 to<br>5.93)                    | 9.38<br>(5.31 to<br>14.93)                   | 8.91<br>(5.16 to<br>13.81)                   | 10.54<br>(5.77 to<br>17.37)                  | 0.26<br>(0.19 to<br>0.34)            | 0.64<br>(0.39 to<br>0.99)              | 0.62<br>(0.38 to<br>0.95)              | 0.70<br>(0.41 to<br>1.11)              |
| Liver cancer due to alcohol use       | 7.47<br>(5.59 to<br>9.85)                    | 14.19<br>(7.64 to<br>23.61)                  | 12.51<br>(6.82 to<br>20.39)                  | 21.44<br>(10.97 to<br>36.86)                 | 0.37<br>(0.28 to<br>0.48)            | 0.84<br>(0.49 to<br>1.33)              | 0.76<br>(0.44 to<br>1.20)              | 1.19<br>(0.67 to<br>1.96)              |
| Liver cancer due to other causes      | 7.38<br>(5.77 to<br>9.36)                    | 13.20<br>(7.49 to<br>20.66)                  | 12.20<br>(7.07 to<br>18.83)                  | 15.06<br>(8.17 to<br>24.40)                  | 0.33<br>(0.26 to<br>0.42)            | 0.75<br>(0.44 to<br>1.16)              | 0.70<br>(0.43 to<br>1.06)              | 0.83<br>(0.47 to<br>1.31)              |
| Gallbladder and biliary tract cancer  | 18.42<br>(14.31 to<br>23.41)                 | 24.45<br>(15.77 to<br>34.68)                 | 24.50<br>(15.67 to<br>35.23)                 | 23.62<br>(15.35 to<br>33.30)                 | 0.92<br>(0.72 to<br>1.16)            | 1.46<br>(1.03 to<br>1.95)              | 1.49<br>(1.03 to<br>2.04)              | 1.39<br>(0.99 to<br>1.83)              |
| Pancreatic cancer                     | 23.84<br>(19.22 to<br>29.38)                 | 51.25<br>(32.71 to<br>74.50)                 | 51.03<br>(32.85 to<br>73.64)                 | 50.80<br>(32.66 to<br>73.68)                 | 1.19<br>(0.96 to<br>1.43)            | 2.97<br>(2.05 to<br>4.16)              | 2.99<br>(2.05 to<br>4.18)              | 2.91<br>(2.02 to<br>4.08)              |

|                                     |                              |                               |                               |                                |                           |                           |                           |                            |
|-------------------------------------|------------------------------|-------------------------------|-------------------------------|--------------------------------|---------------------------|---------------------------|---------------------------|----------------------------|
| Larynx cancer                       | 3.32<br>(2.65 to<br>4.16)    | 5.39<br>(2.53 to<br>10.86)    | 3.64<br>(1.85 to<br>7.05)     | 8.43<br>(3.59 to<br>16.73)     | 0.17<br>(0.14 to<br>0.21) | 0.31<br>(0.15 to<br>0.60) | 0.21<br>(0.11 to<br>0.38) | 0.48<br>(0.21 to<br>0.89)  |
| Tracheal, bronchus, and lung cancer | 48.56<br>(38.98 to<br>60.09) | 81.09<br>(46.15 to<br>128.66) | 58.98<br>(35.05 to<br>91.07)  | 119.50<br>(63.24 to<br>200.85) | 2.40<br>(1.94 to<br>2.93) | 4.62<br>(2.75 to<br>7.02) | 3.42<br>(2.14 to<br>5.11) | 6.76<br>(3.82 to<br>10.94) |
| Malignant skin melanoma             | 4.10<br>(3.21 to<br>5.42)    | 7.03<br>(4.71 to<br>9.90)     | 8.03<br>(5.35 to<br>11.54)    | 6.54<br>(4.47 to<br>9.21)      | 0.18<br>(0.14 to<br>0.24) | 0.40<br>(0.30 to<br>0.55) | 0.47<br>(0.35 to<br>0.65) | 0.36<br>(0.28 to<br>0.49)  |
| Non-melanoma skin cancer            | 3.75<br>(2.99 to<br>4.67)    | 8.40<br>(5.95 to<br>11.23)    | 7.50<br>(5.12 to<br>10.30)    | 8.41<br>(5.93 to<br>11.21)     | 0.22<br>(0.18 to<br>0.26) | 0.62<br>(0.48 to<br>0.76) | 0.57<br>(0.43 to<br>0.73) | 0.60<br>(0.48 to<br>0.72)  |
| Breast cancer                       | 36.19<br>(25.22 to<br>52.54) | 56.62<br>(28.34 to<br>97.09)  | 50.51<br>(25.72 to<br>85.31)  | 64.30<br>(32.17 to<br>109.02)  | 1.35<br>(0.96 to<br>1.90) | 2.70<br>(1.54 to<br>4.36) | 2.46<br>(1.39 to<br>3.97) | 2.97<br>(1.70 to<br>4.71)  |
| Cervical cancer                     | 43.33<br>(29.97 to<br>59.81) | 51.30<br>(26.47 to<br>89.28)  | 43.39<br>(21.50 to<br>77.46)  | 54.68<br>(27.66 to<br>99.10)   | 1.58<br>(1.10 to<br>2.17) | 2.34<br>(1.30 to<br>3.80) | 2.01<br>(1.09 to<br>3.35) | 2.46<br>(1.35 to<br>4.04)  |
| Uterine cancer                      | 8.05<br>(5.66 to<br>11.06)   | 16.67<br>(9.61 to<br>25.39)   | 14.66<br>(8.28 to<br>22.33)   | 17.36<br>(9.94 to<br>25.99)    | 0.37<br>(0.26 to<br>0.50) | 0.96<br>(0.63 to<br>1.36) | 0.86<br>(0.54 to<br>1.26) | 0.98<br>(0.64 to<br>1.37)  |
| Ovarian cancer                      | 14.05<br>(9.98 to<br>19.04)  | 22.16<br>(11.49 to<br>38.43)  | 21.64<br>(11.22 to<br>36.45)  | 21.89<br>(11.23 to<br>37.32)   | 0.52<br>(0.37 to<br>0.69) | 1.03<br>(0.58 to<br>1.68) | 1.02<br>(0.57 to<br>1.65) | 1.01<br>(0.56 to<br>1.64)  |
| Prostate cancer                     | 29.04<br>(21.17 to<br>40.02) | 84.75<br>(58.46 to<br>118.52) | 84.59<br>(57.77 to<br>120.70) | 79.72<br>(55.53 to<br>112.16)  | 2.19<br>(1.63 to<br>3.01) | 7.15<br>(5.37 to<br>9.59) | 7.28<br>(5.39 to<br>9.82) | 6.59<br>(5.02 to<br>8.92)  |
| Testicular cancer                   | 2.17<br>(1.56 to<br>2.96)    | 2.45<br>(1.45 to<br>3.76)     | 2.20<br>(1.27 to<br>3.45)     | 2.49<br>(1.47 to<br>3.77)      | 0.06<br>(0.04 to<br>0.07) | 0.09<br>(0.06 to<br>0.12) | 0.08<br>(0.05 to<br>0.11) | 0.09<br>(0.06 to<br>0.12)  |
| <b>Peru</b>                         |                              |                               |                               |                                |                           |                           |                           |                            |
| Cause                               | YLLs (in 1000s)              |                               |                               |                                | Deaths (in 1000s)         |                           |                           |                            |
|                                     | 2016                         | 2040 Forecast                 | 2040 Better Scenario          | 2040 Worse Scenario            | 2016                      | 2040 Forecast             | 2040 Better Scenario      | 2040 Worse Scenario        |
| Kidney cancer                       | 11.86<br>(9.45 to<br>14.57)  | 23.97<br>(15.50 to<br>33.94)  | 25.18<br>(16.21 to<br>35.86)  | 22.96<br>(15.14 to<br>32.82)   | 0.50<br>(0.40 to<br>0.61) | 1.25<br>(0.87 to<br>1.66) | 1.34<br>(0.93 to<br>1.82) | 1.17<br>(0.84 to<br>1.57)  |
| Bladder cancer                      | 5.16<br>(4.18 to<br>6.29)    | 10.65<br>(6.97 to<br>15.19)   | 9.79<br>(6.43 to<br>13.69)    | 10.95<br>(7.12 to<br>15.54)    | 0.33<br>(0.27 to<br>0.39) | 0.79<br>(0.56 to<br>1.05) | 0.73<br>(0.52 to<br>0.98) | 0.80<br>(0.57 to<br>1.06)  |
| Brain and nervous system cancer     | 31.86<br>(21.27 to<br>40.95) | 46.69<br>(27.08 to<br>67.54)  | 44.38<br>(25.78 to<br>65.24)  | 45.96<br>(26.84 to<br>66.09)   | 0.87<br>(0.57 to<br>1.12) | 1.74<br>(1.01 to<br>2.47) | 1.73<br>(0.98 to<br>2.48) | 1.66<br>(0.98 to<br>2.32)  |
| Thyroid cancer                      | 4.56<br>(3.61 to<br>5.74)    | 7.99<br>(4.53 to<br>12.74)    | 6.90<br>(3.97 to<br>11.07)    | 8.89<br>(4.98 to<br>14.41)     | 0.21<br>(0.17 to<br>0.27) | 0.45<br>(0.28 to<br>0.69) | 0.40<br>(0.25 to<br>0.61) | 0.49<br>(0.30 to<br>0.76)  |
| Mesothelioma                        | 1.40<br>(1.81)               | 3.38<br>(2.26 to<br>4.71)     | 3.36<br>(2.19 to<br>4.81)     | 3.36<br>(2.25 to<br>4.62)      | 0.06<br>(0.05 to<br>0.08) | 0.19<br>(0.14 to<br>0.25) | 0.19<br>(0.14 to<br>0.25) | 0.18<br>(0.13 to<br>0.24)  |
| Hodgkin lymphoma                    | 1.91<br>(1.41 to<br>2.44)    | 2.40<br>(1.47 to<br>3.49)     | 1.90<br>(1.15 to<br>2.91)     | 2.59<br>(1.60 to<br>3.71)      | 0.06<br>(0.04 to<br>0.08) | 0.11<br>(0.06 to<br>0.15) | 0.09<br>(0.05 to<br>0.13) | 0.11<br>(0.07 to<br>0.15)  |
| Non-Hodgkin lymphoma                | 28.16<br>(22.98 to<br>34.76) | 48.46<br>(31.48 to<br>68.85)  | 46.18<br>(29.71 to<br>65.95)  | 48.66<br>(31.52 to<br>69.70)   | 1.02<br>(0.84 to<br>1.24) | 2.34<br>(1.60 to<br>3.21) | 2.30<br>(1.56 to<br>3.20) | 2.30<br>(1.57 to<br>3.16)  |
| Multiple myeloma                    | 7.84<br>(6.13 to<br>10.24)   | 18.07<br>(11.08 to<br>27.00)  | 17.98<br>(11.05 to<br>27.17)  | 18.02<br>(11.01 to<br>27.18)   | 0.36<br>(0.29 to<br>0.47) | 0.98<br>(0.65 to<br>1.40) | 0.99<br>(0.66 to<br>1.41) | 0.96<br>(0.64 to<br>1.37)  |
| Leukemia                            | 50.92<br>(32.18 to<br>62.86) | 54.67<br>(32.76 to<br>77.65)  | 47.68<br>(28.61 to<br>68.46)  | 58.64<br>(34.80 to<br>83.78)   | 1.20<br>(0.85 to<br>1.47) | 1.99<br>(1.33 to<br>2.74) | 1.83<br>(1.22 to<br>2.51) | 2.09<br>(1.40 to<br>2.91)  |
| Acute lymphoid leukemia             | 15.70<br>(9.03 to<br>20.32)  | 12.62<br>(6.94 to<br>18.84)   | 10.74<br>(5.91 to<br>16.02)   | 13.30<br>(7.30 to<br>19.89)    | 0.28<br>(0.17 to<br>0.36) | 0.31<br>(0.18 to<br>0.43) | 0.28<br>(0.16 to<br>0.39) | 0.32<br>(0.19 to<br>0.44)  |

|                                |                                     |                                       |                                     |                                       |                                  |                                  |                                  |                                  |
|--------------------------------|-------------------------------------|---------------------------------------|-------------------------------------|---------------------------------------|----------------------------------|----------------------------------|----------------------------------|----------------------------------|
| Chronic lymphoid leukemia      | 1.09<br>(0.73 to 1.43)              | 1.67<br>(0.94 to 2.57)                | 1.59<br>(0.91 to 2.42)              | 1.76<br>(0.99 to 2.72)                | 0.04<br>(0.03 to 0.06)           | 0.09<br>(0.05 to 0.13)           | 0.08<br>(0.05 to 0.12)           | 0.09<br>(0.06 to 0.13)           |
| Acute myeloid leukemia         | 11.20<br>(6.71 to 13.94)            | 15.41<br>(8.89 to 22.68)              | 14.88<br>(8.69 to 22.01)            | 15.86<br>(9.26 to 23.53)              | 0.29<br>(0.19 to 0.36)           | 0.58<br>(0.36 to 0.82)           | 0.58<br>(0.37 to 0.82)           | 0.58<br>(0.37 to 0.83)           |
| Chronic myeloid leukemia       | 1.54<br>(0.97 to 1.98)              | 1.54<br>(0.84 to 2.37)                | 1.30<br>(0.69 to 2.06)              | 1.64<br>(0.89 to 2.58)                | 0.05<br>(0.04 to 0.07)           | 0.07<br>(0.04 to 0.11)           | 0.06<br>(0.04 to 0.09)           | 0.07<br>(0.05 to 0.11)           |
| Other leukemia                 | 21.39<br>(13.64 to 27.60)           | 23.43<br>(14.13 to 33.47)             | 19.17<br>(11.59 to 27.90)           | 26.09<br>(15.74 to 37.49)             | 0.54<br>(0.40 to 0.67)           | 0.95<br>(0.66 to 1.28)           | 0.82<br>(0.56 to 1.11)           | 1.03<br>(0.71 to 1.39)           |
| Other neoplasms                | 30.76<br>(24.57 to 41.36)           | 53.32<br>(37.12 to 74.68)             | 52.01<br>(35.61 to 73.80)           | 52.57<br>(36.92 to 73.07)             | 1.06<br>(0.86 to 1.37)           | 2.59<br>(1.93 to 3.40)           | 2.64<br>(1.93 to 3.51)           | 2.48<br>(1.87 to 3.20)           |
| <b>Cardiovascular diseases</b> | <b>436.99</b><br>(362.73 to 525.12) | <b>598.81</b><br>(383.78 to 1,007.37) | <b>349.57</b><br>(207.76 to 566.99) | <b>868.54</b><br>(460.93 to 1,472.40) | <b>24.97</b><br>(21.21 to 29.62) | <b>45.94</b><br>(28.37 to 72.68) | <b>29.29</b><br>(18.73 to 44.01) | <b>61.11</b><br>(36.14 to 96.89) |
| Rheumatic heart disease        | 7.18<br>(5.80 to 8.90)              | 5.51<br>(3.52 to 8.22)                | 4.18<br>(2.63 to 6.31)              | 6.11<br>(3.91 to 9.08)                | 0.30<br>(0.24 to 0.37)           | 0.35<br>(0.25 to 0.51)           | 0.28<br>(0.19 to 0.41)           | 0.38<br>(0.26 to 0.53)           |
| Ischemic heart disease         | 233.44<br>(191.15 to 285.92)        | 320.70<br>(158.13 to 597.84)          | 171.61<br>(88.92 to 308.23)         | 492.08<br>(236.41 to 894.24)          | 15.11<br>(12.74 to 17.98)        | 26.36<br>(14.34 to 45.49)        | 15.50<br>(8.49 to 26.46)         | 36.95<br>(19.72 to 61.26)        |
| Stroke                         | 122.42<br>(99.34 to 149.82)         | 142.44<br>(75.76 to 245.79)           | 72.24<br>(40.41 to 122.65)          | 226.98<br>(114.56 to 406.43)          | 5.87<br>(4.90 to 7.02)           | 9.59<br>(5.56 to 15.62)          | 5.54<br>(3.34 to 9.25)           | 13.59<br>(7.63 to 22.11)         |
| Ischemic stroke                | 40.17<br>(32.59 to 48.91)           | 61.88<br>(31.59 to 115.08)            | 35.23<br>(18.76 to 63.59)           | 87.44<br>(42.74 to 160.17)            | 2.79<br>(2.32 to 3.35)           | 5.30<br>(2.85 to 10.02)          | 3.33<br>(1.87 to 6.01)           | 6.86<br>(3.60 to 12.94)          |
| Intracerebral hemorrhage       | 82.25<br>(66.64 to 100.73)          | 80.56<br>(39.30 to 148.87)            | 37.02<br>(19.84 to 67.78)           | 139.54<br>(61.32 to 270.65)           | 3.08<br>(2.53 to 3.73)           | 4.29<br>(2.52 to 7.35)           | 2.21<br>(1.29 to 3.64)           | 6.73<br>(3.43 to 11.89)          |
| Hypertensive heart disease     | 12.09<br>(9.31 to 16.06)            | 27.24<br>(13.26 to 56.88)             | 18.05<br>(10.13 to 31.63)           | 34.40<br>(16.07 to 71.77)             | 0.77<br>(0.59 to 1.09)           | 0.77<br>(1.23 to 4.98)           | 1.61<br>(2.80 to 2.80)           | 2.83<br>(1.43 to 6.10)           |
| Cardiomyopathy and myocarditis | 7.48<br>(5.83 to 10.39)             | 10.24<br>(6.36 to 15.91)              | 8.34<br>(5.13 to 13.14)             | 10.42<br>(6.54 to 16.08)              | 0.25<br>(0.20 to 0.34)           | 0.53<br>(0.35 to 0.81)           | 0.46<br>(0.29 to 0.71)           | 0.52<br>(0.35 to 0.78)           |
| Myocarditis                    | 1.30<br>(0.94 to 1.92)              | 1.58<br>(1.05 to 2.51)                | 1.48<br>(0.96 to 2.34)              | 1.61<br>(1.07 to 2.53)                | 0.05<br>(0.03 to 0.06)           | 0.09<br>(0.06 to 0.12)           | 0.08<br>(0.06 to 0.12)           | 0.08<br>(0.06 to 0.12)           |

Peru

| Cause                           | YLLs (in 1000s)          |                           |                           |                           | Deaths (in 1000s)      |                        |                        |                        |
|---------------------------------|--------------------------|---------------------------|---------------------------|---------------------------|------------------------|------------------------|------------------------|------------------------|
|                                 | 2016                     | 2040 Forecast             | 2040 Better Scenario      | 2040 Worse Scenario       | 2016                   | 2040 Forecast          | 2040 Better Scenario   | 2040 Worse Scenario    |
| Alcoholic cardiomyopathy        | 0.35<br>(0.24 to 0.48)   | 0.44<br>(0.26 to 0.68)    | 0.41<br>(0.24 to 0.64)    | 0.57<br>(0.34 to 0.87)    | 0.01<br>(0.01 to 0.02) | 0.02<br>(0.01 to 0.05) | 0.02<br>(0.01 to 0.03) | 0.03<br>(0.02 to 0.04) |
| Other cardiomyopathy            | 5.84<br>(4.45 to 8.24)   | 8.22<br>(4.98 to 13.09)   | 6.46<br>(3.78 to 10.39)   | 8.25<br>(5.00 to 13.10)   | 0.19<br>(0.15 to 0.26) | 0.42<br>(0.26 to 0.67) | 0.35<br>(0.20 to 0.57) | 0.41<br>(0.25 to 0.65) |
| Atrial fibrillation and flutter | 7.83<br>(5.81 to 10.08)  | 19.85<br>(13.28 to 28.22) | 18.29<br>(12.44 to 26.02) | 20.62<br>(13.82 to 29.34) | 0.79<br>(0.59 to 1.03) | 2.16<br>(1.53 to 2.99) | 2.06<br>(1.47 to 2.82) | 2.17<br>(1.54 to 3.00) |
| Aortic aneurysm                 | 5.20<br>(4.21 to 6.45)   | 9.90<br>(6.26 to 14.54)   | 8.87<br>(5.76 to 12.85)   | 9.85<br>(6.29 to 14.27)   | 0.30<br>(0.25 to 0.36) | 0.71<br>(0.50 to 0.96) | 0.67<br>(0.48 to 0.90) | 0.68<br>(0.49 to 0.93) |
| Peripheral artery disease       | 0.34<br>(0.26 to 0.44)   | 1.42<br>(0.92 to 2.10)    | 1.39<br>(0.90 to 2.08)    | 1.31<br>(0.85 to 1.94)    | 0.03<br>(0.03 to 0.04) | 0.15<br>(0.10 to 0.22) | 0.16<br>(0.10 to 0.23) | 0.14<br>(0.09 to 0.20) |
| Endocarditis                    | 10.64<br>(8.19 to 13.70) | 13.98<br>(9.06 to 20.56)  | 12.04<br>(7.91 to 17.50)  | 14.43<br>(9.40 to 21.18)  | 0.36<br>(0.28 to 0.44) | 0.78<br>(0.49 to 1.17) | 0.72<br>(0.45 to 1.05) | 0.77<br>(0.49 to 1.15) |

|                                                                |                                      |                                      |                                      |                                      |                                |                                  |                                  |                                   |
|----------------------------------------------------------------|--------------------------------------|--------------------------------------|--------------------------------------|--------------------------------------|--------------------------------|----------------------------------|----------------------------------|-----------------------------------|
| Other cardiovascular and circulatory diseases                  | 30.37<br>(20.06 to 38.16)            | 47.53<br>(28.43 to 70.48)            | 34.56<br>(20.67 to 52.66)            | 52.34<br>(30.88 to 76.88)            | 1.19<br>(0.81 to 1.49)         | 2.94<br>(1.85 to 4.25)           | 2.30<br>(1.44 to 3.37)           | 3.09<br>(1.94 to 4.44)            |
| <b>Chronic respiratory diseases</b>                            | <b>104.76<br/>(84.24 to 125.00)</b>  | <b>166.34<br/>(115.41 to 225.13)</b> | <b>159.26<br/>(108.53 to 214.26)</b> | <b>192.39<br/>(128.94 to 271.50)</b> | <b>7.01<br/>(5.72 to 8.30)</b> | <b>13.13<br/>(9.81 to 16.60)</b> | <b>12.94<br/>(9.62 to 16.44)</b> | <b>14.90<br/>(10.86 to 19.28)</b> |
| Chronic obstructive pulmonary disease                          | 50.82<br>(40.93 to 62.17)            | 65.61<br>(39.98 to 102.97)           | 42.67<br>(26.62 to 66.84)            | 97.05<br>(55.92 to 154.62)           | 3.59<br>(2.93 to 4.40)         | 5.39<br>(3.51 to 8.04)           | 3.63<br>(2.35 to 5.48)           | 7.81<br>(4.92 to 11.64)           |
| Pneumoconiosis                                                 | 1.49<br>(1.15 to 1.88)               | 2.12<br>(1.34 to 3.01)               | 1.76<br>(1.09 to 2.65)               | 2.26<br>(1.45 to 3.14)               | 0.08<br>(0.06 to 0.10)         | 0.16<br>(0.10 to 0.22)           | 0.13<br>(0.08 to 0.20)           | 0.16<br>(0.11 to 0.23)            |
| Silicosis                                                      | 0.21<br>(0.14 to 0.30)               | 0.28<br>(0.16 to 0.43)               | 0.21<br>(0.11 to 0.37)               | 0.28<br>(0.17 to 0.44)               | 0.01<br>(0.01 to 0.01)         | 0.02<br>(0.01 to 0.05)           | 0.01<br>(0.01 to 0.02)           | 0.02<br>(0.01 to 0.03)            |
| Asbestosis                                                     | 0.12<br>(0.09 to 0.18)               | 0.19<br>(0.11 to 0.33)               | 0.20<br>(0.12 to 0.34)               | 0.19<br>(0.11 to 0.32)               | 0.00<br>(0.00 to 0.01)         | 0.01<br>(0.01 to 0.02)           | 0.01<br>(0.01 to 0.02)           | 0.01<br>(0.01 to 0.02)            |
| Coal workers pneumoconiosis                                    | 0.06<br>(0.04 to 0.09)               | 0.11<br>(0.06 to 0.18)               | 0.07<br>(0.04 to 0.12)               | 0.12<br>(0.07 to 0.20)               | 0.00<br>(0.00 to 0.00)         | 0.01<br>(0.00 to 0.01)           | 0.01<br>(0.00 to 0.01)           | 0.01<br>(0.00 to 0.01)            |
| Other pneumoconiosis                                           | 1.10<br>(0.83 to 1.39)               | 1.54<br>(0.94 to 2.28)               | 1.27<br>(0.76 to 1.97)               | 1.67<br>(1.02 to 2.43)               | 0.06<br>(0.05 to 0.08)         | 0.12<br>(0.08 to 0.18)           | 0.10<br>(0.06 to 0.16)           | 0.13<br>(0.08 to 0.19)            |
| Asthma                                                         | 4.46<br>(3.54 to 5.65)               | 4.16<br>(2.33 to 6.93)               | 2.84<br>(1.54 to 5.08)               | 5.20<br>(2.85 to 8.92)               | 0.19<br>(0.15 to 0.24)         | 0.26<br>(0.15 to 0.42)           | 0.31<br>(0.11 to 0.33)           | 0.31<br>(0.17 to 0.51)            |
| Interstitial lung disease and pulmonary sarcoidosis            | 42.62<br>(30.23 to 52.75)            | 86.71<br>(58.70 to 112.97)           | 105.10<br>(69.81 to 142.87)          | 79.68<br>(52.93 to 102.61)           | 2.96<br>(1.98 to 3.68)         | 6.96<br>(4.75 to 8.63)           | 8.65<br>(6.06 to 11.26)          | 6.25<br>(4.16 to 7.77)            |
| Other chronic respiratory diseases                             | 5.38<br>(3.72 to 8.28)               | 7.75<br>(4.83 to 12.76)              | 6.90<br>(4.25 to 11.53)              | 8.20<br>(5.11 to 13.22)              | 0.17<br>(0.12 to 0.28)         | 0.36<br>(0.25 to 0.61)           | 0.35<br>(0.22 to 0.62)           | 0.36<br>(0.24 to 0.61)            |
| <b>Cirrhosis and other chronic liver diseases</b>              | <b>128.54<br/>(100.46 to 158.27)</b> | <b>185.71<br/>(123.78 to 252.76)</b> | <b>160.08<br/>(105.24 to 223.00)</b> | <b>216.49<br/>(144.46 to 292.23)</b> | <b>5.23<br/>(4.18 to 6.35)</b> | <b>9.36<br/>(6.77 to 12.09)</b>  | <b>8.24<br/>(5.86 to 11.01)</b>  | <b>10.60<br/>(7.69 to 13.52)</b>  |
| Cirrhosis and other chronic liver diseases due to hepatitis B  | 28.84<br>(21.47 to 37.63)            | 46.08<br>(29.31 to 64.47)            | 41.46<br>(26.05 to 60.28)            | 46.90<br>(29.73 to 64.97)            | 1.19<br>(0.90 to 1.54)         | 2.30<br>(1.57 to 3.09)           | 2.09<br>(1.42 to 2.89)           | 2.30<br>(1.58 to 3.08)            |
| Cirrhosis and other chronic liver diseases due to hepatitis C  | 23.88<br>(17.74 to 30.50)            | 36.67<br>(23.10 to 51.87)            | 32.73<br>(20.69 to 47.46)            | 37.44<br>(23.84 to 52.22)            | 0.94<br>(0.71 to 1.19)         | 1.72<br>(1.19 to 2.29)           | 1.55<br>(1.04 to 2.13)           | 1.73<br>(1.21 to 2.29)            |
| Cirrhosis and other chronic liver diseases due to alcohol use  | 49.32<br>(38.52 to 61.79)            | 65.43<br>(43.03 to 90.55)            | 53.00<br>(34.84 to 75.30)            | 93.39<br>(61.67 to 129.60)           | 2.10<br>(1.67 to 2.62)         | 3.46<br>(2.45 to 4.49)           | 2.89<br>(2.03 to 3.86)           | 4.65<br>(3.29 to 6.01)            |
| Cirrhosis and other chronic liver diseases due to other causes | 26.50<br>(21.23 to 33.28)            | 37.53<br>(25.39 to 51.18)            | 32.89<br>(21.77 to 46.02)            | 38.76<br>(26.50 to 52.80)            | 1.00<br>(0.80 to 1.23)         | 1.89<br>(1.34 to 2.51)           | 1.70<br>(1.19 to 2.35)           | 1.91<br>(1.36 to 2.48)            |
| <b>Digestive diseases</b>                                      | <b>93.15<br/>(72.94 to 125.71)</b>   | <b>128.68<br/>(84.64 to 187.08)</b>  | <b>108.47<br/>(71.70 to 159.70)</b>  | <b>142.70<br/>(92.05 to 210.91)</b>  | <b>3.85<br/>(2.97 to 5.31)</b> | <b>7.83<br/>(5.60 to 10.92)</b>  | <b>6.94<br/>(4.90 to 9.86)</b>   | <b>8.33<br/>(5.89 to 11.65)</b>   |
| Peptic ulcer disease                                           | 10.44<br>(7.73 to 13.94)             | 11.70<br>(7.78 to 16.40)             | 8.66<br>(5.59 to 12.62)              | 12.93<br>(8.78 to 17.78)             | 0.55<br>(0.41 to 0.72)         | 0.85<br>(0.62 to 1.14)           | 0.65<br>(0.45 to 0.89)           | 0.91<br>(0.69 to 1.20)            |
| <b>Peru</b>                                                    |                                      |                                      |                                      |                                      |                                |                                  |                                  |                                   |
| Cause                                                          | YLLs (in 1000s)                      |                                      |                                      |                                      | Deaths (in 1000s)              |                                  |                                  |                                   |
|                                                                | 2016                                 | 2040 Forecast                        | 2040 Better Scenario                 | 2040 Worse Scenario                  | 2016                           | 2040 Forecast                    | 2040 Better Scenario             | 2040 Worse Scenario               |
| Gastritis and duodenitis                                       | 7.66<br>(5.85 to 9.73)               | 10.09<br>(6.95 to 14.01)             | 8.67<br>(5.86 to 12.27)              | 10.38<br>(7.20 to 14.21)             | 0.44<br>(0.34 to 0.55)         | 0.76<br>(0.55 to 1.01)           | 0.68<br>(0.48 to 0.92)           | 0.76<br>(0.57 to 1.00)            |
| Appendicitis                                                   | 8.23<br>(6.33 to 11.31)              | 8.01<br>(5.15 to 11.85)              | 5.93<br>(3.77 to 8.90)               | 8.84<br>(5.72 to 13.08)              | 0.21<br>(0.16 to 0.29)         | 0.31<br>(0.21 to 0.43)           | 0.24<br>(0.16 to 0.35)           | 0.32<br>(0.23 to 0.46)            |

|                                            |                                                   |                                                      |                                                      |                                                      |                                                |                                                   |                                                   |                                                   |
|--------------------------------------------|---------------------------------------------------|------------------------------------------------------|------------------------------------------------------|------------------------------------------------------|------------------------------------------------|---------------------------------------------------|---------------------------------------------------|---------------------------------------------------|
|                                            | 29.80<br>(21.62 to<br>43.90)                      | 43.55<br>(29.08 to<br>66.20)                         | 40.49<br>(26.98 to<br>62.14)                         | 44.61<br>(29.94 to<br>68.58)                         | 1.11<br>(0.82 to<br>1.69)                      | 2.56<br>(1.87 to<br>3.84)                         | 2.54<br>(1.83 to<br>3.79)                         | 2.51<br>(1.85 to<br>3.78)                         |
| Paralytic ileus and intestinal obstruction |                                                   |                                                      |                                                      |                                                      |                                                |                                                   |                                                   |                                                   |
|                                            | 3.36<br>(2.34 to<br>4.87)                         | 3.21<br>(2.04 to<br>4.97)                            | 2.72<br>(1.73 to<br>4.35)                            | 3.36<br>(2.15 to<br>5.21)                            | 0.12<br>(0.08 to<br>0.19)                      | 0.18<br>(0.12 to<br>0.29)                         | 0.16<br>(0.11 to<br>0.27)                         | 0.18<br>(0.12 to<br>0.28)                         |
| Inguinal, femoral, and abdominal hernia    |                                                   |                                                      |                                                      |                                                      |                                                |                                                   |                                                   |                                                   |
|                                            | 2.68<br>(1.80 to<br>3.93)                         | 3.06<br>(2.00 to<br>4.58)                            | 2.89<br>(1.87 to<br>4.33)                            | 3.08<br>(2.03 to<br>4.65)                            | 0.09<br>(0.06 to<br>0.12)                      | 0.16<br>(0.12 to<br>0.23)                         | 0.17<br>(0.12 to<br>0.23)                         | 0.16<br>(0.12 to<br>0.22)                         |
| Inflammatory bowel disease                 |                                                   |                                                      |                                                      |                                                      |                                                |                                                   |                                                   |                                                   |
|                                            | 2.55<br>(1.94 to<br>3.72)                         | 5.46<br>(3.70 to<br>7.76)                            | 5.08<br>(3.43 to<br>7.36)                            | 5.48<br>(3.79 to<br>7.77)                            | 0.16<br>(0.12 to<br>0.22)                      | 0.43<br>(0.32 to<br>0.58)                         | 0.41<br>(0.30 to<br>0.57)                         | 0.42<br>(0.31 to<br>0.56)                         |
| Vascular intestinal disorders              |                                                   |                                                      |                                                      |                                                      |                                                |                                                   |                                                   |                                                   |
|                                            | 9.46<br>(6.71 to<br>16.04)                        | 18.44<br>(8.22 to<br>37.41)                          | 13.53<br>(6.33 to<br>26.73)                          | 23.77<br>(10.08 to<br>47.82)                         | 0.50<br>(0.36 to<br>0.86)                      | 1.29<br>(0.61 to<br>2.56)                         | 0.99<br>(0.48 to<br>1.90)                         | 1.60<br>(0.74 to<br>3.09)                         |
| Gallbladder and biliary diseases           |                                                   |                                                      |                                                      |                                                      |                                                |                                                   |                                                   |                                                   |
|                                            | 12.47<br>(9.38 to<br>16.27)                       | 17.22<br>(7.84 to<br>34.39)                          | 13.73<br>(6.49 to<br>27.61)                          | 21.81<br>(9.33 to<br>44.97)                          | 0.43<br>(0.33 to<br>0.60)                      | 0.80<br>(0.43 to<br>1.50)                         | 0.66<br>(0.36 to<br>1.23)                         | 0.97<br>(0.49 to<br>1.94)                         |
| Pancreatitis                               |                                                   |                                                      |                                                      |                                                      |                                                |                                                   |                                                   |                                                   |
|                                            | 6.50<br>(4.91 to<br>8.68)                         | 7.92<br>(5.50 to<br>10.84)                           | 6.78<br>(4.71 to<br>9.37)                            | 8.44<br>(5.92 to<br>11.46)                           | 0.25<br>(0.19 to<br>0.32)                      | 0.49<br>(0.37 to<br>0.63)                         | 0.45<br>(0.33 to<br>0.59)                         | 0.50<br>(0.39 to<br>0.64)                         |
| Other digestive diseases                   |                                                   |                                                      |                                                      |                                                      |                                                |                                                   |                                                   |                                                   |
| <b>Neurological disorders</b>              | <b>78.43</b><br><b>(63.53 to</b><br><b>97.16)</b> | <b>190.64</b><br><b>(134.60 to</b><br><b>260.23)</b> | <b>186.66</b><br><b>(132.47 to</b><br><b>253.83)</b> | <b>195.77</b><br><b>(137.08 to</b><br><b>273.45)</b> | <b>7.16</b><br><b>(5.71 to</b><br><b>8.87)</b> | <b>20.03</b><br><b>(14.89 to</b><br><b>27.27)</b> | <b>20.21</b><br><b>(14.99 to</b><br><b>26.76)</b> | <b>19.90</b><br><b>(14.57 to</b><br><b>27.56)</b> |
| Alzheimer's disease and other dementias    |                                                   |                                                      |                                                      |                                                      |                                                |                                                   |                                                   |                                                   |
|                                            | 57.18<br>(45.21 to<br>72.39)                      | 152.47<br>(103.97 to<br>216.40)                      | 147.83<br>(102.29 to<br>205.38)                      | 157.20<br>(105.91 to<br>228.50)                      | 6.20<br>(4.85 to<br>7.73)                      | 17.54<br>(12.55 to<br>24.43)                      | 17.49<br>(12.50 to<br>23.89)                      | 17.56<br>(12.37 to<br>25.26)                      |
| Parkinson's disease                        |                                                   |                                                      |                                                      |                                                      |                                                |                                                   |                                                   |                                                   |
|                                            | 7.11<br>(5.23 to<br>9.61)                         | 20.04<br>(13.96 to<br>27.42)                         | 22.36<br>(15.55 to<br>30.89)                         | 18.22<br>(12.94 to<br>25.03)                         | 0.60<br>(0.44 to<br>0.81)                      | 1.82<br>(1.32 to<br>2.47)                         | 2.06<br>(1.49 to<br>2.83)                         | 1.62<br>(1.19 to<br>2.19)                         |
| Epilepsy                                   |                                                   |                                                      |                                                      |                                                      |                                                |                                                   |                                                   |                                                   |
|                                            | 8.65<br>(6.65 to<br>12.89)                        | 9.12<br>(4.91 to<br>16.37)                           | 7.26<br>(3.94 to<br>12.88)                           | 11.67<br>(6.10 to<br>21.20)                          | 0.19<br>(0.14 to<br>0.26)                      | 0.27<br>(0.15 to<br>0.44)                         | 0.22<br>(0.13 to<br>0.37)                         | 0.34<br>(0.19 to<br>0.56)                         |
| Multiple sclerosis                         |                                                   |                                                      |                                                      |                                                      |                                                |                                                   |                                                   |                                                   |
|                                            | 0.89<br>(0.68 to<br>1.20)                         | 1.10<br>(0.68 to<br>1.63)                            | 1.13<br>(0.69 to<br>1.67)                            | 1.08<br>(0.67 to<br>1.59)                            | 0.03<br>(0.02 to<br>0.04)                      | 0.05<br>(0.03 to<br>0.06)                         | 0.05<br>(0.03 to<br>0.07)                         | 0.05<br>(0.03 to<br>0.06)                         |
| Motor neuron disease                       |                                                   |                                                      |                                                      |                                                      |                                                |                                                   |                                                   |                                                   |
|                                            | 1.37<br>(1.08 to<br>1.69)                         | 2.86<br>(1.82 to<br>4.00)                            | 2.95<br>(1.87 to<br>4.17)                            | 2.74<br>(1.78 to<br>3.82)                            | 0.05<br>(0.04 to<br>0.06)                      | 0.13<br>(0.09 to<br>0.17)                         | 0.13<br>(0.09 to<br>0.18)                         | 0.12<br>(0.08 to<br>0.16)                         |
| Other neurological disorders               |                                                   |                                                      |                                                      |                                                      |                                                |                                                   |                                                   |                                                   |
|                                            | 3.24<br>(2.64 to<br>3.94)                         | 5.04<br>(3.63 to<br>6.73)                            | 5.13<br>(3.64 to<br>6.92)                            | 4.88<br>(3.54 to<br>6.49)                            | 0.09<br>(0.08 to<br>0.11)                      | 0.23<br>(0.18 to<br>0.29)                         | 0.25<br>(0.19 to<br>0.32)                         | 0.22<br>(0.17 to<br>0.27)                         |
| <b>Mental disorders</b>                    | <b>23.43</b><br><b>(16.55 to</b><br><b>40.46)</b> | <b>34.10</b><br><b>(20.15 to</b><br><b>60.17)</b>    | <b>35.50</b><br><b>(20.63 to</b><br><b>61.35)</b>    | <b>35.41</b><br><b>(20.97 to</b><br><b>62.22)</b>    | <b>0.67</b><br><b>(0.48 to</b><br><b>1.16)</b> | <b>1.29</b><br><b>(0.86 to</b><br><b>2.16)</b>    | <b>1.38</b><br><b>(0.90 to</b><br><b>2.29)</b>    | <b>1.30</b><br><b>(0.86 to</b><br><b>2.19)</b>    |
| Alcohol use disorders                      |                                                   |                                                      |                                                      |                                                      |                                                |                                                   |                                                   |                                                   |
|                                            | 9.37<br>(5.45 to<br>23.40)                        | 11.24<br>(5.33 to<br>29.22)                          | 11.06<br>(5.12 to<br>29.18)                          | 12.61<br>(6.03 to<br>32.88)                          | 0.28<br>(0.17 to<br>0.67)                      | 0.42<br>(0.23 to<br>1.02)                         | 0.42<br>(0.22 to<br>1.01)                         | 0.46<br>(0.25 to<br>1.11)                         |
| Drug use disorders                         |                                                   |                                                      |                                                      |                                                      |                                                |                                                   |                                                   |                                                   |
|                                            | 13.98<br>(10.24 to<br>18.93)                      | 22.74<br>(14.54 to<br>34.69)                         | 24.33<br>(15.23 to<br>37.58)                         | 22.69<br>(14.64 to<br>34.69)                         | 0.39<br>(0.29 to<br>0.53)                      | 0.87<br>(1.24 to<br>1.43)                         | 0.96<br>(0.66 to<br>1.43)                         | 0.84<br>(0.60 to<br>1.21)                         |
| Opioid use disorders                       |                                                   |                                                      |                                                      |                                                      |                                                |                                                   |                                                   |                                                   |
|                                            | 8.62<br>(6.02 to<br>11.94)                        | 10.71<br>(6.30 to<br>16.92)                          | 10.88<br>(6.36 to<br>17.17)                          | 10.71<br>(6.33 to<br>17.05)                          | 0.21<br>(0.16 to<br>0.30)                      | 0.34<br>(0.22 to<br>0.52)                         | 0.36<br>(0.23 to<br>0.54)                         | 0.34<br>(0.22 to<br>0.51)                         |
| Cocaine use disorders                      |                                                   |                                                      |                                                      |                                                      |                                                |                                                   |                                                   |                                                   |
|                                            | 0.86<br>(0.57 to<br>1.29)                         | 2.03<br>(1.16 to<br>3.51)                            | 2.15<br>(1.18 to<br>3.72)                            | 2.07<br>(1.18 to<br>3.58)                            | 0.02<br>(0.02 to<br>0.04)                      | 0.07<br>(0.04 to<br>0.12)                         | 0.07<br>(0.04 to<br>0.12)                         | 0.07<br>(0.04 to<br>0.12)                         |
| Amphetamine use disorders                  |                                                   |                                                      |                                                      |                                                      |                                                |                                                   |                                                   |                                                   |
|                                            | 0.53<br>(0.33 to<br>0.76)                         | 1.67<br>(0.95 to<br>2.72)                            | 1.87<br>(1.03 to<br>3.10)                            | 1.71<br>(0.98 to<br>2.77)                            | 0.01<br>(0.01 to<br>0.02)                      | 0.05<br>(0.03 to<br>0.07)                         | 0.05<br>(0.03 to<br>0.08)                         | 0.05<br>(0.03 to<br>0.07)                         |
| Other drug use disorders                   |                                                   |                                                      |                                                      |                                                      |                                                |                                                   |                                                   |                                                   |
|                                            | 3.98<br>(2.81 to<br>5.62)                         | 8.33<br>(5.46 to<br>12.95)                           | 9.42<br>(5.88 to<br>14.89)                           | 8.20<br>(5.35 to<br>12.61)                           | 0.14<br>(0.10 to<br>0.20)                      | 0.41<br>(0.30 to<br>0.60)                         | 0.48<br>(0.33 to<br>0.73)                         | 0.39<br>(0.28 to<br>0.57)                         |
| Eating disorders                           |                                                   |                                                      |                                                      |                                                      |                                                |                                                   |                                                   |                                                   |
|                                            | 0.07<br>(0.05 to<br>0.13)                         | 0.12<br>(0.06 to<br>0.20)                            | 0.11<br>(0.06 to<br>0.19)                            | 0.12<br>(0.07 to<br>0.21)                            | 0.00<br>(0.00 to<br>0.00)                      | 0.00<br>(0.00 to<br>0.00)                         | 0.00<br>(0.00 to<br>0.00)                         | 0.00<br>(0.00 to<br>0.00)                         |

| Peru                                                       |                                     |                                     |                                     |                                     |                                 |                                  |                                  |                                  |
|------------------------------------------------------------|-------------------------------------|-------------------------------------|-------------------------------------|-------------------------------------|---------------------------------|----------------------------------|----------------------------------|----------------------------------|
| Cause                                                      | YLLs (in 1000s)                     |                                     |                                     |                                     | Deaths (in 1000s)               |                                  |                                  |                                  |
|                                                            | 2016                                | 2040 Forecast                       | 2040 Better Scenario                | 2040 Worse Scenario                 | 2016                            | 2040 Forecast                    | 2040 Better Scenario             | 2040 Worse Scenario              |
| <b>Diabetes, urogenital, blood, and endocrine diseases</b> | <b>221.98</b><br>(182.93 to 273.56) | <b>444.09</b><br>(279.09 to 666.23) | <b>325.70</b><br>(205.23 to 474.35) | <b>508.72</b><br>(319.56 to 762.08) | <b>11.36</b><br>(9.48 to 13.62) | <b>31.28</b><br>(21.42 to 44.87) | <b>23.75</b><br>(16.32 to 33.74) | <b>34.60</b><br>(23.37 to 49.32) |
| Diabetes mellitus                                          | 74.08<br>(60.01 to 90.56)           | 125.28<br>(75.30 to 197.34)         | 89.60<br>(54.33 to 139.74)          | 153.79<br>(89.83 to 242.48)         | 3.92<br>(3.21 to 4.76)          | 8.13<br>(5.35 to 11.79)          | 6.04<br>(3.98 to 8.93)           | 9.60<br>(6.28 to 14.19)          |
| Acute glomerulonephritis                                   | 0.24<br>(0.19 to 0.31)              | 0.20<br>(0.13 to 0.29)              | 0.16<br>(0.11 to 0.23)              | 0.22<br>(0.14 to 0.32)              | 0.01<br>(0.00 to 0.01)          | 0.01<br>(0.00 to 0.01)           | 0.01<br>(0.00 to 0.01)           | 0.01<br>(0.00 to 0.01)           |
| Chronic kidney disease                                     | 106.97<br>(88.03 to 131.27)         | 232.35<br>(125.39 to 391.65)        | 157.59<br>(88.36 to 260.90)         | 268.46<br>(143.85 to 454.92)        | 5.60<br>(4.67 to 6.77)          | 16.75<br>(9.40 to 27.51)         | 11.56<br>(6.92 to 18.83)         | 18.89<br>(10.46 to 31.54)        |
| Chronic kidney disease due to diabetes mellitus            | 31.20<br>(23.94 to 40.38)           | 83.39<br>(43.55 to 146.02)          | 56.81<br>(31.26 to 95.68)           | 96.55<br>(49.74 to 170.69)          | 1.65<br>(1.28 to 2.12)          | 5.48<br>(2.98 to 9.34)           | 3.78<br>(2.15 to 6.31)           | 6.22<br>(3.32 to 10.68)          |
| Chronic kidney disease due to hypertension                 | 14.63<br>(11.33 to 18.68)           | 42.28<br>(22.08 to 74.29)           | 29.42<br>(16.50 to 49.69)           | 48.01<br>(25.37 to 82.24)           | 1.22<br>(0.95 to 1.54)          | 4.19<br>(2.38 to 7.10)           | 2.99<br>(1.79 to 4.98)           | 4.64<br>(2.56 to 7.83)           |
| Chronic kidney disease due to glomerulonephritis           | 34.24<br>(26.99 to 42.57)           | 57.37<br>(30.41 to 100.40)          | 38.15<br>(20.62 to 64.25)           | 66.67<br>(34.06 to 115.06)          | 1.47<br>(1.13 to 1.86)          | 3.62<br>(1.87 to 6.35)           | 2.43<br>(1.33 to 4.10)           | 4.12<br>(2.11 to 7.35)           |
| Chronic kidney disease due to other and unspecified causes | 26.90<br>(21.28 to 34.17)           | 49.32<br>(26.90 to 83.66)           | 33.19<br>(18.74 to 55.68)           | 57.23<br>(30.95 to 96.39)           | 1.27<br>(0.99 to 1.63)          | 3.45<br>(1.93 to 5.93)           | 2.36<br>(1.37 to 3.93)           | 3.91<br>(2.17 to 6.54)           |
| Urinary diseases and male infertility                      | 25.96<br>(21.69 to 31.07)           | 63.48<br>(47.43 to 79.91)           | 58.27<br>(42.46 to 77.36)           | 62.26<br>(47.18 to 77.33)           | 1.40<br>(1.17 to 1.65)          | 5.30<br>(4.24 to 6.45)           | 5.11<br>(3.95 to 6.50)           | 5.00<br>(4.08 to 5.99)           |
| Urinary tract infections                                   | 21.30<br>(20.38 to 29.20)           | 61.15<br>(45.49 to 76.96)           | 56.34<br>(40.87 to 75.31)           | 59.85<br>(45.25 to 74.55)           | 1.31<br>(1.09 to 1.55)          | 5.12<br>(4.08 to 6.25)           | 4.96<br>(3.82 to 6.32)           | 4.82<br>(3.91 to 5.79)           |
| Urolithiasis                                               | 0.28<br>(0.18 to 0.39)              | 0.51<br>(0.30 to 0.76)              | 0.45<br>(0.26 to 0.68)              | 0.50<br>(0.29 to 0.74)              | 0.01<br>(0.01 to 0.02)          | 0.03<br>(0.02 to 0.04)           | 0.03<br>(0.02 to 0.04)           | 0.03<br>(0.02 to 0.04)           |
| Other urinary diseases                                     | 1.17<br>(0.72 to 1.73)              | 1.83<br>(0.98 to 2.89)              | 1.48<br>(0.78 to 2.47)              | 1.91<br>(1.05 to 2.98)              | 0.07<br>(0.04 to 0.11)          | 0.15<br>(0.08 to 0.22)           | 0.12<br>(0.07 to 0.20)           | 0.15<br>(0.08 to 0.23)           |
| Gynecological diseases                                     | 0.35<br>(0.23 to 0.55)              | 0.48<br>(0.25 to 0.91)              | 0.35<br>(0.18 to 0.68)              | 0.53<br>(0.28 to 0.97)              | 0.01<br>(0.01 to 0.02)          | 0.02<br>(0.01 to 0.03)           | 0.01<br>(0.01 to 0.02)           | 0.02<br>(0.01 to 0.03)           |
| Uterine fibroids                                           | 0.00<br>(0.00 to 0.00)              | 0.00<br>(0.00 to 0.01)              | 0.00<br>(0.00 to 0.01)              | 0.01<br>(0.01 to 0.01)              | 0.00<br>(0.00 to 0.00)          | 0.00<br>(0.00 to 0.00)           | 0.00<br>(0.00 to 0.00)           | 0.00<br>(0.00 to 0.00)           |
| Polycystic ovarian syndrome                                | 0.03<br>(0.01 to 0.06)              | 0.02<br>(0.01 to 0.05)              | 0.01<br>(0.00 to 0.03)              | 0.03<br>(0.01 to 0.06)              | 0.00<br>(0.00 to 0.00)          | 0.00<br>(0.00 to 0.00)           | 0.00<br>(0.00 to 0.00)           | 0.00<br>(0.00 to 0.00)           |
| Endometriosis                                              | 0.00<br>(0.00 to 0.00)              | 0.00<br>(0.00 to 0.00)              | 0.00<br>(0.00 to 0.00)              | 0.00<br>(0.00 to 0.00)              | 0.00<br>(0.00 to 0.00)          | 0.00<br>(0.00 to 0.00)           | 0.00<br>(0.00 to 0.00)           | 0.00<br>(0.00 to 0.00)           |
| Genital prolapse                                           | 0.03<br>(0.02 to 0.06)              | 0.07<br>(0.03 to 0.13)              | 0.05<br>(0.02 to 0.10)              | 0.07<br>(0.04 to 0.15)              | 0.00<br>(0.00 to 0.00)          | 0.00<br>(0.00 to 0.01)           | 0.00<br>(0.00 to 0.01)           | 0.00<br>(0.00 to 0.01)           |
| Other gynecological diseases                               | 0.29<br>(0.19 to 0.45)              | 0.39<br>(0.19 to 0.74)              | 0.29<br>(0.13 to 0.55)              | 0.42<br>(0.20 to 0.80)              | 0.01<br>(0.01 to 0.01)          | 0.01<br>(0.01 to 0.02)           | 0.01<br>(0.01 to 0.02)           | 0.01<br>(0.01 to 0.02)           |
| Hemoglobinopathies and hemolytic anemias                   | 4.26<br>(3.44 to 5.40)              | 5.33<br>(3.59 to 7.44)              | 4.29<br>(2.85 to 6.33)              | 5.66<br>(3.82 to 7.86)              | 0.13<br>(0.11 to 0.17)          | 0.25<br>(0.18 to 0.33)           | 0.21<br>(0.15 to 0.29)           | 0.26<br>(0.19 to 0.34)           |
| Thalassemias                                               | 0.36<br>(0.24 to 0.54)              | 0.14<br>(0.08 to 0.25)              | 0.12<br>(0.07 to 0.19)              | 0.15<br>(0.08 to 0.25)              | 0.00<br>(0.00 to 0.01)          | 0.00<br>(0.00 to 0.00)           | 0.00<br>(0.00 to 0.00)           | 0.00<br>(0.00 to 0.00)           |

|                                                   |                                 |                                |                               |                                |                           |                           |                           |                           |
|---------------------------------------------------|---------------------------------|--------------------------------|-------------------------------|--------------------------------|---------------------------|---------------------------|---------------------------|---------------------------|
| Sickle cell disorders                             | 2.25<br>(1.78 to<br>2.86)       | 2.39<br>(1.47 to<br>3.55)      | 1.91<br>(1.16 to<br>2.95)     | 2.54<br>(1.56 to<br>3.76)      | 0.04<br>(0.03 to<br>0.05) | 0.05<br>(0.03 to<br>0.08) | 0.04<br>(0.03 to<br>0.07) | 0.06<br>(0.03 to<br>0.08) |
| G6PD deficiency                                   | 0.56<br>(0.44 to<br>0.73)       | 0.96<br>(0.60 to<br>1.40)      | 0.75<br>(0.46 to<br>1.15)     | 1.05<br>(0.65 to<br>1.53)      | 0.02<br>(0.01 to<br>0.02) | 0.04<br>(0.02 to<br>0.05) | 0.03<br>(0.02 to<br>0.04) | 0.04<br>(0.03 to<br>0.06) |
| Other hemoglobinopathies and hemolytic anemias    | 1.10<br>(0.87 to<br>1.45)       | 1.83<br>(1.28 to<br>2.52)      | 1.52<br>(1.04 to<br>2.18)     | 1.92<br>(1.35 to<br>2.60)      | 0.07<br>(0.06 to<br>0.10) | 0.15<br>(0.12 to<br>0.20) | 0.13<br>(0.10 to<br>0.18) | 0.16<br>(0.12 to<br>0.21) |
| Endocrine, metabolic, blood, and immune disorders | 10.12<br>(6.36 to<br>23.88)     | 16.96<br>(9.47 to<br>39.23)    | 15.43<br>(8.63 to<br>35.27)   | 17.81<br>(10.05 to<br>41.50)   | 0.28<br>(0.18 to<br>0.69) | 0.83<br>(0.49 to<br>2.02) | 0.82<br>(0.47 to<br>1.98) | 0.83<br>(0.49 to<br>2.02) |
| <b>Peru</b>                                       |                                 |                                |                               |                                |                           |                           |                           |                           |
| Cause                                             | YLLs (in 1000s)                 |                                |                               |                                | Deaths (in 1000s)         |                           |                           |                           |
|                                                   | 2016                            | 2040 Forecast                  | 2040 Better Scenario          | 2040 Worse Scenario            | 2016                      | 2040 Forecast             | 2040 Better Scenario      | 2040 Worse Scenario       |
| Musculoskeletal disorders                         | 5.03<br>(3.97 to<br>6.51)       | 8.96<br>(5.84 to<br>12.66)     | 8.09<br>(5.17 to<br>11.51)    | 8.96<br>(5.86 to<br>12.60)     | 0.18<br>(0.14 to<br>0.23) | 0.47<br>(0.34 to<br>0.64) | 0.43<br>(0.29 to<br>0.59) | 0.47<br>(0.34 to<br>0.62) |
| Rheumatoid arthritis                              | 1.09<br>(0.76 to<br>1.43)       | 3.77<br>(2.39 to<br>5.35)      | 2.94<br>(1.75 to<br>4.38)     | 3.98<br>(2.51 to<br>5.58)      | 0.06<br>(0.04 to<br>0.08) | 0.26<br>(0.18 to<br>0.35) | 0.21<br>(0.13 to<br>0.30) | 0.27<br>(0.19 to<br>0.35) |
| Other musculoskeletal disorders                   | 3.94<br>(3.10 to<br>5.19)       | 5.20<br>(3.24 to<br>7.65)      | 5.15<br>(3.24 to<br>7.60)     | 4.99<br>(3.16 to<br>7.40)      | 0.12<br>(0.09 to<br>0.16) | 0.21<br>(0.14 to<br>0.30) | 0.22<br>(0.15 to<br>0.31) | 0.20<br>(0.14 to<br>0.28) |
| Other non-communicable diseases                   | 192.54<br>(145.17 to<br>249.46) | 125.39<br>(85.71 to<br>179.93) | 81.81<br>(55.39 to<br>119.95) | 143.07<br>(97.76 to<br>205.16) | 2.53<br>(1.96 to<br>3.20) | 2.60<br>(1.71 to<br>3.47) | 2.06<br>(1.31 to<br>2.82) | 2.75<br>(1.85 to<br>3.68) |
| Congenital birth defects                          | 183.46<br>(137.29 to<br>239.74) | 104.83<br>(69.69 to<br>156.14) | 63.28<br>(40.36 to<br>95.50)  | 8.96<br>(80.95 to<br>181.80)   | 2.21<br>(1.66 to<br>2.86) | 1.33<br>(0.88 to<br>1.94) | 0.82<br>(0.54 to<br>1.24) | 1.54<br>(1.02 to<br>2.24) |
| Neural tube defects                               | 9.03<br>(5.40 to<br>14.57)      | 2.54<br>(1.26 to<br>4.92)      | 1.34<br>(0.64 to<br>2.66)     | 3.20<br>(1.55 to<br>6.27)      | 0.11<br>(0.06 to<br>0.17) | 0.03<br>(0.02 to<br>0.06) | 0.02<br>(0.01 to<br>0.03) | 0.04<br>(0.02 to<br>0.08) |
| Congenital heart anomalies                        | 78.98<br>(45.42 to<br>105.08)   | 42.14<br>(22.19 to<br>65.81)   | 24.79<br>(12.61 to<br>41.30)  | 48.80<br>(25.10 to<br>76.70)   | 0.96<br>(0.56 to<br>1.27) | 0.54<br>(0.29 to<br>0.82) | 0.33<br>(0.17 to<br>0.53) | 0.62<br>(0.32 to<br>0.95) |
| Orofacial clefts                                  | 0.20<br>(0.08 to<br>0.34)       | 0.10<br>(0.03 to<br>0.20)      | 0.05<br>(0.02 to<br>0.10)     | 0.12<br>(0.04 to<br>0.27)      | 0.00<br>(0.00 to<br>0.00) | 0.00<br>(0.00 to<br>0.00) | 0.00<br>(0.00 to<br>0.00) | 0.00<br>(0.00 to<br>0.00) |
| Down syndrome                                     | 4.60<br>(2.73 to<br>8.57)       | 3.94<br>(2.18 to<br>7.54)      | 2.90<br>(1.64 to<br>5.41)     | 4.63<br>(2.54 to<br>8.97)      | 0.06<br>(0.04 to<br>0.11) | 0.05<br>(0.03 to<br>0.10) | 0.04<br>(0.03 to<br>0.07) | 0.06<br>(0.04 to<br>0.12) |
| Other chromosomal abnormalities                   | 5.65<br>(3.48 to<br>11.60)      | 6.51<br>(3.64 to<br>12.16)     | 4.22<br>(2.41 to<br>7.75)     | 7.73<br>(4.31 to<br>14.58)     | 0.07<br>(0.04 to<br>0.14) | 0.08<br>(0.04 to<br>0.15) | 0.05<br>(0.03 to<br>0.09) | 0.09<br>(0.05 to<br>0.17) |
| Congenital musculoskeletal and limb anomalies     | 2.79<br>(1.84 to<br>4.23)       | 1.99<br>(1.13 to<br>3.24)      | 1.23<br>(0.70 to<br>2.02)     | 2.29<br>(1.31 to<br>3.72)      | 0.03<br>(0.02 to<br>0.05) | 0.02<br>(0.01 to<br>0.04) | 0.02<br>(0.01 to<br>0.03) | 0.03<br>(0.02 to<br>0.05) |
| Urogenital congenital anomalies                   | 3.61<br>(2.53 to<br>5.21)       | 2.61<br>(1.65 to<br>3.89)      | 1.78<br>(1.15 to<br>2.73)     | 2.95<br>(1.86 to<br>4.47)      | 0.05<br>(0.04 to<br>0.07) | 0.05<br>(0.03 to<br>0.07) | 0.03<br>(0.02 to<br>0.05) | 0.05<br>(0.03 to<br>0.07) |
| Digestive congenital anomalies                    | 21.44<br>(14.57 to<br>34.10)    | 14.17<br>(8.22 to<br>24.30)    | 8.21<br>(4.61 to<br>14.30)    | 16.77<br>(9.70 to<br>28.65)    | 0.25<br>(0.17 to<br>0.40) | 0.17<br>(0.10 to<br>0.29) | 0.10<br>(0.06 to<br>0.17) | 0.20<br>(0.12 to<br>0.34) |
| Other congenital birth defects                    | 57.17<br>(39.80 to<br>78.93)    | 30.84<br>(18.56 to<br>47.80)   | 18.77<br>(11.09 to<br>30.39)  | 35.87<br>(21.66 to<br>55.70)   | 0.68<br>(0.47 to<br>0.93) | 0.38<br>(0.23 to<br>0.58) | 0.23<br>(0.14 to<br>0.37) | 0.44<br>(0.27 to<br>0.67) |
| Skin and subcutaneous diseases                    | 7.19<br>(4.19 to<br>10.72)      | 19.47<br>(10.21 to<br>28.37)   | 17.84<br>(9.24 to<br>25.80)   | 19.44<br>(10.42 to<br>28.07)   | 0.30<br>(0.15 to<br>0.42) | 1.26<br>(0.59 to<br>1.77) | 1.23<br>(0.58 to<br>1.77) | 1.20<br>(0.57 to<br>1.66) |
| Cellulitis                                        | 1.60<br>(0.93 to<br>3.40)       | 5.74<br>(3.22 to<br>10.17)     | 5.63<br>(3.20 to<br>9.75)     | 5.53<br>(3.09 to<br>9.95)      | 0.06<br>(0.04 to<br>0.12) | 0.33<br>(0.17 to<br>0.52) | 0.35<br>(0.18 to<br>0.54) | 0.31<br>(0.17 to<br>0.49) |



|                                      |                                                      |                                                      |                                                      |                                                        |                                                   |                                                  |                                                  |                                                   |
|--------------------------------------|------------------------------------------------------|------------------------------------------------------|------------------------------------------------------|--------------------------------------------------------|---------------------------------------------------|--------------------------------------------------|--------------------------------------------------|---------------------------------------------------|
| Pyoderma                             | 5.00<br>(2.52 to<br>7.17)                            | 11.30<br>(4.42 to<br>17.43)                          | 9.97<br>(3.72 to<br>15.54)                           | 11.55<br>(4.61 to<br>17.61)                            | 0.21<br>(0.08 to<br>0.30)                         | 0.72<br>(0.23 to<br>1.11)                        | 0.69<br>(0.21 to<br>1.10)                        | 0.70<br>(0.23 to<br>1.06)                         |
| Decubitus ulcer                      | 0.37<br>(0.18 to<br>0.87)                            | 1.92<br>(0.80 to<br>4.36)                            | 1.77<br>(0.73 to<br>3.97)                            | 1.85<br>(0.78 to<br>4.22)                              | 0.02<br>(0.01 to<br>0.06)                         | 0.18<br>(0.07 to<br>0.42)                        | 0.17<br>(0.07 to<br>0.40)                        | 0.17<br>(0.07 to<br>0.39)                         |
| Other skin and subcutaneous diseases | 0.23<br>(0.13 to<br>0.41)                            | 0.51<br>(0.26 to<br>0.83)                            | 0.48<br>(0.24 to<br>0.77)                            | 0.50<br>(0.26 to<br>0.82)                              | 0.01<br>(0.00 to<br>0.01)                         | 0.02<br>(0.01 to<br>0.04)                        | 0.02<br>(0.01 to<br>0.04)                        | 0.02<br>(0.01 to<br>0.03)                         |
| Sudden infant death syndrome         | 1.90<br>(1.20 to<br>2.89)                            | 1.10<br>(0.53 to<br>2.08)                            | 0.69<br>(0.34 to<br>1.32)                            | 1.27<br>(0.62 to<br>2.41)                              | 0.02<br>(0.01 to<br>0.03)                         | 0.01<br>(0.01 to<br>0.02)                        | 0.01<br>(0.00 to<br>0.02)                        | 0.01<br>(0.01 to<br>0.03)                         |
| <b>Injuries</b>                      | <b>609.66</b><br><b>(508.11 to</b><br><b>722.87)</b> | <b>570.24</b><br><b>(346.76 to</b><br><b>849.13)</b> | <b>428.08</b><br><b>(250.09 to</b><br><b>625.59)</b> | <b>692.85</b><br><b>(424.81 to</b><br><b>1,092.83)</b> | <b>12.68</b><br><b>(10.46 to</b><br><b>15.14)</b> | <b>15.67</b><br><b>(8.09 to</b><br><b>21.56)</b> | <b>12.52</b><br><b>(8.09 to</b><br><b>17.15)</b> | <b>18.32</b><br><b>(12.04 to</b><br><b>26.76)</b> |
| <b>Transport injuries</b>            | <b>204.19</b><br><b>(166.48 to</b><br><b>247.84)</b> | <b>164.93</b><br><b>(96.75 to</b><br><b>266.49)</b>  | <b>91.76</b><br><b>(52.41 to</b><br><b>147.67)</b>   | <b>253.44</b><br><b>(145.18 to</b><br><b>414.10)</b>   | <b>4.55</b><br><b>(3.69 to</b><br><b>5.54)</b>    | <b>4.69</b><br><b>(2.90 to</b><br><b>7.20)</b>   | <b>2.85</b><br><b>(1.78 to</b><br><b>4.31)</b>   | <b>6.79</b><br><b>(4.04 to</b><br><b>10.77)</b>   |
| Road injuries                        | 188.24<br>(153.70 to<br>228.44)                      | 149.35<br>(88.56 to<br>240.56)                       | 79.92<br>(45.93 to<br>127.83)                        | 235.18<br>(135.83 to<br>383.24)                        | 4.20<br>(3.42 to<br>5.09)                         | 4.26<br>(2.67 to<br>6.52)                        | 2.51<br>(1.59 to<br>3.75)                        | 6.29<br>(3.76 to<br>9.90)                         |
| Pedestrian road injuries             | 83.90<br>(66.26 to<br>103.95)                        | 60.23<br>(36.04 to<br>95.95)                         | 32.26<br>(18.79 to<br>51.64)                         | 88.41<br>(51.23 to<br>145.49)                          | 2.01<br>(1.59 to<br>2.49)                         | 1.99<br>(1.31 to<br>2.98)                        | 1.17<br>(0.75 to<br>1.75)                        | 2.78<br>(1.74 to<br>4.34)                         |
| <b>Peru</b>                          |                                                      |                                                      |                                                      |                                                        |                                                   |                                                  |                                                  |                                                   |
| Cause                                | YLLs (in 1000s)                                      |                                                      |                                                      |                                                        | Deaths (in 1000s)                                 |                                                  |                                                  |                                                   |
|                                      | 2016                                                 | 2040 Forecast                                        | 2040 Better Scenario                                 | 2040 Worse Scenario                                    | 2016                                              | 2040 Forecast                                    | 2040 Better Scenario                             | 2040 Worse Scenario                               |
| Cyclist road injuries                | 7.13<br>(5.26 to<br>9.39)                            | 5.39<br>(2.78 to<br>9.40)                            | 3.16<br>(1.62 to<br>5.65)                            | 8.41<br>(4.29 to<br>14.74)                             | 0.16<br>(0.12 to<br>0.20)                         | 0.14<br>(0.08 to<br>0.24)                        | 0.09<br>(0.05 to<br>0.16)                        | 0.20<br>(0.11 to<br>0.35)                         |
| Motorcyclist road injuries           | 13.56<br>(10.14 to<br>17.80)                         | 12.41<br>(6.09 to<br>23.02)                          | 8.09<br>(3.80 to<br>15.11)                           | 18.15<br>(8.90 to<br>33.51)                            | 0.25<br>(0.18 to<br>0.32)                         | 0.24<br>(0.12 to<br>0.44)                        | 0.17<br>(0.08 to<br>0.30)                        | 0.34<br>(0.17 to<br>0.63)                         |
| Motor vehicle road injuries          | 80.63<br>(63.92 to<br>100.96)                        | 69.28<br>(40.85 to<br>115.75)                        | 35.32<br>(20.39 to<br>58.19)                         | 116.89<br>(67.09 to<br>197.08)                         | 1.72<br>(1.36 to<br>2.16)                         | 1.82<br>(1.12 to<br>2.81)                        | 1.04<br>(0.65 to<br>1.57)                        | 2.87<br>(1.71 to<br>4.64)                         |
| Other road injuries                  | 3.02<br>(2.14 to<br>3.94)                            | 2.03<br>(1.15 to<br>3.30)                            | 1.09<br>(0.61 to<br>1.78)                            | 3.32<br>(1.83 to<br>5.45)                              | 0.07<br>(0.05 to<br>0.09)                         | 0.06<br>(0.04 to<br>0.10)                        | 0.04<br>(0.02 to<br>0.06)                        | 0.09<br>(0.05 to<br>0.15)                         |
| Other transport injuries             | 15.95<br>(11.99 to<br>21.34)                         | 15.58<br>(8.65 to<br>26.34)                          | 11.84<br>(6.31 to<br>20.16)                          | 18.26<br>(9.82 to<br>31.07)                            | 0.35<br>(0.27 to<br>0.46)                         | 0.43<br>(0.25 to<br>0.72)                        | 0.34<br>(0.19 to<br>0.56)                        | 0.50<br>(0.28 to<br>0.83)                         |
| <b>Unintentional injuries</b>        | <b>308.56</b><br><b>(256.26 to</b><br><b>367.58)</b> | <b>247.52</b><br><b>(178.91 to</b><br><b>335.05)</b> | <b>197.15</b><br><b>(142.55 to</b><br><b>269.84)</b> | <b>268.92</b><br><b>(193.93 to</b><br><b>364.93)</b>   | <b>6.16</b><br><b>(5.12 to</b><br><b>7.26)</b>    | <b>7.34</b><br><b>(5.72 to</b><br><b>9.15)</b>   | <b>6.37</b><br><b>(4.92 to</b><br><b>8.07)</b>   | <b>7.62</b><br><b>(5.93 to</b><br><b>9.49)</b>    |
| Falls                                | 26.12<br>(18.56 to<br>33.08)                         | 33.57<br>(22.28 to<br>45.05)                         | 30.26<br>(19.59 to<br>41.18)                         | 34.04<br>(22.45 to<br>45.29)                           | 1.05<br>(0.73 to<br>1.30)                         | 2.00<br>(1.37 to<br>2.45)                        | 1.86<br>(1.27 to<br>2.34)                        | 1.96<br>(1.35 to<br>2.42)                         |
| Drowning                             | 47.10<br>(37.85 to<br>58.18)                         | 33.88<br>(21.64 to<br>51.49)                         | 26.17<br>(16.82 to<br>39.94)                         | 38.60<br>(24.60 to<br>58.86)                           | 0.86<br>(0.69 to<br>1.04)                         | 0.81<br>(0.54 to<br>1.21)                        | 0.66<br>(0.43 to<br>0.99)                        | 0.90<br>(0.59 to<br>1.38)                         |
| Fire, heat, and hot substances       | 15.16<br>(11.80 to<br>19.59)                         | 11.00<br>(7.30 to<br>15.95)                          | 8.14<br>(5.19 to<br>12.14)                           | 12.64<br>(8.30 to<br>18.53)                            | 0.36<br>(0.27 to<br>0.44)                         | 0.42<br>(0.29 to<br>0.57)                        | 0.34<br>(0.23 to<br>0.47)                        | 0.46<br>(0.31 to<br>0.63)                         |
| Poisonings                           | 10.25<br>(8.03 to<br>13.57)                          | 5.44<br>(3.34 to<br>8.82)                            | 3.66<br>(2.21 to<br>6.20)                            | 6.56<br>(3.93 to<br>10.47)                             | 0.19<br>(0.15 to<br>0.25)                         | 0.13<br>(0.08 to<br>0.21)                        | 0.09<br>(0.06 to<br>0.15)                        | 0.15<br>(0.10 to<br>0.25)                         |
| Exposure to mechanical forces        | 38.92<br>(30.59 to<br>49.30)                         | 28.39<br>(19.12 to<br>41.03)                         | 21.54<br>(14.20 to<br>32.34)                         | 31.53<br>(21.17 to<br>45.34)                           | 0.74<br>(0.58 to<br>0.94)                         | 0.68<br>(0.49 to<br>0.94)                        | 0.55<br>(0.38 to<br>0.78)                        | 0.74<br>(0.52 to<br>1.02)                         |
| Unintentional firearm injuries       | 17.16<br>(9.29 to<br>24.34)                          | 10.42<br>(4.91 to<br>17.35)                          | 8.15<br>(3.87 to<br>13.96)                           | 11.54<br>(5.50 to<br>19.08)                            | 0.34<br>(0.18 to<br>0.48)                         | 0.25<br>(0.13 to<br>0.38)                        | 0.20<br>(0.11 to<br>0.32)                        | 0.27<br>(0.14 to<br>0.42)                         |

|                                                 |                                 |                               |                               |                                |                           |                           |                           |                           |
|-------------------------------------------------|---------------------------------|-------------------------------|-------------------------------|--------------------------------|---------------------------|---------------------------|---------------------------|---------------------------|
| Unintentional suffocation                       | 9.76<br>(7.25 to<br>13.64)      | 6.23<br>(3.81 to<br>9.62)     | 4.19<br>(2.65 to<br>6.53)     | 7.25<br>(4.46 to<br>11.33)     | 0.13<br>(0.10 to<br>0.17) | 0.09<br>(0.06 to<br>0.13) | 0.06<br>(0.04 to<br>0.09) | 0.10<br>(0.07 to<br>0.15) |
| Other exposure to mechanical forces             | 11.99<br>(9.38 to<br>15.62)     | 11.74<br>(7.87 to<br>16.94)   | 9.21<br>(5.89 to<br>13.87)    | 12.73<br>(8.57 to<br>18.41)    | 0.28<br>(0.22 to<br>0.36) | 0.35<br>(0.25 to<br>0.48) | 0.29<br>(0.19 to<br>0.41) | 0.37<br>(0.26 to<br>0.51) |
| Adverse effects of medical treatment            | 25.15<br>(19.63 to<br>33.25)    | 22.52<br>(15.68 to<br>31.81)  | 18.14<br>(12.71 to<br>25.57)  | 24.54<br>(17.23 to<br>34.69)   | 0.55<br>(0.44 to<br>0.71) | 0.78<br>(0.59 to<br>1.07) | 0.69<br>(0.52 to<br>0.97) | 0.81<br>(0.62 to<br>1.09) |
| Animal contact                                  | 2.70<br>(2.07 to<br>3.36)       | 3.00<br>(1.96 to<br>4.30)     | 2.23<br>(1.48 to<br>3.26)     | 3.42<br>(2.27 to<br>4.90)      | 0.05<br>(0.04 to<br>0.07) | 0.08<br>(0.06 to<br>0.11) | 0.06<br>(0.04 to<br>0.09) | 0.09<br>(0.06 to<br>0.12) |
| Venomous animal contact                         | 1.15<br>(0.85 to<br>1.59)       | 1.52<br>(0.97 to<br>2.29)     | 1.16<br>(0.76 to<br>1.76)     | 1.73<br>(1.13 to<br>2.61)      | 0.02<br>(0.02 to<br>0.03) | 0.04<br>(0.03 to<br>0.06) | 0.04<br>(0.02 to<br>0.05) | 0.05<br>(0.03 to<br>0.07) |
| Non-venomous animal contact                     | 1.55<br>(1.04 to<br>1.99)       | 1.48<br>(0.87 to<br>2.16)     | 1.08<br>(0.66 to<br>1.59)     | 1.68<br>(1.00 to<br>2.49)      | 0.03<br>(0.02 to<br>0.04) | 0.04<br>(0.02 to<br>0.05) | 0.03<br>(0.02 to<br>0.04) | 0.04<br>(0.03 to<br>0.05) |
| Foreign body                                    | 129.64<br>(100.02 to<br>165.07) | 95.97<br>(65.70 to<br>136.12) | 77.10<br>(54.07 to<br>107.24) | 102.44<br>(69.72 to<br>146.38) | 2.05<br>(1.63 to<br>2.54) | 2.04<br>(1.54 to<br>2.69) | 1.82<br>(1.36 to<br>2.34) | 2.08<br>(1.56 to<br>2.75) |
| Pulmonary aspiration and foreign body in airway | 123.94<br>(94.87 to<br>158.89)  | 91.43<br>(61.03 to<br>130.29) | 73.21<br>(50.78 to<br>102.75) | 97.47<br>(65.38 to<br>139.09)  | 1.95<br>(1.54 to<br>2.44) | 1.93<br>(1.44 to<br>2.53) | 1.71<br>(1.28 to<br>2.21) | 1.96<br>(1.45 to<br>2.59) |
| Foreign body in other body part                 | 5.70<br>(4.19 to<br>8.63)       | 4.54<br>(2.88 to<br>7.14)     | 3.89<br>(2.51 to<br>6.15)     | 4.97<br>(3.20 to<br>7.83)      | 0.11<br>(0.08 to<br>0.17) | 0.12<br>(0.08 to<br>0.18) | 0.11<br>(0.08 to<br>0.17) | 0.12<br>(0.09 to<br>0.19) |
| Environmental heat and cold exposure            | 5.99<br>(4.07 to<br>7.93)       | 5.87<br>(3.56 to<br>9.02)     | 4.29<br>(2.59 to<br>6.84)     | 6.70<br>(4.07 to<br>10.43)     | 0.15<br>(0.10 to<br>0.20) | 0.19<br>(0.12 to<br>0.29) | 0.15<br>(0.09 to<br>0.22) | 0.21<br>(0.14 to<br>0.31) |
| Other unintentional injuries                    | 7.53<br>(5.86 to<br>10.21)      | 7.89<br>(4.99 to<br>11.93)    | 5.61<br>(3.28 to<br>9.25)     | 8.45<br>(5.38 to<br>12.53)     | 0.16<br>(0.12 to<br>0.21) | 0.21<br>(0.14 to<br>0.30) | 0.15<br>(0.10 to<br>0.24) | 0.22<br>(0.15 to<br>0.31) |
| Self-harm and interpersonal violence            | 96.72<br>(73.28 to<br>122.70)   | 94.30<br>(53.50 to<br>152.43) | 79.81<br>(45.03 to<br>129.93) | 105.71<br>(57.77 to<br>175.44) | 1.97<br>(1.49 to<br>2.50) | 2.27<br>(1.34 to<br>3.56) | 1.97<br>(1.17 to<br>3.07) | 2.33<br>(1.44 to<br>4.11) |

**Peru**

| Cause                                                                        | YLLs (in 1000s)              |                              |                              |                               | Deaths (in 1000s)         |                           |                           |                           |
|------------------------------------------------------------------------------|------------------------------|------------------------------|------------------------------|-------------------------------|---------------------------|---------------------------|---------------------------|---------------------------|
|                                                                              | 2016                         | 2040 Forecast                | 2040 Better Scenario         | 2040 Worse Scenario           | 2016                      | 2040 Forecast             | 2040 Better Scenario      | 2040 Worse Scenario       |
| Self-harm                                                                    | 42.14<br>(32.38 to<br>54.01) | 53.24<br>(27.35 to<br>93.35) | 45.20<br>(23.40 to<br>79.65) | 63.01<br>(30.65 to<br>116.66) | 0.92<br>(0.71 to<br>1.18) | 1.38<br>(0.75 to<br>2.34) | 1.20<br>(0.67 to<br>1.98) | 1.60<br>(0.84 to<br>2.86) |
| Self-harm by firearm                                                         | 1.95<br>(1.31 to<br>3.28)    | 2.18<br>(0.94 to<br>4.53)    | 1.76<br>(0.76 to<br>3.59)    | 2.62<br>(1.06 to<br>5.51)     | 0.05<br>(0.03 to<br>0.07) | 0.06<br>(0.03 to<br>0.12) | 0.05<br>(0.02 to<br>0.10) | 0.07<br>(0.03 to<br>0.15) |
| Self-harm by other specified means                                           | 40.19<br>(31.00 to<br>51.72) | 51.06<br>(26.35 to<br>89.37) | 43.44<br>(22.55 to<br>76.18) | 60.39<br>(29.41 to<br>111.92) | 0.87<br>(0.67 to<br>1.11) | 1.32<br>(0.72 to<br>2.23) | 1.15<br>(0.64 to<br>1.89) | 1.53<br>(0.80 to<br>2.69) |
| Interpersonal violence                                                       | 54.58<br>(37.57 to<br>73.65) | 41.06<br>(22.68 to<br>65.87) | 34.61<br>(19.08 to<br>56.46) | 42.70<br>(23.23 to<br>68.40)  | 1.05<br>(0.72 to<br>1.42) | 0.90<br>(0.51 to<br>1.39) | 0.77<br>(0.44 to<br>1.22) | 0.93<br>(0.52 to<br>1.44) |
| Physical violence by firearm                                                 | 27.82<br>(17.77 to<br>40.14) | 20.54<br>(10.60 to<br>34.39) | 17.20<br>(9.00 to<br>29.27)  | 20.79<br>(10.64 to<br>34.78)  | 0.54<br>(0.34 to<br>0.78) | 0.44<br>(0.23 to<br>0.71) | 0.37<br>(0.20 to<br>0.62) | 0.44<br>(0.23 to<br>0.71) |
| Physical violence by sharp object                                            | 11.94<br>(6.60 to<br>17.71)  | 10.03<br>(4.71 to<br>16.55)  | 8.70<br>(4.02 to<br>14.51)   | 9.98<br>(4.75 to<br>16.52)    | 0.23<br>(0.13 to<br>0.34) | 0.22<br>(0.11 to<br>0.35) | 0.19<br>(0.09 to<br>0.31) | 0.22<br>(0.11 to<br>0.35) |
| Physical violence by other means                                             | 14.82<br>(9.44 to<br>20.83)  | 10.49<br>(5.45 to<br>18.28)  | 8.71<br>(4.52 to<br>15.32)   | 11.92<br>(6.03 to<br>20.94)   | 0.28<br>(0.17 to<br>0.38) | 0.24<br>(0.13 to<br>0.41) | 0.21<br>(0.11 to<br>0.35) | 0.27<br>(0.14 to<br>0.47) |
| Forces of nature, conflict and terrorism, and executions and police conflict | 0.18<br>(0.15 to<br>0.21)    | 63.48<br>(0.00 to<br>112.05) | 59.37<br>(0.00 to<br>105.00) | 64.78<br>(0.00 to<br>114.38)  | 0.00<br>(0.00 to<br>0.00) | 1.38<br>(0.00 to<br>2.50) | 1.34<br>(0.00 to<br>2.43) | 1.38<br>(0.00 to<br>2.50) |

|                                                                   |                                          |                                          |                                          |                                          |                                       |                                       |                                       |                                       |
|-------------------------------------------------------------------|------------------------------------------|------------------------------------------|------------------------------------------|------------------------------------------|---------------------------------------|---------------------------------------|---------------------------------------|---------------------------------------|
| Exposure to forces of nature                                      | 0.00<br>(0.00 to<br>0.00)                | 59.46<br>(0.00 to<br>112.05)             | 55.58<br>(0.00 to<br>105.00)             | 60.67<br>(0.00 to<br>114.38)             | 0.00<br>(0.00 to<br>0.00)             | 1.30<br>(0.00 to<br>2.50)             | 1.26<br>(0.00 to<br>2.43)             | 1.30<br>(0.00 to<br>2.50)             |
| Conflict and terrorism                                            | 0.00<br>(0.00 to<br>0.00)                | 4.03<br>(0.00 to<br>34.05)               | 3.79<br>(0.00 to<br>31.95)               | 4.10<br>(0.00 to<br>34.75)               | 0.00<br>(0.00 to<br>0.00)             | 0.08<br>(0.00 to<br>0.66)             | 0.08<br>(0.00 to<br>0.64)             | 0.08<br>(0.00 to<br>0.66)             |
| Executions and police conflict                                    | 0.18<br>(0.15 to<br>0.21)                | 0.00<br>(0.00 to<br>0.00)                | 0.00<br>(0.00 to<br>0.00)                | 0.00<br>(0.00 to<br>0.00)                | 0.00<br>(0.00 to<br>0.00)             | 0.00<br>(0.00 to<br>0.00)             | 0.00<br>(0.00 to<br>0.00)             | 0.00<br>(0.00 to<br>0.00)             |
| <b>Central Latin America</b>                                      |                                          |                                          |                                          |                                          |                                       |                                       |                                       |                                       |
| Cause                                                             | YLLs (in 1000s)                          |                                          |                                          |                                          | Deaths (in 1000s)                     |                                       |                                       |                                       |
|                                                                   | 2016                                     | 2040 Forecast                            | 2040 Better Scenario                     | 2040 Worse Scenario                      | 2016                                  | 2040 Forecast                         | 2040 Better Scenario                  | 2040 Worse Scenario                   |
| All causes                                                        | 35,723.50<br>(34,619.41 to<br>36,829.38) | 45,581.48<br>(37,847.85 to<br>54,410.56) | 34,347.13<br>(29,158.11 to<br>40,842.47) | 55,936.44<br>(46,296.98 to<br>66,742.54) | 1,271.86<br>(1,235.20 to<br>1,309.97) | 2,274.33<br>(1,889.71 to<br>2,667.49) | 1,808.86<br>(1,513.55 to<br>2,117.05) | 2,673.24<br>(2,223.37 to<br>3,122.04) |
| Communicable, maternal, neonatal, and nutritional diseases        | 6,327.25<br>(6,033.42 to<br>6,752.31)    | 4,437.58<br>(3,706.86 to<br>5,375.77)    | 2,940.33<br>(2,484.13 to<br>3,500.21)    | 6,001.44<br>(4,999.44 to<br>7,515.99)    | 128.68<br>(123.74 to<br>134.96)       | 144.29<br>(123.47 to<br>172.40)       | 113.56<br>(97.34 to<br>135.23)        | 181.41<br>(151.33 to<br>225.14)       |
| HIV/AIDS and tuberculosis                                         | 711.53<br>(695.45 to<br>729.38)          | 689.00<br>(492.11 to<br>834.17)          | 455.86<br>(268.82 to<br>579.92)          | 1,014.21<br>(822.03 to<br>1,180.55)      | 16.88<br>(16.48 to<br>17.30)          | 17.70<br>(12.20 to<br>22.01)          | 11.69<br>(6.70 to<br>15.19)           | 25.31<br>(19.78 to<br>30.68)          |
| Tuberculosis                                                      | 168.38<br>(158.29 to<br>181.54)          | 142.86<br>(99.60 to<br>215.06)           | 69.39<br>(49.24 to<br>101.68)            | 203.84<br>(137.13 to<br>317.32)          | 5.32<br>(5.03 to<br>5.66)             | 2.92<br>(4.08 to<br>8.51)             | 7.96<br>(2.11 to<br>4.25)             | 12.26<br>(5.38 to<br>12.26)           |
| HIV/AIDS                                                          | 543.15<br>(530.94 to<br>557.48)          | 546.14<br>(361.60 to<br>661.29)          | 386.47<br>(205.41 to<br>504.38)          | 810.37<br>(630.19 to<br>934.47)          | 11.56<br>(11.30 to<br>11.86)          | 11.94<br>(6.97 to<br>15.02)           | 8.77<br>(3.87 to<br>11.97)            | 17.34<br>(12.77 to<br>20.50)          |
| Diarrhea, lower respiratory, and other common infectious diseases | 2,307.89<br>(2,164.15 to<br>2,521.79)    | 1,782.04<br>(1,306.66 to<br>2,532.11)    | 1,241.94<br>(952.62 to<br>1,687.71)      | 2,666.60<br>(1,845.01 to<br>4,044.40)    | 58.53<br>(55.45 to<br>62.60)          | 80.01<br>(62.38 to<br>105.94)         | 64.59<br>(51.60 to<br>83.45)          | 105.88<br>(78.70 to<br>147.19)        |
| Diarrheal diseases                                                | 477.63<br>(437.92 to<br>526.86)          | 201.10<br>(78.12 to<br>513.87)           | 148.75<br>(64.74 to<br>349.27)           | 355.53<br>(110.27 to<br>1,038.54)        | 10.60<br>(9.83 to<br>11.65)           | 9.26<br>(4.00 to<br>21.40)            | 8.12<br>(3.79 to<br>17.81)            | 14.14<br>(4.92 to<br>36.92)           |
| Intestinal infectious diseases                                    | 7.69<br>(4.04 to<br>12.95)               | 5.94<br>(2.83 to<br>10.80)               | 5.36<br>(2.59 to<br>9.73)                | 6.25<br>(2.94 to<br>11.31)               | 0.17<br>(0.09 to<br>0.29)             | 0.16<br>(0.08 to<br>0.28)             | 0.15<br>(0.08 to<br>0.27)             | 0.16<br>(0.08 to<br>0.28)             |
| Typhoid fever                                                     | 7.29<br>(3.65 to<br>12.57)               | 5.70<br>(2.65 to<br>10.41)               | 5.19<br>(2.46 to<br>9.55)                | 5.99<br>(2.79 to<br>10.95)               | 0.16<br>(0.08 to<br>0.27)             | 0.15<br>(0.08 to<br>0.27)             | 0.15<br>(0.07 to<br>0.26)             | 0.15<br>(0.08 to<br>0.27)             |
| Paratyphoid fever                                                 | 0.08<br>(0.03 to<br>0.16)                | 0.10<br>(0.04 to<br>0.22)                | 0.08<br>(0.03 to<br>0.17)                | 0.11<br>(0.04 to<br>0.23)                | 0.00<br>(0.00 to<br>0.00)             | 0.00<br>(0.00 to<br>0.01)             | 0.00<br>(0.00 to<br>0.01)             | 0.00<br>(0.00 to<br>0.01)             |
| Other intestinal infectious diseases                              | 0.32<br>(0.12 to<br>0.69)                | 0.13<br>(0.05 to<br>0.31)                | 0.09<br>(0.03 to<br>0.21)                | 0.15<br>(0.06 to<br>0.36)                | 0.01<br>(0.00 to<br>0.01)             | 0.00<br>(0.00 to<br>0.01)             | 0.00<br>(0.00 to<br>0.01)             | 0.00<br>(0.00 to<br>0.01)             |
| Lower respiratory infections                                      | 1,555.24<br>(1,463.50 to<br>1,675.90)    | 1,221.01<br>(868.04 to<br>1,743.21)      | 855.95<br>(639.37 to<br>1,160.96)        | 1,780.99<br>(1,185.21 to<br>2,685.27)    | 43.19<br>(40.60 to<br>46.41)          | 63.56<br>(49.54 to<br>82.29)          | 51.17<br>(40.97 to<br>64.57)          | 82.18<br>(61.38 to<br>110.76)         |
| Upper respiratory infections                                      | 1.41<br>(1.15 to<br>1.75)                | 1.01<br>(0.67 to<br>1.51)                | 0.60<br>(0.41 to<br>0.87)                | 1.20<br>(0.80 to<br>1.81)                | 0.03<br>(0.03 to<br>0.04)             | 0.03<br>(0.02 to<br>0.05)             | 0.02<br>(0.02 to<br>0.03)             | 0.04<br>(0.03 to<br>0.05)             |
| Otitis media                                                      | 0.35<br>(0.32 to<br>0.41)                | 0.08<br>(0.05 to<br>0.12)                | 0.08<br>(0.05 to<br>0.12)                | 0.08<br>(0.05 to<br>0.12)                | 0.01<br>(0.01 to<br>0.01)             | 0.00<br>(0.00 to<br>0.00)             | 0.00<br>(0.00 to<br>0.00)             | 0.00<br>(0.00 to<br>0.00)             |
| Meningitis                                                        | 131.70<br>(119.20 to<br>154.20)          | 72.07<br>(47.68 to<br>101.24)            | 54.15<br>(38.49 to<br>73.74)             | 85.27<br>(53.30 to<br>126.84)            | 2.32<br>(2.14 to<br>2.68)             | 1.78<br>(1.41 to<br>2.26)             | 1.50<br>(1.22 to<br>1.85)             | 1.92<br>(1.47 to<br>2.52)             |
| Pneumococcal meningitis                                           | 19.05<br>(16.72 to<br>22.81)             | 8.85<br>(6.29 to<br>11.96)               | 7.93<br>(5.94 to<br>10.43)               | 9.60<br>(6.75 to<br>13.13)               | 0.36<br>(0.33 to<br>0.42)             | 0.26<br>(0.21 to<br>0.32)             | 0.25<br>(0.21 to<br>0.31)             | 0.27<br>(0.21 to<br>0.33)             |
| H influenzae type B meningitis                                    | 11.89<br>(10.37 to<br>14.25)             | 14.21<br>(4.60 to<br>33.71)              | 7.89<br>(3.70 to<br>15.38)               | 23.64<br>(6.43 to<br>57.19)              | 0.19<br>(0.17 to<br>0.23)             | 0.22<br>(0.11 to<br>0.46)             | 0.15<br>(0.10 to<br>0.24)             | 0.33<br>(0.13 to<br>0.72)             |

|                          |                               |                                |                                |                                |                           |                           |                           |                            |
|--------------------------|-------------------------------|--------------------------------|--------------------------------|--------------------------------|---------------------------|---------------------------|---------------------------|----------------------------|
| Meningococcal meningitis | 35.21<br>(30.62 to<br>43.28)  | 15.56<br>(11.20 to<br>21.24)   | 12.26<br>(8.96 to<br>16.93)    | 16.76<br>(12.00 to<br>23.14)   | 0.60<br>(0.54 to<br>0.72) | 0.40<br>(0.32 to<br>0.50) | 0.33<br>(0.27 to<br>0.42) | 0.41<br>(0.33 to<br>0.52)  |
| Other meningitis         | 65.55<br>(59.18 to<br>76.57)  | 33.45<br>(23.63 to<br>45.05)   | 26.07<br>(18.95 to<br>35.17)   | 35.28<br>(24.64 to<br>47.45)   | 1.17<br>(1.07 to<br>1.34) | 0.91<br>(0.74 to<br>1.12) | 0.76<br>(0.62 to<br>0.94) | 0.92<br>(0.74 to<br>1.13)  |
| Encephalitis             | 94.22<br>(79.19 to<br>138.27) | 63.58<br>(38.02 to<br>100.29)  | 49.35<br>(31.26 to<br>74.95)   | 67.92<br>(40.71 to<br>106.89)  | 1.60<br>(1.32 to<br>2.20) | 1.51<br>(1.03 to<br>2.04) | 1.28<br>(0.89 to<br>1.68) | 1.57<br>(1.09 to<br>2.15)  |
| Diphtheria               | 0.46<br>(0.39 to<br>0.55)     | 0.09<br>(0.05 to<br>0.15)      | 0.06<br>(0.04 to<br>0.09)      | 0.14<br>(0.06 to<br>0.27)      | 0.01<br>(0.01 to<br>0.01) | 0.00<br>(0.00 to<br>0.00) | 0.00<br>(0.00 to<br>0.00) | 0.00<br>(0.00 to<br>0.00)  |
| Whooping cough           | 21.42<br>(12.09 to<br>42.78)  | 12.49<br>(2.03 to<br>31.84)    | 2.38<br>(0.73 to<br>5.43)      | 29.17<br>(5.47 to<br>75.84)    | 0.26<br>(0.15 to<br>0.51) | 0.15<br>(0.05 to<br>0.38) | 0.03<br>(0.01 to<br>0.07) | 0.34<br>(0.07 to<br>0.89)  |
| Tetanus                  | 2.01<br>(1.66 to<br>2.62)     | 0.34<br>(0.23 to<br>0.51)      | 0.27<br>(0.19 to<br>0.39)      | 0.55<br>(0.33 to<br>0.94)      | 0.04<br>(0.04 to<br>0.06) | 0.01<br>(0.01 to<br>0.01) | 0.01<br>(0.01 to<br>0.01) | 0.01<br>(0.01 to<br>0.02)  |
| Measles                  | 0.15<br>(0.12 to<br>0.20)     | 196.99<br>(37.25 to<br>516.59) | 120.47<br>(27.37 to<br>290.68) | 331.04<br>(56.49 to<br>890.45) | 0.00<br>(0.00 to<br>0.00) | 3.30<br>(0.70 to<br>8.03) | 2.14<br>(0.51 to<br>4.99) | 5.26<br>(1.04 to<br>13.21) |

**Central Latin America**

| Cause                                          | YLLs (in 1000s)                        |                                          |                                          |                                          | Deaths (in 1000s)                  |                                    |                                    |                                    |
|------------------------------------------------|----------------------------------------|------------------------------------------|------------------------------------------|------------------------------------------|------------------------------------|------------------------------------|------------------------------------|------------------------------------|
|                                                | 2016                                   | 2040 Forecast                            | 2040 Better Scenario                     | 2040 Worse Scenario                      | 2016                               | 2040 Forecast                      | 2040 Better Scenario               | 2040 Worse Scenario                |
| Varicella and herpes zoster                    | 15.60<br>(9.99 to<br>28.34)            | 7.33<br>(3.87 to<br>13.32)               | 4.53<br>(2.53 to<br>8.12)                | 8.44<br>(4.50 to<br>15.66)               | 0.30<br>(0.19 to<br>0.52)          | 0.23<br>(0.14 to<br>0.39)          | 0.16<br>(0.10 to<br>0.28)          | 0.24<br>(0.14 to<br>0.43)          |
| <b>Neglected tropical diseases and malaria</b> | <b>84.61<br/>(70.48 to<br/>102.93)</b> | <b>139.56<br/>(116.39 to<br/>172.33)</b> | <b>131.68<br/>(110.69 to<br/>160.70)</b> | <b>145.91<br/>(120.54 to<br/>180.92)</b> | <b>2.27<br/>(1.97 to<br/>2.64)</b> | <b>4.48<br/>(3.85 to<br/>5.20)</b> | <b>4.68<br/>(4.07 to<br/>5.39)</b> | <b>4.37<br/>(3.74 to<br/>5.13)</b> |
| Malaria                                        | 6.36<br>(3.71 to<br>16.51)             | 3.59<br>(1.72 to<br>11.69)               | 3.31<br>(1.60 to<br>10.84)               | 3.77<br>(1.80 to<br>12.22)               | 0.13<br>(0.08 to<br>0.33)          | 0.09<br>(0.05 to<br>0.29)          | 0.09<br>(0.05 to<br>0.28)          | 0.09<br>(0.05 to<br>0.30)          |
| Chagas disease                                 | 20.31<br>(17.70 to<br>23.35)           | 17.28<br>(14.34 to<br>21.12)             | 21.63<br>(18.07 to<br>26.27)             | 15.39<br>(12.66 to<br>18.76)             | 1.03<br>(0.90 to<br>1.17)          | 1.07<br>(0.89 to<br>1.29)          | 1.38<br>(1.17 to<br>1.62)          | 0.93<br>(0.77 to<br>1.12)          |
| Leishmaniasis                                  | 0.22<br>(0.13 to<br>0.32)              | 0.12<br>(0.07 to<br>0.18)                | 0.08<br>(0.05 to<br>0.12)                | 0.15<br>(0.08 to<br>0.22)                | 0.01<br>(0.00 to<br>0.01)          | 0.00<br>(0.00 to<br>0.01)          | 0.00<br>(0.00 to<br>0.00)          | 0.00<br>(0.00 to<br>0.01)          |
| African trypanosomiasis                        | 0.00<br>(0.00 to<br>0.00)              | 0.00<br>(0.00 to<br>0.00)                | 0.00<br>(0.00 to<br>0.00)                | 0.00<br>(0.00 to<br>0.00)                | 0.00<br>(0.00 to<br>0.00)          | 0.00<br>(0.00 to<br>0.00)          | 0.00<br>(0.00 to<br>0.00)          | 0.00<br>(0.00 to<br>0.00)          |
| Schistosomiasis                                | 0.48<br>(0.25 to<br>0.88)              | 0.35<br>(0.17 to<br>0.67)                | 0.29<br>(0.14 to<br>0.55)                | 0.37<br>(0.18 to<br>0.72)                | 0.01<br>(0.01 to<br>0.02)          | 0.01<br>(0.01 to<br>0.02)          | 0.01<br>(0.01 to<br>0.02)          | 0.01<br>(0.01 to<br>0.02)          |
| Cysticercosis                                  | 2.90<br>(2.62 to<br>3.29)              | 0.82<br>(0.65 to<br>1.07)                | 0.73<br>(0.58 to<br>0.96)                | 0.84<br>(0.67 to<br>1.10)                | 0.07<br>(0.06 to<br>0.08)          | 0.02<br>(0.02 to<br>0.03)          | 0.02<br>(0.02 to<br>0.03)          | 0.02<br>(0.02 to<br>0.03)          |
| Cystic echinococcosis                          | 0.10<br>(0.08 to<br>0.12)              | 0.05<br>(0.04 to<br>0.07)                | 0.03<br>(0.02 to<br>0.04)                | 0.06<br>(0.05 to<br>0.08)                | 0.00<br>(0.00 to<br>0.00)          | 0.00<br>(0.00 to<br>0.00)          | 0.00<br>(0.00 to<br>0.00)          | 0.00<br>(0.00 to<br>0.00)          |
| Dengue                                         | 39.60<br>(28.59 to<br>48.63)           | 108.26<br>(84.51 to<br>133.20)           | 98.80<br>(77.35 to<br>121.11)            | 114.78<br>(89.72 to<br>141.46)           | 0.79<br>(0.57 to<br>0.96)          | 3.09<br>(2.46 to<br>3.66)          | 3.02<br>(2.40 to<br>3.58)          | 3.10<br>(2.44 to<br>3.67)          |
| Yellow fever                                   | 0.68<br>(0.15 to<br>1.94)              | 0.21<br>(0.04 to<br>0.64)                | 0.15<br>(0.03 to<br>0.45)                | 0.26<br>(0.05 to<br>0.76)                | 0.01<br>(0.00 to<br>0.03)          | 0.00<br>(0.00 to<br>0.01)          | 0.00<br>(0.00 to<br>0.01)          | 0.00<br>(0.00 to<br>0.01)          |
| Rabies                                         | 0.03<br>(0.02 to<br>0.04)              | 0.01<br>(0.01 to<br>0.02)                | 0.01<br>(0.00 to<br>0.01)                | 0.01<br>(0.01 to<br>0.02)                | 0.00<br>(0.00 to<br>0.00)          | 0.00<br>(0.00 to<br>0.00)          | 0.00<br>(0.00 to<br>0.00)          | 0.00<br>(0.00 to<br>0.00)          |
| Intestinal nematode infections                 | 3.16<br>(2.52 to<br>3.91)              | 2.66<br>(1.90 to<br>3.88)                | 2.21<br>(1.59 to<br>3.21)                | 2.89<br>(2.07 to<br>4.16)                | 0.05<br>(0.04 to<br>0.06)          | 0.05<br>(0.05 to<br>0.06)          | 0.04<br>(0.03 to<br>0.06)          | 0.05<br>(0.04 to<br>0.07)          |

|                                                          |                                                            |                                                          |                                                      |                                                            |                                                   |                                                   |                                                   |                                                   |
|----------------------------------------------------------|------------------------------------------------------------|----------------------------------------------------------|------------------------------------------------------|------------------------------------------------------------|---------------------------------------------------|---------------------------------------------------|---------------------------------------------------|---------------------------------------------------|
| Other neglected tropical diseases                        | 10.64<br>(7.72 to<br>18.02)                                | 6.20<br>(4.37 to<br>12.08)                               | 4.43<br>(3.16 to<br>8.72)                            | 7.39<br>(5.17 to<br>13.87)                                 | 0.18<br>(0.14 to<br>0.32)                         | 0.14<br>(0.10 to<br>0.30)                         | 0.11<br>(0.08 to<br>0.25)                         | 0.16<br>(0.11 to<br>0.34)                         |
| <b>Maternal disorders</b>                                | <b>148.86</b><br><b>(135.14 to</b><br><b>165.18)</b>       | <b>85.16</b><br><b>(70.21 to</b><br><b>103.27)</b>       | <b>52.54</b><br><b>(43.03 to</b><br><b>64.91)</b>    | <b>103.92</b><br><b>(85.68 to</b><br><b>128.44)</b>        | <b>2.60</b><br><b>(2.36 to</b><br><b>2.89)</b>    | <b>1.52</b><br><b>(1.26 to</b><br><b>1.84)</b>    | <b>0.94</b><br><b>(0.78 to</b><br><b>1.16)</b>    | <b>1.86</b><br><b>(1.54 to</b><br><b>2.28)</b>    |
| Maternal hemorrhage                                      | 33.62<br>(27.57 to<br>41.02)                               | 21.06<br>(15.83 to<br>27.15)                             | 13.05<br>(9.80 to<br>17.02)                          | 26.03<br>(19.49 to<br>34.18)                               | 0.60<br>(0.49 to<br>0.73)                         | 0.38<br>(0.29 to<br>0.50)                         | 0.24<br>(0.18 to<br>0.31)                         | 0.47<br>(0.35 to<br>0.62)                         |
| Maternal sepsis and other maternal infections            | 7.58<br>(5.54 to<br>9.98)                                  | 5.08<br>(3.42 to<br>7.32)                                | 3.11<br>(2.12 to<br>4.44)                            | 6.34<br>(4.21 to<br>9.04)                                  | 0.13<br>(0.10 to<br>0.17)                         | 0.09<br>(0.06 to<br>0.13)                         | 0.06<br>(0.04 to<br>0.08)                         | 0.11<br>(0.08 to<br>0.16)                         |
| Maternal hypertensive disorders                          | 35.22<br>(28.28 to<br>42.94)                               | 20.91<br>(15.98 to<br>27.53)                             | 12.77<br>(9.54 to<br>16.79)                          | 25.40<br>(19.27 to<br>33.51)                               | 0.61<br>(0.50 to<br>0.74)                         | 0.37<br>(0.28 to<br>0.49)                         | 0.23<br>(0.17 to<br>0.30)                         | 0.45<br>(0.34 to<br>0.59)                         |
| Maternal obstructed labor and uterine rupture            | 4.32<br>(3.25 to<br>5.63)                                  | 2.62<br>(1.77 to<br>3.76)                                | 1.53<br>(1.03 to<br>2.21)                            | 3.16<br>(2.13 to<br>4.65)                                  | 0.08<br>(0.06 to<br>0.10)                         | 0.05<br>(0.03 to<br>0.07)                         | 0.03<br>(0.02 to<br>0.04)                         | 0.06<br>(0.04 to<br>0.08)                         |
| Maternal abortion, miscarriage, and ectopic pregnancy    | 17.26<br>(13.75 to<br>21.27)                               | 9.87<br>(6.42 to<br>15.62)                               | 6.10<br>(3.92 to<br>9.53)                            | 11.96<br>(7.75 to<br>19.10)                                | 0.31<br>(0.25 to<br>0.38)                         | 0.18<br>(0.12 to<br>0.28)                         | 0.11<br>(0.07 to<br>0.17)                         | 0.22<br>(0.14 to<br>0.35)                         |
| Indirect maternal deaths                                 | 27.01<br>(20.79 to<br>37.87)                               | 12.58<br>(8.76 to<br>18.81)                              | 7.74<br>(5.36 to<br>11.80)                           | 15.27<br>(10.33 to<br>23.43)                               | 0.46<br>(0.35 to<br>0.64)                         | 0.22<br>(0.15 to<br>0.33)                         | 0.13<br>(0.09 to<br>0.20)                         | 0.26<br>(0.18 to<br>0.40)                         |
| Late maternal deaths                                     | 5.06<br>(4.07 to<br>6.08)                                  | 1.74<br>(1.18 to<br>2.35)                                | 1.05<br>(0.72 to<br>1.44)                            | 2.08<br>(1.41 to<br>2.85)                                  | 0.09<br>(0.07 to<br>0.11)                         | 0.02<br>(0.02 to<br>0.04)                         | 0.02<br>(0.01 to<br>0.03)                         | 0.04<br>(0.03 to<br>0.05)                         |
| Maternal deaths aggravated by HIV/AIDS                   | 0.13<br>(0.07 to<br>0.19)                                  | 0.32<br>(0.15 to<br>0.57)                                | 0.19<br>(0.10 to<br>0.34)                            | 0.43<br>(0.21 to<br>0.75)                                  | 0.00<br>(0.00 to<br>0.00)                         | 0.01<br>(0.00 to<br>0.01)                         | 0.00<br>(0.00 to<br>0.01)                         | 0.01<br>(0.00 to<br>0.01)                         |
| Other maternal disorders                                 | 18.66<br>(15.00 to<br>23.06)                               | 10.99<br>(8.01 to<br>14.71)                              | 7.00<br>(5.21 to<br>9.35)                            | 13.25<br>(9.75 to<br>17.76)                                | 0.33<br>(0.26 to<br>0.40)                         | 0.20<br>(0.14 to<br>0.26)                         | 0.13<br>(0.09 to<br>0.17)                         | 0.24<br>(0.18 to<br>0.32)                         |
| <b>Central Latin America</b>                             |                                                            |                                                          |                                                      |                                                            |                                                   |                                                   |                                                   |                                                   |
| Cause                                                    | YLLs (in 1000s)                                            |                                                          |                                                      |                                                            | Deaths (in 1000s)                                 |                                                   |                                                   |                                                   |
|                                                          | 2016                                                       | 2040 Forecast                                            | 2040 Better Scenario                                 | 2040 Worse Scenario                                        | 2016                                              | 2040 Forecast                                     | 2040 Better Scenario                              | 2040 Worse Scenario                               |
| <b>Neonatal disorders</b>                                | <b>2,535.57</b><br><b>(2,366.48 to</b><br><b>2,738.13)</b> | <b>1,305.62</b><br><b>(979.06 to</b><br><b>1,698.26)</b> | <b>698.87</b><br><b>(550.57 to</b><br><b>880.55)</b> | <b>1,605.35</b><br><b>(1,205.13 to</b><br><b>2,077.18)</b> | <b>29.30</b><br><b>(27.35 to</b><br><b>31.64)</b> | <b>15.09</b><br><b>(11.32 to</b><br><b>19.62)</b> | <b>8.08</b><br><b>(6.36 to</b><br><b>10.18)</b>   | <b>18.55</b><br><b>(13.93 to</b><br><b>24.01)</b> |
| Neonatal preterm birth                                   | 1,198.79<br>(1,105.93 to<br>1,295.59)                      | 589.72<br>(442.51 to<br>753.71)                          | 278.75<br>(222.16 to<br>342.18)                      | 725.03<br>(545.14 to<br>922.79)                            | 13.85<br>(12.78 to<br>14.97)                      | 6.81<br>(5.11 to<br>8.71)                         | 3.22<br>(2.57 to<br>3.95)                         | 8.38<br>(6.30 to<br>10.66)                        |
| Neonatal encephalopathy due to birth asphyxia and trauma | 525.65<br>(476.81 to<br>581.61)                            | 239.32<br>(161.51 to<br>351.46)                          | 139.14<br>(97.99 to<br>201.21)                       | 293.18<br>(198.47 to<br>425.21)                            | 6.08<br>(5.51 to<br>6.72)                         | 2.77<br>(1.87 to<br>4.06)                         | 1.61<br>(1.13 to<br>2.33)                         | 3.39<br>(2.30 to<br>4.91)                         |
| Neonatal sepsis and other neonatal infections            | 511.95<br>(443.04 to<br>659.55)                            | 322.94<br>(233.09 to<br>449.25)                          | 190.28<br>(144.37 to<br>255.58)                      | 393.58<br>(283.25 to<br>542.81)                            | 5.92<br>(5.12 to<br>7.62)                         | 3.73<br>(2.69 to<br>5.19)                         | 2.20<br>(1.67 to<br>2.95)                         | 4.55<br>(3.27 to<br>6.27)                         |
| Hemolytic disease and other neonatal jaundice            | 15.95<br>(13.26 to<br>20.71)                               | 5.92<br>(3.62 to<br>9.61)                                | 3.29<br>(2.12 to<br>5.24)                            | 7.43<br>(4.50 to<br>12.06)                                 | 0.18<br>(0.15 to<br>0.24)                         | 0.07<br>(0.04 to<br>0.11)                         | 0.04<br>(0.02 to<br>0.06)                         | 0.09<br>(0.05 to<br>0.14)                         |
| Other neonatal disorders                                 | 283.24<br>(249.00 to<br>316.50)                            | 147.71<br>(105.16 to<br>208.20)                          | 87.41<br>(65.18 to<br>119.07)                        | 186.13<br>(130.63 to<br>263.94)                            | 3.27<br>(2.88 to<br>3.66)                         | 1.71<br>(1.22 to<br>2.41)                         | 1.01<br>(0.75 to<br>1.38)                         | 2.15<br>(1.51 to<br>3.05)                         |
| <b>Nutritional deficiencies</b>                          | <b>418.37</b><br><b>(391.48 to</b><br><b>446.56)</b>       | <b>340.94</b><br><b>(307.70 to</b><br><b>377.52)</b>     | <b>287.12</b><br><b>(260.16 to</b><br><b>315.15)</b> | <b>362.33</b><br><b>(326.21 to</b><br><b>403.56)</b>       | <b>16.49</b><br><b>(15.61 to</b><br><b>17.40)</b> | <b>22.38</b><br><b>(19.51 to</b><br><b>25.09)</b> | <b>21.06</b><br><b>(18.68 to</b><br><b>23.53)</b> | <b>22.21</b><br><b>(19.18 to</b><br><b>25.22)</b> |
| Protein-energy malnutrition                              | 383.02<br>(352.28 to<br>414.20)                            | 289.10<br>(253.09 to<br>326.16)                          | 246.70<br>(217.12 to<br>275.78)                      | 307.56<br>(266.85 to<br>348.74)                            | 15.02<br>(13.76 to<br>16.00)                      | 19.51<br>(16.45 to<br>22.10)                      | 18.62<br>(15.79 to<br>21.02)                      | 19.34<br>(16.13 to<br>22.25)                      |
| Iodine deficiency                                        | 1.42<br>(0.69 to<br>2.77)                                  | 6.33<br>(1.46 to<br>17.60)                               | 4.61<br>(1.06 to<br>12.44)                           | 7.03<br>(1.65 to<br>19.08)                                 | 0.03<br>(0.02 to<br>0.06)                         | 0.37<br>(0.06 to<br>1.24)                         | 0.30<br>(0.04 to<br>1.07)                         | 0.39<br>(0.07 to<br>1.21)                         |

|                                                                         |                                                               |                                                               |                                                               |                                                               |                                                        |                                                            |                                                            |                                                            |
|-------------------------------------------------------------------------|---------------------------------------------------------------|---------------------------------------------------------------|---------------------------------------------------------------|---------------------------------------------------------------|--------------------------------------------------------|------------------------------------------------------------|------------------------------------------------------------|------------------------------------------------------------|
|                                                                         | 2.05<br>(0.98 to<br>2.70)                                     | 1.66<br>(2.09)                                                | 1.43<br>(0.62 to<br>1.79)                                     | 1.75<br>(0.82 to<br>2.17)                                     | 0.06<br>(0.02 to<br>0.07)                              | 0.06<br>(0.02 to<br>0.08)                                  | 0.06<br>(0.02 to<br>0.08)                                  | 0.06<br>(0.02 to<br>0.08)                                  |
| Dietary iron deficiency                                                 |                                                               |                                                               |                                                               |                                                               |                                                        |                                                            |                                                            |                                                            |
|                                                                         | 31.88<br>(18.81 to<br>47.89)                                  | 43.85<br>(24.64 to<br>68.00)                                  | 34.39<br>(18.92 to<br>55.05)                                  | 45.99<br>(26.12 to<br>70.01)                                  | 1.37<br>(0.71 to<br>2.32)                              | 2.43<br>(1.23 to<br>4.12)                                  | 2.08<br>(1.03 to<br>3.57)                                  | 2.42<br>(1.25 to<br>4.06)                                  |
| Other nutritional deficiencies                                          |                                                               |                                                               |                                                               |                                                               |                                                        |                                                            |                                                            |                                                            |
| <b>Other communicable, maternal, neonatal, and nutritional diseases</b> | <b>120.42</b><br><b>(106.25 to</b><br><b>142.02)</b>          | <b>95.27</b><br><b>(83.20 to</b><br><b>110.41)</b>            | <b>72.32</b><br><b>(63.46 to</b><br><b>83.64)</b>             | <b>103.13</b><br><b>(90.30 to</b><br><b>119.83)</b>           | <b>2.60</b><br><b>(2.40 to</b><br><b>2.90)</b>         | <b>3.11</b><br><b>(2.81 to</b><br><b>3.49)</b>             | <b>2.53</b><br><b>(2.27 to</b><br><b>2.87)</b>             | <b>3.23</b><br><b>(2.90 to</b><br><b>3.63)</b>             |
|                                                                         | 33.07<br>(20.74 to<br>51.44)                                  | 9.99<br>(6.90 to<br>15.10)                                    | 7.34<br>(5.35 to<br>10.64)                                    | 11.30<br>(7.61 to<br>17.44)                                   | 0.51<br>(0.37 to<br>0.73)                              | 0.21<br>(0.17 to<br>0.27)                                  | 0.17<br>(0.14 to<br>0.21)                                  | 0.23<br>(0.18 to<br>0.30)                                  |
| Sexually transmitted infections excluding HIV                           |                                                               |                                                               |                                                               |                                                               |                                                        |                                                            |                                                            |                                                            |
|                                                                         | 26.95<br>(14.86 to<br>45.40)                                  | 6.48<br>(3.58 to<br>11.64)                                    | 4.35<br>(2.42 to<br>7.64)                                     | 7.62<br>(4.09 to<br>13.79)                                    | 0.35<br>(0.21 to<br>0.57)                              | 0.10<br>(0.07 to<br>0.16)                                  | 0.07<br>(0.05 to<br>0.11)                                  | 0.12<br>(0.07 to<br>0.19)                                  |
| Syphilis                                                                |                                                               |                                                               |                                                               |                                                               |                                                        |                                                            |                                                            |                                                            |
|                                                                         | 1.20<br>(1.10 to<br>1.31)                                     | 0.68<br>(0.57 to<br>0.79)                                     | 0.58<br>(0.49 to<br>0.68)                                     | 0.71<br>(0.60 to<br>0.83)                                     | 0.03<br>(0.03 to<br>0.03)                              | 0.02<br>(0.02 to<br>0.02)                                  | 0.02<br>(0.02 to<br>0.02)                                  | 0.02<br>(0.02 to<br>0.02)                                  |
| Chlamydial infection                                                    |                                                               |                                                               |                                                               |                                                               |                                                        |                                                            |                                                            |                                                            |
|                                                                         | 3.21<br>(2.96 to<br>3.50)                                     | 1.88<br>(1.58 to<br>2.21)                                     | 1.61<br>(1.35 to<br>1.90)                                     | 1.96<br>(1.64 to<br>2.32)                                     | 0.09<br>(0.08 to<br>0.09)                              | 0.06<br>(0.05 to<br>0.07)                                  | 0.05<br>(0.05 to<br>0.06)                                  | 0.06<br>(0.05 to<br>0.07)                                  |
| Gonococcal infection                                                    |                                                               |                                                               |                                                               |                                                               |                                                        |                                                            |                                                            |                                                            |
|                                                                         | 1.71<br>(1.57 to<br>1.87)                                     | 0.95<br>(0.80 to<br>1.13)                                     | 0.81<br>(0.68 to<br>0.96)                                     | 1.00<br>(0.84 to<br>1.19)                                     | 0.04<br>(0.04 to<br>0.05)                              | 0.03<br>(0.02 to<br>0.03)                                  | 0.02<br>(0.02 to<br>0.03)                                  | 0.03<br>(0.02 to<br>0.03)                                  |
| Other sexually transmitted infections                                   |                                                               |                                                               |                                                               |                                                               |                                                        |                                                            |                                                            |                                                            |
|                                                                         | 37.06<br>(34.75 to<br>40.01)                                  | 34.93<br>(29.55 to<br>40.61)                                  | 25.77<br>(21.50 to<br>31.13)                                  | 36.72<br>(31.00 to<br>42.94)                                  | 0.95<br>(0.90 to<br>1.02)                              | 1.25<br>(1.08 to<br>1.45)                                  | 0.96<br>(0.81 to<br>1.15)                                  | 1.29<br>(1.11 to<br>1.50)                                  |
| Acute hepatitis                                                         |                                                               |                                                               |                                                               |                                                               |                                                        |                                                            |                                                            |                                                            |
|                                                                         | 3.18<br>(2.45 to<br>4.02)                                     | 1.47<br>(1.02 to<br>2.07)                                     | 0.99<br>(0.70 to<br>1.36)                                     | 1.59<br>(1.10 to<br>2.21)                                     | 0.05<br>(0.04 to<br>0.06)                              | 0.03<br>(0.02 to<br>0.05)                                  | 0.02<br>(0.04 to<br>0.04)                                  | 0.04<br>(0.02 to<br>0.05)                                  |
| Acute hepatitis A                                                       |                                                               |                                                               |                                                               |                                                               |                                                        |                                                            |                                                            |                                                            |
|                                                                         | 22.43<br>(20.32 to<br>24.79)                                  | 23.52<br>(19.36 to<br>28.45)                                  | 17.40<br>(13.91 to<br>21.69)                                  | 24.85<br>(20.53 to<br>30.07)                                  | 0.64<br>(0.58 to<br>0.71)                              | 0.85<br>(0.69 to<br>1.03)                                  | 0.64<br>(0.51 to<br>0.80)                                  | 0.88<br>(0.72 to<br>1.07)                                  |
| Acute hepatitis B                                                       |                                                               |                                                               |                                                               |                                                               |                                                        |                                                            |                                                            |                                                            |
|                                                                         | 2.00<br>(1.57 to<br>2.51)                                     | 2.68<br>(1.96 to<br>3.61)                                     | 2.13<br>(1.54 to<br>2.94)                                     | 2.73<br>(2.00 to<br>3.67)                                     | 0.06<br>(0.05 to<br>0.08)                              | 0.10<br>(0.07 to<br>0.14)                                  | 0.08<br>(0.06 to<br>0.11)                                  | 0.10<br>(0.07 to<br>0.14)                                  |
| Acute hepatitis C                                                       |                                                               |                                                               |                                                               |                                                               |                                                        |                                                            |                                                            |                                                            |
|                                                                         | 9.45<br>(8.14 to<br>10.77)                                    | 7.26<br>(5.61 to<br>9.16)                                     | 5.26<br>(4.01 to<br>6.69)                                     | 7.55<br>(5.82 to<br>9.55)                                     | 0.20<br>(0.17 to<br>0.24)                              | 0.27<br>(0.20 to<br>0.35)                                  | 0.22<br>(0.16 to<br>0.28)                                  | 0.27<br>(0.20 to<br>0.35)                                  |
| Acute hepatitis E                                                       |                                                               |                                                               |                                                               |                                                               |                                                        |                                                            |                                                            |                                                            |
|                                                                         | 50.29<br>(45.82 to<br>61.96)                                  | 50.35<br>(44.16 to<br>61.19)                                  | 39.21<br>(34.71 to<br>46.86)                                  | 55.12<br>(47.94 to<br>66.54)                                  | 1.14<br>(1.05 to<br>1.35)                              | 1.64<br>(1.48 to<br>1.95)                                  | 1.40<br>(1.26 to<br>1.63)                                  | 1.72<br>(1.55 to<br>2.01)                                  |
| Other unspecified infectious diseases                                   |                                                               |                                                               |                                                               |                                                               |                                                        |                                                            |                                                            |                                                            |
| <b>Non-communicable diseases</b>                                        | <b>21,337.83</b><br><b>(20,631.17 to</b><br><b>22,051.90)</b> | <b>34,049.33</b><br><b>(27,248.01 to</b><br><b>42,461.36)</b> | <b>25,904.16</b><br><b>(21,193.50 to</b><br><b>31,946.68)</b> | <b>41,344.86</b><br><b>(32,629.98 to</b><br><b>51,193.82)</b> | <b>978.58</b><br><b>(950.02 to</b><br><b>1,006.42)</b> | <b>1,952.73</b><br><b>(1,576.48 to</b><br><b>2,324.70)</b> | <b>1,552.43</b><br><b>(1,274.08 to</b><br><b>1,849.92)</b> | <b>2,283.76</b><br><b>(1,838.06 to</b><br><b>2,734.55)</b> |

**Central Latin America**

| Cause                      | YLLs (in 1000s)                                            |                                                            |                                                            |                                                             | Deaths (in 1000s)                                    |                                                      |                                                      |                                                      |
|----------------------------|------------------------------------------------------------|------------------------------------------------------------|------------------------------------------------------------|-------------------------------------------------------------|------------------------------------------------------|------------------------------------------------------|------------------------------------------------------|------------------------------------------------------|
|                            | 2016                                                       | 2040 Forecast                                              | 2040 Better Scenario                                       | 2040 Worse Scenario                                         | 2016                                                 | 2040 Forecast                                        | 2040 Better Scenario                                 | 2040 Worse Scenario                                  |
| <b>Neoplasms</b>           | <b>4,818.69</b><br><b>(4,626.17 to</b><br><b>5,038.63)</b> | <b>8,129.94</b><br><b>(7,028.40 to</b><br><b>9,288.01)</b> | <b>7,498.92</b><br><b>(6,481.56 to</b><br><b>8,557.74)</b> | <b>8,960.68</b><br><b>(7,656.57 to</b><br><b>10,357.84)</b> | <b>192.74</b><br><b>(185.61 to</b><br><b>200.24)</b> | <b>405.95</b><br><b>(355.89 to</b><br><b>463.55)</b> | <b>387.97</b><br><b>(338.22 to</b><br><b>441.09)</b> | <b>437.21</b><br><b>(377.93 to</b><br><b>502.48)</b> |
| Lip and oral cavity cancer | 48.17<br>(45.64 to<br>50.73)                               | 80.25<br>(58.23 to<br>107.51)                              | 59.38<br>(44.44 to<br>77.32)                               | 116.56<br>(80.25 to<br>165.85)                              | 2.10<br>(2.00 to<br>2.20)                            | 3.98<br>(2.89 to<br>5.37)                            | 3.04<br>(2.30 to<br>4.01)                            | 5.67<br>(3.88 to<br>8.08)                            |
| Nasopharynx cancer         | 18.16<br>(16.95 to<br>19.49)                               | 30.12<br>(23.69 to<br>38.84)                               | 21.15<br>(16.91 to<br>26.84)                               | 44.80<br>(33.37 to<br>61.02)                                | 0.66<br>(0.62 to<br>0.71)                            | 1.29<br>(0.99 to<br>1.67)                            | 0.94<br>(0.74 to<br>1.19)                            | 1.90<br>(1.39 to<br>2.63)                            |
| Other pharynx cancer       | 21.51<br>(20.19 to<br>22.95)                               | 36.93<br>(24.98 to<br>52.59)                               | 30.27<br>(21.36 to<br>42.28)                               | 44.12<br>(29.41 to<br>65.40)                                | 0.86<br>(0.81 to<br>0.91)                            | 1.68<br>(1.13 to<br>2.41)                            | 1.42<br>(1.00 to<br>1.96)                            | 1.97<br>(1.31 to<br>2.92)                            |
| Esophageal cancer          | 64.33<br>(60.57 to<br>68.16)                               | 102.83<br>(71.18 to<br>148.55)                             | 81.51<br>(59.29 to<br>111.64)                              | 143.35<br>(92.77 to<br>216.58)                              | 3.03<br>(2.87 to<br>3.20)                            | 5.49<br>(3.89 to<br>7.77)                            | 4.48<br>(3.32 to<br>6.02)                            | 7.53<br>(4.97 to<br>11.13)                           |

|                                      |                                 |                                 |                                 |                                     |                              |                              |                              |                              |
|--------------------------------------|---------------------------------|---------------------------------|---------------------------------|-------------------------------------|------------------------------|------------------------------|------------------------------|------------------------------|
| Stomach cancer                       | 442.20<br>(420.60 to<br>464.70) | 600.78<br>(487.86 to<br>758.97) | 513.14<br>(420.40 to<br>633.24) | 622.03<br>(505.55 to<br>782.63)     | 20.11<br>(19.23 to<br>21.05) | 32.98<br>(27.06 to<br>41.95) | 28.91<br>(24.03 to<br>35.61) | 33.33<br>(27.32 to<br>42.15) |
| Colon and rectum cancer              | 344.79<br>(323.29 to<br>368.97) | 682.09<br>(489.52 to<br>956.31) | 612.32<br>(445.31 to<br>836.57) | 739.15<br>(516.91 to<br>1,043.80)   | 15.74<br>(14.80 to<br>16.73) | 38.53<br>(28.12 to<br>53.70) | 35.74<br>(26.32 to<br>49.74) | 40.47<br>(28.85 to<br>57.24) |
| Liver cancer                         | 281.57<br>(266.10 to<br>297.79) | 600.28<br>(421.12 to<br>851.56) | 545.36<br>(398.07 to<br>755.76) | 708.09<br>(475.30 to<br>1,052.87)   | 13.14<br>(12.48 to<br>13.86) | 31.79<br>(22.88 to<br>44.94) | 29.84<br>(22.19 to<br>40.71) | 36.42<br>(24.95 to<br>53.16) |
| Liver cancer due to hepatitis B      | 63.94<br>(49.20 to<br>83.74)    | 124.00<br>(79.79 to<br>187.18)  | 115.97<br>(76.50 to<br>169.59)  | 142.24<br>(87.35 to<br>222.21)      | 2.56<br>(1.89 to<br>3.35)    | 5.65<br>(3.58 to<br>8.55)    | 5.46<br>(3.49 to<br>8.07)    | 6.33<br>(3.90 to<br>9.85)    |
| Liver cancer due to hepatitis C      | 87.72<br>(74.79 to<br>101.41)   | 196.27<br>(134.66 to<br>282.28) | 186.57<br>(132.37 to<br>258.66) | 220.19<br>(146.49 to<br>327.48)     | 4.59<br>(3.97 to<br>5.21)    | 11.38<br>(8.06 to<br>15.93)  | 11.16<br>(8.10 to<br>15.39)  | 12.40<br>(8.45 to<br>17.88)  |
| Liver cancer due to alcohol use      | 70.90<br>(60.59 to<br>81.56)    | 163.20<br>(107.77 to<br>244.79) | 134.76<br>(91.87 to<br>196.41)  | 210.76<br>(132.35 to<br>329.35)     | 3.41<br>(2.98 to<br>3.87)    | 8.78<br>(5.91 to<br>13.03)   | 7.50<br>(5.17 to<br>10.85)   | 10.97<br>(6.99 to<br>16.87)  |
| Liver cancer due to other causes     | 59.02<br>(51.82 to<br>66.41)    | 116.80<br>(75.69 to<br>183.03)  | 108.06<br>(71.89 to<br>162.83)  | 134.90<br>(82.30 to<br>220.27)      | 2.59<br>(2.27 to<br>2.91)    | 5.97<br>(3.87 to<br>9.28)    | 5.73<br>(3.79 to<br>8.58)    | 6.72<br>(4.16 to<br>10.81)   |
| Gallbladder and biliary tract cancer | 96.15<br>(91.70 to<br>105.39)   | 148.31<br>(131.32 to<br>168.20) | 150.89<br>(132.16 to<br>172.52) | 142.72<br>(127.65 to<br>160.62)     | 4.61<br>(4.40 to<br>5.08)    | 8.14<br>(7.38 to<br>9.19)    | 8.49<br>(7.56 to<br>9.62)    | 7.67<br>(7.04 to<br>8.56)    |
| Pancreatic cancer                    | 196.48<br>(188.00 to<br>204.49) | 444.68<br>(356.13 to<br>565.81) | 454.35<br>(364.71 to<br>573.01) | 452.32<br>(358.47 to<br>579.27)     | 9.18<br>(8.80 to<br>9.54)    | 23.41<br>(19.07 to<br>29.82) | 24.42<br>(19.84 to<br>30.73) | 23.40<br>(18.86 to<br>29.99) |
| Larynx cancer                        | 49.05<br>(46.01 to<br>52.48)    | 70.99<br>(46.51 to<br>106.09)   | 50.36<br>(34.56 to<br>72.49)    | 118.45<br>(69.04 to<br>190.44)      | 2.33<br>(2.20 to<br>2.48)    | 3.72<br>(2.46 to<br>5.52)    | 2.74<br>(1.91 to<br>3.95)    | 6.10<br>(3.64 to<br>9.64)    |
| Tracheal, bronchus, and lung cancer  | 426.56<br>(401.63 to<br>452.70) | 725.20<br>(563.28 to<br>928.24) | 595.63<br>(480.54 to<br>737.60) | 1,167.76<br>(881.90 to<br>1,553.93) | 20.17<br>(19.10 to<br>21.38) | 38.47<br>(30.45 to<br>49.28) | 32.61<br>(26.48 to<br>40.28) | 60.60<br>(46.34 to<br>79.94) |
| Malignant skin melanoma              | 36.25<br>(31.49 to<br>45.46)    | 56.25<br>(47.36 to<br>69.54)    | 64.63<br>(53.65 to<br>79.40)    | 52.91<br>(44.64 to<br>65.60)        | 1.40<br>(1.23 to<br>1.73)    | 2.72<br>(2.32 to<br>3.34)    | 3.22<br>(2.71 to<br>3.97)    | 2.49<br>(2.13 to<br>3.06)    |
| Non-melanoma skin cancer             | 44.53<br>(42.05 to<br>46.90)    | 96.54<br>(87.67 to<br>104.34)   | 87.27<br>(77.75 to<br>96.95)    | 94.68<br>(87.03 to<br>101.87)       | 2.47<br>(2.35 to<br>2.58)    | 6.20<br>(5.72 to<br>6.69)    | 5.85<br>(5.27 to<br>6.39)    | 5.89<br>(5.42 to<br>6.35)    |
| Breast cancer                        | 392.30<br>(357.98 to<br>426.29) | 660.56<br>(501.16 to<br>880.87) | 586.09<br>(448.23 to<br>771.49) | 706.28<br>(523.83 to<br>957.66)     | 13.98<br>(12.78 to<br>15.20) | 28.80<br>(21.83 to<br>38.50) | 26.15<br>(19.87 to<br>34.56) | 30.18<br>(22.55 to<br>41.06) |
| Cervical cancer                      | 318.62<br>(295.23 to<br>345.26) | 446.96<br>(375.43 to<br>530.08) | 380.47<br>(314.46 to<br>454.08) | 468.53<br>(391.81 to<br>562.39)     | 10.85<br>(10.11 to<br>11.73) | 18.26<br>(15.42 to<br>21.22) | 15.87<br>(13.10 to<br>18.85) | 18.79<br>(15.87 to<br>22.10) |
| Uterine cancer                       | 52.26<br>(48.45 to<br>57.00)    | 102.53<br>(87.80 to<br>116.04)  | 90.16<br>(76.07 to<br>104.05)   | 104.91<br>(90.35 to<br>119.31)      | 2.30<br>(2.14 to<br>2.50)    | 5.37<br>(4.68 to<br>6.04)    | 4.84<br>(4.16 to<br>5.53)    | 5.38<br>(4.74 to<br>6.00)    |
| Ovarian cancer                       | 134.23<br>(123.69 to<br>145.23) | 225.64<br>(156.22 to<br>321.56) | 224.56<br>(157.07 to<br>315.87) | 227.75<br>(151.93 to<br>333.66)     | 4.76<br>(4.39 to<br>5.15)    | 9.71<br>(6.56 to<br>13.99)   | 9.80<br>(6.71 to<br>14.00)   | 9.66<br>(6.36 to<br>14.28)   |
| Prostate cancer                      | 232.62<br>(212.19 to<br>260.76) | 651.65<br>(580.79 to<br>738.50) | 679.20<br>(600.93 to<br>781.49) | 608.26<br>(537.55 to<br>690.23)     | 16.27<br>(14.77 to<br>18.08) | 49.57<br>(42.25 to<br>55.59) | 53.33<br>(46.81 to<br>60.50) | 45.13<br>(37.74 to<br>50.76) |
| Testicular cancer                    | 37.12<br>(33.26 to<br>42.82)    | 29.90<br>(22.25 to<br>41.22)    | 26.03<br>(19.46 to<br>36.71)    | 30.25<br>(22.46 to<br>41.77)        | 0.75<br>(0.68 to<br>0.85)    | 0.75<br>(0.61 to<br>0.94)    | 0.67<br>(0.55 to<br>0.85)    | 0.74<br>(0.60 to<br>0.92)    |

**Central Latin America**

| Cause         | YLLs (in 1000s)                 |                                 |                                 |                                 | Deaths (in 1000s)         |                           |                            |                           |
|---------------|---------------------------------|---------------------------------|---------------------------------|---------------------------------|---------------------------|---------------------------|----------------------------|---------------------------|
|               | 2016                            | 2040 Forecast                   | 2040 Better Scenario            | 2040 Worse Scenario             | 2016                      | 2040 Forecast             | 2040 Better Scenario       | 2040 Worse Scenario       |
| Kidney cancer | 109.90<br>(105.28 to<br>115.24) | 200.47<br>(177.73 to<br>223.13) | 216.15<br>(190.80 to<br>241.93) | 197.55<br>(174.54 to<br>221.40) | 4.13<br>(3.95 to<br>4.33) | 8.98<br>(8.06 to<br>9.92) | 9.97<br>(8.89 to<br>11.09) | 8.67<br>(7.73 to<br>9.72) |





|                                                               |                                                |                                                |                                                |                                                |                                       |                                         |                                        |                                          |
|---------------------------------------------------------------|------------------------------------------------|------------------------------------------------|------------------------------------------------|------------------------------------------------|---------------------------------------|-----------------------------------------|----------------------------------------|------------------------------------------|
| Mycocarditis                                                  | 19.97<br>(17.18 to<br>26.94)                   | 20.14<br>(16.18 to<br>28.38)                   | 18.36<br>(14.60 to<br>25.83)                   | 20.48<br>(16.47 to<br>29.06)                   | 0.51<br>(0.44 to<br>0.70)             | 0.71<br>(0.59 to<br>1.05)               | 0.69<br>(0.57 to<br>1.03)              | 0.69<br>(0.57 to<br>1.01)                |
| <b>Central Latin America</b>                                  |                                                |                                                |                                                |                                                |                                       |                                         |                                        |                                          |
| Cause                                                         | YLLs (in 1000s)                                |                                                |                                                |                                                | Deaths (in 1000s)                     |                                         |                                        |                                          |
|                                                               | 2016                                           | 2040 Forecast                                  | 2040 Better Scenario                           | 2040 Worse Scenario                            | 2016                                  | 2040 Forecast                           | 2040 Better Scenario                   | 2040 Worse Scenario                      |
| Alcoholic cardiomyopathy                                      | 10.67<br>(8.07 to<br>13.89)                    | 14.92<br>(10.70 to<br>19.56)                   | 13.71<br>(9.49 to<br>17.72)                    | 18.00<br>(13.02 to<br>23.30)                   | 0.37<br>(0.26 to<br>0.47)             | 0.61<br>(0.41 to<br>0.77)               | 0.58<br>(0.37 to<br>0.74)              | 0.71<br>(0.49 to<br>0.90)                |
| Other cardiomyopathy                                          | 90.71<br>(75.04 to<br>98.87)                   | 131.03<br>(88.39 to<br>181.57)                 | 109.25<br>(73.70 to<br>151.39)                 | 130.97<br>(88.61 to<br>181.43)                 | 3.10<br>(2.42 to<br>3.42)             | 6.75<br>(4.05 to<br>10.09)              | 5.97<br>(3.56 to<br>8.78)              | 6.49<br>(3.94 to<br>9.76)                |
| Atrial fibrillation and flutter                               | 64.70<br>(51.95 to<br>78.66)                   | 158.33<br>(119.02 to<br>208.68)                | 147.71<br>(112.28 to<br>190.21)                | 163.51<br>(121.29 to<br>216.44)                | 6.43<br>(5.08 to<br>8.04)             | 16.04<br>(11.91 to<br>21.27)            | 15.66<br>(11.87 to<br>20.47)           | 15.89<br>(11.63 to<br>21.25)             |
| Aortic aneurysm                                               | 62.01<br>(57.27 to<br>66.55)                   | 114.15<br>(90.15 to<br>146.80)                 | 105.80<br>(85.27 to<br>132.40)                 | 117.25<br>(91.07 to<br>151.50)                 | 3.41<br>(3.18 to<br>3.65)             | 7.54<br>(6.12 to<br>9.37)               | 7.33<br>(6.06 to<br>8.92)              | 7.39<br>(5.97 to<br>9.24)                |
| Peripheral artery disease                                     | 11.86<br>(8.22 to<br>24.68)                    | 45.67<br>(27.32 to<br>98.83)                   | 46.97<br>(27.84 to<br>104.47)                  | 46.10<br>(27.43 to<br>101.20)                  | 1.00<br>(0.68 to<br>2.16)             | 4.10<br>(2.40 to<br>8.86)               | 4.45<br>(2.60 to<br>9.68)              | 3.93<br>(2.31 to<br>8.59)                |
| Endocarditis                                                  | 60.63<br>(49.55 to<br>83.12)                   | 85.06<br>(61.29 to<br>117.82)                  | 74.21<br>(54.82 to<br>102.04)                  | 87.43<br>(63.25 to<br>121.62)                  | 1.80<br>(1.40 to<br>2.33)             | 3.51<br>(2.37 to<br>4.89)               | 3.25<br>(2.22 to<br>4.43)              | 3.48<br>(2.33 to<br>4.84)                |
| Other cardiovascular and circulatory diseases                 | 261.50<br>(246.43 to<br>274.85)                | 483.20<br>(382.32 to<br>625.71)                | 363.10<br>(291.92 to<br>457.10)                | 531.25<br>(413.96 to<br>689.20)                | 11.44<br>(10.80 to<br>12.03)          | 28.85<br>(23.32 to<br>36.37)            | 23.21<br>(19.06 to<br>28.77)           | 30.05<br>(24.01 to<br>38.05)             |
| <b>Chronic respiratory diseases</b>                           | <b>933.64<br/>(899.09 to<br/>973.89)</b>       | <b>1,202.17<br/>(981.28 to<br/>1,463.49)</b>   | <b>983.68<br/>(810.46 to<br/>1,174.05)</b>     | <b>1,726.25<br/>(1,326.48 to<br/>2,223.45)</b> | <b>60.93<br/>(58.82 to<br/>63.40)</b> | <b>85.85<br/>(70.54 to<br/>103.03)</b>  | <b>72.89<br/>(60.59 to<br/>86.24)</b>  | <b>120.46<br/>(93.56 to<br/>154.98)</b>  |
| Chronic obstructive pulmonary disease                         | 712.14<br>(678.63 to<br>749.36)                | 922.72<br>(716.18 to<br>1,188.30)              | 696.33<br>(544.40 to<br>879.08)                | 1,437.41<br>(1,056.96 to<br>1,944.02)          | 51.86<br>(49.64 to<br>54.21)          | 70.97<br>(56.37 to<br>89.29)            | 56.73<br>(45.42 to<br>69.89)           | 105.65<br>(78.98 to<br>139.44)           |
| Pneumoconiosis                                                | 4.60<br>(4.19 to<br>5.07)                      | 6.40<br>(5.51 to<br>7.43)                      | 5.55<br>(4.66 to<br>6.61)                      | 6.48<br>(5.60 to<br>7.48)                      | 0.24<br>(0.22 to<br>0.26)             | 0.40<br>(0.34 to<br>0.47)               | 0.36<br>(0.30 to<br>0.42)              | 0.40<br>(0.34 to<br>0.46)                |
| Silicosis                                                     | 1.71<br>(1.34 to<br>2.02)                      | 2.17<br>(1.48 to<br>2.87)                      | 1.69<br>(1.08 to<br>2.38)                      | 2.13<br>(1.47 to<br>2.81)                      | 0.09<br>(0.07 to<br>0.11)             | 0.14<br>(0.09 to<br>0.18)               | 0.11<br>(0.07 to<br>0.15)              | 0.13<br>(0.09 to<br>0.18)                |
| Asbestosis                                                    | 0.93<br>(0.78 to<br>1.52)                      | 1.61<br>(1.28 to<br>2.61)                      | 1.73<br>(1.36 to<br>2.62)                      | 1.56<br>(1.23 to<br>2.52)                      | 0.04<br>(0.03 to<br>0.07)             | 0.09<br>(0.07 to<br>0.15)               | 0.10<br>(0.08 to<br>0.15)              | 0.08<br>(0.06 to<br>0.14)                |
| Coal workers pneumoconiosis                                   | 0.60<br>(0.33 to<br>0.75)                      | 0.76<br>(0.47 to<br>1.02)                      | 0.54<br>(0.33 to<br>0.76)                      | 0.84<br>(0.52 to<br>1.13)                      | 0.03<br>(0.02 to<br>0.04)             | 0.05<br>(0.03 to<br>0.07)               | 0.04<br>(0.03 to<br>0.05)              | 0.06<br>(0.04 to<br>0.08)                |
| Other pneumoconiosis                                          | 1.36<br>(1.15 to<br>1.52)                      | 1.86<br>(1.48 to<br>2.29)                      | 1.59<br>(1.22 to<br>1.99)                      | 1.95<br>(1.56 to<br>2.41)                      | 0.07<br>(0.06 to<br>0.08)             | 0.12<br>(0.10 to<br>0.15)               | 0.11<br>(0.09 to<br>0.14)              | 0.13<br>(0.10 to<br>0.16)                |
| Asthma                                                        | 81.00<br>(73.38 to<br>101.13)                  | 71.86<br>(45.88 to<br>116.35)                  | 49.28<br>(31.91 to<br>78.36)                   | 89.50<br>(55.07 to<br>148.78)                  | 3.23<br>(2.94 to<br>4.43)             | 3.96<br>(2.51 to<br>6.72)               | 2.89<br>(1.85 to<br>4.82)              | 4.69<br>(2.87 to<br>8.06)                |
| Interstitial lung disease and pulmonary sarcoidosis           | 96.36<br>(66.07 to<br>112.38)                  | 162.86<br>(108.55 to<br>190.15)                | 198.23<br>(137.11 to<br>234.44)                | 152.68<br>(101.94 to<br>178.48)                | 4.66<br>(3.08 to<br>5.35)             | 9.23<br>(5.98 to<br>10.78)              | 11.65<br>(7.82 to<br>13.85)            | 8.42<br>(5.37 to<br>9.85)                |
| Other chronic respiratory diseases                            | 39.55<br>(29.39 to<br>50.56)                   | 38.32<br>(26.68 to<br>49.01)                   | 34.27<br>(23.21 to<br>43.82)                   | 40.18<br>(28.18 to<br>51.19)                   | 0.95<br>(0.62 to<br>1.19)             | 1.30<br>(0.76 to<br>1.61)               | 1.27<br>(0.71 to<br>1.60)              | 1.31<br>(0.77 to<br>1.63)                |
| <b>Cirrhosis and other chronic liver diseases</b>             | <b>1,685.11<br/>(1,567.67 to<br/>1,798.33)</b> | <b>2,653.98<br/>(2,333.27 to<br/>2,958.08)</b> | <b>2,233.31<br/>(1,932.61 to<br/>2,545.90)</b> | <b>2,914.52<br/>(2,590.03 to<br/>3,218.02)</b> | <b>59.69<br/>(55.72 to<br/>63.08)</b> | <b>106.18<br/>(95.86 to<br/>115.57)</b> | <b>91.24<br/>(80.64 to<br/>101.61)</b> | <b>114.00<br/>(103.82 to<br/>123.68)</b> |
| Cirrhosis and other chronic liver diseases due to hepatitis B | 55.60<br>(49.45 to<br>62.01)                   | 91.05<br>(78.44 to<br>103.81)                  | 81.87<br>(69.47 to<br>95.04)                   | 91.10<br>(78.84 to<br>103.03)                  | 1.99<br>(1.77 to<br>2.20)             | 3.64<br>(3.19 to<br>4.08)               | 3.34<br>(2.87 to<br>3.81)              | 3.58<br>(3.14 to<br>4.00)                |

|                                                                |                                        |                                            |                                            |                                            |                                   |                                      |                                      |                                      |
|----------------------------------------------------------------|----------------------------------------|--------------------------------------------|--------------------------------------------|--------------------------------------------|-----------------------------------|--------------------------------------|--------------------------------------|--------------------------------------|
| Cirrhosis and other chronic liver diseases due to hepatitis C  | 728.97<br>(669.66 to 785.85)           | 1,222.05<br>(1,060.42 to 1,380.40)         | 1,086.02<br>(923.44 to 1,246.90)           | 1,224.50<br>(1,069.17 to 1,378.86)         | 25.01<br>(23.08 to 26.85)         | 46.36<br>(41.35 to 51.36)            | 41.92<br>(36.53 to 47.17)            | 45.76<br>(40.95 to 50.43)            |
| Cirrhosis and other chronic liver diseases due to alcohol use  | 608.82<br>(556.55 to 657.42)           | 906.45<br>(789.33 to 1,026.34)             | 684.84<br>(586.55 to 788.48)               | 1,159.67<br>(1,013.68 to 1,303.89)         | 22.67<br>(20.80 to 24.37)         | 38.21<br>(34.10 to 42.61)            | 29.79<br>(26.20 to 33.63)            | 46.88<br>(42.00 to 51.79)            |
| Cirrhosis and other chronic liver diseases due to other causes | 291.72<br>(258.44 to 328.12)           | 434.44<br>(366.61 to 511.80)               | 380.59<br>(321.38 to 458.82)               | 439.25<br>(371.18 to 516.05)               | 10.01<br>(8.85 to 11.25)          | 17.97<br>(15.33 to 20.93)            | 16.19<br>(13.65 to 19.08)            | 17.78<br>(15.21 to 20.64)            |
| <b>Digestive diseases</b>                                      | <b>861.83<br/>(804.06 to 974.42)</b>   | <b>1,152.88<br/>(960.83 to 1,387.35)</b>   | <b>950.92<br/>(792.89 to 1,134.07)</b>     | <b>1,252.06<br/>(1,035.00 to 1,534.83)</b> | <b>37.49<br/>(35.19 to 41.25)</b> | <b>65.89<br/>(56.15 to 77.91)</b>    | <b>57.41<br/>(48.83 to 67.38)</b>    | <b>68.38<br/>(57.81 to 82.00)</b>    |
| Peptic ulcer disease                                           | 138.34<br>(126.78 to 157.32)           | 155.35<br>(131.39 to 182.66)               | 115.18<br>(95.76 to 137.61)                | 170.16<br>(143.12 to 201.13)               | 7.31<br>(6.77 to 8.16)            | 10.12<br>(8.72 to 11.77)             | 7.81<br>(6.63 to 9.21)               | 10.65<br>(9.07 to 12.48)             |
| <b>Central Latin America</b>                                   |                                        |                                            |                                            |                                            |                                   |                                      |                                      |                                      |
| Cause                                                          | YLLs (in 1000s)                        |                                            |                                            |                                            | Deaths (in 1000s)                 |                                      |                                      |                                      |
|                                                                | 2016                                   | 2040 Forecast                              | 2040 Better Scenario                       | 2040 Worse Scenario                        | 2016                              | 2040 Forecast                        | 2040 Better Scenario                 | 2040 Worse Scenario                  |
| Gastritis and duodenitis                                       | 37.05<br>(32.70 to 48.52)              | 74.96<br>(61.64 to 98.23)                  | 64.48<br>(51.86 to 84.22)                  | 74.84<br>(61.97 to 96.46)                  | 2.02<br>(1.77 to 2.62)            | 4.78<br>(3.93 to 6.24)               | 4.30<br>(3.48 to 5.62)               | 4.61<br>(3.83 to 5.86)               |
| Appendicitis                                                   | 65.82<br>(55.87 to 81.86)              | 65.33<br>(54.24 to 81.43)                  | 50.47<br>(41.75 to 62.66)                  | 69.08<br>(57.04 to 85.73)                  | 1.96<br>(1.64 to 2.42)            | 2.70<br>(2.25 to 3.32)               | 2.19<br>(1.80 to 2.74)               | 2.75<br>(2.29 to 3.37)               |
| Paralytic ileus and intestinal obstruction                     | 185.01<br>(150.01 to 212.46)           | 207.24<br>(159.09 to 241.16)               | 191.18<br>(146.50 to 223.56)               | 207.97<br>(160.12 to 240.07)               | 6.20<br>(4.84 to 6.94)            | 11.12<br>(8.32 to 12.85)             | 11.12<br>(8.39 to 12.93)             | 10.63<br>(7.93 to 12.18)             |
| Inguinal, femoral, and abdominal hernia                        | 40.04<br>(31.43 to 51.80)              | 45.87<br>(36.01 to 61.21)                  | 41.11<br>(31.44 to 55.74)                  | 45.67<br>(35.81 to 59.89)                  | 2.14<br>(1.72 to 2.89)            | 2.90<br>(2.31 to 4.01)               | 2.72<br>(2.15 to 3.75)               | 2.79<br>(2.21 to 3.87)               |
| Inflammatory bowel disease                                     | 20.24<br>(13.93 to 22.74)              | 24.61<br>(17.33 to 28.68)                  | 23.99<br>(16.84 to 28.44)                  | 24.19<br>(17.08 to 27.99)                  | 0.73<br>(0.52 to 0.81)            | 1.19<br>(0.86 to 1.35)               | 1.21<br>(0.88 to 1.39)               | 1.13<br>(0.82 to 1.28)               |
| Vascular intestinal disorders                                  | 68.50<br>(57.78 to 76.76)              | 131.44<br>(110.13 to 147.85)               | 123.27<br>(103.21 to 140.92)               | 128.41<br>(107.95 to 144.57)               | 4.12<br>(3.40 to 4.53)            | 9.33<br>(7.76 to 10.41)              | 9.06<br>(7.65 to 10.32)              | 8.87<br>(7.33 to 9.91)               |
| Gallbladder and biliary diseases                               | 106.67<br>(98.86 to 122.36)            | 163.89<br>(92.76 to 284.32)                | 116.95<br>(68.63 to 201.12)                | 206.58<br>(113.75 to 364.76)               | 5.37<br>(4.97 to 6.03)            | 10.05<br>(5.83 to 17.40)             | 7.54<br>(4.52 to 12.79)              | 12.10<br>(6.90 to 20.97)             |
| Pancreatitis                                                   | 107.99<br>(92.86 to 125.26)            | 161.58<br>(102.63 to 269.51)               | 118.17<br>(76.98 to 190.34)                | 200.20<br>(120.21 to 351.79)               | 3.52<br>(2.97 to 3.97)            | 6.52<br>(4.35 to 10.70)              | 4.95<br>(3.35 to 7.80)               | 7.77<br>(4.91 to 13.54)              |
| Other digestive diseases                                       | 92.18<br>(78.63 to 113.04)             | 122.60<br>(103.67 to 146.34)               | 106.12<br>(88.39 to 128.40)                | 124.95<br>(105.53 to 150.44)               | 4.13<br>(3.57 to 4.90)            | 7.19<br>(6.13 to 8.48)               | 6.52<br>(5.44 to 7.71)               | 7.08<br>(6.07 to 8.39)               |
| <b>Neurological disorders</b>                                  | <b>985.88<br/>(884.55 to 1,109.43)</b> | <b>2,154.35<br/>(1,644.47 to 2,904.04)</b> | <b>2,117.60<br/>(1,634.78 to 2,778.72)</b> | <b>2,237.27<br/>(1,664.38 to 3,123.50)</b> | <b>78.72<br/>(68.13 to 91.14)</b> | <b>193.65<br/>(142.61 to 268.17)</b> | <b>200.06<br/>(152.08 to 266.12)</b> | <b>193.68<br/>(138.37 to 278.62)</b> |
| Alzheimer's disease and other dementias                        | 632.92<br>(536.75 to 754.86)           | 1,629.44<br>(1,145.29 to 2,363.85)         | 1,617.09<br>(1,175.66 to 2,264.07)         | 1,693.30<br>(1,139.86 to 2,569.77)         | 67.44<br>(57.00 to 80.04)         | 170.20<br>(119.87 to 244.71)         | 175.11<br>(127.93 to 241.16)         | 171.03<br>(116.47 to 255.47)         |
| Parkinson's disease                                            | 51.82<br>(39.67 to 65.89)              | 145.34<br>(109.50 to 185.69)               | 168.96<br>(127.60 to 216.55)               | 131.40<br>(99.49 to 168.00)                | 4.25<br>(3.25 to 5.44)            | 12.16<br>(9.15 to 15.73)             | 14.50<br>(11.01 to 18.67)            | 10.77<br>(8.09 to 13.99)             |
| Epilepsy                                                       | 182.76<br>(169.29 to 198.66)           | 213.03<br>(162.29 to 283.18)               | 161.45<br>(123.85 to 212.73)               | 250.00<br>(186.10 to 336.40)               | 3.86<br>(3.61 to 4.15)            | 5.63<br>(4.30 to 7.34)               | 4.44<br>(3.44 to 5.79)               | 6.48<br>(4.79 to 8.67)               |
| Multiple sclerosis                                             | 15.60<br>(11.21 to 17.37)              | 19.74<br>(13.45 to 24.14)                  | 20.42<br>(13.88 to 25.15)                  | 19.76<br>(13.49 to 24.29)                  | 0.46<br>(0.33 to 0.51)            | 0.68<br>(0.46 to 0.85)               | 0.72<br>(0.47 to 0.88)               | 0.67<br>(0.46 to 0.82)               |
| Motor neuron disease                                           | 22.04<br>(20.06 to 23.43)              | 38.43<br>(33.51 to 43.57)                  | 40.02<br>(34.79 to 45.90)                  | 37.01<br>(32.43 to 41.59)                  | 0.75<br>(0.68 to 0.79)            | 1.55<br>(1.36 to 1.74)               | 1.64<br>(1.42 to 1.86)               | 1.47<br>(1.30 to 1.63)               |

|                              |                                          |                                          |                                          |                                          |                                     |                                       |                                       |                                       |
|------------------------------|------------------------------------------|------------------------------------------|------------------------------------------|------------------------------------------|-------------------------------------|---------------------------------------|---------------------------------------|---------------------------------------|
| Other neurological disorders | 80.75<br>(76.10 to<br>86.38)             | 108.37<br>(95.76 to<br>123.32)           | 109.66<br>(96.64 to<br>125.42)           | 105.81<br>(94.10 to<br>120.06)           | 1.96<br>(1.87 to<br>2.07)           | 3.43<br>(3.12 to<br>3.72)             | 3.65<br>(3.27 to<br>4.00)             | 3.26<br>(2.99 to<br>3.54)             |
| <b>Mental disorders</b>      | <b>347.84<br/>(311.07 to<br/>394.23)</b> | <b>575.88<br/>(483.64 to<br/>683.05)</b> | <b>567.49<br/>(473.82 to<br/>682.06)</b> | <b>604.61<br/>(510.64 to<br/>711.88)</b> | <b>9.11<br/>(8.25 to<br/>10.19)</b> | <b>16.97<br/>(14.73 to<br/>19.49)</b> | <b>17.09<br/>(14.80 to<br/>19.70)</b> | <b>17.59<br/>(15.29 to<br/>20.13)</b> |
| Alcohol use disorders        | 261.23<br>(231.43 to<br>294.86)          | 389.32<br>(323.92 to<br>464.43)          | 371.00<br>(306.16 to<br>445.64)          | 420.26<br>(352.01 to<br>500.45)          | 7.15<br>(6.41 to<br>7.98)           | 11.89<br>(10.18 to<br>13.80)          | 11.55<br>(9.80 to<br>13.45)           | 12.68<br>(10.90 to<br>14.62)          |
| Drug use disorders           | 84.57<br>(70.72 to<br>99.18)             | 183.97<br>(147.65 to<br>230.86)          | 194.03<br>(155.76 to<br>244.95)          | 181.73<br>(146.11 to<br>228.27)          | 1.93<br>(1.64 to<br>2.20)           | 5.02<br>(4.24 to<br>5.91)             | 5.50<br>(4.62 to<br>6.48)             | 4.87<br>(4.09 to<br>5.71)             |
| Opioid use disorders         | 58.27<br>(49.36 to<br>72.02)             | 89.96<br>(69.48 to<br>117.54)            | 89.94<br>(69.35 to<br>118.15)            | 89.80<br>(69.55 to<br>117.75)            | 1.22<br>(1.05 to<br>1.48)           | 2.10<br>(1.69 to<br>2.64)             | 2.14<br>(1.72 to<br>2.73)             | 2.07<br>(1.68 to<br>2.60)             |
| Cocaine use disorders        | 3.63<br>(2.29 to<br>4.73)                | 9.98<br>(6.59 to<br>12.89)               | 10.39<br>(6.90 to<br>13.39)              | 10.06<br>(6.70 to<br>12.96)              | 0.09<br>(0.05 to<br>0.11)           | 0.27<br>(0.19 to<br>0.34)             | 0.29<br>(0.20 to<br>0.36)             | 0.27<br>(0.19 to<br>0.34)             |
| Amphetamine use disorders    | 2.74<br>(1.84 to<br>4.22)                | 7.84<br>(5.41 to<br>11.80)               | 8.53<br>(5.98 to<br>12.76)               | 7.94<br>(5.47 to<br>11.99)               | 0.06<br>(0.04 to<br>0.09)           | 0.19<br>(0.14 to<br>0.28)             | 0.22<br>(0.15 to<br>0.31)             | 0.20<br>(0.14 to<br>0.29)             |
| Other drug use disorders     | 19.93<br>(14.68 to<br>25.06)             | 76.19<br>(56.77 to<br>98.62)             | 85.18<br>(63.08 to<br>109.93)            | 73.93<br>(55.17 to<br>95.63)             | 0.56<br>(0.42 to<br>0.67)           | 2.46<br>(1.97 to<br>2.96)             | 2.86<br>(2.28 to<br>3.45)             | 2.33<br>(1.85 to<br>2.81)             |
| Eating disorders             | 2.04<br>(1.85 to<br>2.25)                | 2.59<br>(2.11 to<br>3.23)                | 2.46<br>(2.00 to<br>3.06)                | 2.61<br>(2.12 to<br>3.24)                | 0.04<br>(0.03 to<br>0.04)           | 0.05<br>(0.04 to<br>0.06)             | 0.05<br>(0.04 to<br>0.06)             | 0.05<br>(0.04 to<br>0.06)             |

| Central Latin America                                      |                                                |                                                 |                                                 |                                                  |                                          |                                          |                                          |                                          |
|------------------------------------------------------------|------------------------------------------------|-------------------------------------------------|-------------------------------------------------|--------------------------------------------------|------------------------------------------|------------------------------------------|------------------------------------------|------------------------------------------|
| Cause                                                      | YLLs (in 1000s)                                |                                                 |                                                 |                                                  | Deaths (in 1000s)                        |                                          |                                          |                                          |
|                                                            | 2016                                           | 2040 Forecast                                   | 2040 Better Scenario                            | 2040 Worse Scenario                              | 2016                                     | 2040 Forecast                            | 2040 Better Scenario                     | 2040 Worse Scenario                      |
| <b>Diabetes, urogenital, blood, and endocrine diseases</b> | <b>4,346.87<br/>(4,201.48 to<br/>4,493.74)</b> | <b>8,749.26<br/>(5,387.38 to<br/>14,420.09)</b> | <b>5,983.60<br/>(3,844.99 to<br/>10,056.04)</b> | <b>10,369.45<br/>(6,287.24 to<br/>16,320.90)</b> | <b>197.15<br/>(191.38 to<br/>203.03)</b> | <b>491.91<br/>(304.39 to<br/>793.32)</b> | <b>351.79<br/>(225.03 to<br/>587.53)</b> | <b>562.74<br/>(343.37 to<br/>886.81)</b> |
| Diabetes mellitus                                          | 1,816.26<br>(1,752.88 to<br>1,881.41)          | 3,440.28<br>(2,508.75 to<br>4,794.45)           | 2,350.01<br>(1,725.51 to<br>3,206.53)           | 4,152.57<br>(2,923.45 to<br>5,877.28)            | 87.92<br>(84.96 to<br>91.01)             | 193.98<br>(147.24 to<br>259.27)          | 138.77<br>(106.08 to<br>180.54)          | 224.16<br>(165.66 to<br>304.95)          |
| Acute glomerulonephritis                                   | 4.00<br>(3.71 to<br>4.35)                      | 3.62<br>(3.06 to<br>4.21)                       | 2.98<br>(2.48 to<br>3.51)                       | 3.75<br>(3.19 to<br>4.36)                        | 0.14<br>(0.13 to<br>0.15)                | 0.14<br>(0.11 to<br>0.16)                | 0.12<br>(0.10 to<br>0.15)                | 0.14<br>(0.11 to<br>0.16)                |
| Chronic kidney disease                                     | 2,038.13<br>(1,965.32 to<br>2,108.17)          | 4,507.05<br>(1,734.40 to<br>9,704.39)           | 2,895.54<br>(1,198.37 to<br>6,642.81)           | 5,419.03<br>(2,100.85 to<br>11,331.36)           | 90.28<br>(87.22 to<br>93.26)             | 254.74<br>(95.58 to<br>562.45)           | 170.91<br>(66.17 to<br>402.73)           | 297.41<br>(109.79 to<br>626.15)          |
| Chronic kidney disease due to diabetes mellitus            | 768.20<br>(678.53 to<br>857.17)                | 1,962.12<br>(698.62 to<br>4,467.70)             | 1,251.72<br>(470.99 to<br>3,042.75)             | 2,365.11<br>(825.00 to<br>5,223.01)              | 33.99<br>(29.79 to<br>37.95)             | 103.21<br>(35.56 to<br>237.93)           | 68.29<br>(24.30 to<br>168.78)            | 121.27<br>(42.09 to<br>265.12)           |
| Chronic kidney disease due to hypertension                 | 234.82<br>(197.39 to<br>273.02)                | 648.35<br>(233.98 to<br>1,425.02)               | 437.18<br>(163.97 to<br>1,019.76)               | 762.78<br>(274.67 to<br>1,594.01)                | 15.22<br>(12.98 to<br>17.63)             | 50.15<br>(18.58 to<br>112.46)            | 35.71<br>(8.60 to<br>88.60)              | 56.73<br>(21.19 to<br>118.80)            |
| Chronic kidney disease due to glomerulonephritis           | 597.18<br>(514.62 to<br>678.61)                | 1,037.92<br>(435.38 to<br>2,220.80)             | 656.95<br>(291.22 to<br>1,421.87)               | 1,257.20<br>(521.52 to<br>2,544.05)              | 22.64<br>(19.20 to<br>26.06)             | 53.03<br>(19.88 to<br>114.06)            | 34.64<br>(13.71 to<br>80.41)             | 62.82<br>(23.80 to<br>131.96)            |
| Chronic kidney disease due to other and unspecified causes | 437.92<br>(375.38 to<br>513.56)                | 858.65<br>(346.36 to<br>1,809.75)               | 549.70<br>(232.65 to<br>1,204.44)               | 1,033.94<br>(416.95 to<br>2,106.29)              | 18.43<br>(15.53 to<br>21.60)             | 48.35<br>(18.30 to<br>103.35)            | 32.27<br>(12.44 to<br>74.88)             | 56.59<br>(21.58 to<br>118.67)            |
| Urinary diseases and male infertility                      | 194.23<br>(186.65 to<br>205.35)                | 404.07<br>(364.77 to<br>439.79)                 | 377.52<br>(331.33 to<br>422.80)                 | 391.68<br>(356.75 to<br>423.97)                  | 9.86<br>(9.48 to<br>10.36)               | 26.94<br>(24.63 to<br>29.13)             | 26.53<br>(23.56 to<br>29.48)             | 25.13<br>(22.90 to<br>27.19)             |
| Urinary tract infections                                   | 165.75<br>(156.57 to<br>174.86)                | 356.04<br>(321.38 to<br>389.12)                 | 336.56<br>(295.91 to<br>376.57)                 | 344.12<br>(312.90 to<br>373.87)                  | 8.51<br>(7.98 to<br>8.95)                | 24.16<br>(21.95 to<br>26.28)             | 24.07<br>(21.40 to<br>26.80)             | 22.47<br>(20.40 to<br>24.49)             |
| Urolithiasis                                               | 12.33<br>(10.69 to<br>17.13)                   | 24.67<br>(19.02 to<br>36.79)                    | 21.98<br>(16.32 to<br>33.80)                    | 24.05<br>(18.68 to<br>35.94)                     | 0.52<br>(0.45 to<br>0.75)                | 1.20<br>(0.91 to<br>1.86)                | 1.11<br>(0.82 to<br>1.75)                | 1.14<br>(0.87 to<br>1.77)                |

|                                                   |                                       |                                       |                                   |                                       |                              |                              |                              |                              |
|---------------------------------------------------|---------------------------------------|---------------------------------------|-----------------------------------|---------------------------------------|------------------------------|------------------------------|------------------------------|------------------------------|
| Other urinary diseases                            | 16.15<br>(13.25 to<br>21.85)          | 22.36<br>(18.17 to<br>32.87)          | 18.98<br>(14.48 to<br>27.51)      | 22.51<br>(18.20 to<br>33.17)          | 0.83<br>(0.68 to<br>1.15)    | 1.58<br>(1.18 to<br>2.35)    | 1.36<br>(1.01 to<br>2.06)    | 1.53<br>(1.14 to<br>2.25)    |
| Gynecological diseases                            | 6.25<br>(4.80 to<br>7.57)             | 8.46<br>(6.32 to<br>11.15)            | 6.22<br>(4.66 to<br>8.44)         | 9.03<br>(6.76 to<br>12.20)            | 0.19<br>(0.15 to<br>0.24)    | 0.30<br>(0.22 to<br>0.39)    | 0.22<br>(0.17 to<br>0.29)    | 0.31<br>(0.24 to<br>0.40)    |
| Uterine fibroids                                  | 2.05<br>(1.63 to<br>2.75)             | 2.27<br>(1.48 to<br>3.44)             | 1.65<br>(1.08 to<br>2.51)         | 2.45<br>(1.62 to<br>3.68)             | 0.06<br>(0.04 to<br>0.08)    | 0.07<br>(0.05 to<br>0.11)    | 0.05<br>(0.04 to<br>0.08)    | 0.08<br>(0.05 to<br>0.11)    |
| Polycystic ovarian syndrome                       | 0.08<br>(0.06 to<br>0.17)             | 0.08<br>(0.05 to<br>0.17)             | 0.05<br>(0.03 to<br>0.11)         | 0.09<br>(0.06 to<br>0.20)             | 0.00<br>(0.00 to<br>0.00)    | 0.00<br>(0.00 to<br>0.00)    | 0.00<br>(0.00 to<br>0.00)    | 0.00<br>(0.00 to<br>0.00)    |
| Endometriosis                                     | 0.05<br>(0.02 to<br>0.09)             | 0.10<br>(0.04 to<br>0.20)             | 0.08<br>(0.03 to<br>0.15)         | 0.12<br>(0.05 to<br>0.22)             | 0.00<br>(0.00 to<br>0.00)    | 0.00<br>(0.00 to<br>0.00)    | 0.00<br>(0.00 to<br>0.00)    | 0.00<br>(0.00 to<br>0.00)    |
| Genital prolapse                                  | 0.42<br>(0.26 to<br>0.57)             | 0.69<br>(0.42 to<br>1.09)             | 0.48<br>(0.29 to<br>0.76)         | 0.74<br>(0.44 to<br>1.15)             | 0.02<br>(0.02 to<br>0.03)    | 0.04<br>(0.02 to<br>0.06)    | 0.03<br>(0.02 to<br>0.05)    | 0.04<br>(0.02 to<br>0.06)    |
| Other gynecological diseases                      | 3.64<br>(2.71 to<br>4.42)             | 5.32<br>(3.85 to<br>7.15)             | 3.96<br>(2.85 to<br>5.49)         | 5.64<br>(4.10 to<br>7.50)             | 0.11<br>(0.08 to<br>0.13)    | 0.18<br>(0.14 to<br>0.24)    | 0.14<br>(0.10 to<br>0.19)    | 0.19<br>(0.14 to<br>0.25)    |
| Hemoglobinopathies and hemolytic anemias          | 57.22<br>(51.48 to<br>71.50)          | 58.12<br>(48.59 to<br>74.35)          | 46.63<br>(38.13 to<br>59.83)      | 60.93<br>(50.78 to<br>78.33)          | 1.52<br>(1.34 to<br>1.92)    | 2.19<br>(1.85 to<br>2.79)    | 1.81<br>(1.50 to<br>2.36)    | 2.23<br>(1.91 to<br>2.90)    |
| Thalassemias                                      | 7.36<br>(6.61 to<br>8.21)             | 2.75<br>(2.15 to<br>3.49)             | 2.36<br>(1.90 to<br>2.93)         | 2.73<br>(2.13 to<br>3.48)             | 0.09<br>(0.08 to<br>0.10)    | 0.04<br>(0.03 to<br>0.04)    | 0.03<br>(0.02 to<br>0.04)    | 0.03<br>(0.03 to<br>0.04)    |
| Sickle cell disorders                             | 22.41<br>(19.45 to<br>28.87)          | 22.45<br>(17.71 to<br>30.44)          | 18.28<br>(14.39 to<br>24.98)      | 23.83<br>(18.87 to<br>32.42)          | 0.41<br>(0.35 to<br>0.54)    | 0.49<br>(0.39 to<br>0.67)    | 0.40<br>(0.32 to<br>0.56)    | 0.51<br>(0.41 to<br>0.71)    |
| G6PD deficiency                                   | 10.33<br>(8.92 to<br>12.71)           | 14.24<br>(11.32 to<br>18.05)          | 10.79<br>(8.33 to<br>13.91)       | 15.28<br>(12.03 to<br>19.41)          | 0.24<br>(0.20 to<br>0.29)    | 0.45<br>(0.36 to<br>0.57)    | 0.35<br>(0.27 to<br>0.44)    | 0.47<br>(0.38 to<br>0.60)    |
| Other hemoglobinopathies and hemolytic anemias    | 17.11<br>(14.85 to<br>21.97)          | 18.68<br>(15.37 to<br>23.72)          | 15.20<br>(12.37 to<br>19.78)      | 19.08<br>(16.06 to<br>24.55)          | 0.78<br>(0.68 to<br>1.01)    | 1.22<br>(1.03 to<br>1.57)    | 1.03<br>(0.84 to<br>1.33)    | 1.21<br>(1.01 to<br>1.57)    |
| Endocrine, metabolic, blood, and immune disorders | 230.78<br>(185.05 to<br>259.21)       | 327.65<br>(263.40 to<br>385.43)       | 304.70<br>(241.79 to<br>361.26)   | 332.46<br>(269.14 to<br>391.65)       | 7.24<br>(5.76 to<br>8.18)    | 13.64<br>(10.88 to<br>16.14) | 13.42<br>(10.68 to<br>16.01) | 13.36<br>(10.83 to<br>15.76) |
| <b>Central Latin America</b>                      |                                       |                                       |                                   |                                       |                              |                              |                              |                              |
| Cause                                             | YLLs (in 1000s)                       |                                       |                                   |                                       | Deaths (in 1000s)            |                              |                              |                              |
|                                                   | 2016                                  | 2040 Forecast                         | 2040 Better Scenario              | 2040 Worse Scenario                   | 2016                         | 2040 Forecast                | 2040 Better Scenario         | 2040 Worse Scenario          |
| Musculoskeletal disorders                         | 161.93<br>(126.87 to<br>174.14)       | 286.91<br>(237.10 to<br>333.94)       | 265.91<br>(218.74 to<br>314.63)   | 283.54<br>(234.39 to<br>327.94)       | 5.24<br>(4.63 to<br>5.62)    | 12.70<br>(10.99 to<br>15.10) | 11.80<br>(9.96 to<br>14.17)  | 12.31<br>(10.73 to<br>14.46) |
| Rheumatoid arthritis                              | 38.75<br>(30.11 to<br>48.03)          | 102.20<br>(79.84 to<br>129.43)        | 79.75<br>(59.65 to<br>103.58)     | 104.76<br>(82.28 to<br>133.24)        | 2.00<br>(1.63 to<br>2.41)    | 6.34<br>(5.12 to<br>8.05)    | 5.13<br>(3.99 to<br>6.54)    | 6.32<br>(5.12 to<br>7.93)    |
| Other musculoskeletal disorders                   | 123.18<br>(96.81 to<br>134.14)        | 184.71<br>(148.46 to<br>214.65)       | 186.18<br>(149.89 to<br>218.64)   | 178.78<br>(142.38 to<br>206.09)       | 3.24<br>(2.72 to<br>3.52)    | 6.36<br>(5.29 to<br>7.64)    | 6.67<br>(5.52 to<br>7.95)    | 6.00<br>(5.00 to<br>7.07)    |
| Other non-communicable diseases                   | 1,678.71<br>(1,303.55 to<br>1,846.38) | 1,332.81<br>(1,034.86 to<br>1,615.70) | 924.57<br>(733.58 to<br>1,108.03) | 1,438.29<br>(1,117.51 to<br>1,741.17) | 23.96<br>(19.15 to<br>26.93) | 31.59<br>(23.84 to<br>41.57) | 26.75<br>(19.43 to<br>37.01) | 31.81<br>(23.92 to<br>41.24) |
| Congenital birth defects                          | 1,527.54<br>(1,128.56 to<br>1,698.07) | 1,009.43<br>(717.20 to<br>1,257.33)   | 625.27<br>(451.30 to<br>761.33)   | 1,119.62<br>(793.28 to<br>1,402.12)   | 18.70<br>(13.76 to<br>20.72) | 13.17<br>(9.43 to<br>16.22)  | 8.40<br>(6.11 to<br>10.14)   | 14.49<br>(10.31 to<br>17.88) |
| Neural tube defects                               | 68.44<br>(57.45 to<br>85.33)          | 21.59<br>(15.79 to<br>29.18)          | 11.47<br>(8.70 to<br>15.44)       | 25.52<br>(18.74 to<br>34.15)          | 0.82<br>(0.69 to<br>1.02)    | 0.27<br>(0.20 to<br>0.37)    | 0.15<br>(0.11 to<br>0.20)    | 0.32<br>(0.24 to<br>0.43)    |
| Congenital heart anomalies                        | 782.61<br>(567.53 to<br>872.10)       | 510.30<br>(356.13 to<br>644.61)       | 308.42<br>(216.20 to<br>380.79)   | 563.77<br>(393.73 to<br>714.48)       | 9.61<br>(7.01 to<br>10.67)   | 6.66<br>(4.78 to<br>8.30)    | 4.13<br>(2.95 to<br>5.07)    | 7.31<br>(5.19 to<br>9.16)    |



|                                                 |                                                            |                                                            |                                                            |                                                            |                                                   |                                                    |                                                   |                                                    |
|-------------------------------------------------|------------------------------------------------------------|------------------------------------------------------------|------------------------------------------------------------|------------------------------------------------------------|---------------------------------------------------|----------------------------------------------------|---------------------------------------------------|----------------------------------------------------|
| Other road injuries                             | 45.03<br>(34.84 to<br>58.79)                               | 29.43<br>(18.06 to<br>47.76)                               | 11.56<br>(7.58 to<br>17.85)                                | 62.36<br>(37.54 to<br>103.91)                              | 0.96<br>(0.75 to<br>1.26)                         | 0.79<br>(0.50 to<br>1.23)                          | 0.37<br>(0.25 to<br>0.55)                         | 1.53<br>(0.95 to<br>2.45)                          |
| Other transport injuries                        | 128.46<br>(109.27 to<br>157.48)                            | 172.89<br>(110.04 to<br>284.70)                            | 131.55<br>(83.31 to<br>214.54)                             | 193.83<br>(121.24 to<br>312.90)                            | 2.67<br>(2.32 to<br>3.18)                         | 4.19<br>(2.79 to<br>6.48)                          | 3.26<br>(2.20 to<br>4.96)                         | 4.64<br>(3.03 to<br>7.25)                          |
| <b>Unintentional injuries</b>                   | <b>1,692.61</b><br><b>(1,557.51 to</b><br><b>1,938.60)</b> | <b>1,684.93</b><br><b>(1,392.24 to</b><br><b>2,108.76)</b> | <b>1,401.97</b><br><b>(1,156.50 to</b><br><b>1,766.02)</b> | <b>1,757.22</b><br><b>(1,454.33 to</b><br><b>2,172.04)</b> | <b>39.61</b><br><b>(36.46 to</b><br><b>46.08)</b> | <b>57.36</b><br><b>(49.86 to</b><br><b>69.14)</b>  | <b>51.31</b><br><b>(44.47 to</b><br><b>61.34)</b> | <b>57.31</b><br><b>(49.74 to</b><br><b>69.15)</b>  |
| Falls                                           | 302.95<br>(273.49 to<br>395.71)                            | 475.58<br>(409.41 to<br>617.21)                            | 436.05<br>(372.66 to<br>558.71)                            | 471.42<br>(406.89 to<br>611.88)                            | 11.79<br>(10.80 to<br>15.12)                      | 25.17<br>(22.25 to<br>32.35)                       | 24.04<br>(21.25 to<br>30.42)                      | 24.11<br>(21.27 to<br>31.35)                       |
| Drowning                                        | 388.60<br>(360.52 to<br>429.56)                            | 314.17<br>(232.66 to<br>436.78)                            | 248.82<br>(183.93 to<br>350.55)                            | 342.84<br>(249.63 to<br>476.72)                            | 7.11<br>(6.63 to<br>7.80)                         | 7.15<br>(5.44 to<br>9.54)                          | 5.87<br>(4.46 to<br>7.89)                         | 7.68<br>(5.74 to<br>10.41)                         |
| Fire, heat, and hot substances                  | 83.89<br>(72.48 to<br>103.18)                              | 77.95<br>(59.75 to<br>105.56)                              | 59.13<br>(45.27 to<br>80.48)                               | 84.54<br>(64.44 to<br>114.71)                              | 2.25<br>(2.07 to<br>2.79)                         | 3.00<br>(2.38 to<br>3.94)                          | 2.44<br>(1.95 to<br>3.23)                         | 3.11<br>(2.45 to<br>4.17)                          |
| Poisonings                                      | 55.15<br>(46.85 to<br>75.67)                               | 33.38<br>(24.03 to<br>49.54)                               | 22.76<br>(16.18 to<br>34.37)                               | 37.99<br>(26.95 to<br>57.72)                               | 1.06<br>(0.90 to<br>1.44)                         | 0.80<br>(0.58 to<br>1.18)                          | 0.57<br>(0.42 to<br>0.85)                         | 0.89<br>(0.64 to<br>1.35)                          |
| Exposure to mechanical forces                   | 275.99<br>(232.07 to<br>338.78)                            | 224.91<br>(173.55 to<br>303.68)                            | 173.95<br>(131.21 to<br>243.07)                            | 240.08<br>(186.74 to<br>321.30)                            | 5.39<br>(4.58 to<br>6.51)                         | 5.39<br>(4.36 to<br>6.90)                          | 4.33<br>(3.45 to<br>5.64)                         | 5.63<br>(4.59 to<br>7.13)                          |
| Unintentional firearm injuries                  | 131.29<br>(82.24 to<br>178.02)                             | 85.80<br>(52.95 to<br>137.51)                              | 66.50<br>(40.89 to<br>110.63)                              | 92.10<br>(57.12 to<br>147.08)                              | 2.45<br>(1.63 to<br>3.23)                         | 1.85<br>(1.26 to<br>2.69)                          | 1.47<br>(1.18 to<br>2.18)                         | 1.95<br>(1.33 to<br>2.84)                          |
| Unintentional suffocation                       | 31.74<br>(27.38 to<br>45.46)                               | 22.71<br>(17.42 to<br>31.11)                               | 15.99<br>(12.07 to<br>21.52)                               | 25.34<br>(19.50 to<br>34.01)                               | 0.44<br>(0.38 to<br>0.60)                         | 0.34<br>(0.26 to<br>0.45)                          | 0.25<br>(0.19 to<br>0.34)                         | 0.37<br>(0.29 to<br>0.49)                          |
| Other exposure to mechanical forces             | 112.96<br>(99.28 to<br>151.42)                             | 116.39<br>(92.31 to<br>157.48)                             | 91.46<br>(71.75 to<br>123.48)                              | 122.64<br>(98.42 to<br>164.96)                             | 2.51<br>(2.23 to<br>3.34)                         | 3.21<br>(2.66 to<br>4.27)                          | 2.61<br>(2.15 to<br>3.48)                         | 3.30<br>(2.78 to<br>4.36)                          |
| Adverse effects of medical treatment            | 100.31<br>(84.69 to<br>139.47)                             | 109.44<br>(87.27 to<br>161.28)                             | 91.11<br>(72.31 to<br>137.13)                              | 114.87<br>(92.35 to<br>166.49)                             | 4.75<br>(2.53 to<br>4.33)                         | 2.98<br>(3.81 to<br>7.12)                          | 4.75<br>(4.24 to<br>6.42)                         | 4.75<br>(3.81 to<br>7.16)                          |
| Animal contact                                  | 38.88<br>(33.22 to<br>61.24)                               | 47.55<br>(36.84 to<br>75.24)                               | 35.24<br>(27.81 to<br>56.10)                               | 50.98<br>(40.17 to<br>79.23)                               | 0.85<br>(0.72 to<br>1.32)                         | 1.41<br>(1.14 to<br>2.12)                          | 1.14<br>(0.90 to<br>1.72)                         | 1.46<br>(1.19 to<br>2.23)                          |
| Venomous animal contact                         | 27.07<br>(21.48 to<br>44.57)                               | 31.39<br>(23.53 to<br>49.78)                               | 23.19<br>(17.04 to<br>37.16)                               | 33.76<br>(25.68 to<br>53.80)                               | 0.58<br>(0.45 to<br>0.91)                         | 0.90<br>(0.66 to<br>1.42)                          | 0.73<br>(0.53 to<br>1.15)                         | 0.94<br>(0.69 to<br>1.47)                          |
| Non-venomous animal contact                     | 11.81<br>(8.27 to<br>20.75)                                | 16.16<br>(11.18 to<br>28.02)                               | 12.05<br>(8.21 to<br>20.76)                                | 17.22<br>(11.99 to<br>28.57)                               | 0.27<br>(0.19 to<br>0.48)                         | 0.51<br>(0.35 to<br>0.86)                          | 0.41<br>(0.28 to<br>0.70)                         | 0.52<br>(0.37 to<br>0.88)                          |
| Foreign body                                    | 336.02<br>(300.13 to<br>410.87)                            | 302.69<br>(251.53 to<br>390.69)                            | 260.97<br>(216.80 to<br>337.99)                            | 309.70<br>(257.83 to<br>397.86)                            | 5.85<br>(5.27 to<br>7.28)                         | 7.16<br>(6.10 to<br>9.24)                          | 6.74<br>(5.77 to<br>8.68)                         | 7.06<br>(6.04 to<br>9.01)                          |
| Pulmonary aspiration and foreign body in airway | 325.97<br>(290.42 to<br>399.60)                            | 293.73<br>(242.80 to<br>381.00)                            | 253.33<br>(210.53 to<br>328.61)                            | 300.21<br>(248.27 to<br>389.64)                            | 5.68<br>(5.10 to<br>7.08)                         | 6.98<br>(5.95 to<br>9.05)                          | 6.58<br>(5.63 to<br>8.50)                         | 6.87<br>(5.88 to<br>8.86)                          |
| Foreign body in other body part                 | 10.05<br>(8.28 to<br>16.36)                                | 8.96<br>(6.70 to<br>14.69)                                 | 7.64<br>(5.68 to<br>12.74)                                 | 9.49<br>(7.10 to<br>15.48)                                 | 0.18<br>(0.15 to<br>0.29)                         | 0.18<br>(0.14 to<br>0.29)                          | 0.16<br>(0.12 to<br>0.25)                         | 0.19<br>(0.14 to<br>0.30)                          |
| Environmental heat and cold exposure            | 16.29<br>(11.68 to<br>30.44)                               | 20.75<br>(14.20 to<br>39.70)                               | 14.82<br>(9.81 to<br>28.65)                                | 22.32<br>(14.92 to<br>41.28)                               | 0.45<br>(0.33 to<br>0.88)                         | 0.73<br>(0.50 to<br>1.49)                          | 0.54<br>(0.37 to<br>1.09)                         | 0.76<br>(0.53 to<br>1.51)                          |
| Other unintentional injuries                    | 94.53<br>(85.11 to<br>109.45)                              | 78.52<br>(61.63 to<br>100.78)                              | 59.12<br>(45.98 to<br>79.49)                               | 82.47<br>(65.90 to<br>104.68)                              | 1.86<br>(1.69 to<br>2.12)                         | 1.81<br>(1.50 to<br>2.22)                          | 1.40<br>(1.14 to<br>1.74)                         | 1.86<br>(1.56 to<br>2.25)                          |
| <b>Self-harm and interpersonal violence</b>     | <b>4,185.40</b><br><b>(3,238.30 to</b><br><b>4,741.73)</b> | <b>3,753.65</b><br><b>(2,542.22 to</b><br><b>5,325.96)</b> | <b>3,247.32</b><br><b>(2,245.70 to</b><br><b>4,577.36)</b> | <b>3,932.24</b><br><b>(2,587.89 to</b><br><b>5,584.36)</b> | <b>80.00</b><br><b>(62.01 to</b><br><b>90.50)</b> | <b>78.89</b><br><b>(56.22 to</b><br><b>107.10)</b> | <b>69.07</b><br><b>(50.39 to</b><br><b>93.56)</b> | <b>82.22</b><br><b>(56.02 to</b><br><b>112.69)</b> |
| <b>Central Latin America</b>                    |                                                            |                                                            |                                                            |                                                            |                                                   |                                                    |                                                   |                                                    |
| <b>YLLs (in 1000s)</b>                          |                                                            |                                                            |                                                            |                                                            | <b>Deaths (in 1000s)</b>                          |                                                    |                                                   |                                                    |

| Cause                                                                        | 2016                               | 2040 Forecast                      | 2040 Better Scenario               | 2040 Worse Scenario                 | 2016                         | 2040 Forecast                | 2040 Better Scenario         | 2040 Worse Scenario          |
|------------------------------------------------------------------------------|------------------------------------|------------------------------------|------------------------------------|-------------------------------------|------------------------------|------------------------------|------------------------------|------------------------------|
| Self-harm                                                                    | 812.51<br>(657.07 to 988.49)       | 883.19<br>(546.22 to 1,401.08)     | 729.16<br>(460.50 to 1,171.24)     | 1,005.39<br>(603.18 to 1,602.53)    | 16.22<br>(13.09 to 19.35)    | 19.93<br>(12.85 to 29.96)    | 16.74<br>(11.06 to 25.07)    | 22.47<br>(13.99 to 34.50)    |
| Self-harm by firearm                                                         | 130.48<br>(88.10 to 186.74)        | 135.17<br>(67.83 to 251.17)        | 106.52<br>(53.98 to 201.12)        | 156.30<br>(76.04 to 299.05)         | 2.66<br>(1.81 to 3.62)       | 3.14<br>(1.70 to 5.40)       | 2.52<br>(1.40 to 4.20)       | 3.58<br>(1.87 to 6.43)       |
| Self-harm by other specified means                                           | 682.03<br>(557.01 to 825.77)       | 748.02<br>(472.78 to 1,161.10)     | 622.64<br>(403.70 to 975.92)       | 849.10<br>(515.30 to 1,339.80)      | 13.56<br>(10.96 to 16.29)    | 16.80<br>(11.05 to 24.93)    | 14.22<br>(9.58 to 21.06)     | 18.89<br>(12.01 to 29.01)    |
| Interpersonal violence                                                       | 3,372.89<br>(2,322.89 to 3,913.49) | 2,870.46<br>(1,797.92 to 4,041.44) | 2,518.16<br>(1,604.78 to 3,534.22) | 2,926.84<br>(1,764.36 to 4,149.89)  | 63.78<br>(43.76 to 73.90)    | 58.96<br>(38.12 to 80.05)    | 52.32<br>(35.07 to 70.67)    | 59.75<br>(37.53 to 81.28)    |
| Physical violence by firearm                                                 | 2,514.93<br>(1,475.80 to 3,026.26) | 2,119.27<br>(1,140.63 to 3,142.67) | 1,853.28<br>(1,039.57 to 2,708.12) | 2,149.52<br>(1,132.20 to 3,190.05)  | 46.99<br>(27.79 to 55.99)    | 42.02<br>(23.37 to 58.89)    | 37.07<br>(21.22 to 52.14)    | 42.38<br>(22.66 to 60.14)    |
| Physical violence by sharp object                                            | 468.26<br>(305.52 to 805.53)       | 429.80<br>(261.94 to 769.57)       | 391.86<br>(245.58 to 700.32)       | 427.48<br>(255.19 to 760.95)        | 9.21<br>(5.92 to 15.66)      | 9.49<br>(5.87 to 16.71)      | 8.76<br>(5.62 to 15.22)      | 9.36<br>(5.69 to 16.70)      |
| Physical violence by other means                                             | 389.70<br>(232.37 to 627.91)       | 321.39<br>(176.64 to 536.64)       | 273.03<br>(153.96 to 460.78)       | 350.05<br>(189.27 to 591.56)        | 7.58<br>(4.43 to 12.58)      | 7.45<br>(4.11 to 13.04)      | 6.49<br>(3.62 to 11.45)      | 8.01<br>(4.35 to 14.00)      |
| Forces of nature, conflict and terrorism, and executions and police conflict | 31.12<br>(9.34 to 45.86)           | 137.74<br>(0.98 to 938.72)         | 130.97<br>(0.97 to 920.86)         | 140.87<br>(1.00 to 958.26)          | 0.54<br>(0.17 to 0.78)       | 2.94<br>(0.02 to 22.31)      | 2.89<br>(0.02 to 22.46)      | 2.94<br>(0.02 to 21.97)      |
| Exposure to forces of nature                                                 | 4.70<br>(3.17 to 6.25)             | 106.42<br>(0.00 to 921.96)         | 100.91<br>(0.00 to 904.36)         | 108.90<br>(0.00 to 941.17)          | 0.09<br>(0.06 to 0.12)       | 2.32<br>(0.00 to 21.94)      | 2.29<br>(0.00 to 22.08)      | 2.32<br>(0.00 to 21.60)      |
| Conflict and terrorism                                                       | 0.00<br>(0.00 to 0.00)             | 27.66<br>(0.00 to 169.71)          | 26.49<br>(0.00 to 162.47)          | 28.27<br>(0.00 to 173.63)           | 0.00<br>(0.00 to 0.00)       | 0.54<br>(0.00 to 3.35)       | 0.53<br>(0.00 to 3.28)       | 0.55<br>(0.00 to 3.35)       |
| Executions and police conflict                                               | 26.42<br>(4.75 to 41.10)           | 3.67<br>(0.00 to 45.64)            | 3.57<br>(0.00 to 44.25)            | 3.69<br>(0.00 to 45.94)             | 0.45<br>(0.08 to 0.69)       | 0.07<br>(0.00 to 0.88)       | 0.07<br>(0.00 to 0.86)       | 0.07<br>(0.00 to 0.88)       |
| <b>Colombia</b>                                                              |                                    |                                    |                                    |                                     |                              |                              |                              |                              |
| Cause                                                                        | YLLs (in 1000s)                    |                                    |                                    |                                     | Deaths (in 1000s)            |                              |                              |                              |
|                                                                              | 2016                               | 2040 Forecast                      | 2040 Better Scenario               | 2040 Worse Scenario                 | 2016                         | 2040 Forecast                | 2040 Better Scenario         | 2040 Worse Scenario          |
| All causes                                                                   | 5,784.43<br>(5,333.03 to 6,277.53) | 7,135.32<br>(5,850.33 to 8,605.83) | 5,781.27<br>(4,767.90 to 6,938.35) | 8,766.57<br>(7,086.21 to 10,727.41) | 219.94<br>(203.40 to 237.59) | 444.37<br>(370.96 to 524.18) | 370.91<br>(313.89 to 434.44) | 518.63<br>(428.44 to 611.45) |
| Communicable, maternal, neonatal, and nutritional diseases                   | 918.86<br>(801.07 to 1,066.15)     | 624.52<br>(517.08 to 759.37)       | 481.74<br>(397.07 to 576.86)       | 844.18<br>(687.08 to 1,048.47)      | 18.77<br>(17.12 to 20.68)    | 23.44<br>(20.00 to 27.57)    | 20.26<br>(17.29 to 23.63)    | 29.31<br>(24.53 to 35.78)    |
| HIV/AIDS and tuberculosis                                                    | 134.09<br>(127.00 to 141.09)       | 131.23<br>(94.24 to 150.36)        | 103.86<br>(69.36 to 122.54)        | 176.46<br>(148.79 to 204.62)        | 3.26<br>(3.10 to 3.44)       | 3.64<br>(2.53 to 4.29)       | 2.85<br>(1.62 to 3.39)       | 4.72<br>(3.92 to 5.57)       |
| Tuberculosis                                                                 | 24.35<br>(21.04 to 28.65)          | 18.06<br>(11.02 to 28.59)          | 9.75<br>(5.98 to 15.05)            | 25.07<br>(15.27 to 40.11)           | 0.84<br>(0.74 to 0.97)       | 0.91<br>(0.55 to 1.42)       | 0.51<br>(0.32 to 0.79)       | 1.21<br>(0.73 to 1.94)       |
| HIV/AIDS                                                                     | 109.74<br>(103.78 to 115.50)       | 113.17<br>(76.85 to 128.61)        | 94.11<br>(50.01 to 111.22)         | 151.39<br>(126.24 to 172.71)        | 2.42<br>(2.29 to 2.54)       | 2.73<br>(1.73 to 3.11)       | 2.34<br>(1.12 to 2.77)       | 3.51<br>(2.81 to 3.99)       |
| Diarrhea, lower respiratory, and other common infectious diseases            | 256.44<br>(222.86 to 298.33)       | 226.62<br>(172.25 to 312.40)       | 183.72<br>(142.02 to 243.10)       | 335.73<br>(241.05 to 482.58)        | 7.58<br>(6.81 to 8.43)       | 13.44<br>(10.67 to 17.27)    | 11.99<br>(9.65 to 15.17)     | 17.52<br>(13.36 to 23.61)    |
| Diarrheal diseases                                                           | 28.49<br>(22.64 to 35.82)          | 12.23<br>(5.25 to 28.98)           | 10.90<br>(4.84 to 25.42)           | 21.58<br>(6.89 to 58.58)            | 0.70<br>(0.60 to 0.81)       | 0.80<br>(0.35 to 1.80)       | 0.79<br>(0.35 to 1.74)       | 1.24<br>(0.43 to 3.20)       |
| Intestinal infectious diseases                                               | 0.37<br>(0.19 to 0.65)             | 0.28<br>(0.13 to 0.50)             | 0.26<br>(0.12 to 0.46)             | 0.30<br>(0.14 to 0.54)              | 0.01<br>(0.00 to 0.01)       | 0.01<br>(0.00 to 0.02)       | 0.01<br>(0.00 to 0.01)       | 0.01<br>(0.00 to 0.02)       |

|                                         |                                                   |                                                   |                                                   |                                                   |                                                |                                                |                                                |                                                |
|-----------------------------------------|---------------------------------------------------|---------------------------------------------------|---------------------------------------------------|---------------------------------------------------|------------------------------------------------|------------------------------------------------|------------------------------------------------|------------------------------------------------|
| Typhoid fever                           | 0.33<br>(0.15 to<br>0.60)                         | 0.25<br>(0.11 to<br>0.45)                         | 0.23<br>(0.11 to<br>0.43)                         | 0.26<br>(0.12 to<br>0.49)                         | 0.01<br>(0.00 to<br>0.01)                      | 0.01<br>(0.00 to<br>0.01)                      | 0.01<br>(0.00 to<br>0.01)                      | 0.01<br>(0.00 to<br>0.01)                      |
| Paratyphoid fever                       | 0.00<br>(0.00 to<br>0.01)                         | 0.00<br>(0.00 to<br>0.01)                         | 0.00<br>(0.00 to<br>0.01)                         | 0.00<br>(0.00 to<br>0.01)                         | 0.00<br>(0.00 to<br>0.00)                      | 0.00<br>(0.00 to<br>0.00)                      | 0.00<br>(0.00 to<br>0.00)                      | 0.00<br>(0.00 to<br>0.00)                      |
| Other intestinal infectious diseases    | 0.04<br>(0.02 to<br>0.09)                         | 0.03<br>(0.01 to<br>0.06)                         | 0.02<br>(0.01 to<br>0.05)                         | 0.03<br>(0.01 to<br>0.07)                         | 0.00<br>(0.00 to<br>0.00)                      | 0.00<br>(0.00 to<br>0.00)                      | 0.00<br>(0.00 to<br>0.00)                      | 0.00<br>(0.00 to<br>0.00)                      |
| Lower respiratory infections            | 183.86<br>(160.52 to<br>211.51)                   | 175.10<br>(130.43 to<br>246.47)                   | 141.06<br>(107.06 to<br>192.21)                   | 255.47<br>(176.14 to<br>376.68)                   | 6.04<br>(5.38 to<br>6.82)                      | 11.64<br>(9.11 to<br>15.18)                    | 10.34<br>(8.21 to<br>13.08)                    | 15.03<br>(11.25 to<br>20.85)                   |
| Upper respiratory infections            | 0.20<br>(0.10 to<br>0.33)                         | 0.15<br>(0.07 to<br>0.29)                         | 0.10<br>(0.04 to<br>0.20)                         | 0.18<br>(0.08 to<br>0.35)                         | 0.00<br>(0.00 to<br>0.01)                      | 0.01<br>(0.00 to<br>0.01)                      | 0.00<br>(0.00 to<br>0.01)                      | 0.01<br>(0.00 to<br>0.01)                      |
| Otitis media                            | 0.05<br>(0.04 to<br>0.08)                         | 0.01<br>(0.01 to<br>0.02)                         | 0.01<br>(0.01 to<br>0.02)                         | 0.01<br>(0.01 to<br>0.02)                         | 0.00<br>(0.00 to<br>0.00)                      | 0.00<br>(0.00 to<br>0.00)                      | 0.00<br>(0.00 to<br>0.00)                      | 0.00<br>(0.00 to<br>0.00)                      |
| Meningitis                              | 23.75<br>(20.10 to<br>30.01)                      | 13.11<br>(9.38 to<br>17.49)                       | 11.32<br>(8.04 to<br>14.92)                       | 16.95<br>(10.50 to<br>24.68)                      | 0.46<br>(0.40 to<br>0.55)                      | 0.42<br>(0.33 to<br>0.51)                      | 0.38<br>(0.30 to<br>0.46)                      | 0.46<br>(0.35 to<br>0.57)                      |
| Pneumococcal meningitis                 | 2.79<br>(2.33 to<br>3.51)                         | 1.43<br>(1.05 to<br>1.83)                         | 1.39<br>(1.04 to<br>1.77)                         | 1.70<br>(1.18 to<br>2.31)                         | 0.06<br>(0.05 to<br>0.07)                      | 0.05<br>(0.04 to<br>0.06)                      | 0.05<br>(0.04 to<br>0.07)                      | 0.06<br>(0.05 to<br>0.07)                      |
| H influenzae type B meningitis          | 1.72<br>(1.40 to<br>2.20)                         | 1.67<br>(0.67 to<br>3.52)                         | 1.42<br>(0.62 to<br>2.81)                         | 4.64<br>(1.10 to<br>11.16)                        | 0.03<br>(0.03 to<br>0.04)                      | 0.03<br>(0.02 to<br>0.06)                      | 0.03<br>(0.02 to<br>0.05)                      | 0.07<br>(0.03 to<br>0.14)                      |
| Meningococcal meningitis                | 5.03<br>(4.16 to<br>6.43)                         | 2.36<br>(1.68 to<br>3.17)                         | 2.01<br>(1.40 to<br>2.68)                         | 2.52<br>(1.75 to<br>3.48)                         | 0.09<br>(0.08 to<br>0.11)                      | 0.08<br>(0.06 to<br>0.09)                      | 0.07<br>(0.05 to<br>0.08)                      | 0.08<br>(0.06 to<br>0.09)                      |
| Other meningitis                        | 14.21<br>(11.94 to<br>17.91)                      | 7.64<br>(5.57 to<br>10.01)                        | 6.51<br>(4.63 to<br>8.65)                         | 8.09<br>(5.71 to<br>10.87)                        | 0.27<br>(0.24 to<br>0.33)                      | 0.26<br>(0.20 to<br>0.31)                      | 0.23<br>(0.17 to<br>0.28)                      | 0.26<br>(0.20 to<br>0.31)                      |
| Encephalitis                            | 15.06<br>(11.71 to<br>22.45)                      | 9.26<br>(6.10 to<br>13.78)                        | 7.94<br>(5.33 to<br>11.69)                        | 10.25<br>(6.51 to<br>15.83)                       | 0.27<br>(0.21 to<br>0.38)                      | 0.27<br>(0.18 to<br>0.34)                      | 0.24<br>(0.16 to<br>0.31)                      | 0.28<br>(0.19 to<br>0.36)                      |
| Diphtheria                              | 0.04<br>(0.02 to<br>0.06)                         | 0.01<br>(0.00 to<br>0.01)                         | 0.01<br>(0.00 to<br>0.01)                         | 0.02<br>(0.00 to<br>0.06)                         | 0.00<br>(0.00 to<br>0.00)                      | 0.00<br>(0.00 to<br>0.00)                      | 0.00<br>(0.00 to<br>0.00)                      | 0.00<br>(0.00 to<br>0.00)                      |
| Whooping cough                          | 1.43<br>(0.18 to<br>2.91)                         | 0.38<br>(0.02 to<br>1.25)                         | 0.19<br>(0.02 to<br>0.60)                         | 1.88<br>(0.04 to<br>5.87)                         | 0.02<br>(0.00 to<br>0.03)                      | 0.00<br>(0.00 to<br>0.01)                      | 0.00<br>(0.00 to<br>0.01)                      | 0.02<br>(0.00 to<br>0.07)                      |
| Tetanus                                 | 0.62<br>(0.47 to<br>0.81)                         | 0.08<br>(0.04 to<br>0.12)                         | 0.06<br>(0.04 to<br>0.10)                         | 0.23<br>(0.11 to<br>0.46)                         | 0.01<br>(0.01 to<br>0.02)                      | 0.00<br>(0.00 to<br>0.00)                      | 0.00<br>(0.00 to<br>0.00)                      | 0.00<br>(0.00 to<br>0.01)                      |
| Measles                                 | 0.06<br>(0.04 to<br>0.09)                         | 15.00<br>(1.84 to<br>44.35)                       | 11.10<br>(1.59 to<br>30.73)                       | 27.64<br>(2.73 to<br>86.18)                       | 0.00<br>(0.00 to<br>0.00)                      | 0.25<br>(0.03 to<br>0.66)                      | 0.19<br>(0.03 to<br>0.48)                      | 0.42<br>(0.05 to<br>1.17)                      |
| <b>Colombia</b>                         |                                                   |                                                   |                                                   |                                                   |                                                |                                                |                                                |                                                |
| Cause                                   | YLLs (in 1000s)                                   |                                                   |                                                   |                                                   | Deaths (in 1000s)                              |                                                |                                                |                                                |
|                                         | 2016                                              | 2040 Forecast                                     | 2040 Better Scenario                              | 2040 Worse Scenario                               | 2016                                           | 2040 Forecast                                  | 2040 Better Scenario                           | 2040 Worse Scenario                            |
| Varicella and herpes zoster             | 2.52<br>(1.51 to<br>4.73)                         | 1.03<br>(0.49 to<br>1.75)                         | 0.76<br>(0.35 to<br>1.29)                         | 1.22<br>(0.57 to<br>2.17)                         | 0.05<br>(0.03 to<br>0.09)                      | 0.04<br>(0.02 to<br>0.06)                      | 0.03<br>(0.02 to<br>0.05)                      | 0.04<br>(0.02 to<br>0.07)                      |
| Neglected tropical diseases and malaria | <b>23.68</b><br><b>(17.34 to</b><br><b>32.34)</b> | <b>37.69</b><br><b>(28.94 to</b><br><b>49.99)</b> | <b>35.57</b><br><b>(27.58 to</b><br><b>46.71)</b> | <b>40.36</b><br><b>(30.41 to</b><br><b>54.24)</b> | <b>0.51</b><br><b>(0.40 to</b><br><b>0.68)</b> | <b>1.19</b><br><b>(0.95 to</b><br><b>1.51)</b> | <b>1.20</b><br><b>(0.96 to</b><br><b>1.52)</b> | <b>1.19</b><br><b>(0.95 to</b><br><b>1.52)</b> |
| Malaria                                 | 2.52<br>(1.26 to<br>7.35)                         | 0.97<br>(0.41 to<br>3.57)                         | 0.90<br>(0.39 to<br>3.31)                         | 1.03<br>(0.43 to<br>3.82)                         | 0.05<br>(0.02 to<br>0.15)                      | 0.03<br>(0.01 to<br>0.10)                      | 0.03<br>(0.01 to<br>0.10)                      | 0.03<br>(0.01 to<br>0.10)                      |
| Chagas disease                          | 3.36<br>(2.90 to<br>4.03)                         | 2.51<br>(1.87 to<br>3.40)                         | 2.89<br>(2.19 to<br>3.87)                         | 2.31<br>(1.73 to<br>3.16)                         | 0.14<br>(0.12 to<br>0.17)                      | 0.14<br>(0.10 to<br>0.18)                      | 0.16<br>(0.12 to<br>0.21)                      | 0.12<br>(0.09 to<br>0.17)                      |



|                                                       |                                                   |                                                 |                                                |                                                  |                                                |                                                |                                                |                                                |
|-------------------------------------------------------|---------------------------------------------------|-------------------------------------------------|------------------------------------------------|--------------------------------------------------|------------------------------------------------|------------------------------------------------|------------------------------------------------|------------------------------------------------|
| Leishmaniasis                                         | 0.09<br>(0.05 to<br>0.13)                         | 0.04<br>(0.02 to<br>0.06)                       | 0.03<br>(0.01 to<br>0.04)                      | 0.05<br>(0.02 to<br>0.08)                        | 0.00<br>(0.00 to<br>0.00)                      | 0.00<br>(0.00 to<br>0.00)                      | 0.00<br>(0.00 to<br>0.00)                      | 0.00<br>(0.00 to<br>0.00)                      |
| African trypanosomiasis                               | 0.00<br>(0.00 to<br>0.00)                         | 0.00<br>(0.00 to<br>0.00)                       | 0.00<br>(0.00 to<br>0.00)                      | 0.00<br>(0.00 to<br>0.00)                        | 0.00<br>(0.00 to<br>0.00)                      | 0.00<br>(0.00 to<br>0.00)                      | 0.00<br>(0.00 to<br>0.00)                      | 0.00<br>(0.00 to<br>0.00)                      |
| Schistosomiasis                                       | 0.00<br>(0.00 to<br>0.00)                         | 0.00<br>(0.00 to<br>0.00)                       | 0.00<br>(0.00 to<br>0.00)                      | 0.00<br>(0.00 to<br>0.00)                        | 0.00<br>(0.00 to<br>0.00)                      | 0.00<br>(0.00 to<br>0.00)                      | 0.00<br>(0.00 to<br>0.00)                      | 0.00<br>(0.00 to<br>0.00)                      |
| Cysticercosis                                         | 0.00<br>(0.00 to<br>0.00)                         | 0.00<br>(0.00 to<br>0.00)                       | 0.00<br>(0.00 to<br>0.00)                      | 0.00<br>(0.00 to<br>0.00)                        | 0.00<br>(0.00 to<br>0.00)                      | 0.00<br>(0.00 to<br>0.00)                      | 0.00<br>(0.00 to<br>0.00)                      | 0.00<br>(0.00 to<br>0.00)                      |
| Cystic echinococcosis                                 | 0.02<br>(0.02 to<br>0.03)                         | 0.01<br>(0.01 to<br>0.01)                       | 0.01<br>(0.00 to<br>0.01)                      | 0.01<br>(0.01 to<br>0.02)                        | 0.00<br>(0.00 to<br>0.00)                      | 0.00<br>(0.00 to<br>0.00)                      | 0.00<br>(0.00 to<br>0.00)                      | 0.00<br>(0.00 to<br>0.00)                      |
| Dengue                                                | 14.96<br>(9.66 to<br>21.58)                       | 52.67<br>(24.61 to<br>42.97)                    | 30.50<br>(22.81 to<br>39.76)                   | 35.20<br>(26.08 to<br>47.11)                     | 0.28<br>(0.19 to<br>0.38)                      | 0.99<br>(0.76 to<br>1.25)                      | 0.98<br>(0.75 to<br>1.24)                      | 1.00<br>(0.76 to<br>1.26)                      |
| Yellow fever                                          | 0.18<br>(0.04 to<br>0.53)                         | 0.04<br>(0.01 to<br>0.12)                       | 0.03<br>(0.01 to<br>0.09)                      | 0.04<br>(0.01 to<br>0.13)                        | 0.00<br>(0.00 to<br>0.01)                      | 0.00<br>(0.00 to<br>0.00)                      | 0.00<br>(0.01 to<br>0.00)                      | 0.00<br>(0.00 to<br>0.00)                      |
| Rabies                                                | 0.00<br>(0.00 to<br>0.00)                         | 0.00<br>(0.00 to<br>0.00)                       | 0.00<br>(0.00 to<br>0.00)                      | 0.00<br>(0.00 to<br>0.00)                        | 0.00<br>(0.00 to<br>0.00)                      | 0.00<br>(0.00 to<br>0.00)                      | 0.00<br>(0.00 to<br>0.00)                      | 0.00<br>(0.00 to<br>0.00)                      |
| Intestinal nematode infections                        | 0.65<br>(0.38 to<br>1.04)                         | 0.48<br>(0.26 to<br>0.87)                       | 0.45<br>(0.25 to<br>0.81)                      | 0.54<br>(0.29 to<br>0.99)                        | 0.01<br>(0.01 to<br>0.02)                      | 0.01<br>(0.01 to<br>0.02)                      | 0.01<br>(0.01 to<br>0.02)                      | 0.01<br>(0.01 to<br>0.02)                      |
| Other neglected tropical diseases                     | 1.86<br>(1.20 to<br>3.52)                         | 0.98<br>(0.58 to<br>2.43)                       | 0.78<br>(0.46 to<br>2.01)                      | 1.18<br>(0.70 to<br>2.91)                        | 0.03<br>(0.02 to<br>0.07)                      | 0.03<br>(0.02 to<br>0.08)                      | 0.02<br>(0.01 to<br>0.07)                      | 0.03<br>(0.02 to<br>0.09)                      |
| <b>Maternal disorders</b>                             | <b>21.66</b><br><b>(17.72 to</b><br><b>26.01)</b> | <b>9.39</b><br><b>(6.75 to</b><br><b>12.42)</b> | <b>6.38</b><br><b>(4.50 to</b><br><b>8.57)</b> | <b>11.53</b><br><b>(8.00 to</b><br><b>15.74)</b> | <b>0.38</b><br><b>(0.51 to</b><br><b>0.45)</b> | <b>0.17</b><br><b>(0.12 to</b><br><b>0.22)</b> | <b>0.11</b><br><b>(0.08 to</b><br><b>0.15)</b> | <b>0.20</b><br><b>(0.14 to</b><br><b>0.28)</b> |
| Maternal hemorrhage                                   | 3.05<br>(2.05 to<br>4.27)                         | 1.61<br>(0.98 to<br>2.45)                       | 1.10<br>(0.65 to<br>1.68)                      | 1.96<br>(1.15 to<br>3.06)                        | 0.05<br>(0.04 to<br>0.07)                      | 0.03<br>(0.02 to<br>0.04)                      | 0.02<br>(0.01 to<br>0.03)                      | 0.04<br>(0.02 to<br>0.06)                      |
| Maternal sepsis and other maternal infections         | 1.02<br>(0.66 to<br>1.52)                         | 0.57<br>(0.31 to<br>1.00)                       | 0.39<br>(0.21 to<br>0.68)                      | 0.70<br>(0.38 to<br>1.23)                        | 0.02<br>(0.01 to<br>0.03)                      | 0.01<br>(0.01 to<br>0.02)                      | 0.01<br>(0.00 to<br>0.01)                      | 0.01<br>(0.01 to<br>0.02)                      |
| Maternal hypertensive disorders                       | 4.73<br>(3.32 to<br>6.48)                         | 2.47<br>(1.48 to<br>3.69)                       | 1.67<br>(0.98 to<br>2.47)                      | 3.04<br>(1.80 to<br>4.61)                        | 0.08<br>(0.06 to<br>0.11)                      | 0.04<br>(0.03 to<br>0.06)                      | 0.03<br>(0.02 to<br>0.04)                      | 0.05<br>(0.03 to<br>0.08)                      |
| Maternal obstructed labor and uterine rupture         | 0.42<br>(0.24 to<br>0.66)                         | 0.23<br>(0.11 to<br>0.40)                       | 0.15<br>(0.07 to<br>0.28)                      | 0.29<br>(0.13 to<br>0.51)                        | 0.01<br>(0.00 to<br>0.01)                      | 0.00<br>(0.00 to<br>0.01)                      | 0.00<br>(0.00 to<br>0.00)                      | 0.01<br>(0.00 to<br>0.01)                      |
| Maternal abortion, miscarriage, and ectopic pregnancy | 6.93<br>(4.88 to<br>9.06)                         | 1.78<br>(0.95 to<br>2.99)                       | 1.20<br>(0.63 to<br>2.01)                      | 2.19<br>(1.16 to<br>3.68)                        | 0.12<br>(0.09 to<br>0.16)                      | 0.03<br>(0.02 to<br>0.05)                      | 0.02<br>(0.01 to<br>0.04)                      | 0.04<br>(0.02 to<br>0.07)                      |
| Indirect maternal deaths                              | 3.56<br>(2.22 to<br>7.06)                         | 1.62<br>(0.86 to<br>3.41)                       | 1.11<br>(0.58 to<br>2.41)                      | 2.00<br>(1.04 to<br>4.23)                        | 0.06<br>(0.04 to<br>0.12)                      | 0.03<br>(0.02 to<br>0.06)                      | 0.02<br>(0.01 to<br>0.04)                      | 0.03<br>(0.02 to<br>0.07)                      |
| Late maternal deaths                                  | 0.37<br>(0.25 to<br>0.51)                         | 0.17<br>(0.10 to<br>0.28)                       | 0.12<br>(0.06 to<br>0.19)                      | 0.21<br>(0.12 to<br>0.35)                        | 0.01<br>(0.00 to<br>0.01)                      | 0.00<br>(0.00 to<br>0.00)                      | 0.00<br>(0.00 to<br>0.00)                      | 0.00<br>(0.00 to<br>0.01)                      |
| Maternal deaths aggravated by HIV/AIDS                | 0.01<br>(0.01 to<br>0.03)                         | 0.03<br>(0.01 to<br>0.06)                       | 0.02<br>(0.01 to<br>0.04)                      | 0.03<br>(0.01 to<br>0.07)                        | 0.00<br>(0.00 to<br>0.00)                      | 0.00<br>(0.00 to<br>0.00)                      | 0.00<br>(0.00 to<br>0.00)                      | 0.00<br>(0.00 to<br>0.00)                      |
| Other maternal disorders                              | 1.57<br>(1.00 to<br>2.27)                         | 0.91<br>(0.50 to<br>1.42)                       | 0.64<br>(0.35 to<br>1.02)                      | 1.11<br>(0.60 to<br>1.78)                        | 0.03<br>(0.02 to<br>0.04)                      | 0.02<br>(0.01 to<br>0.03)                      | 0.01<br>(0.01 to<br>0.02)                      | 0.02<br>(0.01 to<br>0.03)                      |
| <b>Colombia</b>                                       |                                                   |                                                 |                                                |                                                  |                                                |                                                |                                                |                                                |
| Cause                                                 | YLLs (in 1000s)                                   |                                                 |                                                |                                                  | Deaths (in 1000s)                              |                                                |                                                |                                                |
|                                                       | 2016                                              | 2040 Forecast                                   | 2040 Better Scenario                           | 2040 Worse Scenario                              | 2016                                           | 2040 Forecast                                  | 2040 Better Scenario                           | 2040 Worse Scenario                            |

|                                                                         |                                                   |                                                   |                                                   |                                                   |                                                |                                                |                                                |                                                |
|-------------------------------------------------------------------------|---------------------------------------------------|---------------------------------------------------|---------------------------------------------------|---------------------------------------------------|------------------------------------------------|------------------------------------------------|------------------------------------------------|------------------------------------------------|
|                                                                         | 406.28<br>(327.84 to<br>506.40)                   | 173.03<br>(116.06 to<br>263.31)                   | 111.62<br>(73.89 to<br>169.77)                    | 229.11<br>(148.96 to<br>358.49)                   | 4.69<br>(3.79 to<br>5.85)                      | 2.00<br>(1.34 to<br>3.04)                      | 1.29<br>(0.85 to<br>1.96)                      | 2.65<br>(1.72 to<br>4.14)                      |
| <b>Neonatal disorders</b>                                               |                                                   |                                                   |                                                   |                                                   |                                                |                                                |                                                |                                                |
| Neonatal preterm birth                                                  | 181.42<br>(143.00 to<br>229.51)                   | 83.92<br>(51.99 to<br>138.65)                     | 46.82<br>(29.13 to<br>74.28)                      | 111.36<br>(67.57 to<br>187.77)                    | 2.10<br>(1.65 to<br>2.65)                      | 0.97<br>(0.60 to<br>1.60)                      | 0.54<br>(0.34 to<br>0.86)                      | 1.29<br>(0.78 to<br>2.17)                      |
| Neonatal encephalopathy due to birth asphyxia and trauma                | 71.03<br>(53.65 to<br>93.92)                      | 27.62<br>(16.28 to<br>44.39)                      | 20.02<br>(11.89 to<br>32.05)                      | 36.13<br>(20.85 to<br>58.33)                      | 0.82<br>(0.19 to<br>1.09)                      | 0.32<br>(0.19 to<br>0.51)                      | 0.23<br>(0.14 to<br>0.37)                      | 0.42<br>(0.24 to<br>0.67)                      |
| Neonatal sepsis and other neonatal infections                           | 87.58<br>(59.66 to<br>153.97)                     | 39.04<br>(23.02 to<br>70.62)                      | 28.60<br>(16.80 to<br>51.25)                      | 51.21<br>(29.33 to<br>91.04)                      | 1.01<br>(0.69 to<br>1.78)                      | 0.45<br>(0.27 to<br>0.82)                      | 0.33<br>(0.19 to<br>0.59)                      | 0.59<br>(0.34 to<br>1.05)                      |
| Hemolytic disease and other neonatal jaundice                           | 2.74<br>(1.47 to<br>5.57)                         | 0.96<br>(0.41 to<br>2.13)                         | 0.67<br>(0.28 to<br>1.47)                         | 1.30<br>(0.55 to<br>2.86)                         | 0.03<br>(0.02 to<br>0.06)                      | 0.01<br>(0.00 to<br>0.02)                      | 0.01<br>(0.00 to<br>0.02)                      | 0.02<br>(0.01 to<br>0.03)                      |
| Other neonatal disorders                                                | 63.51<br>(46.04 to<br>83.95)                      | 21.49<br>(12.89 to<br>34.23)                      | 15.52<br>(9.32 to<br>24.58)                       | 29.11<br>(16.77 to<br>47.12)                      | 0.73<br>(0.53 to<br>0.97)                      | 0.25<br>(0.15 to<br>0.40)                      | 0.18<br>(0.11 to<br>0.28)                      | 0.34<br>(0.19 to<br>0.54)                      |
| <b>Nutritional deficiencies</b>                                         | <b>60.06</b><br><b>(49.14 to</b><br><b>72.63)</b> | <b>35.05</b><br><b>(29.80 to</b><br><b>40.90)</b> | <b>31.03</b><br><b>(26.57 to</b><br><b>36.05)</b> | <b>38.14</b><br><b>(31.74 to</b><br><b>45.35)</b> | <b>1.98</b><br><b>(1.74 to</b><br><b>2.23)</b> | <b>2.58</b><br><b>(2.17 to</b><br><b>3.05)</b> | <b>2.45</b><br><b>(2.07 to</b><br><b>2.93)</b> | <b>2.58</b><br><b>(2.13 to</b><br><b>3.09)</b> |
| Protein-energy malnutrition                                             | 57.76<br>(46.93 to<br>70.30)                      | 32.01<br>(26.44 to<br>37.53)                      | 28.47<br>(23.57 to<br>33.27)                      | 34.83<br>(28.27 to<br>41.75)                      | 1.90<br>(1.65 to<br>2.15)                      | 2.39<br>(1.94 to<br>2.86)                      | 2.28<br>(1.85 to<br>2.75)                      | 2.39<br>(1.90 to<br>2.91)                      |
| Iodine deficiency                                                       | 0.20<br>(0.01 to<br>0.73)                         | 0.82<br>(0.01 to<br>3.15)                         | 0.67<br>(0.01 to<br>2.65)                         | 0.92<br>(0.01 to<br>3.67)                         | 0.01<br>(0.00 to<br>0.02)                      | 0.06<br>(0.00 to<br>0.30)                      | 0.05<br>(0.00 to<br>0.29)                      | 0.06<br>(0.00 to<br>0.31)                      |
| Dietary iron deficiency                                                 | 0.29<br>(0.15 to<br>0.57)                         | 0.17<br>(0.08 to<br>0.27)                         | 0.15<br>(0.07 to<br>0.24)                         | 0.19<br>(0.10 to<br>0.31)                         | 0.01<br>(0.00 to<br>0.01)                      | 0.00<br>(0.00 to<br>0.01)                      | 0.00<br>(0.00 to<br>0.01)                      | 0.01<br>(0.00 to<br>0.01)                      |
| Other nutritional deficiencies                                          | 1.81<br>(0.98 to<br>3.13)                         | 2.04<br>(0.95 to<br>3.70)                         | 1.74<br>(0.79 to<br>3.19)                         | 2.20<br>(1.03 to<br>3.98)                         | 0.07<br>(0.03 to<br>0.13)                      | 0.13<br>(0.05 to<br>0.25)                      | 0.12<br>(0.05 to<br>0.23)                      | 0.13<br>(0.06 to<br>0.26)                      |
| <b>Other communicable, maternal, neonatal, and nutritional diseases</b> | <b>16.66</b><br><b>(13.97 to</b><br><b>20.49)</b> | <b>11.51</b><br><b>(9.25 to</b><br><b>13.91)</b>  | <b>9.54</b><br><b>(7.68 to</b><br><b>11.67)</b>   | <b>12.85</b><br><b>(10.16 to</b><br><b>15.93)</b> | <b>0.36</b><br><b>(0.32 to</b><br><b>0.42)</b> | <b>0.42</b><br><b>(0.35 to</b><br><b>0.49)</b> | <b>0.36</b><br><b>(0.30 to</b><br><b>0.43)</b> | <b>0.44</b><br><b>(0.36 to</b><br><b>0.52)</b> |
| Sexually transmitted infections excluding HIV                           | 3.85<br>(2.24 to<br>6.39)                         | 1.19<br>(0.77 to<br>1.94)                         | 0.97<br>(0.65 to<br>1.56)                         | 1.36<br>(0.86 to<br>2.34)                         | 0.06<br>(0.04 to<br>0.09)                      | 0.04<br>(0.02 to<br>0.04)                      | 0.03<br>(0.02 to<br>0.03)                      | 0.03<br>(0.02 to<br>0.04)                      |
| Syphilis                                                                | 3.03<br>(1.45 to<br>5.61)                         | 0.75<br>(0.37 to<br>1.47)                         | 0.58<br>(0.29 to<br>1.17)                         | 0.89<br>(0.43 to<br>1.85)                         | 0.04<br>(0.02 to<br>0.07)                      | 0.01<br>(0.01 to<br>0.02)                      | 0.01<br>(0.01 to<br>0.02)                      | 0.02<br>(0.01 to<br>0.03)                      |
| Chlamydial infection                                                    | 0.16<br>(0.13 to<br>0.20)                         | 0.09<br>(0.06 to<br>0.11)                         | 0.08<br>(0.05 to<br>0.10)                         | 0.09<br>(0.06 to<br>0.12)                         | 0.00<br>(0.00 to<br>0.00)                      | 0.00<br>(0.00 to<br>0.00)                      | 0.00<br>(0.00 to<br>0.00)                      | 0.00<br>(0.00 to<br>0.00)                      |
| Gonococcal infection                                                    | 0.43<br>(0.34 to<br>0.53)                         | 0.24<br>(0.18 to<br>0.31)                         | 0.21<br>(0.15 to<br>0.28)                         | 0.25<br>(0.18 to<br>0.33)                         | 0.01<br>(0.01 to<br>0.01)                      | 0.01<br>(0.01 to<br>0.01)                      | 0.01<br>(0.01 to<br>0.01)                      | 0.01<br>(0.01 to<br>0.01)                      |
| Other sexually transmitted infections                                   | 0.23<br>(0.18 to<br>0.29)                         | 0.12<br>(0.09 to<br>0.16)                         | 0.10<br>(0.08 to<br>0.14)                         | 0.13<br>(0.09 to<br>0.17)                         | 0.01<br>(0.00 to<br>0.01)                      | 0.00<br>(0.00 to<br>0.00)                      | 0.00<br>(0.00 to<br>0.00)                      | 0.00<br>(0.00 to<br>0.00)                      |
| Acute hepatitis                                                         | 3.01<br>(2.61 to<br>3.50)                         | 2.63<br>(2.00 to<br>3.38)                         | 2.15<br>(1.57 to<br>2.79)                         | 2.84<br>(2.14 to<br>3.66)                         | 0.08<br>(0.07 to<br>0.09)                      | 0.10<br>(0.08 to<br>0.13)                      | 0.09<br>(0.07 to<br>0.11)                      | 0.11<br>(0.08 to<br>0.14)                      |
| Acute hepatitis A                                                       | 0.17<br>(0.06 to<br>0.35)                         | 0.07<br>(0.03 to<br>0.15)                         | 0.06<br>(0.02 to<br>0.12)                         | 0.09<br>(0.04 to<br>0.17)                         | 0.00<br>(0.00 to<br>0.00)                      | 0.00<br>(0.00 to<br>0.00)                      | 0.00<br>(0.00 to<br>0.00)                      | 0.00<br>(0.00 to<br>0.00)                      |
| Acute hepatitis B                                                       | 2.07<br>(1.73 to<br>2.48)                         | 2.03<br>(1.47 to<br>2.71)                         | 1.65<br>(1.16 to<br>2.24)                         | 2.19<br>(1.59 to<br>2.90)                         | 0.06<br>(0.05 to<br>0.07)                      | 0.08<br>(0.06 to<br>0.10)                      | 0.07<br>(0.05 to<br>0.09)                      | 0.08<br>(0.06 to<br>0.11)                      |
| Acute hepatitis C                                                       | 0.13<br>(0.09 to<br>0.17)                         | 0.13<br>(0.09 to<br>0.19)                         | 0.11<br>(0.07 to<br>0.16)                         | 0.13<br>(0.09 to<br>0.19)                         | 0.00<br>(0.00 to<br>0.00)                      | 0.01<br>(0.00 to<br>0.01)                      | 0.00<br>(0.00 to<br>0.01)                      | 0.01<br>(0.00 to<br>0.01)                      |
| Acute hepatitis E                                                       | 0.64<br>(0.48 to<br>0.85)                         | 0.40<br>(0.27 to<br>0.58)                         | 0.33<br>(0.22 to<br>0.49)                         | 0.43<br>(0.29 to<br>0.63)                         | 0.01<br>(0.01 to<br>0.02)                      | 0.02<br>(0.01 to<br>0.03)                      | 0.02<br>(0.01 to<br>0.03)                      | 0.02<br>(0.01 to<br>0.03)                      |

|                                       |                                                           |                                                            |                                                            |                                                            |                                                      |                                                      |                                                      |                                                      |
|---------------------------------------|-----------------------------------------------------------|------------------------------------------------------------|------------------------------------------------------------|------------------------------------------------------------|------------------------------------------------------|------------------------------------------------------|------------------------------------------------------|------------------------------------------------------|
| Other unspecified infectious diseases | 9.79<br>(8.30 to<br>11.73)                                | 7.69<br>(6.15 to<br>9.38)                                  | 6.42<br>(5.11 to<br>7.82)                                  | 8.65<br>(6.79 to<br>10.80)                                 | 0.22<br>(0.19 to<br>0.26)                            | 0.28<br>(0.23 to<br>0.34)                            | 0.25<br>(0.20 to<br>0.30)                            | 0.30<br>(0.24 to<br>0.36)                            |
| <b>Non-communicable diseases</b>      | <b>3285.60</b><br><b>(3,010.12 to</b><br><b>3,582.79)</b> | <b>5426.80</b><br><b>(4,287.91 to</b><br><b>6,734.76)</b>  | <b>4,379.60</b><br><b>(3,543.89 to</b><br><b>5,341.18)</b> | <b>6,605.42</b><br><b>(5,146.95 to</b><br><b>8,343.43)</b> | <b>168.96</b><br><b>(155.74 to</b><br><b>183.15)</b> | <b>391.38</b><br><b>(319.59 to</b><br><b>472.45)</b> | <b>325.00</b><br><b>(269.07 to</b><br><b>386.72)</b> | <b>454.52</b><br><b>(367.03 to</b><br><b>546.95)</b> |
| <b>Colombia</b>                       |                                                           |                                                            |                                                            |                                                            |                                                      |                                                      |                                                      |                                                      |
| <b>Cause</b>                          | <b>YLLs (in 1000s)</b>                                    |                                                            |                                                            |                                                            | <b>Deaths (in 1000s)</b>                             |                                                      |                                                      |                                                      |
|                                       | <b>2016</b>                                               | <b>2040 Forecast</b>                                       | <b>2040 Better Scenario</b>                                | <b>2040 Worse Scenario</b>                                 | <b>2016</b>                                          | <b>2040 Forecast</b>                                 | <b>2040 Better Scenario</b>                          | <b>2040 Worse Scenario</b>                           |
| <b>Neoplasms</b>                      | <b>997.74</b><br><b>(907.28 to</b><br><b>1,097.12)</b>    | <b>1,643.10</b><br><b>(1,338.83 to</b><br><b>1,972.11)</b> | <b>1,539.57</b><br><b>(1,247.75 to</b><br><b>1,855.26)</b> | <b>1,827.77</b><br><b>(1,489.92 to</b><br><b>2,212.83)</b> | <b>42.26</b><br><b>(38.49 to</b><br><b>46.14)</b>    | <b>95.89</b><br><b>(81.28 to</b><br><b>111.19)</b>   | <b>92.50</b><br><b>(78.96 to</b><br><b>106.81)</b>   | <b>104.25</b><br><b>(87.79 to</b><br><b>121.67)</b>  |
| Lip and oral cavity cancer            | 10.13<br>(8.92 to<br>11.34)                               | 16.42<br>(10.04 to<br>26.00)                               | 12.10<br>(7.80 to<br>18.16)                                | 24.23<br>(14.11 to<br>38.92)                               | 0.49<br>(0.43 to<br>0.54)                            | 0.99<br>(0.62 to<br>1.54)                            | 0.75<br>(0.51 to<br>1.11)                            | 1.44<br>(0.86 to<br>2.32)                            |
| Nasopharynx cancer                    | 3.32<br>(2.85 to<br>3.87)                                 | 5.46<br>(3.49 to<br>8.45)                                  | 3.94<br>(2.56 to<br>6.05)                                  | 8.40<br>(5.16 to<br>13.80)                                 | 0.13<br>(0.12 to<br>0.16)                            | 0.28<br>(0.18 to<br>0.42)                            | 0.21<br>(0.14 to<br>0.31)                            | 0.43<br>(0.27 to<br>0.69)                            |
| Other pharynx cancer                  | 3.88<br>(3.42 to<br>4.38)                                 | 6.87<br>(3.79 to<br>11.23)                                 | 5.34<br>(3.19 to<br>8.30)                                  | 7.96<br>(4.32 to<br>13.18)                                 | 0.16<br>(0.15 to<br>0.19)                            | 0.36<br>(0.20 to<br>0.58)                            | 0.29<br>(0.18 to<br>0.45)                            | 0.41<br>(0.22 to<br>0.67)                            |
| Esophageal cancer                     | 16.64<br>(14.37 to<br>19.19)                              | 26.77<br>(16.59 to<br>40.15)                               | 21.09<br>(13.68 to<br>30.90)                               | 39.31<br>(23.03 to<br>62.78)                               | 0.86<br>(0.76 to<br>0.99)                            | 1.69<br>(1.09 to<br>2.49)                            | 1.37<br>(0.93 to<br>1.94)                            | 2.46<br>(1.47 to<br>3.82)                            |
| Stomach cancer                        | 113.81<br>(101.68 to<br>127.10)                           | 157.62<br>(114.38 to<br>211.45)                            | 137.36<br>(101.79 to<br>181.50)                            | 164.47<br>(119.87 to<br>220.41)                            | 5.39<br>(4.86 to<br>5.96)                            | 9.79<br>(7.46 to<br>12.94)                           | 8.73<br>(6.78 to<br>11.24)                           | 9.99<br>(7.57 to<br>13.09)                           |
| Colon and rectum cancer               | 79.40<br>(69.48 to<br>91.75)                              | 169.51<br>(115.18 to<br>240.45)                            | 152.91<br>(106.68 to<br>216.98)                            | 178.66<br>(120.71 to<br>257.73)                            | 3.84<br>(3.37 to<br>4.37)                            | 11.05<br>(7.71 to<br>16.00)                          | 10.30<br>(7.32 to<br>14.67)                          | 11.29<br>(7.78 to<br>16.36)                          |
| Liver cancer                          | 45.98<br>(40.33 to<br>52.31)                              | 94.38<br>(63.87 to<br>136.46)                              | 83.26<br>(57.93 to<br>116.78)                              | 111.43<br>(72.49 to<br>165.71)                             | 2.20<br>(1.94 to<br>2.50)                            | 5.69<br>(4.05 to<br>8.08)                            | 5.18<br>(3.79 to<br>7.01)                            | 6.53<br>(4.49 to<br>9.54)                            |
| Liver cancer due to hepatitis B       | 12.47<br>(9.22 to<br>16.46)                               | 21.89<br>(12.68 to<br>33.91)                               | 20.25<br>(12.28 to<br>30.72)                               | 25.05<br>(14.46 to<br>40.27)                               | 0.52<br>(0.37 to<br>0.69)                            | 1.15<br>(0.69 to<br>1.81)                            | 1.10<br>(0.67 to<br>1.67)                            | 1.29<br>(0.75 to<br>2.09)                            |
| Liver cancer due to hepatitis C       | 12.04<br>(9.21 to<br>15.26)                               | 26.43<br>(17.35 to<br>39.22)                               | 24.80<br>(16.67 to<br>35.65)                               | 29.74<br>(18.67 to<br>45.53)                               | 0.66<br>(0.51 to<br>0.83)                            | 1.78<br>(1.18 to<br>2.57)                            | 1.72<br>(1.16 to<br>2.44)                            | 1.95<br>(1.26 to<br>2.91)                            |
| Liver cancer due to alcohol use       | 12.15<br>(9.49 to<br>15.03)                               | 28.24<br>(18.01 to<br>43.35)                               | 22.03<br>(14.30 to<br>33.03)                               | 36.27<br>(22.35 to<br>57.77)                               | 0.60<br>(0.47 to<br>0.74)                            | 1.70<br>(1.11 to<br>2.53)                            | 1.39<br>(0.92 to<br>2.03)                            | 2.11<br>(1.33 to<br>3.23)                            |
| Liver cancer due to other causes      | 9.32<br>(7.68 to<br>11.20)                                | 17.82<br>(11.09 to<br>27.21)                               | 16.18<br>(10.49 to<br>24.02)                               | 20.38<br>(12.38 to<br>31.99)                               | 0.43<br>(0.35 to<br>0.51)                            | 1.06<br>(0.68 to<br>1.61)                            | 0.99<br>(0.66 to<br>1.44)                            | 1.18<br>(0.74 to<br>1.83)                            |
| Gallbladder and biliary tract cancer  | 21.34<br>(18.94 to<br>24.30)                              | 30.93<br>(25.74 to<br>37.32)                               | 31.56<br>(25.93 to<br>38.65)                               | 29.67<br>(24.90 to<br>35.46)                               | 1.07<br>(0.96 to<br>1.21)                            | 1.96<br>(1.69 to<br>2.29)                            | 2.04<br>(1.75 to<br>2.40)                            | 1.83<br>(1.59 to<br>2.13)                            |
| Pancreatic cancer                     | 38.49<br>(33.84 to<br>43.18)                              | 82.77<br>(63.40 to<br>106.53)                              | 83.97<br>(64.39 to<br>107.00)                              | 84.60<br>(64.55 to<br>108.48)                              | 1.87<br>(1.66 to<br>2.08)                            | 5.01<br>(3.97 to<br>6.27)                            | 5.17<br>(4.14 to<br>6.36)                            | 5.04<br>(3.99 to<br>6.34)                            |
| Larynx cancer                         | 10.08<br>(8.87 to<br>11.33)                               | 13.74<br>(7.78 to<br>23.93)                                | 10.32<br>(6.17 to<br>17.65)                                | 24.90<br>(12.64 to<br>42.27)                               | 0.52<br>(0.46 to<br>0.58)                            | 0.85<br>(0.49 to<br>1.54)                            | 0.66<br>(0.41 to<br>1.14)                            | 1.52<br>(0.79 to<br>2.61)                            |
| Tracheal, bronchus, and lung cancer   | 96.08<br>(85.13 to<br>109.48)                             | 140.07<br>(102.03 to<br>193.25)                            | 122.91<br>(91.51 to<br>165.17)                             | 249.78<br>(174.80 to<br>356.75)                            | 4.79<br>(4.27 to<br>5.42)                            | 8.48<br>(6.35 to<br>11.35)                           | 7.61<br>(5.81 to<br>9.96)                            | 15.01<br>(10.75 to<br>20.65)                         |
| Malignant skin melanoma               | 9.15<br>(7.31 to<br>14.17)                                | 14.09<br>(10.57 to<br>21.22)                               | 15.65<br>(11.64 to<br>23.48)                               | 13.19<br>(9.98 to<br>19.33)                                | 0.37<br>(0.29 to<br>0.54)                            | 0.78<br>(0.61 to<br>1.14)                            | 0.90<br>(0.70 to<br>1.28)                            | 0.71<br>(0.56 to<br>1.03)                            |
| Non-melanoma skin cancer              | 8.73<br>(7.61 to<br>9.96)                                 | 20.96<br>(17.72 to<br>24.59)                               | 19.77<br>(16.38 to<br>23.56)                               | 20.46<br>(17.41 to<br>23.78)                               | 0.52<br>(0.46 to<br>0.59)                            | 1.61<br>(1.39 to<br>1.84)                            | 1.58<br>(1.34 to<br>1.83)                            | 1.52<br>(1.31 to<br>1.73)                            |

|                   |                              |                                 |                                 |                                 |                           |                              |                              |                             |
|-------------------|------------------------------|---------------------------------|---------------------------------|---------------------------------|---------------------------|------------------------------|------------------------------|-----------------------------|
| Breast cancer     | 79.31<br>(65.62 to<br>94.63) | 130.01<br>(92.71 to<br>178.99)  | 114.66<br>(81.95 to<br>155.25)  | 136.96<br>(97.64 to<br>188.42)  | 2.98<br>(2.48 to<br>3.53) | 6.58<br>(4.80 to<br>8.85)    | 5.97<br>(4.34 to<br>7.96)    | 6.76<br>(4.86 to<br>9.16)   |
| Cervical cancer   | 54.86<br>(46.01 to<br>64.28) | 66.22<br>(49.93 to<br>87.10)    | 59.08<br>(44.31 to<br>79.21)    | 69.87<br>(51.82 to<br>92.12)    | 1.95<br>(1.65 to<br>2.27) | 3.12<br>(2.40 to<br>4.07)    | 2.84<br>(2.18 to<br>3.72)    | 3.25<br>(2.46 to<br>4.27)   |
| Uterine cancer    | 9.14<br>(7.54 to<br>10.99)   | 18.86<br>(14.46 to<br>24.41)    | 17.08<br>(12.97 to<br>22.49)    | 19.26<br>(14.85 to<br>24.99)    | 0.44<br>(0.36 to<br>0.52) | 1.17<br>(0.92 to<br>1.47)    | 1.09<br>(0.85 to<br>1.37)    | 1.17<br>(0.93 to<br>1.45)   |
| Ovarian cancer    | 28.59<br>(22.22 to<br>36.09) | 45.74<br>(28.58 to<br>67.94)    | 45.82<br>(29.19 to<br>66.79)    | 45.08<br>(27.80 to<br>67.80)    | 1.07<br>(0.83 to<br>1.34) | 2.23<br>(1.40 to<br>3.28)    | 2.26<br>(1.45 to<br>3.30)    | 2.16<br>(1.34 to<br>3.24)   |
| Prostate cancer   | 47.89<br>(40.04 to<br>57.37) | 160.64<br>(131.88 to<br>193.20) | 168.51<br>(138.54 to<br>202.16) | 149.88<br>(121.74 to<br>179.59) | 3.36<br>(2.79 to<br>3.95) | 13.08<br>(10.40 to<br>15.45) | 14.10<br>(11.40 to<br>16.63) | 11.88<br>(9.10 to<br>14.21) |
| Testicular cancer | 4.03<br>(3.17 to<br>5.32)    | 3.18<br>(2.19 to<br>4.52)       | 2.93<br>(2.03 to<br>4.14)       | 3.23<br>(2.21 to<br>4.62)       | 0.09<br>(0.07 to<br>0.11) | 0.10<br>(0.08 to<br>0.15)    | 0.10<br>(0.07 to<br>0.12)    | 0.10<br>(0.08 to<br>0.13)   |

**Colombia**

| Cause                           | YLLs (in 1000s)              |                               |                               |                                | Deaths (in 1000s)         |                           |                           |                           |
|---------------------------------|------------------------------|-------------------------------|-------------------------------|--------------------------------|---------------------------|---------------------------|---------------------------|---------------------------|
|                                 | 2016                         | 2040 Forecast                 | 2040 Better Scenario          | 2040 Worse Scenario            | 2016                      | 2040 Forecast             | 2040 Better Scenario      | 2040 Worse Scenario       |
| Kidney cancer                   | 15.47<br>(13.68 to<br>17.43) | 25.23<br>(20.01 to<br>31.45)  | 26.97<br>(21.26 to<br>33.87)  | 25.16<br>(20.12 to<br>31.41)   | 0.57<br>(0.51 to<br>0.64) | 1.27<br>(1.05 to<br>1.52) | 1.39<br>(1.14 to<br>1.68) | 1.24<br>(1.03 to<br>1.50) |
| Bladder cancer                  | 10.56<br>(9.31 to<br>11.90)  | 21.42<br>(16.65 to<br>27.76)  | 20.68<br>(16.10 to<br>26.39)  | 23.12<br>(17.64 to<br>30.50)   | 0.62<br>(0.55 to<br>0.70) | 1.58<br>(1.24 to<br>1.99) | 1.56<br>(1.24 to<br>1.95) | 1.67<br>(1.29 to<br>2.16) |
| Brain and nervous system cancer | 44.55<br>(35.15 to<br>54.36) | 66.06<br>(48.10 to<br>82.12)  | 66.08<br>(47.63 to<br>82.92)  | 65.28<br>(47.84 to<br>80.82)   | 1.25<br>(0.96 to<br>1.47) | 2.66<br>(1.84 to<br>3.21) | 2.74<br>(1.91 to<br>3.56) | 2.53<br>(1.78 to<br>3.03) |
| Thyroid cancer                  | 6.19<br>(5.36 to<br>7.24)    | 11.60<br>(8.26 to<br>16.92)   | 10.25<br>(7.33 to<br>14.80)   | 12.46<br>(8.67 to<br>18.42)    | 0.30<br>(0.26 to<br>0.35) | 0.72<br>(0.52 to<br>1.03) | 0.65<br>(0.48 to<br>0.91) | 0.75<br>(0.53 to<br>1.08) |
| Mesothelioma                    | 2.71<br>(2.25 to<br>3.10)    | 3.77<br>(2.88 to<br>4.78)     | 3.76<br>(2.83 to<br>4.83)     | 3.72<br>(2.88 to<br>4.63)      | 0.10<br>(0.08 to<br>0.11) | 0.18<br>(0.14 to<br>0.22) | 0.18<br>(0.14 to<br>0.22) | 0.17<br>(0.14 to<br>0.21) |
| Hodgkin lymphoma                | 5.60<br>(4.89 to<br>6.58)    | 6.05<br>(4.76 to<br>7.49)     | 5.07<br>(3.90 to<br>6.47)     | 6.44<br>(5.06 to<br>7.98)      | 0.17<br>(0.15 to<br>0.19) | 0.25<br>(0.20 to<br>0.30) | 0.22<br>(0.17 to<br>0.27) | 0.26<br>(0.21 to<br>0.31) |
| Non-Hodgkin lymphoma            | 40.84<br>(35.47 to<br>52.00) | 65.73<br>(51.59 to<br>85.21)  | 64.72<br>(50.63 to<br>82.76)  | 65.78<br>(51.30 to<br>85.93)   | 1.40<br>(1.23 to<br>1.67) | 3.18<br>(2.55 to<br>4.00) | 3.22<br>(2.59 to<br>4.00) | 3.08<br>(2.46 to<br>3.95) |
| Multiple myeloma                | 14.82<br>(12.34 to<br>21.77) | 30.39<br>(22.18 to<br>43.83)  | 30.64<br>(22.49 to<br>44.01)  | 30.18<br>(21.58 to<br>44.08)   | 0.65<br>(0.55 to<br>0.88) | 1.66<br>(1.27 to<br>2.29) | 1.71<br>(1.32 to<br>2.29) | 1.61<br>(1.21 to<br>2.26) |
| Leukemia                        | 87.67<br>(77.66 to<br>98.45) | 97.49<br>(77.89 to<br>120.90) | 92.14<br>(74.31 to<br>113.76) | 104.48<br>(82.90 to<br>130.80) | 2.28<br>(2.04 to<br>2.54) | 4.12<br>(3.39 to<br>5.02) | 4.02<br>(3.30 to<br>4.88) | 4.27<br>(3.46 to<br>5.28) |
| Acute lymphoid leukemia         | 38.71<br>(33.11 to<br>44.35) | 34.56<br>(27.55 to<br>43.16)  | 32.73<br>(26.39 to<br>40.74)  | 37.02<br>(29.37 to<br>46.87)   | 0.82<br>(0.72 to<br>0.92) | 1.22<br>(0.98 to<br>1.49) | 1.20<br>(0.97 to<br>1.47) | 1.26<br>(1.01 to<br>1.56) |
| Chronic lymphoid leukemia       | 3.92<br>(3.22 to<br>4.99)    | 7.53<br>(5.45 to<br>10.34)    | 7.38<br>(5.35 to<br>10.08)    | 7.85<br>(5.53 to<br>10.91)     | 0.20<br>(0.16 to<br>0.24) | 0.49<br>(0.36 to<br>0.66) | 0.49<br>(0.37 to<br>0.66) | 0.50<br>(0.35 to<br>0.68) |
| Acute myeloid leukemia          | 20.57<br>(16.98 to<br>23.60) | 26.39<br>(19.81 to<br>33.59)  | 26.33<br>(19.86 to<br>33.31)  | 27.74<br>(20.93 to<br>35.94)   | 0.52<br>(0.43 to<br>0.59) | 0.99<br>(0.75 to<br>1.24) | 1.02<br>(0.77 to<br>1.28) | 1.01<br>(0.76 to<br>1.29) |
| Chronic myeloid leukemia        | 5.25<br>(4.53 to<br>6.03)    | 5.99<br>(4.35 to<br>8.17)     | 5.46<br>(3.94 to<br>7.39)     | 6.37<br>(4.54 to<br>8.82)      | 0.20<br>(0.18 to<br>0.23) | 0.32<br>(0.24 to<br>0.41) | 0.30<br>(0.22 to<br>0.39) | 0.33<br>(0.24 to<br>0.43) |
| Other leukemia                  | 19.22<br>(16.17 to<br>22.82) | 23.02<br>(18.49 to<br>28.40)  | 20.23<br>(16.28 to<br>25.10)  | 25.50<br>(20.02 to<br>31.97)   | 0.54<br>(0.47 to<br>0.63) | 1.11<br>(0.92 to<br>1.34) | 1.01<br>(0.83 to<br>1.22) | 1.18<br>(0.95 to<br>1.44) |

|                                               |                                                          |                                                            |                                                          |                                                            |                                                   |                                                     |                                                    |                                                      |
|-----------------------------------------------|----------------------------------------------------------|------------------------------------------------------------|----------------------------------------------------------|------------------------------------------------------------|---------------------------------------------------|-----------------------------------------------------|----------------------------------------------------|------------------------------------------------------|
| Other neoplasms                               | 88.50<br>(76.65 to<br>99.69)                             | 111.10<br>(90.26 to<br>132.26)                             | 111.01<br>(89.60 to<br>132.90)                           | 109.78<br>(89.25 to<br>129.76)                             | 2.84<br>(2.46 to<br>3.17)                         | 5.48<br>(4.55 to<br>6.25)                           | 5.68<br>(4.70 to<br>6.57)                          | 5.18<br>(4.33 to<br>5.89)                            |
| <b>Cardiovascular diseases</b>                | <b>1,054.49</b><br><b>(962.73 to</b><br><b>1,151.74)</b> | <b>1,671.19</b><br><b>(1,105.11 to</b><br><b>2,521.76)</b> | <b>1,057.88</b><br><b>(735.91 to</b><br><b>1,512.26)</b> | <b>2,355.02</b><br><b>(1,474.25 to</b><br><b>3,596.02)</b> | <b>64.31</b><br><b>(59.01 to</b><br><b>69.51)</b> | <b>135.56</b><br><b>(93.38 to</b><br><b>192.89)</b> | <b>91.45</b><br><b>(65.67 to</b><br><b>125.15)</b> | <b>173.61</b><br><b>(117.08 to</b><br><b>250.97)</b> |
| Rheumatic heart disease                       | 7.26<br>(6.21 to<br>8.52)                                | 5.93<br>(4.27 to<br>8.27)                                  | 4.72<br>(3.38 to<br>6.61)                                | 6.36<br>(4.58 to<br>8.99)                                  | 0.27<br>(0.23 to<br>0.32)                         | 0.35<br>(0.26 to<br>0.47)                           | 0.29<br>(0.22 to<br>0.39)                          | 0.36<br>(0.27 to<br>0.48)                            |
| Ischemic heart disease                        | 607.99<br>(547.94 to<br>670.17)                          | 861.56<br>(494.21 to<br>1,443.44)                          | 491.99<br>(292.59 to<br>775.43)                          | 1,332.30<br>(744.72 to<br>2,217.54)                        | 39.24<br>(35.66 to<br>42.75)                      | 71.10<br>(41.88 to<br>112.20)                       | 43.67<br>(26.20 to<br>66.79)                       | 98.67<br>(57.05 to<br>156.13)                        |
| Stroke                                        | 221.54<br>(196.59 to<br>246.52)                          | 300.13<br>(181.91 to<br>500.80)                            | 165.22<br>(107.33 to<br>256.57)                          | 455.04<br>(263.70 to<br>774.61)                            | 11.83<br>(10.39 to<br>13.21)                      | 22.42<br>(14.06 to<br>36.17)                        | 13.72<br>(9.06 to<br>21.01)                        | 30.07<br>(18.74 to<br>48.77)                         |
| Ischemic stroke                               | 57.27<br>(49.90 to<br>64.02)                             | 103.67<br>(57.46 to<br>198.52)                             | 65.25<br>(37.26 to<br>117.94)                            | 137.23<br>(75.68 to<br>253.32)                             | 4.28<br>(3.70 to<br>4.82)                         | 9.66<br>(5.29 to<br>19.40)                          | 6.56<br>(3.68 to<br>12.41)                         | 11.69<br>(6.40 to<br>23.60)                          |
| Intracerebral hemorrhage                      | 164.27<br>(145.57 to<br>183.16)                          | 196.46<br>(112.43 to<br>330.41)                            | 99.97<br>(63.14 to<br>156.62)                            | 317.81<br>(172.83 to<br>551.49)                            | 7.55<br>(6.62 to<br>8.47)                         | 12.76<br>(7.87 to<br>21.04)                         | 7.17<br>(4.73 to<br>10.82)                         | 18.38<br>(10.95 to<br>30.44)                         |
| Hypertensive heart disease                    | 71.63<br>(55.79 to<br>118.23)                            | 214.48<br>(115.45 to<br>440.58)                            | 143.62<br>(90.27 to<br>259.21)                           | 258.17<br>(135.95 to<br>552.83)                            | 5.40<br>(4.28 to<br>8.30)                         | 20.18<br>(11.21 to<br>42.42)                        | 14.07<br>(8.91 to<br>25.29)                        | 23.12<br>(12.55 to<br>47.76)                         |
| Cardiomyopathy and myocarditis                | 26.93<br>(22.37 to<br>33.25)                             | 41.54<br>(26.63 to<br>60.24)                               | 36.82<br>(23.53 to<br>52.94)                             | 41.42<br>(27.03 to<br>59.63)                               | 1.03<br>(0.78 to<br>1.19)                         | 2.54<br>(1.43 to<br>3.93)                           | 2.34<br>(1.32 to<br>3.59)                          | 2.41<br>(1.39 to<br>3.73)                            |
| Myocarditis                                   | 4.37<br>(3.24 to<br>6.67)                                | 3.62<br>(2.45 to<br>5.68)                                  | 3.37<br>(2.27 to<br>5.21)                                | 3.76<br>(2.58 to<br>5.90)                                  | 0.10<br>(0.07 to<br>0.15)                         | 0.14<br>(0.09 to<br>0.24)                           | 0.14<br>(0.09 to<br>0.23)                          | 0.13<br>(0.09 to<br>0.23)                            |
| <b>Colombia</b>                               |                                                          |                                                            |                                                          |                                                            |                                                   |                                                     |                                                    |                                                      |
| Cause                                         | YLLs (in 1000s)                                          |                                                            |                                                          |                                                            | Deaths (in 1000s)                                 |                                                     |                                                    |                                                      |
|                                               | 2016                                                     | 2040 Forecast                                              | 2040 Better Scenario                                     | 2040 Worse Scenario                                        | 2016                                              | 2040 Forecast                                       | 2040 Better Scenario                               | 2040 Worse Scenario                                  |
| Alcoholic cardiomyopathy                      | 0.77<br>(0.55 to<br>1.37)                                | 1.16<br>(0.78 to<br>1.85)                                  | 0.98<br>(0.66 to<br>1.61)                                | 1.33<br>(0.90 to<br>2.15)                                  | 0.03<br>(0.02 to<br>0.04)                         | 0.06<br>(0.04 to<br>0.09)                           | 0.05<br>(0.04 to<br>0.08)                          | 0.06<br>(0.05 to<br>0.09)                            |
| Other cardiomyopathy                          | 21.78<br>(18.09 to<br>25.89)                             | 36.76<br>(22.39 to<br>54.29)                               | 32.46<br>(19.43 to<br>47.59)                             | 36.33<br>(22.22 to<br>53.91)                               | 0.90<br>(0.64 to<br>1.05)                         | 2.34<br>(1.22 to<br>3.76)                           | 2.16<br>(1.10 to<br>3.42)                          | 2.22<br>(1.18 to<br>3.54)                            |
| Atrial fibrillation and flutter               | 13.09<br>(10.33 to<br>16.40)                             | 37.65<br>(27.23 to<br>50.96)                               | 35.24<br>(25.97 to<br>46.53)                             | 37.95<br>(27.12 to<br>51.42)                               | 1.25<br>(0.98 to<br>1.60)                         | 4.02<br>(2.90 to<br>5.38)                           | 3.91<br>(2.87 to<br>5.22)                          | 3.88<br>(2.77 to<br>5.26)                            |
| Aortic aneurysm                               | 24.77<br>(21.26 to<br>28.32)                             | 47.90<br>(35.09 to<br>64.40)                               | 44.95<br>(33.77 to<br>59.20)                             | 49.40<br>(36.22 to<br>66.64)                               | 1.34<br>(1.17 to<br>1.52)                         | 3.30<br>(2.53 to<br>4.22)                           | 3.22<br>(2.54 to<br>4.05)                          | 3.24<br>(2.48 to<br>4.17)                            |
| Peripheral artery disease                     | 2.31<br>(1.50 to<br>4.55)                                | 10.26<br>(5.84 to<br>21.26)                                | 10.39<br>(5.94 to<br>21.51)                              | 9.80<br>(5.62 to<br>19.92)                                 | 0.19<br>(0.12 to<br>0.42)                         | 1.02<br>(0.56 to<br>2.19)                           | 1.08<br>(0.59 to<br>2.36)                          | 0.93<br>(0.51 to<br>1.97)                            |
| Endocarditis                                  | 15.47<br>(11.53 to<br>24.02)                             | 21.18<br>(13.08 to<br>31.58)                               | 18.90<br>(11.75 to<br>27.72)                             | 21.71<br>(13.55 to<br>32.88)                               | 0.51<br>(0.34 to<br>0.72)                         | 1.07<br>(0.59 to<br>1.62)                           | 0.99<br>(0.55 to<br>1.45)                          | 1.05<br>(0.58 to<br>1.57)                            |
| Other cardiovascular and circulatory diseases | 63.50<br>(55.24 to<br>72.15)                             | 130.57<br>(95.76 to<br>175.82)                             | 106.02<br>(78.92 to<br>140.95)                           | 142.87<br>(104.05 to<br>193.33)                            | 3.24<br>(2.86 to<br>3.65)                         | 9.58<br>(7.39 to<br>12.39)                          | 8.16<br>(6.31 to<br>10.48)                         | 9.89<br>(7.57 to<br>12.72)                           |
| <b>Chronic respiratory diseases</b>           | <b>202.42</b><br><b>(184.03 to</b><br><b>223.14)</b>     | <b>255.75</b><br><b>(196.64 to</b><br><b>325.75)</b>       | <b>205.75</b><br><b>(162.21 to</b><br><b>258.32)</b>     | <b>422.34</b><br><b>(300.18 to</b><br><b>577.81)</b>       | <b>14.35</b><br><b>(13.09 to</b><br><b>15.68)</b> | <b>21.18</b><br><b>(16.51 to</b><br><b>26.69)</b>   | <b>17.54</b><br><b>(13.95 to</b><br><b>21.83)</b>  | <b>34.44</b><br><b>(24.98 to</b><br><b>45.83)</b>    |
| Chronic obstructive pulmonary disease         | 172.90<br>(156.13 to<br>191.34)                          | 222.03<br>(165.94 to<br>291.01)                            | 172.26<br>(132.68 to<br>222.37)                          | 387.09<br>(267.52 to<br>540.52)                            | 13.23<br>(12.09 to<br>14.50)                      | 19.16<br>(14.59 to<br>24.67)                        | 15.44<br>(12.00 to<br>19.73)                       | 32.42<br>(23.16 to<br>43.85)                         |
| Pneumoconiosis                                | 1.14<br>(0.95 to<br>1.38)                                | 1.32<br>(1.01 to<br>1.72)                                  | 1.15<br>(0.85 to<br>1.52)                                | 1.35<br>(1.04 to<br>1.75)                                  | 0.06<br>(0.05 to<br>0.07)                         | 0.09<br>(0.07 to<br>0.12)                           | 0.08<br>(0.06 to<br>0.11)                          | 0.09<br>(0.07 to<br>0.12)                            |

|                                                                |                                        |                                        |                                        |                                        |                                  |                                     |                                    |                                     |
|----------------------------------------------------------------|----------------------------------------|----------------------------------------|----------------------------------------|----------------------------------------|----------------------------------|-------------------------------------|------------------------------------|-------------------------------------|
|                                                                | 0.51<br>(0.37 to<br>0.67)              | 0.46<br>(0.28 to<br>0.68)              | 0.40<br>(0.23 to<br>0.59)              | 0.46<br>(0.28 to<br>0.67)              | 0.03<br>(0.02 to<br>0.03)        | 0.03<br>(0.02 to<br>0.05)           | 0.03<br>(0.02 to<br>0.04)          | 0.03<br>(0.02 to<br>0.05)           |
| Silicosis                                                      | 0.17<br>(0.12 to<br>0.36)              | 0.25<br>(0.16 to<br>0.50)              | 0.26<br>(0.17 to<br>0.51)              | 0.24<br>(0.16 to<br>0.49)              | 0.01<br>(0.00 to<br>0.02)        | 0.01<br>(0.01 to<br>0.02)           | 0.02<br>(0.01 to<br>0.03)          | 0.02<br>(0.01 to<br>0.03)           |
| Asbestosis                                                     | 0.31<br>(0.13 to<br>0.40)              | 0.33<br>(0.16 to<br>0.50)              | 0.24<br>(0.12 to<br>0.38)              | 0.35<br>(0.17 to<br>0.53)              | 0.02<br>(0.01 to<br>0.02)        | 0.02<br>(0.01 to<br>0.04)           | 0.02<br>(0.01 to<br>0.03)          | 0.02<br>(0.01 to<br>0.04)           |
| Coal workers pneumoconiosis                                    | 0.16<br>(0.12 to<br>0.25)              | 0.28<br>(0.19 to<br>0.42)              | 0.25<br>(0.17 to<br>0.36)              | 0.29<br>(0.20 to<br>0.43)              | 0.01<br>(0.01 to<br>0.01)        | 0.02<br>(0.02 to<br>0.02)           | 0.02<br>(0.03 to<br>0.03)          | 0.02<br>(0.02 to<br>0.03)           |
| Other pneumoconiosis                                           | 8.21<br>(6.73 to<br>12.46)             | 7.79<br>(4.81 to<br>13.51)             | 5.81<br>(3.58 to<br>10.38)             | 9.72<br>(5.85 to<br>17.27)             | 0.31<br>(0.26 to<br>0.51)        | 0.49<br>(0.29 to<br>0.95)           | 0.38<br>(0.23 to<br>0.74)          | 0.57<br>(0.34 to<br>1.08)           |
| Asthma                                                         | 11.18<br>(5.70 to<br>14.29)            | 16.54<br>(8.85 to<br>21.49)            | 18.82<br>(10.03 to<br>24.33)           | 15.48<br>(8.09 to<br>20.14)            | 0.50<br>(0.27 to<br>0.63)        | 1.04<br>(0.59 to<br>1.31)           | 1.22<br>(0.69 to<br>1.54)          | 0.94<br>(0.52 to<br>1.19)           |
| Interstitial lung disease and pulmonary sarcoidosis            | 8.98<br>(6.58 to<br>12.02)             | 8.08<br>(4.95 to<br>10.42)             | 7.71<br>(4.69 to<br>9.95)              | 8.70<br>(5.46 to<br>11.35)             | 0.26<br>(0.14 to<br>0.32)        | 0.40<br>(0.16 to<br>0.58)           | 0.41<br>(0.16 to<br>0.60)          | 0.41<br>(0.17 to<br>0.59)           |
| Other chronic respiratory diseases                             | <b>87.86</b><br>(76.55 to<br>99.82)    | <b>141.57</b><br>(116.75 to<br>169.28) | <b>122.32</b><br>(99.32 to<br>146.61)  | <b>151.74</b><br>(125.83 to<br>180.81) | <b>3.86</b><br>(3.40 to<br>4.32) | <b>8.16</b><br>(7.05 to<br>9.27)    | <b>7.30</b><br>(6.24 to<br>8.36)   | <b>8.43</b><br>(7.29 to<br>9.54)    |
| Cirrhosis and other chronic liver diseases                     | 4.03<br>(3.34 to<br>4.78)              | 6.77<br>(5.36 to<br>8.54)              | 6.35<br>(4.99 to<br>8.03)              | 6.74<br>(5.35 to<br>8.42)              | 0.18<br>(0.15 to<br>0.21)        | 0.39<br>(0.32 to<br>0.47)           | 0.38<br>(0.30 to<br>0.46)          | 0.38<br>(0.31 to<br>0.46)           |
| Cirrhosis and other chronic liver diseases due to hepatitis B  | 33.32<br>(28.56 to<br>38.82)           | 56.76<br>(45.00 to<br>70.30)           | 52.83<br>(41.59 to<br>65.69)           | 56.81<br>(45.24 to<br>69.91)           | 1.43<br>(1.24 to<br>1.64)        | 3.07<br>(2.57 to<br>3.56)           | 2.92<br>(2.43 to<br>3.45)          | 2.99<br>(2.51 to<br>3.48)           |
| Cirrhosis and other chronic liver diseases due to hepatitis C  | 31.84<br>(26.92 to<br>36.34)           | 52.34<br>(42.47 to<br>62.79)           | 39.51<br>(31.86 to<br>47.53)           | 62.08<br>(50.39 to<br>74.16)           | 1.52<br>(1.31 to<br>1.71)        | 3.19<br>(2.69 to<br>3.67)           | 2.55<br>(2.13 to<br>2.96)          | 3.59<br>(3.01 to<br>4.13)           |
| Cirrhosis and other chronic liver diseases due to alcohol use  | 18.68<br>(16.09 to<br>21.18)           | 25.71<br>(21.17 to<br>31.18)           | 23.63<br>(19.21 to<br>28.83)           | 26.11<br>(21.44 to<br>31.40)           | 0.73<br>(0.63 to<br>0.84)        | 1.51<br>(1.25 to<br>1.79)           | 1.44<br>(1.18 to<br>1.72)          | 1.48<br>(1.22 to<br>1.75)           |
| Cirrhosis and other chronic liver diseases due to other causes | <b>133.58</b><br>(112.19 to<br>188.34) | <b>189.99</b><br>(148.72 to<br>248.99) | <b>166.24</b><br>(129.50 to<br>214.83) | <b>202.32</b><br>(157.10 to<br>265.99) | <b>6.57</b><br>(5.42 to<br>8.17) | <b>13.34</b><br>(10.56 to<br>16.44) | <b>12.13</b><br>(9.66 to<br>14.72) | <b>13.62</b><br>(10.72 to<br>16.96) |
| Digestive diseases                                             | 18.24<br>(15.23 to<br>26.18)           | 22.75<br>(18.27 to<br>30.84)           | 18.51<br>(14.46 to<br>24.82)           | 24.99<br>(19.77 to<br>33.34)           | 1.08<br>(0.92 to<br>1.41)        | 1.83<br>(1.49 to<br>2.35)           | 1.54<br>(1.21 to<br>2.03)          | 1.92<br>(1.55 to<br>2.49)           |
| Peptic ulcer disease                                           | <b>Colombia</b>                        |                                        |                                        |                                        |                                  |                                     |                                    |                                     |
| Cause                                                          | YLLs (in 1000s)                        |                                        |                                        |                                        | Deaths (in 1000s)                |                                     |                                    |                                     |
|                                                                | 2016                                   | 2040 Forecast                          | 2040 Better Scenario                   | 2040 Worse Scenario                    | 2016                             | 2040 Forecast                       | 2040 Better Scenario               | 2040 Worse Scenario                 |
| Gastritis and duodenitis                                       | 4.11<br>(3.13 to<br>5.94)              | 7.37<br>(5.34 to<br>10.55)             | 6.72<br>(4.86 to<br>9.71)              | 7.34<br>(5.40 to<br>10.48)             | 0.24<br>(0.18 to<br>0.33)        | 0.59<br>(0.41 to<br>0.80)           | 0.55<br>(0.39 to<br>0.78)          | 0.56<br>(0.39 to<br>0.77)           |
| Appendicitis                                                   | 9.95<br>(7.18 to<br>15.59)             | 9.46<br>(6.54 to<br>13.68)             | 7.94<br>(5.39 to<br>11.46)             | 9.95<br>(6.84 to<br>14.37)             | 0.34<br>(0.24 to<br>0.48)        | 0.51<br>(0.35 to<br>0.67)           | 0.45<br>(0.31 to<br>0.59)          | 0.52<br>(0.36 to<br>0.68)           |
| Paralytic ileus and intestinal obstruction                     | 30.63<br>(22.03 to<br>44.73)           | 39.09<br>(26.85 to<br>50.14)           | 37.91<br>(26.29 to<br>48.81)           | 39.04<br>(27.03 to<br>49.90)           | 1.25<br>(0.88 to<br>1.55)        | 2.61<br>(1.78 to<br>3.25)           | 2.64<br>(1.82 to<br>3.29)          | 2.49<br>(1.69 to<br>3.08)           |
| Inguinal, femoral, and abdominal hernia                        | 5.42<br>(3.82 to<br>7.63)              | 6.82<br>(4.70 to<br>9.40)              | 6.33<br>(4.27 to<br>8.62)              | 6.78<br>(4.62 to<br>9.36)              | 0.31<br>(0.22 to<br>0.43)        | 0.51<br>(0.36 to<br>0.71)           | 0.49<br>(0.34 to<br>0.68)          | 0.49<br>(0.34 to<br>0.68)           |
| Inflammatory bowel disease                                     | 3.59<br>(2.17 to<br>4.55)              | 4.21<br>(2.58 to<br>5.56)              | 4.17<br>(2.57 to<br>5.51)              | 4.15<br>(2.51 to<br>5.41)              | 0.14<br>(0.08 to<br>0.17)        | 0.24<br>(0.15 to<br>0.30)           | 0.25<br>(0.16 to<br>0.31)          | 0.23<br>(0.15 to<br>0.28)           |
| Vascular intestinal disorders                                  | 14.90<br>(10.69 to<br>18.14)           | 29.23<br>(20.91 to<br>35.83)           | 27.99<br>(20.26 to<br>34.65)           | 28.66<br>(20.65 to<br>35.08)           | 0.91<br>(0.67 to<br>1.08)        | 2.28<br>(1.69 to<br>2.74)           | 2.25<br>(1.69 to<br>2.72)          | 2.17<br>(1.62 to<br>2.62)           |

|                                                     |                                                      |                                                      |                                                      |                                                      |                                                   |                                                   |                                                   |                                                   |
|-----------------------------------------------------|------------------------------------------------------|------------------------------------------------------|------------------------------------------------------|------------------------------------------------------|---------------------------------------------------|---------------------------------------------------|---------------------------------------------------|---------------------------------------------------|
| Gallbladder and biliary diseases                    | 20.54<br>(16.93 to<br>26.90)                         | 31.96<br>(18.18 to<br>55.00)                         | 24.10<br>(14.01 to<br>40.47)                         | 39.06<br>(21.36 to<br>67.41)                         | 1.14<br>(0.95 to<br>1.42)                         | 2.33<br>(1.25 to<br>3.88)                         | 1.83<br>(1.08 to<br>3.03)                         | 2.73<br>(1.54 to<br>4.60)                         |
| Pancreatitis                                        | 12.54<br>(9.91 to<br>21.78)                          | 19.95<br>(11.17 to<br>38.00)                         | 15.29<br>(9.08 to<br>27.84)                          | 22.80<br>(12.27 to<br>44.67)                         | 0.48<br>(0.38 to<br>0.66)                         | 1.06<br>(0.62 to<br>1.88)                         | 0.85<br>(0.53 to<br>1.38)                         | 1.16<br>(0.65 to<br>2.12)                         |
| Other digestive diseases                            | 13.66<br>(10.28 to<br>18.25)                         | 19.14<br>(14.41 to<br>24.29)                         | 17.29<br>(12.95 to<br>22.13)                         | 19.55<br>(14.76 to<br>24.92)                         | 0.68<br>(0.53 to<br>0.83)                         | 1.37<br>(1.08 to<br>1.67)                         | 1.29<br>(1.00 to<br>1.57)                         | 1.35<br>(1.06 to<br>1.65)                         |
| <b>Neurological disorders</b>                       | <b>175.74</b><br><b>(152.55 to</b><br><b>202.47)</b> | <b>450.30</b><br><b>(341.46 to</b><br><b>605.42)</b> | <b>441.36</b><br><b>(343.63 to</b><br><b>570.80)</b> | <b>455.69</b><br><b>(337.39 to</b><br><b>632.98)</b> | <b>14.25</b><br><b>(12.10 to</b><br><b>16.79)</b> | <b>45.07</b><br><b>(33.35 to</b><br><b>61.52)</b> | <b>45.76</b><br><b>(34.92 to</b><br><b>60.15)</b> | <b>43.95</b><br><b>(31.73 to</b><br><b>62.33)</b> |
| Alzheimer's disease and other dementias             | 121.65<br>(100.94 to<br>146.15)                      | 372.52<br>(267.81 to<br>528.05)                      | 364.09<br>(271.43 to<br>492.40)                      | 377.27<br>(264.18 to<br>555.19)                      | 12.38<br>(10.27 to<br>14.88)                      | 40.65<br>(29.30 to<br>57.19)                      | 40.99<br>(30.38 to<br>55.26)                      | 39.82<br>(27.96 to<br>58.16)                      |
| Parkinson's disease                                 | 10.06<br>(7.74 to<br>12.81)                          | 31.89<br>(23.66 to<br>41.05)                         | 36.01<br>(27.03 to<br>46.42)                         | 28.71<br>(21.23 to<br>37.16)                         | 0.80<br>(0.61 to<br>1.02)                         | 2.82<br>(2.09 to<br>3.68)                         | 3.25<br>(2.43 to<br>4.25)                         | 2.48<br>(1.82 to<br>3.25)                         |
| Epilepsy                                            | 25.55<br>(22.10 to<br>29.80)                         | 23.30<br>(15.63 to<br>33.58)                         | 17.96<br>(12.14 to<br>25.45)                         | 27.49<br>(17.94 to<br>39.79)                         | 0.55<br>(0.48 to<br>0.63)                         | 0.70<br>(0.48 to<br>0.98)                         | 0.56<br>(0.39 to<br>0.77)                         | 0.79<br>(0.53 to<br>1.13)                         |
| Multiple sclerosis                                  | 2.22<br>(1.26 to<br>2.73)                            | 2.46<br>(1.36 to<br>3.33)                            | 2.52<br>(1.40 to<br>3.43)                            | 2.47<br>(1.36 to<br>3.36)                            | 0.07<br>(0.04 to<br>0.08)                         | 0.09<br>(0.05 to<br>0.12)                         | 0.10<br>(0.05 to<br>0.13)                         | 0.09<br>(0.05 to<br>0.12)                         |
| Motor neuron disease                                | 5.01<br>(4.29 to<br>5.77)                            | 7.24<br>(5.68 to<br>9.07)                            | 7.51<br>(5.86 to<br>9.52)                            | 6.99<br>(5.52 to<br>8.68)                            | 0.18<br>(0.15 to<br>0.20)                         | 0.32<br>(0.26 to<br>0.39)                         | 0.34<br>(0.27 to<br>0.42)                         | 0.31<br>(0.25 to<br>0.37)                         |
| Other neurological disorders                        | 11.25<br>(9.61 to<br>13.14)                          | 12.89<br>(10.48 to<br>15.56)                         | 13.25<br>(10.72 to<br>16.15)                         | 12.75<br>(10.42 to<br>15.31)                         | 0.29<br>(0.25 to<br>0.32)                         | 0.49<br>(0.42 to<br>0.57)                         | 0.52<br>(0.44 to<br>0.61)                         | 0.46<br>(0.39 to<br>0.53)                         |
| <b>Mental disorders</b>                             | <b>13.08</b><br><b>(10.80 to</b><br><b>15.95)</b>    | <b>15.60</b><br><b>(12.09 to</b><br><b>19.63)</b>    | <b>15.70</b><br><b>(12.12 to</b><br><b>20.05)</b>    | <b>15.78</b><br><b>(12.22 to</b><br><b>19.74)</b>    | <b>0.33</b><br><b>(0.28 to</b><br><b>0.39)</b>    | <b>0.57</b><br><b>(0.47 to</b><br><b>0.68)</b>    | <b>0.60</b><br><b>(0.49 to</b><br><b>0.73)</b>    | <b>0.56</b><br><b>(0.46 to</b><br><b>0.66)</b>    |
| Alcohol use disorders                               | 4.26<br>(3.49 to<br>5.08)                            | 3.57<br>(2.57 to<br>4.85)                            | 3.29<br>(2.34 to<br>4.49)                            | 3.84<br>(2.78 to<br>5.17)                            | 0.11<br>(0.09 to<br>0.13)                         | 0.12<br>(0.09 to<br>0.16)                         | 0.11<br>(0.09 to<br>0.15)                         | 0.13<br>(0.10 to<br>0.16)                         |
| Drug use disorders                                  | 8.69<br>(6.74 to<br>10.95)                           | 11.92<br>(9.01 to<br>15.06)                          | 12.30<br>(9.30 to<br>15.80)                          | 11.82<br>(8.94 to<br>14.88)                          | 0.22<br>(0.17 to<br>0.26)                         | 0.45<br>(0.36 to<br>0.54)                         | 0.49<br>(0.39 to<br>0.59)                         | 0.43<br>(0.35 to<br>0.51)                         |
| Opioid use disorders                                | 6.58<br>(5.06 to<br>8.48)                            | 6.59<br>(4.64 to<br>8.89)                            | 6.61<br>(4.63 to<br>8.91)                            | 6.60<br>(4.60 to<br>8.94)                            | 0.15<br>(0.12 to<br>0.18)                         | 0.20<br>(0.15 to<br>0.26)                         | 0.20<br>(0.15 to<br>0.27)                         | 0.19<br>(0.14 to<br>0.25)                         |
| Cocaine use disorders                               | 0.27<br>(0.14 to<br>0.39)                            | 0.65<br>(0.38 to<br>0.98)                            | 0.65<br>(0.38 to<br>0.97)                            | 0.66<br>(0.38 to<br>0.99)                            | 0.01<br>(0.00 to<br>0.01)                         | 0.02<br>(0.01 to<br>0.03)                         | 0.02<br>(0.01 to<br>0.03)                         | 0.02<br>(0.01 to<br>0.03)                         |
| Amphetamine use disorders                           | 0.23<br>(0.12 to<br>0.38)                            | 0.54<br>(0.31 to<br>0.88)                            | 0.55<br>(0.32 to<br>0.88)                            | 0.55<br>(0.32 to<br>0.89)                            | 0.01<br>(0.00 to<br>0.01)                         | 0.01<br>(0.01 to<br>0.02)                         | 0.02<br>(0.01 to<br>0.02)                         | 0.01<br>(0.01 to<br>0.02)                         |
| Other drug use disorders                            | 1.61<br>(0.98 to<br>2.13)                            | 4.13<br>(2.75 to<br>5.43)                            | 4.48<br>(2.98 to<br>6.05)                            | 4.01<br>(2.67 to<br>5.24)                            | 0.06<br>(0.04 to<br>0.07)                         | 0.22<br>(0.17 to<br>0.27)                         | 0.25<br>(0.19 to<br>0.31)                         | 0.20<br>(0.16 to<br>0.25)                         |
| Eating disorders                                    | 0.13<br>(0.10 to<br>0.16)                            | 0.11<br>(0.08 to<br>0.16)                            | 0.11<br>(0.08 to<br>0.16)                            | 0.12<br>(0.08 to<br>0.16)                            | 0.00<br>(0.00 to<br>0.00)                         | 0.00<br>(0.00 to<br>0.00)                         | 0.00<br>(0.00 to<br>0.00)                         | 0.00<br>(0.00 to<br>0.00)                         |
| <b>Colombia</b>                                     |                                                      |                                                      |                                                      |                                                      |                                                   |                                                   |                                                   |                                                   |
| Cause                                               | YLLs (in 1000s)                                      |                                                      |                                                      |                                                      | Deaths (in 1000s)                                 |                                                   |                                                   |                                                   |
|                                                     | 2016                                                 | 2040 Forecast                                        | 2040 Better Scenario                                 | 2040 Worse Scenario                                  | 2016                                              | 2040 Forecast                                     | 2040 Better Scenario                              | 2040 Worse Scenario                               |
| Diabetes, urogenital, blood, and endocrine diseases | 342.34<br>(311.78 to<br>376.04)                      | 806.40<br>(544.20 to<br>1,348.47)                    | 606.85<br>(425.45 to<br>1,006.64)                    | 899.53<br>(591.71 to<br>1,492.51)                    | 18.06<br>(16.52 to<br>19.80)                      | 61.75<br>(41.11 to<br>105.24)                     | 48.04<br>(32.80 to<br>81.47)                      | 66.03<br>(44.10 to<br>111.74)                     |
| Diabetes mellitus                                   | 124.89<br>(109.94 to<br>140.54)                      | 270.14<br>(192.93 to<br>370.31)                      | 206.43<br>(147.81 to<br>278.42)                      | 318.76<br>(219.28 to<br>453.22)                      | 6.89<br>(6.07 to<br>7.74)                         | 19.71<br>(14.81 to<br>25.91)                      | 15.65<br>(11.73 to<br>20.38)                      | 22.15<br>(16.10 to<br>29.96)                      |

|                                                            |                                 |                                 |                                 |                                   |                           |                              |                              |                              |
|------------------------------------------------------------|---------------------------------|---------------------------------|---------------------------------|-----------------------------------|---------------------------|------------------------------|------------------------------|------------------------------|
| Acute glomerulonephritis                                   | 0.39<br>(0.31 to<br>0.52)       | 0.46<br>(0.34 to<br>0.63)       | 0.40<br>(0.29 to<br>0.55)       | 0.50<br>(0.36 to<br>0.69)         | 0.01<br>(0.01 to<br>0.01) | 0.02<br>(0.01 to<br>0.02)    | 0.02<br>(0.01 to<br>0.02)    | 0.02<br>(0.01 to<br>0.02)    |
| Chronic kidney disease                                     | 147.59<br>(133.44 to<br>164.42) | 408.90<br>(195.58 to<br>927.06) | 277.39<br>(142.40 to<br>634.63) | 455.62<br>(219.08 to<br>1,051.52) | 7.90<br>(7.18 to<br>8.73) | 32.35<br>(14.45 to<br>75.13) | 22.56<br>(10.65 to<br>56.36) | 34.83<br>(15.72 to<br>79.98) |
| Chronic kidney disease due to diabetes mellitus            | 48.44<br>(40.62 to<br>56.89)    | 151.95<br>(68.36 to<br>357.10)  | 102.13<br>(49.60 to<br>231.38)  | 170.04<br>(77.43 to<br>408.09)    | 2.50<br>(2.08 to<br>2.96) | 10.82<br>(4.62 to<br>26.60)  | 7.46<br>(3.37 to<br>19.40)   | 11.74<br>(5.13 to<br>28.19)  |
| Chronic kidney disease due to hypertension                 | 20.88<br>(16.98 to<br>25.16)    | 81.59<br>(34.74 to<br>199.31)   | 56.85<br>(25.53 to<br>142.61)   | 88.57<br>(37.79 to<br>213.52)     | 1.67<br>(1.37 to<br>2.01) | 8.37<br>(3.40 to<br>21.42)   | 6.04<br>(2.58 to<br>16.18)   | 8.80<br>(3.61 to<br>22.20)   |
| Chronic kidney disease due to glomerulonephritis           | 44.03<br>(36.43 to<br>51.69)    | 92.19<br>(46.33 to<br>211.54)   | 62.06<br>(33.20 to<br>139.72)   | 103.91<br>(52.72 to<br>237.08)    | 1.99<br>(1.62 to<br>2.40) | 6.59<br>(3.00 to<br>15.75)   | 4.51<br>(2.15 to<br>10.89)   | 7.20<br>(3.34 to<br>17.38)   |
| Chronic kidney disease due to other and unspecified causes | 34.24<br>(28.38 to<br>40.42)    | 83.18<br>(40.53 to<br>183.32)   | 56.34<br>(28.83 to<br>125.30)   | 93.10<br>(45.76 to<br>207.61)     | 1.74<br>(1.42 to<br>2.11) | 6.56<br>(2.90 to<br>16.20)   | 4.55<br>(2.11 to<br>11.68)   | 7.09<br>(3.19 to<br>17.18)   |
| Urinary diseases and male infertility                      | 33.96<br>(30.51 to<br>37.82)    | 85.68<br>(73.40 to<br>97.84)    | 84.56<br>(71.60 to<br>98.11)    | 81.85<br>(70.74 to<br>93.06)      | 2.20<br>(1.97 to<br>2.46) | 7.69<br>(6.58 to<br>8.92)    | 7.89<br>(6.67 to<br>9.26)    | 7.06<br>(6.05 to<br>8.23)    |
| Urinary tract infections                                   | 31.58<br>(28.42 to<br>34.76)    | 81.38<br>(69.71 to<br>92.94)    | 80.63<br>(68.31 to<br>93.95)    | 77.59<br>(66.87 to<br>88.30)      | 2.07<br>(1.83 to<br>2.31) | 7.35<br>(6.27 to<br>8.52)    | 7.57<br>(6.40 to<br>8.88)    | 6.73<br>(5.77 to<br>7.79)    |
| Urolithiasis                                               | 0.86<br>(0.58 to<br>1.77)       | 1.49<br>(0.85 to<br>3.46)       | 1.45<br>(0.81 to<br>3.43)       | 1.45<br>(0.84 to<br>3.31)         | 0.04<br>(0.02 to<br>0.09) | 0.09<br>(0.05 to<br>0.25)    | 0.09<br>(0.01 to<br>0.25)    | 0.09<br>(0.04 to<br>0.23)    |
| Other urinary diseases                                     | 1.52<br>(0.92 to<br>3.27)       | 2.81<br>(1.48 to<br>6.18)       | 2.48<br>(1.30 to<br>5.53)       | 2.81<br>(1.50 to<br>6.14)         | 0.09<br>(0.05 to<br>0.20) | 0.24<br>(0.12 to<br>0.54)    | 0.23<br>(0.11 to<br>0.52)    | 0.23<br>(0.11 to<br>0.53)    |
| Gynecological diseases                                     | 0.40<br>(0.29 to<br>0.57)       | 0.40<br>(0.26 to<br>0.63)       | 0.32<br>(0.20 to<br>0.50)       | 0.43<br>(0.28 to<br>0.67)         | 0.01<br>(0.01 to<br>0.02) | 0.02<br>(0.01 to<br>0.05)    | 0.02<br>(0.01 to<br>0.02)    | 0.02<br>(0.01 to<br>0.03)    |
| Uterine fibroids                                           | 0.14<br>(0.09 to<br>0.21)       | 0.10<br>(0.05 to<br>0.18)       | 0.08<br>(0.04 to<br>0.15)       | 0.11<br>(0.06 to<br>0.19)         | 0.00<br>(0.00 to<br>0.01) | 0.00<br>(0.00 to<br>0.01)    | 0.00<br>(0.00 to<br>0.00)    | 0.00<br>(0.00 to<br>0.01)    |
| Polycystic ovarian syndrome                                | 0.01<br>(0.00 to<br>0.02)       | 0.00<br>(0.00 to<br>0.01)       | 0.00<br>(0.00 to<br>0.01)       | 0.01<br>(0.00 to<br>0.01)         | 0.00<br>(0.00 to<br>0.00) | 0.00<br>(0.00 to<br>0.00)    | 0.00<br>(0.00 to<br>0.00)    | 0.00<br>(0.00 to<br>0.00)    |
| Endometriosis                                              | 0.00<br>(0.00 to<br>0.01)       | 0.00<br>(0.00 to<br>0.01)       | 0.00<br>(0.00 to<br>0.01)       | 0.00<br>(0.00 to<br>0.01)         | 0.00<br>(0.00 to<br>0.00) | 0.00<br>(0.00 to<br>0.00)    | 0.00<br>(0.00 to<br>0.00)    | 0.00<br>(0.00 to<br>0.00)    |
| Genital prolapse                                           | 0.07<br>(0.03 to<br>0.11)       | 0.08<br>(0.03 to<br>0.13)       | 0.06<br>(0.03 to<br>0.11)       | 0.08<br>(0.04 to<br>0.14)         | 0.00<br>(0.00 to<br>0.01) | 0.01<br>(0.00 to<br>0.01)    | 0.00<br>(0.00 to<br>0.01)    | 0.01<br>(0.00 to<br>0.01)    |
| Other gynecological diseases                               | 0.17<br>(0.13 to<br>0.27)       | 0.21<br>(0.13 to<br>0.36)       | 0.17<br>(0.11 to<br>0.29)       | 0.23<br>(0.14 to<br>0.38)         | 0.01<br>(0.00 to<br>0.01) | 0.01<br>(0.01 to<br>0.02)    | 0.01<br>(0.01 to<br>0.01)    | 0.01<br>(0.01 to<br>0.02)    |
| Hemoglobinopathies and hemolytic anemias                   | 9.54<br>(8.14 to<br>13.18)      | 9.59<br>(7.21 to<br>13.80)      | 8.19<br>(6.03 to<br>11.76)      | 10.16<br>(7.65 to<br>14.65)       | 0.26<br>(0.22 to<br>0.37) | 0.42<br>(0.33 to<br>0.61)    | 0.37<br>(0.29 to<br>0.53)    | 0.43<br>(0.34 to<br>0.64)    |
| Thalassemias                                               | 0.83<br>(0.62 to<br>1.09)       | 0.27<br>(0.18 to<br>0.39)       | 0.26<br>(0.18 to<br>0.38)       | 0.29<br>(0.19 to<br>0.42)         | 0.01<br>(0.01 to<br>0.01) | 0.00<br>(0.00 to<br>0.00)    | 0.00<br>(0.00 to<br>0.00)    | 0.00<br>(0.00 to<br>0.01)    |
| Sickle cell disorders                                      | 4.91<br>(4.06 to<br>7.09)       | 4.05<br>(2.78 to<br>6.32)       | 3.47<br>(2.38 to<br>5.46)       | 4.33<br>(2.98 to<br>6.77)         | 0.09<br>(0.07 to<br>0.14) | 0.10<br>(0.07 to<br>0.16)    | 0.08<br>(0.06 to<br>0.14)    | 0.10<br>(0.07 to<br>0.17)    |
| G6PD deficiency                                            | 2.07<br>(1.71 to<br>2.77)       | 2.66<br>(1.91 to<br>3.76)       | 2.17<br>(1.50 to<br>3.13)       | 2.87<br>(2.06 to<br>4.11)         | 0.05<br>(0.04 to<br>0.07) | 0.11<br>(0.08 to<br>0.15)    | 0.09<br>(0.06 to<br>0.13)    | 0.11<br>(0.08 to<br>0.16)    |
| Other hemoglobinopathies and hemolytic anemias             | 1.73<br>(1.45 to<br>2.50)       | 2.62<br>(2.06 to<br>3.78)       | 2.28<br>(1.76 to<br>3.32)       | 2.68<br>(2.09 to<br>3.98)         | 0.11<br>(0.09 to<br>0.15) | 0.22<br>(0.17 to<br>0.31)    | 0.19<br>(0.15 to<br>0.28)    | 0.22<br>(0.17 to<br>0.31)    |
| Endocrine, metabolic, blood, and immune disorders          | 25.56<br>(20.92 to<br>32.52)    | 31.22<br>(24.30 to<br>40.70)    | 29.56<br>(22.74 to<br>38.99)    | 32.20<br>(25.06 to<br>41.74)      | 0.78<br>(0.66 to<br>1.03) | 1.55<br>(1.23 to<br>2.05)    | 1.53<br>(1.19 to<br>2.01)    | 1.52<br>(1.22 to<br>2.00)    |



| Colombia                                      |                                     |                                     |                                     |                                     |                               |                                |                                |                                |
|-----------------------------------------------|-------------------------------------|-------------------------------------|-------------------------------------|-------------------------------------|-------------------------------|--------------------------------|--------------------------------|--------------------------------|
| Cause                                         | YLLs (in 1000s)                     |                                     |                                     |                                     | Deaths (in 1000s)             |                                |                                |                                |
|                                               | 2016                                | 2040 Forecast                       | 2040 Better Scenario                | 2040 Worse Scenario                 | 2016                          | 2040 Forecast                  | 2040 Better Scenario           | 2040 Worse Scenario            |
| <b>Musculoskeletal disorders</b>              | <b>30.46</b><br>(19.80 to 36.18)    | <b>42.93</b><br>(32.55 to 54.82)    | <b>42.37</b><br>(32.17 to 54.63)    | <b>42.34</b><br>(32.39 to 53.46)    | <b>0.87</b><br>(0.70 to 1.02) | <b>1.92</b><br>(1.53 to 2.56)  | <b>1.92</b><br>(1.51 to 2.60)  | <b>1.84</b><br>(1.49 to 2.41)  |
| Rheumatoid arthritis                          | 4.02<br>(3.06 to 5.62)              | 9.34<br>(6.61 to 13.49)             | 8.00<br>(5.50 to 11.97)             | 9.73<br>(6.90 to 13.94)             | 0.19<br>(0.15 to 0.26)        | 0.62<br>(0.44 to 0.90)         | 0.55<br>(0.38 to 0.82)         | 0.63<br>(0.45 to 0.91)         |
| Other musculoskeletal disorders               | 26.43<br>(16.72 to 31.39)           | 33.59<br>(24.69 to 42.65)           | 34.37<br>(25.16 to 44.52)           | 32.62<br>(23.44 to 41.54)           | 0.68<br>(0.53 to 0.80)        | 1.29<br>(1.00 to 1.72)         | 1.37<br>(1.07 to 1.86)         | 1.21<br>(0.94 to 1.60)         |
| <b>Other non-communicable diseases</b>        | <b>247.90</b><br>(160.17 to 320.57) | <b>209.98</b><br>(142.68 to 270.32) | <b>181.56</b><br>(120.12 to 233.18) | <b>232.89</b><br>(156.13 to 308.44) | <b>4.09</b><br>(2.76 to 5.09) | <b>7.93</b><br>(4.83 to 10.61) | <b>7.77</b><br>(4.52 to 10.39) | <b>7.78</b><br>(4.76 to 10.24) |
| Congenital birth defects                      | 216.56<br>(124.50 to 288.35)        | 120.12<br>(70.87 to 165.02)         | 92.94<br>(54.98 to 129.00)          | 145.21<br>(82.84 to 205.24)         | 2.62<br>(1.54 to 3.47)        | 1.52<br>(0.92 to 2.05)         | 1.18<br>(0.72 to 1.61)         | 1.81<br>(1.05 to 2.53)         |
| Neural tube defects                           | 6.58<br>(4.19 to 10.65)             | 1.52<br>(0.85 to 2.73)              | 1.05<br>(0.56 to 1.90)              | 1.96<br>(1.07 to 3.58)              | 0.08<br>(0.05 to 0.13)        | 0.02<br>(0.01 to 0.03)         | 0.01<br>(0.01 to 0.02)         | 0.02<br>(0.01 to 0.04)         |
| Congenital heart anomalies                    | 116.18<br>(68.55 to 155.28)         | 66.28<br>(40.25 to 91.67)           | 50.82<br>(30.30 to 70.43)           | 79.73<br>(46.11 to 113.43)          | 1.42<br>(0.86 to 1.88)        | 0.85<br>(0.53 to 1.14)         | 0.65<br>(0.40 to 0.89)         | 1.01<br>(0.61 to 1.40)         |
| Orofacial clefts                              | 0.16<br>(0.08 to 0.37)              | 0.09<br>(0.04 to 0.21)              | 0.06<br>(0.03 to 0.15)              | 0.11<br>(0.05 to 0.28)              | 0.00<br>(0.00 to 0.00)        | 0.00<br>(0.00 to 0.00)         | 0.00<br>(0.00 to 0.00)         | 0.00<br>(0.00 to 0.00)         |
| Down syndrome                                 | 2.62<br>(1.65 to 4.91)              | 1.97<br>(1.22 to 3.62)              | 1.68<br>(1.05 to 3.10)              | 2.30<br>(1.38 to 4.40)              | 0.04<br>(0.03 to 0.07)        | 0.03<br>(0.02 to 0.05)         | 0.03<br>(0.02 to 0.05)         | 0.04<br>(0.02 to 0.06)         |
| Other chromosomal abnormalities               | 6.34<br>(2.02 to 9.98)              | 4.26<br>(1.52 to 6.92)              | 3.41<br>(1.20 to 5.60)              | 5.21<br>(1.81 to 8.68)              | 0.07<br>(0.02 to 0.12)        | 0.05<br>(0.02 to 0.08)         | 0.04<br>(0.02 to 0.07)         | 0.06<br>(0.02 to 0.10)         |
| Congenital musculoskeletal and limb anomalies | 1.73<br>(1.21 to 2.61)              | 1.40<br>(0.92 to 2.19)              | 1.13<br>(0.74 to 1.76)              | 1.63<br>(1.05 to 2.58)              | 0.02<br>(0.02 to 0.03)        | 0.02<br>(0.01 to 0.03)         | 0.02<br>(0.01 to 0.02)         | 0.02<br>(0.02 to 0.03)         |
| Urogenital congenital anomalies               | 5.08<br>(1.34 to 9.10)              | 3.09<br>(0.91 to 5.63)              | 2.48<br>(0.74 to 4.56)              | 3.68<br>(1.05 to 6.87)              | 0.06<br>(0.02 to 0.11)        | 0.04<br>(0.01 to 0.07)         | 0.03<br>(0.01 to 0.06)         | 0.05<br>(0.01 to 0.09)         |
| Digestive congenital anomalies                | 23.00<br>(12.63 to 34.97)           | 14.46<br>(7.62 to 22.89)            | 10.99<br>(5.78 to 17.59)            | 17.84<br>(9.15 to 29.27)            | 0.27<br>(0.15 to 0.41)        | 0.17<br>(0.09 to 0.27)         | 0.13<br>(0.07 to 0.21)         | 0.21<br>(0.11 to 0.34)         |
| Other congenital birth defects                | 54.96<br>(27.13 to 77.17)           | 27.06<br>(12.94 to 40.00)           | 21.32<br>(10.23 to 31.60)           | 32.73<br>(15.62 to 49.50)           | 0.65<br>(0.33 to 0.91)        | 0.33<br>(0.16 to 0.48)         | 0.26<br>(0.13 to 0.38)         | 0.40<br>(0.19 to 0.59)         |
| Skin and subcutaneous diseases                | 27.99<br>(16.43 to 50.26)           | 87.76<br>(50.62 to 136.03)          | 86.93<br>(49.50 to 136.20)          | 85.12<br>(49.07 to 133.89)          | 1.43<br>(0.77 to 2.24)        | 6.39<br>(3.38 to 9.37)         | 6.37<br>(3.48 to 9.51)         | 5.94<br>(3.14 to 8.71)         |
| Cellulitis                                    | 6.94<br>(4.03 to 15.24)             | 33.27<br>(12.51 to 45.59)           | 24.35<br>(12.98 to 45.94)           | 22.15<br>(11.97 to 44.13)           | 0.29<br>(0.15 to 0.54)        | 1.39<br>(0.66 to 2.36)         | 1.51<br>(0.71 to 2.48)         | 1.27<br>(0.60 to 2.23)         |
| Pyoderma                                      | 13.51<br>(7.50 to 24.45)            | 43.42<br>(20.63 to 64.80)           | 41.64<br>(19.20 to 61.85)           | 42.96<br>(20.68 to 64.68)           | 0.65<br>(0.30 to 0.97)        | 3.19<br>(1.38 to 4.43)         | 3.20<br>(1.36 to 4.51)         | 3.01<br>(1.32 to 4.17)         |
| Decubitus ulcer                               | 6.66<br>(3.77 to 12.31)             | 19.32<br>(10.69 to 35.25)           | 19.19<br>(10.80 to 35.04)           | 18.29<br>(10.16 to 34.01)           | 0.46<br>(0.26 to 0.84)        | 1.72<br>(0.95 to 3.17)         | 1.77<br>(0.98 to 3.28)         | 1.57<br>(0.87 to 2.94)         |
| Other skin and subcutaneous diseases          | 0.89<br>(0.48 to 1.74)              | 1.76<br>(0.94 to 3.22)              | 1.75<br>(0.95 to 3.23)              | 1.72<br>(0.93 to 3.22)              | 0.03<br>(0.02 to 0.06)        | 0.09<br>(0.05 to 0.16)         | 0.09<br>(0.05 to 0.17)         | 0.08<br>(0.04 to 0.15)         |
| Sudden infant death syndrome                  | 3.35<br>(2.31 to 4.72)              | 2.10<br>(1.19 to 3.45)              | 1.69<br>(0.94 to 2.77)              | 2.55<br>(1.44 to 4.26)              | 0.04<br>(0.03 to 0.05)        | 0.02<br>(0.01 to 0.04)         | 0.02<br>(0.01 to 0.03)         | 0.03<br>(0.02 to 0.05)         |

|                                      |                                       |                                     |                                   |                                     |                              |                              |                              |                              |
|--------------------------------------|---------------------------------------|-------------------------------------|-----------------------------------|-------------------------------------|------------------------------|------------------------------|------------------------------|------------------------------|
| Injuries                             | 1,579.97<br>(1,391.40 to<br>1,765.75) | 1,084.00<br>(767.52 to<br>1,556.75) | 919.94<br>(640.06 to<br>1,331.01) | 1,316.97<br>(912.92 to<br>1,885.95) | 32.21<br>(28.30 to<br>36.28) | 29.55<br>(22.19 to<br>39.72) | 25.65<br>(19.17 to<br>34.73) | 34.81<br>(25.69 to<br>47.29) |
| Transport injuries                   | 327.92<br>(280.08 to<br>400.78)       | 184.65<br>(112.59 to<br>308.00)     | 114.13<br>(71.26 to<br>187.45)    | 371.83<br>(224.41 to<br>618.46)     | 7.15<br>(6.21 to<br>8.50)    | 5.64<br>(3.67 to<br>8.77)    | 3.68<br>(2.47 to<br>5.63)    | 10.33<br>(6.59 to<br>16.36)  |
| Road injuries                        | 314.19<br>(268.60 to<br>383.36)       | 168.69<br>(103.24 to<br>283.04)     | 101.43<br>(63.10 to<br>166.52)    | 353.85<br>(213.52 to<br>587.96)     | 6.86<br>(5.95 to<br>8.13)    | 5.22<br>(3.42 to<br>8.09)    | 3.34<br>(2.25 to<br>5.08)    | 9.86<br>(6.32 to<br>15.59)   |
| Pedestrian road injuries             | 118.42<br>(94.96 to<br>161.97)        | 73.72<br>(48.35 to<br>114.13)       | 43.23<br>(28.61 to<br>65.17)      | 146.17<br>(93.55 to<br>230.99)      | 3.06<br>(2.54 to<br>3.86)    | 3.00<br>(2.06 to<br>4.36)    | 1.91<br>(1.34 to<br>2.71)    | 5.33<br>(3.59 to<br>7.85)    |
| <b>Colombia</b>                      |                                       |                                     |                                   |                                     |                              |                              |                              |                              |
| Cause                                | YLLs (in 1000s)                       |                                     |                                   |                                     | Deaths (in 1000s)            |                              |                              |                              |
|                                      | 2016                                  | 2040 Forecast                       | 2040 Better Scenario              | 2040 Worse Scenario                 | 2016                         | 2040 Forecast                | 2040 Better Scenario         | 2040 Worse Scenario          |
| Cyclist road injuries                | 18.14<br>(12.76 to<br>23.23)          | 9.28<br>(5.11 to<br>16.32)          | 5.74<br>(3.29 to<br>9.83)         | 20.16<br>(10.96 to<br>35.34)        | 0.41<br>(0.30 to<br>0.52)    | 0.28<br>(0.16 to<br>0.49)    | 0.19<br>(0.11 to<br>0.33)    | 0.53<br>(0.30 to<br>0.89)    |
| Motorcyclist road injuries           | 106.35<br>(62.04 to<br>144.61)        | 53.15<br>(24.96 to<br>101.87)       | 35.78<br>(17.44 to<br>66.76)      | 96.96<br>(45.13 to<br>187.65)       | 1.96<br>(1.18 to<br>2.59)    | 1.10<br>(0.55 to<br>2.04)    | 0.77<br>(0.40 to<br>1.39)    | 1.90<br>(0.91 to<br>3.58)    |
| Motor vehicle road injuries          | 64.80<br>(48.68 to<br>108.07)         | 29.24<br>(15.93 to<br>56.82)        | 14.84<br>(8.26 to<br>28.53)       | 82.24<br>(44.83 to<br>154.99)       | 1.29<br>(0.98 to<br>2.10)    | 0.72<br>(0.42 to<br>1.32)    | 0.39<br>(0.23 to<br>0.70)    | 1.86<br>(1.05 to<br>3.38)    |
| Other road injuries                  | 6.48<br>(4.51 to<br>11.94)            | 3.30<br>(1.81 to<br>7.07)           | 1.84<br>(1.02 to<br>3.76)         | 8.33<br>(4.47 to<br>17.57)          | 0.15<br>(0.11 to<br>0.27)    | 0.12<br>(0.06 to<br>0.23)    | 0.07<br>(0.04 to<br>0.14)    | 0.25<br>(0.14 to<br>0.49)    |
| Other transport injuries             | 13.73<br>(10.95 to<br>17.25)          | 15.96<br>(9.35 to<br>27.19)         | 12.71<br>(7.52 to<br>21.60)       | 17.98<br>(10.31 to<br>30.80)        | 0.29<br>(0.23 to<br>0.36)    | 0.42<br>(0.26 to<br>0.70)    | 0.34<br>(0.21 to<br>0.55)    | 0.46<br>(0.28 to<br>0.77)    |
| Unintentional injuries               | 230.47<br>(198.43 to<br>279.84)       | 206.89<br>(161.47 to<br>270.06)     | 183.69<br>(143.68 to<br>242.82)   | 219.90<br>(172.43 to<br>287.53)     | 5.39<br>(4.67 to<br>6.68)    | 4.41<br>(3.88 to<br>10.98)   | 7.90<br>(6.44 to<br>10.31)   | 8.40<br>(6.83 to<br>11.19)   |
| Falls                                | 48.98<br>(41.02 to<br>64.05)          | 71.87<br>(57.66 to<br>96.60)        | 68.06<br>(54.47 to<br>90.54)      | 72.01<br>(58.02 to<br>97.63)        | 1.79<br>(1.51 to<br>2.41)    | 4.25<br>(3.46 to<br>6.06)    | 4.15<br>(3.35 to<br>5.88)    | 4.08<br>(3.33 to<br>5.93)    |
| Drowning                             | 69.29<br>(59.04 to<br>81.83)          | 41.14<br>(28.25 to<br>61.19)        | 34.13<br>(23.39 to<br>51.10)      | 46.35<br>(31.66 to<br>69.05)        | 1.19<br>(1.03 to<br>1.38)    | 0.99<br>(0.72 to<br>1.39)    | 0.85<br>(0.62 to<br>1.19)    | 1.07<br>(0.77 to<br>1.52)    |
| Fire, heat, and hot substances       | 9.29<br>(7.67 to<br>12.60)            | 8.14<br>(5.76 to<br>12.86)          | 6.63<br>(4.60 to<br>10.70)        | 9.03<br>(6.34 to<br>14.06)          | 0.23<br>(0.19 to<br>0.35)    | 0.35<br>(0.25 to<br>0.63)    | 0.30<br>(0.21 to<br>0.54)    | 0.37<br>(0.25 to<br>0.65)    |
| Poisonings                           | 4.78<br>(3.62 to<br>9.51)             | 2.73<br>(1.70 to<br>5.29)           | 2.05<br>(1.23 to<br>4.02)         | 3.16<br>(1.94 to<br>6.34)           | 0.10<br>(0.07 to<br>0.19)    | 0.08<br>(0.05 to<br>0.14)    | 0.06<br>(0.04 to<br>0.12)    | 0.09<br>(0.05 to<br>0.17)    |
| Exposure to mechanical forces        | 29.93<br>(25.13 to<br>38.90)          | 22.67<br>(16.56 to<br>30.47)        | 18.92<br>(13.76 to<br>25.85)      | 24.77<br>(18.07 to<br>33.01)        | 0.60<br>(0.51 to<br>0.79)    | 0.62<br>(0.48 to<br>0.80)    | 0.53<br>(0.41 to<br>0.71)    | 0.65<br>(0.50 to<br>0.85)    |
| Unintentional firearm injuries       | 7.64<br>(5.88 to<br>14.27)            | 5.48<br>(3.64 to<br>10.08)          | 4.56<br>(3.00 to<br>8.39)         | 5.98<br>(4.00 to<br>10.95)          | 0.16<br>(0.13 to<br>0.28)    | 0.16<br>(0.12 to<br>0.24)    | 0.14<br>(0.10 to<br>0.20)    | 0.17<br>(0.12 to<br>0.25)    |
| Unintentional suffocation            | 3.55<br>(2.63 to<br>5.63)             | 2.28<br>(1.49 to<br>3.66)           | 1.82<br>(1.17 to<br>2.94)         | 2.72<br>(1.76 to<br>4.37)           | 0.05<br>(0.04 to<br>0.07)    | 0.05<br>(0.02 to<br>0.05)    | 0.03<br>(0.02 to<br>0.04)    | 0.04<br>(0.03 to<br>0.06)    |
| Other exposure to mechanical forces  | 18.73<br>(13.35 to<br>23.96)          | 14.91<br>(10.43 to<br>20.46)        | 12.54<br>(8.62 to<br>17.38)       | 16.07<br>(11.21 to<br>21.71)        | 0.40<br>(0.30 to<br>0.50)    | 0.43<br>(0.32 to<br>0.57)    | 0.37<br>(0.28 to<br>0.51)    | 0.45<br>(0.34 to<br>0.59)    |
| Adverse effects of medical treatment | 10.53<br>(7.54 to<br>17.09)           | 12.00<br>(8.30 to<br>19.42)         | 10.73<br>(7.39 to<br>17.36)       | 12.62<br>(8.69 to<br>20.74)         | 0.35<br>(0.26 to<br>0.56)    | 0.68<br>(0.47 to<br>1.10)    | 0.63<br>(0.44 to<br>1.02)    | 0.67<br>(0.47 to<br>1.11)    |
| Animal contact                       | 6.87<br>(5.21 to<br>12.43)            | 7.57<br>(5.46 to<br>12.38)          | 6.27<br>(4.47 to<br>10.24)        | 8.39<br>(5.97 to<br>14.08)          | 0.16<br>(0.13 to<br>0.28)    | 0.27<br>(0.20 to<br>0.40)    | 0.23<br>(0.17 to<br>0.35)    | 0.28<br>(0.21 to<br>0.44)    |

|                                                 |                                                          |                                                      |                                                      |                                                        |                                                   |                                                   |                                                  |                                                   |
|-------------------------------------------------|----------------------------------------------------------|------------------------------------------------------|------------------------------------------------------|--------------------------------------------------------|---------------------------------------------------|---------------------------------------------------|--------------------------------------------------|---------------------------------------------------|
| Venomous animal contact                         | 4.32<br>(3.13 to<br>8.16)                                | 4.64<br>(3.24 to<br>8.24)                            | 3.85<br>(2.65 to<br>6.72)                            | 5.18<br>(3.56 to<br>9.26)                              | 0.10<br>(0.07 to<br>0.17)                         | 0.16<br>(0.11 to<br>0.25)                         | 0.14<br>(0.09 to<br>0.22)                        | 0.17<br>(0.11 to<br>0.27)                         |
| Non-venomous animal contact                     | 2.55<br>(1.65 to<br>4.92)                                | 2.93<br>(1.82 to<br>5.15)                            | 2.41<br>(1.47 to<br>4.34)                            | 3.21<br>(1.97 to<br>5.62)                              | 0.06<br>(0.04 to<br>0.12)                         | 0.11<br>(0.07 to<br>0.18)                         | 0.09<br>(0.06 to<br>0.15)                        | 0.11<br>(0.07 to<br>0.19)                         |
| Foreign body                                    | 34.50<br>(26.59 to<br>48.27)                             | 28.77<br>(22.37 to<br>41.28)                         | 27.13<br>(21.18 to<br>39.50)                         | 30.72<br>(23.64 to<br>44.10)                           | 0.64<br>(0.53 to<br>0.89)                         | 0.88<br>(0.72 to<br>1.10)                         | 0.88<br>(0.73 to<br>1.09)                        | 0.86<br>(0.72 to<br>1.11)                         |
| Pulmonary aspiration and foreign body in airway | 33.71<br>(26.05 to<br>47.13)                             | 28.10<br>(21.91 to<br>40.48)                         | 26.52<br>(20.75 to<br>38.42)                         | 29.99<br>(23.07 to<br>43.25)                           | 0.63<br>(0.52 to<br>0.88)                         | 0.86<br>(0.71 to<br>1.08)                         | 0.87<br>(0.71 to<br>1.08)                        | 0.85<br>(0.70 to<br>1.08)                         |
| Foreign body in other body part                 | 0.79<br>(0.44 to<br>2.09)                                | 0.67<br>(0.35 to<br>1.79)                            | 0.61<br>(0.31 to<br>1.65)                            | 0.73<br>(0.38 to<br>1.89)                              | 0.01<br>(0.01 to<br>0.04)                         | 0.02<br>(0.01 to<br>0.04)                         | 0.01<br>(0.01 to<br>0.03)                        | 0.02<br>(0.01 to<br>0.04)                         |
| Environmental heat and cold exposure            | 0.81<br>(0.47 to<br>2.18)                                | 1.10<br>(0.54 to<br>3.04)                            | 0.87<br>(0.42 to<br>2.43)                            | 1.22<br>(0.59 to<br>3.35)                              | 0.02<br>(0.01 to<br>0.06)                         | 0.05<br>(0.02 to<br>0.14)                         | 0.04<br>(0.02 to<br>0.12)                        | 0.05<br>(0.03 to<br>0.15)                         |
| Other unintentional injuries                    | 15.49<br>(12.77 to<br>19.38)                             | 10.91<br>(7.56 to<br>14.92)                          | 8.90<br>(6.01 to<br>12.87)                           | 11.63<br>(8.19 to<br>15.83)                            | 0.30<br>(0.25 to<br>0.38)                         | 0.27<br>(0.20 to<br>0.35)                         | 0.22<br>(0.16 to<br>0.30)                        | 0.28<br>(0.21 to<br>0.36)                         |
| <b>Self-harm and interpersonal violence</b>     | <b>1,010.72</b><br><b>(797.18 to</b><br><b>1,174.87)</b> | <b>675.80</b><br><b>(446.02 to</b><br><b>995.71)</b> | <b>605.77</b><br><b>(400.55 to</b><br><b>897.20)</b> | <b>708.19</b><br><b>(456.28 to</b><br><b>1,050.66)</b> | <b>19.48</b><br><b>(15.49 to</b><br><b>23.06)</b> | <b>15.11</b><br><b>(10.49 to</b><br><b>21.48)</b> | <b>13.67</b><br><b>(9.39 to</b><br><b>19.76)</b> | <b>15.69</b><br><b>(10.62 to</b><br><b>22.42)</b> |

**Colombia**

| Cause                                                                               | YLLs (in 1000s)                                  |                                                  |                                                  |                                                  | Deaths (in 1000s)                              |                                                |                                                |                                                |
|-------------------------------------------------------------------------------------|--------------------------------------------------|--------------------------------------------------|--------------------------------------------------|--------------------------------------------------|------------------------------------------------|------------------------------------------------|------------------------------------------------|------------------------------------------------|
|                                                                                     | 2016                                             | 2040 Forecast                                    | 2040 Better Scenario                             | 2040 Worse Scenario                              | 2016                                           | 2040 Forecast                                  | 2040 Better Scenario                           | 2040 Worse Scenario                            |
| Self-harm                                                                           | 137.98<br>(106.83 to<br>181.16)                  | 126.83<br>(67.08 to<br>220.56)                   | 105.16<br>(58.00 to<br>179.22)                   | 144.47<br>(74.58 to<br>261.78)                   | 2.82<br>(2.20 to<br>3.58)                      | 3.14<br>(1.84 to<br>5.17)                      | 2.66<br>(1.62 to<br>4.20)                      | 3.51<br>(1.99 to<br>5.89)                      |
| Self-harm by firearm                                                                | 28.88<br>(17.90 to<br>42.19)                     | 24.96<br>(10.95 to<br>49.49)                     | 20.02<br>(9.17 to<br>39.96)                      | 28.85<br>(12.27 to<br>58.88)                     | 0.60<br>(0.38 to<br>0.86)                      | 0.65<br>(0.31 to<br>1.20)                      | 0.52<br>(0.26 to<br>0.96)                      | 0.71<br>(0.34 to<br>1.39)                      |
| Self-harm by other specified means                                                  | 109.11<br>(82.54 to<br>144.85)                   | 101.88<br>(56.50 to<br>177.69)                   | 85.15<br>(48.71 to<br>144.15)                    | 115.62<br>(62.08 to<br>203.55)                   | 2.22<br>(1.69 to<br>2.87)                      | 2.51<br>(1.46 to<br>4.09)                      | 2.14<br>(1.30 to<br>3.37)                      | 2.79<br>(1.60 to<br>4.77)                      |
| Interpersonal violence                                                              | 872.74<br>(642.50 to<br>1,033.68)                | 548.96<br>(358.29 to<br>792.25)                  | 500.61<br>(328.48 to<br>739.24)                  | 563.72<br>(362.81 to<br>811.88)                  | 16.66<br>(12.39 to<br>20.30)                   | 11.97<br>(8.23 to<br>17.19)                    | 11.01<br>(7.35 to<br>16.18)                    | 12.18<br>(8.21 to<br>17.69)                    |
| Physical violence by firearm                                                        | 665.51<br>(445.25 to<br>807.98)                  | 406.73<br>(241.27 to<br>602.48)                  | 370.24<br>(217.12 to<br>559.82)                  | 416.26<br>(241.25 to<br>617.01)                  | 12.59<br>(8.57 to<br>15.51)                    | 8.53<br>(5.34 to<br>12.55)                     | 7.82<br>(4.82 to<br>11.81)                     | 8.67<br>(5.29 to<br>12.88)                     |
| Physical violence by sharp object                                                   | 137.87<br>(79.87 to<br>237.35)                   | 97.31<br>(51.80 to<br>171.23)                    | 91.55<br>(49.36 to<br>160.89)                    | 97.93<br>(50.38 to<br>170.26)                    | 2.70<br>(1.54 to<br>4.57)                      | 2.25<br>(1.26 to<br>4.14)                      | 2.14<br>(1.19 to<br>3.91)                      | 2.24<br>(1.22 to<br>4.21)                      |
| Physical violence by other means                                                    | 69.37<br>(38.39 to<br>130.16)                    | 44.92<br>(23.77 to<br>88.87)                     | 38.83<br>(20.43 to<br>77.41)                     | 49.53<br>(25.34 to<br>99.29)                     | 1.38<br>(0.75 to<br>2.77)                      | 1.19<br>(0.64 to<br>2.50)                      | 1.05<br>(0.57 to<br>2.23)                      | 1.27<br>(0.68 to<br>2.74)                      |
| <b>Forces of nature, conflict and terrorism, and executions and police conflict</b> | <b>10.86</b><br><b>(0.73 to</b><br><b>17.45)</b> | <b>16.66</b><br><b>(0.00 to</b><br><b>32.77)</b> | <b>16.34</b><br><b>(0.00 to</b><br><b>31.97)</b> | <b>17.05</b><br><b>(0.00 to</b><br><b>33.39)</b> | <b>0.19</b><br><b>(0.01 to</b><br><b>0.29)</b> | <b>0.39</b><br><b>(0.00 to</b><br><b>0.81)</b> | <b>0.40</b><br><b>(0.00 to</b><br><b>0.81)</b> | <b>0.39</b><br><b>(0.00 to</b><br><b>0.81)</b> |
| Exposure to forces of nature                                                        | 0.00<br>(0.00 to<br>0.00)                        | 11.15<br>(0.00 to<br>29.87)                      | 10.94<br>(0.00 to<br>29.33)                      | 11.41<br>(0.00 to<br>30.54)                      | 0.00<br>(0.00 to<br>0.00)                      | 0.28<br>(0.00 to<br>0.75)                      | 0.28<br>(0.00 to<br>0.76)                      | 0.28<br>(0.00 to<br>0.75)                      |
| Conflict and terrorism                                                              | 0.00<br>(0.00 to<br>0.00)                        | 5.50<br>(0.00 to<br>20.64)                       | 5.40<br>(0.00 to<br>20.23)                       | 5.63<br>(0.00 to<br>21.15)                       | 0.00<br>(0.00 to<br>0.00)                      | 0.12<br>(0.00 to<br>0.44)                      | 0.12<br>(0.00 to<br>0.44)                      | 0.12<br>(0.00 to<br>0.44)                      |
| Executions and police conflict                                                      | 10.86<br>(0.73 to<br>17.45)                      | 0.00<br>(0.00 to<br>0.00)                        | 0.00<br>(0.00 to<br>0.00)                        | 0.00<br>(0.00 to<br>0.00)                        | 0.19<br>(0.01 to<br>0.29)                      | 0.00<br>(0.00 to<br>0.00)                      | 0.00<br>(0.00 to<br>0.00)                      | 0.00<br>(0.00 to<br>0.00)                      |

**Costa Rica**

|  | YLLs (actual counts) |  |  |  | Deaths (actual counts) |  |  |  |
|--|----------------------|--|--|--|------------------------|--|--|--|
|--|----------------------|--|--|--|------------------------|--|--|--|

| Cause                                                             | 2016                                        | 2040 Forecast                               | 2040 Better Scenario                        | 2040 Worse Scenario                         | 2016                                     | 2040 Forecast                            | 2040 Better Scenario                     | 2040 Worse Scenario                      |
|-------------------------------------------------------------------|---------------------------------------------|---------------------------------------------|---------------------------------------------|---------------------------------------------|------------------------------------------|------------------------------------------|------------------------------------------|------------------------------------------|
| All causes                                                        | 483,598.75<br>(445,369.40 to<br>526,048.20) | 645,054.00<br>(516,882.68 to<br>795,715.51) | 510,648.06<br>(409,051.94 to<br>623,371.65) | 766,589.27<br>(605,018.91 to<br>947,860.15) | 21,222.25<br>(19,810.67 to<br>22,666.31) | 42,364.49<br>(32,696.54 to<br>54,716.48) | 34,995.96<br>(27,424.40 to<br>44,946.59) | 48,580.58<br>(37,361.00 to<br>62,430.75) |
| Communicable, maternal, neonatal, and nutritional diseases        | 49,513.41<br>(39,080.30 to<br>64,612.70)    | 38,516.10<br>(30,519.87 to<br>48,503.47)    | 28,382.50<br>(22,557.17 to<br>35,272.48)    | 46,832.86<br>(36,782.07 to<br>59,973.23)    | 1,128.21<br>(987.05 to<br>1,314.31)      | 1,666.60<br>(1,303.58 to<br>2,152.45)    | 1,375.19<br>(1,054.92 to<br>1,787.57)    | 1,940.34<br>(1,485.09 to<br>2,556.63)    |
| HIV/AIDS and tuberculosis                                         | 8,314.91<br>(7,892.14 to<br>8,754.36)       | 8,195.18<br>(5,434.47 to<br>9,501.62)       | 6,405.21<br>(3,489.03 to<br>7,636.81)       | 9,487.67<br>(7,265.16 to<br>10,929.37)      | 203.42<br>(193.34 to<br>213.86)          | 225.19<br>(149.93 to<br>275.24)          | 171.53<br>(93.12 to<br>211.95)           | 265.54<br>(193.38 to<br>328.14)          |
| Tuberculosis                                                      | 1,251.60<br>(1,116.34 to<br>1,418.74)       | 1,141.46<br>(698.93 to<br>1,742.41)         | 583.06<br>(348.09 to<br>927.30)             | 1,644.91<br>(958.52 to<br>2,649.03)         | 48.28<br>(43.45 to<br>54.17)             | 60.83<br>(36.78 to<br>95.85)             | 32.33<br>(19.22 to<br>52.60)             | 85.06<br>(47.98 to<br>140.93)            |
| HIV/AIDS                                                          | 7,063.31<br>(6,684.46 to<br>7,470.12)       | 7,053.73<br>(4,337.11 to<br>8,151.93)       | 5,822.15<br>(2,978.49 to<br>7,029.16)       | 7,842.76<br>(5,878.92 to<br>8,867.22)       | 155.13<br>(146.77 to<br>164.21)          | 164.36<br>(92.56 to<br>193.56)           | 139.20<br>(62.32 to<br>171.35)           | 180.48<br>(123.81 to<br>207.93)          |
| Diarrhea, lower respiratory, and other common infectious diseases | 14,957.54<br>(12,532.74 to<br>18,432.31)    | 17,046.08<br>(12,840.00 to<br>22,769.92)    | 13,116.66<br>(9,961.00 to<br>17,211.17)     | 21,500.71<br>(15,737.79 to<br>29,884.31)    | 562.19<br>(499.65 to<br>631.48)          | 1,181.69<br>(851.20 to<br>1,666.26)      | 1,001.51<br>(722.61 to<br>1,394.36)      | 1,383.30<br>(961.90 to<br>1,972.76)      |
| Diarrheal diseases                                                | 2,321.53<br>(1,847.75 to<br>3,028.14)       | 1,509.88<br>(735.26 to<br>3,241.97)         | 1,558.53<br>(741.19 to<br>3,291.72)         | 2,176.77<br>(887.56 to<br>5,186.11)         | 92.85<br>(81.65 to<br>106.05)            | 123.31<br>(57.03 to<br>278.07)           | 135.11<br>(62.00 to<br>303.34)           | 169.45<br>(65.95 to<br>417.36)           |
| Intestinal infectious diseases                                    | 3.40<br>(1.75 to<br>5.81)                   | 2.49<br>(1.25 to<br>4.29)                   | 2.41<br>(1.20 to<br>4.25)                   | 2.65<br>(1.33 to<br>4.64)                   | 0.08<br>(0.04 to<br>0.13)                | 0.08<br>(0.05 to<br>0.14)                | 0.08<br>(0.04 to<br>0.14)                | 0.09<br>(0.05 to<br>0.15)                |
| Typhoid fever                                                     | 2.38<br>(1.08 to<br>4.61)                   | 1.82<br>(0.81 to<br>3.49)                   | 1.90<br>(0.85 to<br>3.63)                   | 1.91<br>(0.85 to<br>3.64)                   | 0.06<br>(0.03 to<br>0.11)                | 0.05<br>(0.03 to<br>0.10)                | 0.06<br>(0.03 to<br>0.11)                | 0.06<br>(0.03 to<br>0.11)                |
| Paratyphoid fever                                                 | 0.27<br>(0.11 to<br>0.58)                   | 0.14<br>(0.05 to<br>0.30)                   | 0.11<br>(0.04 to<br>0.22)                   | 0.15<br>(0.06 to<br>0.33)                   | 0.01<br>(0.00 to<br>0.01)                | 0.00<br>(0.00 to<br>0.01)                | 0.00<br>(0.00 to<br>0.01)                | 0.00<br>(0.00 to<br>0.01)                |
| Other intestinal infectious diseases                              | 0.74<br>(0.29 to<br>1.65)                   | 0.53<br>(0.19 to<br>1.13)                   | 0.41<br>(0.14 to<br>0.89)                   | 0.59<br>(0.22 to<br>1.27)                   | 0.02<br>(0.01 to<br>0.04)                | 0.02<br>(0.01 to<br>0.06)                | 0.02<br>(0.01 to<br>0.05)                | 0.03<br>(0.01 to<br>0.06)                |
| Lower respiratory infections                                      | 9,624.47<br>(8,201.30 to<br>11,495.86)      | 12,694.95<br>(9,141.77 to<br>17,959.14)     | 9,322.49<br>(6,905.44 to<br>12,797.21)      | 16,000.24<br>(11,175.53 to<br>23,502.54)    | 407.07<br>(357.20 to<br>463.11)          | 981.36<br>(706.29 to<br>1,370.33)        | 802.76<br>(574.01 to<br>1,135.44)        | 1,129.29<br>(783.38 to<br>1,624.61)      |
| Upper respiratory infections                                      | 13.76<br>(7.28 to<br>23.15)                 | 13.14<br>(5.71 to<br>26.01)                 | 8.18<br>(3.38 to<br>16.66)                  | 15.24<br>(6.45 to<br>31.01)                 | 0.38<br>(0.22 to<br>0.61)                | 0.58<br>(0.23 to<br>1.17)                | 0.37<br>(0.15 to<br>0.76)                | 0.65<br>(0.26 to<br>1.31)                |
| Otitis media                                                      | 0.91<br>(0.59 to<br>1.48)                   | 0.10<br>(0.05 to<br>0.18)                   | 0.10<br>(0.05 to<br>0.18)                   | 0.10<br>(0.06 to<br>0.19)                   | 0.02<br>(0.01 to<br>0.02)                | 0.00<br>(0.00 to<br>0.01)                | 0.00<br>(0.01 to<br>0.01)                | 0.00<br>(0.00 to<br>0.01)                |
| Meningitis                                                        | 1,690.62<br>(1,375.35 to<br>2,158.16)       | 992.75<br>(749.10 to<br>1,290.44)           | 793.02<br>(582.45 to<br>1,030.68)           | 1,084.24<br>(797.96 to<br>1,454.08)         | 37.37<br>(32.27 to<br>44.88)             | 33.72<br>(26.45 to<br>40.72)             | 28.13<br>(21.14 to<br>35.20)             | 34.58<br>(27.26 to<br>42.01)             |
| Pneumococcal meningitis                                           | 158.09<br>(124.54 to<br>204.92)             | 89.35<br>(66.19 to<br>116.31)               | 86.69<br>(64.23 to<br>112.81)               | 92.72<br>(68.75 to<br>122.15)               | 3.93<br>(3.25 to<br>4.76)                | 3.49<br>(2.59 to<br>4.55)                | 3.50<br>(2.60 to<br>4.52)                | 3.50<br>(2.60 to<br>4.54)                |
| H influenzae type B meningitis                                    | 137.04<br>(103.81 to<br>189.04)             | 129.99<br>(57.65 to<br>268.80)              | 104.53<br>(52.94 to<br>193.25)              | 187.52<br>(66.91 to<br>425.78)              | 2.79<br>(2.28 to<br>3.49)                | 2.82<br>(1.82 to<br>4.51)                | 2.56<br>(1.75 to<br>3.72)                | 3.44<br>(1.99 to<br>6.28)                |
| Meningococcal meningitis                                          | 634.67<br>(520.55 to<br>822.00)             | 334.01<br>(257.03 to<br>427.98)             | 261.93<br>(191.99 to<br>343.11)             | 347.56<br>(267.38 to<br>444.77)             | 13.81<br>(11.80 to<br>16.83)             | 11.72<br>(9.02 to<br>14.37)              | 9.52<br>(6.94 to<br>12.38)               | 11.82<br>(9.00 to<br>14.56)              |
| Other meningitis                                                  | 760.81<br>(614.17 to<br>982.46)             | 439.40<br>(337.44 to<br>554.53)             | 339.88<br>(247.90 to<br>448.47)             | 456.43<br>(347.42 to<br>579.29)             | 16.83<br>(14.47 to<br>20.28)             | 15.69<br>(12.02 to<br>19.11)             | 12.55<br>(9.17 to<br>16.22)              | 15.81<br>(12.21 to<br>19.28)             |
| Encephalitis                                                      | 1,212.20<br>(817.55 to<br>2,160.22)         | 909.91<br>(581.63 to<br>1,596.12)           | 782.89<br>(509.87 to<br>1,349.79)           | 985.60<br>(609.51 to<br>1,767.59)           | 22.23<br>(16.25 to<br>36.91)             | 24.33<br>(17.33 to<br>39.59)             | 21.74<br>(15.50 to<br>35.26)             | 25.60<br>(18.07 to<br>42.86)             |
| Diphtheria                                                        | 2.29<br>(1.41 to<br>3.62)                   | 0.43<br>(0.22 to<br>0.76)                   | 0.34<br>(0.19 to<br>0.56)                   | 0.67<br>(0.25 to<br>1.49)                   | 0.04<br>(0.02 to<br>0.06)                | 0.01<br>(0.00 to<br>0.01)                | 0.01<br>(0.00 to<br>0.01)                | 0.01<br>(0.01 to<br>0.02)                |

|                                               |                                   |                                  |                                  |                                     |                              |                              |                              |                              |
|-----------------------------------------------|-----------------------------------|----------------------------------|----------------------------------|-------------------------------------|------------------------------|------------------------------|------------------------------|------------------------------|
| Whooping cough                                | 9.90<br>(3.92 to<br>20.27)        | 4.75<br>(0.31 to<br>14.89)       | 1.12<br>(0.25 to<br>2.81)        | 16.05<br>(0.36 to<br>51.38)         | 0.12<br>(0.05 to<br>0.24)    | 0.06<br>(0.01 to<br>0.18)    | 0.02<br>(0.00 to<br>0.04)    | 0.19<br>(0.01 to<br>0.60)    |
| Tetanus                                       | 2.41<br>(1.88 to<br>3.59)         | 0.43<br>(0.27 to<br>0.71)        | 0.38<br>(0.23 to<br>0.68)        | 0.59<br>(0.36 to<br>1.02)           | 0.06<br>(0.05 to<br>0.10)    | 0.01<br>(0.01 to<br>0.02)    | 0.01<br>(0.01 to<br>0.02)    | 0.02<br>(0.01 to<br>0.03)    |
| Measles                                       | 1.27<br>(0.92 to<br>1.80)         | 874.00<br>(87.50 to<br>2,603.49) | 616.07<br>(71.87 to<br>1,639.38) | 1,169.07<br>(102.58 to<br>3,719.95) | 0.02<br>(0.01 to<br>0.02)    | 16.22<br>(1.25 to<br>48.05)  | 11.75<br>(1.04 to<br>33.38)  | 21.26<br>(1.60 to<br>66.51)  |
| <b>Costa Rica</b>                             |                                   |                                  |                                  |                                     |                              |                              |                              |                              |
| Cause                                         | YLLs (actual counts)              |                                  |                                  |                                     | Deaths (actual counts)       |                              |                              |                              |
|                                               | 2016                              | 2040 Forecast                    | 2040 Better Scenario             | 2040 Worse Scenario                 | 2016                         | 2040 Forecast                | 2040 Better Scenario         | 2040 Worse Scenario          |
| Varicella and herpes zoster                   | 74.79<br>(39.90 to<br>155.56)     | 43.24<br>(23.77 to<br>85.84)     | 31.12<br>(16.79 to<br>85.84)     | 49.48<br>(27.15 to<br>96.34)        | 1.96<br>(1.13 to<br>3.65)    | 1.99<br>(1.09 to<br>3.68)    | 1.52<br>(0.81 to<br>2.53)    | 2.16<br>(1.19 to<br>3.89)    |
| Neglected tropical diseases and malaria       | 190.02<br>(136.90 to<br>271.31)   | 500.63<br>(344.07 to<br>707.27)  | 484.58<br>(337.38 to<br>676.76)  | 507.65<br>(347.94 to<br>722.13)     | 6.45<br>(4.65 to<br>8.86)    | 24.50<br>(16.51 to<br>35.14) | 24.26<br>(16.70 to<br>34.61) | 24.37<br>(16.41 to<br>35.01) |
| Malaria                                       | 8.67<br>(7.23 to<br>10.50)        | 4.45<br>(3.50 to<br>5.80)        | 4.25<br>(3.35 to<br>5.53)        | 4.52<br>(3.55 to<br>5.86)           | 0.22<br>(0.18 to<br>0.25)    | 0.15<br>(0.12 to<br>0.19)    | 0.15<br>(0.12 to<br>0.19)    | 0.15<br>(0.12 to<br>0.19)    |
| Chagas disease                                | 19.20<br>(16.86 to<br>22.01)      | 15.81<br>(12.04 to<br>22.09)     | 18.09<br>(13.76 to<br>25.03)     | 14.60<br>(11.08 to<br>20.47)        | 1.14<br>(1.01 to<br>1.32)    | 1.27<br>(0.94 to<br>1.78)    | 1.46<br>(1.09 to<br>2.03)    | 1.16<br>(0.86 to<br>1.65)    |
| Leishmaniasis                                 | 4.08<br>(2.25 to<br>6.36)         | 1.94<br>(1.06 to<br>3.08)        | 1.40<br>(0.77 to<br>2.19)        | 2.28<br>(1.21 to<br>3.73)           | 0.11<br>(0.06 to<br>0.16)    | 0.06<br>(0.03 to<br>0.09)    | 0.04<br>(0.02 to<br>0.07)    | 0.07<br>(0.04 to<br>0.11)    |
| African trypanosomiasis                       | 0.00<br>(0.00 to<br>0.00)         | 0.00<br>(0.00 to<br>0.00)        | 0.00<br>(0.00 to<br>0.00)        | 0.00<br>(0.00 to<br>0.00)           | 0.00<br>(0.00 to<br>0.00)    | 0.00<br>(0.00 to<br>0.00)    | 0.00<br>(0.00 to<br>0.00)    | 0.00<br>(0.00 to<br>0.00)    |
| Schistosomiasis                               | 0.00<br>(0.00 to<br>0.00)         | 0.00<br>(0.00 to<br>0.00)        | 0.00<br>(0.00 to<br>0.00)        | 0.00<br>(0.00 to<br>0.00)           | 0.00<br>(0.00 to<br>0.00)    | 0.00<br>(0.00 to<br>0.00)    | 0.00<br>(0.00 to<br>0.00)    | 0.00<br>(0.00 to<br>0.00)    |
| Cysticercosis                                 | 0.00<br>(0.00 to<br>0.00)         | 0.00<br>(0.00 to<br>0.00)        | 0.00<br>(0.00 to<br>0.00)        | 0.00<br>(0.00 to<br>0.00)           | 0.00<br>(0.00 to<br>0.00)    | 0.00<br>(0.00 to<br>0.00)    | 0.00<br>(0.00 to<br>0.00)    | 0.00<br>(0.00 to<br>0.00)    |
| Cystic echinococcosis                         | 0.71<br>(0.59 to<br>0.84)         | 0.37<br>(0.28 to<br>0.49)        | 0.24<br>(0.19 to<br>0.32)        | 0.44<br>(0.34 to<br>0.58)           | 0.02<br>(0.02 to<br>0.03)    | 0.02<br>(0.01 to<br>0.02)    | 0.01<br>(0.01 to<br>0.02)    | 0.02<br>(0.02 to<br>0.03)    |
| Dengue                                        | 83.00<br>(47.58 to<br>129.91)     | 425.26<br>(263.96 to<br>633.43)  | 413.83<br>(262.18 to<br>608.63)  | 428.16<br>(262.09 to<br>642.64)     | 3.58<br>(1.97 to<br>5.68)    | 21.71<br>(13.32 to<br>32.17) | 21.39<br>(13.42 to<br>31.46) | 21.62<br>(13.17 to<br>32.25) |
| Yellow fever                                  | 0.00<br>(0.00 to<br>0.00)         | 0.00<br>(0.00 to<br>0.00)        | 0.00<br>(0.00 to<br>0.00)        | 0.00<br>(0.00 to<br>0.00)           | 0.00<br>(0.00 to<br>0.00)    | 0.00<br>(0.00 to<br>0.00)    | 0.00<br>(0.00 to<br>0.00)    | 0.00<br>(0.00 to<br>0.00)    |
| Rabies                                        | 0.78<br>(0.54 to<br>1.23)         | 0.36<br>(0.22 to<br>0.67)        | 0.25<br>(0.14 to<br>0.39)        | 0.48<br>(0.29 to<br>0.86)           | 0.02<br>(0.01 to<br>0.02)    | 0.01<br>(0.01 to<br>0.01)    | 0.01<br>(0.00 to<br>0.01)    | 0.01<br>(0.01 to<br>0.02)    |
| Intestinal nematode infections                | 30.54<br>(10.18 to<br>66.55)      | 26.99<br>(10.64 to<br>57.00)     | 25.20<br>(10.42 to<br>51.03)     | 28.32<br>(10.78 to<br>61.13)        | 0.56<br>(0.27 to<br>1.00)    | 0.66<br>(0.34 to<br>1.12)    | 0.66<br>(0.34 to<br>1.09)    | 0.66<br>(0.34 to<br>1.13)    |
| Other neglected tropical diseases             | 37.72<br>(28.93 to<br>67.82)      | 25.44<br>(18.78 to<br>48.31)     | 21.36<br>(16.02 to<br>41.30)     | 28.83<br>(21.50 to<br>53.47)        | 0.70<br>(0.53 to<br>1.49)    | 0.62<br>(0.41 to<br>1.74)    | 0.54<br>(0.36 to<br>1.67)    | 0.68<br>(0.46 to<br>1.81)    |
| Maternal disorders                            | 951.36<br>(781.53 to<br>1,160.52) | 504.51<br>(366.52 to<br>667.21)  | 350.84<br>(254.93 to<br>470.34)  | 604.10<br>(434.07 to<br>834.19)     | 16.99<br>(13.95 to<br>20.60) | 9.19<br>(6.72 to<br>12.09)   | 6.41<br>(4.65 to<br>8.59)    | 11.00<br>(7.98 to<br>15.08)  |
| Maternal hemorrhage                           | 181.61<br>(128.60 to<br>245.66)   | 89.82<br>(55.41 to<br>138.37)    | 62.51<br>(38.24 to<br>100.03)    | 107.42<br>(65.52 to<br>167.55)      | 3.30<br>(2.34 to<br>4.46)    | 1.66<br>(1.03 to<br>2.53)    | 1.16<br>(0.71 to<br>1.82)    | 1.99<br>(1.21 to<br>3.09)    |
| Maternal sepsis and other maternal infections | 13.38<br>(6.76 to<br>22.28)       | 8.95<br>(3.90 to<br>16.47)       | 6.17<br>(2.65 to<br>11.23)       | 10.73<br>(4.56 to<br>19.84)         | 0.24<br>(0.12 to<br>0.40)    | 0.16<br>(0.07 to<br>0.29)    | 0.11<br>(0.05 to<br>0.21)    | 0.20<br>(0.08 to<br>0.36)    |

| Maternal hypertensive disorders                                         | 242.00<br>(174.42 to<br>318.77)                 | 118.09<br>(73.24 to<br>175.43)                 | 80.98<br>(49.54 to<br>121.99)                 | 141.89<br>(87.37 to<br>216.73)                 | 4.29<br>(3.12 to<br>5.65)              | 2.14<br>(1.33 to<br>3.18)             | 1.47<br>(0.90 to<br>2.22)            | 2.56<br>(1.58 to<br>3.94)             |
|-------------------------------------------------------------------------|-------------------------------------------------|------------------------------------------------|-----------------------------------------------|------------------------------------------------|----------------------------------------|---------------------------------------|--------------------------------------|---------------------------------------|
| Maternal obstructed labor and uterine rupture                           | 9.20<br>(3.88 to<br>17.86)                      | 6.60<br>(2.56 to<br>13.53)                     | 4.39<br>(1.72 to<br>9.18)                     | 8.01<br>(3.15 to<br>17.01)                     | 0.17<br>(0.07 to<br>0.33)              | 0.12<br>(0.05 to<br>0.25)             | 0.08<br>(0.03 to<br>0.17)            | 0.15<br>(0.06 to<br>0.31)             |
| Maternal abortion, miscarriage, and ectopic pregnancy                   | 35.21<br>(21.17 to<br>52.48)                    | 31.16<br>(15.21 to<br>57.51)                   | 21.55<br>(10.42 to<br>39.01)                  | 37.45<br>(18.18 to<br>68.40)                   | 0.66<br>(0.40 to<br>0.97)              | 0.59<br>(0.29 to<br>1.08)             | 0.41<br>(0.20 to<br>0.76)            | 0.71<br>(0.35 to<br>1.29)             |
| Indirect maternal deaths                                                | 210.56<br>(150.73 to<br>292.53)                 | 110.84<br>(64.87 to<br>171.69)                 | 76.23<br>(44.30 to<br>119.52)                 | 133.09<br>(78.03 to<br>211.55)                 | 3.66<br>(2.64 to<br>5.08)              | 1.96<br>(1.17 to<br>2.97)             | 1.35<br>(0.79 to<br>2.13)            | 2.35<br>(1.39 to<br>3.72)             |
| Late maternal deaths                                                    | 44.66<br>(28.06 to<br>67.12)                    | 20.46<br>(11.15 to<br>35.49)                   | 14.00<br>(7.56 to<br>24.25)                   | 24.60<br>(13.15 to<br>41.55)                   | 0.80<br>(0.50 to<br>1.20)              | 0.37<br>(0.21 to<br>0.63)             | 0.26<br>(0.14 to<br>0.44)            | 0.45<br>(0.24 to<br>0.77)             |
| Maternal deaths aggravated by HIV/AIDS                                  | 0.48<br>(0.23 to<br>0.86)                       | 1.10<br>(0.37 to<br>2.41)                      | 0.77<br>(0.22 to<br>1.79)                     | 1.33<br>(0.49 to<br>2.88)                      | 0.01<br>(0.00 to<br>0.02)              | 0.02<br>(0.01 to<br>0.05)             | 0.01<br>(0.00 to<br>0.03)            | 0.03<br>(0.01 to<br>0.06)             |
| Other maternal disorders                                                | 214.26<br>(153.77 to<br>285.34)                 | 117.51<br>(72.75 to<br>172.80)                 | 84.25<br>(51.32 to<br>125.63)                 | 139.57<br>(83.44 to<br>210.20)                 | 3.86<br>(2.77 to<br>5.14)              | 2.16<br>(1.34 to<br>3.21)             | 1.56<br>(0.94 to<br>2.29)            | 2.57<br>(1.54 to<br>3.83)             |
| <b>Costa Rica</b>                                                       |                                                 |                                                |                                               |                                                |                                        |                                       |                                      |                                       |
| Cause                                                                   | YLLs (actual counts)                            |                                                |                                               |                                                | Deaths (actual counts)                 |                                       |                                      |                                       |
|                                                                         | 2016                                            | 2040 Forecast                                  | 2040 Better Scenario                          | 2040 Worse Scenario                            | 2016                                   | 2040 Forecast                         | 2040 Better Scenario                 | 2040 Worse Scenario                   |
| <b>Neonatal disorders</b>                                               | <b>22,785.19</b><br>(14,635.75 to<br>33,817.41) | <b>10,339.62</b><br>(5,638.28 to<br>17,409.61) | <b>6,386.87</b><br>(3,477.93 to<br>10,753.99) | <b>12,657.32</b><br>(6,967.17 to<br>21,486.68) | <b>263.26</b><br>(169.09 to<br>390.73) | <b>119.50</b><br>(65.16 to<br>201.19) | <b>73.82</b><br>(40.20 to<br>124.29) | <b>146.28</b><br>(80.52 to<br>248.26) |
| Neonatal preterm birth                                                  | 12,934.86<br>(8,077.54 to<br>19,580.39)         | 5,605.62<br>(3,069.83 to<br>9,202.45)          | 3,056.91<br>(1,667.18 to<br>5,256.97)         | 6,814.82<br>(3,725.78 to<br>11,389.89)         | 149.43<br>(93.32 to<br>226.20)         | 64.77<br>(35.48 to<br>106.52)         | 35.32<br>(19.26 to<br>60.74)         | 78.74<br>(43.05 to<br>131.58)         |
| Neonatal encephalopathy due to birth asphyxia and trauma                | 4,269.19<br>(2,628.38 to<br>6,634.05)           | 1,770.01<br>(902.55 to<br>3,263.49)            | 1,191.30<br>(597.76 to<br>2,186.81)           | 2,154.66<br>(1,086.89 to<br>3,911.09)          | 49.24<br>(30.38 to<br>76.67)           | 20.47<br>(10.44 to<br>37.72)          | 13.78<br>(6.91 to<br>25.28)          | 24.91<br>(12.57 to<br>45.21)          |
| Neonatal sepsis and other neonatal infections                           | 1,176.59<br>(611.05 to<br>2,699.61)             | 1,100.43<br>(532.41 to<br>2,533.07)            | 768.16<br>(366.47 to<br>1,830.72)             | 1,342.56<br>(633.04 to<br>3,036.37)            | 13.59<br>(7.06 to<br>31.20)            | 12.72<br>(6.16 to<br>29.29)           | 8.88<br>(4.24 to<br>21.16)           | 15.52<br>(7.32 to<br>35.09)           |
| Hemolytic disease and other neonatal jaundice                           | 61.56<br>(29.95 to<br>112.60)                   | 18.75<br>(7.78 to<br>39.67)                    | 12.45<br>(5.06 to<br>26.59)                   | 23.57<br>(9.38 to<br>49.18)                    | 0.71<br>(0.35 to<br>1.30)              | 0.22<br>(0.09 to<br>0.46)             | 0.14<br>(0.06 to<br>0.31)            | 0.27<br>(0.11 to<br>0.57)             |
| Other neonatal disorders                                                | 4,342.99<br>(2,654.95 to<br>6,643.12)           | 1,844.80<br>(940.20 to<br>3,301.92)            | 1,358.05<br>(720.48 to<br>2,449.16)           | 2,321.71<br>(1,182.89 to<br>4,152.40)          | 50.19<br>(30.69 to<br>76.78)           | 21.32<br>(10.87 to<br>38.16)          | 15.70<br>(8.33 to<br>28.30)          | 26.84<br>(13.67 to<br>47.99)          |
| <b>Nutritional deficiencies</b>                                         | <b>614.37</b><br>(497.38 to<br>781.61)          | <b>559.07</b><br>(468.37 to<br>671.02)         | <b>524.03</b><br>(439.46 to<br>634.66)        | <b>588.45</b><br>(491.80 to<br>707.93)         | <b>32.04</b><br>(28.25 to<br>35.99)    | <b>54.93</b><br>(43.43 to<br>68.15)   | <b>54.34</b><br>(42.80 to<br>68.19)  | <b>55.38</b><br>(43.58 to<br>69.46)   |
| Protein-energy malnutrition                                             | 529.51<br>(413.50 to<br>693.62)                 | 455.58<br>(359.01 to<br>562.56)                | 435.23<br>(341.89 to<br>540.54)               | 478.60<br>(379.04 to<br>596.19)                | 28.86<br>(24.83 to<br>32.76)           | 47.47<br>(34.97 to<br>61.38)          | 47.70<br>(35.63 to<br>61.64)         | 47.78<br>(35.34 to<br>61.81)          |
| Iodine deficiency                                                       | 9.71<br>(0.89 to<br>28.39)                      | 23.30<br>(0.93 to<br>80.30)                    | 19.88<br>(0.67 to<br>74.35)                   | 25.32<br>(1.08 to<br>84.29)                    | 0.33<br>(0.03 to<br>1.20)              | 1.88<br>(0.03 to<br>8.76)             | 1.68<br>(0.02 to<br>8.16)            | 1.97<br>(0.02 to<br>8.82)             |
| Dietary iron deficiency                                                 | 26.91<br>(14.55 to<br>35.92)                    | 18.34<br>(10.19 to<br>24.32)                   | 16.84<br>(9.32 to<br>22.52)                   | 19.68<br>(10.94 to<br>26.38)                   | 0.55<br>(0.28 to<br>0.76)              | 0.47<br>(0.26 to<br>0.71)             | 0.45<br>(0.24 to<br>0.69)            | 0.50<br>(0.27 to<br>0.73)             |
| Other nutritional deficiencies                                          | 48.23<br>(25.46 to<br>76.10)                    | 61.84<br>(33.88 to<br>114.31)                  | 52.07<br>(28.15 to<br>96.42)                  | 64.84<br>(35.62 to<br>115.62)                  | 2.30<br>(1.17 to<br>4.67)              | 5.11<br>(2.68 to<br>11.29)            | 4.52<br>(2.28 to<br>10.05)           | 5.14<br>(2.61 to<br>11.08)            |
| <b>Other communicable, maternal, neonatal, and nutritional diseases</b> | <b>1,700.03</b><br>(1,464.76 to<br>2,034.76)    | <b>1,371.02</b><br>(1,140.95 to<br>1,629.63)   | <b>1,114.31</b><br>(922.26 to<br>1,363.58)    | <b>1,486.96</b><br>(1,229.70 to<br>1,791.00)   | <b>43.86</b><br>(39.20 to<br>49.44)    | <b>51.59</b><br>(43.47 to<br>60.55)   | <b>43.32</b><br>(35.72 to<br>51.91)  | <b>54.46</b><br>(45.17 to<br>64.46)   |
| Sexually transmitted infections excluding HIV                           | 220.09<br>(118.71 to<br>441.60)                 | 73.13<br>(48.84 to<br>129.91)                  | 58.56<br>(39.89 to<br>97.98)                  | 79.52<br>(51.48 to<br>147.41)                  | 4.37<br>(3.02 to<br>6.94)              | 2.13<br>(1.62 to<br>2.91)             | 1.80<br>(1.36 to<br>2.43)            | 2.24<br>(1.69 to<br>3.12)             |

|                                       |                                                    |                                                    |                                                    |                                                    |                                                 |                                                 |                                                 |                                                 |
|---------------------------------------|----------------------------------------------------|----------------------------------------------------|----------------------------------------------------|----------------------------------------------------|-------------------------------------------------|-------------------------------------------------|-------------------------------------------------|-------------------------------------------------|
| Syphilis                              | 169.91<br>(69.10 to<br>388.41)                     | 42.74<br>(20.54 to<br>99.80)                       | 31.63<br>(15.37 to<br>71.61)                       | 47.62<br>(22.10 to<br>113.57)                      | 2.90<br>(1.64 to<br>5.45)                       | 1.00<br>(0.64 to<br>1.68)                       | 0.78<br>(0.50 to<br>1.30)                       | 1.07<br>(0.68 to<br>1.88)                       |
| Chlamydial infection                  | 9.31<br>(7.68 to<br>10.99)                         | 5.69<br>(4.36 to<br>7.35)                          | 5.06<br>(3.89 to<br>6.57)                          | 5.99<br>(4.60 to<br>7.81)                          | 0.26<br>(0.22 to<br>0.31)                       | 0.21<br>(0.17 to<br>0.27)                       | 0.19<br>(0.15 to<br>0.25)                       | 0.22<br>(0.17 to<br>0.28)                       |
| Gonococcal infection                  | 26.84<br>(22.17 to<br>31.68)                       | 16.66<br>(12.72 to<br>21.25)                       | 14.80<br>(11.21 to<br>19.34)                       | 17.46<br>(13.26 to<br>22.59)                       | 0.82<br>(0.68 to<br>0.96)                       | 0.65<br>(0.50 to<br>0.83)                       | 0.59<br>(0.45 to<br>0.77)                       | 0.67<br>(0.52 to<br>0.86)                       |
| Other sexually transmitted infections | 14.04<br>(11.55 to<br>16.68)                       | 8.04<br>(6.15 to<br>10.31)                         | 7.08<br>(5.34 to<br>9.24)                          | 8.45<br>(6.40 to<br>10.98)                         | 0.39<br>(0.32 to<br>0.45)                       | 0.27<br>(0.21 to<br>0.34)                       | 0.24<br>(0.18 to<br>0.31)                       | 0.28<br>(0.21 to<br>0.36)                       |
| Acute hepatitis                       | 665.80<br>(578.20 to<br>763.32)                    | 571.71<br>(448.41 to<br>715.62)                    | 437.83<br>(326.44 to<br>574.23)                    | 611.70<br>(476.48 to<br>770.42)                    | 19.49<br>(17.02 to<br>22.29)                    | 22.65<br>(17.97 to<br>28.27)                    | 17.70<br>(13.12 to<br>23.35)                    | 23.82<br>(18.57 to<br>29.78)                    |
| Acute hepatitis A                     | 49.49<br>(32.40 to<br>73.33)                       | 26.50<br>(15.95 to<br>41.74)                       | 20.88<br>(12.15 to<br>33.41)                       | 28.83<br>(17.18 to<br>45.69)                       | 0.97<br>(0.69 to<br>1.32)                       | 0.83<br>(0.47 to<br>1.37)                       | 0.68<br>(0.38 to<br>1.16)                       | 0.88<br>(0.50 to<br>1.47)                       |
| Acute hepatitis B                     | 486.34<br>(410.68 to<br>567.30)                    | 438.00<br>(328.26 to<br>569.36)                    | 331.89<br>(235.13 to<br>453.25)                    | 470.62<br>(349.30 to<br>614.38)                    | 14.66<br>(12.43 to<br>17.13)                    | 16.62<br>(12.42 to<br>21.80)                    | 12.75<br>(8.94 to<br>17.41)                     | 17.66<br>(13.19 to<br>22.76)                    |
| Acute hepatitis C                     | 37.89<br>(27.83 to<br>50.93)                       | 36.65<br>(25.00 to<br>52.69)                       | 29.42<br>(19.40 to<br>42.50)                       | 38.04<br>(25.53 to<br>55.09)                       | 1.15<br>(0.81 to<br>1.56)                       | 1.41<br>(0.92 to<br>2.00)                       | 1.15<br>(0.75 to<br>1.65)                       | 1.45<br>(0.96 to<br>2.09)                       |
| Acute hepatitis E                     | 92.08<br>(70.40 to<br>118.25)                      | 70.55<br>(47.72 to<br>98.81)                       | 55.64<br>(36.93 to<br>79.86)                       | 74.21<br>(50.39 to<br>104.03)                      | 2.70<br>(1.91 to<br>3.59)                       | 3.79<br>(2.39 to<br>5.61)                       | 3.12<br>(1.90 to<br>4.70)                       | 3.84<br>(2.39 to<br>5.75)                       |
| Other unspecified infectious diseases | 814.14<br>(682.88 to<br>987.31)                    | 726.17<br>(600.49 to<br>871.10)                    | 617.92<br>(508.62 to<br>747.31)                    | 795.75<br>(645.32 to<br>969.70)                    | 20.01<br>(17.57 to<br>23.00)                    | 26.81<br>(22.53 to<br>31.89)                    | 23.83<br>(19.95 to<br>28.28)                    | 28.40<br>(23.75 to<br>33.68)                    |
| Non-communicable diseases             | <b>342,860.75</b><br>(316,909.09 to<br>370,318.81) | <b>534,268.95</b><br>(412,760.96 to<br>673,735.26) | <b>431,188.09</b><br>(337,599.35 to<br>537,558.87) | <b>629,569.41</b><br>(475,873.78 to<br>799,848.54) | <b>17,899.60</b><br>(16,703.80 to<br>19,109.91) | <b>38,186.50</b><br>(28,947.46 to<br>50,511.61) | <b>31,708.30</b><br>(24,358.54 to<br>41,786.28) | <b>43,703.71</b><br>(32,845.93 to<br>57,364.79) |

| Costa Rica                      |                                                    |                                                    |                                                    |                                                    |                                              |                                                |                                                |                                                |
|---------------------------------|----------------------------------------------------|----------------------------------------------------|----------------------------------------------------|----------------------------------------------------|----------------------------------------------|------------------------------------------------|------------------------------------------------|------------------------------------------------|
| Cause                           | YLLs (actual counts)                               |                                                    |                                                    |                                                    | Deaths (actual counts)                       |                                                |                                                |                                                |
|                                 | 2016                                               | 2040 Forecast                                      | 2040 Better Scenario                               | 2040 Worse Scenario                                | 2016                                         | 2040 Forecast                                  | 2040 Better Scenario                           | 2040 Worse Scenario                            |
| <b>Neoplasms</b>                | <b>110,053.40</b><br>(101,717.78 to<br>118,992.27) | <b>181,356.41</b><br>(148,865.98 to<br>216,162.92) | <b>164,750.83</b><br>(133,163.84 to<br>197,508.33) | <b>193,499.23</b><br>(158,740.56 to<br>231,643.05) | <b>5,056.22</b><br>(4,660.17 to<br>5,449.29) | <b>10,937.09</b><br>(8,921.49 to<br>13,054.82) | <b>10,177.90</b><br>(8,123.87 to<br>12,255.15) | <b>11,396.61</b><br>(9,327.56 to<br>13,574.10) |
| Lip and oral cavity cancer      | 1,032.16<br>(923.88 to<br>1,150.23)                | 1,618.00<br>(983.27 to<br>2,463.31)                | 1,176.49<br>(751.78 to<br>1,764.55)                | 2,198.08<br>(1,272.95 to<br>3,501.42)              | 48.35<br>(43.66 to<br>53.37)                 | 91.36<br>(56.61 to<br>143.79)                  | 68.05<br>(44.01 to<br>103.88)                  | 122.17<br>(71.08 to<br>197.55)                 |
| Nasopharynx cancer              | 747.81<br>(666.11 to<br>844.66)                    | 961.14<br>(639.12 to<br>1,353.83)                  | 656.04<br>(446.74 to<br>917.18)                    | 1,331.29<br>(844.11 to<br>1,999.89)                | 25.63<br>(22.92 to<br>28.72)                 | 42.89<br>(28.52 to<br>62.86)                   | 29.70<br>(20.14 to<br>42.60)                   | 58.72<br>(36.96 to<br>88.58)                   |
| Other pharynx cancer            | 646.12<br>(572.83 to<br>727.70)                    | 920.96<br>(533.35 to<br>1,530.70)                  | 755.79<br>(452.82 to<br>1,228.15)                  | 1,115.28<br>(638.57 to<br>1,838.92)                | 27.30<br>(24.42 to<br>30.69)                 | 46.70<br>(26.67 to<br>77.86)                   | 39.44<br>(23.91 to<br>63.17)                   | 55.43<br>(31.27 to<br>91.22)                   |
| Esophageal cancer               | 1,333.57<br>(1,183.74 to<br>1,483.74)              | 2,253.64<br>(1,465.14 to<br>3,376.46)              | 1,794.44<br>(1,202.38 to<br>2,566.33)              | 2,931.68<br>(1,825.45 to<br>4,593.19)              | 69.84<br>(62.63 to<br>77.42)                 | 138.57<br>(89.84 to<br>201.27)                 | 112.29<br>(76.17 to<br>156.56)                 | 176.95<br>(109.98 to<br>273.93)                |
| Stomach cancer                  | 14,395.63<br>(13,001.52 to<br>15,699.92)           | 20,741.19<br>(15,489.62 to<br>28,080.05)           | 17,145.44<br>(12,989.34 to<br>22,775.60)           | 21,307.04<br>(15,974.60 to<br>28,585.25)           | 722.16<br>(658.24 to<br>785.91)              | 1,307.94<br>(987.40 to<br>1,776.69)            | 1,098.80<br>(822.62 to<br>1,477.50)            | 1,320.22<br>(986.08 to<br>1,787.04)            |
| Colon and rectum cancer         | 11,130.24<br>(9,970.75 to<br>12,365.96)            | 20,265.63<br>(14,014.40 to<br>28,780.36)           | 17,641.70<br>(12,205.12 to<br>25,495.03)           | 21,753.30<br>(14,901.68 to<br>31,509.93)           | 559.24<br>(502.98 to<br>619.43)              | 1,340.07<br>(922.92 to<br>1,923.92)            | 1,201.52<br>(819.61 to<br>1,761.93)            | 1,404.31<br>(954.60 to<br>2,053.74)            |
| Liver cancer                    | 5,651.93<br>(5,068.09 to<br>6,324.34)              | 10,805.81<br>(7,420.12 to<br>15,880.36)            | 9,729.71<br>(6,850.53 to<br>13,805.13)             | 12,801.69<br>(8,470.25 to<br>19,304.22)            | 281.99<br>(253.57 to<br>313.01)              | 653.85<br>(448.86 to<br>942.21)                | 603.78<br>(421.94 to<br>845.71)                | 751.90<br>(500.38 to<br>1,105.38)              |
| Liver cancer due to hepatitis B | 1,337.93<br>(1,002.90 to<br>1,779.47)              | 2,304.04<br>(1,453.62 to<br>3,677.20)              | 2,154.70<br>(1,395.33 to<br>3,317.85)              | 2,610.76<br>(1,580.06 to<br>4,291.36)              | 56.80<br>(41.24 to<br>77.82)                 | 118.14<br>(72.76 to<br>189.99)                 | 112.73<br>(70.16 to<br>177.70)                 | 130.51<br>(77.43 to<br>212.92)                 |

|                                      |                                        |                                          |                                          |                                          |                                 |                                       |                                       |                                     |
|--------------------------------------|----------------------------------------|------------------------------------------|------------------------------------------|------------------------------------------|---------------------------------|---------------------------------------|---------------------------------------|-------------------------------------|
| Liver cancer due to hepatitis C      | 1,742.60<br>(1,346.78 to<br>2,174.80)  | 3,548.66<br>(2,251.81 to<br>5,342.29)    | 3,331.48<br>(2,182.04 to<br>4,903.08)    | 3,920.69<br>(2,394.01 to<br>6,062.31)    | 98.15<br>(77.43 to<br>120.54)   | 239.43<br>(154.52 to<br>352.21)       | 229.66<br>(151.46 to<br>328.99)       | 258.27<br>(161.65 to<br>387.20)     |
| Liver cancer due to alcohol use      | 1,373.19<br>(1,094.08 to<br>1,674.90)  | 2,826.59<br>(1,802.61 to<br>4,394.96)    | 2,251.64<br>(1,473.29 to<br>3,387.58)    | 3,813.10<br>(2,362.65 to<br>6,035.85)    | 70.12<br>(56.55 to<br>85.03)    | 171.36<br>(106.73 to<br>266.51)       | 141.83<br>(89.85 to<br>215.70)        | 222.04<br>(136.73 to<br>346.27)     |
| Liver cancer due to other causes     | 1,198.21<br>(1,001.84 to<br>1,433.57)  | 2,126.52<br>(1,345.00 to<br>3,399.24)    | 1,991.90<br>(1,289.47 to<br>3,075.11)    | 2,457.14<br>(1,485.15 to<br>4,092.00)    | 56.92<br>(46.69 to<br>68.75)    | 124.91<br>(79.20 to<br>192.38)        | 119.56<br>(76.99 to<br>180.48)        | 141.08<br>(86.77 to<br>224.29)      |
| Gallbladder and biliary tract cancer | 1,605.36<br>(1,420.45 to<br>2,133.44)  | 2,399.27<br>(1,944.80 to<br>3,350.05)    | 2,391.75<br>(1,918.37 to<br>3,379.31)    | 2,332.22<br>(1,906.76 to<br>3,247.57)    | 83.10<br>(73.27 to<br>111.60)   | 154.81<br>(125.57 to<br>218.37)       | 157.38<br>(125.09 to<br>223.80)       | 147.81<br>(121.63 to<br>205.31)     |
| Pancreatic cancer                    | 5,010.16<br>(4,549.42 to<br>5,511.10)  | 9,968.15<br>(7,814.10 to<br>12,532.08)   | 10,186.45<br>(7,975.43 to<br>12,903.19)  | 10,062.65<br>(7,847.37 to<br>12,775.18)  | 262.11<br>(237.81 to<br>287.12) | 623.18<br>(486.50 to<br>784.82)       | 646.14<br>(501.55 to<br>816.17)       | 621.29<br>(480.98 to<br>788.47)     |
| Larynx cancer                        | 985.77<br>(865.61 to<br>1,111.65)      | 1,380.24<br>(832.48 to<br>2,138.99)      | 942.26<br>(603.09 to<br>1,391.41)        | 2,011.72<br>(1,094.36 to<br>3,385.64)    | 50.30<br>(44.56 to<br>56.53)    | 81.22<br>(50.00 to<br>126.37)         | 55.91<br>(36.86 to<br>83.78)          | 117.08<br>(65.40 to<br>194.28)      |
| Tracheal, bronchus, and lung cancer  | 7,361.57<br>(6,621.09 to<br>8,184.41)  | 12,480.65<br>(9,096.14 to<br>16,383.24)  | 10,184.39<br>(7,713.97 to<br>13,183.93)  | 17,122.89<br>(11,715.56 to<br>23,131.23) | 379.68<br>(344.34 to<br>419.42) | 744.38<br>(539.40 to<br>982.46)       | 615.94<br>(461.41 to<br>804.21)       | 1,008.45<br>(691.98 to<br>1,396.69) |
| Malignant skin melanoma              | 1,145.67<br>(945.76 to<br>1,571.16)    | 1,670.93<br>(1,341.64 to<br>2,269.91)    | 1,902.15<br>(1,511.19 to<br>2,540.58)    | 1,580.25<br>(1,278.09 to<br>2,150.24)    | 48.11<br>(40.24 to<br>63.73)    | 95.45<br>(76.10 to<br>123.82)         | 111.43<br>(87.34 to<br>145.93)        | 88.15<br>(71.88 to<br>116.25)       |
| Non-melanoma skin cancer             | 846.38<br>(763.34 to<br>938.09)        | 2,031.17<br>(1,707.50 to<br>2,358.08)    | 1,812.55<br>(1,462.22 to<br>2,196.59)    | 2,004.48<br>(1,712.64 to<br>2,306.13)    | 59.88<br>(54.19 to<br>66.01)    | 182.47<br>(150.47 to<br>217.58)       | 167.53<br>(133.39 to<br>204.81)       | 175.69<br>(145.71 to<br>205.17)     |
| Breast cancer                        | 9,326.83<br>(7,943.70 to<br>10,849.58) | 14,618.54<br>(10,927.78 to<br>19,040.10) | 12,789.72<br>(9,527.02 to<br>16,627.51)  | 15,915.27<br>(11,776.03 to<br>21,137.08) | 377.86<br>(323.46 to<br>436.86) | 752.21<br>(600.14 to<br>989.25)       | 674.89<br>(496.27 to<br>897.14)       | 803.37<br>(593.56 to<br>1,084.13)   |
| Cervical cancer                      | 4,407.38<br>(3,768.96 to<br>5,061.05)  | 5,754.00<br>(4,608.50 to<br>7,119.91)    | 4,895.52<br>(3,823.76 to<br>6,205.66)    | 5,956.89<br>(4,725.13 to<br>7,395.30)    | 161.63<br>(141.03 to<br>184.28) | 275.13<br>(218.50 to<br>338.62)       | 238.27<br>(184.28 to<br>304.04)       | 280.65<br>(223.40 to<br>342.90)     |
| Uterine cancer                       | 1,310.79<br>(1,104.82 to<br>1,517.60)  | 2,185.31<br>(1,675.04 to<br>2,735.65)    | 1,921.75<br>(1,433.12 to<br>2,451.08)    | 2,253.92<br>(1,724.48 to<br>2,789.41)    | 65.00<br>(55.07 to<br>75.69)    | 138.80<br>(105.60 to<br>173.85)       | 124.31<br>(91.97 to<br>157.25)        | 140.84<br>(108.69 to<br>174.77)     |
| Ovarian cancer                       | 2,348.11<br>(1,986.15 to<br>2,808.28)  | 3,792.81<br>(2,541.68 to<br>5,457.14)    | 3,672.17<br>(2,491.30 to<br>5,216.11)    | 3,806.52<br>(2,508.58 to<br>5,598.08)    | 91.46<br>(77.15 to<br>109.94)   | 185.51<br>(121.98 to<br>271.51)       | 182.15<br>(121.21 to<br>263.30)       | 184.61<br>(118.92 to<br>276.36)     |
| Prostate cancer                      | 6,438.36<br>(4,852.16 to<br>7,387.19)  | 17,662.15<br>(12,906.75 to<br>20,976.17) | 17,464.48<br>(12,492.16 to<br>21,121.32) | 16,665.42<br>(12,292.04 to<br>19,735.69) | 906.37<br>(353.55 to<br>579.54) | 1,617.21<br>(1,062.37 to<br>1,969.28) | 1,636.83<br>(1,080.82 to<br>2,028.58) | 1,500.73<br>(984.45 to<br>1,819.39) |
| Testicular cancer                    | 627.76<br>(503.20 to<br>795.22)        | 429.44<br>(328.25 to<br>560.93)          | 377.98<br>(283.49 to<br>497.57)          | 437.89<br>(334.38 to<br>573.62)          | 13.15<br>(10.77 to<br>16.14)    | 11.91<br>(9.44 to<br>14.86)           | 10.76<br>(8.42 to<br>13.49)           | 11.88<br>(9.47 to<br>14.72)         |
| <b>Costa Rica</b>                    |                                        |                                          |                                          |                                          |                                 |                                       |                                       |                                     |
| Cause                                | YLLs (actual counts)                   |                                          |                                          |                                          | Deaths (actual counts)          |                                       |                                       |                                     |
|                                      | 2016                                   | 2040 Forecast                            | 2040 Better Scenario                     | 2040 Worse Scenario                      | 2016                            | 2040 Forecast                         | 2040 Better Scenario                  | 2040 Worse Scenario                 |
| Kidney cancer                        | 2,098.82<br>(1,858.02 to<br>2,336.61)  | 3,719.79<br>(3,071.57 to<br>4,414.71)    | 3,912.56<br>(3,214.06 to<br>4,669.12)    | 3,625.29<br>(2,998.89 to<br>4,320.65)    | 86.33<br>(77.17 to<br>96.01)    | 192.45<br>(158.13 to<br>228.62)       | 206.17<br>(167.88 to<br>246.26)       | 184.30<br>(152.04 to<br>217.67)     |
| Bladder cancer                       | 1,408.05<br>(1,259.93 to<br>1,568.74)  | 2,435.01<br>(1,886.79 to<br>3,133.00)    | 2,310.89<br>(1,773.40 to<br>2,993.18)    | 2,545.65<br>(1,950.46 to<br>3,340.10)    | 91.88<br>(82.01 to<br>101.97)   | 192.07<br>(147.12 to<br>249.11)       | 185.40<br>(141.03 to<br>240.46)       | 198.22<br>(148.36 to<br>263.45)     |
| Brain and nervous system cancer      | 4,570.52<br>(3,921.11 to<br>5,514.00)  | 6,897.50<br>(5,679.41 to<br>8,229.04)    | 6,700.59<br>(5,477.82 to<br>8,081.14)    | 6,784.18<br>(5,602.24 to<br>8,093.65)    | 133.88<br>(115.54 to<br>156.00) | 269.54<br>(221.79 to<br>317.30)       | 267.52<br>(217.21 to<br>320.04)       | 260.24<br>(215.79 to<br>305.94)     |
| Thyroid cancer                       | 479.78<br>(419.66 to<br>537.09)        | 827.73<br>(561.32 to<br>1,236.49)        | 697.71<br>(474.54 to<br>1,046.14)        | 900.50<br>(597.53 to<br>1,372.33)        | 22.63<br>(19.81 to<br>25.50)    | 48.61<br>(32.87 to<br>72.28)          | 41.79<br>(28.29 to<br>62.17)          | 51.67<br>(34.34 to<br>78.29)        |
| Mesothelioma                         | 165.80<br>(144.40 to<br>215.07)        | 249.30<br>(202.68 to<br>321.50)          | 249.57<br>(200.79 to<br>327.93)          | 246.65<br>(202.53 to<br>317.45)          | 6.73<br>(5.92 to<br>8.40)       | 12.84<br>(10.56 to<br>16.01)          | 13.10<br>(10.53 to<br>16.39)          | 12.49<br>(10.36 to<br>15.41)        |



|                                |                                                |                                                 |                                                |                                                  |                                            |                                              |                                             |                                              |
|--------------------------------|------------------------------------------------|-------------------------------------------------|------------------------------------------------|--------------------------------------------------|--------------------------------------------|----------------------------------------------|---------------------------------------------|----------------------------------------------|
| Hodgkin lymphoma               | 1,063.63<br>(890.24 to 1,205.65)               | 1,070.42<br>(882.48 to 1,267.80)                | 855.07<br>(688.98 to 1,055.65)                 | 1,131.80<br>(926.09 to 1,349.26)                 | 32.04<br>(28.01 to 35.96)                  | 44.21<br>(36.82 to 52.21)                    | 36.11<br>(28.95 to 44.43)                   | 45.85<br>(38.10 to 54.22)                    |
| Non-Hodgkin lymphoma           | 5,020.56<br>(4,459.99 to 5,625.13)             | 7,989.53<br>(6,223.56 to 10,094.12)             | 7,512.67<br>(5,810.07 to 9,405.86)             | 8,034.60<br>(6,212.91 to 10,176.29)              | 190.29<br>(166.89 to 212.14)               | 400.00<br>(307.29 to 509.14)                 | 384.66<br>(295.47 to 486.59)                | 393.79<br>(300.90 to 499.83)                 |
| Multiple myeloma               | 2,229.48<br>(1,917.30 to 3,015.91)             | 4,280.39<br>(3,116.37 to 5,779.51)              | 4,150.77<br>(3,070.64 to 5,570.19)             | 4,283.99<br>(3,091.75 to 5,864.11)               | 103.40<br>(88.09 to 129.27)                | 236.78<br>(172.40 to 315.62)                 | 233.89<br>(169.71 to 305.46)                | 232.73<br>(169.63 to 307.59)                 |
| Leukemia                       | 8,644.36<br>(7,823.46 to 9,569.78)             | 11,108.20<br>(8,985.42 to 13,670.45)            | 10,179.47<br>(8,309.27 to 12,510.75)           | 11,623.50<br>(9,235.05 to 14,482.64)             | 274.17<br>(251.22 to 299.74)               | 512.77<br>(411.54 to 640.23)                 | 480.80<br>(387.34 to 595.92)                | 523.18<br>(416.49 to 650.88)                 |
| Acute lymphoid leukemia        | 3,492.57<br>(3,107.01 to 3,915.21)             | 3,581.22<br>(2,900.02 to 4,389.05)              | 3,232.24<br>(2,632.06 to 3,948.50)             | 3,747.75<br>(3,018.40 to 4,627.58)               | 89.39<br>(79.50 to 98.88)                  | 135.48<br>(106.98 to 172.87)                 | 126.15<br>(99.85 to 158.78)                 | 138.09<br>(109.19 to 177.55)                 |
| Chronic lymphoid leukemia      | 521.32<br>(426.29 to 607.31)                   | 900.81<br>(619.19 to 1,240.30)                  | 858.92<br>(589.02 to 1,178.40)                 | 925.84<br>(629.97 to 1,276.29)                   | 31.00<br>(23.69 to 36.86)                  | 66.10<br>(43.78 to 92.03)                    | 64.42<br>(42.35 to 90.03)                   | 66.36<br>(44.38 to 92.40)                    |
| Acute myeloid leukemia         | 2,628.21<br>(2,321.54 to 3,004.14)             | 3,986.67<br>(3,154.46 to 5,028.53)              | 3,872.06<br>(3,109.31 to 4,801.20)             | 4,120.76<br>(3,245.73 to 5,226.11)               | 76.66<br>(66.63 to 86.81)                  | 159.83<br>(122.10 to 202.51)                 | 158.98<br>(121.96 to 200.30)                | 161.47<br>(124.04 to 207.02)                 |
| Chronic myeloid leukemia       | 777.85<br>(693.40 to 904.60)                   | 934.69<br>(686.78 to 1,285.30)                  | 772.52<br>(554.60 to 1,093.13)                 | 981.68<br>(715.75 to 1,356.95)                   | 33.94<br>(29.78 to 40.97)                  | 52.68<br>(38.87 to 72.53)                    | 44.67<br>(32.28 to 64.36)                   | 53.87<br>(39.46 to 73.80)                    |
| Other leukemia                 | 1,224.41<br>(1,071.36 to 1,426.37)             | 1,704.81<br>(1,358.82 to 2,129.38)              | 1,443.73<br>(1,148.39 to 1,817.11)             | 1,847.46<br>(1,457.42 to 2,327.93)               | 98.69<br>(83.13 to 49.06)                  | 43.17<br>(38.13 to 124.44)                   | 86.58<br>(66.99 to 110.75)                  | 103.39<br>(80.38 to 132.22)                  |
| Other neoplasms                | 8,020.82<br>(7,154.96 to 8,897.81)             | 10,879.52<br>(9,176.95 to 12,498.52)            | 10,740.76<br>(8,932.87 to 12,527.80)           | 10,734.57<br>(9,105.22 to 12,220.52)             | 281.74<br>(250.20 to 311.61)               | 544.36<br>(444.61 to 628.37)                 | 553.32<br>(444.54 to 652.19)                | 523.91<br>(433.15 to 597.43)                 |
| <b>Cardiovascular diseases</b> | <b>96,243.17<br/>(88,475.41 to 104,101.70)</b> | <b>136,265.44<br/>(87,663.11 to 209,775.18)</b> | <b>84,671.82<br/>(57,464.81 to 124,939.97)</b> | <b>192,481.90<br/>(119,657.93 to 306,819.26)</b> | <b>5,850.60<br/>(5,441.12 to 6,288.84)</b> | <b>11,145.13<br/>(7,268.23 to 17,167.79)</b> | <b>7,420.73<br/>(4,918.77 to 11,084.99)</b> | <b>14,611.43<br/>(9,209.62 to 22,373.59)</b> |
| Rheumatic heart disease        | 1,588.05<br>(1,401.80 to 1,777.38)             | 1,029.78<br>(789.46 to 1,388.07)                | 785.59<br>(591.76 to 1,069.55)                 | 1,118.27<br>(850.16 to 1,537.19)                 | 51.30<br>(45.88 to 57.06)                  | 47.37<br>(36.38 to 63.61)                    | 37.02<br>(27.83 to 49.91)                   | 30.39<br>(38.95 to 67.78)                    |
| Ischemic heart disease         | 56,010.69<br>(51,061.68 to 61,576.98)          | 73,044.33<br>(40,485.03 to 127,595.11)          | 40,275.51<br>(22,547.53 to 68,464.54)          | 112,506.07<br>(61,691.80 to 195,105.13)          | 3,501.63<br>(3,205.74 to 3,842.47)         | 5,980.91<br>(3,397.95 to 10,069.05)          | 3,599.44<br>(2,012.21 to 6,261.72)          | 8,456.22<br>(4,739.48 to 14,474.75)          |
| Stroke                         | 16,780.69<br>(15,077.24 to 18,706.12)          | 20,499.32<br>(12,640.19 to 32,158.75)           | 11,223.03<br>(6,993.74 to 17,504.79)           | 31,634.53<br>(18,382.22 to 52,441.21)            | 989.40<br>(877.86 to 1,120.01)             | 1,655.50<br>(1,001.46 to 2,721.56)           | 1,015.58<br>(631.48 to 1,752.76)            | 2,272.95<br>(1,350.27 to 3,821.33)           |
| Ischemic stroke                | 5,405.48<br>(4,787.11 to 6,196.81)             | 8,315.31<br>(4,561.43 to 15,322.41)             | 5,166.64<br>(2,913.28 to 9,472.25)             | 11,371.86<br>(6,050.07 to 21,537.17)             | 433.90<br>(378.68 to 503.50)               | 838.36<br>(444.70 to 1,698.29)               | 560.44<br>(307.25 to 1,116.20)              | 1,059.82<br>(556.26 to 2,212.73)             |
| Intracerebral hemorrhage       | 11,375.21<br>(10,197.31 to 12,665.16)          | 12,184.01<br>(7,114.53 to 19,852.14)            | 6,056.39<br>(3,714.75 to 9,788.55)             | 20,262.66<br>(11,064.42 to 35,778.50)            | 555.50<br>(494.52 to 624.54)               | 817.14<br>(495.00 to 1,319.92)               | 455.13<br>(280.11 to 697.12)                | 1,213.13<br>(696.60 to 2,050.94)             |
| Hypertensive heart disease     | 6,102.58<br>(3,193.55 to 7,644.84)             | 15,218.67<br>(5,965.74 to 34,407.97)            | 10,406.12<br>(4,633.73 to 19,669.24)           | 19,269.31<br>(7,469.08 to 44,982.17)             | 484.44<br>(244.60 to 615.38)               | 1,522.57<br>(574.33 to 3,669.22)             | 1,082.76<br>(452.61 to 2,137.43)            | 1,858.49<br>(687.93 to 4,624.91)             |
| Cardiomyopathy and myocarditis | 4,841.36<br>(4,242.28 to 5,722.90)             | 7,016.02<br>(5,026.06 to 9,854.18)              | 5,764.86<br>(4,045.45 to 8,009.65)             | 7,232.53<br>(5,148.92 to 10,162.08)              | 190.02<br>(164.16 to 219.86)               | 392.42<br>(271.32 to 571.09)                 | 331.83<br>(220.59 to 485.09)                | 392.25<br>(272.12 to 569.61)                 |
| Myocarditis                    | 596.15<br>(468.41 to 731.88)                   | 546.60<br>(420.30 to 754.70)                    | 508.78<br>(384.02 to 712.35)                   | 557.06<br>(431.53 to 757.53)                     | 15.52<br>(12.28 to 23.48)                  | 21.77<br>(14.26 to 44.73)                    | 21.11<br>(13.56 to 43.54)                   | 21.43<br>(14.26 to 42.75)                    |

**Costa Rica**

| Cause | YLLs (actual counts)     |                              |                              |                              | Deaths (actual counts)       |                           |                           |                           |
|-------|--------------------------|------------------------------|------------------------------|------------------------------|------------------------------|---------------------------|---------------------------|---------------------------|
|       | 2016                     | 2040 Forecast                | 2040 Better Scenario         | 2040 Worse Scenario          | 2016                         | 2040 Forecast             | 2040 Better Scenario      | 2040 Worse Scenario       |
|       | Alcoholic cardiomyopathy | 389.72<br>(292.86 to 552.94) | 578.31<br>(408.77 to 818.17) | 505.25<br>(353.94 to 732.95) | 676.14<br>(486.43 to 946.25) | 14.53<br>(10.69 to 20.53) | 26.95<br>(18.91 to 39.31) | 24.39<br>(17.03 to 36.15) |

|                                                                |                                                   |                                                   |                                                   |                                                   |                                                |                                                |                                                |                                                |
|----------------------------------------------------------------|---------------------------------------------------|---------------------------------------------------|---------------------------------------------------|---------------------------------------------------|------------------------------------------------|------------------------------------------------|------------------------------------------------|------------------------------------------------|
|                                                                | 3,855.49<br>(3,370.77 to<br>4,609.22)             | 5,891.11<br>(4,025.71 to<br>8,557.96)             | 4,750.83<br>(3,161.38 to<br>6,885.96)             | 5,999.33<br>(4,083.77 to<br>8,733.31)             | 159.97<br>(137.70 to<br>182.69)                | 343.70<br>(227.37 to<br>515.77)                | 286.32<br>(184.48 to<br>436.87)                | 340.26<br>(224.38 to<br>512.25)                |
| Other cardiomyopathy                                           |                                                   |                                                   |                                                   |                                                   |                                                |                                                |                                                |                                                |
| Atrial fibrillation and flutter                                | 1,700.12<br>(1,350.85 to<br>2,117.81)             | 4,119.35<br>(2,817.24 to<br>5,697.05)             | 3,716.09<br>(2,588.30 to<br>5,060.15)             | 4,299.52<br>(2,926.58 to<br>5,966.23)             | 170.44<br>(132.14 to<br>216.39)                | 457.83<br>(311.43 to<br>636.27)                | 427.24<br>(293.58 to<br>591.38)                | 462.98<br>(314.03 to<br>648.70)                |
| Aortic aneurysm                                                | 2,165.28<br>(1,930.70 to<br>2,444.63)             | 3,213.28<br>(2,388.17 to<br>4,330.34)             | 2,863.86<br>(2,154.07 to<br>3,764.77)             | 3,301.96<br>(2,465.00 to<br>4,449.17)             | 115.40<br>(102.02 to<br>129.96)                | 222.01<br>(166.64 to<br>294.36)                | 205.65<br>(155.21 to<br>267.56)                | 219.83<br>(167.08 to<br>290.47)                |
| Peripheral artery disease                                      | 211.58<br>(151.73 to<br>310.11)                   | 699.84<br>(444.57 to<br>1,105.21)                 | 722.38<br>(451.79 to<br>1,144.82)                 | 728.38<br>(459.11 to<br>1,128.52)                 | 19.59<br>(13.64 to<br>29.44)                   | 76.94<br>(46.39 to<br>118.36)                  | 82.39<br>(48.82 to<br>127.99)                  | 76.67<br>(46.56 to<br>119.52)                  |
| Endocarditis                                                   | 1,455.26<br>(944.11 to<br>1,798.14)               | 2,043.83<br>(1,150.98 to<br>3,131.30)             | 1,834.34<br>(1,067.15 to<br>2,690.66)             | 2,133.11<br>(1,198.53 to<br>3,290.78)             | 53.10<br>(32.14 to<br>66.93)                   | 99.83<br>(54.44 to<br>156.71)                  | 92.13<br>(51.42 to<br>140.24)                  | 101.67<br>(54.25 to<br>160.59)                 |
| Other cardiovascular and circulatory diseases                  | 5,387.56<br>(4,852.73 to<br>5,978.55)             | 9,381.02<br>(6,954.93 to<br>12,714.94)            | 7,080.02<br>(5,224.29 to<br>9,442.76)             | 10,258.24<br>(7,600.92 to<br>13,778.71)           | 275.27<br>(247.16 to<br>305.66)                | 689.76<br>(510.30 to<br>912.86)                | 546.69<br>(401.44 to<br>731.95)                | 719.99<br>(533.38 to<br>950.12)                |
| <b>Chronic respiratory diseases</b>                            | <b>15,704.51<br/>(14,449.66 to<br/>17,111.23)</b> | <b>23,534.02<br/>(18,330.55 to<br/>29,442.11)</b> | <b>19,541.79<br/>(15,445.25 to<br/>24,211.50)</b> | <b>29,718.81<br/>(22,228.30 to<br/>38,510.26)</b> | <b>1,195.03<br/>(1,099.82 to<br/>1,298.26)</b> | <b>2,079.01<br/>(1,619.32 to<br/>2,619.21)</b> | <b>1,751.02<br/>(1,387.58 to<br/>2,188.51)</b> | <b>2,609.78<br/>(1,945.15 to<br/>3,430.64)</b> |
| Chronic obstructive pulmonary disease                          | 11,603.74<br>(10,520.39 to<br>12,675.35)          | 17,886.92<br>(13,183.19 to<br>23,296.78)          | 13,401.13<br>(9,907.29 to<br>17,212.81)           | 24,065.17<br>(16,903.30 to<br>32,831.86)          | 1,001.05<br>(914.35 to<br>1,088.18)            | 1,702.75<br>(1,271.42 to<br>2,227.88)          | 1,319.31<br>(991.07 to<br>1,714.62)            | 2,248.09<br>(1,591.71 to<br>3,052.68)          |
| Pneumoconiosis                                                 | 35.99<br>(30.60 to<br>41.70)                      | 34.62<br>(27.59 to<br>42.77)                      | 30.96<br>(23.46 to<br>39.12)                      | 36.11<br>(29.01 to<br>44.20)                      | 1.78<br>(1.54 to<br>2.06)                      | 2.38<br>(1.86 to<br>2.99)                      | 2.13<br>(1.61 to<br>2.75)                      | 2.44<br>(1.91 to<br>3.06)                      |
| Silicosis                                                      | 9.29<br>(4.95 to<br>12.01)                        | 5.87<br>(3.12 to<br>8.57)                         | 4.38<br>(2.16 to<br>6.93)                         | 5.99<br>(3.23 to<br>8.77)                         | 0.44<br>(0.27 to<br>0.56)                      | 0.35<br>(0.22 to<br>0.52)                      | 0.27<br>(0.15 to<br>0.42)                      | 0.36<br>(0.22 to<br>0.51)                      |
| Asbestosis                                                     | 11.92<br>(9.95 to<br>14.76)                       | 11.12<br>(8.65 to<br>14.48)                       | 11.65<br>(8.74 to<br>15.37)                       | 11.15<br>(8.66 to<br>14.47)                       | 0.36<br>(0.30 to<br>0.44)                      | 0.49<br>(0.36 to<br>0.66)                      | 0.53<br>(0.38 to<br>0.72)                      | 0.48<br>(0.35 to<br>0.65)                      |
| Coal workers pneumoconiosis                                    | 0.82<br>(0.60 to<br>1.34)                         | 1.10<br>(0.66 to<br>1.79)                         | 0.84<br>(0.48 to<br>1.38)                         | 1.29<br>(0.78 to<br>2.11)                         | 0.06<br>(0.04 to<br>0.08)                      | 0.10<br>(0.06 to<br>0.17)                      | 0.08<br>(0.05 to<br>0.14)                      | 0.12<br>(0.07 to<br>0.19)                      |
| Other pneumoconiosis                                           | 13.95<br>(11.63 to<br>17.34)                      | 16.53<br>(12.28 to<br>21.60)                      | 14.09<br>(9.84 to<br>19.11)                       | 17.68<br>(13.32 to<br>22.88)                      | 0.93<br>(0.78 to<br>1.11)                      | 1.43<br>(1.03 to<br>1.91)                      | 1.26<br>(0.87 to<br>1.72)                      | 1.49<br>(1.08 to<br>1.97)                      |
| Asthma                                                         | 1,198.24<br>(999.52 to<br>1,376.78)               | 984.19<br>(575.09 to<br>1,703.63)                 | 642.95<br>(359.13 to<br>1,132.45)                 | 1,218.36<br>(694.93 to<br>2,145.18)               | 43.70<br>(36.51 to<br>59.11)                   | 48.85<br>(27.63 to<br>90.00)                   | 33.08<br>(18.39 to<br>59.95)                   | 58.33<br>(32.65 to<br>108.60)                  |
| Interstitial lung disease and pulmonary sarcoidosis            | 2,612.56<br>(2,186.20 to<br>3,474.77)             | 4,428.35<br>(3,482.41 to<br>5,708.97)             | 5,277.87<br>(4,111.12 to<br>6,736.53)             | 4,189.24<br>(3,325.23 to<br>5,478.91)             | 142.58<br>(115.33 to<br>182.33)                | 318.49<br>(240.80 to<br>406.82)                | 390.13<br>(297.76 to<br>495.63)                | 294.25<br>(224.75 to<br>381.44)                |
| Other chronic respiratory diseases                             | 253.99<br>(160.94 to<br>333.88)                   | 199.93<br>(114.59 to<br>263.48)                   | 188.88<br>(107.75 to<br>251.09)                   | 209.93<br>(124.22 to<br>279.56)                   | 5.92<br>(3.53 to<br>7.60)                      | 6.53<br>(3.83 to<br>8.84)                      | 6.37<br>(3.72 to<br>8.68)                      | 6.67<br>(3.94 to<br>8.95)                      |
| <b>Cirrhosis and other chronic liver diseases</b>              | <b>21,426.90<br/>(19,083.22 to<br/>23,717.92)</b> | <b>28,446.68<br/>(24,188.64 to<br/>32,954.46)</b> | <b>23,636.60<br/>(19,902.75 to<br/>28,157.87)</b> | <b>31,627.91<br/>(26,907.28 to<br/>36,587.73)</b> | <b>827.75<br/>(742.62 to<br/>911.29)</b>       | <b>1,322.74<br/>(1,139.02 to<br/>1,510.97)</b> | <b>1,121.77<br/>(951.23 to<br/>1,321.44)</b>   | <b>1,442.54<br/>(1,245.71 to<br/>1,646.28)</b> |
| Cirrhosis and other chronic liver diseases due to hepatitis B  | 806.70<br>(679.03 to<br>947.78)                   | 1,109.76<br>(904.77 to<br>1,350.15)               | 990.41<br>(792.39 to<br>1,230.10)                 | 1,123.62<br>(920.82 to<br>1,366.61)               | 31.34<br>(26.76 to<br>36.62)                   | 51.18<br>(42.11 to<br>61.54)                   | 46.33<br>(37.39 to<br>56.77)                   | 51.11<br>(42.20 to<br>61.19)                   |
| Cirrhosis and other chronic liver diseases due to hepatitis C  | 9,170.95<br>(8,007.59 to<br>10,296.51)            | 12,832.41<br>(10,840.91 to<br>15,069.78)          | 11,370.57<br>(9,450.74 to<br>13,731.49)           | 13,028.12<br>(10,964.59 to<br>15,323.49)          | 341.74<br>(301.47 to<br>382.49)                | 556.05<br>(473.29 to<br>647.77)                | 499.04<br>(417.65 to<br>597.24)                | 557.62<br>(476.17 to<br>643.90)                |
| Cirrhosis and other chronic liver diseases due to alcohol use  | 7,832.24<br>(6,902.60 to<br>8,839.62)             | 9,969.44<br>(8,239.35 to<br>11,790.18)            | 7,279.83<br>(5,927.39 to<br>8,808.51)             | 12,840.48<br>(10,626.98 to<br>15,287.91)          | 316.15<br>(280.38 to<br>352.99)                | 487.47<br>(406.40 to<br>570.22)                | 371.53<br>(304.28 to<br>444.87)                | 604.72<br>(507.55 to<br>704.47)                |
| Cirrhosis and other chronic liver diseases due to other causes | 3,617.02<br>(3,187.57 to<br>4,102.01)             | 4,535.07<br>(3,770.46 to<br>5,353.80)             | 4,635.68<br>(3,262.15 to<br>4,815.74)             | 4,635.68<br>(3,846.78 to<br>5,450.81)             | 138.52<br>(121.95 to<br>157.14)                | 228.04<br>(189.95 to<br>269.61)                | 204.86<br>(167.98 to<br>247.50)                | 229.09<br>(191.73 to<br>268.25)                |
| <b>Digestive diseases</b>                                      | <b>12,595.59<br/>(10,116.69 to<br/>14,278.72)</b> | <b>18,622.42<br/>(13,499.84 to<br/>23,774.37)</b> | <b>15,652.76<br/>(11,456.28 to<br/>19,956.00)</b> | <b>20,036.36<br/>(14,268.91 to<br/>25,757.30)</b> | <b>681.08<br/>(536.15 to<br/>773.43)</b>       | <b>1,415.73<br/>(1,016.14 to<br/>1,792.79)</b> | <b>1,236.14<br/>(885.19 to<br/>1,583.01)</b>   | <b>1,472.32<br/>(1,045.15 to<br/>1,883.08)</b> |

| Peptic ulcer disease                       | 1,655.35<br>(1,323.42 to<br>1,943.30)                         | 1,674.86<br>(1,328.68 to<br>2,069.87)                         | 1,262.12<br>(940.38 to<br>1,635.82)                           | 1,829.29<br>(1,412.69 to<br>2,282.35)                         | 94.07<br>(77.15 to<br>109.77)                              | 135.43<br>(106.59 to<br>167.88)                            | 104.88<br>(78.03 to<br>137.22)                             | 143.50<br>(111.30 to<br>178.66)                            |
|--------------------------------------------|---------------------------------------------------------------|---------------------------------------------------------------|---------------------------------------------------------------|---------------------------------------------------------------|------------------------------------------------------------|------------------------------------------------------------|------------------------------------------------------------|------------------------------------------------------------|
| <b>Costa Rica</b>                          |                                                               |                                                               |                                                               |                                                               |                                                            |                                                            |                                                            |                                                            |
| Cause                                      | YLLs (actual counts)                                          |                                                               |                                                               |                                                               | Deaths (actual counts)                                     |                                                            |                                                            |                                                            |
|                                            | 2016                                                          | 2040 Forecast                                                 | 2040 Better Scenario                                          | 2040 Worse Scenario                                           | 2016                                                       | 2040 Forecast                                              | 2040 Better Scenario                                       | 2040 Worse Scenario                                        |
| Gastritis and duodenitis                   | 91.25<br>(64.68 to<br>112.50)                                 | 226.17<br>(156.47 to<br>296.23)                               | 194.88<br>(136.48 to<br>265.32)                               | 228.52<br>(158.97 to<br>301.52)                               | 6.05<br>(3.47 to<br>7.27)                                  | 19.64<br>(11.97 to<br>26.18)                               | 17.47<br>(10.71 to<br>23.87)                               | 19.33<br>(11.78 to<br>25.52)                               |
| Appendicitis                               | 668.07<br>(535.73 to<br>852.09)                               | 592.96<br>(461.73 to<br>769.62)                               | 463.24<br>(350.06 to<br>625.61)                               | 626.61<br>(485.06 to<br>825.35)                               | 22.51<br>(18.10 to<br>29.44)                               | 31.29<br>(24.26 to<br>41.84)                               | 25.18<br>(18.45 to<br>34.15)                               | 32.21<br>(24.87 to<br>43.17)                               |
| Paralytic ileus and intestinal obstruction | 1,781.77<br>(1,335.74 to<br>2,237.47)                         | 2,354.43<br>(1,628.77 to<br>2,922.32)                         | 2,272.10<br>(1,554.98 to<br>2,870.07)                         | 2,359.15<br>(1,652.51 to<br>2,922.26)                         | 84.79<br>(58.60 to<br>103.10)                              | 171.56<br>(109.10 to<br>224.46)                            | 171.40<br>(108.80 to<br>228.64)                            | 166.73<br>(105.15 to<br>214.24)                            |
| Inguinal, femoral, and abdominal hernia    | 500.03<br>(366.39 to<br>643.00)                               | 486.04<br>(366.81 to<br>647.14)                               | 432.88<br>(319.58 to<br>583.37)                               | 490.15<br>(370.21 to<br>660.41)                               | 29.48<br>(22.03 to<br>39.61)                               | 38.36<br>(28.69 to<br>53.16)                               | 35.17<br>(25.69 to<br>49.52)                               | 37.73<br>(27.87 to<br>52.16)                               |
| Inflammatory bowel disease                 | 256.19<br>(145.45 to<br>313.25)                               | 280.44<br>(173.66 to<br>351.71)                               | 272.70<br>(170.47 to<br>343.92)                               | 278.62<br>(171.74 to<br>347.29)                               | 9.36<br>(6.20 to<br>11.14)                                 | 14.39<br>(10.56 to<br>17.77)                               | 14.36<br>(10.57 to<br>17.91)                               | 13.99<br>(10.18 to<br>17.17)                               |
| Vascular intestinal disorders              | 2,243.43<br>(1,458.06 to<br>2,665.75)                         | 4,415.21<br>(2,682.24 to<br>5,556.32)                         | 4,121.34<br>(2,475.84 to<br>5,235.05)                         | 4,383.33<br>(2,693.81 to<br>5,449.44)                         | 162.42<br>(103.05 to<br>192.74)                            | 401.45<br>(235.57 to<br>509.90)                            | 383.80<br>(231.40 to<br>494.21)                            | 390.70<br>(228.05 to<br>488.68)                            |
| Gallbladder and biliary diseases           | 1,381.07<br>(1,192.44 to<br>1,589.95)                         | 2,548.31<br>(1,406.93 to<br>4,476.27)                         | 1,800.76<br>(1,018.23 to<br>3,085.29)                         | 3,058.76<br>(1,646.34 to<br>5,521.49)                         | 88.76<br>(75.99 to<br>102.97)                              | 224.96<br>(123.07 to<br>384.40)                            | 165.30<br>(94.26 to<br>278.49)                             | 259.97<br>(140.36 to<br>451.23)                            |
| Pancreatitis                               | 2,178.93<br>(1,552.92 to<br>2,544.20)                         | 3,311.85<br>(1,678.86 to<br>6,185.46)                         | 2,406.63<br>(1,241.89 to<br>4,209.14)                         | 3,964.23<br>(1,871.48 to<br>7,728.21)                         | 86.17<br>(55.07 to<br>102.17)                              | 177.83<br>(82.79 to<br>329.63)                             | 134.96<br>(64.75 to<br>236.77)                             | 206.06<br>(92.56 to<br>387.53)                             |
| Other digestive diseases                   | 1,839.51<br>(1,423.59 to<br>2,193.61)                         | 2,732.17<br>(2,042.79 to<br>3,365.10)                         | 2,426.12<br>(1,796.65 to<br>3,022.68)                         | 2,817.72<br>(2,124.44 to<br>3,452.53)                         | 97.49<br>(74.69 to<br>115.39)                              | 200.83<br>(153.82 to<br>248.91)                            | 183.61<br>(138.11 to<br>232.20)                            | 202.10<br>(154.19 to<br>248.34)                            |
| <b>Neurological disorders</b>              | <b>23,121.91</b><br><b>(20,300.41 to</b><br><b>26,314.51)</b> | <b>50,125.89</b><br><b>(36,366.87 to</b><br><b>69,040.22)</b> | <b>48,454.87</b><br><b>(35,758.35 to</b><br><b>64,758.89)</b> | <b>52,399.13</b><br><b>(37,552.76 to</b><br><b>74,407.06)</b> | <b>1,960.37</b><br><b>(1,683.82 to</b><br><b>2,292.25)</b> | <b>5,139.15</b><br><b>(3,618.55 to</b><br><b>7,237.87)</b> | <b>5,098.10</b><br><b>(3,673.96 to</b><br><b>7,037.80)</b> | <b>5,255.48</b><br><b>(3,613.43 to</b><br><b>7,726.03)</b> |
| Alzheimer's disease and other dementias    | 15,814.35<br>(13,284.50 to<br>18,944.26)                      | 39,673.23<br>(27,132.31 to<br>57,899.20)                      | 38,084.12<br>(26,686.21 to<br>53,859.06)                      | 41,854.48<br>(27,566.62 to<br>63,271.13)                      | 1,686.51<br>(1,417.17 to<br>2,012.11)                      | 4,571.68<br>(3,092.76 to<br>6,631.32)                      | 4,501.48<br>(3,129.87 to<br>6,420.31)                      | 4,708.71<br>(3,123.14 to<br>7,126.83)                      |
| Parkinson's disease                        | 1,317.96<br>(986.27 to<br>1,703.48)                           | 3,344.67<br>(2,461.37 to<br>4,462.58)                         | 3,692.13<br>(2,708.78 to<br>4,968.87)                         | 3,099.53<br>(2,279.01 to<br>4,084.20)                         | 109.56<br>(82.60 to<br>142.54)                             | 304.37<br>(225.09 to<br>409.27)                            | 341.75<br>(249.85 to<br>462.68)                            | 277.86<br>(206.40 to<br>368.64)                            |
| Epilepsy                                   | 2,153.51<br>(1,922.14 to<br>2,410.46)                         | 2,401.75<br>(1,666.16 to<br>3,320.92)                         | 1,882.88<br>(1,338.65 to<br>2,566.59)                         | 2,837.03<br>(1,951.72 to<br>4,005.13)                         | 53.88<br>(48.36 to<br>59.64)                               | 81.82<br>(58.19 to<br>113.49)                              | 65.99<br>(47.61 to<br>89.97)                               | 94.79<br>(65.84 to<br>134.17)                              |
| Multiple sclerosis                         | 254.14<br>(96.49 to<br>333.97)                                | 313.54<br>(233.76 to<br>416.41)                               | 322.16<br>(236.70 to<br>430.57)                               | 312.91<br>(233.28 to<br>417.13)                               | 7.95<br>(6.09 to<br>10.11)                                 | 11.87<br>(8.61 to<br>15.03)                                | 12.39<br>(8.96 to<br>15.76)                                | 11.69<br>(8.66 to<br>14.77)                                |
| Motor neuron disease                       | 1,048.19<br>(894.33 to<br>1,191.75)                           | 1,747.86<br>(1,390.44 to<br>2,092.78)                         | 1,794.57<br>(1,410.87 to<br>2,159.58)                         | 1,687.04<br>(1,353.10 to<br>2,004.56)                         | 40.63<br>(34.86 to<br>46.17)                               | 79.58<br>(62.62 to<br>95.49)                               | 82.43<br>(64.06 to<br>99.72)                               | 76.15<br>(59.98 to<br>90.90)                               |
| Other neurological disorders               | 2,533.75<br>(2,239.59 to<br>2,875.43)                         | 2,644.04<br>(2,274.77 to<br>3,020.59)                         | 2,679.01<br>(2,298.24 to<br>3,066.24)                         | 2,608.13<br>(2,262.83 to<br>2,968.37)                         | 61.84<br>(55.75 to<br>68.63)                               | 89.84<br>(77.14 to<br>101.87)                              | 94.06<br>(79.80 to<br>107.95)                              | 86.29<br>(74.78 to<br>97.39)                               |
| <b>Mental disorders</b>                    | <b>2,837.95</b><br><b>(2,464.47 to</b><br><b>3,270.47)</b>    | <b>3,869.07</b><br><b>(3,247.56 to</b><br><b>4,628.12)</b>    | <b>3,960.55</b><br><b>(3,293.10 to</b><br><b>4,758.07)</b>    | <b>4,008.14</b><br><b>(3,379.38 to</b><br><b>4,775.73)</b>    | <b>79.48</b><br><b>(69.98 to</b><br><b>90.84)</b>          | <b>132.82</b><br><b>(112.71 to</b><br><b>155.90)</b>       | <b>138.77</b><br><b>(116.25 to</b><br><b>165.76)</b>       | <b>135.01</b><br><b>(115.49 to</b><br><b>157.95)</b>       |
| Alcohol use disorders                      | 1,691.91<br>(1,452.77 to<br>1,963.60)                         | 1,902.24<br>(1,505.79 to<br>2,389.75)                         | 1,814.86<br>(1,425.07 to<br>2,278.52)                         | 2,052.51<br>(1,635.54 to<br>2,564.32)                         | 48.04<br>(41.20 to<br>55.50)                               | 62.08<br>(49.55 to<br>76.05)                               | 59.97<br>(47.18 to<br>74.05)                               | 66.22<br>(53.07 to<br>80.99)                               |
| Drug use disorders                         | 1,142.35<br>(958.18 to<br>1,342.83)                           | 1,961.39<br>(1,611.83 to<br>2,358.52)                         | 2,139.98<br>(1,751.90 to<br>2,592.69)                         | 1,950.23<br>(1,603.38 to<br>2,347.13)                         | 31.36<br>(26.91 to<br>35.83)                               | 70.63<br>(59.47 to<br>82.58)                               | 78.68<br>(65.00 to<br>93.82)                               | 68.68<br>(57.96 to<br>79.53)                               |

|                                                            |                                              |                                               |                                               |                                               |                                           |                                            |                                            |                                            |
|------------------------------------------------------------|----------------------------------------------|-----------------------------------------------|-----------------------------------------------|-----------------------------------------------|-------------------------------------------|--------------------------------------------|--------------------------------------------|--------------------------------------------|
| Opioid use disorders                                       | 752.63<br>(629.25 to 949.49)                 | 877.45<br>(706.77 to 1,223.28)                | 904.36<br>(720.21 to 1,267.12)                | 871.15<br>(702.13 to 1,216.14)                | 21.62<br>(18.59 to 25.49)                 | 35.97<br>(27.65 to 43.84)                  | 38.16<br>(28.74 to 46.72)                  | 34.91<br>(27.12 to 42.62)                  |
| Cocaine use disorders                                      | 95.79<br>(55.25 to 126.26)                   | 343.82<br>(222.28 to 465.85)                  | 367.07<br>(232.16 to 508.82)                  | 350.98<br>(223.59 to 479.27)                  | 2.08<br>(1.29 to 2.70)                    | 8.38<br>(5.76 to 11.25)                    | 9.01<br>(6.20 to 12.45)                    | 8.51<br>(5.76 to 11.55)                    |
| Amphetamine use disorders                                  | 41.54<br>(23.78 to 58.34)                    | 76.22<br>(46.05 to 106.50)                    | 87.18<br>(51.97 to 123.90)                    | 77.50<br>(46.76 to 108.29)                    | 0.96<br>(0.57 to 1.34)                    | 2.01<br>(1.31 to 2.76)                     | 2.33<br>(1.44 to 3.28)                     | 2.03<br>(1.28 to 2.82)                     |
| Other drug use disorders                                   | 252.38<br>(156.97 to 331.30)                 | 663.90<br>(474.56 to 858.75)                  | 781.37<br>(556.31 to 1,033.85)                | 650.60<br>(463.40 to 847.20)                  | 6.70<br>(4.99 to 8.80)                    | 24.27<br>(18.22 to 33.03)                  | 29.18<br>(21.90 to 39.60)                  | 23.23<br>(17.55 to 31.25)                  |
| Eating disorders                                           | 3.69<br>(2.97 to 4.60)                       | 5.44<br>(3.96 to 7.47)                        | 5.71<br>(4.10 to 7.92)                        | 5.40<br>(3.97 to 7.38)                        | 0.07<br>(0.06 to 0.09)                    | 0.11<br>(0.08 to 0.16)                     | 0.12<br>(0.08 to 0.17)                     | 0.11<br>(0.08 to 0.15)                     |
| <b>Costa Rica</b>                                          |                                              |                                               |                                               |                                               |                                           |                                            |                                            |                                            |
| Cause                                                      | YLLs (actual counts)                         |                                               |                                               |                                               | Deaths (actual counts)                    |                                            |                                            |                                            |
|                                                            | 2016                                         | 2040 Forecast                                 | 2040 Better Scenario                          | 2040 Worse Scenario                           | 2016                                      | 2040 Forecast                              | 2040 Better Scenario                       | 2040 Worse Scenario                        |
| <b>Diabetes, urogenital, blood, and endocrine diseases</b> | <b>35,517.54</b><br>(32,421.26 to 38,802.34) | <b>69,896.47</b><br>(44,494.53 to 145,948.96) | <b>52,396.05</b><br>(34,035.76 to 112,075.75) | <b>82,150.94</b><br>(51,300.01 to 164,357.30) | <b>1,803.50</b><br>(1,655.80 to 1,954.42) | <b>5,249.12</b><br>(3,134.80 to 12,365.32) | <b>4,064.18</b><br>(2,465.11 to 10,150.84) | <b>6,022.92</b><br>(3,557.91 to 13,558.71) |
| Diabetes mellitus                                          | 71,099.73<br>(64,449.44 to 7,788.34)         | 15,873.84<br>(11,194.11 to 22,026.82)         | 11,430.03<br>(7,976.71 to 15,834.61)          | 18,329.15<br>(12,758.23 to 25,869.37)         | 393.37<br>(356.80 to 433.22)              | 1,128.75<br>(821.67 to 1,517.94)           | 847.99<br>(606.53 to 1,136.45)             | 1,262.81<br>(907.78 to 1,733.63)           |
| Acute glomerulonephritis                                   | 29.29<br>(26.14 to 33.57)                    | 27.33<br>(22.92 to 32.72)                     | 22.89<br>(18.94 to 27.69)                     | 28.98<br>(24.26 to 34.77)                     | 0.63<br>(0.56 to 0.72)                    | 0.67<br>(0.56 to 0.81)                     | 0.58<br>(0.47 to 0.71)                     | 0.70<br>(0.58 to 0.83)                     |
| Chronic kidney disease                                     | 22,355.59<br>(20,293.23 to 24,335.57)        | 44,535.49<br>(23,133.99 to 117,957.62)        | 32,342.34<br>(17,212.26 to 91,799.59)         | 54,391.96<br>(27,501.49 to 135,442.49)        | 1,135.97<br>(1,038.96 to 1,233.81)        | 3,432.87<br>(1,698.76 to 10,599.56)        | 2,562.47<br>(1,232.17 to 8,631.73)         | 4,095.57<br>(1,912.97 to 11,586.83)        |
| Chronic kidney disease due to diabetes mellitus            | 8,531.39<br>(7,372.10 to 9,801.20)           | 18,206.44<br>(9,199.22 to 50,319.29)          | 13,221.48<br>(6,921.33 to 37,478.77)          | 22,345.75<br>(11,132.08 to 60,114.33)         | 413.11<br>(357.55 to 473.94)              | 1,233.33<br>(568.97 to 3,768.53)           | 917.54<br>(426.57 to 3,074.81)             | 1,480.46<br>(681.40 to 4,298.98)           |
| Chronic kidney disease due to hypertension                 | 2,856.80<br>(2,378.69 to 3,374.11)           | 8,086.86<br>(3,618.67 to 24,259.34)           | 6,095.83<br>(2,812.89 to 19,938.58)           | 9,708.46<br>(4,182.34 to 27,475.28)           | 219.76<br>(182.59 to 261.09)              | 878.90<br>(350.96 to 3,215.72)             | 680.70<br>(279.18 to 2,529.36)             | 1,028.97<br>(412.62 to 3,406.14)           |
| Chronic kidney disease due to glomerulonephritis           | 6,242.82<br>(5,320.01 to 7,206.61)           | 9,664.53<br>(5,194.01 to 22,892.01)           | 6,842.71<br>(3,743.57 to 16,621.37)           | 11,848.81<br>(6,260.37 to 27,264.38)          | 270.65<br>(228.08 to 317.24)              | 656.99<br>(307.35 to 1,849.02)             | 474.08<br>(226.65 to 1,408.75)             | 791.97<br>(373.58 to 2,086.00)             |
| Chronic kidney disease due to other and unspecified causes | 4,704.58<br>(3,952.62 to 5,531.27)           | 8,577.65<br>(4,343.33 to 21,816.62)           | 6,182.32<br>(3,228.02 to 16,411.48)           | 10,488.93<br>(5,285.41 to 25,220.98)          | 232.47<br>(193.83 to 275.43)              | 663.65<br>(296.26 to 2,062.99)             | 490.15<br>(224.32 to 1,669.57)             | 794.17<br>(360.73 to 2,331.50)             |
| Urinary diseases and male infertility                      | 2,304.91<br>(2,079.41 to 2,552.85)           | 4,936.70<br>(4,108.95 to 5,819.37)            | 4,552.95<br>(3,658.08 to 5,493.45)            | 4,812.36<br>(4,052.26 to 5,611.45)            | 151.83<br>(136.74 to 169.48)              | 464.23<br>(377.18 to 562.20)               | 442.41<br>(350.47 to 550.59)               | 440.06<br>(363.54 to 527.77)               |
| Urinary tract infections                                   | 2,045.46<br>(1,823.09 to 2,281.61)           | 4,622.83<br>(3,826.05 to 5,451.90)            | 4,292.36<br>(3,437.27 to 5,182.86)            | 4,493.24<br>(3,762.54 to 5,229.72)            | 137.93<br>(121.94 to 154.58)              | 439.70<br>(354.76 to 535.17)               | 421.43<br>(330.71 to 524.22)               | 415.83<br>(338.35 to 497.84)               |
| Urolithiasis                                               | 56.15<br>(40.66 to 84.12)                    | 67.62<br>(47.80 to 106.94)                    | 59.31<br>(39.89 to 96.37)                     | 66.92<br>(47.56 to 104.23)                    | 1.96<br>(1.45 to 3.24)                    | 3.60<br>(2.24 to 6.47)                     | 3.27<br>(1.96 to 6.10)                     | 3.46<br>(2.18 to 6.13)                     |
| Other urinary diseases                                     | 203.29<br>(142.02 to 306.43)                 | 246.25<br>(152.30 to 413.95)                  | 201.29<br>(123.62 to 346.57)                  | 252.20<br>(157.63 to 418.94)                  | 11.93<br>(7.86 to 19.58)                  | 20.93<br>(11.99 to 40.06)                  | 17.71<br>(9.95 to 35.07)                   | 20.78<br>(11.88 to 40.07)                  |
| Gynecological diseases                                     | 26.03<br>(18.80 to 33.79)                    | 26.04<br>(17.69 to 37.67)                     | 18.93<br>(12.06 to 28.64)                     | 27.96<br>(18.90 to 40.34)                     | 0.85<br>(0.65 to 1.12)                    | 1.26<br>(0.87 to 1.87)                     | 0.94<br>(0.59 to 1.49)                     | 1.31<br>(0.89 to 1.99)                     |
| Uterine fibroids                                           | 13.55<br>(10.35 to 18.65)                    | 10.43<br>(6.24 to 16.65)                      | 7.71<br>(4.53 to 12.17)                       | 11.38<br>(6.80 to 17.98)                      | 0.40<br>(0.30 to 0.55)                    | 0.36<br>(0.22 to 0.55)                     | 0.27<br>(0.16 to 0.42)                     | 0.38<br>(0.24 to 0.60)                     |
| Polycystic ovarian syndrome                                | 1.78<br>(1.17 to 2.63)                       | 1.27<br>(0.57 to 2.44)                        | 0.73<br>(0.30 to 1.56)                        | 1.45<br>(0.64 to 2.79)                        | 0.04<br>(0.03 to 0.06)                    | 0.03<br>(0.01 to 0.06)                     | 0.02<br>(0.01 to 0.04)                     | 0.04<br>(0.02 to 0.07)                     |

|                                                   |                                       |                                       |                                       |                                       |                               |                                 |                                 |                                 |
|---------------------------------------------------|---------------------------------------|---------------------------------------|---------------------------------------|---------------------------------------|-------------------------------|---------------------------------|---------------------------------|---------------------------------|
| Endometriosis                                     | 0.21<br>(0.11 to<br>0.38)             | 0.27<br>(0.10 to<br>0.58)             | 0.19<br>(0.07 to<br>0.44)             | 0.29<br>(0.11 to<br>0.65)             | 0.00<br>(0.00 to<br>0.01)     | 0.01<br>(0.00 to<br>0.01)       | 0.00<br>(0.00 to<br>0.01)       | 0.01<br>(0.00 to<br>0.02)       |
| Genital prolapse                                  | 0.96<br>(0.54 to<br>1.42)             | 0.93<br>(0.48 to<br>1.61)             | 0.66<br>(0.32 to<br>1.19)             | 1.01<br>(0.53 to<br>1.77)             | 0.05<br>(0.03 to<br>0.08)     | 0.06<br>(0.03 to<br>0.12)       | 0.04<br>(0.02 to<br>0.09)       | 0.06<br>(0.03 to<br>0.13)       |
| Other gynecological diseases                      | 9.53<br>(6.46 to<br>12.47)            | 13.16<br>(8.51 to<br>20.26)           | 9.64<br>(5.74 to<br>15.53)            | 13.83<br>(9.01 to<br>21.52)           | 0.35<br>(0.26 to<br>0.51)     | 0.80<br>(0.51 to<br>1.31)       | 0.61<br>(0.35 to<br>1.06)       | 0.82<br>(0.51 to<br>1.35)       |
| Hemoglobinopathies and hemolytic anemias          | 1,305.94<br>(1,116.72 to<br>1,654.75) | 1,249.88<br>(1,006.56 to<br>1,570.88) | 1,005.82<br>(788.70 to<br>1,293.26)   | 1,316.66<br>(1,053.82 to<br>1,656.08) | 41.39<br>(34.74 to<br>51.91)  | 60.82<br>(48.19 to<br>74.91)    | 50.27<br>(38.38 to<br>63.57)    | 62.63<br>(49.87 to<br>76.14)    |
| Thalassemias                                      | 121.77<br>(92.27 to<br>162.03)        | 39.38<br>(28.33 to<br>56.63)          | 38.17<br>(28.04 to<br>54.32)          | 39.89<br>(28.74 to<br>57.27)          | 1.55<br>(1.18 to<br>2.06)     | 0.51<br>(0.37 to<br>0.75)       | 0.50<br>(0.37 to<br>0.70)       | 0.52<br>(0.37 to<br>0.74)       |
| Sickle cell disorders                             | 236.47<br>(90.45 to<br>316.02)        | 208.61<br>(159.20 to<br>289.77)       | 170.62<br>(127.37 to<br>236.76)       | 218.81<br>(165.99 to<br>305.69)       | 4.69<br>(3.79 to<br>6.45)     | 4.96<br>(3.76 to<br>7.07)       | 4.08<br>(3.02 to<br>5.72)       | 5.19<br>(3.91 to<br>7.46)       |
| G6PD deficiency                                   | 475.41<br>(403.02 to<br>594.32)       | 497.98<br>(394.21 to<br>636.67)       | 382.62<br>(287.49 to<br>506.61)       | 534.44<br>(423.79 to<br>691.78)       | 10.79<br>(9.12 to<br>13.64)   | 15.58<br>(12.14 to<br>19.66)    | 12.13<br>(9.17 to<br>15.89)     | 16.53<br>(13.00 to<br>21.33)    |
| Other hemoglobinopathies and hemolytic anemias    | 472.30<br>(394.39 to<br>620.70)       | 503.92<br>(383.23 to<br>636.29)       | 414.41<br>(309.13 to<br>539.81)       | 523.53<br>(402.99 to<br>664.30)       | 24.36<br>(19.56 to<br>30.52)  | 39.76<br>(29.66 to<br>48.78)    | 33.56<br>(24.44 to<br>42.85)    | 40.39<br>(30.32 to<br>49.67)    |
| Endocrine, metabolic, blood, and immune disorders | 2,386.06<br>(2,011.12 to<br>3,617.91) | 3,157.19<br>(2,534.93 to<br>5,237.03) | 3,023.08<br>(2,406.41 to<br>5,072.22) | 3,243.88<br>(2,599.66 to<br>5,296.92) | 79.45<br>(67.43 to<br>133.47) | 160.53<br>(126.29 to<br>277.14) | 159.51<br>(124.09 to<br>274.22) | 159.85<br>(126.37 to<br>274.95) |

**Costa Rica**

| Cause                                         | YLLs (actual counts)                                    |                                                         |                                                        |                                                         | Deaths (actual counts)                         |                                                |                                                |                                                |
|-----------------------------------------------|---------------------------------------------------------|---------------------------------------------------------|--------------------------------------------------------|---------------------------------------------------------|------------------------------------------------|------------------------------------------------|------------------------------------------------|------------------------------------------------|
|                                               | 2016                                                    | 2040 Forecast                                           | 2040 Better Scenario                                   | 2040 Worse Scenario                                     | 2016                                           | 2040 Forecast                                  | 2040 Better Scenario                           | 2040 Worse Scenario                            |
| <b>Musculoskeletal disorders</b>              | <b>3,426.87</b><br>(2,567.36 to<br><b>3,892.20</b> )    | <b>5,361.48</b><br>(4,143.05 to<br><b>6,414.03</b> )    | <b>5,032.67</b><br>(3,820.47 to<br><b>6,414.92</b> )   | <b>5,292.89</b><br>(4,092.95 to<br><b>6,339.83</b> )    | <b>109.91</b><br>(94.03 to<br><b>130.35</b> )  | <b>239.45</b><br>(193.73 to<br><b>333.92</b> ) | <b>224.42</b><br>(174.85 to<br><b>315.28</b> ) | <b>233.86</b><br>(191.04 to<br><b>320.01</b> ) |
| Rheumatoid arthritis                          | 620.14<br>(460.48 to<br>846.08)                         | 1,209.74<br>(844.93 to<br>1,698.26)                     | 939.69<br>(634.25 to<br>1,370.66)                      | 1,266.33<br>(882.79 to<br>1,792.71)                     | 31.01<br>(23.92 to<br>40.52)                   | 78.56<br>(52.61 to<br>111.15)                  | 62.20<br>(39.23 to<br>93.14)                   | 80.76<br>(54.46 to<br>113.47)                  |
| Other musculoskeletal disorders               | 2,806.74<br>(2,081.36 to<br>3,206.53)                   | 4,151.75<br>(3,209.10 to<br>5,005.53)                   | 4,092.98<br>(3,082.51 to<br>4,993.66)                  | 4,026.55<br>(3,107.02 to<br>4,850.81)                   | 78.90<br>(66.85 to<br>92.21)                   | 160.89<br>(129.22 to<br>219.06)                | 162.23<br>(130.00 to<br>224.68)                | 153.11<br>(123.62 to<br>205.85)                |
| <b>Other non-communicable diseases</b>        | <b>21,932.90</b><br>(11,768.20 to<br><b>32,612.70</b> ) | <b>16,881.86</b><br>(10,615.64 to<br><b>23,511.77</b> ) | <b>13,090.17</b><br>(8,377.61 to<br><b>18,129.23</b> ) | <b>18,354.12</b><br>(11,354.02 to<br><b>25,972.29</b> ) | <b>335.66</b><br>(203.18 to<br><b>466.42</b> ) | <b>526.25</b><br>(315.08 to<br><b>682.67</b> ) | <b>475.27</b><br>(281.03 to<br><b>621.48</b> ) | <b>523.75</b><br>(318.16 to<br><b>675.45</b> ) |
| Congenital birth defects                      | 20,217.86<br>(9,999.82 to<br>30,850.98)                 | 11,912.22<br>(6,178.04 to<br>18,205.66)                 | 8,319.75<br>(4,279.85 to<br>13,057.61)                 | 13,523.86<br>(6,923.96 to<br>20,767.48)                 | 243.89<br>(125.42 to<br>366.59)                | 149.39<br>(84.76 to<br>222.25)                 | 105.43<br>(59.05 to<br>160.00)                 | 168.58<br>(92.77 to<br>252.70)                 |
| Neural tube defects                           | 1,111.68<br>(682.36 to<br>1,782.37)                     | 293.56<br>(171.56 to<br>509.28)                         | 182.12<br>(101.88 to<br>311.54)                        | 349.12<br>(200.34 to<br>610.16)                         | 13.36<br>(8.33 to<br>21.16)                    | 3.69<br>(2.26 to<br>6.23)                      | 2.31<br>(1.36 to<br>3.81)                      | 4.37<br>(2.64 to<br>7.46)                      |
| Congenital heart anomalies                    | 7,596.15<br>(3,546.38 to<br>11,834.81)                  | 4,491.45<br>(2,306.21 to<br>6,946.02)                   | 2,984.74<br>(1,498.91 to<br>4,789.49)                  | 5,075.19<br>(2,567.78 to<br>7,910.52)                   | 92.38<br>(45.47 to<br>141.89)                  | 56.97<br>(32.45 to<br>85.33)                   | 38.25<br>(21.02 to<br>59.10)                   | 63.95<br>(35.49 to<br>96.45)                   |
| Orofacial clefts                              | 48.37<br>(23.40 to<br>90.91)                            | 26.79<br>(11.26 to<br>56.97)                            | 15.06<br>(6.37 to<br>31.83)                            | 32.67<br>(13.35 to<br>68.88)                            | 0.56<br>(0.27 to<br>1.05)                      | 0.31<br>(0.13 to<br>0.66)                      | 0.17<br>(0.07 to<br>0.37)                      | 0.38<br>(0.15 to<br>0.80)                      |
| Down syndrome                                 | 705.75<br>(364.61 to<br>1,085.34)                       | 538.69<br>(328.77 to<br>794.99)                         | 464.40<br>(288.54 to<br>682.40)                        | 607.86<br>(360.48 to<br>911.47)                         | 9.39<br>(5.45 to<br>13.89)                     | 8.12<br>(5.58 to<br>11.36)                     | 7.14<br>(4.97 to<br>9.82)                      | 9.03<br>(6.06 to<br>12.80)                     |
| Other chromosomal abnormalities               | 1,938.46<br>(87.91 to<br>3,366.40)                      | 1,459.67<br>(87.93 to<br>2,651.65)                      | 1,098.03<br>(66.43 to<br>1,999.33)                     | 1,686.69<br>(97.54 to<br>3,047.47)                      | 22.64<br>(1.11 to<br>39.21)                    | 17.18<br>(1.26 to<br>30.97)                    | 12.95<br>(1.02 to<br>23.38)                    | 19.83<br>(1.43 to<br>35.55)                    |
| Congenital musculoskeletal and limb anomalies | 546.12<br>(93.46 to<br>890.17)                          | 352.62<br>(75.50 to<br>604.79)                          | 250.88<br>(56.86 to<br>421.99)                         | 394.68<br>(82.26 to<br>682.40)                          | 6.58<br>(1.29 to<br>10.58)                     | 4.37<br>(1.25 to<br>7.31)                      | 3.13<br>(0.93 to<br>5.09)                      | 4.87<br>(1.32 to<br>8.17)                      |

|                                      |                                                                |                                                               |                                                               |                                                                |                                                            |                                                            |                                                            |                                                            |
|--------------------------------------|----------------------------------------------------------------|---------------------------------------------------------------|---------------------------------------------------------------|----------------------------------------------------------------|------------------------------------------------------------|------------------------------------------------------------|------------------------------------------------------------|------------------------------------------------------------|
| Urogenital congenital anomalies      | 493.88<br>(104.08 to<br>990.27)                                | 325.24<br>(78.37 to<br>677.07)                                | 238.19<br>(59.81 to<br>495.01)                                | 364.97<br>(84.17 to<br>757.86)                                 | 6.09<br>(1.51 to<br>11.84)                                 | 4.27<br>(1.27 to<br>8.33)                                  | 3.18<br>(1.01 to<br>6.22)                                  | 4.74<br>(1.36 to<br>9.27)                                  |
| Digestive congenital anomalies       | 1,983.39<br>(783.21 to<br>3,283.45)                            | 1,352.02<br>(574.38 to<br>2,337.62)                           | 910.02<br>(383.50 to<br>1,609.00)                             | 1,549.98<br>(647.02 to<br>2,735.48)                            | 23.35<br>(9.38 to<br>38.50)                                | 16.12<br>(7.05 to<br>27.55)                                | 10.89<br>(4.67 to<br>19.01)                                | 18.44<br>(7.91 to<br>32.20)                                |
| Other congenital birth defects       | 5,794.07<br>(3,419.77 to<br>8,783.39)                          | 3,072.17<br>(1,824.45 to<br>4,835.88)                         | 2,176.31<br>(1,298.71 to<br>3,463.11)                         | 3,462.70<br>(2,057.87 to<br>5,482.18)                          | 69.54<br>(41.68 to<br>104.41)                              | 38.36<br>(23.92 to<br>58.62)                               | 27.42<br>(17.03 to<br>42.75)                               | 42.98<br>(26.54 to<br>66.34)                               |
| Skin and subcutaneous diseases       | 1,470.37<br>(906.60 to<br>2,460.86)                            | 4,842.36<br>(2,931.61 to<br>7,525.61)                         | 4,677.16<br>(2,866.26 to<br>7,077.86)                         | 4,685.32<br>(2,821.50 to<br>7,350.24)                          | 88.93<br>(47.45 to<br>128.47)                              | 375.39<br>(198.05 to<br>526.27)                            | 368.75<br>(194.63 to<br>510.61)                            | 353.49<br>(186.59 to<br>494.94)                            |
| Cellulitis                           | 567.88<br>(339.81 to<br>1,079.18)                              | 2,155.84<br>(1,296.96 to<br>3,604.64)                         | 2,184.49<br>(1,330.78 to<br>3,577.41)                         | 2,070.29<br>(1,245.83 to<br>3,508.43)                          | 24.16<br>(12.45 to<br>41.55)                               | 123.94<br>(61.68 to<br>180.83)                             | 128.78<br>(63.85 to<br>185.02)                             | 116.20<br>(58.47 to<br>172.24)                             |
| Psoriasis                            | 284.42<br>(127.93 to<br>466.86)                                | 880.10<br>(321.26 to<br>1,296.64)                             | 811.50<br>(288.98 to<br>1,202.05)                             | 879.60<br>(326.48 to<br>1,274.60)                              | 14.81<br>(4.58 to<br>21.08)                                | 68.71<br>(18.15 to<br>108.08)                              | 65.94<br>(17.11 to<br>105.87)                              | 66.21<br>(18.07 to<br>102.79)                              |
| Decubitus ulcer                      | 478.90<br>(271.33 to<br>832.88)                                | 1,470.16<br>(818.83 to<br>2,609.80)                           | 1,361.13<br>(736.87 to<br>2,389.57)                           | 1,406.87<br>(779.68 to<br>2,521.60)                            | 44.38<br>(22.40 to<br>69.74)                               | 164.23<br>(84.12 to<br>277.42)                             | 155.73<br>(77.88 to<br>255.79)                             | 153.55<br>(78.94 to<br>262.40)                             |
| Other skin and subcutaneous diseases | 139.17<br>(83.34 to<br>298.37)                                 | 336.26<br>(195.50 to<br>638.16)                               | 320.04<br>(182.51 to<br>604.78)                               | 328.56<br>(191.09 to<br>632.61)                                | 5.58<br>(3.05 to<br>10.64)                                 | 18.52<br>(9.34 to<br>31.89)                                | 18.30<br>(8.98 to<br>31.62)                                | 17.53<br>(8.99 to<br>30.63)                                |
| Sudden infant death syndrome         | 244.67<br>(139.43 to<br>412.94)                                | 127.29<br>(64.28 to<br>224.79)                                | 93.26<br>(46.96 to<br>165.12)                                 | 144.94<br>(73.40 to<br>255.10)                                 | 2.84<br>(1.62 to<br>4.79)                                  | 1.48<br>(0.75 to<br>2.61)                                  | 1.08<br>(0.54 to<br>1.92)                                  | 1.68<br>(0.85 to<br>2.96)                                  |
| <b>Injuries</b>                      | <b>91,224.59</b><br><b>(81,287.30 to</b><br><b>100,700.94)</b> | <b>72,268.96</b><br><b>(57,552.98 to</b><br><b>90,213.42)</b> | <b>51,077.47</b><br><b>(39,865.10 to</b><br><b>63,260.46)</b> | <b>90,187.00</b><br><b>(70,756.51 to</b><br><b>115,191.42)</b> | <b>2,194.45</b><br><b>(1,925.27 to</b><br><b>2,427.46)</b> | <b>2,511.39</b><br><b>(2,006.99 to</b><br><b>3,049.47)</b> | <b>1,912.48</b><br><b>(1,472.40 to</b><br><b>2,351.51)</b> | <b>2,936.54</b><br><b>(2,320.62 to</b><br><b>3,622.88)</b> |
| <b>Transport injuries</b>            | <b>34,570.59</b><br><b>(30,544.36 to</b><br><b>39,412.14)</b>  | <b>22,456.90</b><br><b>(15,823.68 to</b><br><b>32,827.60)</b> | <b>9,300.12</b><br><b>(6,476.66 to</b><br><b>13,525.43)</b>   | <b>37,334.13</b><br><b>(25,814.72 to</b><br><b>54,460.72)</b>  | <b>792.81</b><br><b>(707.52 to</b><br><b>889.82)</b>       | <b>685.23</b><br><b>(480.99 to</b><br><b>978.35)</b>       | <b>309.65</b><br><b>(216.64 to</b><br><b>444.50)</b>       | <b>1,064.12</b><br><b>(747.54 to</b><br><b>1,527.45)</b>   |
| Road injuries                        | 31,465.76<br>(27,805.35 to<br>36,017.90)                       | 19,311.00<br>(13,513.69 to<br>27,817.41)                      | 6,950.94<br>(4,878.56 to<br>9,976.23)                         | 33,823.01<br>(23,393.71 to<br>49,455.92)                       | 725.11<br>(647.10 to<br>816.28)                            | 601.40<br>(425.70 to<br>858.32)                            | 246.17<br>(174.22 to<br>349.98)                            | 971.58<br>(683.17 to<br>1,389.06)                          |
| Pedestrian road injuries             | 16,474.66<br>(14,146.61 to<br>19,251.68)                       | 10,077.96<br>(7,093.91 to<br>14,301.46)                       | 3,514.74<br>(2,448.30 to<br>5,058.65)                         | 16,853.67<br>(11,717.70 to<br>24,520.15)                       | 428.81<br>(370.94 to<br>485.56)                            | 388.72<br>(278.22 to<br>552.80)                            | 159.44<br>(112.36 to<br>232.24)                            | 597.58<br>(422.60 to<br>848.62)                            |
| <b>Costa Rica</b>                    |                                                                |                                                               |                                                               |                                                                |                                                            |                                                            |                                                            |                                                            |
| Cause                                | YLLs (actual counts)                                           |                                                               |                                                               |                                                                | Deaths (actual counts)                                     |                                                            |                                                            |                                                            |
|                                      | 2016                                                           | 2040 Forecast                                                 | 2040 Better Scenario                                          | 2040 Worse Scenario                                            | 2016                                                       | 2040 Forecast                                              | 2040 Better Scenario                                       | 2040 Worse Scenario                                        |
| Cyclist road injuries                | 933.93<br>(764.44 to<br>1,222.95)                              | 860.74<br>(549.26 to<br>1,383.53)                             | 341.79<br>(219.15 to<br>544.83)                               | 1,512.16<br>(952.87 to<br>2,393.78)                            | 21.01<br>(17.35 to<br>28.37)                               | 24.21<br>(15.55 to<br>38.47)                               | 11.33<br>(7.13 to<br>18.00)                                | 38.96<br>(24.93 to<br>61.31)                               |
| Motorcyclist road injuries           | 4,611.01<br>(3,769.83 to<br>5,710.14)                          | 3,488.67<br>(2,164.51 to<br>5,704.93)                         | 1,793.05<br>(1,127.81 to<br>2,851.53)                         | 5,228.92<br>(3,234.29 to<br>8,465.54)                          | 85.22<br>(70.32 to<br>106.63)                              | 71.43<br>(45.45 to<br>114.17)                              | 39.58<br>(25.40 to<br>62.14)                               | 103.51<br>(64.78 to<br>165.99)                             |
| Motor vehicle road injuries          | 8,767.83<br>(7,167.39 to<br>11,988.04)                         | 4,534.34<br>(2,997.43 to<br>6,983.55)                         | 1,197.55<br>(800.92 to<br>1,830.40)                           | 9,525.04<br>(6,284.35 to<br>14,672.37)                         | 174.99<br>(144.51 to<br>239.33)                            | 106.80<br>(71.95 to<br>162.44)                             | 32.07<br>(22.02 to<br>48.06)                               | 212.82<br>(142.34 to<br>320.28)                            |
| Other road injuries                  | 678.34<br>(366.72 to<br>859.41)                                | 349.28<br>(187.30 to<br>556.37)                               | 103.80<br>(57.80 to<br>159.80)                                | 703.23<br>(365.03 to<br>1,141.16)                              | 15.08<br>(8.60 to<br>18.79)                                | 10.24<br>(6.07 to<br>15.70)                                | 3.75<br>(2.32 to<br>5.73)                                  | 18.71<br>(10.60 to<br>29.30)                               |
| Other transport injuries             | 3,104.83<br>(2,373.66 to<br>3,818.36)                          | 3,145.90<br>(2,100.25 to<br>4,709.35)                         | 2,349.18<br>(1,531.71 to<br>3,527.66)                         | 3,511.12<br>(2,308.74 to<br>5,284.07)                          | 67.70<br>(53.55 to<br>81.42)                               | 83.83<br>(56.72 to<br>123.91)                              | 63.48<br>(42.12 to<br>96.34)                               | 92.54<br>(61.46 to<br>136.49)                              |
| <b>Unintentional injuries</b>        | <b>20,666.74</b><br><b>(18,599.00 to</b><br><b>23,410.72)</b>  | <b>20,910.14</b><br><b>(17,872.03 to</b><br><b>24,354.85)</b> | <b>17,995.26</b><br><b>(15,028.51 to</b><br><b>21,421.97)</b> | <b>21,748.14</b><br><b>(18,451.44 to</b><br><b>25,524.61)</b>  | <b>665.17</b><br><b>(559.08 to</b><br><b>740.43)</b>       | <b>1,146.16</b><br><b>(842.05 to</b><br><b>1,358.35)</b>   | <b>1,038.66</b><br><b>(753.18 to</b><br><b>1,265.02)</b>   | <b>1,143.54</b><br><b>(832.58 to</b><br><b>1,363.73)</b>   |
| Falls                                | 4,774.49<br>(3,618.89 to<br>5,455.20)                          | 7,726.33<br>(5,186.59 to<br>9,237.70)                         | 7,071.45<br>(4,804.49 to<br>8,600.90)                         | 7,700.64<br>(5,121.88 to<br>9,158.61)                          | 262.99<br>(160.60 to<br>306.40)                            | 636.74<br>(353.60 to<br>797.47)                            | 595.54<br>(341.46 to<br>765.48)                            | 618.96<br>(340.63 to<br>776.03)                            |

|                                                 |                                          |                                          |                                          |                                          |                                 |                                 |                                 |                                   |
|-------------------------------------------------|------------------------------------------|------------------------------------------|------------------------------------------|------------------------------------------|---------------------------------|---------------------------------|---------------------------------|-----------------------------------|
|                                                 | 7,111.01<br>(6,229.20 to<br>8,210.64)    | 5,088.29<br>(3,804.74 to<br>7,096.73)    | 4,122.58<br>(3,057.97 to<br>5,604.03)    | 5,551.65<br>(4,089.85 to<br>7,819.20)    | 138.63<br>(122.69 to<br>157.27) | 121.77<br>(89.98 to<br>168.72)  | 100.16<br>(74.50 to<br>135.63)  | 131.39<br>(96.31 to<br>183.21)    |
| Drowning                                        |                                          |                                          |                                          |                                          |                                 |                                 |                                 |                                   |
|                                                 | 933.57<br>(759.29 to<br>1,076.92)        | 817.64<br>(598.19 to<br>1,055.06)        | 642.77<br>(462.21 to<br>844.15)          | 884.24<br>(641.83 to<br>1,152.48)        | 35.95<br>(25.53 to<br>41.09)    | 53.14<br>(34.22 to<br>70.05)    | 43.90<br>(28.40 to<br>59.22)    | 53.30<br>(34.86 to<br>73.61)      |
| Fire, heat, and hot substances                  |                                          |                                          |                                          |                                          |                                 |                                 |                                 |                                   |
|                                                 | 489.62<br>(387.53 to<br>597.38)          | 252.72<br>(164.94 to<br>369.14)          | 179.09<br>(115.38 to<br>264.91)          | 286.88<br>(182.92 to<br>429.35)          | 11.11<br>(8.55 to<br>13.43)     | 7.31<br>(4.93 to<br>10.43)      | 5.30<br>(3.49 to<br>7.76)       | 8.16<br>(5.34 to<br>11.91)        |
| Poisonings                                      |                                          |                                          |                                          |                                          |                                 |                                 |                                 |                                   |
|                                                 | 1,437.76<br>(1,216.67 to<br>2,126.03)    | 1,240.68<br>(1,005.66 to<br>1,784.95)    | 999.76<br>(775.91 to<br>1,483.11)        | 1,314.83<br>(1,079.21 to<br>1,891.96)    | 35.20<br>(30.47 to<br>49.77)    | 45.10<br>(37.52 to<br>58.56)    | 37.71<br>(30.08 to<br>49.45)    | 46.30<br>(38.54 to<br>59.79)      |
| Exposure to mechanical forces                   |                                          |                                          |                                          |                                          |                                 |                                 |                                 |                                   |
|                                                 | 329.15<br>(275.79 to<br>437.39)          | 194.29<br>(155.34 to<br>258.64)          | 158.09<br>(122.08 to<br>212.99)          | 208.40<br>(165.52 to<br>270.68)          | 7.58<br>(6.53 to<br>9.21)       | 6.56<br>(4.91 to<br>8.05)       | 5.57<br>(4.13 to<br>7.08)       | 6.85<br>(5.08 to<br>8.27)         |
| Unintentional firearm injuries                  |                                          |                                          |                                          |                                          |                                 |                                 |                                 |                                   |
|                                                 | 128.81<br>(79.25 to<br>202.59)           | 72.15<br>(47.35 to<br>104.35)            | 56.15<br>(36.73 to<br>81.12)             | 80.91<br>(52.41 to<br>118.54)            | 1.87<br>(1.27 to<br>2.75)       | 1.21<br>(0.90 to<br>1.65)       | 0.97<br>(0.73 to<br>1.30)       | 1.33<br>(0.98 to<br>1.82)         |
| Unintentional suffocation                       |                                          |                                          |                                          |                                          |                                 |                                 |                                 |                                   |
|                                                 | 979.80<br>(810.93 to<br>1,570.63)        | 974.24<br>(785.06 to<br>1,499.54)        | 785.52<br>(594.16 to<br>1,231.92)        | 1,025.52<br>(835.65 to<br>1,574.06)      | 25.76<br>(21.68 to<br>38.63)    | 37.33<br>(30.41 to<br>50.62)    | 31.18<br>(24.40 to<br>42.45)    | 38.11<br>(31.38 to<br>51.50)      |
| Other exposure to mechanical forces             |                                          |                                          |                                          |                                          |                                 |                                 |                                 |                                   |
|                                                 | 2,537.51<br>(2,071.39 to<br>3,626.20)    | 3,101.61<br>(2,460.59 to<br>4,238.20)    | 2,726.69<br>(2,139.24 to<br>3,823.12)    | 3,221.78<br>(2,561.87 to<br>4,479.31)    | 102.83<br>(84.30 to<br>137.85)  | 186.62<br>(144.30 to<br>257.93) | 169.60<br>(130.49 to<br>239.54) | 188.12<br>(146.04 to<br>254.59)   |
| Adverse effects of medical treatment            |                                          |                                          |                                          |                                          |                                 |                                 |                                 |                                   |
|                                                 | 436.80<br>(273.84 to<br>568.48)          | 486.54<br>(292.85 to<br>635.80)          | 390.04<br>(232.61 to<br>525.95)          | 524.81<br>(316.68 to<br>683.75)          | 11.57<br>(7.16 to<br>14.37)     | 17.61<br>(10.77 to<br>22.61)    | 14.65<br>(8.84 to<br>19.60)     | 18.48<br>(11.41 to<br>23.71)      |
| Animal contact                                  |                                          |                                          |                                          |                                          |                                 |                                 |                                 |                                   |
|                                                 | 159.67<br>(88.72 to<br>230.66)           | 182.56<br>(86.95 to<br>250.66)           | 151.59<br>(70.68 to<br>209.29)           | 197.03<br>(95.81 to<br>267.42)           | 4.76<br>(2.22 to<br>6.13)       | 7.60<br>(3.05 to<br>10.32)      | 6.56<br>(2.53 to<br>9.19)       | 7.94<br>(3.19 to<br>10.81)        |
| Venomous animal contact                         |                                          |                                          |                                          |                                          |                                 |                                 |                                 |                                   |
|                                                 | 277.12<br>(162.32 to<br>381.48)          | 303.98<br>(181.67 to<br>431.46)          | 238.45<br>(143.61 to<br>345.54)          | 327.78<br>(195.95 to<br>461.55)          | 6.82<br>(4.30 to<br>10.06)      | 10.01<br>(6.65 to<br>15.59)     | 8.09<br>(5.38 to<br>12.78)      | 10.54<br>(6.91 to<br>16.03)       |
| Non-venomous animal contact                     |                                          |                                          |                                          |                                          |                                 |                                 |                                 |                                   |
|                                                 | 1,495.98<br>(1,130.21 to<br>2,170.37)    | 1,298.95<br>(1,065.77 to<br>1,631.50)    | 1,212.83<br>(992.91 to<br>1,521.53)      | 1,317.53<br>(1,083.27 to<br>1,672.76)    | 37.57<br>(31.20 to<br>43.80)    | 56.14<br>(44.20 to<br>72.81)    | 55.79<br>(33.08 to<br>73.64)    | 54.09<br>(33.65 to<br>69.50)      |
| Foreign body                                    |                                          |                                          |                                          |                                          |                                 |                                 |                                 |                                   |
|                                                 | 1,446.87<br>(1,085.56 to<br>2,130.24)    | 1,265.82<br>(1,037.27 to<br>1,596.31)    | 1,181.41<br>(959.87 to<br>1,486.12)      | 1,282.72<br>(1,053.05 to<br>1,631.58)    | 36.51<br>(30.28 to<br>42.64)    | 55.17<br>(33.18 to<br>71.84)    | 54.84<br>(32.17 to<br>72.57)    | 53.10<br>(32.75 to<br>68.39)      |
| Pulmonary aspiration and foreign body in airway |                                          |                                          |                                          |                                          |                                 |                                 |                                 |                                   |
|                                                 | 49.12<br>(38.70 to<br>80.62)             | 33.13<br>(25.50 to<br>51.14)             | 31.42<br>(24.19 to<br>49.23)             | 34.83<br>(26.78 to<br>53.75)             | 1.06<br>(0.85 to<br>1.49)       | 0.97<br>(0.71 to<br>1.22)       | 0.96<br>(0.69 to<br>1.20)       | 1.00<br>(0.72 to<br>1.26)         |
| Foreign body in other body part                 |                                          |                                          |                                          |                                          |                                 |                                 |                                 |                                   |
|                                                 | 109.97<br>(60.35 to<br>143.19)           | 103.10<br>(54.52 to<br>143.29)           | 77.96<br>(41.82 to<br>111.66)            | 112.65<br>(60.99 to<br>155.77)           | 3.24<br>(1.86 to<br>4.57)       | 4.13<br>(2.38 to<br>6.70)       | 3.21<br>(1.87 to<br>5.31)       | 4.41<br>(2.66 to<br>6.98)         |
| Environmental heat and cold exposure            |                                          |                                          |                                          |                                          |                                 |                                 |                                 |                                   |
|                                                 | 1,340.04<br>(1,117.74 to<br>1,594.36)    | 794.28<br>(634.22 to<br>984.16)          | 572.09<br>(406.23 to<br>779.53)          | 833.10<br>(670.00 to<br>1,036.32)        | 26.07<br>(21.96 to<br>30.75)    | 17.62<br>(14.40 to<br>21.29)    | 12.79<br>(9.26 to<br>17.25)     | 18.35<br>(15.04 to<br>22.25)      |
| Other unintentional injuries                    |                                          |                                          |                                          |                                          |                                 |                                 |                                 |                                   |
|                                                 | 35,533.02<br>(24,763.19 to<br>42,545.92) | 28,688.62<br>(18,584.15 to<br>39,537.90) | 23,572.10<br>(15,793.34 to<br>31,880.17) | 30,889.73<br>(19,125.43 to<br>44,770.89) | 726.88<br>(512.10 to<br>863.68) | 674.46<br>(454.04 to<br>909.05) | 558.61<br>(387.26 to<br>747.58) | 723.38<br>(464.09 to<br>1,021.49) |
| Self-harm and interpersonal violence            |                                          |                                          |                                          |                                          |                                 |                                 |                                 |                                   |
| <b>Costa Rica</b>                               |                                          |                                          |                                          |                                          |                                 |                                 |                                 |                                   |
| Cause                                           | YLLs (actual counts)                     |                                          |                                          |                                          | Deaths (actual counts)          |                                 |                                 |                                   |
|                                                 | 2016                                     | 2040 Forecast                            | 2040 Better Scenario                     | 2040 Worse Scenario                      | 2016                            | 2040 Forecast                   | 2040 Better Scenario            | 2040 Worse Scenario               |
| Self-harm                                       | 16,323.65<br>(11,617.31 to<br>19,691.19) | 15,423.54<br>(9,379.80 to<br>23,317.90)  | 12,463.32<br>(7,729.16 to<br>18,522.89)  | 17,362.77<br>(10,171.82 to<br>27,857.10) | 348.40<br>(249.59 to<br>413.17) | 380.46<br>(242.45 to<br>565.82) | 310.15<br>(201.07 to<br>449.96) | 424.81<br>(255.66 to<br>659.78)   |
| Self-harm by firearm                            | 2,311.66<br>(1,385.30 to<br>3,154.55)    | 2,112.55<br>(1,057.56 to<br>3,705.01)    | 1,615.81<br>(823.55 to<br>2,799.78)      | 2,403.30<br>(1,119.22 to<br>4,386.71)    | 54.48<br>(34.27 to<br>73.65)    | 60.04<br>(33.46 to<br>101.51)   | 46.66<br>(26.37 to<br>77.45)    | 67.38<br>(34.93 to<br>114.37)     |
| Self-harm by other specified means              | 14,011.98<br>(9,729.24 to<br>17,033.03)  | 13,310.99<br>(8,179.06 to<br>19,999.28)  | 10,847.51<br>(6,799.62 to<br>15,878.68)  | 14,959.47<br>(8,771.18 to<br>23,264.20)  | 293.92<br>(205.26 to<br>351.78) | 320.41<br>(200.85 to<br>472.38) | 263.49<br>(173.73 to<br>376.10) | 357.43<br>(217.24 to<br>544.23)   |

|                                                                              |                                                 |                                                 |                                               |                                                 |                                          |                                          |                                          |                                          |
|------------------------------------------------------------------------------|-------------------------------------------------|-------------------------------------------------|-----------------------------------------------|-------------------------------------------------|------------------------------------------|------------------------------------------|------------------------------------------|------------------------------------------|
| Interpersonal violence                                                       | 19,209.38<br>(10,174.86 to<br>24,935.38)        | 13,265.08<br>(8,877.25 to<br>18,082.68)         | 11,108.77<br>(5,889.73 to<br>15,534.80)       | 13,526.96<br>(6,745.46 to<br>18,563.65)         | 378.48<br>(204.24 to<br>486.55)          | 294.00<br>(156.84 to<br>390.67)          | 248.45<br>(134.40 to<br>343.45)          | 298.57<br>(152.53 to<br>403.89)          |
| Physical violence by firearm                                                 | 12,705.23<br>(4,268.78 to<br>17,720.94)         | 8,417.90<br>(2,834.99 to<br>12,311.00)          | 6,964.12<br>(2,428.50 to<br>10,475.53)        | 8,540.79<br>(2,774.79 to<br>12,623.25)          | 244.94<br>(85.56 to<br>337.18)           | 176.88<br>(63.40 to<br>253.28)           | 147.16<br>(54.18 to<br>216.63)           | 178.77<br>(61.75 to<br>257.34)           |
| Physical violence by sharp object                                            | 4,075.69<br>(2,021.91 to<br>6,922.78)           | 3,121.92<br>(1,584.83 to<br>5,287.43)           | 2,691.13<br>(1,414.16 to<br>4,598.51)         | 3,111.49<br>(1,509.35 to<br>5,171.34)           | 81.95<br>(41.64 to<br>140.36)            | 70.91<br>(37.15 to<br>122.42)            | 61.64<br>(33.24 to<br>108.61)            | 70.25<br>(35.99 to<br>119.60)            |
| Physical violence by other means                                             | 2,428.45<br>(1,462.58 to<br>5,016.91)           | 1,725.25<br>(901.68 to<br>3,738.06)             | 1,453.53<br>(783.67 to<br>3,111.76)           | 1,874.68<br>(973.50 to<br>4,000.30)             | 51.59<br>(30.41 to<br>104.48)            | 46.22<br>(24.69 to<br>95.23)             | 39.65<br>(20.96 to<br>79.10)             | 49.55<br>(25.86 to<br>99.46)             |
| Forces of nature, conflict and terrorism, and executions and police conflict | 454.24<br>(269.47 to<br>640.87)                 | 213.30<br>(0.00 to<br>1,265.69)                 | 209.99<br>(0.00 to<br>1,248.37)               | 215.01<br>(0.00 to<br>1,274.51)                 | 9.58<br>(5.66 to<br>13.52)               | 5.54<br>(0.00 to<br>33.48)               | 5.56<br>(0.00 to<br>33.77)               | 5.50<br>(0.00 to<br>33.15)               |
| Exposure to forces of nature                                                 | 428.11<br>(242.73 to<br>613.05)                 | 208.39<br>(0.00 to<br>1,255.98)                 | 205.12<br>(0.00 to<br>1,238.83)               | 210.10<br>(0.00 to<br>1,264.71)                 | 9.09<br>(5.15 to<br>13.01)               | 5.40<br>(0.00 to<br>33.26)               | 5.43<br>(0.00 to<br>33.55)               | 5.36<br>(0.00 to<br>32.91)               |
| Conflict and terrorism                                                       | 0.00<br>(0.00 to<br>0.00)                       | 4.91<br>(0.00 to<br>59.25)                      | 4.87<br>(0.00 to<br>58.19)                    | 4.92<br>(0.00 to<br>59.81)                      | 0.00<br>(0.00 to<br>0.00)                | 0.13<br>(0.00 to<br>1.33)                | 0.14<br>(0.00 to<br>1.32)                | 0.13<br>(0.00 to<br>1.32)                |
| Executions and police conflict                                               | 26.13<br>(23.73 to<br>29.34)                    | 0.00<br>(0.00 to<br>0.00)                       | 0.00<br>(0.00 to<br>0.00)                     | 0.00<br>(0.00 to<br>0.00)                       | 0.49<br>(0.45 to<br>0.54)                | 0.00<br>(0.00 to<br>0.00)                | 0.00<br>(0.00 to<br>0.00)                | 0.00<br>(0.00 to<br>0.00)                |
| <b>El Salvador</b>                                                           |                                                 |                                                 |                                               |                                                 |                                          |                                          |                                          |                                          |
| Cause                                                                        | YLLs (actual counts)                            |                                                 |                                               |                                                 | Deaths (actual counts)                   |                                          |                                          |                                          |
|                                                                              | 2016                                            | 2040 Forecast                                   | 2040 Better Scenario                          | 2040 Worse Scenario                             | 2016                                     | 2040 Forecast                            | 2040 Better Scenario                     | 2040 Worse Scenario                      |
| All causes                                                                   | 1,016,800.14<br>(912,454.93 to<br>1,128,863.84) | 1,063,964.91<br>(850,835.10 to<br>1,311,851.65) | 851,661.07<br>(692,945.32 to<br>1,036,500.03) | 1,255,654.36<br>(997,742.70 to<br>1,549,906.86) | 37,989.46<br>(34,548.04 to<br>41,737.10) | 55,123.10<br>(45,909.49 to<br>66,154.16) | 45,697.04<br>(39,013.67 to<br>53,997.82) | 62,731.30<br>(52,519.30 to<br>74,239.38) |
| Communicable, maternal, neonatal, and nutritional diseases                   | 128,018.65<br>(103,702.46 to<br>158,443.02)     | 79,253.90<br>(58,376.32 to<br>104,531.05)       | 57,664.89<br>(44,272.16 to<br>73,831.47)      | 107,256.87<br>(78,717.66 to<br>145,731.99)      | 3,578.17<br>(2,970.26 to<br>4,159.90)    | 3,999.61<br>(2,863.27 to<br>5,288.34)    | 3,382.77<br>(2,421.99 to<br>4,327.33)    | 4,859.02<br>(3,384.64 to<br>6,551.15)    |
| HIV/AIDS and tuberculosis                                                    | 9,944.34<br>(6,991.89 to<br>17,228.33)          | 6,274.64<br>(2,984.37 to<br>16,039.17)          | 4,243.79<br>(1,624.24 to<br>13,182.52)        | 11,149.47<br>(6,151.99 to<br>21,914.83)         | 242.03<br>(173.33 to<br>411.20)          | 180.05<br>(89.54 to<br>425.49)           | 121.26<br>(52.43 to<br>351.52)           | 285.26<br>(161.57 to<br>533.49)          |
| Tuberculosis                                                                 | 2,167.21<br>(1,866.72 to<br>2,533.37)           | 1,758.68<br>(1,114.84 to<br>2,733.17)           | 900.48<br>(613.12 to<br>1,361.85)             | 2,331.55<br>(1,441.87 to<br>3,700.80)           | 79.02<br>(68.88 to<br>91.01)             | 79.23<br>(49.57 to<br>123.70)            | 42.95<br>(28.58 to<br>63.87)             | 101.86<br>(61.61 to<br>162.55)           |
| HIV/AIDS                                                                     | 7,777.13<br>(4,863.92 to<br>15,112.89)          | 4,515.96<br>(1,371.75 to<br>13,997.89)          | 3,343.31<br>(767.20 to<br>12,092.10)          | 8,817.92<br>(3,895.75 to<br>19,121.11)          | 163.01<br>(96.30 to<br>335.72)           | 100.82<br>(24.87 to<br>338.41)           | 78.31<br>(14.99 to<br>299.64)            | 183.41<br>(69.92 to<br>427.02)           |
| Diarrhea, lower respiratory, and other common infectious diseases            | 67,551.52<br>(55,884.56 to<br>80,752.18)        | 54,532.43<br>(37,409.55 to<br>76,869.20)        | 40,376.95<br>(29,204.80 to<br>54,602.60)      | 73,842.18<br>(49,156.29 to<br>108,475.39)       | 2,451.55<br>(1,885.31 to<br>2,958.61)    | 3,288.47<br>(2,164.99 to<br>4,573.76)    | 2,817.93<br>(1,895.18 to<br>3,778.92)    | 3,997.76<br>(2,525.42 to<br>5,754.66)    |
| Diarrheal diseases                                                           | 10,553.64<br>(6,910.20 to<br>15,985.81)         | 4,433.37<br>(990.11 to<br>12,819.60)            | 2,295.51<br>(580.93 to<br>6,464.19)           | 7,041.37<br>(1,384.29 to<br>21,145.59)          | 291.73<br>(178.32 to<br>524.45)          | 255.17<br>(65.57 to<br>722.41)           | 149.31<br>(39.69 to<br>425.23)           | 379.77<br>(80.27 to<br>1,105.02)         |
| Intestinal infectious diseases                                               | 105.51<br>(44.96 to<br>223.99)                  | 60.24<br>(20.90 to<br>139.62)                   | 52.03<br>(18.26 to<br>117.95)                 | 64.26<br>(22.34 to<br>150.95)                   | 2.23<br>(1.00 to<br>4.37)                | 1.64<br>(0.66 to<br>3.54)                | 1.48<br>(0.59 to<br>3.14)                | 1.71<br>(0.68 to<br>3.65)                |
| Typhoid fever                                                                | 95.16<br>(37.50 to<br>207.27)                   | 55.74<br>(17.95 to<br>134.76)                   | 48.60<br>(15.82 to<br>113.04)                 | 59.18<br>(18.95 to<br>142.79)                   | 2.01<br>(0.81 to<br>4.12)                | 1.48<br>(0.56 to<br>3.33)                | 1.35<br>(0.51 to<br>2.99)                | 1.53<br>(0.57 to<br>3.46)                |
| Paratyphoid fever                                                            | 1.76<br>(0.48 to<br>4.51)                       | 1.37<br>(0.32 to<br>3.65)                       | 1.15<br>(0.27 to<br>3.18)                     | 1.48<br>(0.35 to<br>4.05)                       | 0.04<br>(0.01 to<br>0.09)                | 0.04<br>(0.01 to<br>0.09)                | 0.03<br>(0.01 to<br>0.08)                | 0.04<br>(0.01 to<br>0.10)                |
| Other intestinal infectious diseases                                         | 8.58<br>(3.32 to<br>18.37)                      | 3.13<br>(1.05 to<br>7.56)                       | 2.29<br>(0.77 to<br>5.76)                     | 3.59<br>(1.19 to<br>9.06)                       | 0.19<br>(0.07 to<br>0.38)                | 0.13<br>(0.04 to<br>0.28)                | 0.10<br>(0.24 to<br>0.24)                | 0.14<br>(0.05 to<br>0.31)                |
| Lower respiratory infections                                                 | 48,155.95<br>(39,125.35 to<br>56,850.70)        | 41,135.82<br>(26,805.30 to<br>60,597.10)        | 31,987.64<br>(21,398.35 to<br>44,440.41)      | 54,274.40<br>(34,051.17 to<br>83,039.65)        | 1,994.31<br>(1,418.85 to<br>2,372.31)    | 2,827.96<br>(1,761.52 to<br>3,917.57)    | 2,508.50<br>(1,617.00 to<br>3,373.67)    | 3,358.73<br>(2,018.24 to<br>4,758.25)    |





|                                                          |                                                            |                                                          |                                                        |                                                          |                                                   |                                                   |                                                  |                                                   |
|----------------------------------------------------------|------------------------------------------------------------|----------------------------------------------------------|--------------------------------------------------------|----------------------------------------------------------|---------------------------------------------------|---------------------------------------------------|--------------------------------------------------|---------------------------------------------------|
| Cystic echinococcosis                                    | 15.87<br>(13.23 to<br>18.80)                               | 10.04<br>(7.00 to<br>13.38)                              | 5.95<br>(4.16 to<br>7.80)                              | 12.44<br>(8.61 to<br>16.49)                              | 0.45<br>(0.38 to<br>0.53)                         | 0.36<br>(0.26 to<br>0.48)                         | 0.22<br>(0.17 to<br>0.29)                        | 0.44<br>(0.32 to<br>0.58)                         |
| Dengue                                                   | 78.82<br>(38.73 to<br>175.48)                              | 378.45<br>(245.44 to<br>641.68)                          | 359.38<br>(231.49 to<br>617.70)                        | 383.92<br>(248.87 to<br>649.75)                          | 2.37<br>(1.15 to<br>4.50)                         | 14.65<br>(9.18 to<br>21.38)                       | 14.57<br>(8.97 to<br>21.46)                      | 14.41<br>(9.00 to<br>21.20)                       |
| Yellow fever                                             | 0.00<br>(0.00 to<br>0.00)                                  | 0.00<br>(0.00 to<br>0.00)                                | 0.00<br>(0.00 to<br>0.00)                              | 0.00<br>(0.00 to<br>0.00)                                | 0.00<br>(0.00 to<br>0.00)                         | 0.00<br>(0.00 to<br>0.00)                         | 0.00<br>(0.00 to<br>0.00)                        | 0.00<br>(0.00 to<br>0.00)                         |
| Rabies                                                   | 0.95<br>(0.29 to<br>6.17)                                  | 0.49<br>(0.17 to<br>2.95)                                | 0.26<br>(0.09 to<br>1.56)                              | 0.65<br>(0.22 to<br>3.95)                                | 0.02<br>(0.01 to<br>0.12)                         | 0.01<br>(0.00 to<br>0.06)                         | 0.01<br>(0.00 to<br>0.04)                        | 0.02<br>(0.01 to<br>0.09)                         |
| Intestinal nematode infections                           | 38.68<br>(12.48 to<br>83.79)                               | 40.02<br>(15.34 to<br>74.76)                             | 35.67<br>(14.13 to<br>66.24)                           | 42.87<br>(16.17 to<br>81.11)                             | 0.62<br>(0.27 to<br>1.19)                         | 0.80<br>(0.42 to<br>1.32)                         | 0.76<br>(0.40 to<br>1.23)                        | 0.82<br>(0.43 to<br>1.37)                         |
| Other neglected tropical diseases                        | 47.65<br>(38.47 to<br>61.45)                               | 39.77<br>(25.73 to<br>56.22)                             | 28.95<br>(19.08 to<br>40.12)                           | 45.93<br>(29.26 to<br>64.64)                             | 0.86<br>(0.72 to<br>1.04)                         | 0.91<br>(0.66 to<br>1.19)                         | 0.70<br>(0.52 to<br>0.90)                        | 1.01<br>(0.73 to<br>1.32)                         |
| <b>Maternal disorders</b>                                | <b>2,205.25</b><br><b>(1,622.70 to</b><br><b>2,959.45)</b> | <b>1,067.69</b><br><b>(707.85 to</b><br><b>1,552.39)</b> | <b>684.35</b><br><b>(437.37 to</b><br><b>1,008.72)</b> | <b>1,299.21</b><br><b>(837.53 to</b><br><b>1,929.82)</b> | <b>39.27</b><br><b>(28.76 to</b><br><b>52.70)</b> | <b>19.76</b><br><b>(13.08 to</b><br><b>28.70)</b> | <b>12.72</b><br><b>(8.14 to</b><br><b>18.72)</b> | <b>24.01</b><br><b>(15.50 to</b><br><b>35.17)</b> |
| Maternal hemorrhage                                      | 519.58<br>(346.73 to<br>738.10)                            | 251.64<br>(143.75 to<br>406.14)                          | 160.50<br>(90.58 to<br>261.43)                         | 305.03<br>(172.53 to<br>495.46)                          | 9.40<br>(6.30 to<br>13.37)                        | 4.71<br>(2.72 to<br>7.48)                         | 3.01<br>(1.69 to<br>4.92)                        | 5.70<br>(3.23 to<br>9.25)                         |
| Maternal sepsis and other maternal infections            | 80.49<br>(46.40 to<br>128.53)                              | 50.10<br>(25.44 to<br>88.63)                             | 31.78<br>(15.77 to<br>57.17)                           | 61.04<br>(30.26 to<br>108.22)                            | 1.46<br>(0.86 to<br>2.30)                         | 0.93<br>(0.48 to<br>1.66)                         | 0.60<br>(0.30 to<br>1.06)                        | 1.14<br>(0.57 to<br>2.02)                         |
| Maternal hypertensive disorders                          | 687.25<br>(464.13 to<br>973.46)                            | 259.89<br>(151.57 to<br>421.29)                          | 163.93<br>(92.01 to<br>266.48)                         | 316.60<br>(181.64 to<br>517.55)                          | 12.08<br>(8.15 to<br>17.09)                       | 4.72<br>(2.77 to<br>7.66)                         | 2.99<br>(1.67 to<br>4.87)                        | 5.74<br>(3.25 to<br>9.27)                         |
| Maternal obstructed labor and uterine rupture            | 20.62<br>(8.63 to<br>38.09)                                | 12.55<br>(4.96 to<br>26.85)                              | 7.73<br>(2.96 to<br>16.91)                             | 15.46<br>(5.77 to<br>32.33)                              | 0.38<br>(0.16 to<br>0.68)                         | 0.24<br>(0.09 to<br>0.51)                         | 0.15<br>(0.06 to<br>0.31)                        | 0.29<br>(0.11 to<br>0.62)                         |
| Maternal abortion, miscarriage, and ectopic pregnancy    | 45.09<br>(24.16 to<br>74.91)                               | 102.69<br>(47.26 to<br>192.72)                           | 66.17<br>(30.20 to<br>130.03)                          | 126.64<br>(56.37 to<br>245.17)                           | 0.84<br>(0.46 to<br>1.39)                         | 1.98<br>(0.92 to<br>3.81)                         | 1.28<br>(0.57 to<br>2.43)                        | 2.44<br>(1.12 to<br>4.81)                         |
| Indirect maternal deaths                                 | 271.42<br>(173.82 to<br>415.92)                            | 136.98<br>(75.52 to<br>234.54)                           | 87.87<br>(47.18 to<br>150.23)                          | 167.24<br>(88.33 to<br>283.48)                           | 4.70<br>(3.02 to<br>7.27)                         | 2.45<br>(1.36 to<br>4.08)                         | 1.58<br>(0.87 to<br>2.70)                        | 2.99<br>(1.59 to<br>4.90)                         |
| Late maternal deaths                                     | 88.70<br>(49.19 to<br>141.10)                              | 35.34<br>(16.83 to<br>62.58)                             | 22.45<br>(10.66 to<br>40.82)                           | 43.16<br>(20.32 to<br>77.81)                             | 1.58<br>(0.88 to<br>2.51)                         | 0.66<br>(0.32 to<br>1.15)                         | 0.42<br>(0.20 to<br>0.75)                        | 0.80<br>(0.39 to<br>1.45)                         |
| Maternal deaths aggravated by HIV/AIDS                   | 2.70<br>(1.24 to<br>5.05)                                  | 7.02<br>(1.50 to<br>18.94)                               | 4.53<br>(0.58 to<br>12.86)                             | 9.29<br>(2.76 to<br>23.50)                               | 0.05<br>(0.02 to<br>0.09)                         | 0.14<br>(0.03 to<br>0.37)                         | 0.09<br>(0.05 to<br>0.25)                        | 0.18<br>(0.05 to<br>0.46)                         |
| Other maternal disorders                                 | 489.40<br>(320.08 to<br>707.37)                            | 211.48<br>(118.44 to<br>346.85)                          | 139.38<br>(78.63 to<br>228.41)                         | 254.74<br>(143.07 to<br>422.20)                          | 8.77<br>(5.76 to<br>12.61)                        | 3.94<br>(2.18 to<br>6.51)                         | 2.61<br>(1.45 to<br>4.23)                        | 4.73<br>(2.65 to<br>7.77)                         |
| <b>El Salvador</b>                                       |                                                            |                                                          |                                                        |                                                          |                                                   |                                                   |                                                  |                                                   |
| Cause                                                    | YLLs (actual counts)                                       |                                                          |                                                        |                                                          | Deaths (actual counts)                            |                                                   |                                                  |                                                   |
|                                                          | 2016                                                       | 2040 Forecast                                            | 2040 Better Scenario                                   | 2040 Worse Scenario                                      | 2016                                              | 2040 Forecast                                     | 2040 Better Scenario                             | 2040 Worse Scenario                               |
| Neonatal disorders                                       | 38,196.72<br>(25,438.70 to<br>54,649.88)                   | 11,135.96<br>(5,912.45 to<br>18,773.22)                  | 7,030.16<br>(3,694.06 to<br>11,886.71)                 | 14,319.58<br>(7,664.07 to<br>24,279.34)                  | 441.54<br>(294.02 to<br>631.65)                   | 128.78<br>(68.40 to<br>217.01)                    | 81.31<br>(42.74 to<br>137.42)                    | 165.58<br>(88.64 to<br>280.59)                    |
| Neonatal preterm birth                                   | 22,140.33<br>(13,893.72 to<br>32,709.96)                   | 5,164.16<br>(2,380.72 to<br>9,315.28)                    | 3,072.76<br>(1,403.30 to<br>5,559.97)                  | 6,840.68<br>(3,145.85 to<br>12,263.92)                   | 255.89<br>(160.53 to<br>378.09)                   | 59.70<br>(27.54 to<br>107.66)                     | 35.53<br>(16.22 to<br>64.27)                     | 79.08<br>(36.39 to<br>141.74)                     |
| Neonatal encephalopathy due to birth asphyxia and trauma | 6,262.29<br>(3,813.94 to<br>9,560.56)                      | 1,633.32<br>(708.06 to<br>3,320.59)                      | 1,109.67<br>(473.41 to<br>2,266.20)                    | 2,024.43<br>(854.77 to<br>4,216.42)                      | 72.39<br>(44.10 to<br>110.50)                     | 18.89<br>(8.20 to<br>38.40)                       | 12.84<br>(5.48 to<br>26.19)                      | 23.42<br>(9.90 to<br>48.76)                       |
| Neonatal sepsis and other neonatal infections            | 6,044.44<br>(3,087.82 to<br>17,184.92)                     | 2,950.59<br>(1,351.12 to<br>7,259.74)                    | 1,969.03<br>(900.71 to<br>4,842.03)                    | 3,681.76<br>(1,656.66 to<br>9,099.44)                    | 69.85<br>(35.69 to<br>198.58)                     | 34.11<br>(15.62 to<br>83.88)                      | 22.76<br>(10.41 to<br>55.96)                     | 42.56<br>(19.16 to<br>105.13)                     |

|                                                                         |                                                                  |                                                                  |                                                                  |                                                                    |                                                               |                                                               |                                                               |                                                               |
|-------------------------------------------------------------------------|------------------------------------------------------------------|------------------------------------------------------------------|------------------------------------------------------------------|--------------------------------------------------------------------|---------------------------------------------------------------|---------------------------------------------------------------|---------------------------------------------------------------|---------------------------------------------------------------|
| Hemolytic disease and other neonatal jaundice                           | 54.89<br>(29.90 to<br>92.77)                                     | 9.83<br>(3.86 to<br>21.92)                                       | 6.21<br>(2.35 to<br>14.07)                                       | 12.57<br>(4.85 to<br>28.75)                                        | 0.63<br>(0.35 to<br>1.07)                                     | 0.11<br>(0.04 to<br>0.25)                                     | 0.07<br>(0.03 to<br>0.16)                                     | 0.15<br>(0.06 to<br>0.33)                                     |
| Other neonatal disorders                                                | 3,694.77<br>(2,084.75 to<br>5,674.14)                            | 1,378.06<br>(606.56 to<br>2,375.59)                              | 872.49<br>(387.90 to<br>1,543.24)                                | 1,760.14<br>(759.97 to<br>3,078.66)                                | 42.77<br>(24.13 to<br>65.67)                                  | 15.96<br>(7.02 to<br>27.53)                                   | 10.11<br>(4.50 to<br>17.88)                                   | 20.39<br>(8.81 to<br>35.64)                                   |
| <b>Nutritional deficiencies</b>                                         | <b>7,341.43</b><br><b>(6,205.52 to</b><br><b>8,965.95)</b>       | <b>3,888.70</b><br><b>(3,280.96 to</b><br><b>4,572.81)</b>       | <b>3,244.89</b><br><b>(2,716.71 to</b><br><b>3,809.91)</b>       | <b>4,159.44</b><br><b>(3,487.86 to</b><br><b>4,909.83)</b>         | <b>326.31</b><br><b>(286.45 to</b><br><b>370.95)</b>          | <b>287.53</b><br><b>(210.64 to</b><br><b>357.63)</b>          | <b>259.59</b><br><b>(197.23 to</b><br><b>322.32)</b>          | <b>290.46</b><br><b>(206.77 to</b><br><b>368.20)</b>          |
| Protein-energy malnutrition                                             | 7,210.62<br>(6,063.86 to<br>8,807.05)                            | 3,731.53<br>(3,109.64 to<br>4,423.89)                            | 3,121.85<br>(2,633.16 to<br>3,719.27)                            | 3,985.73<br>(3,283.24 to<br>4,759.21)                              | 323.07<br>(283.13 to<br>367.84)                               | 279.12<br>(198.71 to<br>352.25)                               | 252.55<br>(191.59 to<br>313.06)                               | 281.65<br>(200.08 to<br>356.39)                               |
| Iodine deficiency                                                       | 43.09<br>(2.48 to<br>149.31)                                     | 107.22<br>(1.47 to<br>353.83)                                    | 81.91<br>(0.93 to<br>281.31)                                     | 119.45<br>(1.73 to<br>392.68)                                      | 1.11<br>(0.08 to<br>3.51)                                     | 6.49<br>(0.04 to<br>32.96)                                    | 5.34<br>(0.03 to<br>29.18)                                    | 6.85<br>(0.05 to<br>34.40)                                    |
| Dietary iron deficiency                                                 | 40.84<br>(31.35 to<br>52.54)                                     | 21.61<br>(16.14 to<br>28.61)                                     | 17.83<br>(13.46 to<br>23.42)                                     | 23.60<br>(17.49 to<br>31.68)                                       | 0.75<br>(0.59 to<br>0.95)                                     | 0.47<br>(0.37 to<br>0.61)                                     | 0.40<br>(0.31 to<br>0.52)                                     | 0.50<br>(0.39 to<br>0.65)                                     |
| Other nutritional deficiencies                                          | 46.87<br>(37.04 to<br>58.76)                                     | 28.33<br>(20.95 to<br>37.23)                                     | 23.29<br>(17.07 to<br>30.15)                                     | 30.65<br>(22.33 to<br>40.72)                                       | 1.38<br>(1.04 to<br>1.70)                                     | 1.44<br>(0.88 to<br>2.01)                                     | 1.30<br>(0.78 to<br>1.85)                                     | 1.46<br>(0.89 to<br>2.08)                                     |
| <b>Other communicable, maternal, neonatal, and nutritional diseases</b> | <b>2,181.26</b><br><b>(1,809.49 to</b><br><b>2,771.79)</b>       | <b>1,507.74</b><br><b>(1,229.74 to</b><br><b>1,820.00)</b>       | <b>1,225.57</b><br><b>(991.83 to</b><br><b>1,482.63)</b>         | <b>1,646.87</b><br><b>(1,326.37 to</b><br><b>2,007.28)</b>         | <b>56.23</b><br><b>(47.99 to</b><br><b>64.75)</b>             | <b>59.53</b><br><b>(46.92 to</b><br><b>71.74)</b>             | <b>51.79</b><br><b>(40.31 to</b><br><b>62.95)</b>             | <b>62.06</b><br><b>(48.19 to</b><br><b>75.19)</b>             |
| Sexually transmitted infections excluding HIV                           | 296.26<br>(195.81 to<br>459.95)                                  | 95.30<br>(63.45 to<br>131.57)                                    | 80.12<br>(54.09 to<br>110.27)                                    | 103.24<br>(69.10 to<br>142.18)                                     | 5.14<br>(3.72 to<br>7.14)                                     | 2.10<br>(1.73 to<br>3.21)                                     | 2.10<br>(1.51 to<br>2.83)                                     | 2.54<br>(1.79 to<br>3.39)                                     |
| Syphilis                                                                | 188.75<br>(96.52 to<br>350.23)                                   | 32.97<br>(20.25 to<br>55.17)                                     | 25.73<br>(15.91 to<br>42.69)                                     | 37.47<br>(22.75 to<br>63.78)                                       | 2.60<br>(1.50 to<br>4.51)                                     | 0.67<br>(0.48 to<br>0.96)                                     | 0.55<br>(0.40 to<br>0.78)                                     | 0.74<br>(0.52 to<br>1.05)                                     |
| Chlamydial infection                                                    | 21.13<br>(12.95 to<br>27.72)                                     | 12.17<br>(7.36 to<br>17.89)                                      | 10.61<br>(6.43 to<br>15.66)                                      | 12.85<br>(7.77 to<br>18.88)                                        | 0.50<br>(0.34 to<br>0.64)                                     | 0.34<br>(0.25 to<br>0.47)                                     | 0.31<br>(0.21 to<br>0.42)                                     | 0.35<br>(0.24 to<br>0.49)                                     |
| Gonococcal infection                                                    | 56.08<br>(35.71 to<br>72.87)                                     | 32.99<br>(20.50 to<br>48.14)                                     | 28.87<br>(18.15 to<br>41.95)                                     | 34.75<br>(21.38 to<br>50.43)                                       | 1.36<br>(0.97 to<br>1.74)                                     | 0.95<br>(0.66 to<br>1.33)                                     | 0.85<br>(0.60 to<br>1.21)                                     | 0.99<br>(0.68 to<br>1.38)                                     |
| Other sexually transmitted infections                                   | 30.33<br>(18.85 to<br>39.58)                                     | 17.18<br>(10.26 to<br>25.42)                                     | 14.91<br>(8.98 to<br>22.17)                                      | 18.18<br>(10.85 to<br>26.85)                                       | 0.68<br>(0.46 to<br>0.88)                                     | 0.44<br>(0.29 to<br>0.63)                                     | 0.39<br>(0.25 to<br>0.55)                                     | 0.46<br>(0.30 to<br>0.65)                                     |
| Acute hepatitis                                                         | 267.17<br>(224.87 to<br>322.03)                                  | 151.14<br>(112.62 to<br>195.73)                                  | 127.29<br>(94.78 to<br>166.83)                                   | 161.77<br>(119.37 to<br>209.49)                                    | 7.66<br>(6.54 to<br>9.09)                                     | 5.72<br>(4.40 to<br>7.32)                                     | 5.02<br>(3.82 to<br>6.49)                                     | 5.96<br>(4.51 to<br>7.69)                                     |
| Acute hepatitis A                                                       | 16.30<br>(5.10 to<br>32.27)                                      | 4.89<br>(2.23 to<br>9.17)                                        | 3.91<br>(1.82 to<br>7.34)                                        | 5.46<br>(2.47 to<br>10.35)                                         | 0.25<br>(0.10 to<br>0.45)                                     | 0.13<br>(0.06 to<br>0.26)                                     | 0.11<br>(0.05 to<br>0.22)                                     | 0.14<br>(0.06 to<br>0.27)                                     |
| Acute hepatitis B                                                       | 190.87<br>(157.43 to<br>232.69)                                  | 115.98<br>(80.73 to<br>153.46)                                   | 96.63<br>(66.96 to<br>130.01)                                    | 124.57<br>(87.57 to<br>166.23)                                     | 5.68<br>(4.69 to<br>6.88)                                     | 4.15<br>(2.97 to<br>5.45)                                     | 3.55<br>(2.51 to<br>4.66)                                     | 4.38<br>(3.13 to<br>5.79)                                     |
| Acute hepatitis C                                                       | 14.20<br>(10.42 to<br>18.99)                                     | 10.01<br>(6.57 to<br>14.89)                                      | 9.09<br>(5.96 to<br>13.45)                                       | 10.36<br>(6.82 to<br>15.36)                                        | 0.43<br>(0.30 to<br>0.57)                                     | 0.37<br>(0.24 to<br>0.53)                                     | 0.35<br>(0.23 to<br>0.50)                                     | 0.38<br>(0.25 to<br>0.55)                                     |
| Acute hepatitis E                                                       | 45.81<br>(34.55 to<br>60.95)                                     | 20.27<br>(13.15 to<br>29.34)                                     | 17.66<br>(11.46 to<br>25.36)                                     | 21.38<br>(13.89 to<br>31.03)                                       | 1.31<br>(0.93 to<br>1.76)                                     | 1.07<br>(0.63 to<br>1.69)                                     | 1.01<br>(0.60 to<br>1.60)                                     | 1.06<br>(0.61 to<br>1.68)                                     |
| Other unspecified infectious diseases                                   | 1,617.83<br>(1,302.21 to<br>2,090.47)                            | 1,261.29<br>(1,016.58 to<br>1,534.62)                            | 1,018.16<br>(809.07 to<br>1,241.38)                              | 1,381.85<br>(1,100.99 to<br>1,702.80)                              | 43.43<br>(36.42 to<br>50.48)                                  | 51.40<br>(39.59 to<br>62.86)                                  | 44.66<br>(33.92 to<br>54.82)                                  | 53.56<br>(40.92 to<br>65.59)                                  |
| <b>Non-communicable diseases</b>                                        | <b>574,969.60</b><br><b>(516,782.39 to</b><br><b>640,301.95)</b> | <b>727,358.93</b><br><b>(560,565.21 to</b><br><b>941,038.97)</b> | <b>574,494.17</b><br><b>(452,350.65 to</b><br><b>728,932.97)</b> | <b>858,237.41</b><br><b>(658,334.65 to</b><br><b>1,104,080.21)</b> | <b>27,876.98</b><br><b>(25,262.71 to</b><br><b>30,673.94)</b> | <b>44,736.61</b><br><b>(36,541.48 to</b><br><b>55,928.81)</b> | <b>36,761.33</b><br><b>(30,693.47 to</b><br><b>45,657.23)</b> | <b>50,789.87</b><br><b>(41,370.06 to</b><br><b>63,096.14)</b> |

**El Salvador**

| Cause | YLLs (actual counts) |               |                      |                     | Deaths (actual counts) |               |                      |                     |
|-------|----------------------|---------------|----------------------|---------------------|------------------------|---------------|----------------------|---------------------|
|       | 2016                 | 2040 Forecast | 2040 Better Scenario | 2040 Worse Scenario | 2016                   | 2040 Forecast | 2040 Better Scenario | 2040 Worse Scenario |

|                                      | 121,966.20<br>(108,845.26 to<br>138,022.31) | 165,147.43<br>(135,931.38 to<br>195,999.42) | 154,988.32<br>(128,809.58 to<br>183,177.29) | 177,242.84<br>(144,671.09 to<br>212,449.33) | 5,203.27<br>(4,672.49 to<br>5,813.52) | 8,505.11<br>(7,125.82 to<br>9,840.25) | 8,339.85<br>(7,047.48 to<br>9,593.92) | 8,850.76<br>(7,373.32 to<br>10,361.33) |
|--------------------------------------|---------------------------------------------|---------------------------------------------|---------------------------------------------|---------------------------------------------|---------------------------------------|---------------------------------------|---------------------------------------|----------------------------------------|
| <b>Neoplasms</b>                     |                                             |                                             |                                             |                                             |                                       |                                       |                                       |                                        |
| Lip and oral cavity cancer           | 1,427.60<br>(1,231.97 to<br>1,648.02)       | 2,511.26<br>(1,514.67 to<br>3,951.89)       | 1,714.39<br>(1,078.11 to<br>2,600.90)       | 3,251.23<br>(1,870.49 to<br>5,248.56)       | 62.20<br>(54.42 to<br>71.48)          | 119.27<br>(71.44 to<br>190.65)        | 85.28<br>(55.40 to<br>128.21)         | 150.08<br>(86.20 to<br>249.31)         |
| Nasopharynx cancer                   | 750.51<br>(647.27 to<br>875.16)             | 1,374.78<br>(880.20 to<br>2,073.59)         | 911.77<br>(601.65 to<br>1,329.31)           | 1,773.01<br>(1,103.93 to<br>2,733.20)       | 29.32<br>(25.38 to<br>34.07)          | 60.92<br>(37.70 to<br>92.89)          | 42.33<br>(27.91 to<br>62.27)          | 76.24<br>(45.86 to<br>119.39)          |
| Other pharynx cancer                 | 876.97<br>(741.41 to<br>1,033.72)           | 1,490.59<br>(846.66 to<br>2,467.26)         | 1,073.59<br>(645.35 to<br>1,707.18)         | 1,725.15<br>(947.60 to<br>2,925.16)         | 34.68<br>(29.62 to<br>40.60)          | 63.54<br>(34.54 to<br>104.58)         | 46.97<br>(28.28 to<br>72.91)          | 72.40<br>(38.51 to<br>121.50)          |
| Esophageal cancer                    | 1,502.27<br>(1,299.11 to<br>1,733.42)       | 2,127.59<br>(1,328.54 to<br>3,307.88)       | 1,566.34<br>(1,029.74 to<br>2,353.54)       | 2,675.30<br>(1,590.80 to<br>4,362.67)       | 76.46<br>(66.85 to<br>87.18)          | 116.56<br>(75.39 to<br>181.22)        | 89.73<br>(60.53 to<br>133.75)         | 142.82<br>(88.18 to<br>228.96)         |
| Stomach cancer                       | 14,014.54<br>(12,440.24 to<br>15,839.65)    | 14,778.81<br>(11,309.24 to<br>19,205.84)    | 13,471.34<br>(10,497.66 to<br>16,998.42)    | 15,146.53<br>(11,717.15 to<br>19,620.87)    | 698.03<br>(624.67 to<br>787.24)       | 851.85<br>(664.78 to<br>1,107.18)     | 801.09<br>(640.83 to<br>1,001.99)     | 851.41<br>(665.66 to<br>1,102.35)      |
| Colon and rectum cancer              | 8,740.48<br>(7,538.89 to<br>10,061.27)      | 14,844.15<br>(10,459.86 to<br>20,870.75)    | 13,947.07<br>(9,993.58 to<br>19,273.04)     | 15,415.70<br>(10,637.95 to<br>21,769.90)    | 429.65<br>(374.33 to<br>490.52)       | 873.24<br>(614.57 to<br>1,255.29)     | 856.57<br>(619.70 to<br>1,201.02)     | 882.76<br>(611.10 to<br>1,286.77)      |
| Liver cancer                         | 7,331.05<br>(6,338.07 to<br>8,411.31)       | 12,258.67<br>(8,319.44 to<br>17,912.69)     | 10,334.17<br>(7,357.81 to<br>14,550.11)     | 13,923.10<br>(9,202.14 to<br>20,948.55)     | 353.98<br>(307.38 to<br>405.04)       | 661.82<br>(460.43 to<br>949.58)       | 582.20<br>(426.84 to<br>806.84)       | 728.72<br>(488.49 to<br>1,064.05)      |
| Liver cancer due to hepatitis B      | 1,738.84<br>(1,286.01 to<br>2,338.33)       | 2,608.48<br>(1,607.76 to<br>4,040.44)       | 2,307.93<br>(1,468.46 to<br>3,494.23)       | 2,882.06<br>(1,729.13 to<br>4,622.16)       | 70.23<br>(50.37 to<br>95.90)          | 117.04<br>(72.18 to<br>179.88)        | 107.30<br>(68.61 to<br>162.50)        | 125.73<br>(76.29 to<br>195.42)         |
| Liver cancer due to hepatitis C      | 2,333.78<br>(1,755.39 to<br>2,944.10)       | 3,925.64<br>(2,560.44 to<br>5,926.99)       | 3,545.53<br>(2,424.91 to<br>5,108.02)       | 4,241.32<br>(2,678.24 to<br>6,557.28)       | 128.74<br>(100.65 to<br>160.17)       | 239.82<br>(158.57 to<br>355.69)       | 225.39<br>(157.03 to<br>320.58)       | 251.56<br>(161.95 to<br>378.63)        |
| Liver cancer due to alcohol use      | 1,773.23<br>(1,375.58 to<br>2,346.83)       | 3,503.35<br>(2,185.53 to<br>5,463.01)       | 2,540.99<br>(1,638.88 to<br>3,792.50)       | 4,332.95<br>(2,588.00 to<br>6,910.19)       | 88.23<br>(68.87 to<br>111.81)         | 189.95<br>(117.56 to<br>296.80)       | 145.10<br>(93.99 to<br>221.18)        | 227.38<br>(136.94 to<br>361.37)        |
| Liver cancer due to other causes     | 1,485.20<br>(1,238.60 to<br>1,772.93)       | 2,221.20<br>(1,432.90 to<br>3,324.16)       | 1,939.71<br>(1,315.64 to<br>2,759.48)       | 2,466.78<br>(1,533.39 to<br>3,777.96)       | 66.77<br>(54.57 to<br>80.72)          | 115.01<br>(74.59 to<br>172.65)        | 104.40<br>(70.46 to<br>148.35)        | 124.06<br>(78.25 to<br>189.71)         |
| Gallbladder and biliary tract cancer | 3,144.02<br>(2,652.32 to<br>3,999.30)       | 3,624.80<br>(2,960.74 to<br>4,648.02)       | 3,775.55<br>(3,072.48 to<br>4,853.23)       | 3,507.10<br>(2,871.99 to<br>4,503.60)       | 159.29<br>(135.52 to<br>200.44)       | 208.06<br>(170.63 to<br>268.67)       | 223.66<br>(185.04 to<br>288.02)       | 196.77<br>(159.94 to<br>252.97)        |
| Pancreatic cancer                    | 4,628.19<br>(4,053.05 to<br>5,323.96)       | 8,002.66<br>(6,270.81 to<br>10,078.35)      | 8,296.57<br>(6,505.28 to<br>10,418.31)      | 7,985.58<br>(6,203.05 to<br>10,210.18)      | 234.65<br>(206.99 to<br>269.69)       | 439.32<br>(349.45 to<br>551.23)       | 467.41<br>(374.21 to<br>580.90)       | 429.89<br>(339.01 to<br>549.84)        |
| Larynx cancer                        | 1,015.55<br>(855.80 to<br>1,211.15)         | 1,316.52<br>(768.64 to<br>2,114.29)         | 894.85<br>(577.00 to<br>1,329.67)           | 1,861.29<br>(1,004.53 to<br>3,169.58)       | 48.53<br>(41.19 to<br>56.91)          | 66.84<br>(40.22 to<br>110.22)         | 47.62<br>(31.47 to<br>72.15)          | 92.01<br>(50.43 to<br>161.04)          |
| Tracheal, bronchus, and lung cancer  | 8,873.00<br>(7,766.31 to<br>10,163.08)      | 12,545.18<br>(8,997.12 to<br>16,851.97)     | 10,640.05<br>(7,957.32 to<br>13,916.36)     | 18,293.89<br>(12,356.52 to<br>25,643.19)    | 432.45<br>(379.26 to<br>493.15)       | 662.10<br>(478.62 to<br>889.37)       | 589.25<br>(445.01 to<br>763.43)       | 928.16<br>(635.37 to<br>1,291.01)      |
| Malignant skin melanoma              | 456.05<br>(371.78 to<br>557.08)             | 615.85<br>(490.69 to<br>818.34)             | 676.00<br>(533.18 to<br>904.12)             | 585.17<br>(470.44 to<br>771.75)             | 15.40<br>(12.70 to<br>21.52)          | 25.33<br>(20.36 to<br>38.03)          | 28.94<br>(23.21 to<br>43.61)          | 23.41<br>(18.70 to<br>35.16)           |
| Non-melanoma skin cancer             | 841.49<br>(708.36 to<br>995.59)             | 1,074.40<br>(892.23 to<br>1,272.96)         | 1,045.75<br>(862.58 to<br>1,248.15)         | 1,064.04<br>(884.51 to<br>1,263.24)         | 47.27<br>(40.77 to<br>54.58)          | 70.83<br>(56.42 to<br>83.50)          | 71.90<br>(58.35 to<br>84.84)          | 68.11<br>(53.13 to<br>80.74)           |
| Breast cancer                        | 9,088.33<br>(7,365.72 to<br>11,058.58)      | 13,657.54<br>(9,671.19 to<br>18,672.02)     | 12,773.18<br>(9,231.57 to<br>17,078.27)     | 14,414.27<br>(10,054.72 to<br>20,092.96)    | 333.64<br>(269.95 to<br>400.97)       | 602.44<br>(433.52 to<br>817.77)       | 581.79<br>(424.70 to<br>769.68)       | 620.60<br>(439.73 to<br>852.29)        |
| Cervical cancer                      | 12,383.30<br>(9,059.56 to<br>15,203.48)     | 13,780.93<br>(9,547.17 to<br>18,622.05)     | 12,584.10<br>(8,793.17 to<br>17,001.68)     | 14,410.07<br>(9,933.37 to<br>19,560.70)     | 442.98<br>(331.01 to<br>543.72)       | 572.02<br>(412.16 to<br>746.03)       | 536.80<br>(388.28 to<br>700.29)       | 586.01<br>(419.83 to<br>768.31)        |
| Uterine cancer                       | 2,428.74<br>(2,015.11 to<br>2,898.29)       | 4,180.89<br>(3,242.55 to<br>5,264.67)       | 3,806.69<br>(2,924.27 to<br>4,878.11)       | 4,295.05<br>(3,391.07 to<br>5,429.73)       | 112.13<br>(93.55 to<br>132.56)        | 227.47<br>(181.11 to<br>276.24)       | 213.39<br>(171.59 to<br>261.95)       | 228.68<br>(182.73 to<br>279.33)        |
| Ovarian cancer                       | 2,942.60<br>(2,352.90 to<br>3,573.75)       | 4,192.25<br>(2,751.23 to<br>6,155.04)       | 4,375.32<br>(2,938.98 to<br>6,316.50)       | 4,145.00<br>(2,683.35 to<br>6,176.53)       | 104.66<br>(85.14 to<br>126.20)        | 173.79<br>(115.02 to<br>256.44)       | 185.10<br>(124.46 to<br>268.61)       | 169.32<br>(110.68 to<br>255.14)        |

| Prostate cancer                 | 5,462.05<br>(4,233.39 to<br>8,043.16)              | 10,432.10<br>(7,770.76 to<br>15,075.01)            | 11,513.16<br>(8,701.40 to<br>16,427.63)           | 9,761.43<br>(7,176.46 to<br>14,155.01)             | 425.63<br>(325.31 to<br>601.90)               | 886.12<br>(580.66 to<br>1,230.24)              | 1,011.31<br>(714.57 to<br>1,386.98)           | 810.30<br>(519.34 to<br>1,151.55)               |
|---------------------------------|----------------------------------------------------|----------------------------------------------------|---------------------------------------------------|----------------------------------------------------|-----------------------------------------------|------------------------------------------------|-----------------------------------------------|-------------------------------------------------|
| Testicular cancer               | 249.79<br>(192.61 to<br>340.02)                    | 154.36<br>(110.95 to<br>226.84)                    | 144.86<br>(104.12 to<br>213.95)                   | 157.09<br>(111.79 to<br>231.56)                    | 6.02<br>(4.82 to<br>7.57)                     | 4.76<br>(3.62 to<br>6.24)                      | 4.72<br>(3.59 to<br>6.15)                     | 4.67<br>(3.54 to<br>6.08)                       |
| <b>El Salvador</b>              |                                                    |                                                    |                                                   |                                                    |                                               |                                                |                                               |                                                 |
| Cause                           | YLLs (actual counts)                               |                                                    |                                                   |                                                    | Deaths (actual counts)                        |                                                |                                               |                                                 |
|                                 | 2016                                               | 2040 Forecast                                      | 2040 Better Scenario                              | 2040 Worse Scenario                                | 2016                                          | 2040 Forecast                                  | 2040 Better Scenario                          | 2040 Worse Scenario                             |
| Kidney cancer                   | 1,680.57<br>(1,446.83 to<br>2,003.70)              | 2,552.49<br>(2,100.40 to<br>3,191.87)              | 2,785.29<br>(2,279.97 to<br>3,468.91)             | 2,477.76<br>(2,039.64 to<br>3,078.64)              | 66.24<br>(57.47 to<br>79.03)                  | 121.12<br>(100.46 to<br>148.88)                | 137.58<br>(114.82 to<br>167.97)               | 114.23<br>(94.70 to<br>141.30)                  |
| Bladder cancer                  | 1,085.83<br>(937.06 to<br>1,250.91)                | 1,522.11<br>(1,179.14 to<br>1,974.03)              | 1,493.96<br>(1,161.47 to<br>1,904.64)             | 1,567.12<br>(1,202.69 to<br>2,068.00)              | 66.42<br>(57.74 to<br>76.30)                  | 106.34<br>(78.77 to<br>139.25)                 | 108.17<br>(83.46 to<br>138.76)                | 106.83<br>(77.32 to<br>143.28)                  |
| Brain and nervous system cancer | 6,494.80<br>(4,540.31 to<br>7,859.44)              | 7,601.90<br>(4,885.11 to<br>9,575.62)              | 7,791.57<br>(4,986.48 to<br>9,944.04)             | 7,479.33<br>(4,877.09 to<br>9,414.27)              | 182.23<br>(119.51 to<br>223.12)               | 277.86<br>(168.31 to<br>359.81)                | 296.26<br>(175.19 to<br>385.66)               | 265.95<br>(163.86 to<br>342.48)                 |
| Thyroid cancer                  | 481.73<br>(346.87 to<br>567.52)                    | 587.82<br>(383.54 to<br>886.88)                    | 513.16<br>(337.31 to<br>750.14)                   | 629.97<br>(402.88 to<br>962.15)                    | 23.93<br>(16.26 to<br>27.84)                  | 32.80<br>(21.73 to<br>48.56)                   | 29.70<br>(20.10 to<br>42.46)                  | 34.21<br>(22.53 to<br>51.20)                    |
| Mesothelioma                    | 218.18<br>(177.77 to<br>265.21)                    | 276.97<br>(218.06 to<br>347.53)                    | 275.32<br>(216.24 to<br>346.96)                   | 274.51<br>(217.60 to<br>345.32)                    | 7.41<br>(6.09 to<br>9.01)                     | 10.53<br>(8.33 to<br>13.24)                    | 10.68<br>(8.36 to<br>13.46)                   | 10.29<br>(8.24 to<br>12.96)                     |
| Hodgkin lymphoma                | 954.71<br>(727.96 to<br>1,571.98)                  | 981.53<br>(744.84 to<br>1,489.45)                  | 840.51<br>(630.53 to<br>1,272.06)                 | 1,037.53<br>(782.80 to<br>1,562.04)                | 30.62<br>(24.06 to<br>42.18)                  | 41.62<br>(29.88 to<br>51.99)                   | 37.22<br>(26.39 to<br>47.07)                  | 42.70<br>(31.14 to<br>53.87)                    |
| Non-Hodgkin lymphoma            | 3,783.67<br>(3,290.11 to<br>4,662.65)              | 5,248.27<br>(4,157.18 to<br>6,656.95)              | 5,316.55<br>(4,247.60 to<br>6,637.08)             | 5,236.08<br>(4,121.32 to<br>6,233.84)              | 133.69<br>(117.75 to<br>153.42)               | 240.33<br>(191.52 to<br>302.54)                | 254.75<br>(205.81 to<br>313.62)               | 232.26<br>(184.02 to<br>295.09)                 |
| Multiple myeloma                | 1,512.15<br>(1,229.00 to<br>2,185.40)              | 2,701.76<br>(1,914.70 to<br>4,250.01)              | 2,752.85<br>(1,978.13 to<br>4,230.41)             | 2,696.63<br>(1,875.81 to<br>4,249.29)              | 63.32<br>(51.30 to<br>94.39)                  | 138.64<br>(92.08 to<br>199.65)                 | 135.04<br>(99.14 to<br>205.08)                | 125.57<br>(87.68 to<br>195.01)                  |
| Leukemia                        | 14,081.49<br>(12,090.84 to<br>18,375.49)           | 13,548.95<br>(10,474.73 to<br>17,524.40)           | 12,383.53<br>(9,658.57 to<br>15,715.36)           | 14,420.93<br>(11,025.48 to<br>18,929.41)           | 375.96<br>(327.58 to<br>432.56)               | 503.33<br>(378.31 to<br>632.27)                | 482.55<br>(359.32 to<br>592.36)               | 519.20<br>(393.62 to<br>656.74)                 |
| Acute lymphoid leukemia         | 3,802.35<br>(3,133.51 to<br>5,529.43)              | 3,696.12<br>(2,863.01 to<br>4,794.91)              | 3,580.86<br>(2,802.64 to<br>4,598.99)             | 3,830.24<br>(2,939.45 to<br>5,040.53)              | 103.46<br>(87.12 to<br>121.05)                | 143.63<br>(91.93 to<br>185.28)                 | 145.81<br>(92.14 to<br>183.80)                | 144.31<br>(93.68 to<br>188.35)                  |
| Chronic lymphoid leukemia       | 857.10<br>(675.76 to<br>1,019.94)                  | 1,140.00<br>(794.34 to<br>1,579.55)                | 1,087.34<br>(771.68 to<br>1,481.13)               | 1,185.95<br>(819.55 to<br>1,675.08)                | 36.21<br>(26.91 to<br>42.73)                  | 56.46<br>(39.06 to<br>78.17)                   | 56.33<br>(39.13 to<br>75.62)                  | 56.91<br>(38.74 to<br>80.73)                    |
| Acute myeloid leukemia          | 1,558.61<br>(1,266.08 to<br>2,216.60)              | 1,592.10<br>(1,187.49 to<br>2,180.19)              | 1,587.43<br>(1,191.69 to<br>2,145.57)             | 1,634.16<br>(1,210.20 to<br>2,261.79)              | 36.00<br>(29.34 to<br>44.72)                  | 49.27<br>(35.55 to<br>63.48)                   | 50.91<br>(36.91 to<br>64.60)                  | 49.46<br>(35.94 to<br>64.50)                    |
| Chronic myeloid leukemia        | 837.31<br>(611.67 to<br>1,028.16)                  | 660.52<br>(441.53 to<br>929.43)                    | 622.98<br>(419.51 to<br>859.93)                   | 694.36<br>(462.27 to<br>984.78)                    | 28.72<br>(18.64 to<br>34.80)                  | 27.40<br>(17.91 to<br>38.15)                   | 27.01<br>(16.64 to<br>37.25)                  | 27.94<br>(17.11 to<br>39.23)                    |
| Other leukemia                  | 7,026.12<br>(5,889.04 to<br>9,270.92)              | 6,460.20<br>(4,885.66 to<br>8,433.90)              | 5,504.93<br>(4,179.97 to<br>7,171.83)             | 7,076.22<br>(5,368.34 to<br>9,345.27)              | 171.57<br>(146.88 to<br>206.78)               | 226.57<br>(175.97 to<br>282.91)                | 202.50<br>(156.43 to<br>248.09)               | 240.58<br>(185.26 to<br>303.53)                 |
| Other neoplasms                 | 5,510.51<br>(4,821.72 to<br>6,485.77)              | 7,162.34<br>(6,111.41 to<br>8,443.54)              | 7,282.83<br>(6,162.62 to<br>8,582.74)             | 7,032.98<br>(6,009.10 to<br>8,234.40)              | 206.49<br>(178.95 to<br>236.05)               | 356.24<br>(286.43 to<br>417.76)                | 381.84<br>(306.93 to<br>447.27)               | 337.17<br>(271.25 to<br>396.23)                 |
| <b>Cardiovascular diseases</b>  | <b>150,895.62</b><br>(134,444.25 to<br>168,071.33) | <b>167,923.19</b><br>(112,024.91 to<br>246,280.02) | <b>101,619.01</b><br>(71,815.81 to<br>141,044.91) | <b>239,135.68</b><br>(154,776.15 to<br>353,768.72) | <b>9,332.18</b><br>(8,410.08 to<br>10,354.64) | <b>12,741.27</b><br>(8,861.10 to<br>17,832.09) | <b>8,504.76</b><br>(6,188.20 to<br>11,625.62) | <b>16,374.96</b><br>(11,254.99 to<br>23,004.73) |
| Rheumatic heart disease         | 1,227.75<br>(1,064.42 to<br>1,405.79)              | 647.79<br>(496.66 to<br>849.62)                    | 516.63<br>(398.13 to<br>662.34)                   | 702.98<br>(542.12 to<br>923.58)                    | 43.93<br>(38.40 to<br>49.71)                  | 35.05<br>(26.71 to<br>46.31)                   | 29.66<br>(23.18 to<br>38.44)                  | 36.48<br>(27.23 to<br>47.93)                    |
| Ischemic heart disease          | 101,025.29<br>(89,788.94 to<br>113,993.15)         | 106,032.65<br>(61,617.03 to<br>171,525.87)         | 59,472.90<br>(36,435.76 to<br>94,336.22)          | 157,786.36<br>(90,605.50 to<br>258,310.07)         | 6,663.24<br>(5,981.44 to<br>7,417.02)         | 8,387.39<br>(5,200.55 to<br>12,846.00)         | 5,248.40<br>(3,304.93 to<br>8,065.66)         | 11,164.99<br>(6,803.98 to<br>17,042.44)         |

|                                               |                                                               |                                                               |                                                               |                                                               |                                                            |                                                            |                                                          |                                                            |
|-----------------------------------------------|---------------------------------------------------------------|---------------------------------------------------------------|---------------------------------------------------------------|---------------------------------------------------------------|------------------------------------------------------------|------------------------------------------------------------|----------------------------------------------------------|------------------------------------------------------------|
| Stroke                                        | 26,083.31<br>(22,890.79 to<br>29,587.46)                      | 26,167.35<br>(16,037.15 to<br>42,358.21)                      | 13,947.72<br>(9,286.19 to<br>21,276.35)                       | 41,361.98<br>(24,497.10 to<br>69,574.72)                      | 1,330.29<br>(1,166.77 to<br>1,510.05)                      | 1,724.81<br>(1,083.10 to<br>2,786.64)                      | 1,064.09<br>(706.90 to<br>1,704.40)                      | 2,389.49<br>(1,478.81 to<br>3,781.53)                      |
| Ischemic stroke                               | 8,057.68<br>(7,022.62 to<br>9,178.60)                         | 9,421.56<br>(5,325.38 to<br>17,484.81)                        | 5,945.54<br>(3,560.02 to<br>10,745.85)                        | 13,166.46<br>(7,282.41 to<br>23,765.75)                       | 574.48<br>(495.22 to<br>656.73)                            | 821.72<br>(461.06 to<br>1,680.24)                          | 574.98<br>(335.37 to<br>1,140.36)                        | 1,036.37<br>(571.20 to<br>2,047.87)                        |
| Intracerebral hemorrhage                      | 18,025.63<br>(15,816.36 to<br>20,538.93)                      | 16,745.79<br>(9,747.13 to<br>28,881.95)                       | 8,002.19<br>(5,212.59 to<br>12,445.33)                        | 28,195.52<br>(15,658.48 to<br>50,583.60)                      | 755.82<br>(665.31 to<br>858.03)                            | 903.08<br>(558.49 to<br>1,413.78)                          | 489.11<br>(332.82 to<br>713.39)                          | 1,353.11<br>(803.61 to<br>2,255.33)                        |
| Hypertensive heart disease                    | 7,864.24<br>(5,441.91 to<br>9,609.34)                         | 14,043.89<br>(7,930.60 to<br>26,945.47)                       | 9,156.09<br>(5,885.25 to<br>14,897.37)                        | 17,086.23<br>(9,410.52 to<br>34,492.04)                       | 537.09<br>(406.02 to<br>643.87)                            | 1,167.38<br>(658.08 to<br>2,292.80)                        | 810.94<br>(524.41 to<br>1,321.35)                        | 1,355.96<br>(732.79 to<br>2,714.18)                        |
| Cardiomyopathy and myocarditis                | 1,680.88<br>(1,269.22 to<br>2,028.25)                         | 1,900.83<br>(1,234.80 to<br>2,669.21)                         | 1,796.00<br>(1,175.07 to<br>2,459.47)                         | 1,931.29<br>(1,261.66 to<br>2,704.01)                         | 56.91<br>(41.06 to<br>68.89)                               | 82.80<br>(52.37 to<br>115.30)                              | 81.75<br>(52.19 to<br>111.33)                            | 81.60<br>(52.13 to<br>113.82)                              |
| Myocarditis                                   | 744.03<br>(460.40 to<br>985.31)                               | 742.41<br>(395.94 to<br>1,070.02)                             | 707.34<br>(372.02 to<br>1,030.16)                             | 752.07<br>(402.44 to<br>1,081.88)                             | 22.59<br>(13.40 to<br>30.36)                               | 27.61<br>(15.38 to<br>38.38)                               | 27.35<br>(15.48 to<br>37.84)                             | 27.21<br>(14.98 to<br>38.07)                               |
| <b>El Salvador</b>                            |                                                               |                                                               |                                                               |                                                               |                                                            |                                                            |                                                          |                                                            |
| Cause                                         | YLLs (actual counts)                                          |                                                               |                                                               |                                                               | Deaths (actual counts)                                     |                                                            |                                                          |                                                            |
|                                               | 2016                                                          | 2040 Forecast                                                 | 2040 Better Scenario                                          | 2040 Worse Scenario                                           | 2016                                                       | 2040 Forecast                                              | 2040 Better Scenario                                     | 2040 Worse Scenario                                        |
| Alcoholic cardiomyopathy                      | 69.75<br>(43.90 to<br>97.80)                                  | 85.22<br>(50.84 to<br>121.98)                                 | 70.73<br>(41.62 to<br>103.90)                                 | 92.61<br>(55.12 to<br>130.92)                                 | 2.70<br>(1.68 to<br>3.64)                                  | 3.75<br>(2.18 to<br>5.15)                                  | 3.26<br>(1.83 to<br>4.56)                                | 3.99<br>(2.36 to<br>5.41)                                  |
| Other cardiomyopathy                          | 867.09<br>(702.98 to<br>1,085.72)                             | 1,073.20<br>(683.15 to<br>1,612.14)                           | 1,017.93<br>(660.75 to<br>1,501.16)                           | 1,086.61<br>(696.51 to<br>1,637.84)                           | 31.61<br>(24.79 to<br>39.46)                               | 51.44<br>(31.91 to<br>77.53)                               | 51.14<br>(31.96 to<br>75.79)                             | 50.40<br>(31.16 to<br>77.23)                               |
| Atrial fibrillation and flutter               | 1,959.45<br>(1,514.04 to<br>2,473.03)                         | 3,793.31<br>(2,669.96 to<br>5,119.79)                         | 3,595.83<br>(2,648.59 to<br>4,667.48)                         | 3,807.61<br>(2,633.05 to<br>5,216.99)                         | 200.49<br>(152.56 to<br>257.25)                            | 415.49<br>(274.89 to<br>575.21)                            | 413.87<br>(290.70 to<br>553.35)                          | 402.94<br>(259.03 to<br>571.20)                            |
| Aortic aneurysm                               | 1,297.71<br>(1,110.67 to<br>1,505.34)                         | 1,724.62<br>(1,317.95 to<br>2,251.27)                         | 1,595.46<br>(1,322.27 to<br>2,132.63)                         | 1,750.39<br>(1,329.09 to<br>2,274.56)                         | 77.02<br>(66.24 to<br>89.23)                               | 120.34<br>(88.07 to<br>154.90)                             | 124.74<br>(94.72 to<br>156.74)                           | 116.17<br>(82.64 to<br>149.50)                             |
| Peripheral artery disease                     | 60.37<br>(40.14 to<br>75.90)                                  | 182.01<br>(108.37 to<br>256.09)                               | 196.74<br>(113.79 to<br>281.20)                               | 173.70<br>(105.43 to<br>246.32)                               | 5.86<br>(3.62 to<br>7.39)                                  | 19.54<br>(10.13 to<br>29.32)                               | 22.51<br>(11.57 to<br>33.33)                             | 17.89<br>(9.47 to<br>26.64)                                |
| Endocarditis                                  | 1,949.65<br>(1,590.93 to<br>2,655.30)                         | 2,482.18<br>(1,831.70 to<br>3,412.77)                         | 2,244.92<br>(1,658.29 to<br>3,022.26)                         | 2,571.30<br>(1,878.28 to<br>3,562.41)                         | 69.28<br>(57.48 to<br>84.31)                               | 122.35<br>(85.31 to<br>171.74)                             | 117.31<br>(83.69 to<br>161.09)                           | 121.65<br>(85.06 to<br>171.38)                             |
| Other cardiovascular and circulatory diseases | 7,746.96<br>(6,335.38 to<br>9,926.57)                         | 10,948.57<br>(7,976.08 to<br>15,262.07)                       | 9,016.73<br>(6,795.28 to<br>12,154.21)                        | 11,963.83<br>(8,701.28 to<br>16,699.13)                       | 348.08<br>(273.13 to<br>443.22)                            | 666.11<br>(469.82 to<br>912.45)                            | 591.48<br>(430.06 to<br>788.41)                          | 687.80<br>(489.66 to<br>946.16)                            |
| <b>Chronic respiratory diseases</b>           | <b>17,358.46</b><br><b>(15,261.93 to</b><br><b>19,847.72)</b> | <b>18,023.77</b><br><b>(13,761.73 to</b><br><b>23,845.40)</b> | <b>14,586.13</b><br><b>(11,369.90 to</b><br><b>18,686.72)</b> | <b>24,148.07</b><br><b>(17,211.74 to</b><br><b>33,678.72)</b> | <b>1,197.87</b><br><b>(1,055.23 to</b><br><b>1,362.83)</b> | <b>1,423.26</b><br><b>(1,023.41 to</b><br><b>1,889.44)</b> | <b>1,203.13</b><br><b>(911.60 to</b><br><b>1,520.87)</b> | <b>1,856.55</b><br><b>(1,256.31 to</b><br><b>2,619.11)</b> |
| Chronic obstructive pulmonary disease         | 11,960.64<br>(10,355.60 to<br>13,662.98)                      | 12,545.57<br>(9,078.45 to<br>17,749.14)                       | 9,445.94<br>(7,054.60 to<br>12,872.88)                        | 18,365.42<br>(12,460.42 to<br>27,309.73)                      | 921.49<br>(811.11 to<br>1,054.59)                          | 1,068.54<br>(728.92 to<br>1,508.98)                        | 853.66<br>(614.24 to<br>1,155.07)                        | 1,496.20<br>(959.50 to<br>2,230.42)                        |
| Pneumoconiosis                                | 66.26<br>(55.40 to<br>82.12)                                  | 63.83<br>(47.74 to<br>84.63)                                  | 57.25<br>(42.84 to<br>75.96)                                  | 66.00<br>(48.89 to<br>88.18)                                  | 3.36<br>(2.78 to<br>4.17)                                  | 4.30<br>(3.01 to<br>6.10)                                  | 3.98<br>(2.86 to<br>5.54)                                | 4.33<br>(3.02 to<br>6.20)                                  |
| Silicosis                                     | 11.75<br>(9.07 to<br>15.42)                                   | 8.56<br>(5.51 to<br>12.86)                                    | 7.57<br>(4.84 to<br>11.31)                                    | 8.91<br>(5.74 to<br>13.49)                                    | 0.64<br>(0.50 to<br>0.86)                                  | 0.59<br>(0.36 to<br>0.95)                                  | 0.54<br>(0.33 to<br>0.86)                                | 0.60<br>(0.36 to<br>0.97)                                  |
| Asbestosis                                    | 17.68<br>(14.03 to<br>22.77)                                  | 18.93<br>(13.98 to<br>26.06)                                  | 18.97<br>(14.01 to<br>25.83)                                  | 18.68<br>(13.91 to<br>25.94)                                  | 0.76<br>(0.58 to<br>1.01)                                  | 1.12<br>(0.77 to<br>1.61)                                  | 1.16<br>(0.82 to<br>1.66)                                | 1.07<br>(0.72 to<br>1.53)                                  |
| Coal workers pneumoconiosis                   | 9.41<br>(6.94 to<br>12.37)                                    | 9.10<br>(5.45 to<br>15.01)                                    | 6.77<br>(4.00 to<br>11.14)                                    | 10.09<br>(6.05 to<br>16.53)                                   | 0.55<br>(0.42 to<br>0.74)                                  | 0.68<br>(0.37 to<br>1.26)                                  | 0.53<br>(0.29 to<br>0.97)                                | 0.74<br>(0.41 to<br>1.35)                                  |
| Other pneumoconiosis                          | 27.42<br>(22.21 to<br>36.17)                                  | 27.23<br>(18.78 to<br>39.30)                                  | 23.94<br>(16.50 to<br>34.07)                                  | 28.31<br>(19.29 to<br>40.96)                                  | 1.40<br>(1.12 to<br>1.83)                                  | 1.91<br>(1.19 to<br>2.91)                                  | 1.75<br>(1.10 to<br>2.68)                                | 1.92<br>(1.19 to<br>3.01)                                  |

|                                                                |                                                               |                                                               |                                                               |                                                               |                                                            |                                                            |                                                            |                                                            |
|----------------------------------------------------------------|---------------------------------------------------------------|---------------------------------------------------------------|---------------------------------------------------------------|---------------------------------------------------------------|------------------------------------------------------------|------------------------------------------------------------|------------------------------------------------------------|------------------------------------------------------------|
| Asthma                                                         | 2,866.43<br>(2,400.54 to<br>3,541.88)                         | 2,430.50<br>(1,460.22 to<br>3,946.56)                         | 1,831.46<br>(1,136.09 to<br>2,919.54)                         | 2,861.32<br>(1,677.92 to<br>4,665.59)                         | 152.77<br>(127.00 to<br>190.87)                            | 167.53<br>(98.17 to<br>272.09)                             | 134.76<br>(82.36 to<br>217.88)                             | 187.88<br>(107.28 to<br>309.18)                            |
| Interstitial lung disease and pulmonary sarcoidosis            | 1,980.42<br>(1,336.30 to<br>2,491.67)                         | 2,573.52<br>(1,678.12 to<br>3,328.51)                         | 2,876.10<br>(1,887.20 to<br>3,652.59)                         | 2,420.03<br>(1,570.63 to<br>3,140.93)                         | 108.87<br>(65.97 to<br>141.09)                             | 168.34<br>(97.98 to<br>222.70)                             | 196.21<br>(116.68 to<br>257.61)                            | 153.53<br>(89.19 to<br>206.56)                             |
| Other chronic respiratory diseases                             | 484.71<br>(353.99 to<br>744.14)                               | 410.36<br>(293.73 to<br>610.10)                               | 375.37<br>(271.75 to<br>549.92)                               | 435.30<br>(305.91 to<br>651.07)                               | 11.38<br>(8.53 to<br>15.49)                                | 14.55<br>(9.61 to<br>19.50)                                | 14.52<br>(9.29 to<br>19.69)                                | 14.62<br>(9.74 to<br>19.53)                                |
| <b>Cirrhosis and other chronic liver diseases</b>              | <b>39,400.14</b><br><b>(33,360.95 to</b><br><b>47,841.35)</b> | <b>48,552.91</b><br><b>(39,872.29 to</b><br><b>60,276.05)</b> | <b>41,227.37</b><br><b>(33,730.46 to</b><br><b>51,165.65)</b> | <b>52,051.97</b><br><b>(42,849.43 to</b><br><b>64,105.79)</b> | <b>1,375.99</b><br><b>(1,185.84 to</b><br><b>1,642.81)</b> | <b>1,908.08</b><br><b>(1,622.83 to</b><br><b>2,300.14)</b> | <b>1,666.55</b><br><b>(1,410.63 to</b><br><b>2,008.59)</b> | <b>2,013.24</b><br><b>(1,705.63 to</b><br><b>2,429.41)</b> |
| Cirrhosis and other chronic liver diseases due to hepatitis B  | 1,479.42<br>(1,205.14 to<br>1,899.74)                         | 1,787.78<br>(1,393.11 to<br>2,303.64)                         | 1,696.26<br>(1,315.53 to<br>2,220.97)                         | 1,809.98<br>(1,416.63 to<br>2,335.86)                         | 51.46<br>(42.97 to<br>64.41)                               | 68.98<br>(55.44 to<br>86.58)                               | 66.88<br>(53.44 to<br>84.16)                               | 68.71<br>(55.21 to<br>87.15)                               |
| Cirrhosis and other chronic liver diseases due to hepatitis C  | 16,253.43<br>(13,380.77 to<br>20,342.23)                      | 20,569.46<br>(16,618.07 to<br>26,228.66)                      | 19,418.16<br>(15,570.57 to<br>24,765.16)                      | 20,883.07<br>(16,902.30 to<br>26,494.47)                      | 542.04<br>(454.24 to<br>671.84)                            | 751.19<br>(622.87 to<br>929.20)                            | 722.81<br>(597.23 to<br>903.87)                            | 751.86<br>(622.53 to<br>942.30)                            |
| Cirrhosis and other chronic liver diseases due to alcohol use  | 14,145.25<br>(11,755.83 to<br>17,481.09)                      | 18,508.73<br>(14,873.26 to<br>23,333.59)                      | 12,983.40<br>(10,415.57 to<br>16,470.45)                      | 21,488.07<br>(17,474.11 to<br>26,949.86)                      | 530.76<br>(450.04 to<br>644.45)                            | 765.94<br>(637.33 to<br>930.85)                            | 568.02<br>(471.67 to<br>694.60)                            | 870.84<br>(728.48 to<br>1,063.67)                          |
| Cirrhosis and other chronic liver diseases due to other causes | 7,522.04<br>(6,445.62 to<br>8,844.33)                         | 7,686.94<br>(6,335.72 to<br>9,430.34)                         | 7,129.54<br>(5,841.19 to<br>8,758.45)                         | 7,870.85<br>(6,518.95 to<br>9,635.84)                         | 251.73<br>(216.18 to<br>291.63)                            | 321.96<br>(269.63 to<br>380.92)                            | 308.83<br>(258.47 to<br>365.63)                            | 321.82<br>(269.83 to<br>381.58)                            |
| <b>Digestive diseases</b>                                      | <b>17,211.99</b><br><b>(13,998.97 to</b><br><b>25,190.63)</b> | <b>20,638.15</b><br><b>(15,227.87 to</b><br><b>30,681.15)</b> | <b>17,167.19</b><br><b>(12,833.75 to</b><br><b>25,370.58)</b> | <b>22,260.21</b><br><b>(16,305.69 to</b><br><b>33,133.62)</b> | <b>808.43</b><br><b>(653.23 to</b><br><b>1,162.59)</b>     | <b>1,219.31</b><br><b>(884.37 to</b><br><b>1,821.28)</b>   | <b>1,074.46</b><br><b>(809.98 to</b><br><b>1,591.51)</b>   | <b>1,267.81</b><br><b>(908.60 to</b><br><b>1,919.40)</b>   |
| Peptic ulcer disease                                           | 4,406.86<br>(3,588.93 to<br>6,005.05)                         | 4,473.48<br>(3,504.63 to<br>6,176.13)                         | 3,640.25<br>(2,828.60 to<br>5,043.05)                         | 4,866.22<br>(3,768.85 to<br>6,798.30)                         | 252.34<br>(204.71 to<br>344.07)                            | 319.50<br>(234.02 to<br>466.30)                            | 272.13<br>(201.58 to<br>392.05)                            | 335.17<br>(239.55 to<br>487.91)                            |

**El Salvador**

| Cause                                      | YLLs (actual counts)                                          |                                                               |                                                               |                                                               | Deaths (actual counts)                                     |                                                            |                                                            |                                                            |
|--------------------------------------------|---------------------------------------------------------------|---------------------------------------------------------------|---------------------------------------------------------------|---------------------------------------------------------------|------------------------------------------------------------|------------------------------------------------------------|------------------------------------------------------------|------------------------------------------------------------|
|                                            | 2016                                                          | 2040 Forecast                                                 | 2040 Better Scenario                                          | 2040 Worse Scenario                                           | 2016                                                       | 2040 Forecast                                              | 2040 Better Scenario                                       | 2040 Worse Scenario                                        |
| Gastritis and duodenitis                   | 317.84<br>(253.48 to<br>430.53)                               | 543.79<br>(410.27 to<br>760.19)                               | 502.57<br>(377.46 to<br>706.13)                               | 551.84<br>(414.61 to<br>763.02)                               | 19.13<br>(15.08 to<br>26.70)                               | 37.91<br>(27.23 to<br>55.56)                               | 36.42<br>(26.41 to<br>53.50)                               | 37.39<br>(26.56 to<br>54.81)                               |
| Appendicitis                               | 2,059.98<br>(1,616.88 to<br>3,249.39)                         | 1,845.91<br>(1,349.35 to<br>3,060.42)                         | 1,563.58<br>(1,146.68 to<br>2,596.93)                         | 1,965.44<br>(1,434.69 to<br>3,196.95)                         | 66.74<br>(52.04 to<br>105.76)                              | 84.13<br>(61.92 to<br>136.24)                              | 75.33<br>(55.23 to<br>121.06)                              | 86.15<br>(62.88 to<br>140.42)                              |
| Paralytic ileus and intestinal obstruction | 2,585.65<br>(2,024.77 to<br>4,129.53)                         | 2,696.60<br>(2,038.66 to<br>4,484.81)                         | 2,554.58<br>(1,905.82 to<br>4,296.48)                         | 2,738.82<br>(2,080.96 to<br>4,532.76)                         | 97.88<br>(72.35 to<br>173.90)                              | 150.88<br>(103.25 to<br>283.43)                            | 152.72<br>(104.39 to<br>287.05)                            | 146.12<br>(98.99 to<br>273.12)                             |
| Inguinal, femoral, and abdominal hernia    | 909.23<br>(609.02 to<br>1,561.94)                             | 887.29<br>(609.57 to<br>1,625.66)                             | 837.42<br>(572.91 to<br>1,535.38)                             | 894.53<br>(616.08 to<br>1,650.59)                             | 51.37<br>(36.15 to<br>95.71)                               | 60.97<br>(39.85 to<br>119.97)                              | 60.66<br>(39.98 to<br>118.36)                              | 59.25<br>(38.14 to<br>116.34)                              |
| Inflammatory bowel disease                 | 269.08<br>(203.59 to<br>467.16)                               | 403.91<br>(299.42 to<br>644.20)                               | 404.94<br>(298.52 to<br>647.51)                               | 397.85<br>(296.24 to<br>639.65)                               | 11.90<br>(9.30 to<br>18.67)                                | 22.75<br>(17.03 to<br>33.99)                               | 23.88<br>(17.93 to<br>35.19)                               | 21.68<br>(16.02 to<br>32.78)                               |
| Vascular intestinal disorders              | 719.67<br>(573.89 to<br>896.93)                               | 1,034.77<br>(812.23 to<br>1,304.63)                           | 1,002.84<br>(790.19 to<br>1,255.44)                           | 1,026.53<br>(803.76 to<br>1,294.78)                           | 45.67<br>(36.17 to<br>58.93)                               | 76.63<br>(57.23 to<br>102.68)                              | 77.11<br>(58.77 to<br>101.71)                              | 74.00<br>(54.09 to<br>100.49)                              |
| Gallbladder and biliary diseases           | 1,627.10<br>(1,234.19 to<br>2,638.60)                         | 2,520.38<br>(1,265.77 to<br>4,894.42)                         | 1,792.97<br>(943.32 to<br>3,371.73)                           | 3,029.19<br>(1,491.65 to<br>6,051.70)                         | 90.56<br>(70.05 to<br>135.76)                              | 168.26<br>(86.68 to<br>308.81)                             | 127.13<br>(67.59 to<br>229.94)                             | 193.64<br>(98.96 to<br>363.77)                             |
| Pancreatitis                               | 2,147.17<br>(1,626.70 to<br>3,615.76)                         | 3,690.99<br>(1,820.40 to<br>7,680.24)                         | 2,616.36<br>(1,373.01 to<br>4,988.58)                         | 4,151.99<br>(2,013.38 to<br>8,690.24)                         | 76.26<br>(58.66 to<br>109.82)                              | 153.11<br>(76.25 to<br>309.13)                             | 113.96<br>(62.41 to<br>215.93)                             | 168.89<br>(82.57 to<br>351.87)                             |
| Other digestive diseases                   | 2,169.40<br>(1,742.70 to<br>3,121.97)                         | 2,541.05<br>(1,962.17 to<br>3,695.76)                         | 2,251.69<br>(1,720.31 to<br>3,281.96)                         | 2,637.79<br>(2,012.51 to<br>3,851.07)                         | 96.57<br>(75.96 to<br>141.50)                              | 145.18<br>(107.31 to<br>217.96)                            | 135.12<br>(100.34 to<br>202.94)                            | 145.52<br>(105.86 to<br>219.19)                            |
| <b>Neurological disorders</b>              | <b>25,683.62</b><br><b>(21,709.92 to</b><br><b>30,020.38)</b> | <b>46,723.65</b><br><b>(34,026.92 to</b><br><b>65,593.42)</b> | <b>45,901.74</b><br><b>(34,655.69 to</b><br><b>61,803.49)</b> | <b>47,208.14</b><br><b>(32,985.14 to</b><br><b>67,423.65)</b> | <b>2,358.49</b><br><b>(1,977.10 to</b><br><b>2,801.74)</b> | <b>4,881.32</b><br><b>(3,052.45 to</b><br><b>6,962.20)</b> | <b>5,028.51</b><br><b>(3,446.37 to</b><br><b>6,820.13)</b> | <b>4,776.62</b><br><b>(2,905.87 to</b><br><b>7,025.14)</b> |

|                                         |                                                               |                                                               |                                                               |                                                               |                                                        |                                                          |                                                          |                                                          |
|-----------------------------------------|---------------------------------------------------------------|---------------------------------------------------------------|---------------------------------------------------------------|---------------------------------------------------------------|--------------------------------------------------------|----------------------------------------------------------|----------------------------------------------------------|----------------------------------------------------------|
| Alzheimer's disease and other dementias | 19,652.63<br>(16,098.45 to<br>23,896.82)                      | 38,857.63<br>(26,325.35 to<br>57,279.52)                      | 38,247.96<br>(27,361.69 to<br>53,024.31)                      | 39,258.95<br>(25,731.68 to<br>59,141.13)                      | 2,124.18<br>(1,761.14 to<br>2,562.84)                  | 4,465.96<br>(2,694.53 to<br>6,542.56)                    | 4,574.05<br>(3,051.87 to<br>6,331.00)                    | 4,383.77<br>(2,571.76 to<br>6,621.53)                    |
| Parkinson's disease                     | 1,500.24<br>(1,108.02 to<br>1,958.01)                         | 3,000.97<br>(2,226.18 to<br>3,942.58)                         | 3,504.00<br>(2,631.61 to<br>4,524.12)                         | 2,732.37<br>(2,013.25 to<br>3,568.37)                         | 128.43<br>(96.66 to<br>168.22)                         | 271.47<br>(194.70 to<br>359.62)                          | 325.88<br>(242.16 to<br>425.03)                          | 242.41<br>(168.99 to<br>324.26)                          |
| Epilepsy                                | 2,923.75<br>(2,515.30 to<br>3,554.86)                         | 3,000.75<br>(2,131.31 to<br>4,322.40)                         | 2,214.41<br>(1,607.85 to<br>3,052.99)                         | 3,389.69<br>(2,346.48 to<br>4,838.10)                         | 63.57<br>(55.24 to<br>74.73)                           | 82.45<br>(59.60 to<br>116.18)                            | 62.69<br>(46.64 to<br>86.20)                             | 91.46<br>(65.83 to<br>129.12)                            |
| Multiple sclerosis                      | 208.13<br>(169.19 to<br>285.50)                               | 271.95<br>(210.12 to<br>374.91)                               | 281.74<br>(215.75 to<br>385.38)                               | 268.70<br>(208.31 to<br>372.46)                               | 6.49<br>(5.34 to<br>8.27)                              | 9.47<br>(7.34 to<br>12.02)                               | 10.00<br>(7.70 to<br>12.69)                              | 9.22<br>(7.18 to<br>11.81)                               |
| Motor neuron disease                    | 262.83<br>(217.63 to<br>307.80)                               | 461.26<br>(363.31 to<br>563.18)                               | 491.33<br>(380.11 to<br>600.90)                               | 445.18<br>(353.59 to<br>538.84)                               | 9.22<br>(7.66 to<br>10.75)                             | 17.49<br>(14.03 to<br>20.90)                             | 18.88<br>(14.97 to<br>22.60)                             | 16.70<br>(13.44 to<br>19.80)                             |
| Other neurological disorders            | 1,136.03<br>(957.05 to<br>1,350.13)                           | 1,130.10<br>(926.52 to<br>1,387.35)                           | 1,162.31<br>(949.08 to<br>1,431.66)                           | 1,113.24<br>(913.11 to<br>1,361.93)                           | 26.60<br>(22.73 to<br>31.23)                           | 34.49<br>(29.27 to<br>40.71)                             | 37.01<br>(31.24 to<br>44.08)                             | 33.06<br>(28.12 to<br>39.11)                             |
| <b>Mental disorders</b>                 | <b>33,756.92</b><br><b>(25,940.80 to</b><br><b>45,763.34)</b> | <b>40,759.93</b><br><b>(30,370.37 to</b><br><b>56,295.73)</b> | <b>36,515.75</b><br><b>(27,358.52 to</b><br><b>50,697.39)</b> | <b>42,144.71</b><br><b>(31,260.24 to</b><br><b>58,556.09)</b> | <b>888.48</b><br><b>(697.55 to</b><br><b>1,246.23)</b> | <b>1,169.27</b><br><b>(896.56 to</b><br><b>1,682.00)</b> | <b>1,063.54</b><br><b>(812.74 to</b><br><b>1,525.77)</b> | <b>1,197.85</b><br><b>(919.61 to</b><br><b>1,729.19)</b> |
| Alcohol use disorders                   | 32,799.24<br>(25,008.34 to<br>44,629.29)                      | 38,942.00<br>(28,760.89 to<br>53,828.74)                      | 34,695.94<br>(25,701.66 to<br>48,219.40)                      | 40,341.79<br>(29,661.89 to<br>56,848.34)                      | 861.46<br>(673.30 to<br>1,216.28)                      | 1,105.40<br>(836.90 to<br>1,621.97)                      | 997.25<br>(747.78 to<br>1,469.94)                        | 1,136.05<br>(859.19 to<br>1,670.90)                      |
| Drug use disorders                      | 893.66<br>(699.73 to<br>1,314.78)                             | 1,735.94<br>(1,369.56 to<br>2,395.20)                         | 1,740.56<br>(1,379.98 to<br>2,374.97)                         | 1,719.56<br>(1,356.32 to<br>2,370.85)                         | 25.88<br>(21.53 to<br>33.65)                           | 62.34<br>(51.13 to<br>76.58)                             | 64.79<br>(53.24 to<br>79.41)                             | 60.26<br>(49.43 to<br>74.30)                             |
| Opioid use disorders                    | 586.45<br>(446.28 to<br>897.80)                               | 867.08<br>(637.03 to<br>1,263.18)                             | 858.73<br>(633.69 to<br>1,238.78)                             | 864.99<br>(637.78 to<br>1,253.90)                             | 14.23<br>(11.29 to<br>19.71)                           | 24.49<br>(18.98 to<br>32.54)                             | 24.75<br>(19.21 to<br>32.75)                             | 24.11<br>(18.69 to<br>31.92)                             |
| Cocaine use disorders                   | 48.93<br>(33.64 to<br>81.56)                                  | 134.65<br>(88.64 to<br>203.82)                                | 128.85<br>(82.67 to<br>195.01)                                | 136.18<br>(89.24 to<br>205.48)                                | 1.32<br>(0.88 to<br>1.95)                              | 4.03<br>(2.52 to<br>5.87)                                | 3.91<br>(2.41 to<br>5.73)                                | 4.03<br>(2.53 to<br>5.82)                                |
| Amphetamine use disorders               | 31.95<br>(21.86 to<br>57.44)                                  | 124.76<br>(86.67 to<br>204.59)                                | 120.07<br>(82.34 to<br>195.11)                                | 126.28<br>(87.55 to<br>210.38)                                | 0.81<br>(0.59 to<br>1.26)                              | 3.45<br>(2.36 to<br>5.08)                                | 3.38<br>(2.30 to<br>4.98)                                | 3.46<br>(2.36 to<br>5.10)                                |
| Other drug use disorders                | 226.32<br>(175.25 to<br>333.59)                               | 809.45<br>(454.72 to<br>855.17)                               | 632.91<br>(473.38 to<br>887.28)                               | 592.11<br>(442.64 to<br>827.54)                               | 9.52<br>(7.58 to<br>12.06)                             | 30.37<br>(23.01 to<br>38.65)                             | 32.75<br>(24.99 to<br>41.37)                             | 28.66<br>(21.63 to<br>36.19)                             |
| Eating disorders                        | 64.02<br>(44.88 to<br>93.32)                                  | 82.00<br>(52.87 to<br>123.67)                                 | 79.25<br>(51.01 to<br>121.71)                                 | 83.37<br>(53.93 to<br>123.81)                                 | 1.14<br>(0.80 to<br>1.69)                              | 1.53<br>(0.97 to<br>2.31)                                | 1.49<br>(0.94 to<br>2.28)                                | 1.54<br>(0.98 to<br>2.31)                                |

**El Salvador**

| Cause                                                      | YLLs (actual counts)                                             |                                                                  |                                                                 |                                                                  | Deaths (actual counts)                                     |                                                              |                                                             |                                                              |
|------------------------------------------------------------|------------------------------------------------------------------|------------------------------------------------------------------|-----------------------------------------------------------------|------------------------------------------------------------------|------------------------------------------------------------|--------------------------------------------------------------|-------------------------------------------------------------|--------------------------------------------------------------|
|                                                            | 2016                                                             | 2040 Forecast                                                    | 2040 Better Scenario                                            | 2040 Worse Scenario                                              | 2016                                                       | 2040 Forecast                                                | 2040 Better Scenario                                        | 2040 Worse Scenario                                          |
| <b>Diabetes, urogenital, blood, and endocrine diseases</b> | <b>131,088.81</b><br><b>(104,714.19 to</b><br><b>148,992.29)</b> | <b>198,127.94</b><br><b>(112,491.64 to</b><br><b>385,354.14)</b> | <b>143,694.16</b><br><b>(84,709.50 to</b><br><b>277,363.98)</b> | <b>230,756.70</b><br><b>(131,578.33 to</b><br><b>448,070.05)</b> | <b>6,117.07</b><br><b>(4,995.80 to</b><br><b>6,864.42)</b> | <b>12,228.45</b><br><b>(6,903.91 to</b><br><b>24,795.02)</b> | <b>9,223.53</b><br><b>(5,467.31 to</b><br><b>18,951.28)</b> | <b>13,792.94</b><br><b>(7,738.29 to</b><br><b>27,065.32)</b> |
| Diabetes mellitus                                          | 41,706.65<br>(36,906.72 to<br>47,716.25)                         | 49,801.62<br>(35,226.47 to<br>69,324.56)                         | 37,227.04<br>(26,185.50 to<br>51,262.42)                        | 58,375.70<br>(39,268.71 to<br>83,992.47)                         | 2,093.83<br>(1,854.97 to<br>2,363.64)                      | 2,993.21<br>(2,218.75 to<br>3,927.70)                        | 2,351.19<br>(1,753.73 to<br>3,049.01)                       | 3,362.77<br>(2,366.89 to<br>4,547.20)                        |
| Acute glomerulonephritis                                   | 40.11<br>(35.32 to<br>46.95)                                     | 34.42<br>(26.91 to<br>44.30)                                     | 29.78<br>(23.38 to<br>38.21)                                    | 36.71<br>(28.82 to<br>47.30)                                     | 0.85<br>(0.74 to<br>1.00)                                  | 0.86<br>(0.66 to<br>1.09)                                    | 0.78<br>(0.59 to<br>0.99)                                   | 0.89<br>(0.69 to<br>1.14)                                    |
| Chronic kidney disease                                     | 80,570.33<br>(52,962.07 to<br>93,052.78)                         | 132,672.74<br>(54,079.07 to<br>322,067.93)                       | 91,115.83<br>(37,748.31 to<br>225,956.82)                       | 156,778.90<br>(63,712.81 to<br>372,212.34)                       | 3,648.58<br>(2,499.94 to<br>4,165.72)                      | 8,321.35<br>(3,179.10 to<br>21,339.53)                       | 5,918.37<br>(2,324.78 to<br>15,898.22)                      | 9,557.28<br>(3,654.33 to<br>22,815.69)                       |
| Chronic kidney disease due to diabetes mellitus            | 29,900.15<br>(18,276.42 to<br>36,500.04)                         | 56,116.64<br>(21,352.30 to<br>143,574.42)                        | 38,353.75<br>(15,630.55 to<br>99,166.84)                        | 66,654.99<br>(25,965.96 to<br>169,347.55)                        | 1,343.83<br>(857.85 to<br>1,612.77)                        | 3,201.98<br>(1,169.01 to<br>8,481.30)                        | 2,256.09<br>(855.42 to<br>6,268.12)                         | 3,709.26<br>(1,350.51 to<br>9,473.79)                        |
| Chronic kidney disease due to hypertension                 | 9,004.31<br>(5,871.45 to<br>11,042.21)                           | 20,038.37<br>(7,307.15 to<br>52,826.50)                          | 14,127.35<br>(5,212.85 to<br>39,305.89)                         | 23,160.68<br>(8,362.97 to<br>58,052.98)                          | 646.23<br>(435.43 to<br>788.45)                            | 1,800.61<br>(653.79 to<br>4,875.95)                          | 1,329.61<br>(503.86 to<br>3,783.65)                         | 2,014.04<br>(732.02 to<br>5,261.92)                          |



|                                                            |                                          |                                          |                                         |                                          |                                   |                                     |                                     |                                     |
|------------------------------------------------------------|------------------------------------------|------------------------------------------|-----------------------------------------|------------------------------------------|-----------------------------------|-------------------------------------|-------------------------------------|-------------------------------------|
| Chronic kidney disease due to glomerulonephritis           | 24,283.56<br>(16,516.58 to<br>29,429.85) | 30,998.73<br>(13,363.44 to<br>70,061.55) | 21,184.10<br>(9,431.03 to<br>48,282.76) | 36,770.67<br>(15,758.02 to<br>84,933.22) | 907.96<br>(619.27 to<br>1,105.79) | 1,714.93<br>(665.08 to<br>4,548.05) | 1,199.28<br>(476.33 to<br>3,155.16) | 1,988.50<br>(759.85 to<br>4,982.99) |
| Chronic kidney disease due to other and unspecified causes | 17,382.32<br>(11,549.01 to<br>21,280.75) | 25,519.00<br>(10,548.04 to<br>61,627.25) | 17,450.63<br>(7,561.67 to<br>43,691.98) | 30,192.56<br>(12,320.53 to<br>70,542.14) | 750.57<br>(516.35 to<br>919.75)   | 1,603.83<br>(612.93 to<br>4,242.90) | 1,133.39<br>(457.00 to<br>3,092.97) | 1,845.48<br>(697.96 to<br>4,671.00) |
| Urinary diseases and male infertility                      | 5,491.33<br>(4,791.29 to<br>6,308.44)    | 11,522.66<br>(9,782.91 to<br>13,472.64)  | 11,626.68<br>(9,803.44 to<br>13,553.97) | 11,300.51<br>(9,629.99 to<br>13,189.04)  | 274.52<br>(242.02 to<br>318.26)   | 745.03<br>(589.25 to<br>876.17)     | 793.66<br>(645.59 to<br>925.05)     | 703.41<br>(548.82 to<br>832.36)     |
| Urinary tract infections                                   | 5,147.54<br>(4,469.69 to<br>5,965.47)    | 11,110.37<br>(9,406.88 to<br>13,063.03)  | 11,243.88<br>(9,484.42 to<br>13,221.91) | 10,882.19<br>(9,258.91 to<br>12,771.71)  | 255.08<br>(223.00 to<br>298.03)   | 716.17<br>(565.26 to<br>852.04)     | 765.52<br>(615.11 to<br>900.96)     | 675.17<br>(527.00 to<br>803.14)     |
| Urolithiasis                                               | 61.75<br>(39.27 to<br>79.12)             | 101.68<br>(53.94 to<br>141.70)           | 104.26<br>(53.43 to<br>144.71)          | 99.33<br>(53.89 to<br>137.17)            | 2.92<br>(1.19 to<br>4.11)         | 6.10<br>(2.08 to<br>9.49)           | 6.64<br>(2.18 to<br>10.38)          | 5.72<br>(2.02 to<br>8.85)           |
| Other urinary diseases                                     | 282.05<br>(173.50 to<br>385.74)          | 310.61<br>(169.11 to<br>453.29)          | 278.53<br>(147.55 to<br>411.17)         | 318.99<br>(178.19 to<br>466.16)          | 16.52<br>(8.90 to<br>23.98)       | 22.75<br>(10.26 to<br>36.76)        | 21.50<br>(9.49 to<br>34.43)         | 22.52<br>(10.26 to<br>35.97)        |
| Gynecological diseases                                     | 92.01<br>(69.11 to<br>120.12)            | 139.30<br>(90.24 to<br>209.56)           | 118.96<br>(75.89 to<br>180.43)          | 148.21<br>(94.31 to<br>224.19)           | 2.56<br>(1.95 to<br>3.34)         | 4.50<br>(3.02 to<br>6.35)           | 3.94<br>(2.60 to<br>5.63)           | 4.70<br>(3.15 to<br>6.65)           |
| Uterine fibroids                                           | 0.75<br>(0.44 to<br>1.52)                | 1.30<br>(0.61 to<br>2.72)                | 1.07<br>(0.50 to<br>2.26)               | 1.40<br>(0.65 to<br>3.02)                | 0.03<br>(0.02 to<br>0.05)         | 0.07<br>(0.03 to<br>0.13)           | 0.06<br>(0.02 to<br>0.11)           | 0.07<br>(0.03 to<br>0.13)           |
| Polycystic ovarian syndrome                                | 2.88<br>(0.89 to<br>10.14)               | 3.25<br>(0.77 to<br>11.20)               | 2.36<br>(0.53 to<br>8.15)               | 3.71<br>(0.89 to<br>12.65)               | 0.07<br>(0.02 to<br>0.23)         | 0.08<br>(0.02 to<br>0.27)           | 0.06<br>(0.01 to<br>0.20)           | 0.09<br>(0.02 to<br>0.31)           |
| Endometriosis                                              | 0.24<br>(0.11 to<br>0.67)                | 0.40<br>(0.13 to<br>1.15)                | 0.33<br>(0.10 to<br>0.97)               | 0.44<br>(0.14 to<br>1.24)                | 0.01<br>(0.00 to<br>0.01)         | 0.01<br>(0.00 to<br>0.03)           | 0.01<br>(0.00 to<br>0.02)           | 0.01<br>(0.00 to<br>0.03)           |
| Genital prolapse                                           | 1.16<br>(0.46 to<br>1.76)                | 1.16<br>(0.42 to<br>2.16)                | 0.95<br>(0.33 to<br>1.79)               | 1.24<br>(0.47 to<br>2.28)                | 0.10<br>(0.02 to<br>0.16)         | 0.09<br>(0.02 to<br>0.19)           | 0.08<br>(0.01 to<br>0.16)           | 0.09<br>(0.02 to<br>0.19)           |
| Other gynecological diseases                               | 86.98<br>(65.33 to<br>115.08)            | 133.19<br>(84.30 to<br>200.23)           | 114.24<br>(71.28 to<br>173.90)          | 141.42<br>(88.94 to<br>217.69)           | 2.36<br>(1.79 to<br>3.09)         | 4.26<br>(2.84 to<br>6.06)           | 3.74<br>(2.42 to<br>5.34)           | 4.44<br>(2.96 to<br>6.31)           |
| Hemoglobinopathies and hemolytic anemias                   | 1,136.14<br>(934.40 to<br>1,520.25)      | 1,165.32<br>(906.91 to<br>1,523.61)      | 1,015.94<br>(781.67 to<br>1,331.89)     | 1,226.33<br>(956.05 to<br>1,602.18)      | 33.85<br>(27.65 to<br>41.75)      | 45.25<br>(34.40 to<br>54.14)        | 40.59<br>(30.13 to<br>48.39)        | 46.48<br>(35.01 to<br>55.95)        |
| Thalassemias                                               | 52.70<br>(30.27 to<br>83.67)             | 18.12<br>(9.14 to<br>33.43)              | 17.80<br>(9.00 to<br>32.39)             | 18.80<br>(9.22 to<br>35.14)              | 0.65<br>(0.37 to<br>1.03)         | 0.23<br>(0.11 to<br>0.43)           | 0.23<br>(0.11 to<br>0.41)           | 0.24<br>(0.12 to<br>0.44)           |
| Sickle cell disorders                                      | 576.59<br>(400.61 to<br>889.68)          | 532.02<br>(358.60 to<br>798.98)          | 467.43<br>(313.56 to<br>692.59)         | 561.05<br>(373.36 to<br>854.00)          | 10.24<br>(7.21 to<br>15.39)       | 11.14<br>(7.41 to<br>16.26)         | 9.89<br>(6.60 to<br>14.56)          | 11.69<br>(7.77 to<br>17.43)         |
| G6PD deficiency                                            | 200.96<br>(133.83 to<br>302.03)          | 289.84<br>(188.94 to<br>412.68)          | 242.99<br>(157.43 to<br>352.41)         | 310.45<br>(208.15 to<br>446.74)          | 5.10<br>(3.58 to<br>7.06)         | 9.25<br>(6.15 to<br>12.75)          | 7.86<br>(5.11 to<br>11.03)          | 9.82<br>(6.54 to<br>13.41)          |
| Other hemoglobinopathies and hemolytic anemias             | 305.88<br>(223.40 to<br>376.56)          | 325.35<br>(230.84 to<br>412.43)          | 287.72<br>(199.56 to<br>365.91)         | 336.03<br>(236.75 to<br>425.26)          | 17.86<br>(12.88 to<br>21.39)      | 24.62<br>(16.86 to<br>30.62)        | 22.62<br>(15.52 to<br>27.81)        | 24.74<br>(16.64 to<br>30.90)        |
| Endocrine, metabolic, blood, and immune disorders          | 2,052.24<br>(1,578.51 to<br>3,443.92)    | 2,791.88<br>(2,044.31 to<br>5,246.00)    | 2,559.93<br>(1,865.47 to<br>4,825.47)   | 2,890.33<br>(2,127.62 to<br>5,430.15)    | 62.89<br>(48.16 to<br>116.90)     | 118.25<br>(86.14 to<br>221.83)      | 115.00<br>(84.36 to<br>214.53)      | 117.40<br>(86.07 to<br>222.61)      |

**El Salvador**

| Cause                            | YLLs (actual counts)                  |                                       |                                       |                                       | Deaths (actual counts)        |                                 |                                 |                                 |
|----------------------------------|---------------------------------------|---------------------------------------|---------------------------------------|---------------------------------------|-------------------------------|---------------------------------|---------------------------------|---------------------------------|
|                                  | 2016                                  | 2040 Forecast                         | 2040 Better Scenario                  | 2040 Worse Scenario                   | 2016                          | 2040 Forecast                   | 2040 Better Scenario            | 2040 Worse Scenario             |
| <b>Musculoskeletal disorders</b> | 3,048.07<br>(2,448.28 to<br>3,838.37) | 4,603.59<br>(3,623.14 to<br>6,339.16) | 4,823.06<br>(3,788.40 to<br>6,688.33) | 4,475.70<br>(3,535.45 to<br>6,153.98) | 99.39<br>(82.71 to<br>140.08) | 208.99<br>(161.48 to<br>316.31) | 227.58<br>(176.57 to<br>346.87) | 197.33<br>(151.32 to<br>297.71) |
| Rheumatoid arthritis             | 291.79<br>(217.86 to<br>443.05)       | 670.76<br>(478.66 to<br>1,132.69)     | 610.75<br>(433.74 to<br>1,050.47)     | 688.75<br>(493.68 to<br>1,150.03)     | 16.96<br>(12.84 to<br>28.69)  | 48.80<br>(32.30 to<br>88.68)    | 46.65<br>(31.01 to<br>86.10)    | 48.38<br>(31.37 to<br>88.07)    |



| El Salvador                                     |                                                     |                                                     |                                                     |                                                     |                                                |                                                  |                                                |                                                |
|-------------------------------------------------|-----------------------------------------------------|-----------------------------------------------------|-----------------------------------------------------|-----------------------------------------------------|------------------------------------------------|--------------------------------------------------|------------------------------------------------|------------------------------------------------|
| Cause                                           | YLLs (actual counts)                                |                                                     |                                                     |                                                     | Deaths (actual counts)                         |                                                  |                                                |                                                |
|                                                 | 2016                                                | 2040 Forecast                                       | 2040 Better Scenario                                | 2040 Worse Scenario                                 | 2016                                           | 2040 Forecast                                    | 2040 Better Scenario                           | 2040 Worse Scenario                            |
| Cyclist road injuries                           | 875.05<br>(706.81 to 1,096.45)                      | 762.76<br>(512.03 to 1,148.13)                      | 450.08<br>(304.02 to 660.94)                        | 1,180.47<br>(797.16 to 1,770.14)                    | 23.37<br>(19.66 to 27.39)                      | 27.85<br>(18.55 to 41.57)                        | 18.91<br>(12.36 to 27.91)                      | 38.14<br>(25.93 to 56.46)                      |
| Motorcyclist road injuries                      | 3,043.16<br>(1,848.10 to 4,310.97)                  | 3,033.32<br>(1,523.49 to 5,760.39)                  | 1,937.14<br>(1,033.77 to 3,609.68)                  | 4,164.29<br>(2,074.29 to 7,958.07)                  | 54.68<br>(34.94 to 75.37)                      | 59.39<br>(32.47 to 107.32)                       | 39.76<br>(22.87 to 69.88)                      | 79.35<br>(42.40 to 144.78)                     |
| Motor vehicle road injuries                     | 22,728.63<br>(17,162.02 to 35,438.88)               | 17,161.96<br>(10,472.15 to 30,892.07)               | 8,360.66<br>(5,181.26 to 14,973.48)                 | 29,184.57<br>(17,939.31 to 51,046.49)               | 457.63<br>(359.01 to 680.06)                   | 391.82<br>(253.62 to 636.01)                     | 204.62<br>(138.75 to 324.81)                   | 638.83<br>(408.88 to 1,040.43)                 |
| Other road injuries                             | 1,791.77<br>(1,275.36 to 2,322.86)                  | 1,594.24<br>(984.90 to 2,566.71)                    | 818.54<br>(528.37 to 1,258.61)                      | 2,626.26<br>(1,565.24 to 4,267.01)                  | 41.95<br>(31.30 to 53.93)                      | 44.90<br>(28.91 to 69.31)                        | 26.14<br>(17.42 to 38.44)                      | 68.26<br>(42.73 to 106.69)                     |
| Other transport injuries                        | 8,579.91<br>(6,438.56 to 10,788.87)                 | 13,107.50<br>(8,683.79 to 21,008.79)                | 10,629.24<br>(7,260.67 to 16,882.99)                | 14,204.95<br>(9,387.08 to 22,864.83)                | 205.18<br>(166.10 to 255.01)                   | 374.93<br>(257.48 to 574.19)                     | 313.47<br>(222.65 to 462.58)                   | 398.86<br>(273.70 to 609.65)                   |
| <b>Unintentional injuries</b>                   | <b>36,007.73</b><br><b>(30,916.54 to 43,409.30)</b> | <b>28,758.03</b><br><b>(23,645.99 to 36,068.26)</b> | <b>25,825.55</b><br><b>(21,286.76 to 32,236.27)</b> | <b>30,000.63</b><br><b>(24,643.64 to 37,563.90)</b> | <b>1,008.78</b><br><b>(883.57 to 1,152.31)</b> | <b>1,228.39</b><br><b>(1,003.41 to 1,427.18)</b> | <b>1,184.16</b><br><b>(985.96 to 1,368.66)</b> | <b>1,222.74</b><br><b>(995.33 to 1,429.72)</b> |
| Falls                                           | 10,266.72<br>(8,731.59 to 12,466.60)                | 11,823.54<br>(9,995.77 to 13,861.99)                | 11,407.97<br>(9,651.42 to 13,404.84)                | 11,848.54<br>(10,103.16 to 13,845.93)               | 480.40<br>(410.64 to 546.64)                   | 766.56<br>(577.10 to 904.77)                     | 772.52<br>(598.22 to 897.11)                   | 742.11<br>(550.92 to 886.46)                   |
| Drowning                                        | 14,701.71<br>(12,081.13 to 17,981.37)               | 8,332.17<br>(5,663.47 to 12,405.36)                 | 6,893.85<br>(4,815.87 to 10,299.46)                 | 9,011.05<br>(6,100.61 to 13,438.37)                 | 267.60<br>(219.58 to 324.51)                   | 179.51<br>(127.62 to 255.90)                     | 152.05<br>(109.27 to 213.71)                   | 191.36<br>(134.63 to 276.61)                   |
| Fire, heat, and hot substances                  | 1,917.11<br>(1,555.70 to 2,724.58)                  | 1,371.80<br>(955.45 to 2,207.29)                    | 1,126.63<br>(799.02 to 1,813.18)                    | 1,489.86<br>(1,050.31 to 2,374.23)                  | 49.97<br>(39.93 to 74.06)                      | 52.66<br>(36.69 to 87.09)                        | 46.17<br>(32.22 to 77.42)                      | 54.78<br>(37.77 to 90.86)                      |
| Poisonings                                      | 488.53<br>(380.17 to 698.14)                        | 277.19<br>(187.74 to 408.19)                        | 210.66<br>(143.76 to 309.17)                        | 310.86<br>(210.74 to 467.46)                        | 10.84<br>(8.09 to 14.04)                       | 7.82<br>(5.29 to 11.31)                          | 6.19<br>(4.20 to 8.72)                         | 8.57<br>(5.84 to 12.62)                        |
| Exposure to mechanical forces                   | 1,314.13<br>(1,038.09 to 2,030.02)                  | 1,021.05<br>(778.07 to 1,541.50)                    | 859.66<br>(645.29 to 1,320.65)                      | 1,099.50<br>(838.68 to 1,644.12)                    | 28.82<br>(23.69 to 40.53)                      | 29.57<br>(24.02 to 38.37)                        | 26.17<br>(21.33 to 34.30)                      | 30.86<br>(24.99 to 39.77)                      |
| Unintentional firearm injuries                  | 381.53<br>(257.49 to 892.28)                        | 304.98<br>(193.10 to 705.93)                        | 251.02<br>(156.43 to 595.37)                        | 330.62<br>(209.60 to 750.95)                        | 7.94<br>(5.58 to 17.14)                        | 7.81<br>(5.44 to 15.51)                          | 6.67<br>(4.61 to 13.20)                        | 8.27<br>(5.72 to 16.32)                        |
| Unintentional suffocation                       | 144.83<br>(99.76 to 256.80)                         | 59.88<br>(38.47 to 109.56)                          | 46.02<br>(30.14 to 83.51)                           | 68.93<br>(43.64 to 123.54)                          | 2.05<br>(1.49 to 3.46)                         | 1.00<br>(0.71 to 1.65)                           | 0.80<br>(0.57 to 1.30)                         | 1.12<br>(0.78 to 1.86)                         |
| Other exposure to mechanical forces             | 787.76<br>(652.27 to 1,018.45)                      | 656.19<br>(519.63 to 868.45)                        | 562.61<br>(445.45 to 739.35)                        | 699.94<br>(549.82 to 923.25)                        | 18.84<br>(16.10 to 22.66)                      | 20.77<br>(16.92 to 24.78)                        | 18.70<br>(15.21 to 22.42)                      | 21.47<br>(17.38 to 25.58)                      |
| Adverse effects of medical treatment            | 1,785.62<br>(1,371.70 to 2,733.50)                  | 1,665.17<br>(1,252.10 to 2,614.26)                  | 1,470.14<br>(1,093.86 to 2,325.96)                  | 1,753.89<br>(1,313.92 to 2,703.86)                  | 56.01<br>(43.25 to 86.04)                      | 77.80<br>(55.60 to 125.50)                       | 73.16<br>(52.92 to 117.56)                     | 78.25<br>(55.21 to 125.42)                     |
| Animal contact                                  | 491.96<br>(396.30 to 587.66)                        | 362.48<br>(261.33 to 451.39)                        | 299.15<br>(217.41 to 375.28)                        | 393.56<br>(281.45 to 498.45)                        | 15.59<br>(11.82 to 18.36)                      | 16.13<br>(10.39 to 20.11)                        | 14.25<br>(9.31 to 17.67)                       | 16.70<br>(10.79 to 20.86)                      |
| Venomous animal contact                         | 388.79<br>(313.03 to 477.86)                        | 270.33<br>(199.39 to 337.68)                        | 221.30<br>(163.68 to 278.38)                        | 294.81<br>(220.23 to 379.75)                        | 12.00<br>(9.32 to 14.12)                       | 11.14<br>(7.53 to 13.82)                         | 9.70<br>(6.71 to 12.06)                        | 11.63<br>(7.81 to 14.64)                       |
| Non-venomous animal contact                     | 103.17<br>(62.59 to 138.95)                         | 92.15<br>(50.25 to 131.95)                          | 77.85<br>(42.16 to 110.17)                          | 98.75<br>(54.27 to 139.94)                          | 3.59<br>(1.96 to 5.19)                         | 4.99<br>(2.36 to 7.45)                           | 4.55<br>(2.15 to 6.67)                         | 5.07<br>(2.41 to 7.56)                         |
| Foreign body                                    | 2,751.80<br>(2,180.00 to 3,727.27)                  | 2,006.57<br>(1,529.37 to 2,578.32)                  | 1,912.80<br>(1,445.21 to 2,440.08)                  | 2,077.28<br>(1,584.35 to 2,707.83)                  | 53.31<br>(43.34 to 66.05)                      | 54.26<br>(41.31 to 65.19)                        | 54.79<br>(41.55 to 65.83)                      | 53.89<br>(40.89 to 64.92)                      |
| Pulmonary aspiration and foreign body in airway | 2,706.54<br>(2,144.52 to 3,651.04)                  | 1,977.23<br>(1,496.23 to 2,544.81)                  | 1,887.21<br>(1,419.29 to 2,398.68)                  | 2,046.06<br>(1,550.60 to 2,674.40)                  | 52.38<br>(42.48 to 65.02)                      | 53.36<br>(40.42 to 64.19)                        | 53.95<br>(40.68 to 64.86)                      | 52.97<br>(40.17 to 63.89)                      |

|                                             |                                                                  |                                                                  |                                                                  |                                                                  |                                                            |                                                            |                                                            |                                                            |
|---------------------------------------------|------------------------------------------------------------------|------------------------------------------------------------------|------------------------------------------------------------------|------------------------------------------------------------------|------------------------------------------------------------|------------------------------------------------------------|------------------------------------------------------------|------------------------------------------------------------|
| Foreign body in other body part             | 45.26<br>(34.64 to<br>82.21)                                     | 29.34<br>(21.20 to<br>55.91)                                     | 25.58<br>(18.37 to<br>48.10)                                     | 31.23<br>(22.39 to<br>58.94)                                     | 0.93<br>(0.77 to<br>1.50)                                  | 0.90<br>(0.67 to<br>1.18)                                  | 0.84<br>(0.61 to<br>1.11)                                  | 0.92<br>(0.68 to<br>1.23)                                  |
| Environmental heat and cold exposure        | 170.32<br>(131.66 to<br>249.46)                                  | 170.50<br>(123.20 to<br>273.71)                                  | 133.20<br>(94.53 to<br>214.05)                                   | 189.23<br>(136.93 to<br>299.72)                                  | 4.49<br>(3.55 to<br>7.22)                                  | 5.40<br>(3.96 to<br>9.45)                                  | 4.40<br>(3.19 to<br>7.96)                                  | 5.82<br>(4.21 to<br>10.12)                                 |
| Other unintentional injuries                | 2,119.84<br>(1,669.39 to<br>2,887.99)                            | 1,727.57<br>(1,286.41 to<br>2,423.21)                            | 1,511.50<br>(1,117.83 to<br>2,180.31)                            | 1,826.86<br>(1,365.76 to<br>2,486.11)                            | 41.73<br>(33.44 to<br>55.78)                               | 38.67<br>(29.90 to<br>51.71)                               | 34.46<br>(26.75 to<br>47.40)                               | 40.41<br>(31.45 to<br>53.05)                               |
| <b>Self-harm and interpersonal violence</b> | <b>210,102.53</b><br><b>(159,029.72 to</b><br><b>245,878.69)</b> | <b>162,741.57</b><br><b>(116,419.70 to</b><br><b>232,597.58)</b> | <b>151,616.06</b><br><b>(111,144.59 to</b><br><b>213,519.20)</b> | <b>167,387.44</b><br><b>(115,618.70 to</b><br><b>239,761.20)</b> | <b>3,946.09</b><br><b>(3,009.03 to</b><br><b>4,626.49)</b> | <b>3,353.68</b><br><b>(2,455.87 to</b><br><b>4,612.26)</b> | <b>3,147.90</b><br><b>(2,376.72 to</b><br><b>4,224.94)</b> | <b>3,431.72</b><br><b>(2,451.94 to</b><br><b>4,724.84)</b> |

**El Salvador**

| Cause                                                                        | YLLs (actual counts)                              |                                                         |                                                         |                                                         | Deaths (actual counts)                         |                                                      |                                                      |                                                      |
|------------------------------------------------------------------------------|---------------------------------------------------|---------------------------------------------------------|---------------------------------------------------------|---------------------------------------------------------|------------------------------------------------|------------------------------------------------------|------------------------------------------------------|------------------------------------------------------|
|                                                                              | 2016                                              | 2040 Forecast                                           | 2040 Better Scenario                                    | 2040 Worse Scenario                                     | 2016                                           | 2040 Forecast                                        | 2040 Better Scenario                                 | 2040 Worse Scenario                                  |
| Self-harm                                                                    | 30,161.07<br>(24,679.48 to<br>39,250.73)          | 33,596.38<br>(20,783.04 to<br>57,214.93)                | 27,858.68<br>(18,259.45 to<br>45,727.12)                | 36,051.78<br>(21,739.18 to<br>61,332.42)                | 591.27<br>(483.75 to<br>751.28)                | 726.31<br>(463.36 to<br>1,172.65)                    | 609.41<br>(409.29 to<br>953.85)                      | 772.80<br>(481.29 to<br>1,256.81)                    |
| Self-harm by firearm                                                         | 633.05<br>(433.11 to<br>1,056.79)                 | 632.37<br>(321.42 to<br>1,289.97)                       | 507.85<br>(272.99 to<br>991.30)                         | 686.35<br>(339.78 to<br>1,416.45)                       | 12.69<br>(8.78 to<br>20.83)                    | 14.38<br>(7.49 to<br>27.55)                          | 11.76<br>(6.53 to<br>21.87)                          | 15.42<br>(7.87 to<br>29.74)                          |
| Self-harm by other specified means                                           | 29,528.03<br>(24,136.67 to<br>38,150.15)          | 32,964.01<br>(20,365.56 to<br>56,537.79)                | 27,350.82<br>(17,943.60 to<br>44,739.73)                | 35,365.43<br>(21,374.07 to<br>60,137.65)                | 578.58<br>(475.08 to<br>731.41)                | 711.93<br>(454.29 to<br>1,149.59)                    | 597.65<br>(401.35 to<br>931.78)                      | 757.39<br>(473.13 to<br>1,227.91)                    |
| Interpersonal violence                                                       | 179,941.46<br>(128,100.74 to<br>213,018.90)       | 129,145.19<br>(86,955.95 to<br>181,576.24)              | 123,757.38<br>(86,424.06 to<br>172,329.82)              | 131,335.66<br>(85,764.67 to<br>183,900.86)              | 3,354.82<br>(2,412.56 to<br>3,965.16)          | 2,627.37<br>(1,839.23 to<br>3,513.12)                | 2,538.49<br>(1,840.49 to<br>3,366.63)                | 2,658.92<br>(1,806.65 to<br>3,561.90)                |
| Physical violence by firearm                                                 | 134,290.77<br>(91,109.70 to<br>163,217.10)        | 94,468.63<br>(60,694.73 to<br>133,170.22)               | 91,306.51<br>(59,859.74 to<br>129,248.53)               | 95,751.16<br>(59,826.80 to<br>135,803.57)               | 2,483.46<br>(1,711.41 to<br>3,013.43)          | 1,881.21<br>(1,235.68 to<br>2,556.88)                | 1,833.11<br>(1,229.37 to<br>2,488.05)                | 1,898.44<br>(1,216.63 to<br>2,598.48)                |
| Physical violence by sharp object                                            | 23,399.44<br>(10,734.78 to<br>43,243.44)          | 18,313.66<br>(8,759.48 to<br>33,024.23)                 | 18,305.98<br>(9,039.76 to<br>33,400.99)                 | 18,294.02<br>(8,514.20 to<br>33,143.20)                 | 436.42<br>(210.38 to<br>780.87)                | 376.16<br>(191.08 to<br>655.26)                      | 380.09<br>(198.45 to<br>667.53)                      | 373.43<br>(186.74 to<br>648.41)                      |
| Physical violence by other means                                             | 22,251.25<br>(12,373.16 to<br>39,375.44)          | 16,362.90<br>(7,762.99 to<br>29,715.42)                 | 14,144.90<br>(7,008.47 to<br>25,635.93)                 | 17,290.48<br>(8,046.32 to<br>31,314.17)                 | 434.93<br>(242.72 to<br>753.18)                | 370.00<br>(188.30 to<br>638.97)                      | 325.30<br>(177.30 to<br>549.33)                      | 387.04<br>(191.26 to<br>672.79)                      |
| Forces of nature, conflict and terrorism, and executions and police conflict | <b>35.94</b><br><b>(31.94 to</b><br><b>40.92)</b> | <b>5,786.38</b><br><b>(0.00 to</b><br><b>46,695.70)</b> | <b>5,583.35</b><br><b>(0.00 to</b><br><b>44,699.99)</b> | <b>5,881.10</b><br><b>(0.00 to</b><br><b>47,553.33)</b> | <b>0.63</b><br><b>(0.57 to</b><br><b>0.72)</b> | <b>122.30</b><br><b>(0.00 to</b><br><b>1,059.97)</b> | <b>121.29</b><br><b>(0.00 to</b><br><b>1,045.87)</b> | <b>122.25</b><br><b>(0.00 to</b><br><b>1,059.03)</b> |
| Exposure to forces of nature                                                 | 0.00<br>(0.00 to<br>0.00)                         | 1,460.96<br>(0.00 to<br>18,263.09)                      | 1,411.39<br>(0.00 to<br>17,836.48)                      | 1,484.75<br>(0.00 to<br>18,541.80)                      | 0.00<br>(0.00 to<br>0.00)                      | 34.22<br>(0.00 to<br>436.93)                         | 34.18<br>(0.00 to<br>438.67)                         | 34.07<br>(0.00 to<br>433.47)                         |
| Conflict and terrorism                                                       | 0.00<br>(0.00 to<br>0.00)                         | 4,325.41<br>(0.00 to<br>39,281.10)                      | 4,171.96<br>(0.00 to<br>37,815.50)                      | 4,396.35<br>(0.00 to<br>39,976.51)                      | 0.00<br>(0.00 to<br>0.00)                      | 88.08<br>(0.00 to<br>801.54)                         | 87.11<br>(0.00 to<br>790.84)                         | 88.18<br>(0.00 to<br>803.80)                         |
| Executions and police conflict                                               | 35.94<br>(31.94 to<br>40.92)                      | 0.00<br>(0.00 to<br>0.00)                               | 0.00<br>(0.00 to<br>0.00)                               | 0.00<br>(0.00 to<br>0.00)                               | 0.63<br>(0.57 to<br>0.72)                      | 0.00<br>(0.00 to<br>0.00)                            | 0.00<br>(0.00 to<br>0.00)                            | 0.00<br>(0.00 to<br>0.00)                            |

**Guatemala**

| Cause                                                      | YLLs (actual counts)                              |                                                   |                                                   |                                                   | Deaths (actual counts)                    |                                             |                                            |                                             |
|------------------------------------------------------------|---------------------------------------------------|---------------------------------------------------|---------------------------------------------------|---------------------------------------------------|-------------------------------------------|---------------------------------------------|--------------------------------------------|---------------------------------------------|
|                                                            | 2016                                              | 2040 Forecast                                     | 2040 Better Scenario                              | 2040 Worse Scenario                               | 2016                                      | 2040 Forecast                               | 2040 Better Scenario                       | 2040 Worse Scenario                         |
| All causes                                                 | 3,107,624.62<br>(2,560,914.31 to<br>3,672,077.67) | 3,701,384.38<br>(2,778,157.65 to<br>5,095,349.11) | 2,916,358.60<br>(2,194,849.91 to<br>4,003,150.67) | 4,746,006.31<br>(3,562,347.71 to<br>6,380,188.52) | 84,494.68<br>(68,779.95 to<br>101,434.36) | 136,222.97<br>(109,619.30 to<br>168,998.50) | 112,349.59<br>(90,624.76 to<br>141,150.73) | 165,412.82<br>(133,046.01 to<br>205,103.36) |
| Communicable, maternal, neonatal, and nutritional diseases | 1,039,448.32<br>(886,021.98 to<br>1,208,779.77)   | 710,707.27<br>(500,819.97 to<br>1,034,578.31)     | 467,920.40<br>(337,599.11 to<br>659,726.85)       | 1,108,906.01<br>(734,756.76 to<br>1,752,850.39)   | 20,129.16<br>(17,258.77 to<br>23,036.25)  | 21,286.07<br>(16,140.19 to<br>28,695.43)    | 16,418.26<br>(12,724.18 to<br>21,754.55)   | 29,859.38<br>(21,376.46 to<br>43,510.34)    |
| HIV/AIDS and tuberculosis                                  | 47,750.22<br>(44,257.05 to<br>51,774.32)          | 70,655.70<br>(47,706.51 to<br>94,365.72)          | 41,805.77<br>(23,681.26 to<br>55,001.38)          | 99,211.67<br>(76,332.57 to<br>131,623.02)         | 1,014.20<br>(924.72 to<br>1,108.52)       | 1,573.43<br>(1,025.04 to<br>2,124.67)       | 963.43<br>(515.84 to<br>1,269.49)          | 2,188.91<br>(1,660.50 to<br>2,931.56)       |

|                                                                          |                                                      |                                                      |                                                      |                                                        |                                                   |                                                  |                                                  |                                                   |
|--------------------------------------------------------------------------|------------------------------------------------------|------------------------------------------------------|------------------------------------------------------|--------------------------------------------------------|---------------------------------------------------|--------------------------------------------------|--------------------------------------------------|---------------------------------------------------|
| Tuberculosis                                                             | 13,677.45<br>(10,430.72 to<br>17,563.79)             | 13,000.12<br>(7,476.39 to<br>23,620.20)              | 7,112.90<br>(4,284.50 to<br>12,422.88)               | 21,006.49<br>(11,495.85 to<br>41,199.48)               | 351.43<br>(270.11 to<br>444.94)                   | 371.74<br>(221.33 to<br>660.75)                  | 209.43<br>(128.91 to<br>367.35)                  | 588.45<br>(320.03 to<br>1,133.40)                 |
| HIV/AIDS                                                                 | 34,072.76<br>(32,488.83 to<br>35,672.58)             | 57,655.59<br>(36,661.82 to<br>79,758.48)             | 34,692.87<br>(17,008.82 to<br>46,658.43)             | 78,205.18<br>(58,795.40 to<br>105,145.34)              | 662.77<br>(632.16 to<br>693.30)                   | 1,201.69<br>(728.91 to<br>1,679.49)              | 754.00<br>(319.26 to<br>1,015.89)                | 1,600.46<br>(1,164.78 to<br>2,198.96)             |
| <b>Diarrhea, lower respiratory, and other common infectious diseases</b> | <b>551,296.89<br/>(474,359.50 to<br/>635,449.33)</b> | <b>367,556.88<br/>(208,391.15 to<br/>651,096.47)</b> | <b>249,091.75<br/>(150,492.37 to<br/>418,807.88)</b> | <b>651,036.93<br/>(341,679.95 to<br/>1,235,630.78)</b> | <b>11,969.63<br/>(10,203.39 to<br/>13,851.13)</b> | <b>13,180.05<br/>(8,799.06 to<br/>20,286.49)</b> | <b>10,404.56<br/>(7,295.71 to<br/>15,067.86)</b> | <b>20,002.87<br/>(12,236.94 to<br/>33,139.35)</b> |
| Diarrheal diseases                                                       | 134,540.23<br>(112,125.87 to<br>161,889.54)          | 53,831.34<br>(11,933.24 to<br>178,267.26)            | 29,440.83<br>(7,456.39 to<br>94,528.96)              | 121,270.70<br>(20,108.01 to<br>431,504.89)             | 2,539.92<br>(2,114.91 to<br>2,997.55)             | 1,706.91<br>(449.23 to<br>5,028.69)              | 1,050.27<br>(308.31 to<br>3,043.33)              | 3,393.83<br>(714.21 to<br>11,513.56)              |
| Intestinal infectious diseases                                           | 2,296.71<br>(1,137.35 to<br>3,940.63)                | 2,066.67<br>(902.70 to<br>3,903.77)                  | 1,721.08<br>(757.63 to<br>3,287.37)                  | 2,268.90<br>(989.22 to<br>4,205.09)                    | 44.33<br>(22.03 to<br>76.54)                      | 45.39<br>(20.61 to<br>83.29)                     | 39.47<br>(17.85 to<br>74.89)                     | 48.73<br>(22.32 to<br>88.93)                      |
| Typhoid fever                                                            | 2,252.56<br>(1,088.53 to<br>3,879.07)                | 2,042.78<br>(893.95 to<br>3,873.09)                  | 1,705.25<br>(745.05 to<br>3,267.08)                  | 2,238.98<br>(979.97 to<br>4,156.02)                    | 43.65<br>(21.50 to<br>75.44)                      | 44.90<br>(20.33 to<br>82.96)                     | 39.12<br>(17.64 to<br>74.32)                     | 48.15<br>(21.97 to<br>88.55)                      |
| Paratyphoid fever                                                        | 3.79<br>(1.51 to<br>7.98)                            | 4.61<br>(1.75 to<br>9.36)                            | 3.71<br>(1.40 to<br>7.53)                            | 5.18<br>(1.94 to<br>10.56)                             | 0.07<br>(0.03 to<br>0.14)                         | 0.10<br>(0.04 to<br>0.20)                        | 0.08<br>(0.03 to<br>0.17)                        | 0.11<br>(0.04 to<br>0.22)                         |
| Other intestinal infectious diseases                                     | 40.36<br>(14.77 to<br>90.75)                         | 19.28<br>(4.79 to<br>55.13)                          | 12.12<br>(3.13 to<br>33.65)                          | 24.75<br>(5.39 to<br>72.22)                            | 0.60<br>(0.22 to<br>1.34)                         | 0.39<br>(0.12 to<br>0.97)                        | 0.27<br>(0.09 to<br>0.65)                        | 0.48<br>(0.15 to<br>1.21)                         |
| Lower respiratory infections                                             | 381,869.19<br>(324,225.22 to<br>442,352.14)          | 246,017.72<br>(147,073.90 to<br>402,010.66)          | 176,551.10<br>(111,956.57 to<br>279,973.98)          | 403,478.00<br>(219,535.84 to<br>733,156.67)            | 8,883.61<br>(7,468.53 to<br>10,423.61)            | 10,333.83<br>(7,063.45 to<br>14,628.66)          | 8,557.23<br>(6,102.18 to<br>11,671.95)           | 14,683.06<br>(9,407.21 to<br>22,376.35)           |
| Upper respiratory infections                                             | 211.97<br>(87.12 to<br>447.59)                       | 170.55<br>(56.87 to<br>429.13)                       | 105.54<br>(35.80 to<br>259.52)                       | 226.71<br>(76.53 to<br>578.03)                         | 3.70<br>(1.86 to<br>6.69)                         | 3.93<br>(1.62 to<br>7.98)                        | 2.60<br>(1.07 to<br>5.28)                        | 5.03<br>(2.08 to<br>10.82)                        |
| Otitis media                                                             | 4.00<br>(2.44 to<br>6.39)                            | 0.76<br>(0.42 to<br>1.28)                            | 0.73<br>(0.40 to<br>1.23)                            | 0.76<br>(0.42 to<br>1.28)                              | 0.08<br>(0.06 to<br>0.12)                         | 0.03<br>(0.02 to<br>0.04)                        | 0.03<br>(0.02 to<br>0.05)                        | 0.03<br>(0.02 to<br>0.04)                         |
| Meningitis                                                               | 19,775.05<br>(16,592.49 to<br>23,656.90)             | 11,204.12<br>(5,938.87 to<br>18,412.54)              | 9,172.11<br>(5,124.88 to<br>15,020.64)               | 12,832.58<br>(6,368.91 to<br>21,520.90)                | 323.18<br>(267.26 to<br>383.15)                   | 232.57<br>(147.68 to<br>343.51)                  | 206.93<br>(132.59 to<br>301.82)                  | 251.13<br>(154.26 to<br>373.97)                   |
| Pneumococcal meningitis                                                  | 3,028.05<br>(2,402.72 to<br>3,811.91)                | 1,499.77<br>(844.49 to<br>2,446.46)                  | 1,364.43<br>(786.40 to<br>2,192.45)                  | 1,591.16<br>(875.39 to<br>2,528.15)                    | 52.94<br>(42.18 to<br>65.22)                      | 36.35<br>(22.73 to<br>53.41)                     | 35.50<br>(22.54 to<br>52.09)                     | 36.85<br>(22.96 to<br>53.03)                      |
| H influenzae type B meningitis                                           | 1,731.12<br>(1,388.60 to<br>2,196.43)                | 1,827.11<br>(453.19 to<br>4,799.35)                  | 1,298.03<br>(408.42 to<br>3,034.93)                  | 2,637.51<br>(509.80 to<br>7,625.07)                    | 26.41<br>(21.23 to<br>32.98)                      | 27.51<br>(10.98 to<br>62.89)                     | 21.62<br>(10.26 to<br>42.84)                     | 36.67<br>(11.15 to<br>95.81)                      |
| Meningococcal meningitis                                                 | 4,233.90<br>(3,456.97 to<br>5,106.86)                | 2,024.66<br>(1,150.24 to<br>3,190.19)                | 1,659.87<br>(967.31 to<br>2,632.41)                  | 2,220.78<br>(1,251.53 to<br>3,479.24)                  | 68.18<br>(55.43 to<br>81.41)                      | 42.88<br>(27.86 to<br>61.30)                     | 37.77<br>(24.53 to<br>54.91)                     | 45.36<br>(29.08 to<br>63.74)                      |
| Other meningitis                                                         | 10,781.97<br>(8,994.03 to<br>12,864.68)              | 5,852.58<br>(3,269.11 to<br>9,520.02)                | 4,849.77<br>(2,801.76 to<br>7,781.93)                | 6,383.13<br>(3,486.22 to<br>10,215.62)                 | 175.66<br>(145.43 to<br>208.69)                   | 125.83<br>(80.54 to<br>182.75)                   | 112.03<br>(72.53 to<br>162.93)                   | 132.25<br>(84.77 to<br>191.52)                    |
| Encephalitis                                                             | 5,613.69<br>(3,685.74 to<br>9,787.15)                | 4,905.80<br>(2,471.78 to<br>9,423.80)                | 3,698.31<br>(1,945.76 to<br>7,099.81)                | 5,622.34<br>(2,769.63 to<br>11,002.58)                 | 86.06<br>(60.08 to<br>141.79)                     | 92.49<br>(57.19 to<br>154.67)                    | 74.37<br>(46.88 to<br>122.00)                    | 103.05<br>(63.28 to<br>174.39)                    |
| Diphtheria                                                               | 36.74<br>(20.07 to<br>63.98)                         | 10.76<br>(3.53 to<br>25.78)                          | 6.00<br>(2.64 to<br>11.44)                           | 21.73<br>(4.00 to<br>60.92)                            | 0.50<br>(0.29 to<br>0.83)                         | 0.16<br>(0.06 to<br>0.35)                        | 0.10<br>(0.05 to<br>0.19)                        | 0.29<br>(0.07 to<br>0.75)                         |
| Whooping cough                                                           | 5,775.24<br>(1,455.61 to<br>20,046.30)               | 4,402.10<br>(229.73 to<br>18,773.15)                 | 943.69<br>(152.85 to<br>3,805.00)                    | 13,045.66<br>(250.11 to<br>57,131.30)                  | 69.15<br>(18.05 to<br>237.45)                     | 52.80<br>(3.48 to<br>221.12)                     | 12.23<br>(2.33 to<br>47.80)                      | 153.99<br>(3.77 to<br>668.85)                     |
| Tetanus                                                                  | 206.90<br>(137.89 to<br>282.05)                      | 48.49<br>(25.36 to<br>80.37)                         | 43.63<br>(22.17 to<br>72.86)                         | 57.86<br>(31.05 to<br>98.73)                           | 5.22<br>(3.30 to<br>7.25)                         | 1.29<br>(0.71 to<br>2.02)                        | 1.26<br>(0.66 to<br>1.97)                        | 1.37<br>(0.82 to<br>2.12)                         |
| Measles                                                                  | 36.88<br>(25.78 to<br>55.57)                         | 44,416.59<br>(4,655.85 to<br>161,972.63)             | 27,128.27<br>(3,202.29 to<br>91,862.28)              | 91,584.12<br>(6,437.01 to<br>360,879.62)               | 0.46<br>(0.33 to<br>0.69)                         | 702.74<br>(75.26 to<br>2,248.39)                 | 455.03<br>(53.48 to<br>1,310.31)                 | 1,352.42<br>(108.93 to<br>4,846.28)               |
| <b>Guatemala</b>                                                         |                                                      |                                                      |                                                      |                                                        |                                                   |                                                  |                                                  |                                                   |
| <b>YLLs (actual counts)</b>                                              |                                                      |                                                      |                                                      |                                                        | <b>Deaths (actual counts)</b>                     |                                                  |                                                  |                                                   |

| Cause                                                 | 2016                                                          | 2040 Forecast                                                | 2040 Better Scenario                                         | 2040 Worse Scenario                                           | 2016                                                 | 2040 Forecast                                        | 2040 Better Scenario                                 | 2040 Worse Scenario                                  |
|-------------------------------------------------------|---------------------------------------------------------------|--------------------------------------------------------------|--------------------------------------------------------------|---------------------------------------------------------------|------------------------------------------------------|------------------------------------------------------|------------------------------------------------------|------------------------------------------------------|
| Varicella and herpes zoster                           | 930.31<br>(368.77 to<br>1,355.38)                             | 481.98<br>(117.48 to<br>1,136.64)                            | 280.46<br>(71.35 to<br>640.61)                               | 627.55<br>(141.52 to<br>1,487.42)                             | 13.41<br>(5.61 to<br>18.76)                          | 7.92<br>(2.63 to<br>16.23)                           | 5.04<br>(1.80 to<br>9.89)                            | 9.95<br>(3.32 to<br>20.64)                           |
| <b>Neglected tropical diseases and malaria</b>        | <b>7,951.77</b><br><b>(5,007.11 to</b><br><b>14,673.02)</b>   | <b>14,206.95</b><br><b>(8,687.34 to</b><br><b>25,282.34)</b> | <b>12,131.40</b><br><b>(7,499.30 to</b><br><b>21,374.27)</b> | <b>15,365.09</b><br><b>(9,325.67 to</b><br><b>27,773.52)</b>  | <b>153.22</b><br><b>(99.70 to</b><br><b>275.35)</b>  | <b>332.49</b><br><b>(221.94 to</b><br><b>575.27)</b> | <b>311.72</b><br><b>(210.93 to</b><br><b>533.17)</b> | <b>341.28</b><br><b>(224.23 to</b><br><b>598.33)</b> |
| Malaria                                               | 963.10<br>(189.27 to<br>4,839.15)                             | 625.45<br>(83.87 to<br>3,748.30)                             | 565.30<br>(77.67 to<br>3,397.11)                             | 662.47<br>(87.77 to<br>4,008.34)                              | 19.87<br>(4.72 to<br>97.39)                          | 14.58<br>(2.54 to<br>81.54)                          | 13.61<br>(2.45 to<br>76.34)                          | 15.12<br>(2.58 to<br>84.88)                          |
| Chagas disease                                        | 477.75<br>(360.80 to<br>611.39)                               | 311.48<br>(211.16 to<br>470.61)                              | 368.02<br>(251.14 to<br>551.08)                              | 276.68<br>(189.44 to<br>428.77)                               | 20.46<br>(15.56 to<br>25.94)                         | 14.99<br>(10.57 to<br>21.74)                         | 18.09<br>(12.85 to<br>25.71)                         | 12.98<br>(9.06 to<br>19.12)                          |
| Leishmaniasis                                         | 1.58<br>(0.87 to<br>2.44)                                     | 0.74<br>(0.35 to<br>1.34)                                    | 0.46<br>(0.23 to<br>0.84)                                    | 0.99<br>(0.48 to<br>1.82)                                     | 0.04<br>(0.02 to<br>0.06)                            | 0.02<br>(0.01 to<br>0.04)                            | 0.01<br>(0.01 to<br>0.02)                            | 0.03<br>(0.01 to<br>0.05)                            |
| African trypanosomiasis                               | 0.00<br>(0.00 to<br>0.00)                                     | 0.00<br>(0.00 to<br>0.00)                                    | 0.00<br>(0.00 to<br>0.00)                                    | 0.00<br>(0.00 to<br>0.00)                                     | 0.00<br>(0.00 to<br>0.00)                            | 0.00<br>(0.00 to<br>0.00)                            | 0.00<br>(0.00 to<br>0.00)                            | 0.00<br>(0.00 to<br>0.00)                            |
| Schistosomiasis                                       | 0.00<br>(0.00 to<br>0.00)                                     | 0.00<br>(0.00 to<br>0.00)                                    | 0.00<br>(0.00 to<br>0.00)                                    | 0.00<br>(0.00 to<br>0.00)                                     | 0.00<br>(0.00 to<br>0.00)                            | 0.00<br>(0.00 to<br>0.00)                            | 0.00<br>(0.00 to<br>0.00)                            | 0.00<br>(0.00 to<br>0.00)                            |
| Cysticercosis                                         | 0.00<br>(0.00 to<br>0.00)                                     | 0.00<br>(0.00 to<br>0.00)                                    | 0.00<br>(0.00 to<br>0.00)                                    | 0.00<br>(0.00 to<br>0.00)                                     | 0.00<br>(0.00 to<br>0.00)                            | 0.00<br>(0.00 to<br>0.00)                            | 0.00<br>(0.00 to<br>0.00)                            | 0.00<br>(0.00 to<br>0.00)                            |
| Cystic echinococcosis                                 | 10.06<br>(7.49 to<br>12.89)                                   | 3.58<br>(2.24 to<br>6.16)                                    | 2.02<br>(1.25 to<br>3.44)                                    | 5.11<br>(3.21 to<br>9.05)                                     | 0.23<br>(0.17 to<br>0.29)                            | 0.10<br>(0.07 to<br>0.17)                            | 0.06<br>(0.04 to<br>0.10)                            | 0.14<br>(0.09 to<br>0.24)                            |
| Dengue                                                | 4,732.88<br>(2,908.73 to<br>6,641.46)                         | 11,990.19<br>(7,357.12 to<br>19,076.92)                      | 10,280.99<br>(6,307.80 to<br>16,490.57)                      | 12,926.34<br>(7,852.07 to<br>20,431.66)                       | 87.99<br>(55.01 to<br>123.37)                        | 283.46<br>(185.33 to<br>436.40)                      | 265.36<br>(175.38 to<br>409.97)                      | 290.82<br>(190.36 to<br>448.96)                      |
| Yellow fever                                          | 0.00<br>(0.00 to<br>0.00)                                     | 0.00<br>(0.00 to<br>0.00)                                    | 0.00<br>(0.00 to<br>0.00)                                    | 0.00<br>(0.00 to<br>0.00)                                     | 0.00<br>(0.00 to<br>0.00)                            | 0.00<br>(0.00 to<br>0.00)                            | 0.00<br>(0.00 to<br>0.00)                            | 0.00<br>(0.00 to<br>0.00)                            |
| Rabies                                                | 3.05<br>(1.80 to<br>5.23)                                     | 0.98<br>(0.51 to<br>1.88)                                    | 0.49<br>(0.26 to<br>0.96)                                    | 1.50<br>(0.80 to<br>2.92)                                     | 0.05<br>(0.03 to<br>0.09)                            | 0.02<br>(0.01 to<br>0.04)                            | 0.01<br>(0.01 to<br>0.02)                            | 0.03<br>(0.02 to<br>0.05)                            |
| Intestinal nematode infections                        | 885.60<br>(534.27 to<br>1,312.33)                             | 778.66<br>(386.74 to<br>1,481.62)                            | 601.06<br>(299.64 to<br>1,137.87)                            | 852.99<br>(438.99 to<br>1,528.82)                             | 11.67<br>(7.32 to<br>16.93)                          | 10.71<br>(5.61 to<br>19.14)                          | 8.63<br>(4.63 to<br>15.35)                           | 11.54<br>(6.25 to<br>20.13)                          |
| Other neglected tropical diseases                     | 866.45<br>(413.08 to<br>3,243.45)                             | 495.87<br>(166.59 to<br>2,204.13)                            | 313.06<br>(102.37 to<br>1,424.60)                            | 639.01<br>(221.41 to<br>2,715.36)                             | 12.72<br>(6.13 to<br>48.59)                          | 8.61<br>(3.04 to<br>39.82)                           | 5.95<br>(2.06 to<br>29.29)                           | 10.63<br>(3.85 to<br>47.39)                          |
| <b>Maternal disorders</b>                             | <b>21,327.82</b><br><b>(13,638.37 to</b><br><b>31,237.61)</b> | <b>12,587.43</b><br><b>(7,518.80 to</b><br><b>19,461.38)</b> | <b>7,778.18</b><br><b>(4,609.10 to</b><br><b>11,843.31)</b>  | <b>17,256.68</b><br><b>(10,115.25 to</b><br><b>26,710.72)</b> | <b>374.65</b><br><b>(238.12 to</b><br><b>548.97)</b> | <b>229.24</b><br><b>(136.32 to</b><br><b>351.04)</b> | <b>142.30</b><br><b>(83.39 to</b><br><b>216.52)</b>  | <b>313.84</b><br><b>(183.22 to</b><br><b>486.11)</b> |
| Maternal hemorrhage                                   | 8,001.11<br>(5,050.35 to<br>11,823.95)                        | 5,248.62<br>(2,968.30 to<br>8,452.32)                        | 3,243.27<br>(1,801.28 to<br>5,208.82)                        | 7,165.18<br>(3,975.69 to<br>11,744.00)                        | 142.11<br>(90.15 to<br>210.04)                       | 96.32<br>(53.84 to<br>155.72)                        | 59.72<br>(32.81 to<br>96.98)                         | 131.39<br>(73.01 to<br>217.17)                       |
| Maternal sepsis and other maternal infections         | 1,785.52<br>(1,048.09 to<br>2,693.85)                         | 1,492.84<br>(788.30 to<br>2,489.00)                          | 912.50<br>(484.84 to<br>1,530.37)                            | 2,055.53<br>(1,047.62 to<br>3,447.48)                         | 31.34<br>(18.55 to<br>47.64)                         | 27.06<br>(14.40 to<br>44.64)                         | 16.63<br>(8.69 to<br>27.94)                          | 37.20<br>(19.07 to<br>62.36)                         |
| Maternal hypertensive disorders                       | 4,313.88<br>(2,522.05 to<br>6,543.25)                         | 1,980.23<br>(1,032.14 to<br>3,407.05)                        | 1,207.02<br>(622.90 to<br>2,085.70)                          | 2,715.42<br>(1,385.68 to<br>4,652.55)                         | 74.39<br>(42.99 to<br>112.46)                        | 35.22<br>(18.33 to<br>61.80)                         | 21.56<br>(11.09 to<br>37.63)                         | 48.24<br>(24.68 to<br>82.88)                         |
| Maternal obstructed labor and uterine rupture         | 532.63<br>(272.88 to<br>858.23)                               | 269.29<br>(121.69 to<br>500.44)                              | 160.26<br>(73.01 to<br>293.65)                               | 375.91<br>(170.96 to<br>705.87)                               | 9.54<br>(4.91 to<br>15.63)                           | 5.00<br>(2.27 to<br>9.18)                            | 2.99<br>(1.37 to<br>5.46)                            | 6.97<br>(3.18 to<br>13.03)                           |
| Maternal abortion, miscarriage, and ectopic pregnancy | 1,411.00<br>(856.35 to<br>2,181.16)                           | 1,210.43<br>(599.88 to<br>2,169.61)                          | 751.57<br>(378.41 to<br>1,343.90)                            | 1,673.26<br>(804.27 to<br>3,064.03)                           | 25.33<br>(15.33 to<br>38.52)                         | 22.30<br>(11.29 to<br>39.78)                         | 13.92<br>(6.98 to<br>24.95)                          | 30.78<br>(15.00 to<br>55.80)                         |
| Indirect maternal deaths                              | 1,942.49<br>(1,104.42 to<br>3,253.72)                         | 496.36<br>(245.98 to<br>899.82)                              | 305.99<br>(143.39 to<br>549.58)                              | 691.41<br>(350.78 to<br>1,260.56)                             | 33.44<br>(19.12 to<br>56.23)                         | 8.84<br>(4.39 to<br>15.93)                           | 5.49<br>(2.60 to<br>9.85)                            | 12.28<br>(5.78 to<br>22.30)                          |

|                                                                  |                                             |                                             |                                           |                                             |                                       |                                       |                                       |                                       |
|------------------------------------------------------------------|---------------------------------------------|---------------------------------------------|-------------------------------------------|---------------------------------------------|---------------------------------------|---------------------------------------|---------------------------------------|---------------------------------------|
| Late maternal deaths                                             | 77.36<br>(36.69 to<br>136.40)               | 95.55<br>(39.71 to<br>186.13)               | 58.28<br>(24.23 to<br>117.88)             | 132.75<br>(53.59 to<br>259.59)              | 1.36<br>(0.65 to<br>2.42)             | 1.74<br>(0.74 to<br>3.37)             | 1.07<br>(0.45 to<br>2.12)             | 2.41<br>(0.99 to<br>4.76)             |
| Maternal deaths aggravated by HIV/AIDS                           | 21.46<br>(8.39 to<br>41.25)                 | 59.27<br>(19.50 to<br>129.44)               | 37.21<br>(10.60 to<br>81.28)              | 81.63<br>(26.67 to<br>172.80)               | 0.39<br>(0.15 to<br>0.75)             | 1.15<br>(0.38 to<br>2.54)             | 0.72<br>(0.21 to<br>1.58)             | 1.58<br>(0.51 to<br>3.36)             |
| Other maternal disorders                                         | 3,242.37<br>(1,984.44 to<br>4,922.46)       | 1,734.84<br>(956.87 to<br>2,872.86)         | 1,102.06<br>(611.90 to<br>1,812.14)       | 2,365.58<br>(1,295.56 to<br>3,937.37)       | 56.75<br>(34.55 to<br>86.57)          | 31.61<br>(17.72 to<br>51.42)          | 20.20<br>(11.18 to<br>32.94)          | 42.99<br>(23.76 to<br>71.69)          |
| <b>Guatemala</b>                                                 |                                             |                                             |                                           |                                             |                                       |                                       |                                       |                                       |
| Cause                                                            | YLLs (actual counts)                        |                                             |                                           |                                             | Deaths (actual counts)                |                                       |                                       |                                       |
|                                                                  | 2016                                        | 2040 Forecast                               | 2040 Better Scenario                      | 2040 Worse Scenario                         | 2016                                  | 2040 Forecast                         | 2040 Better Scenario                  | 2040 Worse Scenario                   |
| Neonatal disorders                                               | 311,766.54<br>(245,324.02 to<br>390,890.28) | 165,440.98<br>(112,159.62 to<br>239,313.14) | 94,849.74<br>(66,376.82 to<br>132,832.06) | 235,569.61<br>(156,980.81 to<br>335,592.63) | 3,602.21<br>(2,834.69 to<br>4,516.80) | 1,912.15<br>(1,296.19 to<br>2,765.85) | 1,096.35<br>(767.43 to<br>1,534.97)   | 2,699.28<br>(1,814.41 to<br>3,878.48) |
| Neonatal preterm birth                                           | 139,049.43<br>(105,196.42 to<br>179,592.20) | 73,090.00<br>(48,624.97 to<br>106,228.60)   | 38,818.48<br>(26,553.22 to<br>54,959.99)  | 105,788.49<br>(69,001.50 to<br>152,481.77)  | 4,606.33<br>(1,215.19 to<br>2,074.60) | 844.54<br>(561.77 to<br>1,227.24)     | 448.59<br>(306.86 to<br>634.92)       | 1,222.29<br>(797.27 to<br>1,761.63)   |
| Neonatal encephalopathy due to birth asphyxia and trauma         | 75,652.56<br>(55,349.39 to<br>99,217.11)    | 31,163.78<br>(17,916.71 to<br>49,386.33)    | 19,475.90<br>(11,513.21 to<br>30,413.61)  | 42,406.61<br>(24,108.23 to<br>67,051.05)    | 874.16<br>(639.68 to<br>1,146.29)     | 360.29<br>(207.23 to<br>570.86)       | 225.18<br>(133.13 to<br>351.72)       | 490.22<br>(279.00 to<br>774.94)       |
| Neonatal sepsis and other neonatal infections                    | 54,556.08<br>(37,808.72 to<br>85,961.68)    | 36,831.44<br>(22,575.06 to<br>60,671.22)    | 22,582.40<br>(13,887.41 to<br>36,540.44)  | 50,503.15<br>(30,530.41 to<br>82,481.06)    | 630.44<br>(436.81 to<br>993.24)       | 425.68<br>(261.00 to<br>701.12)       | 261.00<br>(160.50 to<br>422.30)       | 583.66<br>(352.77 to<br>953.18)       |
| Hemolytic disease and other neonatal jaundice                    | 2,082.37<br>(1,235.42 to<br>3,361.09)       | 614.31<br>(279.66 to<br>1,184.73)           | 352.23<br>(163.89 to<br>651.56)           | 875.18<br>(397.62 to<br>1,711.56)           | 24.08<br>(14.29 to<br>38.85)          | 7.11<br>(3.25 to<br>13.69)            | 4.08<br>(1.90 to<br>7.54)             | 10.13<br>(4.60 to<br>19.79)           |
| Other neonatal disorders                                         | 40,426.11<br>(29,134.36 to<br>55,133.55)    | 23,741.45<br>(14,174.11 to<br>38,339.73)    | 13,620.74<br>(8,419.00 to<br>21,891.14)   | 33,996.19<br>(19,984.35 to<br>54,768.30)    | 467.20<br>(336.70 to<br>637.10)       | 274.53<br>(163.87 to<br>443.69)       | 157.51<br>(97.32 to<br>253.38)        | 393.07<br>(231.15 to<br>653.01)       |
| Nutritional deficiencies                                         | 82,704.90<br>(67,439.81 to<br>99,868.35)    | 71,554.68<br>(56,417.27 to<br>88,541.65)    | 55,891.64<br>(43,441.38 to<br>69,534.90)  | 82,104.44<br>(64,234.34 to<br>102,524.67)   | 2,750.74<br>(2,245.00 to<br>3,337.11) | 3,862.86<br>(3,025.00 to<br>4,623.15) | 3,344.27<br>(2,620.20 to<br>3,991.31) | 4,090.74<br>(3,155.08 to<br>5,007.39) |
| Protein-energy malnutrition                                      | 77,018.06<br>(62,113.28 to<br>92,966.48)    | 64,146.52<br>(50,007.78 to<br>80,397.32)    | 50,211.23<br>(39,122.87 to<br>61,786.38)  | 73,499.16<br>(57,471.91 to<br>91,880.86)    | 2,584.63<br>(2,109.86 to<br>3,124.41) | 3,583.22<br>(2,748.22 to<br>4,304.57) | 3,110.27<br>(2,389.07 to<br>3,741.51) | 3,785.24<br>(2,846.19 to<br>4,653.04) |
| Iodine deficiency                                                | 199.00<br>(5.41 to<br>955.52)               | 1,161.22<br>(5.12 to<br>5,066.63)           | 810.88<br>(3.39 to<br>3,612.78)           | 1,431.57<br>(6.84 to<br>6,451.46)           | 3.54<br>(0.16 to<br>14.00)            | 47.98<br>(0.16 to<br>287.12)          | 37.12<br>(0.10 to<br>244.05)          | 55.02<br>(0.21 to<br>303.04)          |
| Dietary iron deficiency                                          | 114.63<br>(46.09 to<br>165.25)              | 103.12<br>(39.24 to<br>159.41)              | 79.92<br>(30.05 to<br>122.95)             | 117.30<br>(46.01 to<br>179.93)              | 1.89<br>(0.70 to<br>2.71)             | 1.91<br>(0.71 to<br>2.84)             | 1.55<br>(0.56 to<br>2.34)             | 2.13<br>(0.79 to<br>3.15)             |
| Other nutritional deficiencies                                   | 5,373.21<br>(2,656.66 to<br>7,532.25)       | 6,143.82<br>(2,397.45 to<br>9,163.70)       | 4,789.60<br>(1,704.39 to<br>7,110.81)     | 7,056.41<br>(2,846.17 to<br>10,494.47)      | 160.68<br>(59.44 to<br>231.57)        | 229.74<br>(72.47 to<br>338.19)        | 195.34<br>(59.51 to<br>289.85)        | 248.35<br>(80.84 to<br>363.92)        |
| Other communicable, maternal, neonatal, and nutritional diseases | 16,650.19<br>(11,726.58 to<br>24,219.31)    | 8,704.65<br>(5,858.52 to<br>12,318.64)      | 6,371.93<br>(4,388.98 to<br>8,856.81)     | 10,361.59<br>(6,925.37 to<br>14,491.31)     | 264.50<br>(199.50 to<br>360.25)       | 195.85<br>(147.39 to<br>248.71)       | 155.63<br>(118.93 to<br>196.41)       | 222.37<br>(167.76 to<br>282.80)       |
| Sexually transmitted infections excluding HIV                    | 9,243.69<br>(4,860.84 to<br>16,611.25)      | 2,515.50<br>(1,164.73 to<br>4,886.00)       | 1,767.22<br>(874.44 to<br>3,401.96)       | 2,579.25<br>(1,393.13 to<br>5,842.23)       | 116.00<br>(64.36 to<br>202.40)        | 37.02<br>(20.16 to<br>64.07)          | 27.42<br>(15.95 to<br>46.27)          | 43.57<br>(22.94 to<br>77.50)          |
| Syphilis                                                         | 8,688.53<br>(4,293.94 to<br>16,037.28)      | 2,099.40<br>(813.33 to<br>4,444.60)         | 1,411.21<br>(557.89 to<br>3,046.64)       | 2,579.25<br>(995.12 to<br>5,458.78)         | 103.55<br>(52.17 to<br>189.62)        | 26.52<br>(11.32 to<br>54.01)          | 18.20<br>(8.13 to<br>37.66)           | 32.28<br>(13.52 to<br>66.10)          |
| Chlamydia infection                                              | 110.59<br>(70.63 to<br>161.98)              | 81.44<br>(48.86 to<br>123.83)               | 69.55<br>(41.42 to<br>107.06)             | 89.48<br>(53.93 to<br>136.62)               | 2.44<br>(1.58 to<br>3.53)             | 2.03<br>(1.32 to<br>2.99)             | 1.79<br>(1.14 to<br>2.63)             | 2.19<br>(1.41 to<br>3.23)             |
| Gonococcal infection                                             | 284.27<br>(181.21 to<br>421.61)             | 186.45<br>(124.21 to<br>335.47)             | 186.45<br>(106.61 to<br>292.81)           | 237.38<br>(137.24 to<br>365.23)             | 6.61<br>(4.30 to<br>9.58)             | 5.70<br>(3.56 to<br>8.53)             | 5.03<br>(3.13 to<br>7.57)             | 6.10<br>(3.80 to<br>9.10)             |
| Other sexually transmitted infections                            | 160.31<br>(102.02 to<br>236.40)             | 117.84<br>(70.09 to<br>183.42)              | 100.00<br>(58.61 to<br>159.79)            | 129.96<br>(75.43 to<br>206.48)              | 3.40<br>(2.21 to<br>4.98)             | 2.77<br>(1.70 to<br>4.26)             | 2.40<br>(1.49 to<br>3.70)             | 3.00<br>(1.85 to<br>4.65)             |

|                                       |                                                                        |                                                                        |                                                                        |                                                                        |                                                               |                                                                |                                                                |                                                                 |
|---------------------------------------|------------------------------------------------------------------------|------------------------------------------------------------------------|------------------------------------------------------------------------|------------------------------------------------------------------------|---------------------------------------------------------------|----------------------------------------------------------------|----------------------------------------------------------------|-----------------------------------------------------------------|
| Acute hepatitis                       | 2,512.50<br>(2,007.39 to<br>3,092.46)                                  | 1,532.47<br>(1,062.84 to<br>2,114.87)                                  | 1,233.13<br>(829.34 to<br>1,712.46)                                    | 1,737.91<br>(1,199.54 to<br>2,373.71)                                  | 55.72<br>(43.70 to<br>69.39)                                  | 43.51<br>(30.57 to<br>58.82)                                   | 36.31<br>(25.33 to<br>49.91)                                   | 48.23<br>(33.44 to<br>64.96)                                    |
| Acute hepatitis A                     | 214.43<br>(49.89 to<br>424.04)                                         | 89.96<br>(31.86 to<br>180.40)                                          | 64.79<br>(23.50 to<br>127.51)                                          | 107.02<br>(37.97 to<br>213.00)                                         | 2.85<br>(0.87 to<br>5.33)                                     | 1.66<br>(0.63 to<br>3.18)                                      | 1.28<br>(0.50 to<br>2.43)                                      | 1.91<br>(0.75 to<br>3.62)                                       |
| Acute hepatitis B                     | 1,617.01<br>(1,211.46 to<br>2,106.12)                                  | 1,117.32<br>(733.01 to<br>1,622.95)                                    | 905.24<br>(587.83 to<br>1,332.81)                                      | 1,270.09<br>(826.97 to<br>1,831.79)                                    | 39.97<br>(30.14 to<br>51.58)                                  | 32.63<br>(21.55 to<br>46.41)                                   | 26.95<br>(17.74 to<br>38.70)                                   | 36.54<br>(23.99 to<br>51.70)                                    |
| Acute hepatitis C                     | 116.15<br>(82.03 to<br>155.95)                                         | 92.47<br>(57.36 to<br>139.99)                                          | 81.67<br>(50.54 to<br>123.67)                                          | 98.92<br>(61.80 to<br>149.62)                                          | 2.85<br>(1.99 to<br>3.92)                                     | 2.85<br>(1.75 to<br>4.18)                                      | 2.54<br>(1.58 to<br>3.77)                                      | 2.94<br>(1.86 to<br>4.41)                                       |
| Acute hepatitis E                     | 564.91<br>(398.26 to<br>744.76)                                        | 232.72<br>(142.68 to<br>354.43)                                        | 181.44<br>(112.61 to<br>272.43)                                        | 261.88<br>(163.21 to<br>398.72)                                        | 10.06<br>(7.38 to<br>12.95)                                   | 6.43<br>(4.16 to<br>9.24)                                      | 5.55<br>(3.55 to<br>8.01)                                      | 6.85<br>(4.43 to<br>9.87)                                       |
| Other unspecified infectious diseases | 4,894.00<br>(3,947.97 to<br>5,944.63)                                  | 4,656.67<br>(3,289.32 to<br>6,372.95)                                  | 3,371.58<br>(2,381.65 to<br>4,583.34)                                  | 5,587.61<br>(3,932.22 to<br>7,532.02)                                  | 92.78<br>(73.13 to<br>113.12)                                 | 115.32<br>(87.19 to<br>146.58)                                 | 91.90<br>(69.31 to<br>115.75)                                  | 130.57<br>(97.29 to<br>163.32)                                  |
| <b>Non-communicable diseases</b>      | <b>1,357,754.10</b><br><b>(1,081,545.37 to</b><br><b>1,653,644.34)</b> | <b>2,197,329.74</b><br><b>(1,616,698.31 to</b><br><b>3,011,661.99)</b> | <b>1,747,691.01</b><br><b>(1,304,026.07 to</b><br><b>2,353,932.15)</b> | <b>2,709,090.83</b><br><b>(1,965,687.08 to</b><br><b>3,722,693.08)</b> | <b>50,786.25</b><br><b>(40,689.26 to</b><br><b>61,882.55)</b> | <b>97,796.90</b><br><b>(76,537.09 to</b><br><b>127,543.80)</b> | <b>80,426.67</b><br><b>(63,561.08 to</b><br><b>104,566.63)</b> | <b>115,902.33</b><br><b>(90,784.87 to</b><br><b>150,871.22)</b> |
| <b>Guatemala</b>                      |                                                                        |                                                                        |                                                                        |                                                                        |                                                               |                                                                |                                                                |                                                                 |
| Cause                                 | YLLs (actual counts)                                                   |                                                                        |                                                                        |                                                                        | Deaths (actual counts)                                        |                                                                |                                                                |                                                                 |
|                                       | 2016                                                                   | 2040 Forecast                                                          | 2040 Better Scenario                                                   | 2040 Worse Scenario                                                    | 2016                                                          | 2040 Forecast                                                  | 2040 Better Scenario                                           | 2040 Worse Scenario                                             |
| Neoplasms                             | 274,537.06<br>(213,350.63 to<br>344,186.16)                            | 480,667.89<br>(364,612.14 to<br>616,577.72)                            | 449,779.59<br>(342,807.35 to<br>568,448.67)                            | 516,129.20<br>(386,114.93 to<br>672,475.96)                            | 10,274.08<br>(8,084.66 to<br>12,764.10)                       | 20,026.99<br>(16,019.57 to<br>24,533.89)                       | 19,530.83<br>(15,800.11 to<br>23,675.35)                       | 20,747.58<br>(16,470.15 to<br>25,983.20)                        |
| Lip and oral cavity cancer            | 2,332.46<br>(1,769.19 to<br>2,977.41)                                  | 4,953.08<br>(3,000.56 to<br>7,557.28)                                  | 3,835.16<br>(2,450.52 to<br>5,632.07)                                  | 7,107.42<br>(3,943.53 to<br>11,271.45)                                 | 94.26<br>(73.55 to<br>117.71)                                 | 201.02<br>(132.75 to<br>297.95)                                | 162.81<br>(112.64 to<br>232.86)                                | 273.24<br>(166.78 to<br>430.27)                                 |
| Nasopharynx cancer                    | 1,463.73<br>(1,108.68 to<br>1,851.94)                                  | 2,709.02<br>(1,859.74 to<br>3,925.51)                                  | 2,052.91<br>(1,428.94 to<br>2,917.47)                                  | 3,929.30<br>(2,547.68 to<br>6,090.53)                                  | 48.28<br>(36.58 to<br>61.22)                                  | 95.98<br>(67.23 to<br>136.28)                                  | 76.48<br>(55.52 to<br>104.78)                                  | 133.55<br>(88.61 to<br>198.60)                                  |
| Other pharynx cancer                  | 1,459.90<br>(1,114.84 to<br>1,877.90)                                  | 3,034.84<br>(1,814.91 to<br>4,814.84)                                  | 2,480.20<br>(1,556.15 to<br>3,771.13)                                  | 3,807.77<br>(2,239.83 to<br>6,346.21)                                  | 55.04<br>(42.58 to<br>69.58)                                  | 118.65<br>(74.72 to<br>183.49)                                 | 100.40<br>(65.87 to<br>148.17)                                 | 144.39<br>(88.63 to<br>231.86)                                  |
| Esophageal cancer                     | 3,543.46<br>(2,676.46 to<br>4,554.54)                                  | 5,916.79<br>(3,614.49 to<br>9,370.10)                                  | 4,835.59<br>(3,091.24 to<br>7,494.90)                                  | 7,525.20<br>(4,342.88 to<br>12,545.69)                                 | 157.13<br>(120.93 to<br>198.25)                               | 260.83<br>(166.76 to<br>394.85)                                | 220.80<br>(148.04 to<br>323.59)                                | 316.82<br>(192.32 to<br>507.64)                                 |
| Stomach cancer                        | 43,474.43<br>(33,324.65 to<br>54,808.17)                               | 58,831.41<br>(43,995.00 to<br>76,149.54)                               | 54,572.32<br>(40,720.59 to<br>69,754.59)                               | 61,548.91<br>(46,357.64 to<br>79,843.97)                               | 1,909.79<br>(1,498.50 to<br>2,357.77)                         | 2,761.91<br>(2,204.65 to<br>3,452.57)                          | 2,638.81<br>(2,110.67 to<br>3,258.70)                          | 2,798.36<br>(2,233.81 to<br>3,526.23)                           |
| Colon and rectum cancer               | 13,608.14<br>(10,199.18 to<br>17,239.94)                               | 29,638.65<br>(19,431.82 to<br>43,443.32)                               | 29,101.30<br>(19,317.37 to<br>42,576.84)                               | 30,691.30<br>(19,792.14 to<br>45,669.96)                               | 590.41<br>(458.78 to<br>734.60)                               | 1,415.52<br>(965.87 to<br>2,018.68)                            | 1,437.17<br>(999.30 to<br>2,030.12)                            | 1,412.37<br>(938.29 to<br>2,070.13)                             |
| Liver cancer                          | 37,836.89<br>(28,889.49 to<br>48,091.83)                               | 75,770.34<br>(48,673.61 to<br>112,151.01)                              | 64,753.59<br>(43,340.93 to<br>91,065.16)                               | 84,307.56<br>(53,213.12 to<br>127,153.77)                              | 1,580.98<br>(1,221.20 to<br>1,997.90)                         | 3,295.67<br>(2,231.89 to<br>4,787.06)                          | 2,916.40<br>(2,054.96 to<br>4,052.14)                          | 3,552.88<br>(2,341.31 to<br>5,253.64)                           |
| Liver cancer due to hepatitis B       | 10,396.81<br>(7,195.90 to<br>14,496.52)                                | 20,384.14<br>(12,133.35 to<br>32,534.05)                               | 17,730.78<br>(10,989.88 to<br>27,380.21)                               | 22,005.99<br>(12,754.44 to<br>36,010.43)                               | 369.68<br>(255.19 to<br>520.84)                               | 750.31<br>(455.47 to<br>1,162.79)                              | 671.43<br>(418.78 to<br>991.36)                                | 789.56<br>(474.85 to<br>1,143.44)                               |
| Liver cancer due to hepatitis C       | 11,112.02<br>(7,776.56 to<br>15,363.44)                                | 22,416.00<br>(13,695.05 to<br>35,038.45)                               | 19,853.74<br>(12,561.56 to<br>29,714.83)                               | 23,671.46<br>(14,181.87 to<br>37,265.48)                               | 542.23<br>(391.22 to<br>727.72)                               | 1,119.25<br>(715.05 to<br>1,663.60)                            | 1,028.87<br>(691.61 to<br>1,467.92)                            | 1,143.44<br>(718.42 to<br>1,714.44)                             |
| Liver cancer due to alcohol use       | 7,467.01<br>(5,226.87 to<br>10,438.45)                                 | 16,820.65<br>(9,849.04 to<br>27,286.93)                                | 13,402.68<br>(8,343.76 to<br>20,971.81)                                | 21,044.46<br>(12,108.21 to<br>34,547.97)                               | 336.97<br>(240.57 to<br>462.75)                               | 773.26<br>(473.62 to<br>1,230.53)                              | 639.69<br>(413.10 to<br>981.50)                                | 929.82<br>(557.01 to<br>1,487.75)                               |
| Liver cancer due to other causes      | 8,861.06<br>(6,615.51 to<br>11,415.75)                                 | 16,149.54<br>(9,983.48 to<br>25,259.06)                                | 13,766.40<br>(8,846.71 to<br>20,933.65)                                | 17,585.65<br>(10,614.06 to<br>28,139.89)                               | 332.10<br>(251.82 to<br>427.21)                               | 652.85<br>(409.57 to<br>1,018.04)                              | 576.41<br>(376.86 to<br>852.38)                                | 690.26<br>(425.69 to<br>1,100.92)                               |
| Gallbladder and biliary tract cancer  | 4,038.76<br>(3,003.63 to<br>5,297.91)                                  | 8,091.84<br>(6,013.52 to<br>10,594.94)                                 | 8,381.37<br>(6,206.44 to<br>11,029.79)                                 | 7,789.07<br>(5,806.04 to<br>10,142.20)                                 | 184.47<br>(139.70 to<br>238.97)                               | 381.30<br>(300.53 to<br>479.53)                                | 405.36<br>(318.62 to<br>508.60)                                | 357.36<br>(284.70 to<br>446.54)                                 |



|                                     |                                          |                                          |                                          |                                          |                                   |                                       |                                       |                                       |
|-------------------------------------|------------------------------------------|------------------------------------------|------------------------------------------|------------------------------------------|-----------------------------------|---------------------------------------|---------------------------------------|---------------------------------------|
| Pancreatic cancer                   | 7,051.58<br>(5,385.23 to<br>8,907.66)    | 19,887.26<br>(14,307.82 to<br>27,012.59) | 20,620.27<br>(14,855.04 to<br>27,753.13) | 19,555.68<br>(14,019.79 to<br>26,783.83) | 320.17<br>(247.82 to<br>399.61)   | 909.85<br>(679.63 to<br>1,209.71)     | 965.64<br>(730.13 to<br>1,273.22)     | 870.85<br>(650.24 to<br>1,165.73)     |
| Larynx cancer                       | 1,861.27<br>(1,374.05 to<br>2,413.85)    | 2,974.73<br>(1,697.39 to<br>5,054.84)    | 2,326.64<br>(1,414.70 to<br>3,739.68)    | 4,519.19<br>(2,285.40 to<br>8,886.36)    | 79.15<br>(60.13 to<br>100.30)     | 123.24<br>(77.25 to<br>201.90)        | 100.35<br>(66.29 to<br>152.64)        | 178.95<br>(96.89 to<br>340.91)        |
| Tracheal, bronchus, and lung cancer | 13,771.09<br>(10,581.74 to<br>17,325.00) | 25,314.61<br>(16,721.33 to<br>37,830.10) | 21,940.47<br>(15,252.75 to<br>31,197.44) | 37,295.59<br>(22,575.70 to<br>60,853.06) | 601.44<br>(468.87 to<br>743.23)   | 1,112.03<br>(768.03 to<br>1,571.38)   | 1,003.44<br>(729.21 to<br>1,384.40)   | 1,560.91<br>(989.47 to<br>2,496.37)   |
| Malignant skin melanoma             | 1,227.70<br>(888.87 to<br>1,608.46)      | 1,957.79<br>(1,430.51 to<br>2,569.49)    | 2,151.62<br>(1,560.67 to<br>2,829.33)    | 1,816.39<br>(1,327.31 to<br>2,369.24)    | 41.24<br>(30.60 to<br>53.22)      | 75.69<br>(58.49 to<br>94.91)          | 86.55<br>(66.64 to<br>108.76)         | 67.76<br>(52.38 to<br>84.59)          |
| Non-melanoma skin cancer            | 2,795.46<br>(2,099.17 to<br>3,590.45)    | 5,497.64<br>(4,326.31 to<br>6,858.28)    | 5,226.81<br>(4,094.84 to<br>6,547.33)    | 5,578.01<br>(4,413.41 to<br>6,925.62)    | 133.66<br>(104.48 to<br>164.78)   | 284.11<br>(230.98 to<br>334.64)       | 282.07<br>(232.73 to<br>332.75)       | 276.67<br>(225.09 to<br>327.45)       |
| Breast cancer                       | 13,351.18<br>(8,627.08 to<br>18,990.62)  | 28,975.68<br>(17,055.86 to<br>46,778.80) | 27,948.03<br>(16,764.49 to<br>43,768.90) | 30,876.70<br>(17,428.55 to<br>51,954.43) | 466.09<br>(308.26 to<br>658.90)   | 1,113.16<br>(687.54 to<br>1,733.52)   | 1,098.60<br>(692.86 to<br>1,646.22)   | 1,154.17<br>(692.87 to<br>1,852.69)   |
| Cervical cancer                     | 25,230.81<br>(16,384.55 to<br>36,613.47) | 34,143.83<br>(21,501.54 to<br>51,814.48) | 31,081.15<br>(19,589.42 to<br>47,587.41) | 36,482.25<br>(23,026.92 to<br>56,594.52) | 818.67<br>(542.05 to<br>1,160.52) | 1,191.48<br>(803.42 to<br>1,737.33)   | 1,104.64<br>(740.14 to<br>1,609.03)   | 1,245.64<br>(845.26 to<br>1,818.25)   |
| Uterine cancer                      | 3,734.97<br>(2,497.73 to<br>5,252.81)    | 9,177.48<br>(6,042.83 to<br>12,970.66)   | 8,243.53<br>(5,348.50 to<br>11,689.26)   | 9,701.02<br>(6,514.63 to<br>13,740.55)   | 157.24<br>(107.47 to<br>219.69)   | 417.97<br>(300.47 to<br>555.73)       | 384.47<br>(271.31 to<br>514.99)       | 430.76<br>(311.70 to<br>572.38)       |
| Ovarian cancer                      | 4,008.47<br>(2,623.74 to<br>5,920.23)    | 8,347.90<br>(4,773.73 to<br>13,836.45)   | 8,670.24<br>(5,068.32 to<br>13,967.51)   | 8,047.19<br>(4,606.53 to<br>13,457.62)   | 130.85<br>(86.51 to<br>191.69)    | 306.12<br>(179.62 to<br>496.00)       | 323.33<br>(194.26 to<br>514.83)       | 290.34<br>(171.00 to<br>471.88)       |
| Prostate cancer                     | 11,199.70<br>(7,745.90 to<br>15,172.41)  | 24,347.04<br>(18,996.88 to<br>30,654.32) | 26,717.95<br>(20,794.18 to<br>33,689.38) | 22,419.47<br>(17,441.61 to<br>28,415.57) | 823.36<br>(587.79 to<br>1,077.19) | 1,837.26<br>(1,385.95 to<br>2,230.64) | 2,091.78<br>(1,633.66 to<br>2,503.80) | 1,635.69<br>(1,225.85 to<br>2,035.82) |
| Testicular cancer                   | 1,427.88<br>(938.78 to<br>2,077.34)      | 1,735.05<br>(1,036.55 to<br>2,793.82)    | 1,607.96<br>(947.83 to<br>2,584.43)      | 1,799.23<br>(1,068.78 to<br>2,875.88)    | 29.68<br>(20.13 to<br>41.67)      | 40.49<br>(27.69 to<br>58.32)          | 38.62<br>(26.44 to<br>54.91)          | 41.09<br>(28.01 to<br>58.66)          |

| Guatemala                       |                                          |                                          |                                          |                                          |                                 |                                     |                                   |                                     |
|---------------------------------|------------------------------------------|------------------------------------------|------------------------------------------|------------------------------------------|---------------------------------|-------------------------------------|-----------------------------------|-------------------------------------|
| Cause                           | YLLs (actual counts)                     |                                          |                                          |                                          | Deaths (actual counts)          |                                     |                                   |                                     |
|                                 | 2016                                     | 2040 Forecast                            | 2040 Better Scenario                     | 2040 Worse Scenario                      | 2016                            | 2040 Forecast                       | 2040 Better Scenario              | 2040 Worse Scenario                 |
| Kidney cancer                   | 3,687.95<br>(2,879.16 to<br>4,561.01)    | 7,410.45<br>(5,638.32 to<br>9,560.30)    | 7,951.48<br>(5,992.52 to<br>10,343.97)   | 7,083.55<br>(5,418.92 to<br>9,145.82)    | 119.28<br>(92.41 to<br>146.20)  | 266.35<br>(211.34 to<br>326.82)     | 297.47<br>(235.85 to<br>365.98)   | 246.70<br>(196.82 to<br>305.36)     |
| Bladder cancer                  | 1,564.62<br>(1,188.77 to<br>1,958.25)    | 3,066.62<br>(2,220.57 to<br>4,153.79)    | 2,997.26<br>(2,188.79 to<br>3,991.60)    | 3,150.73<br>(2,251.32 to<br>4,334.14)    | 84.78<br>(66.34 to<br>103.37)   | 175.22<br>(130.58 to<br>232.80)     | 177.68<br>(134.76 to<br>232.81)   | 173.14<br>(127.65 to<br>234.21)     |
| Brain and nervous system cancer | 11,715.12<br>(8,714.28 to<br>18,081.65)  | 26,449.15<br>(19,091.62 to<br>38,276.27) | 26,160.36<br>(18,941.82 to<br>37,533.30) | 26,084.49<br>(19,116.72 to<br>37,965.05) | 275.50<br>(204.39 to<br>394.98) | 753.31<br>(578.33 to<br>1,017.49)   | 781.76<br>(596.04 to<br>1,042.32) | 720.57<br>(555.86 to<br>977.80)     |
| Thyroid cancer                  | 1,184.44<br>(877.71 to<br>1,551.07)      | 2,297.92<br>(1,508.43 to<br>3,466.58)    | 1,944.89<br>(1,313.49 to<br>2,868.10)    | 2,474.28<br>(1,605.43 to<br>3,725.97)    | 48.54<br>(36.66 to<br>62.91)    | 101.04<br>(69.07 to<br>145.56)      | 88.40<br>(62.58 to<br>125.31)     | 105.70<br>(72.17 to<br>153.33)      |
| Mesothelioma                    | 457.62<br>(345.37 to<br>594.92)          | 892.63<br>(654.95 to<br>1,178.55)        | 871.62<br>(632.95 to<br>1,163.07)        | 896.91<br>(663.80 to<br>1,168.07)        | 13.55<br>(10.18 to<br>17.94)    | 28.12<br>(21.27 to<br>36.32)        | 28.11<br>(21.06 to<br>36.99)      | 27.75<br>(21.10 to<br>35.55)        |
| Hodgkin lymphoma                | 1,808.81<br>(1,412.79 to<br>2,416.63)    | 2,154.92<br>(1,583.48 to<br>2,871.80)    | 1,743.10<br>(1,272.70 to<br>2,327.76)    | 2,426.45<br>(1,782.22 to<br>3,230.18)    | 47.13<br>(36.76 to<br>59.87)    | 65.96<br>(51.03 to<br>82.06)        | 56.19<br>(43.27 to<br>70.33)      | 71.67<br>(55.83 to<br>89.22)        |
| Non-Hodgkin lymphoma            | 7,879.02<br>(6,214.87 to<br>9,676.65)    | 12,984.39<br>(9,344.39 to<br>17,287.80)  | 12,667.54<br>(9,089.72 to<br>16,614.75)  | 12,853.59<br>(9,312.49 to<br>17,136.53)  | 211.88<br>(164.58 to<br>261.36) | 425.62<br>(318.38 to<br>548.60)     | 435.26<br>(329.23 to<br>552.09)   | 407.60<br>(303.48 to<br>528.85)     |
| Multiple myeloma                | 2,123.93<br>(1,497.49 to<br>3,373.10)    | 5,594.84<br>(3,726.31 to<br>9,280.84)    | 5,665.68<br>(3,812.04 to<br>9,289.40)    | 5,419.27<br>(3,584.21 to<br>9,000.10)    | 81.40<br>(57.49 to<br>134.94)   | 226.38<br>(157.07 to<br>373.36)     | 234.98<br>(165.49 to<br>388.78)   | 214.27<br>(146.85 to<br>355.40)     |
| Leukemia                        | 33,127.51<br>(26,809.57 to<br>40,487.61) | 38,983.28<br>(28,551.01 to<br>52,404.80) | 34,546.57<br>(25,434.71 to<br>46,528.48) | 41,445.28<br>(30,086.81 to<br>55,144.52) | 699.49<br>(557.22 to<br>857.84) | 1,060.38<br>(803.73 to<br>1,366.16) | 983.65<br>(757.60 to<br>1,261.74) | 1,095.60<br>(827.63 to<br>1,412.26) |



|                                                                |                                                      |                                                      |                                                      |                                                      |                                                |                                                |                                                |                                                 |
|----------------------------------------------------------------|------------------------------------------------------|------------------------------------------------------|------------------------------------------------------|------------------------------------------------------|------------------------------------------------|------------------------------------------------|------------------------------------------------|-------------------------------------------------|
| Endocarditis                                                   | 6,290.97<br>(4,759.11 to<br>8,552.52)                | 9,049.98<br>(6,162.20 to<br>13,350.12)               | 7,698.29<br>(5,252.42 to<br>11,505.33)               | 9,774.76<br>(6,679.96 to<br>14,293.92)               | 137.76<br>(102.95 to<br>196.98)                | 257.17<br>(179.02 to<br>379.69)                | 236.38<br>(167.78 to<br>346.87)                | 263.37<br>(184.79 to<br>390.75)                 |
| Other cardiovascular and circulatory diseases                  | 18,193.48<br>(14,703.06 to<br>22,136.47)             | 26,672.70<br>(19,639.90 to<br>34,573.70)             | 21,355.61<br>(15,838.35 to<br>27,347.37)             | 31,007.86<br>(22,978.83 to<br>40,153.93)             | 531.55<br>(424.78 to<br>646.76)                | 1,023.20<br>(817.55 to<br>1,257.75)            | 881.66<br>(707.94 to<br>1,076.77)              | 1,122.04<br>(889.72 to<br>1,393.18)             |
| <b>Chronic respiratory diseases</b>                            | <b>35,900.07<br/>(28,597.88 to<br/>44,054.61)</b>    | <b>42,662.94<br/>(30,532.58 to<br/>58,864.15)</b>    | <b>34,594.47<br/>(25,314.55 to<br/>46,294.10)</b>    | <b>58,028.19<br/>(38,985.15 to<br/>86,706.65)</b>    | <b>1,791.03<br/>(1,443.10 to<br/>2,173.18)</b> | <b>2,190.58<br/>(1,634.47 to<br/>2,923.64)</b> | <b>1,878.41<br/>(1,423.24 to<br/>2,425.32)</b> | <b>2,882.24<br/>(2,004.60 to<br/>4,189.45)</b>  |
| Chronic obstructive pulmonary disease                          | 21,736.31<br>(16,823.90 to<br>27,085.20)             | 24,312.34<br>(16,153.77 to<br>36,334.93)             | 18,183.19<br>(12,326.17 to<br>26,452.53)             | 38,556.27<br>(23,255.44 to<br>64,569.35)             | 1,310.56<br>(1,043.84 to<br>1,591.01)          | 1,456.09<br>(1,020.50 to<br>2,092.98)          | 1,175.61<br>(850.41 to<br>1,638.94)            | 2,140.32<br>(1,374.71 to<br>3,384.72)           |
| Pneumoconiosis                                                 | 127.12<br>(93.47 to<br>166.02)                       | 289.53<br>(200.83 to<br>398.97)                      | 254.00<br>(177.30 to<br>354.81)                      | 304.37<br>(213.11 to<br>410.48)                      | 4.87<br>(3.73 to<br>6.14)                      | 12.01<br>(9.00 to<br>15.76)                    | 10.76<br>(8.11 to<br>14.09)                    | 12.29<br>(9.21 to<br>16.10)                     |
| Silicosis                                                      | 14.51<br>(7.77 to<br>19.93)                          | 17.43<br>(8.97 to<br>26.14)                          | 15.12<br>(7.98 to<br>22.27)                          | 18.79<br>(9.36 to<br>28.07)                          | 0.71<br>(0.36 to<br>0.97)                      | 0.92<br>(0.45 to<br>1.38)                      | 0.83<br>(0.41 to<br>1.25)                      | 0.96<br>(0.47 to<br>1.43)                       |
| Asbestosis                                                     | 47.85<br>(33.48 to<br>65.70)                         | 89.76<br>(59.40 to<br>129.45)                        | 85.95<br>(56.27 to<br>126.87)                        | 90.97<br>(60.78 to<br>129.69)                        | 1.20<br>(0.86 to<br>1.70)                      | 2.74<br>(1.92 to<br>3.87)                      | 2.71<br>(1.88 to<br>3.97)                      | 2.69<br>(1.92 to<br>3.71)                       |
| Coal workers pneumoconiosis                                    | 10.14<br>(5.57 to<br>14.39)                          | 15.04<br>(7.86 to<br>25.09)                          | 10.46<br>(5.31 to<br>18.17)                          | 17.90<br>(9.22 to<br>30.82)                          | 0.41<br>(0.26 to<br>0.56)                      | 0.67<br>(0.36 to<br>1.09)                      | 0.48<br>(0.26 to<br>0.81)                      | 0.77<br>(0.41 to<br>1.24)                       |
| Other pneumoconiosis                                           | 54.63<br>(39.97 to<br>73.15)                         | 167.31<br>(112.52 to<br>240.52)                      | 142.47<br>(95.43 to<br>204.67)                       | 176.70<br>(120.02 to<br>252.75)                      | 2.55<br>(1.94 to<br>3.32)                      | 7.68<br>(5.63 to<br>10.58)                     | 6.74<br>(4.90 to<br>9.17)                      | 7.88<br>(5.73 to<br>10.96)                      |
| Asthma                                                         | 7,795.29<br>(6,162.63 to<br>9,664.22)                | 7,322.32<br>(4,354.33 to<br>11,906.22)               | 5,099.05<br>(3,157.06 to<br>8,027.15)                | 8,758.36<br>(5,133.91 to<br>14,253.06)               | 265.60<br>(206.84 to<br>337.08)                | 303.87<br>(183.97 to<br>479.89)                | 226.70<br>(143.38 to<br>351.82)                | 346.65<br>(207.16 to<br>556.91)                 |
| Interstitial lung disease and pulmonary sarcoidosis            | 3,737.17<br>(2,602.66 to<br>4,987.03)                | 7,431.47<br>(5,244.71 to<br>9,710.77)                | 8,242.92<br>(5,856.32 to<br>10,754.20)               | 6,832.71<br>(4,788.33 to<br>8,905.43)                | 164.42<br>(109.05 to<br>219.94)                | 346.47<br>(244.49 to<br>437.15)                | 399.30<br>(283.81 to<br>501.07)                | 307.66<br>(212.23 to<br>385.89)                 |
| Other chronic respiratory diseases                             | 2,504.18<br>(1,735.95 to<br>3,434.35)                | 3,307.28<br>(2,111.39 to<br>4,723.98)                | 2,815.31<br>(1,823.20 to<br>4,000.14)                | 3,576.48<br>(2,271.42 to<br>5,146.85)                | 45.57<br>(31.51 to<br>65.22)                   | 72.15<br>(48.58 to<br>104.36)                  | 66.04<br>(44.26 to<br>96.66)                   | 75.32<br>(50.17 to<br>109.24)                   |
| <b>Cirrhosis and other chronic liver diseases</b>              | <b>146,210.34<br/>(107,378.89 to<br/>190,861.54)</b> | <b>240,303.28<br/>(174,137.16 to<br/>315,804.30)</b> | <b>212,726.00<br/>(152,832.39 to<br/>280,359.74)</b> | <b>270,725.20<br/>(196,958.97 to<br/>351,669.04)</b> | <b>4,381.64<br/>(3,269.27 to<br/>5,586.99)</b> | <b>7,472.44<br/>(5,671.56 to<br/>9,421.86)</b> | <b>6,712.19<br/>(5,084.55 to<br/>8,483.77)</b> | <b>8,300.00<br/>(6,337.61 to<br/>10,346.52)</b> |
| Cirrhosis and other chronic liver diseases due to hepatitis B  | 5,240.78<br>(3,620.29 to<br>7,218.73)                | 9,188.02<br>(6,414.07 to<br>12,791.64)               | 8,616.86<br>(5,987.16 to<br>12,128.62)               | 9,491.15<br>(6,644.64 to<br>13,250.54)               | 158.56<br>(113.40 to<br>213.58)                | 281.37<br>(207.06 to<br>373.37)                | 267.06<br>(195.20 to<br>355.46)                | 287.13<br>(213.60 to<br>377.26)                 |
| Cirrhosis and other chronic liver diseases due to hepatitis C  | 49,595.00<br>(35,633.46 to<br>66,755.82)             | 90,240.32<br>(63,736.58 to<br>124,547.48)            | 84,288.16<br>(59,135.00 to<br>117,342.42)            | 93,514.67<br>(66,180.96 to<br>127,145.49)            | 1,466.49<br>(1,071.45 to<br>1,936.93)          | 2,696.11<br>(1,995.14 to<br>3,533.31)          | 2,544.26<br>(1,876.09 to<br>3,364.85)          | 2,765.10<br>(2,054.00 to<br>3,578.37)           |
| Cirrhosis and other chronic liver diseases due to alcohol use  | 59,901.77<br>(42,970.15 to<br>77,983.53)             | 97,115.92<br>(69,040.17 to<br>128,706.12)            | 80,274.97<br>(56,522.33 to<br>107,351.95)            | 121,624.69<br>(87,661.55 to<br>159,415.34)           | 1,927.53<br>(1,422.70 to<br>2,451.66)          | 3,182.50<br>(2,385.75 to<br>4,025.96)          | 2,682.17<br>(2,001.22 to<br>3,404.34)          | 3,893.79<br>(2,952.98 to<br>4,861.23)           |
| Cirrhosis and other chronic liver diseases due to other causes | 31,472.80<br>(24,011.83 to<br>39,726.00)             | 43,759.02<br>(31,524.59 to<br>57,581.90)             | 39,546.02<br>(28,033.84 to<br>52,253.91)             | 46,094.69<br>(33,662.34 to<br>60,505.78)             | 829.06<br>(631.11 to<br>1,053.99)              | 1,312.46<br>(993.78 to<br>1,668.67)            | 1,218.70<br>(917.23 to<br>1,555.44)            | 1,353.98<br>(1,029.25 to<br>1,706.74)           |
| <b>Digestive diseases</b>                                      | <b>82,227.66<br/>(62,361.62 to<br/>101,704.15)</b>   | <b>99,358.84<br/>(69,506.34 to<br/>140,403.73)</b>   | <b>79,372.24<br/>(56,026.49 to<br/>110,289.08)</b>   | <b>117,076.90<br/>(80,178.38 to<br/>173,425.95)</b>  | <b>2,524.80<br/>(1,981.90 to<br/>3,117.25)</b> | <b>3,720.57<br/>(2,867.57 to<br/>4,884.93)</b> | <b>3,152.64<br/>(2,457.41 to<br/>4,078.34)</b> | <b>4,166.43<br/>(3,138.77 to<br/>5,655.58)</b>  |
| Peptic ulcer disease                                           | 23,175.74<br>(17,204.90 to<br>29,194.61)             | 22,800.75<br>(16,346.61 to<br>29,089.45)             | 17,917.23<br>(12,602.44 to<br>23,051.49)             | 26,527.14<br>(18,908.85 to<br>34,073.79)             | 1,054.59<br>(693.44 to<br>1,161.03)            | 1,054.59<br>(778.53 to<br>1,304.62)            | 862.19<br>(630.15 to<br>1,078.15)              | 1,181.97<br>(876.22 to<br>1,480.39)             |
| <b>Guatemala</b>                                               |                                                      |                                                      |                                                      |                                                      |                                                |                                                |                                                |                                                 |
| Cause                                                          | YLLs (actual counts)                                 |                                                      |                                                      |                                                      | Deaths (actual counts)                         |                                                |                                                |                                                 |
|                                                                | 2016                                                 | 2040 Forecast                                        | 2040 Better Scenario                                 | 2040 Worse Scenario                                  | 2016                                           | 2040 Forecast                                  | 2040 Better Scenario                           | 2040 Worse Scenario                             |
| Gastritis and duodenitis                                       | 3,435.07<br>(2,231.21 to<br>4,692.05)                | 5,913.00<br>(3,900.60 to<br>8,057.59)                | 5,267.42<br>(3,462.95 to<br>7,206.97)                | 6,276.56<br>(4,127.32 to<br>8,436.89)                | 131.77<br>(94.13 to<br>183.67)                 | 256.03<br>(182.20 to<br>351.13)                | 237.86<br>(169.29 to<br>331.54)                | 261.74<br>(187.93 to<br>355.99)                 |



|                                                            |                                                    |                                                      |                                                    |                                                      |                                                |                                                 |                                                 |                                                 |
|------------------------------------------------------------|----------------------------------------------------|------------------------------------------------------|----------------------------------------------------|------------------------------------------------------|------------------------------------------------|-------------------------------------------------|-------------------------------------------------|-------------------------------------------------|
| Eating disorders                                           | 281.23<br>(206.07 to<br>377.95)                    | 422.63<br>(278.96 to<br>637.37)                      | 399.21<br>(263.96 to<br>602.83)                    | 427.24<br>(283.22 to<br>637.95)                      | 4.71<br>(3.42 to<br>6.37)                      | 7.46<br>(4.98 to<br>11.16)                      | 7.19<br>(4.71 to<br>10.73)                      | 7.49<br>(5.01 to<br>11.17)                      |
| <b>Guatemala</b>                                           |                                                    |                                                      |                                                    |                                                      |                                                |                                                 |                                                 |                                                 |
| Cause                                                      | YLLs (actual counts)                               |                                                      |                                                    |                                                      | Deaths (actual counts)                         |                                                 |                                                 |                                                 |
|                                                            | 2016                                               | 2040 Forecast                                        | 2040 Better Scenario                               | 2040 Worse Scenario                                  | 2016                                           | 2040 Forecast                                   | 2040 Better Scenario                            | 2040 Worse Scenario                             |
| <b>Diabetes, urogenital, blood, and endocrine diseases</b> | <b>261,020.11</b><br>(203,259.66 to<br>327,425.76) | <b>550,771.14</b><br>(286,393.14 to<br>1,122,343.07) | <b>392,446.90</b><br>(207,386.75 to<br>815,259.37) | <b>688,459.86</b><br>(355,422.45 to<br>1,415,781.94) | <b>10,513.34</b><br>(8,246.49 to<br>13,122.53) | <b>26,451.63</b><br>(13,712.27 to<br>56,462.92) | <b>19,619.41</b><br>(10,389.67 to<br>43,327.73) | <b>31,954.42</b><br>(16,296.00 to<br>64,840.00) |
| Diabetes mellitus                                          | 125,769.76<br>(96,766.15 to<br>159,812.02)         | 188,098.08<br>(124,417.77 to<br>284,586.32)          | 137,549.84<br>(91,598.95 to<br>202,973.81)         | 238,643.21<br>(153,275.79 to<br>367,909.86)          | 5,405.51<br>(4,208.45 to<br>6,802.89)          | 8,829.70<br>(6,300.97 to<br>12,418.63)          | 6,729.57<br>(4,862.82 to<br>9,197.82)           | 10,712.57<br>(7,378.00 to<br>15,534.29)         |
| Acute glomerulonephritis                                   | 154.07<br>(121.79 to<br>197.42)                    | 163.61<br>(115.21 to<br>223.88)                      | 131.57<br>(93.42 to<br>178.62)                     | 181.96<br>(127.21 to<br>252.54)                      | 3.41<br>(2.69 to<br>4.29)                      | 3.23<br>(2.37 to<br>4.27)                       | 2.74<br>(2.00 to<br>3.60)                       | 3.50<br>(2.58 to<br>4.61)                       |
| Chronic kidney disease                                     | 112,344.09<br>(88,149.78 to<br>139,889.61)         | 319,886.74<br>(97,972.96 to<br>880,444.32)           | 217,197.37<br>(68,774.78 to<br>642,942.56)         | 404,218.09<br>(123,139.69 to<br>1,105,277.96)        | 4,496.21<br>(3,563.75 to<br>5,574.59)          | 16,160.91<br>(4,518.37 to<br>44,760.53)         | 11,484.51<br>(3,284.61 to<br>34,662.53)         | 19,777.82<br>(5,551.81 to<br>53,469.40)         |
| Chronic kidney disease due to diabetes mellitus            | 37,492.87<br>(27,505.73 to<br>48,730.62)           | 136,641.93<br>(35,365.38 to<br>402,117.95)           | 91,955.34<br>(24,914.89 to<br>282,637.66)          | 172,435.56<br>(43,895.59 to<br>496,044.17)           | 1,629.00<br>(1,218.97 to<br>2,120.78)          | 6,514.35<br>(1,620.33 to<br>18,369.05)          | 4,557.53<br>(1,143.37 to<br>14,168.68)          | 8,009.12<br>(1,967.10 to<br>21,597.47)          |
| Chronic kidney disease due to hypertension                 | 10,925.28<br>(8,108.30 to<br>14,322.49)            | 39,775.27<br>(10,565.27 to<br>120,841.91)            | 28,108.65<br>(7,516.20 to<br>92,092.73)            | 49,020.61<br>(12,859.91 to<br>141,014.66)            | 722.93<br>(547.57 to<br>911.08)                | 2,979.98<br>(847.03 to<br>8,626.05)             | 2,232.51<br>(624.73 to<br>7,249.27)             | 3,504.69<br>(980.52 to<br>9,688.19)             |
| Chronic kidney disease due to glomerulonephritis           | 37,384.45<br>(28,478.25 to<br>47,415.81)           | 80,600.13<br>(29,546.65 to<br>213,857.38)            | 54,634.57<br>(20,525.66 to<br>153,307.51)          | 102,909.85<br>(36,678.01 to<br>270,843.64)           | 1,193.55<br>(905.05 to<br>1,535.47)            | 3,562.74<br>(1,073.65 to<br>9,903.33)           | 2,497.65<br>(757.22 to<br>7,831.48)             | 4,444.64<br>(1,316.92 to<br>11,803.01)          |
| Chronic kidney disease due to other and unspecified causes | 26,541.50<br>(20,415.93 to<br>33,475.49)           | 62,869.42<br>(21,932.90 to<br>167,821.73)            | 42,498.81<br>(15,125.99 to<br>118,880.04)          | 79,852.08<br>(26,921.57 to<br>202,216.07)            | 950.73<br>(731.61 to<br>1,227.87)              | 3,103.84<br>(902.65 to<br>8,996.45)             | 2,196.81<br>(657.77 to<br>6,804.46)             | 3,819.37<br>(1,118.26 to<br>10,318.31)          |
| Urinary diseases and male infertility                      | 8,453.46<br>(7,040.83 to<br>10,089.87)             | 15,455.57<br>(12,035.65 to<br>19,118.55)             | 14,888.90<br>(11,281.77 to<br>18,074.61)           | 15,834.62<br>(12,396.67 to<br>19,440.36)             | 265.26<br>(213.84 to<br>320.16)                | 645.34<br>(532.55 to<br>753.40)                 | 657.43<br>(546.60 to<br>773.06)                 | 619.97<br>(512.42 to<br>721.52)                 |
| Urinary tract infections                                   | 7,420.69<br>(6,100.94 to<br>9,003.37)              | 13,922.28<br>(10,707.27 to<br>17,527.93)             | 13,114.53<br>(10,115.74 to<br>16,450.91)           | 14,216.25<br>(10,898.70 to<br>17,782.19)             | 221.30<br>(173.67 to<br>280.76)                | 568.76<br>(460.84 to<br>692.52)                 | 584.69<br>(474.46 to<br>706.73)                 | 543.02<br>(435.51 to<br>661.07)                 |
| Urolithiasis                                               | 283.86<br>(140.40 to<br>412.90)                    | 463.73<br>(184.29 to<br>726.88)                      | 463.80<br>(167.20 to<br>745.19)                    | 459.74<br>(191.89 to<br>710.34)                      | 9.65<br>(3.84 to<br>14.57)                     | 17.23<br>(5.29 to<br>27.00)                     | 18.21<br>(5.06 to<br>29.06)                     | 16.26<br>(5.33 to<br>25.05)                     |
| Other urinary diseases                                     | 748.92<br>(444.46 to<br>1,025.94)                  | 1,067.56<br>(550.44 to<br>1,498.48)                  | 910.58<br>(444.67 to<br>1,293.82)                  | 1,158.64<br>(620.12 to<br>1,614.07)                  | 34.30<br>(15.32 to<br>49.98)                   | 59.35<br>(24.26 to<br>88.66)                    | 54.53<br>(21.07 to<br>81.75)                    | 60.69<br>(25.34 to<br>90.44)                    |
| Gynecological diseases                                     | 526.69<br>(277.89 to<br>819.74)                    | 981.32<br>(500.75 to<br>1,608.55)                    | 798.79<br>(405.50 to<br>1,308.71)                  | 1,113.24<br>(564.89 to<br>1,852.52)                  | 11.40<br>(6.66 to<br>18.34)                    | 22.40<br>(12.44 to<br>37.91)                    | 18.56<br>(10.18 to<br>31.20)                    | 25.04<br>(13.64 to<br>43.12)                    |
| Uterine fibroids                                           | 126.96<br>(70.49 to<br>219.85)                     | 142.69<br>(63.43 to<br>278.57)                       | 111.86<br>(48.40 to<br>221.63)                     | 165.81<br>(72.95 to<br>327.34)                       | 3.13<br>(1.78 to<br>5.97)                      | 3.66<br>(1.76 to<br>7.71)                       | 2.96<br>(1.42 to<br>6.23)                       | 4.14<br>(1.97 to<br>8.66)                       |
| Polycystic ovarian syndrome                                | 12.19<br>(4.95 to<br>25.15)                        | 20.04<br>(7.10 to<br>45.10)                          | 14.18<br>(4.86 to<br>32.22)                        | 25.07<br>(8.71 to<br>56.12)                          | 0.26<br>(0.10 to<br>0.52)                      | 0.45<br>(0.15 to<br>1.00)                       | 0.32<br>(0.11 to<br>0.71)                       | 0.56<br>(0.19 to<br>1.27)                       |
| Endometriosis                                              | 11.82<br>(1.13 to<br>28.57)                        | 19.54<br>(2.98 to<br>53.78)                          | 15.74<br>(2.36 to<br>44.32)                        | 22.39<br>(3.45 to<br>61.88)                          | 0.22<br>(0.02 to<br>0.52)                      | 0.37<br>(0.06 to<br>0.99)                       | 0.30<br>(0.05 to<br>0.81)                       | 0.43<br>(0.08 to<br>1.16)                       |
| Genital prolapse                                           | 34.19<br>(12.96 to<br>61.10)                       | 67.87<br>(22.02 to<br>143.14)                        | 51.75<br>(17.03 to<br>109.59)                      | 80.03<br>(26.51 to<br>169.32)                        | 0.96<br>(0.49 to<br>2.02)                      | 1.85<br>(0.76 to<br>4.08)                       | 1.45<br>(0.61 to<br>3.18)                       | 2.13<br>(0.88 to<br>4.77)                       |
| Other gynecological diseases                               | 341.53<br>(165.63 to<br>541.31)                    | 731.18<br>(361.85 to<br>1,249.48)                    | 605.27<br>(292.34 to<br>1,024.50)                  | 819.93<br>(397.06 to<br>1,408.37)                    | 6.83<br>(3.74 to<br>10.78)                     | 16.07<br>(8.41 to<br>27.54)                     | 13.53<br>(7.07 to<br>23.16)                     | 17.79<br>(9.19 to<br>29.86)                     |
| Hemoglobinopathies and hemolytic anemias                   | 3,090.70<br>(2,377.96 to<br>4,131.50)              | 3,671.24<br>(2,575.45 to<br>5,028.27)                | 3,104.07<br>(2,144.74 to<br>4,250.50)              | 4,014.02<br>(2,822.81 to<br>5,495.47)                | 72.93<br>(55.55 to<br>96.81)                   | 106.53<br>(78.70 to<br>140.65)                  | 92.46<br>(67.40 to<br>120.81)                   | 114.23<br>(83.07 to<br>149.87)                  |

|                                                   |                                            |                                            |                                           |                                            |                                       |                                     |                                     |                                       |
|---------------------------------------------------|--------------------------------------------|--------------------------------------------|-------------------------------------------|--------------------------------------------|---------------------------------------|-------------------------------------|-------------------------------------|---------------------------------------|
| Thalassemias                                      | 225.94<br>(137.47 to<br>326.78)            | 122.90<br>(63.03 to<br>200.60)             | 110.34<br>(59.75 to<br>176.23)            | 123.79<br>(64.21 to<br>203.27)             | 2.74<br>(1.66 to<br>3.99)             | 1.51<br>(0.77 to<br>2.46)           | 1.35<br>(0.73 to<br>2.18)           | 1.51<br>(0.79 to<br>2.49)             |
| Sickle cell disorders                             | 1,801.64<br>(1,281.02 to<br>2,571.42)      | 2,000.79<br>(1,269.47 to<br>2,954.03)      | 1,699.38<br>(1,065.12 to<br>2,492.44)     | 2,179.94<br>(1,361.67 to<br>3,195.36)      | 30.27<br>(21.12 to<br>44.00)          | 39.54<br>(24.45 to<br>58.50)        | 34.16<br>(20.99 to<br>50.53)        | 42.81<br>(26.44 to<br>64.06)          |
| G6PD deficiency                                   | 474.89<br>(283.43 to<br>719.32)            | 876.67<br>(531.89 to<br>1,349.60)          | 716.52<br>(423.29 to<br>1,105.23)         | 986.57<br>(603.48 to<br>1,494.01)          | 11.15<br>(7.24 to<br>16.33)           | 24.71<br>(15.74 to<br>37.17)        | 20.48<br>(12.87 to<br>31.00)        | 27.55<br>(17.52 to<br>40.90)          |
| Other hemoglobinopathies and hemolytic anemias    | 588.23<br>(412.79 to<br>817.18)            | 670.89<br>(460.31 to<br>918.09)            | 577.84<br>(389.77 to<br>786.02)           | 723.72<br>(497.40 to<br>984.69)            | 28.77<br>(20.92 to<br>38.27)          | 40.77<br>(28.75 to<br>51.87)        | 36.46<br>(25.83 to<br>46.35)        | 42.36<br>(30.31 to<br>55.00)          |
| Endocrine, metabolic, blood, and immune disorders | 10,681.33<br>(7,888.43 to<br>23,552.96)    | 22,514.57<br>(14,816.19 to<br>50,780.64)   | 19,176.36<br>(12,647.57 to<br>43,841.27)  | 24,454.72<br>(16,071.97 to<br>54,916.59)   | 258.62<br>(186.53 to<br>601.50)       | 683.51<br>(477.94 to<br>1,586.97)   | 634.15<br>(443.04 to<br>1,475.19)   | 701.28<br>(493.25 to<br>1,643.39)     |
| <b>Guatemala</b>                                  |                                            |                                            |                                           |                                            |                                       |                                     |                                     |                                       |
| Cause                                             | YLLs (actual counts)                       |                                            |                                           |                                            | Deaths (actual counts)                |                                     |                                     |                                       |
|                                                   | 2016                                       | 2040 Forecast                              | 2040 Better Scenario                      | 2040 Worse Scenario                        | 2016                                  | 2040 Forecast                       | 2040 Better Scenario                | 2040 Worse Scenario                   |
| Musculoskeletal disorders                         | 6,084.38<br>(4,187.94 to<br>7,913.88)      | 10,381.89<br>(6,940.23 to<br>13,641.46)    | 10,490.91<br>(7,021.76 to<br>13,879.55)   | 10,165.64<br>(6,800.13 to<br>13,279.56)    | 194.42<br>(127.92 to<br>251.38)       | 438.48<br>(278.16 to<br>545.02)     | 458.94<br>(295.38 to<br>570.95)     | 415.84<br>(263.43 to<br>517.36)       |
| Rheumatoid arthritis                              | 1,323.06<br>(918.78 to<br>1,825.22)        | 2,758.82<br>(1,885.60 to<br>3,991.97)      | 2,454.40<br>(1,671.54 to<br>3,692.21)     | 2,927.15<br>(2,015.78 to<br>4,162.93)      | 65.66<br>(47.59 to<br>92.13)          | 161.99<br>(111.92 to<br>241.75)     | 150.41<br>(103.92 to<br>231.21)     | 165.04<br>(112.88 to<br>238.19)       |
| Other musculoskeletal disorders                   | 4,761.32<br>(3,222.00 to<br>6,257.05)      | 7,623.08<br>(4,752.69 to<br>10,443.60)     | 8,036.51<br>(5,047.39 to<br>11,024.76)    | 7,238.49<br>(4,475.00 to<br>9,870.57)      | 128.75<br>(77.75 to<br>169.78)        | 276.49<br>(148.01 to<br>357.72)     | 308.52<br>(167.21 to<br>395.60)     | 250.80<br>(134.94 to<br>323.46)       |
| Other non-communicable diseases                   | 135,889.09<br>(82,777.27 to<br>175,677.14) | 101,088.43<br>(59,445.21 to<br>152,879.75) | 73,379.56<br>(44,004.23 to<br>106,667.58) | 121,316.47<br>(70,168.50 to<br>181,870.54) | 1,720.05<br>(1,081.64 to<br>2,198.40) | 1,538.87<br>(947.35 to<br>2,154.64) | 1,222.88<br>(763.65 to<br>1,670.17) | 1,761.01<br>(1,082.70 to<br>2,594.68) |
| Congenital birth defects                          | 121,836.41<br>(70,824.18 to<br>158,753.66) | 84,141.53<br>(46,856.54 to<br>127,282.15)  | 59,094.06<br>(33,422.48 to<br>87,905.83)  | 102,582.11<br>(56,498.92 to<br>154,877.86) | 1,472.24<br>(856.95 to<br>1,905.49)   | 1,069.57<br>(592.76 to<br>1,587.93) | 767.89<br>(428.11 to<br>1,120.04)   | 1,290.07<br>(708.43 to<br>1,926.23)   |
| Neural tube defects                               | 9,431.37<br>(6,126.64 to<br>13,546.98)     | 2,832.41<br>(1,489.75 to<br>4,817.53)      | 1,692.38<br>(924.95 to<br>2,838.42)       | 3,843.02<br>(1,975.40 to<br>6,569.83)      | 110.60<br>(71.68 to<br>158.12)        | 34.14<br>(18.15 to<br>57.03)        | 20.62<br>(11.52 to<br>33.84)        | 46.06<br>(23.95 to<br>77.87)          |
| Congenital heart anomalies                        | 51,898.28<br>(30,882.95 to<br>68,054.55)   | 39,095.34<br>(21,443.95 to<br>61,301.36)   | 27,746.50<br>(15,777.21 to<br>42,645.03)  | 47,241.68<br>(25,967.11 to<br>75,179.48)   | 631.47<br>(371.45 to<br>822.49)       | 495.26<br>(272.30 to<br>760.95)     | 358.59<br>(201.88 to<br>536.31)     | 592.67<br>(325.37 to<br>925.27)       |
| Orofacial clefts                                  | 593.93<br>(214.70 to<br>996.11)            | 430.86<br>(120.51 to<br>938.68)            | 247.93<br>(71.29 to<br>542.29)            | 598.09<br>(166.82 to<br>1,317.56)          | 6.89<br>(2.49 to<br>11.53)            | 5.00<br>(1.40 to<br>10.88)          | 2.88<br>(0.83 to<br>6.29)           | 6.94<br>(1.93 to<br>15.28)            |
| Down syndrome                                     | 8,155.97<br>(3,983.26 to<br>11,659.65)     | 7,536.83<br>(3,581.69 to<br>12,086.66)     | 5,270.54<br>(2,526.16 to<br>8,274.50)     | 9,212.17<br>(4,249.08 to<br>14,799.39)     | 102.84<br>(51.46 to<br>144.21)        | 104.10<br>(51.60 to<br>159.99)      | 75.34<br>(37.56 to<br>114.45)       | 125.17<br>(60.94 to<br>195.59)        |
| Other chromosomal abnormalities                   | 2,291.97<br>(924.34 to<br>3,242.28)        | 2,675.10<br>(1,065.20 to<br>4,389.05)      | 1,848.31<br>(691.96 to<br>2,953.81)       | 3,300.70<br>(1,285.96 to<br>5,450.97)      | 27.67<br>(11.21 to<br>40.24)          | 33.87<br>(13.18 to<br>54.30)        | 23.93<br>(9.08 to<br>38.34)         | 41.32<br>(15.98 to<br>66.80)          |
| Congenital musculoskeletal and limb anomalies     | 1,392.93<br>(389.81 to<br>1,998.03)        | 1,255.14<br>(317.93 to<br>2,070.78)        | 910.66<br>(237.39 to<br>1,439.97)         | 1,498.27<br>(373.96 to<br>2,513.44)        | 16.86<br>(4.81 to<br>23.97)           | 15.63<br>(4.24 to<br>25.01)         | 11.54<br>(3.22 to<br>17.91)         | 18.50<br>(4.84 to<br>30.21)           |
| Urogenital congenital anomalies                   | 4,747.14<br>(2,089.15 to<br>7,051.09)      | 4,092.93<br>(1,844.34 to<br>6,599.63)      | 3,028.15<br>(1,389.53 to<br>4,762.90)     | 4,863.84<br>(2,170.40 to<br>7,956.08)      | 61.01<br>(27.26 to<br>89.28)          | 59.18<br>(26.79 to<br>91.08)        | 45.77<br>(20.49 to<br>70.09)        | 68.73<br>(30.52 to<br>107.40)         |
| Digestive congenital anomalies                    | 11,684.36<br>(5,091.35 to<br>16,753.67)    | 6,464.99<br>(2,646.92 to<br>10,920.02)     | 4,366.20<br>(1,809.76 to<br>7,201.17)     | 8,099.14<br>(3,275.01 to<br>13,828.46)     | 137.45<br>(59.86 to<br>196.87)        | 77.76<br>(31.43 to<br>130.04)       | 53.13<br>(21.91 to<br>86.53)        | 96.87<br>(39.05 to<br>163.57)         |
| Other congenital birth defects                    | 31,640.44<br>(18,115.02 to<br>42,133.05)   | 19,757.93<br>(11,091.73 to<br>29,960.36)   | 13,983.37<br>(7,862.75 to<br>20,840.40)   | 23,925.19<br>(13,186.88 to<br>36,442.53)   | 377.46<br>(216.23 to<br>500.93)       | 244.65<br>(136.38 to<br>369.14)     | 176.10<br>(96.31 to<br>259.22)      | 293.81<br>(160.34 to<br>442.50)       |
| Skin and subcutaneous diseases                    | 4,055.54<br>(1,637.28 to<br>5,595.60)      | 9,949.70<br>(4,227.26 to<br>14,345.28)     | 9,331.53<br>(3,983.89 to<br>13,381.84)    | 10,217.90<br>(4,294.57 to<br>14,762.10)    | 131.83<br>(62.26 to<br>186.93)        | 388.12<br>(184.49 to<br>556.11)     | 397.52<br>(192.35 to<br>561.88)     | 372.13<br>(173.09 to<br>534.78)       |

|                                      |                                                 |                                                   |                                                   |                                                   |                                              |                                              |                                              |                                              |
|--------------------------------------|-------------------------------------------------|---------------------------------------------------|---------------------------------------------------|---------------------------------------------------|----------------------------------------------|----------------------------------------------|----------------------------------------------|----------------------------------------------|
| Cellulitis                           | 806.17<br>(352.56 to 1,411.95)                  | 2,475.87<br>(1,142.82 to 4,071.14)                | 2,555.30<br>(1,187.56 to 4,289.22)                | 2,392.26<br>(1,098.13 to 3,948.86)                | 24.99<br>(12.91 to 49.54)                    | 87.12<br>(45.69 to 157.16)                   | 95.29<br>(50.12 to 174.94)                   | 80.59<br>(42.31 to 145.33)                   |
| Pyoderma                             | 2,695.37<br>(926.52 to 3,879.14)                | 5,490.78<br>(1,725.05 to 8,715.61)                | 4,782.29<br>(1,494.46 to 7,521.13)                | 5,890.67<br>(1,914.87 to 9,276.53)                | 83.10<br>(31.15 to 119.20)                   | 97.13<br>(70.72 to 284.45)                   | 191.30<br>(68.06 to 275.52)                  | 195.57<br>(70.78 to 280.60)                  |
| Decubitus ulcer                      | 434.36<br>(199.48 to 715.47)                    | 1,795.98<br>(816.48 to 2,656.98)                  | 1,816.79<br>(840.75 to 2,716.25)                  | 1,747.26<br>(785.25 to 2,601.13)                  | 20.96<br>(10.81 to 38.55)                    | 99.23<br>(50.85 to 167.72)                   | 106.16<br>(54.02 to 176.90)                  | 91.53<br>(45.92 to 154.51)                   |
| Other skin and subcutaneous diseases | 119.64<br>(48.57 to 187.99)                     | 187.07<br>(74.00 to 290.05)                       | 177.15<br>(67.81 to 272.24)                       | 187.72<br>(75.70 to 289.95)                       | 2.77<br>(1.04 to 4.45)                       | 4.65<br>(1.66 to 7.17)                       | 4.77<br>(1.69 to 7.29)                       | 4.44<br>(1.61 to 6.86)                       |
| Sudden infant death syndrome         | 9,997.14<br>(6,928.73 to 13,818.33)             | 6,997.21<br>(3,191.96 to 12,831.09)               | 4,953.98<br>(2,291.49 to 9,195.87)                | 8,516.46<br>(3,921.06 to 15,764.41)               | 115.99<br>(80.37 to 160.29)                  | 81.18<br>(37.03 to 148.89)                   | 57.48<br>(26.58 to 106.70)                   | 98.80<br>(45.49 to 182.97)                   |
| Injuries                             | <b>710,422.20</b><br>(536,052.24 to 907,408.46) | <b>793,347.38</b><br>(518,853.17 to 1,258,734.81) | <b>700,747.18</b><br>(449,600.75 to 1,100,296.17) | <b>928,009.47</b><br>(599,225.61 to 1,512,971.89) | <b>13,579.27</b><br>(10,168.31 to 17,437.47) | <b>17,139.99</b><br>(11,520.04 to 25,105.88) | <b>15,504.67</b><br>(10,375.68 to 22,674.29) | <b>19,651.11</b><br>(13,298.38 to 29,736.88) |
| Transport injuries                   | <b>133,727.83</b><br>(97,797.13 to 178,088.35)  | <b>96,053.02</b><br>(58,117.39 to 155,647.65)     | <b>60,058.07</b><br>(36,270.06 to 96,241.27)      | <b>193,098.71</b><br>(117,767.71 to 314,459.50)   | <b>2,614.36</b><br>(1,914.03 to 3,457.55)    | <b>2,161.19</b><br>(1,374.81 to 3,457.52)    | <b>1,424.51</b><br>(918.21 to 2,174.70)      | <b>4,099.87</b><br>(2,557.53 to 6,514.23)    |
| Road injuries                        | 126,868.64<br>(92,451.95 to 170,438.98)         | 87,000.90<br>(52,212.43 to 141,397.16)            | 52,414.17<br>(31,523.41 to 84,774.78)             | 182,818.11<br>(110,661.28 to 299,538.39)          | 2,477.32<br>(1,809.48 to 3,283.54)           | 1,953.46<br>(1,228.72 to 3,042.21)           | 1,244.65<br>(797.01 to 1,895.18)             | 3,867.59<br>(2,408.71 to 6,158.98)           |
| Pedestrian road injuries             | 46,465.28<br>(34,032.35 to 62,188.91)           | 30,557.09<br>(19,283.05 to 46,849.77)             | 18,896.61<br>(12,056.41 to 28,614.84)             | 58,702.08<br>(36,037.46 to 92,963.50)             | 1,024.58<br>(752.46 to 1,357.86)             | 835.70<br>(553.35 to 1,213.76)               | 556.93<br>(377.88 to 790.44)                 | 1,499.20<br>(950.32 to 2,227.38)             |
| <b>Guatemala</b>                     |                                                 |                                                   |                                                   |                                                   |                                              |                                              |                                              |                                              |
| Cause                                | YLLs (actual counts)                            |                                                   |                                                   |                                                   | Deaths (actual counts)                       |                                              |                                              |                                              |
|                                      | 2016                                            | 2040 Forecast                                     | 2040 Better Scenario                              | 2040 Worse Scenario                               | 2016                                         | 2040 Forecast                                | 2040 Better Scenario                         | 2040 Worse Scenario                          |
| Cyclist road injuries                | 4,026.24<br>(2,801.44 to 5,852.65)              | 3,297.81<br>(1,811.16 to 5,858.76)                | 2,001.16<br>(1,093.58 to 3,576.15)                | 6,970.34<br>(3,920.66 to 12,428.04)               | 79.51<br>(54.60 to 119.55)                   | 76.42<br>(42.99 to 132.85)                   | 49.86<br>(28.35 to 87.80)                    | 148.85<br>(83.81 to 262.71)                  |
| Motorcyclist road injuries           | 24,433.14<br>(16,345.13 to 35,129.79)           | 22,272.02<br>(12,129.46 to 40,242.20)             | 15,538.90<br>(8,399.57 to 27,582.91)              | 38,250.09<br>(21,362.28 to 69,718.62)             | 430.85<br>(286.35 to 621.90)                 | 426.02<br>(236.74 to 746.92)                 | 305.44<br>(170.24 to 523.17)                 | 709.43<br>(401.84 to 1,256.31)               |
| Motor vehicle road injuries          | 50,116.71<br>(34,749.29 to 70,630.97)           | 29,703.92<br>(16,765.98 to 49,983.53)             | 15,346.40<br>(8,765.89 to 25,837.48)              | 76,022.55<br>(42,569.82 to 126,657.31)            | 905.65<br>(625.44 to 1,275.16)               | 587.20<br>(346.52 to 959.26)                 | 315.53<br>(188.07 to 513.11)                 | 1,447.79<br>(832.77 to 2,373.15)             |
| Other road injuries                  | 1,827.26<br>(1,240.53 to 2,822.54)              | 1,170.06<br>(674.55 to 1,994.11)                  | 631.10<br>(371.28 to 1,067.86)                    | 2,873.05<br>(1,643.04 to 4,941.90)                | 36.73<br>(24.74 to 55.54)                    | 28.12<br>(16.82 to 46.43)                    | 16.88<br>(10.42 to 27.15)                    | 62.32<br>(36.39 to 105.51)                   |
| Other transport injuries             | 6,859.19<br>(4,940.58 to 9,379.45)              | 9,052.12<br>(5,486.39 to 14,209.21)               | 7,643.90<br>(4,586.23 to 12,101.00)               | 10,280.60<br>(6,148.38 to 16,326.23)              | 137.04<br>(96.15 to 186.36)                  | 207.72<br>(128.11 to 315.71)                 | 179.86<br>(110.54 to 271.15)                 | 232.28<br>(141.39 to 361.31)                 |
| Unintentional injuries               | <b>202,126.88</b><br>(155,934.14 to 252,070.98) | <b>197,036.00</b><br>(136,192.36 to 271,079.56)   | <b>170,090.90</b><br>(115,594.80 to 234,063.90)   | <b>212,962.80</b><br>(148,538.53 to 290,514.89)   | <b>4,099.86</b><br>(3,052.78 to 5,173.60)    | <b>5,001.20</b><br>(3,629.90 to 6,435.67)    | <b>4,567.10</b><br>(3,302.79 to 5,883.43)    | <b>5,208.37</b><br>(3,762.53 to 6,763.27)    |
| Falls                                | 22,222.78<br>(15,790.84 to 29,515.64)           | 37,137.02<br>(23,893.11 to 49,550.85)             | 35,412.03<br>(22,747.96 to 47,951.20)             | 37,486.19<br>(23,914.30 to 49,590.44)             | 752.09<br>(503.75 to 982.27)                 | 1,467.75<br>(937.41 to 1,822.51)             | 1,456.10<br>(936.92 to 1,803.60)             | 1,430.06<br>(910.92 to 1,778.17)             |
| Drowning                             | 39,171.63<br>(28,682.89 to 51,148.99)           | 37,593.49<br>(23,192.54 to 57,739.08)             | 31,969.72<br>(19,610.69 to 49,780.54)             | 41,431.87<br>(25,787.99 to 64,346.74)             | 739.76<br>(538.75 to 972.29)                 | 828.90<br>(538.36 to 1,236.40)               | 723.58<br>(468.98 to 1,084.52)               | 900.87<br>(590.06 to 1,364.30)               |
| Fire, heat, and hot substances       | 10,800.94<br>(8,337.57 to 13,090.09)            | 9,967.07<br>(6,506.80 to 14,323.01)               | 8,056.35<br>(5,128.34 to 11,664.35)               | 11,304.17<br>(7,445.93 to 16,587.09)              | 231.38<br>(170.63 to 284.12)                 | 269.31<br>(187.12 to 373.16)                 | 231.23<br>(160.70 to 316.68)                 | 293.71<br>(197.39 to 420.59)                 |
| Poisonings                           | 11,779.16<br>(8,188.04 to 15,623.72)            | 6,653.18<br>(3,671.27 to 10,558.90)               | 4,969.81<br>(2,620.54 to 7,900.43)                | 7,977.37<br>(4,370.29 to 12,857.73)               | 209.76<br>(137.81 to 282.30)                 | 132.89<br>(71.25 to 206.13)                  | 102.16<br>(53.29 to 158.90)                  | 156.92<br>(83.09 to 250.66)                  |
| Exposure to mechanical forces        | 50,973.90<br>(22,738.38 to 68,993.82)           | 34,027.00<br>(13,360.31 to 51,934.52)             | 27,530.48<br>(10,223.61 to 42,276.63)             | 38,111.46<br>(15,485.38 to 57,440.03)             | 936.57<br>(380.83 to 1,270.95)               | 704.37<br>(258.41 to 1,038.25)               | 587.67<br>(212.24 to 864.37)                 | 775.48<br>(293.17 to 1,129.15)               |

|                                                 |                                             |                                             |                                             |                                             |                                       |                                        |                                        |                                        |
|-------------------------------------------------|---------------------------------------------|---------------------------------------------|---------------------------------------------|---------------------------------------------|---------------------------------------|----------------------------------------|----------------------------------------|----------------------------------------|
| Unintentional firearm injuries                  | 29,884.60<br>(7,695.84 to<br>42,278.58)     | 13,135.92<br>(2,623.21 to<br>21,061.72)     | 10,640.47<br>(2,066.03 to<br>17,416.44)     | 14,771.89<br>(2,904.90 to<br>23,554.74)     | 550.27<br>(137.76 to<br>774.70)       | 272.50<br>(56.75 to<br>419.87)         | 225.09<br>(46.91 to<br>352.77)         | 302.86<br>(60.60 to<br>465.80)         |
| Unintentional suffocation                       | 6,594.49<br>(5,084.63 to<br>9,655.12)       | 6,131.60<br>(3,977.18 to<br>9,360.04)       | 4,502.78<br>(2,884.37 to<br>6,880.85)       | 7,127.73<br>(4,596.43 to<br>10,859.07)      | 89.88<br>(69.57 to<br>124.88)         | 90.18<br>(57.86 to<br>136.20)          | 68.28<br>(42.89 to<br>103.39)          | 103.45<br>(66.86 to<br>154.81)         |
| Other exposure to mechanical forces             | 14,494.81<br>(6,667.67 to<br>20,481.65)     | 14,759.49<br>(5,324.11 to<br>22,800.98)     | 12,387.23<br>(4,397.91 to<br>19,331.94)     | 16,211.84<br>(5,928.91 to<br>25,082.15)     | 296.43<br>(127.47 to<br>422.39)       | 341.68<br>(124.64 to<br>508.83)        | 294.29<br>(108.02 to<br>436.52)        | 369.17<br>(135.48 to<br>550.38)        |
| Adverse effects of medical treatment            | 11,459.52<br>(8,298.82 to<br>18,046.45)     | 13,258.15<br>(8,889.02 to<br>21,769.21)     | 10,863.59<br>(7,219.03 to<br>18,160.59)     | 14,688.62<br>(9,861.29 to<br>23,678.32)     | 259.02<br>(183.26 to<br>415.74)       | 400.70<br>(278.87 to<br>636.56)        | 357.32<br>(246.77 to<br>580.24)        | 418.94<br>(292.82 to<br>667.86)        |
| Animal contact                                  | 2,289.32<br>(1,366.26 to<br>3,056.33)       | 2,338.96<br>(1,164.02 to<br>3,687.58)       | 1,753.90<br>(857.83 to<br>2,756.30)         | 2,719.15<br>(1,420.28 to<br>4,196.10)       | 42.60<br>(24.06 to<br>57.61)          | 51.25<br>(25.64 to<br>75.28)           | 41.01<br>(20.34 to<br>59.62)           | 57.49<br>(29.67 to<br>83.82)           |
| Venomous animal contact                         | 1,155.34<br>(778.10 to<br>1,610.18)         | 1,217.48<br>(676.49 to<br>1,822.31)         | 901.81<br>(474.61 to<br>1,362.47)           | 1,424.52<br>(802.23 to<br>2,120.81)         | 22.62<br>(13.41 to<br>30.56)          | 28.08<br>(14.03 to<br>39.62)           | 22.43<br>(10.85 to<br>31.97)           | 31.51<br>(16.13 to<br>44.66)           |
| Non-venomous animal contact                     | 1,133.98<br>(449.31 to<br>1,653.57)         | 1,121.48<br>(410.35 to<br>1,912.44)         | 852.09<br>(312.99 to<br>1,448.04)           | 1,294.63<br>(460.74 to<br>2,202.21)         | 19.99<br>(8.46 to<br>28.57)           | 23.18<br>(9.67 to<br>36.59)            | 18.58<br>(7.84 to<br>29.08)            | 25.98<br>(10.80 to<br>41.08)           |
| Foreign body                                    | 43,863.87<br>(35,128.46 to<br>53,858.65)    | 45,226.71<br>(31,528.12 to<br>61,518.70)    | 40,449.69<br>(27,666.92 to<br>55,340.41)    | 47,324.39<br>(33,342.62 to<br>63,832.28)    | 738.15<br>(574.48 to<br>906.85)       | 901.51<br>(627.31 to<br>1,199.11)      | 858.57<br>(585.47 to<br>1,142.90)      | 909.59<br>(638.73 to<br>1,198.18)      |
| Pulmonary aspiration and foreign body in airway | 41,265.63<br>(32,943.09 to<br>51,141.69)    | 43,143.14<br>(29,885.68 to<br>58,898.45)    | 38,743.73<br>(26,412.98 to<br>53,157.68)    | 45,021.42<br>(31,581.44 to<br>60,772.56)    | 696.23<br>(541.57 to<br>857.67)       | 863.88<br>(596.35 to<br>1,155.68)      | 826.80<br>(560.37 to<br>1,104.58)      | 868.55<br>(604.42 to<br>1,150.74)      |
| Foreign body in other body part                 | 2,598.24<br>(1,602.77 to<br>3,402.40)       | 2,083.57<br>(1,209.26 to<br>2,964.49)       | 1,705.96<br>(993.88 to<br>2,443.61)         | 2,302.97<br>(1,333.31 to<br>3,301.91)       | 41.92<br>(25.99 to<br>55.21)          | 37.63<br>(21.70 to<br>54.44)           | 31.76<br>(18.57 to<br>46.17)           | 41.04<br>(23.55 to<br>59.03)           |
| Environmental heat and cold exposure            | 2,424.62<br>(548.22 to<br>3,734.03)         | 2,334.84<br>(472.16 to<br>3,997.75)         | 1,761.00<br>(358.96 to<br>3,066.55)         | 2,754.48<br>(560.35 to<br>4,719.97)         | 53.22<br>(13.02 to<br>4,719.97)       | 59.95<br>(14.12 to<br>98.81)           | 46.73<br>(11.34 to<br>78.08)           | 69.19<br>(16.09 to<br>115.73)          |
| Other unintentional injuries                    | 7,141.14<br>(5,510.17 to<br>9,396.47)       | 8,499.57<br>(5,400.09 to<br>12,495.55)      | 7,324.32<br>(4,643.87 to<br>10,893.85)      | 9,165.09<br>(6,031.91 to<br>13,608.49)      | 137.30<br>(101.59 to<br>179.17)       | 184.57<br>(124.89 to<br>260.77)        | 162.75<br>(108.89 to<br>230.85)        | 196.13<br>(134.08 to<br>274.14)        |
| Self-harm and interpersonal violence            | 374,457.73<br>(255,873.79 to<br>507,689.59) | 451,580.17<br>(276,758.60 to<br>701,243.05) | 425,251.17<br>(265,393.64 to<br>654,619.12) | 472,196.47<br>(279,778.51 to<br>728,560.75) | 6,863.27<br>(4,676.32 to<br>9,283.71) | 9,004.82<br>(5,607.29 to<br>13,519.00) | 8,573.08<br>(5,396.36 to<br>12,833.43) | 9,367.46<br>(5,757.29 to<br>14,166.06) |

**Guatemala**

| Cause                              | YLLs (actual counts)                        |                                             |                                             |                                             | Deaths (actual counts)                |                                        |                                       |                                        |
|------------------------------------|---------------------------------------------|---------------------------------------------|---------------------------------------------|---------------------------------------------|---------------------------------------|----------------------------------------|---------------------------------------|----------------------------------------|
|                                    | 2016                                        | 2040 Forecast                               | 2040 Better Scenario                        | 2040 Worse Scenario                         | 2016                                  | 2040 Forecast                          | 2040 Better Scenario                  | 2040 Worse Scenario                    |
| Self-harm                          | 55,420.61<br>(37,478.83 to<br>91,268.52)    | 102,015.17<br>(57,196.52 to<br>181,232.23)  | 90,578.09<br>(51,662.63 to<br>159,419.37)   | 116,412.74<br>(63,645.44 to<br>209,087.56)  | 1,056.33<br>(720.25 to<br>1,687.53)   | 2,135.62<br>(1,242.78 to<br>3,649.14)  | 1,921.07<br>(1,145.73 to<br>3,215.08) | 2,417.37<br>(1,375.15 to<br>4,153.08)  |
| Self-harm by firearm               | 5,336.50<br>(3,057.95 to<br>11,401.86)      | 9,549.32<br>(4,412.12 to<br>21,295.51)      | 8,294.75<br>(3,955.92 to<br>21,295.51)      | 11,113.35<br>(4,509.72 to<br>24,716.96)     | 106.65<br>(63.33 to<br>215.79)        | 206.81<br>(100.94 to<br>435.68)        | 182.22<br>(90.26 to<br>377.62)        | 258.10<br>(112.55 to<br>494.63)        |
| Self-harm by other specified means | 50,084.11<br>(34,163.19 to<br>82,067.27)    | 92,465.85<br>(52,895.83 to<br>165,517.31)   | 82,283.34<br>(47,120.86 to<br>145,205.07)   | 105,299.39<br>(58,289.87 to<br>188,853.27)  | 949.68<br>(652.65 to<br>1,516.04)     | 1,928.81<br>(1,145.32 to<br>3,312.08)  | 1,738.85<br>(1,041.33 to<br>2,954.09) | 2,179.27<br>(1,257.71 to<br>3,770.67)  |
| Interpersonal violence             | 319,037.12<br>(200,979.25 to<br>444,484.99) | 349,565.00<br>(194,916.21 to<br>539,938.88) | 334,673.08<br>(189,293.34 to<br>517,976.14) | 355,783.73<br>(189,404.67 to<br>554,452.17) | 5,806.94<br>(3,627.67 to<br>8,110.39) | 6,869.20<br>(3,857.32 to<br>10,373.37) | 6,652.01<br>(3,820.03 to<br>9,984.31) | 6,950.08<br>(3,760.49 to<br>10,536.00) |
| Physical violence by firearm       | 244,549.17<br>(119,290.34 to<br>358,515.31) | 263,895.11<br>(122,123.32 to<br>433,536.99) | 253,514.93<br>(118,975.53 to<br>407,631.24) | 267,233.34<br>(117,452.62 to<br>442,427.20) | 4,430.24<br>(2,147.81 to<br>6,478.05) | 5,105.64<br>(2,343.50 to<br>8,036.44)  | 4,950.84<br>(2,358.84 to<br>7,719.11) | 5,145.45<br>(2,251.28 to<br>8,185.34)  |
| Physical violence by sharp object  | 33,991.12<br>(18,656.79 to<br>82,728.99)    | 43,278.04<br>(22,669.73 to<br>100,723.72)   | 43,272.41<br>(22,792.99 to<br>100,934.93)   | 42,567.59<br>(22,157.25 to<br>98,962.78)    | 641.51<br>(359.22 to<br>1,514.56)     | 889.43<br>(489.49 to<br>1,994.34)      | 900.65<br>(491.67 to<br>2,003.86)     | 868.36<br>(470.50 to<br>1,938.95)      |
| Physical violence by other means   | 40,496.83<br>(24,963.44 to<br>84,023.55)    | 42,391.84<br>(22,466.49 to<br>88,098.24)    | 37,885.74<br>(20,088.02 to<br>79,570.27)    | 45,982.79<br>(23,875.87 to<br>98,004.07)    | 735.19<br>(445.22 to<br>1,508.74)     | 874.13<br>(459.21 to<br>1,809.25)      | 800.53<br>(427.21 to<br>1,694.57)     | 956.27<br>(494.21 to<br>1,923.87)      |



|                                                                              |                                                |                                                |                                                |                                                |                                       |                                       |                                       |                                        |
|------------------------------------------------------------------------------|------------------------------------------------|------------------------------------------------|------------------------------------------------|------------------------------------------------|---------------------------------------|---------------------------------------|---------------------------------------|----------------------------------------|
| Forces of nature, conflict and terrorism, and executions and police conflict | 109.76<br>(90.30 to 154.76)                    | 48,678.19<br>(0.00 to 203,995.56)              | 45,347.04<br>(0.00 to 190,336.17)              | 49,751.50<br>(0.00 to 208,487.90)              | 1.77<br>(1.43 to 2.52)                | 972.78<br>(0.00 to 3,849.46)          | 939.97<br>(0.00 to 3,701.20)          | 975.41<br>(0.00 to 3,873.93)           |
| Exposure to forces of nature                                                 | 0.00<br>(0.00 to 0.00)                         | 37,481.43<br>(0.00 to 44,096.99)               | 34,794.12<br>(0.00 to 40,830.22)               | 38,346.48<br>(0.00 to 45,192.68)               | 0.00<br>(0.00 to 0.00)                | 765.11<br>(0.00 to 904.70)            | 739.50<br>(0.00 to 872.67)            | 766.50<br>(0.00 to 906.90)             |
| Conflict and terrorism                                                       | 0.00<br>(0.00 to 0.00)                         | 9,008.28<br>(0.00 to 35,544.24)                | 8,441.58<br>(0.00 to 33,762.84)                | 9,199.21<br>(0.00 to 36,229.20)                | 0.00<br>(0.00 to 0.00)                | 165.69<br>(0.00 to 665.42)            | 159.35<br>(0.00 to 645.94)            | 166.92<br>(0.00 to 669.01)             |
| Executions and police conflict                                               | 109.76<br>(90.30 to 154.76)                    | 2,188.49<br>(0.00 to 42,614.92)                | 2,111.34<br>(0.00 to 41,075.83)                | 2,205.81<br>(0.00 to 42,932.15)                | 1.77<br>(1.43 to 2.52)                | 41.99<br>(0.00 to 814.81)             | 41.12<br>(0.00 to 797.71)             | 41.99<br>(0.00 to 816.36)              |
| <b>Honduras</b>                                                              |                                                |                                                |                                                |                                                |                                       |                                       |                                       |                                        |
| Cause                                                                        | YLLs (actual counts)                           |                                                |                                                |                                                | Deaths (actual counts)                |                                       |                                       |                                        |
|                                                                              | 2016                                           | 2040 Forecast                                  | 2040 Better Scenario                           | 2040 Worse Scenario                            | 2016                                  | 2040 Forecast                         | 2040 Better Scenario                  | 2040 Worse Scenario                    |
| All causes                                                                   | 1,377,489.73<br>(1,129,779.60 to 1,674,224.10) | 1,665,074.59<br>(1,291,882.65 to 2,222,003.01) | 1,292,750.23<br>(1,012,867.77 to 1,772,177.24) | 2,141,832.49<br>(1,657,470.16 to 2,786,344.95) | 45,038.88<br>(36,428.37 to 55,336.50) | 69,745.80<br>(59,183.68 to 83,409.58) | 56,937.16<br>(48,418.13 to 68,916.11) | 84,648.20<br>(71,403.18 to 101,227.83) |
| Communicable, maternal, neonatal, and nutritional diseases                   | 317,772.00<br>(262,660.84 to 379,484.04)       | 203,315.96<br>(154,772.12 to 267,007.87)       | 133,219.97<br>(103,557.63 to 170,741.25)       | 298,750.08<br>(224,029.86 to 402,744.51)       | 5,539.43<br>(4,683.09 to 6,593.08)    | 4,769.48<br>(3,650.10 to 6,315.93)    | 3,503.71<br>(2,716.47 to 4,603.50)    | 6,585.76<br>(4,843.32 to 9,288.11)     |
| HIV/AIDS and tuberculosis                                                    | 33,226.82<br>(26,917.56 to 42,692.65)          | 32,238.48<br>(22,215.72 to 47,639.39)          | 22,283.17<br>(14,937.98 to 34,209.12)          | 50,493.39<br>(35,757.01 to 70,703.02)          | 859.37<br>(688.03 to 1,071.86)        | 850.16<br>(579.64 to 1,222.86)        | 583.20<br>(384.58 to 862.01)          | 1,263.73<br>(883.85 to 1,792.91)       |
| Tuberculosis                                                                 | 13,319.20<br>(10,075.11 to 17,607.20)          | 9,887.46<br>(6,379.97 to 16,078.89)            | 5,541.74<br>(3,674.72 to 8,640.40)             | 14,439.96<br>(8,879.80 to 24,051.00)           | 471.94<br>(355.30 to 610.37)          | 393.50<br>(259.34 to 622.94)          | 233.68<br>(156.42 to 361.71)          | 550.73<br>(345.65 to 891.88)           |
| HIV/AIDS                                                                     | 19,907.62<br>(15,241.59 to 29,107.73)          | 22,341.02<br>(13,440.79 to 36,761.64)          | 16,741.43<br>(9,926.85 to 28,657.20)           | 36,053.44<br>(23,052.09 to 53,073.97)          | 387.43<br>(293.34 to 579.44)          | 456.65<br>(256.59 to 774.54)          | 349.52<br>(185.15 to 615.63)          | 713.00<br>(430.60 to 1,076.45)         |
| Diarrhea, lower respiratory, and other common infectious diseases            | 101,983.47<br>(81,424.75 to 126,930.21)        | 57,274.14<br>(31,351.25 to 101,010.67)         | 36,035.04<br>(20,263.79 to 60,184.13)          | 94,621.33<br>(48,616.28 to 178,759.78)         | 2,176.28<br>(1,668.26 to 2,866.38)    | 2,176.28<br>(988.44 to 3,277.60)      | 1,887.11<br>(747.95 to 2,341.57)      | 2,817.10<br>(1,378.28 to 5,274.47)     |
| Diarrheal diseases                                                           | 40,780.54<br>(28,385.90 to 56,423.34)          | 16,117.86<br>(2,638.78 to 49,990.60)           | 9,706.21<br>(1,796.99 to 28,760.43)            | 31,094.73<br>(4,591.12 to 95,443.60)           | 976.79<br>(568.82 to 1,566.29)        | 684.95<br>(117.47 to 1,979.19)        | 474.02<br>(90.55 to 1,332.03)         | 1,179.05<br>(188.51 to 3,543.96)       |
| Intestinal infectious diseases                                               | 387.77<br>(179.50 to 763.84)                   | 204.83<br>(62.96 to 444.06)                    | 172.42<br>(52.32 to 366.01)                    | 229.17<br>(68.18 to 511.30)                    | 7.45<br>(3.39 to 14.65)               | 4.85<br>(1.74 to 10.24)               | 4.28<br>(1.54 to 8.92)                | 5.21<br>(1.86 to 11.22)                |
| Typhoid fever                                                                | 305.17<br>(111.87 to 669.80)                   | 181.97<br>(50.51 to 418.52)                    | 156.10<br>(44.35 to 344.55)                    | 200.47<br>(55.92 to 472.93)                    | 5.98<br>(2.26 to 13.27)               | 4.20<br>(1.35 to 9.33)                | 3.77<br>(1.19 to 8.16)                | 4.47<br>(1.40 to 10.00)                |
| Paratyphoid fever                                                            | 5.75<br>(1.54 to 14.86)                        | 4.18<br>(0.88 to 12.11)                        | 3.42<br>(0.73 to 9.63)                         | 4.75<br>(0.99 to 13.76)                        | 0.11<br>(0.03 to 0.27)                | 0.09<br>(0.02 to 0.27)                | 0.08<br>(0.02 to 0.22)                | 0.10<br>(0.02 to 0.29)                 |
| Other intestinal infectious diseases                                         | 76.84<br>(28.28 to 176.78)                     | 18.68<br>(4.74 to 52.77)                       | 12.89<br>(3.41 to 36.48)                       | 23.95<br>(5.79 to 69.59)                       | 1.36<br>(0.52 to 2.95)                | 0.55<br>(0.18 to 1.37)                | 0.43<br>(0.13 to 1.04)                | 0.64<br>(0.21 to 1.63)                 |
| Lower respiratory infections                                                 | 41,406.03<br>(30,181.99 to 56,782.00)          | 23,153.02<br>(12,086.19 to 40,170.34)          | 14,858.00<br>(8,123.39 to 24,753.49)           | 35,922.60<br>(18,157.01 to 65,642.91)          | 878.64<br>(603.00 to 1,363.04)        | 858.73<br>(493.03 to 1,515.46)        | 655.46<br>(384.94 to 1,183.98)        | 1,163.73<br>(637.06 to 2,050.44)       |
| Upper respiratory infections                                                 | 104.86<br>(46.84 to 204.44)                    | 65.67<br>(21.89 to 139.73)                     | 43.08<br>(14.73 to 90.05)                      | 85.65<br>(26.94 to 183.72)                     | 2.17<br>(1.12 to 3.75)                | 2.04<br>(0.76 to 4.35)                | 1.43<br>(0.53 to 3.02)                | 2.49<br>(0.92 to 5.13)                 |
| Otitis media                                                                 | 0.96<br>(0.43 to 2.12)                         | 0.23<br>(0.07 to 0.59)                         | 0.23<br>(0.08 to 0.60)                         | 0.23<br>(0.07 to 0.62)                         | 0.02<br>(0.01 to 0.04)                | 0.01<br>(0.00 to 0.02)                | 0.01<br>(0.00 to 0.02)                | 0.01<br>(0.00 to 0.02)                 |
| Meningitis                                                                   | 10,375.68<br>(6,283.30 to 19,664.24)           | 4,945.33<br>(1,955.50 to 9,663.27)             | 4,079.02<br>(1,698.93 to 7,217.24)             | 5,856.10<br>(2,208.53 to 12,698.72)            | 182.83<br>(122.11 to 306.35)          | 120.09<br>(61.17 to 199.45)           | 110.48<br>(56.78 to 174.52)           | 128.84<br>(65.62 to 230.55)            |
| Pneumococcal meningitis                                                      | 1,477.81<br>(875.80 to 2,663.53)               | 635.20<br>(278.25 to 1,103.48)                 | 591.04<br>(265.88 to 994.72)                   | 683.70<br>(297.66 to 1,268.45)                 | 28.61<br>(18.37 to 45.52)             | 18.69<br>(9.45 to 29.17)              | 18.92<br>(9.58 to 29.51)              | 18.59<br>(9.47 to 30.08)               |

|                                         |                                        |                                         |                                         |                                         |                                |                                 |                                 |                                 |
|-----------------------------------------|----------------------------------------|-----------------------------------------|-----------------------------------------|-----------------------------------------|--------------------------------|---------------------------------|---------------------------------|---------------------------------|
| H influenzae type B meningitis          | 957.61<br>(545.17 to<br>1,921.85)      | 989.29<br>(215.70 to<br>2,913.91)       | 656.36<br>(173.56 to<br>1,700.43)       | 1,419.35<br>(265.07 to<br>4,495.84)     | 15.45<br>(9.85 to<br>27.49)    | 15.42<br>(5.17 to<br>38.48)     | 11.86<br>(4.71 to<br>24.45)     | 20.16<br>(5.62 to<br>56.93)     |
| Meningococcal meningitis                | 3,240.54<br>(1,921.39 to<br>6,323.05)  | 1,277.51<br>(517.27 to<br>2,431.83)     | 1,082.17<br>(454.63 to<br>1,921.15)     | 1,446.79<br>(570.64 to<br>2,896.12)     | 56.41<br>(36.93 to<br>98.39)   | 32.61<br>(16.93 to<br>53.95)    | 30.02<br>(15.64 to<br>48.34)    | 34.31<br>(17.73 to<br>58.70)    |
| Other meningitis                        | 4,699.71<br>(2,799.15 to<br>8,959.99)  | 2,043.32<br>(840.71 to<br>3,793.06)     | 1,749.45<br>(738.60 to<br>3,011.58)     | 2,306.26<br>(945.99 to<br>4,599.39)     | 82.36<br>(53.68 to<br>138.36)  | 53.36<br>(28.19 to<br>87.30)    | 49.68<br>(25.92 to<br>79.90)    | 55.79<br>(28.74 to<br>94.16)    |
| Encephalitis                            | 3,788.84<br>(1,665.17 to<br>7,387.68)  | 2,296.10<br>(814.84 to<br>4,988.14)     | 1,766.52<br>(657.61 to<br>3,698.91)     | 2,777.43<br>(954.92 to<br>6,320.42)     | 57.90<br>(29.06 to<br>107.61)  | 47.33<br>(23.45 to<br>88.86)    | 39.20<br>(20.20 to<br>70.00)    | 53.83<br>(25.72 to<br>105.31)   |
| Diphtheria                              | 14.74<br>(7.67 to<br>25.94)            | 2.43<br>(0.55 to<br>5.44)               | 1.54<br>(0.47 to<br>3.00)               | 3.59<br>(0.63 to<br>9.04)               | 0.21<br>(0.12 to<br>0.35)      | 0.04<br>(0.01 to<br>0.08)       | 0.03<br>(0.01 to<br>0.06)       | 0.05<br>(0.01 to<br>0.12)       |
| Whooping cough                          | 3,969.83<br>(351.26 to<br>13,378.89)   | 1,570.46<br>(14.43 to<br>6,055.87)      | 264.22<br>(8.67 to<br>1,147.91)         | 3,281.18<br>(17.33 to<br>12,431.54)     | 46.95<br>(4.15 to<br>158.06)   | 18.73<br>(0.21 to<br>72.25)     | 3.30<br>(0.12 to<br>14.38)      | 38.91<br>(0.24 to<br>147.59)    |
| Tetanus                                 | 309.84<br>(128.48 to<br>888.55)        | 43.44<br>(12.79 to<br>136.65)           | 26.82<br>(8.43 to<br>70.72)             | 65.29<br>(17.22 to<br>220.73)           | 6.00<br>(2.53 to<br>16.77)     | 0.95<br>(0.31 to<br>2.73)       | 0.80<br>(0.25 to<br>2.29)       | 1.17<br>(0.37 to<br>3.45)       |
| Measles                                 | 0.02<br>(0.00 to<br>0.08)              | 8,558.90<br>(0.00 to<br>32,450.59)      | 4,910.00<br>(0.00 to<br>17,595.59)      | 14,885.05<br>(0.00 to<br>59,610.99)     | 0.00<br>(0.00 to<br>0.00)      | 138.41<br>(0.00 to<br>492.13)   | 84.87<br>(0.00 to<br>290.47)    | 231.32<br>(0.00 to<br>887.01)   |
| <b>Honduras</b>                         |                                        |                                         |                                         |                                         |                                |                                 |                                 |                                 |
| Cause                                   | YLLs (actual counts)                   |                                         |                                         |                                         | Deaths (actual counts)         |                                 |                                 |                                 |
|                                         | 2016                                   | 2040 Forecast                           | 2040 Better Scenario                    | 2040 Worse Scenario                     | 2016                           | 2040 Forecast                   | 2040 Better Scenario            | 2040 Worse Scenario             |
| Varicella and herpes zoster             | 844.37<br>(449.33 to<br>1,457.13)      | 315.87<br>(104.80 to<br>624.39)         | 207.00<br>(76.17 to<br>399.69)          | 420.31<br>(123.74 to<br>855.70)         | 17.32<br>(11.09 to<br>25.40)   | 11.00<br>(5.62 to<br>18.46)     | 8.69<br>(4.52 to<br>14.34)      | 12.49<br>(6.01 to<br>21.76)     |
| Neglected tropical diseases and malaria | 8,238.71<br>(3,521.84 to<br>13,331.92) | 17,952.84<br>(8,721.83 to<br>27,185.00) | 15,690.17<br>(7,941.89 to<br>23,461.34) | 19,758.30<br>(9,173.17 to<br>30,007.16) | 166.14<br>(69.45 to<br>263.29) | 558.47<br>(257.53 to<br>870.89) | 534.24<br>(254.43 to<br>821.81) | 571.56<br>(257.29 to<br>898.19) |
| Malaria                                 | 1,314.52<br>(628.32 to<br>2,759.02)    | 1,150.52<br>(433.35 to<br>3,696.82)     | 1,066.03<br>(403.38 to<br>3,420.73)     | 1,203.44<br>(448.48 to<br>3,787.46)     | 25.70<br>(13.69 to<br>50.91)   | 28.58<br>(12.06 to<br>88.56)    | 27.79<br>(11.50 to<br>86.63)    | 28.70<br>(12.14 to<br>88.13)    |
| Chagas disease                          | 64.52<br>(46.06 to<br>98.97)           | 100.57<br>(54.12 to<br>190.26)          | 121.99<br>(62.88 to<br>232.44)          | 87.44<br>(47.88 to<br>161.14)           | 3.19<br>(2.33 to<br>4.83)      | 5.12<br>(2.78 to<br>9.72)       | 6.33<br>(3.39 to<br>11.79)      | 4.35<br>(2.42 to<br>8.08)       |
| Leishmaniasis                           | 17.76<br>(9.37 to<br>27.84)            | 14.06<br>(6.15 to<br>29.89)             | 9.55<br>(3.97 to<br>21.05)              | 17.61<br>(7.55 to<br>36.23)             | 0.47<br>(0.25 to<br>0.74)      | 0.43<br>(0.17 to<br>0.96)       | 0.31<br>(0.12 to<br>0.70)       | 0.52<br>(0.21 to<br>1.11)       |
| African trypanosomiasis                 | 0.00<br>(0.00 to<br>0.00)              | 0.00<br>(0.00 to<br>0.00)               | 0.00<br>(0.00 to<br>0.00)               | 0.00<br>(0.00 to<br>0.00)               | 0.00<br>(0.00 to<br>0.00)      | 0.00<br>(0.00 to<br>0.00)       | 0.00<br>(0.00 to<br>0.00)       | 0.00<br>(0.00 to<br>0.00)       |
| Schistosomiasis                         | 0.00<br>(0.00 to<br>0.00)              | 0.00<br>(0.00 to<br>0.00)               | 0.00<br>(0.00 to<br>0.00)               | 0.00<br>(0.00 to<br>0.00)               | 0.00<br>(0.00 to<br>0.00)      | 0.00<br>(0.00 to<br>0.00)       | 0.00<br>(0.00 to<br>0.00)       | 0.00<br>(0.00 to<br>0.00)       |
| Cysticercosis                           | 0.00<br>(0.00 to<br>0.00)              | 0.00<br>(0.00 to<br>0.00)               | 0.00<br>(0.00 to<br>0.00)               | 0.00<br>(0.00 to<br>0.00)               | 0.00<br>(0.00 to<br>0.00)      | 0.00<br>(0.00 to<br>0.00)       | 0.00<br>(0.00 to<br>0.00)       | 0.00<br>(0.00 to<br>0.00)       |
| Cystic echinococcosis                   | 5.56<br>(3.96 to<br>7.39)              | 4.26<br>(2.23 to<br>7.95)               | 2.60<br>(1.30 to<br>4.91)               | 5.61<br>(3.06 to<br>10.04)              | 0.15<br>(0.11 to<br>0.20)      | 0.15<br>(0.08 to<br>0.27)       | 0.09<br>(0.05 to<br>0.18)       | 0.19<br>(0.10 to<br>0.33)       |
| Dengue                                  | 3,925.75<br>(536.83 to<br>7,472.65)    | 14,672.02<br>(4,941.88 to<br>24,260.39) | 13,065.87<br>(4,733.49 to<br>21,230.96) | 15,868.04<br>(4,921.51 to<br>26,449.88) | 96.96<br>(14.04 to<br>184.33)  | 488.86<br>(156.71 to<br>812.80) | 472.15<br>(157.58 to<br>779.47) | 495.61<br>(147.56 to<br>836.25) |
| Yellow fever                            | 0.00<br>(0.00 to<br>0.00)              | 0.00<br>(0.00 to<br>0.00)               | 0.00<br>(0.00 to<br>0.00)               | 0.00<br>(0.00 to<br>0.00)               | 0.00<br>(0.00 to<br>0.00)      | 0.00<br>(0.00 to<br>0.00)       | 0.00<br>(0.00 to<br>0.00)       | 0.00<br>(0.00 to<br>0.00)       |
| Rabies                                  | 3.06<br>(0.86 to<br>8.13)              | 1.55<br>(0.33 to<br>4.96)               | 0.79<br>(0.16 to<br>2.66)               | 2.31<br>(0.50 to<br>7.32)               | 0.05<br>(0.01 to<br>0.12)      | 0.03<br>(0.01 to<br>0.09)       | 0.01<br>(0.00 to<br>0.05)       | 0.04<br>(0.01 to<br>0.13)       |

|                                                       |                                                              |                                                             |                                                            |                                                             |                                                      |                                                     |                                                    |                                                     |
|-------------------------------------------------------|--------------------------------------------------------------|-------------------------------------------------------------|------------------------------------------------------------|-------------------------------------------------------------|------------------------------------------------------|-----------------------------------------------------|----------------------------------------------------|-----------------------------------------------------|
|                                                       | 268.71<br>(82.78 to<br>532.23)                               | 306.35<br>(108.49 to<br>642.30)                             | 259.79<br>(94.06 to<br>522.75)                             | 348.29<br>(116.84 to<br>733.71)                             | 3.75<br>(1.53 to<br>6.81)                            | 5.14<br>(2.21 to<br>9.75)                           | 4.72<br>(2.03 to<br>8.78)                          | 5.53<br>(2.28 to<br>10.42)                          |
| Intestinal nematode infections                        |                                                              |                                                             |                                                            |                                                             |                                                      |                                                     |                                                    |                                                     |
|                                                       | 2,619.79<br>(992.56 to<br>5,274.94)                          | 1,703.51<br>(690.35 to<br>3,315.73)                         | 1,163.56<br>(490.64 to<br>2,224.52)                        | 2,225.57<br>(874.28 to<br>4,458.60)                         | 35.55<br>(16.20 to<br>67.23)                         | 30.17<br>(14.83 to<br>55.41)                        | 22.83<br>(11.28 to<br>42.82)                       | 36.63<br>(17.99 to<br>66.96)                        |
| Other neglected tropical diseases                     |                                                              |                                                             |                                                            |                                                             |                                                      |                                                     |                                                    |                                                     |
| <b>Maternal disorders</b>                             | <b>11,276.84</b><br><b>(6,341.26 to</b><br><b>17,629.23)</b> | <b>6,783.97</b><br><b>(3,558.67 to</b><br><b>11,608.26)</b> | <b>4,269.71</b><br><b>(2,169.99 to</b><br><b>7,410.22)</b> | <b>8,974.34</b><br><b>(4,719.48 to</b><br><b>15,235.17)</b> | <b>200.16</b><br><b>(111.75 to</b><br><b>314.52)</b> | <b>124.16</b><br><b>(64.98 to</b><br><b>215.48)</b> | <b>78.41</b><br><b>(39.30 to</b><br><b>137.04)</b> | <b>163.94</b><br><b>(85.67 to</b><br><b>279.22)</b> |
| Maternal hemorrhage                                   | 3,836.97<br>(2,062.32 to<br>6,569.83)                        | 2,282.21<br>(1,072.42 to<br>4,230.03)                       | 1,442.50<br>(669.89 to<br>2,795.13)                        | 2,992.73<br>(1,428.87 to<br>5,647.05)                       | 69.22<br>(36.95 to<br>117.29)                        | 42.52<br>(19.76 to<br>78.11)                        | 26.94<br>(12.12 to<br>50.98)                       | 55.68<br>(26.34 to<br>104.33)                       |
| Maternal sepsis and other maternal infections         | 90.25<br>(35.45 to<br>175.88)                                | 57.28<br>(20.99 to<br>121.52)                               | 35.96<br>(12.88 to<br>78.13)                               | 75.67<br>(28.42 to<br>161.75)                               | 1.63<br>(0.66 to<br>3.16)                            | 1.07<br>(0.40 to<br>2.30)                           | 0.67<br>(0.25 to<br>1.45)                          | 1.40<br>(0.52 to<br>3.01)                           |
| Maternal hypertensive disorders                       | 3,984.20<br>(2,169.10 to<br>6,578.39)                        | 2,253.79<br>(1,115.46 to<br>3,961.09)                       | 1,408.80<br>(675.93 to<br>2,499.22)                        | 2,971.85<br>(1,450.78 to<br>5,215.83)                       | 70.08<br>(37.91 to<br>113.26)                        | 40.78<br>(20.42 to<br>72.19)                        | 25.57<br>(12.21 to<br>45.73)                       | 53.67<br>(26.54 to<br>94.26)                        |
| Maternal obstructed labor and uterine rupture         | 74.06<br>(27.09 to<br>155.99)                                | 51.08<br>(16.60 to<br>120.56)                               | 31.14<br>(9.94 to<br>73.79)                                | 68.24<br>(22.92 to<br>151.43)                               | 1.34<br>(0.49 to<br>2.83)                            | 0.96<br>(0.32 to<br>2.30)                           | 0.59<br>(0.19 to<br>1.42)                          | 1.28<br>(0.42 to<br>2.94)                           |
| Maternal abortion, miscarriage, and ectopic pregnancy | 116.89<br>(47.85 to<br>231.23)                               | 127.61<br>(43.52 to<br>294.92)                              | 81.04<br>(28.17 to<br>192.86)                              | 168.99<br>(59.27 to<br>387.70)                              | 2.15<br>(0.89 to<br>4.27)                            | 2.44<br>(0.86 to<br>5.72)                           | 1.55<br>(0.54 to<br>3.61)                          | 3.22<br>(1.15 to<br>7.39)                           |
| Indirect maternal deaths                              | 1,699.04<br>(888.05 to<br>2,833.43)                          | 1,125.04<br>(494.67 to<br>2,121.31)                         | 710.34<br>(305.84 to<br>1,333.14)                          | 1,502.73<br>(680.02 to<br>2,767.75)                         | 29.35<br>(15.29 to<br>48.84)                         | 19.93<br>(8.85 to<br>37.48)                         | 12.64<br>(5.48 to<br>24.04)                        | 26.55<br>(11.87 to<br>49.05)                        |
| Late maternal deaths                                  | 270.85<br>(130.55 to<br>487.24)                              | 128.04<br>(53.03 to<br>269.35)                              | 80.47<br>(32.18 to<br>175.97)                              | 170.32<br>(70.90 to<br>351.49)                              | 4.82<br>(2.31 to<br>8.65)                            | 2.36<br>(0.97 to<br>5.06)                           | 1.49<br>(0.59 to<br>3.17)                          | 3.13<br>(1.30 to<br>6.46)                           |
| Maternal deaths aggravated by HIV/AIDS                | 19.35<br>(7.53 to<br>39.70)                                  | 47.95<br>(3.60 to<br>203.13)                                | 17.51<br>(0.33 to<br>110.10)                               | 94.03<br>(16.44 to<br>277.82)                               | 0.37<br>(0.14 to<br>0.75)                            | 0.88<br>(0.06 to<br>3.97)                           | 0.32<br>(0.01 to<br>2.24)                          | 1.77<br>(0.28 to<br>5.39)                           |
| Other maternal disorders                              | 1,185.23<br>(631.95 to<br>2,032.12)                          | 710.96<br>(333.31 to<br>1,375.89)                           | 461.95<br>(209.61 to<br>917.56)                            | 929.77<br>(437.94 to<br>1,774.24)                           | 21.21<br>(11.45 to<br>36.59)                         | 13.23<br>(6.21 to<br>25.49)                         | 8.63<br>(3.90 to<br>16.83)                         | 17.24<br>(8.04 to<br>33.31)                         |

### Honduras

| Cause                                                    | YLLs (actual counts)                                             |                                                                |                                                               |                                                                 | Deaths (actual counts)                                     |                                                        |                                                      |                                                          |
|----------------------------------------------------------|------------------------------------------------------------------|----------------------------------------------------------------|---------------------------------------------------------------|-----------------------------------------------------------------|------------------------------------------------------------|--------------------------------------------------------|------------------------------------------------------|----------------------------------------------------------|
|                                                          | 2016                                                             | 2040 Forecast                                                  | 2040 Better Scenario                                          | 2040 Worse Scenario                                             | 2016                                                       | 2040 Forecast                                          | 2040 Better Scenario                                 | 2040 Worse Scenario                                      |
| <b>Neonatal disorders</b>                                | <b>143,597.28</b><br><b>(106,940.06 to</b><br><b>183,454.81)</b> | <b>75,418.31</b><br><b>(49,470.01 to</b><br><b>107,610.31)</b> | <b>44,305.10</b><br><b>(30,207.60 to</b><br><b>62,331.96)</b> | <b>108,858.68</b><br><b>(72,667.19 to</b><br><b>157,338.16)</b> | <b>1,658.99</b><br><b>(1,235.47 to</b><br><b>2,119.42)</b> | <b>871.47</b><br><b>(571.66 to</b><br><b>1,243.30)</b> | <b>511.98</b><br><b>(349.22 to</b><br><b>720.16)</b> | <b>1,257.85</b><br><b>(839.75 to</b><br><b>1,818.07)</b> |
| Neonatal preterm birth                                   | 66,549.21<br>(45,963.84 to<br>91,310.83)                         | 33,507.40<br>(20,341.15 to<br>50,760.64)                       | 17,667.12<br>(11,011.67 to<br>25,701.21)                      | 48,821.82<br>(29,896.34 to<br>73,856.53)                        | 768.74<br>(530.94 to<br>1,054.70)                          | 387.10<br>(235.03 to<br>586.38)                        | 204.12<br>(127.22 to<br>296.88)                      | 564.02<br>(345.44 to<br>853.18)                          |
| Neonatal encephalopathy due to birth asphyxia and trauma | 38,124.27<br>(23,594.31 to<br>56,294.52)                         | 18,846.05<br>(9,778.75 to<br>32,311.46)                        | 12,262.40<br>(6,547.63 to<br>20,894.31)                       | 26,645.21<br>(13,741.98 to<br>45,783.66)                        | 440.49<br>(271.60 to<br>650.38)                            | 217.81<br>(113.12 to<br>373.40)                        | 141.72<br>(75.69 to<br>241.48)                       | 307.93<br>(158.95 to<br>529.24)                          |
| Neonatal sepsis and other neonatal infections            | 20,486.68<br>(13,063.15 to<br>31,556.73)                         | 13,260.24<br>(7,491.88 to<br>21,790.09)                        | 8,499.86<br>(4,929.76 to<br>13,563.60)                        | 18,858.83<br>(10,647.49 to<br>31,256.67)                        | 236.68<br>(150.93 to<br>364.58)                            | 153.22<br>(86.56 to<br>251.77)                         | 98.21<br>(56.96 to<br>156.74)                        | 217.91<br>(123.04 to<br>361.28)                          |
| Hemolytic disease and other neonatal jaundice            | 1,187.11<br>(669.39 to<br>2,019.08)                              | 434.03<br>(185.08 to<br>854.77)                                | 260.68<br>(116.77 to<br>511.33)                               | 643.14<br>(276.19 to<br>1,266.14)                               | 13.71<br>(7.73 to<br>23.32)                                | 5.02<br>(2.14 to<br>9.87)                              | 3.01<br>(1.35 to<br>5.91)                            | 7.43<br>(3.19 to<br>14.63)                               |
| Other neonatal disorders                                 | 17,250.02<br>(10,860.21 to<br>26,685.58)                         | 9,370.58<br>(4,969.37 to<br>15,635.66)                         | 5,615.05<br>(3,071.83 to<br>9,346.46)                         | 13,889.68<br>(7,469.28 to<br>23,608.15)                         | 199.36<br>(125.59 to<br>308.49)                            | 108.32<br>(57.47 to<br>180.79)                         | 64.91<br>(35.52 to<br>108.04)                        | 160.56<br>(86.43 to<br>272.92)                           |
| <b>Nutritional deficiencies</b>                          | <b>12,478.65</b><br><b>(9,016.63 to</b><br><b>17,308.60)</b>     | <b>7,862.01</b><br><b>(5,915.60 to</b><br><b>10,347.96)</b>    | <b>6,103.88</b><br><b>(4,653.51 to</b><br><b>7,855.78)</b>    | <b>9,244.42</b><br><b>(6,799.26 to</b><br><b>12,473.49)</b>     | <b>330.64</b><br><b>(246.48 to</b><br><b>419.29)</b>       | <b>305.23</b><br><b>(230.95 to</b><br><b>387.22)</b>   | <b>264.79</b><br><b>(200.05 to</b><br><b>338.67)</b> | <b>324.88</b><br><b>(241.72 to</b><br><b>413.74)</b>     |
| Protein-energy malnutrition                              | 8,933.63<br>(6,023.30 to<br>12,917.73)                           | 4,202.13<br>(2,759.18 to<br>6,356.36)                          | 3,154.96<br>(2,107.04 to<br>4,823.58)                         | 5,071.26<br>(3,243.59 to<br>7,647.43)                           | 203.43<br>(142.95 to<br>276.19)                            | 146.56<br>(96.91 to<br>232.22)                         | 124.23<br>(80.33 to<br>204.02)                       | 159.05<br>(103.56 to<br>243.85)                          |

|                                                                         |                                                                  |                                                                      |                                                                    |                                                                        |                                                               |                                                               |                                                               |                                                               |
|-------------------------------------------------------------------------|------------------------------------------------------------------|----------------------------------------------------------------------|--------------------------------------------------------------------|------------------------------------------------------------------------|---------------------------------------------------------------|---------------------------------------------------------------|---------------------------------------------------------------|---------------------------------------------------------------|
| Iodine deficiency                                                       | 107.52<br>(5.25 to<br>485.60)                                    | 264.40<br>(6.47 to<br>934.61)                                        | 193.29<br>(4.43 to<br>660.83)                                      | 321.95<br>(7.26 to<br>1,240.94)                                        | 2.50<br>(0.14 to<br>9.03)                                     | 10.27<br>(0.21 to<br>35.31)                                   | 8.28<br>(0.13 to<br>30.13)                                    | 11.38<br>(0.27 to<br>39.58)                                   |
| Dietary iron deficiency                                                 | 103.80<br>(70.27 to<br>149.16)                                   | 85.16<br>(56.68 to<br>125.52)                                        | 69.83<br>(46.08 to<br>104.41)                                      | 96.65<br>(63.75 to<br>144.95)                                          | 2.43<br>(1.58 to<br>3.73)                                     | 2.61<br>(1.59 to<br>4.65)                                     | 2.38<br>(1.40 to<br>4.49)                                     | 2.70<br>(1.71 to<br>4.68)                                     |
| Other nutritional deficiencies                                          | 3,333.70<br>(846.07 to<br>5,141.92)                              | 3,310.32<br>(1,096.49 to<br>4,783.60)                                | 2,685.80<br>(903.15 to<br>3,860.29)                                | 3,754.57<br>(1,203.28 to<br>5,544.80)                                  | 122.29<br>(31.48 to<br>174.60)                                | 145.80<br>(48.89 to<br>210.15)                                | 129.90<br>(45.78 to<br>186.39)                                | 151.74<br>(49.61 to<br>221.98)                                |
| <b>Other communicable, maternal, neonatal, and nutritional diseases</b> | <b>6,970.23</b><br><b>(5,197.55 to</b><br><b>9,330.62)</b>       | <b>5,796.21</b><br><b>(4,298.55 to</b><br><b>7,820.72)</b>           | <b>4,532.90</b><br><b>(3,348.29 to</b><br><b>6,259.72)</b>         | <b>6,799.61</b><br><b>(4,997.91 to</b><br><b>9,394.37)</b>             | <b>147.85</b><br><b>(115.05 to</b><br><b>186.57)</b>          | <b>172.87</b><br><b>(134.62 to</b><br><b>220.05)</b>          | <b>148.53</b><br><b>(113.66 to</b><br><b>190.22)</b>          | <b>186.70</b><br><b>(145.33 to</b><br><b>239.82)</b>          |
| Sexually transmitted infections excluding HIV                           | 801.78<br>(465.96 to<br>1,263.51)                                | 369.56<br>(217.48 to<br>581.61)                                      | 304.22<br>(180.35 to<br>492.51)                                    | 420.02<br>(247.17 to<br>654.79)                                        | 15.90<br>(9.69 to<br>23.93)                                   | 10.83<br>(6.43 to<br>17.43)                                   | 9.53<br>(5.80 to<br>15.67)                                    | 11.53<br>(6.90 to<br>18.56)                                   |
| Syphilis                                                                | 552.78<br>(273.50 to<br>994.43)                                  | 162.80<br>(86.97 to<br>275.19)                                       | 122.11<br>(68.08 to<br>201.95)                                     | 199.98<br>(105.36 to<br>350.46)                                        | 8.13<br>(4.50 to<br>13.06)                                    | 3.55<br>(2.11 to<br>5.51)                                     | 2.89<br>(1.72 to<br>4.55)                                     | 4.05<br>(2.37 to<br>6.47)                                     |
| Chlamydial infection                                                    | 47.74<br>(25.29 to<br>83.10)                                     | 38.91<br>(21.08 to<br>70.91)                                         | 34.15<br>(18.40 to<br>62.33)                                       | 41.54<br>(22.47 to<br>75.79)                                           | 1.46<br>(0.82 to<br>2.40)                                     | 1.33<br>(0.76 to<br>2.17)                                     | 1.22<br>(0.70 to<br>2.00)                                     | 1.37<br>(0.79 to<br>2.28)                                     |
| Gonococcal infection                                                    | 133.95<br>(72.50 to<br>226.83)                                   | 114.07<br>(60.93 to<br>202.48)                                       | 101.04<br>(54.25 to<br>175.85)                                     | 120.76<br>(64.96 to<br>213.95)                                         | 4.44<br>(2.46 to<br>7.51)                                     | 4.25<br>(2.34 to<br>7.20)                                     | 3.90<br>(2.18 to<br>6.68)                                     | 4.35<br>(2.39 to<br>7.58)                                     |
| Other sexually transmitted infections                                   | 67.31<br>(36.04 to<br>117.17)                                    | 53.78<br>(27.22 to<br>97.30)                                         | 46.91<br>(23.62 to<br>85.64)                                       | 57.73<br>(29.24 to<br>104.10)                                          | 1.87<br>(1.06 to<br>3.17)                                     | 1.69<br>(0.94 to<br>2.84)                                     | 1.52<br>(0.84 to<br>2.54)                                     | 1.76<br>(0.97 to<br>3.02)                                     |
| Acute hepatitis                                                         | 1,633.11<br>(1,216.68 to<br>2,089.01)                            | 1,024.08<br>(710.50 to<br>1,412.59)                                  | 830.34<br>(561.41 to<br>1,161.83)                                  | 1,165.65<br>(821.89 to<br>1,605.72)                                    | 33.33<br>(25.62 to<br>42.25)                                  | 29.53<br>(20.70 to<br>41.07)                                  | 25.48<br>(17.60 to<br>36.44)                                  | 31.94<br>(22.82 to<br>43.48)                                  |
| Acute hepatitis A                                                       | 212.96<br>(44.26 to<br>485.60)                                   | 66.61<br>(18.98 to<br>144.56)                                        | 47.23<br>(14.40 to<br>102.30)                                      | 85.35<br>(23.67 to<br>189.19)                                          | 2.68<br>(0.68 to<br>5.93)                                     | 1.07<br>(0.40 to<br>2.15)                                     | 0.81<br>(0.31 to<br>1.61)                                     | 1.30<br>(0.46 to<br>2.65)                                     |
| Acute hepatitis B                                                       | 826.72<br>(581.32 to<br>1,128.21)                                | 678.00<br>(451.61 to<br>986.84)                                      | 559.98<br>(360.48 to<br>820.24)                                    | 756.07<br>(500.82 to<br>1,092.98)                                      | 20.75<br>(15.18 to<br>27.98)                                  | 21.36<br>(14.14 to<br>30.71)                                  | 18.31<br>(11.89 to<br>26.93)                                  | 23.07<br>(15.48 to<br>32.55)                                  |
| Acute hepatitis C                                                       | 68.83<br>(47.22 to<br>94.38)                                     | 60.12<br>(37.99 to<br>93.50)                                         | 53.31<br>(33.43 to<br>82.35)                                       | 64.28<br>(40.79 to<br>99.55)                                           | 1.60<br>(1.10 to<br>2.23)                                     | 1.81<br>(1.13 to<br>2.84)                                     | 1.69<br>(1.05 to<br>2.65)                                     | 1.87<br>(1.18 to<br>2.91)                                     |
| Acute hepatitis E                                                       | 524.60<br>(324.34 to<br>782.86)                                  | 219.35<br>(132.09 to<br>343.90)                                      | 169.81<br>(104.78 to<br>261.80)                                    | 259.95<br>(153.45 to<br>411.81)                                        | 8.30<br>(5.58 to<br>11.57)                                    | 5.29<br>(3.37 to<br>7.95)                                     | 4.67<br>(2.91 to<br>7.19)                                     | 5.70<br>(3.65 to<br>8.54)                                     |
| Other unspecified infectious diseases                                   | 4,535.34<br>(3,237.80 to<br>6,477.96)                            | 4,402.57<br>(3,220.37 to<br>6,085.41)                                | 3,398.35<br>(2,438.29 to<br>4,838.88)                              | 5,213.94<br>(3,756.56 to<br>7,405.62)                                  | 98.63<br>(73.02 to<br>128.44)                                 | 132.51<br>(102.30 to<br>172.14)                               | 113.52<br>(85.81 to<br>148.06)                                | 143.23<br>(109.87 to<br>187.92)                               |
| <b>Non-communicable diseases</b>                                        | <b>780,732.33</b><br><b>(620,811.53 to</b><br><b>971,569.40)</b> | <b>1,172,216.44</b><br><b>(907,901.85 to</b><br><b>1,504,491.53)</b> | <b>900,995.23</b><br><b>(711,065.85 to</b><br><b>1,142,472.51)</b> | <b>1,498,203.79</b><br><b>(1,150,094.41 to</b><br><b>1,938,687.93)</b> | <b>33,929.68</b><br><b>(27,424.34 to</b><br><b>41,775.66)</b> | <b>58,280.52</b><br><b>(49,414.78 to</b><br><b>69,152.04)</b> | <b>47,290.27</b><br><b>(40,374.06 to</b><br><b>56,175.65)</b> | <b>70,293.30</b><br><b>(59,256.85 to</b><br><b>84,013.88)</b> |

| Honduras                   |                                             |                                             |                                             |                                             |                                       |                                         |                                         |                                         |
|----------------------------|---------------------------------------------|---------------------------------------------|---------------------------------------------|---------------------------------------------|---------------------------------------|-----------------------------------------|-----------------------------------------|-----------------------------------------|
| Cause                      | YLLs (actual counts)                        |                                             |                                             |                                             | Deaths (actual counts)                |                                         |                                         |                                         |
|                            | 2016                                        | 2040 Forecast                               | 2040 Better Scenario                        | 2040 Worse Scenario                         | 2016                                  | 2040 Forecast                           | 2040 Better Scenario                    | 2040 Worse Scenario                     |
| Neoplasms                  | 145,422.01<br>(112,340.14 to<br>186,039.62) | 266,813.89<br>(203,539.21 to<br>352,568.82) | 249,394.85<br>(192,304.62 to<br>322,877.41) | 289,016.02<br>(216,791.91 to<br>392,898.26) | 5,613.50<br>(4,406.94 to<br>7,040.37) | 11,389.54<br>(8,982.51 to<br>14,033.61) | 11,148.54<br>(8,949.51 to<br>13,628.73) | 11,817.15<br>(9,156.65 to<br>15,096.68) |
| Lip and oral cavity cancer | 2,341.73<br>(1,660.96 to<br>3,198.41)       | 4,429.33<br>(2,672.12 to<br>7,138.11)       | 3,256.80<br>(2,030.09 to<br>5,138.08)       | 6,317.57<br>(3,469.38 to<br>11,108.17)      | 77.81<br>(57.11 to<br>102.94)         | 152.58<br>(95.83 to<br>235.62)          | 115.14<br>(75.98 to<br>170.39)          | 210.57<br>(122.53 to<br>346.59)         |
| Nasopharynx cancer         | 1,216.10<br>(893.91 to<br>1,632.83)         | 2,819.11<br>(1,721.73 to<br>4,424.06)       | 1,938.71<br>(1,273.34 to<br>2,872.43)       | 3,879.99<br>(2,265.16 to<br>6,449.86)       | 46.98<br>(34.44 to<br>63.46)          | 96.47<br>(73.95 to<br>181.57)           | 86.24<br>(56.33 to<br>126.43)           | 154.06<br>(90.56 to<br>249.57)          |
| Other pharynx cancer       | 2,393.96<br>(1,688.06 to<br>3,323.27)       | 4,155.28<br>(2,536.09 to<br>6,360.39)       | 3,387.67<br>(2,120.95 to<br>5,115.94)       | 4,937.93<br>(2,903.77 to<br>7,856.94)       | 86.70<br>(61.20 to<br>118.10)         | 155.12<br>(96.47 to<br>235.99)          | 128.02<br>(80.93 to<br>189.82)          | 182.46<br>(108.01 to<br>288.34)         |

|                                      |                                          |                                          |                                          |                                          |                                 |                                     |                                     |                                     |
|--------------------------------------|------------------------------------------|------------------------------------------|------------------------------------------|------------------------------------------|---------------------------------|-------------------------------------|-------------------------------------|-------------------------------------|
|                                      | 1,359.37<br>(1,007.60 to<br>1,850.18)    | 2,566.09<br>(1,459.32 to<br>4,560.38)    | 1,919.49<br>(1,187.17 to<br>3,214.46)    | 3,279.44<br>(1,765.67 to<br>6,095.08)    | 59.86<br>(45.36 to<br>79.91)    | 112.97<br>(67.73 to<br>195.40)      | 89.10<br>(57.77 to<br>141.56)       | 138.11<br>(78.36 to<br>250.07)      |
| Esophageal cancer                    | 15,752.66<br>(11,860.19 to<br>20,631.40) | 22,086.90<br>(16,168.54 to<br>29,350.03) | 20,014.86<br>(14,926.13 to<br>26,256.57) | 22,943.86<br>(16,625.47 to<br>30,845.22) | 721.91<br>(561.06 to<br>917.13) | 1,058.52<br>(791.30 to<br>1,390.43) | 995.70<br>(768.26 to<br>1,265.10)   | 1,055.97<br>(780.09 to<br>1,393.19) |
| Stomach cancer                       | 7,466.26<br>(5,304.79 to<br>9,965.82)    | 16,850.14<br>(11,051.68 to<br>24,685.56) | 16,493.27<br>(11,041.25 to<br>23,798.78) | 17,146.30<br>(11,117.22 to<br>25,498.82) | 364.88<br>(267.48 to<br>473.15) | 857.38<br>(579.38 to<br>1,245.94)   | 877.21<br>(603.04 to<br>1,244.11)   | 836.26<br>(557.90 to<br>1,222.15)   |
| Colon and rectum cancer              | 8,142.24<br>(5,815.05 to<br>11,319.31)   | 18,816.20<br>(11,603.77 to<br>28,523.00) | 16,390.98<br>(10,613.85 to<br>23,890.28) | 20,880.51<br>(12,463.37 to<br>32,693.57) | 381.17<br>(276.45 to<br>526.58) | 907.43<br>(576.53 to<br>1,366.91)   | 827.38<br>(554.73 to<br>1,199.28)   | 965.13<br>(597.37 to<br>1,499.46)   |
| Liver cancer                         | 1,981.58<br>(1,296.71 to<br>2,919.36)    | 4,404.26<br>(2,515.60 to<br>7,400.74)    | 3,852.67<br>(2,265.11 to<br>6,204.83)    | 4,837.17<br>(2,652.61 to<br>8,358.68)    | 78.55<br>(50.17 to<br>115.59)   | 182.76<br>(105.40 to<br>300.10)     | 166.49<br>(100.23 to<br>267.53)     | 193.45<br>(108.97 to<br>322.63)     |
| Liver cancer due to hepatitis B      | 2,707.75<br>(1,800.71 to<br>3,933.05)    | 6,277.18<br>(3,602.70 to<br>9,965.54)    | 5,644.51<br>(3,375.82 to<br>8,546.24)    | 6,715.33<br>(3,687.06 to<br>10,793.44)   | 143.70<br>(96.26 to<br>203.55)  | 334.00<br>(201.54 to<br>506.82)     | 314.85<br>(199.26 to<br>460.65)     | 341.60<br>(200.36 to<br>530.53)     |
| Liver cancer due to hepatitis C      | 1,746.25<br>(1,129.65 to<br>2,708.56)    | 4,475.85<br>(2,508.79 to<br>7,617.22)    | 3,722.24<br>(2,157.84 to<br>6,223.62)    | 5,298.19<br>(2,876.69 to<br>9,377.56)    | 84.92<br>(55.61 to<br>129.08)   | 219.22<br>(125.04 to<br>360.50)     | 190.10<br>(111.89 to<br>305.45)     | 249.11<br>(137.43 to<br>422.87)     |
| Liver cancer due to alcohol use      | 1,706.66<br>(1,201.04 to<br>2,390.14)    | 3,658.91<br>(2,184.87 to<br>5,866.14)    | 3,171.55<br>(1,968.83 to<br>4,889.39)    | 4,029.82<br>(2,323.89 to<br>6,611.69)    | 74.00<br>(52.67 to<br>103.26)   | 171.44<br>(104.82 to<br>274.02)     | 155.94<br>(100.48 to<br>241.46)     | 180.97<br>(106.19 to<br>295.08)     |
| Liver cancer due to other causes     | 4,846.83<br>(3,352.89 to<br>6,687.26)    | 6,777.07<br>(4,921.56 to<br>9,091.76)    | 7,041.39<br>(5,063.83 to<br>9,369.37)    | 6,480.33<br>(4,717.02 to<br>8,722.18)    | 221.93<br>(158.12 to<br>292.14) | 315.28<br>(242.18 to<br>399.88)     | 338.40<br>(260.47 to<br>430.20)     | 291.99<br>(224.49 to<br>374.37)     |
| Gallbladder and biliary tract cancer | 5,749.07<br>(4,335.65 to<br>7,454.73)    | 13,877.89<br>(10,235.36 to<br>18,799.79) | 14,328.71<br>(10,668.98 to<br>19,186.96) | 13,884.96<br>(10,031.83 to<br>18,988.81) | 267.36<br>(205.25 to<br>342.27) | 643.75<br>(482.48 to<br>853.49)     | 686.18<br>(523.44 to<br>889.78)     | 623.23<br>(455.52 to<br>848.11)     |
| Pancreatic cancer                    | 1,545.67<br>(1,048.55 to<br>2,257.70)    | 2,872.77<br>(1,427.02 to<br>5,450.37)    | 1,927.32<br>(1,078.25 to<br>3,311.24)    | 4,015.68<br>(1,790.04 to<br>8,081.30)    | 69.75<br>(48.67 to<br>98.17)    | 129.22<br>(70.40 to<br>234.70)      | 93.78<br>(58.03 to<br>151.72)       | 171.48<br>(83.67 to<br>341.00)      |
| Larynx cancer                        | 10,384.36<br>(7,670.87 to<br>13,871.41)  | 20,420.40<br>(11,794.94 to<br>35,765.24) | 14,112.01<br>(9,017.71 to<br>22,395.01)  | 32,084.17<br>(17,036.56 to<br>58,948.51) | 448.39<br>(337.89 to<br>590.21) | 890.58<br>(533.55 to<br>1,522.54)   | 647.52<br>(433.27 to<br>989.98)     | 1,337.30<br>(735.09 to<br>2,415.86) |
| Tracheal, bronchus, and lung cancer  | 815.03<br>(445.05 to<br>1,274.22)        | 1,400.78<br>(825.11 to<br>2,111.65)      | 1,524.82<br>(895.24 to<br>2,296.32)      | 1,320.14<br>(766.60 to<br>1,978.30)      | 22.95<br>(14.94 to<br>33.34)    | 44.10<br>(30.01 to<br>62.44)        | 49.70<br>(34.02 to<br>71.63)        | 40.30<br>(27.01 to<br>56.53)        |
| Malignant skin melanoma              | 1,071.93<br>(717.63 to<br>1,556.23)      | 2,408.84<br>(1,723.15 to<br>3,314.13)    | 2,340.79<br>(1,680.61 to<br>3,223.40)    | 2,393.53<br>(1,722.21 to<br>3,272.15)    | 52.57<br>(36.45 to<br>74.24)    | 122.26<br>(89.53 to<br>161.42)      | 123.50<br>(91.87 to<br>164.66)      | 117.53<br>(85.64 to<br>155.60)      |
| Non-melanoma skin cancer             | 8,265.81<br>(4,856.43 to<br>15,563.10)   | 16,519.99<br>(9,776.59 to<br>30,013.09)  | 16,204.49<br>(9,556.75 to<br>29,129.14)  | 17,145.61<br>(10,018.48 to<br>31,005.99) | 286.40<br>(174.57 to<br>521.27) | 610.54<br>(383.22 to<br>1,070.74)   | 613.73<br>(389.22 to<br>1,076.91)   | 617.45<br>(382.85 to<br>1,094.00)   |
| Breast cancer                        | 8,418.76<br>(4,823.97 to<br>13,557.90)   | 12,345.24<br>(6,721.34 to<br>20,636.80)  | 11,199.06<br>(6,228.62 to<br>18,635.14)  | 13,312.30<br>(7,235.02 to<br>22,956.28)  | 292.13<br>(173.49 to<br>445.78) | 449.48<br>(264.86 to<br>721.85)     | 418.62<br>(248.48 to<br>664.15)     | 470.46<br>(276.19 to<br>756.60)     |
| Cervical cancer                      | 5,474.18<br>(3,534.81 to<br>7,813.62)    | 10,645.36<br>(7,084.62 to<br>14,999.71)  | 9,667.13<br>(6,433.30 to<br>13,570.12)   | 11,020.99<br>(7,393.49 to<br>15,561.23)  | 238.88<br>(158.32 to<br>330.90) | 484.95<br>(346.69 to<br>653.23)     | 454.56<br>(321.20 to<br>614.77)     | 486.35<br>(343.64 to<br>659.01)     |
| Uterine cancer                       | 4,069.75<br>(2,624.48 to<br>5,866.54)    | 9,247.13<br>(5,409.61 to<br>14,441.17)   | 9,682.39<br>(5,685.14 to<br>15,023.14)   | 8,963.90<br>(5,149.65 to<br>14,151.27)   | 146.70<br>(94.06 to<br>204.60)  | 349.59<br>(204.91 to<br>533.24)     | 372.36<br>(224.53 to<br>552.83)     | 332.78<br>(192.17 to<br>510.87)     |
| Ovarian cancer                       | 5,829.43<br>(3,770.37 to<br>8,650.29)    | 15,908.64<br>(11,240.67 to<br>22,328.26) | 17,800.03<br>(12,740.61 to<br>24,650.29) | 14,444.55<br>(10,171.14 to<br>20,088.15) | 406.86<br>(273.51 to<br>590.36) | 1,106.89<br>(774.62 to<br>1,479.67) | 1,291.28<br>(939.21 to<br>1,691.62) | 971.12<br>(666.96 to<br>1,314.22)   |
| Prostate cancer                      | 173.63<br>(102.07 to<br>288.34)          | 204.78<br>(121.86 to<br>336.02)          | 189.29<br>(113.47 to<br>309.16)          | 213.86<br>(125.86 to<br>352.33)          | 3.53<br>(2.16 to<br>5.67)       | 4.70<br>(3.06 to<br>7.16)           | 4.48<br>(2.92 to<br>6.70)           | 4.79<br>(3.12 to<br>7.31)           |
| Testicular cancer                    | <b>Honduras</b>                          |                                          |                                          |                                          |                                 |                                     |                                     |                                     |
| Cause                                | YLLs (actual counts)                     |                                          |                                          |                                          | Deaths (actual counts)          |                                     |                                     |                                     |
|                                      | 2016                                     | 2040 Forecast                            | 2040 Better Scenario                     | 2040 Worse Scenario                      | 2016                            | 2040 Forecast                       | 2040 Better Scenario                | 2040 Worse Scenario                 |



|                                                     |                                                   |                                                    |                                                   |                                                    |                                                |                                                |                                                |                                                |
|-----------------------------------------------------|---------------------------------------------------|----------------------------------------------------|---------------------------------------------------|----------------------------------------------------|------------------------------------------------|------------------------------------------------|------------------------------------------------|------------------------------------------------|
| Cardiomyopathy and myocarditis                      | 3,200.98<br>(2,298.60 to<br>4,749.96)             | 4,065.07<br>(2,799.88 to<br>6,509.53)              | 3,784.46<br>(2,589.53 to<br>5,911.63)             | 4,258.86<br>(2,937.60 to<br>6,797.07)              | 82.41<br>(60.85 to<br>121.76)                  | 139.86<br>(97.28 to<br>217.70)                 | 138.56<br>(96.61 to<br>213.88)                 | 138.35<br>(95.90 to<br>214.99)                 |
| Mycarditis                                          | 550.12<br>(357.57 to<br>980.89)                   | 610.76<br>(382.93 to<br>1,112.47)                  | 558.99<br>(348.24 to<br>997.57)                   | 646.34<br>(406.57 to<br>1,169.38)                  | 12.85<br>(8.78 to<br>21.58)                    | 18.39<br>(12.48 to<br>30.86)                   | 18.08<br>(12.31 to<br>30.40)                   | 18.31<br>(12.36 to<br>31.11)                   |
| <b>Honduras</b>                                     |                                                   |                                                    |                                                   |                                                    |                                                |                                                |                                                |                                                |
| Cause                                               | YLLs (actual counts)                              |                                                    |                                                   |                                                    | Deaths (actual counts)                         |                                                |                                                |                                                |
|                                                     | 2016                                              | 2040 Forecast                                      | 2040 Better Scenario                              | 2040 Worse Scenario                                | 2016                                           | 2040 Forecast                                  | 2040 Better Scenario                           | 2040 Worse Scenario                            |
| Alcoholic cardiomyopathy                            | 194.69<br>(125.47 to<br>327.72)                   | 345.01<br>(218.80 to<br>593.42)                    | 324.80<br>(203.38 to<br>559.56)                   | 366.64<br>(232.31 to<br>612.64)                    | 6.68<br>(4.42 to<br>10.84)                     | 12.40<br>(8.38 to<br>20.16)                    | 12.21<br>(8.16 to<br>20.09)                    | 12.73<br>(8.60 to<br>20.59)                    |
| Other cardiomyopathy                                | 2,456.17<br>(1,763.12 to<br>3,560.73)             | 3,109.30<br>(2,062.04 to<br>4,970.11)              | 2,900.67<br>(1,932.41 to<br>4,579.67)             | 3,245.88<br>(2,148.51 to<br>5,198.01)              | 62.88<br>(45.89 to<br>90.79)                   | 109.07<br>(71.97 to<br>169.32)                 | 108.27<br>(71.24 to<br>168.93)                 | 107.31<br>(70.71 to<br>167.15)                 |
| Atrial fibrillation and flutter                     | 1,365.83<br>(1,015.00 to<br>1,800.84)             | 2,880.92<br>(1,999.46 to<br>3,926.11)              | 2,831.09<br>(2,058.33 to<br>3,756.90)             | 2,857.05<br>(1,925.73 to<br>3,912.24)              | 132.73<br>(98.94 to<br>174.57)                 | 270.22<br>(173.59 to<br>374.61)                | 282.83<br>(191.10 to<br>379.62)                | 252.89<br>(156.59 to<br>355.74)                |
| Aortic aneurysm                                     | 1,116.07<br>(801.33 to<br>1,589.74)               | 2,114.26<br>(1,519.41 to<br>2,948.96)              | 2,046.68<br>(1,506.63 to<br>2,808.25)             | 2,153.82<br>(1,540.51 to<br>3,016.84)              | 62.52<br>(46.64 to<br>85.86)                   | 122.16<br>(89.91 to<br>161.24)                 | 126.58<br>(95.54 to<br>162.06)                 | 117.10<br>(85.34 to<br>155.57)                 |
| Peripheral artery disease                           | 157.94<br>(101.00 to<br>240.65)                   | 547.38<br>(338.48 to<br>829.84)                    | 583.68<br>(361.99 to<br>875.45)                   | 526.72<br>(321.09 to<br>800.11)                    | 13.09<br>(8.40 to<br>19.43)                    | 44.34<br>(25.98 to<br>69.83)                   | 50.94<br>(30.07 to<br>77.90)                   | 39.90<br>(23.04 to<br>61.74)                   |
| Endocarditis                                        | 1,560.72<br>(1,078.10 to<br>2,380.93)             | 2,251.61<br>(1,508.09 to<br>3,531.67)              | 1,986.30<br>(1,326.89 to<br>3,132.61)             | 2,438.36<br>(1,627.40 to<br>3,819.64)              | 39.07<br>(28.70 to<br>57.51)                   | 72.67<br>(50.60 to<br>109.45)                  | 68.47<br>(47.94 to<br>100.94)                  | 74.03<br>(51.49 to<br>111.14)                  |
| Other cardiovascular and circulatory diseases       | 6,557.56<br>(4,632.49 to<br>8,835.40)             | 11,325.34<br>(7,949.03 to<br>15,696.16)            | 9,046.74<br>(6,359.59 to<br>12,289.58)            | 13,071.70<br>(8,998.57 to<br>18,259.79)            | 250.10<br>(178.34 to<br>331.63)                | 538.67<br>(370.80 to<br>724.79)                | 466.38<br>(327.00 to<br>618.26)                | 576.89<br>(394.87 to<br>776.93)                |
| <b>Chronic respiratory diseases</b>                 | <b>48,434.70<br/>(36,709.14 to<br/>67,254.53)</b> | <b>50,688.38<br/>(34,547.50 to<br/>73,681.87)</b>  | <b>37,622.98<br/>(26,570.13 to<br/>51,037.40)</b> | <b>74,645.42<br/>(46,625.31 to<br/>119,491.71)</b> | <b>2,439.88<br/>(1,866.41 to<br/>3,215.37)</b> | <b>2,770.87<br/>(1,932.16 to<br/>3,891.18)</b> | <b>2,176.00<br/>(1,592.18 to<br/>2,909.03)</b> | <b>3,784.16<br/>(2,387.20 to<br/>5,862.32)</b> |
| Chronic obstructive pulmonary disease               | 32,390.33<br>(24,700.06 to<br>43,198.60)          | 35,151.61<br>(21,846.25 to<br>54,559.05)           | 23,319.89<br>(15,534.21 to<br>34,137.56)          | 57,502.06<br>(32,088.03 to<br>98,729.97)           | 1,939.51<br>(1,479.26 to<br>2,503.21)          | 2,137.31<br>(1,394.61 to<br>3,199.69)          | 1,579.74<br>(1,092.57 to<br>2,229.58)          | 3,126.41<br>(1,856.63 to<br>5,056.44)          |
| Pneumoconiosis                                      | 186.64<br>(118.41 to<br>282.00)                   | 235.55<br>(149.79 to<br>350.15)                    | 207.09<br>(131.12 to<br>311.20)                   | 241.20<br>(154.86 to<br>360.60)                    | 8.62<br>(5.56 to<br>12.80)                     | 12.06<br>(7.52 to<br>18.26)                    | 10.96<br>(6.99 to<br>16.40)                    | 11.91<br>(7.45 to<br>18.22)                    |
| Silicosis                                           | 57.00<br>(30.88 to<br>97.72)                      | 59.15<br>(30.25 to<br>99.96)                       | 55.00<br>(28.30 to<br>96.00)                      | 60.42<br>(31.24 to<br>100.57)                      | 2.76<br>(1.53 to<br>4.64)                      | 3.06<br>(1.54 to<br>5.17)                      | 2.93<br>(1.48 to<br>4.97)                      | 3.03<br>(1.56 to<br>4.98)                      |
| Asbestosis                                          | 33.01<br>(18.88 to<br>54.52)                      | 48.43<br>(26.00 to<br>79.44)                       | 47.65<br>(25.66 to<br>79.11)                      | 48.28<br>(25.99 to<br>79.36)                       | 1.15<br>(0.57 to<br>1.95)                      | 2.10<br>(0.89 to<br>3.58)                      | 2.17<br>(0.93 to<br>3.71)                      | 2.01<br>(0.86 to<br>3.41)                      |
| Coal workers pneumoconiosis                         | 23.37<br>(11.01 to<br>41.61)                      | 34.46<br>(14.37 to<br>64.44)                       | 24.63<br>(9.83 to<br>46.43)                       | 38.03<br>(15.93 to<br>71.18)                       | 1.29<br>(0.63 to<br>2.20)                      | 1.99<br>(0.83 to<br>3.73)                      | 1.48<br>(0.60 to<br>2.77)                      | 2.12<br>(0.89 to<br>3.94)                      |
| Other pneumoconiosis                                | 73.26<br>(40.36 to<br>123.34)                     | 93.50<br>(49.09 to<br>156.08)                      | 79.81<br>(41.73 to<br>135.45)                     | 94.47<br>(49.58 to<br>160.18)                      | 3.42<br>(1.88 to<br>5.87)                      | 4.91<br>(2.50 to<br>8.65)                      | 4.39<br>(2.24 to<br>7.49)                      | 4.76<br>(2.47 to<br>8.47)                      |
| Asthma                                              | 10,058.24<br>(7,014.59 to<br>14,700.42)           | 7,170.77<br>(4,106.35 to<br>11,613.05)             | 5,150.72<br>(3,006.68 to<br>8,148.59)             | 8,834.95<br>(4,930.42 to<br>14,466.96)             | 317.99<br>(226.46 to<br>445.76)                | 309.75<br>(172.65 to<br>531.87)                | 239.87<br>(137.98 to<br>400.45)                | 357.00<br>(194.40 to<br>610.74)                |
| Interstitial lung disease and pulmonary sarcoidosis | 3,171.94<br>(1,681.93 to<br>5,366.60)             | 5,858.64<br>(3,198.14 to<br>9,907.24)              | 6,428.62<br>(3,686.05 to<br>10,542.11)            | 5,472.00<br>(2,882.83 to<br>9,313.88)              | 131.00<br>(66.58 to<br>219.13)                 | 264.02<br>(142.15 to<br>427.54)                | 301.86<br>(166.82 to<br>482.17)                | 237.26<br>(124.08 to<br>392.98)                |
| Other chronic respiratory diseases                  | 2,627.55<br>(1,041.60 to<br>5,693.11)             | 2,271.81<br>(976.60 to<br>4,684.67)                | 1,916.46<br>(834.72 to<br>3,850.53)               | 2,595.22<br>(1,091.01 to<br>5,443.53)              | 42.75<br>(17.55 to<br>88.18)                   | 47.73<br>(19.64 to<br>91.21)                   | 43.57<br>(18.29 to<br>81.90)                   | 51.58<br>(20.87 to<br>101.15)                  |
| <b>Cirrhosis and other chronic liver diseases</b>   | <b>43,951.78<br/>(31,713.78 to<br/>61,214.68)</b> | <b>76,768.29<br/>(57,401.93 to<br/>105,362.40)</b> | <b>68,620.47<br/>(51,121.63 to<br/>93,790.28)</b> | <b>82,451.10<br/>(61,478.03 to<br/>112,650.43)</b> | <b>1,653.71<br/>(1,203.46 to<br/>2,232.58)</b> | <b>3,048.15<br/>(2,326.36 to<br/>3,948.06)</b> | <b>2,825.12<br/>(2,177.18 to<br/>3,687.00)</b> | <b>3,169.37<br/>(2,428.19 to<br/>4,162.44)</b> |

|                                                                |                                                               |                                                               |                                                               |                                                                |                                                            |                                                            |                                                            |                                                            |
|----------------------------------------------------------------|---------------------------------------------------------------|---------------------------------------------------------------|---------------------------------------------------------------|----------------------------------------------------------------|------------------------------------------------------------|------------------------------------------------------------|------------------------------------------------------------|------------------------------------------------------------|
|                                                                | 1,532.26<br>(1,044.94 to<br>2,229.11)                         | 2,776.97<br>(1,940.91 to<br>3,960.88)                         | 2,634.02<br>(1,859.13 to<br>3,792.68)                         | 2,821.33<br>(1,981.67 to<br>4,029.91)                          | 58.88<br>(40.97 to<br>82.13)                               | 110.82<br>(80.86 to<br>151.78)                             | 108.22<br>(80.13 to<br>149.47)                             | 109.48<br>(79.07 to<br>149.90)                             |
| Cirrhosis and other chronic liver diseases due to hepatitis B  | 16,467.35<br>(11,420.51 to<br>24,171.94)                      | 31,139.85<br>(22,281.74 to<br>44,449.35)                      | 29,384.97<br>(21,093.10 to<br>42,008.48)                      | 31,780.16<br>(22,810.56 to<br>45,785.83)                       | 602.63<br>(426.93 to<br>851.37)                            | 1,183.28<br>(879.57 to<br>1,610.01)                        | 1,145.59<br>(850.47 to<br>1,550.98)                        | 1,178.46<br>(870.72 to<br>1,613.16)                        |
| Cirrhosis and other chronic liver diseases due to hepatitis C  | 16,131.75<br>(11,434.29 to<br>22,629.18)                      | 28,589.48<br>(20,986.90 to<br>39,134.32)                      | 23,483.80<br>(17,183.41 to<br>31,854.59)                      | 33,057.92<br>(24,029.15 to<br>45,696.80)                       | 657.51<br>(476.55 to<br>887.47)                            | 1,187.80<br>(901.95 to<br>1,555.03)                        | 1,026.39<br>(788.10 to<br>1,331.37)                        | 1,318.73<br>(999.28 to<br>1,741.41)                        |
| Cirrhosis and other chronic liver diseases due to alcohol use  | 9,820.42<br>(7,241.42 to<br>13,187.93)                        | 14,261.98<br>(10,749.35 to<br>18,724.48)                      | 13,117.68<br>(9,804.64 to<br>17,373.03)                       | 14,791.68<br>(11,243.18 to<br>19,552.82)                       | 334.69<br>(243.37 to<br>437.09)                            | 566.26<br>(433.35 to<br>732.92)                            | 544.92<br>(422.64 to<br>696.78)                            | 562.69<br>(431.72 to<br>737.23)                            |
| Cirrhosis and other chronic liver diseases due to other causes | <b>54,636.24</b><br><b>(39,748.95 to</b><br><b>73,275.86)</b> | <b>68,218.22</b><br><b>(48,880.40 to</b><br><b>94,277.09)</b> | <b>55,922.90</b><br><b>(40,483.82 to</b><br><b>76,282.50)</b> | <b>76,630.08</b><br><b>(54,385.01 to</b><br><b>106,602.28)</b> | <b>2,320.65</b><br><b>(1,690.59 to</b><br><b>3,083.92)</b> | <b>3,431.53</b><br><b>(2,450.51 to</b><br><b>4,649.23)</b> | <b>3,002.48</b><br><b>(2,184.57 to</b><br><b>3,981.52)</b> | <b>3,622.98</b><br><b>(2,557.09 to</b><br><b>4,953.61)</b> |
| Digestive diseases                                             | 8,883.72<br>(6,057.76 to<br>12,105.25)                        | 8,697.96<br>(6,299.86 to<br>12,049.00)                        | 6,965.23<br>(5,800.48 to<br>9,714.43)                         | 9,865.60<br>(7,018.01 to<br>13,925.97)                         | 441.06<br>(313.23 to<br>604.14)                            | 476.04<br>(346.85 to<br>652.49)                            | 400.16<br>(289.79 to<br>548.20)                            | 513.84<br>(366.31 to<br>707.03)                            |
| Peptic ulcer disease                                           | <b>Honduras</b>                                               |                                                               |                                                               |                                                                |                                                            |                                                            |                                                            |                                                            |
| Cause                                                          | YLLs (actual counts)                                          |                                                               |                                                               |                                                                | Deaths (actual counts)                                     |                                                            |                                                            |                                                            |
|                                                                | 2016                                                          | 2040 Forecast                                                 | 2040 Better Scenario                                          | 2040 Worse Scenario                                            | 2016                                                       | 2040 Forecast                                              | 2040 Better Scenario                                       | 2040 Worse Scenario                                        |
| Gastritis and duodenitis                                       | 2,609.47<br>(1,634.39 to<br>3,934.89)                         | 4,726.66<br>(3,149.39 to<br>7,057.90)                         | 4,330.92<br>(2,867.66 to<br>6,551.56)                         | 4,845.20<br>(3,164.16 to<br>7,346.32)                          | 151.81<br>(95.18 to<br>228.20)                             | 286.10<br>(184.99 to<br>426.21)                            | 277.33<br>(180.03 to<br>412.40)                            | 277.59<br>(172.76 to<br>413.46)                            |
| Appendicitis                                                   | 4,302.73<br>(2,850.25 to<br>6,194.74)                         | 4,215.58<br>(2,832.12 to<br>6,066.76)                         | 3,457.17<br>(2,304.95 to<br>4,996.98)                         | 4,699.14<br>(3,130.60 to<br>6,729.36)                          | 126.98<br>(83.37 to<br>181.19)                             | 157.58<br>(108.77 to<br>215.90)                            | 137.16<br>(93.93 to<br>185.45)                             | 166.32<br>(111.94 to<br>230.53)                            |
| Paralytic ileus and intestinal obstruction                     | 10,009.63<br>(6,043.62 to<br>17,478.90)                       | 7,655.61<br>(5,072.13 to<br>11,715.97)                        | 6,636.27<br>(4,476.59 to<br>10,007.18)                        | 8,563.44<br>(5,553.47 to<br>13,552.99)                         | 202.50<br>(132.27 to<br>316.96)                            | 245.16<br>(160.63 to<br>400.50)                            | 240.09<br>(155.20 to<br>449.29)                            | 244.77<br>(160.57 to<br>418.02)                            |
| Inguinal, femoral, and abdominal hernia                        | 2,685.65<br>(1,653.10 to<br>4,036.72)                         | 3,002.41<br>(1,876.79 to<br>4,413.67)                         | 2,912.07<br>(1,816.34 to<br>4,282.30)                         | 2,974.62<br>(1,846.15 to<br>4,443.94)                          | 154.73<br>(92.28 to<br>228.93)                             | 179.99<br>(106.75 to<br>274.63)                            | 184.09<br>(109.26 to<br>276.80)                            | 169.55<br>(102.64 to<br>262.07)                            |
| Inflammatory bowel disease                                     | 1,036.03<br>(662.19 to<br>1,583.48)                           | 1,354.24<br>(882.56 to<br>2,052.19)                           | 1,336.79<br>(864.69 to<br>2,029.42)                           | 1,346.95<br>(878.48 to<br>2,024.14)                            | 36.21<br>(22.66 to<br>55.84)                               | 57.50<br>(36.85 to<br>86.30)                               | 60.01<br>(38.48 to<br>90.26)                               | 54.23<br>(34.97 to<br>81.57)                               |
| Vascular intestinal disorders                                  | 3,396.61<br>(2,121.94 to<br>4,878.26)                         | 6,140.01<br>(3,873.00 to<br>8,605.00)                         | 5,973.92<br>(3,883.09 to<br>8,309.59)                         | 6,023.73<br>(3,854.91 to<br>8,544.45)                          | 218.64<br>(133.92 to<br>313.71)                            | 410.19<br>(257.46 to<br>572.91)                            | 417.98<br>(266.12 to<br>581.18)                            | 384.56<br>(234.91 to<br>545.25)                            |
| Gallbladder and biliary diseases                               | 10,955.70<br>(7,038.00 to<br>16,486.15)                       | 17,125.43<br>(7,970.71 to<br>32,492.17)                       | 11,732.71<br>(5,628.21 to<br>21,732.00)                       | 20,897.33<br>(9,512.14 to<br>40,420.64)                        | 555.85<br>(366.83 to<br>784.98)                            | 930.63<br>(459.41 to<br>1,711.52)                          | 681.35<br>(347.32 to<br>1,228.66)                          | 1,071.80<br>(509.45 to<br>1,996.78)                        |
| Pancreatitis                                                   | 5,116.75<br>(2,936.73 to<br>7,634.41)                         | 7,835.68<br>(3,997.68 to<br>14,524.33)                        | 6,021.07<br>(3,255.86 to<br>10,697.35)                        | 9,511.66<br>(4,764.11 to<br>18,702.38)                         | 172.80<br>(98.13 to<br>252.09)                             | 300.03<br>(156.07 to<br>539.84)                            | 241.63<br>(128.02 to<br>415.81)                            | 352.89<br>(174.81 to<br>673.01)                            |
| Other digestive diseases                                       | 5,839.95<br>(3,914.70 to<br>8,402.17)                         | 7,464.63<br>(5,277.57 to<br>10,294.25)                        | 6,556.75<br>(4,578.06 to<br>9,108.05)                         | 7,902.40<br>(5,573.62 to<br>11,006.71)                         | 260.08<br>(172.82 to<br>370.89)                            | 388.33<br>(269.04 to<br>531.29)                            | 362.68<br>(239.48 to<br>493.98)                            | 387.43<br>(264.06 to<br>540.76)                            |
| Neurological disorders                                         | <b>32,425.06</b><br><b>(25,321.06 to</b><br><b>40,944.57)</b> | <b>59,752.53</b><br><b>(44,738.02 to</b><br><b>79,246.73)</b> | <b>58,321.42</b><br><b>(45,051.63 to</b><br><b>74,976.47)</b> | <b>59,762.37</b><br><b>(43,753.75 to</b><br><b>80,455.96)</b>  | <b>2,243.41</b><br><b>(1,759.24 to</b><br><b>2,764.72)</b> | <b>4,550.66</b><br><b>(3,087.17 to</b><br><b>6,291.49)</b> | <b>4,790.28</b><br><b>(3,485.01 to</b><br><b>6,324.74)</b> | <b>4,243.19</b><br><b>(2,744.62 to</b><br><b>6,028.49)</b> |
| Alzheimer's disease and other dementias                        | 18,094.01<br>(13,973.47 to<br>23,199.27)                      | 39,133.86<br>(26,475.14 to<br>56,364.83)                      | 39,404.71<br>(28,248.48 to<br>54,069.85)                      | 37,690.27<br>(24,313.91 to<br>56,096.93)                       | 1,846.77<br>(1,418.12 to<br>2,291.29)                      | 3,816.16<br>(2,387.29 to<br>5,456.50)                      | 4,036.36<br>(2,720.80 to<br>5,532.56)                      | 3,520.01<br>(2,053.85 to<br>5,354.99)                      |
| Parkinson's disease                                            | 1,303.14<br>(909.59 to<br>1,757.26)                           | 3,264.83<br>(2,339.38 to<br>4,387.94)                         | 3,916.35<br>(2,847.18 to<br>5,215.53)                         | 2,808.66<br>(1,968.59 to<br>3,825.70)                          | 107.36<br>(75.56 to<br>145.70)                             | 259.60<br>(182.59 to<br>353.19)                            | 322.47<br>(232.64 to<br>434.39)                            | 216.45<br>(144.72 to<br>302.02)                            |
| Epilepsy                                                       | 9,408.31<br>(6,329.75 to<br>13,868.04)                        | 11,447.95<br>(7,470.42 to<br>16,674.26)                       | 8,951.77<br>(5,794.64 to<br>13,159.22)                        | 13,432.94<br>(8,713.75 to<br>19,656.61)                        | 202.24<br>(143.52 to<br>284.35)                            | 302.83<br>(210.82 to<br>431.17)                            | 247.59<br>(173.71 to<br>353.19)                            | 343.11<br>(234.12 to<br>501.70)                            |
| Multiple sclerosis                                             | 388.04<br>(236.99 to<br>641.26)                               | 682.29<br>(425.75 to<br>1,080.61)                             | 708.36<br>(445.63 to<br>1,127.55)                             | 671.12<br>(417.34 to<br>1,066.35)                              | 11.13<br>(6.99 to<br>18.11)                                | 21.08<br>(13.68 to<br>32.71)                               | 22.24<br>(14.32 to<br>34.63)                               | 20.40<br>(13.05 to<br>31.83)                               |



|                                                            |                                                 |                                                  |                                                  |                                                  |                                            |                                              |                                             |                                              |
|------------------------------------------------------------|-------------------------------------------------|--------------------------------------------------|--------------------------------------------------|--------------------------------------------------|--------------------------------------------|----------------------------------------------|---------------------------------------------|----------------------------------------------|
| Motor neuron disease                                       | 459.82<br>(334.56 to 615.25)                    | 1,006.04<br>(726.49 to 1,349.73)                 | 1,063.89<br>(765.72 to 1,430.56)                 | 963.91<br>(702.12 to 1,285.02)                   | 14.47<br>(10.58 to 19.56)                  | 35.73<br>(26.56 to 47.68)                    | 38.56<br>(28.63 to 51.44)                   | 33.53<br>(24.77 to 44.41)                    |
| Other neurological disorders                               | 2,771.74<br>(2,139.38 to 3,623.91)              | 4,217.56<br>(3,160.77 to 5,542.83)               | 4,276.35<br>(3,229.10 to 5,604.47)               | 4,195.48<br>(3,152.02 to 5,468.63)               | 61.44<br>(47.22 to 80.34)                  | 115.27<br>(90.63 to 145.91)                  | 123.06<br>(96.94 to 155.61)                 | 109.68<br>(86.23 to 138.57)                  |
| <b>Mental disorders</b>                                    | <b>13,083.47<br/>(8,127.44 to 20,911.62)</b>    | <b>23,404.77<br/>(14,512.44 to 35,452.11)</b>    | <b>22,339.49<br/>(13,937.94 to 34,026.15)</b>    | <b>24,069.92<br/>(14,978.48 to 36,652.94)</b>    | <b>358.85<br/>(219.52 to 562.56)</b>       | <b>704.86<br/>(454.57 to 1,039.25)</b>       | <b>691.54<br/>(446.73 to 1,013.34)</b>      | <b>709.58<br/>(456.68 to 1,044.38)</b>       |
| Alcohol use disorders                                      | 9,832.85<br>(5,688.00 to 15,727.49)             | 15,079.69<br>(8,464.30 to 24,165.83)             | 13,972.21<br>(7,903.05 to 22,476.17)             | 15,806.37<br>(9,013.64 to 25,340.43)             | 276.60<br>(160.60 to 446.21)               | 460.23<br>(267.67 to 710.76)                 | 435.20<br>(253.96 to 676.15)                | 474.42<br>(274.88 to 726.68)                 |
| Drug use disorders                                         | 3,184.99<br>(1,653.43 to 5,882.09)              | 8,217.45<br>(4,665.74 to 13,743.20)              | 8,264.83<br>(4,745.20 to 13,663.01)              | 8,152.09<br>(4,626.01 to 13,685.61)              | 81.08<br>(45.29 to 140.64)                 | 242.66<br>(146.17 to 374.46)                 | 254.44<br>(156.35 to 392.74)                | 233.15<br>(140.05 to 360.19)                 |
| Opioid use disorders                                       | 1,818.98<br>(942.62 to 3,553.62)                | 3,508.60<br>(2,059.41 to 6,469.49)               | 3,470.08<br>(2,026.94 to 6,354.14)               | 3,519.86<br>(2,045.19 to 6,542.67)               | 40.32<br>(22.35 to 72.87)                  | 87.34<br>(54.26 to 147.82)                   | 88.06<br>(54.74 to 149.29)                  | 86.22<br>(53.31 to 145.92)                   |
| Cocaine use disorders                                      | 255.41<br>(83.46 to 563.10)                     | 827.68<br>(305.48 to 1,669.92)                   | 776.78<br>(286.44 to 1,569.37)                   | 854.50<br>(312.10 to 1,750.38)                   | 6.37<br>(2.09 to 13.56)                    | 22.55<br>(8.57 to 43.95)                     | 21.52<br>(8.23 to 41.94)                    | 22.95<br>(8.87 to 44.70)                     |
| Amphetamine use disorders                                  | 118.23<br>(35.73 to 255.98)                     | 534.19<br>(185.14 to 1,105.19)                   | 484.15<br>(174.27 to 994.26)                     | 564.81<br>(195.73 to 1,182.76)                   | 2.85<br>(0.89 to 5.91)                     | 13.80<br>(4.89 to 27.40)                     | 12.72<br>(4.57 to 24.76)                    | 14.38<br>(5.08 to 28.79)                     |
| Other drug use disorders                                   | 992.37<br>(479.62 to 1,810.29)                  | 3,346.98<br>(1,697.91 to 5,518.00)               | 3,533.83<br>(1,785.20 to 5,847.69)               | 3,212.92<br>(1,642.83 to 5,292.07)               | 31.55<br>(15.61 to 53.16)                  | 118.97<br>(63.99 to 177.53)                  | 132.14<br>(71.12 to 196.38)                 | 109.60<br>(56.84 to 164.67)                  |
| Eating disorders                                           | 65.62<br>(31.88 to 102.28)                      | 107.63<br>(50.42 to 163.08)                      | 102.45<br>(48.49 to 155.49)                      | 111.47<br>(52.11 to 167.45)                      | 1.16<br>(0.55 to 1.84)                     | 1.97<br>(0.93 to 3.00)                       | 1.90<br>(0.87 to 2.96)                      | 2.01<br>(0.96 to 3.05)                       |
| <b>Honduras</b>                                            |                                                 |                                                  |                                                  |                                                  |                                            |                                              |                                             |                                              |
| Cause                                                      | YLLs (actual counts)                            |                                                  |                                                  |                                                  | Deaths (actual counts)                     |                                              |                                             |                                              |
|                                                            | 2016                                            | 2040 Forecast                                    | 2040 Better Scenario                             | 2040 Worse Scenario                              | 2016                                       | 2040 Forecast                                | 2040 Better Scenario                        | 2040 Worse Scenario                          |
| <b>Diabetes, urogenital, blood, and endocrine diseases</b> | <b>109,683.50<br/>(84,577.37 to 140,211.74)</b> | <b>232,489.93<br/>(133,728.19 to 454,983.12)</b> | <b>177,576.52<br/>(105,629.45 to 345,610.18)</b> | <b>285,214.76<br/>(159,076.27 to 564,298.16)</b> | <b>4,744.94<br/>(3,706.95 to 5,981.91)</b> | <b>11,989.27<br/>(6,626.05 to 24,604.11)</b> | <b>9,529.75<br/>(5,480.78 to 19,482.83)</b> | <b>14,192.16<br/>(7,622.84 to 28,920.05)</b> |
| Diabetes mellitus                                          | 25,905.84<br>(19,295.79 to 33,575.58)           | 47,742.55<br>(31,726.18 to 70,189.62)            | 35,150.92<br>(24,068.24 to 51,590.68)            | 56,877.01<br>(37,094.14 to 86,217.27)            | 1,225.02<br>(934.42 to 1,556.34)           | 2,378.21<br>(1,695.63 to 3,328.84)           | 1,846.58<br>(1,341.72 to 2,535.78)          | 2,708.23<br>(1,885.52 to 3,916.56)           |
| Acute glomerulonephritis                                   | 90.41<br>(63.57 to 133.60)                      | 124.22<br>(84.57 to 184.40)                      | 103.98<br>(71.90 to 155.56)                      | 139.17<br>(94.14 to 210.44)                      | 2.11<br>(1.48 to 2.91)                     | 3.22<br>(2.21 to 4.73)                       | 2.94<br>(1.98 to 4.33)                      | 3.38<br>(2.34 to 4.93)                       |
| Chronic kidney disease                                     | 59,871.05<br>(44,572.10 to 79,007.30)           | 146,278.04<br>(56,309.03 to 367,436.38)          | 105,964.95<br>(41,707.24 to 273,094.97)          | 188,936.01<br>(69,686.19 to 469,336.87)          | 2,669.61<br>(2,017.12 to 3,449.12)         | 7,868.14<br>(2,532.19 to 20,456.22)          | 5,908.66<br>(1,987.22 to 16,478.39)         | 9,810.99<br>(3,177.67 to 24,558.63)          |
| Chronic kidney disease due to diabetes mellitus            | 20,214.46<br>(14,537.70 to 27,113.94)           | 58,921.22<br>(21,336.95 to 160,367.41)           | 42,502.78<br>(15,967.89 to 113,577.26)           | 76,388.07<br>(26,833.92 to 205,022.61)           | 905.03<br>(665.09 to 1,185.28)             | 2,979.97<br>(961.58 to 8,180.31)             | 2,210.03<br>(725.81 to 6,114.28)            | 3,750.32<br>(1,176.60 to 9,874.42)           |
| Chronic kidney disease due to hypertension                 | 7,061.45<br>(5,057.59 to 9,502.66)              | 20,867.78<br>(6,516.17 to 56,678.05)             | 15,577.59<br>(5,049.50 to 44,194.95)             | 26,230.45<br>(7,992.91 to 69,261.58)             | 469.45<br>(342.08 to 617.90)               | 1,510.69<br>(449.09 to 4,289.09)             | 1,184.71<br>(354.31 to 3,399.36)            | 1,806.85<br>(527.73 to 4,257.94)             |
| Chronic kidney disease due to glomerulonephritis           | 18,883.49<br>(13,722.07 to 25,423.60)           | 36,870.84<br>(14,989.23 to 89,288.04)            | 26,540.70<br>(11,364.77 to 66,105.37)            | 48,047.67<br>(18,796.66 to 113,672.19)           | 716.10<br>(517.09 to 956.02)               | 1,795.79<br>(602.83 to 4,663.79)             | 1,330.79<br>(464.89 to 3,535.81)            | 2,276.40<br>(749.35 to 5,677.56)             |
| Chronic kidney disease due to other and unspecified causes | 13,711.65<br>(10,016.53 to 18,734.08)           | 29,618.20<br>(11,457.11 to 76,402.74)            | 21,343.88<br>(8,429.66 to 54,610.04)             | 38,369.82<br>(14,401.44 to 94,583.49)            | 579.02<br>(422.32 to 776.45)               | 1,581.70<br>(527.01 to 4,244.20)             | 1,183.13<br>(393.38 to 3,270.98)            | 1,977.41<br>(655.77 to 5,022.17)             |
| Urinary diseases and male infertility                      | 9,159.23<br>(6,944.49 to 11,872.17)             | 20,141.12<br>(16,019.54 to 24,568.04)            | 20,250.32<br>(16,165.61 to 24,657.81)            | 19,639.95<br>(15,545.36 to 23,847.50)            | 463.95<br>(364.05 to 585.27)               | 1,117.62<br>(870.04 to 1,342.19)             | 1,182.37<br>(941.36 to 1,402.20)            | 1,039.40<br>(795.82 to 1,270.62)             |
| Urinary tract infections                                   | 7,929.83<br>(5,935.62 to 10,325.96)             | 18,415.42<br>(14,413.59 to 22,868.64)            | 18,680.56<br>(14,744.28 to 23,086.19)            | 17,857.72<br>(13,941.73 to 22,118.30)            | 396.27<br>(302.73 to 504.83)               | 1,010.19<br>(781.29 to 1,233.45)             | 1,078.44<br>(849.42 to 1,296.59)            | 934.27<br>(706.24 to 1,154.50)               |



|                                               |                                             |                                             |                                             |                                             |                                       |                                        |                                        |                                        |
|-----------------------------------------------|---------------------------------------------|---------------------------------------------|---------------------------------------------|---------------------------------------------|---------------------------------------|----------------------------------------|----------------------------------------|----------------------------------------|
|                                               | 20,029.01<br>(12,842.42 to<br>29,983.14)    | 12,885.60<br>(8,003.89 to<br>19,113.33)     | 9,612.40<br>(6,217.41 to<br>13,884.49)      | 16,162.19<br>(9,956.83 to<br>24,234.21)     | 245.54<br>(157.40 to<br>362.32)       | 170.97<br>(106.90 to<br>249.72)        | 130.86<br>(84.05 to<br>187.84)         | 210.24<br>(131.60 to<br>309.45)        |
| Congenital heart anomalies                    |                                             |                                             |                                             |                                             |                                       |                                        |                                        |                                        |
|                                               | 202.27<br>(45.27 to<br>503.27)              | 141.80<br>(26.89 to<br>387.92)              | 88.00<br>(16.80 to<br>246.88)               | 200.21<br>(38.15 to<br>530.23)              | 2.35<br>(0.53 to<br>5.91)             | 1.65<br>(0.31 to<br>4.49)              | 1.02<br>(0.19 to<br>2.86)              | 2.33<br>(0.44 to<br>6.15)              |
| Orofacial clefts                              |                                             |                                             |                                             |                                             |                                       |                                        |                                        |                                        |
|                                               | 1,704.19<br>(1,062.34 to<br>2,715.66)       | 1,548.83<br>(935.91 to<br>2,375.86)         | 1,194.24<br>(703.39 to<br>1,801.75)         | 1,881.53<br>(1,125.29 to<br>2,919.12)       | 22.99<br>(14.48 to<br>35.59)          | 24.85<br>(14.42 to<br>37.38)           | 19.98<br>(11.46 to<br>30.02)           | 29.16<br>(17.11 to<br>43.75)           |
| Down syndrome                                 |                                             |                                             |                                             |                                             |                                       |                                        |                                        |                                        |
|                                               | 795.29<br>(333.15 to<br>1,450.77)           | 794.13<br>(328.32 to<br>1,447.20)           | 566.45<br>(239.76 to<br>1,005.68)           | 1,025.61<br>(418.97 to<br>1,899.35)         | 9.68<br>(4.10 to<br>17.31)            | 10.38<br>(4.41 to<br>18.20)            | 7.58<br>(3.32 to<br>13.23)             | 13.15<br>(5.56 to<br>23.64)            |
| Other chromosomal abnormalities               |                                             |                                             |                                             |                                             |                                       |                                        |                                        |                                        |
|                                               | 586.60<br>(246.20 to<br>1,052.91)           | 549.53<br>(220.40 to<br>1,007.69)           | 428.95<br>(175.53 to<br>771.05)             | 668.32<br>(266.15 to<br>1,213.61)           | 7.48<br>(3.04 to<br>13.50)            | 8.07<br>(3.07 to<br>14.69)             | 6.55<br>(2.48 to<br>12.26)             | 9.51<br>(3.62 to<br>17.11)             |
| Congenital musculoskeletal and limb anomalies |                                             |                                             |                                             |                                             |                                       |                                        |                                        |                                        |
|                                               | 1,265.07<br>(733.46 to<br>1,909.36)         | 987.67<br>(547.46 to<br>1,544.44)           | 757.80<br>(426.49 to<br>1,171.66)           | 1,212.69<br>(663.99 to<br>1,931.23)         | 16.66<br>(9.61 to<br>24.58)           | 15.06<br>(8.40 to<br>23.15)            | 11.98<br>(6.73 to<br>18.41)            | 17.91<br>(9.94 to<br>27.38)            |
| Urogenital congenital anomalies               |                                             |                                             |                                             |                                             |                                       |                                        |                                        |                                        |
|                                               | 4,201.23<br>(2,202.02 to<br>7,604.03)       | 2,758.83<br>(1,331.00 to<br>4,966.44)       | 1,971.19<br>(979.76 to<br>3,439.42)         | 3,585.85<br>(1,742.37 to<br>6,567.93)       | 49.36<br>(25.75 to<br>89.24)          | 33.31<br>(16.35 to<br>59.23)           | 24.06<br>(12.33 to<br>41.68)           | 42.96<br>(21.01 to<br>77.26)           |
| Digestive congenital anomalies                |                                             |                                             |                                             |                                             |                                       |                                        |                                        |                                        |
|                                               | 10,349.88<br>(6,499.53 to<br>18,399.50)     | 6,706.90<br>(3,959.76 to<br>12,182.73)      | 4,856.80<br>(2,926.44 to<br>8,742.72)       | 8,611.98<br>(5,095.02 to<br>15,347.42)      | 123.30<br>(78.02 to<br>217.14)        | 83.32<br>(50.72 to<br>147.16)          | 61.19<br>(37.58 to<br>110.12)          | 105.82<br>(64.49 to<br>185.79)         |
| Other congenital birth defects                |                                             |                                             |                                             |                                             |                                       |                                        |                                        |                                        |
|                                               | 797.49<br>(191.53 to<br>1,477.42)           | 1,888.95<br>(558.04 to<br>3,310.54)         | 1,738.30<br>(550.33 to<br>3,008.77)         | 2,009.93<br>(561.21 to<br>3,580.45)         | 17.65<br>(6.99 to<br>28.37)           | 49.88<br>(23.40 to<br>75.06)           | 50.35<br>(25.08 to<br>74.05)           | 49.23<br>(21.65 to<br>75.48)           |
| Skin and subcutaneous diseases                |                                             |                                             |                                             |                                             |                                       |                                        |                                        |                                        |
|                                               | 102.24<br>(24.11 to<br>185.54)              | 329.39<br>(104.85 to<br>565.76)             | 338.75<br>(110.14 to<br>578.22)             | 325.52<br>(101.60 to<br>563.27)             | 2.47<br>(0.75 to<br>4.22)             | 10.18<br>(3.83 to<br>16.53)            | 11.09<br>(4.24 to<br>17.88)            | 9.56<br>(3.56 to<br>15.47)             |
| Cellulitis                                    |                                             |                                             |                                             |                                             |                                       |                                        |                                        |                                        |
|                                               | 489.48<br>(72.67 to<br>1,003.56)            | 1,091.02<br>(204.26 to<br>2,148.28)         | 930.38<br>(187.94 to<br>1,831.55)           | 1,219.19<br>(220.75 to<br>2,410.27)         | 7.65<br>(1.51 to<br>14.76)            | 21.07<br>(6.21 to<br>37.53)            | 19.09<br>(6.23 to<br>33.17)            | 22.45<br>(6.14 to<br>39.94)            |
| Pyoderma                                      |                                             |                                             |                                             |                                             |                                       |                                        |                                        |                                        |
|                                               | 140.11<br>(61.27 to<br>231.90)              | 323.97<br>(157.59 to<br>503.89)             | 329.38<br>(166.16 to<br>510.57)             | 316.12<br>(149.52 to<br>497.01)             | 6.15<br>(3.69 to<br>10.08)            | 15.29<br>(8.94 to<br>26.19)            | 16.74<br>(9.91 to<br>29.38)            | 13.94<br>(7.91 to<br>23.10)            |
| Decubitus ulcer                               |                                             |                                             |                                             |                                             |                                       |                                        |                                        |                                        |
|                                               | 65.65<br>(19.52 to<br>116.70)               | 144.57<br>(51.86 to<br>255.55)              | 139.79<br>(52.37 to<br>241.03)              | 149.10<br>(51.30 to<br>262.52)              | 1.38<br>(0.53 to<br>2.23)             | 3.34<br>(1.51 to<br>5.36)              | 3.44<br>(1.61 to<br>5.41)              | 3.28<br>(1.44 to<br>5.33)              |
| Other skin and subcutaneous diseases          |                                             |                                             |                                             |                                             |                                       |                                        |                                        |                                        |
|                                               | 2,851.41<br>(1,577.09 to<br>5,088.31)       | 1,401.92<br>(652.23 to<br>2,581.32)         | 1,027.34<br>(498.91 to<br>1,894.55)         | 1,814.91<br>(837.27 to<br>3,350.87)         | 33.08<br>(18.30 to<br>59.02)          | 16.26<br>(7.56 to<br>29.94)            | 11.91<br>(5.78 to<br>21.95)            | 21.04<br>(9.70 to<br>38.86)            |
| Sudden infant death syndrome                  |                                             |                                             |                                             |                                             |                                       |                                        |                                        |                                        |
|                                               | 278,985.40<br>(199,692.73 to<br>382,671.59) | 289,542.19<br>(186,863.73 to<br>779,414.11) | 258,535.04<br>(166,618.40 to<br>726,615.48) | 344,878.62<br>(226,190.16 to<br>846,486.42) | 5,569.77<br>(3,970.84 to<br>7,613.35) | 6,695.80<br>(4,544.35 to<br>16,917.26) | 6,143.17<br>(4,149.61 to<br>16,319.85) | 7,769.14<br>(5,339.08 to<br>18,028.53) |
| Injuries                                      |                                             |                                             |                                             |                                             |                                       |                                        |                                        |                                        |
|                                               | 55,010.93<br>(41,497.49 to<br>74,468.08)    | 40,080.90<br>(27,529.00 to<br>60,419.27)    | 27,847.57<br>(19,386.51 to<br>40,812.50)    | 81,636.56<br>(56,616.85 to<br>122,302.65)   | 1,177.54<br>(884.20 to<br>1,577.73)   | 1,037.91<br>(740.39 to<br>1,493.89)    | 767.32<br>(561.50 to<br>1,069.96)      | 1,946.07<br>(1,370.79 to<br>2,832.78)  |
| Transport injuries                            |                                             |                                             |                                             |                                             |                                       |                                        |                                        |                                        |
|                                               | 52,652.05<br>(39,635.24 to<br>71,668.46)    | 36,724.29<br>(25,377.50 to<br>55,262.54)    | 25,097.57<br>(17,464.42 to<br>36,788.12)    | 77,806.78<br>(53,682.38 to<br>117,208.53)   | 1,131.38<br>(847.27 to<br>1,523.14)   | 956.30<br>(681.37 to<br>1,384.33)      | 697.35<br>(507.67 to<br>970.77)        | 1,856.47<br>(1,308.07 to<br>2,709.41)  |
| Road injuries                                 |                                             |                                             |                                             |                                             |                                       |                                        |                                        |                                        |
|                                               | 23,941.19<br>(18,124.58 to<br>31,940.54)    | 16,710.04<br>(11,682.87 to<br>24,381.17)    | 11,750.40<br>(8,279.10 to<br>16,825.49)     | 31,586.24<br>(21,902.03 to<br>46,933.26)    | 569.35<br>(432.09 to<br>749.64)       | 504.59<br>(366.05 to<br>694.36)        | 382.32<br>(285.17 to<br>516.03)        | 879.69<br>(627.14 to<br>1,229.90)      |
| Pedestrian road injuries                      |                                             |                                             |                                             |                                             |                                       |                                        |                                        |                                        |

**Honduras**

| Cause                                  | YLLs (actual counts)                   |                                       |                                         |                                       | Deaths (actual counts)         |                               |                                 |                               |
|----------------------------------------|----------------------------------------|---------------------------------------|-----------------------------------------|---------------------------------------|--------------------------------|-------------------------------|---------------------------------|-------------------------------|
|                                        | 2016                                   | 2040 Forecast                         | 2040 Better Scenario                    | 2040 Worse Scenario                   | 2016                           | 2040 Forecast                 | 2040 Better Scenario            | 2040 Worse Scenario           |
|                                        | 1,910.16<br>(1,235.60 to<br>2,887.61)  | 1,423.53<br>(816.97 to<br>2,336.77)   | 987.75<br>(562.86 to<br>1,596.66)       | 3,064.83<br>(1,827.63 to<br>4,913.98) | 414.0<br>(26.19 to<br>63.32)   | 38.35<br>(21.90 to<br>62.48)  | 28.82<br>(16.33 to<br>46.03)    | 72.45<br>(42.98 to<br>116.52) |
| 6,743.94<br>(4,194.88 to<br>10,344.07) | 6,216.43<br>(3,487.02 to<br>10,799.65) | 4,574.40<br>(2,584.60 to<br>7,894.33) | 11,404.30<br>(6,507.33 to<br>19,284.92) | 123.37<br>(76.38 to<br>189.21)        | 127.63<br>(71.69 to<br>217.72) | 96.94<br>(54.30 to<br>163.46) | 222.12<br>(125.93 to<br>374.67) |                               |
| Cyclist road injuries                  |                                        |                                       |                                         |                                       |                                |                               |                                 |                               |
| Motorcyclist road injuries             |                                        |                                       |                                         |                                       |                                |                               |                                 |                               |

|                                                 |                                                                  |                                                                  |                                                                  |                                                                  |                                                            |                                                            |                                                            |                                                            |
|-------------------------------------------------|------------------------------------------------------------------|------------------------------------------------------------------|------------------------------------------------------------------|------------------------------------------------------------------|------------------------------------------------------------|------------------------------------------------------------|------------------------------------------------------------|------------------------------------------------------------|
| Motor vehicle road injuries                     | 18,974.06<br>(13,234.14 to<br>27,806.85)                         | 11,567.16<br>(7,327.34 to<br>18,542.32)                          | 7,256.03<br>(4,647.55 to<br>11,452.51)                           | 29,812.14<br>(19,232.27 to<br>47,432.73)                         | 372.37<br>(256.37 to<br>550.65)                            | 262.42<br>(167.13 to<br>417.82)                            | 172.45<br>(110.74 to<br>269.44)                            | 633.21<br>(403.94 to<br>1,002.32)                          |
| Other road injuries                             | 1,082.70<br>(689.72 to<br>1,684.33)                              | 807.13<br>(465.91 to<br>1,336.20)                                | 528.99<br>(307.87 to<br>862.43)                                  | 1,939.28<br>(1,132.45 to<br>3,162.04)                            | 24.89<br>(15.59 to<br>38.06)                               | 23.30<br>(13.53 to<br>37.30)                               | 16.83<br>(9.98 to<br>26.29)                                | 49.00<br>(28.40 to<br>79.62)                               |
| Other transport injuries                        | 2,358.88<br>(1,539.67 to<br>3,613.86)                            | 3,356.61<br>(2,106.37 to<br>5,572.83)                            | 2,750.00<br>(1,732.94 to<br>4,614.44)                            | 3,829.78<br>(2,395.96 to<br>6,216.57)                            | 46.16<br>(30.50 to<br>74.73)                               | 81.61<br>(50.79 to<br>146.15)                              | 69.97<br>(43.60 to<br>123.97)                              | 89.61<br>(55.34 to<br>158.38)                              |
| <b>Unintentional injuries</b>                   | <b>64,800.08</b><br><b>(44,176.95 to</b><br><b>84,709.29)</b>    | <b>59,634.49</b><br><b>(41,152.14 to</b><br><b>79,275.27)</b>    | <b>51,261.84</b><br><b>(35,681.86 to</b><br><b>68,799.90)</b>    | <b>66,019.09</b><br><b>(44,350.39 to</b><br><b>87,562.69)</b>    | <b>1,348.21</b><br><b>(956.86 to</b><br><b>1,769.31)</b>   | <b>1,632.02</b><br><b>(1,198.81 to</b><br><b>2,103.61)</b> | <b>1,507.69</b><br><b>(1,104.45 to</b><br><b>1,949.70)</b> | <b>1,696.75</b><br><b>(1,224.61 to</b><br><b>2,182.32)</b> |
| Falls                                           | 5,676.84<br>(3,782.47 to<br>8,272.73)                            | 8,886.97<br>(5,755.73 to<br>12,595.41)                           | 8,585.38<br>(5,507.15 to<br>12,217.44)                           | 8,930.22<br>(5,752.25 to<br>12,517.14)                           | 217.35<br>(147.33 to<br>307.41)                            | 392.05<br>(267.64 to<br>529.24)                            | 399.90<br>(271.81 to<br>538.19)                            | 375.15<br>(252.15 to<br>509.22)                            |
| Drowning                                        | 13,801.32<br>(10,118.75 to<br>18,696.75)                         | 11,687.54<br>(7,851.83 to<br>17,174.83)                          | 9,766.81<br>(6,458.43 to<br>14,509.57)                           | 13,057.50<br>(8,736.64 to<br>19,142.17)                          | 259.69<br>(184.92 to<br>354.85)                            | 270.68<br>(178.77 to<br>394.47)                            | 235.50<br>(153.58 to<br>341.87)                            | 292.98<br>(195.16 to<br>428.35)                            |
| Fire, heat, and hot substances                  | 2,825.15<br>(1,375.65 to<br>4,353.95)                            | 1,992.80<br>(1,003.68 to<br>3,046.79)                            | 1,595.78<br>(821.06 to<br>2,422.77)                              | 2,302.57<br>(1,137.74 to<br>3,571.81)                            | 60.16<br>(32.85 to<br>86.38)                               | 57.36<br>(33.02 to<br>80.78)                               | 49.98<br>(29.41 to<br>69.61)                               | 61.59<br>(34.99 to<br>88.55)                               |
| Poisonings                                      | 2,621.34<br>(1,529.05 to<br>4,856.53)                            | 1,471.90<br>(804.58 to<br>2,657.25)                              | 1,085.05<br>(597.49 to<br>1,900.99)                              | 1,790.04<br>(989.79 to<br>3,334.98)                              | 50.43<br>(29.00 to<br>89.70)                               | 36.14<br>(18.95 to<br>62.26)                               | 28.79<br>(14.64 to<br>49.35)                               | 41.26<br>(22.16 to<br>71.28)                               |
| Exposure to mechanical forces                   | 8,172.30<br>(5,480.83 to<br>11,412.27)                           | 8,119.27<br>(5,151.99 to<br>11,697.11)                           | 6,747.01<br>(4,219.04 to<br>9,910.42)                            | 9,086.59<br>(5,713.45 to<br>13,125.78)                           | 163.44<br>(105.92 to<br>231.71)                            | 196.35<br>(121.63 to<br>282.18)                            | 170.03<br>(105.14 to<br>246.94)                            | 212.27<br>(130.44 to<br>304.60)                            |
| Unintentional firearm injuries                  | 723.16<br>(368.76 to<br>1,105.62)                                | 575.39<br>(287.92 to<br>940.94)                                  | 465.57<br>(240.79 to<br>760.66)                                  | 652.00<br>(330.82 to<br>1,036.08)                                | 13.05<br>(6.95 to<br>20.15)                                | 11.70<br>(6.33 to<br>18.49)                                | 9.78<br>(5.39 to<br>15.35)                                 | 12.92<br>(7.14 to<br>20.29)                                |
| Unintentional suffocation                       | 1,753.23<br>(1,018.18 to<br>2,825.53)                            | 1,109.37<br>(625.90 to<br>1,811.25)                              | 801.95<br>(459.52 to<br>1,290.75)                                | 1,389.68<br>(775.90 to<br>2,303.48)                              | 22.47<br>(13.13 to<br>35.59)                               | 15.28<br>(8.89 to<br>24.15)                                | 11.33<br>(6.61 to<br>17.57)                                | 18.80<br>(10.71 to<br>30.10)                               |
| Other exposure to mechanical forces             | 5,695.90<br>(3,828.25 to<br>8,309.54)                            | 6,434.51<br>(3,993.10 to<br>9,631.54)                            | 5,479.48<br>(3,355.68 to<br>8,192.83)                            | 7,044.92<br>(4,355.12 to<br>10,499.15)                           | 127.92<br>(82.46 to<br>187.84)                             | 169.37<br>(102.88 to<br>245.25)                            | 148.92<br>(90.33 to<br>218.33)                             | 180.55<br>(107.90 to<br>263.47)                            |
| Adverse effects of medical treatment            | 11,677.31<br>(5,241.33 to<br>20,202.21)                          | 8,889.88<br>(5,176.26 to<br>13,343.57)                           | 7,157.37<br>(4,399.25 to<br>10,107.32)                           | 10,406.31<br>(5,652.25 to<br>16,405.27)                          | 234.90<br>(142.04 to<br>327.96)                            | 258.70<br>(191.16 to<br>322.99)                            | 332.67<br>(173.16 to<br>511.11)                            | 273.12<br>(194.19 to<br>349.39)                            |
| Animal contact                                  | 675.75<br>(466.39 to<br>956.38)                                  | 996.03<br>(704.97 to<br>1,435.97)                                | 815.35<br>(568.32 to<br>1,192.34)                                | 1,116.73<br>(778.69 to<br>1,619.75)                              | 19.20<br>(13.66 to<br>27.90)                               | 35.23<br>(25.44 to<br>50.69)                               | 31.28<br>(22.59 to<br>45.38)                               | 36.96<br>(26.82 to<br>53.32)                               |
| Venomous animal contact                         | 423.05<br>(277.26 to<br>620.75)                                  | 594.73<br>(381.74 to<br>917.89)                                  | 488.00<br>(308.01 to<br>764.39)                                  | 666.62<br>(424.22 to<br>1,036.20)                                | 12.43<br>(7.90 to<br>19.04)                                | 21.96<br>(13.52 to<br>33.09)                               | 19.65<br>(11.82 to<br>30.10)                               | 22.92<br>(14.12 to<br>34.72)                               |
| Non-venomous animal contact                     | 252.70<br>(149.06 to<br>404.72)                                  | 401.31<br>(233.02 to<br>664.85)                                  | 327.35<br>(191.13 to<br>537.84)                                  | 450.11<br>(260.97 to<br>752.14)                                  | 6.77<br>(3.97 to<br>11.29)                                 | 13.26<br>(7.63 to<br>21.01)                                | 11.63<br>(6.66 to<br>18.78)                                | 14.03<br>(8.16 to<br>22.05)                                |
| Foreign body                                    | 12,629.18<br>(7,191.50 to<br>18,492.87)                          | 11,026.88<br>(6,604.44 to<br>15,640.48)                          | 9,838.48<br>(6,015.75 to<br>13,732.80)                           | 12,199.72<br>(7,113.22 to<br>17,681.85)                          | 198.52<br>(118.39 to<br>279.99)                            | 223.67<br>(140.76 to<br>300.90)                            | 215.62<br>(137.70 to<br>289.28)                            | 231.85<br>(143.82 to<br>313.57)                            |
| Pulmonary aspiration and foreign body in airway | 12,214.02<br>(6,905.52 to<br>18,110.62)                          | 10,629.26<br>(6,392.23 to<br>15,212.07)                          | 9,505.35<br>(5,767.02 to<br>13,339.79)                           | 11,753.89<br>(6,810.29 to<br>17,094.73)                          | 191.56<br>(112.47 to<br>272.27)                            | 216.06<br>(135.00 to<br>290.51)                            | 209.05<br>(133.17 to<br>282.26)                            | 223.52<br>(137.06 to<br>304.23)                            |
| Foreign body in other body part                 | 415.16<br>(231.54 to<br>609.27)                                  | 397.62<br>(210.22 to<br>602.37)                                  | 333.14<br>(175.41 to<br>508.10)                                  | 445.83<br>(230.82 to<br>665.37)                                  | 6.96<br>(3.74 to<br>10.44)                                 | 7.61<br>(3.89 to<br>11.80)                                 | 6.57<br>(3.38 to<br>10.24)                                 | 8.33<br>(4.23 to<br>12.66)                                 |
| Environmental heat and cold exposure            | 400.78<br>(138.27 to<br>610.01)                                  | 486.50<br>(152.68 to<br>778.03)                                  | 376.54<br>(120.80 to<br>611.37)                                  | 563.91<br>(175.51 to<br>895.43)                                  | 10.39<br>(3.62 to<br>15.97)                                | 14.49<br>(4.71 to<br>22.98)                                | 11.67<br>(3.94 to<br>18.31)                                | 16.25<br>(5.16 to<br>25.29)                                |
| Other unintentional injuries                    | 6,320.11<br>(4,315.98 to<br>9,336.84)                            | 6,076.72<br>(3,907.81 to<br>9,249.44)                            | 5,294.08<br>(3,386.31 to<br>8,053.00)                            | 6,565.50<br>(4,261.90 to<br>9,992.13)                            | 134.13<br>(89.67 to<br>195.31)                             | 147.36<br>(96.22 to<br>215.42)                             | 132.26<br>(85.21 to<br>194.82)                             | 153.33<br>(102.31 to<br>225.77)                            |
| <b>Self-harm and interpersonal violence</b>     | <b>159,106.27</b><br><b>(105,029.77 to</b><br><b>229,174.67)</b> | <b>165,162.74</b><br><b>(109,562.17 to</b><br><b>238,133.24)</b> | <b>156,024.14</b><br><b>(104,533.75 to</b><br><b>224,724.69)</b> | <b>171,660.64</b><br><b>(110,715.43 to</b><br><b>247,906.88)</b> | <b>3,042.88</b><br><b>(2,029.33 to</b><br><b>4,357.96)</b> | <b>3,512.96</b><br><b>(2,389.01 to</b><br><b>4,901.42)</b> | <b>3,363.40</b><br><b>(2,309.74 to</b><br><b>4,717.55)</b> | <b>3,609.92</b><br><b>(2,363.98 to</b><br><b>5,038.25)</b> |

| Honduras                                                                     |                                         |                                         |                                         |                                         |                                    |                                    |                                    |                                    |
|------------------------------------------------------------------------------|-----------------------------------------|-----------------------------------------|-----------------------------------------|-----------------------------------------|------------------------------------|------------------------------------|------------------------------------|------------------------------------|
| Cause                                                                        | YLLs (actual counts)                    |                                         |                                         |                                         | Deaths (actual counts)             |                                    |                                    |                                    |
|                                                                              | 2016                                    | 2040 Forecast                           | 2040 Better Scenario                    | 2040 Worse Scenario                     | 2016                               | 2040 Forecast                      | 2040 Better Scenario               | 2040 Worse Scenario                |
| Self-harm                                                                    | 13,816.00<br>(9,095.91 to 20,952.01)    | 20,452.60<br>(12,590.84 to 33,164.62)   | 17,623.32<br>(11,140.81 to 27,882.36)   | 22,540.16<br>(13,451.00 to 36,458.33)   | 306.56<br>(200.80 to 463.42)       | 497.62<br>(313.44 to 763.78)       | 441.89<br>(286.76 to 669.66)       | 537.03<br>(328.29 to 845.63)       |
| Self-harm by firearm                                                         | 2,178.02<br>(1,147.65 to 3,861.78)      | 3,065.43<br>(1,419.63 to 5,755.25)      | 2,565.01<br>(1,256.50 to 4,840.79)      | 3,433.12<br>(1,539.40 to 6,561.13)      | 50.51<br>(26.38 to 86.45)          | 78.48<br>(35.91 to 140.94)         | 68.22<br>(31.82 to 120.10)         | 85.58<br>(38.29 to 155.19)         |
| Self-harm by other specified means                                           | 11,637.98<br>(7,659.66 to 17,814.99)    | 17,387.17<br>(10,890.09 to 27,520.44)   | 15,058.31<br>(9,571.99 to 23,643.43)    | 19,107.04<br>(11,646.60 to 30,472.87)   | 256.05<br>(169.50 to 384.46)       | 419.14<br>(266.80 to 637.27)       | 373.67<br>(242.28 to 555.99)       | 451.46<br>(277.04 to 689.78)       |
| Interpersonal violence                                                       | 145,290.27<br>(95,074.25 to 210,685.11) | 144,710.14<br>(92,934.15 to 211,374.35) | 138,400.82<br>(90,588.21 to 203,029.15) | 149,120.48<br>(93,022.51 to 217,103.67) | 2,736.32<br>(1,812.18 to 3,940.36) | 3,015.35<br>(1,992.63 to 4,285.43) | 2,921.51<br>(1,971.59 to 4,165.79) | 3,072.88<br>(1,959.71 to 4,368.54) |
| Physical violence by firearm                                                 | 90,486.61<br>(56,435.00 to 138,174.09)  | 89,721.84<br>(55,384.19 to 137,173.82)  | 86,735.05<br>(54,417.44 to 131,798.99)  | 91,578.26<br>(56,479.87 to 140,139.16)  | 1,711.87<br>(1,076.96 to 2,587.48) | 1,846.19<br>(1,165.39 to 2,757.73) | 1,803.10<br>(1,147.42 to 2,668.29) | 1,868.51<br>(1,160.95 to 2,799.57) |
| Physical violence by sharp object                                            | 25,861.30<br>(13,605.45 to 41,969.12)   | 29,313.39<br>(15,662.50 to 46,739.69)   | 29,016.78<br>(15,662.59 to 46,665.65)   | 29,513.26<br>(15,466.10 to 46,662.07)   | 494.05<br>(261.28 to 787.53)       | 617.46<br>(336.69 to 949.22)       | 618.48<br>(341.34 to 947.87)       | 615.21<br>(328.58 to 951.95)       |
| Physical violence by other means                                             | 28,942.36<br>(14,676.74 to 41,697.32)   | 25,674.91<br>(12,165.02 to 39,498.47)   | 22,648.99<br>(10,806.32 to 34,282.63)   | 28,028.96<br>(12,723.23 to 43,023.66)   | 530.40<br>(266.29 to 775.55)       | 551.69<br>(268.92 to 827.37)       | 499.94<br>(247.17 to 743.37)       | 589.16<br>(276.64 to 902.50)       |
| Forces of nature, conflict and terrorism, and executions and police conflict | 68.12<br>(49.61 to 100.79)              | 24,664.05<br>(0.00 to 544,486.59)       | 23,401.49<br>(0.00 to 515,499.50)       | 25,562.33<br>(0.00 to 564,799.68)       | 1.14<br>(0.82 to 1.67)             | 512.91<br>(0.00 to 11,390.49)      | 504.76<br>(0.00 to 11,202.08)      | 516.40<br>(0.00 to 11,463.96)      |
| Exposure to forces of nature                                                 | 0.00<br>(0.00 to 0.00)                  | 23,101.17<br>(0.00 to 544,486.59)       | 21,909.41<br>(0.00 to 515,499.50)       | 23,947.09<br>(0.00 to 564,799.68)       | 0.00<br>(0.00 to 0.00)             | 483.67<br>(0.00 to 11,390.49)      | 476.15<br>(0.00 to 11,202.08)      | 486.77<br>(0.00 to 11,463.96)      |
| Conflict and terrorism                                                       | 0.00<br>(0.00 to 0.00)                  | 1,562.88<br>(0.00 to 22,539.69)         | 1,492.08<br>(0.00 to 21,649.57)         | 1,615.24<br>(0.00 to 23,289.67)         | 0.00<br>(0.00 to 0.00)             | 29.24<br>(0.00 to 422.96)          | 28.61<br>(0.00 to 416.81)          | 29.63<br>(0.00 to 428.61)          |
| Executions and police conflict                                               | 68.12<br>(49.61 to 100.79)              | 0.00<br>(0.00 to 0.00)                  | 0.00<br>(0.00 to 0.00)                  | 0.00<br>(0.00 to 0.00)                  | 1.14<br>(0.82 to 1.67)             | 0.00<br>(0.00 to 0.00)             | 0.00<br>(0.00 to 0.00)             | 0.00<br>(0.00 to 0.00)             |

  

| Mexico                                                            |                                       |                                       |                                       |                                       |                              |                                  |                                |                                    |
|-------------------------------------------------------------------|---------------------------------------|---------------------------------------|---------------------------------------|---------------------------------------|------------------------------|----------------------------------|--------------------------------|------------------------------------|
| Cause                                                             | YLLs (in 1000s)                       |                                       |                                       |                                       | Deaths (in 1000s)            |                                  |                                |                                    |
|                                                                   | 2016                                  | 2040 Forecast                         | 2040 Better Scenario                  | 2040 Worse Scenario                   | 2016                         | 2040 Forecast                    | 2040 Better Scenario           | 2040 Worse Scenario                |
| All causes                                                        | 17,763.31<br>(17,368.56 to 18,152.01) | 23,274.40<br>(18,865.87 to 28,322.05) | 17,050.53<br>(13,970.76 to 20,891.53) | 28,056.20<br>(22,916.44 to 34,264.35) | 659.68<br>(645.95 to 673.58) | 1,139.72<br>(925.29 to 1,356.92) | 888.56<br>(723.73 to 1,064.48) | 1,327.58<br>(1,080.09 to 1,578.50) |
| Communicable, maternal, neonatal, and nutritional diseases        | 2,770.93<br>(2,629.19 to 2,942.00)    | 1,973.50<br>(1,631.30 to 2,412.25)    | 1,221.21<br>(1,028.59 to 1,453.13)    | 2,503.68<br>(2,064.96 to 3,099.93)    | 58.80<br>(56.49 to 61.29)    | 65.33<br>(55.56 to 77.88)        | 49.78<br>(42.12 to 59.02)      | 78.67<br>(64.99 to 95.42)          |
| HIV/AIDS and tuberculosis                                         | 321.56<br>(315.75 to 327.54)          | 277.20<br>(183.61 to 352.65)          | 166.29<br>(97.18 to 236.96)           | 455.73<br>(341.54 to 544.47)          | 7.58<br>(7.43 to 7.73)       | 7.08<br>(4.49 to 9.48)           | 4.18<br>(2.25 to 6.19)         | 11.20<br>(8.13 to 14.06)           |
| Tuberculosis                                                      | 79.80<br>(75.43 to 85.06)             | 70.73<br>(46.57 to 108.14)            | 31.71<br>(19.80 to 49.52)             | 96.76<br>(61.19 to 152.82)            | 2.46<br>(2.33 to 2.59)       | 2.75<br>(1.79 to 4.14)           | 1.27<br>(0.81 to 1.95)         | 3.69<br>(2.33 to 5.73)             |
| HIV/AIDS                                                          | 241.76<br>(238.79 to 245.14)          | 206.47<br>(120.87 to 274.30)          | 134.58<br>(70.00 to 203.15)           | 358.97<br>(255.70 to 431.58)          | 5.13<br>(5.06 to 5.19)       | 4.34<br>(2.13 to 6.21)           | 2.91<br>(1.24 to 4.81)         | 7.51<br>(4.84 to 9.33)             |
| Diarrhea, lower respiratory, and other common infectious diseases | 952.88<br>(897.63 to 1,039.68)        | 780.32<br>(586.37 to 1,053.62)        | 525.53<br>(406.25 to 699.90)          | 1,067.33<br>(763.88 to 1,522.35)      | 25.06<br>(23.66 to 26.76)    | 34.14<br>(26.09 to 44.75)        | 26.46<br>(20.47 to 34.72)      | 43.06<br>(31.87 to 58.39)          |
| Diarrheal diseases                                                | 183.87<br>(168.52 to 203.59)          | 80.44<br>(34.81 to 181.90)            | 69.17<br>(31.43 to 149.63)            | 119.45<br>(42.56 to 316.69)           | 4.42<br>(4.22 to 4.68)       | 4.13<br>(2.04 to 8.79)           | 4.04<br>(1.93 to 8.35)         | 5.55<br>(2.33 to 13.52)            |

|                                                |                                                   |                                                   |                                                   |                                                   |                                                |                                                |                                                |                                                |
|------------------------------------------------|---------------------------------------------------|---------------------------------------------------|---------------------------------------------------|---------------------------------------------------|------------------------------------------------|------------------------------------------------|------------------------------------------------|------------------------------------------------|
| Intestinal infectious diseases                 | 4.32<br>(2.13 to<br>7.72)                         | 3.19<br>(1.29 to<br>6.45)                         | 3.03<br>(1.26 to<br>6.09)                         | 3.24<br>(1.31 to<br>6.56)                         | 0.10<br>(0.05 to<br>0.18)                      | 0.09<br>(0.04 to<br>0.18)                      | 0.10<br>(0.05 to<br>0.18)                      | 0.09<br>(0.04 to<br>0.18)                      |
| Typhoid fever                                  | 4.15<br>(2.01 to<br>7.42)                         | 3.06<br>(1.22 to<br>6.12)                         | 2.94<br>(1.20 to<br>5.96)                         | 3.11<br>(1.23 to<br>6.34)                         | 0.10<br>(0.05 to<br>0.17)                      | 0.09<br>(0.04 to<br>0.17)                      | 0.09<br>(0.04 to<br>0.18)                      | 0.09<br>(0.04 to<br>0.17)                      |
| Paratyphoid fever                              | 0.06<br>(0.03 to<br>0.12)                         | 0.08<br>(0.03 to<br>0.19)                         | 0.06<br>(0.02 to<br>0.14)                         | 0.09<br>(0.03 to<br>0.19)                         | 0.00<br>(0.00 to<br>0.00)                      | 0.00<br>(0.00 to<br>0.01)                      | 0.00<br>(0.00 to<br>0.00)                      | 0.00<br>(0.00 to<br>0.01)                      |
| Other intestinal infectious diseases           | 0.11<br>(0.04 to<br>0.25)                         | 0.05<br>(0.01 to<br>0.12)                         | 0.03<br>(0.01 to<br>0.07)                         | 0.05<br>(0.01 to<br>0.13)                         | 0.00<br>(0.00 to<br>0.00)                      | 0.00<br>(0.00 to<br>0.00)                      | 0.00<br>(0.00 to<br>0.00)                      | 0.00<br>(0.00 to<br>0.00)                      |
| Lower respiratory infections                   | 652.63<br>(615.93 to<br>707.27)                   | 533.38<br>(345.64 to<br>790.27)                   | 350.90<br>(237.71 to<br>500.39)                   | 732.59<br>(442.42 to<br>1,139.36)                 | 18.60<br>(17.37 to<br>19.95)                   | 26.66<br>(19.67 to<br>35.29)                   | 20.03<br>(15.01 to<br>26.56)                   | 33.41<br>(23.49 to<br>45.75)                   |
| Upper respiratory infections                   | 0.60<br>(0.51 to<br>0.72)                         | 0.36<br>(0.18 to<br>0.62)                         | 0.19<br>(0.10 to<br>0.33)                         | 0.39<br>(0.20 to<br>0.66)                         | 0.01<br>(0.01 to<br>0.02)                      | 0.01<br>(0.01 to<br>0.02)                      | 0.01<br>(0.00 to<br>0.01)                      | 0.01<br>(0.01 to<br>0.02)                      |
| Otitis media                                   | 0.28<br>(0.25 to<br>0.32)                         | 0.07<br>(0.04 to<br>0.11)                         | 0.07<br>(0.04 to<br>0.11)                         | 0.07<br>(0.04 to<br>0.11)                         | 0.01<br>(0.01 to<br>0.01)                      | 0.00<br>(0.00 to<br>0.00)                      | 0.00<br>(0.00 to<br>0.00)                      | 0.00<br>(0.00 to<br>0.00)                      |
| Meningitis                                     | 41.79<br>(38.75 to<br>48.07)                      | 24.24<br>(11.04 to<br>39.24)                      | 15.77<br>(8.36 to<br>23.84)                       | 25.04<br>(11.19 to<br>41.29)                      | 0.75<br>(0.70 to<br>0.86)                      | 0.58<br>(0.38 to<br>0.82)                      | 0.44<br>(0.31 to<br>0.59)                      | 0.58<br>(0.38 to<br>0.83)                      |
| Pneumococcal meningitis                        | 7.10<br>(6.49 to<br>8.20)                         | 3.31<br>(1.78 to<br>4.97)                         | 2.82<br>(1.66 to<br>4.09)                         | 3.32<br>(1.78 to<br>5.02)                         | 0.14<br>(0.13 to<br>0.16)                      | 0.09<br>(0.07 to<br>0.13)                      | 0.09<br>(0.07 to<br>0.12)                      | 0.09<br>(0.07 to<br>0.13)                      |
| H influenzae type B meningitis                 | 3.64<br>(3.28 to<br>4.20)                         | 5.46<br>(0.85 to<br>15.73)                        | 2.28<br>(0.68 to<br>5.25)                         | 6.17<br>(0.89 to<br>18.42)                        | 0.06<br>(0.05 to<br>0.07)                      | 0.08<br>(0.02 to<br>0.21)                      | 0.04<br>(0.02 to<br>0.08)                      | 0.09<br>(0.02 to<br>0.23)                      |
| Meningococcal meningitis                       | 7.46<br>(6.83 to<br>8.63)                         | 3.35<br>(1.72 to<br>5.04)                         | 2.31<br>(1.24 to<br>3.53)                         | 3.38<br>(1.73 to<br>5.10)                         | 0.13<br>(0.12 to<br>0.15)                      | 0.09<br>(0.06 to<br>0.12)                      | 0.06<br>(0.04 to<br>0.09)                      | 0.08<br>(0.06 to<br>0.11)                      |
| Other meningitis                               | 23.60<br>(21.84 to<br>27.12)                      | 12.12<br>(6.42 to<br>18.24)                       | 8.36<br>(4.60 to<br>12.70)                        | 12.16<br>(6.40 to<br>18.48)                       | 0.42<br>(0.40 to<br>0.49)                      | 0.32<br>(0.23 to<br>0.43)                      | 0.24<br>(0.16 to<br>0.33)                      | 0.32<br>(0.22 to<br>0.43)                      |
| Encephalitis                                   | 55.52<br>(44.92 to<br>78.89)                      | 36.27<br>(16.22 to<br>60.24)                      | 26.98<br>(13.03 to<br>42.58)                      | 37.13<br>(16.72 to<br>62.18)                      | 0.94<br>(0.73 to<br>1.25)                      | 0.86<br>(0.49 to<br>1.24)                      | 0.71<br>(0.42 to<br>0.97)                      | 0.86<br>(0.49 to<br>1.24)                      |
| Diphtheria                                     | 0.23<br>(0.20 to<br>0.27)                         | 0.04<br>(0.01 to<br>0.07)                         | 0.02<br>(0.01 to<br>0.04)                         | 0.04<br>(0.01 to<br>0.08)                         | 0.00<br>(0.00 to<br>0.00)                      | 0.00<br>(0.00 to<br>0.00)                      | 0.00<br>(0.00 to<br>0.00)                      | 0.00<br>(0.00 to<br>0.00)                      |
| Whooping cough                                 | 5.55<br>(2.47 to<br>11.24)                        | 3.30<br>(0.07 to<br>9.25)                         | 0.30<br>(0.05 to<br>0.69)                         | 3.72<br>(0.07 to<br>10.51)                        | 0.07<br>(0.03 to<br>0.13)                      | 0.04<br>(0.00 to<br>0.11)                      | 0.00<br>(0.01 to<br>0.01)                      | 0.04<br>(0.00 to<br>0.12)                      |
| Tetanus                                        | 0.50<br>(0.44 to<br>0.77)                         | 0.12<br>(0.06 to<br>0.20)                         | 0.08<br>(0.05 to<br>0.15)                         | 0.13<br>(0.07 to<br>0.22)                         | 0.01<br>(0.01 to<br>0.02)                      | 0.00<br>(0.00 to<br>0.01)                      | 0.00<br>(0.00 to<br>0.01)                      | 0.00<br>(0.00 to<br>0.01)                      |
| Measles                                        | 0.00<br>(0.00 to<br>0.00)                         | 95.67<br>(0.00 to<br>320.77)                      | 57.23<br>(0.00 to<br>183.50)                      | 142.09<br>(0.00 to<br>492.67)                     | 0.00<br>(0.00 to<br>0.00)                      | 1.66<br>(0.00 to<br>5.29)                      | 1.06<br>(0.00 to<br>3.31)                      | 2.39<br>(0.00 to<br>7.86)                      |
| <b>Mexico</b>                                  |                                                   |                                                   |                                                   |                                                   |                                                |                                                |                                                |                                                |
| Cause                                          | YLLs (in 1000s)                                   |                                                   |                                                   |                                                   | Deaths (in 1000s)                              |                                                |                                                |                                                |
|                                                | 2016                                              | 2040 Forecast                                     | 2040 Better Scenario                              | 2040 Worse Scenario                               | 2016                                           | 2040 Forecast                                  | 2040 Better Scenario                           | 2040 Worse Scenario                            |
| Varicella and herpes zoster                    | 7.58<br>(4.07 to<br>12.70)                        | 3.24<br>(1.08 to<br>6.53)                         | 1.79<br>(0.71 to<br>3.51)                         | 3.46<br>(1.15 to<br>7.14)                         | 0.14<br>(0.08 to<br>0.24)                      | 0.09<br>(0.05 to<br>0.17)                      | 0.06<br>(0.03 to<br>0.11)                      | 0.09<br>(0.05 to<br>0.18)                      |
| <b>Neglected tropical diseases and malaria</b> | <b>14.81</b><br><b>(12.77 to</b><br><b>18.79)</b> | <b>20.67</b><br><b>(17.15 to</b><br><b>25.23)</b> | <b>18.44</b><br><b>(15.60 to</b><br><b>22.48)</b> | <b>20.80</b><br><b>(17.17 to</b><br><b>25.58)</b> | <b>0.37</b><br><b>(0.33 to</b><br><b>0.45)</b> | <b>0.66</b><br><b>(0.57 to</b><br><b>0.78)</b> | <b>0.65</b><br><b>(0.56 to</b><br><b>0.77)</b> | <b>0.64</b><br><b>(0.55 to</b><br><b>0.76)</b> |
| Malaria                                        | 0.32<br>(0.28 to<br>0.38)                         | 0.12<br>(0.10 to<br>0.16)                         | 0.11<br>(0.09 to<br>0.15)                         | 0.12<br>(0.10 to<br>0.16)                         | 0.01<br>(0.01 to<br>0.01)                      | 0.00<br>(0.00 to<br>0.00)                      | 0.00<br>(0.00 to<br>0.00)                      | 0.00<br>(0.00 to<br>0.00)                      |

|                                                       |                                                   |                                                   |                                                   |                                                   |                                                |                                                |                                                |                                                |  |
|-------------------------------------------------------|---------------------------------------------------|---------------------------------------------------|---------------------------------------------------|---------------------------------------------------|------------------------------------------------|------------------------------------------------|------------------------------------------------|------------------------------------------------|--|
| Chagas disease                                        | 1.51<br>(1.41 to<br>1.61)                         | 0.91<br>(0.75 to<br>1.13)                         | 1.12<br>(0.94 to<br>1.39)                         | 0.84<br>(0.70 to<br>1.03)                         | 0.08<br>(0.07 to<br>0.08)                      | 0.05<br>(0.04 to<br>0.06)                      | 0.07<br>(0.05 to<br>0.08)                      | 0.05<br>(0.04 to<br>0.06)                      |  |
| Leishmaniasis                                         | 0.02<br>(0.01 to<br>0.03)                         | 0.01<br>(0.00 to<br>0.01)                         | 0.00<br>(0.00 to<br>0.01)                         | 0.01<br>(0.00 to<br>0.01)                         | 0.00<br>(0.00 to<br>0.00)                      | 0.00<br>(0.00 to<br>0.00)                      | 0.00<br>(0.00 to<br>0.00)                      | 0.00<br>(0.00 to<br>0.00)                      |  |
| African trypanosomiasis                               | 0.00<br>(0.00 to<br>0.00)                         | 0.00<br>(0.00 to<br>0.00)                         | 0.00<br>(0.00 to<br>0.00)                         | 0.00<br>(0.00 to<br>0.00)                         | 0.00<br>(0.00 to<br>0.00)                      | 0.00<br>(0.00 to<br>0.00)                      | 0.00<br>(0.00 to<br>0.00)                      | 0.00<br>(0.00 to<br>0.00)                      |  |
| Schistosomiasis                                       | 0.00<br>(0.00 to<br>0.00)                         | 0.00<br>(0.00 to<br>0.00)                         | 0.00<br>(0.00 to<br>0.00)                         | 0.00<br>(0.00 to<br>0.00)                         | 0.00<br>(0.00 to<br>0.00)                      | 0.00<br>(0.00 to<br>0.00)                      | 0.00<br>(0.00 to<br>0.00)                      | 0.00<br>(0.00 to<br>0.00)                      |  |
| Cysticercosis                                         | 2.17<br>(1.99 to<br>2.37)                         | 0.52<br>(0.42 to<br>0.65)                         | 0.46<br>(0.37 to<br>0.58)                         | 0.53<br>(0.43 to<br>0.66)                         | 0.05<br>(0.05 to<br>0.06)                      | 0.02<br>(0.01 to<br>0.02)                      | 0.01<br>(0.01 to<br>0.02)                      | 0.02<br>(0.01 to<br>0.02)                      |  |
| Cystic echinococcosis                                 | 0.03<br>(0.02 to<br>0.03)                         | 0.01<br>(0.01 to<br>0.01)                         | 0.01<br>(0.01 to<br>0.01)                         | 0.01<br>(0.01 to<br>0.01)                         | 0.00<br>(0.00 to<br>0.00)                      | 0.00<br>(0.00 to<br>0.00)                      | 0.00<br>(0.00 to<br>0.00)                      | 0.00<br>(0.00 to<br>0.00)                      |  |
| Dengue                                                | 6.04<br>(4.28 to<br>7.21)                         | 16.54<br>(12.68 to<br>20.08)                      | 14.95<br>(11.72 to<br>18.09)                      | 16.58<br>(12.62 to<br>20.13)                      | 0.15<br>(0.10 to<br>0.18)                      | 0.53<br>(0.42 to<br>0.62)                      | 0.52<br>(0.42 to<br>0.61)                      | 0.52<br>(0.41 to<br>0.60)                      |  |
| Yellow fever                                          | 0.00<br>(0.00 to<br>0.00)                         | 0.00<br>(0.00 to<br>0.00)                         | 0.00<br>(0.00 to<br>0.00)                         | 0.00<br>(0.00 to<br>0.00)                         | 0.00<br>(0.00 to<br>0.00)                      | 0.00<br>(0.00 to<br>0.00)                      | 0.00<br>(0.00 to<br>0.00)                      | 0.00<br>(0.00 to<br>0.00)                      |  |
| Rabies                                                | 0.02<br>(0.01 to<br>0.02)                         | 0.01<br>(0.00 to<br>0.01)                         | 0.00<br>(0.00 to<br>0.00)                         | 0.01<br>(0.00 to<br>0.01)                         | 0.00<br>(0.00 to<br>0.00)                      | 0.00<br>(0.00 to<br>0.00)                      | 0.00<br>(0.00 to<br>0.00)                      | 0.00<br>(0.00 to<br>0.00)                      |  |
| Intestinal nematode infections                        | 0.73<br>(0.53 to<br>0.97)                         | 0.52<br>(0.34 to<br>0.74)                         | 0.38<br>(0.27 to<br>0.54)                         | 0.52<br>(0.35 to<br>0.74)                         | 0.01<br>(0.01 to<br>0.01)                      | 0.01<br>(0.01 to<br>0.01)                      | 0.01<br>(0.01 to<br>0.01)                      | 0.01<br>(0.01 to<br>0.01)                      |  |
| Other neglected tropical diseases                     | 3.97<br>(2.85 to<br>7.49)                         | 2.04<br>(1.36 to<br>4.16)                         | 1.40<br>(0.95 to<br>2.94)                         | 2.19<br>(1.44 to<br>4.43)                         | 0.08<br>(0.06 to<br>0.14)                      | 0.05<br>(0.04 to<br>0.10)                      | 0.04<br>(0.03 to<br>0.09)                      | 0.05<br>(0.04 to<br>0.11)                      |  |
| <b>Maternal disorders</b>                             | <b>61.42</b><br><b>(57.57 to</b><br><b>66.02)</b> | <b>37.54</b><br><b>(28.10 to</b><br><b>48.85)</b> | <b>22.34</b><br><b>(16.87 to</b><br><b>29.40)</b> | <b>42.85</b><br><b>(31.81 to</b><br><b>56.84)</b> | <b>1.07</b><br><b>(1.01 to</b><br><b>1.15)</b> | <b>0.67</b><br><b>(0.50 to</b><br><b>0.87)</b> | <b>0.40</b><br><b>(0.30 to</b><br><b>0.52)</b> | <b>0.77</b><br><b>(0.57 to</b><br><b>1.01)</b> |  |
| Maternal hemorrhage                                   | 11.90<br>(10.39 to<br>13.66)                      | 8.36<br>(5.56 to<br>11.72)                        | 5.02<br>(3.36 to<br>7.07)                         | 9.51<br>(6.42 to<br>13.61)                        | 0.21<br>(0.19 to<br>0.24)                      | 0.15<br>(0.10 to<br>0.21)                      | 0.09<br>(0.06 to<br>0.13)                      | 0.17<br>(0.12 to<br>0.25)                      |  |
| Maternal sepsis and other maternal infections         | 2.53<br>(2.05 to<br>3.10)                         | 1.51<br>(0.96 to<br>2.31)                         | 0.89<br>(0.56 to<br>1.34)                         | 1.72<br>(1.07 to<br>2.63)                         | 0.05<br>(0.04 to<br>0.06)                      | 0.03<br>(0.02 to<br>0.04)                      | 0.02<br>(0.01 to<br>0.02)                      | 0.03<br>(0.02 to<br>0.05)                      |  |
| Maternal hypertensive disorders                       | 12.72<br>(11.07 to<br>14.58)                      | 9.18<br>(6.26 to<br>13.08)                        | 5.40<br>(3.68 to<br>7.64)                         | 10.46<br>(7.04 to<br>14.97)                       | 0.22<br>(0.19 to<br>0.25)                      | 0.16<br>(0.11 to<br>0.23)                      | 0.10<br>(0.07 to<br>0.14)                      | 0.18<br>(0.12 to<br>0.26)                      |  |
| Maternal obstructed labor and uterine rupture         | 2.42<br>(2.02 to<br>2.89)                         | 1.52<br>(0.95 to<br>2.30)                         | 0.86<br>(0.52 to<br>1.35)                         | 1.75<br>(1.06 to<br>2.71)                         | 0.04<br>(0.04 to<br>0.05)                      | 0.03<br>(0.02 to<br>0.04)                      | 0.02<br>(0.01 to<br>0.02)                      | 0.03<br>(0.02 to<br>0.05)                      |  |
| Maternal abortion, miscarriage, and ectopic pregnancy | 6.70<br>(5.67 to<br>7.86)                         | 4.38<br>(2.63 to<br>7.23)                         | 2.60<br>(1.55 to<br>4.18)                         | 5.02<br>(2.95 to<br>8.31)                         | 0.12<br>(0.10 to<br>0.14)                      | 0.08<br>(0.05 to<br>0.14)                      | 0.05<br>(0.03 to<br>0.08)                      | 0.09<br>(0.06 to<br>0.15)                      |  |
| Indirect maternal deaths                              | 12.35<br>(10.33 to<br>14.70)                      | 5.65<br>(3.54 to<br>8.60)                         | 3.31<br>(2.11 to<br>5.16)                         | 6.48<br>(4.08 to<br>10.12)                        | 0.21<br>(0.17 to<br>0.25)                      | 0.10<br>(0.06 to<br>0.15)                      | 0.06<br>(0.04 to<br>0.09)                      | 0.11<br>(0.07 to<br>0.17)                      |  |
| Late maternal deaths                                  | 3.92<br>(3.10 to<br>4.78)                         | 1.13<br>(0.69 to<br>1.69)                         | 0.66<br>(0.41 to<br>1.00)                         | 1.29<br>(0.79 to<br>1.99)                         | 0.07<br>(0.05 to<br>0.08)                      | 0.02<br>(0.01 to<br>0.03)                      | 0.01<br>(0.01 to<br>0.02)                      | 0.02<br>(0.01 to<br>0.04)                      |  |
| Maternal deaths aggravated by HIV/AIDS                | 0.03<br>(0.02 to<br>0.05)                         | 0.10<br>(0.04 to<br>0.19)                         | 0.06<br>(0.03 to<br>0.12)                         | 0.12<br>(0.05 to<br>0.23)                         | 0.00<br>(0.00 to<br>0.00)                      | 0.00<br>(0.00 to<br>0.00)                      | 0.00<br>(0.00 to<br>0.00)                      | 0.00<br>(0.00 to<br>0.00)                      |  |
| Other maternal disorders                              | 8.84<br>(7.57 to<br>10.24)                        | 5.72<br>(3.87 to<br>8.11)                         | 3.54<br>(2.38 to<br>5.06)                         | 6.51<br>(4.38 to<br>9.56)                         | 0.15<br>(0.13 to<br>0.18)                      | 0.10<br>(0.07 to<br>0.15)                      | 0.06<br>(0.04 to<br>0.09)                      | 0.12<br>(0.08 to<br>0.17)                      |  |
| <b>Mexico</b>                                         |                                                   |                                                   |                                                   |                                                   |                                                |                                                |                                                |                                                |  |
|                                                       | <b>YLLs (in 1000s)</b>                            |                                                   |                                                   |                                                   | <b>Deaths (in 1000s)</b>                       |                                                |                                                |                                                |  |

| Cause                                                                   | 2016                                      | 2040 Forecast                       | 2040 Better Scenario                | 2040 Worse Scenario                 | 2016                             | 2040 Forecast                    | 2040 Better Scenario             | 2040 Worse Scenario              |
|-------------------------------------------------------------------------|-------------------------------------------|-------------------------------------|-------------------------------------|-------------------------------------|----------------------------------|----------------------------------|----------------------------------|----------------------------------|
| <b>Neonatal disorders</b>                                               | <b>1,152.60</b><br>(1,061.43 to 1,248.61) | <b>610.05</b><br>(410.65 to 843.91) | <b>282.06</b><br>(205.62 to 370.07) | <b>664.39</b><br>(453.99 to 914.56) | <b>13.32</b><br>(12.27 to 14.43) | <b>7.05</b><br>(4.75 to 9.76)    | <b>3.26</b><br>(2.38 to 4.28)    | <b>7.68</b><br>(5.25 to 10.57)   |
| Neonatal preterm birth                                                  | 547.24<br>(495.03 to 596.35)              | 263.78<br>(172.15 to 368.45)        | 106.26<br>(72.19 to 143.79)         | 283.93<br>(186.49 to 399.33)        | 6.32<br>(5.72 to 6.89)           | 3.05<br>(1.99 to 4.26)           | 1.23<br>(0.83 to 1.66)           | 3.28<br>(2.16 to 4.61)           |
| Neonatal encephalopathy due to birth asphyxia and trauma                | 233.50<br>(207.60 to 260.60)              | 112.70<br>(66.58 to 172.79)         | 55.48<br>(34.75 to 81.73)           | 123.18<br>(73.43 to 187.45)         | 2.70<br>(2.40 to 3.01)           | 1.30<br>(0.77 to 2.00)           | 0.64<br>(0.40 to 0.95)           | 1.42<br>(0.85 to 2.17)           |
| Neonatal sepsis and other neonatal infections                           | 241.76<br>(197.93 to 288.84)              | 159.55<br>(106.46 to 234.16)        | 81.26<br>(58.12 to 111.96)          | 174.64<br>(119.16 to 253.21)        | 2.79<br>(2.29 to 3.34)           | 1.84<br>(1.23 to 2.71)           | 0.94<br>(0.67 to 1.29)           | 2.02<br>(1.38 to 2.93)           |
| Hemolytic disease and other neonatal jaundice                           | 7.48<br>(6.13 to 9.15)                    | 2.93<br>(1.65 to 5.15)              | 1.40<br>(0.81 to 2.34)              | 3.28<br>(1.85 to 5.68)              | 0.09<br>(0.07 to 0.11)           | 0.03<br>(0.02 to 0.06)           | 0.02<br>(0.01 to 0.03)           | 0.04<br>(0.02 to 0.07)           |
| Other neonatal disorders                                                | 122.62<br>(107.07 to 139.49)              | 71.08<br>(46.88 to 104.15)          | 37.66<br>(26.75 to 52.21)           | 79.36<br>(51.70 to 116.29)          | 1.42<br>(1.24 to 1.61)           | 0.82<br>(0.54 to 1.20)           | 0.44<br>(0.31 to 0.60)           | 0.92<br>(0.60 to 1.34)           |
| <b>Nutritional deficiencies</b>                                         | <b>213.16</b><br>(202.07 to 224.65)       | <b>197.79</b><br>(174.25 to 223.48) | <b>169.90</b><br>(151.49 to 188.69) | <b>200.74</b><br>(176.78 to 227.78) | <b>10.11</b><br>(9.67 to 10.54)  | <b>14.05</b><br>(11.92 to 16.14) | <b>13.51</b><br>(11.62 to 15.51) | <b>13.62</b><br>(11.36 to 15.88) |
| Protein-energy malnutrition                                             | 191.30<br>(174.62 to 204.34)              | 163.03<br>(135.82 to 189.16)        | 143.04<br>(121.15 to 164.16)        | 165.38<br>(137.28 to 193.61)        | 9.08<br>(8.11 to 9.65)           | 11.96<br>(9.59 to 13.99)         | 11.73<br>(9.57 to 13.67)         | 11.57<br>(9.14 to 13.74)         |
| Iodine deficiency                                                       | 0.66<br>(0.34 to 1.22)                    | 3.23<br>(0.14 to 13.03)             | 2.28<br>(0.09 to 10.27)             | 3.37<br>(0.15 to 13.81)             | 0.02<br>(0.01 to 0.03)           | 0.22<br>(0.01 to 1.06)           | 0.17<br>(0.00 to 0.90)           | 0.22<br>(0.01 to 1.01)           |
| Dietary iron deficiency                                                 | 1.16<br>(0.41 to 1.39)                    | 1.00<br>(0.32 to 1.52)              | 0.87<br>(0.25 to 1.16)              | 1.02<br>(0.32 to 1.54)              | 0.04<br>(0.01 to 0.06)           | 0.05<br>(0.01 to 0.07)           | 0.04<br>(0.01 to 0.07)           | 0.04<br>(0.01 to 0.07)           |
| Other nutritional deficiencies                                          | 20.04<br>(11.81 to 34.30)                 | 30.53<br>(16.78 to 50.65)           | 23.71<br>(12.72 to 40.85)           | 30.98<br>(17.03 to 51.30)           | 0.97<br>(0.51 to 1.81)           | 1.84<br>(0.92 to 3.34)           | 1.56<br>(0.77 to 2.88)           | 1.79<br>(0.89 to 3.29)           |
| <b>Other communicable, maternal, neonatal, and nutritional diseases</b> | <b>54.51</b><br>(49.78 to 63.58)          | <b>49.93</b><br>(41.33 to 60.14)    | <b>36.66</b><br>(30.42 to 44.90)    | <b>51.83</b><br>(43.00 to 62.88)    | <b>1.27</b><br>(1.20 to 1.45)    | <b>1.67</b><br>(1.43 to 1.96)    | <b>1.32</b><br>(1.11 to 1.58)    | <b>1.70</b><br>(1.45 to 2.01)    |
| Sexually transmitted infections excluding HIV                           | 10.69<br>(7.73 to 15.19)                  | 3.71<br>(2.77 to 5.08)              | 2.68<br>(2.06 to 3.50)              | 3.83<br>(2.83 to 5.34)              | 0.20<br>(0.17 to 0.26)           | 0.10<br>(0.08 to 0.12)           | 0.08<br>(0.06 to 0.09)           | 0.10<br>(0.08 to 0.12)           |
| Syphilis                                                                | 6.91<br>(3.92 to 11.37)                   | 1.77<br>(1.02 to 3.13)              | 1.06<br>(0.66 to 1.75)              | 1.84<br>(1.07 to 3.22)              | 0.10<br>(0.06 to 0.15)           | 0.03<br>(0.02 to 0.05)           | 0.02<br>(0.02 to 0.03)           | 0.04<br>(0.02 to 0.05)           |
| Chlamydial infection                                                    | 0.74<br>(0.68 to 0.80)                    | 0.37<br>(0.29 to 0.46)              | 0.31<br>(0.24 to 0.39)              | 0.38<br>(0.30 to 0.47)              | 0.02<br>(0.02 to 0.02)           | 0.01<br>(0.01 to 0.01)           | 0.01<br>(0.01 to 0.01)           | 0.01<br>(0.01 to 0.01)           |
| Gonococcal infection                                                    | 1.99<br>(1.84 to 2.15)                    | 1.04<br>(0.81 to 1.29)              | 0.88<br>(0.68 to 1.10)              | 1.07<br>(0.84 to 1.34)              | 0.06<br>(0.05 to 0.06)           | 0.03<br>(0.03 to 0.04)           | 0.03<br>(0.02 to 0.04)           | 0.03<br>(0.03 to 0.04)           |
| Other sexually transmitted infections                                   | 1.05<br>(0.97 to 1.13)                    | 0.52<br>(0.40 to 0.65)              | 0.44<br>(0.33 to 0.55)              | 0.54<br>(0.42 to 0.67)              | 0.03<br>(0.02 to 0.03)           | 0.01<br>(0.01 to 0.02)           | 0.01<br>(0.01 to 0.02)           | 0.02<br>(0.01 to 0.02)           |
| Acute hepatitis                                                         | 21.88<br>(20.55 to 23.48)                 | 22.19<br>(17.91 to 27.10)           | 15.77<br>(12.27 to 20.39)           | 22.91<br>(18.50 to 28.06)           | 0.56<br>(0.53 to 0.60)           | 0.79<br>(0.64 to 0.97)           | 0.59<br>(0.46 to 0.76)           | 0.80<br>(0.65 to 0.98)           |
| Acute hepatitis A                                                       | 2.13<br>(1.63 to 2.71)                    | 1.01<br>(0.62 to 1.52)              | 0.64<br>(0.40 to 0.96)              | 1.05<br>(0.65 to 1.59)              | 0.03<br>(0.03 to 0.04)           | 0.02<br>(0.01 to 0.03)           | 0.02<br>(0.01 to 0.02)           | 0.02<br>(0.01 to 0.03)           |
| Acute hepatitis B                                                       | 12.26<br>(10.96 to 13.51)                 | 13.91<br>(10.71 to 17.97)           | 9.89<br>(7.21 to 13.73)             | 14.46<br>(11.04 to 18.65)           | 0.36<br>(0.32 to 0.39)           | 0.50<br>(0.38 to 0.64)           | 0.36<br>(0.26 to 0.50)           | 0.51<br>(0.39 to 0.66)           |
| Acute hepatitis C                                                       | 1.24<br>(0.95 to 1.58)                    | 1.92<br>(1.37 to 2.66)              | 1.49<br>(1.03 to 2.13)              | 1.94<br>(1.38 to 2.69)              | 0.04<br>(0.03 to 0.05)           | 0.07<br>(0.05 to 0.10)           | 0.06<br>(0.04 to 0.08)           | 0.07<br>(0.05 to 0.10)           |



|                                       |                                                               |                                                               |                                                               |                                                               |                                                      |                                                        |                                                      |                                                          |
|---------------------------------------|---------------------------------------------------------------|---------------------------------------------------------------|---------------------------------------------------------------|---------------------------------------------------------------|------------------------------------------------------|--------------------------------------------------------|------------------------------------------------------|----------------------------------------------------------|
| Acute hepatitis E                     | 6.25<br>(5.33 to<br>7.14)                                     | 5.35<br>(3.96 to<br>6.95)                                     | 3.75<br>(2.74 to<br>4.96)                                     | 5.46<br>(4.00 to<br>7.10)                                     | 0.14<br>(0.11 to<br>0.16)                            | 0.19<br>(0.14 to<br>0.25)                              | 0.15<br>(0.11 to<br>0.20)                            | 0.19<br>(0.14 to<br>0.25)                                |
| Other unspecified infectious diseases | 21.94<br>(19.76 to<br>29.35)                                  | 24.04<br>(19.99 to<br>31.27)                                  | 18.21<br>(15.32 to<br>23.45)                                  | 25.09<br>(20.67 to<br>32.47)                                  | 0.51<br>(0.47 to<br>0.67)                            | 0.78<br>(0.67 to<br>1.00)                              | 0.66<br>(0.57 to<br>0.83)                            | 0.80<br>(0.68 to<br>1.02)                                |
| <b>Non-communicable diseases</b>      | <b>11,664.36</b><br><b>(11,335.25 to</b><br><b>11,969.88)</b> | <b>18,459.79</b><br><b>(14,456.34 to</b><br><b>23,304.79)</b> | <b>13,780.86</b><br><b>(11,003.78 to</b><br><b>17,223.29)</b> | <b>22,008.95</b><br><b>(17,215.91 to</b><br><b>27,623.92)</b> | <b>529.89</b><br><b>(517.99 to</b><br><b>542.31)</b> | <b>997.55</b><br><b>(787.58 to</b><br><b>1,214.77)</b> | <b>779.88</b><br><b>(621.42 to</b><br><b>949.84)</b> | <b>1,157.25</b><br><b>(910.69 to</b><br><b>1,409.50)</b> |
| <b>Mexico</b>                         |                                                               |                                                               |                                                               |                                                               |                                                      |                                                        |                                                      |                                                          |
| <b>Cause</b>                          | <b>YLLs (in 1000s)</b>                                        |                                                               |                                                               |                                                               | <b>Deaths (in 1000s)</b>                             |                                                        |                                                      |                                                          |
|                                       | <b>2016</b>                                                   | <b>2040 Forecast</b>                                          | <b>2040 Better Scenario</b>                                   | <b>2040 Worse Scenario</b>                                    | <b>2016</b>                                          | <b>2040 Forecast</b>                                   | <b>2040 Better Scenario</b>                          | <b>2040 Worse Scenario</b>                               |
| <b>Neoplasms</b>                      | <b>2,288.85</b><br><b>(2,226.52 to</b><br><b>2,371.91)</b>    | <b>3,952.16</b><br><b>(3,357.96 to</b><br><b>4,646.61)</b>    | <b>3,632.04</b><br><b>(3,078.35 to</b><br><b>4,262.78)</b>    | <b>4,275.27</b><br><b>(3,609.48 to</b><br><b>5,067.03)</b>    | <b>89.85</b><br><b>(87.37 to</b><br><b>93.12)</b>    | <b>188.52</b><br><b>(161.78 to</b><br><b>221.38)</b>   | <b>179.52</b><br><b>(152.90 to</b><br><b>210.19)</b> | <b>200.44</b><br><b>(170.16 to</b><br><b>235.40)</b>     |
| Lip and oral cavity cancer            | 21.66<br>(20.77 to<br>22.62)                                  | 35.33<br>(24.49 to<br>49.79)                                  | 26.97<br>(19.25 to<br>37.12)                                  | 47.72<br>(31.46 to<br>69.17)                                  | 0.94<br>(0.91 to<br>0.98)                            | 1.69<br>(1.17 to<br>2.37)                              | 1.32<br>(0.95 to<br>1.79)                            | 2.24<br>(1.47 to<br>3.31)                                |
| Nasopharynx cancer                    | 6.91<br>(6.59 to<br>7.26)                                     | 11.17<br>(8.03 to<br>15.37)                                   | 7.95<br>(5.70 to<br>10.89)                                    | 15.88<br>(11.10 to<br>22.67)                                  | 0.25<br>(0.24 to<br>0.26)                            | 0.47<br>(0.33 to<br>0.63)                              | 0.34<br>(0.24 to<br>0.46)                            | 0.66<br>(0.46 to<br>0.93)                                |
| Other pharynx cancer                  | 7.54<br>(7.21 to<br>7.90)                                     | 13.28<br>(8.52 to<br>20.10)                                   | 11.20<br>(7.41 to<br>16.20)                                   | 15.73<br>(9.97 to<br>24.28)                                   | 0.31<br>(0.30 to<br>0.32)                            | 0.61<br>(0.40 to<br>0.91)                              | 0.53<br>(0.35 to<br>0.76)                            | 0.72<br>(0.46 to<br>1.09)                                |
| Esophageal cancer                     | 28.71<br>(27.42 to<br>29.91)                                  | 45.89<br>(31.65 to<br>66.71)                                  | 37.08<br>(26.44 to<br>51.20)                                  | 60.33<br>(39.67 to<br>89.88)                                  | 1.30<br>(1.25 to<br>1.35)                            | 2.29<br>(1.60 to<br>3.25)                              | 1.90<br>(1.37 to<br>2.58)                            | 2.95<br>(1.95 to<br>4.38)                                |
| Stomach cancer                        | 168.69<br>(163.18 to<br>174.27)                               | 228.08<br>(184.90 to<br>286.47)                               | 187.99<br>(151.90 to<br>234.56)                               | 231.07<br>(187.90 to<br>289.16)                               | 7.49<br>(7.26 to<br>7.73)                            | 11.89<br>(9.61 to<br>15.05)                            | 10.06<br>(8.13 to<br>12.56)                          | 11.80<br>(9.57 to<br>14.95)                              |
| Colon and rectum cancer               | 162.22<br>(154.10 to<br>171.18)                               | 306.46<br>(211.61 to<br>442.12)                               | 270.48<br>(191.81 to<br>388.66)                               | 338.62<br>(228.56 to<br>494.97)                               | 7.17<br>(6.81 to<br>7.52)                            | 16.10<br>(11.18 to<br>23.30)                           | 14.65<br>(10.57 to<br>21.03)                         | 17.32<br>(11.89 to<br>25.52)                             |
| Liver cancer                          | 140.14<br>(133.26 to<br>147.82)                               | 309.30<br>(216.36 to<br>439.23)                               | 291.44<br>(206.14 to<br>411.70)                               | 366.49<br>(242.93 to<br>546.64)                               | 6.72<br>(6.40 to<br>7.08)                            | 16.43<br>(11.69 to<br>23.22)                           | 15.93<br>(11.42 to<br>22.20)                         | 18.92<br>(12.79 to<br>27.92)                             |
| Liver cancer due to hepatitis B       | 26.89<br>(20.21 to<br>35.97)                                  | 54.54<br>(33.99 to<br>83.34)                                  | 53.45<br>(34.01 to<br>81.13)                                  | 63.63<br>(38.66 to<br>102.74)                                 | 1.12<br>(0.81 to<br>1.50)                            | 2.54<br>(1.59 to<br>3.90)                              | 2.56<br>(1.62 to<br>3.86)                            | 2.89<br>(1.75 to<br>4.62)                                |
| Liver cancer due to hepatitis C       | 47.02<br>(41.80 to<br>51.89)                                  | 108.84<br>(75.33 to<br>154.70)                                | 106.48<br>(75.30 to<br>149.75)                                | 123.36<br>(81.97 to<br>183.63)                                | 2.47<br>(2.21 to<br>2.71)                            | 6.19<br>(4.38 to<br>8.55)                              | 6.24<br>(4.50 to<br>8.62)                            | 6.83<br>(4.61 to<br>9.98)                                |
| Liver cancer due to alcohol use       | 37.25<br>(33.24 to<br>41.37)                                  | 85.98<br>(54.93 to<br>131.21)                                 | 73.79<br>(48.78 to<br>111.01)                                 | 109.08<br>(67.00 to<br>170.56)                                | 1.80<br>(1.62 to<br>1.99)                            | 4.57<br>(3.00 to<br>6.82)                              | 4.03<br>(2.72 to<br>5.94)                            | 5.64<br>(3.55 to<br>8.72)                                |
| Liver cancer due to other causes      | 28.98<br>(25.86 to<br>32.42)                                  | 59.95<br>(37.30 to<br>95.73)                                  | 57.71<br>(36.87 to<br>88.67)                                  | 70.42<br>(41.23 to<br>119.01)                                 | 1.33<br>(1.18 to<br>1.49)                            | 3.12<br>(1.92 to<br>4.95)                              | 3.10<br>(1.99 to<br>4.71)                            | 3.56<br>(2.08 to<br>5.99)                                |
| Gallbladder and biliary tract cancer  | 49.45<br>(47.30 to<br>54.45)                                  | 78.83<br>(68.72 to<br>91.51)                                  | 79.69<br>(67.98 to<br>93.79)                                  | 75.99<br>(66.82 to<br>87.60)                                  | 2.34<br>(2.24 to<br>2.60)                            | 4.16<br>(3.65 to<br>4.79)                              | 4.31<br>(3.68 to<br>5.02)                            | 3.94<br>(3.49 to<br>4.51)                                |
| Pancreatic cancer                     | 104.22<br>(100.24 to<br>108.83)                               | 247.56<br>(192.31 to<br>331.48)                               | 253.95<br>(197.66 to<br>336.97)                               | 250.13<br>(193.66 to<br>335.29)                               | 4.79<br>(4.61 to<br>5.01)                            | 12.49<br>(9.74 to<br>16.64)                            | 13.08<br>(10.14 to<br>17.37)                         | 12.43<br>(9.62 to<br>16.60)                              |
| Larynx cancer                         | 20.68<br>(19.74 to<br>21.80)                                  | 31.22<br>(20.76 to<br>46.30)                                  | 22.37<br>(15.24 to<br>32.34)                                  | 48.87<br>(29.50 to<br>77.54)                                  | 1.01<br>(0.97 to<br>1.06)                            | 1.62<br>(1.09 to<br>2.37)                              | 1.19<br>(0.82 to<br>1.67)                            | 2.49<br>(1.50 to<br>3.98)                                |
| Tracheal, bronchus, and lung cancer   | 174.30<br>(167.78 to<br>181.77)                               | 335.04<br>(253.12 to<br>444.80)                               | 278.60<br>(219.06 to<br>359.13)                               | 495.65<br>(361.89 to<br>679.31)                               | 8.47<br>(8.15 to<br>8.84)                            | 17.65<br>(13.37 to<br>23.67)                           | 15.01<br>(11.81 to<br>19.39)                         | 25.57<br>(18.61 to<br>35.02)                             |
| Malignant skin melanoma               | 18.67<br>(15.96 to<br>22.41)                                  | 29.04<br>(24.11 to<br>34.42)                                  | 34.01<br>(28.17 to<br>40.63)                                  | 27.49<br>(22.89 to<br>32.81)                                  | 0.73<br>(0.62 to<br>0.85)                            | 1.35<br>(1.12 to<br>1.59)                              | 1.63<br>(1.34 to<br>1.92)                            | 1.25<br>(1.03 to<br>1.48)                                |

| Non-melanoma skin cancer        | 21.81<br>(20.93 to<br>22.67)    | 50.79<br>(45.48 to<br>56.10)    | 44.58<br>(38.51 to<br>51.26)    | 49.61<br>(44.83 to<br>54.40)    | 1.22<br>(1.17 to<br>1.26) | 3.09<br>(2.79 to<br>3.42)    | 2.83<br>(2.46 to<br>3.23)    | 2.93<br>(2.64 to<br>3.23)    |
|---------------------------------|---------------------------------|---------------------------------|---------------------------------|---------------------------------|---------------------------|------------------------------|------------------------------|------------------------------|
| Breast cancer                   | 196.96<br>(183.00 to<br>210.77) | 337.72<br>(242.79 to<br>469.22) | 295.14<br>(214.70 to<br>409.24) | 359.86<br>(254.01 to<br>508.67) | 6.85<br>(6.38 to<br>7.32) | 13.94<br>(10.07 to<br>19.60) | 12.44<br>(8.88 to<br>17.63)  | 14.66<br>(10.28 to<br>21.04) |
| Cervical cancer                 | 141.22<br>(132.71 to<br>150.79) | 224.60<br>(183.71 to<br>265.59) | 186.29<br>(147.92 to<br>228.88) | 230.14<br>(189.51 to<br>272.39) | 4.90<br>(4.61 to<br>5.22) | 9.18<br>(7.52 to<br>10.87)   | 7.77<br>(6.16 to<br>9.58)    | 9.26<br>(7.68 to<br>10.94)   |
| Uterine cancer                  | 20.87<br>(19.87 to<br>22.00)    | 38.38<br>(30.75 to<br>46.32)    | 32.83<br>(26.00 to<br>40.30)    | 38.78<br>(31.76 to<br>46.18)    | 0.87<br>(0.83 to<br>0.92) | 1.90<br>(1.53 to<br>2.24)    | 1.66<br>(1.32 to<br>2.01)    | 1.89<br>(1.56 to<br>2.23)    |
| Ovarian cancer                  | 72.53<br>(67.92 to<br>77.04)    | 123.06<br>(83.77 to<br>180.17)  | 121.25<br>(82.14 to<br>177.94)  | 126.66<br>(83.08 to<br>189.54)  | 2.52<br>(2.36 to<br>2.67) | 5.12<br>(3.40 to<br>7.70)    | 5.12<br>(3.42 to<br>7.63)    | 5.22<br>(3.35 to<br>7.94)    |
| Prostate cancer                 | 103.38<br>(95.88 to<br>129.26)  | 286.10<br>(251.15 to<br>349.15) | 293.66<br>(252.82 to<br>361.95) | 267.33<br>(234.48 to<br>329.78) | 7.26<br>(6.73 to<br>9.00) | 20.80<br>(17.71 to<br>25.12) | 22.04<br>(18.85 to<br>26.98) | 19.01<br>(15.95 to<br>22.90) |
| Testicular cancer               | 26.59<br>(23.75 to<br>29.96)    | 20.69<br>(14.41 to<br>30.59)    | 17.67<br>(12.32 to<br>26.16)    | 20.82<br>(14.49 to<br>30.89)    | 0.53<br>(0.47 to<br>0.58) | 0.50<br>(0.39 to<br>0.66)    | 0.44<br>(0.34 to<br>0.58)    | 0.49<br>(0.38 to<br>0.66)    |
| <b>Mexico</b>                   |                                 |                                 |                                 |                                 |                           |                              |                              |                              |
| Cause                           | YLLs (in 1000s)                 |                                 |                                 |                                 | Deaths (in 1000s)         |                              |                              |                              |
|                                 | 2016                            | 2040 Forecast                   | 2040 Better Scenario            | 2040 Worse Scenario             | 2016                      | 2040 Forecast                | 2040 Better Scenario         | 2040 Worse Scenario          |
| Kidney cancer                   | 65.94<br>(63.44 to<br>68.78)    | 124.95<br>(110.44 to<br>139.53) | 135.41<br>(118.88 to<br>152.54) | 121.81<br>(107.10 to<br>136.49) | 2.54<br>(2.44 to<br>2.66) | 5.58<br>(4.93 to<br>6.21)    | 6.23<br>(5.48 to<br>6.96)    | 5.35<br>(4.75 to<br>6.00)    |
| Bladder cancer                  | 23.90<br>(23.08 to<br>24.79)    | 44.04<br>(33.92 to<br>59.89)    | 41.26<br>(32.12 to<br>54.86)    | 45.57<br>(34.70 to<br>62.59)    | 1.34<br>(1.29 to<br>1.38) | 2.67<br>(2.06 to<br>3.64)    | 2.58<br>(2.01 to<br>3.41)    | 2.70<br>(2.05 to<br>3.73)    |
| Brain and nervous system cancer | 96.75<br>(77.82 to<br>106.69)   | 156.61<br>(123.87 to<br>181.94) | 148.73<br>(118.05 to<br>176.71) | 152.22<br>(120.89 to<br>177.00) | 2.55<br>(2.04 to<br>2.80) | 5.40<br>(4.18 to<br>6.15)    | 5.41<br>(4.15 to<br>6.22)    | 5.16<br>(4.02 to<br>5.86)    |
| Thyroid cancer                  | 16.33<br>(15.56 to<br>17.17)    | 28.30<br>(19.79 to<br>40.32)    | 24.19<br>(17.13 to<br>33.94)    | 31.24<br>(21.29 to<br>45.37)    | 0.73<br>(0.70 to<br>0.77) | 1.45<br>(1.04 to<br>2.05)    | 1.27<br>(0.91 to<br>1.76)    | 1.56<br>(1.09 to<br>2.26)    |
| Mesothelioma                    | 9.68<br>(8.56 to<br>10.22)      | 15.69<br>(12.72 to<br>17.77)    | 15.74<br>(12.87 to<br>18.13)    | 15.34<br>(12.61 to<br>17.35)    | 0.37<br>(0.32 to<br>0.39) | 0.67<br>(0.55 to<br>0.76)    | 0.69<br>(0.56 to<br>0.79)    | 0.65<br>(0.54 to<br>0.73)    |
| Hodgkin lymphoma                | 18.69<br>(17.42 to<br>21.16)    | 22.49<br>(18.65 to<br>27.22)    | 16.93<br>(13.61 to<br>21.09)    | 23.05<br>(19.21 to<br>28.03)    | 0.56<br>(0.52 to<br>0.62) | 0.87<br>(0.74 to<br>1.02)    | 0.68<br>(0.56 to<br>0.83)    | 0.87<br>(0.74 to<br>1.01)    |
| Non-Hodgkin lymphoma            | 91.03<br>(86.42 to<br>99.64)    | 153.84<br>(124.24 to<br>191.82) | 146.59<br>(117.24 to<br>180.99) | 156.17<br>(124.29 to<br>197.00) | 3.04<br>(2.78 to<br>3.24) | 6.45<br>(5.21 to<br>7.99)    | 6.41<br>(5.09 to<br>7.98)    | 6.42<br>(5.16 to<br>8.07)    |
| Multiple myeloma                | 31.70<br>(25.69 to<br>39.55)    | 68.00<br>(49.96 to<br>90.20)    | 68.64<br>(50.85 to<br>91.09)    | 69.51<br>(50.79 to<br>93.88)    | 1.30<br>(1.04 to<br>1.62) | 3.13<br>(2.33 to<br>4.15)    | 3.23<br>(2.37 to<br>4.29)    | 3.15<br>(2.31 to<br>4.22)    |
| Leukemia                        | 240.75<br>(230.37 to<br>251.85) | 274.65<br>(226.31 to<br>334.78) | 241.56<br>(199.28 to<br>295.63) | 289.93<br>(233.34 to<br>361.66) | 5.40<br>(5.21 to<br>5.62) | 8.52<br>(7.10 to<br>10.24)   | 7.97<br>(6.61 to<br>9.60)    | 8.91<br>(7.23 to<br>10.97)   |
| Acute lymphoid leukemia         | 126.79<br>(114.28 to<br>133.53) | 113.08<br>(90.73 to<br>139.67)  | 95.33<br>(76.35 to<br>118.78)   | 117.83<br>(93.05 to<br>146.52)  | 2.35<br>(2.08 to<br>2.47) | 2.81<br>(2.30 to<br>3.42)    | 2.55<br>(2.07 to<br>3.10)    | 2.93<br>(2.34 to<br>3.64)    |
| Chronic lymphoid leukemia       | 7.65<br>(7.04 to<br>9.21)       | 13.56<br>(10.10 to<br>18.21)    | 13.21<br>(9.95 to<br>17.66)     | 14.36<br>(10.45 to<br>19.59)    | 0.35<br>(0.32 to<br>0.42) | 0.72<br>(0.54 to<br>0.96)    | 0.73<br>(0.55 to<br>0.96)    | 0.74<br>(0.54 to<br>1.01)    |
| Acute myeloid leukemia          | 54.50<br>(49.35 to<br>62.13)    | 81.19<br>(65.38 to<br>103.40)   | 78.82<br>(63.48 to<br>100.35)   | 85.26<br>(66.61 to<br>111.36)   | 1.27<br>(1.15 to<br>1.44) | 2.49<br>(2.02 to<br>3.15)    | 2.54<br>(2.06 to<br>3.17)    | 2.59<br>(2.05 to<br>3.32)    |
| Chronic myeloid leukemia        | 11.15<br>(10.44 to<br>12.19)    | 12.78<br>(9.69 to<br>16.80)     | 10.63<br>(7.80 to<br>14.31)     | 13.84<br>(10.17 to<br>18.54)    | 0.37<br>(0.35 to<br>0.40) | 0.52<br>(0.40 to<br>0.67)    | 0.45<br>(0.33 to<br>0.59)    | 0.55<br>(0.41 to<br>0.72)    |

|                                               |                                                            |                                                            |                                                            |                                                            |                                                      |                                                      |                                                     |                                                      |
|-----------------------------------------------|------------------------------------------------------------|------------------------------------------------------------|------------------------------------------------------------|------------------------------------------------------------|------------------------------------------------------|------------------------------------------------------|-----------------------------------------------------|------------------------------------------------------|
| Other leukemia                                | 40.66<br>(37.63 to<br>49.62)                               | 54.03<br>(44.24 to<br>67.70)                               | 43.36<br>(35.29 to<br>53.96)                               | 58.65<br>(47.14 to<br>74.18)                               | 1.06<br>(0.99 to<br>1.22)                            | 1.98<br>(1.65 to<br>2.39)                            | 1.70<br>(1.42 to<br>2.06)                           | 2.10<br>(1.72 to<br>2.59)                            |
| Other neoplasms                               | 207.54<br>(199.62 to<br>218.38)                            | 311.07<br>(278.33 to<br>348.28)                            | 300.08<br>(265.59 to<br>340.09)                            | 303.26<br>(272.30 to<br>338.49)                            | 6.36<br>(6.09 to<br>6.68)                            | 12.51<br>(11.36 to<br>13.68)                         | 12.81<br>(11.38 to<br>14.26)                        | 11.91<br>(10.81 to<br>12.96)                         |
| <b>Cardiovascular diseases</b>                | <b>2,567.99</b><br><b>(2,493.03 to</b><br><b>2,639.57)</b> | <b>3,419.34</b><br><b>(2,241.72 to</b><br><b>5,334.28)</b> | <b>1,778.44</b><br><b>(1,221.97 to</b><br><b>2,714.31)</b> | <b>5,035.21</b><br><b>(3,181.84 to</b><br><b>7,929.44)</b> | <b>147.62</b><br><b>(143.50 to</b><br><b>151.47)</b> | <b>225.50</b><br><b>(146.68 to</b><br><b>348.67)</b> | <b>130.08</b><br><b>(87.23 to</b><br><b>200.82)</b> | <b>304.48</b><br><b>(194.18 to</b><br><b>466.35)</b> |
| Rheumatic heart disease                       | 32.54<br>(30.24 to<br>35.16)                               | 31.92<br>(24.50 to<br>42.22)                               | 23.19<br>(17.44 to<br>30.06)                               | 33.41<br>(25.83 to<br>44.13)                               | 1.20<br>(1.11 to<br>1.30)                            | 1.44<br>(1.11 to<br>1.87)                            | 1.08<br>(0.82 to<br>1.42)                           | 1.48<br>(1.15 to<br>1.93)                            |
| Ischemic heart disease                        | 1,574.82<br>(1,503.57 to<br>1,627.05)                      | 1,931.58<br>(1,050.56 to<br>3,501.05)                      | 871.67<br>(479.77 to<br>1,600.50)                          | 3,061.37<br>(1,620.67 to<br>5,501.84)                      | 96.28<br>(91.73 to<br>99.24)                         | 130.48<br>(71.75 to<br>240.58)                       | 66.38<br>(35.51 to<br>126.05)                       | 187.78<br>(102.74 to<br>359.07)                      |
| Stroke                                        | 557.84<br>(527.72 to<br>583.93)                            | 681.65<br>(406.21 to<br>1,226.97)                          | 308.44<br>(191.86 to<br>563.99)                            | 1,079.72<br>(614.17 to<br>1,884.71)                        | 27.74<br>(25.84 to<br>29.53)                         | 41.08<br>(24.20 to<br>79.47)                         | 21.31<br>(12.91 to<br>42.02)                        | 58.80<br>(34.22 to<br>108.69)                        |
| Ischemic stroke                               | 163.03<br>(152.12 to<br>172.89)                            | 239.22<br>(118.72 to<br>655.66)                            | 127.51<br>(67.09 to<br>302.93)                             | 338.09<br>(163.76 to<br>883.65)                            | 11.37<br>(10.39 to<br>12.24)                         | 18.46<br>(9.18 to<br>49.35)                          | 10.96<br>(5.54 to<br>27.00)                         | 23.92<br>(11.63 to<br>64.23)                         |
| Intracerebral hemorrhage                      | 394.80<br>(374.73 to<br>412.65)                            | 442.43<br>(257.43 to<br>792.55)                            | 180.92<br>(108.33 to<br>298.92)                            | 741.62<br>(399.97 to<br>1,355.05)                          | 16.36<br>(15.34 to<br>17.26)                         | 22.63<br>(13.60 to<br>39.18)                         | 10.35<br>(6.30 to<br>16.81)                         | 34.89<br>(19.58 to<br>63.63)                         |
| Hypertensive heart disease                    | 132.35<br>(102.42 to<br>186.55)                            | 300.99<br>(179.74 to<br>544.82)                            | 196.61<br>(129.16 to<br>307.47)                            | 360.75<br>(204.48 to<br>677.12)                            | 9.54<br>(7.28 to<br>13.47)                           | 23.81<br>(14.15 to<br>46.49)                         | 16.30<br>(10.64 to<br>25.81)                        | 27.30<br>(15.51 to<br>54.73)                         |
| Cardiomyopathy and myocarditis                | 56.82<br>(44.29 to<br>62.12)                               | 65.19<br>(47.55 to<br>87.12)                               | 52.49<br>(38.04 to<br>69.67)                               | 66.37<br>(48.48 to<br>88.64)                               | 1.62<br>(1.36 to<br>1.89)                            | 2.65<br>(1.97 to<br>3.59)                            | 2.26<br>(1.64 to<br>3.03)                           | 2.62<br>(1.95 to<br>3.57)                            |
| Myocarditis                                   | 9.67<br>(8.24 to<br>13.39)                                 | 9.26<br>(7.17 to<br>13.83)                                 | 8.30<br>(6.46 to<br>12.58)                                 | 9.23<br>(7.24 to<br>13.89)                                 | 0.26<br>(0.22 to<br>0.37)                            | 0.34<br>(0.27 to<br>0.51)                            | 0.33<br>(0.26 to<br>0.50)                           | 0.33<br>(0.26 to<br>0.50)                            |
| <b>Mexico</b>                                 |                                                            |                                                            |                                                            |                                                            |                                                      |                                                      |                                                     |                                                      |
| <b>Cause</b>                                  | <b>YLLs (in 1000s)</b>                                     |                                                            |                                                            |                                                            | <b>Deaths (in 1000s)</b>                             |                                                      |                                                     |                                                      |
|                                               | <b>2016</b>                                                | <b>2040 Forecast</b>                                       | <b>2040 Better Scenario</b>                                | <b>2040 Worse Scenario</b>                                 | <b>2016</b>                                          | <b>2040 Forecast</b>                                 | <b>2040 Better Scenario</b>                         | <b>2040 Worse Scenario</b>                           |
| Alcoholic cardiomyopathy                      | 5.30<br>(3.19 to<br>6.47)                                  | 6.54<br>(3.84 to<br>8.55)                                  | 5.99<br>(3.47 to<br>7.92)                                  | 8.12<br>(4.77 to<br>10.50)                                 | 0.18<br>(0.11 to<br>0.22)                            | 0.26<br>(0.15 to<br>0.33)                            | 0.24<br>(0.15 to<br>0.31)                           | 0.31<br>(0.19 to<br>0.40)                            |
| Other cardiomyopathy                          | 41.85<br>(31.74 to<br>45.87)                               | 49.39<br>(34.34 to<br>68.70)                               | 38.20<br>(25.87 to<br>53.22)                               | 49.01<br>(33.87 to<br>68.20)                               | 1.19<br>(0.98 to<br>1.33)                            | 2.05<br>(1.42 to<br>2.88)                            | 1.69<br>(1.14 to<br>2.34)                           | 1.99<br>(1.38 to<br>2.84)                            |
| Atrial fibrillation and flutter               | 34.07<br>(27.37 to<br>41.67)                               | 78.66<br>(59.02 to<br>103.86)                              | 72.80<br>(55.32 to<br>93.83)                               | 81.89<br>(60.98 to<br>110.56)                              | 3.48<br>(2.75 to<br>4.37)                            | 7.65<br>(5.66 to<br>10.20)                           | 7.42<br>(5.58 to<br>9.78)                           | 7.66<br>(5.66 to<br>10.27)                           |
| Aortic aneurysm                               | 18.52<br>(17.62 to<br>19.57)                               | 32.71<br>(26.11 to<br>42.05)                               | 29.33<br>(23.90 to<br>36.47)                               | 33.47<br>(26.40 to<br>43.15)                               | 1.05<br>(1.01 to<br>1.10)                            | 2.10<br>(1.71 to<br>2.61)                            | 1.99<br>(1.64 to<br>2.44)                           | 2.06<br>(1.64 to<br>2.59)                            |
| Peripheral artery disease                     | 7.47<br>(4.96 to<br>17.11)                                 | 27.73<br>(15.81 to<br>64.52)                               | 28.72<br>(16.17 to<br>66.65)                               | 28.82<br>(16.28 to<br>68.77)                               | 0.63<br>(0.41 to<br>1.44)                            | 2.34<br>(1.32 to<br>5.52)                            | 2.57<br>(1.42 to<br>6.03)                           | 2.32<br>(1.29 to<br>5.67)                            |
| Endocarditis                                  | 27.49<br>(22.44 to<br>38.94)                               | 37.64<br>(27.25 to<br>54.16)                               | 32.16<br>(23.63 to<br>45.43)                               | 37.93<br>(27.40 to<br>54.55)                               | 0.79<br>(0.62 to<br>1.06)                            | 1.47<br>(1.02 to<br>2.09)                            | 1.34<br>(0.94 to<br>1.87)                           | 1.44<br>(1.00 to<br>2.04)                            |
| Other cardiovascular and circulatory diseases | 126.08<br>(120.33 to<br>132.58)                            | 231.27<br>(181.26 to<br>301.43)                            | 163.03<br>(126.17 to<br>211.97)                            | 251.48<br>(193.84 to<br>328.90)                            | 5.29<br>(5.07 to<br>5.51)                            | 12.50<br>(9.85 to<br>15.99)                          | 9.45<br>(7.40 to<br>12.10)                          | 13.03<br>(10.21 to<br>16.73)                         |
| <b>Chronic respiratory diseases</b>           | <b>496.58</b><br><b>(481.54 to</b><br><b>512.18)</b>       | <b>653.66</b><br><b>(525.24 to</b><br><b>815.83)</b>       | <b>554.72</b><br><b>(450.21 to</b><br><b>674.32)</b>       | <b>867.48</b><br><b>(657.71 to</b><br><b>1,152.00)</b>     | <b>32.93</b><br><b>(31.85 to</b><br><b>33.97)</b>    | <b>44.85</b><br><b>(36.05 to</b><br><b>55.43)</b>    | <b>39.49</b><br><b>(32.16 to</b><br><b>47.78)</b>   | <b>57.68</b><br><b>(43.95 to</b><br><b>75.33)</b>    |
| Chronic obstructive pulmonary disease         | 371.06<br>(352.39 to<br>392.14)                            | 482.59<br>(362.08 to<br>650.56)                            | 371.27<br>(278.39 to<br>483.66)                            | 693.71<br>(487.78 to<br>979.98)                            | 27.44<br>(26.17 to<br>28.69)                         | 35.67<br>(27.38 to<br>46.67)                         | 29.15<br>(22.44 to<br>37.21)                        | 48.60<br>(35.09 to<br>66.06)                         |

|                                                                |                                                  |                                                  |                                                  |                                                  |                                         |                                         |                                         |                                         |
|----------------------------------------------------------------|--------------------------------------------------|--------------------------------------------------|--------------------------------------------------|--------------------------------------------------|-----------------------------------------|-----------------------------------------|-----------------------------------------|-----------------------------------------|
| Pneumoconiosis                                                 | 2.78<br>(2.51 to 3.07)                           | 4.06<br>(3.32 to 4.94)                           | 3.49<br>(2.73 to 4.40)                           | 4.08<br>(3.38 to 4.94)                           | 0.15<br>(0.13 to 0.16)                  | 0.25<br>(0.20 to 0.30)                  | 0.22<br>(0.17 to 0.28)                  | 0.24<br>(0.20 to 0.30)                  |
| Silicosis                                                      | 1.06<br>(0.79 to 1.25)                           | 1.55<br>(0.98 to 2.18)                           | 1.14<br>(0.65 to 1.75)                           | 1.50<br>(0.95 to 2.10)                           | 0.06<br>(0.04 to 0.07)                  | 0.09<br>(0.06 to 0.13)                  | 0.07<br>(0.04 to 0.11)                  | 0.09<br>(0.06 to 0.13)                  |
| Asbestosis                                                     | 0.56<br>(0.46 to 0.93)                           | 1.07<br>(0.78 to 1.80)                           | 1.18<br>(0.87 to 1.83)                           | 1.03<br>(0.75 to 1.73)                           | 0.02<br>(0.02 to 0.04)                  | 0.06<br>(0.04 to 0.10)                  | 0.07<br>(0.05 to 0.11)                  | 0.05<br>(0.04 to 0.09)                  |
| Coal workers pneumoconiosis                                    | 0.24<br>(0.14 to 0.31)                           | 0.34<br>(0.21 to 0.52)                           | 0.24<br>(0.14 to 0.37)                           | 0.39<br>(0.24 to 0.58)                           | 0.01<br>(0.01 to 0.02)                  | 0.02<br>(0.01 to 0.04)                  | 0.02<br>(0.01 to 0.03)                  | 0.03<br>(0.02 to 0.04)                  |
| Other pneumoconiosis                                           | 0.92<br>(0.64 to 1.06)                           | 1.10<br>(0.75 to 1.44)                           | 0.93<br>(0.61 to 1.27)                           | 1.16<br>(0.81 to 1.51)                           | 0.05<br>(0.04 to 0.06)                  | 0.07<br>(0.05 to 0.09)                  | 0.06<br>(0.04 to 0.08)                  | 0.07<br>(0.05 to 0.10)                  |
| Asthma                                                         | 36.01<br>(31.93 to 49.99)                        | 54.59<br>(21.28 to 59.29)                        | 23.00<br>(13.72 to 38.59)                        | 43.36<br>(25.74 to 75.51)                        | 1.63<br>(1.46 to 2.39)                  | 2.06<br>(1.26 to 3.54)                  | 1.46<br>(0.87 to 2.45)                  | 2.47<br>(1.45 to 4.41)                  |
| Interstitial lung disease and pulmonary sarcoidosis            | 64.16<br>(41.82 to 75.84)                        | 110.54<br>(72.34 to 131.10)                      | 137.68<br>(91.62 to 166.71)                      | 104.05<br>(66.84 to 123.23)                      | 3.17<br>(1.99 to 3.72)                  | 6.19<br>(3.86 to 7.43)                  | 7.99<br>(5.15 to 9.79)                  | 5.69<br>(3.51 to 6.80)                  |
| Other chronic respiratory diseases                             | 22.57<br>(16.82 to 30.51)                        | 21.87<br>(15.09 to 29.15)                        | 19.28<br>(13.05 to 26.52)                        | 22.27<br>(15.37 to 29.83)                        | 0.54<br>(0.37 to 0.73)                  | 0.69<br>(0.45 to 0.95)                  | 0.67<br>(0.42 to 0.91)                  | 0.69<br>(0.43 to 0.94)                  |
| <b>Cirrhosis and other chronic liver diseases</b>              | <b>1,185.35</b><br><b>(1,108.77 to 1,259.68)</b> | <b>1,887.10</b><br><b>(1,643.17 to 2,119.72)</b> | <b>1,568.06</b><br><b>(1,335.75 to 1,809.53)</b> | <b>2,066.28</b><br><b>(1,817.70 to 2,316.58)</b> | <b>42.00</b><br><b>(39.34 to 44.44)</b> | <b>74.87</b><br><b>(66.39 to 82.64)</b> | <b>63.43</b><br><b>(54.65 to 72.16)</b> | <b>80.34</b><br><b>(71.88 to 88.50)</b> |
| Cirrhosis and other chronic liver diseases due to hepatitis B  | 36.45<br>(32.71 to 40.10)                        | 60.28<br>(51.42 to 69.23)                        | 53.25<br>(44.04 to 62.84)                        | 59.94<br>(51.37 to 68.49)                        | 1.29<br>(1.17 to 1.42)                  | 2.36<br>(2.05 to 2.68)                  | 2.13<br>(1.80 to 2.46)                  | 2.32<br>(2.02 to 2.61)                  |
| Cirrhosis and other chronic liver diseases due to hepatitis C  | 537.77<br>(495.60 to 590.96)                     | 908.12<br>(775.63 to 1,037.64)                   | 795.98<br>(662.21 to 933.54)                     | 905.13<br>(774.80 to 1,037.08)                   | 18.38<br>(16.95 to 19.79)               | 34.18<br>(29.64 to 38.52)               | 30.46<br>(25.87 to 35.10)               | 33.61<br>(29.40 to 37.84)               |
| Cirrhosis and other chronic liver diseases due to alcohol use  | 417.27<br>(383.27 to 451.34)                     | 616.30<br>(528.99 to 707.04)                     | 457.75<br>(385.41 to 540.53)                     | 798.37<br>(695.34 to 914.85)                     | 15.47<br>(14.27 to 16.63)               | 25.80<br>(22.33 to 29.26)               | 19.74<br>(16.68 to 23.01)               | 32.06<br>(28.22 to 35.95)               |
| Cirrhosis and other chronic liver diseases due to other causes | 193.87<br>(167.46 to 222.46)                     | 302.40<br>(246.00 to 365.18)                     | 261.08<br>(209.34 to 321.12)                     | 302.84<br>(246.00 to 365.82)                     | 6.86<br>(5.93 to 7.88)                  | 12.53<br>(10.29 to 15.09)               | 11.10<br>(8.97 to 13.59)                | 12.35<br>(10.10 to 14.86)               |
| <b>Digestive diseases</b>                                      | <b>465.25</b><br><b>(417.36 to 496.32)</b>       | <b>616.69</b><br><b>(506.01 to 747.42)</b>       | <b>500.07</b><br><b>(402.20 to 607.83)</b>       | <b>661.43</b><br><b>(538.05 to 818.65)</b>       | <b>20.60</b><br><b>(18.55 to 21.78)</b> | <b>34.82</b><br><b>(29.00 to 41.34)</b> | <b>29.77</b><br><b>(24.51 to 35.31)</b> | <b>35.99</b><br><b>(29.73 to 43.49)</b> |
| Peptic ulcer disease                                           | 67.22<br>(59.49 to 74.86)                        | 78.26<br>(63.21 to 94.55)                        | 54.45<br>(42.05 to 69.18)                        | 83.48<br>(67.37 to 102.48)                       | 3.81<br>(3.37 to 4.16)                  | 5.23<br>(4.28 to 6.28)                  | 3.80<br>(2.97 to 4.80)                  | 5.41<br>(4.36 to 6.60)                  |
| <b>Mexico</b>                                                  |                                                  |                                                  |                                                  |                                                  |                                         |                                         |                                         |                                         |
| Cause                                                          | YLLs (in 1000s)                                  |                                                  |                                                  |                                                  | Deaths (in 1000s)                       |                                         |                                         |                                         |
|                                                                | 2016                                             | 2040 Forecast                                    | 2040 Better Scenario                             | 2040 Worse Scenario                              | 2016                                    | 2040 Forecast                           | 2040 Better Scenario                    | 2040 Worse Scenario                     |
| Gastritis and duodenitis                                       | 22.56<br>(19.09 to 29.52)                        | 48.31<br>(37.81 to 63.48)                        | 40.60<br>(30.92 to 54.52)                        | 47.69<br>(37.66 to 62.03)                        | 1.28<br>(1.07 to 1.61)                  | 3.10<br>(2.41 to 3.98)                  | 2.72<br>(2.07 to 3.58)                  | 2.97<br>(2.31 to 3.86)                  |
| Appendicitis                                                   | 32.16<br>(24.95 to 37.66)                        | 31.54<br>(23.19 to 38.31)                        | 23.19<br>(16.73 to 29.58)                        | 32.27<br>(23.51 to 40.13)                        | 1.02<br>(0.77 to 1.18)                  | 1.37<br>(0.99 to 1.63)                  | 1.06<br>(0.76 to 1.34)                  | 1.37<br>(0.98 to 1.64)                  |
| Paralytic ileus and intestinal obstruction                     | 98.51<br>(78.68 to 109.79)                       | 107.43<br>(81.65 to 126.44)                      | 97.79<br>(73.75 to 115.78)                       | 105.55<br>(80.02 to 123.75)                      | 3.31<br>(2.54 to 3.72)                  | 5.65<br>(4.17 to 6.59)                  | 5.63<br>(4.15 to 6.60)                  | 5.38<br>(3.94 to 6.26)                  |
| Inguinal, femoral, and abdominal hernia                        | 21.66<br>(15.74 to 27.61)                        | 24.48<br>(16.91 to 31.51)                        | 21.56<br>(14.75 to 28.18)                        | 24.04<br>(16.92 to 30.97)                        | 1.21<br>(0.89 to 1.54)                  | 1.57<br>(1.11 to 1.99)                  | 1.44<br>(0.98 to 1.83)                  | 1.50<br>(1.06 to 1.91)                  |
| Inflammatory bowel disease                                     | 11.90<br>(7.70 to 13.34)                         | 14.47<br>(9.49 to 17.34)                         | 14.04<br>(9.20 to 17.14)                         | 14.12<br>(9.24 to 16.79)                         | 0.44<br>(0.30 to 0.48)                  | 0.68<br>(0.47 to 0.80)                  | 0.69<br>(0.47 to 0.82)                  | 0.65<br>(0.44 to 0.76)                  |

|                                         |                                                      |                                                          |                                                          |                                                          |                                                   |                                                    |                                                    |                                                    |
|-----------------------------------------|------------------------------------------------------|----------------------------------------------------------|----------------------------------------------------------|----------------------------------------------------------|---------------------------------------------------|----------------------------------------------------|----------------------------------------------------|----------------------------------------------------|
| Vascular intestinal disorders           | 35.48<br>(30.36 to<br>40.29)                         | 68.72<br>(56.91 to<br>79.03)                             | 63.61<br>(52.12 to<br>74.29)                             | 66.81<br>(55.90 to<br>76.73)                             | 2.14<br>(1.82 to<br>2.38)                         | 4.66<br>(3.92 to<br>5.35)                          | 4.47<br>(3.69 to<br>5.19)                          | 4.43<br>(3.71 to<br>5.05)                          |
| Gallbladder and biliary diseases        | 58.53<br>(53.52 to<br>64.67)                         | 84.47<br>(46.01 to<br>148.44)                            | 60.28<br>(33.50 to<br>105.42)                            | 109.25<br>(57.07 to<br>197.23)                           | 2.91<br>(2.63 to<br>3.20)                         | 5.03<br>(2.82 to<br>8.69)                          | 3.75<br>(2.16 to<br>6.38)                          | 6.22<br>(3.36 to<br>11.01)                         |
| Pancreatitis                            | 63.26<br>(51.16 to<br>71.12)                         | 88.26<br>(51.75 to<br>154.69)                            | 64.14<br>(38.02 to<br>108.95)                            | 107.20<br>(60.71 to<br>193.74)                           | 2.05<br>(1.65 to<br>2.29)                         | 3.52<br>(2.17 to<br>5.99)                          | 2.65<br>(1.65 to<br>4.32)                          | 4.15<br>(2.46 to<br>7.42)                          |
| Other digestive diseases                | 53.98<br>(45.31 to<br>65.14)                         | 70.75<br>(58.29 to<br>86.33)                             | 60.42<br>(48.53 to<br>74.88)                             | 71.02<br>(58.72 to<br>86.76)                             | 2.43<br>(2.07 to<br>2.90)                         | 4.00<br>(3.32 to<br>4.82)                          | 3.58<br>(2.93 to<br>4.37)                          | 3.91<br>(3.26 to<br>4.71)                          |
| <b>Neurological disorders</b>           | <b>528.62</b><br><b>(476.04 to</b><br><b>594.95)</b> | <b>1,102.80</b><br><b>(832.68 to</b><br><b>1,509.92)</b> | <b>1,094.27</b><br><b>(839.40 to</b><br><b>1,469.27)</b> | <b>1,165.59</b><br><b>(857.55 to</b><br><b>1,671.19)</b> | <b>43.29</b><br><b>(37.55 to</b><br><b>50.20)</b> | <b>94.50</b><br><b>(68.91 to</b><br><b>134.74)</b> | <b>98.92</b><br><b>(73.36 to</b><br><b>136.32)</b> | <b>97.02</b><br><b>(68.05 to</b><br><b>143.01)</b> |
| Alzheimer's disease and other dementias | 337.38<br>(287.07 to<br>402.62)                      | 819.02<br>(557.45 to<br>1,212.33)                        | 822.91<br>(569.85 to<br>1,196.22)                        | 875.26<br>(572.37 to<br>1,373.75)                        | 37.13<br>(31.42 to<br>44.04)                      | 82.06<br>(56.75 to<br>122.53)                      | 85.64<br>(60.47 to<br>122.92)                      | 84.98<br>(55.76 to<br>131.27)                      |
| Parkinson's disease                     | 27.57<br>(21.06 to<br>35.11)                         | 76.93<br>(57.85 to<br>98.77)                             | 90.27<br>(67.71 to<br>116.62)                            | 70.16<br>(52.88 to<br>89.76)                             | 2.30<br>(1.75 to<br>2.95)                         | 6.22<br>(4.66 to<br>8.06)                          | 7.50<br>(5.66 to<br>9.77)                          | 5.57<br>(4.16 to<br>7.24)                          |
| Epilepsy                                | 93.28<br>(88.42 to<br>99.00)                         | 108.16<br>(79.74 to<br>149.52)                           | 80.84<br>(59.50 to<br>111.49)                            | 124.18<br>(88.10 to<br>174.69)                           | 1.99<br>(1.90 to<br>2.09)                         | 2.90<br>(2.16 to<br>3.96)                          | 2.28<br>(1.71 to<br>3.08)                          | 3.30<br>(2.38 to<br>4.61)                          |
| Multiple sclerosis                      | 9.70<br>(6.82 to<br>10.74)                           | 11.99<br>(7.93 to<br>14.75)                              | 12.40<br>(8.21 to<br>15.26)                              | 12.03<br>(8.02 to<br>14.79)                              | 0.29<br>(0.20 to<br>0.32)                         | 0.41<br>(0.27 to<br>0.51)                          | 0.43<br>(0.29 to<br>0.53)                          | 0.41<br>(0.27 to<br>0.50)                          |
| Motor neuron disease                    | 11.60<br>(10.63 to<br>12.34)                         | 20.58<br>(17.69 to<br>23.94)                             | 21.37<br>(18.29 to<br>24.99)                             | 19.86<br>(17.09 to<br>22.78)                             | 0.38<br>(0.35 to<br>0.40)                         | 0.80<br>(0.69 to<br>0.92)                          | 0.84<br>(0.73 to<br>0.98)                          | 0.76<br>(0.66 to<br>0.87)                          |
| Other neurological disorders            | 49.08<br>(46.24 to<br>51.67)                         | 66.12<br>(57.72 to<br>76.63)                             | 66.48<br>(57.78 to<br>77.20)                             | 64.11<br>(56.36 to<br>73.76)                             | 1.21<br>(1.15 to<br>1.27)                         | 2.09<br>(1.89 to<br>2.32)                          | 2.23<br>(1.99 to<br>2.49)                          | 1.99<br>(1.82 to<br>2.21)                          |
| <b>Mental disorders</b>                 | <b>155.76</b><br><b>(161.52 to</b><br><b>196.49)</b> | <b>279.79</b><br><b>(235.71 to</b><br><b>337.37)</b>     | <b>281.92</b><br><b>(234.05 to</b><br><b>341.66)</b>     | <b>297.91</b><br><b>(252.39 to</b><br><b>358.92)</b>     | <b>4.85</b><br><b>(4.47 to</b><br><b>5.39)</b>    | <b>9.40</b><br><b>(7.79 to</b><br><b>10.54)</b>    | <b>9.28</b><br><b>(7.94 to</b><br><b>10.78)</b>    | <b>9.44</b><br><b>(8.14 to</b><br><b>11.03)</b>    |
| Alcohol use disorders                   | 131.85<br>(120.58 to<br>147.98)                      | 193.85<br>(159.98 to<br>233.83)                          | 188.33<br>(153.65 to<br>228.80)                          | 213.04<br>(176.77 to<br>255.28)                          | 3.84<br>(3.52 to<br>4.29)                         | 6.53<br>(5.51 to<br>7.77)                          | 6.48<br>(5.40 to<br>7.73)                          | 7.05<br>(5.98 to<br>8.38)                          |
| Drug use disorders                      | 42.56<br>(36.60 to<br>48.62)                         | 84.32<br>(66.70 to<br>107.62)                            | 92.07<br>(71.63 to<br>117.17)                            | 83.25<br>(65.70 to<br>106.46)                            | 0.99<br>(0.86 to<br>1.11)                         | 2.73<br>(2.02 to<br>2.88)                          | 2.77<br>(2.27 to<br>3.32)                          | 2.36<br>(1.97 to<br>2.79)                          |
| Opioid use disorders                    | 27.99<br>(24.40 to<br>34.41)                         | 40.51<br>(30.31 to<br>56.16)                             | 40.92<br>(30.41 to<br>56.73)                             | 40.26<br>(30.21 to<br>56.21)                             | 0.60<br>(0.52 to<br>0.74)                         | 0.98<br>(0.76 to<br>1.31)                          | 1.01<br>(0.78 to<br>1.38)                          | 0.96<br>(0.75 to<br>1.29)                          |
| Cocaine use disorders                   | 2.11<br>(1.24 to<br>2.78)                            | 6.12<br>(3.86 to<br>8.52)                                | 6.50<br>(4.07 to<br>9.07)                                | 6.14<br>(3.84 to<br>8.53)                                | 0.05<br>(0.03 to<br>0.06)                         | 0.17<br>(0.11 to<br>0.22)                          | 0.18<br>(0.12 to<br>0.24)                          | 0.17<br>(0.10 to<br>0.22)                          |
| Amphetamine use disorders               | 1.67<br>(1.13 to<br>2.62)                            | 5.18<br>(3.45 to<br>8.57)                                | 5.82<br>(3.91 to<br>9.29)                                | 5.21<br>(3.46 to<br>8.54)                                | 0.04<br>(0.03 to<br>0.06)                         | 0.13<br>(0.09 to<br>0.21)                          | 0.15<br>(0.10 to<br>0.23)                          | 0.13<br>(0.09 to<br>0.21)                          |
| Other drug use disorders                | 10.79<br>(7.36 to<br>13.31)                          | 32.51<br>(22.92 to<br>42.82)                             | 38.83<br>(27.13 to<br>51.45)                             | 31.64<br>(22.28 to<br>41.87)                             | 0.30<br>(0.22 to<br>0.36)                         | 1.16<br>(0.89 to<br>1.40)                          | 1.43<br>(1.09 to<br>1.77)                          | 1.10<br>(0.85 to<br>1.33)                          |
| Eating disorders                        | 1.35<br>(1.22 to<br>1.50)                            | 1.62<br>(1.25 to<br>2.12)                                | 1.52<br>(1.17 to<br>1.97)                                | 1.62<br>(1.24 to<br>2.11)                                | 0.02<br>(0.02 to<br>0.03)                         | 0.03<br>(0.02 to<br>0.04)                          | 0.03<br>(0.02 to<br>0.04)                          | 0.03<br>(0.02 to<br>0.04)                          |

**Mexico**

| Cause                                               | YLLs (in 1000s)                       |                                       |                                       |                                        | Deaths (in 1000s)               |                                 |                                 |                                 |
|-----------------------------------------------------|---------------------------------------|---------------------------------------|---------------------------------------|----------------------------------------|---------------------------------|---------------------------------|---------------------------------|---------------------------------|
|                                                     | 2016                                  | 2040 Forecast                         | 2040 Better Scenario                  | 2040 Worse Scenario                    | 2016                            | 2040 Forecast                   | 2040 Better Scenario            | 2040 Worse Scenario             |
| Diabetes, urogenital, blood, and endocrine diseases | 2,938.49<br>(2,849.69 to<br>3,023.89) | 5,616.04<br>(5,470.30 to<br>8,697.54) | 3,739.77<br>(2,365.91 to<br>6,048.49) | 6,696.91<br>(4,093.59 to<br>10,381.07) | 132.32<br>(128.56 to<br>135.92) | 300.17<br>(188.82 to<br>467.73) | 208.40<br>(131.27 to<br>328.72) | 347.14<br>(214.16 to<br>523.75) |

|                                                            |                                       |                                       |                                       |                                       |                              |                                 |                               |                                 |
|------------------------------------------------------------|---------------------------------------|---------------------------------------|---------------------------------------|---------------------------------------|------------------------------|---------------------------------|-------------------------------|---------------------------------|
| Diabetes mellitus                                          | 1,269.44<br>(1,226.94 to<br>1,312.07) | 2,475.80<br>(1,765.24 to<br>3,452.21) | 1,639.74<br>(1,188.61 to<br>2,256.57) | 2,984.49<br>(2,070.25 to<br>4,245.63) | 61.04<br>(59.12 to<br>63.04) | 135.29<br>(101.39 to<br>181.08) | 93.61<br>(69.92 to<br>122.88) | 156.59<br>(114.87 to<br>214.70) |
| Acute glomerulonephritis                                   | 2.96<br>(2.72 to<br>3.22)             | 2.43<br>(1.98 to<br>2.92)             | 1.98<br>(1.57 to<br>2.45)             | 2.44<br>(2.01 to<br>2.94)             | 0.11<br>(0.10 to<br>0.12)    | 0.10<br>(0.08 to<br>0.13)       | 0.09<br>(0.07 to<br>0.12)     | 0.10<br>(0.08 to<br>0.12)       |
| Chronic kidney disease                                     | 1,360.82<br>(1,313.35 to<br>1,405.66) | 2,659.04<br>(989.31 to<br>5,707.64)   | 1,662.83<br>(650.43 to<br>3,639.93)   | 3,238.02<br>(1,196.06 to<br>6,974.92) | 59.48<br>(57.54 to<br>61.32) | 140.60<br>(49.75 to<br>297.08)  | 91.59<br>(33.69 to<br>204.62) | 167.31<br>(60.53 to<br>341.42)  |
| Chronic kidney disease due to diabetes mellitus            | 527.71<br>(465.25 to<br>590.02)       | 1,189.46<br>(411.66 to<br>2,622.71)   | 742.34<br>(265.74 to<br>1,735.13)     | 1,452.90<br>(487.64 to<br>3,148.70)   | 23.07<br>(20.33 to<br>25.61) | 59.80<br>(19.66 to<br>133.42)   | 38.62<br>(13.08 to<br>89.29)  | 71.49<br>(23.83 to<br>151.64)   |
| Chronic kidney disease due to hypertension                 | 156.17<br>(129.84 to<br>181.47)       | 362.71<br>(125.80 to<br>788.49)       | 238.67<br>(86.11 to<br>541.50)        | 435.12<br>(150.73 to<br>906.51)       | 9.70<br>(8.28 to<br>11.30)   | 25.45<br>(9.00 to<br>54.43)     | 17.68<br>(6.46 to<br>40.70)   | 29.49<br>(10.57 to<br>59.81)    |
| Chronic kidney disease due to glomerulonephritis           | 390.68<br>(334.50 to<br>445.44)       | 609.14<br>(241.12 to<br>1,313.54)     | 372.49<br>(155.42 to<br>781.36)       | 744.17<br>(300.85 to<br>1,540.89)     | 14.80<br>(12.55 to<br>17.07) | 29.29<br>(10.80 to<br>61.33)    | 18.44<br>(7.08 to<br>41.11)   | 35.27<br>(13.15 to<br>72.58)    |
| Chronic kidney disease due to other and unspecified causes | 286.27<br>(240.88 to<br>337.74)       | 497.73<br>(200.54 to<br>1,032.99)     | 309.33<br>(126.90 to<br>662.71)       | 605.82<br>(234.88 to<br>1,249.29)     | 11.92<br>(10.03 to<br>14.09) | 26.06<br>(9.79 to<br>54.39)     | 16.85<br>(6.35 to<br>36.92)   | 31.07<br>(11.51 to<br>62.42)    |
| Urinary diseases and male infertility                      | 115.22<br>(111.03 to<br>121.26)       | 227.03<br>(198.42 to<br>253.59)       | 205.20<br>(171.82 to<br>241.22)       | 219.80<br>(194.77 to<br>245.04)       | 5.60<br>(5.40 to<br>5.83)    | 13.67<br>(12.02 to<br>15.30)    | 12.98<br>(10.99 to<br>15.14)  | 12.85<br>(11.39 to<br>14.28)    |
| Urinary tract infections                                   | 94.64<br>(87.41 to<br>99.90)          | 191.43<br>(164.86 to<br>216.90)       | 175.36<br>(144.29 to<br>207.53)       | 184.81<br>(160.34 to<br>209.02)       | 4.64<br>(4.25 to<br>4.89)    | 11.70<br>(10.14 to<br>13.26)    | 11.27<br>(9.34 to<br>13.24)   | 10.97<br>(9.57 to<br>12.36)     |
| Urolithiasis                                               | 9.55<br>(8.11 to<br>13.73)            | 20.12<br>(15.01 to<br>31.18)          | 17.70<br>(12.51 to<br>28.60)          | 19.60<br>(14.64 to<br>30.25)          | 0.41<br>(0.35 to<br>0.61)    | 0.96<br>(0.71 to<br>1.50)       | 0.87<br>(0.61 to<br>1.42)     | 0.91<br>(0.68 to<br>1.43)       |
| Other urinary diseases                                     | 11.02<br>(8.76 to<br>15.00)           | 15.48<br>(11.28 to<br>22.34)          | 12.14<br>(8.64 to<br>17.87)           | 15.39<br>(11.17 to<br>21.93)          | 0.55<br>(0.44 to<br>0.78)    | 1.01<br>(0.74 to<br>1.48)       | 0.84<br>(0.59 to<br>1.29)     | 0.97<br>(0.70 to<br>1.41)       |
| Gynecological diseases                                     | 4.03<br>(2.81 to<br>4.74)             | 5.16<br>(3.53 to<br>7.23)             | 3.57<br>(2.38 to<br>5.24)             | 5.37<br>(3.62 to<br>7.48)             | 0.13<br>(0.09 to<br>0.16)    | 0.20<br>(0.14 to<br>0.27)       | 0.14<br>(0.10 to<br>0.20)     | 0.20<br>(0.14 to<br>0.27)       |
| Uterine fibroids                                           | 1.35<br>(0.86 to<br>1.60)             | 1.43<br>(0.78 to<br>2.29)             | 1.00<br>(0.54 to<br>1.64)             | 1.51<br>(0.79 to<br>2.46)             | 0.04<br>(0.02 to<br>0.05)    | 0.05<br>(0.03 to<br>0.08)       | 0.04<br>(0.02 to<br>0.06)     | 0.05<br>(0.03 to<br>0.08)       |
| Polycystic ovarian syndrome                                | 0.03<br>(0.02 to<br>0.04)             | 0.02<br>(0.01 to<br>0.03)             | 0.01<br>(0.01 to<br>0.02)             | 0.02<br>(0.01 to<br>0.04)             | 0.00<br>(0.00 to<br>0.00)    | 0.00<br>(0.00 to<br>0.00)       | 0.00<br>(0.00 to<br>0.00)     | 0.00<br>(0.00 to<br>0.00)       |
| Endometriosis                                              | 0.02<br>(0.01 to<br>0.03)             | 0.05<br>(0.02 to<br>0.10)             | 0.03<br>(0.01 to<br>0.07)             | 0.05<br>(0.02 to<br>0.10)             | 0.00<br>(0.00 to<br>0.00)    | 0.00<br>(0.00 to<br>0.00)       | 0.00<br>(0.00 to<br>0.00)     | 0.00<br>(0.00 to<br>0.00)       |
| Genital prolapse                                           | 0.26<br>(0.15 to<br>0.34)             | 0.42<br>(0.22 to<br>0.70)             | 0.28<br>(0.14 to<br>0.49)             | 0.43<br>(0.23 to<br>0.73)             | 0.02<br>(0.01 to<br>0.02)    | 0.02<br>(0.01 to<br>0.04)       | 0.02<br>(0.01 to<br>0.03)     | 0.02<br>(0.01 to<br>0.04)       |
| Other gynecological diseases                               | 2.37<br>(1.81 to<br>2.95)             | 3.25<br>(2.17 to<br>4.81)             | 2.25<br>(1.44 to<br>3.44)             | 3.35<br>(2.24 to<br>4.91)             | 0.08<br>(0.06 to<br>0.09)    | 0.12<br>(0.08 to<br>0.17)       | 0.09<br>(0.06 to<br>0.14)     | 0.13<br>(0.09 to<br>0.18)       |
| Hemoglobinopathies and hemolytic anemias                   | 27.51<br>(24.17 to<br>34.61)          | 24.79<br>(19.62 to<br>32.83)          | 18.92<br>(14.51 to<br>25.22)          | 25.33<br>(20.08 to<br>33.71)          | 0.75<br>(0.64 to<br>0.97)    | 0.96<br>(0.77 to<br>1.27)       | 0.77<br>(0.60 to<br>1.03)     | 0.97<br>(0.77 to<br>1.27)       |
| Thalassemias                                               | 5.02<br>(4.56 to<br>5.62)             | 1.90<br>(1.42 to<br>2.47)             | 1.55<br>(1.21 to<br>1.95)             | 1.83<br>(1.39 to<br>2.38)             | 0.06<br>(0.06 to<br>0.07)    | 0.02<br>(0.02 to<br>0.03)       | 0.02<br>(0.02 to<br>0.03)     | 0.02<br>(0.02 to<br>0.03)       |
| Sickle cell disorders                                      | 5.79<br>(5.04 to<br>7.87)             | 5.00<br>(3.74 to<br>7.24)             | 3.79<br>(2.71 to<br>5.45)             | 5.14<br>(3.87 to<br>7.36)             | 0.11<br>(0.09 to<br>0.15)    | 0.10<br>(0.08 to<br>0.15)       | 0.08<br>(0.06 to<br>0.11)     | 0.11<br>(0.08 to<br>0.15)       |
| G6PD deficiency                                            | 5.18<br>(4.56 to<br>6.65)             | 6.75<br>(5.19 to<br>9.10)             | 4.81<br>(3.60 to<br>6.71)             | 7.08<br>(5.42 to<br>9.55)             | 0.11<br>(0.10 to<br>0.14)    | 0.19<br>(0.15 to<br>0.25)       | 0.14<br>(0.10 to<br>0.19)     | 0.20<br>(0.15 to<br>0.26)       |
| Other hemoglobinopathies and hemolytic anemias             | 11.52<br>(9.70 to<br>14.93)           | 11.14<br>(8.60 to<br>14.62)           | 8.77<br>(6.65 to<br>11.68)            | 11.28<br>(8.87 to<br>14.91)           | 0.47<br>(0.39 to<br>0.62)    | 0.65<br>(0.52 to<br>0.86)       | 0.53<br>(0.41 to<br>0.71)     | 0.64<br>(0.51 to<br>0.86)       |

|                                                   |                                          |                                        |                                        |                                        |                                     |                                     |                                     |                                     |
|---------------------------------------------------|------------------------------------------|----------------------------------------|----------------------------------------|----------------------------------------|-------------------------------------|-------------------------------------|-------------------------------------|-------------------------------------|
| Endocrine, metabolic, blood, and immune disorders | 158.52<br>(102.42 to<br>171.15)          | 221.78<br>(135.97 to<br>262.61)        | 207.53<br>(125.35 to<br>247.83)        | 221.46<br>(134.40 to<br>261.69)        | 5.20<br>(3.26 to<br>5.64)           | 9.35<br>(5.62 to<br>10.95)          | 9.23<br>(5.49 to<br>10.94)          | 9.11<br>(5.56 to<br>10.64)          |
| <b>Mexico</b>                                     |                                          |                                        |                                        |                                        |                                     |                                     |                                     |                                     |
| Cause                                             | YLLs (in 1000s)                          |                                        |                                        |                                        | Deaths (in 1000s)                   |                                     |                                     |                                     |
|                                                   | 2016                                     | 2040 Forecast                          | 2040 Better Scenario                   | 2040 Worse Scenario                    | 2016                                | 2040 Forecast                       | 2040 Better Scenario                | 2040 Worse Scenario                 |
| <b>Musculoskeletal disorders</b>                  | <b>85.68</b><br>(71.64 to<br>91.51)      | <b>146.29</b><br>(133.25 to<br>197.41) | <b>146.29</b><br>(115.81 to<br>179.41) | <b>162.65</b><br>(132.28 to<br>194.95) | <b>3.01</b><br>(2.62 to<br>3.21)    | <b>7.65</b><br>(6.36 to<br>9.23)    | <b>6.80</b><br>(5.46 to<br>8.40)    | <b>7.43</b><br>(6.12 to<br>8.95)    |
| Rheumatoid arthritis                              | 25.98<br>(18.80 to<br>32.53)             | 71.23<br>(53.76 to<br>93.05)           | 53.76<br>(38.10 to<br>73.42)           | 72.46<br>(54.61 to<br>95.14)           | 1.37<br>(1.08 to<br>1.66)           | 4.40<br>(3.38 to<br>5.70)           | 3.44<br>(2.47 to<br>4.64)           | 4.36<br>(3.38 to<br>5.68)           |
| Other musculoskeletal disorders                   | 59.70<br>(49.81 to<br>64.53)             | 93.28<br>(73.86 to<br>112.30)          | 92.53<br>(72.88 to<br>111.53)          | 90.19<br>(71.22 to<br>107.23)          | 1.64<br>(1.33 to<br>1.83)           | 3.25<br>(2.48 to<br>3.95)           | 3.36<br>(2.59 to<br>4.13)           | 3.07<br>(2.37 to<br>3.70)           |
| <b>Other non-communicable diseases</b>            | <b>931.78</b><br>(742.79 to<br>1,046.43) | <b>767.71</b><br>(600.35 to<br>966.90) | <b>485.28</b><br>(379.30 to<br>601.91) | <b>780.23</b><br>(614.11 to<br>980.71) | <b>13.42</b><br>(11.22 to<br>15.94) | <b>17.67</b><br>(13.69 to<br>24.70) | <b>14.18</b><br>(10.63 to<br>21.11) | <b>17.29</b><br>(13.49 to<br>23.68) |
| Congenital birth defects                          | 842.36<br>(634.06 to<br>954.89)          | 577.68<br>(412.27 to<br>741.67)        | 313.31<br>(220.91 to<br>400.12)        | 595.50<br>(417.35 to<br>770.66)        | 10.37<br>(7.82 to<br>11.68)         | 7.61<br>(5.40 to<br>9.67)           | 4.32<br>(3.05 to<br>5.49)           | 7.83<br>(5.56 to<br>9.97)           |
| Neural tube defects                               | 33.65<br>(28.06 to<br>44.13)             | 11.98<br>(7.90 to<br>17.78)            | 5.52<br>(3.73 to<br>8.11)              | 12.85<br>(8.47 to<br>19.37)            | 0.41<br>(0.34 to<br>0.53)           | 0.15<br>(0.10 to<br>0.22)           | 0.07<br>(0.05 to<br>0.11)           | 0.17<br>(0.11 to<br>0.24)           |
| Congenital heart anomalies                        | 445.38<br>(319.99 to<br>500.02)          | 293.37<br>(198.87 to<br>387.07)        | 152.93<br>(101.52 to<br>202.15)        | 302.05<br>(205.46 to<br>399.61)        | 5.48<br>(3.96 to<br>6.12)           | 3.85<br>(2.68 to<br>5.00)           | 2.09<br>(1.40 to<br>2.74)           | 3.96<br>(2.75 to<br>5.15)           |
| Orofacial clefts                                  | 3.82<br>(2.21 to<br>7.31)                | 2.76<br>(1.30 to<br>5.77)              | 1.10<br>(0.50 to<br>2.38)              | 2.98<br>(1.38 to<br>6.08)              | 0.04<br>(0.03 to<br>0.08)           | 0.03<br>(0.02 to<br>0.07)           | 0.01<br>(0.01 to<br>0.03)           | 0.03<br>(0.02 to<br>0.07)           |
| Down syndrome                                     | 32.88<br>(21.66 to<br>43.14)             | 30.41<br>(19.39 to<br>40.31)           | 22.08<br>(13.53 to<br>27.99)           | 31.61<br>(19.55 to<br>41.88)           | 0.46<br>(0.30 to<br>0.57)           | 0.48<br>(0.30 to<br>0.61)           | 0.37<br>(0.22 to<br>0.46)           | 0.50<br>(0.31 to<br>0.64)           |
| Other chromosomal abnormalities                   | 18.97<br>(10.99 to<br>23.31)             | 17.19<br>(9.64 to<br>24.19)            | 10.54<br>(5.70 to<br>14.24)            | 17.82<br>(9.85 to<br>24.82)            | 0.24<br>(0.14 to<br>0.29)           | 0.23<br>(0.13 to<br>0.32)           | 0.15<br>(0.08 to<br>0.21)           | 0.24<br>(0.13 to<br>0.33)           |
| Congenital musculoskeletal and limb anomalies     | 11.97<br>(10.10 to<br>16.06)             | 10.90<br>(8.02 to<br>15.24)            | 6.57<br>(4.89 to<br>9.15)              | 11.10<br>(8.19 to<br>15.48)            | 0.16<br>(0.13 to<br>0.21)           | 0.17<br>(0.13 to<br>0.23)           | 0.11<br>(0.08 to<br>0.15)           | 0.17<br>(0.13 to<br>0.23)           |
| Urogenital congenital anomalies                   | 28.20<br>(18.48 to<br>42.16)             | 22.68<br>(13.87 to<br>34.43)           | 14.52<br>(8.67 to<br>21.69)            | 23.21<br>(14.27 to<br>35.07)           | 0.39<br>(0.25 to<br>0.56)           | 0.35<br>(0.21 to<br>0.52)           | 0.24<br>(0.14 to<br>0.35)           | 0.36<br>(0.22 to<br>0.53)           |
| Digestive congenital anomalies                    | 85.34<br>(61.12 to<br>111.10)            | 63.24<br>(42.11 to<br>92.30)           | 31.98<br>(21.44 to<br>45.31)           | 65.43<br>(42.77 to<br>95.50)           | 1.01<br>(0.72 to<br>1.32)           | 0.77<br>(0.52 to<br>1.11)           | 0.40<br>(0.27 to<br>0.56)           | 0.80<br>(0.53 to<br>1.15)           |
| Other congenital birth defects                    | 182.15<br>(131.21 to<br>234.59)          | 125.14<br>(83.83 to<br>171.55)         | 68.06<br>(46.03 to<br>89.81)           | 128.46<br>(85.67 to<br>174.85)         | 2.19<br>(1.57 to<br>2.68)           | 1.56<br>(1.05 to<br>2.10)           | 0.87<br>(0.60 to<br>1.14)           | 1.60<br>(1.07 to<br>2.15)           |
| Skin and subcutaneous diseases                    | 56.20<br>(35.83 to<br>102.99)            | 173.39<br>(110.89 to<br>302.16)        | 162.85<br>(104.31 to<br>273.56)        | 167.61<br>(107.36 to<br>288.99)        | 2.66<br>(1.65 to<br>4.86)           | 9.87<br>(6.24 to<br>17.42)          | 9.75<br>(6.23 to<br>16.79)          | 9.26<br>(5.77 to<br>16.34)          |
| Cellulitis                                        | 15.99<br>(8.98 to<br>35.67)              | 54.23<br>(31.52 to<br>107.47)          | 55.26<br>(32.55 to<br>109.71)          | 51.98<br>(29.98 to<br>103.61)          | 0.59<br>(0.33 to<br>1.26)           | 2.47<br>(1.42 to<br>5.03)           | 2.61<br>(1.52 to<br>5.22)           | 2.32<br>(1.33 to<br>4.69)           |
| Pyoderma                                          | 25.80<br>(15.58 to<br>48.61)             | 77.84<br>(43.08 to<br>131.12)          | 69.20<br>(37.19 to<br>113.45)          | 76.25<br>(42.90 to<br>127.70)          | 1.17<br>(0.65 to<br>2.06)           | 4.45<br>(2.38 to<br>7.32)           | 4.27<br>(2.26 to<br>7.20)           | 4.22<br>(2.27 to<br>6.98)           |
| Decubitus ulcer                                   | 10.31<br>(6.34 to<br>21.19)              | 32.83<br>(20.67 to<br>64.58)           | 30.48<br>(19.25 to<br>60.58)           | 31.14<br>(19.46 to<br>62.21)           | 0.76<br>(0.48 to<br>1.62)           | 2.61<br>(1.60 to<br>5.44)           | 2.54<br>(1.53 to<br>5.23)           | 2.41<br>(1.48 to<br>5.07)           |
| Other skin and subcutaneous diseases              | 4.11<br>(2.41 to<br>8.11)                | 8.49<br>(4.94 to<br>15.85)             | 7.90<br>(4.60 to<br>14.63)             | 8.24<br>(4.82 to<br>15.62)             | 0.14<br>(0.08 to<br>0.27)           | 0.33<br>(0.19 to<br>0.63)           | 0.33<br>(0.19 to<br>0.61)           | 0.31<br>(0.18 to<br>0.61)           |

|                                      |                                              |                                              |                                              |                                              |                                     |                                      |                                     |                                      |
|--------------------------------------|----------------------------------------------|----------------------------------------------|----------------------------------------------|----------------------------------------------|-------------------------------------|--------------------------------------|-------------------------------------|--------------------------------------|
| Sudden infant death syndrome         | 33.21<br>(28.30 to<br>39.21)                 | 16.64<br>(10.42 to<br>25.28)                 | 9.12<br>(6.05 to<br>13.41)                   | 17.12<br>(11.03 to<br>25.73)                 | 0.39<br>(0.33 to<br>0.45)           | 0.19<br>(0.12 to<br>0.29)            | 0.11<br>(0.07 to<br>0.16)           | 0.20<br>(0.13 to<br>0.30)            |
| <b>Injuries</b>                      | <b>3,328.02</b><br>(3,113.33 to<br>3,569.67) | <b>2,841.11</b><br>(2,083.35 to<br>4,037.48) | <b>2,048.46</b><br>(1,506.15 to<br>2,948.52) | <b>3,543.57</b><br>(2,529.57 to<br>5,195.85) | <b>70.99</b><br>(66.84 to<br>77.62) | <b>76.84</b><br>(60.60 to<br>100.54) | <b>58.91</b><br>(46.79 to<br>76.86) | <b>91.66</b><br>(70.14 to<br>122.69) |
| <b>Transport injuries</b>            | <b>1,037.02</b><br>(971.37 to<br>1,128.28)   | <b>675.46</b><br>(418.98 to<br>1,134.17)     | <b>288.08</b><br>(176.59 to<br>489.53)       | <b>1,302.36</b><br>(781.48 to<br>2,202.95)   | <b>21.49</b><br>(20.22 to<br>23.08) | <b>17.25</b><br>(11.38 to<br>27.28)  | <b>7.96</b><br>(5.29 to<br>12.38)   | <b>31.26</b><br>(19.89 to<br>50.50)  |
| Road injuries                        | 983.80<br>(920.90 to<br>1,067.80)            | 605.70<br>(375.13 to<br>1,016.91)            | 237.62<br>(147.17 to<br>409.23)              | 1,224.59<br>(734.90 to<br>2,085.35)          | 20.35<br>(19.10 to<br>21.87)        | 15.46<br>(10.17 to<br>24.51)         | 6.63<br>(4.44 to<br>10.33)          | 29.29<br>(18.72 to<br>47.26)         |
| Pedestrian road injuries             | 402.64<br>(343.43 to<br>471.60)              | 260.26<br>(172.88 to<br>417.55)              | 99.32<br>(67.01 to<br>156.56)                | 478.31<br>(307.02 to<br>789.45)              | 9.19<br>(7.96 to<br>10.56)          | 7.91<br>(5.55 to<br>12.03)           | 3.36<br>(2.38 to<br>4.99)           | 13.72<br>(9.33 to<br>21.34)          |
| <b>Mexico</b>                        |                                              |                                              |                                              |                                              |                                     |                                      |                                     |                                      |
| <b>Cause</b>                         | <b>YLLs (in 1000s)</b>                       |                                              |                                              |                                              | <b>Deaths (in 1000s)</b>            |                                      |                                     |                                      |
|                                      | <b>2016</b>                                  | <b>2040 Forecast</b>                         | <b>2040 Better Scenario</b>                  | <b>2040 Worse Scenario</b>                   | <b>2016</b>                         | <b>2040 Forecast</b>                 | <b>2040 Better Scenario</b>         | <b>2040 Worse Scenario</b>           |
| Cyclist road injuries                | 36.66<br>(30.44 to<br>45.07)                 | 24.48<br>(13.81 to<br>42.96)                 | 10.92<br>(6.30 to<br>19.01)                  | 48.91<br>(27.26 to<br>89.50)                 | 0.80<br>(0.66 to<br>0.98)           | 0.66<br>(0.40 to<br>1.12)            | 0.35<br>(0.21 to<br>0.59)           | 1.19<br>(0.69 to<br>2.09)            |
| Motorcyclist road injuries           | 136.27<br>(108.25 to<br>157.87)              | 108.95<br>(56.80 to<br>217.71)               | 59.29<br>(30.86 to<br>118.27)                | 184.58<br>(96.99 to<br>367.57)               | 2.45<br>(1.95 to<br>2.84)           | 2.14<br>(1.16 to<br>4.07)            | 1.23<br>(0.67 to<br>2.34)           | 3.51<br>(1.91 to<br>6.73)            |
| Motor vehicle road injuries          | 386.90<br>(326.24 to<br>477.28)              | 199.75<br>(115.53 to<br>338.69)              | 63.73<br>(37.59 to<br>105.68)                | 484.55<br>(275.65 to<br>830.36)              | 7.45<br>(6.22 to<br>9.20)           | 4.41<br>(2.72 to<br>7.16)            | 1.54<br>(0.99 to<br>2.44)           | 10.16<br>(6.08 to<br>16.70)          |
| Other road injuries                  | 21.33<br>(15.75 to<br>27.84)                 | 12.26<br>(7.01 to<br>21.99)                  | 4.36<br>(2.55 to<br>7.39)                    | 28.24<br>(15.87 to<br>51.29)                 | 0.46<br>(0.34 to<br>0.59)           | 0.35<br>(0.20 to<br>0.56)            | 0.15<br>(0.09 to<br>0.24)           | 0.71<br>(0.41 to<br>1.24)            |
| Other transport injuries             | 53.22<br>(46.83 to<br>62.36)                 | 69.76<br>(43.10 to<br>119.35)                | 50.46<br>(30.75 to<br>85.79)                 | 77.78<br>(46.43 to<br>134.00)                | 1.14<br>(1.00 to<br>1.32)           | 1.79<br>(1.15 to<br>2.86)            | 1.33<br>(0.85 to<br>2.16)           | 1.97<br>(1.24 to<br>3.18)            |
| <b>Unintentional injuries</b>        | <b>840.83</b><br>(775.51 to<br>1,020.74)     | <b>896.92</b><br>(709.51 to<br>1,203.22)     | <b>722.89</b><br>(568.45 to<br>967.69)       | <b>913.10</b><br>(726.67 to<br>1,213.97)     | <b>20.82</b><br>(19.11 to<br>25.83) | <b>31.45</b><br>(26.52 to<br>40.57)  | <b>27.49</b><br>(22.85 to<br>36.25) | <b>31.05</b><br>(25.84 to<br>40.26)  |
| Falls                                | 168.33<br>(152.25 to<br>231.69)              | 272.19<br>(228.48 to<br>376.71)              | 244.44<br>(200.86 to<br>337.76)              | 267.74<br>(225.13 to<br>376.74)              | 6.70<br>(6.04 to<br>9.33)           | 14.09<br>(12.03 to<br>19.35)         | 13.21<br>(11.30 to<br>17.84)        | 13.45<br>(11.46 to<br>18.74)         |
| Drowning                             | 177.90<br>(167.97 to<br>193.00)              | 151.89<br>(108.33 to<br>222.68)              | 114.70<br>(80.04 to<br>171.96)               | 162.46<br>(113.10 to<br>241.90)              | 3.35<br>(3.17 to<br>3.61)           | 3.57<br>(2.65 to<br>4.97)            | 2.82<br>(2.06 to<br>3.96)           | 3.79<br>(2.74 to<br>5.44)            |
| Fire, heat, and hot substances       | 45.39<br>(41.63 to<br>59.02)                 | 44.81<br>(33.12 to<br>61.78)                 | 32.68<br>(24.01 to<br>45.44)                 | 47.48<br>(35.06 to<br>66.19)                 | 1.35<br>(1.24 to<br>1.70)           | 1.85<br>(1.44 to<br>2.41)            | 1.46<br>(1.14 to<br>1.92)           | 1.89<br>(1.45 to<br>2.51)            |
| Poisonings                           | 27.36<br>(23.52 to<br>43.52)                 | 17.36<br>(11.62 to<br>29.53)                 | 11.04<br>(7.16 to<br>18.91)                  | 19.02<br>(12.50 to<br>32.88)                 | 0.54<br>(0.46 to<br>0.87)           | 0.43<br>(0.30 to<br>0.76)            | 0.29<br>(0.19 to<br>0.49)           | 0.47<br>(0.32 to<br>0.79)            |
| Exposure to mechanical forces        | 109.40<br>(98.36 to<br>154.09)               | 103.62<br>(77.92 to<br>156.00)               | 76.53<br>(55.92 to<br>115.38)                | 107.23<br>(81.16 to<br>159.84)               | 2.31<br>(2.08 to<br>3.22)           | 2.72<br>(2.17 to<br>3.85)            | 2.12<br>(1.64 to<br>3.03)           | 2.77<br>(2.21 to<br>3.97)            |
| Unintentional firearm injuries       | 36.06<br>(31.75 to<br>50.16)                 | 30.30<br>(21.43 to<br>46.25)                 | 22.60<br>(15.65 to<br>35.20)                 | 31.63<br>(22.52 to<br>47.65)                 | 0.74<br>(0.65 to<br>1.01)           | 0.72<br>(0.54 to<br>1.04)            | 0.56<br>(0.42 to<br>0.81)           | 0.74<br>(0.56 to<br>1.07)            |
| Unintentional suffocation            | 14.61<br>(12.56 to<br>21.55)                 | 9.56<br>(6.63 to<br>14.43)                   | 6.04<br>(4.27 to<br>8.92)                    | 9.98<br>(6.86 to<br>15.00)                   | 0.20<br>(0.17 to<br>0.29)           | 0.14<br>(0.10 to<br>0.21)            | 0.10<br>(0.07 to<br>0.14)           | 0.15<br>(0.11 to<br>0.21)            |
| Other exposure to mechanical forces  | 58.73<br>(51.32 to<br>90.28)                 | 63.77<br>(47.61 to<br>100.68)                | 47.89<br>(34.91 to<br>75.33)                 | 65.61<br>(48.97 to<br>102.89)                | 1.37<br>(1.20 to<br>2.08)           | 1.86<br>(1.48 to<br>2.75)            | 1.46<br>(1.13 to<br>2.18)           | 1.87<br>(1.48 to<br>2.82)            |
| Adverse effects of medical treatment | 49.52<br>(42.40 to<br>71.19)                 | 54.82<br>(42.76 to<br>81.57)                 | 44.68<br>(34.57 to<br>67.43)                 | 55.63<br>(43.65 to<br>83.51)                 | 1.62<br>(1.39 to<br>2.37)           | 2.48<br>(1.97 to<br>3.70)            | 2.17<br>(1.70 to<br>3.28)           | 2.44<br>(1.93 to<br>3.64)            |



|                                                 |                                                            |                                                          |                                                          |                                                          |                                                   |                                                   |                                                   |                                                   |
|-------------------------------------------------|------------------------------------------------------------|----------------------------------------------------------|----------------------------------------------------------|----------------------------------------------------------|---------------------------------------------------|---------------------------------------------------|---------------------------------------------------|---------------------------------------------------|
| Animal contact                                  | 21.09<br>(17.46 to<br>36.47)                               | 27.79<br>(20.29 to<br>47.45)                             | 19.37<br>(14.39 to<br>33.07)                             | 28.96<br>(21.34 to<br>48.70)                             | 0.45<br>(0.38 to<br>0.75)                         | 0.80<br>(0.62 to<br>1.33)                         | 0.62<br>(0.48 to<br>1.05)                         | 0.82<br>(0.63 to<br>1.35)                         |
| Venomous animal contact                         | 14.74<br>(11.63 to<br>26.07)                               | 18.15<br>(12.95 to<br>31.98)                             | 12.51<br>(8.92 to<br>22.06)                              | 18.95<br>(13.63 to<br>32.92)                             | 0.30<br>(0.23 to<br>0.53)                         | 0.50<br>(0.36 to<br>0.88)                         | 0.39<br>(0.28 to<br>0.69)                         | 0.51<br>(0.37 to<br>0.89)                         |
| Non-venomous animal contact                     | 6.35<br>(4.63 to<br>12.74)                                 | 9.64<br>(6.51 to<br>18.48)                               | 6.87<br>(4.55 to<br>13.08)                               | 10.01<br>(6.83 to<br>18.90)                              | 0.15<br>(0.11 to<br>0.29)                         | 0.30<br>(0.21 to<br>0.57)                         | 0.23<br>(0.16 to<br>0.44)                         | 0.31<br>(0.21 to<br>0.58)                         |
| Foreign body                                    | 193.65<br>(171.02 to<br>254.63)                            | 178.11<br>(139.11 to<br>250.15)                          | 147.80<br>(116.31 to<br>207.71)                          | 176.71<br>(138.16 to<br>248.17)                          | 3.42<br>(3.01 to<br>4.61)                         | 4.22<br>(3.39 to<br>6.03)                         | 3.87<br>(3.11 to<br>5.55)                         | 4.11<br>(3.31 to<br>5.87)                         |
| Pulmonary aspiration and foreign body in airway | 188.22<br>(166.20 to<br>249.56)                            | 173.04<br>(135.27 to<br>245.48)                          | 143.47<br>(113.05 to<br>202.52)                          | 171.49<br>(134.53 to<br>241.63)                          | 3.32<br>(2.93 to<br>4.49)                         | 4.12<br>(3.32 to<br>5.94)                         | 3.78<br>(3.04 to<br>5.45)                         | 4.00<br>(3.22 to<br>5.73)                         |
| Foreign body in other body part                 | 5.43<br>(4.40 to<br>9.87)                                  | 5.07<br>(3.44 to<br>9.14)                                | 4.33<br>(2.95 to<br>7.88)                                | 5.22<br>(3.60 to<br>9.30)                                | 0.10<br>(0.08 to<br>0.18)                         | 0.10<br>(0.07 to<br>0.18)                         | 0.09<br>(0.06 to<br>0.16)                         | 0.10<br>(0.07 to<br>0.19)                         |
| Environmental heat and cold exposure            | 11.45<br>(8.66 to<br>24.32)                                | 15.44<br>(9.82 to<br>32.69)                              | 10.78<br>(6.65 to<br>23.28)                              | 16.24<br>(10.23 to<br>34.43)                             | 0.33<br>(0.25 to<br>0.72)                         | 0.56<br>(0.37 to<br>1.22)                         | 0.41<br>(0.26 to<br>0.89)                         | 0.58<br>(0.37 to<br>1.25)                         |
| Other unintentional injuries                    | 36.75<br>(33.78 to<br>40.24)                               | 30.89<br>(22.65 to<br>43.48)                             | 20.87<br>(14.37 to<br>32.14)                             | 31.63<br>(23.46 to<br>43.92)                             | 0.74<br>(0.69 to<br>0.81)                         | 0.73<br>(0.58 to<br>0.95)                         | 0.51<br>(0.37 to<br>0.72)                         | 0.74<br>(0.58 to<br>0.95)                         |
| <b>Self-harm and interpersonal violence</b>     | <b>1,441.42</b><br><b>(1,055.57 to</b><br><b>1,694.95)</b> | <b>1,258.46</b><br><b>(791.97 to</b><br><b>1,909.89)</b> | <b>1,027.85</b><br><b>(641.60 to</b><br><b>1,606.32)</b> | <b>1,317.91</b><br><b>(795.28 to</b><br><b>2,039.96)</b> | <b>28.53</b><br><b>(20.89 to</b><br><b>34.45)</b> | <b>27.90</b><br><b>(18.27 to</b><br><b>40.98)</b> | <b>23.22</b><br><b>(15.05 to</b><br><b>34.13)</b> | <b>29.12</b><br><b>(18.63 to</b><br><b>43.55)</b> |

| Mexico                                                                              |                                                 |                                                   |                                                  |                                                   |                                                |                                                |                                                |                                                |
|-------------------------------------------------------------------------------------|-------------------------------------------------|---------------------------------------------------|--------------------------------------------------|---------------------------------------------------|------------------------------------------------|------------------------------------------------|------------------------------------------------|------------------------------------------------|
| Cause                                                                               | YLLs (in 1000s)                                 |                                                   |                                                  |                                                   | Deaths (in 1000s)                              |                                                |                                                |                                                |
|                                                                                     | 2016                                            | 2040 Forecast                                     | 2040 Better Scenario                             | 2040 Worse Scenario                               | 2016                                           | 2040 Forecast                                  | 2040 Better Scenario                           | 2040 Worse Scenario                            |
| Self-harm                                                                           | 370.39<br>(271.91 to<br>417.47)                 | 351.71<br>(194.40 to<br>590.87)                   | 283.12<br>(159.42 to<br>462.05)                  | 402.06<br>(214.38 to<br>688.11)                   | 7.44<br>(5.46 to<br>8.33)                      | 8.10<br>(4.78 to<br>12.92)                     | 6.66<br>(3.97 to<br>10.27)                     | 9.20<br>(5.19 to<br>14.90)                     |
| Self-harm by firearm                                                                | 36.55<br>(24.76 to<br>53.22)                    | 40.21<br>(19.59 to<br>80.84)                      | 30.66<br>(15.26 to<br>62.35)                     | 46.68<br>(21.81 to<br>96.78)                      | 0.84<br>(0.57 to<br>1.24)                      | 1.07<br>(0.56 to<br>2.06)                      | 0.84<br>(0.45 to<br>1.56)                      | 1.23<br>(0.61 to<br>2.37)                      |
| Self-harm by other specified means                                                  | 333.84<br>(243.42 to<br>377.13)                 | 311.49<br>(173.68 to<br>513.61)                   | 252.46<br>(143.86 to<br>409.73)                  | 355.38<br>(192.74 to<br>597.31)                   | 6.60<br>(4.83 to<br>7.46)                      | 7.03<br>(4.16 to<br>10.97)                     | 5.82<br>(3.48 to<br>8.93)                      | 7.97<br>(4.55 to<br>12.74)                     |
| Interpersonal violence                                                              | 1,071.03<br>(683.32 to<br>1,338.56)             | 906.76<br>(523.65 to<br>1,393.99)                 | 744.72<br>(431.51 to<br>1,155.40)                | 915.84<br>(508.85 to<br>1,418.92)                 | 21.09<br>(13.43 to<br>26.88)                   | 19.80<br>(11.69 to<br>29.44)                   | 16.56<br>(10.02 to<br>25.10)                   | 19.92<br>(11.41 to<br>29.92)                   |
| Physical violence by firearm                                                        | 709.04<br>(353.48 to<br>873.11)                 | 587.17<br>(266.88 to<br>936.97)                   | 476.42<br>(215.62 to<br>780.30)                  | 586.66<br>(258.89 to<br>939.48)                   | 13.84<br>(6.96 to<br>17.29)                    | 12.39<br>(5.61 to<br>18.94)                    | 10.18<br>(4.65 to<br>16.04)                    | 12.33<br>(5.54 to<br>19.06)                    |
| Physical violence by sharp object                                                   | 183.27<br>(108.43 to<br>332.91)                 | 174.21<br>(94.73 to<br>353.11)                    | 148.59<br>(81.95 to<br>293.40)                   | 171.71<br>(92.28 to<br>330.27)                    | 3.72<br>(2.22 to<br>6.81)                      | 3.98<br>(2.31 to<br>7.26)                      | 3.46<br>(1.95 to<br>6.38)                      | 3.90<br>(2.17 to<br>7.25)                      |
| Physical violence by other means                                                    | 178.61<br>(95.41 to<br>308.33)                  | 145.38<br>(73.33 to<br>258.92)                    | 119.71<br>(59.80 to<br>217.52)                   | 157.47<br>(77.50 to<br>290.77)                    | 3.53<br>(1.90 to<br>6.22)                      | 3.43<br>(1.79 to<br>6.37)                      | 2.91<br>(1.49 to<br>5.30)                      | 3.69<br>(1.86 to<br>6.92)                      |
| <b>Forces of nature, conflict and terrorism, and executions and police conflict</b> | <b>8.76</b><br><b>(4.97 to</b><br><b>10.57)</b> | <b>10.27</b><br><b>(0.00 to</b><br><b>141.81)</b> | <b>9.64</b><br><b>(0.00 to</b><br><b>137.04)</b> | <b>10.20</b><br><b>(0.00 to</b><br><b>140.92)</b> | <b>0.16</b><br><b>(0.10 to</b><br><b>0.19)</b> | <b>0.24</b><br><b>(0.00 to</b><br><b>3.25)</b> | <b>0.24</b><br><b>(0.00 to</b><br><b>3.23)</b> | <b>0.23</b><br><b>(0.00 to</b><br><b>3.20)</b> |
| Exposure to forces of nature                                                        | 4.27<br>(2.90 to<br>5.64)                       | 9.77<br>(0.00 to<br>141.73)                       | 9.17<br>(0.00 to<br>136.96)                      | 9.70<br>(0.00 to<br>140.85)                       | 0.08<br>(0.06 to<br>0.11)                      | 0.23<br>(0.00 to<br>3.25)                      | 0.23<br>(0.00 to<br>3.22)                      | 0.22<br>(0.00 to<br>3.20)                      |
| Conflict and terrorism                                                              | 0.00<br>(0.00 to<br>0.00)                       | 0.22<br>(0.00 to<br>2.50)                         | 0.21<br>(0.00 to<br>2.31)                        | 0.22<br>(0.00 to<br>2.48)                         | 0.00<br>(0.00 to<br>0.00)                      | 0.00<br>(0.00 to<br>0.05)                      | 0.00<br>(0.00 to<br>0.05)                      | 0.00<br>(0.00 to<br>0.05)                      |
| Executions and police conflict                                                      | 4.48<br>(0.78 to<br>5.72)                       | 0.28<br>(0.00 to<br>0.00)                         | 0.27<br>(0.00 to<br>0.00)                        | 0.28<br>(0.00 to<br>0.00)                         | 0.08<br>(0.01 to<br>0.10)                      | 0.01<br>(0.00 to<br>0.00)                      | 0.01<br>(0.00 to<br>0.00)                      | 0.01<br>(0.00 to<br>0.00)                      |

| Nicaragua                                                                |                                                 |                                                   |                                                   |                                                     |                                              |                                              |                                              |                                              |
|--------------------------------------------------------------------------|-------------------------------------------------|---------------------------------------------------|---------------------------------------------------|-----------------------------------------------------|----------------------------------------------|----------------------------------------------|----------------------------------------------|----------------------------------------------|
| Cause                                                                    | YLLs (actual counts)                            |                                                   |                                                   |                                                     | Deaths (actual counts)                       |                                              |                                              |                                              |
|                                                                          | 2016                                            | 2040 Forecast                                     | 2040 Better Scenario                              | 2040 Worse Scenario                                 | 2016                                         | 2040 Forecast                                | 2040 Better Scenario                         | 2040 Worse Scenario                          |
| <b>All causes</b>                                                        | <b>694,385.41</b><br>(611,922.77 to 788,352.65) | <b>949,988.50</b><br>(681,235.03 to 1,468,571.86) | <b>744,161.39</b><br>(545,994.13 to 1,152,179.24) | <b>1,168,741.97</b><br>(827,835.72 to 1,770,483.71) | <b>23,948.20</b><br>(21,157.49 to 27,196.34) | <b>47,597.63</b><br>(37,037.62 to 65,067.48) | <b>38,512.57</b><br>(30,497.32 to 51,860.15) | <b>56,089.40</b><br>(42,801.40 to 76,120.43) |
| <b>Communicable, maternal, neonatal, and nutritional diseases</b>        | <b>139,568.31</b><br>(119,719.99 to 163,147.15) | <b>67,662.81</b><br>(49,044.00 to 90,274.53)      | <b>45,959.04</b><br>(33,776.44 to 60,498.94)      | <b>105,865.42</b><br>(73,166.50 to 148,187.34)      | <b>2,362.24</b><br>(2,047.33 to 2,743.74)    | <b>1,901.98</b><br>(1,412.21 to 2,466.07)    | <b>1,465.20</b><br>(1,098.55 to 1,894.95)    | <b>2,747.93</b><br>(1,966.82 to 3,699.16)    |
| <b>HIV/AIDS and tuberculosis</b>                                         | <b>9,678.33</b><br>(7,294.95 to 13,172.63)      | <b>9,859.06</b><br>(5,839.01 to 15,556.60)        | <b>5,252.38</b><br>(2,706.59 to 10,168.80)        | <b>13,148.88</b><br>(8,532.83 to 20,707.63)         | <b>242.29</b><br>(191.56 to 314.11)          | <b>275.30</b><br>(174.33 to 419.00)          | <b>153.17</b><br>(89.01 to 261.99)           | <b>371.85</b><br>(247.87 to 573.12)          |
| <b>Tuberculosis</b>                                                      | <b>5,121.97</b><br>(4,222.13 to 6,177.34)       | <b>4,052.41</b><br>(2,637.58 to 6,404.55)         | <b>2,285.21</b><br>(1,500.32 to 3,690.70)         | <b>6,036.48</b><br>(3,704.85 to 10,346.52)          | <b>156.03</b><br>(129.91 to 185.94)          | <b>155.95</b><br>(105.19 to 240.54)          | <b>91.53</b><br>(61.71 to 137.68)            | <b>224.73</b><br>(141.86 to 377.42)          |
| <b>HIV/AIDS</b>                                                          | <b>4,556.36</b><br>(2,534.44 to 8,182.37)       | <b>5,806.65</b><br>(2,312.04 to 11,116.85)        | <b>2,967.17</b><br>(794.14 to 7,831.10)           | <b>7,112.40</b><br>(3,338.78 to 12,944.76)          | <b>86.26</b><br>(47.17 to 159.41)            | <b>119.35</b><br>(43.32 to 236.49)           | <b>61.64</b><br>(13.57 to 166.01)            | <b>147.11</b><br>(64.43 to 285.77)           |
| <b>Diarrhea, lower respiratory, and other common infectious diseases</b> | <b>60,303.47</b><br>(51,397.53 to 71,900.81)    | <b>28,996.18</b><br>(17,865.38 to 45,995.69)      | <b>20,975.78</b><br>(13,774.05 to 31,321.04)      | <b>55,209.59</b><br>(32,038.94 to 89,811.07)        | <b>1,194.90</b><br>(1,020.63 to 1,441.94)    | <b>1,333.04</b><br>(761.09 to 1,663.75)      | <b>939.91</b><br>(642.86 to 1,322.22)        | <b>1,775.57</b><br>(1,138.95 to 2,726.79)    |
| <b>Diarrheal diseases</b>                                                | <b>12,823.75</b><br>(8,964.16 to 17,664.31)     | <b>3,214.90</b><br>(587.84 to 10,650.43)          | <b>1,845.96</b><br>(398.15 to 5,642.27)           | <b>7,223.03</b><br>(1,163.41 to 22,420.27)          | <b>230.80</b><br>(158.87 to 356.13)          | <b>133.67</b><br>(28.13 to 418.23)           | <b>90.50</b><br>(20.91 to 281.29)            | <b>269.96</b><br>(49.04 to 824.90)           |
| <b>Intestinal infectious diseases</b>                                    | <b>117.10</b><br>(49.26 to 241.83)              | <b>72.42</b><br>(22.39 to 164.32)                 | <b>62.99</b><br>(19.42 to 143.63)                 | <b>77.72</b><br>(24.19 to 179.25)                   | <b>2.26</b><br>(1.00 to 4.34)                | <b>1.86</b><br>(0.67 to 3.95)                | <b>1.67</b><br>(0.61 to 3.51)                | <b>1.94</b><br>(0.71 to 4.12)                |
| <b>Typhoid fever</b>                                                     | <b>105.54</b><br>(41.32 to 223.41)              | <b>67.71</b><br>(20.18 to 158.74)                 | <b>59.43</b><br>(17.53 to 138.96)                 | <b>72.24</b><br>(21.61 to 171.51)                   | <b>2.05</b><br>(0.84 to 4.14)                | <b>1.70</b><br>(0.57 to 3.77)                | <b>1.55</b><br>(0.52 to 3.88)                | <b>1.78</b><br>(0.61 to 3.88)                |
| <b>Paratyphoid fever</b>                                                 | <b>1.96</b><br>(0.55 to 5.11)                   | <b>1.64</b><br>(0.34 to 4.60)                     | <b>1.37</b><br>(0.28 to 3.85)                     | <b>1.79</b><br>(0.36 to 5.06)                       | <b>0.04</b><br>(0.01 to 0.09)                | <b>0.04</b><br>(0.01 to 0.09)                | <b>0.04</b><br>(0.01 to 0.09)                | <b>0.04</b><br>(0.01 to 0.12)                |
| <b>Other intestinal infectious diseases</b>                              | <b>9.60</b><br>(3.65 to 21.23)                  | <b>3.07</b><br>(0.86 to 8.01)                     | <b>2.19</b><br>(0.63 to 5.67)                     | <b>3.69</b><br>(1.02 to 9.70)                       | <b>0.17</b><br>(0.07 to 0.37)                | <b>0.11</b><br>(0.04 to 0.26)                | <b>0.09</b><br>(0.03 to 0.21)                | <b>0.12</b><br>(0.04 to 0.29)                |
| <b>Lower respiratory infections</b>                                      | <b>38,906.48</b><br>(32,263.66 to 47,134.17)    | <b>17,492.90</b><br>(9,855.96 to 28,975.49)       | <b>12,845.23</b><br>(7,741.41 to 20,263.26)       | <b>29,712.36</b><br>(14,899.69 to 54,711.46)        | <b>830.57</b><br>(702.18 to 1,005.55)        | <b>843.43</b><br>(553.50 to 1,232.75)        | <b>723.16</b><br>(499.42 to 1,022.63)        | <b>1,222.30</b><br>(750.08 to 1,846.38)      |
| <b>Upper respiratory infections</b>                                      | <b>48.39</b><br>(23.81 to 92.97)                | <b>31.57</b><br>(10.57 to 71.95)                  | <b>21.57</b><br>(7.07 to 49.64)                   | <b>38.80</b><br>(12.90 to 88.60)                    | <b>1.02</b><br>(0.59 to 1.69)                | <b>1.09</b><br>(0.43 to 2.33)                | <b>0.79</b><br>(0.31 to 1.73)                | <b>1.29</b><br>(0.50 to 2.77)                |
| <b>Otitis media</b>                                                      | <b>1.10</b><br>(0.56 to 2.03)                   | <b>0.13</b><br>(0.04 to 0.33)                     | <b>0.13</b><br>(0.04 to 0.33)                     | <b>0.14</b><br>(0.04 to 0.33)                       | <b>0.02</b><br>(0.01 to 0.03)                | <b>0.01</b><br>(0.00 to 0.01)                | <b>0.01</b><br>(0.00 to 0.01)                | <b>0.01</b><br>(0.00 to 0.01)                |
| <b>Meningitis</b>                                                        | <b>5,333.57</b><br>(3,599.54 to 9,397.56)       | <b>2,406.09</b><br>(1,023.23 to 4,884.51)         | <b>2,091.54</b><br>(905.53 to 4,123.65)           | <b>3,825.64</b><br>(1,277.73 to 8,077.57)           | <b>83.22</b><br>(59.08 to 135.82)            | <b>52.72</b><br>(28.71 to 94.01)             | <b>48.77</b><br>(27.52 to 87.10)             | <b>69.40</b><br>(32.67 to 157.16)            |
| <b>Pneumococcal meningitis</b>                                           | <b>625.87</b><br>(389.96 to 1,080.90)           | <b>253.29</b><br>(117.51 to 479.98)               | <b>239.74</b><br>(112.84 to 455.57)               | <b>511.69</b><br>(135.50 to 621.60)                 | <b>10.42</b><br>(6.96 to 17.29)              | <b>6.72</b><br>(3.83 to 12.53)               | <b>6.74</b><br>(3.87 to 12.39)               | <b>7.58</b><br>(4.22 to 13.69)               |
| <b>H influenzae type B meningitis</b>                                    | <b>552.27</b><br>(347.65 to 1,006.48)           | <b>533.29</b><br>(122.41 to 1,285.28)             | <b>453.67</b><br>(111.11 to 1,046.17)             | <b>1,739.88</b><br>(245.09 to 4,797.60)             | <b>8.08</b><br>(5.37 to 14.17)               | <b>7.99</b><br>(2.82 to 17.57)               | <b>7.14</b><br>(2.72 to 15.04)               | <b>21.99</b><br>(4.42 to 57.83)              |
| <b>Meningococcal meningitis</b>                                          | <b>2,878.78</b><br>(1,969.38 to 5,026.49)       | <b>1,083.51</b><br>(481.83 to 2,140.51)           | <b>930.62</b><br>(422.30 to 1,788.71)             | <b>1,190.36</b><br>(515.14 to 2,477.08)             | <b>44.76</b><br>(32.08 to 74.11)             | <b>25.26</b><br>(14.25 to 46.07)             | <b>23.09</b><br>(13.15 to 42.24)             | <b>26.55</b><br>(14.47 to 48.61)             |
| <b>Other meningitis</b>                                                  | <b>1,276.64</b><br>(844.69 to 2,226.26)         | <b>535.99</b><br>(243.64 to 1,092.12)             | <b>467.51</b><br>(217.34 to 920.70)               | <b>583.72</b><br>(254.66 to 1,197.79)               | <b>19.96</b><br>(14.06 to 33.11)             | <b>12.74</b><br>(7.26 to 23.65)              | <b>11.81</b><br>(6.84 to 22.05)              | <b>13.28</b><br>(7.45 to 24.85)              |
| <b>Encephalitis</b>                                                      | <b>2,085.78</b><br>(1,375.98 to 2,795.76)       | <b>1,146.82</b><br>(517.80 to 2,111.41)           | <b>931.42</b><br>(428.14 to 1,667.63)             | <b>1,291.55</b><br>(566.11 to 2,438.14)             | <b>32.58</b><br>(21.89 to 42.67)             | <b>24.78</b><br>(14.23 to 39.41)             | <b>21.07</b><br>(12.22 to 32.87)             | <b>27.02</b><br>(15.15 to 44.48)             |

|                                                |                                                |                                                |                                                |                                                |                                        |                                       |                                       |                                       |
|------------------------------------------------|------------------------------------------------|------------------------------------------------|------------------------------------------------|------------------------------------------------|----------------------------------------|---------------------------------------|---------------------------------------|---------------------------------------|
| Diphtheria                                     | 5.27<br>(2.99 to<br>8.54)                      | 0.96<br>(0.31 to<br>1.94)                      | 0.89<br>(0.29 to<br>1.80)                      | 5.33<br>(0.37 to<br>16.70)                     | 0.08<br>(0.05 to<br>0.12)              | 0.02<br>(0.01 to<br>0.03)             | 0.02<br>(0.01 to<br>0.03)             | 0.07<br>(0.01 to<br>0.21)             |
| Whooping cough                                 | 722.51<br>(55.56 to<br>2,544.18)               | 291.45<br>(7.00 to<br>1,298.51)                | 241.36<br>(6.11 to<br>1,062.98)                | 3,416.44<br>(10.68 to<br>12,581.77)            | 8.57<br>(0.66 to<br>30.14)             | 3.54<br>(0.11 to<br>15.89)            | 2.94<br>(0.10 to<br>12.88)            | 40.38<br>(0.16 to<br>148.08)          |
| Tetanus                                        | 42.02<br>(35.39 to<br>55.56)                   | 5.40<br>(2.41 to<br>10.60)                     | 5.25<br>(2.33 to<br>10.51)                     | 10.28<br>(3.80 to<br>22.08)                    | 0.75<br>(0.61 to<br>1.13)              | 0.15<br>(0.07 to<br>0.34)             | 0.15<br>(0.07 to<br>0.36)             | 0.20<br>(0.09 to<br>0.42)             |
| Measles                                        | 0.00<br>(0.00 to<br>0.03)                      | 4,243.53<br>(16,526.54)                        | 2,866.10<br>(10,326.26)                        | 9,498.95<br>(0.00 to<br>38,253.30)             | 0.00<br>(0.00 to<br>0.00)              | 66.97<br>(0.00 to<br>241.22)          | 47.00<br>(0.00 to<br>162.81)          | 137.71<br>(0.00 to<br>519.28)         |
| <b>Nicaragua</b>                               |                                                |                                                |                                                |                                                |                                        |                                       |                                       |                                       |
| Cause                                          | YLLs (actual counts)                           |                                                |                                                |                                                | Deaths (actual counts)                 |                                       |                                       |                                       |
|                                                | 2016                                           | 2040 Forecast                                  | 2040 Better Scenario                           | 2040 Worse Scenario                            | 2016                                   | 2040 Forecast                         | 2040 Better Scenario                  | 2040 Worse Scenario                   |
| Varicella and herpes zoster                    | 217.50<br>(126.17 to<br>356.04)                | 90.02<br>(40.28 to<br>162.27)                  | 63.33<br>(30.37 to<br>115.00)                  | 109.34<br>(45.63 to<br>219.41)                 | 5.03<br>(3.43 to<br>7.12)              | 4.81<br>(2.56 to<br>8.16)             | 3.83<br>(2.02 to<br>6.55)             | 5.29<br>(2.74 to<br>8.88)             |
| <b>Neglected tropical diseases and malaria</b> | <b>1,186.11<br/>(720.48 to<br/>1,751.09)</b>   | <b>2,149.71<br/>(1,408.78 to<br/>3,181.87)</b> | <b>1,956.91<br/>(1,303.54 to<br/>2,826.03)</b> | <b>2,278.56<br/>(1,456.77 to<br/>3,429.89)</b> | <b>22.80<br/>(15.19 to<br/>31.27)</b>  | <b>54.39<br/>(39.18 to<br/>74.20)</b> | <b>52.33<br/>(38.35 to<br/>71.04)</b> | <b>55.37<br/>(39.54 to<br/>76.60)</b> |
| Malaria                                        | 159.56<br>(79.77 to<br>467.27)                 | 116.93<br>(45.76 to<br>514.58)                 | 108.91<br>(42.23 to<br>467.28)                 | 120.75<br>(47.02 to<br>530.24)                 | 3.29<br>(1.72 to<br>9.70)              | 3.09<br>(1.33 to<br>12.82)            | 2.93<br>(1.27 to<br>11.97)            | 3.14<br>(1.35 to<br>12.95)            |
| Chagas disease                                 | 100.82<br>(82.13 to<br>120.42)                 | 123.12<br>(85.76 to<br>180.77)                 | 143.12<br>(100.60 to<br>214.37)                | 112.00<br>(78.22 to<br>164.84)                 | 4.33<br>(3.57 to<br>5.14)              | 6.42<br>(4.56 to<br>8.92)             | 7.50<br>(5.48 to<br>10.47)            | 5.77<br>(4.07 to<br>8.09)             |
| Leishmaniasis                                  | 0.90<br>(0.51 to<br>1.37)                      | 0.54<br>(0.26 to<br>1.00)                      | 0.36<br>(0.18 to<br>0.69)                      | 0.66<br>(0.33 to<br>1.21)                      | 0.02<br>(0.01 to<br>0.04)              | 0.02<br>(0.01 to<br>0.05)             | 0.01<br>(0.01 to<br>0.02)             | 0.02<br>(0.01 to<br>0.04)             |
| African trypanosomiasis                        | 0.00<br>(0.00 to<br>0.00)                      | 0.00<br>(0.00 to<br>0.00)                      | 0.00<br>(0.00 to<br>0.00)                      | 0.00<br>(0.00 to<br>0.00)                      | 0.00<br>(0.00 to<br>0.00)              | 0.00<br>(0.00 to<br>0.00)             | 0.00<br>(0.00 to<br>0.00)             | 0.00<br>(0.00 to<br>0.00)             |
| Schistosomiasis                                | 0.00<br>(0.00 to<br>0.00)                      | 0.00<br>(0.00 to<br>0.00)                      | 0.00<br>(0.00 to<br>0.00)                      | 0.00<br>(0.00 to<br>0.00)                      | 0.00<br>(0.00 to<br>0.00)              | 0.00<br>(0.00 to<br>0.00)             | 0.00<br>(0.00 to<br>0.00)             | 0.00<br>(0.00 to<br>0.00)             |
| Cysticercosis                                  | 0.00<br>(0.00 to<br>0.00)                      | 0.00<br>(0.00 to<br>0.00)                      | 0.00<br>(0.00 to<br>0.00)                      | 0.00<br>(0.00 to<br>0.00)                      | 0.00<br>(0.00 to<br>0.00)              | 0.00<br>(0.00 to<br>0.00)             | 0.00<br>(0.00 to<br>0.00)             | 0.00<br>(0.00 to<br>0.00)             |
| Cystic echinococcosis                          | 2.65<br>(2.11 to<br>3.29)                      | 1.53<br>(0.96 to<br>2.65)                      | 0.92<br>(0.59 to<br>1.70)                      | 1.96<br>(1.25 to<br>3.52)                      | 0.07<br>(0.06 to<br>0.09)              | 0.06<br>(0.04 to<br>0.09)             | 0.04<br>(0.02 to<br>0.06)             | 0.07<br>(0.05 to<br>0.12)             |
| Dengue                                         | 695.90<br>(117.10 to<br>1,303.04)              | 1,759.18<br>(755.12 to<br>2,848.25)            | 1,583.72<br>(708.93 to<br>2,498.03)            | 1,872.84<br>(790.96 to<br>3,091.78)            | 11.65<br>(2.66 to<br>20.35)            | 41.78<br>(21.73 to<br>61.13)          | 39.27<br>(21.28 to<br>57.34)          | 43.03<br>(21.96 to<br>63.89)          |
| Yellow fever                                   | 0.00<br>(0.00 to<br>0.00)                      | 0.00<br>(0.00 to<br>0.00)                      | 0.00<br>(0.00 to<br>0.00)                      | 0.00<br>(0.00 to<br>0.00)                      | 0.00<br>(0.00 to<br>0.00)              | 0.00<br>(0.00 to<br>0.00)             | 0.00<br>(0.00 to<br>0.00)             | 0.00<br>(0.00 to<br>0.00)             |
| Rabies                                         | 0.16<br>(0.09 to<br>0.26)                      | 0.07<br>(0.04 to<br>0.15)                      | 0.04<br>(0.02 to<br>0.08)                      | 0.10<br>(0.05 to<br>0.22)                      | 0.00<br>(0.00 to<br>0.00)              | 0.00<br>(0.00 to<br>0.00)             | 0.00<br>(0.00 to<br>0.00)             | 0.00<br>(0.00 to<br>0.00)             |
| Intestinal nematode infections                 | 102.85<br>(25.00 to<br>220.74)                 | 81.09<br>(25.04 to<br>180.07)                  | 71.27<br>(23.75 to<br>157.54)                  | 89.21<br>(27.02 to<br>208.05)                  | 1.47<br>(0.52 to<br>2.92)              | 1.53<br>(0.69 to<br>2.95)             | 1.43<br>(0.69 to<br>2.67)             | 1.60<br>(0.70 to<br>3.27)             |
| Other neglected tropical diseases              | 115.34<br>(79.50 to<br>193.97)                 | 67.26<br>(37.69 to<br>165.45)                  | 48.56<br>(27.74 to<br>120.78)                  | 81.05<br>(46.00 to<br>200.10)                  | 1.81<br>(1.30 to<br>3.30)              | 1.50<br>(0.91 to<br>3.91)             | 1.14<br>(0.69 to<br>3.09)             | 1.74<br>(1.06 to<br>4.43)             |
| <b>Maternal disorders</b>                      | <b>4,314.45<br/>(3,035.96 to<br/>5,880.21)</b> | <b>2,177.91<br/>(1,275.46 to<br/>3,393.65)</b> | <b>1,399.39<br/>(799.40 to<br/>2,237.83)</b>   | <b>2,764.61<br/>(1,547.55 to<br/>4,374.37)</b> | <b>75.07<br/>(53.03 to<br/>102.71)</b> | <b>38.82<br/>(23.08 to<br/>59.40)</b> | <b>25.03<br/>(14.49 to<br/>40.07)</b> | <b>49.18<br/>(28.22 to<br/>77.45)</b> |
| Maternal hemorrhage                            | 1,607.28<br>(1,071.37 to<br>2,334.12)          | 756.95<br>(403.31 to<br>1,258.42)              | 486.94<br>(253.88 to<br>843.69)                | 956.35<br>(488.97 to<br>1,619.83)              | 28.45<br>(19.28 to<br>41.78)           | 13.78<br>(7.39 to<br>22.79)           | 8.89<br>(4.70 to<br>15.05)            | 17.38<br>(9.08 to<br>29.19)           |

|                                                                  |                                          |                                          |                                         |                                          |                                 |                                 |                                |                                 |
|------------------------------------------------------------------|------------------------------------------|------------------------------------------|-----------------------------------------|------------------------------------------|---------------------------------|---------------------------------|--------------------------------|---------------------------------|
|                                                                  | 179.49<br>(98.31 to<br>290.42)           | 114.72<br>(55.78 to<br>214.45)           | 73.01<br>(33.52 to<br>140.16)           | 146.07<br>(66.79 to<br>279.48)           | 3.14<br>(1.75 to<br>5.05)       | 2.03<br>(1.00 to<br>3.73)       | 1.29<br>(0.61 to<br>2.39)      | 2.57<br>(1.21 to<br>4.78)       |
| Maternal sepsis and other maternal infections                    | 1,168.37<br>(753.14 to<br>1,699.88)      | 479.40<br>(259.04 to<br>817.27)          | 304.48<br>(158.03 to<br>537.83)         | 609.24<br>(309.74 to<br>1,035.67)        | 20.05<br>(13.04 to<br>29.28)    | 8.36<br>(4.53 to<br>13.95)      | 5.33<br>(2.79 to<br>9.47)      | 10.61<br>(5.56 to<br>17.72)     |
| Maternal hypertensive disorders                                  | 125.62<br>(64.61 to<br>209.04)           | 78.86<br>(34.15 to<br>148.00)            | 49.00<br>(19.94 to<br>95.33)            | 101.46<br>(42.36 to<br>193.05)           | 2.23<br>(1.13 to<br>3.66)       | 1.44<br>(0.61 to<br>2.66)       | 0.90<br>(0.37 to<br>1.71)      | 1.85<br>(0.80 to<br>3.48)       |
| Maternal obstructed labor and uterine rupture                    | 51.34<br>(18.66 to<br>109.96)            | 121.76<br>(41.40 to<br>269.07)           | 78.79<br>(25.76 to<br>176.36)           | 155.85<br>(49.91 to<br>352.89)           | 0.91<br>(0.35 to<br>1.92)       | 2.20<br>(0.75 to<br>4.64)       | 1.43<br>(0.48 to<br>3.06)      | 2.82<br>(0.92 to<br>6.16)       |
| Maternal abortion, miscarriage, and ectopic pregnancy            | 657.85<br>(393.97 to<br>1,010.58)        | 358.79<br>(177.48 to<br>648.99)          | 231.32<br>(113.38 to<br>425.84)         | 458.65<br>(222.01 to<br>841.42)          | 11.12<br>(6.73 to<br>16.86)     | 6.19<br>(3.16 to<br>11.03)      | 4.01<br>(2.01 to<br>7.22)      | 7.89<br>(3.88 to<br>14.35)      |
| Indirect maternal deaths                                         | 76.31<br>(39.39 to<br>133.84)            | 30.23<br>(13.70 to<br>60.22)             | 19.30<br>(8.19 to<br>40.20)             | 38.68<br>(17.03 to<br>80.26)             | 1.33<br>(0.70 to<br>2.34)       | 0.55<br>(0.25 to<br>1.11)       | 0.35<br>(0.15 to<br>0.72)      | 0.70<br>(0.31 to<br>1.41)       |
| Late maternal deaths                                             | 2.24<br>(0.93 to<br>4.31)                | 3.60<br>(0.78 to<br>10.68)               | 2.04<br>(0.19 to<br>6.43)               | 4.55<br>(1.08 to<br>13.45)               | 0.04<br>(0.02 to<br>0.08)       | 0.06<br>(0.01 to<br>0.17)       | 0.04<br>(0.00 to<br>0.11)      | 0.08<br>(0.02 to<br>0.21)       |
| Maternal deaths aggravated by HIV/AIDS                           | 445.94<br>(266.34 to<br>676.17)          | 233.60<br>(120.27 to<br>414.42)          | 154.50<br>(78.24 to<br>276.04)          | 293.77<br>(151.13 to<br>521.77)          | 7.80<br>(4.73 to<br>11.88)      | 4.22<br>(2.18 to<br>7.42)       | 2.80<br>(1.45 to<br>4.95)      | 5.28<br>(2.74 to<br>9.49)       |
| Other maternal disorders                                         |                                          |                                          |                                         |                                          |                                 |                                 |                                |                                 |
| <b>Nicaragua</b>                                                 |                                          |                                          |                                         |                                          |                                 |                                 |                                |                                 |
| Cause                                                            | YLLs (actual counts)                     |                                          |                                         |                                          | Deaths (actual counts)          |                                 |                                |                                 |
|                                                                  | 2016                                     | 2040 Forecast                            | 2040 Better Scenario                    | 2040 Worse Scenario                      | 2016                            | 2040 Forecast                   | 2040 Better Scenario           | 2040 Worse Scenario             |
| Neonatal disorders                                               | 53,878.57<br>(44,322.05 to<br>65,436.04) | 20,004.36<br>(12,282.88 to<br>30,620.19) | 12,917.55<br>(8,044.62 to<br>19,361.75) | 27,217.46<br>(16,480.73 to<br>42,123.21) | 622.53<br>(512.14 to<br>756.04) | 231.21<br>(141.98 to<br>353.92) | 149.31<br>(93.02 to<br>223.77) | 314.57<br>(190.51 to<br>486.79) |
| Neonatal preterm birth                                           | 24,460.01<br>(19,459.48 to<br>30,134.08) | 7,513.60<br>(4,232.33 to<br>11,784.20)   | 4,382.00<br>(2,510.20 to<br>6,749.15)   | 10,688.80<br>(5,967.86 to<br>16,741.93)  | 282.56<br>(224.81 to<br>348.10) | 86.81<br>(48.90 to<br>136.14)   | 50.63<br>(29.02 to<br>77.98)   | 123.49<br>(68.96 to<br>193.42)  |
| Neonatal encephalopathy due to birth asphyxia and trauma         | 13,664.20<br>(10,141.41 to<br>19,512.25) | 4,375.64<br>(2,198.96 to<br>7,887.22)    | 3,040.69<br>(1,598.01 to<br>5,391.74)   | 5,761.24<br>(2,869.91 to<br>10,440.13)   | 157.93<br>(117.23 to<br>225.44) | 50.61<br>(25.46 to<br>91.18)    | 35.17<br>(18.50 to<br>62.30)   | 66.63<br>(33.22 to<br>120.68)   |
| Neonatal sepsis and other neonatal infections                    | 12,821.01<br>(9,219.64 to<br>17,835.25)  | 6,902.17<br>(4,199.94 to<br>10,793.43)   | 4,715.69<br>(2,930.04 to<br>7,172.87)   | 9,112.97<br>(5,404.33 to<br>14,619.09)   | 148.12<br>(106.51 to<br>206.04) | 79.75<br>(48.53 to<br>124.76)   | 54.49<br>(33.86 to<br>82.88)   | 105.30<br>(62.45 to<br>168.92)  |
| Hemolytic disease and other neonatal jaundice                    | 260.09<br>(154.63 to<br>407.30)          | 97.39<br>(39.69 to<br>204.06)            | 62.89<br>(25.50 to<br>129.36)           | 132.76<br>(55.38 to<br>277.05)           | 3.01<br>(1.79 to<br>4.71)       | 1.13<br>(0.46 to<br>2.36)       | 0.73<br>(0.29 to<br>1.50)      | 1.53<br>(0.64 to<br>3.20)       |
| Other neonatal disorders                                         | 2,673.26<br>(1,847.47 to<br>3,756.46)    | 1,115.56<br>(602.70 to<br>1,895.97)      | 716.28<br>(393.79 to<br>1,164.00)       | 1,521.68<br>(823.25 to<br>2,566.98)      | 30.92<br>(21.37 to<br>43.43)    | 12.91<br>(6.98 to<br>21.94)     | 8.29<br>(4.56 to<br>13.46)     | 17.61<br>(9.53 to<br>29.68)     |
| Nutritional deficiencies                                         | 8,265.37<br>(6,173.69 to<br>10,747.77)   | 3,235.39<br>(2,390.66 to<br>4,336.74)    | 2,452.77<br>(1,876.08 to<br>3,215.96)   | 3,853.16<br>(2,778.24 to<br>5,278.48)    | 167.02<br>(140.00 to<br>199.63) | 131.43<br>(97.71 to<br>160.99)  | 113.20<br>(86.63 to<br>137.60) | 140.65<br>(102.80 to<br>174.13) |
| Protein-energy malnutrition                                      | 8,053.38<br>(6,007.42 to<br>10,547.55)   | 3,036.05<br>(2,181.56 to<br>4,113.67)    | 2,398.74<br>(1,741.46 to<br>3,057.01)   | 3,620.54<br>(2,576.32 to<br>4,986.67)    | 162.40<br>(135.56 to<br>194.61) | 123.89<br>(91.12 to<br>154.15)  | 106.89<br>(80.31 to<br>131.16) | 132.46<br>(96.12 to<br>165.81)  |
| Iodine deficiency                                                | 29.00<br>(1.66 to<br>127.72)             | 87.03<br>(2.00 to<br>417.38)             | 63.28<br>(1.51 to<br>276.31)            | 105.88<br>(2.52 to<br>555.97)            | 0.66<br>(0.05 to<br>2.07)       | 3.72<br>(0.08 to<br>15.44)      | 3.00<br>(0.04 to<br>12.81)     | 4.13<br>(0.09 to<br>16.61)      |
| Dietary iron deficiency                                          | 43.87<br>(34.84 to<br>56.02)             | 26.73<br>(19.85 to<br>36.07)             | 22.19<br>(16.77 to<br>29.65)            | 29.59<br>(21.89 to<br>39.63)             | 0.77<br>(0.63 to<br>0.97)       | 0.57<br>(0.44 to<br>0.77)       | 0.49<br>(0.38 to<br>0.67)      | 0.62<br>(0.47 to<br>0.83)       |
| Other nutritional deficiencies                                   | 139.11<br>(73.27 to<br>203.74)           | 85.58<br>(54.14 to<br>125.87)            | 97.14<br>(44.48 to<br>97.54)            | 97.14<br>(60.27 to<br>146.31)            | 3.19<br>(2.36 to<br>4.10)       | 3.24<br>(2.27 to<br>4.90)       | 2.82<br>(1.96 to<br>4.32)      | 3.44<br>(2.36 to<br>5.13)       |
| Other communicable, maternal, neonatal, and nutritional diseases | 1,942.02<br>(1,609.96 to<br>2,383.60)    | 1,240.19<br>(937.72 to<br>1,593.19)      | 1,004.26<br>(755.82 to<br>1,302.09)     | 1,393.16<br>(1,048.69 to<br>1,835.49)    | 37.62<br>(32.02 to<br>44.43)    | 37.78<br>(29.51 to<br>46.85)    | 32.24<br>(24.87 to<br>40.34)   | 40.74<br>(31.54 to<br>51.66)    |

|                                               |                                             |                                               |                                             |                                               |                                          |                                          |                                          |                                          |
|-----------------------------------------------|---------------------------------------------|-----------------------------------------------|---------------------------------------------|-----------------------------------------------|------------------------------------------|------------------------------------------|------------------------------------------|------------------------------------------|
| Sexually transmitted infections excluding HIV | 400.26<br>(218.56 to<br>711.17)             | 105.39<br>(64.77 to<br>173.05)                | 85.07<br>(53.68 to<br>132.72)               | 120.99<br>(72.52 to<br>202.25)                | 5.74<br>(3.56 to<br>9.40)                | 2.25<br>(1.56 to<br>3.17)                | 1.91<br>(1.33 to<br>2.70)                | 2.46<br>(1.65 to<br>3.56)                |
| Syphilis                                      | 336.18<br>(154.22 to<br>649.43)             | 62.19<br>(28.73 to<br>126.79)                 | 47.29<br>(22.77 to<br>92.30)                | 75.02<br>(33.87 to<br>153.69)                 | 4.22<br>(2.09 to<br>7.86)                | 0.97<br>(0.56 to<br>1.74)                | 0.77<br>(0.46 to<br>1.32)                | 1.13<br>(0.63 to<br>2.07)                |
| Chlamydia infection                           | 12.46<br>(8.79 to<br>16.76)                 | 8.45<br>(5.38 to<br>12.63)                    | 7.38<br>(4.75 to<br>11.19)                  | 9.00<br>(5.71 to<br>13.69)                    | 0.30<br>(0.21 to<br>0.39)                | 0.25<br>(0.17 to<br>0.35)                | 0.23<br>(0.15 to<br>0.32)                | 0.26<br>(0.18 to<br>0.37)                |
| Gonococcal infection                          | 33.66<br>(23.90 to<br>44.48)                | 23.00<br>(14.91 to<br>33.90)                  | 20.18<br>(12.86 to<br>29.86)                | 24.43<br>(15.49 to<br>36.33)                  | 0.82<br>(0.60 to<br>1.08)                | 0.71<br>(0.48 to<br>0.99)                | 0.64<br>(0.43 to<br>0.90)                | 0.74<br>(0.49 to<br>1.04)                |
| Other sexually transmitted infections         | 17.96<br>(12.79 to<br>24.12)                | 11.74<br>(7.48 to<br>17.46)                   | 10.21<br>(6.35 to<br>15.43)                 | 12.54<br>(7.86 to<br>19.12)                   | 0.41<br>(0.29 to<br>0.54)                | 0.31<br>(0.21 to<br>0.44)                | 0.28<br>(0.18 to<br>0.40)                | 0.33<br>(0.22 to<br>0.48)                |
| Acute hepatitis                               | 867.55<br>(729.40 to<br>1,056.48)           | 584.43<br>(412.60 to<br>809.33)               | 484.97<br>(337.83 to<br>673.74)             | 644.81<br>(451.18 to<br>893.84)               | 18.48<br>(15.49 to<br>21.86)             | 18.47<br>(13.38 to<br>24.34)             | 15.94<br>(11.51 to<br>21.14)             | 19.79<br>(14.22 to<br>26.24)             |
| Acute hepatitis A                             | 99.48<br>(20.23 to<br>203.69)               | 31.27<br>(10.62 to<br>63.76)                  | 23.86<br>(8.38 to<br>46.62)                 | 37.31<br>(11.82 to<br>77.51)                  | 1.28<br>(0.36 to<br>2.48)                | 0.57<br>(0.23 to<br>1.06)                | 0.46<br>(0.20 to<br>0.85)                | 0.66<br>(0.26 to<br>1.22)                |
| Acute hepatitis B                             | 510.49<br>(400.68 to<br>638.12)             | 420.86<br>(282.59 to<br>591.52)               | 349.98<br>(236.52 to<br>496.17)             | 461.67<br>(307.01 to<br>648.92)               | 12.54<br>(10.08 to<br>15.21)             | 13.70<br>(9.49 to<br>18.62)              | 11.65<br>(7.85 to<br>15.97)              | 14.77<br>(10.13 to<br>20.25)             |
| Acute hepatitis C                             | 40.04<br>(29.32 to<br>53.29)                | 35.63<br>(22.97 to<br>54.21)                  | 31.89<br>(20.91 to<br>48.57)                | 37.51<br>(24.05 to<br>56.82)                  | 0.92<br>(0.68 to<br>1.23)                | 1.14<br>(0.75 to<br>1.70)                | 1.05<br>(0.70 to<br>1.57)                | 1.17<br>(0.79 to<br>1.77)                |
| Acute hepatitis E                             | 217.55<br>(147.75 to<br>306.79)             | 96.68<br>(59.79 to<br>152.96)                 | 79.23<br>(49.87 to<br>123.26)               | 108.31<br>(66.25 to<br>175.71)                | 3.73<br>(2.76 to<br>4.99)                | 3.06<br>(1.90 to<br>4.53)                | 2.78<br>(1.71 to<br>4.16)                | 3.20<br>(1.99 to<br>4.77)                |
| Other unspecified infectious diseases         | 674.20<br>(542.03 to<br>811.07)             | 550.37<br>(421.87 to<br>702.79)               | 434.23<br>(334.65 to<br>559.27)             | 627.36<br>(480.60 to<br>810.71)               | 13.40<br>(11.24 to<br>15.78)             | 17.07<br>(13.62 to<br>20.90)             | 14.39<br>(11.57 to<br>17.61)             | 18.48<br>(14.78 to<br>22.95)             |
| Non-communicable diseases                     | 424,885.26<br>(369,317.18 to<br>488,103.05) | 737,956.09<br>(595,805.29 to<br>1,191,827.64) | 573,398.40<br>(410,627.37 to<br>890,341.88) | 897,282.52<br>(604,346.89 to<br>1,443,446.59) | 18,910.79<br>(16,620.51 to<br>21,520.53) | 42,023.72<br>(31,596.49 to<br>59,215.26) | 33,766.43<br>(26,216.00 to<br>46,571.49) | 49,251.53<br>(36,515.30 to<br>69,257.60) |

Nicaragua

| Cause                      | YLLs (actual counts)                   |                                                 |                                                    |                                                    | Deaths (actual counts)                             |                                              |                                              |                                              |
|----------------------------|----------------------------------------|-------------------------------------------------|----------------------------------------------------|----------------------------------------------------|----------------------------------------------------|----------------------------------------------|----------------------------------------------|----------------------------------------------|
|                            | 2016                                   | 2040 Forecast                                   | 2040 Better Scenario                               | 2040 Worse Scenario                                | 2016                                               | 2040 Forecast                                | 2040 Better Scenario                         | 2040 Worse Scenario                          |
|                            | <b>Neoplasms</b>                       | <b>86,209.70</b><br>(73,967.90 to<br>98,874.74) | <b>150,424.85</b><br>(117,406.42 to<br>186,646.79) | <b>143,201.76</b><br>(112,588.53 to<br>176,211.46) | <b>160,220.24</b><br>(123,798.77 to<br>198,029.35) | <b>3,233.08</b><br>(2,790.56 to<br>3,709.24) | <b>7,103.15</b><br>(5,738.55 to<br>8,422.67) | <b>7,009.56</b><br>(5,718.81 to<br>8,242.42) |
| Lip and oral cavity cancer | 644.59<br>(534.39 to<br>775.43)        | 1,283.58<br>(825.53 to<br>1,897.35)             | 998.68<br>(661.26 to<br>1,440.50)                  | 1,716.53<br>(1,079.18 to<br>2,637.71)              | 27.74<br>(23.47 to<br>32.63)                       | 61.30<br>(41.08 to<br>88.18)                 | 49.82<br>(34.71 to<br>68.78)                 | 78.46<br>(50.22 to<br>117.42)                |
| Nasopharynx cancer         | 370.71<br>(300.33 to<br>447.30)        | 612.60<br>(403.55 to<br>901.12)                 | 467.93<br>(315.32 to<br>665.83)                    | 867.45<br>(553.10 to<br>1,330.90)                  | 11.64<br>(9.47 to<br>14.02)                        | 23.19<br>(15.92 to<br>33.03)                 | 18.52<br>(12.98 to<br>25.70)                 | 32.00<br>(21.02 to<br>48.45)                 |
| Other pharynx cancer       | 352.26<br>(284.55 to<br>433.63)        | 623.72<br>(377.63 to<br>972.50)                 | 535.37<br>(332.55 to<br>812.80)                    | 772.28<br>(451.83 to<br>1,237.52)                  | 14.22<br>(11.62 to<br>17.35)                       | 28.24<br>(17.78 to<br>43.66)                 | 25.19<br>(16.30 to<br>38.25)                 | 34.08<br>(20.86 to<br>54.41)                 |
| Esophageal cancer          | 738.74<br>(606.48 to<br>904.60)        | 1,430.36<br>(854.60 to<br>2,319.57)             | 1,217.42<br>(741.92 to<br>1,959.40)                | 1,863.93<br>(1,060.49 to<br>3,075.12)              | 34.17<br>(28.34 to<br>41.08)                       | 70.41<br>(43.97 to<br>111.45)                | 62.10<br>(39.86 to<br>97.77)                 | 88.45<br>(52.10 to<br>144.09)                |
| Stomach cancer             | 8,940.98<br>(7,569.32 to<br>10,608.22) | 12,562.04<br>(9,187.10 to<br>16,825.67)         | 11,380.30<br>(8,472.30 to<br>14,949.42)            | 12,940.45<br>(9,473.69 to<br>17,189.63)            | 387.64<br>(331.46 to<br>455.16)                    | 634.67<br>(482.35 to<br>839.51)              | 588.78<br>(456.95 to<br>756.68)              | 639.00<br>(485.65 to<br>843.86)              |
| Colon and rectum cancer    | 5,746.06<br>(4,766.32 to<br>6,787.51)  | 11,940.58<br>(8,301.48 to<br>16,981.15)         | 11,750.61<br>(8,215.85 to<br>16,489.81)            | 12,648.84<br>(8,726.04 to<br>18,306.68)            | 254.14<br>(215.18 to<br>296.05)                    | 642.29<br>(452.46 to<br>907.90)              | 652.33<br>(468.77 to<br>910.04)              | 843.30<br>(453.79 to<br>956.82)              |
| Liver cancer               | 7,498.58<br>(6,293.85 to<br>9,132.79)  | 17,289.81<br>(10,748.03 to<br>26,709.80)        | 14,829.29<br>(9,576.41 to<br>21,913.67)            | 19,503.56<br>(11,683.82 to<br>30,425.15)           | 325.37<br>(273.24 to<br>396.03)                    | 870.20<br>(561.33 to<br>1,281.22)            | 774.77<br>(523.48 to<br>1,112.31)            | 949.32<br>(589.25 to<br>1,430.82)            |

|                                      |                                        |                                         |                                         |                                         |                                 |                                   |                                   |                                   |  |
|--------------------------------------|----------------------------------------|-----------------------------------------|-----------------------------------------|-----------------------------------------|---------------------------------|-----------------------------------|-----------------------------------|-----------------------------------|--|
|                                      | 1,878.05<br>(1,370.62 to<br>2,538.00)  | 3,895.04<br>(2,207.64 to<br>6,344.32)   | 3,416.42<br>(2,019.31 to<br>5,395.72)   | 4,325.39<br>(2,358.62 to<br>7,249.42)   | 68.05<br>(49.48 to<br>92.37)    | 163.41<br>(94.78 to<br>258.33)    | 148.06<br>(90.24 to<br>227.56)    | 176.59<br>(100.01 to<br>284.38)   |  |
| Liver cancer due to hepatitis B      | 2,341.78<br>(1,756.47 to<br>3,076.24)  | 5,727.35<br>(3,347.72 to<br>9,226.34)   | 5,127.50<br>(3,089.69 to<br>8,058.93)   | 6,216.59<br>(3,501.65 to<br>10,245.68)  | 119.85<br>(91.29 to<br>154.07)  | 326.64<br>(202.59 to<br>499.45)   | 303.24<br>(196.72 to<br>450.89)   | 343.56<br>(209.34 to<br>533.75)   |  |
| Liver cancer due to hepatitis C      | 1,507.13<br>(1,122.20 to<br>2,030.95)  | 4,214.32<br>(2,403.58 to<br>6,872.40)   | 3,311.25<br>(1,965.33 to<br>5,214.06)   | 5,117.93<br>(2,873.55 to<br>8,401.84)   | 70.74<br>(52.90 to<br>94.02)    | 219.18<br>(128.73 to<br>354.04)   | 179.73<br>(108.17 to<br>280.42)   | 255.24<br>(148.95 to<br>419.47)   |  |
| Liver cancer due to alcohol use      | 1,771.62<br>(1,416.53 to<br>2,225.81)  | 3,453.10<br>(2,089.12 to<br>5,493.91)   | 2,974.11<br>(1,866.91 to<br>4,580.12)   | 3,843.65<br>(2,270.58 to<br>6,271.51)   | 66.72<br>(52.61 to<br>84.62)    | 160.97<br>(98.85 to<br>251.31)    | 143.75<br>(91.53 to<br>216.88)    | 173.93<br>(103.95 to<br>278.48)   |  |
| Liver cancer due to other causes     | 1,852.31<br>(1,502.36 to<br>2,385.69)  | 3,094.29<br>(2,433.84 to<br>3,988.21)   | 3,197.58<br>(2,484.07 to<br>4,175.61)   | 2,997.95<br>(2,370.15 to<br>3,831.57)   | 88.36<br>(72.15 to<br>112.74)   | 168.22<br>(137.44 to<br>207.73)   | 177.81<br>(144.83 to<br>220.52)   | 159.75<br>(129.30 to<br>197.53)   |  |
| Gallbladder and biliary tract cancer | 2,856.26<br>(2,396.72 to<br>3,359.50)  | 7,602.38<br>(5,664.42 to<br>9,958.80)   | 7,849.74<br>(5,862.29 to<br>10,276.08)  | 7,439.31<br>(5,613.83 to<br>9,742.55)   | 134.94<br>(114.65 to<br>157.14) | 390.48<br>(303.76 to<br>500.45)   | 411.94<br>(322.91 to<br>517.97)   | 374.66<br>(293.72 to<br>478.46)   |  |
| Pancreatic cancer                    | 745.07<br>(597.43 to<br>906.18)        | 1,384.48<br>(872.18 to<br>2,205.93)     | 1,068.74<br>(708.29 to<br>1,595.24)     | 1,958.41<br>(1,135.40 to<br>3,394.40)   | 68.93<br>(28.25 to<br>42.34)    | 88.93<br>(45.32 to<br>106.13)     | 55.66<br>(38.30 to<br>80.25)      | 93.90<br>(56.70 to<br>158.01)     |  |
| Larynx cancer                        | 5,372.55<br>(4,506.69 to<br>6,451.30)  | 10,167.87<br>(6,867.54 to<br>14,179.63) | 8,802.72<br>(6,249.06 to<br>11,809.47)  | 14,245.09<br>(8,928.53 to<br>21,382.91) | 243.18<br>(207.27 to<br>286.88) | 504.57<br>(356.21 to<br>690.43)   | 454.16<br>(336.54 to<br>591.91)   | 682.33<br>(452.07 to<br>1,009.67) |  |
| Tracheal, bronchus, and lung cancer  | 371.36<br>(291.91 to<br>465.74)        | 703.42<br>(532.85 to<br>907.37)         | 777.76<br>(581.21 to<br>1,012.68)       | 660.10<br>(500.44 to<br>847.92)         | 13.72<br>(10.79 to<br>16.88)    | 31.87<br>(24.35 to<br>39.18)      | 36.27<br>(27.68 to<br>44.61)      | 29.21<br>(22.27 to<br>35.98)      |  |
| Malignant skin melanoma              | 714.11<br>(603.18 to<br>844.01)        | 1,536.03<br>(1,251.39 to<br>1,848.43)   | 1,477.85<br>(1,188.29 to<br>1,789.94)   | 1,544.26<br>(1,266.74 to<br>1,847.76)   | 35.15<br>(30.11 to<br>40.97)    | 92.14<br>(73.47 to<br>109.48)     | 92.20<br>(74.94 to<br>109.81)     | 89.71<br>(70.62 to<br>107.17)     |  |
| Non-melanoma skin cancer             | 6,033.40<br>(4,584.56 to<br>7,860.37)  | 11,215.36<br>(7,594.29 to<br>16,432.81) | 10,663.13<br>(7,258.66 to<br>15,452.85) | 11,537.94<br>(7,765.64 to<br>17,231.62) | 207.01<br>(159.86 to<br>262.49) | 468.54<br>(329.97 to<br>607.27)   | 455.53<br>(327.73 to<br>631.27)   | 472.30<br>(332.20 to<br>685.48)   |  |
| Breast cancer                        | 9,918.64<br>(7,138.22 to<br>13,045.60) | 13,795.95<br>(9,313.26 to<br>19,513.95) | 12,605.31<br>(8,526.50 to<br>17,738.33) | 14,421.12<br>(9,749.66 to<br>20,573.55) | 327.09<br>(244.18 to<br>434.02) | 547.13<br>(390.90 to<br>750.05)   | 509.49<br>(364.02 to<br>704.48)   | 560.95<br>(401.37 to<br>773.35)   |  |
| Cervical cancer                      | 600.07<br>(451.38 to<br>774.52)        | 1,258.49<br>(859.55 to<br>1,725.42)     | 1,134.69<br>(761.33 to<br>1,569.01)     | 1,312.26<br>(894.01 to<br>1,803.38)     | 25.74<br>(19.76 to<br>32.82)    | 63.99<br>(47.20 to<br>82.87)      | 58.85<br>(43.02 to<br>77.23)      | 65.47<br>(48.06 to<br>85.23)      |  |
| Uterine cancer                       | 1,770.09<br>(1,318.60 to<br>2,325.72)  | 3,575.08<br>(2,218.31 to<br>5,346.81)   | 3,699.68<br>(2,330.13 to<br>5,422.97)   | 3,519.48<br>(2,150.55 to<br>5,359.02)   | 58.52<br>(44.42 to<br>75.52)    | 145.06<br>(91.87 to<br>221.90)    | 152.29<br>(98.35 to<br>225.73)    | 140.76<br>(87.78 to<br>218.08)    |  |
| Ovarian cancer                       | 3,568.74<br>(2,519.13 to<br>4,614.77)  | 10,399.38<br>(7,544.36 to<br>13,238.87) | 11,462.81<br>(8,426.06 to<br>14,571.94) | 9,714.10<br>(7,035.24 to<br>12,427.81)  | 267.25<br>(179.83 to<br>339.77) | 817.37<br>(534.69 to<br>1,042.29) | 929.96<br>(624.24 to<br>1,160.85) | 746.85<br>(473.26 to<br>964.82)   |  |
| Prostate cancer                      | 477.83<br>(347.81 to<br>632.36)        | 370.97<br>(258.71 to<br>527.47)         | 349.53<br>(241.95 to<br>495.96)         | 380.90<br>(265.89 to<br>537.42)         | 9.94<br>(7.43 to<br>12.89)      | 9.48<br>(6.97 to<br>12.59)        | 9.19<br>(6.72 to<br>12.15)        | 9.55<br>(7.03 to<br>12.60)        |  |
| Testicular cancer                    | <b>Nicaragua</b>                       |                                         |                                         |                                         |                                 |                                   |                                   |                                   |  |
| Cause                                | YLLs (actual counts)                   |                                         |                                         |                                         | Deaths (actual counts)          |                                   |                                   |                                   |  |
|                                      | 2016                                   | 2040 Forecast                           | 2040 Better Scenario                    | 2040 Worse Scenario                     | 2016                            | 2040 Forecast                     | 2040 Better Scenario              | 2040 Worse Scenario               |  |
| Kidney cancer                        | 1,456.25<br>(1,230.62 to<br>1,768.34)  | 2,858.55<br>(2,210.06 to<br>3,843.52)   | 3,089.41<br>(2,391.08 to<br>4,135.79)   | 2,754.51<br>(2,141.04 to<br>3,606.89)   | 48.81<br>(41.06 to<br>60.53)    | 120.26<br>(97.18 to<br>158.16)    | 134.28<br>(107.29 to<br>174.41)   | 112.76<br>(91.09 to<br>146.85)    |  |
| Bladder cancer                       | 577.68<br>(483.19 to<br>682.44)        | 1,222.66<br>(914.98 to<br>1,615.66)     | 1,194.09<br>(892.27 to<br>1,542.39)     | 1,235.81<br>(926.03 to<br>1,645.66)     | 32.59<br>(27.56 to<br>38.08)    | 76.18<br>(57.38 to<br>100.79)     | 76.71<br>(59.58 to<br>98.87)      | 75.07<br>(55.99 to<br>100.78)     |  |
| Brain and nervous system cancer      | 5,043.83<br>(4,231.20 to<br>6,126.79)  | 7,719.31<br>(6,051.62 to<br>10,107.97)  | 7,807.09<br>(6,070.99 to<br>10,247.16)  | 7,661.85<br>(5,989.61 to<br>9,922.38)   | 118.73<br>(98.66 to<br>150.55)  | 246.55<br>(196.78 to<br>319.81)   | 258.04<br>(204.28 to<br>339.24)   | 238.17<br>(190.75 to<br>311.82)   |  |
| Thyroid cancer                       | 512.74<br>(422.13 to<br>618.99)        | 898.88<br>(588.28 to<br>1,330.62)       | 776.66<br>(514.27 to<br>1,131.33)       | 982.59<br>(629.28 to<br>1,470.75)       | 22.48<br>(18.69 to<br>27.10)    | 46.86<br>(31.48 to<br>68.30)      | 41.74<br>(28.61 to<br>59.85)      | 49.84<br>(33.63 to<br>72.92)      |  |

|                                |                                            |                                             |                                           |                                             |                                       |                                         |                                        |                                          |
|--------------------------------|--------------------------------------------|---------------------------------------------|-------------------------------------------|---------------------------------------------|---------------------------------------|-----------------------------------------|----------------------------------------|------------------------------------------|
|                                | 127.07<br>(102.54 to<br>157.27)            | 209.42<br>(159.88 to<br>284.93)             | 207.27<br>(155.64 to<br>286.40)           | 208.92<br>(160.23 to<br>278.10)             | 3.90<br>(3.15 to<br>4.90)             | 7.60<br>(5.96 to<br>10.19)              | 7.67<br>(5.95 to<br>10.28)             | 7.47<br>(5.85 to<br>9.84)                |
| Mesothelioma                   |                                            |                                             |                                           |                                             |                                       |                                         |                                        |                                          |
|                                | 475.49<br>(303.97 to<br>601.07)            | 488.61<br>(298.25 to<br>664.93)             | 414.89<br>(253.19 to<br>574.39)           | 529.50<br>(330.91 to<br>722.62)             | 12.80<br>(8.05 to<br>16.18)           | 17.65<br>(10.87 to<br>23.11)            | 15.48<br>(9.51 to<br>20.39)            | 18.64<br>(11.35 to<br>24.37)             |
| Hodgkin lymphoma               |                                            |                                             |                                           |                                             |                                       |                                         |                                        |                                          |
|                                | 2,804.41<br>(2,339.46 to<br>3,324.25)      | 4,649.94<br>(3,436.67 to<br>6,031.01)       | 4,643.29<br>(3,449.48 to<br>5,950.26)     | 4,685.95<br>(3,481.31 to<br>6,115.82)       | 80.48<br>(66.85 to<br>95.10)          | 180.04<br>(136.03 to<br>233.77)         | 185.52<br>(140.26 to<br>237.15)        | 176.88<br>(132.72 to<br>231.91)          |
| Non-Hodgkin lymphoma           |                                            |                                             |                                           |                                             |                                       |                                         |                                        |                                          |
|                                | 636.54<br>(512.14 to<br>880.84)            | 1,664.46<br>(1,112.78 to<br>2,427.26)       | 1,698.31<br>(1,147.12 to<br>2,449.16)     | 1,657.28<br>(1,107.06 to<br>2,374.24)       | 24.85<br>(20.06 to<br>34.78)          | 72.86<br>(51.97 to<br>105.70)           | 75.84<br>(54.14 to<br>107.97)          | 71.30<br>(50.34 to<br>101.65)            |
| Multiple myeloma               |                                            |                                             |                                           |                                             |                                       |                                         |                                        |                                          |
|                                | 9,319.44<br>(7,220.20 to<br>11,005.91)     | 10,111.83<br>(7,275.00 to<br>13,445.57)     | 9,368.07<br>(6,729.64 to<br>12,580.45)    | 10,740.13<br>(7,670.48 to<br>14,326.41)     | 196.54<br>(154.49 to<br>231.84)       | 305.68<br>(226.98 to<br>393.05)         | 292.32<br>(216.77 to<br>372.10)        | 316.94<br>(234.91 to<br>409.49)          |
| Leukemia                       |                                            |                                             |                                           |                                             |                                       |                                         |                                        |                                          |
|                                | 4,624.21<br>(3,259.18 to<br>5,548.46)      | 3,793.21<br>(2,535.16 to<br>5,131.41)       | 3,554.71<br>(2,412.12 to<br>4,748.06)     | 4,005.97<br>(2,653.84 to<br>5,439.03)       | 81.10<br>(57.36 to<br>96.00)          | 90.23<br>(62.65 to<br>118.65)           | 87.17<br>(60.92 to<br>113.67)          | 93.35<br>(64.36 to<br>123.49)            |
| Acute lymphoid leukemia        |                                            |                                             |                                           |                                             |                                       |                                         |                                        |                                          |
|                                | 381.69<br>(298.77 to<br>477.48)            | 724.89<br>(493.93 to<br>1,024.38)           | 690.99<br>(475.31 to<br>984.49)           | 755.51<br>(511.48 to<br>1,070.97)           | 13.08<br>(10.55 to<br>16.28)          | 29.96<br>(21.07 to<br>41.87)            | 29.64<br>(21.21 to<br>40.85)           | 30.38<br>(21.21 to<br>42.99)             |
| Chronic lymphoid leukemia      |                                            |                                             |                                           |                                             |                                       |                                         |                                        |                                          |
|                                | 1,536.16<br>(1,121.68 to<br>1,909.70)      | 2,321.74<br>(1,559.44 to<br>3,130.26)       | 2,269.93<br>(1,550.53 to<br>3,028.41)     | 2,395.14<br>(1,609.46 to<br>3,248.64)       | 31.92<br>(24.17 to<br>38.82)          | 66.81<br>(47.89 to<br>88.74)            | 67.29<br>(47.89 to<br>87.68)           | 67.46<br>(47.07 to<br>89.78)             |
| Acute myeloid leukemia         |                                            |                                             |                                           |                                             |                                       |                                         |                                        |                                          |
|                                | 548.69<br>(371.54 to<br>678.52)            | 560.79<br>(348.14 to<br>822.42)             | 522.01<br>(328.55 to<br>749.69)           | 594.62<br>(369.56 to<br>883.12)             | 15.74<br>(11.69 to<br>19.18)          | 20.03<br>(13.69 to<br>27.92)            | 19.23<br>(13.28 to<br>26.53)           | 20.72<br>(14.02 to<br>29.25)             |
| Chronic myeloid leukemia       |                                            |                                             |                                           |                                             |                                       |                                         |                                        |                                          |
|                                | 2,228.69<br>(1,757.13 to<br>2,707.11)      | 2,711.20<br>(1,944.34 to<br>3,617.28)       | 2,330.43<br>(1,658.91 to<br>3,062.28)     | 2,988.90<br>(2,126.83 to<br>4,002.05)       | 54.69<br>(42.22 to<br>66.14)          | 98.66<br>(71.17 to<br>125.29)           | 88.99<br>(65.18 to<br>112.36)          | 105.03<br>(76.21 to<br>133.88)           |
| Other leukemia                 |                                            |                                             |                                           |                                             |                                       |                                         |                                        |                                          |
|                                | 6,683.90<br>(5,729.68 to<br>7,674.07)      | 9,754.80<br>(7,825.87 to<br>11,835.01)      | 9,733.55<br>(7,725.21 to<br>11,881.26)    | 9,719.75<br>(7,842.79 to<br>11,674.75)      | 191.27<br>(161.69 to<br>223.01)       | 391.40<br>(320.10 to<br>461.95)         | 407.10<br>(328.76 to<br>482.57)        | 377.13<br>(308.40 to<br>444.15)          |
| Other neoplasms                |                                            |                                             |                                           |                                             |                                       |                                         |                                        |                                          |
|                                | 105,616.32<br>(90,245.93 to<br>121,433.78) | 160,795.90<br>(104,810.79 to<br>245,829.00) | 99,268.56<br>(68,390.08 to<br>146,032.75) | 243,071.03<br>(148,880.93 to<br>380,836.92) | 6,572.60<br>(5,716.49 to<br>7,439.11) | 12,071.20<br>(8,250.79 to<br>17,798.40) | 8,159.27<br>(5,779.48 to<br>11,955.49) | 16,272.96<br>(10,828.32 to<br>24,061.87) |
| Cardiovascular diseases        |                                            |                                             |                                           |                                             |                                       |                                         |                                        |                                          |
|                                | 1,268.38<br>(1,037.50 to<br>1,537.23)      | 828.33<br>(579.35 to<br>1,166.78)           | 651.36<br>(464.07 to<br>903.00)           | 925.08<br>(636.65 to<br>1,309.61)           | 35.53<br>(29.33 to<br>42.48)          | 33.53<br>(25.02 to<br>45.34)            | 27.49<br>(20.79 to<br>36.50)           | 36.20<br>(26.47 to<br>49.86)             |
| Rheumatic heart disease        |                                            |                                             |                                           |                                             |                                       |                                         |                                        |                                          |
|                                | 61,779.53<br>(52,733.46 to<br>71,600.77)   | 89,025.83<br>(50,323.34 to<br>160,935.08)   | 50,806.45<br>(30,318.31 to<br>89,927.25)  | 141,723.98<br>(77,104.96 to<br>256,348.77)  | 4,182.69<br>(3,659.41 to<br>4,742.56) | 7,055.71<br>(4,264.73 to<br>11,788.07)  | 4,472.15<br>(2,679.82 to<br>7,437.55)  | 9,902.54<br>(5,816.31 to<br>16,852.57)   |
| Ischemic heart disease         |                                            |                                             |                                           |                                             |                                       |                                         |                                        |                                          |
|                                | 25,406.39<br>(21,419.22 to<br>30,079.71)   | 34,776.76<br>(19,679.73 to<br>61,727.64)    | 19,377.15<br>(11,825.94 to<br>34,643.48)  | 58,708.42<br>(31,519.16 to<br>104,301.37)   | 1,333.39<br>(1,133.51 to<br>1,564.15) | 2,276.00<br>(1,398.68 to<br>4,152.92)   | 1,441.00<br>(897.48 to<br>2,491.17)    | 3,342.33<br>(2,001.60 to<br>5,712.70)    |
| Stroke                         |                                            |                                             |                                           |                                             |                                       |                                         |                                        |                                          |
|                                | 7,393.76<br>(6,231.94 to<br>8,787.38)      | 12,603.81<br>(6,444.09 to<br>28,894.95)     | 8,035.52<br>(4,393.44 to<br>17,045.15)    | 18,238.41<br>(9,086.64 to<br>38,608.52)     | 540.60<br>(457.62 to<br>639.04)       | 1,073.49<br>(562.04 to<br>2,394.72)     | 755.31<br>(410.26 to<br>1,582.95)      | 1,397.12<br>(725.37 to<br>3,064.80)      |
| Ischemic stroke                |                                            |                                             |                                           |                                             |                                       |                                         |                                        |                                          |
|                                | 18,012.64<br>(15,117.68 to<br>21,428.80)   | 22,172.96<br>(11,430.85 to<br>41,496.68)    | 11,341.62<br>(6,584.52 to<br>19,941.96)   | 40,470.01<br>(19,313.91 to<br>79,381.43)    | 792.80<br>(669.59 to<br>938.31)       | 1,202.50<br>(696.99 to<br>2,078.72)     | 685.70<br>(447.58 to<br>1,100.72)      | 1,945.21<br>(1,071.08 to<br>3,475.61)    |
| Intracerebral hemorrhage       |                                            |                                             |                                           |                                             |                                       |                                         |                                        |                                          |
|                                | 7,586.39<br>(5,340.03 to<br>9,425.57)      | 18,460.41<br>(9,994.68 to<br>35,385.60)     | 12,662.18<br>(7,704.52 to<br>20,961.20)   | 22,885.27<br>(11,900.87 to<br>45,540.74)    | 556.68<br>(397.67 to<br>681.97)       | 1,563.21<br>(836.23 to<br>3,105.36)     | 1,133.22<br>(691.20 to<br>1,797.68)    | 1,838.13<br>(951.00 to<br>3,614.41)      |
| Hypertensive heart disease     |                                            |                                             |                                           |                                             |                                       |                                         |                                        |                                          |
|                                | 2,248.65<br>(1,835.90 to<br>2,703.82)      | 3,538.21<br>(2,324.85 to<br>5,175.69)       | 3,357.51<br>(2,218.34 to<br>4,821.26)     | 3,651.57<br>(2,396.65 to<br>5,296.65)       | 74.73<br>(55.45 to<br>91.76)          | 157.37<br>(98.09 to<br>230.12)          | 155.68<br>(98.30 to<br>223.86)         | 156.65<br>(97.32 to<br>229.09)           |
| Cardiomyopathy and myocarditis |                                            |                                             |                                           |                                             |                                       |                                         |                                        |                                          |
|                                | 250.17<br>(184.72 to<br>326.39)            | 308.49<br>(198.28 to<br>432.22)             | 290.94<br>(183.15 to<br>415.25)           | 316.74<br>(205.17 to<br>445.22)             | 6.61<br>(4.63 to<br>8.73)             | 11.24<br>(7.07 to<br>15.65)             | 11.06<br>(6.95 to<br>15.45)            | 11.14<br>(7.09 to<br>15.59)              |
| Myocarditis                    |                                            |                                             |                                           |                                             |                                       |                                         |                                        |                                          |
| <b>Nicaragua</b>               |                                            |                                             |                                           |                                             |                                       |                                         |                                        |                                          |
| Cause                          | YLLs (actual counts)                       |                                             |                                           |                                             | Deaths (actual counts)                |                                         |                                        |                                          |
|                                | 2016                                       | 2040 Forecast                               | 2040 Better Scenario                      | 2040 Worse Scenario                         | 2016                                  | 2040 Forecast                           | 2040 Better Scenario                   | 2040 Worse Scenario                      |





|                                            | 11,860.59<br>(9,890.30 to<br>14,069.11)                       | 16,485.65<br>(12,521.75 to<br>21,423.14)                      | 14,008.17<br>(10,684.63 to<br>17,986.62)                      | 18,441.09<br>(13,957.99 to<br>24,178.63)                      | 482.42<br>(405.83 to<br>572.27)                            | 906.65<br>(690.31 to<br>1,130.38)                          | 808.32<br>(638.39 to<br>1,001.84)                          | 967.61<br>(738.26 to<br>1,227.06)                          |
|--------------------------------------------|---------------------------------------------------------------|---------------------------------------------------------------|---------------------------------------------------------------|---------------------------------------------------------------|------------------------------------------------------------|------------------------------------------------------------|------------------------------------------------------------|------------------------------------------------------------|
| Digestive diseases                         |                                                               |                                                               |                                                               |                                                               |                                                            |                                                            |                                                            |                                                            |
| Peptic ulcer disease                       | 2,073.81<br>(1,676.86 to<br>2,527.63)                         | 2,323.36<br>(1,792.18 to<br>2,925.44)                         | 1,869.83<br>(1,420.92 to<br>2,384.52)                         | 2,616.58<br>(1,991.26 to<br>3,336.31)                         | 105.65<br>(86.84 to<br>126.67)                             | 149.23<br>(113.06 to<br>184.82)                            | 125.36<br>(95.69 to<br>154.37)                             | 161.70<br>(121.74 to<br>203.17)                            |
| <b>Nicaragua</b>                           |                                                               |                                                               |                                                               |                                                               |                                                            |                                                            |                                                            |                                                            |
| Cause                                      | YLLs (actual counts)                                          |                                                               |                                                               |                                                               | Deaths (actual counts)                                     |                                                            |                                                            |                                                            |
|                                            | 2016                                                          | 2040 Forecast                                                 | 2040 Better Scenario                                          | 2040 Worse Scenario                                           | 2016                                                       | 2040 Forecast                                              | 2040 Better Scenario                                       | 2040 Worse Scenario                                        |
| Gastritis and duodenitis                   | 565.16<br>(452.58 to<br>705.79)                               | 1,216.74<br>(918.90 to<br>1,548.02)                           | 1,120.23<br>(851.42 to<br>1,453.95)                           | 1,254.68<br>(953.46 to<br>1,593.82)                           | 28.46<br>(23.04 to<br>35.25)                               | 71.23<br>(54.06 to<br>89.27)                               | 67.77<br>(51.74 to<br>85.01)                               | 71.45<br>(54.06 to<br>90.26)                               |
| Appendicitis                               | 1,206.47<br>(967.44 to<br>1,484.29)                           | 1,257.76<br>(932.20 to<br>1,640.35)                           | 1,061.04<br>(775.45 to<br>1,396.01)                           | 1,370.78<br>(1,009.86 to<br>1,787.78)                         | 32.43<br>(26.10 to<br>40.66)                               | 47.54<br>(35.93 to<br>62.31)                               | 41.61<br>(30.81 to<br>55.57)                               | 50.25<br>(38.12 to<br>65.80)                               |
| Paralytic ileus and intestinal obstruction | 2,815.01<br>(2,095.49 to<br>3,798.82)                         | 3,385.64<br>(2,546.91 to<br>4,263.42)                         | 3,183.35<br>(2,396.03 to<br>3,972.88)                         | 3,491.30<br>(2,623.26 to<br>4,440.53)                         | 92.44<br>(71.13 to<br>112.64)                              | 183.06<br>(136.37 to<br>224.37)                            | 182.99<br>(137.58 to<br>223.32)                            | 179.06<br>(133.86 to<br>220.32)                            |
| Inguinal, femoral, and abdominal hernia    | 722.24<br>(543.72 to<br>1,115.47)                             | 905.00<br>(625.49 to<br>1,548.23)                             | 843.12<br>(582.73 to<br>1,462.29)                             | 927.80<br>(644.30 to<br>1,568.23)                             | 36.70<br>(25.83 to<br>62.18)                               | 57.45<br>(37.96 to<br>102.43)                              | 56.06<br>(37.84 to<br>101.15)                              | 56.75<br>(37.66 to<br>99.68)                               |
| Inflammatory bowel disease                 | 187.22<br>(139.15 to<br>231.57)                               | 255.75<br>(186.70 to<br>326.96)                               | 252.12<br>(182.34 to<br>326.07)                               | 255.69<br>(187.98 to<br>325.62)                               | 6.01<br>(4.72 to<br>7.43)                                  | 11.09<br>(8.66 to<br>13.75)                                | 11.35<br>(8.97 to<br>14.14)                                | 10.78<br>(8.44 to<br>13.38)                                |
| Vascular intestinal disorders              | 471.71<br>(300.01 to<br>581.24)                               | 936.07<br>(587.06 to<br>1,165.28)                             | 901.43<br>(558.47 to<br>1,127.32)                             | 937.96<br>(580.79 to<br>1,162.55)                             | 28.42<br>(18.26 to<br>34.72)                               | 65.37<br>(41.83 to<br>81.18)                               | 64.89<br>(42.20 to<br>80.50)                               | 63.80<br>(40.64 to<br>79.48)                               |
| Gallbladder and biliary diseases           | 1,201.79<br>(933.73 to<br>1,533.54)                           | 2,409.11<br>(1,185.22 to<br>4,441.36)                         | 1,711.32<br>(865.23 to<br>3,098.15)                           | 2,977.16<br>(1,470.48 to<br>5,414.05)                         | 59.53<br>(46.44 to<br>76.86)                               | 148.31<br>(73.89 to<br>271.70)                             | 111.04<br>(57.52 to<br>202.24)                             | 175.22<br>(86.57 to<br>318.90)                             |
| Pancreatitis                               | 1,532.60<br>(1,165.89 to<br>1,931.09)                         | 2,516.30<br>(1,364.99 to<br>4,839.10)                         | 1,938.25<br>(1,080.54 to<br>3,541.82)                         | 3,254.55<br>(1,667.40 to<br>6,663.65)                         | 48.17<br>(35.60 to<br>60.58)                               | 99.10<br>(55.41 to<br>182.47)                              | 78.81<br>(46.63 to<br>140.16)                              | 123.00<br>(63.86 to<br>204.40)                             |
| Other digestive diseases                   | 1,084.60<br>(866.15 to<br>1,398.85)                           | 1,279.92<br>(978.26 to<br>1,598.54)                           | 1,127.49<br>(850.81 to<br>1,420.18)                           | 1,354.60<br>(1,046.51 to<br>1,689.93)                         | 44.60<br>(36.56 to<br>54.04)                               | 74.28<br>(56.55 to<br>91.30)                               | 68.43<br>(53.00 to<br>84.58)                               | 75.61<br>(57.93 to<br>93.91)                               |
| <b>Neurological disorders</b>              | <b>19,120.97</b><br><b>(16,021.96 to</b><br><b>22,618.71)</b> | <b>46,900.51</b><br><b>(34,576.22 to</b><br><b>64,036.42)</b> | <b>44,979.50</b><br><b>(34,012.73 to</b><br><b>59,473.40)</b> | <b>48,227.94</b><br><b>(34,576.45 to</b><br><b>67,686.04)</b> | <b>1,587.25</b><br><b>(1,315.31 to</b><br><b>1,899.25)</b> | <b>4,496.48</b><br><b>(2,976.91 to</b><br><b>6,389.12)</b> | <b>4,493.01</b><br><b>(3,150.10 to</b><br><b>6,142.57)</b> | <b>4,447.39</b><br><b>(2,865.13 to</b><br><b>6,486.25)</b> |
| Alzheimer's disease and other dementias    | 12,662.82<br>(10,250.80 to<br>15,689.55)                      | 37,166.30<br>(25,253.71 to<br>53,928.05)                      | 35,606.64<br>(25,261.88 to<br>49,627.93)                      | 37,922.64<br>(24,654.47 to<br>55,879.09)                      | 1,390.34<br>(1,135.55 to<br>1,696.48)                      | 4,053.94<br>(2,598.61 to<br>5,924.52)                      | 4,021.76<br>(2,718.04 to<br>5,674.53)                      | 4,014.96<br>(2,458.06 to<br>6,049.44)                      |
| Parkinson's disease                        | 916.56<br>(696.58 to<br>1,206.12)                             | 2,844.09<br>(2,134.58 to<br>3,743.77)                         | 3,286.06<br>(2,475.93 to<br>4,280.82)                         | 2,574.89<br>(1,909.39 to<br>3,374.80)                         | 77.48<br>(58.33 to<br>101.74)                              | 245.84<br>(176.38 to<br>322.20)                            | 290.63<br>(208.60 to<br>380.70)                            | 218.44<br>(154.51 to<br>290.51)                            |
| Epilepsy                                   | 3,761.05<br>(3,071.97 to<br>4,794.00)                         | 4,224.83<br>(2,950.05 to<br>6,079.63)                         | 3,329.87<br>(2,309.39 to<br>4,801.95)                         | 5,111.77<br>(3,507.52 to<br>7,567.52)                         | 76.87<br>(63.58 to<br>95.12)                               | 114.87<br>(82.62 to<br>159.97)                             | 93.68<br>(68.35 to<br>131.14)                              | 135.25<br>(94.39 to<br>195.35)                             |
| Multiple sclerosis                         | 239.77<br>(192.73 to<br>307.15)                               | 360.80<br>(265.42 to<br>496.92)                               | 368.83<br>(270.71 to<br>504.37)                               | 358.99<br>(264.15 to<br>489.49)                               | 6.77<br>(5.45 to<br>8.53)                                  | 12.02<br>(9.03 to<br>15.90)                                | 12.50<br>(9.35 to<br>16.37)                                | 11.79<br>(8.88 to<br>15.51)                                |
| Motor neuron disease                       | 234.40<br>(189.06 to<br>282.81)                               | 569.25<br>(425.32 to<br>742.77)                               | 605.48<br>(448.71 to<br>793.42)                               | 547.33<br>(411.75 to<br>707.14)                               | 7.72<br>(6.25 to<br>9.27)                                  | 21.08<br>(16.14 to<br>26.57)                               | 22.65<br>(17.05 to<br>28.77)                               | 20.07<br>(15.48 to<br>25.12)                               |
| Other neurological disorders               | 1,306.38<br>(1,101.83 to<br>1,548.49)                         | 1,735.24<br>(1,380.13 to<br>2,123.85)                         | 1,782.62<br>(1,404.29 to<br>2,195.45)                         | 1,712.31<br>(1,374.58 to<br>2,086.62)                         | 28.07<br>(23.77 to<br>33.34)                               | 48.73<br>(40.07 to<br>58.46)                               | 51.78<br>(42.29 to<br>62.32)                               | 46.88<br>(38.75 to<br>55.91)                               |
| <b>Mental disorders</b>                    | <b>13,750.47</b><br><b>(9,830.66 to</b><br><b>18,351.62)</b>  | <b>19,358.03</b><br><b>(13,137.00 to</b><br><b>27,014.31)</b> | <b>18,479.31</b><br><b>(12,517.84 to</b><br><b>25,800.22)</b> | <b>20,806.05</b><br><b>(14,082.92 to</b><br><b>29,037.66)</b> | <b>362.23</b><br><b>(258.89 to</b><br><b>484.03)</b>       | <b>579.88</b><br><b>(403.93 to</b><br><b>789.05)</b>       | <b>562.79</b><br><b>(391.06 to</b><br><b>765.33)</b>       | <b>614.41</b><br><b>(430.10 to</b><br><b>837.63)</b>       |
| Alcohol use disorders                      | 12,580.91<br>(8,511.25 to<br>16,989.72)                       | 16,437.45<br>(10,032.21 to<br>23,427.25)                      | 15,564.79<br>(9,373.91 to<br>22,145.74)                       | 17,893.79<br>(10,915.54 to<br>25,210.69)                      | 335.56<br>(227.72 to<br>453.62)                            | 498.79<br>(321.98 to<br>696.62)                            | 479.91<br>(304.57 to<br>669.58)                            | 535.04<br>(346.70 to<br>748.80)                            |

|                                                            |                                               |                                                 |                                                |                                                 |                                           |                                             |                                            |                                             |
|------------------------------------------------------------|-----------------------------------------------|-------------------------------------------------|------------------------------------------------|-------------------------------------------------|-------------------------------------------|---------------------------------------------|--------------------------------------------|---------------------------------------------|
| Drug use disorders                                         | 1,158.48<br>(834.58 to 1,811.69)              | 2,905.02<br>(2,064.97 to 4,516.99)              | 2,899.53<br>(2,058.08 to 4,500.50)             | 2,896.40<br>(2,070.72 to 4,462.09)              | 26.47<br>(19.50 to 41.35)                 | 80.79<br>(60.09 to 122.98)                  | 82.59<br>(60.90 to 126.28)                 | 79.07<br>(59.04 to 120.65)                  |
| Opioid use disorders                                       | 653.80<br>(442.36 to 1,226.95)                | 1,381.73<br>(898.82 to 2,652.77)                | 1,366.85<br>(879.47 to 2,627.85)               | 1,384.05<br>(901.97 to 2,663.61)                | 13.89<br>(9.71 to 25.70)                  | 34.27<br>(23.53 to 62.18)                   | 34.43<br>(23.66 to 62.44)                  | 33.92<br>(23.35 to 61.23)                   |
| Cocaine use disorders                                      | 74.51<br>(46.55 to 120.27)                    | 229.72<br>(140.08 to 381.51)                    | 217.75<br>(133.49 to 364.55)                   | 235.27<br>(144.59 to 391.73)                    | 1.67<br>(1.09 to 2.67)                    | 5.99<br>(3.83 to 9.70)                      | 5.76<br>(3.67 to 9.21)                     | 6.07<br>(3.90 to 9.78)                      |
| Amphetamine use disorders                                  | 46.78<br>(30.89 to 82.56)                     | 203.20<br>(130.08 to 344.51)                    | 195.35<br>(124.75 to 335.31)                   | 207.11<br>(133.13 to 345.44)                    | 1.08<br>(0.74 to 1.78)                    | 5.36<br>(3.51 to 8.42)                      | 5.25<br>(3.38 to 8.41)                     | 5.40<br>(3.57 to 8.40)                      |
| Other drug use disorders                                   | 383.38<br>(248.90 to 533.47)                  | 1,090.38<br>(738.70 to 1,563.45)                | 1,119.58<br>(763.00 to 1,596.67)               | 1,069.97<br>(729.78 to 1,518.53)                | 9.84<br>(7.29 to 13.53)                   | 35.17<br>(26.28 to 49.16)                   | 37.15<br>(27.36 to 52.38)                  | 33.69<br>(24.91 to 47.15)                   |
| Eating disorders                                           | 11.08<br>(8.54 to 14.45)                      | 15.55<br>(10.58 to 21.87)                       | 14.99<br>(10.10 to 21.10)                      | 15.87<br>(10.80 to 22.45)                       | 0.21<br>(0.16 to 0.27)                    | 0.30<br>(0.20 to 0.45)                      | 0.29<br>(0.19 to 0.42)                     | 0.31<br>(0.21 to 0.43)                      |
| <b>Nicaragua</b>                                           |                                               |                                                 |                                                |                                                 |                                           |                                             |                                            |                                             |
| Cause                                                      | YLLs (actual counts)                          |                                                 |                                                |                                                 | Deaths (actual counts)                    |                                             |                                            |                                             |
|                                                            | 2016                                          | 2040 Forecast                                   | 2040 Better Scenario                           | 2040 Worse Scenario                             | 2016                                      | 2040 Forecast                               | 2040 Better Scenario                       | 2040 Worse Scenario                         |
| <b>Diabetes, urogenital, blood, and endocrine diseases</b> | <b>96,118.86</b><br>(80,244.51 to 112,953.20) | <b>249,141.85</b><br>(108,854.47 to 646,827.24) | <b>170,907.57</b><br>(79,918.91 to 442,817.67) | <b>296,849.59</b><br>(127,520.58 to 767,847.85) | <b>3,918.14</b><br>(3,384.21 to 4,535.89) | <b>13,082.45</b><br>(5,978.90 to 31,408.68) | <b>9,332.54</b><br>(4,489.40 to 23,068.17) | <b>15,283.36</b><br>(6,825.93 to 35,379.83) |
| Diabetes mellitus                                          | 29,052.93<br>(24,161.99 to 34,359.19)         | 54,245.14<br>(35,957.16 to 79,693.02)           | 41,845.62<br>(27,338.31 to 62,141.36)          | 66,468.40<br>(42,062.55 to 101,321.94)          | 1,364.89<br>(1,152.32 to 1,603.88)        | 3,035.76<br>(2,160.00 to 4,212.63)          | 2,422.83<br>(1,724.67 to 3,295.57)         | 3,567.75<br>(2,460.94 to 5,073.77)          |
| Acute glomerulonephritis                                   | 40.28<br>(34.52 to 48.25)                     | 43.74<br>(32.11 to 59.58)                       | 37.29<br>(27.30 to 50.41)                      | 47.92<br>(34.57 to 64.94)                       | 0.71<br>(0.61 to 0.84)                    | 0.95<br>(0.71 to 1.24)                      | 0.84<br>(0.62 to 1.10)                     | 1.01<br>(0.75 to 1.33)                      |
| Chronic kidney disease                                     | 60,352.87<br>(46,530.78 to 72,061.27)         | 184,927.20<br>(54,686.53 to 582,496.59)         | 119,781.89<br>(37,508.69 to 404,086.80)        | 220,070.35<br>(64,172.52 to 686,229.48)         | 2,345.03<br>(1,939.58 to 2,754.73)        | 9,588.16<br>(2,714.22 to 28,128.46)         | 6,457.25<br>(1,931.98 to 20,536.34)        | 11,262.46<br>(3,128.47 to 31,803.75)        |
| Chronic kidney disease due to diabetes mellitus            | 21,603.58<br>(15,778.68 to 27,434.31)         | 81,126.51<br>(21,646.22 to 276,009.57)          | 51,777.12<br>(15,308.64 to 182,747.45)         | 95,889.07<br>(25,634.79 to 316,127.40)          | 848.28<br>(660.24 to 1,055.39)            | 3,852.63<br>(991.68 to 12,172.67)           | 2,537.61<br>(697.58 to 8,667.85)           | 4,509.09<br>(1,158.08 to 13,831.87)         |
| Chronic kidney disease due to hypertension                 | 6,039.65<br>(4,717.63 to 7,521.38)            | 24,778.20<br>(6,603.32 to 77,283.62)            | 16,593.85<br>(4,619.82 to 52,519.55)           | 29,229.53<br>(7,734.51 to 88,173.48)            | 369.82<br>(298.50 to 452.62)              | 1,805.92<br>(486.34 to 5,059.11)            | 1,279.56<br>(357.25 to 4,007.39)           | 2,080.94<br>(560.38 to 5,642.23)            |
| Chronic kidney disease due to glomerulonephritis           | 19,074.19<br>(14,772.34 to 23,912.69)         | 43,214.74<br>(14,413.17 to 135,348.84)          | 28,187.36<br>(9,859.74 to 89,444.85)           | 52,043.71<br>(16,883.17 to 159,392.74)          | 627.16<br>(495.20 to 777.30)              | 2,061.40<br>(604.99 to 6,231.36)            | 1,381.09<br>(409.21 to 4,334.28)           | 2,462.99<br>(688.90 to 7,196.19)            |
| Chronic kidney disease due to other and unspecified causes | 13,535.45<br>(10,335.27 to 16,875.68)         | 35,807.75<br>(11,200.25 to 107,335.43)          | 23,223.57<br>(7,633.34 to 75,574.89)           | 42,908.04<br>(13,232.85 to 130,757.69)          | 499.77<br>(389.86 to 613.46)              | 1,868.21<br>(548.94 to 5,521.34)            | 1,259.00<br>(382.03 to 3,935.95)           | 2,209.44<br>(654.65 to 6,282.00)            |
| Urinary diseases and male infertility                      | 1,863.89<br>(1,595.73 to 2,179.08)            | 3,969.80<br>(3,299.41 to 4,690.77)              | 3,910.57<br>(3,222.27 to 4,663.26)             | 3,959.64<br>(3,307.30 to 4,652.39)              | 84.07<br>(72.31 to 97.84)                 | 245.25<br>(192.02 to 292.77)                | 254.31<br>(206.94 to 298.51)               | 254.47<br>(180.48 to 279.92)                |
| Urinary tract infections                                   | 1,567.24<br>(1,321.88 to 1,857.92)            | 3,475.05<br>(2,851.64 to 4,185.15)              | 3,454.95<br>(2,825.12 to 4,189.20)             | 3,449.15<br>(2,839.51 to 4,147.69)              | 68.34<br>(57.31 to 82.35)                 | 213.72<br>(166.76 to 258.32)                | 224.11<br>(180.64 to 269.84)               | 202.96<br>(155.50 to 246.70)                |
| Urolithiasis                                               | 58.34<br>(45.89 to 73.16)                     | 109.79<br>(74.58 to 146.89)                     | 109.24<br>(72.55 to 146.90)                    | 109.38<br>(75.18 to 145.01)                     | 1.91<br>(1.31 to 2.43)                    | 4.68<br>(2.82 to 6.33)                      | 4.86<br>(2.89 to 6.61)                     | 4.51<br>(2.74 to 6.09)                      |
| Other urinary diseases                                     | 238.31<br>(146.95 to 323.19)                  | 384.97<br>(186.74 to 551.72)                    | 346.38<br>(160.71 to 509.05)                   | 401.11<br>(196.90 to 572.54)                    | 13.82<br>(6.73 to 19.47)                  | 26.86<br>(11.64 to 40.80)                   | 25.35<br>(10.63 to 38.68)                  | 27.01<br>(11.77 to 40.88)                   |
| Gynecological diseases                                     | 80.23<br>(57.71 to 109.72)                    | 107.00<br>(65.27 to 160.40)                     | 90.00<br>(53.60 to 136.18)                     | 116.45<br>(70.87 to 177.01)                     | 2.46<br>(1.79 to 3.27)                    | 4.08<br>(2.69 to 5.86)                      | 3.56<br>(2.33 to 5.07)                     | 4.30<br>(2.79 to 6.11)                      |
| Uterine fibroids                                           | 2.20<br>(1.19 to 4.70)                        | 5.53<br>(1.99 to 13.52)                         | 4.50<br>(1.63 to 10.81)                        | 6.13<br>(2.16 to 15.05)                         | 0.08<br>(0.05 to 0.14)                    | 0.25<br>(0.10 to 0.55)                      | 0.21<br>(0.08 to 0.47)                     | 0.26<br>(0.11 to 0.59)                      |

|                                                   |                                       |                                       |                                       |                                       |                               |                                 |                                 |                                 |
|---------------------------------------------------|---------------------------------------|---------------------------------------|---------------------------------------|---------------------------------------|-------------------------------|---------------------------------|---------------------------------|---------------------------------|
| Polycystic ovarian syndrome                       | 5.39<br>(2.19 to<br>12.29)            | 4.48<br>(1.48 to<br>11.40)            | 3.25<br>(1.06 to<br>8.41)             | 5.30<br>(1.75 to<br>13.22)            | 0.13<br>(0.05 to<br>0.29)     | 0.11<br>(0.04 to<br>0.27)       | 0.08<br>(0.02 to<br>0.20)       | 0.13<br>(0.04 to<br>0.32)       |
| Endometriosis                                     | 0.51<br>(0.25 to<br>1.17)             | 0.73<br>(0.25 to<br>1.85)             | 0.60<br>(0.20 to<br>1.53)             | 0.81<br>(0.28 to<br>2.09)             | 0.01<br>(0.01 to<br>0.02)     | 0.02<br>(0.01 to<br>0.04)       | 0.01<br>(0.00 to<br>0.03)       | 0.02<br>(0.01 to<br>0.05)       |
| Genital prolapse                                  | 6.19<br>(1.45 to<br>9.51)             | 6.60<br>(1.34 to<br>12.34)            | 5.36<br>(1.08 to<br>10.21)            | 7.23<br>(1.52 to<br>13.63)            | 0.40<br>(0.09 to<br>0.61)     | 0.46<br>(0.08 to<br>0.91)       | 0.38<br>(0.07 to<br>0.79)       | 0.49<br>(0.17 to<br>0.97)       |
| Other gynecological diseases                      | 65.94<br>(46.80 to<br>90.45)          | 89.66<br>(53.88 to<br>136.83)         | 76.29<br>(45.55 to<br>117.92)         | 96.97<br>(57.95 to<br>150.36)         | 1.84<br>(1.32 to<br>2.57)     | 3.25<br>(2.08 to<br>4.82)       | 2.87<br>(1.85 to<br>4.20)       | 3.40<br>(2.17 to<br>5.10)       |
| Hemoglobinopathies and hemolytic anemias          | 2,057.02<br>(1,294.84 to<br>2,661.69) | 1,908.40<br>(1,240.04 to<br>2,656.74) | 1,643.88<br>(1,061.58 to<br>2,301.47) | 2,059.54<br>(1,331.24 to<br>2,887.19) | 46.74<br>(33.02 to<br>57.66)  | 60.34<br>(44.71 to<br>76.42)    | 52.99<br>(39.12 to<br>67.79)    | 63.75<br>(46.57 to<br>81.96)    |
| Thalassemias                                      | 177.42<br>(79.80 to<br>304.67)        | 63.42<br>(24.44 to<br>127.21)         | 61.46<br>(24.81 to<br>120.53)         | 66.70<br>(25.95 to<br>134.27)         | 2.17<br>(0.96 to<br>3.68)     | 0.79<br>(0.30 to<br>1.52)       | 0.77<br>(0.31 to<br>1.52)       | 0.83<br>(0.32 to<br>1.69)       |
| Sickle cell disorders                             | 1,170.53<br>(630.62 to<br>1,682.05)   | 973.03<br>(525.38 to<br>1,465.72)     | 843.32<br>(461.46 to<br>1,269.64)     | 1,050.06<br>(557.83 to<br>1,593.47)   | 19.61<br>(10.91 to<br>27.95)  | 19.47<br>(11.05 to<br>29.03)    | 17.09<br>(9.67 to<br>25.86)     | 20.84<br>(11.69 to<br>31.47)    |
| G6PD deficiency                                   | 353.14<br>(191.96 to<br>576.76)       | 475.57<br>(265.56 to<br>743.76)       | 394.45<br>(218.01 to<br>633.64)       | 523.22<br>(289.52 to<br>819.81)       | 7.82<br>(4.61 to<br>11.87)    | 13.76<br>(8.37 to<br>20.06)     | 11.57<br>(7.00 to<br>17.10)     | 14.97<br>(9.10 to<br>22.16)     |
| Other hemoglobinopathies and hemolytic anemias    | 355.92<br>(260.16 to<br>474.23)       | 396.38<br>(292.19 to<br>540.90)       | 344.64<br>(255.35 to<br>469.16)       | 419.55<br>(310.26 to<br>565.70)       | 17.15<br>(13.59 to<br>22.48)  | 26.32<br>(19.76 to<br>37.23)    | 23.57<br>(17.99 to<br>33.40)    | 27.12<br>(20.13 to<br>38.43)    |
| Endocrine, metabolic, blood, and immune disorders | 2,771.65<br>(2,284.45 to<br>3,654.88) | 3,940.57<br>(2,957.83 to<br>5,587.33) | 3,598.33<br>(2,675.36 to<br>5,140.56) | 4,127.30<br>(3,123.00 to<br>5,722.52) | 74.24<br>(60.30 to<br>105.99) | 147.91<br>(112.62 to<br>222.93) | 140.76<br>(106.97 to<br>215.42) | 149.60<br>(114.26 to<br>224.62) |

**Nicaragua**

| Cause                                  | YLLs (actual counts)                            |                                                 |                                                 |                                                 | Deaths (actual counts)                 |                                        |                                        |                                        |
|----------------------------------------|-------------------------------------------------|-------------------------------------------------|-------------------------------------------------|-------------------------------------------------|----------------------------------------|----------------------------------------|----------------------------------------|----------------------------------------|
|                                        | 2016                                            | 2040 Forecast                                   | 2040 Better Scenario                            | 2040 Worse Scenario                             | 2016                                   | 2040 Forecast                          | 2040 Better Scenario                   | 2040 Worse Scenario                    |
| <b>Musculoskeletal disorders</b>       | <b>3,637.38</b><br>(2,309.39 to<br>4,604.12)    | <b>5,921.80</b><br>(4,283.29 to<br>7,995.84)    | <b>6,031.26</b><br>(4,319.94 to<br>8,141.89)    | <b>5,839.74</b><br>(4,238.42 to<br>7,844.16)    | <b>97.78</b><br>(76.13 to<br>126.91)   | <b>233.12</b><br>(176.55 to<br>365.31) | <b>240.69</b><br>(181.41 to<br>378.16) | <b>225.62</b><br>(170.22 to<br>352.31) |
| Rheumatoid arthritis                   | 422.85<br>(318.73 to<br>640.03)                 | 1,198.30<br>(821.54 to<br>1,927.53)             | 1,073.21<br>(728.94 to<br>1,722.05)             | 1,257.43<br>(855.96 to<br>2,042.28)             | 23.26<br>(17.97 to<br>36.65)           | 84.71<br>(56.89 to<br>136.55)          | 79.29<br>(52.49 to<br>125.12)          | 85.59<br>(56.03 to<br>140.23)          |
| Other musculoskeletal disorders        | 3,214.53<br>(1,935.13 to<br>4,133.28)           | 4,723.50<br>(3,307.37 to<br>6,402.88)           | 4,958.05<br>(3,455.23 to<br>6,703.89)           | 4,582.31<br>(3,202.09 to<br>6,168.80)           | 74.52<br>(55.97 to<br>96.19)           | 148.41<br>(109.17 to<br>238.51)        | 161.39<br>(118.29 to<br>258.38)        | 140.02<br>(103.46 to<br>222.71)        |
| <b>Other non-communicable diseases</b> | <b>36,189.40</b><br>(26,447.98 to<br>46,567.90) | <b>19,410.78</b><br>(13,392.60 to<br>27,091.31) | <b>15,549.62</b><br>(10,764.84 to<br>21,145.31) | <b>22,959.52</b><br>(15,479.31 to<br>32,340.05) | <b>463.85</b><br>(339.81 to<br>588.96) | <b>360.24</b><br>(235.77 to<br>486.91) | <b>319.10</b><br>(206.06 to<br>428.28) | <b>396.38</b><br>(261.95 to<br>542.52) |
| Congenital birth defects               | 34,080.66<br>(24,866.82 to<br>43,820.49)        | 16,347.51<br>(10,860.89 to<br>23,293.83)        | 12,639.87<br>(8,646.09 to<br>17,568.65)         | 19,780.05<br>(12,988.47 to<br>28,665.48)        | 410.39<br>(301.31 to<br>525.00)        | 209.48<br>(144.64 to<br>292.00)        | 164.46<br>(115.70 to<br>223.82)        | 250.42<br>(169.81 to<br>356.94)        |
| Neural tube defects                    | 1,539.07<br>(953.74 to<br>2,449.15)             | 308.13<br>(158.08 to<br>558.58)                 | 205.24<br>(104.20 to<br>371.73)                 | 408.65<br>(206.07 to<br>764.74)                 | 18.01<br>(11.15 to<br>28.60)           | 3.71<br>(1.95 to<br>6.62)              | 2.49<br>(1.30 to<br>4.43)              | 4.89<br>(2.52 to<br>9.04)              |
| Congenital heart anomalies             | 15,831.92<br>(12,057.57 to<br>20,293.60)        | 7,700.88<br>(5,349.27 to<br>11,135.26)          | 6,032.52<br>(4,238.78 to<br>8,697.72)           | 9,189.92<br>(6,238.80 to<br>13,619.15)          | 193.70<br>(149.40 to<br>246.17)        | 101.47<br>(72.27 to<br>142.91)         | 80.85<br>(58.56 to<br>113.40)          | 119.45<br>(83.83 to<br>173.36)         |
| Orofacial clefts                       | 24.07<br>(14.24 to<br>38.89)                    | 17.46<br>(7.70 to<br>34.83)                     | 11.66<br>(5.18 to<br>23.38)                     | 23.11<br>(9.93 to<br>47.14)                     | 0.28<br>(0.17 to<br>0.45)              | 0.20<br>(0.09 to<br>0.40)              | 0.14<br>(0.06 to<br>0.27)              | 0.27<br>(0.12 to<br>0.55)              |
| Down syndrome                          | 753.57<br>(500.77 to<br>1,243.44)               | 525.04<br>(332.70 to<br>830.00)                 | 412.04<br>(265.76 to<br>663.49)                 | 615.72<br>(382.24 to<br>1,007.44)               | 10.22<br>(7.20 to<br>16.18)            | 8.63<br>(5.84 to<br>12.93)             | 6.98<br>(4.74 to<br>10.49)             | 9.88<br>(6.59 to<br>15.30)             |
| Other chromosomal abnormalities        | 538.09<br>(67.56 to<br>793.56)                  | 474.41<br>(80.63 to<br>817.20)                  | 349.39<br>(62.24 to<br>597.13)                  | 593.74<br>(95.87 to<br>1,034.27)                | 6.29<br>(0.83 to<br>9.26)              | 5.60<br>(1.09 to<br>9.57)              | 4.13<br>(0.85 to<br>7.00)              | 6.99<br>(1.28 to<br>12.10)             |



|                                                 |                                          |                                          |                                          |                                          |                                     |                                     |                                     |                                     |
|-------------------------------------------------|------------------------------------------|------------------------------------------|------------------------------------------|------------------------------------------|-------------------------------------|-------------------------------------|-------------------------------------|-------------------------------------|
| Falls                                           | 5,426.80<br>(4,328.25 to<br>6,584.29)    | 7,851.15<br>(5,945.92 to<br>9,667.67)    | 7,589.73<br>(5,701.35 to<br>9,399.69)    | 7,898.37<br>(5,976.85 to<br>9,669.79)    | 244.38<br>(172.42 to<br>295.81)     | 499.76<br>(322.83 to<br>626.65)     | 501.09<br>(322.95 to<br>619.73)     | 485.62<br>(312.35 to<br>612.87)     |
| Drowning                                        | 10,857.27<br>(8,788.36 to<br>13,290.35)  | 7,801.11<br>(5,382.60 to<br>11,257.21)   | 6,672.69<br>(4,588.50 to<br>9,602.73)    | 8,721.09<br>(5,939.94 to<br>12,801.18)   | 197.26<br>(158.76 to<br>241.77)     | 172.16<br>(119.39 to<br>235.83)     | 151.06<br>(106.20 to<br>207.70)     | 189.30<br>(129.66 to<br>264.76)     |
| Fire, heat, and hot substances                  | 1,242.66<br>(986.15 to<br>1,716.93)      | 1,035.17<br>(743.07 to<br>1,525.36)      | 867.70<br>(620.79 to<br>1,272.10)        | 1,160.58<br>(816.83 to<br>1,724.13)      | 31.64<br>(25.77 to<br>41.36)        | 41.53<br>(30.51 to<br>57.84)        | 37.08<br>(27.50 to<br>51.69)        | 43.96<br>(31.88 to<br>61.57)        |
| Poisonings                                      | 1,342.60<br>(944.10 to<br>1,869.04)      | 617.08<br>(395.99 to<br>923.55)          | 468.69<br>(306.49 to<br>703.06)          | 735.85<br>(466.63 to<br>1,142.33)        | 23.61<br>(17.40 to<br>31.43)        | 23.61<br>(9.49 to<br>20.50)         | 11.15<br>(7.67 to<br>16.35)         | 16.32<br>(10.85 to<br>24.38)        |
| Exposure to mechanical forces                   | 3,646.42<br>(2,916.63 to<br>4,600.09)    | 3,193.67<br>(2,266.86 to<br>4,312.77)    | 2,679.35<br>(1,892.98 to<br>3,682.03)    | 3,509.82<br>(2,483.82 to<br>4,787.86)    | 71.50<br>(56.77 to<br>90.65)        | 79.03<br>(58.61 to<br>103.77)       | 68.59<br>(50.45 to<br>90.64)        | 84.78<br>(62.18 to<br>111.85)       |
| Unintentional firearm injuries                  | 1,520.43<br>(1,052.70 to<br>2,122.18)    | 1,134.69<br>(683.51 to<br>1,691.98)      | 933.16<br>(551.94 to<br>1,410.98)        | 1,257.52<br>(760.06 to<br>1,895.33)      | 28.89<br>(20.01 to<br>39.38)        | 25.26<br>(15.94 to<br>36.13)        | 21.23<br>(13.29 to<br>30.92)        | 27.57<br>(17.45 to<br>39.09)        |
| Unintentional suffocation                       | 428.95<br>(338.24 to<br>544.24)          | 217.48<br>(133.43 to<br>346.76)          | 165.59<br>(103.62 to<br>260.41)          | 258.33<br>(156.50 to<br>411.35)          | 5.71<br>(4.54 to<br>7.13)           | 3.22<br>(2.12 to<br>4.92)           | 2.52<br>(1.69 to<br>3.77)           | 3.75<br>(2.44 to<br>5.78)           |
| Other exposure to mechanical forces             | 1,697.04<br>(1,320.82 to<br>2,320.12)    | 1,841.51<br>(1,296.05 to<br>2,611.46)    | 1,580.60<br>(1,100.67 to<br>2,253.14)    | 1,993.98<br>(1,406.04 to<br>2,845.48)    | 36.90<br>(28.86 to<br>50.04)        | 50.54<br>(37.39 to<br>69.08)        | 44.84<br>(32.77 to<br>62.35)        | 53.45<br>(39.29 to<br>75.05)        |
| Adverse effects of medical treatment            | 1,775.54<br>(1,374.44 to<br>2,537.23)    | 1,968.87<br>(1,465.23 to<br>2,763.13)    | 1,724.67<br>(1,287.88 to<br>2,425.28)    | 2,111.19<br>(1,567.25 to<br>2,979.52)    | 51.03<br>(40.28 to<br>71.38)        | 86.85<br>(66.12 to<br>124.74)       | 80.17<br>(60.89 to<br>115.28)       | 88.87<br>(66.90 to<br>127.24)       |
| Animal contact                                  | 880.80<br>(690.03 to<br>1,086.32)        | 790.20<br>(551.30 to<br>1,064.33)        | 636.88<br>(447.48 to<br>859.45)          | 890.33<br>(625.85 to<br>1,201.79)        | 18.55<br>(14.58 to<br>23.01)        | 21.65<br>(16.09 to<br>27.91)        | 18.30<br>(13.37 to<br>23.70)        | 23.57<br>(17.19 to<br>30.72)        |
| Venomous animal contact                         | 614.34<br>(478.25 to<br>770.87)          | 573.64<br>(393.04 to<br>779.76)          | 461.16<br>(316.51 to<br>628.51)          | 647.65<br>(440.77 to<br>882.28)          | 13.09<br>(10.07 to<br>16.34)        | 15.70<br>(11.20 to<br>20.70)        | 13.23<br>(9.45 to<br>17.60)         | 17.12<br>(12.10 to<br>22.64)        |
| Non-venomous animal contact                     | 266.46<br>(191.02 to<br>361.21)          | 216.56<br>(147.45 to<br>316.36)          | 175.72<br>(119.26 to<br>254.03)          | 242.68<br>(164.20 to<br>353.31)          | 5.47<br>(3.99 to<br>7.31)           | 5.95<br>(4.21 to<br>8.27)           | 5.07<br>(3.56 to<br>7.06)           | 6.44<br>(4.56 to<br>9.03)           |
| Foreign body                                    | 6,501.67<br>(4,888.02 to<br>8,261.27)    | 4,828.03<br>(3,645.86 to<br>6,484.02)    | 4,441.92<br>(3,394.48 to<br>5,869.36)    | 5,181.25<br>(3,871.74 to<br>7,072.84)    | 104.81<br>(83.66 to<br>128.89)      | 112.73<br>(90.89 to<br>142.55)      | 111.42<br>(90.42 to<br>140.18)      | 114.29<br>(91.89 to<br>144.69)      |
| Pulmonary aspiration and foreign body in airway | 6,263.22<br>(4,594.79 to<br>8,009.14)    | 4,665.70<br>(3,495.90 to<br>6,262.04)    | 4,305.81<br>(3,294.93 to<br>5,699.20)    | 5,000.16<br>(3,693.21 to<br>6,802.58)    | 100.91<br>(79.20 to<br>124.74)      | 109.40<br>(88.15 to<br>138.13)      | 108.51<br>(87.71 to<br>136.43)      | 110.69<br>(88.37 to<br>140.23)      |
| Foreign body in other body part                 | 238.45<br>(177.71 to<br>345.15)          | 162.33<br>(107.25 to<br>256.11)          | 136.11<br>(90.22 to<br>219.55)           | 181.09<br>(118.39 to<br>287.89)          | 3.91<br>(2.98 to<br>5.69)           | 3.33<br>(2.37 to<br>5.00)           | 2.91<br>(2.08 to<br>4.30)           | 3.60<br>(2.58 to<br>5.36)           |
| Environmental heat and cold exposure            | 237.57<br>(137.34 to<br>315.42)          | 262.82<br>(142.76 to<br>383.77)          | 207.49<br>(111.29 to<br>303.25)          | 297.22<br>(157.43 to<br>435.64)          | 7.74<br>(3.64 to<br>7.52)           | 7.74<br>(4.93 to<br>10.78)          | 6.28<br>(4.00 to<br>8.90)           | 8.57<br>(5.34 to<br>11.93)          |
| Other unintentional injuries                    | 2,454.70<br>(1,923.06 to<br>3,108.13)    | 1,862.38<br>(1,333.84 to<br>2,516.52)    | 1,631.96<br>(1,161.04 to<br>2,218.45)    | 1,996.60<br>(1,445.10 to<br>2,718.13)    | 47.17<br>(36.84 to<br>59.08)        | 42.46<br>(31.13 to<br>55.82)        | 38.01<br>(27.74 to<br>50.37)        | 44.79<br>(32.94 to<br>58.67)        |
| Self-harm and interpersonal violence            | 57,144.52<br>(46,050.42 to<br>70,546.79) | 55,661.03<br>(40,022.46 to<br>77,599.85) | 51,931.76<br>(37,673.58 to<br>71,724.99) | 60,378.99<br>(42,589.53 to<br>85,777.36) | 1,079.74<br>(860.29 to<br>1,349.37) | 1,188.23<br>(858.09 to<br>1,624.79) | 1,121.00<br>(819.87 to<br>1,508.37) | 1,281.17<br>(902.09 to<br>1,769.47) |

**Nicaragua**

| Cause                | YLLs (actual counts)                     |                                          |                                          |                                          | Deaths (actual counts)          |                                 |                                 |                                   |
|----------------------|------------------------------------------|------------------------------------------|------------------------------------------|------------------------------------------|---------------------------------|---------------------------------|---------------------------------|-----------------------------------|
|                      | 2016                                     | 2040 Forecast                            | 2040 Better Scenario                     | 2040 Worse Scenario                      | 2016                            | 2040 Forecast                   | 2040 Better Scenario            | 2040 Worse Scenario               |
| Self-harm            | 23,707.98<br>(18,369.53 to<br>29,511.44) | 26,980.90<br>(17,135.92 to<br>39,989.73) | 23,917.44<br>(15,614.25 to<br>35,294.93) | 31,161.30<br>(19,069.94 to<br>48,479.08) | 450.46<br>(352.56 to<br>560.37) | 578.32<br>(371.49 to<br>854.08) | 519.78<br>(340.56 to<br>747.29) | 663.63<br>(411.22 to<br>1,018.03) |
| Self-harm by firearm | 1,217.04<br>(693.39 to<br>1,747.11)      | 1,277.32<br>(592.82 to<br>2,215.94)      | 1,111.46<br>(532.18 to<br>1,887.85)      | 1,511.03<br>(684.54 to<br>2,656.29)      | 25.93<br>(15.29 to<br>37.13)    | 31.77<br>(15.66 to<br>53.04)    | 28.18<br>(14.34 to<br>46.77)    | 37.10<br>(17.61 to<br>65.51)      |

|                                                                              |                                          |                                          |                                          |                                          |                                 |                                 |                                 |                                 |
|------------------------------------------------------------------------------|------------------------------------------|------------------------------------------|------------------------------------------|------------------------------------------|---------------------------------|---------------------------------|---------------------------------|---------------------------------|
| Self-harm by other specified means                                           | 22,490.94<br>(17,679.69 to<br>27,790.20) | 25,703.58<br>(16,496.07 to<br>38,009.96) | 22,805.98<br>(14,984.75 to<br>33,613.87) | 29,650.27<br>(18,265.25 to<br>45,872.31) | 424.54<br>(331.90 to<br>528.37) | 546.55<br>(351.69 to<br>804.37) | 491.60<br>(324.04 to<br>707.79) | 626.54<br>(389.39 to<br>956.44) |
| Interpersonal violence                                                       | 33,436.54<br>(25,531.10 to<br>43,366.53) | 28,680.13<br>(20,777.01 to<br>38,520.71) | 28,014.32<br>(20,484.58 to<br>37,699.79) | 29,217.69<br>(20,863.34 to<br>39,540.83) | 629.27<br>(475.86 to<br>812.81) | 609.91<br>(442.97 to<br>819.46) | 601.22<br>(439.11 to<br>804.79) | 617.54<br>(440.67 to<br>831.43) |
| Physical violence by firearm                                                 | 17,434.26<br>(11,235.64 to<br>23,750.14) | 14,446.99<br>(8,874.28 to<br>21,166.96)  | 14,069.09<br>(8,615.75 to<br>20,723.02)  | 14,640.26<br>(8,951.13 to<br>21,568.82)  | 327.62<br>(212.08 to<br>447.33) | 299.44<br>(184.81 to<br>439.68) | 293.74<br>(181.28 to<br>430.81) | 301.96<br>(187.22 to<br>445.35) |
| Physical violence by sharp object                                            | 11,144.82<br>(6,578.08 to<br>16,798.32)  | 10,504.43<br>(5,835.97 to<br>16,512.56)  | 10,572.52<br>(5,873.98 to<br>16,568.98)  | 10,458.81<br>(5,751.89 to<br>16,577.61)  | 210.73<br>(123.20 to<br>316.87) | 223.71<br>(124.22 to<br>343.73) | 227.28<br>(126.93 to<br>349.09) | 221.27<br>(122.42 to<br>341.42) |
| Physical violence by other means                                             | 4,857.46<br>(3,582.40 to<br>7,414.74)    | 3,728.71<br>(2,368.18 to<br>6,080.87)    | 3,372.71<br>(2,130.57 to<br>5,587.02)    | 4,118.62<br>(2,575.74 to<br>6,744.10)    | 90.93<br>(66.48 to<br>139.25)   | 86.75<br>(55.25 to<br>138.70)   | 80.19<br>(51.41 to<br>128.27)   | 94.30<br>(59.13 to<br>153.19)   |
| Forces of nature, conflict and terrorism, and executions and police conflict | 49.87<br>(38.00 to<br>77.59)             | 19,806.73<br>(0.00 to<br>95,190.21)      | 19,022.76<br>(0.00 to<br>91,650.22)      | 20,332.41<br>(0.00 to<br>97,699.03)      | 0.87<br>(0.00 to<br>1.34)       | 423.14<br>(0.00 to<br>1,858.47) | 417.49<br>(0.00 to<br>1,824.90) | 425.78<br>(0.00 to<br>1,878.01) |
| Exposure to forces of nature                                                 | 0.00<br>(0.00 to<br>0.00)                | 13,385.78<br>(0.00 to<br>57,696.97)      | 12,839.15<br>(0.00 to<br>55,395.42)      | 13,750.00<br>(0.00 to<br>59,246.69)      | 0.00<br>(0.00 to<br>0.00)       | 297.73<br>(0.00 to<br>1,294.19) | 294.13<br>(0.00 to<br>1,282.34) | 299.17<br>(0.00 to<br>1,303.42) |
| Conflict and terrorism                                                       | 0.00<br>(0.00 to<br>0.00)                | 6,420.95<br>(0.00 to<br>87,938.25)       | 6,183.61<br>(0.00 to<br>85,535.92)       | 6,582.41<br>(0.00 to<br>89,773.45)       | 0.00<br>(0.00 to<br>0.00)       | 125.41<br>(0.00 to<br>1,737.74) | 123.36<br>(0.00 to<br>1,722.76) | 126.61<br>(0.00 to<br>1,749.41) |
| Executions and police conflict                                               | 49.87<br>(38.00 to<br>77.59)             | 0.00<br>(0.00 to<br>0.00)                | 0.00<br>(0.00 to<br>0.00)                | 0.00<br>(0.00 to<br>0.00)                | 0.87<br>(0.65 to<br>1.34)       | 0.00<br>(0.00 to<br>0.00)       | 0.00<br>(0.00 to<br>0.00)       | 0.00<br>(0.00 to<br>0.00)       |

| Panama                                                            |                                             |                                             |                                             |                                             |                                          |                                          |                                          |                                          |
|-------------------------------------------------------------------|---------------------------------------------|---------------------------------------------|---------------------------------------------|---------------------------------------------|------------------------------------------|------------------------------------------|------------------------------------------|------------------------------------------|
| Cause                                                             | YLLs (actual counts)                        |                                             |                                             |                                             | Deaths (actual counts)                   |                                          |                                          |                                          |
|                                                                   | 2016                                        | 2040 Forecast                               | 2040 Better Scenario                        | 2040 Worse Scenario                         | 2016                                     | 2040 Forecast                            | 2040 Better Scenario                     | 2040 Worse Scenario                      |
| All causes                                                        | 492,836.95<br>(434,419.95 to<br>560,708.64) | 576,267.95<br>(455,656.58 to<br>723,837.53) | 419,958.11<br>(335,116.49 to<br>514,119.35) | 750,708.79<br>(595,145.36 to<br>914,581.46) | 18,515.79<br>(16,640.87 to<br>20,761.93) | 31,693.49<br>(24,176.97 to<br>40,339.57) | 24,779.36<br>(19,192.49 to<br>31,344.33) | 39,435.80<br>(30,642.54 to<br>48,934.75) |
| Communicable, maternal, neonatal, and nutritional diseases        | 109,640.14<br>(89,779.66 to<br>137,949.08)  | 70,128.58<br>(51,555.01 to<br>96,549.41)    | 49,378.97<br>(36,027.84 to<br>66,785.27)    | 100,678.93<br>(74,939.63 to<br>138,987.51)  | 2,281.29<br>(2,002.46 to<br>2,640.55)    | 2,288.29<br>(1,735.20 to<br>3,041.66)    | 1,803.06<br>(1,354.59 to<br>2,363.81)    | 3,081.33<br>(2,307.99 to<br>4,102.11)    |
| HIV/AIDS and tuberculosis                                         | 28,868.99<br>(27,363.69 to<br>30,510.62)    | 19,637.43<br>(11,837.81 to<br>30,351.95)    | 13,437.05<br>(7,574.72 to<br>23,939.22)     | 28,660.48<br>(19,942.54 to<br>38,797.63)    | 658.12<br>(623.96 to<br>694.74)          | 456.64<br>(249.61 to<br>745.68)          | 300.39<br>(154.78 to<br>572.86)          | 686.71<br>(451.16 to<br>974.23)          |
| Tuberculosis                                                      | 6,797.99<br>(5,802.34 to<br>8,089.56)       | 3,930.46<br>(2,288.45 to<br>7,115.31)       | 1,812.06<br>(1,063.27 to<br>3,021.81)       | 6,771.90<br>(4,078.15 to<br>11,897.82)      | 191.35<br>(165.17 to<br>223.73)          | 145.31<br>(84.00 to<br>269.05)           | 68.71<br>(39.78 to<br>114.89)            | 245.68<br>(146.83 to<br>436.07)          |
| HIV/AIDS                                                          | 22,071.00<br>(20,995.18 to<br>23,293.93)    | 15,706.97<br>(8,567.20 to<br>26,521.05)     | 11,624.99<br>(5,966.95 to<br>22,146.78)     | 21,888.58<br>(14,185.94 to<br>31,051.93)    | 466.77<br>(443.94 to<br>491.43)          | 311.33<br>(140.41 to<br>591.47)          | 231.68<br>(95.68 to<br>506.99)           | 441.03<br>(249.88 to<br>684.86)          |
| Diarrhea, lower respiratory, and other common infectious diseases | 39,430.11<br>(31,363.97 to<br>50,250.90)    | 28,529.56<br>(19,201.88 to<br>45,006.76)    | 20,622.56<br>(14,317.89 to<br>30,690.33)    | 42,343.56<br>(26,832.78 to<br>69,121.63)    | 1,040.17<br>(909.30 to<br>1,197.78)      | 1,418.27<br>(989.18 to<br>1,989.66)      | 1,151.97<br>(815.39 to<br>1,628.96)      | 1,884.57<br>(1,271.18 to<br>2,736.00)    |
| Diarrheal diseases                                                | 9,857.15<br>(7,399.00 to<br>13,045.44)      | 2,867.37<br>(872.29 to<br>7,854.76)         | 3,369.47<br>(1,213.10 to<br>8,688.10)       | 4,932.29<br>(1,296.09 to<br>14,545.73)      | 170.13<br>(146.06 to<br>219.83)          | 112.29<br>(40.69 to<br>279.26)           | 153.41<br>(61.98 to<br>367.54)           | 171.86<br>(56.38 to<br>471.85)           |
| Intestinal infectious diseases                                    | 44.94<br>(17.88 to<br>96.55)                | 38.83<br>(13.41 to<br>91.39)                | 44.44<br>(15.44 to<br>101.31)               | 39.11<br>(13.79 to<br>88.14)                | 0.92<br>(0.38 to<br>1.90)                | 0.94<br>(0.36 to<br>2.03)                | 1.12<br>(0.42 to<br>2.40)                | 0.93<br>(0.36 to<br>1.99)                |
| Typhoid fever                                                     | 40.69<br>(14.25 to<br>90.32)                | 36.67<br>(12.16 to<br>87.91)                | 42.77<br>(14.36 to<br>99.24)                | 36.38<br>(11.94 to<br>83.87)                | 0.84<br>(0.32 to<br>1.83)                | 0.88<br>(0.31 to<br>1.98)                | 1.07<br>(0.37 to<br>2.36)                | 0.85<br>(0.31 to<br>1.91)                |
| Paratyphoid fever                                                 | 0.74<br>(0.20 to<br>1.90)                   | 0.74<br>(0.20 to<br>1.96)                   | 0.52<br>(0.14 to<br>1.36)                   | 0.91<br>(0.24 to<br>2.46)                   | 0.01<br>(0.00 to<br>0.04)                | 0.01<br>(0.00 to<br>0.04)                | 0.01<br>(0.00 to<br>0.03)                | 0.02<br>(0.01 to<br>0.05)                |
| Other intestinal infectious diseases                              | 3.50<br>(1.27 to<br>8.00)                   | 1.43<br>(0.41 to<br>3.57)                   | 1.15<br>(0.33 to<br>2.91)                   | 1.82<br>(0.51 to<br>4.53)                   | 0.06<br>(0.02 to<br>0.14)                | 0.05<br>(0.02 to<br>0.11)                | 0.04<br>(0.01 to<br>0.10)                | 0.06<br>(0.02 to<br>0.13)                |



|                                                          |                                          |                                         |                                        |                                          |                                 |                                 |                                |                                 |                           |
|----------------------------------------------------------|------------------------------------------|-----------------------------------------|----------------------------------------|------------------------------------------|---------------------------------|---------------------------------|--------------------------------|---------------------------------|---------------------------|
|                                                          | 0.00<br>(0.00 to<br>0.00)                | 0.00<br>(0.00 to<br>0.00)               | 0.00<br>(0.00 to<br>0.00)              | 0.00<br>(0.00 to<br>0.00)                | 0.00<br>(0.00 to<br>0.00)       | 0.00<br>(0.00 to<br>0.00)       | 0.00<br>(0.00 to<br>0.00)      | 0.00<br>(0.00 to<br>0.00)       | 0.00<br>(0.00 to<br>0.00) |
| Cysticercosis                                            | 0.53<br>(0.43 to<br>0.65)                | 0.16<br>(0.10 to<br>0.24)               | 0.12<br>(0.08 to<br>0.18)              | 0.23<br>(0.15 to<br>0.34)                | 0.01<br>(0.01 to<br>0.02)       | 0.01<br>(0.00 to<br>0.01)       | 0.01<br>(0.00 to<br>0.01)      | 0.01<br>(0.00 to<br>0.01)       | 0.01<br>(0.01 to<br>0.01) |
| Cystic echinococcosis                                    | 240.74<br>(138.09 to<br>360.64)          | 562.30<br>(358.10 to<br>789.73)         | 541.53<br>(352.39 to<br>757.46)        | 585.33<br>(372.83 to<br>839.91)          | 6.10<br>(3.84 to<br>8.58)       | 20.49<br>(14.31 to<br>27.83)    | 21.11<br>(14.80 to<br>28.72)   | 20.07<br>(13.97 to<br>27.37)    |                           |
| Dengue                                                   | 107.63<br>(23.99 to<br>308.36)           | 22.49<br>(3.18 to<br>81.22)             | 17.97<br>(2.54 to<br>65.02)            | 29.60<br>(4.31 to<br>105.08)             | 1.84<br>(0.41 to<br>5.37)       | 0.40<br>(0.06 to<br>1.41)       | 0.32<br>(0.05 to<br>1.14)      | 0.51<br>(0.08 to<br>1.79)       |                           |
| Yellow fever                                             | 0.13<br>(0.09 to<br>0.18)                | 0.04<br>(0.02 to<br>0.07)               | 0.03<br>(0.02 to<br>0.05)              | 0.06<br>(0.03 to<br>0.11)                | 0.00<br>(0.00 to<br>0.00)       | 0.00<br>(0.00 to<br>0.00)       | 0.00<br>(0.00 to<br>0.00)      | 0.00<br>(0.00 to<br>0.00)       |                           |
| Rabies                                                   | 66.17<br>(13.69 to<br>155.45)            | 69.61<br>(10.46 to<br>193.18)           | 60.20<br>(9.90 to<br>162.85)           | 74.31<br>(10.93 to<br>205.87)            | 0.94<br>(0.29 to<br>2.02)       | 1.06<br>(0.30 to<br>2.50)       | 0.96<br>(0.30 to<br>2.21)      | 1.11<br>(0.30 to<br>2.64)       |                           |
| Intestinal nematode infections                           | 83.26<br>(49.06 to<br>132.19)            | 44.75<br>(23.22 to<br>85.90)            | 40.70<br>(22.21 to<br>76.72)           | 55.38<br>(28.46 to<br>102.31)            | 1.25<br>(0.83 to<br>2.00)       | 0.80<br>(0.46 to<br>1.65)       | 0.77<br>(0.45 to<br>1.66)      | 0.95<br>(0.55 to<br>1.83)       |                           |
| Other neglected tropical diseases                        | 2,748.26<br>(2,072.35 to<br>3,502.41)    | 1,174.84<br>(666.78 to<br>1,966.31)     | 920.58<br>(520.30 to<br>1,593.16)      | 1,670.07<br>(935.49 to<br>2,756.01)      | 47.79<br>(36.17 to<br>60.97)    | 20.54<br>(11.77 to<br>34.00)    | 16.17<br>(9.27 to<br>27.55)    | 29.16<br>(16.36 to<br>48.38)    |                           |
| Maternal disorders                                       | 657.20<br>(461.93 to<br>895.80)          | 241.96<br>(127.16 to<br>424.88)         | 193.19<br>(95.57 to<br>347.20)         | 342.98<br>(175.06 to<br>608.41)          | 11.72<br>(8.31 to<br>15.95)     | 4.32<br>(2.31 to<br>7.55)       | 3.46<br>(1.76 to<br>6.14)      | 6.12<br>(3.14 to<br>10.71)      |                           |
| Maternal hemorrhage                                      | 74.43<br>(41.40 to<br>121.83)            | 29.56<br>(12.62 to<br>58.30)            | 23.11<br>(10.05 to<br>46.32)           | 42.24<br>(17.88 to<br>85.12)             | 1.29<br>(0.73 to<br>2.06)       | 0.51<br>(0.23 to<br>0.99)       | 0.40<br>(0.18 to<br>0.82)      | 0.73<br>(0.32 to<br>1.46)       |                           |
| Maternal sepsis and other maternal infections            | 699.14<br>(501.85 to<br>954.22)          | 277.57<br>(146.43 to<br>483.77)         | 215.90<br>(110.19 to<br>398.87)        | 398.04<br>(208.41 to<br>743.92)          | 12.05<br>(8.63 to<br>16.50)     | 4.81<br>(2.55 to<br>8.45)       | 3.76<br>(1.94 to<br>6.86)      | 6.89<br>(3.64 to<br>12.73)      |                           |
| Maternal hypertensive disorders                          | 27.53<br>(12.37 to<br>49.90)             | 14.76<br>(5.53 to<br>32.06)             | 11.14<br>(4.18 to<br>24.46)            | 21.81<br>(7.92 to<br>48.71)              | 0.49<br>(0.22 to<br>0.90)       | 0.26<br>(0.10 to<br>0.58)       | 0.20<br>(0.07 to<br>0.44)      | 0.39<br>(0.14 to<br>0.89)       |                           |
| Maternal obstructed labor and uterine rupture            | 144.60<br>(90.70 to<br>214.72)           | 125.28<br>(58.13 to<br>259.02)          | 98.32<br>(45.98 to<br>201.36)          | 179.15<br>(80.52 to<br>361.83)           | 2.60<br>(1.67 to<br>3.89)       | 2.26<br>(1.05 to<br>4.46)       | 1.78<br>(0.84 to<br>3.55)      | 3.22<br>(1.46 to<br>6.35)       |                           |
| Maternal abortion, miscarriage, and ectopic pregnancy    | 620.72<br>(440.47 to<br>851.71)          | 258.85<br>(125.01 to<br>484.52)         | 197.34<br>(90.75 to<br>365.72)         | 370.36<br>(174.13 to<br>696.97)          | 10.48<br>(7.44 to<br>14.35)     | 4.39<br>(2.16 to<br>8.29)       | 3.37<br>(1.56 to<br>6.32)      | 6.28<br>(3.01 to<br>11.78)      |                           |
| Indirect maternal deaths                                 | 86.09<br>(53.06 to<br>136.28)            | 32.56<br>(14.95 to<br>62.50)            | 24.97<br>(11.63 to<br>47.60)           | 46.87<br>(20.61 to<br>90.35)             | 1.50<br>(0.93 to<br>2.31)       | 0.57<br>(0.27 to<br>1.09)       | 0.44<br>(0.21 to<br>0.84)      | 0.82<br>(0.36 to<br>1.53)       |                           |
| Late maternal deaths                                     | 6.42<br>(3.11 to<br>10.76)               | 12.01<br>(4.07 to<br>26.04)             | 9.62<br>(3.01 to<br>20.82)             | 16.81<br>(5.96 to<br>36.39)              | 0.12<br>(0.06 to<br>0.19)       | 0.22<br>(0.08 to<br>0.48)       | 0.18<br>(0.05 to<br>0.38)      | 0.31<br>(0.11 to<br>0.67)       |                           |
| Maternal deaths aggravated by HIV/AIDS                   | 432.13<br>(295.75 to<br>597.29)          | 182.30<br>(93.48 to<br>313.54)          | 147.01<br>(74.21 to<br>260.78)         | 251.82<br>(127.37 to<br>448.16)          | 7.53<br>(5.23 to<br>10.43)      | 3.20<br>(1.66 to<br>5.46)       | 2.59<br>(1.35 to<br>4.56)      | 4.41<br>(2.24 to<br>7.89)       |                           |
| Other maternal disorders                                 | <b>Panama</b>                            |                                         |                                        |                                          |                                 |                                 |                                |                                 |                           |
| Cause                                                    | YLLs (actual counts)                     |                                         |                                        |                                          | Deaths (actual counts)          |                                 |                                |                                 |                           |
|                                                          | 2016                                     | 2040 Forecast                           | 2040 Better Scenario                   | 2040 Worse Scenario                      | 2016                            | 2040 Forecast                   | 2040 Better Scenario           | 2040 Worse Scenario             |                           |
| Neonatal disorders                                       | 29,615.29<br>(19,065.69 to<br>44,665.64) | 15,120.36<br>(8,918.44 to<br>23,545.85) | 9,122.05<br>(5,563.63 to<br>14,039.42) | 21,476.95<br>(12,914.83 to<br>33,464.01) | 342.18<br>(220.29 to<br>516.05) | 174.77<br>(103.10 to<br>272.20) | 105.45<br>(64.30 to<br>162.31) | 248.22<br>(149.24 to<br>386.82) |                           |
| Neonatal preterm birth                                   | 12,721.29<br>(8,106.06 to<br>19,414.18)  | 6,212.57<br>(3,624.13 to<br>10,073.00)  | 3,170.94<br>(1,821.91 to<br>5,024.47)  | 9,178.09<br>(5,292.53 to<br>14,725.52)   | 146.94<br>(93.63 to<br>224.25)  | 71.77<br>(41.87 to<br>116.36)   | 36.64<br>(21.05 to<br>58.06)   | 106.03<br>(61.14 to<br>170.12)  |                           |
| Neonatal encephalopathy due to birth asphyxia and trauma | 7,076.02<br>(4,525.61 to<br>10,626.30)   | 3,146.60<br>(1,764.94 to<br>5,280.35)   | 1,904.02<br>(1,071.68 to<br>3,181.79)  | 4,422.91<br>(2,471.31 to<br>7,496.61)    | 81.79<br>(52.33 to<br>122.80)   | 36.40<br>(20.41 to<br>61.09)    | 22.03<br>(12.40 to<br>36.78)   | 51.16<br>(28.59 to<br>86.71)    |                           |



|                                                                         |                                                                  |                                                                  |                                                                  |                                                                  |                                                               |                                                               |                                                               |                                                               |
|-------------------------------------------------------------------------|------------------------------------------------------------------|------------------------------------------------------------------|------------------------------------------------------------------|------------------------------------------------------------------|---------------------------------------------------------------|---------------------------------------------------------------|---------------------------------------------------------------|---------------------------------------------------------------|
| Neonatal sepsis and other neonatal infections                           | 6,165.93<br>(3,806.03 to<br>9,760.47)                            | 3,736.20<br>(1,987.20 to<br>6,236.35)                            | 2,459.59<br>(1,377.25 to<br>3,962.80)                            | 5,154.10<br>(2,764.35 to<br>8,665.80)                            | 71.23<br>(43.97 to<br>112.76)                                 | 43.17<br>(22.96 to<br>72.06)                                  | 28.42<br>(15.92 to<br>45.79)                                  | 59.56<br>(31.95 to<br>100.11)                                 |
| Hemolytic disease and other neonatal jaundice                           | 76.75<br>(43.22 to<br>131.28)                                    | 36.19<br>(16.80 to<br>67.40)                                     | 23.27<br>(10.82 to<br>45.51)                                     | 82.24<br>(23.88 to<br>101.35)                                    | 0.89<br>(0.50 to<br>1.52)                                     | 0.42<br>(0.19 to<br>0.78)                                     | 0.27<br>(0.13 to<br>0.53)                                     | 0.60<br>(0.28 to<br>1.17)                                     |
| Other neonatal disorders                                                | 3,575.30<br>(2,236.53 to<br>5,483.71)                            | 1,988.81<br>(1,068.75 to<br>3,277.89)                            | 1,564.23<br>(878.42 to<br>2,576.14)                              | 2,669.61<br>(1,408.61 to<br>4,517.10)                            | 41.32<br>(25.85 to<br>63.38)                                  | 23.00<br>(12.36 to<br>37.88)                                  | 18.09<br>(10.16 to<br>29.78)                                  | 30.87<br>(16.29 to<br>52.22)                                  |
| <b>Nutritional deficiencies</b>                                         | <b>6,386.76</b><br><b>(4,510.52 to</b><br><b>8,892.38)</b>       | <b>3,646.87</b><br><b>(2,486.64 to</b><br><b>5,293.32)</b>       | <b>3,520.99</b><br><b>(2,463.27 to</b><br><b>4,977.89)</b>       | <b>4,191.37</b><br><b>(2,812.81 to</b><br><b>6,210.27)</b>       | <b>143.17</b><br><b>(117.00 to</b><br><b>174.85)</b>          | <b>157.88</b><br><b>(123.79 to</b><br><b>199.50)</b>          | <b>172.38</b><br><b>(132.87 to</b><br><b>217.89)</b>          | <b>167.03</b><br><b>(128.36 to</b><br><b>214.12)</b>          |
| Protein-energy malnutrition                                             | 5,977.32<br>(4,153.88 to<br>8,434.65)                            | 3,115.01<br>(2,042.48 to<br>4,650.89)                            | 3,076.67<br>(2,089.58 to<br>4,473.09)                            | 3,552.74<br>(2,266.57 to<br>5,400.50)                            | 130.13<br>(105.15 to<br>162.63)                               | 132.77<br>(100.12 to<br>174.61)                               | 149.70<br>(112.32 to<br>193.38)                               | 138.61<br>(102.81 to<br>180.45)                               |
| Iodine deficiency                                                       | 22.83<br>(0.86 to<br>101.70)                                     | 84.96<br>(0.96 to<br>429.94)                                     | 73.84<br>(0.71 to<br>362.86)                                     | 106.35<br>(1.39 to<br>546.82)                                    | 0.49<br>(0.03 to<br>1.65)                                     | 3.57<br>(0.03 to<br>17.17)                                    | 3.45<br>(0.02 to<br>16.89)                                    | 4.14<br>(0.04 to<br>18.63)                                    |
| Dietary iron deficiency                                                 | 32.64<br>(20.65 to<br>81.88)                                     | 27.62<br>(16.29 to<br>57.60)                                     | 26.50<br>(15.52 to<br>55.55)                                     | 30.42<br>(17.87 to<br>63.02)                                     | 0.60<br>(0.40 to<br>1.35)                                     | 0.57<br>(0.36 to<br>1.04)                                     | 0.57<br>(0.35 to<br>1.04)                                     | 0.61<br>(0.39 to<br>1.11)                                     |
| Other nutritional deficiencies                                          | 353.98<br>(226.16 to<br>598.38)                                  | 419.29<br>(246.09 to<br>683.05)                                  | 343.98<br>(193.67 to<br>576.23)                                  | 501.88<br>(296.96 to<br>823.03)                                  | 11.96<br>(6.08 to<br>19.82)                                   | 20.97<br>(9.39 to<br>33.18)                                   | 18.67<br>(7.92 to<br>31.72)                                   | 23.67<br>(11.02 to<br>38.62)                                  |
| <b>Other communicable, maternal, neonatal, and nutritional diseases</b> | <b>2,003.32</b><br><b>(1,469.27 to</b><br><b>2,732.41)</b>       | <b>1,283.52</b><br><b>(903.57 to</b><br><b>1,790.60)</b>         | <b>1,055.67</b><br><b>(741.74 to</b><br><b>1,450.73)</b>         | <b>1,558.37</b><br><b>(1,081.80 to</b><br><b>2,212.76)</b>       | <b>35.56</b><br><b>(28.59 to</b><br><b>45.95)</b>             | <b>36.88</b><br><b>(26.88 to</b><br><b>45.72)</b>             | <b>31.45</b><br><b>(23.71 to</b><br><b>40.20)</b>             | <b>41.36</b><br><b>(31.05 to</b><br><b>53.04)</b>             |
| Sexually transmitted infections excluding HIV                           | 648.33<br>(288.58 to<br>1,226.36)                                | 181.25<br>(76.54 to<br>380.27)                                   | 126.90<br>(55.53 to<br>268.78)                                   | 231.68<br>(94.66 to<br>500.46)                                   | 8.63<br>(4.39 to<br>15.42)                                    | 2.85<br>(1.55 to<br>5.22)                                     | 2.15<br>(1.23 to<br>3.91)                                     | 3.51<br>(1.81 to<br>6.73)                                     |
| Syphilis                                                                | 579.70<br>(222.35 to<br>1,150.26)                                | 147.17<br>(45.90 to<br>342.04)                                   | 95.96<br>(28.75 to<br>232.99)                                    | 193.46<br>(59.91 to<br>465.86)                                   | 7.06<br>(2.84 to<br>13.74)                                    | 1.90<br>(0.71 to<br>4.22)                                     | 1.27<br>(0.47 to<br>2.90)                                     | 2.47<br>(0.90 to<br>5.63)                                     |
| Chlamydial infection                                                    | 13.35<br>(9.04 to<br>17.37)                                      | 6.66<br>(3.72 to<br>10.16)                                       | 6.04<br>(3.43 to<br>9.24)                                        | 7.46<br>(4.25 to<br>11.53)                                       | 0.31<br>(0.22 to<br>0.39)                                     | 0.19<br>(0.12 to<br>0.27)                                     | 0.18<br>(0.11 to<br>0.25)                                     | 0.21<br>(0.13 to<br>0.30)                                     |
| Gonococcal infection                                                    | 35.70<br>(24.10 to<br>46.83)                                     | 17.94<br>(9.84 to<br>27.30)                                      | 16.33<br>(9.11 to<br>24.95)                                      | 20.07<br>(11.18 to<br>30.86)                                     | 0.83<br>(0.59 to<br>1.07)                                     | 0.52<br>(0.33 to<br>0.75)                                     | 0.49<br>(0.31 to<br>0.70)                                     | 0.57<br>(0.37 to<br>0.82)                                     |
| Other sexually transmitted infections                                   | 19.58<br>(13.06 to<br>25.75)                                     | 9.49<br>(5.08 to<br>14.63)                                       | 8.57<br>(4.61 to<br>13.15)                                       | 10.69<br>(5.80 to<br>16.42)                                      | 0.43<br>(0.29 to<br>0.55)                                     | 0.24<br>(0.14 to<br>0.34)                                     | 0.22<br>(0.13 to<br>0.32)                                     | 0.26<br>(0.16 to<br>0.38)                                     |
| Acute hepatitis                                                         | 383.93<br>(318.42 to<br>458.14)                                  | 308.59<br>(218.36 to<br>434.96)                                  | 219.16<br>(146.59 to<br>322.30)                                  | 388.07<br>(275.23 to<br>536.07)                                  | 8.62<br>(7.29 to<br>10.24)                                    | 9.36<br>(6.86 to<br>12.93)                                    | 6.85<br>(4.72 to<br>9.59)                                     | 11.54<br>(8.55 to<br>15.37)                                   |
| Acute hepatitis A                                                       | 33.14<br>(11.02 to<br>64.45)                                     | 16.05<br>(5.91 to<br>33.85)                                      | 11.27<br>(4.14 to<br>23.72)                                      | 20.41<br>(7.20 to<br>42.04)                                      | 0.45<br>(0.18 to<br>0.82)                                     | 0.28<br>(0.12 to<br>0.55)                                     | 0.21<br>(0.09 to<br>0.40)                                     | 0.35<br>(0.14 to<br>0.66)                                     |
| Acute hepatitis B                                                       | 236.97<br>(191.67 to<br>291.66)                                  | 214.37<br>(148.75 to<br>311.75)                                  | 153.67<br>(101.64 to<br>226.85)                                  | 271.04<br>(190.18 to<br>377.65)                                  | 6.01<br>(4.95 to<br>7.31)                                     | 6.83<br>(4.81 to<br>9.81)                                     | 4.98<br>(3.34 to<br>7.07)                                     | 8.52<br>(6.11 to<br>11.68)                                    |
| Acute hepatitis C                                                       | 19.09<br>(14.07 to<br>25.08)                                     | 19.35<br>(12.87 to<br>29.11)                                     | 13.91<br>(8.82 to<br>21.86)                                      | 23.15<br>(15.31 to<br>34.48)                                     | 0.47<br>(0.35 to<br>0.64)                                     | 0.61<br>(0.40 to<br>0.91)                                     | 0.45<br>(0.29 to<br>0.69)                                     | 0.71<br>(0.47 to<br>1.06)                                     |
| Acute hepatitis E                                                       | 94.73<br>(68.34 to<br>127.48)                                    | 58.83<br>(36.50 to<br>91.83)                                     | 40.31<br>(24.90 to<br>65.01)                                     | 73.48<br>(45.69 to<br>116.39)                                    | 1.69<br>(1.26 to<br>2.17)                                     | 1.64<br>(1.07 to<br>2.37)                                     | 1.21<br>(0.75 to<br>1.83)                                     | 1.96<br>(1.25 to<br>2.87)                                     |
| Other unspecified infectious diseases                                   | 971.05<br>(566.81 to<br>1,305.65)                                | 793.68<br>(492.73 to<br>1,111.97)                                | 709.62<br>(450.20 to<br>980.58)                                  | 938.62<br>(573.79 to<br>1,325.55)                                | 19.63<br>(12.57 to<br>24.44)                                  | 23.35<br>(15.91 to<br>29.93)                                  | 22.45<br>(15.59 to<br>28.59)                                  | 26.30<br>(17.59 to<br>34.04)                                  |
| <b>Non-communicable diseases</b>                                        | <b>285,414.15</b><br><b>(252,339.96 to</b><br><b>323,732.60)</b> | <b>418,998.99</b><br><b>(323,912.54 to</b><br><b>535,073.64)</b> | <b>316,689.74</b><br><b>(247,469.66 to</b><br><b>399,814.62)</b> | <b>540,546.78</b><br><b>(406,935.24 to</b><br><b>684,944.85)</b> | <b>14,212.74</b><br><b>(12,742.30 to</b><br><b>15,866.24)</b> | <b>27,207.82</b><br><b>(20,255.39 to</b><br><b>35,610.96)</b> | <b>21,525.28</b><br><b>(16,431.53 to</b><br><b>27,939.77)</b> | <b>33,678.05</b><br><b>(25,652.89 to</b><br><b>42,834.92)</b> |
| <b>Panama</b>                                                           |                                                                  |                                                                  |                                                                  |                                                                  |                                                               |                                                               |                                                               |                                                               |
| <b>YLLs (actual counts)</b>                                             |                                                                  |                                                                  |                                                                  |                                                                  | <b>Deaths (actual counts)</b>                                 |                                                               |                                                               |                                                               |

| Cause                                | 2016                                                          | 2040 Forecast                                                    | 2040 Better Scenario                                            | 2040 Worse Scenario                                              | 2016                                                       | 2040 Forecast                                              | 2040 Better Scenario                                       | 2040 Worse Scenario                                        |
|--------------------------------------|---------------------------------------------------------------|------------------------------------------------------------------|-----------------------------------------------------------------|------------------------------------------------------------------|------------------------------------------------------------|------------------------------------------------------------|------------------------------------------------------------|------------------------------------------------------------|
| <b>Neoplasms</b>                     | <b>78,011.08</b><br><b>(68,512.45 to</b><br><b>88,818.33)</b> | <b>136,967.23</b><br><b>(112,187.30 to</b><br><b>167,206.85)</b> | <b>112,521.50</b><br><b>(92,763.63 to</b><br><b>135,209.34)</b> | <b>156,035.55</b><br><b>(125,650.73 to</b><br><b>193,005.82)</b> | <b>3,382.23</b><br><b>(3,010.92 to</b><br><b>3,830.26)</b> | <b>7,327.11</b><br><b>(6,026.05 to</b><br><b>8,879.40)</b> | <b>6,220.50</b><br><b>(5,093.86 to</b><br><b>7,400.88)</b> | <b>8,127.90</b><br><b>(6,619.19 to</b><br><b>9,925.20)</b> |
| Lip and oral cavity cancer           | 827.32<br>(716.42 to<br>963.86)                               | 1,771.04<br>(1,090.68 to<br>2,813.69)                            | 1,016.79<br>(672.27 to<br>1,491.50)                             | 2,552.42<br>(1,485.18 to<br>4,146.36)                            | 39.84<br>(35.02 to<br>45.80)                               | 96.16<br>(60.15 to<br>150.63)                              | 57.71<br>(38.20 to<br>83.57)                               | 135.54<br>(79.96 to<br>221.22)                             |
| Nasopharynx cancer                   | 442.68<br>(369.79 to<br>524.76)                               | 796.90<br>(514.23 to<br>1,174.14)                                | 401.12<br>(280.76 to<br>560.79)                                 | 1,206.14<br>(751.42 to<br>1,892.68)                              | 17.09<br>(14.43 to<br>20.05)                               | 35.99<br>(22.93 to<br>54.26)                               | 18.47<br>(12.81 to<br>26.03)                               | 53.83<br>(32.15 to<br>84.62)                               |
| Other pharynx cancer                 | 574.68<br>(487.09 to<br>683.49)                               | 1,050.69<br>(653.57 to<br>1,690.31)                              | 829.47<br>(539.32 to<br>1,289.87)                               | 1,182.24<br>(710.87 to<br>1,922.22)                              | 25.28<br>(21.61 to<br>29.90)                               | 53.09<br>(32.25 to<br>86.85)                               | 43.14<br>(27.35 to<br>68.29)                               | 58.73<br>(35.48 to<br>97.40)                               |
| Esophageal cancer                    | 1,000.31<br>(841.88 to<br>1,183.13)                           | 1,785.49<br>(1,072.39 to<br>2,928.39)                            | 1,240.25<br>(813.24 to<br>1,892.21)                             | 2,515.13<br>(1,394.54 to<br>4,339.76)                            | 47.87<br>(40.91 to<br>56.09)                               | 92.20<br>(57.17 to<br>147.55)                              | 66.38<br>(44.63 to<br>98.53)                               | 127.40<br>(74.01 to<br>216.37)                             |
| Stomach cancer                       | 7,337.66<br>(6,365.62 to<br>8,495.07)                         | 8,624.06<br>(6,378.26 to<br>11,671.73)                           | 6,605.57<br>(4,925.07 to<br>8,636.16)                           | 9,926.61<br>(7,389.49 to<br>13,273.73)                           | 342.96<br>(300.14 to<br>394.66)                            | 478.99<br>(353.63 to<br>653.81)                            | 375.00<br>(282.12 to<br>492.27)                            | 539.50<br>(402.43 to<br>718.95)                            |
| Colon and rectum cancer              | 6,848.89<br>(5,871.12 to<br>8,011.65)                         | 14,294.51<br>(9,667.55 to<br>21,198.81)                          | 11,061.45<br>(7,682.16 to<br>15,882.41)                         | 15,885.81<br>(10,883.30 to<br>23,082.21)                         | 345.60<br>(300.71 to<br>401.96)                            | 860.89<br>(588.66 to<br>1,263.06)                          | 689.85<br>(475.12 to<br>993.95)                            | 934.00<br>(638.79 to<br>1,363.83)                          |
| Liver cancer                         | 3,570.19<br>(3,063.53 to<br>4,184.65)                         | 7,281.55<br>(4,911.75 to<br>10,569.40)                           | 6,299.95<br>(4,528.72 to<br>8,646.74)                           | 8,092.20<br>(5,328.70 to<br>11,944.69)                           | 170.72<br>(147.57 to<br>198.32)                            | 402.51<br>(280.42 to<br>572.92)                            | 360.41<br>(262.86 to<br>486.47)                            | 435.89<br>(293.83 to<br>642.54)                            |
| Liver cancer due to hepatitis B      | 879.21<br>(654.17 to<br>1,191.13)                             | 1,569.09<br>(968.01 to<br>2,471.95)                              | 1,437.94<br>(934.29 to<br>2,106.94)                             | 1,687.72<br>(1,016.21 to<br>2,715.21)                            | 35.34<br>(25.24 to<br>49.07)                               | 73.77<br>(45.25 to<br>115.56)                              | 69.48<br>(44.23 to<br>105.19)                              | 77.64<br>(46.05 to<br>124.18)                              |
| Liver cancer due to hepatitis C      | 1,049.27<br>(871.12 to<br>1,331.31)                           | 2,221.47<br>(1,430.76 to<br>3,285.50)                            | 2,060.28<br>(1,381.24 to<br>2,913.01)                           | 2,354.17<br>(1,488.06 to<br>3,570.04)                            | 58.70<br>(44.88 to<br>73.96)                               | 139.22<br>(90.61 to<br>201.97)                             | 133.29<br>(90.34 to<br>184.54)                             | 143.81<br>(91.10 to<br>210.69)                             |
| Liver cancer due to alcohol use      | 873.34<br>(670.06 to<br>1,103.88)                             | 2,086.89<br>(1,310.10 to<br>3,231.75)                            | 1,528.84<br>(1,006.09 to<br>2,251.86)                           | 2,533.49<br>(1,548.22 to<br>3,965.02)                            | 43.81<br>(33.80 to<br>54.84)                               | 116.59<br>(74.53 to<br>176.94)                             | 89.64<br>(59.18 to<br>131.64)                              | 89.64<br>(86.85 to<br>210.95)                              |
| Liver cancer due to other causes     | 768.37<br>(622.13 to<br>951.16)                               | 1,404.11<br>(891.69 to<br>2,163.41)                              | 1,272.89<br>(852.52 to<br>1,860.41)                             | 1,516.81<br>(946.23 to<br>2,407.87)                              | 32.88<br>(26.48 to<br>40.70)                               | 72.94<br>(46.00 to<br>113.32)                              | 68.00<br>(44.77 to<br>100.91)                              | 77.02<br>(47.35 to<br>122.74)                              |
| Gallbladder and biliary tract cancer | 1,008.33<br>(855.91 to<br>1,232.43)                           | 1,466.80<br>(1,204.31 to<br>1,787.47)                            | 1,427.53<br>(1,161.74 to<br>1,757.22)                           | 1,444.86<br>(1,195.28 to<br>1,747.66)                            | 50.62<br>(43.25 to<br>61.77)                               | 87.18<br>(71.59 to<br>107.05)                              | 86.79<br>(70.46 to<br>106.59)                              | 84.03<br>(70.02 to<br>101.50)                              |
| Pancreatic cancer                    | 2,970.60<br>(2,579.23 to<br>3,417.95)                         | 6,762.45<br>(5,149.55 to<br>8,879.05)                            | 6,431.05<br>(4,991.21 to<br>8,315.04)                           | 6,838.64<br>(5,167.11 to<br>9,077.55)                            | 151.81<br>(132.66 to<br>173.86)                            | 387.96<br>(296.43 to<br>507.23)                            | 376.63<br>(292.60 to<br>482.10)                            | 384.89<br>(292.93 to<br>505.24)                            |
| Larynx cancer                        | 776.74<br>(644.04 to<br>934.49)                               | 1,441.51<br>(784.87 to<br>2,607.83)                              | 662.24<br>(419.19 to<br>1,069.62)                               | 2,401.28<br>(1,219.91 to<br>4,612.58)                            | 37.67<br>(31.60 to<br>44.75)                               | 75.81<br>(42.10 to<br>137.14)                              | 36.27<br>(23.70 to<br>57.26)                               | 123.68<br>(64.66 to<br>255.74)                             |
| Tracheal, bronchus, and lung cancer  | 7,039.07<br>(6,081.14 to<br>8,196.89)                         | 15,416.65<br>(10,169.96 to<br>23,048.21)                         | 8,931.60<br>(6,524.08 to<br>12,138.04)                          | 24,564.20<br>(15,331.93 to<br>39,869.21)                         | 349.56<br>(303.83 to<br>403.69)                            | 833.20<br>(554.17 to<br>1,216.61)                          | 500.34<br>(367.24 to<br>674.45)                            | 1,288.74<br>(812.15 to<br>2,015.80)                        |
| Malignant skin melanoma              | 496.68<br>(396.53 to<br>627.19)                               | 911.28<br>(706.72 to<br>1,167.04)                                | 1,059.53<br>(809.23 to<br>1,392.21)                             | 806.50<br>(631.81 to<br>1,026.37)                                | 20.33<br>(16.46 to<br>25.02)                               | 47.08<br>(36.86 to<br>58.80)                               | 56.38<br>(43.44 to<br>70.50)                               | 40.58<br>(32.29 to<br>49.87)                               |
| Non-melanoma skin cancer             | 472.41<br>(399.95 to<br>558.25)                               | 858.05<br>(697.11 to<br>1,043.72)                                | 723.17<br>(578.61 to<br>882.63)                                 | 936.29<br>(786.64 to<br>1,099.31)                                | 24.74<br>(21.36 to<br>28.53)                               | 54.67<br>(44.73 to<br>64.68)                               | 47.72<br>(38.10 to<br>57.58)                               | 57.87<br>(48.38 to<br>66.95)                               |
| Breast cancer                        | 6,554.19<br>(5,228.25 to<br>8,197.79)                         | 10,509.65<br>(7,332.48 to<br>14,977.09)                          | 8,473.06<br>(6,006.55 to<br>11,737.88)                          | 11,623.77<br>(7,948.48 to<br>16,731.95)                          | 248.20<br>(201.23 to<br>305.43)                            | 497.16<br>(353.90 to<br>695.45)                            | 409.60<br>(290.81 to<br>562.53)                            | 537.62<br>(376.84 to<br>773.12)                            |
| Cervical cancer                      | 4,968.96<br>(3,973.22 to<br>6,152.57)                         | 5,995.11<br>(4,448.83 to<br>8,308.25)                            | 4,855.35<br>(3,537.08 to<br>6,571.45)                           | 6,908.62<br>(5,115.13 to<br>9,530.43)                            | 169.52<br>(137.90 to<br>206.40)                            | 248.61<br>(186.70 to<br>332.40)                            | 204.53<br>(148.89 to<br>271.27)                            | 281.63<br>(211.84 to<br>377.42)                            |
| Uterine cancer                       | 1,064.09<br>(864.18 to<br>1,310.29)                           | 1,615.89<br>(1,221.74 to<br>2,129.52)                            | 1,426.87<br>(1,065.83 to<br>1,888.27)                           | 1,791.03<br>(1,367.09 to<br>2,325.58)                            | 51.03<br>(41.54 to<br>62.43)                               | 93.87<br>(71.90 to<br>120.18)                              | 84.32<br>(62.46 to<br>109.37)                              | 102.15<br>(78.27 to<br>130.72)                             |

|                                 |                                                               |                                                                |                                                               |                                                                 |                                                            |                                                             |                                                            |                                                              |
|---------------------------------|---------------------------------------------------------------|----------------------------------------------------------------|---------------------------------------------------------------|-----------------------------------------------------------------|------------------------------------------------------------|-------------------------------------------------------------|------------------------------------------------------------|--------------------------------------------------------------|
| Ovarian cancer                  | 1,712.21<br>(1,375.89 to<br>2,115.21)                         | 3,108.77<br>(2,097.04 to<br>4,522.56)                          | 2,739.20<br>(1,867.94 to<br>3,884.48)                         | 3,115.53<br>(2,123.28 to<br>4,627.59)                           | 66.49<br>(53.86 to<br>81.10)                               | 149.32<br>(99.70 to<br>219.48)                              | 133.47<br>(90.84 to<br>193.23)                             | 147.58<br>(98.68 to<br>218.73)                               |
| Prostate cancer                 | 5,331.23<br>(3,906.82 to<br>6,536.36)                         | 13,956.21<br>(10,160.67 to<br>17,161.09)                       | 12,957.06<br>(9,348.52 to<br>16,049.48)                       | 13,774.75<br>(9,954.57 to<br>16,698.29)                         | 403.23<br>(282.68 to<br>485.17)                            | 1,126.01<br>(764.77 to<br>1,366.53)                         | 1,077.80<br>(717.56 to<br>1,319.08)                        | 1,084.93<br>(734.41 to<br>1,305.62)                          |
| Testicular cancer               | 288.37<br>(208.12 to<br>391.59)                               | 261.54<br>(173.65 to<br>384.13)                                | 221.54<br>(147.76 to<br>329.86)                               | 287.04<br>(190.35 to<br>419.21)                                 | 6.32<br>(4.71 to<br>8.21)                                  | 7.12<br>(5.17 to<br>9.49)                                   | 6.22<br>(4.45 to<br>8.22)                                  | 7.65<br>(5.55 to<br>10.10)                                   |
| <b>Panama</b>                   |                                                               |                                                                |                                                               |                                                                 |                                                            |                                                             |                                                            |                                                              |
| Cause                           | YLLs (actual counts)                                          |                                                                |                                                               |                                                                 | Deaths (actual counts)                                     |                                                             |                                                            |                                                              |
|                                 | 2016                                                          | 2040 Forecast                                                  | 2040 Better Scenario                                          | 2040 Worse Scenario                                             | 2016                                                       | 2040 Forecast                                               | 2040 Better Scenario                                       | 2040 Worse Scenario                                          |
| Kidney cancer                   | 1,672.87<br>(1,432.92 to<br>1,948.07)                         | 3,282.78<br>(2,598.22 to<br>4,095.89)                          | 3,195.22<br>(2,564.41 to<br>3,906.05)                         | 3,212.99<br>(2,517.09 to<br>4,073.39)                           | 65.80<br>(56.34 to<br>76.27)                               | 154.20<br>(123.44 to<br>189.89)                             | 154.41<br>(126.49 to<br>185.31)                            | 147.75<br>(117.04 to<br>186.15)                              |
| Bladder cancer                  | 725.41<br>(623.86 to<br>839.17)                               | 1,460.87<br>(1,065.72 to<br>1,984.47)                          | 1,251.60<br>(948.77 to<br>1,648.75)                           | 1,612.30<br>(1,161.66 to<br>2,248.11)                           | 44.61<br>(38.66 to<br>51.36)                               | 103.10<br>(75.77 to<br>138.79)                              | 91.27<br>(68.40 to<br>118.43)                              | 110.86<br>(80.66 to<br>150.74)                               |
| Brain and nervous system cancer | 4,052.13<br>(3,379.11 to<br>4,864.20)                         | 6,607.26<br>(5,391.17 to<br>8,102.70)                          | 5,982.44<br>(4,844.70 to<br>7,203.41)                         | 6,711.13<br>(5,491.93 to<br>8,123.23)                           | 108.50<br>(91.07 to<br>127.98)                             | 228.92<br>(187.30 to<br>269.25)                             | 215.57<br>(176.60 to<br>256.06)                            | 226.19<br>(186.65 to<br>264.47)                              |
| Thyroid cancer                  | 392.16<br>(333.08 to<br>462.69)                               | 667.29<br>(471.82 to<br>968.04)                                | 555.65<br>(401.19 to<br>771.01)                               | 742.16<br>(516.69 to<br>1,072.84)                               | 17.61<br>(15.00 to<br>21.05)                               | 35.63<br>(25.67 to<br>51.52)                                | 30.38<br>(22.02 to<br>42.03)                               | 38.83<br>(27.52 to<br>56.34)                                 |
| Mesothelioma                    | 156.07<br>(129.80 to<br>188.57)                               | 240.22<br>(193.02 to<br>295.12)                                | 245.62<br>(195.58 to<br>304.51)                               | 238.19<br>(192.32 to<br>290.31)                                 | 5.95<br>(4.98 to<br>7.17)                                  | 10.86<br>(8.79 to<br>12.95)                                 | 11.35<br>(9.10 to<br>13.78)                                | 10.56<br>(8.67 to<br>12.53)                                  |
| Hodgkin lymphoma                | 474.69<br>(276.76 to<br>574.01)                               | 349.25<br>(198.91 to<br>456.83)                                | 268.78<br>(153.89 to<br>350.79)                               | 421.81<br>(243.82 to<br>541.76)                                 | 13.57<br>(7.87 to<br>16.26)                                | 13.19<br>(7.61 to<br>16.77)                                 | 10.48<br>(6.16 to<br>13.47)                                | 15.57<br>(9.09 to<br>19.48)                                  |
| Non-Hodgkin lymphoma            | 3,057.52<br>(2,610.34 to<br>3,617.57)                         | 5,223.85<br>(4,123.42 to<br>6,615.52)                          | 4,528.67<br>(3,553.35 to<br>5,610.37)                         | 5,341.36<br>(4,233.64 to<br>6,731.91)                           | 107.94<br>(90.83 to<br>125.65)                             | 236.84<br>(183.78 to<br>298.71)                             | 212.40<br>(162.74 to<br>265.09)                            | 235.76<br>(184.19 to<br>297.81)                              |
| Multiple myeloma                | 1,410.83<br>(1,156.10 to<br>1,881.96)                         | 3,101.17<br>(2,357.26 to<br>4,204.21)                          | 2,838.59<br>(2,170.34 to<br>3,788.63)                         | 3,068.64<br>(2,319.56 to<br>4,166.06)                           | 63.34<br>(52.56 to<br>79.51)                               | 160.53<br>(121.23 to<br>212.13)                             | 150.33<br>(114.32 to<br>194.98)                            | 155.80<br>(117.79 to<br>207.32)                              |
| Leukemia                        | 7,120.74<br>(6,123.93 to<br>8,190.31)                         | 9,250.08<br>(7,315.22 to<br>11,671.49)                         | 7,730.21<br>(6,154.53 to<br>9,630.11)                         | 9,939.23<br>(7,785.04 to<br>12,549.97)                          | 193.17<br>(168.71 to<br>221.22)                            | 352.48<br>(282.54 to<br>441.73)                             | 306.22<br>(244.58 to<br>375.80)                            | 369.78<br>(294.16 to<br>464.47)                              |
| Acute lymphoid leukemia         | 3,106.44<br>(2,646.84 to<br>3,629.26)                         | 3,411.40<br>(2,656.03 to<br>4,392.22)                          | 2,745.47<br>(2,143.91 to<br>3,482.53)                         | 3,681.74<br>(2,859.93 to<br>4,755.24)                           | 70.14<br>(60.29 to<br>81.68)                               | 106.72<br>(83.22 to<br>134.88)                              | 89.32<br>(69.82 to<br>111.79)                              | 112.30<br>(87.01 to<br>141.67)                               |
| Chronic lymphoid leukemia       | 313.21<br>(253.97 to<br>381.69)                               | 550.35<br>(378.96 to<br>748.46)                                | 496.72<br>(347.81 to<br>665.41)                               | 573.78<br>(394.25 to<br>805.67)                                 | 17.11<br>(13.49 to<br>20.54)                               | 35.43<br>(24.64 to<br>48.43)                                | 33.09<br>(23.08 to<br>44.19)                               | 35.90<br>(24.91 to<br>49.79)                                 |
| Acute myeloid leukemia          | 1,805.17<br>(1,528.03 to<br>2,128.11)                         | 3,094.17<br>(2,397.98 to<br>3,976.43)                          | 2,774.55<br>(2,165.85 to<br>3,595.23)                         | 3,142.05<br>(2,394.52 to<br>4,056.72)                           | 47.14<br>(39.57 to<br>55.27)                               | 110.90<br>(83.68 to<br>141.89)                              | 102.76<br>(78.63 to<br>129.14)                             | 110.10<br>(82.05 to<br>142.48)                               |
| Chronic myeloid leukemia        | 457.54<br>(369.27 to<br>579.55)                               | 452.40<br>(298.08 to<br>654.91)                                | 316.66<br>(213.31 to<br>450.12)                               | 527.60<br>(350.44 to<br>754.28)                                 | 16.33<br>(13.29 to<br>20.85)                               | 30.66<br>(13.29 to<br>29.73)                                | 14.97<br>(10.19 to<br>21.73)                               | 23.40<br>(15.86 to<br>33.43)                                 |
| Other leukemia                  | 1,438.38<br>(1,188.48 to<br>1,747.60)                         | 1,741.76<br>(1,341.01 to<br>2,276.87)                          | 1,396.81<br>(1,081.43 to<br>1,786.58)                         | 2,014.06<br>(1,541.22 to<br>2,624.09)                           | 42.46<br>(35.92 to<br>51.27)                               | 78.77<br>(62.42 to<br>99.51)                                | 66.08<br>(51.72 to<br>84.02)                               | 88.09<br>(69.20 to<br>111.73)                                |
| Other neoplasms                 | 5,664.05<br>(4,884.92 to<br>6,599.59)                         | 8,876.32<br>(7,454.90 to<br>10,539.50)                         | 8,561.93<br>(7,157.79 to<br>10,117.92)                        | 8,894.66<br>(7,556.30 to<br>10,521.83)                          | 192.85<br>(166.46 to<br>221.49)                            | 403.53<br>(344.68 to<br>464.65)                             | 407.07<br>(342.72 to<br>474.16)                            | 390.57<br>(332.31 to<br>446.43)                              |
| <b>Cardiovascular diseases</b>  | <b>82,969.59</b><br><b>(73,092.32 to</b><br><b>94,573.51)</b> | <b>96,478.21</b><br><b>(62,872.65 to</b><br><b>146,209.46)</b> | <b>59,426.53</b><br><b>(40,091.62 to</b><br><b>87,478.04)</b> | <b>158,901.15</b><br><b>(99,222.95 to</b><br><b>235,126.70)</b> | <b>5,063.00</b><br><b>(4,539.28 to</b><br><b>5,663.29)</b> | <b>7,499.83</b><br><b>(4,798.09 to</b><br><b>11,577.31)</b> | <b>4,973.22</b><br><b>(3,248.16 to</b><br><b>7,719.94)</b> | <b>11,227.51</b><br><b>(7,179.66 to</b><br><b>16,697.35)</b> |
| Rheumatic heart disease         | 1,122.55<br>(957.61 to<br>1,309.33)                           | 704.52<br>(511.19 to<br>985.96)                                | 538.34<br>(381.49 to<br>737.62)                               | 881.49<br>(643.12 to<br>1,199.75)                               | 30.78<br>(26.46 to<br>35.61)                               | 26.29<br>(19.70 to<br>35.52)                                | 20.79<br>(15.40 to<br>27.42)                               | 31.98<br>(24.00 to<br>42.49)                                 |

|                                |                                          |                                          |                                          |                                           |                                       |                                       |                                       |                                       |
|--------------------------------|------------------------------------------|------------------------------------------|------------------------------------------|-------------------------------------------|---------------------------------------|---------------------------------------|---------------------------------------|---------------------------------------|
| Ischemic heart disease         | 41,514.72<br>(36,423.28 to<br>47,909.75) | 44,812.04<br>(24,778.94 to<br>75,560.20) | 25,555.73<br>(14,563.39 to<br>42,864.17) | 82,136.14<br>(46,174.09 to<br>133,954.36) | 2,724.06<br>(2,434.38 to<br>3,074.39) | 3,625.56<br>(1,983.23 to<br>5,994.57) | 2,252.34<br>(1,277.97 to<br>3,760.51) | 5,940.23<br>(3,321.37 to<br>9,572.94) |
| Stroke                         | 24,058.04<br>(20,996.15 to<br>27,395.06) | 25,271.54<br>(15,027.23 to<br>44,229.92) | 13,665.86<br>(8,415.63 to<br>22,102.84)  | 45,888.02<br>(26,910.55 to<br>76,206.32)  | 1,448.38<br>(1,271.50 to<br>1,635.40) | 1,973.28<br>(1,145.05 to<br>3,417.72) | 1,183.40<br>(691.79 to<br>2,027.21)   | 3,158.16<br>(1,843.94 to<br>5,227.54) |
| Ischemic stroke                | 7,985.33<br>(6,949.73 to<br>9,168.04)    | 10,358.41<br>(5,421.76 to<br>20,500.66)  | 6,256.02<br>(3,309.87 to<br>11,512.93)   | 16,379.33<br>(8,478.54 to<br>32,549.30)   | 652.86<br>(571.93 to<br>740.31)       | 1,008.11<br>(512.68 to<br>2,070.35)   | 657.72<br>(340.36 to<br>1,304.93)     | 1,453.38<br>(727.32 to<br>3,039.89)   |
| Intracerebral hemorrhage       | 16,072.71<br>(13,959.79 to<br>18,525.00) | 14,913.13<br>(8,613.65 to<br>25,757.57)  | 7,409.84<br>(4,554.36 to<br>11,743.94)   | 29,508.69<br>(16,456.68 to<br>52,800.59)  | 795.52<br>(695.52 to<br>900.77)       | 965.18<br>(587.54 to<br>1,563.25)     | 525.68<br>(331.76 to<br>841.96)       | 1,704.79<br>(1,007.55 to<br>2,903.25) |
| Hypertensive heart disease     | 3,153.90<br>(1,875.35 to<br>3,988.11)    | 6,601.93<br>(3,320.08 to<br>14,121.21)   | 4,546.18<br>(2,530.35 to<br>7,686.58)    | 8,483.24<br>(4,085.94 to<br>18,533.04)    | 223.23<br>(144.18 to<br>274.82)       | 575.31<br>(294.65 to<br>1,257.22)     | 414.79<br>(231.56 to<br>739.28)       | 711.04<br>(352.05 to<br>1,567.06)     |
| Cardiomyopathy and myocarditis | 3,986.10<br>(2,946.85 to<br>4,877.10)    | 4,812.17<br>(2,784.50 to<br>7,115.31)    | 3,582.09<br>(2,040.55 to<br>5,000.40)    | 5,438.86<br>(3,253.84 to<br>7,830.37)     | 144.30<br>(93.70 to<br>182.21)        | 232.48<br>(121.57 to<br>354.15)       | 171.01<br>(92.78 to<br>261.78)        | 254.20<br>(139.80 to<br>384.20)       |
| Myocarditis                    | 227.62<br>(175.32 to<br>320.63)          | 223.61<br>(159.45 to<br>316.31)          | 207.52<br>(145.96 to<br>296.60)          | 239.12<br>(170.30 to<br>345.32)           | 5.98<br>(4.33 to<br>8.42)             | 8.98<br>(5.41 to<br>13.19)            | 9.02<br>(5.35 to<br>13.06)            | 9.08<br>(5.49 to<br>13.13)            |

**Panama**

| Cause                                         | YLLs (actual counts)                            |                                                 |                                                |                                                 | Deaths (actual counts)                 |                                            |                                          |                                              |
|-----------------------------------------------|-------------------------------------------------|-------------------------------------------------|------------------------------------------------|-------------------------------------------------|----------------------------------------|--------------------------------------------|------------------------------------------|----------------------------------------------|
|                                               | 2016                                            | 2020 Forecast                                   | 2040 Better Scenario                           | 2040 Worse Scenario                             | 2016                                   | 2020 Forecast                              | 2040 Better Scenario                     | 2040 Worse Scenario                          |
| Alcoholic cardiomyopathy                      | 195.44<br>(128.88 to<br>326.78)                 | 297.74<br>(189.38 to<br>484.03)                 | 225.13<br>(140.07 to<br>362.36)                | 329.76<br>(205.43 to<br>521.39)                 | 8.11<br>(4.79 to<br>11.60)             | 14.78<br>(8.37 to<br>20.38)                | 11.82<br>(6.55 to<br>16.34)              | 16.03<br>(9.24 to<br>21.99)                  |
| Other cardiomyopathy                          | 3,563.05<br>(2,543.68 to<br>4,413.25)           | 4,290.82<br>(2,560.38 to<br>6,537.81)           | 2,949.43<br>(1,629.23 to<br>4,543.35)          | 4,869.99<br>(2,738.50 to<br>7,223.76)           | 130.21<br>(82.25 to<br>166.00)         | 208.72<br>(103.06 to<br>332.13)            | 150.16<br>(76.35 to<br>237.20)           | 229.08<br>(119.28 to<br>358.68)              |
| Atrial fibrillation and flutter               | 1,185.32<br>(926.86 to<br>1,496.19)             | 2,756.43<br>(1,933.44 to<br>3,862.65)           | 2,393.84<br>(1,705.00 to<br>3,264.69)          | 2,912.57<br>(2,029.36 to<br>4,096.53)           | 123.02<br>(94.78 to<br>158.16)         | 308.10<br>(210.06 to<br>437.30)            | 278.53<br>(194.17 to<br>388.81)          | 314.34<br>(213.31 to<br>447.08)              |
| Aortic aneurysm                               | 1,492.27<br>(1,250.96 to<br>1,786.49)           | 2,536.73<br>(1,864.06 to<br>3,429.50)           | 2,194.54<br>(1,648.44 to<br>2,887.11)          | 2,720.57<br>(2,022.25 to<br>3,677.62)           | 78.11<br>(66.30 to<br>91.27)           | 159.13<br>(122.30 to<br>210.84)            | 143.83<br>(111.25 to<br>184.39)          | 163.63<br>(127.22 to<br>212.61)              |
| Peripheral artery disease                     | 386.52<br>(269.90 to<br>697.08)                 | 1,548.51<br>(963.56 to<br>2,677.90)             | 1,426.15<br>(893.66 to<br>2,447.16)            | 1,493.03<br>(934.79 to<br>2,594.67)             | 36.27<br>(25.35 to<br>65.01)           | 164.47<br>(97.01 to<br>288.72)             | 159.04<br>(95.08 to<br>271.81)           | 151.58<br>(90.93 to<br>268.14)               |
| Endocarditis                                  | 1,338.69<br>(968.40 to<br>1,739.11)             | 1,841.51<br>(1,165.46 to<br>2,583.30)           | 1,638.80<br>(1,042.24 to<br>2,268.92)          | 1,965.03<br>(1,277.77 to<br>2,777.77)           | 46.04<br>(28.87 to<br>58.66)           | 84.07<br>(46.59 to<br>126.07)              | 78.50<br>(43.67 to<br>116.89)            | 86.44<br>(48.19 to<br>129.60)                |
| Other cardiovascular and circulatory diseases | 4,731.47<br>(4,076.23 to<br>5,433.41)           | 5,592.84<br>(4,079.20 to<br>7,806.19)           | 4,085.00<br>(3,012.19 to<br>5,483.80)          | 6,982.19<br>(5,223.10 to<br>9,385.05)           | 208.82<br>(182.16 to<br>238.57)        | 351.14<br>(258.00 to<br>481.08)            | 270.99<br>(198.86 to<br>365.96)          | 415.91<br>(313.35 to<br>552.15)              |
| <b>Chronic respiratory diseases</b>           | <b>11,665.83</b><br>(10,300.26 to<br>13,232.18) | <b>15,703.09</b><br>(11,648.16 to<br>21,157.73) | <b>11,442.72</b><br>(8,926.65 to<br>14,628.69) | <b>23,233.34</b><br>(16,253.22 to<br>33,332.51) | <b>755.64</b><br>(673.86 to<br>852.74) | <b>1,218.08</b><br>(887.38 to<br>1,648.99) | <b>909.09</b><br>(695.46 to<br>1,173.07) | <b>1,752.42</b><br>(1,235.08 to<br>2,510.55) |
| Chronic obstructive pulmonary disease         | 8,068.23<br>(7,009.46 to<br>9,193.73)           | 11,982.04<br>(8,403.30 to<br>17,216.80)         | 7,621.72<br>(5,619.12 to<br>10,337.70)         | 19,424.84<br>(12,799.38 to<br>29,189.83)        | 614.53<br>(544.37 to<br>692.54)        | 1,013.65<br>(709.19 to<br>1,440.24)        | 685.81<br>(496.26 to<br>927.70)          | 1,553.57<br>(1,053.16 to<br>2,292.54)        |
| Pneumoconiosis                                | 25.38<br>(20.74 to<br>31.26)                    | 28.44<br>(21.73 to<br>36.36)                    | 25.87<br>(19.30 to<br>34.24)                   | 30.97<br>(23.90 to<br>39.64)                    | 1.46<br>(1.19 to<br>1.75)              | 2.11<br>(1.57 to<br>2.77)                  | 1.95<br>(1.39 to<br>2.73)                | 2.27<br>(1.66 to<br>3.00)                    |
| Silicosis                                     | 3.91<br>(2.73 to<br>5.31)                       | 3.18<br>(1.76 to<br>5.09)                       | 2.22<br>(1.18 to<br>3.81)                      | 3.84<br>(2.30 to<br>6.01)                       | 0.28<br>(0.19 to<br>0.37)              | 0.29<br>(0.15 to<br>0.48)                  | 0.21<br>(0.11 to<br>0.39)                | 0.33<br>(0.18 to<br>0.57)                    |
| Asbestosis                                    | 9.28<br>(7.34 to<br>12.19)                      | 10.31<br>(7.49 to<br>14.08)                     | 11.53<br>(8.42 to<br>15.60)                    | 9.85<br>(7.34 to<br>13.31)                      | 0.34<br>(0.26 to<br>0.44)              | 0.52<br>(0.35 to<br>0.74)                  | 0.61<br>(0.41 to<br>0.86)                | 0.49<br>(0.33 to<br>0.67)                    |
| Coal workers pneumoconiosis                   | 2.22<br>(1.19 to<br>3.12)                       | 2.04<br>(1.08 to<br>3.48)                       | 1.75<br>(0.84 to<br>3.25)                      | 2.60<br>(1.35 to<br>4.28)                       | 0.16<br>(0.09 to<br>0.22)              | 0.19<br>(0.10 to<br>0.35)                  | 0.18<br>(0.08 to<br>0.36)                | 0.23<br>(0.12 to<br>0.43)                    |

|                                                                |                                                  |                                                   |                                                  |                                                   |                                          |                                          |                                          |                                            |
|----------------------------------------------------------------|--------------------------------------------------|---------------------------------------------------|--------------------------------------------------|---------------------------------------------------|------------------------------------------|------------------------------------------|------------------------------------------|--------------------------------------------|
| Other pneumoconiosis                                           | 9.98<br>(7.70 to<br>12.60)                       | 12.90<br>(9.00 to<br>17.96)                       | 10.37<br>(6.74 to<br>15.14)                      | 14.68<br>(10.45 to<br>20.48)                      | 0.67<br>(0.53 to<br>0.85)                | 1.10<br>(0.77 to<br>1.58)                | 0.95<br>(0.60 to<br>1.43)                | 1.21<br>(0.84 to<br>1.71)                  |
| Asthma                                                         | 1,803.06<br>(1,504.60 to<br>2,177.51)            | 1,094.15<br>(675.08 to<br>1,786.06)               | 646.22<br>(397.37 to<br>1,027.37)                | 1,479.65<br>(926.57 to<br>2,347.81)               | 62.00<br>(52.31 to<br>80.79)             | 55.23<br>(32.87 to<br>95.42)             | 34.64<br>(20.85 to<br>57.94)             | 71.60<br>(43.26 to<br>120.23)              |
| Interstitial lung disease and pulmonary sarcoidosis            | 1,476.90<br>(1,045.38 to<br>1,842.58)            | 2,347.25<br>(1,645.42 to<br>3,025.74)             | 2,921.96<br>(2,098.67 to<br>3,729.72)            | 2,025.79<br>(1,420.66 to<br>2,575.01)             | 70.38<br>(50.12 to<br>87.49)             | 137.91<br>(95.70 to<br>180.22)           | 177.70<br>(124.69 to<br>224.70)          | 115.52<br>(79.00 to<br>144.17)             |
| Other chronic respiratory diseases                             | 292.26<br>(202.88 to<br>424.65)                  | 251.22<br>(158.28 to<br>362.26)                   | 226.95<br>(144.60 to<br>321.09)                  | 272.08<br>(170.80 to<br>392.71)                   | 7.29<br>(3.90 to<br>9.40)                | 9.19<br>(4.23 to<br>12.92)               | 8.99<br>(3.99 to<br>12.86)               | 9.47<br>(4.45 to<br>13.12)                 |
| <b>Cirrhosis and other chronic liver diseases</b>              | <b>11,270.40<br/>(9,571.58 to<br/>13,219.05)</b> | <b>15,372.66<br/>(12,589.50 to<br/>18,334.52)</b> | <b>12,022.95<br/>(9,825.12 to<br/>14,492.08)</b> | <b>17,859.17<br/>(15,005.66 to<br/>21,119.81)</b> | <b>460.56<br/>(396.09 to<br/>533.42)</b> | <b>741.08<br/>(618.52 to<br/>865.71)</b> | <b>596.79<br/>(495.47 to<br/>709.57)</b> | <b>843.76<br/>(722.77 to<br/>971.78)</b>   |
| Cirrhosis and other chronic liver diseases due to hepatitis B  | 403.95<br>(321.31 to<br>495.31)                  | 554.16<br>(437.61 to<br>691.19)                   | 483.20<br>(379.45 to<br>607.31)                  | 600.34<br>(477.30 to<br>744.35)                   | 17.05<br>(13.80 to<br>20.68)             | 26.99<br>(21.83 to<br>33.10)             | 24.01<br>(19.18 to<br>29.42)             | 28.72<br>(23.48 to<br>34.78)               |
| Cirrhosis and other chronic liver diseases due to hepatitis C  | 4,242.46<br>(3,471.55 to<br>5,111.42)            | 6,055.54<br>(4,832.38 to<br>7,490.56)             | 5,224.96<br>(4,113.11 to<br>6,481.23)            | 6,602.23<br>(5,406.26 to<br>8,032.38)             | 169.78<br>(142.09 to<br>200.50)          | 276.81<br>(225.61 to<br>330.57)          | 243.24<br>(195.65 to<br>293.60)          | 296.96<br>(248.04 to<br>349.72)            |
| Cirrhosis and other chronic liver diseases due to alcohol use  | 4,313.97<br>(3,613.53 to<br>5,119.07)            | 6,131.17<br>(5,002.51 to<br>7,417.32)             | 4,072.27<br>(3,267.74 to<br>5,012.14)            | 7,743.35<br>(6,444.85 to<br>9,288.82)             | 189.79<br>(161.77 to<br>221.67)          | 309.96<br>(256.19 to<br>366.51)          | 217.24<br>(177.84 to<br>263.56)          | 380.99<br>(322.32 to<br>449.04)            |
| Cirrhosis and other chronic liver diseases due to other causes | 2,310.02<br>(1,985.97 to<br>2,680.24)            | 2,631.79<br>(2,119.03 to<br>3,184.77)             | 2,342.52<br>(1,795.40 to<br>2,742.06)            | 2,913.25<br>(2,372.58 to<br>3,476.65)             | 83.93<br>(71.60 to<br>97.90)             | 127.33<br>(102.05 to<br>152.36)          | 112.30<br>(91.39 to<br>137.31)           | 137.09<br>(113.52 to<br>163.11)            |
| <b>Digestive diseases</b>                                      | <b>9,509.22<br/>(8,082.70 to<br/>12,029.99)</b>  | <b>11,452.27<br/>(8,929.01 to<br/>15,205.36)</b>  | <b>9,555.38<br/>(7,477.22 to<br/>12,609.15)</b>  | <b>13,087.05<br/>(10,216.73 to<br/>17,662.25)</b> | <b>408.64<br/>(347.37 to<br/>522.41)</b> | <b>709.26<br/>(545.20 to<br/>940.03)</b> | <b>626.07<br/>(479.55 to<br/>831.97)</b> | <b>778.09<br/>(595.84 to<br/>1,034.04)</b> |
| Peptic ulcer disease                                           | 1,054.45<br>(848.01 to<br>1,417.21)              | 925.74<br>(696.78 to<br>1,287.75)                 | 693.57<br>(504.25 to<br>965.21)                  | 1,184.74<br>(903.32 to<br>1,637.03)               | 56.44<br>(46.21 to<br>74.52)             | 64.99<br>(48.93 to<br>90.37)             | 50.18<br>(36.52 to<br>69.58)             | 80.69<br>(62.20 to<br>107.97)              |

**Panama**

| Cause                                      | YLLs (actual counts)                  |                                       |                                       |                                       | Deaths (actual counts)         |                                 |                                 |                                 |
|--------------------------------------------|---------------------------------------|---------------------------------------|---------------------------------------|---------------------------------------|--------------------------------|---------------------------------|---------------------------------|---------------------------------|
|                                            | 2016                                  | 2040 Forecast                         | 2040 Better Scenario                  | 2040 Worse Scenario                   | 2016                           | 2040 Forecast                   | 2040 Better Scenario            | 2040 Worse Scenario             |
| Gastritis and duodenitis                   | 162.57<br>(121.20 to<br>227.41)       | 226.51<br>(158.21 to<br>336.15)       | 187.72<br>(127.48 to<br>275.26)       | 257.21<br>(183.74 to<br>380.07)       | 8.21<br>(6.19 to<br>12.77)     | 14.72<br>(10.39 to<br>25.86)    | 12.68<br>(8.79 to<br>22.30)     | 16.16<br>(11.55 to<br>28.76)    |
| Appendicitis                               | 889.15<br>(691.58 to<br>1,147.33)     | 626.41<br>(448.21 to<br>920.29)       | 455.77<br>(318.52 to<br>680.39)       | 777.25<br>(573.37 to<br>1,159.24)     | 23.24<br>(18.42 to<br>33.06)   | 24.78<br>(18.21 to<br>39.45)    | 19.05<br>(13.36 to<br>30.99)    | 29.54<br>(22.23 to<br>47.82)    |
| Paralytic ileus and intestinal obstruction | 2,771.91<br>(2,135.79 to<br>3,617.98) | 3,025.99<br>(2,301.19 to<br>3,970.06) | 2,907.72<br>(2,202.81 to<br>3,771.07) | 3,165.55<br>(2,405.68 to<br>4,250.05) | 103.07<br>(77.46 to<br>127.59) | 179.05<br>(129.54 to<br>227.42) | 183.74<br>(132.19 to<br>234.34) | 177.34<br>(127.14 to<br>228.70) |
| Inguinal, femoral, and abdominal hernia    | 400.51<br>(296.63 to<br>749.48)       | 419.68<br>(278.59 to<br>899.85)       | 356.20<br>(226.88 to<br>899.85)       | 471.17<br>(315.61 to<br>1,031.52)     | 19.49<br>(12.84 to<br>44.19)   | 27.48<br>(16.66 to<br>67.74)    | 24.61<br>(14.64 to<br>60.38)    | 29.51<br>(17.98 to<br>72.51)    |
| Inflammatory bowel disease                 | 704.69<br>(512.16 to<br>874.29)       | 670.78<br>(515.53 to<br>860.75)       | 638.92<br>(485.23 to<br>823.28)       | 687.19<br>(529.44 to<br>886.09)       | 24.39<br>(18.58 to<br>29.90)   | 35.62<br>(26.51 to<br>45.96)    | 36.07<br>(26.27 to<br>46.48)    | 34.78<br>(26.10 to<br>44.06)    |
| Vascular intestinal disorders              | 772.61<br>(620.27 to<br>1,011.83)     | 1,379.15<br>(1,078.13 to<br>1,802.79) | 1,276.87<br>(978.35 to<br>1,697.08)   | 1,452.93<br>(1,146.59 to<br>1,921.82) | 47.02<br>(38.42 to<br>60.52)   | 103.54<br>(81.04 to<br>138.80)  | 99.17<br>(76.10 to<br>132.76)   | 106.00<br>(83.77 to<br>139.65)  |
| Gallbladder and biliary diseases           | 826.01<br>(672.44 to<br>1,187.57)     | 1,530.90<br>(840.27 to<br>2,780.09)   | 1,028.95<br>(597.72 to<br>1,772.24)   | 1,934.32<br>(1,052.78 to<br>3,435.03) | 45.24<br>(37.41 to<br>62.68)   | 109.40<br>(59.97 to<br>198.89)  | 77.62<br>(44.78 to<br>134.43)   | 132.75<br>(71.61 to<br>239.19)  |
| Pancreatitis                               | 892.13<br>(628.77 to<br>1,129.75)     | 1,353.09<br>(668.02 to<br>2,847.94)   | 827.65<br>(429.16 to<br>1,668.29)     | 1,720.15<br>(837.44 to<br>3,571.66)   | 31.78<br>(20.53 to<br>39.91)   | 62.54<br>(27.67 to<br>135.43)   | 39.56<br>(18.88 to<br>82.53)    | 78.19<br>(34.87 to<br>166.64)   |
| Other digestive diseases                   | 1,035.19<br>(827.66 to<br>1,396.18)   | 1,294.04<br>(972.93 to<br>1,738.45)   | 1,182.02<br>(878.02 to<br>1,588.02)   | 1,436.56<br>(1,086.10 to<br>1,961.00) | 49.77<br>(38.81 to<br>64.28)   | 87.13<br>(64.99 to<br>114.68)   | 83.41<br>(61.36 to<br>109.92)   | 93.11<br>(69.85 to<br>124.40)   |

|                                                     |                                          |                                           |                                           |                                            |                                       |                                        |                                       |                                        |
|-----------------------------------------------------|------------------------------------------|-------------------------------------------|-------------------------------------------|--------------------------------------------|---------------------------------------|----------------------------------------|---------------------------------------|----------------------------------------|
|                                                     | 15,892.24<br>(13,534.29 to<br>19,009.49) | 34,979.75<br>(25,993.67 to<br>47,972.21)  | 33,049.75<br>(24,778.09 to<br>43,488.38)  | 34,960.26<br>(25,878.85 to<br>48,629.53)   | 1,463.99<br>(1,179.84 to<br>1,694.76) | 3,598.06<br>(2,556.97 to<br>5,142.32)  | 3,524.23<br>(2,567.04 to<br>4,787.75) | 3,468.01<br>(2,399.74 to<br>5,060.16)  |
| <b>Neurological disorders</b>                       |                                          |                                           |                                           |                                            |                                       |                                        |                                       |                                        |
| Alzheimer's disease and other dementias             | 11,162.13<br>(9,221.25 to<br>13,896.89)  | 27,455.70<br>(18,726.09 to<br>40,460.89)  | 25,949.55<br>(18,460.75 to<br>36,005.23)  | 27,230.04<br>(18,456.19 to<br>40,811.58)   | 1,236.75<br>(1,014.39 to<br>1,506.83) | 3,210.17<br>(2,170.24 to<br>4,712.49)  | 3,127.17<br>(2,204.53 to<br>4,381.00) | 3,097.95<br>(2,039.16 to<br>4,648.02)  |
| Parkinson's disease                                 | 976.09<br>(734.56 to<br>1,281.19)        | 2,514.10<br>(1,885.17 to<br>3,287.76)     | 2,725.01<br>(2,032.70 to<br>3,573.77)     | 2,240.08<br>(1,686.58 to<br>2,913.65)      | 82.83<br>(61.99 to<br>108.29)         | 223.89<br>(168.28 to<br>295.87)        | 247.91<br>(184.63 to<br>325.22)       | 195.57<br>(146.93 to<br>258.23)        |
| Epilepsy                                            | 2,305.29<br>(1,893.18 to<br>2,758.04)    | 2,692.77<br>(1,840.86 to<br>3,866.15)     | 2,099.65<br>(1,505.95 to<br>2,944.60)     | 3,232.32<br>(2,184.85 to<br>4,644.24)      | 54.32<br>(45.62 to<br>63.70)          | 83.07<br>(57.99 to<br>117.86)          | 67.14<br>(48.67 to<br>93.05)          | 97.39<br>(66.24 to<br>141.12)          |
| Multiple sclerosis                                  | 211.61<br>(151.97 to<br>263.44)          | 288.00<br>(193.02 to<br>370.13)           | 296.64<br>(196.50 to<br>383.92)           | 280.08<br>(188.92 to<br>358.75)            | 6.37<br>(4.52 to<br>7.93)             | 9.92<br>(6.62 to<br>12.47)             | 10.32<br>(6.91 to<br>13.07)           | 9.55<br>(6.42 to<br>11.92)             |
| Motor neuron disease                                | 358.96<br>(289.84 to<br>425.75)          | 718.93<br>(573.63 to<br>869.09)           | 708.43<br>(559.44 to<br>858.18)           | 693.68<br>(553.35 to<br>835.18)            | 12.44<br>(10.15 to<br>14.67)          | 29.25<br>(23.49 to<br>35.04)           | 29.24<br>(23.39 to<br>35.04)          | 27.92<br>(22.56 to<br>33.28)           |
| Other neurological disorders                        | 878.15<br>(743.35 to<br>1,042.72)        | 1,310.25<br>(1,072.85 to<br>1,597.09)     | 1,270.47<br>(1,046.61 to<br>1,534.11)     | 1,284.06<br>(1,047.72 to<br>1,559.06)      | 21.27<br>(18.44 to<br>24.69)          | 41.77<br>(35.80 to<br>48.10)           | 42.46<br>(35.95 to<br>49.05)          | 39.63<br>(34.12 to<br>45.71)           |
| <b>Mental disorders</b>                             | 1,844.25<br>(1,445.79 to<br>2,322.01)    | 3,406.55<br>(2,596.73 to<br>4,434.35)     | 3,822.35<br>(2,865.64 to<br>5,012.38)     | 3,270.21<br>(2,534.85 to<br>4,252.08)      | 49.84<br>(39.93 to<br>61.55)          | 107.33<br>(85.53 to<br>134.28)         | 123.86<br>(96.14 to<br>155.67)        | 101.02<br>(82.22 to<br>124.28)         |
| Alcohol use disorders                               | 851.03<br>(658.85 to<br>1,070.41)        | 1,165.64<br>(870.05 to<br>1,519.11)       | 1,137.48<br>(838.27 to<br>1,464.97)       | 1,187.12<br>(898.20 to<br>1,517.44)        | 25.80<br>(20.34 to<br>31.93)          | 40.83<br>(31.07 to<br>51.71)           | 40.64<br>(30.52 to<br>51.96)          | 41.06<br>(31.47 to<br>51.35)           |
| Drug use disorders                                  | 973.56<br>(712.80 to<br>1,294.02)        | 2,223.44<br>(1,584.82 to<br>3,062.74)     | 2,667.38<br>(1,882.30 to<br>3,663.02)     | 2,065.54<br>(1,480.90 to<br>2,846.94)      | 23.67<br>(17.80 to<br>30.97)          | 66.16<br>(49.56 to<br>86.66)           | 82.89<br>(60.71 to<br>107.31)         | 59.63<br>(45.54 to<br>77.51)           |
| Opioid use disorders                                | 597.68<br>(416.79 to<br>838.64)          | 829.97<br>(552.78 to<br>1,313.71)         | 867.66<br>(576.47 to<br>1,300.28)         | 814.46<br>(546.17 to<br>1,269.23)          | 12.92<br>(9.28 to<br>17.78)           | 20.42<br>(14.64 to<br>30.27)           | 21.86<br>(15.47 to<br>32.60)          | 19.72<br>(14.06 to<br>28.75)           |
| Cocaine use disorders                               | 79.10<br>(48.14 to<br>113.55)            | 338.76<br>(214.38 to<br>499.90)           | 407.98<br>(250.70 to<br>595.86)           | 322.70<br>(208.84 to<br>462.23)            | 1.78<br>(1.12 to<br>2.56)             | 8.23<br>(5.54 to<br>12.10)             | 10.03<br>(6.56 to<br>14.46)           | 7.79<br>(5.25 to<br>10.83)             |
| Amphetamine use disorders                           | 33.22<br>(18.82 to<br>54.44)             | 135.09<br>(75.99 to<br>226.33)            | 181.63<br>(102.21 to<br>309.16)           | 122.59<br>(71.05 to<br>208.68)             | 0.77<br>(0.45 to<br>1.22)             | 3.40<br>(2.01 to<br>5.48)              | 4.67<br>(2.77 to<br>7.41)             | 3.05<br>(1.86 to<br>4.89)              |
| Other drug use disorders                            | 263.56<br>(166.40 to<br>358.96)          | 919.62<br>(588.28 to<br>1,310.68)         | 1,210.11<br>(755.30 to<br>1,700.12)       | 805.77<br>(522.81 to<br>1,134.97)          | 8.19<br>(5.65 to<br>10.78)            | 34.10<br>(23.89 to<br>46.53)           | 46.34<br>(31.40 to<br>62.10)          | 29.07<br>(20.73 to<br>38.22)           |
| Eating disorders                                    | 19.66<br>(15.25 to<br>24.65)             | 17.48<br>(12.27 to<br>24.02)              | 17.49<br>(12.22 to<br>23.95)              | 17.56<br>(12.42 to<br>24.03)               | 0.37<br>(0.28 to<br>0.46)             | 0.33<br>(0.23 to<br>0.46)              | 0.34<br>(0.23 to<br>0.47)             | 0.33<br>(0.23 to<br>0.45)              |
| <b>Panama</b>                                       |                                          |                                           |                                           |                                            |                                       |                                        |                                       |                                        |
| Cause                                               | YLLs (actual counts)                     |                                           |                                           |                                            | Deaths (actual counts)                |                                        |                                       |                                        |
|                                                     | 2016                                     | 2040 Forecast                             | 2040 Better Scenario                      | 2040 Worse Scenario                        | 2016                                  | 2040 Forecast                          | 2040 Better Scenario                  | 2040 Worse Scenario                    |
| Diabetes, urogenital, blood, and endocrine diseases | 44,973.58<br>(39,403.30 to<br>51,636.49) | 80,049.08<br>(48,318.49 to<br>159,294.58) | 58,470.30<br>(35,592.51 to<br>111,531.60) | 102,224.19<br>(61,167.76 to<br>197,229.72) | 2,237.94<br>(1,985.15 to<br>2,543.36) | 5,401.78<br>(3,069.70 to<br>11,174.31) | 4,074.34<br>(2,343.21 to<br>8,758.19) | 6,694.35<br>(3,825.36 to<br>13,238.32) |
| Diabetes mellitus                                   | 19,803.38<br>(17,208.68 to<br>22,986.91) | 27,143.47<br>(19,217.40 to<br>37,880.91)  | 20,175.83<br>(14,287.00 to<br>27,832.85)  | 36,159.98<br>(25,698.80 to<br>50,173.65)   | 1,105.11<br>(975.98 to<br>1,267.75)   | 1,846.08<br>(1,352.47 to<br>2,459.15)  | 1,426.34<br>(1,039.13 to<br>1,913.74) | 2,368.64<br>(1,741.93 to<br>3,132.46)  |
| Acute glomerulonephritis                            | 64.82<br>(42.96 to<br>105.41)            | 44.59<br>(28.77 to<br>72.25)              | 34.21<br>(22.62 to<br>55.79)              | 53.01<br>(34.32 to<br>90.55)               | 1.02<br>(0.74 to<br>1.51)             | 0.83<br>(0.59 to<br>1.21)              | 0.67<br>(0.48 to<br>0.96)             | 0.97<br>(0.68 to<br>1.46)              |
| Chronic kidney disease                              | 18,983.52<br>(16,428.93 to<br>21,967.75) | 44,409.66<br>(17,699.39 to<br>120,815.93) | 30,743.27<br>(13,017.86 to<br>82,754.08)  | 56,851.13<br>(23,256.62 to<br>148,286.61)  | 912.80<br>(803.76 to<br>1,047.59)     | 3,100.13<br>(1,064.49 to<br>8,596.02)  | 2,224.63<br>(791.84 to<br>6,455.96)   | 3,855.63<br>(1,353.20 to<br>10,477.81) |
| Chronic kidney disease due to diabetes mellitus     | 6,922.79<br>(5,651.98 to<br>8,315.76)    | 18,929.60<br>(7,048.18 to<br>53,735.98)   | 12,986.97<br>(5,337.96 to<br>36,130.89)   | 24,101.05<br>(9,261.22 to<br>64,881.44)    | 332.10<br>(272.92 to<br>393.48)       | 1,198.79<br>(395.57 to<br>3,228.42)    | 848.22<br>(295.93 to<br>2,506.39)     | 1,488.98<br>(504.12 to<br>4,065.61)    |

|                                                            |                                    |                                     |                                     |                                      |                              |                                |                                |                                |
|------------------------------------------------------------|------------------------------------|-------------------------------------|-------------------------------------|--------------------------------------|------------------------------|--------------------------------|--------------------------------|--------------------------------|
| Chronic kidney disease due to hypertension                 | 2,226.85<br>(1,791.69 to 2,716.88) | 7,474.41<br>(2,481.43 to 21,549.34) | 5,479.99<br>(1,878.12 to 16,924.96) | 9,249.42<br>(3,147.21 to 25,851.52)  | 170.83<br>(137.57 to 209.80) | 726.94<br>(225.25 to 2,108.30) | 555.47<br>(175.13 to 1,796.60) | 872.04<br>(279.17 to 2,356.04) |
| Chronic kidney disease due to glomerulonephritis           | 5,637.50<br>(4,643.80 to 6,736.39) | 9,555.32<br>(4,099.89 to 24,491.82) | 6,445.41<br>(2,977.89 to 16,243.45) | 12,574.39<br>(5,563.07 to 31,024.19) | 221.51<br>(178.48 to 266.48) | 588.77<br>(205.09 to 1,714.90) | 404.84<br>(150.44 to 1,236.01) | 757.70<br>(276.11 to 2,141.61) |
| Chronic kidney disease due to other and unspecified causes | 4,196.38<br>(3,433.35 to 5,159.10) | 8,450.33<br>(3,383.29 to 22,090.29) | 5,830.89<br>(2,527.46 to 15,235.45) | 10,926.28<br>(4,489.52 to 27,685.56) | 188.37<br>(151.81 to 232.46) | 585.63<br>(197.39 to 1,613.42) | 416.10<br>(146.22 to 1,191.48) | 736.91<br>(260.70 to 1,971.97) |
| Urinary diseases and male infertility                      | 2,087.97<br>(1,807.99 to 2,401.99) | 3,354.29<br>(2,779.90 to 4,004.89)  | 2,867.73<br>(2,350.49 to 3,483.74)  | 3,558.81<br>(3,027.66 to 4,175.19)   | 112.50<br>(99.46 to 127.15)  | 262.92<br>(209.41 to 323.74)   | 236.48<br>(186.67 to 294.81)   | 266.63<br>(215.64 to 321.12)   |
| Urinary tract infections                                   | 1,827.68<br>(1,595.44 to 2,088.87) | 3,069.91<br>(2,517.86 to 3,661.31)  | 2,645.70<br>(2,131.77 to 3,209.02)  | 3,227.76<br>(2,747.90 to 3,770.98)   | 99.87<br>(88.04 to 114.05)   | 243.40<br>(192.58 to 296.96)   | 220.31<br>(172.80 to 275.47)   | 244.84<br>(196.16 to 296.79)   |
| Urolithiasis                                               | 45.80<br>(31.18 to 76.61)          | 63.03<br>(40.29 to 104.84)          | 48.57<br>(33.89 to 84.32)           | 69.30<br>(46.13 to 116.88)           | 1.64<br>(1.15 to 2.56)       | 3.19<br>(2.06 to 5.42)         | 2.61<br>(1.64 to 4.71)         | 3.35<br>(2.21 to 5.66)         |
| Other urinary diseases                                     | 214.49<br>(148.91 to 347.16)       | 221.35<br>(142.68 to 372.01)        | 173.45<br>(107.65 to 301.88)        | 261.75<br>(173.55 to 440.06)         | 10.99<br>(7.49 to 18.08)     | 16.33<br>(9.63 to 30.10)       | 13.56<br>(7.78 to 24.39)       | 18.44<br>(11.12 to 33.72)      |
| Gynecological diseases                                     | 26.44<br>(18.53 to 36.16)          | 35.98<br>(22.62 to 55.51)           | 24.29<br>(14.58 to 37.59)           | 46.27<br>(29.33 to 68.63)            | 0.84<br>(0.61 to 1.20)       | 1.50<br>(0.96 to 2.52)         | 1.02<br>(0.63 to 1.73)         | 1.89<br>(1.24 to 2.98)         |
| Uterine fibroids                                           | 9.32<br>(6.57 to 14.10)            | 9.59<br>(4.99 to 17.13)             | 7.02<br>(3.65 to 12.84)             | 12.31<br>(6.29 to 22.41)             | 0.24<br>(0.17 to 0.40)       | 0.29<br>(0.16 to 0.52)         | 0.21<br>(0.12 to 0.39)         | 0.36<br>(0.21 to 0.67)         |
| Polycystic ovarian syndrome                                | 0.93<br>(0.47 to 1.67)             | 0.72<br>(0.25 to 1.60)              | 0.36<br>(0.13 to 0.83)              | 1.12<br>(0.45 to 2.43)               | 0.02<br>(0.01 to 0.04)       | 0.02<br>(0.01 to 0.04)         | 0.01<br>(0.01 to 0.02)         | 0.03<br>(0.01 to 0.06)         |
| Endometriosis                                              | 0.14<br>(0.08 to 0.26)             | 0.24<br>(0.10 to 0.53)              | 0.16<br>(0.06 to 0.37)              | 0.31<br>(0.12 to 0.69)               | 0.00<br>(0.00 to 0.01)       | 0.01<br>(0.00 to 0.01)         | 0.00<br>(0.00 to 0.01)         | 0.01<br>(0.00 to 0.02)         |
| Genital prolapse                                           | 0.20<br>(0.13 to 0.37)             | 0.40<br>(0.20 to 0.86)              | 0.27<br>(0.13 to 0.61)              | 0.54<br>(0.27 to 1.13)               | 0.01<br>(0.01 to 0.02)       | 0.02<br>(0.01 to 0.06)         | 0.02<br>(0.01 to 0.04)         | 0.03<br>(0.01 to 0.08)         |
| Other gynecological diseases                               | 15.84<br>(10.91 to 22.07)          | 25.03<br>(14.92 to 38.80)           | 16.47<br>(9.29 to 26.51)            | 31.99<br>(19.54 to 48.17)            | 0.56<br>(0.40 to 0.80)       | 1.17<br>(0.72 to 1.91)         | 0.78<br>(0.47 to 1.36)         | 1.46<br>(0.93 to 2.30)         |
| Hemoglobinopathies and hemolytic anemias                   | 1,770.00<br>(1,320.84 to 2,144.62) | 1,703.88<br>(1,260.85 to 2,247.21)  | 1,301.50<br>(948.43 to 1,743.14)    | 2,033.32<br>(1,490.80 to 2,680.74)   | 42.98<br>(35.41 to 53.93)    | 55.99<br>(42.42 to 79.85)      | 44.68<br>(32.50 to 64.31)      | 65.51<br>(49.81 to 93.51)      |
| Thalassemias                                               | 153.66<br>(70.98 to 235.94)        | 75.36<br>(33.92 to 130.91)          | 63.06<br>(28.89 to 109.27)          | 75.61<br>(33.26 to 133.25)           | 1.93<br>(0.90 to 2.96)       | 0.97<br>(0.44 to 1.68)         | 0.81<br>(0.38 to 1.39)         | 0.97<br>(0.43 to 1.70)         |
| Sickle cell disorders                                      | 792.80<br>(488.00 to 1,111.85)     | 718.23<br>(435.69 to 1,057.30)      | 538.12<br>(320.76 to 814.35)        | 852.08<br>(509.58 to 1,258.78)       | 13.64<br>(8.61 to 18.99)     | 13.70<br>(8.38 to 19.96)       | 10.41<br>(6.22 to 15.36)       | 16.15<br>(10.07 to 23.61)      |
| G6PD deficiency                                            | 445.08<br>(276.98 to 651.58)       | 527.65<br>(332.52 to 792.31)        | 389.39<br>(235.24 to 588.87)        | 657.01<br>(414.54 to 983.57)         | 9.59<br>(6.43 to 13.52)      | 14.75<br>(9.75 to 21.59)       | 11.09<br>(7.12 to 16.42)       | 18.13<br>(12.24 to 26.87)      |
| Other hemoglobinopathies and hemolytic anemias             | 378.47<br>(287.88 to 511.67)       | 382.63<br>(273.95 to 591.28)        | 310.94<br>(212.96 to 499.47)        | 448.61<br>(317.20 to 712.77)         | 17.81<br>(13.21 to 27.16)    | 26.58<br>(18.24 to 44.79)      | 22.37<br>(14.88 to 38.11)      | 30.26<br>(20.51 to 51.84)      |
| Endocrine, metabolic, blood, and immune disorders          | 2,237.45<br>(1,779.54 to 3,858.98) | 3,357.22<br>(2,505.17 to 6,254.48)  | 3,323.48<br>(2,489.15 to 6,171.84)  | 3,521.68<br>(2,614.98 to 6,497.63)   | 62.69<br>(49.97 to 121.94)   | 134.32<br>(98.77 to 278.40)    | 140.50<br>(103.20 to 288.99)   | 135.09<br>(100.67 to 277.66)   |

| Panama                    |                                    |                                    |                                    |                                    |                           |                             |                            |                             |
|---------------------------|------------------------------------|------------------------------------|------------------------------------|------------------------------------|---------------------------|-----------------------------|----------------------------|-----------------------------|
| Cause                     | YLLs (actual counts)               |                                    |                                    |                                    | Deaths (actual counts)    |                             |                            |                             |
|                           | 2016                               | 2040 Forecast                      | 2040 Better Scenario               | 2040 Worse Scenario                | 2016                      | 2040 Forecast               | 2040 Better Scenario       | 2040 Worse Scenario         |
| Musculoskeletal disorders | 1,691.64<br>(1,326.05 to 2,083.21) | 2,737.34<br>(2,086.59 to 3,537.50) | 2,384.50<br>(1,817.94 to 3,132.23) | 2,836.77<br>(2,179.91 to 3,639.43) | 48.80<br>(40.15 to 62.86) | 102.61<br>(80.31 to 152.67) | 89.43<br>(69.43 to 128.54) | 106.77<br>(85.26 to 159.29) |

|                                               |                                                                |                                                                |                                                               |                                                                 |                                                            |                                                            |                                                            |                                                            |
|-----------------------------------------------|----------------------------------------------------------------|----------------------------------------------------------------|---------------------------------------------------------------|-----------------------------------------------------------------|------------------------------------------------------------|------------------------------------------------------------|------------------------------------------------------------|------------------------------------------------------------|
| Rheumatoid arthritis                          | 193.10<br>(145.19 to<br>274.54)                                | 478.77<br>(327.99 to<br>708.61)                                | 341.81<br>(227.37 to<br>536.98)                               | 586.65<br>(418.77 to<br>863.15)                                 | 9.84<br>(38.96 to<br>13.86)                                | 30.06<br>(20.27 to<br>46.97)                               | 22.01<br>(14.18 to<br>35.48)                               | 35.95<br>(25.90 to<br>52.87)                               |
| Other musculoskeletal disorders               | 1,498.54<br>(1,135.75 to<br>1,853.58)                          | 2,258.57<br>(1,693.38 to<br>2,957.37)                          | 2,042.69<br>(1,535.08 to<br>2,681.19)                         | 2,250.12<br>(1,683.89 to<br>2,920.09)                           | 38.96<br>(31.95 to<br>49.38)                               | 72.55<br>(56.65 to<br>106.71)                              | 67.42<br>(52.23 to<br>100.11)                              | 70.82<br>(55.54 to<br>105.28)                              |
| <b>Other non-communicable diseases</b>        | <b>27,586.32</b><br><b>(14,252.05 to</b><br><b>39,840.35)</b>  | <b>21,852.81</b><br><b>(12,545.30 to</b><br><b>33,388.30)</b>  | <b>13,993.75</b><br><b>(7,938.41 to</b><br><b>20,510.93)</b>  | <b>28,139.08</b><br><b>(15,847.20 to</b><br><b>42,790.52)</b>   | <b>402.09</b><br><b>(224.06 to</b><br><b>549.62)</b>       | <b>502.69</b><br><b>(299.56 to</b><br><b>695.23)</b>       | <b>387.74</b><br><b>(224.38 to</b><br><b>522.12)</b>       | <b>578.22</b><br><b>(345.74 to</b><br><b>788.19)</b>       |
| Congenital birth defects                      | 25,570.58<br>(12,300.78 to<br>37,692.45)                       | 17,720.86<br>(8,547.59 to<br>28,614.79)                        | 10,424.82<br>(4,905.80 to<br>16,704.83)                       | 23,754.96<br>(12,165.82 to<br>37,965.42)                        | 305.88<br>(151.78 to<br>446.85)                            | 216.97<br>(108.46 to<br>344.52)                            | 128.92<br>(63.95 to<br>202.64)                             | 289.42<br>(153.52 to<br>456.80)                            |
| Neural tube defects                           | 703.50<br>(401.08 to<br>1,159.19)                              | 162.78<br>(84.89 to<br>292.09)                                 | 87.39<br>(44.14 to<br>160.03)                                 | 245.65<br>(128.74 to<br>434.30)                                 | 8.25<br>(4.74 to<br>13.54)                                 | 1.96<br>(1.04 to<br>3.45)                                  | 1.06<br>(0.55 to<br>1.90)                                  | 2.94<br>(1.58 to<br>5.12)                                  |
| Congenital heart anomalies                    | 12,725.06<br>(5,527.29 to<br>19,643.92)                        | 8,070.19<br>(3,433.95 to<br>13,384.92)                         | 4,335.24<br>(1,755.65 to<br>7,328.14)                         | 11,120.27<br>(5,121.77 to<br>18,210.63)                         | 152.92<br>(88.30 to<br>232.87)                             | 99.38<br>(44.55 to<br>161.96)                              | 53.84<br>(23.62 to<br>89.82)                               | 136.29<br>(65.80 to<br>219.26)                             |
| Orofacial clefts                              | 3.20<br>(0.95 to<br>6.23)                                      | 1.56<br>(0.45 to<br>3.62)                                      | 0.73<br>(0.20 to<br>1.66)                                     | 2.53<br>(0.76 to<br>5.80)                                       | 0.04<br>(0.01 to<br>0.07)                                  | 0.02<br>(0.01 to<br>0.04)                                  | 0.01<br>(0.00 to<br>0.02)                                  | 0.03<br>(0.01 to<br>0.07)                                  |
| Down syndrome                                 | 548.15<br>(341.46 to<br>825.00)                                | 597.93<br>(362.27 to<br>943.08)                                | 544.85<br>(335.24 to<br>840.49)                               | 684.70<br>(411.20 to<br>1,087.36)                               | 7.15<br>(4.62 to<br>10.42)                                 | 8.39<br>(5.36 to<br>12.62)                                 | 7.81<br>(5.10 to<br>11.46)                                 | 9.50<br>(5.95 to<br>14.36)                                 |
| Other chromosomal abnormalities               | 1,554.43<br>(85.91 to<br>2,712.80)                             | 1,557.68<br>(108.11 to<br>2,956.17)                            | 1,116.44<br>(79.66 to<br>2,033.69)                            | 1,967.45<br>(135.84 to<br>3,769.91)                             | 18.21<br>(1.04 to<br>31.65)                                | 18.40<br>(1.44 to<br>34.63)                                | 13.22<br>(1.07 to<br>23.98)                                | 23.20<br>(1.78 to<br>44.36)                                |
| Congenital musculoskeletal and limb anomalies | 415.35<br>(45.49 to<br>677.91)                                 | 326.48<br>(39.39 to<br>595.47)                                 | 192.52<br>(24.06 to<br>336.65)                                | 426.39<br>(51.79 to<br>741.34)                                  | 4.93<br>(0.60 to<br>7.99)                                  | 3.92<br>(0.57 to<br>7.07)                                  | 2.32<br>(0.35 to<br>4.04)                                  | 5.10<br>(0.70 to<br>8.77)                                  |
| Urogenital congenital anomalies               | 637.51<br>(256.10 to<br>1,072.11)                              | 463.40<br>(206.63 to<br>823.70)                                | 297.72<br>(129.37 to<br>503.83)                               | 590.06<br>(261.68 to<br>1,025.07)                               | 7.92<br>(3.47 to<br>13.94)                                 | 6.18<br>(2.97 to<br>10.47)                                 | 4.06<br>(1.94 to<br>6.59)                                  | 7.78<br>(3.70 to<br>13.28)                                 |
| Digestive congenital anomalies                | 2,368.79<br>(790.80 to<br>3,948.74)                            | 1,829.67<br>(642.06 to<br>3,244.35)                            | 1,029.70<br>(340.34 to<br>1,841.60)                           | 2,509.78<br>(888.40 to<br>4,554.91)                             | 27.69<br>(9.26 to<br>46.08)                                | 21.52<br>(7.63 to<br>39.23)                                | 12.13<br>(4.05 to<br>21.61)                                | 29.48<br>(10.55 to<br>53.35)                               |
| Other congenital birth defects                | 6,614.59<br>(4,109.14 to<br>9,741.60)                          | 4,711.19<br>(2,759.95 to<br>7,596.22)                          | 2,820.24<br>(1,612.33 to<br>4,436.60)                         | 6,208.13<br>(3,739.89 to<br>9,752.17)                           | 78.78<br>(49.32 to<br>115.20)                              | 57.22<br>(34.27 to<br>91.18)                               | 34.48<br>(19.99 to<br>53.36)                               | 75.09<br>(46.10 to<br>116.64)                              |
| Skin and subcutaneous diseases                | 1,606.69<br>(1,005.75 to<br>2,632.29)                          | 3,937.02<br>(2,374.89 to<br>6,137.63)                          | 3,440.50<br>(2,025.20 to<br>5,279.98)                         | 4,132.69<br>(2,478.14 to<br>6,487.03)                           | 91.46<br>(48.31 to<br>128.30)                              | 283.45<br>(144.87 to<br>391.25)                            | 257.33<br>(129.07 to<br>366.18)                            | 285.88<br>(144.30 to<br>406.67)                            |
| Cellulitis                                    | 137.50<br>(79.76 to<br>295.40)                                 | 473.70<br>(267.71 to<br>938.50)                                | 444.25<br>(248.94 to<br>886.38)                               | 471.73<br>(269.14 to<br>960.33)                                 | 4.83<br>(2.41 to<br>9.42)                                  | 21.66<br>(10.38 to<br>37.59)                               | 21.30<br>(10.05 to<br>36.78)                               | 20.73<br>(10.11 to<br>37.86)                               |
| Pyoderma                                      | 631.88<br>(311.79 to<br>1,003.89)                              | 1,696.87<br>(789.62 to<br>2,433.24)                            | 1,502.54<br>(678.19 to<br>2,126.64)                           | 1,822.39<br>(850.56 to<br>2,680.17)                             | 26.64<br>(9.80 to<br>37.71)                                | 107.38<br>(36.45 to<br>159.10)                             | 101.30<br>(33.70 to<br>150.34)                             | 109.47<br>(37.83 to<br>160.01)                             |
| Decubitus ulcer                               | 738.28<br>(447.18 to<br>1,280.42)                              | 1,558.15<br>(932.31 to<br>2,612.40)                            | 1,315.50<br>(781.64 to<br>2,271.95)                           | 1,621.86<br>(966.70 to<br>2,792.72)                             | 56.86<br>(30.09 to<br>85.52)                               | 145.76<br>(77.81 to<br>239.96)                             | 126.99<br>(67.85 to<br>208.62)                             | 146.99<br>(77.41 to<br>247.56)                             |
| Other skin and subcutaneous diseases          | 99.04<br>(60.08 to<br>194.94)                                  | 208.30<br>(128.64 to<br>430.42)                                | 178.22<br>(108.64 to<br>345.56)                               | 216.71<br>(136.10 to<br>443.63)                                 | 3.13<br>(1.70 to<br>5.80)                                  | 8.65<br>(4.62 to<br>16.75)                                 | 7.74<br>(4.09 to<br>15.05)                                 | 8.69<br>(4.73 to<br>16.34)                                 |
| Sudden infant death syndrome                  | 409.04<br>(240.71 to<br>677.50)                                | 194.93<br>(87.66 to<br>380.10)                                 | 128.43<br>(59.88 to<br>243.94)                                | 251.43<br>(112.42 to<br>502.67)                                 | 4.75<br>(2.79 to<br>7.86)                                  | 2.26<br>(1.02 to<br>4.41)                                  | 1.49<br>(0.69 to<br>2.83)                                  | 2.92<br>(1.30 to<br>5.83)                                  |
| <b>Injuries</b>                               | <b>97,782.65</b><br><b>(80,822.04 to</b><br><b>117,029.58)</b> | <b>87,140.37</b><br><b>(61,315.40 to</b><br><b>124,132.70)</b> | <b>53,889.41</b><br><b>(38,533.46 to</b><br><b>75,632.60)</b> | <b>109,483.08</b><br><b>(78,009.53 to</b><br><b>156,091.62)</b> | <b>2,021.77</b><br><b>(1,683.96 to</b><br><b>2,420.48)</b> | <b>2,197.38</b><br><b>(1,629.95 to</b><br><b>2,987.72)</b> | <b>1,451.01</b><br><b>(1,094.95 to</b><br><b>1,903.40)</b> | <b>2,676.42</b><br><b>(2,024.14 to</b><br><b>3,630.86)</b> |
| <b>Transport injuries</b>                     | <b>28,887.31</b><br><b>(23,566.90 to</b><br><b>35,673.48)</b>  | <b>27,688.98</b><br><b>(17,475.21 to</b><br><b>44,163.97)</b>  | <b>9,411.95</b><br><b>(5,983.64 to</b><br><b>14,697.23)</b>   | <b>41,219.73</b><br><b>(25,728.35 to</b><br><b>65,217.47)</b>   | <b>615.34</b><br><b>(508.46 to</b><br><b>747.16)</b>       | <b>678.00</b><br><b>(435.82 to</b><br><b>1,067.33)</b>     | <b>251.44</b><br><b>(162.81 to</b><br><b>381.18)</b>       | <b>977.52</b><br><b>(622.52 to</b><br><b>1,517.40)</b>     |
| Road injuries                                 | 27,972.76<br>(22,848.09 to<br>34,550.98)                       | 26,563.62<br>(16,774.99 to<br>42,181.24)                       | 8,673.53<br>(5,530.92 to<br>13,636.68)                        | 39,823.89<br>(24,876.50 to<br>63,234.23)                        | 595.69<br>(491.66 to<br>723.00)                            | 648.93<br>(417.55 to<br>1,021.78)                          | 231.94<br>(150.39 to<br>349.62)                            | 942.02<br>(602.06 to<br>1,472.74)                          |



|                                      |                                                 |                                                 |                                                 |                                                 |                                        |                                        |                                        |                                        |
|--------------------------------------|-------------------------------------------------|-------------------------------------------------|-------------------------------------------------|-------------------------------------------------|----------------------------------------|----------------------------------------|----------------------------------------|----------------------------------------|
| Pedestrian road injuries             | 11,198.95<br>(8,219.61 to<br>13,841.31)         | 9,370.03<br>(5,517.39 to<br>15,335.03)          | 2,990.60<br>(1,790.19 to<br>4,718.26)           | 14,234.77<br>(8,506.14 to<br>23,472.45)         | 263.69<br>(197.48 to<br>321.24)        | 273.38<br>(170.06 to<br>441.28)        | 95.55<br>(60.53 to<br>149.68)          | 400.74<br>(247.04 to<br>639.34)        |
| <b>Panama</b>                        |                                                 |                                                 |                                                 |                                                 |                                        |                                        |                                        |                                        |
| Cause                                | YLLs (actual counts)                            |                                                 |                                                 |                                                 | Deaths (actual counts)                 |                                        |                                        |                                        |
|                                      | 2016                                            | 2040 Forecast                                   | 2040 Better Scenario                            | 2040 Worse Scenario                             | 2016                                   | 2040 Forecast                          | 2040 Better Scenario                   | 2040 Worse Scenario                    |
| Cyclist road injuries                | 1,379.52<br>(1,032.82 to<br>1,864.31)           | 1,744.74<br>(954.20 to<br>3,019.38)             | 689.77<br>(388.51 to<br>1,188.45)               | 2,445.78<br>(1,319.62 to<br>4,335.06)           | 28.71<br>(21.76 to<br>38.59)           | 41.79<br>(23.54 to<br>72.04)           | 19.22<br>(11.14 to<br>32.48)           | 55.49<br>(31.28 to<br>97.43)           |
| Motorcyclist road injuries           | 1,483.32<br>(1,103.59 to<br>1,996.25)           | 1,582.82<br>(861.68 to<br>2,814.15)             | 834.14<br>(452.11 to<br>1,484.95)               | 1,997.81<br>(1,089.59 to<br>3,532.91)           | 28.60<br>(21.55 to<br>38.25)           | 32.24<br>(18.06 to<br>56.20)           | 18.06<br>(10.17 to<br>30.99)           | 39.79<br>(22.29 to<br>69.44)           |
| Motor vehicle road injuries          | 13,367.69<br>(10,293.05 to<br>18,939.19)        | 13,294.12<br>(8,071.89 to<br>22,489.97)         | 3,975.32<br>(2,427.78 to<br>6,712.62)           | 20,289.39<br>(12,192.60 to<br>34,184.27)        | 262.48<br>(205.10 to<br>363.50)        | 286.37<br>(178.92 to<br>455.98)        | 93.46<br>(60.08 to<br>144.62)          | 424.53<br>(260.88 to<br>688.81)        |
| Other road injuries                  | 543.27<br>(304.51 to<br>720.22)                 | 571.91<br>(282.34 to<br>968.66)                 | 183.70<br>(90.48 to<br>305.92)                  | 856.14<br>(417.20 to<br>1,468.81)               | 12.20<br>(6.87 to<br>15.97)            | 15.15<br>(7.53 to<br>26.33)            | 5.65<br>(2.93 to<br>9.54)              | 21.47<br>(10.35 to<br>37.10)           |
| Other transport injuries             | 914.55<br>(719.12 to<br>1,132.70)               | 1,125.37<br>(686.03 to<br>1,827.65)             | 738.42<br>(453.73 to<br>1,147.51)               | 1,395.84<br>(864.29 to<br>2,181.17)             | 19.65<br>(15.68 to<br>23.99)           | 29.08<br>(18.12 to<br>46.17)           | 19.50<br>(12.24 to<br>30.05)           | 35.51<br>(22.36 to<br>54.88)           |
| Unintentional injuries               | <b>23,960.80</b><br>(19,537.11 to<br>29,418.87) | <b>20,302.99</b><br>(15,527.84 to<br>27,082.18) | <b>16,181.97</b><br>(12,271.97 to<br>21,549.98) | <b>23,409.14</b><br>(18,068.10 to<br>30,662.69) | <b>548.68</b><br>(458.33 to<br>667.77) | <b>690.63</b><br>(556.38 to<br>867.25) | <b>592.55</b><br>(471.64 to<br>750.36) | <b>757.08</b><br>(607.89 to<br>952.39) |
| Falls                                | 4,270.90<br>(3,451.63 to<br>5,384.91)           | 5,035.61<br>(4,058.95 to<br>6,393.07)           | 4,416.83<br>(3,476.72 to<br>5,631.52)           | 5,395.35<br>(4,357.99 to<br>6,798.89)           | 159.13<br>(132.29 to<br>198.70)        | 286.40<br>(230.26 to<br>365.25)        | 261.34<br>(208.19 to<br>337.68)        | 297.58<br>(239.88 to<br>382.07)        |
| Drowning                             | 8,670.61<br>(7,081.21 to<br>10,422.21)          | 6,292.27<br>(4,327.64 to<br>9,405.24)           | 4,768.05<br>(3,254.48 to<br>6,988.59)           | 7,457.53<br>(5,135.63 to<br>10,951.85)          | 157.28<br>(128.64 to<br>185.09)        | 137.31<br>(96.01 to<br>198.22)         | 106.31<br>(74.97 to<br>149.98)         | 160.34<br>(113.10 to<br>231.44)        |
| Fire, heat, and hot substances       | 1,024.80<br>(841.62 to<br>1,244.46)             | 691.22<br>(488.25 to<br>980.27)                 | 493.03<br>(353.22 to<br>689.27)                 | 852.12<br>(602.09 to<br>1,174.34)               | 27.09<br>(22.91 to<br>31.82)           | 27.78<br>(20.47 to<br>37.77)           | 21.26<br>(15.44 to<br>28.60)           | 32.69<br>(23.97 to<br>44.45)           |
| Poisonings                           | 775.32<br>(587.79 to<br>1,297.18)               | 397.12<br>(257.99 to<br>682.83)                 | 259.53<br>(162.98 to<br>439.47)                 | 533.47<br>(352.51 to<br>918.21)                 | 15.25<br>(12.06 to<br>24.96)           | 10.95<br>(7.58 to<br>17.26)            | 7.59<br>(5.10 to<br>11.38)             | 14.10<br>(9.73 to<br>21.80)            |
| Exposure to mechanical forces        | 2,127.28<br>(1,741.13 to<br>2,641.91)           | 1,496.80<br>(1,090.57 to<br>2,047.27)           | 1,129.84<br>(818.53 to<br>1,572.41)             | 1,823.54<br>(1,369.70 to<br>2,449.23)           | 41.69<br>(33.93 to<br>51.76)           | 37.38<br>(28.82 to<br>49.25)           | 29.27<br>(21.68 to<br>39.21)           | 44.36<br>(34.34 to<br>57.79)           |
| Unintentional firearm injuries       | 357.45<br>(262.61 to<br>636.23)                 | 246.38<br>(161.93 to<br>445.80)                 | 194.72<br>(127.50 to<br>349.64)                 | 299.45<br>(197.83 to<br>521.45)                 | 7.07<br>(5.28 to<br>12.24)             | 5.96<br>(4.26 to<br>10.17)             | 4.88<br>(3.44 to<br>8.24)              | 7.07<br>(5.00 to<br>11.62)             |
| Unintentional suffocation            | 456.95<br>(301.25 to<br>628.36)                 | 224.34<br>(133.48 to<br>342.64)                 | 163.54<br>(94.80 to<br>247.95)                  | 281.01<br>(162.13 to<br>433.18)                 | 6.19<br>(4.13 to<br>8.18)              | 3.25<br>(1.95 to<br>4.77)              | 2.43<br>(1.43 to<br>3.57)              | 4.01<br>(2.38 to<br>5.92)              |
| Other exposure to mechanical forces  | 1,312.88<br>(1,008.22 to<br>1,664.96)           | 1,026.09<br>(716.02 to<br>1,408.36)             | 771.59<br>(538.74 to<br>1,069.16)               | 1,243.08<br>(899.81 to<br>1,675.14)             | 28.44<br>(22.06 to<br>36.45)           | 28.18<br>(20.73 to<br>37.17)           | 21.96<br>(16.10 to<br>29.59)           | 33.28<br>(24.93 to<br>43.44)           |
| Adverse effects of medical treatment | 1,116.51<br>(690.84 to<br>1,990.87)             | 1,191.84<br>(702.35 to<br>2,170.12)             | 1,017.07<br>(596.97 to<br>1,876.64)             | 1,355.72<br>(797.90 to<br>2,498.98)             | 32.92<br>(20.55 to<br>59.36)           | 54.72<br>(31.48 to<br>100.70)          | 49.93<br>(28.43 to<br>93.05)           | 59.18<br>(33.75 to<br>109.63)          |
| Animal contact                       | 1,111.80<br>(834.74 to<br>1,537.33)             | 1,101.16<br>(758.77 to<br>1,535.88)             | 897.66<br>(619.60 to<br>1,264.20)               | 1,336.81<br>(919.82 to<br>1,883.94)             | 23.94<br>(17.35 to<br>32.29)           | 30.55<br>(21.55 to<br>42.86)           | 26.27<br>(18.58 to<br>37.87)           | 35.76<br>(24.95 to<br>51.11)           |
| Venomous animal contact              | 988.96<br>(724.02 to<br>1,353.56)               | 983.91<br>(658.60 to<br>1,366.44)               | 808.50<br>(534.53 to<br>1,115.18)               | 1,191.70<br>(805.14 to<br>1,666.87)             | 21.06<br>(15.01 to<br>28.16)           | 26.77<br>(18.71 to<br>37.87)           | 23.22<br>(16.02 to<br>32.98)           | 31.26<br>(21.36 to<br>43.55)           |
| Non-venomous animal contact          | 122.83<br>(78.12 to<br>229.76)                  | 117.25<br>(70.48 to<br>226.11)                  | 89.16<br>(51.78 to<br>170.37)                   | 145.11<br>(85.27 to<br>276.36)                  | 2.88<br>(1.83 to<br>5.23)              | 3.78<br>(2.26 to<br>6.72)              | 3.05<br>(1.73 to<br>5.58)              | 4.49<br>(2.68 to<br>8.08)              |
| Foreign body                         | 3,195.21<br>(2,229.91 to<br>4,655.63)           | 3,172.03<br>(2,135.51 to<br>4,727.42)           | 2,640.03<br>(1,809.00 to<br>3,865.35)           | 3,459.19<br>(2,306.00 to<br>5,121.70)           | 59.15<br>(45.92 to<br>81.43)           | 84.38<br>(67.93 to<br>106.98)          | 77.31<br>(61.98 to<br>95.69)           | 86.18<br>(68.53 to<br>110.23)          |

|                                                                                     |                                                               |                                                               |                                                               |                                                               |                                                        |                                                        |                                                      |                                                        |
|-------------------------------------------------------------------------------------|---------------------------------------------------------------|---------------------------------------------------------------|---------------------------------------------------------------|---------------------------------------------------------------|--------------------------------------------------------|--------------------------------------------------------|------------------------------------------------------|--------------------------------------------------------|
| Pulmonary aspiration and foreign body in airway                                     | 3,156.93<br>(2,195.49 to<br>4,589.42)                         | 3,142.67<br>(2,113.50 to<br>4,690.97)                         | 2,611.06<br>(1,786.01 to<br>3,831.00)                         | 3,427.69<br>(2,283.15 to<br>5,088.45)                         | 58.40<br>(45.31 to<br>80.56)                           | 83.65<br>(67.31 to<br>106.15)                          | 76.55<br>(61.38 to<br>95.04)                         | 85.42<br>(67.84 to<br>109.56)                          |
| Foreign body in other body part                                                     | 38.29<br>(28.95 to<br>70.16)                                  | 29.36<br>(20.83 to<br>53.33)                                  | 28.97<br>(20.41 to<br>52.60)                                  | 31.50<br>(22.58 to<br>55.92)                                  | 0.75<br>(0.60 to<br>1.23)                              | 0.73<br>(0.52 to<br>1.02)                              | 0.76<br>(0.53 to<br>1.04)                            | 0.76<br>(0.54 to<br>1.09)                              |
| Environmental heat and cold exposure                                                | 81.10<br>(55.38 to<br>132.29)                                 | 64.93<br>(41.83 to<br>114.75)                                 | 47.96<br>(30.48 to<br>83.65)                                  | 83.72<br>(54.19 to<br>148.06)                                 | 2.16<br>(1.52 to<br>3.87)                              | 2.38<br>(1.56 to<br>4.34)                              | 1.85<br>(1.19 to<br>3.48)                            | 2.95<br>(1.94 to<br>5.61)                              |
| Other unintentional injuries                                                        | 1,587.25<br>(1,221.65 to<br>2,051.68)                         | 860.00<br>(537.28 to<br>1,326.19)                             | 511.97<br>(319.66 to<br>778.77)                               | 1,111.69<br>(790.41 to<br>1,551.89)                           | 30.07<br>(23.40 to<br>38.29)                           | 18.79<br>(12.34 to<br>27.47)                           | 11.42<br>(7.52 to<br>16.64)                          | 23.96<br>(17.61 to<br>31.78)                           |
| <b>Self-harm and interpersonal violence</b>                                         | <b>44,909.76</b><br><b>(28,641.44 to</b><br><b>59,762.47)</b> | <b>38,851.32</b><br><b>(21,836.48 to</b><br><b>60,570.72)</b> | <b>28,008.06</b><br><b>(16,382.25 to</b><br><b>43,341.60)</b> | <b>44,553.00</b><br><b>(24,612.03 to</b><br><b>69,518.33)</b> | <b>857.31</b><br><b>(558.57 to</b><br><b>1,129.93)</b> | <b>822.25</b><br><b>(489.43 to</b><br><b>1,222.51)</b> | <b>600.57</b><br><b>(372.44 to</b><br><b>894.88)</b> | <b>935.34</b><br><b>(547.20 to</b><br><b>1,377.55)</b> |
| <b>Panama</b>                                                                       |                                                               |                                                               |                                                               |                                                               |                                                        |                                                        |                                                      |                                                        |
| Cause                                                                               | YLLs (actual counts)                                          |                                                               |                                                               |                                                               | Deaths (actual counts)                                 |                                                        |                                                      |                                                        |
|                                                                                     | 2016                                                          | 2040 Forecast                                                 | 2040 Better Scenario                                          | 2040 Worse Scenario                                           | 2016                                                   | 2040 Forecast                                          | 2040 Better Scenario                                 | 2040 Worse Scenario                                    |
| Self-harm                                                                           | 11,166.69<br>(8,342.51 to<br>15,366.24)                       | 13,965.45<br>(8,237.43 to<br>22,516.16)                       | 10,164.27<br>(6,271.18 to<br>16,161.19)                       | 16,138.23<br>(9,479.89 to<br>26,745.13)                       | 232.56<br>(176.83 to<br>313.22)                        | 327.80<br>(202.42 to<br>510.58)                        | 241.32<br>(158.05 to<br>371.06)                      | 375.03<br>(229.18 to<br>592.92)                        |
| Self-harm by firearm                                                                | 528.64<br>(350.69 to<br>960.34)                               | 669.49<br>(329.22 to<br>1,327.02)                             | 447.16<br>(231.33 to<br>876.21)                               | 809.28<br>(402.82 to<br>1,640.45)                             | 12.09<br>(8.09 to<br>21.18)                            | 18.79<br>(9.48 to<br>35.12)                            | 12.32<br>(6.74 to<br>22.89)                          | 21.49<br>(11.25 to<br>41.56)                           |
| Self-harm by other specified means                                                  | 10,638.04<br>(7,944.68 to<br>14,717.34)                       | 13,295.96<br>(7,875.54 to<br>21,388.72)                       | 9,717.11<br>(6,009.60 to<br>15,433.36)                        | 15,328.95<br>(9,122.04 to<br>25,151.09)                       | 220.48<br>(166.86 to<br>297.77)                        | 309.74<br>(190.95 to<br>477.63)                        | 229.01<br>(150.30 to<br>348.06)                      | 353.55<br>(217.19 to<br>557.61)                        |
| Interpersonal violence                                                              | 33,743.07<br>(16,723.91 to<br>47,549.58)                      | 24,885.87<br>(10,846.35 to<br>40,912.88)                      | 17,843.78<br>(7,855.16 to<br>28,867.08)                       | 28,414.77<br>(12,155.45 to<br>45,533.97)                      | 624.75<br>(316.38 to<br>870.27)                        | 494.46<br>(229.38 to<br>772.40)                        | 359.25<br>(167.94 to<br>558.08)                      | 560.31<br>(250.40 to<br>864.34)                        |
| Physical violence by firearm                                                        | 23,781.87<br>(7,915.50 to<br>35,657.48)                       | 16,814.69<br>(4,731.61 to<br>29,921.21)                       | 11,803.69<br>(3,354.22 to<br>20,947.43)                       | 19,291.45<br>(5,615.14 to<br>33,840.72)                       | 430.43<br>(145.12 to<br>640.20)                        | 317.89<br>(95.56 to<br>536.49)                         | 224.97<br>(68.80 to<br>379.37)                       | 364.87<br>(110.83 to<br>600.35)                        |
| Physical violence by sharp object                                                   | 6,335.85<br>(3,008.96 to<br>12,222.75)                        | 5,243.96<br>(2,366.36 to<br>9,643.06)                         | 3,859.25<br>(1,825.07 to<br>6,895.89)                         | 5,816.13<br>(2,631.66 to<br>10,429.37)                        | 122.46<br>(60.91 to<br>227.91)                         | 109.69<br>(52.81 to<br>197.77)                         | 81.58<br>(41.15 to<br>143.84)                        | 120.76<br>(58.11 to<br>208.15)                         |
| Physical violence by other means                                                    | 3,625.35<br>(1,894.56 to<br>7,194.04)                         | 2,827.22<br>(1,338.97 to<br>5,646.60)                         | 2,180.84<br>(1,058.41 to<br>4,300.34)                         | 3,207.19<br>(1,511.34 to<br>6,402.40)                         | 71.86<br>(37.80 to<br>143.35)                          | 66.88<br>(32.63 to<br>131.09)                          | 52.69<br>(26.75 to<br>101.19)                        | 74.68<br>(35.12 to<br>145.05)                          |
| <b>Forces of nature, conflict and terrorism, and executions and police conflict</b> | <b>24.78</b><br><b>(20.99 to</b><br><b>36.29)</b>             | <b>297.08</b><br><b>(0.00 to</b><br><b>1,986.87)</b>          | <b>287.42</b><br><b>(0.00 to</b><br><b>1,922.40)</b>          | <b>301.21</b><br><b>(0.00 to</b><br><b>2,011.55)</b>          | <b>0.44</b><br><b>(0.37 to</b><br><b>0.63)</b>         | <b>6.49</b><br><b>(0.00 to</b><br><b>47.11)</b>        | <b>6.44</b><br><b>(0.00 to</b><br><b>46.71)</b>      | <b>6.47</b><br><b>(0.00 to</b><br><b>46.94)</b>        |
| Exposure to forces of nature                                                        | 0.00<br>(0.00 to<br>0.00)                                     | 125.98<br>(0.00 to<br>993.39)                                 | 121.68<br>(0.00 to<br>965.98)                                 | 127.77<br>(0.00 to<br>1,004.41)                               | 0.00<br>(0.00 to<br>0.00)                              | 2.93<br>(0.00 to<br>23.70)                             | 2.91<br>(0.00 to<br>23.71)                           | 2.92<br>(0.00 to<br>23.48)                             |
| Conflict and terrorism                                                              | 0.00<br>(0.00 to<br>0.00)                                     | 171.10<br>(0.00 to<br>462.23)                                 | 165.75<br>(0.00 to<br>452.01)                                 | 173.44<br>(0.00 to<br>465.85)                                 | 0.00<br>(0.00 to<br>0.00)                              | 3.56<br>(0.00 to<br>9.42)                              | 3.53<br>(0.00 to<br>9.34)                            | 3.55<br>(0.00 to<br>9.39)                              |
| Executions and police conflict                                                      | 24.78<br>(20.99 to<br>36.29)                                  | 0.00<br>(0.00 to<br>0.00)                                     | 0.00<br>(0.00 to<br>0.00)                                     | 0.00<br>(0.00 to<br>0.00)                                     | 0.44<br>(0.37 to<br>0.63)                              | 0.00<br>(0.00 to<br>0.00)                              | 0.00<br>(0.00 to<br>0.00)                            | 0.00<br>(0.00 to<br>0.00)                              |
| <b>Venezuela</b>                                                                    |                                                               |                                                               |                                                               |                                                               |                                                        |                                                        |                                                      |                                                        |
| Cause                                                                               | YLLs (in 1000s)                                               |                                                               |                                                               |                                                               | Deaths (in 1000s)                                      |                                                        |                                                      |                                                        |
|                                                                                     | 2016                                                          | 2040 Forecast                                                 | 2040 Better Scenario                                          | 2040 Worse Scenario                                           | 2016                                                   | 2040 Forecast                                          | 2040 Better Scenario                                 | 2040 Worse Scenario                                    |
| All causes                                                                          | 5,003.02<br>(4,378.44 to<br>5,854.75)                         | 6,570.03<br>(4,918.56 to<br>8,652.27)                         | 4,779.79<br>(3,573.38 to<br>6,339.13)                         | 8,284.13<br>(6,141.15 to<br>10,930.35)                        | 161.04<br>(141.65 to<br>187.83)                        | 307.49<br>(242.86 to<br>380.79)                        | 236.12<br>(185.29 to<br>295.36)                      | 370.13<br>(289.72 to<br>452.47)                        |
| Communicable, maternal, neonatal, and nutritional diseases                          | 853.50<br>(755.06 to<br>967.27)                               | 669.98<br>(528.39 to<br>843.57)                               | 454.85<br>(346.19 to<br>579.83)                               | 885.29<br>(679.77 to<br>1,162.24)                             | 16.10<br>(14.56 to<br>17.88)                           | 19.61<br>(15.57 to<br>24.29)                           | 15.58<br>(12.14 to<br>19.31)                         | 24.36<br>(18.99 to<br>30.82)                           |

|                                                                          |                                        |                                        |                                        |                                        |                                  |                                    |                                   |                                             |
|--------------------------------------------------------------------------|----------------------------------------|----------------------------------------|----------------------------------------|----------------------------------------|----------------------------------|------------------------------------|-----------------------------------|---------------------------------------------|
| <b>HIV/AIDS and tuberculosis</b>                                         | <b>118.09</b><br>(11.41 to<br>125.45)  | <b>133.72</b><br>(86.81 to<br>161.80)  | <b>92.27</b><br>(43.64 to<br>117.63)   | <b>169.87</b><br>(131.99 to<br>203.29) | <b>2.82</b><br>(2.65 to<br>3.01) | <b>3.42</b><br>(2.10 to<br>4.35)   | <b>2.36</b><br>(1.04 to<br>3.11)  | <b>4.32</b><br>(1.04 to<br>3.17 to<br>5.49) |
| Tuberculosis                                                             | 21.90<br>(17.79 to<br>27.28)           | 20.30<br>(11.91 to<br>36.50)           | 9.70<br>(5.26 to<br>17.75)             | 29.78<br>(16.54 to<br>54.90)           | 0.73<br>(0.60 to<br>0.88)        | 0.90<br>(0.53 to<br>1.57)          | 0.45<br>(0.25 to<br>0.82)         | 1.27<br>(0.70 to<br>2.30)                   |
| HIV/AIDS                                                                 | 96.20<br>(90.90 to<br>101.58)          | 113.42<br>(65.55 to<br>134.56)         | 82.58<br>(34.09 to<br>106.36)          | 140.09<br>(104.56 to<br>159.24)        | 2.09<br>(1.98 to<br>2.20)        | 2.52<br>(1.28 to<br>3.08)          | 1.90<br>(0.61 to<br>2.52)         | 3.05<br>(2.07 to<br>3.54)                   |
| <b>Diarrhea, lower respiratory, and other common infectious diseases</b> | <b>263.05</b><br>(227.33 to<br>307.47) | <b>221.16</b><br>(150.10 to<br>338.32) | <b>152.48</b><br>(106.96 to<br>223.01) | <b>324.98</b><br>(209.86 to<br>519.41) | <b>6.51</b><br>(5.70 to<br>7.45) | <b>10.34</b><br>(7.52 to<br>14.41) | <b>8.45</b><br>(6.27 to<br>11.42) | <b>13.44</b><br>(9.35 to<br>19.50)          |
| Diarrheal diseases                                                       | 54.39<br>(42.69 to<br>68.66)           | 26.46<br>(10.44 to<br>67.53)           | 20.46<br>(8.91 to<br>49.90)            | 40.77<br>(13.07 to<br>113.37)          | 1.16<br>(1.00 to<br>1.37)        | 1.31<br>(0.59 to<br>3.05)          | 1.24<br>(0.56 to<br>2.75)         | 1.78<br>(0.65 to<br>4.63)                   |
| Intestinal infectious diseases                                           | 0.04<br>(0.02 to<br>0.07)              | 0.02<br>(0.01 to<br>0.04)              | 0.02<br>(0.01 to<br>0.03)              | 0.03<br>(0.01 to<br>0.05)              | 0.00<br>(0.00 to<br>0.00)        | 0.00<br>(0.00 to<br>0.00)          | 0.00<br>(0.00 to<br>0.00)         | 0.00<br>(0.00 to<br>0.00)                   |
| Typhoid fever                                                            | 0.01<br>(0.01 to<br>0.03)              | 0.01<br>(0.00 to<br>0.02)              | 0.01<br>(0.00 to<br>0.02)              | 0.01<br>(0.00 to<br>0.02)              | 0.00<br>(0.00 to<br>0.00)        | 0.00<br>(0.00 to<br>0.00)          | 0.00<br>(0.00 to<br>0.00)         | 0.00<br>(0.00 to<br>0.00)                   |
| Paratyphoid fever                                                        | 0.00<br>(0.00 to<br>0.00)              | 0.00<br>(0.00 to<br>0.00)              | 0.00<br>(0.00 to<br>0.00)              | 0.00<br>(0.00 to<br>0.00)              | 0.00<br>(0.00 to<br>0.00)        | 0.00<br>(0.00 to<br>0.00)          | 0.00<br>(0.00 to<br>0.00)         | 0.00<br>(0.00 to<br>0.00)                   |
| Other intestinal infectious diseases                                     | 0.03<br>(0.01 to<br>0.06)              | 0.01<br>(0.00 to<br>0.03)              | 0.01<br>(0.00 to<br>0.02)              | 0.01<br>(0.01 to<br>0.03)              | 0.00<br>(0.00 to<br>0.00)        | 0.00<br>(0.00 to<br>0.00)          | 0.00<br>(0.00 to<br>0.00)         | 0.00<br>(0.00 to<br>0.00)                   |
| Lower respiratory infections                                             | 173.61<br>(149.26 to<br>201.52)        | 152.28<br>(99.54 to<br>230.55)         | 105.08<br>(72.67 to<br>151.02)         | 224.55<br>(139.54 to<br>354.55)        | 4.77<br>(4.16 to<br>5.50)        | 8.22<br>(5.89 to<br>11.29)         | 6.63<br>(4.79 to<br>9.00)         | 10.62<br>(7.30 to<br>15.39)                 |
| Upper respiratory infections                                             | 0.17<br>(0.08 to<br>0.32)              | 0.18<br>(0.07 to<br>0.43)              | 0.11<br>(0.04 to<br>0.26)              | 0.22<br>(0.08 to<br>0.51)              | 0.00<br>(0.00 to<br>0.01)        | 0.01<br>(0.00 to<br>0.01)          | 0.00<br>(0.00 to<br>0.01)         | 0.01<br>(0.00 to<br>0.01)                   |
| Otitis media                                                             | 0.01<br>(0.01 to<br>0.01)              | 0.00<br>(0.00 to<br>0.00)              | 0.00<br>(0.00 to<br>0.00)              | 0.00<br>(0.00 to<br>0.00)              | 0.00<br>(0.00 to<br>0.00)        | 0.00<br>(0.00 to<br>0.00)          | 0.00<br>(0.00 to<br>0.00)         | 0.00<br>(0.00 to<br>0.00)                   |
| Meningitis                                                               | 21.00<br>(17.31 to<br>26.37)           | 11.20<br>(6.47 to<br>18.31)            | 7.84<br>(4.87 to<br>12.37)             | 15.15<br>(7.50 to<br>26.82)            | 0.33<br>(0.28 to<br>0.43)        | 0.23<br>(0.16 to<br>0.34)          | 0.18<br>(0.13 to<br>0.26)         | 0.28<br>(0.18 to<br>0.44)                   |
| Pneumococcal meningitis                                                  | 2.64<br>(2.12 to<br>3.39)              | 1.03<br>(0.64 to<br>1.57)              | 0.89<br>(0.58 to<br>1.35)              | 1.27<br>(0.76 to<br>2.02)              | 0.04<br>(0.04 to<br>0.06)        | 0.03<br>(0.02 to<br>0.04)          | 0.02<br>(0.02 to<br>0.03)         | 0.03<br>(0.02 to<br>0.04)                   |
| H influenzae type B meningitis                                           | 2.49<br>(1.97 to<br>3.19)              | 2.88<br>(0.72 to<br>7.54)              | 1.29<br>(0.54 to<br>2.80)              | 5.89<br>(1.07 to<br>16.05)             | 0.04<br>(0.03 to<br>0.05)        | 0.04<br>(0.02 to<br>0.09)          | 0.02<br>(0.01 to<br>0.04)         | 0.08<br>(0.01 to<br>0.19)                   |
| Meningococcal meningitis                                                 | 9.05<br>(7.40 to<br>11.47)             | 4.03<br>(2.51 to<br>6.37)              | 3.14<br>(1.93 to<br>5.10)              | 4.42<br>(2.69 to<br>6.92)              | 0.14<br>(0.12 to<br>0.18)        | 0.09<br>(0.06 to<br>0.15)          | 0.07<br>(0.05 to<br>0.11)         | 0.09<br>(0.07 to<br>0.14)                   |
| Other meningitis                                                         | 6.82<br>(5.55 to<br>8.60)              | 3.26<br>(2.05 to<br>4.96)              | 2.52<br>(1.52 to<br>4.06)              | 3.58<br>(2.20 to<br>5.39)              | 0.11<br>(0.09 to<br>0.14)        | 0.07<br>(0.05 to<br>0.11)          | 0.06<br>(0.04 to<br>0.09)         | 0.08<br>(0.06 to<br>0.11)                   |
| Encephalitis                                                             | 8.68<br>(5.88 to<br>15.22)             | 7.16<br>(4.33 to<br>12.81)             | 5.87<br>(3.62 to<br>10.15)             | 8.04<br>(4.70 to<br>14.88)             | 0.14<br>(0.11 to<br>0.24)        | 0.16<br>(0.11 to<br>0.25)          | 0.14<br>(0.09 to<br>0.21)         | 0.17<br>(0.12 to<br>0.28)                   |
| Diphtheria                                                               | 0.11<br>(0.07 to<br>0.17)              | 0.03<br>(0.01 to<br>0.06)              | 0.02<br>(0.01 to<br>0.04)              | 0.04<br>(0.01 to<br>0.09)              | 0.00<br>(0.00 to<br>0.00)        | 0.00<br>(0.00 to<br>0.00)          | 0.00<br>(0.00 to<br>0.00)         | 0.00<br>(0.00 to<br>0.00)                   |
| Whooping cough                                                           | 1.60<br>(0.08 to<br>3.85)              | 1.52<br>(0.01 to<br>5.49)              | 0.29<br>(0.01 to<br>0.97)              | 1.86<br>(0.01 to<br>6.77)              | 0.02<br>(0.00 to<br>0.05)        | 0.02<br>(0.00 to<br>0.06)          | 0.00<br>(0.01 to<br>0.01)         | 0.02<br>(0.00 to<br>0.08)                   |
| Tetanus                                                                  | 0.26<br>(0.15 to<br>0.35)              | 0.04<br>(0.02 to<br>0.07)              | 0.04<br>(0.02 to<br>0.06)              | 0.04<br>(0.02 to<br>0.07)              | 0.01<br>(0.00 to<br>0.01)        | 0.00<br>(0.00 to<br>0.00)          | 0.00<br>(0.00 to<br>0.00)         | 0.00<br>(0.00 to<br>0.00)                   |
| Measles                                                                  | 0.05<br>(0.03 to<br>0.07)              | 20.29<br>(1.80 to<br>72.11)            | 11.47<br>(1.28 to<br>35.16)            | 31.91<br>(2.19 to<br>123.89)           | 0.00<br>(0.00 to<br>0.00)        | 0.33<br>(2.19 to<br>9.96)          | 0.20<br>(0.02 to<br>0.53)         | 0.50<br>(0.03 to<br>1.59)                   |

| Venezuela                                             |                                         |                                         |                                         |                                         |                                      |                                      |                                      |                                      |
|-------------------------------------------------------|-----------------------------------------|-----------------------------------------|-----------------------------------------|-----------------------------------------|--------------------------------------|--------------------------------------|--------------------------------------|--------------------------------------|
| Cause                                                 | YLLs (in 1000s)                         |                                         |                                         |                                         | Deaths (in 1000s)                    |                                      |                                      |                                      |
|                                                       | 2016                                    | 2040 Forecast                           | 2040 Better Scenario                    | 2040 Worse Scenario                     | 2016                                 | 2040 Forecast                        | 2040 Better Scenario                 | 2040 Worse Scenario                  |
| Varicella and herpes zoster                           | 3.12<br>(1.74 to 8.34)                  | 1.97<br>(0.99 to 4.89)                  | 1.29<br>(0.64 to 3.08)                  | 2.37<br>(1.09 to 6.28)                  | 0.06<br>(0.04 to 0.15)               | 0.06<br>(0.04 to 0.13)               | 0.04<br>(0.02 to 0.09)               | 0.07<br>(0.04 to 0.15)               |
| <b>Neglected tropical diseases and malaria</b>        | <b>27.37</b><br><b>(22.23 to 33.58)</b> | <b>44.80</b><br><b>(34.51 to 58.93)</b> | <b>45.85</b><br><b>(35.71 to 60.02)</b> | <b>45.22</b><br><b>(34.70 to 60.33)</b> | <b>1.00</b><br><b>(0.84 to 1.20)</b> | <b>1.59</b><br><b>(1.32 to 1.89)</b> | <b>1.84</b><br><b>(1.56 to 2.16)</b> | <b>1.48</b><br><b>(1.24 to 1.75)</b> |
| Malaria                                               | 1.03<br>(0.68 to 1.74)                  | 0.58<br>(0.34 to 1.08)                  | 0.53<br>(0.32 to 1.01)                  | 0.60<br>(0.36 to 1.12)                  | 0.02<br>(0.01 to 0.03)               | 0.01<br>(0.01 to 0.05)               | 0.01<br>(0.01 to 0.02)               | 0.01<br>(0.01 to 0.03)               |
| Chagas disease                                        | 14.34<br>(11.92 to 17.33)               | 12.92<br>(10.27 to 16.32)               | 16.55<br>(13.32 to 20.35)               | 11.39<br>(9.06 to 14.25)                | 0.76<br>(0.64 to 0.91)               | 0.83<br>(0.66 to 1.05)               | 1.10<br>(0.90 to 1.32)               | 0.72<br>(0.57 to 0.88)               |
| Leishmaniasis                                         | 0.09<br>(0.05 to 0.13)                  | 0.06<br>(0.03 to 0.09)                  | 0.04<br>(0.02 to 0.06)                  | 0.07<br>(0.04 to 0.11)                  | 0.00<br>(0.00 to 0.00)               | 0.00<br>(0.00 to 0.00)               | 0.00<br>(0.00 to 0.00)               | 0.00<br>(0.00 to 0.00)               |
| African trypanosomiasis                               | 0.00<br>(0.00 to 0.00)                  | 0.00<br>(0.00 to 0.00)                  | 0.00<br>(0.00 to 0.00)                  | 0.00<br>(0.00 to 0.00)                  | 0.00<br>(0.00 to 0.00)               | 0.00<br>(0.00 to 0.00)               | 0.00<br>(0.00 to 0.00)               | 0.00<br>(0.00 to 0.00)               |
| Schistosomiasis                                       | 0.48<br>(0.25 to 0.88)                  | 0.35<br>(0.17 to 0.67)                  | 0.29<br>(0.14 to 0.55)                  | 0.37<br>(0.18 to 0.72)                  | 0.01<br>(0.01 to 0.02)               | 0.01<br>(0.01 to 0.02)               | 0.01<br>(0.01 to 0.02)               | 0.01<br>(0.01 to 0.02)               |
| Cysticercosis                                         | 0.73<br>(0.57 to 0.98)                  | 0.30<br>(0.21 to 0.45)                  | 0.27<br>(0.19 to 0.41)                  | 0.31<br>(0.21 to 0.46)                  | 0.02<br>(0.01 to 0.02)               | 0.01<br>(0.01 to 0.01)               | 0.01<br>(0.01 to 0.01)               | 0.01<br>(0.01 to 0.01)               |
| Cystic echinococcosis                                 | 0.02<br>(0.01 to 0.02)                  | 0.01<br>(0.01 to 0.02)                  | 0.01<br>(0.00 to 0.01)                  | 0.01<br>(0.01 to 0.02)                  | 0.00<br>(0.00 to 0.00)               | 0.00<br>(0.00 to 0.00)               | 0.00<br>(0.00 to 0.00)               | 0.00<br>(0.00 to 0.00)               |
| Dengue                                                | 8.84<br>(5.51 to 12.82)                 | 29.27<br>(19.44 to 42.37)               | 27.11<br>(18.20 to 39.91)               | 30.94<br>(20.56 to 44.36)               | 0.16<br>(0.10 to 0.23)               | 0.70<br>(0.49 to 0.94)               | 0.69<br>(0.48 to 0.92)               | 0.70<br>(0.49 to 0.95)               |
| Yellow fever                                          | 0.39<br>(0.07 to 1.15)                  | 0.15<br>(0.03 to 0.46)                  | 0.10<br>(0.02 to 0.31)                  | 0.18<br>(0.03 to 0.54)                  | 0.01<br>(0.00 to 0.02)               | 0.00<br>(0.00 to 0.01)               | 0.00<br>(0.00 to 0.01)               | 0.00<br>(0.00 to 0.01)               |
| Rabies                                                | 0.00<br>(0.00 to 0.00)                  | 0.00<br>(0.00 to 0.00)                  | 0.00<br>(0.00 to 0.00)                  | 0.00<br>(0.00 to 0.00)                  | 0.00<br>(0.00 to 0.00)               | 0.00<br>(0.00 to 0.00)               | 0.00<br>(0.00 to 0.00)               | 0.00<br>(0.00 to 0.00)               |
| Intestinal nematode infections                        | 0.39<br>(0.17 to 0.65)                  | 0.35<br>(0.16 to 0.65)                  | 0.32<br>(0.15 to 0.58)                  | 0.39<br>(0.18 to 0.71)                  | 0.01<br>(0.00 to 0.01)               | 0.01<br>(0.00 to 0.01)               | 0.01<br>(0.01 to 0.01)               | 0.01<br>(0.00 to 0.01)               |
| Other neglected tropical diseases                     | 1.04<br>(0.69 to 2.30)                  | 0.81<br>(0.50 to 1.73)                  | 0.64<br>(0.40 to 1.35)                  | 0.95<br>(0.59 to 2.03)                  | 0.02<br>(0.01 to 0.04)               | 0.02<br>(0.01 to 0.05)               | 0.02<br>(0.01 to 0.04)               | 0.02<br>(0.01 to 0.05)               |
| <b>Maternal disorders</b>                             | <b>22.96</b><br><b>(16.42 to 30.82)</b> | <b>13.93</b><br><b>(8.29 to 22.24)</b>  | <b>8.41</b><br><b>(4.51 to 14.32)</b>   | <b>16.97</b><br><b>(9.41 to 28.64)</b>  | <b>0.39</b><br><b>(0.28 to 0.53)</b> | <b>0.24</b><br><b>(0.15 to 0.39)</b> | <b>0.15</b><br><b>(0.08 to 0.25)</b> | <b>0.30</b><br><b>(0.17 to 0.49)</b> |
| Maternal hemorrhage                                   | 3.86<br>(2.18 to 5.97)                  | 2.21<br>(1.08 to 3.97)                  | 1.34<br>(0.63 to 2.51)                  | 2.68<br>(1.22 to 5.04)                  | 0.07<br>(0.04 to 0.10)               | 0.04<br>(0.02 to 0.07)               | 0.02<br>(0.01 to 0.05)               | 0.05<br>(0.02 to 0.09)               |
| Maternal sepsis and other maternal infections         | 1.81<br>(0.95 to 2.91)                  | 1.25<br>(0.59 to 2.36)                  | 0.75<br>(0.32 to 1.47)                  | 1.53<br>(0.67 to 2.98)                  | 0.03<br>(0.02 to 0.05)               | 0.02<br>(0.01 to 0.04)               | 0.01<br>(0.01 to 0.03)               | 0.03<br>(0.01 to 0.05)               |
| Maternal hypertensive disorders                       | 6.67<br>(3.98 to 9.65)                  | 3.90<br>(2.00 to 6.93)                  | 2.32<br>(1.12 to 4.35)                  | 4.75<br>(2.31 to 8.75)                  | 0.11<br>(0.07 to 0.17)               | 0.07<br>(0.04 to 0.12)               | 0.04<br>(0.02 to 0.08)               | 0.08<br>(0.04 to 0.15)               |
| Maternal obstructed labor and uterine rupture         | 0.70<br>(0.34 to 1.25)                  | 0.44<br>(0.18 to 0.90)                  | 0.25<br>(0.10 to 0.54)                  | 0.54<br>(0.22 to 1.14)                  | 0.01<br>(0.01 to 0.02)               | 0.01<br>(0.00 to 0.02)               | 0.00<br>(0.00 to 0.01)               | 0.01<br>(0.00 to 0.02)               |
| Maternal abortion, miscarriage, and ectopic pregnancy | 1.82<br>(1.00 to 2.96)                  | 1.99<br>(0.88 to 4.08)                  | 1.20<br>(0.51 to 2.49)                  | 2.42<br>(1.05 to 5.01)                  | 0.03<br>(0.02 to 0.05)               | 0.04<br>(0.02 to 0.07)               | 0.02<br>(0.01 to 0.04)               | 0.04<br>(0.02 to 0.09)               |

|                                        |                            |                           |                           |                           |                           |                           |                           |                           |
|----------------------------------------|----------------------------|---------------------------|---------------------------|---------------------------|---------------------------|---------------------------|---------------------------|---------------------------|
| Indirect maternal deaths               | 5.69<br>(3.28 to<br>12.05) | 2.83<br>(1.27 to<br>6.54) | 1.72<br>(0.72 to<br>4.25) | 3.47<br>(1.43 to<br>8.44) | 0.10<br>(0.06 to<br>0.20) | 0.05<br>(0.02 to<br>0.11) | 0.03<br>(0.01 to<br>0.07) | 0.06<br>(0.01 to<br>0.14) |
| Late maternal deaths                   | 0.13<br>(0.06 to<br>0.21)  | 0.09<br>(0.04 to<br>0.18) | 0.06<br>(0.02 to<br>0.11) | 0.12<br>(0.05 to<br>0.24) | 0.00<br>(0.00 to<br>0.00) | 0.00<br>(0.00 to<br>0.00) | 0.00<br>(0.00 to<br>0.00) | 0.00<br>(0.00 to<br>0.00) |
| Maternal deaths aggravated by HIV/AIDS | 0.03<br>(0.01 to<br>0.05)  | 0.06<br>(0.02 to<br>0.13) | 0.04<br>(0.01 to<br>0.09) | 0.07<br>(0.03 to<br>0.16) | 0.00<br>(0.00 to<br>0.00) | 0.00<br>(0.00 to<br>0.00) | 0.00<br>(0.00 to<br>0.00) | 0.00<br>(0.00 to<br>0.00) |
| Other maternal disorders               | 2.24<br>(1.20 to<br>3.54)  | 1.16<br>(0.57 to<br>2.05) | 0.73<br>(0.34 to<br>1.35) | 1.40<br>(0.63 to<br>2.55) | 0.04<br>(0.02 to<br>0.06) | 0.02<br>(0.01 to<br>0.04) | 0.01<br>(0.01 to<br>0.02) | 0.02<br>(0.01 to<br>0.04) |

Venezuela

| Cause                                                                   | YLLs (in 1000s)                                      |                                                      |                                                     |                                                      | Deaths (in 1000s)                              |                                                |                                                |                                                |
|-------------------------------------------------------------------------|------------------------------------------------------|------------------------------------------------------|-----------------------------------------------------|------------------------------------------------------|------------------------------------------------|------------------------------------------------|------------------------------------------------|------------------------------------------------|
|                                                                         | 2016                                                 | 2040 Forecast                                        | 2040 Better Scenario                                | 2040 Worse Scenario                                  | 2016                                           | 2040 Forecast                                  | 2040 Better Scenario                           | 2040 Worse Scenario                            |
| <b>Neonatal disorders</b>                                               | <b>376.86</b><br><b>(313.17 to</b><br><b>449.47)</b> | <b>225.07</b><br><b>(148.65 to</b><br><b>324.99)</b> | <b>130.57</b><br><b>(83.70 to</b><br><b>190.89)</b> | <b>293.75</b><br><b>(194.42 to</b><br><b>425.40)</b> | <b>4.35</b><br><b>(3.62 to</b><br><b>5.19)</b> | <b>2.60</b><br><b>(1.72 to</b><br><b>3.75)</b> | <b>1.51</b><br><b>(0.97 to</b><br><b>2.21)</b> | <b>3.39</b><br><b>(2.25 to</b><br><b>4.92)</b> |
| Neonatal preterm birth                                                  | 192.28<br>(155.71 to<br>235.07)                      | 110.93<br>(73.96 to<br>160.15)                       | 55.50<br>(35.02 to<br>83.47)                        | 141.60<br>(93.15 to<br>206.50)                       | 2.22<br>(1.80 to<br>2.72)                      | 1.28<br>(0.85 to<br>1.85)                      | 0.64<br>(0.40 to<br>0.96)                      | 1.64<br>(1.08 to<br>2.39)                      |
| Neonatal encephalopathy due to birth asphyxia and trauma                | 76.07<br>(58.18 to<br>98.54)                         | 38.07<br>(21.73 to<br>64.96)                         | 24.66<br>(13.77 to<br>43.12)                        | 50.46<br>(28.66 to<br>85.73)                         | 0.88<br>(0.67 to<br>1.14)                      | 0.44<br>(0.25 to<br>0.75)                      | 0.28<br>(0.16 to<br>0.50)                      | 0.58<br>(0.33 to<br>0.99)                      |
| Neonatal sepsis and other neonatal infections                           | 81.36<br>(54.93 to<br>109.34)                        | 59.56<br>(33.40 to<br>95.46)                         | 39.43<br>(21.66 to<br>63.66)                        | 79.07<br>(43.55 to<br>124.94)                        | 0.94<br>(0.63 to<br>1.26)                      | 0.69<br>(0.39 to<br>1.10)                      | 0.46<br>(0.25 to<br>0.74)                      | 0.91<br>(0.50 to<br>1.44)                      |
| Hemolytic disease and other neonatal jaundice                           | 2.01<br>(1.12 to<br>3.17)                            | 0.81<br>(0.33 to<br>1.68)                            | 0.50<br>(0.21 to<br>1.04)                           | 1.11<br>(0.45 to<br>2.23)                            | 0.02<br>(0.01 to<br>0.04)                      | 0.01<br>(0.00 to<br>0.02)                      | 0.01<br>(0.00 to<br>0.01)                      | 0.01<br>(0.01 to<br>0.03)                      |
| Other neonatal disorders                                                | 25.14<br>(18.46 to<br>33.92)                         | 15.70<br>(9.02 to<br>27.13)                          | 10.49<br>(5.98 to<br>17.80)                         | 21.50<br>(12.37 to<br>36.96)                         | 0.29<br>(0.21 to<br>0.39)                      | 0.18<br>(0.10 to<br>0.31)                      | 0.12<br>(0.07 to<br>0.21)                      | 0.25<br>(0.14 to<br>0.43)                      |
| <b>Nutritional deficiencies</b>                                         | <b>27.37</b><br><b>(21.60 to</b><br><b>34.31)</b>    | <b>17.35</b><br><b>(13.69 to</b><br><b>22.27)</b>    | <b>14.46</b><br><b>(11.49 to</b><br><b>18.48)</b>   | <b>19.31</b><br><b>(14.80 to</b><br><b>25.87)</b>    | <b>0.65</b><br><b>(0.54 to</b><br><b>0.76)</b> | <b>0.94</b><br><b>(0.74 to</b><br><b>1.16)</b> | <b>0.89</b><br><b>(0.71 to</b><br><b>1.09)</b> | <b>0.94</b><br><b>(0.71 to</b><br><b>1.18)</b> |
| Protein-energy malnutrition                                             | 26.24<br>(20.72 to<br>33.10)                         | 15.37<br>(11.97 to<br>20.39)                         | 12.89<br>(10.03 to<br>17.00)                        | 17.15<br>(12.81 to<br>23.69)                         | 0.61<br>(0.51 to<br>0.72)                      | 0.85<br>(0.65 to<br>1.06)                      | 0.81<br>(0.63 to<br>1.01)                      | 0.84<br>(0.63 to<br>1.08)                      |
| Iodine deficiency                                                       | 0.16<br>(0.01 to<br>0.61)                            | 0.55<br>(0.02 to<br>1.89)                            | 0.41<br>(0.01 to<br>1.39)                           | 0.63<br>(0.02 to<br>2.38)                            | 0.00<br>(0.00 to<br>0.01)                      | 0.03<br>(0.00 to<br>0.11)                      | 0.02<br>(0.00 to<br>0.10)                      | 0.03<br>(0.00 to<br>0.11)                      |
| Dietary iron deficiency                                                 | 0.23<br>(0.14 to<br>0.44)                            | 0.20<br>(0.11 to<br>0.37)                            | 0.17<br>(0.10 to<br>0.32)                           | 0.22<br>(0.12 to<br>0.40)                            | 0.00<br>(0.00 to<br>0.01)                      | 0.00<br>(0.00 to<br>0.01)                      | 0.00<br>(0.00 to<br>0.01)                      | 0.00<br>(0.00 to<br>0.01)                      |
| Other nutritional deficiencies                                          | 0.74<br>(0.45 to<br>1.40)                            | 1.23<br>(0.65 to<br>2.20)                            | 0.98<br>(0.48 to<br>1.81)                           | 1.31<br>(0.71 to<br>2.29)                            | 0.02<br>(0.01 to<br>0.04)                      | 0.06<br>(0.02 to<br>0.11)                      | 0.05<br>(0.02 to<br>0.10)                      | 0.06<br>(0.02 to<br>0.11)                      |
| <b>Other communicable, maternal, neonatal, and nutritional diseases</b> | <b>17.80</b><br><b>(13.14 to</b><br><b>25.00)</b>    | <b>13.93</b><br><b>(10.82 to</b><br><b>18.08)</b>    | <b>10.81</b><br><b>(8.09 to</b><br><b>14.40)</b>    | <b>15.20</b><br><b>(11.64 to</b><br><b>19.81)</b>    | <b>0.38</b><br><b>(0.31 to</b><br><b>0.47)</b> | <b>0.47</b><br><b>(0.38 to</b><br><b>0.58)</b> | <b>0.38</b><br><b>(0.30 to</b><br><b>0.49)</b> | <b>0.49</b><br><b>(0.39 to</b><br><b>0.60)</b> |
| Sexually transmitted infections excluding HIV                           | 6.92<br>(3.00 to<br>13.61)                           | 1.76<br>(0.83 to<br>3.57)                            | 1.26<br>(0.60 to<br>2.55)                           | 2.11<br>(0.93 to<br>4.41)                            | 0.09<br>(0.04 to<br>0.17)                      | 0.03<br>(0.02 to<br>0.05)                      | 0.02<br>(0.01 to<br>0.04)                      | 0.03<br>(0.02 to<br>0.06)                      |
| Syphilis                                                                | 6.50<br>(2.58 to<br>13.04)                           | 1.42<br>(0.51 to<br>3.24)                            | 0.97<br>(0.34 to<br>2.24)                           | 1.75<br>(0.61 to<br>3.99)                            | 0.08<br>(0.03 to<br>0.16)                      | 0.02<br>(0.01 to<br>0.04)                      | 0.01<br>(0.01 to<br>0.03)                      | 0.02<br>(0.01 to<br>0.05)                      |
| Chlamydia infection                                                     | 0.08<br>(0.06 to<br>0.11)                            | 0.07<br>(0.04 to<br>0.10)                            | 0.06<br>(0.04 to<br>0.09)                           | 0.07<br>(0.04 to<br>0.10)                            | 0.00<br>(0.00 to<br>0.00)                      | 0.00<br>(0.00 to<br>0.00)                      | 0.00<br>(0.00 to<br>0.00)                      | 0.00<br>(0.00 to<br>0.00)                      |
| Gonococcal infection                                                    | 0.22<br>(0.16 to<br>0.29)                            | 0.18<br>(0.12 to<br>0.26)                            | 0.16<br>(0.10 to<br>0.23)                           | 0.19<br>(0.12 to<br>0.28)                            | 0.01<br>(0.00 to<br>0.01)                      | 0.01<br>(0.00 to<br>0.01)                      | 0.00<br>(0.00 to<br>0.01)                      | 0.01<br>(0.00 to<br>0.01)                      |

|                                       |                                                            |                                                            |                                                            |                                                            |                                                      |                                                      |                                                      |                                                      |
|---------------------------------------|------------------------------------------------------------|------------------------------------------------------------|------------------------------------------------------------|------------------------------------------------------------|------------------------------------------------------|------------------------------------------------------|------------------------------------------------------|------------------------------------------------------|
| Other sexually transmitted infections | 0.12<br>(0.09 to<br>0.16)                                  | 0.09<br>(0.06 to<br>0.14)                                  | 0.08<br>(0.05 to<br>0.12)                                  | 0.10<br>(0.06 to<br>0.15)                                  | 0.00<br>(0.00 to<br>0.00)                            | 0.00<br>(0.00 to<br>0.00)                            | 0.00<br>(0.00 to<br>0.00)                            | 0.00<br>(0.00 to<br>0.00)                            |
| Acute hepatitis                       | 5.84<br>(4.86 to<br>7.19)                                  | 5.94<br>(4.42 to<br>7.95)                                  | 4.52<br>(3.06 to<br>6.36)                                  | 6.26<br>(4.53 to<br>8.28)                                  | 0.17<br>(0.14 to<br>0.20)                            | 0.23<br>(0.17 to<br>0.30)                            | 0.18<br>(0.12 to<br>0.25)                            | 0.23<br>(0.18 to<br>0.30)                            |
| Acute hepatitis A                     | 0.25<br>(0.09 to<br>0.47)                                  | 0.15<br>(0.06 to<br>0.29)                                  | 0.12<br>(0.04 to<br>0.23)                                  | 0.17<br>(0.07 to<br>0.33)                                  | 0.00<br>(0.00 to<br>0.01)                            | 0.00<br>(0.00 to<br>0.01)                            | 0.00<br>(0.00 to<br>0.01)                            | 0.00<br>(0.00 to<br>0.01)                            |
| Acute hepatitis B                     | 4.23<br>(3.39 to<br>5.42)                                  | 4.60<br>(3.28 to<br>6.29)                                  | 3.46<br>(2.26 to<br>4.96)                                  | 4.85<br>(3.34 to<br>6.60)                                  | 0.13<br>(0.10 to<br>0.16)                            | 0.17<br>(0.13 to<br>0.23)                            | 0.13<br>(0.09 to<br>0.19)                            | 0.18<br>(0.13 to<br>0.24)                            |
| Acute hepatitis C                     | 0.34<br>(0.24 to<br>0.46)                                  | 0.38<br>(0.25 to<br>0.55)                                  | 0.31<br>(0.19 to<br>0.46)                                  | 0.38<br>(0.25 to<br>0.56)                                  | 0.01<br>(0.01 to<br>0.01)                            | 0.01<br>(0.01 to<br>0.02)                            | 0.01<br>(0.01 to<br>0.02)                            | 0.01<br>(0.01 to<br>0.02)                            |
| Acute hepatitis E                     | 1.02<br>(0.77 to<br>1.34)                                  | 0.81<br>(0.54 to<br>1.20)                                  | 0.64<br>(0.41 to<br>0.99)                                  | 0.86<br>(0.56 to<br>1.26)                                  | 0.03<br>(0.02 to<br>0.03)                            | 0.04<br>(0.02 to<br>0.05)                            | 0.03<br>(0.02 to<br>0.05)                            | 0.04<br>(0.02 to<br>0.05)                            |
| Other unspecified infectious diseases | 5.05<br>(4.17 to<br>6.61)                                  | 6.23<br>(4.85 to<br>8.18)                                  | 5.03<br>(3.87 to<br>6.67)                                  | 6.83<br>(5.26 to<br>9.08)                                  | 0.12<br>(0.10 to<br>0.15)                            | 0.21<br>(0.17 to<br>0.26)                            | 0.18<br>(0.15 to<br>0.23)                            | 0.22<br>(0.18 to<br>0.27)                            |
| <b>Non-communicable diseases</b>      | <b>2,621.25</b><br><b>(2,269.48 to</b><br><b>3,083.40)</b> | <b>4,374.61</b><br><b>(3,213.68 to</b><br><b>5,932.10)</b> | <b>3,199.25</b><br><b>(2,383.87 to</b><br><b>4,339.37)</b> | <b>5,597.55</b><br><b>(4,083.88 to</b><br><b>7,608.25)</b> | <b>116.11</b><br><b>(101.51 to</b><br><b>135.24)</b> | <b>255.57</b><br><b>(196.67 to</b><br><b>331.38)</b> | <b>196.08</b><br><b>(151.24 to</b><br><b>248.97)</b> | <b>308.38</b><br><b>(237.34 to</b><br><b>388.52)</b> |
| <b>Venezuela</b>                      |                                                            |                                                            |                                                            |                                                            |                                                      |                                                      |                                                      |                                                      |
| Cause                                 | YLLs (in 1000s)                                            |                                                            |                                                            |                                                            | Deaths (in 1000s)                                    |                                                      |                                                      |                                                      |
|                                       | 2016                                                       | 2040 Forecast                                              | 2040 Better Scenario                                       | 2040 Worse Scenario                                        | 2016                                                 | 2040 Forecast                                        | 2040 Better Scenario                                 | 2040 Worse Scenario                                  |
| <b>Neoplasms</b>                      | <b>715.90</b><br><b>(611.40 to</b><br><b>851.84)</b>       | <b>1,153.31</b><br><b>(902.70 to</b><br><b>1,451.92)</b>   | <b>1,052.69</b><br><b>(818.81 to</b><br><b>1,339.87)</b>   | <b>1,365.49</b><br><b>(1,057.30 to</b><br><b>1,768.68)</b> | <b>27.87</b><br><b>(23.98 to</b><br><b>32.83)</b>    | <b>56.26</b><br><b>(45.63 to</b><br><b>68.06)</b>    | <b>53.53</b><br><b>(43.17 to</b><br><b>64.94)</b>    | <b>64.23</b><br><b>(51.54 to</b><br><b>79.64)</b>    |
| Lip and oral cavity cancer            | 7.78<br>(6.42 to<br>9.57)                                  | 11.94<br>(7.18 to<br>19.03)                                | 8.30<br>(5.12 to<br>13.04)                                 | 21.47<br>(11.87 to<br>36.95)                               | 0.32<br>(0.27 to<br>0.39)                            | 0.59<br>(0.36 to<br>0.91)                            | 0.43<br>(0.27 to<br>0.65)                            | 1.02<br>(0.58 to<br>1.64)                            |
| Nasopharynx cancer                    | 2.94<br>(2.36 to<br>3.67)                                  | 4.22<br>(2.69 to<br>6.36)                                  | 2.84<br>(1.85 to<br>4.28)                                  | 7.53<br>(4.50 to<br>11.45)                                 | 0.10<br>(0.08 to<br>0.12)                            | 0.17<br>(0.11 to<br>0.24)                            | 0.12<br>(0.08 to<br>0.17)                            | 0.29<br>(0.18 to<br>0.45)                            |
| Other pharynx cancer                  | 3.80<br>(3.12 to<br>4.69)                                  | 5.50<br>(3.27 to<br>8.85)                                  | 4.67<br>(2.88 to<br>7.39)                                  | 6.88<br>(3.99 to<br>11.11)                                 | 0.14<br>(0.12 to<br>0.18)                            | 0.25<br>(0.15 to<br>0.40)                            | 0.21<br>(0.13 to<br>0.33)                            | 0.30<br>(0.17 to<br>0.50)                            |
| Esophageal cancer                     | 9.50<br>(7.72 to<br>11.83)                                 | 14.10<br>(8.40 to<br>22.86)                                | 10.76<br>(6.83 to<br>16.41)                                | 22.92<br>(12.51 to<br>40.87)                               | 0.42<br>(0.35 to<br>0.51)                            | 0.72<br>(0.46 to<br>1.14)                            | 0.58<br>(0.38 to<br>0.85)                            | 1.13<br>(0.65 to<br>1.87)                            |
| Stomach cancer                        | 55.79<br>(47.10 to<br>67.55)                               | 77.46<br>(56.50 to<br>104.84)                              | 64.60<br>(47.28 to<br>87.54)                               | 82.68<br>(59.88 to<br>112.99)                              | 2.45<br>(2.10 to<br>2.93)                            | 4.20<br>(3.17 to<br>5.50)                            | 3.62<br>(2.75 to<br>4.77)                            | 4.34<br>(3.25 to<br>5.76)                            |
| Colon and rectum cancer               | 49.63<br>(41.61 to<br>60.13)                               | 98.28<br>(65.57 to<br>145.69)                              | 88.94<br>(59.23 to<br>129.87)                              | 108.33<br>(70.82 to<br>163.57)                             | 2.18<br>(1.85 to<br>2.58)                            | 5.39<br>(3.66 to<br>8.05)                            | 5.07<br>(3.46 to<br>7.34)                            | 5.73<br>(3.82 to<br>8.67)                            |
| Liver cancer                          | 25.43<br>(21.30 to<br>30.21)                               | 54.37<br>(35.99 to<br>82.45)                               | 48.32<br>(33.02 to<br>71.09)                               | 70.66<br>(44.21 to<br>110.55)                              | 1.13<br>(0.95 to<br>1.32)                            | 2.87<br>(1.98 to<br>4.24)                            | 2.66<br>(1.86 to<br>3.80)                            | 3.58<br>(2.30 to<br>5.42)                            |
| Liver cancer due to hepatitis B       | 6.37<br>(4.60 to<br>8.69)                                  | 12.41<br>(7.44 to<br>20.61)                                | 11.36<br>(6.97 to<br>18.23)                                | 15.21<br>(8.70 to<br>26.81)                                | 0.24<br>(0.17 to<br>0.33)                            | 0.55<br>(0.32 to<br>0.89)                            | 0.53<br>(0.32 to<br>0.82)                            | 0.66<br>(0.37 to<br>1.11)                            |
| Liver cancer due to hepatitis C       | 7.37<br>(5.35 to<br>9.61)                                  | 16.88<br>(10.41 to<br>26.16)                               | 15.73<br>(9.81 to<br>23.81)                                | 19.98<br>(11.67 to<br>31.85)                               | 0.37<br>(0.27 to<br>0.48)                            | 1.00<br>(0.63 to<br>1.52)                            | 0.97<br>(0.63 to<br>1.43)                            | 1.14<br>(0.70 to<br>1.78)                            |
| Liver cancer due to alcohol use       | 6.76<br>(5.25 to<br>8.64)                                  | 15.06<br>(9.37 to<br>24.45)                                | 12.17<br>(7.56 to<br>19.56)                                | 23.27<br>(13.67 to<br>38.55)                               | 0.31<br>(0.25 to<br>0.40)                            | 0.82<br>(0.50 to<br>1.32)                            | 0.69<br>(0.43 to<br>1.10)                            | 1.20<br>(0.71 to<br>1.96)                            |
| Liver cancer due to other causes      | 4.93<br>(3.87 to<br>6.17)                                  | 10.02<br>(6.06 to<br>16.65)                                | 9.05<br>(5.63 to<br>14.10)                                 | 12.20<br>(6.97 to<br>20.96)                                | 0.20<br>(0.16 to<br>0.25)                            | 0.50<br>(0.31 to<br>0.80)                            | 0.47<br>(0.30 to<br>0.72)                            | 0.59<br>(0.34 to<br>0.97)                            |

|                                      |                                |                                 |                                |                                 |                           |                            |                            |                             |
|--------------------------------------|--------------------------------|---------------------------------|--------------------------------|---------------------------------|---------------------------|----------------------------|----------------------------|-----------------------------|
| Gallbladder and biliary tract cancer | 8.86<br>(7.37 to<br>10.67)     | 13.10<br>(10.64 to<br>16.01)    | 13.43<br>(10.83 to<br>16.61)   | 12.51<br>(10.25 to<br>15.11)    | 0.40<br>(0.34 to<br>0.49) | 0.71<br>(0.60 to<br>0.86)  | 0.75<br>(0.62 to<br>0.92)  | 0.66<br>(0.56 to<br>0.79)   |
| Pancreatic cancer                    | 25.50<br>(21.48 to<br>30.67)   | 48.25<br>(36.17 to<br>64.80)    | 48.73<br>(36.69 to<br>64.34)   | 51.82<br>(38.56 to<br>71.17)    | 1.15<br>(0.97 to<br>1.36) | 2.52<br>(1.94 to<br>3.33)  | 2.62<br>(2.02 to<br>3.38)  | 2.62<br>(2.00 to<br>3.54)   |
| Larynx cancer                        | 11.36<br>(9.12 to<br>14.26)    | 14.65<br>(7.61 to<br>25.30)     | 9.84<br>(5.37 to<br>16.71)     | 27.92<br>(13.69 to<br>52.98)    | 0.49<br>(0.40 to<br>0.60) | 0.71<br>(0.39 to<br>1.20)  | 0.50<br>(0.29 to<br>0.84)  | 1.31<br>(0.67 to<br>2.38)   |
| Tracheal, bronchus, and lung cancer  | 103.38<br>(86.18 to<br>125.93) | 153.74<br>(102.84 to<br>231.87) | 119.51<br>(83.01 to<br>175.07) | 278.73<br>(182.33 to<br>431.58) | 4.45<br>(3.76 to<br>5.41) | 7.59<br>(5.26 to<br>11.03) | 6.18<br>(4.48 to<br>8.73)  | 13.21<br>(8.93 to<br>19.90) |
| Malignant skin melanoma              | 3.91<br>(3.06 to<br>5.06)      | 5.86<br>(4.53 to<br>7.44)       | 6.89<br>(5.15 to<br>8.89)      | 5.46<br>(4.26 to<br>6.95)       | 0.14<br>(0.11 to<br>0.18) | 0.26<br>(0.21 to<br>0.32)  | 0.32<br>(0.25 to<br>0.40)  | 0.24<br>(0.19 to<br>0.29)   |
| Non-melanoma skin cancer             | 7.24<br>(6.03 to<br>8.83)      | 11.38<br>(9.55 to<br>13.55)     | 10.29<br>(8.16 to<br>12.87)    | 11.08<br>(9.28 to<br>13.08)     | 0.38<br>(0.32 to<br>0.44) | 0.69<br>(0.59 to<br>0.80)  | 0.66<br>(0.54 to<br>0.79)  | 0.65<br>(0.55 to<br>0.75)   |
| Breast cancer                        | 63.41<br>(48.14 to<br>81.38)   | 97.34<br>(63.55 to<br>146.13)   | 87.44<br>(57.22 to<br>131.64)  | 107.95<br>(67.11 to<br>168.79)  | 2.24<br>(1.71 to<br>2.83) | 4.24<br>(2.84 to<br>6.38)  | 3.91<br>(2.62 to<br>5.78)  | 4.56<br>(2.94 to<br>7.09)   |
| Cervical cancer                      | 57.21<br>(43.44 to<br>74.48)   | 70.33<br>(45.59 to<br>105.29)   | 57.89<br>(37.13 to<br>87.05)   | 77.03<br>(48.33 to<br>121.69)   | 1.79<br>(1.38 to<br>2.32) | 2.67<br>(1.82 to<br>3.92)  | 2.25<br>(1.50 to<br>3.26)  | 2.86<br>(1.89 to<br>4.34)   |
| Uterine cancer                       | 7.63<br>(5.90 to<br>9.77)      | 16.23<br>(11.78 to<br>21.51)    | 14.05<br>(9.84 to<br>19.08)    | 16.50<br>(11.92 to<br>21.69)    | 0.34<br>(0.27 to<br>0.43) | 0.88<br>(0.66 to<br>1.12)  | 0.78<br>(0.56 to<br>1.02)  | 0.87<br>(0.65 to<br>1.10)   |
| Ovarian cancer                       | 16.25<br>(12.49 to<br>20.74)   | 24.57<br>(15.90 to<br>38.04)    | 24.66<br>(16.06 to<br>38.26)   | 24.42<br>(15.57 to<br>38.68)    | 0.57<br>(0.45 to<br>0.73) | 1.04<br>(0.67 to<br>1.60)  | 1.07<br>(0.68 to<br>1.65)  | 1.02<br>(0.65 to<br>1.58)   |
| Prostate cancer                      | 43.52<br>(32.15 to<br>55.96)   | 112.24<br>(85.19 to<br>139.79)  | 119.11<br>(89.13 to<br>146.51) | 104.26<br>(77.88 to<br>129.20)  | 2.82<br>(2.10 to<br>3.56) | 8.30<br>(6.06 to<br>10.18) | 9.16<br>(6.96 to<br>11.20) | 7.49<br>(5.34 to<br>9.32)   |
| Testicular cancer                    | 3.26<br>(2.18 to<br>5.01)      | 2.88<br>(1.59 to<br>5.05)       | 2.54<br>(1.39 to<br>4.46)      | 2.93<br>(1.62 to<br>5.15)       | 0.07<br>(0.05 to<br>0.10) | 0.07<br>(0.04 to<br>0.10)  | 0.06<br>(0.04 to<br>0.09)  | 0.07<br>(0.04 to<br>0.10)   |

Venezuela

| Cause                           | YLLs (in 1000s)              |                              |                              |                              | Deaths (in 1000s)         |                           |                           |                           |
|---------------------------------|------------------------------|------------------------------|------------------------------|------------------------------|---------------------------|---------------------------|---------------------------|---------------------------|
|                                 | 2016                         | 2040 Forecast                | 2040 Better Scenario         | 2040 Worse Scenario          | 2016                      | 2040 Forecast             | 2040 Better Scenario      | 2040 Worse Scenario       |
| Kidney cancer                   | 16.24<br>(13.49 to<br>19.72) | 27.17<br>(20.82 to<br>35.62) | 29.31<br>(22.66 to<br>38.06) | 28.22<br>(21.22 to<br>38.01) | 0.57<br>(0.48 to<br>0.69) | 1.15<br>(0.90 to<br>1.46) | 1.28<br>(1.01 to<br>1.62) | 1.16<br>(0.89 to<br>1.50) |
| Bladder cancer                  | 7.54<br>(6.36 to<br>9.05)    | 13.39<br>(9.94 to<br>18.14)  | 12.51<br>(9.24 to<br>16.78)  | 15.21<br>(10.92 to<br>21.67) | 0.40<br>(0.34 to<br>0.48) | 0.85<br>(0.65 to<br>1.15) | 0.83<br>(0.64 to<br>1.08) | 0.94<br>(0.69 to<br>1.29) |
| Brain and nervous system cancer | 22.67<br>(16.46 to<br>28.74) | 33.60<br>(23.11 to<br>43.76) | 33.50<br>(23.02 to<br>43.87) | 33.13<br>(23.00 to<br>43.08) | 0.59<br>(0.40 to<br>0.74) | 1.11<br>(0.72 to<br>1.39) | 1.14<br>(0.74 to<br>1.45) | 1.06<br>(0.69 to<br>1.31) |
| Thyroid cancer                  | 2.97<br>(2.35 to<br>3.62)    | 4.63<br>(3.15 to<br>6.86)    | 3.94<br>(2.59 to<br>5.77)    | 5.00<br>(3.28 to<br>7.57)    | 0.13<br>(0.11 to<br>0.16) | 0.24<br>(0.17 to<br>0.35) | 0.21<br>(0.14 to<br>0.31) | 0.26<br>(0.17 to<br>0.38) |
| Mesothelioma                    | 1.06<br>(0.87 to<br>1.33)    | 1.71<br>(1.34 to<br>2.16)    | 1.70<br>(1.32 to<br>2.18)    | 1.68<br>(1.32 to<br>2.10)    | 0.04<br>(0.03 to<br>0.05) | 0.07<br>(0.06 to<br>0.09) | 0.07<br>(0.06 to<br>0.09) | 0.07<br>(0.05 to<br>0.08) |
| Hodgkin lymphoma                | 5.88<br>(4.63 to<br>7.59)    | 6.35<br>(4.68 to<br>8.73)    | 4.94<br>(3.41 to<br>7.09)    | 6.70<br>(4.85 to<br>9.22)    | 0.15<br>(0.12 to<br>0.19) | 0.21<br>(0.16 to<br>0.26) | 0.17<br>(0.13 to<br>0.22) | 0.21<br>(0.17 to<br>0.27) |
| Non-Hodgkin lymphoma            | 23.88<br>(19.33 to<br>31.13) | 42.20<br>(31.08 to<br>56.98) | 41.00<br>(30.25 to<br>55.87) | 42.43<br>(31.08 to<br>57.88) | 0.74<br>(0.61 to<br>0.93) | 1.65<br>(1.27 to<br>2.14) | 1.66<br>(1.27 to<br>2.14) | 1.61<br>(1.23 to<br>2.11) |
| Multiple myeloma                | 9.44<br>(7.58 to<br>11.95)   | 19.56<br>(14.14 to<br>26.44) | 19.81<br>(14.15 to<br>26.37) | 19.45<br>(13.80 to<br>26.47) | 0.39<br>(0.31 to<br>0.48) | 0.92<br>(0.67 to<br>1.22) | 0.96<br>(0.70 to<br>1.26) | 0.90<br>(0.65 to<br>1.19) |

|                                 |                                                        |                                                          |                                                        |                                                            |                                                   |                                                    |                                                   |                                                     |
|---------------------------------|--------------------------------------------------------|----------------------------------------------------------|--------------------------------------------------------|------------------------------------------------------------|---------------------------------------------------|----------------------------------------------------|---------------------------------------------------|-----------------------------------------------------|
| Leukemia                        | 50.50<br>(42.23 to<br>61.41)                           | 66.60<br>(49.30 to<br>89.54)                             | 62.11<br>(45.72 to<br>84.71)                           | 72.50<br>(53.27 to<br>98.19)                               | 1.20<br>(1.02 to<br>1.44)                         | 2.16<br>(1.66 to<br>2.72)                          | 2.09<br>(1.60 to<br>2.64)                         | 2.29<br>(1.73 to<br>2.93)                           |
| Acute lymphoid leukemia         | 20.67<br>(17.31 to<br>24.84)                           | 21.38<br>(15.91 to<br>28.75)                             | 19.65<br>(14.42 to<br>27.05)                           | 23.23<br>(17.32 to<br>31.56)                               | 0.39<br>(0.33 to<br>0.47)                         | 0.55<br>(0.42 to<br>0.70)                          | 0.53<br>(0.40 to<br>0.67)                         | 0.58<br>(0.45 to<br>0.75)                           |
| Chronic lymphoid leukemia       | 2.01<br>(1.56 to<br>2.59)                              | 3.89<br>(2.62 to<br>5.41)                                | 3.78<br>(2.56 to<br>5.20)                              | 4.16<br>(2.76 to<br>5.87)                                  | 0.09<br>(0.07 to<br>0.12)                         | 0.22<br>(0.15 to<br>0.30)                          | 0.22<br>(0.15 to<br>0.30)                         | 0.22<br>(0.15 to<br>0.31)                           |
| Acute myeloid leukemia          | 15.93<br>(12.83 to<br>20.36)                           | 24.64<br>(17.59 to<br>34.31)                             | 24.68<br>(17.71 to<br>34.16)                           | 26.39<br>(18.69 to<br>37.36)                               | 0.38<br>(0.31 to<br>0.47)                         | 0.76<br>(0.57 to<br>0.99)                          | 0.79<br>(0.59 to<br>1.02)                         | 0.80<br>(0.58 to<br>1.05)                           |
| Chronic myeloid leukemia        | 3.55<br>(2.83 to<br>4.47)                              | 4.32<br>(2.89 to<br>6.03)                                | 3.70<br>(2.42 to<br>5.39)                              | 4.76<br>(3.11 to<br>6.81)                                  | 0.12<br>(0.10 to<br>0.15)                         | 0.18<br>(0.13 to<br>0.24)                          | 0.16<br>(0.11 to<br>0.23)                         | 0.19<br>(0.13 to<br>0.27)                           |
| Other leukemia                  | 8.35<br>(6.65 to<br>10.64)                             | 12.37<br>(8.96 to<br>17.21)                              | 10.29<br>(7.31 to<br>14.63)                            | 13.96<br>(9.92 to<br>19.49)                                | 0.21<br>(0.17 to<br>0.26)                         | 0.45<br>(0.35 to<br>0.57)                          | 0.39<br>(0.30 to<br>0.51)                         | 0.49<br>(0.37 to<br>0.63)                           |
| Other neoplasms                 | 69.31<br>(57.45 to<br>85.79)                           | 101.65<br>(80.20 to<br>127.64)                           | 101.27<br>(79.08 to<br>127.72)                         | 100.13<br>(79.89 to<br>125.34)                             | 2.08<br>(1.73 to<br>2.49)                         | 4.01<br>(3.33 to<br>4.73)                          | 4.19<br>(3.44 to<br>4.98)                         | 3.79<br>(3.18 to<br>4.45)                           |
| <b>Cardiovascular diseases</b>  | <b>897.58</b><br><b>(767.00 to</b><br><b>1,067.27)</b> | <b>1,407.78</b><br><b>(897.79 to</b><br><b>2,176.06)</b> | <b>764.68</b><br><b>(502.06 to</b><br><b>1,127.67)</b> | <b>2,132.07</b><br><b>(1,324.55 to</b><br><b>3,283.23)</b> | <b>47.18</b><br><b>(41.10 to</b><br><b>54.71)</b> | <b>94.87</b><br><b>(63.29 to</b><br><b>137.54)</b> | <b>57.43</b><br><b>(39.13 to</b><br><b>83.11)</b> | <b>127.99</b><br><b>(85.03 to</b><br><b>187.69)</b> |
| Rheumatic heart disease         | 4.92<br>(4.03 to<br>6.03)                              | 4.63<br>(3.31 to<br>6.52)                                | 3.39<br>(2.33 to<br>4.94)                              | 4.99<br>(3.50 to<br>6.91)                                  | 0.15<br>(0.12 to<br>0.18)                         | 0.18<br>(0.14 to<br>0.24)                          | 0.14<br>(0.10 to<br>0.19)                         | 0.19<br>(0.14 to<br>0.25)                           |
| Ischemic heart disease          | 556.22<br>(470.16 to<br>666.02)                        | 809.33<br>(446.76 to<br>1,395.07)                        | 394.15<br>(222.14 to<br>684.94)                        | 1,294.78<br>(684.70 to<br>2,257.73)                        | 29.31<br>(25.34 to<br>34.25)                      | 53.65<br>(31.47 to<br>86.11)                       | 29.28<br>(17.07 to<br>48.64)                      | 76.13<br>(43.73 to<br>120.80)                       |
| Stroke                          | 201.22<br>(170.66 to<br>240.73)                        | 283.95<br>(162.69 to<br>498.16)                          | 134.93<br>(81.08 to<br>236.47)                         | 463.87<br>(255.06 to<br>796.68)                            | 9.92<br>(8.45 to<br>11.65)                        | 17.84<br>(10.79 to<br>31.40)                       | 9.76<br>(5.93 to<br>17.38)                        | 25.46<br>(15.30 to<br>42.46)                        |
| Ischemic stroke                 | 51.08<br>(43.24 to<br>60.71)                           | 90.15<br>(47.95 to<br>217.52)                            | 51.07<br>(27.90 to<br>123.63)                          | 122.13<br>(62.28 to<br>295.60)                             | 3.59<br>(3.05 to<br>4.21)                         | 7.54<br>(3.99 to<br>18.22)                         | 4.73<br>(2.56 to<br>10.52)                        | 9.29<br>(4.82 to<br>21.18)                          |
| Intracerebral hemorrhage        | 150.14<br>(126.74 to<br>180.80)                        | 193.80<br>(108.10 to<br>342.61)                          | 83.85<br>(50.31 to<br>137.41)                          | 341.74<br>(178.11 to<br>623.00)                            | 6.34<br>(5.38 to<br>7.53)                         | 10.30<br>(6.15 to<br>17.09)                        | 5.02<br>(3.12 to<br>7.92)                         | 16.17<br>(9.21 to<br>27.15)                         |
| Hypertensive heart disease      | 71.34<br>(55.03 to<br>103.64)                          | 180.37<br>(99.45 to<br>353.69)                           | 121.61<br>(75.74 to<br>201.25)                         | 231.08<br>(122.13 to<br>471.19)                            | 4.65<br>(3.63 to<br>6.63)                         | 14.73<br>(8.14 to<br>29.22)                        | 10.50<br>(6.55 to<br>17.70)                       | 17.75<br>(9.46 to<br>36.34)                         |
| Cardiomyopathy and myocarditis  | 16.78<br>(13.56 to<br>22.68)                           | 31.50<br>(21.53 to<br>43.97)                             | 27.85<br>(18.69 to<br>40.45)                           | 32.40<br>(22.67 to<br>45.32)                               | 0.65<br>(0.46 to<br>0.81)                         | 1.66<br>(0.90 to<br>2.57)                          | 1.54<br>(0.82 to<br>2.43)                         | 1.61<br>(0.90 to<br>2.44)                           |
| Myocarditis                     | 1.95<br>(1.22 to<br>3.93)                              | 2.73<br>(1.63 to<br>5.45)                                | 2.51<br>(1.54 to<br>4.88)                              | 2.78<br>(1.67 to<br>5.56)                                  | 0.05<br>(0.03 to<br>0.08)                         | 0.08<br>(0.06 to<br>0.14)                          | 0.08<br>(0.06 to<br>0.14)                         | 0.08<br>(0.06 to<br>0.14)                           |
| <b>Venezuela</b>                |                                                        |                                                          |                                                        |                                                            |                                                   |                                                    |                                                   |                                                     |
| Cause                           | YLLs (in 1000s)                                        |                                                          |                                                        |                                                            | Deaths (in 1000s)                                 |                                                    |                                                   |                                                     |
|                                 | 2016                                                   | 2040 Forecast                                            | 2040 Better Scenario                                   | 2040 Worse Scenario                                        | 2016                                              | 2040 Forecast                                      | 2040 Better Scenario                              | 2040 Worse Scenario                                 |
| Alcoholic cardiomyopathy        | 3.26<br>(2.30 to<br>5.05)                              | 5.21<br>(3.59 to<br>7.63)                                | 4.93<br>(3.36 to<br>7.21)                              | 6.27<br>(4.43 to<br>9.24)                                  | 0.11<br>(0.08 to<br>0.16)                         | 0.21<br>(0.13 to<br>0.29)                          | 0.21<br>(0.12 to<br>0.29)                         | 0.25<br>(0.16 to<br>0.33)                           |
| Other cardiomyopathy            | 11.57<br>(9.39 to<br>14.57)                            | 23.56<br>(15.03 to<br>34.92)                             | 20.42<br>(12.18 to<br>32.46)                           | 23.35<br>(15.20 to<br>34.45)                               | 0.49<br>(0.32 to<br>0.62)                         | 1.36<br>(0.66 to<br>2.21)                          | 1.25<br>(0.58 to<br>2.09)                         | 1.29<br>(0.63 to<br>2.08)                           |
| Atrial fibrillation and flutter | 6.88<br>(5.22 to<br>8.73)                              | 18.03<br>(12.80 to<br>24.71)                             | 16.96<br>(12.01 to<br>22.66)                           | 19.07<br>(13.20 to<br>26.73)                               | 0.64<br>(0.48 to<br>0.81)                         | 1.86<br>(1.29 to<br>2.55)                          | 1.84<br>(1.30 to<br>2.47)                         | 1.87<br>(1.25 to<br>2.66)                           |
| Aortic aneurysm                 | 9.90<br>(8.10 to<br>12.15)                             | 18.54<br>(13.97 to<br>24.16)                             | 17.44<br>(13.33 to<br>22.65)                           | 18.95<br>(14.31 to<br>24.76)                               | 0.53<br>(0.44 to<br>0.64)                         | 1.19<br>(0.93 to<br>1.52)                          | 1.18<br>(0.93 to<br>1.49)                         | 1.16<br>(0.89 to<br>1.46)                           |



|                                                                |                                           |                                            |                                            |                                            |                                      |                                       |                                      |                                        |
|----------------------------------------------------------------|-------------------------------------------|--------------------------------------------|--------------------------------------------|--------------------------------------------|--------------------------------------|---------------------------------------|--------------------------------------|----------------------------------------|
| Peripheral artery disease                                      | 1.11<br>(0.74 to 1.98)                    | 4.11<br>(2.50 to 7.70)                     | 4.32<br>(2.66 to 8.06)                     | 4.01<br>(2.47 to 7.52)                     | 0.09<br>(0.06 to 0.17)               | 0.38<br>(0.22 to 0.74)                | 0.43<br>(0.26 to 0.82)               | 0.35<br>(0.21 to 0.68)                 |
| Endocarditis                                                   | 3.87<br>(2.91 to 5.27)                    | 6.79<br>(4.32 to 9.93)                     | 6.14<br>(3.83 to 8.93)                     | 7.04<br>(4.54 to 10.51)                    | 0.12<br>(0.08 to 0.15)               | 0.28<br>(0.16 to 0.40)                | 0.26<br>(0.15 to 0.37)               | 0.27<br>(0.16 to 0.39)                 |
| Other cardiovascular and circulatory diseases                  | 25.34<br>(21.39 to 30.30)                 | 50.52<br>(36.89 to 68.01)                  | 37.89<br>(27.65 to 52.07)                  | 55.87<br>(40.72 to 74.91)                  | 1.12<br>(0.96 to 1.34)               | 3.10<br>(2.34 to 4.01)                | 2.50<br>(1.87 to 3.34)               | 3.19<br>(2.38 to 4.16)                 |
| <b>Chronic respiratory diseases</b>                            | <b>91.03</b><br><b>(78.14 to 107.20)</b>  | <b>126.27</b><br><b>(92.80 to 172.35)</b>  | <b>93.19</b><br><b>(69.63 to 125.06)</b>   | <b>205.22</b><br><b>(140.00 to 295.26)</b> | <b>5.30</b><br><b>(4.59 to 6.12)</b> | <b>8.94</b><br><b>(6.60 to 11.70)</b> | <b>6.94</b><br><b>(5.28 to 8.95)</b> | <b>13.93</b><br><b>(9.69 to 19.23)</b> |
| Chronic obstructive pulmonary disease                          | 71.77<br>(61.09 to 84.82)                 | 104.30<br>(72.59 to 148.35)                | 71.45<br>(50.56 to 99.74)                  | 181.69<br>(118.25 to 269.46)               | 4.58<br>(3.93 to 5.30)               | 7.79<br>(5.58 to 10.51)               | 5.70<br>(4.16 to 7.63)               | 12.77<br>(8.64 to 18.00)               |
| Pneumoconiosis                                                 | 0.18<br>(0.15 to 0.22)                    | 0.29<br>(0.23 to 0.38)                     | 0.27<br>(0.20 to 0.36)                     | 0.30<br>(0.23 to 0.38)                     | 0.01<br>(0.01 to 0.01)               | 0.02<br>(0.02 to 0.05)                | 0.02<br>(0.01 to 0.03)               | 0.02<br>(0.02 to 0.03)                 |
| Silicosis                                                      | 0.04<br>(0.03 to 0.05)                    | 0.05<br>(0.03 to 0.07)                     | 0.04<br>(0.02 to 0.07)                     | 0.05<br>(0.03 to 0.08)                     | 0.00<br>(0.00 to 0.00)               | 0.00<br>(0.00 to 0.01)                | 0.00<br>(0.00 to 0.00)               | 0.00<br>(0.00 to 0.01)                 |
| Asbestosis                                                     | 0.06<br>(0.05 to 0.08)                    | 0.10<br>(0.07 to 0.13)                     | 0.10<br>(0.07 to 0.14)                     | 0.09<br>(0.07 to 0.12)                     | 0.00<br>(0.00 to 0.00)               | 0.01<br>(0.00 to 0.01)                | 0.01<br>(0.00 to 0.01)               | 0.01<br>(0.00 to 0.01)                 |
| Coal workers pneumoconiosis                                    | 0.01<br>(0.01 to 0.02)                    | 0.02<br>(0.01 to 0.04)                     | 0.02<br>(0.01 to 0.03)                     | 0.03<br>(0.01 to 0.05)                     | 0.00<br>(0.00 to 0.00)               | 0.00<br>(0.00 to 0.00)                | 0.00<br>(0.00 to 0.00)               | 0.00<br>(0.00 to 0.00)                 |
| Other pneumoconiosis                                           | 0.07<br>(0.05 to 0.08)                    | 0.12<br>(0.08 to 0.18)                     | 0.11<br>(0.07 to 0.16)                     | 0.13<br>(0.09 to 0.19)                     | 0.00<br>(0.00 to 0.01)               | 0.01<br>(0.01 to 0.02)                | 0.01<br>(0.01 to 0.02)               | 0.01<br>(0.01 to 0.02)                 |
| Asthma                                                         | 10.46<br>(8.56 to 12.60)                  | 8.19<br>(4.88 to 13.26)                    | 5.43<br>(3.14 to 9.12)                     | 10.43<br>(6.16 to 17.23)                   | 0.35<br>(0.29 to 0.45)               | 0.39<br>(0.24 to 0.66)                | 0.28<br>(0.16 to 0.50)               | 0.47<br>(0.27 to 0.80)                 |
| Interstitial lung disease and pulmonary sarcoidosis            | 7.20<br>(5.63 to 10.34)                   | 11.81<br>(9.04 to 16.04)                   | 14.51<br>(10.52 to 19.78)                  | 10.97<br>(8.48 to 15.32)                   | 0.34<br>(0.26 to 0.45)               | 0.69<br>(0.51 to 0.89)                | 0.89<br>(0.64 to 1.16)               | 0.62<br>(0.46 to 0.82)                 |
| Other chronic respiratory diseases                             | 1.42<br>(1.02 to 2.53)                    | 1.68<br>(1.15 to 2.91)                     | 1.53<br>(1.05 to 2.62)                     | 1.84<br>(1.25 to 3.23)                     | 0.03<br>(0.02 to 0.05)               | 0.05<br>(0.03 to 0.08)                | 0.05<br>(0.03 to 0.08)               | 0.05<br>(0.04 to 0.09)                 |
| <b>Cirrhosis and other chronic liver diseases</b>              | <b>111.80</b><br><b>(89.30 to 142.21)</b> | <b>162.23</b><br><b>(127.56 to 201.40)</b> | <b>136.56</b><br><b>(105.56 to 175.77)</b> | <b>182.36</b><br><b>(142.23 to 224.29)</b> | <b>3.90</b><br><b>(3.18 to 4.84)</b> | <b>6.65</b><br><b>(5.48 to 7.87)</b>  | <b>5.76</b><br><b>(4.63 to 7.11)</b> | <b>7.30</b><br><b>(6.02 to 8.62)</b>   |
| Cirrhosis and other chronic liver diseases due to hepatitis B  | 4.24<br>(3.23 to 5.62)                    | 6.49<br>(4.90 to 8.51)                     | 5.87<br>(4.39 to 7.88)                     | 6.44<br>(4.88 to 8.38)                     | 0.15<br>(0.12 to 0.19)               | 0.27<br>(0.21 to 0.33)                | 0.25<br>(0.19 to 0.31)               | 0.26<br>(0.20 to 0.32)                 |
| Cirrhosis and other chronic liver diseases due to hepatitis C  | 44.99<br>(35.11 to 58.17)                 | 70.37<br>(53.41 to 90.41)                  | 63.04<br>(46.85 to 84.42)                  | 70.18<br>(53.34 to 90.44)                  | 1.54<br>(1.23 to 1.95)               | 2.74<br>(2.20 to 3.34)                | 2.50<br>(1.95 to 3.20)               | 2.68<br>(2.14 to 3.31)                 |
| Cirrhosis and other chronic liver diseases due to alcohol use  | 41.34<br>(35.42 to 56.18)                 | 59.66<br>(46.01 to 75.57)                  | 44.98<br>(34.46 to 58.58)                  | 79.77<br>(61.29 to 99.55)                  | 1.62<br>(1.32 to 2.03)               | 2.58<br>(2.08 to 3.09)                | 2.03<br>(1.62 to 2.50)               | 3.31<br>(2.68 to 3.97)                 |
| Cirrhosis and other chronic liver diseases due to other causes | 18.23<br>(14.63 to 22.62)                 | 25.70<br>(20.31 to 31.99)                  | 22.67<br>(17.47 to 29.04)                  | 25.98<br>(20.55 to 32.47)                  | 0.59<br>(0.48 to 0.72)               | 1.07<br>(0.88 to 1.27)                | 0.97<br>(0.78 to 1.19)               | 1.05<br>(0.86 to 1.25)                 |
| <b>Digestive diseases</b>                                      | <b>74.95</b><br><b>(62.08 to 95.71)</b>   | <b>111.42</b><br><b>(86.60 to 148.44)</b>  | <b>92.93</b><br><b>(70.08 to 123.52)</b>   | <b>120.77</b><br><b>(92.05 to 165.17)</b>  | <b>3.10</b><br><b>(2.61 to 3.79)</b> | <b>6.33</b><br><b>(5.07 to 8.07)</b>  | <b>5.61</b><br><b>(4.45 to 7.13)</b> | <b>6.49</b><br><b>(5.15 to 8.40)</b>   |
| Peptic ulcer disease                                           | 11.83<br>(9.53 to 15.07)                  | 13.45<br>(10.29 to 17.29)                  | 9.88<br>(6.84 to 13.47)                    | 14.80<br>(11.34 to 19.00)                  | 0.56<br>(0.46 to 0.69)               | 0.86<br>(0.67 to 1.08)                | 0.66<br>(0.47 to 0.88)               | 0.90<br>(0.70 to 1.16)                 |

Venezuela

| Cause | YLLs (in 1000s) |               |                      |                     | Deaths (in 1000s) |               |                      |                     |
|-------|-----------------|---------------|----------------------|---------------------|-------------------|---------------|----------------------|---------------------|
|       | 2016            | 2040 Forecast | 2040 Better Scenario | 2040 Worse Scenario | 2016              | 2040 Forecast | 2040 Better Scenario | 2040 Worse Scenario |



|                                                            |                                        |                                          |                                          |                                            |                                     |                                      |                                     |                                      |
|------------------------------------------------------------|----------------------------------------|------------------------------------------|------------------------------------------|--------------------------------------------|-------------------------------------|--------------------------------------|-------------------------------------|--------------------------------------|
| Other drug use disorders                                   | 1.73<br>(1.09 to<br>2.41)              | 4.40<br>(2.70 to<br>6.62)                | 4.98<br>(2.95 to<br>7.74)                | 4.33<br>(2.66 to<br>6.52)                  | 0.05<br>(0.03 to<br>0.06)           | 0.15<br>(0.11 to<br>0.20)            | 0.18<br>(0.12 to<br>0.24)           | 0.14<br>(0.10 to<br>0.19)            |
| Eating disorders                                           | 0.12<br>(0.09 to<br>0.16)              | 0.21<br>(0.14 to<br>0.33)                | 0.20<br>(0.13 to<br>0.31)                | 0.21<br>(0.14 to<br>0.33)                  | 0.00<br>(0.00 to<br>0.00)           | 0.00<br>(0.00 to<br>0.01)            | 0.00<br>(0.00 to<br>0.01)           | 0.00<br>(0.00 to<br>0.01)            |
| <b>Venezuela</b>                                           |                                        |                                          |                                          |                                            |                                     |                                      |                                     |                                      |
| Cause                                                      | YLLs (in 1000s)                        |                                          |                                          |                                            | Deaths (in 1000s)                   |                                      |                                     |                                      |
|                                                            | 2016                                   | 2040 Forecast                            | 2040 Better Scenario                     | 2040 Worse Scenario                        | 2016                                | 2040 Forecast                        | 2040 Better Scenario                | 2040 Worse Scenario                  |
| <b>Diabetes, urogenital, blood, and endocrine diseases</b> | <b>387.63</b><br>(330.46 to<br>458.33) | <b>946.44</b><br>(505.59 to<br>2,020.21) | <b>641.49</b><br>(353.08 to<br>1,432.28) | <b>1,087.35</b><br>(579.45 to<br>2,228.01) | <b>17.44</b><br>(14.99 to<br>20.35) | <b>55.58</b><br>(30.33 to<br>114.17) | <b>39.50</b><br>(21.97 to<br>84.96) | <b>61.63</b><br>(33.47 to<br>123.56) |
| Diabetes mellitus                                          | 172.58<br>(146.60 to<br>206.69)        | 311.44<br>(220.58 to<br>433.91)          | 220.46<br>(152.32 to<br>310.79)          | 374.46<br>(248.56 to<br>547.76)            | 8.40<br>(7.16 to<br>9.91)           | 18.77<br>(13.79 to<br>25.25)         | 13.89<br>(9.97 to<br>18.76)         | 21.44<br>(15.00 to<br>29.87)         |
| Acute glomerulonephritis                                   | 0.22<br>(0.18 to<br>0.28)              | 0.29<br>(0.22 to<br>0.40)                | 0.24<br>(0.17 to<br>0.33)                | 0.32<br>(0.23 to<br>0.44)                  | 0.00<br>(0.00 to<br>0.01)           | 0.01<br>(0.00 to<br>0.01)            | 0.01<br>(0.00 to<br>0.01)           | 0.01<br>(0.01 to<br>0.01)            |
| Chronic kidney disease                                     | 175.33<br>(148.17 to<br>207.02)        | 566.40<br>(180.13 to<br>1,603.49)        | 358.17<br>(122.44 to<br>1,106.56)        | 644.14<br>(208.68 to<br>1,777.35)          | 7.69<br>(6.57 to<br>9.04)           | 33.33<br>(10.15 to<br>94.34)         | 22.20<br>(6.87 to<br>68.43)         | 36.90<br>(11.43 to<br>101.63)        |
| Chronic kidney disease due to diabetes mellitus            | 67.36<br>(54.24 to<br>83.58)           | 250.76<br>(74.60 to<br>755.46)           | 156.44<br>(49.66 to<br>526.24)           | 284.46<br>(84.86 to<br>848.02)             | 2.95<br>(2.41 to<br>3.60)           | 13.61<br>(3.78 to<br>39.58)          | 8.89<br>(2.55 to<br>28.03)          | 15.09<br>(4.32 to<br>41.79)          |
| Chronic kidney disease due to hypertension                 | 19.66<br>(15.38 to<br>24.44)           | 83.03<br>(23.37 to<br>242.09)            | 55.68<br>(16.33 to<br>182.47)            | 92.48<br>(27.15 to<br>259.67)              | 1.25<br>(0.98 to<br>1.55)           | 6.62<br>(1.97 to<br>18.46)           | 4.72<br>(1.42 to<br>13.81)          | 7.14<br>(2.16 to<br>20.07)           |
| Chronic kidney disease due to glomerulonephritis           | 50.97<br>(40.39 to<br>64.33)           | 125.70<br>(45.08 to<br>349.44)           | 78.56<br>(29.59 to<br>230.71)            | 144.92<br>(51.76 to<br>391.88)             | 1.92<br>(1.50 to<br>2.41)           | 6.77<br>(2.17 to<br>19.01)           | 4.39<br>(1.43 to<br>13.01)          | 7.63<br>(2.47 to<br>20.72)           |
| Chronic kidney disease due to other and unspecified causes | 37.35<br>(29.71 to<br>46.18)           | 106.90<br>(36.58 to<br>295.76)           | 67.49<br>(24.41 to<br>197.01)            | 122.28<br>(42.54 to<br>323.54)             | 1.57<br>(1.23 to<br>1.96)           | 6.32<br>(2.03 to<br>17.60)           | 4.19<br>(1.36 to<br>12.25)          | 7.04<br>(2.29 to<br>18.95)           |
| Urinary diseases and male infertility                      | 15.69<br>(13.36 to<br>18.32)           | 31.97<br>(26.61 to<br>37.62)             | 30.06<br>(24.34 to<br>36.83)             | 30.92<br>(26.02 to<br>36.35)               | 0.71<br>(0.61 to<br>0.83)           | 2.10<br>(1.75 to<br>2.47)            | 2.10<br>(1.71 to<br>2.52)           | 1.92<br>(1.58 to<br>2.26)            |
| Urinary tract infections                                   | 13.58<br>(11.45 to<br>15.96)           | 28.61<br>(23.73 to<br>33.99)             | 27.14<br>(21.87 to<br>33.30)             | 27.60<br>(23.01 to<br>32.63)               | 0.62<br>(0.53 to<br>0.73)           | 1.92<br>(1.58 to<br>2.27)            | 1.93<br>(1.57 to<br>2.34)           | 1.75<br>(1.43 to<br>2.08)            |
| Urolithiasis                                               | 1.34<br>(0.79 to<br>1.83)              | 2.13<br>(1.20 to<br>2.98)                | 1.93<br>(1.01 to<br>2.85)                | 2.07<br>(1.17 to<br>2.88)                  | 0.05<br>(0.03 to<br>0.07)           | 0.10<br>(0.06 to<br>0.15)            | 0.10<br>(0.05 to<br>0.14)           | 0.10<br>(0.06 to<br>0.13)            |
| Other urinary diseases                                     | 0.76<br>(0.57 to<br>1.21)              | 1.23<br>(0.87 to<br>1.93)                | 0.99<br>(0.67 to<br>1.61)                | 1.25<br>(0.88 to<br>1.97)                  | 0.03<br>(0.02 to<br>0.05)           | 0.08<br>(0.05 to<br>0.12)            | 0.07<br>(0.04 to<br>0.11)           | 0.07<br>(0.05 to<br>0.12)            |
| Gynecological diseases                                     | 0.18<br>(0.10 to<br>0.52)              | 0.43<br>(0.22 to<br>1.21)                | 0.30<br>(0.14 to<br>0.84)                | 0.46<br>(0.23 to<br>1.33)                  | 0.01<br>(0.00 to<br>0.02)           | 0.01<br>(0.01 to<br>0.05)            | 0.01<br>(0.01 to<br>0.05)           | 0.02<br>(0.01 to<br>0.05)            |
| Uterine fibroids                                           | 0.12<br>(0.07 to<br>0.34)              | 0.24<br>(0.12 to<br>0.67)                | 0.18<br>(0.08 to<br>0.47)                | 0.27<br>(0.12 to<br>0.73)                  | 0.00<br>(0.00 to<br>0.01)           | 0.01<br>(0.00 to<br>0.02)            | 0.01<br>(0.00 to<br>0.02)           | 0.01<br>(0.00 to<br>0.02)            |
| Polycystic ovarian syndrome                                | 0.01<br>(0.01 to<br>0.04)              | 0.01<br>(0.01 to<br>0.04)                | 0.01<br>(0.00 to<br>0.02)                | 0.02<br>(0.01 to<br>0.04)                  | 0.00<br>(0.00 to<br>0.00)           | 0.00<br>(0.00 to<br>0.00)            | 0.00<br>(0.00 to<br>0.00)           | 0.00<br>(0.00 to<br>0.00)            |
| Endometriosis                                              | 0.00<br>(0.00 to<br>0.00)              | 0.00<br>(0.00 to<br>0.01)                | 0.00<br>(0.00 to<br>0.01)                | 0.00<br>(0.00 to<br>0.01)                  | 0.00<br>(0.00 to<br>0.00)           | 0.00<br>(0.00 to<br>0.00)            | 0.00<br>(0.00 to<br>0.00)           | 0.00<br>(0.00 to<br>0.00)            |
| Genital prolapse                                           | 0.01<br>(0.01 to<br>0.05)              | 0.04<br>(0.02 to<br>0.16)                | 0.03<br>(0.01 to<br>0.11)                | 0.05<br>(0.02 to<br>0.16)                  | 0.00<br>(0.00 to<br>0.00)           | 0.00<br>(0.00 to<br>0.01)            | 0.00<br>(0.00 to<br>0.01)           | 0.00<br>(0.00 to<br>0.01)            |
| Other gynecological diseases                               | 0.03<br>(0.02 to<br>0.11)              | 0.12<br>(0.05 to<br>0.38)                | 0.09<br>(0.03 to<br>0.27)                | 0.13<br>(0.06 to<br>0.42)                  | 0.00<br>(0.00 to<br>0.00)           | 0.00<br>(0.00 to<br>0.02)            | 0.00<br>(0.00 to<br>0.01)           | 0.00<br>(0.00 to<br>0.02)            |

|                                                   |                                        |                                        |                                       |                                        |                                  |                                  |                                  |                                  |
|---------------------------------------------------|----------------------------------------|----------------------------------------|---------------------------------------|----------------------------------------|----------------------------------|----------------------------------|----------------------------------|----------------------------------|
| Hemoglobinopathies and hemolytic anemias          | 8.19<br>(6.49 to<br>11.10)             | 11.03<br>(7.92 to<br>16.35)            | 8.88<br>(6.09 to<br>13.51)            | 11.52<br>(8.18 to<br>17.14)            | 0.20<br>(0.16 to<br>0.27)        | 0.38<br>(0.30 to<br>0.53)        | 0.31<br>(0.23 to<br>0.45)        | 0.38<br>(0.29 to<br>0.54)        |
| Thalassemias                                      | 0.52<br>(0.40 to<br>0.66)              | 0.16<br>(0.11 to<br>0.23)              | 0.16<br>(0.11 to<br>0.22)             | 0.17<br>(0.12 to<br>0.25)              | 0.01<br>(0.00 to<br>0.01)        | 0.00<br>(0.00 to<br>0.00)        | 0.00<br>(0.00 to<br>0.00)        | 0.00<br>(0.00 to<br>0.00)        |
| Sickle cell disorders                             | 5.75<br>(4.43 to<br>7.95)              | 7.45<br>(5.00 to<br>11.72)             | 5.99<br>(3.85 to<br>9.68)             | 7.83<br>(5.24 to<br>12.09)             | 0.11<br>(0.08 to<br>0.15)        | 0.17<br>(0.11 to<br>0.26)        | 0.14<br>(0.09 to<br>0.22)        | 0.17<br>(0.12 to<br>0.27)        |
| G6PD deficiency                                   | 0.76<br>(0.56 to<br>1.06)              | 1.47<br>(1.00 to<br>2.15)              | 1.11<br>(0.70 to<br>1.70)             | 1.55<br>(1.06 to<br>2.26)              | 0.02<br>(0.01 to<br>0.03)        | 0.05<br>(0.04 to<br>0.08)        | 0.04<br>(0.03 to<br>0.06)        | 0.06<br>(0.04 to<br>0.08)        |
| Other hemoglobinopathies and hemolytic anemias    | 1.17<br>(0.93 to<br>1.60)              | 1.96<br>(1.54 to<br>2.64)              | 1.62<br>(1.20 to<br>2.27)             | 1.96<br>(1.50 to<br>2.70)              | 0.07<br>(0.06 to<br>0.09)        | 0.16<br>(0.12 to<br>0.20)        | 0.13<br>(0.10 to<br>0.18)        | 0.15<br>(0.11 to<br>0.20)        |
| Endocrine, metabolic, blood, and immune disorders | 15.43<br>(11.71 to<br>30.84)           | 24.88<br>(17.40 to<br>50.63)           | 23.37<br>(16.13 to<br>48.02)          | 25.54<br>(17.74 to<br>52.54)           | 0.43<br>(0.32 to<br>0.90)        | 0.59<br>(0.72 to<br>2.18)        | 0.59<br>(0.70 to<br>2.16)        | 0.97<br>(0.69 to<br>2.16)        |
| <b>Venezuela</b>                                  |                                        |                                        |                                       |                                        |                                  |                                  |                                  |                                  |
| Cause                                             | YLLs (in 1000s)                        |                                        |                                       |                                        | Deaths (in 1000s)                |                                  |                                  |                                  |
|                                                   | 2016                                   | 2040 Forecast                          | 2040 Better Scenario                  | 2040 Worse Scenario                    | 2016                             | 2040 Forecast                    | 2040 Better Scenario             | 2040 Worse Scenario              |
| <b>Musculoskeletal disorders</b>                  | <b>22.18</b><br>(16.54 to<br>28.40)    | <b>39.12</b><br>(28.81 to<br>52.56)    | <b>37.18</b><br>(27.24 to<br>51.22)   | <b>38.69</b><br>(28.78 to<br>51.76)    | <b>0.62</b><br>(0.48 to<br>0.79) | <b>1.47</b><br>(1.15 to<br>1.99) | <b>1.38</b><br>(1.04 to<br>1.94) | <b>1.43</b><br>(1.13 to<br>1.92) |
| Rheumatoid arthritis                              | 4.02<br>(2.97 to<br>5.52)              | 10.90<br>(7.80 to<br>15.05)            | 8.57<br>(5.59 to<br>12.82)            | 11.25<br>(7.91 to<br>15.67)            | 0.19<br>(0.15 to<br>0.26)        | 0.67<br>(0.48 to<br>0.93)        | 0.55<br>(0.35 to<br>0.81)        | 0.67<br>(0.48 to<br>0.93)        |
| Other musculoskeletal disorders                   | 18.16<br>(13.38 to<br>23.26)           | 28.23<br>(19.96 to<br>39.28)           | 28.61<br>(20.57 to<br>40.41)          | 27.44<br>(19.64 to<br>38.40)           | 0.42<br>(0.32 to<br>0.55)        | 0.80<br>(0.60 to<br>1.14)        | 0.83<br>(0.62 to<br>1.20)        | 0.76<br>(0.57 to<br>1.07)        |
| <b>Other non-communicable diseases</b>            | <b>196.45</b><br>(156.00 to<br>233.14) | <b>148.26</b><br>(111.58 to<br>191.15) | <b>184.80</b><br>(72.22 to<br>143.98) | <b>176.88</b><br>(130.53 to<br>230.83) | <b>2.46</b><br>(1.98 to<br>2.89) | <b>2.18</b><br>(1.71 to<br>2.78) | <b>1.64</b><br>(1.18 to<br>2.20) | <b>2.50</b><br>(1.93 to<br>3.16) |
| Congenital birth defects                          | 193.09<br>(151.19 to<br>228.52)        | 141.82<br>(104.75 to<br>183.46)        | 98.92<br>(67.56 to<br>136.24)         | 170.24<br>(124.53 to<br>222.03)        | 2.38<br>(1.88 to<br>2.80)        | 1.87<br>(1.39 to<br>2.40)        | 1.33<br>(0.91 to<br>1.81)        | 2.21<br>(1.61 to<br>2.86)        |
| Neural tube defects                               | 9.79<br>(7.16 to<br>13.13)             | 3.02<br>(1.96 to<br>4.56)              | 1.79<br>(1.07 to<br>2.89)             | 3.87<br>(2.42 to<br>5.87)              | 0.12<br>(0.09 to<br>0.16)        | 0.04<br>(0.02 to<br>0.06)        | 0.02<br>(0.01 to<br>0.04)        | 0.05<br>(0.03 to<br>0.07)        |
| Congenital heart anomalies                        | 94.45<br>(75.60 to<br>113.79)          | 70.92<br>(51.51 to<br>93.70)           | 48.18<br>(30.96 to<br>70.10)          | 84.54<br>(60.22 to<br>111.68)          | 1.17<br>(0.95 to<br>1.40)        | 0.94<br>(0.69 to<br>1.24)        | 0.65<br>(0.42 to<br>0.94)        | 1.11<br>(0.79 to<br>1.46)        |
| Orofacial clefts                                  | 0.20<br>(0.11 to<br>0.34)              | 0.16<br>(0.07 to<br>0.33)              | 0.09<br>(0.03 to<br>0.19)             | 0.21<br>(0.09 to<br>0.44)              | 0.00<br>(0.00 to<br>0.00)        | 0.00<br>(0.00 to<br>0.00)        | 0.00<br>(0.00 to<br>0.00)        | 0.00<br>(0.00 to<br>0.01)        |
| Down syndrome                                     | 9.61<br>(7.20 to<br>12.50)             | 9.95<br>(6.89 to<br>13.84)             | 8.26<br>(5.67 to<br>11.47)            | 11.48<br>(7.87 to<br>16.18)            | 0.14<br>(0.10 to<br>0.18)        | 0.17<br>(0.11 to<br>0.22)        | 0.14<br>(0.09 to<br>0.19)        | 0.19<br>(0.12 to<br>0.25)        |
| Other chromosomal abnormalities                   | 4.16<br>(2.93 to<br>6.04)              | 5.87<br>(3.64 to<br>9.09)              | 4.49<br>(2.79 to<br>7.07)             | 6.97<br>(4.39 to<br>10.89)             | 0.05<br>(0.04 to<br>0.08)        | 0.08<br>(0.05 to<br>0.12)        | 0.06<br>(0.04 to<br>0.10)        | 0.09<br>(0.06 to<br>0.14)        |
| Congenital musculoskeletal and limb anomalies     | 2.01<br>(0.84 to<br>2.68)              | 1.81<br>(0.77 to<br>2.60)              | 1.32<br>(0.58 to<br>1.97)             | 2.13<br>(0.90 to<br>3.07)              | 0.02<br>(0.01 to<br>0.03)        | 0.02<br>(0.01 to<br>0.03)        | 0.02<br>(0.01 to<br>0.03)        | 0.03<br>(0.01 to<br>0.04)        |
| Urogenital congenital anomalies                   | 2.50<br>(1.50 to<br>3.42)              | 2.18<br>(1.37 to<br>3.76)              | 1.67<br>(1.02 to<br>3.05)             | 2.51<br>(1.55 to<br>4.20)              | 0.03<br>(0.02 to<br>0.05)        | 0.03<br>(0.02 to<br>0.06)        | 0.03<br>(0.02 to<br>0.05)        | 0.04<br>(0.02 to<br>0.06)        |
| Digestive congenital anomalies                    | 31.82<br>(18.22 to<br>42.24)           | 21.53<br>(12.24 to<br>31.85)           | 14.41<br>(8.17 to<br>22.04)           | 26.75<br>(14.89 to<br>39.78)           | 0.37<br>(0.22 to<br>0.50)        | 0.26<br>(0.15 to<br>0.38)        | 0.17<br>(0.10 to<br>0.26)        | 0.32<br>(0.18 to<br>0.47)        |
| Other congenital birth defects                    | 38.56<br>(29.90 to<br>48.16)           | 26.37<br>(18.97 to<br>35.47)           | 18.72<br>(12.55 to<br>26.41)          | 31.79<br>(22.60 to<br>43.59)           | 0.47<br>(0.36 to<br>0.58)        | 0.33<br>(0.24 to<br>0.44)        | 0.24<br>(0.16 to<br>0.33)        | 0.40<br>(0.29 to<br>0.53)        |

|                                      |                                                            |                                                          |                                                          |                                                            |                                                   |                                                   |                                                   |                                                   |
|--------------------------------------|------------------------------------------------------------|----------------------------------------------------------|----------------------------------------------------------|------------------------------------------------------------|---------------------------------------------------|---------------------------------------------------|---------------------------------------------------|---------------------------------------------------|
| Skin and subcutaneous diseases       | 1.59<br>(1.11 to<br>3.10)                                  | 5.37<br>(3.71 to<br>10.36)                               | 5.11<br>(3.45 to<br>9.59)                                | 5.31<br>(3.69 to<br>10.22)                                 | 0.06<br>(0.04 to<br>0.12)                         | 0.29<br>(0.20 to<br>0.57)                         | 0.30<br>(0.20 to<br>0.57)                         | 0.27<br>(0.19 to<br>0.53)                         |
| Cellulitis                           | 0.24<br>(0.14 to<br>0.65)                                  | 1.05<br>(0.58 to<br>2.81)                                | 1.09<br>(0.61 to<br>2.75)                                | 1.01<br>(0.56 to<br>2.63)                                  | 0.01<br>(0.00 to<br>0.02)                         | 0.05<br>(0.03 to<br>0.12)                         | 0.05<br>(0.03 to<br>0.13)                         | 0.04<br>(0.03 to<br>0.11)                         |
| Pyoderma                             | 0.99<br>(0.66 to<br>1.91)                                  | 3.17<br>(2.09 to<br>6.08)                                | 2.90<br>(1.91 to<br>5.55)                                | 3.18<br>(2.09 to<br>6.14)                                  | 0.04<br>(0.03 to<br>0.08)                         | 0.17<br>(0.11 to<br>0.35)                         | 0.17<br>(0.11 to<br>0.34)                         | 0.16<br>(0.11 to<br>0.33)                         |
| Decubitus ulcer                      | 0.18<br>(0.11 to<br>0.32)                                  | 0.69<br>(0.39 to<br>1.22)                                | 0.66<br>(0.37 to<br>1.19)                                | 0.66<br>(0.41 to<br>1.17)                                  | 0.01<br>(0.01 to<br>0.02)                         | 0.05<br>(0.03 to<br>0.11)                         | 0.06<br>(0.03 to<br>0.11)                         | 0.05<br>(0.03 to<br>0.10)                         |
| Other skin and subcutaneous diseases | 0.18<br>(0.11 to<br>0.34)                                  | 0.47<br>(0.28 to<br>0.82)                                | 0.46<br>(0.27 to<br>0.81)                                | 0.46<br>(0.27 to<br>0.81)                                  | 0.01<br>(0.00 to<br>0.01)                         | 0.02<br>(0.01 to<br>0.05)                         | 0.02<br>(0.01 to<br>0.05)                         | 0.02<br>(0.01 to<br>0.05)                         |
| Sudden infant death syndrome         | 1.77<br>(1.24 to<br>2.57)                                  | 1.07<br>(0.57 to<br>1.95)                                | 0.77<br>(0.41 to<br>1.45)                                | 1.33<br>(0.72 to<br>2.39)                                  | 0.02<br>(0.01 to<br>0.03)                         | 0.01<br>(0.01 to<br>0.02)                         | 0.01<br>(0.00 to<br>0.02)                         | 0.02<br>(0.01 to<br>0.03)                         |
| <b>Injuries</b>                      | <b>1,528.27</b><br><b>(1,231.26 to</b><br><b>1,909.58)</b> | <b>1,525.44</b><br><b>(880.68 to</b><br><b>2,714.91)</b> | <b>1,125.69</b><br><b>(638.85 to</b><br><b>2,043.71)</b> | <b>1,801.29</b><br><b>(1,017.48 to</b><br><b>3,247.67)</b> | <b>28.82</b><br><b>(23.35 to</b><br><b>36.05)</b> | <b>32.31</b><br><b>(20.59 to</b><br><b>52.85)</b> | <b>24.46</b><br><b>(15.63 to</b><br><b>40.03)</b> | <b>37.39</b><br><b>(23.37 to</b><br><b>61.64)</b> |
| <b>Transport injuries</b>            | <b>426.13</b><br><b>(318.26 to</b><br><b>595.67)</b>       | <b>373.09</b><br><b>(188.47 to</b><br><b>732.36)</b>     | <b>150.14</b><br><b>(74.83 to</b><br><b>293.81)</b>      | <b>593.05</b><br><b>(293.64 to</b><br><b>1,171.58)</b>     | <b>8.24</b><br><b>(6.28 to</b><br><b>11.20)</b>   | <b>8.00</b><br><b>(4.40 to</b><br><b>14.50)</b>   | <b>3.38</b><br><b>(1.88 to</b><br><b>6.07)</b>    | <b>12.34</b><br><b>(6.57 to</b><br><b>22.97)</b>  |
| Road injuries                        | 389.44<br>(291.36 to<br>541.15)                            | 319.26<br>(161.57 to<br>631.86)                          | 108.92<br>(54.83 to<br>212.71)                           | 532.28<br>(265.09 to<br>1,054.12)                          | 7.53<br>(5.72 to<br>10.21)                        | 6.88<br>(3.78 to<br>12.34)                        | 2.52<br>(1.42 to<br>4.53)                         | 11.08<br>(5.89 to<br>20.58)                       |
| Pedestrian road injuries             | 179.26<br>(136.06 to<br>244.78)                            | 144.02<br>(79.97 to<br>260.15)                           | 49.62<br>(27.51 to<br>88.51)                             | 228.64<br>(122.72 to<br>420.79)                            | 3.74<br>(2.91 to<br>4.95)                         | 3.56<br>(2.14 to<br>6.02)                         | 1.34<br>(0.81 to<br>2.21)                         | 5.43<br>(3.14 to<br>9.40)                         |
| <b>Venezuela</b>                     |                                                            |                                                          |                                                          |                                                            |                                                   |                                                   |                                                   |                                                   |
| Cause                                | YLLs (in 1000s)                                            |                                                          |                                                          |                                                            | Deaths (in 1000s)                                 |                                                   |                                                   |                                                   |
|                                      | 2016                                                       | 2040 Forecast                                            | 2040 Better Scenario                                     | 2040 Worse Scenario                                        | 2016                                              | 2040 Forecast                                     | 2040 Better Scenario                              | 2040 Worse Scenario                               |
| Cyclist road injuries                | 7.69<br>(5.63 to<br>11.37)                                 | 7.80<br>(4.01 to<br>15.81)                               | 2.83<br>(1.43 to<br>5.64)                                | 13.24<br>(6.89 to<br>26.83)                                | 0.16<br>(0.12 to<br>0.23)                         | 0.19<br>(0.10 to<br>0.35)                         | 0.08<br>(0.04 to<br>0.15)                         | 0.29<br>(0.16 to<br>0.56)                         |
| Motorcyclist road injuries           | 64.81<br>(42.27 to<br>101.94)                              | 56.91<br>(21.63 to<br>142.71)                            | 27.26<br>(10.04 to<br>66.15)                             | 83.68<br>(31.40 to<br>204.50)                              | 1.10<br>(0.73 to<br>1.73)                         | 1.00<br>(0.39 to<br>2.37)                         | 0.50<br>(0.20 to<br>1.14)                         | 1.45<br>(0.57 to<br>3.41)                         |
| Motor vehicle road injuries          | 127.62<br>(88.89 to<br>194.94)                             | 102.46<br>(48.12 to<br>214.40)                           | 26.96<br>(12.76 to<br>57.14)                             | 191.79<br>(88.98 to<br>397.33)                             | 2.34<br>(1.67 to<br>3.49)                         | 1.97<br>(0.96 to<br>3.84)                         | 0.55<br>(0.28 to<br>1.07)                         | 3.61<br>(1.75 to<br>7.26)                         |
| Other road injuries                  | 10.06<br>(5.17 to<br>14.95)                                | 8.08<br>(3.40 to<br>16.69)                               | 2.25<br>(1.00 to<br>4.45)                                | 14.92<br>(6.11 to<br>31.23)                                | 0.19<br>(0.10 to<br>0.28)                         | 0.17<br>(0.08 to<br>0.35)                         | 0.06<br>(0.03 to<br>0.10)                         | 0.31<br>(0.14 to<br>0.61)                         |
| Other transport injuries             | 36.69<br>(25.18 to<br>54.73)                               | 53.83<br>(26.08 to<br>115.09)                            | 41.22<br>(19.05 to<br>88.48)                             | 60.78<br>(28.66 to<br>127.94)                              | 0.71<br>(0.50 to<br>1.02)                         | 1.12<br>(0.59 to<br>2.19)                         | 0.86<br>(0.43 to<br>1.67)                         | 1.25<br>(0.64 to<br>2.47)                         |
| <b>Unintentional injuries</b>        | <b>239.37</b><br><b>(191.24 to</b><br><b>325.90)</b>       | <b>224.27</b><br><b>(153.71 to</b><br><b>361.92)</b>     | <b>187.12</b><br><b>(123.90 to</b><br><b>309.88)</b>     | <b>237.58</b><br><b>(164.19 to</b><br><b>372.50)</b>       | <b>4.93</b><br><b>(3.97 to</b><br><b>6.52)</b>    | <b>6.72</b><br><b>(5.21 to</b><br><b>9.16)</b>    | <b>6.00</b><br><b>(4.54 to</b><br><b>8.40)</b>    | <b>6.73</b><br><b>(5.18 to</b><br><b>9.26)</b>    |
| Falls                                | 32.99<br>(24.54 to<br>51.95)                               | 53.06<br>(39.53 to<br>80.85)                             | 49.07<br>(35.19 to<br>75.66)                             | 52.42<br>(39.10 to<br>79.82)                               | 1.18<br>(0.95 to<br>1.67)                         | 2.79<br>(2.24 to<br>3.63)                         | 2.68<br>(2.14 to<br>3.47)                         | 2.63<br>(2.07 to<br>3.45)                         |
| Drowning                             | 47.09<br>(36.93 to<br>62.93)                               | 44.35<br>(25.84 to<br>83.24)                             | 35.79<br>(19.67 to<br>70.80)                             | 48.80<br>(28.41 to<br>90.63)                               | 0.81<br>(0.64 to<br>1.08)                         | 0.88<br>(0.55 to<br>1.56)                         | 0.73<br>(0.44 to<br>1.31)                         | 0.95<br>(0.60 to<br>1.69)                         |
| Fire, heat, and hot substances       | 10.47<br>(8.15 to<br>13.85)                                | 9.13<br>(5.80 to<br>15.47)                               | 7.03<br>(4.33 to<br>12.31)                               | 10.03<br>(6.34 to<br>16.71)                                | 0.24<br>(0.19 to<br>0.32)                         | 0.30<br>(0.21 to<br>0.44)                         | 0.25<br>(0.17 to<br>0.37)                         | 0.31<br>(0.21 to<br>0.47)                         |
| Poisonings                           | 5.52<br>(4.08 to<br>7.30)                                  | 3.63<br>(2.08 to<br>6.48)                                | 2.50<br>(1.33 to<br>4.85)                                | 4.18<br>(2.39 to<br>7.58)                                  | 0.10<br>(0.08 to<br>0.13)                         | 0.08<br>(0.05 to<br>0.14)                         | 0.06<br>(0.03 to<br>0.10)                         | 0.09<br>(0.05 to<br>0.15)                         |

|                                                 |                                          |                                          |                                          |                                          |                                    |                                    |                                    |                                    |
|-------------------------------------------------|------------------------------------------|------------------------------------------|------------------------------------------|------------------------------------------|------------------------------------|------------------------------------|------------------------------------|------------------------------------|
| Exposure to mechanical forces                   | 68.99<br>(36.43 to<br>112.55)            | 49.52<br>(22.70 to<br>98.66)             | 38.55<br>(17.44 to<br>82.85)             | 53.14<br>(24.49 to<br>101.98)            | 1.20<br>(0.69 to<br>1.92)          | 0.96<br>(0.52 to<br>1.75)          | 0.76<br>(0.41 to<br>1.49)          | 1.01<br>(0.55 to<br>1.81)          |
| Unintentional firearm injuries                  | 54.39<br>(18.34 to<br>93.49)             | 34.43<br>(9.18 to<br>75.98)              | 26.69<br>(6.98 to<br>63.34)              | 36.97<br>(9.92 to<br>77.52)              | 0.94<br>(0.35 to<br>1.57)          | 0.64<br>(0.22 to<br>1.30)          | 0.50<br>(0.17 to<br>1.07)          | 0.68<br>(0.23 to<br>1.33)          |
| Unintentional suffocation                       | 4.07<br>(3.17 to<br>5.77)                | 3.06<br>(1.93 to<br>4.92)                | 2.39<br>(1.46 to<br>4.02)                | 3.43<br>(2.20 to<br>5.39)                | 0.06<br>(0.05 to<br>0.08)          | 0.05<br>(0.03 to<br>0.08)          | 0.04<br>(0.02 to<br>0.07)          | 0.06<br>(0.03 to<br>0.09)          |
| Other exposure to mechanical forces             | 10.53<br>(7.35 to<br>17.51)              | 12.02<br>(7.44 to<br>20.06)              | 9.47<br>(5.43 to<br>16.97)               | 12.75<br>(7.85 to<br>20.80)              | 0.21<br>(0.14 to<br>0.35)          | 0.27<br>(0.18 to<br>0.44)          | 0.22<br>(0.14 to<br>0.36)          | 0.28<br>(0.19 to<br>0.45)          |
| Adverse effects of medical treatment            | 9.91<br>(6.39 to<br>17.48)               | 12.54<br>(7.65 to<br>23.91)              | 10.74<br>(6.31 to<br>21.34)              | 13.08<br>(7.91 to<br>24.75)              | 0.28<br>(0.18 to<br>0.49)          | 0.53<br>(0.33 to<br>0.97)          | 0.48<br>(0.29 to<br>0.89)          | 0.52<br>(0.32 to<br>0.96)          |
| Animal contact                                  | 5.04<br>(3.54 to<br>7.38)                | 6.12<br>(3.78 to<br>9.53)                | 4.81<br>(2.84 to<br>7.85)                | 6.66<br>(4.10 to<br>10.08)               | 0.11<br>(0.07 to<br>0.15)          | 0.17<br>(0.11 to<br>0.24)          | 0.14<br>(0.09 to<br>0.21)          | 0.18<br>(0.11 to<br>0.25)          |
| Venomous animal contact                         | 4.28<br>(2.86 to<br>6.10)                | 4.78<br>(2.68 to<br>7.52)                | 3.80<br>(2.08 to<br>6.18)                | 5.21<br>(2.96 to<br>8.06)                | 0.09<br>(0.06 to<br>0.13)          | 0.13<br>(0.08 to<br>0.19)          | 0.11<br>(0.06 to<br>0.17)          | 0.14<br>(0.08 to<br>0.20)          |
| Non-venomous animal contact                     | 0.76<br>(0.44 to<br>1.76)                | 1.33<br>(0.71 to<br>2.87)                | 1.01<br>(0.53 to<br>2.28)                | 1.45<br>(0.78 to<br>3.08)                | 0.02<br>(0.01 to<br>0.03)          | 0.04<br>(0.02 to<br>0.08)          | 0.03<br>(0.02 to<br>0.06)          | 0.04<br>(0.02 to<br>0.08)          |
| Foreign body                                    | 37.44<br>(26.67 to<br>47.50)             | 28.24<br>(20.85 to<br>37.96)             | 25.54<br>(19.11 to<br>34.93)             | 30.70<br>(22.20 to<br>41.82)             | 0.60<br>(0.46 to<br>0.72)          | 0.63<br>(0.49 to<br>0.79)          | 0.61<br>(0.48 to<br>0.77)          | 0.63<br>(0.49 to<br>0.79)          |
| Pulmonary aspiration and foreign body in airway | 36.99<br>(25.93 to<br>47.18)             | 27.76<br>(20.52 to<br>37.58)             | 25.10<br>(18.80 to<br>34.33)             | 30.19<br>(21.79 to<br>41.31)             | 0.59<br>(0.45 to<br>0.71)          | 0.62<br>(0.48 to<br>0.78)          | 0.60<br>(0.47 to<br>0.76)          | 0.62<br>(0.48 to<br>0.78)          |
| Foreign body in other body part                 | 0.45<br>(0.27 to<br>1.16)                | 0.48<br>(0.27 to<br>1.23)                | 0.44<br>(0.23 to<br>1.12)                | 0.51<br>(0.28 to<br>1.31)                | 0.01<br>(0.01 to<br>0.02)          | 0.01<br>(0.01 to<br>0.02)          | 0.01<br>(0.01 to<br>0.02)          | 0.01<br>(0.01 to<br>0.02)          |
| Environmental heat and cold exposure            | 0.60<br>(0.41 to<br>1.21)                | 0.79<br>(0.48 to<br>1.72)                | 0.57<br>(0.32 to<br>1.27)                | 0.86<br>(0.52 to<br>1.89)                | 0.02<br>(0.01 to<br>0.03)          | 0.03<br>(0.02 to<br>0.06)          | 0.02<br>(0.01 to<br>0.04)          | 0.03<br>(0.02 to<br>0.06)          |
| Other unintentional injuries                    | 21.32<br>(15.84 to<br>29.71)             | 16.91<br>(10.53 to<br>27.64)             | 12.50<br>(6.72 to<br>22.48)              | 17.71<br>(11.07 to<br>27.81)             | 0.40<br>(0.30 to<br>0.55)          | 0.36<br>(0.25 to<br>0.55)          | 0.27<br>(0.16 to<br>0.45)          | 0.37<br>(0.25 to<br>0.55)          |
| <b>Self-harm and interpersonal violence</b>     | <b>852.01</b><br>(510.86 to<br>1,193.49) | <b>916.71</b><br>(442.91 to<br>1,707.20) | <b>777.30</b><br>(379.26 to<br>1,489.37) | <b>959.08</b><br>(449.27 to<br>1,805.01) | <b>15.47</b><br>(9.47 to<br>21.46) | <b>17.32</b><br>(8.96 to<br>30.67) | <b>14.81</b><br>(7.79 to<br>26.91) | <b>18.06</b><br>(9.05 to<br>32.43) |

**Venezuela**

| Cause                              | YLLs (in 1000s)                   |                                   |                                   |                                   | Deaths (in 1000s)           |                             |                             |                             |
|------------------------------------|-----------------------------------|-----------------------------------|-----------------------------------|-----------------------------------|-----------------------------|-----------------------------|-----------------------------|-----------------------------|
|                                    | 2016                              | 2040 Forecast                     | 2040 Better Scenario              | 2040 Worse Scenario               | 2016                        | 2040 Forecast               | 2040 Better Scenario        | 2040 Worse Scenario         |
| Self-harm                          | 153.55<br>(101.02 to<br>249.28)   | 192.22<br>(88.49 to<br>409.63)    | 158.27<br>(71.83 to<br>353.86)    | 219.20<br>(97.39 to<br>458.16)    | 2.97<br>(2.03 to<br>4.60)   | 4.04<br>(2.06 to<br>7.72)   | 3.38<br>(1.73 to<br>6.58)   | 4.57<br>(2.28 to<br>8.83)   |
| Self-harm by firearm               | 52.85<br>(29.79 to<br>93.01)      | 57.70<br>(18.19 to<br>129.83)     | 41.30<br>(14.53 to<br>104.68)     | 60.81<br>(20.61 to<br>146.87)     | 0.96<br>(0.55 to<br>1.63)   | 1.02<br>(0.41 to<br>2.33)   | 0.81<br>(0.33 to<br>1.88)   | 1.17<br>(0.46 to<br>2.66)   |
| Self-harm by other specified means | 100.70<br>(63.93 to<br>187.76)    | 139.52<br>(65.61 to<br>286.71)    | 116.97<br>(55.15 to<br>249.79)    | 158.39<br>(74.32 to<br>325.19)    | 2.02<br>(1.35 to<br>3.49)   | 3.02<br>(1.59 to<br>5.67)   | 2.57<br>(1.37 to<br>4.80)   | 3.40<br>(1.76 to<br>6.34)   |
| Interpersonal violence             | 698.46<br>(319.88 to<br>1,028.89) | 724.49<br>(281.41 to<br>1,412.38) | 619.03<br>(244.93 to<br>1,235.28) | 739.88<br>(268.72 to<br>1,453.18) | 12.50<br>(5.98 to<br>18.29) | 13.28<br>(5.63 to<br>24.70) | 11.44<br>(4.96 to<br>21.78) | 13.49<br>(5.36 to<br>25.08) |
| Physical violence by firearm       | 617.13<br>(268.82 to<br>929.03)   | 637.60<br>(234.12 to<br>1,281.00) | 542.23<br>(206.25 to<br>1,119.21) | 649.26<br>(227.67 to<br>1,317.90) | 10.93<br>(4.93 to<br>16.28) | 11.47<br>(4.65 to<br>21.77) | 9.82<br>(4.07 to<br>19.34)  | 11.62<br>(4.44 to<br>22.28) |
| Physical violence by sharp object  | 42.21<br>(18.99 to<br>93.92)      | 48.50<br>(20.05 to<br>109.36)     | 44.00<br>(17.83 to<br>108.33)     | 48.08<br>(18.84 to<br>107.38)     | 0.81<br>(0.38 to<br>1.71)   | 0.97<br>(0.44 to<br>2.08)   | 0.89<br>(0.40 to<br>2.00)   | 0.95<br>(0.41 to<br>1.98)   |

|                                                                              |                                          |                                          |                                          |                                          |                                       |                                       |                                       |                                       |
|------------------------------------------------------------------------------|------------------------------------------|------------------------------------------|------------------------------------------|------------------------------------------|---------------------------------------|---------------------------------------|---------------------------------------|---------------------------------------|
| Physical violence by other means                                             | 39.12<br>(15.44 to<br>61.21)             | 38.38<br>(13.26 to<br>78.50)             | 32.80<br>(11.79 to<br>65.24)             | 42.54<br>(14.04 to<br>87.75)             | 0.76<br>(0.29 to<br>1.20)             | 0.84<br>(0.30 to<br>1.62)             | 0.73<br>(0.27 to<br>1.39)             | 0.92<br>(0.32 to<br>1.83)             |
| Forces of nature, conflict and terrorism, and executions and police conflict | 10.76<br>(2.95 to<br>22.12)              | 11.36<br>(0.00 to<br>19.03)              | 11.14<br>(0.00 to<br>18.61)              | 11.58<br>(0.00 to<br>19.47)              | 0.18<br>(0.05 to<br>0.36)             | 0.26<br>(0.00 to<br>0.44)             | 0.26<br>(0.00 to<br>0.45)             | 0.26<br>(0.00 to<br>0.44)             |
| Exposure to forces of nature                                                 | 0.00<br>(0.00 to<br>0.00)                | 9.73<br>(0.00 to<br>13.50)               | 9.52<br>(0.00 to<br>13.12)               | 9.93<br>(0.00 to<br>13.90)               | 0.00<br>(0.00 to<br>0.00)             | 0.23<br>(0.00 to<br>0.30)             | 0.23<br>(0.00 to<br>0.31)             | 0.23<br>(0.00 to<br>0.31)             |
| Conflict and terrorism                                                       | 0.00<br>(0.00 to<br>0.00)                | 0.44<br>(0.00 to<br>4.97)                | 0.43<br>(0.00 to<br>4.90)                | 0.44<br>(0.00 to<br>5.02)                | 0.00<br>(0.00 to<br>0.00)             | 0.01<br>(0.00 to<br>0.08)             | 0.01<br>(0.00 to<br>0.08)             | 0.01<br>(0.00 to<br>0.08)             |
| Executions and police conflict                                               | 10.76<br>(2.95 to<br>22.12)              | 1.20<br>(0.00 to<br>0.00)                | 1.18<br>(0.00 to<br>0.00)                | 1.21<br>(0.00 to<br>0.00)                | 0.18<br>(0.05 to<br>0.36)             | 0.02<br>(0.00 to<br>0.00)             | 0.02<br>(0.00 to<br>0.00)             | 0.02<br>(0.00 to<br>0.00)             |
| <b>Tropical Latin America</b>                                                |                                          |                                          |                                          |                                          |                                       |                                       |                                       |                                       |
| Cause                                                                        | YLLs (in 1000s)                          |                                          |                                          |                                          | Deaths (in 1000s)                     |                                       |                                       |                                       |
|                                                                              | 2016                                     | 2040 Forecast                            | 2040 Better Scenario                     | 2040 Worse Scenario                      | 2016                                  | 2040 Forecast                         | 2040 Better Scenario                  | 2040 Worse Scenario                   |
| All causes                                                                   | 35,064.60<br>(34,183.86 to<br>35,989.75) | 38,765.83<br>(33,072.57 to<br>45,513.42) | 28,764.99<br>(25,070.19 to<br>33,110.08) | 51,372.87<br>(43,736.28 to<br>59,262.36) | 1,334.35<br>(1,303.11 to<br>1,370.10) | 2,196.72<br>(1,846.70 to<br>2,550.61) | 1,734.29<br>(1,466.80 to<br>2,023.15) | 2,689.52<br>(2,298.74 to<br>3,076.97) |
| Communicable, maternal, neonatal, and nutritional diseases                   | 5,748.66<br>(5,502.50 to<br>6,000.41)    | 4,293.59<br>(3,575.20 to<br>5,230.56)    | 3,326.36<br>(2,774.74 to<br>4,032.59)    | 5,847.66<br>(4,812.04 to<br>7,367.51)    | 149.14<br>(143.46 to<br>154.91)       | 201.75<br>(163.18 to<br>252.52)       | 176.34<br>(142.73 to<br>220.16)       | 248.53<br>(198.37 to<br>321.18)       |
| HIV/AIDS and tuberculosis                                                    | 865.08<br>(850.33 to<br>882.14)          | 592.42<br>(398.03 to<br>709.53)          | 444.07<br>(257.86 to<br>545.68)          | 881.03<br>(724.20 to<br>1,023.02)        | 20.97<br>(20.60 to<br>21.41)          | 16.13<br>(10.58 to<br>19.91)          | 11.74<br>(6.27 to<br>14.92)           | 23.24<br>(18.39 to<br>27.61)          |
| Tuberculosis                                                                 | 180.97<br>(171.66 to<br>194.35)          | 118.11<br>(74.79 to<br>186.57)           | 46.89<br>(31.01 to<br>73.10)             | 192.60<br>(123.13 to<br>303.55)          | 5.59<br>(5.33 to<br>5.94)             | 4.60<br>(2.97 to<br>7.05)             | 1.92<br>(1.31 to<br>2.78)             | 7.15<br>(4.65 to<br>10.88)            |
| HIV/AIDS                                                                     | 684.11<br>(673.47 to<br>694.97)          | 474.30<br>(292.66 to<br>563.58)          | 397.19<br>(213.59 to<br>489.53)          | 688.43<br>(543.44 to<br>782.35)          | 15.38<br>(15.15 to<br>15.63)          | 11.54<br>(6.27 to<br>14.29)           | 9.82<br>(4.43 to<br>12.75)            | 16.09<br>(12.06 to<br>18.68)          |
| Diarrhea, lower respiratory, and other common infectious diseases            | 2,067.06<br>(1,976.40 to<br>2,172.85)    | 2,261.51<br>(1,687.55 to<br>3,094.94)    | 1,718.96<br>(1,299.70 to<br>2,365.08)    | 3,174.38<br>(2,279.16 to<br>4,568.33)    | 81.16<br>(76.52 to<br>85.84)          | 145.80<br>(110.16 to<br>195.17)       | 123.54<br>(92.58 to<br>166.59)        | 183.81<br>(135.63 to<br>254.69)       |
| Diarrheal diseases                                                           | 228.75<br>(211.08 to<br>249.58)          | 171.55<br>(64.14 to<br>425.90)           | 260.39<br>(111.01 to<br>597.80)          | 201.91<br>(67.37 to<br>566.92)           | 6.20<br>(5.91 to<br>6.54)             | 11.41<br>(4.36 to<br>28.68)           | 19.43<br>(8.19 to<br>44.23)           | 11.93<br>(4.13 to<br>32.25)           |
| Intestinal infectious diseases                                               | 1.72<br>(0.92 to<br>2.90)                | 1.39<br>(0.72 to<br>2.50)                | 1.75<br>(0.91 to<br>3.21)                | 1.34<br>(0.70 to<br>2.40)                | 0.04<br>(0.02 to<br>0.06)             | 0.04<br>(0.02 to<br>0.07)             | 0.05<br>(0.03 to<br>0.09)             | 0.04<br>(0.02 to<br>0.07)             |
| Typhoid fever                                                                | 1.23<br>(0.58 to<br>2.25)                | 1.11<br>(0.50 to<br>2.13)                | 1.52<br>(0.73 to<br>2.94)                | 1.02<br>(0.47 to<br>1.97)                | 0.03<br>(0.01 to<br>0.05)             | 0.03<br>(0.01 to<br>0.06)             | 0.04<br>(0.02 to<br>0.08)             | 0.03<br>(0.01 to<br>0.05)             |
| Paratyphoid fever                                                            | 0.01<br>(0.00 to<br>0.02)                | 0.01<br>(0.00 to<br>0.02)                | 0.01<br>(0.00 to<br>0.01)                | 0.01<br>(0.00 to<br>0.02)                | 0.00<br>(0.00 to<br>0.00)             | 0.00<br>(0.00 to<br>0.00)             | 0.00<br>(0.00 to<br>0.00)             | 0.00<br>(0.00 to<br>0.00)             |
| Other intestinal infectious diseases                                         | 0.48<br>(0.19 to<br>1.05)                | 0.27<br>(0.10 to<br>0.59)                | 0.23<br>(0.08 to<br>0.51)                | 0.31<br>(0.11 to<br>0.65)                | 0.01<br>(0.00 to<br>0.02)             | 0.01<br>(0.00 to<br>0.02)             | 0.01<br>(0.00 to<br>0.02)             | 0.01<br>(0.00 to<br>0.03)             |
| Lower respiratory infections                                                 | 1,628.76<br>(1,551.53 to<br>1,713.64)    | 1,860.84<br>(1,369.04 to<br>2,558.03)    | 1,296.22<br>(972.08 to<br>1,767.52)      | 2,654.55<br>(1,883.09 to<br>3,878.55)    | 71.34<br>(66.75 to<br>75.86)          | 129.41<br>(98.72 to<br>172.35)        | 100.36<br>(77.06 to<br>130.24)        | 165.46<br>(121.82 to<br>225.68)       |
| Upper respiratory infections                                                 | 1.24<br>(1.05 to<br>1.48)                | 0.79<br>(0.51 to<br>1.17)                | 0.39<br>(0.26 to<br>0.57)                | 1.05<br>(0.70 to<br>1.56)                | 0.03<br>(0.03 to<br>0.03)             | 0.03<br>(0.02 to<br>0.04)             | 0.02<br>(0.01 to<br>0.02)             | 0.04<br>(0.03 to<br>0.06)             |
| Otitis media                                                                 | 1.26<br>(1.10 to<br>1.48)                | 0.17<br>(0.11 to<br>0.25)                | 0.17<br>(0.11 to<br>0.26)                | 0.17<br>(0.11 to<br>0.25)                | 0.03<br>(0.02 to<br>0.03)             | 0.01<br>(0.00 to<br>0.01)             | 0.01<br>(0.00 to<br>0.01)             | 0.01<br>(0.00 to<br>0.01)             |
| Meningitis                                                                   | 145.38<br>(135.56 to<br>161.42)          | 68.67<br>(43.85 to<br>90.80)             | 49.16<br>(31.68 to<br>63.98)             | 85.28<br>(52.18 to<br>115.23)            | 2.50<br>(2.33 to<br>2.76)             | 1.69<br>(1.31 to<br>2.15)             | 1.26<br>(0.99 to<br>1.54)             | 1.96<br>(1.49 to<br>2.42)             |

|                                |                              |                                |                               |                                |                           |                           |                           |                           |
|--------------------------------|------------------------------|--------------------------------|-------------------------------|--------------------------------|---------------------------|---------------------------|---------------------------|---------------------------|
| Pneumococcal meningitis        | 22.77<br>(20.91 to<br>25.27) | 11.64<br>(8.64 to<br>14.70)    | 11.62<br>(8.75 to<br>14.61)   | 12.06<br>(8.79 to<br>15.44)    | 0.44<br>(0.41 to<br>0.49) | 0.36<br>(0.29 to<br>0.43) | 0.37<br>(0.30 to<br>0.44) | 0.35<br>(0.28 to<br>0.42) |
| H influenzae type B meningitis | 10.92<br>(9.83 to<br>12.44)  | 12.33<br>(3.14 to<br>26.93)    | 10.31<br>(3.05 to<br>19.25)   | 17.41<br>(3.49 to<br>39.75)    | 0.17<br>(0.16 to<br>0.19) | 0.19<br>(0.08 to<br>0.36) | 0.17<br>(0.09 to<br>0.28) | 0.25<br>(0.09 to<br>0.51) |
| Meningococcal meningitis       | 65.56<br>(60.34 to<br>73.03) | 23.58<br>(15.94 to<br>32.33)   | 14.55<br>(9.95 to<br>19.64)   | 29.53<br>(19.54 to<br>40.16)   | 1.06<br>(0.98 to<br>1.18) | 0.57<br>(0.43 to<br>0.74) | 0.37<br>(0.28 to<br>0.47) | 0.68<br>(0.52 to<br>0.85) |
| Other meningitis               | 46.13<br>(42.24 to<br>51.39) | 21.11<br>(14.76 to<br>28.47)   | 12.67<br>(9.05 to<br>17.24)   | 26.27<br>(18.30 to<br>34.99)   | 0.82<br>(0.76 to<br>0.91) | 0.57<br>(0.43 to<br>0.75) | 0.35<br>(0.27 to<br>0.45) | 0.68<br>(0.53 to<br>0.84) |
| Encephalitis                   | 26.96<br>(22.01 to<br>36.70) | 21.49<br>(13.94 to<br>29.22)   | 20.30<br>(13.32 to<br>27.42)  | 23.01<br>(14.72 to<br>32.18)   | 0.51<br>(0.39 to<br>0.65) | 0.69<br>(0.47 to<br>0.86) | 0.68<br>(0.46 to<br>0.85) | 0.69<br>(0.47 to<br>0.87) |
| Diphtheria                     | 0.20<br>(0.17 to<br>0.23)    | 0.04<br>(0.02 to<br>0.05)      | 0.03<br>(0.02 to<br>0.04)     | 0.05<br>(0.02 to<br>0.09)      | 0.00<br>(0.00 to<br>0.00) | 0.00<br>(0.00 to<br>0.00) | 0.00<br>(0.00 to<br>0.00) | 0.00<br>(0.00 to<br>0.00) |
| Whooping cough                 | 15.24<br>(7.51 to<br>29.09)  | 5.97<br>(0.47 to<br>14.99)     | 1.36<br>(0.39 to<br>3.09)     | 11.89<br>(0.59 to<br>27.49)    | 0.18<br>(0.09 to<br>0.35) | 0.07<br>(0.01 to<br>0.18) | 0.02<br>(0.01 to<br>0.04) | 0.14<br>(0.01 to<br>0.33) |
| Tetanus                        | 3.42<br>(2.64 to<br>3.96)    | 0.63<br>(0.43 to<br>0.85)      | 0.60<br>(0.40 to<br>0.81)     | 0.74<br>(0.50 to<br>1.02)      | 0.09<br>(0.07 to<br>0.10) | 0.02<br>(0.01 to<br>0.03) | 0.02<br>(0.01 to<br>0.03) | 0.02<br>(0.01 to<br>0.03) |
| Measles                        | 0.70<br>(0.58 to<br>0.83)    | 125.53<br>(16.37 to<br>325.31) | 85.41<br>(12.57 to<br>218.97) | 188.88<br>(21.64 to<br>516.11) | 0.01<br>(0.01 to<br>0.01) | 2.28<br>(0.27 to<br>6.11) | 1.59<br>(0.20 to<br>4.33) | 3.38<br>(0.36 to<br>9.29) |

**Tropical Latin America**

| Cause                                          | YLLs (in 1000s)                                      |                                                      |                                                      |                                                      | Deaths (in 1000s)                              |                                                |                                                  |                                                |
|------------------------------------------------|------------------------------------------------------|------------------------------------------------------|------------------------------------------------------|------------------------------------------------------|------------------------------------------------|------------------------------------------------|--------------------------------------------------|------------------------------------------------|
|                                                | 2016                                                 | 2040 Forecast                                        | 2040 Better Scenario                                 | 2040 Worse Scenario                                  | 2016                                           | 2040 Forecast                                  | 2040 Better Scenario                             | 2040 Worse Scenario                            |
| Varicella and herpes zoster                    | 13.44<br>(6.42 to<br>19.01)                          | 4.45<br>(1.66 to<br>7.36)                            | 3.17<br>(1.21 to<br>5.16)                            | 5.52<br>(2.07 to<br>9.12)                            | 0.23<br>(0.11 to<br>0.31)                      | 0.14<br>(0.06 to<br>0.21)                      | 0.11<br>(0.04 to<br>0.16)                        | 0.16<br>(0.06 to<br>0.23)                      |
| <b>Neglected tropical diseases and malaria</b> | <b>244.53</b><br><b>(216.72 to</b><br><b>277.93)</b> | <b>198.87</b><br><b>(173.86 to</b><br><b>232.09)</b> | <b>216.39</b><br><b>(190.52 to</b><br><b>248.75)</b> | <b>191.37</b><br><b>(166.03 to</b><br><b>228.65)</b> | <b>8.12</b><br><b>(7.43 to</b><br><b>8.76)</b> | <b>8.85</b><br><b>(7.95 to</b><br><b>9.93)</b> | <b>10.18</b><br><b>(9.16 to</b><br><b>11.32)</b> | <b>8.05</b><br><b>(7.23 to</b><br><b>9.07)</b> |
| Malaria                                        | 3.95<br>(3.09 to<br>6.90)                            | 1.00<br>(0.69 to<br>2.11)                            | 1.01<br>(0.69 to<br>2.14)                            | 1.01<br>(0.69 to<br>2.10)                            | 0.08<br>(0.06 to<br>0.15)                      | 0.03<br>(0.02 to<br>0.06)                      | 0.03<br>(0.02 to<br>0.07)                        | 0.03<br>(0.02 to<br>0.06)                      |
| Chagas disease                                 | 117.07<br>(108.58 to<br>126.37)                      | 65.04<br>(53.59 to<br>81.94)                         | 79.90<br>(66.63 to<br>99.25)                         | 57.13<br>(47.06 to<br>72.80)                         | 5.24<br>(4.89 to<br>5.67)                      | 3.75<br>(3.12 to<br>4.64)                      | 4.69<br>(3.96 to<br>5.76)                        | 3.23<br>(2.68 to<br>4.07)                      |
| Leishmaniasis                                  | 39.62<br>(22.47 to<br>65.35)                         | 8.22<br>(4.74 to<br>19.12)                           | 6.13<br>(3.50 to<br>13.90)                           | 10.21<br>(5.94 to<br>24.68)                          | 0.61<br>(0.36 to<br>1.00)                      | 0.16<br>(0.09 to<br>0.30)                      | 0.13<br>(0.07 to<br>0.23)                        | 0.19<br>(0.11 to<br>0.38)                      |
| African trypanosomiasis                        | 0.00<br>(0.00 to<br>0.00)                            | 0.00<br>(0.00 to<br>0.00)                            | 0.00<br>(0.00 to<br>0.00)                            | 0.00<br>(0.00 to<br>0.00)                            | 0.00<br>(0.00 to<br>0.00)                      | 0.00<br>(0.00 to<br>0.00)                      | 0.00<br>(0.00 to<br>0.00)                        | 0.00<br>(0.00 to<br>0.00)                      |
| Schistosomiasis                                | 17.77<br>(15.28 to<br>20.55)                         | 7.29<br>(5.91 to<br>9.34)                            | 7.05<br>(5.68 to<br>8.92)                            | 7.40<br>(5.94 to<br>9.44)                            | 0.60<br>(0.51 to<br>0.69)                      | 0.34<br>(0.28 to<br>0.43)                      | 0.34<br>(0.27 to<br>0.42)                        | 0.33<br>(0.27 to<br>0.42)                      |
| Cysticercosis                                  | 4.36<br>(3.97 to<br>4.86)                            | 0.88<br>(0.73 to<br>1.13)                            | 0.88<br>(0.73 to<br>1.12)                            | 0.88<br>(0.73 to<br>1.13)                            | 0.11<br>(0.10 to<br>0.12)                      | 0.03<br>(0.02 to<br>0.04)                      | 0.03<br>(0.03 to<br>0.04)                        | 0.03<br>(0.02 to<br>0.04)                      |
| Cystic echinococcosis                          | 0.35<br>(0.31 to<br>0.41)                            | 0.13<br>(0.10 to<br>0.17)                            | 0.10<br>(0.08 to<br>0.13)                            | 0.15<br>(0.12 to<br>0.20)                            | 0.01<br>(0.01 to<br>0.01)                      | 0.01<br>(0.00 to<br>0.01)                      | 0.00<br>(0.00 to<br>0.01)                        | 0.01<br>(0.01 to<br>0.01)                      |
| Dengue                                         | 49.73<br>(32.44 to<br>62.05)                         | 112.15<br>(77.51 to<br>134.81)                       | 116.88<br>(83.30 to<br>140.32)                       | 110.34<br>(76.22 to<br>133.79)                       | 1.27<br>(0.84 to<br>1.59)                      | 4.42<br>(2.99 to<br>5.24)                      | 4.83<br>(3.31 to<br>5.74)                        | 4.12<br>(2.82 to<br>4.86)                      |
| Yellow fever                                   | 0.65<br>(0.14 to<br>1.89)                            | 0.10<br>(0.02 to<br>0.32)                            | 0.08<br>(0.01 to<br>0.26)                            | 0.12<br>(0.02 to<br>0.40)                            | 0.01<br>(0.00 to<br>0.03)                      | 0.00<br>(0.00 to<br>0.01)                      | 0.00<br>(0.00 to<br>0.00)                        | 0.00<br>(0.00 to<br>0.01)                      |



|                                                       |                                                      |                                                    |                                                   |                                                    |                                                |                                                |                                                |                                                |
|-------------------------------------------------------|------------------------------------------------------|----------------------------------------------------|---------------------------------------------------|----------------------------------------------------|------------------------------------------------|------------------------------------------------|------------------------------------------------|------------------------------------------------|
| Rabies                                                | 0.09<br>(0.07 to<br>0.11)                            | 0.02<br>(0.02 to<br>0.03)                          | 0.02<br>(0.01 to<br>0.02)                         | 0.03<br>(0.02 to<br>0.04)                          | 0.00<br>(0.00 to<br>0.00)                      | 0.00<br>(0.00 to<br>0.00)                      | 0.00<br>(0.00 to<br>0.00)                      | 0.00<br>(0.00 to<br>0.00)                      |
| Intestinal nematode infections                        | 1.60<br>(1.25 to<br>1.98)                            | 0.62<br>(0.46 to<br>1.07)                          | 0.62<br>(0.47 to<br>1.07)                         | 0.66<br>(0.48 to<br>1.19)                          | 0.03<br>(0.02 to<br>0.03)                      | 0.02<br>(0.01 to<br>0.02)                      | 0.02<br>(0.01 to<br>0.02)                      | 0.02<br>(0.01 to<br>0.02)                      |
| Other neglected tropical diseases                     | 8.97<br>(3.62 to<br>10.58)                           | 3.32<br>(1.29 to<br>5.13)                          | 3.73<br>(1.39 to<br>5.66)                         | 3.43<br>(1.34 to<br>5.49)                          | 0.16<br>(0.06 to<br>0.18)                      | 0.09<br>(0.04 to<br>0.13)                      | 0.11<br>(0.04 to<br>0.15)                      | 0.09<br>(0.04 to<br>0.13)                      |
| <b>Maternal disorders</b>                             | <b>123.71</b><br><b>(115.86 to</b><br><b>132.59)</b> | <b>74.83</b><br><b>(51.82 to</b><br><b>102.35)</b> | <b>54.73</b><br><b>(38.39 to</b><br><b>76.57)</b> | <b>90.72</b><br><b>(62.27 to</b><br><b>126.35)</b> | <b>2.18</b><br><b>(2.05 to</b><br><b>2.34)</b> | <b>1.34</b><br><b>(0.94 to</b><br><b>1.83)</b> | <b>0.98</b><br><b>(0.69 to</b><br><b>1.37)</b> | <b>1.62</b><br><b>(1.12 to</b><br><b>2.23)</b> |
| Maternal hemorrhage                                   | 18.59<br>(15.80 to<br>21.79)                         | 11.40<br>(7.52 to<br>16.79)                        | 8.48<br>(5.44 to<br>12.91)                        | 13.70<br>(8.87 to<br>20.42)                        | 0.33<br>(0.28 to<br>0.39)                      | 0.21<br>(0.14 to<br>0.30)                      | 0.15<br>(0.10 to<br>0.23)                      | 0.25<br>(0.16 to<br>0.37)                      |
| Maternal sepsis and other maternal infections         | 13.80<br>(11.58 to<br>16.30)                         | 7.32<br>(4.56 to<br>11.30)                         | 5.34<br>(3.28 to<br>8.31)                         | 8.84<br>(5.44 to<br>13.64)                         | 0.24<br>(0.20 to<br>0.29)                      | 0.13<br>(0.08 to<br>0.20)                      | 0.10<br>(0.06 to<br>0.15)                      | 0.16<br>(0.10 to<br>0.24)                      |
| Maternal hypertensive disorders                       | 25.26<br>(22.29 to<br>28.65)                         | 15.95<br>(10.18 to<br>23.94)                       | 11.50<br>(7.31 to<br>17.22)                       | 19.47<br>(12.36 to<br>29.22)                       | 0.44<br>(0.39 to<br>0.50)                      | 0.28<br>(0.18 to<br>0.42)                      | 0.20<br>(0.13 to<br>0.30)                      | 0.34<br>(0.22 to<br>0.51)                      |
| Maternal obstructed labor and uterine rupture         | 1.90<br>(1.46 to<br>2.44)                            | 1.16<br>(0.68 to<br>1.98)                          | 0.80<br>(0.47 to<br>1.31)                         | 1.44<br>(0.85 to<br>2.38)                          | 0.03<br>(0.03 to<br>0.04)                      | 0.02<br>(0.01 to<br>0.04)                      | 0.01<br>(0.01 to<br>0.02)                      | 0.03<br>(0.02 to<br>0.04)                      |
| Maternal abortion, miscarriage, and ectopic pregnancy | 13.96<br>(12.03 to<br>16.33)                         | 10.67<br>(6.14 to<br>17.58)                        | 7.69<br>(4.48 to<br>12.87)                        | 13.01<br>(7.45 to<br>22.30)                        | 0.26<br>(0.23 to<br>0.30)                      | 0.20<br>(0.12 to<br>0.33)                      | 0.15<br>(0.09 to<br>0.24)                      | 0.25<br>(0.14 to<br>0.42)                      |
| Indirect maternal deaths                              | 26.73<br>(23.01 to<br>30.74)                         | 14.92<br>(9.00 to<br>23.25)                        | 10.68<br>(6.46 to<br>16.90)                       | 18.29<br>(10.97 to<br>28.63)                       | 0.46<br>(0.40 to<br>0.53)                      | 0.26<br>(0.16 to<br>0.40)                      | 0.19<br>(0.12 to<br>0.29)                      | 0.32<br>(0.19 to<br>0.50)                      |
| Late maternal deaths                                  | 6.19<br>(5.09 to<br>7.36)                            | 1.95<br>(1.16 to<br>3.20)                          | 1.39<br>(0.82 to<br>2.22)                         | 2.38<br>(1.41 to<br>3.80)                          | 0.11<br>(0.09 to<br>0.13)                      | 0.03<br>(0.02 to<br>0.06)                      | 0.02<br>(0.01 to<br>0.04)                      | 0.04<br>(0.03 to<br>0.07)                      |
| Maternal deaths aggravated by HIV/AIDS                | 0.17<br>(0.09 to<br>0.25)                            | 0.62<br>(0.25 to<br>1.16)                          | 0.50<br>(0.21 to<br>0.94)                         | 0.72<br>(0.30 to<br>1.38)                          | 0.00<br>(0.00 to<br>0.00)                      | 0.00<br>(0.00 to<br>0.02)                      | 0.01<br>(0.00 to<br>0.02)                      | 0.01<br>(0.01 to<br>0.03)                      |
| Other maternal disorders                              | 17.11<br>(14.59 to<br>19.80)                         | 10.84<br>(6.90 to<br>16.12)                        | 8.36<br>(5.31 to<br>12.67)                        | 12.87<br>(7.97 to<br>19.49)                        | 0.30<br>(0.26 to<br>0.35)                      | 0.19<br>(0.12 to<br>0.29)                      | 0.15<br>(0.10 to<br>0.22)                      | 0.23<br>(0.14 to<br>0.34)                      |

### Tropical Latin America

| Cause                                                    | YLLs (in 1000s)                                            |                                                        |                                                      |                                                          | Deaths (in 1000s)                                 |                                                   |                                                   |                                                   |
|----------------------------------------------------------|------------------------------------------------------------|--------------------------------------------------------|------------------------------------------------------|----------------------------------------------------------|---------------------------------------------------|---------------------------------------------------|---------------------------------------------------|---------------------------------------------------|
|                                                          | 2016                                                       | 2040 Forecast                                          | 2040 Better Scenario                                 | 2040 Worse Scenario                                      | 2016                                              | 2040 Forecast                                     | 2040 Better Scenario                              | 2040 Worse Scenario                               |
| <b>Neonatal disorders</b>                                | <b>2,084.45</b><br><b>(1,929.19 to</b><br><b>2,238.83)</b> | <b>846.72</b><br><b>(681.33 to</b><br><b>1,034.70)</b> | <b>557.79</b><br><b>(445.90 to</b><br><b>675.34)</b> | <b>1,189.97</b><br><b>(943.96 to</b><br><b>1,445.80)</b> | <b>24.09</b><br><b>(22.30 to</b><br><b>25.88)</b> | <b>9.79</b><br><b>(7.88 to</b><br><b>11.96)</b>   | <b>6.45</b><br><b>(5.16 to</b><br><b>7.81)</b>    | <b>13.76</b><br><b>(10.91 to</b><br><b>16.71)</b> |
| Neonatal preterm birth                                   | 833.41<br>(753.31 to<br>906.72)                            | 318.38<br>(242.11 to<br>399.03)                        | 173.33<br>(133.59 to<br>217.49)                      | 489.51<br>(385.96 to<br>597.37)                          | 9.63<br>(8.71 to<br>10.48)                        | 3.68<br>(2.80 to<br>4.61)                         | 2.00<br>(1.54 to<br>2.51)                         | 5.66<br>(4.46 to<br>6.90)                         |
| Neonatal encephalopathy due to birth asphyxia and trauma | 471.68<br>(423.87 to<br>519.34)                            | 169.18<br>(118.16 to<br>233.53)                        | 104.28<br>(72.68 to<br>143.96)                       | 236.16<br>(165.28 to<br>320.58)                          | 5.45<br>(4.90 to<br>6.00)                         | 1.96<br>(1.37 to<br>2.70)                         | 1.21<br>(0.84 to<br>1.67)                         | 2.73<br>(1.91 to<br>3.71)                         |
| Neonatal sepsis and other neonatal infections            | 373.82<br>(326.17 to<br>467.85)                            | 207.57<br>(156.33 to<br>277.10)                        | 144.71<br>(107.88 to<br>194.58)                      | 277.12<br>(208.44 to<br>369.00)                          | 4.32<br>(3.77 to<br>5.41)                         | 2.40<br>(1.81 to<br>3.20)                         | 1.67<br>(1.25 to<br>2.25)                         | 3.20<br>(2.41 to<br>4.27)                         |
| Hemolytic disease and other neonatal jaundice            | 15.94<br>(13.56 to<br>18.72)                               | 4.82<br>(2.98 to<br>7.74)                              | 3.23<br>(1.96 to<br>5.18)                            | 6.58<br>(4.00 to<br>10.53)                               | 0.18<br>(0.16 to<br>0.22)                         | 0.06<br>(0.03 to<br>0.09)                         | 0.04<br>(0.02 to<br>0.06)                         | 0.08<br>(0.05 to<br>0.12)                         |
| Other neonatal disorders                                 | 389.60<br>(340.18 to<br>431.85)                            | 146.76<br>(104.76 to<br>199.77)                        | 132.24<br>(96.37 to<br>177.61)                       | 180.59<br>(127.90 to<br>250.56)                          | 4.50<br>(3.93 to<br>4.99)                         | 1.70<br>(1.21 to<br>2.31)                         | 1.53<br>(1.11 to<br>2.05)                         | 2.09<br>(1.48 to<br>2.90)                         |
| <b>Nutritional deficiencies</b>                          | <b>209.68</b><br><b>(195.20 to</b><br><b>223.85)</b>       | <b>203.28</b><br><b>(175.43 to</b><br><b>234.63)</b>   | <b>236.51</b><br><b>(203.04 to</b><br><b>272.41)</b> | <b>192.99</b><br><b>(166.38 to</b><br><b>221.75)</b>     | <b>9.10</b><br><b>(8.51 to</b><br><b>9.61)</b>    | <b>15.81</b><br><b>(13.17 to</b><br><b>18.63)</b> | <b>19.92</b><br><b>(16.73 to</b><br><b>23.22)</b> | <b>13.84</b><br><b>(11.62 to</b><br><b>16.32)</b> |

|                                                                         |                                                               |                                                               |                                                               |                                                               |                                                          |                                                            |                                                            |                                                            |
|-------------------------------------------------------------------------|---------------------------------------------------------------|---------------------------------------------------------------|---------------------------------------------------------------|---------------------------------------------------------------|----------------------------------------------------------|------------------------------------------------------------|------------------------------------------------------------|------------------------------------------------------------|
| Protein-energy malnutrition                                             | 189.74<br>(170.71 to<br>204.79)                               | 178.02<br>(144.15 to<br>211.55)                               | 215.14<br>(177.72 to<br>253.26)                               | 166.08<br>(135.32 to<br>195.14)                               | 8.37<br>(7.52 to<br>8.93)                                | 14.24<br>(11.34 to<br>17.28)                               | 18.50<br>(15.06 to<br>22.00)                               | 12.28<br>(9.74 to<br>14.83)                                |
| Iodine deficiency                                                       | 1.03<br>(0.50 to<br>1.99)                                     | 4.33<br>(0.27 to<br>16.60)                                    | 3.91<br>(0.20 to<br>17.66)                                    | 4.51<br>(0.32 to<br>17.12)                                    | 0.03<br>(0.01 to<br>0.06)                                | 0.33<br>(0.01 to<br>1.61)                                  | 0.31<br>(0.01 to<br>1.81)                                  | 0.32<br>(0.01 to<br>1.51)                                  |
| Dietary iron deficiency                                                 | 1.40<br>(0.72 to<br>2.06)                                     | 1.19<br>(0.56 to<br>1.55)                                     | 1.29<br>(0.57 to<br>1.76)                                     | 1.19<br>(0.59 to<br>1.55)                                     | 0.04<br>(0.01 to<br>0.05)                                | 0.05<br>(0.02 to<br>0.07)                                  | 0.06<br>(0.02 to<br>0.08)                                  | 0.04<br>(0.01 to<br>0.06)                                  |
| Other nutritional deficiencies                                          | 17.52<br>(11.30 to<br>29.78)                                  | 19.74<br>(11.11 to<br>37.77)                                  | 16.16<br>(8.98 to<br>32.68)                                   | 21.22<br>(11.96 to<br>39.60)                                  | 0.67<br>(0.37 to<br>1.36)                                | 1.20<br>(0.63 to<br>2.51)                                  | 1.05<br>(0.53 to<br>2.38)                                  | 1.20<br>(0.63 to<br>2.44)                                  |
| <b>Other communicable, maternal, neonatal, and nutritional diseases</b> | <b>154.15</b><br><b>(130.84 to</b><br><b>187.87)</b>          | <b>115.97</b><br><b>(100.29 to</b><br><b>133.17)</b>          | <b>97.91</b><br><b>(85.33 to</b><br><b>113.15)</b>            | <b>127.19</b><br><b>(109.34 to</b><br><b>147.92)</b>          | <b>3.51</b><br><b>(3.16 to</b><br><b>3.93)</b>           | <b>4.02</b><br><b>(3.53 to</b><br><b>4.50)</b>             | <b>3.53</b><br><b>(3.10 to</b><br><b>3.94)</b>             | <b>4.21</b><br><b>(3.68 to</b><br><b>4.71)</b>             |
| Sexually transmitted infections excluding HIV                           | 49.05<br>(28.12 to<br>81.51)                                  | 11.98<br>(7.77 to<br>19.57)                                   | 9.43<br>(6.31 to<br>14.99)                                    | 14.52<br>(9.02 to<br>24.13)                                   | 0.72<br>(0.47 to<br>1.10)                                | 0.27<br>(0.21 to<br>0.36)                                  | 0.23<br>(0.18 to<br>0.30)                                  | 0.30<br>(0.23 to<br>0.41)                                  |
| Syphilis                                                                | 42.68<br>(21.97 to<br>74.98)                                  | 7.90<br>(3.76 to<br>15.57)                                    | 5.71<br>(2.70 to<br>11.39)                                    | 10.27<br>(4.87 to<br>19.68)                                   | 0.54<br>(0.30 to<br>0.92)                                | 0.13<br>(0.08 to<br>0.22)                                  | 0.09<br>(0.06 to<br>0.16)                                  | 0.16<br>(0.09 to<br>0.27)                                  |
| Chlamydial infection                                                    | 1.23<br>(1.15 to<br>1.31)                                     | 0.79<br>(0.65 to<br>0.97)                                     | 0.73<br>(0.60 to<br>0.90)                                     | 0.83<br>(0.68 to<br>1.00)                                     | 0.03<br>(0.03 to<br>0.04)                                | 0.03<br>(0.02 to<br>0.03)                                  | 0.03<br>(0.02 to<br>0.03)                                  | 0.03<br>(0.02 to<br>0.03)                                  |
| Gonococcal infection                                                    | 3.35<br>(3.14 to<br>3.59)                                     | 2.19<br>(1.77 to<br>2.69)                                     | 2.01<br>(1.62 to<br>2.46)                                     | 2.38<br>(1.84 to<br>2.78)                                     | 0.09<br>(0.09 to<br>0.10)                                | 0.08<br>(0.07 to<br>0.09)                                  | 0.08<br>(0.06 to<br>0.09)                                  | 0.08<br>(0.07 to<br>0.10)                                  |
| Other sexually transmitted infections                                   | 1.79<br>(1.67 to<br>1.92)                                     | 1.09<br>(0.87 to<br>1.34)                                     | 0.99<br>(0.79 to<br>1.22)                                     | 1.15<br>(0.91 to<br>1.41)                                     | 0.05<br>(0.04 to<br>0.05)                                | 0.03<br>(0.03 to<br>0.04)                                  | 0.03<br>(0.03 to<br>0.04)                                  | 0.03<br>(0.03 to<br>0.04)                                  |
| Acute hepatitis                                                         | 38.49<br>(36.22 to<br>40.77)                                  | 32.16<br>(25.59 to<br>40.55)                                  | 20.47<br>(16.07 to<br>25.33)                                  | 37.69<br>(30.36 to<br>44.89)                                  | 1.14<br>(1.08 to<br>1.21)                                | 1.22<br>(0.98 to<br>1.51)                                  | 0.80<br>(0.64 to<br>0.98)                                  | 1.39<br>(1.14 to<br>1.65)                                  |
| Acute hepatitis A                                                       | 1.02<br>(0.78 to<br>1.27)                                     | 0.45<br>(0.29 to<br>0.68)                                     | 0.32<br>(0.22 to<br>0.50)                                     | 0.53<br>(0.35 to<br>0.81)                                     | 0.02<br>(0.01 to<br>0.02)                                | 0.01<br>(0.01 to<br>0.02)                                  | 0.01<br>(0.01 to<br>0.02)                                  | 0.01<br>(0.01 to<br>0.02)                                  |
| Acute hepatitis B                                                       | 33.90<br>(31.76 to<br>36.17)                                  | 28.65<br>(22.37 to<br>36.33)                                  | 18.12<br>(14.07 to<br>22.82)                                  | 33.59<br>(26.65 to<br>40.40)                                  | 1.02<br>(0.96 to<br>1.09)                                | 1.06<br>(0.83 to<br>1.33)                                  | 0.69<br>(0.54 to<br>0.86)                                  | 1.22<br>(0.99 to<br>1.47)                                  |
| Acute hepatitis C                                                       | 0.95<br>(0.72 to<br>1.24)                                     | 1.02<br>(0.71 to<br>1.46)                                     | 0.67<br>(0.45 to<br>0.94)                                     | 1.18<br>(0.82 to<br>1.63)                                     | 0.03<br>(0.02 to<br>0.04)                                | 0.04<br>(0.03 to<br>0.06)                                  | 0.03<br>(0.02 to<br>0.04)                                  | 0.05<br>(0.03 to<br>0.06)                                  |
| Acute hepatitis E                                                       | 2.62<br>(2.15 to<br>3.13)                                     | 2.04<br>(1.48 to<br>2.74)                                     | 1.35<br>(0.97 to<br>1.78)                                     | 2.39<br>(1.77 to<br>3.07)                                     | 0.07<br>(0.06 to<br>0.09)                                | 0.10<br>(0.07 to<br>0.14)                                  | 0.07<br>(0.05 to<br>0.10)                                  | 0.11<br>(0.08 to<br>0.15)                                  |
| Other unspecified infectious diseases                                   | 66.61<br>(57.88 to<br>75.92)                                  | 71.82<br>(60.91 to<br>82.15)                                  | 68.01<br>(58.10 to<br>77.47)                                  | 74.98<br>(62.80 to<br>86.99)                                  | 1.65<br>(1.38 to<br>1.80)                                | 2.53<br>(2.10 to<br>2.84)                                  | 2.51<br>(2.09 to<br>2.81)                                  | 2.52<br>(2.07 to<br>2.86)                                  |
| <b>Non-communicable diseases</b>                                        | <b>21,508.22</b><br><b>(20,872.37 to</b><br><b>22,216.17)</b> | <b>29,522.26</b><br><b>(24,605.72 to</b><br><b>35,216.07)</b> | <b>21,897.15</b><br><b>(18,742.12 to</b><br><b>25,649.58)</b> | <b>38,177.21</b><br><b>(31,547.76 to</b><br><b>45,489.96)</b> | <b>1,019.40</b><br><b>(993.19 to</b><br><b>1,048.47)</b> | <b>1,854.93</b><br><b>(1,520.88 to</b><br><b>2,204.66)</b> | <b>1,450.98</b><br><b>(1,192.98 to</b><br><b>1,719.45)</b> | <b>2,248.42</b><br><b>(1,868.48 to</b><br><b>2,657.11)</b> |

**Tropical Latin America**

| Cause                      | YLLs (in 1000s)                       |                                       |                                       |                                         | Deaths (in 1000s)               |                                 |                                 |                                 |
|----------------------------|---------------------------------------|---------------------------------------|---------------------------------------|-----------------------------------------|---------------------------------|---------------------------------|---------------------------------|---------------------------------|
|                            | 2016                                  | 2040 Forecast                         | 2040 Better Scenario                  | 2040 Worse Scenario                     | 2016                            | 2040 Forecast                   | 2040 Better Scenario            | 2040 Worse Scenario             |
| Neoplasms                  | 5,539.99<br>(5,359.14 to<br>5,754.62) | 8,423.16<br>(7,468.72 to<br>9,438.11) | 7,076.05<br>(6,270.47 to<br>7,933.44) | 10,144.08<br>(9,044.65 to<br>11,353.66) | 233.67<br>(226.30 to<br>241.71) | 442.27<br>(389.93 to<br>499.07) | 385.87<br>(335.34 to<br>435.93) | 513.44<br>(454.28 to<br>578.74) |
| Lip and oral cavity cancer | 122.77<br>(116.05 to<br>129.34)       | 157.73<br>(102.09 to<br>233.49)       | 107.31<br>(73.15 to<br>154.06)        | 264.86<br>(162.26 to<br>413.11)         | 4.98<br>(4.74 to<br>5.23)       | 7.27<br>(4.88 to<br>10.39)      | 5.24<br>(3.72 to<br>7.25)       | 11.84<br>(7.46 to<br>17.71)     |
| Nasopharynx cancer         | 17.05<br>(16.17 to<br>18.02)          | 19.15<br>(13.29 to<br>26.50)          | 11.17<br>(8.05 to<br>14.88)           | 33.65<br>(22.68 to<br>47.86)            | 0.51<br>(0.48 to<br>0.53)       | 0.64<br>(0.45 to<br>0.88)       | 0.38<br>(0.28 to<br>0.51)       | 1.13<br>(0.76 to<br>1.59)       |

|                                      |                                 |                                   |                                 |                                       |                              |                              |                              |                               |  |
|--------------------------------------|---------------------------------|-----------------------------------|---------------------------------|---------------------------------------|------------------------------|------------------------------|------------------------------|-------------------------------|--|
|                                      | 91.87<br>(86.51 to<br>97.79)    | 141.35<br>(87.38 to<br>222.82)    | 123.25<br>(78.65 to<br>184.03)  | 162.36<br>(97.03 to<br>259.51)        | 3.46<br>(3.27 to<br>3.66)    | 6.11<br>(3.79 to<br>9.37)    | 5.52<br>(3.63 to<br>8.11)    | 6.83<br>(4.10 to<br>10.80)    |  |
| Other pharynx cancer                 |                                 |                                   |                                 |                                       |                              |                              |                              |                               |  |
|                                      | 257.85<br>(244.59 to<br>270.64) | 340.34<br>(233.16 to<br>492.54)   | 282.22<br>(203.47 to<br>390.78) | 516.60<br>(325.80 to<br>787.54)       | 10.82<br>(10.30 to<br>11.32) | 15.90<br>(11.10 to<br>22.73) | 13.72<br>(9.97 to<br>19.01)  | 23.61<br>(15.21 to<br>35.83)  |  |
| Esophageal cancer                    |                                 |                                   |                                 |                                       |                              |                              |                              |                               |  |
|                                      | 453.08<br>(435.05 to<br>471.91) | 526.76<br>(409.65 to<br>671.81)   | 377.79<br>(304.81 to<br>474.75) | 606.30<br>(472.73 to<br>778.11)       | 20.77<br>(19.98 to<br>21.58) | 29.42<br>(22.66 to<br>37.92) | 21.74<br>(17.12 to<br>27.42) | 32.89<br>(25.43 to<br>42.34)  |  |
| Stomach cancer                       |                                 |                                   |                                 |                                       |                              |                              |                              |                               |  |
|                                      | 448.18<br>(425.18 to<br>472.86) | 791.67<br>(561.96 to<br>1,068.40) | 587.92<br>(426.31 to<br>801.23) | 931.01<br>(654.35 to<br>1,288.69)     | 20.81<br>(19.77 to<br>21.97) | 46.14<br>(32.55 to<br>63.75) | 35.71<br>(25.57 to<br>49.12) | 52.28<br>(36.67 to<br>73.30)  |  |
| Colon and rectum cancer              |                                 |                                   |                                 |                                       |                              |                              |                              |                               |  |
|                                      | 246.82<br>(236.47 to<br>257.48) | 473.88<br>(332.69 to<br>694.94)   | 435.93<br>(326.85 to<br>603.66) | 523.15<br>(357.74 to<br>781.85)       | 10.91<br>(10.46 to<br>11.35) | 24.76<br>(17.59 to<br>35.79) | 23.72<br>(17.89 to<br>32.23) | 26.49<br>(18.40 to<br>38.66)  |  |
| Liver cancer                         |                                 |                                   |                                 |                                       |                              |                              |                              |                               |  |
|                                      | 73.70<br>(58.83 to<br>91.08)    | 130.96<br>(86.30 to<br>199.21)    | 122.93<br>(84.08 to<br>175.45)  | 139.94<br>(88.87 to<br>221.81)        | 2.83<br>(2.18 to<br>3.52)    | 5.91<br>(3.81 to<br>9.00)    | 5.74<br>(3.85 to<br>8.27)    | 6.17<br>(3.90 to<br>9.62)     |  |
| Liver cancer due to hepatitis B      |                                 |                                   |                                 |                                       |                              |                              |                              |                               |  |
|                                      | 84.92<br>(75.47 to<br>94.16)    | 171.78<br>(119.84 to<br>249.38)   | 164.33<br>(121.32 to<br>224.09) | 181.22<br>(124.72 to<br>267.11)       | 4.17<br>(3.75 to<br>4.58)    | 9.92<br>(7.01 to<br>14.08)   | 9.87<br>(7.35 to<br>13.40)   | 10.16<br>(7.09 to<br>14.75)   |  |
| Liver cancer due to hepatitis C      |                                 |                                   |                                 |                                       |                              |                              |                              |                               |  |
|                                      | 52.28<br>(44.66 to<br>60.19)    | 103.77<br>(69.67 to<br>156.29)    | 85.53<br>(60.39 to<br>122.14)   | 130.29<br>(84.10 to<br>198.99)        | 2.42<br>(2.11 to<br>2.75)    | 5.55<br>(3.75 to<br>8.33)    | 4.83<br>(3.40 to<br>6.90)    | 6.66<br>(4.34 to<br>10.09)    |  |
| Liver cancer due to alcohol use      |                                 |                                   |                                 |                                       |                              |                              |                              |                               |  |
|                                      | 35.92<br>(31.84 to<br>39.97)    | 67.37<br>(43.39 to<br>104.56)     | 63.14<br>(44.42 to<br>91.81)    | 71.69<br>(45.86 to<br>113.79)         | 1.48<br>(1.31 to<br>1.65)    | 3.38<br>(2.16 to<br>5.16)    | 3.28<br>(2.28 to<br>4.71)    | 3.50<br>(2.22 to<br>5.58)     |  |
| Liver cancer due to other causes     |                                 |                                   |                                 |                                       |                              |                              |                              |                               |  |
|                                      | 101.08<br>(96.50 to<br>105.87)  | 128.97<br>(115.05 to<br>142.08)   | 123.71<br>(108.58 to<br>138.17) | 126.32<br>(113.86 to<br>137.87)       | 4.90<br>(4.69 to<br>5.14)    | 7.55<br>(6.77 to<br>8.36)    | 7.46<br>(6.55 to<br>8.41)    | 7.20<br>(6.54 to<br>7.91)     |  |
| Gallbladder and biliary tract cancer |                                 |                                   |                                 |                                       |                              |                              |                              |                               |  |
|                                      | 240.54<br>(231.09 to<br>250.36) | 454.70<br>(388.89 to<br>542.01)   | 451.26<br>(387.22 to<br>535.26) | 483.45<br>(410.24 to<br>582.13)       | 11.57<br>(11.12 to<br>12.02) | 25.38<br>(21.40 to<br>30.67) | 25.81<br>(21.71 to<br>30.99) | 26.35<br>(22.09 to<br>32.19)  |  |
| Pancreatic cancer                    |                                 |                                   |                                 |                                       |                              |                              |                              |                               |  |
|                                      | 116.43<br>(110.33 to<br>122.61) | 110.43<br>(67.14 to<br>171.65)    | 68.34<br>(44.84 to<br>103.74)   | 216.08<br>(123.23 to<br>352.09)       | 4.77<br>(4.55 to<br>5.00)    | 4.94<br>(3.09 to<br>7.76)    | 3.22<br>(2.09 to<br>5.01)    | 9.57<br>(5.44 to<br>15.43)    |  |
| Larynx cancer                        |                                 |                                   |                                 |                                       |                              |                              |                              |                               |  |
|                                      | 670.44<br>(641.89 to<br>698.73) | 856.14<br>(700.01 to<br>1,037.79) | 649.33<br>(543.82 to<br>771.90) | 1,623.03<br>(1,291.69 to<br>2,028.00) | 30.88<br>(29.59 to<br>32.18) | 43.74<br>(35.68 to<br>53.50) | 34.64<br>(28.73 to<br>41.65) | 81.52<br>(64.33 to<br>102.87) |  |
| Tracheal, bronchus, and lung cancer  |                                 |                                   |                                 |                                       |                              |                              |                              |                               |  |
|                                      | 54.88<br>(47.16 to<br>66.98)    | 91.24<br>(77.37 to<br>111.00)     | 113.35<br>(95.89 to<br>136.50)  | 81.40<br>(69.58 to<br>97.67)          | 2.14<br>(1.83 to<br>2.54)    | 4.41<br>(3.70 to<br>5.29)    | 5.65<br>(4.71 to<br>6.83)    | 3.81<br>(3.23 to<br>4.49)     |  |
| Malignant skin melanoma              |                                 |                                   |                                 |                                       |                              |                              |                              |                               |  |
|                                      | 47.41<br>(45.23 to<br>49.49)    | 87.40<br>(76.67 to<br>99.69)      | 67.86<br>(59.45 to<br>78.13)    | 92.11<br>(83.22 to<br>100.31)         | 2.58<br>(2.45 to<br>2.68)    | 5.89<br>(5.12 to<br>6.74)    | 4.81<br>(4.11 to<br>5.54)    | 5.94<br>(5.30 to<br>6.59)     |  |
| Non-melanoma skin cancer             |                                 |                                   |                                 |                                       |                              |                              |                              |                               |  |
|                                      | 474.56<br>(445.11 to<br>505.90) | 719.07<br>(563.07 to<br>922.42)   | 550.53<br>(435.06 to<br>700.98) | 823.85<br>(632.62 to<br>1,090.08)     | 17.53<br>(16.47 to<br>18.72) | 33.03<br>(26.06 to<br>42.72) | 26.05<br>(20.65 to<br>33.32) | 36.89<br>(28.58 to<br>48.04)  |  |
| Breast cancer                        |                                 |                                   |                                 |                                       |                              |                              |                              |                               |  |
|                                      | 275.61<br>(261.70 to<br>293.08) | 293.20<br>(234.99 to<br>364.30)   | 219.10<br>(174.80 to<br>279.23) | 340.63<br>(270.37 to<br>433.93)       | 9.56<br>(9.09 to<br>10.16)   | 12.64<br>(10.17 to<br>15.72) | 9.64<br>(7.78 to<br>12.08)   | 14.38<br>(11.39 to<br>18.39)  |  |
| Cervical cancer                      |                                 |                                   |                                 |                                       |                              |                              |                              |                               |  |
|                                      | 49.14<br>(46.04 to<br>52.54)    | 91.20<br>(78.08 to<br>105.78)     | 76.48<br>(65.42 to<br>89.87)    | 95.70<br>(82.23 to<br>109.56)         | 2.34<br>(2.19 to<br>2.50)    | 5.23<br>(4.47 to<br>6.02)    | 4.48<br>(3.84 to<br>5.24)    | 5.38<br>(4.67 to<br>6.08)     |  |
| Uterine cancer                       |                                 |                                   |                                 |                                       |                              |                              |                              |                               |  |
|                                      | 111.67<br>(105.24 to<br>118.51) | 186.53<br>(136.24 to<br>258.14)   | 158.27<br>(118.80 to<br>210.47) | 195.51<br>(141.49 to<br>270.55)       | 4.27<br>(4.03 to<br>4.54)    | 8.59<br>(6.16 to<br>12.05)   | 7.38<br>(5.40 to<br>9.97)    | 8.94<br>(6.31 to<br>12.77)    |  |
| Ovarian cancer                       |                                 |                                   |                                 |                                       |                              |                              |                              |                               |  |
|                                      | 287.41<br>(267.99 to<br>381.75) | 747.37<br>(647.15 to<br>967.78)   | 672.00<br>(564.55 to<br>863.85) | 739.52<br>(652.82 to<br>969.79)       | 19.63<br>(18.36 to<br>25.72) | 58.54<br>(49.42 to<br>74.63) | 54.79<br>(44.28 to<br>68.92) | 55.85<br>(47.89 to<br>73.12)  |  |
| Prostate cancer                      |                                 |                                   |                                 |                                       |                              |                              |                              |                               |  |
|                                      | 16.09<br>(14.29 to<br>18.73)    | 12.53<br>(9.76 to<br>15.87)       | 9.93<br>(7.67 to<br>12.48)      | 13.65<br>(10.69 to<br>17.21)          | 0.34<br>(0.31 to<br>0.39)    | 0.28<br>(0.28 to<br>0.41)    | 0.28<br>(0.23 to<br>0.33)    | 0.36<br>(0.30 to<br>0.42)     |  |
| Testicular cancer                    |                                 |                                   |                                 |                                       |                              |                              |                              |                               |  |
| <b>Tropical Latin America</b>        |                                 |                                   |                                 |                                       |                              |                              |                              |                               |  |
|                                      | <b>YLLs (in 1000s)</b>          |                                   |                                 |                                       | <b>Deaths (in 1000s)</b>     |                              |                              |                               |  |

| Cause                           | 2016                                                       | 2040 Forecast                                               | 2040 Better Scenario                                       | 2040 Worse Scenario                                          | 2016                                                 | 2040 Forecast                                        | 2040 Better Scenario                                 | 2040 Worse Scenario                                    |
|---------------------------------|------------------------------------------------------------|-------------------------------------------------------------|------------------------------------------------------------|--------------------------------------------------------------|------------------------------------------------------|------------------------------------------------------|------------------------------------------------------|--------------------------------------------------------|
| Kidney cancer                   | 92.67<br>(88.56 to<br>96.92)                               | 153.95<br>(134.57 to<br>174.54)                             | 158.64<br>(138.55 to<br>179.97)                            | 158.74<br>(134.83 to<br>184.51)                              | 3.70<br>(3.54 to<br>3.86)                            | 7.52<br>(6.54 to<br>8.56)                            | 8.01<br>(6.89 to<br>9.19)                            | 7.54<br>(6.37 to<br>8.83)                              |
| Bladder cancer                  | 79.82<br>(76.25 to<br>83.53)                               | 132.53<br>(107.86 to<br>163.55)                             | 118.92<br>(97.17 to<br>146.36)                             | 151.63<br>(120.74 to<br>191.88)                              | 4.72<br>(4.49 to<br>4.95)                            | 9.22<br>(7.37 to<br>11.52)                           | 8.57<br>(6.76 to<br>10.68)                           | 10.22<br>(8.03 to<br>13.12)                            |
| Brain and nervous system cancer | 316.41<br>(238.00 to<br>347.96)                            | 439.25<br>(321.32 to<br>494.39)                             | 398.32<br>(288.88 to<br>454.20)                            | 448.59<br>(326.61 to<br>502.15)                              | 9.52<br>(6.81 to<br>10.45)                           | 17.26<br>(11.94 to<br>19.55)                         | 16.07<br>(11.03 to<br>18.54)                         | 17.07<br>(11.89 to<br>19.08)                           |
| Thyroid cancer                  | 23.06<br>(21.95 to<br>24.25)                               | 41.78<br>(29.94 to<br>61.49)                                | 32.49<br>(24.39 to<br>44.76)                               | 44.29<br>(31.62 to<br>64.90)                                 | 1.04<br>(1.00 to<br>1.10)                            | 2.28<br>(1.66 to<br>3.30)                            | 1.84<br>(1.39 to<br>2.54)                            | 2.35<br>(1.70 to<br>3.39)                              |
| Mesothelioma                    | 21.32<br>(19.80 to<br>22.60)                               | 52.64<br>(28.55 to<br>36.24)                                | 33.65<br>(29.11 to<br>37.97)                               | 31.49<br>(27.81 to<br>34.85)                                 | 0.79<br>(0.73 to<br>0.83)                            | 1.63<br>(1.44 to<br>1.83)                            | 1.75<br>(1.51 to<br>2.02)                            | 1.52<br>(1.36 to<br>1.70)                              |
| Hodgkin lymphoma                | 26.67<br>(24.75 to<br>30.84)                               | 23.90<br>(19.86 to<br>29.10)                                | 16.68<br>(13.91 to<br>20.02)                               | 27.35<br>(23.11 to<br>32.61)                                 | 0.72<br>(0.68 to<br>0.82)                            | 0.85<br>(0.73 to<br>1.01)                            | 0.61<br>(0.52 to<br>0.72)                            | 0.95<br>(0.82 to<br>1.09)                              |
| Non-Hodgkin lymphoma            | 171.47<br>(161.90 to<br>193.90)                            | 282.43<br>(232.16 to<br>347.69)                             | 232.95<br>(195.39 to<br>283.91)                            | 293.59<br>(242.46 to<br>360.73)                              | 6.13<br>(5.80 to<br>6.67)                            | 13.05<br>(10.73 to<br>16.13)                         | 11.10<br>(9.26 to<br>13.54)                          | 13.13<br>(10.82 to<br>16.34)                           |
| Multiple myeloma                | 70.93<br>(57.28 to<br>81.96)                               | 141.09<br>(106.76 to<br>177.48)                             | 123.91<br>(94.34 to<br>154.98)                             | 141.70<br>(107.06 to<br>181.45)                              | 3.17<br>(2.50 to<br>3.53)                            | 7.19<br>(5.35 to<br>9.11)                            | 6.49<br>(4.83 to<br>8.10)                            | 7.06<br>(5.21 to<br>8.94)                              |
| Leukemia                        | 294.14<br>(281.19 to<br>310.61)                            | 385.21<br>(321.87 to<br>457.23)                             | 326.99<br>(280.83 to<br>384.54)                            | 421.67<br>(350.57 to<br>504.06)                              | 8.60<br>(8.27 to<br>8.96)                            | 16.38<br>(13.54 to<br>19.48)                         | 14.32<br>(12.10 to<br>16.90)                         | 17.29<br>(14.23 to<br>21.09)                           |
| Acute lymphoid leukemia         | 81.52<br>(75.81 to<br>88.61)                               | 68.82<br>(57.25 to<br>82.41)                                | 55.50<br>(46.53 to<br>66.30)                               | 78.41<br>(65.92 to<br>93.52)                                 | 1.52<br>(1.42 to<br>1.65)                            | 1.78<br>(1.47 to<br>2.12)                            | 1.45<br>(1.22 to<br>1.73)                            | 1.97<br>(1.64 to<br>2.36)                              |
| Chronic lymphoid leukemia       | 13.01<br>(10.74 to<br>14.60)                               | 23.71<br>(17.58 to<br>31.01)                                | 21.53<br>(15.96 to<br>28.09)                               | 24.76<br>(17.92 to<br>33.27)                                 | 0.75<br>(0.63 to<br>0.83)                            | 1.59<br>(1.16 to<br>2.09)                            | 1.49<br>(1.09 to<br>1.96)                            | 1.60<br>(1.15 to<br>2.15)                              |
| Acute myeloid leukemia          | 107.71<br>(98.84 to<br>117.59)                             | 175.06<br>(144.31 to<br>214.54)                             | 160.91<br>(136.03 to<br>193.60)                            | 184.45<br>(151.15 to<br>227.94)                              | 3.13<br>(2.84 to<br>3.40)                            | 6.95<br>(5.73 to<br>8.45)                            | 6.58<br>(5.47 to<br>7.82)                            | 7.10<br>(5.74 to<br>8.82)                              |
| Chronic myeloid leukemia        | 14.98<br>(13.92 to<br>16.71)                               | 17.28<br>(12.42 to<br>23.13)                                | 10.69<br>(8.06 to<br>14.17)                                | 20.87<br>(15.44 to<br>27.60)                                 | 0.58<br>(0.54 to<br>0.64)                            | 0.83<br>(0.60 to<br>1.12)                            | 0.54<br>(0.40 to<br>0.71)                            | 0.98<br>(0.72 to<br>1.30)                              |
| Other leukemia                  | 76.91<br>(71.72 to<br>84.42)                               | 100.33<br>(83.51 to<br>119.67)                              | 78.36<br>(66.62 to<br>92.77)                               | 113.18<br>(94.62 to<br>136.26)                               | 2.61<br>(2.46 to<br>2.83)                            | 5.23<br>(4.32 to<br>6.26)                            | 4.26<br>(3.60 to<br>5.12)                            | 5.64<br>(4.67 to<br>6.78)                              |
| Other neoplasms                 | 360.64<br>(344.51 to<br>382.00)                            | 560.72<br>(516.83 to<br>607.57)                             | 547.73<br>(497.74 to<br>601.74)                            | 555.84<br>(518.17 to<br>601.69)                              | 12.50<br>(11.98 to<br>13.12)                         | 26.40<br>(24.29 to<br>28.49)                         | 26.84<br>(24.06 to<br>29.63)                         | 25.06<br>(23.41 to<br>26.84)                           |
| <b>Cardiovascular diseases</b>  | <b>7,419.44</b><br><b>(7,187.08 to</b><br><b>7,679.41)</b> | <b>8,670.04</b><br><b>(5,905.37 to</b><br><b>12,436.79)</b> | <b>4,909.21</b><br><b>(3,531.81 to</b><br><b>6,892.59)</b> | <b>13,380.72</b><br><b>(9,183.28 to</b><br><b>19,229.93)</b> | <b>389.45</b><br><b>(378.54 to</b><br><b>402.46)</b> | <b>591.77</b><br><b>(394.58 to</b><br><b>860.03)</b> | <b>365.80</b><br><b>(254.68 to</b><br><b>518.77)</b> | <b>817.25</b><br><b>(564.79 to</b><br><b>1,172.21)</b> |
| Rheumatic heart disease         | 84.07<br>(78.45 to<br>89.80)                               | 55.97<br>(43.24 to<br>74.66)                                | 39.39<br>(30.56 to<br>50.89)                               | 63.58<br>(50.06 to<br>83.05)                                 | 2.81<br>(2.63 to<br>3.00)                            | 2.57<br>(2.00 to<br>3.37)                            | 1.88<br>(1.45 to<br>2.44)                            | 2.81<br>(2.23 to<br>3.63)                              |
| Ischemic heart disease          | 3,580.13<br>(3,431.23 to<br>3,729.70)                      | 3,691.14<br>(2,203.34 to<br>5,882.76)                       | 1,850.34<br>(1,111.77 to<br>2,946.50)                      | 6,257.41<br>(3,621.68 to<br>10,031.14)                       | 191.18<br>(184.31 to<br>198.61)                      | 253.33<br>(151.47 to<br>395.68)                      | 139.58<br>(81.70 to<br>220.95)                       | 381.39<br>(221.63 to<br>607.08)                        |
| Stroke                          | 2,115.77<br>(2,017.51 to<br>2,210.01)                      | 2,123.03<br>(1,311.34 to<br>3,382.59)                       | 991.27<br>(636.21 to<br>1,522.65)                          | 3,691.28<br>(2,178.00 to<br>5,950.05)                        | 111.10<br>(105.14 to<br>116.40)                      | 143.19<br>(87.04 to<br>240.63)                       | 76.41<br>(47.18 to<br>121.99)                        | 215.11<br>(130.60 to<br>342.93)                        |
| Ischemic stroke                 | 982.75<br>(928.28 to<br>1,033.52)                          | 1,144.69<br>(646.02 to<br>2,052.92)                         | 594.32<br>(350.72 to<br>989.53)                            | 1,759.47<br>(984.14 to<br>3,087.21)                          | 67.26<br>(63.20 to<br>70.91)                         | 95.32<br>(52.30 to<br>177.26)                        | 54.56<br>(31.28 to<br>97.00)                         | 131.34<br>(73.84 to<br>244.63)                         |
| Intracerebral hemorrhage        | 1,133.02<br>(1,080.38 to<br>1,184.69)                      | 978.34<br>(562.78 to<br>1,593.54)                           | 396.95<br>(259.78 to<br>603.36)                            | 1,931.81<br>(1,051.80 to<br>3,313.18)                        | 43.84<br>(41.68 to<br>45.85)                         | 47.88<br>(28.94 to<br>74.28)                         | 21.86<br>(14.61 to<br>32.56)                         | 83.77<br>(48.33 to<br>134.28)                          |



|                                                                |                                                      |                                                      |                                                      |                                                      |                                              |                                                |                                                |                                                |
|----------------------------------------------------------------|------------------------------------------------------|------------------------------------------------------|------------------------------------------------------|------------------------------------------------------|----------------------------------------------|------------------------------------------------|------------------------------------------------|------------------------------------------------|
| <b>Cirrhosis and other chronic liver diseases</b>              | <b>1,127.95</b><br>(1,059.07 to<br><b>1,200.19</b> ) | <b>1,424.40</b><br>(1,274.12 to<br><b>1,593.35</b> ) | <b>1,078.31</b><br>(959.04 to<br><b>1,208.90</b> )   | <b>1,632.73</b><br>(1,489.61 to<br><b>1,775.89</b> ) | <b>37.95</b><br>(35.84 to<br><b>40.03</b> )  | <b>57.50</b><br>(51.90 to<br><b>63.69</b> )    | <b>45.01</b><br>(40.35 to<br><b>50.04</b> )    | <b>63.83</b><br>(58.76 to<br><b>68.70</b> )    |
| Cirrhosis and other chronic liver diseases due to hepatitis B  | 170.93<br>(153.73 to<br>188.29)                      | 223.37<br>(193.31 to<br>257.13)                      | 180.07<br>(154.98 to<br>206.76)                      | 237.01<br>(207.34 to<br>268.07)                      | 5.89<br>(5.34 to<br>6.43)                    | 9.17<br>(7.96 to<br>10.45)                     | 7.57<br>(6.57 to<br>8.70)                      | 9.50<br>(8.38 to<br>10.62)                     |
| Cirrhosis and other chronic liver diseases due to hepatitis C  | 470.64<br>(436.78 to<br>507.33)                      | 613.88<br>(537.11 to<br>696.98)                      | 486.92<br>(427.49 to<br>554.18)                      | 656.46<br>(587.83 to<br>729.35)                      | 15.69<br>(14.68 to<br>16.76)                 | 24.15<br>(21.41 to<br>27.14)                   | 19.57<br>(17.23 to<br>22.12)                   | 25.31<br>(23.00 to<br>27.82)                   |
| Cirrhosis and other chronic liver diseases due to alcohol use  | 375.27<br>(346.74 to<br>408.44)                      | 463.47<br>(402.33 to<br>530.00)                      | 311.98<br>(270.80 to<br>356.29)                      | 606.00<br>(536.17 to<br>679.20)                      | 12.97<br>(12.04 to<br>13.96)                 | 19.07<br>(16.84 to<br>21.48)                   | 13.63<br>(11.92 to<br>15.39)                   | 23.70<br>(21.26 to<br>26.20)                   |
| Cirrhosis and other chronic liver diseases due to other causes | 111.11<br>(96.41 to<br>127.17)                       | 123.68<br>(103.21 to<br>148.24)                      | 99.34<br>(83.04 to<br>118.36)                        | 133.26<br>(112.11 to<br>157.73)                      | 3.40<br>(2.94 to<br>3.89)                    | 5.11<br>(4.31 to<br>6.20)                      | 4.24<br>(3.53 to<br>5.02)                      | 5.32<br>(4.51 to<br>6.29)                      |
| <b>Digestive diseases</b>                                      | <b>776.12</b><br>(674.84 to<br><b>828.35</b> )       | <b>1,038.88</b><br>(829.42 to<br><b>1,295.09</b> )   | <b>809.46</b><br>(663.55 to<br><b>994.52</b> )       | <b>1,152.64</b><br>(930.12 to<br><b>1,441.77</b> )   | <b>34.47</b><br>(30.16 to<br><b>36.47</b> )  | <b>63.31</b><br>(51.28 to<br><b>77.69</b> )    | <b>52.29</b><br>(42.20 to<br><b>62.92</b> )    | <b>66.55</b><br>(53.71 to<br><b>81.19</b> )    |
| Peptic ulcer disease                                           | 102.20<br>(90.83 to<br>116.02)                       | 87.97<br>(68.83 to<br>111.57)                        | 57.23<br>(44.50 to<br>72.24)                         | 108.73<br>(86.23 to<br>133.20)                       | 4.80<br>(4.29 to<br>5.39)                    | 5.66<br>(4.52 to<br>7.10)                      | 3.82<br>(3.02 to<br>4.77)                      | 6.66<br>(5.36 to<br>8.07)                      |
| <b>Tropical Latin America</b>                                  |                                                      |                                                      |                                                      |                                                      |                                              |                                                |                                                |                                                |
| <b>Cause</b>                                                   | <b>YLLs (in 1000s)</b>                               |                                                      |                                                      |                                                      | <b>Deaths (in 1000s)</b>                     |                                                |                                                |                                                |
|                                                                | <b>2016</b>                                          | <b>2040 Forecast</b>                                 | <b>2040 Better Scenario</b>                          | <b>2040 Worse Scenario</b>                           | <b>2016</b>                                  | <b>2040 Forecast</b>                           | <b>2040 Better Scenario</b>                    | <b>2040 Worse Scenario</b>                     |
| Gastritis and duodenitis                                       | 15.15<br>(11.90 to<br>18.32)                         | 25.45<br>(19.28 to<br>33.30)                         | 19.14<br>(14.71 to<br>24.87)                         | 27.43<br>(21.54 to<br>34.04)                         | 0.70<br>(0.55 to<br>0.84)                    | 1.58<br>(1.20 to<br>2.06)                      | 1.26<br>(0.96 to<br>1.67)                      | 1.63<br>(1.28 to<br>2.04)                      |
| Appendicitis                                                   | 47.58<br>(38.96 to<br>56.65)                         | 38.48<br>(29.96 to<br>48.71)                         | 25.56<br>(19.58 to<br>32.46)                         | 44.72<br>(34.91 to<br>56.71)                         | 1.46<br>(1.20 to<br>1.76)                    | 1.73<br>(1.34 to<br>2.22)                      | 1.19<br>(0.94 to<br>1.53)                      | 1.92<br>(1.52 to<br>2.35)                      |
| Paralytic ileus and intestinal obstruction                     | 147.95<br>(121.28 to<br>167.97)                      | 193.07<br>(149.38 to<br>223.84)                      | 192.79<br>(149.98 to<br>223.30)                      | 189.62<br>(147.50 to<br>217.57)                      | 6.04<br>(4.74 to<br>6.88)                    | 12.25<br>(9.19 to<br>14.15)                    | 12.83<br>(9.75 to<br>15.11)                    | 11.43<br>(8.59 to<br>13.23)                    |
| Inguinal, femoral, and abdominal hernia                        | 33.17<br>(22.03 to<br>37.76)                         | 34.02<br>(22.93 to<br>40.82)                         | 27.85<br>(18.57 to<br>34.03)                         | 35.54<br>(23.50 to<br>41.49)                         | 1.79<br>(1.19 to<br>2.02)                    | 2.32<br>(1.55 to<br>2.77)                      | 1.98<br>(1.30 to<br>2.40)                      | 2.32<br>(1.52 to<br>2.72)                      |
| Inflammatory bowel disease                                     | 25.10<br>(18.38 to<br>27.93)                         | 33.29<br>(24.19 to<br>39.14)                         | 32.23<br>(23.30 to<br>38.29)                         | 32.92<br>(24.07 to<br>38.38)                         | 0.94<br>(0.70 to<br>1.04)                    | 1.68<br>(1.23 to<br>1.96)                      | 1.69<br>(1.22 to<br>2.02)                      | 1.59<br>(1.17 to<br>1.86)                      |
| Vascular intestinal disorders                                  | 68.76<br>(56.13 to<br>76.52)                         | 134.64<br>(106.03 to<br>155.53)                      | 120.23<br>(95.52 to<br>140.07)                       | 135.68<br>(109.84 to<br>153.99)                      | 3.70<br>(3.01 to<br>4.11)                    | 9.18<br>(7.36 to<br>10.53)                     | 8.55<br>(6.88 to<br>10.00)                     | 8.93<br>(7.21 to<br>10.23)                     |
| Gallbladder and biliary diseases                               | 114.93<br>(104.81 to<br>127.92)                      | 187.90<br>(104.32 to<br>330.81)                      | 109.64<br>(63.03 to<br>187.52)                       | 220.74<br>(122.66 to<br>384.25)                      | 6.03<br>(5.48 to<br>6.72)                    | 12.89<br>(7.27 to<br>22.36)                    | 7.98<br>(4.67 to<br>13.62)                     | 14.48<br>(8.21 to<br>24.99)                    |
| Pancreatitis                                                   | 132.53<br>(98.60 to<br>147.23)                       | 177.03<br>(99.89 to<br>309.19)                       | 111.48<br>(64.55 to<br>185.92)                       | 227.54<br>(123.80 to<br>401.22)                      | 4.56<br>(3.35 to<br>5.05)                    | 7.62<br>(4.40 to<br>12.30)                     | 5.11<br>(3.08 to<br>8.08)                      | 9.33<br>(5.24 to<br>16.22)                     |
| Other digestive diseases                                       | 88.76<br>(74.77 to<br>105.93)                        | 127.03<br>(104.73 to<br>150.14)                      | 113.31<br>(92.95 to<br>134.63)                       | 129.72<br>(106.77 to<br>154.33)                      | 4.45<br>(3.76 to<br>5.15)                    | 8.41<br>(6.86 to<br>9.77)                      | 7.87<br>(6.41 to<br>9.27)                      | 8.24<br>(6.75 to<br>9.53)                      |
| <b>Neurological disorders</b>                                  | <b>1,129.35</b><br>(1,006.65 to<br><b>1,294.91</b> ) | <b>2,680.24</b><br>(2,008.03 to<br><b>3,624.69</b> ) | <b>2,526.80</b><br>(1,950.86 to<br><b>3,234.29</b> ) | <b>2,639.37</b><br>(1,977.85 to<br><b>3,620.41</b> ) | <b>92.36</b><br>(80.46 to<br><b>107.15</b> ) | <b>258.87</b><br>(190.71 to<br><b>356.85</b> ) | <b>254.47</b><br>(191.15 to<br><b>331.94</b> ) | <b>244.64</b><br>(178.71 to<br><b>344.12</b> ) |
| Alzheimer's disease and other dementias                        | 856.51<br>(732.41 to<br>1,019.24)                    | 2,274.58<br>(1,622.56 to<br>3,204.96)                | 2,127.70<br>(1,573.04 to<br>2,827.80)                | 2,226.81<br>(1,563.45 to<br>3,203.89)                | 82.38<br>(70.59 to<br>97.17)                 | 237.48<br>(170.73 to<br>335.26)                | 231.60<br>(169.64 to<br>306.73)                | 224.51<br>(159.01 to<br>323.59)                |
| Parkinson's disease                                            | 52.32<br>(39.91 to<br>67.27)                         | 137.21<br>(103.77 to<br>177.35)                      | 153.90<br>(115.39 to<br>200.62)                      | 123.17<br>(93.47 to<br>158.45)                       | 4.13<br>(3.15 to<br>5.33)                    | 11.82<br>(8.94 to<br>15.59)                    | 13.65<br>(10.21 to<br>18.00)                   | 10.35<br>(7.81 to<br>13.45)                    |
| Epilepsy                                                       | 112.00<br>(104.68 to<br>121.60)                      | 119.97<br>(87.69 to<br>165.62)                       | 94.47<br>(70.58 to<br>128.57)                        | 142.90<br>(102.62 to<br>200.58)                      | 2.58<br>(2.44 to<br>2.77)                    | 3.57<br>(2.66 to<br>4.80)                      | 2.94<br>(2.25 to<br>3.85)                      | 4.08<br>(3.00 to<br>5.63)                      |

|                                                            |                                                            |                                                            |                                                            |                                                            |                                                      |                                                      |                                                      |                                                      |
|------------------------------------------------------------|------------------------------------------------------------|------------------------------------------------------------|------------------------------------------------------------|------------------------------------------------------------|------------------------------------------------------|------------------------------------------------------|------------------------------------------------------|------------------------------------------------------|
| Multiple sclerosis                                         | 10.83<br>(9.27 to<br>14.02)                                | 15.34<br>(12.36 to<br>20.43)                               | 16.28<br>(12.98 to<br>21.82)                               | 15.31<br>(12.18 to<br>20.60)                               | 0.38<br>(0.33 to<br>0.50)                            | 0.71<br>(0.57 to<br>0.99)                            | 0.78<br>(0.62 to<br>1.10)                            | 0.68<br>(0.54 to<br>0.95)                            |
| Motor neuron disease                                       | 31.91<br>(29.59 to<br>33.72)                               | 49.92<br>(44.35 to<br>55.60)                               | 49.40<br>(43.64 to<br>55.46)                               | 48.72<br>(43.43 to<br>53.78)                               | 1.16<br>(1.07 to<br>1.22)                            | 2.17<br>(1.92 to<br>2.42)                            | 2.18<br>(1.91 to<br>2.47)                            | 2.08<br>(1.85 to<br>2.31)                            |
| Other neurological disorders                               | 65.79<br>(62.15 to<br>70.79)                               | 83.23<br>(75.00 to<br>93.38)                               | 85.05<br>(75.97 to<br>95.51)                               | 82.45<br>(74.17 to<br>92.87)                               | 1.72<br>(1.64 to<br>1.83)                            | 3.12<br>(2.86 to<br>3.39)                            | 3.32<br>(3.00 to<br>3.66)                            | 2.95<br>(2.71 to<br>3.19)                            |
| <b>Mental disorders</b>                                    | <b>409.49</b><br><b>(379.48 to</b><br><b>450.14)</b>       | <b>500.98</b><br><b>(436.95 to</b><br><b>567.90)</b>       | <b>545.60</b><br><b>(476.48 to</b><br><b>626.67)</b>       | <b>501.78</b><br><b>(439.91 to</b><br><b>568.50)</b>       | <b>11.04</b><br><b>(10.32 to</b><br><b>11.91)</b>    | <b>16.20</b><br><b>(14.27 to</b><br><b>18.18)</b>    | <b>18.48</b><br><b>(16.26 to</b><br><b>20.84)</b>    | <b>15.70</b><br><b>(14.09 to</b><br><b>17.50)</b>    |
| Alcohol use disorders                                      | 335.00<br>(310.28 to<br>364.50)                            | 380.64<br>(328.70 to<br>436.52)                            | 392.86<br>(335.86 to<br>453.91)                            | 390.48<br>(338.59 to<br>444.05)                            | 9.32<br>(8.70 to<br>10.02)                           | 12.16<br>(10.62 to<br>13.83)                         | 12.91<br>(11.21 to<br>14.74)                         | 12.18<br>(10.75 to<br>13.80)                         |
| Drug use disorders                                         | 72.82<br>(62.26 to<br>84.82)                               | 118.18<br>(95.26 to<br>145.09)                             | 150.46<br>(121.99 to<br>182.05)                            | 109.13<br>(87.75 to<br>134.88)                             | 1.69<br>(1.48 to<br>1.90)                            | 4.00<br>(3.36 to<br>4.66)                            | 5.52<br>(4.67 to<br>6.54)                            | 3.47<br>(2.98 to<br>3.99)                            |
| Opioid use disorders                                       | 43.22<br>(36.80 to<br>59.12)                               | 57.77<br>(44.58 to<br>82.41)                               | 61.96<br>(47.42 to<br>82.81)                               | 56.78<br>(43.42 to<br>80.27)                               | 0.92<br>(0.80 to<br>1.25)                            | 1.55<br>(1.27 to<br>2.20)                            | 1.73<br>(1.40 to<br>2.53)                            | 1.47<br>(1.19 to<br>2.04)                            |
| Cocaine use disorders                                      | 7.40<br>(2.03 to<br>9.21)                                  | 13.18<br>(4.64 to<br>17.40)                                | 17.37<br>(6.44 to<br>22.46)                                | 12.00<br>(4.23 to<br>15.71)                                | 0.17<br>(0.05 to<br>0.20)                            | 0.38<br>(0.15 to<br>0.49)                            | 0.52<br>(0.20 to<br>0.65)                            | 0.34<br>(0.13 to<br>0.42)                            |
| Amphetamine use disorders                                  | 1.62<br>(1.08 to<br>2.19)                                  | 5.22<br>(3.42 to<br>7.53)                                  | 8.23<br>(5.65 to<br>11.71)                                 | 4.45<br>(3.02 to<br>6.66)                                  | 0.04<br>(0.03 to<br>0.05)                            | 0.16<br>(0.10 to<br>0.22)                            | 0.26<br>(0.18 to<br>0.35)                            | 0.13<br>(0.09 to<br>0.19)                            |
| Other drug use disorders                                   | 20.59<br>(10.92 to<br>25.38)                               | 42.01<br>(25.73 to<br>54.66)                               | 62.90<br>(40.41 to<br>82.26)                               | 35.89<br>(21.97 to<br>46.83)                               | 0.56<br>(0.35 to<br>0.65)                            | 1.90<br>(1.37 to<br>2.40)                            | 3.01<br>(2.21 to<br>3.75)                            | 1.53<br>(1.10 to<br>1.85)                            |
| Eating disorders                                           | 1.67<br>(1.51 to<br>1.86)                                  | 2.16<br>(1.72 to<br>2.72)                                  | 2.28<br>(1.80 to<br>2.90)                                  | 2.17<br>(1.75 to<br>2.74)                                  | 0.03<br>(0.03 to<br>0.03)                            | 0.04<br>(0.03 to<br>0.05)                            | 0.04<br>(0.03 to<br>0.06)                            | 0.04<br>(0.03 to<br>0.05)                            |
| <b>Tropical Latin America</b>                              |                                                            |                                                            |                                                            |                                                            |                                                      |                                                      |                                                      |                                                      |
| Cause                                                      | YLLs (in 1000s)                                            |                                                            |                                                            |                                                            | Deaths (in 1000s)                                    |                                                      |                                                      |                                                      |
|                                                            | 2016                                                       | 2040 Forecast                                              | 2040 Better Scenario                                       | 2040 Worse Scenario                                        | 2016                                                 | 2040 Forecast                                        | 2040 Better Scenario                                 | 2040 Worse Scenario                                  |
| <b>Diabetes, urogenital, blood, and endocrine diseases</b> | <b>2,489.62</b><br><b>(2,392.20 to</b><br><b>2,576.76)</b> | <b>4,124.65</b><br><b>(3,242.78 to</b><br><b>5,190.90)</b> | <b>2,941.08</b><br><b>(2,328.02 to</b><br><b>3,671.61)</b> | <b>4,826.15</b><br><b>(3,764.80 to</b><br><b>6,073.40)</b> | <b>123.25</b><br><b>(119.16 to</b><br><b>127.47)</b> | <b>272.06</b><br><b>(215.99 to</b><br><b>335.24)</b> | <b>202.77</b><br><b>(160.60 to</b><br><b>249.67)</b> | <b>365.12</b><br><b>(244.70 to</b><br><b>376.53)</b> |
| Diabetes mellitus                                          | 1,124.78<br>(1,080.76 to<br>1,171.31)                      | 1,825.74<br>(1,292.97 to<br>2,565.22)                      | 1,194.67<br>(873.14 to<br>1,630.15)                        | 2,242.59<br>(89.34 to<br>1,571.11 to<br>3,095.38)          | 59.33<br>(57.14 to<br>61.70)                         | 121.37<br>(89.34 to<br>162.91)                       | 84.20<br>(62.62 to<br>109.47)                        | 142.19<br>(103.96 to<br>187.20)                      |
| Acute glomerulonephritis                                   | 2.80<br>(2.56 to<br>3.09)                                  | 4.57<br>(3.75 to<br>5.54)                                  | 3.56<br>(2.92 to<br>4.32)                                  | 5.27<br>(4.32 to<br>6.43)                                  | 0.06<br>(0.06 to<br>0.07)                            | 0.14<br>(0.12 to<br>0.17)                            | 0.12<br>(0.10 to<br>0.15)                            | 0.15<br>(0.13 to<br>0.18)                            |
| Chronic kidney disease                                     | 743.49<br>(715.79 to<br>771.31)                            | 1,364.41<br>(855.08 to<br>2,143.25)                        | 926.36<br>(608.29 to<br>1,384.52)                          | 1,624.47<br>(991.09 to<br>2,568.95)                        | 35.77<br>(34.52 to<br>36.98)                         | 87.62<br>(53.37 to<br>138.87)                        | 61.62<br>(39.03 to<br>94.36)                         | 101.08<br>(59.42 to<br>161.28)                       |
| Chronic kidney disease due to diabetes mellitus            | 260.18<br>(227.61 to<br>292.53)                            | 545.29<br>(336.70 to<br>893.22)                            | 372.13<br>(242.47 to<br>585.44)                            | 648.53<br>(386.72 to<br>1,091.56)                          | 12.44<br>(10.86 to<br>13.95)                         | 32.50<br>(19.32 to<br>53.80)                         | 22.80<br>(14.25 to<br>35.79)                         | 37.66<br>(22.01 to<br>63.16)                         |
| Chronic kidney disease due to hypertension                 | 96.89<br>(81.00 to<br>111.81)                              | 228.98<br>(132.88 to<br>373.85)                            | 166.32<br>(103.22 to<br>262.77)                            | 262.64<br>(150.92 to<br>427.44)                            | 6.72<br>(5.71 to<br>7.75)                            | 20.05<br>(11.53 to<br>32.40)                         | 15.16<br>(9.25 to<br>23.76)                          | 22.21<br>(12.67 to<br>35.37)                         |
| Chronic kidney disease due to glomerulonephritis           | 217.99<br>(188.40 to<br>247.94)                            | 317.48<br>(197.03 to<br>511.93)                            | 204.37<br>(128.48 to<br>317.04)                            | 387.01<br>(231.16 to<br>638.21)                            | 9.04<br>(7.69 to<br>10.42)                           | 17.95<br>(10.58 to<br>29.44)                         | 11.79<br>(7.06 to<br>19.24)                          | 21.33<br>(12.03 to<br>36.41)                         |
| Chronic kidney disease due to other and unspecified causes | 168.42<br>(144.33 to<br>193.86)                            | 272.65<br>(167.71 to<br>427.99)                            | 183.54<br>(119.19 to<br>280.05)                            | 326.28<br>(197.40 to<br>515.39)                            | 7.58<br>(6.38 to<br>8.89)                            | 17.13<br>(10.07 to<br>27.59)                         | 11.85<br>(7.37 to<br>18.51)                          | 19.87<br>(11.42 to<br>32.23)                         |
| Urinary diseases and male infertility                      | 291.19<br>(278.45 to<br>305.45)                            | 536.92<br>(471.37 to<br>613.04)                            | 433.47<br>(374.59 to<br>498.69)                            | 556.24<br>(502.10 to<br>611.56)                            | 17.32<br>(16.49 to<br>18.18)                         | 44.34<br>(38.23 to<br>51.29)                         | 37.79<br>(32.24 to<br>44.54)                         | 43.79<br>(38.74 to<br>49.41)                         |

|                                                   |                                       |                                   |                                 |                                     |                              |                              |                              |                              |
|---------------------------------------------------|---------------------------------------|-----------------------------------|---------------------------------|-------------------------------------|------------------------------|------------------------------|------------------------------|------------------------------|
| Urinary tract infections                          | 260.68<br>(242.11 to<br>275.69)       | 500.55<br>(437.26 to<br>575.15)   | 408.02<br>(351.51 to<br>470.60) | 516.05<br>(460.46 to<br>572.90)     | 15.94<br>(14.86 to<br>16.84) | 42.09<br>(36.19 to<br>48.70) | 36.13<br>(30.74 to<br>42.43) | 41.42<br>(36.36 to<br>46.84) |
| Urolithiasis                                      | 13.26<br>(10.76 to<br>22.03)          | 17.10<br>(12.07 to<br>29.49)      | 11.95<br>(8.48 to<br>21.28)     | 18.94<br>(13.77 to<br>32.68)        | 0.56<br>(0.44 to<br>0.98)    | 0.91<br>(0.62 to<br>1.62)    | 0.66<br>(0.45 to<br>1.24)    | 0.97<br>(0.67 to<br>1.73)    |
| Other urinary diseases                            | 17.25<br>(12.76 to<br>27.97)          | 19.27<br>(13.34 to<br>33.53)      | 13.49<br>(9.17 to<br>23.62)     | 21.25<br>(15.07 to<br>36.88)        | 0.81<br>(0.63 to<br>1.34)    | 1.34<br>(0.92 to<br>2.37)    | 0.99<br>(0.66 to<br>1.74)    | 1.40<br>(0.97 to<br>2.53)    |
| Gynecological diseases                            | 5.44<br>(2.70 to<br>6.29)             | 4.14<br>(2.05 to<br>5.90)         | 2.37<br>(1.25 to<br>3.28)       | 5.08<br>(2.59 to<br>6.78)           | 0.17<br>(0.08 to<br>0.20)    | 0.16<br>(0.08 to<br>0.22)    | 0.09<br>(0.05 to<br>0.13)    | 0.19<br>(0.09 to<br>0.25)    |
| Uterine fibroids                                  | 1.99<br>(0.93 to<br>2.55)             | 1.30<br>(0.54 to<br>2.08)         | 0.80<br>(0.34 to<br>1.25)       | 1.55<br>(0.63 to<br>2.46)           | 0.06<br>(0.03 to<br>0.07)    | 0.04<br>(0.02 to<br>0.07)    | 0.03<br>(0.01 to<br>0.04)    | 0.05<br>(0.02 to<br>0.08)    |
| Polycystic ovarian syndrome                       | 0.94<br>(0.03 to<br>0.05)             | 0.02<br>(0.01 to<br>0.04)         | 0.01<br>(0.00 to<br>0.02)       | 0.03<br>(0.02 to<br>0.05)           | 0.00<br>(0.00 to<br>0.00)    | 0.00<br>(0.00 to<br>0.00)    | 0.00<br>(0.00 to<br>0.00)    | 0.00<br>(0.00 to<br>0.00)    |
| Endometriosis                                     | 0.29<br>(0.03 to<br>0.40)             | 0.20<br>(0.02 to<br>0.39)         | 0.11<br>(0.01 to<br>0.21)       | 0.25<br>(0.02 to<br>0.46)           | 0.01<br>(0.00 to<br>0.01)    | 0.00<br>(0.00 to<br>0.01)    | 0.00<br>(0.00 to<br>0.00)    | 0.01<br>(0.00 to<br>0.01)    |
| Genital prolapse                                  | 0.34<br>(0.15 to<br>0.42)             | 0.32<br>(0.12 to<br>0.51)         | 0.18<br>(0.07 to<br>0.29)       | 0.39<br>(0.15 to<br>0.61)           | 0.02<br>(0.01 to<br>0.03)    | 0.02<br>(0.01 to<br>0.04)    | 0.01<br>(0.00 to<br>0.02)    | 0.03<br>(0.01 to<br>0.04)    |
| Other gynecological diseases                      | 2.78<br>(1.49 to<br>3.21)             | 2.30<br>(1.16 to<br>3.40)         | 1.27<br>(0.71 to<br>1.89)       | 2.86<br>(1.50 to<br>4.02)           | 0.08<br>(0.04 to<br>0.10)    | 0.09<br>(0.04 to<br>0.13)    | 0.05<br>(0.03 to<br>0.07)    | 0.11<br>(0.05 to<br>0.15)    |
| Hemoglobinopathies and hemolytic anemias          | 72.85<br>(56.08 to<br>81.78)          | 71.25<br>(53.67 to<br>88.13)      | 50.05<br>(37.38 to<br>61.36)    | 81.24<br>(61.86 to<br>97.07)        | 2.07<br>(1.65 to<br>2.38)    | 3.20<br>(2.51 to<br>3.94)    | 2.36<br>(1.82 to<br>2.89)    | 3.47<br>(2.74 to<br>4.17)    |
| Thalassemias                                      | 6.09<br>(4.29 to<br>7.26)             | 1.81<br>(1.25 to<br>2.38)         | 1.71<br>(1.19 to<br>2.22)       | 2.02<br>(1.39 to<br>2.65)           | 0.07<br>(0.05 to<br>0.09)    | 0.02<br>(0.02 to<br>0.03)    | 0.02<br>(0.02 to<br>0.03)    | 0.03<br>(0.02 to<br>0.03)    |
| Sickle cell disorders                             | 29.05<br>(22.08 to<br>33.14)          | 24.83<br>(17.66 to<br>31.90)      | 17.12<br>(12.36 to<br>22.00)    | 29.06<br>(20.96 to<br>35.72)        | 0.52<br>(0.40 to<br>0.59)    | 0.59<br>(0.42 to<br>0.73)    | 0.41<br>(0.30 to<br>0.52)    | 0.67<br>(0.49 to<br>0.81)    |
| G6PD deficiency                                   | 20.15<br>(14.99 to<br>22.99)          | 21.88<br>(15.88 to<br>28.48)      | 14.27<br>(10.20 to<br>18.22)    | 25.74<br>(18.51 to<br>31.61)        | 0.48<br>(0.36 to<br>0.55)    | 0.74<br>(0.55 to<br>0.96)    | 0.50<br>(0.36 to<br>0.62)    | 0.85<br>(0.63 to<br>1.04)    |
| Other hemoglobinopathies and hemolytic anemias    | 17.56<br>(13.98 to<br>20.39)          | 22.72<br>(17.71 to<br>28.19)      | 16.95<br>(13.15 to<br>20.96)    | 24.42<br>(19.33 to<br>29.42)        | 1.00<br>(0.81 to<br>1.18)    | 1.85<br>(1.46 to<br>2.31)    | 1.44<br>(1.11 to<br>1.79)    | 1.92<br>(1.53 to<br>2.36)    |
| Endocrine, metabolic, blood, and immune disorders | 249.07<br>(161.66 to<br>269.74)       | 317.62<br>(196.26 to<br>366.87)   | 330.60<br>(207.44 to<br>385.72) | 311.27<br>(194.51 to<br>359.15)     | 8.52<br>(5.33 to<br>9.24)    | 15.23<br>(9.35 to<br>17.57)  | 16.58<br>(10.31 to<br>19.34) | 14.26<br>(8.85 to<br>16.36)  |
| <b>Tropical Latin America</b>                     |                                       |                                   |                                 |                                     |                              |                              |                              |                              |
| Cause                                             | YLLs (in 1000s)                       |                                   |                                 |                                     | Deaths (in 1000s)            |                              |                              |                              |
|                                                   | 2016                                  | 2040 Forecast                     | 2040 Better Scenario            | 2040 Worse Scenario                 | 2016                         | 2040 Forecast                | 2040 Better Scenario         | 2040 Worse Scenario          |
| Musculoskeletal disorders                         | 104.13<br>(82.22 to<br>111.41)        | 153.70<br>(119.20 to<br>176.59)   | 132.80<br>(102.39 to<br>153.11) | 160.36<br>(122.99 to<br>180.91)     | 3.25<br>(2.54 to<br>3.46)    | 7.06<br>(5.74 to<br>8.09)    | 6.27<br>(5.06 to<br>7.29)    | 7.12<br>(5.62 to<br>8.00)    |
| Rheumatoid arthritis                              | 12.60<br>(7.60 to<br>15.93)           | 22.61<br>(14.10 to<br>31.20)      | 14.00<br>(8.53 to<br>19.31)     | 27.10<br>(17.07 to<br>35.67)        | 0.56<br>(0.34 to<br>0.70)    | 1.35<br>(0.87 to<br>1.84)    | 0.86<br>(0.55 to<br>1.17)    | 1.56<br>(1.01 to<br>2.04)    |
| Other musculoskeletal disorders                   | 91.53<br>(74.04 to<br>98.29)          | 131.09<br>(102.85 to<br>151.99)   | 118.81<br>(93.21 to<br>137.09)  | 133.25<br>(104.68 to<br>152.03)     | 2.69<br>(2.23 to<br>2.88)    | 5.71<br>(4.65 to<br>6.56)    | 5.42<br>(4.45 to<br>6.23)    | 5.55<br>(4.53 to<br>6.31)    |
| Other non-communicable diseases                   | 1,293.04<br>(1,134.15 to<br>1,418.36) | 941.82<br>(729.84 to<br>1,154.68) | 671.52<br>(512.85 to<br>826.56) | 1,144.58<br>(932.63 to<br>1,346.82) | 20.73<br>(17.47 to<br>24.17) | 33.70<br>(22.23 to<br>46.66) | 28.59<br>(18.33 to<br>40.37) | 35.46<br>(23.70 to<br>48.01) |
| Congenital birth defects                          | 1,140.65<br>(966.95 to<br>1,250.76)   | 537.26<br>(410.36 to<br>681.43)   | 318.92<br>(242.97 to<br>389.34) | 728.54<br>(582.95 to<br>859.81)     | 14.02<br>(11.92 to<br>15.36) | 7.24<br>(5.52 to<br>9.17)    | 4.38<br>(3.31 to<br>5.30)    | 9.64<br>(7.72 to<br>11.33)   |



|                                               |                                              |                                              |                                              |                                              |                                        |                                        |                                       |                                        |
|-----------------------------------------------|----------------------------------------------|----------------------------------------------|----------------------------------------------|----------------------------------------------|----------------------------------------|----------------------------------------|---------------------------------------|----------------------------------------|
| Neural tube defects                           | 79.29<br>(67.37 to<br>105.58)                | 13.80<br>(9.21 to<br>21.41)                  | 7.18<br>(4.83 to<br>11.64)                   | 20.03<br>(13.95 to<br>30.07)                 | 0.94<br>(0.80 to<br>1.25)              | 0.17<br>(0.12 to<br>0.27)              | 0.09<br>(0.06 to<br>0.14)             | 0.25<br>(0.18 to<br>0.37)              |
| Congenital heart anomalies                    | 508.65<br>(442.32 to<br>612.64)              | 243.27<br>(172.15 to<br>323.63)              | 123.93<br>(90.97 to<br>163.38)               | 343.29<br>(266.93 to<br>425.29)              | 6.30<br>(5.50 to<br>7.64)              | 3.29<br>(2.35 to<br>4.38)              | 1.68<br>(1.25 to<br>2.22)             | 4.57<br>(3.61 to<br>5.66)              |
| Orofacial clefts                              | 2.95<br>(1.70 to<br>4.78)                    | 1.10<br>(0.50 to<br>2.01)                    | 0.46<br>(0.22 to<br>0.84)                    | 1.71<br>(0.81 to<br>3.10)                    | 0.03<br>(0.02 to<br>0.06)              | 0.01<br>(0.01 to<br>0.02)              | 0.01<br>(0.00 to<br>0.01)             | 0.02<br>(0.01 to<br>0.04)              |
| Down syndrome                                 | 49.07<br>(32.37 to<br>56.81)                 | 38.02<br>(23.07 to<br>47.25)                 | 39.34<br>(25.09 to<br>48.37)                 | 40.89<br>(24.65 to<br>50.62)                 | 0.70<br>(0.44 to<br>0.81)              | 0.65<br>(0.38 to<br>0.80)              | 0.70<br>(0.41 to<br>0.82)             | 0.68<br>(0.39 to<br>0.84)              |
| Other chromosomal abnormalities               | 62.83<br>(26.58 to<br>78.49)                 | 35.95<br>(14.90 to<br>49.38)                 | 27.90<br>(12.11 to<br>38.42)                 | 44.33<br>(18.76 to<br>60.68)                 | 0.76<br>(0.32 to<br>0.95)              | 0.46<br>(0.19 to<br>0.63)              | 0.36<br>(0.16 to<br>0.49)             | 0.56<br>(0.23 to<br>0.77)              |
| Congenital musculoskeletal and limb anomalies | 19.52<br>(14.58 to<br>23.88)                 | 11.00<br>(7.88 to<br>15.01)                  | 6.45<br>(4.70 to<br>8.83)                    | 14.59<br>(10.52 to<br>18.92)                 | 0.25<br>(0.19 to<br>0.31)              | 0.17<br>(0.12 to<br>0.23)              | 0.10<br>(0.07 to<br>0.14)             | 0.22<br>(0.16 to<br>0.29)              |
| Urogenital congenital anomalies               | 31.93<br>(17.35 to<br>40.74)                 | 16.42<br>(8.93 to<br>23.56)                  | 10.44<br>(6.15 to<br>14.62)                  | 21.28<br>(11.88 to<br>29.41)                 | 0.41<br>(0.23 to<br>0.52)              | 0.25<br>(0.15 to<br>0.35)              | 0.16<br>(0.10 to<br>0.22)             | 0.32<br>(0.18 to<br>0.43)              |
| Digestive congenital anomalies                | 130.46<br>(99.71 to<br>157.20)               | 62.16<br>(42.41 to<br>85.67)                 | 34.12<br>(23.59 to<br>46.08)                 | 86.80<br>(60.96 to<br>113.79)                | 1.55<br>(1.18 to<br>1.87)              | 0.77<br>(0.53 to<br>1.06)              | 0.42<br>(0.29 to<br>0.57)             | 1.06<br>(0.76 to<br>1.39)              |
| Other congenital birth defects                | 255.94<br>(179.01 to<br>286.78)              | 115.54<br>(80.71 to<br>150.33)               | 69.10<br>(48.87 to<br>87.19)                 | 155.62<br>(111.31 to<br>188.66)              | 3.08<br>(2.16 to<br>3.46)              | 1.47<br>(1.04 to<br>1.90)              | 0.88<br>(0.62 to<br>1.11)             | 1.96<br>(1.40 to<br>2.36)              |
| Skin and subcutaneous diseases                | 135.11<br>(80.72 to<br>214.21)               | 397.15<br>(232.31 to<br>594.96)              | 347.26<br>(205.61 to<br>512.27)              | 406.23<br>(235.72 to<br>614.36)              | 6.50<br>(3.66 to<br>10.00)             | 26.37<br>(14.57 to<br>38.98)           | 24.14<br>(13.68 to<br>35.77)          | 25.70<br>(14.20 to<br>39.09)           |
| Cellulitis                                    | 23.97<br>(12.04 to<br>47.75)                 | 78.09<br>(39.20 to<br>139.02)                | 74.09<br>(37.55 to<br>127.34)                | 77.34<br>(39.03 to<br>141.30)                | 0.96<br>(0.47 to<br>1.74)              | 4.31<br>(2.08 to<br>7.39)              | 4.27<br>(2.06 to<br>7.09)             | 4.09<br>(1.98 to<br>6.99)              |
| Psoriasis                                     | 82.97<br>(47.77 to<br>134.80)                | 259.78<br>(140.20 to<br>383.66)              | 226.60<br>(125.63 to<br>343.00)              | 266.78<br>(147.41 to<br>401.64)              | 3.82<br>(2.05 to<br>5.95)              | 17.27<br>(9.24 to<br>26.20)            | 15.99<br>(8.63 to<br>24.78)           | 16.80<br>(9.01 to<br>25.35)            |
| Decubitus ulcer                               | 21.17<br>(10.25 to<br>34.82)                 | 46.49<br>(22.25 to<br>81.65)                 | 35.81<br>(16.66 to<br>62.24)                 | 48.66<br>(23.19 to<br>87.13)                 | 1.47<br>(0.69 to<br>2.50)              | 4.16<br>(1.85 to<br>7.81)              | 3.33<br>(1.52 to<br>5.96)             | 4.19<br>(1.94 to<br>7.83)              |
| Other skin and subcutaneous diseases          | 7.00<br>(3.76 to<br>12.67)                   | 12.80<br>(6.92 to<br>22.44)                  | 10.75<br>(5.96 to<br>18.27)                  | 13.44<br>(7.45 to<br>23.92)                  | 0.26<br>(0.14 to<br>0.46)              | 0.63<br>(0.34 to<br>1.13)              | 0.55<br>(0.30 to<br>0.99)             | 0.63<br>(0.34 to<br>1.14)              |
| Sudden infant death syndrome                  | 17.28<br>(14.90 to<br>20.18)                 | 7.41<br>(4.85 to<br>10.96)                   | 5.35<br>(3.58 to<br>7.97)                    | 9.81<br>(6.42 to<br>14.40)                   | 0.20<br>(0.17 to<br>0.23)              | 0.09<br>(0.06 to<br>0.13)              | 0.06<br>(0.04 to<br>0.09)             | 0.11<br>(0.07 to<br>0.17)              |
| <b>Injuries</b>                               | <b>7,807.72</b><br>(7,266.16 to<br>8,217.48) | <b>4,949.98</b><br>(3,788.32 to<br>6,404.65) | <b>3,541.48</b><br>(2,773.31 to<br>4,665.20) | <b>7,348.00</b><br>(5,620.01 to<br>9,350.85) | <b>165.81</b><br>(154.11 to<br>175.02) | <b>140.04</b><br>(115.46 to<br>170.63) | <b>106.97</b><br>(88.90 to<br>133.21) | <b>192.57</b><br>(157.97 to<br>233.42) |
| <b>Transport injuries</b>                     | <b>2,478.90</b><br>(2,296.23 to<br>2,830.67) | <b>982.51</b><br>(608.39 to<br>1,580.02)     | <b>741.92</b><br>(483.07 to<br>1,133.79)     | <b>2,818.34</b><br>(1,797.37 to<br>4,334.99) | <b>52.38</b><br>(49.03 to<br>58.29)    | <b>25.42</b><br>(16.83 to<br>38.88)    | <b>19.34</b><br>(13.45 to<br>28.31)   | <b>67.60</b><br>(45.75 to<br>100.23)   |
| Road injuries                                 | 2,383.61<br>(2,204.71 to<br>2,725.57)        | 849.35<br>(529.95 to<br>1,353.83)            | 662.88<br>(431.66 to<br>1,012.85)            | 2,654.76<br>(1,685.75 to<br>4,092.54)        | 50.37<br>(47.00 to<br>56.02)           | 22.15<br>(14.69 to<br>33.79)           | 17.37<br>(12.04 to<br>25.37)          | 63.65<br>(42.94 to<br>94.54)           |
| Pedestrian road injuries                      | 69.42<br>(542.97 to<br>815.71)               | 219.03<br>(146.58 to<br>337.58)              | 123.15<br>(84.60 to<br>185.59)               | 728.82<br>(485.56 to<br>1,102.40)            | 14.79<br>(13.25 to<br>19.02)           | 7.27<br>(5.02 to<br>10.95)             | 4.27<br>(3.04 to<br>6.16)             | 21.76<br>(15.29 to<br>31.34)           |
| <b>Tropical Latin America</b>                 |                                              |                                              |                                              |                                              |                                        |                                        |                                       |                                        |
| Cause                                         | YLLs (in 1000s)                              |                                              |                                              |                                              | Deaths (in 1000s)                      |                                        |                                       |                                        |
|                                               | 2016                                         | 2040 Forecast                                | 2040 Better Scenario                         | 2040 Worse Scenario                          | 2016                                   | 2040 Forecast                          | 2040 Better Scenario                  | 2040 Worse Scenario                    |
| Cyclist road injuries                         | 88.71<br>(77.86 to<br>107.18)                | 29.15<br>(18.12 to<br>46.79)                 | 25.59<br>(16.70 to<br>39.80)                 | 95.42<br>(58.37 to<br>153.12)                | 1.99<br>(1.75 to<br>2.36)              | 0.89<br>(0.57 to<br>1.37)              | 0.81<br>(0.54 to<br>1.21)             | 2.36<br>(1.51 to<br>3.74)              |

|                                                 |                                                            |                                                            |                                                        |                                                            |                                                   |                                                   |                                                   |                                                   |
|-------------------------------------------------|------------------------------------------------------------|------------------------------------------------------------|--------------------------------------------------------|------------------------------------------------------------|---------------------------------------------------|---------------------------------------------------|---------------------------------------------------|---------------------------------------------------|
| Motorcyclist road injuries                      | 868.77<br>(739.98 to<br>1,038.60)                          | 412.95<br>(234.21 to<br>693.05)                            | 355.73<br>(212.00 to<br>570.69)                        | 927.85<br>(528.24 to<br>1,580.96)                          | 16.44<br>(14.05 to<br>19.28)                      | 8.78<br>(5.23 to<br>14.19)                        | 7.68<br>(4.85 to<br>11.86)                        | 18.28<br>(10.81 to<br>29.76)                      |
| Motor vehicle road injuries                     | 782.37<br>(593.68 to<br>923.42)                            | 178.82<br>(109.70 to<br>278.79)                            | 150.48<br>(96.50 to<br>228.62)                         | 863.01<br>(520.21 to<br>1,331.46)                          | 16.39<br>(12.48 to<br>19.02)                      | 4.92<br>(3.24 to<br>7.35)                         | 4.34<br>(3.01 to<br>6.31)                         | 20.23<br>(13.03 to<br>30.39)                      |
| Other road injuries                             | 34.34<br>(28.44 to<br>51.21)                               | 9.39<br>(5.78 to<br>16.12)                                 | 7.93<br>(5.05 to<br>13.86)                             | 39.66<br>(24.52 to<br>70.57)                               | 0.76<br>(0.63 to<br>1.14)                         | 0.29<br>(0.19 to<br>0.50)                         | 0.26<br>(0.17 to<br>0.44)                         | 1.02<br>(0.65 to<br>1.77)                         |
| Other transport injuries                        | 95.30<br>(85.02 to<br>114.25)                              | 133.16<br>(80.62 to<br>220.52)                             | 79.04<br>(50.29 to<br>125.08)                          | 163.59<br>(102.18 to<br>255.35)                            | 2.01<br>(1.81 to<br>2.36)                         | 3.26<br>(2.09 to<br>5.14)                         | 1.98<br>(1.33 to<br>3.00)                         | 3.95<br>(2.61 to<br>5.88)                         |
| <b>Unintentional injuries</b>                   | <b>1,370.61</b><br><b>(1,276.39 to</b><br><b>1,505.49)</b> | <b>1,208.91</b><br><b>(1,026.20 to</b><br><b>1,408.45)</b> | <b>951.73</b><br><b>(819.11 to</b><br><b>1,095.20)</b> | <b>1,321.61</b><br><b>(1,147.51 to</b><br><b>1,506.11)</b> | <b>37.92</b><br><b>(33.74 to</b><br><b>40.86)</b> | <b>54.90</b><br><b>(45.52 to</b><br><b>61.93)</b> | <b>46.58</b><br><b>(38.68 to</b><br><b>52.09)</b> | <b>56.33</b><br><b>(46.88 to</b><br><b>62.25)</b> |
| Falls                                           | 343.99<br>(266.31 to<br>376.93)                            | 471.81<br>(351.54 to<br>537.62)                            | 397.86<br>(300.63 to<br>453.49)                        | 486.45<br>(360.57 to<br>542.01)                            | 15.52<br>(11.32 to<br>16.87)                      | 31.10<br>(22.50 to<br>35.84)                      | 27.36<br>(20.05 to<br>31.31)                      | 30.84<br>(21.95 to<br>35.14)                      |
| Drowning                                        | 388.24<br>(362.35 to<br>438.50)                            | 247.75<br>(181.43 to<br>345.04)                            | 181.44<br>(136.19 to<br>247.88)                        | 286.17<br>(211.70 to<br>391.02)                            | 7.06<br>(6.61 to<br>7.87)                         | 5.49<br>(4.21 to<br>7.34)                         | 4.11<br>(3.16 to<br>5.39)                         | 6.20<br>(4.68 to<br>8.24)                         |
| Fire, heat, and hot substances                  | 66.93<br>(60.96 to<br>75.72)                               | 50.51<br>(38.53 to<br>66.49)                               | 34.11<br>(26.47 to<br>44.03)                           | 59.33<br>(46.15 to<br>77.80)                               | 1.77<br>(1.60 to<br>1.97)                         | 2.18<br>(1.76 to<br>2.81)                         | 1.58<br>(1.28 to<br>2.00)                         | 2.41<br>(1.94 to<br>3.07)                         |
| Poisonings                                      | 17.95<br>(15.52 to<br>22.12)                               | 7.84<br>(5.53 to<br>11.10)                                 | 4.80<br>(3.50 to<br>6.82)                              | 9.76<br>(6.98 to<br>13.76)                                 | 0.37<br>(0.32 to<br>0.46)                         | 0.26<br>(0.19 to<br>0.34)                         | 0.16<br>(0.12 to<br>0.22)                         | 0.29<br>(0.22 to<br>0.40)                         |
| Exposure to mechanical forces                   | 137.56<br>(121.87 to<br>164.60)                            | 91.39<br>(73.36 to<br>114.26)                              | 65.47<br>(53.69 to<br>81.48)                           | 104.19<br>(85.93 to<br>126.93)                             | 2.79<br>(2.49 to<br>3.31)                         | 2.43<br>(2.03 to<br>2.98)                         | 1.80<br>(1.51 to<br>2.22)                         | 2.68<br>(2.29 to<br>3.22)                         |
| Unintentional firearm injuries                  | 45.57<br>(35.67 to<br>56.23)                               | 26.96<br>(19.75 to<br>36.30)                               | 19.99<br>(15.09 to<br>26.65)                           | 30.23<br>(22.35 to<br>39.04)                               | 0.89<br>(0.72 to<br>1.07)                         | 0.69<br>(0.55 to<br>0.86)                         | 0.53<br>(0.43 to<br>0.66)                         | 0.74<br>(0.58 to<br>0.91)                         |
| Unintentional suffocation                       | 18.32<br>(15.66 to<br>24.33)                               | 9.59<br>(7.57 to<br>12.40)                                 | 7.25<br>(5.71 to<br>9.31)                              | 11.46<br>(8.99 to<br>14.84)                                | 0.26<br>(0.22 to<br>0.34)                         | 0.15<br>(0.12 to<br>0.19)                         | 0.12<br>(0.09 to<br>0.15)                         | 0.18<br>(0.14 to<br>0.22)                         |
| Other exposure to mechanical forces             | 73.48<br>(62.58 to<br>95.24)                               | 54.84<br>(43.37 to<br>72.04)                               | 38.22<br>(30.76 to<br>49.95)                           | 62.50<br>(50.43 to<br>80.87)                               | 1.64<br>(1.40 to<br>2.09)                         | 1.59<br>(1.31 to<br>2.01)                         | 1.15<br>(0.95 to<br>1.45)                         | 1.76<br>(1.48 to<br>2.19)                         |
| Adverse effects of medical treatment            | 95.79<br>(79.03 to<br>128.73)                              | 104.47<br>(84.47 to<br>142.04)                             | 89.67<br>(72.77 to<br>123.20)                          | 109.60<br>(88.52 to<br>147.25)                             | 3.12<br>(2.54 to<br>4.16)                         | 5.05<br>(4.03 to<br>6.75)                         | 4.55<br>(3.64 to<br>6.22)                         | 5.07<br>(4.02 to<br>6.82)                         |
| Animal contact                                  | 25.40<br>(21.26 to<br>43.67)                               | 25.82<br>(20.14 to<br>44.68)                               | 20.59<br>(16.11 to<br>35.85)                           | 28.42<br>(22.37 to<br>49.12)                               | 0.65<br>(0.55 to<br>1.11)                         | 0.93<br>(0.75 to<br>1.57)                         | 0.78<br>(0.62 to<br>1.35)                         | 0.97<br>(0.78 to<br>1.65)                         |
| Venomous animal contact                         | 16.96<br>(13.57 to<br>31.80)                               | 17.41<br>(12.97 to<br>32.05)                               | 14.51<br>(10.91 to<br>26.88)                           | 18.86<br>(14.09 to<br>34.80)                               | 0.44<br>(0.35 to<br>0.80)                         | 0.63<br>(0.48 to<br>1.17)                         | 0.55<br>(0.42 to<br>1.00)                         | 0.65<br>(0.49 to<br>1.19)                         |
| Non-venomous animal contact                     | 8.43<br>(5.36 to<br>14.57)                                 | 8.41<br>(4.94 to<br>14.68)                                 | 6.07<br>(3.80 to<br>10.01)                             | 9.56<br>(5.94 to<br>15.81)                                 | 0.21<br>(0.13 to<br>0.36)                         | 0.30<br>(0.18 to<br>0.50)                         | 0.23<br>(0.14 to<br>0.37)                         | 0.33<br>(0.20 to<br>0.52)                         |
| Foreign body                                    | 145.38<br>(111.79 to<br>162.29)                            | 121.36<br>(92.00 to<br>138.89)                             | 111.34<br>(85.30 to<br>127.77)                         | 127.41<br>(96.69 to<br>146.74)                             | 3.29<br>(2.48 to<br>3.69)                         | 4.85<br>(3.44 to<br>5.64)                         | 4.80<br>(3.39 to<br>5.63)                         | 4.70<br>(3.32 to<br>5.45)                         |
| Pulmonary aspiration and foreign body in airway | 132.70<br>(99.83 to<br>149.44)                             | 107.67<br>(79.90 to<br>125.06)                             | 96.43<br>(72.34 to<br>111.89)                          | 114.19<br>(84.85 to<br>132.78)                             | 2.94<br>(2.16 to<br>3.33)                         | 4.31<br>(2.98 to<br>5.08)                         | 4.18<br>(2.85 to<br>4.92)                         | 4.20<br>(2.89 to<br>4.91)                         |
| Foreign body in other body part                 | 12.68<br>(9.87 to<br>16.33)                                | 13.69<br>(10.08 to<br>17.15)                               | 14.91<br>(10.97 to<br>18.34)                           | 13.22<br>(9.71 to<br>16.26)                                | 0.35<br>(0.25 to<br>0.41)                         | 0.54<br>(0.37 to<br>0.66)                         | 0.62<br>(0.42 to<br>0.75)                         | 0.50<br>(0.34 to<br>0.60)                         |
| Environmental heat and cold exposure            | 10.16<br>(7.09 to<br>19.09)                                | 11.59<br>(7.99 to<br>22.49)                                | 7.86<br>(5.40 to<br>15.37)                             | 13.33<br>(9.19 to<br>25.44)                                | 0.31<br>(0.22 to<br>0.57)                         | 0.50<br>(0.35 to<br>0.96)                         | 0.35<br>(0.25 to<br>0.69)                         | 0.55<br>(0.39 to<br>1.05)                         |
| Other unintentional injuries                    | 139.21<br>(128.21 to<br>156.80)                            | 76.36<br>(56.34 to<br>102.37)                              | 38.60<br>(29.27 to<br>50.62)                           | 96.95<br>(78.31 to<br>114.80)                              | 3.04<br>(2.83 to<br>3.34)                         | 2.12<br>(1.61 to<br>2.80)                         | 1.10<br>(0.86 to<br>1.39)                         | 2.62<br>(2.15 to<br>3.00)                         |

|                                                                              | 3,926.01<br>(2,998.35 to<br>4,473.60)    | 2,688.52<br>(1,888.61 to<br>3,611.57)    | 1,777.44<br>(1,270.99 to<br>2,322.57)    | 3,137.28<br>(2,185.77 to<br>4,058.75)    | 74.99<br>(57.46 to<br>87.30)          | 58.19<br>(42.45 to<br>77.29)          | 39.50<br>(29.59 to<br>50.67)          | 67.12<br>(47.63 to<br>86.33)          |
|------------------------------------------------------------------------------|------------------------------------------|------------------------------------------|------------------------------------------|------------------------------------------|---------------------------------------|---------------------------------------|---------------------------------------|---------------------------------------|
| Self-harm and interpersonal violence                                         |                                          |                                          |                                          |                                          |                                       |                                       |                                       |                                       |
| <b>Tropical Latin America</b>                                                |                                          |                                          |                                          |                                          |                                       |                                       |                                       |                                       |
| Cause                                                                        | YLLs (in 1000s)                          |                                          |                                          |                                          | Deaths (in 1000s)                     |                                       |                                       |                                       |
|                                                                              | 2016                                     | 2040 Forecast                            | 2040 Better Scenario                     | 2040 Worse Scenario                      | 2016                                  | 2040 Forecast                         | 2040 Better Scenario                  | 2040 Worse Scenario                   |
| Self-harm                                                                    | 648.77<br>(543.28 to<br>803.44)          | 646.25<br>(414.23 to<br>969.91)          | 462.35<br>(307.22 to<br>662.10)          | 769.47<br>(466.96 to<br>1,156.13)        | 14.27<br>(11.89 to<br>17.57)          | 16.93<br>(11.41 to<br>24.36)          | 12.45<br>(8.71 to<br>17.25)           | 19.71<br>(12.58 to<br>28.77)          |
| Self-harm by firearm                                                         | 80.49<br>(60.01 to<br>139.20)            | 74.50<br>(40.31 to<br>134.70)            | 48.10<br>(27.04 to<br>85.37)             | 92.16<br>(48.78 to<br>168.62)            | 1.82<br>(1.35 to<br>2.98)             | 2.04<br>(1.17 to<br>3.41)             | 1.37<br>(0.83 to<br>2.22)             | 2.45<br>(1.36 to<br>4.11)             |
| Self-harm by other specified means                                           | 568.29<br>(463.84 to<br>708.22)          | 571.74<br>(371.07 to<br>844.20)          | 414.25<br>(278.08 to<br>589.93)          | 677.31<br>(419.57 to<br>1,008.66)        | 12.45<br>(10.22 to<br>15.46)          | 14.89<br>(10.15 to<br>21.30)          | 11.08<br>(7.83 to<br>15.25)           | 17.26<br>(11.19 to<br>25.12)          |
| Interpersonal violence                                                       | 3,277.24<br>(2,278.36 to<br>3,856.90)    | 2,042.28<br>(1,314.91 to<br>2,816.34)    | 1,315.09<br>(852.70 to<br>1,769.72)      | 2,367.80<br>(1,484.31 to<br>3,122.13)    | 60.72<br>(42.17 to<br>74.57)          | 41.26<br>(27.07 to<br>56.75)          | 27.05<br>(17.77 to<br>36.15)          | 47.41<br>(30.12 to<br>63.20)          |
| Physical violence by firearm                                                 | 2,296.03<br>(1,278.44 to<br>2,681.48)    | 1,348.93<br>(699.90 to<br>1,940.13)      | 829.14<br>(425.97 to<br>1,178.03)        | 1,581.51<br>(780.88 to<br>2,203.77)      | 41.19<br>(22.38 to<br>48.45)          | 25.67<br>(13.50 to<br>36.75)          | 15.92<br>(8.33 to<br>21.87)           | 29.90<br>(14.82 to<br>40.69)          |
| Physical violence by sharp object                                            | 590.28<br>(365.53 to<br>1,186.29)        | 410.62<br>(248.47 to<br>851.86)          | 272.81<br>(173.49 to<br>553.23)          | 464.54<br>(278.95 to<br>974.93)          | 11.50<br>(7.12 to<br>22.86)           | 8.81<br>(5.48 to<br>18.28)            | 5.92<br>(3.84 to<br>11.77)            | 9.89<br>(5.96 to<br>20.46)            |
| Physical violence by other means                                             | 390.92<br>(234.83 to<br>733.55)          | 282.73<br>(160.35 to<br>521.26)          | 213.14<br>(122.03 to<br>389.27)          | 321.75<br>(170.18 to<br>613.87)          | 8.02<br>(4.73 to<br>15.18)            | 6.78<br>(3.80 to<br>12.57)            | 5.20<br>(2.99 to<br>9.67)             | 7.61<br>(4.00 to<br>14.52)            |
| Forces of nature, conflict and terrorism, and executions and police conflict | 32.19<br>(1.61 to<br>46.54)              | 70.04<br>(0.00 to<br>1,066.08)           | 70.39<br>(0.00 to<br>1,065.28)           | 70.77<br>(0.00 to<br>1,069.11)           | 0.52<br>(0.03 to<br>0.75)             | 1.53<br>(0.00 to<br>22.94)            | 1.55<br>(0.00 to<br>23.20)            | 1.52<br>(0.00 to<br>22.77)            |
| Exposure to forces of nature                                                 | 0.00<br>(0.00 to<br>0.00)                | 3.69<br>(0.00 to<br>32.77)               | 3.71<br>(0.00 to<br>32.96)               | 3.74<br>(0.00 to<br>33.41)               | 0.00<br>(0.00 to<br>0.00)             | 0.09<br>(0.00 to<br>0.82)             | 0.10<br>(0.00 to<br>0.84)             | 0.09<br>(0.00 to<br>0.81)             |
| Conflict and terrorism                                                       | 0.00<br>(0.00 to<br>0.00)                | 0.07<br>(0.00 to<br>0.34)                | 0.07<br>(0.00 to<br>0.34)                | 0.07<br>(0.00 to<br>0.35)                | 0.00<br>(0.00 to<br>0.00)             | 0.00<br>(0.00 to<br>0.01)             | 0.00<br>(0.00 to<br>0.01)             | 0.00<br>(0.00 to<br>0.01)             |
| Executions and police conflict                                               | 32.19<br>(1.61 to<br>46.54)              | 66.28<br>(0.00 to<br>1,058.98)           | 66.61<br>(0.00 to<br>1,064.17)           | 66.95<br>(0.00 to<br>1,067.99)           | 0.52<br>(0.03 to<br>0.75)             | 1.43<br>(0.00 to<br>22.91)            | 1.45<br>(0.00 to<br>23.18)            | 1.43<br>(0.00 to<br>22.74)            |
| <b>Brazil</b>                                                                |                                          |                                          |                                          |                                          |                                       |                                       |                                       |                                       |
| Cause                                                                        | YLLs (in 1000s)                          |                                          |                                          |                                          | Deaths (in 1000s)                     |                                       |                                       |                                       |
|                                                                              | 2016                                     | 2040 Forecast                            | 2040 Better Scenario                     | 2040 Worse Scenario                      | 2016                                  | 2040 Forecast                         | 2040 Better Scenario                  | 2040 Worse Scenario                   |
| All causes                                                                   | 34,070.08<br>(33,188.13 to<br>35,012.20) | 37,513.65<br>(32,047.17 to<br>44,079.23) | 27,760.73<br>(24,215.65 to<br>32,006.13) | 49,721.59<br>(42,452.57 to<br>57,409.42) | 1,298.35<br>(1,267.06 to<br>1,334.05) | 2,136.90<br>(1,793.08 to<br>2,489.17) | 1,683.87<br>(1,420.45 to<br>1,968.47) | 2,616.47<br>(2,232.00 to<br>2,993.69) |
| Communicable, maternal, neonatal, and nutritional diseases                   | 5,549.70<br>(5,315.47 to<br>5,803.89)    | 4,164.82<br>(3,448.92 to<br>5,047.47)    | 3,231.32<br>(2,695.71 to<br>3,914.60)    | 5,653.39<br>(4,629.54 to<br>7,122.33)    | 145.22<br>(139.45 to<br>150.99)       | 197.88<br>(160.16 to<br>247.74)       | 173.07<br>(139.80 to<br>215.99)       | 243.16<br>(194.52 to<br>313.63)       |
| HIV/AIDS and tuberculosis                                                    | 852.70<br>(838.38 to<br>869.71)          | 581.66<br>(390.83 to<br>698.10)          | 437.40<br>(252.74 to<br>537.74)          | 863.18<br>(705.80 to<br>1,003.10)        | 20.63<br>(20.28 to<br>21.08)          | 15.82<br>(10.25 to<br>19.57)          | 11.54<br>(6.07 to<br>14.69)           | 22.75<br>(17.93 to<br>26.98)          |
| Tuberculosis                                                                 | 172.80<br>(163.34 to<br>187.05)          | 111.75<br>(69.25 to<br>177.23)           | 42.89<br>(28.02 to<br>67.36)             | 182.22<br>(114.74 to<br>290.05)          | 5.33<br>(5.07 to<br>5.70)             | 4.38<br>(2.77 to<br>6.77)             | 1.78<br>(1.18 to<br>2.63)             | 6.81<br>(4.36 to<br>10.40)            |
| HIV/AIDS                                                                     | 679.90<br>(669.98 to<br>690.10)          | 469.91<br>(289.80 to<br>559.37)          | 394.51<br>(212.17 to<br>486.37)          | 680.96<br>(538.30 to<br>773.53)          | 15.30<br>(15.07 to<br>15.53)          | 11.45<br>(6.25 to<br>14.19)           | 9.76<br>(4.41 to<br>12.68)            | 15.94<br>(11.97 to<br>18.48)          |
| Diarrhea, lower respiratory, and other common infectious diseases            | 2,005.27<br>(1,914.81 to<br>2,108.43)    | 2,204.31<br>(1,647.16 to<br>3,028.69)    | 1,678.83<br>(1,265.57 to<br>2,306.72)    | 3,085.73<br>(2,208.56 to<br>4,450.18)    | 79.37<br>(74.61 to<br>83.98)          | 143.37<br>(108.15 to<br>192.00)       | 121.47<br>(91.00 to<br>164.23)        | 180.39<br>(133.27 to<br>249.97)       |

|                                      |                                       |                                       |                                     |                                       |                              |                                |                               |                                 |
|--------------------------------------|---------------------------------------|---------------------------------------|-------------------------------------|---------------------------------------|------------------------------|--------------------------------|-------------------------------|---------------------------------|
| Diarrheal diseases                   | 219.71<br>(202.34 to<br>240.01)       | 168.40<br>(62.94 to<br>421.07)        | 258.16<br>(109.88 to<br>595.43)     | 195.59<br>(65.15 to<br>553.55)        | 6.00<br>(5.73 to<br>6.32)    | 11.26<br>(4.29 to<br>28.22)    | 19.30<br>(8.14 to<br>44.03)   | 11.66<br>(4.07 to<br>31.76)     |
| Intestinal infectious diseases       | 1.61<br>(0.85 to<br>2.73)             | 1.32<br>(0.66 to<br>2.39)             | 1.69<br>(0.87 to<br>3.09)           | 1.26<br>(0.65 to<br>2.25)             | 0.03<br>(0.02 to<br>0.06)    | 0.04<br>(0.02 to<br>0.07)      | 0.05<br>(0.03 to<br>0.09)     | 0.04<br>(0.02 to<br>0.06)       |
| Typhoid fever                        | 1.16<br>(0.55 to<br>2.14)             | 1.06<br>(0.48 to<br>2.04)             | 1.47<br>(0.71 to<br>2.83)           | 0.97<br>(0.44 to<br>1.89)             | 0.03<br>(0.01 to<br>0.05)    | 0.03<br>(0.01 to<br>0.06)      | 0.04<br>(0.02 to<br>0.08)     | 0.03<br>(0.01 to<br>0.05)       |
| Paratyphoid fever                    | 0.01<br>(0.00 to<br>0.02)             | 0.01<br>(0.00 to<br>0.02)             | 0.01<br>(0.00 to<br>0.01)           | 0.01<br>(0.00 to<br>0.02)             | 0.00<br>(0.00 to<br>0.00)    | 0.00<br>(0.00 to<br>0.00)      | 0.00<br>(0.00 to<br>0.00)     | 0.00<br>(0.00 to<br>0.00)       |
| Other intestinal infectious diseases | 0.43<br>(0.17 to<br>0.96)             | 0.26<br>(0.09 to<br>0.56)             | 0.21<br>(0.07 to<br>0.47)           | 0.29<br>(0.10 to<br>0.62)             | 0.01<br>(0.00 to<br>0.02)    | 0.01<br>(0.00 to<br>0.02)      | 0.01<br>(0.00 to<br>0.02)     | 0.01<br>(0.00 to<br>0.02)       |
| Lower respiratory infections         | 1,589.53<br>(1,513.47 to<br>1,669.99) | 1,825.50<br>(1,336.33 to<br>2,317.54) | 1,268.98<br>(947.31 to<br>1,730.77) | 2,599.14<br>(1,834.73 to<br>3,792.43) | 69.96<br>(65.40 to<br>74.35) | 127.46<br>(96.85 to<br>169.77) | 98.63<br>(75.55 to<br>128.10) | 162.74<br>(119.85 to<br>221.89) |
| Upper respiratory infections         | 1.19<br>(1.00 to<br>1.43)             | 0.75<br>(0.47 to<br>1.13)             | 0.36<br>(0.24 to<br>0.54)           | 1.00<br>(0.67 to<br>1.50)             | 0.03<br>(0.02 to<br>0.03)    | 0.03<br>(0.02 to<br>0.04)      | 0.01<br>(0.01 to<br>0.02)     | 0.04<br>(0.02 to<br>0.05)       |
| Otitis media                         | 1.26<br>(1.10 to<br>1.48)             | 0.17<br>(0.11 to<br>0.25)             | 0.17<br>(0.11 to<br>0.26)           | 0.17<br>(0.11 to<br>0.25)             | 0.03<br>(0.02 to<br>0.03)    | 0.01<br>(0.00 to<br>0.01)      | 0.01<br>(0.00 to<br>0.01)     | 0.01<br>(0.00 to<br>0.01)       |
| Meningitis                           | 137.88<br>(128.17 to<br>151.77)       | 64.37<br>(40.80 to<br>85.96)          | 45.76<br>(28.85 to<br>60.06)        | 79.74<br>(47.94 to<br>107.13)         | 2.38<br>(2.21 to<br>2.62)    | 1.60<br>(1.23 to<br>2.02)      | 1.18<br>(0.92 to<br>1.45)     | 1.85<br>(1.39 to<br>2.29)       |
| Pneumococcal meningitis              | 21.65<br>(19.74 to<br>23.93)          | 11.07<br>(8.15 to<br>14.05)           | 11.11<br>(8.28 to<br>14.10)         | 11.42<br>(8.19 to<br>14.87)           | 0.42<br>(0.39 to<br>0.47)    | 0.34<br>(0.29 to<br>0.41)      | 0.35<br>(0.29 to<br>0.42)     | 0.33<br>(0.27 to<br>0.40)       |
| H influenzae type B meningitis       | 9.84<br>(8.92 to<br>10.95)            | 11.02<br>(2.66 to<br>22.25)           | 9.66<br>(2.63 to<br>17.58)          | 15.31<br>(2.89 to<br>33.80)           | 0.16<br>(0.14 to<br>0.17)    | 0.17<br>(0.07 to<br>0.31)      | 0.16<br>(0.08 to<br>0.26)     | 0.22<br>(0.08 to<br>0.44)       |
| Meningococcal meningitis             | 63.04<br>(58.15 to<br>69.85)          | 22.56<br>(15.08 to<br>31.02)          | 13.61<br>(9.01 to<br>18.67)         | 28.34<br>(18.53 to<br>38.98)          | 1.02<br>(0.94 to<br>1.13)    | 0.55<br>(0.41 to<br>0.71)      | 0.35<br>(0.27 to<br>0.44)     | 0.65<br>(0.50 to<br>0.82)       |
| Other meningitis                     | 43.35<br>(39.71 to<br>47.99)          | 19.72<br>(13.37 to<br>26.52)          | 11.38<br>(7.80 to<br>15.60)         | 24.68<br>(17.07 to<br>32.82)          | 0.78<br>(0.71 to<br>0.85)    | 0.54<br>(0.40 to<br>0.70)      | 0.32<br>(0.24 to<br>0.41)     | 0.64<br>(0.50 to<br>0.79)       |
| Encephalitis                         | 25.58<br>(20.70 to<br>35.22)          | 20.43<br>(13.40 to<br>28.04)          | 19.36<br>(12.75 to<br>26.27)        | 21.73<br>(13.78 to<br>30.78)          | 0.49<br>(0.37 to<br>0.63)    | 0.67<br>(0.44 to<br>0.84)      | 0.66<br>(0.45 to<br>0.82)     | 0.66<br>(0.44 to<br>0.84)       |
| Diphtheria                           | 0.18<br>(0.16 to<br>0.21)             | 0.03<br>(0.02 to<br>0.05)             | 0.03<br>(0.02 to<br>0.04)           | 0.05<br>(0.02 to<br>0.08)             | 0.00<br>(0.00 to<br>0.00)    | 0.00<br>(0.00 to<br>0.00)      | 0.00<br>(0.00 to<br>0.00)     | 0.00<br>(0.00 to<br>0.00)       |
| Whooping cough                       | 11.23<br>(4.82 to<br>21.27)           | 2.60<br>(0.32 to<br>6.69)             | 0.93<br>(0.26 to<br>1.95)           | 7.49<br>(0.37 to<br>20.47)            | 0.13<br>(0.06 to<br>0.25)    | 0.03<br>(0.00 to<br>0.08)      | 0.01<br>(0.00 to<br>0.02)     | 0.09<br>(0.01 to<br>0.24)       |
| Tetanus                              | 3.23<br>(2.26 to<br>3.65)             | 0.60<br>(0.38 to<br>0.80)             | 0.58<br>(0.37 to<br>0.78)           | 0.68<br>(0.44 to<br>0.96)             | 0.08<br>(0.06 to<br>0.10)    | 0.02<br>(0.01 to<br>0.02)      | 0.02<br>(0.01 to<br>0.03)     | 0.02<br>(0.01 to<br>0.02)       |
| Measles                              | 0.70<br>(0.58 to<br>0.83)             | 115.85<br>(12.52 to<br>306.78)        | 79.76<br>(9.83 to<br>207.96)        | 173.55<br>(16.33 to<br>488.19)        | 0.01<br>(0.01 to<br>0.01)    | 2.12<br>(0.19 to<br>5.98)      | 1.49<br>(0.14 to<br>4.23)     | 3.13<br>(0.25 to<br>8.81)       |

| Brazil                                  |                                 |                                 |                                 |                                 |                           |                           |                            |                           |
|-----------------------------------------|---------------------------------|---------------------------------|---------------------------------|---------------------------------|---------------------------|---------------------------|----------------------------|---------------------------|
| Cause                                   | YLLs (in 1000s)                 |                                 |                                 |                                 | Deaths (in 1000s)         |                           |                            |                           |
|                                         | 2016                            | 2040 Forecast                   | 2040 Better Scenario            | 2040 Worse Scenario             | 2016                      | 2040 Forecast             | 2040 Better Scenario       | 2040 Worse Scenario       |
| Varicella and herpes zoster             | 13.16<br>(6.17 to<br>18.75)     | 4.31<br>(1.53 to<br>7.22)       | 3.05<br>(1.08 to<br>5.04)       | 5.32<br>(1.88 to<br>8.92)       | 0.23<br>(0.10 to<br>0.31) | 0.13<br>(0.05 to<br>0.20) | 0.10<br>(0.04 to<br>0.15)  | 0.15<br>(0.06 to<br>0.23) |
| Neglected tropical diseases and malaria | 239.20<br>(211.90 to<br>270.98) | 194.59<br>(170.73 to<br>225.25) | 212.11<br>(187.04 to<br>242.35) | 186.93<br>(162.61 to<br>221.44) | 7.97<br>(7.31 to<br>8.61) | 8.65<br>(7.78 to<br>9.68) | 9.96<br>(8.98 to<br>11.04) | 7.86<br>(7.07 to<br>8.84) |



| Brazil                                                                  |                                           |                                     |                                     |                                         |                                  |                                  |                                  |                                  |
|-------------------------------------------------------------------------|-------------------------------------------|-------------------------------------|-------------------------------------|-----------------------------------------|----------------------------------|----------------------------------|----------------------------------|----------------------------------|
| Cause                                                                   | YLLs (in 1000s)                           |                                     |                                     |                                         | Deaths (in 1000s)                |                                  |                                  |                                  |
|                                                                         | 2016                                      | 2040 Forecast                       | 2040 Better Scenario                | 2040 Worse Scenario                     | 2016                             | 2040 Forecast                    | 2040 Better Scenario             | 2040 Worse Scenario              |
| <b>Neonatal disorders</b>                                               | <b>1,997.12</b><br>(1,844.48 to 2,148.58) | <b>803.98</b><br>(644.06 to 984.71) | <b>525.31</b><br>(418.99 to 637.55) | <b>1,124.59</b><br>(890.55 to 1,364.66) | <b>23.08</b><br>(21.32 to 24.83) | <b>9.29</b><br>(7.45 to 11.38)   | <b>6.07</b><br>(4.85 to 7.37)    | <b>13.00</b><br>(10.30 to 15.77) |
| Neonatal preterm birth                                                  | 786.38<br>(709.93 to 857.82)              | 299.38<br>(224.50 to 379.84)        | 159.99<br>(120.80 to 204.03)        | 458.80<br>(357.49 to 568.93)            | 9.09<br>(8.20 to 9.91)           | 3.46<br>(2.59 to 4.39)           | 1.85<br>(1.40 to 2.36)           | 5.30<br>(4.13 to 6.57)           |
| Neonatal encephalopathy due to birth asphyxia and trauma                | 452.94<br>(404.50 to 497.59)              | 160.16<br>(110.45 to 221.34)        | 96.91<br>(67.59 to 132.53)          | 223.22<br>(155.98 to 302.99)            | 5.24<br>(4.68 to 5.75)           | 1.85<br>(1.28 to 2.56)           | 1.12<br>(0.78 to 1.53)           | 2.58<br>(1.80 to 3.50)           |
| Neonatal sepsis and other neonatal infections                           | 362.51<br>(316.69 to 462.12)              | 197.48<br>(147.84 to 269.18)        | 136.56<br>(101.09 to 185.24)        | 262.47<br>(195.84 to 355.23)            | 4.19<br>(3.66 to 5.34)           | 2.28<br>(1.71 to 3.11)           | 1.58<br>(1.17 to 2.14)           | 3.03<br>(2.26 to 4.11)           |
| Hemolytic disease and other neonatal jaundice                           | 15.25<br>(12.94 to 18.02)                 | 4.60<br>(2.75 to 7.50)              | 3.05<br>(1.83 to 4.89)              | 6.25<br>(3.75 to 10.23)                 | 0.18<br>(0.15 to 0.21)           | 0.05<br>(0.03 to 0.09)           | 0.04<br>(0.02 to 0.06)           | 0.07<br>(0.04 to 0.12)           |
| Other neonatal disorders                                                | 380.04<br>(330.01 to 421.49)              | 142.36<br>(100.68 to 193.08)        | 128.81<br>(92.92 to 171.82)         | 173.86<br>(121.49 to 238.84)            | 4.39<br>(3.82 to 4.87)           | 1.65<br>(1.16 to 2.23)           | 1.49<br>(1.07 to 1.99)           | 2.01<br>(1.41 to 2.76)           |
| <b>Nutritional deficiencies</b>                                         | <b>199.15</b><br>(184.85 to 213.17)       | <b>198.18</b><br>(169.81 to 230.06) | <b>232.04</b><br>(199.18 to 268.11) | <b>186.77</b><br>(160.60 to 215.11)     | <b>8.78</b><br>(8.21 to 9.27)    | <b>15.55</b><br>(12.89 to 18.35) | <b>19.65</b><br>(16.44 to 22.95) | <b>13.56</b><br>(11.34 to 16.06) |
| Protein-energy malnutrition                                             | 179.49<br>(161.79 to 194.77)              | 173.32<br>(140.05 to 207.00)        | 211.01<br>(174.38 to 248.48)        | 160.34<br>(130.17 to 188.98)            | 8.06<br>(7.22 to 8.63)           | 13.99<br>(11.10 to 17.04)        | 18.26<br>(14.84 to 21.76)        | 12.02<br>(9.49 to 14.54)         |
| Iodine deficiency                                                       | 0.99<br>(0.46 to 1.91)                    | 4.19<br>(0.18 to 16.54)             | 3.80<br>(0.13 to 17.63)             | 4.33<br>(0.21 to 17.05)                 | 0.03<br>(0.01 to 0.06)           | 0.32<br>(0.01 to 1.61)           | 0.31<br>(0.01 to 1.81)           | 0.31<br>(0.01 to 1.49)           |
| Dietary iron deficiency                                                 | 1.35<br>(0.67 to 2.00)                    | 1.14<br>(0.51 to 1.50)              | 1.26<br>(0.53 to 1.71)              | 1.14<br>(0.53 to 1.50)                  | 0.04<br>(0.01 to 0.04)           | 0.05<br>(0.01 to 0.06)           | 0.05<br>(0.02 to 0.08)           | 0.04<br>(0.01 to 0.06)           |
| Other nutritional deficiencies                                          | 17.31<br>(11.14 to 29.56)                 | 19.52<br>(10.86 to 37.58)           | 15.97<br>(8.88 to 32.50)            | 20.96<br>(11.70 to 39.48)               | 0.66<br>(0.37 to 1.36)           | 1.19<br>(0.62 to 2.51)           | 1.04<br>(0.53 to 2.37)           | 1.19<br>(0.62 to 2.43)           |
| <b>Other communicable, maternal, neonatal, and nutritional diseases</b> | <b>139.67</b><br>(122.34 to 165.62)       | <b>111.68</b><br>(97.19 to 128.36)  | <b>94.25</b><br>(82.30 to 108.17)   | <b>121.73</b><br>(105.12 to 140.33)     | <b>3.32</b><br>(3.01 to 3.67)    | <b>3.93</b><br>(3.46 to 4.42)    | <b>3.45</b><br>(3.03 to 3.86)    | <b>4.10</b><br>(3.60 to 4.60)    |
| Sexually transmitted infections excluding HIV                           | 36.61<br>(21.81 to 59.41)                 | 9.54<br>(6.49 to 14.57)             | 7.37<br>(5.22 to 10.85)             | 11.27<br>(7.34 to 17.62)                | 0.57<br>(0.39 to 0.84)           | 0.24<br>(0.19 to 0.30)           | 0.20<br>(0.16 to 0.25)           | 0.26<br>(0.20 to 0.34)           |
| Syphilis                                                                | 30.39<br>(15.65 to 53.11)                 | 5.56<br>(2.73 to 10.16)             | 3.75<br>(1.83 to 6.91)              | 7.14<br>(3.43 to 13.24)                 | 0.40<br>(0.23 to 0.67)           | 0.10<br>(0.06 to 0.15)           | 0.07<br>(0.05 to 0.11)           | 0.12<br>(0.07 to 0.19)           |
| Chlamydial infection                                                    | 1.20<br>(1.12 to 1.28)                    | 0.77<br>(0.63 to 0.95)              | 0.71<br>(0.58 to 0.88)              | 0.80<br>(0.66 to 0.95)                  | 0.03<br>(0.03 to 0.03)           | 0.03<br>(0.02 to 0.03)           | 0.03<br>(0.02 to 0.03)           | 0.03<br>(0.02 to 0.03)           |
| Gonococcal infection                                                    | 3.28<br>(3.07 to 3.52)                    | 2.14<br>(1.72 to 2.63)              | 1.96<br>(1.58 to 2.40)              | 2.21<br>(1.78 to 2.71)                  | 0.09<br>(0.09 to 0.10)           | 0.08<br>(0.07 to 0.09)           | 0.07<br>(0.06 to 0.09)           | 0.08<br>(0.07 to 0.09)           |
| Other sexually transmitted infections                                   | 1.75<br>(1.63 to 1.88)                    | 1.06<br>(0.84 to 1.31)              | 0.96<br>(0.76 to 1.19)              | 1.11<br>(0.88 to 1.38)                  | 0.04<br>(0.04 to 0.05)           | 0.03<br>(0.03 to 0.04)           | 0.03<br>(0.03 to 0.04)           | 0.03<br>(0.03 to 0.04)           |
| Acute hepatitis                                                         | 38.01<br>(35.73 to 40.30)                 | 31.75<br>(25.19 to 40.18)           | 20.10<br>(15.71 to 25.01)           | 37.22<br>(29.86 to 44.41)               | 1.13<br>(1.07 to 1.19)           | 1.21<br>(0.96 to 1.50)           | 0.78<br>(0.62 to 0.97)           | 1.38<br>(1.12 to 1.63)           |
| Acute hepatitis A                                                       | 1.00<br>(0.77 to 1.26)                    | 0.44<br>(0.29 to 0.67)              | 0.32<br>(0.21 to 0.49)              | 0.52<br>(0.34 to 0.80)                  | 0.02<br>(0.01 to 0.02)           | 0.01<br>(0.01 to 0.02)           | 0.01<br>(0.01 to 0.01)           | 0.01<br>(0.01 to 0.02)           |
| Acute hepatitis B                                                       | 33.52<br>(31.38 to 35.78)                 | 28.31<br>(22.03 to 35.97)           | 17.81<br>(13.75 to 22.43)           | 33.20<br>(26.25 to 40.00)               | 1.01<br>(0.95 to 1.08)           | 1.05<br>(0.82 to 1.32)           | 0.68<br>(0.53 to 0.85)           | 1.21<br>(0.98 to 1.45)           |

|                                       |                                                               |                                                               |                                                               |                                                               |                                                        |                                                            |                                                            |                                                            |
|---------------------------------------|---------------------------------------------------------------|---------------------------------------------------------------|---------------------------------------------------------------|---------------------------------------------------------------|--------------------------------------------------------|------------------------------------------------------------|------------------------------------------------------------|------------------------------------------------------------|
| Acute hepatitis C                     | 0.93<br>(0.70 to<br>1.21)                                     | 1.01<br>(0.69 to<br>1.44)                                     | 0.65<br>(0.44 to<br>0.92)                                     | 1.16<br>(0.81 to<br>1.60)                                     | 0.03<br>(0.02 to<br>0.04)                              | 0.04<br>(0.03 to<br>0.06)                                  | 0.03<br>(0.02 to<br>0.04)                                  | 0.05<br>(0.02 to<br>0.06)                                  |
| Acute hepatitis E                     | 2.56<br>(2.10 to<br>3.06)                                     | 2.00<br>(1.45 to<br>2.69)                                     | 1.31<br>(0.95 to<br>1.74)                                     | 2.35<br>(1.74 to<br>3.03)                                     | 0.07<br>(0.06 to<br>0.09)                              | 0.10<br>(0.07 to<br>0.14)                                  | 0.07<br>(0.05 to<br>0.10)                                  | 0.11<br>(0.08 to<br>0.15)                                  |
| Other unspecified infectious diseases | 65.04<br>(56.66 to<br>74.82)                                  | 70.40<br>(59.99 to<br>80.94)                                  | 66.78<br>(57.30 to<br>76.15)                                  | 73.25<br>(61.76 to<br>84.86)                                  | 1.62<br>(1.36 to<br>1.77)                              | 2.49<br>(2.07 to<br>2.80)                                  | 2.47<br>(2.07 to<br>2.77)                                  | 2.47<br>(2.05 to<br>2.81)                                  |
| <b>Non-communicable diseases</b>      | <b>20,911.35</b><br><b>(20,285.92 to</b><br><b>21,609.48)</b> | <b>28,583.86</b><br><b>(23,847.07 to</b><br><b>34,105.62)</b> | <b>21,140.49</b><br><b>(18,038.60 to</b><br><b>24,745.60)</b> | <b>36,955.94</b><br><b>(30,604.03 to</b><br><b>44,144.08)</b> | <b>991.50</b><br><b>(965.80 to</b><br><b>1,020.47)</b> | <b>1,803.66</b><br><b>(1,474.10 to</b><br><b>2,148.06)</b> | <b>1,407.87</b><br><b>(1,155.45 to</b><br><b>1,673.05)</b> | <b>2,186.35</b><br><b>(1,812.55 to</b><br><b>2,589.07)</b> |
| <b>Brazil</b>                         |                                                               |                                                               |                                                               |                                                               |                                                        |                                                            |                                                            |                                                            |
| Cause                                 | YLLs (in 1000s)                                               |                                                               |                                                               |                                                               | Deaths (in 1000s)                                      |                                                            |                                                            |                                                            |
|                                       | 2016                                                          | 2040 Forecast                                                 | 2040 Better Scenario                                          | 2040 Worse Scenario                                           | 2016                                                   | 2040 Forecast                                              | 2040 Better Scenario                                       | 2040 Worse Scenario                                        |
| <b>Neoplasms</b>                      | <b>5,392.65</b><br><b>(5,217.53 to</b><br><b>5,592.82)</b>    | <b>8,162.99</b><br><b>(7,221.48 to</b><br><b>9,159.80)</b>    | <b>6,830.15</b><br><b>(6,055.19 to</b><br><b>7,651.68)</b>    | <b>9,841.75</b><br><b>(8,771.65 to</b><br><b>11,014.57)</b>   | <b>227.61</b><br><b>(220.47 to</b><br><b>235.62)</b>   | <b>430.19</b><br><b>(379.51 to</b><br><b>486.41)</b>       | <b>374.02</b><br><b>(324.11 to</b><br><b>422.77)</b>       | <b>500.06</b><br><b>(442.45 to</b><br><b>564.32)</b>       |
| Lip and oral cavity cancer            | 120.57<br>(113.82 to<br>127.12)                               | 153.90<br>(99.43 to<br>228.52)                                | 104.51<br>(71.23 to<br>150.81)                                | 258.11<br>(158.53 to<br>403.84)                               | 4.89<br>(4.64 to<br>5.14)                              | 7.10<br>(4.77 to<br>10.17)                                 | 5.12<br>(3.61 to<br>7.13)                                  | 11.56<br>(7.29 to<br>17.45)                                |
| Nasopharynx cancer                    | 16.70<br>(15.85 to<br>17.64)                                  | 18.51<br>(12.81 to<br>25.59)                                  | 10.72<br>(7.67 to<br>14.38)                                   | 32.51<br>(21.83 to<br>46.42)                                  | 0.50<br>(0.47 to<br>0.52)                              | 0.62<br>(0.43 to<br>0.86)                                  | 0.37<br>(0.27 to<br>0.50)                                  | 1.09<br>(0.73 to<br>1.55)                                  |
| Other pharynx cancer                  | 90.49<br>(85.11 to<br>96.18)                                  | 139.02<br>(85.24 to<br>219.06)                                | 121.32<br>(77.31 to<br>182.22)                                | 159.69<br>(95.37 to<br>255.52)                                | 3.40<br>(3.22 to<br>3.60)                              | 6.01<br>(3.72 to<br>9.23)                                  | 5.44<br>(3.57 to<br>8.00)                                  | 6.72<br>(4.02 to<br>10.64)                                 |
| Esophageal cancer                     | 253.55<br>(240.13 to<br>266.50)                               | 333.44<br>(228.62 to<br>483.44)                               | 276.85<br>(199.26 to<br>384.20)                               | 505.01<br>(318.30 to<br>772.45)                               | 10.61<br>(10.11 to<br>11.11)                           | 15.57<br>(10.88 to<br>22.35)                               | 13.46<br>(9.80 to<br>18.68)                                | 23.08<br>(14.87 to<br>35.02)                               |
| Stomach cancer                        | 442.42<br>(424.08 to<br>460.89)                               | 511.54<br>(398.12 to<br>653.19)                               | 363.50<br>(293.67 to<br>456.64)                               | 589.64<br>(461.05 to<br>754.94)                               | 20.28<br>(19.50 to<br>21.08)                           | 28.66<br>(22.04 to<br>37.00)                               | 21.01<br>(16.53 to<br>26.57)                               | 32.10<br>(24.76 to<br>41.41)                               |
| Colon and rectum cancer               | 436.78<br>(414.00 to<br>461.09)                               | 769.29<br>(544.28 to<br>1,040.45)                             | 566.81<br>(408.42 to<br>772.29)                               | 907.59<br>(634.30 to<br>1,262.81)                             | 20.25<br>(19.23 to<br>21.41)                           | 44.92<br>(31.62 to<br>62.17)                               | 34.51<br>(24.64 to<br>47.58)                               | 51.06<br>(35.60 to<br>71.37)                               |
| Liver cancer                          | 242.83<br>(232.70 to<br>253.42)                               | 464.55<br>(325.21 to<br>679.34)                               | 427.87<br>(321.16 to<br>592.84)                               | 512.22<br>(350.13 to<br>761.91)                               | 10.73<br>(10.29 to<br>11.16)                           | 24.30<br>(17.23 to<br>35.22)                               | 23.32<br>(17.60 to<br>31.71)                               | 25.98<br>(18.04 to<br>37.92)                               |
| Liver cancer due to hepatitis B       | 72.56<br>(57.72 to<br>89.83)                                  | 128.37<br>(84.24 to<br>195.95)                                | 120.66<br>(82.67 to<br>172.89)                                | 136.94<br>(87.11 to<br>217.59)                                | 2.79<br>(2.13 to<br>3.47)                              | 5.80<br>(3.73 to<br>8.87)                                  | 5.64<br>(3.77 to<br>8.17)                                  | 6.06<br>(3.81 to<br>9.46)                                  |
| Liver cancer due to hepatitis C       | 83.36<br>(73.93 to<br>92.43)                                  | 168.09<br>(117.23 to<br>244.28)                               | 161.01<br>(118.73 to<br>219.56)                               | 177.11<br>(122.08 to<br>260.99)                               | 4.10<br>(3.68 to<br>4.49)                              | 9.72<br>(6.85 to<br>13.79)                                 | 9.69<br>(7.18 to<br>13.13)                                 | 9.95<br>(6.96 to<br>14.43)                                 |
| Liver cancer due to alcohol use       | 51.50<br>(44.00 to<br>59.29)                                  | 101.85<br>(67.99 to<br>153.88)                                | 84.04<br>(59.36 to<br>120.19)                                 | 127.79<br>(82.40 to<br>195.40)                                | 2.39<br>(2.08 to<br>2.71)                              | 5.46<br>(3.68 to<br>8.20)                                  | 4.75<br>(3.34 to<br>6.78)                                  | 6.54<br>(4.27 to<br>9.94)                                  |
| Liver cancer due to other causes      | 35.41<br>(31.37 to<br>39.47)                                  | 66.23<br>(42.58 to<br>102.96)                                 | 62.16<br>(43.76 to<br>90.30)                                  | 70.58<br>(44.87 to<br>111.58)                                 | 1.46<br>(1.30 to<br>1.62)                              | 3.32<br>(2.13 to<br>5.09)                                  | 3.24<br>(2.25 to<br>4.64)                                  | 3.44<br>(2.19 to<br>5.50)                                  |
| Gallbladder and biliary tract cancer  | 98.83<br>(93.93 to<br>103.44)                                 | 125.76<br>(111.84 to<br>138.43)                               | 120.34<br>(105.40 to<br>134.51)                               | 123.29<br>(111.12 to<br>134.71)                               | 4.79<br>(4.57 to<br>5.01)                              | 7.38<br>(6.60 to<br>8.17)                                  | 7.28<br>(6.36 to<br>8.20)                                  | 7.05<br>(6.36 to<br>7.73)                                  |
| Pancreatic cancer                     | 234.71<br>(225.15 to<br>244.53)                               | 441.63<br>(378.41 to<br>526.38)                               | 438.06<br>(376.77 to<br>519.41)                               | 470.01<br>(398.97 to<br>564.23)                               | 11.28<br>(10.82 to<br>11.74)                           | 24.71<br>(20.84 to<br>29.87)                               | 25.12<br>(21.10 to<br>30.26)                               | 25.69<br>(21.55 to<br>31.34)                               |
| Larynx cancer                         | 114.36<br>(108.23 to<br>120.54)                               | 107.74<br>(65.33 to<br>167.25)                                | 66.42<br>(43.08 to<br>101.64)                                 | 210.66<br>(119.77 to<br>342.96)                               | 4.69<br>(4.46 to<br>4.92)                              | 4.83<br>(3.02 to<br>7.59)                                  | 3.14<br>(2.01 to<br>4.89)                                  | 9.35<br>(5.32 to<br>15.05)                                 |
| Tracheal, bronchus, and lung cancer   | 652.96<br>(624.00 to<br>681.54)                               | 827.76<br>(678.25 to<br>1,004.00)                             | 627.49<br>(523.69 to<br>747.99)                               | 1,569.60<br>(1,251.89 to<br>1,956.46)                         | 30.07<br>(28.79 to<br>31.37)                           | 42.37<br>(34.56 to<br>51.79)                               | 33.56<br>(27.77 to<br>40.32)                               | 79.08<br>(62.51 to<br>99.35)                               |

|                                 |                                 |                                 |                                 |                                   |                              |                              |                              |                              |
|---------------------------------|---------------------------------|---------------------------------|---------------------------------|-----------------------------------|------------------------------|------------------------------|------------------------------|------------------------------|
| Malignant skin melanoma         | 53.86<br>(46.30 to<br>65.90)    | 89.42<br>(75.68 to<br>108.94)   | 111.36<br>(93.97 to<br>133.99)  | 79.77<br>(68.00 to<br>96.34)      | 2.10<br>(1.80 to<br>2.50)    | 4.32<br>(3.61 to<br>5.23)    | 5.55<br>(4.63 to<br>6.75)    | 3.74<br>(3.17 to<br>4.44)    |
| Non-melanoma skin cancer        | 46.23<br>(44.09 to<br>48.35)    | 85.01<br>(74.25 to<br>97.30)    | 65.44<br>(57.21 to<br>75.49)    | 89.76<br>(80.96 to<br>97.96)      | 2.51<br>(2.39 to<br>2.62)    | 5.74<br>(4.97 to<br>6.60)    | 4.65<br>(3.95 to<br>5.38)    | 5.81<br>(5.17 to<br>6.45)    |
| Breast cancer                   | 460.80<br>(431.80 to<br>492.28) | 693.15<br>(539.62 to<br>890.18) | 526.40<br>(415.39 to<br>668.73) | 796.70<br>(609.59 to<br>1,059.86) | 17.02<br>(15.98 to<br>18.19) | 31.96<br>(25.16 to<br>41.39) | 25.03<br>(19.76 to<br>31.94) | 35.81<br>(27.73 to<br>46.63) |
| Cervical cancer                 | 260.71<br>(247.35 to<br>277.17) | 272.57<br>(216.53 to<br>343.00) | 199.52<br>(158.68 to<br>255.89) | 317.84<br>(252.37 to<br>407.37)   | 9.06<br>(8.59 to<br>9.65)    | 11.88<br>(9.43 to<br>14.95)  | 8.91<br>(7.14 to<br>11.24)   | 13.57<br>(10.74 to<br>17.29) |
| Uterine cancer                  | 47.25<br>(44.25 to<br>50.63)    | 86.97<br>(74.15 to<br>101.19)   | 72.43<br>(61.64 to<br>85.24)    | 91.23<br>(77.81 to<br>104.68)     | 2.25<br>(2.11 to<br>2.41)    | 5.02<br>(4.27 to<br>5.81)    | 4.28<br>(3.65 to<br>5.02)    | 5.16<br>(4.45 to<br>5.87)    |
| Ovarian cancer                  | 108.71<br>(102.47 to<br>115.47) | 180.38<br>(131.79 to<br>248.62) | 152.12<br>(113.07 to<br>202.33) | 189.68<br>(137.25 to<br>262.01)   | 4.17<br>(3.92 to<br>4.43)    | 8.34<br>(5.96 to<br>11.77)   | 7.13<br>(5.23 to<br>9.64)    | 8.71<br>(6.16 to<br>12.41)   |
| Prostate cancer                 | 279.80<br>(260.74 to<br>373.49) | 727.45<br>(630.00 to<br>951.71) | 649.97<br>(547.29 to<br>846.99) | 721.68<br>(637.86 to<br>953.07)   | 19.10<br>(17.89 to<br>25.28) | 57.08<br>(47.93 to<br>73.62) | 53.12<br>(42.44 to<br>67.44) | 54.59<br>(46.54 to<br>71.72) |
| Testicular cancer               | 15.23<br>(13.52 to<br>17.79)    | 11.71<br>(9.00 to<br>14.97)     | 9.14<br>(7.04 to<br>11.68)      | 12.80<br>(10.02 to<br>16.24)      | 0.32<br>(0.29 to<br>0.37)    | 0.32<br>(0.27 to<br>0.39)    | 0.26<br>(0.21 to<br>0.31)    | 0.34<br>(0.28 to<br>0.40)    |
| <b>Brazil</b>                   |                                 |                                 |                                 |                                   |                              |                              |                              |                              |
| Cause                           | YLLs (in 1000s)                 |                                 |                                 |                                   | Deaths (in 1000s)            |                              |                              |                              |
|                                 | 2016                            | 2040 Forecast                   | 2040 Better Scenario            | 2040 Worse Scenario               | 2016                         | 2040 Forecast                | 2040 Better Scenario         | 2040 Worse Scenario          |
| Kidney cancer                   | 90.32<br>(86.35 to<br>94.34)    | 148.78<br>(130.35 to<br>168.74) | 153.16<br>(133.87 to<br>173.45) | 153.56<br>(130.01 to<br>178.14)   | 3.61<br>(3.45 to<br>3.76)    | 7.30<br>(6.34 to<br>8.32)    | 7.77<br>(6.66 to<br>8.92)    | 7.33<br>(6.20 to<br>8.59)    |
| Bladder cancer                  | 78.60<br>(75.02 to<br>82.33)    | 130.34<br>(106.03 to<br>160.64) | 116.78<br>(95.40 to<br>143.90)  | 149.17<br>(118.93 to<br>188.93)   | 4.65<br>(4.42 to<br>4.88)    | 9.09<br>(7.28 to<br>11.37)   | 8.44<br>(6.64 to<br>10.51)   | 10.08<br>(7.93 to<br>12.93)  |
| Brain and nervous system cancer | 311.88<br>(231.61 to<br>342.87) | 430.05<br>(308.30 to<br>484.07) | 388.89<br>(277.06 to<br>444.05) | 439.60<br>(315.60 to<br>490.84)   | 9.40<br>(6.63 to<br>10.34)   | 16.97<br>(11.57 to<br>19.25) | 15.76<br>(10.71 to<br>18.24) | 16.79<br>(11.58 to<br>18.78) |
| Thyroid cancer                  | 22.08<br>(21.01 to<br>23.29)    | 40.01<br>(28.72 to<br>58.64)    | 30.90<br>(23.16 to<br>42.72)    | 42.43<br>(30.24 to<br>62.46)      | 1.00<br>(0.95 to<br>1.05)    | 2.20<br>(1.59 to<br>3.18)    | 1.76<br>(1.32 to<br>2.43)    | 2.27<br>(1.63 to<br>3.27)    |
| Mesothelioma                    | 21.02<br>(19.48 to<br>22.30)    | 32.11<br>(28.10 to<br>35.72)    | 33.11<br>(28.66 to<br>37.43)    | 30.97<br>(27.31 to<br>34.32)      | 0.78<br>(0.72 to<br>0.82)    | 1.61<br>(1.42 to<br>1.81)    | 1.73<br>(1.49 to<br>1.99)    | 1.50<br>(1.34 to<br>1.67)    |
| Hodgkin lymphoma                | 25.71<br>(23.81 to<br>29.91)    | 22.96<br>(18.97 to<br>28.14)    | 15.82<br>(13.11 to<br>19.12)    | 26.29<br>(22.05 to<br>31.53)      | 0.70<br>(0.65 to<br>0.80)    | 0.83<br>(0.70 to<br>0.98)    | 0.58<br>(0.49 to<br>0.70)    | 0.92<br>(0.79 to<br>1.06)    |
| Non-Hodgkin lymphoma            | 166.95<br>(157.52 to<br>189.66) | 274.01<br>(225.13 to<br>337.28) | 224.47<br>(188.05 to<br>273.70) | 285.46<br>(235.70 to<br>351.94)   | 5.98<br>(5.64 to<br>6.53)    | 12.71<br>(10.44 to<br>15.76) | 10.75<br>(8.94 to<br>13.17)  | 12.82<br>(10.56 to<br>15.93) |
| Multiple myeloma                | 69.71<br>(55.91 to<br>80.40)    | 138.16<br>(104.65 to<br>174.10) | 120.92<br>(91.09 to<br>150.75)  | 138.96<br>(104.31 to<br>177.76)   | 3.11<br>(2.44 to<br>3.47)    | 7.05<br>(5.22 to<br>8.93)    | 6.35<br>(4.66 to<br>7.91)    | 6.94<br>(5.10 to<br>8.78)    |
| Leukemia                        | 282.48<br>(269.49 to<br>298.30) | 368.76<br>(308.67 to<br>436.59) | 311.36<br>(267.18 to<br>368.75) | 403.89<br>(334.53 to<br>483.80)   | 8.30<br>(7.98 to<br>8.63)    | 15.82<br>(13.06 to<br>18.83) | 13.77<br>(11.63 to<br>16.28) | 16.71<br>(13.74 to<br>20.33) |
| Acute lymphoid leukemia         | 77.57<br>(72.10 to<br>84.38)    | 64.89<br>(53.67 to<br>77.84)    | 51.75<br>(43.23 to<br>61.72)    | 74.17<br>(62.15 to<br>88.60)      | 1.45<br>(1.35 to<br>1.58)    | 1.69<br>(1.39 to<br>2.03)    | 1.37<br>(1.15 to<br>1.64)    | 1.88<br>(1.57 to<br>2.26)    |
| Chronic lymphoid leukemia       | 12.60<br>(10.28 to<br>14.13)    | 22.96<br>(17.02 to<br>29.98)    | 20.78<br>(15.36 to<br>27.03)    | 23.99<br>(17.37 to<br>32.21)      | 0.73<br>(0.60 to<br>0.81)    | 1.54<br>(1.12 to<br>2.03)    | 1.45<br>(1.05 to<br>1.90)    | 1.56<br>(1.12 to<br>2.09)    |
| Acute myeloid leukemia          | 104.56<br>(95.82 to<br>114.33)  | 169.86<br>(140.39 to<br>207.94) | 155.77<br>(131.55 to<br>188.16) | 179.11<br>(146.63 to<br>222.24)   | 3.05<br>(2.77 to<br>3.32)    | 6.78<br>(5.58 to<br>8.27)    | 6.41<br>(5.33 to<br>7.65)    | 6.93<br>(5.61 to<br>8.61)    |



|                                               |                                            |                                             |                                            |                                              |                                      |                                      |                                      |                                        |
|-----------------------------------------------|--------------------------------------------|---------------------------------------------|--------------------------------------------|----------------------------------------------|--------------------------------------|--------------------------------------|--------------------------------------|----------------------------------------|
| Chronic myeloid leukemia                      | 14.45<br>(13.36 to 16.17)                  | 16.67<br>(11.92 to 22.39)                   | 10.11<br>(7.63 to 13.40)                   | 20.21<br>(14.98 to 26.70)                    | 0.56<br>(0.52 to 0.62)               | 0.81<br>(0.58 to 1.09)               | 0.51<br>(0.38 to 0.68)               | 0.95<br>(0.71 to 1.26)                 |
| Other leukemia                                | 73.30<br>(68.39 to 80.18)                  | 94.39<br>(78.16 to 113.27)                  | 72.95<br>(61.86 to 86.58)                  | 106.41<br>(88.41 to 127.76)                  | 2.51<br>(2.36 to 2.71)               | 4.99<br>(4.14 to 6.00)               | 4.04<br>(3.39 to 4.85)               | 5.39<br>(4.42 to 6.48)                 |
| Other neoplasms                               | 347.12<br>(331.42 to 368.18)               | 537.99<br>(496.24 to 583.67)                | 524.46<br>(478.42 to 575.00)               | 533.62<br>(496.35 to 575.91)                 | 12.05<br>(11.54 to 12.63)            | 25.48<br>(23.43 to 27.50)            | 25.86<br>(23.15 to 28.58)            | 24.21<br>(22.61 to 26.00)              |
| <b>Cardiovascular diseases</b>                | <b>7,219.05<br/>(6,985.14 to 7,480.49)</b> | <b>8,394.17<br/>(5,731.45 to 12,004.10)</b> | <b>4,738.08<br/>(3,416.20 to 6,663.89)</b> | <b>12,931.90<br/>(8,909.14 to 18,585.88)</b> | <b>378.28<br/>(367.47 to 390.94)</b> | <b>574.71<br/>(382.89 to 836.09)</b> | <b>354.07<br/>(245.35 to 504.15)</b> | <b>792.82<br/>(545.90 to 1,137.81)</b> |
| Rheumatic heart disease                       | 82.09<br>(76.36 to 87.77)                  | 54.66<br>(42.07 to 72.90)                   | 38.25<br>(29.51 to 49.52)                  | 62.05<br>(48.69 to 81.10)                    | 2.75<br>(2.57 to 2.94)               | 2.52<br>(1.95 to 3.31)               | 1.83<br>(1.41 to 2.39)               | 2.75<br>(2.18 to 3.56)                 |
| Ischemic heart disease                        | 3,477.40<br>(3,328.07 to 3,626.80)         | 3,558.13<br>(2,129.97 to 5,685.24)          | 1,774.38<br>(1,060.91 to 2,819.77)         | 6,028.12<br>(3,505.13 to 9,698.52)           | 185.19<br>(178.24 to 192.53)         | 244.86<br>(145.85 to 383.61)         | 134.19<br>(78.22 to 213.63)          | 368.61<br>(214.46 to 583.48)           |
| Stroke                                        | 2,049.89<br>(1,953.94 to 2,143.60)         | 2,038.10<br>(1,253.56 to 3,257.28)          | 945.60<br>(603.23 to 1,457.93)             | 3,539.29<br>(2,069.94 to 5,659.37)           | 107.66<br>(101.75 to 113.03)         | 138.28<br>(83.18 to 234.23)          | 73.36<br>(44.80 to 117.71)           | 207.49<br>(125.65 to 330.03)           |
| Ischemic stroke                               | 969.87<br>(916.58 to 1,020.70)             | 1,126.42<br>(632.29 to 2,002.64)            | 582.46<br>(343.27 to 967.29)               | 1,733.72<br>(969.15 to 3,025.94)             | 66.27<br>(62.22 to 69.88)            | 93.79<br>(51.29 to 174.27)           | 53.46<br>(30.65 to 95.21)            | 129.40<br>(72.90 to 240.04)            |
| Intracerebral hemorrhage                      | 1,080.02<br>(1,027.42 to 1,131.23)         | 911.68<br>(519.44 to 1,496.29)              | 363.14<br>(237.39 to 551.22)               | 1,805.57<br>(973.70 to 3,106.77)             | 41.39<br>(39.28 to 43.38)            | 44.50<br>(26.89 to 70.02)            | 19.91<br>(13.14 to 29.57)            | 78.09<br>(45.13 to 125.35)             |
| Hypertensive heart disease                    | 397.77<br>(315.44 to 575.18)               | 811.86<br>(469.13 to 1,558.12)              | 576.95<br>(375.62 to 962.98)               | 1,056.81<br>(589.22 to 2,070.77)             | 24.13<br>(18.68 to 34.08)            | 62.99<br>(35.98 to 129.32)           | 47.35<br>(29.99 to 84.00)            | 76.41<br>(42.38 to 154.74)             |
| Cardiomyopathy and myocarditis                | 432.14<br>(366.30 to 499.66)               | 649.99<br>(454.40 to 893.83)                | 419.64<br>(307.40 to 570.79)               | 755.10<br>(543.44 to 1,037.62)               | 18.44<br>(15.99 to 21.83)            | 37.01<br>(24.93 to 53.50)            | 24.75<br>(17.26 to 35.26)            | 41.14<br>(28.77 to 57.86)              |
| Myocarditis                                   | 18.03<br>(15.29 to 26.85)                  | 18.99<br>(15.54 to 29.10)                   | 18.25<br>(14.69 to 27.00)                  | 19.15<br>(15.53 to 29.47)                    | 0.61<br>(0.52 to 0.94)               | 1.08<br>(0.86 to 1.71)               | 1.13<br>(0.87 to 1.75)               | 1.01<br>(0.81 to 1.58)                 |
| <b>Brazil</b>                                 |                                            |                                             |                                            |                                              |                                      |                                      |                                      |                                        |
| Cause                                         | YLLs (in 1000s)                            |                                             |                                            |                                              | Deaths (in 1000s)                    |                                      |                                      |                                        |
|                                               | 2016                                       | 2040 Forecast                               | 2040 Better Scenario                       | 2040 Worse Scenario                          | 2016                                 | 2040 Forecast                        | 2040 Better Scenario                 | 2040 Worse Scenario                    |
| Alcoholic cardiomyopathy                      | 48.02<br>(39.09 to 81.49)                  | 79.43<br>(61.98 to 137.45)                  | 66.16<br>(51.86 to 107.47)                 | 93.72<br>(73.53 to 161.36)                   | 1.56<br>(1.28 to 2.76)               | 3.00<br>(2.33 to 5.39)               | 2.62<br>(2.01 to 4.55)               | 3.39<br>(2.66 to 5.95)                 |
| Other cardiomyopathy                          | 366.09<br>(297.89 to 400.46)               | 551.56<br>(362.69 to 788.88)                | 335.23<br>(225.25 to 473.93)               | 642.23<br>(435.81 to 913.75)                 | 16.27<br>(13.74 to 18.34)            | 32.93<br>(21.13 to 49.94)            | 21.01<br>(13.54 to 31.50)            | 36.74<br>(24.78 to 54.02)              |
| Atrial fibrillation and flutter               | 64.18<br>(52.28 to 77.21)                  | 145.50<br>(107.91 to 191.22)                | 129.79<br>(96.28 to 169.58)                | 155.45<br>(115.52 to 204.82)                 | 5.87<br>(4.76 to 7.15)               | 14.76<br>(10.97 to 19.53)            | 13.82<br>(10.15 to 18.38)            | 14.90<br>(11.14 to 19.57)              |
| Aortic aneurysm                               | 197.39<br>(186.78 to 208.38)               | 266.23<br>(209.92 to 342.29)                | 224.62<br>(180.05 to 286.25)               | 300.83<br>(234.41 to 387.59)                 | 9.83<br>(9.32 to 10.36)              | 16.30<br>(12.86 to 20.85)            | 14.44<br>(11.44 to 18.55)            | 17.27<br>(13.72 to 21.91)              |
| Peripheral artery disease                     | 37.63<br>(22.95 to 58.61)                  | 118.62<br>(66.33 to 189.24)                 | 109.26<br>(61.82 to 175.57)                | 123.29<br>(69.66 to 196.42)                  | 2.65<br>(1.59 to 4.25)               | 10.05<br>(5.71 to 16.54)             | 9.78<br>(5.48 to 16.41)              | 9.82<br>(5.55 to 16.10)                |
| Endocarditis                                  | 79.26<br>(60.75 to 99.98)                  | 115.41<br>(76.32 to 158.67)                 | 103.95<br>(70.72 to 140.40)                | 119.87<br>(80.89 to 163.66)                  | 2.75<br>(1.93 to 3.34)               | 5.42<br>(3.32 to 7.75)               | 5.10<br>(3.18 to 7.26)               | 5.38<br>(3.29 to 7.67)                 |
| Other cardiovascular and circulatory diseases | 401.32<br>(380.44 to 421.57)               | 635.65<br>(473.87 to 863.91)                | 415.63<br>(314.37 to 546.83)               | 791.10<br>(590.71 to 1,043.62)               | 19.01<br>(18.00 to 19.98)            | 42.50<br>(31.76 to 57.15)            | 29.44<br>(22.15 to 38.88)            | 49.05<br>(37.16 to 64.39)              |
| <b>Chronic respiratory diseases</b>           | <b>1,197.75<br/>(1,156.98 to 1,240.89)</b> | <b>1,538.90<br/>(1,228.35 to 1,938.67)</b>  | <b>1,186.64<br/>(978.06 to 1,433.14)</b>   | <b>2,550.75<br/>(1,923.24 to 3,401.93)</b>   | <b>72.00<br/>(69.71 to 74.42)</b>    | <b>110.58<br/>(87.69 to 137.13)</b>  | <b>90.13<br/>(71.86 to 109.74)</b>   | <b>176.67<br/>(135.79 to 230.38)</b>   |

|                                                                |                                                            |                                                            |                                                          |                                                            |                                                   |                                                   |                                                   |                                                   |
|----------------------------------------------------------------|------------------------------------------------------------|------------------------------------------------------------|----------------------------------------------------------|------------------------------------------------------------|---------------------------------------------------|---------------------------------------------------|---------------------------------------------------|---------------------------------------------------|
| Chronic obstructive pulmonary disease                          | 1,026.59<br>(988.51 to<br>1,071.23)                        | 1,326.46<br>(1,015.88 to<br>1,727.04)                      | 944.82<br>(733.74 to<br>1,184.54)                        | 2,339.38<br>(1,723.85 to<br>3,180.42)                      | 64.67<br>(62.49 to<br>67.22)                      | 97.84<br>(75.11 to<br>124.45)                     | 74.73<br>(57.39 to<br>94.45)                      | 164.67<br>(123.00 to<br>218.02)                   |
| Pneumoconiosis                                                 | 10.27<br>(9.28 to<br>11.58)                                | 8.73<br>(7.04 to<br>10.85)                                 | 7.39<br>(5.84 to<br>9.30)                                | 9.58<br>(7.80 to<br>11.54)                                 | 0.45<br>(0.41 to<br>0.51)                         | 0.58<br>(0.45 to<br>0.74)                         | 0.56<br>(0.42 to<br>0.75)                         | 0.60<br>(0.47 to<br>0.75)                         |
| Silicosis                                                      | 5.50<br>(3.85 to<br>6.55)                                  | 3.02<br>(1.72 to<br>4.36)                                  | 1.57<br>(0.88 to<br>2.29)                                | 3.76<br>(2.30 to<br>5.15)                                  | 0.22<br>(0.16 to<br>0.26)                         | 0.17<br>(0.10 to<br>0.24)                         | 0.10<br>(0.06 to<br>0.15)                         | 0.20<br>(0.12 to<br>0.27)                         |
| Asbestosis                                                     | 1.41<br>(1.03 to<br>2.72)                                  | 2.05<br>(1.44 to<br>3.23)                                  | 2.52<br>(1.87 to<br>3.44)                                | 1.85<br>(1.26 to<br>3.01)                                  | 0.06<br>(0.04 to<br>0.12)                         | 0.14<br>(0.09 to<br>0.20)                         | 0.18<br>(0.13 to<br>0.25)                         | 0.12<br>(0.08 to<br>0.18)                         |
| Coal workers pneumoconiosis                                    | 1.01<br>(0.64 to<br>1.19)                                  | 1.06<br>(0.65 to<br>1.58)                                  | 0.91<br>(0.51 to<br>1.46)                                | 1.18<br>(0.73 to<br>1.72)                                  | 0.05<br>(0.03 to<br>0.06)                         | 0.08<br>(0.05 to<br>0.15)                         | 0.08<br>(0.04 to<br>0.13)                         | 0.08<br>(0.05 to<br>0.13)                         |
| Other pneumoconiosis                                           | 2.35<br>(2.06 to<br>3.33)                                  | 2.60<br>(1.90 to<br>3.71)                                  | 2.39<br>(1.60 to<br>3.59)                                | 2.79<br>(2.06 to<br>3.92)                                  | 0.11<br>(0.10 to<br>0.16)                         | 0.20<br>(0.13 to<br>0.31)                         | 0.21<br>(0.12 to<br>0.34)                         | 0.20<br>(0.14 to<br>0.30)                         |
| Asthma                                                         | 66.57<br>(60.00 to<br>75.63)                               | 47.17<br>(28.31 to<br>77.03)                               | 23.74<br>(15.17 to<br>37.90)                             | 62.88<br>(38.78 to<br>100.21)                              | 2.69<br>(2.48 to<br>3.11)                         | 2.86<br>(1.70 to<br>4.79)                         | 1.54<br>(0.96 to<br>2.50)                         | 3.58<br>(2.19 to<br>5.76)                         |
| Interstitial lung disease and pulmonary sarcoidosis            | 64.81<br>(41.87 to<br>82.48)                               | 126.00<br>(80.50 to<br>160.02)                             | 180.53<br>(119.74 to<br>221.42)                          | 106.34<br>(67.25 to<br>135.29)                             | 3.32<br>(2.03 to<br>4.08)                         | 8.01<br>(4.81 to<br>10.22)                        | 11.97<br>(7.48 to<br>14.91)                       | 6.52<br>(3.90 to<br>8.06)                         |
| Other chronic respiratory diseases                             | 29.52<br>(20.56 to<br>39.29)                               | 30.53<br>(19.74 to<br>40.29)                               | 30.17<br>(19.50 to<br>39.40)                             | 32.57<br>(21.26 to<br>42.76)                               | 0.86<br>(0.54 to<br>1.14)                         | 1.28<br>(0.76 to<br>1.68)                         | 1.33<br>(0.79 to<br>1.75)                         | 1.31<br>(0.78 to<br>1.71)                         |
| <b>Cirrhosis and other chronic liver diseases</b>              | <b>1,107.73</b><br><b>(1,038.05 to</b><br><b>1,178.10)</b> | <b>1,392.11</b><br><b>(1,246.99 to</b><br><b>1,560.13)</b> | <b>1,048.65</b><br><b>(933.25 to</b><br><b>1,173.67)</b> | <b>1,597.03</b><br><b>(1,455.94 to</b><br><b>1,739.11)</b> | <b>37.24</b><br><b>(35.14 to</b><br><b>39.29)</b> | <b>56.26</b><br><b>(50.77 to</b><br><b>62.47)</b> | <b>43.84</b><br><b>(39.24 to</b><br><b>48.77)</b> | <b>62.51</b><br><b>(57.51 to</b><br><b>67.35)</b> |
| Cirrhosis and other chronic liver diseases due to hepatitis B  | 167.84<br>(150.89 to<br>184.68)                            | 218.08<br>(189.08 to<br>251.23)                            | 174.84<br>(150.25 to<br>200.80)                          | 231.65<br>(202.34 to<br>263.07)                            | 5.78<br>(5.23 to<br>6.31)                         | 8.96<br>(7.77 to<br>10.24)                        | 7.37<br>(6.38 to<br>8.47)                         | 9.30<br>(8.21 to<br>10.40)                        |
| Cirrhosis and other chronic liver diseases due to hepatitis C  | 461.95<br>(428.99 to<br>498.20)                            | 599.33<br>(522.50 to<br>683.11)                            | 472.62<br>(415.52 to<br>536.71)                          | 641.62<br>(574.60 to<br>712.38)                            | 15.39<br>(14.39 to<br>16.43)                      | 23.61<br>(20.88 to<br>26.54)                      | 19.02<br>(16.77 to<br>21.54)                      | 24.77<br>(22.46 to<br>27.24)                      |
| Cirrhosis and other chronic liver diseases due to alcohol use  | 369.01<br>(340.32 to<br>401.73)                            | 453.79<br>(393.32 to<br>519.83)                            | 304.51<br>(264.59 to<br>348.31)                          | 593.44<br>(524.71 to<br>666.83)                            | 12.74<br>(11.81 to<br>13.71)                      | 18.69<br>(16.51 to<br>21.07)                      | 13.31<br>(11.63 to<br>15.06)                      | 23.23<br>(20.91 to<br>25.68)                      |
| Cirrhosis and other chronic liver diseases due to other causes | 108.93<br>(94.37 to<br>124.83)                             | 120.91<br>(100.68 to<br>145.55)                            | 96.68<br>(80.34 to<br>115.50)                            | 130.32<br>(109.53 to<br>154.46)                            | 3.34<br>(2.88 to<br>3.82)                         | 5.01<br>(4.21 to<br>6.09)                         | 4.14<br>(3.44 to<br>4.92)                         | 5.22<br>(4.42 to<br>6.18)                         |
| <b>Digestive diseases</b>                                      | <b>753.57</b><br><b>(645.62 to</b><br><b>796.83)</b>       | <b>1,007.00</b><br><b>(802.01 to</b><br><b>1,257.39)</b>   | <b>780.08</b><br><b>(635.43 to</b><br><b>961.49)</b>     | <b>1,117.75</b><br><b>(892.27 to</b><br><b>1,400.17)</b>   | <b>33.49</b><br><b>(28.90 to</b><br><b>35.53)</b> | <b>61.66</b><br><b>(49.56 to</b><br><b>76.05)</b> | <b>50.69</b><br><b>(40.81 to</b><br><b>61.43)</b> | <b>64.85</b><br><b>(52.00 to</b><br><b>79.22)</b> |
| Peptic ulcer disease                                           | 99.51<br>(87.20 to<br>112.48)                              | 85.25<br>(66.51 to<br>108.72)                              | 54.75<br>(42.43 to<br>69.23)                             | 105.47<br>(83.32 to<br>129.72)                             | 4.66<br>(4.13 to<br>5.23)                         | 5.50<br>(4.37 to<br>6.91)                         | 3.67<br>(2.89 to<br>4.62)                         | 6.48<br>(5.19 to<br>7.85)                         |
| <b>Brazil</b>                                                  |                                                            |                                                            |                                                          |                                                            |                                                   |                                                   |                                                   |                                                   |
| Cause                                                          | YLLs (in 1000s)                                            |                                                            |                                                          |                                                            | Deaths (in 1000s)                                 |                                                   |                                                   |                                                   |
|                                                                | 2016                                                       | 2040 Forecast                                              | 2040 Better Scenario                                     | 2040 Worse Scenario                                        | 2016                                              | 2040 Forecast                                     | 2040 Better Scenario                              | 2040 Worse Scenario                               |
| Gastritis and duodenitis                                       | 14.97<br>(11.71 to<br>18.10)                               | 25.11<br>(18.83 to<br>32.93)                               | 18.79<br>(14.32 to<br>24.47)                             | 27.08<br>(21.17 to<br>33.41)                               | 0.69<br>(0.54 to<br>0.83)                         | 1.56<br>(1.18 to<br>2.03)                         | 1.23<br>(0.93 to<br>1.65)                         | 1.61<br>(1.26 to<br>2.02)                         |
| Appendicitis                                                   | 45.73<br>(36.74 to<br>53.94)                               | 36.56<br>(27.25 to<br>46.55)                               | 23.79<br>(17.99 to<br>30.20)                             | 42.56<br>(32.62 to<br>53.21)                               | 1.41<br>(1.14 to<br>1.68)                         | 1.66<br>(1.27 to<br>2.11)                         | 1.13<br>(0.87 to<br>1.44)                         | 1.85<br>(1.43 to<br>2.26)                         |
| Paralytic ileus and intestinal obstruction                     | 141.48<br>(113.61 to<br>162.06)                            | 184.53<br>(139.94 to<br>215.02)                            | 184.31<br>(138.22 to<br>214.37)                          | 180.82<br>(138.77 to<br>208.18)                            | 5.80<br>(4.46 to<br>6.61)                         | 11.82<br>(8.68 to<br>13.74)                       | 12.37<br>(9.17 to<br>14.68)                       | 11.02<br>(8.16 to<br>12.80)                       |
| Inguinal, femoral, and abdominal hernia                        | 31.69<br>(20.35 to<br>35.80)                               | 32.28<br>(20.60 to<br>38.84)                               | 26.15<br>(16.17 to<br>32.07)                             | 33.75<br>(21.14 to<br>39.60)                               | 1.71<br>(1.09 to<br>1.93)                         | 2.22<br>(1.44 to<br>2.68)                         | 1.89<br>(1.16 to<br>2.32)                         | 2.23<br>(1.40 to<br>2.63)                         |

|                                         |                                                    |                                                      |                                                      |                                                      |                                              |                                                |                                                |                                                |
|-----------------------------------------|----------------------------------------------------|------------------------------------------------------|------------------------------------------------------|------------------------------------------------------|----------------------------------------------|------------------------------------------------|------------------------------------------------|------------------------------------------------|
| Inflammatory bowel disease              | 24.70<br>(17.88 to<br>27.50)                       | 32.69<br>(23.60 to<br>38.47)                         | 31.63<br>(22.54 to<br>37.66)                         | 32.33<br>(23.25 to<br>37.80)                         | 0.93<br>(0.68 to<br>1.03)                    | 1.65<br>(1.20 to<br>1.94)                      | 1.67<br>(1.20 to<br>1.99)                      | 1.57<br>(1.14 to<br>1.83)                      |
| Vascular intestinal disorders           | 67.12<br>(53.91 to<br>74.94)                       | 131.61<br>(103.80 to<br>151.48)                      | 117.17<br>(93.14 to<br>136.41)                       | 132.70<br>(106.19 to<br>150.88)                      | 3.61<br>(2.93 to<br>4.00)                    | 8.99<br>(7.20 to<br>10.34)                     | 8.36<br>(6.67 to<br>9.81)                      | 8.75<br>(7.07 to<br>10.06)                     |
| Gallbladder and biliary diseases        | 112.58<br>(101.54 to<br>125.78)                    | 183.68<br>(101.89 to<br>323.44)                      | 106.43<br>(60.88 to<br>182.02)                       | 215.68<br>(119.31 to<br>373.82)                      | 5.91<br>(5.33 to<br>6.57)                    | 12.65<br>(7.12 to<br>21.93)                    | 7.79<br>(4.54 to<br>13.37)                     | 14.22<br>(7.99 to<br>24.59)                    |
| Pancreatitis                            | 129.68<br>(95.78 to<br>144.34)                     | 171.92<br>(95.54 to<br>303.77)                       | 107.24<br>(61.14 to<br>181.46)                       | 221.50<br>(119.33 to<br>396.94)                      | 4.45<br>(3.24 to<br>4.93)                    | 7.41<br>(4.25 to<br>12.15)                     | 4.92<br>(2.96 to<br>7.80)                      | 9.08<br>(5.03 to<br>15.92)                     |
| Other digestive diseases                | 86.12<br>(71.38 to<br>102.53)                      | 123.37<br>(99.76 to<br>146.41)                       | 109.81<br>(89.16 to<br>130.97)                       | 125.85<br>(102.75 to<br>148.99)                      | 4.32<br>(3.60 to<br>4.99)                    | 8.21<br>(6.62 to<br>9.55)                      | 7.67<br>(6.20 to<br>9.05)                      | 8.03<br>(6.50 to<br>9.30)                      |
| <b>Neurological disorders</b>           | <b>1,103.29</b><br>(977.62 to<br><b>1,266.84</b> ) | <b>2,621.13</b><br>(1,962.19 to<br><b>3,536.19</b> ) | <b>2,469.22</b><br>(1,905.16 to<br><b>3,161.23</b> ) | <b>2,581.92</b><br>(1,929.55 to<br><b>3,547.19</b> ) | <b>90.32</b><br>(78.67 to<br><b>104.77</b> ) | <b>253.72</b><br>(186.69 to<br><b>349.99</b> ) | <b>249.20</b><br>(186.66 to<br><b>325.69</b> ) | <b>239.95</b><br>(175.54 to<br><b>338.15</b> ) |
| Alzheimer's disease and other dementias | 838.49<br>(716.21 to<br>997.61)                    | 2,228.56<br>(1,587.27 to<br>3,141.86)                | 2,082.76<br>(1,539.90 to<br>2,770.18)                | 2,183.25<br>(1,530.16 to<br>3,143.23)                | 80.60<br>(69.17 to<br>94.94)                 | 232.87<br>(166.92 to<br>328.99)                | 226.91<br>(166.15 to<br>300.31)                | 220.32<br>(155.64 to<br>318.17)                |
| Parkinson's disease                     | 51.08<br>(38.97 to<br>65.67)                       | 133.79<br>(101.09 to<br>172.88)                      | 149.96<br>(112.31 to<br>195.59)                      | 120.31<br>(91.17 to<br>154.82)                       | 4.03<br>(3.07 to<br>5.20)                    | 11.54<br>(8.75 to<br>15.29)                    | 13.32<br>(9.94 to<br>17.52)                    | 10.12<br>(7.63 to<br>13.15)                    |
| Epilepsy                                | 107.78<br>(100.69 to<br>117.36)                    | 114.14<br>(82.53 to<br>158.82)                       | 89.74<br>(66.47 to<br>121.52)                        | 135.63<br>(97.45 to<br>192.22)                       | 2.50<br>(2.35 to<br>2.68)                    | 3.43<br>(2.54 to<br>4.63)                      | 2.82<br>(2.16 to<br>3.70)                      | 3.91<br>(2.86 to<br>5.44)                      |
| Multiple sclerosis                      | 10.61<br>(9.11 to<br>13.83)                        | 14.95<br>(11.94 to<br>20.16)                         | 15.88<br>(12.60 to<br>21.45)                         | 14.93<br>(11.86 to<br>20.31)                         | 0.38<br>(0.32 to<br>0.50)                    | 0.69<br>(0.56 to<br>0.98)                      | 0.77<br>(0.60 to<br>1.08)                      | 0.67<br>(0.53 to<br>0.94)                      |
| Motor neuron disease                    | 31.23<br>(28.95 to<br>33.06)                       | 48.76<br>(43.42 to<br>54.16)                         | 48.17<br>(42.60 to<br>53.93)                         | 47.63<br>(42.47 to<br>53.67)                         | 1.13<br>(1.05 to<br>1.20)                    | 2.13<br>(1.88 to<br>2.37)                      | 2.14<br>(1.87 to<br>2.42)                      | 2.04<br>(1.81 to<br>2.27)                      |
| Other neurological disorders            | 64.10<br>(60.50 to<br>69.17)                       | 80.94<br>(72.97 to<br>90.95)                         | 82.71<br>(73.94 to<br>93.06)                         | 80.18<br>(72.05 to<br>90.25)                         | 1.68<br>(1.60 to<br>1.78)                    | 3.06<br>(2.81 to<br>3.34)                      | 3.25<br>(2.94 to<br>3.59)                      | 2.89<br>(2.65 to<br>3.12)                      |
| <b>Mental disorders</b>                 | <b>401.81</b><br>(371.31 to<br><b>442.62</b> )     | <b>488.09</b><br>(424.94 to<br><b>555.88</b> )       | <b>533.49</b><br>(465.94 to<br><b>611.19</b> )       | <b>488.11</b><br>(427.75 to<br><b>554.31</b> )       | <b>10.81</b><br>(10.09 to<br><b>11.67</b> )  | <b>15.79</b><br>(13.91 to<br><b>17.76</b> )    | <b>18.09</b><br>(15.89 to<br><b>20.41</b> )    | <b>15.28</b><br>(13.66 to<br><b>17.03</b> )    |
| Alcohol use disorders                   | 328.22<br>(304.28 to<br>358.12)                    | 369.90<br>(319.23 to<br>424.55)                      | 382.91<br>(326.85 to<br>442.70)                      | 378.95<br>(327.24 to<br>434.23)                      | 9.11<br>(8.49 to<br>9.79)                    | 11.81<br>(10.31 to<br>13.46)                   | 12.59<br>(10.91 to<br>14.43)                   | 11.82<br>(10.39 to<br>13.42)                   |
| Drug use disorders                      | 71.98<br>(61.49 to<br>83.96)                       | 116.13<br>(93.31 to<br>142.98)                       | 148.40<br>(120.03 to<br>179.82)                      | 107.09<br>(85.94 to<br>132.18)                       | 1.67<br>(1.46 to<br>1.88)                    | 3.94<br>(3.30 to<br>4.60)                      | 5.46<br>(4.61 to<br>6.47)                      | 3.42<br>(2.93 to<br>3.93)                      |
| Opioid use disorders                    | 42.70<br>(36.32 to<br>58.45)                       | 56.68<br>(43.49 to<br>81.02)                         | 60.87<br>(46.39 to<br>91.52)                         | 55.69<br>(42.47 to<br>78.97)                         | 0.91<br>(0.79 to<br>1.24)                    | 1.52<br>(1.23 to<br>2.16)                      | 1.71<br>(1.37 to<br>2.51)                      | 1.44<br>(1.17 to<br>2.01)                      |
| Cocaine use disorders                   | 7.35<br>(2.00 to<br>9.15)                          | 13.03<br>(4.56 to<br>17.22)                          | 17.22<br>(6.28 to<br>22.29)                          | 11.85<br>(4.14 to<br>15.54)                          | 0.17<br>(0.05 to<br>0.20)                    | 0.38<br>(0.15 to<br>0.48)                      | 0.52<br>(0.20 to<br>0.64)                      | 0.34<br>(0.12 to<br>0.42)                      |
| Amphetamine use disorders               | 1.60<br>(1.05 to<br>2.17)                          | 5.11<br>(3.30 to<br>7.41)                            | 8.11<br>(5.56 to<br>11.59)                           | 4.34<br>(2.91 to<br>6.59)                            | 0.04<br>(0.03 to<br>0.05)                    | 0.15<br>(0.10 to<br>0.22)                      | 0.25<br>(0.18 to<br>0.35)                      | 0.13<br>(0.09 to<br>0.18)                      |
| Other drug use disorders                | 20.33<br>(10.77 to<br>25.09)                       | 41.31<br>(25.37 to<br>53.79)                         | 62.19<br>(39.81 to<br>81.30)                         | 35.21<br>(21.41 to<br>46.03)                         | 0.55<br>(0.34 to<br>0.65)                    | 1.88<br>(1.36 to<br>2.38)                      | 2.98<br>(2.18 to<br>3.72)                      | 1.51<br>(1.08 to<br>1.83)                      |
| Eating disorders                        | 1.61<br>(1.45 to<br>1.81)                          | 2.07<br>(1.63 to<br>2.62)                            | 2.19<br>(1.72 to<br>2.79)                            | 2.07<br>(1.66 to<br>2.65)                            | 0.03<br>(0.03 to<br>0.03)                    | 0.04<br>(0.03 to<br>0.05)                      | 0.04<br>(0.03 to<br>0.05)                      | 0.04<br>(0.03 to<br>0.05)                      |

**Brazil**

| Cause | YLLs (in 1000s) |               |                      |                     | Deaths (in 1000s) |               |                      |                     |
|-------|-----------------|---------------|----------------------|---------------------|-------------------|---------------|----------------------|---------------------|
|       | 2016            | 2040 Forecast | 2040 Better Scenario | 2040 Worse Scenario | 2016              | 2040 Forecast | 2040 Better Scenario | 2040 Worse Scenario |

|                                                            |                                           |                                           |                                           |                                           |                                     |                                     |                                     |                                     |
|------------------------------------------------------------|-------------------------------------------|-------------------------------------------|-------------------------------------------|-------------------------------------------|-------------------------------------|-------------------------------------|-------------------------------------|-------------------------------------|
| <b>Diabetes, urogenital, blood, and endocrine diseases</b> | <b>2,393.48</b><br>(2,296.98 to 2,479.24) | <b>3,929.76</b><br>(3,068.34 to 4,914.29) | <b>2,791.93</b><br>(2,224.25 to 3,480.58) | <b>4,596.90</b><br>(3,608.32 to 5,763.84) | <b>118.56</b><br>(114.56 to 122.67) | <b>260.91</b><br>(207.79 to 321.19) | <b>193.87</b><br>(153.25 to 238.54) | <b>292.64</b><br>(233.73 to 358.31) |
| Diabetes mellitus                                          | 1,076.89<br>(1,033.65 to 1,123.53)        | 1,752.15<br>(1,234.44 to 2,477.65)        | 1,134.82<br>(823.58 to 1,548.23)          | 2,148.82<br>(1,508.44 to 2,973.75)        | 56.79<br>(54.67 to 59.13)           | 117.06<br>(85.81 to 157.86)         | 80.50<br>(59.61 to 104.89)          | 137.01<br>(100.12 to 179.93)        |
| Acute glomerulonephritis                                   | 2.76<br>(2.51 to 3.04)                    | 4.50<br>(3.68 to 5.49)                    | 3.50<br>(2.86 to 4.26)                    | 5.19<br>(4.25 to 6.37)                    | 0.06<br>(0.06 to 0.07)              | 0.14<br>(0.12 to 0.17)              | 0.12<br>(0.09 to 0.15)              | 0.15<br>(0.12 to 0.18)              |
| Chronic kidney disease                                     | 707.07<br>(680.12 to 735.95)              | 1,262.28<br>(805.11 to 1,993.94)          | 856.16<br>(574.02 to 1,270.93)            | 1,508.56<br>(942.07 to 2,372.46)          | 34.09<br>(32.89 to 35.34)           | 81.79<br>(51.31 to 129.67)          | 57.50<br>(37.60 to 86.04)           | 94.72<br>(57.34 to 152.73)          |
| Chronic kidney disease due to diabetes mellitus            | 247.03<br>(215.90 to 277.45)              | 502.47<br>(315.35 to 805.61)              | 343.00<br>(227.54 to 531.10)              | 600.16<br>(366.22 to 994.09)              | 11.83<br>(10.30 to 13.33)           | 30.20<br>(18.50 to 49.12)           | 21.19<br>(13.62 to 32.78)           | 35.14<br>(20.81 to 58.16)           |
| Chronic kidney disease due to hypertension                 | 92.38<br>(77.25 to 106.92)                | 213.56<br>(127.33 to 343.78)              | 155.51<br>(99.76 to 239.30)               | 245.71<br>(146.13 to 399.78)              | 6.42<br>(5.46 to 7.40)              | 18.89<br>(10.98 to 30.05)           | 14.52<br>(8.90 to 22.09)            | 21.00<br>(12.08 to 33.29)           |
| Chronic kidney disease due to glomerulonephritis           | 207.33<br>(179.11 to 235.85)              | 293.47<br>(186.54 to 467.34)              | 187.83<br>(121.19 to 289.72)              | 359.19<br>(217.94 to 593.11)              | 8.61<br>(7.33 to 9.92)              | 16.70<br>(9.95 to 27.12)            | 10.92<br>(6.70 to 17.88)            | 19.94<br>(11.54 to 33.59)           |
| Chronic kidney disease due to other and unspecified causes | 160.32<br>(137.35 to 184.71)              | 252.78<br>(158.56 to 398.61)              | 169.83<br>(112.95 to 255.26)              | 303.51<br>(186.53 to 479.27)              | 7.23<br>(6.06 to 8.45)              | 16.01<br>(9.56 to 25.68)            | 11.06<br>(7.00 to 17.16)            | 18.64<br>(10.78 to 29.83)           |
| Urinary diseases and male infertility                      | 286.06<br>(273.22 to 300.00)              | 526.30<br>(460.74 to 601.99)              | 422.50<br>(364.48 to 488.77)              | 545.89<br>(491.10 to 601.13)              | 17.06<br>(16.24 to 17.94)           | 43.64<br>(37.39 to 50.57)           | 37.03<br>(31.50 to 43.75)           | 43.17<br>(38.12 to 48.78)           |
| Urinary tract infections                                   | 256.01<br>(237.26 to 270.82)              | 490.64<br>(427.10 to 565.11)              | 397.77<br>(341.36 to 459.85)              | 506.43<br>(450.85 to 563.25)              | 15.71<br>(14.63 to 16.60)           | 41.43<br>(35.46 to 48.06)           | 35.41<br>(30.04 to 41.70)           | 40.83<br>(35.73 to 46.17)           |
| Urolithiasis                                               | 13.08<br>(10.59 to 21.87)                 | 16.79<br>(11.75 to 29.10)                 | 11.64<br>(8.16 to 20.82)                  | 18.64<br>(13.45 to 23.34)                 | 0.55<br>(0.43 to 0.97)              | 0.90<br>(0.60 to 1.61)              | 0.65<br>(0.43 to 1.23)              | 0.96<br>(0.66 to 1.71)              |
| Other urinary diseases                                     | 16.97<br>(12.56 to 27.68)                 | 18.86<br>(13.01 to 33.00)                 | 13.09<br>(8.77 to 23.11)                  | 20.83<br>(14.71 to 36.43)                 | 0.80<br>(0.61 to 1.33)              | 1.32<br>(0.89 to 2.35)              | 0.97<br>(0.63 to 1.72)              | 1.37<br>(0.94 to 2.50)              |
| Gynecological diseases                                     | 5.28<br>(2.51 to 6.12)                    | 3.92<br>(1.86 to 5.66)                    | 2.17<br>(1.06 to 3.07)                    | 4.83<br>(2.30 to 6.48)                    | 0.17<br>(0.08 to 0.19)              | 0.15<br>(0.07 to 0.21)              | 0.09<br>(0.04 to 0.12)              | 0.18<br>(0.08 to 0.24)              |
| Uterine fibroids                                           | 1.98<br>(0.91 to 2.34)                    | 1.28<br>(0.53 to 2.07)                    | 0.79<br>(0.32 to 1.24)                    | 1.53<br>(0.60 to 2.44)                    | 0.06<br>(0.03 to 0.07)              | 0.04<br>(0.02 to 0.07)              | 0.03<br>(0.01 to 0.04)              | 0.05<br>(0.02 to 0.08)              |
| Polycystic ovarian syndrome                                | 0.04<br>(0.02 to 0.05)                    | 0.02<br>(0.01 to 0.04)                    | 0.01<br>(0.00 to 0.01)                    | 0.03<br>(0.01 to 0.05)                    | 0.00<br>(0.00 to 0.00)              | 0.00<br>(0.00 to 0.00)              | 0.00<br>(0.00 to 0.00)              | 0.00<br>(0.00 to 0.00)              |
| Endometriosis                                              | 0.29<br>(0.03 to 0.40)                    | 0.20<br>(0.02 to 0.39)                    | 0.11<br>(0.01 to 0.21)                    | 0.25<br>(0.02 to 0.46)                    | 0.01<br>(0.00 to 0.01)              | 0.00<br>(0.00 to 0.01)              | 0.00<br>(0.00 to 0.00)              | 0.01<br>(0.00 to 0.01)              |
| Genital prolapse                                           | 0.34<br>(0.14 to 0.42)                    | 0.32<br>(0.11 to 0.51)                    | 0.18<br>(0.07 to 0.29)                    | 0.39<br>(0.15 to 0.61)                    | 0.02<br>(0.01 to 0.03)              | 0.02<br>(0.01 to 0.04)              | 0.01<br>(0.00 to 0.04)              | 0.03<br>(0.01 to 0.04)              |
| Other gynecological diseases                               | 2.64<br>(1.37 to 3.05)                    | 2.10<br>(0.94 to 3.18)                    | 1.09<br>(0.53 to 1.70)                    | 2.64<br>(1.29 to 3.78)                    | 0.08<br>(0.04 to 0.09)              | 0.08<br>(0.04 to 0.12)              | 0.04<br>(0.02 to 0.07)              | 0.10<br>(0.05 to 0.14)              |
| Hemoglobinopathies and hemolytic anemias                   | 71.47<br>(54.97 to 80.33)                 | 69.34<br>(52.54 to 86.04)                 | 48.25<br>(36.01 to 59.19)                 | 79.16<br>(59.88 to 94.57)                 | 2.03<br>(1.62 to 2.33)              | 3.13<br>(2.45 to 3.87)              | 2.29<br>(1.77 to 2.81)              | 3.39<br>(2.68 to 4.09)              |
| Thalassemias                                               | 6.02<br>(4.23 to 7.19)                    | 1.78<br>(1.22 to 2.34)                    | 1.67<br>(1.16 to 2.19)                    | 1.99<br>(1.36 to 2.62)                    | 0.07<br>(0.05 to 0.09)              | 0.02<br>(0.02 to 0.03)              | 0.02<br>(0.01 to 0.03)              | 0.03<br>(0.02 to 0.03)              |
| Sickle cell disorders                                      | 28.37<br>(21.43 to 32.40)                 | 23.88<br>(16.82 to 30.83)                 | 16.24<br>(11.59 to 21.05)                 | 28.02<br>(20.30 to 34.60)                 | 0.51<br>(0.39 to 0.58)              | 0.56<br>(0.40 to 0.71)              | 0.39<br>(0.29 to 0.49)              | 0.65<br>(0.47 to 0.78)              |
| G6PD deficiency                                            | 19.86<br>(14.75 to 22.65)                 | 21.38<br>(15.47 to 27.89)                 | 13.81<br>(9.87 to 17.65)                  | 25.18<br>(18.10 to 30.81)                 | 0.47<br>(0.35 to 0.54)              | 0.73<br>(0.54 to 0.94)              | 0.48<br>(0.35 to 0.61)              | 0.84<br>(0.62 to 1.02)              |

| Other hemoglobinopathies and hemolytic anemias    | 17.22<br>(13.74 to 20.03)                 | 22.29<br>(17.35 to 27.78)             | 16.53<br>(12.80 to 20.52)           | 23.98<br>(19.04 to 29.02)               | 0.97<br>(0.79 to 1.16)           | 1.81<br>(1.43 to 2.28)           | 1.40<br>(1.08 to 1.75)           | 1.88<br>(1.51 to 2.32)           |
|---------------------------------------------------|-------------------------------------------|---------------------------------------|-------------------------------------|-----------------------------------------|----------------------------------|----------------------------------|----------------------------------|----------------------------------|
| Endocrine, metabolic, blood, and immune disorders | 243.96<br>(157.10 to 264.73)              | 311.28<br>(190.35 to 360.48)          | 324.51<br>(200.67 to 379.36)        | 304.44<br>(187.59 to 352.93)            | 8.37<br>(5.18 to 9.07)           | 15.00<br>(9.12 to 17.34)         | 16.35<br>(10.08 to 19.11)        | 14.02<br>(8.62 to 16.12)         |
| <b>Brazil</b>                                     |                                           |                                       |                                     |                                         |                                  |                                  |                                  |                                  |
| Cause                                             | YLLs (in 1000s)                           |                                       |                                     |                                         | Deaths (in 1000s)                |                                  |                                  |                                  |
|                                                   | 2016                                      | 2040 Forecast                         | 2040 Better Scenario                | 2040 Worse Scenario                     | 2016                             | 2040 Forecast                    | 2040 Better Scenario             | 2040 Worse Scenario              |
| <b>Musculoskeletal disorders</b>                  | <b>99.56</b><br>(80.31 to 106.54)         | <b>146.76</b><br>(114.66 to 168.31)   | <b>125.63</b><br>(98.90 to 144.76)  | <b>153.65</b><br>(119.72 to 172.86)     | <b>3.12</b><br>(2.48 to 3.32)    | <b>6.82</b><br>(5.57 to 7.86)    | <b>6.03</b><br>(4.94 to 7.05)    | <b>6.90</b><br>(5.53 to 7.77)    |
| Rheumatoid arthritis                              | 11.87<br>(7.19 to 15.52)                  | 21.72<br>(13.29 to 30.41)             | 13.15<br>(8.04 to 18.19)            | 26.14<br>(16.59 to 34.72)               | 0.53<br>(0.32 to 0.68)           | 1.30<br>(0.84 to 1.81)           | 0.81<br>(0.53 to 1.12)           | 1.52<br>(0.99 to 1.98)           |
| Other musculoskeletal disorders                   | 87.69<br>(72.50 to 94.17)                 | 125.04<br>(100.68 to 144.68)          | 112.48<br>(90.11 to 130.16)         | 127.51<br>(101.26 to 145.33)            | 2.60<br>(2.19 to 2.78)           | 5.52<br>(4.57 to 6.35)           | 5.21<br>(4.34 to 6.04)           | 5.38<br>(4.42 to 6.12)           |
| <b>Other non-communicable diseases</b>            | <b>1,242.43</b><br>(1,094.95 to 1,378.85) | <b>902.94</b><br>(697.29 to 1,114.65) | <b>636.63</b><br>(484.39 to 796.90) | <b>1,096.18</b><br>(888.20 to 1,296.36) | <b>20.07</b><br>(16.93 to 23.63) | <b>33.01</b><br>(21.76 to 46.07) | <b>27.93</b><br>(17.79 to 39.85) | <b>34.68</b><br>(23.06 to 47.34) |
| Congenital birth defects                          | 1,093.86<br>(935.31 to 1,205.90)          | 505.40<br>(381.44 to 646.63)          | 290.98<br>(221.60 to 358.47)        | 687.64<br>(547.71 to 811.86)            | 13.46<br>(11.51 to 14.79)        | 6.84<br>(5.19 to 8.78)           | 4.03<br>(3.03 to 4.93)           | 9.13<br>(7.25 to 10.71)          |
| Neural tube defects                               | 75.53<br>(64.30 to 100.47)                | 12.94<br>(8.38 to 20.23)              | 6.48<br>(4.15 to 11.01)             | 18.79<br>(12.69 to 28.74)               | 0.89<br>(0.76 to 1.19)           | 0.16<br>(0.11 to 0.25)           | 0.08<br>(0.05 to 0.13)           | 0.23<br>(0.16 to 0.35)           |
| Congenital heart anomalies                        | 486.18<br>(420.88 to 594.25)              | 227.38<br>(158.99 to 309.16)          | 109.92<br>(79.03 to 148.14)         | 323.15<br>(249.14 to 405.58)            | 6.02<br>(5.25 to 7.39)           | 3.09<br>(2.17 to 4.21)           | 1.50<br>(1.09 to 2.05)           | 4.32<br>(3.36 to 5.44)           |
| Orofacial clefts                                  | 2.92<br>(1.67 to 4.77)                    | 1.08<br>(0.49 to 2.00)                | 0.44<br>(0.21 to 0.83)              | 1.68<br>(0.79 to 3.09)                  | 0.03<br>(0.02 to 0.06)           | 0.01<br>(0.01 to 0.02)           | 0.01<br>(0.01 to 0.01)           | 0.02<br>(0.01 to 0.04)           |
| Down syndrome                                     | 47.71<br>(31.57 to 55.25)                 | 37.13<br>(22.45 to 46.12)             | 38.56<br>(24.73 to 47.24)           | 39.75<br>(23.85 to 49.44)               | 0.68<br>(0.43 to 0.79)           | 0.63<br>(0.37 to 0.79)           | 0.67<br>(0.40 to 0.81)           | 0.66<br>(0.38 to 0.82)           |
| Other chromosomal abnormalities                   | 61.20<br>(25.35 to 76.47)                 | 33.57<br>(13.92 to 46.64)             | 25.85<br>(10.93 to 36.05)           | 41.20<br>(16.25 to 57.16)               | 0.74<br>(0.30 to 0.93)           | 0.43<br>(0.17 to 0.60)           | 0.33<br>(0.14 to 0.46)           | 0.52<br>(0.20 to 0.72)           |
| Congenital musculoskeletal and limb anomalies     | 18.88<br>(14.32 to 23.25)                 | 10.58<br>(7.65 to 14.45)              | 6.07<br>(4.36 to 8.46)              | 14.06<br>(10.23 to 18.49)               | 0.24<br>(0.19 to 0.30)           | 0.16<br>(0.12 to 0.22)           | 0.09<br>(0.07 to 0.13)           | 0.21<br>(0.15 to 0.28)           |
| Urogenital congenital anomalies                   | 31.21<br>(16.54 to 39.92)                 | 15.85<br>(8.26 to 22.90)              | 9.93<br>(5.38 to 14.09)             | 20.57<br>(11.17 to 28.78)               | 0.40<br>(0.22 to 0.51)           | 0.24<br>(0.14 to 0.34)           | 0.16<br>(0.09 to 0.22)           | 0.31<br>(0.17 to 0.42)           |
| Digestive congenital anomalies                    | 124.90<br>(97.51 to 151.29)               | 58.82<br>(39.58 to 82.63)             | 31.23<br>(21.42 to 43.44)           | 82.39<br>(58.04 to 109.76)              | 1.49<br>(1.16 to 1.80)           | 0.73<br>(0.50 to 1.02)           | 0.39<br>(0.27 to 0.54)           | 1.01<br>(0.72 to 1.34)           |
| Other congenital birth defects                    | 245.24<br>(169.70 to 275.69)              | 108.06<br>(74.62 to 142.13)           | 62.49<br>(42.73 to 79.54)           | 146.05<br>(102.05 to 178.60)            | 2.96<br>(2.05 to 3.32)           | 1.38<br>(0.95 to 1.80)           | 0.80<br>(0.55 to 1.01)           | 1.84<br>(1.28 to 2.24)           |
| Skin and subcutaneous diseases                    | 133.36<br>(80.02 to 213.16)               | 392.01<br>(229.86 to 592.08)          | 341.98<br>(201.74 to 508.31)        | 401.15<br>(231.89 to 611.33)            | 6.43<br>(3.63 to 9.96)           | 26.11<br>(14.41 to 38.83)        | 23.86<br>(13.52 to 35.61)        | 25.47<br>(14.09 to 38.94)        |
| Cellulitis                                        | 23.34<br>(11.80 to 47.61)                 | 76.01<br>(38.33 to 138.07)            | 71.88<br>(36.34 to 125.97)          | 75.41<br>(38.15 to 140.42)              | 0.93<br>(0.46 to 1.72)           | 4.21<br>(2.05 to 7.35)           | 4.16<br>(2.02 to 7.05)           | 4.00<br>(1.94 to 6.96)           |
| Pyoderma                                          | 82.19<br>(47.31 to 134.13)                | 257.35<br>(138.66 to 382.02)          | 224.21<br>(124.25 to 340.53)        | 264.25<br>(145.95 to 400.04)            | 3.79<br>(2.03 to 5.93)           | 17.15<br>(9.13 to 26.09)         | 15.86<br>(8.54 to 24.64)         | 16.69<br>(8.94 to 25.31)         |
| Decubitus ulcer                                   | 20.96<br>(10.14 to 34.74)                 | 46.14<br>(22.05 to 81.35)             | 35.44<br>(16.48 to 62.11)           | 48.34<br>(23.03 to 86.95)               | 1.45<br>(0.68 to 2.49)           | 4.14<br>(1.84 to 7.80)           | 3.30<br>(1.50 to 5.94)           | 4.17<br>(1.94 to 7.81)           |

|                                      |                                                            |                                                            |                                                            |                                                            |                                                      |                                                      |                                                     |                                                      |
|--------------------------------------|------------------------------------------------------------|------------------------------------------------------------|------------------------------------------------------------|------------------------------------------------------------|------------------------------------------------------|------------------------------------------------------|-----------------------------------------------------|------------------------------------------------------|
| Other skin and subcutaneous diseases | 6.88<br>(3.69 to<br>12.59)                                 | 12.50<br>(6.76 to<br>22.26)                                | 10.45<br>(5.78 to<br>18.09)                                | 13.15<br>(7.29 to<br>23.75)                                | 0.25<br>(0.14 to<br>0.46)                            | 0.61<br>(0.33 to<br>1.13)                            | 0.54<br>(0.29 to<br>0.98)                           | 0.61<br>(0.33 to<br>1.13)                            |
| Sudden infant death syndrome         | 15.21<br>(13.04 to<br>17.43)                               | 5.53<br>(3.44 to<br>8.81)                                  | 3.68<br>(2.31 to<br>5.68)                                  | 7.38<br>(4.63 to<br>11.09)                                 | 0.18<br>(0.15 to<br>0.20)                            | 0.06<br>(0.04 to<br>0.10)                            | 0.04<br>(0.03 to<br>0.07)                           | 0.09<br>(0.05 to<br>0.13)                            |
| <b>Injuries</b>                      | <b>7,609.03</b><br><b>(7,054.11 to</b><br><b>8,014.19)</b> | <b>4,764.98</b><br><b>(3,619.86 to</b><br><b>6,214.14)</b> | <b>3,388.91</b><br><b>(2,638.79 to</b><br><b>4,505.76)</b> | <b>7,112.26</b><br><b>(5,432.20 to</b><br><b>9,031.53)</b> | <b>161.64</b><br><b>(149.58 to</b><br><b>170.89)</b> | <b>135.37</b><br><b>(111.63 to</b><br><b>165.84)</b> | <b>102.93</b><br><b>(85.38 to</b><br><b>129.26)</b> | <b>186.95</b><br><b>(153.66 to</b><br><b>225.89)</b> |
| <b>Transport injuries</b>            | <b>2,395.68</b><br><b>(2,213.63 to</b><br><b>2,749.46)</b> | <b>909.83</b><br><b>(565.04 to</b><br><b>1,444.22)</b>     | <b>698.65</b><br><b>(453.79 to</b><br><b>1,072.15)</b>     | <b>2,699.87</b><br><b>(1,728.26 to</b><br><b>4,150.15)</b> | <b>50.69</b><br><b>(47.31 to</b><br><b>56.64)</b>    | <b>23.75</b><br><b>(15.64 to</b><br><b>35.89)</b>    | <b>18.30</b><br><b>(12.76 to</b><br><b>26.73)</b>   | <b>65.00</b><br><b>(44.13 to</b><br><b>96.48)</b>    |
| Road injuries                        | 2,302.49<br>(2,126.11 to<br>2,646.26)                      | 779.78<br>(489.25 to<br>1,231.09)                          | 622.40<br>(405.15 to<br>946.06)                            | 2,539.79<br>(1,621.90 to<br>3,914.69)                      | 48.72<br>(45.38 to<br>54.50)                         | 20.56<br>(13.63 to<br>30.81)                         | 16.40<br>(11.45 to<br>23.87)                        | 61.14<br>(41.45 to<br>90.52)                         |
| Pedestrian road injuries             | 582.41<br>(512.87 to<br>792.40)                            | 199.63<br>(132.21 to<br>310.36)                            | 112.44<br>(76.67 to<br>171.59)                             | 696.05<br>(463.05 to<br>1,059.36)                          | 14.18<br>(12.65 to<br>18.42)                         | 6.74<br>(4.60 to<br>10.14)                           | 3.96<br>(2.77 to<br>5.75)                           | 20.91<br>(14.69 to<br>30.31)                         |

**Brazil**

| Cause                               | YLLs (in 1000s)                                            |                                                          |                                                        |                                                            | Deaths (in 1000s)                                 |                                                   |                                                   |                                                   |
|-------------------------------------|------------------------------------------------------------|----------------------------------------------------------|--------------------------------------------------------|------------------------------------------------------------|---------------------------------------------------|---------------------------------------------------|---------------------------------------------------|---------------------------------------------------|
|                                     | 2016                                                       | 2040 Forecast                                            | 2040 Better Scenario                                   | 2040 Worse Scenario                                        | 2016                                              | 2040 Forecast                                     | 2040 Better Scenario                              | 2040 Worse Scenario                               |
| Cyclist road injuries               | 87.82<br>(76.93 to<br>106.19)                              | 28.32<br>(17.46 to<br>45.98)                             | 25.15<br>(16.43 to<br>39.23)                           | 93.90<br>(57.16 to<br>149.62)                              | 1.97<br>(1.73 to<br>2.34)                         | 0.87<br>(0.56 to<br>1.34)                         | 0.80<br>(0.53 to<br>1.19)                         | 2.33<br>(1.48 to<br>3.69)                         |
| Motorcyclist road injuries          | 829.41<br>(703.60 to<br>1,001.06)                          | 374.99<br>(212.21 to<br>631.98)                          | 331.43<br>(198.22 to<br>535.41)                        | 870.53<br>(493.62 to<br>1,484.86)                          | 15.71<br>(13.34 to<br>18.57)                      | 8.02<br>(4.82 to<br>12.70)                        | 7.17<br>(4.56 to<br>10.98)                        | 17.17<br>(10.19 to<br>27.77)                      |
| Motor vehicle road injuries         | 769.51<br>(579.85 to<br>910.04)                            | 168.26<br>(102.69 to<br>265.36)                          | 145.81<br>(93.00 to<br>221.82)                         | 841.28<br>(505.86 to<br>1,308.79)                          | 16.12<br>(12.25 to<br>18.78)                      | 4.66<br>(3.05 to<br>7.01)                         | 4.22<br>(2.91 to<br>6.11)                         | 19.75<br>(12.64 to<br>29.58)                      |
| Other road injuries                 | 33.35<br>(27.45 to<br>50.25)                               | 8.59<br>(5.30 to<br>15.22)                               | 7.56<br>(4.74 to<br>13.32)                             | 38.04<br>(23.23 to<br>67.81)                               | 0.74<br>(0.61 to<br>1.12)                         | 0.27<br>(0.17 to<br>0.47)                         | 0.25<br>(0.16 to<br>0.43)                         | 0.98<br>(0.62 to<br>1.71)                         |
| Other transport injuries            | 93.18<br>(83.17 to<br>112.12)                              | 130.05<br>(78.37 to<br>215.60)                           | 76.25<br>(48.34 to<br>119.76)                          | 160.08<br>(100.15 to<br>250.30)                            | 1.96<br>(1.77 to<br>2.31)                         | 3.18<br>(2.04 to<br>5.06)                         | 1.91<br>(1.28 to<br>2.85)                         | 3.87<br>(2.55 to<br>5.72)                         |
| <b>Unintentional injuries</b>       | <b>1,325.77</b><br><b>(1,234.67 to</b><br><b>1,462.04)</b> | <b>1,166.98</b><br><b>(988.19 to</b><br><b>1,364.51)</b> | <b>911.62</b><br><b>(782.19 to</b><br><b>1,050.85)</b> | <b>1,276.37</b><br><b>(1,105.18 to</b><br><b>1,461.90)</b> | <b>36.81</b><br><b>(32.67 to</b><br><b>39.74)</b> | <b>53.40</b><br><b>(44.38 to</b><br><b>60.30)</b> | <b>45.06</b><br><b>(37.34 to</b><br><b>50.44)</b> | <b>54.83</b><br><b>(45.61 to</b><br><b>60.67)</b> |
| Falls                               | 336.93<br>(260.03 to<br>369.38)                            | 461.91<br>(345.19 to<br>527.31)                          | 387.76<br>(292.55 to<br>442.72)                        | 476.73<br>(353.01 to<br>532.90)                            | 15.18<br>(11.04 to<br>16.51)                      | 30.46<br>(21.98 to<br>35.17)                      | 26.68<br>(19.56 to<br>30.64)                      | 30.24<br>(21.48 to<br>34.48)                      |
| Drowning                            | 376.90<br>(350.95 to<br>426.42)                            | 239.57<br>(175.05 to<br>334.71)                          | 173.99<br>(130.04 to<br>256.84)                        | 276.91<br>(204.70 to<br>378.88)                            | 6.86<br>(6.41 to<br>7.66)                         | 5.32<br>(4.05 to<br>7.16)                         | 3.95<br>(3.04 to<br>5.19)                         | 6.01<br>(4.55 to<br>8.00)                         |
| Fire, heat, and hot substances      | 63.99<br>(58.21 to<br>72.77)                               | 48.10<br>(36.72 to<br>63.79)                             | 31.93<br>(24.80 to<br>41.35)                           | 56.56<br>(43.75 to<br>74.63)                               | 1.70<br>(1.52 to<br>1.91)                         | 2.10<br>(1.69 to<br>2.72)                         | 1.50<br>(1.21 to<br>1.90)                         | 2.33<br>(1.87 to<br>2.95)                         |
| Poisonings                          | 16.99<br>(14.50 to<br>21.04)                               | 7.28<br>(4.99 to<br>10.29)                               | 4.33<br>(3.05 to<br>6.24)                              | 9.05<br>(6.38 to<br>12.84)                                 | 0.35<br>(0.30 to<br>0.43)                         | 0.24<br>(0.17 to<br>0.32)                         | 0.15<br>(0.11 to<br>0.20)                         | 0.28<br>(0.20 to<br>0.37)                         |
| Exposure to mechanical forces       | 132.82<br>(117.57 to<br>161.04)                            | 87.17<br>(69.73 to<br>110.40)                            | 61.57<br>(50.23 to<br>77.71)                           | 99.43<br>(81.56 to<br>123.36)                              | 2.70<br>(2.40 to<br>3.24)                         | 2.33<br>(1.93 to<br>2.88)                         | 1.70<br>(1.42 to<br>2.12)                         | 2.57<br>(2.18 to<br>3.13)                         |
| Unintentional firearm injuries      | 44.05<br>(34.49 to<br>54.65)                               | 25.73<br>(18.81 to<br>34.87)                             | 18.88<br>(14.22 to<br>25.51)                           | 28.83<br>(21.18 to<br>37.56)                               | 0.87<br>(0.70 to<br>1.04)                         | 0.66<br>(0.53 to<br>0.84)                         | 0.51<br>(0.41 to<br>0.64)                         | 0.72<br>(0.56 to<br>0.88)                         |
| Unintentional suffocation           | 17.79<br>(15.01 to<br>23.82)                               | 9.17<br>(7.18 to<br>11.99)                               | 6.88<br>(5.38 to<br>9.10)                              | 10.92<br>(8.47 to<br>14.55)                                | 0.25<br>(0.21 to<br>0.33)                         | 0.15<br>(0.12 to<br>0.19)                         | 0.11<br>(0.09 to<br>0.14)                         | 0.17<br>(0.14 to<br>0.22)                         |
| Other exposure to mechanical forces | 70.97<br>(60.12 to<br>92.88)                               | 52.27<br>(40.90 to<br>69.80)                             | 35.81<br>(28.56 to<br>47.60)                           | 59.68<br>(48.08 to<br>77.97)                               | 1.58<br>(1.34 to<br>2.03)                         | 1.52<br>(1.25 to<br>1.95)                         | 1.08<br>(0.89 to<br>1.38)                         | 1.69<br>(1.41 to<br>2.13)                         |

|                                                                                     |                                                            |                                                            |                                                            |                                                            |                                                   |                                                   |                                                   |                                                   |
|-------------------------------------------------------------------------------------|------------------------------------------------------------|------------------------------------------------------------|------------------------------------------------------------|------------------------------------------------------------|---------------------------------------------------|---------------------------------------------------|---------------------------------------------------|---------------------------------------------------|
| Adverse effects of medical treatment                                                | 91.61<br>(75.02 to<br>124.67)                              | 99.74<br>(80.69 to<br>137.36)                              | 85.13<br>(68.53 to<br>118.45)                              | 104.51<br>(84.29 to<br>141.76)                             | 3.00<br>(2.42 to<br>4.04)                         | 4.86<br>(3.83 to<br>6.56)                         | 4.35<br>(3.46 to<br>6.01)                         | 4.88<br>(3.86 to<br>6.57)                         |
| Animal contact                                                                      | 24.55<br>(20.39 to<br>42.76)                               | 24.92<br>(19.26 to<br>43.86)                               | 19.77<br>(15.33 to<br>35.02)                               | 27.39<br>(21.37 to<br>48.52)                               | 0.63<br>(0.53 to<br>1.09)                         | 0.75<br>(0.72 to<br>1.54)                         | 0.94<br>(0.60 to<br>1.32)                         | 0.94<br>(0.75 to<br>1.62)                         |
| Venomous animal contact                                                             | 16.41<br>(13.04 to<br>31.25)                               | 16.79<br>(12.34 to<br>31.46)                               | 13.95<br>(10.31 to<br>26.35)                               | 18.15<br>(13.41 to<br>34.21)                               | 0.42<br>(0.34 to<br>0.79)                         | 0.61<br>(0.46 to<br>1.15)                         | 0.53<br>(0.40 to<br>0.99)                         | 0.63<br>(0.47 to<br>1.17)                         |
| Non-venomous animal contact                                                         | 8.15<br>(5.10 to<br>14.28)                                 | 8.13<br>(4.69 to<br>14.44)                                 | 5.82<br>(3.56 to<br>9.73)                                  | 9.24<br>(5.62 to<br>15.56)                                 | 0.21<br>(0.13 to<br>0.36)                         | 0.29<br>(0.17 to<br>0.50)                         | 0.22<br>(0.13 to<br>0.36)                         | 0.32<br>(0.19 to<br>0.51)                         |
| Foreign body                                                                        | 139.95<br>(106.91 to<br>156.61)                            | 115.98<br>(87.02 to<br>133.45)                             | 106.02<br>(80.06 to<br>121.76)                             | 121.66<br>(91.19 to<br>140.01)                             | 3.19<br>(2.37 to<br>3.59)                         | 4.70<br>(3.29 to<br>5.49)                         | 4.65<br>(3.25 to<br>5.46)                         | 4.56<br>(3.17 to<br>5.30)                         |
| Pulmonary aspiration and foreign body in airway                                     | 127.53<br>(95.06 to<br>144.19)                             | 102.57<br>(74.44 to<br>119.57)                             | 91.37<br>(67.22 to<br>106.72)                              | 108.74<br>(79.39 to<br>126.34)                             | 2.84<br>(2.07 to<br>3.23)                         | 4.17<br>(2.84 to<br>4.91)                         | 4.07<br>(2.77 to<br>4.79)                         | 4.06<br>(2.77 to<br>4.77)                         |
| Foreign body in other body part                                                     | 12.42<br>(9.59 to<br>16.10)                                | 13.41<br>(9.90 to<br>16.85)                                | 14.65<br>(10.80 to<br>18.08)                               | 12.93<br>(9.44 to<br>15.95)                                | 0.34<br>(0.25 to<br>0.41)                         | 0.54<br>(0.36 to<br>0.65)                         | 0.62<br>(0.41 to<br>0.75)                         | 0.49<br>(0.33 to<br>0.59)                         |
| Environmental heat and cold exposure                                                | 9.76<br>(6.74 to<br>18.86)                                 | 11.17<br>(7.49 to<br>22.16)                                | 7.48<br>(5.05 to<br>15.05)                                 | 12.83<br>(8.69 to<br>25.18)                                | 0.30<br>(0.21 to<br>0.56)                         | 0.48<br>(0.33 to<br>0.95)                         | 0.34<br>(0.24 to<br>0.67)                         | 0.53<br>(0.37 to<br>1.03)                         |
| Other unintentional injuries                                                        | 132.27<br>(121.81 to<br>149.61)                            | 71.13<br>(51.42 to<br>96.64)                               | 33.64<br>(25.31 to<br>44.84)                               | 91.30<br>(72.44 to<br>109.09)                              | 2.91<br>(2.71 to<br>3.21)                         | 2.00<br>(1.50 to<br>2.66)                         | 0.98<br>(0.76 to<br>1.27)                         | 2.50<br>(2.02 to<br>2.88)                         |
| <b>Self-harm and interpersonal violence</b>                                         | <b>3,855.62</b><br><b>(2,926.90 to</b><br><b>4,391.10)</b> | <b>2,618.42</b><br><b>(1,817.81 to</b><br><b>3,539.76)</b> | <b>1,708.52</b><br><b>(1,208.54 to</b><br><b>2,224.26)</b> | <b>3,065.55</b><br><b>(2,107.51 to</b><br><b>3,970.47)</b> | <b>73.62</b><br><b>(56.11 to</b><br><b>85.90)</b> | <b>56.70</b><br><b>(40.87 to</b><br><b>75.68)</b> | <b>38.02</b><br><b>(27.89 to</b><br><b>48.76)</b> | <b>65.60</b><br><b>(46.37 to</b><br><b>84.69)</b> |
| <b>Brazil</b>                                                                       |                                                            |                                                            |                                                            |                                                            |                                                   |                                                   |                                                   |                                                   |
| Cause                                                                               | YLLs (in 1000s)                                            |                                                            |                                                            |                                                            | Deaths (in 1000s)                                 |                                                   |                                                   |                                                   |
|                                                                                     | 2016                                                       | 2040 Forecast                                              | 2040 Better Scenario                                       | 2040 Worse Scenario                                        | 2016                                              | 2040 Forecast                                     | 2040 Better Scenario                              | 2040 Worse Scenario                               |
| Self-harm                                                                           | 627.48<br>(520.53 to<br>785.99)                            | 624.95<br>(399.15 to<br>938.15)                            | 443.15<br>(290.96 to<br>634.13)                            | 745.83<br>(451.32 to<br>1,117.65)                          | 13.85<br>(11.49 to<br>17.20)                      | 16.46<br>(11.03 to<br>23.72)                      | 12.02<br>(8.37 to<br>16.65)                       | 19.20<br>(12.23 to<br>28.15)                      |
| Self-harm by firearm                                                                | 76.46<br>(56.83 to<br>136.13)                              | 70.56<br>(37.62 to<br>130.57)                              | 44.59<br>(25.15 to<br>82.63)                               | 87.72<br>(45.18 to<br>163.86)                              | 1.73<br>(1.28 to<br>2.92)                         | 1.95<br>(1.11 to<br>3.29)                         | 1.28<br>(0.76 to<br>2.15)                         | 2.34<br>(1.29 to<br>3.98)                         |
| Self-harm by other specified means                                                  | 551.01<br>(450.84 to<br>693.34)                            | 554.39<br>(359.49 to<br>819.55)                            | 398.56<br>(264.83 to<br>566.15)                            | 658.10<br>(408.85 to<br>977.83)                            | 12.12<br>(9.97 to<br>15.14)                       | 14.51<br>(9.90 to<br>20.78)                       | 10.74<br>(7.53 to<br>14.72)                       | 16.85<br>(10.93 to<br>24.65)                      |
| Interpersonal violence                                                              | 3,228.14<br>(2,220.42 to<br>3,808.95)                      | 1,993.46<br>(1,264.91 to<br>2,764.69)                      | 1,265.37<br>(797.87 to<br>1,719.31)                        | 2,319.72<br>(1,430.60 to<br>3,073.01)                      | 59.77<br>(41.25 to<br>73.74)                      | 40.24<br>(25.95 to<br>55.74)                      | 26.00<br>(16.63 to<br>35.06)                      | 46.41<br>(29.01 to<br>62.06)                      |
| Physical violence by firearm                                                        | 2,264.09<br>(1,240.37 to<br>2,649.56)                      | 1,318.75<br>(672.10 to<br>1,912.92)                        | 798.43<br>(392.10 to<br>1,141.20)                          | 1,551.72<br>(747.81 to<br>2,168.42)                        | 40.59<br>(21.80 to<br>47.84)                      | 25.06<br>(12.83 to<br>35.94)                      | 15.30<br>(7.66 to<br>21.17)                       | 29.30<br>(14.14 to<br>39.91)                      |
| Physical violence by sharp object                                                   | 577.00<br>(351.45 to<br>1,173.75)                          | 395.70<br>(236.42 to<br>837.44)                            | 257.26<br>(159.39 to<br>537.55)                            | 450.26<br>(263.64 to<br>962.08)                            | 11.24<br>(6.91 to<br>22.60)                       | 8.49<br>(5.16 to<br>17.93)                        | 5.59<br>(3.55 to<br>11.46)                        | 9.58<br>(5.67 to<br>20.21)                        |
| Physical violence by other means                                                    | 387.06<br>(231.86 to<br>729.73)                            | 279.01<br>(157.38 to<br>513.91)                            | 209.68<br>(115.05 to<br>385.16)                            | 317.74<br>(166.29 to<br>608.97)                            | 7.95<br>(4.66 to<br>15.06)                        | 6.69<br>(3.73 to<br>12.45)                        | 5.12<br>(2.88 to<br>9.57)                         | 7.52<br>(3.92 to<br>14.41)                        |
| <b>Forces of nature, conflict and terrorism, and executions and police conflict</b> | <b>31.96</b><br><b>(1.52 to</b><br><b>46.24)</b>           | <b>69.75</b><br><b>(0.00 to</b><br><b>1,059.87)</b>        | <b>70.11</b><br><b>(0.00 to</b><br><b>1,065.07)</b>        | <b>70.47</b><br><b>(0.00 to</b><br><b>1,068.88)</b>        | <b>0.52</b><br><b>(0.03 to</b><br><b>0.74)</b>    | <b>1.52</b><br><b>(0.00 to</b><br><b>22.93)</b>   | <b>1.54</b><br><b>(0.00 to</b><br><b>23.20)</b>   | <b>1.52</b><br><b>(0.00 to</b><br><b>22.76)</b>   |
| Exposure to forces of nature                                                        | 0.00<br>(0.00 to<br>0.00)                                  | 3.61<br>(0.00 to<br>32.77)                                 | 3.64<br>(0.00 to<br>32.96)                                 | 3.66<br>(0.00 to<br>33.41)                                 | 0.00<br>(0.00 to<br>0.00)                         | 0.09<br>(0.00 to<br>0.82)                         | 0.09<br>(0.00 to<br>0.84)                         | 0.09<br>(0.00 to<br>0.81)                         |
| Conflict and terrorism                                                              | 0.00<br>(0.00 to<br>0.00)                                  | 0.03<br>(0.00 to<br>0.23)                                  | 0.03<br>(0.00 to<br>0.23)                                  | 0.03<br>(0.00 to<br>0.23)                                  | 0.00<br>(0.00 to<br>0.00)                         | 0.00<br>(0.00 to<br>0.00)                         | 0.00<br>(0.00 to<br>0.01)                         | 0.00<br>(0.00 to<br>0.00)                         |

|                                                                          |                                                      |                                                        |                                                        |                                                          |                                                 |                                                 |                                                 |                                                 |
|--------------------------------------------------------------------------|------------------------------------------------------|--------------------------------------------------------|--------------------------------------------------------|----------------------------------------------------------|-------------------------------------------------|-------------------------------------------------|-------------------------------------------------|-------------------------------------------------|
|                                                                          | 31.96<br>(1.52 to<br>46.24)                          | 66.11<br>(0.00 to<br>1,058.98)                         | 66.44<br>(0.00 to<br>1,064.17)                         | 66.78<br>(0.00 to<br>1,067.99)                           | 0.52<br>(0.03 to<br>0.74)                       | 1.43<br>(0.00 to<br>22.91)                      | 1.45<br>(0.00 to<br>23.18)                      | 1.43<br>(0.00 to<br>22.74)                      |
| Executions and police conflict                                           |                                                      |                                                        |                                                        |                                                          |                                                 |                                                 |                                                 |                                                 |
| <b>Paraguay</b>                                                          |                                                      |                                                        |                                                        |                                                          |                                                 |                                                 |                                                 |                                                 |
| Cause                                                                    | YLLs (actual counts)                                 |                                                        |                                                        |                                                          | Deaths (actual counts)                          |                                                 |                                                 |                                                 |
|                                                                          | 2016                                                 | 2040 Forecast                                          | 2040 Better Scenario                                   | 2040 Worse Scenario                                      | 2016                                            | 2040 Forecast                                   | 2040 Better Scenario                            | 2040 Worse Scenario                             |
| <b>All causes</b>                                                        | <b>994,523.79</b><br>(899,458.51 to<br>1,103,125.10) | <b>1,252,180.74</b><br>(946,536.42 to<br>1,570,861.99) | <b>1,004,259.94</b><br>(776,277.96 to<br>1,244,819.33) | <b>1,651,277.83</b><br>(1,214,397.10 to<br>2,107,590.73) | <b>35,994.02</b><br>(32,882.60 to<br>39,502.74) | <b>59,817.43</b><br>(49,391.01 to<br>70,326.42) | <b>50,420.66</b><br>(42,446.93 to<br>58,698.74) | <b>73,049.71</b><br>(59,588.17 to<br>85,959.69) |
| <b>Communicable, maternal, neonatal, and nutritional diseases</b>        | <b>198,956.44</b><br>(162,115.14 to<br>245,148.83)   | <b>128,774.20</b><br>(92,539.84 to<br>178,660.93)      | <b>95,035.58</b><br>(68,945.42 to<br>129,503.20)       | <b>194,268.25</b><br>(135,295.95 to<br>275,180.77)       | <b>3,925.30</b><br>(3,406.33 to<br>4,580.10)    | <b>3,872.84</b><br>(2,848.48 to<br>5,100.51)    | <b>3,267.75</b><br>(2,401.02 to<br>4,255.36)    | <b>5,368.62</b><br>(3,802.07 to<br>7,286.05)    |
| <b>HIV/AIDS and tuberculosis</b>                                         | <b>12,380.36</b><br>(10,177.34 to<br>17,021.77)      | <b>10,754.64</b><br>(6,841.50 to<br>18,329.56)         | <b>6,672.86</b><br>(3,571.72 to<br>13,137.63)          | <b>17,854.15</b><br>(11,153.11 to<br>28,383.24)          | <b>338.96</b><br>(285.35 to<br>441.03)          | <b>310.38</b><br>(184.33 to<br>507.59)          | <b>200.11</b><br>(113.16 to<br>364.42)          | <b>496.64</b><br>(313.17 to<br>775.38)          |
| Tuberculosis                                                             | 8,163.74<br>(6,953.08 to<br>9,514.25)                | 6,358.92<br>(3,374.14 to<br>11,460.53)                 | 3,996.13<br>(2,098.12 to<br>7,037.75)                  | 10,386.20<br>(5,243.33 to<br>19,035.10)                  | 254.09<br>(216.05 to<br>295.74)                 | 219.02<br>(124.46 to<br>368.93)                 | 142.89<br>(81.34 to<br>236.21)                  | 345.51<br>(188.31 to<br>594.38)                 |
| HIV/AIDS                                                                 | 4,216.62<br>(2,604.54 to<br>8,577.95)                | 4,395.71<br>(1,679.40 to<br>11,049.07)                 | 2,676.74<br>(843.32 to<br>8,706.57)                    | 7,467.95<br>(3,915.41 to<br>14,344.21)                   | 84.87<br>(50.17 to<br>181.86)                   | 91.35<br>(29.19 to<br>243.49)                   | 57.22<br>(14.62 to<br>199.41)                   | 151.13<br>(69.81 to<br>309.83)                  |
| <b>Diarrhea, lower respiratory, and other common infectious diseases</b> | <b>61,793.94</b><br>(49,607.07 to<br>77,509.92)      | <b>57,203.92</b><br>(36,115.23 to<br>89,002.74)        | <b>40,129.31</b><br>(25,800.19 to<br>60,681.72)        | <b>88,656.18</b><br>(53,081.62 to<br>143,182.12)         | <b>1,781.75</b><br>(1,497.41 to<br>2,150.70)    | <b>2,431.00</b><br>(1,593.29 to<br>3,583.29)    | <b>2,076.06</b><br>(1,372.80 to<br>2,956.18)    | <b>3,425.75</b><br>(2,164.63 to<br>5,154.92)    |
| Diarrheal diseases                                                       | 9,042.71<br>(6,157.76 to<br>12,818.95)               | 3,150.80<br>(877.07 to<br>9,311.55)                    | 2,229.78<br>(677.32 to<br>6,120.68)                    | 6,322.32<br>(1,320.59 to<br>20,923.25)                   | 200.53<br>(132.85 to<br>309.18)                 | 156.74<br>(48.36 to<br>420.52)                  | 128.81<br>(42.24 to<br>346.89)                  | 268.41<br>(70.06 to<br>806.26)                  |
| Intestinal infectious diseases                                           | 109.16<br>(60.39 to<br>179.53)                       | 66.00<br>(25.53 to<br>142.17)                          | 59.31<br>(22.66 to<br>126.83)                          | 76.90<br>(29.09 to<br>165.73)                            | 2.21<br>(1.28 to<br>3.55)                       | 1.66<br>(0.85 to<br>3.39)                       | 1.66<br>(0.78 to<br>3.14)                       | 1.99<br>(0.93 to<br>3.78)                       |
| Typhoid fever                                                            | 61.38<br>(31.27 to<br>114.60)                        | 49.65<br>(18.06 to<br>111.56)                          | 45.69<br>(16.49 to<br>102.83)                          | 55.60<br>(19.67 to<br>122.67)                            | 1.32<br>(0.66 to<br>2.36)                       | 1.21<br>(0.52 to<br>2.43)                       | 1.14<br>(0.50 to<br>2.28)                       | 1.31<br>(0.55 to<br>2.63)                       |
| Paratyphoid fever                                                        | 0.44<br>(0.17 to<br>0.95)                            | 0.44<br>(0.12 to<br>1.08)                              | 0.39<br>(0.11 to<br>0.96)                              | 0.51<br>(0.14 to<br>1.27)                                | 0.01<br>(0.00 to<br>0.02)                       | 0.01<br>(0.00 to<br>0.02)                       | 0.01<br>(0.00 to<br>0.02)                       | 0.01<br>(0.00 to<br>0.03)                       |
| Other intestinal infectious diseases                                     | 44.34<br>(16.95 to<br>100.25)                        | 15.91<br>(4.21 to<br>42.69)                            | 13.23<br>(3.49 to<br>36.33)                            | 20.79<br>(5.27 to<br>57.02)                              | 0.88<br>(0.34 to<br>1.85)                       | 0.79<br>(0.18 to<br>1.37)                       | 0.51<br>(0.16 to<br>1.26)                       | 0.67<br>(0.21 to<br>1.63)                       |
| Lower respiratory infections                                             | 39,224.17<br>(32,378.46 to<br>47,852.44)             | 35,339.90<br>(18,649.99 to<br>60,902.80)               | 27,243.29<br>(15,750.40 to<br>43,242.48)               | 55,403.88<br>(26,977.51 to<br>98,817.61)                 | 1,375.82<br>(1,147.71 to<br>1,652.05)           | 1,950.66<br>(1,240.70 to<br>2,951.80)           | 1,729.49<br>(1,141.92 to<br>2,578.32)           | 2,712.18<br>(1,638.26 to<br>4,270.49)           |
| Upper respiratory infections                                             | 44.65<br>(21.95 to<br>80.81)                         | 40.48<br>(11.84 to<br>93.31)                           | 32.06<br>(9.24 to<br>73.35)                            | 55.09<br>(16.25 to<br>128.64)                            | 1.04<br>(0.57 to<br>1.70)                       | 1.38<br>(0.46 to<br>2.94)                       | 1.14<br>(0.37 to<br>2.40)                       | 1.76<br>(0.59 to<br>3.85)                       |
| Otitis media                                                             | 1.03<br>(0.63 to<br>1.76)                            | 0.15<br>(0.07 to<br>0.29)                              | 0.15<br>(0.07 to<br>0.28)                              | 0.15<br>(0.06 to<br>0.03)                                | 0.02<br>(0.01 to<br>0.02)                       | 0.01<br>(0.00 to<br>0.02)                       | 0.01<br>(0.00 to<br>0.02)                       | 0.01<br>(0.00 to<br>0.01)                       |
| Meningitis                                                               | 7,497.90<br>(5,144.19 to<br>11,962.91)               | 4,300.91<br>(1,450.50 to<br>9,293.71)                  | 3,401.30<br>(1,289.07 to<br>6,558.14)                  | 5,533.75<br>(1,622.16 to<br>12,633.34)                   | 120.73<br>(89.12 to<br>180.56)                  | 90.45<br>(43.03 to<br>162.42)                   | 79.89<br>(41.02 to<br>134.87)                   | 104.77<br>(46.38 to<br>202.83)                  |
| Pneumococcal meningitis                                                  | 1,113.51<br>(775.49 to<br>1,723.75)                  | 571.41<br>(234.26 to<br>1,093.63)                      | 517.10<br>(217.79 to<br>931.06)                        | 641.80<br>(257.30 to<br>1,215.69)                        | 20.27<br>(15.42 to<br>30.24)                    | 15.56<br>(8.39 to<br>26.42)                     | 14.86<br>(8.25 to<br>24.83)                     | 16.25<br>(8.58 to<br>26.90)                     |
| H influenzae type B meningitis                                           | 1,086.27<br>(703.86 to<br>1,810.37)                  | 1,305.52<br>(193.97 to<br>4,279.14)                    | 658.28<br>(157.96 to<br>1,738.13)                      | 2,101.59<br>(233.98 to<br>7,373.88)                      | 16.25<br>(11.46 to<br>25.77)                    | 19.06<br>(5.01 to<br>54.12)                     | 11.67<br>(4.56 to<br>25.56)                     | 28.16<br>(5.53 to<br>90.31)                     |
| Meningococcal meningitis                                                 | 2,514.38<br>(1,695.36 to<br>4,009.86)                | 1,028.55<br>(359.35 to<br>2,110.29)                    | 935.75<br>(337.18 to<br>1,843.43)                      | 1,194.53<br>(397.14 to<br>2,520.70)                      | 38.42<br>(27.71 to<br>59.17)                    | 22.33<br>(10.73 to<br>40.63)                    | 21.21<br>(10.52 to<br>37.81)                    | 24.35<br>(11.24 to<br>44.52)                    |
| Other meningitis                                                         | 2,783.73<br>(1,886.48 to<br>4,547.92)                | 1,395.42<br>(555.95 to<br>2,791.04)                    | 1,290.18<br>(527.18 to<br>2,412.49)                    | 1,595.82<br>(617.29 to<br>3,217.02)                      | 45.80<br>(33.90 to<br>69.36)                    | 33.50<br>(17.84 to<br>57.05)                    | 32.15<br>(17.25 to<br>54.60)                    | 36.01<br>(18.68 to<br>62.32)                    |



|                                                |                                                            |                                                            |                                                            |                                                             |                                                     |                                                     |                                                     |                                                     |
|------------------------------------------------|------------------------------------------------------------|------------------------------------------------------------|------------------------------------------------------------|-------------------------------------------------------------|-----------------------------------------------------|-----------------------------------------------------|-----------------------------------------------------|-----------------------------------------------------|
| Encephalitis                                   | 1,379.85<br>(964.06 to<br>1,778.75)                        | 1,065.29<br>(410.46 to<br>1,980.41)                        | 937.60<br>(383.92 to<br>1,679.62)                          | 1,279.34<br>(477.66 to<br>2,363.10)                         | 23.06<br>(17.18 to<br>28.32)                        | 24.53<br>(13.55 to<br>39.67)                        | 22.45<br>(12.61 to<br>35.20)                        | 27.82<br>(14.65 to<br>45.69)                        |
| Diphtheria                                     | 16.97<br>(9.98 to<br>27.15)                                | 3.37<br>(0.78 to<br>7.53)                                  | 2.26<br>(0.64 to<br>4.49)                                  | 4.68<br>(0.85 to<br>11.74)                                  | 0.25<br>(0.16 to<br>0.38)                           | 0.06<br>(0.02 to<br>0.12)                           | 0.05<br>(0.01 to<br>0.09)                           | 0.08<br>(0.02 to<br>0.17)                           |
| Whooping cough                                 | 4,011.36<br>(346.17 to<br>11,952.04)                       | 3,374.78<br>(16.49 to<br>12,171.57)                        | 434.39<br>(9.55 to<br>1,720.95)                            | 4,397.45<br>(18.91 to<br>16,167.84)                         | 47.64<br>(4.12 to<br>141.95)                        | 40.09<br>(0.26 to<br>144.36)                        | 5.44<br>(0.13 to<br>21.64)                          | 52.15<br>(0.30 to<br>191.40)                        |
| Tetanus                                        | 183.20<br>(107.76 to<br>399.43)                            | 38.07<br>(15.59 to<br>94.86)                               | 21.79<br>(9.08 to<br>52.22)                                | 51.41<br>(20.35 to<br>129.12)                               | 3.55<br>(2.30 to<br>7.54)                           | 0.83<br>(0.43 to<br>2.00)                           | 0.67<br>(0.34 to<br>1.63)                           | 0.97<br>(0.48 to<br>2.25)                           |
| Measles                                        | 0.09<br>(0.00 to<br>0.44)                                  | 9,680.10<br>(0.00 to<br>34,295.25)                         | 5,650.33<br>(0.00 to<br>19,373.90)                         | 15,337.57<br>(0.00 to<br>56,931.81)                         | 0.00<br>(0.00 to<br>0.01)                           | 157.89<br>(0.00 to<br>535.99)                       | 100.48<br>(0.00 to<br>343.95)                       | 248.05<br>(0.00 to<br>863.45)                       |
| <b>Paraguay</b>                                |                                                            |                                                            |                                                            |                                                             |                                                     |                                                     |                                                     |                                                     |
| Cause                                          | YLLs (actual counts)                                       |                                                            |                                                            |                                                             | Deaths (actual counts)                              |                                                     |                                                     |                                                     |
|                                                | 2016                                                       | 2040 Forecast                                              | 2040 Better Scenario                                       | 2040 Worse Scenario                                         | 2016                                                | 2040 Forecast                                       | 2040 Better Scenario                                | 2040 Worse Scenario                                 |
| Varicella and herpes zoster                    | 282.85<br>(171.02 to<br>455.29)                            | 144.08<br>(55.34 to<br>282.89)                             | 117.05<br>(47.03 to<br>228.31)                             | 193.64<br>(67.33 to<br>402.51)                              | 6.90<br>(4.79 to<br>9.58)                           | 6.57<br>(3.27 to<br>11.74)                          | 5.98<br>(3.01 to<br>10.57)                          | 7.57<br>(3.64 to<br>13.41)                          |
| <b>Neglected tropical diseases and malaria</b> | <b>5,324.74</b><br><b>(2,768.65 to</b><br><b>7,630.18)</b> | <b>4,283.24</b><br><b>(1,312.88 to</b><br><b>7,464.10)</b> | <b>4,279.83</b><br><b>(1,331.31 to</b><br><b>7,312.35)</b> | <b>4,434.62</b><br><b>(1,322.96 to</b><br><b>7,947.00)</b>  | <b>152.49</b><br><b>(64.39 to</b><br><b>230.34)</b> | <b>203.06</b><br><b>(57.63 to</b><br><b>350.60)</b> | <b>217.16</b><br><b>(62.58 to</b><br><b>371.74)</b> | <b>191.47</b><br><b>(53.06 to</b><br><b>334.35)</b> |
| Malaria                                        | 17.32<br>(14.27 to<br>21.05)                               | 4.66<br>(2.20 to<br>12.10)                                 | 4.50<br>(2.11 to<br>11.98)                                 | 4.90<br>(2.35 to<br>12.41)                                  | 0.40<br>(0.34 to<br>0.48)                           | 0.14<br>(0.07 to<br>0.38)                           | 0.14<br>(0.07 to<br>0.38)                           | 0.14<br>(0.07 to<br>0.37)                           |
| Chagas disease                                 | 547.45<br>(472.24 to<br>634.01)                            | 243.99<br>(120.00 to<br>678.30)                            | 287.41<br>(145.45 to<br>798.83)                            | 199.90<br>(100.04 to<br>564.03)                             | 26.60<br>(23.13 to<br>30.42)                        | 14.47<br>(7.26 to<br>39.02)                         | 17.58<br>(9.00 to<br>46.62)                         | 11.45<br>(5.68 to<br>31.66)                         |
| Leishmaniasis                                  | 1,926.75<br>(1,073.14 to<br>3,240.63)                      | 1,998.51<br>(134.57 to<br>966.21)                          | 225.30<br>(97.68 to<br>702.21)                             | 438.29<br>(200.53 to<br>1,516.72)                           | 30.12<br>(17.93 to<br>48.93)                        | 5.56<br>(2.55 to<br>13.59)                          | 4.40<br>(1.95 to<br>10.62)                          | 7.65<br>(3.63 to<br>20.50)                          |
| African trypanosomiasis                        | 0.00<br>(0.00 to<br>0.00)                                  | 0.00<br>(0.00 to<br>0.00)                                  | 0.00<br>(0.00 to<br>0.00)                                  | 0.00<br>(0.00 to<br>0.00)                                   | 0.00<br>(0.00 to<br>0.00)                           | 0.00<br>(0.00 to<br>0.00)                           | 0.00<br>(0.00 to<br>0.00)                           | 0.00<br>(0.00 to<br>0.00)                           |
| Schistosomiasis                                | 0.00<br>(0.00 to<br>0.00)                                  | 0.00<br>(0.00 to<br>0.00)                                  | 0.00<br>(0.00 to<br>0.00)                                  | 0.00<br>(0.00 to<br>0.00)                                   | 0.00<br>(0.00 to<br>0.00)                           | 0.00<br>(0.00 to<br>0.00)                           | 0.00<br>(0.00 to<br>0.00)                           | 0.00<br>(0.00 to<br>0.00)                           |
| Cysticercosis                                  | 188.16<br>(162.48 to<br>216.75)                            | 32.59<br>(16.09 to<br>84.72)                               | 31.14<br>(15.20 to<br>84.08)                               | 34.78<br>(17.65 to<br>88.79)                                | 4.56<br>(3.93 to<br>5.25)                           | 0.99<br>(0.50 to<br>2.62)                           | 0.97<br>(0.48 to<br>2.61)                           | 1.02<br>(0.52 to<br>2.65)                           |
| Cystic echinococcosis                          | 10.57<br>(8.84 to<br>12.41)                                | 2.53<br>(1.21 to<br>6.82)                                  | 1.92<br>(0.91 to<br>5.29)                                  | 3.59<br>(1.75 to<br>9.51)                                   | 0.31<br>(0.26 to<br>0.36)                           | 0.11<br>(0.05 to<br>0.30)                           | 0.08<br>(0.04 to<br>0.23)                           | 0.14<br>(0.07 to<br>0.39)                           |
| Dengue                                         | 2,046.65<br>(29.11 to<br>3,939.05)                         | 3,570.66<br>(120.43 to<br>6,551.23)                        | 3,616.41<br>(117.98 to<br>6,603.60)                        | 3,585.15<br>(119.04 to<br>6,602.59)                         | 80.78<br>(0.68 to<br>156.03)                        | 179.14<br>(4.53 to<br>332.14)                       | 191.58<br>(4.76 to<br>355.00)                       | 167.94<br>(4.26 to<br>315.44)                       |
| Yellow fever                                   | 346.28<br>(72.38 to<br>1,037.73)                           | 51.23<br>(5.91 to<br>213.57)                               | 40.79<br>(4.63 to<br>171.77)                               | 69.41<br>(8.07 to<br>282.02)                                | 5.80<br>(1.25 to<br>16.82)                          | 0.92<br>(0.11 to<br>3.68)                           | 0.75<br>(0.09 to<br>3.04)                           | 1.21<br>(0.15 to<br>4.81)                           |
| Rabies                                         | 1.01<br>(0.21 to<br>8.94)                                  | 0.25<br>(0.02 to<br>2.36)                                  | 0.17<br>(0.01 to<br>1.72)                                  | 0.39<br>(0.04 to<br>3.58)                                   | 0.02<br>(0.00 to<br>0.16)                           | 0.01<br>(0.00 to<br>0.06)                           | 0.00<br>(0.00 to<br>0.04)                           | 0.01<br>(0.00 to<br>0.09)                           |
| Intestinal nematode infections                 | 89.01<br>(27.66 to<br>179.99)                              | 37.65<br>(10.11 to<br>97.14)                               | 35.99<br>(9.77 to<br>89.48)                                | 41.42<br>(10.87 to<br>109.94)                               | 1.39<br>(0.61 to<br>2.53)                           | 0.77<br>(0.27 to<br>1.85)                           | 0.78<br>(0.28 to<br>1.86)                           | 0.78<br>(0.27 to<br>1.83)                           |
| Other neglected tropical diseases              | 149.48<br>(100.98 to<br>213.05)                            | 43.18<br>(24.45 to<br>85.84)                               | 36.19<br>(20.54 to<br>74.08)                               | 56.79<br>(31.94 to<br>108.14)                               | 2.47<br>(1.68 to<br>3.25)                           | 0.96<br>(0.54 to<br>2.34)                           | 0.87<br>(0.49 to<br>2.19)                           | 1.14<br>(0.66 to<br>2.51)                           |
| <b>Maternal disorders</b>                      | <b>7,112.37</b><br><b>(5,375.50 to</b><br><b>9,477.78)</b> | <b>4,406.06</b><br><b>(2,335.28 to</b><br><b>7,254.54)</b> | <b>3,338.26</b><br><b>(1,718.00 to</b><br><b>5,531.32)</b> | <b>6,260.40</b><br><b>(3,167.76 to</b><br><b>10,475.65)</b> | <b>125.09</b><br><b>(94.27 to</b><br><b>166.36)</b> | <b>79.09</b><br><b>(42.06 to</b><br><b>128.65)</b>  | <b>60.02</b><br><b>(31.38 to</b><br><b>98.49)</b>   | <b>112.10</b><br><b>(56.93 to</b><br><b>186.22)</b> |

|                                                          |                                           |                                          |                                          |                                           |                                     |                                 |                                 |                                   |
|----------------------------------------------------------|-------------------------------------------|------------------------------------------|------------------------------------------|-------------------------------------------|-------------------------------------|---------------------------------|---------------------------------|-----------------------------------|
| Maternal hemorrhage                                      | 1,390.78<br>(852.22 to<br>2,103.40)       | 956.54<br>(446.51 to<br>1,736.58)        | 724.56<br>(331.14 to<br>1,325.44)        | 1,349.60<br>(614.06 to<br>2,476.95)       | 24.81<br>(15.21 to<br>37.37)        | 17.52<br>(8.31 to<br>31.81)     | 13.29<br>(6.16 to<br>23.87)     | 24.68<br>(11.36 to<br>45.00)      |
| Maternal sepsis and other maternal infections            | 284.17<br>(149.09 to<br>479.41)           | 289.98<br>(118.00 to<br>551.57)          | 218.71<br>(85.95 to<br>420.50)           | 413.32<br>(162.45 to<br>804.23)           | 5.03<br>(2.67 to<br>8.35)           | 5.18<br>(2.13 to<br>9.78)       | 3.91<br>(1.55 to<br>7.43)       | 7.36<br>(2.94 to<br>14.00)        |
| Maternal hypertensive disorders                          | 1,861.94<br>(1,191.48 to<br>2,704.59)     | 1,013.25<br>(477.90 to<br>1,836.36)      | 762.07<br>(352.34 to<br>1,373.18)        | 1,440.48<br>(676.95 to<br>2,541.57)       | 32.44<br>(20.73 to<br>46.59)        | 18.10<br>(8.53 to<br>32.44)     | 13.64<br>(6.34 to<br>24.65)     | 25.67<br>(12.11 to<br>45.01)      |
| Maternal obstructed labor and uterine rupture            | 95.00<br>(39.53 to<br>190.49)             | 82.02<br>(25.56 to<br>182.02)            | 60.74<br>(18.58 to<br>136.33)            | 119.01<br>(35.98 to<br>267.82)            | 1.70<br>(0.70 to<br>3.34)           | 1.50<br>(0.47 to<br>3.33)       | 1.11<br>(0.34 to<br>2.50)       | 2.17<br>(0.65 to<br>4.88)         |
| Maternal abortion, miscarriage, and ectopic pregnancy    | 637.93<br>(376.01 to<br>1,026.06)         | 697.34<br>(303.72 to<br>1,454.01)        | 528.43<br>(227.06 to<br>1,074.59)        | 1,001.29<br>(420.29 to<br>2,032.50)       | 11.48<br>(6.81 to<br>18.02)         | 12.55<br>(5.62 to<br>25.74)     | 9.52<br>(4.20 to<br>19.07)      | 17.98<br>(7.77 to<br>36.25)       |
| Indirect maternal deaths                                 | 1,779.62<br>(1,154.86 to<br>2,814.13)     | 783.92<br>(338.95 to<br>1,528.68)        | 596.34<br>(249.89 to<br>1,186.33)        | 1,118.31<br>(459.15 to<br>2,185.76)       | 30.94<br>(20.02 to<br>48.87)        | 13.75<br>(6.03 to<br>26.43)     | 10.48<br>(4.57 to<br>20.75)     | 19.55<br>(8.18 to<br>37.68)       |
| Late maternal deaths                                     | 116.98<br>(62.14 to<br>198.03)            | 55.56<br>(21.89 to<br>112.46)            | 41.78<br>(16.01 to<br>86.78)             | 80.03<br>(30.22 to<br>166.37)             | 2.05<br>(1.08 to<br>3.47)           | 0.99<br>(0.39 to<br>1.95)       | 0.74<br>(0.29 to<br>1.53)       | 1.41<br>(0.54 to<br>2.93)         |
| Maternal deaths aggravated by HIV/AIDS                   | 5.27<br>(2.40 to<br>9.94)                 | 11.14<br>(2.91 to<br>28.59)              | 7.87<br>(1.07 to<br>22.72)               | 16.10<br>(4.89 to<br>40.82)               | 0.10<br>(0.04 to<br>0.18)           | 0.21<br>(0.05 to<br>0.55)       | 0.15<br>(0.02 to<br>0.43)       | 0.30<br>(0.09 to<br>0.77)         |
| Other maternal disorders                                 | 940.68<br>(602.52 to<br>1,377.00)         | 516.30<br>(244.60 to<br>905.18)          | 397.77<br>(181.27 to<br>695.53)          | 722.26<br>(335.55 to<br>1,288.00)         | 16.55<br>(10.70 to<br>24.19)        | 7.18<br>(4.50 to<br>16.20)      | 12.97<br>(3.30 to<br>12.52)     | 12.97<br>(5.99 to<br>23.18)       |
| <b>Paraguay</b>                                          |                                           |                                          |                                          |                                           |                                     |                                 |                                 |                                   |
| Cause                                                    | YLLs (actual counts)                      |                                          |                                          |                                           | Deaths (actual counts)              |                                 |                                 |                                   |
|                                                          | 2016                                      | 2040 Forecast                            | 2040 Better Scenario                     | 2040 Worse Scenario                       | 2016                                | 2040 Forecast                   | 2040 Better Scenario            | 2040 Worse Scenario               |
| Neonatal disorders                                       | 87,327.49<br>(62,912.45 to<br>118,244.84) | 42,740.84<br>(25,089.73 to<br>68,687.80) | 32,473.86<br>(19,490.94 to<br>51,655.17) | 65,379.13<br>(37,078.61 to<br>104,012.26) | 1,008.82<br>(726.75 to<br>1,365.95) | 493.85<br>(289.92 to<br>793.71) | 375.23<br>(225.31 to<br>589.83) | 755.39<br>(428.40 to<br>1,201.89) |
| Neonatal preterm birth                                   | 47,031.36<br>(32,879.25 to<br>65,579.37)  | 19,003.05<br>(11,019.53 to<br>31,733.03) | 13,245.66<br>(7,892.12 to<br>21,610.95)  | 30,715.03<br>(17,502.32 to<br>50,686.95)  | 543.28<br>(379.80 to<br>757.43)     | 219.55<br>(127.35 to<br>366.57) | 154.20<br>(91.21 to<br>249.71)  | 354.84<br>(202.61 to<br>585.61)   |
| Neonatal encephalopathy due to birth asphyxia and trauma | 18,739.93<br>(12,511.71 to<br>26,729.84)  | 9,022.65<br>(4,660.39 to<br>15,893.60)   | 7,372.65<br>(3,858.18 to<br>12,964.73)   | 12,943.92<br>(6,505.64 to<br>23,065.59)   | 216.50<br>(144.56 to<br>308.78)     | 104.27<br>(53.85 to<br>183.62)  | 85.20<br>(44.60 to<br>149.78)   | 149.58<br>(75.20 to<br>266.45)    |
| Neonatal sepsis and other neonatal infections            | 11,309.19<br>(4,156.70 to<br>17,520.42)   | 10,084.34<br>(3,793.43 to<br>17,411.31)  | 8,154.60<br>(3,161.86 to<br>13,965.32)   | 14,648.93<br>(5,511.69 to<br>25,763.28)   | 130.64<br>(48.04 to<br>202.38)      | 116.51<br>(43.84 to<br>201.17)  | 94.22<br>(36.54 to<br>161.33)   | 169.25<br>(63.68 to<br>297.71)    |
| Hemolytic disease and other neonatal jaundice            | 690.69<br>(390.16 to<br>1,160.97)         | 223.91<br>(84.75 to<br>499.82)           | 175.75<br>(66.79 to<br>385.72)           | 336.74<br>(125.53 to<br>740.10)           | 7.98<br>(4.51 to<br>13.41)          | 2.59<br>(0.98 to<br>5.77)       | 0.77<br>(0.46 to<br>1.11)       | 3.89<br>(1.45 to<br>8.55)         |
| Other neonatal disorders                                 | 9,556.32<br>(6,172.86 to<br>14,096.80)    | 4,406.90<br>(2,314.63 to<br>8,178.42)    | 3,425.19<br>(1,808.84 to<br>6,362.79)    | 6,734.52<br>(3,380.91 to<br>12,708.61)    | 110.42<br>(71.34 to<br>162.90)      | 50.93<br>(26.76 to<br>94.50)    | 39.59<br>(20.90 to<br>73.52)    | 77.83<br>(39.07 to<br>146.87)     |
| Nutritional deficiencies                                 | 10,533.24<br>(8,151.02 to<br>13,605.83)   | 5,099.19<br>(3,587.40 to<br>7,358.77)    | 4,475.71<br>(3,194.28 to<br>6,208.73)    | 6,225.30<br>(4,266.47 to<br>9,229.41)     | 321.46<br>(277.81 to<br>369.60)     | 267.99<br>(190.73 to<br>352.29) | 261.35<br>(191.38 to<br>341.89) | 282.70<br>(196.44 to<br>380.95)   |
| Protein-energy malnutrition                              | 10,246.74<br>(7,891.24 to<br>13,313.50)   | 4,701.91<br>(3,262.31 to<br>6,725.79)    | 4,128.90<br>(2,892.58 to<br>5,794.23)    | 5,742.04<br>(3,910.38 to<br>8,488.35)     | 312.56<br>(269.54 to<br>360.24)     | 250.48<br>(175.30 to<br>331.72) | 244.90<br>(176.86 to<br>320.54) | 263.48<br>(179.51 to<br>354.68)   |
| Iodine deficiency                                        | 36.40<br>(2.48 to<br>130.92)              | 137.38<br>(2.46 to<br>607.26)            | 115.04<br>(2.00 to<br>482.85)            | 177.41<br>(3.46 to<br>855.67)             | 0.92<br>(0.08 to<br>3.02)           | 6.17<br>(0.09 to<br>27.84)      | 5.60<br>(0.08 to<br>27.55)      | 7.09<br>(0.12 to<br>31.17)        |
| Dietary iron deficiency                                  | 46.15<br>(37.52 to<br>56.75)              | 43.05<br>(29.68 to<br>58.33)             | 38.43<br>(26.38 to<br>52.55)             | 50.35<br>(34.21 to<br>68.40)              | 0.82<br>(0.68 to<br>0.99)           | 0.87<br>(0.61 to<br>1.20)       | 0.80<br>(0.55 to<br>1.11)       | 0.99<br>(0.69 to<br>1.35)         |
| Other nutritional deficiencies                           | 203.95<br>(123.31 to<br>275.90)           | 216.84<br>(118.85 to<br>332.49)          | 193.34<br>(108.31 to<br>288.64)          | 255.51<br>(135.48 to<br>400.59)           | 7.15<br>(3.76 to<br>9.13)           | 10.46<br>(5.29 to<br>16.13)     | 10.06<br>(5.20 to<br>15.40)     | 11.13<br>(5.47 to<br>17.16)       |

|                                                                         |                                                 |                                                   |                                                 |                                                     |                                              |                                              |                                              |                                              |
|-------------------------------------------------------------------------|-------------------------------------------------|---------------------------------------------------|-------------------------------------------------|-----------------------------------------------------|----------------------------------------------|----------------------------------------------|----------------------------------------------|----------------------------------------------|
| <b>Other communicable, maternal, neonatal, and nutritional diseases</b> | <b>14,484.28</b><br>(6,062.18 to 28,773.36)     | <b>4,284.30</b><br>(2,206.12 to 8,289.64)         | <b>3,665.75</b><br>(1,927.48 to 6,804.25)       | <b>5,458.48</b><br>(2,727.26 to 10,872.14)          | <b>196.73</b><br>(96.52 to 359.36)           | <b>87.48</b><br>(54.33 to 138.33)            | <b>77.82</b><br>(49.20 to 117.08)            | <b>164.57</b><br>(62.92 to 174.59)           |
| Sexually transmitted infections excluding HIV                           | 12,432.82<br>(3,938.48 to 27,055.20)            | 2,446.71<br>(710.40 to 6,258.61)                  | 2,059.00<br>(622.85 to 5,027.95)                | 3,252.15<br>(923.54 to 8,420.08)                    | 148.19<br>(48.80 to 319.28)                  | 30.89<br>(10.41 to 75.83)                    | 26.24<br>(9.04 to 61.36)                     | 40.46<br>(12.91 to 101.07)                   |
| Syphilis                                                                | 12,296.90<br>(3,801.78 to 26,918.43)            | 2,338.60<br>(619.73 to 6,116.43)                  | 1,960.26<br>(529.68 to 4,937.76)                | 3,131.37<br>(818.36 to 8,286.82)                    | 145.10<br>(45.64 to 316.27)                  | 28.16<br>(7.85 to 73.05)                     | 23.69<br>(6.79 to 58.50)                     | 37.49<br>(10.23 to 97.62)                    |
| Chlamydial infection                                                    | 25.81<br>(18.63 to 34.29)                       | 21.05<br>(13.47 to 30.59)                         | 19.17<br>(12.22 to 27.86)                       | 23.60<br>(14.70 to 34.43)                           | 0.58<br>(0.45 to 0.76)                       | 0.53<br>(0.37 to 0.74)                       | 0.50<br>(0.34 to 0.69)                       | 0.58<br>(0.39 to 0.81)                       |
| Gonococcal infection                                                    | 70.86<br>(51.71 to 93.71)                       | 56.43<br>(36.40 to 81.63)                         | 51.68<br>(33.21 to 73.93)                       | 62.83<br>(39.47 to 90.53)                           | 1.66<br>(1.30 to 2.13)                       | 1.48<br>(1.03 to 2.04)                       | 1.39<br>(0.96 to 1.91)                       | 1.60<br>(1.10 to 2.20)                       |
| Other sexually transmitted infections                                   | 39.25<br>(28.18 to 51.92)                       | 30.63<br>(19.53 to 44.40)                         | 27.88<br>(17.77 to 40.47)                       | 34.36<br>(21.45 to 50.16)                           | 0.86<br>(0.66 to 1.10)                       | 0.72<br>(0.48 to 1.01)                       | 0.67<br>(0.45 to 0.93)                       | 0.79<br>(0.53 to 1.12)                       |
| Acute hepatitis                                                         | 476.33<br>(408.85 to 553.51)                    | 410.71<br>(279.61 to 580.36)                      | 369.54<br>(248.72 to 520.93)                    | 469.46<br>(316.43 to 653.15)                        | 13.79<br>(11.87 to 16.17)                    | 14.90<br>(10.70 to 20.30)                    | 13.82<br>(9.96 to 18.97)                     | 16.38<br>(11.75 to 22.13)                    |
| Acute hepatitis A                                                       | 16.59<br>(5.77 to 30.75)                        | 9.28<br>(3.89 to 18.23)                           | 8.10<br>(3.37 to 15.91)                         | 11.31<br>(4.56 to 22.10)                            | 0.26<br>(0.12 to 0.45)                       | 0.24<br>(0.09 to 0.49)                       | 0.22<br>(0.08 to 0.45)                       | 0.27<br>(0.11 to 0.54)                       |
| Acute hepatitis B                                                       | 378.44<br>(321.28 to 449.10)                    | 343.97<br>(229.53 to 487.10)                      | 308.50<br>(205.07 to 442.67)                    | 393.45<br>(259.67 to 554.19)                        | 11.51<br>(9.78 to 13.66)                     | 12.35<br>(8.62 to 17.16)                     | 11.34<br>(7.85 to 15.92)                     | 13.72<br>(9.63 to 19.10)                     |
| Acute hepatitis C                                                       | 20.51<br>(15.24 to 27.76)                       | 18.63<br>(12.01 to 27.11)                         | 17.46<br>(11.21 to 25.50)                       | 20.34<br>(12.96 to 29.76)                           | 0.55<br>(0.41 to 0.74)                       | 0.67<br>(0.43 to 0.96)                       | 0.65<br>(0.41 to 0.93)                       | 0.70<br>(0.46 to 1.00)                       |
| Acute hepatitis E                                                       | 60.79<br>(44.06 to 82.51)                       | 38.82<br>(24.42 to 57.62)                         | 35.47<br>(22.15 to 52.32)                       | 44.36<br>(27.47 to 66.11)                           | 1.47<br>(1.08 to 2.51)                       | 1.64<br>(0.95 to 2.51)                       | 1.62<br>(0.93 to 2.51)                       | 1.69<br>(1.01 to 2.63)                       |
| Other unspecified infectious diseases                                   | 1,575.13<br>(826.13 to 2,608.75)                | 1,426.88<br>(718.47 to 2,115.09)                  | 1,237.22<br>(629.24 to 1,813.12)                | 1,736.86<br>(874.25 to 2,600.66)                    | 34.75<br>(18.12 to 48.18)                    | 41.69<br>(21.11 to 57.98)                    | 37.76<br>(19.04 to 52.42)                    | 47.72<br>(23.71 to 66.54)                    |
| <b>Non-communicable diseases</b>                                        | <b>596,874.89</b><br>(542,298.10 to 653,535.32) | <b>938,398.45</b><br>(690,101.82 to 1,191,638.36) | <b>756,652.71</b><br>(574,643.66 to 934,441.20) | <b>1,221,271.90</b><br>(877,960.66 to 1,578,526.34) | <b>27,899.91</b><br>(25,426.15 to 30,460.31) | <b>51,270.91</b><br>(41,677.35 to 61,082.95) | <b>43,109.69</b><br>(35,765.44 to 50,359.03) | <b>62,060.83</b><br>(49,767.51 to 73,740.77) |
| <b>Paraguay</b>                                                         |                                                 |                                                   |                                                 |                                                     |                                              |                                              |                                              |                                              |
| Cause                                                                   | YLLs (actual counts)                            |                                                   |                                                 |                                                     | Deaths (actual counts)                       |                                              |                                              |                                              |
|                                                                         | 2016                                            | 2040 Forecast                                     | 2040 Better Scenario                            | 2040 Worse Scenario                                 | 2016                                         | 2040 Forecast                                | 2040 Better Scenario                         | 2040 Worse Scenario                          |
| <b>Neoplasms</b>                                                        | <b>147,342.76</b><br>(133,251.66 to 164,311.42) | <b>260,163.66</b><br>(203,975.47 to 318,966.15)   | <b>245,899.50</b><br>(194,152.54 to 300,375.16) | <b>302,328.93</b><br>(234,230.10 to 376,402.96)     | <b>6,055.03</b><br>(5,465.87 to 6,719.72)    | <b>12,081.95</b><br>(10,072.95 to 14,291.16) | <b>11,853.30</b><br>(9,973.75 to 13,933.60)  | <b>13,378.95</b><br>(10,975.95 to 16,082.21) |
| Lip and oral cavity cancer                                              | 2,206.90<br>(1,875.71 to 2,589.24)              | 3,837.00<br>(1,926.21 to 6,813.89)                | 2,802.69<br>(1,495.16 to 4,787.45)              | 6,745.93<br>(3,172.23 to 12,171.23)                 | 91.37<br>(77.91 to 107.33)                   | 162.42<br>(91.26 to 270.79)                  | 123.73<br>(72.72 to 198.39)                  | 271.86<br>(141.80 to 473.94)                 |
| Nasopharynx cancer                                                      | 342.92<br>(294.49 to 403.83)                    | 637.96<br>(335.98 to 1,087.63)                    | 455.29<br>(248.41 to 762.38)                    | 1,137.19<br>(562.86 to 2,030.37)                    | 10.41<br>(8.94 to 12.16)                     | 19.89<br>(10.97 to 32.68)                    | 14.44<br>(8.27 to 23.21)                     | 35.02<br>(18.11 to 60.32)                    |
| Other pharynx cancer                                                    | 1,384.69<br>(1,138.49 to 1,683.74)              | 2,327.24<br>(1,063.74 to 4,103.83)                | 1,926.19<br>(946.14 to 3,250.11)                | 2,679.60<br>(1,286.75 to 4,613.54)                  | 54.35<br>(44.76 to 65.67)                    | 95.35<br>(48.80 to 162.37)                   | 81.31<br>(43.11 to 130.84)                   | 106.87<br>(54.51 to 177.41)                  |
| Esophageal cancer                                                       | 4,302.87<br>(3,707.92 to 5,071.73)              | 6,899.85<br>(4,002.29 to 11,660.52)               | 5,365.76<br>(3,223.41 to 8,797.89)              | 11,590.78<br>(6,084.61 to 20,687.32)                | 203.11<br>(175.57 to 236.75)                 | 332.82<br>(204.87 to 539.23)                 | 268.62<br>(173.79 to 418.07)                 | 530.02<br>(294.50 to 920.08)                 |
| Stomach cancer                                                          | 10,659.90<br>(9,332.89 to 12,183.44)            | 15,220.53<br>(10,740.58 to 20,808.31)             | 14,289.76<br>(10,196.81 to 18,957.69)           | 16,660.52<br>(11,711.27 to 22,955.91)               | 490.06<br>(429.76 to 556.68)                 | 754.30<br>(574.23 to 1,009.55)               | 727.88<br>(561.86 to 943.71)                 | 790.76<br>(592.20 to 1,057.93)               |
| Colon and rectum cancer                                                 | 11,398.51<br>(9,964.16 to 13,148.71)            | 22,379.92<br>(14,875.62 to 32,464.38)             | 21,109.89<br>(14,372.16 to 29,987.23)           | 23,417.97<br>(15,462.86 to 33,610.19)               | 554.12<br>(485.95 to 638.71)                 | 1,221.02<br>(835.35 to 1,754.94)             | 1,201.67<br>(848.94 to 1,672.10)             | 1,214.29<br>(828.99 to 1,726.70)             |

|                                      |                                          |                                          |                                          |                                          |                                 |                                     |                                       |                                       |
|--------------------------------------|------------------------------------------|------------------------------------------|------------------------------------------|------------------------------------------|---------------------------------|-------------------------------------|---------------------------------------|---------------------------------------|
| Liver cancer                         | 3,984.14<br>(3,439.83 to<br>4,632.95)    | 9,328.81<br>(6,178.66 to<br>14,125.54)   | 8,064.88<br>(5,541.42 to<br>11,602.71)   | 10,927.43<br>(7,017.47 to<br>17,265.41)  | 179.56<br>(155.71 to<br>207.74) | 451.20<br>(311.08 to<br>658.87)     | 405.97<br>(296.08 to<br>565.50)       | 504.16<br>(335.11 to<br>755.65)       |
| Liver cancer due to hepatitis B      | 1,141.79<br>(936.61 to<br>1,411.14)      | 2,591.22<br>(1,626.42 to<br>4,224.68)    | 2,270.95<br>(1,471.50 to<br>3,493.59)    | 3,003.34<br>(1,814.16 to<br>5,006.07)    | 43.24<br>(35.05 to<br>53.77)    | 104.81<br>(68.28 to<br>163.00)      | 94.66<br>(64.52 to<br>139.20)         | 117.20<br>(73.81 to<br>188.53)        |
| Liver cancer due to hepatitis C      | 1,560.97<br>(1,313.65 to<br>1,856.66)    | 3,686.49<br>(2,486.23 to<br>5,513.55)    | 3,324.96<br>(2,319.06 to<br>4,704.43)    | 4,113.99<br>(2,715.76 to<br>6,278.92)    | 79.22<br>(66.86 to<br>92.79)    | 199.78<br>(140.28 to<br>290.35)     | 187.25<br>(134.92 to<br>259.99)       | 212.98<br>(145.94 to<br>315.57)       |
| Liver cancer due to alcohol use      | 775.62<br>(620.73 to<br>964.48)          | 1,912.45<br>(1,215.51 to<br>3,030.54)    | 1,490.27<br>(973.21 to<br>2,268.98)      | 2,501.36<br>(1,527.75 to<br>4,050.46)    | 36.33<br>(29.27 to<br>45.00)    | 94.37<br>(62.05 to<br>145.19)       | 77.69<br>(52.74 to<br>116.04)         | 116.48<br>(74.52 to<br>181.16)        |
| Liver cancer due to other causes     | 505.77<br>(430.69 to<br>600.69)          | 1,138.64<br>(709.19 to<br>1,778.27)      | 978.70<br>(643.40 to<br>1,467.05)        | 1,308.74<br>(793.21 to<br>2,136.86)      | 20.76<br>(17.42 to<br>24.77)    | 52.24<br>(33.20 to<br>81.07)        | 46.36<br>(31.70 to<br>67.32)          | 57.49<br>(35.13 to<br>90.92)          |
| Gallbladder and biliary tract cancer | 2,248.67<br>(1,928.20 to<br>2,845.03)    | 3,210.73<br>(2,563.27 to<br>4,094.12)    | 3,366.36<br>(2,648.61 to<br>4,382.14)    | 3,023.94<br>(2,450.08 to<br>3,796.29)    | 110.27<br>(94.71 to<br>139.62)  | 169.76<br>(140.33 to<br>216.78)     | 183.37<br>(149.88 to<br>232.13)       | 154.30<br>(127.54 to<br>196.97)       |
| Pancreatic cancer                    | 5,831.98<br>(5,159.15 to<br>6,620.77)    | 13,063.55<br>(9,744.84 to<br>17,282.08)  | 13,200.67<br>(9,874.98 to<br>17,065.79)  | 13,434.13<br>(10,042.73 to<br>17,856.84) | 287.02<br>(252.26 to<br>326.55) | 670.04<br>(519.99 to<br>865.68)     | 694.55<br>(547.71 to<br>874.19)       | 660.49<br>(512.36 to<br>853.52)       |
| Larynx cancer                        | 2,070.85<br>(1,742.93 to<br>2,436.27)    | 2,692.98<br>(1,280.39 to<br>4,938.18)    | 1,916.48<br>(963.33 to<br>3,424.75)      | 5,423.56<br>(2,267.13 to<br>10,466.14)   | 87.10<br>(74.08 to<br>102.78)   | 114.84<br>(57.90 to<br>208.26)      | 84.13<br>(45.20 to<br>147.33)         | 220.99<br>(102.39 to<br>407.87)       |
| Tracheal, bronchus, and lung cancer  | 17,487.77<br>(15,095.87 to<br>20,276.85) | 28,384.29<br>(18,495.77 to<br>41,749.57) | 21,843.13<br>(14,669.27 to<br>31,218.04) | 53,439.08<br>(33,611.16 to<br>80,270.74) | 810.63<br>(704.38 to<br>942.67) | 1,368.49<br>(937.12 to<br>1,939.95) | 1,080.41<br>(768.82 to<br>1,501.94)   | 2,442.15<br>(1,604.71 to<br>3,539.53) |
| Malignant skin melanoma              | 1,014.01<br>(709.00 to<br>1,225.47)      | 1,823.73<br>(1,200.22 to<br>2,367.66)    | 1,995.78<br>(1,302.01 to<br>2,603.67)    | 1,633.05<br>(1,088.56 to<br>2,087.50)    | 41.99<br>(26.69 to<br>51.23)    | 85.85<br>(52.08 to<br>110.64)       | 97.70<br>(59.12 to<br>126.57)         | 73.38<br>(45.59 to<br>93.82)          |
| Non-melanoma skin cancer             | 1,171.84<br>(998.34 to<br>1,372.09)      | 2,388.35<br>(1,894.21 to<br>2,919.13)    | 2,425.87<br>(1,894.03 to<br>2,998.17)    | 2,340.23<br>(1,853.33 to<br>2,858.11)    | 65.86<br>(56.90 to<br>76.46)    | 147.95<br>(118.02 to<br>176.83)     | 157.19<br>(125.43 to<br>186.03)       | 137.41<br>(109.30 to<br>165.97)       |
| Breast cancer                        | 13,754.37<br>(10,491.31 to<br>16,893.63) | 25,913.30<br>(17,583.80 to<br>36,418.36) | 24,128.94<br>(16,596.85 to<br>33,412.05) | 27,155.82<br>(18,169.64 to<br>38,255.50) | 510.12<br>(385.71 to<br>621.71) | 1,068.97<br>(750.17 to<br>1,478.04) | 1,026.56<br>(735.61 to<br>1,391.91)   | 1,080.19<br>(753.73 to<br>1,499.32)   |
| Cervical cancer                      | 14,896.02<br>(10,237.62 to<br>18,416.97) | 20,629.58<br>(13,870.25 to<br>28,535.75) | 19,577.96<br>(12,943.50 to<br>27,013.85) | 22,791.75<br>(14,761.88 to<br>32,582.51) | 503.31<br>(368.75 to<br>616.84) | 753.65<br>(523.84 to<br>1,017.10)   | 729.61<br>(507.60 to<br>983.89)       | 809.75<br>(545.84 to<br>1,113.02)     |
| Uterine cancer                       | 1,898.78<br>(1,537.90 to<br>2,290.97)    | 4,231.85<br>(3,101.20 to<br>5,457.02)    | 4,047.79<br>(2,934.63 to<br>5,298.56)    | 4,465.41<br>(3,260.22 to<br>5,727.66)    | 87.28<br>(70.95 to<br>104.58)   | 210.30<br>(160.43 to<br>263.53)     | 205.87<br>(154.95 to<br>260.30)       | 215.80<br>(165.52 to<br>272.93)       |
| Ovarian cancer                       | 2,952.72<br>(2,301.32 to<br>3,633.32)    | 6,147.92<br>(3,969.29 to<br>9,053.87)    | 6,151.99<br>(4,076.05 to<br>8,797.61)    | 5,825.22<br>(3,749.22 to<br>8,542.53)    | 108.44<br>(85.76 to<br>130.96)  | 249.88<br>(162.30 to<br>371.06)     | 252.61<br>(166.64 to<br>365.20)       | 231.96<br>(150.11 to<br>340.89)       |
| Prostate cancer                      | 7,615.51<br>(5,041.90 to<br>9,484.33)    | 19,917.74<br>(13,418.82 to<br>24,794.95) | 22,022.18<br>(14,863.71 to<br>27,551.66) | 17,846.04<br>(11,806.11 to<br>22,339.40) | 526.02<br>(346.16 to<br>653.20) | 1,459.13<br>(983.93 to<br>1,832.06) | 1,668.20<br>(1,149.10 to<br>2,057.71) | 1,254.25<br>(813.58 to<br>1,600.54)   |
| Testicular cancer                    | 859.94<br>(654.10 to<br>1,114.56)        | 817.95<br>(463.28 to<br>1,281.99)        | 793.70<br>(446.12 to<br>1,259.30)        | 849.43<br>(480.48 to<br>1,331.20)        | 17.63<br>(13.74 to<br>22.56)    | 18.68<br>(11.92 to<br>27.57)        | 18.55<br>(11.92 to<br>27.54)          | 18.88<br>(12.01 to<br>27.87)          |

**Paraguay**

| Cause                           | YLLs (actual counts)                  |                                        |                                        |                                        | Deaths (actual counts)         |                                 |                                 |                                 |
|---------------------------------|---------------------------------------|----------------------------------------|----------------------------------------|----------------------------------------|--------------------------------|---------------------------------|---------------------------------|---------------------------------|
|                                 | 2016                                  | 2040 Forecast                          | 2040 Better Scenario                   | 2040 Worse Scenario                    | 2016                           | 2040 Forecast                   | 2040 Better Scenario            | 2040 Worse Scenario             |
| Kidney cancer                   | 2,347.67<br>(1,998.16 to<br>2,900.92) | 5,163.82<br>(3,780.05 to<br>6,843.01)  | 5,481.47<br>(3,956.49 to<br>7,313.54)  | 5,178.96<br>(3,764.76 to<br>7,030.29)  | 89.04<br>(75.02 to<br>110.68)  | 218.03<br>(164.72 to<br>287.35) | 238.60<br>(181.36 to<br>316.15) | 209.79<br>(156.84 to<br>280.20) |
| Bladder cancer                  | 1,226.82<br>(1,045.21 to<br>1,450.51) | 2,190.89<br>(1,576.53 to<br>2,966.21)  | 2,137.83<br>(1,548.87 to<br>2,873.78)  | 2,462.93<br>(1,709.49 to<br>3,504.76)  | 69.48<br>(59.87 to<br>81.49)   | 133.85<br>(99.55 to<br>179.56)  | 134.89<br>(102.64 to<br>176.40) | 142.52<br>(101.72 to<br>201.23) |
| Brain and nervous system cancer | 4,537.86<br>(3,181.24 to<br>7,769.71) | 9,191.72<br>(6,018.76 to<br>16,000.74) | 9,425.05<br>(6,179.25 to<br>16,435.34) | 8,996.48<br>(5,925.97 to<br>15,558.48) | 120.43<br>(82.48 to<br>212.84) | 291.06<br>(195.62 to<br>525.42) | 307.35<br>(206.64 to<br>554.45) | 272.99<br>(185.80 to<br>485.20) |

|                                |                                                                  |                                                                  |                                                                  |                                                                  |                                                               |                                                               |                                                              |                                                               |  |
|--------------------------------|------------------------------------------------------------------|------------------------------------------------------------------|------------------------------------------------------------------|------------------------------------------------------------------|---------------------------------------------------------------|---------------------------------------------------------------|--------------------------------------------------------------|---------------------------------------------------------------|--|
|                                | 983.80<br>(774.44 to<br>1,146.29)                                | 1,763.21<br>(1,149.34 to<br>2,619.75)                            | 1,594.54<br>(1,046.07 to<br>2,285.50)                            | 1,856.48<br>(1,205.79 to<br>2,768.08)                            | 43.79<br>(34.97 to<br>51.08)                                  | 83.90<br>(57.32 to<br>120.90)                                 | 78.25<br>(53.97 to<br>109.54)                                | 85.62<br>(57.80 to<br>124.91)                                 |  |
| Thyroid cancer                 | 299.33<br>(253.13 to<br>354.90)                                  | 829.42<br>(392.91 to<br>702.38)                                  | 536.93<br>(391.67 to<br>719.98)                                  | 521.41<br>(389.70 to<br>675.93)                                  | 11.49<br>(9.82 to<br>13.54)                                   | 22.19<br>(17.45 to<br>27.39)                                  | 23.21<br>(18.14 to<br>28.86)                                 | 21.06<br>(16.64 to<br>25.82)                                  |  |
| Mesothelioma                   | 955.43<br>(670.93 to<br>1,161.58)                                | 942.18<br>(602.05 to<br>1,305.64)                                | 860.35<br>(552.98 to<br>1,188.89)                                | 1,059.11<br>(681.44 to<br>1,450.30)                              | 25.06<br>(17.44 to<br>30.31)                                  | 28.76<br>(19.05 to<br>38.38)                                  | 26.97<br>(17.81 to<br>36.60)                                 | 31.19<br>(20.63 to<br>41.42)                                  |  |
| Hodgkin lymphoma               | 4,519.48<br>(3,742.65 to<br>5,417.87)                            | 8,426.34<br>(6,186.48 to<br>11,125.45)                           | 8,481.62<br>(6,245.24 to<br>11,154.18)                           | 8,129.26<br>(5,999.92 to<br>10,725.57)                           | 152.37<br>(122.40 to<br>184.34)                               | 336.47<br>(255.69 to<br>435.50)                               | 350.40<br>(266.80 to<br>447.88)                              | 310.59<br>(236.19 to<br>401.71)                               |  |
| Non-Hodgkin lymphoma           | 1,217.24<br>(893.60 to<br>1,796.37)                              | 2,929.29<br>(1,936.42 to<br>4,403.29)                            | 2,992.15<br>(1,975.86 to<br>4,478.85)                            | 2,737.27<br>(1,835.02 to<br>4,080.33)                            | 52.25<br>(39.20 to<br>78.99)                                  | 132.45<br>(91.96 to<br>199.23)                                | 138.81<br>(96.77 to<br>208.92)                               | 120.28<br>(83.29 to<br>177.20)                                |  |
| Multiple myeloma               | 11,661.00<br>(9,969.20 to<br>13,826.52)                          | 16,448.77<br>(12,278.03 to<br>21,454.12)                         | 15,632.37<br>(11,838.96 to<br>20,380.86)                         | 17,778.23<br>(13,192.16 to<br>23,769.24)                         | 301.26<br>(262.88 to<br>364.29)                               | 557.46<br>(434.49 to<br>731.85)                               | 548.21<br>(431.71 to<br>719.55)                              | 576.69<br>(443.36 to<br>770.64)                               |  |
| Leukemia                       | 3,951.68<br>(3,085.82 to<br>4,812.60)                            | 3,927.94<br>(2,757.38 to<br>5,230.98)                            | 3,754.58<br>(2,663.77 to<br>4,999.96)                            | 4,241.15<br>(2,962.24 to<br>5,656.36)                            | 70.15<br>(54.53 to<br>84.04)                                  | 85.32<br>(59.90 to<br>113.50)                                 | 82.95<br>(58.66 to<br>109.69)                                | 89.90<br>(62.96 to<br>121.39)                                 |  |
| Acute lymphoid leukemia        | 414.78<br>(338.65 to<br>533.56)                                  | 757.18<br>(516.01 to<br>1,123.08)                                | 752.99<br>(510.63 to<br>1,114.85)                                | 773.63<br>(508.32 to<br>1,175.00)                                | 22.57<br>(18.41 to<br>28.59)                                  | 44.08<br>(30.30 to<br>64.67)                                  | 45.44<br>(31.72 to<br>64.99)                                 | 43.07<br>(28.51 to<br>64.97)                                  |  |
| Chronic lymphoid leukemia      | 3,142.72<br>(2,559.86 to<br>3,734.96)                            | 5,206.73<br>(3,780.73 to<br>7,003.59)                            | 5,133.95<br>(3,749.32 to<br>6,828.64)                            | 5,342.07<br>(3,849.83 to<br>7,241.80)                            | 83.53<br>(69.26 to<br>101.38)                                 | 169.23<br>(127.91 to<br>220.01)                               | 172.14<br>(130.89 to<br>223.91)                              | 167.07<br>(125.72 to<br>220.04)                               |  |
| Acute myeloid leukemia         | 537.71<br>(401.20 to<br>667.84)                                  | 612.51<br>(389.01 to<br>892.94)                                  | 581.19<br>(373.05 to<br>839.23)                                  | 660.44<br>(413.31 to<br>1,004.25)                                | 19.20<br>(14.65 to<br>23.42)                                  | 24.53<br>(16.51 to<br>34.19)                                  | 24.14<br>(16.63 to<br>33.26)                                 | 25.28<br>(16.64 to<br>36.67)                                  |  |
| Chronic myeloid leukemia       | 3,614.12<br>(2,956.76 to<br>5,167.72)                            | 5,944.42<br>(4,358.39 to<br>9,097.85)                            | 5,409.64<br>(3,905.17 to<br>8,230.38)                            | 6,760.94<br>(4,873.62 to<br>10,146.38)                           | 105.81<br>(88.23 to<br>153.21)                                | 234.30<br>(178.10 to<br>316.94)                               | 223.54<br>(171.71 to<br>333.05)                              | 251.37<br>(188.30 to<br>374.15)                               |  |
| Other leukemia                 | 13,511.73<br>(10,878.07 to<br>15,746.58)                         | 22,724.70<br>(16,700.65 to<br>28,377.96)                         | 23,271.87<br>(17,000.42 to<br>29,277.12)                         | 22,221.72<br>(16,494.56 to<br>27,536.98)                         | 451.21<br>(341.78 to<br>537.71)                               | 923.24<br>(692.79 to<br>1,131.29)                             | 984.24<br>(732.42 to<br>1,210.04)                            | 855.70<br>(642.94 to<br>1,030.50)                             |  |
| Other neoplasms                | <b>200,385.07</b><br><b>(180,962.49 to</b><br><b>222,991.76)</b> | <b>275,867.28</b><br><b>(164,891.92 to</b><br><b>418,200.72)</b> | <b>171,131.54</b><br><b>(111,403.32 to</b><br><b>249,533.87)</b> | <b>448,820.92</b><br><b>(258,345.85 to</b><br><b>685,248.30)</b> | <b>11,175.21</b><br><b>(10,090.28 to</b><br><b>12,289.77)</b> | <b>17,064.09</b><br><b>(11,519.20 to</b><br><b>24,557.40)</b> | <b>11,721.61</b><br><b>(8,413.14 to</b><br><b>16,137.87)</b> | <b>24,430.09</b><br><b>(16,095.03 to</b><br><b>34,918.84)</b> |  |
| <b>Cardiovascular diseases</b> | 1,982.49<br>(1,712.83 to<br>2,286.85)                            | 1,312.60<br>(909.72 to<br>1,874.48)                              | 1,140.87<br>(788.71 to<br>1,600.18)                              | 1,527.19<br>(1,061.26 to<br>2,185.88)                            | 63.25<br>(54.93 to<br>71.97)                                  | 52.71<br>(39.48 to<br>70.71)                                  | 47.79<br>(35.75 to<br>63.57)                                 | 58.10<br>(43.00 to<br>78.60)                                  |  |
| Rheumatic heart disease        | 102,734.30<br>(91,672.15 to<br>114,670.67)                       | 133,011.41<br>(68,405.31 to<br>237,950.35)                       | 75,956.67<br>(40,759.80 to<br>130,340.33)                        | 229,290.68<br>(114,863.95 to<br>402,455.45)                      | 5,988.41<br>(5,356.92 to<br>6,638.08)                         | 8,464.92<br>(4,817.78 to<br>14,306.22)                        | 5,393.09<br>(3,197.58 to<br>8,873.81)                        | 12,786.04<br>(7,346.10 to<br>21,777.45)                       |  |
| Ischemic heart disease         | 65,874.42<br>(58,639.13 to<br>74,330.38)                         | 84,920.10<br>(47,191.30 to<br>146,749.58)                        | 45,665.30<br>(28,081.34 to<br>74,508.28)                         | 151,988.95<br>(79,339.06 to<br>262,457.47)                       | 3,441.55<br>(3,005.08 to<br>3,896.52)                         | 4,908.28<br>(2,991.39 to<br>7,939.68)                         | 3,051.05<br>(2,020.35 to<br>4,943.18)                        | 7,616.57<br>(4,500.94 to<br>12,717.08)                        |  |
| Stroke                         | 12,875.96<br>(11,067.93 to<br>14,877.08)                         | 18,266.71<br>(9,440.33 to<br>42,071.12)                          | 11,854.09<br>(6,567.95 to<br>26,026.17)                          | 25,747.08<br>(13,572.68 to<br>56,371.57)                         | 989.41<br>(848.97 to<br>1,137.06)                             | 1,527.19<br>(794.69 to<br>3,759.67)                           | 1,102.61<br>(609.56 to<br>2,549.49)                          | 1,938.11<br>(1,002.70 to<br>4,936.73)                         |  |
| Ischemic stroke                | 52,998.46<br>(47,137.76 to<br>59,675.96)                         | 66,653.39<br>(33,927.94 to<br>120,053.01)                        | 33,811.21<br>(19,527.05 to<br>55,299.35)                         | 126,241.87<br>(61,042.06 to<br>231,427.47)                       | 2,452.13<br>(2,146.05 to<br>2,773.33)                         | 3,381.09<br>(1,949.33 to<br>5,541.18)                         | 1,948.45<br>(1,255.84 to<br>3,008.00)                        | 5,678.46<br>(3,126.17 to<br>9,542.85)                         |  |
| Intracerebral hemorrhage       | 11,029.41<br>(6,452.42 to<br>13,625.01)                          | 21,621.33<br>(9,971.23 to<br>43,812.03)                          | 15,587.62<br>(7,896.84 to<br>27,317.49)                          | 27,798.31<br>(12,542.74 to<br>58,315.67)                         | 746.87<br>(399.53 to<br>936.13)                               | 1,621.58<br>(678.88 to<br>3,521.12)                           | 1,233.37<br>(582.06 to<br>2,209.11)                          | 1,926.79<br>(788.72 to<br>4,278.27)                           |  |
| Hypertensive heart disease     | 2,905.76<br>(2,376.82 to<br>3,522.39)                            | 5,439.90<br>(3,607.00 to<br>7,944.98)                            | 5,226.33<br>(3,526.86 to<br>7,453.26)                            | 5,386.33<br>(3,575.25 to<br>7,757.25)                            | 122.58<br>(101.35 to<br>151.01)                               | 264.70<br>(183.03 to<br>369.19)                               | 266.65<br>(188.94 to<br>364.31)                              | 247.83<br>(170.44 to<br>344.30)                               |  |
| Cardiomyopathy and myocarditis | 359.66<br>(219.76 to<br>468.84)                                  | 446.64<br>(253.87 to<br>662.53)                                  | 439.88<br>(248.69 to<br>654.94)                                  | 461.17<br>(264.44 to<br>678.62)                                  | 11.42<br>(7.54 to<br>15.22)                                   | 18.33<br>(11.90 to<br>25.81)                                  | 19.17<br>(12.57 to<br>27.23)                                 | 17.53<br>(11.13 to<br>24.48)                                  |  |
| Mycocarditis                   | <b>Paraguay</b>                                                  |                                                                  |                                                                  |                                                                  |                                                               |                                                               |                                                              |                                                               |  |
|                                | <b>YLLs (actual counts)</b>                                      |                                                                  |                                                                  |                                                                  | <b>Deaths (actual counts)</b>                                 |                                                               |                                                              |                                                               |  |

| Cause                                                         | 2016                                                | 2040 Forecast                                       | 2040 Better Scenario                                | 2040 Worse Scenario                                 | 2016                                             | 2040 Forecast                                    | 2040 Better Scenario                           | 2040 Worse Scenario                              |
|---------------------------------------------------------------|-----------------------------------------------------|-----------------------------------------------------|-----------------------------------------------------|-----------------------------------------------------|--------------------------------------------------|--------------------------------------------------|------------------------------------------------|--------------------------------------------------|
| Alcoholic cardiomyopathy                                      | 238.03<br>(136.23 to 334.08)                        | 408.49<br>(217.22 to 605.47)                        | 361.85<br>(189.80 to 541.63)                        | 453.08<br>(248.62 to 670.51)                        | 10.32<br>(5.52 to 14.38)                         | 18.34<br>(8.87 to 26.14)                         | 17.34<br>(8.26 to 24.74)                       | 19.15<br>(9.72 to 27.04)                         |
| Other cardiomyopathy                                          | 2,308.08<br>(1,933.91 to 2,781.33)                  | 4,584.78<br>(2,961.19 to 6,852.82)                  | 4,424.60<br>(2,932.66 to 6,368.76)                  | 4,472.08<br>(2,893.68 to 6,649.25)                  | 100.85<br>(84.29 to 125.48)                      | 228.02<br>(152.62 to 329.00)                     | 230.14<br>(157.05 to 322.88)                   | 211.15<br>(141.49 to 303.49)                     |
| Atrial fibrillation and flutter                               | 1,692.07<br>(1,314.08 to 2,133.10)                  | 4,052.50<br>(2,875.78 to 5,440.94)                  | 4,021.18<br>(2,933.44 to 5,299.49)                  | 4,107.77<br>(2,900.25 to 5,514.85)                  | 160.15<br>(122.16 to 201.99)                     | 391.57<br>(265.89 to 527.62)                     | 409.08<br>(286.83 to 541.13)                   | 371.05<br>(246.13 to 507.56)                     |
| Aortic aneurysm                                               | 3,745.98<br>(3,242.65 to 4,327.22)                  | 6,217.26<br>(4,291.66 to 8,660.06)                  | 6,126.68<br>(4,351.74 to 8,331.35)                  | 6,604.26<br>(4,577.60 to 9,232.22)                  | 187.01<br>(162.75 to 218.26)                     | 332.90<br>(251.50 to 440.20)                     | 342.83<br>(264.53 to 446.73)                   | 330.52<br>(246.19 to 457.17)                     |
| Peripheral artery disease                                     | 240.58<br>(132.73 to 316.59)                        | 705.82<br>(335.25 to 1,030.33)                      | 688.88<br>(338.34 to 994.83)                        | 657.44<br>(314.27 to 961.79)                        | 18.44<br>(9.52 to 24.41)                         | 57.97<br>(27.17 to 87.11)                        | 60.52<br>(28.52 to 89.04)                      | 50.00<br>(23.20 to 75.06)                        |
| Endocarditis                                                  | 2,381.76<br>(1,945.10 to 2,838.88)                  | 4,444.09<br>(2,921.66 to 6,287.85)                  | 4,122.98<br>(2,757.83 to 5,686.68)                  | 4,630.08<br>(3,071.79 to 6,564.35)                  | 80.53<br>(63.31 to 93.81)                        | 178.26<br>(119.05 to 251.86)                     | 172.53<br>(117.04 to 236.12)                   | 175.19<br>(117.79 to 249.38)                     |
| Other cardiovascular and circulatory diseases                 | 7,798.30<br>(5,684.35 to 9,416.74)                  | 14,142.26<br>(9,234.26 to 19,947.92)                | 12,595.03<br>(8,400.42 to 17,429.09)                | 16,829.93<br>(10,815.00 to 24,063.98)               | 366.42<br>(264.54 to 445.52)                     | 791.21<br>(535.54 to 1,053.67)                   | 744.69<br>(521.84 to 968.45)                   | 868.00<br>(574.39 to 1,174.68)                   |
| <b>Chronic respiratory diseases</b>                           | <b>21,334.86</b><br><b>(18,686.35 to 24,694.18)</b> | <b>25,477.63</b><br><b>(18,352.99 to 35,638.30)</b> | <b>19,679.80</b><br><b>(14,422.81 to 26,625.66)</b> | <b>44,049.20</b><br><b>(29,542.48 to 66,008.43)</b> | <b>1,248.95</b><br><b>(1,091.24 to 1,462.41)</b> | <b>1,615.25</b><br><b>(1,163.41 to 2,190.73)</b> | <b>1,301.90</b><br><b>(976.15 to 1,697.41)</b> | <b>2,651.10</b><br><b>(1,797.39 to 3,836.18)</b> |
| Chronic obstructive pulmonary disease                         | 16,822.61<br>(14,539.81 to 20,117.62)               | 20,565.68<br>(13,946.90 to 30,659.68)               | 14,947.48<br>(10,247.82 to 21,359.63)               | 38,875.30<br>(24,670.98 to 60,686.09)               | 1,068.08<br>(925.66 to 1,269.71)                 | 1,379.30<br>(938.64 to 1,946.66)                 | 1,063.33<br>(751.76 to 1,457.13)               | 2,417.19<br>(1,580.05 to 3,599.81)               |
| Pneumoconiosis                                                | 595.07<br>(460.47 to 733.80)                        | 541.36<br>(336.27 to 794.16)                        | 514.71<br>(316.15 to 760.29)                        | 544.28<br>(338.72 to 793.41)                        | 18.78<br>(14.60 to 22.98)                        | 19.33<br>(13.47 to 26.35)                        | 18.71<br>(12.78 to 25.73)                      | 19.00<br>(13.44 to 26.06)                        |
| Silicosis                                                     | 430.61<br>(283.92 to 542.59)                        | 263.75<br>(134.58 to 413.48)                        | 255.69<br>(126.78 to 404.26)                        | 270.16<br>(138.45 to 424.16)                        | 13.42<br>(9.24 to 16.87)                         | 9.01<br>(5.03 to 13.65)                          | 8.85<br>(4.96 to 13.70)                        | 9.08<br>(5.02 to 13.67)                          |
| Asbestosis                                                    | 31.85<br>(22.90 to 45.64)                           | 34.31<br>(21.85 to 50.79)                           | 35.16<br>(22.40 to 51.66)                           | 33.30<br>(21.40 to 48.90)                           | 0.86<br>(0.62 to 1.16)                           | 1.35<br>(0.85 to 1.92)                           | 1.43<br>(0.91 to 2.04)                         | 1.25<br>(0.79 to 1.78)                           |
| Coal workers pneumoconiosis                                   | 6.74<br>(2.64 to 9.53)                              | 6.76<br>(2.55 to 11.69)                             | 5.44<br>(2.11 to 9.66)                              | 7.84<br>(2.84 to 13.52)                             | 0.35<br>(0.14 to 0.48)                           | 0.43<br>(0.16 to 0.80)                           | 0.37<br>(0.14 to 0.70)                         | 0.49<br>(0.18 to 0.91)                           |
| Other pneumoconiosis                                          | 125.88<br>(91.54 to 207.56)                         | 236.55<br>(145.38 to 372.85)                        | 218.42<br>(132.09 to 343.73)                        | 232.98<br>(142.57 to 364.19)                        | 4.14<br>(3.17 to 6.34)                           | 8.53<br>(5.87 to 12.07)                          | 8.06<br>(5.43 to 11.54)                        | 8.18<br>(5.70 to 11.77)                          |
| Asthma                                                        | 2,048.78<br>(1,658.07 to 2,530.81)                  | 1,543.73<br>(946.34 to 2,475.16)                    | 1,219.87<br>(765.87 to 1,874.65)                    | 1,930.53<br>(1,144.17 to 3,174.84)                  | 88.13<br>(66.62 to 110.68)                       | 81.75<br>(48.26 to 130.05)                       | 68.57<br>(42.07 to 105.52)                     | 95.99<br>(55.48 to 154.31)                       |
| Interstitial lung disease and pulmonary sarcoidosis           | 1,271.38<br>(806.25 to 1,658.39)                    | 2,191.10<br>(1,342.21 to 2,972.13)                  | 2,401.41<br>(1,472.15 to 3,255.11)                  | 1,966.37<br>(1,171.41 to 2,647.08)                  | 62.92<br>(37.34 to 84.71)                        | 119.74<br>(70.77 to 162.76)                      | 136.41<br>(82.46 to 184.01)                    | 102.39<br>(59.59 to 138.77)                      |
| Other chronic respiratory diseases                            | 597.02<br>(346.13 to 899.03)                        | 635.76<br>(402.25 to 899.52)                        | 596.33<br>(386.48 to 842.01)                        | 732.72<br>(453.86 to 1,053.68)                      | 11.04<br>(7.26 to 14.94)                         | 15.13<br>(10.71 to 21.77)                        | 14.87<br>(10.64 to 21.75)                      | 16.52<br>(11.53 to 23.54)                        |
| <b>Cirrhosis and other chronic liver diseases</b>             | <b>20,220.71</b><br><b>(17,168.35 to 23,989.62)</b> | <b>32,294.64</b><br><b>(22,851.62 to 42,594.92)</b> | <b>29,664.94</b><br><b>(20,699.23 to 39,455.60)</b> | <b>35,699.81</b><br><b>(25,657.09 to 46,767.96)</b> | <b>713.80</b><br><b>(599.78 to 846.93)</b>       | <b>1,233.99</b><br><b>(941.06 to 1,556.50)</b>   | <b>1,171.56</b><br><b>(882.54 to 1,479.09)</b> | <b>1,313.96</b><br><b>(1,001.06 to 1,641.93)</b> |
| Cirrhosis and other chronic liver diseases due to hepatitis B | 3,092.13<br>(2,451.61 to 3,881.11)                  | 5,295.95<br>(3,564.55 to 7,387.82)                  | 5,236.21<br>(3,508.19 to 7,398.12)                  | 5,361.37<br>(3,625.14 to 7,451.59)                  | 112.91<br>(90.52 to 141.72)                      | 205.13<br>(151.72 to 269.69)                     | 207.72<br>(152.05 to 273.26)                   | 201.68<br>(150.25 to 264.71)                     |
| Cirrhosis and other chronic liver diseases due to hepatitis C | 8,691.62<br>(7,255.05 to 10,480.60)                 | 14,549.70<br>(10,057.11 to 19,401.98)               | 14,298.37<br>(9,638.94 to 19,190.36)                | 14,841.73<br>(10,397.38 to 19,716.71)               | 307.53<br>(255.33 to 366.67)                     | 547.20<br>(408.13 to 694.86)                     | 549.44<br>(403.56 to 700.14)                   | 543.65<br>(406.40 to 685.26)                     |
| Cirrhosis and other chronic liver diseases due to alcohol use | 6,255.83<br>(5,088.66 to 7,671.11)                  | 9,678.66<br>(6,688.88 to 13,128.61)                 | 7,469.73<br>(5,098.78 to 10,221.17)                 | 12,558.75<br>(8,761.42 to 17,005.64)                | 231.32<br>(189.68 to 280.33)                     | 381.84<br>(289.82 to 488.50)                     | 314.49<br>(236.72 to 403.70)                   | 468.45<br>(354.10 to 601.29)                     |



|                                                            |                                                  |                                                    |                                                   |                                                    |                                              |                                                |                                               |                                                |
|------------------------------------------------------------|--------------------------------------------------|----------------------------------------------------|---------------------------------------------------|----------------------------------------------------|----------------------------------------------|------------------------------------------------|-----------------------------------------------|------------------------------------------------|
| Alcohol use disorders                                      | 6,782.82<br>(4,518.22 to<br>8,698.40)            | 10,746.43<br>(6,057.73 to<br>15,746.42)            | 9,956.67<br>(5,563.74 to<br>14,637.31)            | 11,531.21<br>(6,553.65 to<br>16,787.69)            | 206.96<br>(120.45 to<br>266.83)              | 345.40<br>(176.76 to<br>492.24)                | 326.22<br>(164.55 to<br>466.99)               | 363.25<br>(190.01 to<br>510.91)                |
| Drug use disorders                                         | 838.24<br>(611.34 to<br>1,071.16)                | 2,047.09<br>(1,318.53 to<br>2,950.04)              | 2,061.25<br>(1,331.39 to<br>2,967.12)             | 2,038.39<br>(1,314.61 to<br>2,920.13)              | 20.71<br>(15.13 to<br>25.96)                 | 57.78<br>(39.31 to<br>76.29)                   | 60.21<br>(40.89 to<br>80.24)                  | 55.26<br>(37.29 to<br>72.83)                   |
| Opioid use disorders                                       | 515.26<br>(379.66 to<br>688.68)                  | 1,084.56<br>(668.36 to<br>1,697.03)                | 1,085.65<br>(667.25 to<br>1,722.75)               | 1,086.04<br>(667.78 to<br>1,683.73)                | 11.40<br>(8.27 to<br>14.57)                  | 26.61<br>(17.29 to<br>38.47)                   | 27.17<br>(17.57 to<br>39.29)                  | 26.01<br>(16.90 to<br>37.41)                   |
| Cocaine use disorders                                      | 45.37<br>(23.48 to<br>65.47)                     | 150.83<br>(72.58 to<br>242.80)                     | 147.46<br>(71.60 to<br>236.87)                    | 155.50<br>(73.67 to<br>250.22)                     | 1.11<br>(0.58 to<br>1.57)                    | 4.14<br>(1.99 to<br>6.22)                      | 4.14<br>(1.99 to<br>6.28)                     | 4.15<br>(1.99 to<br>6.22)                      |
| Amphetamine use disorders                                  | 22.96<br>(13.58 to<br>32.25)                     | 112.81<br>(62.27 to<br>174.48)                     | 110.73<br>(61.95 to<br>171.93)                    | 116.18<br>(64.36 to<br>179.43)                     | 0.57<br>(0.34 to<br>0.77)                    | 3.02<br>(1.75 to<br>4.51)                      | 3.01<br>(1.76 to<br>4.56)                     | 3.05<br>(1.76 to<br>4.53)                      |
| Other drug use disorders                                   | 254.64<br>(130.68 to<br>348.73)                  | 698.88<br>(387.74 to<br>1,031.84)                  | 717.41<br>(395.57 to<br>1,065.23)                 | 680.67<br>(373.40 to<br>1,012.80)                  | 7.62<br>(4.47 to<br>9.82)                    | 24.00<br>(15.41 to<br>31.48)                   | 25.88<br>(16.54 to<br>34.05)                  | 22.05<br>(13.87 to<br>29.15)                   |
| Eating disorders                                           | 51.92<br>(38.62 to<br>67.92)                     | 93.42<br>(61.13 to<br>139.45)                      | 91.85<br>(59.15 to<br>136.95)                     | 96.63<br>(64.14 to<br>142.40)                      | 0.90<br>(0.68 to<br>1.18)                    | 1.71<br>(1.11 to<br>2.55)                      | 1.69<br>(1.09 to<br>2.54)                     | 1.75<br>(1.15 to<br>2.60)                      |
| <b>Paraguay</b>                                            |                                                  |                                                    |                                                   |                                                    |                                              |                                                |                                               |                                                |
| Cause                                                      | YLLs (actual counts)                             |                                                    |                                                   |                                                    | Deaths (actual counts)                       |                                                |                                               |                                                |
|                                                            | 2016                                             | 2040 Forecast                                      | 2040 Better Scenario                              | 2040 Worse Scenario                                | 2016                                         | 2040 Forecast                                  | 2040 Better Scenario                          | 2040 Worse Scenario                            |
| <b>Diabetes, urogenital, blood, and endocrine diseases</b> | <b>96,135.59</b><br>(86,027.46 to<br>107,011.20) | <b>194,888.10</b><br>(115,328.19 to<br>347,142.46) | <b>149,147.78</b><br>(92,360.32 to<br>264,770.12) | <b>229,250.79</b><br>(138,054.93 to<br>400,009.06) | <b>4,682.30</b><br>(4,165.98 to<br>5,215.11) | <b>11,145.40</b><br>(6,944.29 to<br>20,160.06) | <b>8,897.30</b><br>(5,754.42 to<br>16,325.67) | <b>12,480.29</b><br>(7,845.66 to<br>21,720.25) |
| Diabetes mellitus                                          | 47,887.46<br>(42,491.62 to<br>53,899.19)         | 73,595.65<br>(50,395.18 to<br>106,139.30)          | 59,842.40<br>(42,192.39 to<br>83,184.56)          | 93,765.59<br>(62,564.41 to<br>137,816.49)          | 2,540.45<br>(2,243.31 to<br>2,863.28)        | 4,312.44<br>(3,146.10 to<br>5,664.09)          | 3,705.45<br>(2,781.99 to<br>4,788.44)         | 5,185.81<br>(3,663.97 to<br>7,011.46)          |
| Acute glomerulonephritis                                   | 41.50<br>(36.28 to<br>48.46)                     | 65.91<br>(46.61 to<br>89.52)                       | 60.26<br>(42.29 to<br>82.21)                      | 75.19<br>(52.94 to<br>101.33)                      | 0.79<br>(0.69 to<br>0.89)                    | 1.36<br>(0.99 to<br>1.81)                      | 1.28<br>(0.93 to<br>1.71)                     | 1.49<br>(1.08 to<br>1.98)                      |
| Chronic kidney disease                                     | 36,423.66<br>(28,838.95 to<br>41,174.64)         | 102,127.29<br>(36,462.29 to<br>260,599.28)         | 70,201.07<br>(26,351.33 to<br>190,685.74)         | 115,905.30<br>(41,001.37 to<br>284,346.69)         | 1,679.45<br>(1,325.49 to<br>1,896.07)        | 5,828.25<br>(1,904.54 to<br>14,969.61)         | 4,120.71<br>(1,392.98 to<br>11,740.54)        | 6,357.66<br>(2,038.47 to<br>16,261.31)         |
| Chronic kidney disease due to diabetes mellitus            | 13,153.77<br>(9,821.21 to<br>15,821.62)          | 42,825.76<br>(14,174.85 to<br>114,793.24)          | 29,123.90<br>(10,232.06 to<br>82,500.65)          | 48,367.92<br>(16,076.56 to<br>125,408.46)          | 607.08<br>(449.95 to<br>722.57)              | 2,305.64<br>(691.63 to<br>6,092.53)            | 1,610.04<br>(520.67 to<br>4,999.37)           | 2,519.79<br>(775.36 to<br>6,590.60)            |
| Chronic kidney disease due to hypertension                 | 4,510.87<br>(3,353.72 to<br>5,485.88)            | 15,423.81<br>(4,790.06 to<br>41,625.71)            | 10,811.73<br>(3,465.08 to<br>31,640.98)           | 16,931.13<br>(5,205.60 to<br>44,190.98)            | 296.68<br>(226.07 to<br>362.56)              | 1,152.34<br>(350.46 to<br>3,111.05)            | 843.52<br>(268.50 to<br>2,675.75)             | 1,213.79<br>(372.02 to<br>3,259.77)            |
| Chronic kidney disease due to glomerulonephritis           | 10,657.98<br>(8,370.73 to<br>12,766.62)          | 24,009.84<br>(8,906.12 to<br>59,576.89)            | 16,547.39<br>(6,475.73 to<br>42,411.96)           | 27,828.10<br>(10,475.58 to<br>66,809.90)           | 425.49<br>(326.92 to<br>519.25)              | 1,250.80<br>(402.59 to<br>3,300.99)            | 875.63<br>(292.52 to<br>2,471.60)             | 1,394.64<br>(449.89 to<br>3,693.83)            |
| Chronic kidney disease due to other and unspecified causes | 8,101.04<br>(6,308.36 to<br>9,831.72)            | 19,867.88<br>(7,113.52 to<br>48,368.97)            | 13,718.06<br>(5,265.76 to<br>36,256.01)           | 22,778.15<br>(8,447.42 to<br>55,750.83)            | 350.19<br>(266.54 to<br>428.46)              | 1,119.47<br>(354.67 to<br>2,967.07)            | 791.52<br>(266.44 to<br>2,282.65)             | 1,229.43<br>(396.84 to<br>3,205.00)            |
| Urinary diseases and male infertility                      | 5,122.81<br>(4,525.92 to<br>5,778.37)            | 10,624.53<br>(8,978.65 to<br>12,289.28)            | 10,963.26<br>(9,268.44 to<br>12,736.44)           | 10,351.09<br>(8,746.38 to<br>12,059.73)            | 259.96<br>(230.19 to<br>292.53)              | 693.43<br>(540.50 to<br>830.45)                | 760.76<br>(608.01 to<br>889.55)               | 621.47<br>(470.62 to<br>756.32)                |
| Urinary tract infections                                   | 4,662.56<br>(4,074.97 to<br>5,335.98)            | 9,909.40<br>(8,312.77 to<br>11,572.17)             | 10,256.24<br>(8,623.28 to<br>12,004.47)           | 9,622.28<br>(8,059.75 to<br>11,253.25)             | 238.15<br>(208.27 to<br>271.99)              | 655.54<br>(505.86 to<br>792.83)                | 721.59<br>(571.75 to<br>853.72)               | 585.00<br>(440.82 to<br>723.47)                |
| Urolithiasis                                               | 178.86<br>(54.61 to<br>264.43)                   | 306.73<br>(85.90 to<br>469.61)                     | 312.51<br>(84.61 to<br>481.95)                    | 301.18<br>(87.38 to<br>456.28)                     | 6.79<br>(1.68 to<br>10.14)                   | 12.50<br>(2.95 to<br>19.40)                    | 13.25<br>(3.12 to<br>20.33)                   | 11.68<br>(2.78 to<br>18.02)                    |
| Other urinary diseases                                     | 281.39<br>(157.97 to<br>373.83)                  | 394.51<br>(185.81 to<br>591.33)                    | 394.51<br>(175.35 to<br>573.00)                   | 427.63<br>(198.07 to<br>616.71)                    | 15.01<br>(7.46 to<br>20.98)                  | 25.39<br>(11.18 to<br>37.96)                   | 25.92<br>(11.38 to<br>38.09)                  | 24.80<br>(11.07 to<br>36.98)                   |
| Gynecological diseases                                     | 162.01<br>(121.21 to<br>209.18)                  | 214.73<br>(124.32 to<br>330.56)                    | 194.48<br>(111.70 to<br>305.50)                   | 243.22<br>(141.97 to<br>372.58)                    | 4.34<br>(3.35 to<br>5.51)                    | 6.15<br>(3.88 to<br>8.97)                      | 5.71<br>(3.62 to<br>8.33)                     | 6.75<br>(4.22 to<br>9.88)                      |



|                                                   |                                       |                                       |                                       |                                       |                                 |                                 |                                 |                                 |
|---------------------------------------------------|---------------------------------------|---------------------------------------|---------------------------------------|---------------------------------------|---------------------------------|---------------------------------|---------------------------------|---------------------------------|
| Uterine fibroids                                  | 17.00<br>(8.95 to<br>32.32)           | 15.65<br>(5.79 to<br>33.60)           | 13.87<br>(4.99 to<br>30.54)           | 18.24<br>(6.57 to<br>39.96)           | 0.56<br>(0.31 to<br>0.96)       | 0.52<br>(0.21 to<br>1.00)       | 0.47<br>(0.19 to<br>0.92)       | 0.59<br>(0.25 to<br>1.15)       |
| Polycystic ovarian syndrome                       | 2.81<br>(1.37 to<br>6.50)             | 2.93<br>(1.08 to<br>7.18)             | 2.40<br>(0.88 to<br>5.95)             | 3.75<br>(1.40 to<br>9.44)             | 0.06<br>(0.03 to<br>0.14)       | 0.07<br>(0.03 to<br>0.16)       | 0.06<br>(0.02 to<br>0.14)       | 0.09<br>(0.03 to<br>0.21)       |
| Endometriosis                                     | 0.28<br>(0.16 to<br>0.61)             | 0.56<br>(0.21 to<br>1.42)             | 0.50<br>(0.18 to<br>1.28)             | 0.66<br>(0.25 to<br>1.68)             | 0.01<br>(0.00 to<br>0.01)       | 0.01<br>(0.00 to<br>0.03)       | 0.01<br>(0.00 to<br>0.03)       | 0.01<br>(0.00 to<br>0.03)       |
| Genital prolapse                                  | 0.64<br>(0.39 to<br>1.03)             | 0.60<br>(0.30 to<br>1.09)             | 0.53<br>(0.26 to<br>0.99)             | 0.70<br>(0.35 to<br>1.30)             | 0.04<br>(0.02 to<br>0.06)       | 0.04<br>(0.01 to<br>0.05)       | 0.03<br>(0.01 to<br>0.05)       | 0.03<br>(0.01 to<br>0.06)       |
| Other gynecological diseases                      | 141.28<br>(104.51 to<br>185.42)       | 195.00<br>(112.76 to<br>305.74)       | 177.19<br>(101.37 to<br>282.77)       | 219.86<br>(125.35 to<br>347.07)       | 3.67<br>(2.80 to<br>4.72)       | 5.52<br>(3.53 to<br>8.09)       | 5.16<br>(3.27 to<br>7.63)       | 6.03<br>(3.81 to<br>8.96)       |
| Hemoglobinopathies and hemolytic anemias          | 1,385.29<br>(1,117.89 to<br>1,642.83) | 1,913.58<br>(1,345.36 to<br>2,599.23) | 1,797.14<br>(1,248.30 to<br>2,427.22) | 2,081.66<br>(1,472.90 to<br>2,809.36) | 43.81<br>(32.57 to<br>51.20)    | 72.79<br>(51.39 to<br>91.64)    | 70.99<br>(49.65 to<br>89.38)    | 75.41<br>(52.53 to<br>95.03)    |
| Thalassemias                                      | 63.34<br>(45.13 to<br>86.46)          | 31.84<br>(20.57 to<br>46.58)          | 32.48<br>(21.11 to<br>47.23)          | 33.08<br>(21.06 to<br>48.93)          | 0.79<br>(0.56 to<br>1.07)       | 0.40<br>(0.26 to<br>0.59)       | 0.41<br>(0.27 to<br>0.60)       | 0.42<br>(0.27 to<br>0.61)       |
| Sickle cell disorders                             | 683.26<br>(563.46 to<br>845.72)       | 951.14<br>(659.16 to<br>1,348.35)     | 887.33<br>(597.48 to<br>1,259.59)     | 1,044.78<br>(719.03 to<br>1,481.36)   | 12.58<br>(10.30 to<br>15.36)    | 22.17<br>(15.37 to<br>30.50)    | 20.95<br>(14.51 to<br>28.88)    | 23.89<br>(16.54 to<br>32.43)    |
| G6PD deficiency                                   | 297.72<br>(225.10 to<br>368.48)       | 499.57<br>(322.55 to<br>715.06)       | 456.17<br>(288.59 to<br>655.48)       | 560.46<br>(358.42 to<br>794.82)       | 7.94<br>(5.77 to<br>9.76)       | 16.40<br>(10.65 to<br>22.55)    | 15.30<br>(9.62 to<br>21.31)     | 17.87<br>(11.76 to<br>24.45)    |
| Other hemoglobinopathies and hemolytic anemias    | 340.97<br>(242.97 to<br>405.71)       | 431.03<br>(293.00 to<br>538.37)       | 421.15<br>(285.21 to<br>529.23)       | 443.34<br>(303.38 to<br>561.08)       | 22.51<br>(15.27 to<br>27.07)    | 33.81<br>(22.35 to<br>43.58)    | 34.32<br>(22.43 to<br>43.68)    | 33.24<br>(21.93 to<br>43.82)    |
| Endocrine, metabolic, blood, and immune disorders | 5,112.87<br>(4,136.11 to<br>6,186.88) | 6,346.41<br>(4,622.87 to<br>8,487.29) | 6,089.17<br>(4,366.24 to<br>8,207.35) | 6,828.75<br>(4,963.09 to<br>9,057.26) | 153.49<br>(125.94 to<br>191.42) | 231.00<br>(176.45 to<br>304.68) | 232.40<br>(176.46 to<br>305.25) | 231.71<br>(177.65 to<br>301.96) |

| Paraguay                               |                                                 |                                                 |                                                 |                                                 |                                        |                                        |                                        |                                          |
|----------------------------------------|-------------------------------------------------|-------------------------------------------------|-------------------------------------------------|-------------------------------------------------|----------------------------------------|----------------------------------------|----------------------------------------|------------------------------------------|
| Cause                                  | YLLs (actual counts)                            |                                                 |                                                 |                                                 | Deaths (actual counts)                 |                                        |                                        |                                          |
|                                        | 2016                                            | 2040 Forecast                                   | 2040 Better Scenario                            | 2040 Worse Scenario                             | 2016                                   | 2040 Forecast                          | 2040 Better Scenario                   | 2040 Worse Scenario                      |
| <b>Musculoskeletal disorders</b>       | <b>4,568.78</b><br>(1,499.98 to<br>5,951.20)    | <b>6,940.83</b><br>(2,159.86 to<br>9,607.28)    | <b>7,173.20</b><br>(2,233.57 to<br>9,978.08)    | <b>6,705.48</b><br>(2,066.40 to<br>9,233.77)    | <b>125.43</b><br>(44.09 to<br>160.12)  | <b>233.94</b><br>(84.73 to<br>311.78)  | <b>247.93</b><br>(91.76 to<br>330.30)  | <b>219.47</b><br>(77.07 to<br>293.05)    |
| Rheumatoid arthritis                   | 728.61<br>(295.86 to<br>1,469.73)               | 890.29<br>(376.48 to<br>1,895.30)               | 845.44<br>(357.00 to<br>1,796.49)               | 966.86<br>(401.13 to<br>2,000.54)               | 31.49<br>(12.70 to<br>57.38)           | 44.46<br>(18.99 to<br>85.26)           | 43.43<br>(18.88 to<br>83.12)           | 46.60<br>(19.42 to<br>86.91)             |
| Other musculoskeletal disorders        | 3,840.18<br>(1,186.87 to<br>5,037.85)           | 6,050.53<br>(1,758.64 to<br>8,475.43)           | 6,327.76<br>(1,857.83 to<br>8,907.82)           | 5,738.62<br>(1,651.58 to<br>8,000.68)           | 93.95<br>(30.10 to<br>122.88)          | 189.49<br>(62.82 to<br>258.00)         | 204.49<br>(69.46 to<br>276.97)         | 172.87<br>(54.19 to<br>256.47)           |
| <b>Other non-communicable diseases</b> | <b>50,606.91</b><br>(34,148.12 to<br>68,757.79) | <b>38,885.47</b><br>(24,401.06 to<br>57,255.22) | <b>34,894.86</b><br>(22,078.35 to<br>50,661.19) | <b>48,400.73</b><br>(29,605.50 to<br>72,666.16) | <b>657.54</b><br>(445.51 to<br>879.46) | <b>683.14</b><br>(412.89 to<br>941.54) | <b>655.47</b><br>(387.73 to<br>897.36) | <b>774.03</b><br>(477.59 to<br>1,082.98) |
| Congenital birth defects               | 46,787.93<br>(31,483.42 to<br>63,752.84)        | 31,860.30<br>(19,355.88 to<br>47,850.46)        | 27,939.18<br>(17,356.76 to<br>40,732.44)        | 40,893.71<br>(24,399.92 to<br>62,439.25)        | 561.52<br>(380.46 to<br>762.29)        | 402.03<br>(250.59 to<br>596.03)        | 355.54<br>(222.14 to<br>509.50)        | 510.62<br>(310.23 to<br>767.19)          |
| Neural tube defects                    | 3,759.66<br>(2,033.43 to<br>6,088.81)           | 863.55<br>(355.98 to<br>1,746.96)               | 694.15<br>(291.61 to<br>1,411.68)               | 1,249.08<br>(511.36 to<br>2,564.17)             | 43.74<br>(23.77 to<br>70.66)           | 10.22<br>(4.33 to<br>20.59)            | 8.23<br>(3.53 to<br>16.58)             | 14.72<br>(6.09 to<br>29.92)              |
| Congenital heart anomalies             | 22,474.96<br>(14,140.70 to<br>31,264.57)        | 15,894.76<br>(9,359.47 to<br>23,644.10)         | 14,005.84<br>(8,315.35 to<br>20,922.40)         | 20,142.63<br>(11,540.49 to<br>30,481.70)        | 274.92<br>(174.30 to<br>377.98)        | 205.18<br>(123.67 to<br>299.67)        | 181.96<br>(110.66 to<br>263.51)        | 256.29<br>(149.82 to<br>381.78)          |
| Orofacial clefts                       | 36.11<br>(5.82 to<br>71.22)                     | 16.77<br>(2.73 to<br>39.79)                     | 13.27<br>(2.19 to<br>30.81)                     | 24.81<br>(3.88 to<br>59.62)                     | 0.42<br>(0.07 to<br>0.83)              | 0.19<br>(0.03 to<br>0.46)              | 0.15<br>(0.03 to<br>0.36)              | 0.29<br>(0.05 to<br>0.69)                |
| Down syndrome                          | 1,357.73<br>(707.48 to<br>2,087.04)             | 897.24<br>(413.11 to<br>1,480.59)               | 783.98<br>(360.84 to<br>1,260.34)               | 1,135.64<br>(511.24 to<br>1,902.20)             | 18.14<br>(9.16 to<br>27.15)            | 14.11<br>(6.02 to<br>22.20)            | 12.53<br>(5.38 to<br>19.30)            | 17.25<br>(7.59 to<br>27.62)              |



|                                                 |                                          |                                           |                                           |                                           |                                       |                                       |                                       |                                       |
|-------------------------------------------------|------------------------------------------|-------------------------------------------|-------------------------------------------|-------------------------------------------|---------------------------------------|---------------------------------------|---------------------------------------|---------------------------------------|
|                                                 | 44,844.31<br>(37,558.04 to<br>51,729.36) | 41,932.98<br>(30,706.63 to<br>54,446.08)  | 40,109.77<br>(29,326.45 to<br>52,385.61)  | 45,235.19<br>(33,345.64 to<br>58,973.69)  | 1,109.88<br>(909.37 to<br>1,269.47)   | 1,502.94<br>(1,115.43 to<br>1,885.12) | 1,519.81<br>(1,133.11 to<br>1,923.57) | 1,500.46<br>(1,110.84 to<br>1,904.51) |
| <b>Unintentional injuries</b>                   |                                          |                                           |                                           |                                           |                                       |                                       |                                       |                                       |
| Falls                                           | 7,062.65<br>(5,011.32 to<br>8,441.39)    | 9,901.33<br>(6,557.87 to<br>12,888.74)    | 10,095.80<br>(6,673.09 to<br>13,061.96)   | 9,722.52<br>(6,408.96 to<br>12,434.35)    | 340.34<br>(215.10 to<br>413.23)       | 640.62<br>(373.25 to<br>843.50)       | 679.61<br>(401.81 to<br>879.86)       | 597.49<br>(338.64 to<br>799.74)       |
| Drowning                                        | 11,340.20<br>(9,224.13 to<br>13,471.39)  | 8,182.55<br>(5,123.95 to<br>12,434.06)    | 7,451.61<br>(4,630.06 to<br>11,242.40)    | 9,264.65<br>(5,810.36 to<br>14,084.87)    | 200.34<br>(164.65 to<br>237.02)       | 170.49<br>(108.86 to<br>258.66)       | 157.61<br>(100.43 to<br>233.44)       | 188.15<br>(119.39 to<br>282.94)       |
| Fire, heat, and hot substances                  | 2,945.58<br>(2,292.15 to<br>3,528.48)    | 2,411.57<br>(1,599.61 to<br>3,519.16)     | 2,183.37<br>(1,453.25 to<br>3,139.05)     | 2,768.37<br>(1,844.28 to<br>4,023.06)     | 69.17<br>(54.05 to<br>82.17)          | 81.55<br>(55.64 to<br>114.15)         | 78.02<br>(53.37 to<br>107.91)         | 86.63<br>(59.19 to<br>121.68)         |
| Poisonings                                      | 959.28<br>(680.43 to<br>1,383.97)        | 560.94<br>(339.67 to<br>908.45)           | 478.48<br>(285.43 to<br>778.66)           | 702.66<br>(408.87 to<br>1,133.07)         | 16.66<br>(12.17 to<br>25.24)          | 12.59<br>(7.65 to<br>21.58)           | 11.15<br>(6.61 to<br>20.07)           | 14.90<br>(8.81 to<br>25.30)           |
| Exposure to mechanical forces                   | 4,743.14<br>(3,751.11 to<br>5,608.83)    | 4,219.97<br>(2,886.86 to<br>5,870.28)     | 3,894.90<br>(2,604.72 to<br>5,536.02)     | 4,757.63<br>(3,213.80 to<br>6,647.68)     | 91.80<br>(74.26 to<br>107.54)         | 100.06<br>(71.54 to<br>134.67)        | 94.64<br>(66.39 to<br>128.65)         | 108.58<br>(77.76 to<br>144.91)        |
| Unintentional firearm injuries                  | 1,514.42<br>(1,039.34 to<br>1,930.52)    | 1,223.36<br>(727.85 to<br>1,843.90)       | 1,116.09<br>(649.01 to<br>1,713.33)       | 1,394.68<br>(819.29 to<br>2,105.27)       | 27.94<br>(19.49 to<br>35.08)          | 26.16<br>(16.46 to<br>37.80)          | 24.31<br>(15.05 to<br>35.69)          | 29.02<br>(18.13 to<br>42.18)          |
| Unintentional suffocation                       | 724.67<br>(389.62 to<br>1,042.10)        | 423.54<br>(209.75 to<br>689.95)           | 369.47<br>(185.30 to<br>600.48)           | 536.57<br>(260.02 to<br>912.51)           | 9.46<br>(5.32 to<br>13.29)            | 5.96<br>(3.21 to<br>9.30)             | 5.27<br>(2.87 to<br>8.09)             | 7.38<br>(3.86 to<br>11.98)            |
| Other exposure to mechanical forces             | 2,504.04<br>(2,019.90 to<br>2,995.97)    | 2,573.07<br>(1,748.05 to<br>3,584.22)     | 2,409.34<br>(1,578.03 to<br>3,392.82)     | 2,826.38<br>(1,910.64 to<br>3,914.92)     | 54.40<br>(44.44 to<br>64.20)          | 67.94<br>(47.80 to<br>91.06)          | 65.07<br>(45.11 to<br>88.32)          | 72.19<br>(50.67 to<br>95.74)          |
| Adverse effects of medical treatment            | 4,176.10<br>(3,276.92 to<br>5,025.66)    | 4,732.10<br>(3,440.84 to<br>6,198.82)     | 4,537.11<br>(3,234.32 to<br>6,030.35)     | 5,088.68<br>(3,662.35 to<br>6,688.96)     | 121.97<br>(94.88 to<br>146.16)        | 192.05<br>(139.16 to<br>250.06)       | 192.40<br>(138.15 to<br>250.51)       | 193.28<br>(139.67 to<br>253.14)       |
| Animal contact                                  | 842.76<br>(657.10 to<br>1,004.99)        | 896.24<br>(611.58 to<br>1,205.63)         | 814.16<br>(546.80 to<br>1,101.05)         | 1,029.61<br>(681.24 to<br>1,391.48)       | 20.08<br>(15.43 to<br>23.86)          | 27.33<br>(19.22 to<br>36.19)          | 25.77<br>(17.98 to<br>34.36)          | 29.70<br>(20.13 to<br>39.79)          |
| Venomous animal contact                         | 557.80<br>(423.24 to<br>678.93)          | 618.95<br>(393.05 to<br>846.92)           | 561.11<br>(354.19 to<br>769.88)           | 712.58<br>(448.10 to<br>985.30)           | 13.07<br>(9.73 to<br>15.80)           | 18.10<br>(12.01 to<br>24.30)          | 16.96<br>(11.42 to<br>22.88)          | 19.83<br>(13.05 to<br>26.92)          |
| Non-venomous animal contact                     | 284.96<br>(197.84 to<br>363.63)          | 277.29<br>(178.42 to<br>385.01)           | 253.05<br>(161.00 to<br>353.81)           | 317.03<br>(200.47 to<br>443.86)           | 7.02<br>(4.93 to<br>8.77)             | 9.23<br>(5.84 to<br>12.84)            | 8.80<br>(5.51 to<br>12.17)            | 9.87<br>(6.25 to<br>13.65)            |
| Foreign body                                    | 5,432.34<br>(4,147.53 to<br>7,043.83)    | 5,375.62<br>(3,883.54 to<br>7,094.86)     | 5,319.22<br>(3,841.14 to<br>6,946.14)     | 5,746.51<br>(4,082.08 to<br>7,775.07)     | 103.96<br>(82.04 to<br>126.12)        | 146.91<br>(110.96 to<br>182.25)       | 154.75<br>(116.52 to<br>192.57)       | 142.06<br>(106.84 to<br>175.66)       |
| Pulmonary aspiration and foreign body in airway | 5,166.13<br>(3,911.75 to<br>6,733.95)    | 5,104.23<br>(3,677.00 to<br>6,769.74)     | 5,060.86<br>(3,654.59 to<br>6,630.60)     | 5,451.23<br>(3,870.65 to<br>7,469.37)     | 98.34<br>(77.27 to<br>120.46)         | 139.47<br>(104.47 to<br>172.69)       | 147.36<br>(111.49 to<br>183.66)       | 134.43<br>(100.15 to<br>166.75)       |
| Foreign body in other body part                 | 266.21<br>(170.75 to<br>342.52)          | 271.39<br>(170.21 to<br>387.34)           | 258.35<br>(163.20 to<br>368.35)           | 295.29<br>(182.06 to<br>419.32)           | 5.62<br>(3.92 to<br>7.17)             | 7.44<br>(5.10 to<br>10.55)            | 7.38<br>(5.01 to<br>10.70)            | 7.62<br>(5.18 to<br>10.69)            |
| Environmental heat and cold exposure            | 394.30<br>(207.72 to<br>491.39)          | 429.07<br>(214.32 to<br>634.07)           | 380.63<br>(190.45 to<br>565.97)           | 503.93<br>(245.26 to<br>745.58)           | 10.56<br>(6.24 to<br>12.87)           | 14.29<br>(8.66 to<br>20.04)           | 13.13<br>(8.07 to<br>18.58)           | 15.99<br>(9.48 to<br>23.77)           |
| Other unintentional injuries                    | 6,947.97<br>(4,149.11 to<br>8,553.80)    | 5,223.59<br>(3,057.44 to<br>7,303.54)     | 4,954.51<br>(2,825.67 to<br>7,062.34)     | 5,650.63<br>(3,298.72 to<br>7,839.37)     | 135.01<br>(84.90 to<br>164.50)        | 117.05<br>(72.72 to<br>158.70)        | 112.73<br>(70.92 to<br>156.22)        | 123.67<br>(76.35 to<br>167.23)        |
| Self-harm and interpersonal violence            | 70,392.15<br>(58,063.58 to<br>86,423.80) | 70,108.02<br>(44,541.67 to<br>105,108.98) | 68,913.08<br>(43,221.78 to<br>102,637.18) | 71,731.37<br>(45,612.14 to<br>106,522.22) | 1,365.03<br>(1,128.21 to<br>1,662.78) | 1,497.68<br>(963.55 to<br>2,197.10)   | 1,478.89<br>(954.38 to<br>2,152.05)   | 1,518.01<br>(968.09 to<br>2,210.53)   |
| <b>Paraguay</b>                                 |                                          |                                           |                                           |                                           |                                       |                                       |                                       |                                       |
| Cause                                           | YLLs (actual counts)                     |                                           |                                           |                                           | Deaths (actual counts)                |                                       |                                       |                                       |
|                                                 | 2016                                     | 2040 Forecast                             | 2040 Better Scenario                      | 2040 Worse Scenario                       | 2016                                  | 2040 Forecast                         | 2040 Better Scenario                  | 2040 Worse Scenario                   |
| Self-harm                                       | 21,296.81<br>(14,644.47 to<br>26,297.10) | 21,292.50<br>(11,009.02 to<br>37,717.21)  | 19,196.51<br>(10,191.10 to<br>33,513.63)  | 23,646.61<br>(12,099.73 to<br>41,191.79)  | 421.67<br>(299.98 to<br>514.15)       | 474.31<br>(257.37 to<br>818.69)       | 432.78<br>(241.49 to<br>720.68)       | 517.89<br>(277.27 to<br>881.27)       |

|                                                                              |                                          |                                          |                                          |                                          |                                   |                                     |                                     |                                     |
|------------------------------------------------------------------------------|------------------------------------------|------------------------------------------|------------------------------------------|------------------------------------------|-----------------------------------|-------------------------------------|-------------------------------------|-------------------------------------|
| Self-harm by firearm                                                         | 4,023.65<br>(2,357.97 to<br>5,269.63)    | 3,944.32<br>(1,759.82 to<br>7,855.11)    | 3,505.61<br>(1,615.44 to<br>6,912.24)    | 4,440.00<br>(1,942.57 to<br>8,966.32)    | 85.71<br>(50.41 to<br>110.84)     | 96.97<br>(46.98 to<br>185.49)       | 87.98<br>(43.96 to<br>164.53)       | 106.43<br>(49.01 to<br>206.07)      |
| Self-harm by other specified means                                           | 17,273.17<br>(11,658.38 to<br>21,259.23) | 17,348.17<br>(9,214.88 to<br>29,715.26)  | 15,690.89<br>(8,530.76 to<br>26,705.25)  | 19,206.61<br>(10,028.05 to<br>33,109.44) | 335.96<br>(234.32 to<br>411.70)   | 377.34<br>(208.26 to<br>628.83)     | 344.80<br>(194.95 to<br>565.04)     | 411.46<br>(222.09 to<br>694.05)     |
| Interpersonal violence                                                       | 49,095.33<br>(39,123.21 to<br>64,962.25) | 48,815.53<br>(31,643.73 to<br>71,342.19) | 49,716.57<br>(32,248.84 to<br>73,566.38) | 48,084.75<br>(31,350.96 to<br>70,977.87) | 943.36<br>(754.74 to<br>1,218.67) | 1,023.37<br>(673.59 to<br>1,465.52) | 1,046.11<br>(687.04 to<br>1,524.54) | 1,000.11<br>(659.24 to<br>1,429.01) |
| Physical violence by firearm                                                 | 31,945.56<br>(24,162.17 to<br>44,930.68) | 30,183.46<br>(18,804.82 to<br>47,149.70) | 30,710.02<br>(18,761.69 to<br>48,532.29) | 29,794.55<br>(18,897.46 to<br>46,708.77) | 601.90<br>(463.30 to<br>835.01)   | 612.37<br>(394.85 to<br>940.72)     | 624.95<br>(390.95 to<br>967.36)     | 600.52<br>(389.77 to<br>913.66)     |
| Physical violence by sharp object                                            | 13,285.72<br>(7,918.39 to<br>19,305.58)  | 14,920.93<br>(8,254.12 to<br>23,467.01)  | 15,553.82<br>(8,574.45 to<br>24,348.75)  | 14,277.44<br>(7,950.16 to<br>22,637.47)  | 263.01<br>(158.72 to<br>379.74)   | 322.16<br>(180.84 to<br>484.21)     | 337.19<br>(187.18 to<br>517.07)     | 305.85<br>(171.70 to<br>463.66)     |
| Physical violence by other means                                             | 3,864.05<br>(2,571.30 to<br>5,781.92)    | 3,711.13<br>(2,106.62 to<br>6,287.89)    | 3,452.72<br>(1,909.40 to<br>5,726.75)    | 4,012.77<br>(2,354.87 to<br>6,874.31)    | 78.45<br>(52.51 to<br>115.73)     | 88.84<br>(52.03 to<br>141.58)       | 83.97<br>(49.37 to<br>132.59)       | 93.75<br>(54.24 to<br>150.85)       |
| Forces of nature, conflict and terrorism, and executions and police conflict | 228.05<br>(64.56 to<br>409.90)           | 286.83<br>(0.00 to<br>2,653.55)          | 283.63<br>(0.00 to<br>2,602.03)          | 293.27<br>(0.00 to<br>2,752.77)          | 4.01<br>(1.10 to<br>7.16)         | 5.81<br>(0.00 to<br>57.38)          | 5.82<br>(0.00 to<br>57.62)          | 5.83<br>(0.00 to<br>57.63)          |
| Exposure to forces of nature                                                 | 0.00<br>(0.00 to<br>0.00)                | 78.60<br>(0.00 to<br>787.47)             | 77.38<br>(0.00 to<br>770.13)             | 81.26<br>(0.00 to<br>819.82)             | 0.00<br>(0.00 to<br>0.00)         | 1.70<br>(0.00 to<br>16.74)          | 1.71<br>(0.00 to<br>16.80)          | 1.70<br>(0.00 to<br>16.80)          |
| Conflict and terrorism                                                       | 0.00<br>(0.00 to<br>0.00)                | 34.21<br>(0.00 to<br>146.73)             | 33.74<br>(0.00 to<br>148.79)             | 35.26<br>(0.00 to<br>143.19)             | 0.00<br>(0.00 to<br>0.00)         | 0.67<br>(0.00 to<br>4.05)           | 0.67<br>(0.00 to<br>4.11)           | 0.68<br>(0.00 to<br>3.95)           |
| Executions and police conflict                                               | 228.05<br>(64.56 to<br>409.90)           | 174.02<br>(0.00 to<br>0.00)              | 172.51<br>(0.00 to<br>0.00)              | 176.75<br>(0.00 to<br>0.00)              | 4.01<br>(1.10 to<br>7.16)         | 3.44<br>(0.00 to<br>0.00)           | 3.44<br>(0.00 to<br>0.00)           | 3.45<br>(0.00 to<br>0.00)           |

#### North Africa and Middle East

| Cause                                                             | YLLs (in 1000s)                            |                                            |                                           |                                             | Deaths (in 1000s)                     |                                       |                                       |                                       |
|-------------------------------------------------------------------|--------------------------------------------|--------------------------------------------|-------------------------------------------|---------------------------------------------|---------------------------------------|---------------------------------------|---------------------------------------|---------------------------------------|
|                                                                   | 2016                                       | 2040 Forecast                              | 2040 Better Scenario                      | 2040 Worse Scenario                         | 2016                                  | 2040 Forecast                         | 2040 Better Scenario                  | 2040 Worse Scenario                   |
| All causes                                                        | 101,447.29<br>(94,842.41 to<br>108,068.78) | 113,212.14<br>(94,127.20 to<br>137,200.03) | 84,208.42<br>(71,102.94 to<br>100,697.86) | 161,353.70<br>(135,639.42 to<br>193,243.95) | 2,940.63<br>(2,817.05 to<br>3,064.94) | 4,889.78<br>(4,037.88 to<br>5,853.85) | 3,869.30<br>(3,219.55 to<br>4,618.25) | 6,266.47<br>(5,217.91 to<br>7,431.07) |
| Communicable, maternal, neonatal, and nutritional diseases        | 25,302.48<br>(21,588.50 to<br>29,571.07)   | 15,701.74<br>(11,817.27 to<br>20,657.20)   | 10,954.38<br>(8,395.07 to<br>14,374.80)   | 29,800.24<br>(21,723.10 to<br>39,993.73)    | 390.94<br>(346.35 to<br>443.75)       | 348.89<br>(281.44 to<br>429.38)       | 269.23<br>(219.06 to<br>328.48)       | 551.77<br>(429.38 to<br>698.89)       |
| HIV/AIDS and tuberculosis                                         | 1,500.38<br>(1,074.65 to<br>1,914.74)      | 1,235.35<br>(833.01 to<br>1,711.40)        | 744.30<br>(513.76 to<br>1,102.18)         | 2,014.05<br>(1,377.22 to<br>2,736.93)       | 44.05<br>(30.53 to<br>63.03)          | 41.61<br>(27.37 to<br>67.74)          | 27.92<br>(18.95 to<br>47.83)          | 63.01<br>(42.07 to<br>95.27)          |
| Tuberculosis                                                      | 1,260.62<br>(816.70 to<br>1,672.74)        | 932.05<br>(529.26 to<br>1,400.94)          | 571.94<br>(349.07 to<br>886.17)           | 1,492.14<br>(866.59 to<br>2,193.65)         | 39.14<br>(25.50 to<br>57.73)          | 35.01<br>(20.53 to<br>59.80)          | 24.03<br>(15.05 to<br>42.84)          | 52.00<br>(31.30 to<br>83.25)          |
| HIV/AIDS                                                          | 239.76<br>(180.75 to<br>321.45)            | 303.30<br>(192.14 to<br>464.56)            | 172.57<br>(77.58 to<br>464.56)            | 521.91<br>(376.43 to<br>713.20)             | 4.90<br>(3.81 to<br>6.54)             | 6.60<br>(4.26 to<br>10.26)            | 3.89<br>(1.73 to<br>7.57)             | 11.01<br>(7.97 to<br>15.08)           |
| Diarrhea, lower respiratory, and other common infectious diseases | 9,741.86<br>(8,323.00 to<br>11,325.51)     | 7,047.33<br>(4,588.00 to<br>10,551.93)     | 5,010.82<br>(3,430.44 to<br>7,154.58)     | 13,988.97<br>(8,596.50 to<br>21,043.02)     | 170.47<br>(150.85 to<br>192.99)       | 205.88<br>(155.38 to<br>272.82)       | 167.27<br>(128.51 to<br>213.44)       | 310.60<br>(221.12 to<br>419.81)       |
| Diarrheal diseases                                                | 2,499.51<br>(1,892.45 to<br>3,222.70)      | 845.30<br>(387.01 to<br>1,540.37)          | 629.77<br>(233.36 to<br>1,197.52)         | 1,767.19<br>(849.51 to<br>3,073.58)         | 35.00<br>(26.77 to<br>44.68)          | 20.60<br>(8.46 to<br>44.32)           | 19.09<br>(7.06 to<br>41.58)           | 35.01<br>(14.91 to<br>73.76)          |
| Intestinal infectious diseases                                    | 194.38<br>(100.09 to<br>336.96)            | 166.57<br>(85.28 to<br>297.52)             | 155.81<br>(80.42 to<br>272.31)            | 205.91<br>(100.82 to<br>374.21)             | 2.91<br>(1.51 to<br>5.03)             | 2.67<br>(1.40 to<br>4.80)             | 2.55<br>(1.36 to<br>4.45)             | 3.17<br>(1.61 to<br>5.67)             |
| Typhoid fever                                                     | 172.56<br>(87.43 to<br>299.24)             | 146.22<br>(73.91 to<br>260.81)             | 138.90<br>(71.70 to<br>242.37)            | 178.76<br>(87.21 to<br>319.11)              | 2.57<br>(1.32 to<br>4.46)             | 2.33<br>(1.20 to<br>4.12)             | 2.27<br>(1.21 to<br>3.91)             | 2.74<br>(1.37 to<br>4.88)             |
| Paratyphoid fever                                                 | 21.57<br>(9.46 to<br>43.02)                | 20.23<br>(8.93 to<br>39.64)                | 16.82<br>(7.37 to<br>32.72)               | 26.93<br>(11.59 to<br>52.63)                | 0.33<br>(0.15 to<br>0.67)             | 0.33<br>(0.15 to<br>0.66)             | 0.28<br>(0.13 to<br>0.55)             | 0.43<br>(0.19 to<br>0.85)             |



|                                                       |                                            |                                            |                                            |                                              |                                         |                                        |                                      |                                         |
|-------------------------------------------------------|--------------------------------------------|--------------------------------------------|--------------------------------------------|----------------------------------------------|-----------------------------------------|----------------------------------------|--------------------------------------|-----------------------------------------|
| Schistosomiasis                                       | 24.59<br>(20.90 to 29.01)                  | 15.56<br>(12.10 to 22.01)                  | 14.10<br>(11.06 to 20.04)                  | 18.50<br>(14.35 to 26.14)                    | 0.73<br>(0.62 to 0.86)                  | 0.55<br>(0.44 to 0.75)                 | 0.52<br>(0.41 to 0.70)               | 0.62<br>(0.49 to 0.85)                  |
| Cysticercosis                                         | 1.11<br>(0.77 to 1.54)                     | 0.45<br>(0.30 to 0.69)                     | 0.41<br>(0.28 to 0.64)                     | 0.51<br>(0.35 to 0.79)                       | 0.02<br>(0.02 to 0.03)                  | 0.01<br>(0.01 to 0.02)                 | 0.01<br>(0.01 to 0.02)               | 0.01<br>(0.01 to 0.02)                  |
| Cystic echinococcosis                                 | 0.00<br>(0.00 to 0.00)                     | 0.00<br>(0.00 to 0.00)                     | 0.00<br>(0.00 to 0.00)                     | 0.00<br>(0.00 to 0.00)                       | 0.00<br>(0.00 to 0.00)                  | 0.00<br>(0.00 to 0.00)                 | 0.00<br>(0.00 to 0.00)               | 0.00<br>(0.00 to 0.00)                  |
| Dengue                                                | 0.27<br>(0.06 to 0.70)                     | 1.26<br>(0.33 to 2.65)                     | 1.24<br>(0.32 to 2.59)                     | 1.36<br>(0.41 to 2.89)                       | 0.01<br>(0.00 to 0.01)                  | 0.04<br>(0.01 to 0.10)                 | 0.04<br>(0.01 to 0.10)               | 0.04<br>(0.01 to 0.10)                  |
| Yellow fever                                          | 26.22<br>(4.69 to 78.86)                   | 6.53<br>(0.83 to 23.46)                    | 5.40<br>(0.68 to 19.58)                    | 12.45<br>(1.66 to 46.79)                     | 0.41<br>(0.07 to 1.24)                  | 0.10<br>(0.01 to 0.38)                 | 0.09<br>(0.01 to 0.31)               | 0.19<br>(0.02 to 0.71)                  |
| Rabies                                                | 2.54<br>(0.65 to 4.09)                     | 1.12<br>(0.28 to 2.05)                     | 0.69<br>(0.16 to 1.27)                     | 2.01<br>(0.59 to 3.62)                       | 0.05<br>(0.01 to 0.07)                  | 0.03<br>(0.01 to 0.04)                 | 0.02<br>(0.00 to 0.03)               | 0.04<br>(0.01 to 0.07)                  |
| Intestinal nematode infections                        | 4.36<br>(3.10 to 6.10)                     | 6.39<br>(3.67 to 10.51)                    | 6.32<br>(3.59 to 10.57)                    | 9.16<br>(5.22 to 14.95)                      | 0.06<br>(0.04 to 0.08)                  | 0.09<br>(0.05 to 0.14)                 | 0.09<br>(0.05 to 0.14)               | 0.12<br>(0.07 to 0.19)                  |
| Other neglected tropical diseases                     | 9.14<br>(7.59 to 11.77)                    | 6.85<br>(5.34 to 8.58)                     | 6.47<br>(4.88 to 8.14)                     | 8.02<br>(6.36 to 10.01)                      | 0.18<br>(0.15 to 0.22)                  | 0.19<br>(0.13 to 0.24)                 | 0.20<br>(0.13 to 0.24)               | 0.21<br>(0.15 to 0.25)                  |
| <b>Maternal disorders</b>                             | <b>750.75</b><br><b>(646.98 to 874.44)</b> | <b>556.56</b><br><b>(402.70 to 754.28)</b> | <b>345.80</b><br><b>(255.68 to 470.79)</b> | <b>912.11</b><br><b>(655.25 to 1,250.45)</b> | <b>13.52</b><br><b>(11.64 to 15.78)</b> | <b>10.18</b><br><b>(7.32 to 13.82)</b> | <b>6.33</b><br><b>(4.67 to 8.59)</b> | <b>16.59</b><br><b>(11.87 to 22.65)</b> |
| Maternal hemorrhage                                   | 224.40<br>(171.23 to 287.04)               | 178.16<br>(114.85 to 265.87)               | 107.01<br>(69.93 to 157.56)                | 282.37<br>(180.97 to 425.73)                 | 4.09<br>(3.11 to 5.23)                  | 3.29<br>(2.12 to 4.86)                 | 1.98<br>(1.29 to 2.91)               | 5.20<br>(3.29 to 7.80)                  |
| Maternal sepsis and other maternal infections         | 111.95<br>(81.60 to 150.53)                | 65.05<br>(43.07 to 97.66)                  | 42.26<br>(28.69 to 62.15)                  | 108.05<br>(70.80 to 159.57)                  | 2.02<br>(1.50 to 2.70)                  | 1.20<br>(0.80 to 1.78)                 | 0.78<br>(0.53 to 1.13)               | 1.98<br>(1.31 to 2.92)                  |
| Maternal hypertensive disorders                       | 117.82<br>(88.48 to 153.63)                | 94.39<br>(59.84 to 145.81)                 | 56.81<br>(36.60 to 84.87)                  | 151.54<br>(95.43 to 230.38)                  | 2.10<br>(1.58 to 2.73)                  | 1.70<br>(1.09 to 2.59)                 | 1.02<br>(0.66 to 1.52)               | 2.72<br>(1.70 to 4.13)                  |
| Maternal obstructed labor and uterine rupture         | 25.55<br>(15.72 to 36.95)                  | 22.70<br>(11.58 to 38.25)                  | 12.45<br>(6.81 to 20.84)                   | 37.17<br>(19.53 to 63.89)                    | 0.47<br>(0.29 to 0.67)                  | 0.42<br>(0.21 to 0.72)                 | 0.23<br>(0.12 to 0.39)               | 0.68<br>(0.36 to 1.17)                  |
| Maternal abortion, miscarriage, and ectopic pregnancy | 36.62<br>(23.36 to 52.92)                  | 27.61<br>(15.00 to 48.44)                  | 17.81<br>(9.73 to 30.38)                   | 46.06<br>(24.38 to 80.87)                    | 0.69<br>(0.44 to 0.98)                  | 0.53<br>(0.29 to 0.90)                 | 0.34<br>(0.19 to 0.57)               | 0.87<br>(0.46 to 1.52)                  |
| Indirect maternal deaths                              | 95.01<br>(67.64 to 126.81)                 | 69.06<br>(43.82 to 100.43)                 | 44.73<br>(28.83 to 64.91)                  | 120.78<br>(76.66 to 179.97)                  | 1.67<br>(1.18 to 2.24)                  | 1.23<br>(0.77 to 1.78)                 | 0.80<br>(0.51 to 1.15)               | 2.13<br>(1.36 to 3.19)                  |
| Late maternal deaths                                  | 9.84<br>(5.40 to 16.41)                    | 5.49<br>(2.92 to 9.79)                     | 3.56<br>(1.92 to 6.38)                     | 9.43<br>(4.95 to 16.93)                      | 0.17<br>(0.10 to 0.29)                  | 0.10<br>(0.05 to 0.18)                 | 0.06<br>(0.03 to 0.11)               | 0.17<br>(0.09 to 0.30)                  |
| Maternal deaths aggravated by HIV/AIDS                | 0.19<br>(0.10 to 0.31)                     | 0.79<br>(0.30 to 1.73)                     | 0.34<br>(0.05 to 1.00)                     | 1.50<br>(0.59 to 3.28)                       | 0.00<br>(0.00 to 0.01)                  | 0.02<br>(0.01 to 0.05)                 | 0.01<br>(0.00 to 0.02)               | 0.03<br>(0.01 to 0.06)                  |
| Other maternal disorders                              | 129.36<br>(93.86 to 171.05)                | 93.30<br>(61.31 to 136.00)                 | 60.84<br>(40.67 to 88.60)                  | 155.22<br>(101.74 to 228.71)                 | 2.32<br>(1.68 to 3.04)                  | 1.70<br>(1.11 to 2.48)                 | 1.11<br>(0.74 to 1.62)               | 2.81<br>(1.82 to 4.14)                  |
| <b>North Africa and Middle East</b>                   |                                            |                                            |                                            |                                              |                                         |                                        |                                      |                                         |
| Cause                                                 | YLLs (in 1000s)                            |                                            |                                            |                                              | Deaths (in 1000s)                       |                                        |                                      |                                         |
|                                                       | 2016                                       | 2040 Forecast                              | 2040 Better Scenario                       | 2040 Worse Scenario                          | 2016                                    | 2040 Forecast                          | 2040 Better Scenario                 | 2040 Worse Scenario                     |
| Neonatal disorders                                    | 11,567.50<br>(9,326.40 to 14,120.16)       | 6,046.20<br>(4,262.98 to 8,248.54)         | 4,148.98<br>(2,922.33 to 5,831.81)         | 11,659.45<br>(8,106.65 to 16,221.68)         | 133.72<br>(107.82 to 163.21)            | 69.91<br>(49.30 to 95.36)              | 47.98<br>(33.82 to 67.42)            | 134.80<br>(93.74 to 187.49)             |
| Neonatal preterm birth                                | 6,736.50<br>(5,290.97 to 8,391.69)         | 3,096.41<br>(2,221.88 to 4,165.54)         | 1,991.14<br>(1,407.79 to 2,676.46)         | 6,102.78<br>(4,207.50 to 8,447.51)           | 77.85<br>(61.14 to 96.97)               | 35.79<br>(25.68 to 48.13)              | 23.02<br>(16.28 to 30.94)            | 70.53<br>(48.62 to 97.62)               |

|                                                                         |                                                               |                                                                |                                                               |                                                                 |                                                            |                                                            |                                                            |                                                            |
|-------------------------------------------------------------------------|---------------------------------------------------------------|----------------------------------------------------------------|---------------------------------------------------------------|-----------------------------------------------------------------|------------------------------------------------------------|------------------------------------------------------------|------------------------------------------------------------|------------------------------------------------------------|
| Neonatal encephalopathy due to birth asphyxia and trauma                | 1,520.98<br>(1,168.84 to<br>1,969.04)                         | 759.22<br>(451.53 to<br>1,245.21)                              | 568.11<br>(338.06 to<br>933.66)                               | 1,422.30<br>(808.86 to<br>2,394.29)                             | 17.60<br>(13.52 to<br>22.78)                               | 8.79<br>(5.23 to<br>14.41)                                 | 6.58<br>(3.92 to<br>10.80)                                 | 16.46<br>(9.38 to<br>27.71)                                |
| Neonatal sepsis and other neonatal infections                           | 1,610.49<br>(1,047.28 to<br>2,162.10)                         | 1,140.52<br>(642.88 to<br>1,760.79)                            | 830.16<br>(478.40 to<br>1,281.44)                             | 2,086.96<br>(1,130.03 to<br>3,259.17)                           | 18.62<br>(12.11 to<br>25.00)                               | 13.19<br>(7.43 to<br>20.36)                                | 9.60<br>(5.53 to<br>14.81)                                 | 24.13<br>(13.07 to<br>37.67)                               |
| Hemolytic disease and other neonatal jaundice                           | 131.11<br>(84.84 to<br>207.87)                                | 57.03<br>(26.89 to<br>113.33)                                  | 38.34<br>(18.59 to<br>72.23)                                  | 120.80<br>(55.44 to<br>238.17)                                  | 1.51<br>(0.98 to<br>2.40)                                  | 0.66<br>(0.31 to<br>1.31)                                  | 0.44<br>(0.21 to<br>0.83)                                  | 1.40<br>(0.64 to<br>2.75)                                  |
| Other neonatal disorders                                                | 1,568.42<br>(1,160.43 to<br>2,134.36)                         | 993.02<br>(600.32 to<br>1,632.65)                              | 721.24<br>(432.30 to<br>1,164.33)                             | 1,926.62<br>(1,125.48 to<br>3,114.43)                           | 18.14<br>(13.43 to<br>24.68)                               | 11.49<br>(6.95 to<br>18.88)                                | 8.34<br>(5.01 to<br>13.46)                                 | 22.29<br>(13.03 to<br>36.01)                               |
| <b>Nutritional deficiencies</b>                                         | <b>184.93</b><br><b>(151.80 to</b><br><b>223.39)</b>          | <b>107.63</b><br><b>(89.26 to</b><br><b>130.89)</b>            | <b>93.75</b><br><b>(78.88 to</b><br><b>112.48)</b>            | <b>150.68</b><br><b>(118.84 to</b><br><b>195.18)</b>            | <b>4.33</b><br><b>(3.81 to</b><br><b>4.92)</b>             | <b>4.58</b><br><b>(3.85 to</b><br><b>5.48)</b>             | <b>4.66</b><br><b>(3.92 to</b><br><b>5.57)</b>             | <b>4.95</b><br><b>(4.06 to</b><br><b>5.98)</b>             |
| Protein-energy malnutrition                                             | 156.13<br>(124.31 to<br>192.12)                               | 78.54<br>(63.07 to<br>100.08)                                  | 67.47<br>(55.58 to<br>82.74)                                  | 114.92<br>(87.23 to<br>157.26)                                  | 3.53<br>(3.07 to<br>4.04)                                  | 3.28<br>(2.69 to<br>3.95)                                  | 3.38<br>(2.81 to<br>3.99)                                  | 3.56<br>(2.85 to<br>4.30)                                  |
| Iodine deficiency                                                       | 4.49<br>(2.06 to<br>9.66)                                     | 5.57<br>(2.91 to<br>10.44)                                     | 4.70<br>(2.53 to<br>7.96)                                     | 7.96<br>(3.69 to<br>17.89)                                      | 0.10<br>(0.05 to<br>0.17)                                  | 0.24<br>(0.12 to<br>0.42)                                  | 0.23<br>(0.11 to<br>0.42)                                  | 0.27<br>(0.14 to<br>0.47)                                  |
| Dietary iron deficiency                                                 | 7.29<br>(6.25 to<br>8.69)                                     | 8.33<br>(6.74 to<br>9.86)                                      | 8.13<br>(6.47 to<br>9.66)                                     | 9.16<br>(7.48 to<br>10.89)                                      | 0.14<br>(0.12 to<br>0.17)                                  | 0.29<br>(0.19 to<br>0.36)                                  | 0.30<br>(0.19 to<br>0.38)                                  | 0.29<br>(0.20 to<br>0.35)                                  |
| Other nutritional deficiencies                                          | 17.03<br>(13.96 to<br>20.88)                                  | 15.20<br>(12.25 to<br>19.78)                                   | 13.46<br>(10.75 to<br>17.71)                                  | 18.64<br>(14.91 to<br>24.15)                                    | 0.56<br>(0.45 to<br>0.73)                                  | 0.77<br>(0.57 to<br>1.12)                                  | 0.75<br>(0.55 to<br>1.11)                                  | 0.83<br>(0.62 to<br>1.19)                                  |
| <b>Other communicable, maternal, neonatal, and nutritional diseases</b> | <b>1,079.79</b><br><b>(675.82 to</b><br><b>1,657.67)</b>      | <b>456.74</b><br><b>(341.52 to</b><br><b>624.69)</b>           | <b>382.64</b><br><b>(289.57 to</b><br><b>525.40)</b>          | <b>713.46</b><br><b>(486.43 to</b><br><b>1,062.82)</b>          | <b>16.39</b><br><b>(11.55 to</b><br><b>23.25)</b>          | <b>11.81</b><br><b>(10.03 to</b><br><b>14.15)</b>          | <b>10.53</b><br><b>(8.91 to</b><br><b>12.48)</b>           | <b>15.35</b><br><b>(12.37 to</b><br><b>19.60)</b>          |
| Sexually transmitted infections excluding HIV                           | 757.61<br>(556.14 to<br>1,320.64)                             | 166.19<br>(69.75 to<br>310.65)                                 | 136.73<br>(57.72 to<br>255.52)                                | 329.15<br>(132.87 to<br>632.90)                                 | 8.95<br>(4.26 to<br>15.52)                                 | 2.03<br>(0.90 to<br>3.72)                                  | 1.68<br>(0.75 to<br>3.07)                                  | 3.94<br>(1.64 to<br>7.47)                                  |
| Syphilis                                                                | 753.03<br>(551.15 to<br>1,315.75)                             | 161.96<br>(65.59 to<br>306.31)                                 | 132.99<br>(53.98 to<br>251.73)                                | 324.35<br>(128.89 to<br>628.29)                                 | 8.84<br>(4.15 to<br>15.41)                                 | 1.92<br>(0.79 to<br>3.60)                                  | 1.58<br>(0.65 to<br>2.97)                                  | 3.82<br>(1.53 to<br>7.36)                                  |
| Chlamydial infection                                                    | 0.87<br>(0.63 to<br>1.05)                                     | 0.83<br>(0.55 to<br>1.08)                                      | 0.73<br>(0.50 to<br>0.96)                                     | 0.94<br>(0.62 to<br>1.24)                                       | 0.02<br>(0.01 to<br>0.02)                                  | 0.02<br>(0.01 to<br>0.03)                                  | 0.02<br>(0.01 to<br>0.02)                                  | 0.02<br>(0.02 to<br>0.03)                                  |
| Gonococcal infection                                                    | 2.40<br>(1.77 to<br>2.89)                                     | 2.21<br>(1.51 to<br>2.87)                                      | 1.97<br>(1.37 to<br>2.54)                                     | 2.50<br>(1.70 to<br>3.23)                                       | 0.06<br>(0.04 to<br>0.07)                                  | 0.06<br>(0.04 to<br>0.07)                                  | 0.06<br>(0.04 to<br>0.07)                                  | 0.06<br>(0.05 to<br>0.08)                                  |
| Other sexually transmitted infections                                   | 1.31<br>(0.95 to<br>1.59)                                     | 1.19<br>(0.78 to<br>1.58)                                      | 1.04<br>(0.71 to<br>1.37)                                     | 1.36<br>(0.89 to<br>1.81)                                       | 0.03<br>(0.02 to<br>0.03)                                  | 0.03<br>(0.02 to<br>0.04)                                  | 0.03<br>(0.02 to<br>0.03)                                  | 0.03<br>(0.02 to<br>0.04)                                  |
| Acute hepatitis                                                         | 137.55<br>(125.79 to<br>151.06)                               | 125.75<br>(109.17 to<br>144.82)                                | 102.39<br>(86.80 to<br>118.64)                                | 154.91<br>(134.52 to<br>178.11)                                 | 3.87<br>(3.54 to<br>4.24)                                  | 4.37<br>(3.82 to<br>4.98)                                  | 3.65<br>(3.13 to<br>4.17)                                  | 5.20<br>(4.57 to<br>5.88)                                  |
| Acute hepatitis A                                                       | 6.96<br>(4.30 to<br>9.99)                                     | 3.35<br>(2.19 to<br>4.90)                                      | 2.70<br>(1.78 to<br>3.93)                                     | 4.75<br>(2.97 to<br>7.01)                                       | 0.10<br>(0.07 to<br>0.14)                                  | 0.08<br>(0.06 to<br>0.12)                                  | 0.07<br>(0.05 to<br>0.11)                                  | 0.11<br>(0.07 to<br>0.15)                                  |
| Acute hepatitis B                                                       | 107.00<br>(95.98 to<br>119.13)                                | 104.90<br>(88.64 to<br>122.51)                                 | 85.02<br>(70.95 to<br>99.46)                                  | 128.19<br>(109.78 to<br>148.09)                                 | 3.20<br>(2.85 to<br>3.57)                                  | 3.63<br>(3.10 to<br>4.20)                                  | 3.01<br>(2.54 to<br>3.50)                                  | 4.34<br>(3.73 to<br>4.97)                                  |
| Acute hepatitis C                                                       | 2.48<br>(1.90 to<br>3.22)                                     | 2.99<br>(2.17 to<br>4.08)                                      | 2.58<br>(1.88 to<br>3.52)                                     | 3.41<br>(2.51 to<br>4.66)                                       | 0.08<br>(0.06 to<br>0.11)                                  | 0.12<br>(0.08 to<br>0.16)                                  | 0.10<br>(0.07 to<br>0.14)                                  | 0.13<br>(0.09 to<br>0.18)                                  |
| Acute hepatitis E                                                       | 21.10<br>(17.24 to<br>25.79)                                  | 14.51<br>(10.61 to<br>19.63)                                   | 12.09<br>(8.72 to<br>16.38)                                   | 18.56<br>(13.72 to<br>24.63)                                    | 0.49<br>(0.36 to<br>0.63)                                  | 0.53<br>(0.35 to<br>0.76)                                  | 0.47<br>(0.31 to<br>0.68)                                  | 0.62<br>(0.42 to<br>0.87)                                  |
| Other unspecified infectious diseases                                   | 184.63<br>(114.97 to<br>343.18)                               | 164.80<br>(121.46 to<br>229.34)                                | 143.52<br>(107.00 to<br>197.21)                               | 229.40<br>(155.72 to<br>385.24)                                 | 3.57<br>(2.53 to<br>5.46)                                  | 5.41<br>(4.30 to<br>6.92)                                  | 5.20<br>(4.18 to<br>6.57)                                  | 6.22<br>(4.71 to<br>8.26)                                  |
| <b>Non-communicable diseases</b>                                        | <b>53,009.99</b><br><b>(50,238.32 to</b><br><b>55,855.38)</b> | <b>81,542.21</b><br><b>(64,203.38 to</b><br><b>103,494.94)</b> | <b>60,996.01</b><br><b>(49,516.19 to</b><br><b>76,579.68)</b> | <b>110,965.52</b><br><b>(87,534.00 to</b><br><b>139,879.54)</b> | <b>2,123.45</b><br><b>(2,038.54 to</b><br><b>2,216.03)</b> | <b>4,173.18</b><br><b>(3,326.30 to</b><br><b>5,127.01)</b> | <b>3,309.98</b><br><b>(2,682.94 to</b><br><b>4,058.43)</b> | <b>5,262.50</b><br><b>(4,243.66 to</b><br><b>6,417.32)</b> |

| North Africa and Middle East         |                                            |                                              |                                              |                                              |                                     |                                     |                                     |                                     |
|--------------------------------------|--------------------------------------------|----------------------------------------------|----------------------------------------------|----------------------------------------------|-------------------------------------|-------------------------------------|-------------------------------------|-------------------------------------|
| Cause                                | YLLs (in 1000s)                            |                                              |                                              |                                              | Deaths (in 1000s)                   |                                     |                                     |                                     |
|                                      | 2016                                       | 2040 Forecast                                | 2040 Better Scenario                         | 2040 Worse Scenario                          | 2016                                | 2040 Forecast                       | 2040 Better Scenario                | 2040 Worse Scenario                 |
| <b>Neoplasms</b>                     | <b>9,664.39</b><br>(9,065.94 to 10,291.33) | <b>17,087.51</b><br>(14,403.43 to 20,063.79) | <b>15,273.56</b><br>(13,025.89 to 17,729.32) | <b>19,823.56</b><br>(16,570.17 to 23,627.25) | <b>343.07</b><br>(323.62 to 364.05) | <b>734.19</b><br>(630.15 to 854.39) | <b>675.53</b><br>(579.82 to 779.42) | <b>825.53</b><br>(696.25 to 973.81) |
| Lip and oral cavity cancer           | 75.56<br>(70.47 to 82.87)                  | 136.85<br>(104.66 to 181.33)                 | 109.53<br>(86.72 to 139.26)                  | 186.01<br>(136.75 to 258.81)                 | 2.90<br>(2.72 to 3.13)              | 5.99<br>(4.68 to 7.68)              | 5.04<br>(4.05 to 6.30)              | 7.79<br>(5.80 to 10.49)             |
| Nasopharynx cancer                   | 77.73<br>(71.08 to 83.65)                  | 131.93<br>(93.52 to 186.40)                  | 96.28<br>(71.61 to 130.44)                   | 194.08<br>(131.67 to 281.10)                 | 2.33<br>(2.14 to 2.50)              | 4.42<br>(3.17 to 6.14)              | 3.31<br>(2.49 to 4.41)              | 6.36<br>(4.37 to 9.08)              |
| Other pharynx cancer                 | 37.95<br>(34.27 to 41.32)                  | 63.94<br>(51.05 to 81.04)                    | 62.21<br>(49.89 to 77.34)                    | 69.19<br>(53.58 to 89.74)                    | 1.36<br>(1.25 to 1.46)              | 2.69<br>(2.20 to 3.38)              | 2.71<br>(2.22 to 3.33)              | 2.80<br>(2.23 to 3.60)              |
| Esophageal cancer                    | 170.53<br>(159.42 to 182.45)               | 314.05<br>(221.64 to 448.31)                 | 261.30<br>(194.02 to 358.23)                 | 394.06<br>(264.26 to 574.82)                 | 7.00<br>(6.54 to 7.49)              | 14.63<br>(10.40 to 20.43)           | 12.73<br>(9.55 to 17.13)            | 17.55<br>(11.90 to 25.57)           |
| Stomach cancer                       | 711.33<br>(664.86 to 765.72)               | 928.25<br>(740.86 to 1,160.38)               | 770.72<br>(626.98 to 941.18)                 | 1,076.06<br>(849.55 to 1,365.84)             | 28.93<br>(26.91 to 31.16)           | 43.87<br>(35.35 to 54.59)           | 37.59<br>(30.92 to 45.76)           | 49.34<br>(39.60 to 61.45)           |
| Colon and rectum cancer              | 729.46<br>(667.81 to 791.59)               | 1,449.32<br>(1,039.66 to 2,096.56)           | 1,344.51<br>(973.40 to 1,925.90)             | 1,560.76<br>(1,106.49 to 2,254.08)           | 28.74<br>(26.34 to 30.99)           | 68.77<br>(49.05 to 99.44)           | 65.40<br>(47.50 to 92.59)           | 72.14<br>(51.26 to 103.88)          |
| Liver cancer                         | 678.80<br>(584.93 to 763.11)               | 1,601.94<br>(1,083.34 to 2,287.24)           | 1,470.27<br>(1,031.17 to 2,107.78)           | 1,825.67<br>(1,171.02 to 2,818.76)           | 27.03<br>(23.57 to 30.06)           | 73.68<br>(50.46 to 108.60)          | 69.78<br>(49.60 to 99.22)           | 79.86<br>(51.12 to 122.24)          |
| Liver cancer due to hepatitis B      | 186.17<br>(147.61 to 231.54)               | 433.39<br>(274.19 to 650.11)                 | 391.69<br>(260.31 to 563.20)                 | 488.95<br>(296.73 to 767.87)                 | 6.78<br>(5.28 to 8.49)              | 18.35<br>(11.63 to 27.54)           | 17.10<br>(11.23 to 24.90)           | 19.80<br>(12.18 to 31.05)           |
| Liver cancer due to hepatitis C      | 283.51<br>(229.20 to 338.34)               | 646.78<br>(423.10 to 1,003.66)               | 608.53<br>(410.43 to 913.73)                 | 742.04<br>(455.23 to 1,192.24)               | 11.95<br>(9.95 to 14.03)            | 30.66<br>(20.69 to 46.01)           | 29.73<br>(20.84 to 43.10)           | 33.34<br>(21.12 to 52.34)           |
| Liver cancer due to alcohol use      | 53.58<br>(37.46 to 77.47)                  | 127.30<br>(71.81 to 221.13)                  | 114.85<br>(66.68 to 191.20)                  | 152.15<br>(80.95 to 272.81)                  | 2.23<br>(1.55 to 3.19)              | 8.89<br>(3.39 to 9.90)              | 5.47<br>(3.24 to 8.79)              | 6.72<br>(3.68 to 11.65)             |
| Liver cancer due to other causes     | 155.53<br>(124.55 to 188.24)               | 394.47<br>(242.10 to 638.03)                 | 355.19<br>(227.91 to 548.08)                 | 442.54<br>(261.88 to 738.72)                 | 6.06<br>(4.87 to 7.34)              | 18.78<br>(11.47 to 30.18)           | 17.48<br>(11.16 to 26.53)           | 20.00<br>(11.83 to 32.98)           |
| Gallbladder and biliary tract cancer | 125.16<br>(111.59 to 145.48)               | 184.98<br>(160.30 to 217.69)                 | 187.94<br>(160.94 to 222.24)                 | 179.33<br>(156.37 to 211.61)                 | 5.41<br>(4.88 to 6.44)              | 9.23<br>(8.12 to 11.12)             | 9.64<br>(8.41 to 11.70)             | 8.68<br>(7.70 to 10.43)             |
| Pancreatic cancer                    | 352.21<br>(329.08 to 378.69)               | 810.07<br>(642.47 to 1,042.51)               | 799.22<br>(638.62 to 1,013.30)               | 829.64<br>(650.18 to 1,089.29)               | 15.10<br>(14.08 to 16.20)           | 39.38<br>(31.43 to 50.43)           | 39.93<br>(32.17 to 50.46)           | 39.03<br>(30.75 to 51.12)           |
| Larynx cancer                        | 154.01<br>(142.60 to 167.03)               | 253.25<br>(144.34 to 447.46)                 | 169.66<br>(105.34 to 285.57)                 | 393.46<br>(213.38 to 685.86)                 | 6.06<br>(5.63 to 6.56)              | 10.82<br>(6.30 to 18.98)            | 7.49<br>(4.70 to 12.49)             | 16.47<br>(9.03 to 29.08)            |
| Tracheal, bronchus, and lung cancer  | 1,378.71<br>(1,252.13 to 1,517.98)         | 2,538.49<br>(1,837.76 to 3,474.37)           | 1,735.04<br>(1,285.70 to 2,321.07)           | 3,916.81<br>(2,744.56 to 5,471.83)           | 55.46<br>(50.51 to 60.94)           | 113.23<br>(83.04 to 154.83)         | 80.29<br>(59.93 to 106.64)          | 171.77<br>(122.72 to 239.19)        |
| Malignant skin melanoma              | 43.77<br>(36.03 to 70.54)                  | 85.38<br>(67.06 to 138.00)                   | 95.47<br>(75.04 to 152.99)                   | 73.27<br>(58.95 to 117.68)                   | 1.60<br>(1.31 to 2.63)              | 3.97<br>(3.17 to 6.75)              | 4.58<br>(3.67 to 7.68)              | 3.25<br>(2.64 to 5.33)              |
| Non-melanoma skin cancer             | 34.78<br>(32.00 to 37.45)                  | 69.70<br>(63.86 to 75.85)                    | 65.15<br>(58.88 to 71.72)                    | 75.52<br>(69.71 to 81.53)                    | 1.66<br>(1.55 to 1.78)              | 4.07<br>(3.68 to 4.46)              | 3.95<br>(3.55 to 4.38)              | 4.23<br>(3.81 to 4.64)              |
| Breast cancer                        | 963.23<br>(830.29 to 1,111.75)             | 1,646.96<br>(1,246.76 to 2,187.07)           | 1,520.20<br>(1,176.39 to 1,968.62)           | 1,769.51<br>(1,316.57 to 2,399.54)           | 29.59<br>(25.92 to 34.18)           | 58.10<br>(45.00 to 78.05)           | 54.49<br>(42.81 to 72.05)           | 61.50<br>(46.78 to 83.62)           |
| Cervical cancer                      | 158.50<br>(118.60 to 179.80)               | 221.86<br>(168.48 to 273.35)                 | 195.00<br>(148.26 to 237.30)                 | 251.62<br>(187.36 to 316.13)                 | 5.25<br>(4.05 to 5.88)              | 8.18<br>(6.39 to 9.74)              | 7.37<br>(5.82 to 8.85)              | 9.05<br>(7.04 to 11.04)             |



|                                     |                                                               |                                                               |                                                               |                                                               |                                                            |                                                            |                                                          |                                                            |
|-------------------------------------|---------------------------------------------------------------|---------------------------------------------------------------|---------------------------------------------------------------|---------------------------------------------------------------|------------------------------------------------------------|------------------------------------------------------------|----------------------------------------------------------|------------------------------------------------------------|
| Uterine cancer                      | 85.28<br>(74.66 to<br>94.13)                                  | 153.43<br>(132.13 to<br>174.63)                               | 141.40<br>(120.91 to<br>163.38)                               | 168.51<br>(144.66 to<br>191.21)                               | 3.34<br>(2.99 to<br>3.66)                                  | 6.90<br>(6.01 to<br>7.72)                                  | 6.52<br>(5.65 to<br>7.42)                                | 7.40<br>(6.49 to<br>8.28)                                  |
| Ovarian cancer                      | 191.33<br>(170.88 to<br>213.68)                               | 360.33<br>(268.44 to<br>498.05)                               | 349.62<br>(266.27 to<br>474.42)                               | 365.77<br>(267.21 to<br>518.64)                               | 6.66<br>(6.02 to<br>7.34)                                  | 14.41<br>(10.66 to<br>20.01)                               | 14.12<br>(10.76 to<br>19.23)                             | 14.47<br>(10.45 to<br>20.35)                               |
| Prostate cancer                     | 217.63<br>(164.23 to<br>263.55)                               | 587.55<br>(455.41 to<br>717.45)                               | 598.16<br>(468.70 to<br>738.67)                               | 569.15<br>(438.49 to<br>703.00)                               | 14.05<br>(10.78 to<br>17.47)                               | 41.86<br>(33.08 to<br>53.13)                               | 43.96<br>(35.33 to<br>56.10)                             | 39.11<br>(29.86 to<br>49.43)                               |
| Testicular cancer                   | 30.56<br>(26.78 to<br>34.85)                                  | 32.19<br>(26.49 to<br>38.88)                                  | 29.61<br>(24.18 to<br>36.15)                                  | 35.75<br>(29.59 to<br>43.35)                                  | 0.64<br>(0.57 to<br>0.73)                                  | 0.77<br>(0.65 to<br>0.89)                                  | 0.71<br>(0.60 to<br>0.84)                                | 0.83<br>(0.71 to<br>0.97)                                  |
| <b>North Africa and Middle East</b> |                                                               |                                                               |                                                               |                                                               |                                                            |                                                            |                                                          |                                                            |
| Cause                               | YLLs (in 1000s)                                               |                                                               |                                                               |                                                               | Deaths (in 1000s)                                          |                                                            |                                                          |                                                            |
|                                     | 2016                                                          | 2040 Forecast                                                 | 2040 Better Scenario                                          | 2040 Worse Scenario                                           | 2016                                                       | 2040 Forecast                                              | 2040 Better Scenario                                     | 2040 Worse Scenario                                        |
| Kidney cancer                       | 120.97<br>(110.79 to<br>132.88)                               | 244.29<br>(198.92 to<br>299.34)                               | 248.74<br>(206.74 to<br>301.44)                               | 244.74<br>(195.02 to<br>306.73)                               | 4.19<br>(3.81 to<br>4.60)                                  | 10.52<br>(8.61 to<br>12.84)                                | 11.02<br>(9.17 to<br>13.37)                              | 10.13<br>(8.11 to<br>12.68)                                |
| Bladder cancer                      | 298.28<br>(271.76 to<br>327.48)                               | 566.89<br>(439.85 to<br>751.25)                               | 522.91<br>(416.53 to<br>675.56)                               | 630.05<br>(469.43 to<br>862.85)                               | 13.16<br>(12.15 to<br>14.23)                               | 28.50<br>(22.31 to<br>37.77)                               | 27.21<br>(21.85 to<br>35.03)                             | 30.46<br>(22.97 to<br>41.80)                               |
| Brain and nervous system cancer     | 624.63<br>(509.86 to<br>715.67)                               | 1,038.45<br>(843.44 to<br>1,210.76)                           | 1,027.53<br>(841.09 to<br>1,206.08)                           | 1,064.70<br>(865.35 to<br>1,236.36)                           | 16.17<br>(13.32 to<br>18.63)                               | 35.23<br>(29.48 to<br>41.07)                               | 35.76<br>(29.81 to<br>42.04)                             | 34.64<br>(28.90 to<br>40.24)                               |
| Thyroid cancer                      | 65.88<br>(60.12 to<br>71.21)                                  | 112.64<br>(80.73 to<br>155.39)                                | 98.36<br>(72.97 to<br>132.09)                                 | 128.01<br>(89.72 to<br>181.69)                                | 2.38<br>(2.20 to<br>2.68)                                  | 4.87<br>(3.56 to<br>6.89)                                  | 4.39<br>(3.28 to<br>6.04)                                | 5.35<br>(3.81 to<br>7.62)                                  |
| Mesothelioma                        | 40.09<br>(34.76 to<br>46.98)                                  | 72.36<br>(60.74 to<br>84.94)                                  | 73.94<br>(61.22 to<br>87.74)                                  | 70.60<br>(60.24 to<br>82.38)                                  | 1.46<br>(1.28 to<br>1.69)                                  | 3.12<br>(2.68 to<br>3.62)                                  | 3.29<br>(2.80 to<br>3.81)                                | 2.95<br>(2.57 to<br>3.38)                                  |
| Hodgkin lymphoma                    | 134.13<br>(97.54 to<br>153.21)                                | 135.46<br>(104.65 to<br>167.69)                               | 113.45<br>(87.56 to<br>138.86)                                | 162.99<br>(126.86 to<br>199.77)                               | 3.01<br>(2.32 to<br>3.63)                                  | 5.53<br>(2.88 to<br>4.45)                                  | 3.03<br>(2.46 to<br>3.87)                                | 4.12<br>(3.33 to<br>5.24)                                  |
| Non-Hodgkin lymphoma                | 424.49<br>(391.09 to<br>470.83)                               | 730.11<br>(588.86 to<br>913.68)                               | 700.87<br>(569.45 to<br>867.18)                               | 756.39<br>(603.36 to<br>966.52)                               | 12.77<br>(11.76 to<br>14.51)                               | 27.90<br>(22.34 to<br>35.41)                               | 27.39<br>(22.07 to<br>34.58)                             | 27.93<br>(22.12 to<br>35.78)                               |
| Multiple myeloma                    | 114.86<br>(100.10 to<br>147.88)                               | 264.31<br>(201.92 to<br>361.85)                               | 258.21<br>(199.69 to<br>357.55)                               | 267.48<br>(201.24 to<br>372.32)                               | 4.60<br>(4.00 to<br>6.08)                                  | 12.29<br>(9.42 to<br>17.26)                                | 12.26<br>(9.50 to<br>17.44)                              | 12.10<br>(9.11 to<br>17.30)                                |
| Leukemia                            | 949.53<br>(829.40 to<br>1,064.82)                             | 1,300.77<br>(1,042.43 to<br>1,627.30)                         | 1,176.24<br>(950.02 to<br>1,460.02)                           | 1,493.83<br>(1,171.12 to<br>1,907.50)                         | 23.89<br>(21.68 to<br>27.42)                               | 45.26<br>(36.21 to<br>58.43)                               | 42.12<br>(34.29 to<br>53.50)                             | 49.63<br>(38.77 to<br>65.01)                               |
| Acute lymphoid leukemia             | 192.01<br>(160.47 to<br>226.11)                               | 187.97<br>(150.06 to<br>247.46)                               | 173.80<br>(138.51 to<br>228.47)                               | 217.28<br>(170.92 to<br>291.40)                               | 3.33<br>(2.91 to<br>3.94)                                  | 4.19<br>(3.32 to<br>5.68)                                  | 3.90<br>(3.14 to<br>5.24)                                | 4.70<br>(3.64 to<br>6.54)                                  |
| Chronic lymphoid leukemia           | 33.10<br>(28.44 to<br>43.43)                                  | 59.56<br>(44.35 to<br>82.88)                                  | 55.88<br>(42.18 to<br>76.50)                                  | 65.06<br>(47.19 to<br>91.48)                                  | 1.35<br>(1.18 to<br>1.74)                                  | 2.89<br>(2.20 to<br>3.95)                                  | 2.80<br>(2.15 to<br>3.77)                                | 3.04<br>(2.26 to<br>4.23)                                  |
| Acute myeloid leukemia              | 209.27<br>(188.52 to<br>251.56)                               | 334.29<br>(263.72 to<br>445.32)                               | 322.55<br>(255.10 to<br>422.63)                               | 359.18<br>(278.27 to<br>485.28)                               | 5.07<br>(4.58 to<br>6.42)                                  | 10.80<br>(8.26 to<br>15.21)                                | 10.63<br>(8.23 to<br>14.71)                              | 11.21<br>(8.38 to<br>15.97)                                |
| Chronic myeloid leukemia            | 56.58<br>(38.95 to<br>69.92)                                  | 65.45<br>(45.07 to<br>88.39)                                  | 58.02<br>(39.05 to<br>76.54)                                  | 75.09<br>(51.32 to<br>104.57)                                 | 1.80<br>(1.27 to<br>2.13)                                  | 2.46<br>(1.71 to<br>3.24)                                  | 2.23<br>(1.53 to<br>2.89)                                | 2.76<br>(1.92 to<br>3.69)                                  |
| Other leukemia                      | 458.57<br>(394.44 to<br>519.00)                               | 653.50<br>(511.90 to<br>813.87)                               | 565.99<br>(449.51 to<br>697.09)                               | 777.21<br>(596.54 to<br>987.32)                               | 12.33<br>(10.97 to<br>14.06)                               | 24.93<br>(20.00 to<br>31.40)                               | 22.55<br>(18.38 to<br>27.80)                             | 27.93<br>(21.90 to<br>35.62)                               |
| Other neoplasms                     | 675.01<br>(626.66 to<br>740.73)                               | 1,051.73<br>(949.74 to<br>1,192.57)                           | 1,052.00<br>(934.34 to<br>1,203.54)                           | 1,070.58<br>(970.47 to<br>1,214.25)                           | 18.33<br>(17.09 to<br>20.34)                               | 37.99<br>(34.71 to<br>42.80)                               | 39.44<br>(35.59 to<br>44.79)                             | 36.58<br>(33.77 to<br>41.29)                               |
| <b>Cardiovascular diseases</b>      | <b>22,168.12</b><br><b>(21,194.94 to</b><br><b>23,323.51)</b> | <b>32,107.12</b><br><b>(20,753.65 to</b><br><b>50,265.47)</b> | <b>18,553.60</b><br><b>(12,629.29 to</b><br><b>28,634.27)</b> | <b>50,734.86</b><br><b>(32,987.32 to</b><br><b>76,611.62)</b> | <b>1,055.01</b><br><b>(1,010.30 to</b><br><b>1,105.99)</b> | <b>1,773.59</b><br><b>(1,187.29 to</b><br><b>2,672.25)</b> | <b>1,150.14</b><br><b>(797.08 to</b><br><b>1,757.84)</b> | <b>2,560.44</b><br><b>(1,723.72 to</b><br><b>3,716.46)</b> |

|                                |                                       |                                       |                                      |                                       |                              |                                  |                                |                                  |
|--------------------------------|---------------------------------------|---------------------------------------|--------------------------------------|---------------------------------------|------------------------------|----------------------------------|--------------------------------|----------------------------------|
| Rheumatic heart disease        | 314.43<br>(253.12 to 388.20)          | 220.80<br>(163.93 to 308.57)          | 176.01<br>(133.54 to 241.27)         | 280.37<br>(208.63 to 392.88)          | 8.61<br>(7.02 to 10.38)      | 7.89<br>(6.13 to 10.70)          | 6.66<br>(5.28 to 9.00)         | 9.30<br>(7.13 to 12.59)          |
| Ischemic heart disease         | 13,997.59<br>(13,277.86 to 14,746.32) | 19,991.59<br>(11,155.49 to 35,988.65) | 10,571.35<br>(6,028.71 to 18,680.79) | 33,355.96<br>(18,814.23 to 57,288.89) | 680.37<br>(647.71 to 714.32) | 1,076.67<br>(618.91 to 1,884.66) | 639.58<br>(382.33 to 1,114.29) | 1,654.06<br>(981.27 to 2,747.54) |
| Stroke                         | 5,076.47<br>(4,683.60 to 5,535.92)    | 6,658.20<br>(3,958.26 to 12,615.57)   | 3,607.05<br>(2,263.23 to 7,015.52)   | 10,876.04<br>(6,452.61 to 18,851.00)  | 238.93<br>(219.63 to 260.10) | 372.69<br>(225.00 to 803.90)     | 232.79<br>(146.15 to 504.27)   | 544.60<br>(335.25 to 1,026.76)   |
| Ischemic stroke                | 2,354.26<br>(2,152.54 to 2,581.74)    | 3,377.68<br>(1,715.28 to 8,338.73)    | 1,996.66<br>(1,077.39 to 5,011.24)   | 4,910.48<br>(2,540.46 to 11,472.91)   | 137.01<br>(125.08 to 149.19) | 226.32<br>(117.12 to 623.06)     | 151.22<br>(80.30 to 407.02)    | 301.99<br>(155.40 to 790.90)     |
| Intracerebral hemorrhage       | 2,722.22<br>(2,485.76 to 3,008.49)    | 3,280.51<br>(1,842.36 to 5,801.12)    | 1,610.39<br>(1,010.91 to 2,638.58)   | 5,965.55<br>(3,293.03 to 10,560.06)   | 101.91<br>(92.30 to 112.26)  | 146.37<br>(87.15 to 246.55)      | 81.56<br>(52.78 to 126.61)     | 242.60<br>(141.89 to 415.64)     |
| Hypertensive heart disease     | 854.24<br>(733.81 to 1,034.84)        | 1,871.61<br>(1,103.88 to 3,768.93)    | 1,379.69<br>(919.05 to 2,352.00)     | 2,314.23<br>(1,322.33 to 4,885.00)    | 48.15<br>(38.85 to 54.81)    | 126.60<br>(74.54 to 252.42)      | 100.96<br>(65.37 to 173.83)    | 147.97<br>(83.33 to 306.96)      |
| Cardiomyopathy and myocarditis | 389.21<br>(334.65 to 456.07)          | 525.01<br>(388.05 to 720.27)          | 469.03<br>(349.38 to 633.49)         | 581.49<br>(431.60 to 799.14)          | 11.35<br>(10.10 to 13.79)    | 21.82<br>(16.10 to 30.32)        | 20.19<br>(15.11 to 27.78)      | 22.74<br>(16.80 to 31.75)        |
| Myocarditis                    | 89.42<br>(70.53 to 118.33)            | 95.27<br>(75.26 to 123.77)            | 90.17<br>(70.49 to 117.99)           | 105.52<br>(82.75 to 137.61)           | 1.97<br>(1.61 to 2.51)       | 3.15<br>(2.54 to 3.98)           | 3.19<br>(2.56 to 4.00)         | 3.20<br>(2.57 to 4.00)           |

**North Africa and Middle East**

| Cause                                         | YLLs (in 1000s)                            |                                            |                                            |                                            | Deaths (in 1000s)                    |                                      |                                      |                                      |
|-----------------------------------------------|--------------------------------------------|--------------------------------------------|--------------------------------------------|--------------------------------------------|--------------------------------------|--------------------------------------|--------------------------------------|--------------------------------------|
|                                               | 2016                                       | 2040 Forecast                              | 2040 Better Scenario                       | 2040 Worse Scenario                        | 2016                                 | 2040 Forecast                        | 2040 Better Scenario                 | 2040 Worse Scenario                  |
| Alcoholic cardiomyopathy                      | 25.59<br>(15.58 to 33.19)                  | 40.87<br>(25.63 to 53.21)                  | 40.86<br>(25.52 to 53.29)                  | 41.72<br>(25.96 to 54.38)                  | 0.97<br>(0.65 to 1.28)               | 1.83<br>(1.21 to 2.41)               | 1.91<br>(1.25 to 2.48)               | 1.79<br>(1.18 to 2.39)               |
| Other cardiomyopathy                          | 274.21<br>(236.09 to 319.79)               | 388.87<br>(267.45 to 558.57)               | 337.99<br>(237.99 to 475.91)               | 434.25<br>(301.33 to 624.09)               | 8.41<br>(7.43 to 10.33)              | 16.83<br>(11.46 to 24.52)            | 15.10<br>(10.46 to 21.95)            | 17.76<br>(12.01 to 25.88)            |
| Atrial fibrillation and flutter               | 88.65<br>(70.05 to 109.07)                 | 240.84<br>(177.94 to 311.77)               | 236.70<br>(178.36 to 302.38)               | 237.92<br>(176.42 to 306.48)               | 8.41<br>(6.51 to 10.55)              | 24.28<br>(18.02 to 31.57)            | 24.97<br>(18.64 to 32.36)            | 22.88<br>(16.65 to 29.98)            |
| Aortic aneurysm                               | 122.34<br>(110.49 to 133.91)               | 204.40<br>(161.65 to 259.16)               | 185.61<br>(150.01 to 229.54)               | 220.93<br>(173.19 to 282.80)               | 5.62<br>(5.16 to 6.17)               | 11.26<br>(9.25 to 13.82)             | 10.87<br>(9.04 to 13.17)             | 11.39<br>(9.30 to 14.06)             |
| Peripheral artery disease                     | 16.02<br>(13.19 to 21.26)                  | 54.74<br>(39.54 to 83.74)                  | 51.14<br>(36.84 to 79.61)                  | 56.54<br>(40.91 to 83.21)                  | 1.14<br>(0.91 to 1.84)               | 4.63<br>(3.19 to 8.23)               | 4.58<br>(3.12 to 8.24)               | 4.44<br>(3.12 to 7.60)               |
| Endocarditis                                  | 178.25<br>(154.25 to 215.21)               | 301.59<br>(225.53 to 403.09)               | 279.90<br>(211.94 to 368.99)               | 322.36<br>(242.39 to 430.61)               | 6.67<br>(5.78 to 8.09)               | 15.60<br>(11.44 to 21.89)            | 15.31<br>(11.32 to 21.10)            | 15.47<br>(11.35 to 21.41)            |
| Other cardiovascular and circulatory diseases | 1,130.91<br>(933.61 to 1,579.02)           | 2,038.35<br>(1,468.15 to 2,860.14)         | 1,597.13<br>(1,198.98 to 2,219.60)         | 2,489.02<br>(1,789.55 to 3,536.75)         | 45.75<br>(38.13 to 64.70)            | 112.16<br>(82.63 to 159.14)          | 94.23<br>(71.19 to 133.04)           | 127.59<br>(92.75 to 181.50)          |
| <b>Chronic respiratory diseases</b>           | <b>2,411.30<br/>(2,244.03 to 2,601.89)</b> | <b>3,335.42<br/>(2,542.98 to 4,420.49)</b> | <b>2,575.68<br/>(2,014.09 to 3,322.07)</b> | <b>4,774.62<br/>(3,527.13 to 6,546.00)</b> | <b>112.96<br/>(103.69 to 121.99)</b> | <b>183.07<br/>(140.56 to 237.44)</b> | <b>151.39<br/>(119.42 to 190.68)</b> | <b>248.29<br/>(182.34 to 335.86)</b> |
| Chronic obstructive pulmonary disease         | 1,508.77<br>(1,357.51 to 1,657.07)         | 2,277.53<br>(1,549.67 to 3,285.71)         | 1,616.92<br>(1,125.25 to 2,324.58)         | 3,547.56<br>(2,389.95 to 5,215.59)         | 79.35<br>(70.88 to 86.42)            | 131.94<br>(94.11 to 183.93)          | 102.20<br>(75.61 to 140.23)          | 193.35<br>(133.54 to 273.27)         |
| Pneumoconiosis                                | 8.72<br>(7.49 to 10.10)                    | 9.31<br>(8.11 to 10.80)                    | 8.93<br>(7.70 to 10.46)                    | 10.05<br>(8.77 to 11.67)                   | 0.40<br>(0.35 to 0.46)               | 0.57<br>(0.49 to 0.68)               | 0.58<br>(0.49 to 0.69)               | 0.58<br>(0.49 to 0.70)               |
| Silicosis                                     | 2.17<br>(1.71 to 2.72)                     | 1.35<br>(1.02 to 1.80)                     | 1.13<br>(0.83 to 1.52)                     | 1.81<br>(1.38 to 2.37)                     | 0.09<br>(0.08 to 0.12)               | 0.08<br>(0.06 to 0.10)               | 0.07<br>(0.05 to 0.09)               | 0.09<br>(0.07 to 0.13)               |
| Asbestosis                                    | 1.81<br>(1.39 to 2.23)                     | 2.75<br>(2.07 to 3.40)                     | 2.95<br>(2.20 to 3.65)                     | 2.55<br>(1.89 to 3.16)                     | 0.07<br>(0.05 to 0.09)               | 0.15<br>(0.10 to 0.20)               | 0.17<br>(0.11 to 0.22)               | 0.13<br>(0.08 to 0.17)               |

|                                                                |                                                            |                                                            |                                                            |                                                            |                                                    |                                                      |                                                      |                                                      |
|----------------------------------------------------------------|------------------------------------------------------------|------------------------------------------------------------|------------------------------------------------------------|------------------------------------------------------------|----------------------------------------------------|------------------------------------------------------|------------------------------------------------------|------------------------------------------------------|
| Coal workers pneumoconiosis                                    | 0.75<br>(0.36 to<br>1.00)                                  | 0.77<br>(0.43 to<br>1.03)                                  | 0.63<br>(0.35 to<br>0.86)                                  | 1.02<br>(0.54 to<br>1.39)                                  | 0.04<br>(0.02 to<br>0.06)                          | 0.05<br>(0.03 to<br>0.07)                            | 0.05<br>(0.02 to<br>0.06)                            | 0.07<br>(0.03 to<br>0.09)                            |
| Other pneumoconiosis                                           | 3.99<br>(3.30 to<br>4.94)                                  | 4.44<br>(3.66 to<br>5.61)                                  | 4.21<br>(3.40 to<br>5.32)                                  | 4.66<br>(3.83 to<br>5.85)                                  | 0.20<br>(0.16 to<br>0.25)                          | 0.29<br>(0.23 to<br>0.38)                            | 0.30<br>(0.23 to<br>0.40)                            | 0.29<br>(0.23 to<br>0.38)                            |
| Asthma                                                         | 618.54<br>(528.01 to<br>735.84)                            | 505.37<br>(321.32 to<br>757.83)                            | 366.97<br>(235.72 to<br>534.85)                            | 703.09<br>(435.48 to<br>1,074.33)                          | 22.49<br>(19.09 to<br>26.85)                       | 23.05<br>(14.78 to<br>34.88)                         | 17.44<br>(11.24 to<br>25.89)                         | 30.15<br>(18.99 to<br>45.99)                         |
| Interstitial lung disease and pulmonary sarcoidosis            | 135.73<br>(88.56 to<br>172.18)                             | 329.35<br>(230.07 to<br>407.03)                            | 378.99<br>(267.66 to<br>466.01)                            | 279.67<br>(188.95 to<br>349.82)                            | 6.25<br>(4.27 to<br>7.74)                          | 18.37<br>(13.42 to<br>22.99)                         | 21.92<br>(16.11 to<br>27.10)                         | 14.91<br>(10.49 to<br>19.07)                         |
| Other chronic respiratory diseases                             | 139.55<br>(106.45 to<br>198.96)                            | 213.87<br>(156.07 to<br>303.57)                            | 203.88<br>(151.55 to<br>285.96)                            | 234.24<br>(167.13 to<br>340.29)                            | 4.46<br>(3.29 to<br>6.32)                          | 9.13<br>(6.53 to<br>12.86)                           | 9.25<br>(6.68 to<br>12.79)                           | 9.30<br>(6.47 to<br>13.46)                           |
| <b>Cirrhosis and other chronic liver diseases</b>              | <b>2,299.11</b><br><b>(2,048.89 to</b><br><b>2,707.23)</b> | <b>3,960.06</b><br><b>(3,528.40 to</b><br><b>4,533.13)</b> | <b>3,839.24</b><br><b>(3,404.41 to</b><br><b>4,398.89)</b> | <b>4,151.98</b><br><b>(3,683.57 to</b><br><b>4,751.00)</b> | <b>96.05</b><br><b>(85.94 to</b><br><b>109.69)</b> | <b>192.15</b><br><b>(170.01 to</b><br><b>216.20)</b> | <b>193.67</b><br><b>(171.52 to</b><br><b>217.18)</b> | <b>193.09</b><br><b>(167.26 to</b><br><b>218.99)</b> |
| Cirrhosis and other chronic liver diseases due to hepatitis B  | 557.18<br>(458.45 to<br>697.37)                            | 1,011.65<br>(833.17 to<br>1,274.87)                        | 977.87<br>(794.77 to<br>1,240.95)                          | 1,055.26<br>(866.75 to<br>1,332.03)                        | 23.24<br>(18.86 to<br>29.08)                       | 47.56<br>(38.30 to<br>59.57)                         | 47.56<br>(38.07 to<br>60.06)                         | 47.91<br>(38.35 to<br>59.52)                         |
| Cirrhosis and other chronic liver diseases due to hepatitis C  | 1,039.23<br>(852.72 to<br>1,265.31)                        | 1,886.18<br>(1,557.45 to<br>2,284.82)                      | 1,847.75<br>(1,517.46 to<br>2,238.39)                      | 1,943.78<br>(1,606.49 to<br>2,361.73)                      | 45.86<br>(37.61 to<br>55.65)                       | 93.45<br>(76.05 to<br>113.22)                        | 94.88<br>(77.31 to<br>114.24)                        | 92.94<br>(74.59 to<br>113.00)                        |
| Cirrhosis and other chronic liver diseases due to alcohol use  | 158.90<br>(132.38 to<br>195.10)                            | 269.54<br>(226.89 to<br>327.20)                            | 257.68<br>(213.90 to<br>315.44)                            | 293.12<br>(244.63 to<br>357.12)                            | 7.12<br>(5.94 to<br>8.62)                          | 13.61<br>(11.08 to<br>16.32)                         | 13.55<br>(11.14 to<br>16.19)                         | 14.19<br>(11.51 to<br>17.08)                         |
| Cirrhosis and other chronic liver diseases due to other causes | 543.81<br>(476.04 to<br>645.85)                            | 792.68<br>(679.21 to<br>934.18)                            | 755.94<br>(645.33 to<br>892.18)                            | 859.82<br>(736.45 to<br>1,020.86)                          | 19.82<br>(16.96 to<br>23.39)                       | 37.52<br>(30.93 to<br>44.65)                         | 37.68<br>(31.13 to<br>44.55)                         | 38.05<br>(31.39 to<br>45.35)                         |
| <b>Digestive diseases</b>                                      | <b>1,059.43</b><br><b>(922.25 to</b><br><b>1,184.13)</b>   | <b>1,374.19</b><br><b>(1,120.61 to</b><br><b>1,665.96)</b> | <b>1,226.22</b><br><b>(1,011.88 to</b><br><b>1,487.40)</b> | <b>1,617.23</b><br><b>(1,304.54 to</b><br><b>1,970.38)</b> | <b>37.85</b><br><b>(33.44 to</b><br><b>43.32)</b>  | <b>68.09</b><br><b>(55.42 to</b><br><b>85.78)</b>    | <b>63.99</b><br><b>(52.36 to</b><br><b>80.30)</b>    | <b>74.32</b><br><b>(59.49 to</b><br><b>94.47)</b>    |
| Peptic ulcer disease                                           | 228.77<br>(187.91 to<br>297.26)                            | 215.37<br>(164.43 to<br>306.85)                            | 168.30<br>(126.80 to<br>242.13)                            | 267.39<br>(203.95 to<br>376.28)                            | 8.79<br>(7.31 to<br>11.67)                         | 10.54<br>(8.07 to<br>14.99)                          | 8.71<br>(6.58 to<br>12.44)                           | 12.33<br>(9.26 to<br>17.36)                          |

**North Africa and Middle East**

| Cause                                      | YLLs (in 1000s)                 |                                 |                                 |                                 | Deaths (in 1000s)          |                              |                              |                              |
|--------------------------------------------|---------------------------------|---------------------------------|---------------------------------|---------------------------------|----------------------------|------------------------------|------------------------------|------------------------------|
|                                            | 2016                            | 2040 Forecast                   | 2040 Better Scenario            | 2040 Worse Scenario             | 2016                       | 2040 Forecast                | 2040 Better Scenario         | 2040 Worse Scenario          |
| Gastritis and duodenitis                   | 10.25<br>(8.31 to<br>12.50)     | 17.37<br>(13.98 to<br>21.51)    | 15.28<br>(12.09 to<br>19.17)    | 19.08<br>(15.33 to<br>23.58)    | 0.41<br>(0.35 to<br>0.50)  | 0.94<br>(0.76 to<br>1.17)    | 0.87<br>(0.68 to<br>1.10)    | 0.98<br>(0.78 to<br>1.23)    |
| Appendicitis                               | 76.42<br>(55.57 to<br>101.55)   | 79.99<br>(59.10 to<br>108.62)   | 67.54<br>(50.01 to<br>93.32)    | 97.86<br>(71.91 to<br>131.18)   | 2.03<br>(1.55 to<br>2.80)  | 3.02<br>(2.32 to<br>4.42)    | 2.69<br>(2.04 to<br>4.04)    | 3.39<br>(2.61 to<br>4.82)    |
| Paralytic ileus and intestinal obstruction | 282.12<br>(231.41 to<br>354.64) | 339.96<br>(276.14 to<br>466.06) | 336.09<br>(271.56 to<br>462.16) | 370.79<br>(294.97 to<br>509.20) | 8.45<br>(6.97 to<br>12.06) | 16.57<br>(12.97 to<br>25.93) | 17.44<br>(13.66 to<br>26.90) | 16.08<br>(12.47 to<br>21.86) |
| Inguinal, femoral, and abdominal hernia    | 23.33<br>(18.72 to<br>32.01)    | 27.52<br>(20.83 to<br>38.89)    | 26.11<br>(19.48 to<br>36.34)    | 29.68<br>(22.68 to<br>42.30)    | 1.10<br>(0.83 to<br>1.58)  | 1.71<br>(1.23 to<br>2.51)    | 1.71<br>(1.23 to<br>2.53)    | 1.73<br>(1.23 to<br>2.55)    |
| Inflammatory bowel disease                 | 43.43<br>(36.30 to<br>57.77)    | 59.36<br>(48.30 to<br>81.62)    | 58.87<br>(47.39 to<br>80.33)    | 60.62<br>(49.37 to<br>83.70)    | 1.32<br>(1.12 to<br>1.75)  | 2.55<br>(2.15 to<br>3.35)    | 2.65<br>(2.20 to<br>3.48)    | 2.45<br>(2.07 to<br>3.26)    |
| Vascular intestinal disorders              | 57.65<br>(47.82 to<br>70.60)    | 112.00<br>(91.16 to<br>136.35)  | 109.45<br>(87.47 to<br>134.24)  | 115.24<br>(95.15 to<br>142.05)  | 2.71<br>(2.21 to<br>3.34)  | 6.43<br>(5.12 to<br>7.96)    | 6.53<br>(5.11 to<br>8.07)    | 6.32<br>(5.09 to<br>7.98)    |
| Gallbladder and biliary diseases           | 141.66<br>(95.71 to<br>172.28)  | 238.08<br>(120.20 to<br>399.69) | 186.84<br>(96.71 to<br>313.05)  | 325.67<br>(161.29 to<br>551.27) | 6.05<br>(4.45 to<br>7.08)  | 12.81<br>(6.83 to<br>21.56)  | 10.44<br>(5.79 to<br>17.44)  | 16.37<br>(8.62 to<br>27.38)  |
| Pancreatitis                               | 84.97<br>(64.55 to<br>100.14)   | 137.08<br>(95.46 to<br>182.80)  | 121.47<br>(81.96 to<br>160.34)  | 163.70<br>(113.37 to<br>226.53) | 3.18<br>(2.30 to<br>3.79)  | 6.33<br>(4.17 to<br>8.41)    | 5.83<br>(3.78 to<br>7.73)    | 7.23<br>(4.73 to<br>9.86)    |

|                                                     |                                                            |                                                            |                                                            |                                                            |                                                      |                                                      |                                                      |                                                      |
|-----------------------------------------------------|------------------------------------------------------------|------------------------------------------------------------|------------------------------------------------------------|------------------------------------------------------------|------------------------------------------------------|------------------------------------------------------|------------------------------------------------------|------------------------------------------------------|
| Other digestive diseases                            | 110.83<br>(88.62 to<br>135.65)                             | 147.46<br>(118.68 to<br>183.86)                            | 136.36<br>(108.68 to<br>170.55)                            | 167.22<br>(132.66 to<br>210.69)                            | 3.82<br>(3.11 to<br>4.84)                            | 7.20<br>(5.72 to<br>9.42)                            | 7.11<br>(5.61 to<br>9.47)                            | 7.45<br>(5.86 to<br>9.73)                            |
| <b>Neurological disorders</b>                       | <b>2,038.14</b><br><b>(1,828.96 to</b><br><b>2,305.56)</b> | <b>5,064.85</b><br><b>(3,807.67 to</b><br><b>7,091.75)</b> | <b>4,961.77</b><br><b>(3,835.13 to</b><br><b>6,660.04)</b> | <b>5,104.23</b><br><b>(3,762.02 to</b><br><b>7,178.36)</b> | <b>141.93</b><br><b>(123.39 to</b><br><b>164.07)</b> | <b>434.62</b><br><b>(316.53 to</b><br><b>623.66)</b> | <b>443.22</b><br><b>(334.86 to</b><br><b>609.08)</b> | <b>412.44</b><br><b>(289.62 to</b><br><b>612.25)</b> |
| Alzheimer's disease and other dementias             | 1,304.13<br>(1,105.19 to<br>1,549.80)                      | 3,941.28<br>(2,730.29 to<br>5,917.94)                      | 3,836.36<br>(2,720.74 to<br>5,460.53)                      | 3,927.99<br>(2,611.28 to<br>6,047.45)                      | 120.09<br>(102.17 to<br>141.72)                      | 382.56<br>(265.12 to<br>568.03)                      | 386.34<br>(278.27 to<br>549.22)                      | 364.63<br>(243.89 to<br>565.57)                      |
| Parkinson's disease                                 | 119.55<br>(92.77 to<br>151.52)                             | 381.91<br>(296.64 to<br>488.01)                            | 433.19<br>(336.83 to<br>548.86)                            | 325.98<br>(247.90 to<br>412.19)                            | 9.47<br>(7.35 to<br>12.24)                           | 32.59<br>(24.97 to<br>41.81)                         | 37.96<br>(29.18 to<br>48.86)                         | 26.91<br>(20.01 to<br>34.94)                         |
| Epilepsy                                            | 392.30<br>(339.72 to<br>434.81)                            | 424.83<br>(353.37 to<br>497.83)                            | 369.78<br>(305.04 to<br>454.69)                            | 530.16<br>(438.63 to<br>637.50)                            | 7.36<br>(6.40 to<br>8.17)                            | 10.07<br>(8.39 to<br>11.66)                          | 9.12<br>(7.54 to<br>10.64)                           | 11.86<br>(9.91 to<br>13.78)                          |
| Multiple sclerosis                                  | 35.19<br>(29.54 to<br>44.65)                               | 53.57<br>(42.14 to<br>70.82)                               | 54.04<br>(42.68 to<br>71.01)                               | 52.65<br>(41.58 to<br>69.62)                               | 0.94<br>(0.80 to<br>1.16)                            | 1.63<br>(1.33 to<br>2.05)                            | 1.68<br>(1.36 to<br>2.10)                            | 1.58<br>(1.29 to<br>1.99)                            |
| Motor neuron disease                                | 42.70<br>(35.66 to<br>48.36)                               | 70.99<br>(58.14 to<br>82.56)                               | 72.28<br>(58.80 to<br>84.66)                               | 69.84<br>(57.12 to<br>80.48)                               | 1.14<br>(0.96 to<br>1.28)                            | 2.41<br>(2.05 to<br>2.77)                            | 2.49<br>(2.10 to<br>2.87)                            | 2.32<br>(1.97 to<br>2.63)                            |
| Other neurological disorders                        | 144.27<br>(130.12 to<br>159.41)                            | 192.28<br>(170.49 to<br>214.91)                            | 196.12<br>(173.58 to<br>220.58)                            | 197.62<br>(173.27 to<br>225.15)                            | 2.93<br>(2.69 to<br>3.18)                            | 5.35<br>(4.90 to<br>5.83)                            | 5.63<br>(5.11 to<br>6.18)                            | 5.15<br>(4.72 to<br>5.61)                            |
| <b>Mental disorders</b>                             | <b>366.78</b><br><b>(277.38 to</b><br><b>428.78)</b>       | <b>735.28</b><br><b>(561.36 to</b><br><b>881.84)</b>       | <b>787.89</b><br><b>(610.40 to</b><br><b>949.31)</b>       | <b>708.09</b><br><b>(544.81 to</b><br><b>841.04)</b>       | <b>8.20</b><br><b>(6.37 to</b><br><b>9.43)</b>       | <b>19.33</b><br><b>(15.47 to</b><br><b>22.49)</b>    | <b>21.33</b><br><b>(17.43 to</b><br><b>24.85)</b>    | <b>17.95</b><br><b>(14.37 to</b><br><b>20.77)</b>    |
| Alcohol use disorders                               | 57.38<br>(44.92 to<br>78.42)                               | 79.10<br>(58.86 to<br>121.95)                              | 79.80<br>(59.39 to<br>121.64)                              | 79.58<br>(59.18 to<br>122.79)                              | 1.47<br>(1.15 to<br>1.99)                            | 2.31<br>(1.74 to<br>3.35)                            | 2.39<br>(1.80 to<br>3.40)                            | 2.27<br>(1.72 to<br>3.30)                            |
| Drug use disorders                                  | 308.31<br>(219.30 to<br>365.02)                            | 654.69<br>(482.54 to<br>797.06)                            | 706.58<br>(527.30 to<br>859.75)                            | 627.02<br>(460.27 to<br>754.72)                            | 6.71<br>(4.95 to<br>7.85)                            | 16.99<br>(13.22 to<br>19.91)                         | 18.91<br>(14.97 to<br>22.13)                         | 15.66<br>(12.23 to<br>18.25)                         |
| Opioid use disorders                                | 242.27<br>(172.26 to<br>288.27)                            | 480.66<br>(350.68 to<br>588.08)                            | 493.42<br>(370.07 to<br>605.98)                            | 474.50<br>(345.69 to<br>580.44)                            | 5.11<br>(3.79 to<br>6.03)                            | 11.58<br>(8.93 to<br>13.89)                          | 12.15<br>(9.50 to<br>14.61)                          | 11.16<br>(8.52 to<br>13.36)                          |
| Cocaine use disorders                               | 11.09<br>(6.70 to<br>14.94)                                | 29.23<br>(19.02 to<br>39.48)                               | 33.31<br>(21.89 to<br>44.92)                               | 27.16<br>(17.90 to<br>36.35)                               | 0.25<br>(0.16 to<br>0.33)                            | 0.77<br>(0.51 to<br>1.04)                            | 0.89<br>(0.60 to<br>1.20)                            | 0.70<br>(0.48 to<br>0.94)                            |
| Amphetamine use disorders                           | 6.50<br>(3.93 to<br>8.92)                                  | 23.65<br>(14.66 to<br>32.64)                               | 29.64<br>(18.05 to<br>39.83)                               | 20.75<br>(13.03 to<br>28.73)                               | 0.14<br>(0.09 to<br>0.19)                            | 0.59<br>(0.37 to<br>0.80)                            | 0.74<br>(0.47 to<br>1.01)                            | 0.50<br>(0.33 to<br>0.70)                            |
| Other drug use disorders                            | 48.34<br>(27.00 to<br>60.00)                               | 121.15<br>(76.61 to<br>155.04)                             | 150.20<br>(92.65 to<br>193.24)                             | 104.62<br>(64.80 to<br>131.65)                             | 1.21<br>(0.75 to<br>1.45)                            | 4.05<br>(2.81 to<br>4.89)                            | 5.12<br>(3.57 to<br>6.20)                            | 3.29<br>(2.32 to<br>3.91)                            |
| Eating disorders                                    | 1.08<br>(0.85 to<br>1.42)                                  | 1.48<br>(1.12 to<br>1.97)                                  | 1.51<br>(1.14 to<br>2.06)                                  | 1.48<br>(1.12 to<br>1.94)                                  | 0.02<br>(0.02 to<br>0.03)                            | 0.03<br>(0.02 to<br>0.04)                            | 0.03<br>(0.02 to<br>0.04)                            | 0.03<br>(0.02 to<br>0.04)                            |
| <b>North Africa and Middle East</b>                 |                                                            |                                                            |                                                            |                                                            |                                                      |                                                      |                                                      |                                                      |
| Cause                                               | YLLs (in 1000s)                                            |                                                            |                                                            |                                                            | Deaths (in 1000s)                                    |                                                      |                                                      |                                                      |
|                                                     | 2016                                                       | 2040 Forecast                                              | 2040 Better Scenario                                       | 2040 Worse Scenario                                        | 2016                                                 | 2040 Forecast                                        | 2040 Better Scenario                                 | 2040 Worse Scenario                                  |
| Diabetes, urogenital, blood, and endocrine diseases | 5,742.80<br>(5,436.71 to<br>6,164.01)                      | 12,845.70<br>(7,574.26 to<br>23,703.60)                    | 9,625.16<br>(5,944.67 to<br>18,830.52)                     | 16,001.46<br>(9,660.01 to<br>27,912.58)                    | 236.40<br>(223.81 to<br>252.80)                      | 686.32<br>(389.39 to<br>1,279.74)                    | 539.17<br>(316.31 to<br>1,092.87)                    | 813.58<br>(472.83 to<br>1,435.58)                    |
| Diabetes mellitus                                   | 2,439.28<br>(2,294.50 to<br>2,599.26)                      | 4,076.38<br>(2,909.20 to<br>5,635.47)                      | 3,203.51<br>(2,307.63 to<br>4,413.73)                      | 5,316.16<br>(3,756.56 to<br>7,283.19)                      | 112.43<br>(105.96 to<br>119.32)                      | 221.84<br>(161.50 to<br>292.70)                      | 184.60<br>(137.61 to<br>238.34)                      | 274.11<br>(196.10 to<br>363.28)                      |
| Acute glomerulonephritis                            | 26.11<br>(20.58 to<br>34.54)                               | 24.60<br>(19.22 to<br>31.29)                               | 20.71<br>(15.81 to<br>26.66)                               | 27.18<br>(21.34 to<br>34.50)                               | 0.67<br>(0.56 to<br>0.83)                            | 0.87<br>(0.68 to<br>1.10)                            | 0.77<br>(0.58 to<br>1.01)                            | 0.92<br>(0.73 to<br>1.16)                            |
| Chronic kidney disease                              | 2,200.66<br>(2,022.44 to<br>2,525.60)                      | 7,341.74<br>(2,121.41 to<br>18,694.04)                     | 5,079.19<br>(1,573.31 to<br>14,444.74)                     | 9,087.10<br>(2,709.13 to<br>21,626.71)                     | 95.15<br>(87.14 to<br>112.12)                        | 406.12<br>(106.31 to<br>1,042.28)                    | 296.51<br>(80.57 to<br>873.83)                       | 480.07<br>(128.99 to<br>1,130.39)                    |

|                                                            |                                   |                                     |                                     |                                        |                              |                                |                                |                                |
|------------------------------------------------------------|-----------------------------------|-------------------------------------|-------------------------------------|----------------------------------------|------------------------------|--------------------------------|--------------------------------|--------------------------------|
| Chronic kidney disease due to diabetes mellitus            | 895.19<br>(773.21 to<br>1,040.45) | 3,485.27<br>(922.20 to<br>9,102.93) | 2,379.86<br>(671.27 to<br>7,156.19) | 4,321.89<br>(1,170.54 to<br>10,576.19) | 39.07<br>(33.94 to<br>45.90) | 176.90<br>(43.33 to<br>452.45) | 126.33<br>(32.36 to<br>373.74) | 212.45<br>(54.26 to<br>508.04) |
| Chronic kidney disease due to hypertension                 | 332.08<br>(283.48 to<br>390.72)   | 1,392.95<br>(334.86 to<br>3,670.83) | 1,014.05<br>(260.06 to<br>3,095.03) | 1,641.22<br>(406.25 to<br>4,048.56)    | 21.72<br>(18.61 to<br>25.86) | 105.89<br>(25.90 to<br>265.01) | 82.28<br>(21.19 to<br>237.55)  | 118.84<br>(30.08 to<br>287.22) |
| Chronic kidney disease due to glomerulonephritis           | 315.42<br>(265.75 to<br>370.39)   | 701.21<br>(268.03 to<br>1,666.32)   | 477.00<br>(196.48 to<br>1,256.81)   | 900.25<br>(360.55 to<br>2,040.11)      | 9.82<br>(8.20 to<br>11.82)   | 31.68<br>(9.30 to<br>81.58)    | 22.18<br>(6.74 to<br>64.27)    | 38.80<br>(12.01 to<br>94.53)   |
| Chronic kidney disease due to other and unspecified causes | 657.96<br>(564.70 to<br>779.49)   | 1,762.30<br>(566.59 to<br>4,250.25) | 1,208.28<br>(412.41 to<br>3,330.79) | 2,223.74<br>(745.73 to<br>4,998.77)    | 24.54<br>(20.76 to<br>29.75) | 91.65<br>(24.26 to<br>227.76)  | 65.72<br>(18.04 to<br>192.70)  | 109.98<br>(30.41 to<br>256.78) |
| Urinary diseases and male infertility                      | 167.27<br>(151.88 to<br>186.43)   | 320.72<br>(283.13 to<br>361.17)     | 304.61<br>(265.00 to<br>347.20)     | 340.12<br>(303.81 to<br>380.50)        | 7.29<br>(6.74 to<br>8.03)    | 20.79<br>(18.52 to<br>23.33)   | 20.76<br>(18.36 to<br>23.58)   | 20.57<br>(18.13 to<br>23.10)   |
| Urinary tract infections                                   | 106.64<br>(91.72 to<br>121.78)    | 254.26<br>(222.52 to<br>287.22)     | 248.74<br>(214.55 to<br>285.21)     | 262.57<br>(229.61 to<br>295.38)        | 4.99<br>(4.35 to<br>5.57)    | 17.11<br>(14.94 to<br>19.23)   | 17.49<br>(15.24 to<br>19.92)   | 16.60<br>(14.41 to<br>18.66)   |
| Urolithiasis                                               | 6.68<br>(5.62 to<br>7.79)         | 11.65<br>(9.27 to<br>14.06)         | 10.27<br>(8.18 to<br>12.57)         | 12.96<br>(10.44 to<br>15.40)           | 0.25<br>(0.19 to<br>0.29)    | 0.56<br>(0.41 to<br>0.68)      | 0.51<br>(0.37 to<br>0.63)      | 0.60<br>(0.45 to<br>0.73)      |
| Other urinary diseases                                     | 53.95<br>(43.81 to<br>67.69)      | 54.82<br>(42.37 to<br>70.73)        | 45.60<br>(34.64 to<br>60.24)        | 64.78<br>(50.83 to<br>83.43)           | 2.05<br>(1.70 to<br>2.54)    | 3.12<br>(2.34 to<br>4.11)      | 2.76<br>(2.04 to<br>3.77)      | 3.37<br>(2.55 to<br>4.39)      |
| Gynecological diseases                                     | 7.48<br>(5.87 to<br>9.17)         | 8.84<br>(6.45 to<br>11.52)          | 7.35<br>(5.22 to<br>9.81)           | 10.94<br>(8.13 to<br>14.20)            | 0.17<br>(0.14 to<br>0.21)    | 0.22<br>(0.16 to<br>0.27)      | 0.18<br>(0.13 to<br>0.23)      | 0.27<br>(0.20 to<br>0.34)      |
| Uterine fibroids                                           | 0.46<br>(0.23 to<br>0.76)         | 0.48<br>(0.23 to<br>0.87)           | 0.39<br>(0.18 to<br>0.73)           | 0.60<br>(0.29 to<br>1.07)              | 0.01<br>(0.01 to<br>0.02)    | 0.02<br>(0.01 to<br>0.03)      | 0.01<br>(0.01 to<br>0.02)      | 0.02<br>(0.01 to<br>0.03)      |
| Polycystic ovarian syndrome                                | 1.14<br>(0.49 to<br>2.16)         | 0.87<br>(0.29 to<br>2.00)           | 0.63<br>(0.20 to<br>1.45)           | 1.20<br>(0.41 to<br>2.58)              | 0.02<br>(0.01 to<br>0.05)    | 0.02<br>(0.01 to<br>0.04)      | 0.01<br>(0.00 to<br>0.03)      | 0.03<br>(0.01 to<br>0.06)      |
| Endometriosis                                              | 0.07<br>(0.03 to<br>0.15)         | 0.11<br>(0.05 to<br>0.24)           | 0.09<br>(0.04 to<br>0.20)           | 0.13<br>(0.06 to<br>0.29)              | 0.00<br>(0.00 to<br>0.00)    | 0.00<br>(0.00 to<br>0.01)      | 0.00<br>(0.00 to<br>0.00)      | 0.00<br>(0.00 to<br>0.01)      |
| Genital prolapse                                           | 0.14<br>(0.07 to<br>0.29)         | 0.15<br>(0.06 to<br>0.33)           | 0.12<br>(0.05 to<br>0.27)           | 0.19<br>(0.08 to<br>0.44)              | 0.01<br>(0.00 to<br>0.01)    | 0.01<br>(0.00 to<br>0.01)      | 0.00<br>(0.00 to<br>0.01)      | 0.01<br>(0.00 to<br>0.02)      |
| Other gynecological diseases                               | 5.66<br>(3.95 to<br>7.43)         | 7.23<br>(4.95 to<br>9.80)           | 6.13<br>(4.10 to<br>8.39)           | 8.82<br>(6.02 to<br>11.76)             | 0.13<br>(0.09 to<br>0.17)    | 0.17<br>(0.12 to<br>0.23)      | 0.15<br>(0.10 to<br>0.20)      | 0.21<br>(0.15 to<br>0.28)      |
| Hemoglobinopathies and hemolytic anemias                   | 341.01<br>(267.92 to<br>505.37)   | 367.17<br>(280.52 to<br>541.23)     | 320.32<br>(244.36 to<br>468.45)     | 440.71<br>(331.20 to<br>665.25)        | 6.70<br>(5.51 to<br>9.50)    | 9.73<br>(7.86 to<br>13.52)     | 8.69<br>(6.95 to<br>12.00)     | 11.13<br>(8.87 to<br>15.68)    |
| Thalassemias                                               | 62.48<br>(43.51 to<br>110.47)     | 27.23<br>(16.02 to<br>50.79)        | 27.74<br>(16.36 to<br>51.74)        | 32.78<br>(18.39 to<br>62.88)           | 0.76<br>(0.54 to<br>1.34)    | 0.34<br>(0.20 to<br>0.63)      | 0.35<br>(0.21 to<br>0.64)      | 0.41<br>(0.23 to<br>0.78)      |
| Sickle cell disorders                                      | 200.15<br>(149.76 to<br>303.30)   | 234.37<br>(168.49 to<br>359.26)     | 202.54<br>(145.47 to<br>310.35)     | 284.06<br>(202.59 to<br>443.66)        | 3.27<br>(2.47 to<br>4.85)    | 4.71<br>(3.47 to<br>7.00)      | 4.13<br>(3.05 to<br>6.10)      | 5.55<br>(4.13 to<br>8.38)      |
| G6PD deficiency                                            | 47.63<br>(36.93 to<br>68.31)      | 66.61<br>(48.44 to<br>99.39)        | 54.91<br>(40.10 to<br>82.49)        | 80.73<br>(58.86 to<br>121.06)          | 1.06<br>(0.83 to<br>1.50)    | 1.94<br>(1.48 to<br>2.82)      | 1.64<br>(1.24 to<br>2.39)      | 2.28<br>(1.74 to<br>3.34)      |
| Other hemoglobinopathies and hemolytic anemias             | 30.75<br>(25.44 to<br>42.33)      | 38.96<br>(31.47 to<br>54.34)        | 35.12<br>(28.01 to<br>48.78)        | 43.14<br>(34.88 to<br>60.20)           | 1.61<br>(1.37 to<br>2.20)    | 2.73<br>(2.20 to<br>3.73)      | 2.57<br>(2.09 to<br>3.50)      | 2.89<br>(2.31 to<br>3.94)      |
| Endocrine, metabolic, blood, and immune disorders          | 560.99<br>(423.63 to<br>649.58)   | 706.27<br>(532.77 to<br>829.10)     | 689.47<br>(519.39 to<br>819.83)     | 779.25<br>(589.62 to<br>916.65)        | 13.98<br>(10.97 to<br>15.73) | 26.76<br>(21.14 to<br>30.67)   | 27.66<br>(21.88 to<br>32.21)   | 26.52<br>(20.97 to<br>30.29)   |

**North Africa and Middle East**

| Cause | YLLs (in 1000s) |               |                      |                     | Deaths (in 1000s) |               |                      |                     |
|-------|-----------------|---------------|----------------------|---------------------|-------------------|---------------|----------------------|---------------------|
|       | 2016            | 2040 Forecast | 2040 Better Scenario | 2040 Worse Scenario | 2016              | 2040 Forecast | 2040 Better Scenario | 2040 Worse Scenario |

|                                               |                                                               |                                                               |                                                               |                                                               |                                                      |                                                      |                                                      |                                                      |
|-----------------------------------------------|---------------------------------------------------------------|---------------------------------------------------------------|---------------------------------------------------------------|---------------------------------------------------------------|------------------------------------------------------|------------------------------------------------------|------------------------------------------------------|------------------------------------------------------|
|                                               | 118.49<br>(98.58 to<br>141.32)                                | 206.65<br>(154.48 to<br>238.64)                               | 202.45<br>(151.86 to<br>237.10)                               | 214.03<br>(161.78 to<br>245.39)                               | 3.19<br>(2.48 to<br>3.59)                            | 7.67<br>(5.36 to<br>8.84)                            | 7.63<br>(5.32 to<br>8.87)                            | 7.75<br>(5.40 to<br>8.88)                            |
| <b>Musculoskeletal disorders</b>              |                                                               |                                                               |                                                               |                                                               |                                                      |                                                      |                                                      |                                                      |
| Rheumatoid arthritis                          | 15.76<br>(11.84 to<br>21.38)                                  | 29.44<br>(21.01 to<br>39.19)                                  | 24.42<br>(17.35 to<br>33.21)                                  | 37.19<br>(26.50 to<br>48.53)                                  | 0.56<br>(0.38 to<br>0.73)                            | 1.45<br>(0.95 to<br>1.90)                            | 1.24<br>(0.81 to<br>1.64)                            | 1.76<br>(1.18 to<br>2.29)                            |
| Other musculoskeletal disorders               | 102.73<br>(84.76 to<br>126.38)                                | 177.20<br>(130.47 to<br>206.00)                               | 178.03<br>(131.82 to<br>208.88)                               | 176.84<br>(130.84 to<br>205.42)                               | 2.63<br>(2.03 to<br>2.96)                            | 6.22<br>(4.24 to<br>7.20)                            | 6.39<br>(4.39 to<br>7.43)                            | 5.98<br>(4.06 to<br>6.87)                            |
| <b>Other non-communicable diseases</b>        | <b>7,141.43</b><br><b>(5,613.35 to</b><br><b>8,605.13)</b>    | <b>4,825.43</b><br><b>(3,502.86 to</b><br><b>6,468.92)</b>    | <b>3,950.43</b><br><b>(2,833.18 to</b><br><b>5,309.87)</b>    | <b>7,835.47</b><br><b>(5,315.60 to</b><br><b>10,896.59)</b>   | <b>88.80</b><br><b>(70.13 to</b><br><b>106.51)</b>   | <b>74.15</b><br><b>(57.18 to</b><br><b>93.86)</b>    | <b>63.90</b><br><b>(49.38 to</b><br><b>80.50)</b>    | <b>109.10</b><br><b>(78.46 to</b><br><b>145.76)</b>  |
| Congenital birth defects                      | 6,808.62<br>(5,308.14 to<br>8,221.05)                         | 4,415.53<br>(3,124.35 to<br>5,961.84)                         | 3,567.63<br>(2,491.70 to<br>4,821.81)                         | 7,305.00<br>(4,833.54 to<br>10,269.49)                        | 81.66<br>(63.97 to<br>98.13)                         | 55.18<br>(39.86 to<br>73.19)                         | 44.83<br>(31.89 to<br>59.58)                         | 89.41<br>(60.20 to<br>124.17)                        |
| Neural tube defects                           | 414.14<br>(240.55 to<br>689.81)                               | 143.01<br>(64.39 to<br>274.49)                                | 103.67<br>(46.58 to<br>199.22)                                | 298.35<br>(129.26 to<br>581.08)                               | 4.88<br>(2.86 to<br>8.09)                            | 1.74<br>(0.81 to<br>3.30)                            | 1.26<br>(0.58 to<br>2.37)                            | 3.57<br>(1.58 to<br>6.88)                            |
| Congenital heart anomalies                    | 2,969.20<br>(2,388.30 to<br>3,744.52)                         | 1,871.54<br>(1,366.20 to<br>2,547.56)                         | 1,493.72<br>(1,070.36 to<br>2,055.94)                         | 3,084.32<br>(2,160.36 to<br>4,367.08)                         | 35.72<br>(28.94 to<br>44.90)                         | 23.43<br>(17.47 to<br>31.49)                         | 18.78<br>(13.86 to<br>25.36)                         | 37.85<br>(26.88 to<br>52.89)                         |
| Orofacial clefts                              | 15.55<br>(8.72 to<br>32.31)                                   | 5.10<br>(2.52 to<br>11.41)                                    | 3.29<br>(1.61 to<br>7.45)                                     | 9.72<br>(4.66 to<br>22.46)                                    | 0.18<br>(0.10 to<br>0.37)                            | 0.06<br>(0.03 to<br>0.13)                            | 0.04<br>(0.02 to<br>0.09)                            | 0.11<br>(0.05 to<br>0.26)                            |
| Down syndrome                                 | 210.00<br>(160.86 to<br>292.38)                               | 165.23<br>(113.23 to<br>257.74)                               | 145.99<br>(102.44 to<br>224.88)                               | 244.70<br>(153.08 to<br>432.59)                               | 2.64<br>(2.04 to<br>3.64)                            | 2.28<br>(1.63 to<br>3.49)                            | 2.04<br>(1.48 to<br>3.06)                            | 3.24<br>(2.10 to<br>5.48)                            |
| Other chromosomal abnormalities               | 200.86<br>(138.60 to<br>410.87)                               | 186.95<br>(121.27 to<br>395.35)                               | 151.83<br>(97.58 to<br>323.38)                                | 279.20<br>(173.68 to<br>615.21)                               | 2.38<br>(1.65 to<br>4.83)                            | 2.28<br>(1.50 to<br>4.75)                            | 1.86<br>(1.21 to<br>3.91)                            | 3.37<br>(2.13 to<br>7.36)                            |
| Congenital musculoskeletal and limb anomalies | 161.07<br>(109.99 to<br>280.41)                               | 115.72<br>(67.37 to<br>244.59)                                | 95.62<br>(53.85 to<br>212.00)                                 | 185.11<br>(98.70 to<br>414.90)                                | 1.93<br>(1.33 to<br>3.36)                            | 1.43<br>(0.84 to<br>2.97)                            | 1.18<br>(0.68 to<br>2.58)                            | 2.25<br>(1.22 to<br>4.99)                            |
| Urogenital congenital anomalies               | 246.62<br>(171.40 to<br>331.10)                               | 158.51<br>(103.54 to<br>221.89)                               | 129.64<br>(82.14 to<br>182.45)                                | 250.51<br>(151.77 to<br>360.68)                               | 3.05<br>(2.14 to<br>4.05)                            | 2.21<br>(1.48 to<br>2.99)                            | 1.84<br>(1.22 to<br>2.49)                            | 3.31<br>(2.07 to<br>4.67)                            |
| Digestive congenital anomalies                | 301.08<br>(108.21 to<br>476.94)                               | 185.96<br>(58.07 to<br>333.42)                                | 145.09<br>(46.06 to<br>279.51)                                | 328.93<br>(101.41 to<br>622.73)                               | 3.52<br>(1.27 to<br>5.58)                            | 2.20<br>(0.70 to<br>3.93)                            | 1.72<br>(0.55 to<br>3.30)                            | 3.87<br>(1.21 to<br>7.33)                            |
| Other congenital birth defects                | 2,290.10<br>(1,542.47 to<br>3,143.84)                         | 1,583.52<br>(894.40 to<br>2,454.35)                           | 1,298.79<br>(725.62 to<br>2,028.68)                           | 2,624.15<br>(1,382.42 to<br>4,327.65)                         | 27.35<br>(18.38 to<br>37.43)                         | 19.56<br>(11.22 to<br>30.02)                         | 16.10<br>(9.12 to<br>24.84)                          | 31.85<br>(17.05 to<br>52.05)                         |
| Skin and subcutaneous diseases                | 81.44<br>(43.06 to<br>106.34)                                 | 251.63<br>(142.29 to<br>335.87)                               | 245.85<br>(138.18 to<br>334.09)                               | 258.68<br>(143.72 to<br>340.25)                               | 4.22<br>(2.41 to<br>5.95)                            | 17.14<br>(10.10 to<br>24.16)                         | 17.48<br>(10.39 to<br>24.64)                         | 16.54<br>(9.70 to<br>23.09)                          |
| Cellulitis                                    | 8.37<br>(4.29 to<br>12.77)                                    | 31.20<br>(17.01 to<br>51.86)                                  | 31.90<br>(17.80 to<br>53.12)                                  | 30.20<br>(15.81 to<br>49.75)                                  | 0.36<br>(0.20 to<br>0.65)                            | 1.85<br>(1.08 to<br>3.45)                            | 1.97<br>(1.16 to<br>3.66)                            | 1.69<br>(0.96 to<br>3.08)                            |
| Pyoderma                                      | 39.06<br>(19.86 to<br>52.48)                                  | 129.98<br>(74.29 to<br>180.49)                                | 125.85<br>(73.30 to<br>177.45)                                | 135.79<br>(76.21 to<br>187.93)                                | 1.70<br>(1.00 to<br>2.64)                            | 8.26<br>(5.90 to<br>12.60)                           | 8.42<br>(5.12 to<br>12.80)                           | 8.00<br>(4.78 to<br>12.13)                           |
| Decubitus ulcer                               | 29.98<br>(15.13 to<br>38.75)                                  | 83.28<br>(39.45 to<br>111.23)                                 | 81.21<br>(37.65 to<br>109.27)                                 | 85.12<br>(40.64 to<br>114.23)                                 | 2.03<br>(1.02 to<br>2.66)                            | 6.71<br>(3.13 to<br>8.98)                            | 6.77<br>(3.14 to<br>8.95)                            | 6.54<br>(3.12 to<br>8.79)                            |
| Other skin and subcutaneous diseases          | 4.04<br>(2.17 to<br>5.67)                                     | 7.17<br>(4.04 to<br>10.50)                                    | 6.89<br>(3.87 to<br>9.96)                                     | 7.57<br>(4.24 to<br>10.87)                                    | 0.12<br>(0.07 to<br>0.20)                            | 0.32<br>(0.20 to<br>0.52)                            | 0.32<br>(0.20 to<br>0.52)                            | 0.31<br>(0.20 to<br>0.51)                            |
| Sudden infant death syndrome                  | 251.37<br>(169.40 to<br>363.64)                               | 158.27<br>(85.50 to<br>258.56)                                | 136.94<br>(73.05 to<br>225.52)                                | 271.79<br>(141.76 to<br>447.60)                               | 2.92<br>(1.97 to<br>4.22)                            | 1.84<br>(0.99 to<br>3.00)                            | 1.59<br>(0.85 to<br>2.62)                            | 3.15<br>(1.64 to<br>5.19)                            |
| <b>Injuries</b>                               | <b>23,134.81</b><br><b>(20,111.85 to</b><br><b>26,460.88)</b> | <b>15,968.19</b><br><b>(14,069.74 to</b><br><b>19,112.24)</b> | <b>12,258.03</b><br><b>(10,671.90 to</b><br><b>15,228.82)</b> | <b>20,587.94</b><br><b>(18,230.19 to</b><br><b>23,954.95)</b> | <b>426.23</b><br><b>(375.20 to</b><br><b>481.12)</b> | <b>367.71</b><br><b>(328.80 to</b><br><b>426.31)</b> | <b>290.09</b><br><b>(256.84 to</b><br><b>346.90)</b> | <b>452.19</b><br><b>(404.94 to</b><br><b>516.66)</b> |
| <b>Transport injuries</b>                     | <b>8,007.24</b><br><b>(7,530.83 to</b><br><b>8,547.33)</b>    | <b>8,732.43</b><br><b>(7,845.00 to</b><br><b>9,740.66)</b>    | <b>5,734.43</b><br><b>(5,139.28 to</b><br><b>6,365.00)</b>    | <b>12,161.86</b><br><b>(10,917.79 to</b><br><b>13,630.33)</b> | <b>158.77</b><br><b>(149.81 to</b><br><b>168.36)</b> | <b>199.38</b><br><b>(180.64 to</b><br><b>220.97)</b> | <b>134.12</b><br><b>(121.46 to</b><br><b>149.02)</b> | <b>265.08</b><br><b>(239.91 to</b><br><b>295.20)</b> |

|                                      |                                                            |                                                            |                                                            |                                                            |                                                   |                                                     |                                                    |                                                     |
|--------------------------------------|------------------------------------------------------------|------------------------------------------------------------|------------------------------------------------------------|------------------------------------------------------------|---------------------------------------------------|-----------------------------------------------------|----------------------------------------------------|-----------------------------------------------------|
| Road injuries                        | 7,787.91<br>(7,330.67 to<br>8,221.19)                      | 8,450.08<br>(7,592.57 to<br>9,429.68)                      | 5,494.12<br>(4,927.93 to<br>6,104.06)                      | 11,817.66<br>(10,608.11 to<br>13,229.33)                   | 154.33<br>(145.60 to<br>163.86)                   | 192.32<br>(173.96 to<br>212.93)                     | 127.99<br>(115.79 to<br>142.11)                    | 256.84<br>(232.22 to<br>286.00)                     |
| Pedestrian road injuries             | 2,052.70<br>(1,748.44 to<br>2,517.95)                      | 1,964.34<br>(1,587.14 to<br>2,607.66)                      | 1,289.63<br>(1,037.16 to<br>1,789.77)                      | 2,662.28<br>(2,162.43 to<br>3,547.13)                      | 42.67<br>(36.14 to<br>52.08)                      | 49.66<br>(40.75 to<br>63.59)                        | 33.05<br>(26.99 to<br>43.92)                       | 64.62<br>(53.37 to<br>83.03)                        |
| <b>North Africa and Middle East</b>  |                                                            |                                                            |                                                            |                                                            |                                                   |                                                     |                                                    |                                                     |
| Cause                                | YLLs (in 1000s)                                            |                                                            |                                                            |                                                            | Deaths (in 1000s)                                 |                                                     |                                                    |                                                     |
|                                      | 2016                                                       | 2040 Forecast                                              | 2040 Better Scenario                                       | 2040 Worse Scenario                                        | 2016                                              | 2040 Forecast                                       | 2040 Better Scenario                               | 2040 Worse Scenario                                 |
| Cyclist road injuries                | 168.09<br>(131.70 to<br>215.48)                            | 194.92<br>(150.71 to<br>248.37)                            | 132.74<br>(102.10 to<br>168.66)                            | 269.38<br>(203.94 to<br>348.60)                            | 3.25<br>(2.59 to<br>4.21)                         | 4.38<br>(3.44 to<br>5.60)                           | 3.13<br>(2.45 to<br>4.01)                          | 5.62<br>(4.39 to<br>7.22)                           |
| Motorcyclist road injuries           | 697.68<br>(583.21 to<br>935.25)                            | 888.86<br>(714.55 to<br>1,156.35)                          | 685.24<br>(551.08 to<br>891.17)                            | 1,111.42<br>(890.29 to<br>1,428.85)                        | 12.17<br>(10.16 to<br>16.28)                      | 16.32<br>(13.21 to<br>20.99)                        | 12.88<br>(10.46 to<br>16.35)                       | 19.79<br>(15.95 to<br>25.56)                        |
| Motor vehicle road injuries          | 4,834.12<br>(4,289.79 to<br>5,289.80)                      | 5,362.26<br>(4,574.15 to<br>6,150.58)                      | 3,359.67<br>(2,810.06 to<br>3,876.16)                      | 7,715.48<br>(6,584.33 to<br>8,895.06)                      | 95.54<br>(84.29 to<br>104.37)                     | 120.99<br>(103.29 to<br>137.52)                     | 78.23<br>(66.59 to<br>89.26)                       | 165.52<br>(142.12 to<br>188.93)                     |
| Other road injuries                  | 35.32<br>(27.27 to<br>45.20)                               | 39.70<br>(28.38 to<br>54.10)                               | 26.84<br>(18.42 to<br>37.72)                               | 59.09<br>(41.36 to<br>79.27)                               | 0.70<br>(0.56 to<br>0.89)                         | 0.97<br>(0.75 to<br>1.33)                           | 0.71<br>(0.53 to<br>0.99)                          | 1.30<br>(0.99 to<br>1.74)                           |
| Other transport injuries             | 219.33<br>(191.80 to<br>246.07)                            | 282.35<br>(234.65 to<br>331.05)                            | 240.30<br>(199.86 to<br>281.77)                            | 344.20<br>(284.77 to<br>403.88)                            | 4.44<br>(3.92 to<br>5.01)                         | 7.05<br>(6.01 to<br>8.23)                           | 6.13<br>(5.23 to<br>7.15)                          | 8.24<br>(6.96 to<br>9.60)                           |
| <b>Unintentional injuries</b>        | <b>4,474.79</b><br><b>(3,906.76 to</b><br><b>4,922.32)</b> | <b>3,899.24</b><br><b>(3,314.01 to</b><br><b>4,488.63)</b> | <b>3,398.45</b><br><b>(2,898.39 to</b><br><b>3,882.62)</b> | <b>4,795.71</b><br><b>(4,047.20 to</b><br><b>5,517.33)</b> | <b>86.76</b><br><b>(75.39 to</b><br><b>94.69)</b> | <b>100.44</b><br><b>(84.30 to</b><br><b>112.33)</b> | <b>91.82</b><br><b>(76.79 to</b><br><b>103.07)</b> | <b>114.33</b><br><b>(95.20 to</b><br><b>128.55)</b> |
| Falls                                | 993.01<br>(788.04 to<br>1,193.73)                          | 1,121.82<br>(894.54 to<br>1,351.56)                        | 1,037.83<br>(839.28 to<br>1,233.36)                        | 1,310.89<br>(993.86 to<br>1,658.53)                        | 24.05<br>(19.31 to<br>27.40)                      | 38.39<br>(29.99 to<br>43.67)                        | 37.34<br>(29.24 to<br>42.54)                       | 40.86<br>(31.14 to<br>47.24)                        |
| Drowning                             | 882.76<br>(757.27 to<br>979.14)                            | 627.72<br>(534.61 to<br>734.48)                            | 541.17<br>(456.72 to<br>633.89)                            | 802.90<br>(667.62 to<br>954.34)                            | 13.96<br>(12.31 to<br>15.35)                      | 11.50<br>(9.93 to<br>13.18)                         | 10.09<br>(8.73 to<br>11.60)                        | 14.07<br>(11.96 to<br>16.30)                        |
| Fire, heat, and hot substances       | 533.63<br>(411.11 to<br>613.86)                            | 386.49<br>(297.98 to<br>458.07)                            | 320.19<br>(245.38 to<br>379.71)                            | 484.40<br>(367.87 to<br>578.30)                            | 10.42<br>(8.40 to<br>11.89)                       | 9.97<br>(8.28 to<br>11.79)                          | 8.57<br>(7.10 to<br>10.14)                         | 11.75<br>(9.71 to<br>13.97)                         |
| Poisonings                           | 249.61<br>(183.49 to<br>317.04)                            | 127.53<br>(93.95 to<br>166.22)                             | 96.58<br>(70.26 to<br>127.81)                              | 179.22<br>(125.84 to<br>240.43)                            | 4.33<br>(3.26 to<br>5.37)                         | 2.72<br>(2.04 to<br>3.53)                           | 2.11<br>(1.56 to<br>2.75)                          | 3.58<br>(2.60 to<br>4.70)                           |
| Exposure to mechanical forces        | 675.08<br>(539.29 to<br>773.16)                            | 569.78<br>(429.32 to<br>681.44)                            | 479.70<br>(362.09 to<br>573.48)                            | 727.48<br>(549.13 to<br>876.62)                            | 12.17<br>(9.66 to<br>13.92)                       | 12.01<br>(9.07 to<br>14.20)                         | 10.38<br>(7.72 to<br>12.29)                        | 14.65<br>(11.18 to<br>17.44)                        |
| Unintentional firearm injuries       | 201.44<br>(132.61 to<br>251.24)                            | 155.38<br>(100.61 to<br>204.69)                            | 129.93<br>(83.30 to<br>171.61)                             | 196.62<br>(126.44 to<br>258.48)                            | 3.71<br>(2.42 to<br>4.63)                         | 3.23<br>(2.10 to<br>4.19)                           | 2.77<br>(1.81 to<br>3.62)                          | 3.95<br>(2.56 to<br>5.13)                           |
| Unintentional suffocation            | 131.63<br>(94.22 to<br>197.22)                             | 80.07<br>(54.00 to<br>121.14)                              | 64.47<br>(43.31 to<br>95.56)                               | 121.30<br>(79.79 to<br>180.31)                             | 1.70<br>(1.24 to<br>2.52)                         | 1.10<br>(0.78 to<br>1.62)                           | 0.89<br>(0.63 to<br>1.30)                          | 1.62<br>(1.10 to<br>2.37)                           |
| Other exposure to mechanical forces  | 342.00<br>(252.43 to<br>399.25)                            | 334.33<br>(241.31 to<br>405.93)                            | 285.30<br>(205.21 to<br>348.13)                            | 409.57<br>(295.60 to<br>499.68)                            | 6.76<br>(4.97 to<br>7.87)                         | 7.68<br>(5.59 to<br>9.17)                           | 6.71<br>(4.86 to<br>8.02)                          | 9.08<br>(6.64 to<br>10.86)                          |
| Adverse effects of medical treatment | 350.33<br>(247.52 to<br>422.57)                            | 372.72<br>(266.34 to<br>464.54)                            | 336.16<br>(243.84 to<br>418.03)                            | 435.65<br>(309.50 to<br>544.40)                            | 7.81<br>(5.57 to<br>9.45)                         | 11.06<br>(8.02 to<br>13.73)                         | 10.44<br>(7.66 to<br>12.93)                        | 12.03<br>(8.65 to<br>14.93)                         |
| Animal contact                       | 71.79<br>(50.91 to<br>84.86)                               | 75.31<br>(52.95 to<br>95.45)                               | 62.00<br>(43.84 to<br>78.71)                               | 97.90<br>(68.16 to<br>124.75)                              | 1.27<br>(0.93 to<br>1.49)                         | 1.73<br>(1.26 to<br>2.11)                           | 1.50<br>(1.11 to<br>1.84)                          | 2.08<br>(1.50 to<br>2.55)                           |
| Venomous animal contact              | 33.10<br>(23.75 to<br>41.72)                               | 29.26<br>(20.93 to<br>39.11)                               | 23.94<br>(17.28 to<br>31.68)                               | 38.78<br>(27.03 to<br>52.92)                               | 0.57<br>(0.42 to<br>0.71)                         | 0.67<br>(0.50 to<br>0.86)                           | 0.58<br>(0.44 to<br>0.74)                          | 0.81<br>(0.59 to<br>1.04)                           |
| Non-venomous animal contact          | 38.69<br>(25.80 to<br>48.70)                               | 46.05<br>(30.80 to<br>60.71)                               | 38.07<br>(25.40 to<br>50.48)                               | 59.12<br>(39.43 to<br>78.22)                               | 0.70<br>(0.48 to<br>0.86)                         | 1.06<br>(0.72 to<br>1.35)                           | 0.92<br>(0.63 to<br>1.17)                          | 1.27<br>(0.86 to<br>1.61)                           |

|                                                 |                                                      |                                                      |                                                      |                                                      |                                             |                                             |                                             |                                             |
|-------------------------------------------------|------------------------------------------------------|------------------------------------------------------|------------------------------------------------------|------------------------------------------------------|---------------------------------------------|---------------------------------------------|---------------------------------------------|---------------------------------------------|
| Foreign body                                    | 272.13<br>(221.15 to<br>324.36)                      | 235.76<br>(183.57 to<br>290.50)                      | 219.40<br>(171.25 to<br>270.15)                      | 277.56<br>(212.74 to<br>349.18)                      | 4.53<br>(3.71 to<br>5.31)                   | 5.07<br>(4.03 to<br>6.00)                   | 4.93<br>(3.95 to<br>5.86)                   | 5.52<br>(4.34 to<br>6.64)                   |
| Pulmonary aspiration and foreign body in airway | 182.42<br>(148.36 to<br>222.51)                      | 146.88<br>(115.59 to<br>183.04)                      | 137.73<br>(108.38 to<br>171.80)                      | 174.41<br>(134.86 to<br>223.21)                      | 2.94<br>(2.43 to<br>3.52)                   | 3.22<br>(2.61 to<br>3.81)                   | 3.17<br>(2.56 to<br>3.74)                   | 3.48<br>(2.80 to<br>4.17)                   |
| Foreign body in other body part                 | 89.72<br>(61.69 to<br>118.49)                        | 88.88<br>(54.79 to<br>124.30)                        | 81.67<br>(51.40 to<br>113.45)                        | 103.15<br>(64.07 to<br>146.84)                       | 1.59<br>(1.08 to<br>2.09)                   | 1.85<br>(1.13 to<br>2.54)                   | 1.77<br>(1.09 to<br>2.40)                   | 2.04<br>(1.24 to<br>2.84)                   |
| Environmental heat and cold exposure            | 92.73<br>(59.91 to<br>113.38)                        | 97.72<br>(62.62 to<br>126.84)                        | 76.24<br>(48.56 to<br>98.62)                         | 131.91<br>(85.92 to<br>172.62)                       | 1.90<br>(1.24 to<br>2.34)                   | 2.34<br>(1.50 to<br>3.02)                   | 1.88<br>(1.22 to<br>2.45)                   | 3.00<br>(1.94 to<br>3.92)                   |
| Other unintentional injuries                    | 353.71<br>(302.05 to<br>413.28)                      | 284.41<br>(227.82 to<br>356.34)                      | 229.19<br>(180.73 to<br>291.70)                      | 347.80<br>(279.14 to<br>431.99)                      | 6.33<br>(5.41 to<br>7.32)                   | 5.65<br>(4.58 to<br>6.89)                   | 4.57<br>(3.66 to<br>5.68)                   | 6.78<br>(5.52 to<br>8.25)                   |
| <b>Self-harm and interpersonal violence</b>     | <b>2,531.86</b><br>(1,795.88 to<br><b>2,448.91</b> ) | <b>2,549.39</b><br>(1,944.65 to<br><b>3,049.87</b> ) | <b>2,347.81</b><br>(1,808.60 to<br><b>2,792.26</b> ) | <b>2,799.89</b><br>(2,098.84 to<br><b>3,394.49</b> ) | <b>43.04</b><br>(34.76 to<br><b>47.07</b> ) | <b>53.18</b><br>(40.69 to<br><b>63.09</b> ) | <b>49.42</b><br>(38.33 to<br><b>58.28</b> ) | <b>57.66</b><br>(43.58 to<br><b>68.84</b> ) |

#### North Africa and Middle East

| Cause                                                                               | YLLs (in 1000s)                                       |                                                 |                                                 |                                                 | Deaths (in 1000s)                             |                                            |                                            |                                            |
|-------------------------------------------------------------------------------------|-------------------------------------------------------|-------------------------------------------------|-------------------------------------------------|-------------------------------------------------|-----------------------------------------------|--------------------------------------------|--------------------------------------------|--------------------------------------------|
|                                                                                     | 2016                                                  | 2040 Forecast                                   | 2040 Better Scenario                            | 2040 Worse Scenario                             | 2016                                          | 2040 Forecast                              | 2040 Better Scenario                       | 2040 Worse Scenario                        |
| Self-harm                                                                           | 1,281.92<br>(1,141.82 to<br>1,533.54)                 | 1,538.72<br>(1,230.77 to<br>1,946.64)           | 1,392.20<br>(1,124.08 to<br>1,756.24)           | 1,714.28<br>(1,367.31 to<br>2,173.90)           | 25.89<br>(22.97 to<br>30.55)                  | 34.10<br>(27.67 to<br>42.71)               | 31.32<br>(25.62 to<br>39.01)               | 37.37<br>(30.22 to<br>47.06)               |
| Self-harm by firearm                                                                | 111.28<br>(78.53 to<br>160.31)                        | 114.64<br>(71.04 to<br>175.46)                  | 101.33<br>(62.44 to<br>155.49)                  | 134.21<br>(82.63 to<br>207.32)                  | 2.27<br>(1.60 to<br>3.29)                     | 2.59<br>(1.65 to<br>3.84)                  | 2.33<br>(1.48 to<br>3.45)                  | 2.98<br>(1.88 to<br>4.45)                  |
| Self-harm by other specified means                                                  | 1,170.64<br>(1,040.05 to<br>1,401.31)                 | 1,424.08<br>(1,145.18 to<br>1,800.25)           | 1,290.87<br>(1,045.23 to<br>1,637.59)           | 1,580.07<br>(1,262.39 to<br>2,006.82)           | 23.62<br>(20.76 to<br>28.06)                  | 31.51<br>(25.68 to<br>39.20)               | 29.00<br>(23.63 to<br>36.00)               | 34.39<br>(27.67 to<br>43.07)               |
| Interpersonal violence                                                              | 949.94<br>(536.60 to<br>1,116.94)                     | 1,010.67<br>(533.15 to<br>1,251.47)             | 955.61<br>(510.30 to<br>1,186.27)               | 1,085.61<br>(563.57 to<br>1,353.33)             | 17.15<br>(9.81 to<br>20.07)                   | 19.08<br>(10.34 to<br>23.40)               | 18.10<br>(9.92 to<br>22.12)                | 20.29<br>(10.83 to<br>24.91)               |
| Physical violence by firearm                                                        | 475.48<br>(268.19 to<br>712.00)                       | 502.45<br>(263.95 to<br>818.08)                 | 473.46<br>(253.30 to<br>777.18)                 | 536.02<br>(275.68 to<br>872.51)                 | 8.60<br>(4.88 to<br>12.76)                    | 9.32<br>(5.04 to<br>14.97)                 | 8.79<br>(4.89 to<br>14.24)                 | 9.90<br>(5.25 to<br>15.81)                 |
| Physical violence by sharp object                                                   | 224.88<br>(97.70 to<br>312.82)                        | 255.02<br>(105.06 to<br>382.84)                 | 249.92<br>(102.79 to<br>377.12)                 | 266.76<br>(110.81 to<br>397.84)                 | 4.10<br>(1.81 to<br>5.63)                     | 4.84<br>(2.07 to<br>7.06)                  | 4.75<br>(2.03 to<br>6.98)                  | 5.03<br>(2.16 to<br>7.34)                  |
| Physical violence by other means                                                    | 249.59<br>(125.17 to<br>339.95)                       | 253.19<br>(107.59 to<br>369.14)                 | 232.24<br>(100.61 to<br>338.53)                 | 282.83<br>(125.03 to<br>410.58)                 | 4.45<br>(2.20 to<br>6.02)                     | 4.91<br>(2.15 to<br>6.99)                  | 4.55<br>(2.02 to<br>6.46)                  | 5.36<br>(2.41 to<br>7.60)                  |
| <b>Forces of nature, conflict and terrorism, and executions and police conflict</b> | <b>8,420.93</b><br>(5,445.17 to<br><b>11,613.78</b> ) | <b>787.13</b><br>(95.12 to<br><b>3,707.27</b> ) | <b>777.35</b><br>(94.56 to<br><b>3,710.40</b> ) | <b>830.49</b><br>(97.63 to<br><b>3,766.26</b> ) | <b>137.67</b><br>(88.58 to<br><b>189.66</b> ) | <b>14.70</b><br>(1.88 to<br><b>72.88</b> ) | <b>14.74</b><br>(1.89 to<br><b>72.99</b> ) | <b>15.12</b><br>(1.90 to<br><b>74.79</b> ) |
| Exposure to forces of nature                                                        | 6.58<br>(1.88 to<br>11.59)                            | 108.50<br>(0.91 to<br>669.80)                   | 108.44<br>(0.90 to<br>669.71)                   | 115.10<br>(0.92 to<br>699.88)                   | 0.11<br>(0.03 to<br>0.20)                     | 2.29<br>(0.02 to<br>16.18)                 | 2.33<br>(0.02 to<br>16.61)                 | 2.34<br>(0.02 to<br>15.92)                 |
| Conflict and terrorism                                                              | 8,382.87<br>(5,409.41 to<br>11,580.57)                | 407.68<br>(1.58 to<br>2,334.67)                 | 400.46<br>(1.58 to<br>2,291.99)                 | 439.74<br>(1.63 to<br>2,541.25)                 | 136.93<br>(87.83 to<br>189.00)                | 7.07<br>(0.03 to<br>39.31)                 | 7.04<br>(0.03 to<br>39.17)                 | 7.41<br>(0.03 to<br>41.60)                 |
| Executions and police conflict                                                      | 31.48<br>(7.81 to<br>51.72)                           | 270.95<br>(0.00 to<br>2,036.67)                 | 268.45<br>(0.00 to<br>1,988.02)                 | 275.64<br>(0.00 to<br>2,089.54)                 | 0.62<br>(0.14 to<br>1.00)                     | 5.35<br>(0.00 to<br>37.35)                 | 5.38<br>(0.00 to<br>36.89)                 | 5.38<br>(0.00 to<br>37.72)                 |

#### North Africa and Middle East

| Cause             | YLLs (in 1000s)                                           |                                                           |                                                          |                                                            | Deaths (in 1000s)                                    |                                                      |                                                      |                                                      |
|-------------------|-----------------------------------------------------------|-----------------------------------------------------------|----------------------------------------------------------|------------------------------------------------------------|------------------------------------------------------|------------------------------------------------------|------------------------------------------------------|------------------------------------------------------|
|                   | 2016                                                      | 2040 Forecast                                             | 2040 Better Scenario                                     | 2040 Worse Scenario                                        | 2016                                                 | 2040 Forecast                                        | 2040 Better Scenario                                 | 2040 Worse Scenario                                  |
| <b>All causes</b> | <b>101,351.60</b><br>(94,752.39 to<br><b>107,967.54</b> ) | <b>113,212.14</b><br>(94,127.20 to<br><b>137,200.03</b> ) | <b>84,208.42</b><br>(71,102.94 to<br><b>100,697.86</b> ) | <b>161,353.70</b><br>(135,639.42 to<br><b>193,243.95</b> ) | <b>2,938.18</b><br>(2,814.69 to<br><b>3,062.36</b> ) | <b>4,889.78</b><br>(4,037.88 to<br><b>5,853.85</b> ) | <b>3,869.30</b><br>(3,219.55 to<br><b>4,618.25</b> ) | <b>6,266.47</b><br>(5,217.91 to<br><b>7,431.07</b> ) |





|                                                |                                                      |                                                      |                                                      |                                                        |                                                   |                                                  |                                                |                                                   |
|------------------------------------------------|------------------------------------------------------|------------------------------------------------------|------------------------------------------------------|--------------------------------------------------------|---------------------------------------------------|--------------------------------------------------|------------------------------------------------|---------------------------------------------------|
| Measles                                        | 83.47<br>(27.89 to<br>199.81)                        | 95.30<br>(6.40 to<br>441.01)                         | 33.73<br>(4.07 to<br>148.10)                         | 234.51<br>(18.95 to<br>893.35)                         | 1.00<br>(0.34 to<br>2.41)                         | 1.14<br>(0.08 to<br>5.24)                        | 0.42<br>(0.06 to<br>1.77)                      | 2.79<br>(0.23 to<br>10.67)                        |
| <b>North Africa and Middle East</b>            |                                                      |                                                      |                                                      |                                                        |                                                   |                                                  |                                                |                                                   |
| Cause                                          | YLLs (in 1000s)                                      |                                                      |                                                      |                                                        | Deaths (in 1000s)                                 |                                                  |                                                |                                                   |
|                                                | 2016                                                 | 2040 Forecast                                        | 2040 Better Scenario                                 | 2040 Worse Scenario                                    | 2016                                              | 2040 Forecast                                    | 2040 Better Scenario                           | 2040 Worse Scenario                               |
| Varicella and herpes zoster                    | 42.82<br>(31.43 to<br>58.94)                         | 26.56<br>(16.74 to<br>41.66)                         | 18.34<br>(11.70 to<br>28.57)                         | 47.87<br>(28.63 to<br>78.92)                           | 0.72<br>(0.58 to<br>0.92)                         | 0.57<br>(0.43 to<br>0.77)                        | 0.45<br>(0.34 to<br>0.59)                      | 0.85<br>(0.61 to<br>1.25)                         |
| <b>Neglected tropical diseases and malaria</b> | <b>476.82</b><br><b>(346.80 to</b><br><b>652.61)</b> | <b>251.92</b><br><b>(173.98 to</b><br><b>383.53)</b> | <b>228.08</b><br><b>(158.80 to</b><br><b>341.82)</b> | <b>361.51</b><br><b>(238.47 to</b><br><b>566.97)</b>   | <b>8.45</b><br><b>(6.45 to</b><br><b>11.22)</b>   | <b>4.93</b><br><b>(3.60 to</b><br><b>7.46)</b>   | <b>4.55</b><br><b>(3.37 to</b><br><b>6.83)</b> | <b>6.46</b><br><b>(4.55 to</b><br><b>10.01)</b>   |
| Malaria                                        | 317.33<br>(204.89 to<br>493.27)                      | 182.09<br>(113.85 to<br>297.54)                      | 168.39<br>(108.25 to<br>262.27)                      | 243.00<br>(143.19 to<br>415.50)                        | 4.84<br>(3.33 to<br>7.13)                         | 3.19<br>(2.10 to<br>5.45)                        | 3.00<br>(1.99 to<br>4.78)                      | 3.94<br>(2.46 to<br>6.58)                         |
| Chagas disease                                 | 0.00<br>(0.00 to<br>0.00)                            | 0.00<br>(0.00 to<br>0.00)                            | 0.00<br>(0.00 to<br>0.00)                            | 0.00<br>(0.00 to<br>0.00)                              | 0.00<br>(0.00 to<br>0.00)                         | 0.00<br>(0.00 to<br>0.00)                        | 0.00<br>(0.00 to<br>0.00)                      | 0.00<br>(0.00 to<br>0.00)                         |
| Leishmaniasis                                  | 91.32<br>(51.15 to<br>153.95)                        | 31.68<br>(18.26 to<br>67.57)                         | 25.07<br>(14.51 to<br>54.29)                         | 66.50<br>(37.33 to<br>135.22)                          | 2.15<br>(1.23 to<br>3.65)                         | 0.72<br>(0.43 to<br>1.69)                        | 0.59<br>(0.35 to<br>1.41)                      | 1.29<br>(0.77 to<br>2.80)                         |
| African trypanosomiasis                        | 0.00<br>(0.00 to<br>0.00)                            | 0.00<br>(0.00 to<br>0.00)                            | 0.00<br>(0.00 to<br>0.00)                            | 0.00<br>(0.00 to<br>0.00)                              | 0.00<br>(0.00 to<br>0.00)                         | 0.00<br>(0.00 to<br>0.00)                        | 0.00<br>(0.00 to<br>0.00)                      | 0.00<br>(0.00 to<br>0.00)                         |
| Schistosomiasis                                | 24.56<br>(20.88 to<br>28.97)                         | 15.56<br>(12.10 to<br>22.01)                         | 14.10<br>(11.06 to<br>20.04)                         | 18.50<br>(14.35 to<br>26.14)                           | 0.73<br>(0.62 to<br>0.86)                         | 0.55<br>(0.44 to<br>0.75)                        | 0.52<br>(0.41 to<br>0.70)                      | 0.62<br>(0.49 to<br>0.85)                         |
| Cysticercosis                                  | 1.11<br>(0.77 to<br>1.54)                            | 0.45<br>(0.30 to<br>0.69)                            | 0.41<br>(0.28 to<br>0.64)                            | 0.51<br>(0.35 to<br>0.79)                              | 0.02<br>(0.02 to<br>0.03)                         | 0.01<br>(0.01 to<br>0.02)                        | 0.01<br>(0.01 to<br>0.02)                      | 0.01<br>(0.01 to<br>0.02)                         |
| Cystic echinococcosis                          | 0.00<br>(0.00 to<br>0.00)                            | 0.00<br>(0.00 to<br>0.00)                            | 0.00<br>(0.00 to<br>0.00)                            | 0.00<br>(0.00 to<br>0.00)                              | 0.00<br>(0.00 to<br>0.00)                         | 0.00<br>(0.00 to<br>0.00)                        | 0.00<br>(0.00 to<br>0.00)                      | 0.00<br>(0.00 to<br>0.00)                         |
| Dengue                                         | 0.27<br>(0.06 to<br>0.70)                            | 1.26<br>(0.33 to<br>2.65)                            | 1.24<br>(0.32 to<br>2.59)                            | 1.36<br>(0.41 to<br>2.89)                              | 0.01<br>(0.00 to<br>0.01)                         | 0.04<br>(0.01 to<br>0.10)                        | 0.04<br>(0.01 to<br>0.10)                      | 0.04<br>(0.01 to<br>0.10)                         |
| Yellow fever                                   | 26.20<br>(4.69 to<br>78.79)                          | 6.53<br>(0.83 to<br>23.46)                           | 5.40<br>(0.68 to<br>19.58)                           | 12.45<br>(1.66 to<br>46.79)                            | 0.41<br>(0.07 to<br>1.24)                         | 0.10<br>(0.01 to<br>0.38)                        | 0.09<br>(0.01 to<br>0.31)                      | 0.19<br>(0.02 to<br>0.71)                         |
| Rabies                                         | 2.54<br>(0.65 to<br>4.08)                            | 1.12<br>(0.28 to<br>2.05)                            | 0.69<br>(0.16 to<br>1.27)                            | 2.01<br>(0.59 to<br>3.62)                              | 0.05<br>(0.01 to<br>0.07)                         | 0.03<br>(0.01 to<br>0.04)                        | 0.02<br>(0.00 to<br>0.03)                      | 0.04<br>(0.00 to<br>0.07)                         |
| Intestinal nematode infections                 | 4.35<br>(3.10 to<br>6.10)                            | 6.39<br>(3.67 to<br>10.51)                           | 6.32<br>(3.59 to<br>10.57)                           | 9.16<br>(5.22 to<br>14.95)                             | 0.06<br>(0.04 to<br>0.08)                         | 0.09<br>(0.05 to<br>0.14)                        | 0.09<br>(0.05 to<br>0.14)                      | 0.12<br>(0.07 to<br>0.19)                         |
| Other neglected tropical diseases              | 9.14<br>(7.58 to<br>11.76)                           | 6.85<br>(5.34 to<br>8.58)                            | 6.47<br>(4.88 to<br>8.14)                            | 8.02<br>(6.36 to<br>10.01)                             | 0.18<br>(0.14 to<br>0.22)                         | 0.19<br>(0.13 to<br>0.24)                        | 0.20<br>(0.13 to<br>0.24)                      | 0.21<br>(0.15 to<br>0.25)                         |
| <b>Maternal disorders</b>                      | <b>749.93</b><br><b>(646.26 to</b><br><b>873.47)</b> | <b>556.56</b><br><b>(402.70 to</b><br><b>754.28)</b> | <b>345.80</b><br><b>(255.68 to</b><br><b>470.79)</b> | <b>912.11</b><br><b>(655.25 to</b><br><b>1,250.45)</b> | <b>13.51</b><br><b>(11.63 to</b><br><b>15.76)</b> | <b>10.18</b><br><b>(7.32 to</b><br><b>13.82)</b> | <b>6.33</b><br><b>(4.67 to</b><br><b>8.59)</b> | <b>16.59</b><br><b>(11.87 to</b><br><b>22.65)</b> |
| Maternal hemorrhage                            | 224.15<br>(171.05 to<br>286.72)                      | 178.16<br>(114.85 to<br>265.87)                      | 107.01<br>(69.93 to<br>157.56)                       | 282.37<br>(180.97 to<br>425.73)                        | 4.09<br>(3.11 to<br>5.22)                         | 3.29<br>(2.12 to<br>4.86)                        | 1.98<br>(1.29 to<br>2.91)                      | 5.20<br>(3.29 to<br>7.80)                         |
| Maternal sepsis and other maternal infections  | 111.83<br>(81.51 to<br>150.37)                       | 65.05<br>(43.07 to<br>97.66)                         | 42.26<br>(28.69 to<br>62.15)                         | 108.05<br>(70.80 to<br>159.57)                         | 2.01<br>(1.50 to<br>2.70)                         | 1.20<br>(0.80 to<br>1.78)                        | 0.78<br>(0.53 to<br>1.13)                      | 1.98<br>(1.31 to<br>2.92)                         |
| Maternal hypertensive disorders                | 117.70<br>(88.38 to<br>153.46)                       | 94.39<br>(59.84 to<br>145.81)                        | 56.81<br>(36.60 to<br>84.87)                         | 151.54<br>(95.43 to<br>230.38)                         | 2.09<br>(1.58 to<br>2.72)                         | 1.70<br>(1.09 to<br>2.59)                        | 1.02<br>(0.66 to<br>1.52)                      | 2.72<br>(1.70 to<br>4.13)                         |
| Maternal obstructed labor and uterine rupture  | 25.52<br>(15.71 to<br>36.91)                         | 22.70<br>(11.58 to<br>38.25)                         | 12.45<br>(6.81 to<br>20.84)                          | 37.17<br>(19.53 to<br>63.89)                           | 0.47<br>(0.29 to<br>0.67)                         | 0.42<br>(0.21 to<br>0.72)                        | 0.23<br>(0.12 to<br>0.39)                      | 0.68<br>(0.36 to<br>1.17)                         |

|                                                                  |                                         |                                       |                                       |                                         |                                 |                              |                              |                                |
|------------------------------------------------------------------|-----------------------------------------|---------------------------------------|---------------------------------------|-----------------------------------------|---------------------------------|------------------------------|------------------------------|--------------------------------|
| Maternal abortion, miscarriage, and ectopic pregnancy            | 36.58<br>(23.34 to<br>52.87)            | 27.61<br>(15.00 to<br>48.44)          | 17.81<br>(9.73 to<br>30.38)           | 46.06<br>(24.38 to<br>80.87)            | 0.68<br>(0.44 to<br>0.98)       | 0.53<br>(0.29 to<br>0.90)    | 0.34<br>(0.19 to<br>0.57)    | 0.87<br>(0.46 to<br>1.52)      |
| Indirect maternal deaths                                         | 94.91<br>(67.57 to<br>126.67)           | 69.06<br>(43.82 to<br>100.43)         | 44.73<br>(28.83 to<br>64.91)          | 120.78<br>(76.66 to<br>179.97)          | 1.67<br>(1.18 to<br>2.24)       | 1.23<br>(0.77 to<br>1.78)    | 0.80<br>(0.51 to<br>1.15)    | 2.13<br>(1.36 to<br>3.19)      |
| Late maternal deaths                                             | 9.83<br>(5.39 to<br>16.39)              | 5.49<br>(2.92 to<br>9.79)             | 3.56<br>(1.92 to<br>6.38)             | 9.43<br>(4.95 to<br>16.93)              | 0.17<br>(0.10 to<br>0.29)       | 0.10<br>(0.05 to<br>0.18)    | 0.06<br>(0.03 to<br>0.11)    | 0.17<br>(0.09 to<br>0.30)      |
| Maternal deaths aggravated by HIV/AIDS                           | 0.19<br>(0.10 to<br>0.31)               | 0.79<br>(0.30 to<br>1.73)             | 0.34<br>(0.05 to<br>1.00)             | 1.50<br>(0.59 to<br>3.28)               | 0.00<br>(0.00 to<br>0.01)       | 0.02<br>(0.01 to<br>0.03)    | 0.01<br>(0.00 to<br>0.02)    | 0.03<br>(0.01 to<br>0.06)      |
| Other maternal disorders                                         | 129.22<br>(93.76 to<br>170.86)          | 93.30<br>(61.31 to<br>136.00)         | 60.84<br>(40.67 to<br>88.60)          | 155.22<br>(101.74 to<br>228.71)         | 2.32<br>(1.67 to<br>3.03)       | 1.70<br>(1.11 to<br>2.48)    | 1.11<br>(0.74 to<br>1.62)    | 2.81<br>(1.82 to<br>4.14)      |
| <b>North Africa and Middle East</b>                              |                                         |                                       |                                       |                                         |                                 |                              |                              |                                |
| Cause                                                            | YLLs (in 1000s)                         |                                       |                                       |                                         | Deaths (in 1000s)               |                              |                              |                                |
|                                                                  | 2016                                    | 2040 Forecast                         | 2040 Better Scenario                  | 2040 Worse Scenario                     | 2016                            | 2040 Forecast                | 2040 Better Scenario         | 2040 Worse Scenario            |
| Neonatal disorders                                               | 11,558.25<br>(9,318.94 to<br>14,108.88) | 6,046.20<br>(4,262.98 to<br>8,248.54) | 4,148.98<br>(2,922.33 to<br>5,831.81) | 11,659.45<br>(8,106.65 to<br>16,221.68) | 133.62<br>(107.73 to<br>163.08) | 69.91<br>(49.30 to<br>95.36) | 47.98<br>(33.82 to<br>67.42) | 134.80<br>(93.74 to<br>187.49) |
| Neonatal preterm birth                                           | 6,731.12<br>(5,286.74 to<br>8,384.98)   | 3,096.41<br>(2,221.88 to<br>4,165.54) | 1,991.14<br>(1,407.79 to<br>2,676.46) | 6,102.78<br>(4,207.50 to<br>8,447.51)   | 77.79<br>(61.09 to<br>96.89)    | 35.79<br>(25.68 to<br>48.13) | 23.02<br>(16.28 to<br>30.94) | 70.53<br>(48.62 to<br>97.62)   |
| Neonatal encephalopathy due to birth asphyxia and trauma         | 1,519.77<br>(1,167.90 to<br>1,967.46)   | 759.22<br>(451.53 to<br>1,245.21)     | 568.11<br>(338.06 to<br>933.66)       | 1,422.30<br>(808.86 to<br>2,394.29)     | 17.58<br>(13.51 to<br>22.76)    | 8.79<br>(5.23 to<br>14.41)   | 6.58<br>(3.92 to<br>10.80)   | 16.46<br>(9.38 to<br>27.71)    |
| Neonatal sepsis and other neonatal infections                    | 1,609.20<br>(1,046.44 to<br>2,160.37)   | 1,140.52<br>(642.88 to<br>1,760.79)   | 830.16<br>(478.40 to<br>1,281.44)     | 2,086.96<br>(1,130.03 to<br>3,259.17)   | 18.60<br>(12.10 to<br>24.98)    | 13.19<br>(7.43 to<br>20.36)  | 9.60<br>(5.53 to<br>14.81)   | 24.13<br>(13.07 to<br>37.67)   |
| Hemolytic disease and other neonatal jaundice                    | 131.00<br>(84.78 to<br>207.70)          | 57.03<br>(26.89 to<br>113.33)         | 38.34<br>(18.59 to<br>72.23)          | 120.80<br>(55.44 to<br>238.17)          | 1.51<br>(0.98 to<br>2.40)       | 0.66<br>(0.31 to<br>1.31)    | 0.44<br>(0.21 to<br>0.83)    | 1.40<br>(0.64 to<br>2.75)      |
| Other neonatal disorders                                         | 1,567.17<br>(1,159.50 to<br>2,132.65)   | 993.02<br>(600.32 to<br>1,632.65)     | 721.24<br>(432.30 to<br>1,164.33)     | 1,926.62<br>(1,125.48 to<br>3,114.43)   | 18.13<br>(13.42 to<br>24.66)    | 11.49<br>(6.95 to<br>18.88)  | 8.34<br>(5.01 to<br>13.46)   | 22.29<br>(13.03 to<br>36.01)   |
| Nutritional deficiencies                                         | 184.78<br>(151.67 to<br>223.21)         | 107.63<br>(89.26 to<br>130.89)        | 93.75<br>(78.88 to<br>112.48)         | 150.68<br>(118.84 to<br>195.18)         | 4.33<br>(3.81 to<br>4.92)       | 4.58<br>(3.85 to<br>5.48)    | 4.66<br>(3.92 to<br>5.57)    | 4.95<br>(4.06 to<br>5.98)      |
| Protein-energy malnutrition                                      | 156.00<br>(124.21 to<br>191.96)         | 78.54<br>(63.07 to<br>100.08)         | 67.47<br>(55.58 to<br>82.74)          | 114.92<br>(87.23 to<br>157.26)          | 3.53<br>(3.07 to<br>4.04)       | 3.28<br>(2.69 to<br>3.93)    | 3.38<br>(2.81 to<br>3.99)    | 3.56<br>(2.85 to<br>4.30)      |
| Iodine deficiency                                                | 4.48<br>(2.06 to<br>9.65)               | 5.57<br>(2.91 to<br>10.44)            | 4.70<br>(2.53 to<br>7.96)             | 7.96<br>(3.69 to<br>17.89)              | 0.10<br>(0.05 to<br>0.17)       | 0.24<br>(0.12 to<br>0.42)    | 0.23<br>(0.11 to<br>0.42)    | 0.27<br>(0.14 to<br>0.47)      |
| Dietary iron deficiency                                          | 7.29<br>(6.24 to<br>8.68)               | 8.33<br>(6.74 to<br>9.86)             | 8.13<br>(6.47 to<br>9.66)             | 9.16<br>(7.48 to<br>10.89)              | 0.14<br>(0.12 to<br>0.17)       | 0.29<br>(0.19 to<br>0.36)    | 0.30<br>(0.19 to<br>0.38)    | 0.29<br>(0.20 to<br>0.35)      |
| Other nutritional deficiencies                                   | 17.01<br>(13.94 to<br>20.86)            | 15.20<br>(12.25 to<br>19.78)          | 13.46<br>(10.75 to<br>17.71)          | 18.64<br>(14.91 to<br>24.15)            | 0.56<br>(0.45 to<br>0.73)       | 0.77<br>(0.57 to<br>1.12)    | 0.75<br>(0.55 to<br>1.11)    | 0.83<br>(0.62 to<br>1.19)      |
| Other communicable, maternal, neonatal, and nutritional diseases | 1,078.87<br>(675.22 to<br>1,656.28)     | 456.74<br>(341.52 to<br>624.69)       | 382.64<br>(289.57 to<br>525.40)       | 713.46<br>(486.43 to<br>1,062.82)       | 16.37<br>(11.54 to<br>23.23)    | 11.81<br>(10.03 to<br>14.15) | 10.53<br>(8.91 to<br>12.48)  | 15.35<br>(12.37 to<br>19.60)   |
| Sexually transmitted infections excluding HIV                    | 757.00<br>(355.85 to<br>1,319.58)       | 166.19<br>(69.75 to<br>310.65)        | 136.73<br>(57.72 to<br>255.52)        | 329.15<br>(132.87 to<br>632.90)         | 8.94<br>(4.25 to<br>15.51)      | 2.03<br>(0.90 to<br>3.72)    | 1.68<br>(0.75 to<br>3.07)    | 3.94<br>(1.64 to<br>7.47)      |
| Syphilis                                                         | 752.42<br>(350.87 to<br>1,314.70)       | 161.96<br>(65.59 to<br>306.31)        | 132.99<br>(53.98 to<br>251.73)        | 324.35<br>(128.89 to<br>628.29)         | 8.83<br>(4.14 to<br>15.39)      | 1.92<br>(0.79 to<br>3.60)    | 1.58<br>(0.65 to<br>2.97)    | 3.82<br>(1.53 to<br>7.36)      |
| Chlamydial infection                                             | 0.87<br>(0.63 to<br>1.05)               | 0.83<br>(0.55 to<br>1.08)             | 0.73<br>(0.50 to<br>0.96)             | 0.94<br>(0.62 to<br>1.24)               | 0.02<br>(0.01 to<br>0.02)       | 0.02<br>(0.02 to<br>0.03)    | 0.02<br>(0.02 to<br>0.02)    | 0.02<br>(0.02 to<br>0.03)      |

|                                       |                                                     |                                                      |                                                     |                                                       |                                                  |                                                  |                                                  |                                                  |
|---------------------------------------|-----------------------------------------------------|------------------------------------------------------|-----------------------------------------------------|-------------------------------------------------------|--------------------------------------------------|--------------------------------------------------|--------------------------------------------------|--------------------------------------------------|
| Gonococcal infection                  | 2.40<br>(1.77 to 2.89)                              | 2.21<br>(1.51 to 2.87)                               | 1.97<br>(1.37 to 2.54)                              | 2.50<br>(1.70 to 3.23)                                | 0.06<br>(0.04 to 0.07)                           | 0.06<br>(0.04 to 0.07)                           | 0.06<br>(0.04 to 0.07)                           | 0.06<br>(0.04 to 0.08)                           |
| Other sexually transmitted infections | 1.30<br>(0.95 to 1.59)                              | 1.19<br>(0.78 to 1.58)                               | 1.04<br>(0.71 to 1.37)                              | 1.36<br>(0.89 to 1.81)                                | 0.03<br>(0.02 to 0.03)                           | 0.03<br>(0.02 to 0.04)                           | 0.03<br>(0.02 to 0.03)                           | 0.03<br>(0.02 to 0.04)                           |
| Acute hepatitis                       | 137.40<br>(125.65 to 150.90)                        | 125.75<br>(109.17 to 144.82)                         | 102.39<br>(86.80 to 118.64)                         | 154.91<br>(134.52 to 178.11)                          | 3.86<br>(3.53 to 4.23)                           | 4.37<br>(3.82 to 4.98)                           | 3.65<br>(3.13 to 4.17)                           | 5.20<br>(4.57 to 5.88)                           |
| Acute hepatitis A                     | 6.96<br>(4.29 to 9.98)                              | 3.35<br>(2.19 to 4.90)                               | 2.70<br>(1.78 to 3.93)                              | 4.75<br>(2.97 to 7.01)                                | 0.10<br>(0.07 to 0.14)                           | 0.08<br>(0.06 to 0.12)                           | 0.11<br>(0.05 to 0.11)                           | 0.11<br>(0.07 to 0.15)                           |
| Acute hepatitis B                     | 106.88<br>(95.87 to 119.00)                         | 104.90<br>(88.64 to 122.51)                          | 85.02<br>(70.95 to 99.46)                           | 128.19<br>(109.78 to 148.09)                          | 3.19<br>(2.85 to 3.57)                           | 3.63<br>(3.10 to 4.20)                           | 3.01<br>(2.54 to 3.50)                           | 4.34<br>(3.73 to 4.97)                           |
| Acute hepatitis C                     | 2.48<br>(1.89 to 3.22)                              | 2.99<br>(2.17 to 4.08)                               | 2.58<br>(1.88 to 3.52)                              | 3.41<br>(2.51 to 4.66)                                | 0.08<br>(0.06 to 0.11)                           | 0.12<br>(0.08 to 0.16)                           | 0.10<br>(0.07 to 0.14)                           | 0.13<br>(0.09 to 0.18)                           |
| Acute hepatitis E                     | 21.08<br>(17.22 to 25.77)                           | 14.51<br>(10.61 to 19.63)                            | 12.09<br>(8.72 to 16.38)                            | 18.56<br>(13.72 to 24.63)                             | 0.49<br>(0.36 to 0.63)                           | 0.53<br>(0.35 to 0.76)                           | 0.47<br>(0.31 to 0.68)                           | 0.62<br>(0.42 to 0.87)                           |
| Other unspecified infectious diseases | 184.47<br>(114.87 to 342.89)                        | 164.80<br>(121.46 to 229.34)                         | 143.52<br>(107.00 to 197.21)                        | 229.40<br>(155.72 to 385.24)                          | 3.57<br>(2.53 to 5.45)                           | 5.41<br>(4.30 to 6.92)                           | 5.20<br>(4.18 to 6.57)                           | 6.22<br>(4.71 to 8.26)                           |
| <b>Non-communicable diseases</b>      | <b>52,959.21</b><br><b>(50,190.03 to 55,801.90)</b> | <b>81,542.21</b><br><b>(64,203.38 to 103,494.94)</b> | <b>60,996.01</b><br><b>(49,516.19 to 76,579.68)</b> | <b>110,965.52</b><br><b>(87,534.00 to 139,879.54)</b> | <b>2,121.76</b><br><b>(2,036.92 to 2,214.27)</b> | <b>4,173.18</b><br><b>(3,326.30 to 5,127.01)</b> | <b>3,309.98</b><br><b>(2,682.94 to 4,058.43)</b> | <b>5,262.50</b><br><b>(4,243.66 to 6,417.32)</b> |

**North Africa and Middle East**

| Cause                           | YLLs (in 1000s)                                   |                                                     |                                                     |                                                     | Deaths (in 1000s)                          |                                            |                                            |                                            |
|---------------------------------|---------------------------------------------------|-----------------------------------------------------|-----------------------------------------------------|-----------------------------------------------------|--------------------------------------------|--------------------------------------------|--------------------------------------------|--------------------------------------------|
|                                 | 2016                                              | 2040 Forecast                                       | 2040 Better Scenario                                | 2040 Worse Scenario                                 | 2016                                       | 2040 Forecast                              | 2040 Better Scenario                       | 2040 Worse Scenario                        |
| <b>Neoplasms</b>                | <b>9,654.08</b><br><b>(9,056.30 to 10,280.31)</b> | <b>17,087.51</b><br><b>(14,403.43 to 20,063.79)</b> | <b>15,273.56</b><br><b>(13,025.89 to 17,729.32)</b> | <b>19,823.56</b><br><b>(16,570.17 to 23,627.25)</b> | <b>342.74</b><br><b>(323.31 to 363.71)</b> | <b>734.19</b><br><b>(630.15 to 854.39)</b> | <b>675.53</b><br><b>(579.82 to 779.42)</b> | <b>825.53</b><br><b>(696.25 to 973.81)</b> |
| Lip and oral cavity cancer      | 75.48<br>(70.39 to 82.77)                         | 136.85<br>(104.66 to 181.33)                        | 109.53<br>(86.72 to 139.26)                         | 186.01<br>(136.75 to 258.81)                        | 2.90<br>(2.72 to 3.13)                     | 5.99<br>(4.68 to 7.68)                     | 5.04<br>(4.05 to 6.30)                     | 7.79<br>(5.80 to 10.49)                    |
| Nasopharynx cancer              | 77.64<br>(71.00 to 83.55)                         | 131.93<br>(95.52 to 186.40)                         | 96.28<br>(71.61 to 130.44)                          | 194.08<br>(131.67 to 281.10)                        | 2.33<br>(2.14 to 2.50)                     | 4.42<br>(3.17 to 6.14)                     | 3.31<br>(2.49 to 4.41)                     | 6.36<br>(4.37 to 9.08)                     |
| Other pharynx cancer            | 37.91<br>(34.23 to 41.27)                         | 63.94<br>(51.05 to 81.04)                           | 62.21<br>(49.89 to 77.34)                           | 69.19<br>(53.58 to 89.74)                           | 1.36<br>(1.25 to 1.46)                     | 2.69<br>(2.20 to 3.38)                     | 2.71<br>(2.22 to 3.33)                     | 2.80<br>(2.23 to 3.60)                     |
| Esophageal cancer               | 170.35<br>(159.25 to 182.26)                      | 314.05<br>(221.64 to 448.31)                        | 261.30<br>(194.02 to 358.23)                        | 394.06<br>(264.26 to 574.82)                        | 7.00<br>(6.54 to 7.49)                     | 14.63<br>(10.40 to 20.43)                  | 12.73<br>(9.55 to 17.13)                   | 17.55<br>(11.90 to 25.57)                  |
| Stomach cancer                  | 710.57<br>(664.15 to 764.90)                      | 928.25<br>(740.86 to 1,160.38)                      | 770.72<br>(626.98 to 941.18)                        | 1,076.06<br>(849.55 to 1,365.84)                    | 28.90<br>(26.89 to 31.13)                  | 43.87<br>(35.35 to 54.59)                  | 37.59<br>(30.92 to 45.76)                  | 49.34<br>(39.60 to 61.45)                  |
| Colon and rectum cancer         | 728.67<br>(667.10 to 790.74)                      | 1,449.32<br>(1,039.66 to 2,096.56)                  | 1,344.51<br>(973.40 to 1,925.90)                    | 1,560.76<br>(1,106.49 to 2,254.08)                  | 28.71<br>(26.31 to 30.96)                  | 68.77<br>(49.05 to 99.44)                  | 65.40<br>(47.50 to 92.59)                  | 72.14<br>(51.26 to 103.88)                 |
| Liver cancer                    | 678.06<br>(584.28 to 762.27)                      | 1,601.94<br>(1,083.34 to 2,387.24)                  | 1,470.27<br>(1,031.17 to 2,107.78)                  | 1,825.67<br>(1,171.02 to 2,818.76)                  | 27.00<br>(23.55 to 30.03)                  | 73.68<br>(50.46 to 108.60)                 | 69.78<br>(49.60 to 99.22)                  | 79.86<br>(51.12 to 122.24)                 |
| Liver cancer due to hepatitis B | 185.96<br>(147.45 to 231.28)                      | 433.39<br>(274.19 to 650.11)                        | 391.69<br>(260.31 to 563.20)                        | 488.95<br>(296.73 to 767.87)                        | 6.78<br>(5.28 to 8.48)                     | 18.35<br>(11.63 to 27.54)                  | 17.10<br>(11.23 to 24.90)                  | 19.80<br>(12.18 to 31.05)                  |
| Liver cancer due to hepatitis C | 283.21<br>(228.95 to 337.97)                      | 646.78<br>(423.10 to 1,003.66)                      | 608.53<br>(410.43 to 913.73)                        | 742.04<br>(455.23 to 1,192.24)                      | 11.94<br>(9.94 to 14.02)                   | 30.66<br>(20.69 to 46.01)                  | 29.73<br>(20.84 to 43.10)                  | 33.34<br>(21.12 to 52.34)                  |
| Liver cancer due to alcohol use | 53.53<br>(37.42 to 77.38)                         | 127.30<br>(71.81 to 221.13)                         | 114.85<br>(66.68 to 191.20)                         | 152.15<br>(80.95 to 272.81)                         | 2.23<br>(1.55 to 3.19)                     | 5.89<br>(3.39 to 9.90)                     | 5.47<br>(3.24 to 8.79)                     | 6.72<br>(3.68 to 11.65)                    |

|                                      |                                    |                                    |                                    |                                    |                           |                             |                            |                              |
|--------------------------------------|------------------------------------|------------------------------------|------------------------------------|------------------------------------|---------------------------|-----------------------------|----------------------------|------------------------------|
| Liver cancer due to other causes     | 155.37<br>(124.42 to 188.03)       | 394.47<br>(242.10 to 638.03)       | 355.19<br>(227.91 to 548.08)       | 442.54<br>(261.88 to 738.72)       | 6.05<br>(4.87 to 7.34)    | 18.78<br>(11.47 to 30.18)   | 17.48<br>(11.16 to 26.53)  | 20.00<br>(11.83 to 32.98)    |
| Gallbladder and biliary tract cancer | 125.04<br>(111.48 to 145.34)       | 184.98<br>(160.30 to 217.69)       | 187.94<br>(160.94 to 222.24)       | 179.33<br>(156.37 to 211.61)       | 5.41<br>(4.87 to 6.43)    | 9.23<br>(8.12 to 11.12)     | 9.64<br>(8.41 to 11.70)    | 8.68<br>(7.70 to 10.43)      |
| Pancreatic cancer                    | 351.84<br>(328.73 to 378.29)       | 810.07<br>(642.47 to 1,042.51)     | 799.22<br>(638.62 to 1,013.30)     | 829.64<br>(650.18 to 1,089.29)     | 15.08<br>(14.07 to 16.19) | 39.38<br>(31.43 to 50.43)   | 39.93<br>(32.17 to 50.46)  | 39.03<br>(30.75 to 51.12)    |
| Larynx cancer                        | 153.83<br>(142.44 to 166.84)       | 253.25<br>(144.34 to 447.46)       | 169.66<br>(105.34 to 285.57)       | 393.46<br>(213.38 to 685.86)       | 6.05<br>(5.62 to 6.55)    | 10.82<br>(6.30 to 18.98)    | 7.49<br>(4.70 to 12.49)    | 16.47<br>(9.03 to 29.08)     |
| Tracheal, bronchus, and lung cancer  | 1,377.17<br>(1,250.74 to 1,516.28) | 2,538.49<br>(1,837.76 to 3,474.37) | 1,735.04<br>(1,285.70 to 2,321.07) | 3,916.81<br>(2,744.56 to 5,471.83) | 55.40<br>(50.46 to 60.88) | 113.23<br>(83.04 to 154.83) | 80.29<br>(59.93 to 106.64) | 171.77<br>(122.72 to 239.19) |
| Malignant skin melanoma              | 43.72<br>(35.99 to 70.46)          | 85.38<br>(67.08 to 138.00)         | 95.47<br>(75.04 to 152.99)         | 73.27<br>(58.95 to 117.68)         | 1.60<br>(1.31 to 2.63)    | 3.97<br>(3.17 to 6.75)      | 4.58<br>(3.67 to 7.88)     | 3.25<br>(2.64 to 5.33)       |
| Non-melanoma skin cancer             | 34.74<br>(31.96 to 37.41)          | 69.70<br>(63.86 to 75.85)          | 65.15<br>(58.88 to 71.72)          | 75.52<br>(69.71 to 81.53)          | 1.65<br>(1.55 to 1.78)    | 4.07<br>(3.68 to 4.46)      | 3.95<br>(3.55 to 4.38)     | 4.23<br>(3.81 to 4.64)       |
| Breast cancer                        | 962.14<br>(829.37 to 1,110.48)     | 1,646.96<br>(1,246.76 to 2,187.07) | 1,520.20<br>(1,176.39 to 1,968.62) | 1,769.51<br>(1,316.57 to 2,399.54) | 29.56<br>(25.90 to 34.14) | 58.10<br>(45.00 to 78.05)   | 54.49<br>(42.81 to 72.05)  | 61.50<br>(46.78 to 83.62)    |
| Cervical cancer                      | 158.33<br>(118.47 to 179.60)       | 221.86<br>(168.48 to 273.35)       | 195.00<br>(148.26 to 237.30)       | 251.62<br>(187.36 to 316.13)       | 5.24<br>(4.05 to 5.87)    | 8.18<br>(6.39 to 9.74)      | 7.37<br>(5.82 to 8.85)     | 9.05<br>(7.04 to 11.04)      |
| Uterine cancer                       | 85.19<br>(74.59 to 94.04)          | 153.43<br>(132.13 to 174.63)       | 141.40<br>(120.91 to 163.38)       | 168.51<br>(144.66 to 191.21)       | 3.34<br>(2.98 to 3.66)    | 6.90<br>(6.01 to 7.72)      | 6.52<br>(5.65 to 7.42)     | 7.40<br>(6.49 to 8.28)       |
| Ovarian cancer                       | 191.13<br>(170.71 to 213.45)       | 360.33<br>(268.44 to 498.05)       | 349.62<br>(266.27 to 474.42)       | 365.77<br>(267.21 to 518.54)       | 6.65<br>(6.02 to 7.33)    | 14.41<br>(10.66 to 20.01)   | 14.12<br>(10.76 to 19.23)  | 14.47<br>(10.45 to 20.35)    |
| Prostate cancer                      | 217.44<br>(164.09 to 263.32)       | 587.55<br>(455.41 to 717.45)       | 598.16<br>(468.70 to 738.67)       | 569.15<br>(438.49 to 703.00)       | 14.04<br>(10.77 to 17.46) | 41.86<br>(33.08 to 53.13)   | 43.96<br>(35.33 to 56.10)  | 39.11<br>(29.86 to 49.43)    |
| Testicular cancer                    | 30.53<br>(26.75 to 34.81)          | 32.19<br>(26.49 to 38.88)          | 29.61<br>(24.18 to 36.15)          | 35.75<br>(29.59 to 43.35)          | 0.64<br>(0.57 to 0.73)    | 0.77<br>(0.65 to 0.89)      | 0.71<br>(0.60 to 0.84)     | 0.83<br>(0.71 to 0.97)       |

**North Africa and Middle East**

| Cause                           | YLLs (in 1000s)              |                                  |                                  |                                  | Deaths (in 1000s)         |                           |                           |                           |
|---------------------------------|------------------------------|----------------------------------|----------------------------------|----------------------------------|---------------------------|---------------------------|---------------------------|---------------------------|
|                                 | 2016                         | 2040 Forecast                    | 2040 Better Scenario             | 2040 Worse Scenario              | 2016                      | 2040 Forecast             | 2040 Better Scenario      | 2040 Worse Scenario       |
| Kidney cancer                   | 120.84<br>(110.67 to 132.74) | 244.29<br>(198.92 to 299.34)     | 248.74<br>(206.74 to 301.44)     | 244.74<br>(195.02 to 306.73)     | 4.18<br>(3.81 to 4.60)    | 10.52<br>(8.61 to 12.84)  | 11.02<br>(9.17 to 13.37)  | 10.13<br>(8.11 to 12.68)  |
| Bladder cancer                  | 297.96<br>(271.47 to 327.12) | 566.89<br>(439.85 to 751.25)     | 522.91<br>(416.53 to 675.56)     | 630.05<br>(469.43 to 862.85)     | 13.15<br>(12.14 to 14.21) | 28.50<br>(22.31 to 37.77) | 27.21<br>(21.85 to 35.03) | 30.46<br>(22.97 to 41.80) |
| Brain and nervous system cancer | 623.98<br>(509.33 to 714.91) | 1,038.45<br>(843.44 to 1,210.76) | 1,027.53<br>(841.09 to 1,206.08) | 1,064.70<br>(865.35 to 1,236.36) | 16.16<br>(13.30 to 18.61) | 35.23<br>(29.48 to 41.07) | 35.76<br>(29.81 to 42.04) | 34.64<br>(28.90 to 40.24) |
| Thyroid cancer                  | 65.81<br>(60.06 to 71.13)    | 112.64<br>(80.73 to 155.39)      | 98.36<br>(72.97 to 132.09)       | 128.01<br>(89.72 to 181.69)      | 2.38<br>(2.20 to 2.68)    | 4.87<br>(3.56 to 6.89)    | 4.39<br>(3.28 to 6.04)    | 5.35<br>(3.81 to 7.62)    |
| Mesothelioma                    | 40.04<br>(34.72 to 46.92)    | 72.36<br>(60.74 to 84.94)        | 73.94<br>(61.22 to 87.74)        | 70.60<br>(60.24 to 82.38)        | 1.46<br>(1.28 to 1.69)    | 3.12<br>(2.68 to 3.62)    | 3.29<br>(2.80 to 3.81)    | 2.95<br>(2.57 to 3.38)    |
| Hodgkin lymphoma                | 133.99<br>(97.44 to 153.04)  | 135.46<br>(104.65 to 167.69)     | 113.45<br>(87.56 to 138.86)      | 162.99<br>(126.86 to 199.77)     | 3.01<br>(2.31 to 3.62)    | 3.53<br>(2.88 to 4.45)    | 3.03<br>(2.46 to 3.87)    | 4.12<br>(3.33 to 5.24)    |
| Non-Hodgkin lymphoma            | 424.04<br>(390.67 to 470.33) | 730.11<br>(588.86 to 913.68)     | 700.87<br>(569.45 to 867.18)     | 756.39<br>(603.36 to 966.52)     | 12.75<br>(11.74 to 14.49) | 27.90<br>(22.34 to 35.41) | 27.39<br>(22.07 to 34.58) | 27.93<br>(22.12 to 35.78) |



|                                                                |                                                            |                                                            |                                                            |                                                            |                                                      |                                                      |                                                      |                                                      |
|----------------------------------------------------------------|------------------------------------------------------------|------------------------------------------------------------|------------------------------------------------------------|------------------------------------------------------------|------------------------------------------------------|------------------------------------------------------|------------------------------------------------------|------------------------------------------------------|
| Aortic aneurysm                                                | 122.22<br>(110.38 to<br>133.78)                            | 204.40<br>(161.65 to<br>259.16)                            | 185.61<br>(150.01 to<br>229.54)                            | 220.93<br>(173.19 to<br>282.80)                            | 5.61<br>(5.16 to<br>6.17)                            | 11.26<br>(9.25 to<br>13.82)                          | 10.87<br>(9.04 to<br>13.17)                          | 11.39<br>(9.30 to<br>14.06)                          |
| Peripheral artery disease                                      | 16.01<br>(13.18 to<br>21.25)                               | 54.74<br>(39.54 to<br>83.74)                               | 51.14<br>(36.84 to<br>79.61)                               | 56.54<br>(40.91 to<br>83.21)                               | 1.14<br>(0.91 to<br>1.84)                            | 4.63<br>(3.19 to<br>8.23)                            | 4.58<br>(3.12 to<br>8.24)                            | 4.44<br>(3.12 to<br>7.60)                            |
| Endocarditis                                                   | 178.09<br>(154.10 to<br>215.01)                            | 301.59<br>(225.53 to<br>403.09)                            | 279.90<br>(211.94 to<br>368.99)                            | 322.36<br>(242.39 to<br>430.61)                            | 6.67<br>(5.77 to<br>8.08)                            | 15.60<br>(11.44 to<br>21.89)                         | 15.31<br>(11.32 to<br>21.10)                         | 15.47<br>(11.35 to<br>21.41)                         |
| Other cardiovascular and circulatory diseases                  | 1,129.86<br>(932.75 to<br>1,577.47)                        | 2,038.35<br>(1,468.15 to<br>2,860.14)                      | 1,597.13<br>(1,198.98 to<br>2,219.60)                      | 2,489.02<br>(1,789.55 to<br>3,536.75)                      | 45.71<br>(38.10 to<br>64.65)                         | 112.16<br>(82.63 to<br>159.14)                       | 94.23<br>(71.19 to<br>133.04)                        | 127.59<br>(92.75 to<br>181.50)                       |
| <b>Chronic respiratory diseases</b>                            | <b>2,409.02</b><br><b>(2,241.91 to</b><br><b>2,599.50)</b> | <b>3,335.42</b><br><b>(2,542.98 to</b><br><b>4,420.49)</b> | <b>2,575.68</b><br><b>(2,014.09 to</b><br><b>3,322.07)</b> | <b>4,774.62</b><br><b>(3,527.13 to</b><br><b>6,546.00)</b> | <b>112.87</b><br><b>(103.61 to</b><br><b>121.90)</b> | <b>183.07</b><br><b>(140.56 to</b><br><b>237.44)</b> | <b>151.39</b><br><b>(119.42 to</b><br><b>190.68)</b> | <b>248.29</b><br><b>(182.34 to</b><br><b>335.86)</b> |
| Chronic obstructive pulmonary disease                          | 1,507.38<br>(1,356.25 to<br>1,655.53)                      | 2,277.57<br>(1,549.67 to<br>3,285.71)                      | 1,616.92<br>(1,125.25 to<br>2,324.58)                      | 3,547.56<br>(2,389.95 to<br>5,215.59)                      | 79.29<br>(70.82 to<br>86.35)                         | 131.94<br>(94.11 to<br>183.93)                       | 102.20<br>(75.61 to<br>140.23)                       | 193.35<br>(133.54 to<br>273.27)                      |
| Pneumoconiosis                                                 | 8.71<br>(7.48 to<br>10.09)                                 | 9.31<br>(8.11 to<br>10.80)                                 | 8.93<br>(7.70 to<br>10.46)                                 | 10.05<br>(8.77 to<br>11.67)                                | 0.40<br>(0.35 to<br>0.46)                            | 0.57<br>(0.49 to<br>0.68)                            | 0.58<br>(0.49 to<br>0.69)                            | 0.58<br>(0.49 to<br>0.70)                            |
| Silicosis                                                      | 2.17<br>(1.71 to<br>2.72)                                  | 1.35<br>(1.02 to<br>1.80)                                  | 1.13<br>(0.83 to<br>1.52)                                  | 1.81<br>(1.38 to<br>2.37)                                  | 0.09<br>(0.08 to<br>0.12)                            | 0.08<br>(0.06 to<br>0.10)                            | 0.07<br>(0.05 to<br>0.09)                            | 0.09<br>(0.07 to<br>0.13)                            |
| Asbestosis                                                     | 1.81<br>(1.39 to<br>2.23)                                  | 2.75<br>(2.07 to<br>3.40)                                  | 2.95<br>(2.20 to<br>3.65)                                  | 2.55<br>(1.89 to<br>3.16)                                  | 0.07<br>(0.05 to<br>0.09)                            | 0.15<br>(0.10 to<br>0.20)                            | 0.17<br>(0.11 to<br>0.22)                            | 0.13<br>(0.08 to<br>0.17)                            |
| Coal workers pneumoconiosis                                    | 0.75<br>(0.36 to<br>1.00)                                  | 0.77<br>(0.43 to<br>1.03)                                  | 0.63<br>(0.35 to<br>0.86)                                  | 1.02<br>(0.54 to<br>1.39)                                  | 0.04<br>(0.02 to<br>0.06)                            | 0.05<br>(0.03 to<br>0.07)                            | 0.05<br>(0.02 to<br>0.06)                            | 0.07<br>(0.03 to<br>0.09)                            |
| Other pneumoconiosis                                           | 3.99<br>(3.30 to<br>4.93)                                  | 4.44<br>(3.66 to<br>5.61)                                  | 4.21<br>(3.40 to<br>5.32)                                  | 4.66<br>(3.83 to<br>5.85)                                  | 0.20<br>(0.16 to<br>0.25)                            | 0.29<br>(0.23 to<br>0.38)                            | 0.30<br>(0.23 to<br>0.40)                            | 0.29<br>(0.23 to<br>0.38)                            |
| Asthma                                                         | 617.92<br>(527.50 to<br>735.10)                            | 505.37<br>(321.32 to<br>757.83)                            | 366.97<br>(235.72 to<br>534.85)                            | 703.09<br>(435.48 to<br>1,074.33)                          | 22.47<br>(19.07 to<br>26.83)                         | 23.05<br>(14.78 to<br>34.88)                         | 17.44<br>(11.24 to<br>25.89)                         | 30.15<br>(18.99 to<br>45.99)                         |
| Interstitial lung disease and pulmonary sarcoidosis            | 135.60<br>(88.48 to<br>172.01)                             | 329.35<br>(230.07 to<br>407.03)                            | 378.99<br>(267.66 to<br>466.01)                            | 279.67<br>(188.95 to<br>349.82)                            | 6.25<br>(4.26 to<br>7.73)                            | 18.37<br>(13.42 to<br>22.99)                         | 21.92<br>(16.11 to<br>27.10)                         | 14.91<br>(10.49 to<br>19.07)                         |
| Other chronic respiratory diseases                             | 139.41<br>(106.34 to<br>198.75)                            | 213.87<br>(156.07 to<br>303.57)                            | 203.88<br>(151.55 to<br>285.96)                            | 234.24<br>(167.13 to<br>340.29)                            | 4.46<br>(3.29 to<br>6.31)                            | 9.13<br>(6.53 to<br>12.86)                           | 9.25<br>(6.68 to<br>12.79)                           | 9.30<br>(6.47 to<br>13.46)                           |
| <b>Cirrhosis and other chronic liver diseases</b>              | <b>2,296.76</b><br><b>(2,046.82 to</b><br><b>2,704.36)</b> | <b>3,960.06</b><br><b>(3,528.40 to</b><br><b>4,533.13)</b> | <b>3,839.24</b><br><b>(3,404.41 to</b><br><b>4,398.89)</b> | <b>4,151.98</b><br><b>(3,683.57 to</b><br><b>4,751.00)</b> | <b>95.97</b><br><b>(85.87 to</b><br><b>109.59)</b>   | <b>192.15</b><br><b>(170.01 to</b><br><b>216.20)</b> | <b>193.67</b><br><b>(171.52 to</b><br><b>217.18)</b> | <b>193.09</b><br><b>(167.26 to</b><br><b>218.99)</b> |
| Cirrhosis and other chronic liver diseases due to hepatitis B  | 556.58<br>(457.95 to<br>696.63)                            | 1,011.65<br>(833.17 to<br>1,274.87)                        | 977.87<br>(794.77 to<br>1,240.95)                          | 1,055.26<br>(866.75 to<br>1,332.03)                        | 23.22<br>(18.84 to<br>29.06)                         | 47.56<br>(38.30 to<br>59.57)                         | 47.56<br>(38.07 to<br>60.06)                         | 47.91<br>(38.35 to<br>59.52)                         |
| Cirrhosis and other chronic liver diseases due to hepatitis C  | 1,038.15<br>(851.86 to<br>1,263.96)                        | 1,886.18<br>(1,557.45 to<br>2,284.82)                      | 1,847.75<br>(1,517.46 to<br>2,238.59)                      | 1,943.78<br>(1,606.49 to<br>2,361.73)                      | 45.82<br>(37.58 to<br>55.61)                         | 93.45<br>(76.05 to<br>113.22)                        | 94.88<br>(77.31 to<br>114.24)                        | 92.94<br>(74.59 to<br>113.00)                        |
| Cirrhosis and other chronic liver diseases due to alcohol use  | 158.73<br>(132.25 to<br>194.89)                            | 269.54<br>(226.89 to<br>327.20)                            | 257.68<br>(213.90 to<br>315.44)                            | 293.12<br>(244.63 to<br>357.12)                            | 7.11<br>(5.94 to<br>8.61)                            | 13.61<br>(11.08 to<br>16.32)                         | 13.55<br>(11.14 to<br>16.19)                         | 14.19<br>(11.51 to<br>17.08)                         |
| Cirrhosis and other chronic liver diseases due to other causes | 543.30<br>(475.60 to<br>645.24)                            | 792.68<br>(679.21 to<br>934.18)                            | 755.94<br>(645.33 to<br>892.18)                            | 859.82<br>(736.45 to<br>1,020.86)                          | 19.81<br>(16.95 to<br>23.37)                         | 37.52<br>(30.93 to<br>44.65)                         | 37.68<br>(31.13 to<br>44.55)                         | 38.05<br>(31.39 to<br>45.35)                         |
| <b>Digestive diseases</b>                                      | <b>1,658.38</b><br><b>(921.36 to</b><br><b>1,183.00)</b>   | <b>1,374.19</b><br><b>(1,120.61 to</b><br><b>1,665.96)</b> | <b>1,226.22</b><br><b>(1,011.88 to</b><br><b>1,487.40)</b> | <b>1,617.23</b><br><b>(1,304.54 to</b><br><b>1,970.38)</b> | <b>37.82</b><br><b>(33.41 to</b><br><b>43.29)</b>    | <b>68.09</b><br><b>(55.42 to</b><br><b>85.78)</b>    | <b>63.99</b><br><b>(52.36 to</b><br><b>80.30)</b>    | <b>74.32</b><br><b>(59.49 to</b><br><b>94.47)</b>    |
| Peptic ulcer disease                                           | 228.53<br>(187.71 to<br>296.95)                            | 215.37<br>(164.43 to<br>306.85)                            | 168.20<br>(126.80 to<br>242.13)                            | 267.39<br>(203.95 to<br>376.28)                            | 8.79<br>(7.30 to<br>11.66)                           | 10.54<br>(8.07 to<br>14.99)                          | 8.71<br>(6.58 to<br>12.44)                           | 12.33<br>(9.26 to<br>17.36)                          |
| <b>North Africa and Middle East</b>                            |                                                            |                                                            |                                                            |                                                            |                                                      |                                                      |                                                      |                                                      |
| <b>YLLs (in 1000s)</b>                                         |                                                            |                                                            |                                                            |                                                            | <b>Deaths (in 1000s)</b>                             |                                                      |                                                      |                                                      |

| Cause                                      | 2016                                                       | 2040 Forecast                                              | 2040 Better Scenario                                       | 2040 Worse Scenario                                        | 2016                                                 | 2040 Forecast                                        | 2040 Better Scenario                                 | 2040 Worse Scenario                                  |
|--------------------------------------------|------------------------------------------------------------|------------------------------------------------------------|------------------------------------------------------------|------------------------------------------------------------|------------------------------------------------------|------------------------------------------------------|------------------------------------------------------|------------------------------------------------------|
| Gastritis and duodenitis                   | 10.24<br>(8.31 to<br>12.49)                                | 17.37<br>(13.98 to<br>21.51)                               | 15.28<br>(12.09 to<br>19.17)                               | 19.08<br>(15.33 to<br>23.58)                               | 0.41<br>(0.35 to<br>0.50)                            | 0.94<br>(0.76 to<br>1.17)                            | 0.87<br>(0.68 to<br>1.10)                            | 0.98<br>(0.78 to<br>1.23)                            |
| Appendicitis                               | 76.35<br>(55.51 to<br>101.46)                              | 79.99<br>(59.10 to<br>108.62)                              | 67.54<br>(50.01 to<br>93.32)                               | 97.86<br>(71.91 to<br>131.18)                              | 2.03<br>(1.55 to<br>2.80)                            | 3.02<br>(2.32 to<br>4.42)                            | 2.69<br>(2.04 to<br>4.04)                            | 3.39<br>(2.61 to<br>4.82)                            |
| Paralytic ileus and intestinal obstruction | 281.86<br>(231.21 to<br>354.32)                            | 339.96<br>(276.14 to<br>466.06)                            | 336.09<br>(271.56 to<br>462.16)                            | 370.79<br>(294.97 to<br>509.20)                            | 8.44<br>(6.96 to<br>12.05)                           | 16.57<br>(12.97 to<br>25.93)                         | 17.44<br>(13.66 to<br>26.90)                         | 16.08<br>(12.47 to<br>24.86)                         |
| Inguinal, femoral, and abdominal hernia    | 23.31<br>(18.71 to<br>31.98)                               | 27.52<br>(20.83 to<br>38.89)                               | 26.11<br>(19.48 to<br>36.34)                               | 29.68<br>(22.68 to<br>42.30)                               | 1.10<br>(0.83 to<br>1.58)                            | 1.71<br>(1.23 to<br>2.51)                            | 1.71<br>(1.23 to<br>2.53)                            | 1.73<br>(1.23 to<br>2.55)                            |
| Inflammatory bowel disease                 | 43.38<br>(36.27 to<br>57.71)                               | 59.36<br>(48.30 to<br>81.62)                               | 58.87<br>(47.39 to<br>80.33)                               | 60.62<br>(49.37 to<br>83.70)                               | 1.52<br>(1.12 to<br>1.75)                            | 2.55<br>(2.15 to<br>3.35)                            | 2.65<br>(2.20 to<br>3.48)                            | 2.45<br>(2.07 to<br>3.26)                            |
| Vascular intestinal disorders              | 57.59<br>(47.77 to<br>70.54)                               | 112.00<br>(91.16 to<br>136.35)                             | 109.45<br>(87.47 to<br>134.24)                             | 115.24<br>(95.15 to<br>142.05)                             | 2.71<br>(2.21 to<br>3.34)                            | 6.43<br>(5.12 to<br>7.96)                            | 6.53<br>(5.11 to<br>8.07)                            | 6.32<br>(5.09 to<br>7.98)                            |
| Gallbladder and biliary diseases           | 141.52<br>(95.62 to<br>172.09)                             | 238.08<br>(120.20 to<br>399.69)                            | 186.84<br>(96.71 to<br>313.05)                             | 325.67<br>(161.29 to<br>551.27)                            | 6.04<br>(4.45 to<br>7.07)                            | 12.81<br>(6.83 to<br>21.56)                          | 10.44<br>(5.79 to<br>17.44)                          | 16.37<br>(8.62 to<br>27.38)                          |
| Pancreatitis                               | 84.87<br>(64.48 to<br>100.03)                              | 137.08<br>(95.46 to<br>182.80)                             | 121.47<br>(81.96 to<br>160.34)                             | 163.70<br>(113.37 to<br>226.53)                            | 3.17<br>(2.30 to<br>3.78)                            | 6.33<br>(4.17 to<br>8.41)                            | 5.83<br>(3.78 to<br>7.73)                            | 7.23<br>(4.73 to<br>9.86)                            |
| Other digestive diseases                   | 110.73<br>(88.53 to<br>135.53)                             | 147.46<br>(118.68 to<br>183.86)                            | 136.36<br>(108.68 to<br>170.55)                            | 167.22<br>(132.66 to<br>210.69)                            | 3.82<br>(3.11 to<br>4.84)                            | 7.20<br>(5.72 to<br>9.42)                            | 7.11<br>(5.61 to<br>9.47)                            | 7.45<br>(5.86 to<br>9.73)                            |
| <b>Neurological disorders</b>              | <b>2,036.68</b><br><b>(1,827.65 to</b><br><b>2,303.91)</b> | <b>5,064.85</b><br><b>(3,807.67 to</b><br><b>7,091.75)</b> | <b>4,961.77</b><br><b>(3,835.13 to</b><br><b>6,660.04)</b> | <b>5,104.23</b><br><b>(3,762.02 to</b><br><b>7,178.36)</b> | <b>141.86</b><br><b>(123.33 to</b><br><b>163.99)</b> | <b>434.62</b><br><b>(316.53 to</b><br><b>623.66)</b> | <b>443.22</b><br><b>(334.86 to</b><br><b>609.08)</b> | <b>412.44</b><br><b>(289.62 to</b><br><b>612.25)</b> |
| Alzheimer's disease and other dementias    | 1,303.37<br>(1,104.54 to<br>1,548.90)                      | 3,941.28<br>(2,730.29 to<br>5,917.94)                      | 3,836.36<br>(2,720.74 to<br>5,460.53)                      | 3,927.99<br>(2,611.28 to<br>6,047.45)                      | 120.04<br>(102.12 to<br>141.65)                      | 382.56<br>(265.12 to<br>568.03)                      | 386.34<br>(278.27 to<br>549.22)                      | 364.63<br>(243.89 to<br>565.57)                      |
| Parkinson's disease                        | 119.47<br>(92.70 to<br>151.42)                             | 381.91<br>(296.64 to<br>488.01)                            | 433.19<br>(336.83 to<br>548.86)                            | 325.98<br>(247.90 to<br>412.19)                            | 9.46<br>(7.35 to<br>12.23)                           | 32.59<br>(24.97 to<br>41.81)                         | 37.96<br>(29.18 to<br>48.86)                         | 26.91<br>(20.01 to<br>34.94)                         |
| Epilepsy                                   | 391.91<br>(339.38 to<br>434.38)                            | 424.83<br>(353.37 to<br>497.83)                            | 369.78<br>(305.04 to<br>434.69)                            | 530.16<br>(438.63 to<br>637.50)                            | 7.36<br>(6.39 to<br>8.16)                            | 10.07<br>(8.39 to<br>11.66)                          | 9.12<br>(7.54 to<br>10.64)                           | 11.86<br>(9.91 to<br>13.78)                          |
| Multiple sclerosis                         | 35.15<br>(29.51 to<br>44.63)                               | 53.57<br>(42.14 to<br>70.82)                               | 54.04<br>(42.68 to<br>71.01)                               | 52.65<br>(41.58 to<br>69.62)                               | 0.94<br>(0.80 to<br>1.16)                            | 1.63<br>(1.33 to<br>2.05)                            | 1.68<br>(1.36 to<br>2.10)                            | 1.58<br>(1.29 to<br>1.99)                            |
| Motor neuron disease                       | 42.65<br>(35.62 to<br>48.30)                               | 70.99<br>(58.14 to<br>82.56)                               | 72.28<br>(58.80 to<br>84.66)                               | 69.84<br>(57.12 to<br>80.48)                               | 1.14<br>(0.96 to<br>1.28)                            | 2.41<br>(2.05 to<br>2.77)                            | 2.49<br>(2.10 to<br>2.87)                            | 2.32<br>(1.97 to<br>2.63)                            |
| Other neurological disorders               | 144.13<br>(129.99 to<br>159.25)                            | 192.28<br>(170.49 to<br>214.91)                            | 196.12<br>(173.58 to<br>220.58)                            | 197.62<br>(173.27 to<br>225.15)                            | 2.93<br>(2.69 to<br>3.18)                            | 5.35<br>(4.90 to<br>5.85)                            | 5.63<br>(5.11 to<br>6.18)                            | 5.15<br>(4.72 to<br>5.61)                            |
| <b>Mental disorders</b>                    | <b>366.36</b><br><b>(277.07 to</b><br><b>428.30)</b>       | <b>735.28</b><br><b>(561.36 to</b><br><b>881.84)</b>       | <b>787.89</b><br><b>(610.40 to</b><br><b>949.31)</b>       | <b>708.09</b><br><b>(544.81 to</b><br><b>841.04)</b>       | <b>8.19</b><br><b>(6.36 to</b><br><b>9.42)</b>       | <b>19.33</b><br><b>(15.47 to</b><br><b>22.49)</b>    | <b>21.33</b><br><b>(17.43 to</b><br><b>24.85)</b>    | <b>17.95</b><br><b>(14.37 to</b><br><b>20.77)</b>    |
| Alcohol use disorders                      | 57.31<br>(44.87 to<br>78.32)                               | 79.10<br>(58.86 to<br>121.95)                              | 79.80<br>(59.39 to<br>121.64)                              | 79.58<br>(59.18 to<br>122.79)                              | 1.47<br>(1.15 to<br>1.98)                            | 2.31<br>(1.74 to<br>3.35)                            | 2.39<br>(1.80 to<br>3.40)                            | 2.27<br>(1.72 to<br>3.30)                            |
| Drug use disorders                         | 307.97<br>(219.06 to<br>364.61)                            | 654.69<br>(482.54 to<br>797.06)                            | 706.58<br>(527.30 to<br>859.73)                            | 627.02<br>(460.27 to<br>754.72)                            | 6.70<br>(4.94 to<br>7.84)                            | 16.99<br>(13.22 to<br>19.91)                         | 18.91<br>(14.97 to<br>22.13)                         | 15.66<br>(12.23 to<br>18.25)                         |
| Opioid use disorders                       | 242.10<br>(172.17 to<br>287.94)                            | 480.66<br>(350.68 to<br>588.08)                            | 493.42<br>(370.07 to<br>605.98)                            | 474.50<br>(345.69 to<br>580.44)                            | 5.10<br>(3.78 to<br>6.02)                            | 11.58<br>(8.93 to<br>13.89)                          | 12.15<br>(9.50 to<br>14.61)                          | 11.16<br>(8.52 to<br>13.36)                          |
| Cocaine use disorders                      | 11.08<br>(6.70 to<br>14.92)                                | 29.23<br>(19.02 to<br>39.48)                               | 33.31<br>(21.89 to<br>44.92)                               | 27.16<br>(17.90 to<br>36.35)                               | 0.25<br>(0.16 to<br>0.33)                            | 0.77<br>(0.51 to<br>1.04)                            | 0.89<br>(0.60 to<br>1.20)                            | 0.70<br>(0.48 to<br>0.94)                            |



|                                                            |                                       |                                         |                                        |                                         |                                 |                                   |                                   |                                   |
|------------------------------------------------------------|---------------------------------------|-----------------------------------------|----------------------------------------|-----------------------------------------|---------------------------------|-----------------------------------|-----------------------------------|-----------------------------------|
| Amphetamine use disorders                                  | 6.49<br>(3.93 to<br>8.91)             | 23.65<br>(14.66 to<br>32.64)            | 29.64<br>(18.05 to<br>39.83)           | 20.75<br>(13.03 to<br>28.73)            | 0.14<br>(0.09 to<br>0.19)       | 0.59<br>(0.37 to<br>0.80)         | 0.74<br>(0.47 to<br>1.01)         | 0.50<br>(0.33 to<br>0.70)         |
| Other drug use disorders                                   | 48.29<br>(26.97 to<br>59.93)          | 121.15<br>(76.61 to<br>155.04)          | 150.20<br>(92.65 to<br>193.24)         | 104.62<br>(64.80 to<br>131.65)          | 1.21<br>(0.75 to<br>1.45)       | 4.05<br>(2.81 to<br>4.89)         | 5.12<br>(3.57 to<br>6.20)         | 3.29<br>(2.32 to<br>3.91)         |
| Eating disorders                                           | 1.08<br>(0.85 to<br>1.42)             | 1.48<br>(1.12 to<br>1.97)               | 1.51<br>(1.14 to<br>2.06)              | 1.48<br>(1.12 to<br>1.94)               | 0.02<br>(0.02 to<br>0.03)       | 0.03<br>(0.02 to<br>0.04)         | 0.03<br>(0.02 to<br>0.04)         | 0.03<br>(0.02 to<br>0.04)         |
| <b>North Africa and Middle East</b>                        |                                       |                                         |                                        |                                         |                                 |                                   |                                   |                                   |
| Cause                                                      | YLLs (in 1000s)                       |                                         |                                        |                                         | Deaths (in 1000s)               |                                   |                                   |                                   |
|                                                            | 2016                                  | 2040 Forecast                           | 2040 Better Scenario                   | 2040 Worse Scenario                     | 2016                            | 2040 Forecast                     | 2040 Better Scenario              | 2040 Worse Scenario               |
|                                                            | 5,737.31<br>(5,431.59 to<br>6,158.08) | 12,845.70<br>(7,574.26 to<br>23,703.60) | 9,625.16<br>(5,944.67 to<br>18,830.52) | 16,001.46<br>(9,660.01 to<br>27,912.58) | 236.21<br>(223.63 to<br>252.60) | 686.32<br>(389.39 to<br>1,279.74) | 599.17<br>(316.31 to<br>1,092.87) | 813.58<br>(472.83 to<br>1,435.58) |
| Diabetes, urogenital, blood, and endocrine diseases        |                                       |                                         |                                        |                                         |                                 |                                   |                                   |                                   |
| Diabetes mellitus                                          | 2,436.94<br>(2,292.30 to<br>2,596.77) | 4,076.38<br>(2,909.20 to<br>5,635.47)   | 3,203.51<br>(2,307.63 to<br>4,413.73)  | 5,316.16<br>(3,756.56 to<br>7,283.19)   | 112.34<br>(105.88 to<br>119.22) | 221.84<br>(161.50 to<br>292.70)   | 184.60<br>(137.61 to<br>238.34)   | 274.11<br>(196.10 to<br>363.28)   |
| Acute glomerulonephritis                                   | 26.09<br>(20.56 to<br>34.51)          | 24.60<br>(19.22 to<br>31.29)            | 20.71<br>(15.81 to<br>26.66)           | 27.18<br>(21.34 to<br>34.50)            | 0.67<br>(0.56 to<br>0.82)       | 0.87<br>(0.68 to<br>1.10)         | 0.77<br>(0.58 to<br>1.01)         | 0.92<br>(0.73 to<br>1.16)         |
| Chronic kidney disease                                     | 2,198.53<br>(2,020.48 to<br>2,523.15) | 7,341.74<br>(2,121.41 to<br>18,694.04)  | 5,079.19<br>(1,573.31 to<br>14,444.74) | 9,087.10<br>(2,709.13 to<br>21,626.71)  | 95.08<br>(87.07 to<br>112.03)   | 406.12<br>(106.31 to<br>1,042.28) | 296.51<br>(80.57 to<br>873.83)    | 480.07<br>(128.99 to<br>1,130.39) |
| Chronic kidney disease due to diabetes mellitus            | 894.28<br>(772.42 to<br>1,039.38)     | 3,485.27<br>(922.20 to<br>9,102.93)     | 2,379.86<br>(671.27 to<br>7,156.19)    | 4,321.89<br>(1,170.54 to<br>10,576.19)  | 39.04<br>(33.91 to<br>45.86)    | 176.90<br>(43.33 to<br>452.45)    | 126.33<br>(32.36 to<br>373.74)    | 212.45<br>(54.26 to<br>508.04)    |
| Chronic kidney disease due to hypertension                 | 331.81<br>(283.24 to<br>390.40)       | 1,392.95<br>(334.86 to<br>3,670.83)     | 1,014.05<br>(260.06 to<br>3,095.03)    | 1,641.22<br>(406.25 to<br>4,048.56)     | 21.71<br>(18.60 to<br>25.84)    | 105.89<br>(25.90 to<br>265.01)    | 82.28<br>(21.19 to<br>237.55)     | 118.84<br>(30.08 to<br>287.22)    |
| Chronic kidney disease due to glomerulonephritis           | 315.11<br>(265.49 to<br>370.01)       | 701.21<br>(268.03 to<br>1,666.32)       | 477.00<br>(196.48 to<br>1,256.81)      | 900.25<br>(360.55 to<br>2,040.11)       | 9.81<br>(8.19 to<br>11.81)      | 31.68<br>(9.30 to<br>81.58)       | 22.18<br>(6.74 to<br>64.27)       | 38.80<br>(12.01 to<br>94.53)      |
| Chronic kidney disease due to other and unspecified causes | 657.33<br>(564.14 to<br>778.74)       | 1,762.30<br>(566.59 to<br>4,250.25)     | 1,208.28<br>(412.41 to<br>3,330.79)    | 2,233.74<br>(745.73 to<br>4,998.77)     | 24.52<br>(20.75 to<br>29.72)    | 91.65<br>(24.26 to<br>227.76)     | 65.72<br>(18.04 to<br>192.70)     | 109.98<br>(30.41 to<br>256.78)    |
| Urinary diseases and male infertility                      | 167.12<br>(151.75 to<br>186.27)       | 320.72<br>(283.13 to<br>361.17)         | 304.61<br>(265.00 to<br>347.20)        | 340.12<br>(303.81 to<br>380.50)         | 7.29<br>(6.74 to<br>8.02)       | 20.79<br>(18.52 to<br>23.33)      | 20.76<br>(18.36 to<br>23.58)      | 20.57<br>(18.13 to<br>23.10)      |
| Urinary tract infections                                   | 106.55<br>(91.65 to<br>121.67)        | 254.26<br>(222.52 to<br>287.22)         | 248.74<br>(214.55 to<br>285.21)        | 262.37<br>(229.61 to<br>295.38)         | 4.99<br>(4.35 to<br>5.56)       | 17.11<br>(14.94 to<br>19.23)      | 17.49<br>(15.24 to<br>19.92)      | 16.60<br>(14.41 to<br>18.66)      |
| Urolithiasis                                               | 6.67<br>(5.61 to<br>7.78)             | 11.65<br>(9.27 to<br>14.06)             | 10.27<br>(8.18 to<br>12.57)            | 12.96<br>(10.44 to<br>15.40)            | 0.25<br>(0.19 to<br>0.29)       | 0.56<br>(0.41 to<br>0.68)         | 0.51<br>(0.37 to<br>0.63)         | 0.60<br>(0.45 to<br>0.73)         |
| Other urinary diseases                                     | 53.90<br>(43.77 to<br>67.63)          | 54.82<br>(42.37 to<br>70.73)            | 45.60<br>(34.64 to<br>60.24)           | 64.78<br>(50.83 to<br>83.43)            | 2.05<br>(1.70 to<br>2.54)       | 3.12<br>(2.34 to<br>4.11)         | 2.76<br>(2.04 to<br>3.77)         | 3.37<br>(2.55 to<br>4.39)         |
| Gynecological diseases                                     | 7.47<br>(5.86 to<br>9.16)             | 8.84<br>(6.45 to<br>11.52)              | 7.35<br>(5.22 to<br>9.81)              | 10.94<br>(8.13 to<br>14.20)             | 0.17<br>(0.14 to<br>0.21)       | 0.22<br>(0.16 to<br>0.27)         | 0.18<br>(0.13 to<br>0.23)         | 0.27<br>(0.20 to<br>0.34)         |
| Uterine fibroids                                           | 0.46<br>(0.23 to<br>0.76)             | 0.48<br>(0.23 to<br>0.87)               | 0.39<br>(0.18 to<br>0.73)              | 0.60<br>(0.29 to<br>1.07)               | 0.01<br>(0.01 to<br>0.02)       | 0.02<br>(0.01 to<br>0.03)         | 0.01<br>(0.01 to<br>0.02)         | 0.02<br>(0.01 to<br>0.03)         |
| Polycystic ovarian syndrome                                | 1.14<br>(0.49 to<br>2.16)             | 0.87<br>(0.29 to<br>2.00)               | 0.63<br>(0.20 to<br>1.45)              | 1.20<br>(0.41 to<br>2.58)               | 0.02<br>(0.01 to<br>0.05)       | 0.02<br>(0.01 to<br>0.04)         | 0.01<br>(0.00 to<br>0.03)         | 0.03<br>(0.01 to<br>0.06)         |
| Endometriosis                                              | 0.07<br>(0.03 to<br>0.15)             | 0.11<br>(0.05 to<br>0.24)               | 0.09<br>(0.04 to<br>0.20)              | 0.13<br>(0.06 to<br>0.29)               | 0.00<br>(0.00 to<br>0.00)       | 0.00<br>(0.00 to<br>0.01)         | 0.00<br>(0.00 to<br>0.00)         | 0.00<br>(0.00 to<br>0.01)         |
| Genital prolapse                                           | 0.14<br>(0.07 to<br>0.29)             | 0.15<br>(0.06 to<br>0.33)               | 0.12<br>(0.05 to<br>0.27)              | 0.19<br>(0.08 to<br>0.44)               | 0.01<br>(0.00 to<br>0.01)       | 0.01<br>(0.00 to<br>0.01)         | 0.00<br>(0.00 to<br>0.01)         | 0.01<br>(0.00 to<br>0.02)         |

|                                                   |                              |                              |                              |                              |                           |                           |                           |                           |
|---------------------------------------------------|------------------------------|------------------------------|------------------------------|------------------------------|---------------------------|---------------------------|---------------------------|---------------------------|
| Other gynecological diseases                      | 5.66<br>(3.95 to 7.42)       | 7.23<br>(4.95 to 9.80)       | 6.13<br>(4.10 to 8.39)       | 8.82<br>(6.02 to 11.76)      | 0.13<br>(0.09 to 0.17)    | 0.17<br>(0.12 to 0.23)    | 0.15<br>(0.10 to 0.20)    | 0.21<br>(0.15 to 0.28)    |
| Hemoglobinopathies and hemolytic anemias          | 340.69<br>(267.66 to 504.89) | 367.17<br>(280.52 to 541.23) | 320.32<br>(244.36 to 468.45) | 440.71<br>(331.20 to 665.25) | 6.69<br>(5.50 to 9.49)    | 9.73<br>(7.86 to 13.52)   | 8.69<br>(6.95 to 12.00)   | 11.13<br>(8.87 to 15.68)  |
| Thalassemias                                      | 62.43<br>(43.48 to 110.38)   | 27.23<br>(16.02 to 50.79)    | 27.74<br>(16.36 to 51.74)    | 32.78<br>(18.39 to 62.88)    | 0.76<br>(0.53 to 1.34)    | 0.34<br>(0.20 to 0.63)    | 0.35<br>(0.21 to 0.64)    | 0.41<br>(0.23 to 0.78)    |
| Sickle cell disorders                             | 199.95<br>(149.61 to 303.01) | 234.37<br>(168.49 to 359.26) | 202.54<br>(145.47 to 310.35) | 284.06<br>(202.59 to 443.66) | 3.27<br>(2.46 to 4.84)    | 4.71<br>(3.47 to 7.00)    | 4.13<br>(3.05 to 6.10)    | 5.55<br>(4.13 to 8.38)    |
| G6PD deficiency                                   | 47.58<br>(36.89 to 68.23)    | 66.61<br>(48.44 to 99.39)    | 54.91<br>(40.10 to 82.49)    | 80.73<br>(58.86 to 121.06)   | 1.06<br>(0.83 to 1.50)    | 1.94<br>(1.48 to 2.82)    | 1.64<br>(1.24 to 2.39)    | 2.28<br>(1.74 to 3.34)    |
| Other hemoglobinopathies and hemolytic anemias    | 30.73<br>(25.42 to 42.30)    | 38.96<br>(31.47 to 54.34)    | 35.12<br>(28.01 to 48.78)    | 43.14<br>(34.88 to 60.20)    | 1.61<br>(1.37 to 2.20)    | 2.73<br>(2.20 to 3.75)    | 2.57<br>(2.09 to 3.50)    | 2.89<br>(2.31 to 3.94)    |
| Endocrine, metabolic, blood, and immune disorders | 560.47<br>(423.24 to 648.98) | 706.27<br>(532.77 to 829.10) | 689.47<br>(519.39 to 819.83) | 779.25<br>(589.62 to 916.65) | 13.97<br>(10.96 to 15.71) | 26.76<br>(21.14 to 30.67) | 27.66<br>(21.88 to 32.21) | 26.52<br>(20.97 to 30.29) |

#### North Africa and Middle East

| Cause                                         | YLLs (in 1000s)                          |                                          |                                           |                                            | Deaths (in 1000s)                   |                                  |                                  |                                    |
|-----------------------------------------------|------------------------------------------|------------------------------------------|-------------------------------------------|--------------------------------------------|-------------------------------------|----------------------------------|----------------------------------|------------------------------------|
|                                               | 2016                                     | 2040 Forecast                            | 2040 Better Scenario                      | 2040 Worse Scenario                        | 2016                                | 2040 Forecast                    | 2040 Better Scenario             | 2040 Worse Scenario                |
|                                               | <b>Musculoskeletal disorders</b>         | <b>118.37</b><br>(98.48 to 141.17)       | <b>206.65</b><br>(154.48 to 238.64)       | <b>202.45</b><br>(151.86 to 237.10)        | <b>214.03</b><br>(161.78 to 245.39) | <b>3.18</b><br>(2.48 to 3.58)    | <b>7.67</b><br>(5.36 to 8.84)    | <b>7.63</b><br>(5.32 to 8.87)      |
| Rheumatoid arthritis                          | 15.75<br>(11.83 to 21.36)                | 29.44<br>(21.01 to 39.19)                | 24.42<br>(17.35 to 33.21)                 | 37.19<br>(26.50 to 48.53)                  | 0.56<br>(0.38 to 0.73)              | 1.45<br>(0.95 to 1.90)           | 1.24<br>(0.81 to 1.64)           | 1.76<br>(1.18 to 2.29)             |
| Other musculoskeletal disorders               | 102.62<br>(84.67 to 126.24)              | 177.20<br>(130.47 to 206.00)             | 178.03<br>(131.82 to 208.88)              | 176.84<br>(130.84 to 205.42)               | 2.63<br>(2.02 to 2.96)              | 6.22<br>(4.24 to 7.20)           | 6.39<br>(4.39 to 7.43)           | 5.98<br>(4.06 to 6.87)             |
| <b>Other non-communicable diseases</b>        | <b>7135.62</b><br>(5,608.78 to 8,598.12) | <b>4825.43</b><br>(3,502.86 to 6,468.92) | <b>3,950.43</b><br>(2,833.18 to 5,309.87) | <b>7,835.47</b><br>(5,315.60 to 10,896.59) | <b>88.72</b><br>(70.08 to 106.42)   | <b>74.15</b><br>(57.18 to 93.86) | <b>63.90</b><br>(49.38 to 80.50) | <b>109.10</b><br>(78.46 to 145.76) |
| Congenital birth defects                      | 6,803.08<br>(5,303.82 to 8,214.35)       | 4,415.53<br>(3,124.35 to 5,961.84)       | 3,567.63<br>(2,491.70 to 4,821.81)        | 7,305.00<br>(4,833.54 to 10,269.49)        | 81.59<br>(63.92 to 98.04)           | 55.18<br>(39.86 to 73.19)        | 44.83<br>(31.89 to 59.58)        | 89.41<br>(60.20 to 124.17)         |
| Neural tube defects                           | 413.81<br>(240.36 to 689.25)             | 143.01<br>(64.39 to 274.49)              | 103.67<br>(46.58 to 199.22)               | 298.35<br>(129.26 to 581.08)               | 4.88<br>(2.85 to 8.08)              | 1.74<br>(0.81 to 3.30)           | 1.26<br>(0.58 to 2.37)           | 3.57<br>(1.58 to 6.88)             |
| Congenital heart anomalies                    | 2,966.77<br>(2,386.34 to 3,741.46)       | 1,871.54<br>(1,366.20 to 2,547.56)       | 1,493.72<br>(1,070.36 to 2,055.94)        | 3,084.32<br>(2,160.36 to 4,367.08)         | 35.69<br>(28.92 to 44.87)           | 23.43<br>(17.47 to 31.49)        | 18.78<br>(13.86 to 25.36)        | 37.85<br>(26.88 to 52.89)          |
| Orofacial clefts                              | 15.54<br>(8.71 to 32.29)                 | 5.10<br>(2.52 to 11.41)                  | 3.29<br>(1.61 to 7.45)                    | 9.72<br>(4.66 to 22.46)                    | 0.18<br>(0.10 to 0.37)              | 0.06<br>(0.03 to 0.13)           | 0.04<br>(0.02 to 0.09)           | 0.11<br>(0.05 to 0.26)             |
| Down syndrome                                 | 209.82<br>(160.72 to 292.14)             | 165.23<br>(113.23 to 257.74)             | 145.99<br>(102.44 to 224.88)              | 244.70<br>(153.08 to 432.59)               | 2.64<br>(2.04 to 3.63)              | 2.28<br>(1.63 to 3.49)           | 2.04<br>(1.48 to 3.06)           | 3.24<br>(2.10 to 5.48)             |
| Other chromosomal abnormalities               | 200.70<br>(138.49 to 410.54)             | 186.95<br>(121.27 to 395.35)             | 151.83<br>(97.58 to 323.38)               | 279.20<br>(173.68 to 615.21)               | 2.38<br>(1.65 to 4.83)              | 2.28<br>(1.50 to 4.75)           | 1.86<br>(1.21 to 3.91)           | 3.37<br>(2.13 to 7.36)             |
| Congenital musculoskeletal and limb anomalies | 160.94<br>(109.90 to 280.19)             | 115.72<br>(67.37 to 244.59)              | 95.62<br>(53.85 to 212.00)                | 185.11<br>(98.70 to 414.90)                | 1.93<br>(1.33 to 3.35)              | 1.43<br>(0.84 to 2.97)           | 1.18<br>(0.68 to 2.58)           | 2.25<br>(1.22 to 4.99)             |
| Urogenital congenital anomalies               | 246.42<br>(171.26 to 330.83)             | 158.51<br>(103.54 to 221.89)             | 129.64<br>(82.14 to 182.45)               | 250.51<br>(151.77 to 360.68)               | 3.05<br>(2.13 to 4.05)              | 2.21<br>(1.48 to 2.99)           | 1.84<br>(1.22 to 2.49)           | 3.31<br>(2.07 to 4.67)             |
| Digestive congenital anomalies                | 300.84<br>(108.12 to 476.56)             | 185.96<br>(58.07 to 333.42)              | 145.09<br>(46.06 to 279.51)               | 328.93<br>(101.41 to 622.73)               | 3.52<br>(1.27 to 5.58)              | 2.20<br>(0.70 to 3.93)           | 1.72<br>(0.55 to 3.30)           | 3.87<br>(1.21 to 7.33)             |

|                                      |                                                               |                                                               |                                                               |                                                               |                                                      |                                                      |                                                      |                                                      |
|--------------------------------------|---------------------------------------------------------------|---------------------------------------------------------------|---------------------------------------------------------------|---------------------------------------------------------------|------------------------------------------------------|------------------------------------------------------|------------------------------------------------------|------------------------------------------------------|
| Other congenital birth defects       | 2,288.24<br>(1,541.22 to<br>3,141.28)                         | 1,583.52<br>(894.40 to<br>2,454.35)                           | 1,298.79<br>(725.62 to<br>2,028.68)                           | 2,624.15<br>(1,382.42 to<br>4,327.65)                         | 27.32<br>(18.37 to<br>37.40)                         | 19.56<br>(11.22 to<br>30.02)                         | 16.10<br>(9.12 to<br>24.84)                          | 31.85<br>(17.05 to<br>52.05)                         |
| Skin and subcutaneous diseases       | 81.37<br>(43.03 to<br>106.25)                                 | 251.63<br>(142.29 to<br>335.87)                               | 245.85<br>(138.18 to<br>334.09)                               | 258.68<br>(143.72 to<br>340.25)                               | 4.21<br>(2.41 to<br>5.94)                            | 17.14<br>(10.10 to<br>24.16)                         | 17.48<br>(10.39 to<br>24.64)                         | 16.54<br>(9.70 to<br>23.09)                          |
| Cellulitis                           | 8.36<br>(4.29 to<br>12.76)                                    | 31.20<br>(17.01 to<br>51.86)                                  | 31.90<br>(17.80 to<br>53.12)                                  | 30.20<br>(15.81 to<br>49.75)                                  | 0.36<br>(0.20 to<br>0.65)                            | 1.85<br>(1.08 to<br>3.45)                            | 1.97<br>(1.16 to<br>3.66)                            | 1.69<br>(0.96 to<br>3.08)                            |
| Pyoderma                             | 39.03<br>(19.84 to<br>52.43)                                  | 129.98<br>(74.29 to<br>180.49)                                | 125.85<br>(73.30 to<br>177.45)                                | 135.79<br>(76.21 to<br>187.93)                                | 1.70<br>(1.00 to<br>2.64)                            | 8.26<br>(5.00 to<br>12.60)                           | 8.42<br>(5.12 to<br>12.80)                           | 8.00<br>(4.78 to<br>12.13)                           |
| Decubitus ulcer                      | 29.95<br>(15.12 to<br>38.72)                                  | 83.28<br>(39.45 to<br>111.23)                                 | 81.21<br>(37.65 to<br>109.27)                                 | 85.12<br>(40.64 to<br>114.23)                                 | 2.03<br>(1.02 to<br>2.66)                            | 6.71<br>(3.13 to<br>8.98)                            | 6.77<br>(3.14 to<br>8.95)                            | 6.54<br>(3.12 to<br>8.79)                            |
| Other skin and subcutaneous diseases | 4.03<br>(2.17 to<br>5.66)                                     | 7.17<br>(4.04 to<br>10.50)                                    | 6.89<br>(3.87 to<br>9.96)                                     | 7.57<br>(4.24 to<br>10.87)                                    | 0.12<br>(0.07 to<br>0.20)                            | 0.32<br>(0.20 to<br>0.52)                            | 0.32<br>(0.20 to<br>0.51)                            | 0.31<br>(0.20 to<br>0.51)                            |
| Sudden infant death syndrome         | 251.17<br>(169.26 to<br>363.35)                               | 158.27<br>(85.50 to<br>258.56)                                | 136.94<br>(73.05 to<br>225.52)                                | 271.79<br>(141.76 to<br>447.60)                               | 2.92<br>(1.96 to<br>4.22)                            | 1.84<br>(0.99 to<br>3.00)                            | 1.59<br>(0.85 to<br>2.62)                            | 3.15<br>(1.64 to<br>5.19)                            |
| <b>Injuries</b>                      | <b>23,111.33</b><br><b>(20,091.20 to</b><br><b>26,434.13)</b> | <b>15,968.19</b><br><b>(14,069.74 to</b><br><b>19,112.24)</b> | <b>12,258.03</b><br><b>(10,671.90 to</b><br><b>15,228.82)</b> | <b>20,587.94</b><br><b>(18,230.19 to</b><br><b>23,954.95)</b> | <b>425.79</b><br><b>(374.81 to</b><br><b>480.63)</b> | <b>367.71</b><br><b>(328.80 to</b><br><b>426.31)</b> | <b>290.09</b><br><b>(256.84 to</b><br><b>346.90)</b> | <b>452.19</b><br><b>(404.94 to</b><br><b>516.66)</b> |
| <b>Transport injuries</b>            | <b>7,998.80</b><br><b>(7,522.89 to</b><br><b>8,538.38)</b>    | <b>8,732.43</b><br><b>(7,845.00 to</b><br><b>9,740.66)</b>    | <b>5,734.43</b><br><b>(5,139.28 to</b><br><b>6,365.00)</b>    | <b>12,161.86</b><br><b>(10,917.79 to</b><br><b>13,630.33)</b> | <b>199.38</b><br><b>(149.65 to</b><br><b>168.18)</b> | <b>199.38</b><br><b>(180.64 to</b><br><b>220.97)</b> | <b>134.12</b><br><b>(121.46 to</b><br><b>149.02)</b> | <b>265.08</b><br><b>(239.91 to</b><br><b>295.20)</b> |
| Road injuries                        | 7,779.70<br>(7,322.94 to<br>8,312.46)                         | 8,450.08<br>(7,592.57 to<br>9,429.68)                         | 5,494.12<br>(4,927.93 to<br>6,104.06)                         | 11,817.66<br>(10,608.11 to<br>13,229.33)                      | 154.16<br>(145.45 to<br>163.69)                      | 192.32<br>(173.96 to<br>212.93)                      | 127.99<br>(115.79 to<br>142.11)                      | 256.84<br>(232.22 to<br>286.00)                      |
| Pedestrian road injuries             | 2,050.54<br>(1,746.63 to<br>2,515.28)                         | 1,964.34<br>(1,587.14 to<br>2,607.66)                         | 1,289.63<br>(1,037.16 to<br>1,789.77)                         | 2,662.28<br>(2,162.43 to<br>3,547.13)                         | 42.62<br>(36.10 to<br>52.02)                         | 49.66<br>(40.75 to<br>63.59)                         | 33.05<br>(26.99 to<br>43.92)                         | 64.62<br>(53.37 to<br>83.03)                         |

#### North Africa and Middle East

| Cause                          | YLLs (in 1000s)                                            |                                                            |                                                            |                                                            | Deaths (in 1000s)                                 |                                                     |                                                    |                                                     |
|--------------------------------|------------------------------------------------------------|------------------------------------------------------------|------------------------------------------------------------|------------------------------------------------------------|---------------------------------------------------|-----------------------------------------------------|----------------------------------------------------|-----------------------------------------------------|
|                                | 2016                                                       | 2040 Forecast                                              | 2040 Better Scenario                                       | 2040 Worse Scenario                                        | 2016                                              | 2040 Forecast                                       | 2040 Better Scenario                               | 2040 Worse Scenario                                 |
| Cyclist road injuries          | 167.91<br>(131.56 to<br>215.25)                            | 194.92<br>(150.71 to<br>248.37)                            | 132.74<br>(102.10 to<br>168.66)                            | 269.38<br>(203.94 to<br>348.60)                            | 3.25<br>(2.58 to<br>4.21)                         | 4.38<br>(3.44 to<br>5.60)                           | 3.13<br>(2.45 to<br>4.01)                          | 5.62<br>(4.39 to<br>7.22)                           |
| Motorcyclist road injuries     | 696.96<br>(582.62 to<br>934.38)                            | 888.86<br>(714.55 to<br>1,156.35)                          | 685.24<br>(551.08 to<br>891.17)                            | 1,111.42<br>(890.29 to<br>1,428.85)                        | 12.16<br>(10.15 to<br>16.26)                      | 16.32<br>(13.21 to<br>20.99)                        | 12.88<br>(10.46 to<br>16.35)                       | 19.79<br>(15.95 to<br>25.56)                        |
| Motor vehicle road injuries    | 4,829.00<br>(4,285.24 to<br>5,284.20)                      | 5,362.26<br>(4,574.15 to<br>6,150.58)                      | 3,359.67<br>(2,810.06 to<br>3,876.16)                      | 7,715.48<br>(6,584.33 to<br>8,895.06)                      | 95.44<br>(84.20 to<br>104.26)                     | 120.99<br>(103.29 to<br>137.52)                     | 78.23<br>(66.59 to<br>89.26)                       | 165.52<br>(142.12 to<br>188.93)                     |
| Other road injuries            | 35.29<br>(27.25 to<br>45.16)                               | 39.70<br>(28.38 to<br>54.10)                               | 26.84<br>(18.42 to<br>37.72)                               | 59.09<br>(41.36 to<br>79.27)                               | 0.70<br>(0.56 to<br>0.89)                         | 0.97<br>(0.75 to<br>1.33)                           | 0.71<br>(0.53 to<br>0.99)                          | 1.30<br>(0.99 to<br>1.74)                           |
| Other transport injuries       | 219.10<br>(191.60 to<br>245.81)                            | 282.35<br>(234.65 to<br>331.05)                            | 240.50<br>(199.86 to<br>281.77)                            | 344.20<br>(284.77 to<br>403.88)                            | 4.44<br>(3.91 to<br>5.00)                         | 7.05<br>(6.01 to<br>8.23)                           | 6.13<br>(5.23 to<br>7.15)                          | 8.24<br>(6.96 to<br>9.60)                           |
| <b>Unintentional injuries</b>  | <b>4,470.34</b><br><b>(3,902.85 to</b><br><b>4,917.50)</b> | <b>3,899.24</b><br><b>(3,314.01 to</b><br><b>4,458.63)</b> | <b>3,398.45</b><br><b>(2,898.39 to</b><br><b>3,852.62)</b> | <b>4,795.71</b><br><b>(4,047.20 to</b><br><b>5,517.33)</b> | <b>86.68</b><br><b>(75.32 to</b><br><b>94.59)</b> | <b>100.44</b><br><b>(84.30 to</b><br><b>112.33)</b> | <b>91.82</b><br><b>(76.79 to</b><br><b>103.07)</b> | <b>114.33</b><br><b>(95.20 to</b><br><b>128.55)</b> |
| Falls                          | 992.02<br>(787.21 to<br>1,192.56)                          | 1,121.82<br>(894.54 to<br>1,351.56)                        | 1,037.83<br>(839.28 to<br>1,233.36)                        | 1,310.89<br>(993.86 to<br>1,658.53)                        | 24.03<br>(19.29 to<br>27.38)                      | 38.39<br>(29.99 to<br>43.67)                        | 37.34<br>(29.24 to<br>42.54)                       | 40.86<br>(31.14 to<br>47.24)                        |
| Drowning                       | 881.92<br>(756.54 to<br>978.22)                            | 627.72<br>(534.61 to<br>734.48)                            | 541.17<br>(456.72 to<br>633.89)                            | 802.90<br>(667.62 to<br>954.34)                            | 13.95<br>(12.30 to<br>15.33)                      | 11.50<br>(9.93 to<br>13.18)                         | 10.09<br>(8.73 to<br>11.60)                        | 14.07<br>(11.96 to<br>16.30)                        |
| Fire, heat, and hot substances | 533.09<br>(410.70 to<br>613.25)                            | 386.49<br>(297.98 to<br>458.07)                            | 320.19<br>(245.38 to<br>379.71)                            | 484.40<br>(367.87 to<br>578.30)                            | 10.41<br>(8.39 to<br>11.88)                       | 9.97<br>(8.28 to<br>11.79)                          | 8.57<br>(7.10 to<br>10.14)                         | 11.75<br>(9.71 to<br>13.97)                         |

|                                                 |                                                            |                                                            |                                                            |                                                            |                                                   |                                                   |                                                   |                                                   |
|-------------------------------------------------|------------------------------------------------------------|------------------------------------------------------------|------------------------------------------------------------|------------------------------------------------------------|---------------------------------------------------|---------------------------------------------------|---------------------------------------------------|---------------------------------------------------|
| Poisonings                                      | 249.37<br>(183.30 to<br>316.74)                            | 127.53<br>(93.95 to<br>166.22)                             | 96.58<br>(70.26 to<br>127.81)                              | 179.22<br>(125.84 to<br>240.43)                            | 4.32<br>(3.26 to<br>5.37)                         | 2.72<br>(2.04 to<br>3.55)                         | 2.11<br>(1.56 to<br>2.75)                         | 3.58<br>(2.60 to<br>4.70)                         |
| Exposure to mechanical forces                   | 674.39<br>(538.75 to<br>772.39)                            | 569.78<br>(429.32 to<br>681.44)                            | 479.70<br>(362.09 to<br>573.48)                            | 727.48<br>(549.13 to<br>876.62)                            | 12.15<br>(9.65 to<br>13.91)                       | 12.01<br>(9.07 to<br>14.20)                       | 10.38<br>(7.72 to<br>12.29)                       | 14.65<br>(11.18 to<br>17.44)                      |
| Unintentional firearm injuries                  | 201.23<br>(132.47 to<br>250.98)                            | 155.38<br>(100.61 to<br>204.69)                            | 129.93<br>(83.30 to<br>171.61)                             | 196.62<br>(126.44 to<br>258.48)                            | 3.71<br>(2.42 to<br>4.62)                         | 3.23<br>(2.10 to<br>4.19)                         | 2.77<br>(1.81 to<br>3.62)                         | 3.95<br>(2.56 to<br>5.13)                         |
| Unintentional suffocation                       | 131.52<br>(94.14 to<br>197.06)                             | 80.07<br>(54.00 to<br>121.14)                              | 64.47<br>(43.31 to<br>95.56)                               | 121.30<br>(79.79 to<br>180.31)                             | 1.70<br>(1.24 to<br>2.51)                         | 1.10<br>(0.78 to<br>1.62)                         | 0.89<br>(0.63 to<br>1.30)                         | 1.62<br>(1.10 to<br>2.37)                         |
| Other exposure to mechanical forces             | 341.63<br>(252.17 to<br>398.81)                            | 334.33<br>(241.31 to<br>405.93)                            | 285.30<br>(205.21 to<br>348.13)                            | 409.57<br>(295.60 to<br>499.68)                            | 6.75<br>(4.97 to<br>7.86)                         | 7.68<br>(5.59 to<br>9.17)                         | 6.71<br>(4.86 to<br>8.02)                         | 9.08<br>(6.64 to<br>10.86)                        |
| Adverse effects of medical treatment            | 349.98<br>(247.27 to<br>422.14)                            | 372.72<br>(266.34 to<br>464.54)                            | 336.16<br>(243.84 to<br>418.03)                            | 435.65<br>(309.50 to<br>544.40)                            | 7.80<br>(5.57 to<br>9.45)                         | 11.06<br>(8.02 to<br>13.73)                       | 10.44<br>(7.66 to<br>12.93)                       | 12.03<br>(8.65 to<br>14.93)                       |
| Animal contact                                  | 71.72<br>(50.86 to<br>84.79)                               | 75.31<br>(52.95 to<br>95.45)                               | 62.00<br>(43.84 to<br>78.71)                               | 97.90<br>(68.16 to<br>124.75)                              | 1.27<br>(0.93 to<br>1.48)                         | 1.73<br>(1.26 to<br>2.11)                         | 1.50<br>(1.11 to<br>1.84)                         | 2.08<br>(1.50 to<br>2.55)                         |
| Venomous animal contact                         | 33.07<br>(23.73 to<br>41.68)                               | 29.26<br>(20.93 to<br>39.11)                               | 23.94<br>(17.28 to<br>31.68)                               | 38.78<br>(27.03 to<br>52.92)                               | 0.57<br>(0.42 to<br>0.71)                         | 0.67<br>(0.50 to<br>0.86)                         | 0.58<br>(0.44 to<br>0.74)                         | 0.81<br>(0.59 to<br>1.04)                         |
| Non-venomous animal contact                     | 38.65<br>(25.77 to<br>48.65)                               | 46.05<br>(30.80 to<br>60.71)                               | 38.07<br>(25.40 to<br>50.48)                               | 59.12<br>(39.43 to<br>78.22)                               | 0.70<br>(0.48 to<br>0.86)                         | 1.06<br>(0.72 to<br>1.35)                         | 0.92<br>(0.63 to<br>1.17)                         | 1.27<br>(0.86 to<br>1.61)                         |
| Foreign body                                    | 271.88<br>(220.94 to<br>324.05)                            | 235.76<br>(183.57 to<br>290.50)                            | 219.40<br>(171.25 to<br>270.15)                            | 277.56<br>(212.74 to<br>349.18)                            | 4.53<br>(3.71 to<br>5.30)                         | 5.07<br>(4.03 to<br>6.00)                         | 4.93<br>(3.95 to<br>5.86)                         | 5.52<br>(4.34 to<br>6.64)                         |
| Pulmonary aspiration and foreign body in airway | 182.25<br>(148.22 to<br>222.31)                            | 146.88<br>(115.59 to<br>183.04)                            | 137.73<br>(108.38 to<br>171.80)                            | 174.41<br>(134.86 to<br>223.21)                            | 2.93<br>(2.43 to<br>3.51)                         | 3.22<br>(2.61 to<br>3.81)                         | 3.17<br>(2.56 to<br>3.74)                         | 3.48<br>(2.80 to<br>4.17)                         |
| Foreign body in other body part                 | 89.63<br>(61.63 to<br>118.37)                              | 88.88<br>(54.79 to<br>124.30)                              | 81.67<br>(51.40 to<br>113.45)                              | 103.15<br>(64.07 to<br>146.84)                             | 1.59<br>(1.08 to<br>2.09)                         | 1.85<br>(1.13 to<br>2.54)                         | 1.77<br>(1.09 to<br>2.40)                         | 2.04<br>(1.24 to<br>2.84)                         |
| Environmental heat and cold exposure            | 92.63<br>(59.84 to<br>113.26)                              | 97.72<br>(62.62 to<br>126.84)                              | 76.24<br>(48.56 to<br>98.62)                               | 131.91<br>(85.92 to<br>172.62)                             | 1.90<br>(1.23 to<br>2.33)                         | 2.34<br>(1.50 to<br>3.02)                         | 1.88<br>(1.22 to<br>2.45)                         | 3.00<br>(1.94 to<br>3.92)                         |
| Other unintentional injuries                    | 353.35<br>(301.73 to<br>412.85)                            | 284.41<br>(227.82 to<br>356.34)                            | 229.19<br>(180.73 to<br>291.70)                            | 347.80<br>(279.14 to<br>431.99)                            | 6.32<br>(5.41 to<br>7.32)                         | 5.65<br>(4.58 to<br>6.89)                         | 4.57<br>(3.66 to<br>5.68)                         | 6.78<br>(5.52 to<br>8.25)                         |
| <b>Self-harm and interpersonal violence</b>     | <b>2,229.44</b><br><b>(1,793.94 to</b><br><b>2,446.26)</b> | <b>2,549.39</b><br><b>(1,944.65 to</b><br><b>3,049.87)</b> | <b>2,347.81</b><br><b>(1,808.60 to</b><br><b>2,792.26)</b> | <b>2,799.89</b><br><b>(2,098.84 to</b><br><b>3,394.49)</b> | <b>42.99</b><br><b>(34.72 to</b><br><b>47.02)</b> | <b>53.18</b><br><b>(40.69 to</b><br><b>63.09)</b> | <b>49.42</b><br><b>(38.33 to</b><br><b>58.28)</b> | <b>57.66</b><br><b>(43.58 to</b><br><b>68.84)</b> |

**North Africa and Middle East**

| Cause                              | YLLs (in 1000s)                       |                                       |                                       |                                       | Deaths (in 1000s)            |                              |                              |                              |
|------------------------------------|---------------------------------------|---------------------------------------|---------------------------------------|---------------------------------------|------------------------------|------------------------------|------------------------------|------------------------------|
|                                    | 2016                                  | 2040 Forecast                         | 2040 Better Scenario                  | 2040 Worse Scenario                   | 2016                         | 2040 Forecast                | 2040 Better Scenario         | 2040 Worse Scenario          |
| Self-harm                          | 1,280.50<br>(1,140.56 to<br>1,531.84) | 1,538.72<br>(1,230.77 to<br>1,946.64) | 1,392.20<br>(1,124.08 to<br>1,756.24) | 1,714.28<br>(1,367.31 to<br>2,173.90) | 25.86<br>(22.95 to<br>30.52) | 34.10<br>(27.67 to<br>42.71) | 31.32<br>(25.62 to<br>39.01) | 37.37<br>(30.22 to<br>47.06) |
| Self-harm by firearm               | 111.16<br>(78.44 to<br>160.13)        | 114.64<br>(71.04 to<br>175.46)        | 101.33<br>(62.44 to<br>155.49)        | 134.21<br>(82.63 to<br>207.32)        | 2.27<br>(1.60 to<br>3.29)    | 2.59<br>(1.65 to<br>3.84)    | 2.33<br>(1.48 to<br>3.45)    | 2.98<br>(1.88 to<br>4.45)    |
| Self-harm by other specified means | 1,169.34<br>(1,038.91 to<br>1,399.77) | 1,424.08<br>(1,145.18 to<br>1,800.25) | 1,290.87<br>(1,045.23 to<br>1,637.59) | 1,580.07<br>(1,262.39 to<br>2,006.82) | 23.60<br>(20.73 to<br>28.03) | 31.51<br>(25.68 to<br>39.20) | 29.00<br>(23.63 to<br>36.00) | 34.39<br>(27.67 to<br>43.07) |
| Interpersonal violence             | 948.94<br>(536.04 to<br>1,115.76)     | 1,010.67<br>(533.15 to<br>1,251.47)   | 955.61<br>(510.30 to<br>1,186.27)     | 1,085.61<br>(563.57 to<br>1,353.33)   | 17.13<br>(9.80 to<br>20.05)  | 19.08<br>(10.34 to<br>23.40) | 18.10<br>(9.92 to<br>22.12)  | 20.29<br>(10.83 to<br>24.91) |
| Physical violence by firearm       | 474.97<br>(267.91 to<br>711.25)       | 502.45<br>(263.95 to<br>818.08)       | 473.46<br>(253.30 to<br>777.18)       | 536.02<br>(275.68 to<br>872.51)       | 8.59<br>(4.88 to<br>12.75)   | 9.32<br>(5.04 to<br>14.97)   | 8.79<br>(4.89 to<br>14.24)   | 9.90<br>(5.25 to<br>15.81)   |

|                                                                                     |                                                               |                                                               |                                                              |                                                               |                                                      |                                                      |                                                      |                                                      |
|-------------------------------------------------------------------------------------|---------------------------------------------------------------|---------------------------------------------------------------|--------------------------------------------------------------|---------------------------------------------------------------|------------------------------------------------------|------------------------------------------------------|------------------------------------------------------|------------------------------------------------------|
| Physical violence by sharp object                                                   | 224.64<br>(97.60 to<br>312.49)                                | 255.02<br>(105.06 to<br>382.84)                               | 249.92<br>(102.79 to<br>377.12)                              | 266.76<br>(110.81 to<br>397.84)                               | 4.09<br>(1.81 to<br>5.62)                            | 4.84<br>(2.07 to<br>7.06)                            | 4.75<br>(2.03 to<br>6.98)                            | 5.03<br>(2.16 to<br>7.34)                            |
| Physical violence by other means                                                    | 249.33<br>(125.05 to<br>339.60)                               | 253.19<br>(107.59 to<br>369.14)                               | 232.24<br>(100.61 to<br>338.53)                              | 282.83<br>(125.03 to<br>410.58)                               | 4.44<br>(2.20 to<br>6.02)                            | 4.91<br>(2.15 to<br>6.99)                            | 4.55<br>(2.02 to<br>6.46)                            | 5.36<br>(2.41 to<br>7.60)                            |
| <b>Forces of nature, conflict and terrorism, and executions and police conflict</b> | <b>8,412.75</b><br><b>(5,439.89 to</b><br><b>11,602.50)</b>   | <b>787.13</b><br><b>(95.12 to</b><br><b>3,707.27)</b>         | <b>777.35</b><br><b>(94.56 to</b><br><b>3,710.40)</b>        | <b>830.49</b><br><b>(97.63 to</b><br><b>3,766.26)</b>         | <b>137.53</b><br><b>(88.49 to</b><br><b>189.47)</b>  | <b>14.70</b><br><b>(1.88 to</b><br><b>72.88)</b>     | <b>14.74</b><br><b>(1.89 to</b><br><b>72.99)</b>     | <b>15.12</b><br><b>(1.90 to</b><br><b>74.79)</b>     |
| Exposure to forces of nature                                                        | 6.57<br>(1.88 to<br>11.58)                                    | 108.50<br>(0.91 to<br>669.80)                                 | 108.44<br>(0.90 to<br>669.71)                                | 115.10<br>(0.92 to<br>699.88)                                 | 0.11<br>(0.03 to<br>0.20)                            | 2.29<br>(0.02 to<br>16.18)                           | 2.33<br>(0.02 to<br>16.61)                           | 2.34<br>(0.02 to<br>15.92)                           |
| Conflict and terrorism                                                              | 8,374.73<br>(5,404.17 to<br>11,569.33)                        | 407.68<br>(1.58 to<br>2,334.67)                               | 400.46<br>(1.58 to<br>2,291.99)                              | 439.74<br>(1.63 to<br>2,541.25)                               | 136.80<br>(87.74 to<br>188.81)                       | 7.07<br>(0.03 to<br>39.31)                           | 7.04<br>(0.03 to<br>39.17)                           | 7.41<br>(0.03 to<br>41.60)                           |
| Executions and police conflict                                                      | 31.44<br>(7.80 to<br>51.66)                                   | 270.95<br>(0.00 to<br>2,036.67)                               | 268.45<br>(0.00 to<br>1,988.02)                              | 275.64<br>(0.00 to<br>2,089.54)                               | 0.62<br>(0.14 to<br>1.00)                            | 5.35<br>(0.00 to<br>37.35)                           | 5.36<br>(0.00 to<br>36.89)                           | 5.38<br>(0.00 to<br>37.72)                           |
| <b>Afghanistan</b>                                                                  |                                                               |                                                               |                                                              |                                                               |                                                      |                                                      |                                                      |                                                      |
| Cause                                                                               | YLLs (in 1000s)                                               |                                                               |                                                              |                                                               | Deaths (in 1000s)                                    |                                                      |                                                      |                                                      |
|                                                                                     | 2016                                                          | 2040 Forecast                                                 | 2040 Better Scenario                                         | 2040 Worse Scenario                                           | 2016                                                 | 2040 Forecast                                        | 2040 Better Scenario                                 | 2040 Worse Scenario                                  |
| <b>All causes</b>                                                                   | <b>15,006.20</b><br><b>(12,434.90 to</b><br><b>17,904.06)</b> | <b>17,424.66</b><br><b>(14,083.76 to</b><br><b>21,210.14)</b> | <b>12,165.39</b><br><b>(9,982.03 to</b><br><b>14,907.27)</b> | <b>28,467.88</b><br><b>(22,074.56 to</b><br><b>35,612.50)</b> | <b>303.81</b><br><b>(267.52 to</b><br><b>341.79)</b> | <b>408.53</b><br><b>(351.51 to</b><br><b>473.33)</b> | <b>286.69</b><br><b>(252.12 to</b><br><b>328.09)</b> | <b>590.63</b><br><b>(499.15 to</b><br><b>692.08)</b> |
| Communicable, maternal, neonatal, and nutritional diseases                          | 5,961.02<br>(4,259.43 to<br>8,018.58)                         | 5,569.15<br>(3,591.82 to<br>8,056.51)                         | 3,685.87<br>(2,419.31 to<br>5,368.62)                        | 11,966.72<br>(7,573.56 to<br>17,401.74)                       | 84.49<br>(63.81 to<br>109.30)                        | 81.33<br>(56.63 to<br>112.28)                        | 53.84<br>(38.17 to<br>74.54)                         | 161.23<br>(106.29 to<br>226.45)                      |
| HIV/AIDS and tuberculosis                                                           | 536.25<br>(224.48 to<br>686.13)                               | 469.05<br>(178.13 to<br>697.89)                               | 234.58<br>(78.97 to<br>362.08)                               | 723.98<br>(291.90 to<br>1,117.56)                             | 14.10<br>(5.47 to<br>18.72)                          | 12.49<br>(4.23 to<br>18.75)                          | 6.68<br>(2.03 to<br>10.71)                           | 18.00<br>(6.50 to<br>28.58)                          |
| Tuberculosis                                                                        | 527.77<br>(219.66 to<br>668.02)                               | 441.00<br>(152.91 to<br>671.78)                               | 220.39<br>(70.43 to<br>343.30)                               | 688.81<br>(257.06 to<br>1,067.67)                             | 13.94<br>(5.30 to<br>18.53)                          | 11.93<br>(3.74 to<br>18.50)                          | 6.41<br>(1.81 to<br>10.39)                           | 17.32<br>(5.84 to<br>27.64)                          |
| HIV/AIDS                                                                            | 8.49<br>(0.27 to<br>34.20)                                    | 28.06<br>(2.13 to<br>89.25)                                   | 14.18<br>(0.09 to<br>67.89)                                  | 35.17<br>(4.27 to<br>98.30)                                   | 0.16<br>(0.00 to<br>0.62)                            | 0.56<br>(0.04 to<br>1.76)                            | 0.28<br>(0.00 to<br>1.29)                            | 0.68<br>(0.08 to<br>1.89)                            |
| Diarrhea, lower respiratory, and other common infectious diseases                   | 2,803.67<br>(1,887.82 to<br>3,858.55)                         | 2,575.76<br>(1,313.06 to<br>4,417.98)                         | 1,725.95<br>(943.65 to<br>2,838.47)                          | 6,327.65<br>(3,198.30 to<br>10,182.97)                        | 37.08<br>(26.32 to<br>49.58)                         | 36.44<br>(20.94 to<br>58.86)                         | 24.98<br>(15.03 to<br>38.26)                         | 81.99<br>(44.51 to<br>127.06)                        |
| Diarrheal diseases                                                                  | 391.28<br>(226.75 to<br>616.64)                               | 266.98<br>(124.48 to<br>471.78)                               | 183.94<br>(62.63 to<br>362.47)                               | 483.67<br>(232.09 to<br>833.53)                               | 4.91<br>(2.96 to<br>7.42)                            | 3.65<br>(1.66 to<br>6.67)                            | 2.48<br>(0.83 to<br>4.86)                            | 6.35<br>(3.02 to<br>10.98)                           |
| Intestinal infectious diseases                                                      | 30.53<br>(15.26 to<br>52.19)                                  | 41.17<br>(19.27 to<br>76.79)                                  | 34.84<br>(16.43 to<br>63.08)                                 | 54.67<br>(24.99 to<br>103.85)                                 | 0.44<br>(0.22 to<br>0.75)                            | 0.59<br>(0.28 to<br>1.08)                            | 0.50<br>(0.24 to<br>0.89)                            | 0.77<br>(0.36 to<br>1.43)                            |
| Typhoid fever                                                                       | 27.12<br>(13.23 to<br>46.99)                                  | 35.96<br>(16.64 to<br>67.55)                                  | 30.58<br>(14.13 to<br>56.11)                                 | 47.65<br>(21.38 to<br>90.40)                                  | 0.39<br>(0.19 to<br>0.66)                            | 0.51<br>(0.24 to<br>0.94)                            | 0.44<br>(0.21 to<br>0.80)                            | 0.67<br>(0.31 to<br>1.25)                            |
| Paratyphoid fever                                                                   | 3.30<br>(1.38 to<br>6.61)                                     | 5.14<br>(2.13 to<br>10.35)                                    | 4.21<br>(1.72 to<br>8.44)                                    | 6.89<br>(2.79 to<br>14.00)                                    | 0.05<br>(0.02 to<br>0.10)                            | 0.08<br>(0.03 to<br>0.15)                            | 0.06<br>(0.03 to<br>0.13)                            | 0.10<br>(0.04 to<br>0.20)                            |
| Other intestinal infectious diseases                                                | 0.12<br>(0.04 to<br>0.29)                                     | 0.07<br>(0.02 to<br>0.21)                                     | 0.05<br>(0.01 to<br>0.16)                                    | 0.13<br>(0.03 to<br>0.40)                                     | 0.00<br>(0.00 to<br>0.00)                            | 0.00<br>(0.00 to<br>0.00)                            | 0.00<br>(0.00 to<br>0.00)                            | 0.00<br>(0.00 to<br>0.01)                            |
| Lower respiratory infections                                                        | 1,465.94<br>(969.12 to<br>2,072.55)                           | 1,316.38<br>(461.57 to<br>2,741.65)                           | 646.06<br>(254.56 to<br>1,329.51)                            | 3,759.94<br>(1,297.95 to<br>6,686.34)                         | 20.14<br>(14.34 to<br>27.23)                         | 19.96<br>(8.75 to<br>37.70)                          | 10.86<br>(5.53 to<br>19.61)                          | 49.96<br>(20.25 to<br>85.20)                         |
| Upper respiratory infections                                                        | 2.59<br>(1.08 to<br>5.75)                                     | 2.63<br>(1.01 to<br>6.09)                                     | 1.54<br>(0.60 to<br>3.63)                                    | 4.71<br>(1.70 to<br>11.57)                                    | 0.04<br>(0.02 to<br>0.08)                            | 0.05<br>(0.02 to<br>0.10)                            | 0.03<br>(0.01 to<br>0.06)                            | 0.08<br>(0.03 to<br>0.17)                            |
| Otitis media                                                                        | 1.69<br>(0.50 to<br>4.65)                                     | 0.58<br>(0.16 to<br>1.63)                                     | 0.60<br>(0.17 to<br>1.65)                                    | 0.64<br>(0.16 to<br>1.83)                                     | 0.03<br>(0.01 to<br>0.08)                            | 0.01<br>(0.00 to<br>0.03)                            | 0.02<br>(0.00 to<br>0.04)                            | 0.01<br>(0.00 to<br>0.03)                            |

|                                |                                   |                                 |                                 |                                     |                            |                            |                            |                             |
|--------------------------------|-----------------------------------|---------------------------------|---------------------------------|-------------------------------------|----------------------------|----------------------------|----------------------------|-----------------------------|
| Meningitis                     | 566.42<br>(335.06 to<br>1,022.00) | 481.86<br>(243.24 to<br>903.69) | 456.53<br>(225.51 to<br>850.71) | 1,250.80<br>(527.98 to<br>2,613.12) | 7.30<br>(4.52 to<br>12.62) | 6.45<br>(3.60 to<br>11.38) | 6.15<br>(3.34 to<br>10.94) | 15.45<br>(7.00 to<br>31.37) |
| Pneumococcal meningitis        | 4.39<br>(2.14 to<br>8.45)         | 2.71<br>(1.27 to<br>5.55)       | 2.81<br>(1.29 to<br>6.01)       | 7.07<br>(2.73 to<br>16.34)          | 0.06<br>(0.03 to<br>0.11)  | 0.04<br>(0.02 to<br>0.07)  | 0.04<br>(0.02 to<br>0.08)  | 0.10<br>(0.04 to<br>0.21)   |
| H influenzae type B meningitis | 54.44<br>(29.62 to<br>106.43)     | 141.39<br>(21.86 to<br>449.67)  | 143.95<br>(22.99 to<br>435.37)  | 722.56<br>(109.13 to<br>1,999.52)   | 0.69<br>(0.39 to<br>1.29)  | 1.71<br>(0.31 to<br>5.32)  | 1.74<br>(0.33 to<br>5.14)  | 8.49<br>(1.33 to<br>23.40)  |
| Meningococcal meningitis       | 220.41<br>(125.38 to<br>398.91)   | 140.22<br>(71.67 to<br>260.92)  | 127.55<br>(63.43 to<br>236.19)  | 216.60<br>(101.44 to<br>442.28)     | 2.86<br>(1.72 to<br>4.95)  | 1.97<br>(1.12 to<br>3.45)  | 1.82<br>(1.02 to<br>3.11)  | 2.87<br>(1.47 to<br>5.48)   |
| Other meningitis               | 287.18<br>(166.67 to<br>507.61)   | 197.53<br>(107.02 to<br>357.65) | 182.22<br>(95.47 to<br>336.36)  | 304.57<br>(146.19 to<br>582.99)     | 3.69<br>(2.29 to<br>6.26)  | 2.73<br>(1.59 to<br>4.62)  | 2.55<br>(1.47 to<br>4.32)  | 3.99<br>(2.07 to<br>7.34)   |
| Encephalitis                   | 17.25<br>(6.08 to<br>44.17)       | 26.64<br>(9.45 to<br>67.82)     | 21.90<br>(7.95 to<br>54.41)     | 37.65<br>(12.77 to<br>96.10)        | 0.27<br>(0.10 to<br>0.67)  | 0.44<br>(0.17 to<br>1.07)  | 0.36<br>(0.14 to<br>0.85)  | 0.58<br>(0.21 to<br>1.46)   |
| Diphtheria                     | 1.26<br>(0.62 to<br>2.37)         | 1.53<br>(0.54 to<br>3.78)       | 1.64<br>(0.55 to<br>4.07)       | 3.67<br>(1.07 to<br>9.45)           | 0.02<br>(0.01 to<br>0.03)  | 0.02<br>(0.01 to<br>0.05)  | 0.02<br>(0.01 to<br>0.05)  | 0.05<br>(0.02 to<br>0.11)   |
| Whooping cough                 | 180.22<br>(12.90 to<br>566.32)    | 304.56<br>(22.00 to<br>938.83)  | 308.11<br>(27.31 to<br>862.39)  | 461.67<br>(29.29 to<br>1,449.53)    | 2.14<br>(0.15 to<br>6.71)  | 3.61<br>(0.26 to<br>11.12) | 3.65<br>(0.32 to<br>10.21) | 5.46<br>(0.35 to<br>17.15)  |
| Tetanus                        | 67.55<br>(17.01 to<br>172.04)     | 32.05<br>(6.23 to<br>94.57)     | 30.79<br>(6.34 to<br>86.25)     | 51.53<br>(9.55 to<br>173.77)        | 0.80<br>(0.20 to<br>2.01)  | 0.38<br>(0.07 to<br>1.10)  | 0.36<br>(0.07 to<br>1.01)  | 0.60<br>(0.11 to<br>2.02)   |
| Measles                        | 57.23<br>(16.56 to<br>145.95)     | 84.16<br>(4.86 to<br>388.97)    | 28.81<br>(3.08 to<br>129.84)    | 186.83<br>(13.06 to<br>758.53)      | 0.69<br>(0.20 to<br>1.75)  | 1.01<br>(0.06 to<br>4.64)  | 0.35<br>(0.04 to<br>1.56)  | 2.22<br>(0.16 to<br>8.85)   |

**Afghanistan**

| Cause                                          | YLLs (in 1000s)                         |                                         |                                         |                                         | Deaths (in 1000s)                  |                                    |                                    |                                    |
|------------------------------------------------|-----------------------------------------|-----------------------------------------|-----------------------------------------|-----------------------------------------|------------------------------------|------------------------------------|------------------------------------|------------------------------------|
|                                                | 2016                                    | 2040 Forecast                           | 2040 Better Scenario                    | 2040 Worse Scenario                     | 2016                               | 2040 Forecast                      | 2040 Better Scenario               | 2040 Worse Scenario                |
| Varicella and herpes zoster                    | 21.72<br>(11.79 to<br>37.68)            | 17.20<br>(8.18 to<br>32.08)             | 11.19<br>(5.21 to<br>21.70)             | 31.87<br>(14.09 to<br>62.27)            | 0.32<br>(0.20 to<br>0.50)          | 0.26<br>(0.15 to<br>0.45)          | 0.18<br>(0.10 to<br>0.31)          | 0.44<br>(0.22 to<br>0.82)          |
| <b>Neglected tropical diseases and malaria</b> | <b>135.78<br/>(82.90 to<br/>241.13)</b> | <b>136.21<br/>(82.52 to<br/>257.85)</b> | <b>124.03<br/>(77.83 to<br/>218.25)</b> | <b>162.55<br/>(96.38 to<br/>308.77)</b> | <b>2.20<br/>(1.37 to<br/>4.11)</b> | <b>2.31<br/>(1.45 to<br/>4.65)</b> | <b>2.13<br/>(1.38 to<br/>3.84)</b> | <b>2.66<br/>(1.62 to<br/>5.25)</b> |
| Malaria                                        | 132.26<br>(79.42 to<br>236.89)          | 130.24<br>(76.85 to<br>252.46)          | 118.48<br>(72.90 to<br>213.38)          | 154.09<br>(88.06 to<br>301.73)          | 2.15<br>(1.32 to<br>4.04)          | 2.23<br>(1.37 to<br>4.56)          | 2.05<br>(1.31 to<br>3.77)          | 2.54<br>(1.49 to<br>5.17)          |
| Chagas disease                                 | 0.00<br>(0.00 to<br>0.00)               | 0.00<br>(0.00 to<br>0.00)               | 0.00<br>(0.00 to<br>0.00)               | 0.00<br>(0.00 to<br>0.00)               | 0.00<br>(0.00 to<br>0.00)          | 0.00<br>(0.00 to<br>0.00)          | 0.00<br>(0.00 to<br>0.00)          | 0.00<br>(0.00 to<br>0.00)          |
| Leishmaniasis                                  | 0.17<br>(0.09 to<br>0.25)               | 0.16<br>(0.08 to<br>0.26)               | 0.09<br>(0.05 to<br>0.14)               | 0.25<br>(0.13 to<br>0.43)               | 0.00<br>(0.00 to<br>0.01)          | 0.00<br>(0.00 to<br>0.01)          | 0.00<br>(0.00 to<br>0.01)          | 0.00<br>(0.00 to<br>0.01)          |
| African trypanosomiasis                        | 0.00<br>(0.00 to<br>0.00)               | 0.00<br>(0.00 to<br>0.00)               | 0.00<br>(0.00 to<br>0.00)               | 0.00<br>(0.00 to<br>0.00)               | 0.00<br>(0.00 to<br>0.00)          | 0.00<br>(0.00 to<br>0.00)          | 0.00<br>(0.00 to<br>0.00)          | 0.00<br>(0.00 to<br>0.00)          |
| Schistosomiasis                                | 0.00<br>(0.00 to<br>0.00)               | 0.00<br>(0.00 to<br>0.00)               | 0.00<br>(0.00 to<br>0.00)               | 0.00<br>(0.00 to<br>0.00)               | 0.00<br>(0.00 to<br>0.00)          | 0.00<br>(0.00 to<br>0.00)          | 0.00<br>(0.00 to<br>0.00)          | 0.00<br>(0.00 to<br>0.00)          |
| Cysticercosis                                  | 0.32<br>(0.22 to<br>0.44)               | 0.19<br>(0.13 to<br>0.27)               | 0.17<br>(0.12 to<br>0.24)               | 0.22<br>(0.15 to<br>0.31)               | 0.01<br>(0.00 to<br>0.01)          | 0.00<br>(0.00 to<br>0.01)          | 0.00<br>(0.00 to<br>0.01)          | 0.00<br>(0.00 to<br>0.01)          |
| Cystic echinococcosis                          | 0.00<br>(0.00 to<br>0.00)               | 0.00<br>(0.00 to<br>0.00)               | 0.00<br>(0.00 to<br>0.00)               | 0.00<br>(0.00 to<br>0.00)               | 0.00<br>(0.00 to<br>0.00)          | 0.00<br>(0.00 to<br>0.00)          | 0.00<br>(0.00 to<br>0.00)          | 0.00<br>(0.00 to<br>0.00)          |
| Dengue                                         | 0.01<br>(0.00 to<br>0.04)               | 0.10<br>(0.02 to<br>0.26)               | 0.09<br>(0.02 to<br>0.24)               | 0.12<br>(0.02 to<br>0.31)               | 0.00<br>(0.00 to<br>0.00)          | 0.00<br>(0.00 to<br>0.00)          | 0.00<br>(0.00 to<br>0.00)          | 0.00<br>(0.00 to<br>0.01)          |

|                                                       |                                            |                                            |                                           |                                            |                                      |                                      |                                      |                                       |
|-------------------------------------------------------|--------------------------------------------|--------------------------------------------|-------------------------------------------|--------------------------------------------|--------------------------------------|--------------------------------------|--------------------------------------|---------------------------------------|
| Yellow fever                                          | 0.00<br>(0.00 to 0.00)                     | 0.00<br>(0.00 to 0.00)                     | 0.00<br>(0.00 to 0.00)                    | 0.00<br>(0.00 to 0.00)                     | 0.00<br>(0.00 to 0.00)               | 0.00<br>(0.00 to 0.00)               | 0.00<br>(0.00 to 0.00)               | 0.00<br>(0.00 to 0.00)                |
| Rabies                                                | 0.26<br>(0.08 to 0.65)                     | 0.19<br>(0.05 to 0.50)                     | 0.08<br>(0.02 to 0.22)                    | 0.40<br>(0.12 to 1.04)                     | 0.00<br>(0.00 to 0.01)               | 0.00<br>(0.00 to 0.01)               | 0.00<br>(0.00 to 0.01)               | 0.01<br>(0.00 to 0.02)                |
| Intestinal nematode infections                        | 2.31<br>(1.37 to 3.59)                     | 4.75<br>(2.35 to 8.63)                     | 4.73<br>(2.32 to 8.77)                    | 6.53<br>(3.17 to 11.89)                    | 0.03<br>(0.02 to 0.05)               | 0.06<br>(0.03 to 0.11)               | 0.06<br>(0.03 to 0.11)               | 0.08<br>(0.04 to 0.15)                |
| Other neglected tropical diseases                     | 0.45<br>(0.30 to 0.99)                     | 0.58<br>(0.39 to 1.08)                     | 0.39<br>(0.27 to 0.71)                    | 0.94<br>(0.60 to 1.81)                     | 0.01<br>(0.00 to 0.01)               | 0.01<br>(0.01 to 0.02)               | 0.01<br>(0.00 to 0.01)               | 0.01<br>(0.01 to 0.03)                |
| <b>Maternal disorders</b>                             | <b>282.66</b><br><b>(208.59 to 377.32)</b> | <b>268.66</b><br><b>(146.66 to 447.55)</b> | <b>138.94</b><br><b>(70.20 to 234.49)</b> | <b>438.29</b><br><b>(233.88 to 749.82)</b> | <b>5.14</b><br><b>(3.81 to 6.92)</b> | <b>4.92</b><br><b>(2.69 to 8.18)</b> | <b>2.54</b><br><b>(1.29 to 4.29)</b> | <b>7.98</b><br><b>(4.30 to 13.46)</b> |
| Maternal hemorrhage                                   | 105.43<br>(73.90 to 147.40)                | 103.02<br>(52.35 to 175.55)                | 53.16<br>(25.49 to 94.70)                 | 163.19<br>(84.14 to 293.92)                | 1.94<br>(1.35 to 2.76)               | 1.91<br>(0.97 to 3.26)               | 0.98<br>(0.47 to 1.74)               | 3.01<br>(1.56 to 5.39)                |
| Maternal sepsis and other maternal infections         | 29.52<br>(19.40 to 45.07)                  | 23.41<br>(11.96 to 42.28)                  | 12.00<br>(5.73 to 21.69)                  | 38.25<br>(18.39 to 70.60)                  | 0.54<br>(0.36 to 0.81)               | 0.43<br>(0.22 to 0.78)               | 0.22<br>(0.11 to 0.39)               | 0.70<br>(0.34 to 1.27)                |
| Maternal hypertensive disorders                       | 51.21<br>(33.44 to 72.63)                  | 51.46<br>(25.14 to 92.64)                  | 26.31<br>(11.99 to 48.64)                 | 82.19<br>(39.75 to 146.48)                 | 0.92<br>(0.60 to 1.30)               | 0.93<br>(0.45 to 1.65)               | 0.47<br>(0.22 to 0.86)               | 1.47<br>(0.72 to 2.66)                |
| Maternal obstructed labor and uterine rupture         | 15.32<br>(9.39 to 22.61)                   | 15.65<br>(7.00 to 28.85)                   | 7.65<br>(3.38 to 14.57)                   | 25.71<br>(11.11 to 49.53)                  | 0.28<br>(0.17 to 0.42)               | 0.29<br>(0.13 to 0.53)               | 0.14<br>(0.06 to 0.27)               | 0.47<br>(0.20 to 0.91)                |
| Maternal abortion, miscarriage, and ectopic pregnancy | 10.48<br>(5.70 to 17.15)                   | 11.08<br>(4.68 to 22.29)                   | 5.80<br>(2.36 to 12.31)                   | 18.62<br>(7.58 to 39.85)                   | 0.20<br>(0.11 to 0.32)               | 0.21<br>(0.09 to 0.43)               | 0.11<br>(0.05 to 0.23)               | 0.35<br>(0.14 to 0.74)                |
| Indirect maternal deaths                              | 26.11<br>(16.62 to 39.84)                  | 24.68<br>(11.42 to 46.20)                  | 12.84<br>(5.63 to 23.81)                  | 43.76<br>(19.93 to 81.90)                  | 0.46<br>(0.29 to 0.71)               | 0.44<br>(0.21 to 0.82)               | 0.23<br>(0.10 to 0.42)               | 0.77<br>(0.35 to 1.43)                |
| Late maternal deaths                                  | 2.28<br>(1.04 to 4.28)                     | 1.73<br>(0.71 to 3.76)                     | 0.89<br>(0.34 to 1.96)                    | 2.96<br>(1.14 to 6.36)                     | 0.04<br>(0.02 to 0.08)               | 0.04<br>(0.01 to 0.07)               | 0.02<br>(0.01 to 0.03)               | 0.05<br>(0.02 to 0.11)                |
| Maternal deaths aggravated by HIV/AIDS                | 0.02<br>(0.00 to 0.08)                     | 0.12<br>(0.00 to 0.62)                     | 0.06<br>(0.00 to 0.33)                    | 0.21<br>(0.01 to 1.03)                     | 0.00<br>(0.00 to 0.00)               | 0.00<br>(0.00 to 0.01)               | 0.00<br>(0.00 to 0.01)               | 0.00<br>(0.00 to 0.02)                |
| Other maternal disorders                              | 42.29<br>(27.07 to 62.58)                  | 37.51<br>(18.79 to 64.80)                  | 20.25<br>(9.80 to 37.63)                  | 63.41<br>(31.18 to 113.96)                 | 0.77<br>(0.50 to 1.14)               | 0.68<br>(0.35 to 1.19)               | 0.37<br>(0.18 to 0.68)               | 1.15<br>(0.57 to 2.08)                |

**Afghanistan**

| Cause                                                    | YLLs (in 1000s)                                  |                                                  |                                                |                                                  | Deaths (in 1000s)                       |                                         |                                        |                                         |
|----------------------------------------------------------|--------------------------------------------------|--------------------------------------------------|------------------------------------------------|--------------------------------------------------|-----------------------------------------|-----------------------------------------|----------------------------------------|-----------------------------------------|
|                                                          | 2016                                             | 2040 Forecast                                    | 2040 Better Scenario                           | 2040 Worse Scenario                              | 2016                                    | 2040 Forecast                           | 2040 Better Scenario                   | 2040 Worse Scenario                     |
| <b>Neonatal disorders</b>                                | <b>1,941.73</b><br><b>(1,226.60 to 2,873.93)</b> | <b>1,972.25</b><br><b>(1,172.74 to 3,082.86)</b> | <b>1,350.20</b><br><b>(792.70 to 2,094.54)</b> | <b>4,072.13</b><br><b>(2,384.43 to 6,463.26)</b> | <b>22.45</b><br><b>(14.18 to 33.23)</b> | <b>22.80</b><br><b>(13.55 to 35.64)</b> | <b>15.61</b><br><b>(9.16 to 24.21)</b> | <b>47.08</b><br><b>(27.57 to 74.73)</b> |
| Neonatal preterm birth                                   | 822.41<br>(483.07 to 1,311.44)                   | 744.00<br>(434.21 to 1,236.47)                   | 496.58<br>(283.82 to 820.96)                   | 1,596.63<br>(917.75 to 2,565.70)                 | 9.50<br>(5.58 to 15.16)                 | 8.60<br>(5.02 to 14.29)                 | 5.74<br>(3.28 to 9.49)                 | 18.45<br>(10.60 to 29.65)               |
| Neonatal encephalopathy due to birth asphyxia and trauma | 269.87<br>(145.42 to 436.85)                     | 262.21<br>(120.39 to 492.43)                     | 194.29<br>(88.66 to 354.39)                    | 505.05<br>(224.84 to 925.88)                     | 3.12<br>(1.68 to 5.05)                  | 3.03<br>(1.39 to 5.69)                  | 2.25<br>(1.03 to 4.10)                 | 5.84<br>(2.61 to 10.70)                 |
| Neonatal sepsis and other neonatal infections            | 343.63<br>(155.93 to 594.74)                     | 450.09<br>(178.62 to 815.58)                     | 324.26<br>(131.85 to 587.23)                   | 884.43<br>(360.04 to 1,612.34)                   | 3.97<br>(1.80 to 6.87)                  | 5.20<br>(2.07 to 9.43)                  | 3.75<br>(1.52 to 6.79)                 | 10.23<br>(4.16 to 18.64)                |
| Hemolytic disease and other neonatal jaundice            | 60.06<br>(29.67 to 123.38)                       | 37.75<br>(14.55 to 91.20)                        | 24.15<br>(9.27 to 52.91)                       | 80.85<br>(30.62 to 185.85)                       | 0.69<br>(0.34 to 1.43)                  | 0.44<br>(0.17 to 1.05)                  | 0.28<br>(0.11 to 0.61)                 | 0.93<br>(0.35 to 2.15)                  |
| Other neonatal disorders                                 | 445.76<br>(245.86 to 744.34)                     | 478.20<br>(227.68 to 875.56)                     | 310.92<br>(149.34 to 570.07)                   | 1,005.17<br>(471.91 to 1,836.24)                 | 5.16<br>(2.84 to 8.61)                  | 5.53<br>(2.63 to 10.13)                 | 3.60<br>(1.73 to 6.60)                 | 11.63<br>(5.46 to 21.23)                |

|                                                                         |                                              |                                               |                                              |                                                |                                        |                                        |                                        |                                        |
|-------------------------------------------------------------------------|----------------------------------------------|-----------------------------------------------|----------------------------------------------|------------------------------------------------|----------------------------------------|----------------------------------------|----------------------------------------|----------------------------------------|
|                                                                         | 40.52<br>(26.04 to<br>65.89)                 | 27.40<br>(16.51 to<br>45.51)                  | 18.87<br>(11.98 to<br>31.48)                 | 45.41<br>(25.45 to<br>81.23)                   | 0.64<br>(0.44 to<br>0.97)              | 0.49<br>(0.32 to<br>0.73)              | 0.37<br>(0.26 to<br>0.55)              | 0.70<br>(0.44 to<br>1.17)              |
| <b>Nutritional deficiencies</b>                                         |                                              |                                               |                                              |                                                |                                        |                                        |                                        |                                        |
| Protein-energy malnutrition                                             | 38.27<br>(24.00 to<br>62.66)                 | 24.21<br>(14.24 to<br>41.35)                  | 16.43<br>(10.18 to<br>28.16)                 | 40.91<br>(21.66 to<br>76.09)                   | 0.57<br>(0.38 to<br>0.87)              | 0.39<br>(0.26 to<br>0.61)              | 0.29<br>(0.20 to<br>0.43)              | 0.60<br>(0.36 to<br>1.01)              |
| Iodine deficiency                                                       | 0.58<br>(0.04 to<br>2.96)                    | 1.11<br>(0.04 to<br>6.22)                     | 0.73<br>(0.03 to<br>3.89)                    | 1.87<br>(0.06 to<br>11.30)                     | 0.01<br>(0.00 to<br>0.04)              | 0.02<br>(0.00 to<br>0.09)              | 0.02<br>(0.00 to<br>0.06)              | 0.03<br>(0.00 to<br>0.15)              |
| Dietary iron deficiency                                                 | 0.22<br>(0.13 to<br>0.36)                    | 0.31<br>(0.17 to<br>0.52)                     | 0.26<br>(0.14 to<br>0.43)                    | 0.39<br>(0.20 to<br>0.67)                      | 0.00<br>(0.00 to<br>0.01)              | 0.01<br>(0.00 to<br>0.01)              | 0.01<br>(0.00 to<br>0.01)              | 0.01<br>(0.00 to<br>0.01)              |
| Other nutritional deficiencies                                          | 1.46<br>(0.60 to<br>3.25)                    | 1.77<br>(0.74 to<br>3.71)                     | 1.45<br>(0.64 to<br>2.94)                    | 2.24<br>(0.88 to<br>5.18)                      | 0.05<br>(0.02 to<br>0.10)              | 0.06<br>(0.03 to<br>0.12)              | 0.06<br>(0.03 to<br>0.12)              | 0.07<br>(0.03 to<br>0.13)              |
| <b>Other communicable, maternal, neonatal, and nutritional diseases</b> | <b>220.40</b><br>(111.84 to<br>407.45)       | <b>119.82</b><br>(64.41 to<br>216.73)         | <b>93.30</b><br>(50.34 to<br>170.13)         | <b>196.71</b><br>(101.00 to<br>371.89)         | <b>2.89</b><br>(1.60 to<br>5.06)       | <b>1.89</b><br>(1.17 to<br>3.07)       | <b>1.52</b><br>(0.96 to<br>2.48)       | <b>2.82</b><br>(1.61 to<br>4.85)       |
| Sexually transmitted infections excluding HIV                           | 181.59<br>(80.86 to<br>351.17)               | 72.01<br>(27.77 to<br>157.94)                 | 56.90<br>(21.85 to<br>124.24)                | 127.85<br>(48.64 to<br>282.46)                 | 2.14<br>(0.96 to<br>4.11)              | 0.86<br>(0.34 to<br>1.85)              | 0.68<br>(0.27 to<br>1.46)              | 1.51<br>(0.58 to<br>3.31)              |
| Syphilis                                                                | 180.56<br>(79.19 to<br>350.95)               | 70.69<br>(26.42 to<br>156.39)                 | 55.81<br>(21.09 to<br>123.02)                | 126.32<br>(47.33 to<br>281.78)                 | 2.12<br>(0.93 to<br>4.11)              | 0.83<br>(0.31 to<br>1.84)              | 0.66<br>(0.25 to<br>1.45)              | 1.48<br>(0.56 to<br>3.30)              |
| Chlamydial infection                                                    | 0.20<br>(0.05 to<br>0.34)                    | 0.27<br>(0.07 to<br>0.45)                     | 0.22<br>(0.06 to<br>0.37)                    | 0.31<br>(0.08 to<br>0.53)                      | 0.00<br>(0.00 to<br>0.01)              | 0.01<br>(0.00 to<br>0.01)              | 0.00<br>(0.00 to<br>0.01)              | 0.01<br>(0.00 to<br>0.01)              |
| Gonococcal infection                                                    | 0.53<br>(0.12 to<br>0.86)                    | 0.67<br>(0.16 to<br>1.10)                     | 0.55<br>(0.14 to<br>0.91)                    | 0.77<br>(0.18 to<br>1.28)                      | 0.01<br>(0.00 to<br>0.02)              | 0.01<br>(0.00 to<br>0.02)              | 0.01<br>(0.00 to<br>0.02)              | 0.02<br>(0.00 to<br>0.02)              |
| Other sexually transmitted infections                                   | 0.30<br>(0.07 to<br>0.50)                    | 0.38<br>(0.09 to<br>0.66)                     | 0.31<br>(0.07 to<br>0.54)                    | 0.45<br>(0.10 to<br>0.77)                      | 0.01<br>(0.00 to<br>0.01)              | 0.01<br>(0.00 to<br>0.01)              | 0.01<br>(0.00 to<br>0.01)              | 0.01<br>(0.00 to<br>0.01)              |
| Acute hepatitis                                                         | 17.36<br>(13.82 to<br>22.20)                 | 18.07<br>(13.44 to<br>24.26)                  | 14.19<br>(10.39 to<br>18.92)                 | 22.40<br>(16.20 to<br>30.18)                   | 0.38<br>(0.31 to<br>0.49)              | 0.45<br>(0.32 to<br>0.60)              | 0.36<br>(0.26 to<br>0.50)              | 0.52<br>(0.38 to<br>0.71)              |
| Acute hepatitis A                                                       | 1.09<br>(0.22 to<br>2.43)                    | 0.70<br>(0.21 to<br>1.54)                     | 0.53<br>(0.17 to<br>1.17)                    | 1.16<br>(0.29 to<br>2.74)                      | 0.01<br>(0.00 to<br>0.03)              | 0.01<br>(0.00 to<br>0.02)              | 0.01<br>(0.00 to<br>0.02)              | 0.02<br>(0.01 to<br>0.04)              |
| Acute hepatitis B                                                       | 12.94<br>(9.88 to<br>16.67)                  | 14.59<br>(10.42 to<br>20.29)                  | 11.35<br>(7.97 to<br>15.85)                  | 17.55<br>(12.18 to<br>24.36)                   | 0.32<br>(0.24 to<br>0.41)              | 0.38<br>(0.27 to<br>0.53)              | 0.30<br>(0.21 to<br>0.42)              | 0.44<br>(0.31 to<br>0.61)              |
| Acute hepatitis C                                                       | 0.18<br>(0.12 to<br>0.26)                    | 0.25<br>(0.16 to<br>0.38)                     | 0.23<br>(0.15 to<br>0.35)                    | 0.27<br>(0.17 to<br>0.40)                      | 0.01<br>(0.00 to<br>0.01)              | 0.01<br>(0.00 to<br>0.01)              | 0.01<br>(0.00 to<br>0.01)              | 0.01<br>(0.00 to<br>0.01)              |
| Acute hepatitis E                                                       | 3.16<br>(2.10 to<br>4.70)                    | 2.53<br>(1.56 to<br>3.97)                     | 2.07<br>(1.30 to<br>3.18)                    | 3.43<br>(2.06 to<br>5.54)                      | 0.05<br>(0.03 to<br>0.07)              | 0.05<br>(0.03 to<br>0.07)              | 0.04<br>(0.03 to<br>0.06)              | 0.06<br>(0.04 to<br>0.09)              |
| Other unspecified infectious diseases                                   | 21.46<br>(7.80 to<br>59.50)                  | 29.73<br>(12.92 to<br>64.67)                  | 22.21<br>(9.79 to<br>50.91)                  | 46.47<br>(18.68 to<br>110.12)                  | 0.36<br>(0.16 to<br>0.81)              | 0.59<br>(0.29 to<br>1.03)              | 0.48<br>(0.25 to<br>0.84)              | 0.79<br>(0.37 to<br>1.56)              |
| <b>Non-communicable diseases</b>                                        | <b>5,390.26</b><br>(4,543.18 to<br>6,294.96) | <b>8,613.28</b><br>(6,856.31 to<br>10,611.95) | <b>5,615.56</b><br>(4,571.19 to<br>6,919.70) | <b>12,338.76</b><br>(9,959.74 to<br>15,145.28) | <b>158.48</b><br>(143.34 to<br>174.17) | <b>269.17</b><br>(224.73 to<br>316.87) | <b>180.78</b><br>(156.52 to<br>210.13) | <b>357.74</b><br>(304.54 to<br>412.69) |

**Afghanistan**

| Cause                      | YLLs (in 1000s)                        |                                            |                                            |                                            | Deaths (in 1000s)                   |                                     |                                     |                                     |
|----------------------------|----------------------------------------|--------------------------------------------|--------------------------------------------|--------------------------------------------|-------------------------------------|-------------------------------------|-------------------------------------|-------------------------------------|
|                            | 2016                                   | 2040 Forecast                              | 2040 Better Scenario                       | 2040 Worse Scenario                        | 2016                                | 2040 Forecast                       | 2040 Better Scenario                | 2040 Worse Scenario                 |
| <b>Neoplasms</b>           | <b>686.80</b><br>(459.94 to<br>862.30) | <b>1,333.22</b><br>(784.68 to<br>1,823.42) | <b>1,162.08</b><br>(749.45 to<br>1,508.40) | <b>1,429.40</b><br>(810.94 to<br>1,987.02) | <b>20.05</b><br>(14.06 to<br>24.73) | <b>39.86</b><br>(24.19 to<br>54.94) | <b>36.23</b><br>(24.58 to<br>46.26) | <b>40.50</b><br>(23.55 to<br>56.62) |
| Lip and oral cavity cancer | 4.87<br>(3.23 to<br>7.68)              | 12.39<br>(4.80 to<br>28.18)                | 7.97<br>(3.53 to<br>16.58)                 | 14.36<br>(5.37 to<br>33.40)                | 0.16<br>(0.11 to<br>0.25)           | 0.39<br>(0.17 to<br>0.88)           | 0.27<br>(0.13 to<br>0.54)           | 0.43<br>(0.18 to<br>0.99)           |



|                                      |                               |                                |                                |                                |                           |                            |                            |                            |
|--------------------------------------|-------------------------------|--------------------------------|--------------------------------|--------------------------------|---------------------------|----------------------------|----------------------------|----------------------------|
| Nasopharynx cancer                   | 6.01<br>(3.25 to<br>9.66)     | 18.17<br>(5.69 to<br>39.81)    | 11.12<br>(3.96 to<br>22.87)    | 22.22<br>(6.79 to<br>50.03)    | 0.16<br>(0.09 to<br>0.26) | 0.49<br>(0.15 to<br>1.06)  | 0.30<br>(0.11 to<br>0.61)  | 0.58<br>(0.18 to<br>1.28)  |
| Other pharynx cancer                 | 3.35<br>(1.49 to<br>6.24)     | 5.96<br>(2.43 to<br>12.45)     | 5.48<br>(2.31 to<br>11.26)     | 6.23<br>(2.43 to<br>13.42)     | 0.10<br>(0.05 to<br>0.19) | 0.18<br>(0.08 to<br>0.38)  | 0.18<br>(0.08 to<br>0.37)  | 0.18<br>(0.07 to<br>0.40)  |
| Esophageal cancer                    | 14.83<br>(11.94 to<br>17.88)  | 26.54<br>(12.41 to<br>47.53)   | 17.63<br>(9.52 to<br>29.84)    | 33.12<br>(14.43 to<br>62.12)   | 0.52<br>(0.42 to<br>0.63) | 0.91<br>(0.45 to<br>1.61)  | 0.65<br>(0.37 to<br>1.06)  | 1.07<br>(0.48 to<br>1.91)  |
| Stomach cancer                       | 83.07<br>(69.88 to<br>97.04)  | 107.20<br>(75.91 to<br>145.02) | 88.45<br>(66.63 to<br>115.94)  | 115.00<br>(81.36 to<br>157.95) | 2.72<br>(2.30 to<br>3.18) | 3.53<br>(2.55 to<br>4.74)  | 3.09<br>(2.34 to<br>4.00)  | 3.58<br>(2.56 to<br>4.86)  |
| Colon and rectum cancer              | 47.33<br>(22.75 to<br>85.32)  | 108.42<br>(44.60 to<br>208.63) | 108.71<br>(48.44 to<br>201.29) | 106.49<br>(41.46 to<br>212.47) | 1.53<br>(0.82 to<br>2.67) | 3.51<br>(1.60 to<br>6.64)  | 3.76<br>(1.89 to<br>6.79)  | 3.26<br>(1.39 to<br>6.39)  |
| Liver cancer                         | 22.19<br>(14.75 to<br>39.62)  | 47.86<br>(26.94 to<br>90.86)   | 42.73<br>(26.30 to<br>78.24)   | 52.14<br>(27.80 to<br>104.58)  | 0.84<br>(0.59 to<br>1.40) | 1.81<br>(1.16 to<br>3.23)  | 1.75<br>(1.11 to<br>2.96)  | 1.84<br>(1.00 to<br>3.47)  |
| Liver cancer due to hepatitis B      | 8.85<br>(5.21 to<br>17.26)    | 19.14<br>(9.92 to<br>38.41)    | 16.79<br>(9.36 to<br>32.05)    | 21.32<br>(10.27 to<br>44.85)   | 0.30<br>(0.18 to<br>0.56) | 0.65<br>(0.35 to<br>1.22)  | 0.61<br>(0.35 to<br>1.08)  | 0.68<br>(0.35 to<br>1.34)  |
| Liver cancer due to hepatitis C      | 6.34<br>(3.75 to<br>12.29)    | 13.44<br>(7.24 to<br>27.14)    | 12.66<br>(7.35 to<br>24.75)    | 14.11<br>(7.17 to<br>29.67)    | 0.28<br>(0.18 to<br>0.51) | 0.59<br>(0.32 to<br>1.14)  | 0.60<br>(0.35 to<br>1.10)  | 0.57<br>(0.29 to<br>1.14)  |
| Liver cancer due to alcohol use      | 1.50<br>(0.83 to<br>2.66)     | 3.18<br>(1.54 to<br>6.31)      | 2.80<br>(1.45 to<br>5.32)      | 3.43<br>(1.53 to<br>6.88)      | 0.06<br>(0.03 to<br>0.11) | 0.13<br>(0.06 to<br>0.26)  | 0.12<br>(0.06 to<br>0.23)  | 0.13<br>(0.06 to<br>0.28)  |
| Liver cancer due to other causes     | 5.49<br>(3.41 to<br>9.44)     | 12.09<br>(6.24 to<br>23.77)    | 10.48<br>(5.88 to<br>18.96)    | 13.29<br>(6.57 to<br>26.89)    | 0.20<br>(0.12 to<br>0.32) | 0.45<br>(0.22 to<br>0.81)  | 0.42<br>(0.23 to<br>0.72)  | 0.46<br>(0.22 to<br>0.87)  |
| Gallbladder and biliary tract cancer | 9.58<br>(4.62 to<br>16.86)    | 13.56<br>(6.16 to<br>23.87)    | 14.89<br>(6.84 to<br>25.64)    | 12.48<br>(5.39 to<br>22.53)    | 0.36<br>(0.19 to<br>0.60) | 0.49<br>(0.24 to<br>0.84)  | 0.58<br>(0.30 to<br>0.95)  | 0.43<br>(0.20 to<br>0.75)  |
| Pancreatic cancer                    | 11.65<br>(9.28 to<br>15.05)   | 28.42<br>(17.62 to<br>44.47)   | 27.80<br>(18.28 to<br>41.58)   | 26.72<br>(16.04 to<br>43.83)   | 0.44<br>(0.37 to<br>0.55) | 1.07<br>(0.68 to<br>1.58)  | 1.12<br>(0.77 to<br>1.57)  | 0.94<br>(0.57 to<br>1.46)  |
| Larynx cancer                        | 10.20<br>(6.10 to<br>13.58)   | 22.66<br>(8.29 to<br>46.75)    | 12.94<br>(5.19 to<br>26.17)    | 25.83<br>(9.53 to<br>52.45)    | 0.34<br>(0.21 to<br>0.45) | 0.75<br>(0.28 to<br>1.54)  | 0.43<br>(0.18 to<br>0.87)  | 0.83<br>(0.30 to<br>1.66)  |
| Tracheal, bronchus, and lung cancer  | 76.51<br>(42.02 to<br>125.86) | 193.68<br>(49.97 to<br>410.77) | 107.84<br>(30.27 to<br>239.40) | 222.05<br>(62.42 to<br>441.00) | 2.64<br>(1.54 to<br>4.22) | 6.51<br>(1.86 to<br>14.02) | 3.62<br>(1.17 to<br>7.96)  | 7.31<br>(2.21 to<br>14.68) |
| Malignant skin melanoma              | 1.66<br>(0.75 to<br>4.17)     | 3.66<br>(1.57 to<br>9.29)      | 4.28<br>(1.81 to<br>10.35)     | 3.30<br>(1.42 to<br>8.64)      | 0.05<br>(0.02 to<br>0.11) | 0.10<br>(0.05 to<br>0.24)  | 0.13<br>(0.06 to<br>0.27)  | 0.09<br>(0.04 to<br>0.21)  |
| Non-melanoma skin cancer             | 2.46<br>(1.16 to<br>3.61)     | 5.02<br>(2.42 to<br>7.41)      | 4.85<br>(2.43 to<br>7.09)      | 5.09<br>(2.38 to<br>7.61)      | 0.09<br>(0.04 to<br>0.12) | 0.18<br>(0.09 to<br>0.25)  | 0.19<br>(0.10 to<br>0.26)  | 0.17<br>(0.08 to<br>0.24)  |
| Breast cancer                        | 99.75<br>(33.14 to<br>192.99) | 221.07<br>(73.82 to<br>431.38) | 205.59<br>(79.60 to<br>380.39) | 224.42<br>(67.37 to<br>452.71) | 2.71<br>(1.00 to<br>5.09) | 6.03<br>(2.16 to<br>11.46) | 5.77<br>(2.41 to<br>10.48) | 5.95<br>(1.91 to<br>11.62) |
| Cervical cancer                      | 26.02<br>(9.39 to<br>40.24)   | 41.19<br>(14.28 to<br>70.64)   | 34.31<br>(13.44 to<br>57.34)   | 46.88<br>(14.69 to<br>85.20)   | 0.74<br>(0.29 to<br>1.12) | 1.15<br>(0.43 to<br>1.92)  | 1.00<br>(0.41 to<br>1.63)  | 1.26<br>(0.42 to<br>2.26)  |
| Uterine cancer                       | 10.04<br>(4.51 to<br>14.12)   | 17.53<br>(7.90 to<br>25.61)    | 15.46<br>(7.69 to<br>23.70)    | 18.73<br>(7.84 to<br>27.64)    | 0.33<br>(0.17 to<br>0.46) | 0.58<br>(0.29 to<br>0.83)  | 0.53<br>(0.30 to<br>0.77)  | 0.59<br>(0.27 to<br>0.85)  |
| Ovarian cancer                       | 7.51<br>(4.85 to<br>15.09)    | 16.71<br>(9.43 to<br>35.46)    | 18.80<br>(10.64 to<br>38.66)   | 15.51<br>(8.65 to<br>33.63)    | 0.24<br>(0.16 to<br>0.43) | 0.52<br>(0.30 to<br>1.02)  | 0.60<br>(0.36 to<br>1.14)  | 0.46<br>(0.26 to<br>0.95)  |
| Prostate cancer                      | 8.36<br>(5.70 to<br>17.64)    | 19.76<br>(11.72 to<br>43.33)   | 24.48<br>(15.09 to<br>49.92)   | 16.13<br>(9.25 to<br>37.27)    | 0.46<br>(0.32 to<br>0.88) | 1.11<br>(0.64 to<br>2.31)  | 1.50<br>(0.91 to<br>2.82)  | 0.85<br>(0.46 to<br>1.87)  |
| Testicular cancer                    | 3.65<br>(2.43 to<br>5.27)     | 5.65<br>(3.62 to<br>8.81)      | 5.13<br>(3.34 to<br>7.88)      | 6.08<br>(3.88 to<br>9.39)      | 0.07<br>(0.05 to<br>0.10) | 0.11<br>(0.07 to<br>0.17)  | 0.10<br>(0.07 to<br>0.16)  | 0.12<br>(0.08 to<br>0.18)  |

| Afghanistan                     |                                                  |                                                  |                                                  |                                                  |                                         |                                           |                                         |                                            |
|---------------------------------|--------------------------------------------------|--------------------------------------------------|--------------------------------------------------|--------------------------------------------------|-----------------------------------------|-------------------------------------------|-----------------------------------------|--------------------------------------------|
| Cause                           | YLLs (in 1000s)                                  |                                                  |                                                  |                                                  | Deaths (in 1000s)                       |                                           |                                         |                                            |
|                                 | 2016                                             | 2040 Forecast                                    | 2040 Better Scenario                             | 2040 Worse Scenario                              | 2016                                    | 2040 Forecast                             | 2040 Better Scenario                    | 2040 Worse Scenario                        |
| Kidney cancer                   | 4.66<br>(3.50 to 6.09)                           | 10.09<br>(6.65 to 15.59)                         | 10.80<br>(7.52 to 15.65)                         | 9.74<br>(6.47 to 15.36)                          | 0.13<br>(0.10 to 0.16)                  | 0.30<br>(0.20 to 0.44)                    | 0.33<br>(0.24 to 0.48)                  | 0.26<br>(0.17 to 0.40)                     |
| Bladder cancer                  | 10.72<br>(6.60 to 18.36)                         | 23.07<br>(9.98 to 46.35)                         | 19.39<br>(9.36 to 36.58)                         | 23.12<br>(9.37 to 47.95)                         | 0.44<br>(0.29 to 0.71)                  | 0.92<br>(0.43 to 1.84)                    | 0.85<br>(0.45 to 1.58)                  | 0.86<br>(0.37 to 1.78)                     |
| Brain and nervous system cancer | 29.28<br>(21.50 to 35.59)                        | 60.77<br>(43.84 to 76.45)                        | 65.04<br>(46.24 to 81.87)                        | 62.70<br>(45.72 to 79.15)                        | 0.63<br>(0.44 to 0.77)                  | 1.39<br>(0.96 to 1.76)                    | 1.57<br>(1.06 to 1.99)                  | 1.33<br>(0.93 to 1.67)                     |
| Thyroid cancer                  | 6.11<br>(2.89 to 9.29)                           | 10.42<br>(4.68 to 17.50)                         | 9.27<br>(4.47 to 15.16)                          | 11.73<br>(4.88 to 20.34)                         | 0.20<br>(0.11 to 0.30)                  | 0.35<br>(0.17 to 0.57)                    | 0.33<br>(0.17 to 0.52)                  | 0.37<br>(0.16 to 0.62)                     |
| Mesothelioma                    | 2.38<br>(1.17 to 3.93)                           | 4.55<br>(2.28 to 7.69)                           | 4.33<br>(2.28 to 7.14)                           | 4.65<br>(2.21 to 7.93)                           | 0.07<br>(0.04 to 0.12)                  | 0.14<br>(0.08 to 0.24)                    | 0.14<br>(0.08 to 0.22)                  | 0.14<br>(0.07 to 0.24)                     |
| Hodgkin lymphoma                | 21.08<br>(15.30 to 34.57)                        | 28.08<br>(18.22 to 48.92)                        | 21.98<br>(13.90 to 37.31)                        | 34.10<br>(21.95 to 58.67)                        | 0.44<br>(0.32 to 0.72)                  | 0.60<br>(0.39 to 1.01)                    | 0.48<br>(0.31 to 0.82)                  | 0.70<br>(0.46 to 1.20)                     |
| Non-Hodgkin lymphoma            | 21.58<br>(15.44 to 31.69)                        | 44.78<br>(29.50 to 67.24)                        | 48.94<br>(32.85 to 73.60)                        | 44.58<br>(29.24 to 67.54)                        | 0.56<br>(0.42 to 0.77)                  | 1.20<br>(0.79 to 1.78)                    | 1.39<br>(0.97 to 2.02)                  | 1.11<br>(0.73 to 1.66)                     |
| Multiple myeloma                | 5.06<br>(3.25 to 8.98)                           | 12.30<br>(7.50 to 23.00)                         | 14.01<br>(8.89 to 25.32)                         | 11.43<br>(6.74 to 21.30)                         | 0.17<br>(0.12 to 0.30)                  | 0.42<br>(0.26 to 0.81)                    | 0.51<br>(0.33 to 0.91)                  | 0.37<br>(0.22 to 0.71)                     |
| Leukemia                        | 97.72<br>(52.31 to 150.46)                       | 146.75<br>(75.36 to 238.12)                      | 130.62<br>(69.86 to 208.94)                      | 173.43<br>(84.30 to 284.41)                      | 2.02<br>(1.18 to 3.02)                  | 3.31<br>(1.78 to 5.25)                    | 3.06<br>(1.75 to 4.60)                  | 3.66<br>(1.87 to 5.89)                     |
| Acute lymphoid leukemia         | 14.52<br>(7.67 to 32.45)                         | 21.83<br>(11.07 to 51.08)                        | 21.53<br>(11.29 to 48.78)                        | 25.39<br>(12.66 to 60.08)                        | 0.22<br>(0.12 to 0.49)                  | 0.36<br>(0.19 to 0.86)                    | 0.36<br>(0.20 to 0.82)                  | 0.41<br>(0.20 to 0.98)                     |
| Chronic lymphoid leukemia       | 1.96<br>(0.74 to 4.63)                           | 3.70<br>(1.28 to 10.13)                          | 3.45<br>(1.27 to 8.97)                           | 3.99<br>(1.29 to 11.10)                          | 0.06<br>(0.02 to 0.12)                  | 0.10<br>(0.04 to 0.25)                    | 0.10<br>(0.04 to 0.24)                  | 0.11<br>(0.04 to 0.28)                     |
| Acute myeloid leukemia          | 8.51<br>(5.35 to 17.98)                          | 16.98<br>(10.24 to 37.32)                        | 17.74<br>(10.89 to 37.13)                        | 18.15<br>(10.93 to 40.48)                        | 0.16<br>(0.10 to 0.33)                  | 0.34<br>(0.20 to 0.75)                    | 0.37<br>(0.23 to 0.75)                  | 0.35<br>(0.21 to 0.77)                     |
| Chronic myeloid leukemia        | 8.84<br>(4.09 to 18.57)                          | 10.34<br>(4.70 to 21.53)                         | 9.51<br>(4.57 to 18.82)                          | 11.16<br>(4.85 to 24.73)                         | 0.23<br>(0.12 to 0.44)                  | 0.27<br>(0.14 to 0.54)                    | 0.26<br>(0.14 to 0.47)                  | 0.28<br>(0.13 to 0.59)                     |
| Other leukemia                  | 63.89<br>(29.32 to 102.19)                       | 93.89<br>(40.49 to 159.49)                       | 78.39<br>(35.05 to 133.65)                       | 114.73<br>(48.18 to 201.16)                      | 1.36<br>(0.69 to 2.07)                  | 2.23<br>(1.06 to 3.62)                    | 1.97<br>(1.00 to 3.13)                  | 2.52<br>(1.12 to 4.23)                     |
| Other neoplasms                 | 39.19<br>(29.24 to 56.20)                        | 76.98<br>(57.07 to 112.07)                       | 79.24<br>(59.66 to 114.00)                       | 81.15<br>(59.53 to 119.67)                       | 0.89<br>(0.69 to 1.18)                  | 1.82<br>(1.36 to 2.47)                    | 2.00<br>(1.55 to 2.65)                  | 1.76<br>(1.30 to 2.44)                     |
| <b>Cardiovascular diseases</b>  | <b>2,181.14</b><br><b>(1,975.15 to 2,406.75)</b> | <b>3,502.28</b><br><b>(2,262.11 to 4,980.12)</b> | <b>1,557.24</b><br><b>(1,016.08 to 2,317.46)</b> | <b>5,620.33</b><br><b>(3,840.06 to 7,512.34)</b> | <b>80.33</b><br><b>(73.86 to 87.46)</b> | <b>128.97</b><br><b>(87.43 to 177.61)</b> | <b>64.57</b><br><b>(44.81 to 93.90)</b> | <b>194.21</b><br><b>(137.12 to 254.16)</b> |
| Rheumatic heart disease         | 60.98<br>(35.15 to 84.29)                        | 90.57<br>(28.61 to 79.45)                        | 35.59<br>(21.74 to 55.89)                        | 64.43<br>(36.08 to 104.77)                       | 1.48<br>(0.83 to 2.03)                  | 1.29<br>(0.75 to 2.01)                    | 0.96<br>(0.59 to 1.48)                  | 1.56<br>(0.87 to 2.47)                     |
| Ischemic heart disease          | 1,348.10<br>(1,197.35 to 1,532.86)               | 2,287.65<br>(1,275.17 to 3,662.82)               | 963.03<br>(534.26 to 1,698.10)                   | 3,667.63<br>(2,260.66 to 5,198.51)               | 50.81<br>(45.58 to 56.40)               | 84.95<br>(49.85 to 135.90)                | 39.98<br>(23.42 to 67.94)               | 129.44<br>(82.48 to 186.03)                |
| Stroke                          | 629.07<br>(505.90 to 778.10)                     | 902.70<br>(466.70 to 1,628.11)                   | 362.85<br>(207.07 to 662.01)                     | 1,575.41<br>(847.73 to 2,633.98)                 | 23.13<br>(18.80 to 27.67)               | 33.53<br>(18.00 to 60.99)                 | 15.96<br>(9.17 to 31.09)                | 53.15<br>(29.95 to 87.29)                  |
| Ischemic stroke                 | 220.32<br>(171.03 to 274.17)                     | 295.97<br>(139.50 to 639.07)                     | 147.64<br>(72.83 to 367.98)                      | 429.35<br>(208.27 to 834.67)                     | 10.02<br>(7.93 to 12.18)                | 13.75<br>(6.45 to 33.22)                  | 8.07<br>(3.96 to 23.11)                 | 18.23<br>(8.70 to 39.06)                   |

|                                                     |                                          |                                          |                                          |                                          |                                     |                                      |                                    |                                      |
|-----------------------------------------------------|------------------------------------------|------------------------------------------|------------------------------------------|------------------------------------------|-------------------------------------|--------------------------------------|------------------------------------|--------------------------------------|
| Intracerebral hemorrhage                            | 408.75<br>(330.28 to<br>506.46)          | 606.73<br>(269.92 to<br>1,253.18)        | 215.21<br>(109.89 to<br>418.63)          | 1,146.06<br>(522.38 to<br>2,109.31)      | 13.11<br>(10.86 to<br>15.84)        | 19.78<br>(9.69 to<br>39.73)          | 7.89<br>(4.24 to<br>14.69)         | 34.92<br>(16.64 to<br>64.73)         |
| Hypertensive heart disease                          | 50.20<br>(12.20 to<br>78.60)             | 85.78<br>(19.42 to<br>177.12)            | 53.91<br>(14.69 to<br>101.10)            | 113.70<br>(24.13 to<br>238.13)           | 1.86<br>(0.53 to<br>2.89)           | 3.18<br>(0.82 to<br>6.69)            | 2.20<br>(0.68 to<br>4.09)          | 3.92<br>(0.94 to<br>8.30)            |
| Cardiomyopathy and myocarditis                      | 16.49<br>(9.62 to<br>25.34)              | 28.16<br>(15.63 to<br>46.31)             | 26.90<br>(15.67 to<br>44.03)             | 29.93<br>(16.09 to<br>49.80)             | 0.43<br>(0.27 to<br>0.64)           | 0.78<br>(0.45 to<br>1.28)            | 0.80<br>(0.48 to<br>1.32)          | 0.76<br>(0.43 to<br>1.25)            |
| Myocarditis                                         | 3.74<br>(1.97 to<br>7.14)                | 5.38<br>(2.79 to<br>10.14)               | 4.82<br>(2.59 to<br>8.88)                | 6.14<br>(3.13 to<br>12.06)               | 0.08<br>(0.04 to<br>0.14)           | 0.12<br>(0.06 to<br>0.21)            | 0.11<br>(0.06 to<br>0.19)          | 0.13<br>(0.07 to<br>0.24)            |
| <b>Afghanistan</b>                                  |                                          |                                          |                                          |                                          |                                     |                                      |                                    |                                      |
| Cause                                               | YLLs (in 1000s)                          |                                          |                                          |                                          | Deaths (in 1000s)                   |                                      |                                    |                                      |
|                                                     | 2016                                     | 2040 Forecast                            | 2040 Better Scenario                     | 2040 Worse Scenario                      | 2016                                | 2040 Forecast                        | 2040 Better Scenario               | 2040 Worse Scenario                  |
| Alcoholic cardiomyopathy                            | 2.28<br>(0.78 to<br>4.48)                | 3.39<br>(1.29 to<br>6.42)                | 3.27<br>(1.39 to<br>5.68)                | 3.41<br>(1.20 to<br>6.67)                | 0.07<br>(0.03 to<br>0.13)           | 0.10<br>(0.04 to<br>0.18)            | 0.11<br>(0.05 to<br>0.17)          | 0.10<br>(0.04 to<br>0.18)            |
| Other cardiomyopathy                                | 10.46<br>(5.75 to<br>16.25)              | 19.39<br>(9.63 to<br>34.61)              | 18.80<br>(9.86 to<br>33.16)              | 20.38<br>(9.74 to<br>35.51)              | 0.28<br>(0.17 to<br>0.43)           | 0.56<br>(0.29 to<br>0.97)            | 0.58<br>(0.33 to<br>1.02)          | 0.54<br>(0.27 to<br>0.94)            |
| Atrial fibrillation and flutter                     | 1.99<br>(1.49 to<br>2.57)                | 4.08<br>(2.65 to<br>5.70)                | 4.64<br>(3.15 to<br>6.27)                | 3.40<br>(2.16 to<br>4.83)                | 0.14<br>(0.11 to<br>0.19)           | 0.30<br>(0.17 to<br>0.45)            | 0.39<br>(0.23 to<br>0.55)          | 0.22<br>(0.12 to<br>0.35)            |
| Aortic aneurysm                                     | 5.26<br>(2.42 to<br>8.35)                | 9.83<br>(4.45 to<br>16.46)               | 8.82<br>(4.39 to<br>14.26)               | 9.69<br>(4.19 to<br>16.45)               | 0.18<br>(0.10 to<br>0.28)           | 0.34<br>(0.19 to<br>0.55)            | 0.34<br>(0.19 to<br>0.52)          | 0.31<br>(0.15 to<br>0.51)            |
| Peripheral artery disease                           | 0.10<br>(0.05 to<br>0.30)                | 0.36<br>(0.14 to<br>1.07)                | 0.38<br>(0.15 to<br>1.04)                | 0.30<br>(0.12 to<br>0.90)                | 0.01<br>(0.00 to<br>0.02)           | 0.02<br>(0.01 to<br>0.06)            | 0.02<br>(0.01 to<br>0.07)          | 0.02<br>(0.01 to<br>0.04)            |
| Endocarditis                                        | 6.30<br>(4.31 to<br>8.39)                | 11.77<br>(7.49 to<br>17.20)              | 10.90<br>(7.07 to<br>16.08)              | 12.66<br>(8.03 to<br>18.60)              | 0.20<br>(0.14 to<br>0.26)           | 0.39<br>(0.25 to<br>0.57)            | 0.40<br>(0.26 to<br>0.60)          | 0.37<br>(0.24 to<br>0.54)            |
| Other cardiovascular and circulatory diseases       | 62.64<br>(28.53 to<br>98.69)             | 121.40<br>(52.53 to<br>197.74)           | 90.24<br>(43.05 to<br>146.40)            | 143.18<br>(60.17 to<br>235.57)           | 2.08<br>(0.97 to<br>3.37)           | 4.19<br>(1.88 to<br>7.04)            | 3.52<br>(1.70 to<br>5.92)          | 4.45<br>(1.91 to<br>7.33)            |
| <b>Chronic respiratory diseases</b>                 | <b>275.07<br/>(242.20 to<br/>314.48)</b> | <b>323.15<br/>(195.82 to<br/>543.59)</b> | <b>177.24<br/>(126.94 to<br/>249.74)</b> | <b>466.19<br/>(273.04 to<br/>795.02)</b> | <b>9.92<br/>(8.80 to<br/>11.09)</b> | <b>11.76<br/>(7.03 to<br/>19.09)</b> | <b>6.74<br/>(4.84 to<br/>9.43)</b> | <b>15.88<br/>(9.03 to<br/>27.21)</b> |
| Chronic obstructive pulmonary disease               | 157.78<br>(122.19 to<br>195.64)          | 217.63<br>(107.32 to<br>402.20)          | 92.99<br>(54.97 to<br>150.62)            | 331.99<br>(162.81 to<br>635.05)          | 6.39<br>(5.06 to<br>7.70)           | 8.45<br>(4.24 to<br>14.90)           | 3.85<br>(2.25 to<br>6.27)          | 12.03<br>(5.86 to<br>22.27)          |
| Pneumoconiosis                                      | 0.71<br>(0.42 to<br>1.19)                | 0.68<br>(0.39 to<br>1.10)                | 0.62<br>(0.34 to<br>1.05)                | 0.69<br>(0.40 to<br>1.14)                | 0.03<br>(0.02 to<br>0.04)           | 0.03<br>(0.01 to<br>0.04)            | 0.03<br>(0.01 to<br>0.04)          | 0.03<br>(0.01 to<br>0.04)            |
| Silicosis                                           | 0.19<br>(0.08 to<br>0.38)                | 0.14<br>(0.06 to<br>0.29)                | 0.13<br>(0.05 to<br>0.28)                | 0.15<br>(0.06 to<br>0.30)                | 0.01<br>(0.00 to<br>0.02)           | 0.01<br>(0.00 to<br>0.01)            | 0.01<br>(0.00 to<br>0.01)          | 0.01<br>(0.00 to<br>0.01)            |
| Asbestosis                                          | 0.09<br>(0.05 to<br>0.17)                | 0.12<br>(0.07 to<br>0.21)                | 0.12<br>(0.06 to<br>0.21)                | 0.13<br>(0.07 to<br>0.22)                | 0.00<br>(0.00 to<br>0.00)           | 0.00<br>(0.00 to<br>0.01)            | 0.00<br>(0.00 to<br>0.01)          | 0.00<br>(0.00 to<br>0.01)            |
| Coal workers pneumoconiosis                         | 0.09<br>(0.02 to<br>0.16)                | 0.08<br>(0.02 to<br>0.16)                | 0.06<br>(0.01 to<br>0.11)                | 0.10<br>(0.02 to<br>0.18)                | 0.00<br>(0.00 to<br>0.01)           | 0.00<br>(0.00 to<br>0.01)            | 0.00<br>(0.00 to<br>0.01)          | 0.00<br>(0.00 to<br>0.01)            |
| Other pneumoconiosis                                | 0.34<br>(0.15 to<br>0.64)                | 0.33<br>(0.14 to<br>0.60)                | 0.31<br>(0.13 to<br>0.57)                | 0.32<br>(0.14 to<br>0.59)                | 0.01<br>(0.01 to<br>0.03)           | 0.01<br>(0.01 to<br>0.03)            | 0.01<br>(0.01 to<br>0.03)          | 0.01<br>(0.01 to<br>0.02)            |
| Asthma                                              | 105.35<br>(76.57 to<br>144.27)           | 81.32<br>(45.99 to<br>133.72)            | 59.52<br>(33.74 to<br>91.88)             | 110.31<br>(62.13 to<br>184.13)           | 3.15<br>(2.23 to<br>4.51)           | 2.48<br>(1.36 to<br>4.16)            | 1.95<br>(1.08 to<br>3.08)          | 3.12<br>(1.67 to<br>5.34)            |
| Interstitial lung disease and pulmonary sarcoidosis | 5.28<br>(0.94 to<br>16.18)               | 13.42<br>(2.51 to<br>38.71)              | 15.67<br>(3.24 to<br>40.53)              | 11.72<br>(2.07 to<br>35.20)              | 0.21<br>(0.04 to<br>0.61)           | 0.52<br>(0.10 to<br>1.39)            | 0.66<br>(0.14 to<br>1.62)          | 0.42<br>(0.07 to<br>1.17)            |

|                                                                |                                                     |                                                      |                                                      |                                                      |                                                |                                                 |                                                  |                                                 |
|----------------------------------------------------------------|-----------------------------------------------------|------------------------------------------------------|------------------------------------------------------|------------------------------------------------------|------------------------------------------------|-------------------------------------------------|--------------------------------------------------|-------------------------------------------------|
| Other chronic respiratory diseases                             | 5.95<br>(2.38 to<br>11.43)                          | 10.10<br>(3.94 to<br>22.16)                          | 8.44<br>(3.51 to<br>17.57)                           | 11.48<br>(4.36 to<br>25.04)                          | 0.15<br>(0.06 to<br>0.29)                      | 0.28<br>(0.11 to<br>0.64)                       | 0.25<br>(0.10 to<br>0.53)                        | 0.29<br>(0.11 to<br>0.66)                       |
| <b>Cirrhosis and other chronic liver diseases</b>              | <b>139.72</b><br><b>(97.34 to</b><br><b>187.68)</b> | <b>243.14</b><br><b>(161.93 to</b><br><b>343.99)</b> | <b>225.72</b><br><b>(157.11 to</b><br><b>321.31)</b> | <b>257.68</b><br><b>(169.29 to</b><br><b>362.01)</b> | <b>4.09</b><br><b>(3.01 to</b><br><b>5.45)</b> | <b>7.33</b><br><b>(5.11 to</b><br><b>10.34)</b> | <b>7.18</b><br><b>(5.12 to</b><br><b>10.02)</b>  | <b>7.31</b><br><b>(5.00 to</b><br><b>10.31)</b> |
| Cirrhosis and other chronic liver diseases due to hepatitis B  | 39.03<br>(24.72 to<br>59.82)                        | 72.80<br>(44.65 to<br>111.85)                        | 68.92<br>(44.05 to<br>106.40)                        | 74.23<br>(44.39 to<br>114.76)                        | 1.28<br>(0.86 to<br>1.92)                      | 2.37<br>(1.53 to<br>3.65)                       | 2.36<br>(1.57 to<br>3.66)                        | 2.31<br>(1.44 to<br>3.58)                       |
| Cirrhosis and other chronic liver diseases due to hepatitis C  | 42.01<br>(26.65 to<br>63.31)                        | 80.52<br>(49.74 to<br>122.55)                        | 75.87<br>(47.86 to<br>115.91)                        | 82.36<br>(50.45 to<br>125.95)                        | 1.36<br>(0.90 to<br>2.03)                      | 2.36<br>(1.64 to<br>3.95)                       | 2.58<br>(1.65 to<br>3.90)                        | 2.56<br>(1.58 to<br>3.90)                       |
| Cirrhosis and other chronic liver diseases due to alcohol use  | 8.53<br>(5.62 to<br>12.49)                          | 14.85<br>(9.38 to<br>22.67)                          | 13.30<br>(8.66 to<br>19.90)                          | 15.53<br>(9.63 to<br>23.86)                          | 0.29<br>(0.20 to<br>0.41)                      | 0.50<br>(0.32 to<br>0.75)                       | 0.47<br>(0.31 to<br>0.69)                        | 0.50<br>(0.32 to<br>0.76)                       |
| Cirrhosis and other chronic liver diseases due to other causes | 30.15<br>(16.67 to<br>67.15)                        | 74.96<br>(52.34 to<br>107.18)                        | 67.64<br>(47.25 to<br>99.14)                         | 85.56<br>(58.93 to<br>122.36)                        | 1.16<br>(0.87 to<br>1.55)                      | 1.85<br>(1.32 to<br>2.61)                       | 1.78<br>(1.26 to<br>2.54)                        | 1.94<br>(1.38 to<br>2.74)                       |
| <b>Digestive diseases</b>                                      | <b>147.96</b><br><b>(83.10 to</b><br><b>202.18)</b> | <b>164.68</b><br><b>(93.48 to</b><br><b>234.08)</b>  | <b>134.91</b><br><b>(79.76 to</b><br><b>202.36)</b>  | <b>203.78</b><br><b>(114.69 to</b><br><b>294.26)</b> | <b>4.08</b><br><b>(2.49 to</b><br><b>6.23)</b> | <b>8.03</b><br><b>(3.07 to</b><br><b>8.42)</b>  | <b>4.52</b><br><b>(2.81 to</b><br><b>7.90)</b>   | <b>5.51</b><br><b>(3.28 to</b><br><b>8.81)</b>  |
| Peptic ulcer disease                                           | 58.62<br>(33.89 to<br>100.11)                       | 51.81<br>(29.37 to<br>99.06)                         | 37.59<br>(21.38 to<br>75.47)                         | 63.82<br>(35.18 to<br>119.24)                        | 1.84<br>(1.10 to<br>3.36)                      | 1.74<br>(0.97 to<br>3.51)                       | 1.38<br>(0.77 to<br>2.95)                        | 1.96<br>(1.09 to<br>3.88)                       |
| <b>Afghanistan</b>                                             |                                                     |                                                      |                                                      |                                                      |                                                |                                                 |                                                  |                                                 |
| Cause                                                          | YLLs (in 1000s)                                     |                                                      |                                                      |                                                      | Deaths (in 1000s)                              |                                                 |                                                  |                                                 |
|                                                                | 2016                                                | 2040 Forecast                                        | 2040 Better Scenario                                 | 2040 Worse Scenario                                  | 2016                                           | 2040 Forecast                                   | 2040 Better Scenario                             | 2040 Worse Scenario                             |
| Gastritis and duodenitis                                       | 0.85<br>(0.26 to<br>1.63)                           | 1.31<br>(0.43 to<br>2.48)                            | 1.14<br>(0.41 to<br>2.20)                            | 1.50<br>(0.48 to<br>2.97)                            | 0.02<br>(0.01 to<br>0.04)                      | 0.04<br>(0.01 to<br>0.07)                       | 0.04<br>(0.01 to<br>0.07)                        | 0.04<br>(0.01 to<br>0.07)                       |
| Appendicitis                                                   | 17.44<br>(6.37 to<br>31.75)                         | 18.55<br>(6.81 to<br>34.05)                          | 14.51<br>(5.60 to<br>28.12)                          | 23.86<br>(8.35 to<br>44.36)                          | 0.37<br>(0.14 to<br>0.73)                      | 0.46<br>(0.18 to<br>0.98)                       | 0.39<br>(0.15 to<br>0.89)                        | 0.52<br>(0.20 to<br>1.03)                       |
| Paralytic ileus and intestinal obstruction                     | 25.92<br>(11.55 to<br>50.87)                        | 28.37<br>(13.33 to<br>52.95)                         | 26.54<br>(12.85 to<br>49.15)                         | 38.88<br>(16.95 to<br>76.42)                         | 0.50<br>(0.27 to<br>0.85)                      | 0.68<br>(0.36 to<br>1.20)                       | 0.73<br>(0.39 to<br>1.33)                        | 0.75<br>(0.37 to<br>1.32)                       |
| Inguinal, femoral, and abdominal hernia                        | 3.05<br>(1.40 to<br>5.92)                           | 3.29<br>(1.53 to<br>6.03)                            | 3.11<br>(1.48 to<br>5.97)                            | 3.47<br>(1.58 to<br>6.28)                            | 0.12<br>(0.06 to<br>0.25)                      | 0.14<br>(0.06 to<br>0.30)                       | 0.15<br>(0.07 to<br>0.34)                        | 0.13<br>(0.06 to<br>0.27)                       |
| Inflammatory bowel disease                                     | 2.88<br>(0.88 to<br>8.87)                           | 4.50<br>(1.35 to<br>13.31)                           | 4.39<br>(1.41 to<br>12.57)                           | 4.73<br>(1.38 to<br>14.37)                           | 0.07<br>(0.02 to<br>0.20)                      | 0.11<br>(0.04 to<br>0.31)                       | 0.12<br>(0.04 to<br>0.30)                        | 0.11<br>(0.04 to<br>0.31)                       |
| Vascular intestinal disorders                                  | 4.81<br>(2.29 to<br>7.88)                           | 8.09<br>(3.85 to<br>13.27)                           | 7.79<br>(3.91 to<br>12.41)                           | 8.20<br>(3.72 to<br>13.48)                           | 0.17<br>(0.09 to<br>0.27)                      | 0.30<br>(0.15 to<br>0.48)                       | 0.32<br>(0.17 to<br>0.50)                        | 0.28<br>(0.14 to<br>0.45)                       |
| Gallbladder and biliary diseases                               | 9.29<br>(4.68 to<br>14.72)                          | 12.78<br>(6.09 to<br>22.99)                          | 9.84<br>(5.01 to<br>18.85)                           | 17.19<br>(7.77 to<br>30.89)                          | 0.33<br>(0.19 to<br>0.66)                      | 0.50<br>(0.23 to<br>1.10)                       | 0.44<br>(0.21 to<br>1.04)                        | 0.61<br>(0.27 to<br>1.23)                       |
| Pancreatitis                                                   | 7.51<br>(3.88 to<br>11.48)                          | 13.08<br>(6.46 to<br>22.28)                          | 10.92<br>(5.59 to<br>17.65)                          | 14.36<br>(6.78 to<br>25.24)                          | 0.22<br>(0.12 to<br>0.35)                      | 0.39<br>(0.20 to<br>0.67)                       | 0.35<br>(0.19 to<br>0.60)                        | 0.41<br>(0.20 to<br>0.70)                       |
| Other digestive diseases                                       | 17.58<br>(8.57 to<br>27.99)                         | 22.89<br>(12.13 to<br>36.99)                         | 19.06<br>(10.50 to<br>31.74)                         | 27.79<br>(14.13 to<br>46.27)                         | 0.44<br>(0.24 to<br>0.76)                      | 0.66<br>(0.37 to<br>1.17)                       | 0.61<br>(0.34 to<br>1.19)                        | 0.70<br>(0.38 to<br>1.20)                       |
| <b>Neurological disorders</b>                                  | <b>113.83</b><br><b>(77.58 to</b><br><b>155.16)</b> | <b>206.82</b><br><b>(141.10 to</b><br><b>282.80)</b> | <b>207.85</b><br><b>(149.99 to</b><br><b>273.09)</b> | <b>220.45</b><br><b>(140.51 to</b><br><b>314.34)</b> | <b>4.31</b><br><b>(3.39 to</b><br><b>5.32)</b> | <b>8.74</b><br><b>(5.75 to</b><br><b>12.41)</b> | <b>10.73</b><br><b>(7.42 to</b><br><b>14.18)</b> | <b>7.59</b><br><b>(4.75 to</b><br><b>11.01)</b> |
| Alzheimer's disease and other dementias                        | 40.00<br>(32.43 to<br>49.14)                        | 82.46<br>(51.09 to<br>128.07)                        | 99.50<br>(68.59 to<br>138.60)                        | 69.49<br>(39.84 to<br>111.27)                        | 2.90<br>(2.36 to<br>3.58)                      | 6.13<br>(3.47 to<br>9.67)                       | 8.15<br>(5.22 to<br>11.74)                       | 4.73<br>(2.47 to<br>7.70)                       |
| Parkinson's disease                                            | 2.77<br>(2.09 to<br>3.54)                           | 6.64<br>(4.32 to<br>9.47)                            | 9.72<br>(6.78 to<br>13.00)                           | 4.80<br>(2.95 to<br>7.00)                            | 0.18<br>(0.14 to<br>0.23)                      | 0.45<br>(0.25 to<br>0.67)                       | 0.71<br>(0.46 to<br>1.01)                        | 0.30<br>(0.16 to<br>0.47)                       |

|                              |                                      |                                        |                                        |                                        |                                    |                                    |                                    |                                    |
|------------------------------|--------------------------------------|----------------------------------------|----------------------------------------|----------------------------------------|------------------------------------|------------------------------------|------------------------------------|------------------------------------|
| Epilepsy                     | 58.91<br>(26.81 to<br>93.53)         | 93.01<br>(41.31 to<br>157.17)          | 72.45<br>(32.10 to<br>121.47)          | 119.81<br>(52.19 to<br>205.36)         | 1.00<br>(0.46 to<br>1.59)          | 1.65<br>(0.75 to<br>2.74)          | 1.31<br>(0.60 to<br>2.14)          | 2.05<br>(0.90 to<br>3.48)          |
| Multiple sclerosis           | 2.69<br>(1.20 to<br>6.45)            | 6.62<br>(2.94 to<br>16.88)             | 6.76<br>(2.99 to<br>17.04)             | 6.41<br>(2.81 to<br>16.47)             | 0.06<br>(0.03 to<br>0.15)          | 0.16<br>(0.07 to<br>0.38)          | 0.16<br>(0.08 to<br>0.39)          | 0.15<br>(0.07 to<br>0.37)          |
| Motor neuron disease         | 1.58<br>(0.83 to<br>2.56)            | 3.35<br>(1.76 to<br>5.25)              | 3.67<br>(1.99 to<br>5.85)              | 3.30<br>(1.65 to<br>5.17)              | 0.04<br>(0.02 to<br>0.06)          | 0.09<br>(0.05 to<br>0.14)          | 0.10<br>(0.06 to<br>0.15)          | 0.08<br>(0.04 to<br>0.13)          |
| Other neurological disorders | 7.88<br>(5.69 to<br>10.41)           | 14.76<br>(10.81 to<br>19.33)           | 15.75<br>(11.78 to<br>20.28)           | 16.64<br>(11.79 to<br>22.33)           | 0.13<br>(0.10 to<br>0.16)          | 0.26<br>(0.20 to<br>0.33)          | 0.29<br>(0.23 to<br>0.36)          | 0.28<br>(0.21 to<br>0.36)          |
| <b>Mental disorders</b>      | <b>18.71<br/>(6.92 to<br/>43.74)</b> | <b>51.29<br/>(19.38 to<br/>117.11)</b> | <b>50.33<br/>(19.38 to<br/>113.26)</b> | <b>52.32<br/>(19.39 to<br/>119.62)</b> | <b>0.41<br/>(0.16 to<br/>0.92)</b> | <b>1.11<br/>(0.45 to<br/>2.44)</b> | <b>1.12<br/>(0.47 to<br/>2.37)</b> | <b>1.10<br/>(0.43 to<br/>2.46)</b> |
| Alcohol use disorders        | 5.80<br>(1.99 to<br>12.80)           | 10.74<br>(3.12 to<br>28.87)            | 10.30<br>(3.06 to<br>27.97)            | 10.97<br>(3.10 to<br>29.06)            | 0.14<br>(0.05 to<br>0.30)          | 0.26<br>(0.08 to<br>0.67)          | 0.25<br>(0.08 to<br>0.67)          | 0.26<br>(0.08 to<br>0.67)          |
| Drug use disorders           | 12.86<br>(3.45 to<br>36.31)          | 40.43<br>(13.60 to<br>107.12)          | 39.90<br>(13.83 to<br>104.11)          | 41.22<br>(13.84 to<br>109.29)          | 0.27<br>(0.08 to<br>0.75)          | 0.85<br>(0.31 to<br>2.17)          | 0.86<br>(0.33 to<br>2.16)          | 0.84<br>(0.30 to<br>2.19)          |
| Opioid use disorders         | 9.60<br>(1.74 to<br>29.83)           | 29.54<br>(7.33 to<br>86.70)            | 29.05<br>(7.58 to<br>83.93)            | 30.18<br>(7.03 to<br>88.71)            | 0.20<br>(0.04 to<br>0.60)          | 0.61<br>(0.16 to<br>1.77)          | 0.61<br>(0.17 to<br>1.72)          | 0.61<br>(0.15 to<br>1.78)          |
| Cocaine use disorders        | 0.62<br>(0.22 to<br>1.23)            | 2.19<br>(0.76 to<br>5.08)              | 2.08<br>(0.72 to<br>4.89)              | 2.38<br>(0.79 to<br>5.31)              | 0.01<br>(0.00 to<br>0.03)          | 0.28<br>(0.02 to<br>0.10)          | 0.04<br>(0.01 to<br>0.10)          | 0.05<br>(0.02 to<br>0.11)          |
| Amphetamine use disorders    | 0.34<br>(0.12 to<br>0.69)            | 1.52<br>(0.52 to<br>3.54)              | 1.40<br>(0.49 to<br>3.53)              | 1.63<br>(0.55 to<br>3.63)              | 0.01<br>(0.00 to<br>0.01)          | 0.03<br>(0.01 to<br>0.07)          | 0.03<br>(0.01 to<br>0.07)          | 0.03<br>(0.01 to<br>0.07)          |
| Other drug use disorders     | 2.30<br>(0.49 to<br>6.28)            | 7.18<br>(2.05 to<br>17.72)             | 7.36<br>(2.18 to<br>18.35)             | 7.13<br>(2.00 to<br>17.80)             | 0.05<br>(0.01 to<br>0.14)          | 0.16<br>(0.06 to<br>0.39)          | 0.18<br>(0.07 to<br>0.42)          | 0.15<br>(0.05 to<br>0.38)          |
| Eating disorders             | 0.05<br>(0.02 to<br>0.10)            | 0.12<br>(0.05 to<br>0.26)              | 0.13<br>(0.06 to<br>0.27)              | 0.13<br>(0.06 to<br>0.26)              | 0.00<br>(0.00 to<br>0.00)          | 0.00<br>(0.00 to<br>0.00)          | 0.00<br>(0.00 to<br>0.01)          | 0.00<br>(0.00 to<br>0.00)          |

**Afghanistan**

| Cause                                                      | YLLs (in 1000s)                          |                                              |                                            |                                                | Deaths (in 1000s)                     |                                       |                                       |                                        |
|------------------------------------------------------------|------------------------------------------|----------------------------------------------|--------------------------------------------|------------------------------------------------|---------------------------------------|---------------------------------------|---------------------------------------|----------------------------------------|
|                                                            | 2016                                     | 2040 Forecast                                | 2040 Better Scenario                       | 2040 Worse Scenario                            | 2016                                  | 2040 Forecast                         | 2040 Better Scenario                  | 2040 Worse Scenario                    |
| <b>Diabetes, urogenital, blood, and endocrine diseases</b> | <b>676.06<br/>(585.59 to<br/>797.48)</b> | <b>1,432.12<br/>(859.99 to<br/>2,446.83)</b> | <b>968.05<br/>(607.40 to<br/>1,775.35)</b> | <b>1,811.43<br/>(1,119.17 to<br/>3,063.80)</b> | <b>21.41<br/>(18.53 to<br/>24.91)</b> | <b>49.43<br/>(27.68 to<br/>89.36)</b> | <b>35.32<br/>(20.62 to<br/>67.91)</b> | <b>57.97<br/>(33.34 to<br/>103.16)</b> |
| Diabetes mellitus                                          | 295.88<br>(254.44 to<br>346.61)          | 560.14<br>(359.14 to<br>822.56)              | 386.85<br>(256.45 to<br>561.28)            | 709.53<br>(454.06 to<br>1,057.03)              | 11.07<br>(9.46 to<br>12.89)           | 21.63<br>(13.47 to<br>30.72)          | 16.38<br>(11.06 to<br>22.66)          | 25.14<br>(15.66 to<br>36.70)           |
| Acute glomerulonephritis                                   | 0.32<br>(0.27 to<br>0.39)                | 0.59<br>(0.44 to<br>0.78)                    | 0.51<br>(0.37 to<br>0.68)                  | 0.72<br>(0.53 to<br>0.97)                      | 0.01<br>(0.01 to<br>0.01)             | 0.01<br>(0.01 to<br>0.02)             | 0.01<br>(0.01 to<br>0.02)             | 0.01<br>(0.01 to<br>0.02)              |
| Chronic kidney disease                                     | 253.86<br>(194.67 to<br>331.47)          | 689.73<br>(205.33 to<br>1,794.78)            | 423.78<br>(137.96 to<br>1,269.65)          | 874.03<br>(286.02 to<br>2,172.14)              | 8.05<br>(6.11 to<br>10.52)            | 24.19<br>(5.37 to<br>66.39)           | 15.65<br>(3.58 to<br>52.18)           | 28.68<br>(7.10 to<br>76.28)            |
| Chronic kidney disease due to diabetes mellitus            | 91.86<br>(66.64 to<br>120.50)            | 301.08<br>(65.99 to<br>852.53)               | 180.68<br>(41.08 to<br>598.75)             | 374.94<br>(87.58 to<br>1,045.52)               | 3.30<br>(2.40 to<br>4.30)             | 11.02<br>(2.04 to<br>32.30)           | 6.94<br>(1.29 to<br>23.88)            | 13.11<br>(2.52 to<br>36.21)            |
| Chronic kidney disease due to hypertension                 | 29.14<br>(21.32 to<br>38.88)             | 86.80<br>(17.83 to<br>242.08)                | 55.67<br>(11.98 to<br>186.03)              | 102.72<br>(22.92 to<br>282.21)                 | 1.31<br>(0.97 to<br>1.76)             | 4.11<br>(0.66 to<br>12.34)            | 2.94<br>(0.47 to<br>10.21)            | 4.44<br>(0.76 to<br>12.43)             |
| Chronic kidney disease due to glomerulonephritis           | 47.66<br>(34.71 to<br>65.91)             | 103.94<br>(45.57 to<br>238.25)               | 65.15<br>(29.36 to<br>161.33)              | 137.39<br>(62.39 to<br>299.23)                 | 1.12<br>(0.82 to<br>1.55)             | 2.83<br>(0.95 to<br>7.25)             | 1.79<br>(0.62 to<br>5.43)             | 3.53<br>(1.25 to<br>8.56)              |
| Chronic kidney disease due to other and unspecified causes | 85.20<br>(63.15 to<br>115.13)            | 197.91<br>(74.47 to<br>472.61)               | 122.28<br>(48.08 to<br>313.76)             | 258.98<br>(101.96 to<br>586.50)                | 2.32<br>(1.68 to<br>3.15)             | 6.24<br>(1.65 to<br>16.33)            | 3.98<br>(1.08 to<br>12.10)            | 7.60<br>(2.24 to<br>19.22)             |

|                                                   |                                     |                                     |                                     |                                       |                             |                             |                             |                              |
|---------------------------------------------------|-------------------------------------|-------------------------------------|-------------------------------------|---------------------------------------|-----------------------------|-----------------------------|-----------------------------|------------------------------|
| Urinary diseases and male infertility             | 9.07<br>(6.46 to<br>13.96)          | 11.10<br>(7.59 to<br>17.36)         | 10.39<br>(7.04 to<br>16.54)         | 12.76<br>(8.51 to<br>19.89)           | 0.27<br>(0.20 to<br>0.40)   | 0.38<br>(0.25 to<br>0.58)   | 0.41<br>(0.28 to<br>0.63)   | 0.36<br>(0.24 to<br>0.55)    |
| Urinary tract infections                          | 2.60<br>(0.96 to<br>5.46)           | 4.80<br>(2.16 to<br>8.63)           | 5.09<br>(2.48 to<br>8.69)           | 4.97<br>(2.08 to<br>9.44)             | 0.09<br>(0.04 to<br>0.17)   | 0.19<br>(0.10 to<br>0.32)   | 0.24<br>(0.13 to<br>0.38)   | 0.16<br>(0.08 to<br>0.28)    |
| Urolithiasis                                      | 0.15<br>(0.08 to<br>0.26)           | 0.30<br>(0.15 to<br>0.52)           | 0.30<br>(0.16 to<br>0.51)           | 0.33<br>(0.16 to<br>0.58)             | 0.00<br>(0.00 to<br>0.01)   | 0.01<br>(0.00 to<br>0.01)   | 0.01<br>(0.01 to<br>0.01)   | 0.01<br>(0.00 to<br>0.01)    |
| Other urinary diseases                            | 6.32<br>(3.47 to<br>11.10)          | 6.00<br>(2.64 to<br>11.08)          | 5.00<br>(2.01 to<br>9.51)           | 7.47<br>(3.39 to<br>13.83)            | 0.17<br>(0.10 to<br>0.31)   | 0.18<br>(0.08 to<br>0.34)   | 0.17<br>(0.07 to<br>0.33)   | 0.19<br>(0.09 to<br>0.36)    |
| Gynecological diseases                            | 1.05<br>(0.27 to<br>1.90)           | 1.77<br>(0.46 to<br>3.58)           | 1.33<br>(0.38 to<br>2.76)           | 2.16<br>(0.58 to<br>4.24)             | 0.02<br>(0.01 to<br>0.04)   | 0.04<br>(0.01 to<br>0.07)   | 0.03<br>(0.01 to<br>0.06)   | 0.04<br>(0.01 to<br>0.08)    |
| Uterine fibroids                                  | 0.07<br>(0.00 to<br>0.21)           | 0.09<br>(0.00 to<br>0.30)           | 0.07<br>(0.00 to<br>0.24)           | 0.11<br>(0.01 to<br>0.37)             | 0.00<br>(0.00 to<br>0.01)   | 0.00<br>(0.00 to<br>0.01)   | 0.00<br>(0.00 to<br>0.01)   | 0.00<br>(0.00 to<br>0.01)    |
| Polycystic ovarian syndrome                       | 0.28<br>(0.02 to<br>0.81)           | 0.32<br>(0.01 to<br>1.06)           | 0.21<br>(0.01 to<br>0.75)           | 0.43<br>(0.02 to<br>1.43)             | 0.01<br>(0.00 to<br>0.02)   | 0.01<br>(0.00 to<br>0.02)   | 0.00<br>(0.00 to<br>0.02)   | 0.01<br>(0.00 to<br>0.03)    |
| Endometriosis                                     | 0.01<br>(0.00 to<br>0.04)           | 0.02<br>(0.00 to<br>0.10)           | 0.02<br>(0.00 to<br>0.08)           | 0.03<br>(0.00 to<br>0.12)             | 0.00<br>(0.00 to<br>0.00)   | 0.00<br>(0.00 to<br>0.00)   | 0.00<br>(0.00 to<br>0.00)   | 0.00<br>(0.00 to<br>0.00)    |
| Genital prolapse                                  | 0.03<br>(0.00 to<br>0.08)           | 0.03<br>(0.00 to<br>0.12)           | 0.02<br>(0.00 to<br>0.09)           | 0.04<br>(0.00 to<br>0.15)             | 0.00<br>(0.00 to<br>0.00)   | 0.00<br>(0.00 to<br>0.00)   | 0.00<br>(0.00 to<br>0.00)   | 0.00<br>(0.00 to<br>0.00)    |
| Other gynecological diseases                      | 0.67<br>(0.16 to<br>1.36)           | 1.30<br>(0.32 to<br>2.75)           | 1.02<br>(0.28 to<br>2.15)           | 1.55<br>(0.36 to<br>3.23)             | 0.01<br>(0.00 to<br>0.03)   | 0.03<br>(0.01 to<br>0.05)   | 0.02<br>(0.01 to<br>0.04)   | 0.03<br>(0.01 to<br>0.06)    |
| Hemoglobinopathies and hemolytic anemias          | 72.83<br>(44.05 to<br>123.18)       | 105.75<br>(61.79 to<br>187.82)      | 89.39<br>(51.57 to<br>155.82)       | 129.52<br>(74.13 to<br>235.83)        | 1.23<br>(0.77 to<br>2.01)   | 1.91<br>(1.15 to<br>3.25)   | 1.63<br>(0.98 to<br>2.77)   | 2.25<br>(1.34 to<br>3.94)    |
| Thalassemias                                      | 3.64<br>(0.43 to<br>13.83)          | 3.36<br>(0.40 to<br>12.83)          | 3.92<br>(0.49 to<br>13.58)          | 4.10<br>(0.45 to<br>15.70)            | 0.04<br>(0.01 to<br>0.17)   | 0.04<br>(0.01 to<br>0.16)   | 0.05<br>(0.01 to<br>0.17)   | 0.05<br>(0.01 to<br>0.20)    |
| Sickle cell disorders                             | 59.91<br>(32.60 to<br>105.91)       | 87.03<br>(46.48 to<br>158.19)       | 73.20<br>(39.88 to<br>131.06)       | 107.64<br>(55.83 to<br>201.95)        | 0.90<br>(0.48 to<br>1.58)   | 1.40<br>(0.72 to<br>2.52)   | 1.18<br>(0.62 to<br>2.10)   | 1.70<br>(0.85 to<br>3.09)    |
| G6PD deficiency                                   | 5.74<br>(2.09 to<br>14.04)          | 11.39<br>(3.82 to<br>27.92)         | 8.83<br>(3.04 to<br>21.89)          | 13.55<br>(4.48 to<br>34.04)           | 0.14<br>(0.06 to<br>0.29)   | 0.29<br>(0.12 to<br>0.66)   | 0.23<br>(0.09 to<br>0.52)   | 0.34<br>(0.13 to<br>0.77)    |
| Other hemoglobinopathies and hemolytic anemias    | 3.53<br>(1.94 to<br>6.49)           | 3.96<br>(1.84 to<br>8.14)           | 3.44<br>(1.67 to<br>6.91)           | 4.23<br>(1.91 to<br>9.01)             | 0.14<br>(0.09 to<br>0.24)   | 0.17<br>(0.09 to<br>0.31)   | 0.16<br>(0.09 to<br>0.28)   | 0.17<br>(0.08 to<br>0.32)    |
| Endocrine, metabolic, blood, and immune disorders | 43.05<br>(31.35 to<br>57.39)        | 63.04<br>(45.20 to<br>85.33)        | 55.80<br>(40.45 to<br>75.34)        | 82.70<br>(55.69 to<br>115.93)         | 0.78<br>(0.60 to<br>0.98)   | 1.28<br>(0.96 to<br>1.66)   | 1.21<br>(0.91 to<br>1.59)   | 1.48<br>(1.07 to<br>1.97)    |
| <b>Afghanistan</b>                                |                                     |                                     |                                     |                                       |                             |                             |                             |                              |
| Cause                                             | YLLs (in 1000s)                     |                                     |                                     |                                       | Deaths (in 1000s)           |                             |                             |                              |
|                                                   | 2016                                | 2040 Forecast                       | 2040 Better Scenario                | 2040 Worse Scenario                   | 2016                        | 2040 Forecast               | 2040 Better Scenario        | 2040 Worse Scenario          |
| Musculoskeletal disorders                         | 11.79<br>(6.86 to<br>18.11)         | 27.80<br>(14.94 to<br>45.33)        | 29.69<br>(16.29 to<br>49.03)        | 27.58<br>(14.96 to<br>44.35)          | 0.24<br>(0.14 to<br>0.35)   | 0.58<br>(0.33 to<br>0.90)   | 0.63<br>(0.37 to<br>0.99)   | 0.55<br>(0.31 to<br>0.86)    |
| Rheumatoid arthritis                              | 2.46<br>(1.29 to<br>4.50)           | 4.16<br>(1.98 to<br>8.18)           | 3.51<br>(1.62 to<br>6.99)           | 4.92<br>(2.35 to<br>9.19)             | 0.06<br>(0.03 to<br>0.10)   | 0.11<br>(0.05 to<br>0.19)   | 0.10<br>(0.05 to<br>0.17)   | 0.12<br>(0.06 to<br>0.21)    |
| Other musculoskeletal disorders                   | 9.34<br>(5.21 to<br>15.97)          | 23.64<br>(12.31 to<br>41.88)        | 26.18<br>(13.74 to<br>46.29)        | 22.66<br>(11.66 to<br>40.23)          | 0.18<br>(0.10 to<br>0.30)   | 0.47<br>(0.25 to<br>0.82)   | 0.53<br>(0.29 to<br>0.91)   | 0.44<br>(0.23 to<br>0.77)    |
| Other non-communicable diseases                   | 1,139.19<br>(523.38 to<br>1,828.73) | 1,328.77<br>(612.98 to<br>2,218.76) | 1,102.44<br>(522.71 to<br>1,810.01) | 2,249.62<br>(1,030.60 to<br>3,881.76) | 13.64<br>(6.35 to<br>21.81) | 16.37<br>(7.87 to<br>26.95) | 13.75<br>(6.83 to<br>22.14) | 27.10<br>(12.63 to<br>46.29) |

|                                               |                                       |                                       |                                       |                                       |                              |                              |                              |                              |
|-----------------------------------------------|---------------------------------------|---------------------------------------|---------------------------------------|---------------------------------------|------------------------------|------------------------------|------------------------------|------------------------------|
| Congenital birth defects                      | 1,075.80<br>(471.87 to<br>1,751.25)   | 1,250.29<br>(547.54 to<br>2,102.68)   | 1,031.65<br>(461.26 to<br>1,708.59)   | 2,124.10<br>(920.06 to<br>3,726.07)   | 12.79<br>(5.66 to<br>20.80)  | 15.14<br>(6.73 to<br>25.37)  | 12.50<br>(5.68 to<br>20.45)  | 25.39<br>(11.05 to<br>44.44) |
| Neural tube defects                           | 146.00<br>(47.11 to<br>310.47)        | 79.67<br>(20.37 to<br>182.71)         | 54.78<br>(13.69 to<br>125.08)         | 155.29<br>(39.63 to<br>365.12)        | 1.72<br>(0.56 to<br>3.65)    | 0.96<br>(0.25 to<br>2.18)    | 0.66<br>(0.17 to<br>1.51)    | 1.84<br>(0.48 to<br>4.29)    |
| Congenital heart anomalies                    | 446.84<br>(225.62 to<br>764.40)       | 522.14<br>(267.26 to<br>942.78)       | 435.89<br>(224.27 to<br>789.10)       | 873.78<br>(425.89 to<br>1,612.02)     | 5.33<br>(2.71 to<br>9.10)    | 6.33<br>(3.25 to<br>11.36)   | 5.29<br>(2.76 to<br>9.57)    | 10.46<br>(5.17 to<br>19.03)  |
| Orofacial clefts                              | 0.96<br>(0.17 to<br>3.85)             | 0.93<br>(0.15 to<br>3.77)             | 0.63<br>(0.10 to<br>2.46)             | 1.91<br>(0.30 to<br>7.49)             | 0.01<br>(0.00 to<br>0.04)    | 0.01<br>(0.00 to<br>0.04)    | 0.01<br>(0.00 to<br>0.03)    | 0.02<br>(0.00 to<br>0.09)    |
| Down syndrome                                 | 20.39<br>(5.79 to<br>53.50)           | 32.34<br>(9.82 to<br>82.75)           | 25.01<br>(7.54 to<br>62.05)           | 55.21<br>(15.51 to<br>152.03)         | 0.25<br>(0.07 to<br>0.65)    | 0.41<br>(0.13 to<br>1.05)    | 0.32<br>(0.10 to<br>0.79)    | 0.69<br>(0.20 to<br>1.86)    |
| Other chromosomal abnormalities               | 8.44<br>(2.22 to<br>25.27)            | 21.03<br>(5.39 to<br>66.04)           | 17.05<br>(4.11 to<br>56.27)           | 36.73<br>(9.12 to<br>118.25)          | 0.10<br>(0.03 to<br>0.30)    | 0.25<br>(0.06 to<br>0.77)    | 0.20<br>(0.05 to<br>0.66)    | 0.43<br>(0.11 to<br>1.38)    |
| Congenital musculoskeletal and limb anomalies | 20.34<br>(4.56 to<br>61.64)           | 30.05<br>(6.85 to<br>91.67)           | 26.41<br>(6.11 to<br>83.22)           | 48.95<br>(10.74 to<br>151.44)         | 0.24<br>(0.05 to<br>0.73)    | 0.36<br>(0.08 to<br>1.09)    | 0.32<br>(0.07 to<br>1.00)    | 0.58<br>(0.13 to<br>1.80)    |
| Urogenital congenital anomalies               | 30.11<br>(7.45 to<br>57.20)           | 35.29<br>(8.83 to<br>66.20)           | 29.45<br>(8.00 to<br>56.96)           | 59.88<br>(14.85 to<br>111.37)         | 0.36<br>(0.09 to<br>0.68)    | 0.44<br>(0.11 to<br>0.80)    | 0.37<br>(0.10 to<br>0.70)    | 0.73<br>(0.18 to<br>1.34)    |
| Digestive congenital anomalies                | 44.31<br>(8.88 to<br>107.59)          | 57.75<br>(12.56 to<br>142.63)         | 46.76<br>(10.25 to<br>116.40)         | 101.82<br>(21.27 to<br>257.03)        | 0.52<br>(0.10 to<br>1.26)    | 0.68<br>(0.15 to<br>1.68)    | 0.55<br>(0.17 to<br>1.37)    | 1.19<br>(0.25 to<br>2.99)    |
| Other congenital birth defects                | 358.41<br>(87.69 to<br>754.26)        | 471.09<br>(121.66 to<br>1,005.23)     | 395.67<br>(106.33 to<br>829.79)       | 790.53<br>(192.67 to<br>1,760.02)     | 4.26<br>(1.04 to<br>8.94)    | 5.70<br>(1.46 to<br>12.22)   | 4.78<br>(1.29 to<br>10.09)   | 9.45<br>(2.30 to<br>21.05)   |
| Skin and subcutaneous diseases                | 3.93<br>(1.79 to<br>5.76)             | 10.80<br>(5.07 to<br>16.57)           | 11.56<br>(5.37 to<br>17.58)           | 10.97<br>(5.13 to<br>16.77)           | 0.16<br>(0.07 to<br>0.22)    | 0.45<br>(0.20 to<br>0.70)    | 0.56<br>(0.26 to<br>0.86)    | 0.38<br>(0.17 to<br>0.59)    |
| Cellulitis                                    | 0.22<br>(0.07 to<br>0.38)             | 0.76<br>(0.25 to<br>1.32)             | 0.85<br>(0.28 to<br>1.47)             | 0.77<br>(0.26 to<br>1.37)             | 0.01<br>(0.00 to<br>0.01)    | 0.02<br>(0.01 to<br>0.05)    | 0.03<br>(0.01 to<br>0.06)    | 0.02<br>(0.01 to<br>0.04)    |
| Pyoderma                                      | 1.90<br>(0.88 to<br>3.31)             | 5.70<br>(2.68 to<br>9.85)             | 5.77<br>(2.74 to<br>10.05)            | 6.19<br>(2.95 to<br>10.77)            | 0.07<br>(0.03 to<br>0.11)    | 0.22<br>(0.10 to<br>0.39)    | 0.26<br>(0.12 to<br>0.45)    | 0.20<br>(0.09 to<br>0.35)    |
| Decubitus ulcer                               | 1.66<br>(0.53 to<br>2.80)             | 3.91<br>(1.21 to<br>7.17)             | 4.48<br>(1.39 to<br>8.00)             | 3.54<br>(1.11 to<br>6.68)             | 0.08<br>(0.03 to<br>0.14)    | 0.19<br>(0.05 to<br>0.37)    | 0.25<br>(0.07 to<br>0.46)    | 0.15<br>(0.04 to<br>0.30)    |
| Other skin and subcutaneous diseases          | 0.16<br>(0.06 to<br>0.28)             | 0.43<br>(0.17 to<br>0.80)             | 0.46<br>(0.18 to<br>0.84)             | 0.47<br>(0.18 to<br>0.83)             | 0.00<br>(0.00 to<br>0.01)    | 0.01<br>(0.00 to<br>0.01)    | 0.01<br>(0.00 to<br>0.02)    | 0.01<br>(0.00 to<br>0.01)    |
| Sudden infant death syndrome                  | 59.46<br>(26.58 to<br>117.00)         | 67.68<br>(25.57 to<br>143.69)         | 59.23<br>(22.89 to<br>123.50)         | 114.55<br>(42.02 to<br>242.77)        | 0.69<br>(0.31 to<br>1.36)    | 0.79<br>(0.30 to<br>1.67)    | 0.69<br>(0.27 to<br>1.43)    | 1.33<br>(0.49 to<br>2.82)    |
| Injuries                                      | 3,654.91<br>(2,553.51 to<br>4,859.19) | 3,242.23<br>(2,652.83 to<br>4,388.05) | 2,863.96<br>(2,315.04 to<br>3,991.57) | 4,162.39<br>(3,346.07 to<br>5,498.56) | 60.84<br>(43.35 to<br>79.47) | 58.03<br>(48.81 to<br>75.74) | 52.07<br>(43.63 to<br>69.61) | 71.67<br>(59.59 to<br>91.75) |
| Transport injuries                            | 999.68<br>(799.71 to<br>1,042.56)     | 1,444.64<br>(1,197.29 to<br>1,723.02) | 1,236.38<br>(1,030.07 to<br>1,483.89) | 2,014.22<br>(1,675.54 to<br>2,408.12) | 16.13<br>(14.20 to<br>18.37) | 26.14<br>(21.93 to<br>30.77) | 22.67<br>(19.06 to<br>26.92) | 35.26<br>(29.66 to<br>41.48) |
| Road injuries                                 | 899.14<br>(790.56 to<br>1,031.97)     | 1,422.27<br>(1,173.48 to<br>1,701.04) | 1,217.42<br>(1,008.89 to<br>1,463.81) | 1,987.84<br>(1,653.07 to<br>2,377.95) | 15.94<br>(14.06 to<br>18.17) | 25.71<br>(21.50 to<br>30.34) | 22.30<br>(18.73 to<br>26.49) | 34.77<br>(29.23 to<br>40.97) |
| Pedestrian road injuries                      | 265.36<br>(179.24 to<br>498.76)       | 371.60<br>(235.88 to<br>738.21)       | 318.44<br>(203.84 to<br>623.91)       | 496.47<br>(314.68 to<br>998.27)       | 4.76<br>(3.24 to<br>8.95)    | 6.97<br>(4.47 to<br>13.69)   | 6.06<br>(3.92 to<br>11.83)   | 9.01<br>(5.75 to<br>18.03)   |

**Afghanistan**

| Cause | YLLs (in 1000s) |               |                      |                     | Deaths (in 1000s) |               |                      |                     |
|-------|-----------------|---------------|----------------------|---------------------|-------------------|---------------|----------------------|---------------------|
|       | 2016            | 2040 Forecast | 2040 Better Scenario | 2040 Worse Scenario | 2016              | 2040 Forecast | 2040 Better Scenario | 2040 Worse Scenario |





|                                                                              |                                                      |                                                      |                                                      |                                                      |                                                 |                                                  |                                                  |                                                  |
|------------------------------------------------------------------------------|------------------------------------------------------|------------------------------------------------------|------------------------------------------------------|------------------------------------------------------|-------------------------------------------------|--------------------------------------------------|--------------------------------------------------|--------------------------------------------------|
| Other unintentional injuries                                                 | 50.26<br>(28.19 to<br>86.92)                         | 51.69<br>(29.15 to<br>87.79)                         | 42.84<br>(23.74 to<br>74.89)                         | 63.45<br>(34.76 to<br>107.94)                        | 0.86<br>(0.49 to<br>1.48)                       | 0.93<br>(0.53 to<br>1.55)                        | 0.78<br>(0.45 to<br>1.33)                        | 1.11<br>(0.62 to<br>1.87)                        |
| <b>Self-harm and interpersonal violence</b>                                  | <b>472.90</b><br><b>(322.64 to</b><br><b>574.38)</b> | <b>719.25</b><br><b>(481.26 to</b><br><b>903.64)</b> | <b>695.48</b><br><b>(476.13 to</b><br><b>865.47)</b> | <b>754.90</b><br><b>(502.47 to</b><br><b>952.10)</b> | <b>8.52</b><br><b>(5.87 to</b><br><b>10.26)</b> | <b>13.23</b><br><b>(8.95 to</b><br><b>16.35)</b> | <b>12.89</b><br><b>(8.83 to</b><br><b>15.80)</b> | <b>13.69</b><br><b>(9.12 to</b><br><b>17.17)</b> |
| <b>Afghanistan</b>                                                           |                                                      |                                                      |                                                      |                                                      |                                                 |                                                  |                                                  |                                                  |
| Cause                                                                        | YLLs (in 1000s)                                      |                                                      |                                                      |                                                      | Deaths (in 1000s)                               |                                                  |                                                  |                                                  |
|                                                                              | 2016                                                 | 2040 Forecast                                        | 2040 Better Scenario                                 | 2040 Worse Scenario                                  | 2016                                            | 2040 Forecast                                    | 2040 Better Scenario                             | 2040 Worse Scenario                              |
| Self-harm                                                                    | 115.72<br>(90.30 to<br>191.71)                       | 225.16<br>(164.85 to<br>351.52)                      | 208.67<br>(153.94 to<br>330.34)                      | 239.22<br>(173.84 to<br>367.24)                      | 2.25<br>(1.79 to<br>3.68)                       | 4.42<br>(3.29 to<br>6.81)                        | 4.18<br>(3.18 to<br>6.50)                        | 4.60<br>(3.40 to<br>7.09)                        |
| Self-harm by firearm                                                         | 11.64<br>(3.78 to<br>30.35)                          | 18.68<br>(5.67 to<br>44.75)                          | 16.70<br>(5.03 to<br>40.20)                          | 20.28<br>(6.11 to<br>47.96)                          | 0.23<br>(0.08 to<br>0.58)                       | 0.37<br>(0.12 to<br>0.86)                        | 0.34<br>(0.11 to<br>0.79)                        | 0.40<br>(0.12 to<br>0.93)                        |
| Self-harm by other specified means                                           | 104.08<br>(79.64 to<br>166.08)                       | 206.48<br>(148.57 to<br>319.50)                      | 191.97<br>(139.05 to<br>299.87)                      | 218.94<br>(156.57 to<br>332.18)                      | 2.02<br>(1.55 to<br>3.23)                       | 4.05<br>(2.95 to<br>6.23)                        | 3.84<br>(2.85 to<br>5.84)                        | 4.21<br>(3.04 to<br>6.44)                        |
| Interpersonal violence                                                       | 357.18<br>(176.89 to<br>455.89)                      | 494.08<br>(226.37 to<br>656.02)                      | 486.81<br>(228.82 to<br>641.43)                      | 515.68<br>(237.64 to<br>692.74)                      | 6.27<br>(3.10 to<br>7.96)                       | 8.81<br>(4.09 to<br>11.59)                       | 8.71<br>(4.20 to<br>11.39)                       | 9.08<br>(4.18 to<br>12.09)                       |
| Physical violence by firearm                                                 | 177.64<br>(83.48 to<br>323.42)                       | 237.15<br>(98.77 to<br>458.80)                       | 232.16<br>(97.84 to<br>449.89)                       | 245.85<br>(101.18 to<br>475.20)                      | 3.15<br>(1.47 to<br>5.78)                       | 4.25<br>(1.84 to<br>8.05)                        | 4.17<br>(1.83 to<br>7.93)                        | 4.37<br>(1.85 to<br>8.35)                        |
| Physical violence by sharp object                                            | 94.40<br>(26.20 to<br>163.98)                        | 144.77<br>(40.83 to<br>259.29)                       | 149.70<br>(43.14 to<br>264.43)                       | 144.80<br>(41.58 to<br>260.81)                       | 1.66<br>(0.47 to<br>2.88)                       | 2.58<br>(0.74 to<br>4.51)                        | 2.67<br>(0.79 to<br>4.63)                        | 2.56<br>(0.72 to<br>4.53)                        |
| Physical violence by other means                                             | 85.15<br>(32.16 to<br>143.65)                        | 112.16<br>(38.98 to<br>195.67)                       | 104.95<br>(36.87 to<br>183.18)                       | 125.03<br>(45.87 to<br>215.80)                       | 1.45<br>(0.53 to<br>2.44)                       | 1.98<br>(0.68 to<br>3.43)                        | 1.86<br>(0.64 to<br>3.23)                        | 2.15<br>(0.76 to<br>3.71)                        |
| Forces of nature, conflict and terrorism, and executions and police conflict | 1427.84<br>(305.39 to<br>2,553.88)                   | 178.24<br>(0.00 to<br>1,273.21)                      | 178.52<br>(0.00 to<br>1,275.46)                      | 201.63<br>(0.00 to<br>1,429.59)                      | 22.63<br>(4.84 to<br>40.47)                     | 2.77<br>(0.00 to<br>19.41)                       | 2.79<br>(0.00 to<br>19.49)                       | 3.04<br>(0.00 to<br>21.22)                       |
| Exposure to forces of nature                                                 | 0.00<br>(0.00 to<br>0.00)                            | 34.37<br>(0.00 to<br>441.27)                         | 34.50<br>(0.00 to<br>442.07)                         | 39.43<br>(0.00 to<br>500.63)                         | 0.00<br>(0.00 to<br>0.00)                       | 0.55<br>(0.00 to<br>7.28)                        | 0.56<br>(0.00 to<br>7.45)                        | 0.61<br>(0.00 to<br>7.94)                        |
| Conflict and terrorism                                                       | 1427.47<br>(305.04 to<br>2,553.55)                   | 143.87<br>(0.00 to<br>1,273.21)                      | 144.02<br>(0.00 to<br>1,275.46)                      | 162.19<br>(0.00 to<br>1,429.59)                      | 22.62<br>(4.83 to<br>40.47)                     | 2.22<br>(0.00 to<br>19.41)                       | 2.23<br>(0.00 to<br>19.49)                       | 2.43<br>(0.00 to<br>21.22)                       |
| Executions and police conflict                                               | 0.37<br>(0.27 to<br>0.78)                            | 0.00<br>(0.00 to<br>0.00)                            | 0.00<br>(0.00 to<br>0.00)                            | 0.00<br>(0.00 to<br>0.00)                            | 0.01<br>(0.00 to<br>0.01)                       | 0.00<br>(0.00 to<br>0.00)                        | 0.00<br>(0.00 to<br>0.00)                        | 0.00<br>(0.00 to<br>0.00)                        |
| <b>Algeria</b>                                                               |                                                      |                                                      |                                                      |                                                      |                                                 |                                                  |                                                  |                                                  |
| Cause                                                                        | YLLs (in 1000s)                                      |                                                      |                                                      |                                                      | Deaths (in 1000s)                               |                                                  |                                                  |                                                  |
|                                                                              | 2016                                                 | 2040 Forecast                                        | 2040 Better Scenario                                 | 2040 Worse Scenario                                  | 2016                                            | 2040 Forecast                                    | 2040 Better Scenario                             | 2040 Worse Scenario                              |
| All causes                                                                   | 4922.12<br>(4,354.14 to<br>5,610.48)                 | 6,424.58<br>(5,219.71 to<br>8,026.89)                | 4,441.53<br>(3,663.78 to<br>5,496.20)                | 8,144.76<br>(6,581.77 to<br>10,142.47)               | 178.03<br>(164.87 to<br>190.93)                 | 336.86<br>(285.65 to<br>410.04)                  | 251.11<br>(216.26 to<br>302.12)                  | 402.09<br>(338.75 to<br>481.12)                  |
| Communicable, maternal, neonatal, and nutritional diseases                   | 1,027.24<br>(748.57 to<br>1,425.35)                  | 716.89<br>(465.54 to<br>1,063.69)                    | 492.05<br>(326.39 to<br>703.51)                      | 958.03<br>(608.18 to<br>1,422.69)                    | 18.60<br>(14.77 to<br>23.48)                    | 22.10<br>(15.25 to<br>28.86)                     | 17.28<br>(12.07 to<br>22.37)                     | 27.61<br>(19.31 to<br>36.37)                     |
| HIV/AIDS and tuberculosis                                                    | 33.44<br>(17.44 to<br>45.92)                         | 28.42<br>(14.86 to<br>45.01)                         | 15.77<br>(8.05 to<br>24.78)                          | 40.12<br>(20.58 to<br>62.18)                         | 1.28<br>(0.61 to<br>1.88)                       | 1.38<br>(0.63 to<br>2.33)                        | 0.79<br>(0.35 to<br>1.33)                        | 1.89<br>(0.88 to<br>3.15)                        |
| Tuberculosis                                                                 | 30.39<br>(14.69 to<br>42.97)                         | 23.73<br>(10.18 to<br>39.73)                         | 12.63<br>(5.46 to<br>21.04)                          | 34.18<br>(15.04 to<br>56.34)                         | 1.21<br>(0.55 to<br>1.81)                       | 1.29<br>(0.54 to<br>2.23)                        | 0.72<br>(0.30 to<br>1.25)                        | 1.77<br>(0.77 to<br>3.03)                        |
| HIV/AIDS                                                                     | 3.05<br>(2.16 to<br>4.80)                            | 4.69<br>(1.36 to<br>8.03)                            | 3.13<br>(1.29 to<br>5.69)                            | 5.94<br>(1.38 to<br>9.00)                            | 0.06<br>(0.04 to<br>0.10)                       | 0.10<br>(0.05 to<br>0.17)                        | 0.07<br>(0.03 to<br>0.13)                        | 0.12<br>(0.05 to<br>0.19)                        |

|                                                                   |                              |                              |                              |                              |                        |                          |                          |                           |
|-------------------------------------------------------------------|------------------------------|------------------------------|------------------------------|------------------------------|------------------------|--------------------------|--------------------------|---------------------------|
| Diarrhea, lower respiratory, and other common infectious diseases | 245.43<br>(194.07 to 310.87) | 267.60<br>(184.24 to 364.30) | 207.18<br>(144.20 to 273.68) | 383.21<br>(260.28 to 539.27) | 8.03<br>(5.97 to 9.87) | 15.06<br>(9.63 to 20.39) | 12.64<br>(8.13 to 16.89) | 18.68<br>(11.96 to 25.47) |
| Diarrheal diseases                                                | 27.68<br>(17.52 to 42.74)    | 11.03<br>(3.76 to 29.19)     | 17.71<br>(6.16 to 45.29)     | 19.96<br>(5.52 to 54.77)     | 0.68<br>(0.44 to 1.08) | 0.66<br>(0.20 to 1.77)   | 1.15<br>(0.38 to 3.01)   | 0.99<br>(0.26 to 2.78)    |
| Intestinal infectious diseases                                    | 10.00<br>(4.87 to 18.45)     | 9.16<br>(4.42 to 16.64)      | 10.53<br>(5.37 to 18.21)     | 9.70<br>(4.65 to 17.86)      | 0.15<br>(0.08 to 0.28) | 0.15<br>(0.07 to 0.27)   | 0.17<br>(0.09 to 0.30)   | 0.15<br>(0.07 to 0.28)    |
| Typhoid fever                                                     | 8.87<br>(4.18 to 16.45)      | 8.04<br>(3.73 to 14.74)      | 9.74<br>(4.96 to 16.65)      | 8.41<br>(3.90 to 15.46)      | 0.14<br>(0.06 to 0.25) | 0.13<br>(0.06 to 0.24)   | 0.16<br>(0.08 to 0.27)   | 0.13<br>(0.06 to 0.25)    |
| Paratyphoid fever                                                 | 1.12<br>(0.47 to 2.31)       | 1.11<br>(0.46 to 2.28)       | 0.79<br>(0.34 to 1.60)       | 1.29<br>(0.54 to 2.67)       | 0.02<br>(0.01 to 0.04) | 0.02<br>(0.01 to 0.04)   | 0.01<br>(0.01 to 0.03)   | 0.02<br>(0.01 to 0.04)    |
| Other intestinal infectious diseases                              | 0.00<br>(0.00 to 0.01)       | 0.00<br>(0.00 to 0.01)       | 0.00<br>(0.00 to 0.01)       | 0.00<br>(0.00 to 0.01)       | 0.00<br>(0.00 to 0.00) | 0.00<br>(0.00 to 0.00)   | 0.00<br>(0.00 to 0.00)   | 0.00<br>(0.00 to 0.00)    |
| Lower respiratory infections                                      | 174.57<br>(133.74 to 224.71) | 224.52<br>(145.19 to 316.15) | 161.45<br>(103.26 to 224.49) | 310.53<br>(199.00 to 446.53) | 6.58<br>(4.54 to 8.46) | 13.66<br>(8.26 to 19.10) | 10.84<br>(6.76 to 15.11) | 16.69<br>(10.41 to 23.34) |
| Upper respiratory infections                                      | 0.20<br>(0.10 to 0.39)       | 0.18<br>(0.08 to 0.37)       | 0.10<br>(0.04 to 0.20)       | 0.23<br>(0.11 to 0.49)       | 0.00<br>(0.00 to 0.01) | 0.01<br>(0.00 to 0.01)   | 0.00<br>(0.00 to 0.01)   | 0.01<br>(0.00 to 0.02)    |
| Otitis media                                                      | 0.03<br>(0.01 to 0.07)       | 0.01<br>(0.00 to 0.03)       | 0.01<br>(0.00 to 0.03)       | 0.01<br>(0.00 to 0.03)       | 0.00<br>(0.00 to 0.00) | 0.00<br>(0.00 to 0.00)   | 0.00<br>(0.00 to 0.00)   | 0.00<br>(0.00 to 0.00)    |
| Meningitis                                                        | 19.50<br>(11.90 to 31.58)    | 12.33<br>(7.47 to 20.94)     | 8.43<br>(5.11 to 14.45)      | 15.26<br>(8.69 to 26.88)     | 0.37<br>(0.25 to 0.56) | 0.33<br>(0.22 to 0.53)   | 0.24<br>(0.16 to 0.38)   | 0.38<br>(0.25 to 0.61)    |
| Pneumococcal meningitis                                           | 0.15<br>(0.09 to 0.27)       | 0.10<br>(0.06 to 0.18)       | 0.09<br>(0.05 to 0.18)       | 0.10<br>(0.06 to 0.19)       | 0.00<br>(0.00 to 0.01) | 0.00<br>(0.00 to 0.01)   | 0.00<br>(0.00 to 0.01)   | 0.00<br>(0.00 to 0.01)    |
| H influenzae type B meningitis                                    | 1.74<br>(0.97 to 2.95)       | 2.02<br>(0.86 to 4.44)       | 1.77<br>(0.80 to 3.71)       | 3.59<br>(1.21 to 8.37)       | 0.03<br>(0.02 to 0.05) | 0.04<br>(0.02 to 0.07)   | 0.04<br>(0.02 to 0.06)   | 0.06<br>(0.03 to 0.11)    |
| Meningococcal meningitis                                          | 7.72<br>(4.70 to 12.53)      | 4.37<br>(2.65 to 7.66)       | 2.87<br>(1.75 to 5.11)       | 4.93<br>(2.94 to 8.84)       | 0.15<br>(0.10 to 0.24) | 0.13<br>(0.09 to 0.22)   | 0.09<br>(0.06 to 0.15)   | 0.14<br>(0.09 to 0.24)    |
| Other meningitis                                                  | 9.89<br>(5.93 to 16.44)      | 5.85<br>(3.53 to 9.86)       | 3.69<br>(2.29 to 6.25)       | 6.65<br>(4.00 to 11.57)      | 0.18<br>(0.12 to 0.28) | 0.16<br>(0.11 to 0.26)   | 0.11<br>(0.07 to 0.18)   | 0.17<br>(0.11 to 0.29)    |
| Encephalitis                                                      | 7.30<br>(4.67 to 11.84)      | 7.65<br>(4.95 to 12.49)      | 6.98<br>(4.55 to 11.28)      | 8.40<br>(5.19 to 14.01)      | 0.14<br>(0.09 to 0.22) | 0.19<br>(0.13 to 0.31)   | 0.18<br>(0.12 to 0.29)   | 0.20<br>(0.13 to 0.33)    |
| Diphtheria                                                        | 0.04<br>(0.02 to 0.06)       | 0.01<br>(0.01 to 0.02)       | 0.01<br>(0.00 to 0.02)       | 0.04<br>(0.01 to 0.12)       | 0.00<br>(0.00 to 0.00) | 0.00<br>(0.00 to 0.00)   | 0.00<br>(0.00 to 0.00)   | 0.00<br>(0.00 to 0.00)    |
| Whooping cough                                                    | 2.12<br>(0.13 to 6.81)       | 1.35<br>(0.07 to 5.65)       | 0.92<br>(0.05 to 3.74)       | 15.12<br>(1.09 to 47.48)     | 0.03<br>(0.00 to 0.08) | 0.02<br>(0.00 to 0.07)   | 0.01<br>(0.00 to 0.04)   | 0.18<br>(0.01 to 0.56)    |
| Tetanus                                                           | 0.36<br>(0.28 to 0.51)       | 0.05<br>(0.03 to 0.09)       | 0.05<br>(0.03 to 0.08)       | 0.18<br>(0.06 to 0.54)       | 0.01<br>(0.00 to 0.01) | 0.00<br>(0.00 to 0.00)   | 0.00<br>(0.00 to 0.00)   | 0.00<br>(0.00 to 0.01)    |
| Measles                                                           | 2.16<br>(0.65 to 5.23)       | 0.32<br>(0.02 to 1.97)       | 0.26<br>(0.02 to 1.72)       | 2.54<br>(0.09 to 17.47)      | 0.03<br>(0.01 to 0.06) | 0.00<br>(0.00 to 0.02)   | 0.00<br>(0.00 to 0.02)   | 0.03<br>(0.00 to 0.21)    |
| <b>Algeria</b>                                                    |                              |                              |                              |                              |                        |                          |                          |                           |
| Cause                                                             | YLLs (in 1000s)              |                              |                              |                              | Deaths (in 1000s)      |                          |                          |                           |
|                                                                   | 2016                         | 2040 Forecast                | 2040 Better Scenario         | 2040 Worse Scenario          | 2016                   | 2040 Forecast            | 2040 Better Scenario     | 2040 Worse Scenario       |
| Varicella and herpes zoster                                       | 1.66<br>(0.94 to 2.89)       | 0.99<br>(0.54 to 1.82)       | 0.73<br>(0.40 to 1.32)       | 1.24<br>(0.65 to 2.37)       | 0.04<br>(0.03 to 0.05) | 0.04<br>(0.02 to 0.06)   | 0.03<br>(0.02 to 0.05)   | 0.04<br>(0.02 to 0.07)    |

|                                                       |                                                   |                                                   |                                                  |                                                   |                                                |                                                |                                                |                                                |
|-------------------------------------------------------|---------------------------------------------------|---------------------------------------------------|--------------------------------------------------|---------------------------------------------------|------------------------------------------------|------------------------------------------------|------------------------------------------------|------------------------------------------------|
| Neglected tropical diseases and malaria               | 4.53<br>(3.39 to<br>5.83)                         | 3.35<br>(2.40 to<br>4.45)                         | 3.07<br>(2.20 to<br>4.08)                        | 3.68<br>(2.66 to<br>4.94)                         | 0.14<br>(0.10 to<br>0.19)                      | 0.13<br>(0.09 to<br>0.18)                      | 0.12<br>(0.09 to<br>0.17)                      | 0.14<br>(0.09 to<br>0.19)                      |
| Malaria                                               | 0.37<br>(0.24 to<br>0.88)                         | 0.23<br>(0.15 to<br>0.55)                         | 0.22<br>(0.14 to<br>0.51)                        | 0.24<br>(0.15 to<br>0.58)                         | 0.01<br>(0.01 to<br>0.02)                      | 0.01<br>(0.00 to<br>0.01)                      | 0.01<br>(0.00 to<br>0.01)                      | 0.01<br>(0.00 to<br>0.01)                      |
| Chagas disease                                        | 0.00<br>(0.00 to<br>0.00)                         | 0.00<br>(0.00 to<br>0.00)                         | 0.00<br>(0.00 to<br>0.00)                        | 0.00<br>(0.00 to<br>0.00)                         | 0.00<br>(0.00 to<br>0.00)                      | 0.00<br>(0.00 to<br>0.00)                      | 0.00<br>(0.00 to<br>0.00)                      | 0.00<br>(0.00 to<br>0.00)                      |
| Leishmaniasis                                         | 0.30<br>(0.17 to<br>0.45)                         | 0.14<br>(0.08 to<br>0.22)                         | 0.11<br>(0.06 to<br>0.17)                        | 0.17<br>(0.10 to<br>0.27)                         | 0.01<br>(0.00 to<br>0.01)                      | 0.00<br>(0.00 to<br>0.01)                      | 0.00<br>(0.00 to<br>0.01)                      | 0.00<br>(0.00 to<br>0.01)                      |
| African trypanosomiasis                               | 0.00<br>(0.00 to<br>0.00)                         | 0.00<br>(0.00 to<br>0.00)                         | 0.00<br>(0.00 to<br>0.00)                        | 0.00<br>(0.00 to<br>0.00)                         | 0.00<br>(0.00 to<br>0.00)                      | 0.00<br>(0.00 to<br>0.00)                      | 0.00<br>(0.00 to<br>0.00)                      | 0.00<br>(0.00 to<br>0.00)                      |
| Schistosomiasis                                       | 3.48<br>(2.42 to<br>4.73)                         | 2.68<br>(1.79 to<br>3.79)                         | 2.44<br>(1.64 to<br>3.47)                        | 2.92<br>(1.93 to<br>4.16)                         | 0.12<br>(0.08 to<br>0.16)                      | 0.12<br>(0.08 to<br>0.16)                      | 0.11<br>(0.07 to<br>0.15)                      | 0.12<br>(0.08 to<br>0.17)                      |
| Cysticercosis                                         | 0.02<br>(0.02 to<br>0.03)                         | 0.01<br>(0.01 to<br>0.01)                         | 0.01<br>(0.01 to<br>0.01)                        | 0.01<br>(0.01 to<br>0.01)                         | 0.00<br>(0.00 to<br>0.00)                      | 0.00<br>(0.00 to<br>0.00)                      | 0.00<br>(0.00 to<br>0.00)                      | 0.00<br>(0.00 to<br>0.00)                      |
| Cystic echinococcosis                                 | 0.00<br>(0.00 to<br>0.00)                         | 0.00<br>(0.00 to<br>0.00)                         | 0.00<br>(0.00 to<br>0.00)                        | 0.00<br>(0.00 to<br>0.00)                         | 0.00<br>(0.00 to<br>0.00)                      | 0.00<br>(0.00 to<br>0.00)                      | 0.00<br>(0.00 to<br>0.00)                      | 0.00<br>(0.00 to<br>0.00)                      |
| Dengue                                                | 0.00<br>(0.00 to<br>0.00)                         | 0.00<br>(0.00 to<br>0.00)                         | 0.00<br>(0.00 to<br>0.00)                        | 0.00<br>(0.00 to<br>0.00)                         | 0.00<br>(0.00 to<br>0.00)                      | 0.00<br>(0.00 to<br>0.00)                      | 0.00<br>(0.00 to<br>0.00)                      | 0.00<br>(0.00 to<br>0.00)                      |
| Yellow fever                                          | 0.00<br>(0.00 to<br>0.00)                         | 0.00<br>(0.00 to<br>0.00)                         | 0.00<br>(0.00 to<br>0.00)                        | 0.00<br>(0.00 to<br>0.00)                         | 0.00<br>(0.00 to<br>0.00)                      | 0.00<br>(0.00 to<br>0.00)                      | 0.00<br>(0.00 to<br>0.00)                      | 0.00<br>(0.00 to<br>0.00)                      |
| Rabies                                                | 0.01<br>(0.01 to<br>0.02)                         | 0.01<br>(0.00 to<br>0.01)                         | 0.00<br>(0.00 to<br>0.01)                        | 0.01<br>(0.00 to<br>0.01)                         | 0.00<br>(0.00 to<br>0.00)                      | 0.00<br>(0.00 to<br>0.00)                      | 0.00<br>(0.00 to<br>0.00)                      | 0.00<br>(0.00 to<br>0.00)                      |
| Intestinal nematode infections                        | 0.06<br>(0.01 to<br>0.13)                         | 0.06<br>(0.02 to<br>0.13)                         | 0.05<br>(0.01 to<br>0.12)                        | 0.06<br>(0.02 to<br>0.14)                         | 0.00<br>(0.00 to<br>0.00)                      | 0.00<br>(0.00 to<br>0.00)                      | 0.00<br>(0.00 to<br>0.00)                      | 0.00<br>(0.00 to<br>0.00)                      |
| Other neglected tropical diseases                     | 0.29<br>(0.25 to<br>0.34)                         | 0.23<br>(0.19 to<br>0.28)                         | 0.22<br>(0.19 to<br>0.27)                        | 0.27<br>(0.22 to<br>0.32)                         | 0.01<br>(0.00 to<br>0.01)                      | 0.00<br>(0.00 to<br>0.01)                      | 0.00<br>(0.00 to<br>0.01)                      | 0.01<br>(0.00 to<br>0.01)                      |
| <b>Maternal disorders</b>                             | <b>31.30</b><br><b>(23.99 to</b><br><b>39.84)</b> | <b>18.51</b><br><b>(12.18 to</b><br><b>26.27)</b> | <b>14.33</b><br><b>(9.43 to</b><br><b>20.19)</b> | <b>23.83</b><br><b>(15.35 to</b><br><b>34.28)</b> | <b>0.56</b><br><b>(0.43 to</b><br><b>0.71)</b> | <b>0.33</b><br><b>(0.21 to</b><br><b>0.46)</b> | <b>0.25</b><br><b>(0.17 to</b><br><b>0.36)</b> | <b>0.42</b><br><b>(0.27 to</b><br><b>0.60)</b> |
| Maternal hemorrhage                                   | 10.70<br>(7.52 to<br>14.52)                       | 5.82<br>(3.54 to<br>8.94)                         | 4.57<br>(2.79 to<br>7.10)                        | 7.47<br>(4.52 to<br>11.66)                        | 0.19<br>(0.14 to<br>0.26)                      | 0.10<br>(0.06 to<br>0.16)                      | 0.08<br>(0.05 to<br>0.13)                      | 0.13<br>(0.08 to<br>0.21)                      |
| Maternal sepsis and other maternal infections         | 5.05<br>(3.50 to<br>6.99)                         | 2.67<br>(1.58 to<br>4.19)                         | 2.05<br>(1.19 to<br>3.19)                        | 3.45<br>(1.96 to<br>5.38)                         | 0.09<br>(0.06 to<br>0.12)                      | 0.05<br>(0.03 to<br>0.07)                      | 0.04<br>(0.02 to<br>0.05)                      | 0.06<br>(0.04 to<br>0.09)                      |
| Maternal hypertensive disorders                       | 4.07<br>(2.72 to<br>5.71)                         | 2.43<br>(1.40 to<br>3.87)                         | 1.86<br>(1.04 to<br>2.98)                        | 3.14<br>(1.75 to<br>5.07)                         | 0.07<br>(0.05 to<br>0.10)                      | 0.04<br>(0.02 to<br>0.07)                      | 0.03<br>(0.02 to<br>0.05)                      | 0.05<br>(0.03 to<br>0.09)                      |
| Maternal obstructed labor and uterine rupture         | 0.95<br>(0.59 to<br>1.47)                         | 0.54<br>(0.29 to<br>0.93)                         | 0.40<br>(0.21 to<br>0.69)                        | 0.71<br>(0.37 to<br>1.21)                         | 0.02<br>(0.01 to<br>0.03)                      | 0.01<br>(0.01 to<br>0.02)                      | 0.01<br>(0.00 to<br>0.01)                      | 0.01<br>(0.01 to<br>0.02)                      |
| Maternal abortion, miscarriage, and ectopic pregnancy | 0.44<br>(0.24 to<br>0.75)                         | 0.28<br>(0.13 to<br>0.56)                         | 0.22<br>(0.10 to<br>0.42)                        | 0.37<br>(0.17 to<br>0.73)                         | 0.01<br>(0.00 to<br>0.01)                      | 0.01<br>(0.00 to<br>0.01)                      | 0.00<br>(0.00 to<br>0.01)                      | 0.01<br>(0.00 to<br>0.01)                      |
| Indirect maternal deaths                              | 4.60<br>(3.14 to<br>6.41)                         | 3.40<br>(1.95 to<br>5.53)                         | 2.55<br>(1.46 to<br>4.11)                        | 4.40<br>(2.46 to<br>7.18)                         | 0.08<br>(0.05 to<br>0.11)                      | 0.06<br>(0.03 to<br>0.10)                      | 0.04<br>(0.03 to<br>0.07)                      | 0.08<br>(0.04 to<br>0.12)                      |
| Late maternal deaths                                  | 0.36<br>(0.18 to<br>0.64)                         | 0.19<br>(0.08 to<br>0.36)                         | 0.14<br>(0.06 to<br>0.27)                        | 0.24<br>(0.11 to<br>0.48)                         | 0.01<br>(0.00 to<br>0.01)                      | 0.00<br>(0.00 to<br>0.01)                      | 0.00<br>(0.00 to<br>0.00)                      | 0.00<br>(0.00 to<br>0.01)                      |
| Maternal deaths aggravated by HIV/AIDS                | 0.00<br>(0.00 to<br>0.01)                         | 0.01<br>(0.00 to<br>0.02)                         | 0.01<br>(0.00 to<br>0.02)                        | 0.01<br>(0.00 to<br>0.03)                         | 0.00<br>(0.00 to<br>0.00)                      | 0.00<br>(0.00 to<br>0.00)                      | 0.00<br>(0.00 to<br>0.00)                      | 0.00<br>(0.00 to<br>0.00)                      |

| Other maternal disorders                                                | 5.13<br>(3.43 to<br>7.24)                | 3.17<br>(1.87 to<br>4.89)              | 2.53<br>(1.48 to<br>3.89)             | 4.01<br>(2.35 to<br>6.18)              | 0.09<br>(0.06 to<br>0.13)         | 0.06<br>(0.03 to<br>0.09)        | 0.04<br>(0.03 to<br>0.07)        | 0.07<br>(0.04 to<br>0.11)        |
|-------------------------------------------------------------------------|------------------------------------------|----------------------------------------|---------------------------------------|----------------------------------------|-----------------------------------|----------------------------------|----------------------------------|----------------------------------|
| <b>Algeria</b>                                                          |                                          |                                        |                                       |                                        |                                   |                                  |                                  |                                  |
| Cause                                                                   | YLLs (in 1000s)                          |                                        |                                       |                                        | Deaths (in 1000s)                 |                                  |                                  |                                  |
|                                                                         | 2016                                     | 2040 Forecast                          | 2040 Better Scenario                  | 2040 Worse Scenario                    | 2016                              | 2040 Forecast                    | 2040 Better Scenario             | 2040 Worse Scenario              |
| <b>Neonatal disorders</b>                                               | <b>686.09</b><br>(447.78 to<br>1,025.43) | <b>377.74</b><br>(153.09 to<br>678.55) | <b>233.82</b><br>(97.06 to<br>423.30) | <b>483.29</b><br>(188.27 to<br>857.18) | <b>7.93</b><br>(5.18 to<br>11.85) | <b>4.37</b><br>(1.77 to<br>7.85) | <b>2.70</b><br>(1.12 to<br>4.89) | <b>5.59</b><br>(2.18 to<br>9.91) |
| Neonatal preterm birth                                                  | 472.31<br>(293.50 to<br>711.68)          | 239.77<br>(85.83 to<br>450.53)         | 134.70<br>(49.68 to<br>254.47)        | 314.52<br>(111.61 to<br>587.45)        | 5.46<br>(3.39 to<br>8.23)         | 2.77<br>(0.99 to<br>5.21)        | 1.56<br>(0.58 to<br>2.94)        | 3.64<br>(1.29 to<br>6.79)        |
| Neonatal encephalopathy due to birth asphyxia and trauma                | 77.40<br>(39.84 to<br>137.71)            | 42.10<br>(14.98 to<br>86.16)           | 26.76<br>(9.66 to<br>53.56)           | 51.86<br>(18.26 to<br>108.05)          | 0.90<br>(0.46 to<br>1.59)         | 0.49<br>(0.17 to<br>1.00)        | 0.31<br>(0.11 to<br>0.62)        | 0.60<br>(0.21 to<br>1.25)        |
| Neonatal sepsis and other neonatal infections                           | 79.62<br>(37.29 to<br>132.62)            | 60.44<br>(24.80 to<br>113.23)          | 42.28<br>(18.00 to<br>78.78)          | 73.75<br>(30.05 to<br>139.26)          | 0.92<br>(0.43 to<br>1.53)         | 0.70<br>(0.29 to<br>1.31)        | 0.49<br>(0.21 to<br>0.91)        | 0.85<br>(0.35 to<br>1.61)        |
| Hemolytic disease and other neonatal jaundice                           | 2.73<br>(1.37 to<br>4.67)                | 0.95<br>(0.30 to<br>2.28)              | 0.64<br>(0.20 to<br>1.54)             | 1.22<br>(0.38 to<br>2.94)              | 0.03<br>(0.02 to<br>0.05)         | 0.01<br>(0.00 to<br>0.03)        | 0.01<br>(0.00 to<br>0.02)        | 0.01<br>(0.00 to<br>0.03)        |
| Other neonatal disorders                                                | 54.04<br>(27.19 to<br>96.96)             | 34.48<br>(12.87 to<br>76.34)           | 29.44<br>(10.82 to<br>64.52)          | 41.94<br>(14.88 to<br>93.16)           | 0.63<br>(0.31 to<br>1.12)         | 0.40<br>(0.15 to<br>0.88)        | 0.34<br>(0.13 to<br>0.75)        | 0.49<br>(0.17 to<br>1.08)        |
| <b>Nutritional deficiencies</b>                                         | <b>4.08</b><br>(3.00 to<br>5.75)         | <b>2.98</b><br>(2.17 to<br>4.16)       | <b>3.15</b><br>(2.30 to<br>4.34)      | <b>3.23</b><br>(2.33 to<br>4.59)       | <b>0.13</b><br>(0.11 to<br>0.16)  | <b>0.17</b><br>(0.11 to<br>0.23) | <b>0.20</b><br>(0.14 to<br>0.28) | <b>0.17</b><br>(0.11 to<br>0.24) |
| Protein-energy malnutrition                                             | 3.08<br>(2.11 to<br>4.56)                | 2.00<br>(1.36 to<br>3.09)              | 2.24<br>(1.56 to<br>3.33)             | 2.15<br>(1.44 to<br>3.35)              | 0.10<br>(0.08 to<br>0.12)         | 0.12<br>(0.08 to<br>0.18)        | 0.16<br>(0.10 to<br>0.23)        | 0.12<br>(0.07 to<br>0.19)        |
| Iodine deficiency                                                       | 0.16<br>(0.01 to<br>0.63)                | 0.19<br>(0.02 to<br>0.54)              | 0.19<br>(0.01 to<br>0.52)             | 0.22<br>(0.02 to<br>0.62)              | 0.00<br>(0.00 to<br>0.01)         | 0.00<br>(0.00 to<br>0.04)        | 0.01<br>(0.00 to<br>0.04)        | 0.01<br>(0.00 to<br>0.04)        |
| Dietary iron deficiency                                                 | 0.34<br>(0.26 to<br>0.45)                | 0.30<br>(0.21 to<br>0.43)              | 0.31<br>(0.22 to<br>0.43)             | 0.33<br>(0.22 to<br>0.47)              | 0.01<br>(0.00 to<br>0.01)         | 0.01<br>(0.00 to<br>0.01)        | 0.01<br>(0.00 to<br>0.01)        | 0.01<br>(0.00 to<br>0.01)        |
| Other nutritional deficiencies                                          | 0.50<br>(0.36 to<br>0.73)                | 0.49<br>(0.32 to<br>0.75)              | 0.41<br>(0.27 to<br>0.64)             | 0.54<br>(0.35 to<br>0.82)              | 0.02<br>(0.01 to<br>0.03)         | 0.03<br>(0.02 to<br>0.05)        | 0.03<br>(0.01 to<br>0.04)        | 0.03<br>(0.02 to<br>0.05)        |
| <b>Other communicable, maternal, neonatal, and nutritional diseases</b> | <b>22.38</b><br>(16.17 to<br>36.80)      | <b>18.28</b><br>(13.89 to<br>26.98)    | <b>14.73</b><br>(11.31 to<br>21.09)   | <b>20.66</b><br>(15.67 to<br>30.58)    | <b>0.53</b><br>(0.44 to<br>0.70)  | <b>0.66</b><br>(0.53 to<br>0.82) | <b>0.57</b><br>(0.46 to<br>0.71) | <b>0.72</b><br>(0.58 to<br>0.91) |
| Sexually transmitted infections excluding HIV                           | 4.25<br>(1.41 to<br>8.90)                | 1.17<br>(0.40 to<br>2.60)              | 0.83<br>(0.31 to<br>1.84)             | 1.35<br>(0.46 to<br>3.09)              | 0.05<br>(0.02 to<br>0.11)         | 0.02<br>(0.01 to<br>0.05)        | 0.01<br>(0.01 to<br>0.03)        | 0.02<br>(0.01 to<br>0.04)        |
| Syphilis                                                                | 4.02<br>(1.21 to<br>8.61)                | 1.00<br>(0.25 to<br>2.46)              | 0.68<br>(0.16 to<br>1.70)             | 1.17<br>(0.29 to<br>2.92)              | 0.05<br>(0.02 to<br>0.10)         | 0.01<br>(0.00 to<br>0.05)        | 0.01<br>(0.00 to<br>0.02)        | 0.01<br>(0.00 to<br>0.04)        |
| Chlamydial infection                                                    | 0.04<br>(0.03 to<br>0.06)                | 0.03<br>(0.02 to<br>0.05)              | 0.03<br>(0.02 to<br>0.04)             | 0.03<br>(0.02 to<br>0.05)              | 0.00<br>(0.00 to<br>0.00)         | 0.00<br>(0.00 to<br>0.00)        | 0.00<br>(0.00 to<br>0.00)        | 0.00<br>(0.00 to<br>0.00)        |
| Gonococcal infection                                                    | 0.12<br>(0.09 to<br>0.18)                | 0.09<br>(0.06 to<br>0.13)              | 0.08<br>(0.05 to<br>0.12)             | 0.09<br>(0.06 to<br>0.14)              | 0.00<br>(0.00 to<br>0.00)         | 0.00<br>(0.00 to<br>0.00)        | 0.00<br>(0.00 to<br>0.00)        | 0.00<br>(0.00 to<br>0.00)        |
| Other sexually transmitted infections                                   | 0.07<br>(0.05 to<br>0.09)                | 0.04<br>(0.03 to<br>0.06)              | 0.04<br>(0.03 to<br>0.06)             | 0.05<br>(0.03 to<br>0.07)              | 0.00<br>(0.00 to<br>0.00)         | 0.00<br>(0.00 to<br>0.00)        | 0.00<br>(0.00 to<br>0.00)        | 0.00<br>(0.00 to<br>0.00)        |
| Acute hepatitis                                                         | 9.14<br>(7.71 to<br>10.77)               | 8.31<br>(6.33 to<br>10.81)             | 5.82<br>(4.38 to<br>7.71)             | 9.58<br>(7.45 to<br>12.33)             | 0.27<br>(0.23 to<br>0.31)         | 0.31<br>(0.24 to<br>0.40)        | 0.22<br>(0.17 to<br>0.29)        | 0.35<br>(0.27 to<br>0.45)        |
| Acute hepatitis A                                                       | 0.48<br>(0.08 to<br>1.06)                | 0.25<br>(0.07 to<br>0.54)              | 0.19<br>(0.06 to<br>0.40)             | 0.29<br>(0.08 to<br>0.63)              | 0.01<br>(0.00 to<br>0.01)         | 0.01<br>(0.00 to<br>0.01)        | 0.00<br>(0.00 to<br>0.01)        | 0.01<br>(0.00 to<br>0.02)        |

|                                       |                                                            |                                                            |                                                            |                                                            |                                                      |                                                      |                                                      |                                                      |
|---------------------------------------|------------------------------------------------------------|------------------------------------------------------------|------------------------------------------------------------|------------------------------------------------------------|------------------------------------------------------|------------------------------------------------------|------------------------------------------------------|------------------------------------------------------|
| Acute hepatitis B                     | 6.81<br>(5.63 to<br>7.99)                                  | 6.76<br>(4.95 to<br>8.94)                                  | 4.71<br>(3.38 to<br>6.34)                                  | 7.82<br>(5.90 to<br>10.19)                                 | 0.22<br>(0.18 to<br>0.26)                            | 0.26<br>(0.19 to<br>0.34)                            | 0.18<br>(0.13 to<br>0.24)                            | 0.30<br>(0.22 to<br>0.38)                            |
| Acute hepatitis C                     | 0.20<br>(0.14 to<br>0.29)                                  | 0.25<br>(0.16 to<br>0.38)                                  | 0.18<br>(0.11 to<br>0.27)                                  | 0.27<br>(0.17 to<br>0.41)                                  | 0.01<br>(0.00 to<br>0.01)                            | 0.01<br>(0.01 to<br>0.02)                            | 0.01<br>(0.00 to<br>0.01)                            | 0.01<br>(0.01 to<br>0.02)                            |
| Acute hepatitis E                     | 1.65<br>(1.10 to<br>2.37)                                  | 1.06<br>(0.67 to<br>1.69)                                  | 0.74<br>(0.46 to<br>1.21)                                  | 1.20<br>(0.75 to<br>1.90)                                  | 0.04<br>(0.02 to<br>0.05)                            | 0.04<br>(0.02 to<br>0.06)                            | 0.03<br>(0.02 to<br>0.05)                            | 0.04<br>(0.02 to<br>0.07)                            |
| Other unspecified infectious diseases | 8.98<br>(5.24 to<br>22.73)                                 | 8.80<br>(6.15 to<br>15.88)                                 | 8.09<br>(5.87 to<br>13.43)                                 | 9.74<br>(6.68 to<br>17.77)                                 | 0.21<br>(0.15 to<br>0.37)                            | 0.33<br>(0.25 to<br>0.44)                            | 0.33<br>(0.25 to<br>0.43)                            | 0.35<br>(0.26 to<br>0.47)                            |
| <b>Non-communicable diseases</b>      | <b>3,119.79</b><br><b>(2,816.48 to</b><br><b>3,458.72)</b> | <b>4,937.35</b><br><b>(3,872.76 to</b><br><b>6,470.54)</b> | <b>3,473.11</b><br><b>(2,815.57 to</b><br><b>4,506.56)</b> | <b>6,199.44</b><br><b>(4,835.90 to</b><br><b>8,177.08)</b> | <b>142.96</b><br><b>(132.54 to</b><br><b>153.19)</b> | <b>294.50</b><br><b>(240.61 to</b><br><b>370.56)</b> | <b>220.27</b><br><b>(185.66 to</b><br><b>270.75)</b> | <b>349.77</b><br><b>(286.28 to</b><br><b>432.25)</b> |
| <b>Algeria</b>                        |                                                            |                                                            |                                                            |                                                            |                                                      |                                                      |                                                      |                                                      |
| <b>Cause</b>                          | <b>YLLs (in 1000s)</b>                                     |                                                            |                                                            |                                                            | <b>Deaths (in 1000s)</b>                             |                                                      |                                                      |                                                      |
|                                       | <b>2016</b>                                                | <b>2040 Forecast</b>                                       | <b>2040 Better Scenario</b>                                | <b>2040 Worse Scenario</b>                                 | <b>2016</b>                                          | <b>2040 Forecast</b>                                 | <b>2040 Better Scenario</b>                          | <b>2040 Worse Scenario</b>                           |
| <b>Neoplasms</b>                      | <b>548.26</b><br><b>(489.41 to</b><br><b>606.02)</b>       | <b>942.72</b><br><b>(788.56 to</b><br><b>1,129.87)</b>     | <b>800.83</b><br><b>(677.57 to</b><br><b>936.57)</b>       | <b>1,048.17</b><br><b>(860.76 to</b><br><b>1,277.71)</b>   | <b>19.73</b><br><b>(17.90 to</b><br><b>21.58)</b>    | <b>41.17</b><br><b>(34.56 to</b><br><b>49.06)</b>    | <b>36.31</b><br><b>(30.78 to</b><br><b>42.41)</b>    | <b>44.24</b><br><b>(36.62 to</b><br><b>53.35)</b>    |
| Lip and oral cavity cancer            | 4.51<br>(3.79 to<br>5.33)                                  | 7.90<br>(5.54 to<br>11.32)                                 | 6.59<br>(4.79 to<br>9.04)                                  | 10.59<br>(6.73 to<br>16.41)                                | 0.19<br>(0.16 to<br>0.22)                            | 0.37<br>(0.27 to<br>0.53)                            | 0.33<br>(0.24 to<br>0.45)                            | 0.47<br>(0.31 to<br>0.72)                            |
| Nasopharynx cancer                    | 15.43<br>(12.55 to<br>18.65)                               | 22.77<br>(14.84 to<br>34.76)                               | 16.35<br>(11.17 to<br>23.52)                               | 33.51<br>(20.29 to<br>56.14)                               | 0.46<br>(0.38 to<br>0.55)                            | 0.75<br>(0.50 to<br>1.14)                            | 0.55<br>(0.38 to<br>0.80)                            | 1.08<br>(0.65 to<br>1.75)                            |
| Other pharynx cancer                  | 3.28<br>(2.70 to<br>3.93)                                  | 7.24<br>(5.15 to<br>10.54)                                 | 7.21<br>(5.20 to<br>10.14)                                 | 8.14<br>(5.44 to<br>12.48)                                 | 0.12<br>(0.10 to<br>0.14)                            | 0.30<br>(0.21 to<br>0.45)                            | 0.30<br>(0.22 to<br>0.43)                            | 0.33<br>(0.22 to<br>0.50)                            |
| Esophageal cancer                     | 6.80<br>(5.70 to<br>7.88)                                  | 10.89<br>(7.17 to<br>16.25)                                | 10.13<br>(6.96 to<br>14.55)                                | 14.08<br>(8.38 to<br>22.99)                                | 0.31<br>(0.26 to<br>0.35)                            | 0.54<br>(0.36 to<br>0.80)                            | 0.53<br>(0.37 to<br>0.74)                            | 0.66<br>(0.41 to<br>1.04)                            |
| Stomach cancer                        | 31.63<br>(27.79 to<br>35.75)                               | 42.12<br>(32.08 to<br>54.23)                               | 31.84<br>(25.10 to<br>40.03)                               | 45.98<br>(35.36 to<br>59.07)                               | 1.34<br>(1.18 to<br>1.50)                            | 2.11<br>(1.63 to<br>2.73)                            | 1.65<br>(1.30 to<br>2.06)                            | 2.23<br>(1.72 to<br>2.87)                            |
| Colon and rectum cancer               | 54.07<br>(46.27 to<br>62.08)                               | 98.94<br>(69.58 to<br>143.87)                              | 80.54<br>(57.23 to<br>113.83)                              | 105.85<br>(72.93 to<br>153.01)                             | 2.07<br>(1.78 to<br>2.37)                            | 4.62<br>(3.19 to<br>6.74)                            | 3.88<br>(2.73 to<br>5.47)                            | 4.81<br>(3.32 to<br>7.03)                            |
| Liver cancer                          | 15.45<br>(12.49 to<br>18.57)                               | 38.68<br>(25.36 to<br>58.84)                               | 35.45<br>(24.32 to<br>50.34)                               | 40.88<br>(25.92 to<br>62.48)                               | 0.69<br>(0.57 to<br>0.84)                            | 1.94<br>(1.30 to<br>2.94)                            | 1.86<br>(1.29 to<br>2.66)                            | 1.99<br>(1.29 to<br>3.02)                            |
| Liver cancer due to hepatitis B       | 5.78<br>(4.21 to<br>7.62)                                  | 13.42<br>(7.88 to<br>21.07)                                | 12.22<br>(7.71 to<br>18.46)                                | 14.26<br>(8.13 to<br>22.92)                                | 0.23<br>(0.16 to<br>0.30)                            | 0.59<br>(0.36 to<br>0.94)                            | 0.56<br>(0.35 to<br>0.85)                            | 0.61<br>(0.37 to<br>0.98)                            |
| Liver cancer due to hepatitis C       | 4.88<br>(3.50 to<br>6.63)                                  | 13.05<br>(8.03 to<br>20.32)                                | 12.18<br>(7.72 to<br>18.38)                                | 13.51<br>(8.09 to<br>21.51)                                | 0.25<br>(0.18 to<br>0.34)                            | 0.73<br>(0.45 to<br>1.13)                            | 0.71<br>(0.46 to<br>1.06)                            | 0.73<br>(0.45 to<br>1.15)                            |
| Liver cancer due to alcohol use       | 1.18<br>(0.73 to<br>1.84)                                  | 2.99<br>(1.46 to<br>5.28)                                  | 2.71<br>(1.39 to<br>4.54)                                  | 3.30<br>(1.59 to<br>5.89)                                  | 0.05<br>(0.03 to<br>0.09)                            | 0.15<br>(0.07 to<br>0.26)                            | 0.14<br>(0.07 to<br>0.23)                            | 0.16<br>(0.08 to<br>0.28)                            |
| Liver cancer due to other causes      | 3.61<br>(2.47 to<br>5.13)                                  | 9.23<br>(5.01 to<br>16.00)                                 | 8.34<br>(4.83 to<br>13.64)                                 | 9.81<br>(5.17 to<br>17.22)                                 | 0.16<br>(0.11 to<br>0.23)                            | 0.47<br>(0.25 to<br>0.83)                            | 0.44<br>(0.24 to<br>0.73)                            | 0.48<br>(0.25 to<br>0.87)                            |
| Gallbladder and biliary tract cancer  | 21.32<br>(17.13 to<br>25.44)                               | 31.74<br>(25.62 to<br>37.78)                               | 30.59<br>(24.92 to<br>36.49)                               | 31.33<br>(25.33 to<br>37.25)                               | 0.90<br>(0.77 to<br>1.04)                            | 1.51<br>(1.26 to<br>1.78)                            | 1.50<br>(1.26 to<br>1.77)                            | 1.46<br>(1.22 to<br>1.71)                            |
| Pancreatic cancer                     | 22.50<br>(19.34 to<br>25.45)                               | 53.32<br>(40.85 to<br>70.58)                               | 52.33<br>(40.51 to<br>67.70)                               | 53.20<br>(40.44 to<br>70.58)                               | 1.02<br>(0.88 to<br>1.16)                            | 2.71<br>(2.05 to<br>3.61)                            | 2.74<br>(2.12 to<br>3.55)                            | 2.62<br>(1.98 to<br>3.50)                            |
| Larynx cancer                         | 7.85<br>(6.55 to<br>9.35)                                  | 11.32<br>(6.84 to<br>18.92)                                | 8.09<br>(5.26 to<br>12.59)                                 | 17.48<br>(9.43 to<br>31.90)                                | 0.31<br>(0.26 to<br>0.37)                            | 0.50<br>(0.32 to<br>0.81)                            | 0.38<br>(0.26 to<br>0.56)                            | 0.73<br>(0.41 to<br>1.27)                            |

|                                     |                               |                                |                               |                                |                           |                           |                           |                            |
|-------------------------------------|-------------------------------|--------------------------------|-------------------------------|--------------------------------|---------------------------|---------------------------|---------------------------|----------------------------|
| Tracheal, bronchus, and lung cancer | 51.21<br>(42.58 to<br>61.31)  | 97.86<br>(62.61 to<br>149.20)  | 72.03<br>(50.23 to<br>101.56) | 150.30<br>(87.58 to<br>241.85) | 2.11<br>(1.79 to<br>2.50) | 4.57<br>(3.05 to<br>6.68) | 3.56<br>(2.57 to<br>4.93) | 6.53<br>(3.90 to<br>10.15) |
| Malignant skin melanoma             | 2.26<br>(1.78 to<br>2.99)     | 4.33<br>(3.31 to<br>5.80)      | 5.11<br>(3.89 to<br>6.92)     | 3.97<br>(3.03 to<br>5.26)      | 0.09<br>(0.07 to<br>0.12) | 0.22<br>(0.16 to<br>0.29) | 0.27<br>(0.20 to<br>0.36) | 0.19<br>(0.14 to<br>0.26)  |
| Non-melanoma skin cancer            | 2.14<br>(1.69 to<br>2.82)     | 4.52<br>(3.39 to<br>6.20)      | 3.71<br>(2.84 to<br>5.04)     | 4.69<br>(3.58 to<br>6.33)      | 0.11<br>(0.09 to<br>0.15) | 0.29<br>(0.20 to<br>0.40) | 0.25<br>(0.18 to<br>0.34) | 0.29<br>(0.20 to<br>0.40)  |
| Breast cancer                       | 81.56<br>(60.25 to<br>102.31) | 119.28<br>(82.98 to<br>168.75) | 96.58<br>(68.60 to<br>132.40) | 127.70<br>(88.35 to<br>179.91) | 2.46<br>(1.90 to<br>3.03) | 4.36<br>(3.06 to<br>6.18) | 3.59<br>(2.58 to<br>4.95) | 4.59<br>(3.23 to<br>6.54)  |
| Cervical cancer                     | 16.94<br>(10.48 to<br>22.06)  | 24.93<br>(14.56 to<br>33.26)   | 19.78<br>(11.48 to<br>26.80)  | 26.96<br>(15.58 to<br>36.62)   | 0.60<br>(0.37 to<br>0.77) | 1.00<br>(0.58 to<br>1.32) | 0.81<br>(0.49 to<br>1.09) | 1.07<br>(0.63 to<br>1.42)  |
| Uterine cancer                      | 4.11<br>(3.23 to<br>5.04)     | 8.45<br>(6.50 to<br>10.63)     | 7.40<br>(5.63 to<br>9.42)     | 9.01<br>(6.90 to<br>11.38)     | 0.18<br>(0.14 to<br>0.22) | 0.42<br>(0.32 to<br>0.52) | 0.37<br>(0.28 to<br>0.47) | 0.44<br>(0.33 to<br>0.55)  |
| Ovarian cancer                      | 10.37<br>(8.60 to<br>12.32)   | 22.32<br>(15.85 to<br>31.80)   | 18.92<br>(13.82 to<br>26.09)  | 22.04<br>(15.45 to<br>31.12)   | 0.36<br>(0.30 to<br>0.43) | 0.90<br>(0.63 to<br>1.30) | 0.78<br>(0.56 to<br>1.09) | 0.88<br>(0.61 to<br>1.27)  |
| Prostate cancer                     | 12.62<br>(9.12 to<br>16.65)   | 33.13<br>(23.67 to<br>44.82)   | 30.42<br>(22.02 to<br>41.02)  | 31.93<br>(22.72 to<br>43.79)   | 0.86<br>(0.64 to<br>1.18) | 2.47<br>(1.71 to<br>3.57) | 2.36<br>(1.70 to<br>3.36) | 2.32<br>(1.57 to<br>3.36)  |
| Testicular cancer                   | 1.06<br>(0.79 to<br>1.42)     | 1.24<br>(0.90 to<br>1.71)      | 1.02<br>(0.75 to<br>1.41)     | 1.31<br>(0.97 to<br>1.78)      | 0.03<br>(0.02 to<br>0.03) | 0.04<br>(0.03 to<br>0.05) | 0.03<br>(0.02 to<br>0.04) | 0.04<br>(0.03 to<br>0.05)  |

**Algeria**

| Cause                           | YLLs (in 1000s)              |                              |                              |                              | Deaths (in 1000s)         |                           |                           |                           |
|---------------------------------|------------------------------|------------------------------|------------------------------|------------------------------|---------------------------|---------------------------|---------------------------|---------------------------|
|                                 | 2016                         | 2040 Forecast                | 2040 Better Scenario         | 2040 Worse Scenario          | 2016                      | 2040 Forecast             | 2040 Better Scenario      | 2040 Worse Scenario       |
| Kidney cancer                   | 6.67<br>(5.65 to<br>7.77)    | 13.17<br>(10.45 to<br>16.55) | 13.43<br>(10.64 to<br>16.81) | 12.93<br>(10.20 to<br>16.50) | 0.24<br>(0.20 to<br>0.29) | 0.58<br>(0.46 to<br>0.72) | 0.61<br>(0.49 to<br>0.76) | 0.55<br>(0.43 to<br>0.70) |
| Bladder cancer                  | 10.08<br>(8.29 to<br>11.84)  | 19.64<br>(14.33 to<br>27.11) | 17.54<br>(13.08 to<br>23.81) | 21.02<br>(14.95 to<br>29.66) | 0.49<br>(0.41 to<br>0.57) | 1.08<br>(0.78 to<br>1.49) | 1.00<br>(0.75 to<br>1.33) | 1.11<br>(0.79 to<br>1.56) |
| Brain and nervous system cancer | 25.82<br>(17.37 to<br>34.29) | 42.96<br>(30.50 to<br>56.51) | 39.12<br>(27.92 to<br>52.19) | 43.03<br>(30.11 to<br>56.85) | 0.67<br>(0.49 to<br>0.89) | 1.41<br>(1.09 to<br>1.85) | 1.33<br>(1.03 to<br>1.75) | 1.38<br>(1.07 to<br>1.81) |
| Thyroid cancer                  | 7.13<br>(6.02 to<br>8.37)    | 12.15<br>(8.47 to<br>17.47)  | 9.34<br>(6.80 to<br>12.82)   | 13.20<br>(9.33 to<br>18.91)  | 0.25<br>(0.22 to<br>0.30) | 0.51<br>(0.36 to<br>0.74) | 0.40<br>(0.29 to<br>0.57) | 0.54<br>(0.38 to<br>0.79) |
| Mesothelioma                    | 1.33<br>(1.03 to<br>1.91)    | 2.08<br>(1.58 to<br>3.05)    | 2.12<br>(1.61 to<br>3.16)    | 2.07<br>(1.57 to<br>2.99)    | 0.05<br>(0.04 to<br>0.07) | 0.09<br>(0.06 to<br>0.13) | 0.09<br>(0.07 to<br>0.14) | 0.09<br>(0.06 to<br>0.12) |
| Hodgkin lymphoma                | 10.68<br>(5.21 to<br>14.25)  | 9.43<br>(4.96 to<br>13.00)   | 6.93<br>(3.69 to<br>9.52)    | 10.76<br>(5.62 to<br>14.87)  | 0.23<br>(0.14 to<br>0.30) | 0.24<br>(0.15 to<br>0.31) | 0.18<br>(0.12 to<br>0.24) | 0.27<br>(0.17 to<br>0.35) |
| Non-Hodgkin lymphoma            | 35.18<br>(29.58 to<br>40.95) | 62.23<br>(48.50 to<br>79.44) | 52.18<br>(41.54 to<br>64.68) | 62.72<br>(48.87 to<br>79.61) | 1.07<br>(0.91 to<br>1.23) | 2.37<br>(1.81 to<br>3.00) | 2.04<br>(1.59 to<br>2.55) | 2.33<br>(1.79 to<br>2.95) |
| Multiple myeloma                | 8.65<br>(4.78 to<br>11.25)   | 19.86<br>(10.80 to<br>28.54) | 17.52<br>(9.79 to<br>24.27)  | 19.61<br>(10.57 to<br>28.33) | 0.34<br>(0.21 to<br>0.44) | 0.88<br>(0.54 to<br>1.24) | 0.80<br>(0.51 to<br>1.08) | 0.86<br>(0.51 to<br>1.20) |
| Leukemia                        | 36.20<br>(27.60 to<br>41.42) | 51.55<br>(39.81 to<br>64.92) | 42.33<br>(33.11 to<br>51.76) | 55.19<br>(41.94 to<br>70.19) | 0.96<br>(0.82 to<br>1.10) | 1.82<br>(1.44 to<br>2.36) | 1.54<br>(1.25 to<br>1.99) | 1.89<br>(1.49 to<br>2.45) |
| Acute lymphoid leukemia         | 7.06<br>(5.27 to<br>8.96)    | 8.31<br>(6.02 to<br>10.92)   | 6.69<br>(4.79 to<br>8.65)    | 8.78<br>(6.40 to<br>11.46)   | 0.14<br>(0.11 to<br>0.17) | 0.21<br>(0.16 to<br>0.28) | 0.17<br>(0.13 to<br>0.23) | 0.22<br>(0.16 to<br>0.29) |
| Chronic lymphoid leukemia       | 1.20<br>(0.92 to<br>1.48)    | 2.19<br>(1.55 to<br>3.01)    | 1.94<br>(1.38 to<br>2.60)    | 2.25<br>(1.57 to<br>3.14)    | 0.05<br>(0.04 to<br>0.06) | 0.11<br>(0.08 to<br>0.15) | 0.11<br>(0.08 to<br>0.14) | 0.11<br>(0.08 to<br>0.16) |

|                                               |                                                            |                                                            |                                                        |                                                            |                                                   |                                                     |                                                    |                                                      |
|-----------------------------------------------|------------------------------------------------------------|------------------------------------------------------------|--------------------------------------------------------|------------------------------------------------------------|---------------------------------------------------|-----------------------------------------------------|----------------------------------------------------|------------------------------------------------------|
| Acute myeloid leukemia                        | 8.44<br>(6.93 to<br>11.01)                                 | 15.12<br>(11.43 to<br>20.62)                               | 13.72<br>(10.52 to<br>18.43)                           | 15.30<br>(11.46 to<br>20.89)                               | 0.22<br>(0.18 to<br>0.29)                         | 0.54<br>(0.39 to<br>0.77)                           | 0.50<br>(0.38 to<br>0.71)                          | 0.53<br>(0.38 to<br>0.75)                            |
| Chronic myeloid leukemia                      | 2.52<br>(1.55 to<br>3.38)                                  | 3.02<br>(1.71 to<br>4.78)                                  | 1.98<br>(1.15 to<br>3.04)                              | 3.31<br>(1.90 to<br>5.07)                                  | 0.09<br>(0.06 to<br>0.13)                         | 0.14<br>(0.08 to<br>0.23)                           | 0.10<br>(0.06 to<br>0.15)                          | 0.15<br>(0.08 to<br>0.23)                            |
| Other leukemia                                | 16.98<br>(10.97 to<br>20.43)                               | 22.90<br>(15.77 to<br>30.03)                               | 18.00<br>(12.62 to<br>22.91)                           | 25.55<br>(17.24 to<br>33.57)                               | 0.46<br>(0.37 to<br>0.53)                         | 0.82<br>(0.62 to<br>1.09)                           | 0.67<br>(0.51 to<br>0.89)                          | 0.89<br>(0.67 to<br>1.17)                            |
| Other neoplasms                               | 41.42<br>(36.42 to<br>46.86)                               | 68.67<br>(59.13 to<br>79.35)                               | 66.24<br>(57.12 to<br>76.89)                           | 68.70<br>(59.22 to<br>78.91)                               | 1.21<br>(1.06 to<br>1.39)                         | 2.56<br>(2.18 to<br>3.02)                           | 2.57<br>(2.19 to<br>3.05)                          | 2.49<br>(2.14 to<br>2.93)                            |
| <b>Cardiovascular diseases</b>                | <b>1,251.76</b><br><b>(1,105.63 to</b><br><b>1,419.22)</b> | <b>1,781.25</b><br><b>(1,129.83 to</b><br><b>2,743.81)</b> | <b>972.88</b><br><b>(655.48 to</b><br><b>1,477.11)</b> | <b>2,680.06</b><br><b>(1,683.43 to</b><br><b>4,119.49)</b> | <b>71.76</b><br><b>(64.40 to</b><br><b>79.50)</b> | <b>119.78</b><br><b>(81.10 to</b><br><b>172.69)</b> | <b>72.22</b><br><b>(51.00 to</b><br><b>102.27)</b> | <b>163.99</b><br><b>(110.26 to</b><br><b>252.62)</b> |
| Rheumatic heart disease                       | 11.75<br>(9.33 to<br>14.68)                                | 8.50<br>(6.00 to<br>12.13)                                 | 6.40<br>(4.59 to<br>8.92)                              | 9.82<br>(7.01 to<br>13.99)                                 | 0.39<br>(0.31 to<br>0.49)                         | 0.41<br>(0.30 to<br>0.58)                           | 0.32<br>(0.24 to<br>0.45)                          | 0.45<br>(0.33 to<br>0.65)                            |
| Ischemic heart disease                        | 784.96<br>(671.55 to<br>897.45)                            | 1,113.08<br>(997.91 to<br>2,003.26)                        | 556.97<br>(312.20 to<br>965.16)                        | 1,763.80<br>(952.05 to<br>3,067.63)                        | 46.00<br>(39.99 to<br>51.59)                      | 73.82<br>(42.49 to<br>124.37)                       | 41.10<br>(24.56 to<br>68.69)                       | 106.12<br>(62.11 to<br>172.19)                       |
| Stroke                                        | 287.71<br>(244.83 to<br>335.59)                            | 347.82<br>(207.39 to<br>597.66)                            | 175.76<br>(109.21 to<br>300.19)                        | 549.21<br>(327.60 to<br>911.65)                            | 16.68<br>(14.19 to<br>19.37)                      | 24.67<br>(14.61 to<br>43.07)                        | 14.04<br>(8.55 to<br>24.41)                        | 34.65<br>(21.23 to<br>62.03)                         |
| Ischemic stroke                               | 136.38<br>(116.53 to<br>158.18)                            | 180.05<br>(92.68 to<br>393.06)                             | 97.18<br>(52.32 to<br>201.21)                          | 259.60<br>(135.98 to<br>544.65)                            | 9.72<br>(8.23 to<br>11.27)                        | 14.86<br>(7.71 to<br>32.32)                         | 8.89<br>(4.74 to<br>18.27)                         | 19.47<br>(9.95 to<br>42.89)                          |
| Intracerebral hemorrhage                      | 151.33<br>(125.00 to<br>184.11)                            | 167.77<br>(94.13 to<br>284.62)                             | 78.57<br>(47.92 to<br>125.02)                          | 289.61<br>(162.26 to<br>490.52)                            | 6.96<br>(5.73 to<br>8.31)                         | 9.81<br>(5.67 to<br>16.46)                          | 5.14<br>(3.21 to<br>8.16)                          | 15.18<br>(8.92 to<br>24.87)                          |
| Hypertensive heart disease                    | 39.98<br>(27.55 to<br>59.85)                               | 78.45<br>(38.95 to<br>158.41)                              | 55.93<br>(31.75 to<br>103.36)                          | 97.45<br>(47.34 to<br>209.79)                              | 2.30<br>(1.60 to<br>3.34)                         | 5.41<br>(2.70 to<br>11.26)                          | 4.08<br>(2.32 to<br>7.36)                          | 6.40<br>(3.08 to<br>14.05)                           |
| Cardiomyopathy and myocarditis                | 24.16<br>(19.40 to<br>30.21)                               | 35.53<br>(24.11 to<br>51.02)                               | 25.22<br>(17.94 to<br>35.68)                           | 37.88<br>(26.08 to<br>53.76)                               | 0.89<br>(0.71 to<br>1.13)                         | 0.89<br>(1.21 to<br>2.71)                           | 1.37<br>(0.92 to<br>1.98)                          | 1.89<br>(1.25 to<br>2.81)                            |
| Myocarditis                                   | 3.87<br>(2.85 to<br>5.77)                                  | 3.84<br>(2.70 to<br>5.80)                                  | 3.60<br>(2.54 to<br>5.38)                              | 4.01<br>(2.81 to<br>6.12)                                  | 0.10<br>(0.07 to<br>0.14)                         | 0.15<br>(0.10 to<br>0.22)                           | 0.15<br>(0.10 to<br>0.22)                          | 0.15<br>(0.10 to<br>0.22)                            |
| <b>Algeria</b>                                |                                                            |                                                            |                                                        |                                                            |                                                   |                                                     |                                                    |                                                      |
| Cause                                         | YLLs (in 1000s)                                            |                                                            |                                                        |                                                            | Deaths (in 1000s)                                 |                                                     |                                                    |                                                      |
|                                               | 2016                                                       | 2040 Forecast                                              | 2040 Better Scenario                                   | 2040 Worse Scenario                                        | 2016                                              | 2040 Forecast                                       | 2040 Better Scenario                               | 2040 Worse Scenario                                  |
| Alcoholic cardiomyopathy                      | 1.99<br>(1.11 to<br>3.23)                                  | 3.04<br>(1.63 to<br>5.02)                                  | 2.81<br>(1.53 to<br>4.52)                              | 3.18<br>(1.69 to<br>5.34)                                  | 0.09<br>(0.05 to<br>0.16)                         | 0.17<br>(0.09 to<br>0.29)                           | 0.16<br>(0.09 to<br>0.27)                          | 0.17<br>(0.09 to<br>0.30)                            |
| Other cardiomyopathy                          | 18.30<br>(14.61 to<br>23.01)                               | 28.65<br>(18.66 to<br>42.87)                               | 18.81<br>(12.42 to<br>27.66)                           | 30.68<br>(20.00 to<br>45.83)                               | 0.70<br>(0.55 to<br>0.89)                         | 1.52<br>(0.95 to<br>2.32)                           | 1.05<br>(0.66 to<br>1.59)                          | 1.57<br>(0.98 to<br>2.40)                            |
| Atrial fibrillation and flutter               | 9.07<br>(6.80 to<br>11.69)                                 | 23.35<br>(16.30 to<br>31.57)                               | 21.92<br>(15.70 to<br>29.13)                           | 23.65<br>(16.42 to<br>31.85)                               | 0.89<br>(0.66 to<br>1.17)                         | 2.44<br>(1.63 to<br>3.38)                           | 2.41<br>(1.66 to<br>3.28)                          | 2.38<br>(1.54 to<br>3.32)                            |
| Aortic aneurysm                               | 6.58<br>(5.30 to<br>9.06)                                  | 11.21<br>(8.18 to<br>16.09)                                | 9.63<br>(7.14 to<br>13.41)                             | 11.99<br>(8.73 to<br>17.34)                                | 0.35<br>(0.28 to<br>0.50)                         | 0.72<br>(0.51 to<br>1.05)                           | 0.66<br>(0.47 to<br>0.94)                          | 0.73<br>(0.52 to<br>1.08)                            |
| Peripheral artery disease                     | 0.50<br>(0.29 to<br>0.91)                                  | 1.69<br>(0.93 to<br>3.11)                                  | 1.53<br>(0.85 to<br>2.84)                              | 1.65<br>(0.89 to<br>3.03)                                  | 0.04<br>(0.03 to<br>0.08)                         | 0.16<br>(0.08 to<br>0.30)                           | 0.16<br>(0.08 to<br>0.30)                          | 0.15<br>(0.08 to<br>0.28)                            |
| Endocarditis                                  | 13.70<br>(10.61 to<br>18.52)                               | 24.58<br>(17.03 to<br>35.43)                               | 22.15<br>(15.75 to<br>32.19)                           | 25.45<br>(17.58 to<br>36.76)                               | 0.60<br>(0.46 to<br>0.81)                         | 1.44<br>(0.94 to<br>2.24)                           | 1.38<br>(0.92 to<br>2.09)                          | 1.44<br>(0.92 to<br>2.25)                            |
| Other cardiovascular and circulatory diseases | 73.35<br>(53.47 to<br>102.18)                              | 137.03<br>(88.39 to<br>207.79)                             | 97.36<br>(64.72 to<br>146.55)                          | 159.16<br>(101.88 to<br>239.42)                            | 3.60<br>(2.54 to<br>5.11)                         | 8.86<br>(5.45 to<br>13.40)                          | 6.72<br>(4.30 to<br>10.05)                         | 9.79<br>(6.02 to<br>14.94)                           |

|                                                                |                                    |                                     |                                     |                                     |                               |                                 |                                 |                                 |
|----------------------------------------------------------------|------------------------------------|-------------------------------------|-------------------------------------|-------------------------------------|-------------------------------|---------------------------------|---------------------------------|---------------------------------|
| <b>Chronic respiratory diseases</b>                            | <b>112.38</b><br>(96.99 to 130.29) | <b>172.28</b><br>(124.88 to 232.61) | <b>145.75</b><br>(109.98 to 191.64) | <b>217.92</b><br>(151.86 to 305.98) | <b>6.13</b><br>(5.22 to 7.21) | <b>11.20</b><br>(7.96 to 15.26) | <b>10.20</b><br>(7.59 to 13.72) | <b>13.23</b><br>(9.11 to 18.66) |
| Chronic obstructive pulmonary disease                          | 68.16<br>(57.52 to 79.17)          | 110.45<br>(72.41 to 164.98)         | 87.09<br>(58.59 to 126.08)          | 152.49<br>(94.51 to 233.38)         | 4.14<br>(3.49 to 4.80)        | 7.62<br>(5.05 to 11.22)         | 6.54<br>(4.49 to 9.52)          | 9.62<br>(6.11 to 14.62)         |
| Pneumoconiosis                                                 | 0.38<br>(0.29 to 0.50)             | 0.50<br>(0.36 to 0.69)              | 0.48<br>(0.35 to 0.68)              | 0.53<br>(0.39 to 0.73)              | 0.02<br>(0.02 to 0.03)        | 0.04<br>(0.03 to 0.06)          | 0.04<br>(0.03 to 0.06)          | 0.04<br>(0.03 to 0.06)          |
| Silicosis                                                      | 0.06<br>(0.03 to 0.10)             | 0.06<br>(0.03 to 0.11)              | 0.04<br>(0.02 to 0.08)              | 0.07<br>(0.04 to 0.12)              | 0.00<br>(0.00 to 0.01)        | 0.00<br>(0.00 to 0.01)          | 0.00<br>(0.00 to 0.01)          | 0.01<br>(0.00 to 0.01)          |
| Asbestosis                                                     | 0.09<br>(0.06 to 0.11)             | 0.13<br>(0.09 to 0.18)              | 0.15<br>(0.11 to 0.21)              | 0.12<br>(0.09 to 0.17)              | 0.00<br>(0.00 to 0.00)        | 0.01<br>(0.00 to 0.01)          | 0.01<br>(0.01 to 0.01)          | 0.01<br>(0.00 to 0.01)          |
| Coal workers pneumoconiosis                                    | 0.02<br>(0.01 to 0.04)             | 0.04<br>(0.02 to 0.07)              | 0.03<br>(0.02 to 0.07)              | 0.04<br>(0.02 to 0.08)              | 0.00<br>(0.00 to 0.00)        | 0.00<br>(0.00 to 0.01)          | 0.00<br>(0.00 to 0.01)          | 0.00<br>(0.00 to 0.01)          |
| Other pneumoconiosis                                           | 0.22<br>(0.16 to 0.30)             | 0.27<br>(0.19 to 0.40)              | 0.25<br>(0.17 to 0.38)              | 0.30<br>(0.20 to 0.44)              | 0.01<br>(0.01 to 0.02)        | 0.02<br>(0.01 to 0.04)          | 0.02<br>(0.01 to 0.04)          | 0.02<br>(0.01 to 0.04)          |
| Asthma                                                         | 26.60<br>(20.91 to 35.36)          | 25.96<br>(14.90 to 42.94)           | 14.02<br>(8.33 to 22.73)            | 31.88<br>(18.71 to 53.12)           | 1.14<br>(0.86 to 1.61)        | 1.41<br>(0.81 to 2.40)          | 0.82<br>(0.47 to 1.35)          | 1.66<br>(0.95 to 2.86)          |
| Interstitial lung disease and pulmonary sarcoidosis            | 11.35<br>(6.77 to 15.94)           | 26.60<br>(15.52 to 38.83)           | 35.40<br>(22.20 to 50.74)           | 23.79<br>(13.67 to 35.40)           | 0.61<br>(0.36 to 0.90)        | 1.69<br>(0.95 to 2.59)          | 2.33<br>(1.41 to 3.47)          | 1.47<br>(0.82 to 2.30)          |
| Other chronic respiratory diseases                             | 5.90<br>(3.79 to 9.74)             | 8.77<br>(5.42 to 15.23)             | 8.75<br>(5.40 to 15.09)             | 9.23<br>(5.64 to 16.26)             | 0.22<br>(0.14 to 0.38)        | 0.44<br>(0.26 to 0.83)          | 0.47<br>(0.27 to 0.88)          | 0.44<br>(0.26 to 0.85)          |
| <b>Cirrhosis and other chronic liver diseases</b>              | <b>92.82</b><br>(74.37 to 124.02)  | <b>154.51</b><br>(120.19 to 207.37) | <b>130.76</b><br>(102.00 to 175.64) | <b>162.54</b><br>(126.26 to 221.95) | <b>3.85</b><br>(3.04 to 5.29) | <b>7.61</b><br>(5.87 to 10.62)  | <b>6.67</b><br>(5.18 to 9.08)   | <b>7.80</b><br>(6.01 to 10.88)  |
| Cirrhosis and other chronic liver diseases due to hepatitis B  | 29.42<br>(21.16 to 40.77)          | 50.86<br>(36.47 to 72.47)           | 43.37<br>(30.55 to 61.69)           | 52.99<br>(37.67 to 74.42)           | 1.28<br>(0.93 to 1.81)        | 2.54<br>(1.81 to 3.69)          | 2.24<br>(1.60 to 3.22)          | 2.59<br>(1.83 to 3.74)          |
| Cirrhosis and other chronic liver diseases due to hepatitis C  | 24.83<br>(19.81 to 32.84)          | 36.05<br>(27.59 to 48.34)           | 30.50<br>(23.06 to 40.76)           | 38.13<br>(29.15 to 50.85)           | 0.92<br>(0.72 to 1.23)        | 1.76<br>(1.32 to 2.40)          | 1.56<br>(1.17 to 2.14)          | 1.80<br>(1.35 to 2.47)          |
| Cirrhosis and other chronic liver diseases due to alcohol use  | 6.55<br>(4.89 to 9.15)             | 10.60<br>(7.67 to 14.91)            | 8.98<br>(6.49 to 12.62)             | 11.73<br>(8.45 to 16.24)            | 0.29<br>(0.22 to 0.41)        | 0.55<br>(0.39 to 0.78)          | 0.48<br>(0.35 to 0.68)          | 0.59<br>(0.42 to 0.83)          |
| Cirrhosis and other chronic liver diseases due to other causes | 52.93<br>(41.36 to 85.02)          | 80.29<br>(56.70 to 140.84)          | 67.12<br>(48.09 to 116.63)          | 87.00<br>(60.98 to 153.78)          | 2.49<br>(1.93 to 4.12)        | 5.08<br>(3.34 to 9.09)          | 4.47<br>(3.09 to 7.76)          | 5.30<br>(3.43 to 9.50)          |
| Peptic ulcer disease                                           | 9.71<br>(6.98 to 16.38)            | 10.04<br>(6.55 to 18.23)            | 7.08<br>(4.62 to 12.83)             | 11.93<br>(7.97 to 21.28)            | 0.52<br>(0.37 to 0.88)        | 0.68<br>(0.42 to 1.25)          | 0.51<br>(0.31 to 0.92)          | 0.77<br>(0.48 to 1.39)          |

**Algeria**

| Cause                                      | YLLs (in 1000s)          |                           |                           |                           | Deaths (in 1000s)      |                        |                        |                        |
|--------------------------------------------|--------------------------|---------------------------|---------------------------|---------------------------|------------------------|------------------------|------------------------|------------------------|
|                                            | 2016                     | 2040 Forecast             | 2040 Better Scenario      | 2040 Worse Scenario       | 2016                   | 2040 Forecast          | 2040 Better Scenario   | 2040 Worse Scenario    |
| Gastritis and duodenitis                   | 0.38<br>(0.26 to 0.65)   | 0.60<br>(0.40 to 1.08)    | 0.48<br>(0.32 to 0.88)    | 0.64<br>(0.43 to 1.14)    | 0.02<br>(0.01 to 0.03) | 0.04<br>(0.02 to 0.07) | 0.03<br>(0.02 to 0.06) | 0.04<br>(0.02 to 0.07) |
| Appendicitis                               | 4.09<br>(2.63 to 7.93)   | 4.82<br>(2.97 to 10.05)   | 3.51<br>(2.15 to 7.39)    | 5.43<br>(3.40 to 11.42)   | 0.15<br>(0.10 to 0.31) | 0.26<br>(0.16 to 0.57) | 0.20<br>(0.12 to 0.44) | 0.28<br>(0.17 to 0.62) |
| Paralytic ileus and intestinal obstruction | 13.81<br>(9.41 to 21.19) | 20.92<br>(14.42 to 31.53) | 20.97<br>(14.76 to 31.57) | 20.97<br>(14.34 to 31.59) | 0.60<br>(0.44 to 0.89) | 1.32<br>(0.89 to 2.02) | 1.40<br>(0.96 to 2.12) | 1.27<br>(0.84 to 1.94) |



|                                         |                                                      |                                                      |                                                      |                                                      |                                                   |                                                   |                                                   |                                                   |
|-----------------------------------------|------------------------------------------------------|------------------------------------------------------|------------------------------------------------------|------------------------------------------------------|---------------------------------------------------|---------------------------------------------------|---------------------------------------------------|---------------------------------------------------|
|                                         | 1.34<br>(0.86 to<br>2.39)                            | 1.71<br>(0.98 to<br>3.33)                            | 1.49<br>(0.85 to<br>2.87)                            | 1.77<br>(1.02 to<br>3.40)                            | 0.08<br>(0.04 to<br>0.14)                         | 0.12<br>(0.06 to<br>0.25)                         | 0.11<br>(0.06 to<br>0.23)                         | 0.12<br>(0.06 to<br>0.25)                         |
| Inguinal, femoral, and abdominal hernia |                                                      |                                                      |                                                      |                                                      |                                                   |                                                   |                                                   |                                                   |
|                                         | 2.10<br>(1.42 to<br>3.33)                            | 2.95<br>(1.92 to<br>4.59)                            | 2.87<br>(1.86 to<br>4.38)                            | 2.95<br>(1.93 to<br>4.61)                            | 0.07<br>(0.05 to<br>0.11)                         | 0.14<br>(0.09 to<br>0.22)                         | 0.14<br>(0.09 to<br>0.22)                         | 0.14<br>(0.08 to<br>0.21)                         |
| Inflammatory bowel disease              |                                                      |                                                      |                                                      |                                                      |                                                   |                                                   |                                                   |                                                   |
|                                         | 3.50<br>(2.18 to<br>6.32)                            | 6.97<br>(4.28 to<br>13.34)                           | 6.44<br>(3.90 to<br>12.48)                           | 7.09<br>(4.34 to<br>13.56)                           | 0.19<br>(0.12 to<br>0.36)                         | 0.46<br>(0.28 to<br>0.90)                         | 0.44<br>(0.27 to<br>0.88)                         | 0.45<br>(0.27 to<br>0.89)                         |
| Vascular intestinal disorders           |                                                      |                                                      |                                                      |                                                      |                                                   |                                                   |                                                   |                                                   |
|                                         | 6.17<br>(3.99 to<br>12.09)                           | 14.22<br>(6.27 to<br>35.31)                          | 8.82<br>(4.03 to<br>21.53)                           | 16.38<br>(7.38 to<br>39.25)                          | 0.35<br>(0.22 to<br>0.71)                         | 1.00<br>(0.42 to<br>2.46)                         | 0.67<br>(0.29 to<br>1.61)                         | 1.11<br>(0.47 to<br>2.70)                         |
| Gallbladder and biliary diseases        |                                                      |                                                      |                                                      |                                                      |                                                   |                                                   |                                                   |                                                   |
|                                         | 5.50<br>(3.60 to<br>9.68)                            | 8.80<br>(5.10 to<br>17.09)                           | 6.93<br>(4.01 to<br>13.38)                           | 10.00<br>(5.78 to<br>18.96)                          | 0.23<br>(0.14 to<br>0.44)                         | 0.47<br>(0.26 to<br>0.96)                         | 0.39<br>(0.21 to<br>0.79)                         | 0.52<br>(0.28 to<br>1.04)                         |
| Pancreatitis                            |                                                      |                                                      |                                                      |                                                      |                                                   |                                                   |                                                   |                                                   |
|                                         | 6.31<br>(4.40 to<br>10.72)                           | 9.28<br>(6.07 to<br>17.14)                           | 8.55<br>(5.58 to<br>16.12)                           | 9.82<br>(6.41 to<br>18.28)                           | 0.29<br>(0.20 to<br>0.52)                         | 0.59<br>(0.36 to<br>1.14)                         | 0.58<br>(0.36 to<br>1.12)                         | 0.60<br>(0.36 to<br>1.16)                         |
| Other digestive diseases                |                                                      |                                                      |                                                      |                                                      |                                                   |                                                   |                                                   |                                                   |
| <b>Neurological disorders</b>           | <b>171.78</b><br><b>(148.12 to</b><br><b>197.86)</b> | <b>451.60</b><br><b>(329.69 to</b><br><b>625.23)</b> | <b>420.62</b><br><b>(327.49 to</b><br><b>544.02)</b> | <b>443.04</b><br><b>(316.18 to</b><br><b>627.54)</b> | <b>13.56</b><br><b>(11.56 to</b><br><b>15.98)</b> | <b>41.33</b><br><b>(28.32 to</b><br><b>57.78)</b> | <b>40.27</b><br><b>(29.57 to</b><br><b>52.88)</b> | <b>39.14</b><br><b>(25.93 to</b><br><b>56.12)</b> |
|                                         | 125.09<br>(104.05 to<br>150.09)                      | 376.11<br>(256.75 to<br>552.31)                      | 344.06<br>(250.96 to<br>468.43)                      | 368.19<br>(243.72 to<br>553.70)                      | 11.87<br>(9.92 to<br>14.31)                       | 37.20<br>(24.48 to<br>53.57)                      | 35.72<br>(25.36 to<br>48.41)                      | 35.34<br>(22.81 to<br>52.10)                      |
| Alzheimer's disease and other dementias |                                                      |                                                      |                                                      |                                                      |                                                   |                                                   |                                                   |                                                   |
|                                         | 11.34<br>(8.57 to<br>14.60)                          | 33.40<br>(24.75 to<br>43.82)                         | 37.25<br>(28.19 to<br>48.67)                         | 29.89<br>(21.64 to<br>39.27)                         | 0.94<br>(0.71 to<br>1.24)                         | 2.96<br>(2.06 to<br>3.95)                         | 3.41<br>(2.47 to<br>4.52)                         | 2.59<br>(1.76 to<br>3.50)                         |
| Parkinson's disease                     |                                                      |                                                      |                                                      |                                                      |                                                   |                                                   |                                                   |                                                   |
|                                         | 21.82<br>(17.42 to<br>28.40)                         | 22.97<br>(17.46 to<br>31.67)                         | 20.49<br>(15.55 to<br>28.04)                         | 26.08<br>(19.54 to<br>36.05)                         | 0.44<br>(0.35 to<br>0.57)                         | 0.60<br>(0.44 to<br>0.83)                         | 0.55<br>(0.41 to<br>0.77)                         | 0.66<br>(0.49 to<br>0.93)                         |
| Epilepsy                                |                                                      |                                                      |                                                      |                                                      |                                                   |                                                   |                                                   |                                                   |
|                                         | 2.13<br>(1.75 to<br>2.56)                            | 2.80<br>(2.28 to<br>3.39)                            | 2.85<br>(2.31 to<br>3.46)                            | 2.80<br>(2.26 to<br>3.39)                            | 0.06<br>(0.05 to<br>0.07)                         | 0.09<br>(0.07 to<br>0.11)                         | 0.09<br>(0.08 to<br>0.11)                         | 0.09<br>(0.07 to<br>0.11)                         |
| Multiple sclerosis                      |                                                      |                                                      |                                                      |                                                      |                                                   |                                                   |                                                   |                                                   |
|                                         | 2.13<br>(1.76 to<br>2.54)                            | 3.98<br>(3.27 to<br>4.75)                            | 3.88<br>(3.16 to<br>4.62)                            | 3.88<br>(3.21 to<br>4.61)                            | 0.06<br>(0.05 to<br>0.07)                         | 0.14<br>(0.11 to<br>0.16)                         | 0.13<br>(0.11 to<br>0.16)                         | 0.13<br>(0.11 to<br>0.15)                         |
| Motor neuron disease                    |                                                      |                                                      |                                                      |                                                      |                                                   |                                                   |                                                   |                                                   |
|                                         | 9.27<br>(7.46 to<br>11.74)                           | 12.34<br>(9.98 to<br>14.96)                          | 12.08<br>(9.88 to<br>14.58)                          | 12.20<br>(9.81 to<br>14.85)                          | 0.19<br>(0.16 to<br>0.23)                         | 0.35<br>(0.28 to<br>0.42)                         | 0.36<br>(0.29 to<br>0.43)                         | 0.34<br>(0.27 to<br>0.40)                         |
| Other neurological disorders            |                                                      |                                                      |                                                      |                                                      |                                                   |                                                   |                                                   |                                                   |
| <b>Mental disorders</b>                 | <b>18.65</b><br><b>(14.36 to</b><br><b>23.09)</b>    | <b>32.48</b><br><b>(24.85 to</b><br><b>40.51)</b>    | <b>37.33</b><br><b>(28.87 to</b><br><b>46.43)</b>    | <b>31.68</b><br><b>(24.10 to</b><br><b>39.16)</b>    | <b>0.48</b><br><b>(0.36 to</b><br><b>0.59)</b>    | <b>1.04</b><br><b>(0.78 to</b><br><b>1.31)</b>    | <b>1.25</b><br><b>(0.92 to</b><br><b>1.57)</b>    | <b>0.99</b><br><b>(0.73 to</b><br><b>1.23)</b>    |
|                                         | 3.89<br>(2.85 to<br>5.36)                            | 4.54<br>(3.12 to<br>6.64)                            | 4.90<br>(3.38 to<br>7.25)                            | 4.57<br>(3.14 to<br>6.67)                            | 0.11<br>(0.08 to<br>0.15)                         | 0.15<br>(0.10 to<br>0.22)                         | 0.17<br>(0.11 to<br>0.24)                         | 0.15<br>(0.10 to<br>0.21)                         |
| Alcohol use disorders                   |                                                      |                                                      |                                                      |                                                      |                                                   |                                                   |                                                   |                                                   |
|                                         | 14.70<br>(10.89 to<br>18.70)                         | 27.86<br>(21.20 to<br>35.38)                         | 32.35<br>(24.74 to<br>40.93)                         | 27.03<br>(20.36 to<br>34.05)                         | 0.37<br>(0.27 to<br>0.47)                         | 0.89<br>(0.65 to<br>1.14)                         | 1.08<br>(0.78 to<br>1.39)                         | 0.84<br>(0.60 to<br>1.07)                         |
| Drug use disorders                      |                                                      |                                                      |                                                      |                                                      |                                                   |                                                   |                                                   |                                                   |
|                                         | 11.32<br>(8.41 to<br>14.45)                          | 19.21<br>(14.35 to<br>24.60)                         | 20.56<br>(15.38 to<br>26.44)                         | 18.94<br>(14.06 to<br>24.32)                         | 0.27<br>(0.20 to<br>0.35)                         | 0.57<br>(0.41 to<br>0.74)                         | 0.62<br>(0.45 to<br>0.82)                         | 0.55<br>(0.39 to<br>0.71)                         |
| Opioid use disorders                    |                                                      |                                                      |                                                      |                                                      |                                                   |                                                   |                                                   |                                                   |
|                                         | 0.48<br>(0.31 to<br>0.74)                            | 1.18<br>(0.77 to<br>1.93)                            | 1.48<br>(0.97 to<br>2.45)                            | 1.15<br>(0.76 to<br>1.84)                            | 0.01<br>(0.01 to<br>0.02)                         | 0.03<br>(0.02 to<br>0.06)                         | 0.04<br>(0.03 to<br>0.07)                         | 0.03<br>(0.02 to<br>0.05)                         |
| Cocaine use disorders                   |                                                      |                                                      |                                                      |                                                      |                                                   |                                                   |                                                   |                                                   |
|                                         | 0.30<br>(0.18 to<br>0.44)                            | 1.06<br>(0.64 to<br>1.75)                            | 1.52<br>(0.91 to<br>2.52)                            | 1.00<br>(0.59 to<br>1.65)                            | 0.01<br>(0.00 to<br>0.01)                         | 0.03<br>(0.02 to<br>0.05)                         | 0.04<br>(0.02 to<br>0.08)                         | 0.03<br>(0.02 to<br>0.05)                         |
| Amphetamine use disorders               |                                                      |                                                      |                                                      |                                                      |                                                   |                                                   |                                                   |                                                   |
|                                         | 2.61<br>(1.53 to<br>3.49)                            | 6.40<br>(3.95 to<br>8.48)                            | 8.80<br>(5.44 to<br>11.54)                           | 5.94<br>(3.66 to<br>7.92)                            | 0.08<br>(0.05 to<br>0.11)                         | 0.26<br>(0.16 to<br>0.35)                         | 0.37<br>(0.23 to<br>0.50)                         | 0.23<br>(0.14 to<br>0.31)                         |
| Other drug use disorders                |                                                      |                                                      |                                                      |                                                      |                                                   |                                                   |                                                   |                                                   |
|                                         | 0.06<br>(0.04 to<br>0.09)                            | 0.08<br>(0.05 to<br>0.11)                            | 0.08<br>(0.05 to<br>0.13)                            | 0.08<br>(0.05 to<br>0.11)                            | 0.00<br>(0.00 to<br>0.00)                         | 0.00<br>(0.00 to<br>0.00)                         | 0.00<br>(0.00 to<br>0.00)                         | 0.00<br>(0.00 to<br>0.00)                         |
| Eating disorders                        |                                                      |                                                      |                                                      |                                                      |                                                   |                                                   |                                                   |                                                   |
| <b>Algeria</b>                          |                                                      |                                                      |                                                      |                                                      |                                                   |                                                   |                                                   |                                                   |
| <b>YLLs (in 1000s)</b>                  |                                                      |                                                      |                                                      |                                                      | <b>Deaths (in 1000s)</b>                          |                                                   |                                                   |                                                   |

| Cause                                                      | 2016                         | 2040 Forecast                  | 2040 Better Scenario           | 2040 Worse Scenario              | 2016                      | 2040 Forecast              | 2040 Better Scenario      | 2040 Worse Scenario        |
|------------------------------------------------------------|------------------------------|--------------------------------|--------------------------------|----------------------------------|---------------------------|----------------------------|---------------------------|----------------------------|
|                                                            | 366.20<br>(329.41 to 409.16) | 939.71<br>(495.45 to 2,037.31) | 648.80<br>(357.85 to 1,467.67) | 1,083.36<br>(582.71 to 2,304.37) | 18.32<br>(16.62 to 20.30) | 60.16<br>(31.63 to 125.19) | 43.49<br>(23.91 to 96.05) | 67.28<br>(36.37 to 137.41) |
| Diabetes, urogenital, blood, and endocrine diseases        | 153.08<br>(134.95 to 172.30) | 244.20<br>(164.81 to 349.21)   | 179.38<br>(122.58 to 250.41)   | 303.78<br>(200.89 to 431.69)     | 8.68<br>(7.63 to 9.78)    | 16.63<br>(11.11 to 23.58)  | 12.91<br>(8.73 to 17.66)  | 19.78<br>(12.75 to 27.77)  |
| Diabetes mellitus                                          | 0.28<br>(0.25 to 0.32)       | 0.33<br>(0.27 to 0.40)         | 0.26<br>(0.22 to 0.32)         | 0.36<br>(0.30 to 0.43)           | 0.01<br>(0.00 to 0.01)    | 0.01<br>(0.01 to 0.01)     | 0.01<br>(0.01 to 0.01)    | 0.01<br>(0.01 to 0.01)     |
| Acute glomerulonephritis                                   | 149.13<br>(127.94 to 178.46) | 612.00<br>(168.62 to 1,758.34) | 391.71<br>(110.26 to 1,225.47) | 693.08<br>(194.45 to 1,972.85)   | 7.54<br>(6.46 to 9.00)    | 39.16<br>(10.49 to 108.24) | 26.29<br>(6.98 to 81.46)  | 43.20<br>(11.50 to 118.36) |
| Chronic kidney disease                                     | 60.21<br>(47.91 to 75.04)    | 285.58<br>(72.17 to 840.33)    | 179.49<br>(47.72 to 591.87)    | 324.31<br>(81.47 to 932.37)      | 2.91<br>(2.30 to 3.64)    | 16.39<br>(4.02 to 45.91)   | 10.71<br>(2.62 to 32.85)  | 18.23<br>(4.49 to 49.62)   |
| Chronic kidney disease due to diabetes mellitus            | 25.97<br>(20.62 to 31.73)    | 131.48<br>(32.94 to 380.24)    | 90.21<br>(22.36 to 281.67)     | 144.97<br>(36.93 to 414.90)      | 1.96<br>(1.57 to 2.42)    | 11.04<br>(2.98 to 32.01)   | 7.97<br>(2.17 to 25.64)   | 11.85<br>(3.19 to 33.54)   |
| Chronic kidney disease due to hypertension                 | 20.23<br>(16.06 to 24.92)    | 53.61<br>(18.19 to 144.86)     | 32.90<br>(11.48 to 97.18)      | 62.02<br>(21.32 to 166.15)       | 0.76<br>(0.59 to 0.97)    | 3.01<br>(0.82 to 8.29)     | 1.90<br>(0.53 to 5.65)    | 3.39<br>(0.95 to 9.34)     |
| Chronic kidney disease due to glomerulonephritis           | 42.71<br>(34.62 to 53.02)    | 141.32<br>(41.66 to 401.04)    | 89.11<br>(26.98 to 279.45)     | 161.78<br>(48.46 to 452.34)      | 1.92<br>(1.53 to 2.42)    | 8.72<br>(2.36 to 24.64)    | 5.71<br>(1.53 to 17.45)   | 9.73<br>(2.66 to 26.67)    |
| Chronic kidney disease due to other and unspecified causes | 9.83<br>(8.04 to 12.49)      | 20.83<br>(16.02 to 27.19)      | 17.93<br>(14.07 to 23.71)      | 20.81<br>(16.02 to 27.30)        | 0.61<br>(0.49 to 0.78)    | 1.76<br>(1.22 to 2.39)     | 1.60<br>(1.19 to 2.16)    | 1.69<br>(1.16 to 2.28)     |
| Urinary diseases and male infertility                      | 7.97<br>(5.85 to 10.35)      | 18.68<br>(13.67 to 24.82)      | 16.28<br>(12.09 to 21.58)      | 18.49<br>(13.45 to 24.53)        | 0.52<br>(0.39 to 0.68)    | 1.61<br>(1.08 to 2.21)     | 1.48<br>(1.07 to 2.03)    | 1.54<br>(1.02 to 2.10)     |
| Urinary tract infections                                   | 0.28<br>(0.22 to 0.37)       | 0.42<br>(0.30 to 0.60)         | 0.31<br>(0.23 to 0.45)         | 0.44<br>(0.32 to 0.62)           | 0.01<br>(0.01 to 0.01)    | 0.02<br>(0.01 to 0.05)     | 0.02<br>(0.01 to 0.05)    | 0.02<br>(0.01 to 0.05)     |
| Urolithiasis                                               | 1.57<br>(0.93 to 2.56)       | 1.72<br>(0.99 to 2.97)         | 1.34<br>(0.76 to 2.36)         | 1.88<br>(1.10 to 3.24)           | 0.08<br>(0.05 to 0.14)    | 0.13<br>(0.07 to 0.22)     | 0.10<br>(0.05 to 0.18)    | 0.13<br>(0.07 to 0.23)     |
| Other urinary diseases                                     | 0.17<br>(0.11 to 0.26)       | 0.17<br>(0.10 to 0.27)         | 0.10<br>(0.06 to 0.16)         | 0.20<br>(0.12 to 0.32)           | 0.00<br>(0.00 to 0.01)    | 0.00<br>(0.00 to 0.01)     | 0.00<br>(0.00 to 0.01)    | 0.01<br>(0.00 to 0.01)     |
| Gynecological diseases                                     | 0.01<br>(0.00 to 0.02)       | 0.01<br>(0.00 to 0.02)         | 0.01<br>(0.00 to 0.01)         | 0.01<br>(0.00 to 0.02)           | 0.00<br>(0.00 to 0.00)    | 0.00<br>(0.00 to 0.00)     | 0.00<br>(0.00 to 0.00)    | 0.00<br>(0.00 to 0.00)     |
| Uterine fibroids                                           | 0.02<br>(0.01 to 0.05)       | 0.01<br>(0.00 to 0.03)         | 0.01<br>(0.00 to 0.01)         | 0.02<br>(0.00 to 0.04)           | 0.00<br>(0.00 to 0.00)    | 0.00<br>(0.00 to 0.00)     | 0.00<br>(0.00 to 0.00)    | 0.00<br>(0.00 to 0.00)     |
| Polycystic ovarian syndrome                                | 0.00<br>(0.00 to 0.00)       | 0.00<br>(0.00 to 0.00)         | 0.00<br>(0.00 to 0.00)         | 0.00<br>(0.00 to 0.00)           | 0.00<br>(0.00 to 0.00)    | 0.00<br>(0.00 to 0.00)     | 0.00<br>(0.00 to 0.00)    | 0.00<br>(0.00 to 0.00)     |
| Endometriosis                                              | 0.00<br>(0.00 to 0.00)       | 0.00<br>(0.00 to 0.00)         | 0.00<br>(0.00 to 0.00)         | 0.00<br>(0.00 to 0.00)           | 0.00<br>(0.00 to 0.00)    | 0.00<br>(0.00 to 0.00)     | 0.00<br>(0.00 to 0.00)    | 0.00<br>(0.00 to 0.00)     |
| Genital prolapse                                           | 0.00<br>(0.00 to 0.01)       | 0.00<br>(0.00 to 0.01)         | 0.00<br>(0.00 to 0.01)         | 0.00<br>(0.00 to 0.01)           | 0.00<br>(0.00 to 0.00)    | 0.00<br>(0.00 to 0.00)     | 0.00<br>(0.00 to 0.00)    | 0.00<br>(0.00 to 0.00)     |
| Other gynecological diseases                               | 0.14<br>(0.09 to 0.20)       | 0.14<br>(0.09 to 0.23)         | 0.09<br>(0.05 to 0.15)         | 0.17<br>(0.10 to 0.27)           | 0.00<br>(0.00 to 0.00)    | 0.00<br>(0.00 to 0.01)     | 0.00<br>(0.00 to 0.00)    | 0.00<br>(0.00 to 0.01)     |
| Hemoglobinopathies and hemolytic anemias                   | 13.92<br>(10.12 to 21.44)    | 13.92<br>(9.61 to 22.10)       | 10.72<br>(7.21 to 17.12)       | 15.34<br>(10.59 to 24.22)        | 0.33<br>(0.25 to 0.50)    | 0.47<br>(0.34 to 0.75)     | 0.37<br>(0.26 to 0.59)    | 0.51<br>(0.36 to 0.79)     |
| Thalassemias                                               | 3.59<br>(2.07 to 6.79)       | 1.86<br>(0.99 to 3.73)         | 1.69<br>(0.90 to 3.26)         | 1.85<br>(0.97 to 3.74)           | 0.04<br>(0.03 to 0.08)    | 0.02<br>(0.01 to 0.05)     | 0.02<br>(0.01 to 0.04)    | 0.02<br>(0.01 to 0.05)     |
| Sickle cell disorders                                      | 4.46<br>(3.22 to 6.81)       | 5.08<br>(3.32 to 8.38)         | 3.77<br>(2.39 to 6.25)         | 5.66<br>(3.69 to 9.33)           | 0.08<br>(0.06 to 0.12)    | 0.11<br>(0.07 to 0.19)     | 0.09<br>(0.05 to 0.14)    | 0.13<br>(0.08 to 0.21)     |

|                                                   |                                        |                                        |                                        |                                        |                                  |                                  |                                  |                                   |
|---------------------------------------------------|----------------------------------------|----------------------------------------|----------------------------------------|----------------------------------------|----------------------------------|----------------------------------|----------------------------------|-----------------------------------|
| G6PD deficiency                                   | 2.97<br>(2.13 to<br>4.54)              | 3.63<br>(2.34 to<br>5.85)              | 2.59<br>(1.64 to<br>4.19)              | 4.19<br>(2.71 to<br>6.66)              | 0.06<br>(0.05 to<br>0.09)        | 0.10<br>(0.07 to<br>0.16)        | 0.07<br>(0.05 to<br>0.12)        | 0.11<br>(0.08 to<br>0.18)         |
| Other hemoglobinopathies and hemolytic anemias    | 2.90<br>(2.18 to<br>4.41)              | 3.34<br>(2.24 to<br>5.35)              | 2.67<br>(1.78 to<br>4.43)              | 3.64<br>(2.49 to<br>5.89)              | 0.14<br>(0.11 to<br>0.22)        | 0.23<br>(0.16 to<br>0.38)        | 0.20<br>(0.14 to<br>0.32)        | 0.25<br>(0.17 to<br>0.40)         |
| Endocrine, metabolic, blood, and immune disorders | 39.80<br>(28.29 to<br>57.41)           | 48.27<br>(34.33 to<br>69.12)           | 48.70<br>(35.04 to<br>68.85)           | 49.78<br>(35.34 to<br>71.94)           | 1.15<br>(0.84 to<br>1.63)        | 2.13<br>(1.49 to<br>3.09)        | 2.30<br>(1.65 to<br>3.31)        | 2.09<br>(1.45 to<br>3.06)         |
| <b>Algeria</b>                                    |                                        |                                        |                                        |                                        |                                  |                                  |                                  |                                   |
| Cause                                             | YLLs (in 1000s)                        |                                        |                                        |                                        | Deaths (in 1000s)                |                                  |                                  |                                   |
|                                                   | 2016                                   | 2040 Forecast                          | 2040 Better Scenario                   | 2040 Worse Scenario                    | 2016                             | 2040 Forecast                    | 2040 Better Scenario             | 2040 Worse Scenario               |
| <b>Musculoskeletal disorders</b>                  | <b>8.26</b><br>(6.02 to<br>10.38)      | <b>13.43</b><br>(9.25 to<br>17.70)     | <b>11.78</b><br>(8.27 to<br>15.43)     | <b>13.48</b><br>(9.23 to<br>17.66)     | <b>0.22</b><br>(0.16 to<br>0.29) | <b>0.50</b><br>(0.34 to<br>0.70) | <b>0.45</b><br>(0.30 to<br>0.62) | <b>0.48</b><br>(0.33 to<br>0.69)  |
| Rheumatoid arthritis                              | 0.80<br>(0.50 to<br>1.20)              | 1.54<br>(0.90 to<br>2.48)              | 1.04<br>(0.60 to<br>1.66)              | 1.75<br>(1.04 to<br>2.74)              | 0.03<br>(0.02 to<br>0.05)        | 0.08<br>(0.04 to<br>0.13)        | 0.06<br>(0.03 to<br>0.09)        | 0.09<br>(0.05 to<br>0.14)         |
| Other musculoskeletal disorders                   | 7.47<br>(5.36 to<br>9.36)              | 11.88<br>(8.18 to<br>15.57)            | 10.73<br>(7.53 to<br>14.06)            | 11.73<br>(8.02 to<br>15.19)            | 0.19<br>(0.14 to<br>0.25)        | 0.42<br>(0.28 to<br>0.58)        | 0.39<br>(0.26 to<br>0.54)        | 0.40<br>(0.26 to<br>0.55)         |
| <b>Other non-communicable diseases</b>            | <b>496.74</b><br>(313.11 to<br>779.27) | <b>369.08</b><br>(214.82 to<br>603.01) | <b>237.24</b><br>(141.43 to<br>385.33) | <b>432.20</b><br>(252.26 to<br>705.20) | <b>6.43</b><br>(4.18 to<br>9.79) | <b>6.64</b><br>(4.24 to<br>9.70) | <b>4.93</b><br>(3.13 to<br>7.03) | <b>7.31</b><br>(4.63 to<br>10.80) |
| Congenital birth defects                          | 471.99<br>(291.19 to<br>742.37)        | 329.07<br>(183.24 to<br>558.66)        | 202.55<br>(109.67 to<br>343.12)        | 391.15<br>(214.35 to<br>655.90)        | 5.65<br>(3.52 to<br>8.82)        | 4.07<br>(2.34 to<br>6.73)        | 2.52<br>(1.42 to<br>4.15)        | 4.82<br>(2.74 to<br>7.93)         |
| Neural tube defects                               | 8.90<br>(4.24 to<br>17.99)             | 2.72<br>(0.88 to<br>7.89)              | 1.48<br>(0.51 to<br>4.01)              | 3.52<br>(1.14 to<br>9.37)              | 0.10<br>(0.05 to<br>0.21)        | 0.03<br>(0.01 to<br>0.09)        | 0.02<br>(0.01 to<br>0.05)        | 0.04<br>(0.02 to<br>0.11)         |
| Congenital heart anomalies                        | 191.26<br>(118.50 to<br>297.72)        | 129.38<br>(70.17 to<br>219.51)         | 69.59<br>(36.91 to<br>118.60)          | 156.78<br>(85.60 to<br>265.83)         | 2.29<br>(1.44 to<br>3.54)        | 1.60<br>(0.90 to<br>2.68)        | 0.86<br>(0.48 to<br>1.45)        | 1.93<br>(1.08 to<br>3.20)         |
| Orofacial clefts                                  | 0.17<br>(0.06 to<br>0.44)              | 0.08<br>(0.02 to<br>0.25)              | 0.04<br>(0.01 to<br>0.13)              | 0.11<br>(0.03 to<br>0.34)              | 0.00<br>(0.00 to<br>0.01)        | 0.00<br>(0.00 to<br>0.00)        | 0.00<br>(0.00 to<br>0.00)        | 0.00<br>(0.00 to<br>0.00)         |
| Down syndrome                                     | 28.66<br>(17.06 to<br>47.89)           | 21.57<br>(11.43 to<br>39.22)           | 20.62<br>(11.15 to<br>36.50)           | 24.02<br>(12.65 to<br>43.62)           | 0.36<br>(0.22 to<br>0.59)        | 0.29<br>(0.16 to<br>0.51)        | 0.28<br>(0.16 to<br>0.47)        | 0.32<br>(0.18 to<br>0.57)         |
| Other chromosomal abnormalities                   | 22.44<br>(11.11 to<br>51.32)           | 22.14<br>(9.26 to<br>52.05)            | 16.76<br>(7.06 to<br>39.65)            | 25.67<br>(10.63 to<br>59.70)           | 0.26<br>(0.13 to<br>0.60)        | 0.27<br>(0.11 to<br>0.63)        | 0.20<br>(0.09 to<br>0.47)        | 0.31<br>(0.13 to<br>0.73)         |
| Congenital musculoskeletal and limb anomalies     | 9.85<br>(5.67 to<br>16.38)             | 7.33<br>(3.39 to<br>14.00)             | 4.45<br>(2.01 to<br>8.58)              | 8.60<br>(3.91 to<br>16.28)             | 0.12<br>(0.07 to<br>0.19)        | 0.09<br>(0.04 to<br>0.17)        | 0.05<br>(0.03 to<br>0.10)        | 0.10<br>(0.05 to<br>0.19)         |
| Urogenital congenital anomalies                   | 13.69<br>(7.22 to<br>23.14)            | 9.31<br>(4.26 to<br>17.03)             | 6.10<br>(2.78 to<br>11.27)             | 10.85<br>(4.87 to<br>20.25)            | 0.17<br>(0.09 to<br>0.28)        | 0.13<br>(0.07 to<br>0.22)        | 0.09<br>(0.05 to<br>0.15)        | 0.15<br>(0.08 to<br>0.26)         |
| Digestive congenital anomalies                    | 18.83<br>(6.08 to<br>33.36)            | 12.92<br>(3.85 to<br>27.10)            | 7.43<br>(2.20 to<br>15.36)             | 15.65<br>(4.61 to<br>32.46)            | 0.22<br>(0.07 to<br>0.39)        | 0.15<br>(0.05 to<br>0.32)        | 0.09<br>(0.03 to<br>0.18)        | 0.19<br>(0.06 to<br>0.38)         |
| Other congenital birth defects                    | 178.11<br>(91.77 to<br>296.25)         | 123.61<br>(53.52 to<br>227.25)         | 76.08<br>(32.88 to<br>141.26)          | 145.94<br>(63.35 to<br>272.75)         | 2.12<br>(1.11 to<br>3.50)        | 1.51<br>(0.67 to<br>2.74)        | 0.93<br>(0.42 to<br>1.71)        | 1.78<br>(0.79 to<br>3.28)         |
| Skin and subcutaneous diseases                    | 9.45<br>(4.54 to<br>12.78)             | 32.29<br>(15.36 to<br>44.34)           | 29.22<br>(14.40 to<br>40.05)           | 32.20<br>(15.05 to<br>44.48)           | 0.60<br>(0.29 to<br>0.82)        | 2.48<br>(1.15 to<br>3.59)        | 2.35<br>(1.11 to<br>3.34)        | 2.39<br>(1.07 to<br>3.48)         |
| Cellulitis                                        | 0.98<br>(0.38 to<br>1.51)              | 4.01<br>(1.53 to<br>6.19)              | 3.90<br>(1.49 to<br>6.02)              | 3.84<br>(1.45 to<br>5.98)              | 0.05<br>(0.02 to<br>0.08)        | 0.26<br>(0.09 to<br>0.42)        | 0.27<br>(0.10 to<br>0.42)        | 0.24<br>(0.08 to<br>0.39)         |
| Pyoderma                                          | 5.01<br>(2.39 to<br>7.23)              | 19.08<br>(9.30 to<br>27.92)            | 17.55<br>(8.71 to<br>25.39)            | 19.25<br>(9.47 to<br>28.27)            | 0.30<br>(0.15 to<br>0.45)        | 1.42<br>(0.70 to<br>2.16)        | 1.37<br>(0.67 to<br>2.05)        | 1.39<br>(0.67 to<br>2.13)         |

|                                      |                                                      |                                                      |                                                      |                                                        |                                                   |                                                   |                                                   |                                                   |
|--------------------------------------|------------------------------------------------------|------------------------------------------------------|------------------------------------------------------|--------------------------------------------------------|---------------------------------------------------|---------------------------------------------------|---------------------------------------------------|---------------------------------------------------|
|                                      | 3.13<br>(0.99 to<br>4.80)                            | 8.62<br>(2.41 to<br>14.24)                           | 7.26<br>(2.08 to<br>12.11)                           | 8.53<br>(2.40 to<br>14.13)                             | 0.25<br>(0.07 to<br>0.38)                         | 0.78<br>(0.21 to<br>1.32)                         | 0.69<br>(0.19 to<br>1.16)                         | 0.75<br>(0.20 to<br>1.26)                         |
| Decubitus ulcer                      |                                                      |                                                      |                                                      |                                                        |                                                   |                                                   |                                                   |                                                   |
|                                      | 0.34<br>(0.15 to<br>0.48)                            | 0.58<br>(0.26 to<br>0.85)                            | 0.50<br>(0.22 to<br>0.71)                            | 0.59<br>(0.25 to<br>0.86)                              | 0.01<br>(0.00 to<br>0.01)                         | 0.02<br>(0.01 to<br>0.03)                         | 0.02<br>(0.01 to<br>0.03)                         | 0.02<br>(0.01 to<br>0.03)                         |
| Other skin and subcutaneous diseases |                                                      |                                                      |                                                      |                                                        |                                                   |                                                   |                                                   |                                                   |
|                                      | 15.30<br>(7.48 to<br>27.51)                          | 7.72<br>(2.97 to<br>16.63)                           | 5.47<br>(2.13 to<br>11.61)                           | 8.84<br>(3.39 to<br>19.04)                             | 0.18<br>(0.09 to<br>0.32)                         | 0.09<br>(0.03 to<br>0.19)                         | 0.06<br>(0.02 to<br>0.13)                         | 0.10<br>(0.04 to<br>0.22)                         |
| Sudden infant death syndrome         |                                                      |                                                      |                                                      |                                                        |                                                   |                                                   |                                                   |                                                   |
| <b>Injuries</b>                      | <b>775.08</b><br><b>(686.92 to</b><br><b>878.58)</b> | <b>770.33</b><br><b>(633.55 to</b><br><b>996.19)</b> | <b>476.37</b><br><b>(382.03 to</b><br><b>679.21)</b> | <b>987.28</b><br><b>(821.57 to</b><br><b>1,241.30)</b> | <b>16.47</b><br><b>(14.47 to</b><br><b>19.17)</b> | <b>20.26</b><br><b>(16.74 to</b><br><b>25.33)</b> | <b>13.55</b><br><b>(10.99 to</b><br><b>18.01)</b> | <b>24.71</b><br><b>(20.67 to</b><br><b>30.77)</b> |
| <b>Transport injuries</b>            | <b>457.98</b><br><b>(404.85 to</b><br><b>527.83)</b> | <b>445.32</b><br><b>(370.47 to</b><br><b>553.32)</b> | <b>212.20</b><br><b>(173.86 to</b><br><b>269.04)</b> | <b>632.64</b><br><b>(527.60 to</b><br><b>782.92)</b>   | <b>9.66</b><br><b>(8.59 to</b><br><b>11.01)</b>   | <b>11.32</b><br><b>(9.58 to</b><br><b>13.68)</b>  | <b>5.97</b><br><b>(5.00 to</b><br><b>7.27)</b>    | <b>15.24</b><br><b>(12.89 to</b><br><b>18.52)</b> |
|                                      | 446.07<br>(394.99 to<br>512.51)                      | 428.70<br>(357.41 to<br>532.89)                      | 200.72<br>(164.15 to<br>255.08)                      | 613.66<br>(512.22 to<br>759.30)                        | 9.36<br>(8.31 to<br>10.66)                        | 10.75<br>(9.12 to<br>13.03)                       | 5.56<br>(4.65 to<br>6.76)                         | 14.62<br>(12.39 to<br>17.78)                      |
| Road injuries                        |                                                      |                                                      |                                                      |                                                        |                                                   |                                                   |                                                   |                                                   |
|                                      | 101.95<br>(78.57 to<br>137.10)                       | 89.34<br>(66.19 to<br>125.62)                        | 37.79<br>(27.58 to<br>53.32)                         | 123.96<br>(91.16 to<br>171.47)                         | 2.27<br>(1.77 to<br>3.06)                         | 2.58<br>(1.94 to<br>3.66)                         | 1.20<br>(0.88 to<br>1.68)                         | 3.42<br>(2.56 to<br>4.74)                         |
| Pedestrian road injuries             |                                                      |                                                      |                                                      |                                                        |                                                   |                                                   |                                                   |                                                   |

**Algeria**

| Cause                          | YLLs (in 1000s)                                      |                                                      |                                                      |                                                      | Deaths (in 1000s)                              |                                                |                                                |                                                |
|--------------------------------|------------------------------------------------------|------------------------------------------------------|------------------------------------------------------|------------------------------------------------------|------------------------------------------------|------------------------------------------------|------------------------------------------------|------------------------------------------------|
|                                | 2016                                                 | 2040 Forecast                                        | 2040 Better Scenario                                 | 2040 Worse Scenario                                  | 2016                                           | 2040 Forecast                                  | 2040 Better Scenario                           | 2040 Worse Scenario                            |
|                                |                                                      |                                                      |                                                      |                                                      |                                                |                                                |                                                |                                                |
| Cyclist road injuries          | 7.12<br>(5.08 to<br>10.60)                           | 7.53<br>(5.12 to<br>11.81)                           | 4.02<br>(2.71 to<br>6.42)                            | 10.45<br>(7.19 to<br>16.30)                          | 0.15<br>(0.10 to<br>0.21)                      | 0.18<br>(0.13 to<br>0.27)                      | 0.11<br>(0.08 to<br>0.17)                      | 0.24<br>(0.16 to<br>0.35)                      |
| Motorcyclist road injuries     | 25.35<br>(17.69 to<br>39.52)                         | 26.76<br>(17.01 to<br>44.96)                         | 16.80<br>(10.45 to<br>28.06)                         | 34.14<br>(21.92 to<br>57.04)                         | 0.45<br>(0.32 to<br>0.70)                      | 0.49<br>(0.32 to<br>0.81)                      | 0.32<br>(0.21 to<br>0.53)                      | 0.61<br>(0.40 to<br>1.01)                      |
| Motor vehicle road injuries    | 310.31<br>(261.95 to<br>362.74)                      | 303.60<br>(243.62 to<br>381.37)                      | 141.31<br>(112.21 to<br>181.86)                      | 443.05<br>(359.38 to<br>551.04)                      | 6.46<br>(5.44 to<br>7.59)                      | 7.45<br>(6.06 to<br>9.37)                      | 3.90<br>(3.14 to<br>4.96)                      | 10.29<br>(8.41 to<br>12.94)                    |
| Other road injuries            | 1.34<br>(0.89 to<br>2.02)                            | 1.49<br>(1.00 to<br>2.27)                            | 0.79<br>(0.52 to<br>1.18)                            | 2.06<br>(1.37 to<br>3.18)                            | 0.03<br>(0.02 to<br>0.05)                      | 0.05<br>(0.03 to<br>0.08)                      | 0.03<br>(0.02 to<br>0.05)                      | 0.06<br>(0.04 to<br>0.10)                      |
| Other transport injuries       | 11.91<br>(9.36 to<br>17.04)                          | 16.62<br>(12.52 to<br>24.00)                         | 11.47<br>(8.50 to<br>16.67)                          | 18.98<br>(14.52 to<br>27.64)                         | 0.30<br>(0.23 to<br>0.43)                      | 0.57<br>(0.41 to<br>0.80)                      | 0.41<br>(0.30 to<br>0.60)                      | 0.62<br>(0.46 to<br>0.90)                      |
| <b>Unintentional injuries</b>  | <b>220.82</b><br><b>(167.83 to</b><br><b>286.30)</b> | <b>196.13</b><br><b>(143.76 to</b><br><b>268.36)</b> | <b>155.70</b><br><b>(116.76 to</b><br><b>207.27)</b> | <b>216.92</b><br><b>(155.26 to</b><br><b>298.29)</b> | <b>4.84</b><br><b>(3.58 to</b><br><b>6.47)</b> | <b>6.05</b><br><b>(4.30 to</b><br><b>8.59)</b> | <b>5.11</b><br><b>(3.71 to</b><br><b>7.14)</b> | <b>6.42</b><br><b>(4.49 to</b><br><b>9.12)</b> |
| Falls                          | 46.93<br>(35.25 to<br>65.54)                         | 55.77<br>(40.71 to<br>79.88)                         | 47.44<br>(35.50 to<br>65.86)                         | 58.62<br>(42.20 to<br>85.17)                         | 1.34<br>(1.00 to<br>1.91)                      | 2.31<br>(1.65 to<br>3.29)                      | 2.08<br>(1.51 to<br>2.92)                      | 2.33<br>(1.65 to<br>3.39)                      |
| Drowning                       | 41.78<br>(32.46 to<br>50.99)                         | 29.81<br>(22.34 to<br>37.87)                         | 25.04<br>(17.63 to<br>33.87)                         | 33.66<br>(24.90 to<br>43.36)                         | 0.71<br>(0.55 to<br>0.85)                      | 0.61<br>(0.47 to<br>0.76)                      | 0.48<br>(0.37 to<br>0.59)                      | 0.67<br>(0.52 to<br>0.82)                      |
| Fire, heat, and hot substances | 30.64<br>(18.66 to<br>48.11)                         | 23.69<br>(13.59 to<br>39.12)                         | 17.12<br>(9.89 to<br>27.75)                          | 27.23<br>(15.52 to<br>44.68)                         | 0.69<br>(0.41 to<br>1.11)                      | 0.74<br>(0.41 to<br>1.27)                      | 0.56<br>(0.32 to<br>0.96)                      | 0.82<br>(0.45 to<br>1.38)                      |
| Poisonings                     | 14.68<br>(7.20 to<br>26.87)                          | 7.65<br>(3.80 to<br>14.09)                           | 4.99<br>(2.62 to<br>8.85)                            | 9.31<br>(4.56 to<br>16.91)                           | 0.27<br>(0.13 to<br>0.47)                      | 0.17<br>(0.09 to<br>0.31)                      | 0.12<br>(0.06 to<br>0.21)                      | 0.20<br>(0.10 to<br>0.37)                      |
| Exposure to mechanical forces  | 31.44<br>(22.49 to<br>43.59)                         | 25.70<br>(16.99 to<br>37.51)                         | 19.09<br>(13.49 to<br>26.97)                         | 29.32<br>(19.77 to<br>42.85)                         | 0.62<br>(0.42 to<br>0.85)                      | 0.63<br>(0.41 to<br>0.93)                      | 0.49<br>(0.33 to<br>0.69)                      | 0.70<br>(0.45 to<br>1.02)                      |
| Unintentional firearm injuries | 5.52<br>(3.59 to<br>8.88)                            | 3.98<br>(2.49 to<br>6.90)                            | 3.15<br>(1.99 to<br>5.41)                            | 4.53<br>(2.76 to<br>7.85)                            | 0.11<br>(0.07 to<br>0.18)                      | 0.10<br>(0.06 to<br>0.17)                      | 0.08<br>(0.05 to<br>0.14)                      | 0.11<br>(0.07 to<br>0.19)                      |
| Unintentional suffocation      | 6.14<br>(3.17 to<br>11.18)                           | 3.93<br>(1.94 to<br>7.71)                            | 2.90<br>(1.47 to<br>5.54)                            | 4.64<br>(2.29 to<br>9.27)                            | 0.08<br>(0.04 to<br>0.14)                      | 0.05<br>(0.03 to<br>0.10)                      | 0.04<br>(0.02 to<br>0.07)                      | 0.06<br>(0.03 to<br>0.12)                      |

|                                                 |                                                    |                                                    |                                                   |                                                     |                                                |                                                |                                                |                                                |
|-------------------------------------------------|----------------------------------------------------|----------------------------------------------------|---------------------------------------------------|-----------------------------------------------------|------------------------------------------------|------------------------------------------------|------------------------------------------------|------------------------------------------------|
| Other exposure to mechanical forces             | 19.78<br>(12.90 to<br>26.36)                       | 17.80<br>(11.01 to<br>25.01)                       | 13.04<br>(8.52 to<br>18.14)                       | 20.15<br>(12.62 to<br>28.28)                        | 0.43<br>(0.27 to<br>0.58)                      | 0.48<br>(0.29 to<br>0.68)                      | 0.36<br>(0.23 to<br>0.51)                      | 0.53<br>(0.32 to<br>0.75)                      |
| Adverse effects of medical treatment            | 22.42<br>(13.01 to<br>33.51)                       | 24.90<br>(13.75 to<br>39.10)                       | 21.41<br>(11.99 to<br>33.09)                      | 26.98<br>(14.88 to<br>43.03)                        | 0.58<br>(0.33 to<br>0.89)                      | 0.89<br>(0.48 to<br>1.42)                      | 0.80<br>(0.43 to<br>1.26)                      | 0.93<br>(0.49 to<br>1.49)                      |
| Animal contact                                  | 2.55<br>(1.47 to<br>3.65)                          | 2.86<br>(1.56 to<br>4.21)                          | 2.31<br>(1.28 to<br>3.37)                         | 3.26<br>(1.75 to<br>4.83)                           | 0.06<br>(0.03 to<br>0.08)                      | 0.09<br>(0.05 to<br>0.13)                      | 0.08<br>(0.04 to<br>0.11)                      | 0.10<br>(0.05 to<br>0.14)                      |
| Venomous animal contact                         | 1.10<br>(0.62 to<br>1.64)                          | 1.11<br>(0.58 to<br>1.77)                          | 0.92<br>(0.48 to<br>1.44)                         | 1.27<br>(0.66 to<br>2.06)                           | 0.02<br>(0.01 to<br>0.04)                      | 0.03<br>(0.02 to<br>0.05)                      | 0.03<br>(0.02 to<br>0.05)                      | 0.04<br>(0.02 to<br>0.06)                      |
| Non-venomous animal contact                     | 1.45<br>(0.77 to<br>2.19)                          | 1.76<br>(0.87 to<br>2.74)                          | 1.39<br>(0.69 to<br>2.15)                         | 1.99<br>(1.00 to<br>3.14)                           | 0.03<br>(0.02 to<br>0.05)                      | 0.06<br>(0.03 to<br>0.09)                      | 0.05<br>(0.02 to<br>0.08)                      | 0.06<br>(0.03 to<br>0.10)                      |
| Foreign body                                    | 17.34<br>(12.65 to<br>23.12)                       | 15.71<br>(11.38 to<br>21.49)                       | 14.07<br>(10.35 to<br>18.76)                      | 16.65<br>(11.82 to<br>23.22)                        | 0.30<br>(0.22 to<br>0.39)                      | 0.36<br>(0.26 to<br>0.47)                      | 0.34<br>(0.25 to<br>0.44)                      | 0.36<br>(0.26 to<br>0.48)                      |
| Pulmonary aspiration and foreign body in airway | 12.81<br>(8.91 to<br>17.24)                        | 11.69<br>(8.37 to<br>16.12)                        | 10.03<br>(7.38 to<br>13.35)                       | 12.37<br>(8.76 to<br>17.30)                         | 0.22<br>(0.16 to<br>0.28)                      | 0.27<br>(0.20 to<br>0.35)                      | 0.24<br>(0.18 to<br>0.32)                      | 0.27<br>(0.20 to<br>0.36)                      |
| Foreign body in other body part                 | 4.53<br>(2.39 to<br>6.91)                          | 4.02<br>(2.05 to<br>6.35)                          | 4.03<br>(2.10 to<br>6.23)                         | 4.28<br>(2.14 to<br>6.81)                           | 0.08<br>(0.04 to<br>0.13)                      | 0.09<br>(0.05 to<br>0.14)                      | 0.09<br>(0.05 to<br>0.15)                      | 0.09<br>(0.05 to<br>0.15)                      |
| Environmental heat and cold exposure            | 4.80<br>(2.45 to<br>8.36)                          | 4.51<br>(2.12 to<br>8.71)                          | 3.20<br>(1.56 to<br>5.91)                         | 5.37<br>(2.50 to<br>10.30)                          | 0.11<br>(0.06 to<br>0.20)                      | 0.13<br>(0.06 to<br>0.26)                      | 0.10<br>(0.05 to<br>0.18)                      | 0.15<br>(0.07 to<br>0.30)                      |
| Other unintentional injuries                    | 8.24<br>(5.72 to<br>13.27)                         | 5.53<br>(3.51 to<br>9.54)                          | 3.04<br>(1.91 to<br>5.10)                         | 6.53<br>(4.28 to<br>10.93)                          | 0.16<br>(0.11 to<br>0.26)                      | 0.13<br>(0.08 to<br>0.21)                      | 0.07<br>(0.05 to<br>0.12)                      | 0.15<br>(0.10 to<br>0.24)                      |
| <b>Self-harm and interpersonal violence</b>     | <b>92.83</b><br><b>(76.52 to</b><br><b>114.62)</b> | <b>96.22</b><br><b>(74.01 to</b><br><b>125.93)</b> | <b>76.30</b><br><b>(60.07 to</b><br><b>98.14)</b> | <b>104.75</b><br><b>(79.22 to</b><br><b>137.54)</b> | <b>1.91</b><br><b>(1.57 to</b><br><b>2.38)</b> | <b>2.24</b><br><b>(1.74 to</b><br><b>2.93)</b> | <b>1.81</b><br><b>(1.43 to</b><br><b>2.32)</b> | <b>2.40</b><br><b>(1.85 to</b><br><b>3.17)</b> |

**Algeria**

| Cause                                                                               | YLLs (in 1000s)                                |                                                   |                                                   |                                                   | Deaths (in 1000s)                              |                                                |                                                |                                                |
|-------------------------------------------------------------------------------------|------------------------------------------------|---------------------------------------------------|---------------------------------------------------|---------------------------------------------------|------------------------------------------------|------------------------------------------------|------------------------------------------------|------------------------------------------------|
|                                                                                     | 2016                                           | 2040 Forecast                                     | 2040 Better Scenario                              | 2040 Worse Scenario                               | 2016                                           | 2040 Forecast                                  | 2040 Better Scenario                           | 2040 Worse Scenario                            |
| Self-harm                                                                           | 67.75<br>(53.60 to<br>92.98)                   | 76.49<br>(56.56 to<br>105.13)                     | 61.80<br>(46.72 to<br>83.80)                      | 83.48<br>(61.98 to<br>115.90)                     | 1.44<br>(1.14 to<br>1.96)                      | 1.83<br>(1.38 to<br>2.51)                      | 1.51<br>(1.16 to<br>2.02)                      | 1.97<br>(1.46 to<br>2.74)                      |
| Self-harm by firearm                                                                | 3.63<br>(2.08 to<br>7.36)                      | 3.30<br>(1.79 to<br>6.65)                         | 2.43<br>(1.32 to<br>4.75)                         | 3.70<br>(2.01 to<br>7.37)                         | 0.08<br>(0.05 to<br>0.15)                      | 0.08<br>(0.05 to<br>0.17)                      | 0.06<br>(0.04 to<br>0.12)                      | 0.09<br>(0.05 to<br>0.18)                      |
| Self-harm by other specified means                                                  | 64.12<br>(50.67 to<br>87.48)                   | 73.19<br>(54.11 to<br>100.47)                     | 59.37<br>(45.05 to<br>79.94)                      | 79.78<br>(58.31 to<br>110.99)                     | 1.36<br>(1.08 to<br>1.84)                      | 1.75<br>(1.31 to<br>2.39)                      | 1.45<br>(1.12 to<br>1.93)                      | 1.88<br>(1.39 to<br>2.59)                      |
| Interpersonal violence                                                              | 25.08<br>(15.26 to<br>32.11)                   | 19.73<br>(11.52 to<br>26.24)                      | 14.50<br>(8.70 to<br>19.06)                       | 21.28<br>(12.52 to<br>28.29)                      | 0.47<br>(0.29 to<br>0.60)                      | 0.41<br>(0.25 to<br>0.52)                      | 0.30<br>(0.19 to<br>0.39)                      | 0.43<br>(0.27 to<br>0.56)                      |
| Physical violence by firearm                                                        | 10.21<br>(5.05 to<br>19.11)                    | 7.61<br>(3.53 to<br>14.67)                        | 5.19<br>(2.37 to<br>10.18)                        | 8.26<br>(3.80 to<br>15.98)                        | 0.19<br>(0.09 to<br>0.35)                      | 0.15<br>(0.07 to<br>0.29)                      | 0.10<br>(0.05 to<br>0.20)                      | 0.16<br>(0.08 to<br>0.31)                      |
| Physical violence by sharp object                                                   | 7.27<br>(3.18 to<br>11.41)                     | 6.19<br>(2.79 to<br>9.62)                         | 4.48<br>(2.15 to<br>6.84)                         | 6.57<br>(2.98 to<br>10.20)                        | 0.14<br>(0.06 to<br>0.21)                      | 0.13<br>(0.06 to<br>0.19)                      | 0.09<br>(0.05 to<br>0.14)                      | 0.13<br>(0.06 to<br>0.20)                      |
| Physical violence by other means                                                    | 7.60<br>(3.89 to<br>11.88)                     | 5.93<br>(2.96 to<br>9.44)                         | 4.83<br>(2.47 to<br>7.61)                         | 6.45<br>(3.19 to<br>10.23)                        | 0.14<br>(0.07 to<br>0.22)                      | 0.13<br>(0.07 to<br>0.20)                      | 0.11<br>(0.06 to<br>0.16)                      | 0.14<br>(0.07 to<br>0.21)                      |
| <b>Forces of nature, conflict and terrorism, and executions and police conflict</b> | <b>3.45</b><br><b>(1.00 to</b><br><b>6.01)</b> | <b>32.65</b><br><b>(0.00 to</b><br><b>201.64)</b> | <b>32.17</b><br><b>(0.00 to</b><br><b>198.97)</b> | <b>32.97</b><br><b>(0.00 to</b><br><b>204.43)</b> | <b>0.06</b><br><b>(0.02 to</b><br><b>0.11)</b> | <b>0.65</b><br><b>(0.00 to</b><br><b>3.96)</b> | <b>0.66</b><br><b>(0.00 to</b><br><b>3.98)</b> | <b>0.65</b><br><b>(0.00 to</b><br><b>3.96)</b> |
| Exposure to forces of nature                                                        | 0.00<br>(0.00 to<br>0.00)                      | 2.92<br>(0.00 to<br>61.56)                        | 2.88<br>(0.00 to<br>60.71)                        | 2.94<br>(0.00 to<br>62.16)                        | 0.00<br>(0.00 to<br>0.00)                      | 0.06<br>(0.00 to<br>1.37)                      | 0.07<br>(0.00 to<br>1.38)                      | 0.06<br>(0.00 to<br>1.36)                      |

| Conflict and terrorism                                            | 3.17<br>(0.71 to<br>5.74)                         | 26.80<br>(0.00 to<br>200.53)                       | 26.39<br>(0.00 to<br>197.43)                       | 27.08<br>(0.00 to<br>202.40)                       | 0.06<br>(0.01 to<br>0.10)                    | 0.53<br>(0.00 to<br>3.95)                      | 0.53<br>(0.00 to<br>3.97)                     | 0.53<br>(0.00 to<br>3.93)                      |
|-------------------------------------------------------------------|---------------------------------------------------|----------------------------------------------------|----------------------------------------------------|----------------------------------------------------|----------------------------------------------|------------------------------------------------|-----------------------------------------------|------------------------------------------------|
| Executions and police conflict                                    | 0.28<br>(0.24 to<br>0.32)                         | 2.93<br>(0.00 to<br>19.08)                         | 2.91<br>(0.00 to<br>18.91)                         | 2.95<br>(0.00 to<br>19.16)                         | 0.01<br>(0.00 to<br>0.01)                    | 0.06<br>(0.00 to<br>0.38)                      | 0.06<br>(0.00 to<br>0.38)                     | 0.06<br>(0.00 to<br>0.38)                      |
| <b>Bahrain</b>                                                    |                                                   |                                                    |                                                    |                                                    |                                              |                                                |                                               |                                                |
| Cause                                                             | YLLs (actual counts)                              |                                                    |                                                    |                                                    | Deaths (actual counts)                       |                                                |                                               |                                                |
|                                                                   | 2016                                              | 2040 Forecast                                      | 2040 Better Scenario                               | 2040 Worse Scenario                                | 2016                                         | 2040 Forecast                                  | 2040 Better Scenario                          | 2040 Worse Scenario                            |
| <b>All causes</b>                                                 | <b>105,472.30</b><br>(88,083.10 to<br>128,394.01) | <b>211,404.26</b><br>(141,171.28 to<br>317,304.51) | <b>156,302.39</b><br>(105,757.39 to<br>229,457.90) | <b>278,800.35</b><br>(185,388.79 to<br>420,231.85) | <b>3,549.46</b><br>(2,971.49 to<br>4,264.20) | <b>10,428.76</b><br>(7,563.04 to<br>14,753.17) | <b>8,122.28</b><br>(5,948.08 to<br>11,567.14) | <b>13,092.95</b><br>(9,446.84 to<br>18,275.44) |
| Communicable, maternal, neonatal, and nutritional diseases        | 9,910.72<br>(8,431.14 to<br>11,604.22)            | 11,842.72<br>(7,516.85 to<br>19,032.69)            | 8,704.99<br>(5,798.43 to<br>13,275.69)             | 15,760.93<br>(10,142.29 to<br>25,071.93)           | 210.29<br>(179.12 to<br>248.57)              | 436.62<br>(311.03 to<br>601.11)                | 352.59<br>(257.71 to<br>473.74)               | 540.00<br>(382.06 to<br>760.81)                |
| HIV/AIDS and tuberculosis                                         | 1,091.93<br>(968.58 to<br>1,268.53)               | 728.24<br>(519.95 to<br>1,041.23)                  | 498.77<br>(354.08 to<br>720.54)                    | 1,757.75<br>(1,365.37 to<br>2,264.41)              | 26.38<br>(23.31 to<br>30.43)                 | 24.23<br>(16.51 to<br>35.10)                   | 16.09<br>(11.25 to<br>22.62)                  | 50.65<br>(38.15 to<br>69.37)                   |
| Tuberculosis                                                      | 337.48<br>(263.24 to<br>433.27)                   | 360.89<br>(203.87 to<br>603.27)                    | 199.51<br>(113.50 to<br>330.11)                    | 589.24<br>(309.20 to<br>1,028.90)                  | 10.41<br>(8.28 to<br>13.13)                  | 15.72<br>(9.21 to<br>26.03)                    | 9.03<br>(5.40 to<br>14.48)                    | 24.37<br>(13.26 to<br>41.45)                   |
| HIV/AIDS                                                          | 754.45<br>(670.07 to<br>894.48)                   | 367.35<br>(246.72 to<br>595.91)                    | 299.26<br>(196.51 to<br>504.00)                    | 1,168.51<br>(913.03 to<br>1,491.08)                | 15.96<br>(14.25 to<br>18.86)                 | 8.51<br>(5.57 to<br>13.78)                     | 7.07<br>(4.41 to<br>11.99)                    | 26.29<br>(20.43 to<br>33.65)                   |
| Diarrhea, lower respiratory, and other common infectious diseases | 4,039.20<br>(3,271.52 to<br>4,981.93)             | 6,609.94<br>(4,242.03 to<br>10,384.12)             | 5,093.46<br>(3,356.38 to<br>7,652.14)              | 8,520.29<br>(5,232.70 to<br>14,233.56)             | 113.01<br>(89.95 to<br>139.38)               | 318.45<br>(218.48 to<br>442.27)                | 262.77<br>(183.62 to<br>359.77)               | 382.27<br>(254.21 to<br>555.94)                |
| Diarrheal diseases                                                | 276.18<br>(181.78 to<br>446.57)                   | 402.87<br>(121.03 to<br>1,067.25)                  | 549.41<br>(183.06 to<br>1,350.20)                  | 488.33<br>(134.67 to<br>1,396.84)                  | 8.95<br>(5.05 to<br>14.57)                   | 24.28<br>(6.98 to<br>65.25)                    | 34.85<br>(11.04 to<br>86.38)                  | 27.47<br>(7.15 to<br>80.15)                    |
| Intestinal infectious diseases                                    | 309.01<br>(69.37 to<br>475.65)                    | 190.58<br>(58.25 to<br>449.71)                     | 218.73<br>(69.75 to<br>489.99)                     | 201.21<br>(60.14 to<br>483.61)                     | 3.36<br>(1.08 to<br>7.81)                    | 3.32<br>(1.04 to<br>7.97)                      | 3.86<br>(1.24 to<br>8.87)                     | 3.44<br>(1.04 to<br>8.42)                      |
| Typhoid fever                                                     | 183.76<br>(60.67 to<br>429.13)                    | 164.82<br>(49.79 to<br>383.64)                     | 200.19<br>(64.28 to<br>450.62)                     | 170.91<br>(51.14 to<br>407.14)                     | 2.94<br>(0.97 to<br>6.74)                    | 2.85<br>(0.89 to<br>6.73)                      | 3.52<br>(1.13 to<br>8.01)                     | 2.90<br>(0.88 to<br>7.05)                      |
| Paratyphoid fever                                                 | 25.19<br>(7.04 to<br>64.17)                       | 25.72<br>(6.51 to<br>70.63)                        | 18.50<br>(4.84 to<br>48.39)                        | 30.25<br>(7.50 to<br>80.61)                        | 0.42<br>(0.12 to<br>1.09)                    | 0.47<br>(0.12 to<br>1.27)                      | 0.34<br>(0.09 to<br>0.87)                     | 0.54<br>(0.14 to<br>1.47)                      |
| Other intestinal infectious diseases                              | 0.06<br>(0.02 to<br>0.12)                         | 0.04<br>(0.01 to<br>0.10)                          | 0.04<br>(0.01 to<br>0.08)                          | 0.05<br>(0.02 to<br>0.12)                          | 0.00<br>(0.00 to<br>0.00)                    | 0.00<br>(0.00 to<br>0.00)                      | 0.00<br>(0.00 to<br>0.00)                     | 0.00<br>(0.00 to<br>0.00)                      |
| Lower respiratory infections                                      | 2,933.96<br>(2,232.73 to<br>3,600.80)             | 5,302.29<br>(3,182.23 to<br>8,699.96)              | 3,715.71<br>(2,266.30 to<br>5,832.24)              | 6,944.45<br>(4,040.69 to<br>12,100.69)             | 88.13<br>(66.95 to<br>109.02)                | 270.14<br>(180.74 to<br>384.71)                | 205.91<br>(138.51 to<br>290.66)               | 328.39<br>(214.66 to<br>484.95)                |
| Upper respiratory infections                                      | 1.92<br>(0.92 to<br>3.45)                         | 2.94<br>(1.08 to<br>6.89)                          | 1.74<br>(0.64 to<br>4.15)                          | 3.79<br>(1.35 to<br>8.60)                          | 0.05<br>(0.02 to<br>0.08)                    | 0.11<br>(0.04 to<br>0.25)                      | 0.07<br>(0.03 to<br>0.15)                     | 0.14<br>(0.05 to<br>0.30)                      |
| Otitis media                                                      | 0.60<br>(0.44 to<br>0.87)                         | 0.32<br>(0.19 to<br>0.53)                          | 0.33<br>(0.19 to<br>0.56)                          | 0.30<br>(0.18 to<br>0.49)                          | 0.02<br>(0.01 to<br>0.03)                    | 0.02<br>(0.01 to<br>0.03)                      | 0.02<br>(0.01 to<br>0.04)                     | 0.02<br>(0.01 to<br>0.03)                      |
| Meningitis                                                        | 296.33<br>(222.82 to<br>458.79)                   | 277.11<br>(174.87 to<br>474.95)                    | 200.35<br>(125.01 to<br>336.32)                    | 325.54<br>(206.07 to<br>549.29)                    | 6.17<br>(4.63 to<br>9.30)                    | 8.57<br>(6.03 to<br>12.86)                     | 6.39<br>(4.41 to<br>9.74)                     | 9.31<br>(6.64 to<br>14.39)                     |
| Pneumococcal meningitis                                           | 2.72<br>(1.70 to<br>4.94)                         | 2.93<br>(1.63 to<br>5.69)                          | 2.97<br>(1.61 to<br>5.77)                          | 2.95<br>(1.65 to<br>5.77)                          | 0.07<br>(0.04 to<br>0.12)                    | 0.11<br>(0.06 to<br>0.20)                      | 0.12<br>(0.06 to<br>0.21)                     | 0.11<br>(0.06 to<br>0.19)                      |
| H influenzae type B meningitis                                    | 23.88<br>(17.53 to<br>36.20)                      | 40.43<br>(19.86 to<br>78.75)                       | 38.02<br>(18.92 to<br>72.23)                       | 59.11<br>(24.39 to<br>125.01)                      | 0.49<br>(0.36 to<br>0.76)                    | 0.87<br>(0.54 to<br>1.42)                      | 0.87<br>(0.55 to<br>1.38)                     | 1.05<br>(0.60 to<br>1.90)                      |
| Meningococcal meningitis                                          | 76.28<br>(57.55 to<br>115.53)                     | 61.62<br>(39.33 to<br>99.07)                       | 43.32<br>(27.09 to<br>70.11)                       | 69.31<br>(44.63 to<br>114.50)                      | 1.64<br>(1.24 to<br>2.42)                    | 2.13<br>(1.50 to<br>3.24)                      | 1.57<br>(1.08 to<br>2.33)                     | 2.27<br>(1.62 to<br>3.41)                      |

|                                         |                                   |                                   |                                   |                                   |                                  |                                  |                                  |                                  |
|-----------------------------------------|-----------------------------------|-----------------------------------|-----------------------------------|-----------------------------------|----------------------------------|----------------------------------|----------------------------------|----------------------------------|
| Other meningitis                        | 193.45<br>(144.14 to<br>300.95)   | 172.14<br>(110.51 to<br>299.87)   | 116.04<br>(72.57 to<br>203.85)    | 194.16<br>(125.06 to<br>340.96)   | 3.98<br>(2.95 to<br>6.09)        | 5.46<br>(3.76 to<br>8.59)        | 3.84<br>(2.62 to<br>5.99)        | 5.89<br>(4.11 to<br>9.46)        |
| Encephalitis                            | 288.88<br>(198.78 to<br>475.96)   | 415.43<br>(262.01 to<br>681.43)   | 392.79<br>(250.20 to<br>638.31)   | 447.20<br>(275.95 to<br>748.93)   | 5.82<br>(4.21 to<br>9.06)        | 11.65<br>(8.27 to<br>16.86)      | 11.37<br>(8.11 to<br>16.28)      | 12.06<br>(8.47 to<br>17.80)      |
| Diphtheria                              | 0.51<br>(0.31 to<br>0.80)         | 0.17<br>(0.08 to<br>0.32)         | 0.16<br>(0.08 to<br>0.29)         | 0.45<br>(0.14 to<br>1.22)         | 0.01<br>(0.01 to<br>0.01)        | 0.00<br>(0.00 to<br>0.01)        | 0.00<br>(0.00 to<br>0.01)        | 0.01<br>(0.00 to<br>0.02)        |
| Whooping cough                          | 10.44<br>(0.99 to<br>35.81)       | 8.63<br>(0.54 to<br>33.51)        | 6.67<br>(0.40 to<br>25.78)        | 94.93<br>(6.61 to<br>340.07)      | 0.12<br>(0.01 to<br>0.43)        | 0.10<br>(0.01 to<br>0.40)        | 0.08<br>(0.00 to<br>0.31)        | 1.12<br>(0.08 to<br>4.03)        |
| Tetanus                                 | 8.08<br>(6.68 to<br>9.93)         | 1.08<br>(0.71 to<br>1.73)         | 1.05<br>(0.69 to<br>1.68)         | 2.19<br>(1.00 to<br>5.30)         | 0.15<br>(0.12 to<br>0.18)        | 0.02<br>(0.01 to<br>0.04)        | 0.02<br>(0.01 to<br>0.03)        | 0.04<br>(0.02 to<br>0.07)        |
| Measles                                 | 3.53<br>(0.88 to<br>9.98)         | 0.95<br>(0.06 to<br>5.58)         | 0.75<br>(0.05 to<br>4.10)         | 2.43<br>(0.12 to<br>16.39)        | 0.04<br>(0.01 to<br>0.12)        | 0.01<br>(0.00 to<br>0.07)        | 0.01<br>(0.00 to<br>0.05)        | 0.03<br>(0.00 to<br>0.19)        |
| <b>Bahrain</b>                          |                                   |                                   |                                   |                                   |                                  |                                  |                                  |                                  |
| Cause                                   | YLLs (actual counts)              |                                   |                                   |                                   | Deaths (actual counts)           |                                  |                                  |                                  |
|                                         | 2016                              | 2040 Forecast                     | 2040 Better Scenario              | 2040 Worse Scenario               | 2016                             | 2040 Forecast                    | 2040 Better Scenario             | 2040 Worse Scenario              |
| Varicella and herpes zoster             | 9.75<br>(6.09 to<br>15.17)        | 7.58<br>(3.51 to<br>15.11)        | 5.76<br>(2.72 to<br>11.37)        | 9.45<br>(4.27 to<br>19.90)        | 0.18<br>(0.13 to<br>0.25)        | 0.22<br>(0.12 to<br>0.38)        | 0.19<br>(0.10 to<br>0.33)        | 0.25<br>(0.14 to<br>0.44)        |
| Neglected tropical diseases and malaria | <b>8.69</b><br>(7.18 to<br>10.58) | <b>8.86</b><br>(6.54 to<br>12.04) | <b>9.06</b><br>(6.59 to<br>12.40) | <b>9.98</b><br>(7.32 to<br>13.64) | <b>0.17</b><br>(0.14 to<br>0.21) | <b>0.20</b><br>(0.15 to<br>0.27) | <b>0.21</b><br>(0.15 to<br>0.28) | <b>0.22</b><br>(0.16 to<br>0.30) |
| Malaria                                 | 0.00<br>(0.00 to<br>0.00)         | 0.00<br>(0.00 to<br>0.00)         | 0.00<br>(0.00 to<br>0.00)         | 0.00<br>(0.00 to<br>0.00)         | 0.00<br>(0.00 to<br>0.00)        | 0.00<br>(0.00 to<br>0.00)        | 0.00<br>(0.00 to<br>0.00)        | 0.00<br>(0.00 to<br>0.00)        |
| Chagas disease                          | 0.00<br>(0.00 to<br>0.00)         | 0.00<br>(0.00 to<br>0.00)         | 0.00<br>(0.00 to<br>0.00)         | 0.00<br>(0.00 to<br>0.00)         | 0.00<br>(0.00 to<br>0.00)        | 0.00<br>(0.00 to<br>0.00)        | 0.00<br>(0.00 to<br>0.00)        | 0.00<br>(0.00 to<br>0.00)        |
| Leishmaniasis                           | 0.00<br>(0.00 to<br>0.00)         | 0.00<br>(0.00 to<br>0.00)         | 0.00<br>(0.00 to<br>0.00)         | 0.00<br>(0.00 to<br>0.00)         | 0.00<br>(0.00 to<br>0.00)        | 0.00<br>(0.00 to<br>0.00)        | 0.00<br>(0.00 to<br>0.00)        | 0.00<br>(0.00 to<br>0.00)        |
| African trypanosomiasis                 | 0.00<br>(0.00 to<br>0.00)         | 0.00<br>(0.00 to<br>0.00)         | 0.00<br>(0.00 to<br>0.00)         | 0.00<br>(0.00 to<br>0.00)         | 0.00<br>(0.00 to<br>0.00)        | 0.00<br>(0.00 to<br>0.00)        | 0.00<br>(0.00 to<br>0.00)        | 0.00<br>(0.00 to<br>0.00)        |
| Schistosomiasis                         | 0.00<br>(0.00 to<br>0.00)         | 0.00<br>(0.00 to<br>0.00)         | 0.00<br>(0.00 to<br>0.00)         | 0.00<br>(0.00 to<br>0.00)         | 0.00<br>(0.00 to<br>0.00)        | 0.00<br>(0.00 to<br>0.00)        | 0.00<br>(0.00 to<br>0.00)        | 0.00<br>(0.00 to<br>0.00)        |
| Cysticercosis                           | 0.00<br>(0.00 to<br>0.00)         | 0.00<br>(0.00 to<br>0.00)         | 0.00<br>(0.00 to<br>0.00)         | 0.00<br>(0.00 to<br>0.00)         | 0.00<br>(0.00 to<br>0.00)        | 0.00<br>(0.00 to<br>0.00)        | 0.00<br>(0.00 to<br>0.00)        | 0.00<br>(0.00 to<br>0.00)        |
| Cystic echinococcosis                   | 0.00<br>(0.00 to<br>0.00)         | 0.00<br>(0.00 to<br>0.00)         | 0.00<br>(0.00 to<br>0.00)         | 0.00<br>(0.00 to<br>0.00)         | 0.00<br>(0.00 to<br>0.00)        | 0.00<br>(0.00 to<br>0.00)        | 0.00<br>(0.00 to<br>0.00)        | 0.00<br>(0.00 to<br>0.00)        |
| Dengue                                  | 0.00<br>(0.00 to<br>0.00)         | 0.00<br>(0.00 to<br>0.00)         | 0.00<br>(0.00 to<br>0.00)         | 0.00<br>(0.00 to<br>0.00)         | 0.00<br>(0.00 to<br>0.00)        | 0.00<br>(0.00 to<br>0.00)        | 0.00<br>(0.00 to<br>0.00)        | 0.00<br>(0.00 to<br>0.00)        |
| Yellow fever                            | 0.00<br>(0.00 to<br>0.00)         | 0.00<br>(0.00 to<br>0.00)         | 0.00<br>(0.00 to<br>0.00)         | 0.00<br>(0.00 to<br>0.00)         | 0.00<br>(0.00 to<br>0.00)        | 0.00<br>(0.00 to<br>0.00)        | 0.00<br>(0.00 to<br>0.00)        | 0.00<br>(0.00 to<br>0.00)        |
| Rabies                                  | 0.89<br>(0.28 to<br>1.31)         | 0.85<br>(0.19 to<br>1.42)         | 0.74<br>(0.16 to<br>1.25)         | 1.11<br>(0.28 to<br>1.84)         | 0.03<br>(0.01 to<br>0.04)        | 0.03<br>(0.01 to<br>0.06)        | 0.03<br>(0.01 to<br>0.06)        | 0.04<br>(0.01 to<br>0.07)        |
| Intestinal nematode infections          | 0.00<br>(0.00 to<br>0.00)         | 0.00<br>(0.00 to<br>0.00)         | 0.00<br>(0.00 to<br>0.00)         | 0.00<br>(0.00 to<br>0.00)         | 0.00<br>(0.00 to<br>0.00)        | 0.00<br>(0.00 to<br>0.00)        | 0.00<br>(0.00 to<br>0.00)        | 0.00<br>(0.00 to<br>0.00)        |
| Other neglected tropical diseases       | 7.80<br>(6.49 to<br>9.46)         | 8.01<br>(5.95 to<br>10.90)        | 8.32<br>(6.10 to<br>11.51)        | 8.87<br>(6.58 to<br>12.15)        | 0.14<br>(0.12 to<br>0.17)        | 0.17<br>(0.13 to<br>0.23)        | 0.18<br>(0.13 to<br>0.25)        | 0.18<br>(0.14 to<br>0.25)        |

|                                                          |                                       |                                     |                                     |                                       |                              |                              |                             |                               |
|----------------------------------------------------------|---------------------------------------|-------------------------------------|-------------------------------------|---------------------------------------|------------------------------|------------------------------|-----------------------------|-------------------------------|
|                                                          | 217.27<br>(149.02 to<br>306.71)       | 190.35<br>(93.65 to<br>335.50)      | 148.21<br>(72.86 to<br>256.14)      | 239.94<br>(119.40 to<br>414.30)       | 4.08<br>(2.78 to<br>5.75)    | 3.66<br>(1.82 to<br>6.56)    | 2.86<br>(1.42 to<br>5.01)   | 4.61<br>(2.27 to<br>8.10)     |
| <b>Maternal disorders</b>                                |                                       |                                     |                                     |                                       |                              |                              |                             |                               |
| Maternal hemorrhage                                      | 24.57<br>(14.65 to<br>39.71)          | 20.28<br>(8.82 to<br>39.27)         | 16.21<br>(6.96 to<br>30.84)         | 25.40<br>(10.59 to<br>48.04)          | 0.46<br>(0.27 to<br>0.74)    | 0.39<br>(0.17 to<br>0.76)    | 0.31<br>(0.13 to<br>0.61)   | 0.49<br>(0.20 to<br>0.94)     |
| Maternal sepsis and other maternal infections            | 4.19<br>(2.37 to<br>6.70)             | 3.14<br>(1.32 to<br>6.02)           | 2.47<br>(1.03 to<br>4.84)           | 3.97<br>(1.66 to<br>7.60)             | 0.08<br>(0.04 to<br>0.13)    | 0.06<br>(0.03 to<br>0.11)    | 0.05<br>(0.02 to<br>0.09)   | 0.08<br>(0.03 to<br>0.15)     |
| Maternal hypertensive disorders                          | 15.53<br>(9.38 to<br>24.79)           | 12.62<br>(5.74 to<br>23.82)         | 9.86<br>(4.48 to<br>18.61)          | 15.96<br>(7.26 to<br>30.43)           | 0.29<br>(0.17 to<br>0.46)    | 0.24<br>(0.11 to<br>0.45)    | 0.19<br>(0.08 to<br>0.35)   | 0.30<br>(0.14 to<br>0.58)     |
| Maternal obstructed labor and uterine rupture            | 10.97<br>(6.60 to<br>18.18)           | 8.73<br>(3.64 to<br>17.11)          | 6.59<br>(2.76 to<br>12.96)          | 11.24<br>(4.80 to<br>22.28)           | 0.21<br>(0.12 to<br>0.34)    | 0.17<br>(0.07 to<br>0.34)    | 0.13<br>(0.05 to<br>0.25)   | 0.22<br>(0.09 to<br>0.43)     |
| Maternal abortion, miscarriage, and ectopic pregnancy    | 126.24<br>(82.70 to<br>185.21)        | 114.11<br>(54.06 to<br>212.47)      | 87.91<br>(41.53 to<br>160.21)       | 143.95<br>(68.77 to<br>267.22)        | 2.39<br>(1.56 to<br>3.52)    | 2.22<br>(1.03 to<br>4.11)    | 1.71<br>(0.81 to<br>3.12)   | 2.79<br>(1.33 to<br>5.25)     |
| Indirect maternal deaths                                 | 11.86<br>(6.97 to<br>19.23)           | 10.64<br>(4.54 to<br>20.15)         | 8.21<br>(3.53 to<br>15.58)          | 13.51<br>(5.90 to<br>26.06)           | 0.22<br>(0.13 to<br>0.35)    | 0.20<br>(0.08 to<br>0.37)    | 0.15<br>(0.07 to<br>0.29)   | 0.25<br>(0.11 to<br>0.49)     |
| Late maternal deaths                                     | 2.62<br>(1.32 to<br>4.75)             | 1.90<br>(0.78 to<br>3.87)           | 1.47<br>(0.61 to<br>3.00)           | 2.42<br>(1.00 to<br>4.91)             | 0.05<br>(0.02 to<br>0.09)    | 0.04<br>(0.01 to<br>0.07)    | 0.03<br>(0.01 to<br>0.06)   | 0.05<br>(0.02 to<br>0.09)     |
| Maternal deaths aggravated by HIV/AIDS                   | 0.02<br>(0.01 to<br>0.05)             | 0.09<br>(0.02 to<br>0.24)           | 0.07<br>(0.02 to<br>0.20)           | 0.11<br>(0.03 to<br>0.30)             | 0.00<br>(0.00 to<br>0.00)    | 0.00<br>(0.00 to<br>0.00)    | 0.00<br>(0.00 to<br>0.00)   | 0.00<br>(0.00 to<br>0.01)     |
| Other maternal disorders                                 | 21.26<br>(12.91 to<br>34.24)          | 18.84<br>(8.68 to<br>35.58)         | 15.43<br>(7.19 to<br>29.00)         | 23.38<br>(10.83 to<br>44.32)          | 0.40<br>(0.24 to<br>0.64)    | 0.36<br>(0.16 to<br>0.68)    | 0.29<br>(0.13 to<br>0.56)   | 0.44<br>(0.20 to<br>0.85)     |
| <b>Bahrain</b>                                           |                                       |                                     |                                     |                                       |                              |                              |                             |                               |
| Cause                                                    | YLLs (actual counts)                  |                                     |                                     |                                       | Deaths (actual counts)       |                              |                             |                               |
|                                                          | 2016                                  | 2040 Forecast                       | 2040 Better Scenario                | 2040 Worse Scenario                   | 2016                         | 2040 Forecast                | 2040 Better Scenario        | 2040 Worse Scenario           |
| <b>Neonatal disorders</b>                                | 3752.66<br>(2,927.86 to<br>4,690.02)  | 3059.92<br>(990.34 to<br>7,289.22)  | 1,923.61<br>(644.00 to<br>4,480.38) | 3,857.83<br>(1,292.68 to<br>9,005.83) | 43.43<br>(33.89 to<br>54.29) | 35.41<br>(11.48 to<br>84.37) | 22.27<br>(7.45 to<br>51.85) | 44.64<br>(14.96 to<br>104.23) |
| Neonatal preterm birth                                   | 2,268.86<br>(1,736.56 to<br>2,880.81) | 1,859.26<br>(566.18 to<br>4,308.12) | 1,006.14<br>(308.73 to<br>2,329.33) | 2,330.91<br>(729.79 to<br>5,357.93)   | 26.25<br>(20.09 to<br>33.33) | 21.50<br>(6.56 to<br>49.79)  | 11.64<br>(3.57 to<br>26.92) | 26.96<br>(8.44 to<br>61.94)   |
| Neonatal encephalopathy due to birth asphyxia and trauma | 532.19<br>(394.89 to<br>705.63)       | 373.37<br>(111.10 to<br>905.89)     | 247.98<br>(76.23 to<br>583.97)      | 481.75<br>(146.26 to<br>1,127.04)     | 6.17<br>(4.58 to<br>8.17)    | 4.33<br>(1.29 to<br>10.49)   | 2.88<br>(0.89 to<br>6.79)   | 5.59<br>(1.69 to<br>13.05)    |
| Neonatal sepsis and other neonatal infections            | 398.47<br>(238.82 to<br>789.88)       | 358.59<br>(100.29 to<br>979.08)     | 260.47<br>(74.96 to<br>711.24)      | 456.30<br>(128.40 to<br>1,251.70)     | 4.61<br>(2.76 to<br>9.13)    | 4.15<br>(1.16 to<br>11.32)   | 3.01<br>(0.87 to<br>8.23)   | 5.28<br>(1.48 to<br>14.47)    |
| Hemolytic disease and other neonatal jaundice            | 30.76<br>(17.97 to<br>47.76)          | 13.32<br>(3.71 to<br>36.86)         | 9.45<br>(2.60 to<br>25.32)          | 17.64<br>(4.80 to<br>47.37)           | 0.36<br>(0.21 to<br>0.55)    | 0.15<br>(0.04 to<br>0.43)    | 0.11<br>(0.03 to<br>0.29)   | 0.20<br>(0.06 to<br>0.55)     |
| Other neonatal disorders                                 | 522.39<br>(363.09 to<br>715.02)       | 455.38<br>(131.88 to<br>1,121.95)   | 399.56<br>(119.05 to<br>966.38)     | 571.22<br>(166.77 to<br>1,404.31)     | 6.05<br>(4.20 to<br>8.28)    | 5.27<br>(1.53 to<br>12.99)   | 4.63<br>(1.38 to<br>11.21)  | 6.61<br>(1.93 to<br>16.25)    |
| <b>Nutritional deficiencies</b>                          | 152.54<br>(120.88 to<br>189.99)       | 206.27<br>(144.31 to<br>287.82)     | 214.08<br>(150.10 to<br>296.28)     | 216.13<br>(149.25 to<br>304.86)       | 4.64<br>(3.89 to<br>5.52)    | 11.86<br>(8.47 to<br>15.57)  | 13.32<br>(9.57 to<br>17.54) | 11.52<br>(8.32 to<br>15.13)   |
| Protein-energy malnutrition                              | 105.32<br>(80.04 to<br>135.49)        | 129.67<br>(88.02 to<br>189.37)      | 146.11<br>(100.42 to<br>207.24)     | 132.99<br>(89.17 to<br>200.31)        | 3.18<br>(2.66 to<br>3.80)    | 7.83<br>(5.37 to<br>10.54)   | 9.53<br>(6.64 to<br>12.74)  | 7.42<br>(5.01 to<br>10.20)    |
| Iodine deficiency                                        | 2.34<br>(0.16 to<br>7.26)             | 8.96<br>(0.31 to<br>26.59)          | 8.50<br>(0.25 to<br>26.57)          | 9.76<br>(0.37 to<br>28.56)            | 0.06<br>(0.00 to<br>0.19)    | 0.50<br>(0.01 to<br>1.85)    | 0.50<br>(0.01 to<br>1.97)   | 0.51<br>(0.01 to<br>1.87)     |
| Dietary iron deficiency                                  | 5.75<br>(4.43 to<br>7.32)             | 6.61<br>(4.07 to<br>9.88)           | 6.68<br>(4.09 to<br>10.07)          | 7.05<br>(4.32 to<br>10.57)            | 0.11<br>(0.08 to<br>0.14)    | 0.14<br>(0.09 to<br>0.22)    | 0.15<br>(0.09 to<br>0.22)   | 0.15<br>(0.09 to<br>0.22)     |



|                                                                         |                                                               |                                                                  |                                                                 |                                                                  |                                                            |                                                             |                                                             |                                                              |
|-------------------------------------------------------------------------|---------------------------------------------------------------|------------------------------------------------------------------|-----------------------------------------------------------------|------------------------------------------------------------------|------------------------------------------------------------|-------------------------------------------------------------|-------------------------------------------------------------|--------------------------------------------------------------|
| Other nutritional deficiencies                                          | 39.13<br>(28.76 to<br>50.18)                                  | 61.03<br>(40.46 to<br>86.31)                                     | 52.80<br>(35.05 to<br>74.48)                                    | 66.33<br>(43.63 to<br>94.87)                                     | 1.29<br>(1.02 to<br>1.60)                                  | 3.39<br>(2.32 to<br>4.76)                                   | 3.14<br>(2.15 to<br>4.45)                                   | 3.44<br>(2.31 to<br>4.89)                                    |
| <b>Other communicable, maternal, neonatal, and nutritional diseases</b> | <b>648.43</b><br><b>(502.63 to</b><br><b>836.82)</b>          | <b>1,039.14</b><br><b>(712.63 to</b><br><b>1,487.04)</b>         | <b>817.80</b><br><b>(565.79 to</b><br><b>1,165.14)</b>          | <b>1,159.03</b><br><b>(804.60 to</b><br><b>1,641.78)</b>         | <b>18.59</b><br><b>(14.41 to</b><br><b>23.87)</b>          | <b>42.81</b><br><b>(30.95 to</b><br><b>58.02)</b>           | <b>35.06</b><br><b>(25.20 to</b><br><b>48.02)</b>           | <b>46.08</b><br><b>(33.72 to</b><br><b>61.47)</b>            |
| Sexually transmitted infections excluding HIV                           | 35.14<br>(23.23 to<br>54.92)                                  | 18.38<br>(11.30 to<br>28.84)                                     | 14.55<br>(8.87 to<br>22.41)                                     | 20.47<br>(12.50 to<br>33.01)                                     | 0.78<br>(0.57 to<br>1.08)                                  | 0.64<br>(0.37 to<br>0.88)                                   | 0.54<br>(0.30 to<br>0.74)                                   | 0.67<br>(0.39 to<br>0.93)                                    |
| Syphilis                                                                | 24.86<br>(13.70 to<br>43.99)                                  | 10.03<br>(5.49 to<br>19.32)                                      | 7.02<br>(3.85 to<br>13.42)                                      | 11.61<br>(6.26 to<br>22.68)                                      | 0.49<br>(0.33 to<br>0.74)                                  | 0.31<br>(0.19 to<br>0.47)                                   | 0.23<br>(0.14 to<br>0.34)                                   | 0.34<br>(0.21 to<br>0.51)                                    |
| Chlamydial infection                                                    | 1.78<br>(1.20 to<br>2.53)                                     | 1.53<br>(0.89 to<br>2.27)                                        | 1.41<br>(0.82 to<br>2.10)                                       | 1.63<br>(0.94 to<br>2.43)                                        | 0.05<br>(0.03 to<br>0.07)                                  | 0.06<br>(0.03 to<br>0.09)                                   | 0.06<br>(0.03 to<br>0.09)                                   | 0.06<br>(0.03 to<br>0.09)                                    |
| Gonococcal infection                                                    | 5.58<br>(3.91 to<br>7.70)                                     | 4.58<br>(2.81 to<br>6.80)                                        | 4.14<br>(2.45 to<br>6.20)                                       | 4.84<br>(2.92 to<br>7.22)                                        | 0.16<br>(0.10 to<br>0.21)                                  | 0.19<br>(0.09 to<br>0.27)                                   | 0.18<br>(0.08 to<br>0.26)                                   | 0.19<br>(0.10 to<br>0.28)                                    |
| Other sexually transmitted infections                                   | 2.92<br>(2.05 to<br>4.01)                                     | 2.23<br>(1.34 to<br>3.38)                                        | 1.98<br>(1.18 to<br>3.07)                                       | 2.39<br>(1.43 to<br>3.64)                                        | 0.08<br>(0.05 to<br>0.10)                                  | 0.08<br>(0.04 to<br>0.11)                                   | 0.07<br>(0.04 to<br>0.11)                                   | 0.08<br>(0.04 to<br>0.12)                                    |
| Acute hepatitis                                                         | 441.96<br>(324.35 to<br>602.71)                               | 708.86<br>(467.01 to<br>1,062.09)                                | 507.18<br>(334.76 to<br>755.40)                                 | 802.09<br>(535.88 to<br>1,188.67)                                | 13.30<br>(10.00 to<br>17.80)                               | 28.49<br>(20.04 to<br>40.88)                                | 20.89<br>(14.58 to<br>29.66)                                | 31.44<br>(22.52 to<br>43.69)                                 |
| Acute hepatitis A                                                       | 9.66<br>(3.57 to<br>17.29)                                    | 10.51<br>(3.40 to<br>23.62)                                      | 8.21<br>(2.65 to<br>18.59)                                      | 11.79<br>(3.92 to<br>26.20)                                      | 0.18<br>(0.08 to<br>0.30)                                  | 0.31<br>(0.11 to<br>0.89)                                   | 0.31<br>(0.09 to<br>0.73)                                   | 0.40<br>(0.12 to<br>0.92)                                    |
| Acute hepatitis B                                                       | 387.15<br>(280.68 to<br>540.53)                               | 618.63<br>(396.43 to<br>944.44)                                  | 439.86<br>(280.88 to<br>675.12)                                 | 703.58<br>(460.80 to<br>1,061.74)                                | 11.68<br>(8.60 to<br>16.03)                                | 24.10<br>(16.24 to<br>34.90)                                | 17.48<br>(11.49 to<br>25.51)                                | 26.85<br>(18.66 to<br>38.00)                                 |
| Acute hepatitis C                                                       | 9.26<br>(5.85 to<br>14.77)                                    | 18.73<br>(10.93 to<br>31.24)                                     | 13.70<br>(8.11 to<br>23.14)                                     | 20.31<br>(12.25 to<br>33.85)                                     | 0.32<br>(0.20 to<br>0.50)                                  | 0.82<br>(0.50 to<br>1.30)                                   | 0.61<br>(0.36 to<br>0.99)                                   | 0.87<br>(0.53 to<br>1.41)                                    |
| Acute hepatitis E                                                       | 35.89<br>(23.65 to<br>53.87)                                  | 60.98<br>(32.67 to<br>107.10)                                    | 45.41<br>(24.68 to<br>78.00)                                    | 66.41<br>(36.72 to<br>112.97)                                    | 1.12<br>(0.70 to<br>1.74)                                  | 3.19<br>(1.72 to<br>5.46)                                   | 2.49<br>(1.33 to<br>4.33)                                   | 3.32<br>(1.80 to<br>5.72)                                    |
| Other unspecified infectious diseases                                   | 171.32<br>(134.63 to<br>215.38)                               | 311.91<br>(219.03 to<br>439.25)                                  | 296.06<br>(206.93 to<br>413.46)                                 | 336.47<br>(233.95 to<br>473.96)                                  | 4.51<br>(3.47 to<br>6.21)                                  | 13.68<br>(9.53 to<br>22.21)                                 | 13.63<br>(9.49 to<br>21.98)                                 | 13.97<br>(9.85 to<br>22.26)                                  |
| <b>Non-communicable diseases</b>                                        | <b>76,650.33</b><br><b>(63,869.19 to</b><br><b>93,288.37)</b> | <b>178,908.23</b><br><b>(118,477.75 to</b><br><b>281,005.04)</b> | <b>133,969.09</b><br><b>(89,075.85 to</b><br><b>203,448.29)</b> | <b>235,817.52</b><br><b>(152,199.22 to</b><br><b>369,732.61)</b> | <b>2,952.11</b><br><b>(2,465.71 to</b><br><b>3,531.30)</b> | <b>9,455.43</b><br><b>(6,709.98 to</b><br><b>13,525.23)</b> | <b>7,401.61</b><br><b>(5,289.28 to</b><br><b>10,744.65)</b> | <b>11,872.44</b><br><b>(8,417.88 to</b><br><b>17,018.69)</b> |

**Bahrain**

| Cause                      | YLLs (actual counts)                                          |                                                               |                                                               |                                                               | Deaths (actual counts)                               |                                                            |                                                            |                                                            |
|----------------------------|---------------------------------------------------------------|---------------------------------------------------------------|---------------------------------------------------------------|---------------------------------------------------------------|------------------------------------------------------|------------------------------------------------------------|------------------------------------------------------------|------------------------------------------------------------|
|                            | 2016                                                          | 2040 Forecast                                                 | 2040 Better Scenario                                          | 2040 Worse Scenario                                           | 2016                                                 | 2040 Forecast                                              | 2040 Better Scenario                                       | 2040 Worse Scenario                                        |
| <b>Neoplasms</b>           | <b>16,690.88</b><br><b>(13,582.84 to</b><br><b>20,420.53)</b> | <b>35,158.53</b><br><b>(23,897.25 to</b><br><b>51,378.01)</b> | <b>29,933.31</b><br><b>(20,444.88 to</b><br><b>43,107.39)</b> | <b>41,704.40</b><br><b>(27,696.20 to</b><br><b>62,153.46)</b> | <b>571.99</b><br><b>(471.30 to</b><br><b>690.94)</b> | <b>1,604.04</b><br><b>(1,163.10 to</b><br><b>2,188.33)</b> | <b>1,398.80</b><br><b>(1,015.02 to</b><br><b>1,907.77)</b> | <b>1,859.99</b><br><b>(1,323.77 to</b><br><b>2,622.35)</b> |
| Lip and oral cavity cancer | 232.78<br>(179.96 to<br>300.20)                               | 404.23<br>(234.50 to<br>715.27)                               | 312.95<br>(185.33 to<br>543.94)                               | 637.26<br>(332.20 to<br>1,202.23)                             | 7.95<br>(6.25 to<br>10.01)                           | 17.51<br>(10.52 to<br>29.61)                               | 13.86<br>(8.57 to<br>22.75)                                | 26.52<br>(14.45 to<br>49.46)                               |
| Nasopharynx cancer         | 153.54<br>(115.72 to<br>207.58)                               | 243.21<br>(126.13 to<br>469.31)                               | 172.25<br>(91.06 to<br>322.34)                                | 402.27<br>(186.09 to<br>866.54)                               | 4.29<br>(3.28 to<br>5.75)                            | 8.22<br>(4.46 to<br>15.54)                                 | 5.86<br>(3.29 to<br>10.57)                                 | 13.25<br>(6.57 to<br>26.29)                                |
| Other pharynx cancer       | 99.78<br>(78.13 to<br>128.61)                                 | 163.09<br>(101.86 to<br>258.97)                               | 163.90<br>(102.29 to<br>261.45)                               | 193.70<br>(112.17 to<br>322.89)                               | 3.35<br>(2.66 to<br>4.20)                            | 7.22<br>(4.70 to<br>10.86)                                 | 7.47<br>(4.86 to<br>11.26)                                 | 8.22<br>(4.87 to<br>13.45)                                 |
| Esophageal cancer          | 270.14<br>(212.59 to<br>342.91)                               | 587.92<br>(335.91 to<br>1,021.23)                             | 503.83<br>(298.18 to<br>830.02)                               | 813.92<br>(440.35 to<br>1,526.51)                             | 10.70<br>(8.53 to<br>13.46)                          | 29.22<br>(17.37 to<br>47.52)                               | 25.63<br>(15.70 to<br>40.33)                               | 39.38<br>(22.28 to<br>68.64)                               |
| Stomach cancer             | 770.73<br>(621.81 to<br>958.02)                               | 1,395.25<br>(921.30 to<br>2,104.32)                           | 1,061.58<br>(716.93 to<br>1,566.92)                           | 1,535.90<br>(1,014.23 to<br>2,299.42)                         | 29.87<br>(24.48 to<br>36.66)                         | 70.22<br>(49.61 to<br>100.56)                              | 54.60<br>(39.68 to<br>75.31)                               | 75.52<br>(53.46 to<br>105.96)                              |

|                                      |                                       |                                       |                                       |                                        |                               |                                 |                                |                                 |
|--------------------------------------|---------------------------------------|---------------------------------------|---------------------------------------|----------------------------------------|-------------------------------|---------------------------------|--------------------------------|---------------------------------|
| Colon and rectum cancer              | 1,498.46<br>(1,187.45 to<br>1,916.48) | 3,699.66<br>(2,167.51 to<br>5,990.11) | 2,999.37<br>(1,766.76 to<br>4,931.57) | 4,004.10<br>(2,312.97 to<br>6,853.95)  | 54.05<br>(43.39 to<br>67.67)  | 173.64<br>(108.51 to<br>285.38) | 148.39<br>(91.18 to<br>244.44) | 186.78<br>(114.33 to<br>313.13) |
| Liver cancer                         | 662.37<br>(523.41 to<br>842.10)       | 1,788.27<br>(1,075.26 to<br>2,959.25) | 1,767.94<br>(1,073.82 to<br>2,913.90) | 2,169.29<br>(1,220.84 to<br>3,762.80)  | 25.24<br>(20.18 to<br>31.65)  | 87.22<br>(55.19 to<br>137.84)   | 88.59<br>(56.31 to<br>137.67)  | 102.44<br>(61.44 to<br>166.13)  |
| Liver cancer due to hepatitis B      | 266.39<br>(187.61 to<br>362.43)       | 634.70<br>(347.94 to<br>1,150.56)     | 623.92<br>(347.22 to<br>1,115.20)     | 766.01<br>(396.23 to<br>1,405.65)      | 9.02<br>(6.37 to<br>12.38)    | 27.01<br>(15.27 to<br>46.09)    | 27.15<br>(15.50 to<br>46.58)   | 31.70<br>(17.04 to<br>56.27)    |
| Liver cancer due to hepatitis C      | 186.40<br>(133.74 to<br>254.23)       | 575.03<br>(334.66 to<br>968.80)       | 574.59<br>(338.11 to<br>957.94)       | 672.85<br>(373.87 to<br>1,175.62)      | 8.27<br>(6.09 to<br>11.06)    | 31.94<br>(19.27 to<br>50.51)    | 32.87<br>(20.00 to<br>51.52)   | 36.12<br>(21.07 to<br>58.98)    |
| Liver cancer due to alcohol use      | 57.47<br>(35.63 to<br>90.29)          | 166.85<br>(81.30 to<br>322.60)        | 161.43<br>(79.17 to<br>309.47)        | 219.63<br>(101.75 to<br>434.85)        | 2.31<br>(1.43 to<br>3.51)     | 8.18<br>(4.04 to<br>15.30)      | 8.11<br>(4.09 to<br>14.90)     | 10.39<br>(4.81 to<br>20.06)     |
| Liver cancer due to other causes     | 152.11<br>(100.57 to<br>230.68)       | 411.69<br>(200.85 to<br>766.66)       | 408.00<br>(198.86 to<br>763.26)       | 510.81<br>(231.25 to<br>1,009.93)      | 5.65<br>(3.78 to<br>8.16)     | 20.09<br>(9.84 to<br>36.97)     | 20.46<br>(9.86 to<br>37.36)    | 24.23<br>(11.09 to<br>46.60)    |
| Gallbladder and biliary tract cancer | 123.04<br>(95.57 to<br>160.31)        | 205.71<br>(149.65 to<br>289.15)       | 202.17<br>(143.80 to<br>291.64)       | 198.03<br>(146.58 to<br>273.21)        | 4.78<br>(3.76 to<br>6.18)     | 10.32<br>(7.97 to<br>13.50)     | 10.42<br>(7.94 to<br>14.06)    | 9.66<br>(7.64 to<br>12.46)      |
| Pancreatic cancer                    | 831.63<br>(662.28 to<br>1,046.84)     | 2,028.39<br>(1,252.15 to<br>3,244.82) | 2,010.60<br>(1,234.44 to<br>3,189.89) | 2,145.80<br>(1,294.05 to<br>3,480.12)  | 31.88<br>(25.75 to<br>39.80)  | 96.47<br>(62.57 to<br>147.90)   | 97.55<br>(63.27 to<br>150.81)  | 100.21<br>(65.51 to<br>154.92)  |
| Larynx cancer                        | 184.43<br>(139.10 to<br>245.97)       | 339.71<br>(159.77 to<br>683.32)       | 218.27<br>(107.12 to<br>422.51)       | 559.05<br>(247.77 to<br>1,137.68)      | 6.86<br>(5.28 to<br>8.94)     | 15.94<br>(7.69 to<br>31.82)     | 10.39<br>(5.18 to<br>19.24)    | 25.68<br>(11.50 to<br>51.70)    |
| Tracheal, bronchus, and lung cancer  | 2,233.70<br>(1,767.21 to<br>2,839.37) | 5,308.04<br>(2,741.61 to<br>9,791.34) | 3,397.98<br>(1,847.60 to<br>6,134.88) | 8,763.98<br>(4,291.48 to<br>16,711.82) | 88.09<br>(70.63 to<br>110.92) | 257.48<br>(140.90 to<br>454.09) | 168.44<br>(95.13 to<br>294.50) | 417.74<br>(215.98 to<br>748.38) |
| Malignant skin melanoma              | 48.88<br>(37.00 to<br>70.03)          | 92.86<br>(63.81 to<br>140.07)         | 109.85<br>(74.48 to<br>170.81)        | 84.04<br>(58.86 to<br>126.53)          | 1.51<br>(1.16 to<br>2.07)     | 3.83<br>(2.88 to<br>5.32)       | 4.68<br>(3.44 to<br>6.48)      | 3.35<br>(2.55 to<br>4.60)       |
| Non-melanoma skin cancer             | 60.01<br>(46.60 to<br>78.66)          | 156.37<br>(114.05 to<br>211.75)       | 130.58<br>(93.90 to<br>178.41)        | 160.29<br>(118.85 to<br>209.41)        | 2.40<br>(1.91 to<br>3.04)     | 8.67<br>(6.84 to<br>10.67)      | 7.53<br>(5.89 to<br>9.43)      | 8.54<br>(6.86 to<br>10.29)      |
| Breast cancer                        | 2,352.80<br>(1,666.68 to<br>3,171.50) | 3,907.49<br>(2,269.46 to<br>6,318.71) | 3,244.15<br>(1,901.79 to<br>5,394.15) | 4,447.76<br>(2,555.35 to<br>7,403.90)  | 71.77<br>(51.63 to<br>95.07)  | 148.11<br>(89.79 to<br>236.36)  | 125.57<br>(76.44 to<br>205.25) | 164.84<br>(98.45 to<br>270.59)  |
| Cervical cancer                      | 231.89<br>(162.45 to<br>321.68)       | 352.07<br>(211.23 to<br>553.91)       | 278.64<br>(168.18 to<br>438.33)       | 391.06<br>(235.78 to<br>636.06)        | 7.64<br>(5.44 to<br>10.36)    | 14.68<br>(9.39 to<br>21.72)     | 11.90<br>(7.65 to<br>17.75)    | 15.91<br>(10.36 to<br>23.84)    |
| Uterine cancer                       | 170.55<br>(120.88 to<br>229.81)       | 390.70<br>(254.82 to<br>571.46)       | 344.26<br>(221.79 to<br>527.80)       | 412.77<br>(272.80 to<br>601.71)        | 6.23<br>(4.47 to<br>8.20)     | 18.02<br>(12.61 to<br>25.02)    | 16.26<br>(11.17 to<br>23.29)   | 18.59<br>(13.23 to<br>25.60)    |
| Ovarian cancer                       | 435.53<br>(307.74 to<br>588.79)       | 915.07<br>(524.24 to<br>1,494.03)     | 826.38<br>(473.85 to<br>1,344.32)     | 955.79<br>(539.87 to<br>1,607.90)      | 15.22<br>(11.05 to<br>20.07)  | 41.80<br>(26.06 to<br>66.65)    | 38.74<br>(23.82 to<br>60.98)   | 42.53<br>(26.60 to<br>68.21)    |
| Prostate cancer                      | 405.33<br>(286.79 to<br>580.55)       | 1,557.13<br>(1,085.16 to<br>2,183.39) | 1,442.52<br>(983.99 to<br>2,066.43)   | 1,491.74<br>(1,062.66 to<br>2,068.72)  | 23.04<br>(16.61 to<br>32.76)  | 106.43<br>(79.42 to<br>144.79)  | 101.63<br>(73.84 to<br>138.51) | 98.95<br>(74.48 to<br>137.34)   |
| Testicular cancer                    | 32.67<br>(22.68 to<br>46.27)          | 37.22<br>(20.32 to<br>64.53)          | 31.39<br>(17.10 to<br>54.60)          | 39.10<br>(21.72 to<br>66.72)           | 0.69<br>(0.49 to<br>0.97)     | 1.03<br>(0.65 to<br>1.61)       | 0.89<br>(0.57 to<br>1.40)      | 1.05<br>(0.67 to<br>1.63)       |

**Bahrain**

| Cause          | YLLs (actual counts)            |                                     |                                     |                                     | Deaths (actual counts)       |                              |                              |                               |
|----------------|---------------------------------|-------------------------------------|-------------------------------------|-------------------------------------|------------------------------|------------------------------|------------------------------|-------------------------------|
|                | 2016                            | 2040 Forecast                       | 2040 Better Scenario                | 2040 Worse Scenario                 | 2016                         | 2040 Forecast                | 2040 Better Scenario         | 2040 Worse Scenario           |
| Kidney cancer  | 388.42<br>(309.77 to<br>496.42) | 922.19<br>(600.96 to<br>1,405.54)   | 922.19<br>(606.01 to<br>1,392.44)   | 917.33<br>(597.63 to<br>1,408.10)   | 12.98<br>(10.42 to<br>16.58) | 40.38<br>(28.00 to<br>58.97) | 41.39<br>(28.70 to<br>59.99) | 39.36<br>(27.30 to<br>58.10)  |
| Bladder cancer | 468.07<br>(364.91 to<br>605.39) | 1,163.83<br>(692.64 to<br>1,925.29) | 1,040.09<br>(622.31 to<br>1,721.56) | 1,333.41<br>(774.62 to<br>2,293.78) | 19.71<br>(15.60 to<br>25.13) | 63.21<br>(40.21 to<br>99.04) | 58.06<br>(37.15 to<br>89.77) | 70.95<br>(43.80 to<br>115.08) |

|                                 |                                              |                                              |                                              |                                               |                                       |                                           |                                         |                                           |
|---------------------------------|----------------------------------------------|----------------------------------------------|----------------------------------------------|-----------------------------------------------|---------------------------------------|-------------------------------------------|-----------------------------------------|-------------------------------------------|
| Brain and nervous system cancer | 711.52<br>(557.40 to 904.72)                 | 1,414.35<br>(991.24 to 1,998.21)             | 1,316.68<br>(919.40 to 1,878.17)             | 1,397.92<br>(995.77 to 1,944.28)              | 18.82<br>(14.83 to 23.77)             | 50.94<br>(37.14 to 67.78)                 | 48.69<br>(34.93 to 66.43)               | 48.91<br>(36.56 to 64.58)                 |
| Thyroid cancer                  | 118.54<br>(92.23 to 148.22)                  | 255.11<br>(154.97 to 394.39)                 | 217.67<br>(133.33 to 337.97)                 | 295.29<br>(179.66 to 461.95)                  | 4.43<br>(3.48 to 5.48)                | 12.41<br>(8.08 to 18.43)                  | 10.86<br>(7.15 to 15.99)                | 13.89<br>(8.96 to 20.54)                  |
| Mesothelioma                    | 109.60<br>(78.13 to 147.46)                  | 191.05<br>(121.18 to 285.64)                 | 197.50<br>(123.87 to 302.14)                 | 184.31<br>(117.52 to 271.84)                  | 3.59<br>(2.57 to 4.76)                | 8.09<br>(4.95 to 11.01)                   | 8.56<br>(5.14 to 12.03)                 | 7.61<br>(4.81 to 10.15)                   |
| Hodgkin lymphoma                | 256.19<br>(178.47 to 426.06)                 | 352.15<br>(209.38 to 619.42)                 | 270.19<br>(161.63 to 465.37)                 | 392.99<br>(237.76 to 691.31)                  | 6.42<br>(4.56 to 10.49)               | 11.72<br>(7.61 to 18.85)                  | 9.18<br>(5.97 to 14.58)                 | 12.78<br>(8.54 to 20.55)                  |
| Non-Hodgkin lymphoma            | 842.30<br>(671.11 to 1,064.38)               | 1,601.53<br>(1,074.38 to 2,411.89)           | 1,414.88<br>(947.33 to 2,112.87)             | 1,679.17<br>(1,119.96 to 2,507.52)            | 24.06<br>(19.21 to 30.21)             | 63.26<br>(44.70 to 87.88)                 | 57.49<br>(40.19 to 81.21)               | 64.23<br>(45.40 to 90.16)                 |
| Multiple myeloma                | 319.74<br>(231.17 to 408.62)                 | 777.50<br>(505.21 to 1,121.06)               | 725.01<br>(471.80 to 1,075.40)               | 797.38<br>(539.11 to 1,143.09)                | 11.44<br>(8.66 to 14.47)              | 35.62<br>(24.99 to 48.54)                 | 34.03<br>(23.60 to 46.93)               | 35.51<br>(24.49 to 48.71)                 |
| Leukemia                        | 1,396.76<br>(1,098.40 to 1,778.26)           | 2,526.14<br>(1,631.28 to 3,751.99)           | 2,185.85<br>(1,406.85 to 3,261.65)           | 2,875.68<br>(1,829.96 to 4,401.42)            | 37.79<br>(29.92 to 48.18)             | 100.11<br>(68.85 to 141.61)               | 88.45<br>(60.11 to 124.99)              | 110.88<br>(74.71 to 159.94)               |
| Acute lymphoid leukemia         | 238.92<br>(163.13 to 328.61)                 | 296.22<br>(171.26 to 472.18)                 | 252.83<br>(143.60 to 403.57)                 | 333.43<br>(193.53 to 534.30)                  | 4.71<br>(3.37 to 6.36)                | 7.61<br>(4.70 to 11.46)                   | 6.60<br>(4.07 to 9.84)                  | 8.45<br>(5.15 to 13.07)                   |
| Chronic lymphoid leukemia       | 40.43<br>(30.49 to 52.47)                    | 85.95<br>(55.37 to 126.47)                   | 79.65<br>(51.16 to 117.48)                   | 94.81<br>(60.72 to 141.87)                    | 1.45<br>(1.12 to 1.85)                | 4.12<br>(2.80 to 5.76)                    | 3.93<br>(2.66 to 5.52)                  | 4.39<br>(2.91 to 6.25)                    |
| Acute myeloid leukemia          | 363.77<br>(272.71 to 508.50)                 | 674.34<br>(408.53 to 1,087.25)               | 640.37<br>(389.27 to 1,028.86)               | 733.13<br>(433.12 to 1,159.15)                | 8.89<br>(6.59 to 12.37)               | 22.28<br>(13.97 to 34.15)                 | 21.65<br>(13.66 to 32.94)               | 23.59<br>(14.60 to 36.24)                 |
| Chronic myeloid leukemia        | 87.62<br>(54.30 to 121.43)                   | 121.41<br>(62.85 to 191.75)                  | 86.05<br>(45.14 to 136.77)                   | 144.74<br>(76.01 to 229.73)                   | 2.73<br>(1.68 to 3.65)                | 5.27<br>(2.92 to 7.85)                    | 3.83<br>(2.10 to 5.62)                  | 6.06<br>(3.38 to 8.90)                    |
| Other leukemia                  | 666.02<br>(503.49 to 882.92)                 | 1,248.21<br>(848.79 to 2,027.43)             | 1,126.96<br>(697.07 to 1,708.51)             | 1,569.57<br>(966.27 to 2,391.18)              | 20.01<br>(15.36 to 26.40)             | 60.83<br>(41.10 to 86.41)                 | 52.44<br>(35.42 to 73.67)               | 68.39<br>(45.28 to 97.87)                 |
| Other neoplasms                 | 1,281.67<br>(1,019.70 to 1,618.84)           | 2,473.58<br>(1,804.19 to 3,387.37)           | 2,424.63<br>(1,750.62 to 3,390.61)           | 2,425.05<br>(1,805.58 to 3,244.19)            | 37.20<br>(29.96 to 46.43)             | 102.28<br>(79.35 to 129.63)               | 103.68<br>(78.99 to 134.02)             | 96.71<br>(76.39 to 120.54)                |
| <b>Cardiovascular diseases</b>  | <b>23,274.05</b><br>(18,931.76 to 29,007.47) | <b>50,595.70</b><br>(25,644.72 to 98,539.97) | <b>28,095.17</b><br>(15,319.57 to 54,443.41) | <b>84,160.61</b><br>(41,305.20 to 167,258.19) | <b>997.78</b><br>(830.40 to 1,203.06) | <b>2,781.53</b><br>(1,522.09 to 5,078.18) | <b>1,689.31</b><br>(993.91 to 3,001.82) | <b>4,247.32</b><br>(2,315.66 to 7,686.53) |
| Rheumatic heart disease         | 303.48<br>(242.97 to 377.77)                 | 289.94<br>(181.30 to 460.90)                 | 223.08<br>(138.92 to 350.28)                 | 326.80<br>(206.15 to 516.02)                  | 9.25<br>(7.46 to 11.43)               | 13.39<br>(9.07 to 19.89)                  | 10.73<br>(7.24 to 15.49)                | 14.51<br>(9.92 to 21.01)                  |
| Ischemic heart disease          | 16,653.20<br>(13,394.09 to 20,864.38)        | 36,618.67<br>(16,257.62 to 81,323.56)        | 18,640.69<br>(8,861.95 to 40,971.14)         | 64,650.22<br>(27,941.78 to 144,539.17)        | 724.81<br>(598.50 to 880.33)          | 1,976.19<br>(967.21 to 4,159.76)          | 1,105.61<br>(557.99 to 2,338.43)        | 3,203.75<br>(1,539.33 to 6,547.12)        |
| Stroke                          | 3,236.54<br>(2,615.51 to 4,003.34)           | 6,107.12<br>(3,020.84 to 12,807.14)          | 3,349.33<br>(1,747.30 to 7,402.23)           | 10,406.76<br>(5,058.55 to 20,092.26)          | 138.90<br>(113.66 to 168.86)          | 356.10<br>(186.34 to 839.24)              | 215.75<br>(114.95 to 562.08)            | 547.01<br>(285.82 to 1,168.95)            |
| Ischemic stroke                 | 1,350.99<br>(1,088.39 to 1,672.73)           | 2,827.90<br>(1,223.47 to 8,411.84)           | 1,684.73<br>(733.45 to 5,228.40)             | 4,355.10<br>(1,835.46 to 12,264.13)           | 72.37<br>(59.11 to 87.59)             | 195.32<br>(85.19 to 641.20)               | 126.68<br>(54.61 to 410.96)             | 275.89<br>(119.96 to 845.50)              |
| Intracerebral hemorrhage        | 1,885.55<br>(1,513.87 to 2,350.21)           | 3,279.22<br>(1,584.88 to 6,524.04)           | 1,664.62<br>(868.26 to 3,506.72)             | 6,051.65<br>(2,738.91 to 12,393.93)           | 66.53<br>(54.00 to 81.97)             | 160.78<br>(81.45 to 319.16)               | 89.07<br>(49.15 to 166.45)              | 271.12<br>(135.16 to 538.90)              |
| Hypertensive heart disease      | 546.72<br>(424.67 to 719.69)                 | 1,561.83<br>(800.15 to 3,284.97)             | 1,193.78<br>(685.96 to 2,184.79)             | 2,045.90<br>(996.65 to 4,396.39)              | 28.60<br>(22.08 to 36.00)             | 104.23<br>(54.87 to 234.65)               | 83.31<br>(48.34 to 158.07)              | 130.32<br>(65.57 to 308.55)               |
| Cardiomyopathy and myocarditis  | 764.79<br>(582.92 to 1,067.39)               | 1,501.58<br>(901.11 to 2,376.06)             | 1,088.70<br>(662.22 to 1,736.40)             | 1,631.31<br>(980.41 to 2,577.57)              | 24.07<br>(18.70 to 32.18)             | 69.20<br>(44.89 to 103.45)                | 52.13<br>(33.82 to 76.41)               | 72.16<br>(47.13 to 105.54)                |
| Myocarditis                     | 55.46<br>(37.83 to 95.33)                    | 84.85<br>(54.34 to 139.31)                   | 81.40<br>(52.17 to 131.97)                   | 86.50<br>(55.15 to 143.65)                    | 1.41<br>(1.03 to 2.15)                | 3.39<br>(2.44 to 4.74)                    | 3.43<br>(2.41 to 4.73)                  | 3.28<br>(2.35 to 4.62)                    |

| Bahrain                                                       |                                                  |                                                  |                                                  |                                                   |                                           |                                            |                                            |                                            |
|---------------------------------------------------------------|--------------------------------------------------|--------------------------------------------------|--------------------------------------------------|---------------------------------------------------|-------------------------------------------|--------------------------------------------|--------------------------------------------|--------------------------------------------|
| Cause                                                         | YLLs (actual counts)                             |                                                  |                                                  |                                                   | Deaths (actual counts)                    |                                            |                                            |                                            |
|                                                               | 2016                                             | 2040 Forecast                                    | 2040 Better Scenario                             | 2040 Worse Scenario                               | 2016                                      | 2040 Forecast                              | 2040 Better Scenario                       | 2040 Worse Scenario                        |
| Alcoholic cardiomyopathy                                      | 43.03<br>(28.87 to 79.75)                        | 106.91<br>(65.17 to 207.44)                      | 104.94<br>(62.81 to 198.92)                      | 111.39<br>(69.84 to 211.35)                       | 1.51<br>(1.06 to 2.69)                    | 5.00<br>(3.28 to 9.04)                     | 5.06<br>(3.28 to 9.09)                     | 5.01<br>(3.38 to 8.66)                     |
| Other cardiomyopathy                                          | 666.30<br>(501.92 to 923.14)                     | 1,309.81<br>(769.85 to 2,104.85)                 | 902.35<br>(527.10 to 1,450.88)                   | 1,433.43<br>(830.67 to 2,306.71)                  | 21.15<br>(16.37 to 28.38)                 | 60.81<br>(38.27 to 91.99)                  | 43.65<br>(27.47 to 66.01)                  | 63.87<br>(39.88 to 95.28)                  |
| Atrial fibrillation and flutter                               | 112.59<br>(84.61 to 143.13)                      | 415.75<br>(294.61 to 570.62)                     | 387.35<br>(280.97 to 520.01)                     | 424.71<br>(302.09 to 586.14)                      | 9.04<br>(6.85 to 11.67)                   | 36.76<br>(26.01 to 49.78)                  | 35.82<br>(25.90 to 47.39)                  | 35.71<br>(24.83 to 48.75)                  |
| Aortic aneurysm                                               | 1500.01<br>(116.28 to 196.60)                    | 315.78<br>(204.18 to 481.15)                     | 265.41<br>(177.26 to 399.41)                     | 340.17<br>(221.46 to 518.11)                      | 5.77<br>(4.56 to 7.26)                    | 16.08<br>(11.55 to 22.27)                  | 14.15<br>(10.31 to 19.23)                  | 16.48<br>(11.89 to 22.72)                  |
| Peripheral artery disease                                     | 142.53<br>(89.43 to 195.39)                      | 520.09<br>(327.70 to 767.99)                     | 497.40<br>(318.12 to 738.55)                     | 585.19<br>(355.24 to 884.59)                      | 7.82<br>(5.83 to 10.43)                   | 35.81<br>(24.28 to 51.37)                  | 35.77<br>(24.61 to 51.72)                  | 37.64<br>(25.22 to 53.89)                  |
| Endocarditis                                                  | 320.21<br>(250.14 to 420.85)                     | 645.50<br>(409.52 to 1,035.45)                   | 597.13<br>(382.01 to 925.59)                     | 673.91<br>(427.07 to 1,068.19)                    | 10.22<br>(8.05 to 13.10)                  | 30.17<br>(20.26 to 42.90)                  | 29.16<br>(19.79 to 41.43)                  | 30.10<br>(20.37 to 42.98)                  |
| Other cardiovascular and circulatory diseases                 | 1,043.99<br>(819.22 to 1,390.93)                 | 2,619.43<br>(1,645.24 to 3,989.38)               | 1,852.29<br>(1,201.61 to 2,769.37)               | 3,075.64<br>(1,947.47 to 4,700.20)                | 39.28<br>(31.18 to 52.11)                 | 143.60<br>(97.09 to 206.87)                | 106.88<br>(73.26 to 149.97)                | 159.65<br>(108.32 to 227.63)               |
| <b>Chronic respiratory diseases</b>                           | <b>2,639.13</b><br><b>(2,132.08 to 3,200.13)</b> | <b>5,911.07</b><br><b>(3,728.51 to 9,686.35)</b> | <b>4,579.07</b><br><b>(2,988.19 to 7,033.79)</b> | <b>8,234.52</b><br><b>(5,014.97 to 14,171.03)</b> | <b>121.66</b><br><b>(99.06 to 146.01)</b> | <b>349.59</b><br><b>(231.21 to 530.82)</b> | <b>277.66</b><br><b>(190.04 to 397.49)</b> | <b>475.46</b><br><b>(300.64 to 742.57)</b> |
| Chronic obstructive pulmonary disease                         | 1,580.34<br>(1,257.00 to 1,946.34)               | 3,929.84<br>(2,122.97 to 7,078.59)               | 2,564.87<br>(1,375.31 to 4,506.89)               | 6,072.50<br>(3,231.92 to 11,022.67)               | 80.17<br>(64.95 to 96.25)                 | 243.73<br>(141.28 to 412.12)               | 167.15<br>(98.48 to 269.74)                | 363.78<br>(202.40 to 623.41)               |
| Pneumoconiosis                                                | 31.30<br>(25.38 to 46.35)                        | 58.29<br>(41.63 to 78.60)                        | 62.54<br>(42.99 to 86.15)                        | 56.26<br>(41.38 to 73.81)                         | 1.32<br>(0.99 to 1.74)                    | 3.39<br>(2.59 to 4.29)                     | 3.81<br>(2.81 to 4.94)                     | 3.15<br>(2.44 to 3.92)                     |
| Silicosis                                                     | 2.53<br>(1.56 to 3.88)                           | 2.72<br>(1.59 to 4.56)                           | 1.98<br>(1.12 to 3.31)                           | 3.04<br>(1.81 to 4.92)                            | 0.09<br>(0.06 to 0.14)                    | 0.15<br>(0.09 to 0.25)                     | 0.12<br>(0.07 to 0.20)                     | 0.17<br>(0.10 to 0.26)                     |
| Asbestosis                                                    | 21.35<br>(14.57 to 29.73)                        | 39.89<br>(26.04 to 58.30)                        | 46.33<br>(29.97 to 68.38)                        | 36.64<br>(24.49 to 52.45)                         | 0.87<br>(0.59 to 1.19)                    | 2.30<br>(1.58 to 3.14)                     | 2.77<br>(1.90 to 3.77)                     | 2.05<br>(1.40 to 2.77)                     |
| Coal workers pneumoconiosis                                   | 0.71<br>(0.45 to 1.10)                           | 1.64<br>(0.89 to 2.81)                           | 1.40<br>(0.69 to 2.46)                           | 1.88<br>(1.02 to 3.15)                            | 0.03<br>(0.02 to 0.05)                    | 0.10<br>(0.06 to 0.17)                     | 0.09<br>(0.05 to 0.16)                     | 0.11<br>(0.06 to 0.19)                     |
| Other pneumoconiosis                                          | 9.71<br>(6.72 to 14.14)                          | 14.05<br>(8.92 to 21.63)                         | 12.83<br>(7.88 to 20.23)                         | 14.71<br>(9.31 to 22.44)                          | 0.33<br>(0.23 to 0.48)                    | 0.83<br>(0.54 to 1.28)                     | 0.83<br>(0.52 to 1.33)                     | 0.83<br>(0.54 to 1.28)                     |
| Asthma                                                        | 476.70<br>(373.52 to 599.90)                     | 640.61<br>(349.35 to 1,067.54)                   | 398.87<br>(216.48 to 669.55)                     | 918.63<br>(500.39 to 1,566.77)                    | 19.96<br>(15.69 to 25.00)                 | 36.70<br>(21.16 to 59.28)                  | 23.87<br>(13.63 to 39.12)                  | 49.93<br>(28.35 to 82.96)                  |
| Interstitial lung disease and pulmonary sarcoidosis           | 397.48<br>(274.50 to 521.09)                     | 981.66<br>(690.93 to 1,333.53)                   | 1,259.40<br>(883.29 to 1,757.95)                 | 867.39<br>(618.32 to 1,161.09)                    | 15.37<br>(11.62 to 20.04)                 | 51.70<br>(39.42 to 66.02)                  | 68.53<br>(51.70 to 87.77)                  | 44.19<br>(33.94 to 55.95)                  |
| Other chronic respiratory diseases                            | 150.31<br>(103.26 to 254.24)                     | 300.68<br>(189.62 to 492.71)                     | 293.40<br>(185.44 to 474.05)                     | 319.74<br>(204.58 to 534.20)                      | 4.64<br>(3.38 to 7.11)                    | 14.06<br>(8.45 to 20.50)                   | 14.30<br>(8.53 to 20.85)                   | 14.41<br>(8.69 to 21.33)                   |
| <b>Cirrhosis and other chronic liver diseases</b>             | <b>2,015.86</b><br><b>(1,555.31 to 2,710.87)</b> | <b>4,417.00</b><br><b>(3,131.38 to 6,330.78)</b> | <b>3,840.49</b><br><b>(2,649.72 to 5,543.88)</b> | <b>4,575.26</b><br><b>(3,263.37 to 6,431.04)</b>  | <b>72.45</b><br><b>(57.29 to 94.01)</b>   | <b>216.02</b><br><b>(166.22 to 278.72)</b> | <b>193.77</b><br><b>(148.70 to 256.33)</b> | <b>216.45</b><br><b>(170.41 to 276.20)</b> |
| Cirrhosis and other chronic liver diseases due to hepatitis B | 691.94<br>(494.48 to 1,000.41)                   | 1,575.77<br>(1,040.02 to 2,353.27)               | 1,376.54<br>(908.41 to 2,090.65)                 | 1,612.94<br>(1,082.22 to 2,406.23)                | 25.19<br>(18.32 to 34.71)                 | 76.53<br>(54.43 to 105.12)                 | 68.82<br>(47.69 to 95.28)                  | 75.96<br>(54.23 to 103.67)                 |
| Cirrhosis and other chronic liver diseases due to hepatitis C | 718.08<br>(488.88 to 1,040.57)                   | 1,629.16<br>(1,033.96 to 2,442.81)               | 1,406.97<br>(881.48 to 2,171.46)                 | 1,677.39<br>(1,096.28 to 2,501.27)                | 25.73<br>(18.03 to 36.21)                 | 77.11<br>(52.81 to 107.63)                 | 68.45<br>(46.29 to 97.51)                  | 77.10<br>(53.43 to 106.56)                 |

|                                                                |                                                            |                                                             |                                                             |                                                             |                                                      |                                                      |                                                      |                                                        |
|----------------------------------------------------------------|------------------------------------------------------------|-------------------------------------------------------------|-------------------------------------------------------------|-------------------------------------------------------------|------------------------------------------------------|------------------------------------------------------|------------------------------------------------------|--------------------------------------------------------|
| Cirrhosis and other chronic liver diseases due to alcohol use  | 158.93<br>(116.48 to<br>225.14)                            | 336.39<br>(224.92 to<br>504.06)                             | 292.25<br>(191.83 to<br>443.10)                             | 381.93<br>(256.21 to<br>566.17)                             | 6.05<br>(4.51 to<br>8.23)                            | 17.14<br>(12.44 to<br>23.20)                         | 15.39<br>(10.90 to<br>20.80)                         | 18.60<br>(13.68 to<br>24.61)                           |
| Cirrhosis and other chronic liver diseases due to other causes | 446.90<br>(350.04 to<br>574.01)                            | 875.67<br>(616.55 to<br>1,204.68)                           | 764.74<br>(536.34 to<br>1,063.68)                           | 902.99<br>(646.91 to<br>1,212.77)                           | 15.48<br>(12.11 to<br>19.71)                         | 45.24<br>(33.65 to<br>58.85)                         | 41.11<br>(30.46 to<br>53.87)                         | 44.78<br>(33.94 to<br>57.81)                           |
| <b>Digestive diseases</b>                                      | <b>1,777.76</b><br><b>(1,426.97 to</b><br><b>2,325.52)</b> | <b>3,652.94</b><br><b>(2,532.67 to</b><br><b>5,388.11)</b>  | <b>3,124.98</b><br><b>(2,156.47 to</b><br><b>4,557.49)</b>  | <b>4,067.00</b><br><b>(2,764.01 to</b><br><b>5,965.50)</b>  | <b>66.04</b><br><b>(52.20 to</b><br><b>91.16)</b>    | <b>200.66</b><br><b>(146.43 to</b><br><b>293.59)</b> | <b>178.45</b><br><b>(129.09 to</b><br><b>259.87)</b> | <b>213.60</b><br><b>(158.61 to</b><br><b>306.70)</b>   |
| Peptic ulcer disease                                           | 358.53<br>(279.26 to<br>466.50)                            | 560.04<br>(382.82 to<br>784.87)                             | 409.81<br>(276.58 to<br>583.84)                             | 651.51<br>(451.56 to<br>904.21)                             | 14.72<br>(11.57 to<br>19.36)                         | 33.58<br>(23.70 to<br>46.63)                         | 25.51<br>(18.29 to<br>34.84)                         | 37.55<br>(27.24 to<br>52.45)                           |
| <b>Bahrain</b>                                                 |                                                            |                                                             |                                                             |                                                             |                                                      |                                                      |                                                      |                                                        |
| Cause                                                          | YLLs (actual counts)                                       |                                                             |                                                             |                                                             | Deaths (actual counts)                               |                                                      |                                                      |                                                        |
|                                                                | 2016                                                       | 2040 Forecast                                               | 2040 Better Scenario                                        | 2040 Worse Scenario                                         | 2016                                                 | 2040 Forecast                                        | 2040 Better Scenario                                 | 2040 Worse Scenario                                    |
| Gastritis and duodenitis                                       | 71.25<br>(54.51 to<br>90.94)                               | 146.38<br>(102.05 to<br>204.41)                             | 123.80<br>(83.61 to<br>173.68)                              | 152.80<br>(108.18 to<br>210.89)                             | 2.87<br>(2.17 to<br>3.73)                            | 8.60<br>(6.11 to<br>11.92)                           | 7.60<br>(5.31 to<br>10.50)                           | 8.60<br>(6.17 to<br>11.91)                             |
| Appendicitis                                                   | 197.75<br>(153.36 to<br>251.30)                            | 311.21<br>(208.71 to<br>458.71)                             | 233.97<br>(155.52 to<br>344.16)                             | 343.11<br>(234.65 to<br>500.79)                             | 5.92<br>(4.57 to<br>7.92)                            | 14.70<br>(10.43 to<br>21.40)                         | 11.55<br>(8.16 to<br>16.81)                          | 15.50<br>(11.41 to<br>22.53)                           |
| Paralytic ileus and intestinal obstruction                     | 321.20<br>(249.13 to<br>457.07)                            | 607.55<br>(405.10 to<br>994.78)                             | 614.40<br>(405.63 to<br>1,004.60)                           | 598.40<br>(401.69 to<br>973.63)                             | 10.59<br>(7.94 to<br>17.34)                          | 31.66<br>(22.38 to<br>53.90)                         | 33.51<br>(23.57 to<br>57.12)                         | 29.73<br>(21.24 to<br>50.78)                           |
| Inguinal, femoral, and abdominal hernia                        | 42.29<br>(30.07 to<br>63.97)                               | 68.16<br>(45.02 to<br>115.69)                               | 60.28<br>(39.00 to<br>103.70)                               | 69.55<br>(45.84 to<br>118.71)                               | 1.78<br>(1.25 to<br>3.17)                            | 4.02<br>(2.64 to<br>7.99)                            | 3.72<br>(2.39 to<br>7.42)                            | 3.93<br>(2.64 to<br>7.78)                              |
| Inflammatory bowel disease                                     | 38.42<br>(26.63 to<br>59.95)                               | 74.43<br>(46.92 to<br>123.20)                               | 73.37<br>(45.86 to<br>120.46)                               | 73.24<br>(46.97 to<br>120.40)                               | 1.12<br>(0.79 to<br>1.78)                            | 3.20<br>(2.19 to<br>5.00)                            | 3.29<br>(2.23 to<br>5.19)                            | 3.02<br>(2.08 to<br>4.76)                              |
| Vascular intestinal disorders                                  | 183.18<br>(137.26 to<br>274.08)                            | 519.01<br>(356.67 to<br>832.45)                             | 489.80<br>(331.58 to<br>796.64)                             | 515.89<br>(362.33 to<br>841.51)                             | 7.79<br>(5.74 to<br>12.66)                           | 30.03<br>(21.36 to<br>52.00)                         | 29.37<br>(20.15 to<br>50.60)                         | 28.87<br>(20.89 to<br>49.58)                           |
| Gallbladder and biliary diseases                               | 161.16<br>(124.27 to<br>216.77)                            | 477.08<br>(243.53 to<br>895.70)                             | 356.41<br>(183.16 to<br>666.89)                             | 637.95<br>(310.86 to<br>1,210.06)                           | 7.09<br>(5.50 to<br>9.98)                            | 29.22<br>(15.68 to<br>52.91)                         | 22.88<br>(12.19 to<br>41.83)                         | 36.91<br>(19.11 to<br>68.71)                           |
| Pancreatitis                                                   | 260.79<br>(193.73 to<br>363.23)                            | 551.56<br>(327.15 to<br>1,005.49)                           | 446.47<br>(273.94 to<br>797.03)                             | 677.26<br>(374.02 to<br>1,427.22)                           | 8.85<br>(6.72 to<br>12.19)                           | 27.09<br>(17.90 to<br>45.67)                         | 22.83<br>(15.16 to<br>38.07)                         | 31.22<br>(19.03 to<br>60.11)                           |
| Other digestive diseases                                       | 143.18<br>(111.35 to<br>186.65)                            | 337.50<br>(234.42 to<br>491.46)                             | 316.67<br>(215.08 to<br>457.39)                             | 347.27<br>(241.32 to<br>499.24)                             | 5.32<br>(4.13 to<br>7.22)                            | 18.55<br>(13.61 to<br>26.59)                         | 18.20<br>(13.16 to<br>25.55)                         | 18.27<br>(13.48 to<br>26.00)                           |
| <b>Neurological disorders</b>                                  | <b>2,978.35</b><br><b>(2,441.82 to</b><br><b>3,649.17)</b> | <b>8,762.54</b><br><b>(6,237.54 to</b><br><b>12,552.16)</b> | <b>8,783.31</b><br><b>(6,207.09 to</b><br><b>12,511.91)</b> | <b>9,391.04</b><br><b>(6,528.01 to</b><br><b>14,021.42)</b> | <b>165.58</b><br><b>(134.92 to</b><br><b>205.37)</b> | <b>646.79</b><br><b>(462.85 to</b><br><b>952.07)</b> | <b>677.65</b><br><b>(488.08 to</b><br><b>976.90)</b> | <b>664.45</b><br><b>(451.86 to</b><br><b>1,023.21)</b> |
| Alzheimer's disease and other dementias                        | 1,566.92<br>(1,224.52 to<br>1,977.08)                      | 6,284.22<br>(4,123.75 to<br>9,929.96)                       | 6,343.65<br>(4,210.22 to<br>9,825.43)                       | 6,815.73<br>(4,255.67 to<br>11,478.33)                      | 127.81<br>(102.24 to<br>160.07)                      | 540.34<br>(362.93 to<br>839.43)                      | 564.74<br>(385.24 to<br>854.61)                      | 563.05<br>(349.39 to<br>921.93)                        |
| Parkinson's disease                                            | 169.95<br>(124.10 to<br>227.13)                            | 722.55<br>(532.74 to<br>957.57)                             | 806.20<br>(585.67 to<br>1,080.26)                           | 632.53<br>(466.52 to<br>825.84)                             | 11.49<br>(8.45 to<br>15.39)                          | 56.10<br>(41.64 to<br>73.85)                         | 64.36<br>(47.55 to<br>87.40)                         | 47.75<br>(34.48 to<br>62.97)                           |
| Epilepsy                                                       | 918.65<br>(725.36 to<br>1,164.82)                          | 1,178.80<br>(750.31 to<br>1,799.57)                         | 1,052.44<br>(664.16 to<br>1,620.50)                         | 1,381.18<br>(864.70 to<br>2,137.01)                         | 18.55<br>(14.72 to<br>23.46)                         | 31.89<br>(22.29 to<br>45.89)                         | 29.42<br>(20.37 to<br>42.51)                         | 36.25<br>(24.65 to<br>52.92)                           |
| Multiple sclerosis                                             | 53.00<br>(39.94 to<br>72.78)                               | 82.28<br>(52.97 to<br>128.25)                               | 83.86<br>(53.81 to<br>131.59)                               | 81.62<br>(52.70 to<br>126.67)                               | 1.37<br>(1.05 to<br>1.83)                            | 2.50<br>(1.72 to<br>3.59)                            | 2.58<br>(1.77 to<br>3.74)                            | 2.44<br>(1.69 to<br>3.49)                              |
| Motor neuron disease                                           | 52.08<br>(40.15 to<br>67.84)                               | 111.71<br>(71.66 to<br>179.30)                              | 110.26<br>(70.50 to<br>178.98)                              | 107.79<br>(70.10 to<br>170.59)                              | 1.44<br>(1.12 to<br>1.86)                            | 3.62<br>(2.49 to<br>5.35)                            | 3.62<br>(2.47 to<br>5.50)                            | 3.45<br>(2.40 to<br>5.00)                              |
| Other neurological disorders                                   | 217.75<br>(172.44 to<br>277.99)                            | 382.99<br>(272.17 to<br>545.14)                             | 386.92<br>(273.41 to<br>560.75)                             | 372.21<br>(267.83 to<br>521.92)                             | 4.93<br>(3.94 to<br>6.21)                            | 12.33<br>(9.45 to<br>16.15)                          | 12.93<br>(9.81 to<br>17.26)                          | 11.52<br>(8.93 to<br>15.05)                            |

|                           |                                                    |                                                      |                                                      |                                                      |                                             |                                             |                                              |                                             |
|---------------------------|----------------------------------------------------|------------------------------------------------------|------------------------------------------------------|------------------------------------------------------|---------------------------------------------|---------------------------------------------|----------------------------------------------|---------------------------------------------|
| <b>Mental disorders</b>   | <b>1,041.01</b><br>(725.78 to<br><b>1,518.78</b> ) | <b>2,070.26</b><br>(1,199.85 to<br><b>3,610.76</b> ) | <b>2,378.37</b><br>(1,371.58 to<br><b>4,132.01</b> ) | <b>2,000.28</b><br>(1,175.75 to<br><b>3,433.02</b> ) | <b>23.63</b><br>(16.67 to<br><b>34.14</b> ) | <b>56.05</b><br>(35.66 to<br><b>91.80</b> ) | <b>65.53</b><br>(41.28 to<br><b>106.02</b> ) | <b>53.24</b><br>(34.22 to<br><b>86.49</b> ) |
| Alcohol use disorders     | 394.94<br>(266.89 to<br>621.39)                    | 542.56<br>(291.74 to<br>969.99)                      | 585.47<br>(315.24 to<br>1,046.92)                    | 547.65<br>(298.90 to<br>961.90)                      | 9.64<br>(6.59 to<br>15.08)                  | 16.02<br>(9.61 to<br>27.10)                 | 17.58<br>(10.39 to<br>29.68)                 | 15.87<br>(9.61 to<br>26.63)                 |
| Drug use disorders        | 635.37<br>(428.45 to<br>946.40)                    | 1,511.69<br>(859.85 to<br>2,690.00)                  | 1,777.14<br>(1,013.43 to<br>3,172.17)                | 1,436.35<br>(822.68 to<br>2,518.09)                  | 13.78<br>(9.39 to<br>20.05)                 | 39.71<br>(24.47 to<br>65.99)                | 47.64<br>(29.31 to<br>79.61)                 | 37.05<br>(23.09 to<br>60.56)                |
| Opioid use disorders      | 458.87<br>(301.52 to<br>707.61)                    | 1,034.74<br>(577.01 to<br>1,834.02)                  | 1,113.89<br>(613.42 to<br>1,962.75)                  | 1,007.06<br>(561.11 to<br>1,754.47)                  | 9.86<br>(6.55 to<br>14.97)                  | 26.59<br>(15.85 to<br>44.04)                | 29.07<br>(17.35 to<br>48.27)                 | 25.49<br>(15.35 to<br>41.48)                |
| Cocaine use disorders     | 6.42<br>(3.97 to<br>10.80)                         | 18.71<br>(9.79 to<br>35.54)                          | 23.25<br>(12.29 to<br>44.02)                         | 17.90<br>(9.42 to<br>33.50)                          | 0.15<br>(0.09 to<br>0.26)                   | 0.50<br>(0.28 to<br>0.95)                   | 0.63<br>(0.35 to<br>1.14)                    | 0.47<br>(0.26 to<br>0.88)                   |
| Amphetamine use disorders | 3.62<br>(2.22 to<br>5.70)                          | 14.97<br>(7.62 to<br>26.97)                          | 21.12<br>(10.54 to<br>38.18)                         | 13.79<br>(7.18 to<br>24.65)                          | 0.08<br>(0.05 to<br>0.13)                   | 0.38<br>(0.20 to<br>0.67)                   | 0.54<br>(0.28 to<br>0.95)                    | 0.35<br>(0.18 to<br>0.61)                   |
| Other drug use disorders  | 166.46<br>(99.99 to<br>253.22)                     | 443.27<br>(235.98 to<br>812.78)                      | 618.89<br>(326.65 to<br>1,127.67)                    | 397.60<br>(212.86 to<br>702.71)                      | 3.69<br>(2.33 to<br>5.59)                   | 12.24<br>(7.26 to<br>20.81)                 | 17.41<br>(10.34 to<br>29.38)                 | 10.74<br>(6.52 to<br>18.04)                 |
| Eating disorders          | 10.70<br>(7.79 to<br>14.12)                        | 16.00<br>(9.07 to<br>27.98)                          | 15.76<br>(8.98 to<br>27.57)                          | 16.28<br>(9.31 to<br>28.07)                          | 0.20<br>(0.14 to<br>0.26)                   | 0.31<br>(0.17 to<br>0.56)                   | 0.31<br>(0.17 to<br>0.55)                    | 0.32<br>(0.18 to<br>0.56)                   |

**Bahrain**

| Cause                                                      | YLLs (actual counts)                                    |                                                          |                                                         |                                                          | Deaths (actual counts)                         |                                                      |                                                      |                                                      |
|------------------------------------------------------------|---------------------------------------------------------|----------------------------------------------------------|---------------------------------------------------------|----------------------------------------------------------|------------------------------------------------|------------------------------------------------------|------------------------------------------------------|------------------------------------------------------|
|                                                            | 2016                                                    | 2040 Forecast                                            | 2040 Better Scenario                                    | 2040 Worse Scenario                                      | 2016                                           | 2040 Forecast                                        | 2040 Better Scenario                                 | 2040 Worse Scenario                                  |
| <b>Diabetes, urogenital, blood, and endocrine diseases</b> | <b>19,907.52</b><br>(16,393.80 to<br><b>24,275.68</b> ) | <b>57,516.47</b><br>(32,808.63 to<br><b>106,511.06</b> ) | <b>44,421.32</b><br>(25,475.27 to<br><b>86,604.58</b> ) | <b>70,019.60</b><br>(41,274.00 to<br><b>122,942.93</b> ) | <b>803.71</b><br>(666.08 to<br><b>963.22</b> ) | <b>3,163.89</b><br>(1,899.97 to<br><b>5,561.95</b> ) | <b>2,521.94</b><br>(1,510.07 to<br><b>4,699.42</b> ) | <b>3,715.35</b><br>(2,283.38 to<br><b>6,137.07</b> ) |
| Diabetes mellitus                                          | 11,856.64<br>(9,663.07 to<br>14,500.09)                 | 28,220.12<br>(18,230.74 to<br>41,396.12)                 | 20,936.15<br>(13,751.51 to<br>31,228.98)                | 34,469.40<br>(22,239.27 to<br>50,705.37)                 | 534.98<br>(440.53 to<br>644.84)                | 1,613.32<br>(1,120.73 to<br>2,176.26)                | 1,241.05<br>(869.68 to<br>1,702.00)                  | 1,888.18<br>(1,316.09 to<br>2,593.32)                |
| Acute glomerulonephritis                                   | 8.01<br>(6.64 to<br>9.80)                               | 10.17<br>(6.49 to<br>15.73)                              | 8.38<br>(5.35 to<br>13.32)                              | 11.21<br>(7.21 to<br>17.24)                              | 0.15<br>(0.12 to<br>0.18)                      | 0.22<br>(0.15 to<br>0.34)                            | 0.19<br>(0.12 to<br>0.29)                            | 0.24<br>(0.16 to<br>0.36)                            |
| Chronic kidney disease                                     | 3,477.89<br>(2,827.98 to<br>4,348.73)                   | 20,667.70<br>(3,468.86 to<br>64,018.48)                  | 15,983.62<br>(2,622.77 to<br>52,440.26)                 | 26,489.76<br>(4,839.67 to<br>72,860.41)                  | 140.25<br>(115.20 to<br>175.67)                | 1,168.21<br>(183.17 to<br>3,494.55)                  | 934.76<br>(142.68 to<br>2,935.76)                    | 1,441.25<br>(246.78 to<br>3,708.26)                  |
| Chronic kidney disease due to diabetes mellitus            | 1,519.00<br>(1,180.89 to<br>1,985.09)                   | 10,408.41<br>(1,465.39 to<br>34,772.77)                  | 8,004.36<br>(1,178.78 to<br>28,654.57)                  | 13,437.15<br>(2,137.56 to<br>39,194.55)                  | 61.07<br>(47.85 to<br>78.15)                   | 547.96<br>(77.31 to<br>1,785.90)                     | 432.64<br>(60.37 to<br>1,460.42)                     | 685.16<br>(104.17 to<br>1,933.34)                    |
| Chronic kidney disease due to hypertension                 | 485.19<br>(376.51 to<br>635.93)                         | 3,890.76<br>(614.76 to<br>11,619.43)                     | 3,188.98<br>(498.96 to<br>10,237.98)                    | 4,792.09<br>(834.08 to<br>12,499.95)                     | 28.58<br>(22.26 to<br>36.56)                   | 276.14<br>(42.75 to<br>787.51)                       | 235.22<br>(35.62 to<br>723.63)                       | 325.39<br>(56.26 to<br>856.17)                       |
| Chronic kidney disease due to glomerulonephritis           | 491.62<br>(373.32 to<br>638.48)                         | 1,741.08<br>(391.17 to<br>5,019.61)                      | 1,277.51<br>(294.24 to<br>3,987.14)                     | 2,274.55<br>(517.91 to<br>6,011.15)                      | 15.10<br>(11.54 to<br>19.74)                   | 88.61<br>(15.84 to<br>270.51)                        | 66.84<br>(11.54 to<br>214.90)                        | 112.07<br>(21.71 to<br>300.38)                       |
| Chronic kidney disease due to other and unspecified causes | 982.08<br>(773.55 to<br>1,269.08)                       | 4,627.45<br>(901.61 to<br>13,775.80)                     | 3,512.77<br>(672.89 to<br>10,480.70)                    | 5,985.98<br>(1,219.84 to<br>15,932.81)                   | 35.51<br>(27.54 to<br>45.80)                   | 255.51<br>(43.10 to<br>720.96)                       | 200.07<br>(33.43 to<br>609.54)                       | 318.63<br>(60.09 to<br>827.00)                       |
| Urinary diseases and male infertility                      | 793.25<br>(650.16 to<br>953.18)                         | 1,459.07<br>(1,087.89 to<br>1,902.70)                    | 1,192.67<br>(886.03 to<br>1,578.74)                     | 1,529.02<br>(1,154.48 to<br>1,967.56)                    | 34.41<br>(28.46 to<br>40.93)                   | 90.82<br>(70.36 to<br>111.79)                        | 77.67<br>(60.21 to<br>96.32)                         | 90.92<br>(72.24 to<br>110.35)                        |
| Urinary tract infections                                   | 113.57<br>(81.61 to<br>175.94)                          | 406.89<br>(281.43 to<br>588.37)                          | 355.97<br>(242.49 to<br>510.58)                         | 402.55<br>(280.67 to<br>567.04)                          | 5.19<br>(3.56 to<br>8.34)                      | 26.62<br>(18.59 to<br>38.67)                         | 24.25<br>(16.76 to<br>35.55)                         | 25.28<br>(17.81 to<br>36.50)                         |
| Urolithiasis                                               | 19.96<br>(14.78 to<br>29.35)                            | 54.12<br>(36.25 to<br>77.25)                             | 42.33<br>(27.91 to<br>61.68)                            | 55.46<br>(38.09 to<br>78.64)                             | 0.80<br>(0.59 to<br>1.18)                      | 2.92<br>(2.03 to<br>4.04)                            | 2.39<br>(3.55)                                       | 2.86<br>(2.02 to<br>3.89)                            |
| Other urinary diseases                                     | 659.72<br>(541.79 to<br>801.12)                         | 998.06<br>(677.36 to<br>1,369.18)                        | 794.37<br>(529.27 to<br>1,105.19)                       | 1,071.02<br>(744.90 to<br>1,451.48)                      | 28.43<br>(23.03 to<br>34.38)                   | 61.28<br>(42.21 to<br>80.70)                         | 51.03<br>(35.10 to<br>67.85)                         | 62.78<br>(45.12 to<br>82.01)                         |

|                                                   |                                       |                                       |                                       |                                       |                              |                                 |                                 |                                 |
|---------------------------------------------------|---------------------------------------|---------------------------------------|---------------------------------------|---------------------------------------|------------------------------|---------------------------------|---------------------------------|---------------------------------|
| Gynecological diseases                            | 4.95<br>(3.05 to<br>7.35)             | 7.24<br>(3.44 to<br>13.52)            | 4.51<br>(2.14 to<br>8.84)             | 8.59<br>(4.20 to<br>16.34)            | 0.11<br>(0.07 to<br>0.16)    | 0.18<br>(0.09 to<br>0.32)       | 0.11<br>(0.06 to<br>0.21)       | 0.21<br>(0.11 to<br>0.37)       |
| Uterine fibroids                                  | 0.10<br>(0.06 to<br>0.17)             | 0.12<br>(0.06 to<br>0.23)             | 0.09<br>(0.05 to<br>0.17)             | 0.14<br>(0.07 to<br>0.27)             | 0.00<br>(0.00 to<br>0.00)    | 0.00<br>(0.00 to<br>0.01)       | 0.00<br>(0.00 to<br>0.01)       | 0.01<br>(0.00 to<br>0.01)       |
| Polycystic ovarian syndrome                       | 0.20<br>(0.09 to<br>0.41)             | 0.15<br>(0.05 to<br>0.35)             | 0.07<br>(0.02 to<br>0.18)             | 0.21<br>(0.07 to<br>0.49)             | 0.00<br>(0.00 to<br>0.01)    | 0.00<br>(0.00 to<br>0.01)       | 0.00<br>(0.00 to<br>0.00)       | 0.00<br>(0.00 to<br>0.01)       |
| Endometriosis                                     | 0.07<br>(0.03 to<br>0.17)             | 0.11<br>(0.04 to<br>0.27)             | 0.07<br>(0.02 to<br>0.17)             | 0.13<br>(0.04 to<br>0.33)             | 0.00<br>(0.00 to<br>0.00)    | 0.00<br>(0.00 to<br>0.01)       | 0.00<br>(0.00 to<br>0.00)       | 0.00<br>(0.00 to<br>0.01)       |
| Genital prolapse                                  | 0.11<br>(0.05 to<br>0.21)             | 0.13<br>(0.05 to<br>0.25)             | 0.08<br>(0.04 to<br>0.16)             | 0.15<br>(0.07 to<br>0.30)             | 0.00<br>(0.00 to<br>0.00)    | 0.00<br>(0.00 to<br>0.01)       | 0.00<br>(0.00 to<br>0.00)       | 0.00<br>(0.00 to<br>0.01)       |
| Other gynecological diseases                      | 4.46<br>(2.69 to<br>6.69)             | 6.73<br>(3.04 to<br>12.68)            | 4.20<br>(1.87 to<br>8.44)             | 7.96<br>(3.78 to<br>15.31)            | 0.10<br>(0.06 to<br>0.15)    | 0.16<br>(0.08 to<br>0.29)       | 0.10<br>(0.05 to<br>0.20)       | 0.19<br>(0.10 to<br>0.35)       |
| Hemoglobinopathies and hemolytic anemias          | 2,169.55<br>(1,668.58 to<br>3,062.73) | 4,085.82<br>(2,711.51 to<br>6,091.39) | 3,131.00<br>(2,064.42 to<br>4,634.80) | 4,423.74<br>(3,025.29 to<br>6,576.81) | 51.03<br>(39.66 to<br>71.03) | 164.79<br>(115.91 to<br>226.73) | 130.73<br>(92.75 to<br>180.70)  | 173.09<br>(126.51 to<br>234.83) |
| Thalassemias                                      | 53.16<br>(36.30 to<br>77.14)          | 22.14<br>(10.85 to<br>41.27)          | 19.99<br>(9.62 to<br>37.30)           | 23.13<br>(11.30 to<br>42.76)          | 0.64<br>(0.44 to<br>0.94)    | 0.27<br>(0.14 to<br>0.50)       | 0.25<br>(0.12 to<br>0.45)       | 0.28<br>(0.14 to<br>0.52)       |
| Sickle cell disorders                             | 1,947.84<br>(1,481.35 to<br>2,772.24) | 3,439.74<br>(2,233.76 to<br>5,258.59) | 2,616.90<br>(1,716.25 to<br>3,962.71) | 3,742.75<br>(2,504.62 to<br>5,651.56) | 41.51<br>(31.75 to<br>59.03) | 119.25<br>(80.01 to<br>173.23)  | 93.05<br>(61.97 to<br>135.65)   | 126.82<br>(88.33 to<br>179.81)  |
| G6PD deficiency                                   | 105.22<br>(77.23 to<br>150.48)        | 379.74<br>(245.83 to<br>549.48)       | 287.76<br>(186.97 to<br>420.91)       | 412.15<br>(278.96 to<br>595.89)       | 3.10<br>(2.33 to<br>4.36)    | 21.43<br>(14.81 to<br>30.24)    | 16.69<br>(11.31 to<br>23.64)    | 22.62<br>(16.02 to<br>31.28)    |
| Other hemoglobinopathies and hemolytic anemias    | 63.33<br>(47.34 to<br>80.49)          | 244.19<br>(172.61 to<br>322.68)       | 206.35<br>(145.57 to<br>271.83)       | 245.71<br>(174.82 to<br>317.69)       | 5.77<br>(4.14 to<br>7.18)    | 23.83<br>(16.35 to<br>31.38)    | 20.74<br>(14.28 to<br>27.19)    | 23.37<br>(15.92 to<br>30.54)    |
| Endocrine, metabolic, blood, and immune disorders | 1,597.23<br>(1,272.00 to<br>1,973.46) | 3,066.36<br>(2,130.38 to<br>4,291.81) | 3,164.99<br>(2,180.69 to<br>4,439.69) | 3,087.88<br>(2,177.05 to<br>4,290.54) | 42.79<br>(34.35 to<br>53.68) | 126.36<br>(95.18 to<br>163.20)  | 136.46<br>(101.55 to<br>178.89) | 121.46<br>(93.12 to<br>155.44)  |

**Bahrain**

| Cause                                  | YLLs (actual counts)                         |                                               |                                               |                                                | Deaths (actual counts)                   |                                        |                                        |                                        |
|----------------------------------------|----------------------------------------------|-----------------------------------------------|-----------------------------------------------|------------------------------------------------|------------------------------------------|----------------------------------------|----------------------------------------|----------------------------------------|
|                                        | 2016                                         | 2040 Forecast                                 | 2040 Better Scenario                          | 2040 Worse Scenario                            | 2016                                     | 2040 Forecast                          | 2040 Better Scenario                   | 2040 Worse Scenario                    |
|                                        | <b>Musculoskeletal disorders</b>             | <b>448.58</b><br>(339.62 to<br>654.51)        | <b>916.87</b><br>(639.75 to<br>1,301.93)      | <b>807.69</b><br>(563.73 to<br>1,145.57)       | <b>926.80</b><br>(653.80 to<br>1,299.23) | <b>12.25</b><br>(9.39 to<br>16.36)     | <b>37.42</b><br>(25.25 to<br>48.41)    | <b>33.92</b><br>(22.52 to<br>44.07)    |
| Rheumatoid arthritis                   | 96.40<br>(65.28 to<br>128.07)                | 211.90<br>(130.84 to<br>311.50)               | 149.37<br>(91.84 to<br>224.90)                | 238.23<br>(153.60 to<br>344.10)                | 3.21<br>(2.21 to<br>4.21)                | 10.25<br>(6.51 to<br>14.69)            | 7.42<br>(4.75 to<br>10.78)             | 11.20<br>(7.39 to<br>15.57)            |
| Other musculoskeletal disorders        | 352.18<br>(263.13 to<br>543.22)              | 704.97<br>(489.04 to<br>1,009.05)             | 658.31<br>(455.12 to<br>935.93)               | 688.57<br>(483.76 to<br>987.36)                | 9.04<br>(6.91 to<br>12.57)               | 27.18<br>(17.88 to<br>35.18)           | 26.51<br>(17.21 to<br>34.70)           | 25.39<br>(16.76 to<br>33.73)           |
| <b>Other non-communicable diseases</b> | <b>5,877.21</b><br>(4,701.70 to<br>7,443.18) | <b>9,906.86</b><br>(6,189.55 to<br>16,202.79) | <b>8,005.37</b><br>(5,136.68 to<br>13,040.47) | <b>10,738.01</b><br>(6,522.49 to<br>17,211.28) | <b>117.02</b><br>(92.11 to<br>169.52)    | <b>399.44</b><br>(275.62 to<br>679.23) | <b>364.56</b><br>(252.06 to<br>625.13) | <b>389.99</b><br>(272.05 to<br>660.92) |
| Congenital birth defects               | 4,406.28<br>(3,393.12 to<br>5,621.96)        | 4,220.72<br>(1,773.35 to<br>8,427.12)         | 2,796.19<br>(1,212.99 to<br>5,499.54)         | 5,158.84<br>(2,191.00 to<br>10,361.58)         | 54.95<br>(43.04 to<br>69.51)             | 56.60<br>(26.05 to<br>105.82)          | 38.08<br>(17.90 to<br>70.79)           | 68.36<br>(31.43 to<br>130.22)          |
| Neural tube defects                    | 135.64<br>(87.51 to<br>193.43)               | 56.14<br>(20.16 to<br>126.61)                 | 31.69<br>(11.24 to<br>69.02)                  | 74.26<br>(26.28 to<br>164.91)                  | 1.69<br>(1.12 to<br>2.37)                | 0.78<br>(0.32 to<br>1.65)              | 0.44<br>(0.18 to<br>0.92)              | 1.02<br>(0.40 to<br>2.10)              |
| Congenital heart anomalies             | 1,441.99<br>(940.71 to<br>1,971.75)          | 1,294.58<br>(511.34 to<br>2,740.51)           | 723.13<br>(284.35 to<br>1,538.71)             | 1,637.00<br>(646.81 to<br>3,393.30)            | 17.91<br>(12.05 to<br>24.16)             | 17.19<br>(7.31 to<br>34.49)            | 9.71<br>(4.20 to<br>19.47)             | 21.52<br>(9.19 to<br>42.67)            |
| Orofacial clefts                       | 0.87<br>(0.43 to<br>1.49)                    | 0.53<br>(0.15 to<br>1.40)                     | 0.27<br>(0.07 to<br>0.69)                     | 0.73<br>(0.20 to<br>1.81)                      | 0.01<br>(0.01 to<br>0.02)                | 0.01<br>(0.00 to<br>0.02)              | 0.00<br>(0.00 to<br>0.01)              | 0.01<br>(0.00 to<br>0.02)              |

|                                               |                                                               |                                                               |                                                              |                                                               |                                                      |                                                      |                                                      |                                                        |  |
|-----------------------------------------------|---------------------------------------------------------------|---------------------------------------------------------------|--------------------------------------------------------------|---------------------------------------------------------------|------------------------------------------------------|------------------------------------------------------|------------------------------------------------------|--------------------------------------------------------|--|
|                                               | 356.80<br>(218.59 to<br>587.34)                               | 347.42<br>(134.98 to<br>708.14)                               | 334.77<br>(133.71 to<br>665.65)                              | 389.11<br>(149.20 to<br>786.82)                               | 4.78<br>(2.97 to<br>7.74)                            | 5.22<br>(2.17 to<br>9.94)                            | 5.09<br>(2.17 to<br>9.42)                            | 5.77<br>(2.40 to<br>11.25)                             |  |
| Down syndrome                                 | 644.68<br>(398.22 to<br>1,235.19)                             | 793.78<br>(292.12 to<br>1,858.48)                             | 607.81<br>(218.58 to<br>1,367.25)                            | 948.47<br>(336.93 to<br>2,181.97)                             | 7.88<br>(4.96 to<br>14.90)                           | 10.08<br>(3.96 to<br>22.88)                          | 7.78<br>(3.08 to<br>17.27)                           | 11.96<br>(4.63 to<br>26.79)                            |  |
| Other chromosomal abnormalities               | 250.61<br>(148.31 to<br>564.14)                               | 260.86<br>(118.77 to<br>558.16)                               | 166.19<br>(78.02 to<br>355.23)                               | 312.80<br>(144.98 to<br>671.13)                               | 3.28<br>(2.02 to<br>6.90)                            | 3.76<br>(1.87 to<br>7.35)                            | 2.43<br>(1.24 to<br>4.74)                            | 4.45<br>(2.20 to<br>8.68)                              |  |
| Congenital musculoskeletal and limb anomalies | 256.32<br>(141.42 to<br>367.94)                               | 241.41<br>(98.38 to<br>513.99)                                | 162.89<br>(68.84 to<br>337.67)                               | 286.00<br>(119.28 to<br>606.56)                               | 3.35<br>(1.98 to<br>4.68)                            | 3.87<br>(1.93 to<br>7.37)                            | 2.69<br>(1.35 to<br>4.93)                            | 4.46<br>(2.21 to<br>8.35)                              |  |
| Urogenital congenital anomalies               | 141.52<br>(74.44 to<br>216.97)                                | 124.32<br>(36.59 to<br>306.26)                                | 73.33<br>(22.46 to<br>169.67)                                | 157.45<br>(47.95 to<br>378.75)                                | 1.67<br>(0.89 to<br>2.55)                            | 1.51<br>(0.46 to<br>3.62)                            | 0.89<br>(0.29 to<br>2.04)                            | 1.90<br>(0.61 to<br>4.49)                              |  |
| Digestive congenital anomalies                | 1,177.86<br>(813.10 to<br>1,627.28)                           | 1,101.69<br>(433.45 to<br>2,238.15)                           | 696.12<br>(272.57 to<br>1,411.14)                            | 1,353.04<br>(536.45 to<br>2,756.07)                           | 14.38<br>(10.02 to<br>19.66)                         | 14.19<br>(6.13 to<br>27.96)                          | 9.05<br>(3.87 to<br>17.55)                           | 17.28<br>(7.43 to<br>33.97)                            |  |
| Other congenital birth defects                | 1,376.29<br>(951.68 to<br>2,482.18)                           | 5,625.54<br>(3,717.45 to<br>9,973.71)                         | 5,163.01<br>(3,345.85 to<br>9,252.34)                        | 5,507.40<br>(3,649.43 to<br>9,915.73)                         | 60.96<br>(41.73 to<br>112.40)                        | 342.14<br>(232.02 to<br>625.37)                      | 325.95<br>(221.14 to<br>593.27)                      | 320.80<br>(217.06 to<br>592.94)                        |  |
| Skin and subcutaneous diseases                | 352.06<br>(203.08 to<br>654.39)                               | 1,889.33<br>(1,120.35 to<br>3,709.12)                         | 1,861.47<br>(1,096.40 to<br>3,648.00)                        | 1,769.97<br>(1,043.31 to<br>3,498.66)                         | 13.58<br>(8.22 to<br>27.49)                          | 104.35<br>(64.04 to<br>213.24)                       | 106.67<br>(64.95 to<br>217.91)                       | 94.00<br>(57.80 to<br>195.85)                          |  |
| Cellulitis                                    | 474.21<br>(308.25 to<br>878.37)                               | 2,019.98<br>(1,238.55 to<br>3,892.94)                         | 1,843.46<br>(1,117.35 to<br>3,552.77)                        | 2,037.47<br>(1,264.54 to<br>3,924.96)                         | 18.94<br>(12.17 to<br>38.08)                         | 120.33<br>(76.03 to<br>237.77)                       | 115.21<br>(72.35 to<br>226.57)                       | 115.60<br>(73.30 to<br>225.58)                         |  |
| Pyoderma                                      | 450.69<br>(292.70 to<br>866.64)                               | 1,464.18<br>(896.77 to<br>2,961.74)                           | 1,236.38<br>(770.66 to<br>2,534.48)                          | 1,447.69<br>(907.80 to<br>2,863.55)                           | 25.13<br>(16.36 to<br>49.02)                         | 105.18<br>(63.98 to<br>207.56)                       | 92.70<br>(56.26 to<br>187.40)                        | 99.56<br>(60.71 to<br>197.76)                          |  |
| Decubitus ulcer                               | 99.33<br>(64.22 to<br>199.43)                                 | 252.06<br>(147.34 to<br>518.17)                               | 221.71<br>(130.32 to<br>461.33)                              | 252.26<br>(146.75 to<br>530.94)                               | 3.31<br>(2.05 to<br>7.32)                            | 12.27<br>(7.16 to<br>26.25)                          | 11.36<br>(6.72 to<br>23.58)                          | 11.64<br>(6.88 to<br>25.64)                            |  |
| Other skin and subcutaneous diseases          | 94.63<br>(58.47 to<br>145.62)                                 | 60.60<br>(14.02 to<br>148.16)                                 | 46.16<br>(10.71 to<br>114.98)                                | 71.77<br>(17.31 to<br>174.83)                                 | 1.10<br>(0.68 to<br>1.69)                            | 0.70<br>(0.16 to<br>1.72)                            | 0.54<br>(0.12 to<br>1.33)                            | 0.83<br>(0.20 to<br>2.03)                              |  |
| Sudden infant death syndrome                  | <b>18,911.24</b><br><b>(14,779.80 to</b><br><b>24,401.42)</b> | <b>20,653.31</b><br><b>(13,048.33 to</b><br><b>33,239.91)</b> | <b>13,628.32</b><br><b>(8,584.45 to</b><br><b>22,604.71)</b> | <b>27,221.90</b><br><b>(17,095.82 to</b><br><b>42,960.24)</b> | <b>387.06</b><br><b>(303.19 to</b><br><b>501.49)</b> | <b>536.71</b><br><b>(369.11 to</b><br><b>804.50)</b> | <b>368.08</b><br><b>(252.14 to</b><br><b>569.42)</b> | <b>680.51</b><br><b>(454.60 to</b><br><b>1,018.80)</b> |  |
| <b>Injuries</b>                               | <b>8,485.32</b><br><b>(6,597.51 to</b><br><b>11,075.56)</b>   | <b>8,136.53</b><br><b>(5,213.22 to</b><br><b>12,943.84)</b>   | <b>3,399.21</b><br><b>(2,158.10 to</b><br><b>5,493.76)</b>   | <b>13,029.74</b><br><b>(8,218.00 to</b><br><b>21,105.29)</b>  | <b>174.76</b><br><b>(136.84 to</b><br><b>228.98)</b> | <b>217.97</b><br><b>(148.05 to</b><br><b>334.99)</b> | <b>100.48</b><br><b>(69.27 to</b><br><b>152.05)</b>  | <b>329.35</b><br><b>(218.60 to</b><br><b>516.27)</b>   |  |
| <b>Transport injuries</b>                     | 7,955.69<br>(6,167.43 to<br>10,421.22)                        | 7,250.20<br>(4,590.71 to<br>11,559.23)                        | 2,777.94<br>(1,757.48 to<br>4,459.42)                        | 11,980.40<br>(7,538.06 to<br>19,426.61)                       | 163.20<br>(127.51 to<br>214.49)                      | 193.09<br>(130.69 to<br>295.70)                      | 82.62<br>(56.32 to<br>125.37)                        | 300.52<br>(199.59 to<br>471.95)                        |  |
| Road injuries                                 | 854.52<br>(538.67 to<br>1,208.26)                             | 810.73<br>(459.89 to<br>1,333.58)                             | 294.49<br>(168.97 to<br>488.81)                              | 1,275.61<br>(695.23 to<br>2,128.35)                           | 18.69<br>(12.05 to<br>26.62)                         | 24.81<br>(14.77 to<br>38.98)                         | 9.84<br>(6.03 to<br>15.53)                           | 37.07<br>(21.94 to<br>58.51)                           |  |
| Pedestrian road injuries                      | <b>Bahrain</b>                                                |                                                               |                                                              |                                                               |                                                      |                                                      |                                                      |                                                        |  |
| Cause                                         | YLLs (actual counts)                                          |                                                               |                                                              |                                                               | Deaths (actual counts)                               |                                                      |                                                      |                                                        |  |
|                                               | 2016                                                          | 2040 Forecast                                                 | 2040 Better Scenario                                         | 2040 Worse Scenario                                           | 2016                                                 | 2040 Forecast                                        | 2040 Better Scenario                                 | 2040 Worse Scenario                                    |  |
| Cyclist road injuries                         | 76.36<br>(48.35 to<br>108.38)                                 | 79.07<br>(41.05 to<br>135.71)                                 | 37.93<br>(19.80 to<br>65.03)                                 | 120.41<br>(63.10 to<br>209.34)                                | 1.60<br>(1.02 to<br>2.28)                            | 2.14<br>(1.20 to<br>3.52)                            | 1.19<br>(0.66 to<br>1.97)                            | 3.03<br>(1.68 to<br>5.06)                              |  |
| Motorcyclist road injuries                    | 359.01<br>(204.21 to<br>555.05)                               | 363.97<br>(170.79 to<br>666.09)                               | 220.86<br>(102.32 to<br>409.08)                              | 487.65<br>(230.37 to<br>888.00)                               | 6.59<br>(3.85 to<br>10.14)                           | 7.65<br>(3.79 to<br>13.58)                           | 4.97<br>(2.47 to<br>8.98)                            | 9.92<br>(4.90 to<br>17.97)                             |  |
| Motor vehicle road injuries                   | 6,636.57<br>(5,113.80 to<br>8,641.18)                         | 5,969.19<br>(3,836.30 to<br>9,548.49)                         | 2,213.40<br>(1,427.14 to<br>3,564.21)                        | 10,052.68<br>(6,414.80 to<br>16,108.25)                       | 135.69<br>(104.61 to<br>176.66)                      | 157.67<br>(106.95 to<br>242.46)                      | 66.21<br>(45.10 to<br>100.47)                        | 249.31<br>(166.48 to<br>392.82)                        |  |
| Other road injuries                           | 29.22<br>(16.16 to<br>41.11)                                  | 27.25<br>(14.54 to<br>44.07)                                  | 11.25<br>(6.15 to<br>18.31)                                  | 44.05<br>(23.05 to<br>72.36)                                  | 0.62<br>(0.36 to<br>0.87)                            | 0.82<br>(0.49 to<br>1.30)                            | 0.41<br>(0.26 to<br>0.65)                            | 1.20<br>(0.69 to<br>1.94)                              |  |



|                                                 |                                                            |                                                             |                                                             |                                                             |                                                     |                                                      |                                                     |                                                      |
|-------------------------------------------------|------------------------------------------------------------|-------------------------------------------------------------|-------------------------------------------------------------|-------------------------------------------------------------|-----------------------------------------------------|------------------------------------------------------|-----------------------------------------------------|------------------------------------------------------|
| Other transport injuries                        | 529.64<br>(410.91 to<br>697.96)                            | 886.33<br>(554.27 to<br>1,392.98)                           | 621.27<br>(393.42 to<br>994.94)                             | 1,049.34<br>(659.96 to<br>1,679.52)                         | 11.56<br>(8.97 to<br>15.15)                         | 24.88<br>(16.45 to<br>37.87)                         | 17.86<br>(11.84 to<br>27.44)                        | 28.83<br>(18.93 to<br>44.76)                         |
| <b>Unintentional injuries</b>                   | <b>4,173.96</b><br><b>(3,316.42 to</b><br><b>5,345.88)</b> | <b>4,583.07</b><br><b>(3,033.70 to</b><br><b>6,817.19)</b>  | <b>3,670.10</b><br><b>(2,425.11 to</b><br><b>5,426.64)</b>  | <b>5,086.53</b><br><b>(3,326.97 to</b><br><b>7,527.41)</b>  | <b>87.30</b><br><b>(69.66 to</b><br><b>112.31)</b>  | <b>135.61</b><br><b>(97.18 to</b><br><b>183.66)</b>  | <b>114.12</b><br><b>(82.53 to</b><br><b>155.66)</b> | <b>143.92</b><br><b>(103.60 to</b><br><b>197.89)</b> |
| Falls                                           | 788.14<br>(591.67 to<br>1,067.71)                          | 1,218.95<br>(855.15 to<br>1,789.26)                         | 1,068.08<br>(741.13 to<br>1,564.72)                         | 1,262.01<br>(881.07 to<br>1,858.94)                         | 20.27<br>(15.39 to<br>26.78)                        | 48.71<br>(37.38 to<br>63.22)                         | 44.58<br>(33.82 to<br>58.23)                        | 48.17<br>(36.71 to<br>62.25)                         |
| Drowning                                        | 693.24<br>(533.38 to<br>901.75)                            | 625.03<br>(391.32 to<br>951.61)                             | 497.65<br>(316.41 to<br>755.42)                             | 710.38<br>(445.10 to<br>1,089.94)                           | 12.38<br>(9.47 to<br>16.32)                         | 13.89<br>(9.05 to<br>20.64)                          | 11.28<br>(7.42 to<br>16.72)                         | 15.46<br>(10.04 to<br>22.99)                         |
| Fire, heat, and hot substances                  | 447.07<br>(341.73 to<br>590.65)                            | 457.91<br>(282.87 to<br>713.52)                             | 337.03<br>(212.12 to<br>531.75)                             | 531.02<br>(330.80 to<br>837.55)                             | 9.40<br>(7.28 to<br>12.43)                          | 13.01<br>(8.73 to<br>19.17)                          | 9.91<br>(6.74 to<br>14.96)                          | 14.58<br>(9.79 to<br>21.95)                          |
| Poisonings                                      | 170.24<br>(124.72 to<br>261.62)                            | 133.13<br>(77.55 to<br>227.15)                              | 90.00<br>(53.10 to<br>153.94)                               | 163.12<br>(94.28 to<br>274.29)                              | 3.39<br>(2.48 to<br>5.03)                           | 3.30<br>(2.02 to<br>5.28)                            | 2.28<br>(1.44 to<br>3.64)                           | 3.95<br>(2.48 to<br>6.28)                            |
| Exposure to mechanical forces                   | 611.79<br>(463.44 to<br>887.55)                            | 539.87<br>(324.93 to<br>854.97)                             | 411.07<br>(251.30 to<br>653.33)                             | 620.97<br>(374.80 to<br>979.64)                             | 11.45<br>(8.91 to<br>15.35)                         | 12.38<br>(7.94 to<br>18.94)                          | 9.62<br>(6.32 to<br>14.53)                          | 13.87<br>(8.88 to<br>21.22)                          |
| Unintentional firearm injuries                  | 142.48<br>(68.44 to<br>204.51)                             | 107.51<br>(45.86 to<br>192.20)                              | 84.93<br>(37.40 to<br>151.72)                               | 122.58<br>(52.23 to<br>225.29)                              | 2.72<br>(1.35 to<br>3.89)                           | 2.38<br>(1.15 to<br>4.09)                            | 1.91<br>(0.97 to<br>3.25)                           | 2.67<br>(1.29 to<br>4.67)                            |
| Unintentional suffocation                       | 159.94<br>(76.96 to<br>442.92)                             | 125.90<br>(48.87 to<br>344.55)                              | 96.01<br>(40.58 to<br>246.05)                               | 151.20<br>(56.96 to<br>420.07)                              | 2.28<br>(1.20 to<br>5.78)                           | 2.06<br>(1.01 to<br>4.82)                            | 1.61<br>(0.83 to<br>3.48)                           | 2.41<br>(1.12 to<br>5.83)                            |
| Other exposure to mechanical forces             | 309.37<br>(209.10 to<br>417.69)                            | 306.46<br>(172.81 to<br>501.82)                             | 230.14<br>(130.65 to<br>378.98)                             | 347.20<br>(198.75 to<br>556.16)                             | 6.45<br>(4.44 to<br>8.73)                           | 7.94<br>(4.88 to<br>12.35)                           | 6.10<br>(3.66 to<br>9.28)                           | 8.80<br>(5.37 to<br>13.28)                           |
| Adverse effects of medical treatment            | 339.36<br>(255.22 to<br>437.64)                            | 444.93<br>(287.78 to<br>650.27)                             | 390.33<br>(252.70 to<br>572.19)                             | 476.99<br>(307.53 to<br>692.60)                             | 8.23<br>(6.25 to<br>10.44)                          | 15.16<br>(10.31 to<br>21.05)                         | 13.78<br>(9.36 to<br>19.19)                         | 15.67<br>(10.68 to<br>21.65)                         |
| Animal contact                                  | 76.40<br>(56.50 to<br>98.99)                               | 99.77<br>(58.48 to<br>157.74)                               | 81.62<br>(48.15 to<br>128.86)                               | 114.03<br>(65.27 to<br>181.64)                              | 1.53<br>(1.17 to<br>1.94)                           | 2.85<br>(1.84 to<br>4.18)                            | 2.42<br>(1.58 to<br>3.54)                           | 3.08<br>(1.98 to<br>4.52)                            |
| Venomous animal contact                         | 36.20<br>(26.45 to<br>49.03)                               | 44.35<br>(25.15 to<br>73.72)                                | 37.31<br>(21.05 to<br>63.07)                                | 51.00<br>(28.04 to<br>86.64)                                | 0.67<br>(0.50 to<br>0.89)                           | 1.14<br>(0.70 to<br>1.75)                            | 1.01<br>(0.62 to<br>1.51)                           | 1.25<br>(0.77 to<br>1.93)                            |
| Non-venomous animal contact                     | 40.20<br>(27.93 to<br>52.59)                               | 55.42<br>(31.94 to<br>87.30)                                | 44.30<br>(25.35 to<br>69.56)                                | 63.03<br>(36.04 to<br>99.37)                                | 0.86<br>(0.62 to<br>1.10)                           | 1.69<br>(1.08 to<br>2.48)                            | 1.41<br>(0.89 to<br>2.07)                           | 1.83<br>(1.16 to<br>2.69)                            |
| Foreign body                                    | 388.55<br>(288.56 to<br>588.10)                            | 426.88<br>(269.81 to<br>664.29)                             | 404.13<br>(257.52 to<br>630.51)                             | 450.37<br>(284.42 to<br>717.74)                             | 7.21<br>(5.44 to<br>10.62)                          | 10.31<br>(7.29 to<br>15.27)                          | 10.14<br>(7.16 to<br>15.02)                         | 10.46<br>(7.30 to<br>15.42)                          |
| Pulmonary aspiration and foreign body in airway | 223.13<br>(162.27 to<br>346.19)                            | 225.99<br>(143.80 to<br>353.36)                             | 194.85<br>(124.91 to<br>298.06)                             | 241.62<br>(151.05 to<br>380.51)                             | 3.90<br>(2.89 to<br>5.79)                           | 5.34<br>(3.78 to<br>7.71)                            | 4.81<br>(3.41 to<br>6.90)                           | 5.45<br>(3.82 to<br>7.90)                            |
| Foreign body in other body part                 | 165.43<br>(114.83 to<br>282.97)                            | 200.89<br>(116.99 to<br>358.82)                             | 209.28<br>(124.15 to<br>373.63)                             | 208.75<br>(123.78 to<br>372.72)                             | 3.31<br>(2.34 to<br>5.49)                           | 4.97<br>(3.21 to<br>8.32)                            | 5.33<br>(3.45 to<br>8.79)                           | 5.01<br>(3.23 to<br>8.45)                            |
| Environmental heat and cold exposure            | 108.15<br>(74.93 to<br>161.33)                             | 143.86<br>(79.60 to<br>242.59)                              | 105.60<br>(56.12 to<br>180.87)                              | 169.19<br>(92.03 to<br>277.99)                              | 2.47<br>(1.72 to<br>3.65)                           | 4.08<br>(2.34 to<br>6.64)                            | 3.06<br>(1.76 to<br>5.02)                           | 4.69<br>(2.73 to<br>7.51)                            |
| Other unintentional injuries                    | 551.02<br>(414.38 to<br>744.70)                            | 492.74<br>(288.31 to<br>831.25)                             | 284.58<br>(166.38 to<br>474.33)                             | 588.45<br>(346.58 to<br>973.96)                             | 10.98<br>(8.28 to<br>14.71)                         | 11.96<br>(7.45 to<br>18.90)                          | 7.05<br>(4.43 to<br>11.12)                          | 13.99<br>(8.80 to<br>21.68)                          |
| Self-harm and interpersonal violence            | <b>6,084.39</b><br><b>(4,495.47 to</b><br><b>8,423.08)</b> | <b>7,689.28</b><br><b>(4,561.85 to</b><br><b>13,280.19)</b> | <b>6,315.98</b><br><b>(3,737.39 to</b><br><b>10,722.29)</b> | <b>8,859.89</b><br><b>(5,113.50 to</b><br><b>15,436.44)</b> | <b>121.78</b><br><b>(90.46 to</b><br><b>167.05)</b> | <b>178.31</b><br><b>(111.30 to</b><br><b>294.00)</b> | <b>148.66</b><br><b>(93.95 to</b><br><b>241.48)</b> | <b>202.43</b><br><b>(122.51 to</b><br><b>334.71)</b> |
| <b>Bahrain</b>                                  |                                                            |                                                             |                                                             |                                                             |                                                     |                                                      |                                                     |                                                      |
| Cause                                           | YLLs (actual counts)                                       |                                                             |                                                             |                                                             | Deaths (actual counts)                              |                                                      |                                                     |                                                      |
|                                                 | 2016                                                       | 2040 Forecast                                               | 2040 Better Scenario                                        | 2040 Worse Scenario                                         | 2016                                                | 2040 Forecast                                        | 2040 Better Scenario                                | 2040 Worse Scenario                                  |

|                                                                              |                                       |                                        |                                       |                                        |                               |                                |                                |                                 |
|------------------------------------------------------------------------------|---------------------------------------|----------------------------------------|---------------------------------------|----------------------------------------|-------------------------------|--------------------------------|--------------------------------|---------------------------------|
| Self-harm                                                                    | 4,767.72<br>(3,454.06 to<br>6,828.92) | 6,565.18<br>(3,806.44 to<br>11,524.03) | 5,441.78<br>(3,177.31 to<br>9,402.39) | 7,622.03<br>(4,230.51 to<br>13,577.09) | 95.97<br>(70.01 to<br>136.93) | 152.43<br>(93.22 to<br>258.54) | 128.10<br>(80.11 to<br>210.86) | 174.30<br>(103.08 to<br>300.10) |
| Self-harm by firearm                                                         | 147.08<br>(76.45 to<br>229.93)        | 128.67<br>(64.00 to<br>244.69)         | 97.21<br>(49.70 to<br>181.60)         | 154.48<br>(75.26 to<br>302.58)         | 2.89<br>(1.57 to<br>4.59)     | 2.95<br>(1.59 to<br>5.41)      | 2.26<br>(1.24 to<br>4.19)      | 3.48<br>(1.83 to<br>6.61)       |
| Self-harm by other specified means                                           | 4,620.64<br>(3,359.20 to<br>6,610.15) | 6,436.51<br>(3,733.84 to<br>11,308.68) | 5,344.57<br>(3,118.89 to<br>9,293.07) | 7,467.55<br>(4,143.26 to<br>13,317.17) | 93.08<br>(67.64 to<br>132.52) | 149.48<br>(91.47 to<br>253.91) | 125.84<br>(78.71 to<br>207.34) | 170.82<br>(100.99 to<br>295.27) |
| Interpersonal violence                                                       | 1,316.67<br>(915.91 to<br>1,815.09)   | 1,124.10<br>(653.17 to<br>1,858.85)    | 874.21<br>(507.72 to<br>1,423.62)     | 1,237.86<br>(731.17 to<br>2,050.05)    | 25.82<br>(17.84 to<br>35.44)  | 25.88<br>(15.33 to<br>41.43)   | 20.56<br>(11.97 to<br>32.61)   | 28.13<br>(16.73 to<br>44.73)    |
| Physical violence by firearm                                                 | 401.82<br>(238.33 to<br>708.29)       | 319.64<br>(162.62 to<br>624.07)        | 221.72<br>(114.85 to<br>430.70)       | 352.60<br>(182.62 to<br>681.68)        | 7.68<br>(4.54 to<br>13.69)    | 6.71<br>(3.55 to<br>12.70)     | 4.69<br>(2.46 to<br>8.73)      | 7.35<br>(3.93 to<br>14.03)      |
| Physical violence by sharp object                                            | 240.68<br>(129.33 to<br>351.49)       | 213.54<br>(108.75 to<br>362.78)        | 156.73<br>(78.46 to<br>264.57)        | 229.80<br>(112.59 to<br>396.12)        | 4.58<br>(2.47 to<br>6.59)     | 4.59<br>(2.27 to<br>7.60)      | 3.42<br>(1.73 to<br>5.63)      | 4.89<br>(2.37 to<br>8.12)       |
| Physical violence by other means                                             | 674.17<br>(386.32 to<br>927.03)       | 590.92<br>(300.38 to<br>984.35)        | 495.75<br>(247.42 to<br>811.55)       | 655.46<br>(323.73 to<br>1,099.71)      | 13.56<br>(7.60 to<br>18.61)   | 14.57<br>(7.26 to<br>23.40)    | 12.45<br>(6.24 to<br>19.64)    | 15.88<br>(7.76 to<br>25.63)     |
| Forces of nature, conflict and terrorism, and executions and police conflict | 167.57<br>(97.60 to<br>271.18)        | 244.43<br>(0.00 to<br>492.36)          | 243.02<br>(0.00 to<br>486.04)         | 245.74<br>(0.00 to<br>491.49)          | 3.21<br>(1.89 to<br>5.02)     | 4.82<br>(0.00 to<br>9.64)      | 4.82<br>(0.00 to<br>9.64)      | 4.81<br>(0.00 to<br>9.62)       |
| Exposure to forces of nature                                                 | 0.00<br>(0.00 to<br>0.00)             | 0.00<br>(0.00 to<br>0.00)              | 0.00<br>(0.00 to<br>0.00)             | 0.00<br>(0.00 to<br>0.00)              | 0.00<br>(0.00 to<br>0.00)     | 0.00<br>(0.00 to<br>0.00)      | 0.00<br>(0.00 to<br>0.00)      | 0.00<br>(0.00 to<br>0.00)       |
| Conflict and terrorism                                                       | 0.00<br>(0.00 to<br>0.00)             | 21.38<br>(0.00 to<br>42.76)            | 21.17<br>(0.00 to<br>42.34)           | 21.61<br>(0.00 to<br>43.22)            | 0.00<br>(0.00 to<br>0.00)     | 0.42<br>(0.00 to<br>0.84)      | 0.42<br>(0.00 to<br>0.84)      | 0.42<br>(0.00 to<br>0.84)       |
| Executions and police conflict                                               | 167.57<br>(97.60 to<br>271.18)        | 223.05<br>(0.00 to<br>446.10)          | 221.84<br>(0.00 to<br>443.68)         | 224.13<br>(0.00 to<br>448.26)          | 3.21<br>(1.89 to<br>5.02)     | 4.40<br>(0.00 to<br>8.80)      | 4.40<br>(0.00 to<br>8.80)      | 4.40<br>(0.00 to<br>8.80)       |

**Egypt**

| Cause                                                                    | YLLs (in 1000s)                          |                                          |                                          |                                          | Deaths (in 1000s)               |                                   |                                 |                                   |
|--------------------------------------------------------------------------|------------------------------------------|------------------------------------------|------------------------------------------|------------------------------------------|---------------------------------|-----------------------------------|---------------------------------|-----------------------------------|
|                                                                          | 2016                                     | 2040 Forecast                            | 2040 Better Scenario                     | 2040 Worse Scenario                      | 2016                            | 2040 Forecast                     | 2040 Better Scenario            | 2040 Worse Scenario               |
| <b>All causes</b>                                                        | 15,619.96<br>(13,646.60 to<br>17,658.40) | 18,723.90<br>(14,605.09 to<br>24,143.22) | 14,402.30<br>(11,494.00 to<br>18,452.98) | 24,285.64<br>(18,806.94 to<br>30,995.84) | 517.77<br>(461.76 to<br>571.21) | 820.21<br>(651.71 to<br>1,017.46) | 666.29<br>(537.00 to<br>838.10) | 998.45<br>(803.43 to<br>1,222.53) |
| <b>Communicable, maternal, neonatal, and nutritional diseases</b>        | 3,246.86<br>(2,346.46 to<br>4,509.89)    | 1,560.40<br>(976.62 to<br>2,531.98)      | 1,160.08<br>(742.12 to<br>1,814.80)      | 2,327.32<br>(1,375.72 to<br>4,003.41)    | 50.33<br>(39.29 to<br>64.54)    | 38.69<br>(26.90 to<br>55.78)      | 31.67<br>(22.10 to<br>45.81)    | 50.21<br>(33.89 to<br>74.86)      |
| <b>HIV/AIDS and tuberculosis</b>                                         | 41.42<br>(33.02 to<br>51.68)             | 29.44<br>(20.59 to<br>41.50)             | 17.98<br>(11.68 to<br>26.84)             | 45.38<br>(32.03 to<br>63.59)             | 1.05<br>(0.80 to<br>1.29)       | 0.79<br>(0.55 to<br>1.13)         | 0.51<br>(0.33 to<br>0.75)       | 1.20<br>(0.83 to<br>1.75)         |
| <b>Tuberculosis</b>                                                      | 35.29<br>(27.31 to<br>44.61)             | 18.91<br>(12.34 to<br>28.78)             | 13.38<br>(8.37 to<br>20.60)              | 29.60<br>(18.79 to<br>46.65)             | 0.93<br>(0.70 to<br>1.17)       | 0.57<br>(0.37 to<br>0.88)         | 0.41<br>(0.26 to<br>0.63)       | 0.87<br>(0.55 to<br>1.38)         |
| <b>HIV/AIDS</b>                                                          | 6.13<br>(3.49 to<br>10.16)               | 10.54<br>(5.63 to<br>17.40)              | 4.60<br>(1.93 to<br>9.65)                | 15.78<br>(9.11 to<br>24.63)              | 0.12<br>(0.06 to<br>0.20)       | 0.22<br>(0.11 to<br>0.37)         | 0.09<br>(0.03 to<br>0.21)       | 0.33<br>(0.18 to<br>0.53)         |
| <b>Diarrhea, lower respiratory, and other common infectious diseases</b> | 2,098.42<br>(1,559.42 to<br>2,846.51)    | 1,037.23<br>(607.41 to<br>1,810.15)      | 781.13<br>(474.76 to<br>1,300.03)        | 1,529.70<br>(834.61 to<br>2,911.16)      | 34.93<br>(27.62 to<br>44.89)    | 30.62<br>(19.95 to<br>46.40)      | 25.48<br>(16.41 to<br>38.94)    | 38.53<br>(24.82 to<br>61.21)      |
| <b>Diarrheal diseases</b>                                                | 817.96<br>(493.46 to<br>1,308.88)        | 109.65<br>(24.62 to<br>330.78)           | 60.91<br>(14.72 to<br>178.51)            | 272.91<br>(55.91 to<br>748.43)           | 10.54<br>(6.59 to<br>16.57)     | 2.19<br>(0.57 to<br>6.03)         | 1.51<br>(0.42 to<br>4.02)       | 4.69<br>(1.10 to<br>12.39)        |
| <b>Intestinal infectious diseases</b>                                    | 26.63<br>(13.33 to<br>46.97)             | 17.28<br>(7.74 to<br>32.36)              | 15.65<br>(7.16 to<br>29.17)              | 21.23<br>(9.40 to<br>39.54)              | 0.40<br>(0.21 to<br>0.70)       | 0.28<br>(0.13 to<br>0.51)         | 0.26<br>(0.13 to<br>0.47)       | 0.34<br>(0.16 to<br>0.61)         |
| <b>Typhoid fever</b>                                                     | 23.65<br>(11.64 to<br>42.44)             | 14.98<br>(6.48 to<br>27.62)              | 13.65<br>(6.01 to<br>24.97)              | 18.36<br>(7.88 to<br>34.00)              | 0.36<br>(0.18 to<br>0.63)       | 0.24<br>(0.11 to<br>0.44)         | 0.22<br>(0.11 to<br>0.41)       | 0.29<br>(0.13 to<br>0.52)         |

|                                         |                                     |                                   |                                   |                                     |                              |                              |                              |                              |
|-----------------------------------------|-------------------------------------|-----------------------------------|-----------------------------------|-------------------------------------|------------------------------|------------------------------|------------------------------|------------------------------|
| Paratyphoid fever                       | 2.98<br>(1.25 to<br>5.90)           | 2.30<br>(0.89 to<br>4.70)         | 2.00<br>(0.78 to<br>4.07)         | 2.86<br>(1.10 to<br>5.95)           | 0.05<br>(0.02 to<br>0.09)    | 0.04<br>(0.02 to<br>0.08)    | 0.03<br>(0.01 to<br>0.07)    | 0.05<br>(0.02 to<br>0.09)    |
| Other intestinal infectious diseases    | 0.01<br>(0.00 to<br>0.01)           | 0.00<br>(0.00 to<br>0.00)         | 0.00<br>(0.00 to<br>0.00)         | 0.00<br>(0.00 to<br>0.00)           | 0.00<br>(0.00 to<br>0.00)    | 0.00<br>(0.00 to<br>0.00)    | 0.00<br>(0.00 to<br>0.00)    | 0.00<br>(0.00 to<br>0.00)    |
| Lower respiratory infections            | 1,097.81<br>(810.75 to<br>1,463.82) | 828.82<br>(475.22 to<br>1,452.82) | 634.07<br>(367.54 to<br>1,087.61) | 1,122.31<br>(601.01 to<br>2,191.43) | 21.52<br>(16.93 to<br>27.85) | 26.46<br>(16.45 to<br>41.80) | 22.17<br>(13.94 to<br>34.98) | 31.41<br>(19.34 to<br>50.10) |
| Upper respiratory infections            | 0.60<br>(0.29 to<br>1.17)           | 0.46<br>(0.19 to<br>0.93)         | 0.37<br>(0.15 to<br>0.75)         | 0.67<br>(0.28 to<br>1.35)           | 0.01<br>(0.01 to<br>0.02)    | 0.02<br>(0.01 to<br>0.03)    | 0.01<br>(0.01 to<br>0.03)    | 0.02<br>(0.01 to<br>0.04)    |
| Otitis media                            | 0.00<br>(0.00 to<br>0.01)           | 0.00<br>(0.00 to<br>0.00)         | 0.00<br>(0.00 to<br>0.00)         | 0.00<br>(0.00 to<br>0.00)           | 0.00<br>(0.00 to<br>0.00)    | 0.00<br>(0.00 to<br>0.00)    | 0.00<br>(0.00 to<br>0.00)    | 0.00<br>(0.00 to<br>0.00)    |
| Meningitis                              | 69.48<br>(39.31 to<br>125.85)       | 33.08<br>(17.26 to<br>57.13)      | 29.88<br>(15.71 to<br>50.15)      | 39.24<br>(20.05 to<br>70.72)        | 1.12<br>(0.69 to<br>1.83)    | 0.70<br>(0.44 to<br>1.09)    | 0.67<br>(0.41 to<br>1.04)    | 0.77<br>(0.47 to<br>1.22)    |
| Pneumococcal meningitis                 | 0.46<br>(0.25 to<br>0.79)           | 0.20<br>(0.11 to<br>0.36)         | 0.20<br>(0.11 to<br>0.35)         | 0.22<br>(0.11 to<br>0.39)           | 0.01<br>(0.01 to<br>0.01)    | 0.01<br>(0.00 to<br>0.01)    | 0.01<br>(0.00 to<br>0.01)    | 0.01<br>(0.00 to<br>0.01)    |
| H influenzae type B meningitis          | 4.95<br>(2.81 to<br>9.62)           | 2.88<br>(1.16 to<br>7.76)         | 2.52<br>(1.10 to<br>6.18)         | 4.27<br>(1.37 to<br>12.87)          | 0.08<br>(0.05 to<br>0.14)    | 0.05<br>(0.03 to<br>0.11)    | 0.05<br>(0.03 to<br>0.09)    | 0.07<br>(0.03 to<br>0.17)    |
| Meningococcal meningitis                | 35.13<br>(20.04 to<br>63.21)        | 15.80<br>(8.45 to<br>27.01)       | 14.31<br>(7.85 to<br>23.65)       | 18.38<br>(9.53 to<br>32.69)         | 0.57<br>(0.36 to<br>0.95)    | 0.35<br>(0.22 to<br>0.55)    | 0.33<br>(0.21 to<br>0.53)    | 0.38<br>(0.23 to<br>0.60)    |
| Other meningitis                        | 28.95<br>(16.49 to<br>52.85)        | 14.19<br>(7.14 to<br>24.48)       | 12.85<br>(6.70 to<br>21.80)       | 16.38<br>(8.30 to<br>29.01)         | 0.46<br>(0.28 to<br>0.76)    | 0.30<br>(0.18 to<br>0.46)    | 0.28<br>(0.17 to<br>0.43)    | 0.32<br>(0.19 to<br>0.52)    |
| Encephalitis                            | 56.07<br>(25.56 to<br>104.53)       | 40.96<br>(21.28 to<br>71.31)      | 36.31<br>(19.17 to<br>60.70)      | 51.32<br>(25.20 to<br>93.49)        | 0.91<br>(0.48 to<br>1.48)    | 0.85<br>(0.52 to<br>1.24)    | 0.78<br>(0.49 to<br>1.11)    | 1.00<br>(0.58 to<br>1.53)    |
| Diphtheria                              | 0.11<br>(0.06 to<br>0.18)           | 0.02<br>(0.01 to<br>0.04)         | 0.02<br>(0.01 to<br>0.03)         | 0.05<br>(0.02 to<br>0.11)           | 0.00<br>(0.00 to<br>0.00)    | 0.00<br>(0.00 to<br>0.00)    | 0.00<br>(0.00 to<br>0.00)    | 0.00<br>(0.00 to<br>0.00)    |
| Whooping cough                          | 12.61<br>(0.74 to<br>43.82)         | 3.41<br>(0.19 to<br>14.31)        | 1.10<br>(0.07 to<br>4.36)         | 14.63<br>(0.76 to<br>60.55)         | 0.15<br>(0.01 to<br>0.52)    | 0.04<br>(0.00 to<br>0.17)    | 0.01<br>(0.00 to<br>0.05)    | 0.17<br>(0.01 to<br>0.72)    |
| Tetanus                                 | 12.01<br>(2.50 to<br>25.32)         | 1.69<br>(0.31 to<br>4.59)         | 1.46<br>(0.26 to<br>3.96)         | 2.64<br>(0.46 to<br>8.38)           | 0.19<br>(0.05 to<br>0.40)    | 0.03<br>(0.01 to<br>0.07)    | 0.03<br>(0.01 to<br>0.06)    | 0.04<br>(0.01 to<br>0.11)    |
| Measles                                 | 1.55<br>(0.45 to<br>4.06)           | 0.54<br>(0.02 to<br>3.92)         | 0.28<br>(0.02 to<br>1.81)         | 2.75<br>(0.07 to<br>20.57)          | 0.02<br>(0.01 to<br>0.05)    | 0.01<br>(0.00 to<br>0.05)    | 0.00<br>(0.00 to<br>0.02)    | 0.03<br>(0.00 to<br>0.24)    |
| <b>Egypt</b>                            |                                     |                                   |                                   |                                     |                              |                              |                              |                              |
| Cause                                   | YLLs (in 1000s)                     |                                   |                                   |                                     | Deaths (in 1000s)            |                              |                              |                              |
|                                         | 2016                                | 2040 Forecast                     | 2040 Better Scenario              | 2040 Worse Scenario                 | 2016                         | 2040 Forecast                | 2040 Better Scenario         | 2040 Worse Scenario          |
| Varicella and herpes zoster             | 3.59<br>(2.10 to<br>6.13)           | 1.31<br>(0.70 to<br>2.35)         | 1.06<br>(0.56 to<br>1.89)         | 1.96<br>(0.99 to<br>3.68)           | 0.07<br>(0.05 to<br>0.11)    | 0.04<br>(0.03 to<br>0.07)    | 0.04<br>(0.02 to<br>0.06)    | 0.05<br>(0.03 to<br>0.08)    |
| Neglected tropical diseases and malaria | 6.53<br>(4.79 to<br>8.58)           | 4.59<br>(3.20 to<br>6.28)         | 4.22<br>(2.95 to<br>5.77)         | 5.44<br>(3.83 to<br>7.32)           | 0.19<br>(0.14 to<br>0.25)    | 0.15<br>(0.10 to<br>0.20)    | 0.14<br>(0.10 to<br>0.19)    | 0.17<br>(0.12 to<br>0.23)    |
| Malaria                                 | 0.34<br>(0.18 to<br>0.46)           | 0.22<br>(0.12 to<br>0.31)         | 0.21<br>(0.12 to<br>0.30)         | 0.23<br>(0.12 to<br>0.32)           | 0.01<br>(0.00 to<br>0.01)    | 0.01<br>(0.00 to<br>0.01)    | 0.01<br>(0.00 to<br>0.01)    | 0.01<br>(0.00 to<br>0.01)    |
| Chagas disease                          | 0.00<br>(0.00 to<br>0.00)           | 0.00<br>(0.00 to<br>0.00)         | 0.00<br>(0.00 to<br>0.00)         | 0.00<br>(0.00 to<br>0.00)           | 0.00<br>(0.00 to<br>0.00)    | 0.00<br>(0.00 to<br>0.00)    | 0.00<br>(0.00 to<br>0.00)    | 0.00<br>(0.00 to<br>0.00)    |
| Leishmaniasis                           | 0.01<br>(0.00 to<br>0.01)           | 0.00<br>(0.00 to<br>0.00)         | 0.00<br>(0.00 to<br>0.00)         | 0.00<br>(0.00 to<br>0.01)           | 0.00<br>(0.00 to<br>0.00)    | 0.00<br>(0.00 to<br>0.00)    | 0.00<br>(0.00 to<br>0.00)    | 0.00<br>(0.00 to<br>0.00)    |

|                                                       |                                         |                                         |                                         |                                         |                                      |                                      |                                      |                                      |                        |
|-------------------------------------------------------|-----------------------------------------|-----------------------------------------|-----------------------------------------|-----------------------------------------|--------------------------------------|--------------------------------------|--------------------------------------|--------------------------------------|------------------------|
| African trypanosomiasis                               | 0.00<br>(0.00 to 0.00)                  | 0.00<br>(0.00 to 0.00)                  | 0.00<br>(0.00 to 0.00)                  | 0.00<br>(0.00 to 0.00)                  | 0.00<br>(0.00 to 0.00)               | 0.00<br>(0.00 to 0.00)               | 0.00<br>(0.00 to 0.00)               | 0.00<br>(0.00 to 0.00)               | 0.00<br>(0.00 to 0.00) |
| Schistosomiasis                                       | 4.54<br>(3.05 to 6.43)                  | 3.09<br>(1.92 to 4.53)                  | 2.88<br>(1.82 to 4.26)                  | 3.53<br>(2.24 to 5.18)                  | 0.15<br>(0.10 to 0.22)               | 0.12<br>(0.07 to 0.17)               | 0.11<br>(0.07 to 0.16)               | 0.13<br>(0.08 to 0.18)               |                        |
| Cysticercosis                                         | 0.07<br>(0.05 to 0.10)                  | 0.03<br>(0.02 to 0.04)                  | 0.03<br>(0.02 to 0.04)                  | 0.03<br>(0.02 to 0.05)                  | 0.00<br>(0.00 to 0.00)               | 0.00<br>(0.00 to 0.00)               | 0.00<br>(0.00 to 0.00)               | 0.00<br>(0.00 to 0.00)               | 0.00<br>(0.00 to 0.00) |
| Cystic echinococcosis                                 | 0.00<br>(0.00 to 0.00)                  | 0.00<br>(0.00 to 0.00)                  | 0.00<br>(0.00 to 0.00)                  | 0.00<br>(0.00 to 0.00)                  | 0.00<br>(0.00 to 0.00)               | 0.00<br>(0.00 to 0.00)               | 0.00<br>(0.00 to 0.00)               | 0.00<br>(0.00 to 0.00)               | 0.00<br>(0.00 to 0.00) |
| Dengue                                                | 0.17<br>(0.01 to 0.55)                  | 0.39<br>(0.03 to 1.05)                  | 0.36<br>(0.03 to 0.98)                  | 0.45<br>(0.03 to 1.23)                  | 0.00<br>(0.00 to 0.01)               | 0.00<br>(0.00 to 0.02)               | 0.01<br>(0.00 to 0.02)               | 0.01<br>(0.00 to 0.02)               | 0.01<br>(0.00 to 0.02) |
| Yellow fever                                          | 0.00<br>(0.00 to 0.00)                  | 0.00<br>(0.00 to 0.00)                  | 0.00<br>(0.00 to 0.00)                  | 0.00<br>(0.00 to 0.00)                  | 0.00<br>(0.00 to 0.00)               | 0.00<br>(0.00 to 0.00)               | 0.00<br>(0.00 to 0.00)               | 0.00<br>(0.00 to 0.00)               | 0.00<br>(0.00 to 0.00) |
| Rabies                                                | 0.53<br>(0.15 to 1.16)                  | 0.20<br>(0.05 to 0.55)                  | 0.15<br>(0.03 to 0.40)                  | 0.35<br>(0.09 to 0.85)                  | 0.01<br>(0.00 to 0.02)               | 0.00<br>(0.00 to 0.01)               | 0.00<br>(0.00 to 0.01)               | 0.01<br>(0.00 to 0.02)               | 0.01<br>(0.00 to 0.02) |
| Intestinal nematode infections                        | 0.10<br>(0.03 to 0.21)                  | 0.09<br>(0.03 to 0.21)                  | 0.09<br>(0.03 to 0.19)                  | 0.11<br>(0.04 to 0.24)                  | 0.00<br>(0.00 to 0.00)               | 0.00<br>(0.00 to 0.00)               | 0.00<br>(0.00 to 0.00)               | 0.00<br>(0.00 to 0.00)               | 0.00<br>(0.00 to 0.00) |
| Other neglected tropical diseases                     | 0.76<br>(0.61 to 1.04)                  | 0.57<br>(0.40 to 0.82)                  | 0.50<br>(0.34 to 0.72)                  | 0.74<br>(0.52 to 1.05)                  | 0.01<br>(0.01 to 0.02)               | 0.01<br>(0.01 to 0.02)               | 0.01<br>(0.01 to 0.02)               | 0.02<br>(0.01 to 0.02)               | 0.02<br>(0.01 to 0.02) |
| <b>Maternal disorders</b>                             | <b>54.70</b><br><b>(39.41 to 75.16)</b> | <b>26.43</b><br><b>(14.33 to 42.88)</b> | <b>20.40</b><br><b>(10.96 to 33.87)</b> | <b>41.09</b><br><b>(21.90 to 66.46)</b> | <b>0.96</b><br><b>(0.69 to 1.31)</b> | <b>0.46</b><br><b>(0.25 to 0.76)</b> | <b>0.36</b><br><b>(0.19 to 0.60)</b> | <b>0.72</b><br><b>(0.38 to 1.16)</b> |                        |
| Maternal hemorrhage                                   | 20.09<br>(13.42 to 29.16)               | 9.68<br>(4.98 to 17.42)                 | 7.49<br>(3.70 to 13.19)                 | 14.91<br>(7.25 to 25.99)                | 0.36<br>(0.24 to 0.52)               | 0.17<br>(0.09 to 0.31)               | 0.13<br>(0.07 to 0.23)               | 0.26<br>(0.13 to 0.46)               |                        |
| Maternal sepsis and other maternal infections         | 14.51<br>(9.41 to 20.73)                | 6.53<br>(3.22 to 11.46)                 | 5.02<br>(2.43 to 8.95)                  | 10.23<br>(4.94 to 17.94)                | 0.25<br>(0.17 to 0.36)               | 0.11<br>(0.06 to 0.20)               | 0.09<br>(0.04 to 0.15)               | 0.18<br>(0.09 to 0.31)               |                        |
| Maternal hypertensive disorders                       | 10.59<br>(6.83 to 15.66)                | 5.10<br>(2.47 to 9.41)                  | 3.92<br>(1.84 to 7.18)                  | 7.95<br>(3.63 to 14.21)                 | 0.18<br>(0.12 to 0.27)               | 0.09<br>(0.04 to 0.16)               | 0.07<br>(0.03 to 0.12)               | 0.14<br>(0.06 to 0.24)               |                        |
| Maternal obstructed labor and uterine rupture         | 0.45<br>(0.21 to 0.85)                  | 0.21<br>(0.08 to 0.45)                  | 0.16<br>(0.06 to 0.35)                  | 0.34<br>(0.12 to 0.72)                  | 0.01<br>(0.00 to 0.01)               | 0.00<br>(0.00 to 0.01)               | 0.00<br>(0.00 to 0.01)               | 0.01<br>(0.00 to 0.01)               |                        |
| Maternal abortion, miscarriage, and ectopic pregnancy | 1.49<br>(0.82 to 2.43)                  | 0.84<br>(0.37 to 1.68)                  | 0.65<br>(0.27 to 1.30)                  | 1.31<br>(0.56 to 2.55)                  | 0.03<br>(0.01 to 0.04)               | 0.02<br>(0.01 to 0.03)               | 0.01<br>(0.01 to 0.02)               | 0.02<br>(0.01 to 0.05)               |                        |
| Indirect maternal deaths                              | 2.75<br>(1.61 to 4.30)                  | 1.54<br>(0.67 to 2.83)                  | 1.19<br>(0.51 to 2.20)                  | 2.44<br>(1.02 to 4.46)                  | 0.05<br>(0.03 to 0.07)               | 0.03<br>(0.01 to 0.05)               | 0.02<br>(0.01 to 0.04)               | 0.04<br>(0.02 to 0.08)               |                        |
| Late maternal deaths                                  | 0.58<br>(0.28 to 1.07)                  | 0.26<br>(0.10 to 0.53)                  | 0.20<br>(0.08 to 0.41)                  | 0.41<br>(0.16 to 0.84)                  | 0.01<br>(0.00 to 0.02)               | 0.00<br>(0.00 to 0.01)               | 0.00<br>(0.00 to 0.01)               | 0.01<br>(0.00 to 0.01)               |                        |
| Maternal deaths aggravated by HIV/AIDS                | 0.00<br>(0.00 to 0.00)                  | 0.00<br>(0.00 to 0.01)                  | 0.00<br>(0.00 to 0.01)                  | 0.01<br>(0.00 to 0.02)                  | 0.00<br>(0.00 to 0.00)               | 0.00<br>(0.00 to 0.00)               | 0.00<br>(0.00 to 0.00)               | 0.00<br>(0.00 to 0.00)               |                        |
| Other maternal disorders                              | 4.25<br>(2.55 to 6.61)                  | 2.27<br>(1.08 to 3.90)                  | 1.78<br>(0.87 to 3.08)                  | 3.50<br>(1.67 to 6.20)                  | 0.07<br>(0.04 to 0.11)               | 0.04<br>(0.02 to 0.07)               | 0.03<br>(0.02 to 0.05)               | 0.06<br>(0.03 to 0.11)               |                        |

**Egypt**

| Cause              | YLLs (in 1000s)                |                              |                              |                                | Deaths (in 1000s)        |                        |                        |                         |
|--------------------|--------------------------------|------------------------------|------------------------------|--------------------------------|--------------------------|------------------------|------------------------|-------------------------|
|                    | 2016                           | 2040 Forecast                | 2040 Better Scenario         | 2040 Worse Scenario            | 2016                     | 2040 Forecast          | 2040 Better Scenario   | 2040 Worse Scenario     |
| Neonatal disorders | 965.22<br>(581.41 to 1,494.19) | 411.10<br>(187.49 to 816.73) | 289.89<br>(132.60 to 589.37) | 641.84<br>(300.92 to 1,280.13) | 11.15<br>(6.72 to 17.27) | 4.75<br>(2.17 to 9.44) | 3.35<br>(1.53 to 6.81) | 7.42<br>(3.48 to 14.79) |

|                                                                         |                                     |                                     |                                     |                                     |                                  |                                  |                                  |                                  |
|-------------------------------------------------------------------------|-------------------------------------|-------------------------------------|-------------------------------------|-------------------------------------|----------------------------------|----------------------------------|----------------------------------|----------------------------------|
| Neonatal preterm birth                                                  | 400.08<br>(198.93 to<br>638.76)     | 166.76<br>(70.26 to<br>345.34)      | 105.37<br>(42.33 to<br>221.44)      | 257.08<br>(110.20 to<br>530.02)     | 4.62<br>(2.30 to<br>7.38)        | 1.93<br>(0.81 to<br>3.99)        | 1.22<br>(0.49 to<br>2.56)        | 2.97<br>(1.27 to<br>6.12)        |
| Neonatal encephalopathy due to birth asphyxia and trauma                | 210.86<br>(115.97 to<br>366.08)     | 77.90<br>(27.67 to<br>189.95)       | 59.22<br>(21.51 to<br>144.94)       | 119.08<br>(43.69 to<br>283.20)      | 2.44<br>(1.34 to<br>4.23)        | 0.90<br>(0.32 to<br>2.19)        | 0.68<br>(0.25 to<br>1.68)        | 1.38<br>(0.51 to<br>3.27)        |
| Neonatal sepsis and other neonatal infections                           | 201.65<br>(99.73 to<br>350.76)      | 103.75<br>(40.44 to<br>203.97)      | 78.89<br>(30.22 to<br>154.54)       | 161.68<br>(64.79 to<br>319.79)      | 2.33<br>(1.15 to<br>4.05)        | 1.20<br>(0.47 to<br>2.36)        | 0.91<br>(0.35 to<br>1.79)        | 1.87<br>(0.75 to<br>3.70)        |
| Hemolytic disease and other neonatal jaundice                           | 7.87<br>(3.75 to<br>14.85)          | 2.48<br>(0.77 to<br>6.15)           | 1.80<br>(0.57 to<br>4.46)           | 4.16<br>(1.32 to<br>10.46)          | 0.09<br>(0.04 to<br>0.17)        | 0.03<br>(0.01 to<br>0.07)        | 0.02<br>(0.01 to<br>0.05)        | 0.05<br>(0.02 to<br>0.12)        |
| Other neonatal disorders                                                | 144.75<br>(78.90 to<br>251.17)      | 60.20<br>(23.36 to<br>134.02)       | 44.62<br>(17.44 to<br>100.58)       | 99.84<br>(38.72 to<br>221.98)       | 1.67<br>(0.91 to<br>2.90)        | 0.70<br>(0.27 to<br>1.55)        | 0.52<br>(0.20 to<br>1.16)        | 1.15<br>(0.45 to<br>2.57)        |
| <b>Nutritional deficiencies</b>                                         | <b>22.24</b><br>(12.70 to<br>34.90) | <b>11.33</b><br>(6.43 to<br>16.94)  | <b>10.51</b><br>(5.99 to<br>15.47)  | <b>14.06</b><br>(7.81 to<br>21.97)  | <b>0.70</b><br>(0.42 to<br>0.98) | <b>0.61</b><br>(0.34 to<br>0.91) | <b>0.62</b><br>(0.35 to<br>0.93) | <b>0.66</b><br>(0.37 to<br>0.99) |
| Protein-energy malnutrition                                             | 17.42<br>(9.13 to<br>28.69)         | 8.18<br>(4.29 to<br>13.19)          | 7.66<br>(4.04 to<br>12.01)          | 10.10<br>(5.16 to<br>17.00)         | 0.59<br>(0.34 to<br>0.85)        | 0.49<br>(0.26 to<br>0.78)        | 0.51<br>(0.27 to<br>0.79)        | 0.53<br>(0.28 to<br>0.85)        |
| Iodine deficiency                                                       | 0.87<br>(0.06 to<br>3.50)           | 0.70<br>(0.06 to<br>2.12)           | 0.62<br>(0.05 to<br>1.89)           | 0.91<br>(0.08 to<br>2.78)           | 0.02<br>(0.00 to<br>0.06)        | 0.03<br>(0.00 to<br>0.12)        | 0.03<br>(0.00 to<br>0.13)        | 0.04<br>(0.00 to<br>0.14)        |
| Dietary iron deficiency                                                 | 1.55<br>(0.98 to<br>2.35)           | 0.97<br>(0.54 to<br>1.61)           | 0.87<br>(0.49 to<br>1.41)           | 1.22<br>(0.67 to<br>2.06)           | 0.03<br>(0.02 to<br>0.04)        | 0.02<br>(0.01 to<br>0.03)        | 0.02<br>(0.01 to<br>0.03)        | 0.02<br>(0.01 to<br>0.04)        |
| Other nutritional deficiencies                                          | 2.39<br>(1.52 to<br>3.60)           | 1.49<br>(0.85 to<br>2.37)           | 1.35<br>(0.77 to<br>2.17)           | 1.82<br>(1.04 to<br>2.90)           | 0.07<br>(0.04 to<br>0.11)        | 0.07<br>(0.03 to<br>0.11)        | 0.06<br>(0.03 to<br>0.11)        | 0.07<br>(0.04 to<br>0.12)        |
| <b>Other communicable, maternal, neonatal, and nutritional diseases</b> | <b>58.33</b><br>(43.59 to<br>82.65) | <b>40.28</b><br>(30.74 to<br>52.17) | <b>35.95</b><br>(27.55 to<br>46.50) | <b>49.81</b><br>(37.18 to<br>65.75) | <b>1.35</b><br>(1.08 to<br>1.67) | <b>1.30</b><br>(1.03 to<br>1.60) | <b>1.21</b><br>(0.96 to<br>1.49) | <b>1.51</b><br>(1.18 to<br>1.87) |
| Sexually transmitted infections excluding HIV                           | 4.69<br>(3.62 to<br>18.61)          | 1.48<br>(0.61 to<br>3.28)           | 1.24<br>(0.52 to<br>2.72)           | 2.07<br>(0.80 to<br>4.81)           | 0.11<br>(0.05 to<br>0.22)        | 0.02<br>(0.01 to<br>0.04)        | 0.02<br>(0.01 to<br>0.04)        | 0.03<br>(0.01 to<br>0.06)        |
| Syphilis                                                                | 3.42<br>(3.35 to<br>18.42)          | 1.31<br>(0.44 to<br>3.13)           | 1.08<br>(0.37 to<br>2.58)           | 1.87<br>(0.61 to<br>4.61)           | 0.10<br>(0.04 to<br>0.22)        | 0.02<br>(0.01 to<br>0.04)        | 0.01<br>(0.01 to<br>0.03)        | 0.02<br>(0.01 to<br>0.06)        |
| Chlamydial infection                                                    | 0.05<br>(0.03 to<br>0.07)           | 0.03<br>(0.02 to<br>0.05)           | 0.03<br>(0.02 to<br>0.05)           | 0.04<br>(0.02 to<br>0.06)           | 0.00<br>(0.00 to<br>0.00)        | 0.00<br>(0.00 to<br>0.00)        | 0.00<br>(0.00 to<br>0.00)        | 0.00<br>(0.00 to<br>0.00)        |
| Gonococcal infection                                                    | 0.15<br>(0.10 to<br>0.23)           | 0.09<br>(0.05 to<br>0.15)           | 0.09<br>(0.05 to<br>0.14)           | 0.10<br>(0.06 to<br>0.17)           | 0.00<br>(0.00 to<br>0.01)        | 0.00<br>(0.00 to<br>0.00)        | 0.00<br>(0.00 to<br>0.00)        | 0.00<br>(0.00 to<br>0.00)        |
| Other sexually transmitted infections                                   | 0.08<br>(0.05 to<br>0.12)           | 0.05<br>(0.03 to<br>0.08)           | 0.05<br>(0.03 to<br>0.07)           | 0.06<br>(0.03 to<br>0.09)           | 0.00<br>(0.00 to<br>0.00)        | 0.00<br>(0.00 to<br>0.00)        | 0.00<br>(0.00 to<br>0.00)        | 0.00<br>(0.00 to<br>0.00)        |
| Acute hepatitis                                                         | 23.54<br>(19.59 to<br>28.50)        | 19.82<br>(14.55 to<br>26.03)        | 17.85<br>(12.96 to<br>23.80)        | 23.37<br>(17.13 to<br>30.59)        | 0.70<br>(0.57 to<br>0.85)        | 0.68<br>(0.50 to<br>0.90)        | 0.63<br>(0.46 to<br>0.83)        | 0.78<br>(0.58 to<br>1.03)        |
| Acute hepatitis A                                                       | 0.81<br>(0.23 to<br>1.54)           | 0.40<br>(0.16 to<br>0.85)           | 0.36<br>(0.14 to<br>0.74)           | 0.50<br>(0.20 to<br>1.03)           | 0.01<br>(0.01 to<br>0.02)        | 0.01<br>(0.00 to<br>0.02)        | 0.01<br>(0.00 to<br>0.02)        | 0.01<br>(0.01 to<br>0.03)        |
| Acute hepatitis B                                                       | 19.26<br>(15.46 to<br>23.71)        | 16.78<br>(12.02 to<br>22.68)        | 15.08<br>(10.73 to<br>20.41)        | 19.81<br>(14.00 to<br>26.61)        | 0.60<br>(0.47 to<br>0.74)        | 0.58<br>(0.42 to<br>0.79)        | 0.53<br>(0.37 to<br>0.71)        | 0.67<br>(0.48 to<br>0.90)        |
| Acute hepatitis C                                                       | 0.54<br>(0.38 to<br>0.74)           | 0.59<br>(0.37 to<br>0.90)           | 0.55<br>(0.35 to<br>0.86)           | 0.64<br>(0.41 to<br>0.98)           | 0.02<br>(0.01 to<br>0.02)        | 0.02<br>(0.01 to<br>0.03)        | 0.02<br>(0.01 to<br>0.03)        | 0.02<br>(0.01 to<br>0.03)        |
| Acute hepatitis E                                                       | 2.93<br>(2.07 to<br>4.01)           | 2.05<br>(1.28 to<br>3.12)           | 1.86<br>(1.15 to<br>2.91)           | 2.42<br>(1.50 to<br>3.68)           | 0.07<br>(0.05 to<br>0.10)        | 0.07<br>(0.04 to<br>0.11)        | 0.07<br>(0.04 to<br>0.11)        | 0.08<br>(0.05 to<br>0.12)        |
| Other unspecified infectious diseases                                   | 26.09<br>(14.79 to<br>47.52)        | 18.98<br>(12.03 to<br>27.31)        | 16.86<br>(11.09 to<br>23.68)        | 24.37<br>(15.30 to<br>36.69)        | 0.55<br>(0.35 to<br>0.81)        | 0.59<br>(0.42 to<br>0.78)        | 0.56<br>(0.40 to<br>0.75)        | 0.70<br>(0.48 to<br>0.92)        |

|                                      | 10,402.26<br>(9,172.43 to<br>11,653.57)        | 15,058.29<br>(11,460.66 to<br>20,172.91)        | 11,666.64<br>(9,187.67 to<br>15,496.46)        | 19,427.09<br>(14,605.76 to<br>25,937.95)        | 425.94<br>(382.84 to<br>471.78)        | 729.41<br>(562.50 to<br>928.34)        | 593.51<br>(467.95 to<br>765.37)        | 888.43<br>(697.65 to<br>1,113.84)        |
|--------------------------------------|------------------------------------------------|-------------------------------------------------|------------------------------------------------|-------------------------------------------------|----------------------------------------|----------------------------------------|----------------------------------------|------------------------------------------|
| Egypt                                |                                                |                                                 |                                                |                                                 |                                        |                                        |                                        |                                          |
| Cause                                | YLLs (in 1000s)                                |                                                 |                                                |                                                 | Deaths (in 1000s)                      |                                        |                                        |                                          |
|                                      | 2016                                           | 2040 Forecast                                   | 2040 Better Scenario                           | 2040 Worse Scenario                             | 2016                                   | 2040 Forecast                          | 2040 Better Scenario                   | 2040 Worse Scenario                      |
| <b>Non-communicable diseases</b>     | <b>10,402.26</b><br>(9,172.43 to<br>11,653.57) | <b>15,058.29</b><br>(11,460.66 to<br>20,172.91) | <b>11,666.64</b><br>(9,187.67 to<br>15,496.46) | <b>19,427.09</b><br>(14,605.76 to<br>25,937.95) | <b>425.94</b><br>(382.84 to<br>471.78) | <b>729.41</b><br>(562.50 to<br>928.34) | <b>593.51</b><br>(467.95 to<br>765.37) | <b>888.43</b><br>(697.65 to<br>1,113.84) |
| <b>Neoplasms</b>                     | <b>1,517.46</b><br>(1,316.23 to<br>1,754.18)   | <b>2,602.24</b><br>(2,044.85 to<br>3,273.48)    | <b>2,491.76</b><br>(1,984.40 to<br>3,100.17)   | <b>2,885.15</b><br>(2,197.74 to<br>3,743.33)    | <b>50.49</b><br>(43.41 to<br>59.66)    | <b>98.98</b><br>(78.50 to<br>123.97)   | <b>97.81</b><br>(79.24 to<br>120.81)   | <b>105.21</b><br>(80.72 to<br>135.58)    |
| Lip and oral cavity cancer           | 9.93<br>(7.99 to<br>12.01)                     | 15.93<br>(11.36 to<br>22.22)                    | 14.41<br>(10.45 to<br>19.53)                   | 21.06<br>(13.96 to<br>31.50)                    | 0.36<br>(0.29 to<br>0.44)              | 0.64<br>(0.47 to<br>0.88)              | 0.61<br>(0.45 to<br>0.81)              | 0.79<br>(0.55 to<br>1.17)                |
| Nasopharynx cancer                   | 3.29<br>(2.58 to<br>4.19)                      | 5.28<br>(3.45 to<br>8.22)                       | 4.55<br>(3.06 to<br>6.92)                      | 7.41<br>(4.55 to<br>12.37)                      | 0.09<br>(0.07 to<br>0.11)              | 0.16<br>(0.10 to<br>0.25)              | 0.14<br>(0.09 to<br>0.21)              | 0.22<br>(0.13 to<br>0.36)                |
| Other pharynx cancer                 | 4.85<br>(3.76 to<br>6.05)                      | 6.77<br>(4.90 to<br>9.43)                       | 6.74<br>(4.86 to<br>9.30)                      | 7.23<br>(5.16 to<br>10.33)                      | 0.16<br>(0.13 to<br>0.21)              | 0.25<br>(0.19 to<br>0.35)              | 0.26<br>(0.19 to<br>0.35)              | 0.26<br>(0.19 to<br>0.37)                |
| Esophageal cancer                    | 29.00<br>(24.66 to<br>33.65)                   | 38.16<br>(26.36 to<br>54.04)                    | 34.37<br>(24.58 to<br>46.81)                   | 49.79<br>(32.13 to<br>76.33)                    | 1.05<br>(0.90 to<br>1.22)              | 1.49<br>(1.06 to<br>2.05)              | 1.39<br>(1.03 to<br>1.86)              | 1.84<br>(1.22 to<br>2.73)                |
| Stomach cancer                       | 65.02<br>(54.95 to<br>75.76)                   | 75.69<br>(56.67 to<br>97.40)                    | 70.29<br>(52.22 to<br>89.71)                   | 81.61<br>(61.55 to<br>105.54)                   | 2.43<br>(2.07 to<br>2.82)              | 3.25<br>(2.48 to<br>4.14)              | 3.12<br>(2.40 to<br>3.91)              | 3.35<br>(2.60 to<br>4.26)                |
| Colon and rectum cancer              | 86.50<br>(69.68 to<br>105.47)                  | 176.48<br>(118.27 to<br>266.14)                 | 173.09<br>(117.09 to<br>255.65)                | 168.41<br>(112.76 to<br>255.95)                 | 3.09<br>(2.51 to<br>3.75)              | 7.15<br>(4.83 to<br>10.75)             | 7.20<br>(4.96 to<br>10.50)             | 6.60<br>(4.48 to<br>9.97)                |
| Liver cancer                         | 314.59<br>(244.22 to<br>397.52)                | 612.66<br>(376.95 to<br>977.22)                 | 575.76<br>(365.32 to<br>918.40)                | 746.82<br>(422.64 to<br>1,259.39)               | 11.82<br>(9.35 to<br>14.37)            | 24.29<br>(15.50 to<br>38.18)           | 23.43<br>(15.51 to<br>36.50)           | 28.52<br>(16.72 to<br>46.82)             |
| Liver cancer due to hepatitis B      | 43.66<br>(30.57 to<br>59.33)                   | 80.96<br>(44.72 to<br>138.98)                   | 75.48<br>(43.43 to<br>126.37)                  | 100.73<br>(51.81 to<br>183.85)                  | 1.45<br>(1.02 to<br>1.97)              | 3.85<br>(1.60 to<br>4.84)              | 2.72<br>(1.59 to<br>4.51)              | 3.44<br>(1.81 to<br>6.13)                |
| Liver cancer due to hepatitis C      | 197.48<br>(150.15 to<br>245.34)                | 389.21<br>(237.45 to<br>624.74)                 | 369.80<br>(231.42 to<br>592.12)                | 468.89<br>(263.37 to<br>804.44)                 | 7.68<br>(6.09 to<br>9.42)              | 15.90<br>(10.12 to<br>25.03)           | 15.51<br>(10.13 to<br>24.03)           | 18.43<br>(10.84 to<br>30.33)             |
| Liver cancer due to alcohol use      | 23.42<br>(14.30 to<br>37.34)                   | 45.99<br>(22.41 to<br>86.62)                    | 42.80<br>(21.59 to<br>79.79)                   | 58.07<br>(26.27 to<br>112.16)                   | 0.89<br>(0.55 to<br>1.40)              | 1.80<br>(0.91 to<br>3.32)              | 1.71<br>(0.89 to<br>3.03)              | 2.19<br>(1.04 to<br>4.19)                |
| Liver cancer due to other causes     | 50.03<br>(35.94 to<br>67.07)                   | 96.50<br>(53.30 to<br>166.52)                   | 87.67<br>(50.32 to<br>144.39)                  | 119.12<br>(61.96 to<br>216.56)                  | 1.80<br>(1.30 to<br>2.40)              | 3.75<br>(2.15 to<br>6.38)              | 3.49<br>(2.08 to<br>5.68)              | 4.45<br>(2.37 to<br>7.96)                |
| Gallbladder and biliary tract cancer | 16.42<br>(12.91 to<br>23.32)                   | 21.53<br>(16.70 to<br>31.91)                    | 22.59<br>(17.39 to<br>32.95)                   | 20.31<br>(15.75 to<br>30.27)                    | 0.67<br>(0.51 to<br>1.02)              | 0.97<br>(0.75 to<br>1.51)              | 1.05<br>(0.81 to<br>1.65)              | 0.89<br>(0.68 to<br>1.40)                |
| Pancreatic cancer                    | 58.98<br>(49.11 to<br>68.91)                   | 129.91<br>(98.10 to<br>173.12)                  | 131.80<br>(101.00 to<br>171.43)                | 125.81<br>(93.23 to<br>168.25)                  | 2.44<br>(2.04 to<br>2.84)              | 5.78<br>(4.43 to<br>7.69)              | 6.04<br>(4.73 to<br>7.87)              | 5.39<br>(4.01 to<br>7.30)                |
| Larynx cancer                        | 17.01<br>(13.43 to<br>20.73)                   | 24.59<br>(14.15 to<br>41.78)                    | 19.75<br>(12.07 to<br>31.38)                   | 38.40<br>(19.07 to<br>70.45)                    | 0.59<br>(0.46 to<br>0.70)              | 0.90<br>(0.55 to<br>1.46)              | 0.76<br>(0.49 to<br>1.15)              | 1.33<br>(0.70 to<br>2.40)                |
| Tracheal, bronchus, and lung cancer  | 123.38<br>(99.71 to<br>146.24)                 | 232.48<br>(144.17 to<br>358.56)                 | 187.98<br>(124.00 to<br>276.80)                | 320.13<br>(174.97 to<br>526.13)                 | 4.48<br>(3.66 to<br>5.26)              | 9.23<br>(6.00 to<br>13.64)             | 7.88<br>(5.42 to<br>11.02)             | 11.87<br>(6.97 to<br>18.73)              |
| Malignant skin melanoma              | 4.03<br>(3.09 to<br>5.32)                      | 7.09<br>(5.32 to<br>9.57)                       | 7.71<br>(5.73 to<br>10.36)                     | 6.37<br>(4.80 to<br>8.62)                       | 0.13<br>(0.10 to<br>0.17)              | 0.27<br>(0.20 to<br>0.36)              | 0.31<br>(0.23 to<br>0.41)              | 0.24<br>(0.18 to<br>0.32)                |
| Non-melanoma skin cancer             | 3.61<br>(2.88 to<br>4.51)                      | 6.93<br>(5.55 to<br>8.60)                       | 6.95<br>(5.53 to<br>8.63)                      | 7.03<br>(5.61 to<br>8.73)                       | 0.16<br>(0.13 to<br>0.19)              | 0.34<br>(0.28 to<br>0.41)              | 0.36<br>(0.30 to<br>0.44)              | 0.33<br>(0.26 to<br>0.40)                |
| Breast cancer                        | 104.62<br>(69.74 to<br>196.67)                 | 180.74<br>(112.64 to<br>338.02)                 | 175.00<br>(110.97 to<br>328.44)                | 183.98<br>(113.11 to<br>352.71)                 | 3.26<br>(2.17 to<br>6.29)              | 6.35<br>(3.93 to<br>12.51)             | 6.24<br>(3.98 to<br>12.15)             | 6.32<br>(3.89 to<br>12.43)               |

|                                 |                                 |                                 |                                 |                                 |                           |                            |                            |                            |
|---------------------------------|---------------------------------|---------------------------------|---------------------------------|---------------------------------|---------------------------|----------------------------|----------------------------|----------------------------|
| Cervical cancer                 | 13.34<br>(8.99 to<br>19.75)     | 16.50<br>(10.53 to<br>24.56)    | 15.63<br>(9.96 to<br>23.46)     | 18.01<br>(11.37 to<br>26.80)    | 0.46<br>(0.31 to<br>0.67) | 0.62<br>(0.41 to<br>0.90)  | 0.61<br>(0.40 to<br>0.88)  | 0.66<br>(0.43 to<br>0.95)  |
| Uterine cancer                  | 11.18<br>(8.70 to<br>14.53)     | 17.20<br>(13.07 to<br>22.36)    | 16.33<br>(12.26 to<br>21.30)    | 18.84<br>(14.31 to<br>24.65)    | 0.41<br>(0.32 to<br>0.53) | 0.69<br>(0.54 to<br>0.89)  | 0.67<br>(0.52 to<br>0.86)  | 0.74<br>(0.57 to<br>0.96)  |
| Ovarian cancer                  | 44.93<br>(34.03 to<br>55.74)    | 83.79<br>(55.97 to<br>118.34)   | 83.79<br>(57.64 to<br>115.48)   | 80.12<br>(53.05 to<br>114.94)   | 1.53<br>(1.21 to<br>1.88) | 3.18<br>(2.23 to<br>4.57)  | 3.24<br>(2.31 to<br>4.52)  | 2.98<br>(2.03 to<br>4.26)  |
| Prostate cancer                 | 25.70<br>(19.28 to<br>37.46)    | 64.46<br>(48.90 to<br>96.60)    | 70.94<br>(54.08 to<br>105.92)   | 57.35<br>(43.53 to<br>87.39)    | 1.50<br>(1.09 to<br>2.33) | 4.08<br>(2.94 to<br>6.47)  | 4.65<br>(3.38 to<br>7.37)  | 3.49<br>(2.44 to<br>5.60)  |
| Testicular cancer               | 1.51<br>(1.11 to<br>1.96)       | 1.75<br>(1.26 to<br>2.53)       | 1.69<br>(1.22 to<br>2.28)       | 1.84<br>(1.33 to<br>2.49)       | 0.03<br>(0.03 to<br>0.04) | 0.05<br>(0.03 to<br>0.06)  | 0.05<br>(0.03 to<br>0.06)  | 0.05<br>(0.03 to<br>0.06)  |
| <b>Egypt</b>                    |                                 |                                 |                                 |                                 |                           |                            |                            |                            |
| Cause                           | YLLs (in 1000s)                 |                                 |                                 |                                 | Deaths (in 1000s)         |                            |                            |                            |
|                                 | 2016                            | 2040 Forecast                   | 2040 Better Scenario            | 2040 Worse Scenario             | 2016                      | 2040 Forecast              | 2040 Better Scenario       | 2040 Worse Scenario        |
| Kidney cancer                   | 18.79<br>(15.04 to<br>22.97)    | 35.36<br>(26.04 to<br>48.77)    | 37.14<br>(27.61 to<br>50.34)    | 33.98<br>(24.60 to<br>48.13)    | 0.57<br>(0.45 to<br>0.73) | 1.27<br>(0.93 to<br>1.77)  | 1.38<br>(1.04 to<br>1.88)  | 1.17<br>(0.84 to<br>1.66)  |
| Bladder cancer                  | 123.57<br>(100.41 to<br>149.14) | 211.29<br>(151.78 to<br>296.34) | 201.60<br>(147.79 to<br>273.32) | 229.64<br>(158.98 to<br>326.84) | 4.42<br>(3.62 to<br>5.29) | 8.27<br>(6.04 to<br>11.55) | 8.15<br>(6.04 to<br>10.95) | 8.58<br>(6.08 to<br>12.11) |
| Brain and nervous system cancer | 83.30<br>(62.49 to<br>119.16)   | 136.53<br>(94.83 to<br>207.11)  | 138.52<br>(95.96 to<br>210.90)  | 134.81<br>(93.76 to<br>204.50)  | 2.02<br>(1.40 to<br>3.15) | 4.08<br>(2.67 to<br>6.67)  | 4.26<br>(2.76 to<br>6.92)  | 3.86<br>(2.53 to<br>6.30)  |
| Thyroid cancer                  | 5.17<br>(4.15 to<br>9.94)       | 8.23<br>(5.23 to<br>16.14)      | 7.72<br>(4.97 to<br>14.87)      | 9.61<br>(5.84 to<br>19.28)      | 0.18<br>(0.14 to<br>0.41) | 0.33<br>(0.21 to<br>0.76)  | 0.32<br>(0.21 to<br>0.74)  | 0.38<br>(0.23 to<br>0.84)  |
| Mesothelioma                    | 3.62<br>(2.25 to<br>5.12)       | 5.78<br>(3.58 to<br>8.12)       | 5.88<br>(3.72 to<br>8.37)       | 5.78<br>(3.58 to<br>8.01)       | 0.12<br>(0.08 to<br>0.17) | 0.22<br>(0.14 to<br>0.30)  | 0.22<br>(0.15 to<br>0.32)  | 0.21<br>(0.14 to<br>0.29)  |
| Hodgkin lymphoma                | 32.74<br>(16.67 to<br>44.47)    | 30.17<br>(16.56 to<br>41.67)    | 27.04<br>(14.78 to<br>37.46)    | 36.01<br>(19.39 to<br>50.58)    | 0.70<br>(0.41 to<br>0.90) | 0.74<br>(0.49 to<br>0.96)  | 0.68<br>(0.46 to<br>0.88)  | 0.86<br>(0.56 to<br>1.12)  |
| Non-Hodgkin lymphoma            | 54.36<br>(40.46 to<br>92.38)    | 89.78<br>(58.66 to<br>175.06)   | 90.30<br>(59.02 to<br>174.36)   | 90.97<br>(58.56 to<br>176.99)   | 1.45<br>(1.01 to<br>2.93) | 3.00<br>(1.83 to<br>6.62)  | 3.11<br>(1.91 to<br>6.91)  | 2.92<br>(1.76 to<br>6.49)  |
| Multiple myeloma                | 16.02<br>(10.84 to<br>27.39)    | 35.38<br>(21.45 to<br>64.73)    | 36.48<br>(22.37 to<br>67.81)    | 34.73<br>(20.69 to<br>64.45)    | 0.59<br>(0.38 to<br>1.08) | 1.43<br>(0.84 to<br>2.77)  | 1.52<br>(0.91 to<br>2.97)  | 1.37<br>(0.79 to<br>2.68)  |
| Leukemia                        | 120.15<br>(99.72 to<br>149.60)  | 156.63<br>(116.40 to<br>220.57) | 151.42<br>(112.35 to<br>214.24) | 171.95<br>(124.76 to<br>243.31) | 2.75<br>(2.22 to<br>3.97) | 4.50<br>(3.12 to<br>7.75)  | 4.48<br>(3.14 to<br>7.81)  | 4.77<br>(3.26 to<br>8.05)  |
| Acute lymphoid leukemia         | 33.36<br>(23.81 to<br>43.67)    | 35.03<br>(23.83 to<br>49.80)    | 33.76<br>(23.20 to<br>47.73)    | 38.07<br>(25.46 to<br>54.28)    | 0.58<br>(0.43 to<br>0.77) | 0.75<br>(0.52 to<br>1.14)  | 0.74<br>(0.50 to<br>1.15)  | 0.80<br>(0.54 to<br>1.21)  |
| Chronic lymphoid leukemia       | 4.16<br>(2.98 to<br>6.73)       | 6.74<br>(4.37 to<br>11.87)      | 6.66<br>(4.33 to<br>11.52)      | 7.23<br>(4.55 to<br>12.57)      | 0.15<br>(0.11 to<br>0.27) | 0.28<br>(0.19 to<br>0.54)  | 0.29<br>(0.19 to<br>0.55)  | 0.29<br>(0.19 to<br>0.55)  |
| Acute myeloid leukemia          | 36.24<br>(28.33 to<br>45.44)    | 57.97<br>(41.70 to<br>81.56)    | 57.99<br>(42.37 to<br>82.13)    | 60.33<br>(42.18 to<br>85.10)    | 0.81<br>(0.63 to<br>1.16) | 1.64<br>(1.14 to<br>2.72)  | 1.69<br>(1.18 to<br>2.82)  | 1.65<br>(1.12 to<br>2.69)  |
| Chronic myeloid leukemia        | 12.12<br>(6.51 to<br>15.94)     | 13.56<br>(7.08 to<br>19.98)     | 12.94<br>(6.92 to<br>19.02)     | 14.95<br>(7.63 to<br>22.46)     | 0.38<br>(0.22 to<br>0.53) | 0.49<br>(0.27 to<br>0.76)  | 0.49<br>(0.28 to<br>0.75)  | 0.52<br>(0.27 to<br>0.81)  |
| Other leukemia                  | 34.27<br>(24.75 to<br>60.17)    | 43.34<br>(28.22 to<br>85.72)    | 40.07<br>(25.81 to<br>81.80)    | 51.38<br>(32.94 to<br>98.94)    | 0.83<br>(0.57 to<br>1.87) | 1.33<br>(0.79 to<br>3.52)  | 1.27<br>(0.75 to<br>3.49)  | 1.52<br>(0.90 to<br>3.77)  |
| Other neoplasms                 | 121.86<br>(102.79 to<br>147.93) | 175.17<br>(140.84 to<br>231.43) | 176.29<br>(141.12 to<br>231.85) | 177.17<br>(142.17 to<br>232.22) | 3.03<br>(2.47 to<br>4.10) | 5.44<br>(4.30 to<br>7.72)  | 5.68<br>(4.47 to<br>8.16)  | 5.24<br>(4.14 to<br>7.44)  |

|                                               |                                          |                                            |                                          |                                            |                                       |                                       |                                       |                                       |
|-----------------------------------------------|------------------------------------------|--------------------------------------------|------------------------------------------|--------------------------------------------|---------------------------------------|---------------------------------------|---------------------------------------|---------------------------------------|
| <b>Cardiovascular diseases</b>                | 4,671.92<br>(4,113.16 to<br>5,255.00)    | 6,049.54<br>(3,639.02 to<br>10,234.63)     | 3,549.09<br>(2,197.78 to<br>5,985.25)    | 9,130.80<br>(5,562.32 to<br>14,525.01)     | 217.25<br>(192.54 to<br>243.07)       | 315.50<br>(194.58 to<br>534.37)       | 203.69<br>(130.38 to<br>354.18)       | 443.06<br>(280.32 to<br>677.20)       |
| Rheumatic heart disease                       | 42.11<br>(33.12 to<br>53.31)             | 25.78<br>(18.15 to<br>36.87)               | 22.33<br>(15.48 to<br>31.45)             | 31.67<br>(22.08 to<br>44.70)               | 1.30<br>(1.01 to<br>1.64)             | 1.02<br>(0.73 to<br>1.44)             | 0.92<br>(0.66 to<br>1.28)             | 1.19<br>(0.84 to<br>1.66)             |
| Ischemic heart disease                        | 3,129.69<br>(2,710.42 to<br>3,581.63)    | 3,896.88<br>(1,932.68 to<br>8,052.71)      | 2,116.56<br>(1,097.11 to<br>4,222.29)    | 6,161.14<br>(3,103.35 to<br>11,300.87)     | 145.00<br>(126.61 to<br>163.95)       | 196.36<br>(102.28 to<br>382.30)       | 116.65<br>(61.38 to<br>228.81)        | 291.43<br>(154.21 to<br>510.13)       |
| Stroke                                        | 1,087.79<br>(927.08 to<br>1,274.74)      | 1,419.67<br>(776.41 to<br>3,046.02)        | 824.59<br>(468.53 to<br>1,841.79)        | 2,138.79<br>(1,156.08 to<br>4,303.28)      | 52.09<br>(44.63 to<br>60.47)          | 78.20<br>(43.21 to<br>191.34)         | 51.00<br>(28.91 to<br>127.69)         | 107.90<br>(60.72 to<br>244.10)        |
| Ischemic stroke                               | 551.20<br>(469.85 to<br>654.92)          | 757.48<br>(355.04 to<br>2,104.97)          | 468.47<br>(230.34 to<br>1,363.40)        | 1,041.13<br>(475.26 to<br>2,841.30)        | 30.88<br>(26.43 to<br>36.18)          | 48.09<br>(22.55 to<br>148.03)         | 33.27<br>(16.06 to<br>101.19)         | 61.32<br>(28.41 to<br>180.12)         |
| Intracerebral hemorrhage                      | 536.59<br>(442.99 to<br>641.85)          | 662.19<br>(338.50 to<br>1,309.55)          | 356.11<br>(200.29 to<br>647.95)          | 1,097.66<br>(539.39 to<br>2,125.51)        | 21.21<br>(17.43 to<br>25.33)          | 30.10<br>(15.98 to<br>58.32)          | 17.73<br>(10.38 to<br>31.35)          | 46.58<br>(24.09 to<br>92.15)          |
| Hypertensive heart disease                    | 121.78<br>(77.02 to<br>180.22)           | 219.85<br>(105.08 to<br>471.55)            | 149.70<br>(83.63 to<br>281.86)           | 268.54<br>(121.87 to<br>605.87)            | 5.96<br>(4.15 to<br>8.45)             | 12.49<br>(6.25 to<br>27.28)           | 8.95<br>(5.16 to<br>16.52)            | 14.51<br>(6.92 to<br>32.78)           |
| Cardiomyopathy and myocarditis                | 60.01<br>(45.19 to<br>75.84)             | 87.68<br>(58.54 to<br>131.61)              | 82.53<br>(55.83 to<br>122.64)            | 88.33<br>(59.29 to<br>132.20)              | 2.01<br>(1.55 to<br>2.50)             | 3.84<br>(2.58 to<br>5.58)             | 3.78<br>(2.58 to<br>5.47)             | 3.65<br>(2.45 to<br>5.31)             |
| Myocarditis                                   | 9.95<br>(5.89 to<br>17.03)               | 9.57<br>(5.52 to<br>16.66)                 | 9.25<br>(5.41 to<br>16.01)               | 10.42<br>(5.97 to<br>17.98)                | 0.24<br>(0.15 to<br>0.40)             | 0.32<br>(0.20 to<br>0.51)             | 0.33<br>(0.21 to<br>0.52)             | 0.33<br>(0.20 to<br>0.53)             |
| <b>Egypt</b>                                  |                                          |                                            |                                          |                                            |                                       |                                       |                                       |                                       |
| Cause                                         | YLLs (in 1000s)                          |                                            |                                          |                                            | Deaths (in 1000s)                     |                                       |                                       |                                       |
|                                               | 2016                                     | 2040 Forecast                              | 2040 Better Scenario                     | 2040 Worse Scenario                        | 2016                                  | 2040 Forecast                         | 2040 Better Scenario                  | 2040 Worse Scenario                   |
| Alcoholic cardiomyopathy                      | 5.80<br>(2.92 to<br>8.57)                | 8.42<br>(3.82 to<br>12.95)                 | 8.73<br>(3.86 to<br>13.65)               | 8.27<br>(3.84 to<br>12.79)                 | 0.24<br>(0.12 to<br>0.36)             | 0.39<br>(0.18 to<br>0.60)             | 0.41<br>(0.19 to<br>0.63)             | 0.37<br>(0.17 to<br>0.59)             |
| Other cardiomyopathy                          | 44.26<br>(33.21 to<br>54.75)             | 69.68<br>(44.40 to<br>108.42)              | 64.54<br>(41.88 to<br>99.84)             | 69.65<br>(44.49 to<br>107.79)              | 1.54<br>(1.19 to<br>1.89)             | 3.13<br>(1.99 to<br>4.74)             | 3.04<br>(1.96 to<br>4.60)             | 2.96<br>(1.86 to<br>4.50)             |
| Atrial fibrillation and flutter               | 15.05<br>(11.50 to<br>19.44)             | 36.19<br>(26.38 to<br>48.49)               | 36.63<br>(26.82 to<br>48.69)             | 34.26<br>(24.57 to<br>46.68)               | 1.40<br>(1.06 to<br>1.81)             | 3.52<br>(2.41 to<br>4.82)             | 3.74<br>(2.58 to<br>5.02)             | 3.19<br>(2.03 to<br>4.41)             |
| Aortic aneurysm                               | 17.44<br>(12.98 to<br>21.17)             | 28.73<br>(20.20 to<br>39.26)               | 26.15<br>(19.40 to<br>34.51)             | 28.95<br>(19.94 to<br>39.90)               | 0.79<br>(0.62 to<br>0.94)             | 1.47<br>(1.11 to<br>1.97)             | 1.43<br>(1.11 to<br>1.85)             | 1.41<br>(1.01 to<br>1.88)             |
| Peripheral artery disease                     | 1.10<br>(0.79 to<br>1.75)                | 3.91<br>(2.62 to<br>6.29)                  | 3.74<br>(2.59 to<br>6.02)                | 3.47<br>(2.31 to<br>5.70)                  | 0.08<br>(0.06 to<br>0.13)             | 0.32<br>(0.21 to<br>0.55)             | 0.33<br>(0.22 to<br>0.54)             | 0.27<br>(0.18 to<br>0.43)             |
| Endocarditis                                  | 27.65<br>(20.81 to<br>35.08)             | 44.93<br>(31.51 to<br>63.84)               | 41.63<br>(29.52 to<br>57.26)             | 46.76<br>(32.68 to<br>66.10)               | 1.13<br>(0.85 to<br>1.47)             | 2.38<br>(1.56 to<br>3.53)             | 2.33<br>(1.54 to<br>3.43)             | 2.34<br>(1.55 to<br>3.49)             |
| Other cardiovascular and circulatory diseases | 169.28<br>(119.80 to<br>238.00)          | 285.94<br>(185.98 to<br>437.98)            | 245.24<br>(164.84 to<br>370.71)          | 328.90<br>(210.25 to<br>499.54)            | 7.49<br>(5.35 to<br>10.83)            | 15.90<br>(10.19 to<br>24.37)          | 14.55<br>(9.48 to<br>22.04)           | 17.17<br>(10.84 to<br>26.22)          |
| <b>Chronic respiratory diseases</b>           | <b>537.18<br/>(450.10 to<br/>652.04)</b> | <b>699.83<br/>(479.55 to<br/>1,038.65)</b> | <b>600.77<br/>(421.61 to<br/>883.55)</b> | <b>943.08<br/>(614.94 to<br/>1,442.59)</b> | <b>22.82<br/>(19.13 to<br/>26.99)</b> | <b>33.98<br/>(24.19 to<br/>49.78)</b> | <b>31.00<br/>(22.56 to<br/>44.17)</b> | <b>42.33<br/>(28.62 to<br/>62.75)</b> |
| Chronic obstructive pulmonary disease         | 327.21<br>(266.00 to<br>402.79)          | 484.52<br>(288.80 to<br>819.41)            | 399.33<br>(244.94 to<br>665.73)          | 689.13<br>(392.25 to<br>1,177.54)          | 15.24<br>(12.59 to<br>18.33)          | 24.40<br>(15.54 to<br>38.46)          | 21.56<br>(14.03 to<br>34.14)          | 31.76<br>(19.25 to<br>52.53)          |
| Pneumoconiosis                                | 1.66<br>(1.23 to<br>2.26)                | 1.80<br>(1.35 to<br>2.37)                  | 1.74<br>(1.30 to<br>2.35)                | 1.86<br>(1.40 to<br>2.43)                  | 0.07<br>(0.06 to<br>0.10)             | 0.10<br>(0.07 to<br>0.15)             | 0.09<br>(0.07 to<br>0.13)             | 0.10<br>(0.07 to<br>0.13)             |
| Silicosis                                     | 0.24<br>(0.13 to<br>0.37)                | 0.20<br>(0.11 to<br>0.32)                  | 0.20<br>(0.11 to<br>0.31)                | 0.22<br>(0.12 to<br>0.35)                  | 0.01<br>(0.01 to<br>0.02)             | 0.01<br>(0.01 to<br>0.02)             | 0.01<br>(0.01 to<br>0.02)             | 0.01<br>(0.01 to<br>0.02)             |



|                                                                |                                       |                                       |                                       |                                       |                              |                                |                                |                                |
|----------------------------------------------------------------|---------------------------------------|---------------------------------------|---------------------------------------|---------------------------------------|------------------------------|--------------------------------|--------------------------------|--------------------------------|
|                                                                | 0.34<br>(0.23 to<br>0.50)             | 0.45<br>(0.31 to<br>0.66)             | 0.47<br>(0.32 to<br>0.70)             | 0.45<br>(0.31 to<br>0.65)             | 0.01<br>(0.01 to<br>0.02)    | 0.02<br>(0.01 to<br>0.03)      | 0.02<br>(0.01 to<br>0.03)      | 0.02<br>(0.01 to<br>0.03)      |
| Asbestosis                                                     | 0.12<br>(0.06 to<br>0.22)             | 0.13<br>(0.06 to<br>0.24)             | 0.11<br>(0.05 to<br>0.20)             | 0.16<br>(0.08 to<br>0.29)             | 0.01<br>(0.00 to<br>0.01)    | 0.01<br>(0.00 to<br>0.01)      | 0.01<br>(0.00 to<br>0.01)      | 0.01<br>(0.00 to<br>0.02)      |
| Coal workers pneumoconiosis                                    | 0.97<br>(0.69 to<br>1.37)             | 1.02<br>(0.74 to<br>1.42)             | 0.97<br>(0.69 to<br>1.35)             | 1.03<br>(0.74 to<br>1.42)             | 0.05<br>(0.03 to<br>0.06)    | 0.06<br>(0.04 to<br>0.08)      | 0.06<br>(0.04 to<br>0.08)      | 0.06<br>(0.04 to<br>0.08)      |
| Other pneumoconiosis                                           | 145.52<br>(101.99 to<br>202.78)       | 103.56<br>(50.72 to<br>175.10)        | 82.30<br>(40.56 to<br>140.69)         | 147.08<br>(70.67 to<br>251.99)        | 5.12<br>(3.54 to<br>6.83)    | 4.34<br>(2.15 to<br>7.51)      | 3.60<br>(1.79 to<br>6.13)      | 5.84<br>(2.84 to<br>10.06)     |
| Asthma                                                         | 38.95<br>(20.65 to<br>58.10)          | 79.79<br>(44.98 to<br>115.59)         | 88.32<br>(50.41 to<br>126.41)         | 71.17<br>(39.28 to<br>105.67)         | 1.72<br>(0.95 to<br>2.48)    | 4.03<br>(2.38 to<br>5.65)      | 4.61<br>(2.74 to<br>6.46)      | 3.46<br>(1.99 to<br>4.97)      |
| Interstitial lung disease and pulmonary sarcoidosis            | 23.85<br>(14.78 to<br>39.19)          | 30.16<br>(17.64 to<br>52.58)          | 29.07<br>(17.32 to<br>49.83)          | 33.84<br>(18.99 to<br>59.90)          | 0.68<br>(0.41 to<br>1.15)    | 1.12<br>(0.66 to<br>1.96)      | 1.13<br>(0.68 to<br>1.96)      | 1.17<br>(0.67 to<br>2.11)      |
| Other chronic respiratory diseases                             | 1,295.54<br>(1,039.98 to<br>1,640.75) | 2,233.39<br>(1,771.74 to<br>2,728.89) | 2,233.13<br>(1,769.33 to<br>2,727.11) | 2,283.09<br>(1,817.85 to<br>2,836.63) | 60.31<br>(48.78 to<br>73.44) | 117.72<br>(92.82 to<br>141.14) | 122.25<br>(98.81 to<br>144.84) | 115.59<br>(89.29 to<br>140.78) |
| Cirrhosis and other chronic liver diseases                     | 226.85<br>(159.93 to<br>309.24)       | 396.77<br>(279.11 to<br>544.73)       | 398.77<br>(280.40 to<br>544.48)       | 401.83<br>(281.51 to<br>558.49)       | 10.54<br>(7.50 to<br>14.29)  | 20.47<br>(14.19 to<br>27.69)   | 21.33<br>(14.84 to<br>28.77)   | 19.97<br>(13.69 to<br>27.10)   |
| Cirrhosis and other chronic liver diseases due to hepatitis B  | 733.11<br>(569.95 to<br>938.34)       | 1,313.15<br>(1,025.54 to<br>1,658.82) | 1,315.80<br>(1,020.29 to<br>1,645.90) | 1,334.46<br>(1,043.81 to<br>1,705.01) | 34.28<br>(26.48 to<br>43.27) | 68.52<br>(52.65 to<br>85.95)   | 71.13<br>(55.39 to<br>88.10)   | 67.10<br>(50.36 to<br>84.59)   |
| Cirrhosis and other chronic liver diseases due to hepatitis C  | 93.19<br>(71.22 to<br>120.94)         | 151.83<br>(114.25 to<br>195.01)       | 150.04<br>(112.41 to<br>190.68)       | 160.87<br>(120.02 to<br>207.20)       | 4.50<br>(3.44 to<br>5.77)    | 8.20<br>(6.06 to<br>10.50)     | 8.43<br>(6.27 to<br>10.64)     | 8.34<br>(6.05 to<br>10.77)     |
| Cirrhosis and other chronic liver diseases due to alcohol use  | 242.39<br>(188.02 to<br>313.04)       | 371.64<br>(287.01 to<br>465.39)       | 368.51<br>(285.97 to<br>462.75)       | 385.93<br>(298.19 to<br>489.24)       | 10.99<br>(8.47 to<br>13.80)  | 20.53<br>(15.34 to<br>25.88)   | 21.36<br>(16.16 to<br>26.95)   | 20.19<br>(14.96 to<br>25.90)   |
| Cirrhosis and other chronic liver diseases due to other causes | 301.27<br>(226.11 to<br>374.88)       | 371.77<br>(245.94 to<br>516.71)       | 338.13<br>(226.58 to<br>465.91)       | 450.71<br>(290.72 to<br>643.27)       | 9.76<br>(7.31 to<br>11.95)   | 14.68<br>(9.28 to<br>20.39)    | 13.89<br>(8.81 to<br>19.47)    | 17.01<br>(10.35 to<br>24.07)   |
| Digestive diseases                                             | 49.01<br>(30.64 to<br>66.80)          | 39.27<br>(21.94 to<br>59.94)          | 32.65<br>(18.22 to<br>49.10)          | 48.76<br>(27.77 to<br>74.56)          | 1.58<br>(1.03 to<br>2.14)    | 1.42<br>(0.86 to<br>2.10)      | 1.21<br>(0.72 to<br>1.78)      | 1.73<br>(1.03 to<br>2.58)      |
| Peptic ulcer disease                                           | <b>Egypt</b>                          |                                       |                                       |                                       |                              |                                |                                |                                |
| Cause                                                          | YLLs (in 1000s)                       |                                       |                                       |                                       | Deaths (in 1000s)            |                                |                                |                                |
|                                                                | 2016                                  | 2040 Forecast                         | 2040 Better Scenario                  | 2040 Worse Scenario                   | 2016                         | 2040 Forecast                  | 2040 Better Scenario           | 2040 Worse Scenario            |
| Gastritis and duodenitis                                       | 1.73<br>(0.96 to<br>2.79)             | 2.67<br>(1.45 to<br>4.58)             | 2.57<br>(1.39 to<br>4.34)             | 2.86<br>(1.53 to<br>5.07)             | 0.06<br>(0.04 to<br>0.09)    | 0.11<br>(0.06 to<br>0.16)      | 0.11<br>(0.06 to<br>0.16)      | 0.11<br>(0.06 to<br>0.17)      |
| Appendicitis                                                   | 12.86<br>(6.91 to<br>17.20)           | 15.12<br>(7.12 to<br>21.35)           | 13.92<br>(6.32 to<br>20.03)           | 17.29<br>(8.32 to<br>24.42)           | 0.37<br>(0.20 to<br>0.50)    | 0.50<br>(0.26 to<br>0.70)      | 0.47<br>(0.25 to<br>0.66)      | 0.56<br>(0.29 to<br>0.77)      |
| Paralytic ileus and intestinal obstruction                     | 88.12<br>(66.06 to<br>121.99)         | 96.79<br>(68.56 to<br>148.09)         | 94.79<br>(66.17 to<br>146.08)         | 104.04<br>(74.83 to<br>156.60)        | 2.37<br>(1.59 to<br>4.09)    | 3.65<br>(2.06 to<br>7.58)      | 3.76<br>(2.08 to<br>7.86)      | 3.69<br>(2.14 to<br>7.39)      |
| Inguinal, femoral, and abdominal hernia                        | 4.94<br>(3.37 to<br>6.73)             | 5.46<br>(3.48 to<br>7.75)             | 5.34<br>(3.20 to<br>7.56)             | 5.81<br>(3.78 to<br>8.34)             | 0.21<br>(0.14 to<br>0.30)    | 0.28<br>(0.17 to<br>0.39)      | 0.29<br>(0.17 to<br>0.40)      | 0.28<br>(0.17 to<br>0.40)      |
| Inflammatory bowel disease                                     | 6.58<br>(4.58 to<br>9.68)             | 9.00<br>(6.15 to<br>13.67)            | 9.10<br>(6.18 to<br>13.76)            | 9.04<br>(6.17 to<br>13.83)            | 0.20<br>(0.14 to<br>0.29)    | 0.34<br>(0.23 to<br>0.49)      | 0.35<br>(0.25 to<br>0.51)      | 0.33<br>(0.22 to<br>0.47)      |
| Vascular intestinal disorders                                  | 12.94<br>(9.08 to<br>18.33)           | 22.17<br>(14.63 to<br>31.95)          | 22.22<br>(14.40 to<br>32.62)          | 22.64<br>(15.28 to<br>32.41)          | 0.55<br>(0.37 to<br>0.76)    | 1.05<br>(0.68 to<br>1.45)      | 1.09<br>(0.67 to<br>1.50)      | 1.04<br>(0.69 to<br>1.43)      |
| Gallbladder and biliary diseases                               | 76.15<br>(45.69 to<br>107.12)         | 112.51<br>(49.61 to<br>206.48)        | 92.59<br>(39.85 to<br>170.23)         | 161.21<br>(67.72 to<br>298.68)        | 2.67<br>(1.69 to<br>3.69)    | 4.46<br>(1.96 to<br>7.99)      | 3.80<br>(1.70 to<br>6.78)      | 6.12<br>(2.58 to<br>11.26)     |

|                                         |                                                      |                                                      |                                                      |                                                      |                                                   |                                                   |                                                   |                                                   |
|-----------------------------------------|------------------------------------------------------|------------------------------------------------------|------------------------------------------------------|------------------------------------------------------|---------------------------------------------------|---------------------------------------------------|---------------------------------------------------|---------------------------------------------------|
| Pancreatitis                            | 25.46<br>(15.39 to<br>37.74)                         | 38.32<br>(20.42 to<br>64.28)                         | 35.88<br>(18.47 to<br>60.62)                         | 45.12<br>(23.59 to<br>78.05)                         | 0.88<br>(0.52 to<br>1.29)                         | 1.51<br>(0.81 to<br>2.44)                         | 1.46<br>(0.76 to<br>2.38)                         | 1.71<br>(0.91 to<br>2.91)                         |
| Other digestive diseases                | 23.47<br>(14.46 to<br>32.03)                         | 30.47<br>(17.78 to<br>43.23)                         | 29.08<br>(17.23 to<br>42.21)                         | 33.94<br>(19.65 to<br>48.89)                         | 0.85<br>(0.55 to<br>1.15)                         | 1.37<br>(0.86 to<br>1.91)                         | 1.36<br>(0.84 to<br>1.94)                         | 1.45<br>(0.88 to<br>2.03)                         |
| <b>Neurological disorders</b>           | <b>245.34</b><br><b>(209.09 to</b><br><b>291.59)</b> | <b>545.62</b><br><b>(398.03 to</b><br><b>767.64)</b> | <b>554.40</b><br><b>(419.37 to</b><br><b>748.56)</b> | <b>542.55</b><br><b>(380.34 to</b><br><b>779.78)</b> | <b>17.53</b><br><b>(14.58 to</b><br><b>20.90)</b> | <b>45.06</b><br><b>(30.61 to</b><br><b>66.13)</b> | <b>47.65</b><br><b>(33.85 to</b><br><b>67.25)</b> | <b>42.55</b><br><b>(27.11 to</b><br><b>64.48)</b> |
| Alzheimer's disease and other dementias | 169.36<br>(137.93 to<br>207.59)                      | 422.57<br>(281.23 to<br>643.01)                      | 424.14<br>(294.42 to<br>614.23)                      | 423.77<br>(263.81 to<br>663.47)                      | 14.93<br>(12.17 to<br>18.15)                      | 38.97<br>(25.11 to<br>59.69)                      | 40.66<br>(27.91 to<br>60.02)                      | 37.30<br>(22.28 to<br>58.78)                      |
| Parkinson's disease                     | 18.84<br>(14.16 to<br>24.34)                         | 53.18<br>(39.22 to<br>69.21)                         | 62.13<br>(47.48 to<br>79.19)                         | 43.78<br>(31.38 to<br>57.71)                         | 1.44<br>(1.07 to<br>1.86)                         | 4.31<br>(3.07 to<br>5.75)                         | 5.18<br>(3.87 to<br>6.70)                         | 3.43<br>(2.34 to<br>4.58)                         |
| Epilepsy                                | 28.05<br>(20.92 to<br>39.11)                         | 26.82<br>(19.29 to<br>37.96)                         | 24.05<br>(17.32 to<br>34.06)                         | 32.84<br>(23.26 to<br>46.70)                         | 0.50<br>(0.39 to<br>0.66)                         | 0.55<br>(0.41 to<br>0.75)                         | 0.50<br>(0.38 to<br>0.66)                         | 0.65<br>(0.49 to<br>0.87)                         |
| Multiple sclerosis                      | 2.98<br>(2.24 to<br>4.55)                            | 4.66<br>(3.38 to<br>6.88)                            | 4.67<br>(3.38 to<br>6.85)                            | 4.53<br>(3.25 to<br>6.87)                            | 0.08<br>(0.06 to<br>0.12)                         | 0.15<br>(0.10 to<br>0.21)                         | 0.15<br>(0.11 to<br>0.22)                         | 0.14<br>(0.10 to<br>0.21)                         |
| Motor neuron disease                    | 5.81<br>(3.47 to<br>7.60)                            | 11.51<br>(6.71 to<br>15.17)                          | 12.04<br>(7.16 to<br>16.10)                          | 10.80<br>(6.14 to<br>14.17)                          | 0.17<br>(0.10 to<br>0.22)                         | 0.37<br>(0.23 to<br>0.49)                         | 0.39<br>(0.25 to<br>0.52)                         | 0.34<br>(0.21 to<br>0.45)                         |
| Other neurological disorders            | 20.31<br>(15.19 to<br>27.07)                         | 26.88<br>(20.43 to<br>36.29)                         | 27.37<br>(20.87 to<br>36.70)                         | 26.82<br>(19.97 to<br>36.55)                         | 0.42<br>(0.33 to<br>0.55)                         | 0.72<br>(0.59 to<br>0.95)                         | 0.77<br>(0.63 to<br>0.98)                         | 0.68<br>(0.55 to<br>0.90)                         |
| <b>Mental disorders</b>                 | <b>10.47</b><br><b>(6.60 to</b><br><b>14.22)</b>     | <b>14.89</b><br><b>(9.23 to</b><br><b>20.58)</b>     | <b>14.99</b><br><b>(9.30 to</b><br><b>20.57)</b>     | <b>15.15</b><br><b>(9.52 to</b><br><b>20.81)</b>     | <b>0.25</b><br><b>(0.16 to</b><br><b>0.34)</b>    | <b>0.40</b><br><b>(0.26 to</b><br><b>0.54)</b>    | <b>0.41</b><br><b>(0.26 to</b><br><b>0.55)</b>    | <b>0.39</b><br><b>(0.26 to</b><br><b>0.54)</b>    |
| Alcohol use disorders                   | 6.97<br>(4.35 to<br>9.39)                            | 8.51<br>(5.12 to<br>11.95)                           | 8.55<br>(5.08 to<br>12.05)                           | 8.71<br>(5.29 to<br>12.17)                           | 0.18<br>(0.12 to<br>0.25)                         | 0.25<br>(0.15 to<br>0.35)                         | 0.25<br>(0.15 to<br>0.36)                         | 0.25<br>(0.15 to<br>0.35)                         |
| Drug use disorders                      | 2.37<br>(1.68 to<br>5.28)                            | 6.20<br>(3.47 to<br>9.53)                            | 6.26<br>(3.50 to<br>9.58)                            | 6.26<br>(3.51 to<br>9.65)                            | 0.07<br>(0.04 to<br>0.11)                         | 0.14<br>(0.09 to<br>0.21)                         | 0.15<br>(0.09 to<br>0.22)                         | 0.14<br>(0.09 to<br>0.21)                         |
| Opioid use disorders                    | 2.66<br>(1.31 to<br>4.20)                            | 4.56<br>(2.39 to<br>7.13)                            | 4.58<br>(2.43 to<br>7.20)                            | 4.63<br>(2.42 to<br>7.30)                            | 0.05<br>(0.03 to<br>0.08)                         | 0.10<br>(0.06 to<br>0.15)                         | 0.10<br>(0.06 to<br>0.16)                         | 0.10<br>(0.06 to<br>0.15)                         |
| Cocaine use disorders                   | 0.09<br>(0.05 to<br>0.16)                            | 0.21<br>(0.11 to<br>0.35)                            | 0.21<br>(0.11 to<br>0.34)                            | 0.22<br>(0.12 to<br>0.36)                            | 0.00<br>(0.00 to<br>0.00)                         | 0.01<br>(0.00 to<br>0.01)                         | 0.01<br>(0.00 to<br>0.01)                         | 0.01<br>(0.00 to<br>0.01)                         |
| Amphetamine use disorders               | 0.06<br>(0.03 to<br>0.10)                            | 0.19<br>(0.10 to<br>0.32)                            | 0.20<br>(0.10 to<br>0.33)                            | 0.20<br>(0.10 to<br>0.33)                            | 0.00<br>(0.00 to<br>0.00)                         | 0.00<br>(0.00 to<br>0.01)                         | 0.00<br>(0.00 to<br>0.01)                         | 0.00<br>(0.00 to<br>0.01)                         |
| Other drug use disorders                | 0.56<br>(0.26 to<br>0.90)                            | 1.23<br>(0.58 to<br>1.91)                            | 1.28<br>(0.61 to<br>1.98)                            | 1.21<br>(0.58 to<br>1.88)                            | 0.01<br>(0.01 to<br>0.02)                         | 0.03<br>(0.02 to<br>0.05)                         | 0.04<br>(0.02 to<br>0.05)                         | 0.03<br>(0.02 to<br>0.05)                         |
| Eating disorders                        | 0.13<br>(0.08 to<br>0.20)                            | 0.18<br>(0.11 to<br>0.27)                            | 0.18<br>(0.11 to<br>0.27)                            | 0.18<br>(0.11 to<br>0.27)                            | 0.00<br>(0.00 to<br>0.00)                         | 0.00<br>(0.00 to<br>0.01)                         | 0.00<br>(0.00 to<br>0.01)                         | 0.00<br>(0.00 to<br>0.01)                         |

**Egypt**

| Cause                                                      | YLLs (in 1000s)                                        |                                                          |                                                          |                                                            | Deaths (in 1000s)                                 |                                                    |                                                    |                                                     |
|------------------------------------------------------------|--------------------------------------------------------|----------------------------------------------------------|----------------------------------------------------------|------------------------------------------------------------|---------------------------------------------------|----------------------------------------------------|----------------------------------------------------|-----------------------------------------------------|
|                                                            | 2016                                                   | 2040 Forecast                                            | 2040 Better Scenario                                     | 2040 Worse Scenario                                        | 2016                                              | 2040 Forecast                                      | 2040 Better Scenario                               | 2040 Worse Scenario                                 |
| <b>Diabetes, urogenital, blood, and endocrine diseases</b> | <b>987.88</b><br><b>(848.46 to</b><br><b>1,155.62)</b> | <b>2,093.80</b><br><b>(894.91 to</b><br><b>4,853.83)</b> | <b>1,508.45</b><br><b>(698.84 to</b><br><b>4,076.85)</b> | <b>2,564.91</b><br><b>(1,130.78 to</b><br><b>5,638.73)</b> | <b>37.24</b><br><b>(31.93 to</b><br><b>44.03)</b> | <b>96.87</b><br><b>(37.20 to</b><br><b>232.89)</b> | <b>71.43</b><br><b>(30.02 to</b><br><b>205.41)</b> | <b>114.13</b><br><b>(45.02 to</b><br><b>259.44)</b> |
| Diabetes mellitus                                          | 423.19<br>(359.05 to<br>491.47)                        | 543.15<br>(368.01 to<br>762.81)                          | 440.59<br>(294.23 to<br>627.66)                          | 726.57<br>(480.66 to<br>1,029.50)                          | 16.27<br>(13.84 to<br>18.90)                      | 22.95<br>(16.06 to<br>31.66)                       | 19.20<br>(13.65 to<br>26.63)                       | 29.70<br>(20.41 to<br>40.94)                        |
| Acute glomerulonephritis                                   | 0.54<br>(0.44 to<br>0.65)                              | 0.55<br>(0.42 to<br>0.74)                                | 0.50<br>(0.38 to<br>0.67)                                | 0.65<br>(0.48 to<br>0.89)                                  | 0.01<br>(0.01 to<br>0.01)                         | 0.01<br>(0.01 to<br>0.01)                          | 0.01<br>(0.01 to<br>0.01)                          | 0.01<br>(0.01 to<br>0.02)                           |

|                                                            |                              |                                  |                                |                                  |                           |                           |                           |                            |
|------------------------------------------------------------|------------------------------|----------------------------------|--------------------------------|----------------------------------|---------------------------|---------------------------|---------------------------|----------------------------|
| Chronic kidney disease                                     | 371.92<br>(311.98 to 498.74) | 1,309.19<br>(200.66 to 4,090.91) | 838.69<br>(134.49 to 3,323.77) | 1,572.57<br>(251.28 to 4,596.28) | 16.17<br>(13.53 to 22.44) | 65.78<br>(9.14 to 202.91) | 44.21<br>(6.04 to 179.16) | 75.99<br>(10.82 to 224.56) |
| Chronic kidney disease due to diabetes mellitus            | 154.33<br>(122.28 to 202.85) | 624.57<br>(82.36 to 1,984.23)    | 394.29<br>(54.11 to 1,649.82)  | 750.80<br>(102.83 to 2,279.32)   | 6.61<br>(5.22 to 9.06)    | 28.77<br>(3.66 to 89.08)  | 18.89<br>(2.41 to 78.08)  | 33.61<br>(4.38 to 99.11)   |
| Chronic kidney disease due to hypertension                 | 59.72<br>(46.52 to 81.35)    | 234.26<br>(30.77 to 742.84)      | 156.25<br>(21.14 to 631.45)    | 271.87<br>(36.88 to 825.72)      | 3.55<br>(2.78 to 5.10)    | 15.58<br>(2.02 to 49.05)  | 11.10<br>(1.41 to 45.93)  | 17.23<br>(2.34 to 52.12)   |
| Chronic kidney disease due to glomerulonephritis           | 49.25<br>(38.82 to 66.31)    | 128.80<br>(26.41 to 411.47)      | 82.66<br>(18.89 to 314.94)     | 158.17<br>(33.21 to 487.86)      | 1.71<br>(1.31 to 2.32)    | 5.76<br>(0.89 to 18.03)   | 3.80<br>(0.61 to 15.53)   | 6.82<br>(1.08 to 20.54)    |
| Chronic kidney disease due to other and unspecified causes | 108.62<br>(85.99 to 146.70)  | 321.56<br>(58.12 to 986.41)      | 205.49<br>(38.65 to 787.31)    | 391.73<br>(71.53 to 1,143.86)    | 4.30<br>(3.37 to 5.82)    | 15.66<br>(2.32 to 47.82)  | 10.42<br>(1.50 to 40.42)  | 18.33<br>(2.82 to 53.59)   |
| Urinary diseases and male infertility                      | 10.22<br>(8.48 to 11.94)     | 14.45<br>(11.47 to 17.43)        | 14.31<br>(11.14 to 17.54)      | 14.72<br>(11.60 to 17.90)        | 0.40<br>(0.34 to 0.46)    | 0.81<br>(0.62 to 0.96)    | 0.84<br>(0.65 to 1.03)    | 0.76<br>(0.57 to 0.94)     |
| Urinary tract infections                                   | 4.74<br>(3.41 to 6.11)       | 9.23<br>(6.64 to 11.56)          | 9.41<br>(6.82 to 11.91)        | 8.93<br>(6.41 to 11.23)          | 0.22<br>(0.15 to 0.28)    | 0.56<br>(0.40 to 0.72)    | 0.60<br>(0.43 to 0.77)    | 0.51<br>(0.35 to 0.67)     |
| Urolithiasis                                               | 0.94<br>(0.67 to 1.22)       | 1.46<br>(0.97 to 1.96)           | 1.43<br>(0.94 to 1.94)         | 1.49<br>(0.99 to 2.01)           | 0.03<br>(0.02 to 0.04)    | 0.06<br>(0.03 to 0.08)    | 0.06<br>(0.03 to 0.08)    | 0.05<br>(0.03 to 0.08)     |
| Other urinary diseases                                     | 4.53<br>(3.21 to 6.43)       | 3.76<br>(2.33 to 5.88)           | 3.47<br>(2.11 to 5.45)         | 4.30<br>(2.64 to 6.71)           | 0.16<br>(0.11 to 0.23)    | 0.18<br>(0.11 to 0.30)    | 0.18<br>(0.10 to 0.29)    | 0.19<br>(0.11 to 0.31)     |
| Gynecological diseases                                     | 3.62<br>(2.05 to 5.44)       | 3.86<br>(2.01 to 6.23)           | 3.38<br>(1.74 to 5.53)         | 4.57<br>(2.40 to 7.47)           | 0.08<br>(0.05 to 0.12)    | 0.09<br>(0.05 to 0.14)    | 0.08<br>(0.04 to 0.13)    | 0.10<br>(0.06 to 0.17)     |
| Uterine fibroids                                           | 0.18<br>(0.06 to 0.28)       | 0.17<br>(0.05 to 0.28)           | 0.15<br>(0.04 to 0.32)         | 0.21<br>(0.06 to 0.47)           | 0.01<br>(0.00 to 0.01)    | 0.01<br>(0.00 to 0.01)    | 0.00<br>(0.00 to 0.01)    | 0.01<br>(0.00 to 0.01)     |
| Polycystic ovarian syndrome                                | 0.46<br>(0.16 to 1.02)       | 0.27<br>(0.08 to 0.67)           | 0.22<br>(0.06 to 0.54)         | 0.36<br>(0.11 to 0.87)           | 0.01<br>(0.00 to 0.02)    | 0.01<br>(0.00 to 0.01)    | 0.00<br>(0.00 to 0.01)    | 0.01<br>(0.00 to 0.02)     |
| Endometriosis                                              | 0.04<br>(0.01 to 0.09)       | 0.05<br>(0.01 to 0.13)           | 0.04<br>(0.01 to 0.11)         | 0.06<br>(0.02 to 0.15)           | 0.00<br>(0.00 to 0.00)    | 0.00<br>(0.00 to 0.00)    | 0.00<br>(0.00 to 0.00)    | 0.00<br>(0.00 to 0.00)     |
| Genital prolapse                                           | 0.06<br>(0.02 to 0.11)       | 0.05<br>(0.02 to 0.12)           | 0.04<br>(0.01 to 0.10)         | 0.07<br>(0.02 to 0.15)           | 0.00<br>(0.00 to 0.00)    | 0.00<br>(0.00 to 0.00)    | 0.00<br>(0.00 to 0.00)    | 0.00<br>(0.00 to 0.00)     |
| Other gynecological diseases                               | 2.88<br>(1.58 to 4.66)       | 3.32<br>(1.65 to 5.54)           | 2.93<br>(1.42 to 4.91)         | 3.87<br>(1.97 to 6.50)           | 0.06<br>(0.03 to 0.10)    | 0.07<br>(0.04 to 0.12)    | 0.07<br>(0.03 to 0.11)    | 0.08<br>(0.04 to 0.14)     |
| Hemoglobinopathies and hemolytic anemias                   | 38.66<br>(25.80 to 61.77)    | 45.43<br>(31.18 to 69.03)        | 41.88<br>(29.05 to 64.74)      | 50.81<br>(34.68 to 78.34)        | 0.88<br>(0.66 to 1.31)    | 1.41<br>(1.01 to 2.10)    | 1.33<br>(0.94 to 1.98)    | 1.53<br>(1.08 to 2.30)     |
| Thalassemias                                               | 4.67<br>(1.71 to 11.02)      | 1.72<br>(0.52 to 4.60)           | 1.68<br>(0.49 to 4.53)         | 1.87<br>(0.56 to 5.16)           | 0.06<br>(0.02 to 0.13)    | 0.02<br>(0.01 to 0.06)    | 0.02<br>(0.01 to 0.06)    | 0.02<br>(0.01 to 0.06)     |
| Sickle cell disorders                                      | 26.34<br>(17.33 to 41.62)    | 32.70<br>(21.82 to 49.94)        | 29.98<br>(20.03 to 46.21)      | 36.62<br>(23.82 to 55.90)        | 0.50<br>(0.35 to 0.76)    | 0.83<br>(0.56 to 1.25)    | 0.76<br>(0.51 to 1.16)    | 0.90<br>(0.61 to 1.38)     |
| G6PD deficiency                                            | 4.04<br>(2.64 to 6.49)       | 6.44<br>(4.12 to 10.51)          | 5.83<br>(3.64 to 9.27)         | 7.45<br>(4.65 to 12.19)          | 0.11<br>(0.08 to 0.17)    | 0.24<br>(0.15 to 0.38)    | 0.22<br>(0.14 to 0.35)    | 0.27<br>(0.17 to 0.43)     |
| Other hemoglobinopathies and hemolytic anemias             | 3.60<br>(2.68 to 5.31)       | 4.56<br>(3.10 to 7.01)           | 4.39<br>(2.92 to 6.62)         | 4.86<br>(3.28 to 7.54)           | 0.22<br>(0.16 to 0.32)    | 0.33<br>(0.22 to 0.50)    | 0.33<br>(0.21 to 0.50)    | 0.34<br>(0.21 to 0.53)     |
| Endocrine, metabolic, blood, and immune disorders          | 139.74<br>(85.36 to 191.44)  | 177.18<br>(100.94 to 249.71)     | 169.09<br>(97.02 to 237.91)    | 195.02<br>(110.91 to 273.96)     | 3.43<br>(2.18 to 4.43)    | 5.82<br>(3.61 to 8.16)    | 5.76<br>(3.64 to 8.03)    | 6.04<br>(3.68 to 8.51)     |
| <b>Egypt</b>                                               |                              |                                  |                                |                                  |                           |                           |                           |                            |
| <b>YLLs (in 1000s)</b>                                     |                              |                                  |                                |                                  | <b>Deaths (in 1000s)</b>  |                           |                           |                            |

| Cause                                         | 2016                                      | 2040 Forecast                             | 2040 Better Scenario                      | 2040 Worse Scenario                       | 2016                             | 2040 Forecast                    | 2040 Better Scenario             | 2040 Worse Scenario              |
|-----------------------------------------------|-------------------------------------------|-------------------------------------------|-------------------------------------------|-------------------------------------------|----------------------------------|----------------------------------|----------------------------------|----------------------------------|
| <b>Musculoskeletal disorders</b>              | <b>5.62</b><br>(4.15 to 7.01)             | <b>10.18</b><br>(6.10 to 13.07)           | <b>10.22</b><br>(6.08 to 13.18)           | <b>10.11</b><br>(6.14 to 13.00)           | <b>0.17</b><br>(0.10 to 0.22)    | <b>0.40</b><br>(0.19 to 0.53)    | <b>0.41</b><br>(0.19 to 0.55)    | <b>0.39</b><br>(0.19 to 0.52)    |
| Rheumatoid arthritis                          | 1.58<br>(0.88 to 2.21)                    | 3.43<br>(1.54 to 5.10)                    | 3.22<br>(1.37 to 4.77)                    | 3.75<br>(1.72 to 5.56)                    | 0.07<br>(0.03 to 0.10)           | 0.19<br>(0.07 to 0.27)           | 0.18<br>(0.07 to 0.27)           | 0.20<br>(0.07 to 0.29)           |
| Other musculoskeletal disorders               | 4.05<br>(3.04 to 5.04)                    | 6.75<br>(4.33 to 8.83)                    | 7.01<br>(4.44 to 9.26)                    | 6.37<br>(4.12 to 8.32)                    | 0.10<br>(0.07 to 0.14)           | 0.21<br>(0.11 to 0.28)           | 0.22<br>(0.12 to 0.30)           | 0.19<br>(0.10 to 0.26)           |
| <b>Other non-communicable diseases</b>        | <b>829.59</b><br>(341.69 to 1,451.24)     | <b>437.04</b><br>(186.57 to 778.37)       | <b>365.71</b><br>(155.69 to 652.36)       | <b>601.54</b><br>(245.94 to 1,092.05)     | <b>10.10</b><br>(4.20 to 17.51)  | <b>5.82</b><br>(2.56 to 10.16)   | <b>4.97</b><br>(2.25 to 8.52)    | <b>7.76</b><br>(3.28 to 13.84)   |
| <b>Congenital birth defects</b>               | <b>796.50</b><br>(307.55 to 1,402.44)     | <b>420.51</b><br>(166.30 to 760.08)       | <b>350.93</b><br>(143.10 to 639.14)       | <b>580.48</b><br>(224.87 to 1,070.59)     | <b>9.66</b><br>(3.77 to 16.92)   | <b>5.46</b><br>(2.19 to 9.61)    | <b>4.61</b><br>(1.86 to 8.16)    | <b>7.37</b><br>(2.85 to 13.32)   |
| Neural tube defects                           | 23.25<br>(8.09 to 57.99)                  | 4.79<br>(1.45 to 12.05)                   | 3.68<br>(1.11 to 9.31)                    | 7.59<br>(2.23 to 19.51)                   | 0.28<br>(0.10 to 0.68)           | 0.06<br>(0.02 to 0.15)           | 0.05<br>(0.01 to 0.12)           | 0.10<br>(0.03 to 0.24)           |
| Congenital heart anomalies                    | 324.16<br>(113.45 to 631.07)              | 168.50<br>(62.25 to 329.18)               | 139.43<br>(52.32 to 274.08)               | 232.71<br>(83.62 to 467.36)               | 3.93<br>(1.40 to 7.74)           | 2.16<br>(0.81 to 4.12)           | 1.81<br>(0.69 to 3.50)           | 2.93<br>(1.08 to 5.81)           |
| Orofacial clefts                              | 1.64<br>(0.37 to 4.41)                    | 0.63<br>(0.12 to 1.97)                    | 0.48<br>(0.09 to 1.50)                    | 1.01<br>(0.19 to 3.07)                    | 0.02<br>(0.00 to 0.05)           | 0.01<br>(0.00 to 0.02)           | 0.01<br>(0.00 to 0.02)           | 0.01<br>(0.00 to 0.04)           |
| Down syndrome                                 | 22.40<br>(8.12 to 44.59)                  | 14.31<br>(4.92 to 30.16)                  | 12.26<br>(4.21 to 25.48)                  | 19.80<br>(6.63 to 42.81)                  | 0.29<br>(0.10 to 0.56)           | 0.21<br>(0.07 to 0.42)           | 0.18<br>(0.06 to 0.37)           | 0.28<br>(0.09 to 0.58)           |
| Other chromosomal abnormalities               | 17.83<br>(4.86 to 57.79)                  | 15.02<br>(4.07 to 45.11)                  | 12.35<br>(3.44 to 37.65)                  | 21.90<br>(5.93 to 67.50)                  | 0.21<br>(0.06 to 0.68)           | 0.18<br>(0.05 to 0.54)           | 0.15<br>(0.04 to 0.40)           | 0.26<br>(0.07 to 0.81)           |
| Congenital musculoskeletal and limb anomalies | 23.61<br>(8.43 to 51.06)                  | 13.56<br>(4.68 to 32.07)                  | 11.46<br>(3.89 to 26.51)                  | 18.33<br>(6.09 to 43.43)                  | 0.28<br>(0.10 to 0.61)           | 0.17<br>(0.06 to 0.40)           | 0.15<br>(0.05 to 0.33)           | 0.23<br>(0.08 to 0.53)           |
| Urogenital congenital anomalies               | 33.84<br>(12.45 to 73.10)                 | 18.13<br>(6.54 to 39.92)                  | 15.53<br>(5.74 to 33.37)                  | 24.37<br>(8.51 to 56.47)                  | 0.44<br>(0.17 to 0.93)           | 0.28<br>(0.11 to 0.58)           | 0.25<br>(0.09 to 0.51)           | 0.36<br>(0.13 to 0.76)           |
| Digestive congenital anomalies                | 7.94<br>(2.71 to 17.22)                   | 4.13<br>(1.38 to 9.77)                    | 3.37<br>(1.15 to 7.78)                    | 5.93<br>(1.93 to 14.10)                   | 0.09<br>(0.03 to 0.20)           | 0.05<br>(0.02 to 0.12)           | 0.04<br>(0.02 to 0.09)           | 0.07<br>(0.02 to 0.17)           |
| Other congenital birth defects                | 341.82<br>(135.45 to 607.90)              | 181.44<br>(72.14 to 349.33)               | 152.37<br>(62.61 to 293.93)               | 248.85<br>(98.17 to 481.89)               | 4.12<br>(1.65 to 7.22)           | 2.33<br>(0.95 to 4.39)           | 1.98<br>(0.82 to 3.74)           | 3.13<br>(1.24 to 5.94)           |
| Skin and subcutaneous diseases                | 2.57<br>(1.50 to 3.69)                    | 5.08<br>(3.37 to 8.33)                    | 5.15<br>(3.38 to 8.90)                    | 5.11<br>(3.32 to 7.94)                    | 0.09<br>(0.05 to 0.17)           | 0.23<br>(0.11 to 0.55)           | 0.25<br>(0.12 to 0.60)           | 0.21<br>(0.11 to 0.47)           |
| Cellulitis                                    | 0.36<br>(0.16 to 0.58)                    | 0.89<br>(0.49 to 1.64)                    | 0.93<br>(0.51 to 1.80)                    | 0.85<br>(0.45 to 1.47)                    | 0.01<br>(0.01 to 0.02)           | 0.03<br>(0.02 to 0.09)           | 0.04<br>(0.02 to 0.11)           | 0.03<br>(0.02 to 0.07)           |
| Pyoderma                                      | 0.95<br>(0.32 to 1.70)                    | 1.60<br>(0.69 to 2.63)                    | 1.52<br>(0.67 to 2.50)                    | 1.79<br>(0.74 to 3.00)                    | 0.02<br>(0.01 to 0.04)           | 0.05<br>(0.03 to 0.15)           | 0.05<br>(0.03 to 0.16)           | 0.05<br>(0.03 to 0.13)           |
| Decubitus ulcer                               | 1.02<br>(0.61 to 1.92)                    | 2.23<br>(1.16 to 4.76)                    | 2.34<br>(1.21 to 5.15)                    | 2.11<br>(1.12 to 4.32)                    | 0.05<br>(0.02 to 0.12)           | 0.14<br>(0.05 to 0.36)           | 0.15<br>(0.06 to 0.41)           | 0.12<br>(0.05 to 0.32)           |
| Other skin and subcutaneous diseases          | 0.24<br>(0.11 to 0.38)                    | 0.36<br>(0.18 to 0.56)                    | 0.36<br>(0.18 to 0.55)                    | 0.37<br>(0.18 to 0.59)                    | 0.00<br>(0.00 to 0.01)           | 0.01<br>(0.01 to 0.01)           | 0.01<br>(0.01 to 0.02)           | 0.01<br>(0.00 to 0.01)           |
| Sudden infant death syndrome                  | 30.52<br>(14.15 to 55.18)                 | 11.44<br>(3.88 to 26.29)                  | 9.63<br>(3.11 to 22.84)                   | 15.94<br>(5.37 to 35.67)                  | 0.35<br>(0.16 to 0.64)           | 0.13<br>(0.04 to 0.30)           | 0.11<br>(0.04 to 0.26)           | 0.18<br>(0.06 to 0.41)           |
| <b>Injuries</b>                               | <b>1,970.84</b><br>(1,691.31 to 2,253.13) | <b>2,105.22</b><br>(1,731.21 to 2,533.06) | <b>1,575.58</b><br>(1,285.91 to 1,895.82) | <b>2,531.23</b><br>(2,079.05 to 3,076.50) | <b>41.50</b><br>(35.52 to 47.69) | <b>52.12</b><br>(43.60 to 61.33) | <b>41.11</b><br>(34.22 to 48.84) | <b>59.81</b><br>(50.02 to 70.22) |

|                                      |                                              |                                              |                                            |                                              |                                     |                                     |                                     |                                     |
|--------------------------------------|----------------------------------------------|----------------------------------------------|--------------------------------------------|----------------------------------------------|-------------------------------------|-------------------------------------|-------------------------------------|-------------------------------------|
| <b>Transport injuries</b>            | <b>1,284.38</b><br>(1,080.05 to<br>1,496.76) | <b>1,500.07</b><br>(1,220.11 to<br>1,821.95) | <b>1,007.86</b><br>(809.39 to<br>1,232.48) | <b>1,860.77</b><br>(1,519.40 to<br>2,268.83) | <b>27.43</b><br>(22.89 to<br>31.78) | <b>36.55</b><br>(30.13 to<br>43.94) | <b>25.96</b><br>(21.03 to<br>31.43) | <b>43.33</b><br>(35.97 to<br>51.98) |
| Road injuries                        | 1,246.26<br>(1,047.50 to<br>1,452.30)        | 1,444.68<br>(1,173.24 to<br>1,760.78)        | 957.05<br>(769.74 to<br>1,170.80)          | 1,798.13<br>(1,467.54 to<br>2,193.24)        | 26.64<br>(22.27 to<br>30.89)        | 35.26<br>(28.92 to<br>42.41)        | 24.76<br>(20.15 to<br>30.02)        | 41.90<br>(34.76 to<br>50.32)        |
| Pedestrian road injuries             | 322.68<br>(233.95 to<br>435.95)              | 341.31<br>(235.79 to<br>480.06)              | 241.97<br>(166.01 to<br>341.34)            | 410.82<br>(284.66 to<br>578.95)              | 7.36<br>(5.33 to<br>10.13)          | 9.34<br>(6.52 to<br>13.13)          | 6.97<br>(4.83 to<br>9.94)           | 10.75<br>(7.54 to<br>15.08)         |
| <b>Egypt</b>                         |                                              |                                              |                                            |                                              |                                     |                                     |                                     |                                     |
| <b>Cause</b>                         | <b>YLLs (in 1000s)</b>                       |                                              |                                            |                                              | <b>Deaths (in 1000s)</b>            |                                     |                                     |                                     |
|                                      | <b>2016</b>                                  | <b>2040 Forecast</b>                         | <b>2040 Better Scenario</b>                | <b>2040 Worse Scenario</b>                   | <b>2016</b>                         | <b>2040 Forecast</b>                | <b>2040 Better Scenario</b>         | <b>2040 Worse Scenario</b>          |
| Cyclist road injuries                | 24.46<br>(14.83 to<br>37.57)                 | 31.05<br>(18.45 to<br>50.36)                 | 21.70<br>(12.96 to<br>35.37)               | 37.99<br>(22.31 to<br>61.80)                 | 0.52<br>(0.31 to<br>0.81)           | 0.75<br>(0.45 to<br>1.20)           | 0.56<br>(0.34 to<br>0.90)           | 0.87<br>(0.52 to<br>1.40)           |
| Motorcyclist road injuries           | 75.34<br>(51.78 to<br>113.50)                | 91.56<br>(58.69 to<br>143.78)                | 69.17<br>(43.89 to<br>109.40)              | 107.45<br>(69.10 to<br>168.06)               | 1.33<br>(0.92 to<br>1.98)           | 1.69<br>(1.10 to<br>2.57)           | 1.31<br>(0.85 to<br>2.00)           | 1.94<br>(1.27 to<br>2.96)           |
| Motor vehicle road injuries          | 819.77<br>(648.24 to<br>996.09)              | 975.89<br>(738.18 to<br>1,255.44)            | 620.92<br>(461.46 to<br>803.56)            | 1,235.83<br>(940.69 to<br>1,589.16)          | 17.35<br>(13.46 to<br>21.22)        | 23.34<br>(17.75 to<br>29.50)        | 15.81<br>(11.77 to<br>20.13)        | 28.19<br>(21.52 to<br>35.76)        |
| Other road injuries                  | 4.02<br>(2.42 to<br>8.31)                    | 4.87<br>(2.97 to<br>9.62)                    | 3.28<br>(2.04 to<br>6.47)                  | 6.05<br>(3.63 to<br>12.15)                   | 0.09<br>(0.06 to<br>0.19)           | 0.14<br>(0.09 to<br>0.28)           | 0.11<br>(0.07 to<br>0.21)           | 0.16<br>(0.10 to<br>0.31)           |
| Other transport injuries             | 38.12<br>(25.91 to<br>50.70)                 | 55.39<br>(37.68 to<br>77.01)                 | 50.80<br>(33.46 to<br>71.81)               | 62.64<br>(42.12 to<br>86.70)                 | 0.79<br>(0.55 to<br>1.06)           | 1.29<br>(0.89 to<br>1.77)           | 1.20<br>(0.81 to<br>1.69)           | 1.42<br>(0.98 to<br>1.97)           |
| <b>Unintentional injuries</b>        | <b>445.30</b><br>(331.61 to<br>538.32)       | <b>384.28</b><br>(272.84 to<br>481.71)       | <b>356.84</b><br>(259.02 to<br>450.19)     | <b>435.04</b><br>(304.51 to<br>556.38)       | <b>9.27</b><br>(7.08 to<br>11.16)   | <b>10.54</b><br>(7.89 to<br>12.92)  | <b>10.27</b><br>(7.73 to<br>12.59)  | <b>11.22</b><br>(8.20 to<br>13.86)  |
| Falls                                | 129.73<br>(90.35 to<br>170.01)               | 154.28<br>(103.23 to<br>207.38)              | 150.36<br>(101.60 to<br>201.93)            | 161.58<br>(108.91 to<br>218.96)              | 3.48<br>(2.41 to<br>4.64)           | 5.36<br>(3.66 to<br>7.01)           | 5.46<br>(3.81 to<br>7.10)           | 5.34<br>(3.64 to<br>7.04)           |
| Drowning                             | 81.25<br>(56.71 to<br>105.85)                | 53.68<br>(33.65 to<br>74.55)                 | 48.14<br>(30.70 to<br>66.01)               | 63.79<br>(40.08 to<br>89.90)                 | 1.33<br>(0.95 to<br>1.67)           | 1.00<br>(0.68 to<br>1.33)           | 0.91<br>(0.63 to<br>1.22)           | 1.15<br>(0.79 to<br>1.55)           |
| Fire, heat, and hot substances       | 80.73<br>(49.99 to<br>111.68)                | 56.67<br>(33.45 to<br>80.18)                 | 50.32<br>(29.85 to<br>70.49)               | 67.98<br>(39.65 to<br>97.21)                 | 1.55<br>(1.06 to<br>2.04)           | 1.30<br>(0.92 to<br>1.71)           | 1.19<br>(0.86 to<br>1.58)           | 1.50<br>(1.05 to<br>1.98)           |
| Poisonings                           | 8.37<br>(4.41 to<br>14.46)                   | 4.20<br>(1.96 to<br>7.09)                    | 3.55<br>(1.65 to<br>5.91)                  | 5.45<br>(2.51 to<br>9.54)                    | 0.14<br>(0.08 to<br>0.24)           | 0.08<br>(0.04 to<br>0.14)           | 0.07<br>(0.04 to<br>0.12)           | 0.10<br>(0.05 to<br>0.18)           |
| Exposure to mechanical forces        | 43.82<br>(29.62 to<br>56.63)                 | 32.59<br>(18.93 to<br>44.98)                 | 28.74<br>(16.86 to<br>39.71)               | 39.68<br>(23.22 to<br>56.39)                 | 0.78<br>(0.52 to<br>0.99)           | 0.68<br>(0.41 to<br>0.95)           | 0.62<br>(0.38 to<br>0.85)           | 0.80<br>(0.48 to<br>1.10)           |
| Unintentional firearm injuries       | 3.87<br>(2.36 to<br>5.40)                    | 2.72<br>(1.44 to<br>4.23)                    | 2.41<br>(1.30 to<br>3.66)                  | 3.30<br>(1.84 to<br>5.11)                    | 0.08<br>(0.05 to<br>0.11)           | 0.06<br>(0.04 to<br>0.09)           | 0.06<br>(0.03 to<br>0.08)           | 0.07<br>(0.04 to<br>0.11)           |
| Unintentional suffocation            | 15.24<br>(8.10 to<br>25.21)                  | 7.28<br>(3.37 to<br>13.41)                   | 6.03<br>(2.86 to<br>11.31)                 | 9.98<br>(4.53 to<br>18.78)                   | 0.20<br>(0.11 to<br>0.32)           | 0.10<br>(0.05 to<br>0.18)           | 0.08<br>(0.04 to<br>0.15)           | 0.13<br>(0.06 to<br>0.25)           |
| Other exposure to mechanical forces  | 24.70<br>(13.97 to<br>31.99)                 | 22.58<br>(11.75 to<br>31.72)                 | 20.30<br>(10.40 to<br>28.93)               | 26.39<br>(13.30 to<br>36.87)                 | 0.51<br>(0.29 to<br>0.66)           | 0.52<br>(0.29 to<br>0.73)           | 0.48<br>(0.27 to<br>0.67)           | 0.60<br>(0.33 to<br>0.83)           |
| Adverse effects of medical treatment | 30.17<br>(23.35 to<br>36.57)                 | 29.70<br>(21.32 to<br>37.83)                 | 27.49<br>(20.04 to<br>34.79)               | 34.08<br>(24.41 to<br>43.72)                 | 0.75<br>(0.57 to<br>0.93)           | 0.96<br>(0.71 to<br>1.24)           | 0.93<br>(0.68 to<br>1.21)           | 1.04<br>(0.77 to<br>1.35)           |
| Animal contact                       | 10.88<br>(4.25 to<br>18.53)                  | 5.73<br>(2.44 to<br>11.30)                   | 4.62<br>(2.09 to<br>9.09)                  | 8.27<br>(3.23 to<br>16.58)                   | 0.14<br>(0.07 to<br>0.23)           | 0.09<br>(0.05 to<br>0.15)           | 0.07<br>(0.04 to<br>0.12)           | 0.12<br>(0.06 to<br>0.22)           |
| Venomous animal contact              | 5.23<br>(2.01 to<br>9.66)                    | 2.56<br>(1.01 to<br>5.50)                    | 2.05<br>(0.84 to<br>4.26)                  | 3.72<br>(1.39 to<br>8.29)                    | 0.07<br>(0.03 to<br>0.12)           | 0.04<br>(0.02 to<br>0.07)           | 0.03<br>(0.02 to<br>0.06)           | 0.05<br>(0.02 to<br>0.11)           |

|                                                 |                                                      |                                                      |                                                      |                                                      |                                                |                                                |                                                |                                                |
|-------------------------------------------------|------------------------------------------------------|------------------------------------------------------|------------------------------------------------------|------------------------------------------------------|------------------------------------------------|------------------------------------------------|------------------------------------------------|------------------------------------------------|
| Non-venomous animal contact                     | 5.64<br>(1.89 to<br>11.03)                           | 3.18<br>(1.19 to<br>6.87)                            | 2.57<br>(1.02 to<br>5.59)                            | 4.54<br>(1.59 to<br>10.17)                           | 0.07<br>(0.03 to<br>0.14)                      | 0.05<br>(0.02 to<br>0.09)                      | 0.04<br>(0.02 to<br>0.08)                      | 0.07<br>(0.03 to<br>0.13)                      |
| Foreign body                                    | 36.37<br>(25.98 to<br>48.07)                         | 28.70<br>(19.22 to<br>40.68)                         | 26.98<br>(18.23 to<br>37.93)                         | 32.34<br>(21.38 to<br>46.55)                         | 0.62<br>(0.46 to<br>0.81)                      | 0.65<br>(0.45 to<br>0.85)                      | 0.64<br>(0.46 to<br>0.83)                      | 0.68<br>(0.47 to<br>0.91)                      |
| Pulmonary aspiration and foreign body in airway | 26.24<br>(18.47 to<br>35.92)                         | 20.63<br>(13.74 to<br>29.50)                         | 19.53<br>(13.15 to<br>27.58)                         | 22.94<br>(15.10 to<br>33.85)                         | 0.44<br>(0.32 to<br>0.57)                      | 0.47<br>(0.34 to<br>0.61)                      | 0.47<br>(0.34 to<br>0.61)                      | 0.48<br>(0.34 to<br>0.65)                      |
| Foreign body in other body part                 | 10.13<br>(5.76 to<br>16.33)                          | 8.07<br>(4.06 to<br>13.48)                           | 7.45<br>(3.76 to<br>12.49)                           | 9.40<br>(4.78 to<br>15.74)                           | 0.18<br>(0.10 to<br>0.29)                      | 0.18<br>(0.09 to<br>0.29)                      | 0.17<br>(0.08 to<br>0.27)                      | 0.20<br>(0.10 to<br>0.32)                      |
| Environmental heat and cold exposure            | 3.07<br>(2.26 to<br>4.40)                            | 2.56<br>(1.74 to<br>3.91)                            | 2.19<br>(1.48 to<br>3.44)                            | 3.32<br>(2.24 to<br>5.06)                            | 0.07<br>(0.05 to<br>0.10)                      | 0.07<br>(0.05 to<br>0.11)                      | 0.06<br>(0.04 to<br>0.10)                      | 0.09<br>(0.06 to<br>0.13)                      |
| Other unintentional injuries                    | 20.91<br>(15.62 to<br>28.17)                         | 16.16<br>(10.83 to<br>22.35)                         | 14.46<br>(9.54 to<br>20.73)                          | 18.56<br>(12.50 to<br>25.46)                         | 0.40<br>(0.29 to<br>0.54)                      | 0.40<br>(0.24 to<br>0.48)                      | 0.32<br>(0.21 to<br>0.46)                      | 0.39<br>(0.27 to<br>0.54)                      |
| <b>Self-harm and interpersonal violence</b>     | <b>176.82</b><br><b>(133.56 to</b><br><b>230.22)</b> | <b>210.58</b><br><b>(151.72 to</b><br><b>280.39)</b> | <b>200.72</b><br><b>(146.18 to</b><br><b>269.53)</b> | <b>224.74</b><br><b>(161.18 to</b><br><b>301.03)</b> | <b>3.70</b><br><b>(2.74 to</b><br><b>4.91)</b> | <b>4.83</b><br><b>(3.44 to</b><br><b>6.49)</b> | <b>4.88</b><br><b>(3.36 to</b><br><b>6.26)</b> | <b>5.06</b><br><b>(3.55 to</b><br><b>6.86)</b> |

#### Egypt

| Cause                                                                        | YLLs (in 1000s)                                    |                                                  |                                                  |                                                  | Deaths (in 1000s)                              |                                                |                                                |                                                |
|------------------------------------------------------------------------------|----------------------------------------------------|--------------------------------------------------|--------------------------------------------------|--------------------------------------------------|------------------------------------------------|------------------------------------------------|------------------------------------------------|------------------------------------------------|
|                                                                              | 2016                                               | 2040 Forecast                                    | 2040 Better Scenario                             | 2040 Worse Scenario                              | 2016                                           | 2040 Forecast                                  | 2040 Better Scenario                           | 2040 Worse Scenario                            |
| Self-harm                                                                    | 144.41<br>(101.70 to<br>199.47)                    | 181.66<br>(123.63 to<br>253.39)                  | 172.91<br>(119.39 to<br>240.30)                  | 194.77<br>(131.56 to<br>271.98)                  | 3.09<br>(2.18 to<br>4.29)                      | 4.22<br>(2.88 to<br>5.90)                      | 4.08<br>(2.78 to<br>5.69)                      | 4.44<br>(2.99 to<br>6.22)                      |
| Self-harm by firearm                                                         | 8.61<br>(2.39 to<br>21.94)                         | 10.32<br>(2.66 to<br>27.62)                      | 9.69<br>(2.49 to<br>26.13)                       | 11.24<br>(2.93 to<br>29.57)                      | 0.20<br>(0.05 to<br>0.52)                      | 0.26<br>(0.07 to<br>0.71)                      | 0.25<br>(0.06 to<br>0.68)                      | 0.28<br>(0.07 to<br>0.75)                      |
| Self-harm by other specified means                                           | 135.80<br>(95.83 to<br>184.90)                     | 171.34<br>(117.40 to<br>237.00)                  | 163.22<br>(112.23 to<br>223.76)                  | 183.53<br>(124.88 to<br>253.05)                  | 2.89<br>(2.03 to<br>3.88)                      | 3.96<br>(2.68 to<br>5.42)                      | 3.83<br>(2.63 to<br>5.20)                      | 4.16<br>(2.81 to<br>5.70)                      |
| Interpersonal violence                                                       | 32.41<br>(18.68 to<br>43.01)                       | 28.92<br>(15.48 to<br>40.17)                     | 27.81<br>(15.22 to<br>38.40)                     | 29.97<br>(16.27 to<br>41.93)                     | 0.62<br>(0.36 to<br>0.81)                      | 0.61<br>(0.34 to<br>0.83)                      | 0.59<br>(0.33 to<br>0.81)                      | 0.62<br>(0.34 to<br>0.85)                      |
| Physical violence by firearm                                                 | 14.11<br>(6.74 to<br>24.11)                        | 12.63<br>(5.84 to<br>21.77)                      | 12.11<br>(5.57 to<br>20.94)                      | 13.00<br>(6.02 to<br>22.33)                      | 0.27<br>(0.13 to<br>0.45)                      | 0.26<br>(0.12 to<br>0.44)                      | 0.25<br>(0.12 to<br>0.43)                      | 0.26<br>(0.12 to<br>0.44)                      |
| Physical violence by sharp object                                            | 8.61<br>(4.12 to<br>13.50)                         | 8.54<br>(4.10 to<br>13.30)                       | 8.34<br>(4.07 to<br>13.04)                       | 8.59<br>(4.15 to<br>13.39)                       | 0.16<br>(0.08 to<br>0.25)                      | 0.18<br>(0.09 to<br>0.27)                      | 0.17<br>(0.09 to<br>0.26)                      | 0.17<br>(0.09 to<br>0.26)                      |
| Physical violence by other means                                             | 9.68<br>(5.21 to<br>14.61)                         | 7.74<br>(3.50 to<br>12.32)                       | 7.36<br>(3.34 to<br>11.74)                       | 8.38<br>(3.88 to<br>13.38)                       | 0.18<br>(0.09 to<br>0.28)                      | 0.17<br>(0.08 to<br>0.27)                      | 0.17<br>(0.08 to<br>0.26)                      | 0.18<br>(0.08 to<br>0.28)                      |
| Forces of nature, conflict and terrorism, and executions and police conflict | <b>64.34</b><br><b>(14.30 to</b><br><b>114.93)</b> | <b>10.29</b><br><b>(0.00 to</b><br><b>87.37)</b> | <b>10.16</b><br><b>(0.00 to</b><br><b>86.83)</b> | <b>10.68</b><br><b>(0.00 to</b><br><b>91.69)</b> | <b>1.09</b><br><b>(0.24 to</b><br><b>1.95)</b> | <b>0.20</b><br><b>(0.00 to</b><br><b>1.86)</b> | <b>0.20</b><br><b>(0.00 to</b><br><b>1.89)</b> | <b>0.20</b><br><b>(0.00 to</b><br><b>1.88)</b> |
| Exposure to forces of nature                                                 | 0.00<br>(0.00 to<br>0.00)                          | 0.61<br>(0.00 to<br>13.57)                       | 0.60<br>(0.00 to<br>13.31)                       | 0.65<br>(0.00 to<br>14.27)                       | 0.00<br>(0.00 to<br>0.00)                      | 0.01<br>(0.00 to<br>0.28)                      | 0.01<br>(0.00 to<br>0.28)                      | 0.01<br>(0.00 to<br>0.29)                      |
| Conflict and terrorism                                                       | 63.79<br>(13.73 to<br>114.41)                      | 4.49<br>(0.00 to<br>75.74)                       | 4.42<br>(0.00 to<br>74.58)                       | 4.72<br>(0.00 to<br>79.53)                       | 1.08<br>(0.23 to<br>1.94)                      | 0.09<br>(0.00 to<br>1.63)                      | 0.09<br>(0.00 to<br>1.64)                      | 0.09<br>(0.00 to<br>1.66)                      |
| Executions and police conflict                                               | 0.55<br>(0.45 to<br>0.67)                          | 5.18<br>(0.00 to<br>79.91)                       | 5.14<br>(0.00 to<br>79.25)                       | 5.31<br>(0.00 to<br>82.08)                       | 0.01<br>(0.01 to<br>0.01)                      | 0.10<br>(0.00 to<br>1.52)                      | 0.10<br>(0.00 to<br>1.53)                      | 0.10<br>(0.00 to<br>1.54)                      |

#### Iran

| Cause | YLLs (in 1000s) |               |                      |                     | Deaths (in 1000s) |               |                      |                     |
|-------|-----------------|---------------|----------------------|---------------------|-------------------|---------------|----------------------|---------------------|
|       | 2016            | 2040 Forecast | 2040 Better Scenario | 2040 Worse Scenario | 2016              | 2040 Forecast | 2040 Better Scenario | 2040 Worse Scenario |

|                                                                   |                                         |                                          |                                        |                                          |                                 |                                   |                                 |                                   |
|-------------------------------------------------------------------|-----------------------------------------|------------------------------------------|----------------------------------------|------------------------------------------|---------------------------------|-----------------------------------|---------------------------------|-----------------------------------|
| All causes                                                        | 10,441.71<br>(8,565.06 to<br>13,303.65) | 14,159.38<br>(10,065.52 to<br>19,938.57) | 9,658.11<br>(6,971.96 to<br>13,386.35) | 17,671.68<br>(12,962.84 to<br>24,628.80) | 360.68<br>(309.17 to<br>421.28) | 741.23<br>(528.11 to<br>1,010.04) | 546.63<br>(387.25 to<br>750.04) | 887.50<br>(647.45 to<br>1,171.56) |
| Communicable, maternal, neonatal, and nutritional diseases        | 1,700.64<br>(859.50 to<br>3,278.62)     | 822.04<br>(515.18 to<br>1,391.85)        | 595.64<br>(386.40 to<br>970.46)        | 1,044.01<br>(629.64 to<br>1,819.09)      | 28.10<br>(18.03 to<br>46.40)    | 27.55<br>(21.02 to<br>35.82)      | 22.76<br>(17.14 to<br>29.28)    | 32.02<br>(23.70 to<br>42.42)      |
| HIV/AIDS and tuberculosis                                         | 39.74<br>(32.21 to<br>54.35)            | 34.71<br>(20.95 to<br>55.97)             | 19.53<br>(10.81 to<br>37.33)           | 45.80<br>(29.02 to<br>67.60)             | 1.26<br>(1.04 to<br>1.59)       | 1.38<br>(0.90 to<br>2.06)         | 0.80<br>(0.48 to<br>1.31)       | 1.80<br>(1.19 to<br>2.55)         |
| Tuberculosis                                                      | 29.50<br>(24.19 to<br>35.99)            | 23.89<br>(15.19 to<br>37.02)             | 12.50<br>(7.67 to<br>19.35)            | 32.52<br>(21.19 to<br>47.66)             | 1.04<br>(0.87 to<br>1.26)       | 1.13<br>(0.74 to<br>1.76)         | 0.63<br>(0.40 to<br>0.97)       | 1.50<br>(1.00 to<br>2.17)         |
| HIV/AIDS                                                          | 10.24<br>(5.68 to<br>23.81)             | 10.82<br>(2.51 to<br>26.80)              | 7.03<br>(1.49 to<br>23.04)             | 13.28<br>(3.54 to<br>29.67)              | 0.22<br>(0.12 to<br>0.52)       | 0.25<br>(0.05 to<br>0.65)         | 0.17<br>(0.03 to<br>0.56)       | 0.30<br>(0.07 to<br>0.69)         |
| Diarrhea, lower respiratory, and other common infectious diseases | 399.47<br>(283.02 to<br>613.93)         | 363.54<br>(254.76 to<br>530.37)          | 275.27<br>(197.57 to<br>383.20)        | 440.50<br>(300.83 to<br>666.07)          | 11.25<br>(8.96 to<br>14.24)     | 19.58<br>(14.38 to<br>25.88)      | 16.85<br>(12.56 to<br>22.25)    | 22.01<br>(15.71 to<br>29.62)      |
| Diarrheal diseases                                                | 49.11<br>(28.05 to<br>90.43)            | 37.50<br>(12.24 to<br>93.51)             | 48.58<br>(17.51 to<br>107.48)          | 38.71<br>(11.95 to<br>101.67)            | 1.20<br>(0.78 to<br>2.03)       | 2.29<br>(0.73 to<br>6.02)         | 3.29<br>(1.19 to<br>7.55)       | 2.20<br>(0.70 to<br>5.64)         |
| Intestinal infectious diseases                                    | 14.28<br>(6.67 to<br>26.34)             | 9.47<br>(4.15 to<br>17.91)               | 11.11<br>(5.20 to<br>19.40)            | 9.27<br>(4.09 to<br>17.50)               | 0.22<br>(0.11 to<br>0.41)       | 0.17<br>(0.08 to<br>0.32)         | 0.21<br>(0.10 to<br>0.36)       | 0.17<br>(0.08 to<br>0.31)         |
| Typhoid fever                                                     | 12.63<br>(5.94 to<br>23.40)             | 8.36<br>(3.59 to<br>15.89)               | 10.33<br>(4.87 to<br>18.18)            | 7.95<br>(3.54 to<br>15.28)               | 0.20<br>(0.09 to<br>0.36)       | 0.15<br>(0.07 to<br>0.28)         | 0.19<br>(0.09 to<br>0.34)       | 0.14<br>(0.06 to<br>0.27)         |
| Paratyphoid fever                                                 | 1.65<br>(0.67 to<br>3.41)               | 1.10<br>(0.44 to<br>2.30)                | 0.78<br>(0.32 to<br>1.64)              | 1.31<br>(0.53 to<br>2.68)                | 0.03<br>(0.01 to<br>0.05)       | 0.02<br>(0.01 to<br>0.04)         | 0.02<br>(0.01 to<br>0.03)       | 0.02<br>(0.01 to<br>0.05)         |
| Other intestinal infectious diseases                              | 0.00<br>(0.00 to<br>0.01)               | 0.00<br>(0.00 to<br>0.00)                | 0.00<br>(0.00 to<br>0.00)              | 0.00<br>(0.00 to<br>0.00)                | 0.00<br>(0.00 to<br>0.00)       | 0.00<br>(0.00 to<br>0.00)         | 0.00<br>(0.00 to<br>0.00)       | 0.00<br>(0.00 to<br>0.00)         |
| Lower respiratory infections                                      | 280.28<br>(198.45 to<br>420.36)         | 285.73<br>(194.91 to<br>438.55)          | 191.53<br>(134.57 to<br>271.96)        | 356.88<br>(236.78 to<br>558.59)          | 8.68<br>(6.87 to<br>10.87)      | 16.02<br>(11.66 to<br>21.42)      | 12.45<br>(9.25 to<br>16.24)     | 18.44<br>(13.07 to<br>24.43)      |
| Upper respiratory infections                                      | 0.32<br>(0.17 to<br>0.66)               | 0.31<br>(0.13 to<br>0.62)                | 0.18<br>(0.07 to<br>0.39)              | 0.41<br>(0.16 to<br>0.87)                | 0.01<br>(0.00 to<br>0.01)       | 0.01<br>(0.00 to<br>0.03)         | 0.01<br>(0.00 to<br>0.02)       | 0.02<br>(0.01 to<br>0.03)         |
| Otitis media                                                      | 0.01<br>(0.00 to<br>0.01)               | 0.00<br>(0.00 to<br>0.01)                | 0.01<br>(0.00 to<br>0.01)              | 0.00<br>(0.00 to<br>0.01)                | 0.00<br>(0.00 to<br>0.00)       | 0.00<br>(0.00 to<br>0.00)         | 0.00<br>(0.00 to<br>0.00)       | 0.00<br>(0.00 to<br>0.00)         |
| Meningitis                                                        | 41.92<br>(27.31 to<br>70.64)            | 20.65<br>(14.21 to<br>33.99)             | 14.57<br>(9.77 to<br>23.91)            | 24.30<br>(17.09 to<br>39.49)             | 0.88<br>(0.64 to<br>1.35)       | 0.75<br>(0.53 to<br>1.12)         | 0.57<br>(0.40 to<br>0.87)       | 0.84<br>(0.61 to<br>1.28)         |
| Pneumococcal meningitis                                           | 0.10<br>(0.07 to<br>0.16)               | 0.05<br>(0.03 to<br>0.07)                | 0.05<br>(0.03 to<br>0.07)              | 0.04<br>(0.03 to<br>0.07)                | 0.00<br>(0.00 to<br>0.00)       | 0.00<br>(0.00 to<br>0.00)         | 0.00<br>(0.00 to<br>0.00)       | 0.00<br>(0.00 to<br>0.00)         |
| H influenzae type B meningitis                                    | 3.63<br>(2.22 to<br>6.37)               | 1.97<br>(1.27 to<br>3.40)                | 1.95<br>(1.27 to<br>3.34)              | 2.05<br>(1.27 to<br>3.71)                | 0.07<br>(0.05 to<br>0.11)       | 0.06<br>(0.04 to<br>0.09)         | 0.07<br>(0.05 to<br>0.10)       | 0.06<br>(0.04 to<br>0.09)         |
| Meningococcal meningitis                                          | 21.98<br>(14.37 to<br>36.88)            | 10.81<br>(7.41 to<br>17.94)              | 7.44<br>(4.98 to<br>12.27)             | 12.78<br>(9.07 to<br>20.85)              | 0.48<br>(0.35 to<br>0.73)       | 0.41<br>(0.29 to<br>0.62)         | 0.31<br>(0.21 to<br>0.48)       | 0.47<br>(0.33 to<br>0.71)         |
| Other meningitis                                                  | 16.22<br>(10.49 to<br>27.20)            | 7.83<br>(5.26 to<br>12.82)               | 5.13<br>(3.38 to<br>8.49)              | 9.43<br>(6.65 to<br>15.28)               | 0.32<br>(0.23 to<br>0.51)       | 0.27<br>(0.19 to<br>0.41)         | 0.19<br>(0.13 to<br>0.29)       | 0.31<br>(0.23 to<br>0.47)         |
| Encephalitis                                                      | 10.29<br>(7.00 to<br>15.50)             | 8.90<br>(6.67 to<br>11.83)               | 8.50<br>(6.25 to<br>11.43)             | 9.35<br>(6.88 to<br>12.84)               | 0.21<br>(0.16 to<br>0.28)       | 0.30<br>(0.21 to<br>0.37)         | 0.30<br>(0.21 to<br>0.38)       | 0.30<br>(0.22 to<br>0.38)         |
| Diphtheria                                                        | 0.06<br>(0.03 to<br>0.11)               | 0.01<br>(0.01 to<br>0.02)                | 0.01<br>(0.01 to<br>0.02)              | 0.01<br>(0.01 to<br>0.03)                | 0.00<br>(0.00 to<br>0.00)       | 0.00<br>(0.00 to<br>0.00)         | 0.00<br>(0.00 to<br>0.00)       | 0.00<br>(0.00 to<br>0.00)         |
| Whooping cough                                                    | 0.59<br>(0.04 to<br>2.31)               | 0.21<br>(0.01 to<br>0.87)                | 0.19<br>(0.01 to<br>0.83)              | 0.58<br>(0.03 to<br>2.42)                | 0.01<br>(0.00 to<br>0.03)       | 0.00<br>(0.00 to<br>0.01)         | 0.00<br>(0.00 to<br>0.01)       | 0.01<br>(0.00 to<br>0.03)         |

| Tetanus                                       | 0.59<br>(0.47 to<br>0.78)                  | 0.07<br>(0.05 to<br>0.10)                 | 0.07<br>(0.05 to<br>0.10)                | 0.08<br>(0.05 to<br>0.13)                 | 0.01<br>(0.01 to<br>0.02)                | 0.00<br>(0.00 to<br>0.00)                | 0.00<br>(0.00 to<br>0.00)                | 0.00<br>(0.00 to<br>0.00)                |
|-----------------------------------------------|--------------------------------------------|-------------------------------------------|------------------------------------------|-------------------------------------------|------------------------------------------|------------------------------------------|------------------------------------------|------------------------------------------|
| Measles                                       | 0.59<br>(0.13 to<br>1.65)                  | 0.07<br>(0.00 to<br>0.54)                 | 0.05<br>(0.00 to<br>0.30)                | 0.16<br>(0.00 to<br>1.32)                 | 0.01<br>(0.00 to<br>0.02)                | 0.00<br>(0.00 to<br>0.01)                | 0.00<br>(0.00 to<br>0.00)                | 0.00<br>(0.00 to<br>0.02)                |
| <b>Iran</b>                                   |                                            |                                           |                                          |                                           |                                          |                                          |                                          |                                          |
| Cause                                         | YLLs (in 1000s)                            |                                           |                                          |                                           | Deaths (in 1000s)                        |                                          |                                          |                                          |
|                                               | 2016                                       | 2040 Forecast                             | 2040 Better Scenario                     | 2040 Worse Scenario                       | 2016                                     | 2040 Forecast                            | 2040 Better Scenario                     | 2040 Worse Scenario                      |
| Varicella and herpes zoster                   | 1.42<br>(0.76 to<br>2.91)                  | 0.62<br>(0.36 to<br>1.10)                 | 0.48<br>(0.27 to<br>0.84)                | 0.74<br>(0.42 to<br>1.39)                 | 0.03<br>(0.02 to<br>0.05)                | 0.03<br>(0.02 to<br>0.05)                | 0.03<br>(0.01 to<br>0.04)                | 0.03<br>(0.02 to<br>0.05)                |
| Neglected tropical diseases and malaria       | <b>4.43</b><br>(3.27 to<br><b>6.60</b> )   | <b>2.56</b><br>(1.90 to<br><b>3.70</b> )  | <b>2.49</b><br>(1.84 to<br><b>3.55</b> ) | <b>2.75</b><br>(2.02 to<br><b>4.02</b> )  | <b>0.10</b><br>(0.08 to<br><b>0.13</b> ) | <b>0.09</b><br>(0.06 to<br><b>0.12</b> ) | <b>0.09</b><br>(0.06 to<br><b>0.12</b> ) | <b>0.09</b><br>(0.06 to<br><b>0.12</b> ) |
| Malaria                                       | 0.49<br>(0.34 to<br>0.94)                  | 0.21<br>(0.14 to<br>0.43)                 | 0.20<br>(0.13 to<br>0.41)                | 0.22<br>(0.14 to<br>0.46)                 | 0.01<br>(0.01 to<br>0.02)                | 0.01<br>(0.00 to<br>0.01)                | 0.01<br>(0.00 to<br>0.01)                | 0.01<br>(0.00 to<br>0.01)                |
| Chagas disease                                | 0.00<br>(0.00 to<br>0.00)                  | 0.00<br>(0.00 to<br>0.00)                 | 0.00<br>(0.00 to<br>0.00)                | 0.00<br>(0.00 to<br>0.00)                 | 0.00<br>(0.00 to<br>0.00)                | 0.00<br>(0.00 to<br>0.00)                | 0.00<br>(0.00 to<br>0.00)                | 0.00<br>(0.00 to<br>0.00)                |
| Leishmaniasis                                 | 0.90<br>(0.49 to<br>1.59)                  | 0.35<br>(0.19 to<br>0.62)                 | 0.27<br>(0.15 to<br>0.47)                | 0.41<br>(0.23 to<br>0.71)                 | 0.02<br>(0.01 to<br>0.04)                | 0.01<br>(0.01 to<br>0.02)                | 0.01<br>(0.00 to<br>0.02)                | 0.01<br>(0.01 to<br>0.02)                |
| African trypanosomiasis                       | 0.00<br>(0.00 to<br>0.00)                  | 0.00<br>(0.00 to<br>0.00)                 | 0.00<br>(0.00 to<br>0.00)                | 0.00<br>(0.00 to<br>0.00)                 | 0.00<br>(0.00 to<br>0.00)                | 0.00<br>(0.00 to<br>0.00)                | 0.00<br>(0.00 to<br>0.00)                | 0.00<br>(0.00 to<br>0.00)                |
| Schistosomiasis                               | 0.03<br>(0.01 to<br>0.06)                  | 0.02<br>(0.01 to<br>0.04)                 | 0.02<br>(0.01 to<br>0.03)                | 0.02<br>(0.01 to<br>0.04)                 | 0.00<br>(0.00 to<br>0.00)                | 0.00<br>(0.00 to<br>0.00)                | 0.00<br>(0.00 to<br>0.00)                | 0.00<br>(0.00 to<br>0.00)                |
| Cysticercosis                                 | 0.07<br>(0.04 to<br>0.09)                  | 0.02<br>(0.01 to<br>0.03)                 | 0.02<br>(0.01 to<br>0.03)                | 0.02<br>(0.01 to<br>0.03)                 | 0.00<br>(0.00 to<br>0.00)                | 0.00<br>(0.00 to<br>0.00)                | 0.00<br>(0.00 to<br>0.00)                | 0.00<br>(0.00 to<br>0.00)                |
| Cystic echinococcosis                         | 0.00<br>(0.00 to<br>0.00)                  | 0.00<br>(0.00 to<br>0.00)                 | 0.00<br>(0.00 to<br>0.00)                | 0.00<br>(0.00 to<br>0.00)                 | 0.00<br>(0.00 to<br>0.00)                | 0.00<br>(0.00 to<br>0.00)                | 0.00<br>(0.00 to<br>0.00)                | 0.00<br>(0.00 to<br>0.00)                |
| Dengue                                        | 0.00<br>(0.00 to<br>0.00)                  | 0.00<br>(0.00 to<br>0.00)                 | 0.00<br>(0.00 to<br>0.00)                | 0.00<br>(0.00 to<br>0.00)                 | 0.00<br>(0.00 to<br>0.00)                | 0.00<br>(0.00 to<br>0.00)                | 0.00<br>(0.00 to<br>0.00)                | 0.00<br>(0.00 to<br>0.00)                |
| Yellow fever                                  | 0.00<br>(0.00 to<br>0.00)                  | 0.00<br>(0.00 to<br>0.00)                 | 0.00<br>(0.00 to<br>0.00)                | 0.00<br>(0.00 to<br>0.00)                 | 0.00<br>(0.00 to<br>0.00)                | 0.00<br>(0.00 to<br>0.00)                | 0.00<br>(0.00 to<br>0.00)                | 0.00<br>(0.00 to<br>0.00)                |
| Rabies                                        | 0.14<br>(0.04 to<br>0.21)                  | 0.06<br>(0.02 to<br>0.11)                 | 0.05<br>(0.01 to<br>0.08)                | 0.08<br>(0.02 to<br>0.13)                 | 0.00<br>(0.00 to<br>0.00)                | 0.00<br>(0.00 to<br>0.00)                | 0.00<br>(0.00 to<br>0.00)                | 0.00<br>(0.00 to<br>0.00)                |
| Intestinal nematode infections                | 0.08<br>(0.02 to<br>0.21)                  | 0.04<br>(0.02 to<br>0.09)                 | 0.04<br>(0.02 to<br>0.09)                | 0.05<br>(0.02 to<br>0.10)                 | 0.00<br>(0.00 to<br>0.00)                | 0.00<br>(0.00 to<br>0.00)                | 0.00<br>(0.00 to<br>0.00)                | 0.00<br>(0.00 to<br>0.00)                |
| Other neglected tropical diseases             | 2.72<br>(1.88 to<br>4.37)                  | 1.86<br>(1.26 to<br>2.72)                 | 1.90<br>(1.29 to<br>2.72)                | 1.95<br>(1.28 to<br>2.84)                 | 0.06<br>(0.04 to<br>0.08)                | 0.06<br>(0.04 to<br>0.09)                | 0.07<br>(0.04 to<br>0.10)                | 0.07<br>(0.04 to<br>0.09)                |
| Maternal disorders                            | <b>11.55</b><br>(8.07 to<br><b>15.76</b> ) | <b>7.09</b><br>(4.03 to<br><b>11.54</b> ) | <b>5.40</b><br>(2.90 to<br><b>9.35</b> ) | <b>8.59</b><br>(4.81 to<br><b>14.64</b> ) | <b>0.21</b><br>(0.15 to<br><b>0.29</b> ) | <b>0.13</b><br>(0.08 to<br><b>0.21</b> ) | <b>0.10</b><br>(0.05 to<br><b>0.17</b> ) | <b>0.16</b><br>(0.09 to<br><b>0.27</b> ) |
| Maternal hemorrhage                           | 2.15<br>(1.40 to<br>3.10)                  | 1.36<br>(0.74 to<br>2.37)                 | 1.06<br>(0.54 to<br>1.90)                | 1.64<br>(0.84 to<br>2.88)                 | 0.04<br>(0.03 to<br>0.06)                | 0.03<br>(0.01 to<br>0.04)                | 0.02<br>(0.01 to<br>0.04)                | 0.03<br>(0.02 to<br>0.05)                |
| Maternal sepsis and other maternal infections | 1.04<br>(0.69 to<br>1.52)                  | 0.61<br>(0.33 to<br>1.06)                 | 0.47<br>(0.24 to<br>0.84)                | 0.74<br>(0.38 to<br>1.33)                 | 0.02<br>(0.01 to<br>0.03)                | 0.01<br>(0.01 to<br>0.02)                | 0.01<br>(0.00 to<br>0.02)                | 0.01<br>(0.01 to<br>0.02)                |
| Maternal hypertensive disorders               | 1.41<br>(0.95 to<br>2.03)                  | 0.85<br>(0.45 to<br>1.50)                 | 0.64<br>(0.32 to<br>1.15)                | 1.04<br>(0.52 to<br>1.93)                 | 0.03<br>(0.02 to<br>0.04)                | 0.02<br>(0.01 to<br>0.03)                | 0.01<br>(0.01 to<br>0.02)                | 0.02<br>(0.01 to<br>0.03)                |



|                                                                         |                                            |                                        |                                       |                                          |                                    |                                  |                                  |                                   |
|-------------------------------------------------------------------------|--------------------------------------------|----------------------------------------|---------------------------------------|------------------------------------------|------------------------------------|----------------------------------|----------------------------------|-----------------------------------|
| Maternal obstructed labor and uterine rupture                           | 0.70<br>(0.45 to<br>1.06)                  | 0.46<br>(0.22 to<br>0.84)              | 0.33<br>(0.15 to<br>0.65)             | 0.57<br>(0.27 to<br>1.12)                | 0.01<br>(0.01 to<br>0.02)          | 0.01<br>(0.00 to<br>0.02)        | 0.01<br>(0.00 to<br>0.01)        | 0.01<br>(0.00 to<br>0.02)         |
| Maternal abortion, miscarriage, and ectopic pregnancy                   | 1.65<br>(1.11 to<br>2.38)                  | 0.97<br>(0.49 to<br>1.82)              | 0.73<br>(0.36 to<br>1.37)             | 1.18<br>(0.60 to<br>2.24)                | 0.03<br>(0.02 to<br>0.04)          | 0.02<br>(0.01 to<br>0.04)        | 0.01<br>(0.01 to<br>0.03)        | 0.02<br>(0.01 to<br>0.04)         |
| Indirect maternal deaths                                                | 1.87<br>(1.26 to<br>2.71)                  | 1.41<br>(0.75 to<br>2.53)              | 1.05<br>(0.52 to<br>1.99)             | 1.73<br>(0.85 to<br>3.24)                | 0.03<br>(0.02 to<br>0.05)          | 0.03<br>(0.01 to<br>0.04)        | 0.02<br>(0.01 to<br>0.04)        | 0.03<br>(0.02 to<br>0.06)         |
| Late maternal deaths                                                    | 0.33<br>(0.17 to<br>0.59)                  | 0.15<br>(0.06 to<br>0.28)              | 0.11<br>(0.05 to<br>0.22)             | 0.18<br>(0.08 to<br>0.37)                | 0.01<br>(0.00 to<br>0.01)          | 0.00<br>(0.00 to<br>0.01)        | 0.00<br>(0.00 to<br>0.00)        | 0.00<br>(0.00 to<br>0.01)         |
| Maternal deaths aggravated by HIV/AIDS                                  | 0.00<br>(0.00 to<br>0.00)                  | 0.00<br>(0.00 to<br>0.00)              | 0.00<br>(0.00 to<br>0.00)             | 0.00<br>(0.00 to<br>0.01)                | 0.00<br>(0.00 to<br>0.00)          | 0.00<br>(0.00 to<br>0.00)        | 0.00<br>(0.00 to<br>0.00)        | 0.00<br>(0.00 to<br>0.00)         |
| Other maternal disorders                                                | 2.40<br>(1.59 to<br>3.35)                  | 1.28<br>(0.69 to<br>2.15)              | 1.01<br>(0.53 to<br>1.75)             | 1.51<br>(0.81 to<br>2.62)                | 0.04<br>(0.03 to<br>0.06)          | 0.02<br>(0.01 to<br>0.04)        | 0.02<br>(0.01 to<br>0.03)        | 0.03<br>(0.01 to<br>0.05)         |
| <b>Iran</b>                                                             |                                            |                                        |                                       |                                          |                                    |                                  |                                  |                                   |
| Cause                                                                   | YLLs (in 1000s)                            |                                        |                                       |                                          | Deaths (in 1000s)                  |                                  |                                  |                                   |
|                                                                         | 2016                                       | 2040 Forecast                          | 2040 Better Scenario                  | 2040 Worse Scenario                      | 2016                               | 2040 Forecast                    | 2040 Better Scenario             | 2040 Worse Scenario               |
| <b>Neonatal disorders</b>                                               | <b>1,194.75</b><br>(465.66 to<br>2,556.05) | <b>365.24</b><br>(123.23 to<br>861.08) | <b>251.76</b><br>(80.45 to<br>564.82) | <b>492.08</b><br>(161.65 to<br>1,137.08) | <b>13.81</b><br>(5.38 to<br>29.54) | <b>4.22</b><br>(1.42 to<br>9.95) | <b>2.91</b><br>(0.93 to<br>6.53) | <b>5.69</b><br>(1.87 to<br>13.14) |
| Neonatal preterm birth                                                  | 770.11<br>(305.69 to<br>1,656.91)          | 206.75<br>(68.19 to<br>470.34)         | 122.92<br>(40.62 to<br>284.37)        | 299.31<br>(100.57 to<br>682.34)          | 8.90<br>(3.53 to<br>19.15)         | 2.39<br>(0.79 to<br>5.43)        | 1.42<br>(0.47 to<br>3.29)        | 3.46<br>(1.16 to<br>7.89)         |
| Neonatal encephalopathy due to birth asphyxia and trauma                | 109.71<br>(37.36 to<br>238.66)             | 28.57<br>(8.35 to<br>72.96)            | 18.57<br>(5.42 to<br>46.01)           | 37.48<br>(10.96 to<br>95.45)             | 1.27<br>(0.43 to<br>2.76)          | 0.33<br>(0.10 to<br>0.83)        | 0.21<br>(0.06 to<br>0.53)        | 0.43<br>(0.13 to<br>1.10)         |
| Neonatal sepsis and other neonatal infections                           | 68.14<br>(23.37 to<br>182.93)              | 28.22<br>(7.95 to<br>77.69)            | 20.58<br>(5.84 to<br>58.45)           | 35.45<br>(9.87 to<br>97.20)              | 0.79<br>(0.27 to<br>2.12)          | 0.33<br>(0.09 to<br>0.90)        | 0.24<br>(0.07 to<br>0.68)        | 0.41<br>(0.11 to<br>1.12)         |
| Hemolytic disease and other neonatal jaundice                           | 11.97<br>(4.63 to<br>26.23)                | 3.45<br>(1.02 to<br>8.44)              | 2.42<br>(0.72 to<br>5.89)             | 4.45<br>(1.28 to<br>11.27)               | 0.14<br>(0.05 to<br>0.30)          | 0.04<br>(0.01 to<br>0.10)        | 0.03<br>(0.01 to<br>0.07)        | 0.05<br>(0.01 to<br>0.13)         |
| Other neonatal disorders                                                | 234.82<br>(91.87 to<br>525.30)             | 98.24<br>(30.16 to<br>238.92)          | 87.27<br>(26.63 to<br>211.45)         | 115.38<br>(34.71 to<br>285.12)           | 2.71<br>(1.06 to<br>6.07)          | 1.14<br>(0.35 to<br>2.76)        | 1.01<br>(0.31 to<br>2.44)        | 1.33<br>(0.40 to<br>3.30)         |
| <b>Nutritional deficiencies</b>                                         | <b>10.20</b><br>(6.72 to<br>16.61)         | <b>7.90</b><br>(5.84 to<br>11.19)      | <b>8.70</b><br>(6.50 to<br>11.98)     | <b>7.84</b><br>(5.78 to<br>11.13)        | <b>0.30</b><br>(0.24 to<br>0.38)   | <b>0.48</b><br>(0.34 to<br>0.64) | <b>0.59</b><br>(0.44 to<br>0.77) | <b>0.44</b><br>(0.31 to<br>0.60)  |
| Protein-energy malnutrition                                             | 7.55<br>(4.60 to<br>13.23)                 | 5.26<br>(3.64 to<br>7.90)              | 6.18<br>(4.38 to<br>8.79)             | 5.08<br>(3.52 to<br>7.60)                | 0.22<br>(0.17 to<br>0.28)          | 0.34<br>(0.23 to<br>0.48)        | 0.45<br>(0.32 to<br>0.61)        | 0.30<br>(0.20 to<br>0.44)         |
| Iodine deficiency                                                       | 0.23<br>(0.02 to<br>0.89)                  | 0.42<br>(0.03 to<br>1.15)              | 0.42<br>(0.02 to<br>1.19)             | 0.43<br>(0.03 to<br>1.20)                | 0.01<br>(0.00 to<br>0.02)          | 0.02<br>(0.00 to<br>0.09)        | 0.03<br>(0.00 to<br>0.11)        | 0.02<br>(0.00 to<br>0.08)         |
| Dietary iron deficiency                                                 | 0.57<br>(0.41 to<br>0.91)                  | 0.76<br>(0.49 to<br>1.47)              | 0.81<br>(0.52 to<br>1.58)             | 0.76<br>(0.49 to<br>1.46)                | 0.01<br>(0.01 to<br>0.03)          | 0.02<br>(0.01 to<br>0.06)        | 0.03<br>(0.01 to<br>0.07)        | 0.02<br>(0.01 to<br>0.05)         |
| Other nutritional deficiencies                                          | 1.85<br>(0.98 to<br>2.68)                  | 1.46<br>(0.80 to<br>2.02)              | 1.30<br>(0.69 to<br>1.85)             | 1.58<br>(0.86 to<br>2.21)                | 0.07<br>(0.04 to<br>0.08)          | 0.09<br>(0.05 to<br>0.13)        | 0.09<br>(0.05 to<br>0.13)        | 0.09<br>(0.05 to<br>0.13)         |
| <b>Other communicable, maternal, neonatal, and nutritional diseases</b> | <b>40.51</b><br>(32.50 to<br>51.12)        | <b>40.99</b><br>(30.86 to<br>52.85)    | <b>32.49</b><br>(24.11 to<br>42.67)   | <b>46.46</b><br>(35.59 to<br>61.62)      | <b>1.18</b><br>(0.96 to<br>1.43)   | <b>1.68</b><br>(1.32 to<br>2.08) | <b>1.42</b><br>(1.10 to<br>1.77) | <b>1.84</b><br>(1.47 to<br>2.32)  |
| Sexually transmitted infections excluding HIV                           | 1.08<br>(0.64 to<br>1.52)                  | 0.44<br>(0.18 to<br>0.62)              | 0.37<br>(0.15 to<br>0.54)             | 0.48<br>(0.20 to<br>0.69)                | 0.03<br>(0.01 to<br>0.04)          | 0.02<br>(0.00 to<br>0.03)        | 0.02<br>(0.00 to<br>0.03)        | 0.02<br>(0.01 to<br>0.03)         |
| Syphilis                                                                | 0.71<br>(0.37 to<br>1.15)                  | 0.19<br>(0.08 to<br>0.28)              | 0.14<br>(0.06 to<br>0.21)             | 0.22<br>(0.09 to<br>0.33)                | 0.02<br>(0.01 to<br>0.03)          | 0.01<br>(0.00 to<br>0.01)        | 0.01<br>(0.00 to<br>0.01)        | 0.01<br>(0.00 to<br>0.01)         |

|                                       |                                                            |                                                              |                                                             |                                                              |                                                      |                                                      |                                                      |                                                        |
|---------------------------------------|------------------------------------------------------------|--------------------------------------------------------------|-------------------------------------------------------------|--------------------------------------------------------------|------------------------------------------------------|------------------------------------------------------|------------------------------------------------------|--------------------------------------------------------|
| Chlamydial infection                  | 0.06<br>(0.04 to<br>0.08)                                  | 0.05<br>(0.02 to<br>0.07)                                    | 0.05<br>(0.02 to<br>0.07)                                   | 0.05<br>(0.02 to<br>0.08)                                    | 0.00<br>(0.00 to<br>0.00)                            | 0.00<br>(0.00 to<br>0.00)                            | 0.00<br>(0.00 to<br>0.00)                            | 0.00<br>(0.00 to<br>0.00)                              |
| Gonococcal infection                  | 0.20<br>(0.12 to<br>0.26)                                  | 0.14<br>(0.05 to<br>0.21)                                    | 0.13<br>(0.05 to<br>0.20)                                   | 0.14<br>(0.06 to<br>0.22)                                    | 0.01<br>(0.00 to<br>0.01)                            | 0.01<br>(0.00 to<br>0.01)                            | 0.01<br>(0.00 to<br>0.01)                            | 0.01<br>(0.00 to<br>0.01)                              |
| Other sexually transmitted infections | 0.10<br>(0.06 to<br>0.13)                                  | 0.06<br>(0.03 to<br>0.09)                                    | 0.06<br>(0.02 to<br>0.09)                                   | 0.07<br>(0.03 to<br>0.10)                                    | 0.00<br>(0.00 to<br>0.00)                            | 0.00<br>(0.00 to<br>0.00)                            | 0.00<br>(0.00 to<br>0.00)                            | 0.00<br>(0.00 to<br>0.00)                              |
| Acute hepatitis                       | 28.67<br>(22.51 to<br>36.19)                               | 28.21<br>(20.21 to<br>38.21)                                 | 19.84<br>(13.57 to<br>27.82)                                | 33.15<br>(24.46 to<br>44.43)                                 | 0.88<br>(0.70 to<br>1.09)                            | 1.10<br>(0.81 to<br>1.44)                            | 0.80<br>(0.57 to<br>1.08)                            | 1.27<br>(0.96 to<br>1.65)                              |
| Acute hepatitis A                     | 1.11<br>(0.30 to<br>2.65)                                  | 0.65<br>(0.21 to<br>1.46)                                    | 0.51<br>(0.16 to<br>1.19)                                   | 0.74<br>(0.25 to<br>1.70)                                    | 0.02<br>(0.01 to<br>0.04)                            | 0.02<br>(0.01 to<br>0.05)                            | 0.02<br>(0.01 to<br>0.04)                            | 0.02<br>(0.01 to<br>0.06)                              |
| Acute hepatitis B                     | 23.54<br>(18.22 to<br>29.86)                               | 23.99<br>(16.73 to<br>33.49)                                 | 16.73<br>(11.36 to<br>24.19)                                | 28.30<br>(20.41 to<br>38.30)                                 | 0.74<br>(0.57 to<br>0.94)                            | 0.91<br>(0.65 to<br>1.25)                            | 0.65<br>(0.45 to<br>0.90)                            | 1.06<br>(0.78 to<br>1.41)                              |
| Acute hepatitis C                     | 0.53<br>(0.35 to<br>0.79)                                  | 0.66<br>(0.39 to<br>1.06)                                    | 0.47<br>(0.28 to<br>0.76)                                   | 0.75<br>(0.46 to<br>1.17)                                    | 0.02<br>(0.01 to<br>0.03)                            | 0.03<br>(0.02 to<br>0.05)                            | 0.02<br>(0.01 to<br>0.03)                            | 0.03<br>(0.02 to<br>0.05)                              |
| Acute hepatitis E                     | 3.48<br>(2.51 to<br>4.80)                                  | 2.91<br>(1.75 to<br>4.62)                                    | 2.13<br>(1.21 to<br>3.40)                                   | 3.36<br>(2.05 to<br>5.18)                                    | 0.10<br>(0.07 to<br>0.15)                            | 0.14<br>(0.08 to<br>0.21)                            | 0.11<br>(0.06 to<br>0.17)                            | 0.15<br>(0.09 to<br>0.24)                              |
| Other unspecified infectious diseases | 10.76<br>(6.77 to<br>17.08)                                | 12.35<br>(9.42 to<br>15.92)                                  | 12.27<br>(9.25 to<br>15.77)                                 | 12.82<br>(9.66 to<br>16.86)                                  | 0.26<br>(0.19 to<br>0.34)                            | 0.56<br>(0.44 to<br>0.69)                            | 0.60<br>(0.47 to<br>0.75)                            | 0.56<br>(0.43 to<br>0.69)                              |
| <b>Non-communicable diseases</b>      | <b>6,541.08</b><br><b>(5,507.95 to</b><br><b>7,839.88)</b> | <b>11,267.17</b><br><b>(7,545.22 to</b><br><b>16,667.84)</b> | <b>7,784.14</b><br><b>(5,429.56 to</b><br><b>11,102.49)</b> | <b>14,284.73</b><br><b>(9,885.85 to</b><br><b>20,959.84)</b> | <b>287.37</b><br><b>(247.38 to</b><br><b>334.10)</b> | <b>658.75</b><br><b>(453.84 to</b><br><b>928.53)</b> | <b>487.76</b><br><b>(338.47 to</b><br><b>691.08)</b> | <b>794.82</b><br><b>(565.97 to</b><br><b>1,080.98)</b> |
| <b>Iran</b>                           |                                                            |                                                              |                                                             |                                                              |                                                      |                                                      |                                                      |                                                        |
| Cause                                 | <b>YLLs (in 1000s)</b>                                     |                                                              |                                                             |                                                              | <b>Deaths (in 1000s)</b>                             |                                                      |                                                      |                                                        |
|                                       | <b>2016</b>                                                | <b>2040 Forecast</b>                                         | <b>2040 Better Scenario</b>                                 | <b>2040 Worse Scenario</b>                                   | <b>2016</b>                                          | <b>2040 Forecast</b>                                 | <b>2040 Better Scenario</b>                          | <b>2040 Worse Scenario</b>                             |
| Neoplasms                             | 1416.19<br>(1,172.48 to<br>1,672.65)                       | 2,556.98<br>(1,904.72 to<br>3,357.57)                        | 2,100.41<br>(1,574.89 to<br>2,696.36)                       | 2,923.37<br>(2,146.89 to<br>3,897.20)                        | 53.84<br>(45.06 to<br>63.65)                         | 121.06<br>(92.50 to<br>154.33)                       | 103.68<br>(80.11 to<br>129.27)                       | 134.98<br>(101.57 to<br>174.34)                        |
| Lip and oral cavity cancer            | 9.89<br>(8.22 to<br>11.88)                                 | 20.75<br>(13.50 to<br>30.91)                                 | 15.94<br>(10.71 to<br>22.18)                                | 25.26<br>(16.07 to<br>38.85)                                 | 0.40<br>(0.34 to<br>0.47)                            | 0.97<br>(0.66 to<br>1.37)                            | 0.79<br>(0.54 to<br>1.05)                            | 1.16<br>(0.76 to<br>1.70)                              |
| Nasopharynx cancer                    | 3.55<br>(2.89 to<br>4.38)                                  | 6.94<br>(3.94 to<br>11.81)                                   | 4.56<br>(2.80 to<br>7.27)                                   | 8.95<br>(5.01 to<br>15.68)                                   | 0.11<br>(0.09 to<br>0.14)                            | 0.26<br>(0.16 to<br>0.44)                            | 0.18<br>(0.11 to<br>0.27)                            | 0.33<br>(0.19 to<br>0.57)                              |
| Other pharynx cancer                  | 3.78<br>(3.09 to<br>4.56)                                  | 6.19<br>(4.72 to<br>8.00)                                    | 6.50<br>(4.89 to<br>8.30)                                   | 6.04<br>(4.65 to<br>7.66)                                    | 0.15<br>(0.12 to<br>0.18)                            | 0.31<br>(0.24 to<br>0.38)                            | 0.33<br>(0.25 to<br>0.41)                            | 0.29<br>(0.23 to<br>0.36)                              |
| Esophageal cancer                     | 51.18<br>(42.33 to<br>61.92)                               | 120.48<br>(73.58 to<br>187.09)                               | 99.73<br>(64.83 to<br>143.70)                               | 139.21<br>(82.07 to<br>224.23)                               | 2.36<br>(1.97 to<br>2.82)                            | 6.11<br>(3.89 to<br>9.08)                            | 5.30<br>(3.61 to<br>7.39)                            | 6.89<br>(4.23 to<br>10.57)                             |
| Stomach cancer                        | 200.91<br>(165.77 to<br>240.63)                            | 301.57<br>(208.35 to<br>413.29)                              | 225.48<br>(156.68 to<br>304.49)                             | 341.26<br>(244.02 to<br>461.23)                              | 8.94<br>(7.49 to<br>10.63)                           | 15.43<br>(11.02 to<br>20.50)                         | 12.00<br>(8.74 to<br>15.79)                          | 17.07<br>(12.70 to<br>22.35)                           |
| Colon and rectum cancer               | 92.56<br>(75.29 to<br>111.09)                              | 171.28<br>(112.66 to<br>255.39)                              | 140.75<br>(93.61 to<br>209.20)                              | 186.08<br>(122.91 to<br>273.87)                              | 3.79<br>(3.14 to<br>4.51)                            | 8.54<br>(5.71 to<br>12.68)                           | 7.32<br>(5.00 to<br>10.53)                           | 9.06<br>(6.16 to<br>13.50)                             |
| Liver cancer                          | 90.03<br>(66.75 to<br>110.18)                              | 218.25<br>(136.34 to<br>326.32)                              | 206.18<br>(134.64 to<br>298.36)                             | 240.06<br>(145.61 to<br>375.33)                              | 3.75<br>(2.87 to<br>4.55)                            | 10.58<br>(6.80 to<br>15.57)                          | 10.45<br>(7.02 to<br>14.89)                          | 11.31<br>(7.01 to<br>17.21)                            |
| Liver cancer due to hepatitis B       | 25.91<br>(16.49 to<br>36.53)                               | 58.37<br>(32.54 to<br>96.45)                                 | 55.16<br>(31.91 to<br>86.66)                                | 64.80<br>(34.59 to<br>110.25)                                | 0.96<br>(0.61 to<br>1.34)                            | 2.50<br>(1.43 to<br>3.98)                            | 2.46<br>(1.42 to<br>3.86)                            | 2.71<br>(1.51 to<br>4.42)                              |
| Liver cancer due to hepatitis C       | 14.77<br>(9.76 to<br>20.37)                                | 39.09<br>(23.40 to<br>61.70)                                 | 38.16<br>(23.47 to<br>58.82)                                | 42.63<br>(24.36 to<br>70.20)                                 | 0.73<br>(0.50 to<br>0.98)                            | 2.17<br>(1.33 to<br>3.35)                            | 2.22<br>(1.39 to<br>3.32)                            | 2.29<br>(1.35 to<br>3.61)                              |

|                                      |                                 |                                 |                                 |                                 |                           |                              |                             |                              |
|--------------------------------------|---------------------------------|---------------------------------|---------------------------------|---------------------------------|---------------------------|------------------------------|-----------------------------|------------------------------|
| Liver cancer due to alcohol use      | 5.56<br>(3.70 to<br>7.98)       | 14.09<br>(7.83 to<br>23.68)     | 13.46<br>(7.82 to<br>21.75)     | 15.52<br>(8.11 to<br>26.86)     | 0.24<br>(0.17 to<br>0.35) | 0.68<br>(0.38 to<br>1.14)    | 0.68<br>(0.39 to<br>1.08)   | 0.73<br>(0.40 to<br>1.25)    |
| Liver cancer due to other causes     | 43.79<br>(31.90 to<br>55.86)    | 106.70<br>(63.44 to<br>173.34)  | 99.40<br>(61.36 to<br>154.98)   | 117.11<br>(66.79 to<br>195.49)  | 1.82<br>(1.37 to<br>2.28) | 5.23<br>(3.13 to<br>8.38)    | 5.09<br>(3.19 to<br>7.80)   | 5.58<br>(3.23 to<br>9.29)    |
| Gallbladder and biliary tract cancer | 15.50<br>(12.49 to<br>19.44)    | 24.57<br>(18.96 to<br>31.70)    | 24.21<br>(18.14 to<br>32.10)    | 24.39<br>(19.03 to<br>31.10)    | 0.69<br>(0.55 to<br>0.86) | 1.28<br>(1.03 to<br>1.60)    | 1.32<br>(1.02 to<br>1.67)   | 1.24<br>(1.01 to<br>1.54)    |
| Pancreatic cancer                    | 43.67<br>(35.75 to<br>52.42)    | 105.08<br>(72.89 to<br>147.54)  | 100.50<br>(71.37 to<br>137.36)  | 107.03<br>(73.82 to<br>151.83)  | 1.90<br>(1.57 to<br>2.25) | 5.09<br>(3.63 to<br>7.00)    | 5.05<br>(3.63 to<br>6.84)   | 5.08<br>(3.59 to<br>6.96)    |
| Larynx cancer                        | 31.55<br>(25.68 to<br>38.43)    | 65.22<br>(30.58 to<br>143.58)   | 37.84<br>(19.53 to<br>79.45)    | 94.18<br>(42.46 to<br>207.82)   | 1.30<br>(1.07 to<br>1.57) | 2.99<br>(1.43 to<br>6.56)    | 1.81<br>(0.94 to<br>3.89)   | 4.23<br>(1.93 to<br>9.39)    |
| Tracheal, bronchus, and lung cancer  | 169.37<br>(138.70 to<br>205.05) | 395.01<br>(243.17 to<br>619.38) | 229.80<br>(148.80 to<br>340.24) | 569.93<br>(339.25 to<br>920.18) | 7.13<br>(5.94 to<br>8.62) | 19.07<br>(11.99 to<br>29.44) | 11.63<br>(7.66 to<br>17.09) | 26.63<br>(16.07 to<br>41.86) |
| Malignant skin melanoma              | 6.61<br>(5.30 to<br>8.90)       | 13.00<br>(10.25 to<br>17.00)    | 15.74<br>(11.99 to<br>20.51)    | 11.73<br>(9.23 to<br>14.98)     | 0.25<br>(0.21 to<br>0.32) | 0.64<br>(0.50 to<br>0.78)    | 0.82<br>(0.62 to<br>1.02)   | 0.56<br>(0.44 to<br>0.69)    |
| Non-melanoma skin cancer             | 4.96<br>(4.09 to<br>5.99)       | 9.20<br>(7.46 to<br>11.18)      | 7.67<br>(5.94 to<br>9.39)       | 9.89<br>(8.18 to<br>11.75)      | 0.24<br>(0.20 to<br>0.29) | 0.54<br>(0.45 to<br>0.64)    | 0.48<br>(0.39 to<br>0.57)   | 0.56<br>(0.47 to<br>0.66)    |
| Breast cancer                        | 103.35<br>(70.28 to<br>138.83)  | 149.51<br>(89.36 to<br>226.33)  | 121.78<br>(74.22 to<br>180.29)  | 162.93<br>(97.77 to<br>244.11)  | 3.12<br>(2.17 to<br>4.13) | 5.68<br>(3.52 to<br>8.50)    | 4.74<br>(2.97 to<br>6.92)   | 6.09<br>(3.79 to<br>9.02)    |
| Cervical cancer                      | 15.09<br>(10.29 to<br>19.88)    | 21.37<br>(12.78 to<br>32.27)    | 16.60<br>(9.92 to<br>25.02)     | 24.52<br>(14.89 to<br>38.04)    | 0.50<br>(0.34 to<br>0.65) | 0.87<br>(0.54 to<br>1.25)    | 0.69<br>(0.43 to<br>1.01)   | 0.97<br>(0.62 to<br>1.44)    |
| Uterine cancer                       | 9.05<br>(6.49 to<br>11.86)      | 16.00<br>(10.57 to<br>22.37)    | 13.96<br>(9.00 to<br>19.86)     | 17.16<br>(11.29 to<br>24.11)    | 0.36<br>(0.26 to<br>0.46) | 0.77<br>(0.52 to<br>1.05)    | 0.69<br>(0.45 to<br>0.94)   | 0.81<br>(0.57 to<br>1.07)    |
| Ovarian cancer                       | 21.52<br>(15.47 to<br>27.80)    | 38.43<br>(23.96 to<br>59.42)    | 33.25<br>(20.81 to<br>50.17)    | 40.53<br>(25.25 to<br>62.73)    | 0.72<br>(0.52 to<br>0.91) | 1.56<br>(0.97 to<br>2.39)    | 1.38<br>(0.86 to<br>2.04)   | 1.62<br>(1.02 to<br>2.47)    |
| Prostate cancer                      | 41.31<br>(25.78 to<br>54.51)    | 111.02<br>(72.14 to<br>143.36)  | 104.33<br>(66.78 to<br>133.63)  | 111.56<br>(73.29 to<br>140.75)  | 2.77<br>(1.77 to<br>3.56) | 7.82<br>(5.24 to<br>9.79)    | 7.73<br>(5.18 to<br>9.61)   | 7.66<br>(5.03 to<br>9.63)    |
| Testicular cancer                    | 3.10<br>(2.32 to<br>4.04)       | 2.68<br>(1.95 to<br>3.55)       | 2.28<br>(1.60 to<br>3.09)       | 2.85<br>(2.11 to<br>3.71)       | 0.08<br>(0.06 to<br>0.11) | 0.10<br>(0.08 to<br>0.13)    | 0.09<br>(0.07 to<br>0.12)   | 0.11<br>(0.08 to<br>0.13)    |

| Cause                           | Iran                           |                                 |                                 |                                 | Iran                      |                           |                           |                           |
|---------------------------------|--------------------------------|---------------------------------|---------------------------------|---------------------------------|---------------------------|---------------------------|---------------------------|---------------------------|
|                                 | YLLs (in 1000s)                |                                 |                                 |                                 | Deaths (in 1000s)         |                           |                           |                           |
|                                 | 2016                           | 2040 Forecast                   | 2040 Better Scenario            | 2040 Worse Scenario             | 2016                      | 2040 Forecast             | 2040 Better Scenario      | 2040 Worse Scenario       |
| Kidney cancer                   | 17.83<br>(14.73 to<br>21.80)   | 35.59<br>(25.43 to<br>48.64)    | 35.50<br>(25.47 to<br>46.97)    | 35.54<br>(24.92 to<br>49.54)    | 0.64<br>(0.53 to<br>0.77) | 1.63<br>(1.21 to<br>2.16) | 1.70<br>(1.26 to<br>2.19) | 1.59<br>(1.16 to<br>2.14) |
| Bladder cancer                  | 24.00<br>(19.60 to<br>29.68)   | 51.41<br>(35.72 to<br>75.38)    | 44.07<br>(30.80 to<br>61.77)    | 55.49<br>(38.04 to<br>82.87)    | 1.24<br>(1.03 to<br>1.51) | 3.00<br>(2.13 to<br>4.32) | 2.71<br>(1.96 to<br>3.75) | 3.16<br>(2.20 to<br>4.56) |
| Brain and nervous system cancer | 119.30<br>(79.94 to<br>152.71) | 182.97<br>(118.39 to<br>240.88) | 170.14<br>(108.96 to<br>226.23) | 186.27<br>(121.16 to<br>243.42) | 3.31<br>(2.18 to<br>4.27) | 7.01<br>(4.60 to<br>9.01) | 6.77<br>(4.43 to<br>8.82) | 6.98<br>(4.60 to<br>8.92) |
| Thyroid cancer                  | 6.31<br>(4.98 to<br>7.67)      | 11.08<br>(7.33 to<br>16.06)     | 9.30<br>(6.31 to<br>13.62)      | 12.57<br>(8.25 to<br>18.61)     | 0.25<br>(0.20 to<br>0.31) | 0.52<br>(0.36 to<br>0.75) | 0.45<br>(0.30 to<br>0.66) | 0.58<br>(0.39 to<br>0.84) |
| Mesothelioma                    | 10.45<br>(8.12 to<br>13.53)    | 19.62<br>(14.77 to<br>24.82)    | 20.65<br>(15.25 to<br>26.37)    | 19.01<br>(14.47 to<br>24.10)    | 0.40<br>(0.32 to<br>0.50) | 0.92<br>(0.72 to<br>1.09) | 1.01<br>(0.79 to<br>1.22) | 0.87<br>(0.69 to<br>1.03) |
| Hodgkin lymphoma                | 11.51<br>(8.38 to<br>14.65)    | 11.44<br>(7.73 to<br>15.71)     | 8.61<br>(5.68 to<br>11.90)      | 13.13<br>(8.79 to<br>17.88)     | 0.30<br>(0.21 to<br>0.38) | 0.40<br>(0.25 to<br>0.53) | 0.31<br>(0.19 to<br>0.42) | 0.45<br>(0.29 to<br>0.60) |

|                                |                                                            |                                                            |                                                            |                                                             |                                                      |                                                      |                                                      |                                                      |
|--------------------------------|------------------------------------------------------------|------------------------------------------------------------|------------------------------------------------------------|-------------------------------------------------------------|------------------------------------------------------|------------------------------------------------------|------------------------------------------------------|------------------------------------------------------|
| Non-Hodgkin lymphoma           | 38.48<br>(31.57 to<br>46.69)                               | 55.35<br>(40.83 to<br>72.52)                               | 48.22<br>(35.30 to<br>63.50)                               | 59.03<br>(43.21 to<br>78.26)                                | 1.16<br>(0.97 to<br>1.39)                            | 2.26<br>(1.71 to<br>2.92)                            | 2.04<br>(1.51 to<br>2.67)                            | 2.36<br>(1.76 to<br>3.09)                            |
| Multiple myeloma               | 12.73<br>(9.81 to<br>15.77)                                | 26.01<br>(18.44 to<br>35.50)                               | 24.03<br>(17.16 to<br>32.52)                               | 27.10<br>(19.05 to<br>37.08)                                | 0.50<br>(0.39 to<br>0.61)                            | 1.19<br>(0.88 to<br>1.58)                            | 1.14<br>(0.84 to<br>1.50)                            | 1.21<br>(0.89 to<br>1.62)                            |
| Leukemia                       | 165.04<br>(116.07 to<br>202.44)                            | 214.79<br>(146.01 to<br>288.40)                            | 181.71<br>(126.67 to<br>240.92)                            | 240.37<br>(164.18 to<br>324.59)                             | 4.48<br>(3.29 to<br>5.41)                            | 8.67<br>(6.17 to<br>11.46)                           | 7.63<br>(5.47 to<br>9.96)                            | 9.48<br>(6.65 to<br>12.63)                           |
| Acute lymphoid leukemia        | 33.32<br>(24.57 to<br>43.11)                               | 26.08<br>(19.03 to<br>35.16)                               | 21.34<br>(15.66 to<br>28.87)                               | 29.35<br>(21.28 to<br>39.70)                                | 0.59<br>(0.46 to<br>0.73)                            | 0.65<br>(0.47 to<br>0.91)                            | 0.55<br>(0.40 to<br>0.76)                            | 0.73<br>(0.53 to<br>1.03)                            |
| Chronic lymphoid leukemia      | 7.59<br>(6.00 to<br>9.74)                                  | 14.58<br>(10.05 to<br>20.63)                               | 13.36<br>(9.18 to<br>18.58)                                | 15.65<br>(10.64 to<br>22.44)                                | 0.31<br>(0.25 to<br>0.40)                            | 0.71<br>(0.50 to<br>0.97)                            | 0.68<br>(0.48 to<br>0.91)                            | 0.74<br>(0.52 to<br>1.04)                            |
| Acute myeloid leukemia         | 33.36<br>(25.23 to<br>41.38)                               | 50.76<br>(33.95 to<br>68.88)                               | 47.16<br>(32.14 to<br>63.40)                               | 53.98<br>(35.26 to<br>74.56)                                | 0.82<br>(0.64 to<br>1.01)                            | 1.73<br>(1.22 to<br>2.32)                            | 1.66<br>(1.19 to<br>2.20)                            | 1.81<br>(1.25 to<br>2.49)                            |
| Chronic myeloid leukemia       | 4.73<br>(3.64 to<br>6.06)                                  | 4.67<br>(3.10 to<br>6.83)                                  | 3.18<br>(2.14 to<br>4.56)                                  | 5.69<br>(3.90 to<br>8.28)                                   | 0.15<br>(0.12 to<br>0.20)                            | 0.20<br>(0.14 to<br>0.29)                            | 0.14<br>(0.10 to<br>0.20)                            | 0.24<br>(0.17 to<br>0.34)                            |
| Other leukemia                 | 86.04<br>(49.59 to<br>106.94)                              | 118.70<br>(70.62 to<br>161.37)                             | 96.68<br>(58.78 to<br>129.98)                              | 135.71<br>(79.41 to<br>186.44)                              | 2.61<br>(1.64 to<br>3.24)                            | 5.37<br>(3.47 to<br>7.15)                            | 4.60<br>(3.00 to<br>6.04)                            | 5.96<br>(3.76 to<br>7.94)                            |
| Other neoplasms                | 93.55<br>(74.90 to<br>112.67)                              | 152.15<br>(114.31 to<br>185.58)                            | 151.05<br>(111.80 to<br>186.54)                            | 151.29<br>(113.88 to<br>182.13)                             | 3.01<br>(2.28 to<br>3.61)                            | 6.85<br>(4.97 to<br>8.00)                            | 7.13<br>(5.10 to<br>8.49)                            | 6.62<br>(4.81 to<br>7.76)                            |
| <b>Cardiovascular diseases</b> | <b>2,868.38</b><br><b>(2,414.78 to</b><br><b>3,373.41)</b> | <b>4,998.82</b><br><b>(2,812.81 to</b><br><b>8,804.94)</b> | <b>2,750.07</b><br><b>(1,649.01 to</b><br><b>4,841.83)</b> | <b>7,153.58</b><br><b>(4,152.24 to</b><br><b>12,301.81)</b> | <b>150.89</b><br><b>(129.90 to</b><br><b>173.90)</b> | <b>319.68</b><br><b>(186.71 to</b><br><b>552.60)</b> | <b>198.67</b><br><b>(122.17 to</b><br><b>347.70)</b> | <b>422.80</b><br><b>(260.28 to</b><br><b>707.63)</b> |
| Rheumatic heart disease        | 23.83<br>(19.43 to<br>28.30)                               | 17.08<br>(11.41 to<br>24.74)                               | 13.22<br>(8.75 to<br>19.09)                                | 19.44<br>(13.28 to<br>28.08)                                | 0.90<br>(0.74 to<br>1.05)                            | 0.91<br>(0.65 to<br>1.29)                            | 0.75<br>(0.51 to<br>1.05)                            | 1.00<br>(0.71 to<br>1.37)                            |
| Ischemic heart disease         | 1,714.87<br>(1,438.94 to<br>2,038.76)                      | 2,670.98<br>(1,300.01 to<br>5,557.67)                      | 1,251.73<br>(639.05 to<br>2,502.06)                        | 4,251.72<br>(2,132.57 to<br>8,374.02)                       | 90.89<br>(77.55 to<br>105.76)                        | 165.92<br>(82.73 to<br>344.75)                       | 88.92<br>(44.81 to<br>183.18)                        | 241.60<br>(125.49 to<br>465.44)                      |
| Stroke                         | 531.88<br>(448.75 to<br>632.21)                            | 914.31<br>(444.56 to<br>2,409.97)                          | 461.54<br>(234.14 to<br>1,336.77)                          | 1,267.89<br>(650.53 to<br>3,092.46)                         | 28.79<br>(24.53 to<br>33.89)                         | 60.82<br>(29.33 to<br>176.15)                        | 35.63<br>(17.26 to<br>115.68)                        | 78.20<br>(40.28 to<br>223.96)                        |
| Ischemic stroke                | 370.61<br>(312.27 to<br>440.65)                            | 679.65<br>(300.06 to<br>2,064.94)                          | 359.43<br>(164.95 to<br>1,178.54)                          | 920.96<br>(418.21 to<br>2,634.52)                           | 22.50<br>(19.15 to<br>26.35)                         | 48.76<br>(21.01 to<br>163.30)                        | 29.64<br>(13.19 to<br>105.57)                        | 61.48<br>(28.17 to<br>199.94)                        |
| Intracerebral hemorrhage       | 161.27<br>(134.34 to<br>193.60)                            | 234.66<br>(115.03 to<br>451.67)                            | 102.11<br>(56.68 to<br>188.23)                             | 346.93<br>(181.10 to<br>657.62)                             | 6.29<br>(5.28 to<br>7.47)                            | 12.06<br>(6.24 to<br>23.82)                          | 5.98<br>(3.37 to<br>10.84)                           | 16.72<br>(8.87 to<br>31.22)                          |
| Hypertensive heart disease     | 298.15<br>(239.85 to<br>389.92)                            | 765.45<br>(402.95 to<br>1,569.47)                          | 563.81<br>(331.03 to<br>1,005.86)                          | 887.95<br>(462.51 to<br>1,902.40)                           | 17.52<br>(14.06 to<br>21.40)                         | 53.37<br>(29.05 to<br>112.42)                        | 42.50<br>(25.75 to<br>76.26)                         | 59.48<br>(30.93 to<br>129.15)                        |
| Cardiomyopathy and myocarditis | 46.34<br>(35.51 to<br>66.66)                               | 62.92<br>(41.90 to<br>93.92)                               | 49.92<br>(33.71 to<br>75.01)                               | 69.14<br>(47.48 to<br>103.29)                               | 1.53<br>(1.19 to<br>2.16)                            | 3.20<br>(2.22 to<br>4.82)                            | 2.69<br>(1.87 to<br>4.07)                            | 3.41<br>(2.37 to<br>5.17)                            |
| Myocarditis                    | 13.38<br>(10.06 to<br>20.63)                               | 18.99<br>(13.62 to<br>24.39)                               | 18.85<br>(13.43 to<br>24.73)                               | 19.02<br>(13.99 to<br>24.47)                                | 0.42<br>(0.32 to<br>0.53)                            | 0.95<br>(0.61 to<br>1.23)                            | 1.00<br>(0.65 to<br>1.31)                            | 0.92<br>(0.59 to<br>1.20)                            |
| <b>Iran</b>                    |                                                            |                                                            |                                                            |                                                             |                                                      |                                                      |                                                      |                                                      |
| Cause                          | YLLs (in 1000s)                                            |                                                            |                                                            |                                                             | Deaths (in 1000s)                                    |                                                      |                                                      |                                                      |
|                                | 2016                                                       | 2040 Forecast                                              | 2040 Better Scenario                                       | 2040 Worse Scenario                                         | 2016                                                 | 2040 Forecast                                        | 2040 Better Scenario                                 | 2040 Worse Scenario                                  |
| Alcoholic cardiomyopathy       | 1.78<br>(1.23 to<br>2.48)                                  | 3.19<br>(2.14 to<br>4.87)                                  | 3.25<br>(2.17 to<br>5.03)                                  | 3.11<br>(2.11 to<br>4.71)                                   | 0.07<br>(0.05 to<br>0.10)                            | 0.15<br>(0.11 to<br>0.25)                            | 0.16<br>(0.11 to<br>0.27)                            | 0.15<br>(0.10 to<br>0.24)                            |
| Other cardiomyopathy           | 31.18<br>(23.50 to<br>44.87)                               | 40.74<br>(23.03 to<br>69.15)                               | 27.82<br>(16.02 to<br>48.07)                               | 47.00<br>(28.39 to<br>77.09)                                | 1.04<br>(0.78 to<br>1.56)                            | 2.10<br>(1.18 to<br>3.67)                            | 1.53<br>(0.86 to<br>2.76)                            | 2.34<br>(1.42 to<br>3.99)                            |

|                                                                |                                                |                                                |                                                |                                                |                                             |                                             |                                             |                                             |
|----------------------------------------------------------------|------------------------------------------------|------------------------------------------------|------------------------------------------------|------------------------------------------------|---------------------------------------------|---------------------------------------------|---------------------------------------------|---------------------------------------------|
| Atrial fibrillation and flutter                                | 12.50<br>(9.55 to<br>16.03)                    | 36.25<br>(25.63 to<br>48.36)                   | 34.93<br>(24.49 to<br>46.18)                   | 36.20<br>(26.29 to<br>48.08)                   | 1.16<br>(0.87 to<br>1.51)                   | 3.55<br>(2.48 to<br>4.78)                   | 3.64<br>(2.57 to<br>4.82)                   | 3.42<br>(2.31 to<br>4.67)                   |
| Aortic aneurysm                                                | 9.36<br>(7.64 to<br>11.52)                     | 16.81<br>(11.92 to<br>22.69)                   | 13.80<br>(9.85 to<br>18.19)                    | 17.91<br>(12.81 to<br>24.25)                   | 0.42<br>(0.36 to<br>0.51)                   | 0.94<br>(0.72 to<br>1.21)                   | 0.84<br>(0.64 to<br>1.05)                   | 0.96<br>(0.73 to<br>1.24)                   |
| Peripheral artery disease                                      | 3.78<br>(2.93 to<br>4.84)                      | 15.07<br>(10.35 to<br>21.78)                   | 12.93<br>(8.87 to<br>18.88)                    | 14.81<br>(10.23 to<br>21.22)                   | 0.25<br>(0.19 to<br>0.38)                   | 1.12<br>(0.76 to<br>1.82)                   | 1.06<br>(0.71 to<br>1.81)                   | 1.06<br>(0.72 to<br>1.69)                   |
| Endocarditis                                                   | 12.30<br>(9.44 to<br>16.71)                    | 19.52<br>(13.54 to<br>29.24)                   | 18.21<br>(12.70 to<br>27.51)                   | 20.05<br>(13.75 to<br>29.66)                   | 0.42<br>(0.33 to<br>0.59)                   | 1.01<br>(0.68 to<br>1.56)                   | 1.00<br>(0.69 to<br>1.56)                   | 1.00<br>(0.68 to<br>1.54)                   |
| Other cardiovascular and circulatory diseases                  | 215.39<br>(165.82 to<br>339.55)                | 480.43<br>(313.72 to<br>775.46)                | 329.98<br>(216.69 to<br>528.14)                | 568.48<br>(381.43 to<br>914.45)                | 9.02<br>(6.99 to<br>14.66)                  | 28.85<br>(19.38 to<br>45.61)                | 21.64<br>(14.54 to<br>34.78)                | 32.66<br>(22.49 to<br>51.86)                |
| <b>Chronic respiratory diseases</b>                            | <b>265.12</b><br>(220.54 to<br><b>315.36</b> ) | <b>455.96</b><br>(300.01 to<br><b>659.53</b> ) | <b>305.54</b><br>(208.85 to<br><b>431.88</b> ) | <b>633.60</b><br>(408.82 to<br><b>950.74</b> ) | <b>13.67</b><br>(11.47 to<br><b>16.07</b> ) | <b>28.11</b><br>(19.42 to<br><b>38.38</b> ) | <b>20.25</b><br>(14.57 to<br><b>27.14</b> ) | <b>37.51</b><br>(24.85 to<br><b>52.91</b> ) |
| Chronic obstructive pulmonary disease                          | 175.64<br>(144.34 to<br>211.84)                | 339.57<br>(206.73 to<br>527.47)                | 213.80<br>(135.54 to<br>321.18)                | 492.03<br>(288.63 to<br>785.26)                | 9.63<br>(8.06 to<br>11.44)                  | 21.37<br>(13.75 to<br>31.40)                | 14.71<br>(9.99 to<br>20.79)                 | 29.54<br>(17.91 to<br>44.46)                |
| Pneumoconiosis                                                 | 1.45<br>(1.14 to<br>1.84)                      | 1.45<br>(1.11 to<br>1.82)                      | 1.35<br>(0.99 to<br>1.78)                      | 1.54<br>(1.20 to<br>1.90)                      | 0.07<br>(0.06 to<br>0.09)                   | 0.10<br>(0.07 to<br>0.13)                   | 0.10<br>(0.07 to<br>0.13)                   | 0.10<br>(0.07 to<br>0.13)                   |
| Silicosis                                                      | 0.39<br>(0.15 to<br>0.54)                      | 0.21<br>(0.06 to<br>0.34)                      | 0.12<br>(0.03 to<br>0.20)                      | 0.25<br>(0.08 to<br>0.37)                      | 0.02<br>(0.01 to<br>0.03)                   | 0.02<br>(0.00 to<br>0.02)                   | 0.01<br>(0.00 to<br>0.01)                   | 0.02<br>(0.00 to<br>0.02)                   |
| Asbestosis                                                     | 0.27<br>(0.19 to<br>0.36)                      | 0.34<br>(0.21 to<br>0.47)                      | 0.40<br>(0.26 to<br>0.55)                      | 0.31<br>(0.19 to<br>0.43)                      | 0.01<br>(0.01 to<br>0.02)                   | 0.02<br>(0.01 to<br>0.03)                   | 0.02<br>(0.01 to<br>0.03)                   | 0.02<br>(0.01 to<br>0.02)                   |
| Coal workers pneumoconiosis                                    | 0.11<br>(0.06 to<br>0.16)                      | 0.11<br>(0.05 to<br>0.18)                      | 0.08<br>(0.03 to<br>0.14)                      | 0.13<br>(0.07 to<br>0.21)                      | 0.01<br>(0.00 to<br>0.01)                   | 0.01<br>(0.00 to<br>0.01)                   | 0.01<br>(0.00 to<br>0.01)                   | 0.01<br>(0.00 to<br>0.01)                   |
| Other pneumoconiosis                                           | 0.68<br>(0.52 to<br>0.94)                      | 0.80<br>(0.57 to<br>1.12)                      | 0.74<br>(0.50 to<br>1.09)                      | 0.84<br>(0.61 to<br>1.16)                      | 0.04<br>(0.03 to<br>0.05)                   | 0.06<br>(0.04 to<br>0.08)                   | 0.06<br>(0.04 to<br>0.09)                   | 0.06<br>(0.04 to<br>0.08)                   |
| Asthma                                                         | 60.60<br>(48.83 to<br>74.28)                   | 68.79<br>(39.91 to<br>114.13)                  | 40.31<br>(23.03 to<br>67.07)                   | 94.76<br>(54.77 to<br>152.22)                  | 2.92<br>(2.30 to<br>3.55)                   | 4.26<br>(2.49 to<br>6.94)                   | 2.70<br>(1.58 to<br>4.28)                   | 5.62<br>(3.35 to<br>8.89)                   |
| Interstitial lung disease and pulmonary sarcoidosis            | 6.24<br>(3.68 to<br>8.22)                      | 12.01<br>(7.07 to<br>16.06)                    | 16.22<br>(9.45 to<br>21.79)                    | 10.30<br>(6.22 to<br>13.34)                    | 0.28<br>(0.18 to<br>0.36)                   | 0.65<br>(0.54 to<br>0.86)                   | 0.92<br>(0.57 to<br>1.20)                   | 0.54<br>(0.34 to<br>0.70)                   |
| Other chronic respiratory diseases                             | 21.18<br>(15.86 to<br>29.82)                   | 34.14<br>(22.48 to<br>49.54)                   | 33.86<br>(22.58 to<br>47.21)                   | 34.97<br>(23.24 to<br>51.44)                   | 0.77<br>(0.54 to<br>1.03)                   | 1.73<br>(1.09 to<br>2.43)                   | 1.83<br>(1.18 to<br>2.53)                   | 1.71<br>(1.07 to<br>2.44)                   |
| <b>Cirrhosis and other chronic liver diseases</b>              | <b>122.82</b><br>(100.91 to<br><b>150.04</b> ) | <b>189.69</b><br>(149.81 to<br><b>242.32</b> ) | <b>162.65</b><br>(125.33 to<br><b>212.70</b> ) | <b>202.28</b><br>(161.54 to<br><b>252.66</b> ) | <b>4.48</b><br>(3.72 to<br><b>5.49</b> )    | <b>8.80</b><br>(7.11 to<br><b>10.71</b> )   | <b>7.87</b><br>(6.16 to<br><b>9.83</b> )    | <b>9.17</b><br>(7.51 to<br><b>10.97</b> )   |
| Cirrhosis and other chronic liver diseases due to hepatitis B  | 34.50<br>(26.32 to<br>44.93)                   | 58.17<br>(42.85 to<br>77.33)                   | 50.28<br>(36.15 to<br>68.77)                   | 61.64<br>(46.11 to<br>81.18)                   | 1.35<br>(1.05 to<br>1.76)                   | 2.72<br>(2.04 to<br>3.51)                   | 2.44<br>(1.77 to<br>3.29)                   | 2.82<br>(2.15 to<br>3.63)                   |
| Cirrhosis and other chronic liver diseases due to hepatitis C  | 49.26<br>(38.51 to<br>62.97)                   | 84.10<br>(62.89 to<br>110.27)                  | 71.75<br>(51.93 to<br>96.67)                   | 89.67<br>(68.11 to<br>117.01)                  | 1.92<br>(1.50 to<br>2.45)                   | 3.89<br>(2.97 to<br>5.00)                   | 3.45<br>(2.52 to<br>4.48)                   | 4.07<br>(3.11 to<br>5.14)                   |
| Cirrhosis and other chronic liver diseases due to alcohol use  | 6.44<br>(5.02 to<br>8.31)                      | 10.40<br>(7.71 to<br>13.81)                    | 9.08<br>(6.52 to<br>12.14)                     | 11.05<br>(8.20 to<br>14.44)                    | 0.26<br>(0.21 to<br>0.34)                   | 0.50<br>(0.39 to<br>0.64)                   | 0.46<br>(0.34 to<br>0.59)                   | 0.52<br>(0.41 to<br>0.66)                   |
| Cirrhosis and other chronic liver diseases due to other causes | 32.63<br>(26.24 to<br>41.18)                   | 37.01<br>(28.58 to<br>47.92)                   | 31.55<br>(23.51 to<br>41.60)                   | 39.92<br>(30.97 to<br>51.46)                   | 0.95<br>(0.78 to<br>1.16)                   | 1.69<br>(1.31 to<br>2.14)                   | 1.53<br>(1.15 to<br>1.99)                   | 1.76<br>(1.38 to<br>2.22)                   |
| <b>Digestive diseases</b>                                      | <b>116.19</b><br>(96.33 to<br><b>141.81</b> )  | <b>170.72</b><br>(133.66 to<br><b>214.59</b> ) | <b>148.06</b><br>(111.48 to<br><b>189.75</b> ) | <b>186.01</b><br>(146.16 to<br><b>232.75</b> ) | <b>4.95</b><br>(4.17 to<br><b>5.82</b> )    | <b>10.42</b><br>(8.19 to<br><b>12.82</b> )  | <b>9.57</b><br>(7.46 to<br><b>11.84</b> )   | <b>11.01</b><br>(8.49 to<br><b>13.77</b> )  |
| Peptic ulcer disease                                           | 30.70<br>(25.28 to<br>37.26)                   | 35.96<br>(25.67 to<br>47.88)                   | 25.19<br>(17.30 to<br>36.17)                   | 42.44<br>(31.11 to<br>55.33)                   | 1.47<br>(1.22 to<br>1.77)                   | 2.33<br>(1.69 to<br>3.04)                   | 1.74<br>(1.21 to<br>2.38)                   | 2.65<br>(1.94 to<br>3.48)                   |

| Iran                                       |                                     |                                       |                                     |                                       |                                  |                                  |                                  |                                  |
|--------------------------------------------|-------------------------------------|---------------------------------------|-------------------------------------|---------------------------------------|----------------------------------|----------------------------------|----------------------------------|----------------------------------|
| Cause                                      | YLLs (in 1000s)                     |                                       |                                     |                                       | Deaths (in 1000s)                |                                  |                                  |                                  |
|                                            | 2016                                | 2040 Forecast                         | 2040 Better Scenario                | 2040 Worse Scenario                   | 2016                             | 2040 Forecast                    | 2040 Better Scenario             | 2040 Worse Scenario              |
| Gastritis and duodenitis                   | 4.44<br>(3.60 to 5.49)              | 8.27<br>(6.23 to 10.66)               | 6.87<br>(4.90 to 9.04)              | 8.96<br>(6.83 to 11.30)               | 0.20<br>(0.16 to 0.24)           | 0.52<br>(0.39 to 0.66)           | 0.46<br>(0.33 to 0.58)           | 0.54<br>(0.41 to 0.68)           |
| Appendicitis                               | 7.19<br>(5.72 to 9.46)              | 7.84<br>(5.85 to 10.51)               | 5.80<br>(4.09 to 8.23)              | 9.03<br>(6.83 to 12.13)               | 0.23<br>(0.19 to 0.31)           | 0.41<br>(0.31 to 0.54)           | 0.32<br>(0.24 to 0.43)           | 0.45<br>(0.34 to 0.58)           |
| Paralytic ileus and intestinal obstruction | 30.01<br>(21.36 to 45.05)           | 41.17<br>(31.16 to 58.46)             | 42.43<br>(31.70 to 61.08)           | 40.63<br>(30.87 to 58.16)             | 1.06<br>(0.82 to 1.49)           | 2.43<br>(1.85 to 3.61)           | 2.67<br>(2.01 to 3.97)           | 2.30<br>(1.73 to 3.53)           |
| Inguinal, femoral, and abdominal hernia    | 2.84<br>(2.15 to 4.19)              | 3.81<br>(2.65 to 6.58)                | 3.38<br>(2.23 to 5.95)              | 4.02<br>(2.80 to 6.79)                | 0.14<br>(0.10 to 0.23)           | 0.25<br>(0.17 to 0.46)           | 0.24<br>(0.15 to 0.44)           | 0.26<br>(0.17 to 0.46)           |
| Inflammatory bowel disease                 | 7.92<br>(6.39 to 10.09)             | 12.11<br>(9.42 to 15.14)              | 12.10<br>(9.01 to 15.54)            | 12.01<br>(9.32 to 14.97)              | 0.28<br>(0.22 to 0.34)           | 0.62<br>(0.47 to 0.76)           | 0.66<br>(0.49 to 0.82)           | 0.59<br>(0.46 to 0.72)           |
| Vascular intestinal disorders              | 6.65<br>(5.35 to 8.19)              | 15.24<br>(11.54 to 19.54)             | 14.33<br>(10.41 to 18.96)           | 15.57<br>(11.73 to 19.74)             | 0.33<br>(0.26 to 0.41)           | 0.93<br>(0.71 to 1.18)           | 0.93<br>(0.70 to 1.19)           | 0.93<br>(0.70 to 1.16)           |
| Gallbladder and biliary diseases           | 8.90<br>(6.32 to 11.08)             | 17.98<br>(8.85 to 32.12)              | 12.95<br>(6.39 to 23.19)            | 23.15<br>(11.15 to 41.06)             | 0.51<br>(0.33 to 0.65)           | 1.31<br>(0.57 to 2.46)           | 1.02<br>(0.46 to 1.92)           | 1.61<br>(0.71 to 2.98)           |
| Pancreatitis                               | 8.02<br>(6.24 to 11.07)             | 13.73<br>(9.96 to 18.61)              | 11.32<br>(7.89 to 16.13)            | 15.05<br>(10.99 to 20.57)             | 0.33<br>(0.26 to 0.43)           | 0.75<br>(0.54 to 0.98)           | 0.65<br>(0.45 to 0.88)           | 0.80<br>(0.56 to 1.06)           |
| Other digestive diseases                   | 9.50<br>(7.47 to 11.83)             | 14.61<br>(10.76 to 18.62)             | 13.70<br>(9.80 to 18.04)            | 15.16<br>(11.33 to 19.42)             | 0.41<br>(0.32 to 0.50)           | 0.88<br>(0.65 to 1.12)           | 0.88<br>(0.64 to 1.14)           | 0.88<br>(0.64 to 1.13)           |
| Neurological disorders                     | <b>276.81</b><br>(231.48 to 330.67) | <b>731.80</b><br>(529.27 to 1,014.17) | <b>736.36</b><br>(527.38 to 981.54) | <b>738.43</b><br>(525.16 to 1,049.77) | <b>20.07</b><br>(16.62 to 24.07) | <b>63.37</b><br>(44.69 to 88.33) | <b>67.22</b><br>(49.36 to 88.67) | <b>61.97</b><br>(42.28 to 90.03) |
| Alzheimer's disease and other dementias    | 184.02<br>(148.00 to 226.39)        | 382.92<br>(392.03 to 863.40)          | 579.28<br>(393.27 to 813.30)        | 594.40<br>(391.52 to 898.94)          | 16.74<br>(13.61 to 20.49)        | 55.18<br>(36.89 to 79.66)        | 57.83<br>(40.80 to 79.45)        | 54.45<br>(35.52 to 81.94)        |
| Parkinson's disease                        | 23.22<br>(17.66 to 30.42)           | 68.77<br>(53.14 to 89.53)             | 79.57<br>(59.78 to 103.22)          | 62.32<br>(47.57 to 81.76)             | 1.81<br>(1.34 to 2.38)           | 5.68<br>(4.24 to 7.42)           | 6.85<br>(5.13 to 8.98)           | 5.02<br>(3.59 to 6.60)           |
| Epilepsy                                   | 40.32<br>(32.21 to 51.38)           | 35.83<br>(27.68 to 46.70)             | 32.50<br>(24.26 to 43.52)           | 38.43<br>(29.36 to 50.69)             | 0.76<br>(0.63 to 0.94)           | 0.98<br>(0.79 to 1.22)           | 0.93<br>(0.72 to 1.19)           | 1.02<br>(0.82 to 1.29)           |
| Multiple sclerosis                         | 11.19<br>(8.57 to 16.13)            | 15.08<br>(11.27 to 21.41)             | 15.29<br>(11.33 to 21.51)           | 14.71<br>(11.05 to 20.70)             | 0.30<br>(0.24 to 0.42)           | 0.51<br>(0.40 to 0.67)           | 0.53<br>(0.41 to 0.70)           | 0.49<br>(0.39 to 0.64)           |
| Motor neuron disease                       | 3.41<br>(2.78 to 4.15)              | 7.14<br>(5.47 to 8.82)                | 7.11<br>(5.39 to 8.86)              | 7.02<br>(5.38 to 8.65)                | 0.11<br>(0.09 to 0.13)           | 0.26<br>(0.20 to 0.31)           | 0.26<br>(0.20 to 0.32)           | 0.25<br>(0.20 to 0.30)           |
| Other neurological disorders               | 14.65<br>(11.63 to 18.85)           | 22.05<br>(17.84 to 27.12)             | 22.60<br>(18.10 to 27.89)           | 21.55<br>(17.43 to 26.36)             | 0.34<br>(0.28 to 0.42)           | 0.77<br>(0.63 to 0.91)           | 0.82<br>(0.67 to 0.99)           | 0.73<br>(0.61 to 0.87)           |
| Mental disorders                           | <b>134.19</b><br>(81.73 to 177.84)  | <b>238.51</b><br>(161.66 to 329.96)   | <b>277.17</b><br>(191.99 to 376.59) | <b>222.87</b><br>(148.34 to 303.81)   | <b>2.88</b><br>(1.92 to 3.74)    | <b>6.01</b><br>(4.36 to 7.90)    | <b>7.14</b><br>(5.26 to 9.37)    | <b>5.55</b><br>(4.11 to 7.16)    |
| Alcohol use disorders                      | 6.57<br>(4.34 to 8.70)              | 6.98<br>(4.59 to 9.73)                | 7.68<br>(4.93 to 10.76)             | 6.66<br>(4.38 to 9.14)                | 0.17<br>(0.11 to 0.22)           | 0.22<br>(0.15 to 0.30)           | 0.25<br>(0.17 to 0.34)           | 0.21<br>(0.14 to 0.28)           |
| Drug use disorders                         | 127.41<br>(77.17 to 169.47)         | 231.31<br>(155.73 to 321.25)          | 269.27<br>(184.38 to 367.07)        | 215.99<br>(142.05 to 295.38)          | 2.71<br>(1.79 to 3.53)           | 5.78<br>(4.17 to 7.62)           | 6.89<br>(5.04 to 9.07)           | 5.33<br>(3.95 to 6.91)           |
| Opioid use disorders                       | 93.16<br>(58.71 to 123.05)          | 155.82<br>(105.39 to 214.28)          | 165.80<br>(112.78 to 227.37)        | 150.46<br>(100.71 to 207.03)          | 1.96<br>(1.28 to 2.53)           | 3.80<br>(2.68 to 5.10)           | 4.11<br>(2.92 to 5.56)           | 3.63<br>(2.58 to 4.85)           |



|                                                   |                                |                              |                             |                              |                         |                        |                        |                        |                        |
|---------------------------------------------------|--------------------------------|------------------------------|-----------------------------|------------------------------|-------------------------|------------------------|------------------------|------------------------|------------------------|
| Genital prolapse                                  | 0.00<br>(0.00 to 0.00)         | 0.00<br>(0.00 to 0.01)       | 0.00<br>(0.00 to 0.01)      | 0.00<br>(0.00 to 0.01)       | 0.00<br>(0.00 to 0.01)  | 0.00<br>(0.00 to 0.00) | 0.00<br>(0.00 to 0.00) | 0.00<br>(0.00 to 0.00) | 0.00<br>(0.00 to 0.00) |
| Other gynecological diseases                      | 0.05<br>(0.03 to 0.07)         | 0.04<br>(0.02 to 0.06)       | 0.02<br>(0.01 to 0.04)      | 0.05<br>(0.03 to 0.07)       | 0.05<br>(0.03 to 0.07)  | 0.00<br>(0.00 to 0.00) | 0.00<br>(0.00 to 0.00) | 0.00<br>(0.00 to 0.00) | 0.00<br>(0.00 to 0.00) |
| Hemoglobinopathies and hemolytic anemias          | 25.68<br>(19.81 to 34.27)      | 20.19<br>(14.59 to 27.29)    | 15.25<br>(10.40 to 21.65)   | 23.07<br>(16.47 to 31.77)    | 0.53<br>(0.42 to 0.67)  | 0.69<br>(0.50 to 0.93) | 0.54<br>(0.38 to 0.76) | 0.76<br>(0.56 to 1.04) |                        |
| Thalassemias                                      | 7.52<br>(4.23 to 14.26)        | 1.80<br>(1.02 to 3.30)       | 1.64<br>(0.93 to 3.02)      | 1.90<br>(1.07 to 3.56)       | 0.09<br>(0.05 to 0.17)  | 0.02<br>(0.01 to 0.04) | 0.02<br>(0.01 to 0.04) | 0.02<br>(0.01 to 0.04) |                        |
| Sickle cell disorders                             | 7.96<br>(5.60 to 10.28)        | 7.14<br>(4.62 to 10.34)      | 5.25<br>(3.26 to 7.81)      | 8.22<br>(5.35 to 12.24)      | 0.14<br>(0.10 to 0.18)  | 0.17<br>(0.11 to 0.24) | 0.12<br>(0.08 to 0.18) | 0.19<br>(0.13 to 0.27) |                        |
| G6PD deficiency                                   | 6.62<br>(4.34 to 9.09)         | 6.81<br>(4.37 to 10.10)      | 4.78<br>(2.99 to 7.45)      | 8.06<br>(5.26 to 12.51)      | 0.14<br>(0.09 to 0.18)  | 0.19<br>(0.13 to 0.28) | 0.14<br>(0.09 to 0.21) | 0.23<br>(0.16 to 0.33) |                        |
| Other hemoglobinopathies and hemolytic anemias    | 3.57<br>(2.82 to 4.58)         | 4.44<br>(3.05 to 6.55)       | 3.58<br>(2.37 to 5.47)      | 4.88<br>(3.34 to 7.33)       | 0.16<br>(0.13 to 0.22)  | 0.30<br>(0.21 to 0.45) | 0.26<br>(0.17 to 0.39) | 0.32<br>(0.23 to 0.48) |                        |
| Endocrine, metabolic, blood, and immune disorders | 57.98<br>(35.08 to 87.21)      | 65.34<br>(42.72 to 85.88)    | 67.61<br>(44.86 to 90.16)   | 64.75<br>(42.50 to 86.32)    | 1.47<br>(0.98 to 1.89)  | 2.89<br>(1.91 to 3.63) | 3.20<br>(2.14 to 4.10) | 2.75<br>(1.82 to 3.45) |                        |
| <b>Iran</b>                                       |                                |                              |                             |                              |                         |                        |                        |                        |                        |
| Cause                                             | YLLs (in 1000s)                |                              |                             |                              | Deaths (in 1000s)       |                        |                        |                        |                        |
|                                                   | 2016                           | 2040 Forecast                | 2040 Better Scenario        | 2040 Worse Scenario          | 2016                    | 2040 Forecast          | 2040 Better Scenario   | 2040 Worse Scenario    |                        |
| Musculoskeletal disorders                         | 20.86<br>(16.76 to 28.74)      | 34.43<br>(26.35 to 43.92)    | 30.91<br>(23.07 to 40.29)   | 35.61<br>(27.72 to 45.35)    | 0.61<br>(0.49 to 0.76)  | 1.55<br>(1.06 to 1.91) | 1.47<br>(0.97 to 1.83) | 1.56<br>(1.07 to 1.91) |                        |
| Rheumatoid arthritis                              | 2.29<br>(1.59 to 3.15)         | 5.51<br>(3.58 to 7.85)       | 3.73<br>(2.43 to 5.83)      | 6.51<br>(4.31 to 9.20)       | 0.09<br>(0.06 to 0.12)  | 0.29<br>(0.19 to 0.41) | 0.20<br>(0.13 to 0.32) | 0.33<br>(0.22 to 0.48) |                        |
| Other musculoskeletal disorders                   | 18.57<br>(14.86 to 25.68)      | 28.92<br>(21.81 to 37.08)    | 27.18<br>(20.57 to 35.11)   | 29.10<br>(22.06 to 37.16)    | 0.52<br>(0.41 to 0.66)  | 1.26<br>(0.82 to 1.55) | 1.27<br>(0.81 to 1.57) | 1.23<br>(0.79 to 1.52) |                        |
| Other non-communicable diseases                   | 699.87<br>(301.12 to 1,378.38) | 263.12<br>(126.15 to 524.59) | 173.25<br>(84.43 to 345.67) | 334.35<br>(150.71 to 687.16) | 8.59<br>(4.10 to 16.52) | 4.59<br>(2.85 to 7.63) | 3.42<br>(2.14 to 5.52) | 5.45<br>(3.17 to 9.45) |                        |
| Congenital birth defects                          | 674.93<br>(292.20 to 1,353.08) | 240.57<br>(102.88 to 500.85) | 153.32<br>(66.27 to 324.72) | 310.71<br>(128.54 to 657.77) | 8.08<br>(3.61 to 15.94) | 3.07<br>(1.44 to 6.08) | 1.98<br>(0.94 to 3.96) | 3.93<br>(1.79 to 8.00) |                        |
| Neural tube defects                               | 23.06<br>(10.85 to 48.28)      | 4.36<br>(2.13 to 8.78)       | 2.44<br>(1.16 to 5.38)      | 6.03<br>(2.85 to 12.50)      | 0.28<br>(0.14 to 0.57)  | 0.06<br>(0.03 to 0.11) | 0.03<br>(0.02 to 0.07) | 0.08<br>(0.04 to 0.16) |                        |
| Congenital heart anomalies                        | 277.42<br>(107.39 to 574.01)   | 83.16<br>(31.67 to 176.86)   | 45.87<br>(16.86 to 99.33)   | 113.02<br>(42.93 to 245.04)  | 3.33<br>(1.35 to 6.79)  | 1.06<br>(0.44 to 2.15) | 0.59<br>(0.24 to 1.21) | 1.43<br>(0.62 to 2.98) |                        |
| Orofacial clefts                                  | 5.94<br>(2.05 to 14.23)        | 1.42<br>(0.40 to 3.82)       | 0.70<br>(0.20 to 1.87)      | 2.11<br>(0.61 to 5.51)       | 0.07<br>(0.02 to 0.16)  | 0.02<br>(0.00 to 0.04) | 0.01<br>(0.00 to 0.02) | 0.02<br>(0.01 to 0.06) |                        |
| Down syndrome                                     | 20.02<br>(9.28 to 38.89)       | 11.02<br>(5.43 to 20.64)     | 11.05<br>(5.62 to 20.47)    | 11.67<br>(5.74 to 22.61)     | 0.25<br>(0.13 to 0.47)  | 0.16<br>(0.09 to 0.28) | 0.16<br>(0.09 to 0.28) | 0.17<br>(0.09 to 0.29) |                        |
| Other chromosomal abnormalities                   | 39.51<br>(14.96 to 108.43)     | 29.82<br>(11.68 to 75.52)    | 23.49<br>(9.31 to 58.63)    | 35.27<br>(13.25 to 91.10)    | 0.47<br>(0.19 to 1.27)  | 0.37<br>(0.16 to 0.91) | 0.30<br>(0.13 to 0.71) | 0.44<br>(0.18 to 1.09) |                        |
| Congenital musculoskeletal and limb anomalies     | 25.91<br>(12.36 to 63.13)      | 11.33<br>(5.97 to 24.86)     | 7.17<br>(3.72 to 15.71)     | 14.32<br>(7.28 to 32.28)     | 0.33<br>(0.17 to 0.76)  | 0.16<br>(0.09 to 0.32) | 0.10<br>(0.06 to 0.20) | 0.20<br>(0.11 to 0.41) |                        |
| Urogenital congenital anomalies                   | 15.98<br>(4.29 to 35.23)       | 5.11<br>(1.55 to 11.55)      | 3.45<br>(1.09 to 7.96)      | 6.39<br>(1.90 to 14.50)      | 0.19<br>(0.06 to 0.41)  | 0.07<br>(0.03 to 0.14) | 0.05<br>(0.02 to 0.10) | 0.09<br>(0.03 to 0.18) |                        |



|                                      |                                                      |                                                      |                                                    |                                                      |                                             |                                             |                                             |                                             |
|--------------------------------------|------------------------------------------------------|------------------------------------------------------|----------------------------------------------------|------------------------------------------------------|---------------------------------------------|---------------------------------------------|---------------------------------------------|---------------------------------------------|
| Digestive congenital anomalies       | 44.70<br>(14.40 to<br>97.85)                         | 14.02<br>(4.29 to<br>33.07)                          | 8.32<br>(2.51 to<br>20.18)                         | 18.68<br>(5.38 to<br>44.25)                          | 0.52<br>(0.17 to<br>1.14)                   | 0.17<br>(0.05 to<br>0.39)                   | 0.10<br>(0.03 to<br>0.24)                   | 0.22<br>(0.07 to<br>0.52)                   |
| Other congenital birth defects       | 222.39<br>(91.29 to<br>473.04)                       | 80.32<br>(30.14 to<br>178.33)                        | 50.83<br>(18.95 to<br>111.46)                      | 103.22<br>(38.84 to<br>228.08)                       | 2.64<br>(1.12 to<br>5.56)                   | 1.00<br>(0.42 to<br>2.14)                   | 0.64<br>(0.26 to<br>1.35)                   | 1.28<br>(0.53 to<br>2.73)                   |
| Skin and subcutaneous diseases       | 8.32<br>(4.81 to<br>12.30)                           | 21.13<br>(13.76 to<br>33.74)                         | 18.93<br>(12.15 to<br>30.00)                       | 21.85<br>(14.18 to<br>34.31)                         | 0.43<br>(0.29 to<br>0.70)                   | 1.50<br>(0.98 to<br>2.48)                   | 1.43<br>(0.94 to<br>2.31)                   | 1.50<br>(0.97 to<br>2.45)                   |
| Cellulitis                           | 0.66<br>(0.28 to<br>1.03)                            | 1.70<br>(0.81 to<br>2.69)                            | 1.67<br>(0.78 to<br>2.66)                          | 1.68<br>(0.78 to<br>2.67)                            | 0.02<br>(0.01 to<br>0.03)                   | 0.09<br>(0.04 to<br>0.16)                   | 0.10<br>(0.04 to<br>0.17)                   | 0.09<br>(0.04 to<br>0.15)                   |
| Pyoderma                             | 2.54<br>(1.32 to<br>3.97)                            | 7.44<br>(4.77 to<br>12.77)                           | 6.89<br>(4.30 to<br>11.98)                         | 7.67<br>(4.80 to<br>13.00)                           | 0.10<br>(0.06 to<br>0.17)                   | 0.47<br>(0.29 to<br>0.85)                   | 0.47<br>(0.29 to<br>0.86)                   | 0.46<br>(0.28 to<br>0.84)                   |
| Decubitus ulcer                      | 4.37<br>(2.53 to<br>6.81)                            | 10.74<br>(6.45 to<br>17.80)                          | 9.22<br>(5.47 to<br>15.24)                         | 11.21<br>(6.77 to<br>17.67)                          | 0.28<br>(0.18 to<br>0.46)                   | 0.87<br>(0.51 to<br>1.45)                   | 0.79<br>(0.47 to<br>1.29)                   | 0.88<br>(0.50 to<br>1.44)                   |
| Other skin and subcutaneous diseases | 0.75<br>(0.38 to<br>1.12)                            | 1.26<br>(0.75 to<br>1.96)                            | 1.15<br>(0.68 to<br>1.82)                          | 1.28<br>(0.76 to<br>1.99)                            | 0.03<br>(0.02 to<br>0.04)                   | 0.08<br>(0.05 to<br>0.13)                   | 0.08<br>(0.05 to<br>0.12)                   | 0.07<br>(0.05 to<br>0.12)                   |
| Sudden infant death syndrome         | 6.62<br>(2.44 to<br>15.57)                           | 1.42<br>(0.33 to<br>4.08)                            | 1.01<br>(0.23 to<br>2.84)                          | 1.79<br>(0.41 to<br>5.18)                            | 0.08<br>(0.03 to<br>0.18)                   | 0.02<br>(0.00 to<br>0.05)                   | 0.01<br>(0.00 to<br>0.03)                   | 0.02<br>(0.00 to<br>0.06)                   |
| <b>Injuries</b>                      | <b>2,199.99</b><br>(1,837.66 to<br><b>2,690.11</b> ) | <b>2,070.17</b><br>(1,463.40 to<br><b>3,327.56</b> ) | <b>1,278.32</b><br>(847.31 to<br><b>2,463.11</b> ) | <b>2,342.94</b><br>(1,650.56 to<br><b>3,681.70</b> ) | <b>45.21</b><br>(37.69 to<br><b>54.61</b> ) | <b>54.93</b><br>(41.45 to<br><b>82.06</b> ) | <b>36.11</b><br>(25.66 to<br><b>61.84</b> ) | <b>60.66</b><br>(46.09 to<br><b>88.34</b> ) |
| <b>Transport injuries</b>            | <b>1,283.09</b><br>(1,061.76 to<br><b>1,560.83</b> ) | <b>1,300.43</b><br>(981.20 to<br><b>1,682.57</b> )   | <b>640.26</b><br>(474.52 to<br><b>841.64</b> )     | <b>1,492.83</b><br>(1,119.51 to<br><b>1,916.35</b> ) | <b>26.74</b><br>(22.06 to<br><b>32.64</b> ) | <b>34.41</b><br>(27.08 to<br><b>43.03</b> ) | <b>18.40</b><br>(14.35 to<br><b>23.24</b> ) | <b>38.59</b><br>(30.45 to<br><b>47.60</b> ) |
| Road injuries                        | 1,255.00<br>(1,040.41 to<br>1,525.88)                | 1,270.74<br>(957.64 to<br>1,649.83)                  | 619.71<br>(458.79 to<br>815.51)                    | 1,458.14<br>(1,094.94 to<br>1,879.76)                | 26.14<br>(21.59 to<br>31.85)                | 33.60<br>(26.49 to<br>42.01)                | 17.81<br>(13.89 to<br>22.54)                | 37.66<br>(29.68 to<br>46.51)                |
| Pedestrian road injuries             | 427.36<br>(333.42 to<br>531.42)                      | 352.50<br>(252.32 to<br>482.76)                      | 148.69<br>(106.52 to<br>202.93)                    | 438.19<br>(321.83 to<br>577.67)                      | 9.31<br>(7.40 to<br>11.54)                  | 10.60<br>(7.87 to<br>13.87)                 | 4.87<br>(3.59 to<br>6.47)                   | 12.79<br>(9.78 to<br>16.13)                 |

**Iran**

| Cause                         | YLLs (in 1000s)                                |                                                |                                                |                                                | Deaths (in 1000s)                          |                                            |                                           |                                            |
|-------------------------------|------------------------------------------------|------------------------------------------------|------------------------------------------------|------------------------------------------------|--------------------------------------------|--------------------------------------------|-------------------------------------------|--------------------------------------------|
|                               | 2016                                           | 2040 Forecast                                  | 2040 Better Scenario                           | 2040 Worse Scenario                            | 2016                                       | 2040 Forecast                              | 2040 Better Scenario                      | 2040 Worse Scenario                        |
| Cyclist road injuries         | 34.52<br>(24.82 to<br>52.95)                   | 40.40<br>(27.04 to<br>61.56)                   | 22.73<br>(15.21 to<br>33.18)                   | 44.19<br>(29.60 to<br>68.00)                   | 0.72<br>(0.51 to<br>1.10)                  | 1.06<br>(0.69 to<br>1.71)                  | 0.66<br>(0.43 to<br>1.03)                 | 1.12<br>(0.73 to<br>1.84)                  |
| Motorcyclist road injuries    | 151.12<br>(107.33 to<br>258.71)                | 165.03<br>(104.87 to<br>278.82)                | 110.23<br>(71.16 to<br>176.44)                 | 176.66<br>(111.51 to<br>298.29)                | 2.83<br>(2.04 to<br>4.64)                  | 3.47<br>(2.34 to<br>5.33)                  | 2.52<br>(1.72 to<br>3.64)                 | 3.63<br>(2.47 to<br>5.64)                  |
| Motor vehicle road injuries   | 639.40<br>(513.11 to<br>799.10)                | 710.62<br>(523.92 to<br>924.85)                | 336.95<br>(250.47 to<br>444.72)                | 796.66<br>(585.02 to<br>1,030.81)              | 13.23<br>(10.38 to<br>16.36)               | 18.42<br>(14.17 to<br>23.20)               | 9.71<br>(7.49 to<br>12.31)                | 20.05<br>(15.46 to<br>25.42)               |
| Other road injuries           | 2.61<br>(1.34 to<br>3.53)                      | 2.19<br>(1.14 to<br>3.12)                      | 1.11<br>(0.59 to<br>1.56)                      | 2.44<br>(1.27 to<br>3.48)                      | 0.06<br>(0.03 to<br>0.07)                  | 0.06<br>(0.04 to<br>0.08)                  | 0.04<br>(0.02 to<br>0.05)                 | 0.07<br>(0.04 to<br>0.09)                  |
| Other transport injuries      | 28.09<br>(21.64 to<br>37.13)                   | 29.69<br>(20.73 to<br>41.76)                   | 20.55<br>(14.17 to<br>29.89)                   | 34.69<br>(24.43 to<br>49.15)                   | 0.60<br>(0.46 to<br>0.78)                  | 0.82<br>(0.60 to<br>1.15)                  | 0.59<br>(0.42 to<br>0.84)                 | 0.94<br>(0.69 to<br>1.28)                  |
| <b>Unintentional injuries</b> | <b>535.13</b><br>(429.32 to<br><b>697.39</b> ) | <b>337.17</b><br>(253.92 to<br><b>449.97</b> ) | <b>258.06</b><br>(186.58 to<br><b>356.96</b> ) | <b>383.90</b><br>(286.80 to<br><b>521.24</b> ) | <b>11.05</b><br>(9.06 to<br><b>13.75</b> ) | <b>10.84</b><br>(8.64 to<br><b>13.46</b> ) | <b>9.03</b><br>(7.03 to<br><b>11.59</b> ) | <b>11.79</b><br>(9.32 to<br><b>14.94</b> ) |
| Falls                         | 100.77<br>(79.19 to<br>134.80)                 | 94.78<br>(72.45 to<br>127.87)                  | 81.10<br>(60.64 to<br>112.65)                  | 100.71<br>(77.52 to<br>135.99)                 | 2.74<br>(2.21 to<br>3.56)                  | 4.14<br>(3.32 to<br>5.15)                  | 3.80<br>(3.00 to<br>4.87)                 | 4.24<br>(3.35 to<br>5.32)                  |
| Drowning                      | 83.01<br>(64.11 to<br>111.61)                  | 39.38<br>(27.90 to<br>54.68)                   | 30.17<br>(20.64 to<br>42.98)                   | 45.05<br>(31.41 to<br>62.68)                   | 1.33<br>(1.06 to<br>1.71)                  | 0.80<br>(0.59 to<br>1.07)                  | 0.63<br>(0.46 to<br>0.87)                 | 0.89<br>(0.65 to<br>1.22)                  |

|                                                 |                                                      |                                                      |                                                      |                                                      |                                                |                                                |                                                |                                                |
|-------------------------------------------------|------------------------------------------------------|------------------------------------------------------|------------------------------------------------------|------------------------------------------------------|------------------------------------------------|------------------------------------------------|------------------------------------------------|------------------------------------------------|
| Fire, heat, and hot substances                  | 100.52<br>(79.70 to<br>136.34)                       | 65.11<br>(46.12 to<br>95.51)                         | 46.95<br>(30.93 to<br>72.57)                         | 76.05<br>(52.33 to<br>113.69)                        | 2.09<br>(1.64 to<br>2.94)                      | 1.99<br>(1.37 to<br>3.23)                      | 1.52<br>(0.99 to<br>2.51)                      | 2.24<br>(1.54 to<br>3.56)                      |
| Poisonings                                      | 64.84<br>(47.46 to<br>101.85)                        | 29.59<br>(19.60 to<br>47.68)                         | 19.28<br>(12.42 to<br>31.78)                         | 36.48<br>(24.16 to<br>58.35)                         | 1.22<br>(0.92 to<br>1.89)                      | 0.75<br>(0.53 to<br>1.15)                      | 0.51<br>(0.35 to<br>0.81)                      | 0.91<br>(0.64 to<br>1.40)                      |
| Exposure to mechanical forces                   | 31.38<br>(17.78 to<br>69.83)                         | 14.01<br>(8.46 to<br>28.16)                          | 10.34<br>(6.00 to<br>20.92)                          | 16.42<br>(9.47 to<br>33.27)                          | 0.51<br>(0.34 to<br>0.99)                      | 0.31<br>(0.22 to<br>0.49)                      | 0.24<br>(0.16 to<br>0.38)                      | 0.35<br>(0.24 to<br>0.56)                      |
| Unintentional firearm injuries                  | 5.01<br>(1.73 to<br>7.27)                            | 2.15<br>(0.66 to<br>3.49)                            | 1.65<br>(0.52 to<br>2.68)                            | 2.46<br>(0.75 to<br>4.09)                            | 0.10<br>(0.03 to<br>0.14)                      | 0.06<br>(0.02 to<br>0.09)                      | 0.05<br>(0.02 to<br>0.07)                      | 0.06<br>(0.02 to<br>0.10)                      |
| Unintentional suffocation                       | 20.03<br>(7.05 to<br>59.76)                          | 7.70<br>(3.08 to<br>22.34)                           | 5.68<br>(2.31 to<br>16.54)                           | 9.15<br>(3.45 to<br>26.54)                           | 0.27<br>(0.11 to<br>0.77)                      | 0.13<br>(0.07 to<br>0.32)                      | 0.10<br>(0.05 to<br>0.24)                      | 0.15<br>(0.07 to<br>0.38)                      |
| Other exposure to mechanical forces             | 6.34<br>(4.99 to<br>8.01)                            | 4.16<br>(2.87 to<br>5.85)                            | 3.01<br>(2.05 to<br>4.24)                            | 4.82<br>(3.41 to<br>6.74)                            | 0.14<br>(0.11 to<br>0.17)                      | 0.12<br>(0.09 to<br>0.16)                      | 0.09<br>(0.06 to<br>0.12)                      | 0.14<br>(0.10 to<br>0.18)                      |
| Adverse effects of medical treatment            | 41.03<br>(24.66 to<br>56.66)                         | 31.83<br>(17.83 to<br>46.23)                         | 27.47<br>(15.21 to<br>40.88)                         | 34.11<br>(18.96 to<br>50.23)                         | 1.04<br>(0.61 to<br>1.40)                      | 1.21<br>(0.69 to<br>1.66)                      | 1.10<br>(0.64 to<br>1.54)                      | 1.25<br>(0.71 to<br>1.76)                      |
| Animal contact                                  | 10.28<br>(6.92 to<br>14.64)                          | 7.05<br>(4.79 to<br>10.53)                           | 5.69<br>(3.76 to<br>8.56)                            | 8.02<br>(5.29 to<br>12.15)                           | 0.19<br>(0.14 to<br>0.25)                      | 0.21<br>(0.15 to<br>0.31)                      | 0.18<br>(0.13 to<br>0.27)                      | 0.23<br>(0.16 to<br>0.34)                      |
| Venomous animal contact                         | 7.82<br>(5.10 to<br>11.41)                           | 4.99<br>(3.23 to<br>7.76)                            | 4.10<br>(2.61 to<br>6.47)                            | 5.67<br>(3.56 to<br>9.14)                            | 0.14<br>(0.10 to<br>0.19)                      | 0.14<br>(0.09 to<br>0.23)                      | 0.12<br>(0.08 to<br>0.20)                      | 0.15<br>(0.10 to<br>0.24)                      |
| Non-venomous animal contact                     | 2.47<br>(1.59 to<br>3.62)                            | 2.06<br>(1.28 to<br>2.94)                            | 1.59<br>(0.94 to<br>2.38)                            | 2.35<br>(1.41 to<br>3.56)                            | 0.05<br>(0.04 to<br>0.07)                      | 0.07<br>(0.05 to<br>0.10)                      | 0.06<br>(0.04 to<br>0.08)                      | 0.08<br>(0.05 to<br>0.11)                      |
| Foreign body                                    | 32.71<br>(22.34 to<br>50.80)                         | 18.43<br>(13.13 to<br>26.30)                         | 16.64<br>(11.94 to<br>23.49)                         | 19.43<br>(13.77 to<br>28.11)                         | 0.57<br>(0.42 to<br>0.81)                      | 0.51<br>(0.40 to<br>0.68)                      | 0.50<br>(0.39 to<br>0.69)                      | 0.51<br>(0.40 to<br>0.69)                      |
| Pulmonary aspiration and foreign body in airway | 25.62<br>(16.66 to<br>42.08)                         | 13.42<br>(9.28 to<br>20.40)                          | 11.51<br>(8.00 to<br>17.10)                          | 14.41<br>(9.80 to<br>22.06)                          | 0.43<br>(0.31 to<br>0.63)                      | 0.37<br>(0.29 to<br>0.51)                      | 0.35<br>(0.27 to<br>0.48)                      | 0.38<br>(0.29 to<br>0.53)                      |
| Foreign body in other body part                 | 7.09<br>(5.08 to<br>12.24)                           | 5.01<br>(3.46 to<br>8.10)                            | 5.12<br>(3.56 to<br>8.04)                            | 5.02<br>(3.49 to<br>8.25)                            | 0.14<br>(0.11 to<br>0.23)                      | 0.14<br>(0.10 to<br>0.21)                      | 0.15<br>(0.11 to<br>0.22)                      | 0.14<br>(0.10 to<br>0.20)                      |
| Environmental heat and cold exposure            | 3.83<br>(1.77 to<br>5.23)                            | 2.89<br>(1.29 to<br>4.34)                            | 2.03<br>(0.92 to<br>3.19)                            | 3.44<br>(1.53 to<br>5.39)                            | 0.09<br>(0.04 to<br>0.12)                      | 0.09<br>(0.04 to<br>0.13)                      | 0.07<br>(0.03 to<br>0.10)                      | 0.10<br>(0.05 to<br>0.16)                      |
| Other unintentional injuries                    | 66.77<br>(52.96 to<br>85.70)                         | 34.08<br>(22.54 to<br>51.85)                         | 18.40<br>(11.38 to<br>28.66)                         | 44.19<br>(29.73 to<br>63.76)                         | 1.28<br>(1.02 to<br>1.63)                      | 0.83<br>(0.57 to<br>1.21)                      | 0.47<br>(0.30 to<br>0.69)                      | 1.06<br>(0.76 to<br>1.44)                      |
| <b>Self-harm and interpersonal violence</b>     | <b>348.18</b><br><b>(280.56 to</b><br><b>432.88)</b> | <b>262.52</b><br><b>(185.20 to</b><br><b>365.12)</b> | <b>209.70</b><br><b>(144.13 to</b><br><b>295.26)</b> | <b>294.98</b><br><b>(206.43 to</b><br><b>416.59)</b> | <b>6.76</b><br><b>(5.47 to</b><br><b>8.41)</b> | <b>5.89</b><br><b>(4.39 to</b><br><b>7.91)</b> | <b>4.82</b><br><b>(3.54 to</b><br><b>6.60)</b> | <b>6.51</b><br><b>(4.80 to</b><br><b>8.88)</b> |

| Iran                               |                                 |                                 |                                 |                                 |                           |                           |                           |                           |
|------------------------------------|---------------------------------|---------------------------------|---------------------------------|---------------------------------|---------------------------|---------------------------|---------------------------|---------------------------|
| Cause                              | YLLs (in 1000s)                 |                                 |                                 |                                 | Deaths (in 1000s)         |                           |                           |                           |
|                                    | 2016                            | 2040 Forecast                   | 2040 Better Scenario            | 2040 Worse Scenario             | 2016                      | 2040 Forecast             | 2040 Better Scenario      | 2040 Worse Scenario       |
| Self-harm                          | 255.50<br>(206.30 to<br>316.14) | 209.71<br>(148.53 to<br>294.60) | 170.76<br>(117.89 to<br>242.32) | 235.42<br>(161.62 to<br>335.67) | 5.01<br>(4.07 to<br>6.25) | 4.73<br>(3.49 to<br>6.41) | 3.95<br>(2.87 to<br>5.36) | 5.22<br>(3.84 to<br>7.13) |
| Self-harm by firearm               | 9.54<br>(6.22 to<br>13.73)      | 7.37<br>(4.46 to<br>11.81)      | 5.49<br>(3.24 to<br>8.89)       | 8.65<br>(5.06 to<br>14.01)      | 0.19<br>(0.13 to<br>0.28) | 0.18<br>(0.12 to<br>0.28) | 0.14<br>(0.09 to<br>0.21) | 0.21<br>(0.13 to<br>0.32) |
| Self-harm by other specified means | 245.97<br>(198.67 to<br>305.54) | 202.34<br>(143.74 to<br>283.65) | 165.27<br>(114.69 to<br>234.96) | 226.77<br>(156.23 to<br>321.85) | 4.82<br>(3.92 to<br>6.00) | 4.55<br>(3.35 to<br>6.19) | 3.81<br>(2.77 to<br>5.17) | 5.02<br>(3.67 to<br>6.89) |
| Interpersonal violence             | 92.68<br>(61.10 to<br>122.37)   | 52.81<br>(31.83 to<br>76.43)    | 38.94<br>(24.50 to<br>56.52)    | 59.56<br>(35.90 to<br>86.44)    | 1.75<br>(1.16 to<br>2.30) | 1.16<br>(0.74 to<br>1.61) | 0.87<br>(0.57 to<br>1.22) | 1.29<br>(0.81 to<br>1.80) |

|                                                                                     |                                                   |                                                      |                                                      |                                                      |                                                |                                                 |                                                 |                                                 |
|-------------------------------------------------------------------------------------|---------------------------------------------------|------------------------------------------------------|------------------------------------------------------|------------------------------------------------------|------------------------------------------------|-------------------------------------------------|-------------------------------------------------|-------------------------------------------------|
| Physical violence by firearm                                                        | 34.94<br>(19.44 to<br>49.35)                      | 18.79<br>(9.76 to<br>30.27)                          | 12.52<br>(6.80 to<br>19.93)                          | 21.99<br>(11.70 to<br>35.15)                         | 0.65<br>(0.37 to<br>0.93)                      | 0.38<br>(0.21 to<br>0.60)                       | 0.26<br>(0.15 to<br>0.41)                       | 0.45<br>(0.25 to<br>0.69)                       |
| Physical violence by sharp object                                                   | 20.63<br>(12.53 to<br>31.22)                      | 12.50<br>(7.31 to<br>19.12)                          | 8.77<br>(5.24 to<br>13.15)                           | 14.24<br>(8.35 to<br>21.59)                          | 0.39<br>(0.24 to<br>0.59)                      | 0.27<br>(0.17 to<br>0.41)                       | 0.20<br>(0.12 to<br>0.29)                       | 0.31<br>(0.19 to<br>0.45)                       |
| Physical violence by other means                                                    | 37.12<br>(19.26 to<br>51.37)                      | 21.53<br>(10.61 to<br>31.79)                         | 17.65<br>(9.00 to<br>26.07)                          | 23.32<br>(11.35 to<br>34.83)                         | 0.71<br>(0.36 to<br>0.97)                      | 0.50<br>(0.27 to<br>0.70)                       | 0.42<br>(0.23 to<br>0.59)                       | 0.53<br>(0.28 to<br>0.76)                       |
| <b>Forces of nature, conflict and terrorism, and executions and police conflict</b> | <b>33.59</b><br><b>(10.05 to</b><br><b>53.53)</b> | <b>170.05</b><br><b>(0.00 to</b><br><b>1,310.83)</b> | <b>170.32</b><br><b>(0.00 to</b><br><b>1,313.94)</b> | <b>171.24</b><br><b>(0.00 to</b><br><b>1,312.46)</b> | <b>0.66</b><br><b>(0.18 to</b><br><b>1.04)</b> | <b>3.79</b><br><b>(0.00 to</b><br><b>28.19)</b> | <b>3.86</b><br><b>(0.00 to</b><br><b>28.78)</b> | <b>3.77</b><br><b>(0.00 to</b><br><b>27.92)</b> |
| Exposure to forces of nature                                                        | 0.00<br>(0.00 to<br>0.00)                         | 49.92<br>(0.00 to<br>656.53)                         | 49.98<br>(0.00 to<br>655.80)                         | 50.41<br>(0.00 to<br>659.93)                         | 0.00<br>(0.00 to<br>0.00)                      | 1.19<br>(0.00 to<br>16.13)                      | 1.23<br>(0.00 to<br>16.56)                      | 1.18<br>(0.00 to<br>15.87)                      |
| Conflict and terrorism                                                              | 6.19<br>(1.26 to<br>10.99)                        | 21.63<br>(0.00 to<br>253.03)                         | 21.64<br>(0.00 to<br>253.26)                         | 21.85<br>(0.00 to<br>259.67)                         | 0.11<br>(0.02 to<br>0.20)                      | 0.48<br>(0.00 to<br>5.50)                       | 0.49<br>(0.00 to<br>5.65)                       | 0.47<br>(0.00 to<br>5.51)                       |
| Executions and police conflict                                                      | 27.40<br>(3.95 to<br>47.73)                       | 98.50<br>(0.00 to<br>1,160.88)                       | 98.70<br>(0.00 to<br>1,164.33)                       | 98.98<br>(0.00 to<br>1,161.82)                       | 0.55<br>(0.07 to<br>0.94)                      | 2.12<br>(0.00 to<br>24.94)                      | 2.15<br>(0.00 to<br>25.38)                      | 2.11<br>(0.00 to<br>24.72)                      |
| <b>Iraq</b>                                                                         |                                                   |                                                      |                                                      |                                                      |                                                |                                                 |                                                 |                                                 |
| Cause                                                                               | YLLs (in 1000s)                                   |                                                      |                                                      |                                                      | Deaths (in 1000s)                              |                                                 |                                                 |                                                 |
|                                                                                     | 2016                                              | 2040 Forecast                                        | 2040 Better Scenario                                 | 2040 Worse Scenario                                  | 2016                                           | 2040 Forecast                                   | 2040 Better Scenario                            | 2040 Worse Scenario                             |
| All causes                                                                          | 10,091.23<br>(7,521.03 to<br>12,562.85)           | 9,669.41<br>(7,389.86 to<br>12,691.41)               | 7,170.51<br>(5,561.47 to<br>9,517.02)                | 13,417.60<br>(10,183.21 to<br>17,399.63)             | 227.20<br>(186.80 to<br>269.42)                | 316.10<br>(261.30 to<br>386.13)                 | 247.25<br>(204.35 to<br>304.39)                 | 416.81<br>(341.72 to<br>507.15)                 |
| Communicable, maternal, neonatal, and nutritional diseases                          | 2,943.13<br>(1,481.98 to<br>4,388.93)             | 1,420.33<br>(796.30 to<br>2,143.72)                  | 867.07<br>(519.32 to<br>1,264.29)                    | 2,273.17<br>(1,242.71 to<br>3,456.33)                | 38.45<br>(21.57 to<br>54.99)                   | 23.28<br>(15.59 to<br>32.59)                    | 15.62<br>(11.18 to<br>20.97)                    | 35.06<br>(22.75 to<br>50.10)                    |
| HIV/AIDS and tuberculosis                                                           | 66.19<br>(46.05 to<br>101.92)                     | 63.41<br>(31.18 to<br>124.76)                        | 35.20<br>(16.71 to<br>96.25)                         | 99.26<br>(54.40 to<br>163.59)                        | 1.60<br>(1.16 to<br>2.28)                      | 1.63<br>(0.89 to<br>2.88)                       | 1.01<br>(0.52 to<br>2.19)                       | 2.46<br>(1.43 to<br>3.83)                       |
| Tuberculosis                                                                        | 53.00<br>(39.73 to<br>69.11)                      | 38.44<br>(23.66 to<br>58.58)                         | 23.88<br>(14.50 to<br>35.89)                         | 61.52<br>(36.99 to<br>97.94)                         | 1.35<br>(1.04 to<br>1.71)                      | 1.12<br>(0.72 to<br>1.66)                       | 0.72<br>(0.46 to<br>1.04)                       | 1.71<br>(1.03 to<br>2.62)                       |
| HIV/AIDS                                                                            | 13.19<br>(1.37 to<br>46.77)                       | 24.97<br>(1.53 to<br>86.45)                          | 14.32<br>(0.01 to<br>71.88)                          | 37.74<br>(5.13 to<br>107.45)                         | 0.25<br>(0.03 to<br>0.87)                      | 0.51<br>(0.03 to<br>1.79)                       | 0.29<br>(0.00 to<br>1.41)                       | 0.76<br>(0.10 to<br>2.13)                       |
| Diarrhea, lower respiratory, and other common infectious diseases                   | 842.75<br>(482.79 to<br>1,213.21)                 | 479.96<br>(295.67 to<br>747.07)                      | 296.33<br>(201.57 to<br>435.01)                      | 750.32<br>(435.95 to<br>1,230.81)                    | 12.55<br>(8.22 to<br>16.98)                    | 10.75<br>(7.66 to<br>14.92)                     | 7.81<br>(5.81 to<br>10.26)                      | 15.20<br>(10.19 to<br>22.06)                    |
| Diarrheal diseases                                                                  | 170.36<br>(83.49 to<br>271.43)                    | 53.99<br>(12.18 to<br>123.33)                        | 28.75<br>(6.75 to<br>74.63)                          | 108.35<br>(27.36 to<br>229.95)                       | 2.47<br>(1.33 to<br>3.66)                      | 1.24<br>(0.30 to<br>3.15)                       | 0.83<br>(0.19 to<br>2.25)                       | 2.28<br>(0.56 to<br>5.66)                       |
| Intestinal infectious diseases                                                      | 13.18<br>(5.98 to<br>23.71)                       | 12.26<br>(5.66 to<br>23.13)                          | 9.99<br>(4.70 to<br>18.22)                           | 15.19<br>(6.76 to<br>28.18)                          | 0.19<br>(0.09 to<br>0.34)                      | 0.19<br>(0.09 to<br>0.35)                       | 0.16<br>(0.07 to<br>0.28)                       | 0.23<br>(0.10 to<br>0.42)                       |
| Typhoid fever                                                                       | 11.73<br>(5.28 to<br>21.40)                       | 10.66<br>(4.77 to<br>20.36)                          | 8.73<br>(3.94 to<br>16.13)                           | 13.17<br>(5.72 to<br>25.20)                          | 0.17<br>(0.08 to<br>0.31)                      | 0.16<br>(0.07 to<br>0.30)                       | 0.13<br>(0.06 to<br>0.25)                       | 0.19<br>(0.09 to<br>0.37)                       |
| Paratyphoid fever                                                                   | 1.43<br>(0.58 to<br>3.01)                         | 1.60<br>(0.63 to<br>3.41)                            | 1.26<br>(0.49 to<br>2.65)                            | 2.01<br>(0.80 to<br>4.31)                            | 0.02<br>(0.01 to<br>0.04)                      | 0.03<br>(0.01 to<br>0.05)                       | 0.02<br>(0.01 to<br>0.04)                       | 0.03<br>(0.01 to<br>0.07)                       |
| Other intestinal infectious diseases                                                | 0.02<br>(0.00 to<br>0.04)                         | 0.01<br>(0.00 to<br>0.01)                            | 0.00<br>(0.00 to<br>0.01)                            | 0.01<br>(0.00 to<br>0.02)                            | 0.00<br>(0.00 to<br>0.00)                      | 0.00<br>(0.00 to<br>0.00)                       | 0.00<br>(0.00 to<br>0.00)                       | 0.00<br>(0.00 to<br>0.00)                       |
| Lower respiratory infections                                                        | 445.81<br>(251.48 to<br>664.40)                   | 280.16<br>(163.82 to<br>487.70)                      | 176.29<br>(115.15 to<br>278.34)                      | 451.62<br>(241.28 to<br>849.68)                      | 6.96<br>(4.63 to<br>9.60)                      | 7.05<br>(4.88 to<br>10.22)                      | 5.19<br>(3.78 to<br>7.14)                       | 9.91<br>(6.32 to<br>15.49)                      |
| Upper respiratory infections                                                        | 0.38<br>(0.16 to<br>0.82)                         | 0.32<br>(0.13 to<br>0.66)                            | 0.22<br>(0.08 to<br>0.44)                            | 0.48<br>(0.18 to<br>1.00)                            | 0.01<br>(0.00 to<br>0.01)                      | 0.01<br>(0.00 to<br>0.02)                       | 0.01<br>(0.00 to<br>0.01)                       | 0.01<br>(0.00 to<br>0.02)                       |



|                                                          |                                     |                                     |                                     |                                     |                                  |                                  |                                  |                                  |                                  |
|----------------------------------------------------------|-------------------------------------|-------------------------------------|-------------------------------------|-------------------------------------|----------------------------------|----------------------------------|----------------------------------|----------------------------------|----------------------------------|
| Dengue                                                   | 0.00<br>(0.00 to<br>0.00)           | 0.00<br>(0.00 to<br>0.00)           | 0.00<br>(0.00 to<br>0.00)           | 0.00<br>(0.00 to<br>0.00)           | 0.00<br>(0.00 to<br>0.00)        | 0.00<br>(0.00 to<br>0.00)        | 0.00<br>(0.00 to<br>0.00)        | 0.00<br>(0.00 to<br>0.00)        | 0.00<br>(0.00 to<br>0.00)        |
| Yellow fever                                             | 0.00<br>(0.00 to<br>0.00)           | 0.00<br>(0.00 to<br>0.00)           | 0.00<br>(0.00 to<br>0.00)           | 0.00<br>(0.00 to<br>0.00)           | 0.00<br>(0.00 to<br>0.00)        | 0.00<br>(0.00 to<br>0.00)        | 0.00<br>(0.00 to<br>0.00)        | 0.00<br>(0.00 to<br>0.00)        | 0.00<br>(0.00 to<br>0.00)        |
| Rabies                                                   | 1.27<br>(0.05 to<br>2.66)           | 0.45<br>(0.00 to<br>1.25)           | 0.25<br>(0.00 to<br>0.75)           | 0.82<br>(0.01 to<br>2.30)           | 0.02<br>(0.00 to<br>0.04)        | 0.01<br>(0.00 to<br>0.02)        | 0.00<br>(0.00 to<br>0.01)        | 0.01<br>(0.00 to<br>0.03)        | 0.01<br>(0.00 to<br>0.03)        |
| Intestinal nematode infections                           | 0.07<br>(0.02 to<br>0.17)           | 0.03<br>(0.01 to<br>0.09)           | 0.03<br>(0.00 to<br>0.08)           | 0.04<br>(0.01 to<br>0.11)           | 0.00<br>(0.00 to<br>0.00)        | 0.00<br>(0.00 to<br>0.00)        | 0.00<br>(0.00 to<br>0.00)        | 0.00<br>(0.00 to<br>0.00)        | 0.00<br>(0.00 to<br>0.00)        |
| Other neglected tropical diseases                        | 0.82<br>(0.30 to<br>1.41)           | 0.25<br>(0.06 to<br>0.58)           | 0.18<br>(0.04 to<br>0.41)           | 0.38<br>(0.08 to<br>0.86)           | 0.01<br>(0.00 to<br>0.02)        | 0.00<br>(0.00 to<br>0.01)        | 0.00<br>(0.00 to<br>0.01)        | 0.01<br>(0.00 to<br>0.01)        | 0.01<br>(0.00 to<br>0.01)        |
| <b>Maternal disorders</b>                                | <b>47.07</b><br>(27.15 to<br>75.42) | <b>34.09</b><br>(17.28 to<br>64.02) | <b>23.17</b><br>(11.41 to<br>43.87) | <b>52.14</b><br>(25.60 to<br>96.60) | <b>0.87</b><br>(0.59 to<br>1.39) | <b>0.63</b><br>(0.32 to<br>1.18) | <b>0.43</b><br>(0.21 to<br>0.83) | <b>0.96</b><br>(0.47 to<br>1.77) | <b>0.96</b><br>(0.47 to<br>1.77) |
| Maternal hemorrhage                                      | 13.75<br>(7.52 to<br>23.68)         | 9.74<br>(4.48 to<br>19.43)          | 6.67<br>(2.96 to<br>13.43)          | 14.77<br>(6.84 to<br>28.81)         | 0.26<br>(0.14 to<br>0.44)        | 0.18<br>(0.08 to<br>0.37)        | 0.13<br>(0.06 to<br>0.25)        | 0.28<br>(0.13 to<br>0.54)        | 0.28<br>(0.13 to<br>0.54)        |
| Maternal sepsis and other maternal infections            | 5.42<br>(2.64 to<br>9.61)           | 3.39<br>(1.44 to<br>6.73)           | 2.29<br>(0.92 to<br>4.71)           | 5.19<br>(2.14 to<br>10.62)          | 0.10<br>(0.05 to<br>0.18)        | 0.06<br>(0.03 to<br>0.13)        | 0.04<br>(0.02 to<br>0.09)        | 0.10<br>(0.04 to<br>0.19)        | 0.10<br>(0.04 to<br>0.19)        |
| Maternal hypertensive disorders                          | 7.82<br>(4.37 to<br>13.60)          | 5.72<br>(2.55 to<br>11.22)          | 3.89<br>(1.72 to<br>7.78)           | 8.75<br>(4.06 to<br>17.09)          | 0.14<br>(0.08 to<br>0.25)        | 0.10<br>(0.05 to<br>0.21)        | 0.07<br>(0.03 to<br>0.14)        | 0.16<br>(0.07 to<br>0.32)        | 0.16<br>(0.07 to<br>0.32)        |
| Maternal obstructed labor and uterine rupture            | 1.42<br>(0.66 to<br>2.70)           | 1.03<br>(0.40 to<br>2.19)           | 0.68<br>(0.27 to<br>1.47)           | 1.61<br>(0.63 to<br>3.46)           | 0.03<br>(0.01 to<br>0.05)        | 0.02<br>(0.01 to<br>0.04)        | 0.01<br>(0.01 to<br>0.03)        | 0.03<br>(0.01 to<br>0.06)        | 0.03<br>(0.01 to<br>0.06)        |
| Maternal abortion, miscarriage, and ectopic pregnancy    | 2.00<br>(0.94 to<br>3.52)           | 1.64<br>(0.62 to<br>3.52)           | 1.11<br>(0.42 to<br>2.21)           | 2.53<br>(0.95 to<br>5.09)           | 0.04<br>(0.02 to<br>0.07)        | 0.03<br>(0.01 to<br>0.06)        | 0.02<br>(0.01 to<br>0.04)        | 0.05<br>(0.02 to<br>0.10)        | 0.05<br>(0.02 to<br>0.10)        |
| Indirect maternal deaths                                 | 6.00<br>(3.18 to<br>10.38)          | 4.75<br>(2.08 to<br>9.33)           | 3.17<br>(1.35 to<br>6.39)           | 7.40<br>(3.26 to<br>14.58)          | 0.09<br>(0.06 to<br>0.19)        | 0.09<br>(0.04 to<br>0.17)        | 0.06<br>(0.02 to<br>0.11)        | 0.13<br>(0.06 to<br>0.26)        | 0.13<br>(0.06 to<br>0.26)        |
| Late maternal deaths                                     | 0.66<br>(0.28 to<br>1.34)           | 0.41<br>(0.15 to<br>0.88)           | 0.27<br>(0.10 to<br>0.60)           | 0.63<br>(0.23 to<br>1.35)           | 0.01<br>(0.01 to<br>0.02)        | 0.01<br>(0.00 to<br>0.02)        | 0.00<br>(0.00 to<br>0.01)        | 0.01<br>(0.00 to<br>0.03)        | 0.01<br>(0.00 to<br>0.03)        |
| Maternal deaths aggravated by HIV/AIDS                   | 0.00<br>(0.00 to<br>0.02)           | 0.02<br>(0.00 to<br>0.12)           | 0.01<br>(0.00 to<br>0.07)           | 0.04<br>(0.00 to<br>0.17)           | 0.00<br>(0.00 to<br>0.00)        | 0.00<br>(0.00 to<br>0.00)        | 0.00<br>(0.00 to<br>0.00)        | 0.00<br>(0.00 to<br>0.00)        | 0.00<br>(0.00 to<br>0.00)        |
| Other maternal disorders                                 | 9.98<br>(5.41 to<br>17.22)          | 7.40<br>(3.33 to<br>14.78)          | 5.08<br>(2.27 to<br>10.09)          | 11.21<br>(5.18 to<br>20.92)         | 0.18<br>(0.10 to<br>0.32)        | 0.14<br>(0.06 to<br>0.28)        | 0.09<br>(0.04 to<br>0.19)        | 0.21<br>(0.10 to<br>0.39)        | 0.21<br>(0.10 to<br>0.39)        |
| <b>Iraq</b>                                              |                                     |                                     |                                     |                                     |                                  |                                  |                                  |                                  |                                  |
| Cause                                                    | YLLs (in 1000s)                     |                                     |                                     |                                     | Deaths (in 1000s)                |                                  |                                  |                                  |                                  |
|                                                          | 2016                                | 2040 Forecast                       | 2040 Better Scenario                | 2040 Worse Scenario                 | 2016                             | 2040 Forecast                    | 2040 Better Scenario             | 2040 Worse Scenario              |                                  |
| Neonatal disorders                                       | 1,887.35<br>(816.75 to<br>2,970.53) | 798.03<br>(327.44 to<br>1,343.54)   | 475.02<br>(191.05 to<br>803.75)     | 1,310.90<br>(533.46 to<br>2,203.22) | 21.82<br>(9.44 to<br>34.35)      | 9.23<br>(3.79 to<br>15.55)       | 5.50<br>(2.21 to<br>9.30)        | 15.16<br>(6.17 to<br>25.48)      |                                  |
| Neonatal preterm birth                                   | 1,107.07<br>(467.27 to<br>1,780.85) | 427.92<br>(171.34 to<br>739.31)     | 240.19<br>(95.05 to<br>410.16)      | 710.23<br>(288.92 to<br>1,194.40)   | 12.80<br>(5.40 to<br>20.59)      | 4.95<br>(1.98 to<br>8.55)        | 2.78<br>(1.10 to<br>4.74)        | 8.21<br>(3.34 to<br>13.81)       |                                  |
| Neonatal encephalopathy due to birth asphyxia and trauma | 207.03<br>(73.50 to<br>398.18)      | 83.41<br>(28.19 to<br>177.04)       | 53.70<br>(18.55 to<br>112.78)       | 132.01<br>(44.37 to<br>283.64)      | 2.40<br>(0.85 to<br>4.61)        | 0.97<br>(0.33 to<br>2.05)        | 0.62<br>(0.22 to<br>1.31)        | 1.53<br>(0.51 to<br>3.28)        |                                  |
| Neonatal sepsis and other neonatal infections            | 415.67<br>(156.81 to<br>732.77)     | 217.29<br>(76.68 to<br>410.66)      | 138.46<br>(50.53 to<br>263.04)      | 350.73<br>(124.99 to<br>655.87)     | 4.81<br>(1.81 to<br>8.47)        | 2.51<br>(0.89 to<br>4.75)        | 1.60<br>(0.58 to<br>3.04)        | 4.06<br>(1.44 to<br>7.58)        |                                  |
| Hemolytic disease and other neonatal jaundice            | 6.74<br>(2.48 to<br>12.88)          | 1.58<br>(0.47 to<br>3.84)           | 0.94<br>(0.28 to<br>2.22)           | 2.77<br>(0.83 to<br>6.61)           | 0.08<br>(0.03 to<br>0.15)        | 0.02<br>(0.01 to<br>0.04)        | 0.01<br>(0.00 to<br>0.03)        | 0.03<br>(0.01 to<br>0.08)        |                                  |

|                                                                         |                                                            |                                                            |                                                            |                                                             |                                                      |                                                      |                                                      |                                                      |
|-------------------------------------------------------------------------|------------------------------------------------------------|------------------------------------------------------------|------------------------------------------------------------|-------------------------------------------------------------|------------------------------------------------------|------------------------------------------------------|------------------------------------------------------|------------------------------------------------------|
| Other neonatal disorders                                                | 150.84<br>(54.41 to<br>258.61)                             | 67.83<br>(23.57 to<br>131.92)                              | 41.73<br>(14.72 to<br>79.31)                               | 115.16<br>(40.57 to<br>224.12)                              | 1.75<br>(0.63 to<br>2.99)                            | 0.79<br>(0.27 to<br>1.55)                            | 0.48<br>(0.17 to<br>0.92)                            | 1.33<br>(0.47 to<br>2.59)                            |
| <b>Nutritional deficiencies</b>                                         | <b>23.39</b><br><b>(12.89 to</b><br><b>36.10)</b>          | <b>9.70</b><br><b>(6.61 to</b><br><b>14.22)</b>            | <b>7.39</b><br><b>(5.39 to</b><br><b>10.50)</b>            | <b>13.30</b><br><b>(8.73 to</b><br><b>20.69)</b>            | <b>0.38</b><br><b>(0.25 to</b><br><b>0.53)</b>       | <b>0.24</b><br><b>(0.19 to</b><br><b>0.31)</b>       | <b>0.21</b><br><b>(0.16 to</b><br><b>0.26)</b>       | <b>0.29</b><br><b>(0.22 to</b><br><b>0.40)</b>       |
| Protein-energy malnutrition                                             | 19.37<br>(9.63 to<br>31.30)                                | 6.01<br>(3.60 to<br>9.70)                                  | 4.41<br>(2.91 to<br>6.77)                                  | 8.61<br>(4.87 to<br>14.46)                                  | 0.30<br>(0.18 to<br>0.44)                            | 0.15<br>(0.11 to<br>0.21)                            | 0.13<br>(0.10 to<br>0.17)                            | 0.19<br>(0.13 to<br>0.27)                            |
| Iodine deficiency                                                       | 0.46<br>(0.03 to<br>2.30)                                  | 0.50<br>(0.02 to<br>1.98)                                  | 0.37<br>(0.02 to<br>1.32)                                  | 0.72<br>(0.03 to<br>3.12)                                   | 0.01<br>(0.00 to<br>0.03)                            | 0.01<br>(0.00 to<br>0.04)                            | 0.01<br>(0.00 to<br>0.03)                            | 0.02<br>(0.00 to<br>0.05)                            |
| Dietary iron deficiency                                                 | 0.52<br>(0.37 to<br>0.70)                                  | 0.54<br>(0.36 to<br>0.82)                                  | 0.45<br>(0.30 to<br>0.69)                                  | 0.65<br>(0.42 to<br>0.98)                                   | 0.01<br>(0.01 to<br>0.01)                            | 0.01<br>(0.01 to<br>0.02)                            | 0.01<br>(0.01 to<br>0.01)                            | 0.01<br>(0.01 to<br>0.02)                            |
| Other nutritional deficiencies                                          | 3.04<br>(1.82 to<br>4.74)                                  | 2.66<br>(1.86 to<br>3.78)                                  | 2.16<br>(1.51 to<br>3.01)                                  | 5.32<br>(2.24 to<br>4.87)                                   | 0.06<br>(0.04 to<br>0.08)                            | 0.07<br>(0.05 to<br>0.09)                            | 0.06<br>(0.04 to<br>0.08)                            | 0.08<br>(0.06 to<br>0.11)                            |
| <b>Other communicable, maternal, neonatal, and nutritional diseases</b> | <b>65.27</b><br><b>(29.83 to</b><br><b>139.59)</b>         | <b>32.62</b><br><b>(21.16 to</b><br><b>55.32)</b>          | <b>25.22</b><br><b>(16.67 to</b><br><b>39.68)</b>          | <b>43.48</b><br><b>(26.04 to</b><br><b>80.64)</b>           | <b>0.99</b><br><b>(0.55 to</b><br><b>1.85)</b>       | <b>0.75</b><br><b>(0.57 to</b><br><b>1.02)</b>       | <b>0.63</b><br><b>(0.48 to</b><br><b>0.83)</b>       | <b>0.90</b><br><b>(0.64 to</b><br><b>1.35)</b>       |
| Sexually transmitted infections excluding HIV                           | 28.53<br>(6.87 to<br>82.05)                                | 6.00<br>(1.56 to<br>17.87)                                 | 4.23<br>(1.20 to<br>12.29)                                 | 8.78<br>(2.14 to<br>27.24)                                  | 0.34<br>(0.09 to<br>0.97)                            | 0.08<br>(0.03 to<br>0.22)                            | 0.06<br>(0.02 to<br>0.15)                            | 0.11<br>(0.03 to<br>0.33)                            |
| Syphilis                                                                | 27.88<br>(6.15 to<br>81.19)                                | 5.39<br>(1.02 to<br>17.31)                                 | 3.68<br>(0.73 to<br>11.92)                                 | 8.08<br>(1.45 to<br>26.32)                                  | 0.33<br>(0.07 to<br>0.95)                            | 0.07<br>(0.01 to<br>0.20)                            | 0.04<br>(0.01 to<br>0.14)                            | 0.10<br>(0.02 to<br>0.31)                            |
| Chlamydia infection                                                     | 0.12<br>(0.05 to<br>0.20)                                  | 0.12<br>(0.05 to<br>0.20)                                  | 0.11<br>(0.05 to<br>0.18)                                  | 0.13<br>(0.06 to<br>0.22)                                   | 0.00<br>(0.00 to<br>0.00)                            | 0.00<br>(0.00 to<br>0.00)                            | 0.00<br>(0.00 to<br>0.00)                            | 0.00<br>(0.00 to<br>0.00)                            |
| Gonococcal infection                                                    | 0.34<br>(0.14 to<br>0.54)                                  | 0.33<br>(0.13 to<br>0.55)                                  | 0.29<br>(0.12 to<br>0.49)                                  | 0.37<br>(0.15 to<br>0.63)                                   | 0.01<br>(0.00 to<br>0.01)                            | 0.01<br>(0.00 to<br>0.01)                            | 0.01<br>(0.00 to<br>0.01)                            | 0.01<br>(0.00 to<br>0.01)                            |
| Other sexually transmitted infections                                   | 0.18<br>(0.08 to<br>0.29)                                  | 0.17<br>(0.07 to<br>0.29)                                  | 0.15<br>(0.07 to<br>0.26)                                  | 0.20<br>(0.08 to<br>0.33)                                   | 0.00<br>(0.00 to<br>0.01)                            | 0.00<br>(0.00 to<br>0.01)                            | 0.00<br>(0.00 to<br>0.01)                            | 0.00<br>(0.00 to<br>0.01)                            |
| Acute hepatitis                                                         | 13.36<br>(10.08 to<br>16.98)                               | 11.81<br>(8.78 to<br>16.12)                                | 10.01<br>(7.11 to<br>13.64)                                | 13.89<br>(10.16 to<br>18.96)                                | 0.31<br>(0.24 to<br>0.39)                            | 0.36<br>(0.28 to<br>0.48)                            | 0.32<br>(0.23 to<br>0.43)                            | 0.40<br>(0.30 to<br>0.53)                            |
| Acute hepatitis A                                                       | 1.49<br>(0.20 to<br>3.41)                                  | 0.47<br>(0.15 to<br>1.09)                                  | 0.35<br>(0.12 to<br>0.76)                                  | 0.66<br>(0.18 to<br>1.60)                                   | 0.02<br>(0.00 to<br>0.04)                            | 0.01<br>(0.00 to<br>0.02)                            | 0.01<br>(0.00 to<br>0.01)                            | 0.01<br>(0.00 to<br>0.02)                            |
| Acute hepatitis B                                                       | 9.53<br>(6.94 to<br>12.76)                                 | 9.76<br>(7.02 to<br>13.61)                                 | 8.32<br>(5.69 to<br>11.64)                                 | 11.55<br>(8.10 to<br>16.14)                                 | 0.25<br>(0.19 to<br>0.32)                            | 0.30<br>(0.23 to<br>0.41)                            | 0.27<br>(0.19 to<br>0.36)                            | 0.34<br>(0.25 to<br>0.45)                            |
| Acute hepatitis C                                                       | 0.19<br>(0.13 to<br>0.26)                                  | 0.26<br>(0.17 to<br>0.39)                                  | 0.24<br>(0.16 to<br>0.37)                                  | 0.28<br>(0.18 to<br>0.41)                                   | 0.01<br>(0.00 to<br>0.01)                            | 0.01<br>(0.01 to<br>0.01)                            | 0.01<br>(0.01 to<br>0.01)                            | 0.01<br>(0.01 to<br>0.01)                            |
| Acute hepatitis E                                                       | 2.16<br>(1.42 to<br>3.18)                                  | 1.32<br>(0.85 to<br>2.03)                                  | 1.09<br>(0.72 to<br>1.63)                                  | 1.60<br>(1.00 to<br>2.45)                                   | 0.04<br>(0.03 to<br>0.05)                            | 0.04<br>(0.02 to<br>0.06)                            | 0.04<br>(0.02 to<br>0.06)                            | 0.04<br>(0.03 to<br>0.06)                            |
| Other unspecified infectious diseases                                   | 23.38<br>(7.03 to<br>77.45)                                | 14.81<br>(8.16 to<br>31.63)                                | 10.99<br>(6.42 to<br>21.45)                                | 20.80<br>(10.38 to<br>47.55)                                | 0.34<br>(0.14 to<br>0.95)                            | 0.31<br>(0.22 to<br>0.51)                            | 0.25<br>(0.19 to<br>0.40)                            | 0.39<br>(0.26 to<br>0.71)                            |
| <b>Non-communicable diseases</b>                                        | <b>4,223.28</b><br><b>(3,397.27 to</b><br><b>5,174.74)</b> | <b>6,398.03</b><br><b>(4,844.47 to</b><br><b>8,408.42)</b> | <b>4,825.31</b><br><b>(3,721.99 to</b><br><b>6,330.03)</b> | <b>8,965.88</b><br><b>(6,668.62 to</b><br><b>11,818.48)</b> | <b>139.29</b><br><b>(115.77 to</b><br><b>163.50)</b> | <b>256.98</b><br><b>(210.19 to</b><br><b>318.11)</b> | <b>202.41</b><br><b>(167.88 to</b><br><b>249.11)</b> | <b>340.57</b><br><b>(277.44 to</b><br><b>415.36)</b> |

| Iraq      |                                 |                                     |                                     |                                     |                              |                              |                              |                              |
|-----------|---------------------------------|-------------------------------------|-------------------------------------|-------------------------------------|------------------------------|------------------------------|------------------------------|------------------------------|
| Cause     | YLLs (in 1000s)                 |                                     |                                     |                                     | Deaths (in 1000s)            |                              |                              |                              |
|           | 2016                            | 2040 Forecast                       | 2040 Better Scenario                | 2040 Worse Scenario                 | 2016                         | 2040 Forecast                | 2040 Better Scenario         | 2040 Worse Scenario          |
| Neoplasms | 555.47<br>(439.36 to<br>677.02) | 1,149.30<br>(872.18 to<br>1,496.38) | 1,066.07<br>(814.19 to<br>1,365.14) | 1,282.78<br>(948.84 to<br>1,717.67) | 16.73<br>(13.45 to<br>20.09) | 39.16<br>(30.41 to<br>50.12) | 37.45<br>(29.73 to<br>46.59) | 42.26<br>(31.97 to<br>55.33) |

|                                      |                               |                                 |                                 |                                 |                           |                           |                           |                            |
|--------------------------------------|-------------------------------|---------------------------------|---------------------------------|---------------------------------|---------------------------|---------------------------|---------------------------|----------------------------|
| Lip and oral cavity cancer           | 4.89<br>(3.76 to<br>6.25)     | 9.84<br>(6.06 to<br>16.86)      | 7.56<br>(4.93 to<br>11.83)      | 13.99<br>(7.83 to<br>25.06)     | 0.17<br>(0.13 to<br>0.21) | 0.35<br>(0.23 to<br>0.57) | 0.28<br>(0.20 to<br>0.42) | 0.48<br>(0.28 to<br>0.83)  |
| Nasopharynx cancer                   | 3.04<br>(2.29 to<br>3.97)     | 6.33<br>(3.44 to<br>11.43)      | 4.57<br>(2.64 to<br>7.68)       | 9.54<br>(4.63 to<br>18.58)      | 0.09<br>(0.07 to<br>0.11) | 0.19<br>(0.10 to<br>0.34) | 0.14<br>(0.08 to<br>0.23) | 0.28<br>(0.14 to<br>0.53)  |
| Other pharynx cancer                 | 2.55<br>(1.96 to<br>3.27)     | 4.52<br>(2.95 to<br>6.68)       | 4.11<br>(2.81 to<br>5.95)       | 4.97<br>(3.12 to<br>7.67)       | 0.08<br>(0.06 to<br>0.10) | 0.16<br>(0.10 to<br>0.23) | 0.15<br>(0.10 to<br>0.21) | 0.17<br>(0.11 to<br>0.26)  |
| Esophageal cancer                    | 4.92<br>(3.73 to<br>6.21)     | 9.34<br>(5.44 to<br>15.85)      | 7.46<br>(4.52 to<br>12.27)      | 13.18<br>(6.98 to<br>23.99)     | 0.18<br>(0.14 to<br>0.23) | 0.36<br>(0.21 to<br>0.61) | 0.30<br>(0.19 to<br>0.48) | 0.48<br>(0.26 to<br>0.86)  |
| Stomach cancer                       | 20.80<br>(16.02 to<br>26.04)  | 30.22<br>(21.84 to<br>40.92)    | 26.86<br>(19.52 to<br>35.90)    | 32.96<br>(23.38 to<br>45.50)    | 0.75<br>(0.59 to<br>0.92) | 1.17<br>(0.88 to<br>1.55) | 1.08<br>(0.83 to<br>1.37) | 1.22<br>(0.90 to<br>1.59)  |
| Colon and rectum cancer              | 29.63<br>(22.94 to<br>37.15)  | 78.08<br>(50.37 to<br>120.26)   | 77.22<br>(50.94 to<br>118.05)   | 77.39<br>(48.90 to<br>120.10)   | 1.08<br>(0.86 to<br>1.31) | 3.05<br>(2.17 to<br>4.68) | 3.13<br>(2.10 to<br>4.72) | 2.89<br>(1.88 to<br>4.40)  |
| Liver cancer                         | 17.19<br>(13.35 to<br>21.46)  | 43.87<br>(28.59 to<br>66.25)    | 39.80<br>(27.08 to<br>59.27)    | 53.33<br>(32.39 to<br>86.43)    | 0.63<br>(0.50 to<br>0.78) | 1.75<br>(1.17 to<br>2.58) | 1.65<br>(1.14 to<br>2.38) | 2.02<br>(1.25 to<br>3.17)  |
| Liver cancer due to hepatitis B      | 6.96<br>(4.79 to<br>9.56)     | 17.00<br>(10.05 to<br>26.98)    | 15.40<br>(9.39 to<br>23.80)     | 20.93<br>(11.52 to<br>35.46)    | 0.23<br>(0.16 to<br>0.31) | 0.60<br>(0.36 to<br>0.95) | 0.56<br>(0.35 to<br>0.85) | 0.71<br>(0.40 to<br>1.19)  |
| Liver cancer due to hepatitis C      | 4.94<br>(3.39 to<br>6.78)     | 13.05<br>(7.87 to<br>20.99)     | 12.23<br>(7.62 to<br>19.22)     | 15.30<br>(8.59 to<br>25.68)     | 0.21<br>(0.15 to<br>0.29) | 0.60<br>(0.37 to<br>0.94) | 0.59<br>(0.38 to<br>0.89) | 0.66<br>(0.39 to<br>1.08)  |
| Liver cancer due to alcohol use      | 1.16<br>(0.73 to<br>1.78)     | 3.17<br>(1.67 to<br>5.82)       | 2.79<br>(1.53 to<br>4.92)       | 3.99<br>(1.95 to<br>7.72)       | 0.05<br>(0.03 to<br>0.07) | 0.13<br>(0.07 to<br>0.23) | 0.12<br>(0.06 to<br>0.21) | 0.16<br>(0.08 to<br>0.29)  |
| Liver cancer due to other causes     | 4.13<br>(2.80 to<br>5.93)     | 10.65<br>(5.69 to<br>18.36)     | 9.38<br>(5.24 to<br>15.57)      | 13.12<br>(6.62 to<br>23.51)     | 0.15<br>(0.10 to<br>0.21) | 0.41<br>(0.22 to<br>0.70) | 0.38<br>(0.21 to<br>0.62) | 0.48<br>(0.24 to<br>0.85)  |
| Gallbladder and biliary tract cancer | 4.20<br>(3.26 to<br>5.34)     | 6.53<br>(5.13 to<br>8.17)       | 6.85<br>(5.38 to<br>8.62)       | 6.11<br>(4.76 to<br>7.68)       | 0.16<br>(0.13 to<br>0.21) | 0.27<br>(0.22 to<br>0.34) | 0.29<br>(0.24 to<br>0.37) | 0.24<br>(0.19 to<br>0.31)  |
| Pancreatic cancer                    | 14.57<br>(11.30 to<br>18.11)  | 41.12<br>(28.10 to<br>58.49)    | 41.02<br>(29.06 to<br>56.13)    | 41.20<br>(27.46 to<br>59.59)    | 0.58<br>(0.46 to<br>0.70) | 1.70<br>(1.21 to<br>2.36) | 1.76<br>(1.29 to<br>2.36) | 1.62<br>(1.11 to<br>2.29)  |
| Larynx cancer                        | 10.91<br>(8.20 to<br>14.16)   | 21.04<br>(9.38 to<br>46.75)     | 14.07<br>(6.77 to<br>30.19)     | 34.22<br>(14.30 to<br>76.05)    | 0.40<br>(0.30 to<br>0.50) | 0.78<br>(0.36 to<br>1.69) | 0.54<br>(0.27 to<br>1.10) | 1.23<br>(0.54 to<br>2.63)  |
| Tracheal, bronchus, and lung cancer  | 53.43<br>(40.86 to<br>67.49)  | 131.85<br>(74.13 to<br>224.62)  | 93.79<br>(57.28 to<br>151.39)   | 200.89<br>(105.94 to<br>349.31) | 2.11<br>(1.63 to<br>2.60) | 5.35<br>(3.14 to<br>8.46) | 3.96<br>(2.51 to<br>5.98) | 7.80<br>(4.27 to<br>12.80) |
| Malignant skin melanoma              | 1.75<br>(1.29 to<br>2.30)     | 4.06<br>(3.02 to<br>5.30)       | 4.51<br>(3.32 to<br>5.94)       | 3.61<br>(2.66 to<br>4.75)       | 0.06<br>(0.04 to<br>0.07) | 0.14<br>(0.11 to<br>0.17) | 0.16<br>(0.12 to<br>0.20) | 0.12<br>(0.09 to<br>0.15)  |
| Non-melanoma skin cancer             | 2.31<br>(1.71 to<br>2.96)     | 5.42<br>(4.18 to<br>6.82)       | 5.18<br>(3.98 to<br>6.56)       | 5.55<br>(4.27 to<br>6.96)       | 0.08<br>(0.06 to<br>0.10) | 0.20<br>(0.17 to<br>0.24) | 0.20<br>(0.16 to<br>0.25) | 0.20<br>(0.16 to<br>0.24)  |
| Breast cancer                        | 91.53<br>(61.49 to<br>129.70) | 195.92<br>(123.85 to<br>292.85) | 186.12<br>(118.35 to<br>275.34) | 204.69<br>(127.41 to<br>317.92) | 2.69<br>(1.86 to<br>3.71) | 6.27<br>(4.08 to<br>9.25) | 6.08<br>(4.01 to<br>8.73) | 6.39<br>(4.09 to<br>9.67)  |
| Cervical cancer                      | 5.37<br>(3.37 to<br>7.65)     | 8.18<br>(5.06 to<br>12.68)      | 7.46<br>(4.58 to<br>11.47)      | 9.09<br>(5.48 to<br>14.30)      | 0.16<br>(0.11 to<br>0.23) | 0.27<br>(0.18 to<br>0.39) | 0.25<br>(0.17 to<br>0.37) | 0.29<br>(0.19 to<br>0.43)  |
| Uterine cancer                       | 5.51<br>(3.84 to<br>7.76)     | 10.57<br>(7.24 to<br>14.86)     | 9.71<br>(6.74 to<br>13.53)      | 11.50<br>(8.03 to<br>16.12)     | 0.19<br>(0.13 to<br>0.26) | 0.39<br>(0.28 to<br>0.52) | 0.36<br>(0.26 to<br>0.49) | 0.41<br>(0.30 to<br>0.55)  |
| Ovarian cancer                       | 10.07<br>(6.53 to<br>14.44)   | 23.29<br>(14.61 to<br>36.39)    | 24.12<br>(15.26 to<br>36.81)    | 22.41<br>(13.71 to<br>35.79)    | 0.31<br>(0.21 to<br>0.44) | 0.78<br>(0.50 to<br>1.21) | 0.83<br>(0.54 to<br>1.24) | 0.74<br>(0.46 to<br>1.16)  |
| Prostate cancer                      | 7.34<br>(5.11 to<br>10.18)    | 22.73<br>(16.67 to<br>31.20)    | 24.94<br>(18.22 to<br>34.44)    | 19.69<br>(14.25 to<br>27.25)    | 0.42<br>(0.29 to<br>0.62) | 1.33<br>(0.96 to<br>1.97) | 1.52<br>(1.12 to<br>2.26) | 1.09<br>(0.74 to<br>1.63)  |

|                                 |                                                      |                                                      |                                                      |                                                      |                                             |                                               |                                              |                                                |
|---------------------------------|------------------------------------------------------|------------------------------------------------------|------------------------------------------------------|------------------------------------------------------|---------------------------------------------|-----------------------------------------------|----------------------------------------------|------------------------------------------------|
| Testicular cancer               | 3.86<br>(2.48 to<br>5.41)                            | 5.64<br>(3.46 to<br>8.31)                            | 5.30<br>(3.24 to<br>7.91)                            | 5.97<br>(3.73 to<br>8.80)                            | 0.08<br>(0.05 to<br>0.11)                   | 0.12<br>(0.07 to<br>0.17)                     | 0.11<br>(0.07 to<br>0.16)                    | 0.12<br>(0.08 to<br>0.17)                      |
| <b>Iraq</b>                     |                                                      |                                                      |                                                      |                                                      |                                             |                                               |                                              |                                                |
| Cause                           | YLLs (in 1000s)                                      |                                                      |                                                      |                                                      | Deaths (in 1000s)                           |                                               |                                              |                                                |
|                                 | 2016                                                 | 2040 Forecast                                        | 2040 Better Scenario                                 | 2040 Worse Scenario                                  | 2016                                        | 2040 Forecast                                 | 2040 Better Scenario                         | 2040 Worse Scenario                            |
| Kidney cancer                   | 7.22<br>(5.71 to<br>8.88)                            | 18.20<br>(12.80 to<br>25.61)                         | 19.06<br>(13.75 to<br>26.37)                         | 17.59<br>(12.07 to<br>25.78)                         | 0.23<br>(0.18 to<br>0.28)                   | 0.66<br>(0.48 to<br>0.88)                     | 0.72<br>(0.53 to<br>0.95)                    | 0.60<br>(0.42 to<br>0.86)                      |
| Bladder cancer                  | 19.98<br>(15.05 to<br>25.10)                         | 45.45<br>(29.64 to<br>70.03)                         | 42.14<br>(28.73 to<br>61.44)                         | 49.30<br>(30.89 to<br>79.59)                         | 0.89<br>(0.68 to<br>1.09)                   | 2.11<br>(1.44 to<br>3.15)                     | 2.04<br>(1.45 to<br>2.87)                    | 2.15<br>(1.40 to<br>3.34)                      |
| Brain and nervous system cancer | 53.81<br>(41.76 to<br>67.01)                         | 114.30<br>(88.51 to<br>141.93)                       | 114.34<br>(86.82 to<br>143.56)                       | 113.15<br>(87.42 to<br>139.65)                       | 1.19<br>(0.94 to<br>1.47)                   | 2.98<br>(2.38 to<br>3.59)                     | 3.10<br>(2.47 to<br>3.73)                    | 2.81<br>(2.25 to<br>3.36)                      |
| Thyroid cancer                  | 6.55<br>(4.53 to<br>8.55)                            | 11.07<br>(6.99 to<br>17.10)                          | 9.98<br>(6.43 to<br>15.22)                           | 12.96<br>(7.97 to<br>20.45)                          | 0.19<br>(0.14 to<br>0.24)                   | 0.36<br>(0.24 to<br>0.53)                     | 0.33<br>(0.22 to<br>0.49)                    | 0.41<br>(0.26 to<br>0.62)                      |
| Mesothelioma                    | 1.63<br>(1.17 to<br>2.15)                            | 3.78<br>(2.75 to<br>4.86)                            | 3.84<br>(2.75 to<br>4.96)                            | 3.68<br>(2.72 to<br>4.69)                            | 0.05<br>(0.04 to<br>0.07)                   | 0.13<br>(0.10 to<br>0.16)                     | 0.14<br>(0.10 to<br>0.17)                    | 0.12<br>(0.09 to<br>0.15)                      |
| Hodgkin lymphoma                | 10.57<br>(6.07 to<br>14.16)                          | 12.10<br>(7.14 to<br>17.06)                          | 10.22<br>(6.13 to<br>14.71)                          | 14.34<br>(8.19 to<br>20.07)                          | 0.21<br>(0.13 to<br>0.28)                   | 0.27<br>(0.18 to<br>0.37)                     | 0.23<br>(0.15 to<br>0.32)                    | 0.31<br>(0.20 to<br>0.42)                      |
| Non-Hodgkin lymphoma            | 35.00<br>(27.67 to<br>43.48)                         | 72.80<br>(54.55 to<br>94.39)                         | 73.25<br>(54.67 to<br>95.42)                         | 73.03<br>(53.74 to<br>95.03)                         | 0.90<br>(0.71 to<br>1.11)                   | 2.17<br>(1.68 to<br>2.79)                     | 2.27<br>(1.76 to<br>2.87)                    | 2.08<br>(1.57 to<br>2.71)                      |
| Multiple myeloma                | 3.27<br>(2.49 to<br>4.13)                            | 10.21<br>(7.45 to<br>13.94)                          | 10.73<br>(7.91 to<br>14.54)                          | 9.81<br>(6.97 to<br>13.63)                           | 0.12<br>(0.09 to<br>0.15)                   | 0.39<br>(0.29 to<br>0.53)                     | 0.42<br>(0.32 to<br>0.56)                    | 0.36<br>(0.26 to<br>0.50)                      |
| Leukemia                        | 69.24<br>(54.35 to<br>84.05)                         | 102.68<br>(75.73 to<br>135.76)                       | 93.18<br>(69.12 to<br>123.39)                        | 117.45<br>(84.59 to<br>157.69)                       | 1.48<br>(1.18 to<br>1.83)                   | 2.76<br>(2.04 to<br>3.68)                     | 2.61<br>(1.98 to<br>3.44)                    | 3.03<br>(2.17 to<br>4.16)                      |
| Acute lymphoid leukemia         | 11.29<br>(8.04 to<br>14.78)                          | 14.85<br>(10.36 to<br>20.28)                         | 13.77<br>(9.60 to<br>18.81)                          | 16.26<br>(11.23 to<br>22.53)                         | 0.18<br>(0.13 to<br>0.23)                   | 0.28<br>(0.19 to<br>0.40)                     | 0.27<br>(0.19 to<br>0.37)                    | 0.30<br>(0.21 to<br>0.43)                      |
| Chronic lymphoid leukemia       | 1.25<br>(0.78 to<br>2.07)                            | 2.49<br>(1.54 to<br>4.21)                            | 2.40<br>(1.52 to<br>3.92)                            | 2.70<br>(1.60 to<br>4.73)                            | 0.04<br>(0.03 to<br>0.06)                   | 0.09<br>(0.06 to<br>0.14)                     | 0.09<br>(0.06 to<br>0.14)                    | 0.10<br>(0.06 to<br>0.15)                      |
| Acute myeloid leukemia          | 9.45<br>(6.78 to<br>13.54)                           | 19.40<br>(13.06 to<br>29.69)                         | 19.10<br>(12.79 to<br>29.07)                         | 20.36<br>(13.34 to<br>31.58)                         | 0.19<br>(0.14 to<br>0.28)                   | 0.47<br>(0.32 to<br>0.73)                     | 0.48<br>(0.33 to<br>0.73)                    | 0.48<br>(0.32 to<br>0.76)                      |
| Chronic myeloid leukemia        | 4.08<br>(2.24 to<br>6.01)                            | 5.76<br>(3.03 to<br>9.14)                            | 5.38<br>(2.83 to<br>8.41)                            | 6.39<br>(3.28 to<br>10.32)                           | 0.12<br>(0.07 to<br>0.16)                   | 0.18<br>(0.10 to<br>0.27)                     | 0.17<br>(0.10 to<br>0.26)                    | 0.19<br>(0.10 to<br>0.30)                      |
| Other leukemia                  | 43.16<br>(32.22 to<br>54.72)                         | 60.17<br>(43.03 to<br>81.74)                         | 52.52<br>(37.41 to<br>71.00)                         | 71.73<br>(51.02 to<br>97.82)                         | 0.96<br>(0.73 to<br>1.18)                   | 1.73<br>(1.28 to<br>2.29)                     | 1.59<br>(1.18 to<br>2.11)                    | 1.96<br>(1.40 to<br>2.64)                      |
| Other neoplasms                 | 54.33<br>(43.19 to<br>65.76)                         | 100.15<br>(79.38 to<br>123.05)                       | 98.68<br>(78.14 to<br>120.65)                        | 101.14<br>(80.34 to<br>122.60)                       | 1.25<br>(0.99 to<br>1.52)                   | 2.72<br>(2.23 to<br>3.22)                     | 2.80<br>(2.30 to<br>3.32)                    | 2.60<br>(2.14 to<br>3.09)                      |
| <b>Cardiovascular diseases</b>  | <b>1,885.03</b><br>(1,518.88 to<br><b>2,280.38</b> ) | <b>2,719.69</b><br>(1,756.19 to<br><b>4,166.20</b> ) | <b>1,697.65</b><br>(1,148.11 to<br><b>2,545.77</b> ) | <b>4,526.85</b><br>(2,845.29 to<br><b>6,585.50</b> ) | <b>77.56</b><br>(64.22 to<br><b>91.85</b> ) | <b>123.70</b><br>(86.00 to<br><b>176.26</b> ) | <b>83.30</b><br>(60.26 to<br><b>116.67</b> ) | <b>188.92</b><br>(130.35 to<br><b>264.09</b> ) |
| Rheumatic heart disease         | 36.64<br>(28.31 to<br>45.77)                         | 27.20<br>(18.79 to<br>39.06)                         | 21.81<br>(15.22 to<br>31.26)                         | 33.23<br>(22.63 to<br>48.78)                         | 0.97<br>(0.77 to<br>1.20)                   | 0.89<br>(0.65 to<br>1.24)                     | 0.75<br>(0.56 to<br>1.03)                    | 1.01<br>(0.72 to<br>1.41)                      |
| Ischemic heart disease          | 1,070.48<br>(842.78 to<br>1,313.83)                  | 1,568.03<br>(853.06 to<br>2,875.49)                  | 886.61<br>(495.30 to<br>1,610.08)                    | 2,820.67<br>(1,525.45 to<br>4,546.69)                | 48.25<br>(39.23 to<br>57.14)                | 74.14<br>(43.52 to<br>122.33)                 | 45.95<br>(27.67 to<br>77.60)                 | 121.17<br>(70.55 to<br>193.69)                 |
| Stroke                          | 425.15<br>(342.47 to<br>517.89)                      | 542.62<br>(302.10 to<br>954.69)                      | 309.39<br>(179.18 to<br>574.99)                      | 978.41<br>(543.99 to<br>1,617.95)                    | 17.08<br>(14.06 to<br>20.29)                | 24.76<br>(14.42 to<br>45.77)                  | 15.58<br>(9.34 to<br>33.31)                  | 40.35<br>(23.46 to<br>69.54)                   |



|                                               |                                                      |                                                      |                                                      |                                                      |                                                |                                                 |                                                |                                                  |
|-----------------------------------------------|------------------------------------------------------|------------------------------------------------------|------------------------------------------------------|------------------------------------------------------|------------------------------------------------|-------------------------------------------------|------------------------------------------------|--------------------------------------------------|
| Ischemic stroke                               | 172.34<br>(139.80 to<br>208.49)                      | 238.67<br>(116.08 to<br>553.45)                      | 148.72<br>(75.76 to<br>386.49)                       | 382.06<br>(186.53 to<br>813.15)                      | 8.64<br>(7.19 to<br>10.23)                     | 12.99<br>(6.35 to<br>31.76)                     | 8.89<br>(4.55 to<br>24.91)                     | 18.96<br>(9.25 to<br>43.12)                      |
| Intracerebral hemorrhage                      | 252.81<br>(202.07 to<br>312.90)                      | 303.95<br>(156.68 to<br>574.72)                      | 160.67<br>(88.78 to<br>293.52)                       | 596.36<br>(311.40 to<br>1,095.58)                    | 8.44<br>(6.87 to<br>10.23)                     | 11.77<br>(6.53 to<br>21.80)                     | 6.68<br>(3.87 to<br>11.78)                     | 21.40<br>(11.44 to<br>38.90)                     |
| Hypertensive heart disease                    | 60.22<br>(40.25 to<br>79.47)                         | 117.20<br>(60.67 to<br>229.34)                       | 83.38<br>(47.29 to<br>145.22)                        | 156.41<br>(79.23 to<br>313.82)                       | 2.60<br>(1.73 to<br>3.38)                      | 5.64<br>(2.90 to<br>11.75)                      | 4.27<br>(2.41 to<br>7.72)                      | 7.04<br>(3.55 to<br>14.20)                       |
| Cardiomyopathy and myocarditis                | 76.07<br>(55.44 to<br>99.43)                         | 100.35<br>(68.73 to<br>143.28)                       | 92.14<br>(63.93 to<br>130.72)                        | 107.14<br>(73.63 to<br>152.73)                       | 1.59<br>(1.24 to<br>2.01)                      | 2.78<br>(1.87 to<br>4.06)                       | 2.69<br>(1.81 to<br>3.94)                      | 2.77<br>(1.89 to<br>4.04)                        |
| Myocarditis                                   | 28.60<br>(19.38 to<br>40.54)                         | 29.21<br>(21.07 to<br>40.95)                         | 26.48<br>(18.84 to<br>37.31)                         | 32.59<br>(23.21 to<br>45.36)                         | 0.50<br>(0.37 to<br>0.66)                      | 0.65<br>(0.47 to<br>0.94)                       | 0.62<br>(0.44 to<br>0.94)                      | 0.68<br>(0.50 to<br>0.96)                        |
| <b>Iraq</b>                                   |                                                      |                                                      |                                                      |                                                      |                                                |                                                 |                                                |                                                  |
| Cause                                         | YLLs (in 1000s)                                      |                                                      |                                                      |                                                      | Deaths (in 1000s)                              |                                                 |                                                |                                                  |
|                                               | 2016                                                 | 2040 Forecast                                        | 2040 Better Scenario                                 | 2040 Worse Scenario                                  | 2016                                           | 2040 Forecast                                   | 2040 Better Scenario                           | 2040 Worse Scenario                              |
| Alcoholic cardiomyopathy                      | 2.41<br>(1.64 to<br>3.38)                            | 4.68<br>(3.11 to<br>6.55)                            | 4.80<br>(3.12 to<br>6.79)                            | 4.52<br>(3.04 to<br>6.28)                            | 0.08<br>(0.05 to<br>0.11)                      | 0.16<br>(0.11 to<br>0.24)                       | 0.17<br>(0.12 to<br>0.26)                      | 0.15<br>(0.10 to<br>0.21)                        |
| Other cardiomyopathy                          | 45.07<br>(32.49 to<br>60.99)                         | 66.46<br>(41.94 to<br>103.67)                        | 60.87<br>(38.75 to<br>93.17)                         | 70.04<br>(44.44 to<br>108.92)                        | 1.01<br>(0.79 to<br>1.33)                      | 1.97<br>(1.22 to<br>3.06)                       | 1.89<br>(1.18 to<br>2.95)                      | 1.94<br>(1.22 to<br>2.97)                        |
| Atrial fibrillation and flutter               | 3.57<br>(2.70 to<br>4.59)                            | 9.23<br>(6.45 to<br>12.37)                           | 9.35<br>(6.69 to<br>12.20)                           | 8.62<br>(5.84 to<br>11.74)                           | 0.30<br>(0.22 to<br>0.39)                      | 0.80<br>(0.49 to<br>1.14)                       | 0.87<br>(0.54 to<br>1.20)                      | 0.69<br>(0.40 to<br>1.02)                        |
| Aortic aneurysm                               | 15.76<br>(12.21 to<br>19.76)                         | 30.84<br>(23.61 to<br>39.73)                         | 29.24<br>(22.91 to<br>36.85)                         | 31.68<br>(23.74 to<br>41.02)                         | 0.69<br>(0.56 to<br>0.83)                      | 1.48<br>(1.14 to<br>1.83)                       | 1.50<br>(1.19 to<br>1.82)                      | 1.40<br>(1.06 to<br>1.76)                        |
| Peripheral artery disease                     | 0.25<br>(0.17 to<br>0.33)                            | 1.00<br>(0.64 to<br>1.44)                            | 0.98<br>(0.63 to<br>1.39)                            | 0.95<br>(0.58 to<br>1.43)                            | 0.02<br>(0.01 to<br>0.02)                      | 0.07<br>(0.04 to<br>0.10)                       | 0.07<br>(0.04 to<br>0.11)                      | 0.06<br>(0.03 to<br>0.09)                        |
| Endocarditis                                  | 34.61<br>(25.32 to<br>45.84)                         | 52.70<br>(37.33 to<br>75.03)                         | 47.56<br>(33.70 to<br>67.53)                         | 58.45<br>(41.14 to<br>82.98)                         | 0.97<br>(0.75 to<br>1.26)                      | 1.99<br>(1.37 to<br>2.80)                       | 1.95<br>(1.34 to<br>2.77)                      | 2.00<br>(1.36 to<br>2.80)                        |
| Other cardiovascular and circulatory diseases | 162.28<br>(119.89 to<br>223.72)                      | 270.53<br>(190.92 to<br>383.83)                      | 217.18<br>(154.32 to<br>302.43)                      | 331.27<br>(230.36 to<br>468.26)                      | 5.10<br>(3.96 to<br>6.92)                      | 11.15<br>(8.17 to<br>15.48)                     | 9.68<br>(7.10 to<br>13.07)                     | 12.43<br>(8.83 to<br>17.64)                      |
| <b>Chronic respiratory diseases</b>           | <b>137.45</b><br><b>(102.83 to</b><br><b>170.58)</b> | <b>201.58</b><br><b>(134.78 to</b><br><b>285.86)</b> | <b>159.09</b><br><b>(110.10 to</b><br><b>215.12)</b> | <b>282.69</b><br><b>(178.14 to</b><br><b>424.28)</b> | <b>5.41</b><br><b>(4.23 to</b><br><b>6.56)</b> | <b>8.68</b><br><b>(5.98 to</b><br><b>12.15)</b> | <b>7.23</b><br><b>(5.19 to</b><br><b>9.64)</b> | <b>11.46</b><br><b>(7.56 to</b><br><b>16.61)</b> |
| Chronic obstructive pulmonary disease         | 58.29<br>(43.15 to<br>74.31)                         | 99.24<br>(55.28 to<br>164.72)                        | 68.67<br>(40.88 to<br>107.91)                        | 158.17<br>(83.64 to<br>273.15)                       | 2.81<br>(2.22 to<br>3.44)                      | 4.89<br>(2.95 to<br>7.75)                       | 3.70<br>(2.34 to<br>5.51)                      | 7.13<br>(4.07 to<br>11.55)                       |
| Pneumoconiosis                                | 0.41<br>(0.25 to<br>0.62)                            | 0.57<br>(0.35 to<br>0.82)                            | 0.56<br>(0.35 to<br>0.82)                            | 0.59<br>(0.35 to<br>0.86)                            | 0.02<br>(0.01 to<br>0.02)                      | 0.03<br>(0.02 to<br>0.04)                       | 0.03<br>(0.02 to<br>0.04)                      | 0.03<br>(0.02 to<br>0.04)                        |
| Silicosis                                     | 0.02<br>(0.01 to<br>0.03)                            | 0.03<br>(0.02 to<br>0.05)                            | 0.03<br>(0.01 to<br>0.05)                            | 0.03<br>(0.02 to<br>0.06)                            | 0.00<br>(0.00 to<br>0.00)                      | 0.00<br>(0.00 to<br>0.00)                       | 0.00<br>(0.00 to<br>0.00)                      | 0.00<br>(0.00 to<br>0.00)                        |
| Asbestosis                                    | 0.11<br>(0.06 to<br>0.16)                            | 0.18<br>(0.10 to<br>0.28)                            | 0.19<br>(0.10 to<br>0.28)                            | 0.18<br>(0.10 to<br>0.28)                            | 0.00<br>(0.00 to<br>0.00)                      | 0.01<br>(0.00 to<br>0.01)                       | 0.01<br>(0.00 to<br>0.01)                      | 0.01<br>(0.00 to<br>0.01)                        |
| Coal workers pneumoconiosis                   | 0.02<br>(0.01 to<br>0.03)                            | 0.03<br>(0.01 to<br>0.05)                            | 0.02<br>(0.01 to<br>0.04)                            | 0.03<br>(0.01 to<br>0.06)                            | 0.00<br>(0.00 to<br>0.00)                      | 0.00<br>(0.00 to<br>0.00)                       | 0.00<br>(0.00 to<br>0.00)                      | 0.00<br>(0.00 to<br>0.00)                        |
| Other pneumoconiosis                          | 0.27<br>(0.16 to<br>0.39)                            | 0.33<br>(0.20 to<br>0.49)                            | 0.32<br>(0.20 to<br>0.48)                            | 0.34<br>(0.20 to<br>0.51)                            | 0.01<br>(0.01 to<br>0.02)                      | 0.02<br>(0.01 to<br>0.03)                       | 0.02<br>(0.01 to<br>0.03)                      | 0.02<br>(0.01 to<br>0.02)                        |
| Asthma                                        | 46.27<br>(32.13 to<br>60.34)                         | 40.14<br>(22.00 to<br>66.18)                         | 31.31<br>(17.15 to<br>50.78)                         | 57.35<br>(30.46 to<br>95.96)                         | 1.58<br>(1.16 to<br>2.01)                      | 1.56<br>(0.86 to<br>2.57)                       | 1.28<br>(0.74 to<br>2.08)                      | 2.08<br>(1.12 to<br>3.49)                        |

|                                                                |                                                    |                                                     |                                                     |                                                      |                                                |                                                |                                                |                                                |
|----------------------------------------------------------------|----------------------------------------------------|-----------------------------------------------------|-----------------------------------------------------|------------------------------------------------------|------------------------------------------------|------------------------------------------------|------------------------------------------------|------------------------------------------------|
| Interstitial lung disease and pulmonary sarcoidosis            | 3.32<br>(2.27 to<br>4.62)                          | 8.79<br>(6.14 to<br>12.44)                          | 9.90<br>(6.73 to<br>14.43)                          | 7.75<br>(5.34 to<br>10.79)                           | 0.12<br>(0.08 to<br>0.19)                      | 0.36<br>(0.24 to<br>0.59)                      | 0.43<br>(0.28 to<br>0.71)                      | 0.30<br>(0.20 to<br>0.49)                      |
| Other chronic respiratory diseases                             | 29.15<br>(20.19 to<br>39.43)                       | 52.85<br>(34.78 to<br>75.37)                        | 48.66<br>(32.42 to<br>68.40)                        | 58.83<br>(37.45 to<br>87.03)                         | 0.87<br>(0.58 to<br>1.18)                      | 1.84<br>(1.17 to<br>2.59)                      | 1.79<br>(1.17 to<br>2.46)                      | 1.92<br>(1.18 to<br>2.79)                      |
| <b>Cirrhosis and other chronic liver diseases</b>              | <b>70.63</b><br><b>(55.08 to</b><br><b>88.80)</b>  | <b>122.90</b><br><b>(96.49 to</b><br><b>155.52)</b> | <b>114.82</b><br><b>(89.43 to</b><br><b>146.41)</b> | <b>130.23</b><br><b>(102.80 to</b><br><b>164.26)</b> | <b>1.92</b><br><b>(1.50 to</b><br><b>2.39)</b> | <b>3.84</b><br><b>(3.11 to</b><br><b>4.71)</b> | <b>3.70</b><br><b>(2.97 to</b><br><b>4.58)</b> | <b>3.92</b><br><b>(3.18 to</b><br><b>4.82)</b> |
| Cirrhosis and other chronic liver diseases due to hepatitis B  | 19.26<br>(13.39 to<br>26.91)                       | 37.01<br>(27.42 to<br>52.79)                        | 37.01<br>(25.50 to<br>50.91)                        | 39.93<br>(28.30 to<br>54.11)                         | 0.60<br>(0.43 to<br>0.81)                      | 1.28<br>(0.94 to<br>1.70)                      | 1.25<br>(0.91 to<br>1.69)                      | 1.28<br>(0.94 to<br>1.70)                      |
| Cirrhosis and other chronic liver diseases due to hepatitis C  | 21.07<br>(14.77 to<br>29.29)                       | 42.94<br>(29.97 to<br>59.28)                        | 40.84<br>(29.00 to<br>56.41)                        | 44.47<br>(31.44 to<br>61.24)                         | 0.65<br>(0.46 to<br>0.89)                      | 1.41<br>(1.03 to<br>1.88)                      | 1.37<br>(1.00 to<br>1.83)                      | 1.42<br>(1.04 to<br>1.90)                      |
| Cirrhosis and other chronic liver diseases due to alcohol use  | 4.09<br>(2.99 to<br>5.47)                          | 7.74<br>(5.79 to<br>10.35)                          | 6.98<br>(5.04 to<br>9.45)                           | 8.46<br>(6.27 to<br>11.30)                           | 0.13<br>(0.10 to<br>0.17)                      | 0.26<br>(0.20 to<br>0.34)                      | 0.25<br>(0.18 to<br>0.32)                      | 0.28<br>(0.21 to<br>0.36)                      |
| Cirrhosis and other chronic liver diseases due to other causes | 26.21<br>(20.32 to<br>32.84)                       | 33.47<br>(26.08 to<br>42.56)                        | 29.99<br>(22.75 to<br>38.16)                        | 37.36<br>(29.06 to<br>47.41)                         | 0.54<br>(0.44 to<br>0.67)                      | 0.89<br>(0.70 to<br>1.11)                      | 0.83<br>(0.65 to<br>1.06)                      | 0.93<br>(0.75 to<br>1.17)                      |
| <b>Digestive diseases</b>                                      | <b>59.59</b><br><b>(38.54 to</b><br><b>100.62)</b> | <b>54.57</b><br><b>(40.43 to</b><br><b>74.28)</b>   | <b>47.65</b><br><b>(35.36 to</b><br><b>64.51)</b>   | <b>63.93</b><br><b>(46.25 to</b><br><b>88.69)</b>    | <b>1.31</b><br><b>(0.99 to</b><br><b>1.78)</b> | <b>1.80</b><br><b>(1.32 to</b><br><b>2.74)</b> | <b>1.70</b><br><b>(1.25 to</b><br><b>2.63)</b> | <b>1.94</b><br><b>(1.39 to</b><br><b>2.90)</b> |
| Peptic ulcer disease                                           | 7.73<br>(5.33 to<br>11.91)                         | 7.03<br>(4.64 to<br>11.02)                          | 5.76<br>(3.68 to<br>9.14)                           | 8.77<br>(5.60 to<br>14.13)                           | 0.25<br>(0.18 to<br>0.40)                      | 0.27<br>(0.18 to<br>0.45)                      | 0.23<br>(0.15 to<br>0.37)                      | 0.32<br>(0.21 to<br>0.53)                      |

| Iraq                                       |                                                    |                                                      |                                                      |                                                      |                                                |                                                  |                                                   |                                                  |
|--------------------------------------------|----------------------------------------------------|------------------------------------------------------|------------------------------------------------------|------------------------------------------------------|------------------------------------------------|--------------------------------------------------|---------------------------------------------------|--------------------------------------------------|
| Cause                                      | YLLs (in 1000s)                                    |                                                      |                                                      |                                                      | Deaths (in 1000s)                              |                                                  |                                                   |                                                  |
|                                            | 2016                                               | 2040 Forecast                                        | 2040 Better Scenario                                 | 2040 Worse Scenario                                  | 2016                                           | 2040 Forecast                                    | 2040 Better Scenario                              | 2040 Worse Scenario                              |
| Gastritis and duodenitis                   | 0.21<br>(0.15 to<br>0.29)                          | 0.35<br>(0.25 to<br>0.52)                            | 0.32<br>(0.23 to<br>0.49)                            | 0.38<br>(0.27 to<br>0.55)                            | 0.01<br>(0.01 to<br>0.01)                      | 0.01<br>(0.01 to<br>0.02)                        | 0.01<br>(0.01 to<br>0.02)                         | 0.01<br>(0.01 to<br>0.02)                        |
| Appendicitis                               | 3.95<br>(2.53 to<br>6.98)                          | 3.46<br>(2.43 to<br>4.97)                            | 2.87<br>(1.98 to<br>4.20)                            | 4.19<br>(2.86 to<br>6.13)                            | 0.08<br>(0.06 to<br>0.12)                      | 0.09<br>(0.07 to<br>0.14)                        | 0.08<br>(0.06 to<br>0.13)                         | 0.10<br>(0.07 to<br>0.16)                        |
| Paralytic ileus and intestinal obstruction | 29.29<br>(11.81 to<br>68.80)                       | 19.65<br>(12.85 to<br>31.69)                         | 17.24<br>(11.55 to<br>25.68)                         | 23.05<br>(14.16 to<br>39.86)                         | 0.50<br>(0.30 to<br>0.92)                      | 0.58<br>(0.39 to<br>1.00)                        | 0.57<br>(0.39 to<br>1.02)                         | 0.59<br>(0.40 to<br>0.96)                        |
| Inguinal, femoral, and abdominal hernia    | 0.72<br>(0.51 to<br>0.94)                          | 0.74<br>(0.43 to<br>1.01)                            | 0.68<br>(0.39 to<br>0.94)                            | 0.80<br>(0.48 to<br>1.10)                            | 0.02<br>(0.01 to<br>0.03)                      | 0.03<br>(0.01 to<br>0.04)                        | 0.03<br>(0.01 to<br>0.04)                         | 0.03<br>(0.01 to<br>0.04)                        |
| Inflammatory bowel disease                 | 5.28<br>(2.47 to<br>10.34)                         | 5.27<br>(3.69 to<br>7.56)                            | 4.85<br>(3.48 to<br>6.82)                            | 5.76<br>(3.79 to<br>8.88)                            | 0.09<br>(0.06 to<br>0.15)                      | 0.13<br>(0.09 to<br>0.18)                        | 0.12<br>(0.09 to<br>0.19)                         | 0.13<br>(0.09 to<br>0.18)                        |
| Vascular intestinal disorders              | 1.57<br>(1.16 to<br>2.44)                          | 3.29<br>(2.40 to<br>5.17)                            | 3.25<br>(2.39 to<br>5.05)                            | 3.26<br>(2.37 to<br>5.21)                            | 0.07<br>(0.05 to<br>0.11)                      | 0.17<br>(0.12 to<br>0.25)                        | 0.17<br>(0.12 to<br>0.25)                         | 0.15<br>(0.11 to<br>0.24)                        |
| Gallbladder and biliary diseases           | 1.80<br>(1.36 to<br>2.56)                          | 3.27<br>(1.68 to<br>6.31)                            | 2.62<br>(1.39 to<br>4.97)                            | 4.53<br>(2.27 to<br>8.89)                            | 0.07<br>(0.06 to<br>0.10)                      | 0.15<br>(0.08 to<br>0.30)                        | 0.13<br>(0.07 to<br>0.25)                         | 0.20<br>(0.10 to<br>0.38)                        |
| Pancreatitis                               | 1.93<br>(1.32 to<br>3.20)                          | 3.71<br>(2.41 to<br>6.40)                            | 3.29<br>(2.14 to<br>5.49)                            | 4.11<br>(2.56 to<br>7.23)                            | 0.06<br>(0.04 to<br>0.09)                      | 0.13<br>(0.09 to<br>0.21)                        | 0.12<br>(0.08 to<br>0.18)                         | 0.14<br>(0.09 to<br>0.23)                        |
| Other digestive diseases                   | 7.11<br>(4.92 to<br>11.22)                         | 7.79<br>(5.60 to<br>11.21)                           | 6.76<br>(4.83 to<br>9.85)                            | 9.07<br>(6.46 to<br>13.15)                           | 0.16<br>(0.12 to<br>0.23)                      | 0.24<br>(0.18 to<br>0.36)                        | 0.23<br>(0.16 to<br>0.34)                         | 0.26<br>(0.18 to<br>0.39)                        |
| <b>Neurological disorders</b>              | <b>99.93</b><br><b>(81.37 to</b><br><b>120.59)</b> | <b>221.99</b><br><b>(167.54 to</b><br><b>300.93)</b> | <b>223.50</b><br><b>(173.18 to</b><br><b>292.11)</b> | <b>224.39</b><br><b>(163.89 to</b><br><b>311.46)</b> | <b>5.44</b><br><b>(4.47 to</b><br><b>6.58)</b> | <b>14.37</b><br><b>(9.32 to</b><br><b>21.11)</b> | <b>15.56</b><br><b>(10.76 to</b><br><b>21.66)</b> | <b>13.32</b><br><b>(8.00 to</b><br><b>20.66)</b> |
| Alzheimer's disease and other dementias    | 51.91<br>(40.88 to<br>65.43)                       | 140.32<br>(88.71 to<br>217.89)                       | 144.57<br>(97.73 to<br>212.78)                       | 138.36<br>(81.00 to<br>226.92)                       | 4.29<br>(3.43 to<br>5.34)                      | 11.85<br>(7.03 to<br>18.47)                      | 12.85<br>(8.20 to<br>18.92)                       | 10.96<br>(5.77 to<br>18.10)                      |

|                                                            |                                                      |                                                          |                                                        |                                                            |                                                   |                                                   |                                                   |                                                    |
|------------------------------------------------------------|------------------------------------------------------|----------------------------------------------------------|--------------------------------------------------------|------------------------------------------------------------|---------------------------------------------------|---------------------------------------------------|---------------------------------------------------|----------------------------------------------------|
| Parkinson's disease                                        | 4.09<br>(3.01 to<br>5.30)                            | 13.19<br>(9.46 to<br>17.45)                              | 15.93<br>(11.66 to<br>20.48)                           | 10.37<br>(7.31 to<br>14.27)                                | 0.30<br>(0.22 to<br>0.39)                         | 0.98<br>(0.65 to<br>1.36)                         | 1.24<br>(0.86 to<br>1.64)                         | 0.73<br>(0.45 to<br>1.05)                          |
| Epilepsy                                                   | 28.19<br>(21.63 to<br>35.09)                         | 36.98<br>(26.63 to<br>49.24)                             | 30.63<br>(21.67 to<br>41.00)                           | 45.13<br>(31.94 to<br>60.81)                               | 0.51<br>(0.39 to<br>0.63)                         | 0.75<br>(0.55 to<br>1.00)                         | 0.64<br>(0.46 to<br>0.84)                         | 0.90<br>(0.64 to<br>1.21)                          |
| Multiple sclerosis                                         | 1.64<br>(1.12 to<br>2.22)                            | 3.31<br>(2.29 to<br>4.51)                                | 3.39<br>(2.36 to<br>4.67)                              | 3.26<br>(2.25 to<br>4.43)                                  | 0.04<br>(0.03 to<br>0.05)                         | 0.08<br>(0.06 to<br>0.11)                         | 0.09<br>(0.06 to<br>0.11)                         | 0.08<br>(0.06 to<br>0.11)                          |
| Motor neuron disease                                       | 1.52<br>(1.12 to<br>2.07)                            | 3.29<br>(2.53 to<br>4.18)                                | 3.46<br>(2.64 to<br>4.41)                              | 3.09<br>(2.39 to<br>3.91)                                  | 0.04<br>(0.03 to<br>0.05)                         | 0.10<br>(0.08 to<br>0.12)                         | 0.10<br>(0.08 to<br>0.13)                         | 0.09<br>(0.07 to<br>0.11)                          |
| Other neurological disorders                               | 12.58<br>(9.83 to<br>15.54)                          | 24.90<br>(18.94 to<br>30.98)                             | 25.53<br>(19.55 to<br>31.68)                           | 24.19<br>(18.57 to<br>30.02)                               | 0.26<br>(0.21 to<br>0.32)                         | 0.60<br>(0.48 to<br>0.73)                         | 0.64<br>(0.50 to<br>0.78)                         | 0.57<br>(0.45 to<br>0.69)                          |
| <b>Mental disorders</b>                                    | <b>63.18</b><br><b>(39.94 to</b><br><b>89.36)</b>    | <b>158.34</b><br><b>(101.80 to</b><br><b>225.05)</b>     | <b>157.27</b><br><b>(101.44 to</b><br><b>221.13)</b>   | <b>159.62</b><br><b>(101.59 to</b><br><b>227.42)</b>       | <b>1.28</b><br><b>(0.85 to</b><br><b>1.75)</b>    | <b>3.40</b><br><b>(2.34 to</b><br><b>4.65)</b>    | <b>3.44</b><br><b>(2.38 to</b><br><b>4.69)</b>    | <b>3.36</b><br><b>(2.27 to</b><br><b>4.60)</b>     |
| Alcohol use disorders                                      | 5.84<br>(3.96 to<br>8.90)                            | 9.38<br>(6.33 to<br>14.54)                               | 9.07<br>(6.08 to<br>14.21)                             | 9.73<br>(6.61 to<br>15.23)                                 | 0.14<br>(0.10 to<br>0.21)                         | 0.25<br>(0.17 to<br>0.36)                         | 0.24<br>(0.17 to<br>0.36)                         | 0.25<br>(0.17 to<br>0.37)                          |
| Drug use disorders                                         | 57.28<br>(33.88 to<br>83.04)                         | 148.84<br>(93.24 to<br>214.01)                           | 148.09<br>(93.19 to<br>210.93)                         | 149.77<br>(93.23 to<br>216.68)                             | 1.14<br>(0.73 to<br>1.59)                         | 3.15<br>(2.11 to<br>4.35)                         | 3.19<br>(2.16 to<br>4.38)                         | 3.11<br>(2.04 to<br>4.32)                          |
| Opioid use disorders                                       | 55.27<br>(31.31 to<br>81.06)                         | 141.42<br>(84.84 to<br>206.33)                           | 140.39<br>(85.18 to<br>203.73)                         | 142.55<br>(84.72 to<br>210.39)                             | 1.08<br>(0.67 to<br>1.52)                         | 2.92<br>(1.90 to<br>4.11)                         | 2.94<br>(1.93 to<br>4.11)                         | 2.89<br>(1.86 to<br>4.10)                          |
| Cocaine use disorders                                      | 0.58<br>(0.32 to<br>1.23)                            | 2.35<br>(1.32 to<br>4.71)                                | 2.36<br>(1.32 to<br>4.69)                              | 2.37<br>(1.34 to<br>4.80)                                  | 0.01<br>(0.01 to<br>0.03)                         | 0.06<br>(0.03 to<br>0.11)                         | 0.06<br>(0.04 to<br>0.11)                         | 0.06<br>(0.03 to<br>0.11)                          |
| Amphetamine use disorders                                  | 0.14<br>(0.08 to<br>0.24)                            | 0.73<br>(0.42 to<br>1.47)                                | 0.74<br>(0.42 to<br>1.50)                              | 0.73<br>(0.42 to<br>1.56)                                  | 0.00<br>(0.00 to<br>0.01)                         | 0.02<br>(0.01 to<br>0.05)                         | 0.02<br>(0.01 to<br>0.03)                         | 0.02<br>(0.01 to<br>0.03)                          |
| Other drug use disorders                                   | 1.29<br>(0.82 to<br>2.52)                            | 4.34<br>(2.91 to<br>7.88)                                | 4.60<br>(3.07 to<br>8.33)                              | 4.12<br>(2.75 to<br>7.67)                                  | 0.04<br>(0.03 to<br>0.06)                         | 0.16<br>(0.11 to<br>0.22)                         | 0.18<br>(0.12 to<br>0.24)                         | 0.14<br>(0.10 to<br>0.20)                          |
| Eating disorders                                           | 0.05<br>(0.03 to<br>0.07)                            | 0.12<br>(0.07 to<br>0.18)                                | 0.12<br>(0.07 to<br>0.17)                              | 0.13<br>(0.08 to<br>0.18)                                  | 0.00<br>(0.00 to<br>0.00)                         | 0.00<br>(0.00 to<br>0.00)                         | 0.00<br>(0.00 to<br>0.00)                         | 0.00<br>(0.00 to<br>0.00)                          |
| <b>Iraq</b>                                                |                                                      |                                                          |                                                        |                                                            |                                                   |                                                   |                                                   |                                                    |
| Cause                                                      | YLLs (in 1000s)                                      |                                                          |                                                        |                                                            | Deaths (in 1000s)                                 |                                                   |                                                   |                                                    |
|                                                            | 2016                                                 | 2040 Forecast                                            | 2040 Better Scenario                                   | 2040 Worse Scenario                                        | 2016                                              | 2040 Forecast                                     | 2040 Better Scenario                              | 2040 Worse Scenario                                |
| <b>Diabetes, urogenital, blood, and endocrine diseases</b> | <b>583.05</b><br><b>(469.82 to</b><br><b>712.06)</b> | <b>1,264.62</b><br><b>(781.70 to</b><br><b>2,167.09)</b> | <b>977.57</b><br><b>(599.10 to</b><br><b>1,742.30)</b> | <b>1,615.56</b><br><b>(1,010.32 to</b><br><b>2,653.14)</b> | <b>20.23</b><br><b>(16.49 to</b><br><b>24.24)</b> | <b>54.79</b><br><b>(32.80 to</b><br><b>95.18)</b> | <b>44.22</b><br><b>(26.09 to</b><br><b>80.96)</b> | <b>66.14</b><br><b>(39.89 to</b><br><b>107.65)</b> |
| Diabetes mellitus                                          | 291.93<br>(231.74 to<br>361.43)                      | 485.88<br>(299.81 to<br>747.22)                          | 383.25<br>(239.43 to<br>592.28)                        | 635.95<br>(397.75 to<br>976.18)                            | 11.38<br>(9.26 to<br>13.73)                       | 21.20<br>(13.94 to<br>30.48)                      | 17.62<br>(11.69 to<br>25.25)                      | 26.06<br>(16.88 to<br>37.88)                       |
| Acute glomerulonephritis                                   | 0.31<br>(0.25 to<br>0.37)                            | 0.45<br>(0.35 to<br>0.58)                                | 0.38<br>(0.29 to<br>0.50)                              | 0.52<br>(0.40 to<br>0.68)                                  | 0.01<br>(0.00 to<br>0.01)                         | 0.01<br>(0.01 to<br>0.01)                         | 0.01<br>(0.01 to<br>0.01)                         | 0.01<br>(0.01 to<br>0.01)                          |
| Chronic kidney disease                                     | 185.83<br>(143.66 to<br>237.83)                      | 652.72<br>(194.89 to<br>1,611.57)                        | 479.95<br>(141.87 to<br>1,280.65)                      | 840.04<br>(252.05 to<br>1,919.85)                          | 6.89<br>(5.41 to<br>8.72)                         | 30.18<br>(7.45 to<br>71.93)                       | 23.30<br>(5.79 to<br>62.08)                       | 36.60<br>(9.64 to<br>81.63)                        |
| Chronic kidney disease due to diabetes mellitus            | 74.42<br>(54.55 to<br>97.92)                         | 325.44<br>(82.03 to<br>878.48)                           | 238.44<br>(60.46 to<br>686.23)                         | 420.92<br>(111.37 to<br>1,062.76)                          | 2.93<br>(2.19 to<br>3.85)                         | 14.47<br>(3.33 to<br>36.92)                       | 11.01<br>(2.50 to<br>29.98)                       | 17.88<br>(4.38 to<br>40.92)                        |
| Chronic kidney disease due to hypertension                 | 23.68<br>(17.59 to<br>30.73)                         | 100.64<br>(24.39 to<br>250.06)                           | 77.03<br>(18.63 to<br>221.89)                          | 122.64<br>(32.04 to<br>286.97)                             | 1.31<br>(0.99 to<br>1.68)                         | 6.31<br>(1.45 to<br>15.61)                        | 5.18<br>(1.11 to<br>14.58)                        | 7.10<br>(1.69 to<br>16.19)                         |
| Chronic kidney disease due to glomerulonephritis           | 30.53<br>(22.25 to<br>41.11)                         | 70.05<br>(28.28 to<br>157.28)                            | 50.67<br>(20.83 to<br>119.51)                          | 91.97<br>(37.98 to<br>198.34)                              | 0.83<br>(0.60 to<br>1.10)                         | 2.63<br>(0.82 to<br>6.05)                         | 1.97<br>(0.61 to<br>5.01)                         | 3.29<br>(1.06 to<br>7.05)                          |

|                                                            |                           |                             |                             |                             |                        |                         |                         |                         |
|------------------------------------------------------------|---------------------------|-----------------------------|-----------------------------|-----------------------------|------------------------|-------------------------|-------------------------|-------------------------|
| Chronic kidney disease due to other and unspecified causes | 57.20<br>(43.10 to 74.53) | 156.59<br>(53.13 to 373.80) | 113.81<br>(39.06 to 295.90) | 204.51<br>(71.48 to 453.70) | 1.82<br>(1.36 to 2.36) | 6.77<br>(1.80 to 16.20) | 5.14<br>(1.34 to 13.95) | 8.33<br>(2.34 to 19.06) |
| Urinary diseases and male infertility                      | 31.42<br>(21.85 to 42.37) | 50.27<br>(38.76 to 63.70)   | 47.51<br>(36.74 to 60.57)   | 53.28<br>(40.49 to 67.75)   | 0.64<br>(0.50 to 0.81) | 1.49<br>(1.22 to 1.80)  | 1.52<br>(1.23 to 1.82)  | 1.45<br>(1.17 to 1.76)  |
| Urinary tract infections                                   | 26.49<br>(18.53 to 36.26) | 46.64<br>(35.59 to 59.92)   | 44.49<br>(33.98 to 57.18)   | 48.81<br>(37.19 to 62.96)   | 0.57<br>(0.44 to 0.73) | 1.41<br>(1.15 to 1.72)  | 1.44<br>(1.17 to 1.74)  | 1.36<br>(1.09 to 1.66)  |
| Urolithiasis                                               | 0.58<br>(0.38 to 0.97)    | 1.36<br>(0.89 to 2.33)      | 1.29<br>(0.83 to 2.24)      | 1.42<br>(0.92 to 2.44)      | 0.01<br>(0.01 to 0.02) | 0.03<br>(0.02 to 0.05)  | 0.03<br>(0.02 to 0.05)  | 0.03<br>(0.02 to 0.05)  |
| Other urinary diseases                                     | 4.35<br>(1.95 to 9.93)    | 2.27<br>(1.29 to 4.42)      | 1.73<br>(0.99 to 3.34)      | 3.05<br>(1.62 to 6.20)      | 0.06<br>(0.03 to 0.13) | 0.05<br>(0.03 to 0.08)  | 0.04<br>(0.02 to 0.06)  | 0.06<br>(0.02 to 0.10)  |
| Gynecological diseases                                     | 0.58<br>(0.29 to 0.92)    | 0.83<br>(0.41 to 1.45)      | 0.69<br>(0.31 to 1.25)      | 0.99<br>(0.48 to 1.73)      | 0.01<br>(0.01 to 0.02) | 0.02<br>(0.01 to 0.05)  | 0.01<br>(0.01 to 0.02)  | 0.02<br>(0.01 to 0.03)  |
| Uterine fibroids                                           | 0.01<br>(0.00 to 0.03)    | 0.01<br>(0.00 to 0.04)      | 0.01<br>(0.00 to 0.03)      | 0.01<br>(0.00 to 0.05)      | 0.00<br>(0.00 to 0.00) | 0.00<br>(0.00 to 0.00)  | 0.00<br>(0.00 to 0.00)  | 0.00<br>(0.00 to 0.00)  |
| Polycystic ovarian syndrome                                | 0.07<br>(0.02 to 0.20)    | 0.06<br>(0.01 to 0.20)      | 0.05<br>(0.01 to 0.14)      | 0.08<br>(0.02 to 0.26)      | 0.00<br>(0.00 to 0.00) | 0.00<br>(0.00 to 0.00)  | 0.00<br>(0.00 to 0.00)  | 0.00<br>(0.00 to 0.01)  |
| Endometriosis                                              | 0.00<br>(0.00 to 0.00)    | 0.00<br>(0.00 to 0.01)      | 0.00<br>(0.00 to 0.01)      | 0.00<br>(0.00 to 0.01)      | 0.00<br>(0.00 to 0.00) | 0.00<br>(0.00 to 0.00)  | 0.00<br>(0.00 to 0.00)  | 0.00<br>(0.00 to 0.00)  |
| Genital prolapse                                           | 0.00<br>(0.00 to 0.00)    | 0.00<br>(0.00 to 0.01)      | 0.00<br>(0.00 to 0.00)      | 0.00<br>(0.00 to 0.01)      | 0.00<br>(0.00 to 0.00) | 0.00<br>(0.00 to 0.00)  | 0.00<br>(0.00 to 0.00)  | 0.00<br>(0.00 to 0.00)  |
| Other gynecological diseases                               | 0.49<br>(0.23 to 0.80)    | 0.76<br>(0.33 to 1.32)      | 0.63<br>(0.27 to 1.16)      | 0.89<br>(0.39 to 1.58)      | 0.01<br>(0.00 to 0.01) | 0.01<br>(0.01 to 0.02)  | 0.01<br>(0.01 to 0.02)  | 0.02<br>(0.01 to 0.03)  |
| Hemoglobinopathies and hemolytic anemias                   | 54.07<br>(36.07 to 79.31) | 46.05<br>(31.88 to 69.23)   | 39.62<br>(27.02 to 60.51)   | 53.47<br>(36.96 to 81.97)   | 0.83<br>(0.59 to 1.21) | 0.95<br>(0.67 to 1.42)  | 0.84<br>(0.59 to 1.28)  | 1.06<br>(0.74 to 1.61)  |
| Thalassemias                                               | 11.59<br>(6.21 to 19.03)  | 4.84<br>(2.29 to 9.06)      | 4.43<br>(2.15 to 8.13)      | 5.19<br>(2.36 to 10.12)     | 0.14<br>(0.08 to 0.23) | 0.06<br>(0.03 to 0.11)  | 0.05<br>(0.03 to 0.10)  | 0.06<br>(0.03 to 0.12)  |
| Sickle cell disorders                                      | 38.09<br>(25.93 to 56.51) | 34.99<br>(23.40 to 54.28)   | 29.79<br>(19.41 to 46.84)   | 41.14<br>(27.59 to 64.24)   | 0.56<br>(0.39 to 0.82) | 0.65<br>(0.43 to 1.01)  | 0.56<br>(0.37 to 0.91)  | 0.74<br>(0.50 to 1.16)  |
| G6PD deficiency                                            | 2.93<br>(2.01 to 4.44)    | 4.35<br>(2.77 to 7.21)      | 3.65<br>(2.21 to 6.07)      | 5.16<br>(3.24 to 8.50)      | 0.06<br>(0.04 to 0.09) | 0.12<br>(0.08 to 0.20)  | 0.11<br>(0.07 to 0.17)  | 0.14<br>(0.09 to 0.22)  |
| Other hemoglobinopathies and hemolytic anemias             | 1.46<br>(1.05 to 2.20)    | 1.88<br>(1.25 to 2.93)      | 1.75<br>(1.17 to 2.77)      | 1.97<br>(1.27 to 3.14)      | 0.07<br>(0.05 to 0.11) | 0.12<br>(0.08 to 0.18)  | 0.12<br>(0.08 to 0.18)  | 0.12<br>(0.07 to 0.19)  |
| Endocrine, metabolic, blood, and immune disorders          | 18.92<br>(14.03 to 25.77) | 28.41<br>(21.01 to 35.81)   | 26.16<br>(18.98 to 33.32)   | 31.30<br>(23.46 to 39.68)   | 0.46<br>(0.34 to 0.58) | 0.93<br>(0.60 to 1.17)  | 0.92<br>(0.58 to 1.16)  | 0.94<br>(0.62 to 1.19)  |

**Iraq**

| Cause                           | YLLs (in 1000s)         |                           |                           |                           | Deaths (in 1000s)      |                        |                        |                        |
|---------------------------------|-------------------------|---------------------------|---------------------------|---------------------------|------------------------|------------------------|------------------------|------------------------|
|                                 | 2016                    | 2040 Forecast             | 2040 Better Scenario      | 2040 Worse Scenario       | 2016                   | 2040 Forecast          | 2040 Better Scenario   | 2040 Worse Scenario    |
| Musculoskeletal disorders       | 7.79<br>(5.39 to 10.09) | 17.26<br>(11.56 to 23.16) | 17.65<br>(11.72 to 23.69) | 16.68<br>(11.10 to 22.40) | 0.16<br>(0.11 to 0.21) | 0.40<br>(0.29 to 0.52) | 0.42<br>(0.30 to 0.54) | 0.38<br>(0.26 to 0.49) |
| Rheumatoid arthritis            | 0.40<br>(0.28 to 0.58)  | 0.79<br>(0.55 to 1.12)    | 0.69<br>(0.48 to 1.01)    | 0.89<br>(0.63 to 1.26)    | 0.01<br>(0.01 to 0.02) | 0.02<br>(0.02 to 0.05) | 0.03<br>(0.02 to 0.04) | 0.03<br>(0.02 to 0.05) |
| Other musculoskeletal disorders | 7.40<br>(5.07 to 9.61)  | 16.47<br>(10.93 to 22.24) | 16.96<br>(11.19 to 22.89) | 15.80<br>(10.32 to 21.23) | 0.15<br>(0.11 to 0.19) | 0.37<br>(0.26 to 0.48) | 0.39<br>(0.28 to 0.51) | 0.34<br>(0.24 to 0.45) |

|                                               |                                                      |                                                      |                                                    |                                                      |                                             |                                             |                                             |                                             |
|-----------------------------------------------|------------------------------------------------------|------------------------------------------------------|----------------------------------------------------|------------------------------------------------------|---------------------------------------------|---------------------------------------------|---------------------------------------------|---------------------------------------------|
| <b>Other non-communicable diseases</b>        | <b>761.16</b><br>(363.28 to<br><b>1,323.25</b> )     | <b>487.79</b><br>(266.20 to<br><b>807.89</b> )       | <b>364.03</b><br>(206.43 to<br><b>581.66</b> )     | <b>663.13</b><br>(349.57 to<br><b>1,121.80</b> )     | <b>9.27</b><br>(4.68 to<br><b>15.84</b> )   | <b>6.85</b><br>(4.27 to<br><b>10.68</b> )   | <b>5.40</b><br>(3.37 to<br><b>8.27</b> )    | <b>8.88</b><br>(5.23 to<br><b>14.44</b> )   |
| Congenital birth defects                      | 726.75<br>(343.71 to<br>1,287.58)                    | 455.86<br>(243.51 to<br>777.56)                      | 336.23<br>(185.36 to<br>549.90)                    | 625.38<br>(324.25 to<br>1,092.07)                    | 8.76<br>(4.34 to<br>15.34)                  | 5.94<br>(3.49 to<br>9.67)                   | 4.48<br>(2.64 to<br>7.02)                   | 7.97<br>(4.45 to<br>13.39)                  |
| Neural tube defects                           | 12.07<br>(5.08 to<br>22.79)                          | 2.84<br>(1.06 to<br>6.49)                            | 1.80<br>(0.67 to<br>4.13)                          | 4.60<br>(1.68 to<br>10.49)                           | 0.14<br>(0.06 to<br>0.27)                   | 0.03<br>(0.01 to<br>0.08)                   | 0.02<br>(0.01 to<br>0.05)                   | 0.06<br>(0.02 to<br>0.12)                   |
| Congenital heart anomalies                    | 388.96<br>(184.24 to<br>755.47)                      | 242.31<br>(135.65 to<br>437.95)                      | 179.56<br>(98.07 to<br>316.18)                     | 329.13<br>(176.06 to<br>617.71)                      | 4.73<br>(2.35 to<br>8.98)                   | 3.21<br>(1.93 to<br>5.52)                   | 2.43<br>(1.45 to<br>4.04)                   | 4.26<br>(2.45 to<br>7.67)                   |
| Orofacial clefts                              | 0.71<br>(0.19 to<br>2.00)                            | 0.27<br>(0.06 to<br>0.81)                            | 0.17<br>(0.04 to<br>0.49)                          | 0.45<br>(0.10 to<br>1.33)                            | 0.01<br>(0.00 to<br>0.02)                   | 0.00<br>(0.00 to<br>0.01)                   | 0.00<br>(0.00 to<br>0.01)                   | 0.01<br>(0.00 to<br>0.02)                   |
| Down syndrome                                 | 6.48<br>(2.85 to<br>14.47)                           | 5.72<br>(3.02 to<br>11.75)                           | 4.35<br>(2.37 to<br>8.66)                          | 7.86<br>(3.90 to<br>16.79)                           | 0.08<br>(0.04 to<br>0.18)                   | 0.08<br>(0.05 to<br>0.16)                   | 0.07<br>(0.04 to<br>0.12)                   | 0.11<br>(0.06 to<br>0.22)                   |
| Other chromosomal abnormalities               | 17.65<br>(7.33 to<br>32.37)                          | 19.72<br>(8.34 to<br>36.20)                          | 14.20<br>(6.10 to<br>26.30)                        | 28.10<br>(11.65 to<br>53.31)                         | 0.21<br>(0.09 to<br>0.38)                   | 0.24<br>(0.11 to<br>0.43)                   | 0.18<br>(0.08 to<br>0.31)                   | 0.34<br>(0.15 to<br>0.63)                   |
| Congenital musculoskeletal and limb anomalies | 11.57<br>(4.57 to<br>21.23)                          | 7.90<br>(3.19 to<br>14.94)                           | 5.80<br>(2.38 to<br>11.01)                         | 10.84<br>(4.34 to<br>20.60)                          | 0.14<br>(0.05 to<br>0.25)                   | 0.10<br>(0.04 to<br>0.18)                   | 0.07<br>(0.03 to<br>0.13)                   | 0.13<br>(0.05 to<br>0.24)                   |
| Urogenital congenital anomalies               | 61.94<br>(27.19 to<br>124.72)                        | 38.71<br>(19.66 to<br>74.09)                         | 29.41<br>(15.24 to<br>53.12)                       | 52.08<br>(25.36 to<br>102.88)                        | 0.76<br>(0.36 to<br>1.48)                   | 0.55<br>(0.32 to<br>0.97)                   | 0.44<br>(0.26 to<br>0.71)                   | 0.71<br>(0.40 to<br>1.31)                   |
| Digestive congenital anomalies                | 30.24<br>(3.81 to<br>57.42)                          | 16.72<br>(2.06 to<br>35.13)                          | 11.43<br>(1.37 to<br>24.05)                        | 24.81<br>(3.05 to<br>53.28)                          | 0.35<br>(0.04 to<br>0.66)                   | 0.19<br>(0.02 to<br>0.41)                   | 0.13<br>(0.02 to<br>0.28)                   | 0.29<br>(0.04 to<br>0.62)                   |
| Other congenital birth defects                | 197.13<br>(87.66 to<br>335.70)                       | 121.67<br>(59.52 to<br>206.38)                       | 89.52<br>(45.05 to<br>151.87)                      | 167.50<br>(79.16 to<br>290.39)                       | 2.34<br>(1.06 to<br>3.95)                   | 1.52<br>(0.80 to<br>2.55)                   | 1.14<br>(0.61 to<br>1.87)                   | 2.07<br>(1.04 to<br>3.53)                   |
| Skin and subcutaneous diseases                | 8.80<br>(2.90 to<br>17.05)                           | 21.37<br>(11.79 to<br>31.30)                         | 30.20<br>(12.01 to<br>28.71)                       | 22.77<br>(11.31 to<br>34.57)                         | 0.21<br>(0.13 to<br>0.32)                   | 0.79<br>(0.49 to<br>1.57)                   | 0.83<br>(0.49 to<br>1.69)                   | 0.74<br>(0.49 to<br>1.40)                   |
| Cellulitis                                    | 0.94<br>(0.41 to<br>1.64)                            | 3.61<br>(2.06 to<br>7.45)                            | 3.89<br>(2.27 to<br>8.29)                          | 3.29<br>(1.88 to<br>6.42)                            | 0.03<br>(0.02 to<br>0.09)                   | 0.18<br>(0.07 to<br>0.53)                   | 0.20<br>(0.08 to<br>0.63)                   | 0.14<br>(0.06 to<br>0.41)                   |
| Pyoderma                                      | 7.29<br>(2.10 to<br>15.07)                           | 16.49<br>(8.14 to<br>24.79)                          | 15.08<br>(8.14 to<br>21.74)                        | 18.19<br>(8.15 to<br>29.32)                          | 0.16<br>(0.09 to<br>0.25)                   | 0.58<br>(0.37 to<br>1.09)                   | 0.58<br>(0.36 to<br>1.15)                   | 0.56<br>(0.36 to<br>0.98)                   |
| Decubitus ulcer                               | 0.30<br>(0.14 to<br>0.44)                            | 0.66<br>(0.32 to<br>0.98)                            | 0.63<br>(0.32 to<br>0.95)                          | 0.67<br>(0.32 to<br>1.00)                            | 0.01<br>(0.00 to<br>0.01)                   | 0.02<br>(0.01 to<br>0.05)                   | 0.02<br>(0.01 to<br>0.06)                   | 0.02<br>(0.01 to<br>0.04)                   |
| Other skin and subcutaneous diseases          | 0.27<br>(0.12 to<br>0.42)                            | 0.62<br>(0.28 to<br>0.92)                            | 0.60<br>(0.28 to<br>0.91)                          | 0.63<br>(0.28 to<br>0.95)                            | 0.01<br>(0.00 to<br>0.01)                   | 0.01<br>(0.01 to<br>0.02)                   | 0.02<br>(0.01 to<br>0.03)                   | 0.01<br>(0.01 to<br>0.02)                   |
| Sudden infant death syndrome                  | 25.61<br>(9.54 to<br>52.56)                          | 10.56<br>(3.59 to<br>22.60)                          | 7.59<br>(2.58 to<br>16.63)                         | 14.98<br>(5.99 to<br>32.64)                          | 0.30<br>(0.11 to<br>0.61)                   | 0.12<br>(0.04 to<br>0.26)                   | 0.09<br>(0.03 to<br>0.19)                   | 0.17<br>(0.06 to<br>0.38)                   |
| <b>Injuries</b>                               | <b>2,924.82</b><br>(1,609.59 to<br><b>4,320.37</b> ) | <b>1,851.05</b><br>(1,238.68 to<br><b>3,445.67</b> ) | <b>1,478.13</b><br>(952.32 to<br><b>3,055.57</b> ) | <b>2,178.55</b><br>(1,499.23 to<br><b>3,781.68</b> ) | <b>49.46</b><br>(28.53 to<br><b>72.01</b> ) | <b>35.84</b><br>(24.76 to<br><b>65.37</b> ) | <b>29.23</b><br>(19.52 to<br><b>58.49</b> ) | <b>41.18</b><br>(28.97 to<br><b>70.14</b> ) |
| <b>Transport injuries</b>                     | <b>467.07</b><br>(351.75 to<br><b>587.00</b> )       | <b>645.03</b><br>(474.20 to<br><b>851.55</b> )       | <b>393.47</b><br>(285.00 to<br><b>527.49</b> )     | <b>836.76</b><br>(619.80 to<br><b>1,101.08</b> )     | <b>8.49</b><br>(6.48 to<br><b>10.62</b> )   | <b>12.79</b><br>(9.60 to<br><b>16.84</b> )  | <b>8.15</b><br>(6.09 to<br><b>10.73</b> )   | <b>16.04</b><br>(12.11 to<br><b>21.04</b> ) |
| Road injuries                                 | 454.14<br>(342.37 to<br>571.94)                      | 624.53<br>(457.21 to<br>827.77)                      | 375.87<br>(270.47 to<br>503.90)                    | 813.08<br>(601.64 to<br>1,071.09)                    | 8.25<br>(6.29 to<br>10.34)                  | 12.35<br>(9.25 to<br>16.28)                 | 7.76<br>(5.79 to<br>10.26)                  | 15.55<br>(11.73 to<br>20.41)                |
| Pedestrian road injuries                      | 143.57<br>(106.43 to<br>187.40)                      | 174.29<br>(121.14 to<br>241.46)                      | 113.35<br>(76.76 to<br>158.29)                     | 218.09<br>(151.71 to<br>301.61)                      | 2.68<br>(2.01 to<br>3.49)                   | 3.68<br>(2.61 to<br>5.02)                   | 2.48<br>(1.74 to<br>3.39)                   | 4.46<br>(3.17 to<br>6.07)                   |
| <b>Iraq</b>                                   |                                                      |                                                      |                                                    |                                                      |                                             |                                             |                                             |                                             |
|                                               | <b>YLLs (in 1000s)</b>                               |                                                      |                                                    |                                                      | <b>Deaths (in 1000s)</b>                    |                                             |                                             |                                             |

| Cause                                           | 2016                                     | 2040 Forecast                            | 2040 Better Scenario                     | 2040 Worse Scenario                      | 2016                                | 2040 Forecast                        | 2040 Better Scenario                | 2040 Worse Scenario                  |
|-------------------------------------------------|------------------------------------------|------------------------------------------|------------------------------------------|------------------------------------------|-------------------------------------|--------------------------------------|-------------------------------------|--------------------------------------|
| Cyclist road injuries                           | 3.97<br>(2.92 to<br>5.27)                | 5.65<br>(3.85 to<br>8.22)                | 3.35<br>(2.28 to<br>4.85)                | 7.54<br>(5.14 to<br>10.82)               | 0.07<br>(0.05 to<br>0.09)           | 0.11<br>(0.08 to<br>0.16)            | 0.08<br>(0.05 to<br>0.11)           | 0.14<br>(0.10 to<br>0.20)            |
| Motorcyclist road injuries                      | 22.56<br>(14.56 to<br>36.44)             | 38.18<br>(22.20 to<br>64.43)             | 27.22<br>(15.41 to<br>46.88)             | 46.07<br>(27.37 to<br>76.83)             | 0.37<br>(0.24 to<br>0.61)           | 0.65<br>(0.38 to<br>1.10)            | 0.47<br>(0.27 to<br>0.82)           | 0.77<br>(0.46 to<br>1.29)            |
| Motor vehicle road injuries                     | 281.45<br>(209.30 to<br>366.82)          | 402.60<br>(290.70 to<br>550.29)          | 229.73<br>(162.43 to<br>321.04)          | 536.32<br>(393.42 to<br>721.04)          | 5.08<br>(3.79 to<br>6.64)           | 7.83<br>(5.73 to<br>10.55)           | 4.68<br>(3.40 to<br>6.40)           | 10.08<br>(7.40 to<br>13.53)          |
| Other road injuries                             | 2.60<br>(1.75 to<br>3.52)                | 3.81<br>(2.46 to<br>5.63)                | 2.23<br>(1.43 to<br>3.30)                | 5.06<br>(3.29 to<br>7.41)                | 0.05<br>(0.03 to<br>0.06)           | 0.08<br>(0.05 to<br>0.11)            | 0.05<br>(0.03 to<br>0.07)           | 0.10<br>(0.07 to<br>0.14)            |
| Other transport injuries                        | 12.93<br>(9.00 to<br>18.40)              | 20.50<br>(13.97 to<br>29.78)             | 17.61<br>(11.69 to<br>25.61)             | 23.69<br>(16.08 to<br>34.77)             | 0.24<br>(0.17 to<br>0.33)           | 0.44<br>(0.31 to<br>0.60)            | 0.39<br>(0.27 to<br>0.55)           | 0.49<br>(0.35 to<br>0.68)            |
| <b>Unintentional injuries</b>                   | <b>588.68<br/>(431.03 to<br/>699.73)</b> | <b>547.68<br/>(394.12 to<br/>726.77)</b> | <b>467.23<br/>(334.39 to<br/>633.35)</b> | <b>642.53<br/>(458.47 to<br/>851.67)</b> | <b>9.79<br/>(7.43 to<br/>12.09)</b> | <b>10.70<br/>(7.98 to<br/>13.90)</b> | <b>9.39<br/>(6.93 to<br/>12.41)</b> | <b>12.18<br/>(8.96 to<br/>15.94)</b> |
| Falls                                           | 64.52<br>(47.44 to<br>85.89)             | 79.65<br>(58.37 to<br>106.67)            | 73.46<br>(53.38 to<br>99.33)             | 86.15<br>(62.92 to<br>114.44)            | 1.23<br>(0.93 to<br>1.59)           | 1.82<br>(1.39 to<br>2.36)            | 1.74<br>(1.31 to<br>2.30)           | 1.88<br>(1.43 to<br>2.45)            |
| Drowning                                        | 79.49<br>(60.52 to<br>99.94)             | 62.33<br>(45.02 to<br>84.62)             | 52.46<br>(36.96 to<br>71.20)             | 74.15<br>(52.89 to<br>100.04)            | 1.23<br>(0.94 to<br>1.54)           | 1.08<br>(0.78 to<br>1.44)            | 0.93<br>(0.65 to<br>1.24)           | 1.25<br>(0.90 to<br>1.69)            |
| Fire, heat, and hot substances                  | 66.40<br>(40.61 to<br>89.24)             | 50.90<br>(31.40 to<br>72.38)             | 41.70<br>(26.07 to<br>59.12)             | 62.26<br>(37.60 to<br>87.51)             | 1.11<br>(0.75 to<br>1.47)           | 0.98<br>(0.69 to<br>1.33)            | 0.83<br>(0.58 to<br>1.13)           | 1.16<br>(0.80 to<br>1.59)            |
| Poisonings                                      | 15.70<br>(10.37 to<br>25.76)             | 8.38<br>(5.65 to<br>12.44)               | 6.38<br>(4.26 to<br>9.43)                | 11.11<br>(7.35 to<br>16.79)              | 0.25<br>(0.17 to<br>0.37)           | 0.15<br>(0.10 to<br>0.21)            | 0.12<br>(0.08 to<br>0.17)           | 0.19<br>(0.13 to<br>0.28)            |
| Exposure to mechanical forces                   | 108.69<br>(76.91 to<br>144.53)           | 106.92<br>(66.72 to<br>154.68)           | 89.77<br>(55.00 to<br>130.55)            | 127.72<br>(80.37 to<br>184.21)           | 1.96<br>(1.34 to<br>2.66)           | 2.11<br>(1.30 to<br>3.04)            | 1.80<br>(1.10 to<br>2.60)           | 2.46<br>(1.54 to<br>3.56)            |
| Unintentional firearm injuries                  | 34.52<br>(34.87 to<br>76.84)             | 51.27<br>(27.81 to<br>80.43)             | 42.91<br>(23.01 to<br>68.04)             | 61.55<br>(34.46 to<br>95.68)             | 1.01<br>(0.61 to<br>1.44)           | 1.00<br>(0.54 to<br>1.56)            | 0.85<br>(0.46 to<br>1.34)           | 1.19<br>(0.66 to<br>1.82)            |
| Unintentional suffocation                       | 12.19<br>(7.61 to<br>19.97)              | 8.43<br>(5.15 to<br>12.83)               | 6.43<br>(4.00 to<br>9.78)                | 11.11<br>(6.75 to<br>17.05)              | 0.16<br>(0.10 to<br>0.25)           | 0.12<br>(0.07 to<br>0.18)            | 0.09<br>(0.06 to<br>0.14)           | 0.15<br>(0.10 to<br>0.23)            |
| Other exposure to mechanical forces             | 41.98<br>(23.14 to<br>62.42)             | 47.22<br>(24.47 to<br>74.10)             | 40.42<br>(20.61 to<br>64.32)             | 55.06<br>(28.26 to<br>86.55)             | 0.79<br>(0.42 to<br>1.20)           | 0.98<br>(0.52 to<br>1.51)            | 0.86<br>(0.46 to<br>1.34)           | 1.12<br>(0.58 to<br>1.74)            |
| Adverse effects of medical treatment            | 31.81<br>(20.03 to<br>44.62)             | 32.45<br>(22.59 to<br>44.81)             | 28.07<br>(19.42 to<br>39.50)             | 37.92<br>(25.82 to<br>52.86)             | 0.56<br>(0.40 to<br>0.72)           | 0.70<br>(0.52 to<br>0.97)            | 0.63<br>(0.46 to<br>0.91)           | 0.78<br>(0.58 to<br>1.05)            |
| Animal contact                                  | 18.77<br>(12.59 to<br>24.94)             | 25.61<br>(15.28 to<br>37.99)             | 20.93<br>(12.43 to<br>31.66)             | 31.63<br>(18.67 to<br>47.30)             | 0.33<br>(0.22 to<br>0.44)           | 0.50<br>(0.31 to<br>0.73)            | 0.42<br>(0.26 to<br>0.62)           | 0.60<br>(0.37 to<br>0.88)            |
| Venomous animal contact                         | 5.29<br>(3.23 to<br>7.50)                | 6.20<br>(3.25 to<br>9.56)                | 4.97<br>(2.62 to<br>7.85)                | 7.86<br>(4.14 to<br>12.14)               | 0.09<br>(0.06 to<br>0.13)           | 0.12<br>(0.07 to<br>0.18)            | 0.10<br>(0.05 to<br>0.15)           | 0.15<br>(0.08 to<br>0.23)            |
| Non-venomous animal contact                     | 13.48<br>(8.29 to<br>18.33)              | 19.40<br>(11.11 to<br>29.48)             | 15.96<br>(9.10 to<br>24.35)              | 23.76<br>(13.43 to<br>36.05)             | 0.24<br>(0.15 to<br>0.32)           | 0.38<br>(0.22 to<br>0.56)            | 0.32<br>(0.19 to<br>0.47)           | 0.45<br>(0.27 to<br>0.67)            |
| Foreign body                                    | 41.19<br>(30.36 to<br>54.09)             | 40.45<br>(29.07 to<br>53.47)             | 35.65<br>(25.57 to<br>48.02)             | 46.39<br>(33.69 to<br>61.93)             | 0.66<br>(0.50 to<br>0.87)           | 0.76<br>(0.55 to<br>1.00)            | 0.69<br>(0.50 to<br>0.92)           | 0.83<br>(0.61 to<br>1.11)            |
| Pulmonary aspiration and foreign body in airway | 17.48<br>(11.92 to<br>24.73)             | 15.39<br>(11.09 to<br>20.88)             | 13.53<br>(9.86 to<br>18.14)              | 17.54<br>(12.36 to<br>24.22)             | 0.26<br>(0.18 to<br>0.35)           | 0.28<br>(0.21 to<br>0.36)            | 0.26<br>(0.20 to<br>0.33)           | 0.30<br>(0.22 to<br>0.39)            |
| Foreign body in other body part                 | 23.71<br>(16.81 to<br>33.21)             | 25.06<br>(15.61 to<br>35.95)             | 22.12<br>(13.58 to<br>32.11)             | 28.85<br>(18.73 to<br>41.52)             | 0.41<br>(0.29 to<br>0.57)           | 0.48<br>(0.30 to<br>0.68)            | 0.43<br>(0.27 to<br>0.62)           | 0.54<br>(0.34 to<br>0.76)            |

|                                                                                     |                                               |                                                 |                                             |                                                 |                                          |                                          |                                          |                                          |
|-------------------------------------------------------------------------------------|-----------------------------------------------|-------------------------------------------------|---------------------------------------------|-------------------------------------------------|------------------------------------------|------------------------------------------|------------------------------------------|------------------------------------------|
| Environmental heat and cold exposure                                                | 15.45<br>(8.51 to<br>21.31)                   | 17.28<br>(8.52 to<br>26.46)                     | 13.62<br>(6.65 to<br>20.84)                 | 22.12<br>(11.06 to<br>34.27)                    | 0.29<br>(0.17 to<br>0.40)                | 0.35<br>(0.20 to<br>0.52)                | 0.28<br>(0.16 to<br>0.43)                | 0.44<br>(0.24 to<br>0.66)                |
| Other unintentional injuries                                                        | 126.65<br>(86.73 to<br>164.79)                | 123.73<br>(79.39 to<br>177.91)                  | 105.19<br>(65.17 to<br>155.17)              | 143.08<br>(92.62 to<br>209.05)                  | 2.17<br>(1.49 to<br>2.86)                | 2.26<br>(1.47 to<br>3.22)                | 1.95<br>(1.23 to<br>2.83)                | 2.58<br>(1.69 to<br>3.70)                |
| <b>Self-harm and interpersonal violence</b>                                         | <b>302.23</b><br>(213.79 to<br>402.48)        | <b>427.45</b><br>(289.02 to<br>618.82)          | <b>395.02</b><br>(265.92 to<br>566.78)      | <b>458.81</b><br>(309.99 to<br>669.46)          | <b>5.61</b><br>(3.97 to<br>7.45)         | <b>8.23</b><br>(5.65 to<br>11.70)        | <b>7.66</b><br>(5.24 to<br>10.81)        | <b>8.76</b><br>(6.03 to<br>12.67)        |
| <b>Iraq</b>                                                                         |                                               |                                                 |                                             |                                                 |                                          |                                          |                                          |                                          |
| Cause                                                                               | YLLs (in 1000s)                               |                                                 |                                             |                                                 | Deaths (in 1000s)                        |                                          |                                          |                                          |
|                                                                                     | 2016                                          | 2040 Forecast                                   | 2040 Better Scenario                        | 2040 Worse Scenario                             | 2016                                     | 2040 Forecast                            | 2040 Better Scenario                     | 2040 Worse Scenario                      |
| Self-harm                                                                           | 149.18<br>(103.96 to<br>197.67)               | 237.12<br>(150.65 to<br>347.43)                 | 216.14<br>(137.61 to<br>317.73)             | 259.69<br>(164.68 to<br>388.56)                 | 2.92<br>(2.05 to<br>3.87)                | 4.74<br>(3.07 to<br>6.86)                | 4.35<br>(2.84 to<br>6.27)                | 5.14<br>(3.30 to<br>7.56)                |
| Self-harm by firearm                                                                | 27.61<br>(15.84 to<br>41.99)                  | 37.24<br>(19.50 to<br>64.09)                    | 33.22<br>(17.85 to<br>57.15)                | 41.61<br>(21.38 to<br>72.76)                    | 0.55<br>(0.32 to<br>0.82)                | 0.77<br>(0.42 to<br>1.30)                | 0.69<br>(0.38 to<br>1.14)                | 0.85<br>(0.45 to<br>1.43)                |
| Self-harm by other specified means                                                  | 121.56<br>(85.10 to<br>160.91)                | 199.88<br>(129.31 to<br>292.21)                 | 182.92<br>(117.31 to<br>268.55)             | 218.08<br>(139.63 to<br>323.67)                 | 2.37<br>(1.66 to<br>3.14)                | 3.97<br>(2.61 to<br>5.70)                | 3.66<br>(2.41 to<br>5.24)                | 4.29<br>(2.80 to<br>6.19)                |
| Interpersonal violence                                                              | 153.05<br>(94.97 to<br>208.06)                | 190.32<br>(112.29 to<br>275.08)                 | 178.88<br>(105.94 to<br>260.95)             | 199.12<br>(116.83 to<br>287.72)                 | 2.69<br>(1.66 to<br>3.69)                | 3.49<br>(2.10 to<br>5.01)                | 3.31<br>(2.00 to<br>4.77)                | 3.62<br>(2.14 to<br>5.18)                |
| Physical violence by firearm                                                        | 95.48<br>(57.25 to<br>141.29)                 | 121.07<br>(70.10 to<br>186.83)                  | 115.00<br>(66.33 to<br>176.35)              | 124.67<br>(71.81 to<br>194.73)                  | 1.69<br>(1.02 to<br>2.51)                | 2.21<br>(1.30 to<br>3.42)                | 2.11<br>(1.23 to<br>3.22)                | 2.25<br>(1.31 to<br>3.50)                |
| Physical violence by sharp object                                                   | 9.42<br>(5.25 to<br>14.59)                    | 13.38<br>(6.93 to<br>21.44)                     | 12.82<br>(6.73 to<br>20.21)                 | 13.75<br>(7.25 to<br>22.13)                     | 0.17<br>(0.09 to<br>0.26)                | 0.25<br>(0.13 to<br>0.40)                | 0.24<br>(0.13 to<br>0.38)                | 0.26<br>(0.14 to<br>0.41)                |
| Physical violence by other means                                                    | 48.15<br>(22.35 to<br>73.97)                  | 55.88<br>(20.69 to<br>91.93)                    | 51.06<br>(18.86 to<br>85.53)                | 60.79<br>(22.94 to<br>100.20)                   | 0.84<br>(0.38 to<br>1.27)                | 1.03<br>(0.39 to<br>1.67)                | 0.95<br>(0.36 to<br>1.55)                | 1.11<br>(0.43 to<br>1.80)                |
| <b>Forces of nature, conflict and terrorism, and executions and police conflict</b> | <b>1,586.84</b><br>(82.67 to<br>2,955.49)     | <b>230.90</b><br>(0.00 to<br>1,874.15)          | <b>222.40</b><br>(0.00 to<br>1,833.34)      | <b>240.44</b><br>(0.00 to<br>1,920.34)          | <b>25.56</b><br>(4.55 to<br>47.61)       | <b>4.11</b><br>(0.00 to<br>34.39)        | <b>4.03</b><br>(0.00 to<br>34.03)        | <b>4.20</b><br>(0.00 to<br>34.64)        |
| Exposure to forces of nature                                                        | 0.00<br>(0.00 to<br>0.00)                     | 0.05<br>(0.00 to<br>0.89)                       | 0.05<br>(0.00 to<br>0.84)                   | 0.06<br>(0.00 to<br>0.95)                       | 0.00<br>(0.00 to<br>0.00)                | 0.00<br>(0.00 to<br>0.02)                | 0.00<br>(0.00 to<br>0.02)                | 0.00<br>(0.00 to<br>0.02)                |
| Conflict and terrorism                                                              | 1,586.55<br>(282.32 to<br>2,955.22)           | 126.51<br>(0.00 to<br>1,171.82)                 | 120.45<br>(0.00 to<br>1,116.08)             | 133.47<br>(0.00 to<br>1,233.83)                 | 25.56<br>(4.55 to<br>47.61)              | 2.20<br>(0.00 to<br>20.58)               | 2.14<br>(0.00 to<br>20.07)               | 2.27<br>(0.00 to<br>21.16)               |
| Executions and police conflict                                                      | 0.29<br>(0.24 to<br>0.36)                     | 104.34<br>(0.00 to<br>1,874.04)                 | 101.91<br>(0.00 to<br>1,832.55)             | 106.91<br>(0.00 to<br>1,912.95)                 | 0.00<br>(0.00 to<br>0.01)                | 1.91<br>(0.00 to<br>34.39)               | 1.89<br>(0.00 to<br>34.02)               | 1.93<br>(0.00 to<br>34.55)               |
| <b>Jordan</b>                                                                       |                                               |                                                 |                                             |                                                 |                                          |                                          |                                          |                                          |
| Cause                                                                               | YLLs (actual counts)                          |                                                 |                                             |                                                 | Deaths (actual counts)                   |                                          |                                          |                                          |
|                                                                                     | 2016                                          | 2040 Forecast                                   | 2040 Better Scenario                        | 2040 Worse Scenario                             | 2016                                     | 2040 Forecast                            | 2040 Better Scenario                     | 2040 Worse Scenario                      |
| All causes                                                                          | 916,672.15<br>(769,079.24 to<br>1,074,167.25) | 1,071,452.66<br>(790,218.42 to<br>1,426,054.11) | 690,882.18<br>(506,213.89 to<br>938,591.14) | 1,365,691.09<br>(994,312.06 to<br>1,825,460.70) | 25,835.31<br>(21,489.16 to<br>30,807.18) | 48,830.01<br>(37,549.63 to<br>61,925.42) | 34,016.52<br>(26,263.74 to<br>43,968.14) | 59,072.69<br>(45,034.86 to<br>75,327.62) |
| Communicable, maternal, neonatal, and nutritional diseases                          | 186,497.01<br>(149,957.85 to<br>231,473.48)   | 100,218.30<br>(75,964.59 to<br>133,615.90)      | 61,784.60<br>(46,386.77 to<br>82,643.39)    | 140,596.97<br>(104,363.23 to<br>190,506.36)     | 2,683.86<br>(2,236.86 to<br>3,213.06)    | 2,370.18<br>(1,811.22 to<br>3,056.56)    | 1,560.36<br>(1,216.98 to<br>1,995.57)    | 2,930.62<br>(2,253.57 to<br>3,806.23)    |
| HIV/AIDS and tuberculosis                                                           | 962.71<br>(794.62 to<br>1,155.53)             | 1,024.87<br>(707.91 to<br>1,406.26)             | 450.50<br>(294.35 to<br>642.33)             | 1,438.65<br>(1,092.40 to<br>1,893.71)           | 30.25<br>(24.59 to<br>36.29)             | 38.77<br>(26.60 to<br>54.46)             | 17.72<br>(11.73 to<br>25.22)             | 50.36<br>(36.04 to<br>69.75)             |
| Tuberculosis                                                                        | 607.97<br>(468.03 to<br>769.56)               | 616.32<br>(388.10 to<br>944.93)                 | 257.51<br>(157.31 to<br>415.32)             | 787.63<br>(497.59 to<br>1,234.10)               | 22.88<br>(17.75 to<br>28.83)             | 29.50<br>(18.69 to<br>44.36)             | 13.07<br>(8.16 to<br>20.61)              | 36.25<br>(22.95 to<br>55.70)             |

|                                                                          |                                                   |                                                   |                                                   |                                                   |                                              |                                                |                                              |                                                |
|--------------------------------------------------------------------------|---------------------------------------------------|---------------------------------------------------|---------------------------------------------------|---------------------------------------------------|----------------------------------------------|------------------------------------------------|----------------------------------------------|------------------------------------------------|
| HIV/AIDS                                                                 | 354.75<br>(296.69 to<br>458.86)                   | 408.55<br>(234.90 to<br>586.70)                   | 192.99<br>(95.67 to<br>333.12)                    | 651.02<br>(502.53 to<br>823.06)                   | 7.37<br>(6.22 to<br>9.51)                    | 9.27<br>(5.33 to<br>13.31)                     | 4.66<br>(2.17 to<br>7.94)                    | 14.11<br>(10.59 to<br>18.00)                   |
| <b>Diarrhea, lower respiratory, and other common infectious diseases</b> | <b>48,392.73<br/>(39,499.58 to<br/>58,448.91)</b> | <b>37,529.56<br/>(26,134.12 to<br/>54,153.22)</b> | <b>23,791.31<br/>(17,001.16 to<br/>34,306.82)</b> | <b>49,951.80<br/>(33,192.86 to<br/>77,547.74)</b> | <b>1,011.61<br/>(823.45 to<br/>1,208.18)</b> | <b>1,549.06<br/>(1,115.16 to<br/>2,119.09)</b> | <b>1,049.41<br/>(781.64 to<br/>1,408.66)</b> | <b>1,775.30<br/>(1,252.78 to<br/>2,517.47)</b> |
| Diarrheal diseases                                                       | 2,715.23<br>(1,850.70 to<br>3,766.58)             | 823.20<br>(298.48 to<br>1,931.40)                 | 1,360.07<br>(508.33 to<br>3,227.13)               | 1,488.62<br>(446.92 to<br>4,184.07)               | 49.97<br>(34.53 to<br>71.88)                 | 38.35<br>(12.98 to<br>93.26)                   | 70.77<br>(23.57 to<br>157.80)                | 55.83<br>(15.74 to<br>147.21)                  |
| Intestinal infectious diseases                                           | 2,389.56<br>(1,128.68 to<br>4,304.34)             | 1,653.85<br>(761.45 to<br>3,037.25)               | 1,898.70<br>(926.81 to<br>3,335.34)               | 1,868.66<br>(844.18 to<br>3,448.90)               | 35.25<br>(16.77 to<br>63.07)                 | 25.99<br>(12.15 to<br>47.08)                   | 30.32<br>(15.02 to<br>52.93)                 | 28.84<br>(13.22 to<br>52.35)                   |
| Typhoid fever                                                            | 2,124.76<br>(1,002.15 to<br>3,849.89)             | 1,436.91<br>(648.42 to<br>2,615.24)               | 1,762.58<br>(850.49 to<br>3,119.08)               | 1,618.75<br>(727.12 to<br>3,004.33)               | 31.22<br>(14.92 to<br>56.00)                 | 22.43<br>(10.25 to<br>40.32)                   | 28.04<br>(13.78 to<br>49.54)                 | 24.81<br>(11.30 to<br>45.42)                   |
| Paratyphoid fever                                                        | 263.17<br>(106.54 to<br>539.10)                   | 216.46<br>(88.19 to<br>447.96)                    | 135.77<br>(54.31 to<br>285.52)                    | 249.33<br>(98.84 to<br>516.07)                    | 4.01<br>(1.64 to<br>8.21)                    | 3.55<br>(1.43 to<br>7.26)                      | 2.27<br>(0.90 to<br>4.70)                    | 4.01<br>(1.61 to<br>8.21)                      |
| Other intestinal infectious diseases                                     | 1.63<br>(0.58 to<br>3.96)                         | 0.48<br>(0.16 to<br>1.08)                         | 0.35<br>(0.12 to<br>0.82)                         | 0.58<br>(0.19 to<br>1.40)                         | 0.03<br>(0.01 to<br>0.06)                    | 0.01<br>(0.00 to<br>0.03)                      | 0.01<br>(0.00 to<br>0.02)                    | 0.01<br>(0.01 to<br>0.03)                      |
| Lower respiratory infections                                             | 38,010.55<br>(30,693.73 to<br>46,983.95)          | 31,970.83<br>(21,596.47 to<br>47,756.35)          | 18,390.14<br>(12,474.98 to<br>27,839.53)          | 42,139.30<br>(26,617.18 to<br>66,815.67)          | 846.22<br>(682.35 to<br>1,030.75)            | 1,423.89<br>(992.27 to<br>1,967.44)            | 904.47<br>(651.47 to<br>1,249.62)            | 1,613.31<br>(1,107.83 to<br>2,293.09)          |
| Upper respiratory infections                                             | 35.94<br>(18.29 to<br>67.91)                      | 33.68<br>(15.42 to<br>64.55)                      | 15.44<br>(6.34 to<br>30.32)                       | 40.99<br>(19.40 to<br>78.29)                      | 0.71<br>(0.40 to<br>1.16)                    | 1.06<br>(0.50 to<br>1.96)                      | 0.52<br>(0.22 to<br>1.01)                    | 1.23<br>(0.57 to<br>2.29)                      |
| Otitis media                                                             | 8.54<br>(4.05 to<br>18.05)                        | 1.25<br>(0.57 to<br>2.61)                         | 1.17<br>(0.55 to<br>2.43)                         | 1.36<br>(0.61 to<br>2.89)                         | 0.13<br>(0.07 to<br>0.25)                    | 0.03<br>(0.01 to<br>0.05)                      | 0.03<br>(0.02 to<br>0.05)                    | 0.03<br>(0.01 to<br>0.05)                      |
| Meningitis                                                               | 3,717.89<br>(2,781.98 to<br>5,041.58)             | 1,815.24<br>(1,258.02 to<br>2,530.85)             | 1,131.95<br>(741.23 to<br>1,645.15)               | 2,204.34<br>(1,486.82 to<br>3,094.73)             | 56.16<br>(42.49 to<br>72.92)                 | 35.82<br>(25.94 to<br>47.79)                   | 22.91<br>(15.99 to<br>32.18)                 | 40.35<br>(29.34 to<br>54.08)                   |
| Pneumococcal meningitis                                                  | 32.52<br>(19.81 to<br>51.98)                      | 11.29<br>(6.36 to<br>17.91)                       | 10.96<br>(6.13 to<br>17.35)                       | 12.08<br>(6.82 to<br>19.49)                       | 0.56<br>(0.35 to<br>0.82)                    | 0.31<br>(0.19 to<br>0.53)                      | 0.32<br>(0.19 to<br>0.56)                    | 0.31<br>(0.19 to<br>0.52)                      |
| H influenzae type B meningitis                                           | 388.07<br>(282.17 to<br>544.93)                   | 391.13<br>(222.79 to<br>669.40)                   | 332.98<br>(199.68 to<br>560.97)                   | 575.04<br>(297.15 to<br>1,047.69)                 | 5.71<br>(4.27 to<br>7.71)                    | 5.76<br>(3.71 to<br>9.11)                      | 5.15<br>(3.45 to<br>7.84)                    | 7.85<br>(4.51 to<br>13.72)                     |
| Meningococcal meningitis                                                 | 506.65<br>(362.13 to<br>728.25)                   | 202.07<br>(133.13 to<br>291.05)                   | 117.23<br>(73.27 to<br>179.21)                    | 232.67<br>(149.38 to<br>339.09)                   | 7.76<br>(5.67 to<br>10.43)                   | 4.44<br>(3.18 to<br>6.13)                      | 2.72<br>(1.83 to<br>4.04)                    | 4.80<br>(3.40 to<br>6.69)                      |
| Other meningitis                                                         | 2,790.65<br>(2,077.09 to<br>3,776.46)             | 1,210.74<br>(784.22 to<br>1,695.58)               | 670.78<br>(406.01 to<br>1,014.75)                 | 1,384.54<br>(890.56 to<br>1,927.98)               | 42.14<br>(31.51 to<br>55.23)                 | 25.31<br>(17.77 to<br>33.71)                   | 14.71<br>(9.54 to<br>21.45)                  | 27.38<br>(19.00 to<br>36.65)                   |
| Encephalitis                                                             | 1,015.86<br>(707.50 to<br>1,315.72)               | 994.52<br>(708.61 to<br>1,316.45)                 | 859.00<br>(608.13 to<br>1,151.07)                 | 1,127.93<br>(784.99 to<br>1,527.84)               | 16.41<br>(11.99 to<br>20.48)                 | 20.22<br>(15.19 to<br>26.06)                   | 18.10<br>(13.33 to<br>23.39)                 | 22.05<br>(16.14 to<br>28.44)                   |
| Diphtheria                                                               | 6.15<br>(3.58 to<br>9.79)                         | 1.36<br>(0.71 to<br>2.43)                         | 1.14<br>(0.63 to<br>1.96)                         | 3.02<br>(1.15 to<br>6.62)                         | 0.09<br>(0.05 to<br>0.13)                    | 0.02<br>(0.01 to<br>0.04)                      | 0.02<br>(0.01 to<br>0.03)                    | 0.04<br>(0.02 to<br>0.08)                      |
| Whooping cough                                                           | 307.17<br>(21.53 to<br>1,066.56)                  | 161.39<br>(11.32 to<br>572.18)                    | 84.19<br>(5.69 to<br>284.67)                      | 947.17<br>(74.76 to<br>2,994.79)                  | 3.64<br>(0.25 to<br>12.67)                   | 1.92<br>(0.14 to<br>6.82)                      | 1.01<br>(0.07 to<br>3.44)                    | 11.20<br>(0.88 to<br>35.49)                    |
| Tetanus                                                                  | 51.70<br>(43.79 to<br>62.26)                      | 5.29<br>(3.73 to<br>7.51)                         | 4.74<br>(3.40 to<br>6.49)                         | 9.29<br>(5.19 to<br>19.46)                        | 0.84<br>(0.70 to<br>1.02)                    | 0.09<br>(0.07 to<br>0.12)                      | 0.09<br>(0.06 to<br>0.11)                    | 0.14<br>(0.09 to<br>0.27)                      |
| Measles                                                                  | 28.79<br>(7.93 to<br>75.67)                       | 13.71<br>(1.18 to<br>85.47)                       | 9.99<br>(0.92 to<br>60.83)                        | 50.59<br>(2.22 to<br>357.06)                      | 0.34<br>(0.10 to<br>0.90)                    | 0.16<br>(0.01 to<br>1.01)                      | 0.12<br>(0.01 to<br>0.73)                    | 0.60<br>(0.03 to<br>4.18)                      |
| <b>Jordan</b>                                                            |                                                   |                                                   |                                                   |                                                   |                                              |                                                |                                              |                                                |
| Cause                                                                    | YLLs (actual counts)                              |                                                   |                                                   |                                                   | Deaths (actual counts)                       |                                                |                                              |                                                |
|                                                                          | 2016                                              | 2040 Forecast                                     | 2040 Better Scenario                              | 2040 Worse Scenario                               | 2016                                         | 2040 Forecast                                  | 2040 Better Scenario                         | 2040 Worse Scenario                            |



|                                                       |                                                            |                                                            |                                                          |                                                            |                                                    |                                                   |                                                   |                                                    |
|-------------------------------------------------------|------------------------------------------------------------|------------------------------------------------------------|----------------------------------------------------------|------------------------------------------------------------|----------------------------------------------------|---------------------------------------------------|---------------------------------------------------|----------------------------------------------------|
| Varicella and herpes zoster                           | 105.35<br>(62.67 to<br>164.55)                             | 55.23<br>(31.35 to<br>96.07)                               | 34.80<br>(19.77 to<br>60.49)                             | 70.52<br>(38.63 to<br>126.44)                              | 1.85<br>(1.25 to<br>2.60)                          | 1.49<br>(0.94 to<br>2.32)                         | 1.07<br>(0.67 to<br>1.67)                         | 1.69<br>(1.06 to<br>2.64)                          |
| <b>Neglected tropical diseases and malaria</b>        | <b>202.95</b><br><b>(132.02 to</b><br><b>306.76)</b>       | <b>144.04</b><br><b>(83.67 to</b><br><b>233.06)</b>        | <b>128.42</b><br><b>(73.79 to</b><br><b>201.96)</b>      | <b>157.61</b><br><b>(91.60 to</b><br><b>248.88)</b>        | <b>5.23</b><br><b>(3.08 to</b><br><b>8.32)</b>     | <b>4.52</b><br><b>(2.33 to</b><br><b>7.59)</b>    | <b>4.11</b><br><b>(2.09 to</b><br><b>6.98)</b>    | <b>4.76</b><br><b>(2.47 to</b><br><b>8.00)</b>     |
| Malaria                                               | 0.00<br>(0.00 to<br>0.00)                                  | 0.00<br>(0.00 to<br>0.00)                                  | 0.00<br>(0.00 to<br>0.00)                                | 0.00<br>(0.00 to<br>0.00)                                  | 0.00<br>(0.00 to<br>0.00)                          | 0.00<br>(0.00 to<br>0.00)                         | 0.00<br>(0.00 to<br>0.00)                         | 0.00<br>(0.00 to<br>0.00)                          |
| Chagas disease                                        | 0.00<br>(0.00 to<br>0.00)                                  | 0.00<br>(0.00 to<br>0.00)                                  | 0.00<br>(0.00 to<br>0.00)                                | 0.00<br>(0.00 to<br>0.00)                                  | 0.00<br>(0.00 to<br>0.00)                          | 0.00<br>(0.00 to<br>0.00)                         | 0.00<br>(0.00 to<br>0.00)                         | 0.00<br>(0.00 to<br>0.00)                          |
| Leishmaniasis                                         | 12.58<br>(6.78 to<br>19.79)                                | 5.36<br>(2.94 to<br>9.48)                                  | 3.90<br>(2.11 to<br>6.88)                                | 6.31<br>(3.42 to<br>11.01)                                 | 0.30<br>(0.16 to<br>0.46)                          | 0.14<br>(0.08 to<br>0.26)                         | 0.11<br>(0.06 to<br>0.20)                         | 0.16<br>(0.09 to<br>0.29)                          |
| African trypanosomiasis                               | 0.00<br>(0.00 to<br>0.00)                                  | 0.00<br>(0.00 to<br>0.00)                                  | 0.00<br>(0.00 to<br>0.00)                                | 0.00<br>(0.00 to<br>0.00)                                  | 0.00<br>(0.00 to<br>0.00)                          | 0.00<br>(0.00 to<br>0.00)                         | 0.00<br>(0.00 to<br>0.00)                         | 0.00<br>(0.00 to<br>0.00)                          |
| Schistosomiasis                                       | 125.50<br>(60.57 to<br>226.05)                             | 94.84<br>(41.37 to<br>176.04)                              | 83.52<br>(35.63 to<br>154.56)                            | 100.68<br>(43.89 to<br>182.18)                             | 3.86<br>(1.79 to<br>6.87)                          | 3.58<br>(1.47 to<br>6.59)                         | 3.24<br>(1.33 to<br>6.04)                         | 3.70<br>(1.53 to<br>6.85)                          |
| Cysticercosis                                         | 3.22<br>(2.04 to<br>4.85)                                  | 1.02<br>(0.63 to<br>1.58)                                  | 0.91<br>(0.56 to<br>1.43)                                | 1.06<br>(0.65 to<br>1.65)                                  | 0.07<br>(0.05 to<br>0.11)                          | 0.03<br>(0.02 to<br>0.04)                         | 0.03<br>(0.02 to<br>0.04)                         | 0.03<br>(0.02 to<br>0.04)                          |
| Cystic echinococcosis                                 | 0.00<br>(0.00 to<br>0.00)                                  | 0.00<br>(0.00 to<br>0.00)                                  | 0.00<br>(0.00 to<br>0.00)                                | 0.00<br>(0.00 to<br>0.00)                                  | 0.00<br>(0.00 to<br>0.00)                          | 0.00<br>(0.00 to<br>0.00)                         | 0.00<br>(0.00 to<br>0.00)                         | 0.00<br>(0.00 to<br>0.00)                          |
| Dengue                                                | 0.00<br>(0.00 to<br>0.00)                                  | 0.00<br>(0.00 to<br>0.00)                                  | 0.00<br>(0.00 to<br>0.00)                                | 0.00<br>(0.00 to<br>0.00)                                  | 0.00<br>(0.00 to<br>0.00)                          | 0.00<br>(0.00 to<br>0.00)                         | 0.00<br>(0.00 to<br>0.00)                         | 0.00<br>(0.00 to<br>0.00)                          |
| Yellow fever                                          | 0.00<br>(0.00 to<br>0.00)                                  | 0.00<br>(0.00 to<br>0.00)                                  | 0.00<br>(0.00 to<br>0.00)                                | 0.00<br>(0.00 to<br>0.00)                                  | 0.00<br>(0.00 to<br>0.00)                          | 0.00<br>(0.00 to<br>0.00)                         | 0.00<br>(0.00 to<br>0.00)                         | 0.00<br>(0.00 to<br>0.00)                          |
| Rabies                                                | 0.96<br>(0.41 to<br>1.76)                                  | 0.48<br>(0.16 to<br>0.99)                                  | 0.33<br>(0.11 to<br>0.68)                                | 0.65<br>(0.22 to<br>1.37)                                  | 0.02<br>(0.01 to<br>0.04)                          | 0.01<br>(0.00 to<br>0.05)                         | 0.01<br>(0.00 to<br>0.02)                         | 0.02<br>(0.00 to<br>0.04)                          |
| Intestinal nematode infections                        | 8.56<br>(1.55 to<br>20.44)                                 | 7.19<br>(1.49 to<br>18.36)                                 | 6.55<br>(1.45 to<br>16.31)                               | 8.13<br>(1.53 to<br>21.21)                                 | 0.12<br>(0.03 to<br>0.26)                          | 0.11<br>(0.04 to<br>0.24)                         | 0.10<br>(0.04 to<br>0.22)                         | 0.12<br>(0.04 to<br>0.28)                          |
| Other neglected tropical diseases                     | 52.12<br>(43.99 to<br>63.05)                               | 35.16<br>(27.11 to<br>45.96)                               | 33.21<br>(25.42 to<br>43.03)                             | 40.78<br>(31.19 to<br>53.26)                               | 0.86<br>(0.71 to<br>1.04)                          | 0.64<br>(0.50 to<br>0.83)                         | 0.62<br>(0.48 to<br>0.79)                         | 0.73<br>(0.56 to<br>0.95)                          |
| <b>Maternal disorders</b>                             | <b>3,863.34</b><br><b>(2,532.50 to</b><br><b>5,939.18)</b> | <b>2,648.98</b><br><b>(1,407.89 to</b><br><b>4,512.40)</b> | <b>1,839.39</b><br><b>(960.96 to</b><br><b>3,278.55)</b> | <b>3,224.51</b><br><b>(1,720.19 to</b><br><b>5,600.63)</b> | <b>70.40</b><br><b>(46.40 to</b><br><b>110.23)</b> | <b>48.87</b><br><b>(26.44 to</b><br><b>82.93)</b> | <b>33.98</b><br><b>(17.92 to</b><br><b>59.63)</b> | <b>59.38</b><br><b>(32.08 to</b><br><b>103.71)</b> |
| Maternal hemorrhage                                   | 603.78<br>(364.34 to<br>1,008.27)                          | 431.40<br>(202.40 to<br>801.42)                            | 301.74<br>(138.65 to<br>565.90)                          | 520.20<br>(241.90 to<br>1,015.48)                          | 11.14<br>(6.68 to<br>18.68)                        | 8.06<br>(3.81 to<br>15.01)                        | 5.64<br>(2.61 to<br>10.73)                        | 9.71<br>(4.51 to<br>18.47)                         |
| Maternal sepsis and other maternal infections         | 498.50<br>(295.82 to<br>808.48)                            | 291.21<br>(141.71 to<br>574.53)                            | 199.16<br>(91.98 to<br>383.90)                           | 354.47<br>(166.85 to<br>688.02)                            | 9.06<br>(5.43 to<br>14.91)                         | 5.35<br>(2.63 to<br>10.27)                        | 3.67<br>(1.68 to<br>7.18)                         | 6.51<br>(3.01 to<br>13.52)                         |
| Maternal hypertensive disorders                       | 390.68<br>(227.43 to<br>622.25)                            | 284.28<br>(135.22 to<br>539.21)                            | 192.75<br>(84.71 to<br>371.43)                           | 344.55<br>(154.08 to<br>659.04)                            | 7.06<br>(4.13 to<br>11.26)                         | 5.21<br>(2.45 to<br>9.92)                         | 3.54<br>(1.54 to<br>6.88)                         | 6.31<br>(2.80 to<br>12.18)                         |
| Maternal obstructed labor and uterine rupture         | 259.39<br>(145.29 to<br>434.23)                            | 180.49<br>(81.03 to<br>346.86)                             | 116.32<br>(52.51 to<br>228.29)                           | 220.87<br>(96.35 to<br>423.46)                             | 4.77<br>(2.67 to<br>7.89)                          | 3.36<br>(1.50 to<br>6.40)                         | 2.17<br>(0.98 to<br>4.30)                         | 4.10<br>(1.80 to<br>8.02)                          |
| Maternal abortion, miscarriage, and ectopic pregnancy | 302.74<br>(165.79 to<br>511.12)                            | 179.10<br>(83.38 to<br>350.33)                             | 120.83<br>(55.10 to<br>243.63)                           | 218.22<br>(96.42 to<br>437.01)                             | 5.66<br>(3.14 to<br>9.64)                          | 3.39<br>(1.58 to<br>6.68)                         | 2.29<br>(1.03 to<br>4.55)                         | 4.12<br>(1.81 to<br>8.14)                          |
| Indirect maternal deaths                              | 425.04<br>(247.90 to<br>709.60)                            | 317.22<br>(148.30 to<br>601.76)                            | 211.98<br>(93.25 to<br>414.23)                           | 392.88<br>(178.59 to<br>745.26)                            | 7.59<br>(4.44 to<br>12.47)                         | 5.72<br>(2.65 to<br>10.96)                        | 3.83<br>(1.69 to<br>7.47)                         | 7.07<br>(3.20 to<br>13.25)                         |
| Late maternal deaths                                  | 28.61<br>(11.31 to<br>56.01)                               | 17.43<br>(6.37 to<br>38.90)                                | 11.63<br>(4.05 to<br>25.94)                              | 21.46<br>(7.48 to<br>48.78)                                | 0.51<br>(0.20 to<br>1.01)                          | 0.32<br>(0.11 to<br>0.71)                         | 0.21<br>(0.07 to<br>0.47)                         | 0.39<br>(0.14 to<br>0.90)                          |

| Maternal deaths aggravated by HIV/AIDS                                  | 0.04<br>(0.01 to<br>0.08)                          | 0.15<br>(0.04 to<br>0.40)                       | 0.08<br>(0.01 to<br>0.25)                       | 0.20<br>(0.06 to<br>0.50)                        | 0.00<br>(0.00 to<br>0.00)                    | 0.00<br>(0.00 to<br>0.01)              | 0.00<br>(0.00 to<br>0.00)              | 0.00<br>(0.00 to<br>0.00)                |
|-------------------------------------------------------------------------|----------------------------------------------------|-------------------------------------------------|-------------------------------------------------|--------------------------------------------------|----------------------------------------------|----------------------------------------|----------------------------------------|------------------------------------------|
| Other maternal disorders                                                | 1,354.57<br>(852.24 to<br>2,161.38)                | 947.68<br>(472.91 to<br>1,700.46)               | 684.90<br>(326.96 to<br>1,282.19)               | 1,151.66<br>(549.41 to<br>2,118.30)              | 24.61<br>(15.34 to<br>39.55)                 | 17.46<br>(8.68 to<br>31.20)            | 12.64<br>(6.05 to<br>23.72)            | 21.18<br>(10.17 to<br>38.53)             |
| <b>Jordan</b>                                                           |                                                    |                                                 |                                                 |                                                  |                                              |                                        |                                        |                                          |
| Cause                                                                   | YLLs (actual counts)                               |                                                 |                                                 |                                                  | Deaths (actual counts)                       |                                        |                                        |                                          |
|                                                                         | 2016                                               | 2040 Forecast                                   | 2040 Better Scenario                            | 2040 Worse Scenario                              | 2016                                         | 2040 Forecast                          | 2040 Better Scenario                   | 2040 Worse Scenario                      |
| <b>Neonatal disorders</b>                                               | <b>130,859.14</b><br>(101,142.92 to<br>169,303.12) | <b>57,096.99</b><br>(40,249.56 to<br>81,961.24) | <b>34,196.89</b><br>(24,059.15 to<br>49,409.81) | <b>83,861.39</b><br>(58,715.31 to<br>119,762.71) | <b>1,512.61</b><br>(1,169.25 to<br>1,956.82) | <b>660.20</b><br>(465.50 to<br>947.39) | <b>395.45</b><br>(278.22 to<br>571.55) | <b>969.55</b><br>(679.18 to<br>1,384.72) |
| Neonatal preterm birth                                                  | 79,644.82<br>(59,308.18 to<br>105,318.00)          | 30,454.89<br>(20,665.66 to<br>44,783.51)        | 17,051.24<br>(11,055.46 to<br>25,398.31)        | 48,453.00<br>(32,705.22 to<br>71,016.42)         | 920.23<br>(685.98 to<br>1,216.95)            | 351.94<br>(238.83 to<br>517.45)        | 197.05<br>(127.74 to<br>293.46)        | 559.87<br>(377.96 to<br>820.63)          |
| Neonatal encephalopathy due to birth asphyxia and trauma                | 20,458.80<br>(13,663.89 to<br>29,215.98)           | 8,802.74<br>(4,868.39 to<br>14,652.12)          | 4,987.75<br>(2,783.27 to<br>8,500.60)           | 11,633.43<br>(6,585.56 to<br>19,556.42)          | 236.77<br>(158.04 to<br>338.10)              | 101.95<br>(56.44 to<br>169.51)         | 57.77<br>(32.28 to<br>98.42)           | 134.72<br>(76.32 to<br>226.63)           |
| Neonatal sepsis and other neonatal infections                           | 21,098.18<br>(14,376.09 to<br>31,264.35)           | 12,824.60<br>(7,435.62 to<br>20,461.66)         | 8,193.27<br>(4,754.43 to<br>13,242.62)          | 17,007.70<br>(9,634.32 to<br>28,224.27)          | 243.87<br>(166.24 to<br>361.40)              | 148.24<br>(85.96 to<br>236.52)         | 94.71<br>(54.95 to<br>153.07)          | 196.59<br>(111.42 to<br>326.20)          |
| Hemolytic disease and other neonatal jaundice                           | 1,896.95<br>(1,256.65 to<br>2,728.56)              | 556.45<br>(278.45 to<br>1,003.19)               | 339.21<br>(173.22 to<br>607.69)                 | 759.83<br>(376.88 to<br>1,401.10)                | 21.93<br>(14.52 to<br>31.53)                 | 6.44<br>(3.22 to<br>11.60)             | 3.92<br>(2.00 to<br>7.03)              | 8.79<br>(4.36 to<br>16.20)               |
| Other neonatal disorders                                                | 7,760.38<br>(5,133.47 to<br>10,994.21)             | 4,458.31<br>(2,578.03 to<br>7,495.06)           | 3,625.42<br>(2,113.69 to<br>6,034.03)           | 6,007.42<br>(3,445.78 to<br>10,444.03)           | 89.81<br>(59.39 to<br>127.21)                | 51.64<br>(29.90 to<br>86.82)           | 41.99<br>(24.50 to<br>69.83)           | 69.57<br>(39.91 to<br>120.98)            |
| <b>Nutritional deficiencies</b>                                         | <b>476.52</b><br>(355.38 to<br>630.32)             | <b>330.88</b><br>(257.61 to<br>433.82)          | <b>327.33</b><br>(257.29 to<br>418.83)          | <b>365.42</b><br>(277.47 to<br>490.27)           | <b>13.48</b><br>(11.20 to<br>16.38)          | <b>19.04</b><br>(13.15 to<br>25.94)    | <b>21.83</b><br>(15.39 to<br>29.25)    | <b>18.78</b><br>(12.61 to<br>25.69)      |
| Protein-energy malnutrition                                             | 343.78<br>(244.12 to<br>469.96)                    | 185.95<br>(132.37 to<br>259.91)                 | 206.39<br>(149.83 to<br>278.00)                 | 205.25<br>(142.77 to<br>292.35)                  | 10.17<br>(8.28 to<br>12.36)                  | 12.87<br>(7.96 to<br>18.98)            | 16.36<br>(10.51 to<br>23.06)           | 12.48<br>(7.53 to<br>18.30)              |
| Iodine deficiency                                                       | 16.14<br>(1.12 to<br>70.85)                        | 20.33<br>(1.06 to<br>54.42)                     | 17.73<br>(0.84 to<br>49.28)                     | 22.97<br>(1.17 to<br>65.40)                      | 0.37<br>(0.03 to<br>1.16)                    | 1.04<br>(0.03 to<br>3.47)              | 1.01<br>(0.02 to<br>3.80)              | 1.08<br>(0.04 to<br>3.40)                |
| Dietary iron deficiency                                                 | 42.11<br>(32.23 to<br>54.72)                       | 36.46<br>(25.75 to<br>52.07)                    | 35.69<br>(25.56 to<br>50.36)                    | 40.71<br>(28.24 to<br>58.88)                     | 0.74<br>(0.58 to<br>0.95)                    | 0.75<br>(0.53 to<br>1.03)              | 0.76<br>(0.54 to<br>1.05)              | 0.80<br>(0.57 to<br>1.12)                |
| Other nutritional deficiencies                                          | 74.48<br>(54.59 to<br>102.50)                      | 88.15<br>(64.72 to<br>120.12)                   | 67.52<br>(48.06 to<br>92.81)                    | 96.50<br>(70.14 to<br>132.70)                    | 2.20<br>(1.71 to<br>2.86)                    | 4.38<br>(3.02 to<br>6.06)              | 3.71<br>(2.52 to<br>5.14)              | 4.41<br>(2.99 to<br>6.17)                |
| <b>Other communicable, maternal, neonatal, and nutritional diseases</b> | <b>1,739.63</b><br>(1,323.10 to<br>2,670.00)       | <b>1,442.97</b><br>(1,087.30 to<br>1,934.23)    | <b>1,050.76</b><br>(771.63 to<br>1,437.75)      | <b>1,597.59</b><br>(1,207.17 to<br>2,162.94)     | <b>40.29</b><br>(31.61 to<br>52.97)          | <b>49.73</b><br>(38.98 to<br>62.64)    | <b>37.85</b><br>(29.23 to<br>48.43)    | <b>52.49</b><br>(40.94 to<br>67.55)      |
| Sexually transmitted infections excluding HIV                           | 269.83<br>(131.43 to<br>513.26)                    | 82.23<br>(44.30 to<br>145.38)                   | 58.27<br>(31.49 to<br>104.59)                   | 96.05<br>(49.38 to<br>179.39)                    | 3.72<br>(2.06 to<br>6.71)                    | 1.36<br>(0.81 to<br>2.23)              | 1.02<br>(0.62 to<br>1.66)              | 1.54<br>(0.90 to<br>2.59)                |
| Syphilis                                                                | 223.54<br>(86.48 to<br>463.32)                     | 52.02<br>(20.97 to<br>112.34)                   | 32.36<br>(12.93 to<br>72.63)                    | 63.80<br>(24.81 to<br>146.04)                    | 2.80<br>(1.20 to<br>5.61)                    | 0.71<br>(0.33 to<br>1.41)              | 0.45<br>(0.21 to<br>0.94)              | 0.86<br>(0.38 to<br>1.80)                |
| Chlamydial infection                                                    | 8.82<br>(4.28 to<br>14.07)                         | 5.88<br>(2.82 to<br>9.85)                       | 5.08<br>(2.43 to<br>8.56)                       | 6.29<br>(2.97 to<br>10.50)                       | 0.17<br>(0.09 to<br>0.28)                    | 0.17<br>(0.07 to<br>0.20)              | 0.11<br>(0.06 to<br>0.18)              | 0.13<br>(0.07 to<br>0.21)                |
| Gonococcal infection                                                    | 23.99<br>(12.38 to<br>37.81)                       | 15.63<br>(7.85 to<br>25.81)                     | 13.41<br>(6.45 to<br>22.27)                     | 16.66<br>(8.27 to<br>27.87)                      | 0.48<br>(0.27 to<br>0.76)                    | 0.34<br>(0.20 to<br>0.55)              | 0.30<br>(0.17 to<br>0.47)              | 0.36<br>(0.20 to<br>0.58)                |
| Other sexually transmitted infections                                   | 13.48<br>(6.72 to<br>21.52)                        | 8.70<br>(4.16 to<br>14.83)                      | 7.42<br>(3.60 to<br>12.64)                      | 9.31<br>(4.50 to<br>15.75)                       | 0.26<br>(0.14 to<br>0.42)                    | 0.31<br>(0.10 to<br>0.30)              | 0.16<br>(0.08 to<br>0.26)              | 0.19<br>(0.10 to<br>0.32)                |
| Acute hepatitis                                                         | 841.92<br>(659.27 to<br>1,072.83)                  | 829.44<br>(589.34 to<br>1,113.41)               | 518.35<br>(352.00 to<br>735.56)                 | 892.99<br>(659.63 to<br>1,200.97)                | 24.78<br>(18.98 to<br>31.65)                 | 31.34<br>(22.86 to<br>41.70)           | 20.18<br>(13.94 to<br>28.24)           | 32.99<br>(24.10 to<br>43.99)             |

|                                       |                                                                  |                                                                    |                                                                  |                                                                      |                                                               |                                                               |                                                               |                                                               |
|---------------------------------------|------------------------------------------------------------------|--------------------------------------------------------------------|------------------------------------------------------------------|----------------------------------------------------------------------|---------------------------------------------------------------|---------------------------------------------------------------|---------------------------------------------------------------|---------------------------------------------------------------|
| Acute hepatitis A                     | 47.84<br>(7.68 to<br>96.79)                                      | 20.37<br>(6.72 to<br>43.71)                                        | 13.88<br>(4.68 to<br>30.12)                                      | 23.52<br>(7.45 to<br>50.70)                                          | 0.68<br>(0.19 to<br>1.26)                                     | 0.55<br>(0.20 to<br>1.24)                                     | 0.40<br>(0.14 to<br>0.90)                                     | 0.60<br>(0.22 to<br>1.30)                                     |
| Acute hepatitis B                     | 675.35<br>(499.88 to<br>879.49)                                  | 713.11<br>(488.47 to<br>975.44)                                    | 442.46<br>(292.96 to<br>638.73)                                  | 766.51<br>(533.27 to<br>1,052.41)                                    | 20.97<br>(15.50 to<br>27.35)                                  | 26.68<br>(18.64 to<br>36.45)                                  | 16.94<br>(11.33 to<br>24.38)                                  | 28.22<br>(19.89 to<br>38.36)                                  |
| Acute hepatitis C                     | 14.02<br>(9.23 to<br>20.55)                                      | 19.26<br>(11.72 to<br>30.32)                                       | 12.53<br>(7.21 to<br>20.36)                                      | 19.85<br>(12.27 to<br>30.70)                                         | 0.51<br>(0.33 to<br>0.76)                                     | 0.81<br>(0.50 to<br>1.25)                                     | 0.54<br>(0.32 to<br>0.85)                                     | 0.82<br>(0.51 to<br>1.25)                                     |
| Acute hepatitis E                     | 104.72<br>(73.69 to<br>144.91)                                   | 76.70<br>(46.08 to<br>123.51)                                      | 49.48<br>(29.09 to<br>82.77)                                     | 83.11<br>(50.16 to<br>131.44)                                        | 2.61<br>(1.70 to<br>3.80)                                     | 3.30<br>(1.88 to<br>5.49)                                     | 2.30<br>(1.27 to<br>3.85)                                     | 3.35<br>(1.92 to<br>5.47)                                     |
| Other unspecified infectious diseases | 627.88<br>(389.65 to<br>1,416.16)                                | 531.30<br>(384.69 to<br>834.95)                                    | 474.14<br>(350.49 to<br>692.59)                                  | 608.54<br>(427.65 to<br>1,021.08)                                    | 11.79<br>(8.47 to<br>21.03)                                   | 17.02<br>(13.23 to<br>22.58)                                  | 16.65<br>(13.08 to<br>21.67)                                  | 17.96<br>(13.78 to<br>24.25)                                  |
| <b>Non-communicable diseases</b>      | <b>514,804.80</b><br><b>(425,496.85 to</b><br><b>625,181.53)</b> | <b>861,260.72</b><br><b>(606,817.73 to</b><br><b>1,188,329.39)</b> | <b>564,813.46</b><br><b>(400,220.40 to</b><br><b>780,235.41)</b> | <b>1,081,495.91</b><br><b>(754,312.50 to</b><br><b>1,492,424.45)</b> | <b>19,351.58</b><br><b>(15,925.33 to</b><br><b>23,528.47)</b> | <b>43,911.49</b><br><b>(33,042.64 to</b><br><b>56,726.72)</b> | <b>30,863.92</b><br><b>(23,485.24 to</b><br><b>40,552.10)</b> | <b>52,983.74</b><br><b>(39,370.56 to</b><br><b>69,279.24)</b> |
| <b>Jordan</b>                         |                                                                  |                                                                    |                                                                  |                                                                      |                                                               |                                                               |                                                               |                                                               |
| Cause                                 | YLLs (actual counts)                                             |                                                                    |                                                                  |                                                                      | Deaths (actual counts)                                        |                                                               |                                                               |                                                               |
|                                       | 2016                                                             | 2040 Forecast                                                      | 2040 Better Scenario                                             | 2040 Worse Scenario                                                  | 2016                                                          | 2040 Forecast                                                 | 2040 Better Scenario                                          | 2040 Worse Scenario                                           |
| <b>Neoplasms</b>                      | <b>114,059.17</b><br><b>(89,645.05 to</b><br><b>144,437.85)</b>  | <b>201,187.94</b><br><b>(139,653.17 to</b><br><b>283,200.35)</b>   | <b>156,819.01</b><br><b>(110,146.13 to</b><br><b>216,354.99)</b> | <b>221,764.89</b><br><b>(149,647.94 to</b><br><b>317,724.22)</b>     | <b>3,743.97</b><br><b>(2,965.79 to</b><br><b>4,737.04)</b>    | <b>8,288.10</b><br><b>(5,981.15 to</b><br><b>11,166.66)</b>   | <b>6,686.83</b><br><b>(4,914.88 to</b><br><b>8,798.25)</b>    | <b>8,899.67</b><br><b>(6,274.45 to</b><br><b>12,256.45)</b>   |
| Lip and oral cavity cancer            | 1,235.66<br>(915.41 to<br>1,616.05)                              | 2,304.76<br>(1,288.38 to<br>4,146.81)                              | 1,524.99<br>(915.55 to<br>2,502.94)                              | 2,797.74<br>(1,498.01 to<br>5,092.79)                                | 45.46<br>(34.60 to<br>59.17)                                  | 99.72<br>(59.42 to<br>169.11)                                 | 70.29<br>(46.34 to<br>107.54)                                 | 115.74<br>(66.14 to<br>202.65)                                |
| Nasopharynx cancer                    | 859.57<br>(645.66 to<br>1,140.66)                                | 1,655.57<br>(817.49 to<br>3,180.93)                                | 923.77<br>(491.79 to<br>1,629.98)                                | 2,085.78<br>(985.82 to<br>4,115.85)                                  | 24.38<br>(18.22 to<br>32.28)                                  | 55.49<br>(27.25 to<br>103.13)                                 | 31.65<br>(16.80 to<br>53.81)                                  | 68.46<br>(31.81 to<br>132.01)                                 |
| Other pharynx cancer                  | 462.15<br>(350.67 to<br>609.51)                                  | 655.68<br>(437.58 to<br>959.57)                                    | 652.05<br>(445.37 to<br>934.50)                                  | 696.68<br>(461.49 to<br>1,055.86)                                    | 16.45<br>(12.69 to<br>21.03)                                  | 27.35<br>(19.56 to<br>39.65)                                  | 28.79<br>(20.55 to<br>40.18)                                  | 28.77<br>(19.92 to<br>42.19)                                  |
| Esophageal cancer                     | 1,023.87<br>(770.65 to<br>1,344.17)                              | 1,948.34<br>(995.80 to<br>3,485.21)                                | 1,444.20<br>(826.78 to<br>2,384.66)                              | 2,332.16<br>(1,135.47 to<br>4,326.33)                                | 39.02<br>(29.80 to<br>50.42)                                  | 86.56<br>(47.24 to<br>147.86)                                 | 67.71<br>(41.36 to<br>107.39)                                 | 99.70<br>(51.93 to<br>178.91)                                 |
| Stomach cancer                        | 5,104.23<br>(3,925.53 to<br>6,495.93)                            | 6,602.74<br>(4,353.78 to<br>9,503.53)                              | 4,464.18<br>(3,007.37 to<br>6,335.99)                            | 6,949.92<br>(4,609.02 to<br>10,122.21)                               | 184.21<br>(143.89 to<br>231.95)                               | 292.22<br>(206.92 to<br>399.57)                               | 205.35<br>(146.46 to<br>276.71)                               | 298.64<br>(209.34 to<br>409.66)                               |
| Colon and rectum cancer               | 11,971.83<br>(9,226.64 to<br>15,506.19)                          | 24,864.71<br>(15,476.86 to<br>39,056.91)                           | 19,457.84<br>(11,951.44 to<br>30,645.39)                         | 26,006.95<br>(15,768.54 to<br>41,290.06)                             | 448.39<br>(348.20 to<br>573.90)                               | 1,102.93<br>(717.03 to<br>1,697.46)                           | 895.02<br>(571.20 to<br>1,381.40)                             | 1,126.77<br>(713.69 to<br>1,769.39)                           |
| Liver cancer                          | 2,775.06<br>(2,078.84 to<br>3,607.06)                            | 6,403.96<br>(3,619.89 to<br>10,870.07)                             | 5,907.97<br>(3,534.49 to<br>9,506.57)                            | 7,396.90<br>(3,963.51 to<br>13,053.29)                               | 111.84<br>(84.66 to<br>144.97)                                | 298.94<br>(177.91 to<br>494.99)                               | 182.57<br>(118.57 to<br>453.94)                               | 333.95<br>(191.07 to<br>564.50)                               |
| Liver cancer due to hepatitis B       | 1,087.07<br>(748.75 to<br>1,520.70)                              | 2,316.04<br>(1,230.67 to<br>4,035.23)                              | 2,111.52<br>(1,202.08 to<br>3,514.15)                            | 2,685.58<br>(1,365.78 to<br>4,831.21)                                | 38.66<br>(26.41 to<br>55.37)                                  | 95.97<br>(53.39 to<br>163.55)                                 | 90.89<br>(52.80 to<br>146.91)                                 | 108.08<br>(58.63 to<br>187.51)                                |
| Liver cancer due to hepatitis C       | 791.90<br>(538.90 to<br>1,111.08)                                | 2,003.08<br>(1,112.89 to<br>3,497.36)                              | 1,892.47<br>(1,093.72 to<br>3,199.16)                            | 2,255.47<br>(1,202.55 to<br>4,030.31)                                | 37.96<br>(26.36 to<br>52.62)                                  | 106.32<br>(61.77 to<br>176.60)                                | 105.24<br>(63.90 to<br>169.06)                                | 115.41<br>(65.61 to<br>195.00)                                |
| Liver cancer due to alcohol use       | 197.27<br>(113.44 to<br>315.78)                                  | 500.24<br>(220.85 to<br>1,005.24)                                  | 450.93<br>(212.59 to<br>869.07)                                  | 588.17<br>(251.14 to<br>1,206.01)                                    | 8.54<br>(5.01 to<br>13.72)                                    | 23.64<br>(11.12 to<br>40.94)                                  | 22.18<br>(11.14 to<br>40.94)                                  | 26.95<br>(12.09 to<br>54.31)                                  |
| Liver cancer due to other causes      | 698.82<br>(457.94 to<br>999.90)                                  | 1,584.59<br>(782.72 to<br>2,970.77)                                | 1,453.05<br>(762.59 to<br>2,587.93)                              | 1,867.67<br>(887.13 to<br>3,635.14)                                  | 26.67<br>(17.07 to<br>38.84)                                  | 73.02<br>(35.65 to<br>134.45)                                 | 69.92<br>(35.99 to<br>122.71)                                 | 83.52<br>(39.48 to<br>159.09)                                 |
| Gallbladder and biliary tract cancer  | 1,401.53<br>(1,054.34 to<br>1,854.58)                            | 1,932.63<br>(1,435.89 to<br>2,529.63)                              | 1,857.39<br>(1,360.61 to<br>2,471.24)                            | 1,868.88<br>(1,403.47 to<br>2,433.21)                                | 59.70<br>(45.67 to<br>77.71)                                  | 95.08<br>(73.78 to<br>119.81)                                 | 94.45<br>(72.28 to<br>120.97)                                 | 89.81<br>(70.03 to<br>113.02)                                 |
| Pancreatic cancer                     | 3,789.76<br>(2,867.32 to<br>4,963.43)                            | 8,384.76<br>(5,371.39 to<br>12,442.69)                             | 7,968.25<br>(5,198.57 to<br>11,608.69)                           | 8,652.43<br>(5,461.39 to<br>13,177.42)                               | 153.62<br>(117.60 to<br>196.38)                               | 385.05<br>(258.70 to<br>548.39)                               | 380.10<br>(260.77 to<br>534.14)                               | 387.52<br>(258.92 to<br>560.22)                               |

|                                     |                                          |                                          |                                          |                                          |                                 |                                     |                                   |                                     |
|-------------------------------------|------------------------------------------|------------------------------------------|------------------------------------------|------------------------------------------|---------------------------------|-------------------------------------|-----------------------------------|-------------------------------------|
| Larynx cancer                       | 809.50<br>(557.11 to<br>1,115.27)        | 1,987.30<br>(747.21 to<br>4,350.11)      | 966.06<br>(432.14 to<br>1,930.93)        | 2,567.10<br>(5,600.35)                   | 31.08<br>(21.92 to<br>42.53)    | 87.40<br>(36.99 to<br>185.90)       | 44.54<br>(22.01 to<br>86.45)      | 109.65<br>(44.55 to<br>238.86)      |
| Tracheal, bronchus, and lung cancer | 13,691.32<br>(10,001.07 to<br>18,210.98) | 30,432.89<br>(14,509.73 to<br>55,996.91) | 16,293.24<br>(8,791.61 to<br>27,555.93)  | 41,255.24<br>(18,828.56 to<br>76,514.85) | 529.92<br>(392.88 to<br>701.47) | 1,338.80<br>(672.61 to<br>2,361.82) | 746.05<br>(423.45 to<br>1,219.47) | 1,760.64<br>(850.84 to<br>3,216.34) |
| Malignant skin melanoma             | 341.80<br>(256.15 to<br>446.02)          | 546.21<br>(400.73 to<br>721.08)          | 666.54<br>(481.34 to<br>904.15)          | 516.76<br>(382.52 to<br>673.60)          | 10.79<br>(8.25 to<br>14.15)     | 21.90<br>(17.17 to<br>28.47)        | 27.80<br>(21.33 to<br>36.54)      | 20.14<br>(15.83 to<br>25.79)        |
| Non-melanoma skin cancer            | 472.43<br>(359.74 to<br>617.77)          | 997.57<br>(767.16 to<br>1,284.59)        | 760.25<br>(555.59 to<br>993.28)          | 1,006.02<br>(775.19 to<br>1,278.91)      | 18.05<br>(14.16 to<br>23.31)    | 48.82<br>(39.93 to<br>58.80)        | 39.33<br>(30.68 to<br>48.36)      | 47.53<br>(38.68 to<br>57.09)        |
| Breast cancer                       | 15,759.97<br>(10,096.21 to<br>23,886.21) | 25,275.54<br>(14,176.51 to<br>41,351.24) | 19,896.02<br>(11,032.43 to<br>32,637.46) | 27,075.35<br>(14,757.25 to<br>45,042.40) | 479.89<br>(308.68 to<br>718.42) | 910.68<br>(530.39 to<br>1,434.77)   | 731.33<br>(421.36 to<br>1,165.19) | 959.90<br>(541.94 to<br>1,544.15)   |
| Cervical cancer                     | 1,349.94<br>(823.63 to<br>2,085.34)      | 1,826.27<br>(1,016.70 to<br>3,129.43)    | 1,317.28<br>(715.71 to<br>2,244.88)      | 1,933.59<br>(1,073.45 to<br>3,324.01)    | 43.36<br>(27.07 to<br>65.11)    | 69.10<br>(41.72 to<br>111.42)       | 51.06<br>(29.76 to<br>81.97)      | 71.55<br>(43.45 to<br>115.53)       |
| Uterine cancer                      | 1,172.71<br>(753.02 to<br>1,754.27)      | 2,371.58<br>(1,545.02 to<br>3,563.04)    | 1,943.14<br>(1,241.33 to<br>3,030.45)    | 2,443.15<br>(1,580.96 to<br>3,645.03)    | 46.08<br>(30.41 to<br>67.42)    | 108.55<br>(75.12 to<br>154.90)      | 91.14<br>(60.69 to<br>134.33)     | 109.60<br>(75.59 to<br>155.40)      |
| Ovarian cancer                      | 2,319.15<br>(1,531.13 to<br>3,494.30)    | 3,941.41<br>(2,229.26 to<br>6,384.44)    | 3,428.18<br>(1,910.06 to<br>5,509.22)    | 4,070.17<br>(2,216.52 to<br>6,730.90)    | 76.18<br>(50.19 to<br>111.28)   | 153.01<br>(88.49 to<br>239.75)      | 135.43<br>(77.01 to<br>213.66)    | 156.11<br>(87.67 to<br>252.62)      |
| Prostate cancer                     | 2,223.72<br>(1,345.89 to<br>3,208.24)    | 6,647.91<br>(4,172.85 to<br>9,270.31)    | 5,963.85<br>(3,622.36 to<br>8,458.92)    | 6,275.59<br>(3,936.06 to<br>8,633.48)    | 144.49<br>(89.65 to<br>204.43)  | 457.51<br>(296.85 to<br>599.64)     | 428.59<br>(278.34 to<br>569.68)   | 421.97<br>(272.20 to<br>557.38)     |
| Testicular cancer                   | 406.67<br>(270.68 to<br>592.82)          | 466.12<br>(277.09 to<br>727.45)          | 361.29<br>(205.38 to<br>568.07)          | 482.26<br>(285.80 to<br>733.20)          | 8.09<br>(5.36 to<br>11.65)      | 10.19<br>(6.39 to<br>15.37)         | 8.01<br>(4.89 to<br>12.11)        | 10.43<br>(6.64 to<br>15.64)         |

**Jordan**

| Cause                           | YLLs (actual counts)                     |                                          |                                         |                                          | Deaths (actual counts)          |                                 |                                 |                                 |
|---------------------------------|------------------------------------------|------------------------------------------|-----------------------------------------|------------------------------------------|---------------------------------|---------------------------------|---------------------------------|---------------------------------|
|                                 | 2016                                     | 2040 Forecast                            | 2040 Better Scenario                    | 2040 Worse Scenario                      | 2016                            | 2040 Forecast                   | 2040 Better Scenario            | 2040 Worse Scenario             |
| Kidney cancer                   | 1,509.01<br>(1,148.82 to<br>1,932.42)    | 3,113.83<br>(1,953.82 to<br>4,860.57)    | 2,999.83<br>(1,995.65 to<br>4,440.55)   | 3,084.89<br>(1,935.14 to<br>4,866.91)    | 51.75<br>(38.85 to<br>66.78)    | 132.02<br>(87.01 to<br>196.46)  | 132.80<br>(91.42 to<br>187.64)  | 127.00<br>(83.82 to<br>190.72)  |
| Bladder cancer                  | 2,403.90<br>(1,723.97 to<br>3,229.93)    | 5,758.65<br>(3,396.87 to<br>9,376.39)    | 4,642.79<br>(2,855.27 to<br>7,186.07)   | 6,143.53<br>(3,511.73 to<br>10,252.04)   | 115.55<br>(85.40 to<br>154.07)  | 310.39<br>(197.56 to<br>477.13) | 264.32<br>(172.65 to<br>392.02) | 321.08<br>(196.99 to<br>512.89) |
| Brain and nervous system cancer | 7,612.46<br>(5,815.75 to<br>9,647.41)    | 11,651.40<br>(8,572.05 to<br>15,217.30)  | 10,343.88<br>(7,618.21 to<br>13,612.13) | 11,724.35<br>(8,693.98 to<br>15,318.41)  | 177.09<br>(135.30 to<br>225.28) | 353.07<br>(270.35 to<br>449.10) | 325.11<br>(244.50 to<br>418.72) | 344.03<br>(266.98 to<br>436.06) |
| Thyroid cancer                  | 746.32<br>(553.02 to<br>984.76)          | 1,502.87<br>(933.46 to<br>2,248.63)      | 1,176.86<br>(723.48 to<br>1,722.34)     | 1,675.50<br>(1,017.34 to<br>2,547.39)    | 28.00<br>(20.91 to<br>36.38)    | 67.20<br>(43.52 to<br>98.56)    | 54.24<br>(34.83 to<br>80.84)    | 72.83<br>(46.25 to<br>109.23)   |
| Mesothelioma                    | 271.41<br>(191.91 to<br>374.09)          | 570.45<br>(412.54 to<br>770.45)          | 591.52<br>(420.36 to<br>814.33)         | 557.74<br>(409.98 to<br>739.64)          | 9.85<br>(7.09 to<br>13.48)      | 25.29<br>(18.96 to<br>32.12)    | 27.19<br>(19.93 to<br>35.15)    | 24.15<br>(18.22 to<br>30.37)    |
| Hodgkin lymphoma                | 292.61<br>(204.42 to<br>392.33)          | 323.23<br>(214.99 to<br>459.46)          | 218.10<br>(134.98 to<br>312.16)         | 349.13<br>(234.21 to<br>486.99)          | 6.68<br>(4.68 to<br>8.94)       | 9.17<br>(6.21 to<br>12.64)      | 6.34<br>(4.06 to<br>8.77)       | 9.70<br>(6.63 to<br>13.03)      |
| Non-Hodgkin lymphoma            | 8,726.34<br>(6,568.53 to<br>11,323.83)   | 14,497.91<br>(9,823.00 to<br>19,862.29)  | 12,028.89<br>(8,082.36 to<br>16,681.83) | 14,962.46<br>(10,047.46 to<br>20,629.26) | 239.95<br>(185.78 to<br>309.97) | 508.51<br>(363.76 to<br>690.35) | 436.14<br>(312.77 to<br>595.19) | 511.19<br>(359.39 to<br>704.34) |
| Multiple myeloma                | 1,302.97<br>(976.23 to<br>1,755.36)      | 3,193.43<br>(2,208.55 to<br>4,530.82)    | 2,876.71<br>(1,992.79 to<br>4,098.60)   | 3,243.00<br>(2,238.09 to<br>4,703.60)    | 49.89<br>(37.92 to<br>66.46)    | 142.38<br>(101.54 to<br>198.53) | 132.22<br>(94.43 to<br>186.25)  | 141.27<br>(99.67 to<br>198.62)  |
| Leukemia                        | 13,746.70<br>(10,793.56 to<br>17,206.17) | 17,750.93<br>(12,173.22 to<br>25,049.80) | 13,324.69<br>(8,899.17 to<br>18,686.39) | 19,861.09<br>(13,429.81 to<br>28,350.68) | 348.65<br>(267.74 to<br>441.21) | 650.56<br>(456.79 to<br>894.44) | 508.74<br>(354.29 to<br>697.58) | 703.17<br>(480.89 to<br>974.08) |
| Acute lymphoid leukemia         | 641.32<br>(451.14 to<br>839.17)          | 588.53<br>(385.57 to<br>839.75)          | 449.13<br>(292.28 to<br>652.99)         | 647.35<br>(418.90 to<br>930.09)          | 11.04<br>(7.63 to<br>14.30)     | 13.11<br>(8.10 to<br>19.12)     | 10.16<br>(6.33 to<br>14.84)     | 14.20<br>(8.69 to<br>20.85)     |

|                                |                                                        |                                                        |                                                       |                                                        |                                                   |                                                     |                                                   |                                                     |
|--------------------------------|--------------------------------------------------------|--------------------------------------------------------|-------------------------------------------------------|--------------------------------------------------------|---------------------------------------------------|-----------------------------------------------------|---------------------------------------------------|-----------------------------------------------------|
| Chronic lymphoid leukemia      | 133.83<br>(80.74 to 200.67)                            | 169.69<br>(100.15 to 277.12)                           | 142.17<br>(85.41 to 230.91)                           | 187.81<br>(108.03 to 317.69)                           | 3.62<br>(2.23 to 5.34)                            | 5.68<br>(3.43 to 8.77)                              | 4.91<br>(3.04 to 7.48)                            | 6.11<br>(3.62 to 9.77)                              |
| Acute myeloid leukemia         | 839.75<br>(618.90 to 1,091.32)                         | 1,194.99<br>(807.23 to 1,748.54)                       | 1,070.98<br>(739.16 to 1,538.83)                      | 1,278.94<br>(854.33 to 1,880.86)                       | 17.78<br>(13.18 to 23.20)                         | 34.34<br>(22.70 to 50.49)                           | 31.74<br>(21.34 to 45.55)                         | 35.77<br>(23.42 to 52.80)                           |
| Chronic myeloid leukemia       | 155.68<br>(80.53 to 221.30)                            | 139.92<br>(79.13 to 230.85)                            | 82.77<br>(44.44 to 133.89)                            | 156.42<br>(85.70 to 261.86)                            | 3.76<br>(2.25 to 5.25)                            | 4.14<br>(2.48 to 6.52)                              | 2.51<br>(1.44 to 3.91)                            | 4.55<br>(2.74 to 7.17)                              |
| Other leukemia                 | 11,976.12<br>(9,352.87 to 15,036.93)                   | 15,657.79<br>(10,663.06 to 22,201.34)                  | 11,579.64<br>(7,640.91 to 16,248.11)                  | 17,590.56<br>(11,717.68 to 25,083.24)                  | 312.45<br>(239.98 to 396.77)                      | 593.29<br>(415.95 to 811.60)                        | 459.43<br>(317.52 to 625.74)                      | 642.55<br>(440.75 to 885.46)                        |
| Other neoplasms                | 10,276.59<br>(8,260.39 to 12,739.17)                   | 13,579.29<br>(10,626.53 to 17,094.55)                  | 12,819.14<br>(9,854.62 to 16,277.56)                  | 13,750.53<br>(10,796.66 to 17,215.27)                  | 245.56<br>(198.49 to 307.01)                      | 439.71<br>(353.12 to 532.53)                        | 434.86<br>(345.32 to 532.06)                      | 428.36<br>(346.19 to 515.62)                        |
| <b>Cardiovascular diseases</b> | <b>171,113.59</b><br><b>(134,832.05 to 215,437.89)</b> | <b>293,846.40</b><br><b>(169,415.00 to 490,877.86)</b> | <b>138,926.39</b><br><b>(87,990.20 to 227,705.65)</b> | <b>429,833.11</b><br><b>(245,000.05 to 709,695.34)</b> | <b>8,515.80</b><br><b>(6,841.56 to 10,507.24)</b> | <b>16,879.52</b><br><b>(11,836.04 to 26,380.83)</b> | <b>9,084.02</b><br><b>(6,312.05 to 14,267.12)</b> | <b>23,013.29</b><br><b>(15,188.35 to 35,154.31)</b> |
| Rheumatic heart disease        | 1,319.44<br>(1,060.71 to 1,649.16)                     | 883.75<br>(602.52 to 1,291.81)                         | 596.41<br>(394.24 to 871.73)                          | 977.29<br>(653.77 to 1,450.59)                         | 35.59<br>(28.35 to 44.93)                         | 34.45<br>(24.99 to 47.99)                           | 24.50<br>(17.41 to 34.73)                         | 35.58<br>(25.94 to 51.46)                           |
| Ischemic heart disease         | 101,348.08<br>(76,606.17 to 131,043.41)                | 161,325.20<br>(80,067.07 to 312,037.80)                | 64,464.21<br>(33,092.36 to 131,653.47)                | 255,638.45<br>(126,259.08 to 481,888.80)               | 4,868.78<br>(3,811.90 to 6,155.72)                | 8,690.67<br>(4,767.40 to 16,272.15)                 | 4,006.76<br>(2,229.22 to 7,756.67)                | 12,893.35<br>(7,051.04 to 23,134.23)                |
| Stroke                         | 36,211.40<br>(28,055.05 to 46,759.22)                  | 59,200.88<br>(31,958.97 to 121,173.30)                 | 26,089.34<br>(14,542.61 to 56,150.31)                 | 90,614.50<br>(48,303.46 to 183,404.61)                 | 1,991.05<br>(1,572.91 to 2,518.07)                | 3,712.29<br>(2,158.24 to 8,052.60)                  | 1,878.66<br>(1,061.69 to 4,193.18)                | 5,205.73<br>(2,967.53 to 10,681.65)                 |
| Ischemic stroke                | 22,474.71<br>(17,340.82 to 28,966.71)                  | 38,016.17<br>(18,512.06 to 96,536.00)                  | 18,102.16<br>(8,960.82 to 47,173.97)                  | 55,512.28<br>(25,977.39 to 133,466.60)                 | 1,425.72<br>(1,125.09 to 1,796.51)                | 2,667.69<br>(1,364.99 to 7,257.69)                  | 1,434.05<br>(733.24 to 3,767.32)                  | 3,596.48<br>(1,763.16 to 9,123.03)                  |
| Intracerebral hemorrhage       | 13,736.69<br>(10,578.12 to 17,720.86)                  | 21,184.71<br>(11,210.34 to 38,597.52)                  | 7,987.17<br>(4,362.27 to 14,979.38)                   | 35,102.21<br>(17,214.90 to 64,547.78)                  | 565.33<br>(439.01 to 724.07)                      | 1,044.60<br>(594.21 to 1,809.53)                    | 444.61<br>(250.86 to 781.56)                      | 1,609.24<br>(855.42 to 2,997.04)                    |
| Hypertensive heart disease     | 18,065.38<br>(8,689.96 to 25,190.76)                   | 44,563.15<br>(14,752.93 to 102,322.86)                 | 28,732.98<br>(11,060.44 to 56,504.41)                 | 52,943.06<br>(16,851.85 to 127,585.79)                 | 1,041.16<br>(450.24 to 1,465.93)                  | 2,922.10<br>(917.45 to 6,385.59)                    | 2,034.80<br>(748.88 to 3,993.79)                  | 3,339.09<br>(994.05 to 7,722.15)                    |
| Cardiomyopathy and myocarditis | 1,374.83<br>(1,047.54 to 1,742.12)                     | 1,943.74<br>(1,265.55 to 2,899.24)                     | 1,373.86<br>(900.24 to 2,041.67)                      | 1,998.55<br>(1,329.39 to 2,938.63)                     | 38.42<br>(29.38 to 52.46)                         | 76.42<br>(50.22 to 123.51)                          | 56.27<br>(36.30 to 92.34)                         | 75.41<br>(50.75 to 118.82)                          |
| Myocarditis                    | 546.39<br>(393.49 to 725.67)                           | 587.34<br>(412.12 to 820.36)                           | 522.05<br>(366.00 to 730.90)                          | 608.96<br>(426.46 to 851.97)                           | 12.57<br>(9.47 to 16.44)                          | 19.17<br>(14.57 to 26.18)                           | 18.31<br>(13.77 to 26.01)                         | 18.96<br>(14.51 to 25.65)                           |

| Jordan                          |                                    |                                    |                                    |                                    |                            |                              |                              |                              |
|---------------------------------|------------------------------------|------------------------------------|------------------------------------|------------------------------------|----------------------------|------------------------------|------------------------------|------------------------------|
| Cause                           | YLLs (actual counts)               |                                    |                                    |                                    | Deaths (actual counts)     |                              |                              |                              |
|                                 | 2016                               | 2040 Forecast                      | 2040 Better Scenario               | 2040 Worse Scenario                | 2016                       | 2040 Forecast                | 2040 Better Scenario         | 2040 Worse Scenario          |
| Alcoholic cardiomyopathy        | 75.17<br>(48.60 to 107.36)         | 118.85<br>(76.10 to 180.28)        | 113.94<br>(71.20 to 176.92)        | 116.79<br>(75.46 to 174.94)        | 2.37<br>(1.64 to 3.46)     | 4.67<br>(3.05 to 7.52)       | 4.66<br>(2.95 to 8.20)       | 4.46<br>(2.96 to 6.99)       |
| Other cardiomyopathy            | 753.27<br>(575.04 to 1,000.16)     | 1,237.55<br>(729.48 to 2,034.15)   | 737.87<br>(411.57 to 1,277.08)     | 1,272.80<br>(759.26 to 2,078.47)   | 23.48<br>(17.25 to 34.58)  | 52.58<br>(30.71 to 91.16)    | 33.30<br>(61.81)             | 51.99<br>(30.86 to 88.82)    |
| Atrial fibrillation and flutter | 900.05<br>(657.97 to 1,227.60)     | 2,504.56<br>(1,813.85 to 3,414.07) | 2,187.26<br>(1,582.61 to 3,018.14) | 2,449.19<br>(1,771.67 to 3,314.22) | 80.38<br>(59.13 to 109.49) | 237.83<br>(163.43 to 331.53) | 221.96<br>(154.82 to 312.94) | 224.00<br>(148.43 to 311.66) |
| Aortic aneurysm                 | 1,642.04<br>(1,243.53 to 2,162.97) | 3,237.46<br>(2,238.74 to 4,711.53) | 2,358.31<br>(1,681.39 to 3,354.19) | 3,255.18<br>(2,265.73 to 4,713.99) | 71.79<br>(55.27 to 92.15)  | 168.89<br>(128.01 to 226.72) | 135.51<br>(103.43 to 179.15) | 164.04<br>(123.41 to 219.22) |
| Peripheral artery disease       | 49.21<br>(33.65 to 65.04)          | 172.74<br>(111.49 to 246.92)       | 158.12<br>(105.35 to 228.84)       | 177.41<br>(114.62 to 252.45)       | 3.96<br>(2.64 to 5.15)     | 15.50<br>(9.37 to 22.43)     | 15.59<br>(9.37 to 22.54)     | 15.05<br>(8.94 to 22.12)     |
| Endocarditis                    | 2,383.77<br>(1,822.16 to 3,125.22) | 4,167.58<br>(2,830.29 to 5,947.63) | 3,648.86<br>(2,481.27 to 5,210.51) | 4,314.10<br>(2,912.36 to 6,119.44) | 82.68<br>(62.25 to 109.63) | 195.62<br>(135.37 to 288.95) | 181.59<br>(124.08 to 268.97) | 193.87<br>(133.67 to 283.58) |

|                                                                |                                                   |                                                   |                                                   |                                                   |                                          |                                                |                                              |                                                |
|----------------------------------------------------------------|---------------------------------------------------|---------------------------------------------------|---------------------------------------------------|---------------------------------------------------|------------------------------------------|------------------------------------------------|----------------------------------------------|------------------------------------------------|
| Other cardiovascular and circulatory diseases                  | 7,819.40<br>(6,023.51 to<br>10,723.39)            | 15,847.35<br>(10,432.40 to<br>24,209.79)          | 9,317.04<br>(6,197.72 to<br>14,263.01)            | 17,465.38<br>(11,638.77 to<br>26,411.52)          | 301.99<br>(232.11 to<br>443.80)          | 825.75<br>(583.68 to<br>1,295.06)              | 528.39<br>(359.77 to<br>853.22)              | 866.19<br>(607.56 to<br>1,317.05)              |
| <b>Chronic respiratory diseases</b>                            | <b>13,733.96<br/>(10,770.88 to<br/>17,444.81)</b> | <b>28,709.92<br/>(17,773.00 to<br/>44,105.49)</b> | <b>20,615.03<br/>(14,043.99 to<br/>28,967.14)</b> | <b>35,396.42<br/>(20,994.48 to<br/>56,983.68)</b> | <b>651.90<br/>(519.64 to<br/>817.68)</b> | <b>1,642.54<br/>(1,065.36 to<br/>2,441.94)</b> | <b>1,251.87<br/>(904.65 to<br/>1,683.72)</b> | <b>1,930.36<br/>(1,201.33 to<br/>2,964.45)</b> |
| Chronic obstructive pulmonary disease                          | 7,482.24<br>(5,719.47 to<br>9,734.79)             | 18,995.92<br>(9,590.61 to<br>32,897.13)           | 10,404.45<br>(5,809.38 to<br>17,028.75)           | 25,162.92<br>(12,490.72 to<br>44,838.23)          | 406.39<br>(316.79 to<br>517.57)          | 1,145.86<br>(637.14 to<br>1,887.28)            | 690.32<br>(420.99 to<br>1,057.57)            | 1,431.13<br>(760.00 to<br>2,384.16)            |
| Pneumoconiosis                                                 | 26.05<br>(19.26 to<br>34.69)                      | 34.97<br>(26.23 to<br>45.67)                      | 31.37<br>(23.02 to<br>42.09)                      | 35.38<br>(26.67 to<br>46.01)                      | 1.20<br>(0.90 to<br>1.60)                | 2.11<br>(1.58 to<br>2.74)                      | 1.93<br>(1.41 to<br>2.57)                    | 2.07<br>(1.54 to<br>2.70)                      |
| Silicosis                                                      | 2.69<br>(1.78 to<br>3.89)                         | 2.84<br>(1.80 to<br>4.33)                         | 1.74<br>(0.97 to<br>2.91)                         | 2.92<br>(1.87 to<br>4.46)                         | 0.16<br>(0.11 to<br>0.24)                | 0.20<br>(0.13 to<br>0.30)                      | 0.13<br>(0.07 to<br>0.21)                    | 0.20<br>(0.13 to<br>0.30)                      |
| Asbestosis                                                     | 7.89<br>(5.77 to<br>10.68)                        | 10.89<br>(7.57 to<br>14.80)                       | 12.83<br>(8.79 to<br>17.79)                       | 10.77<br>(7.57 to<br>14.58)                       | 0.24<br>(0.18 to<br>0.33)                | 0.47<br>(0.33 to<br>0.64)                      | 0.57<br>(0.40 to<br>0.77)                    | 0.45<br>(0.32 to<br>0.61)                      |
| Coal workers pneumoconiosis                                    | 1.34<br>(0.79 to<br>2.00)                         | 1.68<br>(0.90 to<br>3.02)                         | 1.41<br>(0.67 to<br>2.84)                         | 1.84<br>(1.04 to<br>3.27)                         | 0.08<br>(0.05 to<br>0.12)                | 0.12<br>(0.06 to<br>0.20)                      | 0.10<br>(0.05 to<br>0.20)                    | 0.12<br>(0.07 to<br>0.21)                      |
| Other pneumoconiosis                                           | 14.13<br>(10.33 to<br>18.72)                      | 19.55<br>(14.35 to<br>26.06)                      | 15.39<br>(10.79 to<br>21.05)                      | 19.85<br>(14.65 to<br>26.30)                      | 0.71<br>(0.52 to<br>0.95)                | 1.33<br>(0.95 to<br>1.80)                      | 1.12<br>(0.77 to<br>1.58)                    | 1.30<br>(0.92 to<br>1.75)                      |
| Asthma                                                         | 3,122.05<br>(2,414.09 to<br>4,059.64)             | 2,971.82<br>(1,624.40 to<br>5,180.03)             | 1,423.56<br>(718.15 to<br>2,581.82)               | 3,785.64<br>(2,085.16 to<br>6,700.13)             | 109.29<br>(83.00 to<br>142.46)           | 138.06<br>(79.04 to<br>239.65)                 | 69.85<br>(36.73 to<br>122.40)                | 167.95<br>(95.62 to<br>286.58)                 |
| Interstitial lung disease and pulmonary sarcoidosis            | 2,472.62<br>(1,843.03 to<br>3,399.90)             | 5,484.85<br>(3,984.00 to<br>7,646.15)             | 7,628.23<br>(5,449.56 to<br>10,501.24)            | 5,127.78<br>(3,786.56 to<br>7,017.41)             | 110.90<br>(81.74 to<br>153.76)           | 296.19<br>(222.67 to<br>421.56)                | 430.20<br>(325.84 to<br>580.16)              | 268.46<br>(200.01 to<br>374.04)                |
| Other chronic respiratory diseases                             | 630.99<br>(383.78 to<br>927.56)                   | 1,222.36<br>(620.17 to<br>2,132.10)               | 1,127.42<br>(553.61 to<br>1,900.20)               | 2,284.70<br>(645.65 to<br>2,219.95)               | 24.13<br>(12.60 to<br>37.13)             | 60.32<br>(28.31 to<br>101.49)                  | 59.58<br>(27.03 to<br>99.68)                 | 60.76<br>(28.53 to<br>103.40)                  |
| <b>Cirrhosis and other chronic liver diseases</b>              | <b>12,240.84<br/>(9,468.71 to<br/>15,927.64)</b>  | <b>21,215.79<br/>(15,971.91 to<br/>27,502.33)</b> | <b>16,973.73<br/>(12,379.12 to<br/>22,785.41)</b> | <b>21,612.51<br/>(16,212.84 to<br/>28,083.00)</b> | <b>425.39<br/>(325.49 to<br/>558.30)</b> | <b>935.25<br/>(740.58 to<br/>1,165.07)</b>     | <b>777.33<br/>(600.87 to<br/>998.11)</b>     | <b>926.15<br/>(741.92 to<br/>1,153.10)</b>     |
| Cirrhosis and other chronic liver diseases due to hepatitis B  | 3,653.31<br>(2,552.84 to<br>5,188.49)             | 6,901.11<br>(4,748.44 to<br>9,846.54)             | 5,591.06<br>(3,799.14 to<br>8,043.11)             | 6,958.08<br>(4,805.42 to<br>9,849.51)             | 137.33<br>(96.84 to<br>191.76)           | 310.60<br>(225.81 to<br>423.68)                | 260.20<br>(185.20 to<br>363.09)              | 306.04<br>(223.92 to<br>417.06)                |
| Cirrhosis and other chronic liver diseases due to hepatitis C  | 3,910.69<br>(2,733.27 to<br>5,414.28)             | 7,716.11<br>(5,304.59 to<br>10,743.72)            | 6,149.14<br>(4,148.85 to<br>8,912.08)             | 7,802.18<br>(5,373.43 to<br>10,848.18)            | 144.58<br>(103.50 to<br>199.04)          | 340.07<br>(240.32 to<br>458.06)                | 279.72<br>(192.76 to<br>390.08)              | 336.39<br>(238.26 to<br>453.25)                |
| Cirrhosis and other chronic liver diseases due to alcohol use  | 804.64<br>(569.00 to<br>1,127.99)                 | 1,426.39<br>(1,001.25 to<br>1,997.77)             | 1,146.04<br>(779.82 to<br>1,618.43)               | 1,489.49<br>(1,046.00 to<br>2,061.79)             | 31.62<br>(22.85 to<br>43.86)             | 66.84<br>(49.68 to<br>88.76)                   | 55.79<br>(40.63 to<br>75.51)                 | 67.86<br>(50.81 to<br>90.62)                   |
| Cirrhosis and other chronic liver diseases due to other causes | 3,872.20<br>(3,075.57 to<br>4,997.74)             | 5,172.19<br>(3,847.57 to<br>6,973.74)             | 4,087.48<br>(3,010.90 to<br>5,623.72)             | 5,362.76<br>(4,031.04 to<br>7,210.12)             | 111.86<br>(85.85 to<br>146.38)           | 217.73<br>(167.85 to<br>283.14)                | 181.63<br>(136.78 to<br>238.22)              | 215.86<br>(166.87 to<br>282.13)                |
| <b>Digestive diseases</b>                                      | <b>8,341.53<br/>(6,597.00 to<br/>10,454.24)</b>   | <b>14,054.98<br/>(10,454.50 to<br/>18,004.59)</b> | <b>11,482.47<br/>(8,422.56 to<br/>14,757.85)</b>  | <b>14,782.84<br/>(10,922.56 to<br/>19,041.40)</b> | <b>345.73<br/>(267.84 to<br/>430.27)</b> | <b>814.72<br/>(664.31 to<br/>1,030.06)</b>     | <b>703.09<br/>(527.91 to<br/>891.96)</b>     | <b>822.85<br/>(609.52 to<br/>1,061.91)</b>     |
| Peptic ulcer disease                                           | 1,190.37<br>(913.65 to<br>1,533.87)               | 1,711.64<br>(1,173.75 to<br>2,390.88)             | 1,022.41<br>(686.87 to<br>1,482.61)               | 1,820.39<br>(1,255.93 to<br>2,522.91)             | 60.28<br>(46.03 to<br>75.99)             | 118.51<br>(79.81 to<br>166.18)                 | 75.25<br>(51.30 to<br>109.35)                | 121.35<br>(81.45 to<br>172.14)                 |

**Jordan**

| Cause                    | YLLs (actual counts)            |                                 |                                 |                                 | Deaths (actual counts)     |                              |                             |                              |
|--------------------------|---------------------------------|---------------------------------|---------------------------------|---------------------------------|----------------------------|------------------------------|-----------------------------|------------------------------|
|                          | 2016                            | 2040 Forecast                   | 2040 Better Scenario            | 2040 Worse Scenario             | 2016                       | 2040 Forecast                | 2040 Better Scenario        | 2040 Worse Scenario          |
| Gastritis and duodenitis | 31.12<br>(22.27 to<br>44.08)    | 50.91<br>(36.31 to<br>67.22)    | 37.43<br>(25.77 to<br>51.15)    | 53.04<br>(38.19 to<br>70.49)    | 1.01<br>(0.75 to<br>1.30)  | 2.42<br>(1.75 to<br>3.15)    | 1.92<br>(1.34 to<br>2.54)   | 2.38<br>(1.73 to<br>3.10)    |
| Appendicitis             | 330.35<br>(244.76 to<br>451.65) | 420.71<br>(297.33 to<br>566.30) | 272.31<br>(180.79 to<br>384.79) | 450.11<br>(320.21 to<br>609.70) | 9.19<br>(7.00 to<br>12.00) | 17.51<br>(12.88 to<br>22.46) | 12.03<br>(8.47 to<br>16.52) | 17.92<br>(13.26 to<br>23.00) |



| Jordan                                                     |                                              |                                                |                                                |                                                 |                                           |                                             |                                            |                                             |
|------------------------------------------------------------|----------------------------------------------|------------------------------------------------|------------------------------------------------|-------------------------------------------------|-------------------------------------------|---------------------------------------------|--------------------------------------------|---------------------------------------------|
| Cause                                                      | YLLs (actual counts)                         |                                                |                                                |                                                 | Deaths (actual counts)                    |                                             |                                            |                                             |
|                                                            | 2016                                         | 2040 Forecast                                  | 2040 Better Scenario                           | 2040 Worse Scenario                             | 2016                                      | 2040 Forecast                               | 2040 Better Scenario                       | 2040 Worse Scenario                         |
| <b>Diabetes, urogenital, blood, and endocrine diseases</b> | <b>69,310.22</b><br>(55,406.96 to 85,556.76) | <b>180,652.94</b><br>(97,550.31 to 367,123.93) | <b>126,755.46</b><br>(66,166.16 to 274,782.82) | <b>220,802.35</b><br>(120,369.29 to 415,794.83) | <b>2,957.78</b><br>(2,373.73 to 3,660.09) | <b>10,246.92</b><br>(5,620.79 to 20,480.36) | <b>7,504.74</b><br>(3,889.36 to 16,455.68) | <b>12,111.52</b><br>(6,627.07 to 22,550.97) |
| Diabetes mellitus                                          | 29,304.27<br>(22,482.29 to 37,261.67)        | 63,890.19<br>(40,199.34 to 95,918.34)          | 40,715.96<br>(25,454.97 to 61,435.74)          | 74,108.51<br>(45,725.54 to 110,192.51)          | 1,453.82<br>(1,137.94 to 1,813.83)        | 3,656.09<br>(2,383.32 to 5,264.96)          | 2,446.47<br>(1,600.41 to 3,451.83)         | 4,086.99<br>(2,608.05 to 5,895.61)          |
| Acute glomerulonephritis                                   | 55.38<br>(45.65 to 71.03)                    | 60.88<br>(45.92 to 82.08)                      | 45.72<br>(33.44 to 63.51)                      | 66.80<br>(49.96 to 91.34)                       | 1.08<br>(0.87 to 1.37)                    | 1.50<br>(1.13 to 2.06)                      | 1.20<br>(0.87 to 1.67)                     | 1.57<br>(1.18 to 2.13)                      |
| Chronic kidney disease                                     | 28,142.10<br>(22,083.58 to 36,130.24)        | 103,617.78<br>(25,613.35 to 290,274.55)        | 74,596.58<br>(18,077.03 to 226,817.76)         | 132,812.47<br>(33,991.24 to 330,531.05)         | 1,228.31<br>(990.00 to 1,537.70)          | 6,086.21<br>(1,404.49 to 16,601.68)         | 4,592.75<br>(1,070.09 to 13,591.75)        | 7,527.63<br>(1,890.71 to 18,099.09)         |
| Chronic kidney disease due to diabetes mellitus            | 13,057.73<br>(10,038.15 to 17,088.04)        | 57,488.86<br>(12,571.86 to 164,225.43)         | 41,183.76<br>(9,044.43 to 130,446.85)          | 74,309.11<br>(17,077.08 to 189,097.28)          | 582.28<br>(457.62 to 741.85)              | 3,152.34<br>(681.92 to 8,720.18)            | 2,341.06<br>(506.10 to 7,219.09)           | 3,947.08<br>(901.63 to 9,890.23)            |
| Chronic kidney disease due to hypertension                 | 3,758.11<br>(2,858.21 to 4,906.56)           | 17,775.71<br>(3,907.29 to 51,819.34)           | 13,845.25<br>(3,092.51 to 42,307.84)           | 22,052.92<br>(5,164.52 to 56,948.50)            | 251.91<br>(197.23 to 322.01)              | 1,392.68<br>(335.11 to 3,953.30)            | 1,141.79<br>(275.40 to 3,511.54)           | 1,658.40<br>(420.53 to 4,137.92)            |
| Chronic kidney disease due to glomerulonephritis           | 4,774.85<br>(3,664.39 to 6,168.78)           | 10,375.57<br>(3,464.06 to 28,315.73)           | 6,949.90<br>(2,321.13 to 20,131.04)            | 13,333.81<br>(4,483.72 to 32,279.29)            | 150.00<br>(115.58 to 197.56)              | 527.52<br>(133.43 to 1,499.40)              | 367.19<br>(91.00 to 1,117.57)              | 660.70<br>(181.44 to 1,655.93)              |
| Chronic kidney disease due to other and unspecified causes | 6,551.40<br>(4,928.66 to 8,497.99)           | 17,977.64<br>(5,124.72 to 47,992.79)           | 12,617.67<br>(3,601.01 to 36,756.82)           | 23,116.63<br>(6,665.72 to 57,936.75)            | 244.12<br>(182.83 to 320.60)              | 1,013.67<br>(244.56 to 2,796.94)            | 742.71<br>(177.34 to 2,180.85)             | 1,261.45<br>(316.26 to 3,075.77)            |
| Urinary diseases and male infertility                      | 1,549.13<br>(1,262.67 to 1,930.95)           | 2,707.48<br>(2,225.83 to 3,217.96)             | 2,142.05<br>(1,691.98 to 2,701.53)             | 2,674.51<br>(2,210.01 to 3,277.80)              | 68.24<br>(54.92 to 84.52)                 | 176.72<br>(139.27 to 215.40)                | 150.93<br>(119.57 to 188.18)               | 164.91<br>(127.65 to 202.31)                |
| Urinary tract infections                                   | 1,266.74<br>(1,025.80 to 1,576.14)           | 2,322.91<br>(1,909.70 to 2,852.65)             | 1,877.29<br>(1,473.69 to 2,367.71)             | 2,273.50<br>(1,875.09 to 2,804.38)              | 57.76<br>(46.67 to 71.99)                 | 155.70<br>(120.53 to 191.95)                | 135.24<br>(106.48 to 170.52)               | 144.17<br>(108.56 to 179.40)                |
| Urolithiasis                                               | 69.16<br>(49.12 to 104.25)                   | 106.59<br>(71.36 to 172.56)                    | 72.58<br>(45.81 to 120.01)                     | 109.78<br>(74.22 to 175.82)                     | 1.61<br>(1.14 to 2.67)                    | 3.57<br>(2.39 to 6.36)                      | 2.64<br>(1.67 to 4.89)                     | 3.46<br>(2.37 to 6.03)                      |
| Other urinary diseases                                     | 213.23<br>(156.37 to 290.57)                 | 277.97<br>(195.52 to 385.37)                   | 192.18<br>(130.31 to 286.16)                   | 291.23<br>(207.69 to 404.37)                    | 8.87<br>(6.13 to 12.61)                   | 17.46<br>(11.47 to 25.47)                   | 13.05<br>(8.25 to 19.48)                   | 17.27<br>(11.25 to 24.99)                   |
| Gynecological diseases                                     | 23.59<br>(14.34 to 35.97)                    | 25.18<br>(13.91 to 42.13)                      | 12.79<br>(6.53 to 23.21)                       | 27.76<br>(14.89 to 46.60)                       | 0.48<br>(0.29 to 0.73)                    | 0.56<br>(0.32 to 0.90)                      | 0.29<br>(0.15 to 0.51)                     | 0.61<br>(0.34 to 0.98)                      |
| Uterine fibroids                                           | 0.55<br>(0.28 to 1.24)                       | 0.52<br>(0.26 to 1.06)                         | 0.32<br>(0.15 to 0.66)                         | 0.58<br>(0.28 to 1.20)                          | 0.01<br>(0.01 to 0.03)                    | 0.02<br>(0.01 to 0.05)                      | 0.01<br>(0.01 to 0.02)                     | 0.02<br>(0.01 to 0.03)                      |
| Polycystic ovarian syndrome                                | 1.85<br>(0.87 to 4.07)                       | 1.22<br>(0.50 to 2.80)                         | 0.44<br>(0.15 to 1.16)                         | 1.44<br>(0.57 to 3.30)                          | 0.04<br>(0.02 to 0.09)                    | 0.03<br>(0.01 to 0.06)                      | 0.01<br>(0.00 to 0.04)                     | 0.03<br>(0.01 to 0.07)                      |
| Endometriosis                                              | 0.55<br>(0.17 to 1.63)                       | 0.67<br>(0.20 to 1.98)                         | 0.36<br>(0.10 to 1.03)                         | 0.75<br>(0.22 to 2.24)                          | 0.01<br>(0.00 to 0.03)                    | 0.01<br>(0.00 to 0.03)                      | 0.01<br>(0.00 to 0.02)                     | 0.01<br>(0.00 to 0.04)                      |
| Genital prolapse                                           | 0.79<br>(0.37 to 1.57)                       | 0.69<br>(0.33 to 1.40)                         | 0.36<br>(0.16 to 0.73)                         | 0.78<br>(0.37 to 1.59)                          | 0.02<br>(0.01 to 0.03)                    | 0.02<br>(0.01 to 0.03)                      | 0.01<br>(0.01 to 0.02)                     | 0.02<br>(0.01 to 0.04)                      |
| Other gynecological diseases                               | 19.85<br>(11.48 to 30.85)                    | 22.08<br>(11.62 to 37.55)                      | 11.32<br>(5.61 to 20.82)                       | 24.22<br>(12.55 to 41.08)                       | 0.40<br>(0.24 to 0.62)                    | 0.48<br>(0.27 to 0.79)                      | 0.25<br>(0.13 to 0.45)                     | 0.52<br>(0.28 to 0.87)                      |
| Hemoglobinopathies and hemolytic anemias                   | 2,861.15<br>(2,184.28 to 3,933.55)           | 2,822.10<br>(1,984.11 to 4,030.15)             | 1,889.22<br>(1,288.79 to 2,800.73)             | 3,048.46<br>(2,156.69 to 4,318.87)              | 58.27<br>(44.83 to 79.58)                 | 85.17<br>(64.65 to 117.23)                  | 60.47<br>(44.14 to 85.44)                  | 88.26<br>(66.95 to 121.00)                  |
| Thalassemias                                               | 225.00<br>(30.93 to 576.34)                  | 83.91<br>(12.48 to 224.42)                     | 72.36<br>(12.25 to 185.34)                     | 92.72<br>(13.56 to 253.74)                      | 2.75<br>(0.39 to 7.07)                    | 1.06<br>(0.17 to 2.78)                      | 0.92<br>(0.17 to 2.36)                     | 1.16<br>(0.18 to 3.15)                      |



|                                                   |                                                          |                                                         |                                                         |                                                          |                                                    |                                                  |                                                |                                                    |
|---------------------------------------------------|----------------------------------------------------------|---------------------------------------------------------|---------------------------------------------------------|----------------------------------------------------------|----------------------------------------------------|--------------------------------------------------|------------------------------------------------|----------------------------------------------------|
| Sickle cell disorders                             | 1,988.12<br>(1,214.59 to<br>2,939.25)                    | 1,666.41<br>(925.05 to<br>2,655.95)                     | 1,085.73<br>(587.87 to<br>1,813.17)                     | 1,830.05<br>(1,019.76 to<br>2,856.37)                    | 31.13<br>(18.76 to<br>46.72)                       | 30.28<br>(16.34 to<br>50.68)                     | 20.03<br>(10.38 to<br>34.25)                   | 32.81<br>(17.68 to<br>54.24)                       |
| G6PD deficiency                                   | 405.45<br>(168.14 to<br>802.44)                          | 683.00<br>(337.47 to<br>1,256.89)                       | 441.68<br>(208.51 to<br>817.16)                         | 732.72<br>(359.62 to<br>1,328.34)                        | 9.90<br>(4.87 to<br>17.55)                         | 9.90<br>(13.49 to<br>38.79)                      | 15.76<br>(8.67 to<br>26.16)                    | 24.91<br>(14.19 to<br>40.06)                       |
| Other hemoglobinopathies and hemolytic anemias    | 242.58<br>(160.14 to<br>368.95)                          | 388.78<br>(272.12 to<br>568.98)                         | 289.45<br>(198.55 to<br>431.73)                         | 392.97<br>(276.22 to<br>587.80)                          | 14.49<br>(10.75 to<br>19.75)                       | 30.15<br>(21.64 to<br>40.73)                     | 23.76<br>(17.07 to<br>32.64)                   | 29.37<br>(20.50 to<br>40.25)                       |
| Endocrine, metabolic, blood, and immune disorders | 7,374.60<br>(5,489.87 to<br>9,156.09)                    | 7,529.33<br>(5,813.74 to<br>9,633.25)                   | 7,353.12<br>(5,683.37 to<br>9,530.00)                   | 8,063.84<br>(6,214.82 to<br>10,412.03)                   | 147.59<br>(118.31 to<br>182.98)                    | 240.66<br>(190.54 to<br>337.90)                  | 252.64<br>(198.42 to<br>358.27)                | 241.56<br>(192.15 to<br>327.92)                    |
| <b>Jordan</b>                                     |                                                          |                                                         |                                                         |                                                          |                                                    |                                                  |                                                |                                                    |
| Cause                                             | YLLs (actual counts)                                     |                                                         |                                                         |                                                          | Deaths (actual counts)                             |                                                  |                                                |                                                    |
|                                                   | 2016                                                     | 2040 Forecast                                           | 2040 Better Scenario                                    | 2040 Worse Scenario                                      | 2016                                               | 2040 Forecast                                    | 2040 Better Scenario                           | 2040 Worse Scenario                                |
| <b>Musculoskeletal disorders</b>                  | <b>3,175.03</b><br>(2,300.52 to<br><b>4,372.65</b> )     | <b>4,807.86</b><br>(3,373.54 to<br><b>7,073.20</b> )    | <b>4,135.33</b><br>(2,866.62 to<br><b>6,180.21</b> )    | <b>4,784.51</b><br>(3,353.76 to<br><b>7,081.07</b> )     | <b>67.20</b><br>(48.59 to<br><b>92.59</b> )        | <b>133.62</b><br>(98.08 to<br><b>191.84</b> )    | <b>118.58</b><br>(87.40 to<br><b>173.69</b> )  | <b>128.94</b><br>(95.47 to<br><b>183.28</b> )      |
| Rheumatoid arthritis                              | 111.64<br>(79.35 to<br>160.71)                           | 242.87<br>(158.93 to<br>355.14)                         | 141.59<br>(83.38 to<br>219.39)                          | 260.65<br>(176.75 to<br>388.18)                          | 3.32<br>(2.24 to<br>4.98)                          | 10.83<br>(6.70 to<br>17.11)                      | 6.63<br>(3.83 to<br>10.56)                     | 11.15<br>(7.11 to<br>17.61)                        |
| Other musculoskeletal disorders                   | 3,063.39<br>(2,208.52 to<br>4,206.30)                    | 4,564.99<br>(3,179.11 to<br>6,834.44)                   | 3,993.74<br>(2,754.50 to<br>6,000.28)                   | 4,523.86<br>(3,160.96 to<br>6,714.33)                    | 63.88<br>(46.12 to<br>88.24)                       | 122.79<br>(90.46 to<br>178.01)                   | 111.96<br>(82.27 to<br>162.45)                 | 117.79<br>(85.92 to<br>170.31)                     |
| <b>Other non-communicable diseases</b>            | <b>97,175.84</b><br>(77,460.74 to<br><b>123,624.26</b> ) | <b>61,967.34</b><br>(46,482.32 to<br><b>82,622.24</b> ) | <b>34,868.74</b><br>(25,507.17 to<br><b>47,565.43</b> ) | <b>75,394.63</b><br>(57,893.35 to<br><b>100,470.48</b> ) | <b>1,218.64</b><br>(985.75 to<br><b>1,527.67</b> ) | <b>987.12</b><br>(769.90 to<br><b>1,254.87</b> ) | <b>630.91</b><br>(477.99 to<br><b>826.21</b> ) | <b>1,129.99</b><br>(886.97 to<br><b>1,451.69</b> ) |
| Congenital birth defects                          | 95,144.33<br>(75,055.32 to<br>121,406.66)                | 57,880.59<br>(42,789.99 to<br>78,076.20)                | 31,469.91<br>(22,238.38 to<br>44,001.56)                | 71,326.81<br>(53,751.22 to<br>96,295.18)                 | 1,140.84<br>(912.71 to<br>1,444.88)                | 726.25<br>(543.84 to<br>974.15)                  | 400.64<br>(286.06 to<br>552.50)                | 886.58<br>(671.70 to<br>1,181.98)                  |
| Neural tube defects                               | 1,119.11<br>(727.03 to<br>1,775.60)                      | 306.01<br>(172.23 to<br>570.17)                         | 140.59<br>(72.61 to<br>264.96)                          | 400.35<br>(220.86 to<br>766.90)                          | 13.29<br>(8.74 to<br>20.90)                        | 3.83<br>(2.23 to<br>6.96)                        | 1.77<br>(0.96 to<br>3.25)                      | 4.96<br>(2.81 to<br>9.22)                          |
| Congenital heart anomalies                        | 43,553.98<br>(33,670.24 to<br>57,012.91)                 | 25,082.94<br>(17,714.78 to<br>34,280.77)                | 11,661.08<br>(7,594.64 to<br>17,555.75)                 | 30,956.01<br>(22,464.71 to<br>41,863.56)                 | 523.42<br>(406.95 to<br>678.67)                    | 315.39<br>(227.36 to<br>424.73)                  | 147.76<br>(97.19 to<br>220.48)                 | 385.61<br>(283.34 to<br>515.84)                    |
| Orofacial clefts                                  | 341.34<br>(153.50 to<br>742.12)                          | 157.12<br>(59.37 to<br>395.28)                          | 56.82<br>(20.85 to<br>145.52)                           | 214.53<br>(83.26 to<br>528.57)                           | 3.95<br>(1.78 to<br>8.59)                          | 1.82<br>(0.69 to<br>4.57)                        | 0.66<br>(0.24 to<br>1.68)                      | 2.49<br>(0.97 to<br>6.12)                          |
| Down syndrome                                     | 5,542.55<br>(3,969.79 to<br>7,818.77)                    | 4,170.21<br>(2,989.36 to<br>5,982.15)                   | 3,990.04<br>(2,921.07 to<br>5,649.47)                   | 4,949.98<br>(3,473.23 to<br>7,189.34)                    | 70.29<br>(52.03 to<br>96.72)                       | 58.36<br>(42.76 to<br>81.14)                     | 56.60<br>(42.04 to<br>78.28)                   | 68.04<br>(49.43 to<br>97.19)                       |
| Other chromosomal abnormalities                   | 2,064.24<br>(1,359.01 to<br>3,276.15)                    | 1,863.19<br>(1,138.51 to<br>3,076.86)                   | 1,326.93<br>(807.83 to<br>2,162.76)                     | 2,304.21<br>(1,400.20 to<br>3,778.38)                    | 24.47<br>(16.26 to<br>38.44)                       | 22.60<br>(14.20 to<br>36.66)                     | 16.16<br>(9.94 to<br>26.01)                    | 27.81<br>(17.02 to<br>45.07)                       |
| Congenital musculoskeletal and limb anomalies     | 2,198.49<br>(1,537.89 to<br>3,187.06)                    | 1,581.57<br>(1,021.60 to<br>2,341.95)                   | 857.08<br>(540.85 to<br>1,327.32)                       | 1,922.64<br>(1,244.22 to<br>2,853.10)                    | 26.33<br>(18.57 to<br>37.72)                       | 19.72<br>(12.90 to<br>28.72)                     | 10.76<br>(6.86 to<br>16.49)                    | 23.77<br>(15.63 to<br>34.81)                       |
| Urogenital congenital anomalies                   | 3,006.15<br>(2,083.42 to<br>4,616.87)                    | 1,759.55<br>(1,156.42 to<br>2,791.59)                   | 1,041.24<br>(663.97 to<br>1,626.43)                     | 2,144.40<br>(1,393.78 to<br>3,427.29)                    | 37.04<br>(26.38 to<br>55.66)                       | 25.40<br>(17.70 to<br>38.34)                     | 15.44<br>(10.24 to<br>23.33)                   | 30.06<br>(20.82 to<br>45.69)                       |
| Digestive congenital anomalies                    | 6,286.94<br>(1,274.89 to<br>9,366.58)                    | 3,639.33<br>(772.05 to<br>6,143.84)                     | 1,810.90<br>(376.38 to<br>3,106.34)                     | 4,612.36<br>(950.72 to<br>7,708.76)                      | 72.99<br>(14.96 to<br>108.67)                      | 42.49<br>(9.20 to<br>71.62)                      | 21.17<br>(4.51 to<br>36.23)                    | 53.78<br>(11.40 to<br>89.78)                       |
| Other congenital birth defects                    | 31,031.54<br>(23,159.69 to<br>41,362.65)                 | 19,320.66<br>(13,315.45 to<br>27,638.54)                | 10,585.32<br>(7,066.28 to<br>15,674.51)                 | 23,822.33<br>(16,760.56 to<br>34,387.59)                 | 369.05<br>(277.08 to<br>490.39)                    | 236.65<br>(164.25 to<br>334.21)                  | 130.32<br>(87.88 to<br>190.77)                 | 290.06<br>(205.49 to<br>412.97)                    |
| Skin and subcutaneous diseases                    | 1,307.57<br>(883.96 to<br>2,210.80)                      | 3,804.05<br>(2,597.44 to<br>6,470.94)                   | 3,211.39<br>(2,178.49 to<br>5,523.18)                   | 3,720.12<br>(2,517.53 to<br>6,272.32)                    | 69.40<br>(45.66 to<br>115.53)                      | 257.58<br>(165.85 to<br>415.58)                  | 228.09<br>(146.32 to<br>368.52)                | 239.38<br>(154.62 to<br>391.74)                    |
| Cellulitis                                        | 174.22<br>(99.68 to<br>306.74)                           | 578.34<br>(309.17 to<br>1,022.45)                       | 548.74<br>(296.38 to<br>939.98)                         | 556.37<br>(298.79 to<br>985.02)                          | 6.95<br>(3.39 to<br>12.10)                         | 30.53<br>(14.40 to<br>52.33)                     | 30.64<br>(14.08 to<br>49.88)                   | 28.20<br>(13.36 to<br>47.93)                       |



|                                                 |                                          |                                          |                                          |                                          |                                 |                                 |                                 |                                 |
|-------------------------------------------------|------------------------------------------|------------------------------------------|------------------------------------------|------------------------------------------|---------------------------------|---------------------------------|---------------------------------|---------------------------------|
|                                                 | 1,199.33<br>(737.06 to<br>1,735.33)      | 615.63<br>(321.07 to<br>992.81)          | 423.03<br>(214.50 to<br>672.12)          | 745.00<br>(378.10 to<br>1,217.77)        | 15.37<br>(9.50 to<br>21.84)     | 8.33<br>(4.49 to<br>13.06)      | 5.78<br>(3.03 to<br>9.00)       | 9.97<br>(5.22 to<br>15.98)      |
| Unintentional suffocation                       | 3,015.92<br>(2,339.30 to<br>4,059.55)    | 2,601.08<br>(1,829.66 to<br>3,905.99)    | 1,727.98<br>(1,175.03 to<br>2,663.95)    | 2,895.83<br>(2,038.72 to<br>4,255.62)    | 52.80<br>(39.93 to<br>76.41)    | 60.01<br>(43.07 to<br>92.70)    | 41.86<br>(29.06 to<br>65.47)    | 64.24<br>(46.66 to<br>100.24)   |
| Other exposure to mechanical forces             | 1,789.10<br>(1,404.74 to<br>2,271.14)    | 1,799.61<br>(1,335.65 to<br>2,434.69)    | 1,477.77<br>(1,080.75 to<br>2,019.92)    | 1,928.09<br>(1,424.63 to<br>2,612.83)    | 38.49<br>(30.13 to<br>49.90)    | 55.38<br>(42.20 to<br>73.19)    | 47.81<br>(36.05 to<br>64.05)    | 56.81<br>(43.48 to<br>75.70)    |
| Adverse effects of medical treatment            | 779.51<br>(565.03 to<br>1,040.16)        | 707.29<br>(479.28 to<br>1,038.40)        | 531.48<br>(350.07 to<br>801.22)          | 811.60<br>(535.15 to<br>1,212.56)        | 13.74<br>(10.26 to<br>18.83)    | 17.53<br>(12.52 to<br>24.99)    | 14.24<br>(10.14 to<br>20.56)    | 18.83<br>(13.47 to<br>27.14)    |
| Animal contact                                  | 345.74<br>(250.63 to<br>478.85)          | 297.78<br>(195.94 to<br>448.66)          | 227.81<br>(150.92 to<br>347.57)          | 346.92<br>(226.18 to<br>527.94)          | 6.06<br>(4.44 to<br>8.82)       | 7.31<br>(5.11 to<br>11.28)      | 6.14<br>(4.27 to<br>9.62)       | 7.91<br>(5.47 to<br>12.26)      |
| Venomous animal contact                         | 433.77<br>(279.70 to<br>591.51)          | 409.50<br>(259.39 to<br>646.05)          | 303.67<br>(187.28 to<br>474.26)          | 464.68<br>(283.95 to<br>730.93)          | 7.69<br>(5.04 to<br>10.89)      | 10.22<br>(6.57 to<br>15.96)     | 8.10<br>(5.10 to<br>12.69)      | 10.91<br>(6.97 to<br>16.77)     |
| Non-venomous animal contact                     | 5,683.35<br>(4,475.26 to<br>7,684.68)    | 4,138.64<br>(3,174.39 to<br>5,895.25)    | 3,657.04<br>(2,797.95 to<br>5,211.84)    | 4,530.83<br>(3,397.42 to<br>6,476.20)    | 90.80<br>(71.56 to<br>122.82)   | 88.98<br>(70.39 to<br>118.38)   | 83.88<br>(66.51 to<br>110.02)   | 92.19<br>(72.28 to<br>123.82)   |
| Foreign body                                    | 4,137.49<br>(3,202.71 to<br>5,458.85)    | 2,917.90<br>(2,215.45 to<br>4,036.25)    | 2,412.93<br>(1,819.84 to<br>3,356.85)    | 3,213.29<br>(2,430.85 to<br>4,447.80)    | 63.00<br>(49.66 to<br>82.76)    | 60.98<br>(48.69 to<br>80.10)    | 53.94<br>(42.08 to<br>70.41)    | 63.14<br>(50.25 to<br>83.59)    |
| Pulmonary aspiration and foreign body in airway | 1,545.86<br>(1,092.40 to<br>2,651.72)    | 1,220.74<br>(830.72 to<br>2,012.14)      | 1,244.12<br>(848.56 to<br>2,016.43)      | 1,317.54<br>(891.89 to<br>2,201.18)      | 27.80<br>(20.05 to<br>46.11)    | 28.00<br>(20.24 to<br>42.51)    | 29.94<br>(21.98 to<br>43.80)    | 29.05<br>(21.10 to<br>45.29)    |
| Foreign body in other body part                 | 788.12<br>(580.49 to<br>1,156.16)        | 724.23<br>(479.91 to<br>1,184.05)        | 461.00<br>(290.93 to<br>775.30)          | 823.84<br>(535.69 to<br>1,355.02)        | 15.58<br>(11.08 to<br>24.63)    | 18.40<br>(12.28 to<br>31.40)    | 12.17<br>(7.85 to<br>21.23)     | 20.29<br>(13.63 to<br>35.64)    |
| Environmental heat and cold exposure            | 4,411.47<br>(3,217.05 to<br>5,587.31)    | 2,865.44<br>(1,907.34 to<br>4,025.20)    | 1,353.68<br>(786.85 to<br>2,123.43)      | 3,188.85<br>(2,159.70 to<br>4,453.16)    | 74.33<br>(55.99 to<br>95.32)    | 74.33<br>(38.00 to<br>76.40)    | 55.62<br>(16.18 to<br>40.77)    | 60.76<br>(42.56 to<br>82.07)    |
| Other unintentional injuries                    | 36,337.68<br>(18,554.56 to<br>34,711.03) | 26,182.29<br>(17,648.26 to<br>37,460.03) | 19,625.46<br>(12,640.38 to<br>27,143.28) | 27,428.03<br>(18,154.82 to<br>39,554.80) | 496.24<br>(354.05 to<br>651.31) | 496.24<br>(394.94 to<br>803.09) | 575.87<br>(295.66 to<br>599.73) | 436.88<br>(407.04 to<br>831.05) |
| Self-harm and interpersonal violence            |                                          |                                          |                                          |                                          |                                 |                                 |                                 |                                 |

**Jordan**

| Cause                                                                        | YLLs (actual counts)                      |                                         |                                         |                                          | Deaths (actual counts)              |                                 |                                 |                                 |
|------------------------------------------------------------------------------|-------------------------------------------|-----------------------------------------|-----------------------------------------|------------------------------------------|-------------------------------------|---------------------------------|---------------------------------|---------------------------------|
|                                                                              | 2016                                      | 2040 Forecast                           | 2040 Better Scenario                    | 2040 Worse Scenario                      | 2016                                | 2040 Forecast                   | 2040 Better Scenario            | 2040 Worse Scenario             |
| Self-harm                                                                    | 10,645.51<br>(7,598.21 to<br>14,984.85)   | 14,077.81<br>(9,575.59 to<br>21,631.23) | 10,913.79<br>(7,362.83 to<br>16,607.43) | 14,757.03<br>(10,015.72 to<br>22,639.08) | 217.96<br>(157.95 to<br>304.57)     | 335.75<br>(237.79 to<br>486.82) | 267.19<br>(188.43 to<br>382.58) | 346.13<br>(244.62 to<br>502.41) |
| Self-harm by firearm                                                         | 641.24<br>(416.39 to<br>1,193.84)         | 590.59<br>(362.96 to<br>1,071.01)       | 409.38<br>(249.04 to<br>730.63)         | 626.31<br>(380.04 to<br>1,142.58)        | 13.61<br>(9.05 to<br>24.88)         | 15.11<br>(9.82 to<br>25.10)     | 10.88<br>(7.07 to<br>17.69)     | 15.67<br>(10.12 to<br>26.71)    |
| Self-harm by other specified means                                           | 10,004.26<br>(7,150.20 to<br>14,048.94)   | 13,487.22<br>(9,192.39 to<br>20,746.22) | 10,504.41<br>(7,065.72 to<br>15,934.74) | 14,130.72<br>(9,615.88 to<br>21,649.79)  | 204.35<br>(148.20 to<br>282.18)     | 320.64<br>(226.71 to<br>466.53) | 256.30<br>(180.85 to<br>369.73) | 330.46<br>(233.69 to<br>480.85) |
| Interpersonal violence                                                       | 15,692.17<br>(8,234.90 to<br>21,168.30)   | 12,104.48<br>(5,730.22 to<br>17,737.13) | 8,111.67<br>(3,904.48 to<br>11,955.09)  | 12,671.00<br>(5,967.88 to<br>18,644.15)  | 278.28<br>(148.32 to<br>376.37)     | 240.12<br>(117.53 to<br>344.64) | 163.69<br>(81.05 to<br>236.47)  | 248.00<br>(121.50 to<br>354.58) |
| Physical violence by firearm                                                 | 8,838.40<br>(4,656.89 to<br>12,831.51)    | 6,874.62<br>(3,376.60 to<br>10,732.40)  | 4,326.45<br>(2,065.45 to<br>6,851.66)   | 7,145.24<br>(3,455.49 to<br>11,032.21)   | 160.30<br>(85.59 to<br>231.16)      | 136.11<br>(67.50 to<br>208.46)  | 86.64<br>(42.64 to<br>133.16)   | 140.04<br>(68.87 to<br>214.35)  |
| Physical violence by sharp object                                            | 3,418.22<br>(1,167.91 to<br>5,170.71)     | 2,879.15<br>(958.44 to<br>4,552.91)     | 1,964.07<br>(682.90 to<br>3,132.61)     | 2,977.25<br>(979.28 to<br>4,684.60)      | 59.96<br>(21.40 to<br>89.43)        | 55.40<br>(19.61 to<br>85.40)    | 38.29<br>(14.35 to<br>59.31)    | 56.63<br>(20.08 to<br>87.70)    |
| Physical violence by other means                                             | 3,435.54<br>(1,627.51 to<br>4,623.32)     | 2,350.71<br>(1,060.22 to<br>3,442.03)   | 1,821.15<br>(823.16 to<br>2,651.80)     | 2,548.51<br>(1,137.67 to<br>3,729.99)    | 58.02<br>(27.82 to<br>78.97)        | 48.60<br>(21.78 to<br>69.36)    | 38.76<br>(17.70 to<br>55.85)    | 51.32<br>(23.25 to<br>73.94)    |
| Forces of nature, conflict and terrorism, and executions and police conflict | 76,702.05<br>(17,591.25 to<br>136,425.19) | 777.63<br>(0.00 to<br>23,787.38)        | 758.30<br>(0.00 to<br>23,227.15)        | 804.49<br>(0.00 to<br>24,618.93)         | 1,277.79<br>(293.06 to<br>2,272.73) | 15.47<br>(0.00 to<br>450.29)    | 15.41<br>(0.00 to<br>447.84)    | 15.69<br>(0.00 to<br>457.08)    |

|                                                                   |                                             |                                             |                                             |                                               |                                       |                                          |                                          |                                          |
|-------------------------------------------------------------------|---------------------------------------------|---------------------------------------------|---------------------------------------------|-----------------------------------------------|---------------------------------------|------------------------------------------|------------------------------------------|------------------------------------------|
| Exposure to forces of nature                                      | 0.00<br>(0.00 to<br>0.00)                   | 394.03<br>(17,543.12 to<br>136,375.56)      | 384.28<br>(0.00 to<br>892.86)               | 407.76<br>(0.00 to<br>953.72)                 | 0.00<br>(0.00 to<br>0.00)             | 8.24<br>(0.00 to<br>19.25)               | 8.22<br>(0.00 to<br>19.10)               | 8.33<br>(0.00 to<br>19.53)               |
| Conflict and terrorism                                            | 76,650.80<br>(17,543.12 to<br>136,375.56)   | 383.59<br>(0.00 to<br>661.90)               | 374.03<br>(0.00 to<br>650.74)               | 396.73<br>(0.00 to<br>684.07)                 | 1,276.95<br>(292.26 to<br>2,271.92)   | 7.24<br>(0.00 to<br>12.84)               | 7.18<br>(0.00 to<br>12.87)               | 7.36<br>(0.00 to<br>12.99)               |
| Executions and police conflict                                    | 51.25<br>(42.62 to<br>64.51)                | 0.00<br>(0.00 to<br>0.00)                   | 0.00<br>(0.00 to<br>0.00)                   | 0.00<br>(0.00 to<br>0.00)                     | 0.84<br>(0.69 to<br>1.08)             | 0.00<br>(0.00 to<br>0.00)                | 0.00<br>(0.00 to<br>0.00)                | 0.00<br>(0.00 to<br>0.00)                |
| <b>Kuwait</b>                                                     |                                             |                                             |                                             |                                               |                                       |                                          |                                          |                                          |
| Cause                                                             | YLLs (actual counts)                        |                                             |                                             |                                               | Deaths (actual counts)                |                                          |                                          |                                          |
|                                                                   | 2016                                        | 2040 Forecast                               | 2040 Better Scenario                        | 2040 Worse Scenario                           | 2016                                  | 2040 Forecast                            | 2040 Better Scenario                     | 2040 Worse Scenario                      |
| All causes                                                        | 233,618.24<br>(181,869.80 to<br>296,327.41) | 510,182.74<br>(287,711.56 to<br>913,124.91) | 407,936.21<br>(232,390.18 to<br>712,638.04) | 686,101.92<br>(375,606.23 to<br>1,223,777.06) | 6,747.29<br>(5,235.02 to<br>8,562.92) | 25,624.51<br>(15,244.97 to<br>42,884.87) | 21,614.39<br>(12,780.71 to<br>35,633.97) | 32,700.63<br>(19,492.03 to<br>54,212.77) |
| Communicable, maternal, neonatal, and nutritional diseases        | 28,226.53<br>(21,643.79 to<br>36,747.47)    | 37,619.85<br>(21,536.86 to<br>64,222.98)    | 30,180.67<br>(17,209.60 to<br>49,878.85)    | 46,743.75<br>(26,621.09 to<br>79,681.53)      | 584.79<br>(465.61 to<br>719.24)       | 1,882.25<br>(1,204.15 to<br>2,826.78)    | 1,697.51<br>(1,032.20 to<br>2,353.14)    | 2,300.11<br>(1,393.89 to<br>3,362.65)    |
| HIV/AIDS and tuberculosis                                         | 871.54<br>(720.58 to<br>1,056.84)           | 1,055.68<br>(616.72 to<br>1,793.82)         | 887.18<br>(515.51 to<br>1,448.94)           | 1,632.05<br>(979.39 to<br>2,616.30)           | 23.89<br>(19.02 to<br>29.57)          | 52.85<br>(29.72 to<br>89.89)             | 45.24<br>(25.85 to<br>75.16)             | 76.57<br>(44.13 to<br>125.90)            |
| Tuberculosis                                                      | 551.92<br>(401.16 to<br>730.25)             | 852.40<br>(398.85 to<br>1,586.60)           | 702.21<br>(325.62 to<br>1,260.53)           | 1,260.02<br>(615.18 to<br>2,254.90)           | 18.20<br>(13.44 to<br>23.64)          | 48.37<br>(24.98 to<br>85.30)             | 41.02<br>(21.55 to<br>70.78)             | 68.59<br>(35.73 to<br>116.78)            |
| HIV/AIDS                                                          | 319.62<br>(280.21 to<br>373.12)             | 203.27<br>(159.98 to<br>257.25)             | 184.97<br>(144.14 to<br>236.16)             | 372.03<br>(299.05 to<br>458.24)               | 5.69<br>(5.05 to<br>6.49)             | 4.48<br>(3.41 to<br>5.61)                | 4.22<br>(3.15 to<br>5.31)                | 7.98<br>(6.14 to<br>9.94)                |
| Diarrhea, lower respiratory, and other common infectious diseases | 12,094.46<br>(9,614.12 to<br>15,025.29)     | 27,663.35<br>(15,783.79 to<br>46,996.10)    | 22,618.83<br>(13,012.29 to<br>37,116.42)    | 33,737.56<br>(19,161.53 to<br>56,539.88)      | 375.98<br>(297.66 to<br>470.57)       | 1,699.32<br>(1,075.28 to<br>2,528.46)    | 1,458.14<br>(930.75 to<br>2,134.42)      | 1,963.63<br>(1,234.72 to<br>2,981.93)    |
| Diarrheal diseases                                                | 433.60<br>(299.19 to<br>626.35)             | 434.15<br>(167.46 to<br>1,049.90)           | 426.69<br>(170.37 to<br>1,045.43)           | 419.92<br>(136.12 to<br>1,214.83)             | 6.62<br>(4.93 to<br>8.97)             | 20.92<br>(9.32 to<br>45.19)              | 22.36<br>(9.81 to<br>49.03)              | 17.54<br>(6.60 to<br>42.82)              |
| Intestinal infectious diseases                                    | 606.36<br>(195.74 to<br>1,329.31)           | 722.22<br>(230.46 to<br>1,718.80)           | 752.69<br>(242.90 to<br>1,779.15)           | 658.73<br>(186.33 to<br>1,655.84)             | 9.53<br>(3.05 to<br>21.47)            | 12.94<br>(3.97 to<br>30.16)              | 13.67<br>(4.29 to<br>32.53)              | 11.62<br>(3.34 to<br>28.92)              |
| Typhoid fever                                                     | 534.35<br>(172.59 to<br>1,212.81)           | 661.11<br>(210.23 to<br>1,583.55)           | 699.20<br>(219.09 to<br>1,674.17)           | 583.15<br>(168.86 to<br>1,472.46)             | 8.35<br>(2.67 to<br>19.25)            | 11.79<br>(3.70 to<br>27.45)              | 12.65<br>(3.95 to<br>29.75)              | 10.22<br>(3.01 to<br>25.53)              |
| Paratyphoid fever                                                 | 71.89<br>(20.90 to<br>179.15)               | 61.01<br>(13.64 to<br>159.96)               | 53.39<br>(12.33 to<br>132.36)               | 75.47<br>(17.00 to<br>195.20)                 | 1.18<br>(0.34 to<br>2.92)             | 1.14<br>(0.26 to<br>2.99)                | 1.01<br>(0.23 to<br>2.57)                | 1.40<br>(0.32 to<br>3.67)                |
| Other intestinal infectious diseases                              | 0.11<br>(0.04 to<br>0.26)                   | 0.10<br>(0.03 to<br>0.28)                   | 0.10<br>(0.03 to<br>0.28)                   | 0.11<br>(0.03 to<br>0.31)                     | 0.00<br>(0.00 to<br>0.00)             | 0.00<br>(0.00 to<br>0.01)                | 0.00<br>(0.00 to<br>0.01)                | 0.00<br>(0.00 to<br>0.01)                |
| Lower respiratory infections                                      | 10,082.59<br>(8,035.19 to<br>12,591.11)     | 25,641.97<br>(14,433.55 to<br>43,664.01)    | 20,639.85<br>(11,771.09 to<br>34,099.31)    | 31,618.06<br>(17,599.80 to<br>53,147.90)      | 342.30<br>(209.63 to<br>427.17)       | 1,641.12<br>(1,026.62 to<br>2,450.45)    | 1,399.07<br>(894.96 to<br>2,043.94)      | 1,906.65<br>(1,185.61 to<br>2,883.78)    |
| Upper respiratory infections                                      | 3.58<br>(1.75 to<br>6.94)                   | 4.84<br>(0.93 to<br>15.76)                  | 3.97<br>(0.81 to<br>11.74)                  | 6.78<br>(1.46 to<br>18.74)                    | 0.08<br>(0.04 to<br>0.13)             | 0.19<br>(0.04 to<br>0.52)                | 0.16<br>(0.04 to<br>0.43)                | 0.25<br>(0.06 to<br>0.65)                |
| Otitis media                                                      | 0.33<br>(0.17 to<br>0.63)                   | 0.08<br>(0.04 to<br>0.14)                   | 0.08<br>(0.04 to<br>0.15)                   | 0.08<br>(0.04 to<br>0.14)                     | 0.01<br>(0.00 to<br>0.01)             | 0.00<br>(0.00 to<br>0.01)                | 0.00<br>(0.00 to<br>0.01)                | 0.00<br>(0.00 to<br>0.01)                |
| Meningitis                                                        | 648.55<br>(481.04 to<br>839.85)             | 437.11<br>(207.69 to<br>831.16)             | 386.63<br>(185.56 to<br>705.19)             | 571.73<br>(272.96 to<br>1,061.28)             | 11.86<br>(8.69 to<br>15.40)           | 13.28<br>(7.66 to<br>21.14)              | 12.14<br>(7.01 to<br>18.85)              | 16.26<br>(9.24 to<br>25.69)              |
| Pneumococcal meningitis                                           | 3.29<br>(2.35 to<br>4.44)                   | 3.00<br>(1.84 to<br>5.00)                   | 3.02<br>(1.84 to<br>5.13)                   | 3.04<br>(1.88 to<br>5.14)                     | 0.07<br>(0.05 to<br>0.09)             | 0.11<br>(0.07 to<br>0.16)                | 0.11<br>(0.07 to<br>0.17)                | 0.10<br>(0.07 to<br>0.16)                |
| H influenzae type B meningitis                                    | 49.40<br>(35.06 to<br>66.46)                | 78.99<br>(36.91 to<br>173.27)               | 74.30<br>(35.25 to<br>160.55)               | 109.72<br>(45.52 to<br>258.80)                | 0.87<br>(0.63 to<br>1.13)             | 1.62<br>(0.98 to<br>2.78)                | 1.60<br>(0.98 to<br>2.72)                | 1.93<br>(1.06 to<br>3.71)                |



|                                                          |                                                              |                                                             |                                                             |                                                             |                                                      |                                                    |                                                    |                                                     |
|----------------------------------------------------------|--------------------------------------------------------------|-------------------------------------------------------------|-------------------------------------------------------------|-------------------------------------------------------------|------------------------------------------------------|----------------------------------------------------|----------------------------------------------------|-----------------------------------------------------|
|                                                          | 22.48<br>(17.95 to<br>27.99)                                 | 28.07<br>(17.76 to<br>44.00)                                | 28.08<br>(17.86 to<br>44.65)                                | 27.87<br>(17.82 to<br>43.55)                                | 0.40<br>(0.31 to<br>0.50)                            | 0.59<br>(0.38 to<br>0.92)                          | 0.60<br>(0.38 to<br>0.95)                          | 0.58<br>(0.37 to<br>0.90)                           |
| Other neglected tropical diseases                        |                                                              |                                                             |                                                             |                                                             |                                                      |                                                    |                                                    |                                                     |
| <b>Maternal disorders</b>                                | <b>276.34</b><br><b>(167.15 to</b><br><b>425.25)</b>         | <b>233.04</b><br><b>(63.78 to</b><br><b>639.38)</b>         | <b>212.18</b><br><b>(58.98 to</b><br><b>569.54)</b>         | <b>272.87</b><br><b>(74.74 to</b><br><b>732.84)</b>         | <b>5.27</b><br><b>(3.17 to</b><br><b>8.12)</b>       | <b>4.58</b><br><b>(1.28 to</b><br><b>12.50)</b>    | <b>4.18</b><br><b>(1.17 to</b><br><b>11.13)</b>    | <b>5.36</b><br><b>(1.49 to</b><br><b>14.41)</b>     |
| Maternal hemorrhage                                      | 58.61<br>(32.06 to<br>99.68)                                 | 46.91<br>(12.13 to<br>129.06)                               | 43.01<br>(11.61 to<br>119.25)                               | 54.38<br>(14.82 to<br>152.25)                               | 1.12<br>(0.62 to<br>1.91)                            | 0.92<br>(0.24 to<br>2.58)                          | 0.85<br>(0.23 to<br>2.35)                          | 1.07<br>(0.29 to<br>2.96)                           |
| Maternal sepsis and other maternal infections            | 51.29<br>(28.76 to<br>81.84)                                 | 37.93<br>(10.38 to<br>100.35)                               | 34.55<br>(9.59 to<br>88.87)                                 | 44.41<br>(12.20 to<br>116.58)                               | 0.99<br>(0.55 to<br>1.58)                            | 0.76<br>(0.22 to<br>2.05)                          | 0.70<br>(0.20 to<br>1.82)                          | 0.89<br>(0.26 to<br>2.32)                           |
| Maternal hypertensive disorders                          | 39.87<br>(22.07 to<br>65.68)                                 | 32.45<br>(7.70 to<br>91.62)                                 | 29.45<br>(7.47 to<br>81.53)                                 | 38.17<br>(9.31 to<br>106.12)                                | 0.75<br>(0.41 to<br>1.25)                            | 0.62<br>(0.15 to<br>1.78)                          | 0.57<br>(0.14 to<br>1.61)                          | 0.73<br>(0.18 to<br>2.12)                           |
| Maternal obstructed labor and uterine rupture            | 12.10<br>(6.16 to<br>19.75)                                  | 9.68<br>(2.23 to<br>27.84)                                  | 8.67<br>(2.00 to<br>23.51)                                  | 11.63<br>(2.72 to<br>32.58)                                 | 0.23<br>(0.12 to<br>0.38)                            | 0.19<br>(0.05 to<br>0.55)                          | 0.17<br>(0.04 to<br>0.46)                          | 0.23<br>(0.05 to<br>0.63)                           |
| Maternal abortion, miscarriage, and ectopic pregnancy    | 30.23<br>(17.35 to<br>49.04)                                 | 28.40<br>(7.54 to<br>73.57)                                 | 25.87<br>(6.64 to<br>67.14)                                 | 33.93<br>(8.99 to<br>91.24)                                 | 0.60<br>(0.34 to<br>0.97)                            | 0.59<br>(0.16 to<br>1.50)                          | 0.54<br>(0.14 to<br>1.41)                          | 0.70<br>(0.18 to<br>1.80)                           |
| Indirect maternal deaths                                 | 40.34<br>(22.88 to<br>65.49)                                 | 36.46<br>(8.31 to<br>107.05)                                | 32.74<br>(7.74 to<br>95.31)                                 | 43.20<br>(10.21 to<br>128.00)                               | 0.75<br>(0.42 to<br>1.22)                            | 0.69<br>(0.16 to<br>2.09)                          | 0.62<br>(0.15 to<br>1.82)                          | 0.82<br>(0.19 to<br>2.43)                           |
| Late maternal deaths                                     | 3.52<br>(1.69 to<br>6.39)                                    | 2.50<br>(0.60 to<br>7.21)                                   | 2.25<br>(0.53 to<br>6.43)                                   | 2.96<br>(0.70 to<br>8.22)                                   | 0.07<br>(0.03 to<br>0.12)                            | 0.07<br>(0.01 to<br>0.14)                          | 0.04<br>(0.01 to<br>0.12)                          | 0.06<br>(0.01 to<br>0.16)                           |
| Maternal deaths aggravated by HIV/AIDS                   | 0.00<br>(0.00 to<br>0.01)                                    | 0.01<br>(0.00 to<br>0.03)                                   | 0.01<br>(0.00 to<br>0.03)                                   | 0.02<br>(0.00 to<br>0.06)                                   | 0.00<br>(0.00 to<br>0.00)                            | 0.00<br>(0.00 to<br>0.00)                          | 0.00<br>(0.00 to<br>0.00)                          | 0.00<br>(0.00 to<br>0.00)                           |
| Other maternal disorders                                 | 40.39<br>(22.34 to<br>64.26)                                 | 38.71<br>(10.22 to<br>111.42)                               | 35.64<br>(9.63 to<br>98.37)                                 | 44.18<br>(12.53 to<br>121.65)                               | 0.77<br>(0.42 to<br>1.24)                            | 0.75<br>(0.20 to<br>2.17)                          | 0.70<br>(0.18 to<br>1.87)                          | 0.86<br>(0.23 to<br>2.39)                           |
| <b>Kuwait</b>                                            |                                                              |                                                             |                                                             |                                                             |                                                      |                                                    |                                                    |                                                     |
| <b>Cause</b>                                             | <b>YLLs (actual counts)</b>                                  |                                                             |                                                             |                                                             | <b>Deaths (actual counts)</b>                        |                                                    |                                                    |                                                     |
|                                                          | <b>2016</b>                                                  | <b>2040 Forecast</b>                                        | <b>2040 Better Scenario</b>                                 | <b>2040 Worse Scenario</b>                                  | <b>2016</b>                                          | <b>2040 Forecast</b>                               | <b>2040 Better Scenario</b>                        | <b>2040 Worse Scenario</b>                          |
| <b>Neonatal disorders</b>                                | <b>13,660.59</b><br><b>(9,046.99 to</b><br><b>19,930.96)</b> | <b>7,650.04</b><br><b>(3,088.24 to</b><br><b>17,775.31)</b> | <b>5,514.87</b><br><b>(2,108.77 to</b><br><b>12,423.52)</b> | <b>9,937.33</b><br><b>(3,865.71 to</b><br><b>21,872.53)</b> | <b>157.98</b><br><b>(104.62 to</b><br><b>230.51)</b> | <b>88.48</b><br><b>(35.71 to</b><br><b>205.54)</b> | <b>63.80</b><br><b>(24.39 to</b><br><b>143.60)</b> | <b>114.94</b><br><b>(44.70 to</b><br><b>252.95)</b> |
| Neonatal preterm birth                                   | 11,181.15<br>(7,375.57 to<br>16,367.73)                      | 5,677.39<br>(2,220.25 to<br>13,417.07)                      | 3,809.78<br>(1,428.65 to<br>8,748.80)                       | 7,456.90<br>(2,899.35 to<br>16,677.89)                      | 129.27<br>(85.27 to<br>189.23)                       | 65.64<br>(25.66 to<br>155.15)                      | 44.05<br>(16.52 to<br>101.16)                      | 86.21<br>(33.51 to<br>192.81)                       |
| Neonatal encephalopathy due to birth asphyxia and trauma | 1,263.87<br>(801.40 to<br>1,979.09)                          | 788.69<br>(292.72 to<br>1,888.27)                           | 651.35<br>(239.44 to<br>1,524.38)                           | 1,069.51<br>(395.48 to<br>2,443.59)                         | 14.65<br>(9.29 to<br>22.93)                          | 9.15<br>(3.39 to<br>21.95)                         | 7.55<br>(2.78 to<br>17.67)                         | 12.40<br>(4.59 to<br>28.27)                         |
| Neonatal sepsis and other neonatal infections            | 570.78<br>(326.62 to<br>1,006.28)                            | 515.67<br>(174.84 to<br>1,203.92)                           | 440.90<br>(148.10 to<br>1,036.05)                           | 656.20<br>(219.20 to<br>1,565.84)                           | 6.60<br>(3.78 to<br>11.63)                           | 5.96<br>(2.02 to<br>15.10)                         | 5.10<br>(1.71 to<br>11.98)                         | 7.59<br>(2.53 to<br>18.12)                          |
| Hemolytic disease and other neonatal jaundice            | 29.25<br>(14.45 to<br>55.06)                                 | 17.49<br>(5.19 to<br>48.43)                                 | 14.84<br>(4.35 to<br>41.64)                                 | 22.94<br>(6.81 to<br>64.16)                                 | 0.34<br>(0.17 to<br>0.64)                            | 0.20<br>(0.06 to<br>0.56)                          | 0.17<br>(0.05 to<br>0.48)                          | 0.27<br>(0.08 to<br>0.74)                           |
| Other neonatal disorders                                 | 615.54<br>(360.77 to<br>978.76)                              | 650.80<br>(255.75 to<br>1,680.67)                           | 597.99<br>(235.06 to<br>1,512.04)                           | 731.77<br>(285.18 to<br>1,901.26)                           | 7.12<br>(4.17 to<br>11.33)                           | 7.53<br>(2.96 to<br>19.42)                         | 6.92<br>(2.72 to<br>17.48)                         | 8.47<br>(3.30 to<br>21.98)                          |
| <b>Nutritional deficiencies</b>                          | <b>40.78</b><br><b>(32.08 to</b><br><b>52.17)</b>            | <b>41.55</b><br><b>(22.27 to</b><br><b>78.33)</b>           | <b>41.34</b><br><b>(22.02 to</b><br><b>77.03)</b>           | <b>41.65</b><br><b>(22.62 to</b><br><b>79.66)</b>           | <b>0.77</b><br><b>(0.61 to</b><br><b>0.97)</b>       | <b>1.59</b><br><b>(1.00 to</b><br><b>2.48)</b>     | <b>1.65</b><br><b>(1.01 to</b><br><b>2.61)</b>     | <b>1.50</b><br><b>(0.94 to</b><br><b>2.39)</b>      |
| Protein-energy malnutrition                              | 19.22<br>(13.34 to<br>26.23)                                 | 15.59<br>(8.61 to<br>31.15)                                 | 15.99<br>(8.69 to<br>31.46)                                 | 14.66<br>(8.02 to<br>29.92)                                 | 0.34<br>(0.26 to<br>0.45)                            | 0.66<br>(0.40 to<br>1.07)                          | 0.72<br>(0.41 to<br>1.17)                          | 0.57<br>(0.34 to<br>0.97)                           |
| Iodine deficiency                                        | 1.99<br>(0.17 to<br>7.00)                                    | 3.28<br>(0.28 to<br>9.51)                                   | 3.21<br>(0.27 to<br>9.17)                                   | 3.40<br>(0.34 to<br>9.85)                                   | 0.04<br>(0.01 to<br>0.10)                            | 0.14<br>(0.01 to<br>0.38)                          | 0.15<br>(0.01 to<br>0.39)                          | 0.14<br>(0.01 to<br>0.36)                           |

|                                                                         |                                                                  |                                                                  |                                                                  |                                                                    |                                                            |                                                               |                                                               |                                                               |
|-------------------------------------------------------------------------|------------------------------------------------------------------|------------------------------------------------------------------|------------------------------------------------------------------|--------------------------------------------------------------------|------------------------------------------------------------|---------------------------------------------------------------|---------------------------------------------------------------|---------------------------------------------------------------|
| Dietary iron deficiency                                                 | 9.64<br>(7.09 to<br>12.62)                                       | 12.23<br>(6.21 to<br>22.27)                                      | 12.26<br>(6.22 to<br>22.51)                                      | 12.02<br>(6.17 to<br>22.31)                                        | 0.18<br>(0.13 to<br>0.23)                                  | 0.30<br>(0.15 to<br>0.54)                                     | 0.31<br>(0.16 to<br>0.56)                                     | 0.29<br>(0.16 to<br>0.52)                                     |
| Other nutritional deficiencies                                          | 9.93<br>(7.32 to<br>13.02)                                       | 10.45<br>(4.63 to<br>19.15)                                      | 9.88<br>(4.31 to<br>17.65)                                       | 11.58<br>(5.16 to<br>20.86)                                        | 0.22<br>(0.16 to<br>0.28)                                  | 0.48<br>(0.23 to<br>0.81)                                     | 0.48<br>(0.23 to<br>0.82)                                     | 0.49<br>(0.24 to<br>0.83)                                     |
| <b>Other communicable, maternal, neonatal, and nutritional diseases</b> | <b>1,258.62</b><br><b>(620.17 to</b><br><b>2,740.80)</b>         | <b>947.06</b><br><b>(454.93 to</b><br><b>1,798.56)</b>           | <b>877.13</b><br><b>(431.76 to</b><br><b>1,580.07)</b>           | <b>1,093.31</b><br><b>(517.88 to</b><br><b>2,048.74)</b>           | <b>20.47</b><br><b>(12.33 to</b><br><b>37.67)</b>          | <b>34.80</b><br><b>(19.60 to</b><br><b>54.84)</b>             | <b>33.87</b><br><b>(19.08 to</b><br><b>54.05)</b>             | <b>37.50</b><br><b>(20.46 to</b><br><b>59.65)</b>             |
| Sexually transmitted infections excluding HIV                           | 835.23<br>(226.31 to<br>2,335.13)                                | 200.00<br>(39.44 to<br>729.61)                                   | 169.40<br>(34.99 to<br>592.80)                                   | 254.09<br>(50.59 to<br>890.80)                                     | 10.13<br>(3.00 to<br>27.67)                                | 3.02<br>(0.87 to<br>9.16)                                     | 2.65<br>(0.78 to<br>7.69)                                     | 3.67<br>(1.02 to<br>11.30)                                    |
| Syphilis                                                                | 808.54<br>(198.35 to<br>2,303.93)                                | 174.86<br>(24.96 to<br>692.80)                                   | 145.14<br>(20.99 to<br>559.60)                                   | 227.13<br>(33.58 to<br>854.34)                                     | 9.54<br>(2.37 to<br>27.01)                                 | 2.20<br>(0.38 to<br>8.34)                                     | 1.85<br>(0.33 to<br>6.71)                                     | 2.83<br>(0.54 to<br>10.17)                                    |
| Chlamydial infection                                                    | 5.31<br>(3.10 to<br>8.20)                                        | 4.92<br>(1.92 to<br>9.65)                                        | 4.75<br>(1.84 to<br>9.04)                                        | 5.28<br>(2.10 to<br>10.20)                                         | 0.12<br>(0.07 to<br>0.18)                                  | 0.16<br>(0.07 to<br>0.29)                                     | 0.16<br>(0.07 to<br>0.29)                                     | 0.16<br>(0.07 to<br>0.29)                                     |
| Gonococcal infection                                                    | 13.94<br>(8.19 to<br>21.75)                                      | 13.47<br>(5.35 to<br>27.27)                                      | 13.03<br>(5.05 to<br>25.43)                                      | 14.39<br>(5.67 to<br>28.93)                                        | 0.32<br>(0.19 to<br>0.49)                                  | 0.46<br>(0.20 to<br>0.84)                                     | 0.45<br>(0.19 to<br>0.82)                                     | 0.47<br>(0.20 to<br>0.85)                                     |
| Other sexually transmitted infections                                   | 7.45<br>(4.39 to<br>11.56)                                       | 6.75<br>(2.74 to<br>13.53)                                       | 6.48<br>(2.51 to<br>12.88)                                       | 7.29<br>(2.87 to<br>14.38)                                         | 0.16<br>(0.10 to<br>0.25)                                  | 0.20<br>(0.08 to<br>0.38)                                     | 0.19<br>(0.08 to<br>0.37)                                     | 0.21<br>(0.09 to<br>0.39)                                     |
| Acute hepatitis                                                         | 210.91<br>(142.72 to<br>299.86)                                  | 327.30<br>(148.14 to<br>612.73)                                  | 290.93<br>(128.84 to<br>549.68)                                  | 413.86<br>(195.22 to<br>735.93)                                    | 5.41<br>(3.60 to<br>7.80)                                  | 11.44<br>(5.38 to<br>21.09)                                   | 10.26<br>(4.78 to<br>18.31)                                   | 14.29<br>(7.02 to<br>24.56)                                   |
| Acute hepatitis A                                                       | 8.17<br>(2.06 to<br>16.41)                                       | 5.98<br>(1.40 to<br>17.14)                                       | 5.34<br>(1.26 to<br>14.90)                                       | 7.23<br>(1.75 to<br>20.02)                                         | 0.12<br>(0.04 to<br>0.22)                                  | 0.17<br>(0.04 to<br>0.50)                                     | 0.16<br>(0.03 to<br>0.45)                                     | 0.20<br>(0.05 to<br>0.55)                                     |
| Acute hepatitis B                                                       | 175.64<br>(114.72 to<br>257.08)                                  | 285.96<br>(129.17 to<br>544.20)                                  | 254.01<br>(112.81 to<br>483.37)                                  | 362.58<br>(169.43 to<br>664.02)                                    | 4.70<br>(3.06 to<br>6.92)                                  | 9.95<br>(4.64 to<br>18.20)                                    | 8.90<br>(4.12 to<br>16.06)                                    | 12.48<br>(6.13 to<br>21.77)                                   |
| Acute hepatitis C                                                       | 4.14<br>(2.51 to<br>6.63)                                        | 8.56<br>(3.82 to<br>17.11)                                       | 7.70<br>(3.32 to<br>15.36)                                       | 10.67<br>(5.12 to<br>20.48)                                        | 0.12<br>(0.07 to<br>0.20)                                  | 0.35<br>(0.15 to<br>0.62)                                     | 0.30<br>(0.13 to<br>0.57)                                     | 0.40<br>(0.20 to<br>0.76)                                     |
| Acute hepatitis E                                                       | 22.96<br>(15.57 to<br>33.17)                                     | 26.79<br>(11.25 to<br>52.43)                                     | 23.88<br>(9.53 to<br>47.76)                                      | 33.38<br>(14.14 to<br>63.38)                                       | 0.47<br>(0.29 to<br>0.72)                                  | 1.00<br>(0.42 to<br>1.98)                                     | 0.91<br>(0.38 to<br>1.85)                                     | 1.20<br>(0.51 to<br>2.30)                                     |
| Other unspecified infectious diseases                                   | 212.49<br>(154.82 to<br>274.88)                                  | 419.77<br>(237.98 to<br>702.58)                                  | 416.81<br>(234.23 to<br>689.34)                                  | 425.36<br>(240.78 to<br>713.00)                                    | 4.93<br>(3.58 to<br>6.18)                                  | 20.35<br>(12.21 to<br>30.84)                                  | 20.96<br>(12.31 to<br>33.00)                                  | 19.54<br>(11.95 to<br>29.58)                                  |
| <b>Non-communicable diseases</b>                                        | <b>159,462.60</b><br><b>(123,592.33 to</b><br><b>203,668.73)</b> | <b>426,432.93</b><br><b>(231,405.91 to</b><br><b>802,603.29)</b> | <b>346,181.95</b><br><b>(193,440.56 to</b><br><b>631,692.79)</b> | <b>577,867.09</b><br><b>(298,156.83 to</b><br><b>1,093,982.89)</b> | <b>5,247.41</b><br><b>(4,044.77 to</b><br><b>6,688.17)</b> | <b>22,444.05</b><br><b>(12,854.91 to</b><br><b>38,422.02)</b> | <b>19,069.50</b><br><b>(11,130.85 to</b><br><b>32,503.58)</b> | <b>28,846.48</b><br><b>(16,343.20 to</b><br><b>49,259.28)</b> |
| <b>Kuwait</b>                                                           |                                                                  |                                                                  |                                                                  |                                                                    |                                                            |                                                               |                                                               |                                                               |
| Cause                                                                   | YLLs (actual counts)                                             |                                                                  |                                                                  |                                                                    | Deaths (actual counts)                                     |                                                               |                                                               |                                                               |
|                                                                         | 2016                                                             | 2040 Forecast                                                    | 2040 Better Scenario                                             | 2040 Worse Scenario                                                | 2016                                                       | 2040 Forecast                                                 | 2040 Better Scenario                                          | 2040 Worse Scenario                                           |
| Neoplasms                                                               | 31,734.71<br>(24,024.52 to<br>40,452.41)                         | 103,218.21<br>(59,451.15 to<br>170,371.47)                       | 94,802.95<br>(54,347.84 to<br>158,733.40)                        | 118,182.40<br>(67,909.60 to<br>192,036.81)                         | 1,061.69<br>(802.71 to<br>1,346.57)                        | 4,917.21<br>(3,066.21 to<br>7,577.11)                         | 4,570.68<br>(2,794.38 to<br>7,136.65)                         | 5,511.96<br>(3,377.81 to<br>8,517.67)                         |
| Lip and oral cavity cancer                                              | 330.85<br>(244.77 to<br>429.68)                                  | 1,022.84<br>(541.04 to<br>1,781.97)                              | 899.44<br>(485.40 to<br>1,562.21)                                | 1,209.22<br>(627.71 to<br>2,175.31)                                | 11.34<br>(8.51 to<br>14.68)                                | 46.36<br>(27.09 to<br>74.24)                                  | 41.23<br>(24.48 to<br>66.01)                                  | 54.06<br>(31.54 to<br>88.94)                                  |
| Nasopharynx cancer                                                      | 176.02<br>(127.42 to<br>242.34)                                  | 503.33<br>(233.43 to<br>977.12)                                  | 428.00<br>(207.99 to<br>849.21)                                  | 629.32<br>(297.57 to<br>1,212.74)                                  | 5.03<br>(3.61 to<br>6.92)                                  | 17.99<br>(8.83 to<br>32.59)                                   | 15.32<br>(7.62 to<br>28.25)                                   | 22.56<br>(11.08 to<br>41.74)                                  |
| Other pharynx cancer                                                    | 148.08<br>(109.08 to<br>194.51)                                  | 520.78<br>(301.79 to<br>857.52)                                  | 521.94<br>(299.76 to<br>874.79)                                  | 494.89<br>(291.03 to<br>807.07)                                    | 5.16<br>(3.82 to<br>6.66)                                  | 25.20<br>(15.93 to<br>38.41)                                  | 25.60<br>(16.03 to<br>39.32)                                  | 23.35<br>(15.08 to<br>34.83)                                  |
| Esophageal cancer                                                       | 477.49<br>(346.27 to<br>638.86)                                  | 1,927.15<br>(947.94 to<br>3,425.74)                              | 1,657.16<br>(859.76 to<br>2,848.86)                              | 2,104.80<br>(997.23 to<br>3,798.46)                                | 18.27<br>(13.45 to<br>24.08)                               | 97.48<br>(51.77 to<br>162.83)                                 | 84.68<br>(46.40 to<br>137.19)                                 | 105.10<br>(54.83 to<br>178.02)                                |

|                                      |                                       |                                         |                                         |                                         |                                |                                   |                                 |                                   |
|--------------------------------------|---------------------------------------|-----------------------------------------|-----------------------------------------|-----------------------------------------|--------------------------------|-----------------------------------|---------------------------------|-----------------------------------|
| Stomach cancer                       | 1,181.33<br>(879.21 to<br>1,555.74)   | 2,700.29<br>(1,532.46 to<br>4,497.87)   | 2,445.90<br>(1,386.53 to<br>4,110.09)   | 3,155.56<br>(1,768.80 to<br>5,313.81)   | 43.48<br>(32.83 to<br>56.60)   | 137.48<br>(84.77 to<br>208.34)    | 126.20<br>(78.00 to<br>191.55)  | 156.72<br>(97.67 to<br>239.44)    |
| Colon and rectum cancer              | 3,032.55<br>(2,241.86 to<br>3,984.06) | 9,914.04<br>(5,195.38 to<br>17,014.39)  | 8,972.21<br>(4,582.21 to<br>15,900.10)  | 11,357.74<br>(6,018.08 to<br>19,961.00) | 112.90<br>(84.31 to<br>148.09) | 510.65<br>(290.91 to<br>836.83)   | 468.89<br>(263.38 to<br>774.66) | 570.31<br>(326.71 to<br>924.84)   |
| Liver cancer                         | 1,846.84<br>(1,343.86 to<br>2,477.48) | 10,371.04<br>(5,109.99 to<br>18,634.51) | 9,705.18<br>(4,871.09 to<br>17,605.08)  | 11,438.78<br>(5,495.48 to<br>21,339.00) | 71.22<br>(52.57 to<br>94.35)   | 515.46<br>(278.27 to<br>859.13)   | 490.74<br>(269.81 to<br>826.48) | 552.34<br>(289.74 to<br>943.87)   |
| Liver cancer due to hepatitis B      | 724.13<br>(478.44 to<br>1,039.63)     | 3,526.65<br>(1,603.33 to<br>7,184.20)   | 3,283.71<br>(1,549.70 to<br>6,644.59)   | 3,893.47<br>(1,708.99 to<br>7,813.25)   | 25.27<br>(16.71 to<br>36.40)   | 156.39<br>(76.59 to<br>292.37)    | 147.71<br>(72.59 to<br>279.21)  | 168.59<br>(79.77 to<br>319.27)    |
| Liver cancer due to hepatitis C      | 538.57<br>(357.57 to<br>760.57)       | 3,564.63<br>(1,776.51 to<br>6,582.47)   | 3,352.76<br>(1,716.91 to<br>6,056.99)   | 3,844.78<br>(1,852.36 to<br>7,153.38)   | 23.70<br>(16.20 to<br>32.79)   | 196.94<br>(105.80 to<br>336.42)   | 188.76<br>(101.61 to<br>321.41) | 205.66<br>(106.86 to<br>353.87)   |
| Liver cancer due to alcohol use      | 125.39<br>(70.73 to<br>207.45)        | 743.84<br>(315.57 to<br>1,585.58)       | 694.02<br>(300.68 to<br>1,492.70)       | 821.47<br>(332.47 to<br>1,781.60)       | 5.05<br>(2.96 to<br>8.18)      | 36.42<br>(16.19 to<br>72.78)      | 34.46<br>(15.55 to<br>69.45)    | 39.26<br>(16.97 to<br>80.73)      |
| Liver cancer due to other causes     | 458.75<br>(278.69 to<br>683.57)       | 2,535.92<br>(1,055.14 to<br>4,982.11)   | 2,374.68<br>(993.22 to<br>4,545.21)     | 2,879.06<br>(1,188.36 to<br>5,833.49)   | 17.20<br>(10.39 to<br>25.51)   | 125.71<br>(57.25 to<br>235.17)    | 119.81<br>(55.05 to<br>227.05)  | 138.84<br>(61.50 to<br>217.34)    |
| Gallbladder and biliary tract cancer | 391.13<br>(284.77 to<br>519.49)       | 1,207.62<br>(736.90 to<br>1,962.58)     | 1,219.39<br>(729.63 to<br>2,034.24)     | 1,199.69<br>(747.60 to<br>1,866.93)     | 15.50<br>(11.48 to<br>20.36)   | 63.23<br>(42.41 to<br>92.33)      | 64.77<br>(42.00 to<br>96.36)    | 61.14<br>(41.77 to<br>86.30)      |
| Pancreatic cancer                    | 1,602.51<br>(1,189.89 to<br>2,138.38) | 6,960.95<br>(3,892.79 to<br>11,888.67)  | 6,978.69<br>(3,865.61 to<br>11,925.79)  | 7,220.80<br>(4,023.81 to<br>12,486.22)  | 61.76<br>(46.40 to<br>80.49)   | 345.84<br>(211.96 to<br>551.12)   | 350.67<br>(213.01 to<br>565.82) | 352.49<br>(215.76 to<br>571.87)   |
| Larynx cancer                        | 215.68<br>(152.86 to<br>297.09)       | 706.21<br>(304.58 to<br>1,510.38)       | 536.04<br>(247.97 to<br>1,092.27)       | 997.80<br>(400.06 to<br>2,233.42)       | 8.42<br>(6.02 to<br>11.57)     | 35.40<br>(16.17 to<br>74.06)      | 26.90<br>(13.18 to<br>52.85)    | 49.41<br>(20.65 to<br>106.16)     |
| Tracheal, bronchus, and lung cancer  | 3,088.86<br>(2,225.00 to<br>4,192.78) | 12,822.10<br>(6,192.80 to<br>24,658.60) | 9,057.74<br>(4,477.10 to<br>16,663.37)  | 18,644.43<br>(8,462.50 to<br>38,380.53) | 122.15<br>(89.25 to<br>164.06) | 641.18<br>(331.98 to<br>1,189.62) | 453.77<br>(243.25 to<br>805.38) | 921.10<br>(445.38 to<br>1,786.50) |
| Malignant skin melanoma              | 138.12<br>(93.03 to<br>226.75)        | 387.40<br>(225.81 to<br>687.80)         | 415.81<br>(238.50 to<br>764.52)         | 343.22<br>(204.66 to<br>611.89)         | 3.99<br>(2.72 to<br>6.55)      | 16.23<br>(10.22 to<br>27.79)      | 17.65<br>(11.10 to<br>31.54)    | 14.01<br>(9.11 to<br>24.29)       |
| Non-melanoma skin cancer             | 112.06<br>(80.51 to<br>155.51)        | 357.77<br>(213.09 to<br>560.59)         | 342.01<br>(198.76 to<br>544.93)         | 399.90<br>(244.37 to<br>612.34)         | 4.14<br>(3.04 to<br>5.62)      | 18.83<br>(12.42 to<br>27.10)      | 18.28<br>(11.59 to<br>26.70)    | 20.48<br>(14.06 to<br>28.56)      |
| Breast cancer                        | 4,559.91<br>(2,827.20 to<br>6,784.02) | 12,417.28<br>(5,654.20 to<br>24,285.69) | 11,739.31<br>(5,252.24 to<br>23,262.17) | 14,341.47<br>(6,424.01 to<br>27,538.69) | 146.17<br>(92.66 to<br>214.47) | 530.66<br>(268.40 to<br>952.63)   | 508.52<br>(251.61 to<br>939.28) | 599.19<br>(300.78 to<br>1,062.59) |
| Cervical cancer                      | 472.85<br>(295.82 to<br>717.69)       | 1,076.13<br>(489.74 to<br>2,099.05)     | 999.37<br>(460.27 to<br>1,931.94)       | 1,255.06<br>(588.17 to<br>2,419.92)     | 14.86<br>(9.41 to<br>22.19)    | 46.72<br>(23.36 to<br>84.34)      | 43.89<br>(21.85 to<br>80.36)    | 53.36<br>(27.20 to<br>93.44)      |
| Uterine cancer                       | 492.91<br>(311.17 to<br>730.36)       | 1,879.96<br>(931.27 to<br>3,477.25)     | 1,823.43<br>(900.22 to<br>3,421.22)     | 1,999.36<br>(1,011.27 to<br>3,523.29)   | 19.65<br>(12.70 to<br>29.10)   | 97.74<br>(54.21 to<br>162.82)     | 96.39<br>(53.19 to<br>164.86)   | 100.86<br>(56.69 to<br>162.16)    |
| Ovarian cancer                       | 848.48<br>(535.67 to<br>1,243.83)     | 2,977.17<br>(1,374.37 to<br>5,568.74)   | 2,814.75<br>(1,286.13 to<br>5,373.10)   | 3,296.12<br>(1,508.14 to<br>6,138.75)   | 28.33<br>(18.24 to<br>41.11)   | 137.15<br>(67.75 to<br>246.57)    | 130.88<br>(63.30 to<br>239.78)  | 148.63<br>(72.56 to<br>266.00)    |
| Prostate cancer                      | 600.49<br>(397.17 to<br>879.33)       | 3,121.58<br>(1,984.78 to<br>4,734.76)   | 3,101.91<br>(1,949.16 to<br>4,838.58)   | 3,240.33<br>(2,094.24 to<br>4,839.77)   | 34.19<br>(23.13 to<br>48.89)   | 217.45<br>(145.98 to<br>306.90)   | 219.37<br>(143.10 to<br>315.15) | 220.04<br>(151.06 to<br>302.90)   |
| Testicular cancer                    | 67.87<br>(42.75 to<br>101.44)         | 90.91<br>(42.99 to<br>174.62)           | 86.93<br>(40.63 to<br>162.64)           | 101.71<br>(49.45 to<br>184.02)          | 1.46<br>(0.92 to<br>2.19)      | 2.59<br>(1.32 to<br>4.59)         | 2.50<br>(1.27 to<br>4.39)       | 2.84<br>(1.51 to<br>4.97)         |

**Kuwait**

| Cause         | YLLs (actual counts)            |                                       |                                       |                                       | Deaths (actual counts)       |                                |                                |                               |
|---------------|---------------------------------|---------------------------------------|---------------------------------------|---------------------------------------|------------------------------|--------------------------------|--------------------------------|-------------------------------|
|               | 2016                            | 2040 Forecast                         | 2040 Better Scenario                  | 2040 Worse Scenario                   | 2016                         | 2040 Forecast                  | 2040 Better Scenario           | 2040 Worse Scenario           |
| Kidney cancer | 649.56<br>(490.88 to<br>856.72) | 2,257.15<br>(1,334.93 to<br>3,630.25) | 2,279.98<br>(1,325.63 to<br>3,735.59) | 2,222.24<br>(1,337.73 to<br>3,525.36) | 20.25<br>(15.14 to<br>26.81) | 101.15<br>(62.69 to<br>151.43) | 103.84<br>(63.78 to<br>155.98) | 97.08<br>(61.40 to<br>142.38) |





|                                                               |                                                            |                                                              |                                                              |                                                              |                                                      |                                                        |                                                      |                                                        |
|---------------------------------------------------------------|------------------------------------------------------------|--------------------------------------------------------------|--------------------------------------------------------------|--------------------------------------------------------------|------------------------------------------------------|--------------------------------------------------------|------------------------------------------------------|--------------------------------------------------------|
| Mycarditis                                                    | 470.45<br>(338.94 to<br>649.01)                            | 598.59<br>(303.80 to<br>1,131.86)                            | 592.81<br>(299.40 to<br>1,123.47)                            | 621.98<br>(321.16 to<br>1,161.52)                            | 9.55<br>(6.86 to<br>13.17)                           | 18.08<br>(10.17 to<br>30.88)                           | 18.26<br>(10.16 to<br>31.53)                         | 18.13<br>(10.35 to<br>30.77)                           |
| <b>Kuwait</b>                                                 |                                                            |                                                              |                                                              |                                                              |                                                      |                                                        |                                                      |                                                        |
| Cause                                                         | YLLs (actual counts)                                       |                                                              |                                                              |                                                              | Deaths (actual counts)                               |                                                        |                                                      |                                                        |
|                                                               | 2016                                                       | 2040 Forecast                                                | 2040 Better Scenario                                         | 2040 Worse Scenario                                          | 2016                                                 | 2040 Forecast                                          | 2040 Better Scenario                                 | 2040 Worse Scenario                                    |
| Alcoholic cardiomyopathy                                      | 61.81<br>(38.01 to<br>95.74)                               | 129.83<br>(67.79 to<br>223.64)                               | 131.44<br>(67.97 to<br>234.76)                               | 130.27<br>(69.40 to<br>219.24)                               | 1.90<br>(1.16 to<br>2.87)                            | 5.87<br>(3.41 to<br>9.20)                              | 6.00<br>(3.43 to<br>9.64)                            | 5.75<br>(3.37 to<br>8.85)                              |
| Other cardiomyopathy                                          | 541.08<br>(377.53 to<br>804.09)                            | 994.35<br>(496.97 to<br>1,900.72)                            | 863.01<br>(431.38 to<br>1,613.15)                            | 1,287.27<br>(646.41 to<br>2,420.93)                          | 15.56<br>(11.09 to<br>22.46)                         | 46.44<br>(25.23 to<br>81.05)                           | 41.22<br>(22.15 to<br>71.76)                         | 57.96<br>(31.45 to<br>99.95)                           |
| Atrial fibrillation and flutter                               | 239.63<br>(170.86 to<br>324.18)                            | 1,546.13<br>(979.77 to<br>2,210.43)                          | 1,485.91<br>(949.86 to<br>2,095.52)                          | 1,565.17<br>(1,021.63 to<br>2,204.72)                        | 17.52<br>(12.99 to<br>23.31)                         | 136.60<br>(91.56 to<br>184.54)                         | 135.56<br>(89.65 to<br>185.22)                       | 132.42<br>(91.20 to<br>178.12)                         |
| Aortic aneurysm                                               | 621.01<br>(443.47 to<br>841.49)                            | 1,684.71<br>(978.51 to<br>2,747.22)                          | 1,513.63<br>(902.61 to<br>2,443.15)                          | 1,852.91<br>(1,089.40 to<br>3,047.47)                        | 22.72<br>(16.68 to<br>29.93)                         | 90.82<br>(57.56 to<br>133.48)                          | 85.02<br>(54.88 to<br>122.82)                        | 95.59<br>(62.26 to<br>139.39)                          |
| Peripheral artery disease                                     | 15.20<br>(10.28 to<br>21.88)                               | 101.70<br>(59.43 to<br>163.30)                               | 99.21<br>(57.22 to<br>157.98)                                | 112.65<br>(66.16 to<br>175.65)                               | 0.98<br>(0.65 to<br>1.41)                            | 8.57<br>(5.18 to<br>13.02)                             | 8.66<br>(5.15 to<br>13.12)                           | 8.95<br>(5.38 to<br>13.31)                             |
| Endocarditis                                                  | 741.42<br>(492.39 to<br>1,033.16)                          | 2,169.58<br>(1,075.51 to<br>3,850.32)                        | 2,099.63<br>(1,049.78 to<br>3,775.64)                        | 2,257.82<br>(1,140.71 to<br>3,936.65)                        | 23.57<br>(15.12 to<br>33.11)                         | 119.51<br>(64.03 to<br>199.49)                         | 118.61<br>(63.06 to<br>200.79)                       | 119.00<br>(64.26 to<br>194.15)                         |
| Other cardiovascular and circulatory diseases                 | 3,114.13<br>(2,357.66 to<br>4,004.17)                      | 8,129.34<br>(4,288.26 to<br>14,085.06)                       | 6,958.86<br>(3,764.12 to<br>11,776.06)                       | 10,030.24<br>(5,353.29 to<br>17,306.22)                      | 100.83<br>(76.17 to<br>130.56)                       | 447.37<br>(269.43 to<br>703.05)                        | 399.21<br>(240.67 to<br>612.56)                      | 524.42<br>(309.52 to<br>810.48)                        |
| <b>Chronic respiratory diseases</b>                           | <b>3,310.57</b><br><b>(2,524.00 to</b><br><b>4,269.89)</b> | <b>11,767.18</b><br><b>(6,512.16 to</b><br><b>19,731.87)</b> | <b>10,624.01</b><br><b>(6,064.57 to</b><br><b>17,353.51)</b> | <b>13,713.12</b><br><b>(7,294.20 to</b><br><b>23,556.06)</b> | <b>128.91</b><br><b>(98.27 to</b><br><b>163.49)</b>  | <b>673.78</b><br><b>(412.22 to</b><br><b>1,041.25)</b> | <b>624.89</b><br><b>(382.40 to</b><br><b>948.90)</b> | <b>755.99</b><br><b>(446.23 to</b><br><b>1,207.91)</b> |
| Chronic obstructive pulmonary disease                         | 1,443.32<br>(1,053.28 to<br>1,901.20)                      | 5,315.04<br>(2,477.79 to<br>11,243.15)                       | 4,189.51<br>(1,834.39 to<br>8,344.65)                        | 7,644.96<br>(3,301.06 to<br>15,634.62)                       | 63.20<br>(46.99 to<br>81.52)                         | 316.97<br>(156.63 to<br>580.99)                        | 246.82<br>(120.33 to<br>449.23)                      | 427.46<br>(202.70 to<br>800.42)                        |
| Pneumoconiosis                                                | 8.23<br>(5.71 to<br>11.17)                                 | 32.12<br>(19.15 to<br>50.05)                                 | 32.57<br>(18.39 to<br>52.55)                                 | 32.00<br>(19.52 to<br>48.48)                                 | 0.36<br>(0.26 to<br>0.48)                            | 2.06<br>(1.34 to<br>2.91)                              | 2.15<br>(1.32 to<br>3.22)                            | 1.95<br>(1.33 to<br>2.71)                              |
| Silicosis                                                     | 0.51<br>(0.31 to<br>0.73)                                  | 1.83<br>(0.85 to<br>3.61)                                    | 1.75<br>(0.75 to<br>3.53)                                    | 2.11<br>(1.02 to<br>3.69)                                    | 0.03<br>(0.02 to<br>0.04)                            | 0.13<br>(0.06 to<br>0.24)                              | 0.13<br>(0.06 to<br>0.24)                            | 0.14<br>(0.08 to<br>0.24)                              |
| Asbestosis                                                    | 3.89<br>(2.57 to<br>5.37)                                  | 13.30<br>(6.74 to<br>24.06)                                  | 14.17<br>(6.91 to<br>26.25)                                  | 12.04<br>(6.04 to<br>21.29)                                  | 0.11<br>(0.08 to<br>0.15)                            | 0.51<br>(0.29 to<br>0.84)                              | 0.55<br>(0.30 to<br>0.94)                            | 0.45<br>(0.26 to<br>0.74)                              |
| Coal workers pneumoconiosis                                   | 0.25<br>(0.15 to<br>0.38)                                  | 1.58<br>(0.67 to<br>3.01)                                    | 1.59<br>(0.61 to<br>3.19)                                    | 1.60<br>(0.74 to<br>2.90)                                    | 0.01<br>(0.01 to<br>0.02)                            | 0.11<br>(0.05 to<br>0.21)                              | 0.12<br>(0.05 to<br>0.23)                            | 0.11<br>(0.05 to<br>0.20)                              |
| Other pneumoconiosis                                          | 3.57<br>(2.40 to<br>5.05)                                  | 15.41<br>(9.59 to<br>22.78)                                  | 15.06<br>(8.79 to<br>22.86)                                  | 16.25<br>(10.03 to<br>23.38)                                 | 0.20<br>(0.14 to<br>0.28)                            | 1.31<br>(0.86 to<br>1.95)                              | 1.36<br>(0.84 to<br>2.19)                            | 1.25<br>(0.84 to<br>1.81)                              |
| Asthma                                                        | 765.91<br>(566.50 to<br>1,003.00)                          | 1,229.28<br>(514.15 to<br>2,665.91)                          | 951.77<br>(384.70 to<br>2,083.64)                            | 1,775.16<br>(786.23 to<br>3,636.70)                          | 25.00<br>(18.49 to<br>33.31)                         | 69.01<br>(31.27 to<br>136.55)                          | 55.59<br>(25.00 to<br>110.13)                        | 93.88<br>(45.01 to<br>180.11)                          |
| Interstitial lung disease and pulmonary sarcoidosis           | 604.66<br>(417.86 to<br>826.02)                            | 3,752.23<br>(2,392.52 to<br>5,703.35)                        | 4,220.14<br>(2,593.16 to<br>6,668.22)                        | 3,014.69<br>(1,960.76 to<br>4,543.01)                        | 26.63<br>(18.75 to<br>35.83)                         | 232.93<br>(156.32 to<br>323.43)                        | 266.68<br>(174.21 to<br>381.73)                      | 181.00<br>(124.30 to<br>252.56)                        |
| Other chronic respiratory diseases                            | 488.45<br>(300.91 to<br>731.56)                            | 1,238.51<br>(600.62 to<br>2,197.92)                          | 1,230.02<br>(576.11 to<br>2,217.36)                          | 1,246.31<br>(615.40 to<br>2,211.09)                          | 13.73<br>(8.34 to<br>20.80)                          | 52.81<br>(27.77 to<br>88.86)                           | 53.65<br>(27.30 to<br>91.43)                         | 51.70<br>(27.89 to<br>85.35)                           |
| <b>Cirrhosis and other chronic liver diseases</b>             | <b>4,267.83</b><br><b>(3,130.37 to</b><br><b>5,786.28)</b> | <b>10,961.77</b><br><b>(6,126.13 to</b><br><b>18,476.05)</b> | <b>10,584.40</b><br><b>(5,812.29 to</b><br><b>18,138.46)</b> | <b>11,969.24</b><br><b>(6,826.17 to</b><br><b>19,671.22)</b> | <b>137.81</b><br><b>(101.74 to</b><br><b>184.76)</b> | <b>474.62</b><br><b>(282.99 to</b><br><b>734.88)</b>   | <b>463.25</b><br><b>(273.77 to</b><br><b>727.08)</b> | <b>507.49</b><br><b>(319.09 to</b><br><b>770.97)</b>   |
| Cirrhosis and other chronic liver diseases due to hepatitis B | 1,446.44<br>(977.10 to<br>2,068.88)                        | 3,719.79<br>(2,013.03 to<br>6,382.42)                        | 3,602.87<br>(1,877.95 to<br>6,144.67)                        | 4,051.12<br>(2,232.15 to<br>6,719.52)                        | 47.20<br>(32.34 to<br>65.82)                         | 159.18<br>(93.89 to<br>254.05)                         | 155.65<br>(89.68 to<br>249.54)                       | 170.04<br>(101.75 to<br>263.43)                        |

|                                                                |                                                            |                                                               |                                                               |                                                               |                                                      |                                                            |                                                            |                                                            |
|----------------------------------------------------------------|------------------------------------------------------------|---------------------------------------------------------------|---------------------------------------------------------------|---------------------------------------------------------------|------------------------------------------------------|------------------------------------------------------------|------------------------------------------------------------|------------------------------------------------------------|
| Cirrhosis and other chronic liver diseases due to hepatitis C  | 1,630.82<br>(1,102.15 to<br>2,400.30)                      | 4,378.54<br>(2,321.42 to<br>7,667.78)                         | 4,219.77<br>(2,194.20 to<br>7,551.71)                         | 4,804.71<br>(2,479.55 to<br>8,241.12)                         | 53.31<br>(36.47 to<br>77.10)                         | 185.58<br>(104.69 to<br>305.51)                            | 180.49<br>(99.03 to<br>299.78)                             | 199.98<br>(114.40 to<br>322.01)                            |
| Cirrhosis and other chronic liver diseases due to alcohol use  | 285.47<br>(194.57 to<br>394.87)                            | 713.73<br>(386.99 to<br>1,232.35)                             | 691.96<br>(372.10 to<br>1,208.03)                             | 772.92<br>(436.50 to<br>1,301.81)                             | 9.55<br>(6.74 to<br>13.13)                           | 31.37<br>(18.29 to<br>48.65)                               | 30.74<br>(18.02 to<br>48.49)                               | 33.26<br>(19.97 to<br>51.11)                               |
| Cirrhosis and other chronic liver diseases due to other causes | 905.09<br>(671.81 to<br>1,221.78)                          | 2,149.71<br>(1,190.72 to<br>3,706.45)                         | 2,069.80<br>(1,108.44 to<br>3,561.64)                         | 2,340.50<br>(1,298.84 to<br>3,890.09)                         | 27.74<br>(20.26 to<br>37.17)                         | 98.49<br>(58.54 to<br>156.49)                              | 96.37<br>(56.03 to<br>154.58)                              | 104.20<br>(63.85 to<br>157.88)                             |
| <b>Digestive diseases</b>                                      | <b>2,304.44</b><br><b>(1,734.89 to</b><br><b>2,992.82)</b> | <b>6,262.17</b><br><b>(3,627.83 to</b><br><b>9,936.93)</b>    | <b>6,003.18</b><br><b>(3,462.25 to</b><br><b>9,585.10)</b>    | <b>6,823.09</b><br><b>(4,008.80 to</b><br><b>10,563.89)</b>   | <b>80.77</b><br><b>(60.59 to</b><br><b>103.49)</b>   | <b>359.32</b><br><b>(229.56 to</b><br><b>515.22)</b>       | <b>351.68</b><br><b>(219.77 to</b><br><b>512.38)</b>       | <b>377.22</b><br><b>(247.43 to</b><br><b>530.53)</b>       |
| Peptic ulcer disease                                           | 248.89<br>(181.75 to<br>337.98)                            | 560.89<br>(324.36 to<br>927.27)                               | 491.46<br>(272.34 to<br>785.14)                               | 693.56<br>(402.36 to<br>1,100.99)                             | 10.65<br>(7.90 to<br>14.06)                          | 35.42<br>(22.47 to<br>52.83)                               | 31.88<br>(19.42 to<br>46.84)                               | 42.20<br>(26.43 to<br>61.56)                               |
| <b>Kuwait</b>                                                  |                                                            |                                                               |                                                               |                                                               |                                                      |                                                            |                                                            |                                                            |
| Cause                                                          | YLLs (actual counts)                                       |                                                               |                                                               |                                                               | Deaths (actual counts)                               |                                                            |                                                            |                                                            |
|                                                                | 2016                                                       | 2040 Forecast                                                 | 2040 Better Scenario                                          | 2040 Worse Scenario                                           | 2016                                                 | 2040 Forecast                                              | 2040 Better Scenario                                       | 2040 Worse Scenario                                        |
| Gastritis and duodenitis                                       | 12.23<br>(8.30 to<br>17.81)                                | 27.05<br>(14.01 to<br>46.70)                                  | 25.62<br>(13.06 to<br>44.82)                                  | 30.83<br>(15.64 to<br>52.80)                                  | 0.39<br>(0.26 to<br>0.56)                            | 1.32<br>(0.74 to<br>2.08)                                  | 1.28<br>(0.69 to<br>2.00)                                  | 1.45<br>(0.80 to<br>2.19)                                  |
| Appendicitis                                                   | 159.55<br>(110.08 to<br>215.92)                            | 299.02<br>(151.41 to<br>522.75)                               | 275.76<br>(136.43 to<br>481.57)                               | 353.45<br>(182.67 to<br>592.54)                               | 5.33<br>(3.61 to<br>7.23)                            | 17.46<br>(9.64 to<br>27.28)                                | 16.51<br>(8.86 to<br>26.19)                                | 19.76<br>(10.95 to<br>30.09)                               |
| Paralytic ileus and intestinal obstruction                     | 540.44<br>(408.44 to<br>715.97)                            | 1,489.83<br>(930.12 to<br>2,190.70)                           | 1,516.58<br>(927.89 to<br>2,317.86)                           | 1,452.70<br>(927.74 to<br>2,107.38)                           | 16.61<br>(12.49 to<br>22.11)                         | 88.49<br>(59.46 to<br>119.63)                              | 92.30<br>(60.28 to<br>129.34)                              | 82.83<br>(57.16 to<br>111.37)                              |
| Inguinal, femoral, and abdominal hernia                        | 36.78<br>(25.68 to<br>55.00)                               | 98.95<br>(59.88 to<br>159.88)                                 | 97.06<br>(57.35 to<br>157.25)                                 | 104.71<br>(65.04 to<br>164.67)                                | 1.74<br>(1.20 to<br>2.56)                            | 6.67<br>(4.34 to<br>9.98)                                  | 6.70<br>(4.25 to<br>10.11)                                 | 6.77<br>(4.57 to<br>10.02)                                 |
| Inflammatory bowel disease                                     | 105.14<br>(69.55 to<br>147.40)                             | 241.40<br>(133.82 to<br>418.86)                               | 242.93<br>(132.39 to<br>422.78)                               | 242.64<br>(135.78 to<br>410.48)                               | 3.05<br>(2.01 to<br>4.23)                            | 10.47<br>(6.44 to<br>16.43)                                | 10.71<br>(6.51 to<br>17.06)                                | 10.24<br>(6.35 to<br>15.67)                                |
| Vascular intestinal disorders                                  | 253.05<br>(179.02 to<br>347.07)                            | 1,112.22<br>(629.51 to<br>1,805.36)                           | 1,110.49<br>(599.34 to<br>1,842.06)                           | 1,132.05<br>(647.38 to<br>1,769.67)                           | 10.93<br>(7.86 to<br>14.78)                          | 67.39<br>(40.84 to<br>102.41)                              | 68.36<br>(39.91 to<br>106.04)                              | 66.55<br>(41.88 to<br>98.29)                               |
| Gallbladder and biliary diseases                               | 169.47<br>(124.03 to<br>225.59)                            | 648.88<br>(282.90 to<br>1,288.38)                             | 526.25<br>(224.37 to<br>1,084.36)                             | 863.74<br>(390.12 to<br>1,725.24)                             | 7.48<br>(5.59 to<br>9.70)                            | 41.76<br>(19.45 to<br>77.52)                               | 35.03<br>(15.96 to<br>68.28)                               | 52.57<br>(25.63 to<br>97.78)                               |
| Pancreatitis                                                   | 513.11<br>(358.75 to<br>709.98)                            | 1,079.76<br>(573.59 to<br>1,894.64)                           | 1,016.79<br>(514.33 to<br>1,771.44)                           | 1,226.37<br>(672.34 to<br>2,092.25)                           | 15.33<br>(10.85 to<br>20.77)                         | 48.72<br>(28.41 to<br>75.82)                               | 46.52<br>(25.97 to<br>72.79)                               | 53.91<br>(32.36 to<br>83.63)                               |
| Other digestive diseases                                       | 265.78<br>(181.14 to<br>357.71)                            | 704.18<br>(394.79 to<br>1,161.85)                             | 700.23<br>(378.52 to<br>1,169.15)                             | 723.05<br>(408.70 to<br>1,168.13)                             | 9.26<br>(6.48 to<br>12.43)                           | 41.61<br>(25.68 to<br>62.17)                               | 42.38<br>(25.87 to<br>64.29)                               | 40.95<br>(25.92 to<br>60.30)                               |
| <b>Neurological disorders</b>                                  | <b>5,989.39</b><br><b>(4,599.47 to</b><br><b>7,623.89)</b> | <b>33,955.50</b><br><b>(20,897.42 to</b><br><b>52,428.18)</b> | <b>32,892.98</b><br><b>(19,948.46 to</b><br><b>51,184.90)</b> | <b>35,652.98</b><br><b>(21,754.40 to</b><br><b>55,941.10)</b> | <b>331.93</b><br><b>(233.94 to</b><br><b>424.91)</b> | <b>2,671.55</b><br><b>(1,698.87 to</b><br><b>4,027.92)</b> | <b>2,645.78</b><br><b>(1,665.41 to</b><br><b>3,963.06)</b> | <b>2,704.52</b><br><b>(1,694.13 to</b><br><b>4,238.21)</b> |
| Alzheimer's disease and other dementias                        | 3,450.72<br>(2,544.99 to<br>4,609.73)                      | 27,625.68<br>(15,927.79 to<br>44,644.98)                      | 26,445.44<br>(15,106.10 to<br>43,141.24)                      | 29,476.37<br>(16,800.21 to<br>49,572.14)                      | 261.57<br>(196.85 to<br>344.28)                      | 2,349.68<br>(1,443.99 to<br>3,678.75)                      | 2,306.37<br>(1,409.85 to<br>3,571.05)                      | 2,408.70<br>(1,444.66 to<br>3,958.75)                      |
| Parkinson's disease                                            | 418.25<br>(288.45 to<br>593.24)                            | 2,846.55<br>(1,930.61 to<br>3,983.87)                         | 3,021.84<br>(1,964.19 to<br>4,327.80)                         | 2,580.42<br>(1,773.24 to<br>3,537.16)                         | 26.71<br>(18.59 to<br>37.50)                         | 221.76<br>(155.23 to<br>303.32)                            | 238.79<br>(161.37 to<br>339.08)                            | 195.73<br>(140.07 to<br>266.42)                            |
| Epilepsy                                                       | 1,193.74<br>(919.76 to<br>1,520.74)                        | 1,850.74<br>(989.94 to<br>3,356.22)                           | 1,794.94<br>(930.63 to<br>3,222.75)                           | 1,964.36<br>(1,038.71 to<br>3,504.91)                         | 22.10<br>(16.91 to<br>28.66)                         | 49.58<br>(28.51 to<br>82.18)                               | 49.15<br>(27.67 to<br>81.22)                               | 50.96<br>(29.53 to<br>83.01)                               |
| Multiple sclerosis                                             | 128.60<br>(81.20 to<br>188.83)                             | 249.09<br>(123.56 to<br>461.19)                               | 246.75<br>(120.38 to<br>464.63)                               | 246.19<br>(124.48 to<br>451.06)                               | 3.19<br>(2.03 to<br>4.65)                            | 7.79<br>(4.15 to<br>13.86)                                 | 7.78<br>(4.09 to<br>13.82)                                 | 7.60<br>(4.10 to<br>13.34)                                 |
| Motor neuron disease                                           | 238.06<br>(176.40 to<br>318.71)                            | 548.21<br>(325.28 to<br>919.29)                               | 550.22<br>(322.29 to<br>933.41)                               | 551.03<br>(334.30 to<br>915.47)                               | 5.30<br>(3.89 to<br>7.19)                            | 18.55<br>(11.29 to<br>29.10)                               | 18.90<br>(11.30 to<br>30.43)                               | 18.22<br>(11.21 to<br>28.28)                               |

|                                                            |                                                              |                                                                |                                                                |                                                                |                                                      |                                                            |                                                            |                                                             |
|------------------------------------------------------------|--------------------------------------------------------------|----------------------------------------------------------------|----------------------------------------------------------------|----------------------------------------------------------------|------------------------------------------------------|------------------------------------------------------------|------------------------------------------------------------|-------------------------------------------------------------|
| Other neurological disorders                               | 560.02<br>(427.95 to<br>716.73)                              | 835.23<br>(527.24 to<br>1,273.31)                              | 833.81<br>(519.18 to<br>1,287.15)                              | 834.61<br>(532.24 to<br>1,262.92)                              | 10.07<br>(7.71 to<br>12.95)                          | 24.20<br>(16.66 to<br>35.66)                               | 24.80<br>(16.73 to<br>36.97)                               | 23.31<br>(16.23 to<br>33.61)                                |
| <b>Mental disorders</b>                                    | <b>2,029.33</b><br><b>(1,278.37 to</b><br><b>3,058.56)</b>   | <b>5,663.91</b><br><b>(3,031.82 to</b><br><b>10,310.96)</b>    | <b>6,221.79</b><br><b>(3,194.00 to</b><br><b>11,719.13)</b>    | <b>4,851.99</b><br><b>(2,494.25 to</b><br><b>8,720.03)</b>     | <b>42.38</b><br><b>(27.01 to</b><br><b>63.10)</b>    | <b>154.16</b><br><b>(89.40 to</b><br><b>257.96)</b>        | <b>171.46</b><br><b>(97.00 to</b><br><b>296.81)</b>        | <b>129.27</b><br><b>(74.82 to</b><br><b>219.62)</b>         |
| Alcohol use disorders                                      | 306.69<br>(198.92 to<br>458.33)                              | 550.08<br>(278.29 to<br>1,040.17)                              | 577.64<br>(283.11 to<br>1,128.02)                              | 515.58<br>(261.55 to<br>973.91)                                | 7.31<br>(4.74 to<br>10.86)                           | 16.25<br>(9.03 to<br>28.93)                                | 17.16<br>(9.23 to<br>31.44)                                | 15.05<br>(8.33 to<br>26.40)                                 |
| Drug use disorders                                         | 1,719.42<br>(1,049.83 to<br>2,598.94)                        | 5,108.45<br>(2,694.58 to<br>9,347.50)                          | 5,638.67<br>(2,883.19 to<br>10,783.16)                         | 4,331.13<br>(2,223.21 to<br>7,841.43)                          | 35.01<br>(21.73 to<br>52.79)                         | 137.81<br>(79.01 to<br>230.50)                             | 154.19<br>(87.25 to<br>266.03)                             | 114.11<br>(65.20 to<br>193.30)                              |
| Opioid use disorders                                       | 788.58<br>(471.87 to<br>1,268.85)                            | 1,543.17<br>(777.90 to<br>3,047.91)                            | 1,600.62<br>(772.94 to<br>3,257.23)                            | 1,467.61<br>(730.70 to<br>2,885.31)                            | 15.80<br>(9.54 to<br>25.17)                          | 39.79<br>(21.54 to<br>74.44)                               | 41.64<br>(21.99 to<br>81.69)                               | 37.28<br>(20.15 to<br>68.49)                                |
| Cocaine use disorders                                      | 138.59<br>(72.10 to<br>225.55)                               | 496.86<br>(228.62 to<br>974.00)                                | 546.56<br>(244.11 to<br>1,089.39)                              | 423.36<br>(190.44 to<br>831.46)                                | 2.91<br>(1.54 to<br>4.63)                            | 12.93<br>(6.30 to<br>23.44)                                | 14.52<br>(6.91 to<br>27.01)                                | 10.88<br>(5.26 to<br>20.17)                                 |
| Amphetamine use disorders                                  | 174.29<br>(79.09 to<br>309.98)                               | 896.26<br>(383.38 to<br>1,870.84)                              | 1,025.49<br>(402.73 to<br>2,254.82)                            | 708.73<br>(298.40 to<br>1,472.33)                              | 3.53<br>(1.60 to<br>6.24)                            | 21.15<br>(9.16 to<br>42.12)                                | 24.34<br>(10.44 to<br>51.24)                               | 16.57<br>(7.11 to<br>33.30)                                 |
| Other drug use disorders                                   | 617.95<br>(286.32 to<br>1,006.82)                            | 2,172.16<br>(1,028.06 to<br>3,960.29)                          | 2,466.01<br>(1,163.27 to<br>4,626.27)                          | 1,731.43<br>(776.64 to<br>3,265.62)                            | 12.76<br>(6.24 to<br>20.49)                          | 63.94<br>(35.61 to<br>104.22)                              | 73.89<br>(39.48 to<br>124.15)                              | 49.38<br>(25.97 to<br>82.16)                                |
| Eating disorders                                           | 3.22<br>(2.33 to<br>4.33)                                    | 5.37<br>(2.56 to<br>10.99)                                     | 5.48<br>(2.53 to<br>11.16)                                     | 5.28<br>(2.50 to<br>10.69)                                     | 0.06<br>(0.04 to<br>0.08)                            | 0.11<br>(0.05 to<br>0.23)                                  | 0.11<br>(0.05 to<br>0.24)                                  | 0.11<br>(0.05 to<br>0.22)                                   |
| <b>Kuwait</b>                                              |                                                              |                                                                |                                                                |                                                                |                                                      |                                                            |                                                            |                                                             |
| Cause                                                      | YLLs (actual counts)                                         |                                                                |                                                                |                                                                | Deaths (actual counts)                               |                                                            |                                                            |                                                             |
|                                                            | 2016                                                         | 2040 Forecast                                                  | 2040 Better Scenario                                           | 2040 Worse Scenario                                            | 2016                                                 | 2040 Forecast                                              | 2040 Better Scenario                                       | 2040 Worse Scenario                                         |
| <b>Diabetes, urogenital, blood, and endocrine diseases</b> | <b>11,955.71</b><br><b>(9,317.07 to</b><br><b>15,143.45)</b> | <b>61,204.36</b><br><b>(33,669.57 to</b><br><b>180,073.21)</b> | <b>54,063.02</b><br><b>(20,495.93 to</b><br><b>165,813.49)</b> | <b>81,122.32</b><br><b>(31,437.72 to</b><br><b>216,084.25)</b> | <b>456.69</b><br><b>(351.77 to</b><br><b>574.44)</b> | <b>3,478.99</b><br><b>(1,418.08 to</b><br><b>9,321.53)</b> | <b>3,138.92</b><br><b>(1,233.40 to</b><br><b>9,119.27)</b> | <b>4,420.23</b><br><b>(1,785.07 to</b><br><b>10,421.54)</b> |
| Diabetes mellitus                                          | 4,347.68<br>(3,271.33 to<br>5,594.80)                        | 19,673.22<br>(10,645.66 to<br>31,120.63)                       | 16,401.67<br>(8,825.27 to<br>26,083.75)                        | 24,836.41<br>(14,011.10 to<br>38,173.96)                       | 196.97<br>(151.75 to<br>251.84)                      | 1,187.34<br>(721.46 to<br>1,689.23)                        | 1,021.61<br>(409.11 to<br>1,446.15)                        | 1,434.83<br>(895.32 to<br>2,007.07)                         |
| Acute glomerulonephritis                                   | 22.45<br>(17.80 to<br>27.85)                                 | 27.40<br>(13.71 to<br>49.58)                                   | 25.55<br>(12.27 to<br>45.11)                                   | 31.20<br>(15.57 to<br>55.38)                                   | 0.41<br>(0.32 to<br>0.51)                            | 0.67<br>(0.35 to<br>1.14)                                  | 0.64<br>(0.31 to<br>1.10)                                  | 0.74<br>(0.39 to<br>1.25)                                   |
| Chronic kidney disease                                     | 4,521.99<br>(3,438.47 to<br>5,795.54)                        | 35,386.00<br>(4,909.04 to<br>146,870.20)                       | 31,676.90<br>(4,488.40 to<br>138,644.15)                       | 49,768.56<br>(7,150.61 to<br>174,109.89)                       | 181.65<br>(138.09 to<br>230.59)                      | 1,989.21<br>(235.01 to<br>7,724.00)                        | 1,814.39<br>(217.17 to<br>7,522.15)                        | 2,678.50<br>(342.44 to<br>8,400.58)                         |
| Chronic kidney disease due to diabetes mellitus            | 1,976.86<br>(1,438.66 to<br>2,622.93)                        | 17,828.38<br>(2,241.49 to<br>75,286.48)                        | 15,894.67<br>(2,032.37 to<br>71,236.79)                        | 25,423.67<br>(3,374.54 to<br>95,799.79)                        | 80.47<br>(59.66 to<br>104.34)                        | 921.53<br>(101.27 to<br>3,719.20)                          | 832.94<br>(94.57 to<br>3,638.78)                           | 1,269.93<br>(154.06 to<br>4,342.88)                         |
| Chronic kidney disease due to hypertension                 | 620.83<br>(452.29 to<br>809.82)                              | 6,836.90<br>(827.37 to<br>28,759.98)                           | 6,275.01<br>(733.80 to<br>27,956.78)                           | 9,066.68<br>(1,165.60 to<br>30,785.80)                         | 36.05<br>(26.30 to<br>46.32)                         | 488.67<br>(54.28 to<br>1,854.20)                           | 459.08<br>(52.27 to<br>1,887.69)                           | 614.03<br>(75.99 to<br>1,896.41)                            |
| Chronic kidney disease due to glomerulonephritis           | 638.92<br>(474.84 to<br>843.50)                              | 2,931.35<br>(541.08 to<br>12,429.81)                           | 2,575.80<br>(479.37 to<br>11,238.45)                           | 4,235.63<br>(787.49 to<br>15,819.62)                           | 19.56<br>(14.18 to<br>26.13)                         | 150.29<br>(20.74 to<br>616.99)                             | 134.19<br>(18.55 to<br>575.61)                             | 210.23<br>(30.50 to<br>719.19)                              |
| Chronic kidney disease due to other and unspecified causes | 1,285.38<br>(970.78 to<br>1,706.83)                          | 7,789.37<br>(1,244.83 to<br>32,376.01)                         | 6,931.43<br>(1,086.81 to<br>28,922.48)                         | 11,042.58<br>(1,810.96 to<br>36,141.78)                        | 45.57<br>(33.63 to<br>60.69)                         | 428.72<br>(55.37 to<br>1,719.95)                           | 388.18<br>(48.44 to<br>1,619.41)                           | 584.31<br>(80.27 to<br>1,845.17)                            |
| Urinary diseases and male infertility                      | 601.93<br>(469.62 to<br>766.71)                              | 1,973.74<br>(1,223.09 to<br>2,973.45)                          | 1,918.49<br>(1,186.62 to<br>2,924.40)                          | 2,114.68<br>(1,373.69 to<br>3,009.65)                          | 26.42<br>(20.26 to<br>33.51)                         | 141.02<br>(96.83 to<br>190.04)                             | 140.53<br>(93.00 to<br>196.04)                             | 144.39<br>(102.86 to<br>189.20)                             |
| Urinary tract infections                                   | 536.89<br>(415.10 to<br>690.14)                              | 1,858.04<br>(1,164.62 to<br>2,750.87)                          | 1,811.15<br>(1,123.68 to<br>2,775.28)                          | 1,979.13<br>(1,295.13 to<br>2,817.99)                          | 24.47<br>(18.81 to<br>31.38)                         | 134.70<br>(92.43 to<br>180.43)                             | 134.51<br>(88.39 to<br>187.26)                             | 137.31<br>(98.22 to<br>179.15)                              |
| Urolithiasis                                               | 23.96<br>(15.44 to<br>40.09)                                 | 45.11<br>(21.20 to<br>97.05)                                   | 41.84<br>(19.23 to<br>87.82)                                   | 52.82<br>(24.87 to<br>107.44)                                  | 0.62<br>(0.38 to<br>1.13)                            | 2.29<br>(1.04 to<br>5.40)                                  | 2.20<br>(0.97 to<br>5.27)                                  | 2.53<br>(1.18 to<br>5.70)                                   |

|                                                   |                                          |                                         |                                         |                                         |                                 |                                 |                                 |                                 |
|---------------------------------------------------|------------------------------------------|-----------------------------------------|-----------------------------------------|-----------------------------------------|---------------------------------|---------------------------------|---------------------------------|---------------------------------|
| Other urinary diseases                            | 41.08<br>(26.73 to<br>67.14)             | 70.58<br>(31.41 to<br>138.50)           | 65.49<br>(29.56 to<br>126.09)           | 82.72<br>(38.46 to<br>154.81)           | 1.32<br>(0.82 to<br>2.27)       | 4.02<br>(1.96 to<br>7.70)       | 3.82<br>(1.84 to<br>7.55)       | 4.55<br>(2.22 to<br>8.47)       |
| Gynecological diseases                            | 13.69<br>(4.10 to<br>23.51)              | 10.44<br>(1.94 to<br>30.52)             | 8.86<br>(1.78 to<br>26.60)              | 14.24<br>(2.82 to<br>42.58)             | 0.29<br>(0.09 to<br>0.50)       | 0.26<br>(0.06 to<br>0.71)       | 0.22<br>(0.05 to<br>0.61)       | 0.35<br>(0.08 to<br>0.97)       |
| Uterine fibroids                                  | 5.09<br>(1.73 to<br>8.87)                | 3.68<br>(0.80 to<br>10.10)              | 3.24<br>(0.70 to<br>8.88)               | 4.67<br>(1.03 to<br>12.61)              | 0.11<br>(0.04 to<br>0.19)       | 0.09<br>(0.02 to<br>0.23)       | 0.08<br>(0.02 to<br>0.20)       | 0.11<br>(0.03 to<br>0.30)       |
| Polycystic ovarian syndrome                       | 1.07<br>(0.23 to<br>3.33)                | 0.55<br>(0.06 to<br>2.24)               | 0.41<br>(0.04 to<br>1.65)               | 0.92<br>(0.10 to<br>3.68)               | 0.02<br>(0.01 to<br>0.07)       | 0.01<br>(0.00 to<br>0.05)       | 0.01<br>(0.00 to<br>0.04)       | 0.02<br>(0.00 to<br>0.08)       |
| Endometriosis                                     | 0.10<br>(0.02 to<br>0.25)                | 0.09<br>(0.01 to<br>0.51)               | 0.08<br>(0.01 to<br>0.25)               | 0.12<br>(0.02 to<br>0.41)               | 0.00<br>(0.00 to<br>0.01)       | 0.00<br>(0.00 to<br>0.01)       | 0.00<br>(0.00 to<br>0.01)       | 0.00<br>(0.00 to<br>0.01)       |
| Genital prolapse                                  | 0.06<br>(0.02 to<br>0.10)                | 0.06<br>(0.02 to<br>0.15)               | 0.01<br>(0.01 to<br>0.13)               | 0.08<br>(0.02 to<br>0.20)               | 0.00<br>(0.00 to<br>0.00)       | 0.00<br>(0.00 to<br>0.01)       | 0.00<br>(0.00 to<br>0.00)       | 0.00<br>(0.00 to<br>0.01)       |
| Other gynecological diseases                      | 7.37<br>(2.02 to<br>13.49)               | 6.06<br>(0.99 to<br>18.68)              | 5.07<br>(0.88 to<br>15.81)              | 8.45<br>(1.41 to<br>26.43)              | 0.16<br>(0.05 to<br>0.29)       | 0.15<br>(0.03 to<br>0.44)       | 0.13<br>(0.03 to<br>0.36)       | 0.21<br>(0.05 to<br>0.61)       |
| Hemoglobinopathies and hemolytic anemias          | 955.74<br>(700.71 to<br>1,243.87)        | 1,512.20<br>(698.08 to<br>2,974.10)     | 1,390.70<br>(629.30 to<br>2,676.11)     | 1,781.26<br>(825.62 to<br>3,326.08)     | 21.00<br>(15.02 to<br>27.57)    | 57.29<br>(27.83 to<br>105.05)   | 53.72<br>(26.23 to<br>96.16)    | 65.52<br>(32.12 to<br>115.19)   |
| Thalassemias                                      | 64.53<br>(39.01 to<br>98.05)             | 26.52<br>(13.94 to<br>45.52)            | 24.89<br>(12.81 to<br>42.44)            | 28.43<br>(14.91 to<br>48.95)            | 0.82<br>(0.51 to<br>1.22)       | 0.35<br>(0.19 to<br>0.58)       | 0.33<br>(0.18 to<br>0.55)       | 0.38<br>(0.20 to<br>0.64)       |
| Sickle cell disorders                             | 530.06<br>(375.68 to<br>719.81)          | 832.51<br>(314.68 to<br>1,744.74)       | 761.66<br>(297.87 to<br>1,542.56)       | 987.35<br>(392.10 to<br>1,958.74)       | 10.40<br>(7.22 to<br>14.23)     | 26.05<br>(10.50 to<br>52.47)    | 24.08<br>(9.47 to<br>49.44)     | 30.44<br>(12.44 to<br>57.64)    |
| G6PD deficiency                                   | 235.36<br>(163.80 to<br>319.66)          | 334.00<br>(145.19 to<br>702.84)         | 300.81<br>(124.54 to<br>601.92)         | 409.47<br>(184.68 to<br>802.45)         | 4.74<br>(3.25 to<br>6.52)       | 10.46<br>(4.98 to<br>20.42)     | 9.56<br>(4.41 to<br>18.02)      | 12.58<br>(6.15 to<br>22.60)     |
| Other hemoglobinopathies and hemolytic anemias    | 125.80<br>(87.28 to<br>171.33)           | 319.17<br>(166.65 to<br>594.50)         | 303.35<br>(156.20 to<br>558.42)         | 356.00<br>(184.23 to<br>620.41)         | 5.04<br>(3.44 to<br>6.77)       | 20.42<br>(12.09 to<br>33.48)    | 19.75<br>(11.33 to<br>31.90)    | 22.12<br>(13.00 to<br>34.59)    |
| Endocrine, metabolic, blood, and immune disorders | 1,492.22<br>(1,062.62 to<br>1,961.38)    | 2,621.36<br>(1,481.82 to<br>4,240.49)   | 2,640.85<br>(1,467.35 to<br>4,272.01)   | 2,575.98<br>(1,478.24 to<br>4,163.70)   | 29.96<br>(21.55 to<br>38.85)    | 103.21<br>(61.35 to<br>151.44)  | 107.82<br>(63.70 to<br>162.19)  | 95.92<br>(58.30 to<br>140.05)   |
| <b>Kuwait</b>                                     |                                          |                                         |                                         |                                         |                                 |                                 |                                 |                                 |
| Cause                                             | YLLs (actual counts)                     |                                         |                                         |                                         | Deaths (actual counts)          |                                 |                                 |                                 |
|                                                   | 2016                                     | 2040 Forecast                           | 2040 Better Scenario                    | 2040 Worse Scenario                     | 2016                            | 2040 Forecast                   | 2040 Better Scenario            | 2040 Worse Scenario             |
| Musculoskeletal disorders                         | 539.76<br>(311.31 to<br>761.08)          | 962.97<br>(398.10 to<br>1,685.11)       | 933.80<br>(378.16 to<br>1,608.31)       | 1,030.14<br>(432.33 to<br>1,762.98)     | 12.29<br>(7.05 to<br>17.39)     | 35.43<br>(16.87 to<br>57.26)    | 35.01<br>(16.56 to<br>56.84)    | 36.78<br>(17.46 to<br>58.23)    |
| Rheumatoid arthritis                              | 41.13<br>(24.09 to<br>64.98)             | 83.75<br>(37.18 to<br>158.08)           | 74.01<br>(33.40 to<br>138.38)           | 106.11<br>(47.32 to<br>190.75)          | 1.26<br>(0.71 to<br>2.04)       | 4.03<br>(1.88 to<br>7.45)       | 3.63<br>(1.69 to<br>6.69)       | 4.95<br>(2.29 to<br>8.38)       |
| Other musculoskeletal disorders                   | 498.63<br>(285.79 to<br>713.60)          | 879.22<br>(359.88 to<br>1,553.26)       | 859.79<br>(352.13 to<br>1,509.57)       | 924.04<br>(374.01 to<br>1,627.69)       | 11.03<br>(6.34 to<br>15.90)     | 31.40<br>(14.79 to<br>51.28)    | 31.37<br>(14.34 to<br>51.43)    | 31.83<br>(14.96 to<br>51.90)    |
| Other non-communicable diseases                   | 23,345.63<br>(16,291.33 to<br>33,085.39) | 15,159.12<br>(6,692.85 to<br>32,211.61) | 12,633.17<br>(5,699.08 to<br>25,699.99) | 20,090.05<br>(8,916.02 to<br>41,289.38) | 291.36<br>(205.10 to<br>404.40) | 273.62<br>(144.45 to<br>502.86) | 243.88<br>(131.85 to<br>424.14) | 334.60<br>(174.43 to<br>611.48) |
| Congenital birth defects                          | 22,240.29<br>(15,353.28 to<br>31,517.30) | 13,286.82<br>(5,349.34 to<br>29,594.60) | 10,842.63<br>(4,568.65 to<br>22,456.28) | 18,058.39<br>(7,446.31 to<br>38,244.81) | 272.82<br>(189.25 to<br>381.90) | 178.68<br>(75.13 to<br>389.52)  | 147.85<br>(64.51 to<br>293.70)  | 240.25<br>(102.94 to<br>486.72) |
| Neural tube defects                               | 681.25<br>(380.96 to<br>1,098.88)        | 193.45<br>(42.36 to<br>606.56)          | 149.05<br>(33.58 to<br>447.20)          | 279.91<br>(62.95 to<br>865.57)          | 7.99<br>(4.50 to<br>12.81)      | 2.40<br>(0.56 to<br>7.57)       | 1.86<br>(0.45 to<br>5.47)       | 3.45<br>(0.84 to<br>10.28)      |
| Congenital heart anomalies                        | 9,268.23<br>(6,388.20 to<br>13,252.59)   | 4,886.05<br>(1,897.82 to<br>11,249.04)  | 3,803.63<br>(1,563.30 to<br>8,046.94)   | 7,212.66<br>(2,937.19 to<br>15,360.04)  | 115.74<br>(80.33 to<br>163.49)  | 66.09<br>(25.75 to<br>147.92)   | 52.09<br>(22.08 to<br>106.04)   | 96.77<br>(41.15 to<br>194.90)   |

|                                               |                                          |                                          |                                          |                                           |                                   |                                     |                                   |                                     |  |
|-----------------------------------------------|------------------------------------------|------------------------------------------|------------------------------------------|-------------------------------------------|-----------------------------------|-------------------------------------|-----------------------------------|-------------------------------------|--|
|                                               | 2.53<br>(1.17 to<br>6.03)                | 1.03<br>(0.25 to<br>3.62)                | 0.75<br>(0.18 to<br>2.42)                | 1.64<br>(0.43 to<br>5.36)                 | 0.03<br>(0.01 to<br>0.07)         | 0.01<br>(0.00 to<br>0.04)           | 0.01<br>(0.00 to<br>0.03)         | 0.02<br>(0.00 to<br>0.06)           |  |
| Orofacial clefts                              | 577.72<br>(362.71 to<br>851.54)          | 667.62<br>(321.25 to<br>1,417.21)        | 644.05<br>(302.14 to<br>1,381.86)        | 682.64<br>(330.60 to<br>1,467.12)         | 7.68<br>(4.88 to<br>11.06)        | 10.35<br>(5.09 to<br>21.11)         | 10.15<br>(4.92 to<br>20.73)       | 10.44<br>(5.01 to<br>21.33)         |  |
| Down syndrome                                 | 2,015.22<br>(1,269.33 to<br>3,126.95)    | 2,178.86<br>(973.42 to<br>4,860.33)      | 1,902.66<br>(837.09 to<br>4,244.30)      | 2,593.41<br>(1,158.13 to<br>5,744.03)     | 24.36<br>(15.46 to<br>37.20)      | 28.31<br>(12.56 to<br>62.20)        | 24.97<br>(11.01 to<br>54.52)      | 33.41<br>(14.79 to<br>70.82)        |  |
| Other chromosomal abnormalities               | 582.04<br>(382.01 to<br>867.75)          | 340.33<br>(119.53 to<br>773.44)          | 275.31<br>(102.51 to<br>584.40)          | 466.11<br>(169.00 to<br>1,002.18)         | 7.07<br>(4.65 to<br>10.46)        | 4.45<br>(1.62 to<br>9.86)           | 3.64<br>(1.39 to<br>7.42)         | 6.05<br>(2.36 to<br>12.85)          |  |
| Congenital musculoskeletal and limb anomalies | 1,210.73<br>(664.06 to<br>1,935.26)      | 745.01<br>(290.48 to<br>1,657.45)        | 622.38<br>(250.41 to<br>1,281.26)        | 968.73<br>(397.73 to<br>2,095.43)         | 15.07<br>(8.50 to<br>23.64)       | 11.87<br>(5.17 to<br>24.56)         | 10.18<br>(4.53 to<br>20.55)       | 15.10<br>(6.81 to<br>29.77)         |  |
| Urogenital congenital anomalies               | 1,391.66<br>(865.56 to<br>2,048.88)      | 830.38<br>(281.97 to<br>2,040.03)        | 654.40<br>(215.44 to<br>1,497.77)        | 1,175.28<br>(411.22 to<br>2,782.88)       | 16.62<br>(10.42 to<br>24.26)      | 10.55<br>(3.72 to<br>25.71)         | 8.39<br>(2.85 to<br>18.23)        | 14.83<br>(5.12 to<br>34.84)         |  |
| Digestive congenital anomalies                | 6,510.92<br>(4,249.88 to<br>9,659.80)    | 3,444.09<br>(1,246.36 to<br>7,745.88)    | 2,790.39<br>(1,051.26 to<br>5,762.86)    | 4,678.01<br>(1,801.11 to<br>10,074.19)    | 78.27<br>(51.41 to<br>114.06)     | 44.65<br>(17.23 to<br>97.25)        | 36.56<br>(14.71 to<br>73.54)      | 60.18<br>(23.94 to<br>124.65)       |  |
| Other congenital birth defects                | 238.64<br>(117.60 to<br>373.36)          | 1,341.65<br>(665.98 to<br>2,222.34)      | 1,335.26<br>(655.11 to<br>2,263.24)      | 1,371.26<br>(672.23 to<br>2,244.02)       | 8.47<br>(4.00 to<br>13.21)        | 88.78<br>(43.99 to<br>135.29)       | 90.74<br>(44.63 to<br>139.75)     | 86.69<br>(43.88 to<br>131.20)       |  |
| Skin and subcutaneous diseases                | 40.01<br>(18.63 to<br>64.85)             | 203.65<br>(80.49 to<br>374.29)           | 203.48<br>(80.10 to<br>381.54)           | 206.07<br>(80.47 to<br>376.94)            | 1.22<br>(0.52 to<br>2.01)         | 11.03<br>(4.09 to<br>18.72)         | 11.31<br>(4.20 to<br>19.87)       | 10.67<br>(3.96 to<br>18.16)         |  |
| Cellulitis                                    | 156.35<br>(76.98 to<br>252.88)           | 1,046.94<br>(508.19 to<br>1,675.35)      | 1,045.62<br>(503.30 to<br>1,745.35)      | 1,063.21<br>(522.12 to<br>1,719.12)       | 6.16<br>(2.95 to<br>9.68)         | 73.19<br>(36.47 to<br>112.21)       | 74.98<br>(36.58 to<br>118.98)     | 71.15<br>(35.59 to<br>108.85)       |  |
| Pyoderma                                      | 23.75<br>(11.44 to<br>41.96)             | 59.60<br>(24.61 to<br>124.51)            | 56.13<br>(22.89 to<br>115.34)            | 67.45<br>(26.86 to<br>138.91)             | 0.72<br>(0.33 to<br>1.35)         | 3.53<br>(1.37 to<br>7.49)           | 3.43<br>(1.31 to<br>7.57)         | 3.78<br>(1.46 to<br>8.07)           |  |
| Decubitus ulcer                               | 18.53<br>(8.96 to<br>30.11)              | 31.46<br>(14.60 to<br>60.76)             | 30.02<br>(14.07 to<br>55.94)             | 34.53<br>(16.01 to<br>65.93)              | 0.38<br>(0.18 to<br>0.62)         | 1.04<br>(0.51 to<br>1.86)           | 1.02<br>(0.49 to<br>1.80)         | 1.09<br>(0.53 to<br>1.93)           |  |
| Other skin and subcutaneous diseases          | 866.70<br>(523.33 to<br>1,309.43)        | 530.65<br>(215.31 to<br>1,330.09)        | 455.29<br>(181.79 to<br>1,105.01)        | 660.39<br>(258.11 to<br>1,580.58)         | 10.06<br>(6.07 to<br>15.20)       | 6.16<br>(2.50 to<br>15.44)          | 5.28<br>(2.11 to<br>12.82)        | 7.66<br>(2.99 to<br>18.34)          |  |
| Sudden infant death syndrome                  | 45,929.11<br>(33,652.89 to<br>61,204.13) | 46,129.96<br>(24,877.72 to<br>78,703.15) | 31,573.59<br>(17,093.33 to<br>53,367.06) | 61,491.08<br>(33,382.36 to<br>103,453.27) | 915.08<br>(662.12 to<br>1,233.56) | 1,298.20<br>(780.74 to<br>2,010.10) | 937.38<br>(563.60 to<br>1,464.29) | 1,654.04<br>(986.97 to<br>2,590.10) |  |
| Injuries                                      | 27,619.16<br>(19,902.29 to<br>37,302.14) | 26,756.69<br>(14,560.56 to<br>44,824.30) | 13,612.73<br>(7,494.43 to<br>22,691.79)  | 39,426.87<br>(21,552.05 to<br>65,600.14)  | 546.78<br>(388.27 to<br>746.84)   | 747.58<br>(444.11 to<br>1,161.23)   | 415.84<br>(251.77 to<br>640.58)   | 1,045.97<br>(614.49 to<br>1,615.87) |  |
| Transport injuries                            | 26,045.98<br>(18,825.83 to<br>35,201.79) | 24,337.40<br>(13,359.95 to<br>40,424.33) | 11,481.86<br>(6,350.77 to<br>18,921.94)  | 36,418.27<br>(19,941.52 to<br>59,987.94)  | 515.00<br>(364.49 to<br>700.95)   | 675.28<br>(402.01 to<br>1,051.81)   | 350.58<br>(212.30 to<br>535.55)   | 958.42<br>(565.77 to<br>1,478.89)   |  |
| Road injuries                                 | 7,001.12<br>(4,723.11 to<br>9,780.08)    | 5,207.60<br>(2,392.40 to<br>9,437.63)    | 2,649.03<br>(1,189.15 to<br>4,567.16)    | 8,435.76<br>(3,635.28 to<br>14,900.83)    | 144.09<br>(96.40 to<br>202.71)    | 167.34<br>(81.52 to<br>279.21)      | 91.90<br>(45.02 to<br>147.53)     | 257.57<br>(126.12 to<br>421.93)     |  |
| Pedestrian road injuries                      | <b>Kuwait</b>                            |                                          |                                          |                                           |                                   |                                     |                                   |                                     |  |
| Cause                                         | YLLs (actual counts)                     |                                          |                                          |                                           | Deaths (actual counts)            |                                     |                                   |                                     |  |
|                                               | 2016                                     | 2040 Forecast                            | 2040 Better Scenario                     | 2040 Worse Scenario                       | 2016                              | 2040 Forecast                       | 2040 Better Scenario              | 2040 Worse Scenario                 |  |
| Cyclist road injuries                         | 586.25<br>(385.15 to<br>835.97)          | 838.28<br>(443.62 to<br>1,432.33)        | 499.53<br>(266.70 to<br>858.42)          | 1,093.10<br>(598.87 to<br>1,804.63)       | 12.53<br>(8.10 to<br>18.31)       | 25.41<br>(14.16 to<br>41.43)        | 16.69<br>(9.15 to<br>27.27)       | 31.05<br>(17.45 to<br>50.27)        |  |
| Motorcyclist road injuries                    | 1,334.69<br>(875.00 to<br>1,943.10)      | 1,283.37<br>(623.18 to<br>2,299.65)      | 788.29<br>(376.67 to<br>1,426.89)        | 1,651.38<br>(804.76 to<br>2,897.63)       | 22.54<br>(14.83 to<br>32.99)      | 23.73<br>(11.81 to<br>41.69)        | 15.25<br>(7.58 to<br>27.23)       | 29.78<br>(14.79 to<br>51.80)        |  |
| Motor vehicle road injuries                   | 16,742.51<br>(11,702.22 to<br>23,030.02) | 16,588.61<br>(9,243.84 to<br>27,585.89)  | 7,348.96<br>(4,083.61 to<br>12,047.60)   | 24,629.00<br>(13,735.23 to<br>41,246.11)  | 328.33<br>(227.95 to<br>461.87)   | 446.62<br>(271.33 to<br>692.50)     | 220.14<br>(136.24 to<br>337.51)   | 623.74<br>(377.24 to<br>976.20)     |  |

|                                                 |                                                              |                                                              |                                                              |                                                              |                                                      |                                                      |                                                      |                                                      |
|-------------------------------------------------|--------------------------------------------------------------|--------------------------------------------------------------|--------------------------------------------------------------|--------------------------------------------------------------|------------------------------------------------------|------------------------------------------------------|------------------------------------------------------|------------------------------------------------------|
|                                                 | 381.41<br>(244.36 to<br>558.48)                              | 419.54<br>(217.16 to<br>717.40)                              | 196.05<br>(101.88 to<br>335.50)                              | 609.03<br>(323.98 to<br>1,053.53)                            | 7.52<br>(4.79 to<br>10.94)                           | 12.19<br>(6.81 to<br>19.44)                          | 6.60<br>(3.70 to<br>10.35)                           | 16.28<br>(9.09 to<br>26.48)                          |
| Other road injuries                             | 1,573.18<br>(1,114.40 to<br>2,149.92)                        | 2,413.29<br>(1,193.66 to<br>4,266.48)                        | 2,130.87<br>(1,034.95 to<br>3,771.39)                        | 3,008.59<br>(1,505.06 to<br>5,348.74)                        | 31.78<br>(22.56 to<br>43.65)                         | 72.30<br>(39.62 to<br>116.48)                        | 65.26<br>(35.18 to<br>105.77)                        | 87.55<br>(47.98 to<br>142.67)                        |
| Other transport injuries                        | <b>10,525.63</b><br><b>(7,942.45 to</b><br><b>13,877.13)</b> | <b>11,458.69</b><br><b>(6,296.27 to</b><br><b>20,259.69)</b> | <b>10,653.70</b><br><b>(5,766.57 to</b><br><b>18,328.60)</b> | <b>13,012.99</b><br><b>(6,994.63 to</b><br><b>23,101.99)</b> | <b>214.19</b><br><b>(160.32 to</b><br><b>284.70)</b> | <b>364.14</b><br><b>(222.73 to</b><br><b>578.96)</b> | <b>347.87</b><br><b>(209.81 to</b><br><b>541.59)</b> | <b>397.52</b><br><b>(240.28 to</b><br><b>630.98)</b> |
| Unintentional injuries                          | 3,839.27<br>(2,655.94 to<br>5,402.54)                        | 4,725.89<br>(2,525.20 to<br>8,353.53)                        | 4,473.74<br>(2,363.33 to<br>7,704.56)                        | 5,201.42<br>(2,735.22 to<br>9,155.47)                        | 81.96<br>(56.60 to<br>116.02)                        | 156.30<br>(94.82 to<br>244.26)                       | 151.38<br>(91.65 to<br>236.67)                       | 166.27<br>(99.66 to<br>258.19)                       |
| Falls                                           | 1,415.07<br>(1,074.06 to<br>1,832.61)                        | 1,148.55<br>(595.39 to<br>2,006.12)                          | 1,050.90<br>(536.58 to<br>1,828.00)                          | 1,333.11<br>(691.57 to<br>2,327.26)                          | 24.63<br>(18.24 to<br>32.55)                         | 26.85<br>(14.92 to<br>45.40)                         | 24.99<br>(13.74 to<br>41.33)                         | 30.53<br>(17.16 to<br>51.36)                         |
| Drowning                                        | 1,452.53<br>(1,021.53 to<br>1,914.58)                        | 1,102.83<br>(525.01 to<br>2,068.94)                          | 986.01<br>(472.73 to<br>1,802.95)                            | 1,339.75<br>(626.88 to<br>2,461.26)                          | 29.32<br>(20.85 to<br>39.18)                         | 35.08<br>(19.00 to<br>60.47)                         | 32.23<br>(17.35 to<br>52.45)                         | 41.08<br>(22.21 to<br>68.30)                         |
| Fire, heat, and hot substances                  | 330.70<br>(231.69 to<br>464.45)                              | 179.72<br>(82.65 to<br>381.59)                               | 153.85<br>(69.53 to<br>308.03)                               | 233.11<br>(106.91 to<br>485.78)                              | 5.69<br>(3.94 to<br>8.15)                            | 4.20<br>(2.13 to<br>8.28)                            | 3.68<br>(1.85 to<br>6.92)                            | 5.31<br>(2.68 to<br>10.24)                           |
| Poisonings                                      | 1,023.70<br>(659.12 to<br>1,539.33)                          | 1,060.23<br>(497.28 to<br>2,090.35)                          | 952.94<br>(449.29 to<br>1,809.42)                            | 1,279.82<br>(583.91 to<br>2,534.00)                          | 20.26<br>(12.77 to<br>30.82)                         | 27.46<br>(14.09 to<br>51.35)                         | 25.12<br>(12.88 to<br>44.79)                         | 32.38<br>(16.45 to<br>61.15)                         |
| Exposure to mechanical forces                   | 49.96<br>(36.63 to<br>65.40)                                 | 50.03<br>(24.10 to<br>97.60)                                 | 46.85<br>(22.23 to<br>89.81)                                 | 55.52<br>(26.56 to<br>108.38)                                | 1.02<br>(0.74 to<br>1.34)                            | 1.70<br>(0.94 to<br>2.87)                            | 1.65<br>(0.92 to<br>2.76)                            | 1.79<br>(1.00 to<br>3.00)                            |
| Unintentional firearm injuries                  | 68.24<br>(50.99 to<br>88.28)                                 | 48.74<br>(21.34 to<br>104.95)                                | 43.21<br>(19.07 to<br>86.91)                                 | 57.70<br>(25.55 to<br>119.61)                                | 0.98<br>(0.75 to<br>1.25)                            | 0.82<br>(0.39 to<br>1.65)                            | 0.74<br>(0.35 to<br>1.41)                            | 0.96<br>(0.46 to<br>1.88)                            |
| Unintentional suffocation                       | 905.50<br>(551.63 to<br>1,403.83)                            | 961.47<br>(432.39 to<br>1,937.94)                            | 862.89<br>(391.41 to<br>1,655.88)                            | 1,166.60<br>(524.79 to<br>2,378.46)                          | 18.26<br>(10.96 to<br>28.36)                         | 24.94<br>(12.51 to<br>47.76)                         | 22.73<br>(11.42 to<br>41.30)                         | 29.63<br>(14.70 to<br>56.91)                         |
| Other exposure to mechanical forces             | 1,153.28<br>(783.58 to<br>1,556.14)                          | 1,923.44<br>(1,028.57 to<br>3,263.37)                        | 1,837.23<br>(977.81 to<br>3,193.64)                          | 2,072.78<br>(1,104.83 to<br>3,597.92)                        | 28.08<br>(18.99 to<br>38.53)                         | 77.04<br>(43.92 to<br>121.27)                        | 75.32<br>(42.92 to<br>119.87)                        | 80.30<br>(46.63 to<br>126.08)                        |
| Adverse effects of medical treatment            | 52.32<br>(38.54 to<br>78.71)                                 | 85.31<br>(43.10 to<br>162.63)                                | 79.35<br>(39.63 to<br>144.70)                                | 95.65<br>(48.43 to<br>177.03)                                | 1.11<br>(0.81 to<br>1.65)                            | 3.31<br>(1.73 to<br>5.55)                            | 3.20<br>(1.66 to<br>5.30)                            | 3.51<br>(1.88 to<br>5.79)                            |
| Animal contact                                  | 20.65<br>(14.60 to<br>33.17)                                 | 25.74<br>(10.98 to<br>53.58)                                 | 23.89<br>(10.06 to<br>49.49)                                 | 28.74<br>(12.56 to<br>59.44)                                 | 0.39<br>(0.28 to<br>0.64)                            | 0.72<br>(0.34 to<br>1.38)                            | 0.69<br>(0.33 to<br>1.34)                            | 0.77<br>(0.37 to<br>1.50)                            |
| Venomous animal contact                         | 31.67<br>(23.10 to<br>45.49)                                 | 59.57<br>(29.69 to<br>108.06)                                | 55.46<br>(27.91 to<br>98.10)                                 | 66.91<br>(33.93 to<br>120.40)                                | 0.72<br>(0.51 to<br>1.01)                            | 2.59<br>(1.39 to<br>4.31)                            | 2.51<br>(1.31 to<br>4.16)                            | 2.74<br>(1.46 to<br>4.52)                            |
| Non-venomous animal contact                     | 666.70<br>(494.57 to<br>963.13)                              | 767.91<br>(452.87 to<br>1,361.16)                            | 726.21<br>(421.81 to<br>1,247.36)                            | 824.29<br>(479.73 to<br>1,451.90)                            | 11.32<br>(8.51 to<br>15.86)                          | 21.67<br>(14.18 to<br>33.20)                         | 21.39<br>(13.92 to<br>32.71)                         | 22.00<br>(14.34 to<br>33.90)                         |
| Foreign body                                    | 594.76<br>(425.31 to<br>887.66)                              | 692.40<br>(407.73 to<br>1,216.60)                            | 651.58<br>(382.36 to<br>1,114.75)                            | 749.29<br>(439.42 to<br>1,342.33)                            | 10.05<br>(7.34 to<br>14.67)                          | 19.85<br>(13.18 to<br>30.71)                         | 19.55<br>(12.71 to<br>30.07)                         | 20.25<br>(13.26 to<br>31.13)                         |
| Pulmonary aspiration and foreign body in airway | 71.95<br>(38.25 to<br>107.03)                                | 75.51<br>(32.13 to<br>151.65)                                | 74.63<br>(31.92 to<br>151.96)                                | 75.00<br>(32.01 to<br>153.31)                                | 1.28<br>(0.69 to<br>1.90)                            | 1.82<br>(0.90 to<br>3.32)                            | 1.84<br>(0.91 to<br>3.42)                            | 1.75<br>(0.85 to<br>3.32)                            |
| Foreign body in other body part                 | 144.49<br>(77.55 to<br>231.23)                               | 180.55<br>(74.53 to<br>386.92)                               | 161.27<br>(64.52 to<br>328.19)                               | 220.77<br>(89.42 to<br>454.02)                               | 3.22<br>(1.74 to<br>5.19)                            | 5.70<br>(2.56 to<br>11.20)                           | 5.19<br>(2.27 to<br>9.77)                            | 6.80<br>(3.00 to<br>12.95)                           |
| Environmental heat and cold exposure            | 447.55<br>(301.67 to<br>648.73)                              | 284.26<br>(119.84 to<br>604.61)                              | 232.21<br>(95.01 to<br>454.24)                               | 412.30<br>(172.13 to<br>827.40)                              | 8.60<br>(5.72 to<br>12.65)                           | 6.52<br>(2.76 to<br>13.41)                           | 5.38<br>(2.28 to<br>10.64)                           | 9.34<br>(4.01 to<br>18.12)                           |
| Other unintentional injuries                    | <b>7,762.04</b><br><b>(5,221.16 to</b><br><b>10,889.86)</b>  | <b>7,618.39</b><br><b>(3,693.00 to</b><br><b>13,687.32)</b>  | <b>7,007.02</b><br><b>(3,445.48 to</b><br><b>12,581.98)</b>  | <b>8,747.32</b><br><b>(4,218.87 to</b><br><b>15,549.17)</b>  | <b>153.71</b><br><b>(101.99 to</b><br><b>216.75)</b> | <b>180.38</b><br><b>(91.70 to</b><br><b>311.17)</b>  | <b>167.57</b><br><b>(86.67 to</b><br><b>293.16)</b>  | <b>204.47</b><br><b>(102.83 to</b><br><b>352.35)</b> |
| Self-harm and interpersonal violence            | <b>Kuwait</b>                                                |                                                              |                                                              |                                                              |                                                      |                                                      |                                                      |                                                      |
|                                                 | <b>YLLs (actual counts)</b>                                  |                                                              |                                                              |                                                              | <b>Deaths (actual counts)</b>                        |                                                      |                                                      |                                                      |

| Cause                                                                        | 2016                                     | 2040 Forecast                            | 2040 Better Scenario                     | 2040 Worse Scenario                        | 2016                                  | 2040 Forecast                         | 2040 Better Scenario                  | 2040 Worse Scenario                   |
|------------------------------------------------------------------------------|------------------------------------------|------------------------------------------|------------------------------------------|--------------------------------------------|---------------------------------------|---------------------------------------|---------------------------------------|---------------------------------------|
|                                                                              | Self-harm                                | 5,672.92<br>(3,515.87 to 8,169.15)       | 6,126.48<br>(2,984.04 to 11,153.41)      | 5,667.09<br>(2,739.05 to 10,604.50)        | 6,936.47<br>(3,209.60 to 12,700.91)   | 113.45<br>(70.11 to 162.92)           | 145.86<br>(74.80 to 259.13)           | 136.22<br>(69.94 to 242.50)           |
| Self-harm by firearm                                                         | 189.25<br>(83.60 to 332.05)              | 185.75<br>(72.68 to 388.18)              | 167.73<br>(66.31 to 354.97)              | 221.74<br>(85.44 to 465.48)                | 4.13<br>(1.82 to 7.14)                | 5.38<br>(2.31 to 10.46)               | 4.94<br>(2.13 to 9.86)                | 6.27<br>(2.61 to 12.27)               |
| Self-harm by other specified means                                           | 5,483.67<br>(3,427.40 to 7,889.22)       | 5,940.73<br>(2,905.14 to 10,862.90)      | 5,499.36<br>(2,669.56 to 10,185.12)      | 6,714.73<br>(3,097.72 to 12,253.61)        | 109.32<br>(67.89 to 157.18)           | 140.48<br>(72.15 to 250.62)           | 131.28<br>(67.69 to 233.30)           | 156.90<br>(79.04 to 277.61)           |
| Interpersonal violence                                                       | 2,089.13<br>(1,274.24 to 3,617.77)       | 1,491.91<br>(649.50 to 3,136.25)         | 1,339.93<br>(570.16 to 2,617.36)         | 1,810.84<br>(798.07 to 3,567.01)           | 40.26<br>(24.07 to 69.83)             | 34.51<br>(15.68 to 68.38)             | 31.35<br>(14.33 to 60.53)             | 41.29<br>(19.40 to 80.08)             |
| Physical violence by firearm                                                 | 711.09<br>(353.22 to 1,506.20)           | 472.03<br>(172.35 to 1,157.83)           | 414.20<br>(153.86 to 968.20)             | 599.83<br>(224.49 to 1,413.15)             | 14.21<br>(6.95 to 29.96)              | 10.67<br>(3.93 to 25.83)              | 9.41<br>(3.55 to 22.06)               | 13.50<br>(5.20 to 30.97)              |
| Physical violence by sharp object                                            | 898.22<br>(501.89 to 1,556.47)           | 620.88<br>(255.35 to 1,266.66)           | 554.17<br>(228.68 to 1,082.89)           | 763.72<br>(318.48 to 1,519.63)             | 16.87<br>(9.40 to 29.55)              | 13.92<br>(6.18 to 26.93)              | 12.56<br>(5.66 to 23.94)              | 16.88<br>(7.52 to 32.98)              |
| Physical violence by other means                                             | 479.82<br>(243.84 to 893.65)             | 399.01<br>(154.11 to 872.63)             | 371.56<br>(143.37 to 816.47)             | 447.29<br>(169.00 to 966.55)               | 9.18<br>(4.71 to 17.33)               | 9.92<br>(4.10 to 20.96)               | 9.38<br>(3.95 to 19.52)               | 10.91<br>(4.44 to 22.62)              |
| Forces of nature, conflict and terrorism, and executions and police conflict | 22.28<br>(17.69 to 27.65)                | 302.18<br>(0.00 to 3,895.79)             | 300.13<br>(0.00 to 3,862.70)             | 303.90<br>(0.00 to 3,910.57)               | 0.39<br>(0.31 to 0.50)                | 6.10<br>(0.00 to 78.15)               | 6.10<br>(0.00 to 78.16)               | 6.08<br>(0.00 to 78.09)               |
| Exposure to forces of nature                                                 | 0.00<br>(0.00 to 0.00)                   | 0.93<br>(0.00 to 0.00)                   | 0.92<br>(0.00 to 0.00)                   | 0.93<br>(0.00 to 0.00)                     | 0.00<br>(0.00 to 0.00)                | 0.02<br>(0.00 to 0.00)                | 0.02<br>(0.00 to 0.00)                | 0.02<br>(0.00 to 0.00)                |
| Conflict and terrorism                                                       | 0.00<br>(0.00 to 0.00)                   | 301.26<br>(0.00 to 3,895.79)             | 299.21<br>(0.00 to 3,862.70)             | 302.97<br>(0.00 to 3,910.57)               | 0.00<br>(0.00 to 0.00)                | 6.08<br>(0.00 to 78.15)               | 6.08<br>(0.00 to 78.16)               | 6.06<br>(0.00 to 78.09)               |
| Executions and police conflict                                               | 22.28<br>(17.69 to 27.65)                | 0.00<br>(0.00 to 0.00)                   | 0.00<br>(0.00 to 0.00)                   | 0.00<br>(0.00 to 0.00)                     | 0.39<br>(0.31 to 0.50)                | 0.00<br>(0.00 to 0.00)                | 0.00<br>(0.00 to 0.00)                | 0.00<br>(0.00 to 0.00)                |
| <b>Lebanon</b>                                                               |                                          |                                          |                                          |                                            |                                       |                                       |                                       |                                       |
| Cause                                                                        | YLLs (actual counts)                     |                                          |                                          |                                            | Deaths (actual counts)                |                                       |                                       |                                       |
|                                                                              | 2016                                     | 2040 Forecast                            | 2040 Better Scenario                     | 2040 Worse Scenario                        | 2016                                  | 2040 Forecast                         | 2040 Better Scenario                  | 2040 Worse Scenario                   |
| All causes                                                                   | 543,931.33<br>(483,822.26 to 611,352.44) | 661,038.10<br>(473,628.91 to 943,357.49) | 436,474.95<br>(324,497.16 to 611,595.75) | 803,953.78<br>(569,007.15 to 1,170,704.66) | 25,765.94<br>(23,013.76 to 28,811.74) | 45,289.07<br>(36,067.28 to 57,209.64) | 32,441.25<br>(26,377.60 to 39,949.84) | 52,251.56<br>(41,436.80 to 66,811.42) |
| Communicable, maternal, neonatal, and nutritional diseases                   | 42,049.95<br>(31,544.19 to 55,953.89)    | 25,006.53<br>(17,311.27 to 34,736.91)    | 16,969.50<br>(11,538.34 to 23,979.35)    | 35,523.97<br>(23,972.50 to 50,495.02)      | 927.85<br>(737.20 to 1,149.18)        | 1,229.86<br>(829.50 to 1,767.61)      | 917.47<br>(625.08 to 1,308.62)        | 1,538.23<br>(1,010.68 to 2,192.61)    |
| HIV/AIDS and tuberculosis                                                    | 2,686.92<br>(965.24 to 8,843.78)         | 1,970.13<br>(603.54 to 7,170.33)         | 1,369.80<br>(222.15 to 6,476.94)         | 2,734.92<br>(953.08 to 8,232.75)           | 83.59<br>(40.89 to 216.82)            | 82.67<br>(38.56 to 216.47)            | 48.54<br>(15.23 to 176.74)            | 107.90<br>(50.21 to 240.54)           |
| Tuberculosis                                                                 | 996.08<br>(757.97 to 1,301.93)           | 775.96<br>(437.57 to 1,286.94)           | 284.72<br>(159.53 to 465.42)             | 1,043.87<br>(573.14 to 1,771.21)           | 46.92<br>(34.90 to 61.14)             | 53.31<br>(30.94 to 86.29)             | 21.41<br>(12.27 to 34.67)             | 68.06<br>(38.04 to 114.82)            |
| HIV/AIDS                                                                     | 1,690.84<br>(82.24 to 7,848.52)          | 1,194.17<br>(25.25 to 6,532.32)          | 1,085.08<br>(10.84 to 6,232.87)          | 1,691.04<br>(122.46 to 7,084.45)           | 36.67<br>(1.72 to 169.08)             | 29.35<br>(0.43 to 160.47)             | 27.13<br>(0.20 to 154.07)             | 39.84<br>(2.06 to 172.55)             |
| Diarrhea, lower respiratory, and other common infectious diseases            | 12,908.65<br>(10,023.92 to 16,584.25)    | 13,594.15<br>(8,751.97 to 20,403.29)     | 9,656.89<br>(6,354.07 to 14,405.66)      | 19,099.36<br>(12,213.87 to 29,011.63)      | 503.60<br>(382.81 to 652.77)          | 992.29<br>(617.22 to 1,512.63)        | 753.20<br>(474.27 to 1,129.05)        | 1,225.68<br>(748.46 to 1,837.24)      |
| Diarrheal diseases                                                           | 1,852.20<br>(1,135.82 to 3,093.46)       | 966.80<br>(229.27 to 2,816.48)           | 1,715.13<br>(436.72 to 4,577.89)         | 1,604.87<br>(342.14 to 4,865.80)           | 68.48<br>(35.42 to 126.49)            | 81.15<br>(18.12 to 245.04)            | 156.70<br>(37.99 to 417.31)           | 119.38<br>(22.59 to 376.14)           |
| Intestinal infectious diseases                                               | 1,764.62<br>(838.68 to 3,285.21)         | 813.37<br>(371.45 to 1,543.40)           | 1,056.17<br>(501.54 to 1,873.37)         | 961.86<br>(415.60 to 1,852.05)             | 27.94<br>(13.50 to 51.00)             | 14.45<br>(6.82 to 26.53)              | 18.90<br>(9.30 to 32.92)              | 16.41<br>(7.41 to 30.54)              |





|                                                       |                                                      |                                                     |                                                     |                                                      |                                                 |                                                |                                                |                                                |
|-------------------------------------------------------|------------------------------------------------------|-----------------------------------------------------|-----------------------------------------------------|------------------------------------------------------|-------------------------------------------------|------------------------------------------------|------------------------------------------------|------------------------------------------------|
| Leishmaniasis                                         | 2.13<br>(1.12 to<br>3.37)                            | 0.59<br>(0.32 to<br>0.94)                           | 0.44<br>(0.24 to<br>0.70)                           | 0.74<br>(0.40 to<br>1.19)                            | 0.05<br>(0.03 to<br>0.07)                       | 0.02<br>(0.01 to<br>0.03)                      | 0.01<br>(0.01 to<br>0.02)                      | 0.02<br>(0.01 to<br>0.03)                      |
| African trypanosomiasis                               | 0.00<br>(0.00 to<br>0.00)                            | 0.00<br>(0.00 to<br>0.00)                           | 0.00<br>(0.00 to<br>0.00)                           | 0.00<br>(0.00 to<br>0.00)                            | 0.00<br>(0.00 to<br>0.00)                       | 0.00<br>(0.00 to<br>0.00)                      | 0.00<br>(0.00 to<br>0.00)                      | 0.00<br>(0.00 to<br>0.00)                      |
| Schistosomiasis                                       | 1.37<br>(0.59 to<br>2.47)                            | 0.73<br>(0.26 to<br>1.47)                           | 0.68<br>(0.23 to<br>1.40)                           | 0.78<br>(0.28 to<br>1.57)                            | 0.06<br>(0.02 to<br>0.11)                       | 0.04<br>(0.01 to<br>0.09)                      | 0.04<br>(0.01 to<br>0.09)                      | 0.04<br>(0.01 to<br>0.09)                      |
| Cysticercosis                                         | 3.85<br>(2.22 to<br>6.03)                            | 0.94<br>(0.48 to<br>1.73)                           | 0.89<br>(0.45 to<br>1.62)                           | 0.98<br>(0.49 to<br>1.78)                            | 0.10<br>(0.06 to<br>0.16)                       | 0.03<br>(0.02 to<br>0.06)                      | 0.03<br>(0.02 to<br>0.06)                      | 0.03<br>(0.02 to<br>0.06)                      |
| Cystic echinococcosis                                 | 0.00<br>(0.00 to<br>0.00)                            | 0.00<br>(0.00 to<br>0.00)                           | 0.00<br>(0.00 to<br>0.00)                           | 0.00<br>(0.00 to<br>0.00)                            | 0.00<br>(0.00 to<br>0.00)                       | 0.00<br>(0.00 to<br>0.00)                      | 0.00<br>(0.00 to<br>0.00)                      | 0.00<br>(0.00 to<br>0.00)                      |
| Dengue                                                | 0.00<br>(0.00 to<br>0.00)                            | 0.00<br>(0.00 to<br>0.00)                           | 0.00<br>(0.00 to<br>0.00)                           | 0.00<br>(0.00 to<br>0.00)                            | 0.00<br>(0.00 to<br>0.00)                       | 0.00<br>(0.00 to<br>0.00)                      | 0.00<br>(0.00 to<br>0.00)                      | 0.00<br>(0.00 to<br>0.00)                      |
| Yellow fever                                          | 0.00<br>(0.00 to<br>0.00)                            | 0.00<br>(0.00 to<br>0.00)                           | 0.00<br>(0.00 to<br>0.00)                           | 0.00<br>(0.00 to<br>0.00)                            | 0.00<br>(0.00 to<br>0.00)                       | 0.00<br>(0.00 to<br>0.00)                      | 0.00<br>(0.00 to<br>0.00)                      | 0.00<br>(0.00 to<br>0.00)                      |
| Rabies                                                | 0.60<br>(0.28 to<br>1.27)                            | 0.36<br>(0.11 to<br>0.92)                           | 0.28<br>(0.08 to<br>0.83)                           | 0.45<br>(0.16 to<br>1.16)                            | 0.02<br>(0.01 to<br>0.05)                       | 0.02<br>(0.00 to<br>0.06)                      | 0.02<br>(0.00 to<br>0.06)                      | 0.02<br>(0.01 to<br>0.07)                      |
| Intestinal nematode infections                        | 0.38<br>(0.13 to<br>0.84)                            | 0.25<br>(0.09 to<br>0.51)                           | 0.26<br>(0.10 to<br>0.53)                           | 0.29<br>(0.10 to<br>0.60)                            | 0.01<br>(0.00 to<br>0.01)                       | 0.01<br>(0.00 to<br>0.01)                      | 0.01<br>(0.00 to<br>0.01)                      | 0.01<br>(0.00 to<br>0.01)                      |
| Other neglected tropical diseases                     | 31.68<br>(25.75 to<br>38.22)                         | 14.90<br>(11.36 to<br>18.75)                        | 15.19<br>(11.43 to<br>19.59)                        | 17.88<br>(13.64 to<br>22.93)                         | 0.57<br>(0.47 to<br>0.68)                       | 0.34<br>(0.26 to<br>0.42)                      | 0.36<br>(0.28 to<br>0.47)                      | 0.38<br>(0.30 to<br>0.49)                      |
| <b>Maternal disorders</b>                             | <b>531.57</b><br><b>(363.74 to</b><br><b>752.89)</b> | <b>168.06</b><br><b>(87.11 to</b><br><b>298.07)</b> | <b>115.45</b><br><b>(56.77 to</b><br><b>212.81)</b> | <b>216.00</b><br><b>(103.83 to</b><br><b>389.05)</b> | <b>9.11</b><br><b>(6.27 to</b><br><b>12.92)</b> | <b>2.97</b><br><b>(1.54 to</b><br><b>5.38)</b> | <b>2.04</b><br><b>(0.99 to</b><br><b>3.79)</b> | <b>3.79</b><br><b>(1.84 to</b><br><b>6.71)</b> |
| Maternal hemorrhage                                   | 168.75<br>(105.16 to<br>258.43)                      | 51.79<br>(24.92 to<br>96.51)                        | 35.89<br>(16.18 to<br>69.79)                        | 65.73<br>(29.27 to<br>123.97)                        | 2.93<br>(1.84 to<br>4.47)                       | 0.92<br>(0.45 to<br>1.74)                      | 0.64<br>(0.29 to<br>1.27)                      | 1.17<br>(0.52 to<br>2.24)                      |
| Maternal sepsis and other maternal infections         | 52.75<br>(28.59 to<br>88.88)                         | 15.24<br>(6.93 to<br>29.72)                         | 10.35<br>(4.33 to<br>20.67)                         | 19.65<br>(8.68 to<br>38.25)                          | 0.90<br>(0.50 to<br>1.50)                       | 0.27<br>(0.13 to<br>0.52)                      | 0.18<br>(0.08 to<br>0.36)                      | 0.35<br>(0.16 to<br>0.67)                      |
| Maternal hypertensive disorders                       | 104.05<br>(62.55 to<br>167.74)                       | 32.33<br>(14.74 to<br>62.07)                        | 21.71<br>(9.35 to<br>43.26)                         | 41.57<br>(17.36 to<br>82.03)                         | 1.77<br>(1.08 to<br>2.83)                       | 0.56<br>(0.26 to<br>1.11)                      | 0.38<br>(0.16 to<br>0.76)                      | 0.72<br>(0.31 to<br>1.39)                      |
| Maternal obstructed labor and uterine rupture         | 17.10<br>(9.06 to<br>28.84)                          | 5.28<br>(2.22 to<br>10.53)                          | 3.36<br>(1.31 to<br>6.97)                           | 6.87<br>(2.66 to<br>14.20)                           | 0.29<br>(0.16 to<br>0.51)                       | 0.09<br>(0.04 to<br>0.19)                      | 0.06<br>(0.02 to<br>0.12)                      | 0.12<br>(0.05 to<br>0.25)                      |
| Maternal abortion, miscarriage, and ectopic pregnancy | 17.67<br>(8.64 to<br>31.68)                          | 6.61<br>(2.78 to<br>14.06)                          | 4.44<br>(1.84 to<br>9.61)                           | 8.51<br>(3.49 to<br>18.94)                           | 0.31<br>(0.15 to<br>0.54)                       | 0.12<br>(0.05 to<br>0.25)                      | 0.08<br>(0.04 to<br>0.17)                      | 0.15<br>(0.06 to<br>0.33)                      |
| Indirect maternal deaths                              | 64.69<br>(37.02 to<br>102.37)                        | 21.62<br>(9.46 to<br>39.87)                         | 14.37<br>(5.77 to<br>28.14)                         | 28.38<br>(11.99 to<br>55.67)                         | 1.09<br>(0.63 to<br>1.70)                       | 0.37<br>(0.17 to<br>0.68)                      | 0.25<br>(0.10 to<br>0.48)                      | 0.48<br>(0.20 to<br>0.93)                      |
| Late maternal deaths                                  | 7.29<br>(3.53 to<br>13.68)                           | 1.95<br>(0.79 to<br>4.14)                           | 1.30<br>(0.51 to<br>2.82)                           | 2.56<br>(0.98 to<br>5.77)                            | 0.12<br>(0.06 to<br>0.23)                       | 0.03<br>(0.01 to<br>0.07)                      | 0.02<br>(0.01 to<br>0.05)                      | 0.04<br>(0.02 to<br>0.10)                      |
| Maternal deaths aggravated by HIV/AIDS                | 0.05<br>(0.00 to<br>0.21)                            | 0.14<br>(0.00 to<br>0.78)                           | 0.10<br>(0.00 to<br>0.58)                           | 0.19<br>(0.00 to<br>1.04)                            | 0.00<br>(0.00 to<br>0.00)                       | 0.00<br>(0.00 to<br>0.01)                      | 0.00<br>(0.00 to<br>0.01)                      | 0.00<br>(0.00 to<br>0.02)                      |
| Other maternal disorders                              | 99.21<br>(61.75 to<br>153.30)                        | 33.09<br>(15.79 to<br>63.09)                        | 23.93<br>(11.01 to<br>47.55)                        | 42.55<br>(19.53 to<br>84.34)                         | 1.69<br>(1.05 to<br>2.61)                       | 0.58<br>(0.28 to<br>1.11)                      | 0.42<br>(0.20 to<br>0.83)                      | 0.74<br>(0.35 to<br>1.47)                      |

**Lebanon**

| Cause | YLLs (actual counts) |               |                      |                     | Deaths (actual counts) |               |                      |                     |
|-------|----------------------|---------------|----------------------|---------------------|------------------------|---------------|----------------------|---------------------|
|       | 2016                 | 2040 Forecast | 2040 Better Scenario | 2040 Worse Scenario | 2016                   | 2040 Forecast | 2040 Better Scenario | 2040 Worse Scenario |

|                                                                         |                                                          |                                                        |                                                      |                                                        |                                                   |                                                   |                                                   |                                                   |
|-------------------------------------------------------------------------|----------------------------------------------------------|--------------------------------------------------------|------------------------------------------------------|--------------------------------------------------------|---------------------------------------------------|---------------------------------------------------|---------------------------------------------------|---------------------------------------------------|
|                                                                         | 24,410.07<br>(15,728.06 to<br>36,150.72)                 | 8,319.25<br>(4,684.90 to<br>13,498.09)                 | 5,006.57<br>(2,756.42 to<br>8,369.26)                | 12,402.33<br>(6,670.90 to<br>21,614.48)                | 282.26<br>(181.89 to<br>417.96)                   | 96.24<br>(54.19 to<br>156.14)                     | 57.93<br>(31.92 to<br>96.82)                      | 143.46<br>(77.16 to<br>250.05)                    |
| <b>Neonatal disorders</b>                                               |                                                          |                                                        |                                                      |                                                        |                                                   |                                                   |                                                   |                                                   |
| Neonatal preterm birth                                                  | 14,204.21<br>(8,994.88 to<br>20,858.36)                  | 4,567.44<br>(2,499.95 to<br>7,851.69)                  | 2,367.17<br>(1,230.34 to<br>4,032.85)                | 6,869.26<br>(3,545.94 to<br>12,077.61)                 | 164.18<br>(103.98 to<br>241.13)                   | 52.81<br>(28.93 to<br>90.80)                      | 27.37<br>(14.23 to<br>46.62)                      | 79.41<br>(41.01 to<br>139.59)                     |
| Neonatal encephalopathy due to birth asphyxia and trauma                | 3,902.91<br>(2,033.24 to<br>6,702.28)                    | 1,208.67<br>(525.10 to<br>2,435.06)                    | 725.22<br>(310.43 to<br>1,468.70)                    | 1,772.44<br>(753.59 to<br>3,670.72)                    | 45.18<br>(23.57 to<br>77.55)                      | 14.01<br>(6.09 to<br>28.24)                       | 8.41<br>(3.60 to<br>17.01)                        | 20.54<br>(8.75 to<br>42.48)                       |
| Neonatal sepsis and other neonatal infections                           | 3,759.37<br>(1,898.41 to<br>6,359.82)                    | 1,638.74<br>(702.09 to<br>3,171.34)                    | 1,118.02<br>(479.39 to<br>2,122.83)                  | 2,408.75<br>(976.32 to<br>4,693.11)                    | 43.47<br>(21.95 to<br>73.57)                      | 18.95<br>(8.12 to<br>36.66)                       | 12.93<br>(5.54 to<br>24.56)                       | 27.86<br>(11.29 to<br>54.29)                      |
| Hemolytic disease and other neonatal jaundice                           | 88.04<br>(43.28 to<br>154.80)                            | 19.94<br>(7.84 to<br>42.87)                            | 13.07<br>(5.04 to<br>27.71)                          | 30.62<br>(11.10 to<br>64.71)                           | 1.02<br>(0.50 to<br>1.79)                         | 0.23<br>(0.09 to<br>0.50)                         | 0.15<br>(0.06 to<br>0.32)                         | 0.35<br>(0.13 to<br>0.75)                         |
| Other neonatal disorders                                                | 2,455.53<br>(1,310.76 to<br>4,567.29)                    | 884.46<br>(398.87 to<br>1,821.91)                      | 783.09<br>(357.64 to<br>1,552.36)                    | 1,521.26<br>(571.03 to<br>2,738.58)                    | 28.41<br>(15.17 to<br>52.83)                      | 10.24<br>(4.62 to<br>21.09)                       | 9.07<br>(4.14 to<br>17.97)                        | 15.30<br>(6.60 to<br>31.68)                       |
| <b>Nutritional deficiencies</b>                                         | <b>270.28</b><br><b>(215.69 to</b><br><b>346.62)</b>     | <b>180.05</b><br><b>(130.39 to</b><br><b>251.92)</b>   | <b>203.43</b><br><b>(145.58 to</b><br><b>290.22)</b> | <b>193.81</b><br><b>(135.55 to</b><br><b>277.27)</b>   | <b>13.70</b><br><b>(11.43 to</b><br><b>16.62)</b> | <b>17.43</b><br><b>(11.40 to</b><br><b>25.98)</b> | <b>21.68</b><br><b>(14.18 to</b><br><b>32.12)</b> | <b>17.28</b><br><b>(10.96 to</b><br><b>26.17)</b> |
| Protein-energy malnutrition                                             | 189.42<br>(143.89 to<br>254.92)                          | 118.64<br>(77.42 to<br>173.75)                         | 147.01<br>(96.56 to<br>212.47)                       | 126.25<br>(80.31 to<br>186.04)                         | 10.76<br>(8.69 to<br>13.34)                       | 13.00<br>(7.50 to<br>20.38)                       | 17.42<br>(10.31 to<br>26.41)                      | 12.79<br>(7.35 to<br>20.52)                       |
| Iodine deficiency                                                       | 8.99<br>(0.91 to<br>27.53)                               | 11.95<br>(1.00 to<br>38.75)                            | 11.70<br>(0.79 to<br>41.15)                          | 13.21<br>(1.16 to<br>42.39)                            | 0.36<br>(0.03 to<br>1.22)                         | 1.06<br>(0.03 to<br>4.43)                         | 1.12<br>(0.03 to<br>4.98)                         | 1.09<br>(0.04 to<br>4.63)                         |
| Dietary iron deficiency                                                 | 29.65<br>(22.66 to<br>37.97)                             | 16.42<br>(10.70 to<br>24.52)                           | 17.52<br>(11.24 to<br>25.98)                         | 18.68<br>(11.80 to<br>28.39)                           | 0.62<br>(0.48 to<br>0.80)                         | 0.48<br>(0.30 to<br>0.76)                         | 0.53<br>(0.32 to<br>0.86)                         | 0.51<br>(0.31 to<br>0.80)                         |
| Other nutritional deficiencies                                          | 42.23<br>(32.49 to<br>53.86)                             | 33.05<br>(21.95 to<br>48.23)                           | 27.20<br>(17.21 to<br>41.32)                         | 35.67<br>(23.43 to<br>53.15)                           | 1.96<br>(1.42 to<br>2.64)                         | 2.89<br>(1.70 to<br>4.65)                         | 2.61<br>(1.51 to<br>4.36)                         | 2.89<br>(1.66 to<br>4.74)                         |
| <b>Other communicable, maternal, neonatal, and nutritional diseases</b> | <b>1,202.43</b><br><b>(780.83 to</b><br><b>2,416.01)</b> | <b>757.11</b><br><b>(502.53 to</b><br><b>1,204.71)</b> | <b>599.63</b><br><b>(396.85 to</b><br><b>932.40)</b> | <b>856.44</b><br><b>(551.95 to</b><br><b>1,484.17)</b> | <b>34.78</b><br><b>(25.68 to</b><br><b>50.66)</b> | <b>37.82</b><br><b>(27.09 to</b><br><b>51.83)</b> | <b>33.62</b><br><b>(24.25 to</b><br><b>45.60)</b> | <b>39.61</b><br><b>(28.04 to</b><br><b>55.75)</b> |
| Sexually transmitted infections excluding HIV                           | 149.21<br>(64.06 to<br>358.61)                           | 29.23<br>(13.29 to<br>68.43)                           | 20.82<br>(9.61 to<br>46.46)                          | 36.51<br>(15.18 to<br>90.81)                           | 2.24<br>(1.16 to<br>4.65)                         | 0.69<br>(0.39 to<br>1.20)                         | 0.56<br>(0.32 to<br>0.98)                         | 0.78<br>(0.42 to<br>1.51)                         |
| Syphilis                                                                | 127.72<br>(43.59 to<br>340.91)                           | 20.53<br>(6.64 to<br>59.38)                            | 13.23<br>(3.87 to<br>38.50)                          | 27.13<br>(8.00 to<br>81.61)                            | 1.67<br>(0.68 to<br>4.12)                         | 0.34<br>(0.16 to<br>0.80)                         | 0.23<br>(0.10 to<br>0.52)                         | 0.42<br>(0.17 to<br>1.04)                         |
| Chlamydial infection                                                    | 4.07<br>(2.76 to<br>6.61)                                | 1.72<br>(1.00 to<br>2.93)                              | 1.52<br>(0.87 to<br>2.62)                            | 1.85<br>(1.07 to<br>3.14)                              | 0.11<br>(0.07 to<br>0.18)                         | 0.07<br>(0.04 to<br>0.12)                         | 0.07<br>(0.04 to<br>0.12)                         | 0.07<br>(0.04 to<br>0.13)                         |
| Gonococcal infection                                                    | 11.43<br>(7.90 to<br>18.03)                              | 4.67<br>(2.72 to<br>7.73)                              | 4.08<br>(2.34 to<br>6.79)                            | 5.01<br>(2.91 to<br>8.26)                              | 0.31<br>(0.21 to<br>0.51)                         | 0.20<br>(0.11 to<br>0.35)                         | 0.19<br>(0.11 to<br>0.33)                         | 0.20<br>(0.12 to<br>0.35)                         |
| Other sexually transmitted infections                                   | 5.98<br>(4.11 to<br>9.43)                                | 2.32<br>(1.37 to<br>3.78)                              | 1.99<br>(1.16 to<br>3.34)                            | 2.52<br>(1.48 to<br>4.14)                              | 0.14<br>(0.10 to<br>0.23)                         | 0.08<br>(0.05 to<br>0.14)                         | 0.07<br>(0.04 to<br>0.12)                         | 0.08<br>(0.05 to<br>0.14)                         |
| Acute hepatitis                                                         | 397.27<br>(303.46 to<br>520.10)                          | 297.66<br>(191.62 to<br>458.69)                        | 178.85<br>(109.93 to<br>282.75)                      | 325.07<br>(203.74 to<br>496.77)                        | 13.18<br>(9.97 to<br>17.65)                       | 13.29<br>(8.90 to<br>19.95)                       | 8.33<br>(5.20 to<br>12.80)                        | 14.09<br>(9.25 to<br>21.33)                       |
| Acute hepatitis A                                                       | 11.03<br>(4.07 to<br>21.53)                              | 5.70<br>(1.99 to<br>12.59)                             | 3.97<br>(1.34 to<br>8.93)                            | 6.54<br>(2.34 to<br>14.31)                             | 0.21<br>(0.09 to<br>0.36)                         | 0.22<br>(0.06 to<br>0.51)                         | 0.16<br>(0.04 to<br>0.39)                         | 0.23<br>(0.07 to<br>0.54)                         |
| Acute hepatitis B                                                       | 336.49<br>(252.29 to<br>443.44)                          | 256.14<br>(159.16 to<br>397.14)                        | 151.98<br>(89.68 to<br>244.70)                       | 279.97<br>(170.77 to<br>429.61)                        | 11.30<br>(8.31 to<br>15.10)                       | 10.99<br>(7.00 to<br>16.74)                       | 6.74<br>(4.12 to<br>10.65)                        | 11.75<br>(7.49 to<br>17.80)                       |
| Acute hepatitis C                                                       | 9.73<br>(6.62 to<br>14.08)                               | 9.01<br>(5.14 to<br>14.21)                             | 5.60<br>(3.12 to<br>9.01)                            | 9.44<br>(5.46 to<br>14.90)                             | 0.36<br>(0.23 to<br>0.53)                         | 0.43<br>(0.25 to<br>0.68)                         | 0.27<br>(0.16 to<br>0.44)                         | 0.43<br>(0.25 to<br>0.68)                         |
| Acute hepatitis E                                                       | 40.02<br>(27.91 to<br>56.01)                             | 26.81<br>(15.79 to<br>45.45)                           | 17.30<br>(9.86 to<br>29.13)                          | 29.11<br>(17.03 to<br>47.52)                           | 1.31<br>(0.84 to<br>1.97)                         | 1.66<br>(0.88 to<br>2.87)                         | 1.16<br>(0.59 to<br>2.02)                         | 1.67<br>(0.88 to<br>2.90)                         |

|                                       |                                             |                                             |                                             |                                               |                                          |                                          |                                          |                                          |
|---------------------------------------|---------------------------------------------|---------------------------------------------|---------------------------------------------|-----------------------------------------------|------------------------------------------|------------------------------------------|------------------------------------------|------------------------------------------|
|                                       | 655.95<br>(333.10 to<br>1,868.10)           | 430.22<br>(257.98 to<br>856.35)             | 399.96<br>(249.26 to<br>690.72)             | 494.85<br>(277.14 to<br>1,085.68)             | 19.37<br>(12.48 to<br>35.07)             | 23.84<br>(16.57 to<br>34.53)             | 24.73<br>(17.43 to<br>35.08)             | 24.75<br>(16.35 to<br>37.28)             |
| Other unspecified infectious diseases |                                             |                                             |                                             |                                               |                                          |                                          |                                          |                                          |
| Non-communicable diseases             | 423,474.12<br>(378,572.03 to<br>474,164.68) | 601,853.29<br>(425,414.56 to<br>871,145.51) | 391,774.87<br>(287,729.51 to<br>549,476.49) | 728,373.04<br>(502,507.60 to<br>1,087,513.36) | 23,183.19<br>(20,684.91 to<br>25,863.72) | 42,923.76<br>(33,943.70 to<br>54,999.48) | 30,559.97<br>(24,716.85 to<br>37,992.68) | 49,462.34<br>(38,898.87 to<br>63,905.82) |
| <b>Lebanon</b>                        |                                             |                                             |                                             |                                               |                                          |                                          |                                          |                                          |
| Cause                                 | YLLs (actual counts)                        |                                             |                                             |                                               | Deaths (actual counts)                   |                                          |                                          |                                          |
|                                       | 2016                                        | 2040 Forecast                               | 2040 Better Scenario                        | 2040 Worse Scenario                           | 2016                                     | 2040 Forecast                            | 2040 Better Scenario                     | 2040 Worse Scenario                      |
| Neoplasms                             | 152,621.29<br>(134,136.76 to<br>174,209.55) | 214,159.69<br>(155,024.81 to<br>293,194.92) | 159,790.20<br>(115,570.64 to<br>218,665.02) | 235,220.33<br>(170,156.58 to<br>322,898.81)   | 6,807.66<br>(5,998.26 to<br>7,774.13)    | 12,420.09<br>(9,879.35 to<br>15,671.74)  | 9,810.02<br>(7,772.52 to<br>12,146.32)   | 13,181.59<br>(10,297.66 to<br>16,785.52) |
| Lip and oral cavity cancer            | 1,240.91<br>(1,043.26 to<br>1,472.49)       | 1,790.50<br>(974.20 to<br>3,077.85)         | 941.51<br>(569.84 to<br>1,504.84)           | 2,337.68<br>(1,232.13 to<br>4,042.26)         | 53.65<br>(45.43 to<br>63.14)             | 92.84<br>(55.28 to<br>147.26)            | 52.89<br>(34.76 to<br>77.85)             | 116.89<br>(66.87 to<br>190.21)           |
| Nasopharynx cancer                    | 541.41<br>(431.47 to<br>675.98)             | 734.58<br>(316.89 to<br>1,588.14)           | 315.79<br>(152.34 to<br>632.92)             | 1,002.44<br>(418.91 to<br>2,208.69)           | 17.22<br>(13.83 to<br>21.19)             | 26.65<br>(12.70 to<br>53.61)             | 11.90<br>(6.29 to<br>22.09)              | 35.73<br>(16.13 to<br>72.04)             |
| Other pharynx cancer                  | 416.15<br>(340.92 to<br>511.05)             | 591.70<br>(340.92 to<br>930.47)             | 528.38<br>(314.96 to<br>823.90)             | 654.49<br>(370.31 to<br>1,072.37)             | 17.79<br>(14.65 to<br>21.54)             | 29.48<br>(19.11 to<br>43.96)             | 27.84<br>(18.68 to<br>39.24)             | 31.58<br>(19.80 to<br>48.33)             |
| Esophageal cancer                     | 1,118.58<br>(940.87 to<br>1,327.74)         | 1,674.40<br>(935.62 to<br>2,926.98)         | 1,073.37<br>(653.86 to<br>1,702.98)         | 2,057.10<br>(1,115.87 to<br>3,692.85)         | 54.23<br>(46.08 to<br>64.42)             | 97.64<br>(59.37 to<br>157.73)            | 66.44<br>(44.56 to<br>98.72)             | 116.51<br>(67.98 to<br>193.49)           |
| Stomach cancer                        | 6,677.87<br>(5,681.33 to<br>7,764.17)       | 6,836.79<br>(4,512.36 to<br>10,362.19)      | 4,411.24<br>(2,997.26 to<br>6,705.76)       | 7,303.49<br>(4,796.93 to<br>11,098.38)        | 313.66<br>(269.32 to<br>363.71)          | 403.41<br>(292.04 to<br>556.24)          | 273.12<br>(200.41 to<br>372.90)          | 419.61<br>(299.34 to<br>578.45)          |
| Colon and rectum cancer               | 13,372.47<br>(11,171.08 to<br>15,668.29)    | 23,149.46<br>(14,905.63 to<br>34,570.88)    | 17,111.73<br>(10,948.95 to<br>25,726.10)    | 24,114.98<br>(15,385.61 to<br>36,878.84)      | 674.71<br>(564.68 to<br>786.49)          | 1,497.64<br>(1,020.72 to<br>2,210.09)    | 1,173.24<br>(789.54 to<br>1,694.20)      | 1,508.72<br>(1,013.15 to<br>2,283.99)    |
| Liver cancer                          | 3,425.01<br>(2,839.51 to<br>4,129.76)       | 5,680.79<br>(3,223.16 to<br>9,990.92)       | 5,055.30<br>(3,019.52 to<br>8,466.16)       | 6,663.47<br>(3,644.31 to<br>11,934.20)        | 155.09<br>(128.86 to<br>187.30)          | 306.89<br>(190.22 to<br>502.86)          | 288.81<br>(188.16 to<br>443.85)          | 347.91<br>(207.53 to<br>583.06)          |
| Liver cancer due to hepatitis B       | 1,510.31<br>(1,164.23 to<br>1,924.15)       | 2,329.02<br>(1,259.39 to<br>4,186.87)       | 2,075.98<br>(1,177.79 to<br>3,638.96)       | 2,711.75<br>(1,406.36 to<br>4,992.40)         | 61.33<br>(46.61 to<br>78.71)             | 112.30<br>(66.12 to<br>192.46)           | 105.26<br>(65.07 to<br>171.71)           | 126.85<br>(72.19 to<br>219.43)           |
| Liver cancer due to hepatitis C       | 767.49<br>(538.25 to<br>1,041.00)           | 1,377.96<br>(757.65 to<br>2,396.65)         | 1,279.63<br>(740.46 to<br>2,103.55)         | 1,567.09<br>(843.62 to<br>2,787.09)           | 42.17<br>(29.86 to<br>57.67)             | 88.95<br>(51.82 to<br>143.04)            | 87.18<br>(53.13 to<br>136.87)            | 97.77<br>(55.06 to<br>161.26)            |
| Liver cancer due to alcohol use       | 449.00<br>(288.64 to<br>663.30)             | 814.79<br>(396.97 to<br>1,623.41)           | 662.15<br>(341.10 to<br>1,246.19)           | 1,016.84<br>(479.42 to<br>2,089.13)           | 20.87<br>(13.42 to<br>30.55)             | 42.80<br>(21.76 to<br>79.40)             | 37.15<br>(19.79 to<br>65.18)             | 51.40<br>(25.12 to<br>99.18)             |
| Liver cancer due to other causes      | 698.20<br>(476.26 to<br>990.75)             | 1,159.01<br>(549.79 to<br>2,218.88)         | 1,037.54<br>(524.98 to<br>1,884.24)         | 1,367.79<br>(618.66 to<br>2,693.29)           | 30.71<br>(20.83 to<br>44.19)             | 62.84<br>(31.29 to<br>111.74)            | 59.22<br>(30.66 to<br>102.25)            | 71.89<br>(34.56 to<br>128.80)            |
| Gallbladder and biliary tract cancer  | 1,791.21<br>(1,455.77 to<br>2,135.14)       | 1,913.26<br>(1,407.44 to<br>2,442.04)       | 1,867.21<br>(1,359.23 to<br>2,473.77)       | 1,843.81<br>(1,308.96 to<br>2,321.26)         | 103.35<br>(82.07 to<br>122.55)           | 131.24<br>(99.21 to<br>156.11)           | 134.14<br>(100.74 to<br>162.00)          | 123.21<br>(93.58 to<br>145.78)           |
| Pancreatic cancer                     | 4,704.13<br>(3,954.69 to<br>5,555.24)       | 7,052.01<br>(4,662.38 to<br>10,479.65)      | 6,407.39<br>(4,273.15 to<br>9,575.11)       | 7,343.59<br>(4,768.01 to<br>11,009.46)        | 212.21<br>(180.81 to<br>249.12)          | 376.03<br>(270.11 to<br>517.83)          | 356.93<br>(259.81 to<br>488.31)          | 383.21<br>(272.20 to<br>532.54)          |
| Larynx cancer                         | 2,635.78<br>(2,140.19 to<br>3,195.96)       | 3,994.15<br>(1,751.81 to<br>8,189.43)       | 1,700.90<br>(815.60 to<br>3,328.33)         | 5,275.50<br>(2,256.81 to<br>11,397.99)        | 122.56<br>(99.79 to<br>148.73)           | 215.29<br>(102.37 to<br>425.67)          | 97.29<br>(48.19 to<br>179.93)            | 277.26<br>(127.56 to<br>562.85)          |
| Tracheal, bronchus, and lung cancer   | 26,118.99<br>(22,131.77 to<br>30,755.01)    | 41,423.21<br>(23,743.93 to<br>65,421.46)    | 20,072.62<br>(12,057.26 to<br>30,991.16)    | 53,639.30<br>(30,857.77 to<br>86,729.40)      | 1,226.40<br>(1,043.88 to<br>1,440.88)    | 2,274.99<br>(1,434.15 to<br>3,396.10)    | 1,173.60<br>(768.44 to<br>1,708.81)      | 2,883.41<br>(1,804.10 to<br>4,309.49)    |
| Malignant skin melanoma               | 706.42<br>(573.96 to<br>865.93)             | 925.48<br>(679.35 to<br>1,269.67)           | 1,209.63<br>(864.33 to<br>1,688.56)         | 858.82<br>(634.89 to<br>1,175.30)             | 32.01<br>(25.46 to<br>38.60)             | 57.73<br>(42.41 to<br>72.53)             | 79.61<br>(58.50 to<br>101.07)            | 51.75<br>(38.50 to<br>64.88)             |
| Non-melanoma skin cancer              | 251.62<br>(178.63 to<br>348.52)             | 450.54<br>(310.49 to<br>658.04)             | 344.17<br>(230.36 to<br>521.70)             | 450.96<br>(308.08 to<br>652.87)               | 14.59<br>(10.70 to<br>19.55)             | 34.21<br>(25.20 to<br>45.77)             | 27.86<br>(20.38 to<br>37.24)             | 33.03<br>(24.03 to<br>44.41)             |

|                   |                                          |                                          |                                         |                                          |                                 |                                     |                                     |                                     |
|-------------------|------------------------------------------|------------------------------------------|-----------------------------------------|------------------------------------------|---------------------------------|-------------------------------------|-------------------------------------|-------------------------------------|
| Breast cancer     | 15,593.30<br>(11,877.52 to<br>20,270.33) | 19,655.33<br>(11,959.07 to<br>30,958.81) | 14,680.93<br>(8,823.66 to<br>23,305.77) | 20,922.85<br>(12,427.31 to<br>33,483.14) | 632.38<br>(464.46 to<br>817.49) | 984.20<br>(636.59 to<br>1,429.04)   | 775.97<br>(493.28 to<br>1,121.38)   | 1,017.41<br>(649.27 to<br>1,479.14) |
| Cervical cancer   | 1,222.61<br>(784.91 to<br>1,642.25)      | 1,137.56<br>(620.13 to<br>1,876.29)      | 758.69<br>(414.14 to<br>1,253.90)       | 1,235.60<br>(678.01 to<br>2,044.92)      | 48.46<br>(32.33 to<br>64.00)    | 53.45<br>(33.24 to<br>78.10)        | 37.33<br>(22.89 to<br>55.07)        | 56.68<br>(35.32 to<br>85.04)        |
| Uterine cancer    | 1,090.95<br>(848.35 to<br>1,392.36)      | 1,529.14<br>(1,050.86 to<br>2,176.10)    | 1,249.42<br>(836.95 to<br>1,844.18)     | 1,593.66<br>(1,093.64 to<br>2,275.57)    | 58.28<br>(45.67 to<br>74.24)    | 98.37<br>(73.58 to<br>129.18)       | 84.16<br>(61.91 to<br>110.79)       | 99.87<br>(75.04 to<br>131.16)       |
| Ovarian cancer    | 3,524.80<br>(2,672.48 to<br>4,455.45)    | 4,276.88<br>(2,516.81 to<br>6,834.10)    | 3,652.35<br>(2,132.10 to<br>5,754.85)   | 4,409.86<br>(2,556.72 to<br>7,048.03)    | 152.39<br>(117.06 to<br>190.75) | 217.28<br>(141.71 to<br>325.96)     | 192.39<br>(124.93 to<br>285.23)     | 212.60<br>(140.20 to<br>338.07)     |
| Prostate cancer   | 7,184.83<br>(4,434.38 to<br>9,479.59)    | 16,133.74<br>(9,850.76 to<br>21,280.40)  | 14,287.54<br>(8,616.88 to<br>19,156.20) | 15,303.12<br>(9,285.46 to<br>20,019.55)  | 533.93<br>(324.38 to<br>697.53) | 1,390.31<br>(842.17 to<br>1,792.44) | 1,288.38<br>(792.05 to<br>1,653.06) | 1,287.26<br>(774.89 to<br>1,675.30) |
| Testicular cancer | 400.97<br>(285.35 to<br>561.80)          | 274.24<br>(168.78 to<br>452.60)          | 211.92<br>(131.84 to<br>353.73)         | 285.19<br>(176.92 to<br>465.87)          | 9.49<br>(6.97 to<br>13.10)      | 285.19<br>(6.99 to<br>14.44)        | 8.13<br>(5.46 to<br>12.22)          | 9.73<br>(6.60 to<br>14.34)          |

**Lebanon**

| Cause                           | YLLs (actual counts)                    |                                          |                                         |                                          | Deaths (actual counts)          |                                     |                                   |                                     |
|---------------------------------|-----------------------------------------|------------------------------------------|-----------------------------------------|------------------------------------------|---------------------------------|-------------------------------------|-----------------------------------|-------------------------------------|
|                                 | 2016                                    | 2040 Forecast                            | 2040 Better Scenario                    | 2040 Worse Scenario                      | 2016                            | 2040 Forecast                       | 2040 Better Scenario              | 2040 Worse Scenario                 |
| Kidney cancer                   | 1,757.26<br>(1,412.76 to<br>2,135.72)   | 2,962.60<br>(1,947.11 to<br>4,525.29)    | 2,816.45<br>(1,896.21 to<br>4,237.22)   | 2,933.93<br>(1,918.51 to<br>4,570.24)    | 80.85<br>(65.15 to<br>98.37)    | 168.07<br>(116.28 to<br>235.98)     | 168.13<br>(121.19 to<br>233.59)   | 162.13<br>(110.95 to<br>233.75)     |
| Bladder cancer                  | 8,904.48<br>(7,354.43 to<br>10,786.38)  | 15,209.37<br>(10,046.99 to<br>23,065.10) | 11,940.24<br>(8,171.40 to<br>17,256.65) | 16,355.78<br>(10,591.89 to<br>25,231.76) | 565.39<br>(470.37 to<br>672.76) | 1,154.77<br>(808.33 to<br>1,658.21) | 954.24<br>(687.75 to<br>1,317.11) | 1,211.70<br>(824.43 to<br>1,777.39) |
| Brain and nervous system cancer | 7,285.21<br>(5,880.21 to<br>8,780.57)   | 8,477.25<br>(6,036.26 to<br>11,690.80)   | 7,576.99<br>(5,341.57 to<br>10,969.19)  | 8,548.23<br>(6,138.03 to<br>11,708.58)   | 200.32<br>(165.64 to<br>244.23) | 317.74<br>(221.96 to<br>451.10)     | 294.45<br>(199.12 to<br>434.40)   | 309.00<br>(219.05 to<br>453.17)     |
| Thyroid cancer                  | 841.55<br>(704.16 to<br>1,022.05)       | 1,082.17<br>(682.80 to<br>1,743.92)      | 865.57<br>(547.69 to<br>1,381.73)       | 1,195.93<br>(747.68 to<br>1,910.55)      | 38.05<br>(31.64 to<br>48.66)    | 63.49<br>(42.70 to<br>97.71)        | 53.28<br>(35.65 to<br>81.58)      | 67.73<br>(44.49 to<br>103.60)       |
| Mesothelioma                    | 193.44<br>(128.31 to<br>319.95)         | 246.85<br>(148.61 to<br>429.11)          | 255.45<br>(150.50 to<br>456.63)         | 245.01<br>(148.93 to<br>419.92)          | 8.22<br>(5.47 to<br>12.85)      | 13.57<br>(8.84 to<br>20.96)         | 14.78<br>(9.58 to<br>23.66)       | 13.09<br>(8.55 to<br>19.66)         |
| Hodgkin lymphoma                | 2,257.25<br>(1,406.66 to<br>2,944.41)   | 1,493.46<br>(871.30 to<br>2,251.07)      | 989.80<br>(574.83 to<br>1,565.36)       | 1,641.56<br>(948.07 to<br>2,496.36)      | 62.14<br>(38.91 to<br>80.25)    | 58.18<br>(33.95 to<br>83.41)        | 40.15<br>(23.25 to<br>60.39)      | 61.85<br>(36.05 to<br>88.61)        |
| Non-Hodgkin lymphoma            | 13,444.77<br>(9,768.41 to<br>16,369.99) | 15,523.14<br>(9,891.67 to<br>22,218.13)  | 12,969.70<br>(8,238.12 to<br>18,674.42) | 15,817.03<br>(10,093.82 to<br>22,586.38) | 519.83<br>(369.04 to<br>652.46) | 814.70<br>(552.47 to<br>1,107.00)   | 714.65<br>(477.58 to<br>977.76)   | 802.33<br>(535.80 to<br>1,107.54)   |
| Multiple myeloma                | 3,015.17<br>(2,441.33 to<br>3,574.21)   | 5,409.60<br>(3,799.40 to<br>7,773.29)    | 4,887.34<br>(3,379.54 to<br>6,990.04)   | 5,434.37<br>(3,773.40 to<br>7,682.48)    | 146.33<br>(117.47 to<br>173.68) | 315.37<br>(235.66 to<br>419.53)     | 298.42<br>(223.05 to<br>395.83)   | 307.88<br>(226.51 to<br>415.28)     |
| Leukemia                        | 10,428.05<br>(8,850.67 to<br>12,480.76) | 11,364.43<br>(8,022.92 to<br>16,756.52)  | 8,847.98<br>(6,330.76 to<br>13,090.09)  | 12,519.28<br>(8,734.58 to<br>18,551.52)  | 341.48<br>(286.92 to<br>420.67) | 578.48<br>(419.20 to<br>835.92)     | 468.04<br>(341.68 to<br>668.70)   | 612.40<br>(438.38 to<br>907.35)     |
| Acute lymphoid leukemia         | 1,813.53<br>(1,261.47 to<br>2,581.08)   | 1,252.33<br>(790.55 to<br>1,914.48)      | 973.14<br>(617.16 to<br>1,489.35)       | 1,400.77<br>(871.76 to<br>2,146.07)      | 36.95<br>(26.45 to<br>50.79)    | 38.18<br>(24.37 to<br>58.54)        | 30.18<br>(19.71 to<br>45.82)      | 41.04<br>(26.03 to<br>62.18)        |
| Chronic lymphoid leukemia       | 330.66<br>(238.30 to<br>433.10)         | 431.43<br>(266.46 to<br>670.13)          | 373.79<br>(236.37 to<br>570.47)         | 461.75<br>(281.67 to<br>717.96)          | 15.80<br>(11.33 to<br>21.03)    | 26.81<br>(17.48 to<br>40.57)        | 24.45<br>(16.38 to<br>36.21)      | 27.74<br>(17.94 to<br>42.95)        |
| Acute myeloid leukemia          | 2,474.20<br>(1,604.54 to<br>3,534.82)   | 2,838.23<br>(1,560.96 to<br>4,758.04)    | 2,559.49<br>(1,455.10 to<br>4,136.58)   | 3,031.83<br>(1,650.02 to<br>5,091.00)    | 71.77<br>(45.91 to<br>103.42)   | 121.09<br>(67.74 to<br>198.46)      | 114.40<br>(65.94 to<br>185.96)    | 124.33<br>(67.39 to<br>204.71)      |
| Chronic myeloid leukemia        | 705.13<br>(404.63 to<br>1,156.08)       | 654.98<br>(345.53 to<br>1,203.50)        | 377.18<br>(197.86 to<br>690.19)         | 726.42<br>(375.08 to<br>1,351.17)        | 28.42<br>(16.53 to<br>48.78)    | 36.16<br>(20.83 to<br>66.01)        | 22.03<br>(12.55 to<br>40.59)      | 38.65<br>(21.60 to<br>70.92)        |
| Other leukemia                  | 5,104.53<br>(4,044.01 to<br>6,370.99)   | 6,187.45<br>(4,235.19 to<br>9,339.90)    | 4,564.38<br>(3,128.26 to<br>6,758.63)   | 6,898.52<br>(4,661.12 to<br>10,474.06)   | 188.54<br>(152.33 to<br>236.51) | 356.24<br>(249.30 to<br>519.73)     | 276.98<br>(197.90 to<br>397.68)   | 380.65<br>(263.26 to<br>570.72)     |

|                                               |                                                                  |                                                                  |                                                                  |                                                                  |                                                              |                                                               |                                                             |                                                               |
|-----------------------------------------------|------------------------------------------------------------------|------------------------------------------------------------------|------------------------------------------------------------------|------------------------------------------------------------------|--------------------------------------------------------------|---------------------------------------------------------------|-------------------------------------------------------------|---------------------------------------------------------------|
| Other neoplasms                               | 12,476.13<br>(10,535.82 to<br>14,549.72)                         | 13,167.06<br>(10,122.92 to<br>16,834.02)                         | 12,760.60<br>(9,635.54 to<br>16,711.06)                          | 13,223.27<br>(10,193.57 to<br>16,850.07)                         | 412.64<br>(352.75 to<br>481.54)                              | 638.27<br>(529.20 to<br>755.28)                               | 653.87<br>(528.37 to<br>794.65)                             | 612.12<br>(509.91 to<br>715.91)                               |
| <b>Cardiovascular diseases</b>                | <b>157,918.10</b><br><b>(137,460.21 to</b><br><b>180,001.14)</b> | <b>158,011.21</b><br><b>(122,416.28 to</b><br><b>199,514.49)</b> | <b>158,011.21</b><br><b>(122,416.28 to</b><br><b>199,514.49)</b> | <b>158,011.21</b><br><b>(122,416.28 to</b><br><b>199,514.49)</b> | <b>10,152.49</b><br><b>(8,957.52 to</b><br><b>11,429.40)</b> | <b>16,612.45</b><br><b>(10,692.02 to</b><br><b>26,116.53)</b> | <b>8,535.35</b><br><b>(5,668.38 to</b><br><b>13,663.69)</b> | <b>21,997.89</b><br><b>(13,618.07 to</b><br><b>33,852.28)</b> |
| Rheumatic heart disease                       | 836.79<br>(580.39 to<br>1,162.24)                                | 527.60<br>(309.83 to<br>877.96)                                  | 361.00<br>(206.03 to<br>586.03)                                  | 581.01<br>(332.87 to<br>966.47)                                  | 33.93<br>(22.74 to<br>46.86)                                 | 34.56<br>(21.12 to<br>54.00)                                  | 25.39<br>(15.17 to<br>38.85)                                | 36.27<br>(21.68 to<br>57.44)                                  |
| Ischemic heart disease                        | 119,908.36<br>(101,958.78 to<br>139,132.14)                      | 164,087.58<br>(83,033.81 to<br>326,370.67)                       | 65,445.67<br>(35,479.89 to<br>123,304.19)                        | 236,839.38<br>(116,065.93 to<br>461,790.33)                      | 7,805.91<br>(6,763.93 to<br>8,869.04)                        | 12,186.01<br>(6,867.39 to<br>21,553.85)                       | 5,739.02<br>(3,368.30 to<br>10,703.80)                      | 16,405.01<br>(9,177.51 to<br>28,588.53)                       |
| Stroke                                        | 18,741.62<br>(14,471.27 to<br>23,942.98)                         | 22,732.29<br>(11,203.63 to<br>43,921.88)                         | 8,968.65<br>(4,717.81 to<br>17,692.59)                           | 32,025.54<br>(15,751.72 to<br>62,413.33)                         | 1,174.17<br>(895.07 to<br>1,542.94)                          | 1,784.89<br>(967.84 to<br>3,359.62)                           | 861.83<br>(453.19 to<br>1,640.00)                           | 2,301.83<br>(1,225.95 to<br>4,285.82)                         |
| Ischemic stroke                               | 9,858.81<br>(7,499.66 to<br>12,716.67)                           | 12,205.16<br>(5,786.59 to<br>26,201.47)                          | 5,494.67<br>(2,837.29 to<br>11,970.42)                           | 16,221.67<br>(7,640.24 to<br>35,374.71)                          | 748.25<br>(567.54 to<br>984.16)                              | 1,139.44<br>(542.67 to<br>2,391.39)                           | 596.30<br>(285.80 to<br>1,269.00)                           | 1,415.95<br>(682.86 to<br>3,317.53)                           |
| Intracerebral hemorrhage                      | 8,882.80<br>(6,757.84 to<br>11,465.13)                           | 10,527.13<br>(4,916.29 to<br>20,016.92)                          | 3,473.99<br>(1,810.36 to<br>6,001.44)                            | 15,803.86<br>(7,162.23 to<br>31,241.24)                          | 425.92<br>(314.88 to<br>571.89)                              | 645.45<br>(337.76 to<br>1,129.75)                             | 265.53<br>(147.71 to<br>439.72)                             | 885.88<br>(457.88 to<br>1,600.67)                             |
| Hypertensive heart disease                    | 3,728.77<br>(2,463.63 to<br>6,450.08)                            | 7,222.77<br>(3,196.96 to<br>17,012.98)                           | 4,392.64<br>(2,275.83 to<br>8,890.15)                            | 8,217.66<br>(3,578.45 to<br>19,977.23)                           | 253.14<br>(169.25 to<br>431.40)                              | 638.94<br>(315.66 to<br>1,446.21)                             | 432.02<br>(238.95 to<br>817.21)                             | 694.93<br>(325.73 to<br>1,615.54)                             |
| Cardiomyopathy and myocarditis                | 2,664.73<br>(1,842.24 to<br>3,572.22)                            | 3,349.71<br>(1,949.75 to<br>5,190.63)                            | 2,161.92<br>(1,267.20 to<br>3,398.53)                            | 3,385.83<br>(2,016.04 to<br>5,172.77)                            | 120.63<br>(81.76 to<br>159.46)                               | 228.43<br>(128.46 to<br>353.21)                               | 157.23<br>(93.61 to<br>240.23)                              | 220.48<br>(126.98 to<br>343.07)                               |
| Myocarditis                                   | 338.08<br>(218.54 to<br>552.08)                                  | 280.08<br>(167.36 to<br>491.62)                                  | 265.27<br>(159.46 to<br>463.39)                                  | 290.20<br>(172.07 to<br>505.70)                                  | 11.06<br>(6.88 to<br>18.24)                                  | 16.02<br>(9.27 to<br>27.02)                                   | 16.63<br>(9.67 to<br>27.71)                                 | 15.51<br>(8.99 to<br>26.20)                                   |
| <b>Lebanon</b>                                |                                                                  |                                                                  |                                                                  |                                                                  |                                                              |                                                               |                                                             |                                                               |
| Cause                                         | YLLs (actual counts)                                             |                                                                  |                                                                  |                                                                  | Deaths (actual counts)                                       |                                                               |                                                             |                                                               |
|                                               | 2016                                                             | 2040 Forecast                                                    | 2040 Better Scenario                                             | 2040 Worse Scenario                                              | 2016                                                         | 2040 Forecast                                                 | 2040 Better Scenario                                        | 2040 Worse Scenario                                           |
| Alcoholic cardiomyopathy                      | 209.49<br>(106.87 to<br>345.63)                                  | 284.92<br>(136.06 to<br>525.60)                                  | 259.61<br>(121.42 to<br>475.82)                                  | 288.70<br>(138.05 to<br>514.78)                                  | 10.57<br>(5.28 to<br>17.58)                                  | 18.79<br>(8.99 to<br>33.66)                                   | 18.31<br>(9.02 to<br>33.04)                                 | 18.22<br>(8.72 to<br>31.98)                                   |
| Other cardiomyopathy                          | 2,117.16<br>(1,499.46 to<br>2,842.41)                            | 2,784.70<br>(1,575.79 to<br>4,481.84)                            | 1,637.04<br>(914.37 to<br>2,681.24)                              | 2,806.93<br>(1,625.65 to<br>4,437.40)                            | 99.01<br>(68.44 to<br>131.37)                                | 193.61<br>(105.19 to<br>312.73)                               | 122.29<br>(69.27 to<br>195.98)                              | 186.74<br>(103.63 to<br>301.80)                               |
| Atrial fibrillation and flutter               | 1,541.12<br>(1,141.72 to<br>2,018.50)                            | 3,464.97<br>(2,470.03 to<br>4,633.81)                            | 2,983.53<br>(2,163.62 to<br>3,935.63)                            | 3,393.58<br>(2,391.43 to<br>4,554.34)                            | 159.63<br>(121.13 to<br>208.52)                              | 403.86<br>(283.28 to<br>551.01)                               | 371.33<br>(269.84 to<br>501.86)                             | 383.71<br>(257.55 to<br>528.51)                               |
| Aortic aneurysm                               | 979.88<br>(682.19 to<br>1,365.30)                                | 1,534.34<br>(953.69 to<br>2,427.25)                              | 1,148.02<br>(737.68 to<br>1,724.53)                              | 1,534.20<br>(947.00 to<br>2,406.76)                              | 57.27<br>(41.00 to<br>77.34)                                 | 112.64<br>(74.19 to<br>158.85)                                | 94.79<br>(64.78 to<br>127.49)                               | 108.10<br>(70.11 to<br>153.16)                                |
| Peripheral artery disease                     | 103.53<br>(40.17 to<br>187.81)                                   | 339.99<br>(126.22 to<br>631.31)                                  | 314.76<br>(117.89 to<br>587.11)                                  | 335.33<br>(123.45 to<br>622.24)                                  | 9.88<br>(3.82 to<br>17.63)                                   | 38.35<br>(13.57 to<br>74.73)                                  | 38.40<br>(13.79 to<br>72.69)                                | 36.26<br>(12.76 to<br>71.11)                                  |
| Endocarditis                                  | 1,657.67<br>(1,208.75 to<br>2,272.95)                            | 2,285.41<br>(1,476.34 to<br>3,477.17)                            | 2,058.00<br>(1,341.10 to<br>3,091.17)                            | 2,307.86<br>(1,492.96 to<br>3,490.04)                            | 86.38<br>(63.44 to<br>118.02)                                | 174.53<br>(110.17 to<br>267.65)                               | 168.25<br>(107.59 to<br>250.45)                             | 168.59<br>(105.48 to<br>260.66)                               |
| Other cardiovascular and circulatory diseases | 7,755.64<br>(5,646.60 to<br>10,358.41)                           | 12,556.57<br>(7,755.26 to<br>19,813.41)                          | 7,210.22<br>(4,639.16 to<br>11,215.35)                           | 13,586.46<br>(8,425.79 to<br>21,664.11)                          | 451.54<br>(320.63 to<br>605.18)                              | 1,010.23<br>(652.79 to<br>1,516.07)                           | 647.09<br>(428.16 to<br>945.06)                             | 1,042.72<br>(667.59 to<br>1,578.19)                           |
| <b>Chronic respiratory diseases</b>           | <b>13,499.13</b><br><b>(10,957.58 to</b><br><b>19,312.54)</b>    | <b>19,863.64</b><br><b>(13,341.16 to</b><br><b>28,993.88)</b>    | <b>13,871.65</b><br><b>(9,885.83 to</b><br><b>19,644.64)</b>     | <b>24,959.33</b><br><b>(16,546.30 to</b><br><b>36,659.41)</b>    | <b>898.28</b><br><b>(731.76 to</b><br><b>1,293.46)</b>       | <b>1,650.82</b><br><b>(1,138.65 to</b><br><b>2,324.90)</b>    | <b>1,207.87</b><br><b>(886.19 to</b><br><b>1,641.03)</b>    | <b>2,007.37</b><br><b>(1,335.28 to</b><br><b>2,885.20)</b>    |
| Chronic obstructive pulmonary disease         | 8,543.23<br>(6,769.73 to<br>11,768.67)                           | 13,649.49<br>(8,399.27 to<br>21,176.61)                          | 6,998.46<br>(4,269.64 to<br>10,671.42)                           | 18,478.36<br>(11,134.50 to<br>28,922.31)                         | 616.97<br>(488.43 to<br>852.24)                              | 1,188.57<br>(741.61 to<br>1,753.11)                           | 660.89<br>(409.62 to<br>969.75)                             | 1,544.93<br>(952.50 to<br>2,354.90)                           |
| Pneumoconiosis                                | 44.73<br>(29.25 to<br>66.02)                                     | 55.65<br>(35.78 to<br>83.34)                                     | 51.68<br>(32.36 to<br>85.45)                                     | 58.12<br>(38.14 to<br>87.27)                                     | 3.09<br>(2.10 to<br>4.49)                                    | 5.26<br>(3.35 to<br>7.96)                                     | 5.43<br>(3.25 to<br>9.12)                                   | 5.33<br>(3.29 to<br>8.05)                                     |

|                                                                |                                                             |                                                              |                                                              |                                                              |                                                      |                                                        |                                                      |                                                        |
|----------------------------------------------------------------|-------------------------------------------------------------|--------------------------------------------------------------|--------------------------------------------------------------|--------------------------------------------------------------|------------------------------------------------------|--------------------------------------------------------|------------------------------------------------------|--------------------------------------------------------|
| Silicosis                                                      | 7.30<br>(3.68 to<br>12.88)                                  | 7.43<br>(3.68 to<br>13.28)                                   | 4.15<br>(1.81 to<br>8.04)                                    | 7.70<br>(3.83 to<br>13.41)                                   | 0.49<br>(0.25 to<br>0.82)                            | 0.64<br>(0.30 to<br>1.15)                              | 0.41<br>(0.18 to<br>0.83)                            | 0.64<br>(0.31 to<br>1.14)                              |
| Asbestosis                                                     | 8.84<br>(5.77 to<br>13.22)                                  | 12.02<br>(7.15 to<br>19.97)                                  | 15.02<br>(8.77 to<br>25.78)                                  | 11.72<br>(7.04 to<br>19.06)                                  | 0.47<br>(0.28 to<br>0.79)                            | 0.94<br>(0.49 to<br>1.62)                              | 1.25<br>(0.65 to<br>2.16)                            | 0.88<br>(0.46 to<br>1.58)                              |
| Coal workers pneumoconiosis                                    | 1.81<br>(0.80 to<br>4.77)                                   | 2.81<br>(1.06 to<br>7.63)                                    | 2.79<br>(0.92 to<br>8.23)                                    | 3.21<br>(1.21 to<br>8.35)                                    | 0.15<br>(0.06 to<br>0.37)                            | 0.30<br>(0.10 to<br>0.80)                              | 0.32<br>(0.10 to<br>0.96)                            | 0.32<br>(0.11 to<br>0.86)                              |
| Other pneumoconiosis                                           | 26.78<br>(17.41 to<br>39.30)                                | 33.38<br>(21.23 to<br>51.81)                                 | 29.72<br>(17.30 to<br>51.54)                                 | 35.49<br>(22.35 to<br>53.96)                                 | 1.99<br>(1.37 to<br>2.87)                            | 3.39<br>(2.07 to<br>5.37)                              | 3.46<br>(1.90 to<br>6.05)                            | 3.48<br>(2.11 to<br>5.57)                              |
| Asthma                                                         | 2,240.24<br>(1,424.74 to<br>4,501.80)                       | 1,791.26<br>(842.82 to<br>3,862.42)                          | 828.62<br>(369.35 to<br>1,947.91)                            | 2,272.06<br>(1,054.87 to<br>5,066.75)                        | 121.12<br>(75.31 to<br>257.63)                       | 129.53<br>(61.19 to<br>272.45)                         | 65.26<br>(29.07 to<br>147.46)                        | 156.16<br>(73.12 to<br>333.72)                         |
| Interstitial lung disease and pulmonary sarcoidosis            | 2,132.69<br>(945.23 to<br>3,569.08)                         | 3,644.08<br>(1,751.14 to<br>5,824.84)                        | 5,313.95<br>(2,851.91 to<br>8,264.87)                        | 3,384.34<br>(1,520.22 to<br>5,505.92)                        | 132.16<br>(88.06 to<br>223.95)                       | 279.07<br>(137.62 to<br>438.66)                        | 427.99<br>(237.39 to<br>665.95)                      | 251.75<br>(116.87 to<br>409.77)                        |
| Other chronic respiratory diseases                             | 538.24<br>(303.44 to<br>1,054.01)                           | 723.16<br>(353.25 to<br>1,600.52)                            | 678.94<br>(330.16 to<br>1,479.04)                            | 766.45<br>(373.11 to<br>1,693.25)                            | 24.94<br>(13.70 to<br>51.39)                         | 24.94<br>(23.70 to<br>105.68)                          | 48.39<br>(23.46 to<br>104.75)                        | 49.20<br>(23.52 to<br>107.93)                          |
| <b>Cirrhosis and other chronic liver diseases</b>              | <b>9,666.93</b><br><b>(7,092.18 to</b><br><b>13,153.19)</b> | <b>13,625.13</b><br><b>(9,516.50 to</b><br><b>20,474.06)</b> | <b>10,864.04</b><br><b>(7,177.51 to</b><br><b>16,509.32)</b> | <b>13,908.95</b><br><b>(9,664.08 to</b><br><b>20,934.64)</b> | <b>462.35</b><br><b>(344.78 to</b><br><b>621.06)</b> | <b>817.87</b><br><b>(685.72 to</b><br><b>1,114.85)</b> | <b>685.16</b><br><b>(492.72 to</b><br><b>950.89)</b> | <b>810.09</b><br><b>(598.83 to</b><br><b>1,099.54)</b> |
| Cirrhosis and other chronic liver diseases due to hepatitis B  | 3,549.89<br>(2,432.54 to<br>5,116.54)                       | 5,251.54<br>(3,417.58 to<br>8,161.12)                        | 4,238.75<br>(2,635.63 to<br>6,716.74)                        | 5,302.93<br>(3,446.20 to<br>8,072.65)                        | 174.66<br>(120.28 to<br>248.39)                      | 313.20<br>(209.98 to<br>456.16)                        | 264.38<br>(172.00 to<br>385.71)                      | 308.20<br>(206.09 to<br>444.37)                        |
| Cirrhosis and other chronic liver diseases due to hepatitis C  | 3,112.49<br>(2,046.19 to<br>4,507.61)                       | 4,671.44<br>(2,850.17 to<br>7,400.90)                        | 3,696.80<br>(2,171.46 to<br>5,934.26)                        | 4,738.39<br>(2,871.88 to<br>7,411.74)                        | 148.33<br>(98.72 to<br>210.41)                       | 268.28<br>(169.81 to<br>398.18)                        | 222.01<br>(135.94 to<br>337.00)                      | 265.24<br>(166.68 to<br>388.34)                        |
| Cirrhosis and other chronic liver diseases due to alcohol use  | 660.68<br>(469.43 to<br>928.69)                             | 942.10<br>(632.58 to<br>1,405.67)                            | 706.98<br>(456.63 to<br>1,069.47)                            | 1,027.30<br>(682.00 to<br>1,571.56)                          | 33.88<br>(24.59 to<br>47.23)                         | 58.60<br>(41.44 to<br>82.67)                           | 47.05<br>(32.22 to<br>66.62)                         | 61.32<br>(43.39 to<br>87.45)                           |
| Cirrhosis and other chronic liver diseases due to other causes | 2,343.86<br>(1,673.85 to<br>3,065.65)                       | 2,760.05<br>(1,913.27 to<br>3,865.07)                        | 2,221.50<br>(1,504.81 to<br>3,215.57)                        | 2,840.34<br>(1,964.37 to<br>3,944.51)                        | 105.47<br>(76.40 to<br>138.47)                       | 177.99<br>(130.27 to<br>238.24)                        | 151.72<br>(106.87 to<br>202.29)                      | 175.32<br>(127.80 to<br>234.57)                        |
| <b>Digestive diseases</b>                                      | <b>4,543.80</b><br><b>(3,761.60 to</b><br><b>5,787.44)</b>  | <b>6,040.04</b><br><b>(4,412.29 to</b><br><b>8,118.15)</b>   | <b>4,889.02</b><br><b>(3,568.56 to</b><br><b>6,543.40)</b>   | <b>6,413.59</b><br><b>(4,629.90 to</b><br><b>8,669.65)</b>   | <b>265.75</b><br><b>(219.64 to</b><br><b>332.56)</b> | <b>493.23</b><br><b>(372.36 to</b><br><b>656.71)</b>   | <b>425.94</b><br><b>(325.58 to</b><br><b>554.97)</b> | <b>503.02</b><br><b>(373.71 to</b><br><b>678.45)</b>   |
| Peptic ulcer disease                                           | 642.33<br>(489.06 to<br>892.87)                             | 666.14<br>(425.79 to<br>1,013.76)                            | 375.92<br>(239.16 to<br>579.52)                              | 726.39<br>(473.97 to<br>1,088.15)                            | 40.97<br>(31.58 to<br>55.94)                         | 57.52<br>(36.36 to<br>86.12)                           | 34.77<br>(22.31 to<br>53.15)                         | 60.54<br>(38.91 to<br>89.94)                           |

**Lebanon**

| Cause                                      | YLLs (actual counts)                |                                       |                                       |                                       | Deaths (actual counts)        |                                |                                 |                                |
|--------------------------------------------|-------------------------------------|---------------------------------------|---------------------------------------|---------------------------------------|-------------------------------|--------------------------------|---------------------------------|--------------------------------|
|                                            | 2016                                | 2040 Forecast                         | 2040 Better Scenario                  | 2040 Worse Scenario                   | 2016                          | 2040 Forecast                  | 2040 Better Scenario            | 2040 Worse Scenario            |
| Gastritis and duodenitis                   | 37.95<br>(25.22 to<br>59.55)        | 53.84<br>(32.20 to<br>88.83)          | 39.78<br>(23.26 to<br>67.09)          | 55.01<br>(33.09 to<br>90.25)          | 2.06<br>(1.40 to<br>3.15)     | 3.98<br>(2.54 to<br>6.12)      | 3.17<br>(2.01 to<br>4.91)       | 3.91<br>(2.53 to<br>6.03)      |
| Appendicitis                               | 264.24<br>(204.91 to<br>343.56)     | 272.12<br>(191.05 to<br>376.74)       | 177.82<br>(118.45 to<br>259.07)       | 289.74<br>(206.28 to<br>405.20)       | 12.73<br>(9.82 to<br>16.36)   | 20.80<br>(14.45 to<br>28.31)   | 14.58<br>(9.92 to<br>20.39)     | 21.09<br>(14.96 to<br>28.98)   |
| Paralytic ileus and intestinal obstruction | 1,235.33<br>(917.49 to<br>1,800.85) | 1,576.78<br>(1,136.35 to<br>2,385.77) | 1,610.60<br>(1,147.01 to<br>2,396.64) | 1,561.24<br>(1,125.88 to<br>2,404.78) | 70.55<br>(52.78 to<br>103.20) | 129.56<br>(93.10 to<br>197.96) | 139.97<br>(103.45 to<br>204.54) | 122.89<br>(87.96 to<br>192.83) |
| Inguinal, femoral, and abdominal hernia    | 101.49<br>(77.00 to<br>139.29)      | 97.06<br>(68.21 to<br>138.40)         | 79.71<br>(54.08 to<br>115.80)         | 98.05<br>(68.75 to<br>140.49)         | 6.07<br>(4.44 to<br>8.74)     | 8.89<br>(6.02 to<br>13.36)     | 7.83<br>(5.27 to<br>11.50)      | 8.57<br>(5.70 to<br>12.77)     |
| Inflammatory bowel disease                 | 207.16<br>(123.50 to<br>345.12)     | 210.21<br>(116.66 to<br>353.29)       | 204.34<br>(111.27 to<br>340.71)       | 208.60<br>(116.54 to<br>352.43)       | 8.44<br>(4.92 to<br>14.17)    | 12.92<br>(7.51 to<br>22.11)    | 13.41<br>(7.74 to<br>22.26)     | 12.29<br>(7.19 to<br>21.02)    |
| Vascular intestinal disorders              | 450.12<br>(326.37 to<br>652.28)     | 739.11<br>(516.32 to<br>1,073.59)     | 662.17<br>(457.11 to<br>978.34)       | 731.52<br>(513.74 to<br>1,068.71)     | 29.38<br>(21.60 to<br>42.30)  | 61.83<br>(43.90 to<br>88.17)   | 58.81<br>(41.83 to<br>83.94)    | 59.33<br>(42.16 to<br>85.31)   |

|                                         |                                                               |                                                               |                                                               |                                                               |                                                            |                                                            |                                                            |                                                            |
|-----------------------------------------|---------------------------------------------------------------|---------------------------------------------------------------|---------------------------------------------------------------|---------------------------------------------------------------|------------------------------------------------------------|------------------------------------------------------------|------------------------------------------------------------|------------------------------------------------------------|
|                                         | 582.28<br>(397.90 to<br>909.09)                               | 1,029.17<br>(498.64 to<br>1,978.37)                           | 649.07<br>(318.13 to<br>1,243.02)                             | 1,254.61<br>(600.35 to<br>2,367.58)                           | 39.58<br>(27.31 to<br>60.25)                               | 91.26<br>(44.25 to<br>174.55)                              | 62.11<br>(31.45 to<br>115.43)                              | 106.32<br>(50.98 to<br>198.55)                             |
| Gallbladder and biliary diseases        |                                                               |                                                               |                                                               |                                                               |                                                            |                                                            |                                                            |                                                            |
|                                         | 499.01<br>(325.36 to<br>753.34)                               | 732.82<br>(396.93 to<br>1,255.55)                             | 495.01<br>(273.97 to<br>829.94)                               | 808.15<br>(425.61 to<br>1,459.61)                             | 25.23<br>(16.24 to<br>39.78)                               | 49.40<br>(28.64 to<br>78.78)                               | 36.15<br>(20.84 to<br>58.05)                               | 51.82<br>(29.35 to<br>83.24)                               |
| Pancreatitis                            |                                                               |                                                               |                                                               |                                                               |                                                            |                                                            |                                                            |                                                            |
|                                         | 523.78<br>(391.26 to<br>763.37)                               | 662.77<br>(456.12 to<br>988.93)                               | 594.60<br>(405.36 to<br>888.02)                               | 680.27<br>(462.12 to<br>1,031.10)                             | 30.74<br>(23.01 to<br>44.01)                               | 57.26<br>(39.98 to<br>84.43)                               | 55.16<br>(38.75 to<br>79.89)                               | 56.25<br>(38.31 to<br>82.29)                               |
| Other digestive diseases                |                                                               |                                                               |                                                               |                                                               |                                                            |                                                            |                                                            |                                                            |
| <b>Neurological disorders</b>           | <b>26,431.57</b><br><b>(22,257.95 to</b><br><b>31,747.07)</b> | <b>52,365.97</b><br><b>(38,368.70 to</b><br><b>73,475.09)</b> | <b>51,350.11</b><br><b>(38,938.24 to</b><br><b>69,252.08)</b> | <b>54,183.90</b><br><b>(39,159.54 to</b><br><b>77,653.07)</b> | <b>2,323.45</b><br><b>(1,939.83 to</b><br><b>2,803.47)</b> | <b>5,554.96</b><br><b>(4,112.15 to</b><br><b>7,802.31)</b> | <b>5,747.48</b><br><b>(4,395.56 to</b><br><b>7,678.60)</b> | <b>5,576.03</b><br><b>(3,874.85 to</b><br><b>8,182.92)</b> |
|                                         | 20,964.46<br>(17,183.58 to<br>25,902.17)                      | 44,671.64<br>(31,291.07 to<br>65,087.82)                      | 43,079.73<br>(30,792.52 to<br>60,524.16)                      | 46,727.54<br>(31,883.38 to<br>70,139.10)                      | 2,071.15<br>(1,704.06 to<br>2,531.02)                      | 4,997.94<br>(3,511.34 to<br>7,207.63)                      | 5,096.19<br>(3,760.00 to<br>7,057.50)                      | 5,070.21<br>(3,409.82 to<br>7,665.00)                      |
| Alzheimer's disease and other dementias |                                                               |                                                               |                                                               |                                                               |                                                            |                                                            |                                                            |                                                            |
|                                         | 1,937.80<br>(1,454.98 to<br>2,582.86)                         | 4,639.83<br>(3,470.35 to<br>6,127.82)                         | 5,434.35<br>(4,040.06 to<br>7,195.93)                         | 4,174.83<br>(3,090.63 to<br>5,501.28)                         | 167.92<br>(125.43 to<br>224.05)                            | 448.30<br>(326.45 to<br>587.61)                            | 544.89<br>(409.57 to<br>708.96)                            | 595.18<br>(384.95 to<br>827.66)                            |
| Parkinson's disease                     |                                                               |                                                               |                                                               |                                                               |                                                            |                                                            |                                                            |                                                            |
|                                         | 1,862.41<br>(1,382.16 to<br>2,558.80)                         | 1,329.60<br>(816.80 to<br>2,093.56)                           | 1,107.08<br>(670.74 to<br>1,756.53)                           | 1,544.89<br>(923.30 to<br>2,452.40)                           | 40.64<br>(29.97 to<br>55.85)                               | 44.56<br>(28.65 to<br>68.10)                               | 39.22<br>(25.14 to<br>59.41)                               | 48.95<br>(30.92 to<br>74.99)                               |
| Epilepsy                                |                                                               |                                                               |                                                               |                                                               |                                                            |                                                            |                                                            |                                                            |
|                                         | 276.01<br>(212.11 to<br>361.75)                               | 295.52<br>(185.96 to<br>449.61)                               | 282.45<br>(179.14 to<br>433.28)                               | 293.33<br>(185.95 to<br>440.46)                               | 7.90<br>(6.05 to<br>10.34)                                 | 10.48<br>(7.10 to<br>14.87)                                | 10.33<br>(7.02 to<br>14.75)                                | 10.23<br>(6.95 to<br>14.50)                                |
| Multiple sclerosis                      |                                                               |                                                               |                                                               |                                                               |                                                            |                                                            |                                                            |                                                            |
|                                         | 239.57<br>(146.89 to<br>327.31)                               | 372.59<br>(203.13 to<br>587.83)                               | 364.69<br>(196.99 to<br>585.91)                               | 363.37<br>(201.53 to<br>572.99)                               | 7.73<br>(4.81 to<br>10.61)                                 | 14.18<br>(8.12 to<br>21.04)                                | 14.26<br>(8.17 to<br>21.49)                                | 13.57<br>(7.84 to<br>20.19)                                |
| Motor neuron disease                    |                                                               |                                                               |                                                               |                                                               |                                                            |                                                            |                                                            |                                                            |
|                                         | 1,151.31<br>(889.55 to<br>1,438.11)                           | 1,056.80<br>(773.63 to<br>1,421.49)                           | 1,081.81<br>(790.52 to<br>1,464.33)                           | 1,079.95<br>(784.28 to<br>1,449.77)                           | 28.13<br>(22.65 to<br>34.15)                               | 39.50<br>(30.63 to<br>50.22)                               | 42.60<br>(33.00 to<br>54.82)                               | 37.90<br>(29.69 to<br>48.14)                               |
| Other neurological disorders            |                                                               |                                                               |                                                               |                                                               |                                                            |                                                            |                                                            |                                                            |
| <b>Mental disorders</b>                 | <b>3,044.04</b><br><b>(1,797.69 to</b><br><b>4,723.13)</b>    | <b>3,561.02</b><br><b>(1,952.82 to</b><br><b>6,000.98)</b>    | <b>4,390.03</b><br><b>(2,418.80 to</b><br><b>7,169.25)</b>    | <b>3,568.01</b><br><b>(1,968.30 to</b><br><b>5,929.99)</b>    | <b>78.31</b><br><b>(48.80 to</b><br><b>116.18)</b>         | <b>128.17</b><br><b>(78.13 to</b><br><b>198.27)</b>        | <b>169.71</b><br><b>(102.62 to</b><br><b>261.18)</b>       | <b>123.51</b><br><b>(75.17 to</b><br><b>191.53)</b>        |
|                                         | 376.47<br>(210.48 to<br>643.04)                               | 350.81<br>(164.84 to<br>655.39)                               | 381.12<br>(175.75 to<br>720.11)                               | 359.05<br>(170.63 to<br>668.72)                               | 11.07<br>(6.32 to<br>18.41)                                | 13.48<br>(6.94 to<br>23.65)                                | 15.37<br>(7.85 to<br>27.13)                                | 15.41<br>(6.93 to<br>23.37)                                |
| Alcohol use disorders                   |                                                               |                                                               |                                                               |                                                               |                                                            |                                                            |                                                            |                                                            |
|                                         | 2,659.34<br>(1,438.65 to<br>4,285.15)                         | 3,203.38<br>(1,683.87 to<br>5,531.96)                         | 4,001.39<br>(2,122.32 to<br>6,731.93)                         | 3,202.01<br>(1,683.10 to<br>5,509.10)                         | 67.09<br>(38.21 to<br>103.52)                              | 114.55<br>(66.79 to<br>182.06)                             | 154.19<br>(90.13 to<br>244.01)                             | 109.96<br>(64.18 to<br>173.19)                             |
| Drug use disorders                      |                                                               |                                                               |                                                               |                                                               |                                                            |                                                            |                                                            |                                                            |
|                                         | 2,062.45<br>(981.20 to<br>3,425.65)                           | 2,210.56<br>(1,032.82 to<br>4,097.45)                         | 2,453.84<br>(1,156.06 to<br>4,474.95)                         | 2,234.35<br>(1,040.98 to<br>4,075.09)                         | 48.67<br>(24.43 to<br>78.87)                               | 71.19<br>(34.64 to<br>123.22)                              | 82.87<br>(40.33 to<br>146.58)                              | 69.48<br>(33.91 to<br>120.24)                              |
| Opioid use disorders                    |                                                               |                                                               |                                                               |                                                               |                                                            |                                                            |                                                            |                                                            |
|                                         | 91.00<br>(33.12 to<br>215.50)                                 | 153.01<br>(47.30 to<br>397.22)                                | 203.46<br>(64.89 to<br>526.23)                                | 154.16<br>(47.98 to<br>401.24)                                | 2.37<br>(0.82 to<br>5.79)                                  | 4.88<br>(1.52 to<br>12.98)                                 | 6.63<br>(2.14 to<br>17.66)                                 | 4.81<br>(1.50 to<br>12.66)                                 |
| Cocaine use disorders                   |                                                               |                                                               |                                                               |                                                               |                                                            |                                                            |                                                            |                                                            |
|                                         | 95.29<br>(28.63 to<br>271.69)                                 | 215.72<br>(58.51 to<br>617.68)                                | 346.98<br>(95.70 to<br>935.44)                                | 6.21<br>(58.73 to<br>593.85)                                  | 2.40<br>(0.67 to<br>7.15)                                  | 6.61<br>(1.69 to<br>20.08)                                 | 10.86<br>(2.86 to<br>31.44)                                | 6.34<br>(1.65 to<br>18.80)                                 |
| Amphetamine use disorders               |                                                               |                                                               |                                                               |                                                               |                                                            |                                                            |                                                            |                                                            |
|                                         | 410.59<br>(224.70 to<br>650.89)                               | 624.10<br>(327.18 to<br>1,037.86)                             | 997.11<br>(520.92 to<br>1,640.25)                             | 601.27<br>(319.58 to<br>983.82)                               | 13.65<br>(8.01 to<br>20.47)                                | 31.87<br>(18.16 to<br>49.43)                               | 53.82<br>(30.33 to<br>82.54)                               | 29.33<br>(16.72 to<br>44.65)                               |
| Other drug use disorders                |                                                               |                                                               |                                                               |                                                               |                                                            |                                                            |                                                            |                                                            |
|                                         | 8.24<br>(4.20 to<br>13.34)                                    | 6.83<br>(3.21 to<br>11.93)                                    | 7.52<br>(3.28 to<br>13.58)                                    | 6.95<br>(3.29 to<br>11.88)                                    | 0.15<br>(0.08 to<br>0.25)                                  | 0.14<br>(0.06 to<br>0.25)                                  | 0.15<br>(0.06 to<br>0.29)                                  | 0.14<br>(0.06 to<br>0.25)                                  |
| Eating disorders                        |                                                               |                                                               |                                                               |                                                               |                                                            |                                                            |                                                            |                                                            |

**Lebanon**

| Cause             | YLLs (actual counts)                                       |                                                               |                                                                |                                                               | Deaths (actual counts)                                         |                                                            |                                                            |                                                            |
|-------------------|------------------------------------------------------------|---------------------------------------------------------------|----------------------------------------------------------------|---------------------------------------------------------------|----------------------------------------------------------------|------------------------------------------------------------|------------------------------------------------------------|------------------------------------------------------------|
|                   | 2016                                                       | 2040 Forecast                                                 | 2040 Better Scenario                                           | 2040 Worse Scenario                                           | 2016                                                           | 2040 Forecast                                              | 2040 Better Scenario                                       | 2040 Worse Scenario                                        |
|                   | <b>Diabetes, urogenital, blood, and endocrine diseases</b> | <b>31,130.83</b><br><b>(26,914.87 to</b><br><b>36,052.15)</b> | <b>58,470.10</b><br><b>(35,205.78 to</b><br><b>108,177.31)</b> | <b>41,232.47</b><br><b>(24,858.25 to</b><br><b>81,430.42)</b> | <b>68,810.15</b><br><b>(40,511.85 to</b><br><b>132,010.32)</b> | <b>1,790.98</b><br><b>(1,546.42 to</b><br><b>2,083.38)</b> | <b>4,684.97</b><br><b>(2,868.07 to</b><br><b>9,308.68)</b> | <b>3,511.96</b><br><b>(2,156.89 to</b><br><b>7,218.06)</b> |
| Diabetes mellitus | 16,212.87<br>(13,598.80 to<br>19,280.03)                   | 27,976.14<br>(18,605.65 to<br>40,098.05)                      | 18,307.86<br>(12,044.31 to<br>26,363.92)                       | 32,254.16<br>(21,192.48 to<br>47,258.16)                      | 1,027.90<br>(861.93 to<br>1,222.89)                            | 2,188.40<br>(1,514.17 to<br>2,961.42)                      | 1,534.27<br>(1,075.24 to<br>2,072.76)                      | 2,416.99<br>(1,644.74 to<br>3,353.52)                      |





| Lebanon                                       |                                              |                                             |                                            |                                              |                                     |                                     |                                     |                                     |
|-----------------------------------------------|----------------------------------------------|---------------------------------------------|--------------------------------------------|----------------------------------------------|-------------------------------------|-------------------------------------|-------------------------------------|-------------------------------------|
| Cause                                         | YLLs (actual counts)                         |                                             |                                            |                                              | Deaths (actual counts)              |                                     |                                     |                                     |
|                                               | 2016                                         | 2040 Forecast                               | 2040 Better Scenario                       | 2040 Worse Scenario                          | 2016                                | 2040 Forecast                       | 2040 Better Scenario                | 2040 Worse Scenario                 |
| <b>Musculoskeletal disorders</b>              | <b>919.76</b><br>(539.34 to 1,249.20)        | <b>1,023.58</b><br>(569.64 to 1,435.65)     | <b>884.77</b><br>(500.38 to 1,239.54)      | <b>1,020.15</b><br>(570.96 to 1,427.10)      | <b>26.99</b><br>(15.92 to 36.92)    | <b>50.05</b><br>(27.98 to 68.18)    | <b>45.71</b><br>(26.47 to 61.84)    | <b>47.41</b><br>(26.21 to 64.68)    |
| Rheumatoid arthritis                          | 65.69<br>(34.34 to 121.68)                   | 100.38<br>(46.53 to 192.64)                 | 56.87<br>(26.00 to 109.86)                 | 107.55<br>(50.14 to 198.74)                  | 2.75<br>(1.39 to 4.87)              | 6.66<br>(3.13 to 11.92)             | 3.98<br>(1.86 to 7.35)              | 6.85<br>(3.20 to 12.31)             |
| Other musculoskeletal disorders               | 854.07<br>(502.24 to 1,150.62)               | 923.19<br>(519.01 to 1,285.34)              | 827.90<br>(470.04 to 1,160.02)             | 912.60<br>(518.59 to 1,274.35)               | 24.24<br>(14.39 to 32.87)           | 43.39<br>(24.31 to 59.06)           | 41.73<br>(24.37 to 56.70)           | 40.56<br>(22.65 to 55.34)           |
| <b>Other non-communicable diseases</b>        | <b>23,698.68</b><br>(16,305.70 to 33,158.52) | <b>14,642.92</b><br>(9,138.02 to 21,728.39) | <b>9,458.14</b><br>(5,929.38 to 13,871.50) | <b>18,081.77</b><br>(10,872.26 to 28,305.85) | <b>376.92</b><br>(268.49 to 496.52) | <b>511.16</b><br>(297.23 to 693.43) | <b>420.75</b><br>(234.03 to 581.88) | <b>530.33</b><br>(317.15 to 723.22) |
| Congenital birth defects                      | 21,233.11<br>(14,212.91 to 30,415.92)        | 10,300.86<br>(5,898.56 to 16,752.98)        | 5,686.26<br>(3,002.30 to 9,515.14)         | 13,746.91<br>(7,360.87 to 23,774.07)         | 262.76<br>(180.01 to 371.10)        | 136.74<br>(82.59 to 215.34)         | 76.02<br>(41.40 to 123.92)          | 178.39<br>(99.94 to 301.77)         |
| Neural tube defects                           | 275.10<br>(144.38 to 543.05)                 | 55.64<br>(23.35 to 123.91)                  | 27.81<br>(10.60 to 64.08)                  | 78.65<br>(30.30 to 184.08)                   | 3.38<br>(1.85 to 6.55)              | 0.77<br>(0.35 to 1.64)              | 0.38<br>(0.16 to 0.84)              | 1.05<br>(0.43 to 2.36)              |
| Congenital heart anomalies                    | 10,706.15<br>(6,861.01 to 15,618.61)         | 4,998.63<br>(2,839.27 to 8,419.99)          | 2,375.28<br>(1,216.04 to 4,111.16)         | 6,685.86<br>(3,587.92 to 11,669.25)          | 132.82<br>(86.23 to 190.20)         | 66.03<br>(38.70 to 108.22)          | 31.48<br>(16.47 to 52.60)           | 86.50<br>(48.65 to 148.32)          |
| Orofacial clefts                              | 8.02<br>(2.59 to 26.41)                      | 2.85<br>(0.81 to 10.07)                     | 1.11<br>(0.30 to 3.80)                     | 4.32<br>(1.17 to 15.53)                      | 0.09<br>(0.03 to 0.31)              | 0.03<br>(0.01 to 0.12)              | 0.01<br>(0.00 to 0.04)              | 0.05<br>(0.01 to 0.18)              |
| Down syndrome                                 | 656.33<br>(382.15 to 1,104.23)               | 394.91<br>(194.92 to 711.16)                | 415.20<br>(205.03 to 741.65)               | 497.90<br>(252.02 to 939.03)                 | 8.67<br>(5.20 to 14.26)             | 5.77<br>(2.94 to 10.11)             | 6.08<br>(3.11 to 10.70)             | 7.06<br>(3.47 to 12.85)             |
| Other chromosomal abnormalities               | 743.26<br>(236.35 to 2,695.56)               | 581.51<br>(176.46 to 1,995.35)              | 431.25<br>(130.62 to 1,484.47)             | 792.49<br>(232.00 to 3,004.04)               | 8.89<br>(2.84 to 32.01)             | 7.11<br>(2.16 to 24.38)             | 5.28<br>(1.64 to 18.22)             | 9.60<br>(2.85 to 36.64)             |
| Congenital musculoskeletal and limb anomalies | 483.18<br>(249.77 to 908.41)                 | 228.70<br>(101.35 to 436.46)                | 127.95<br>(56.11 to 252.43)                | 302.96<br>(126.68 to 613.89)                 | 5.90<br>(3.09 to 10.94)             | 2.95<br>(1.37 to 5.60)              | 1.66<br>(0.74 to 3.22)              | 3.84<br>(1.67 to 7.65)              |
| Urogenital congenital anomalies               | 656.93<br>(366.67 to 1,084.85)               | 325.51<br>(170.79 to 564.53)                | 201.32<br>(101.69 to 352.79)               | 420.19<br>(207.05 to 754.06)                 | 8.82<br>(5.18 to 14.11)             | 5.51<br>(3.05 to 9.13)              | 3.46<br>(1.85 to 6.03)              | 6.69<br>(3.55 to 11.19)             |
| Digestive congenital anomalies                | 826.98<br>(319.87 to 1,507.83)               | 396.56<br>(135.30 to 794.37)                | 208.71<br>(63.45 to 418.34)                | 542.72<br>(176.59 to 1,080.93)               | 9.84<br>(3.81 to 17.81)             | 4.89<br>(1.72 to 9.64)              | 2.58<br>(0.79 to 5.11)              | 6.61<br>(2.21 to 13.10)             |
| Other congenital birth defects                | 6,877.04<br>(3,965.25 to 12,057.59)          | 3,316.55<br>(1,609.70 to 6,262.73)          | 1,897.64<br>(829.95 to 3,739.38)           | 4,421.80<br>(2,039.69 to 8,675.34)           | 84.35<br>(49.00 to 146.39)          | 43.69<br>(22.01 to 80.02)           | 25.09<br>(11.67 to 48.68)           | 56.98<br>(27.41 to 107.97)          |
| Skin and subcutaneous diseases                | 1,408.11<br>(690.85 to 1,996.18)             | 3,980.79<br>(1,909.49 to 5,735.94)          | 3,501.43<br>(1,674.48 to 5,092.51)         | 3,850.27<br>(1,836.21 to 5,501.32)           | 101.89<br>(48.90 to 143.83)         | 370.23<br>(170.49 to 532.49)        | 341.59<br>(162.78 to 494.89)        | 346.31<br>(157.70 to 502.52)        |
| Cellulitis                                    | 224.06<br>(103.92 to 381.51)                 | 683.95<br>(285.20 to 1,113.48)              | 675.23<br>(276.05 to 1,095.12)             | 641.63<br>(1,039.70)                         | 14.36<br>(6.27 to 24.71)            | 55.62<br>(22.56 to 92.25)           | 57.77<br>(22.95 to 93.92)           | 50.50<br>(20.17 to 82.57)           |
| Pyoderma                                      | 769.82<br>(367.01 to 1,182.39)               | 2,444.60<br>(1,139.40 to 3,757.03)          | 2,141.94<br>(998.41 to 3,289.54)           | 2,394.29<br>(1,121.38 to 3,655.40)           | 54.49<br>(26.29 to 85.46)           | 225.27<br>(104.42 to 351.29)        | 208.25<br>(99.38 to 318.43)         | 213.53<br>(98.57 to 333.37)         |
| Decubitus ulcer                               | 370.10<br>(116.87 to 689.59)                 | 801.00<br>(214.80 to 1,559.98)              | 640.33<br>(166.94 to 1,292.01)             | 762.99<br>(202.76 to 1,493.39)               | 31.58<br>(9.04 to 58.66)            | 86.41<br>(23.81 to 166.98)          | 72.83<br>(19.54 to 142.34)          | 79.57<br>(21.76 to 155.63)          |
| Other skin and subcutaneous diseases          | 44.13<br>(20.86 to 63.14)                    | 51.24<br>(22.54 to 78.89)                   | 43.94<br>(19.87 to 69.49)                  | 51.36<br>(22.45 to 78.20)                    | 1.46<br>(0.68 to 2.19)              | 2.92<br>(1.27 to 4.69)              | 2.74<br>(1.19 to 4.35)              | 2.71<br>(1.17 to 4.30)              |
| Sudden infant death syndrome                  | 1,057.46<br>(483.02 to 1,859.55)             | 361.27<br>(125.45 to 804.37)                | 270.45<br>(88.59 to 636.41)                | 484.60<br>(163.98 to 1,104.11)               | 12.27<br>(5.61 to 21.59)            | 4.19<br>(1.46 to 9.33)              | 3.14<br>(1.03 to 7.39)              | 5.62<br>(1.90 to 12.81)             |

|                                      |                                           |                                           |                                           |                                           |                                       |                                     |                                   |                                     |
|--------------------------------------|-------------------------------------------|-------------------------------------------|-------------------------------------------|-------------------------------------------|---------------------------------------|-------------------------------------|-----------------------------------|-------------------------------------|
| Injuries                             | 78,407.27<br>(53,744.69 to<br>104,754.07) | 34,178.28<br>(20,879.15 to<br>115,874.31) | 27,730.58<br>(16,068.39 to<br>109,490.63) | 40,056.77<br>(24,587.08 to<br>127,278.40) | 1,654.90<br>(1,199.55 to<br>2,151.42) | 1,135.44<br>(800.59 to<br>3,002.32) | 963.81<br>(649.27 to<br>2,999.53) | 1,250.99<br>(881.75 to<br>3,195.25) |
| Transport injuries                   | 17,678.89<br>(14,289.25 to<br>22,312.11)  | 8,379.08<br>(5,659.00 to<br>12,496.20)    | 7,210.61<br>(4,916.99 to<br>10,616.70)    | 12,342.80<br>(8,260.17 to<br>18,365.05)   | 402.58<br>(330.44 to<br>491.94)       | 289.13<br>(212.84 to<br>393.63)     | 256.36<br>(191.28 to<br>345.79)   | 385.39<br>(284.18 to<br>527.57)     |
| Road injuries                        | 17,027.77<br>(13,813.33 to<br>21,364.46)  | 7,705.75<br>(5,149.99 to<br>11,516.94)    | 6,808.19<br>(4,682.05 to<br>10,072.56)    | 11,596.17<br>(7,785.74 to<br>17,225.34)   | 385.21<br>(316.32 to<br>467.79)       | 261.20<br>(192.90 to<br>354.89)     | 238.46<br>(178.04 to<br>321.45)   | 356.10<br>(263.26 to<br>489.59)     |
| Pedestrian road injuries             | 3,562.92<br>(2,117.36 to<br>5,214.37)     | 1,848.16<br>(1,022.59 to<br>2,929.78)     | 1,131.05<br>(627.58 to<br>1,848.76)       | 2,584.49<br>(1,440.08 to<br>4,152.91)     | 92.22<br>(56.20 to<br>130.99)         | 77.09<br>(44.47 to<br>114.86)       | 50.65<br>(28.98 to<br>78.22)      | 98.42<br>(57.45 to<br>147.36)       |
| <b>Lebanon</b>                       |                                           |                                           |                                           |                                           |                                       |                                     |                                   |                                     |
| Cause                                | YLLs (actual counts)                      |                                           |                                           |                                           | Deaths (actual counts)                |                                     |                                   |                                     |
|                                      | 2016                                      | 2040 Forecast                             | 2040 Better Scenario                      | 2040 Worse Scenario                       | 2016                                  | 2040 Forecast                       | 2040 Better Scenario              | 2040 Worse Scenario                 |
| Cyclist road injuries                | 322.49<br>(187.07 to<br>570.18)           | 180.51<br>(88.43 to<br>354.68)            | 174.93<br>(86.56 to<br>345.77)            | 257.42<br>(129.15 to<br>500.33)           | 7.04<br>(4.16 to<br>12.23)            | 5.63<br>(2.99 to<br>10.71)          | 5.74<br>(3.07 to<br>10.87)        | 7.20<br>(3.79 to<br>13.72)          |
| Motorcyclist road injuries           | 1,092.03<br>(628.13 to<br>1,952.30)       | 538.34<br>(255.45 to<br>1,086.12)         | 513.95<br>(247.69 to<br>1,018.38)         | 729.85<br>(346.55 to<br>1,446.37)         | 19.12<br>(11.16 to<br>33.87)          | 11.09<br>(5.67 to<br>20.87)         | 10.91<br>(5.70 to<br>20.16)       | 14.17<br>(7.22 to<br>27.19)         |
| Motor vehicle road injuries          | 12,001.63<br>(9,754.20 to<br>14,754.27)   | 5,111.55<br>(3,407.04 to<br>7,630.04)     | 4,960.59<br>(3,395.86 to<br>7,284.63)     | 7,985.62<br>(5,242.03 to<br>12,072.81)    | 265.40<br>(216.33 to<br>322.53)       | 165.91<br>(116.41 to<br>229.87)     | 169.53<br>(123.66 to<br>231.74)   | 234.52<br>(164.19 to<br>328.19)     |
| Other road injuries                  | 48.70<br>(34.48 to<br>74.52)              | 27.20<br>(18.09 to<br>43.02)              | 27.67<br>(18.25 to<br>43.42)              | 38.80<br>(25.41 to<br>62.15)              | 1.42<br>(1.02 to<br>2.14)             | 1.48<br>(0.94 to<br>2.30)           | 1.64<br>(1.07 to<br>2.55)         | 1.79<br>(1.15 to<br>2.80)           |
| Other transport injuries             | 651.12<br>(424.38 to<br>986.16)           | 673.33<br>(403.55 to<br>1,077.12)         | 402.43<br>(236.02 to<br>643.39)           | 746.62<br>(440.96 to<br>1,184.65)         | 17.37<br>(12.14 to<br>25.71)          | 27.92<br>(18.47 to<br>41.40)        | 17.90<br>(11.53 to<br>26.93)      | 29.29<br>(19.31 to<br>44.04)        |
| Unintentional injuries               | 14,349.48<br>(11,602.91 to<br>17,695.69)  | 10,136.18<br>(7,440.05 to<br>13,863.29)   | 7,791.07<br>(5,499.11 to<br>10,791.23)    | 10,912.14<br>(7,778.42 to<br>14,918.99)   | 384.05<br>(301.79 to<br>488.45)       | 468.53<br>(339.36 to<br>605.93)     | 391.28<br>(283.20 to<br>513.93)   | 471.49<br>(340.19 to<br>616.82)     |
| Falls                                | 2,962.47<br>(2,280.51 to<br>4,502.13)     | 3,296.71<br>(2,529.53 to<br>4,731.07)     | 2,748.93<br>(2,048.25 to<br>4,050.02)     | 3,336.04<br>(2,540.75 to<br>4,898.81)     | 121.50<br>(96.12 to<br>176.58)        | 221.89<br>(163.12 to<br>305.57)     | 197.31<br>(144.66 to<br>272.92)   | 214.19<br>(155.33 to<br>299.82)     |
| Drowning                             | 2,952.28<br>(2,251.97 to<br>3,864.45)     | 1,498.76<br>(1,000.98 to<br>2,225.55)     | 1,083.72<br>(692.37 to<br>1,678.98)       | 1,695.60<br>(1,109.09 to<br>2,585.39)     | 55.68<br>(42.41 to<br>71.40)          | 37.83<br>(25.12 to<br>54.98)        | 28.17<br>(18.44 to<br>41.63)      | 41.08<br>(27.66 to<br>60.98)        |
| Fire, heat, and hot substances       | 2,229.99<br>(1,338.41 to<br>3,448.34)     | 1,337.45<br>(769.64 to<br>2,147.65)       | 872.90<br>(472.89 to<br>1,420.53)         | 1,487.92<br>(838.40 to<br>2,457.56)       | 58.52<br>(34.38 to<br>90.41)          | 57.48<br>(32.48 to<br>89.93)        | 40.33<br>(22.16 to<br>63.67)      | 60.20<br>(34.57 to<br>93.50)        |
| Poisonings                           | 639.46<br>(337.03 to<br>991.74)           | 238.34<br>(115.13 to<br>392.42)           | 136.34<br>(64.35 to<br>228.81)            | 284.04<br>(134.47 to<br>481.80)           | 12.89<br>(6.80 to<br>19.57)           | 6.87<br>(3.37 to<br>10.87)          | 4.13<br>(2.00 to<br>6.68)         | 7.74<br>(3.73 to<br>12.35)          |
| Exposure to mechanical forces        | 1,758.23<br>(1,194.57 to<br>2,201.14)     | 1,076.34<br>(646.99 to<br>1,597.58)       | 735.63<br>(439.25 to<br>1,122.33)         | 1,198.24<br>(724.00 to<br>1,798.96)       | 38.57<br>(26.09 to<br>49.03)          | 34.99<br>(21.91 to<br>48.52)        | 25.23<br>(15.74 to<br>35.71)      | 36.93<br>(23.38 to<br>51.70)        |
| Unintentional firearm injuries       | 295.85<br>(182.88 to<br>466.75)           | 139.72<br>(76.81 to<br>243.10)            | 104.85<br>(57.46 to<br>176.71)            | 156.72<br>(85.55 to<br>272.79)            | 6.43<br>(4.00 to<br>10.14)            | 4.60<br>(2.74 to<br>7.48)           | 3.68<br>(2.23 to<br>5.94)         | 4.88<br>(2.90 to<br>8.06)           |
| Unintentional suffocation            | 267.13<br>(151.85 to<br>472.26)           | 97.70<br>(46.74 to<br>192.73)             | 71.79<br>(33.88 to<br>142.70)             | 125.38<br>(56.87 to<br>259.06)            | 3.59<br>(2.11 to<br>6.19)             | 1.45<br>(0.76 to<br>2.62)           | 1.08<br>(0.56 to<br>2.01)         | 1.80<br>(0.88 to<br>3.45)           |
| Other exposure to mechanical forces  | 1,195.24<br>(775.57 to<br>1,590.44)       | 838.82<br>(469.28 to<br>1,273.56)         | 558.99<br>(314.38 to<br>870.26)           | 916.14<br>(522.41 to<br>1,411.77)         | 28.56<br>(18.23 to<br>37.62)          | 28.95<br>(17.09 to<br>41.15)        | 20.47<br>(12.05 to<br>29.51)      | 30.25<br>(18.16 to<br>43.10)        |
| Adverse effects of medical treatment | 1,744.73<br>(1,166.69 to<br>2,225.25)     | 1,441.30<br>(888.26 to<br>2,035.06)       | 1,214.05<br>(734.58 to<br>1,733.20)       | 1,527.32<br>(932.11 to<br>2,163.04)       | 53.39<br>(36.00 to<br>68.98)          | 69.02<br>(44.88 to<br>91.94)        | 61.85<br>(39.77 to<br>84.06)      | 69.39<br>(44.66 to<br>93.67)        |
| Animal contact                       | 160.09<br>(85.19 to<br>236.83)            | 125.46<br>(62.69 to<br>200.23)            | 96.72<br>(48.69 to<br>159.88)             | 141.43<br>(70.80 to<br>230.76)            | 4.28<br>(2.30 to<br>6.51)             | 5.85<br>(3.12 to<br>9.26)           | 4.85<br>(2.54 to<br>7.90)         | 6.07<br>(3.25 to<br>9.76)           |

|                                                                              |                                          |                                        |                                        |                                         |                                 |                                 |                                 |                                 |
|------------------------------------------------------------------------------|------------------------------------------|----------------------------------------|----------------------------------------|-----------------------------------------|---------------------------------|---------------------------------|---------------------------------|---------------------------------|
|                                                                              | 57.27<br>(29.92 to<br>92.75)             | 38.76<br>(17.50 to<br>70.56)           | 31.25<br>(13.95 to<br>57.77)           | 44.67<br>(19.93 to<br>82.58)            | 1.37<br>(0.69 to<br>2.30)       | 1.57<br>(0.66 to<br>2.95)       | 1.37<br>(0.58 to<br>2.63)       | 1.66<br>(0.69 to<br>3.14)       |
| Venomous animal contact                                                      |                                          |                                        |                                        |                                         |                                 |                                 |                                 |                                 |
|                                                                              | 102.82<br>(52.69 to<br>154.11)           | 86.70<br>(43.03 to<br>139.61)          | 65.47<br>(32.21 to<br>108.56)          | 96.75<br>(46.65 to<br>158.47)           | 2.91<br>(1.53 to<br>4.38)       | 4.28<br>(2.20 to<br>6.69)       | 3.48<br>(1.73 to<br>5.54)       | 4.41<br>(2.24 to<br>7.00)       |
| Non-venomous animal contact                                                  |                                          |                                        |                                        |                                         |                                 |                                 |                                 |                                 |
|                                                                              | 1,334.49<br>(971.19 to<br>1,744.23)      | 756.42<br>(513.34 to<br>1,043.30)      | 698.87<br>(467.55 to<br>969.66)        | 830.48<br>(552.18 to<br>1,151.99)       | 25.61<br>(19.11 to<br>32.46)    | 22.59<br>(16.12 to<br>29.86)    | 22.30<br>(15.71 to<br>29.92)    | 22.85<br>(16.16 to<br>30.50)    |
| Foreign body                                                                 |                                          |                                        |                                        |                                         |                                 |                                 |                                 |                                 |
|                                                                              | 1,005.08<br>(693.49 to<br>1,378.15)      | 574.58<br>(386.56 to<br>798.76)        | 507.56<br>(336.20 to<br>713.84)        | 632.39<br>(410.44 to<br>903.91)         | 19.03<br>(13.63 to<br>24.76)    | 17.33<br>(12.04 to<br>22.98)    | 16.42<br>(11.22 to<br>21.91)    | 17.44<br>(12.22 to<br>23.33)    |
| Pulmonary aspiration and foreign body in airway                              |                                          |                                        |                                        |                                         |                                 |                                 |                                 |                                 |
|                                                                              | 329.41<br>(179.72 to<br>493.01)          | 181.84<br>(91.49 to<br>297.07)         | 191.31<br>(98.01 to<br>314.46)         | 198.08<br>(99.06 to<br>326.84)          | 6.58<br>(3.56 to<br>9.72)       | 5.27<br>(2.71 to<br>8.17)       | 5.88<br>(3.07 to<br>9.09)       | 5.41<br>(2.77 to<br>8.39)       |
| Foreign body in other body part                                              |                                          |                                        |                                        |                                         |                                 |                                 |                                 |                                 |
|                                                                              | 289.82<br>(145.87 to<br>393.14)          | 214.35<br>(95.83 to<br>359.05)         | 135.67<br>(58.82 to<br>227.50)         | 243.37<br>(109.49 to<br>407.46)         | 7.70<br>(3.74 to<br>10.49)      | 7.65<br>(3.46 to<br>12.02)      | 5.06<br>(2.28 to<br>8.06)       | 8.37<br>(3.88 to<br>13.05)      |
| Environmental heat and cold exposure                                         |                                          |                                        |                                        |                                         |                                 |                                 |                                 |                                 |
|                                                                              | 277.93<br>(204.80 to<br>402.65)          | 151.15<br>(93.09 to<br>242.43)         | 68.24<br>(39.64 to<br>114.76)          | 167.70<br>(104.52 to<br>265.98)         | 5.91<br>(4.42 to<br>8.56)       | 4.36<br>(2.86 to<br>6.57)       | 2.05<br>(1.28 to<br>3.29)       | 4.65<br>(3.13 to<br>7.09)       |
| Other unintentional injuries                                                 |                                          |                                        |                                        |                                         |                                 |                                 |                                 |                                 |
|                                                                              | 16,916.22<br>(12,244.97 to<br>23,618.79) | 9,784.29<br>(6,140.74 to<br>15,533.98) | 6,815.79<br>(4,195.28 to<br>10,872.72) | 10,612.60<br>(6,589.23 to<br>17,257.56) | 332.75<br>(244.34 to<br>460.56) | 238.59<br>(153.65 to<br>366.29) | 172.52<br>(111.39 to<br>262.04) | 252.88<br>(161.89 to<br>395.94) |
| Self-harm and interpersonal violence                                         |                                          |                                        |                                        |                                         |                                 |                                 |                                 |                                 |
| <b>Lebanon</b>                                                               |                                          |                                        |                                        |                                         |                                 |                                 |                                 |                                 |
| Cause                                                                        | YLLs (actual counts)                     |                                        |                                        |                                         | Deaths (actual counts)          |                                 |                                 |                                 |
|                                                                              | 2016                                     | 2040 Forecast                          | 2040 Better Scenario                   | 2040 Worse Scenario                     | 2016                            | 2040 Forecast                   | 2040 Better Scenario            | 2040 Worse Scenario             |
|                                                                              | 6,833.02<br>(4,684.09 to<br>10,351.24)   | 5,300.44<br>(3,047.52 to<br>8,356.94)  | 3,873.04<br>(2,261.55 to<br>6,376.43)  | 5,808.24<br>(3,288.84 to<br>9,817.10)   | 146.34<br>(99.13 to<br>217.79)  | 143.54<br>(86.61 to<br>230.56)  | 108.84<br>(67.02 to<br>171.98)  | 152.80<br>(91.92 to<br>246.87)  |
| Self-harm                                                                    |                                          |                                        |                                        |                                         |                                 |                                 |                                 |                                 |
|                                                                              | 208.23<br>(87.23 to<br>499.41)           | 147.71<br>(51.63 to<br>377.59)         | 94.52<br>(34.01 to<br>243.66)          | 164.02<br>(57.25 to<br>439.11)          | 4.88<br>(2.06 to<br>11.52)      | 4.67<br>(1.86 to<br>11.33)      | 3.18<br>(1.31 to<br>7.76)       | 4.99<br>(1.92 to<br>12.44)      |
| Self-harm by firearm                                                         |                                          |                                        |                                        |                                         |                                 |                                 |                                 |                                 |
|                                                                              | 6,624.80<br>(4,532.06 to<br>10,048.14)   | 5,152.72<br>(2,956.85 to<br>8,601.67)  | 3,778.51<br>(2,213.87 to<br>6,181.48)  | 5,644.22<br>(3,207.51 to<br>9,531.52)   | 141.46<br>(95.61 to<br>211.10)  | 138.86<br>(83.93 to<br>221.61)  | 105.66<br>(64.62 to<br>166.10)  | 147.81<br>(87.86 to<br>237.35)  |
| Self-harm by other specified means                                           |                                          |                                        |                                        |                                         |                                 |                                 |                                 |                                 |
|                                                                              | 10,083.20<br>(4,867.78 to<br>16,076.45)  | 4,483.85<br>(2,014.98 to<br>8,229.68)  | 2,942.75<br>(1,297.14 to<br>5,382.76)  | 4,804.36<br>(2,117.99 to<br>8,913.89)   | 186.42<br>(95.40 to<br>293.02)  | 95.05<br>(49.63 to<br>164.67)   | 63.69<br>(33.24 to<br>109.93)   | 100.08<br>(51.10 to<br>178.18)  |
| Interpersonal violence                                                       |                                          |                                        |                                        |                                         |                                 |                                 |                                 |                                 |
|                                                                              | 4,375.63<br>(1,985.57 to<br>7,404.10)    | 1,837.70<br>(788.04 to<br>3,540.88)    | 1,100.86<br>(438.90 to<br>2,158.54)    | 1,963.31<br>(827.77 to<br>3,697.25)     | 79.89<br>(37.54 to<br>132.99)   | 36.89<br>(16.58 to<br>68.86)    | 22.26<br>(9.66 to<br>43.58)     | 38.91<br>(17.27 to<br>72.63)    |
| Physical violence by firearm                                                 |                                          |                                        |                                        |                                         |                                 |                                 |                                 |                                 |
|                                                                              | 3,182.95<br>(1,197.10 to<br>5,979.39)    | 1,493.91<br>(544.72 to<br>3,038.19)    | 964.43<br>(358.50 to<br>1,945.96)      | 1,568.12<br>(556.61 to<br>3,259.89)     | 58.85<br>(23.35 to<br>106.49)   | 31.48<br>(13.96 to<br>59.56)    | 20.72<br>(9.78 to<br>39.06)     | 32.48<br>(14.13 to<br>63.03)    |
| Physical violence by sharp object                                            |                                          |                                        |                                        |                                         |                                 |                                 |                                 |                                 |
|                                                                              | 2,524.62<br>(1,091.63 to<br>4,923.41)    | 1,152.25<br>(467.19 to<br>2,486.35)    | 877.46<br>(363.90 to<br>1,851.35)      | 1,272.93<br>(506.96 to<br>2,776.05)     | 47.68<br>(21.39 to<br>89.74)    | 26.68<br>(12.83 to<br>52.66)    | 20.70<br>(10.35 to<br>40.16)    | 28.69<br>(13.47 to<br>58.17)    |
| Physical violence by other means                                             |                                          |                                        |                                        |                                         |                                 |                                 |                                 |                                 |
|                                                                              | 29,462.68<br>(6,651.29 to<br>51,884.09)  | 5,878.73<br>(0.00 to<br>86,756.58)     | 5,913.11<br>(0.00 to<br>87,231.13)     | 6,189.23<br>(0.00 to<br>93,410.84)      | 535.52<br>(120.91 to<br>943.02) | 139.19<br>(0.00 to<br>2,014.21) | 143.65<br>(0.00 to<br>2,090.99) | 141.23<br>(0.00 to<br>2,061.21) |
| Forces of nature, conflict and terrorism, and executions and police conflict |                                          |                                        |                                        |                                         |                                 |                                 |                                 |                                 |
|                                                                              | 0.00<br>(0.00 to<br>0.00)                | 222.17<br>(0.00 to<br>334.06)          | 223.66<br>(0.00 to<br>336.92)          | 233.73<br>(0.00 to<br>358.18)           | 0.00<br>(0.00 to<br>0.00)       | 5.60<br>(0.00 to<br>8.67)       | 5.75<br>(0.00 to<br>8.94)       | 5.68<br>(0.00 to<br>8.77)       |
| Exposure to forces of nature                                                 |                                          |                                        |                                        |                                         |                                 |                                 |                                 |                                 |
|                                                                              | 29,431.31<br>(6,617.43 to<br>51,854.80)  | 5,656.56<br>(0.00 to<br>86,756.58)     | 5,689.45<br>(0.00 to<br>87,231.13)     | 5,955.50<br>(0.00 to<br>93,410.84)      | 534.93<br>(120.28 to<br>942.49) | 133.59<br>(0.00 to<br>2,014.21) | 137.90<br>(0.00 to<br>2,090.99) | 135.55<br>(0.00 to<br>2,061.21) |
| Conflict and terrorism                                                       |                                          |                                        |                                        |                                         |                                 |                                 |                                 |                                 |
|                                                                              | 31.36<br>(25.56 to<br>37.17)             | 0.00<br>(0.00 to<br>0.00)              | 0.00<br>(0.00 to<br>0.00)              | 0.00<br>(0.00 to<br>0.00)               | 0.59<br>(0.49 to<br>0.69)       | 0.00<br>(0.00 to<br>0.00)       | 0.00<br>(0.00 to<br>0.00)       | 0.00<br>(0.00 to<br>0.00)       |
| Executions and police conflict                                               |                                          |                                        |                                        |                                         |                                 |                                 |                                 |                                 |
| <b>Libya</b>                                                                 |                                          |                                        |                                        |                                         |                                 |                                 |                                 |                                 |
| Cause                                                                        | YLLs (actual counts)                     |                                        |                                        |                                         | Deaths (actual counts)          |                                 |                                 |                                 |
|                                                                              | 2016                                     | 2040 Forecast                          | 2040 Better Scenario                   | 2040 Worse Scenario                     | 2016                            | 2040 Forecast                   | 2040 Better Scenario            | 2040 Worse Scenario             |

| Cause                                                             | 2016                                        | 2040 Forecast                                   | 2040 Better Scenario                          | 2040 Worse Scenario                               | 2016                                     | 2040 Forecast                            | 2040 Better Scenario                     | 2040 Worse Scenario                      |
|-------------------------------------------------------------------|---------------------------------------------|-------------------------------------------------|-----------------------------------------------|---------------------------------------------------|------------------------------------------|------------------------------------------|------------------------------------------|------------------------------------------|
| All causes                                                        | 785,511.38<br>(684,542.27 to<br>897,438.97) | 1,226,737.01<br>(970,562.06 to<br>1,550,202.17) | 894,884.01<br>(700,011.50 to<br>1,158,603.45) | 1,500,352.69<br>(1,161,264.17 to<br>1,879,679.25) | 26,956.95<br>(24,190.85 to<br>29,892.96) | 61,067.10<br>(51,231.53 to<br>73,342.47) | 47,679.02<br>(39,811.97 to<br>58,890.05) | 71,598.23<br>(59,480.09 to<br>84,604.07) |
| Communicable, maternal, neonatal, and nutritional diseases        | 70,670.40<br>(52,873.75 to<br>94,085.00)    | 82,345.82<br>(54,591.76 to<br>119,567.31)       | 58,793.88<br>(38,514.45 to<br>87,419.62)      | 98,314.79<br>(64,339.12 to<br>144,155.22)         | 1,588.33<br>(1,247.75 to<br>1,974.01)    | 3,156.28<br>(2,232.89 to<br>4,213.72)    | 2,509.85<br>(1,736.56 to<br>3,393.78)    | 3,453.78<br>(2,438.42 to<br>4,698.62)    |
| HIV/AIDS and tuberculosis                                         | 5,933.42<br>(2,794.55 to<br>12,241.12)      | 6,911.75<br>(2,829.41 to<br>14,253.43)          | 4,499.67<br>(1,655.71 to<br>11,089.02)        | 9,909.82<br>(4,171.68 to<br>18,823.21)            | 176.78<br>(90.08 to<br>303.34)           | 267.81<br>(125.53 to<br>458.99)          | 181.19<br>(74.51 to<br>349.72)           | 347.68<br>(157.06 to<br>575.72)          |
| Tuberculosis                                                      | 3,489.31<br>(1,649.40 to<br>4,424.98)       | 4,278.29<br>(1,867.59 to<br>6,582.05)           | 2,757.62<br>(1,168.79 to<br>4,577.64)         | 5,127.85<br>(2,298.89 to<br>8,029.98)             | 126.37<br>(57.38 to<br>164.55)           | 209.85<br>(87.30 to<br>332.05)           | 142.50<br>(58.98 to<br>240.95)           | 242.91<br>(106.76 to<br>390.96)          |
| HIV/AIDS                                                          | 2,444.11<br>(243.13 to<br>8,816.25)         | 2,653.46<br>(115.78 to<br>10,183.15)            | 1,742.05<br>(9.36 to<br>8,437.42)             | 4,781.97<br>(656.33 to<br>13,382.42)              | 50.41<br>(5.34 to<br>178.96)             | 57.96<br>(1.79 to<br>221.65)             | 38.69<br>(0.15 to<br>186.88)             | 104.77<br>(14.85 to<br>290.78)           |
| Diarrhea, lower respiratory, and other common infectious diseases | 26,928.16<br>(19,897.24 to<br>34,477.92)    | 47,162.86<br>(31,978.83 to<br>65,704.71)        | 35,101.22<br>(24,333.86 to<br>48,881.35)      | 54,742.93<br>(36,362.19 to<br>76,465.66)          | 919.25<br>(662.81 to<br>1,169.20)        | 2,462.26<br>(1,655.27 to<br>3,393.11)    | 2,013.34<br>(1,364.67 to<br>2,769.36)    | 2,615.05<br>(1,735.35 to<br>3,637.14)    |
| Diarrheal diseases                                                | 2,670.20<br>(1,740.02 to<br>4,186.80)       | 1,706.12<br>(580.40 to<br>4,536.43)             | 1,373.03<br>(468.48 to<br>3,391.24)           | 2,663.64<br>(810.81 to<br>7,593.38)               | 62.34<br>(40.39 to<br>97.49)             | 83.22<br>(28.45 to<br>207.18)            | 78.23<br>(27.51 to<br>192.12)            | 114.56<br>(35.71 to<br>290.63)           |
| Intestinal infectious diseases                                    | 1,356.01<br>(651.26 to<br>2,394.74)         | 979.96<br>(404.81 to<br>1,944.31)               | 937.25<br>(395.34 to<br>1,842.13)             | 1,073.50<br>(436.81 to<br>2,148.94)               | 21.07<br>(10.23 to<br>37.13)             | 17.15<br>(7.49 to<br>33.30)              | 16.77<br>(7.63 to<br>32.21)              | 18.45<br>(7.91 to<br>35.74)              |
| Typhoid fever                                                     | 1,200.91<br>(570.06 to<br>2,126.57)         | 841.56<br>(341.59 to<br>1,695.00)               | 825.39<br>(340.65 to<br>1,654.77)             | 921.14<br>(359.53 to<br>1,858.39)                 | 18.56<br>(8.92 to<br>32.79)              | 14.63<br>(6.43 to<br>28.12)              | 14.69<br>(6.56 to<br>28.45)              | 15.72<br>(6.64 to<br>30.77)              |
| Paratyphoid fever                                                 | 154.79<br>(61.99 to<br>315.20)              | 138.14<br>(50.71 to<br>310.06)                  | 111.65<br>(39.20 to<br>248.06)                | 152.06<br>(54.45 to<br>339.95)                    | 2.50<br>(1.02 to<br>5.09)                | 2.51<br>(0.98 to<br>5.42)                | 2.07<br>(0.80 to<br>4.42)                | 2.72<br>(1.04 to<br>5.94)                |
| Other intestinal infectious diseases                              | 0.31<br>(0.11 to<br>0.65)                   | 0.26<br>(0.08 to<br>0.60)                       | 0.21<br>(0.07 to<br>0.49)                     | 0.30<br>(0.09 to<br>0.70)                         | 0.01<br>(0.00 to<br>0.01)                | 0.01<br>(0.00 to<br>0.02)                | 0.01<br>(0.00 to<br>0.02)                | 0.01<br>(0.00 to<br>0.02)                |
| Lower respiratory infections                                      | 19,158.72<br>(13,346.63 to<br>24,971.39)    | 41,354.97<br>(26,842.51 to<br>58,543.26)        | 30,260.74<br>(19,883.33 to<br>43,475.77)      | 46,544.04<br>(29,782.20 to<br>67,755.89)          | 762.70<br>(516.46 to<br>996.39)          | 2,273.41<br>(1,484.65 to<br>3,198.40)    | 1,839.89<br>(1,194.57 to<br>2,575.02)    | 2,378.53<br>(1,515.52 to<br>3,380.05)    |
| Upper respiratory infections                                      | 22.32<br>(11.84 to<br>38.24)                | 36.78<br>(11.83 to<br>89.83)                    | 25.60<br>(7.67 to<br>62.97)                   | 42.63<br>(13.17 to<br>104.34)                     | 0.58<br>(0.32 to<br>0.95)                | 1.38<br>(0.45 to<br>3.36)                | 1.00<br>(0.30 to<br>2.62)                | 1.54<br>(0.47 to<br>3.71)                |
| Otitis media                                                      | 2.77<br>(1.02 to<br>6.82)                   | 0.97<br>(0.30 to<br>2.32)                       | 1.03<br>(0.32 to<br>2.38)                     | 0.93<br>(0.29 to<br>2.31)                         | 0.09<br>(0.03 to<br>0.19)                | 0.06<br>(0.02 to<br>0.15)                | 0.07<br>(0.02 to<br>0.17)                | 0.05<br>(0.02 to<br>0.13)                |
| Meningitis                                                        | 2,018.73<br>(1,387.13 to<br>3,262.61)       | 1,556.31<br>(1,010.80 to<br>2,638.71)           | 1,304.12<br>(830.59 to<br>2,230.17)           | 1,698.45<br>(1,042.11 to<br>3,027.57)             | 43.04<br>(30.94 to<br>68.31)             | 47.91<br>(33.28 to<br>75.44)             | 42.86<br>(28.58 to<br>69.17)             | 48.49<br>(32.97 to<br>75.87)             |
| Pneumococcal meningitis                                           | 17.68<br>(10.58 to<br>31.79)                | 13.16<br>(7.87 to<br>24.23)                     | 13.28<br>(8.00 to<br>24.67)                   | 13.61<br>(7.99 to<br>25.03)                       | 0.44<br>(0.28 to<br>0.79)                | 0.48<br>(0.28 to<br>0.96)                | 0.51<br>(0.30 to<br>1.01)                | 0.47<br>(0.28 to<br>0.93)                |
| H influenzae type B meningitis                                    | 164.89<br>(105.82 to<br>270.45)             | 179.84<br>(85.43 to<br>382.82)                  | 154.37<br>(81.70 to<br>304.46)                | 279.83<br>(106.62 to<br>704.92)                   | 3.44<br>(2.40 to<br>5.51)                | 3.96<br>(2.48 to<br>7.00)                | 3.85<br>(2.56 to<br>6.59)                | 5.00<br>(2.68 to<br>10.27)               |
| Meningococcal meningitis                                          | 810.90<br>(544.17 to<br>1,347.17)           | 593.93<br>(362.15 to<br>1,032.00)               | 499.13<br>(302.04 to<br>905.71)               | 611.92<br>(357.71 to<br>1,091.42)                 | 17.80<br>(12.43 to<br>28.58)             | 19.79<br>(12.91 to<br>32.17)             | 17.71<br>(11.55 to<br>29.67)             | 19.53<br>(12.53 to<br>32.22)             |
| Other meningitis                                                  | 1,025.26<br>(683.00 to<br>1,666.71)         | 769.38<br>(495.26 to<br>1,296.21)               | 637.34<br>(396.24 to<br>1,096.93)             | 793.08<br>(490.42 to<br>1,385.56)                 | 21.36<br>(14.87 to<br>34.21)             | 23.68<br>(16.39 to<br>37.55)             | 20.79<br>(13.64 to<br>33.53)             | 23.48<br>(15.91 to<br>37.44)             |
| Encephalitis                                                      | 900.08<br>(598.00 to<br>1,435.24)           | 1,143.73<br>(703.30 to<br>1,897.41)             | 1,034.03<br>(642.65 to<br>1,715.40)           | 1,218.36<br>(717.48 to<br>2,135.75)               | 18.28<br>(12.61 to<br>28.44)             | 32.23<br>(20.88 to<br>50.40)             | 30.40<br>(19.76 to<br>47.54)             | 33.28<br>(21.38 to<br>53.25)             |
| Diphtheria                                                        | 4.16<br>(2.48 to<br>6.58)                   | 1.20<br>(0.61 to<br>2.28)                       | 0.91<br>(0.50 to<br>1.55)                     | 2.92<br>(1.01 to<br>7.63)                         | 0.07<br>(0.04 to<br>0.10)                | 0.02<br>(0.01 to<br>0.04)                | 0.02<br>(0.01 to<br>0.03)                | 0.04<br>(0.02 to<br>0.10)                |

|                                               |                                                        |                                                        |                                                        |                                                          |                                                   |                                                   |                                                   |                                                   |
|-----------------------------------------------|--------------------------------------------------------|--------------------------------------------------------|--------------------------------------------------------|----------------------------------------------------------|---------------------------------------------------|---------------------------------------------------|---------------------------------------------------|---------------------------------------------------|
| Whooping cough                                | 354.47<br>(32.81 to<br>1,070.78)                       | 267.50<br>(21.52 to<br>1,009.82)                       | 82.84<br>(6.60 to<br>314.12)                           | 1,254.40<br>(125.53 to<br>4,095.68)                      | 4.24<br>(0.39 to<br>12.78)                        | 3.19<br>(0.26 to<br>12.06)                        | 1.01<br>(0.08 to<br>3.79)                         | 14.85<br>(1.49 to<br>48.37)                       |
| Tetanus                                       | 42.08<br>(35.91 to<br>50.40)                           | 4.69<br>(3.19 to<br>7.36)                              | 4.14<br>(2.99 to<br>5.79)                              | 7.95<br>(4.06 to<br>18.59)                               | 0.76<br>(0.64 to<br>0.94)                         | 0.10<br>(0.07 to<br>0.15)                         | 0.09<br>(0.07 to<br>0.14)                         | 0.13<br>(0.08 to<br>0.26)                         |
| Measles                                       | 291.30<br>(93.59 to<br>741.22)                         | 27.18<br>(1.52 to<br>193.69)                           | 13.72<br>(1.10 to<br>91.39)                            | 140.28<br>(4.35 to<br>953.74)                            | 3.52<br>(1.13 to<br>8.91)                         | 0.32<br>(0.02 to<br>2.30)                         | 0.17<br>(0.01 to<br>1.08)                         | 1.66<br>(0.05 to<br>11.34)                        |
| <b>Libya</b>                                  |                                                        |                                                        |                                                        |                                                          |                                                   |                                                   |                                                   |                                                   |
| Cause                                         | YLLs (actual counts)                                   |                                                        |                                                        |                                                          | Deaths (actual counts)                            |                                                   |                                                   |                                                   |
|                                               | 2016                                                   | 2040 Forecast                                          | 2040 Better Scenario                                   | 2040 Worse Scenario                                      | 2016                                              | 2040 Forecast                                     | 2040 Better Scenario                              | 2040 Worse Scenario                               |
|                                               | 107.32<br>(66.69 to<br>164.05)                         | 83.45<br>(40.13 to<br>160.23)                          | 63.79<br>(29.25 to<br>120.66)                          | 95.83<br>(41.44 to<br>196.47)                            | 2.56<br>(1.86 to<br>3.47)                         | 3.28<br>(1.96 to<br>5.76)                         | 2.83<br>(1.37 to<br>5.04)                         | 3.46<br>(1.64 to<br>6.20)                         |
| Varicella and herpes zoster                   |                                                        |                                                        |                                                        |                                                          |                                                   |                                                   |                                                   |                                                   |
| Neglected tropical diseases and malaria       | <b>615.14</b><br><b>(386.55 to</b><br><b>931.03)</b>   | <b>562.82</b><br><b>(319.15 to</b><br><b>899.71)</b>   | <b>502.66</b><br><b>(282.71 to</b><br><b>807.38)</b>   | <b>598.84</b><br><b>(341.91 to</b><br><b>966.62)</b>     | <b>18.86</b><br><b>(11.41 to</b><br><b>27.93)</b> | <b>22.38</b><br><b>(12.10 to</b><br><b>37.13)</b> | <b>20.66</b><br><b>(11.15 to</b><br><b>33.81)</b> | <b>23.19</b><br><b>(12.63 to</b><br><b>38.80)</b> |
| Malaria                                       | 0.00<br>(0.00 to<br>0.00)                              | 0.00<br>(0.00 to<br>0.00)                              | 0.00<br>(0.00 to<br>0.00)                              | 0.00<br>(0.00 to<br>0.00)                                | 0.00<br>(0.00 to<br>0.00)                         | 0.00<br>(0.00 to<br>0.00)                         | 0.00<br>(0.00 to<br>0.00)                         | 0.00<br>(0.00 to<br>0.00)                         |
| Chagas disease                                | 0.00<br>(0.00 to<br>0.00)                              | 0.00<br>(0.00 to<br>0.00)                              | 0.00<br>(0.00 to<br>0.00)                              | 0.00<br>(0.00 to<br>0.00)                                | 0.00<br>(0.00 to<br>0.00)                         | 0.00<br>(0.00 to<br>0.00)                         | 0.00<br>(0.00 to<br>0.00)                         | 0.00<br>(0.00 to<br>0.00)                         |
| Leishmaniasis                                 | 61.16<br>(34.31 to<br>91.79)                           | 31.07<br>(16.31 to<br>58.54)                           | 24.50<br>(12.89 to<br>46.70)                           | 35.55<br>(18.17 to<br>65.56)                             | 1.50<br>(0.89 to<br>2.20)                         | 1.02<br>(0.48 to<br>1.85)                         | 0.83<br>(0.40 to<br>1.54)                         | 1.13<br>(0.54 to<br>2.10)                         |
| African trypanosomiasis                       | 0.00<br>(0.00 to<br>0.00)                              | 0.00<br>(0.00 to<br>0.00)                              | 0.00<br>(0.00 to<br>0.00)                              | 0.00<br>(0.00 to<br>0.00)                                | 0.00<br>(0.00 to<br>0.00)                         | 0.00<br>(0.00 to<br>0.00)                         | 0.00<br>(0.00 to<br>0.00)                         | 0.00<br>(0.00 to<br>0.00)                         |
| Schistosomiasis                               | 499.23<br>(275.38 to<br>813.52)                        | 491.89<br>(254.91 to<br>819.39)                        | 443.37<br>(231.31 to<br>738.02)                        | 518.71<br>(270.13 to<br>868.74)                          | 16.34<br>(9.15 to<br>25.31)                       | 20.46<br>(10.35 to<br>34.76)                      | 19.02<br>(9.68 to<br>31.82)                       | 21.07<br>(10.56 to<br>36.42)                      |
| Cysticercosis                                 | 3.79<br>(3.99 to<br>8.13)                              | 2.27<br>(1.45 to<br>3.39)                              | 2.15<br>(1.39 to<br>3.23)                              | 2.33<br>(1.47 to<br>3.50)                                | 0.14<br>(0.10 to<br>0.20)                         | 0.07<br>(0.05 to<br>0.11)                         | 0.07<br>(0.05 to<br>0.11)                         | 0.07<br>(0.05 to<br>0.11)                         |
| Cystic echinococcosis                         | 0.00<br>(0.00 to<br>0.00)                              | 0.00<br>(0.00 to<br>0.00)                              | 0.00<br>(0.00 to<br>0.00)                              | 0.00<br>(0.00 to<br>0.00)                                | 0.00<br>(0.00 to<br>0.00)                         | 0.00<br>(0.00 to<br>0.00)                         | 0.00<br>(0.00 to<br>0.00)                         | 0.00<br>(0.00 to<br>0.00)                         |
| Dengue                                        | 0.00<br>(0.00 to<br>0.00)                              | 0.00<br>(0.00 to<br>0.00)                              | 0.00<br>(0.00 to<br>0.00)                              | 0.00<br>(0.00 to<br>0.00)                                | 0.00<br>(0.00 to<br>0.00)                         | 0.00<br>(0.00 to<br>0.00)                         | 0.00<br>(0.00 to<br>0.00)                         | 0.00<br>(0.00 to<br>0.00)                         |
| Yellow fever                                  | 0.00<br>(0.00 to<br>0.00)                              | 0.00<br>(0.00 to<br>0.00)                              | 0.00<br>(0.00 to<br>0.00)                              | 0.00<br>(0.00 to<br>0.00)                                | 0.00<br>(0.00 to<br>0.00)                         | 0.00<br>(0.00 to<br>0.00)                         | 0.00<br>(0.00 to<br>0.00)                         | 0.00<br>(0.00 to<br>0.00)                         |
| Rabies                                        | 0.86<br>(0.28 to<br>1.76)                              | 0.73<br>(0.21 to<br>1.67)                              | 0.53<br>(0.15 to<br>1.23)                              | 0.89<br>(0.27 to<br>1.97)                                | 0.02<br>(0.01 to<br>0.05)                         | 0.03<br>(0.01 to<br>0.09)                         | 0.03<br>(0.01 to<br>0.07)                         | 0.04<br>(0.01 to<br>0.10)                         |
| Intestinal nematode infections                | 8.08<br>(2.06 to<br>18.22)                             | 7.03<br>(2.25 to<br>16.12)                             | 6.53<br>(2.25 to<br>14.51)                             | 7.38<br>(2.28 to<br>17.57)                               | 0.13<br>(0.05 to<br>0.25)                         | 0.15<br>(0.07 to<br>0.27)                         | 0.15<br>(0.07 to<br>0.27)                         | 0.15<br>(0.07 to<br>0.28)                         |
| Other neglected tropical diseases             | 39.92<br>(34.62 to<br>46.81)                           | 29.83<br>(23.04 to<br>38.31)                           | 25.58<br>(20.04 to<br>32.75)                           | 33.97<br>(26.07 to<br>44.28)                             | 0.71<br>(0.63 to<br>0.83)                         | 0.64<br>(0.50 to<br>0.82)                         | 0.57<br>(0.45 to<br>0.73)                         | 0.72<br>(0.57 to<br>0.92)                         |
| Maternal disorders                            | <b>979.91</b><br><b>(659.61 to</b><br><b>1,397.52)</b> | <b>894.85</b><br><b>(490.19 to</b><br><b>1,494.14)</b> | <b>656.43</b><br><b>(341.69 to</b><br><b>1,098.69)</b> | <b>1,084.58</b><br><b>(579.28 to</b><br><b>1,825.49)</b> | <b>19.44</b><br><b>(12.87 to</b><br><b>28.03)</b> | <b>17.70</b><br><b>(9.83 to</b><br><b>29.80)</b>  | <b>13.00</b><br><b>(6.80 to</b><br><b>21.63)</b>  | <b>21.42</b><br><b>(11.38 to</b><br><b>36.15)</b> |
| Maternal hemorrhage                           | 305.85<br>(176.98 to<br>478.98)                        | 266.69<br>(130.32 to<br>470.31)                        | 195.82<br>(87.86 to<br>343.15)                         | 323.13<br>(156.49 to<br>569.06)                          | 6.10<br>(3.55 to<br>9.62)                         | 5.31<br>(2.58 to<br>9.42)                         | 3.90<br>(1.76 to<br>6.99)                         | 6.43<br>(3.13 to<br>11.40)                        |
| Maternal sepsis and other maternal infections | 113.41<br>(65.10 to<br>183.73)                         | 94.40<br>(46.41 to<br>168.37)                          | 68.77<br>(32.54 to<br>122.84)                          | 114.66<br>(55.30 to<br>205.93)                           | 2.28<br>(1.29 to<br>3.74)                         | 1.90<br>(0.92 to<br>3.51)                         | 1.39<br>(0.64 to<br>2.55)                         | 2.30<br>(1.09 to<br>4.15)                         |

| Maternal hypertensive disorders                                         | 162.20<br>(96.46 to 255.78)                  | 143.62<br>(72.24 to 263.92)                 | 104.38<br>(50.59 to 193.99)                 | 174.78<br>(84.25 to 320.94)                 | 3.19<br>(1.88 to 5.11)              | 2.82<br>(1.42 to 5.21)             | 2.05<br>(1.00 to 3.87)             | 3.43<br>(1.64 to 6.38)             |
|-------------------------------------------------------------------------|----------------------------------------------|---------------------------------------------|---------------------------------------------|---------------------------------------------|-------------------------------------|------------------------------------|------------------------------------|------------------------------------|
| Maternal obstructed labor and uterine rupture                           | 30.98<br>(15.92 to 54.37)                    | 27.25<br>(11.89 to 54.41)                   | 19.29<br>(7.84 to 38.87)                    | 33.56<br>(13.98 to 68.27)                   | 0.62<br>(0.32 to 1.11)              | 0.55<br>(0.23 to 1.10)             | 0.39<br>(0.16 to 0.78)             | 0.67<br>(0.28 to 1.39)             |
| Maternal abortion, miscarriage, and ectopic pregnancy                   | 34.25<br>(16.49 to 59.18)                    | 32.95<br>(13.07 to 67.89)                   | 23.85<br>(9.37 to 50.26)                    | 40.05<br>(15.53 to 82.21)                   | 0.70<br>(0.35 to 1.23)              | 0.68<br>(0.27 to 1.43)             | 0.49<br>(0.20 to 1.08)             | 0.83<br>(0.33 to 1.69)             |
| Indirect maternal deaths                                                | 113.87<br>(67.44 to 178.18)                  | 118.22<br>(57.13 to 220.85)                 | 85.75<br>(40.13 to 163.96)                  | 143.85<br>(68.17 to 279.05)                 | 2.20<br>(1.29 to 3.44)              | 2.27<br>(1.09 to 4.24)             | 1.65<br>(0.78 to 3.11)             | 2.76<br>(1.29 to 5.36)             |
| Late maternal deaths                                                    | 14.16<br>(6.95 to 26.55)                     | 11.38<br>(4.75 to 22.74)                    | 8.24<br>(3.37 to 16.49)                     | 13.85<br>(5.90 to 27.87)                    | 0.28<br>(0.14 to 0.53)              | 0.22<br>(0.09 to 0.44)             | 0.16<br>(0.07 to 0.33)             | 0.27<br>(0.12 to 0.55)             |
| Maternal deaths aggravated by HIV/AIDS                                  | 0.10<br>(0.01 to 0.35)                       | 0.61<br>(0.00 to 2.88)                      | 0.41<br>(0.00 to 2.18)                      | 0.78<br>(0.02 to 3.55)                      | 0.00<br>(0.00 to 0.01)              | 0.01<br>(0.00 to 0.06)             | 0.01<br>(0.00 to 0.04)             | 0.02<br>(0.00 to 0.07)             |
| Other maternal disorders                                                | 205.08<br>(123.52 to 320.26)                 | 199.73<br>(102.34 to 356.88)                | 149.94<br>(73.14 to 269.94)                 | 239.94<br>(116.90 to 435.78)                | 4.07<br>(2.43 to 6.33)              | 3.94<br>(2.01 to 7.03)             | 2.96<br>(1.44 to 5.35)             | 4.73<br>(2.30 to 8.59)             |
| <b>Libya</b>                                                            |                                              |                                             |                                             |                                             |                                     |                                    |                                    |                                    |
| Cause                                                                   | YLLs (actual counts)                         |                                             |                                             |                                             | Deaths (actual counts)              |                                    |                                    |                                    |
|                                                                         | 2016                                         | 2040 Forecast                               | 2040 Better Scenario                        | 2040 Worse Scenario                         | 2016                                | 2040 Forecast                      | 2040 Better Scenario               | 2040 Worse Scenario                |
| <b>Neonatal disorders</b>                                               | <b>33,800.00</b><br>(21,876.32 to 49,936.28) | <b>24,156.81</b><br>(7,033.71 to 52,226.26) | <b>15,737.60</b><br>(4,544.62 to 33,475.49) | <b>29,113.99</b><br>(8,173.07 to 63,416.11) | <b>390.87</b><br>(252.94 to 577.64) | <b>279.55</b><br>(81.51 to 604.05) | <b>182.17</b><br>(52.78 to 387.16) | <b>336.90</b><br>(94.74 to 733.37) |
| Neonatal preterm birth                                                  | 21,462.05<br>(13,441.00 to 32,508.52)        | 14,839.93<br>(4,077.00 to 32,444.58)        | 8,885.70<br>(2,436.33 to 19,533.07)         | 17,760.70<br>(4,740.38 to 39,633.56)        | 248.09<br>(155.40 to 375.90)        | 171.61<br>(47.26 to 375.00)        | 102.78<br>(28.26 to 225.85)        | 205.37<br>(54.88 to 458.08)        |
| Neonatal encephalopathy due to birth asphyxia and trauma                | 4,011.95<br>(2,127.65 to 6,997.58)           | 2,534.31<br>(710.17 to 5,851.99)            | 1,823.94<br>(508.42 to 4,122.67)            | 3,041.56<br>(818.38 to 6,983.30)            | 46.47<br>(24.71 to 81.12)           | 29.44<br>(8.27 to 67.83)           | 21.18<br>(5.93 to 47.79)           | 35.32<br>(9.54 to 81.10)           |
| Neonatal sepsis and other neonatal infections                           | 5,094.94<br>(2,514.00 to 8,595.90)           | 4,343.42<br>(1,045.41 to 10,035.31)         | 3,181.41<br>(763.69 to 7,411.16)            | 5,262.16<br>(1,201.23 to 12,164.60)         | 58.91<br>(29.07 to 99.39)           | 50.24<br>(12.08 to 116.01)         | 36.80<br>(8.84 to 85.75)           | 60.86<br>(13.89 to 140.64)         |
| Hemolytic disease and other neonatal jaundice                           | 98.75<br>(52.78 to 174.42)                   | 51.79<br>(11.27 to 126.51)                  | 36.19<br>(7.69 to 89.08)                    | 65.69<br>(13.37 to 160.75)                  | 1.14<br>(0.61 to 2.02)              | 0.60<br>(0.13 to 1.46)             | 0.42<br>(0.09 to 1.03)             | 0.76<br>(0.16 to 1.86)             |
| Other neonatal disorders                                                | 3,132.31<br>(1,560.14 to 5,610.33)           | 2,387.36<br>(651.54 to 5,744.14)            | 1,811.26<br>(474.54 to 4,485.27)            | 2,983.88<br>(779.93 to 7,703.05)            | 36.26<br>(18.08 to 65.00)           | 27.67<br>(7.56 to 66.46)           | 21.00<br>(5.52 to 52.00)           | 34.58<br>(9.07 to 89.09)           |
| <b>Nutritional deficiencies</b>                                         | <b>445.61</b><br>(364.04 to 564.63)          | <b>417.14</b><br>(279.78 to 619.15)         | <b>390.74</b><br>(262.60 to 576.33)         | <b>445.90</b><br>(289.61 to 671.84)         | <b>16.19</b><br>(14.00 to 18.81)    | <b>24.53</b><br>(15.76 to 35.12)   | <b>25.20</b><br>(15.76 to 37.32)   | <b>24.57</b><br>(15.14 to 36.26)   |
| Protein-energy malnutrition                                             | 306.90<br>(239.49 to 408.84)                 | 267.77<br>(176.27 to 399.61)                | 256.98<br>(167.88 to 384.90)                | 285.33<br>(184.43 to 435.44)                | 12.36<br>(10.47 to 14.67)           | 17.94<br>(10.91 to 26.68)          | 18.87<br>(11.42 to 28.80)          | 17.87<br>(10.44 to 27.40)          |
| Iodine deficiency                                                       | 17.03<br>(2.19 to 43.35)                     | 29.71<br>(3.28 to 76.74)                    | 26.36<br>(2.56 to 69.92)                    | 32.41<br>(3.48 to 85.33)                    | 0.48<br>(0.06 to 1.31)              | 1.66<br>(0.11 to 5.70)             | 1.59<br>(0.08 to 5.81)             | 1.72<br>(0.12 to 5.80)             |
| Dietary iron deficiency                                                 | 52.34<br>(40.94 to 66.71)                    | 45.00<br>(29.04 to 68.84)                   | 41.61<br>(26.56 to 63.39)                   | 48.91<br>(30.54 to 75.75)                   | 0.99<br>(0.79 to 1.24)              | 1.03<br>(0.67 to 1.57)             | 0.99<br>(0.64 to 1.52)             | 1.09<br>(0.70 to 1.65)             |
| Other nutritional deficiencies                                          | 69.34<br>(55.37 to 88.26)                    | 74.65<br>(47.58 to 113.38)                  | 65.78<br>(40.21 to 102.17)                  | 79.25<br>(49.23 to 121.12)                  | 2.35<br>(1.82 to 3.07)              | 3.91<br>(2.29 to 6.33)             | 3.75<br>(2.15 to 6.35)             | 3.89<br>(2.22 to 6.40)             |
| <b>Other communicable, maternal, neonatal, and nutritional diseases</b> | <b>1,968.15</b><br>(1,316.06 to 3,804.68)    | <b>2,239.58</b><br>(1,448.65 to 3,948.19)   | <b>1,905.57</b><br>(1,221.79 to 3,116.35)   | <b>2,418.74</b><br>(1,493.58 to 4,345.94)   | <b>46.95</b><br>(36.56 to 68.74)    | <b>82.04</b><br>(57.84 to 113.99)  | <b>74.29</b><br>(52.22 to 103.80)  | <b>84.97</b><br>(57.66 to 120.01)  |
| Sexually transmitted infections excluding HIV                           | 323.57<br>(115.33 to 796.63)                 | 108.61<br>(40.18 to 310.87)                 | 86.36<br>(33.16 to 234.61)                  | 120.98<br>(42.74 to 347.97)                 | 4.45<br>(2.01 to 9.92)              | 1.94<br>(0.97 to 4.30)             | 1.64<br>(0.83 to 3.45)             | 2.10<br>(1.00 to 4.84)             |

|                                       |                                                    |                                                        |                                                    |                                                        |                                                 |                                                 |                                                 |                                                 |
|---------------------------------------|----------------------------------------------------|--------------------------------------------------------|----------------------------------------------------|--------------------------------------------------------|-------------------------------------------------|-------------------------------------------------|-------------------------------------------------|-------------------------------------------------|
| Syphilis                              | 286.65<br>(77.11 to<br>743.62)                     | 83.14<br>(17.46 to<br>282.86)                          | 63.28<br>(13.82 to<br>217.10)                      | 94.09<br>(18.80 to<br>318.58)                          | 3.57<br>(1.10 to<br>8.98)                       | 1.16<br>(0.38 to<br>3.51)                       | 0.91<br>(0.30 to<br>2.66)                       | 1.30<br>(0.39 to<br>3.91)                       |
| Chlamydial infection                  | 6.93<br>(3.82 to<br>10.27)                         | 4.90<br>(2.74 to<br>7.18)                              | 4.45<br>(2.52 to<br>6.59)                          | 5.18<br>(2.84 to<br>7.72)                              | 0.17<br>(0.09 to<br>0.25)                       | 0.15<br>(0.09 to<br>0.23)                       | 0.14<br>(0.08 to<br>0.22)                       | 0.16<br>(0.09 to<br>0.24)                       |
| Gonococcal infection                  | 19.51<br>(11.19 to<br>28.69)                       | 13.53<br>(7.80 to<br>20.75)                            | 12.30<br>(7.03 to<br>18.95)                        | 14.24<br>(8.12 to<br>21.77)                            | 0.48<br>(0.27 to<br>0.69)                       | 0.44<br>(0.25 to<br>0.67)                       | 0.41<br>(0.24 to<br>0.65)                       | 0.45<br>(0.25 to<br>0.70)                       |
| Other sexually transmitted infections | 10.48<br>(5.99 to<br>15.35)                        | 7.04<br>(3.98 to<br>10.79)                             | 6.34<br>(3.63 to<br>9.55)                          | 7.47<br>(4.24 to<br>11.55)                             | 0.24<br>(0.13 to<br>0.35)                       | 0.19<br>(0.11 to<br>0.30)                       | 0.18<br>(0.10 to<br>0.28)                       | 0.20<br>(0.12 to<br>0.31)                       |
| Acute hepatitis                       | 726.65<br>(573.20 to<br>930.95)                    | 948.63<br>(613.67 to<br>1,389.15)                      | 786.81<br>(496.62 to<br>1,194.58)                  | 1,000.56<br>(639.24 to<br>1,469.83)                    | 21.61<br>(16.99 to<br>27.75)                    | 35.73<br>(23.44 to<br>51.98)                    | 30.43<br>(19.20 to<br>46.13)                    | 36.97<br>(23.81 to<br>53.71)                    |
| Acute hepatitis A                     | 16.07<br>(6.89 to<br>30.07)                        | 17.92<br>(5.73 to<br>41.27)                            | 15.13<br>(4.64 to<br>36.86)                        | 19.15<br>(6.05 to<br>44.47)                            | 0.30<br>(0.15 to<br>0.51)                       | 0.58<br>(0.16 to<br>1.47)                       | 0.51<br>(0.14 to<br>1.34)                       | 0.60<br>(0.17 to<br>1.53)                       |
| Acute hepatitis B                     | 616.65<br>(473.34 to<br>811.31)                    | 820.49<br>(529.90 to<br>1,200.75)                      | 676.91<br>(412.35 to<br>1,050.90)                  | 867.50<br>(554.33 to<br>1,289.29)                      | 18.67<br>(14.31 to<br>24.35)                    | 30.55<br>(19.66 to<br>44.89)                    | 25.75<br>(15.61 to<br>39.56)                    | 31.80<br>(20.15 to<br>46.67)                    |
| Acute hepatitis C                     | 14.01<br>(9.70 to<br>20.01)                        | 22.49<br>(13.36 to<br>35.77)                           | 19.75<br>(11.34 to<br>32.76)                       | 22.73<br>(13.65 to<br>36.00)                           | 0.48<br>(0.33 to<br>0.70)                       | 0.93<br>(0.56 to<br>1.48)                       | 0.83<br>(0.48 to<br>1.38)                       | 0.92<br>(0.56 to<br>1.47)                       |
| Acute hepatitis E                     | 79.92<br>(55.53 to<br>109.77)                      | 87.73<br>(47.10 to<br>149.99)                          | 75.01<br>(39.42 to<br>133.95)                      | 91.18<br>(48.48 to<br>154.95)                          | 2.16<br>(1.42 to<br>3.19)                       | 3.68<br>(1.89 to<br>6.63)                       | 3.34<br>(1.67 to<br>6.11)                       | 3.65<br>(1.86 to<br>6.62)                       |
| Other unspecified infectious diseases | 917.93<br>(481.21 to<br>2,832.08)                  | 1,182.34<br>(697.30 to<br>2,461.58)                    | 1,032.39<br>(621.47 to<br>2,005.72)                | 1,297.20<br>(730.23 to<br>2,823.93)                    | 20.89<br>(14.13 to<br>42.41)                    | 44.37<br>(30.18 to<br>66.97)                    | 42.22<br>(29.21 to<br>61.47)                    | 45.91<br>(30.64 to<br>71.60)                    |
| Non-communicable diseases             | <b>492,509.81</b><br>(440,775.07 to<br>553,819.75) | <b>1,019,372.73</b><br>(792,472.84 to<br>1,308,943.92) | <b>758,516.92</b><br>(589,136.25 to<br>981,395.84) | <b>1,245,603.07</b><br>(944,938.43 to<br>1,579,299.13) | <b>20,998.37</b><br>(18,911.63 to<br>23,230.94) | <b>54,545.16</b><br>(44,917.72 to<br>66,258.59) | <b>42,929.01</b><br>(35,352.22 to<br>53,431.50) | <b>64,127.72</b><br>(52,515.38 to<br>77,598.11) |

**Libya**

| Cause                           | YLLs (actual counts)                               |                                                    |                                                    |                                                    | Deaths (actual counts)                       |                                                |                                                |                                                 |
|---------------------------------|----------------------------------------------------|----------------------------------------------------|----------------------------------------------------|----------------------------------------------------|----------------------------------------------|------------------------------------------------|------------------------------------------------|-------------------------------------------------|
|                                 | 2016                                               | 2040 Forecast                                      | 2040 Better Scenario                               | 2040 Worse Scenario                                | 2016                                         | 2040 Forecast                                  | 2040 Better Scenario                           | 2040 Worse Scenario                             |
| <b>Neoplasms</b>                | <b>125,890.88</b><br>(110,768.32 to<br>142,772.04) | <b>268,341.72</b><br>(209,809.22 to<br>334,360.14) | <b>226,278.75</b><br>(183,591.53 to<br>274,668.11) | <b>297,482.93</b><br>(229,201.10 to<br>379,891.42) | <b>4,735.25</b><br>(4,177.21 to<br>5,365.57) | <b>12,572.05</b><br>(9,762.23 to<br>15,807.35) | <b>10,910.97</b><br>(8,699.23 to<br>13,151.06) | <b>13,588.28</b><br>(10,349.42 to<br>17,400.05) |
| Lip and oral cavity cancer      | 1,047.55<br>(872.13 to<br>1,285.15)                | 2,403.64<br>(1,610.55 to<br>3,645.24)              | 1,804.09<br>(1,290.24 to<br>2,546.00)              | 2,859.65<br>(1,849.76 to<br>4,429.36)              | 41.70<br>(35.30 to<br>51.04)                 | 110.25<br>(74.52 to<br>164.67)                 | 85.49<br>(61.79 to<br>120.68)                  | 126.95<br>(82.71 to<br>194.29)                  |
| Nasopharynx cancer              | 2,016.90<br>(1,638.07 to<br>2,515.44)              | 4,819.02<br>(2,771.83 to<br>7,961.29)              | 3,262.22<br>(2,002.88 to<br>5,097.05)              | 5,902.34<br>(3,318.22 to<br>9,916.67)              | 66.40<br>(54.10 to<br>81.68)                 | 187.55<br>(105.66 to<br>307.97)                | 128.23<br>(77.63 to<br>199.13)                 | 225.79<br>(123.14 to<br>380.10)                 |
| Other pharynx cancer            | 349.73<br>(297.30 to<br>412.43)                    | 735.79<br>(556.28 to<br>966.25)                    | 751.37<br>(569.41 to<br>983.92)                    | 719.30<br>(585.16 to<br>933.75)                    | 16.10<br>(13.63 to<br>18.68)                 | 40.48<br>(29.67 to<br>54.02)                   | 43.45<br>(32.41 to<br>56.82)                   | 38.21<br>(27.73 to<br>51.05)                    |
| Esophageal cancer               | 1,253.87<br>(1,031.96 to<br>1,493.34)              | 3,197.09<br>(1,686.22 to<br>5,841.86)              | 2,248.68<br>(1,315.66 to<br>3,272.53)              | 3,802.85<br>(1,923.03 to<br>7,162.89)              | 55.28<br>(45.76 to<br>65.93)                 | 158.00<br>(84.08 to<br>283.99)                 | 114.53<br>(67.12 to<br>189.51)                 | 182.81<br>(93.03 to<br>343.44)                  |
| Stomach cancer                  | 5,326.86<br>(4,526.97 to<br>6,238.04)              | 8,601.02<br>(6,326.14 to<br>11,583.83)             | 7,046.56<br>(5,207.74 to<br>9,347.40)              | 9,068.02<br>(6,523.36 to<br>12,234.76)             | 217.59<br>(186.87 to<br>248.62)              | 417.76<br>(308.93 to<br>548.52)                | 352.43<br>(265.08 to<br>463.22)                | 429.47<br>(311.89 to<br>565.62)                 |
| Colon and rectum cancer         | 14,500.76<br>(11,825.38 to<br>17,494.16)           | 30,404.84<br>(20,690.94 to<br>43,671.11)           | 27,879.94<br>(19,014.72 to<br>39,567.27)           | 30,695.81<br>(20,595.82 to<br>45,138.91)           | 538.80<br>(442.74 to<br>647.00)              | 1,405.71<br>(969.63 to<br>2,049.61)            | 1,331.19<br>(911.20 to<br>1,902.03)            | 1,384.59<br>(939.23 to<br>2,059.97)             |
| Liver cancer                    | 5,015.78<br>(4,087.70 to<br>5,940.41)              | 14,908.64<br>(9,303.55 to<br>22,827.06)            | 13,037.85<br>(8,636.10 to<br>19,500.68)            | 17,703.10<br>(10,428.35 to<br>28,149.70)           | 220.85<br>(179.51 to<br>258.64)              | 750.67<br>(473.54 to<br>1,117.82)              | 680.63<br>(459.92 to<br>981.80)                | 862.77<br>(514.66 to<br>1,325.36)               |
| Liver cancer due to hepatitis B | 1,881.20<br>(1,346.88 to<br>2,499.62)              | 5,034.37<br>(2,832.52 to<br>8,346.69)              | 4,368.37<br>(2,609.92 to<br>6,960.13)              | 6,016.95<br>(3,223.61 to<br>10,268.10)             | 73.41<br>(52.28 to<br>99.05)                 | 228.71<br>(127.67 to<br>372.97)                | 204.80<br>(121.33 to<br>322.40)                | 265.67<br>(143.41 to<br>442.84)                 |



|                                      |                                          |                                          |                                          |                                           |                                   |                                       |                                     |                                       |
|--------------------------------------|------------------------------------------|------------------------------------------|------------------------------------------|-------------------------------------------|-----------------------------------|---------------------------------------|-------------------------------------|---------------------------------------|
| Liver cancer due to hepatitis C      | 1,612.02<br>(1,172.90 to<br>2,132.66)    | 5,152.29<br>(3,035.50 to<br>8,235.11)    | 4,640.73<br>(2,824.40 to<br>7,047.79)    | 5,962.19<br>(3,344.78 to<br>9,832.75)     | 80.89<br>(59.49 to<br>105.58)     | 285.06<br>(166.90 to<br>440.38)       | 266.45<br>(164.42 to<br>404.10)     | 318.68<br>(178.75 to<br>511.11)       |
| Liver cancer due to alcohol use      | 334.25<br>(210.63 to<br>515.68)          | 1,058.48<br>(513.06 to<br>2,008.07)      | 909.79<br>(456.89 to<br>1,657.15)        | 1,267.97<br>(585.90 to<br>2,475.37)       | 14.93<br>(9.25 to<br>23.06)       | 52.36<br>(25.53 to<br>93.67)          | 46.44<br>(23.35 to<br>81.82)        | 61.03<br>(28.70 to<br>115.58)         |
| Liver cancer due to other causes     | 1,188.31<br>(813.17 to<br>1,683.50)      | 3,663.50<br>(1,919.29 to<br>6,265.62)    | 3,118.97<br>(1,726.17 to<br>5,203.43)    | 4,456.00<br>(2,195.16 to<br>7,938.91)     | 51.62<br>(35.78 to<br>72.44)      | 184.54<br>(98.00 to<br>318.20)        | 162.95<br>(92.37 to<br>270.00)      | 217.39<br>(109.09 to<br>388.18)       |
| Gallbladder and biliary tract cancer | 2,535.70<br>(2,040.71 to<br>3,041.35)    | 3,916.79<br>(3,141.73 to<br>4,711.10)    | 4,019.31<br>(3,217.84 to<br>4,840.19)    | 3,765.29<br>(3,015.51 to<br>4,524.95)     | 114.32<br>(93.77 to<br>134.30)    | 209.68<br>(160.24 to<br>253.42)       | 223.00<br>(170.15 to<br>268.20)     | 196.17<br>(149.42 to<br>238.67)       |
| Pancreatic cancer                    | 5,991.98<br>(5,142.88 to<br>6,901.17)    | 15,429.05<br>(11,466.56 to<br>20,773.91) | 14,715.53<br>(11,162.89 to<br>19,594.32) | 16,020.13<br>(11,781.68 to<br>22,158.01)  | 260.19<br>(224.64 to<br>297.15)   | 770.11<br>(579.73 to<br>1,029.00)     | 760.16<br>(584.76 to<br>989.01)     | 778.35<br>(569.52 to<br>1,069.30)     |
| Larynx cancer                        | 2,535.37<br>(2,034.12 to<br>3,019.64)    | 6,319.06<br>(2,966.94 to<br>12,434.25)   | 3,729.94<br>(1,874.11 to<br>7,135.22)    | 8,247.25<br>(3,786.05 to<br>16,521.49)    | 114.31<br>(90.48 to<br>134.58)    | 313.78<br>(144.14 to<br>620.23)       | 190.35<br>(95.51 to<br>358.09)      | 397.81<br>(181.47 to<br>791.13)       |
| Tracheal, bronchus, and lung cancer  | 22,290.86<br>(18,259.33 to<br>26,752.29) | 56,556.27<br>(32,286.33 to<br>88,465.59) | 32,392.87<br>(19,672.46 to<br>48,900.97) | 75,311.19<br>(43,068.03 to<br>119,528.77) | 925.97<br>(759.79 to<br>1,106.29) | 2,713.40<br>(1,564.88 to<br>4,269.76) | 1,590.02<br>(971.00 to<br>2,413.14) | 3,514.49<br>(1,987.42 to<br>5,604.71) |
| Malignant skin melanoma              | 354.41<br>(271.16 to<br>453.67)          | 650.45<br>(457.75 to<br>888.89)          | 735.65<br>(514.03 to<br>1,017.34)        | 611.97<br>(431.59 to<br>844.54)           | 12.60<br>(9.60 to<br>16.02)       | 28.90<br>(20.26 to<br>40.00)          | 34.24<br>(23.80 to<br>47.97)        | 26.31<br>(18.40 to<br>36.01)          |
| Non-melanoma skin cancer             | 336.11<br>(276.44 to<br>405.09)          | 887.06<br>(711.81 to<br>1,092.51)        | 834.18<br>(654.73 to<br>1,062.64)        | 874.42<br>(701.01 to<br>1,081.27)         | 15.21<br>(12.72 to<br>17.83)      | 47.88<br>(38.18 to<br>58.64)          | 47.12<br>(36.22 to<br>59.35)        | 45.68<br>(36.01 to<br>56.76)          |
| Breast cancer                        | 10,713.62<br>(8,009.39 to<br>14,210.42)  | 15,791.03<br>(11,044.10 to<br>22,175.92) | 14,710.19<br>(10,282.68 to<br>20,294.71) | 16,211.53<br>(11,147.80 to<br>23,091.13)  | 324.08<br>(245.08 to<br>424.24)   | 603.16<br>(418.73 to<br>859.55)       | 572.91<br>(398.12 to<br>800.27)     | 609.04<br>(415.94 to<br>880.93)       |
| Cervical cancer                      | 2,345.85<br>(1,665.60 to<br>3,108.42)    | 3,898.69<br>(2,562.34 to<br>5,291.75)    | 3,474.53<br>(2,249.96 to<br>4,854.81)    | 4,045.90<br>(2,652.22 to<br>5,615.48)     | 87.18<br>(59.75 to<br>113.97)     | 176.10<br>(106.33 to<br>232.68)       | 161.50<br>(97.44 to<br>218.87)      | 178.15<br>(109.00 to<br>237.17)       |
| Uterine cancer                       | 669.89<br>(526.97 to<br>842.94)          | 1,779.13<br>(1,331.30 to<br>2,356.82)    | 1,625.75<br>(1,177.65 to<br>2,148.76)    | 1,825.59<br>(1,351.50 to<br>2,435.94)     | 29.08<br>(22.91 to<br>36.24)      | 88.19<br>(65.88 to<br>116.20)         | 82.00<br>(59.68 to<br>107.87)       | 89.25<br>(65.09 to<br>118.42)         |
| Ovarian cancer                       | 2,723.55<br>(2,205.77 to<br>3,368.41)    | 5,136.99<br>(3,588.63 to<br>7,222.71)    | 3,033.93<br>(3,597.60 to<br>7,023.58)    | 5,171.78<br>(3,546.52 to<br>7,608.71)     | 94.92<br>(77.89 to<br>115.68)     | 223.14<br>(156.36 to<br>320.01)       | 222.36<br>(160.55 to<br>312.68)     | 221.01<br>(150.91 to<br>329.59)       |
| Prostate cancer                      | 2,623.56<br>(1,615.09 to<br>3,314.62)    | 9,772.02<br>(6,051.63 to<br>12,743.07)   | 10,184.49<br>(6,242.73 to<br>13,216.25)  | 9,084.58<br>(5,625.48 to<br>12,005.05)    | 186.62<br>(104.72 to<br>239.36)   | 688.25<br>(387.97 to<br>943.99)       | 747.77<br>(433.90 to<br>1,004.18)   | 620.99<br>(358.44 to<br>869.78)       |
| Testicular cancer                    | 182.51<br>(135.62 to<br>242.49)          | 204.50<br>(143.89 to<br>279.51)          | 186.56<br>(129.82 to<br>256.66)          | 209.07<br>(146.03 to<br>286.04)           | 4.34<br>(3.21 to<br>5.67)         | 5.49<br>(3.90 to<br>7.52)             | 5.08<br>(3.57 to<br>7.06)           | 5.55<br>(3.94 to<br>7.66)             |

**Libya**

| Cause                           | YLLs (actual counts)                   |                                         |                                         |                                         | Deaths (actual counts)          |                                   |                                 |                                   |
|---------------------------------|----------------------------------------|-----------------------------------------|-----------------------------------------|-----------------------------------------|---------------------------------|-----------------------------------|---------------------------------|-----------------------------------|
|                                 | 2016                                   | 2040 Forecast                           | 2040 Better Scenario                    | 2040 Worse Scenario                     | 2016                            | 2040 Forecast                     | 2040 Better Scenario            | 2040 Worse Scenario               |
| Kidney cancer                   | 1,973.56<br>(1,613.34 to<br>2,425.47)  | 5,159.68<br>(3,455.81 to<br>8,031.42)   | 5,116.52<br>(3,546.04 to<br>7,650.62)   | 5,140.99<br>(3,343.27 to<br>8,229.05)   | 85.39<br>(69.20 to<br>108.33)   | 268.04<br>(175.26 to<br>417.68)   | 276.97<br>(188.10 to<br>412.39) | 258.82<br>(165.96 to<br>412.32)   |
| Bladder cancer                  | 4,081.46<br>(3,315.23 to<br>4,987.03)  | 11,165.40<br>(7,266.35 to<br>17,116.96) | 9,473.00<br>(6,500.41 to<br>14,030.33)  | 12,172.76<br>(7,598.05 to<br>19,064.00) | 223.45<br>(182.01 to<br>274.59) | 662.88<br>(429.51 to<br>1,000.04) | 585.10<br>(399.17 to<br>840.69) | 700.76<br>(431.08 to<br>1,090.53) |
| Brain and nervous system cancer | 8,002.55<br>(5,058.60 to<br>10,998.86) | 14,124.72<br>(8,762.77 to<br>20,484.81) | 14,066.52<br>(8,759.01 to<br>20,462.15) | 13,810.32<br>(8,507.34 to<br>20,154.29) | 211.70<br>(136.62 to<br>298.24) | 491.15<br>(330.44 to<br>700.33)   | 501.53<br>(339.72 to<br>715.29) | 470.63<br>(312.66 to<br>677.97)   |
| Thyroid cancer                  | 707.04<br>(595.34 to<br>844.99)        | 1,581.58<br>(1,098.41 to<br>2,251.89)   | 1,412.55<br>(979.55 to<br>2,000.19)     | 1,739.06<br>(1,163.63 to<br>2,524.85)   | 32.80<br>(27.74 to<br>38.28)    | 91.15<br>(61.64 to<br>128.70)     | 84.94<br>(57.75 to<br>121.12)   | 96.27<br>(63.66 to<br>138.17)     |
| Mesothelioma                    | 242.21<br>(173.26 to<br>363.79)        | 414.91<br>(306.80 to<br>611.61)         | 420.23<br>(306.87 to<br>616.85)         | 410.75<br>(301.90 to<br>605.95)         | 8.05<br>(6.02 to<br>11.77)      | 16.90<br>(12.79 to<br>24.31)      | 17.59<br>(13.18 to<br>25.12)    | 16.40<br>(12.38 to<br>23.63)      |

|                                |                                                      |                                                      |                                                      |                                                      |                                                 |                                                   |                                                  |                                                   |
|--------------------------------|------------------------------------------------------|------------------------------------------------------|------------------------------------------------------|------------------------------------------------------|-------------------------------------------------|---------------------------------------------------|--------------------------------------------------|---------------------------------------------------|
| Hodgkin lymphoma               | 1,690.17<br>(779.90 to<br>2,355.95)                  | 1,842.13<br>(976.06 to<br>2,690.72)                  | 1,540.80<br>(809.23 to<br>2,301.55)                  | 1,972.74<br>(1,038.46 to<br>2,892.24)                | 38.81<br>(19.89 to<br>51.87)                    | 52.94<br>(32.52 to<br>71.73)                      | 45.76<br>(27.09 to<br>65.06)                     | 55.27<br>(33.41 to<br>75.35)                      |
| Non-Hodgkin lymphoma           | 6,812.85<br>(5,643.69 to<br>8,361.85)                | 13,598.63<br>(10,268.36 to<br>18,341.79)             | 13,241.34<br>(10,149.30 to<br>17,769.06)             | 13,741.58<br>(10,313.38 to<br>18,589.63)             | 219.93<br>(182.47 to<br>272.44)                 | 582.08<br>(435.26 to<br>792.48)                   | 585.71<br>(444.73 to<br>790.89)                  | 572.61<br>(418.57 to<br>788.48)                   |
| Multiple myeloma               | 1,828.29<br>(1,346.82 to<br>2,365.62)                | 4,971.70<br>(3,304.43 to<br>7,234.16)                | 5,025.58<br>(3,325.30 to<br>7,207.81)                | 4,963.91<br>(3,273.24 to<br>7,335.67)                | 78.64<br>(54.62 to<br>102.50)                   | 247.73<br>(157.97 to<br>369.21)                   | 258.56<br>(163.37 to<br>379.33)                  | 240.91<br>(153.76 to<br>358.57)                   |
| Leukemia                       | 9,307.72<br>(7,875.94 to<br>11,108.60)               | 16,222.53<br>(11,905.46 to<br>22,012.77)             | 14,405.66<br>(10,713.77 to<br>18,916.66)             | 17,741.24<br>(12,703.49 to<br>24,706.52)             | 273.51<br>(230.69 to<br>325.62)                 | 685.81<br>(486.87 to<br>954.91)                   | 625.87<br>(457.48 to<br>838.34)                  | 730.30<br>(506.89 to<br>1,034.29)                 |
| Acute lymphoid leukemia        | 1,889.77<br>(1,469.88 to<br>2,424.26)                | 2,096.69<br>(1,453.05 to<br>2,946.98)                | 1,872.93<br>(1,286.24 to<br>2,602.29)                | 2,264.48<br>(1,556.38 to<br>3,184.64)                | 37.17<br>(29.39 to<br>49.46)                    | 59.70<br>(40.71 to<br>86.80)                      | 54.30<br>(37.69 to<br>77.92)                     | 63.68<br>(42.71 to<br>93.55)                      |
| Chronic lymphoid leukemia      | 362.87<br>(267.61 to<br>484.50)                      | 773.31<br>(521.24 to<br>1,113.09)                    | 712.06<br>(488.96 to<br>1,000.42)                    | 837.08<br>(544.72 to<br>1,239.66)                    | 14.34<br>(10.96 to<br>18.83)                    | 37.67<br>(25.29 to<br>54.68)                      | 55.85<br>(24.86 to<br>50.95)                     | 39.54<br>(25.83 to<br>58.47)                      |
| Acute myeloid leukemia         | 2,716.65<br>(2,124.65 to<br>4,041.92)                | 4,839.77<br>(3,336.08 to<br>7,311.05)                | 4,593.27<br>(3,278.16 to<br>6,826.38)                | 5,160.79<br>(3,474.88 to<br>8,024.22)                | 70.82<br>(54.74 to<br>108.34)                   | 177.61<br>(117.69 to<br>275.58)                   | 173.33<br>(117.62 to<br>264.60)                  | 185.09<br>(119.78 to<br>295.26)                   |
| Chronic myeloid leukemia       | 754.95<br>(469.72 to<br>1,027.30)                    | 972.95<br>(558.04 to<br>1,482.12)                    | 808.86<br>(448.97 to<br>1,246.28)                    | 1,064.98<br>(604.28 to<br>1,641.55)                  | 26.01<br>(16.00 to<br>35.91)                    | 43.55<br>(24.19 to<br>69.20)                      | 37.46<br>(20.63 to<br>59.97)                     | 46.20<br>(25.91 to<br>74.04)                      |
| Other leukemia                 | 3,583.49<br>(2,631.42 to<br>4,536.18)                | 7,539.81<br>(4,995.32 to<br>10,632.82)               | 6,418.54<br>(4,189.84 to<br>8,964.98)                | 8,413.91<br>(5,520.31 to<br>12,034.03)               | 125.16<br>(91.53 to<br>154.68)                  | 367.28<br>(236.42 to<br>532.38)                   | 324.93<br>(211.79 to<br>465.09)                  | 395.79<br>(255.46 to<br>582.25)                   |
| Other neoplasms                | 8,430.18<br>(7,208.21 to<br>10,091.35)               | 13,849.36<br>(11,497.25 to<br>17,318.03)             | 13,902.90<br>(11,485.56 to<br>17,474.68)             | 13,659.81<br>(11,305.77 to<br>17,113.21)             | 237.41<br>(203.62 to<br>290.16)                 | 534.86<br>(445.24 to<br>677.84)                   | 556.49<br>(462.40 to<br>711.44)                  | 512.91<br>(424.56 to<br>651.00)                   |
| <b>Cardiovascular diseases</b> | <b>207,248.89<br/>(183,703.51 to<br/>233,513.66)</b> | <b>361,518.04<br/>(235,286.57 to<br/>539,421.12)</b> | <b>204,082.71<br/>(138,034.50 to<br/>300,273.43)</b> | <b>500,449.74<br/>(315,047.27 to<br/>745,320.17)</b> | <b>9,563.53<br/>(8,577.84 to<br/>10,570.83)</b> | <b>20,015.98<br/>(13,914.26 to<br/>28,690.82)</b> | <b>12,479.13<br/>(8,709.27 to<br/>17,839.98)</b> | <b>26,179.16<br/>(17,651.65 to<br/>37,645.39)</b> |
| Rheumatic heart disease        | 2,181.84<br>(1,482.63 to<br>2,927.83)                | 1,592.47<br>(936.93 to<br>2,470.39)                  | 1,276.49<br>(730.61 to<br>2,006.79)                  | 1,748.29<br>(1,004.56 to<br>2,768.71)                | 54.91<br>(37.07 to<br>73.58)                    | 61.85<br>(37.52 to<br>94.21)                      | 52.17<br>(31.36 to<br>79.39)                     | 65.10<br>(38.68 to<br>99.00)                      |
| Ischemic heart disease         | 137,486.89<br>(120,231.62 to<br>156,953.05)          | 243,053.89<br>(138,955.34 to<br>408,763.55)          | 127,451.59<br>(73,496.65 to<br>211,815.03)           | 354,096.32<br>(196,653.52 to<br>585,164.16)          | 6,658.05<br>(5,889.70 to<br>7,461.08)           | 13,434.71<br>(8,130.20 to<br>21,357.69)           | 7,825.52<br>(4,844.46 to<br>12,398.86)           | 18,473.78<br>(11,027.69 to<br>29,944.36)          |
| Stroke                         | 41,638.55<br>(34,284.91 to<br>50,927.63)             | 66,870.38<br>(40,244.13 to<br>108,723.30)            | 36,030.91<br>(22,225.92 to<br>58,647.90)             | 92,235.95<br>(52,986.15 to<br>155,714.48)            | 1,913.91<br>(1,582.35 to<br>2,352.84)           | 3,807.77<br>(2,369.14 to<br>6,441.11)             | 2,330.04<br>(1,457.73 to<br>4,003.72)            | 4,915.30<br>(2,929.09 to<br>8,340.79)             |
| Ischemic stroke                | 18,262.99<br>(14,348.03 to<br>22,856.31)             | 31,938.13<br>(17,250.35 to<br>61,103.77)             | 18,653.05<br>(10,372.38 to<br>34,749.53)             | 42,000.32<br>(21,865.24 to<br>79,609.87)             | 1,090.96<br>(876.88 to<br>1,367.98)             | 2,152.38<br>(1,200.74 to<br>4,402.02)             | 1,412.01<br>(796.05 to<br>2,890.05)              | 2,659.58<br>(1,413.92 to<br>5,435.87)             |
| Intracerebral hemorrhage       | 23,375.56<br>(18,870.24 to<br>28,676.09)             | 34,932.25<br>(19,545.46 to<br>59,655.80)             | 17,377.87<br>(10,202.99 to<br>28,519.28)             | 50,235.63<br>(27,215.66 to<br>86,519.86)             | 822.96<br>(658.06 to<br>1,022.29)               | 1,655.39<br>(978.96 to<br>2,691.04)               | 918.03<br>(566.38 to<br>1,442.47)                | 2,255.73<br>(1,280.55 to<br>3,770.16)             |
| Hypertensive heart disease     | 4,537.16<br>(3,192.97 to<br>6,525.11)                | 12,298.46<br>(6,308.13 to<br>25,220.61)              | 8,337.35<br>(4,802.31 to<br>14,636.17)               | 13,478.16<br>(6,634.00 to<br>27,353.04)              | 225.11<br>(160.45 to<br>318.30)                 | 751.97<br>(387.33 to<br>1,562.41)                 | 537.26<br>(312.85 to<br>973.51)                  | 799.26<br>(396.07 to<br>1,709.86)                 |
| Cardiomyopathy and myocarditis | 5,631.37<br>(3,939.81 to<br>8,130.16)                | 6,948.90<br>(4,445.60 to<br>10,684.02)               | 5,905.04<br>(3,684.49 to<br>9,130.08)                | 6,996.39<br>(4,469.25 to<br>10,850.06)               | 132.75<br>(96.21 to<br>186.70)                  | 273.22<br>(167.26 to<br>416.93)                   | 245.93<br>(149.89 to<br>384.36)                  | 261.74<br>(159.97 to<br>401.27)                   |
| Myocarditis                    | 1,075.10<br>(562.48 to<br>2,077.25)                  | 882.75<br>(388.44 to<br>1,915.67)                    | 800.91<br>(357.37 to<br>1,715.96)                    | 931.90<br>(409.57 to<br>2,068.25)                    | 18.82<br>(9.57 to<br>37.60)                     | 23.95<br>(11.02 to<br>50.85)                      | 23.45<br>(10.86 to<br>50.30)                     | 23.97<br>(10.76 to<br>50.74)                      |

**Libya**

| Cause                    | YLLs (actual counts)            |                                   |                                   |                                 | Deaths (actual counts)      |                             |                             |                             |
|--------------------------|---------------------------------|-----------------------------------|-----------------------------------|---------------------------------|-----------------------------|-----------------------------|-----------------------------|-----------------------------|
|                          | 2016                            | 2040 Forecast                     | 2040 Better Scenario              | 2040 Worse Scenario             | 2016                        | 2040 Forecast               | 2040 Better Scenario        | 2040 Worse Scenario         |
| Alcoholic cardiomyopathy | 320.39<br>(119.29 to<br>606.19) | 511.53<br>(167.70 to<br>1,046.99) | 519.25<br>(168.36 to<br>1,090.30) | 493.79<br>(166.30 to<br>990.60) | 12.09<br>(4.43 to<br>22.04) | 24.73<br>(7.92 to<br>49.98) | 26.12<br>(8.26 to<br>54.14) | 23.15<br>(7.43 to<br>46.51) |



|                                            |                                                   |                                                   |                                                   |                                                   |                                                |                                                |                                                |                                                |
|--------------------------------------------|---------------------------------------------------|---------------------------------------------------|---------------------------------------------------|---------------------------------------------------|------------------------------------------------|------------------------------------------------|------------------------------------------------|------------------------------------------------|
| Peptic ulcer disease                       | 1,253.26<br>(810.09 to<br>1,928.66)               | 1,889.33<br>(1,144.14 to<br>3,319.11)             | 1,468.98<br>(835.60 to<br>2,605.66)               | 1,987.50<br>(1,161.51 to<br>3,401.56)             | 58.24<br>(38.05 to<br>91.45)                   | 110.43<br>(65.53 to<br>195.17)                 | 90.68<br>(51.23 to<br>160.39)                  | 112.31<br>(65.13 to<br>198.18)                 |
| <b>Libya</b>                               |                                                   |                                                   |                                                   |                                                   |                                                |                                                |                                                |                                                |
| Cause                                      | YLLs (actual counts)                              |                                                   |                                                   |                                                   | Deaths (actual counts)                         |                                                |                                                |                                                |
|                                            | 2016                                              | 2040 Forecast                                     | 2040 Better Scenario                              | 2040 Worse Scenario                               | 2016                                           | 2040 Forecast                                  | 2040 Better Scenario                           | 2040 Worse Scenario                            |
| Gastritis and duodenitis                   | 54.50<br>(31.24 to<br>76.87)                      | 105.53<br>(61.71 to<br>157.37)                    | 95.96<br>(54.15 to<br>148.29)                     | 106.61<br>(61.42 to<br>159.64)                    | 2.19<br>(1.33 to<br>3.12)                      | 5.42<br>(3.26 to<br>8.23)                      | 5.17<br>(3.02 to<br>8.06)                      | 5.29<br>(3.09 to<br>8.09)                      |
| Appendicitis                               | 551.22<br>(301.54 to<br>773.14)                   | 842.17<br>(482.92 to<br>1,323.00)                 | 712.92<br>(411.29 to<br>1,118.14)                 | 880.70<br>(498.26 to<br>1,386.77)                 | 19.02<br>(10.65 to<br>27.32)                   | 42.13<br>(24.11 to<br>68.08)                   | 37.52<br>(21.56 to<br>61.07)                   | 42.38<br>(24.29 to<br>68.90)                   |
| Paralytic ileus and intestinal obstruction | 1,466.95<br>(882.45 to<br>2,181.61)               | 2,986.58<br>(1,824.44 to<br>4,637.38)             | 3,014.96<br>(1,881.23 to<br>4,603.52)             | 2,936.86<br>(1,798.73 to<br>4,589.88)             | 65.44<br>(39.72 to<br>97.03)                   | 175.67<br>(106.30 to<br>271.51)                | 185.73<br>(112.10 to<br>282.89)                | 166.74<br>(100.37 to<br>261.93)                |
| Inguinal, femoral, and abdominal hernia    | 155.88<br>(89.52 to<br>226.13)                    | 231.39<br>(134.55 to<br>377.16)                   | 218.20<br>(127.14 to<br>354.93)                   | 230.59<br>(133.95 to<br>369.37)                   | 7.53<br>(4.46 to<br>11.88)                     | 14.24<br>(8.10 to<br>23.91)                    | 14.21<br>(7.99 to<br>23.69)                    | 13.60<br>(7.63 to<br>22.82)                    |
| Inflammatory bowel disease                 | 300.46<br>(149.49 to<br>508.07)                   | 467.64<br>(244.96 to<br>791.94)                   | 468.50<br>(246.51 to<br>767.03)                   | 460.73<br>(241.64 to<br>791.02)                   | 9.76<br>(5.08 to<br>16.66)                     | 20.87<br>(11.39 to<br>35.51)                   | 21.80<br>(11.95 to<br>36.29)                   | 19.92<br>(10.96 to<br>33.89)                   |
| Vascular intestinal disorders              | 653.80<br>(355.90 to<br>977.16)                   | 1,592.99<br>(881.56 to<br>2,431.90)               | 1,557.41<br>(865.32 to<br>2,413.64)               | 1,567.05<br>(878.10 to<br>2,428.28)               | 31.92<br>(17.58 to<br>47.40)                   | 93.07<br>(52.14 to<br>142.57)                  | 94.60<br>(52.79 to<br>144.38)                  | 89.01<br>(49.91 to<br>138.27)                  |
| Gallbladder and biliary diseases           | 904.05<br>(529.29 to<br>1,247.84)                 | 2,369.99<br>(1,087.02 to<br>4,228.76)             | 1,833.19<br>(817.75 to<br>3,404.51)               | 2,937.49<br>(1,321.76 to<br>5,243.03)             | 46.02<br>(27.17 to<br>67.84)                   | 147.32<br>(66.58 to<br>274.97)                 | 120.94<br>(53.51 to<br>229.04)                 | 173.44<br>(77.21 to<br>314.85)                 |
| Pancreatitis                               | 894.64<br>(492.82 to<br>1,341.99)                 | 1,807.43<br>(1,011.87 to<br>2,728.98)             | 1,623.64<br>(929.55 to<br>2,547.30)               | 1,850.71<br>(1,038.69 to<br>2,796.38)             | 33.74<br>(19.21 to<br>48.44)                   | 88.85<br>(51.20 to<br>140.10)                  | 82.79<br>(48.00 to<br>133.37)                  | 88.42<br>(50.81 to<br>139.73)                  |
| Other digestive diseases                   | 900.97<br>(577.12 to<br>1,312.53)                 | 1,646.11<br>(970.78 to<br>2,545.57)               | 1,537.71<br>(910.30 to<br>2,335.51)               | 1,684.71<br>(988.86 to<br>2,637.17)               | 37.53<br>(23.52 to<br>53.99)                   | 93.00<br>(54.27 to<br>146.54)                  | 91.65<br>(53.37 to<br>142.98)                  | 91.51<br>(53.27 to<br>146.97)                  |
| <b>Neurological disorders</b>              | <b>21,339.65<br/>(18,573.36 to<br/>25,062.13)</b> | <b>61,052.90<br/>(44,329.16 to<br/>83,964.76)</b> | <b>60,952.47<br/>(45,797.49 to<br/>81,966.57)</b> | <b>62,958.55<br/>(43,414.43 to<br/>91,156.13)</b> | <b>1,545.24<br/>(1,321.50 to<br/>1,829.12)</b> | <b>4,832.21<br/>(3,258.98 to<br/>6,908.42)</b> | <b>5,054.10<br/>(3,584.38 to<br/>6,934.60)</b> | <b>4,820.21<br/>(3,136.41 to<br/>7,239.62)</b> |
| Alzheimer's disease and other dementias    | 14,426.42<br>(11,784.81 to<br>17,670.89)          | 49,089.36<br>(33,019.61 to<br>71,866.66)          | 48,620.61<br>(33,849.00 to<br>68,770.26)          | 51,241.84<br>(32,439.45 to<br>78,714.54)          | 1,312.78<br>(1,096.45 to<br>1,584.82)          | 4,268.21<br>(2,746.70 to<br>6,275.43)          | 4,421.22<br>(3,004.90 to<br>6,303.94)          | 4,301.29<br>(2,629.23 to<br>6,642.13)          |
| Parkinson's disease                        | 1,358.47<br>(1,041.13 to<br>1,765.24)             | 4,384.04<br>(3,199.00 to<br>5,796.28)             | 5,124.08<br>(3,836.20 to<br>6,685.92)             | 3,901.00<br>(2,834.27 to<br>5,203.27)             | 105.09<br>(80.00 to<br>136.49)                 | 342.24<br>(240.33 to<br>462.43)                | 413.57<br>(297.47 to<br>546.25)                | 297.00<br>(205.36 to<br>405.17)                |
| Epilepsy                                   | 3,186.70<br>(2,565.27 to<br>3,805.23)             | 3,924.45<br>(2,844.19 to<br>5,315.74)             | 3,484.45<br>(2,474.74 to<br>4,796.10)             | 4,234.89<br>(3,022.63 to<br>5,716.53)             | 65.28<br>(52.46 to<br>77.54)                   | 106.01<br>(79.96 to<br>137.52)                 | 97.69<br>(72.33 to<br>128.38)                  | 111.18<br>(82.46 to<br>145.01)                 |
| Multiple sclerosis                         | 435.87<br>(292.44 to<br>738.31)                   | 544.89<br>(368.50 to<br>896.38)                   | 539.80<br>(369.08 to<br>881.52)                   | 533.53<br>(357.19 to<br>890.76)                   | 11.38<br>(7.82 to<br>18.84)                    | 17.14<br>(11.90 to<br>27.19)                   | 17.27<br>(12.13 to<br>26.55)                   | 16.56<br>(11.43 to<br>26.55)                   |
| Motor neuron disease                       | 527.64<br>(286.14 to<br>697.66)                   | 928.99<br>(513.37 to<br>1,221.69)                 | 958.93<br>(537.22 to<br>1,262.60)                 | 898.20<br>(493.12 to<br>1,191.86)                 | 15.12<br>(8.33 to<br>19.70)                    | 32.05<br>(18.22 to<br>41.62)                   | 33.68<br>(19.52 to<br>43.98)                   | 30.57<br>(17.33 to<br>39.92)                   |
| Other neurological disorders               | 1,604.56<br>(1,162.65 to<br>2,042.98)             | 2,181.16<br>(1,600.16 to<br>2,775.83)             | 2,224.58<br>(1,645.97 to<br>2,839.17)             | 2,149.09<br>(1,553.70 to<br>2,749.85)             | 35.60<br>(26.37 to<br>45.07)                   | 66.57<br>(50.08 to<br>84.53)                   | 70.67<br>(53.77 to<br>89.51)                   | 63.60<br>(47.23 to<br>81.32)                   |
| <b>Mental disorders</b>                    | <b>4,191.54<br/>(2,611.84 to<br/>6,222.47)</b>    | <b>7,267.38<br/>(4,567.44 to<br/>10,381.87)</b>   | <b>7,665.20<br/>(4,891.60 to<br/>10,925.68)</b>   | <b>7,225.71<br/>(4,522.02 to<br/>10,366.30)</b>   | <b>100.59<br/>(63.25 to<br/>145.25)</b>        | <b>222.08<br/>(139.91 to<br/>311.58)</b>       | <b>243.37<br/>(155.57 to<br/>343.06)</b>       | <b>215.04<br/>(135.85 to<br/>301.93)</b>       |
| Alcohol use disorders                      | 716.15<br>(488.29 to<br>1,055.35)                 | 842.96<br>(558.22 to<br>1,243.08)                 | 868.24<br>(576.94 to<br>1,281.62)                 | 841.30<br>(557.59 to<br>1,244.39)                 | 18.90<br>(13.22 to<br>27.55)                   | 27.14<br>(18.46 to<br>39.95)                   | 28.66<br>(19.52 to<br>41.78)                   | 26.60<br>(18.14 to<br>39.13)                   |
| Drug use disorders                         | 3,458.83<br>(2,034.17 to<br>5,353.06)             | 6,407.46<br>(3,886.62 to<br>9,319.59)             | 6,779.74<br>(4,171.62 to<br>9,879.62)             | 6,367.36<br>(3,848.10 to<br>9,275.44)             | 81.36<br>(48.15 to<br>120.63)                  | 194.59<br>(118.69 to<br>279.31)                | 214.36<br>(131.04 to<br>309.47)                | 188.10<br>(114.49 to<br>270.27)                |

|                                                            |                                          |                                             |                                            |                                             |                                       |                                         |                                        |                                         |
|------------------------------------------------------------|------------------------------------------|---------------------------------------------|--------------------------------------------|---------------------------------------------|---------------------------------------|-----------------------------------------|----------------------------------------|-----------------------------------------|
| Opioid use disorders                                       | 2,682.43<br>(1,543.58 to<br>4,246.73)    | 4,513.46<br>(2,666.59 to<br>6,890.67)       | 4,637.00<br>(2,762.04 to<br>7,024.29)      | 4,501.63<br>(2,633.07 to<br>6,877.57)       | 60.90<br>(35.25 to<br>93.91)          | 129.83<br>(76.13 to<br>192.00)          | 138.07<br>(80.27 to<br>204.14)         | 126.30<br>(73.28 to<br>187.42)          |
| Cocaine use disorders                                      | 122.51<br>(47.65 to<br>280.63)           | 300.42<br>(122.87 to<br>689.47)             | 318.73<br>(130.73 to<br>718.46)            | 302.80<br>(124.06 to<br>691.36)             | 2.86<br>(1.14 to<br>6.42)             | 8.74<br>(3.42 to<br>20.29)              | 9.45<br>(3.70 to<br>21.36)             | 8.68<br>(3.42 to<br>20.12)              |
| Amphetamine use disorders                                  | 115.07<br>(43.47 to<br>305.29)           | 360.78<br>(146.05 to<br>863.20)             | 413.42<br>(164.41 to<br>1,013.23)          | 356.42<br>(148.13 to<br>848.63)             | 2.61<br>(1.00 to<br>6.94)             | 10.20<br>(4.06 to<br>25.37)             | 11.93<br>(4.53 to<br>30.04)            | 9.89<br>(3.98 to<br>24.53)              |
| Other drug use disorders                                   | 538.82<br>(309.41 to<br>812.25)          | 1,232.81<br>(740.48 to<br>1,795.14)         | 1,410.59<br>(829.02 to<br>2,121.53)        | 1,206.51<br>(729.45 to<br>1,754.09)         | 14.99<br>(8.86 to<br>22.26)           | 45.83<br>(27.33 to<br>66.67)            | 54.90<br>(32.13 to<br>81.52)           | 43.23<br>(25.81 to<br>62.92)            |
| Eating disorders                                           | 16.55<br>(9.15 to<br>27.97)              | 16.97<br>(9.27 to<br>28.47)                 | 17.22<br>(9.31 to<br>29.18)                | 17.06<br>(9.29 to<br>28.03)                 | 0.33<br>(0.18 to<br>0.56)             | 0.34<br>(0.18 to<br>0.58)               | 0.35<br>(0.19 to<br>0.60)              | 0.34<br>(0.18 to<br>0.58)               |
| <b>Libya</b>                                               |                                          |                                             |                                            |                                             |                                       |                                         |                                        |                                         |
| Cause                                                      | YLLs (actual counts)                     |                                             |                                            |                                             | Deaths (actual counts)                |                                         |                                        |                                         |
|                                                            | 2016                                     | 2040 Forecast                               | 2040 Better Scenario                       | 2040 Worse Scenario                         | 2016                                  | 2040 Forecast                           | 2040 Better Scenario                   | 2040 Worse Scenario                     |
| Diabetes, urogenital, blood, and endocrine diseases        | 59,168.96<br>(51,021.24 to<br>69,452.69) | 201,523.62<br>(107,043.54 to<br>428,320.19) | 160,157.06<br>(85,081.92 to<br>347,750.66) | 242,398.62<br>(127,437.98 to<br>490,980.53) | 2,716.58<br>(2,362.74 to<br>3,105.44) | 11,564.07<br>(6,300.91 to<br>23,963.61) | 9,572.44<br>(5,212.15 to<br>21,406.36) | 13,465.16<br>(7,142.32 to<br>27,330.25) |
| Diabetes mellitus                                          | 20,628.31<br>(17,392.01 to<br>24,017.16) | 49,996.41<br>(32,081.21 to<br>72,916.91)    | 38,370.55<br>(25,169.67 to<br>55,978.75)   | 56,869.79<br>(36,298.38 to<br>84,961.69)    | 1,055.12<br>(897.12 to<br>1,208.11)   | 3,014.38<br>(1,932.96 to<br>4,292.36)   | 2,439.53<br>(1,600.25 to<br>3,425.68)  | 3,300.96<br>(2,070.98 to<br>4,812.75)   |
| Acute glomerulonephritis                                   | 39.86<br>(34.77 to<br>46.64)             | 46.74<br>(33.69 to<br>63.06)                | 40.72<br>(28.69 to<br>55.09)               | 49.83<br>(34.94 to<br>67.79)                | 0.77<br>(0.67 to<br>0.89)             | 1.12<br>(0.82 to<br>1.48)               | 1.01<br>(0.73 to<br>1.37)              | 1.16<br>(0.84 to<br>1.57)               |
| Chronic kidney disease                                     | 29,720.67<br>(23,628.73 to<br>36,679.18) | 134,872.10<br>(40,903.73 to<br>375,522.72)  | 105,771.50<br>(31,946.11 to<br>305,021.20) | 168,809.43<br>(50,084.54 to<br>429,450.76)  | 1,361.22<br>(1,091.14 to<br>1,657.93) | 7,693.98<br>(2,302.12 to<br>20,827.32)  | 6,259.63<br>(1,917.66 to<br>18,306.12) | 9,345.64<br>(2,780.81 to<br>24,036.56)  |
| Chronic kidney disease due to diabetes mellitus            | 13,531.81<br>(10,433.30 to<br>17,125.86) | 69,254.38<br>(19,576.85 to<br>200,968.30)   | 54,156.18<br>(15,450.67 to<br>160,477.71)  | 87,309.67<br>(24,054.51 to<br>232,272.22)   | 598.36<br>(463.29 to<br>753.44)       | 3,666.85<br>(1,002.12 to<br>10,097.35)  | 2,955.47<br>(829.36 to<br>8,840.63)    | 4,505.62<br>(1,247.41 to<br>11,783.59)  |
| Chronic kidney disease due to hypertension                 | 4,473.24<br>(3,482.86 to<br>5,695.43)    | 24,757.90<br>(6,894.24 to<br>70,608.50)     | 20,193.08<br>(5,634.10 to<br>61,771.50)    | 30,189.77<br>(8,455.79 to<br>82,002.19)     | 302.18<br>(237.49 to<br>377.88)       | 1,801.37<br>(556.73 to<br>4,936.71)     | 1,533.92<br>(472.53 to<br>4,390.89)    | 2,118.58<br>(662.66 to<br>5,624.43)     |
| Chronic kidney disease due to glomerulonephritis           | 3,801.77<br>(2,893.50 to<br>4,875.29)    | 11,261.07<br>(4,044.88 to<br>30,246.39)     | 8,537.96<br>(3,022.33 to<br>22,988.38)     | 14,143.99<br>(4,975.49 to<br>35,779.98)     | 133.12<br>(99.31 to<br>171.78)        | 576.29<br>(181.68 to<br>1,593.21)       | 450.18<br>(141.17 to<br>1,298.37)      | 707.64<br>(225.85 to<br>1,928.05)       |
| Chronic kidney disease due to other and unspecified causes | 7,913.85<br>(6,051.92 to<br>10,011.25)   | 29,598.75<br>(9,516.30 to<br>81,158.43)     | 22,884.28<br>(7,280.71 to<br>65,890.32)    | 37,166.00<br>(11,694.33 to<br>98,785.56)    | 327.56<br>(245.56 to<br>414.52)       | 1,649.46<br>(499.66 to<br>4,720.22)     | 1,320.06<br>(404.36 to<br>3,839.60)    | 2,013.80<br>(610.86 to<br>5,326.04)     |
| Urinary diseases and male infertility                      | 1,711.00<br>(1,312.91 to<br>2,331.34)    | 4,939.30<br>(3,628.51 to<br>6,657.52)       | 4,883.67<br>(3,557.57 to<br>6,678.99)      | 4,713.31<br>(3,412.63 to<br>6,366.81)       | 97.90<br>(77.08 to<br>135.21)         | 362.93<br>(250.19 to<br>501.17)         | 378.23<br>(267.38 to<br>518.47)        | 332.79<br>(223.00 to<br>465.48)         |
| Urinary tract infections                                   | 1,456.89<br>(1,103.85 to<br>1,995.98)    | 4,529.17<br>(3,339.04 to<br>6,206.92)       | 4,516.48<br>(3,313.84 to<br>6,223.58)      | 4,297.92<br>(3,126.05 to<br>5,866.39)       | 86.61<br>(66.62 to<br>119.44)         | 339.68<br>(232.11 to<br>472.15)         | 356.24<br>(248.10 to<br>488.69)        | 310.18<br>(205.30 to<br>437.11)         |
| Urolithiasis                                               | 56.76<br>(41.91 to<br>80.60)             | 103.28<br>(70.57 to<br>157.09)              | 95.75<br>(62.45 to<br>152.19)              | 101.45<br>(69.17 to<br>154.05)              | 1.88<br>(1.34 to<br>2.96)             | 4.70<br>(3.09 to<br>7.86)               | 4.62<br>(2.89 to<br>7.84)              | 4.41<br>(2.89 to<br>7.21)               |
| Other urinary diseases                                     | 197.36<br>(111.85 to<br>341.98)          | 306.85<br>(152.35 to<br>573.92)             | 271.44<br>(131.96 to<br>516.75)            | 313.94<br>(150.11 to<br>589.94)             | 9.40<br>(4.86 to<br>17.28)            | 18.56<br>(8.77 to<br>34.74)             | 17.37<br>(8.14 to<br>33.66)            | 18.21<br>(8.49 to<br>34.22)             |
| Gynecological diseases                                     | 26.25<br>(13.79 to<br>40.47)             | 31.40<br>(15.38 to<br>50.79)                | 24.15<br>(11.50 to<br>41.60)               | 33.93<br>(16.76 to<br>55.50)                | 0.62<br>(0.33 to<br>0.92)             | 0.87<br>(0.45 to<br>1.38)               | 0.69<br>(0.33 to<br>1.13)              | 0.92<br>(0.47 to<br>1.45)               |
| Uterine fibroids                                           | 1.03<br>(0.32 to<br>2.45)                | 1.28<br>(0.35 to<br>3.11)                   | 1.02<br>(0.27 to<br>2.57)                  | 1.40<br>(0.37 to<br>3.40)                   | 0.03<br>(0.01 to<br>0.07)             | 0.05<br>(0.01 to<br>0.11)               | 0.04<br>(0.01 to<br>0.10)              | 0.05<br>(0.01 to<br>0.12)               |
| Polycystic ovarian syndrome                                | 2.71<br>(0.83 to<br>7.11)                | 2.14<br>(0.60 to<br>5.76)                   | 1.40<br>(0.35 to<br>4.41)                  | 2.46<br>(0.67 to<br>6.96)                   | 0.06<br>(0.02 to<br>0.16)             | 0.05<br>(0.01 to<br>0.13)               | 0.03<br>(0.01 to<br>0.10)              | 0.06<br>(0.02 to<br>0.16)               |

|                                                   |                                       |                                        |                                        |                                        |                                 |                                 |                                 |                                 |
|---------------------------------------------------|---------------------------------------|----------------------------------------|----------------------------------------|----------------------------------------|---------------------------------|---------------------------------|---------------------------------|---------------------------------|
| Endometriosis                                     | 0.32<br>(0.12 to<br>0.69)             | 0.44<br>(0.15 to<br>0.99)              | 0.34<br>(0.11 to<br>0.77)              | 0.49<br>(0.16 to<br>1.11)              | 0.01<br>(0.00 to<br>0.02)       | 0.01<br>(0.00 to<br>0.02)       | 0.01<br>(0.00 to<br>0.02)       | 0.01<br>(0.00 to<br>0.03)       |
| Genital prolapse                                  | 0.39<br>(0.15 to<br>0.81)             | 0.55<br>(0.17 to<br>1.39)              | 0.42<br>(0.12 to<br>1.13)              | 0.61<br>(0.18 to<br>1.49)              | 0.01<br>(0.00 to<br>0.03)       | 0.01<br>(0.01 to<br>0.06)       | 0.02<br>(0.00 to<br>0.05)       | 0.02<br>(0.01 to<br>0.07)       |
| Other gynecological diseases                      | 21.80<br>(11.26 to<br>34.10)          | 26.99<br>(13.03 to<br>43.55)           | 20.97<br>(9.93 to<br>36.18)            | 28.97<br>(14.29 to<br>47.21)           | 0.50<br>(0.27 to<br>0.76)       | 0.74<br>(0.38 to<br>1.17)       | 0.59<br>(0.28 to<br>0.98)       | 0.78<br>(0.40 to<br>1.24)       |
| Hemoglobinopathies and hemolytic anemias          | 2,068.29<br>(1,567.86 to<br>3,123.96) | 3,234.24<br>(2,103.19 to<br>5,167.97)  | 2,793.84<br>(1,749.86 to<br>4,521.18)  | 3,373.15<br>(2,163.83 to<br>5,351.99)  | 50.02<br>(38.75 to<br>73.19)    | 116.53<br>(80.22 to<br>182.59)  | 104.03<br>(68.40 to<br>164.83)  | 118.44<br>(79.18 to<br>186.33)  |
| Thalassemias                                      | 192.49<br>(95.68 to<br>380.98)        | 61.85<br>(28.98 to<br>138.19)          | 59.36<br>(28.42 to<br>130.20)          | 62.53<br>(29.16 to<br>138.30)          | 2.38<br>(1.21 to<br>4.66)       | 0.78<br>(0.38 to<br>1.72)       | 0.75<br>(0.38 to<br>1.60)       | 0.79<br>(0.38 to<br>1.72)       |
| Sickle cell disorders                             | 1,416.04<br>(1,064.49 to<br>2,133.73) | 2,189.06<br>(1,387.48 to<br>3,508.54)  | 1,881.42<br>(1,142.29 to<br>3,106.84)  | 2,290.89<br>(1,426.46 to<br>3,677.56)  | 28.17<br>(21.46 to<br>42.01)    | 62.37<br>(39.91 to<br>99.76)    | 54.51<br>(33.81 to<br>88.62)    | 64.36<br>(40.53 to<br>103.35)   |
| G6PD deficiency                                   | 258.24<br>(180.95 to<br>392.42)       | 557.45<br>(339.43 to<br>909.34)        | 463.87<br>(273.85 to<br>773.91)        | 594.65<br>(345.07 to<br>987.62)        | 6.36<br>(4.52 to<br>9.54)       | 21.13<br>(13.24 to<br>33.71)    | 18.06<br>(11.10 to<br>29.94)    | 22.05<br>(13.38 to<br>36.03)    |
| Other hemoglobinopathies and hemolytic anemias    | 201.52<br>(153.93 to<br>294.87)       | 425.87<br>(289.87 to<br>673.33)        | 389.19<br>(251.38 to<br>611.47)        | 425.09<br>(279.31 to<br>678.58)        | 13.10<br>(9.96 to<br>19.13)     | 32.24<br>(22.10 to<br>50.11)    | 30.71<br>(20.50 to<br>48.20)    | 31.24<br>(20.70 to<br>49.58)    |
| Endocrine, metabolic, blood, and immune disorders | 4,974.58<br>(3,573.97 to<br>6,959.55) | 8,403.45<br>(5,762.60 to<br>11,634.50) | 8,272.62<br>(5,706.36 to<br>11,496.25) | 8,549.17<br>(5,851.77 to<br>12,002.26) | 150.95<br>(111.55 to<br>205.02) | 374.27<br>(267.08 to<br>501.88) | 389.32<br>(275.56 to<br>517.83) | 365.25<br>(257.48 to<br>496.32) |

**Libya**

| Cause                                         | YLLs (actual counts)                             |                                                  |                                                  |                                                  | Deaths (actual counts)                  |                                           |                                           |                                           |
|-----------------------------------------------|--------------------------------------------------|--------------------------------------------------|--------------------------------------------------|--------------------------------------------------|-----------------------------------------|-------------------------------------------|-------------------------------------------|-------------------------------------------|
|                                               | 2016                                             | 2040 Forecast                                    | 2040 Better Scenario                             | 2040 Worse Scenario                              | 2016                                    | 2040 Forecast                             | 2040 Better Scenario                      | 2040 Worse Scenario                       |
| <b>Musculoskeletal disorders</b>              | 1,551.25<br>(1,014.11 to<br><b>2,040.08</b> )    | 2,322.63<br>(1,443.22 to<br><b>3,065.25</b> )    | 2,299.73<br>(1,441.69 to<br><b>3,068.92</b> )    | 2,260.47<br>(1,394.33 to<br><b>3,001.13</b> )    | 39.26<br>(25.96 to<br><b>50.66</b> )    | 85.40<br>(51.97 to<br><b>115.40</b> )     | 87.33<br>(54.13 to<br><b>117.48</b> )     | 80.75<br>(49.36 to<br><b>108.81</b> )     |
| Rheumatoid arthritis                          | 88.85<br>(50.27 to<br>151.66)                    | 221.05<br>(115.37 to<br>371.89)                  | 183.21<br>(90.89 to<br>313.73)                   | 227.99<br>(118.61 to<br>387.26)                  | 3.04<br>(1.63 to<br>5.08)               | 11.03<br>(5.69 to<br>18.51)               | 9.49<br>(4.65 to<br>16.27)                | 11.06<br>(5.71 to<br>18.63)               |
| Other musculoskeletal disorders               | 1,462.40<br>(951.26 to<br>1,945.51)              | 2,101.58<br>(1,289.83 to<br>2,820.27)            | 2,116.53<br>(1,325.91 to<br>2,851.91)            | 2,032.48<br>(1,239.60 to<br>2,770.02)            | 36.22<br>(23.77 to<br>47.33)            | 74.36<br>(44.70 to<br>101.09)             | 77.84<br>(47.68 to<br>106.82)             | 69.70<br>(42.02 to<br>95.93)              |
| <b>Other non-communicable diseases</b>        | 31,003.47<br>(21,440.94 to<br><b>44,376.45</b> ) | 32,354.35<br>(17,004.89 to<br><b>58,388.58</b> ) | 25,981.64<br>(13,889.36 to<br><b>45,471.79</b> ) | 35,324.89<br>(17,743.12 to<br><b>65,457.37</b> ) | 450.34<br>(322.28 to<br><b>614.91</b> ) | 748.93<br>(446.88 to<br><b>1,108.40</b> ) | 686.32<br>(406.99 to<br><b>1,005.24</b> ) | 759.93<br>(451.23 to<br><b>1,158.42</b> ) |
| Congenital birth defects                      | 28,888.04<br>(19,772.57 to<br>42,065.50)         | 26,346.57<br>(11,935.67 to<br>51,807.10)         | 20,029.80<br>(8,981.89 to<br>38,652.35)          | 29,510.60<br>(13,090.94 to<br>58,844.47)         | 366.74<br>(257.40 to<br>519.49)         | 371.14<br>(193.25 to<br>680.50)           | 288.50<br>(148.19 to<br>515.23)           | 410.62<br>(207.27 to<br>756.28)           |
| Neural tube defects                           | 302.27<br>(152.95 to<br>544.85)                  | 124.11<br>(38.57 to<br>315.71)                   | 84.90<br>(25.84 to<br>221.42)                    | 146.87<br>(42.51 to<br>389.03)                   | 3.78<br>(1.96 to<br>6.66)               | 1.86<br>(0.69 to<br>4.36)                 | 1.31<br>(0.46 to<br>3.10)                 | 2.17<br>(0.76 to<br>5.14)                 |
| Congenital heart anomalies                    | 9,989.68<br>(5,535.59 to<br>15,756.57)           | 8,937.67<br>(3,774.58 to<br>17,938.44)           | 6,446.27<br>(2,547.50 to<br>13,203.84)           | 9,980.54<br>(4,095.35 to<br>20,305.18)           | 125.95<br>(71.70 to<br>193.96)          | 122.74<br>(57.49 to<br>231.22)            | 90.15<br>(40.20 to<br>171.50)             | 135.55<br>(62.09 to<br>259.21)            |
| Orofacial clefts                              | 6.95<br>(2.72 to<br>16.29)                       | 4.65<br>(1.06 to<br>12.80)                       | 2.91<br>(0.65 to<br>8.23)                        | 5.63<br>(1.24 to<br>15.52)                       | 0.08<br>(0.03 to<br>0.19)               | 0.05<br>(0.01 to<br>0.15)                 | 0.03<br>(0.01 to<br>0.10)                 | 0.07<br>(0.01 to<br>0.18)                 |
| Down syndrome                                 | 3,734.70<br>(2,304.47 to<br>6,194.53)            | 3,299.47<br>(1,459.63 to<br>7,222.05)            | 2,835.40<br>(1,283.43 to<br>6,150.88)            | 3,721.22<br>(1,600.78 to<br>8,145.28)            | 50.32<br>(31.96 to<br>81.29)            | 50.34<br>(25.05 to<br>101.70)             | 44.31<br>(22.83 to<br>85.92)              | 55.92<br>(26.93 to<br>112.05)             |
| Other chromosomal abnormalities               | 3,370.01<br>(1,248.41 to<br>10,859.02)           | 3,674.02<br>(927.85 to<br>10,859.84)             | 2,864.16<br>(728.60 to<br>8,688.29)              | 4,176.93<br>(1,045.77 to<br>12,609.35)           | 41.14<br>(15.63 to<br>130.07)           | 48.33<br>(12.72 to<br>141.63)             | 38.24<br>(10.31 to<br>114.83)             | 54.47<br>(14.32 to<br>163.84)             |
| Congenital musculoskeletal and limb anomalies | 489.98<br>(262.67 to<br>824.67)                  | 414.29<br>(153.55 to<br>891.66)                  | 314.46<br>(111.15 to<br>669.22)                  | 458.18<br>(165.48 to<br>1,002.46)                | 6.05<br>(3.42 to<br>9.98)               | 5.52<br>(2.31 to<br>11.20)                | 4.25<br>(1.73 to<br>8.43)                 | 6.05<br>(2.46 to<br>12.45)                |

|                                      |                                                                  |                                                                 |                                                                |                                                                  |                                                            |                                                            |                                                            |                                                            |
|--------------------------------------|------------------------------------------------------------------|-----------------------------------------------------------------|----------------------------------------------------------------|------------------------------------------------------------------|------------------------------------------------------------|------------------------------------------------------------|------------------------------------------------------------|------------------------------------------------------------|
| Urogenital congenital anomalies      | 718.01<br>(361.17 to<br>1,129.46)                                | 743.44<br>(317.70 to<br>1,444.75)                               | 591.49<br>(240.28 to<br>1,149.24)                              | 811.23<br>(337.26 to<br>1,585.33)                                | 10.66<br>(5.48 to<br>16.21)                                | 15.85<br>(6.17 to<br>26.99)                                | 13.11<br>(4.85 to<br>22.22)                                | 16.88<br>(6.47 to<br>28.79)                                |
| Digestive congenital anomalies       | 785.65<br>(225.80 to<br>1,450.36)                                | 711.17<br>(155.82 to<br>1,815.42)                               | 513.20<br>(110.63 to<br>1,325.89)                              | 806.73<br>(173.18 to<br>2,047.38)                                | 9.45<br>(2.70 to<br>17.25)                                 | 9.05<br>(2.04 to<br>22.25)                                 | 6.62<br>(1.51 to<br>16.42)                                 | 10.19<br>(2.26 to<br>24.99)                                |
| Other congenital birth defects       | 9,490.80<br>(4,506.13 to<br>14,723.77)                           | 8,437.74<br>(3,013.48 to<br>17,476.46)                          | 6,377.00<br>(2,213.64 to<br>13,235.20)                         | 9,403.26<br>(3,316.09 to<br>19,995.40)                           | 119.31<br>(56.23 to<br>181.13)                             | 117.38<br>(45.38 to<br>225.01)                             | 90.48<br>(33.28 to<br>175.86)                              | 129.33<br>(48.99 to<br>253.40)                             |
| Skin and subcutaneous diseases       | 1,258.86<br>(594.28 to<br>1,747.33)                              | 5,496.69<br>(2,618.97 to<br>7,790.35)                           | 5,563.54<br>(2,666.76 to<br>7,923.16)                          | 5,239.83<br>(2,455.92 to<br>7,446.92)                            | 73.65<br>(35.15 to<br>101.50)                              | 371.87<br>(174.54 to<br>536.08)                            | 393.31<br>(184.51 to<br>567.18)                            | 342.64<br>(159.06 to<br>504.01)                            |
| Cellulitis                           | 200.72<br>(69.50 to<br>347.38)                                   | 1,092.99<br>(360.98 to<br>1,918.14)                             | 1,182.51<br>(386.84 to<br>2,063.65)                            | 1,010.60<br>(326.82 to<br>1,760.80)                              | 10.91<br>(3.65 to<br>20.09)                                | 69.34<br>(22.45 to<br>128.01)                              | 78.39<br>(25.53 to<br>141.61)                              | 62.05<br>(19.79 to<br>115.44)                              |
| Psoriasis                            | 598.65<br>(282.44 to<br>850.52)                                  | 2,953.99<br>(1,426.85 to<br>4,273.46)                           | 2,908.99<br>(1,393.69 to<br>4,220.59)                          | 2,847.91<br>(1,355.20 to<br>4,168.93)                            | 32.63<br>(15.70 to<br>49.15)                               | 193.73<br>(93.22 to<br>288.01)                             | 200.97<br>(97.41 to<br>305.73)                             | 181.83<br>(85.33 to<br>275.41)                             |
| Decubitus ulcer                      | 409.27<br>(117.64 to<br>643.82)                                  | 1,384.44<br>(349.71 to<br>2,421.59)                             | 1,388.30<br>(322.10 to<br>2,432.28)                            | 1,297.89<br>(320.05 to<br>2,272.35)                              | 28.80<br>(7.92 to<br>45.91)                                | 105.63<br>(25.50 to<br>188.18)                             | 110.61<br>(25.37 to<br>197.02)                             | 95.82<br>(22.57 to<br>173.86)                              |
| Other skin and subcutaneous diseases | 50.23<br>(19.54 to<br>73.54)                                     | 85.27<br>(33.86 to<br>123.86)                                   | 83.74<br>(34.45 to<br>121.35)                                  | 83.43<br>(32.72 to<br>121.10)                                    | 1.31<br>(0.52 to<br>1.91)                                  | 3.17<br>(1.26 to<br>4.82)                                  | 3.34<br>(1.37 to<br>5.03)                                  | 2.94<br>(1.18 to<br>4.50)                                  |
| Sudden infant death syndrome         | 856.56<br>(365.82 to<br>1,636.48)                                | 511.10<br>(151.15 to<br>1,275.08)                               | 388.30<br>(116.66 to<br>987.65)                                | 574.47<br>(166.42 to<br>1,425.96)                                | 9.94<br>(4.24 to<br>19.00)                                 | 5.93<br>(1.75 to<br>14.80)                                 | 4.51<br>(1.35 to<br>11.46)                                 | 6.67<br>(1.93 to<br>16.55)                                 |
| <b>Injuries</b>                      | <b>222,331.16</b><br><b>(144,400.82 to</b><br><b>298,209.72)</b> | <b>125,018.46</b><br><b>(94,097.81 to</b><br><b>179,585.90)</b> | <b>77,573.21</b><br><b>(55,805.71 to</b><br><b>121,533.77)</b> | <b>156,434.84</b><br><b>(118,632.05 to</b><br><b>219,193.70)</b> | <b>4,370.24</b><br><b>(3,008.00 to</b><br><b>5,763.12)</b> | <b>3,365.67</b><br><b>(2,664.53 to</b><br><b>4,556.25)</b> | <b>2,240.16</b><br><b>(1,688.67 to</b><br><b>3,229.87)</b> | <b>4,016.74</b><br><b>(3,181.21 to</b><br><b>5,373.17)</b> |
| <b>Transport injuries</b>            | <b>71,506.89</b><br><b>(59,597.54 to</b><br><b>85,566.51)</b>    | <b>62,708.05</b><br><b>(50,133.03 to</b><br><b>77,184.93)</b>   | <b>21,318.40</b><br><b>(16,648.69 to</b><br><b>26,566.76)</b>  | <b>91,838.99</b><br><b>(73,342.05 to</b><br><b>115,450.58)</b>   | <b>1,521.95</b><br><b>(1,263.19 to</b><br><b>1,824.07)</b> | <b>1,670.53</b><br><b>(1,371.86 to</b><br><b>2,006.48)</b> | <b>654.61</b><br><b>(525.64 to</b><br><b>802.19)</b>       | <b>2,306.58</b><br><b>(1,904.92 to</b><br><b>2,779.92)</b> |
| Road injuries                        | 69,248.49<br>(57,332.88 to<br>82,614.73)                         | 58,985.12<br>(47,081.37 to<br>73,265.75)                        | 18,198.54<br>(14,002.39 to<br>23,384.96)                       | 87,942.89<br>(70,468.34 to<br>109,122.69)                        | 1,466.09<br>(1,213.67 to<br>1,754.75)                      | 1,544.33<br>(1,251.74 to<br>1,864.91)                      | 545.67<br>(424.75 to<br>678.89)                            | 2,179.13<br>(1,783.28 to<br>2,628.28)                      |
| Pedestrian road injuries             | 16,142.80<br>(11,170.10 to<br>23,896.37)                         | 14,014.41<br>(9,388.90 to<br>20,886.38)                         | 4,990.47<br>(3,155.09 to<br>7,435.77)                          | 19,135.58<br>(12,622.93 to<br>28,980.09)                         | 366.45<br>(255.64 to<br>542.35)                            | 417.60<br>(285.19 to<br>612.15)                            | 166.46<br>(106.70 to<br>249.29)                            | 543.32<br>(370.43 to<br>804.94)                            |
| <b>Libya</b>                         |                                                                  |                                                                 |                                                                |                                                                  |                                                            |                                                            |                                                            |                                                            |
| Cause                                | YLLs (actual counts)                                             |                                                                 |                                                                |                                                                  | Deaths (actual counts)                                     |                                                            |                                                            |                                                            |
|                                      | 2016                                                             | 2040 Forecast                                                   | 2040 Better Scenario                                           | 2040 Worse Scenario                                              | 2016                                                       | 2040 Forecast                                              | 2040 Better Scenario                                       | 2040 Worse Scenario                                        |
| Cyclist road injuries                | 1,283.67<br>(761.97 to<br>2,351.20)                              | 1,160.73<br>(655.51 to<br>2,179.63)                             | 441.37<br>(236.01 to<br>830.57)                                | 1,655.39<br>(932.77 to<br>3,076.75)                              | 27.06<br>(16.06 to<br>50.08)                               | 29.56<br>(17.16 to<br>55.41)                               | 13.46<br>(7.44 to<br>24.90)                                | 39.44<br>(23.03 to<br>73.53)                               |
| Motorcyclist road injuries           | 4,491.77<br>(2,714.47 to<br>7,541.94)                            | 4,252.23<br>(2,382.18 to<br>7,076.80)                           | 2,003.22<br>(1,125.08 to<br>3,162.94)                          | 5,603.16<br>(3,156.74 to<br>9,515.21)                            | 80.03<br>(48.56 to<br>130.73)                              | 79.31<br>(46.09 to<br>129.55)                              | 40.48<br>(23.23 to<br>63.00)                               | 101.88<br>(58.49 to<br>168.92)                             |
| Motor vehicle road injuries          | 47,128.45<br>(35,880.72 to<br>58,796.11)                         | 39,371.86<br>(28,966.18 to<br>51,156.08)                        | 10,700.09<br>(7,377.18 to<br>14,409.19)                        | 61,276.81<br>(45,549.08 to<br>78,656.28)                         | 987.69<br>(752.59 to<br>1,232.79)                          | 1,011.51<br>(756.58 to<br>1,300.22)                        | 320.44<br>(226.09 to<br>424.62)                            | 1,486.14<br>(1,131.65 to<br>1,881.22)                      |
| Other road injuries                  | 201.80<br>(136.18 to<br>321.81)                                  | 185.89<br>(124.69 to<br>294.39)                                 | 63.39<br>(41.85 to<br>97.37)                                   | 271.95<br>(179.89 to<br>437.99)                                  | 4.85<br>(3.26 to<br>7.66)                                  | 6.35<br>(4.20 to<br>10.01)                                 | 2.83<br>(1.79 to<br>4.47)                                  | 8.35<br>(5.50 to<br>13.33)                                 |
| Other transport injuries             | 2,258.39<br>(1,528.76 to<br>3,078.65)                            | 3,722.93<br>(2,431.04 to<br>5,249.20)                           | 3,119.86<br>(2,011.99 to<br>4,403.26)                          | 3,896.10<br>(2,493.23 to<br>5,564.37)                            | 55.86<br>(37.65 to<br>74.01)                               | 126.21<br>(83.16 to<br>173.71)                             | 110.94<br>(70.98 to<br>157.07)                             | 127.45<br>(82.92 to<br>178.26)                             |
| <b>Unintentional injuries</b>        | <b>30,657.68</b><br><b>(23,635.56 to</b><br><b>37,655.53)</b>    | <b>32,741.83</b><br><b>(23,346.39 to</b><br><b>43,900.07)</b>   | <b>28,959.73</b><br><b>(20,803.86 to</b><br><b>38,720.19)</b>  | <b>34,317.50</b><br><b>(24,027.64 to</b><br><b>46,788.37)</b>    | <b>691.71</b><br><b>(530.63 to</b><br><b>844.04)</b>       | <b>1,040.24</b><br><b>(757.36 to</b><br><b>1,341.93)</b>   | <b>970.07</b><br><b>(708.11 to</b><br><b>1,253.48)</b>     | <b>1,049.37</b><br><b>(748.76 to</b><br><b>1,369.23)</b>   |
| Falls                                | 7,717.20<br>(5,342.72 to<br>10,437.45)                           | 10,685.86<br>(7,390.55 to<br>14,401.71)                         | 10,037.99<br>(6,988.26 to<br>13,385.18)                        | 10,788.05<br>(7,374.96 to<br>14,579.26)                          | 213.61<br>(150.29 to<br>287.15)                            | 421.30<br>(294.85 to<br>562.37)                            | 415.33<br>(292.36 to<br>545.29)                            | 409.67<br>(284.23 to<br>551.80)                            |

|                                                 |                                          |                                          |                                          |                                          |                                 |                                 |                                 |                                 |
|-------------------------------------------------|------------------------------------------|------------------------------------------|------------------------------------------|------------------------------------------|---------------------------------|---------------------------------|---------------------------------|---------------------------------|
| Drowning                                        | 5,878.04<br>(4,117.85 to<br>7,635.79)    | 4,717.22<br>(2,931.56 to<br>6,797.46)    | 4,061.32<br>(2,510.29 to<br>6,024.44)    | 5,052.58<br>(3,083.75 to<br>7,371.98)    | 106.24<br>(73.59 to<br>137.75)  | 106.20<br>(67.46 to<br>147.57)  | 94.15<br>(60.33 to<br>133.74)   | 111.21<br>(70.70 to<br>155.10)  |
| Fire, heat, and hot substances                  | 3,770.82<br>(2,112.30 to<br>5,386.56)    | 3,570.67<br>(1,865.06 to<br>5,549.49)    | 2,988.96<br>(1,568.15 to<br>4,673.02)    | 3,812.22<br>(1,973.59 to<br>6,012.02)    | 85.34<br>(47.21 to<br>121.09)   | 110.73<br>(58.59 to<br>168.36)  | 97.24<br>(51.08 to<br>151.01)   | 114.08<br>(60.22 to<br>176.97)  |
| Poisonings                                      | 1,579.75<br>(595.27 to<br>2,584.10)      | 1,061.06<br>(369.10 to<br>1,854.21)      | 814.86<br>(286.80 to<br>1,463.17)        | 1,188.10<br>(402.52 to<br>2,118.74)      | 30.32<br>(11.65 to<br>48.37)    | 25.63<br>(9.42 to<br>42.66)     | 20.42<br>(7.52 to<br>35.15)     | 27.91<br>(9.99 to<br>46.94)     |
| Exposure to mechanical forces                   | 4,586.20<br>(2,579.88 to<br>6,369.80)    | 4,565.20<br>(2,396.60 to<br>6,986.21)    | 3,826.55<br>(2,009.60 to<br>6,106.94)    | 4,902.73<br>(2,565.56 to<br>7,732.48)    | 95.15<br>(52.37 to<br>131.45)   | 119.77<br>(65.39 to<br>177.28)  | 103.99<br>(56.93 to<br>159.17)  | 125.31<br>(67.51 to<br>188.21)  |
| Unintentional firearm injuries                  | 748.63<br>(352.95 to<br>1,084.87)        | 638.69<br>(298.96 to<br>1,072.05)        | 538.25<br>(262.27 to<br>888.70)          | 696.12<br>(324.48 to<br>1,187.97)        | 15.20<br>(7.12 to<br>21.60)     | 16.14<br>(7.97 to<br>25.62)     | 14.12<br>(7.11 to<br>22.19)     | 17.12<br>(8.24 to<br>27.85)     |
| Unintentional suffocation                       | 493.96<br>(264.06 to<br>826.59)          | 262.32<br>(94.70 to<br>634.09)           | 204.31<br>(74.75 to<br>472.46)           | 303.33<br>(100.99 to<br>746.62)          | 6.57<br>(3.59 to<br>10.70)      | 3.88<br>(1.64 to<br>8.60)       | 3.09<br>(1.33 to<br>6.64)       | 4.42<br>(1.69 to<br>10.01)      |
| Other exposure to mechanical forces             | 3,343.62<br>(1,675.09 to<br>4,822.97)    | 3,664.20<br>(1,787.69 to<br>5,661.44)    | 3,084.00<br>(1,549.49 to<br>4,975.67)    | 3,903.28<br>(1,879.06 to<br>6,089.64)    | 73.39<br>(36.48 to<br>105.57)   | 99.75<br>(50.52 to<br>150.72)   | 86.78<br>(45.40 to<br>135.31)   | 103.77<br>(51.30 to<br>156.54)  |
| Adverse effects of medical treatment            | 3,098.76<br>(2,057.01 to<br>4,136.84)    | 4,145.10<br>(2,625.58 to<br>6,054.93)    | 3,777.05<br>(2,365.10 to<br>5,456.03)    | 4,320.54<br>(2,668.29 to<br>6,327.99)    | 79.79<br>(52.67 to<br>105.75)   | 147.09<br>(94.84 to<br>209.62)  | 140.04<br>(89.18 to<br>199.77)  | 148.24<br>(94.14 to<br>213.79)  |
| Animal contact                                  | 390.47<br>(224.13 to<br>550.22)          | 502.45<br>(267.81 to<br>803.06)          | 428.30<br>(234.01 to<br>680.69)          | 544.50<br>(273.41 to<br>898.38)          | 8.75<br>(5.04 to<br>12.22)      | 16.80<br>(9.26 to<br>25.77)     | 15.22<br>(8.39 to<br>23.48)     | 17.37<br>(9.45 to<br>27.12)     |
| Venomous animal contact                         | 150.73<br>(81.64 to<br>226.47)           | 169.90<br>(81.06 to<br>298.75)           | 145.28<br>(73.09 to<br>254.17)           | 186.10<br>(88.79 to<br>335.49)           | 3.18<br>(1.79 to<br>4.75)       | 5.22<br>(2.63 to<br>8.74)       | 4.74<br>(2.37 to<br>7.86)       | 5.46<br>(2.76 to<br>9.43)       |
| Non-venomous animal contact                     | 239.74<br>(131.54 to<br>345.06)          | 332.55<br>(173.78 to<br>541.59)          | 283.02<br>(143.40 to<br>463.75)          | 358.39<br>(183.03 to<br>588.53)          | 5.57<br>(3.08 to<br>7.87)       | 11.58<br>(6.23 to<br>17.85)     | 10.48<br>(5.64 to<br>16.08)     | 11.91<br>(6.27 to<br>18.58)     |
| Foreign body                                    | 2,058.79<br>(1,358.90 to<br>2,721.34)    | 1,819.02<br>(1,082.99 to<br>2,571.86)    | 1,702.73<br>(1,047.16 to<br>2,374.30)    | 1,892.39<br>(1,111.80 to<br>2,693.13)    | 37.98<br>(24.53 to<br>49.90)    | 47.10<br>(29.92 to<br>62.52)    | 46.64<br>(29.98 to<br>61.62)    | 47.00<br>(29.32 to<br>63.22)    |
| Pulmonary aspiration and foreign body in airway | 1,526.06<br>(971.48 to<br>2,067.40)      | 1,328.28<br>(810.01 to<br>1,863.96)      | 1,241.68<br>(776.85 to<br>1,727.02)      | 1,369.83<br>(817.22 to<br>1,953.98)      | 27.71<br>(17.69 to<br>35.88)    | 35.56<br>(23.10 to<br>46.19)    | 35.41<br>(22.79 to<br>45.99)    | 35.02<br>(22.61 to<br>45.82)    |
| Foreign body in other body part                 | 532.73<br>(195.49 to<br>856.95)          | 490.74<br>(174.55 to<br>849.90)          | 461.05<br>(161.86 to<br>799.51)          | 522.56<br>(185.63 to<br>907.52)          | 10.28<br>(3.66 to<br>16.48)     | 11.54<br>(4.09 to<br>19.14)     | 11.24<br>(3.93 to<br>18.86)     | 11.98<br>(4.22 to<br>19.96)     |
| Environmental heat and cold exposure            | 691.16<br>(324.68 to<br>978.98)          | 923.00<br>(412.15 to<br>1,475.33)        | 736.38<br>(315.32 to<br>1,205.92)        | 1,019.94<br>(442.26 to<br>1,640.42)      | 16.52<br>(7.66 to<br>23.27)     | 27.66<br>(12.48 to<br>43.58)    | 22.71<br>(10.07 to<br>36.63)    | 29.91<br>(13.36 to<br>46.79)    |
| Other unintentional injuries                    | 886.47<br>(492.88 to<br>1,362.76)        | 752.23<br>(392.74 to<br>1,245.61)        | 585.61<br>(285.63 to<br>1,036.31)        | 796.45<br>(422.05 to<br>1,296.99)        | 18.00<br>(10.21 to<br>27.46)    | 17.95<br>(9.80 to<br>28.62)     | 14.32<br>(7.26 to<br>24.81)     | 18.67<br>(10.09 to<br>29.55)    |
| Self-harm and interpersonal violence            | 19,496.11<br>(14,391.51 to<br>25,930.14) | 20,316.28<br>(14,399.36 to<br>28,037.00) | 18,179.99<br>(13,276.66 to<br>24,709.85) | 20,858.79<br>(14,443.85 to<br>29,006.54) | 398.76<br>(296.37 to<br>532.35) | 472.98<br>(338.58 to<br>645.16) | 432.78<br>(318.66 to<br>583.27) | 478.47<br>(337.80 to<br>659.78) |
| <b>Libya</b>                                    |                                          |                                          |                                          |                                          |                                 |                                 |                                 |                                 |
| Cause                                           | YLLs (actual counts)                     |                                          |                                          |                                          | Deaths (actual counts)          |                                 |                                 |                                 |
|                                                 | 2016                                     | 2040 Forecast                            | 2040 Better Scenario                     | 2040 Worse Scenario                      | 2016                            | 2040 Forecast                   | 2040 Better Scenario            | 2040 Worse Scenario             |
| Self-harm                                       | 13,398.47<br>(9,348.70 to<br>19,369.50)  | 15,220.95<br>(10,482.27 to<br>22,361.67) | 13,673.81<br>(9,482.49 to<br>19,676.96)  | 15,657.08<br>(10,550.30 to<br>23,080.01) | 282.09<br>(198.08 to<br>406.49) | 365.76<br>(254.11 to<br>529.97) | 336.43<br>(237.03 to<br>478.77) | 370.17<br>(254.94 to<br>534.88) |
| Self-harm by firearm                            | 573.35<br>(267.09 to<br>1,016.90)        | 586.43<br>(263.72 to<br>1,077.97)        | 505.18<br>(232.21 to<br>887.46)          | 607.60<br>(267.70 to<br>1,136.99)        | 12.69<br>(5.88 to<br>22.09)     | 15.16<br>(7.00 to<br>26.93)     | 13.44<br>(6.27 to<br>23.13)     | 15.41<br>(6.98 to<br>27.80)     |
| Self-harm by other specified means              | 12,825.12<br>(9,015.78 to<br>18,617.82)  | 14,634.52<br>(10,082.28 to<br>21,565.72) | 13,168.64<br>(9,133.88 to<br>19,029.67)  | 15,049.48<br>(10,192.99 to<br>22,335.07) | 269.41<br>(190.28 to<br>389.87) | 350.60<br>(244.98 to<br>507.72) | 323.00<br>(227.33 to<br>459.34) | 354.76<br>(246.38 to<br>517.36) |



|                                                                              |                                                                 |                                                         |                                                         |                                                         |                                                          |                                                    |                                                    |                                                    |
|------------------------------------------------------------------------------|-----------------------------------------------------------------|---------------------------------------------------------|---------------------------------------------------------|---------------------------------------------------------|----------------------------------------------------------|----------------------------------------------------|----------------------------------------------------|----------------------------------------------------|
| Interpersonal violence                                                       | 6,097.64<br>(3,391.38 to<br>8,248.59)                           | 5,095.33<br>(2,806.82 to<br>7,064.44)                   | 4,506.18<br>(2,548.67 to<br>6,273.56)                   | 5,201.71<br>(2,871.71 to<br>7,255.61)                   | 116.67<br>(65.96 to<br>156.13)                           | 107.23<br>(63.76 to<br>144.32)                     | 96.35<br>(58.83 to<br>130.57)                      | 108.30<br>(63.17 to<br>145.39)                     |
| Physical violence by firearm                                                 | 2,862.66<br>(1,331.96 to<br>4,786.98)                           | 2,316.94<br>(1,028.19 to<br>3,980.29)                   | 2,001.91<br>(898.51 to<br>3,506.65)                     | 2,364.23<br>(1,045.69 to<br>4,079.37)                   | 54.42<br>(26.01 to<br>89.77)                             | 46.80<br>(21.65 to<br>79.46)                       | 40.86<br>(19.46 to<br>70.31)                       | 47.38<br>(21.57 to<br>80.92)                       |
| Physical violence by sharp object                                            | 1,673.82<br>(761.16 to<br>2,644.82)                             | 1,491.05<br>(684.09 to<br>2,421.57)                     | 1,333.14<br>(628.78 to<br>2,178.63)                     | 1,506.14<br>(687.06 to<br>2,454.70)                     | 31.86<br>(14.61 to<br>49.39)                             | 30.67<br>(15.14 to<br>47.90)                       | 27.81<br>(14.18 to<br>43.67)                       | 30.67<br>(15.09 to<br>48.06)                       |
| Physical violence by other means                                             | 1,561.17<br>(732.95 to<br>2,637.42)                             | 1,287.35<br>(581.52 to<br>2,277.46)                     | 1,171.14<br>(544.04 to<br>2,039.33)                     | 1,331.34<br>(607.54 to<br>2,345.35)                     | 30.39<br>(14.47 to<br>50.05)                             | 29.76<br>(14.35 to<br>49.25)                       | 27.68<br>(13.81 to<br>45.29)                       | 30.26<br>(14.50 to<br>50.19)                       |
| Forces of nature, conflict and terrorism, and executions and police conflict | <b>100,670.48</b><br><b>(26,746.18 to</b><br><b>178,594.99)</b> | <b>9,252.30</b><br><b>(0.00 to</b><br><b>42,458.98)</b> | <b>9,115.09</b><br><b>(0.00 to</b><br><b>42,101.61)</b> | <b>9,419.56</b><br><b>(0.00 to</b><br><b>43,685.38)</b> | <b>1,757.82</b><br><b>(467.08 to</b><br><b>3,118.45)</b> | <b>181.91</b><br><b>(0.00 to</b><br><b>834.60)</b> | <b>182.70</b><br><b>(0.00 to</b><br><b>840.83)</b> | <b>182.31</b><br><b>(0.00 to</b><br><b>846.53)</b> |
| Exposure to forces of nature                                                 | 0.00<br>(0.00 to<br>0.00)                                       | 255.33<br>(0.00 to<br>249.43)                           | 251.30<br>(0.00 to<br>245.88)                           | 258.98<br>(0.00 to<br>253.73)                           | 0.00<br>(0.00 to<br>0.00)                                | 5.72<br>(0.00 to<br>5.55)                          | 5.80<br>(0.00 to<br>5.60)                          | 5.68<br>(0.00 to<br>5.51)                          |
| Conflict and terrorism                                                       | 100,630.31<br>(26,705.18 to<br>178,547.42)                      | 8,210.50<br>(0.00 to<br>28,162.88)                      | 8,081.85<br>(0.00 to<br>27,629.70)                      | 8,365.53<br>(0.00 to<br>28,798.43)                      | 1,757.04<br>(466.28 to<br>3,117.50)                      | 160.46<br>(0.00 to<br>537.97)                      | 161.10<br>(0.00 to<br>537.96)                      | 160.88<br>(0.00 to<br>540.94)                      |
| Executions and police conflict                                               | 40.18<br>(34.90 to<br>47.20)                                    | 786.48<br>(0.00 to<br>11,652.10)                        | 781.94<br>(0.00 to<br>11,588.85)                        | 795.05<br>(0.00 to<br>11,748.59)                        | 0.78<br>(0.00 to<br>0.95)                                | 15.73<br>(0.00 to<br>230.45)                       | 15.80<br>(0.00 to<br>231.59)                       | 15.75<br>(0.00 to<br>230.75)                       |
| <b>Morocco</b>                                                               |                                                                 |                                                         |                                                         |                                                         |                                                          |                                                    |                                                    |                                                    |
| Cause                                                                        | YLLs (in 1000s)                                                 |                                                         |                                                         |                                                         | Deaths (in 1000s)                                        |                                                    |                                                    |                                                    |
|                                                                              | 2016                                                            | 2040 Forecast                                           | 2040 Better Scenario                                    | 2040 Worse Scenario                                     | 2016                                                     | 2040 Forecast                                      | 2040 Better Scenario                               | 2040 Worse Scenario                                |
| All causes                                                                   | 4,875.43<br>(4,499.37 to<br>5,284.55)                           | 5,788.93<br>(4,943.04 to<br>6,365.52)                   | 4,705.47<br>(4,086.45 to<br>5,607.28)                   | 7,693.91<br>(6,545.85 to<br>9,166.64)                   | 184.60<br>(171.80 to<br>198.18)                          | 319.14<br>(281.41 to<br>367.53)                    | 273.40<br>(245.21 to<br>319.45)                    | 395.17<br>(348.88 to<br>446.54)                    |
| Communicable, maternal, neonatal, and nutritional diseases                   | 1,090.84<br>(884.32 to<br>1,379.38)                             | 737.66<br>(529.27 to<br>1,013.77)                       | 592.40<br>(433.53 to<br>818.64)                         | 1,029.30<br>(736.78 to<br>1,415.11)                     | 26.54<br>(21.61 to<br>36.32)                             | 29.20<br>(21.08 to<br>43.38)                       | 25.93<br>(18.93 to<br>38.65)                       | 37.23<br>(26.40 to<br>55.46)                       |
| HIV/AIDS and tuberculosis                                                    | 307.31<br>(230.75 to<br>540.57)                                 | 208.95<br>(124.01 to<br>426.57)                         | 171.25<br>(99.62 to<br>365.57)                          | 304.06<br>(181.68 to<br>619.40)                         | 11.99<br>(8.85 to<br>22.70)                              | 11.44<br>(6.37 to<br>25.40)                        | 9.75<br>(5.43 to<br>21.89)                         | 15.76<br>(8.89 to<br>32.81)                        |
| Tuberculosis                                                                 | 292.27<br>(223.23 to<br>525.88)                                 | 193.41<br>(115.57 to<br>400.01)                         | 158.04<br>(93.51 to<br>342.05)                          | 285.25<br>(168.81 to<br>590.46)                         | 11.68<br>(8.67 to<br>22.47)                              | 11.11<br>(6.12 to<br>25.17)                        | 9.46<br>(5.29 to<br>21.84)                         | 15.36<br>(8.63 to<br>32.12)                        |
| HIV/AIDS                                                                     | 15.04<br>(0.63 to<br>80.14)                                     | 15.54<br>(0.82 to<br>87.38)                             | 13.21<br>(0.40 to<br>83.11)                             | 18.82<br>(1.73 to<br>91.07)                             | 0.31<br>(0.01 to<br>1.61)                                | 0.33<br>(0.02 to<br>1.90)                          | 0.29<br>(0.01 to<br>1.82)                          | 0.40<br>(0.03 to<br>1.98)                          |
| Diarrhea, lower respiratory, and other common infectious diseases            | 326.85<br>(247.12 to<br>412.28)                                 | 263.70<br>(178.85 to<br>369.39)                         | 226.59<br>(154.97 to<br>310.19)                         | 379.82<br>(248.17 to<br>555.79)                         | 8.66<br>(6.52 to<br>10.46)                               | 13.89<br>(9.12 to<br>18.95)                        | 13.14<br>(8.70 to<br>17.80)                        | 16.63<br>(10.62 to<br>23.39)                       |
| Diarrheal diseases                                                           | 87.94<br>(54.87 to<br>131.35)                                   | 20.76<br>(4.23 to<br>61.82)                             | 17.03<br>(3.69 to<br>49.08)                             | 34.49<br>(9.94 to<br>143.33)                            | 1.42<br>(0.94 to<br>2.08)                                | 0.70<br>(0.18 to<br>2.02)                          | 0.66<br>(0.17 to<br>1.87)                          | 1.49<br>(0.32 to<br>4.27)                          |
| Intestinal infectious diseases                                               | 11.49<br>(5.69 to<br>20.28)                                     | 7.23<br>(3.75 to<br>12.35)                              | 6.52<br>(3.43 to<br>11.03)                              | 8.24<br>(4.21 to<br>14.60)                              | 0.18<br>(0.09 to<br>0.31)                                | 0.12<br>(0.07 to<br>0.22)                          | 0.11<br>(0.06 to<br>0.20)                          | 0.14<br>(0.07 to<br>0.24)                          |
| Typhoid fever                                                                | 10.19<br>(4.99 to<br>18.28)                                     | 6.25<br>(3.25 to<br>10.96)                              | 5.64<br>(2.94 to<br>9.84)                               | 7.11<br>(3.58 to<br>12.89)                              | 0.16<br>(0.08 to<br>0.28)                                | 0.11<br>(0.06 to<br>0.19)                          | 0.10<br>(0.05 to<br>0.17)                          | 0.12<br>(0.06 to<br>0.21)                          |
| Paratyphoid fever                                                            | 1.30<br>(0.57 to<br>2.64)                                       | 0.97<br>(0.43 to<br>1.96)                               | 0.87<br>(0.39 to<br>1.74)                               | 1.13<br>(0.49 to<br>2.32)                               | 0.02<br>(0.01 to<br>0.04)                                | 0.02<br>(0.01 to<br>0.03)                          | 0.02<br>(0.01 to<br>0.03)                          | 0.02<br>(0.01 to<br>0.04)                          |
| Other intestinal infectious diseases                                         | 0.00<br>(0.00 to<br>0.01)                                       | 0.00<br>(0.00 to<br>0.00)                               | 0.00<br>(0.00 to<br>0.00)                               | 0.00<br>(0.00 to<br>0.01)                               | 0.00<br>(0.00 to<br>0.00)                                | 0.00<br>(0.00 to<br>0.00)                          | 0.00<br>(0.00 to<br>0.00)                          | 0.00<br>(0.00 to<br>0.00)                          |
| Lower respiratory infections                                                 | 173.06<br>(128.57 to<br>218.70)                                 | 206.51<br>(134.04 to<br>290.08)                         | 178.52<br>(118.03 to<br>243.04)                         | 270.63<br>(173.73 to<br>401.42)                         | 6.20<br>(4.35 to<br>7.80)                                | 12.43<br>(7.95 to<br>17.40)                        | 11.78<br>(7.58 to<br>16.33)                        | 14.17<br>(8.88 to<br>20.34)                        |

|                                |                              |                              |                              |                              |                           |                           |                           |                           |
|--------------------------------|------------------------------|------------------------------|------------------------------|------------------------------|---------------------------|---------------------------|---------------------------|---------------------------|
| Upper respiratory infections   | 0.20<br>(0.11 to<br>0.35)    | 0.19<br>(0.08 to<br>0.42)    | 0.16<br>(0.07 to<br>0.35)    | 0.25<br>(0.10 to<br>0.56)    | 0.01<br>(0.00 to<br>0.01) | 0.01<br>(0.00 to<br>0.02) | 0.01<br>(0.00 to<br>0.01) | 0.01<br>(0.00 to<br>0.02) |
| Otitis media                   | 0.03<br>(0.01 to<br>0.07)    | 0.01<br>(0.00 to<br>0.03)    | 0.01<br>(0.00 to<br>0.03)    | 0.01<br>(0.00 to<br>0.03)    | 0.00<br>(0.00 to<br>0.00) | 0.00<br>(0.00 to<br>0.00) | 0.00<br>(0.00 to<br>0.00) | 0.00<br>(0.00 to<br>0.00) |
| Meningitis                     | 38.65<br>(22.25 to<br>82.61) | 20.68<br>(11.41 to<br>46.05) | 17.93<br>(10.42 to<br>37.96) | 26.15<br>(13.35 to<br>65.49) | 0.59<br>(0.38 to<br>1.15) | 0.42<br>(0.28 to<br>0.74) | 0.39<br>(0.27 to<br>0.67) | 0.48<br>(0.30 to<br>0.95) |
| Pneumococcal meningitis        | 0.27<br>(0.14 to<br>0.55)    | 0.14<br>(0.07 to<br>0.27)    | 0.13<br>(0.07 to<br>0.25)    | 0.15<br>(0.08 to<br>0.31)    | 0.00<br>(0.00 to<br>0.01) | 0.00<br>(0.00 to<br>0.01) | 0.00<br>(0.00 to<br>0.01) | 0.00<br>(0.00 to<br>0.01) |
| H influenzae type B meningitis | 3.77<br>(2.02 to<br>8.73)    | 4.43<br>(1.34 to<br>13.20)   | 3.55<br>(1.19 to<br>10.45)   | 7.96<br>(1.87 to<br>25.66)   | 0.05<br>(0.03 to<br>0.11) | 0.06<br>(0.03 to<br>0.17) | 0.06<br>(0.03 to<br>0.14) | 0.10<br>(0.03 to<br>0.31) |
| Meningococcal meningitis       | 14.96<br>(8.38 to<br>33.31)  | 6.69<br>(3.69 to<br>14.93)   | 5.92<br>(3.38 to<br>12.45)   | 7.50<br>(3.85 to<br>19.10)   | 0.23<br>(0.15 to<br>0.46) | 0.15<br>(0.10 to<br>0.26) | 0.15<br>(0.10 to<br>0.24) | 0.16<br>(0.10 to<br>0.30) |
| Other meningitis               | 19.65<br>(11.00 to<br>43.24) | 9.43<br>(5.12 to<br>20.88)   | 8.33<br>(4.74 to<br>17.16)   | 10.55<br>(5.47 to<br>26.46)  | 0.29<br>(0.18 to<br>0.59) | 0.20<br>(0.13 to<br>0.34) | 0.19<br>(0.12 to<br>0.31) | 0.21<br>(0.13 to<br>0.40) |
| Encephalitis                   | 5.10<br>(3.21 to<br>7.98)    | 4.76<br>(3.16 to<br>7.43)    | 4.38<br>(2.94 to<br>6.83)    | 5.34<br>(3.54 to<br>8.43)    | 0.11<br>(0.07 to<br>0.17) | 0.14<br>(0.09 to<br>0.21) | 0.13<br>(0.09 to<br>0.20) | 0.15<br>(0.10 to<br>0.23) |
| Diphtheria                     | 0.03<br>(0.02 to<br>0.04)    | 0.01<br>(0.00 to<br>0.01)    | 0.01<br>(0.00 to<br>0.01)    | 0.01<br>(0.01 to<br>0.04)    | 0.00<br>(0.00 to<br>0.00) | 0.00<br>(0.00 to<br>0.00) | 0.00<br>(0.00 to<br>0.00) | 0.00<br>(0.00 to<br>0.00) |
| Whooping cough                 | 2.88<br>(0.23 to<br>9.28)    | 1.53<br>(0.09 to<br>5.02)    | 0.59<br>(0.04 to<br>1.99)    | 8.29<br>(0.51 to<br>24.57)   | 0.03<br>(0.00 to<br>0.11) | 0.02<br>(0.00 to<br>0.06) | 0.01<br>(0.00 to<br>0.02) | 0.10<br>(0.01 to<br>0.29) |
| Tetanus                        | 5.42<br>(1.06 to<br>15.61)   | 0.83<br>(0.12 to<br>2.95)    | 0.60<br>(0.09 to<br>2.25)    | 2.35<br>(0.26 to<br>9.04)    | 0.09<br>(0.02 to<br>0.28) | 0.02<br>(0.00 to<br>0.05) | 0.01<br>(0.00 to<br>0.05) | 0.03<br>(0.00 to<br>0.11) |
| Measles                        | 1.00<br>(0.29 to<br>2.60)    | 0.61<br>(0.05 to<br>3.93)    | 0.34<br>(0.04 to<br>1.94)    | 3.29<br>(0.11 to<br>20.64)   | 0.01<br>(0.00 to<br>0.03) | 0.01<br>(0.00 to<br>0.05) | 0.01<br>(0.00 to<br>0.02) | 0.04<br>(0.00 to<br>0.25) |

**Morocco**

| Cause                                   | YLLs (in 1000s)                  |                                  |                                  |                                  | Deaths (in 1000s)                |                                  |                                  |                                  |
|-----------------------------------------|----------------------------------|----------------------------------|----------------------------------|----------------------------------|----------------------------------|----------------------------------|----------------------------------|----------------------------------|
|                                         | 2016                             | 2040 Forecast                    | 2040 Better Scenario             | 2040 Worse Scenario              | 2016                             | 2040 Forecast                    | 2040 Better Scenario             | 2040 Worse Scenario              |
| Varicella and herpes zoster             | 1.05<br>(0.67 to<br>1.58)        | 0.59<br>(0.33 to<br>0.99)        | 0.50<br>(0.29 to<br>0.83)        | 0.75<br>(0.42 to<br>1.27)        | 0.03<br>(0.02 to<br>0.04)        | 0.03<br>(0.02 to<br>0.05)        | 0.03<br>(0.01 to<br>0.05)        | 0.03<br>(0.02 to<br>0.05)        |
| Neglected tropical diseases and malaria | <b>2.05</b><br>(1.45 to<br>2.87) | <b>0.68</b><br>(0.44 to<br>1.32) | <b>0.61</b><br>(0.39 to<br>1.21) | <b>0.81</b><br>(0.52 to<br>1.59) | <b>0.05</b><br>(0.04 to<br>0.08) | <b>0.02</b><br>(0.01 to<br>0.04) | <b>0.02</b><br>(0.01 to<br>0.04) | <b>0.03</b><br>(0.02 to<br>0.05) |
| Malaria                                 | 0.00<br>(0.00 to<br>0.00)        | 0.00<br>(0.00 to<br>0.00)        | 0.00<br>(0.00 to<br>0.00)        | 0.00<br>(0.00 to<br>0.00)        | 0.00<br>(0.00 to<br>0.00)        | 0.00<br>(0.00 to<br>0.00)        | 0.00<br>(0.00 to<br>0.00)        | 0.00<br>(0.00 to<br>0.00)        |
| Chagas disease                          | 0.00<br>(0.00 to<br>0.00)        | 0.00<br>(0.00 to<br>0.00)        | 0.00<br>(0.00 to<br>0.00)        | 0.00<br>(0.00 to<br>0.00)        | 0.00<br>(0.00 to<br>0.00)        | 0.00<br>(0.00 to<br>0.00)        | 0.00<br>(0.00 to<br>0.00)        | 0.00<br>(0.00 to<br>0.00)        |
| Leishmaniasis                           | 1.07<br>(0.59 to<br>1.78)        | 0.21<br>(0.10 to<br>0.58)        | 0.18<br>(0.09 to<br>0.50)        | 0.27<br>(0.14 to<br>0.75)        | 0.03<br>(0.01 to<br>0.04)        | 0.01<br>(0.00 to<br>0.02)        | 0.01<br>(0.00 to<br>0.02)        | 0.01<br>(0.00 to<br>0.02)        |
| African trypanosomiasis                 | 0.00<br>(0.00 to<br>0.00)        | 0.00<br>(0.00 to<br>0.00)        | 0.00<br>(0.00 to<br>0.00)        | 0.00<br>(0.00 to<br>0.00)        | 0.00<br>(0.00 to<br>0.00)        | 0.00<br>(0.00 to<br>0.00)        | 0.00<br>(0.00 to<br>0.00)        | 0.00<br>(0.00 to<br>0.00)        |
| Schistosomiasis                         | 0.66<br>(0.41 to<br>1.00)        | 0.32<br>(0.18 to<br>0.57)        | 0.31<br>(0.17 to<br>0.53)        | 0.37<br>(0.20 to<br>0.64)        | 0.02<br>(0.01 to<br>0.03)        | 0.01<br>(0.01 to<br>0.03)        | 0.01<br>(0.01 to<br>0.02)        | 0.02<br>(0.01 to<br>0.03)        |
| Cysticercosis                           | 0.04<br>(0.03 to<br>0.06)        | 0.01<br>(0.01 to<br>0.02)        | 0.01<br>(0.00 to<br>0.02)        | 0.01<br>(0.01 to<br>0.02)        | 0.00<br>(0.00 to<br>0.00)        | 0.00<br>(0.00 to<br>0.00)        | 0.00<br>(0.00 to<br>0.00)        | 0.00<br>(0.00 to<br>0.00)        |

|                                                          |                                         |                                        |                                       |                                         |                                      |                                      |                                      |                                      |
|----------------------------------------------------------|-----------------------------------------|----------------------------------------|---------------------------------------|-----------------------------------------|--------------------------------------|--------------------------------------|--------------------------------------|--------------------------------------|
| Cystic echinococcosis                                    | 0.00<br>(0.00 to 0.00)                  | 0.00<br>(0.00 to 0.00)                 | 0.00<br>(0.00 to 0.00)                | 0.00<br>(0.00 to 0.00)                  | 0.00<br>(0.00 to 0.00)               | 0.00<br>(0.00 to 0.00)               | 0.00<br>(0.00 to 0.00)               | 0.00<br>(0.00 to 0.00)               |
| Dengue                                                   | 0.00<br>(0.00 to 0.00)                  | 0.00<br>(0.00 to 0.00)                 | 0.00<br>(0.00 to 0.00)                | 0.00<br>(0.00 to 0.00)                  | 0.00<br>(0.00 to 0.00)               | 0.00<br>(0.00 to 0.00)               | 0.00<br>(0.00 to 0.00)               | 0.00<br>(0.00 to 0.00)               |
| Yellow fever                                             | 0.00<br>(0.00 to 0.00)                  | 0.00<br>(0.00 to 0.00)                 | 0.00<br>(0.00 to 0.00)                | 0.00<br>(0.00 to 0.00)                  | 0.00<br>(0.00 to 0.00)               | 0.00<br>(0.00 to 0.00)               | 0.00<br>(0.00 to 0.00)               | 0.00<br>(0.00 to 0.00)               |
| Rabies                                                   | 0.02<br>(0.01 to 0.04)                  | 0.01<br>(0.00 to 0.02)                 | 0.00<br>(0.00 to 0.01)                | 0.01<br>(0.00 to 0.03)                  | 0.00<br>(0.00 to 0.00)               | 0.00<br>(0.00 to 0.00)               | 0.00<br>(0.00 to 0.00)               | 0.00<br>(0.00 to 0.00)               |
| Intestinal nematode infections                           | 0.06<br>(0.02 to 0.13)                  | 0.04<br>(0.01 to 0.11)                 | 0.04<br>(0.01 to 0.10)                | 0.05<br>(0.01 to 0.11)                  | 0.00<br>(0.00 to 0.00)               | 0.00<br>(0.00 to 0.00)               | 0.00<br>(0.00 to 0.00)               | 0.00<br>(0.00 to 0.00)               |
| Other neglected tropical diseases                        | 0.20<br>(0.17 to 0.24)                  | 0.08<br>(0.06 to 0.14)                 | 0.07<br>(0.05 to 0.12)                | 0.11<br>(0.07 to 0.17)                  | 0.00<br>(0.00 to 0.00)               | 0.00<br>(0.00 to 0.00)               | 0.00<br>(0.00 to 0.00)               | 0.00<br>(0.00 to 0.00)               |
| <b>Maternal disorders</b>                                | <b>21.18</b><br><b>(14.55 to 28.75)</b> | <b>10.47</b><br><b>(6.76 to 15.26)</b> | <b>8.59</b><br><b>(5.70 to 12.42)</b> | <b>15.19</b><br><b>(10.12 to 22.15)</b> | <b>0.39</b><br><b>(0.27 to 0.52)</b> | <b>0.20</b><br><b>(0.13 to 0.28)</b> | <b>0.16</b><br><b>(0.11 to 0.23)</b> | <b>0.28</b><br><b>(0.19 to 0.41)</b> |
| Maternal hemorrhage                                      | 7.70<br>(4.99 to 11.10)                 | 3.68<br>(2.23 to 5.74)                 | 3.03<br>(1.83 to 4.65)                | 5.36<br>(3.29 to 8.31)                  | 0.14<br>(0.09 to 0.20)               | 0.07<br>(0.04 to 0.11)               | 0.06<br>(0.03 to 0.09)               | 0.10<br>(0.06 to 0.16)               |
| Maternal sepsis and other maternal infections            | 1.73<br>(1.05 to 2.66)                  | 0.77<br>(0.46 to 1.19)                 | 0.63<br>(0.38 to 0.98)                | 1.12<br>(0.67 to 1.77)                  | 0.03<br>(0.02 to 0.05)               | 0.01<br>(0.01 to 0.02)               | 0.01<br>(0.01 to 0.02)               | 0.02<br>(0.01 to 0.03)               |
| Maternal hypertensive disorders                          | 3.93<br>(2.48 to 5.94)                  | 1.85<br>(1.11 to 2.94)                 | 1.51<br>(0.90 to 2.40)                | 2.71<br>(1.66 to 4.21)                  | 0.07<br>(0.04 to 0.11)               | 0.03<br>(0.02 to 0.05)               | 0.03<br>(0.02 to 0.04)               | 0.05<br>(0.03 to 0.08)               |
| Maternal obstructed labor and uterine rupture            | 0.47<br>(0.25 to 0.77)                  | 0.22<br>(0.11 to 0.41)                 | 0.18<br>(0.09 to 0.33)                | 0.33<br>(0.17 to 0.59)                  | 0.01<br>(0.00 to 0.01)               | 0.00<br>(0.00 to 0.00)               | 0.00<br>(0.00 to 0.00)               | 0.01<br>(0.00 to 0.01)               |
| Maternal abortion, miscarriage, and ectopic pregnancy    | 0.19<br>(0.09 to 0.35)                  | 0.10<br>(0.05 to 0.20)                 | 0.09<br>(0.04 to 0.17)                | 0.15<br>(0.07 to 0.30)                  | 0.00<br>(0.00 to 0.01)               | 0.00<br>(0.00 to 0.00)               | 0.00<br>(0.00 to 0.00)               | 0.00<br>(0.00 to 0.01)               |
| Indirect maternal deaths                                 | 1.90<br>(1.14 to 2.93)                  | 1.05<br>(0.56 to 1.73)                 | 0.86<br>(0.47 to 1.44)                | 1.53<br>(0.83 to 2.49)                  | 0.03<br>(0.02 to 0.05)               | 0.02<br>(0.01 to 0.03)               | 0.02<br>(0.01 to 0.03)               | 0.03<br>(0.02 to 0.04)               |
| Late maternal deaths                                     | 0.16<br>(0.07 to 0.31)                  | 0.07<br>(0.03 to 0.13)                 | 0.06<br>(0.02 to 0.11)                | 0.10<br>(0.04 to 0.20)                  | 0.00<br>(0.00 to 0.01)               | 0.00<br>(0.00 to 0.00)               | 0.00<br>(0.00 to 0.00)               | 0.00<br>(0.00 to 0.00)               |
| Maternal deaths aggravated by HIV/AIDS                   | 0.01<br>(0.00 to 0.02)                  | 0.02<br>(0.00 to 0.13)                 | 0.02<br>(0.00 to 0.11)                | 0.03<br>(0.00 to 0.20)                  | 0.00<br>(0.00 to 0.00)               | 0.00<br>(0.00 to 0.00)               | 0.00<br>(0.00 to 0.00)               | 0.00<br>(0.00 to 0.00)               |
| Other maternal disorders                                 | 5.10<br>(3.26 to 7.35)                  | 2.71<br>(1.61 to 4.14)                 | 2.23<br>(1.31 to 3.41)                | 3.85<br>(2.29 to 5.91)                  | 0.09<br>(0.06 to 0.13)               | 0.05<br>(0.03 to 0.08)               | 0.04<br>(0.02 to 0.06)               | 0.07<br>(0.04 to 0.11)               |
| <b>Morocco</b>                                           |                                         |                                        |                                       |                                         |                                      |                                      |                                      |                                      |
| Cause                                                    | YLLs (in 1000s)                         |                                        |                                       |                                         | Deaths (in 1000s)                    |                                      |                                      |                                      |
|                                                          | 2016                                    | 2040 Forecast                          | 2040 Better Scenario                  | 2040 Worse Scenario                     | 2016                                 | 2040 Forecast                        | 2040 Better Scenario                 | 2040 Worse Scenario                  |
| Neonatal disorders                                       | 379.53<br>(261.34 to 523.78)            | 229.16<br>(111.79 to 373.73)           | 163.10<br>(80.99 to 267.55)           | 300.88<br>(147.60 to 493.95)            | 4.39<br>(3.02 to 6.05)               | 2.65<br>(1.29 to 4.32)               | 1.89<br>(0.94 to 3.09)               | 3.48<br>(1.71 to 5.71)               |
| Neonatal preterm birth                                   | 254.99<br>(169.41 to 364.75)            | 146.43<br>(67.53 to 246.99)            | 98.30<br>(45.85 to 168.85)            | 192.59<br>(88.80 to 324.81)             | 2.95<br>(1.96 to 4.21)               | 1.69<br>(0.78 to 2.85)               | 1.14<br>(0.53 to 1.95)               | 2.23<br>(1.03 to 3.75)               |
| Neonatal encephalopathy due to birth asphyxia and trauma | 42.77<br>(24.79 to 71.35)               | 24.53<br>(10.67 to 48.13)              | 19.45<br>(8.53 to 37.23)              | 31.31<br>(13.39 to 61.49)               | 0.49<br>(0.29 to 0.83)               | 0.28<br>(0.12 to 0.56)               | 0.23<br>(0.10 to 0.43)               | 0.36<br>(0.16 to 0.71)               |
| Neonatal sepsis and other neonatal infections            | 45.67<br>(20.87 to 79.10)               | 35.92<br>(14.87 to 69.74)              | 28.30<br>(11.94 to 54.48)             | 46.40<br>(19.35 to 87.87)               | 0.53<br>(0.24 to 0.91)               | 0.42<br>(0.17 to 0.81)               | 0.33<br>(0.14 to 0.63)               | 0.54<br>(0.22 to 1.02)               |

|                                                                         |                                                  |                                                  |                                                  |                                                  |                                            |                                            |                                            |                                            |
|-------------------------------------------------------------------------|--------------------------------------------------|--------------------------------------------------|--------------------------------------------------|--------------------------------------------------|--------------------------------------------|--------------------------------------------|--------------------------------------------|--------------------------------------------|
| Hemolytic disease and other neonatal jaundice                           | 2.17<br>(1.18 to 3.78)                           | 0.84<br>(0.32 to 1.75)                           | 0.64<br>(0.24 to 1.33)                           | 1.17<br>(0.44 to 2.43)                           | 0.03<br>(0.01 to 0.04)                     | 0.01<br>(0.00 to 0.02)                     | 0.01<br>(0.00 to 0.02)                     | 0.01<br>(0.00 to 0.03)                     |
| Other neonatal disorders                                                | 33.93<br>(18.60 to 56.26)                        | 21.44<br>(9.10 to 42.31)                         | 16.41<br>(7.04 to 32.37)                         | 29.42<br>(12.36 to 57.99)                        | 0.39<br>(0.22 to 0.65)                     | 0.25<br>(0.11 to 0.49)                     | 0.19<br>(0.08 to 0.37)                     | 0.34<br>(0.14 to 0.67)                     |
| <b>Nutritional deficiencies</b>                                         | <b>10.61</b><br><b>(5.81 to 21.61)</b>           | <b>8.10</b><br><b>(4.09 to 18.80)</b>            | <b>7.61</b><br><b>(3.84 to 18.11)</b>            | <b>9.11</b><br><b>(4.60 to 20.63)</b>            | <b>0.39</b><br><b>(0.22 to 0.82)</b>       | <b>0.52</b><br><b>(0.25 to 1.27)</b>       | <b>0.53</b><br><b>(0.25 to 1.32)</b>       | <b>0.53</b><br><b>(0.25 to 1.27)</b>       |
| Protein-energy malnutrition                                             | 7.68<br>(4.24 to 15.50)                          | 5.21<br>(2.69 to 12.20)                          | 4.88<br>(2.51 to 11.65)                          | 5.89<br>(3.05 to 13.30)                          | 0.29<br>(0.17 to 0.59)                     | 0.36<br>(0.17 to 0.89)                     | 0.36<br>(0.18 to 0.92)                     | 0.37<br>(0.17 to 0.88)                     |
| Iodine deficiency                                                       | 0.44<br>(0.04 to 1.40)                           | 0.52<br>(0.04 to 1.77)                           | 0.47<br>(0.03 to 1.66)                           | 0.61<br>(0.05 to 2.08)                           | 0.01<br>(0.00 to 0.04)                     | 0.03<br>(0.00 to 0.12)                     | 0.03<br>(0.00 to 0.12)                     | 0.03<br>(0.00 to 0.12)                     |
| Dietary iron deficiency                                                 | 0.94<br>(0.46 to 2.10)                           | 0.67<br>(0.31 to 1.60)                           | 0.62<br>(0.29 to 1.46)                           | 0.76<br>(0.36 to 1.82)                           | 0.02<br>(0.01 to 0.04)                     | 0.02<br>(0.01 to 0.04)                     | 0.01<br>(0.01 to 0.04)                     | 0.02<br>(0.01 to 0.04)                     |
| Other nutritional deficiencies                                          | 1.55<br>(0.76 to 4.03)                           | 1.70<br>(0.71 to 5.09)                           | 1.63<br>(0.67 to 4.92)                           | 1.85<br>(0.77 to 5.49)                           | 0.06<br>(0.03 to 0.20)                     | 0.12<br>(0.04 to 0.40)                     | 0.12<br>(0.04 to 0.40)                     | 0.12<br>(0.04 to 0.41)                     |
| <b>Other communicable, maternal, neonatal, and nutritional diseases</b> | <b>43.30</b><br><b>(22.39 to 78.16)</b>          | <b>16.61</b><br><b>(10.48 to 26.82)</b>          | <b>14.65</b><br><b>(9.49 to 22.98)</b>           | <b>19.43</b><br><b>(11.98 to 31.72)</b>          | <b>0.68</b><br><b>(0.43 to 1.07)</b>       | <b>0.47</b><br><b>(0.36 to 0.63)</b>       | <b>0.44</b><br><b>(0.34 to 0.59)</b>       | <b>0.52</b><br><b>(0.39 to 0.71)</b>       |
| Sexually transmitted infections excluding HIV                           | 33.27<br>(13.14 to 67.50)                        | 7.59<br>(2.57 to 16.17)                          | 6.33<br>(2.17 to 13.43)                          | 9.09<br>(3.01 to 19.79)                          | 0.39<br>(0.16 to 0.80)                     | 0.09<br>(0.03 to 0.19)                     | 0.08<br>(0.03 to 0.16)                     | 0.11<br>(0.04 to 0.24)                     |
| Syphilis                                                                | 33.03<br>(12.96 to 67.23)                        | 7.44<br>(2.45 to 16.02)                          | 6.19<br>(2.04 to 13.26)                          | 8.92<br>(2.88 to 19.55)                          | 0.39<br>(0.15 to 0.79)                     | 0.09<br>(0.03 to 0.19)                     | 0.07<br>(0.03 to 0.16)                     | 0.11<br>(0.04 to 0.23)                     |
| Chlamydial infection                                                    | 0.04<br>(0.02 to 0.07)                           | 0.03<br>(0.02 to 0.05)                           | 0.03<br>(0.02 to 0.04)                           | 0.03<br>(0.02 to 0.05)                           | 0.00<br>(0.00 to 0.00)                     | 0.00<br>(0.00 to 0.00)                     | 0.00<br>(0.00 to 0.00)                     | 0.00<br>(0.00 to 0.00)                     |
| Gonococcal infection                                                    | 0.12<br>(0.07 to 0.19)                           | 0.08<br>(0.05 to 0.12)                           | 0.08<br>(0.04 to 0.12)                           | 0.09<br>(0.05 to 0.14)                           | 0.00<br>(0.00 to 0.01)                     | 0.00<br>(0.00 to 0.00)                     | 0.00<br>(0.00 to 0.00)                     | 0.00<br>(0.00 to 0.01)                     |
| Other sexually transmitted infections                                   | 0.07<br>(0.04 to 0.10)                           | 0.04<br>(0.02 to 0.07)                           | 0.04<br>(0.02 to 0.06)                           | 0.05<br>(0.03 to 0.07)                           | 0.00<br>(0.00 to 0.00)                     | 0.00<br>(0.00 to 0.00)                     | 0.00<br>(0.00 to 0.00)                     | 0.00<br>(0.00 to 0.00)                     |
| Acute hepatitis                                                         | 4.52<br>(3.69 to 5.44)                           | 3.87<br>(2.92 to 5.09)                           | 3.64<br>(2.75 to 4.72)                           | 4.37<br>(3.31 to 5.68)                           | 0.14<br>(0.11 to 0.17)                     | 0.15<br>(0.11 to 0.20)                     | 0.14<br>(0.11 to 0.19)                     | 0.16<br>(0.12 to 0.21)                     |
| Acute hepatitis A                                                       | 0.11<br>(0.05 to 0.19)                           | 0.08<br>(0.03 to 0.15)                           | 0.07<br>(0.03 to 0.13)                           | 0.09<br>(0.04 to 0.17)                           | 0.00<br>(0.00 to 0.00)                     | 0.00<br>(0.00 to 0.01)                     | 0.00<br>(0.00 to 0.01)                     | 0.00<br>(0.00 to 0.01)                     |
| Acute hepatitis B                                                       | 3.82<br>(3.09 to 4.69)                           | 3.30<br>(2.41 to 4.39)                           | 3.09<br>(2.28 to 4.09)                           | 3.75<br>(2.80 to 5.02)                           | 0.12<br>(0.10 to 0.15)                     | 0.12<br>(0.09 to 0.17)                     | 0.12<br>(0.09 to 0.16)                     | 0.14<br>(0.10 to 0.18)                     |
| Acute hepatitis C                                                       | 0.09<br>(0.06 to 0.13)                           | 0.09<br>(0.06 to 0.14)                           | 0.09<br>(0.06 to 0.14)                           | 0.10<br>(0.06 to 0.15)                           | 0.00<br>(0.00 to 0.00)                     | 0.00<br>(0.00 to 0.01)                     | 0.00<br>(0.00 to 0.01)                     | 0.00<br>(0.00 to 0.01)                     |
| Acute hepatitis E                                                       | 0.51<br>(0.36 to 0.69)                           | 0.41<br>(0.25 to 0.63)                           | 0.39<br>(0.24 to 0.60)                           | 0.44<br>(0.27 to 0.68)                           | 0.01<br>(0.01 to 0.02)                     | 0.02<br>(0.01 to 0.03)                     | 0.02<br>(0.01 to 0.03)                     | 0.02<br>(0.01 to 0.03)                     |
| Other unspecified infectious diseases                                   | 5.52<br>(3.14 to 14.27)                          | 5.15<br>(3.49 to 8.77)                           | 4.68<br>(3.20 to 7.73)                           | 5.97<br>(4.07 to 10.55)                          | 0.14<br>(0.10 to 0.24)                     | 0.23<br>(0.16 to 0.34)                     | 0.22<br>(0.16 to 0.33)                     | 0.25<br>(0.18 to 0.36)                     |
| <b>Non-communicable diseases</b>                                        | <b>3,071.26</b><br><b>(2,798.55 to 3,360.02)</b> | <b>4,440.69</b><br><b>(3,658.45 to 5,517.90)</b> | <b>3,650.94</b><br><b>(3,070.74 to 4,514.59)</b> | <b>5,908.39</b><br><b>(4,813.39 to 7,328.05)</b> | <b>142.58</b><br><b>(129.78 to 155.47)</b> | <b>272.89</b><br><b>(233.82 to 325.79)</b> | <b>233.64</b><br><b>(202.81 to 284.25)</b> | <b>338.06</b><br><b>(289.04 to 397.01)</b> |
| <b>Morocco</b>                                                          |                                                  |                                                  |                                                  |                                                  |                                            |                                            |                                            |                                            |
| Cause                                                                   | YLLs (in 1000s)                                  |                                                  |                                                  |                                                  | Deaths (in 1000s)                          |                                            |                                            |                                            |
|                                                                         | 2016                                             | 2040 Forecast                                    | 2040 Better Scenario                             | 2040 Worse Scenario                              | 2016                                       | 2040 Forecast                              | 2040 Better Scenario                       | 2040 Worse Scenario                        |

|                                      | 648.78<br>(578.05 to<br>711.36) | 951.78<br>(811.03 to<br>1,122.24) | 890.08<br>(767.93 to<br>1,024.11) | 1,090.43<br>(899.58 to<br>1,329.59) | 22.57<br>(20.64 to<br>24.57) | 40.81<br>(34.22 to<br>48.01) | 39.23<br>(33.41 to<br>45.37) | 44.94<br>(36.29 to<br>55.03) |
|--------------------------------------|---------------------------------|-----------------------------------|-----------------------------------|-------------------------------------|------------------------------|------------------------------|------------------------------|------------------------------|
| <b>Neoplasms</b>                     |                                 |                                   |                                   |                                     |                              |                              |                              |                              |
| Lip and oral cavity cancer           | 6.77<br>(5.90 to<br>7.75)       | 8.92<br>(6.72 to<br>12.07)        | 7.83<br>(6.07 to<br>10.06)        | 12.57<br>(8.90 to<br>18.59)         | 0.25<br>(0.22 to<br>0.28)    | 0.38<br>(0.29 to<br>0.50)    | 0.35<br>(0.27 to<br>0.44)    | 0.50<br>(0.36 to<br>0.73)    |
| Nasopharynx cancer                   | 12.96<br>(10.79 to<br>15.58)    | 17.71<br>(11.06 to<br>28.25)      | 14.31<br>(9.36 to<br>21.94)       | 28.22<br>(16.45 to<br>47.75)        | 0.41<br>(0.34 to<br>0.49)    | 0.64<br>(0.41 to<br>0.99)    | 0.53<br>(0.36 to<br>0.79)    | 0.98<br>(0.59 to<br>1.63)    |
| Other pharynx cancer                 | 3.65<br>(3.01 to<br>4.24)       | 4.70<br>(3.53 to<br>6.11)         | 4.61<br>(3.48 to<br>5.91)         | 5.12<br>(3.78 to<br>6.85)           | 0.14<br>(0.11 to<br>0.16)    | 0.20<br>(0.15 to<br>0.26)    | 0.20<br>(0.15 to<br>0.25)    | 0.21<br>(0.15 to<br>0.28)    |
| Esophageal cancer                    | 8.69<br>(7.69 to<br>9.80)       | 10.44<br>(7.42 to<br>14.70)       | 9.20<br>(6.82 to<br>12.37)        | 14.21<br>(9.27 to<br>21.51)         | 0.33<br>(0.29 to<br>0.37)    | 0.47<br>(0.33 to<br>0.65)    | 0.43<br>(0.32 to<br>0.57)    | 0.61<br>(0.40 to<br>0.90)    |
| Stomach cancer                       | 28.36<br>(25.12 to<br>31.49)    | 52.46<br>(25.60 to<br>40.82)      | 30.01<br>(24.61 to<br>36.23)      | 55.54<br>(27.07 to<br>45.52)        | 1.17<br>(1.05 to<br>1.30)    | 1.66<br>(1.29 to<br>2.09)    | 1.58<br>(1.27 to<br>1.92)    | 1.73<br>(1.31 to<br>2.20)    |
| Colon and rectum cancer              | 56.29<br>(48.92 to<br>64.16)    | 99.09<br>(70.34 to<br>139.93)     | 98.48<br>(71.00 to<br>136.81)     | 100.23<br>(69.95 to<br>144.38)      | 2.10<br>(1.83 to<br>2.39)    | 4.52<br>(3.12 to<br>6.37)    | 4.60<br>(3.21 to<br>6.31)    | 4.40<br>(3.00 to<br>6.37)    |
| Liver cancer                         | 11.43<br>(9.70 to<br>13.14)     | 22.14<br>(15.12 to<br>32.72)      | 19.43<br>(13.83 to<br>27.23)      | 24.92<br>(16.01 to<br>37.79)        | 0.50<br>(0.42 to<br>0.57)    | 1.20<br>(0.82 to<br>1.80)    | 1.09<br>(0.78 to<br>1.56)    | 1.27<br>(0.83 to<br>1.97)    |
| Liver cancer due to hepatitis B      | 4.29<br>(3.18 to<br>5.56)       | 7.66<br>(4.90 to<br>11.93)        | 6.66<br>(4.45 to<br>9.81)         | 8.74<br>(5.22 to<br>14.36)          | 0.17<br>(0.12 to<br>0.22)    | 0.36<br>(0.22 to<br>0.56)    | 0.33<br>(0.21 to<br>0.48)    | 0.39<br>(0.23 to<br>0.63)    |
| Liver cancer due to hepatitis C      | 3.30<br>(2.40 to<br>4.38)       | 7.28<br>(4.45 to<br>11.24)        | 6.53<br>(4.19 to<br>9.63)         | 7.86<br>(4.58 to<br>12.52)          | 0.17<br>(0.12 to<br>0.22)    | 0.45<br>(0.27 to<br>0.68)    | 0.42<br>(0.27 to<br>0.62)    | 0.46<br>(0.27 to<br>0.73)    |
| Liver cancer due to alcohol use      | 0.83<br>(0.53 to<br>1.27)       | 1.72<br>(0.91 to<br>3.02)         | 1.50<br>(0.82 to<br>2.49)         | 2.03<br>(1.03 to<br>3.76)           | 0.04<br>(0.02 to<br>0.06)    | 0.09<br>(0.05 to<br>0.16)    | 0.08<br>(0.04 to<br>0.14)    | 0.10<br>(0.05 to<br>0.19)    |
| Liver cancer due to other causes     | 5.80<br>(2.10 to<br>4.03)       | 5.48<br>(3.09 to<br>9.28)         | 4.74<br>(2.81 to<br>7.68)         | 6.30<br>(3.39 to<br>11.04)          | 0.12<br>(0.08 to<br>0.17)    | 0.29<br>(0.16 to<br>0.51)    | 0.26<br>(0.15 to<br>0.43)    | 0.32<br>(0.17 to<br>0.58)    |
| Gallbladder and biliary tract cancer | 6.80<br>(5.24 to<br>7.93)       | 8.46<br>(6.66 to<br>10.14)        | 8.72<br>(6.94 to<br>10.47)        | 8.05<br>(6.17 to<br>9.62)           | 0.29<br>(0.24 to<br>0.34)    | 0.42<br>(0.34 to<br>0.53)    | 0.44<br>(0.36 to<br>0.56)    | 0.39<br>(0.31 to<br>0.48)    |
| Pancreatic cancer                    | 21.43<br>(18.63 to<br>23.97)    | 40.92<br>(31.00 to<br>53.31)      | 40.48<br>(31.51 to<br>51.62)      | 42.16<br>(31.40 to<br>55.89)        | 0.91<br>(0.79 to<br>1.02)    | 2.05<br>(1.56 to<br>2.71)    | 2.09<br>(1.62 to<br>2.70)    | 2.01<br>(1.47 to<br>2.70)    |
| Larynx cancer                        | 17.86<br>(14.95 to<br>20.89)    | 19.70<br>(10.47 to<br>34.83)      | 15.35<br>(8.70 to<br>26.11)       | 33.68<br>(15.92 to<br>62.61)        | 0.67<br>(0.57 to<br>0.78)    | 0.82<br>(0.45 to<br>1.38)    | 0.66<br>(0.39 to<br>1.07)    | 1.35<br>(0.66 to<br>2.48)    |
| Tracheal, bronchus, and lung cancer  | 107.37<br>(93.18 to<br>122.81)  | 155.06<br>(104.05 to<br>223.94)   | 116.81<br>(81.73 to<br>163.17)    | 250.30<br>(159.78 to<br>372.56)     | 4.08<br>(3.55 to<br>4.65)    | 6.72<br>(4.52 to<br>9.55)    | 5.29<br>(3.71 to<br>7.37)    | 10.39<br>(6.56 to<br>15.39)  |
| Malignant skin melanoma              | 1.78<br>(1.38 to<br>2.53)       | 2.92<br>(2.17 to<br>4.16)         | 3.11<br>(2.33 to<br>4.44)         | 2.62<br>(1.97 to<br>3.65)           | 0.07<br>(0.05 to<br>0.10)    | 0.15<br>(0.11 to<br>0.21)    | 0.16<br>(0.12 to<br>0.23)    | 0.13<br>(0.09 to<br>0.18)    |
| Non-melanoma skin cancer             | 1.95<br>(1.65 to<br>2.33)       | 3.79<br>(3.02 to<br>4.80)         | 3.83<br>(3.09 to<br>4.84)         | 3.77<br>(2.95 to<br>4.79)           | 0.10<br>(0.08 to<br>0.12)    | 0.25<br>(0.18 to<br>0.33)    | 0.26<br>(0.19 to<br>0.34)    | 0.23<br>(0.16 to<br>0.32)    |
| Breast cancer                        | 107.18<br>(83.19 to<br>130.39)  | 141.95<br>(104.64 to<br>186.91)   | 140.01<br>(104.92 to<br>180.39)   | 144.96<br>(104.81 to<br>195.37)     | 3.12<br>(2.48 to<br>3.77)    | 4.88<br>(3.53 to<br>6.77)    | 4.86<br>(3.59 to<br>6.81)    | 4.90<br>(3.49 to<br>6.80)    |
| Cervical cancer                      | 24.34<br>(11.65 to<br>31.01)    | 29.30<br>(13.70 to<br>38.87)      | 28.44<br>(13.48 to<br>37.87)      | 31.36<br>(14.35 to<br>41.86)        | 0.84<br>(0.41 to<br>1.05)    | 1.14<br>(0.57 to<br>1.48)    | 1.12<br>(0.58 to<br>1.46)    | 1.20<br>(0.58 to<br>1.57)    |
| Uterine cancer                       | 6.67<br>(5.32 to<br>8.23)       | 10.47<br>(8.12 to<br>13.39)       | 10.13<br>(7.85 to<br>12.98)       | 11.26<br>(8.79 to<br>14.34)         | 0.26<br>(0.20 to<br>0.31)    | 0.47<br>(0.37 to<br>0.60)    | 0.46<br>(0.36 to<br>0.59)    | 0.50<br>(0.39 to<br>0.63)    |
| Ovarian cancer                       | 15.84<br>(12.67 to<br>19.27)    | 27.89<br>(19.83 to<br>39.64)      | 27.21<br>(19.74 to<br>37.30)      | 26.39<br>(18.67 to<br>38.21)        | 0.54<br>(0.44 to<br>0.65)    | 1.12<br>(0.79 to<br>1.61)    | 1.09<br>(0.79 to<br>1.52)    | 1.04<br>(0.73 to<br>1.52)    |

|                                 |                                                            |                                                            |                                                          |                                                            |                                                   |                                                     |                                                    |                                                      |
|---------------------------------|------------------------------------------------------------|------------------------------------------------------------|----------------------------------------------------------|------------------------------------------------------------|---------------------------------------------------|-----------------------------------------------------|----------------------------------------------------|------------------------------------------------------|
| Prostate cancer                 | 16.11<br>(8.60 to<br>20.94)                                | 39.47<br>(23.54 to<br>51.30)                               | 41.72<br>(25.69 to<br>53.53)                             | 36.32<br>(20.55 to<br>48.27)                               | 0.93<br>(0.58 to<br>1.16)                         | 2.70<br>(1.77 to<br>3.48)                           | 2.93<br>(1.96 to<br>3.72)                          | 2.38<br>(1.46 to<br>3.12)                            |
| Testicular cancer               | 1.51<br>(1.11 to<br>1.95)                                  | 1.18<br>(0.85 to<br>1.58)                                  | 1.14<br>(0.82 to<br>1.53)                                | 1.25<br>(0.91 to<br>1.67)                                  | 0.03<br>(0.02 to<br>0.04)                         | 0.02<br>(0.02 to<br>0.03)                           | 0.02<br>(0.02 to<br>0.03)                          | 0.03<br>(0.02 to<br>0.03)                            |
| <b>Morocco</b>                  |                                                            |                                                            |                                                          |                                                            |                                                   |                                                     |                                                    |                                                      |
| Cause                           | YLLs (in 1000s)                                            |                                                            |                                                          |                                                            | Deaths (in 1000s)                                 |                                                     |                                                    |                                                      |
|                                 | 2016                                                       | 2040 Forecast                                              | 2040 Better Scenario                                     | 2040 Worse Scenario                                        | 2016                                              | 2040 Forecast                                       | 2040 Better Scenario                               | 2040 Worse Scenario                                  |
| Kidney cancer                   | 4.72<br>(3.95 to<br>5.50)                                  | 8.48<br>(6.46 to<br>11.17)                                 | 8.65<br>(6.62 to<br>11.30)                               | 8.37<br>(6.18 to<br>11.43)                                 | 0.17<br>(0.14 to<br>0.20)                         | 0.39<br>(0.29 to<br>0.50)                           | 0.41<br>(0.31 to<br>0.53)                          | 0.36<br>(0.26 to<br>0.49)                            |
| Bladder cancer                  | 13.79<br>(11.75 to<br>16.06)                               | 21.24<br>(15.41 to<br>29.48)                               | 20.19<br>(14.97 to<br>27.33)                             | 24.34<br>(16.76 to<br>35.78)                               | 0.63<br>(0.53 to<br>0.73)                         | 1.18<br>(0.86 to<br>1.62)                           | 1.16<br>(0.87 to<br>1.57)                          | 1.26<br>(0.88 to<br>1.81)                            |
| Brain and nervous system cancer | 26.00<br>(18.59 to<br>33.22)                               | 37.89<br>(28.91 to<br>48.36)                               | 38.37<br>(29.73 to<br>48.85)                             | 36.67<br>(27.56 to<br>47.26)                               | 0.69<br>(0.54 to<br>0.86)                         | 1.30<br>(1.02 to<br>1.65)                           | 1.34<br>(1.05 to<br>1.73)                          | 1.21<br>(0.97 to<br>1.55)                            |
| Thyroid cancer                  | 9.90<br>(6.10 to<br>11.95)                                 | 12.88<br>(8.68 to<br>18.51)                                | 11.29<br>(7.92 to<br>15.62)                              | 14.13<br>(9.23 to<br>20.42)                                | 0.31<br>(0.26 to<br>0.37)                         | 0.49<br>(0.34 to<br>0.69)                           | 0.44<br>(0.32 to<br>0.61)                          | 0.52<br>(0.35 to<br>0.75)                            |
| Mesothelioma                    | 1.52<br>(1.22 to<br>2.11)                                  | 2.14<br>(1.67 to<br>3.03)                                  | 2.16<br>(1.68 to<br>3.05)                                | 2.13<br>(1.66 to<br>3.01)                                  | 0.06<br>(0.05 to<br>0.08)                         | 0.11<br>(0.08 to<br>0.15)                           | 0.11<br>(0.08 to<br>0.16)                          | 0.11<br>(0.08 to<br>0.15)                            |
| Hodgkin lymphoma                | 9.57<br>(5.11 to<br>12.69)                                 | 7.66<br>(4.37 to<br>10.44)                                 | 7.14<br>(4.16 to<br>9.63)                                | 8.78<br>(4.88 to<br>12.00)                                 | 0.22<br>(0.13 to<br>0.28)                         | 0.23<br>(0.15 to<br>0.31)                           | 0.22<br>(0.14 to<br>0.29)                          | 0.26<br>(0.16 to<br>0.34)                            |
| Non-Hodgkin lymphoma            | 42.12<br>(28.08 to<br>51.56)                               | 71.46<br>(46.83 to<br>94.77)                               | 70.31<br>(47.00 to<br>90.93)                             | 68.92<br>(44.06 to<br>92.83)                               | 1.39<br>(0.96 to<br>1.70)                         | 2.91<br>(2.03 to<br>3.85)                           | 2.91<br>(2.09 to<br>3.76)                          | 2.73<br>(1.85 to<br>3.67)                            |
| Multiple myeloma                | 6.41<br>(5.25 to<br>7.97)                                  | 14.00<br>(10.37 to<br>18.35)                               | 13.94<br>(10.61 to<br>17.96)                             | 13.98<br>(9.59 to<br>17.26)                                | 0.27<br>(0.22 to<br>0.34)                         | 0.72<br>(0.52 to<br>0.95)                           | 0.73<br>(0.55 to<br>0.95)                          | 0.65<br>(0.46 to<br>0.87)                            |
| Leukemia                        | 25.92<br>(19.76 to<br>30.10)                               | 30.64<br>(23.63 to<br>38.34)                               | 28.31<br>(22.42 to<br>34.82)                             | 33.16<br>(24.95 to<br>42.14)                               | 0.70<br>(0.58 to<br>0.80)                         | 1.18<br>(0.93 to<br>1.54)                           | 1.12<br>(0.89 to<br>1.44)                          | 1.23<br>(0.94 to<br>1.64)                            |
| Acute lymphoid leukemia         | 4.53<br>(3.16 to<br>5.84)                                  | 4.08<br>(2.92 to<br>5.30)                                  | 3.85<br>(2.77 to<br>4.98)                                | 4.21<br>(2.99 to<br>5.52)                                  | 0.08<br>(0.06 to<br>0.10)                         | 0.10<br>(0.07 to<br>0.13)                           | 0.09<br>(0.07 to<br>0.12)                          | 0.10<br>(0.07 to<br>0.13)                            |
| Chronic lymphoid leukemia       | 0.65<br>(0.52 to<br>0.80)                                  | 0.98<br>(0.71 to<br>1.34)                                  | 0.92<br>(0.68 to<br>1.22)                                | 1.02<br>(0.72 to<br>1.41)                                  | 0.02<br>(0.02 to<br>0.03)                         | 0.05<br>(0.03 to<br>0.06)                           | 0.05<br>(0.03 to<br>0.06)                          | 0.05<br>(0.03 to<br>0.07)                            |
| Acute myeloid leukemia          | 4.57<br>(3.58 to<br>6.04)                                  | 6.49<br>(4.81 to<br>9.15)                                  | 6.18<br>(4.68 to<br>8.63)                                | 6.54<br>(4.73 to<br>9.51)                                  | 0.11<br>(0.09 to<br>0.15)                         | 0.21<br>(0.15 to<br>0.31)                           | 0.21<br>(0.15 to<br>0.30)                          | 0.21<br>(0.14 to<br>0.31)                            |
| Chronic myeloid leukemia        | 1.64<br>(0.93 to<br>2.11)                                  | 1.66<br>(0.95 to<br>2.40)                                  | 1.53<br>(0.90 to<br>2.14)                                | 1.76<br>(0.99 to<br>2.59)                                  | 0.05<br>(0.03 to<br>0.07)                         | 0.07<br>(0.04 to<br>0.10)                           | 0.07<br>(0.04 to<br>0.10)                          | 0.07<br>(0.04 to<br>0.11)                            |
| Other leukemia                  | 14.52<br>(10.55 to<br>17.09)                               | 17.42<br>(13.14 to<br>22.02)                               | 15.83<br>(12.12 to<br>19.61)                             | 19.62<br>(14.58 to<br>25.65)                               | 0.43<br>(0.35 to<br>0.50)                         | 0.75<br>(0.58 to<br>0.99)                           | 0.71<br>(0.55 to<br>0.92)                          | 0.81<br>(0.60 to<br>1.07)                            |
| Other neoplasms                 | 51.82<br>(45.03 to<br>58.60)                               | 68.81<br>(59.39 to<br>78.54)                               | 68.91<br>(59.01 to<br>79.63)                             | 67.94<br>(59.10 to<br>77.69)                               | 1.41<br>(1.22 to<br>1.62)                         | 2.51<br>(2.10 to<br>3.39)                           | 2.59<br>(2.16 to<br>3.57)                          | 2.38<br>(1.99 to<br>3.14)                            |
| <b>Cardiovascular diseases</b>  | <b>1,341.80</b><br><b>(1,157.71 to</b><br><b>1,516.93)</b> | <b>1,678.56</b><br><b>(1,090.35 to</b><br><b>2,634.46)</b> | <b>1,172.51</b><br><b>(811.81 to</b><br><b>1,854.66)</b> | <b>2,707.73</b><br><b>(1,753.80 to</b><br><b>4,198.19)</b> | <b>72.04</b><br><b>(62.85 to</b><br><b>80.57)</b> | <b>114.23</b><br><b>(78.20 to</b><br><b>177.17)</b> | <b>86.59</b><br><b>(61.63 to</b><br><b>133.69)</b> | <b>164.56</b><br><b>(112.76 to</b><br><b>244.41)</b> |
| Rheumatic heart disease         | 13.90<br>(10.04 to<br>18.50)                               | 8.37<br>(5.57 to<br>12.24)                                 | 7.50<br>(5.10 to<br>10.65)                               | 9.86<br>(6.51 to<br>14.24)                                 | 0.45<br>(0.33 to<br>0.59)                         | 0.41<br>(0.27 to<br>0.57)                           | 0.38<br>(0.26 to<br>0.52)                          | 0.46<br>(0.30 to<br>0.64)                            |
| Ischemic heart disease          | 914.88<br>(772.06 to<br>1,036.30)                          | 1,107.81<br>(633.21 to<br>1,926.39)                        | 731.35<br>(446.11 to<br>1,255.52)                        | 1,910.24<br>(1,089.07 to<br>3,233.52)                      | 49.34<br>(41.33 to<br>55.88)                      | 73.50<br>(43.28 to<br>129.67)                       | 52.81<br>(31.86 to<br>90.85)                       | 113.15<br>(66.20 to<br>190.43)                       |

|                                               |                                                      |                                                      |                                                      |                                                      |                                                |                                                  |                                                 |                                                  |
|-----------------------------------------------|------------------------------------------------------|------------------------------------------------------|------------------------------------------------------|------------------------------------------------------|------------------------------------------------|--------------------------------------------------|-------------------------------------------------|--------------------------------------------------|
| Stroke                                        | 286.47<br>(230.34 to<br>358.04)                      | 342.94<br>(195.95 to<br>761.61)                      | 236.87<br>(137.69 to<br>535.56)                      | 541.60<br>(303.27 to<br>1,072.20)                    | 15.73<br>(12.65 to<br>19.43)                   | 24.92<br>(13.52 to<br>58.49)                     | 18.95<br>(10.53 to<br>43.99)                    | 34.75<br>(18.84 to<br>79.57)                     |
| Ischemic stroke                               | 135.65<br>(107.45 to<br>169.98)                      | 188.17<br>(88.59 to<br>574.49)                       | 136.90<br>(67.26 to<br>397.09)                       | 270.11<br>(123.67 to<br>795.41)                      | 9.06<br>(7.21 to<br>11.24)                     | 15.59<br>(7.17 to<br>47.03)                      | 12.33<br>(5.80 to<br>34.03)                     | 20.22<br>(9.09 to<br>61.04)                      |
| Intracerebral hemorrhage                      | 150.82<br>(114.96 to<br>195.56)                      | 154.78<br>(86.21 to<br>264.35)                       | 99.97<br>(60.08 to<br>167.68)                        | 271.49<br>(148.63 to<br>479.67)                      | 6.67<br>(5.04 to<br>8.51)                      | 9.33<br>(5.20 to<br>16.03)                       | 6.62<br>(3.89 to<br>11.16)                      | 14.53<br>(7.97 to<br>25.96)                      |
| Hypertensive heart disease                    | 31.40<br>(22.49 to<br>48.19)                         | 52.73<br>(27.04 to<br>115.54)                        | 41.42<br>(24.31 to<br>77.90)                         | 68.61<br>(33.81 to<br>152.95)                        | 1.74<br>(1.28 to<br>2.65)                      | 3.75<br>(1.93 to<br>8.27)                        | 3.07<br>(1.80 to<br>5.68)                       | 4.59<br>(2.25 to<br>10.32)                       |
| Cardiomyopathy and myocarditis                | 17.11<br>(14.09 to<br>21.46)                         | 24.51<br>(17.02 to<br>34.86)                         | 23.75<br>(16.82 to<br>33.33)                         | 24.58<br>(17.07 to<br>35.58)                         | 0.64<br>(0.51 to<br>0.82)                      | 1.36<br>(0.86 to<br>2.11)                        | 1.37<br>(0.88 to<br>2.09)                       | 1.28<br>(0.81 to<br>2.02)                        |
| Myocarditis                                   | 2.61<br>(1.87 to<br>4.06)                            | 2.35<br>(1.73 to<br>3.74)                            | 2.28<br>(1.67 to<br>3.58)                            | 2.46<br>(1.79 to<br>3.87)                            | 0.07<br>(0.05 to<br>0.10)                      | 0.10<br>(0.07 to<br>0.15)                        | 0.10<br>(0.07 to<br>0.15)                       | 0.10<br>(0.06 to<br>0.14)                        |
| <b>Morocco</b>                                |                                                      |                                                      |                                                      |                                                      |                                                |                                                  |                                                 |                                                  |
| Cause                                         | YLLs (in 1000s)                                      |                                                      |                                                      |                                                      | Deaths (in 1000s)                              |                                                  |                                                 |                                                  |
|                                               | 2016                                                 | 2040 Forecast                                        | 2040 Better Scenario                                 | 2040 Worse Scenario                                  | 2016                                           | 2040 Forecast                                    | 2040 Better Scenario                            | 2040 Worse Scenario                              |
| Alcoholic cardiomyopathy                      | 1.59<br>(0.90 to<br>2.50)                            | 2.14<br>(1.22 to<br>3.49)                            | 2.19<br>(1.25 to<br>3.50)                            | 2.12<br>(1.19 to<br>3.57)                            | 0.07<br>(0.04 to<br>0.12)                      | 0.12<br>(0.07 to<br>0.21)                        | 0.13<br>(0.07 to<br>0.22)                       | 0.12<br>(0.06 to<br>0.21)                        |
| Other cardiomyopathy                          | 12.91<br>(10.59 to<br>15.80)                         | 20.02<br>(13.03 to<br>29.51)                         | 19.27<br>(12.81 to<br>27.99)                         | 19.99<br>(12.95 to<br>29.89)                         | 0.50<br>(0.39 to<br>0.63)                      | 1.14<br>(0.68 to<br>1.80)                        | 1.14<br>(0.69 to<br>1.79)                       | 1.07<br>(0.63 to<br>1.74)                        |
| Atrial fibrillation and flutter               | 6.71<br>(4.95 to<br>8.97)                            | 17.95<br>(12.32 to<br>24.77)                         | 18.01<br>(12.57 to<br>24.62)                         | 16.95<br>(11.16 to<br>23.58)                         | 0.65<br>(0.47 to<br>0.88)                      | 1.89<br>(1.22 to<br>2.69)                        | 1.95<br>(1.27 to<br>2.72)                       | 1.70<br>(1.01 to<br>2.47)                        |
| Aortic aneurysm                               | 5.74<br>(4.55 to<br>7.18)                            | 8.96<br>(6.52 to<br>12.18)                           | 8.55<br>(6.45 to<br>11.39)                           | 8.93<br>(6.40 to<br>12.25)                           | 0.29<br>(0.23 to<br>0.38)                      | 0.58<br>(0.41 to<br>0.82)                        | 0.59<br>(0.43 to<br>0.81)                       | 0.55<br>(0.38 to<br>0.78)                        |
| Peripheral artery disease                     | 0.30<br>(0.16 to<br>0.59)                            | 1.12<br>(0.54 to<br>2.13)                            | 1.11<br>(0.54 to<br>2.13)                            | 1.03<br>(0.50 to<br>1.91)                            | 0.03<br>(0.01 to<br>0.05)                      | 0.11<br>(0.05 to<br>0.21)                        | 0.11<br>(0.05 to<br>0.22)                       | 0.09<br>(0.04 to<br>0.18)                        |
| Endocarditis                                  | 9.35<br>(7.09 to<br>12.40)                           | 15.73<br>(10.76 to<br>23.64)                         | 15.00<br>(10.52 to<br>22.20)                         | 16.33<br>(11.00 to<br>24.18)                         | 0.42<br>(0.31 to<br>0.55)                      | 1.01<br>(0.63 to<br>1.61)                        | 1.00<br>(0.64 to<br>1.59)                       | 0.98<br>(0.59 to<br>1.58)                        |
| Other cardiovascular and circulatory diseases | 55.94<br>(40.28 to<br>80.02)                         | 98.42<br>(63.06 to<br>151.02)                        | 88.95<br>(59.13 to<br>135.37)                        | 109.62<br>(68.88 to<br>169.07)                       | 2.75<br>(1.96 to<br>4.07)                      | 6.71<br>(4.12 to<br>10.46)                       | 6.36<br>(4.03 to<br>9.81)                       | 7.01<br>(4.22 to<br>11.05)                       |
| <b>Chronic respiratory diseases</b>           | <b>126.04</b><br><b>(109.06 to</b><br><b>144.43)</b> | <b>160.87</b><br><b>(118.30 to</b><br><b>216.47)</b> | <b>137.36</b><br><b>(103.29 to</b><br><b>180.74)</b> | <b>220.23</b><br><b>(152.15 to</b><br><b>308.85)</b> | <b>6.61</b><br><b>(5.79 to</b><br><b>7.69)</b> | <b>10.70</b><br><b>(7.58 to</b><br><b>14.66)</b> | <b>9.72</b><br><b>(6.97 to</b><br><b>12.89)</b> | <b>13.51</b><br><b>(9.14 to</b><br><b>19.28)</b> |
| Chronic obstructive pulmonary disease         | 81.51<br>(67.54 to<br>95.07)                         | 108.59<br>(72.96 to<br>158.82)                       | 89.31<br>(62.77 to<br>125.62)                        | 164.67<br>(104.94 to<br>250.46)                      | 4.66<br>(3.97 to<br>5.46)                      | 7.56<br>(5.04 to<br>10.78)                       | 6.69<br>(4.58 to<br>9.24)                       | 10.38<br>(6.58 to<br>15.60)                      |
| Pneumoconiosis                                | 0.42<br>(0.32 to<br>0.56)                            | 0.49<br>(0.35 to<br>0.69)                            | 0.48<br>(0.34 to<br>0.66)                            | 0.50<br>(0.36 to<br>0.70)                            | 0.02<br>(0.02 to<br>0.03)                      | 0.04<br>(0.02 to<br>0.06)                        | 0.04<br>(0.02 to<br>0.05)                       | 0.04<br>(0.02 to<br>0.05)                        |
| Silicosis                                     | 0.08<br>(0.04 to<br>0.15)                            | 0.08<br>(0.04 to<br>0.14)                            | 0.08<br>(0.04 to<br>0.14)                            | 0.08<br>(0.04 to<br>0.14)                            | 0.00<br>(0.00 to<br>0.01)                      | 0.01<br>(0.00 to<br>0.01)                        | 0.01<br>(0.00 to<br>0.01)                       | 0.01<br>(0.00 to<br>0.01)                        |
| Asbestosis                                    | 0.08<br>(0.05 to<br>0.10)                            | 0.09<br>(0.06 to<br>0.13)                            | 0.09<br>(0.06 to<br>0.13)                            | 0.09<br>(0.06 to<br>0.13)                            | 0.00<br>(0.00 to<br>0.00)                      | 0.01<br>(0.00 to<br>0.01)                        | 0.01<br>(0.00 to<br>0.01)                       | 0.01<br>(0.00 to<br>0.01)                        |
| Coal workers pneumoconiosis                   | 0.02<br>(0.01 to<br>0.04)                            | 0.03<br>(0.01 to<br>0.06)                            | 0.03<br>(0.01 to<br>0.05)                            | 0.04<br>(0.02 to<br>0.07)                            | 0.00<br>(0.00 to<br>0.00)                      | 0.00<br>(0.00 to<br>0.01)                        | 0.00<br>(0.00 to<br>0.00)                       | 0.00<br>(0.00 to<br>0.01)                        |
| Other pneumoconiosis                          | 0.24<br>(0.18 to<br>0.35)                            | 0.29<br>(0.19 to<br>0.44)                            | 0.28<br>(0.19 to<br>0.41)                            | 0.29<br>(0.19 to<br>0.43)                            | 0.01<br>(0.01 to<br>0.02)                      | 0.02<br>(0.01 to<br>0.04)                        | 0.02<br>(0.01 to<br>0.04)                       | 0.02<br>(0.01 to<br>0.04)                        |

|                                                                |                                        |                                        |                                        |                                        |                                    |                                     |                                     |                                     |
|----------------------------------------------------------------|----------------------------------------|----------------------------------------|----------------------------------------|----------------------------------------|------------------------------------|-------------------------------------|-------------------------------------|-------------------------------------|
| Asthma                                                         | 29.48<br>(20.79 to<br>37.84)           | 25.03<br>(13.99 to<br>41.28)           | 19.58<br>(11.71 to<br>31.69)           | 30.01<br>(16.30 to<br>50.28)           | 1.24<br>(0.86 to<br>1.68)          | 1.42<br>(0.78 to<br>2.44)           | 1.16<br>(0.66 to<br>1.97)           | 1.60<br>(0.85 to<br>2.79)           |
| Interstitial lung disease and pulmonary sarcoidosis            | 9.62<br>(5.84 to<br>13.95)             | 20.24<br>(11.70 to<br>31.65)           | 21.71<br>(12.82 to<br>33.23)           | 17.89<br>(9.97 to<br>29.15)            | 0.50<br>(0.29 to<br>0.80)          | 1.33<br>(0.73 to<br>2.24)           | 1.47<br>(0.81 to<br>2.39)           | 1.13<br>(0.59 to<br>1.99)           |
| Other chronic respiratory diseases                             | 5.01<br>(3.07 to<br>8.64)              | 6.52<br>(3.86 to<br>11.99)             | 6.28<br>(3.73 to<br>11.42)             | 7.18<br>(4.17 to<br>13.31)             | 0.19<br>(0.12 to<br>0.33)          | 0.36<br>(0.19 to<br>0.69)           | 0.36<br>(0.20 to<br>0.70)           | 0.36<br>(0.19 to<br>0.70)           |
| <b>Cirrhosis and other chronic liver diseases</b>              | <b>81.38</b><br>(67.55 to<br>98.34)    | <b>123.39</b><br>(97.35 to<br>156.43)  | <b>122.30</b><br>(98.00 to<br>155.12)  | <b>126.85</b><br>(99.24 to<br>160.31)  | <b>3.29</b><br>(2.71 to<br>4.08)   | <b>6.25</b><br>(4.74 to<br>8.17)    | <b>6.35</b><br>(4.94 to<br>8.24)    | <b>6.18</b><br>(4.55 to<br>8.22)    |
| Cirrhosis and other chronic liver diseases due to hepatitis B  | 26.53<br>(20.07 to<br>34.82)           | 42.18<br>(31.20 to<br>56.71)           | 42.04<br>(31.45 to<br>56.85)           | 42.88<br>(31.37 to<br>57.44)           | 1.11<br>(0.84 to<br>1.48)          | 2.15<br>(1.53 to<br>3.05)           | 2.19<br>(1.57 to<br>3.08)           | 2.10<br>(1.48 to<br>2.97)           |
| Cirrhosis and other chronic liver diseases due to hepatitis C  | 26.81<br>(18.96 to<br>36.09)           | 40.45<br>(28.31 to<br>57.10)           | 40.16<br>(28.26 to<br>55.96)           | 41.38<br>(28.69 to<br>58.85)           | 1.09<br>(0.77 to<br>1.48)          | 1.97<br>(1.34 to<br>2.81)           | 2.00<br>(1.36 to<br>2.84)           | 1.95<br>(1.30 to<br>2.80)           |
| Cirrhosis and other chronic liver diseases due to alcohol use  | 6.57<br>(5.13 to<br>8.44)              | 10.64<br>(7.95 to<br>14.43)            | 10.43<br>(7.80 to<br>13.92)            | 11.43<br>(8.43 to<br>15.61)            | 0.28<br>(0.22 to<br>0.37)          | 0.56<br>(0.40 to<br>0.77)           | 0.56<br>(0.41 to<br>0.78)           | 0.58<br>(0.41 to<br>0.80)           |
| Cirrhosis and other chronic liver diseases due to other causes | 21.46<br>(17.47 to<br>26.37)           | 30.11<br>(23.17 to<br>39.36)           | 29.68<br>(23.05 to<br>38.61)           | 31.16<br>(23.66 to<br>40.86)           | 0.81<br>(0.65 to<br>1.04)          | 1.57<br>(1.15 to<br>2.12)           | 1.59<br>(1.18 to<br>2.13)           | 1.55<br>(1.12 to<br>2.12)           |
| <b>Digestive diseases</b>                                      | <b>49.26</b><br>(40.73 to<br>67.49)    | <b>68.50</b><br>(49.25 to<br>104.39)   | <b>64.71</b><br>(47.05 to<br>97.79)    | <b>74.01</b><br>(52.54 to<br>113.36)   | <b>2.33</b><br>(1.88 to<br>3.45)   | <b>4.53</b><br>(3.02 to<br>7.20)    | <b>4.43</b><br>(2.98 to<br>6.94)    | <b>4.63</b><br>(3.00 to<br>7.49)    |
| Peptic ulcer disease                                           | 11.37<br>(8.70 to<br>16.57)            | 10.71<br>(7.34 to<br>17.66)            | 9.92<br>(6.78 to<br>16.21)             | 12.46<br>(8.45 to<br>20.51)            | 0.57<br>(0.43 to<br>0.86)          | 0.73<br>(0.47 to<br>1.24)           | 0.70<br>(0.46 to<br>1.17)           | 0.80<br>(0.51 to<br>1.35)           |
| <b>Morocco</b>                                                 |                                        |                                        |                                        |                                        |                                    |                                     |                                     |                                     |
| Cause                                                          | YLLs (in 1000s)                        |                                        |                                        |                                        | Deaths (in 1000s)                  |                                     |                                     |                                     |
|                                                                | 2016                                   | 2040 Forecast                          | 2040 Better Scenario                   | 2040 Worse Scenario                    | 2016                               | 2040 Forecast                       | 2040 Better Scenario                | 2040 Worse Scenario                 |
| Gastritis and duodenitis                                       | 0.39<br>(0.28 to<br>0.61)              | 0.58<br>(0.39 to<br>0.96)              | 0.57<br>(0.38 to<br>0.95)              | 0.60<br>(0.40 to<br>1.00)              | 0.02<br>(0.01 to<br>0.03)          | 0.03<br>(0.02 to<br>0.06)           | 0.04<br>(0.02 to<br>0.06)           | 0.03<br>(0.02 to<br>0.06)           |
| Appendicitis                                                   | 3.87<br>(2.67 to<br>6.28)              | 4.21<br>(2.79 to<br>7.64)              | 4.01<br>(2.67 to<br>7.35)              | 4.65<br>(3.09 to<br>8.36)              | 0.14<br>(0.10 to<br>0.26)          | 0.24<br>(0.15 to<br>0.47)           | 0.24<br>(0.15 to<br>0.47)           | 0.25<br>(0.15 to<br>0.49)           |
| Paralytic ileus and intestinal obstruction                     | 10.64<br>(7.99 to<br>14.79)            | 16.69<br>(11.76 to<br>24.08)           | 16.87<br>(12.01 to<br>24.09)           | 16.48<br>(11.46 to<br>23.98)           | 0.51<br>(0.38 to<br>0.71)          | 1.14<br>(0.74 to<br>1.68)           | 1.19<br>(0.79 to<br>1.76)           | 1.07<br>(0.67 to<br>1.60)           |
| Inguinal, femoral, and abdominal hernia                        | 1.32<br>(0.90 to<br>2.05)              | 1.60<br>(0.91 to<br>2.74)              | 1.60<br>(0.93 to<br>2.77)              | 1.61<br>(0.93 to<br>2.76)              | 0.07<br>(0.05 to<br>0.12)          | 0.12<br>(0.06 to<br>0.22)           | 0.13<br>(0.06 to<br>0.23)           | 0.12<br>(0.06 to<br>0.21)           |
| Inflammatory bowel disease                                     | 1.80<br>(1.26 to<br>2.88)              | 2.28<br>(1.67 to<br>3.62)              | 2.31<br>(1.68 to<br>3.66)              | 2.25<br>(1.64 to<br>3.55)              | 0.06<br>(0.05 to<br>0.10)          | 0.12<br>(0.08 to<br>0.18)           | 0.12<br>(0.08 to<br>0.19)           | 0.11<br>(0.07 to<br>0.17)           |
| Vascular intestinal disorders                                  | 3.47<br>(2.52 to<br>5.08)              | 6.28<br>(4.32 to<br>10.00)             | 6.34<br>(4.35 to<br>10.29)             | 6.26<br>(4.30 to<br>9.87)              | 0.18<br>(0.13 to<br>0.29)          | 0.42<br>(0.27 to<br>0.69)           | 0.43<br>(0.28 to<br>0.72)           | 0.40<br>(0.25 to<br>0.66)           |
| Gallbladder and biliary diseases                               | 5.50<br>(3.75 to<br>9.29)              | 10.91<br>(5.01 to<br>23.25)            | 8.37<br>(4.03 to<br>17.81)             | 12.65<br>(5.71 to<br>26.98)            | 0.30<br>(0.19 to<br>0.56)          | 0.79<br>(0.34 to<br>1.78)           | 0.64<br>(0.29 to<br>1.44)           | 0.87<br>(0.36 to<br>1.95)           |
| Pancreatitis                                                   | 4.92<br>(3.42 to<br>7.42)              | 7.06<br>(4.26 to<br>11.90)             | 6.74<br>(4.06 to<br>11.56)             | 8.34<br>(4.83 to<br>14.21)             | 0.20<br>(0.13 to<br>0.34)          | 0.39<br>(0.22 to<br>0.71)           | 0.39<br>(0.22 to<br>0.70)           | 0.43<br>(0.23 to<br>0.78)           |
| Other digestive diseases                                       | 5.98<br>(4.40 to<br>8.78)              | 8.18<br>(5.18 to<br>13.34)             | 7.97<br>(5.05 to<br>13.29)             | 8.71<br>(5.52 to<br>14.47)             | 0.27<br>(0.19 to<br>0.43)          | 0.54<br>(0.31 to<br>0.96)           | 0.55<br>(0.32 to<br>0.96)           | 0.55<br>(0.31 to<br>0.98)           |
| <b>Neurological disorders</b>                                  | <b>160.70</b><br>(126.56 to<br>208.06) | <b>375.59</b><br>(273.11 to<br>518.61) | <b>358.54</b><br>(274.58 to<br>471.88) | <b>361.30</b><br>(250.48 to<br>514.61) | <b>11.03</b><br>(9.20 to<br>13.22) | <b>33.54</b><br>(23.33 to<br>47.14) | <b>32.98</b><br>(23.17 to<br>44.39) | <b>30.49</b><br>(19.44 to<br>44.28) |



|                                         |                                       |                                       |                                       |                                       |                                    |                                    |                                    |                                    |
|-----------------------------------------|---------------------------------------|---------------------------------------|---------------------------------------|---------------------------------------|------------------------------------|------------------------------------|------------------------------------|------------------------------------|
| Alzheimer's disease and other dementias | 98.42<br>(80.47 to<br>120.87)         | 296.28<br>(199.99 to<br>433.65)       | 279.38<br>(198.02 to<br>387.64)       | 280.18<br>(180.37 to<br>426.62)       | 9.17<br>(7.46 to<br>11.20)         | 29.57<br>(18.84 to<br>42.96)       | 28.73<br>(19.42 to<br>40.04)       | 26.88<br>(15.82 to<br>40.55)       |
| Parkinson's disease                     | 8.56<br>(6.43 to<br>11.02)            | 26.35<br>(18.60 to<br>35.93)          | 29.26<br>(20.93 to<br>38.77)          | 21.91<br>(14.98 to<br>29.80)          | 0.69<br>(0.53 to<br>0.91)          | 2.37<br>(1.57 to<br>3.27)          | 2.69<br>(1.85 to<br>3.64)          | 1.91<br>(1.21 to<br>2.68)          |
| Epilepsy                                | 44.08<br>(22.98 to<br>87.78)          | 40.25<br>(18.82 to<br>83.75)          | 37.02<br>(17.38 to<br>76.39)          | 47.01<br>(22.18 to<br>96.95)          | 0.92<br>(0.47 to<br>1.89)          | 1.18<br>(0.51 to<br>2.55)          | 1.12<br>(0.49 to<br>2.41)          | 1.32<br>(0.57 to<br>2.84)          |
| Multiple sclerosis                      | 1.89<br>(1.53 to<br>2.40)             | 2.24<br>(1.84 to<br>2.76)             | 2.25<br>(1.86 to<br>2.77)             | 2.20<br>(1.79 to<br>2.74)             | 0.05<br>(0.04 to<br>0.06)          | 0.07<br>(0.06 to<br>0.09)          | 0.07<br>(0.06 to<br>0.09)          | 0.07<br>(0.06 to<br>0.09)          |
| Motor neuron disease                    | 1.57<br>(1.25 to<br>1.89)             | 2.59<br>(2.07 to<br>3.16)             | 2.67<br>(2.15 to<br>3.25)             | 2.44<br>(1.97 to<br>3.00)             | 0.05<br>(0.04 to<br>0.06)          | 0.09<br>(0.07 to<br>0.11)          | 0.09<br>(0.08 to<br>0.11)          | 0.08<br>(0.07 to<br>0.10)          |
| Other neurological disorders            | 6.19<br>(5.03 to<br>7.50)             | 7.88<br>(6.24 to<br>9.64)             | 7.95<br>(6.32 to<br>9.65)             | 7.56<br>(5.98 to<br>9.23)             | 0.14<br>(0.12 to<br>0.17)          | 0.25<br>(0.19 to<br>0.31)          | 0.26<br>(0.20 to<br>0.33)          | 0.23<br>(0.18 to<br>0.29)          |
| <b>Mental disorders</b>                 | <b>14.51<br/>(11.50 to<br/>18.28)</b> | <b>20.46<br/>(16.13 to<br/>25.66)</b> | <b>20.55<br/>(16.29 to<br/>25.79)</b> | <b>20.39<br/>(15.85 to<br/>25.48)</b> | <b>0.36<br/>(0.28 to<br/>0.44)</b> | <b>0.65<br/>(0.51 to<br/>0.80)</b> | <b>0.67<br/>(0.53 to<br/>0.82)</b> | <b>0.63<br/>(0.48 to<br/>0.77)</b> |
| Alcohol use disorders                   | 3.66<br>(2.61 to<br>5.34)             | 3.78<br>(2.56 to<br>5.99)             | 3.76<br>(2.54 to<br>5.97)             | 3.85<br>(2.65 to<br>6.08)             | 0.10<br>(0.07 to<br>0.14)          | 0.12<br>(0.09 to<br>0.19)          | 0.13<br>(0.09 to<br>0.19)          | 0.12<br>(0.09 to<br>0.19)          |
| Drug use disorders                      | 10.81<br>(7.97 to<br>14.39)           | 16.64<br>(12.56 to<br>21.48)          | 16.75<br>(12.65 to<br>21.70)          | 16.49<br>(12.33 to<br>21.45)          | 0.26<br>(0.19 to<br>0.33)          | 0.55<br>(0.39 to<br>0.67)          | 0.55<br>(0.40 to<br>0.69)          | 0.50<br>(0.36 to<br>0.63)          |
| Opioid use disorders                    | 8.36<br>(6.13 to<br>11.25)            | 11.50<br>(8.39 to<br>15.45)           | 11.53<br>(8.42 to<br>15.47)           | 11.45<br>(8.25 to<br>15.36)           | 0.19<br>(0.14 to<br>0.25)          | 0.33<br>(0.24 to<br>0.44)          | 0.34<br>(0.25 to<br>0.45)          | 0.32<br>(0.23 to<br>0.42)          |
| Cocaine use disorders                   | 0.37<br>(0.21 to<br>0.57)             | 0.72<br>(0.42 to<br>1.08)             | 0.70<br>(0.42 to<br>1.06)             | 0.75<br>(0.43 to<br>1.13)             | 0.01<br>(0.01 to<br>0.01)          | 0.02<br>(0.01 to<br>0.03)          | 0.02<br>(0.01 to<br>0.03)          | 0.02<br>(0.01 to<br>0.03)          |
| Amphetamine use disorders               | 0.21<br>(0.13 to<br>0.32)             | 0.52<br>(0.32 to<br>0.76)             | 0.51<br>(0.31 to<br>0.74)             | 0.55<br>(0.33 to<br>0.81)             | 0.00<br>(0.00 to<br>0.01)          | 0.01<br>(0.01 to<br>0.02)          | 0.01<br>(0.01 to<br>0.02)          | 0.01<br>(0.01 to<br>0.02)          |
| Other drug use disorders                | 1.86<br>(1.03 to<br>2.60)             | 3.90<br>(2.32 to<br>5.24)             | 4.00<br>(2.45 to<br>5.36)             | 3.73<br>(2.20 to<br>5.03)             | 0.05<br>(0.03 to<br>0.07)          | 0.16<br>(0.10 to<br>0.21)          | 0.17<br>(0.10 to<br>0.23)          | 0.14<br>(0.08 to<br>0.20)          |
| Eating disorders                        | 0.04<br>(0.03 to<br>0.06)             | 0.04<br>(0.03 to<br>0.06)             | 0.04<br>(0.03 to<br>0.06)             | 0.04<br>(0.03 to<br>0.06)             | 0.00<br>(0.00 to<br>0.00)          | 0.00<br>(0.00 to<br>0.00)          | 0.00<br>(0.00 to<br>0.00)          | 0.00<br>(0.00 to<br>0.00)          |

**Morocco**

| Cause                                                      | YLLs (in 1000s)                          |                                            |                                            |                                              | Deaths (in 1000s)                     |                                        |                                        |                                        |
|------------------------------------------------------------|------------------------------------------|--------------------------------------------|--------------------------------------------|----------------------------------------------|---------------------------------------|----------------------------------------|----------------------------------------|----------------------------------------|
|                                                            | 2016                                     | 2040 Forecast                              | 2040 Better Scenario                       | 2040 Worse Scenario                          | 2016                                  | 2040 Forecast                          | 2040 Better Scenario                   | 2040 Worse Scenario                    |
| <b>Diabetes, urogenital, blood, and endocrine diseases</b> | <b>424.69<br/>(364.80 to<br/>486.43)</b> | <b>874.41<br/>(482.13 to<br/>1,225.10)</b> | <b>720.22<br/>(415.61 to<br/>1,514.84)</b> | <b>1,094.63<br/>(603.37 to<br/>2,025.96)</b> | <b>21.15<br/>(18.10 to<br/>24.32)</b> | <b>57.97<br/>(30.80 to<br/>116.79)</b> | <b>49.60<br/>(27.43 to<br/>107.97)</b> | <b>68.80<br/>(36.44 to<br/>127.38)</b> |
| Diabetes mellitus                                          | 203.46<br>(169.81 to<br>240.16)          | 322.66<br>(221.83 to<br>424.90)            | 287.25<br>(200.07 to<br>376.56)            | 407.80<br>(278.57 to<br>557.74)              | 11.00<br>(9.08 to<br>13.10)           | 27.22<br>(14.86 to<br>29.33)           | 20.54<br>(14.28 to<br>26.67)           | 26.55<br>(17.40 to<br>36.08)           |
| Acute glomerulonephritis                                   | 0.20<br>(0.18 to<br>0.24)                | 0.20<br>(0.16 to<br>0.24)                  | 0.19<br>(0.15 to<br>0.23)                  | 0.22<br>(0.18 to<br>0.27)                    | 0.00<br>(0.00 to<br>0.01)             | 0.01<br>(0.00 to<br>0.01)              | 0.01<br>(0.00 to<br>0.01)              | 0.01<br>(0.00 to<br>0.01)              |
| Chronic kidney disease                                     | 178.03<br>(149.29 to<br>225.21)          | 493.67<br>(107.93 to<br>1,398.04)          | 375.81<br>(83.73 to<br>1,227.48)           | 627.10<br>(143.22 to<br>1,630.44)            | 8.65<br>(7.23 to<br>11.25)            | 32.49<br>(6.01 to<br>95.59)            | 25.67<br>(4.72 to<br>86.83)            | 39.13<br>(7.49 to<br>104.19)           |
| Chronic kidney disease due to diabetes mellitus            | 66.05<br>(53.23 to<br>86.93)             | 199.59<br>(41.89 to<br>581.35)             | 149.88<br>(31.44 to<br>504.68)             | 256.04<br>(54.60 to<br>680.14)               | 3.06<br>(2.43 to<br>4.06)             | 11.53<br>(2.00 to<br>33.63)            | 8.95<br>(1.56 to<br>30.41)             | 14.16<br>(2.63 to<br>37.89)            |
| Chronic kidney disease due to hypertension                 | 27.32<br>(21.36 to<br>35.59)             | 96.97<br>(17.44 to<br>286.99)              | 76.02<br>(13.52 to<br>262.06)              | 117.96<br>(21.26 to<br>321.82)               | 1.95<br>(1.54 to<br>2.56)             | 8.64<br>(1.53 to<br>25.28)             | 7.06<br>(1.25 to<br>24.61)             | 9.94<br>(1.75 to<br>27.13)             |

|                                                            |                              |                                |                                |                                |                           |                             |                            |                             |
|------------------------------------------------------------|------------------------------|--------------------------------|--------------------------------|--------------------------------|---------------------------|-----------------------------|----------------------------|-----------------------------|
| Chronic kidney disease due to glomerulonephritis           | 19.94<br>(15.29 to<br>25.78) | 37.84<br>(10.79 to<br>105.16)  | 28.85<br>(8.52 to<br>85.85)    | 48.90<br>(13.83 to<br>124.80)  | 0.75<br>(0.56 to<br>0.99) | 2.17<br>(0.44 to<br>6.41)   | 1.69<br>(0.35 to<br>5.70)  | 2.67<br>(0.56 to<br>7.13)   |
| Chronic kidney disease due to other and unspecified causes | 64.72<br>(51.63 to<br>82.33) | 159.27<br>(37.52 to<br>443.65) | 121.06<br>(29.36 to<br>379.25) | 304.19<br>(50.34 to<br>523.31) | 2.89<br>(2.27 to<br>3.77) | 10.15<br>(1.94 to<br>29.12) | 7.97<br>(1.51 to<br>26.49) | 12.37<br>(2.42 to<br>32.88) |
| Urinary diseases and male infertility                      | 6.72<br>(5.17 to<br>9.17)    | 15.32<br>(11.13 to<br>20.93)   | 15.93<br>(11.68 to<br>21.73)   | 14.45<br>(10.28 to<br>19.73)   | 0.42<br>(0.32 to<br>0.57) | 1.32<br>(0.89 to<br>1.87)   | 1.42<br>(0.98 to<br>2.01)  | 1.18<br>(0.77 to<br>1.69)   |
| Urinary tract infections                                   | 5.07<br>(3.43 to<br>7.23)    | 13.28<br>(9.03 to<br>18.62)    | 13.93<br>(9.69 to<br>19.67)    | 12.31<br>(8.17 to<br>17.35)    | 0.33<br>(0.22 to<br>0.47) | 1.17<br>(0.73 to<br>1.68)   | 1.27<br>(0.83 to<br>1.82)  | 1.03<br>(0.62 to<br>1.51)   |
| Urolithiasis                                               | 0.20<br>(0.15 to<br>0.27)    | 0.30<br>(0.21 to<br>0.45)      | 0.31<br>(0.21 to<br>0.46)      | 0.30<br>(0.21 to<br>0.44)      | 0.01<br>(0.01 to<br>0.01) | 0.02<br>(0.01 to<br>0.05)   | 0.02<br>(0.01 to<br>0.03)  | 0.01<br>(0.01 to<br>0.02)   |
| Other urinary diseases                                     | 1.45<br>(0.90 to<br>2.25)    | 1.74<br>(0.97 to<br>2.94)      | 1.69<br>(0.95 to<br>2.91)      | 1.84<br>(1.25 to<br>3.10)      | 0.08<br>(0.05 to<br>0.13) | 0.13<br>(0.07 to<br>0.23)   | 0.13<br>(0.07 to<br>0.23)  | 0.13<br>(0.07 to<br>0.23)   |
| Gynecological diseases                                     | 0.16<br>(0.08 to<br>0.22)    | 0.14<br>(0.07 to<br>0.22)      | 0.13<br>(0.07 to<br>0.21)      | 0.16<br>(0.08 to<br>0.26)      | 0.00<br>(0.00 to<br>0.01) | 0.00<br>(0.00 to<br>0.01)   | 0.00<br>(0.00 to<br>0.01)  | 0.00<br>(0.00 to<br>0.01)   |
| Uterine fibroids                                           | 0.01<br>(0.00 to<br>0.02)    | 0.01<br>(0.00 to<br>0.02)      | 0.01<br>(0.00 to<br>0.02)      | 0.01<br>(0.00 to<br>0.02)      | 0.00<br>(0.00 to<br>0.00) | 0.00<br>(0.00 to<br>0.00)   | 0.00<br>(0.00 to<br>0.00)  | 0.00<br>(0.00 to<br>0.00)   |
| Polycystic ovarian syndrome                                | 0.02<br>(0.01 to<br>0.05)    | 0.01<br>(0.00 to<br>0.03)      | 0.01<br>(0.00 to<br>0.02)      | 0.01<br>(0.00 to<br>0.03)      | 0.00<br>(0.00 to<br>0.00) | 0.00<br>(0.00 to<br>0.00)   | 0.00<br>(0.00 to<br>0.00)  | 0.00<br>(0.00 to<br>0.00)   |
| Endometriosis                                              | 0.00<br>(0.00 to<br>0.00)    | 0.00<br>(0.00 to<br>0.00)      | 0.00<br>(0.00 to<br>0.00)      | 0.00<br>(0.00 to<br>0.00)      | 0.00<br>(0.00 to<br>0.00) | 0.00<br>(0.00 to<br>0.00)   | 0.00<br>(0.00 to<br>0.00)  | 0.00<br>(0.00 to<br>0.00)   |
| Genital prolapse                                           | 0.00<br>(0.00 to<br>0.01)    | 0.00<br>(0.00 to<br>0.01)      | 0.00<br>(0.00 to<br>0.01)      | 0.00<br>(0.00 to<br>0.01)      | 0.00<br>(0.00 to<br>0.00) | 0.00<br>(0.00 to<br>0.00)   | 0.00<br>(0.00 to<br>0.00)  | 0.00<br>(0.00 to<br>0.00)   |
| Other gynecological diseases                               | 0.12<br>(0.07 to<br>0.18)    | 0.12<br>(0.06 to<br>0.19)      | 0.11<br>(0.06 to<br>0.18)      | 0.13<br>(0.07 to<br>0.22)      | 0.00<br>(0.00 to<br>0.00) | 0.00<br>(0.00 to<br>0.01)   | 0.00<br>(0.00 to<br>0.01)  | 0.00<br>(0.00 to<br>0.01)   |
| Hemoglobinopathies and hemolytic anemias                   | 12.66<br>(9.01 to<br>19.40)  | 11.61<br>(7.63 to<br>18.29)    | 11.00<br>(7.21 to<br>17.47)    | 12.75<br>(8.36 to<br>19.85)    | 0.32<br>(0.23 to<br>0.48) | 0.43<br>(0.29 to<br>0.67)   | 0.42<br>(0.28 to<br>0.66)  | 0.46<br>(0.30 to<br>0.71)   |
| Thalassemias                                               | 2.64<br>(1.54 to<br>4.70)    | 1.30<br>(0.66 to<br>2.45)      | 1.25<br>(0.64 to<br>2.35)      | 1.23<br>(0.61 to<br>2.37)      | 0.03<br>(0.02 to<br>0.06) | 0.02<br>(0.01 to<br>0.03)   | 0.02<br>(0.01 to<br>0.03)  | 0.02<br>(0.01 to<br>0.03)   |
| Sickle cell disorders                                      | 3.47<br>(2.20 to<br>5.49)    | 3.19<br>(1.91 to<br>5.05)      | 3.02<br>(1.79 to<br>4.78)      | 3.51<br>(2.13 to<br>5.60)      | 0.06<br>(0.04 to<br>0.10) | 0.07<br>(0.05 to<br>0.12)   | 0.07<br>(0.04 to<br>0.12)  | 0.08<br>(0.05 to<br>0.13)   |
| G6PD deficiency                                            | 4.15<br>(2.79 to<br>6.51)    | 4.41<br>(2.61 to<br>7.45)      | 4.09<br>(2.43 to<br>6.91)      | 5.10<br>(3.07 to<br>8.55)      | 0.09<br>(0.06 to<br>0.14) | 0.14<br>(0.08 to<br>0.25)   | 0.13<br>(0.08 to<br>0.21)  | 0.15<br>(0.10 to<br>0.25)   |
| Other hemoglobinopathies and hemolytic anemias             | 2.40<br>(1.70 to<br>3.74)    | 2.72<br>(1.71 to<br>4.58)      | 2.65<br>(1.67 to<br>4.46)      | 2.90<br>(1.79 to<br>4.89)      | 0.12<br>(0.09 to<br>0.19) | 0.20<br>(0.12 to<br>0.34)   | 0.20<br>(0.13 to<br>0.33)  | 0.21<br>(0.12 to<br>0.35)   |
| Endocrine, metabolic, blood, and immune disorders          | 23.46<br>(17.57 to<br>31.96) | 30.81<br>(22.36 to<br>43.22)   | 29.91<br>(21.86 to<br>42.05)   | 32.14<br>(23.24 to<br>45.06)   | 0.76<br>(0.56 to<br>1.04) | 1.51<br>(0.99 to<br>2.25)   | 1.54<br>(1.01 to<br>2.29)  | 1.48<br>(0.95 to<br>2.21)   |
| <b>Morocco</b>                                             |                              |                                |                                |                                |                           |                             |                            |                             |
| Cause                                                      | YLLs (in 1000s)              |                                |                                |                                | Deaths (in 1000s)         |                             |                            |                             |
|                                                            | 2016                         | 2040 Forecast                  | 2040 Better Scenario           | 2040 Worse Scenario            | 2016                      | 2040 Forecast               | 2040 Better Scenario       | 2040 Worse Scenario         |
| Musculoskeletal disorders                                  | 6.05<br>(4.63 to<br>7.45)    | 8.64<br>(6.30 to<br>11.52)     | 8.83<br>(6.50 to<br>11.79)     | 8.29<br>(6.00 to<br>11.09)     | 0.16<br>(0.12 to<br>0.21) | 0.35<br>(0.23 to<br>0.52)   | 0.37<br>(0.25 to<br>0.55)  | 0.32<br>(0.21 to<br>0.48)   |
| Rheumatoid arthritis                                       | 0.84<br>(0.56 to<br>1.33)    | 1.42<br>(0.83 to<br>2.55)      | 1.37<br>(0.80 to<br>2.48)      | 1.54<br>(0.90 to<br>2.73)      | 0.03<br>(0.02 to<br>0.05) | 0.08<br>(0.04 to<br>0.16)   | 0.08<br>(0.04 to<br>0.15)  | 0.08<br>(0.04 to<br>0.16)   |

|                                               |                                          |                                          |                                          |                                          |                                       |                                       |                                       |                                       |
|-----------------------------------------------|------------------------------------------|------------------------------------------|------------------------------------------|------------------------------------------|---------------------------------------|---------------------------------------|---------------------------------------|---------------------------------------|
| Other musculoskeletal disorders               | 5.21<br>(4.01 to<br>6.32)                | 7.22<br>(5.17 to<br>9.21)                | 7.47<br>(5.40 to<br>9.52)                | 6.75<br>(4.82 to<br>8.64)                | 0.13<br>(0.10 to<br>0.16)             | 0.27<br>(0.18 to<br>0.38)             | 0.29<br>(0.19 to<br>0.41)             | 0.24<br>(0.16 to<br>0.34)             |
| <b>Other non-communicable diseases</b>        | <b>218.05<br/>(93.20 to<br/>340.78)</b>  | <b>178.49<br/>(82.90 to<br/>291.08)</b>  | <b>155.82<br/>(74.00 to<br/>250.48)</b>  | <b>204.53<br/>(89.59 to<br/>338.91)</b>  | <b>3.03<br/>(1.46 to<br/>4.53)</b>    | <b>3.85<br/>(2.29 to<br/>5.50)</b>    | <b>3.70<br/>(2.26 to<br/>5.22)</b>    | <b>3.99<br/>(2.34 to<br/>5.78)</b>    |
| Congenital birth defects                      | 204.37<br>(78.56 to<br>327.36)           | 151.63<br>(55.09 to<br>267.66)           | 128.66<br>(47.57 to<br>224.78)           | 178.40<br>(62.72 to<br>313.91)           | 2.51<br>(0.94 to<br>4.00)             | 1.92<br>(0.68 to<br>3.33)             | 1.65<br>(0.59 to<br>2.84)             | 2.25<br>(0.78 to<br>3.91)             |
| Neural tube defects                           | 5.57<br>(1.77 to<br>12.53)               | 1.79<br>(0.42 to<br>4.71)                | 1.42<br>(0.34 to<br>3.72)                | 2.37<br>(0.54 to<br>6.20)                | 0.07<br>(0.02 to<br>0.15)             | 0.02<br>(0.01 to<br>0.06)             | 0.02<br>(0.00 to<br>0.05)             | 0.03<br>(0.01 to<br>0.08)             |
| Congenital heart anomalies                    | 84.82<br>(30.03 to<br>142.06)            | 60.83<br>(20.27 to<br>108.01)            | 51.77<br>(17.57 to<br>91.85)             | 71.37<br>(23.40 to<br>127.02)            | 1.04<br>(0.36 to<br>1.74)             | 0.77<br>(0.25 to<br>1.37)             | 0.67<br>(0.22 to<br>1.18)             | 0.90<br>(0.29 to<br>1.60)             |
| Orofacial clefts                              | 0.99<br>(0.02 to<br>0.28)                | 0.05<br>(0.01 to<br>0.17)                | 0.04<br>(0.01 to<br>0.13)                | 0.06<br>(0.01 to<br>0.22)                | 0.00<br>(0.00 to<br>0.00)             | 0.00<br>(0.00 to<br>0.00)             | 0.00<br>(0.00 to<br>0.00)             | 0.00<br>(0.00 to<br>0.00)             |
| Down syndrome                                 | 11.51<br>(3.76 to<br>23.32)              | 8.60<br>(2.70 to<br>18.14)               | 7.33<br>(2.33 to<br>15.45)               | 10.37<br>(3.14 to<br>21.69)              | 0.15<br>(0.05 to<br>0.30)             | 0.12<br>(0.04 to<br>0.25)             | 0.10<br>(0.03 to<br>0.22)             | 0.14<br>(0.04 to<br>0.30)             |
| Other chromosomal abnormalities               | 9.11<br>(2.40 to<br>28.96)               | 10.16<br>(2.54 to<br>30.31)              | 8.44<br>(2.14 to<br>25.36)               | 12.31<br>(3.01 to<br>36.96)              | 0.11<br>(0.03 to<br>0.35)             | 0.12<br>(0.03 to<br>0.37)             | 0.10<br>(0.03 to<br>0.30)             | 0.15<br>(0.04 to<br>0.45)             |
| Congenital musculoskeletal and limb anomalies | 4.61<br>(1.50 to<br>9.60)                | 3.78<br>(1.10 to<br>8.31)                | 3.23<br>(0.95 to<br>7.04)                | 4.34<br>(1.23 to<br>9.61)                | 0.06<br>(0.02 to<br>0.11)             | 0.35<br>(0.01 to<br>0.10)             | 0.04<br>(0.01 to<br>0.09)             | 0.05<br>(0.02 to<br>0.12)             |
| Urogenital congenital anomalies               | 6.68<br>(2.12 to<br>12.79)               | 4.99<br>(1.43 to<br>10.16)               | 4.29<br>(1.23 to<br>8.53)                | 5.79<br>(1.61 to<br>11.92)               | 0.09<br>(0.03 to<br>0.16)             | 0.08<br>(0.02 to<br>0.14)             | 0.07<br>(0.02 to<br>0.13)             | 0.09<br>(0.02 to<br>0.17)             |
| Digestive congenital anomalies                | 8.39<br>(2.40 to<br>17.21)               | 6.44<br>(1.46 to<br>14.83)               | 5.35<br>(1.23 to<br>12.14)               | 7.75<br>(1.70 to<br>17.86)               | 0.10<br>(0.03 to<br>0.20)             | 0.08<br>(0.02 to<br>0.18)             | 0.06<br>(0.02 to<br>0.15)             | 0.09<br>(0.02 to<br>0.21)             |
| Other congenital birth defects                | 73.59<br>(30.27 to<br>124.87)            | 54.99<br>(18.81 to<br>100.47)            | 46.80<br>(15.95 to<br>85.32)             | 64.04<br>(20.91 to<br>116.94)            | 0.89<br>(0.36 to<br>1.51)             | 0.69<br>(0.23 to<br>1.23)             | 0.59<br>(0.21 to<br>1.05)             | 0.79<br>(0.26 to<br>1.43)             |
| Skin and subcutaneous diseases                | 6.96<br>(3.32 to<br>9.48)                | 22.82<br>(10.87 to<br>32.28)             | 23.72<br>(11.35 to<br>33.40)             | 21.55<br>(10.12 to<br>30.79)             | 0.45<br>(0.21 to<br>0.61)             | 1.88<br>(0.86 to<br>2.76)             | 2.01<br>(0.94 to<br>2.94)             | 1.69<br>(0.76 to<br>2.54)             |
| Cellulitis                                    | 0.40<br>(0.15 to<br>0.59)                | 1.37<br>(0.47 to<br>2.18)                | 1.46<br>(0.49 to<br>2.29)                | 1.24<br>(0.42 to<br>1.95)                | 0.02<br>(0.01 to<br>0.03)             | 0.09<br>(0.03 to<br>0.15)             | 0.10<br>(0.03 to<br>0.17)             | 0.08<br>(0.02 to<br>0.13)             |
| Pyoderma                                      | 3.41<br>(1.58 to<br>4.93)                | 12.92<br>(6.18 to<br>19.27)              | 13.25<br>(6.30 to<br>19.71)              | 12.52<br>(6.03 to<br>18.52)              | 0.20<br>(0.09 to<br>0.31)             | 1.02<br>(0.48 to<br>1.59)             | 1.08<br>(0.51 to<br>1.67)             | 0.95<br>(0.44 to<br>1.47)             |
| Decubitus ulcer                               | 2.92<br>(0.96 to<br>4.27)                | 8.17<br>(2.51 to<br>12.84)               | 8.67<br>(2.63 to<br>13.62)               | 7.46<br>(2.24 to<br>12.05)               | 0.22<br>(0.07 to<br>0.33)             | 0.75<br>(0.23 to<br>1.22)             | 0.81<br>(0.25 to<br>1.32)             | 0.65<br>(0.19 to<br>1.08)             |
| Other skin and subcutaneous diseases          | 0.22<br>(0.10 to<br>0.32)                | 0.34<br>(0.15 to<br>0.50)                | 0.35<br>(0.16 to<br>0.51)                | 0.33<br>(0.15 to<br>0.47)                | 0.01<br>(0.00 to<br>0.01)             | 0.02<br>(0.01 to<br>0.02)             | 0.02<br>(0.01 to<br>0.03)             | 0.01<br>(0.01 to<br>0.02)             |
| Sudden infant death syndrome                  | 6.72<br>(3.37 to<br>11.78)               | 4.04<br>(1.58 to<br>8.75)                | 3.44<br>(1.34 to<br>7.45)                | 4.58<br>(1.84 to<br>9.69)                | 0.08<br>(0.04 to<br>0.14)             | 0.08<br>(0.02 to<br>0.10)             | 0.04<br>(0.02 to<br>0.09)             | 0.05<br>(0.02 to<br>0.11)             |
| <b>Injuries</b>                               | <b>713.33<br/>(638.96 to<br/>793.39)</b> | <b>610.58<br/>(531.03 to<br/>694.65)</b> | <b>462.13<br/>(399.50 to<br/>521.45)</b> | <b>756.22<br/>(655.16 to<br/>866.65)</b> | <b>15.48<br/>(13.70 to<br/>17.14)</b> | <b>17.05<br/>(14.40 to<br/>19.49)</b> | <b>13.83<br/>(11.60 to<br/>15.88)</b> | <b>19.88<br/>(16.78 to<br/>22.80)</b> |
| <b>Transport injuries</b>                     | <b>420.08<br/>(373.74 to<br/>472.35)</b> | <b>354.01<br/>(308.38 to<br/>408.04)</b> | <b>217.67<br/>(187.74 to<br/>253.41)</b> | <b>479.12<br/>(416.58 to<br/>555.53)</b> | <b>8.91<br/>(8.00 to<br/>10.05)</b>   | <b>9.35<br/>(8.14 to<br/>10.85)</b>   | <b>6.24<br/>(5.41 to<br/>7.31)</b>    | <b>11.91<br/>(10.33 to<br/>13.86)</b> |
| Road injuries                                 | 411.70<br>(366.58 to<br>463.65)          | 344.03<br>(299.92 to<br>397.92)          | 208.19<br>(179.47 to<br>243.66)          | 468.11<br>(405.92 to<br>544.06)          | 8.71<br>(7.82 to<br>9.85)             | 9.00<br>(7.82 to<br>10.44)            | 5.89<br>(5.09 to<br>6.92)             | 11.55<br>(10.05 to<br>13.46)          |
| Pedestrian road injuries                      | 100.93<br>(79.95 to<br>131.04)           | 83.50<br>(64.70 to<br>110.47)            | 56.17<br>(43.66 to<br>74.22)             | 107.10<br>(82.76 to<br>141.89)           | 2.31<br>(1.82 to<br>2.97)             | 2.54<br>(1.98 to<br>3.41)             | 1.84<br>(1.43 to<br>2.47)             | 3.07<br>(2.37 to<br>4.11)             |

| Morocco                                         |                                                      |                                                      |                                                      |                                                      |                                                |                                                |                                                |                                                |
|-------------------------------------------------|------------------------------------------------------|------------------------------------------------------|------------------------------------------------------|------------------------------------------------------|------------------------------------------------|------------------------------------------------|------------------------------------------------|------------------------------------------------|
| Cause                                           | YLLs (in 1000s)                                      |                                                      |                                                      |                                                      | Deaths (in 1000s)                              |                                                |                                                |                                                |
|                                                 | 2016                                                 | 2040 Forecast                                        | 2040 Better Scenario                                 | 2040 Worse Scenario                                  | 2016                                           | 2040 Forecast                                  | 2040 Better Scenario                           | 2040 Worse Scenario                            |
| Cyclist road injuries                           | 6.16<br>(4.32 to<br>8.91)                            | 5.77<br>(3.91 to<br>8.60)                            | 3.67<br>(2.46 to<br>5.47)                            | 7.66<br>(5.24 to<br>11.37)                           | 0.13<br>(0.09 to<br>0.19)                      | 0.15<br>(0.10 to<br>0.21)                      | 0.10<br>(0.07 to<br>0.15)                      | 0.18<br>(0.12 to<br>0.26)                      |
| Motorcyclist road injuries                      | 27.47<br>(19.55 to<br>41.36)                         | 23.59<br>(16.30 to<br>36.26)                         | 16.90<br>(11.53 to<br>25.87)                         | 29.29<br>(20.14 to<br>45.28)                         | 0.49<br>(0.35 to<br>0.72)                      | 0.45<br>(0.32 to<br>0.68)                      | 0.33<br>(0.23 to<br>0.51)                      | 0.55<br>(0.39 to<br>0.84)                      |
| Motor vehicle road injuries                     | 275.87<br>(228.89 to<br>321.59)                      | 229.96<br>(184.14 to<br>276.60)                      | 130.69<br>(102.58 to<br>159.83)                      | 322.46<br>(261.41 to<br>388.16)                      | 5.75<br>(4.73 to<br>6.69)                      | 5.82<br>(4.63 to<br>7.05)                      | 3.59<br>(2.80 to<br>4.37)                      | 7.70<br>(6.11 to<br>9.26)                      |
| Other road injuries                             | 1.27<br>(0.84 to<br>1.85)                            | 1.22<br>(0.84 to<br>1.71)                            | 0.76<br>(0.54 to<br>1.06)                            | 1.61<br>(1.10 to<br>2.28)                            | 0.03<br>(0.02 to<br>0.04)                      | 0.05<br>(0.03 to<br>0.07)                      | 0.03<br>(0.02 to<br>0.05)                      | 0.05<br>(0.04 to<br>0.08)                      |
| Other transport injuries                        | 8.38<br>(6.46 to<br>10.32)                           | 9.98<br>(7.47 to<br>12.67)                           | 9.48<br>(7.17 to<br>11.96)                           | 11.00<br>(8.17 to<br>14.14)                          | 0.20<br>(0.15 to<br>0.24)                      | 0.35<br>(0.25 to<br>0.44)                      | 0.34<br>(0.25 to<br>0.44)                      | 0.36<br>(0.26 to<br>0.46)                      |
| <b>Unintentional injuries</b>                   | <b>191.90</b><br><b>(152.35 to</b><br><b>223.58)</b> | <b>152.65</b><br><b>(114.51 to</b><br><b>191.76)</b> | <b>144.19</b><br><b>(109.68 to</b><br><b>177.60)</b> | <b>167.06</b><br><b>(123.70 to</b><br><b>210.52)</b> | <b>4.39</b><br><b>(3.38 to</b><br><b>5.25)</b> | <b>5.08</b><br><b>(3.61 to</b><br><b>6.54)</b> | <b>5.02</b><br><b>(3.60 to</b><br><b>6.39)</b> | <b>5.24</b><br><b>(3.65 to</b><br><b>6.83)</b> |
| Falls                                           | 43.32<br>(32.98 to<br>54.78)                         | 47.32<br>(34.49 to<br>60.73)                         | 46.53<br>(34.35 to<br>58.88)                         | 48.51<br>(35.01 to<br>63.01)                         | 1.26<br>(0.94 to<br>1.59)                      | 2.04<br>(1.44 to<br>2.69)                      | 2.10<br>(1.50 to<br>2.72)                      | 1.98<br>(1.38 to<br>2.62)                      |
| Drowning                                        | 38.89<br>(30.32 to<br>47.18)                         | 23.50<br>(17.36 to<br>30.55)                         | 21.67<br>(16.06 to<br>27.84)                         | 26.47<br>(19.41 to<br>34.64)                         | 0.69<br>(0.54 to<br>0.83)                      | 0.51<br>(0.39 to<br>0.64)                      | 0.48<br>(0.37 to<br>0.60)                      | 0.56<br>(0.42 to<br>0.71)                      |
| Fire, heat, and hot substances                  | 25.18<br>(15.33 to<br>33.44)                         | 17.72<br>(10.22 to<br>25.84)                         | 16.47<br>(9.40 to<br>23.87)                          | 20.06<br>(11.64 to<br>29.22)                         | 0.59<br>(0.36 to<br>0.81)                      | 0.60<br>(0.35 to<br>0.90)                      | 0.58<br>(0.32 to<br>0.88)                      | 0.64<br>(0.36 to<br>0.97)                      |
| Poisonings                                      | 12.24<br>(6.70 to<br>17.85)                          | 5.61<br>(2.82 to<br>9.03)                            | 4.95<br>(2.57 to<br>7.63)                            | 6.87<br>(3.39 to<br>11.03)                           | 0.24<br>(0.13 to<br>0.34)                      | 0.14<br>(0.07 to<br>0.22)                      | 0.13<br>(0.07 to<br>0.19)                      | 0.16<br>(0.08 to<br>0.25)                      |
| Exposure to mechanical forces                   | 27.73<br>(19.79 to<br>35.57)                         | 19.74<br>(13.24 to<br>27.29)                         | 18.14<br>(12.32 to<br>24.51)                         | 22.57<br>(14.91 to<br>31.09)                         | 0.57<br>(0.40 to<br>0.73)                      | 0.52<br>(0.33 to<br>0.72)                      | 0.49<br>(0.32 to<br>0.67)                      | 0.57<br>(0.37 to<br>0.79)                      |
| Unintentional firearm injuries                  | 5.59<br>(3.46 to<br>8.88)                            | 3.30<br>(1.87 to<br>5.56)                            | 3.01<br>(1.73 to<br>5.02)                            | 3.84<br>(2.22 to<br>6.44)                            | 0.11<br>(0.07 to<br>0.18)                      | 0.09<br>(0.05 to<br>0.15)                      | 0.08<br>(0.05 to<br>0.14)                      | 0.10<br>(0.06 to<br>0.17)                      |
| Unintentional suffocation                       | 3.92<br>(2.36 to<br>6.32)                            | 2.08<br>(1.04 to<br>3.63)                            | 1.75<br>(0.90 to<br>3.00)                            | 2.52<br>(1.26 to<br>4.47)                            | 0.05<br>(0.03 to<br>0.08)                      | 0.03<br>(0.02 to<br>0.05)                      | 0.02<br>(0.01 to<br>0.04)                      | 0.03<br>(0.02 to<br>0.06)                      |
| Other exposure to mechanical forces             | 18.23<br>(11.96 to<br>23.84)                         | 14.37<br>(8.88 to<br>19.67)                          | 13.38<br>(8.39 to<br>18.05)                          | 16.21<br>(9.88 to<br>22.05)                          | 0.40<br>(0.26 to<br>0.52)                      | 0.40<br>(0.25 to<br>0.56)                      | 0.38<br>(0.24 to<br>0.53)                      | 0.44<br>(0.27 to<br>0.61)                      |
| Adverse effects of medical treatment            | 18.58<br>(11.56 to<br>25.21)                         | 18.53<br>(10.78 to<br>27.33)                         | 17.62<br>(10.39 to<br>25.76)                         | 20.14<br>(11.65 to<br>29.66)                         | 0.50<br>(0.31 to<br>0.71)                      | 0.71<br>(0.40 to<br>1.10)                      | 0.70<br>(0.39 to<br>1.07)                      | 0.73<br>(0.41 to<br>1.13)                      |
| Animal contact                                  | 1.82<br>(1.20 to<br>2.45)                            | 1.76<br>(1.06 to<br>2.69)                            | 1.61<br>(0.98 to<br>2.44)                            | 2.04<br>(1.22 to<br>3.14)                            | 0.04<br>(0.03 to<br>0.06)                      | 0.06<br>(0.04 to<br>0.10)                      | 0.06<br>(0.04 to<br>0.10)                      | 0.07<br>(0.04 to<br>0.11)                      |
| Venomous animal contact                         | 0.74<br>(0.45 to<br>1.08)                            | 0.64<br>(0.35 to<br>1.06)                            | 0.57<br>(0.32 to<br>0.93)                            | 0.75<br>(0.41 to<br>1.26)                            | 0.02<br>(0.01 to<br>0.02)                      | 0.02<br>(0.01 to<br>0.04)                      | 0.02<br>(0.01 to<br>0.03)                      | 0.02<br>(0.01 to<br>0.04)                      |
| Non-venomous animal contact                     | 1.08<br>(0.66 to<br>1.54)                            | 1.13<br>(0.66 to<br>1.76)                            | 1.04<br>(0.61 to<br>1.60)                            | 1.29<br>(0.75 to<br>2.01)                            | 0.03<br>(0.02 to<br>0.04)                      | 0.04<br>(0.03 to<br>0.07)                      | 0.04<br>(0.02 to<br>0.07)                      | 0.05<br>(0.03 to<br>0.07)                      |
| Foreign body                                    | 11.30<br>(8.35 to<br>14.89)                          | 9.14<br>(6.73 to<br>12.06)                           | 8.64<br>(6.44 to<br>11.36)                           | 9.61<br>(7.02 to<br>12.80)                           | 0.21<br>(0.16 to<br>0.27)                      | 0.24<br>(0.18 to<br>0.31)                      | 0.24<br>(0.18 to<br>0.31)                      | 0.24<br>(0.18 to<br>0.31)                      |
| Pulmonary aspiration and foreign body in airway | 7.86<br>(5.77 to<br>10.43)                           | 6.58<br>(4.83 to<br>8.59)                            | 6.25<br>(4.63 to<br>8.10)                            | 6.77<br>(4.96 to<br>9.02)                            | 0.15<br>(0.11 to<br>0.19)                      | 0.18<br>(0.13 to<br>0.23)                      | 0.18<br>(0.13 to<br>0.23)                      | 0.17<br>(0.13 to<br>0.22)                      |

|                                             |                                                     |                                                    |                                                    |                                                     |                                                |                                                |                                                |                                                |
|---------------------------------------------|-----------------------------------------------------|----------------------------------------------------|----------------------------------------------------|-----------------------------------------------------|------------------------------------------------|------------------------------------------------|------------------------------------------------|------------------------------------------------|
|                                             | 3.43<br>(1.82 to<br>5.31)                           | 2.57<br>(1.29 to<br>4.17)                          | 2.39<br>(1.19 to<br>3.86)                          | 2.84<br>(1.42 to<br>4.57)                           | 0.07<br>(0.04 to<br>0.10)                      | 0.06<br>(0.03 to<br>0.10)                      | 0.06<br>(0.03 to<br>0.10)                      | 0.07<br>(0.03 to<br>0.11)                      |
| Foreign body in other body part             |                                                     |                                                    |                                                    |                                                     |                                                |                                                |                                                |                                                |
|                                             | 4.59<br>(2.52 to<br>6.60)                           | 4.01<br>(2.09 to<br>6.48)                          | 3.59<br>(1.90 to<br>5.70)                          | 4.89<br>(2.58 to<br>7.78)                           | 0.11<br>(0.06 to<br>0.17)                      | 0.12<br>(0.06 to<br>0.20)                      | 0.11<br>(0.06 to<br>0.18)                      | 0.14<br>(0.07 to<br>0.23)                      |
| Environmental heat and cold exposure        |                                                     |                                                    |                                                    |                                                     |                                                |                                                |                                                |                                                |
|                                             | 8.25<br>(5.96 to<br>12.68)                          | 5.31<br>(3.56 to<br>8.38)                          | 4.97<br>(3.33 to<br>7.87)                          | 5.89<br>(3.96 to<br>9.27)                           | 0.17<br>(0.12 to<br>0.25)                      | 0.13<br>(0.09 to<br>0.20)                      | 0.12<br>(0.09 to<br>0.19)                      | 0.14<br>(0.10 to<br>0.21)                      |
| Other unintentional injuries                |                                                     |                                                    |                                                    |                                                     |                                                |                                                |                                                |                                                |
| <b>Self-harm and interpersonal violence</b> | <b>101.16</b><br><b>(81.67 to</b><br><b>121.33)</b> | <b>94.73</b><br><b>(73.71 to</b><br><b>114.77)</b> | <b>91.25</b><br><b>(72.74 to</b><br><b>109.89)</b> | <b>100.78</b><br><b>(76.71 to</b><br><b>123.56)</b> | <b>2.18</b><br><b>(1.79 to</b><br><b>2.62)</b> | <b>2.42</b><br><b>(1.86 to</b><br><b>2.96)</b> | <b>2.37</b><br><b>(1.87 to</b><br><b>2.88)</b> | <b>2.52</b><br><b>(1.88 to</b><br><b>3.10)</b> |

**Morocco**

| Cause                                                                               | YLLs (in 1000s)                                |                                                 |                                                 |                                                 | Deaths (in 1000s)                              |                                                |                                                |                                                |
|-------------------------------------------------------------------------------------|------------------------------------------------|-------------------------------------------------|-------------------------------------------------|-------------------------------------------------|------------------------------------------------|------------------------------------------------|------------------------------------------------|------------------------------------------------|
|                                                                                     | 2016                                           | 2040 Forecast                                   | 2040 Better Scenario                            | 2040 Worse Scenario                             | 2016                                           | 2040 Forecast                                  | 2040 Better Scenario                           | 2040 Worse Scenario                            |
| Self-harm                                                                           | 80.47<br>(63.78 to<br>100.74)                  | 80.26<br>(61.35 to<br>100.01)                   | 77.09<br>(60.26 to<br>95.90)                    | 85.93<br>(65.09 to<br>107.44)                   | 1.79<br>(1.45 to<br>2.21)                      | 2.12<br>(1.61 to<br>2.63)                      | 2.07<br>(1.60 to<br>2.57)                      | 2.21<br>(1.65 to<br>2.78)                      |
| Self-harm by firearm                                                                | 1.92<br>(0.82 to<br>3.70)                      | 1.74<br>(0.63 to<br>3.58)                       | 1.67<br>(0.61 to<br>3.47)                       | 1.88<br>(0.69 to<br>3.83)                       | 0.05<br>(0.02 to<br>0.09)                      | 0.05<br>(0.02 to<br>0.12)                      | 0.05<br>(0.02 to<br>0.12)                      | 0.06<br>(0.02 to<br>0.13)                      |
| Self-harm by other specified means                                                  | 78.54<br>(61.91 to<br>98.41)                   | 78.52<br>(59.74 to<br>98.33)                    | 75.42<br>(58.17 to<br>93.92)                    | 84.05<br>(63.41 to<br>105.06)                   | 1.74<br>(1.39 to<br>2.16)                      | 2.06<br>(1.57 to<br>2.57)                      | 2.01<br>(1.55 to<br>2.51)                      | 2.16<br>(1.62 to<br>2.71)                      |
| Interpersonal violence                                                              | 20.69<br>(10.47 to<br>26.86)                   | 14.47<br>(7.24 to<br>19.00)                     | 14.16<br>(7.16 to<br>18.54)                     | 14.85<br>(7.36 to<br>19.66)                     | 0.39<br>(0.20 to<br>0.50)                      | 0.31<br>(0.16 to<br>0.39)                      | 0.30<br>(0.17 to<br>0.39)                      | 0.31<br>(0.16 to<br>0.40)                      |
| Physical violence by firearm                                                        | 9.02<br>(4.21 to<br>16.49)                     | 6.03<br>(2.76 to<br>11.54)                      | 5.92<br>(2.75 to<br>11.38)                      | 6.17<br>(2.80 to<br>11.81)                      | 0.17<br>(0.08 to<br>0.31)                      | 0.12<br>(0.06 to<br>0.23)                      | 0.12<br>(0.06 to<br>0.23)                      | 0.12<br>(0.06 to<br>0.23)                      |
| Physical violence by sharp object                                                   | 5.97<br>(2.45 to<br>9.24)                      | 4.58<br>(1.93 to<br>7.02)                       | 4.54<br>(1.93 to<br>6.91)                       | 4.57<br>(1.94 to<br>7.01)                       | 0.11<br>(0.05 to<br>0.17)                      | 0.10<br>(0.04 to<br>0.14)                      | 0.10<br>(0.04 to<br>0.14)                      | 0.09<br>(0.04 to<br>0.14)                      |
| Physical violence by other means                                                    | 3.70<br>(2.40 to<br>8.52)                      | 3.86<br>(1.59 to<br>6.01)                       | 3.70<br>(1.54 to<br>5.71)                       | 4.11<br>(1.71 to<br>6.45)                       | 0.11<br>(0.05 to<br>0.16)                      | 0.09<br>(0.04 to<br>0.13)                      | 0.09<br>(0.04 to<br>0.13)                      | 0.09<br>(0.04 to<br>0.14)                      |
| <b>Forces of nature, conflict and terrorism, and executions and police conflict</b> | <b>0.20</b><br><b>(0.17 to</b><br><b>0.23)</b> | <b>9.18</b><br><b>(0.00 to</b><br><b>13.42)</b> | <b>9.02</b><br><b>(0.00 to</b><br><b>13.21)</b> | <b>9.27</b><br><b>(0.00 to</b><br><b>13.57)</b> | <b>0.00</b><br><b>(0.00 to</b><br><b>0.01)</b> | <b>0.20</b><br><b>(0.00 to</b><br><b>0.31)</b> | <b>0.20</b><br><b>(0.00 to</b><br><b>0.31)</b> | <b>0.20</b><br><b>(0.00 to</b><br><b>0.31)</b> |
| Exposure to forces of nature                                                        | 0.00<br>(0.00 to<br>0.00)                      | 8.11<br>(0.00 to<br>13.42)                      | 7.96<br>(0.00 to<br>13.21)                      | 8.18<br>(0.00 to<br>13.57)                      | 0.00<br>(0.00 to<br>0.00)                      | 0.18<br>(0.00 to<br>0.31)                      | 0.18<br>(0.00 to<br>0.31)                      | 0.18<br>(0.00 to<br>0.31)                      |
| Conflict and terrorism                                                              | 0.00<br>(0.00 to<br>0.00)                      | 1.04<br>(0.00 to<br>6.02)                       | 1.02<br>(0.00 to<br>5.91)                       | 1.05<br>(0.00 to<br>6.12)                       | 0.00<br>(0.00 to<br>0.00)                      | 0.02<br>(0.00 to<br>0.12)                      | 0.02<br>(0.00 to<br>0.12)                      | 0.02<br>(0.00 to<br>0.12)                      |
| Executions and police conflict                                                      | 0.20<br>(0.17 to<br>0.23)                      | 0.04<br>(0.00 to<br>0.40)                       | 0.04<br>(0.00 to<br>0.40)                       | 0.04<br>(0.00 to<br>0.40)                       | 0.00<br>(0.00 to<br>0.01)                      | 0.00<br>(0.00 to<br>0.01)                      | 0.00<br>(0.00 to<br>0.01)                      | 0.00<br>(0.00 to<br>0.01)                      |

**Palestine**

| Cause                                                             | YLLs (actual counts)                                             |                                                                      |                                                                    |                                                                        | Deaths (actual counts)                                        |                                                               |                                                               |                                                               |
|-------------------------------------------------------------------|------------------------------------------------------------------|----------------------------------------------------------------------|--------------------------------------------------------------------|------------------------------------------------------------------------|---------------------------------------------------------------|---------------------------------------------------------------|---------------------------------------------------------------|---------------------------------------------------------------|
|                                                                   | 2016                                                             | 2040 Forecast                                                        | 2040 Better Scenario                                               | 2040 Worse Scenario                                                    | 2016                                                          | 2040 Forecast                                                 | 2040 Better Scenario                                          | 2040 Worse Scenario                                           |
| <b>All causes</b>                                                 | <b>764,415.38</b><br><b>(597,383.55 to</b><br><b>956,339.96)</b> | <b>1,163,259.76</b><br><b>(794,340.48 to</b><br><b>1,846,748.98)</b> | <b>874,227.28</b><br><b>(602,357.28 to</b><br><b>1,437,714.61)</b> | <b>1,490,872.56</b><br><b>(1,013,490.08 to</b><br><b>2,291,246.13)</b> | <b>20,861.77</b><br><b>(18,738.77 to</b><br><b>23,233.28)</b> | <b>41,266.31</b><br><b>(30,913.46 to</b><br><b>57,131.37)</b> | <b>32,089.21</b><br><b>(24,459.37 to</b><br><b>44,473.41)</b> | <b>50,025.42</b><br><b>(37,435.24 to</b><br><b>67,243.83)</b> |
| <b>Communicable, maternal, neonatal, and nutritional diseases</b> | <b>236,557.20</b><br><b>(128,750.59 to</b><br><b>364,637.13)</b> | <b>125,655.20</b><br><b>(67,107.34 to</b><br><b>221,552.21)</b>      | <b>93,272.31</b><br><b>(51,323.24 to</b><br><b>158,472.15)</b>     | <b>188,667.35</b><br><b>(94,178.40 to</b><br><b>332,526.18)</b>        | <b>3,260.17</b><br><b>(1,988.81 to</b><br><b>4,737.19)</b>    | <b>2,641.94</b><br><b>(1,679.44 to</b><br><b>4,182.06)</b>    | <b>2,202.84</b><br><b>(1,438.94 to</b><br><b>3,335.91)</b>    | <b>3,507.12</b><br><b>(2,119.44 to</b><br><b>5,702.71)</b>    |
| <b>HIV/AIDS and tuberculosis</b>                                  | <b>871.75</b><br><b>(743.88 to</b><br><b>1,127.09)</b>           | <b>1,644.27</b><br><b>(1,344.48 to</b><br><b>2,040.69)</b>           | <b>661.46</b><br><b>(433.47 to</b><br><b>981.13)</b>               | <b>2,131.65</b><br><b>(1,822.66 to</b><br><b>2,574.14)</b>             | <b>16.75</b><br><b>(14.63 to</b><br><b>20.86)</b>             | <b>33.90</b><br><b>(27.66 to</b><br><b>42.32)</b>             | <b>13.61</b><br><b>(8.91 to</b><br><b>19.91)</b>              | <b>43.27</b><br><b>(36.80 to</b><br><b>52.22)</b>             |

|                                                                          |                                                   |                                                    |                                                   |                                                    |                                              |                                                |                                                |                                                |
|--------------------------------------------------------------------------|---------------------------------------------------|----------------------------------------------------|---------------------------------------------------|----------------------------------------------------|----------------------------------------------|------------------------------------------------|------------------------------------------------|------------------------------------------------|
| Tuberculosis                                                             | 88.29<br>(76.62 to<br>101.43)                     | 116.05<br>(67.19 to<br>214.78)                     | 72.47<br>(42.62 to<br>129.73)                     | 160.35<br>(91.07 to<br>290.82)                     | 2.57<br>(2.28 to<br>2.85)                    | 3.79<br>(2.37 to<br>6.22)                      | 2.52<br>(1.62 to<br>3.95)                      | 4.95<br>(3.05 to<br>8.25)                      |
| HIV/AIDS                                                                 | 783.46<br>(659.59 to<br>1,036.11)                 | 1,528.22<br>(1,250.07 to<br>1,904.42)              | 588.98<br>(372.69 to<br>906.11)                   | 1,971.30<br>(1,686.57 to<br>2,408.17)              | 14.19<br>(12.15 to<br>18.15)                 | 30.11<br>(24.41 to<br>37.87)                   | 11.09<br>(6.67 to<br>17.26)                    | 38.32<br>(32.66 to<br>46.83)                   |
| <b>Diarrhea, lower respiratory, and other common infectious diseases</b> | <b>45,046.62<br/>(33,311.81 to<br/>60,805.27)</b> | <b>54,465.94<br/>(32,601.89 to<br/>103,627.66)</b> | <b>44,322.70<br/>(27,676.67 to<br/>80,647.58)</b> | <b>79,884.28<br/>(45,392.95 to<br/>153,342.22)</b> | <b>1,004.34<br/>(797.18 to<br/>1,391.29)</b> | <b>1,751.37<br/>(1,116.82 to<br/>2,901.25)</b> | <b>1,586.75<br/>(1,044.89 to<br/>2,515.59)</b> | <b>2,169.99<br/>(1,334.73 to<br/>3,626.86)</b> |
| Diarrheal diseases                                                       | 3,564.20<br>(1,987.54 to<br>5,719.21)             | 1,475.28<br>(250.09 to<br>5,231.47)                | 921.70<br>(177.31 to<br>3,103.93)                 | 3,163.11<br>(470.75 to<br>9,971.29)                | 56.77<br>(35.24 to<br>85.96)                 | 42.86<br>(7.79 to<br>144.65)                   | 30.72<br>(6.31 to<br>99.53)                    | 75.07<br>(12.59 to<br>243.04)                  |
| Intestinal infectious diseases                                           | 2,846.62<br>(1,420.97 to<br>4,966.33)             | 3,282.18<br>(1,328.53 to<br>7,377.86)              | 2,857.53<br>(1,166.63 to<br>6,405.57)             | 3,985.46<br>(1,638.20 to<br>8,627.77)              | 40.74<br>(20.54 to<br>70.90)                 | 51.26<br>(21.65 to<br>114.56)                  | 45.06<br>(18.75 to<br>99.22)                   | 60.88<br>(25.13 to<br>133.41)                  |
| Typhoid fever                                                            | 2,536.79<br>(1,255.16 to<br>4,496.58)             | 2,831.96<br>(1,113.69 to<br>6,320.24)              | 2,471.47<br>(1,000.49 to<br>5,416.75)             | 3,440.34<br>(1,372.83 to<br>7,282.87)              | 36.18<br>(18.12 to<br>63.66)                 | 43.94<br>(18.82 to<br>98.69)                   | 38.72<br>(16.26 to<br>87.19)                   | 52.21<br>(21.21 to<br>111.10)                  |
| Paratyphoid fever                                                        | 307.05<br>(132.06 to<br>598.42)                   | 449.32<br>(153.19 to<br>1,111.27)                  | 385.41<br>(132.10 to<br>967.92)                   | 543.86<br>(185.87 to<br>1,337.82)                  | 4.52<br>(1.96 to<br>8.79)                    | 7.30<br>(2.54 to<br>18.19)                     | 6.33<br>(2.22 to<br>15.84)                     | 8.64<br>(3.04 to<br>21.37)                     |
| Other intestinal infectious diseases                                     | 2.78<br>(0.84 to<br>7.19)                         | 0.89<br>(0.25 to<br>2.32)                          | 0.65<br>(0.19 to<br>1.71)                         | 1.27<br>(0.34 to<br>3.44)                          | 0.04<br>(0.01 to<br>0.10)                    | 0.02<br>(0.01 to<br>0.05)                      | 0.02<br>(0.00 to<br>0.04)                      | 0.02<br>(0.01 to<br>0.06)                      |
| Lower respiratory infections                                             | 31,152.59<br>(23,902.30 to<br>41,925.72)          | 45,443.93<br>(26,945.81 to<br>86,693.33)           | 37,116.82<br>(22,859.05 to<br>67,859.99)          | 62,387.13<br>(33,934.08 to<br>121,680.42)          | 803.28<br>(639.02 to<br>1,158.82)            | 1,577.48<br>(998.82 to<br>2,671.59)            | 1,440.14<br>(933.94 to<br>2,340.38)            | 1,882.84<br>(1,124.15 to<br>3,269.47)          |
| Upper respiratory infections                                             | 59.46<br>(23.42 to<br>138.19)                     | 58.70<br>(20.02 to<br>140.35)                      | 40.54<br>(14.15 to<br>91.65)                      | 80.48<br>(26.89 to<br>193.59)                      | 1.06<br>(0.54 to<br>2.00)                    | 1.55<br>(0.58 to<br>3.41)                      | 1.14<br>(0.42 to<br>2.41)                      | 1.98<br>(0.72 to<br>4.23)                      |
| Otitis media                                                             | 9.76<br>(4.95 to<br>19.25)                        | 1.73<br>(0.81 to<br>3.42)                          | 1.67<br>(0.80 to<br>3.27)                         | 1.97<br>(0.90 to<br>3.90)                          | 0.15<br>(0.08 to<br>0.27)                    | 0.03<br>(0.02 to<br>0.06)                      | 0.04<br>(0.02 to<br>0.06)                      | 0.04<br>(0.02 to<br>0.06)                      |
| Meningitis                                                               | 3,385.18<br>(2,035.20 to<br>5,456.11)             | 2,151.54<br>(1,247.97 to<br>3,633.54)              | 1,958.46<br>(1,166.09 to<br>3,330.79)             | 2,905.68<br>(1,531.25 to<br>5,335.87)              | 50.72<br>(33.55 to<br>77.28)                 | 50.72<br>(29.22 to<br>70.87)                   | 43.44<br>(29.28 to<br>69.18)                   | 52.28<br>(31.91 to<br>85.07)                   |
| Pneumococcal meningitis                                                  | 25.93<br>(13.35 to<br>46.43)                      | 16.83<br>(9.22 to<br>31.37)                        | 16.83<br>(9.29 to<br>30.72)                       | 20.05<br>(10.28 to<br>36.41)                       | 0.43<br>(0.26 to<br>0.69)                    | 0.41<br>(0.25 to<br>0.73)                      | 0.46<br>(0.27 to<br>0.79)                      | 0.44<br>(0.26 to<br>0.78)                      |
| H influenzae type B meningitis                                           | 315.48<br>(168.98 to<br>537.55)                   | 342.91<br>(133.86 to<br>778.62)                    | 301.92<br>(127.28 to<br>647.97)                   | 773.72<br>(209.84 to<br>2,075.75)                  | 4.56<br>(2.78 to<br>7.21)                    | 5.32<br>(2.65 to<br>10.86)                     | 5.07<br>(2.79 to<br>9.57)                      | 10.24<br>(3.51 to<br>25.56)                    |
| Meningococcal meningitis                                                 | 1,328.44<br>(758.99 to<br>2,244.30)               | 754.13<br>(424.08 to<br>1,381.38)                  | 688.35<br>(396.08 to<br>1,255.21)                 | 889.86<br>(470.83 to<br>1,640.74)                  | 20.35<br>(13.02 to<br>31.73)                 | 16.73<br>(10.62 to<br>28.28)                   | 16.56<br>(10.88 to<br>27.22)                   | 18.00<br>(11.04 to<br>31.10)                   |
| Other meningitis                                                         | 1,715.33<br>(1,005.70 to<br>2,839.48)             | 1,037.67<br>(598.38 to<br>1,853.76)                | 951.37<br>(562.36 to<br>1,665.79)                 | 1,222.05<br>(654.87 to<br>2,189.99)                | 25.38<br>(16.62 to<br>38.81)                 | 21.76<br>(14.38 to<br>36.03)                   | 21.35<br>(14.44 to<br>35.56)                   | 23.61<br>(14.97 to<br>39.50)                   |
| Encephalitis                                                             | 903.04<br>(630.83 to<br>1,274.27)                 | 1,141.78<br>(693.22 to<br>1,961.31)                | 986.78<br>(608.18 to<br>1,691.80)                 | 1,371.22<br>(816.33 to<br>2,288.56)                | 14.06<br>(10.70 to<br>18.56)                 | 22.46<br>(14.82 to<br>35.85)                   | 20.35<br>(13.59 to<br>32.22)                   | 25.42<br>(16.80 to<br>40.54)                   |
| Diphtheria                                                               | 7.63<br>(3.58 to<br>14.48)                        | 1.99<br>(0.95 to<br>4.11)                          | 1.60<br>(0.81 to<br>3.10)                         | 7.35<br>(2.00 to<br>22.05)                         | 0.10<br>(0.05 to<br>0.18)                    | 0.05<br>(0.02 to<br>0.06)                      | 0.03<br>(0.01 to<br>0.05)                      | 0.09<br>(0.03 to<br>0.27)                      |
| Whooping cough                                                           | 2,050.30<br>(136.66 to<br>6,780.54)               | 780.44<br>(40.36 to<br>3,126.24)                   | 337.44<br>(17.08 to<br>1,468.07)                  | 5,683.95<br>(465.07 to<br>18,167.01)               | 24.21<br>(1.61 to<br>80.02)                  | 9.35<br>(0.49 to<br>37.23)                     | 4.13<br>(0.21 to<br>18.10)                     | 67.23<br>(5.51 to<br>214.51)                   |
| Tetanus                                                                  | 42.53<br>(33.04 to<br>68.99)                      | 7.22<br>(4.18 to<br>13.56)                         | 6.60<br>(3.94 to<br>12.09)                        | 15.75<br>(6.13 to<br>46.55)                        | 0.64<br>(0.52 to<br>0.99)                    | 0.13<br>(0.08 to<br>0.23)                      | 0.12<br>(0.08 to<br>0.22)                      | 0.23<br>(0.10 to<br>0.58)                      |
| Measles                                                                  | 866.62<br>(209.74 to<br>2,389.42)                 | 46.75<br>(3.82 to<br>278.58)                       | 40.74<br>(3.38 to<br>237.73)                      | 170.01<br>(8.52 to<br>1,283.79)                    | 10.31<br>(2.50 to<br>28.39)                  | 0.56<br>(0.05 to<br>3.32)                      | 0.49<br>(0.04 to<br>2.84)                      | 2.03<br>(0.11 to<br>15.18)                     |
| <b>Palestine</b>                                                         |                                                   |                                                    |                                                   |                                                    |                                              |                                                |                                                |                                                |
| <b>YLLs (actual counts)</b>                                              |                                                   |                                                    |                                                   |                                                    | <b>Deaths (actual counts)</b>                |                                                |                                                |                                                |

| Cause                                                 | 2016                                             | 2040 Forecast                                   | 2040 Better Scenario                           | 2040 Worse Scenario                               | 2016                                    | 2040 Forecast                            | 2040 Better Scenario                     | 2040 Worse Scenario                      |
|-------------------------------------------------------|--------------------------------------------------|-------------------------------------------------|------------------------------------------------|---------------------------------------------------|-----------------------------------------|------------------------------------------|------------------------------------------|------------------------------------------|
| Varicella and herpes zoster                           | 158.70<br>(74.16 to 299.23)                      | 74.40<br>(32.20 to 156.25)                      | 52.81<br>(23.58 to 107.64)                     | 112.15<br>(44.26 to 236.47)                       | 2.31<br>(1.27 to 3.98)                  | 1.41<br>(0.73 to 2.65)                   | 1.11<br>(0.58 to 1.98)                   | 1.90<br>(0.89 to 3.61)                   |
| <b>Neglected tropical diseases and malaria</b>        | <b>253.65</b><br><b>(165.69 to 370.48)</b>       | <b>82.93</b><br><b>(31.23 to 352.27)</b>        | <b>60.04</b><br><b>(23.20 to 264.08)</b>       | <b>110.65</b><br><b>(44.41 to 443.85)</b>         | <b>5.60</b><br><b>(3.76 to 7.70)</b>    | <b>1.57</b><br><b>(0.55 to 7.98)</b>     | <b>1.15</b><br><b>(0.41 to 6.16)</b>     | <b>2.02</b><br><b>(0.75 to 9.86)</b>     |
| Malaria                                               | 0.00<br>(0.00 to 0.00)                           | 0.00<br>(0.00 to 0.00)                          | 0.00<br>(0.00 to 0.00)                         | 0.00<br>(0.00 to 0.00)                            | 0.00<br>(0.00 to 0.00)                  | 0.00<br>(0.00 to 0.00)                   | 0.00<br>(0.00 to 0.00)                   | 0.00<br>(0.00 to 0.00)                   |
| Chagas disease                                        | 0.00<br>(0.00 to 0.00)                           | 0.00<br>(0.00 to 0.00)                          | 0.00<br>(0.00 to 0.00)                         | 0.00<br>(0.00 to 0.00)                            | 0.00<br>(0.00 to 0.00)                  | 0.00<br>(0.00 to 0.00)                   | 0.00<br>(0.00 to 0.00)                   | 0.00<br>(0.00 to 0.00)                   |
| Leishmaniasis                                         | 199.71<br>(114.02 to 308.60)                     | 44.32<br>(9.26 to 274.21)                       | 31.40<br>(6.36 to 208.38)                      | 58.60<br>(13.07 to 349.24)                        | 4.77<br>(2.89 to 6.84)                  | 0.94<br>(0.17 to 6.74)                   | 0.69<br>(0.13 to 5.04)                   | 1.20<br>(0.24 to 8.11)                   |
| African trypanosomiasis                               | 0.00<br>(0.00 to 0.00)                           | 0.00<br>(0.00 to 0.00)                          | 0.00<br>(0.00 to 0.00)                         | 0.00<br>(0.00 to 0.00)                            | 0.00<br>(0.00 to 0.00)                  | 0.00<br>(0.00 to 0.00)                   | 0.00<br>(0.00 to 0.00)                   | 0.00<br>(0.00 to 0.00)                   |
| Schistosomiasis                                       | 0.00<br>(0.00 to 0.00)                           | 0.00<br>(0.00 to 0.00)                          | 0.00<br>(0.00 to 0.00)                         | 0.00<br>(0.00 to 0.00)                            | 0.00<br>(0.00 to 0.00)                  | 0.00<br>(0.00 to 0.00)                   | 0.00<br>(0.00 to 0.00)                   | 0.00<br>(0.00 to 0.00)                   |
| Cysticercosis                                         | 2.55<br>(1.75 to 3.58)                           | 0.88<br>(0.38 to 2.19)                          | 0.75<br>(0.33 to 1.98)                         | 1.00<br>(0.44 to 2.42)                            | 0.06<br>(0.04 to 0.08)                  | 0.02<br>(0.01 to 0.05)                   | 0.02<br>(0.01 to 0.05)                   | 0.02<br>(0.01 to 0.06)                   |
| Cystic echinococcosis                                 | 0.00<br>(0.00 to 0.00)                           | 0.00<br>(0.00 to 0.00)                          | 0.00<br>(0.00 to 0.00)                         | 0.00<br>(0.00 to 0.00)                            | 0.00<br>(0.00 to 0.00)                  | 0.00<br>(0.00 to 0.00)                   | 0.00<br>(0.00 to 0.00)                   | 0.00<br>(0.00 to 0.00)                   |
| Dengue                                                | 0.00<br>(0.00 to 0.00)                           | 0.00<br>(0.00 to 0.00)                          | 0.00<br>(0.00 to 0.00)                         | 0.00<br>(0.00 to 0.00)                            | 0.00<br>(0.00 to 0.00)                  | 0.00<br>(0.00 to 0.00)                   | 0.00<br>(0.00 to 0.00)                   | 0.00<br>(0.00 to 0.00)                   |
| Yellow fever                                          | 0.00<br>(0.00 to 0.00)                           | 0.00<br>(0.00 to 0.00)                          | 0.00<br>(0.00 to 0.00)                         | 0.00<br>(0.00 to 0.00)                            | 0.00<br>(0.00 to 0.00)                  | 0.00<br>(0.00 to 0.00)                   | 0.00<br>(0.00 to 0.00)                   | 0.00<br>(0.00 to 0.00)                   |
| Rabies                                                | 1.47<br>(0.50 to 2.87)                           | 0.57<br>(0.13 to 1.39)                          | 0.29<br>(0.07 to 0.71)                         | 1.01<br>(0.22 to 2.55)                            | 0.03<br>(0.01 to 0.05)                  | 0.01<br>(0.00 to 0.03)                   | 0.01<br>(0.00 to 0.02)                   | 0.02<br>(0.00 to 0.04)                   |
| Intestinal nematode infections                        | 7.42<br>(0.96 to 20.21)                          | 4.57<br>(0.66 to 12.99)                         | 4.11<br>(0.60 to 11.74)                        | 5.94<br>(0.81 to 17.41)                           | 0.10<br>(0.02 to 0.25)                  | 0.07<br>(0.01 to 0.17)                   | 0.06<br>(0.01 to 0.16)                   | 0.08<br>(0.02 to 0.23)                   |
| Other neglected tropical diseases                     | 42.50<br>(34.04 to 55.26)                        | 32.60<br>(14.92 to 80.67)                       | 23.49<br>(10.96 to 52.25)                      | 44.10<br>(20.94 to 91.89)                         | 0.65<br>(0.54 to 0.81)                  | 0.53<br>(0.24 to 1.28)                   | 0.38<br>(0.18 to 0.89)                   | 0.70<br>(0.34 to 1.54)                   |
| <b>Maternal disorders</b>                             | <b>2,247.65</b><br><b>(1,743.02 to 2,837.92)</b> | <b>3,265.57</b><br><b>(907.89 to 11,755.69)</b> | <b>2,108.50</b><br><b>(607.76 to 7,731.54)</b> | <b>4,380.16</b><br><b>(1,173.20 to 16,115.45)</b> | <b>40.35</b><br><b>(31.45 to 50.74)</b> | <b>59.07</b><br><b>(16.85 to 211.36)</b> | <b>38.18</b><br><b>(11.29 to 135.46)</b> | <b>79.08</b><br><b>(21.77 to 287.16)</b> |
| Maternal hemorrhage                                   | 749.41<br>(523.30 to 1,014.31)                   | 1,071.28<br>(276.02 to 3,741.14)                | 693.54<br>(190.82 to 2,345.97)                 | 1,425.26<br>(371.25 to 5,151.44)                  | 13.64<br>(9.69 to 18.66)                | 19.59<br>(5.26 to 69.42)                 | 12.69<br>(3.52 to 42.78)                 | 26.04<br>(7.00 to 91.71)                 |
| Maternal sepsis and other maternal infections         | 223.52<br>(134.55 to 350.02)                     | 261.08<br>(65.83 to 939.69)                     | 167.98<br>(42.68 to 604.50)                    | 352.66<br>(87.79 to 1,275.70)                     | 4.03<br>(2.48 to 6.25)                  | 4.76<br>(1.23 to 17.07)                  | 3.07<br>(0.80 to 10.80)                  | 6.41<br>(1.62 to 21.88)                  |
| Maternal hypertensive disorders                       | 442.13<br>(313.01 to 615.36)                     | 675.93<br>(165.53 to 2,477.88)                  | 436.58<br>(109.66 to 1,526.83)                 | 905.38<br>(219.32 to 3,049.39)                    | 7.85<br>(5.58 to 10.84)                 | 12.08<br>(3.07 to 43.99)                 | 7.80<br>(2.01 to 26.94)                  | 16.15<br>(4.02 to 53.97)                 |
| Maternal obstructed labor and uterine rupture         | 76.49<br>(42.35 to 119.56)                       | 117.23<br>(26.11 to 419.73)                     | 73.18<br>(16.27 to 264.35)                     | 159.99<br>(35.72 to 595.59)                       | 1.39<br>(0.80 to 2.16)                  | 2.13<br>(0.48 to 7.48)                   | 1.33<br>(0.30 to 4.63)                   | 2.90<br>(0.65 to 10.39)                  |
| Maternal abortion, miscarriage, and ectopic pregnancy | 61.59<br>(34.60 to 100.86)                       | 100.20<br>(24.25 to 350.17)                     | 63.72<br>(15.91 to 221.81)                     | 135.27<br>(33.64 to 458.16)                       | 1.14<br>(0.64 to 1.86)                  | 1.88<br>(0.47 to 6.19)                   | 1.19<br>(0.31 to 3.96)                   | 2.53<br>(0.64 to 8.45)                   |
| Indirect maternal deaths                              | 253.15<br>(168.46 to 375.92)                     | 426.49<br>(101.73 to 1,771.30)                  | 271.72<br>(64.88 to 1,020.92)                  | 580.47<br>(136.12 to 2,141.59)                    | 4.43<br>(2.96 to 6.52)                  | 7.54<br>(1.84 to 30.61)                  | 4.81<br>(1.20 to 17.70)                  | 10.23<br>(2.46 to 39.26)                 |

|                                                                  |                                            |                                           |                                          |                                           |                                       |                                   |                                   |                                     |
|------------------------------------------------------------------|--------------------------------------------|-------------------------------------------|------------------------------------------|-------------------------------------------|---------------------------------------|-----------------------------------|-----------------------------------|-------------------------------------|
| Late maternal deaths                                             | 30.98<br>(16.14 to<br>55.07)               | 35.04<br>(7.50 to<br>139.28)              | 22.34<br>(4.69 to<br>83.55)              | 47.91<br>(10.26 to<br>173.69)             | 0.55<br>(0.29 to<br>0.97)             | 0.63<br>(0.14 to<br>2.45)         | 0.40<br>(0.09 to<br>1.49)         | 0.86<br>(0.19 to<br>3.08)           |
| Maternal deaths aggravated by HIV/AIDS                           | 0.10<br>(0.04 to<br>0.21)                  | 0.62<br>(0.11 to<br>2.79)                 | 0.35<br>(0.05 to<br>1.55)                | 0.83<br>(0.15 to<br>3.54)                 | 0.00<br>(0.00 to<br>0.00)             | 0.01<br>(0.00 to<br>0.05)         | 0.01<br>(0.00 to<br>0.03)         | 0.02<br>(0.00 to<br>0.06)           |
| Other maternal disorders                                         | 410.29<br>(276.92 to<br>560.39)            | 577.70<br>(154.24 to<br>2,131.44)         | 379.09<br>(102.00 to<br>1,344.21)        | 772.39<br>(209.52 to<br>2,699.35)         | 7.33<br>(4.98 to<br>10.00)            | 10.46<br>(2.84 to<br>37.29)       | 6.88<br>(1.89 to<br>23.96)        | 13.94<br>(3.86 to<br>48.69)         |
| <b>Palestine</b>                                                 |                                            |                                           |                                          |                                           |                                       |                                   |                                   |                                     |
| Cause                                                            | YLLs (actual counts)                       |                                           |                                          |                                           | Deaths (actual counts)                |                                   |                                   |                                     |
|                                                                  | 2016                                       | 2040 Forecast                             | 2040 Better Scenario                     | 2040 Worse Scenario                       | 2016                                  | 2040 Forecast                     | 2040 Better Scenario              | 2040 Worse Scenario                 |
| Neonatal disorders                                               | 185,799.41<br>(89,009.45 to<br>304,123.13) | 64,020.46<br>(20,868.80 to<br>134,370.10) | 44,298.39<br>(14,823.93 to<br>89,637.58) | 99,494.60<br>(32,148.79 to<br>210,740.32) | 2,149.33<br>(1,030.00 to<br>3,516.37) | 741.03<br>(241.55 to<br>1,553.94) | 512.91<br>(171.96 to<br>1,037.53) | 1,151.54<br>(372.16 to<br>2,437.47) |
| Neonatal preterm birth                                           | 117,614.99<br>(55,741.09 to<br>194,205.37) | 38,428.77<br>(11,445.00 to<br>80,738.26)  | 24,781.03<br>(7,681.51 to<br>52,387.65)  | 59,484.76<br>(17,871.70 to<br>130,828.84) | 1,359.78<br>(644.46 to<br>2,245.05)   | 444.51<br>(132.49 to<br>933.32)   | 286.75<br>(89.02 to<br>605.80)    | 688.02<br>(207.03 to<br>1,512.44)   |
| Neonatal encephalopathy due to birth asphyxia and trauma         | 24,689.16<br>(10,795.59 to<br>42,975.14)   | 7,767.37<br>(2,439.22 to<br>16,565.15)    | 6,089.26<br>(1,894.57 to<br>13,002.55)   | 11,860.21<br>(3,629.43 to<br>26,533.27)   | 286.25<br>(125.20 to<br>498.24)       | 90.20<br>(28.35 to<br>192.08)     | 70.72<br>(22.01 to<br>150.91)     | 137.70<br>(42.32 to<br>307.68)      |
| Neonatal sepsis and other neonatal infections                    | 32,157.93<br>(13,409.72 to<br>57,315.27)   | 14,449.23<br>(4,681.74 to<br>32,131.06)   | 11,017.24<br>(3,581.22 to<br>25,100.37)  | 22,605.20<br>(7,265.88 to<br>49,618.01)   | 372.05<br>(155.08 to<br>662.90)       | 167.22<br>(54.15 to<br>372.08)    | 127.51<br>(41.42 to<br>290.34)    | 261.59<br>(84.04 to<br>574.81)      |
| Hemolytic disease and other neonatal jaundice                    | 102.33<br>(45.65 to<br>180.22)             | 20.47<br>(6.99 to<br>45.62)               | 14.54<br>(5.06 to<br>33.04)              | 33.50<br>(11.18 to<br>77.88)              | 1.18<br>(0.53 to<br>2.08)             | 0.24<br>(0.08 to<br>0.53)         | 0.17<br>(0.06 to<br>0.38)         | 0.39<br>(0.13 to<br>0.90)           |
| Other neonatal disorders                                         | 11,234.99<br>(4,992.52 to<br>19,522.45)    | 3,354.62<br>(952.08 to<br>7,910.61)       | 2,396.31<br>(674.90 to<br>5,761.63)      | 5,510.93<br>(1,512.56 to<br>13,279.20)    | 130.06<br>(57.88 to<br>226.16)        | 38.87<br>(11.05 to<br>91.57)      | 27.77<br>(7.84 to<br>67.00)       | 63.84<br>(17.57 to<br>153.70)       |
| Nutritional deficiencies                                         | 638.49<br>(445.06 to<br>935.05)            | 697.66<br>(477.75 to<br>1,077.02)         | 608.62<br>(425.74 to<br>910.79)          | 829.15<br>(557.90 to<br>1,288.77)         | 16.93<br>(14.17 to<br>20.47)          | 23.46<br>(17.26 to<br>32.08)      | 22.62<br>(16.98 to<br>30.08)      | 24.82<br>(17.79 to<br>33.97)        |
| Protein-energy malnutrition                                      | 521.15<br>(352.36 to<br>798.46)            | 381.71<br>(261.06 to<br>562.56)           | 333.88<br>(234.53 to<br>480.31)          | 461.97<br>(294.97 to<br>711.31)           | 14.14<br>(11.71 to<br>17.52)          | 14.88<br>(10.26 to<br>20.33)      | 14.69<br>(10.21 to<br>19.51)      | 15.52<br>(10.67 to<br>21.33)        |
| Iodine deficiency                                                | 24.33<br>(1.79 to<br>97.39)                | 47.08<br>(4.81 to<br>123.87)              | 39.09<br>(3.41 to<br>110.16)             | 57.22<br>(5.73 to<br>171.35)              | 0.58<br>(0.06 to<br>1.68)             | 1.71<br>(0.16 to<br>4.70)         | 1.55<br>(0.12 to<br>4.31)         | 1.87<br>(0.20 to<br>5.09)           |
| Dietary iron deficiency                                          | 41.85<br>(32.25 to<br>63.48)               | 152.90<br>(86.17 to<br>279.04)            | 134.93<br>(76.26 to<br>247.84)           | 176.63<br>(97.82 to<br>320.43)            | 0.80<br>(0.61 to<br>1.66)             | 3.26<br>(1.89 to<br>6.54)         | 2.95<br>(1.72 to<br>6.05)         | 3.61<br>(2.09 to<br>7.03)           |
| Other nutritional deficiencies                                   | 51.16<br>(41.55 to<br>63.32)               | 115.98<br>(73.24 to<br>197.86)            | 100.71<br>(64.63 to<br>168.70)           | 133.33<br>(84.77 to<br>234.19)            | 1.42<br>(1.13 to<br>1.70)             | 3.61<br>(2.31 to<br>5.26)         | 3.43<br>(2.20 to<br>4.95)         | 3.82<br>(2.48 to<br>5.67)           |
| Other communicable, maternal, neonatal, and nutritional diseases | 1,699.64<br>(1,044.82 to<br>2,874.35)      | 1,478.37<br>(872.89 to<br>2,662.49)       | 1,212.61<br>(731.87 to<br>2,134.63)      | 1,836.87<br>(1,068.83 to<br>3,235.22)     | 26.86<br>(19.05 to<br>40.65)          | 31.54<br>(21.23 to<br>49.93)      | 27.63<br>(18.99 to<br>42.64)      | 36.40<br>(23.92 to<br>59.30)        |
| Sexually transmitted infections excluding HIV                    | 631.98<br>(211.17 to<br>1,544.15)          | 231.93<br>(99.99 to<br>534.01)            | 198.94<br>(87.84 to<br>450.78)           | 287.42<br>(117.07 to<br>651.07)           | 8.38<br>(3.40 to<br>18.98)            | 4.19<br>(2.12 to<br>8.90)         | 3.74<br>(1.93 to<br>7.78)         | 4.89<br>(2.36 to<br>10.12)          |
| Syphilis                                                         | 581.70<br>(164.49 to<br>1,494.51)          | 138.03<br>(48.64 to<br>344.08)            | 114.88<br>(41.25 to<br>285.95)           | 185.23<br>(60.35 to<br>476.04)            | 7.16<br>(2.26 to<br>17.78)            | 2.06<br>(0.88 to<br>4.71)         | 1.77<br>(0.79 to<br>3.98)         | 2.63<br>(1.03 to<br>6.36)           |
| Chlamydial infection                                             | 9.58<br>(7.48 to<br>14.67)                 | 18.23<br>(7.63 to<br>51.79)               | 16.27<br>(6.70 to<br>45.78)              | 19.87<br>(8.22 to<br>55.39)               | 0.24<br>(0.19 to<br>0.34)             | 0.42<br>(0.20 to<br>1.00)         | 0.39<br>(0.19 to<br>0.92)         | 0.44<br>(0.21 to<br>1.07)           |
| Gonococcal infection                                             | 26.40<br>(20.62 to<br>40.18)               | 49.87<br>(22.09 to<br>136.62)             | 44.84<br>(19.97 to<br>122.44)            | 54.08<br>(23.55 to<br>144.47)             | 0.66<br>(0.53 to<br>0.96)             | 1.16<br>(0.60 to<br>2.70)         | 1.08<br>(0.57 to<br>2.46)         | 1.22<br>(0.63 to<br>2.87)           |
| Other sexually transmitted infections                            | 14.30<br>(10.92 to<br>22.14)               | 25.80<br>(11.06 to<br>70.63)              | 22.96<br>(9.96 to<br>63.60)              | 28.23<br>(12.22 to<br>75.51)              | 0.32<br>(0.26 to<br>0.48)             | 0.56<br>(0.27 to<br>1.34)         | 0.51<br>(0.25 to<br>1.25)         | 0.60<br>(0.29 to<br>1.44)           |



|                                       |                                                                  |                                                                    |                                                                  |                                                                      |                                                               |                                                               |                                                               |                                                               |
|---------------------------------------|------------------------------------------------------------------|--------------------------------------------------------------------|------------------------------------------------------------------|----------------------------------------------------------------------|---------------------------------------------------------------|---------------------------------------------------------------|---------------------------------------------------------------|---------------------------------------------------------------|
| Acute hepatitis                       | 138.27<br>(110.32 to<br>176.00)                                  | 155.46<br>(94.69 to<br>279.54)                                     | 131.15<br>(81.47 to<br>233.71)                                   | 178.32<br>(109.86 to<br>325.07)                                      | 2.86<br>(2.42 to<br>3.39)                                     | 3.97<br>(2.59 to<br>6.55)                                     | 3.43<br>(2.25 to<br>5.52)                                     | 4.40<br>(2.88 to<br>7.28)                                     |
| Acute hepatitis A                     | 11.52<br>(1.80 to<br>26.36)                                      | 4.67<br>(1.45 to<br>10.87)                                         | 3.84<br>(1.23 to<br>8.69)                                        | 6.09<br>(1.67 to<br>14.20)                                           | 0.15<br>(0.03 to<br>0.32)                                     | 0.09<br>(0.03 to<br>0.20)                                     | 0.07<br>(0.03 to<br>0.17)                                     | 0.11<br>(0.04 to<br>0.23)                                     |
| Acute hepatitis B                     | 96.44<br>(79.64 to<br>118.92)                                    | 131.47<br>(77.50 to<br>246.69)                                     | 110.46<br>(66.13 to<br>202.54)                                   | 149.02<br>(88.11 to<br>278.12)                                       | 2.25<br>(1.93 to<br>2.64)                                     | 3.44<br>(2.16 to<br>5.74)                                     | 2.96<br>(1.89 to<br>4.94)                                     | 3.81<br>(2.42 to<br>6.49)                                     |
| Acute hepatitis C                     | 1.71<br>(1.26 to<br>2.30)                                        | 2.88<br>(1.73 to<br>4.92)                                          | 2.69<br>(1.60 to<br>4.53)                                        | 3.06<br>(1.86 to<br>5.36)                                            | 0.05<br>(0.03 to<br>0.06)                                     | 0.09<br>(0.05 to<br>0.14)                                     | 0.08<br>(0.05 to<br>0.13)                                     | 0.09<br>(0.05 to<br>0.15)                                     |
| Acute hepatitis E                     | 28.61<br>(17.43 to<br>44.73)                                     | 16.44<br>(9.18 to<br>29.07)                                        | 14.16<br>(8.13 to<br>25.22)                                      | 20.15<br>(11.19 to<br>35.33)                                         | 0.42<br>(0.28 to<br>0.64)                                     | 0.35<br>(0.20 to<br>0.59)                                     | 0.32<br>(0.18 to<br>0.53)                                     | 0.40<br>(0.23 to<br>0.68)                                     |
| Other unspecified infectious diseases | 929.59<br>(686.67 to<br>1,627.44)                                | 1,090.98<br>(629.26 to<br>1,991.78)                                | 882.52<br>(523.76 to<br>1,584.35)                                | 1,371.14<br>(769.82 to<br>2,544.22)                                  | 15.61<br>(11.80 to<br>23.90)                                  | 23.39<br>(15.57 to<br>37.27)                                  | 20.45<br>(14.16 to<br>31.23)                                  | 27.11<br>(17.63 to<br>44.53)                                  |
| <b>Non-communicable diseases</b>      | <b>437,654.50</b><br><b>(381,872.45 to</b><br><b>500,442.41)</b> | <b>845,988.84</b><br><b>(560,961.29 to</b><br><b>1,325,548.95)</b> | <b>608,957.78</b><br><b>(422,230.59 to</b><br><b>928,610.74)</b> | <b>1,089,809.77</b><br><b>(722,388.80 to</b><br><b>1,654,582.56)</b> | <b>16,061.77</b><br><b>(15,049.44 to</b><br><b>17,041.31)</b> | <b>35,006.66</b><br><b>(25,401.67 to</b><br><b>48,763.05)</b> | <b>26,554.10</b><br><b>(19,793.06 to</b><br><b>35,834.30)</b> | <b>42,627.24</b><br><b>(31,266.27 to</b><br><b>57,799.16)</b> |

**Palestine**

| Cause                                | YLLs (actual counts)                  |                                                               |                                                                  |                                                                  | Deaths (actual counts)                                           |                                                            |                                                            |                                                            |
|--------------------------------------|---------------------------------------|---------------------------------------------------------------|------------------------------------------------------------------|------------------------------------------------------------------|------------------------------------------------------------------|------------------------------------------------------------|------------------------------------------------------------|------------------------------------------------------------|
|                                      | 2016                                  | 2040 Forecast                                                 | 2040 Better Scenario                                             | 2040 Worse Scenario                                              | 2016                                                             | 2040 Forecast                                              | 2040 Better Scenario                                       | 2040 Worse Scenario                                        |
|                                      | <b>Neoplasms</b>                      | <b>75,382.60</b><br><b>(70,385.60 to</b><br><b>80,953.80)</b> | <b>187,599.77</b><br><b>(136,834.49 to</b><br><b>270,450.83)</b> | <b>173,344.13</b><br><b>(126,600.43 to</b><br><b>256,562.67)</b> | <b>210,875.20</b><br><b>(154,474.24 to</b><br><b>306,590.22)</b> | <b>2,445.53</b><br><b>(2,298.49 to</b><br><b>2,589.86)</b> | <b>6,539.50</b><br><b>(5,168.07 to</b><br><b>8,563.26)</b> | <b>6,297.94</b><br><b>(5,004.52 to</b><br><b>8,239.83)</b> |
| Lip and oral cavity cancer           | 380.00<br>(342.68 to<br>424.39)       | 1,075.42<br>(658.71 to<br>1,937.65)                           | 841.86<br>(528.34 to<br>1,524.62)                                | 1,439.42<br>(849.60 to<br>2,705.24)                              | 13.22<br>(12.07 to<br>14.47)                                     | 35.87<br>(24.59 to<br>55.28)                               | 29.08<br>(20.58 to<br>44.39)                               | 46.39<br>(30.25 to<br>74.62)                               |
| Nasopharynx cancer                   | 256.23<br>(217.06 to<br>299.52)       | 712.66<br>(429.69 to<br>1,192.79)                             | 532.89<br>(322.51 to<br>882.38)                                  | 947.63<br>(560.75 to<br>1,595.38)                                | 7.01<br>(6.01 to<br>8.07)                                        | 20.36<br>(12.43 to<br>32.60)                               | 15.27<br>(9.65 to<br>23.94)                                | 26.98<br>(16.31 to<br>43.38)                               |
| Other pharynx cancer                 | 103.01<br>(91.15 to<br>114.77)        | 282.60<br>(201.65 to<br>402.86)                               | 280.11<br>(200.49 to<br>399.76)                                  | 290.15<br>(206.81 to<br>414.96)                                  | 3.93<br>(3.47 to<br>4.38)                                        | 11.07<br>(8.21 to<br>15.17)                                | 11.41<br>(8.43 to<br>15.74)                                | 11.01<br>(8.01 to<br>15.19)                                |
| Esophageal cancer                    | 542.47<br>(489.50 to<br>599.23)       | 1,432.38<br>(817.45 to<br>2,461.60)                           | 1,073.04<br>(643.90 to<br>1,804.01)                              | 1,887.64<br>(1,039.05 to<br>3,276.50)                            | 22.56<br>(20.46 to<br>24.86)                                     | 57.47<br>(34.19 to<br>94.58)                               | 45.32<br>(28.35 to<br>72.37)                               | 72.61<br>(41.36 to<br>123.61)                              |
| Stomach cancer                       | 3,901.39<br>(3,581.86 to<br>4,237.18) | 6,231.42<br>(4,184.49 to<br>9,775.93)                         | 5,480.92<br>(3,793.02 to<br>8,662.29)                            | 6,849.64<br>(4,559.08 to<br>10,742.84)                           | 146.27<br>(133.88 to<br>158.70)                                  | 231.44<br>(168.08 to<br>317.03)                            | 214.70<br>(160.71 to<br>287.99)                            | 243.95<br>(174.97 to<br>336.07)                            |
| Colon and rectum cancer              | 8,201.31<br>(7,328.25 to<br>9,039.95) | 21,472.34<br>(13,682.96 to<br>35,101.61)                      | 21,422.29<br>(13,800.37 to<br>35,011.09)                         | 21,456.50<br>(13,647.83 to<br>35,243.52)                         | 315.48<br>(283.70 to<br>345.75)                                  | 837.15<br>(551.78 to<br>1,300.21)                          | 882.10<br>(594.18 to<br>1,347.66)                          | 801.01<br>(521.51 to<br>1,253.37)                          |
| Liver cancer                         | 4,347.42<br>(3,893.35 to<br>4,997.20) | 12,902.84<br>(8,107.10 to<br>20,561.48)                       | 11,498.83<br>(7,472.12 to<br>17,383.44)                          | 15,659.36<br>(9,250.15 to<br>25,686.28)                          | 171.75<br>(153.09 to<br>201.46)                                  | 515.42<br>(344.71 to<br>747.57)                            | 486.97<br>(337.01 to<br>701.82)                            | 596.10<br>(368.61 to<br>899.81)                            |
| Liver cancer due to hepatitis B      | 1,683.69<br>(1,312.70 to<br>2,140.03) | 4,981.67<br>(2,856.89 to<br>8,412.37)                         | 4,392.08<br>(2,561.78 to<br>7,349.99)                            | 6,134.30<br>(3,343.10 to<br>10,798.41)                           | 58.24<br>(43.92 to<br>75.86)                                     | 174.60<br>(105.68 to<br>278.36)                            | 161.15<br>(100.05 to<br>252.36)                            | 207.20<br>(119.67 to<br>338.74)                            |
| Liver cancer due to hepatitis C      | 1,264.37<br>(962.69 to<br>1,656.32)   | 3,836.75<br>(2,302.78 to<br>6,038.98)                         | 3,568.77<br>(2,188.91 to<br>5,521.79)                            | 4,526.98<br>(2,609.21 to<br>7,384.77)                            | 60.97<br>(47.01 to<br>81.15)                                     | 181.10<br>(111.55 to<br>273.77)                            | 180.00<br>(115.52 to<br>266.93)                            | 202.05<br>(118.57 to<br>314.33)                            |
| Liver cancer due to alcohol use      | 257.34<br>(170.41 to<br>379.02)       | 795.30<br>(425.50 to<br>1,381.16)                             | 701.45<br>(383.29 to<br>1,187.25)                                | 984.32<br>(494.76 to<br>1,771.82)                                | 11.25<br>(7.19 to<br>16.75)                                      | 33.88<br>(18.22 to<br>57.93)                               | 31.58<br>(17.10 to<br>53.70)                               | 40.02<br>(20.12 to<br>70.67)                               |
| Liver cancer due to other causes     | 1,142.02<br>(851.97 to<br>1,504.74)   | 3,289.13<br>(1,834.37 to<br>5,720.96)                         | 2,836.53<br>(1,616.97 to<br>4,824.09)                            | 4,013.76<br>(2,136.78 to<br>7,169.86)                            | 41.31<br>(29.84 to<br>56.03)                                     | 125.84<br>(68.76 to<br>211.31)                             | 114.24<br>(64.46 to<br>191.70)                             | 146.82<br>(77.93 to<br>258.51)                             |
| Gallbladder and biliary tract cancer | 594.27<br>(461.76 to<br>701.21)       | 978.67<br>(672.14 to<br>1,327.33)                             | 1,044.58<br>(718.17 to<br>1,435.77)                              | 935.98<br>(643.40 to<br>1,253.95)                                | 24.51<br>(19.52 to<br>28.70)                                     | 39.95<br>(29.90 to<br>49.52)                               | 44.70<br>(32.89 to<br>57.16)                               | 36.93<br>(27.62 to<br>45.60)                               |

|                                     |                                          |                                          |                                          |                                          |                                 |                                     |                                   |                                       |
|-------------------------------------|------------------------------------------|------------------------------------------|------------------------------------------|------------------------------------------|---------------------------------|-------------------------------------|-----------------------------------|---------------------------------------|
| Pancreatic cancer                   | 2,021.00<br>(1,855.02 to<br>2,204.70)    | 7,090.89<br>(5,041.29 to<br>10,167.47)   | 6,935.97<br>(4,921.58 to<br>9,842.02)    | 7,358.12<br>(5,227.78 to<br>10,549.33)   | 84.95<br>(78.11 to<br>92.00)    | 289.67<br>(213.27 to<br>399.02)     | 298.09<br>(222.40 to<br>399.32)   | 288.47<br>(211.85 to<br>395.89)       |
| Larynx cancer                       | 471.16<br>(412.03 to<br>532.32)          | 1,349.83<br>(686.55 to<br>2,410.78)      | 894.56<br>(485.74 to<br>1,563.71)        | 1,928.30<br>(943.34 to<br>3,461.73)      | 19.24<br>(16.85 to<br>21.70)    | 53.43<br>(26.63 to<br>94.71)        | 36.46<br>(19.52 to<br>63.32)      | 74.42<br>(36.32 to<br>136.01)         |
| Tracheal, bronchus, and lung cancer | 11,203.10<br>(10,078.14 to<br>12,473.63) | 34,275.30<br>(21,806.21 to<br>52,889.26) | 23,390.68<br>(15,170.67 to<br>35,816.56) | 47,979.32<br>(30,167.49 to<br>74,437.44) | 434.11<br>(393.45 to<br>482.27) | 1,301.52<br>(864.27 to<br>1,909.89) | 918.90<br>(628.18 to<br>1,319.79) | 1,763.26<br>(1,130.24 to<br>2,657.85) |
| Malignant skin melanoma             | 147.89<br>(123.77 to<br>232.50)          | 447.36<br>(303.62 to<br>781.25)          | 500.88<br>(336.96 to<br>899.03)          | 416.47<br>(281.70 to<br>746.74)          | 4.88<br>(4.17 to<br>7.36)       | 14.62<br>(10.82 to<br>23.74)        | 17.44<br>(12.90 to<br>27.84)      | 13.03<br>(9.62 to<br>21.15)           |
| Non-melanoma skin cancer            | 291.59<br>(259.30 to<br>328.47)          | 744.98<br>(576.01 to<br>1,008.28)        | 729.74<br>(558.08 to<br>996.81)          | 757.66<br>(580.90 to<br>1,022.66)        | 11.10<br>(9.98 to<br>12.27)     | 28.69<br>(23.53 to<br>34.49)        | 30.38<br>(24.80 to<br>36.54)      | 27.66<br>(22.82 to<br>33.44)          |
| Breast cancer                       | 8,039.11<br>(5,764.93 to<br>9,441.45)    | 20,795.29<br>(11,522.03 to<br>38,268.03) | 20,422.57<br>(11,388.33 to<br>38,490.10) | 21,530.86<br>(11,907.43 to<br>40,619.05) | 252.10<br>(183.83 to<br>294.50) | 657.56<br>(395.32 to<br>1,097.46)   | 664.16<br>(403.05 to<br>1,106.17) | 663.89<br>(401.77 to<br>1,119.43)     |
| Cervical cancer                     | 518.87<br>(401.25 to<br>627.12)          | 1,172.81<br>(633.27 to<br>2,397.60)      | 1,062.77<br>(585.67 to<br>2,172.52)      | 1,312.69<br>(699.64 to<br>2,724.46)      | 16.36<br>(12.97 to<br>20.76)    | 36.16<br>(22.36 to<br>63.49)        | 33.90<br>(21.04 to<br>58.67)      | 39.34<br>(23.60 to<br>71.34)          |
| Uterine cancer                      | 1,171.48<br>(978.81 to<br>1,388.31)      | 2,511.30<br>(1,705.43 to<br>3,793.63)    | 2,328.69<br>(1,567.45 to<br>3,480.20)    | 2,644.79<br>(1,818.85 to<br>3,902.59)    | 45.36<br>(38.16 to<br>53.41)    | 99.21<br>(72.53 to<br>134.09)       | 95.97<br>(69.72 to<br>129.43)     | 101.41<br>(74.73 to<br>135.73)        |
| Ovarian cancer                      | 998.27<br>(820.37 to<br>1,157.92)        | 3,270.83<br>(1,863.09 to<br>6,644.15)    | 3,469.07<br>(1,973.21 to<br>7,146.01)    | 3,189.40<br>(1,798.42 to<br>6,400.83)    | 30.64<br>(26.57 to<br>35.24)    | 101.05<br>(64.13 to<br>172.28)      | 109.58<br>(69.28 to<br>190.14)    | 96.47<br>(59.02 to<br>167.60)         |
| Prostate cancer                     | 1,380.60<br>(753.66 to<br>1,713.36)      | 4,452.63<br>(2,480.50 to<br>5,726.80)    | 5,186.01<br>(2,820.65 to<br>6,664.79)    | 4,010.06<br>(2,250.23 to<br>5,259.02)    | 90.65<br>(45.86 to<br>115.02)   | 278.24<br>(140.94 to<br>380.97)     | 345.41<br>(176.13 to<br>459.87)   | 239.59<br>(123.19 to<br>340.09)       |
| Testicular cancer                   | 118.81<br>(90.69 to<br>162.89)           | 257.97<br>(149.19 to<br>502.09)          | 243.20<br>(140.57 to<br>472.43)          | 275.39<br>(158.02 to<br>524.85)          | 2.30<br>(1.83 to<br>3.06)       | 5.28<br>(3.35 to<br>9.24)           | 5.15<br>(3.27 to<br>8.81)         | 5.47<br>(3.45 to<br>9.61)             |
| <b>Palestine</b>                    |                                          |                                          |                                          |                                          |                                 |                                     |                                   |                                       |
| Cause                               | YLLs (actual counts)                     |                                          |                                          |                                          | Deaths (actual counts)          |                                     |                                   |                                       |
|                                     | 2016                                     | 2040 Forecast                            | 2040 Better Scenario                     | 2040 Worse Scenario                      | 2016                            | 2040 Forecast                       | 2040 Better Scenario              | 2040 Worse Scenario                   |
| Kidney cancer                       | 940.83<br>(809.47 to<br>1,104.40)        | 2,372.01<br>(1,715.55 to<br>3,196.26)    | 2,460.29<br>(1,772.19 to<br>3,358.39)    | 2,438.51<br>(1,749.47 to<br>3,367.00)    | 25.85<br>(23.47 to<br>28.47)    | 78.05<br>(58.03 to<br>102.04)       | 84.61<br>(63.69 to<br>109.18)     | 76.77<br>(55.70 to<br>103.95)         |
| Bladder cancer                      | 1,111.33<br>(1,007.05 to<br>1,233.53)    | 2,719.53<br>(1,874.93 to<br>3,832.44)    | 2,446.44<br>(1,739.76 to<br>3,373.63)    | 2,986.12<br>(2,019.43 to<br>4,338.20)    | 56.70<br>(51.05 to<br>63.25)    | 134.04<br>(92.66 to<br>190.18)      | 128.61<br>(93.16 to<br>173.46)    | 139.94<br>(94.55 to<br>203.02)        |
| Brain and nervous system cancer     | 9,332.43<br>(7,990.32 to<br>11,098.55)   | 22,691.49<br>(16,342.40 to<br>34,412.43) | 23,649.84<br>(16,834.11 to<br>36,453.48) | 22,932.15<br>(16,763.94 to<br>34,052.44) | 210.93<br>(180.56 to<br>240.50) | 614.83<br>(479.27 to<br>843.47)     | 671.49<br>(513.88 to<br>924.53)   | 589.93<br>(462.87 to<br>805.87)       |
| Thyroid cancer                      | 307.55<br>(267.51 to<br>346.18)          | 701.12<br>(433.13 to<br>1,138.81)        | 644.22<br>(401.20 to<br>1,038.80)        | 796.49<br>(481.91 to<br>1,305.67)        | 11.91<br>(10.32 to<br>13.28)    | 27.27<br>(17.99 to<br>39.97)        | 26.50<br>(17.76 to<br>38.57)      | 29.68<br>(19.32 to<br>44.40)          |
| Mesothelioma                        | 50.46<br>(44.36 to<br>56.35)             | 133.63<br>(94.62 to<br>202.35)           | 131.33<br>(91.72 to<br>199.24)           | 136.00<br>(97.98 to<br>204.31)           | 1.45<br>(1.28 to<br>1.62)       | 3.97<br>(3.02 to<br>5.36)           | 4.03<br>(3.00 to<br>5.53)         | 3.94<br>(3.01 to<br>5.32)             |
| Hodgkin lymphoma                    | 913.70<br>(707.38 to<br>1,406.88)        | 1,688.15<br>(964.15 to<br>3,480.04)      | 1,436.32<br>(814.55 to<br>2,938.00)      | 1,912.10<br>(1,071.03 to<br>3,914.41)    | 20.30<br>(15.51 to<br>32.21)    | 40.37<br>(24.56 to<br>75.97)        | 35.32<br>(21.34 to<br>64.70)      | 44.54<br>(26.85 to<br>82.74)          |
| Non-Hodgkin lymphoma                | 2,761.58<br>(2,410.57 to<br>3,309.47)    | 7,393.01<br>(4,900.15 to<br>12,299.08)   | 7,689.59<br>(5,052.93 to<br>12,999.06)   | 7,583.51<br>(4,982.73 to<br>12,761.08)   | 71.85<br>(63.30 to<br>88.16)    | 217.62<br>(156.39 to<br>322.19)     | 237.18<br>(168.10 to<br>353.28)   | 213.92<br>(151.85 to<br>323.30)       |
| Multiple myeloma                    | 699.42<br>(511.61 to<br>796.58)          | 2,096.41<br>(1,400.13 to<br>3,150.31)    | 2,251.86<br>(1,500.19 to<br>3,426.10)    | 2,081.43<br>(1,383.74 to<br>3,124.26)    | 25.33<br>(20.48 to<br>28.26)    | 77.20<br>(57.57 to<br>101.09)       | 86.82<br>(64.02 to<br>116.36)     | 73.97<br>(53.38 to<br>99.74)          |
| Leukemia                            | 10,476.13<br>(8,760.71 to<br>12,605.31)  | 17,086.80<br>(11,747.12 to<br>26,496.85) | 15,891.05<br>(10,873.75 to<br>24,943.59) | 19,627.39<br>(13,379.30 to<br>30,640.80) | 231.70<br>(203.59 to<br>269.05) | 485.16<br>(351.62 to<br>675.73)     | 473.60<br>(351.70 to<br>654.23)   | 531.35<br>(376.20 to<br>748.85)       |

|                                 |                                                        |                                                        |                                                        |                                                        |                                                  |                                                     |                                                    |                                                     |
|---------------------------------|--------------------------------------------------------|--------------------------------------------------------|--------------------------------------------------------|--------------------------------------------------------|--------------------------------------------------|-----------------------------------------------------|----------------------------------------------------|-----------------------------------------------------|
| Acute lymphoid leukemia         | 1,280.70<br>(822.94 to 1,809.41)                       | 1,952.06<br>(1,146.96 to 3,435.69)                     | 1,930.50<br>(1,118.64 to 3,478.32)                     | 2,186.46<br>(1,284.40 to 3,853.25)                     | 20.14<br>(13.83 to 26.87)                        | 37.61<br>(23.84 to 62.96)                           | 37.60<br>(23.87 to 64.18)                          | 41.28<br>(26.10 to 70.20)                           |
| Chronic lymphoid leukemia       | 116.29<br>(91.73 to 158.14)                            | 310.76<br>(194.29 to 511.58)                           | 303.76<br>(192.61 to 503.24)                           | 339.75<br>(208.40 to 573.20)                           | 4.33<br>(3.39 to 5.67)                           | 11.74<br>(8.03 to 17.61)                            | 12.12<br>(8.42 to 17.93)                           | 12.26<br>(8.05 to 18.86)                            |
| Acute myeloid leukemia          | 1,029.50<br>(680.52 to 1,515.26)                       | 2,646.99<br>(1,488.18 to 4,930.13)                     | 2,692.40<br>(1,512.22 to 5,052.29)                     | 2,864.85<br>(1,606.41 to 5,374.60)                     | 20.64<br>(14.38 to 29.23)                        | 64.45<br>(39.24 to 106.88)                          | 67.38<br>(41.15 to 112.86)                         | 67.73<br>(40.03 to 114.84)                          |
| Chronic myeloid leukemia        | 283.40<br>(150.80 to 369.27)                           | 547.23<br>(250.20 to 966.02)                           | 522.93<br>(235.23 to 918.06)                           | 607.16<br>(272.92 to 1,072.30)                         | 9.37<br>(4.74 to 12.21)                          | 18.37<br>(8.34 to 28.27)                            | 18.53<br>(8.40 to 28.31)                           | 19.57<br>(8.93 to 30.84)                            |
| Other leukemia                  | 7,766.24<br>(6,408.76 to 9,373.26)                     | 11,629.77<br>(7,818.08 to 17,703.68)                   | 10,441.46<br>(7,080.08 to 15,727.31)                   | 13,629.17<br>(9,064.34 to 20,742.09)                   | 177.23<br>(153.54 to 210.62)                     | 353.00<br>(253.94 to 493.71)                        | 337.96<br>(248.87 to 462.77)                       | 390.51<br>(272.47 to 558.20)                        |
| Other neoplasms                 | 4,101.17<br>(3,558.68 to 4,837.16)                     | 9,260.10<br>(6,496.94 to 14,709.23)                    | 9,404.54<br>(6,562.64 to 14,937.97)                    | 9,512.10<br>(6,645.93 to 15,039.18)                    | 93.07<br>(83.15 to 108.20)                       | 246.81<br>(193.24 to 343.88)                        | 264.80<br>(206.73 to 365.87)                       | 239.89<br>(187.71 to 335.21)                        |
| <b>Cardiovascular diseases</b>  | <b>171,851.27</b><br><b>(160,605.07 to 181,384.75)</b> | <b>363,883.00</b><br><b>(319,369.63 to 418,396.37)</b> | <b>193,185.79</b><br><b>(107,865.20 to 373,862.58)</b> | <b>527,685.61</b><br><b>(276,205.49 to 937,033.54)</b> | <b>8,452.95</b><br><b>(7,926.81 to 8,903.86)</b> | <b>16,934.81</b><br><b>(10,424.30 to 29,189.05)</b> | <b>10,171.92</b><br><b>(6,219.73 to 17,649.13)</b> | <b>22,752.60</b><br><b>(13,468.23 to 37,642.36)</b> |
| Rheumatic heart disease         | 1,232.72<br>(1,080.29 to 1,454.51)                     | 1,458.15<br>(860.65 to 2,693.26)                       | 1,170.12<br>(711.79 to 2,163.79)                       | 1,698.90<br>(1,006.65 to 3,121.36)                     | 35.93<br>(32.45 to 40.38)                        | 49.77<br>(33.14 to 79.70)                           | 43.51<br>(29.84 to 67.18)                          | 54.13<br>(35.71 to 86.36)                           |
| Ischemic heart disease          | 110,756.11<br>(104,009.66 to 117,080.28)               | 254,216.57<br>(111,708.50 to 544,371.51)               | 125,154.22<br>(58,751.86 to 281,525.25)                | 378,281.94<br>(165,924.81 to 755,576.47)               | 5,435.46<br>(5,108.07 to 5,727.61)               | 11,568.38<br>(5,812.29 to 13,221.31)                | 6,483.11<br>(3,369.02 to 13,221.31)                | 15,970.50<br>(8,051.45 to 30,110.37)                |
| Stroke                          | 41,498.37<br>(38,427.53 to 45,274.27)                  | 73,881.48<br>(37,534.90 to 149,838.99)                 | 37,966.19<br>(20,942.92 to 77,699.30)                  | 109,295.08<br>(54,335.27 to 214,991.89)                | 2,240.06<br>(2,076.17 to 2,406.55)               | 3,841.54<br>(2,029.73 to 7,930.34)                  | 2,301.00<br>(1,322.21 to 4,962.91)                 | 5,179.56<br>(2,750.22 to 9,941.24)                  |
| Ischemic stroke                 | 23,066.61<br>(21,233.72 to 25,087.05)                  | 29,489.33<br>(13,833.31 to 76,861.59)                  | 16,921.44<br>(8,642.15 to 43,213.41)                   | 40,352.58<br>(18,814.96 to 99,899.96)                  | 1,439.28<br>(1,325.06 to 1,555.35)               | 1,737.42<br>(831.67 to 5,161.89)                    | 1,153.32<br>(591.45 to 3,272.49)                   | 2,180.55<br>(1,063.74 to 5,820.76)                  |
| Intracerebral hemorrhage        | 18,431.76<br>(16,161.61 to 20,728.01)                  | 44,392.15<br>(18,609.42 to 98,770.47)                  | 21,044.74<br>(10,209.39 to 44,487.29)                  | 68,942.50<br>(29,397.61 to 156,561.07)                 | 800.78<br>(734.09 to 876.37)                     | 2,104.13<br>(949.21 to 4,490.68)                    | 1,147.67<br>(570.71 to 2,272.50)                   | 2,999.01<br>(1,345.94 to 6,494.66)                  |
| Hypertensive heart disease      | 5,230.22<br>(1,934.80 to 6,850.21)                     | 10,546.98<br>(2,582.80 to 23,875.49)                   | 7,665.96<br>(2,076.53 to 15,327.10)                    | 12,417.93<br>(3,143.31 to 29,099.78)                   | 303.92<br>(95.10 to 408.07)                      | 565.63<br>(127.25 to 1,295.02)                      | 451.40<br>(110.98 to 913.04)                       | 627.45<br>(140.81 to 1,463.37)                      |
| Cardiomyopathy and myocarditis  | 2,778.83<br>(2,091.85 to 4,100.36)                     | 5,240.44<br>(3,180.24 to 9,471.61)                     | 5,137.59<br>(3,129.10 to 9,209.53)                     | 5,443.87<br>(3,286.50 to 9,808.14)                     | 67.56<br>(53.21 to 102.76)                       | 157.81<br>(100.20 to 272.45)                        | 165.57<br>(105.69 to 279.06)                       | 153.35<br>(97.23 to 263.63)                         |
| Myocarditis                     | 616.12<br>(430.19 to 897.63)                           | 843.20<br>(485.71 to 1,607.25)                         | 794.13<br>(460.84 to 1,540.03)                         | 913.17<br>(531.05 to 1,726.48)                         | 12.44<br>(9.55 to 17.87)                         | 21.19<br>(14.09 to 35.20)                           | 21.20<br>(14.11 to 35.87)                          | 21.64<br>(14.32 to 36.28)                           |
| <b>Palestine</b>                |                                                        |                                                        |                                                        |                                                        |                                                  |                                                     |                                                    |                                                     |
| Cause                           | YLLs (actual counts)                                   |                                                        |                                                        |                                                        | Deaths (actual counts)                           |                                                     |                                                    |                                                     |
|                                 | 2016                                                   | 2040 Forecast                                          | 2040 Better Scenario                                   | 2040 Worse Scenario                                    | 2016                                             | 2040 Forecast                                       | 2040 Better Scenario                               | 2040 Worse Scenario                                 |
| Alcoholic cardiomyopathy        | 130.89<br>(99.81 to 207.07)                            | 331.65<br>(208.39 to 584.34)                           | 364.10<br>(229.63 to 650.35)                           | 316.91<br>(201.65 to 554.62)                           | 4.55<br>(3.42 to 8.27)                           | 11.54<br>(7.82 to 23.00)                            | 13.54<br>(8.95 to 27.17)                           | 10.47<br>(7.11 to 20.80)                            |
| Other cardiomyopathy            | 2,031.82<br>(1,505.27 to 3,090.15)                     | 4,065.59<br>(2,344.33 to 7,593.52)                     | 3,979.36<br>(2,321.80 to 7,349.60)                     | 4,213.79<br>(2,441.78 to 7,861.74)                     | 50.57<br>(39.01 to 79.87)                        | 125.09<br>(75.32 to 220.02)                         | 130.84<br>(80.44 to 225.35)                        | 121.23<br>(72.51 to 218.22)                         |
| Atrial fibrillation and flutter | 433.90<br>(343.62 to 541.63)                           | 1,162.67<br>(830.38 to 1,553.60)                       | 1,238.87<br>(918.24 to 1,633.23)                       | 1,099.70<br>(768.82 to 1,479.24)                       | 36.05<br>(28.36 to 45.38)                        | 86.12<br>(53.33 to 120.82)                          | 101.37<br>(67.97 to 137.73)                        | 76.05<br>(45.68 to 107.14)                          |
| Aortic aneurysm                 | 1,112.34<br>(990.31 to 1,254.37)                       | 2,028.05<br>(1,426.34 to 3,095.80)                     | 1,909.07<br>(1,379.34 to 2,836.19)                     | 2,085.83<br>(1,455.48 to 3,185.13)                     | 50.15<br>(44.75 to 55.90)                        | 87.23<br>(65.94 to 114.98)                          | 91.10<br>(71.09 to 118.12)                         | 83.79<br>(61.32 to 111.05)                          |
| Peripheral artery disease       | 16.47<br>(12.91 to 19.48)                              | 73.48<br>(48.12 to 105.01)                             | 75.72<br>(50.63 to 106.14)                             | 65.97<br>(43.00 to 95.22)                              | 1.19<br>(0.88 to 1.43)                           | 4.89<br>(3.00 to 7.25)                              | 5.70<br>(3.49 to 8.29)                             | 4.08<br>(2.46 to 6.03)                              |

|                                                                |                                                               |                                                               |                                                               |                                                               |                                                      |                                                          |                                                        |                                                          |
|----------------------------------------------------------------|---------------------------------------------------------------|---------------------------------------------------------------|---------------------------------------------------------------|---------------------------------------------------------------|------------------------------------------------------|----------------------------------------------------------|--------------------------------------------------------|----------------------------------------------------------|
| Endocarditis                                                   | 2,085.81<br>(1,667.89 to<br>2,763.41)                         | 4,271.51<br>(2,773.68 to<br>7,115.51)                         | 4,006.17<br>(2,639.62 to<br>6,574.49)                         | 4,510.08<br>(2,925.33 to<br>7,578.50)                         | 70.56<br>(58.72 to<br>86.48)                         | 164.28<br>(113.66 to<br>239.48)                          | 167.40<br>(117.91 to<br>236.35)                        | 160.86<br>(110.15 to<br>237.21)                          |
| Other cardiovascular and circulatory diseases                  | 6,706.51<br>(3,442.03 to<br>8,576.35)                         | 11,003.67<br>(4,771.21 to<br>20,742.91)                       | 8,861.89<br>(3,945.88 to<br>16,085.07)                        | 12,786.31<br>(5,594.68 to<br>23,953.30)                       | 212.08<br>(112.23 to<br>251.44)                      | 409.16<br>(197.19 to<br>644.31)                          | 361.75<br>(174.99 to<br>540.47)                        | 442.83<br>(210.59 to<br>698.79)                          |
| <b>Chronic respiratory diseases</b>                            | <b>12,090.50</b><br><b>(10,895.58 to</b><br><b>13,239.21)</b> | <b>23,686.39</b><br><b>(16,827.94 to</b><br><b>33,241.85)</b> | <b>18,366.68</b><br><b>(13,353.23 to</b><br><b>25,136.45)</b> | <b>33,204.04</b><br><b>(22,562.94 to</b><br><b>48,718.05)</b> | <b>569.69</b><br><b>(508.47 to</b><br><b>624.79)</b> | <b>1,091.04</b><br><b>(775.96 to</b><br><b>1,465.36)</b> | <b>891.24</b><br><b>(669.33 to</b><br><b>1,138.44)</b> | <b>1,458.82</b><br><b>(999.42 to</b><br><b>2,032.90)</b> |
| Chronic obstructive pulmonary disease                          | 7,079.77<br>(6,293.15 to<br>8,057.44)                         | 15,163.43<br>(9,545.53 to<br>23,002.75)                       | 9,820.69<br>(6,383.85 to<br>14,449.58)                        | 24,023.49<br>(14,694.98 to<br>38,075.60)                      | 372.77<br>(332.20 to<br>420.03)                      | 747.13<br>(470.15 to<br>1,111.52)                        | 521.48<br>(344.39 to<br>738.29)                        | 1,109.25<br>(698.25 to<br>1,673.11)                      |
| Pneumoconiosis                                                 | 22.51<br>(18.44 to<br>27.11)                                  | 46.60<br>(31.99 to<br>70.79)                                  | 44.02<br>(30.48 to<br>67.76)                                  | 49.74<br>(33.66 to<br>77.08)                                  | 0.89<br>(0.70 to<br>1.09)                            | 1.99<br>(1.35 to<br>2.71)                                | 2.04<br>(1.43 to<br>2.77)                              | 2.01<br>(1.35 to<br>2.72)                                |
| Silicosis                                                      | 1.28<br>(0.62 to<br>2.03)                                     | 2.03<br>(0.88 to<br>3.68)                                     | 1.73<br>(0.81 to<br>3.01)                                     | 2.28<br>(0.94 to<br>4.00)                                     | 0.06<br>(0.03 to<br>0.10)                            | 0.10<br>(0.05 to<br>0.19)                                | 0.09<br>(0.04 to<br>0.17)                              | 0.11<br>(0.05 to<br>0.21)                                |
| Asbestosis                                                     | 6.94<br>(5.58 to<br>8.67)                                     | 16.94<br>(10.26 to<br>29.62)                                  | 16.04<br>(9.80 to<br>27.91)                                   | 17.85<br>(11.04 to<br>31.26)                                  | 0.18<br>(0.14 to<br>0.23)                            | 0.50<br>(0.31 to<br>0.80)                                | 0.49<br>(0.31 to<br>0.80)                              | 0.51<br>(0.32 to<br>0.81)                                |
| Coal workers pneumoconiosis                                    | 1.34<br>(0.44 to<br>2.24)                                     | 2.14<br>(0.59 to<br>4.29)                                     | 1.66<br>(0.47 to<br>3.39)                                     | 2.58<br>(0.70 to<br>5.26)                                     | 0.06<br>(0.02 to<br>0.11)                            | 0.12<br>(0.03 to<br>0.25)                                | 0.10<br>(0.03 to<br>0.21)                              | 0.13<br>(0.04 to<br>0.28)                                |
| Other pneumoconiosis                                           | 12.96<br>(10.56 to<br>15.86)                                  | 25.49<br>(17.84 to<br>36.77)                                  | 24.59<br>(17.42 to<br>35.29)                                  | 27.02<br>(18.66 to<br>39.58)                                  | 0.59<br>(0.46 to<br>0.72)                            | 1.27<br>(0.85 to<br>1.79)                                | 1.36<br>(0.93 to<br>1.87)                              | 1.25<br>(0.83 to<br>1.76)                                |
| Asthma                                                         | 2,469.67<br>(2,046.71 to<br>2,902.67)                         | 2,532.89<br>(1,393.06 to<br>4,529.04)                         | 1,967.51<br>(1,114.96 to<br>3,489.45)                         | 3,449.73<br>(1,830.41 to<br>6,176.70)                         | 93.39<br>(72.41 to<br>111.12)                        | 97.25<br>(55.92 to<br>160.59)                            | 81.35<br>(47.59 to<br>132.98)                          | 125.02<br>(69.92 to<br>214.07)                           |
| Interstitial lung disease and pulmonary sarcoidosis            | 1,945.82<br>(1,257.23 to<br>2,378.95)                         | 5,030.73<br>(3,206.13 to<br>6,989.91)                         | 5,704.48<br>(3,802.43 to<br>7,860.73)                         | 4,660.16<br>(2,829.78 to<br>6,511.68)                         | 81.06<br>(56.67 to<br>97.86)                         | 210.01<br>(138.55 to<br>267.12)                          | 252.50<br>(182.16 to<br>316.82)                        | 185.99<br>(117.54 to<br>240.02)                          |
| Other chronic respiratory diseases                             | 572.73<br>(251.37 to<br>839.21)                               | 912.73<br>(344.88 to<br>1,576.62)                             | 829.98<br>(312.83 to<br>1,387.40)                             | 1,020.92<br>(391.41 to<br>1,751.26)                           | 21.58<br>(6.86 to<br>35.60)                          | 34.67<br>(10.25 to<br>61.81)                             | 33.87<br>(10.01 to<br>60.29)                           | 36.56<br>(11.06 to<br>65.49)                             |
| <b>Cirrhosis and other chronic liver diseases</b>              | <b>9,624.80</b><br><b>(8,590.11 to</b><br><b>10,708.78)</b>   | <b>17,577.97</b><br><b>(13,391.92 to</b><br><b>24,542.05)</b> | <b>16,912.13</b><br><b>(12,752.25 to</b><br><b>23,909.15)</b> | <b>18,274.02</b><br><b>(13,867.23 to</b><br><b>25,702.55)</b> | <b>308.41</b><br><b>(276.38 to</b><br><b>339.14)</b> | <b>621.18</b><br><b>(507.42 to</b><br><b>777.19)</b>     | <b>632.14</b><br><b>(511.27 to</b><br><b>789.40)</b>   | <b>615.57</b><br><b>(507.30 to</b><br><b>768.33)</b>     |
| Cirrhosis and other chronic liver diseases due to hepatitis B  | 2,463.58<br>(1,999.04 to<br>3,057.18)                         | 5,381.11<br>(3,897.74 to<br>7,584.56)                         | 5,264.47<br>(3,773.49 to<br>7,472.79)                         | 5,451.34<br>(3,995.03 to<br>7,574.23)                         | 94.49<br>(76.91 to<br>117.67)                        | 205.51<br>(155.25 to<br>268.04)                          | 211.64<br>(157.93 to<br>278.98)                        | 200.68<br>(151.29 to<br>263.63)                          |
| Cirrhosis and other chronic liver diseases due to hepatitis C  | 2,780.60<br>(2,211.58 to<br>3,438.40)                         | 6,086.30<br>(4,198.85 to<br>8,625.01)                         | 5,916.80<br>(4,068.78 to<br>8,447.72)                         | 6,191.83<br>(4,325.60 to<br>8,619.71)                         | 104.68<br>(81.74 to<br>130.02)                       | 228.54<br>(165.32 to<br>298.46)                          | 233.03<br>(165.73 to<br>308.21)                        | 224.64<br>(164.33 to<br>294.72)                          |
| Cirrhosis and other chronic liver diseases due to alcohol use  | 487.21<br>(405.52 to<br>588.39)                               | 982.43<br>(723.43 to<br>1,335.67)                             | 939.47<br>(684.66 to<br>1,281.70)                             | 1,020.51<br>(762.26 to<br>1,369.32)                           | 19.51<br>(16.18 to<br>23.64)                         | 39.16<br>(30.03 to<br>50.14)                             | 39.53<br>(29.86 to<br>51.26)                           | 39.13<br>(30.02 to<br>50.74)                             |
| Cirrhosis and other chronic liver diseases due to other causes | 3,893.41<br>(3,216.41 to<br>4,701.56)                         | 5,128.13<br>(3,495.63 to<br>8,241.40)                         | 4,791.39<br>(3,278.81 to<br>7,785.79)                         | 5,610.34<br>(3,827.76 to<br>9,186.00)                         | 89.73<br>(76.26 to<br>103.68)                        | 147.98<br>(109.47 to<br>207.95)                          | 147.94<br>(108.74 to<br>206.40)                        | 151.11<br>(111.64 to<br>213.76)                          |
| <b>Digestive diseases</b>                                      | <b>5,349.92</b><br><b>(3,926.64 to</b><br><b>6,960.77)</b>    | <b>8,194.44</b><br><b>(5,395.95 to</b><br><b>12,020.98)</b>   | <b>7,584.85</b><br><b>(5,081.49 to</b><br><b>10,996.24)</b>   | <b>9,043.52</b><br><b>(5,948.05 to</b><br><b>13,345.19)</b>   | <b>195.38</b><br><b>(145.69 to</b><br><b>239.57)</b> | <b>355.66</b><br><b>(238.21 to</b><br><b>490.60)</b>     | <b>357.13</b><br><b>(240.37 to</b><br><b>479.03)</b>   | <b>367.27</b><br><b>(248.09 to</b><br><b>504.76)</b>     |
| Peptic ulcer disease                                           | 987.08<br>(709.41 to<br>1,395.19)                             | 1,163.06<br>(694.26 to<br>1,870.07)                           | 967.67<br>(581.29 to<br>1,533.53)                             | 1,333.62<br>(794.65 to<br>2,137.99)                           | 45.77<br>(31.79 to<br>64.69)                         | 55.94<br>(33.63 to<br>87.34)                             | 50.64<br>(30.79 to<br>78.38)                           | 60.40<br>(35.71 to<br>96.01)                             |
| <b>Palestine</b>                                               |                                                               |                                                               |                                                               |                                                               |                                                      |                                                          |                                                        |                                                          |
| Cause                                                          | YLLs (actual counts)                                          |                                                               |                                                               |                                                               | Deaths (actual counts)                               |                                                          |                                                        |                                                          |
|                                                                | 2016                                                          | 2040 Forecast                                                 | 2040 Better Scenario                                          | 2040 Worse Scenario                                           | 2016                                                 | 2040 Forecast                                            | 2040 Better Scenario                                   | 2040 Worse Scenario                                      |
| Gastritis and duodenitis                                       | 36.60<br>(20.42 to<br>61.06)                                  | 73.03<br>(37.76 to<br>116.60)                                 | 69.23<br>(36.54 to<br>111.58)                                 | 76.82<br>(40.29 to<br>123.28)                                 | 1.34<br>(0.71 to<br>2.09)                            | 2.90<br>(1.49 to<br>4.46)                                | 2.97<br>(1.54 to<br>4.47)                              | 2.87<br>(1.48 to<br>4.37)                                |



|                                                            | 18.55<br>(8.82 to<br>27.43)                       | 43.10<br>(18.40 to<br>110.02)                       | 44.90<br>(19.03 to<br>116.09)                       | 44.37<br>(19.14 to<br>110.07)                       | 0.30<br>(0.16 to<br>0.43)                      | 0.73<br>(0.34 to<br>1.87)                       | 0.77<br>(0.34 to<br>2.02)                       | 0.74<br>(0.34 to<br>1.87)                       |
|------------------------------------------------------------|---------------------------------------------------|-----------------------------------------------------|-----------------------------------------------------|-----------------------------------------------------|------------------------------------------------|-------------------------------------------------|-------------------------------------------------|-------------------------------------------------|
| Palestine                                                  |                                                   |                                                     |                                                     |                                                     |                                                |                                                 |                                                 |                                                 |
| Cause                                                      | YLLs (actual counts)                              |                                                     |                                                     |                                                     | Deaths (actual counts)                         |                                                 |                                                 |                                                 |
|                                                            | 2016                                              | 2040 Forecast                                       | 2040 Better Scenario                                | 2040 Worse Scenario                                 | 2016                                           | 2040 Forecast                                   | 2040 Better Scenario                            | 2040 Worse Scenario                             |
| <b>Diabetes, urogenital, blood, and endocrine diseases</b> | <b>53,300.21<br/>(48,826.75 to<br/>58,082.55)</b> | <b>145,914.45<br/>(76,655.16 to<br/>286,989.06)</b> | <b>107,602.64<br/>(59,102.30 to<br/>221,991.12)</b> | <b>170,507.83<br/>(90,538.09 to<br/>327,502.32)</b> | <b>2,233.03<br/>(2,082.63 to<br/>2,400.41)</b> | <b>6,735.36<br/>(3,519.01 to<br/>13,035.66)</b> | <b>5,316.74<br/>(2,886.20 to<br/>11,417.09)</b> | <b>7,462.67<br/>(3,967.14 to<br/>14,125.91)</b> |
| Diabetes mellitus                                          | 22,946.27<br>(21,002.07 to<br>24,874.21)          | 48,925.91<br>(31,888.53 to<br>72,282.15)            | 38,820.38<br>(25,613.96 to<br>57,725.57)            | 58,082.28<br>(38,260.60 to<br>88,429.94)            | 1,163.63<br>(1,063.74 to<br>1,270.79)          | 2,517.59<br>(1,731.97 to<br>3,469.82)           | 2,152.75<br>(1,491.98 to<br>2,934.02)           | 2,828.22<br>(1,907.31 to<br>3,941.87)           |
| Acute glomerulonephritis                                   | 44.13<br>(35.42 to<br>59.66)                      | 83.48<br>(52.54 to<br>157.15)                       | 74.85<br>(47.32 to<br>138.49)                       | 96.65<br>(69.99 to<br>174.68)                       | 0.78<br>(0.65 to<br>0.99)                      | 1.79<br>(1.20 to<br>3.00)                       | 1.70<br>(1.14 to<br>2.77)                       | 1.94<br>(1.32 to<br>3.19)                       |
| Chronic kidney disease                                     | 23,723.43<br>(21,454.39 to<br>25,974.34)          | 86,847.57<br>(22,229.24 to<br>238,335.97)           | 59,198.82<br>(15,749.57 to<br>175,715.05)           | 101,175.71<br>(27,615.92 to<br>262,654.67)          | 926.89<br>(849.84 to<br>1,022.61)              | 3,913.00<br>(806.55 to<br>10,508.66)            | 2,846.71<br>(575.87 to<br>9,122.63)             | 4,327.81<br>(923.29 to<br>11,283.85)            |
| Chronic kidney disease due to diabetes mellitus            | 8,899.61<br>(7,722.00 to<br>10,123.05)            | 42,334.11<br>(8,843.94 to<br>120,761.97)            | 28,190.13<br>(6,210.77 to<br>90,901.75)             | 49,284.54<br>(10,845.69 to<br>134,293.14)           | 383.07<br>(331.02 to<br>446.82)                | 1,871.37<br>(348.91 to<br>5,300.32)             | 1,319.26<br>(239.46 to<br>4,407.72)             | 2,095.18<br>(404.44 to<br>5,753.71)             |
| Chronic kidney disease due to hypertension                 | 3,073.70<br>(2,575.18 to<br>3,716.25)             | 13,137.71<br>(2,671.49 to<br>37,126.78)             | 9,470.17<br>(1,855.61 to<br>31,144.12)              | 14,588.50<br>(3,005.00 to<br>39,013.09)             | 188.63<br>(155.82 to<br>230.01)                | 797.00<br>(146.20 to<br>2,191.61)               | 633.53<br>(117.49 to<br>2,083.06)               | 830.48<br>(154.30 to<br>2,209.58)               |
| Chronic kidney disease due to glomerulonephritis           | 4,117.40<br>(3,329.76 to<br>4,913.75)             | 10,020.41<br>(3,702.09 to<br>24,088.14)             | 6,943.71<br>(2,669.03 to<br>17,831.60)              | 11,985.11<br>(4,619.81 to<br>28,626.26)             | 109.84<br>(91.46 to<br>131.50)                 | 357.14<br>(97.14 to<br>943.90)                  | 254.93<br>(68.57 to<br>743.58)                  | 406.52<br>(115.84 to<br>1,033.53)               |
| Chronic kidney disease due to other and unspecified causes | 7,632.72<br>(6,386.52 to<br>9,032.43)             | 21,355.35<br>(6,467.41 to<br>53,862.10)             | 14,594.81<br>(4,652.92 to<br>40,514.41)             | 25,317.55<br>(8,115.30 to<br>63,279.53)             | 245.36<br>(206.89 to<br>290.53)                | 887.49<br>(203.34 to<br>2,408.72)               | 638.99<br>(143.32 to<br>1,979.54)               | 995.63<br>(246.11 to<br>2,601.34)               |
| Urinary diseases and male infertility                      | 1,062.86<br>(860.49 to<br>1,323.60)               | 2,209.29<br>(1,588.62 to<br>3,550.41)               | 2,281.64<br>(1,627.10 to<br>3,688.84)               | 2,247.98<br>(1,607.26 to<br>3,588.18)               | 31.44<br>(28.05 to<br>35.28)                   | 84.49<br>(65.72 to<br>110.28)                   | 96.14<br>(74.79 to<br>124.02)                   | 78.47<br>(61.14 to<br>103.09)                   |
| Urinary tract infections                                   | 877.86<br>(704.03 to<br>1,102.86)                 | 1,960.03<br>(1,407.94 to<br>3,125.61)               | 2,047.11<br>(1,450.85 to<br>3,241.05)               | 1,973.10<br>(1,419.45 to<br>3,149.74)               | 26.79<br>(23.78 to<br>30.18)                   | 76.88<br>(59.58 to<br>99.83)                    | 88.34<br>(68.61 to<br>114.23)                   | 70.78<br>(55.11 to<br>93.07)                    |
| Urolithiasis                                               | 37.91<br>(28.59 to<br>57.43)                      | 101.18<br>(58.91 to<br>226.59)                      | 103.33<br>(59.89 to<br>233.50)                      | 104.38<br>(60.54 to<br>224.81)                      | 0.87<br>(0.71 to<br>1.13)                      | 2.38<br>(1.57 to<br>4.42)                       | 2.57<br>(1.66 to<br>4.71)                       | 2.32<br>(1.55 to<br>4.34)                       |
| Other urinary diseases                                     | 147.10<br>(106.33 to<br>218.49)                   | 148.08<br>(90.76 to<br>253.31)                      | 131.20<br>(79.46 to<br>227.33)                      | 170.50<br>(105.29 to<br>303.58)                     | 3.78<br>(2.70 to<br>4.74)                      | 5.24<br>(2.87 to<br>8.17)                       | 5.22<br>(2.70 to<br>8.23)                       | 5.37<br>(3.13 to<br>8.37)                       |
| Gynecological diseases                                     | 43.47<br>(26.10 to<br>58.39)                      | 88.71<br>(32.51 to<br>256.65)                       | 74.44<br>(27.12 to<br>211.43)                       | 100.37<br>(37.39 to<br>277.84)                      | 0.85<br>(0.55 to<br>1.11)                      | 1.79<br>(0.74 to<br>4.81)                       | 1.52<br>(0.64 to<br>4.01)                       | 2.01<br>(0.84 to<br>5.22)                       |
| Uterine fibroids                                           | 0.31<br>(0.18 to<br>0.67)                         | 0.51<br>(0.23 to<br>1.20)                           | 0.42<br>(0.19 to<br>0.96)                           | 0.58<br>(0.26 to<br>1.35)                           | 0.01<br>(0.01 to<br>0.02)                      | 0.02<br>(0.01 to<br>0.05)                       | 0.01<br>(0.01 to<br>0.03)                       | 0.02<br>(0.01 to<br>0.04)                       |
| Polycystic ovarian syndrome                                | 5.23<br>(2.55 to<br>9.86)                         | 9.70<br>(2.07 to<br>37.17)                          | 7.00<br>(1.50 to<br>27.22)                          | 11.93<br>(2.67 to<br>47.46)                         | 0.10<br>(0.05 to<br>0.19)                      | 0.19<br>(0.04 to<br>0.71)                       | 0.14<br>(0.03 to<br>0.49)                       | 0.23<br>(0.06 to<br>0.88)                       |
| Endometriosis                                              | 0.21<br>(0.07 to<br>0.65)                         | 0.48<br>(0.12 to<br>1.58)                           | 0.39<br>(0.10 to<br>1.28)                           | 0.56<br>(0.14 to<br>1.91)                           | 0.00<br>(0.00 to<br>0.01)                      | 0.01<br>(0.00 to<br>0.03)                       | 0.01<br>(0.00 to<br>0.02)                       | 0.01<br>(0.00 to<br>0.03)                       |
| Genital prolapse                                           | 0.22<br>(0.11 to<br>0.48)                         | 0.30<br>(0.11 to<br>0.91)                           | 0.24<br>(0.08 to<br>0.70)                           | 0.37<br>(0.13 to<br>1.07)                           | 0.00<br>(0.00 to<br>0.01)                      | 0.01<br>(0.00 to<br>0.02)                       | 0.01<br>(0.00 to<br>0.01)                       | 0.01<br>(0.00 to<br>0.02)                       |
| Other gynecological diseases                               | 37.50<br>(20.39 to<br>50.85)                      | 77.72<br>(26.68 to<br>218.45)                       | 66.39<br>(23.58 to<br>179.85)                       | 86.93<br>(30.72 to<br>233.39)                       | 0.72<br>(0.43 to<br>0.96)                      | 1.57<br>(0.62 to<br>4.21)                       | 1.36<br>(0.56 to<br>3.55)                       | 1.74<br>(0.70 to<br>4.44)                       |
| Hemoglobinopathies and hemolytic anemias                   | 2,161.00<br>(1,771.90 to<br>2,851.47)             | 3,443.27<br>(2,085.26 to<br>6,464.01)               | 3,101.47<br>(1,865.82 to<br>5,817.75)               | 3,827.52<br>(2,306.17 to<br>7,219.07)               | 46.84<br>(38.19 to<br>55.79)                   | 91.27<br>(58.59 to<br>142.37)                   | 85.16<br>(53.65 to<br>134.45)                   | 97.31<br>(62.81 to<br>155.79)                   |

|                                                   |                                           |                                          |                                          |                                           |                                     |                                   |                                   |                                     |
|---------------------------------------------------|-------------------------------------------|------------------------------------------|------------------------------------------|-------------------------------------------|-------------------------------------|-----------------------------------|-----------------------------------|-------------------------------------|
| Thalassemias                                      | 185.78<br>(23.17 to<br>534.31)            | 82.13<br>(23.90 to<br>235.90)            | 88.73<br>(14.11 to<br>249.10)            | 93.70<br>(12.67 to<br>278.28)             | 2.26<br>(0.30 to<br>6.42)           | 1.06<br>(0.17 to<br>3.01)         | 1.15<br>(0.20 to<br>3.22)         | 1.20<br>(0.18 to<br>3.54)           |
| Sickle cell disorders                             | 1,463.35<br>(925.04 to<br>2,171.17)       | 2,199.97<br>(997.87 to<br>4,748.15)      | 1,973.60<br>(905.66 to<br>4,301.69)      | 2,478.84<br>(1,148.81 to<br>5,350.16)     | 22.38<br>(13.95 to<br>32.46)        | 41.12<br>(18.51 to<br>85.95)      | 37.10<br>(16.62 to<br>78.28)      | 45.54<br>(20.79 to<br>94.55)        |
| G6PD deficiency                                   | 256.32<br>(117.27 to<br>482.43)           | 717.84<br>(300.78 to<br>1,575.53)        | 617.62<br>(252.62 to<br>1,348.43)        | 798.81<br>(330.95 to<br>1,708.70)         | 7.04<br>(3.83 to<br>11.38)          | 22.67<br>(11.00 to<br>41.25)      | 20.04<br>(9.53 to<br>36.45)       | 24.62<br>(11.76 to<br>44.32)        |
| Other hemoglobinopathies and hemolytic anemias    | 255.54<br>(160.54 to<br>341.12)           | 443.32<br>(234.16 to<br>704.79)          | 421.52<br>(223.70 to<br>657.84)          | 456.18<br>(245.34 to<br>715.93)           | 15.17<br>(9.37 to<br>19.40)         | 26.41<br>(14.37 to<br>39.07)      | 26.86<br>(14.80 to<br>38.87)      | 25.96<br>(13.85 to<br>38.73)        |
| Endocrine, metabolic, blood, and immune disorders | 3,319.07<br>(2,127.05 to<br>4,929.29)     | 4,316.21<br>(2,813.52 to<br>7,156.38)    | 4,051.02<br>(2,670.63 to<br>6,815.51)    | 4,977.31<br>(3,136.55 to<br>8,298.93)     | 62.60<br>(47.47 to<br>88.63)        | 125.44<br>(90.46 to<br>195.79)    | 132.77<br>(97.37 to<br>195.97)    | 126.91<br>(89.79 to<br>204.66)      |
| <b>Palestine</b>                                  |                                           |                                          |                                          |                                           |                                     |                                   |                                   |                                     |
| Cause                                             | YLLs (actual counts)                      |                                          |                                          |                                           | Deaths (actual counts)              |                                   |                                   |                                     |
|                                                   | 2016                                      | 2040 Forecast                            | 2040 Better Scenario                     | 2040 Worse Scenario                       | 2016                                | 2040 Forecast                     | 2040 Better Scenario              | 2040 Worse Scenario                 |
| Musculoskeletal disorders                         | 964.28<br>(614.69 to<br>1,158.41)         | 2,119.20<br>(1,181.57 to<br>4,110.63)    | 2,213.54<br>(1,215.75 to<br>4,318.25)    | 2,129.57<br>(1,191.40 to<br>4,083.13)     | 19.03<br>(13.43 to<br>22.22)        | 47.63<br>(30.38 to<br>80.22)      | 51.22<br>(32.09 to<br>87.49)      | 46.39<br>(29.68 to<br>78.18)        |
| Rheumatoid arthritis                              | 145.09<br>(103.66 to<br>225.21)           | 245.31<br>(153.34 to<br>435.44)          | 214.57<br>(135.14 to<br>378.96)          | 285.83<br>(178.34 to<br>502.42)           | 3.08<br>(2.29 to<br>4.63)           | 6.81<br>(4.58 to<br>10.77)        | 6.38<br>(4.31 to<br>10.27)        | 7.36<br>(4.94 to<br>11.69)          |
| Other musculoskeletal disorders                   | 819.20<br>(488.93 to<br>996.72)           | 1,873.90<br>(974.87 to<br>3,685.55)      | 1,998.97<br>(1,039.65 to<br>3,994.75)    | 1,843.74<br>(945.88 to<br>3,614.63)       | 15.95<br>(10.72 to<br>18.89)        | 40.82<br>(24.75 to<br>71.75)      | 44.84<br>(27.37 to<br>79.78)      | 39.02<br>(23.61 to<br>68.42)        |
| Other non-communicable diseases                   | 92,259.76<br>(48,443.28 to<br>142,429.31) | 56,644.50<br>(28,926.50 to<br>97,493.27) | 48,785.11<br>(24,977.75 to<br>84,699.44) | 76,348.87<br>(38,074.78 to<br>135,358.62) | 1,113.65<br>(599.99 to<br>1,693.25) | 807.17<br>(464.11 to<br>1,294.27) | 724.38<br>(424.82 to<br>1,135.01) | 1,033.93<br>(573.51 to<br>1,719.12) |
| Congenital birth defects                          | 80,131.12<br>(42,150.65 to<br>125,972.08) | 49,730.27<br>(24,470.13 to<br>86,435.71) | 42,330.51<br>(20,981.83 to<br>73,749.64) | 67,764.15<br>(32,845.92 to<br>119,666.58) | 956.29<br>(516.89 to<br>1,483.63)   | 636.12<br>(328.19 to<br>1,074.35) | 544.23<br>(283.30 to<br>924.12)   | 852.54<br>(424.94 to<br>1,467.94)   |
| Neural tube defects                               | 440.26<br>(196.91 to<br>803.18)           | 122.74<br>(47.56 to<br>301.09)           | 92.34<br>(35.82 to<br>225.27)            | 177.37<br>(63.80 to<br>453.10)            | 5.27<br>(2.44 to<br>9.48)           | 1.73<br>(0.75 to<br>3.96)         | 1.31<br>(0.57 to<br>3.01)         | 2.41<br>(0.97 to<br>5.85)           |
| Congenital heart anomalies                        | 41,651.12<br>(21,484.78 to<br>65,720.59)  | 24,598.22<br>(12,075.29 to<br>43,764.66) | 21,063.07<br>(10,474.76 to<br>37,351.48) | 33,260.12<br>(16,032.62 to<br>60,342.21)  | 497.33<br>(264.43 to<br>777.52)     | 315.38<br>(162.22 to<br>556.11)   | 271.38<br>(139.82 to<br>466.77)   | 419.46<br>(210.52 to<br>741.21)     |
| Orofacial clefts                                  | 79.95<br>(20.62 to<br>193.73)             | 21.86<br>(4.39 to<br>60.55)              | 15.89<br>(3.29 to<br>43.80)              | 34.82<br>(7.17 to<br>95.71)               | 0.93<br>(0.24 to<br>2.25)           | 0.25<br>(0.05 to<br>0.70)         | 0.18<br>(0.04 to<br>0.51)         | 0.40<br>(0.08 to<br>1.11)           |
| Down syndrome                                     | 3,365.75<br>(1,882.51 to<br>5,735.93)     | 2,863.00<br>(1,489.84 to<br>5,266.23)    | 2,390.51<br>(1,231.76 to<br>4,463.12)    | 3,672.17<br>(1,930.46 to<br>6,658.72)     | 42.34<br>(25.27 to<br>69.12)        | 42.61<br>(22.06 to<br>78.89)      | 35.83<br>(18.44 to<br>67.69)      | 53.19<br>(27.65 to<br>96.20)        |
| Other chromosomal abnormalities                   | 16,721.04<br>(7,276.56 to<br>28,139.43)   | 13,045.58<br>(5,264.28 to<br>25,528.72)  | 10,865.18<br>(4,321.03 to<br>20,894.66)  | 18,339.72<br>(7,222.27 to<br>35,738.23)   | 196.87<br>(87.07 to<br>328.03)      | 159.05<br>(64.28 to<br>309.71)    | 132.80<br>(53.84 to<br>254.83)    | 221.85<br>(87.89 to<br>428.80)      |
| Congenital musculoskeletal and limb anomalies     | 1,802.12<br>(833.68 to<br>3,058.51)       | 905.91<br>(338.41 to<br>1,915.15)        | 797.62<br>(303.00 to<br>1,699.92)        | 1,227.00<br>(443.35 to<br>2,664.15)       | 21.26<br>(10.03 to<br>35.79)        | 11.18<br>(4.37 to<br>23.17)       | 9.88<br>(3.90 to<br>20.57)        | 14.96<br>(5.68 to<br>31.84)         |
| Urogenital congenital anomalies                   | 1,847.93<br>(840.37 to<br>4,351.16)       | 990.53<br>(475.70 to<br>2,222.61)        | 872.69<br>(426.63 to<br>1,902.26)        | 1,307.90<br>(597.45 to<br>2,994.73)       | 22.81<br>(11.09 to<br>51.77)        | 14.82<br>(8.36 to<br>28.19)       | 13.30<br>(7.71 to<br>25.19)       | 18.64<br>(9.86 to<br>37.35)         |
| Digestive congenital anomalies                    | 1,646.30<br>(615.36 to<br>2,926.79)       | 795.67<br>(236.82 to<br>1,726.89)        | 656.97<br>(200.11 to<br>1,399.80)        | 1,152.88<br>(351.11 to<br>2,457.79)       | 19.15<br>(7.20 to<br>33.99)         | 9.36<br>(2.89 to<br>20.15)        | 7.73<br>(2.42 to<br>16.46)        | 13.52<br>(4.20 to<br>28.63)         |
| Other congenital birth defects                    | 12,576.64<br>(6,391.83 to<br>21,376.71)   | 6,386.77<br>(3,048.80 to<br>11,988.92)   | 5,576.21<br>(2,686.56 to<br>10,369.05)   | 8,592.17<br>(3,975.35 to<br>16,379.11)    | 150.33<br>(78.60 to<br>253.34)      | 81.75<br>(41.64 to<br>146.75)     | 71.80<br>(36.96 to<br>129.65)     | 108.11<br>(53.33 to<br>200.24)      |
| Skin and subcutaneous diseases                    | 772.74<br>(440.03 to<br>1,080.47)         | 2,968.34<br>(1,882.25 to<br>4,650.63)    | 3,049.74<br>(1,991.17 to<br>4,822.86)    | 3,001.85<br>(1,856.10 to<br>4,614.86)     | 25.53<br>(18.17 to<br>44.34)        | 125.26<br>(84.87 to<br>222.74)    | 140.64<br>(96.48 to<br>256.35)    | 116.61<br>(78.90 to<br>204.59)      |

|                                      |                                           |                                            |                                            |                                             |                                       |                                        |                                        |                                        |
|--------------------------------------|-------------------------------------------|--------------------------------------------|--------------------------------------------|---------------------------------------------|---------------------------------------|----------------------------------------|----------------------------------------|----------------------------------------|
| Cellulitis                           | 119.94<br>(71.44 to<br>220.97)            | 575.82<br>(346.70 to<br>1,209.94)          | 650.49<br>(387.65 to<br>1,385.13)          | 540.30<br>(328.79 to<br>1,125.32)           | 4.50<br>(2.70 to<br>10.27)            | 26.37<br>(14.17 to<br>60.83)           | 32.02<br>(17.18 to<br>74.26)           | 23.14<br>(12.39 to<br>53.79)           |
| Pyoderma                             | 580.40<br>(310.07 to<br>806.04)           | 2,217.96<br>(1,299.89 to<br>3,376.21)      | 2,222.30<br>(1,324.10 to<br>3,451.25)      | 2,276.86<br>(1,293.80 to<br>3,439.39)       | 19.57<br>(13.10 to<br>33.74)          | 94.75<br>(63.61 to<br>167.83)          | 104.07<br>(69.66 to<br>187.48)         | 89.42<br>(59.03 to<br>153.50)          |
| Decubitus ulcer                      | 40.25<br>(18.10 to<br>62.59)              | 92.61<br>(39.28 to<br>179.63)              | 92.70<br>(40.51 to<br>180.54)              | 99.08<br>(41.36 to<br>192.41)               | 0.90<br>(0.48 to<br>1.84)             | 2.43<br>(1.20 to<br>5.15)              | 2.70<br>(1.38 to<br>6.54)              | 2.36<br>(1.15 to<br>4.71)              |
| Other skin and subcutaneous diseases | 32.15<br>(14.56 to<br>48.50)              | 81.96<br>(34.32 to<br>162.19)              | 84.25<br>(35.30 to<br>169.54)              | 85.61<br>(35.28 to<br>165.88)               | 0.57<br>(0.30 to<br>0.81)             | 1.71<br>(0.84 to<br>3.05)              | 1.85<br>(0.91 to<br>3.31)              | 1.69<br>(0.79 to<br>3.02)              |
| Sudden infant death syndrome         | 11,355.90<br>(4,805.54 to<br>21,419.85)   | 3,945.88<br>(1,115.13 to<br>9,338.53)      | 3,404.87<br>(953.81 to<br>8,113.76)        | 5,582.86<br>(1,582.81 to<br>13,157.89)      | 131.82<br>(55.79 to<br>248.61)        | 45.79<br>(12.94 to<br>108.58)          | 39.51<br>(11.07 to<br>94.17)           | 64.78<br>(18.36 to<br>152.70)          |
| Injuries                             | 90,203.68<br>(75,342.96 to<br>106,991.05) | 191,615.72<br>(92,355.94 to<br>791,785.39) | 171,997.19<br>(77,965.71 to<br>765,017.08) | 212,395.44<br>(105,824.23 to<br>856,127.48) | 1,539.83<br>(1,309.19 to<br>1,806.84) | 3,617.71<br>(1,855.82 to<br>14,145.16) | 3,332.26<br>(1,628.37 to<br>13,889.08) | 3,891.07<br>(2,027.51 to<br>14,912.11) |
| Transport injuries                   | 40,836.83<br>(32,129.53 to<br>50,792.84)  | 66,394.28<br>(42,902.51 to<br>110,091.33)  | 51,039.13<br>(32,419.67 to<br>85,484.83)   | 77,752.96<br>(50,103.46 to<br>127,144.27)   | 688.59<br>(542.40 to<br>839.95)       | 1,243.54<br>(827.97 to<br>1,973.44)    | 998.64<br>(662.60 to<br>1,596.51)      | 1,402.94<br>(936.12 to<br>2,209.21)    |
| Road injuries                        | 40,003.89<br>(31,442.61 to<br>49,811.10)  | 64,599.89<br>(41,578.41 to<br>107,316.81)  | 49,420.95<br>(31,365.85 to<br>82,938.90)   | 75,740.23<br>(48,771.51 to<br>124,217.36)   | 671.66<br>(525.13 to<br>822.39)       | 1,200.91<br>(793.80 to<br>1,922.79)    | 958.00<br>(632.32 to<br>1,542.51)      | 1,357.48<br>(904.44 to<br>2,152.70)    |
| Pedestrian road injuries             | 3,438.74<br>(2,062.01 to<br>6,061.01)     | 3,873.97<br>(2,197.17 to<br>6,932.87)      | 3,171.94<br>(1,802.05 to<br>5,641.88)      | 4,446.63<br>(2,506.64 to<br>7,779.04)       | 60.90<br>(39.45 to<br>99.31)          | 83.59<br>(50.77 to<br>139.02)          | 72.62<br>(44.75 to<br>121.12)          | 91.02<br>(54.66 to<br>152.26)          |

**Palestine**

| Cause                          | YLLs (actual counts)                     |                                          |                                          |                                           | Deaths (actual counts)          |                                     |                                   |                                     |
|--------------------------------|------------------------------------------|------------------------------------------|------------------------------------------|-------------------------------------------|---------------------------------|-------------------------------------|-----------------------------------|-------------------------------------|
|                                | 2016                                     | 2040 Forecast                            | 2040 Better Scenario                     | 2040 Worse Scenario                       | 2016                            | 2040 Forecast                       | 2040 Better Scenario              | 2040 Worse Scenario                 |
| Cyclist road injuries          | 388.55<br>(219.34 to<br>730.27)          | 616.45<br>(308.12 to<br>1,214.54)        | 484.50<br>(243.99 to<br>963.59)          | 718.26<br>(353.55 to<br>1,410.83)         | 7.21<br>(4.41 to<br>12.97)      | 12.80<br>(7.12 to<br>24.31)         | 10.93<br>(6.18 to<br>20.43)       | 14.06<br>(7.72 to<br>26.24)         |
| Motorcyclist road injuries     | 1,778.95<br>(947.75 to<br>3,798.04)      | 3,421.41<br>(1,437.67 to<br>7,771.48)    | 2,922.52<br>(1,227.24 to<br>6,608.40)    | 3,772.05<br>(1,589.10 to<br>8,584.98)     | 29.29<br>(16.01 to<br>60.07)    | 59.72<br>(26.42 to<br>129.05)       | 52.16<br>(23.09 to<br>112.17)     | 64.69<br>(28.30 to<br>141.64)       |
| Motor vehicle road injuries    | 34,266.66<br>(26,680.42 to<br>42,673.67) | 56,462.16<br>(36,102.82 to<br>95,412.61) | 42,662.43<br>(26,943.24 to<br>73,076.92) | 66,541.40<br>(42,706.47 to<br>111,117.63) | 571.73<br>(448.19 to<br>706.81) | 1,039.69<br>(689.66 to<br>1,667.47) | 817.77<br>(539.78 to<br>1,324.16) | 1,182.23<br>(789.31 to<br>1,893.59) |
| Other road injuries            | 130.99<br>(83.46 to<br>219.92)           | 225.91<br>(127.52 to<br>410.03)          | 179.55<br>(101.85 to<br>325.26)          | 261.89<br>(145.45 to<br>481.63)           | 2.54<br>(1.75 to<br>3.96)       | 5.11<br>(3.19 to<br>8.72)           | 4.52<br>(2.85 to<br>7.50)         | 5.48<br>(3.32 to<br>9.49)           |
| Other transport injuries       | 832.94<br>(509.10 to<br>1,191.89)        | 1,794.39<br>(975.50 to<br>3,208.18)      | 1,618.18<br>(875.53 to<br>2,902.37)      | 2,012.73<br>(1,091.47 to<br>3,675.20)     | 16.93<br>(10.95 to<br>23.37)    | 42.63<br>(24.69 to<br>68.75)        | 40.64<br>(23.86 to<br>64.68)      | 45.46<br>(26.28 to<br>73.75)        |
| Unintentional injuries         | 26,435.34<br>(21,302.57 to<br>33,054.14) | 28,510.77<br>(18,416.78 to<br>45,789.48) | 25,639.86<br>(17,072.17 to<br>40,523.68) | 32,587.17<br>(21,133.58 to<br>52,721.67)  | 457.97<br>(386.61 to<br>561.46) | 616.58<br>(432.10 to<br>921.58)     | 584.77<br>(417.94 to<br>851.15)   | 666.01<br>(461.02 to<br>1,016.82)   |
| Falls                          | 7,409.94<br>(4,431.61 to<br>10,378.60)   | 8,125.32<br>(5,063.63 to<br>12,509.47)   | 7,687.64<br>(4,928.18 to<br>11,653.33)   | 8,876.34<br>(5,456.49 to<br>13,803.19)    | 138.26<br>(99.26 to<br>174.13)  | 193.23<br>(139.99 to<br>268.95)     | 193.99<br>(144.69 to<br>265.64)   | 198.71<br>(141.16 to<br>279.31)     |
| Drowning                       | 5,112.92<br>(3,788.78 to<br>8,458.21)    | 4,860.33<br>(2,865.78 to<br>9,213.93)    | 4,291.86<br>(2,508.75 to<br>8,196.22)    | 5,668.99<br>(3,320.47 to<br>10,631.08)    | 79.62<br>(62.42 to<br>124.89)   | 90.23<br>(57.83 to<br>156.39)       | 83.61<br>(54.80 to<br>144.74)     | 100.47<br>(63.12 to<br>178.19)      |
| Fire, heat, and hot substances | 1,932.43<br>(1,225.84 to<br>3,481.73)    | 2,302.88<br>(1,188.79 to<br>5,173.10)    | 2,001.08<br>(1,045.76 to<br>4,483.27)    | 2,660.71<br>(1,358.37 to<br>5,883.34)     | 37.80<br>(27.31 to<br>62.47)    | 56.75<br>(34.60 to<br>108.46)       | 52.77<br>(32.67 to<br>97.93)      | 61.46<br>(36.65 to<br>118.78)       |
| Poisonings                     | 758.60<br>(490.06 to<br>1,367.26)        | 598.51<br>(300.78 to<br>1,262.76)        | 477.60<br>(248.22 to<br>1,012.57)        | 739.97<br>(373.10 to<br>1,554.69)         | 12.26<br>(8.57 to<br>21.27)     | 11.68<br>(6.58 to<br>23.45)         | 9.74<br>(5.51 to<br>18.91)        | 13.81<br>(7.64 to<br>27.50)         |
| Exposure to mechanical forces  | 2,497.06<br>(1,922.89 to<br>3,394.20)    | 2,488.71<br>(1,490.80 to<br>4,449.59)    | 2,123.89<br>(1,273.70 to<br>3,682.44)    | 2,951.42<br>(1,735.10 to<br>5,252.99)     | 42.64<br>(34.47 to<br>57.95)    | 51.90<br>(34.41 to<br>85.08)        | 46.48<br>(30.76 to<br>74.58)      | 58.36<br>(37.61 to<br>96.55)        |



|                                                 |                                                               |                                                               |                                                               |                                                               |                                                      |                                                      |                                                      |                                                      |
|-------------------------------------------------|---------------------------------------------------------------|---------------------------------------------------------------|---------------------------------------------------------------|---------------------------------------------------------------|------------------------------------------------------|------------------------------------------------------|------------------------------------------------------|------------------------------------------------------|
| Unintentional firearm injuries                  | 718.99<br>(531.38 to<br>1,184.63)                             | 723.53<br>(389.93 to<br>1,481.00)                             | 609.31<br>(330.47 to<br>1,258.10)                             | 850.59<br>(459.22 to<br>1,684.09)                             | 13.43<br>(10.44 to<br>21.15)                         | 16.15<br>(9.93 to<br>28.80)                          | 14.36<br>(9.01 to<br>25.07)                          | 18.02<br>(10.91 to<br>32.17)                         |
| Unintentional suffocation                       | 548.57<br>(346.17 to<br>880.40)                               | 349.75<br>(173.23 to<br>681.28)                               | 288.23<br>(143.21 to<br>535.35)                               | 464.51<br>(225.69 to<br>875.11)                               | 6.92<br>(4.48 to<br>10.89)                           | 4.77<br>(2.41 to<br>9.20)                            | 3.96<br>(2.02 to<br>7.20)                            | 6.24<br>(3.11 to<br>11.58)                           |
| Other exposure to mechanical forces             | 1,229.51<br>(965.12 to<br>1,726.94)                           | 1,415.42<br>(863.40 to<br>2,547.58)                           | 1,226.35<br>(746.64 to<br>2,151.34)                           | 1,636.32<br>(983.68 to<br>2,902.10)                           | 22.29<br>(18.17 to<br>31.31)                         | 30.98<br>(20.46 to<br>52.14)                         | 28.16<br>(18.84 to<br>45.17)                         | 34.11<br>(22.43 to<br>56.62)                         |
| Adverse effects of medical treatment            | 2,572.37<br>(1,789.45 to<br>3,583.29)                         | 3,324.73<br>(1,874.09 to<br>6,208.75)                         | 2,978.45<br>(1,652.64 to<br>5,579.95)                         | 3,783.46<br>(2,123.54 to<br>6,857.05)                         | 47.91<br>(35.02 to<br>71.24)                         | 80.96<br>(47.35 to<br>146.49)                        | 76.96<br>(46.32 to<br>139.44)                        | 86.41<br>(50.79 to<br>153.10)                        |
| Animal contact                                  | 570.09<br>(405.29 to<br>792.44)                               | 689.96<br>(378.91 to<br>1,285.59)                             | 575.76<br>(325.35 to<br>1,081.78)                             | 837.38<br>(462.51 to<br>1,530.74)                             | 9.76<br>(7.03 to<br>12.75)                           | 15.11<br>(8.98 to<br>26.54)                          | 13.45<br>(8.21 to<br>22.90)                          | 17.13<br>(10.22 to<br>29.62)                         |
| Venomous animal contact                         | 242.10<br>(168.51 to<br>346.58)                               | 280.44<br>(157.94 to<br>500.95)                               | 228.32<br>(132.09 to<br>387.94)                               | 346.66<br>(188.77 to<br>605.32)                               | 4.03<br>(2.98 to<br>5.34)                            | 5.76<br>(3.42 to<br>9.68)                            | 4.93<br>(3.05 to<br>8.09)                            | 6.72<br>(4.05 to<br>11.40)                           |
| Non-venomous animal contact                     | 327.99<br>(211.29 to<br>476.93)                               | 409.53<br>(210.39 to<br>804.50)                               | 347.44<br>(179.12 to<br>703.33)                               | 490.72<br>(246.68 to<br>963.13)                               | 5.74<br>(3.74 to<br>7.72)                            | 9.35<br>(5.00 to<br>16.96)                           | 8.51<br>(4.62 to<br>15.30)                           | 10.41<br>(5.64 to<br>18.99)                          |
| Foreign body                                    | 3,019.08<br>(2,122.47 to<br>4,585.29)                         | 3,367.64<br>(2,127.85 to<br>5,799.58)                         | 3,159.15<br>(2,003.38 to<br>5,371.86)                         | 3,869.22<br>(2,419.92 to<br>6,510.81)                         | 45.85<br>(34.57 to<br>67.05)                         | 62.51<br>(42.44 to<br>100.83)                        | 60.82<br>(41.94 to<br>95.87)                         | 68.20<br>(45.59 to<br>109.67)                        |
| Pulmonary aspiration and foreign body in airway | 1,844.73<br>(1,205.33 to<br>2,785.38)                         | 1,883.92<br>(1,210.52 to<br>2,912.55)                         | 1,823.77<br>(1,182.95 to<br>2,797.72)                         | 2,187.18<br>(1,385.69 to<br>3,405.99)                         | 25.85<br>(18.00 to<br>37.99)                         | 32.53<br>(22.23 to<br>48.53)                         | 32.74<br>(22.62 to<br>48.57)                         | 35.64<br>(24.16 to<br>53.98)                         |
| Foreign body in other body part                 | 1,174.35<br>(814.45 to<br>2,187.99)                           | 1,483.72<br>(844.17 to<br>2,880.30)                           | 1,335.38<br>(767.53 to<br>2,598.39)                           | 1,682.04<br>(943.73 to<br>3,237.19)                           | 20.00<br>(14.95 to<br>34.62)                         | 29.99<br>(18.80 to<br>53.05)                         | 28.08<br>(17.88 to<br>48.84)                         | 32.56<br>(20.15 to<br>57.40)                         |
| Environmental heat and cold exposure            | 654.61<br>(513.96 to<br>936.01)                               | 781.30<br>(454.71 to<br>1,445.65)                             | 613.47<br>(363.81 to<br>1,076.62)                             | 958.24<br>(557.84 to<br>1,719.42)                             | 12.31<br>(10.00 to<br>18.05)                         | 17.52<br>(10.85 to<br>30.64)                         | 14.33<br>(8.87 to<br>24.42)                          | 20.58<br>(12.35 to<br>36.34)                         |
| Other unintentional injuries                    | 1,908.23<br>(1,367.34 to<br>2,371.60)                         | 1,971.40<br>(1,136.16 to<br>3,437.16)                         | 1,730.95<br>(1,005.87 to<br>3,030.91)                         | 2,241.44<br>(1,283.23 to<br>3,971.50)                         | 31.56<br>(23.40 to<br>38.11)                         | 36.68<br>(22.09 to<br>61.48)                         | 32.64<br>(19.87 to<br>55.05)                         | 40.88<br>(24.52 to<br>68.61)                         |
| <b>Self-harm and interpersonal violence</b>     | <b>13,761.89</b><br><b>(10,228.02 to</b><br><b>16,462.25)</b> | <b>25,054.58</b><br><b>(14,939.44 to</b><br><b>43,821.81)</b> | <b>24,343.51</b><br><b>(14,652.63 to</b><br><b>42,412.13)</b> | <b>26,443.22</b><br><b>(15,469.09 to</b><br><b>46,151.34)</b> | <b>246.15</b><br><b>(185.82 to</b><br><b>292.00)</b> | <b>479.84</b><br><b>(302.82 to</b><br><b>793.36)</b> | <b>471.12</b><br><b>(300.82 to</b><br><b>770.91)</b> | <b>500.40</b><br><b>(313.67 to</b><br><b>830.97)</b> |

**Palestine**

| Cause                              | YLLs (actual counts)                   |                                         |                                         |                                         | Deaths (actual counts)         |                                 |                                 |                                 |
|------------------------------------|----------------------------------------|-----------------------------------------|-----------------------------------------|-----------------------------------------|--------------------------------|---------------------------------|---------------------------------|---------------------------------|
|                                    | 2016                                   | 2040 Forecast                           | 2040 Better Scenario                    | 2040 Worse Scenario                     | 2016                           | 2040 Forecast                   | 2040 Better Scenario            | 2040 Worse Scenario             |
| Self-harm                          | 5,069.62<br>(3,904.12 to<br>6,751.90)  | 12,206.03<br>(7,174.03 to<br>21,847.89) | 11,688.26<br>(6,818.89 to<br>20,801.10) | 13,109.79<br>(7,577.97 to<br>23,538.77) | 97.78<br>(75.99 to<br>129.14)  | 244.33<br>(149.94 to<br>418.90) | 237.25<br>(145.66 to<br>402.83) | 258.84<br>(157.71 to<br>443.82) |
| Self-harm by firearm               | 422.13<br>(247.55 to<br>720.71)        | 662.64<br>(320.41 to<br>1,315.24)       | 621.18<br>(299.27 to<br>1,208.70)       | 719.10<br>(346.00 to<br>1,409.63)       | 8.78<br>(5.17 to<br>14.69)     | 14.42<br>(7.27 to<br>27.29)     | 13.81<br>(6.96 to<br>25.62)     | 15.36<br>(7.64 to<br>28.89)     |
| Self-harm by other specified means | 4,647.49<br>(3,561.42 to<br>6,120.83)  | 11,543.39<br>(6,792.44 to<br>20,727.67) | 11,067.08<br>(6,486.52 to<br>19,689.74) | 12,390.69<br>(7,166.93 to<br>22,401.15) | 89.01<br>(68.73 to<br>116.20)  | 229.91<br>(141.95 to<br>395.07) | 223.43<br>(137.77 to<br>383.06) | 243.48<br>(147.75 to<br>418.95) |
| Interpersonal violence             | 8,692.28<br>(5,261.15 to<br>11,150.35) | 12,848.54<br>(6,736.35 to<br>23,228.52) | 12,655.26<br>(6,650.66 to<br>22,736.12) | 13,333.42<br>(6,907.24 to<br>24,360.09) | 148.37<br>(91.47 to<br>185.63) | 235.51<br>(128.00 to<br>404.14) | 233.88<br>(129.20 to<br>401.14) | 241.56<br>(131.54 to<br>418.83) |
| Physical violence by firearm       | 5,823.87<br>(2,470.82 to<br>8,312.58)  | 8,535.98<br>(3,103.77 to<br>17,262.33)  | 8,365.10<br>(3,023.72 to<br>16,661.86)  | 8,866.44<br>(3,188.77 to<br>17,940.41)  | 98.84<br>(43.00 to<br>138.61)  | 152.13<br>(59.96 to<br>288.31)  | 149.87<br>(58.99 to<br>283.78)  | 156.71<br>(60.77 to<br>303.81)  |
| Physical violence by sharp object  | 1,860.35<br>(1,160.88 to<br>4,173.35)  | 3,191.75<br>(1,578.19 to<br>7,434.30)   | 3,236.40<br>(1,612.55 to<br>7,530.58)   | 3,230.80<br>(1,605.33 to<br>7,569.78)   | 33.24<br>(21.46 to<br>72.70)   | 61.38<br>(31.98 to<br>134.31)   | 62.78<br>(32.68 to<br>137.17)   | 61.42<br>(31.90 to<br>135.79)   |
| Physical violence by other means   | 1,008.06<br>(669.29 to<br>1,668.47)    | 1,120.81<br>(577.06 to<br>2,532.27)     | 1,053.76<br>(548.89 to<br>2,522.64)     | 1,236.18<br>(638.77 to<br>2,733.07)     | 16.30<br>(11.59 to<br>26.41)   | 21.99<br>(12.42 to<br>46.41)    | 21.22<br>(12.20 to<br>44.59)    | 23.43<br>(13.07 to<br>48.80)    |

|                                                                              |                                          |                                          |                                          |                                              |                                       |                                       |                                       |                                       |
|------------------------------------------------------------------------------|------------------------------------------|------------------------------------------|------------------------------------------|----------------------------------------------|---------------------------------------|---------------------------------------|---------------------------------------|---------------------------------------|
| Forces of nature, conflict and terrorism, and executions and police conflict | 9,169.61<br>(1,511.57 to 17,529.72)      | 71,656.09<br>(542.22 to 685,026.35)      | 70,974.69<br>(534.15 to 676,291.79)      | 75,612.10<br>(583.78 to 733,339.96)          | 147.12<br>(24.18 to 281.24)           | 1,277.76<br>(9.65 to 11,987.60)       | 1,277.72<br>(11,972.63)               | 1,321.71<br>(9.66 to 12,550.34)       |
| Exposure to forces of nature                                                 | 0.00<br>(0.00 to 0.00)                   | 6.12<br>(0.00 to 129.33)                 | 6.03<br>(0.00 to 127.75)                 | 6.64<br>(0.00 to 140.41)                     | 0.00<br>(0.00 to 0.00)                | 0.11<br>(0.00 to 2.39)                | 0.11<br>(0.00 to 2.39)                | 0.12<br>(0.00 to 2.51)                |
| Conflict and terrorism                                                       | 9,127.30<br>(1,459.73 to 17,481.02)      | 37,829.33<br>(0.00 to 625,938.71)        | 37,315.37<br>(0.00 to 617,512.63)        | 40,592.61<br>(0.00 to 672,070.83)            | 146.47<br>(23.43 to 280.53)           | 654.29<br>(0.00 to 10,893.04)         | 652.92<br>(0.00 to 10,876.17)         | 685.40<br>(0.00 to 11,430.64)         |
| Executions and police conflict                                               | 42.31<br>(33.26 to 59.83)                | 33,820.64<br>(0.00 to 72,668.38)         | 33,653.29<br>(0.00 to 72,266.11)         | 35,012.85<br>(0.00 to 75,216.82)             | 0.65<br>(0.53 to 0.88)                | 623.35<br>(0.00 to 1,337.20)          | 624.69<br>(0.00 to 1,339.37)          | 636.19<br>(0.00 to 1,361.16)          |
| <b>Oman</b>                                                                  |                                          |                                          |                                          |                                              |                                       |                                       |                                       |                                       |
| Cause                                                                        | YLLs (actual counts)                     |                                          |                                          |                                              | Deaths (actual counts)                |                                       |                                       |                                       |
|                                                                              | 2016                                     | 2040 Forecast                            | 2040 Better Scenario                     | 2040 Worse Scenario                          | 2016                                  | 2040 Forecast                         | 2040 Better Scenario                  | 2040 Worse Scenario                   |
| All causes                                                                   | 415,849.21<br>(376,800.90 to 457,679.46) | 626,658.45<br>(452,660.60 to 867,689.03) | 518,465.94<br>(382,244.59 to 725,206.57) | 1,006,013.00<br>(720,276.42 to 1,383,216.21) | 12,492.04<br>(11,524.45 to 13,431.29) | 29,509.95<br>(22,596.81 to 39,034.20) | 25,154.73<br>(19,355.55 to 32,833.27) | 42,495.01<br>(32,433.70 to 56,240.12) |
| Communicable, maternal, neonatal, and nutritional diseases                   | 53,723.74<br>(43,977.34 to 65,437.96)    | 66,893.19<br>(44,323.59 to 120,608.52)   | 57,748.20<br>(38,892.47 to 99,413.96)    | 90,705.40<br>(58,306.12 to 172,285.96)       | 1,101.29<br>(957.74 to 1,262.90)      | 2,427.58<br>(1,809.87 to 3,292.14)    | 2,217.01<br>(1,675.90 to 2,906.58)    | 3,067.82<br>(2,235.44 to 4,183.75)    |
| HIV/AIDS and tuberculosis                                                    | 2,179.67<br>(1,759.13 to 2,613.19)       | 2,084.83<br>(1,374.95 to 2,955.61)       | 1,618.33<br>(1,055.79 to 2,317.94)       | 3,875.45<br>(2,640.55 to 5,245.37)           | 52.87<br>(43.45 to 62.25)             | 58.29<br>(38.01 to 80.60)             | 45.85<br>(30.03 to 65.45)             | 107.20<br>(74.90 to 143.49)           |
| Tuberculosis                                                                 | 891.42<br>(688.55 to 1,076.92)           | 683.50<br>(391.70 to 1,106.56)           | 516.88<br>(315.28 to 819.75)             | 1,377.16<br>(827.60 to 2,133.33)             | 24.45<br>(19.45 to 28.97)             | 25.11<br>(14.85 to 38.97)             | 19.56<br>(12.18 to 29.89)             | 48.57<br>(29.50 to 74.46)             |
| HIV/AIDS                                                                     | 1,288.25<br>(891.75 to 1,707.74)         | 1,401.33<br>(723.56 to 2,270.23)         | 1,101.45<br>(582.42 to 1,753.12)         | 2,498.29<br>(1,431.98 to 3,680.76)           | 28.42<br>(19.48 to 37.17)             | 33.18<br>(15.60 to 53.58)             | 26.29<br>(11.59 to 42.74)             | 58.63<br>(33.46 to 86.57)             |
| Diarrhea, lower respiratory, and other common infectious diseases            | 20,520.25<br>(17,171.11 to 24,640.71)    | 37,433.35<br>(26,471.04 to 55,654.26)    | 32,572.66<br>(23,010.62 to 47,033.50)    | 51,735.12<br>(35,781.70 to 78,934.48)        | 595.43<br>(495.01 to 692.95)          | 1,734.40<br>(1,235.02 to 2,320.21)    | 1,559.81<br>(1,109.06 to 2,039.89)    | 2,226.05<br>(1,551.36 to 3,068.63)    |
| Diarrheal diseases                                                           | 750.68<br>(478.93 to 1,038.15)           | 926.30<br>(262.12 to 2,734.96)           | 980.59<br>(275.11 to 2,748.85)           | 948.68<br>(220.03 to 3,039.26)               | 19.77<br>(11.30 to 28.26)             | 53.39<br>(13.85 to 154.68)            | 59.47<br>(15.54 to 168.42)            | 50.07<br>(10.51 to 154.93)            |
| Intestinal infectious diseases                                               | 856.66<br>(275.11 to 1,977.47)           | 1,093.22<br>(347.73 to 2,528.23)         | 1,138.55<br>(375.48 to 2,609.46)         | 987.43<br>(299.04 to 2,432.17)               | 13.67<br>(4.44 to 31.58)              | 18.92<br>(6.10 to 43.58)              | 19.87<br>(6.86 to 44.61)              | 16.84<br>(5.23 to 41.12)              |
| Typhoid fever                                                                | 753.05<br>(245.47 to 1,716.28)           | 988.93<br>(296.07 to 2,278.11)           | 1,043.87<br>(344.94 to 2,417.49)         | 842.66<br>(249.01 to 2,073.75)               | 11.96<br>(3.90 to 27.27)              | 17.02<br>(5.36 to 39.38)              | 18.14<br>(6.19 to 40.89)              | 14.23<br>(4.34 to 34.26)              |
| Paratyphoid fever                                                            | 103.03<br>(28.67 to 252.75)              | 103.79<br>(28.10 to 254.42)              | 94.20<br>(26.27 to 228.16)               | 144.14<br>(38.07 to 360.08)                  | 1.71<br>(0.47 to 4.14)                | 1.88<br>(0.53 to 4.75)                | 1.72<br>(0.49 to 4.16)                | 2.59<br>(0.70 to 6.50)                |
| Other intestinal infectious diseases                                         | 0.59<br>(0.22 to 1.24)                   | 0.50<br>(0.15 to 1.24)                   | 0.48<br>(0.15 to 1.19)                   | 0.63<br>(0.19 to 1.54)                       | 0.01<br>(0.00 to 0.02)                | 0.02<br>(0.01 to 0.04)                | 0.02<br>(0.01 to 0.04)                | 0.02<br>(0.01 to 0.05)                |
| Lower respiratory infections                                                 | 14,573.48<br>(11,677.72 to 17,462.03)    | 30,016.84<br>(19,648.79 to 45,150.21)    | 24,671.44<br>(16,014.29 to 35,812.31)    | 43,191.52<br>(28,296.25 to 68,158.88)        | 474.14<br>(371.93 to 564.76)          | 1,479.39<br>(989.09 to 2,065.16)      | 1,297.20<br>(870.38 to 1,765.73)      | 1,963.29<br>(1,293.77 to 2,764.45)    |
| Upper respiratory infections                                                 | 8.32<br>(3.86 to 15.34)                  | 9.51<br>(2.93 to 23.28)                  | 8.13<br>(2.50 to 19.28)                  | 17.00<br>(5.47 to 40.21)                     | 0.18<br>(0.09 to 0.31)                | 0.31<br>(0.10 to 0.71)                | 0.28<br>(0.09 to 0.60)                | 0.54<br>(0.18 to 1.16)                |
| Otitis media                                                                 | 4.19<br>(2.21 to 7.26)                   | 4.52<br>(1.60 to 9.62)                   | 4.71<br>(1.64 to 10.13)                  | 4.14<br>(1.48 to 8.64)                       | 0.16<br>(0.08 to 0.28)                | 0.27<br>(0.09 to 0.64)                | 0.29<br>(0.10 to 0.70)                | 0.23<br>(0.08 to 0.54)                |
| Meningitis                                                                   | 936.80<br>(682.36 to 1,415.26)           | 740.95<br>(483.24 to 1,304.98)           | 683.30<br>(435.20 to 1,127.53)           | 1,001.90<br>(650.88 to 1,744.76)             | 20.14<br>(15.14 to 29.18)             | 27.62<br>(14.85 to 40.19)             | 26.48<br>(14.33 to 38.41)             | 34.82<br>(20.00 to 50.65)             |
| Pneumococcal meningitis                                                      | 7.24<br>(4.59 to 12.87)                  | 9.75<br>(5.49 to 17.16)                  | 10.03<br>(5.56 to 17.44)                 | 9.22<br>(5.27 to 16.69)                      | 0.19<br>(0.12 to 0.31)                | 0.45<br>(0.20 to 0.85)                | 0.48<br>(0.20 to 0.92)                | 0.40<br>(0.18 to 0.73)                |

|                                         |                                       |                                       |                                       |                                       |                              |                                 |                                 |                                 |
|-----------------------------------------|---------------------------------------|---------------------------------------|---------------------------------------|---------------------------------------|------------------------------|---------------------------------|---------------------------------|---------------------------------|
| H influenzae type B meningitis          | 71.49<br>(50.14 to<br>103.39)         | 113.39<br>(53.66 to<br>247.35)        | 111.74<br>(54.07 to<br>241.52)        | 124.03<br>(54.42 to<br>276.20)        | 1.46<br>(1.10 to<br>2.03)    | 2.91<br>(1.53 to<br>4.90)       | 3.02<br>(1.56 to<br>4.95)       | 2.82<br>(1.52 to<br>4.82)       |
| Meningococcal meningitis                | 430.27<br>(306.66 to<br>675.74)       | 314.87<br>(197.74 to<br>531.38)       | 288.51<br>(182.56 to<br>468.17)       | 433.48<br>(282.98 to<br>726.36)       | 9.64<br>(6.98 to<br>13.98)   | 13.14<br>(6.81 to<br>20.13)     | 12.57<br>(6.35 to<br>19.31)     | 16.72<br>(9.16 to<br>25.26)     |
| Other meningitis                        | 427.80<br>(297.08 to<br>642.11)       | 302.93<br>(196.49 to<br>534.94)       | 273.02<br>(176.51 to<br>454.94)       | 435.16<br>(284.96 to<br>749.45)       | 8.85<br>(6.61 to<br>12.82)   | 11.11<br>(6.30 to<br>16.12)     | 10.40<br>(5.83 to<br>15.31)     | 14.88<br>(8.84 to<br>21.70)     |
| Encephalitis                            | 3,224.20<br>(2,221.85 to<br>5,063.75) | 5,081.21<br>(3,569.22 to<br>7,635.28) | 5,028.05<br>(3,516.00 to<br>7,460.45) | 5,484.24<br>(3,701.65 to<br>8,499.79) | 63.71<br>(48.06 to<br>90.26) | 152.93<br>(113.34 to<br>199.28) | 154.68<br>(114.40 to<br>201.89) | 158.17<br>(116.84 to<br>209.27) |
| Diphtheria                              | 2.10<br>(1.28 to<br>3.18)             | 0.82<br>(0.38 to<br>1.75)             | 0.81<br>(0.37 to<br>1.75)             | 1.02<br>(0.42 to<br>2.46)             | 0.03<br>(0.02 to<br>0.05)    | 0.02<br>(0.01 to<br>0.05)       | 0.02<br>(0.01 to<br>0.03)       | 0.02<br>(0.01 to<br>0.04)       |
| Whooping cough                          | 16.43<br>(1.21 to<br>50.95)           | 12.88<br>(0.54 to<br>56.51)           | 12.51<br>(0.51 to<br>56.03)           | 40.84<br>(1.60 to<br>181.40)          | 0.19<br>(0.01 to<br>0.60)    | 0.15<br>(0.01 to<br>0.67)       | 0.15<br>(0.01 to<br>0.66)       | 0.48<br>(0.02 to<br>2.13)       |
| Tetanus                                 | 95.66<br>(24.71 to<br>144.28)         | 20.96<br>(3.18 to<br>38.76)           | 21.04<br>(3.16 to<br>38.85)           | 21.62<br>(3.73 to<br>39.87)           | 2.58<br>(0.43 to<br>3.98)    | 0.63<br>(0.07 to<br>1.17)       | 0.64<br>(0.07 to<br>1.18)       | 0.62<br>(0.07 to<br>1.16)       |
| Measles                                 | 12.50<br>(3.02 to<br>34.47)           | 2.57<br>(0.09 to<br>17.88)            | 1.76<br>(0.08 to<br>11.48)            | 3.61<br>(0.11 to<br>24.73)            | 0.15<br>(0.04 to<br>0.41)    | 0.03<br>(0.00 to<br>0.21)       | 0.02<br>(0.00 to<br>0.14)       | 0.04<br>(0.00 to<br>0.29)       |
| <b>Oman</b>                             |                                       |                                       |                                       |                                       |                              |                                 |                                 |                                 |
| Cause                                   | YLLs (actual counts)                  |                                       |                                       |                                       | Deaths (actual counts)       |                                 |                                 |                                 |
|                                         | 2016                                  | 2040 Forecast                         | 2040 Better Scenario                  | 2040 Worse Scenario                   | 2016                         | 2040 Forecast                   | 2040 Better Scenario            | 2040 Worse Scenario             |
| Varicella and herpes zoster             | 39.22<br>(23.26 to<br>62.20)          | 23.57<br>(9.56 to<br>61.27)           | 21.77<br>(8.74 to<br>56.30)           | 33.11<br>(12.52 to<br>85.67)          | 0.69<br>(0.47 to<br>0.98)    | 0.74<br>(0.39 to<br>1.45)       | 0.73<br>(0.38 to<br>1.56)       | 0.94<br>(0.47 to<br>1.80)       |
| Neglected tropical diseases and malaria | 203.16<br>(147.63 to<br>293.91)       | 290.26<br>(198.40 to<br>396.37)       | 301.82<br>(202.22 to<br>410.06)       | 273.36<br>(191.84 to<br>377.29)       | 4.51<br>(3.27 to<br>5.90)    | 9.35<br>(5.67 to<br>12.28)      | 9.98<br>(6.11 to<br>13.25)      | 8.38<br>(5.07 to<br>10.98)      |
| Malaria                                 | 0.00<br>(0.00 to<br>0.00)             | 0.00<br>(0.00 to<br>0.00)             | 0.00<br>(0.00 to<br>0.00)             | 0.00<br>(0.00 to<br>0.00)             | 0.00<br>(0.00 to<br>0.00)    | 0.00<br>(0.00 to<br>0.00)       | 0.00<br>(0.00 to<br>0.00)       | 0.00<br>(0.00 to<br>0.00)       |
| Chagas disease                          | 0.00<br>(0.00 to<br>0.00)             | 0.00<br>(0.00 to<br>0.00)             | 0.00<br>(0.00 to<br>0.00)             | 0.00<br>(0.00 to<br>0.00)             | 0.00<br>(0.00 to<br>0.00)    | 0.00<br>(0.00 to<br>0.00)       | 0.00<br>(0.00 to<br>0.00)       | 0.00<br>(0.00 to<br>0.00)       |
| Leishmaniasis                           | 7.02<br>(3.76 to<br>10.98)            | 4.98<br>(2.74 to<br>8.44)             | 4.70<br>(2.53 to<br>8.08)             | 6.63<br>(3.51 to<br>11.33)            | 0.17<br>(0.10 to<br>0.26)    | 0.16<br>(0.09 to<br>0.27)       | 0.15<br>(0.08 to<br>0.26)       | 0.20<br>(0.11 to<br>0.34)       |
| African trypanosomiasis                 | 0.00<br>(0.00 to<br>0.00)             | 0.00<br>(0.00 to<br>0.00)             | 0.00<br>(0.00 to<br>0.00)             | 0.00<br>(0.00 to<br>0.00)             | 0.00<br>(0.00 to<br>0.00)    | 0.00<br>(0.00 to<br>0.00)       | 0.00<br>(0.00 to<br>0.00)       | 0.00<br>(0.00 to<br>0.00)       |
| Schistosomiasis                         | 8.39<br>(2.76 to<br>17.15)            | 9.01<br>(2.60 to<br>20.46)            | 8.92<br>(2.55 to<br>20.30)            | 10.07<br>(2.91 to<br>22.34)           | 0.24<br>(0.09 to<br>0.47)    | 0.34<br>(0.10 to<br>0.77)       | 0.34<br>(0.10 to<br>0.79)       | 0.37<br>(0.11 to<br>0.82)       |
| Cysticercosis                           | 3.42<br>(2.27 to<br>4.90)             | 1.61<br>(1.04 to<br>2.40)             | 1.60<br>(1.02 to<br>2.40)             | 1.71<br>(1.10 to<br>2.56)             | 0.08<br>(0.05 to<br>0.11)    | 0.05<br>(0.03 to<br>0.07)       | 0.05<br>(0.03 to<br>0.07)       | 0.05<br>(0.03 to<br>0.07)       |
| Cystic echinococcosis                   | 0.00<br>(0.00 to<br>0.00)             | 0.00<br>(0.00 to<br>0.00)             | 0.00<br>(0.00 to<br>0.00)             | 0.00<br>(0.00 to<br>0.00)             | 0.00<br>(0.00 to<br>0.00)    | 0.00<br>(0.00 to<br>0.00)       | 0.00<br>(0.00 to<br>0.00)       | 0.00<br>(0.00 to<br>0.00)       |
| Dengue                                  | 0.00<br>(0.00 to<br>0.00)             | 0.00<br>(0.00 to<br>0.00)             | 0.00<br>(0.00 to<br>0.00)             | 0.00<br>(0.00 to<br>0.00)             | 0.00<br>(0.00 to<br>0.00)    | 0.00<br>(0.00 to<br>0.00)       | 0.00<br>(0.00 to<br>0.00)       | 0.00<br>(0.00 to<br>0.00)       |
| Yellow fever                            | 0.00<br>(0.00 to<br>0.00)             | 0.00<br>(0.00 to<br>0.00)             | 0.00<br>(0.00 to<br>0.00)             | 0.00<br>(0.00 to<br>0.00)             | 0.00<br>(0.00 to<br>0.00)    | 0.00<br>(0.00 to<br>0.00)       | 0.00<br>(0.00 to<br>0.00)       | 0.00<br>(0.00 to<br>0.00)       |
| Rabies                                  | 0.45<br>(0.22 to<br>0.87)             | 0.45<br>(0.20 to<br>0.87)             | 0.44<br>(0.19 to<br>0.87)             | 0.62<br>(0.27 to<br>1.19)             | 0.01<br>(0.01 to<br>0.02)    | 0.02<br>(0.01 to<br>0.04)       | 0.02<br>(0.01 to<br>0.04)       | 0.02<br>(0.01 to<br>0.05)       |

|                                                       |                                                      |                                                      |                                                      |                                                      |                                                 |                                                 |                                                 |                                                  |
|-------------------------------------------------------|------------------------------------------------------|------------------------------------------------------|------------------------------------------------------|------------------------------------------------------|-------------------------------------------------|-------------------------------------------------|-------------------------------------------------|--------------------------------------------------|
|                                                       | 1.19<br>(0.34 to<br>2.72)                            | 1.19<br>(0.42 to<br>2.74)                            | 1.16<br>(0.41 to<br>2.67)                            | 1.26<br>(0.41 to<br>2.93)                            | 0.02<br>(0.01 to<br>0.04)                       | 0.03<br>(0.01 to<br>0.05)                       | 0.03<br>(0.01 to<br>0.05)                       | 0.03<br>(0.01 to<br>0.05)                        |
| Intestinal nematode infections                        |                                                      |                                                      |                                                      |                                                      |                                                 |                                                 |                                                 |                                                  |
| Other neglected tropical diseases                     | 182.69<br>(129.33 to<br>270.74)                      | 273.02<br>(181.40 to<br>378.89)                      | 285.01<br>(185.72 to<br>388.57)                      | 253.07<br>(171.38 to<br>352.00)                      | 3.99<br>(2.82 to<br>5.33)                       | 8.76<br>(5.07 to<br>11.63)                      | 9.39<br>(5.60 to<br>12.50)                      | 7.72<br>(4.46 to<br>10.15)                       |
| <b>Maternal disorders</b>                             | <b>442.58</b><br><b>(311.01 to</b><br><b>626.02)</b> | <b>408.24</b><br><b>(212.03 to</b><br><b>709.64)</b> | <b>380.66</b><br><b>(197.83 to</b><br><b>642.63)</b> | <b>579.46</b><br><b>(303.98 to</b><br><b>965.43)</b> | <b>8.26</b><br><b>(5.84 to</b><br><b>11.51)</b> | <b>7.96</b><br><b>(4.17 to</b><br><b>13.82)</b> | <b>7.42</b><br><b>(3.87 to</b><br><b>12.56)</b> | <b>11.26</b><br><b>(5.95 to</b><br><b>18.64)</b> |
| Maternal hemorrhage                                   | 128.93<br>(84.41 to<br>191.38)                       | 114.79<br>(57.43 to<br>199.72)                       | 107.58<br>(53.16 to<br>184.25)                       | 161.66<br>(80.49 to<br>271.67)                       | 2.42<br>(1.57 to<br>3.59)                       | 2.25<br>(1.10 to<br>3.91)                       | 2.11<br>(1.06 to<br>3.62)                       | 3.16<br>(1.55 to<br>5.27)                        |
| Maternal sepsis and other maternal infections         | 19.92<br>(11.36 to<br>32.15)                         | 17.62<br>(8.17 to<br>33.77)                          | 16.42<br>(7.76 to<br>31.24)                          | 25.17<br>(11.62 to<br>47.84)                         | 0.38<br>(0.22 to<br>0.59)                       | 0.35<br>(0.17 to<br>0.68)                       | 0.33<br>(0.15 to<br>0.62)                       | 0.50<br>(0.23 to<br>0.96)                        |
| Maternal hypertensive disorders                       | 84.40<br>(53.04 to<br>127.06)                        | 76.02<br>(34.95 to<br>142.87)                        | 70.73<br>(32.91 to<br>132.21)                        | 109.47<br>(50.96 to<br>201.76)                       | 1.55<br>(0.99 to<br>2.34)                       | 1.45<br>(0.70 to<br>2.69)                       | 1.35<br>(0.65 to<br>2.47)                       | 2.09<br>(0.99 to<br>3.80)                        |
| Maternal obstructed labor and uterine rupture         | 8.84<br>(4.14 to<br>16.35)                           | 8.07<br>(2.86 to<br>17.44)                           | 7.43<br>(2.77 to<br>15.62)                           | 12.10<br>(4.54 to<br>26.15)                          | 0.17<br>(0.08 to<br>0.30)                       | 0.16<br>(0.06 to<br>0.35)                       | 0.15<br>(0.05 to<br>0.31)                       | 0.24<br>(0.09 to<br>0.52)                        |
| Maternal abortion, miscarriage, and ectopic pregnancy | 41.91<br>(25.36 to<br>63.47)                         | 37.20<br>(15.95 to<br>70.47)                         | 34.69<br>(15.40 to<br>65.16)                         | 53.99<br>(23.78 to<br>102.20)                        | 0.82<br>(0.50 to<br>1.23)                       | 0.78<br>(0.32 to<br>1.49)                       | 0.73<br>(0.31 to<br>1.36)                       | 1.13<br>(0.49 to<br>2.15)                        |
| Indirect maternal deaths                              | 60.72<br>(38.89 to<br>92.58)                         | 58.42<br>(27.30 to<br>110.92)                        | 53.78<br>(25.57 to<br>98.23)                         | 85.12<br>(39.47 to<br>155.79)                        | 1.10<br>(0.71 to<br>1.67)                       | 1.09<br>(0.52 to<br>2.01)                       | 1.00<br>(0.48 to<br>1.80)                       | 1.58<br>(0.74 to<br>2.81)                        |
| Late maternal deaths                                  | 9.34<br>(4.71 to<br>17.51)                           | 7.26<br>(2.89 to<br>14.83)                           | 6.71<br>(2.73 to<br>13.55)                           | 10.56<br>(4.28 to<br>21.71)                          | 0.17<br>(0.09 to<br>0.32)                       | 0.14<br>(0.06 to<br>0.28)                       | 0.13<br>(0.05 to<br>0.25)                       | 0.20<br>(0.08 to<br>0.41)                        |
| Maternal deaths aggravated by HIV/AIDS                | 0.12<br>(0.05 to<br>0.23)                            | 0.51<br>(0.14 to<br>1.26)                            | 0.48<br>(0.13 to<br>1.20)                            | 0.68<br>(0.20 to<br>1.72)                            | 0.00<br>(0.00 to<br>0.00)                       | 0.01<br>(0.00 to<br>0.05)                       | 0.01<br>(0.00 to<br>0.03)                       | 0.01<br>(0.00 to<br>0.04)                        |
| Other maternal disorders                              | 88.41<br>(54.88 to<br>132.81)                        | 88.35<br>(43.34 to<br>161.92)                        | 82.86<br>(40.26 to<br>149.38)                        | 120.71<br>(58.46 to<br>217.62)                       | 1.65<br>(1.04 to<br>2.51)                       | 1.72<br>(0.83 to<br>3.12)                       | 1.62<br>(0.79 to<br>2.87)                       | 2.34<br>(1.13 to<br>4.21)                        |

**Oman**

| Cause                                                    | YLLs (actual counts)                                          |                                                              |                                                              |                                                              | Deaths (actual counts)                               |                                                     |                                                     |                                                     |
|----------------------------------------------------------|---------------------------------------------------------------|--------------------------------------------------------------|--------------------------------------------------------------|--------------------------------------------------------------|------------------------------------------------------|-----------------------------------------------------|-----------------------------------------------------|-----------------------------------------------------|
|                                                          | 2016                                                          | 2040 Forecast                                                | 2040 Better Scenario                                         | 2040 Worse Scenario                                          | 2016                                                 | 2040 Forecast                                       | 2040 Better Scenario                                | 2040 Worse Scenario                                 |
| <b>Neonatal disorders</b>                                | <b>25,229.97</b><br><b>(17,799.37 to</b><br><b>34,447.62)</b> | <b>16,603.62</b><br><b>(3,531.52 to</b><br><b>53,368.65)</b> | <b>13,362.94</b><br><b>(2,912.91 to</b><br><b>41,105.82)</b> | <b>23,521.96</b><br><b>(5,017.55 to</b><br><b>74,592.95)</b> | <b>291.62</b><br><b>(205.70 to</b><br><b>398.13)</b> | <b>191.93</b><br><b>(40.83 to</b><br><b>616.41)</b> | <b>154.48</b><br><b>(33.74 to</b><br><b>474.78)</b> | <b>271.89</b><br><b>(58.08 to</b><br><b>862.10)</b> |
| Neonatal preterm birth                                   | 12,240.17<br>(7,465.31 to<br>17,598.90)                       | 6,435.42<br>(1,398.89 to<br>17,253.05)                       | 4,386.87<br>(964.51 to<br>11,234.23)                         | 9,807.41<br>(2,254.81 to<br>27,162.57)                       | 141.44<br>(86.26 to<br>203.40)                       | 74.37<br>(16.17 to<br>199.29)                       | 50.71<br>(11.15 to<br>129.90)                       | 113.34<br>(26.09 to<br>314.00)                      |
| Neonatal encephalopathy due to birth asphyxia and trauma | 2,660.72<br>(1,664.85 to<br>4,098.47)                         | 1,466.04<br>(256.29 to<br>5,162.59)                          | 1,224.08<br>(231.43 to<br>4,021.64)                          | 2,335.06<br>(410.47 to<br>8,233.04)                          | 30.78<br>(19.28 to<br>47.44)                         | 16.96<br>(2.97 to<br>59.66)                         | 14.17<br>(2.69 to<br>46.50)                         | 27.02<br>(4.75 to<br>95.14)                         |
| Neonatal sepsis and other neonatal infections            | 2,523.87<br>(1,409.80 to<br>4,146.26)                         | 1,929.89<br>(378.03 to<br>6,126.35)                          | 1,661.73<br>(333.63 to<br>5,143.12)                          | 2,804.70<br>(572.51 to<br>8,731.64)                          | 29.18<br>(16.29 to<br>47.93)                         | 23.31<br>(4.38 to<br>70.87)                         | 19.21<br>(3.86 to<br>59.41)                         | 32.42<br>(6.62 to<br>101.05)                        |
| Hemolytic disease and other neonatal jaundice            | 10.99<br>(6.06 to<br>18.09)                                   | 5.63<br>(0.91 to<br>19.97)                                   | 4.76<br>(0.77 to<br>16.43)                                   | 8.64<br>(1.35 to<br>29.76)                                   | 0.13<br>(0.07 to<br>0.21)                            | 0.07<br>(0.01 to<br>0.23)                           | 0.06<br>(0.01 to<br>0.19)                           | 0.10<br>(0.02 to<br>0.34)                           |
| Other neonatal disorders                                 | 7,794.23<br>(4,256.22 to<br>15,575.07)                        | 6,766.64<br>(1,074.93 to<br>24,790.90)                       | 6,085.51<br>(1,003.77 to<br>20,687.45)                       | 8,566.15<br>(1,314.08 to<br>31,470.64)                       | 90.09<br>(49.22 to<br>180.05)                        | 78.21<br>(12.43 to<br>286.53)                       | 70.34<br>(11.63 to<br>239.11)                       | 99.01<br>(15.23 to<br>363.72)                       |
| <b>Nutritional deficiencies</b>                          | <b>1,321.02</b><br><b>(1,126.93 to</b><br><b>1,566.87)</b>    | <b>2,139.84</b><br><b>(1,558.11 to</b><br><b>2,870.68)</b>   | <b>2,203.65</b><br><b>(1,608.67 to</b><br><b>2,964.26)</b>   | <b>2,139.87</b><br><b>(1,558.46 to</b><br><b>2,962.93)</b>   | <b>40.83</b><br><b>(35.84 to</b><br><b>46.15)</b>    | <b>103.73</b><br><b>(77.55 to</b><br><b>133.93)</b> | <b>111.68</b><br><b>(83.47 to</b><br><b>145.37)</b> | <b>95.41</b><br><b>(70.87 to</b><br><b>125.77)</b>  |
| Protein-energy malnutrition                              | 754.70<br>(616.85 to<br>938.09)                               | 1,200.43<br>(843.11 to<br>1,690.11)                          | 1,274.94<br>(898.69 to<br>1,783.84)                          | 1,100.13<br>(770.27 to<br>1,581.87)                          | 26.83<br>(23.12 to<br>31.15)                         | 71.77<br>(50.88 to<br>94.86)                        | 79.40<br>(55.18 to<br>106.07)                       | 61.16<br>(42.41 to<br>83.26)                        |

|                                                                         |                                                                  |                                                                  |                                                                  |                                                                    |                                                            |                                                               |                                                               |                                                               |
|-------------------------------------------------------------------------|------------------------------------------------------------------|------------------------------------------------------------------|------------------------------------------------------------------|--------------------------------------------------------------------|------------------------------------------------------------|---------------------------------------------------------------|---------------------------------------------------------------|---------------------------------------------------------------|
| Iodine deficiency                                                       | 66.72<br>(8.68 to<br>165.07)                                     | 165.05<br>(12.70 to<br>459.58)                                   | 166.46<br>(12.02 to<br>469.20)                                   | 178.87<br>(14.86 to<br>482.75)                                     | 2.02<br>(0.23 to<br>5.06)                                  | 7.86<br>(0.38 to<br>22.53)                                    | 8.20<br>(0.39 to<br>24.04)                                    | 8.00<br>(0.50 to<br>21.65)                                    |
| Dietary iron deficiency                                                 | 243.02<br>(197.66 to<br>295.26)                                  | 395.81<br>(260.29 to<br>562.62)                                  | 399.75<br>(266.35 to<br>567.84)                                  | 397.00<br>(261.70 to<br>569.92)                                    | 5.40<br>(4.39 to<br>6.53)                                  | 10.62<br>(7.01 to<br>15.36)                                   | 10.82<br>(7.15 to<br>15.67)                                   | 10.49<br>(6.92 to<br>15.15)                                   |
| Other nutritional deficiencies                                          | 256.58<br>(208.02 to<br>309.40)                                  | 378.56<br>(251.19 to<br>540.98)                                  | 362.50<br>(244.11 to<br>512.63)                                  | 463.87<br>(316.33 to<br>657.18)                                    | 6.58<br>(5.28 to<br>7.94)                                  | 13.47<br>(9.01 to<br>19.50)                                   | 13.26<br>(8.88 to<br>19.14)                                   | 15.75<br>(10.46 to<br>22.65)                                  |
| <b>Other communicable, maternal, neonatal, and nutritional diseases</b> | <b>3,827.09</b><br><b>(3,041.04 to</b><br><b>5,001.08)</b>       | <b>7,433.05</b><br><b>(5,154.01 to</b><br><b>10,683.01)</b>      | <b>7,308.14</b><br><b>(5,089.06 to</b><br><b>10,291.05)</b>      | <b>8,580.18</b><br><b>(5,983.49 to</b><br><b>12,132.54)</b>        | <b>107.77</b><br><b>(88.52 to</b><br><b>127.90)</b>        | <b>321.94</b><br><b>(216.38 to</b><br><b>430.21)</b>          | <b>327.79</b><br><b>(220.06 to</b><br><b>435.23)</b>          | <b>347.62</b><br><b>(235.54 to</b><br><b>458.12)</b>          |
| Sexually transmitted infections excluding HIV                           | 57.75<br>(40.62 to<br>77.15)                                     | 34.52<br>(19.57 to<br>52.61)                                     | 33.19<br>(18.61 to<br>50.31)                                     | 41.41<br>(23.50 to<br>62.80)                                       | 1.19<br>(0.81 to<br>1.53)                                  | 0.99<br>(0.53 to<br>1.47)                                     | 0.97<br>(0.52 to<br>1.47)                                     | 1.15<br>(0.61 to<br>1.67)                                     |
| Syphilis                                                                | 30.58<br>(20.18 to<br>46.86)                                     | 10.60<br>(6.05 to<br>19.63)                                      | 9.71<br>(5.39 to<br>17.39)                                       | 14.55<br>(8.53 to<br>27.27)                                        | 0.55<br>(0.39 to<br>0.76)                                  | 0.28<br>(0.15 to<br>0.45)                                     | 0.26<br>(0.14 to<br>0.41)                                     | 0.37<br>(0.20 to<br>0.59)                                     |
| Chlamydial infection                                                    | 5.01<br>(3.11 to<br>6.90)                                        | 4.63<br>(2.50 to<br>7.17)                                        | 4.55<br>(2.45 to<br>7.02)                                        | 5.18<br>(2.78 to<br>8.06)                                          | 0.12<br>(0.07 to<br>0.16)                                  | 0.14<br>(0.07 to<br>0.21)                                     | 0.14<br>(0.07 to<br>0.21)                                     | 0.15<br>(0.08 to<br>0.23)                                     |
| Gonococcal infection                                                    | 14.60<br>(9.25 to<br>19.74)                                      | 12.79<br>(6.96 to<br>19.30)                                      | 12.57<br>(6.77 to<br>19.09)                                      | 14.32<br>(7.71 to<br>21.60)                                        | 0.35<br>(0.21 to<br>0.48)                                  | 0.40<br>(0.21 to<br>0.61)                                     | 0.40<br>(0.20 to<br>0.61)                                     | 0.43<br>(0.22 to<br>0.66)                                     |
| Other sexually transmitted infections                                   | 7.56<br>(4.89 to<br>10.29)                                       | 6.50<br>(3.58 to<br>10.00)                                       | 6.36<br>(3.47 to<br>9.87)                                        | 7.35<br>(3.98 to<br>11.35)                                         | 0.17<br>(0.10 to<br>0.23)                                  | 0.18<br>(0.09 to<br>0.27)                                     | 0.17<br>(0.09 to<br>0.27)                                     | 0.20<br>(0.10 to<br>0.30)                                     |
| Acute hepatitis                                                         | 1,135.68<br>(916.46 to<br>1,411.02)                              | 1,660.77<br>(1,079.41 to<br>2,483.08)                            | 1,514.91<br>(962.32 to<br>2,244.77)                              | 2,353.94<br>(1,566.86 to<br>3,358.44)                              | 31.19<br>(25.28 to<br>38.47)                               | 55.26<br>(36.35 to<br>80.74)                                  | 50.79<br>(32.74 to<br>73.50)                                  | 77.20<br>(51.86 to<br>108.33)                                 |
| Acute hepatitis A                                                       | 33.62<br>(10.08 to<br>60.15)                                     | 30.58<br>(8.26 to<br>78.40)                                      | 28.49<br>(7.69 to<br>73.30)                                      | 39.91<br>(10.76 to<br>100.03)                                      | 0.56<br>(0.23 to<br>0.95)                                  | 0.91<br>(0.25 to<br>2.39)                                     | 0.86<br>(0.23 to<br>2.18)                                     | 1.16<br>(0.32 to<br>2.96)                                     |
| Acute hepatitis B                                                       | 978.70<br>(771.02 to<br>1,236.50)                                | 1,447.48<br>(915.57 to<br>2,153.36)                              | 1,318.06<br>(813.58 to<br>1,957.71)                              | 2,065.96<br>(1,353.94 to<br>2,946.25)                              | 27.15<br>(21.52 to<br>33.96)                               | 47.45<br>(30.50 to<br>71.20)                                  | 43.47<br>(27.13 to<br>63.61)                                  | 66.93<br>(44.14 to<br>94.84)                                  |
| Acute hepatitis C                                                       | 33.20<br>(16.82 to<br>62.56)                                     | 62.52<br>(26.56 to<br>136.72)                                    | 57.71<br>(25.67 to<br>126.33)                                    | 84.58<br>(37.33 to<br>183.58)                                      | 1.06<br>(0.53 to<br>2.07)                                  | 2.34<br>(1.01 to<br>4.85)                                     | 2.18<br>(0.93 to<br>4.63)                                     | 3.11<br>(1.35 to<br>6.77)                                     |
| Acute hepatitis E                                                       | 90.16<br>(60.46 to<br>130.23)                                    | 120.18<br>(59.40 to<br>213.29)                                   | 110.66<br>(54.05 to<br>204.22)                                   | 163.49<br>(81.76 to<br>294.10)                                     | 2.43<br>(1.51 to<br>3.80)                                  | 4.56<br>(2.23 to<br>8.37)                                     | 4.27<br>(2.15 to<br>7.91)                                     | 6.00<br>(3.05 to<br>10.95)                                    |
| Other unspecified infectious diseases                                   | 2,633.65<br>(1,953.41 to<br>3,787.55)                            | 5,737.76<br>(3,893.21 to<br>8,280.83)                            | 5,760.04<br>(3,868.41 to<br>8,299.81)                            | 6,184.84<br>(4,114.09 to<br>9,003.18)                              | 75.39<br>(58.49 to<br>92.69)                               | 265.68<br>(168.16 to<br>356.20)                               | 276.03<br>(175.92 to<br>368.52)                               | 269.27<br>(168.68 to<br>363.41)                               |
| <b>Non-communicable diseases</b>                                        | <b>230,776.04</b><br><b>(211,465.35 to</b><br><b>251,289.59)</b> | <b>497,642.15</b><br><b>(345,911.59 to</b><br><b>720,649.52)</b> | <b>401,479.16</b><br><b>(286,700.16 to</b><br><b>561,683.82)</b> | <b>741,516.15</b><br><b>(504,929.79 to</b><br><b>1,081,391.51)</b> | <b>8,732.73</b><br><b>(8,142.10 to</b><br><b>9,299.08)</b> | <b>25,292.76</b><br><b>(18,772.60 to</b><br><b>34,456.93)</b> | <b>21,191.99</b><br><b>(15,760.65 to</b><br><b>28,655.87)</b> | <b>35,005.30</b><br><b>(25,694.29 to</b><br><b>48,249.85)</b> |
| <b>Oman</b>                                                             |                                                                  |                                                                  |                                                                  |                                                                    |                                                            |                                                               |                                                               |                                                               |
| Cause                                                                   | YLLs (actual counts)                                             |                                                                  |                                                                  |                                                                    | Deaths (actual counts)                                     |                                                               |                                                               |                                                               |
|                                                                         | 2016                                                             | 2040 Forecast                                                    | 2040 Better Scenario                                             | 2040 Worse Scenario                                                | 2016                                                       | 2040 Forecast                                                 | 2040 Better Scenario                                          | 2040 Worse Scenario                                           |
| Neoplasms                                                               | 39,195.00<br>(34,631.21 to<br>47,152.70)                         | 104,540.87<br>(80,978.06 to<br>134,072.43)                       | 94,131.90<br>(73,408.81 to<br>119,579.50)                        | 119,219.60<br>(92,433.17 to<br>152,368.70)                         | 1,305.63<br>(1,172.40 to<br>1,539.20)                      | 4,426.21<br>(3,478.10 to<br>5,571.76)                         | 4,059.71<br>(3,225.18 to<br>5,106.40)                         | 4,909.56<br>(3,860.89 to<br>6,207.71)                         |
| Lip and oral cavity cancer                                              | 544.77<br>(469.51 to<br>631.21)                                  | 1,533.63<br>(1,057.94 to<br>2,240.84)                            | 1,370.71<br>(971.75 to<br>1,936.76)                              | 2,005.28<br>(1,306.10 to<br>3,164.66)                              | 19.50<br>(17.01 to<br>22.37)                               | 64.85<br>(46.07 to<br>92.42)                                  | 59.70<br>(44.04 to<br>82.87)                                  | 81.22<br>(54.97 to<br>124.22)                                 |
| Nasopharynx cancer                                                      | 127.35<br>(104.73 to<br>154.49)                                  | 351.38<br>(223.70 to<br>533.37)                                  | 300.47<br>(196.96 to<br>440.53)                                  | 508.73<br>(309.65 to<br>821.87)                                    | 3.59<br>(2.97 to<br>4.33)                                  | 11.63<br>(7.45 to<br>17.56)                                   | 10.04<br>(6.63 to<br>14.87)                                   | 16.69<br>(10.17 to<br>27.17)                                  |
| Other pharynx cancer                                                    | 128.88<br>(105.12 to<br>152.59)                                  | 365.75<br>(249.42 to<br>559.83)                                  | 352.18<br>(243.95 to<br>513.32)                                  | 364.36<br>(240.40 to<br>582.66)                                    | 4.40<br>(3.61 to<br>5.20)                                  | 14.69<br>(10.19 to<br>21.71)                                  | 14.44<br>(10.20 to<br>20.69)                                  | 14.19<br>(9.56 to<br>21.70)                                   |

|                                      |                                       |                                         |                                         |                                          |                                 |                                 |                                 |                                   |
|--------------------------------------|---------------------------------------|-----------------------------------------|-----------------------------------------|------------------------------------------|---------------------------------|---------------------------------|---------------------------------|-----------------------------------|
|                                      | 952.51<br>(818.19 to<br>1,116.91)     | 2,825.56<br>(1,985.90 to<br>3,993.61)   | 2,658.43<br>(1,911.21 to<br>3,668.81)   | 3,218.56<br>(2,175.81 to<br>4,738.67)    | 34.03<br>(29.77 to<br>39.30)    | 115.35<br>(84.72 to<br>161.13)  | 110.57<br>(82.73 to<br>147.12)  | 128.03<br>(89.76 to<br>187.68)    |
| Esophageal cancer                    |                                       |                                         |                                         |                                          |                                 |                                 |                                 |                                   |
|                                      | 2,306.65<br>(2,022.90 to<br>2,604.85) | 4,542.06<br>(3,129.95 to<br>6,122.40)   | 4,114.58<br>(2,954.34 to<br>5,528.76)   | 5,656.92<br>(4,105.52 to<br>7,405.22)    | 87.96<br>(77.77 to<br>98.10)    | 213.01<br>(151.29 to<br>284.06) | 196.32<br>(145.39 to<br>257.62) | 255.43<br>(189.52 to<br>330.67)   |
| Stomach cancer                       |                                       |                                         |                                         |                                          |                                 |                                 |                                 |                                   |
|                                      | 3,288.28<br>(2,595.32 to<br>3,862.89) | 8,595.37<br>(5,447.50 to<br>13,260.41)  | 7,684.14<br>(4,963.92 to<br>11,637.67)  | 10,039.95<br>(6,377.36 to<br>15,373.46)  | 114.07<br>(91.51 to<br>131.83)  | 373.18<br>(237.03 to<br>574.32) | 340.29<br>(221.77 to<br>506.90) | 419.06<br>(269.34 to<br>641.20)   |
| Colon and rectum cancer              |                                       |                                         |                                         |                                          |                                 |                                 |                                 |                                   |
|                                      | 2,789.16<br>(2,274.70 to<br>3,284.26) | 13,535.53<br>(7,781.39 to<br>23,590.15) | 10,968.31<br>(6,929.91 to<br>17,532.68) | 12,844.42<br>(7,318.01 to<br>22,235.40)  | 103.63<br>(85.91 to<br>120.72)  | 567.75<br>(332.69 to<br>972.40) | 471.63<br>(304.13 to<br>734.90) | 527.65<br>(310.17 to<br>881.52)   |
| Liver cancer                         |                                       |                                         |                                         |                                          |                                 |                                 |                                 |                                   |
|                                      | 1,105.99<br>(793.35 to<br>1,445.59)   | 4,921.90<br>(2,594.24 to<br>8,663.29)   | 4,001.40<br>(2,323.74 to<br>6,581.47)   | 4,672.23<br>(2,455.46 to<br>8,227.31)    | 37.15<br>(26.40 to<br>48.99)    | 188.04<br>(101.12 to<br>327.78) | 155.89<br>(91.42 to<br>252.93)  | 175.72<br>(94.76 to<br>309.17)    |
| Liver cancer due to hepatitis B      |                                       |                                         |                                         |                                          |                                 |                                 |                                 |                                   |
|                                      | 774.46<br>(560.54 to<br>1,018.44)     | 4,006.96<br>(2,234.17 to<br>6,973.88)   | 3,331.09<br>(2,002.88 to<br>5,525.72)   | 3,763.25<br>(2,098.86 to<br>6,492.82)    | 33.01<br>(24.48 to<br>42.70)    | 185.57<br>(108.59 to<br>311.68) | 158.97<br>(99.20 to<br>251.27)  | 170.04<br>(99.55 to<br>286.57)    |
| Liver cancer due to hepatitis C      |                                       |                                         |                                         |                                          |                                 |                                 |                                 |                                   |
|                                      | 212.45<br>(133.69 to<br>328.90)       | 1,108.43<br>(510.11 to<br>2,171.95)     | 881.68<br>(435.58 to<br>1,671.01)       | 1,095.42<br>(504.76 to<br>2,192.46)      | 8.30<br>(5.16 to<br>12.73)      | 46.97<br>(22.34 to<br>92.87)    | 38.26<br>(19.38 to<br>71.00)    | 45.53<br>(21.64 to<br>91.64)      |
| Liver cancer due to alcohol use      |                                       |                                         |                                         |                                          |                                 |                                 |                                 |                                   |
|                                      | 696.27<br>(477.45 to<br>968.91)       | 3,498.25<br>(1,658.86 to<br>6,954.33)   | 2,754.13<br>(1,439.95 to<br>5,200.62)   | 3,313.52<br>(1,584.32 to<br>6,406.06)    | 25.17<br>(17.35 to<br>34.30)    | 147.17<br>(70.81 to<br>284.32)  | 118.51<br>(62.43 to<br>216.17)  | 136.37<br>(65.32 to<br>263.83)    |
| Liver cancer due to other causes     |                                       |                                         |                                         |                                          |                                 |                                 |                                 |                                   |
|                                      | 380.49<br>(312.84 to<br>459.56)       | 797.63<br>(617.07 to<br>1,007.79)       | 808.19<br>(615.80 to<br>1,035.41)       | 791.69<br>(623.48 to<br>992.55)          | 15.27<br>(12.78 to<br>18.22)    | 38.32<br>(31.04 to<br>47.37)    | 39.68<br>(31.66 to<br>49.50)    | 36.59<br>(29.75 to<br>45.57)      |
| Gallbladder and biliary tract cancer |                                       |                                         |                                         |                                          |                                 |                                 |                                 |                                   |
|                                      | 1,679.65<br>(1,488.48 to<br>1,890.12) | 6,053.11<br>(4,335.14 to<br>8,563.91)   | 5,898.61<br>(4,315.96 to<br>8,137.88)   | 5,918.60<br>(4,299.34 to<br>8,355.01)    | 63.33<br>(56.94 to<br>70.43)    | 259.79<br>(186.72 to<br>369.96) | 256.81<br>(187.74 to<br>355.07) | 246.92<br>(179.03 to<br>352.84)   |
| Pancreatic cancer                    |                                       |                                         |                                         |                                          |                                 |                                 |                                 |                                   |
|                                      | 370.25<br>(309.45 to<br>439.22)       | 952.36<br>(614.02 to<br>1,469.26)       | 806.42<br>(534.87 to<br>1,204.68)       | 1,506.26<br>(886.37 to<br>2,505.55)      | 13.28<br>(11.34 to<br>15.44)    | 39.59<br>(25.89 to<br>61.41)    | 33.87<br>(22.58 to<br>49.60)    | 61.37<br>(36.44 to<br>103.66)     |
| Larynx cancer                        |                                       |                                         |                                         |                                          |                                 |                                 |                                 |                                   |
|                                      | 4,220.35<br>(3,503.50 to<br>4,865.50) | 12,808.14<br>(7,743.67 to<br>20,597.99) | 9,627.87<br>(6,105.75 to<br>14,936.41)  | 20,281.24<br>(11,578.38 to<br>33,159.67) | 171.77<br>(144.55 to<br>196.50) | 592.30<br>(358.85 to<br>958.44) | 447.39<br>(288.43 to<br>697.62) | 919.20<br>(517.50 to<br>1,508.57) |
| Tracheal, bronchus, and lung cancer  |                                       |                                         |                                         |                                          |                                 |                                 |                                 |                                   |
|                                      | 222.89<br>(168.50 to<br>305.56)       | 561.51<br>(393.49 to<br>823.75)         | 596.18<br>(416.81 to<br>873.77)         | 462.27<br>(332.84 to<br>659.83)          | 6.30<br>(4.84 to<br>8.90)       | 20.47<br>(14.40 to<br>30.66)    | 22.18<br>(15.57 to<br>33.54)    | 16.27<br>(11.74 to<br>23.93)      |
| Malignant skin melanoma              |                                       |                                         |                                         |                                          |                                 |                                 |                                 |                                   |
|                                      | 143.62<br>(123.82 to<br>164.62)       | 408.63<br>(328.95 to<br>505.63)         | 396.58<br>(313.61 to<br>499.48)         | 482.41<br>(397.59 to<br>574.34)          | 5.85<br>(5.14 to<br>6.54)       | 21.43<br>(17.62 to<br>25.90)    | 21.40<br>(17.59 to<br>26.40)    | 24.02<br>(19.77 to<br>28.36)      |
| Non-melanoma skin cancer             |                                       |                                         |                                         |                                          |                                 |                                 |                                 |                                   |
|                                      | 3,025.06<br>(2,183.22 to<br>4,101.69) | 6,086.69<br>(3,750.20 to<br>9,760.69)   | 5,555.66<br>(3,448.85 to<br>8,737.46)   | 7,305.15<br>(4,509.44 to<br>11,511.53)   | 91.13<br>(66.50 to<br>125.79)   | 219.72<br>(135.35 to<br>359.39) | 203.01<br>(126.54 to<br>325.90) | 257.54<br>(158.50 to<br>413.83)   |
| Breast cancer                        |                                       |                                         |                                         |                                          |                                 |                                 |                                 |                                   |
|                                      | 544.35<br>(390.79 to<br>698.04)       | 1,001.58<br>(631.76 to<br>1,427.88)     | 947.19<br>(602.44 to<br>1,366.59)       | 1,266.79<br>(823.04 to<br>1,767.32)      | 17.92<br>(12.98 to<br>22.69)    | 37.19<br>(23.84 to<br>51.93)    | 35.62<br>(22.93 to<br>50.64)    | 46.02<br>(30.32 to<br>62.48)      |
| Cervical cancer                      |                                       |                                         |                                         |                                          |                                 |                                 |                                 |                                   |
|                                      | 203.86<br>(165.18 to<br>258.03)       | 535.57<br>(369.72 to<br>745.50)         | 520.92<br>(354.24 to<br>722.88)         | 625.59<br>(441.87 to<br>844.26)          | 7.89<br>(6.51 to<br>9.87)       | 23.43<br>(16.54 to<br>31.86)    | 23.17<br>(16.29 to<br>31.74)    | 26.61<br>(19.22 to<br>35.44)      |
| Uterine cancer                       |                                       |                                         |                                         |                                          |                                 |                                 |                                 |                                   |
|                                      | 545.17<br>(453.83 to<br>672.25)       | 1,427.17<br>(907.70 to<br>2,239.12)     | 1,298.03<br>(843.28 to<br>1,950.73)     | 1,525.87<br>(960.42 to<br>2,377.99)      | 18.97<br>(15.85 to<br>22.96)    | 57.45<br>(36.48 to<br>90.42)    | 52.97<br>(34.23 to<br>80.14)    | 60.01<br>(38.12 to<br>93.83)      |
| Ovarian cancer                       |                                       |                                         |                                         |                                          |                                 |                                 |                                 |                                   |
|                                      | 959.06<br>(715.57 to<br>1,489.47)     | 4,224.55<br>(3,004.28 to<br>6,790.65)   | 4,257.28<br>(3,027.50 to<br>6,721.83)   | 4,342.78<br>(3,195.61 to<br>6,909.34)    | 51.95<br>(38.30 to<br>84.68)    | 262.80<br>(189.37 to<br>444.72) | 271.08<br>(192.20 to<br>453.19) | 258.26<br>(186.27 to<br>434.17)   |
| Prostate cancer                      |                                       |                                         |                                         |                                          |                                 |                                 |                                 |                                   |
|                                      | 134.33<br>(100.86 to<br>178.08)       | 127.63<br>(89.92 to<br>175.14)          | 121.58<br>(86.91 to<br>165.79)          | 152.34<br>(110.82 to<br>205.04)          | 2.68<br>(2.04 to<br>3.51)       | 3.08<br>(2.24 to<br>4.13)       | 2.96<br>(2.16 to<br>3.92)       | 3.60<br>(2.68 to<br>4.78)         |
| Testicular cancer                    |                                       |                                         |                                         |                                          |                                 |                                 |                                 |                                   |

Oman

| Cause | YLLs (actual counts) |               |                      |                     | Deaths (actual counts) |               |                      |                     |
|-------|----------------------|---------------|----------------------|---------------------|------------------------|---------------|----------------------|---------------------|
|       | 2016                 | 2040 Forecast | 2040 Better Scenario | 2040 Worse Scenario | 2016                   | 2040 Forecast | 2040 Better Scenario | 2040 Worse Scenario |



|                                                     |                                                |                                                   |                                                  |                                                   |                                          |                                          |                                          |                                            |
|-----------------------------------------------------|------------------------------------------------|---------------------------------------------------|--------------------------------------------------|---------------------------------------------------|------------------------------------------|------------------------------------------|------------------------------------------|--------------------------------------------|
| Cardiomyopathy and myocarditis                      | 2,727.71<br>(1,816.93 to<br>3,768.64)          | 3,622.68<br>(2,005.91 to<br>5,994.51)             | 3,185.33<br>(1,846.16 to<br>5,087.59)            | 4,559.19<br>(2,595.57 to<br>7,464.72)             | 66.71<br>(45.99 to<br>88.71)             | 139.85<br>(82.52 to<br>210.12)           | 126.48<br>(76.86 to<br>186.45)           | 167.66<br>(98.68 to<br>254.08)             |
| Myocarditis                                         | 647.66<br>(368.56 to<br>1,051.47)              | 717.04<br>(331.37 to<br>1,397.15)                 | 703.10<br>(332.49 to<br>1,364.37)                | 776.25<br>(356.97 to<br>1,540.04)                 | 13.12<br>(6.88 to<br>21.29)              | 25.16<br>(10.70 to<br>43.62)             | 25.61<br>(11.01 to<br>44.20)             | 25.48<br>(10.60 to<br>44.74)               |
| <b>Oman</b>                                         |                                                |                                                   |                                                  |                                                   |                                          |                                          |                                          |                                            |
| Cause                                               | YLLs (actual counts)                           |                                                   |                                                  |                                                   | Deaths (actual counts)                   |                                          |                                          |                                            |
|                                                     | 2016                                           | 2040 Forecast                                     | 2040 Better Scenario                             | 2040 Worse Scenario                               | 2016                                     | 2040 Forecast                            | 2040 Better Scenario                     | 2040 Worse Scenario                        |
| Alcoholic cardiomyopathy                            | 243.62<br>(63.79 to<br>470.84)                 | 428.85<br>(96.88 to<br>848.62)                    | 422.70<br>(97.72 to<br>823.79)                   | 427.45<br>(96.73 to<br>844.97)                    | 7.56<br>(2.15 to<br>14.12)               | 16.57<br>(4.33 to<br>30.91)              | 16.65<br>(4.43 to<br>31.00)              | 15.99<br>(4.10 to<br>30.45)                |
| Other cardiomyopathy                                | 1,836.43<br>(1,228.97 to<br>2,440.76)          | 2,476.79<br>(1,353.88 to<br>4,306.49)             | 2,059.53<br>(1,187.05 to<br>3,444.25)            | 3,355.49<br>(1,841.09 to<br>5,885.41)             | 46.03<br>(33.45 to<br>58.30)             | 98.12<br>(56.64 to<br>154.43)            | 84.22<br>(50.30 to<br>129.37)            | 126.18<br>(72.78 to<br>196.98)             |
| Atrial fibrillation and flutter                     | 494.49<br>(394.04 to<br>612.33)                | 2,061.36<br>(1,478.89 to<br>2,747.11)             | 1,990.81<br>(1,457.91 to<br>2,610.25)            | 2,098.74<br>(1,506.33 to<br>2,762.75)             | 42.02<br>(32.76 to<br>52.26)             | 188.01<br>(131.34 to<br>253.92)          | 189.26<br>(134.96 to<br>250.35)          | 180.32<br>(121.08 to<br>240.46)            |
| Aortic aneurysm                                     | 943.73<br>(771.99 to<br>1,110.53)              | 2,011.04<br>(1,384.76 to<br>2,799.53)             | 1,793.75<br>(1,294.39 to<br>2,395.42)            | 2,370.84<br>(1,644.80 to<br>3,266.19)             | 34.63<br>(28.74 to<br>40.14)             | 96.35<br>(69.38 to<br>127.50)            | 89.68<br>(67.05 to<br>117.04)            | 106.38<br>(76.50 to<br>142.17)             |
| Peripheral artery disease                           | 41.40<br>(26.17 to<br>66.71)                   | 232.09<br>(135.79 to<br>399.00)                   | 203.85<br>(119.46 to<br>351.46)                  | 229.75<br>(135.27 to<br>396.76)                   | 2.91<br>(1.76 to<br>4.68)                | 18.12<br>(10.40 to<br>30.48)             | 16.79<br>(9.68 to<br>28.47)              | 16.62<br>(9.40 to<br>28.27)                |
| Endocarditis                                        | 1,578.53<br>(1,256.65 to<br>1,982.68)          | 3,012.49<br>(1,951.27 to<br>4,714.73)             | 2,754.81<br>(1,834.15 to<br>4,194.61)            | 3,181.49<br>(2,056.20 to<br>5,045.90)             | 43.20<br>(35.48 to<br>52.65)             | 127.92<br>(87.60 to<br>178.76)           | 121.42<br>(84.28 to<br>167.47)           | 127.15<br>(86.85 to<br>178.68)             |
| Other cardiovascular and circulatory diseases       | 7,044.87<br>(5,347.94 to<br>9,053.87)          | 13,714.00<br>(8,391.49 to<br>21,119.33)           | 11,738.58<br>(7,588.88 to<br>18,011.02)          | 19,659.27<br>(12,337.16 to<br>30,007.88)          | 227.68<br>(173.18 to<br>292.43)          | 673.88<br>(434.25 to<br>978.57)          | 603.65<br>(410.42 to<br>873.63)          | 898.59<br>(596.07 to<br>1,318.81)          |
| <b>Chronic respiratory diseases</b>                 | <b>4,386.29<br/>(3,802.13 to<br/>4,963.42)</b> | <b>10,544.15<br/>(7,275.16 to<br/>15,213.62)</b>  | <b>8,789.37<br/>(6,158.17 to<br/>12,473.19)</b>  | <b>15,508.08<br/>(10,334.90 to<br/>23,664.71)</b> | <b>196.35<br/>(171.09 to<br/>220.68)</b> | <b>585.67<br/>(415.38 to<br/>833.94)</b> | <b>509.09<br/>(368.02 to<br/>705.65)</b> | <b>811.22<br/>(548.80 to<br/>1,208.37)</b> |
| Chronic obstructive pulmonary disease               | 2,761.87<br>(2,343.67 to<br>3,239.23)          | 7,733.08<br>(4,841.04 to<br>12,094.93)            | 6,397.45<br>(4,007.65 to<br>9,966.99)            | 11,988.08<br>(7,122.34 to<br>19,495.65)           | 137.19<br>(117.53 to<br>157.72)          | 450.28<br>(293.99 to<br>674.51)          | 389.88<br>(254.71 to<br>577.24)          | 649.91<br>(407.97 to<br>1,038.84)          |
| Pneumoconiosis                                      | 13.62<br>(10.24 to<br>17.39)                   | 28.65<br>(19.87 to<br>38.76)                      | 28.37<br>(19.43 to<br>39.76)                     | 32.25<br>(23.04 to<br>42.46)                      | 0.68<br>(0.51 to<br>0.86)                | 1.77<br>(1.23 to<br>2.39)                | 1.79<br>(1.22 to<br>2.45)                | 1.92<br>(1.37 to<br>2.55)                  |
| Silicosis                                           | 2.20<br>(1.46 to<br>3.13)                      | 3.46<br>(1.94 to<br>5.63)                         | 3.23<br>(1.77 to<br>5.37)                        | 4.93<br>(2.94 to<br>7.56)                         | 0.13<br>(0.08 to<br>0.18)                | 0.23<br>(0.13 to<br>0.38)                | 0.22<br>(0.12 to<br>0.38)                | 0.31<br>(0.18 to<br>0.49)                  |
| Asbestosis                                          | 3.12<br>(2.21 to<br>4.21)                      | 8.82<br>(5.67 to<br>12.63)                        | 9.36<br>(6.01 to<br>13.56)                       | 7.60<br>(4.94 to<br>11.09)                        | 0.11<br>(0.07 to<br>0.16)                | 0.44<br>(0.26 to<br>0.66)                | 0.47<br>(0.28 to<br>0.71)                | 0.36<br>(0.21 to<br>0.56)                  |
| Coal workers pneumoconiosis                         | 0.98<br>(0.42 to<br>1.65)                      | 2.45<br>(0.89 to<br>4.58)                         | 2.35<br>(0.83 to<br>4.58)                        | 3.28<br>(1.26 to<br>5.70)                         | 0.06<br>(0.02 to<br>0.09)                | 0.16<br>(0.06 to<br>0.30)                | 0.15<br>(0.05 to<br>0.30)                | 0.20<br>(0.08 to<br>0.35)                  |
| Other pneumoconiosis                                | 7.31<br>(5.62 to<br>9.33)                      | 13.92<br>(9.57 to<br>19.55)                       | 13.46<br>(8.96 to<br>19.53)                      | 16.44<br>(11.60 to<br>22.20)                      | 0.38<br>(0.30 to<br>0.48)                | 0.94<br>(0.65 to<br>1.32)                | 0.94<br>(0.63 to<br>1.34)                | 1.05<br>(0.71 to<br>1.42)                  |
| Asthma                                              | 1,108.55<br>(834.01 to<br>1,448.35)            | 1,441.39<br>(715.60 to<br>2,603.35)               | 973.28<br>(489.90 to<br>1,711.69)                | 2,240.89<br>(1,171.68 to<br>3,897.10)             | 41.70<br>(30.76 to<br>54.91)             | 70.68<br>(36.36 to<br>129.49)            | 50.28<br>(26.02 to<br>89.98)             | 104.11<br>(55.44 to<br>179.53)             |
| Interstitial lung disease and pulmonary sarcoidosis | 159.91<br>(94.02 to<br>253.66)                 | 502.41<br>(286.35 to<br>839.14)                   | 549.14<br>(311.19 to<br>918.79)                  | 378.19<br>(213.06 to<br>669.37)                   | 6.19<br>(3.53 to<br>10.88)               | 24.93<br>(13.32 to<br>46.46)             | 27.88<br>(14.95 to<br>52.75)             | 18.00<br>(9.53 to<br>34.21)                |
| Other chronic respiratory diseases                  | 342.34<br>(233.04 to<br>581.02)                | 838.61<br>(516.28 to<br>1,524.25)                 | 841.13<br>(523.55 to<br>1,475.62)                | 868.68<br>(524.12 to<br>1,606.43)                 | 10.60<br>(7.14 to<br>18.38)              | 38.00<br>(23.37 to<br>70.02)             | 39.26<br>(24.30 to<br>69.99)             | 37.28<br>(22.30 to<br>69.78)               |
| <b>Cirrhosis and other chronic liver diseases</b>   | <b>6,248.04<br/>(5,227.48 to<br/>7,516.31)</b> | <b>13,354.12<br/>(10,153.97 to<br/>17,529.71)</b> | <b>12,893.83<br/>(9,789.90 to<br/>17,028.11)</b> | <b>15,567.26<br/>(12,093.96 to<br/>19,862.09)</b> | <b>200.24<br/>(169.94 to<br/>239.53)</b> | <b>527.55<br/>(406.34 to<br/>679.82)</b> | <b>517.76<br/>(394.56 to<br/>674.26)</b> | <b>596.68<br/>(468.50 to<br/>753.97)</b>   |



|                                                                |                                                             |                                                               |                                                               |                                                               |                                                      |                                                            |                                                            |                                                            |
|----------------------------------------------------------------|-------------------------------------------------------------|---------------------------------------------------------------|---------------------------------------------------------------|---------------------------------------------------------------|------------------------------------------------------|------------------------------------------------------------|------------------------------------------------------------|------------------------------------------------------------|
| Cirrhosis and other chronic liver diseases due to hepatitis B  | 2,058.25<br>(1,552.36 to<br>2,680.32)                       | 4,645.17<br>(3,224.85 to<br>6,476.51)                         | 4,503.60<br>(3,127.06 to<br>6,358.50)                         | 5,356.64<br>(3,779.39 to<br>7,332.91)                         | 68.17<br>(51.95 to<br>88.68)                         | 185.37<br>(131.74 to<br>253.89)                            | 182.55<br>(128.78 to<br>252.89)                            | 207.61<br>(148.58 to<br>280.72)                            |
| Cirrhosis and other chronic liver diseases due to hepatitis C  | 2,319.89<br>(1,727.62 to<br>3,033.65)                       | 5,315.68<br>(3,638.21 to<br>7,414.89)                         | 5,134.20<br>(3,480.92 to<br>7,166.62)                         | 6,208.70<br>(4,275.65 to<br>8,559.33)                         | 76.58<br>(56.96 to<br>99.60)                         | 208.35<br>(143.41 to<br>284.84)                            | 204.11<br>(139.82 to<br>282.32)                            | 236.97<br>(165.44 to<br>316.80)                            |
| Cirrhosis and other chronic liver diseases due to alcohol use  | 423.87<br>(326.23 to<br>545.61)                             | 942.60<br>(659.28 to<br>1,289.66)                             | 891.15<br>(621.70 to<br>1,240.70)                             | 1,125.12<br>(805.17 to<br>1,523.85)                           | 14.50<br>(11.32 to<br>18.51)                         | 38.33<br>(27.50 to<br>52.27)                               | 36.98<br>(26.62 to<br>50.91)                               | 44.23<br>(32.30 to<br>60.26)                               |
| Cirrhosis and other chronic liver diseases due to other causes | 1,446.02<br>(1,177.13 to<br>1,718.57)                       | 2,450.67<br>(1,761.41 to<br>3,328.51)                         | 2,364.88<br>(1,719.65 to<br>3,265.02)                         | 2,876.79<br>(2,109.27 to<br>3,819.26)                         | 40.98<br>(33.67 to<br>48.83)                         | 95.50<br>(71.16 to<br>128.77)                              | 94.13<br>(69.04 to<br>127.62)                              | 107.87<br>(80.54 to<br>141.98)                             |
| <b>Digestive diseases</b>                                      | <b>1,839.60</b><br><b>(1,454.99 to</b><br><b>2,180.63)</b>  | <b>3,829.76</b><br><b>(2,709.88 to</b><br><b>5,049.38)</b>    | <b>3,659.31</b><br><b>(2,594.31 to</b><br><b>4,833.29)</b>    | <b>4,461.40</b><br><b>(3,193.80 to</b><br><b>5,853.40)</b>    | <b>70.63</b><br><b>(54.16 to</b><br><b>81.77)</b>    | <b>205.07</b><br><b>(142.76 to</b><br><b>259.84)</b>       | <b>202.21</b><br><b>(140.75 to</b><br><b>260.87)</b>       | <b>226.05</b><br><b>(155.85 to</b><br><b>289.29)</b>       |
| Peptic ulcer disease                                           | 354.00<br>(241.53 to<br>443.44)                             | 493.25<br>(298.01 to<br>725.72)                               | 449.43<br>(270.56 to<br>658.94)                               | 696.29<br>(459.64 to<br>984.05)                               | 14.47<br>(10.03 to<br>17.58)                         | 26.29<br>(16.63 to<br>37.15)                               | 24.71<br>(15.55 to<br>35.08)                               | 35.37<br>(22.81 to<br>48.96)                               |
| <b>Oman</b>                                                    |                                                             |                                                               |                                                               |                                                               |                                                      |                                                            |                                                            |                                                            |
| Cause                                                          | YLLs (actual counts)                                        |                                                               |                                                               |                                                               | Deaths (actual counts)                               |                                                            |                                                            |                                                            |
|                                                                | 2016                                                        | 2040 Forecast                                                 | 2040 Better Scenario                                          | 2040 Worse Scenario                                           | 2016                                                 | 2040 Forecast                                              | 2040 Better Scenario                                       | 2040 Worse Scenario                                        |
| Gastritis and duodenitis                                       | 12.65<br>(9.09 to<br>16.62)                                 | 28.12<br>(18.48 to<br>39.05)                                  | 26.63<br>(17.34 to<br>37.29)                                  | 35.23<br>(23.75 to<br>48.55)                                  | 0.42<br>(0.31 to<br>0.53)                            | 1.22<br>(0.83 to<br>1.64)                                  | 1.19<br>(0.81 to<br>1.60)                                  | 1.46<br>(1.02 to<br>1.95)                                  |
| Appendicitis                                                   | 221.63<br>(175.84 to<br>270.60)                             | 357.21<br>(231.68 to<br>494.63)                               | 335.72<br>(203.12 to<br>463.49)                               | 476.19<br>(317.58 to<br>631.23)                               | 8.51<br>(5.59 to<br>10.29)                           | 19.99<br>(10.48 to<br>27.76)                               | 19.42<br>(9.90 to<br>27.02)                                | 25.11<br>(13.92 to<br>34.53)                               |
| Paralytic ileus and intestinal obstruction                     | 370.86<br>(217.46 to<br>519.84)                             | 851.28<br>(427.70 to<br>1,192.66)                             | 873.71<br>(430.51 to<br>1,246.24)                             | 837.43<br>(431.18 to<br>1,176.71)                             | 13.80<br>(7.55 to<br>17.91)                          | 48.94<br>(23.66 to<br>67.45)                               | 51.86<br>(25.39 to<br>71.97)                               | 45.41<br>(22.16 to<br>63.43)                               |
| Inguinal, femoral, and abdominal hernia                        | 51.23<br>(41.85 to<br>69.46)                                | 87.74<br>(60.50 to<br>127.88)                                 | 85.30<br>(59.50 to<br>122.35)                                 | 104.63<br>(73.09 to<br>148.03)                                | 2.24<br>(1.69 to<br>2.95)                            | 5.13<br>(3.55 to<br>7.30)                                  | 5.17<br>(3.58 to<br>7.26)                                  | 5.72<br>(3.90 to<br>8.06)                                  |
| Inflammatory bowel disease                                     | 125.08<br>(92.95 to<br>172.47)                              | 239.90<br>(174.86 to<br>347.21)                               | 240.15<br>(172.34 to<br>348.02)                               | 246.55<br>(178.95 to<br>355.68)                               | 3.66<br>(2.80 to<br>4.97)                            | 9.82<br>(7.32 to<br>13.85)                                 | 10.07<br>(7.50 to<br>14.23)                                | 9.66<br>(7.27 to<br>13.54)                                 |
| Vascular intestinal disorders                                  | 220.04<br>(168.76 to<br>269.14)                             | 644.99<br>(467.10 to<br>867.22)                               | 640.33<br>(452.90 to<br>866.12)                               | 704.49<br>(515.83 to<br>935.32)                               | 9.55<br>(7.36 to<br>11.52)                           | 35.29<br>(25.83 to<br>46.58)                               | 35.97<br>(26.06 to<br>47.53)                               | 36.73<br>(27.16 to<br>47.95)                               |
| Gallbladder and biliary diseases                               | 75.68<br>(46.75 to<br>93.00)                                | 284.90<br>(126.35 to<br>526.87)                               | 199.55<br>(90.47 to<br>359.54)                                | 363.82<br>(166.81 to<br>667.10)                               | 3.56<br>(2.04 to<br>4.42)                            | 16.69<br>(7.55 to<br>29.77)                                | 12.36<br>(5.74 to<br>21.47)                                | 20.14<br>(9.11 to<br>36.29)                                |
| Pancreatitis                                                   | 181.96<br>(124.84 to<br>238.44)                             | 367.25<br>(216.57 to<br>571.82)                               | 336.98<br>(201.32 to<br>507.43)                               | 465.76<br>(273.32 to<br>758.01)                               | 5.86<br>(3.97 to<br>7.60)                            | 15.65<br>(9.31 to<br>23.35)                                | 14.77<br>(9.06 to<br>21.15)                                | 19.03<br>(11.18 to<br>29.51)                               |
| Other digestive diseases                                       | 223.47<br>(173.90 to<br>293.43)                             | 475.14<br>(319.71 to<br>702.50)                               | 471.50<br>(314.37 to<br>686.27)                               | 531.03<br>(356.16 to<br>773.37)                               | 8.55<br>(6.72 to<br>11.21)                           | 26.04<br>(17.76 to<br>37.77)                               | 26.68<br>(18.12 to<br>38.51)                               | 27.43<br>(18.64 to<br>39.27)                               |
| <b>Neurological disorders</b>                                  | <b>8,834.61</b><br><b>(7,591.85 to</b><br><b>10,139.00)</b> | <b>34,692.87</b><br><b>(24,554.33 to</b><br><b>50,035.04)</b> | <b>31,100.38</b><br><b>(22,981.54 to</b><br><b>42,523.70)</b> | <b>32,485.55</b><br><b>(22,863.42 to</b><br><b>47,688.12)</b> | <b>542.36</b><br><b>(469.77 to</b><br><b>629.30)</b> | <b>2,754.76</b><br><b>(1,891.71 to</b><br><b>4,124.72)</b> | <b>2,536.08</b><br><b>(1,867.94 to</b><br><b>3,597.09)</b> | <b>2,427.53</b><br><b>(1,667.33 to</b><br><b>3,726.61)</b> |
| Alzheimer's disease and other dementias                        | 5,071.47<br>(4,287.51 to<br>6,091.74)                       | 27,253.17<br>(17,319.72 to<br>42,808.45)                      | 23,622.09<br>(15,774.79 to<br>35,009.17)                      | 25,050.49<br>(15,833.02 to<br>39,775.17)                      | 439.34<br>(373.83 to<br>526.23)                      | 2,416.96<br>(1,571.62 to<br>3,760.25)                      | 2,180.57<br>(1,508.90 to<br>3,198.28)                      | 2,123.49<br>(1,315.62 to<br>3,421.98)                      |
| Parkinson's disease                                            | 547.61<br>(428.79 to<br>691.69)                             | 2,717.15<br>(2,047.33 to<br>3,518.42)                         | 2,903.56<br>(2,172.76 to<br>3,739.20)                         | 2,286.13<br>(1,756.70 to<br>2,955.73)                         | 38.65<br>(29.83 to<br>49.98)                         | 210.74<br>(156.37 to<br>276.54)                            | 230.40<br>(171.69 to<br>300.29)                            | 170.09<br>(122.39 to<br>226.51)                            |
| Epilepsy                                                       | 1,911.87<br>(1,489.12 to<br>2,371.76)                       | 2,533.22<br>(1,711.16 to<br>3,644.14)                         | 2,395.31<br>(1,624.89 to<br>3,427.74)                         | 3,000.32<br>(2,054.44 to<br>4,258.60)                         | 36.95<br>(29.50 to<br>44.68)                         | 64.31<br>(45.78 to<br>85.72)                               | 61.69<br>(44.06 to<br>82.30)                               | 74.13<br>(53.41 to<br>99.39)                               |
| Multiple sclerosis                                             | 181.90<br>(144.45 to<br>231.66)                             | 315.39<br>(244.14 to<br>410.90)                               | 312.51<br>(240.55 to<br>408.06)                               | 311.85<br>(239.26 to<br>415.65)                               | 4.42<br>(3.53 to<br>5.64)                            | 9.31<br>(7.34 to<br>12.10)                                 | 9.30<br>(7.24 to<br>12.14)                                 | 9.07<br>(7.09 to<br>11.93)                                 |

|                                                            |                                                            |                                                            |                                                            |                                                            |                                                   |                                                    |                                                    |                                                   |
|------------------------------------------------------------|------------------------------------------------------------|------------------------------------------------------------|------------------------------------------------------------|------------------------------------------------------------|---------------------------------------------------|----------------------------------------------------|----------------------------------------------------|---------------------------------------------------|
| Motor neuron disease                                       | 180.38<br>(120.26 to<br>253.73)                            | 430.99<br>(282.23 to<br>616.44)                            | 428.86<br>(280.61 to<br>610.78)                            | 425.96<br>(279.44 to<br>614.35)                            | 4.70<br>(3.16 to<br>6.69)                         | 13.70<br>(8.97 to<br>19.36)                        | 13.75<br>(9.01 to<br>19.42)                        | 13.32<br>(8.83 to<br>18.91)                       |
| Other neurological disorders                               | 941.38<br>(676.34 to<br>1,201.84)                          | 1,442.95<br>(1,083.17 to<br>1,871.93)                      | 1,438.04<br>(1,077.86 to<br>1,868.92)                      | 1,410.79<br>(1,065.24 to<br>1,850.36)                      | 18.31<br>(14.15 to<br>22.06)                      | 39.73<br>(31.77 to<br>47.92)                       | 40.37<br>(32.20 to<br>48.94)                       | 37.43<br>(30.27 to<br>44.74)                      |
| <b>Mental disorders</b>                                    | <b>1,499.85</b><br><b>(1,119.57 to</b><br><b>1,956.40)</b> | <b>3,251.98</b><br><b>(2,347.12 to</b><br><b>4,298.14)</b> | <b>3,405.94</b><br><b>(2,412.95 to</b><br><b>4,585.78)</b> | <b>2,855.98</b><br><b>(2,058.33 to</b><br><b>3,780.37)</b> | <b>32.34</b><br><b>(24.28 to</b><br><b>41.16)</b> | <b>87.80</b><br><b>(65.04 to</b><br><b>112.82)</b> | <b>93.10</b><br><b>(68.11 to</b><br><b>119.84)</b> | <b>75.41</b><br><b>(56.09 to</b><br><b>96.19)</b> |
| Alcohol use disorders                                      | 402.26<br>(269.03 to<br>532.43)                            | 702.42<br>(424.69 to<br>1,002.38)                          | 718.34<br>(429.72 to<br>1,022.58)                          | 654.44<br>(404.44 to<br>928.70)                            | 9.88<br>(6.55 to<br>12.93)                        | 21.80<br>(12.92 to<br>29.85)                       | 22.53<br>(13.02 to<br>31.42)                       | 19.91<br>(12.02 to<br>27.46)                      |
| Drug use disorders                                         | 1,093.81<br>(775.98 to<br>1,481.42)                        | 2,544.18<br>(1,784.37 to<br>3,428.65)                      | 2,682.20<br>(1,869.00 to<br>3,663.30)                      | 2,196.14<br>(1,568.58 to<br>2,986.01)                      | 22.38<br>(16.24 to<br>29.52)                      | 65.88<br>(48.86 to<br>85.35)                       | 70.46<br>(51.41 to<br>92.60)                       | 55.40<br>(41.59 to<br>71.89)                      |
| Opioid use disorders                                       | 660.32<br>(439.16 to<br>930.11)                            | 1,223.40<br>(819.18 to<br>1,703.78)                        | 1,252.86<br>(823.67 to<br>1,732.27)                        | 1,146.95<br>(769.49 to<br>1,599.90)                        | 13.14<br>(8.78 to<br>18.15)                       | 30.05<br>(20.72 to<br>40.96)                       | 31.06<br>(21.25 to<br>43.15)                       | 27.65<br>(19.18 to<br>37.73)                      |
| Cocaine use disorders                                      | 73.54<br>(38.74 to<br>129.37)                              | 224.37<br>(117.50 to<br>377.27)                            | 237.87<br>(129.37 to<br>391.47)                            | 190.18<br>(103.35 to<br>327.50)                            | 1.47<br>(0.81 to<br>2.42)                         | 5.33<br>(2.86 to<br>8.37)                          | 5.69<br>(3.18 to<br>8.90)                          | 4.46<br>(2.47 to<br>7.08)                         |
| Amphetamine use disorders                                  | 46.63<br>(23.46 to<br>87.00)                               | 200.93<br>(99.78 to<br>340.77)                             | 221.58<br>(110.53 to<br>382.16)                            | 148.52<br>(74.90 to<br>261.27)                             | 0.91<br>(0.47 to<br>1.61)                         | 4.61<br>(2.26 to<br>8.28)                          | 5.11<br>(2.56 to<br>9.09)                          | 3.37<br>(1.69 to<br>5.91)                         |
| Other drug use disorders                                   | 313.32<br>(188.89 to<br>438.22)                            | 895.48<br>(565.15 to<br>1,248.71)                          | 969.89<br>(578.00 to<br>1,387.45)                          | 710.49<br>(448.04 to<br>1,003.86)                          | 6.86<br>(4.51 to<br>9.10)                         | 25.88<br>(17.93 to<br>33.75)                       | 28.59<br>(20.09 to<br>38.38)                       | 19.92<br>(14.07 to<br>26.35)                      |
| Eating disorders                                           | 3.77<br>(2.62 to<br>4.95)                                  | 5.38<br>(3.62 to<br>7.52)                                  | 5.40<br>(3.62 to<br>7.57)                                  | 5.40<br>(3.62 to<br>7.50)                                  | 0.07<br>(0.05 to<br>0.10)                         | 0.11<br>(0.08 to<br>0.16)                          | 0.11<br>(0.07 to<br>0.16)                          | 0.11<br>(0.07 to<br>0.16)                         |
| <b>Oman</b>                                                |                                                            |                                                            |                                                            |                                                            |                                                   |                                                    |                                                    |                                                   |
| Cause                                                      | YLLs (actual counts)                                       |                                                            |                                                            |                                                            | Deaths (actual counts)                            |                                                    |                                                    |                                                   |
|                                                            | 2016                                                       | 2040 Forecast                                              | 2040 Better Scenario                                       | 2040 Worse Scenario                                        | 2016                                              | 2040 Forecast                                      | 2040 Better Scenario                               | 2040 Worse Scenario                               |
| Diabetes, urogenital, blood, and endocrine diseases        | 39,762.34<br>(36,127.54 to<br>43,535.95)                   | 113,671.43<br>(72,714.15 to<br>193,232.59)                 | 101,842.62<br>(64,775.72 to<br>170,755.67)                 | 153,591.36<br>(100,042.29 to<br>238,001.79)                | 1,573.40<br>(1,444.91 to<br>1,706.80)             | 5,856.33<br>(3,766.54 to<br>9,938.11)              | 5,380.44<br>(3,451.99 to<br>9,345.24)              | 7,533.49<br>(4,886.59 to<br>11,683.17)            |
| Diabetes mellitus                                          | 23,555.88<br>(20,944.09 to<br>26,081.18)                   | 56,488.31<br>(38,171.04 to<br>79,139.41)                   | 50,937.28<br>(34,394.42 to<br>72,031.61)                   | 79,703.86<br>(54,657.31 to<br>110,459.44)                  | 1,027.83<br>(928.01 to<br>1,125.85)               | 2,905.45<br>(2,068.70 to<br>3,924.29)              | 2,699.21<br>(1,921.90 to<br>3,635.05)              | 3,876.30<br>(2,774.49 to<br>5,162.35)             |
| Acute glomerulonephritis                                   | 26.50<br>(23.45 to<br>29.95)                               | 31.11<br>(21.83 to<br>46.46)                               | 29.30<br>(20.39 to<br>42.30)                               | 38.50<br>(27.36 to<br>55.23)                               | 0.48<br>(0.43 to<br>0.55)                         | 0.70<br>(0.51 to<br>0.94)                          | 0.67<br>(0.49 to<br>0.89)                          | 0.83<br>(0.63 to<br>1.12)                         |
| Chronic kidney disease                                     | 7,269.38<br>(6,270.76 to<br>8,121.10)                      | 39,110.10<br>(7,256.90 to<br>113,784.08)                   | 32,749.02<br>(6,025.52 to<br>105,942.79)                   | 55,206.45<br>(11,025.92 to<br>138,605.05)                  | 305.27<br>(253.45 to<br>341.31)                   | 2,199.56<br>(360.39 to<br>6,186.06)                | 1,902.77<br>(303.41 to<br>5,953.61)                | 2,922.29<br>(511.27 to<br>7,160.25)               |
| Chronic kidney disease due to diabetes mellitus            | 3,107.54<br>(2,531.82 to<br>3,600.95)                      | 20,095.64<br>(3,410.81 to<br>59,984.80)                    | 16,707.45<br>(2,938.79 to<br>53,543.27)                    | 28,671.18<br>(5,432.22 to<br>74,278.09)                    | 130.93<br>(104.29 to<br>151.90)                   | 1,031.72<br>(157.58 to<br>2,978.79)                | 880.99<br>(130.08 to<br>2,797.39)                  | 1,402.65<br>(236.56 to<br>3,554.16)               |
| Chronic kidney disease due to hypertension                 | 1,042.71<br>(833.61 to<br>1,248.61)                        | 7,309.47<br>(1,156.80 to<br>21,199.96)                     | 6,335.13<br>(978.83 to<br>20,510.28)                       | 9,522.92<br>(1,584.14 to<br>24,261.50)                     | 64.57<br>(50.37 to<br>77.43)                      | 546.45<br>(83.30 to<br>1,561.75)                   | 491.57<br>(72.34 to<br>1,556.49)                   | 664.75<br>(108.31 to<br>1,669.86)                 |
| Chronic kidney disease due to glomerulonephritis           | 1,029.00<br>(838.20 to<br>1,229.10)                        | 3,119.59<br>(787.57 to<br>8,644.15)                        | 2,561.51<br>(646.40 to<br>7,946.62)                        | 4,641.97<br>(1,181.67 to<br>11,422.17)                     | 32.04<br>(25.82 to<br>38.80)                      | 153.76<br>(29.15 to<br>445.67)                     | 129.31<br>(24.12 to<br>406.70)                     | 217.88<br>(43.50 to<br>551.23)                    |
| Chronic kidney disease due to other and unspecified causes | 2,090.13<br>(1,725.32 to<br>2,491.97)                      | 8,585.40<br>(1,796.52 to<br>24,409.36)                     | 7,144.93<br>(1,485.87 to<br>22,145.75)                     | 12,370.37<br>(2,635.05 to<br>30,660.84)                    | 77.74<br>(63.01 to<br>93.81)                      | 467.62<br>(79.41 to<br>1,334.90)                   | 400.90<br>(66.80 to<br>1,261.91)                   | 637.01<br>(114.56 to<br>1,584.81)                 |
| Urinary diseases and male infertility                      | 661.80<br>(574.31 to<br>744.60)                            | 1,645.43<br>(1,293.51 to<br>2,030.53)                      | 1,606.00<br>(1,248.88 to<br>2,011.00)                      | 1,885.85<br>(1,506.46 to<br>2,283.33)                      | 29.17<br>(25.52 to<br>32.64)                      | 99.90<br>(78.63 to<br>121.95)                      | 101.03<br>(79.68 to<br>124.64)                     | 107.48<br>(83.07 to<br>130.58)                    |
| Urinary tract infections                                   | 588.81<br>(512.55 to<br>672.48)                            | 1,529.36<br>(1,195.04 to<br>1,898.53)                      | 1,496.70<br>(1,156.76 to<br>1,863.43)                      | 1,734.64<br>(1,357.11 to<br>2,111.99)                      | 26.80<br>(23.44 to<br>29.95)                      | 94.10<br>(73.85 to<br>116.28)                      | 95.36<br>(74.83 to<br>117.04)                      | 100.38<br>(76.71 to<br>121.30)                    |

|                                                   |                                       |                                          |                                          |                                          |                                 |                                 |                                 |                                 |
|---------------------------------------------------|---------------------------------------|------------------------------------------|------------------------------------------|------------------------------------------|---------------------------------|---------------------------------|---------------------------------|---------------------------------|
| Urolithiasis                                      | 23.74<br>(18.44 to<br>32.39)          | 34.95<br>(24.10 to<br>53.07)             | 32.17<br>(22.10 to<br>49.66)             | 46.58<br>(32.87 to<br>69.92)             | 0.59<br>(0.46 to<br>0.84)       | 1.17<br>(0.82 to<br>1.87)       | 1.10<br>(0.78 to<br>1.77)       | 1.50<br>(1.08 to<br>2.37)       |
| Other urinary diseases                            | 49.26<br>(33.44 to<br>75.13)          | 81.12<br>(38.16 to<br>150.26)            | 77.12<br>(36.15 to<br>142.07)            | 104.62<br>(51.28 to<br>189.82)           | 1.78<br>(1.04 to<br>2.87)       | 4.63<br>(2.11 to<br>8.39)       | 4.56<br>(2.05 to<br>8.35)       | 5.61<br>(2.57 to<br>10.16)      |
| Gynecological diseases                            | 17.60<br>(12.92 to<br>23.83)          | 21.66<br>(12.63 to<br>33.96)             | 19.00<br>(10.98 to<br>30.22)             | 35.37<br>(21.55 to<br>54.03)             | 0.43<br>(0.32 to<br>0.57)       | 0.63<br>(0.38 to<br>0.95)       | 0.56<br>(0.33 to<br>0.85)       | 0.99<br>(0.62 to<br>1.46)       |
| Uterine fibroids                                  | 0.70<br>(0.33 to<br>1.14)             | 1.27<br>(0.47 to<br>2.44)                | 1.16<br>(0.43 to<br>2.17)                | 1.82<br>(0.69 to<br>3.47)                | 0.03<br>(0.01 to<br>0.04)       | 0.05<br>(0.02 to<br>0.09)       | 0.05<br>(0.01 to<br>0.09)       | 0.07<br>(0.03 to<br>0.13)       |
| Polycystic ovarian syndrome                       | 1.33<br>(0.70 to<br>2.52)             | 0.94<br>(0.36 to<br>2.03)                | 0.76<br>(0.29 to<br>1.64)                | 2.05<br>(0.85 to<br>4.24)                | 0.03<br>(0.02 to<br>0.06)       | 0.02<br>(0.01 to<br>0.05)       | 0.02<br>(0.01 to<br>0.04)       | 0.05<br>(0.02 to<br>0.10)       |
| Endometriosis                                     | 0.19<br>(0.08 to<br>0.39)             | 0.34<br>(0.10 to<br>0.86)                | 0.30<br>(0.09 to<br>0.77)                | 0.53<br>(0.17 to<br>1.39)                | 0.00<br>(0.00 to<br>0.01)       | 0.01<br>(0.00 to<br>0.02)       | 0.01<br>(0.00 to<br>0.02)       | 0.01<br>(0.00 to<br>0.04)       |
| Genital prolapse                                  | 0.43<br>(0.20 to<br>0.71)             | 0.54<br>(0.19 to<br>1.10)                | 0.48<br>(0.17 to<br>0.96)                | 0.87<br>(0.31 to<br>1.74)                | 0.02<br>(0.01 to<br>0.03)       | 0.02<br>(0.01 to<br>0.04)       | 0.02<br>(0.01 to<br>0.04)       | 0.03<br>(0.01 to<br>0.07)       |
| Other gynecological diseases                      | 14.96<br>(10.85 to<br>20.95)          | 18.58<br>(10.60 to<br>29.78)             | 16.29<br>(9.27 to<br>26.49)              | 30.10<br>(17.88 to<br>47.57)             | 0.35<br>(0.26 to<br>0.48)       | 0.52<br>(0.31 to<br>0.81)       | 0.46<br>(0.27 to<br>0.73)       | 0.82<br>(0.50 to<br>1.25)       |
| Hemoglobinopathies and hemolytic anemias          | 1,167.58<br>(883.06 to<br>1,710.28)   | 1,672.08<br>(1,022.84 to<br>2,743.92)    | 1,547.17<br>(973.18 to<br>2,541.34)      | 2,230.19<br>(1,438.45 to<br>3,568.93)    | 24.99<br>(19.20 to<br>37.13)    | 57.24<br>(36.76 to<br>92.36)    | 54.11<br>(34.49 to<br>88.54)    | 73.59<br>(48.32 to<br>116.61)   |
| Thalassemias                                      | 23.72<br>(13.14 to<br>44.16)          | 8.87<br>(3.45 to<br>21.36)               | 8.38<br>(3.24 to<br>20.20)               | 9.33<br>(3.51 to<br>22.99)               | 0.29<br>(0.16 to<br>0.53)       | 0.11<br>(0.05 to<br>0.26)       | 0.11<br>(0.04 to<br>0.25)       | 0.12<br>(0.05 to<br>0.28)       |
| Sickle cell disorders                             | 955.88<br>(720.17 to<br>1,401.09)     | 1,267.98<br>(773.40 to<br>2,086.27)      | 1,166.84<br>(716.08 to<br>1,912.64)      | 1,697.38<br>(1,082.58 to<br>2,728.46)    | 18.07<br>(13.69 to<br>26.79)    | 35.44<br>(21.63 to<br>59.34)    | 32.91<br>(20.25 to<br>53.75)    | 46.53<br>(29.59 to<br>75.45)    |
| G6PD deficiency                                   | 145.17<br>(102.83 to<br>222.58)       | 284.98<br>(169.46 to<br>482.65)          | 263.47<br>(152.37 to<br>452.86)          | 391.50<br>(231.69 to<br>649.70)          | 3.55<br>(2.38 to<br>5.51)       | 11.94<br>(7.13 to<br>20.17)     | 11.25<br>(6.83 to<br>19.20)     | 15.80<br>(9.63 to<br>26.24)     |
| Other hemoglobinopathies and hemolytic anemias    | 42.81<br>(31.91 to<br>66.08)          | 110.24<br>(71.72 to<br>181.44)           | 108.48<br>(68.96 to<br>177.28)           | 131.98<br>(87.19 to<br>212.82)           | 3.09<br>(2.32 to<br>4.78)       | 9.75<br>(6.36 to<br>15.86)      | 9.85<br>(6.60 to<br>15.66)      | 11.15<br>(7.10 to<br>18.16)     |
| Endocrine, metabolic, blood, and immune disorders | 7,063.60<br>(5,934.60 to<br>8,757.69) | 14,702.73<br>(10,567.84 to<br>20,046.13) | 14,954.87<br>(10,753.15 to<br>20,258.60) | 14,491.14<br>(10,437.76 to<br>20,278.40) | 185.22<br>(150.54 to<br>216.48) | 592.85<br>(435.07 to<br>749.40) | 622.09<br>(458.79 to<br>792.13) | 552.00<br>(403.42 to<br>697.50) |

| Oman                                   |                                                 |                                                |                                                |                                                |                                        |                                        |                                        |                                        |
|----------------------------------------|-------------------------------------------------|------------------------------------------------|------------------------------------------------|------------------------------------------------|----------------------------------------|----------------------------------------|----------------------------------------|----------------------------------------|
| Cause                                  | YLLs (actual counts)                            |                                                |                                                |                                                | Deaths (actual counts)                 |                                        |                                        |                                        |
|                                        | 2016                                            | 2040 Forecast                                  | 2040 Better Scenario                           | 2040 Worse Scenario                            | 2016                                   | 2040 Forecast                          | 2040 Better Scenario                   | 2040 Worse Scenario                    |
| <b>Musculoskeletal disorders</b>       | <b>383.74</b><br>(291.53 to<br>887.86)          | <b>894.10</b><br>(688.26 to<br>1,164.93)       | <b>886.75</b><br>(679.67 to<br>1,139.99)       | <b>938.05</b><br>(724.31 to<br>1,234.35)       | <b>10.51</b><br>(8.40 to<br>13.43)     | <b>37.27</b><br>(26.80 to<br>46.74)    | <b>38.13</b><br>(26.93 to<br>47.69)    | <b>37.11</b><br>(27.03 to<br>46.50)    |
| Rheumatoid arthritis                   | 25.58<br>(15.37 to<br>38.24)                    | 72.13<br>(39.12 to<br>117.80)                  | 65.95<br>(35.39 to<br>110.77)                  | 102.43<br>(59.24 to<br>162.56)                 | 0.86<br>(0.49 to<br>1.33)              | 3.46<br>(1.79 to<br>6.05)              | 3.25<br>(1.67 to<br>5.95)              | 4.71<br>(2.54 to<br>7.77)              |
| Other musculoskeletal disorders        | 358.16<br>(265.69 to<br>563.08)                 | 821.97<br>(624.11 to<br>1,100.57)              | 820.79<br>(622.71 to<br>1,082.24)              | 835.63<br>(627.61 to<br>1,144.35)              | 9.64<br>(7.57 to<br>12.67)             | 33.81<br>(23.76 to<br>42.84)           | 34.89<br>(24.35 to<br>44.73)           | 32.40<br>(23.27 to<br>41.38)           |
| <b>Other non-communicable diseases</b> | <b>18,488.95</b><br>(12,992.95 to<br>24,980.95) | <b>14,563.04</b><br>(7,247.75 to<br>32,035.85) | <b>13,161.47</b><br>(6,705.99 to<br>28,643.97) | <b>20,243.60</b><br>(9,319.01 to<br>48,274.95) | <b>265.01</b><br>(190.23 to<br>347.15) | <b>467.84</b><br>(275.40 to<br>741.07) | <b>461.19</b><br>(270.28 to<br>725.82) | <b>540.33</b><br>(311.60 to<br>909.92) |
| Congenital birth defects               | 16,154.15<br>(11,143.49 to<br>22,356.23)        | 8,373.83<br>(2,696.99 to<br>24,006.47)         | 7,053.35<br>(2,309.89 to<br>20,518.84)         | 13,377.79<br>(4,271.27 to<br>38,299.06)        | 195.46<br>(136.40 to<br>267.02)        | 110.77<br>(41.80 to<br>295.58)         | 94.21<br>(36.11 to<br>255.48)          | 174.66<br>(64.97 to<br>473.16)         |
| Neural tube defects                    | 3,380.21<br>(1,900.02 to<br>5,439.83)           | 944.71<br>(234.54 to<br>3,097.95)              | 772.52<br>(202.13 to<br>2,474.47)              | 1,689.60<br>(422.57 to<br>5,478.47)            | 41.17<br>(23.77 to<br>65.06)           | 12.99<br>(4.15 to<br>38.45)            | 10.73<br>(3.64 to<br>30.40)            | 22.96<br>(7.39 to<br>67.25)            |

|                                               |                                             |                                          |                                          |                                             |                                       |                                       |                                       |                                       |
|-----------------------------------------------|---------------------------------------------|------------------------------------------|------------------------------------------|---------------------------------------------|---------------------------------------|---------------------------------------|---------------------------------------|---------------------------------------|
|                                               | 5,980.91<br>(3,890.12 to<br>8,705.97)       | 3,033.22<br>(945.17 to<br>8,816.46)      | 2,477.36<br>(782.32 to<br>7,304.93)      | 5,232.28<br>(1,670.88 to<br>15,056.02)      | 72.33<br>(47.63 to<br>103.55)         | 39.36<br>(14.43 to<br>106.86)         | 32.39<br>(12.08 to<br>88.87)          | 67.29<br>(24.66 to<br>180.70)         |
| Congenital heart anomalies                    |                                             |                                          |                                          |                                             |                                       |                                       |                                       |                                       |
|                                               | 19.27<br>(2.89 to<br>130.90)                | 11.31<br>(0.55 to<br>80.81)              | 8.76<br>(0.43 to<br>56.60)               | 24.16<br>(1.20 to<br>178.44)                | 0.22<br>(0.03 to<br>1.52)             | 0.13<br>(0.01 to<br>0.93)             | 0.10<br>(0.00 to<br>0.65)             | 0.28<br>(0.01 to<br>2.07)             |
| Orofacial clefts                              |                                             |                                          |                                          |                                             |                                       |                                       |                                       |                                       |
|                                               | 502.36<br>(280.19 to<br>774.37)             | 528.68<br>(197.00 to<br>1,310.45)        | 512.02<br>(195.71 to<br>1,271.72)        | 563.15<br>(203.13 to<br>1,410.65)           | 6.37<br>(3.73 to<br>9.59)             | 7.60<br>(3.32 to<br>16.95)            | 7.44<br>(3.34 to<br>16.34)            | 7.99<br>(3.37 to<br>17.70)            |
| Down syndrome                                 |                                             |                                          |                                          |                                             |                                       |                                       |                                       |                                       |
|                                               | 397.20<br>(196.96 to<br>743.54)             | 390.96<br>(99.69 to<br>1,218.23)         | 349.90<br>(91.95 to<br>1,094.52)         | 510.18<br>(129.92 to<br>1,579.18)           | 4.65<br>(2.32 to<br>8.71)             | 4.70<br>(1.27 to<br>14.27)            | 4.22<br>(1.18 to<br>12.88)            | 6.11<br>(1.68 to<br>18.54)            |
| Other chromosomal abnormalities               |                                             |                                          |                                          |                                             |                                       |                                       |                                       |                                       |
|                                               | 318.90<br>(154.55 to<br>569.16)             | 186.50<br>(51.58 to<br>576.24)           | 156.90<br>(42.22 to<br>454.09)           | 289.22<br>(79.20 to<br>841.92)              | 3.79<br>(1.89 to<br>6.69)             | 2.32<br>(0.74 to<br>6.99)             | 1.96<br>(0.62 to<br>5.47)             | 3.57<br>(1.11 to<br>10.01)            |
| Congenital musculoskeletal and limb anomalies |                                             |                                          |                                          |                                             |                                       |                                       |                                       |                                       |
|                                               | 119.80<br>(67.96 to<br>265.29)              | 128.19<br>(67.38 to<br>258.57)           | 115.46<br>(57.94 to<br>230.81)           | 175.88<br>(94.37 to<br>360.69)              | 1.94<br>(1.36 to<br>3.30)             | 3.37<br>(1.27 to<br>5.40)             | 3.11<br>(1.14 to<br>5.00)             | 4.45<br>(1.77 to<br>7.04)             |
| Urogenital congenital anomalies               |                                             |                                          |                                          |                                             |                                       |                                       |                                       |                                       |
|                                               | 603.94<br>(182.44 to<br>1,046.17)           | 345.13<br>(64.63 to<br>1,177.74)         | 286.14<br>(52.89 to<br>1,017.43)         | 568.54<br>(106.89 to<br>1,915.27)           | 7.09<br>(2.15 to<br>12.21)            | 4.18<br>(0.83 to<br>13.84)            | 3.48<br>(0.71 to<br>11.97)            | 6.86<br>(1.39 to<br>22.50)            |
| Digestive congenital anomalies                |                                             |                                          |                                          |                                             |                                       |                                       |                                       |                                       |
|                                               | 4,831.56<br>(2,816.70 to<br>7,493.14)       | 2,805.13<br>(840.03 to<br>8,280.28)      | 2,374.29<br>(712.58 to<br>7,289.55)      | 4,324.78<br>(1,303.98 to<br>13,253.48)      | 57.89<br>(34.02 to<br>88.78)          | 36.12<br>(12.52 to<br>100.25)         | 30.80<br>(10.88 to<br>88.78)          | 55.15<br>(19.06 to<br>159.64)         |
| Other congenital birth defects                |                                             |                                          |                                          |                                             |                                       |                                       |                                       |                                       |
|                                               | 1,306.86<br>(644.97 to<br>1,790.75)         | 5,678.47<br>(2,967.41 to<br>7,800.73)    | 5,662.59<br>(2,882.23 to<br>7,869.43)    | 6,137.89<br>(3,136.58 to<br>8,439.38)       | 57.62<br>(30.53 to<br>78.64)          | 351.14<br>(191.06 to<br>500.87)       | 361.81<br>(195.08 to<br>514.49)       | 357.23<br>(187.82 to<br>515.02)       |
| Skin and subcutaneous diseases                |                                             |                                          |                                          |                                             |                                       |                                       |                                       |                                       |
|                                               | 72.15<br>(32.20 to<br>109.69)               | 203.41<br>(87.78 to<br>311.04)           | 203.44<br>(88.67 to<br>314.94)           | 200.94<br>(87.06 to<br>314.74)              | 1.59<br>(0.68 to<br>2.45)             | 7.04<br>(2.95 to<br>11.74)            | 7.25<br>(2.97 to<br>12.34)            | 6.56<br>(2.63 to<br>10.82)            |
| Cellulitis                                    |                                             |                                          |                                          |                                             |                                       |                                       |                                       |                                       |
|                                               | 783.14<br>(416.62 to<br>1,112.85)           | 3,969.37<br>(2,130.07 to<br>5,685.34)    | 3,961.67<br>(2,137.21 to<br>5,666.15)    | 4,305.43<br>(2,538.32 to<br>6,154.42)       | 33.57<br>(18.80 to<br>49.18)          | 242.39<br>(136.51 to<br>323.62)       | 249.85<br>(140.06 to<br>366.51)       | 247.22<br>(138.37 to<br>366.02)       |
| Pyoderma                                      |                                             |                                          |                                          |                                             |                                       |                                       |                                       |                                       |
|                                               | 379.84<br>(150.05 to<br>567.01)             | 1,384.48<br>(523.40 to<br>2,220.66)      | 1,379.14<br>(536.66 to<br>2,177.62)      | 1,580.64<br>(379.00 to<br>2,333.14)         | 20.86<br>(8.30 to<br>30.33)           | 97.73<br>(37.68 to<br>158.52)         | 100.67<br>(37.05 to<br>161.91)        | 99.41<br>(38.73 to<br>163.45)         |
| Decubitus ulcer                               |                                             |                                          |                                          |                                             |                                       |                                       |                                       |                                       |
|                                               | 71.73<br>(32.24 to<br>109.06)               | 121.21<br>(55.94 to<br>187.29)           | 118.33<br>(55.84 to<br>182.55)           | 130.88<br>(61.11 to<br>206.24)              | 1.60<br>(0.70 to<br>2.42)             | 3.99<br>(1.86 to<br>6.24)             | 4.04<br>(1.90 to<br>6.20)             | 4.03<br>(1.85 to<br>6.31)             |
| Other skin and subcutaneous diseases          |                                             |                                          |                                          |                                             |                                       |                                       |                                       |                                       |
|                                               | 1,027.94<br>(437.39 to<br>1,823.08)         | 510.74<br>(58.64 to<br>1,910.64)         | 445.53<br>(51.44 to<br>1,567.00)         | 727.92<br>(83.62 to<br>2,763.01)            | 11.93<br>(5.08 to<br>21.17)           | 5.93<br>(0.68 to<br>22.18)            | 5.17<br>(0.60 to<br>18.16)            | 8.45<br>(0.97 to<br>32.07)            |
| Sudden infant death syndrome                  |                                             |                                          |                                          |                                             |                                       |                                       |                                       |                                       |
|                                               | 131,349.42<br>(114,669.50 to<br>149,503.40) | 62,123.11<br>(48,436.38 to<br>78,701.62) | 59,238.57<br>(46,500.48 to<br>74,637.94) | 173,791.45<br>(136,237.85 to<br>221,321.03) | 2,658.02<br>(2,325.72 to<br>3,010.94) | 1,789.61<br>(1,450.88 to<br>2,182.46) | 1,745.72<br>(1,426.59 to<br>2,106.45) | 4,421.89<br>(3,593.25 to<br>5,380.84) |
| Injuries                                      |                                             |                                          |                                          |                                             |                                       |                                       |                                       |                                       |
|                                               | 105,393.70<br>(90,980.01 to<br>121,259.37)  | 34,799.64<br>(26,264.14 to<br>45,006.41) | 33,534.44<br>(25,359.19 to<br>42,994.64) | 140,538.75<br>(109,594.54 to<br>179,098.40) | 2,127.54<br>(1,840.13 to<br>2,428.11) | 998.69<br>(789.24 to<br>1,258.46)     | 979.49<br>(776.87 to<br>1,224.21)     | 3,502.08<br>(2,806.34 to<br>4,314.01) |
| Transport injuries                            |                                             |                                          |                                          |                                             |                                       |                                       |                                       |                                       |
|                                               | 104,707.06<br>(90,411.77 to<br>120,436.77)  | 33,544.71<br>(25,334.78 to<br>43,412.19) | 32,380.76<br>(24,570.40 to<br>41,584.28) | 138,851.37<br>(108,168.16 to<br>176,912.19) | 2,107.70<br>(1,824.28 to<br>2,409.81) | 934.84<br>(738.37 to<br>1,184.02)     | 918.03<br>(735.46 to<br>1,144.62)     | 3,422.22<br>(2,742.59 to<br>4,221.39) |
| Road injuries                                 |                                             |                                          |                                          |                                             |                                       |                                       |                                       |                                       |
|                                               | 27,364.23<br>(20,919.90 to<br>36,435.10)    | 9,524.91<br>(6,461.52 to<br>13,407.37)   | 8,571.44<br>(5,781.18 to<br>12,141.29)   | 35,947.78<br>(25,701.35 to<br>50,034.84)    | 568.38<br>(446.02 to<br>758.76)       | 272.72<br>(192.93 to<br>384.76)       | 250.19<br>(176.91 to<br>351.91)       | 950.66<br>(694.01 to<br>1,320.23)     |
| Pedestrian road injuries                      |                                             |                                          |                                          |                                             |                                       |                                       |                                       |                                       |

| Oman                       |                                       |                                       |                                       |                                       |                                     |                              |                              |                               |
|----------------------------|---------------------------------------|---------------------------------------|---------------------------------------|---------------------------------------|-------------------------------------|------------------------------|------------------------------|-------------------------------|
| Cause                      | YLLs (actual counts)                  |                                       |                                       |                                       | Deaths (actual counts)              |                              |                              |                               |
|                            | 2016                                  | 2040 Forecast                         | 2040 Better Scenario                  | 2040 Worse Scenario                   | 2016                                | 2040 Forecast                | 2040 Better Scenario         | 2040 Worse Scenario           |
|                            | Cyclist road injuries                 | 678.82<br>(482.49 to<br>1,308.25)     | 377.40<br>(254.21 to<br>584.83)       | 381.86<br>(258.34 to<br>597.87)       | 1,095.52<br>(745.10 to<br>1,934.81) | 16.54<br>(12.02 to<br>27.11) | 17.53<br>(11.18 to<br>27.64) | 18.44<br>(11.81 to<br>29.15)  |
| Motorcyclist road injuries | 3,214.99<br>(2,092.51 to<br>7,486.74) | 1,873.41<br>(1,129.80 to<br>3,626.36) | 1,858.31<br>(1,128.53 to<br>3,602.46) | 4,107.63<br>(2,390.86 to<br>9,493.58) | 60.17<br>(40.00 to<br>132.78)       | 47.83<br>(31.50 to<br>77.82) | 48.68<br>(32.49 to<br>79.74) | 89.29<br>(56.53 to<br>180.38) |

|                                                 |                                                               |                                                               |                                                               |                                                               |                                                      |                                                      |                                                      |                                                      |
|-------------------------------------------------|---------------------------------------------------------------|---------------------------------------------------------------|---------------------------------------------------------------|---------------------------------------------------------------|------------------------------------------------------|------------------------------------------------------|------------------------------------------------------|------------------------------------------------------|
| Motor vehicle road injuries                     | 73,250.19<br>(57,784.72 to<br>87,648.25)                      | 21,652.26<br>(15,004.82 to<br>29,199.37)                      | 21,450.87<br>(14,902.52 to<br>28,667.81)                      | 97,344.27<br>(71,442.41 to<br>127,342.15)                     | 1,457.52<br>(1,151.39 to<br>1,742.48)                | 590.54<br>(421.47 to<br>775.07)                      | 594.12<br>(430.14 to<br>777.31)                      | 2,332.36<br>(1,729.38 to<br>2,968.30)                |
| Other road injuries                             | 198.85<br>(151.63 to<br>294.30)                               | 116.72<br>(79.32 to<br>164.33)                                | 118.28<br>(80.01 to<br>166.14)                                | 356.18<br>(245.20 to<br>537.52)                               | 5.09<br>(3.85 to<br>6.63)                            | 6.21<br>(3.41 to<br>9.05)                            | 6.60<br>(3.56 to<br>9.42)                            | 13.60<br>(8.33 to<br>19.24)                          |
| Other transport injuries                        | 686.64<br>(532.36 to<br>857.73)                               | 1,254.93<br>(839.59 to<br>1,765.49)                           | 1,153.68<br>(781.16 to<br>1,617.94)                           | 1,687.38<br>(1,168.51 to<br>2,380.33)                         | 19.84<br>(15.01 to<br>24.21)                         | 63.86<br>(41.22 to<br>88.10)                         | 61.46<br>(39.59 to<br>83.91)                         | 79.86<br>(51.52 to<br>110.23)                        |
| <b>Unintentional injuries</b>                   | <b>16,761.08</b><br><b>(14,199.44 to</b><br><b>21,170.51)</b> | <b>16,779.95</b><br><b>(12,362.99 to</b><br><b>23,770.68)</b> | <b>15,863.13</b><br><b>(11,637.31 to</b><br><b>22,101.80)</b> | <b>20,680.78</b><br><b>(14,884.86 to</b><br><b>30,670.94)</b> | <b>349.54</b><br><b>(299.46 to</b><br><b>431.92)</b> | <b>540.98</b><br><b>(428.79 to</b><br><b>682.45)</b> | <b>530.50</b><br><b>(417.96 to</b><br><b>665.52)</b> | <b>627.15</b><br><b>(492.28 to</b><br><b>809.04)</b> |
| Falls                                           | 3,333.83<br>(2,569.98 to<br>4,481.49)                         | 4,836.09<br>(3,638.22 to<br>6,546.77)                         | 4,714.78<br>(3,523.94 to<br>6,228.40)                         | 5,414.58<br>(3,997.40 to<br>7,463.01)                         | 86.54<br>(69.50 to<br>108.27)                        | 197.02<br>(150.60 to<br>245.52)                      | 199.09<br>(153.38 to<br>248.18)                      | 209.16<br>(159.77 to<br>266.66)                      |
| Drowning                                        | 5,338.12<br>(4,156.80 to<br>7,824.58)                         | 4,209.47<br>(2,806.03 to<br>6,731.83)                         | 3,930.71<br>(2,602.14 to<br>6,273.03)                         | 5,262.82<br>(3,454.53 to<br>8,783.19)                         | 96.14<br>(76.02 to<br>144.65)                        | 104.61<br>(74.73 to<br>149.20)                       | 100.30<br>(71.98 to<br>142.39)                       | 124.97<br>(88.55 to<br>185.87)                       |
| Fire, heat, and hot substances                  | 770.51<br>(573.93 to<br>1,196.99)                             | 720.96<br>(491.07 to<br>1,146.70)                             | 666.21<br>(452.32 to<br>1,051.81)                             | 966.69<br>(645.29 to<br>1,567.15)                             | 17.79<br>(14.44 to<br>24.71)                         | 27.86<br>(17.85 to<br>37.60)                         | 26.96<br>(16.74 to<br>37.26)                         | 34.56<br>(23.80 to<br>45.58)                         |
| Poisonings                                      | 836.67<br>(293.34 to<br>1,390.94)                             | 468.66<br>(146.15 to<br>865.50)                               | 415.18<br>(126.87 to<br>776.67)                               | 708.38<br>(233.80 to<br>1,317.19)                             | 15.72<br>(5.47 to<br>25.58)                          | 11.03<br>(3.51 to<br>19.90)                          | 9.90<br>(3.09 to<br>18.14)                           | 16.30<br>(5.50 to<br>29.04)                          |
| Exposure to mechanical forces                   | 4,222.49<br>(3,197.73 to<br>6,587.27)                         | 4,110.99<br>(2,717.95 to<br>6,691.86)                         | 3,812.79<br>(2,529.08 to<br>6,045.54)                         | 5,452.93<br>(3,558.18 to<br>8,678.66)                         | 88.93<br>(69.62 to<br>132.95)                        | 130.53<br>(93.53 to<br>181.85)                       | 125.46<br>(88.86 to<br>172.84)                       | 163.34<br>(117.25 to<br>226.67)                      |
| Unintentional firearm injuries                  | 47.56<br>(32.18 to<br>70.93)                                  | 39.67<br>(22.29 to<br>70.77)                                  | 37.42<br>(21.20 to<br>65.12)                                  | 50.31<br>(27.94 to<br>90.98)                                  | 0.96<br>(0.64 to<br>1.42)                            | 1.19<br>(0.70 to<br>1.87)                            | 1.17<br>(0.69 to<br>1.83)                            | 1.43<br>(0.84 to<br>2.25)                            |
| Unintentional suffocation                       | 270.75<br>(148.39 to<br>485.12)                               | 168.65<br>(64.25 to<br>406.02)                                | 152.58<br>(56.63 to<br>359.91)                                | 226.99<br>(77.52 to<br>575.35)                                | 3.54<br>(2.05 to<br>5.45)                            | 2.44<br>(1.09 to<br>5.45)                            | 2.22<br>(0.98 to<br>4.83)                            | 3.22<br>(1.30 to<br>7.50)                            |
| Other exposure to mechanical forces             | 3,904.18<br>(2,875.03 to<br>6,307.04)                         | 3,902.67<br>(2,606.56 to<br>6,239.52)                         | 3,622.79<br>(2,425.88 to<br>5,597.79)                         | 5,175.63<br>(3,407.05 to<br>8,220.89)                         | 84.43<br>(65.12 to<br>128.43)                        | 126.90<br>(91.00 to<br>177.01)                       | 122.07<br>(86.34 to<br>166.04)                       | 158.69<br>(114.60 to<br>215.88)                      |
| Adverse effects of medical treatment            | 735.99<br>(610.74 to<br>908.60)                               | 967.38<br>(694.07 to<br>1,370.41)                             | 939.62<br>(674.35 to<br>1,309.13)                             | 1,106.53<br>(782.56 to<br>1,617.00)                           | 17.12<br>(14.30 to<br>20.78)                         | 33.00<br>(23.88 to<br>43.78)                         | 33.02<br>(23.50 to<br>43.48)                         | 35.87<br>(26.31 to<br>47.93)                         |
| Animal contact                                  | 85.11<br>(66.08 to<br>112.63)                                 | 140.29<br>(87.98 to<br>228.42)                                | 133.33<br>(83.65 to<br>211.32)                                | 175.78<br>(109.43 to<br>282.74)                               | 2.08<br>(1.66 to<br>2.68)                            | 5.11<br>(3.33 to<br>7.72)                            | 5.01<br>(3.24 to<br>7.39)                            | 6.07<br>(3.97 to<br>9.07)                            |
| Venomous animal contact                         | 39.38<br>(30.54 to<br>52.35)                                  | 59.37<br>(35.89 to<br>100.98)                                 | 57.43<br>(34.91 to<br>93.34)                                  | 70.01<br>(42.22 to<br>118.90)                                 | 0.90<br>(0.70 to<br>1.18)                            | 2.05<br>(1.22 to<br>3.28)                            | 2.05<br>(1.21 to<br>3.23)                            | 2.28<br>(1.36 to<br>3.66)                            |
| Non-venomous animal contact                     | 45.72<br>(35.43 to<br>60.34)                                  | 80.92<br>(50.33 to<br>130.33)                                 | 75.91<br>(46.56 to<br>119.37)                                 | 105.77<br>(64.69 to<br>170.02)                                | 1.18<br>(0.93 to<br>1.53)                            | 3.06<br>(1.95 to<br>4.69)                            | 2.95<br>(1.87 to<br>4.34)                            | 3.79<br>(2.39 to<br>5.70)                            |
| Foreign body                                    | 1,108.96<br>(790.54 to<br>1,492.85)                           | 1,073.76<br>(692.99 to<br>1,695.71)                           | 1,026.39<br>(668.24 to<br>1,593.91)                           | 1,208.09<br>(757.43 to<br>2,007.82)                           | 18.29<br>(13.96 to<br>22.92)                         | 24.80<br>(17.81 to<br>33.58)                         | 24.37<br>(17.58 to<br>32.51)                         | 26.55<br>(18.55 to<br>37.22)                         |
| Pulmonary aspiration and foreign body in airway | 1,082.63<br>(763.81 to<br>1,466.42)                           | 1,047.49<br>(675.20 to<br>1,658.84)                           | 999.87<br>(649.45 to<br>1,560.31)                             | 1,182.15<br>(738.16 to<br>1,974.50)                           | 17.82<br>(13.49 to<br>22.39)                         | 24.18<br>(17.32 to<br>32.70)                         | 23.73<br>(17.17 to<br>31.61)                         | 25.96<br>(18.13 to<br>36.56)                         |
| Foreign body in other body part                 | 26.33<br>(23.29 to<br>29.62)                                  | 26.27<br>(18.31 to<br>37.80)                                  | 26.52<br>(18.67 to<br>38.27)                                  | 25.94<br>(18.34 to<br>37.83)                                  | 0.47<br>(0.41 to<br>0.54)                            | 0.62<br>(0.42 to<br>0.83)                            | 0.64<br>(0.43 to<br>0.87)                            | 0.59<br>(0.41 to<br>0.80)                            |
| Environmental heat and cold exposure            | 111.21<br>(82.02 to<br>157.56)                                | 123.97<br>(74.45 to<br>199.40)                                | 114.45<br>(67.67 to<br>179.75)                                | 171.55<br>(105.81 to<br>276.21)                               | 2.63<br>(1.81 to<br>3.55)                            | 3.92<br>(2.19 to<br>5.91)                            | 3.70<br>(2.05 to<br>5.55)                            | 5.25<br>(3.18 to<br>7.99)                            |
| Other unintentional injuries                    | 218.19<br>(162.04 to<br>284.53)                               | 128.38<br>(80.40 to<br>198.91)                                | 109.66<br>(68.31 to<br>164.26)                                | 213.43<br>(140.21 to<br>315.89)                               | 4.30<br>(3.23 to<br>5.54)                            | 3.11<br>(1.98 to<br>4.65)                            | 2.68<br>(1.70 to<br>4.06)                            | 5.08<br>(3.41 to<br>7.24)                            |
| <b>Self-harm and interpersonal violence</b>     | <b>9,084.59</b><br><b>(6,945.50 to</b><br><b>12,396.92)</b>   | <b>10,233.53</b><br><b>(7,470.25 to</b><br><b>14,038.25)</b>  | <b>9,531.92</b><br><b>(6,968.39 to</b><br><b>12,883.00)</b>   | <b>12,260.79</b><br><b>(8,855.64 to</b><br><b>17,518.68)</b>  | <b>178.93</b><br><b>(137.56 to</b><br><b>241.95)</b> | <b>243.29</b><br><b>(181.36 to</b><br><b>325.23)</b> | <b>229.05</b><br><b>(172.76 to</b><br><b>304.26)</b> | <b>286.10</b><br><b>(210.63 to</b><br><b>396.94)</b> |

| Oman                                                                         |                                     |                                     |                                     |                                      |                              |                              |                              |                              |
|------------------------------------------------------------------------------|-------------------------------------|-------------------------------------|-------------------------------------|--------------------------------------|------------------------------|------------------------------|------------------------------|------------------------------|
| Cause                                                                        | YLLs (actual counts)                |                                     |                                     |                                      | Deaths (actual counts)       |                              |                              |                              |
|                                                                              | 2016                                | 2040 Forecast                       | 2040 Better Scenario                | 2040 Worse Scenario                  | 2016                         | 2040 Forecast                | 2040 Better Scenario         | 2040 Worse Scenario          |
| Self-harm                                                                    | 7,590.10<br>(5,632.51 to 10,859.42) | 9,054.67<br>(6,477.72 to 12,654.03) | 8,429.28<br>(6,022.28 to 11,723.78) | 10,836.77<br>(7,608.92 to 15,960.11) | 150.42<br>(113.27 to 211.59) | 215.95<br>(157.82 to 295.72) | 203.27<br>(149.18 to 276.90) | 253.59<br>(183.20 to 359.97) |
| Self-harm by firearm                                                         | 281.34<br>(162.37 to 473.40)        | 292.87<br>(156.37 to 491.71)        | 265.69<br>(141.71 to 435.70)        | 382.20<br>(207.81 to 647.31)         | 5.78<br>(3.31 to 9.52)       | 7.64<br>(4.25 to 12.26)      | 7.06<br>(3.85 to 11.22)      | 9.69<br>(5.38 to 15.91)      |
| Self-harm by other specified means                                           | 7,308.76<br>(5,386.62 to 10,450.14) | 8,761.81<br>(6,242.74 to 12,256.96) | 8,163.59<br>(5,832.21 to 11,294.14) | 10,454.57<br>(7,355.29 to 15,351.80) | 144.64<br>(108.30 to 204.79) | 208.31<br>(152.61 to 284.50) | 196.21<br>(144.08 to 269.90) | 243.90<br>(175.83 to 347.25) |
| Interpersonal violence                                                       | 1,494.49<br>(1,111.52 to 1,975.38)  | 1,178.85<br>(808.12 to 1,674.28)    | 1,102.64<br>(768.35 to 1,549.19)    | 1,424.02<br>(965.33 to 2,045.13)     | 28.50<br>(21.10 to 37.57)    | 27.33<br>(19.03 to 37.33)    | 25.78<br>(17.89 to 35.00)    | 32.51<br>(22.59 to 44.84)    |
| Physical violence by firearm                                                 | 157.76<br>(84.13 to 361.35)         | 114.16<br>(60.76 to 246.76)         | 103.66<br>(54.97 to 219.13)         | 153.49<br>(81.13 to 330.27)          | 3.03<br>(1.63 to 6.83)       | 2.53<br>(1.38 to 5.34)       | 2.31<br>(1.28 to 4.90)       | 3.36<br>(1.83 to 7.15)       |
| Physical violence by sharp object                                            | 290.64<br>(179.47 to 627.15)        | 241.17<br>(149.86 to 422.61)        | 222.81<br>(142.16 to 397.51)        | 308.65<br>(192.87 to 582.38)         | 5.64<br>(3.52 to 11.61)      | 5.61<br>(3.64 to 9.00)       | 5.23<br>(3.49 to 8.47)       | 7.05<br>(4.59 to 11.99)      |
| Physical violence by other means                                             | 1,046.09<br>(607.44 to 1,402.30)    | 823.52<br>(457.98 to 1,189.95)      | 776.18<br>(438.37 to 1,113.53)      | 961.88<br>(549.43 to 1,392.46)       | 19.84<br>(11.42 to 26.66)    | 19.88<br>(10.67 to 27.15)    | 18.24<br>(10.12 to 25.57)    | 22.09<br>(12.62 to 31.13)    |
| Forces of nature, conflict and terrorism, and executions and police conflict | 110.06<br>(33.75 to 210.37)         | 309.99<br>(0.00 to 2,202.30)        | 309.08<br>(0.00 to 2,204.95)        | 311.13<br>(0.00 to 2,238.58)         | 2.01<br>(0.00 to 3.83)       | 6.65<br>(0.00 to 45.37)      | 6.69<br>(0.00 to 45.76)      | 6.56<br>(0.00 to 45.31)      |
| Exposure to forces of nature                                                 | 0.00<br>(0.00 to 0.00)              | 164.76<br>(0.00 to 1,115.20)        | 164.26<br>(0.00 to 1,113.55)        | 164.97<br>(0.00 to 1,121.81)         | 0.00<br>(0.00 to 0.00)       | 3.67<br>(0.00 to 24.93)      | 3.69<br>(0.00 to 25.06)      | 3.61<br>(0.00 to 24.69)      |
| Conflict and terrorism                                                       | 0.00<br>(0.00 to 0.00)              | 145.24<br>(0.00 to 2,099.53)        | 144.82<br>(0.00 to 2,090.56)        | 146.16<br>(0.00 to 2,107.61)         | 0.00<br>(0.00 to 0.00)       | 2.98<br>(0.00 to 43.14)      | 3.00<br>(0.00 to 43.24)      | 2.95<br>(0.00 to 42.43)      |
| Executions and police conflict                                               | 110.06<br>(33.75 to 210.37)         | 0.00<br>(0.00 to 0.00)              | 0.00<br>(0.00 to 0.00)              | 0.00<br>(0.00 to 0.00)               | 2.01<br>(0.60 to 3.83)       | 0.00<br>(0.00 to 0.00)       | 0.00<br>(0.00 to 0.00)       | 0.00<br>(0.00 to 0.00)       |

  

| Qatar                                                             |                                          |                                          |                                          |                                          |                                    |                                      |                                     |                                      |
|-------------------------------------------------------------------|------------------------------------------|------------------------------------------|------------------------------------------|------------------------------------------|------------------------------------|--------------------------------------|-------------------------------------|--------------------------------------|
| Cause                                                             | YLLs (actual counts)                     |                                          |                                          |                                          | Deaths (actual counts)             |                                      |                                     |                                      |
|                                                                   | 2016                                     | 2040 Forecast                            | 2040 Better Scenario                     | 2040 Worse Scenario                      | 2016                               | 2040 Forecast                        | 2040 Better Scenario                | 2040 Worse Scenario                  |
| All causes                                                        | 137,887.87<br>(104,013.72 to 180,217.86) | 246,443.45<br>(147,050.56 to 410,065.00) | 182,104.56<br>(108,882.96 to 307,948.07) | 324,330.86<br>(191,509.34 to 544,413.08) | 3,438.50<br>(2,556.28 to 4,550.96) | 11,124.85<br>(7,075.01 to 17,277.54) | 8,916.98<br>(5,703.88 to 14,066.36) | 14,032.18<br>(8,914.67 to 21,539.60) |
| Communicable, maternal, neonatal, and nutritional diseases        | 12,926.82<br>(9,168.83 to 17,732.24)     | 10,763.62<br>(7,020.68 to 15,978.16)     | 8,080.03<br>(5,329.27 to 11,792.54)      | 13,893.05<br>(9,325.71 to 20,419.08)     | 197.95<br>(149.20 to 258.13)       | 321.91<br>(223.76 to 472.52)         | 259.07<br>(180.40 to 377.69)        | 402.51<br>(284.70 to 592.54)         |
| HIV/AIDS and tuberculosis                                         | 480.43<br>(383.55 to 601.54)             | 383.30<br>(230.60 to 637.39)             | 259.54<br>(155.26 to 416.74)             | 929.22<br>(615.22 to 1,382.42)           | 11.78<br>(9.19 to 15.13)           | 15.33<br>(9.24 to 25.20)             | 10.39<br>(6.26 to 16.48)            | 36.64<br>(23.80 to 54.71)            |
| Tuberculosis                                                      | 297.60<br>(206.91 to 416.23)             | 296.79<br>(158.84 to 543.55)             | 189.33<br>(100.71 to 335.49)             | 473.31<br>(243.93 to 891.90)             | 8.01<br>(5.54 to 11.26)            | 13.04<br>(7.19 to 22.37)             | 8.67<br>(4.91 to 14.87)             | 19.82<br>(10.65 to 34.81)            |
| HIV/AIDS                                                          | 182.83<br>(154.36 to 234.16)             | 86.51<br>(45.22 to 162.07)               | 70.21<br>(31.85 to 144.11)               | 455.91<br>(272.36 to 727.41)             | 3.77<br>(3.17 to 4.85)             | 2.30<br>(1.10 to 4.31)               | 1.72<br>(0.67 to 3.75)              | 16.82<br>(9.10 to 28.88)             |
| Diarrhea, lower respiratory, and other common infectious diseases | 3,681.80<br>(2,760.48 to 4,745.16)       | 5,651.15<br>(3,236.21 to 9,828.88)       | 4,518.99<br>(2,583.65 to 7,574.98)       | 7,003.73<br>(4,046.85 to 12,227.97)      | 78.37<br>(57.42 to 103.76)         | 240.39<br>(150.09 to 378.97)         | 199.80<br>(124.87 to 308.83)        | 284.55<br>(173.68 to 451.48)         |
| Diarrheal diseases                                                | 175.50<br>(110.93 to 256.12)             | 202.85<br>(71.23 to 481.10)              | 202.86<br>(77.64 to 460.28)              | 197.10<br>(58.73 to 515.63)              | 2.78<br>(1.81 to 4.04)             | 7.79<br>(2.82 to 17.95)              | 8.66<br>(3.34 to 19.17)             | 6.98<br>(2.17 to 17.54)              |



|                                                       |                                                      |                                                      |                                                     |                                                      |                                                |                                                |                                                |                                                 |
|-------------------------------------------------------|------------------------------------------------------|------------------------------------------------------|-----------------------------------------------------|------------------------------------------------------|------------------------------------------------|------------------------------------------------|------------------------------------------------|-------------------------------------------------|
| Chagas disease                                        | 0.00<br>(0.00 to<br>0.00)                            | 0.00<br>(0.00 to<br>0.00)                            | 0.00<br>(0.00 to<br>0.00)                           | 0.00<br>(0.00 to<br>0.00)                            | 0.00<br>(0.00 to<br>0.00)                      | 0.00<br>(0.00 to<br>0.00)                      | 0.00<br>(0.00 to<br>0.00)                      | 0.00<br>(0.00 to<br>0.00)                       |
| Leishmaniasis                                         | 0.00<br>(0.00 to<br>0.00)                            | 0.00<br>(0.00 to<br>0.00)                            | 0.00<br>(0.00 to<br>0.00)                           | 0.00<br>(0.00 to<br>0.00)                            | 0.00<br>(0.00 to<br>0.00)                      | 0.00<br>(0.00 to<br>0.00)                      | 0.00<br>(0.00 to<br>0.00)                      | 0.00<br>(0.00 to<br>0.00)                       |
| African trypanosomiasis                               | 0.00<br>(0.00 to<br>0.00)                            | 0.00<br>(0.00 to<br>0.00)                            | 0.00<br>(0.00 to<br>0.00)                           | 0.00<br>(0.00 to<br>0.00)                            | 0.00<br>(0.00 to<br>0.00)                      | 0.00<br>(0.00 to<br>0.00)                      | 0.00<br>(0.00 to<br>0.00)                      | 0.00<br>(0.00 to<br>0.00)                       |
| Schistosomiasis                                       | 0.00<br>(0.00 to<br>0.00)                            | 0.00<br>(0.00 to<br>0.00)                            | 0.00<br>(0.00 to<br>0.00)                           | 0.00<br>(0.00 to<br>0.00)                            | 0.00<br>(0.00 to<br>0.00)                      | 0.00<br>(0.00 to<br>0.00)                      | 0.00<br>(0.00 to<br>0.00)                      | 0.00<br>(0.00 to<br>0.00)                       |
| Cysticercosis                                         | 1.40<br>(0.87 to<br>2.23)                            | 0.59<br>(0.31 to<br>1.04)                            | 0.58<br>(0.30 to<br>1.04)                           | 0.60<br>(0.31 to<br>1.06)                            | 0.03<br>(0.02 to<br>0.05)                      | 0.02<br>(0.01 to<br>0.03)                      | 0.02<br>(0.01 to<br>0.03)                      | 0.02<br>(0.01 to<br>0.03)                       |
| Cystic echinococcosis                                 | 0.00<br>(0.00 to<br>0.00)                            | 0.00<br>(0.00 to<br>0.00)                            | 0.00<br>(0.00 to<br>0.00)                           | 0.00<br>(0.00 to<br>0.00)                            | 0.00<br>(0.00 to<br>0.00)                      | 0.00<br>(0.00 to<br>0.00)                      | 0.00<br>(0.00 to<br>0.00)                      | 0.00<br>(0.00 to<br>0.00)                       |
| Dengue                                                | 0.00<br>(0.00 to<br>0.00)                            | 0.00<br>(0.00 to<br>0.00)                            | 0.00<br>(0.00 to<br>0.00)                           | 0.00<br>(0.00 to<br>0.00)                            | 0.00<br>(0.00 to<br>0.00)                      | 0.00<br>(0.00 to<br>0.00)                      | 0.00<br>(0.00 to<br>0.00)                      | 0.00<br>(0.00 to<br>0.00)                       |
| Yellow fever                                          | 0.00<br>(0.00 to<br>0.00)                            | 0.00<br>(0.00 to<br>0.00)                            | 0.00<br>(0.00 to<br>0.00)                           | 0.00<br>(0.00 to<br>0.00)                            | 0.00<br>(0.00 to<br>0.00)                      | 0.00<br>(0.00 to<br>0.00)                      | 0.00<br>(0.00 to<br>0.00)                      | 0.00<br>(0.00 to<br>0.00)                       |
| Rabies                                                | 0.19<br>(0.09 to<br>0.32)                            | 0.21<br>(0.07 to<br>0.40)                            | 0.19<br>(0.06 to<br>0.39)                           | 0.23<br>(0.08 to<br>0.43)                            | 0.00<br>(0.00 to<br>0.01)                      | 0.01<br>(0.00 to<br>0.02)                      | 0.01<br>(0.00 to<br>0.02)                      | 0.01<br>(0.00 to<br>0.02)                       |
| Intestinal nematode infections                        | 0.00<br>(0.00 to<br>0.00)                            | 0.00<br>(0.00 to<br>0.00)                            | 0.00<br>(0.00 to<br>0.00)                           | 0.00<br>(0.00 to<br>0.00)                            | 0.00<br>(0.00 to<br>0.00)                      | 0.00<br>(0.00 to<br>0.00)                      | 0.00<br>(0.00 to<br>0.00)                      | 0.00<br>(0.00 to<br>0.00)                       |
| Other neglected tropical diseases                     | 14.31<br>(11.11 to<br>18.37)                         | 14.81<br>(9.83 to<br>21.81)                          | 15.36<br>(10.05 to<br>23.43)                        | 14.47<br>(9.70 to<br>21.63)                          | 0.25<br>(0.19 to<br>0.32)                      | 0.30<br>(0.19 to<br>0.45)                      | 0.31<br>(0.20 to<br>0.48)                      | 0.29<br>(0.19 to<br>0.43)                       |
| <b>Maternal disorders</b>                             | <b>312.91</b><br><b>(180.15 to</b><br><b>502.25)</b> | <b>234.75</b><br><b>(101.83 to</b><br><b>487.85)</b> | <b>204.37</b><br><b>(90.39 to</b><br><b>423.42)</b> | <b>268.09</b><br><b>(118.22 to</b><br><b>544.98)</b> | <b>5.73</b><br><b>(3.34 to</b><br><b>9.20)</b> | <b>4.33</b><br><b>(1.87 to</b><br><b>9.06)</b> | <b>3.77</b><br><b>(1.64 to</b><br><b>7.84)</b> | <b>4.94</b><br><b>(2.15 to</b><br><b>10.07)</b> |
| Maternal hemorrhage                                   | 76.91<br>(40.19 to<br>132.96)                        | 53.17<br>(20.83 to<br>112.80)                        | 46.64<br>(18.45 to<br>99.49)                        | 60.16<br>(23.91 to<br>126.54)                        | 1.42<br>(0.74 to<br>2.44)                      | 0.99<br>(0.39 to<br>2.15)                      | 0.87<br>(0.35 to<br>1.89)                      | 1.12<br>(0.45 to<br>2.38)                       |
| Maternal sepsis and other maternal infections         | 13.40<br>(6.19 to<br>24.26)                          | 8.37<br>(3.08 to<br>17.83)                           | 7.27<br>(2.71 to<br>15.41)                          | 9.58<br>(3.57 to<br>19.73)                           | 0.24<br>(0.11 to<br>0.44)                      | 0.15<br>(0.06 to<br>0.32)                      | 0.13<br>(0.05 to<br>0.29)                      | 0.18<br>(0.07 to<br>0.38)                       |
| Maternal hypertensive disorders                       | 34.75<br>(18.09 to<br>63.09)                         | 24.15<br>(8.74 to<br>52.64)                          | 20.90<br>(8.02 to<br>44.86)                         | 27.66<br>(10.19 to<br>58.98)                         | 0.63<br>(0.33 to<br>1.14)                      | 0.44<br>(0.16 to<br>0.95)                      | 0.38<br>(0.15 to<br>0.82)                      | 0.50<br>(0.19 to<br>1.08)                       |
| Maternal obstructed labor and uterine rupture         | 3.43<br>(1.35 to<br>6.91)                            | 2.35<br>(0.72 to<br>5.52)                            | 1.99<br>(0.62 to<br>4.59)                           | 2.75<br>(0.86 to<br>6.35)                            | 0.06<br>(0.02 to<br>0.13)                      | 0.04<br>(0.01 to<br>0.10)                      | 0.04<br>(0.01 to<br>0.09)                      | 0.05<br>(0.02 to<br>0.12)                       |
| Maternal abortion, miscarriage, and ectopic pregnancy | 41.74<br>(22.62 to<br>70.12)                         | 33.87<br>(12.49 to<br>75.24)                         | 29.12<br>(10.77 to<br>63.08)                        | 39.22<br>(14.52 to<br>85.56)                         | 0.78<br>(0.42 to<br>1.30)                      | 0.64<br>(0.24 to<br>1.42)                      | 0.55<br>(0.21 to<br>1.18)                      | 0.75<br>(0.28 to<br>1.63)                       |
| Indirect maternal deaths                              | 44.04<br>(21.71 to<br>76.68)                         | 35.62<br>(13.27 to<br>76.72)                         | 30.36<br>(11.54 to<br>65.89)                        | 41.53<br>(15.60 to<br>88.97)                         | 0.79<br>(0.39 to<br>1.39)                      | 0.64<br>(0.24 to<br>1.38)                      | 0.54<br>(0.21 to<br>1.17)                      | 0.74<br>(0.29 to<br>1.59)                       |
| Late maternal deaths                                  | 8.02<br>(3.61 to<br>15.36)                           | 4.62<br>(1.65 to<br>10.87)                           | 3.95<br>(1.44 to<br>9.31)                           | 5.35<br>(1.95 to<br>12.35)                           | 0.15<br>(0.07 to<br>0.28)                      | 0.08<br>(0.03 to<br>0.19)                      | 0.07<br>(0.03 to<br>0.16)                      | 0.10<br>(0.04 to<br>0.23)                       |
| Maternal deaths aggravated by HIV/AIDS                | 0.01<br>(0.00 to<br>0.01)                            | 0.03<br>(0.01 to<br>0.09)                            | 0.03<br>(0.01 to<br>0.08)                           | 0.04<br>(0.01 to<br>0.11)                            | 0.00<br>(0.00 to<br>0.00)                      | 0.00<br>(0.00 to<br>0.00)                      | 0.00<br>(0.00 to<br>0.00)                      | 0.00<br>(0.00 to<br>0.00)                       |
| Other maternal disorders                              | 90.61<br>(49.61 to<br>149.01)                        | 72.57<br>(28.80 to<br>153.18)                        | 64.12<br>(25.99 to<br>134.17)                       | 81.81<br>(32.64 to<br>171.86)                        | 1.66<br>(0.90 to<br>2.74)                      | 1.33<br>(0.53 to<br>2.82)                      | 1.18<br>(0.47 to<br>2.51)                      | 1.50<br>(0.60 to<br>3.20)                       |
| <b>Qatar</b>                                          |                                                      |                                                      |                                                     |                                                      |                                                |                                                |                                                |                                                 |
| <b>YLLs (actual counts)</b>                           |                                                      |                                                      |                                                     |                                                      | <b>Deaths (actual counts)</b>                  |                                                |                                                |                                                 |



| Cause                                                                   | 2016                                       | 2040 Forecast                             | 2040 Better Scenario                      | 2040 Worse Scenario                       | 2016                              | 2040 Forecast                    | 2040 Better Scenario             | 2040 Worse Scenario              |
|-------------------------------------------------------------------------|--------------------------------------------|-------------------------------------------|-------------------------------------------|-------------------------------------------|-----------------------------------|----------------------------------|----------------------------------|----------------------------------|
| <b>Neonatal disorders</b>                                               | <b>7,918.24</b><br>(4,921.57 to 11,862.80) | <b>3,994.65</b><br>(2,263.57 to 6,606.84) | <b>2,651.76</b><br>(1,506.17 to 4,409.46) | <b>5,128.30</b><br>(2,913.74 to 8,419.03) | <b>91.55</b><br>(56.89 to 137.15) | <b>46.21</b><br>(26.18 to 76.39) | <b>30.69</b><br>(17.43 to 51.01) | <b>59.32</b><br>(33.72 to 97.35) |
| Neonatal preterm birth                                                  | 6,309.45<br>(3,896.20 to 9,584.12)         | 3,024.21<br>(1,633.37 to 5,035.23)        | 1,857.81<br>(988.54 to 3,112.97)          | 3,966.56<br>(2,153.70 to 6,709.53)        | 72.93<br>(45.04 to 110.77)        | 34.96<br>(18.90 to 58.21)        | 21.48<br>(11.44 to 35.99)        | 45.86<br>(24.91 to 77.56)        |
| Neonatal encephalopathy due to birth asphyxia and trauma                | 664.65<br>(370.25 to 1,137.70)             | 315.34<br>(151.59 to 606.77)              | 234.51<br>(114.06 to 435.43)              | 412.60<br>(200.40 to 770.71)              | 7.70<br>(4.29 to 13.17)           | 3.66<br>(1.76 to 7.03)           | 2.72<br>(1.33 to 5.06)           | 4.79<br>(2.33 to 8.98)           |
| Neonatal sepsis and other neonatal infections                           | 156.71<br>(71.76 to 279.61)                | 102.59<br>(42.06 to 205.75)               | 79.23<br>(33.23 to 159.42)                | 128.72<br>(53.16 to 258.31)               | 1.81<br>(0.83 to 3.23)            | 1.19<br>(0.49 to 2.38)           | 0.92<br>(0.38 to 1.84)           | 1.49<br>(0.61 to 2.99)           |
| Hemolytic disease and other neonatal jaundice                           | 13.58<br>(7.77 to 22.37)                   | 4.59<br>(2.11 to 8.97)                    | 3.53<br>(1.66 to 6.84)                    | 5.80<br>(2.70 to 11.23)                   | 0.16<br>(0.09 to 0.26)            | 0.05<br>(0.02 to 0.10)           | 0.04<br>(0.02 to 0.08)           | 0.07<br>(0.03 to 0.13)           |
| Other neonatal disorders                                                | 773.85<br>(449.11 to 1,188.56)             | 547.93<br>(274.19 to 1,024.26)            | 476.69<br>(246.67 to 883.15)              | 614.62<br>(303.68 to 1,149.14)            | 8.95<br>(5.20 to 13.76)           | 6.34<br>(3.18 to 11.86)          | 5.52<br>(2.86 to 10.22)          | 7.12<br>(3.52 to 13.29)          |
| <b>Nutritional deficiencies</b>                                         | <b>43.45</b><br>(30.61 to 62.24)           | <b>34.55</b><br>(24.84 to 49.39)          | <b>33.55</b><br>(24.16 to 47.95)          | <b>35.79</b><br>(25.69 to 51.67)          | <b>0.78</b><br>(0.58 to 1.04)     | <b>1.49</b><br>(1.10 to 1.95)    | <b>1.54</b><br>(1.13 to 2.03)    | <b>1.44</b><br>(1.06 to 1.89)    |
| Protein-energy malnutrition                                             | 10.48<br>(6.80 to 22.39)                   | 9.40<br>(6.57 to 13.54)                   | 9.95<br>(6.95 to 14.29)                   | 8.88<br>(6.11 to 13.09)                   | 0.21<br>(0.15 to 0.36)            | 0.56<br>(0.36 to 0.81)           | 0.63<br>(0.41 to 0.92)           | 0.49<br>(0.31 to 0.72)           |
| Iodine deficiency                                                       | 1.73<br>(0.14 to 6.87)                     | 2.51<br>(0.23 to 6.83)                    | 2.35<br>(0.21 to 6.51)                    | 2.66<br>(0.26 to 7.34)                    | 0.03<br>(0.00 to 0.10)            | 0.12<br>(0.01 to 0.35)           | 0.12<br>(0.01 to 0.37)           | 0.12<br>(0.01 to 0.35)           |
| Dietary iron deficiency                                                 | 7.71<br>(5.35 to 12.92)                    | 8.72<br>(5.25 to 14.56)                   | 8.75<br>(5.31 to 14.38)                   | 8.77<br>(5.24 to 14.69)                   | 0.14<br>(0.10 to 0.22)            | 0.20<br>(0.12 to 0.34)           | 0.21<br>(0.13 to 0.34)           | 0.20<br>(0.12 to 0.33)           |
| Other nutritional deficiencies                                          | 23.52<br>(10.99 to 38.28)                  | 13.93<br>(8.68 to 20.88)                  | 12.50<br>(7.92 to 18.62)                  | 15.47<br>(9.48 to 23.49)                  | 0.40<br>(0.23 to 0.59)            | 0.61<br>(0.41 to 0.86)           | 0.59<br>(0.33 to 0.83)           | 0.64<br>(0.44 to 0.88)           |
| <b>Other communicable, maternal, neonatal, and nutritional diseases</b> | <b>474.10</b><br>(268.75 to 1,056.75)      | <b>449.61</b><br>(257.51 to 785.67)       | <b>395.68</b><br>(231.20 to 675.29)       | <b>512.62</b><br>(295.22 to 925.13)       | <b>9.45</b><br>(5.98 to 16.30)    | <b>13.83</b><br>(9.10 to 21.10)  | <b>12.54</b><br>(8.31 to 18.73)  | <b>15.30</b><br>(10.01 to 23.62) |
| Sexually transmitted infections excluding HIV                           | 34.44<br>(18.75 to 59.41)                  | 11.53<br>(5.64 to 20.26)                  | 10.03<br>(4.92 to 17.36)                  | 13.34<br>(6.57 to 23.54)                  | 0.55<br>(0.34 to 0.86)            | 0.23<br>(0.12 to 0.39)           | 0.21<br>(0.01 to 0.35)           | 0.26<br>(0.11 to 0.44)           |
| Syphilis                                                                | 25.69<br>(11.26 to 50.90)                  | 5.95<br>(2.54 to 12.77)                   | 4.78<br>(2.07 to 10.05)                   | 7.40<br>(3.21 to 15.37)                   | 0.37<br>(0.20 to 0.67)            | 0.10<br>(0.05 to 0.18)           | 0.08<br>(0.04 to 0.15)           | 0.12<br>(0.06 to 0.22)           |
| Chlamydial infection                                                    | 1.52<br>(0.69 to 2.49)                     | 1.09<br>(0.46 to 2.08)                    | 1.03<br>(0.43 to 1.98)                    | 1.15<br>(0.48 to 2.21)                    | 0.03<br>(0.01 to 0.05)            | 0.03<br>(0.01 to 0.05)           | 0.02<br>(0.01 to 0.04)           | 0.03<br>(0.01 to 0.05)           |
| Gonococcal infection                                                    | 4.73<br>(2.65 to 7.31)                     | 2.91<br>(1.26 to 5.65)                    | 2.74<br>(1.20 to 5.40)                    | 3.10<br>(1.35 to 6.03)                    | 0.10<br>(0.05 to 0.15)            | 0.07<br>(0.03 to 0.13)           | 0.07<br>(0.03 to 0.13)           | 0.07<br>(0.04 to 0.14)           |
| Other sexually transmitted infections                                   | 2.51<br>(1.35 to 3.93)                     | 1.58<br>(0.67 to 3.08)                    | 1.48<br>(0.62 to 2.83)                    | 1.68<br>(0.71 to 3.28)                    | 0.05<br>(0.03 to 0.08)            | 0.04<br>(0.02 to 0.07)           | 0.03<br>(0.02 to 0.06)           | 0.04<br>(0.02 to 0.07)           |
| Acute hepatitis                                                         | 168.24<br>(112.89 to 242.65)               | 193.86<br>(112.83 to 343.16)              | 159.32<br>(91.74 to 279.75)               | 235.42<br>(138.99 to 409.57)              | 4.45<br>(2.93 to 6.52)            | 6.34<br>(3.79 to 10.82)          | 5.25<br>(3.12 to 8.86)           | 7.63<br>(4.74 to 12.77)          |
| Acute hepatitis A                                                       | 3.54<br>(1.45 to 6.54)                     | 3.07<br>(1.00 to 7.93)                    | 2.64<br>(0.87 to 6.83)                    | 3.55<br>(1.19 to 9.10)                    | 0.06<br>(0.03 to 0.11)            | 0.09<br>(0.03 to 0.24)           | 0.08<br>(0.02 to 0.21)           | 0.10<br>(0.03 to 0.27)           |
| Acute hepatitis B                                                       | 149.76<br>(98.83 to 218.96)                | 173.07<br>(97.36 to 313.02)               | 141.91<br>(79.56 to 250.21)               | 210.71<br>(123.25 to 377.31)              | 4.02<br>(2.59 to 5.95)            | 5.60<br>(3.26 to 9.54)           | 4.62<br>(2.71 to 7.82)           | 6.76<br>(4.11 to 11.52)          |
| Acute hepatitis C                                                       | 3.20<br>(1.89 to 5.22)                     | 4.64<br>(2.43 to 8.36)                    | 3.86<br>(2.00 to 7.00)                    | 5.56<br>(2.94 to 9.98)                    | 0.09<br>(0.05 to 0.16)            | 0.17<br>(0.09 to 0.29)           | 0.14<br>(0.07 to 0.25)           | 0.20<br>(0.11 to 0.34)           |

|                                       |                                          |                                             |                                            |                                             |                                       |                                        |                                        |                                         |
|---------------------------------------|------------------------------------------|---------------------------------------------|--------------------------------------------|---------------------------------------------|---------------------------------------|----------------------------------------|----------------------------------------|-----------------------------------------|
| Acute hepatitis E                     | 11.73<br>(7.29 to<br>19.00)              | 13.08<br>(6.19 to<br>25.03)                 | 10.91<br>(5.21 to<br>20.98)                | 15.60<br>(7.31 to<br>28.74)                 | 0.28<br>(0.16 to<br>0.48)             | 0.49<br>(0.24 to<br>0.89)              | 0.41<br>(0.20 to<br>0.77)              | 0.57<br>(0.27 to<br>1.04)               |
| Other unspecified infectious diseases | 271.42<br>(101.49 to<br>841.57)          | 244.22<br>(122.73 to<br>542.93)             | 226.33<br>(119.98 to<br>471.86)            | 263.86<br>(127.71 to<br>614.28)             | 4.45<br>(2.04 to<br>11.14)            | 7.26<br>(4.49 to<br>11.51)             | 7.09<br>(4.50 to<br>10.98)             | 7.41<br>(4.46 to<br>12.41)              |
| Non-communicable diseases             | 69,417.06<br>(53,224.07 to<br>90,438.03) | 177,888.47<br>(100,716.10 to<br>312,082.23) | 143,992.93<br>(82,142.75 to<br>251,858.57) | 235,555.24<br>(132,151.30 to<br>415,053.05) | 2,153.80<br>(1,610.07 to<br>2,864.05) | 9,405.76<br>(5,831.84 to<br>14,993.72) | 7,898.71<br>(4,947.71 to<br>12,751.32) | 11,855.87<br>(7,361.65 to<br>18,758.67) |
| <b>Qatar</b>                          |                                          |                                             |                                            |                                             |                                       |                                        |                                        |                                         |
| Cause                                 | YLLs (actual counts)                     |                                             |                                            |                                             | Deaths (actual counts)                |                                        |                                        |                                         |
|                                       | 2016                                     | 2040 Forecast                               | 2040 Better Scenario                       | 2040 Worse Scenario                         | 2016                                  | 2040 Forecast                          | 2040 Better Scenario                   | 2040 Worse Scenario                     |
| Neoplasms                             | 17,957.48<br>(13,128.90 to<br>23,875.95) | 45,543.99<br>(25,976.50 to<br>75,668.47)    | 40,564.85<br>(23,464.43 to<br>66,691.23)   | 54,978.50<br>(30,557.42 to<br>96,488.32)    | 537.16<br>(389.20 to<br>721.50)       | 2,044.04<br>(1,242.40 to<br>3,287.28)  | 1,849.34<br>(1,127.29 to<br>2,933.56)  | 2,422.38<br>(1,423.86 to<br>3,982.30)   |
| Lip and oral cavity cancer            | 199.78<br>(137.43 to<br>282.94)          | 536.11<br>(240.69 to<br>1,096.30)           | 393.22<br>(191.17 to<br>755.80)            | 752.89<br>(315.52 to<br>1,605.91)           | 6.17<br>(4.26 to<br>8.70)             | 22.29<br>(10.43 to<br>43.33)           | 16.82<br>(8.44 to<br>30.60)            | 30.42<br>(13.27 to<br>61.06)            |
| Nasopharynx cancer                    | 83.68<br>(55.09 to<br>122.51)            | 179.03<br>(73.32 to<br>415.83)              | 124.44<br>(52.59 to<br>276.81)             | 268.40<br>(99.36 to<br>656.41)              | 2.16<br>(1.42 to<br>3.15)             | 5.75<br>(2.36 to<br>12.69)             | 4.06<br>(1.74 to<br>8.57)              | 8.51<br>(3.23 to<br>19.96)              |
| Other pharynx cancer                  | 73.11<br>(49.95 to<br>105.53)            | 187.45<br>(90.49 to<br>336.94)              | 170.65<br>(85.28 to<br>297.83)             | 198.68<br>(95.11 to<br>364.44)              | 2.18<br>(1.47 to<br>3.16)             | 7.48<br>(3.82 to<br>12.81)             | 6.93<br>(3.66 to<br>11.61)             | 7.78<br>(3.89 to<br>13.89)              |
| Esophageal cancer                     | 374.01<br>(250.26 to<br>540.51)          | 1,269.12<br>(630.86 to<br>2,366.49)         | 1,107.12<br>(572.69 to<br>2,005.55)        | 1,547.94<br>(730.37 to<br>3,032.03)         | 12.80<br>(8.62 to<br>18.33)           | 66.47<br>(36.50 to<br>116.08)          | 59.51<br>(33.39 to<br>99.79)           | 78.68<br>(39.65 to<br>143.83)           |
| Stomach cancer                        | 872.56<br>(631.32 to<br>1,169.84)        | 1,624.63<br>(886.90 to<br>2,735.39)         | 1,362.42<br>(774.04 to<br>2,280.02)        | 1,873.34<br>(1,040.62 to<br>3,147.21)       | 27.91<br>(20.17 to<br>37.42)          | 77.75<br>(46.55 to<br>121.30)          | 65.95<br>(39.61 to<br>101.78)          | 87.65<br>(52.04 to<br>136.17)           |
| Colon and rectum cancer               | 1,569.65<br>(1,121.15 to<br>2,140.04)    | 4,170.62<br>(2,221.32 to<br>7,342.59)       | 3,613.19<br>(1,883.32 to<br>6,368.03)      | 5,035.47<br>(2,601.79 to<br>9,103.63)       | 50.96<br>(36.60 to<br>69.68)          | 197.23<br>(113.23 to<br>329.29)        | 174.46<br>(98.77 to<br>291.16)         | 232.40<br>(130.53 to<br>397.67)         |
| Liver cancer                          | 1,372.85<br>(909.89 to<br>1,949.32)      | 6,184.30<br>(2,864.34 to<br>12,695.75)      | 5,941.63<br>(2,789.88 to<br>12,288.30)     | 7,297.20<br>(3,230.01 to<br>15,143.42)      | 50.08<br>(33.47 to<br>71.91)          | 297.51<br>(143.15 to<br>563.60)        | 289.77<br>(143.73 to<br>561.98)        | 343.19<br>(159.68 to<br>665.88)         |
| Liver cancer due to hepatitis B       | 559.23<br>(339.68 to<br>850.04)          | 2,153.25<br>(909.17 to<br>4,552.21)         | 2,074.19<br>(903.89 to<br>4,318.71)        | 2,524.75<br>(1,002.20 to<br>5,585.02)       | 18.72<br>(11.31 to<br>28.72)          | 94.06<br>(41.14 to<br>195.46)          | 91.67<br>(40.87 to<br>188.23)          | 108.06<br>(45.83 to<br>237.20)          |
| Liver cancer due to hepatitis C       | 355.51<br>(222.54 to<br>538.53)          | 1,899.80<br>(909.75 to<br>3,875.38)         | 1,841.56<br>(895.33 to<br>3,765.93)        | 2,174.58<br>(987.29 to<br>4,512.50)         | 14.44<br>(9.18 to<br>21.68)           | 99.49<br>(49.35 to<br>194.34)          | 97.87<br>(48.78 to<br>189.51)          | 111.19<br>(52.28 to<br>222.22)          |
| Liver cancer due to alcohol use       | 123.66<br>(67.48 to<br>216.65)           | 598.10<br>(236.02 to<br>1,248.97)           | 540.09<br>(218.60 to<br>1,141.16)          | 738.19<br>(279.96 to<br>1,578.45)           | 4.72<br>(2.57 to<br>8.01)             | 28.93<br>(11.80 to<br>58.63)           | 26.55<br>(11.10 to<br>53.34)           | 34.88<br>(13.35 to<br>72.41)            |
| Liver cancer due to other causes      | 334.46<br>(187.94 to<br>531.16)          | 1,533.15<br>(569.97 to<br>3,440.16)         | 1,485.80<br>(569.25 to<br>3,231.02)        | 1,859.68<br>(642.30 to<br>4,360.36)         | 12.21<br>(6.90 to<br>19.29)           | 75.04<br>(29.20 to<br>162.42)          | 73.69<br>(29.30 to<br>156.48)          | 89.06<br>(33.28 to<br>197.49)           |
| Gallbladder and biliary tract cancer  | 155.70<br>(104.38 to<br>223.62)          | 376.66<br>(237.03 to<br>578.43)             | 376.17<br>(233.97 to<br>586.32)            | 375.17<br>(240.25 to<br>568.21)             | 5.21<br>(3.57 to<br>7.39)             | 18.66<br>(12.74 to<br>26.80)           | 18.89<br>(12.68 to<br>27.58)           | 18.22<br>(12.71 to<br>25.24)            |
| Pancreatic cancer                     | 889.37<br>(632.32 to<br>1,238.15)        | 3,006.96<br>(1,620.53 to<br>5,230.46)       | 3,017.41<br>(1,610.72 to<br>5,368.50)      | 3,202.75<br>(1,681.69 to<br>5,648.18)       | 29.76<br>(21.00 to<br>41.33)          | 137.99<br>(77.16 to<br>235.00)         | 140.32<br>(77.37 to<br>240.95)         | 144.39<br>(78.25 to<br>249.05)          |
| Larynx cancer                         | 171.96<br>(115.73 to<br>245.42)          | 495.92<br>(177.88 to<br>1,132.56)           | 343.87<br>(132.34 to<br>740.80)            | 783.80<br>(261.58 to<br>1,893.68)           | 6.09<br>(4.12 to<br>8.81)             | 24.18<br>(9.09 to<br>54.07)            | 17.05<br>(7.17 to<br>35.45)            | 37.37<br>(12.78 to<br>85.99)            |
| Tracheal, bronchus, and lung cancer   | 2,241.44<br>(1,503.48 to<br>3,278.96)    | 6,568.36<br>(2,674.46 to<br>14,670.97)      | 4,663.95<br>(2,047.73 to<br>9,919.57)      | 10,566.88<br>(3,935.67 to<br>24,739.37)     | 79.29<br>(53.29 to<br>115.24)         | 315.11<br>(131.97 to<br>671.06)        | 227.39<br>(102.96 to<br>460.17)        | 495.84<br>(187.89 to<br>1,106.98)       |
| Malignant skin melanoma               | 96.80<br>(66.85 to<br>136.47)            | 202.45<br>(116.48 to<br>347.36)             | 226.75<br>(127.89 to<br>393.02)            | 182.04<br>(104.45 to<br>303.54)             | 2.46<br>(1.70 to<br>3.47)             | 7.44<br>(4.69 to<br>11.74)             | 8.46<br>(5.25 to<br>13.35)             | 6.54<br>(4.20 to<br>10.05)              |

|                          |                                    |                                    |                                    |                                     |                           |                             |                             |                             |
|--------------------------|------------------------------------|------------------------------------|------------------------------------|-------------------------------------|---------------------------|-----------------------------|-----------------------------|-----------------------------|
| Non-melanoma skin cancer | 63.16<br>(41.66 to 89.18)          | 159.17<br>(94.24 to 255.69)        | 144.61<br>(84.42 to 234.45)        | 173.50<br>(107.08 to 272.09)        | 1.97<br>(1.29 to 2.80)    | 8.01<br>(5.33 to 11.36)     | 7.41<br>(4.86 to 10.62)     | 8.49<br>(5.81 to 11.78)     |
| Breast cancer            | 2,461.70<br>(1,462.26 to 3,738.67) | 4,565.23<br>(1,978.10 to 9,410.89) | 3,889.97<br>(1,681.69 to 7,848.97) | 5,383.17<br>(2,277.73 to 11,362.19) | 64.55<br>(38.92 to 97.63) | 160.61<br>(76.36 to 307.90) | 138.74<br>(66.98 to 265.99) | 186.99<br>(87.00 to 375.45) |
| Cervical cancer          | 207.62<br>(119.02 to 331.38)       | 324.37<br>(157.18 to 637.45)       | 283.13<br>(134.56 to 560.09)       | 377.59<br>(183.78 to 778.79)        | 5.64<br>(3.28 to 8.89)    | 12.09<br>(6.59 to 22.30)    | 10.68<br>(5.86 to 19.23)    | 13.80<br>(7.63 to 26.20)    |
| Uterine cancer           | 117.15<br>(70.06 to 184.09)        | 313.03<br>(161.18 to 536.41)       | 288.73<br>(149.65 to 491.49)       | 336.29<br>(177.84 to 565.07)        | 4.00<br>(2.43 to 6.13)    | 14.01<br>(8.05 to 22.47)    | 13.05<br>(7.47 to 21.01)    | 14.86<br>(8.60 to 23.65)    |
| Ovarian cancer           | 402.01<br>(226.84 to 657.56)       | 854.49<br>(358.46 to 1,724.86)     | 787.29<br>(331.52 to 1,594.11)     | 965.42<br>(394.90 to 1,977.74)      | 11.63<br>(6.50 to 18.90)  | 31.70<br>(14.31 to 60.98)   | 29.43<br>(13.16 to 57.45)   | 35.57<br>(15.68 to 69.47)   |
| Prostate cancer          | 360.10<br>(198.83 to 567.16)       | 1,962.63<br>(978.24 to 3,280.43)   | 1,897.24<br>(919.70 to 3,254.20)   | 2,008.57<br>(1,006.69 to 3,223.10)  | 18.31<br>(9.94 to 29.12)  | 132.11<br>(71.17 to 200.75) | 129.80<br>(69.65 to 203.25) | 132.07<br>(71.20 to 196.22) |
| Testicular cancer        | 53.54<br>(34.32 to 79.37)          | 45.27<br>(21.85 to 89.30)          | 41.35<br>(19.62 to 83.43)          | 49.57<br>(24.26 to 95.14)           | 1.04<br>(0.67 to 1.54)    | 1.02<br>(0.53 to 1.93)      | 0.94<br>(0.48 to 1.82)      | 1.11<br>(0.57 to 2.06)      |

**Qatar**

| Cause                           | YLLs (actual counts)               |                                    |                                    |                                    | Deaths (actual counts)    |                             |                             |                             |
|---------------------------------|------------------------------------|------------------------------------|------------------------------------|------------------------------------|---------------------------|-----------------------------|-----------------------------|-----------------------------|
|                                 | 2016                               | 2020 Forecast                      | 2040 Better Scenario               | 2040 Worse Scenario                | 2016                      | 2020 Forecast               | 2040 Better Scenario        | 2040 Worse Scenario         |
| Kidney cancer                   | 338.35<br>(235.37 to 475.60)       | 974.68<br>(512.84 to 1,709.46)     | 974.14<br>(514.62 to 1,728.00)     | 998.17<br>(526.92 to 1,799.35)     | 10.03<br>(6.85 to 14.44)  | 42.01<br>(22.92 to 69.98)   | 42.52<br>(23.13 to 71.99)   | 42.25<br>(22.96 to 71.98)   |
| Bladder cancer                  | 201.95<br>(133.53 to 295.85)       | 878.43<br>(443.03 to 1,595.18)     | 825.84<br>(419.47 to 1,483.44)     | 1,002.92<br>(483.94 to 1,887.59)   | 8.78<br>(5.92 to 12.76)   | 55.02<br>(30.82 to 94.02)   | 52.71<br>(29.92 to 89.74)   | 61.33<br>(32.78 to 107.71)  |
| Brain and nervous system cancer | 1,131.89<br>(842.25 to 1,494.93)   | 2,112.04<br>(1,318.10 to 3,236.74) | 2,040.03<br>(1,257.41 to 3,268.41) | 2,185.46<br>(1,373.49 to 3,380.34) | 25.91<br>(18.73 to 35.17) | 71.24<br>(46.21 to 104.48)  | 69.90<br>(44.85 to 104.64)  | 72.30<br>(47.29 to 104.47)  |
| Thyroid cancer                  | 71.91<br>(50.68 to 99.85)          | 204.65<br>(108.15 to 369.08)       | 185.54<br>(98.56 to 331.41)        | 240.53<br>(124.97 to 442.31)       | 2.20<br>(1.57 to 3.05)    | 9.34<br>(5.36 to 15.64)     | 8.61<br>(4.97 to 14.51)     | 10.65<br>(6.00 to 17.88)    |
| Mesothelioma                    | 65.70<br>(39.35 to 96.38)          | 117.98<br>(59.10 to 215.52)        | 121.69<br>(61.11 to 224.85)        | 114.94<br>(58.69 to 205.27)        | 1.73<br>(1.03 to 2.55)    | 3.99<br>(2.12 to 6.97)      | 4.15<br>(2.19 to 7.31)      | 3.84<br>(2.08 to 6.47)      |
| Hodgkin lymphoma                | 83.45<br>(52.47 to 121.06)         | 85.04<br>(45.14 to 156.27)         | 73.68<br>(38.50 to 134.27)         | 97.73<br>(53.55 to 174.77)         | 1.85<br>(1.14 to 2.71)    | 2.52<br>(1.37 to 4.37)      | 2.20<br>(1.16 to 3.79)      | 2.86<br>(1.59 to 4.87)      |
| Non-Hodgkin lymphoma            | 914.09<br>(655.86 to 1,245.31)     | 1,721.31<br>(1,023.16 to 2,910.10) | 1,590.76<br>(937.76 to 2,697.64)   | 1,922.88<br>(1,134.40 to 3,219.96) | 23.07<br>(16.38 to 31.60) | 66.73<br>(41.95 to 105.86)  | 62.73<br>(39.13 to 100.42)  | 72.71<br>(45.62 to 115.06)  |
| Multiple myeloma                | 208.91<br>(133.69 to 294.47)       | 611.57<br>(318.95 to 1,041.80)     | 582.99<br>(302.29 to 1,001.77)     | 664.47<br>(351.94 to 1,116.94)     | 6.43<br>(4.08 to 9.17)    | 27.02<br>(15.24 to 43.14)   | 26.08<br>(14.59 to 42.32)   | 28.76<br>(16.14 to 46.21)   |
| Leukemia                        | 1,917.08<br>(1,392.00 to 2,556.55) | 3,523.89<br>(2,029.74 to 5,838.69) | 3,219.91<br>(1,853.94 to 5,303.13) | 4,075.74<br>(2,342.86 to 6,807.06) | 45.17<br>(32.15 to 60.69) | 140.04<br>(84.21 to 217.24) | 130.61<br>(77.86 to 204.20) | 157.34<br>(94.74 to 248.62) |
| Acute lymphoid leukemia         | 333.73<br>(205.72 to 496.87)       | 427.82<br>(228.22 to 783.13)       | 383.24<br>(203.25 to 691.28)       | 503.23<br>(270.72 to 935.27)       | 6.29<br>(3.93 to 9.33)    | 11.56<br>(6.24 to 20.74)    | 10.55<br>(5.68 to 18.73)    | 13.35<br>(7.26 to 23.73)    |
| Chronic lymphoid leukemia       | 49.90<br>(32.27 to 69.66)          | 153.51<br>(76.84 to 263.07)        | 146.20<br>(72.01 to 253.00)        | 169.26<br>(85.71 to 285.40)        | 1.57<br>(0.99 to 2.21)    | 8.17<br>(4.05 to 13.54)     | 8.01<br>(3.85 to 13.42)     | 8.65<br>(4.32 to 14.44)     |
| Acute myeloid leukemia          | 632.58<br>(425.53 to 980.92)       | 1,301.29<br>(710.47 to 2,257.68)   | 1,239.18<br>(683.32 to 2,185.85)   | 1,448.36<br>(776.24 to 2,561.64)   | 14.05<br>(9.40 to 21.84)  | 45.05<br>(26.30 to 75.27)   | 43.91<br>(25.68 to 74.30)   | 48.59<br>(27.59 to 81.67)   |
| Chronic myeloid leukemia        | 109.75<br>(70.22 to 154.60)        | 136.61<br>(69.52 to 239.30)        | 110.15<br>(57.41 to 195.55)        | 178.01<br>(91.02 to 330.81)        | 2.84<br>(1.82 to 3.99)    | 6.01<br>(3.20 to 9.59)      | 4.99<br>(2.67 to 8.17)      | 7.50<br>(3.97 to 12.30)     |

|                                               |                                                               |                                                                |                                                               |                                                                |                                                        |                                                            |                                                            |                                                            |
|-----------------------------------------------|---------------------------------------------------------------|----------------------------------------------------------------|---------------------------------------------------------------|----------------------------------------------------------------|--------------------------------------------------------|------------------------------------------------------------|------------------------------------------------------------|------------------------------------------------------------|
| Other leukemia                                | 791.11<br>(517.61 to<br>1,114.62)                             | 1,504.66<br>(801.03 to<br>2,568.52)                            | 1,341.14<br>(704.28 to<br>2,341.32)                           | 1,776.88<br>(950.79 to<br>3,109.65)                            | 20.42<br>(12.86 to<br>29.40)                           | 69.25<br>(38.31 to<br>111.99)                              | 63.14<br>(34.55 to<br>104.20)                              | 79.24<br>(43.81 to<br>129.91)                              |
| Other neoplasms                               | 1,257.94<br>(922.04 to<br>1,659.16)                           | 2,288.61<br>(1,480.36 to<br>3,451.63)                          | 2,277.14<br>(1,463.56 to<br>3,466.65)                         | 2,296.99<br>(1,503.13 to<br>3,435.08)                          | 29.78<br>(21.67 to<br>39.72)                           | 88.73<br>(61.37 to<br>122.30)                              | 90.16<br>(61.35 to<br>125.66)                              | 86.56<br>(60.82 to<br>117.29)                              |
| <b>Cardiovascular diseases</b>                | <b>22,984.29</b><br><b>(16,277.93 to</b><br><b>31,727.41)</b> | <b>50,690.80</b><br><b>(23,253.72 to</b><br><b>102,449.22)</b> | <b>32,668.25</b><br><b>(16,612.75 to</b><br><b>64,838.60)</b> | <b>83,849.56</b><br><b>(37,422.81 to</b><br><b>178,891.32)</b> | <b>797.66</b><br><b>(574.45 to</b><br><b>1,089.32)</b> | <b>2,682.49</b><br><b>(1,410.04 to</b><br><b>5,207.19)</b> | <b>1,857.26</b><br><b>(1,033.30 to</b><br><b>3,482.22)</b> | <b>4,106.12</b><br><b>(2,126.23 to</b><br><b>8,019.50)</b> |
| Rheumatic heart disease                       | 187.09<br>(137.06 to<br>250.43)                               | 232.40<br>(127.01 to<br>433.38)                                | 197.16<br>(110.33 to<br>352.70)                               | 264.08<br>(146.08 to<br>480.30)                                | 4.63<br>(3.39 to<br>6.18)                              | 9.48<br>(5.78 to<br>15.74)                                 | 8.19<br>(5.09 to<br>13.40)                                 | 10.49<br>(6.43 to<br>16.98)                                |
| Ischemic heart disease                        | 15,682.45<br>(10,788.65 to<br>22,059.88)                      | 37,223.28<br>(15,648.68 to<br>84,371.10)                       | 23,083.87<br>(10,448.31 to<br>51,471.21)                      | 64,578.45<br>(26,691.37 to<br>148,610.20)                      | 589.37<br>(418.27 to<br>817.48)                        | 1,995.18<br>(946.19 to<br>4,091.12)                        | 1,330.73<br>(662.56 to<br>2,910.32)                        | 3,198.37<br>(1,506.46 to<br>6,720.93)                      |
| Stroke                                        | 4,392.14<br>(3,238.88 to<br>5,871.76)                         | 7,007.82<br>(3,180.96 to<br>14,908.53)                         | 4,326.06<br>(2,090.47 to<br>9,370.43)                         | 11,614.45<br>(5,142.58 to<br>24,889.78)                        | 125.16<br>(91.96 to<br>168.91)                         | 342.76<br>(178.52 to<br>690.36)                            | 233.40<br>(127.47 to<br>471.29)                            | 518.30<br>(265.58 to<br>1,020.35)                          |
| Ischemic stroke                               | 901.99<br>(647.92 to<br>1,253.09)                             | 2,180.98<br>(960.74 to<br>4,950.48)                            | 1,521.35<br>(708.09 to<br>3,354.88)                           | 3,287.76<br>(1,442.88 to<br>7,697.13)                          | 38.46<br>(27.98 to<br>51.85)                           | 161.80<br>(76.42 to<br>410.04)                             | 121.49<br>(59.27 to<br>313.21)                             | 223.61<br>(104.99 to<br>551.65)                            |
| Intracerebral hemorrhage                      | 3,490.15<br>(2,565.54 to<br>4,642.13)                         | 4,826.83<br>(1,992.68 to<br>11,050.64)                         | 2,804.71<br>(1,248.10 to<br>6,021.49)                         | 8,326.69<br>(3,254.52 to<br>19,659.32)                         | 86.70<br>(63.04 to<br>116.92)                          | 180.96<br>(85.91 to<br>370.92)                             | 111.91<br>(58.09 to<br>222.04)                             | 294.69<br>(133.47 to<br>653.15)                            |
| Hypertensive heart disease                    | 306.61<br>(214.25 to<br>430.17)                               | 1,073.13<br>(476.75 to<br>2,444.21)                            | 807.56<br>(418.30 to<br>1,655.91)                             | 1,344.05<br>(572.23 to<br>3,113.43)                            | 10.49<br>(7.42 to<br>14.77)                            | 61.88<br>(29.82 to<br>144.89)                              | 48.58<br>(27.51 to<br>97.75)                               | 74.79<br>(35.35 to<br>177.65)                              |
| Cardiomyopathy and myocarditis                | 755.19<br>(537.89 to<br>1,029.83)                             | 1,064.38<br>(578.60 to<br>1,949.52)                            | 886.81<br>(493.81 to<br>1,577.63)                             | 1,272.91<br>(689.04 to<br>2,280.18)                            | 18.20<br>(12.59 to<br>25.39)                           | 45.82<br>(85.91 to<br>74.50)                               | 38.96<br>(23.67 to<br>61.63)                               | 53.11<br>(31.61 to<br>86.01)                               |
| Myocarditis                                   | 91.28<br>(61.12 to<br>132.65)                                 | 112.29<br>(65.20 to<br>194.11)                                 | 109.53<br>(63.26 to<br>1,655.91)                              | 114.85<br>(66.27 to<br>196.09)                                 | 1.80<br>(1.19 to<br>2.66)                              | 3.65<br>(2.29 to<br>5.90)                                  | 3.65<br>(2.26 to<br>5.90)                                  | 3.62<br>(2.28 to<br>5.81)                                  |
| <b>Qatar</b>                                  |                                                               |                                                                |                                                               |                                                                |                                                        |                                                            |                                                            |                                                            |
| Cause                                         | YLLs (actual counts)                                          |                                                                |                                                               |                                                                | Deaths (actual counts)                                 |                                                            |                                                            |                                                            |
|                                               | 2016                                                          | 2040 Forecast                                                  | 2040 Better Scenario                                          | 2040 Worse Scenario                                            | 2016                                                   | 2040 Forecast                                              | 2040 Better Scenario                                       | 2040 Worse Scenario                                        |
| Alcoholic cardiomyopathy                      | 50.13<br>(31.11 to<br>76.38)                                  | 106.48<br>(56.36 to<br>185.04)                                 | 102.38<br>(53.13 to<br>179.70)                                | 109.60<br>(59.86 to<br>186.97)                                 | 1.37<br>(0.86 to<br>2.07)                              | 4.57<br>(2.76 to<br>7.22)                                  | 4.50<br>(2.67 to<br>7.17)                                  | 4.57<br>(2.81 to<br>7.10)                                  |
| Other cardiomyopathy                          | 613.78<br>(431.79 to<br>843.97)                               | 845.61<br>(435.54 to<br>1,568.80)                              | 674.90<br>(361.17 to<br>1,227.85)                             | 1,048.45<br>(546.99 to<br>1,943.64)                            | 15.04<br>(10.44 to<br>21.26)                           | 37.59<br>(21.81 to<br>62.96)                               | 30.81<br>(17.53 to<br>50.99)                               | 44.92<br>(25.81 to<br>75.64)                               |
| Atrial fibrillation and flutter               | 100.44<br>(69.02 to<br>139.02)                                | 640.74<br>(422.89 to<br>918.52)                                | 583.43<br>(393.69 to<br>826.69)                               | 663.25<br>(442.93 to<br>949.74)                                | 6.45<br>(4.52 to<br>8.76)                              | 56.20<br>(39.15 to<br>78.83)                               | 53.23<br>(37.79 to<br>73.29)                               | 55.79<br>(38.91 to<br>77.46)                               |
| Aortic aneurysm                               | 199.55<br>(136.23 to<br>281.89)                               | 540.60<br>(286.41 to<br>916.78)                                | 461.02<br>(258.97 to<br>760.95)                               | 603.05<br>(322.76 to<br>1,035.99)                              | 6.60<br>(4.59 to<br>9.30)                              | 28.30<br>(18.12 to<br>42.81)                               | 25.28<br>(16.62 to<br>37.41)                               | 30.11<br>(19.21 to<br>45.40)                               |
| Peripheral artery disease                     | 12.45<br>(8.00 to<br>19.15)                                   | 105.58<br>(52.80 to<br>167.80)                                 | 103.22<br>(50.97 to<br>165.56)                                | 116.53<br>(60.04 to<br>182.65)                                 | 0.80<br>(0.46 to<br>1.24)                              | 9.46<br>(4.39 to<br>14.84)                                 | 9.52<br>(4.41 to<br>14.87)                                 | 9.96<br>(4.74 to<br>15.58)                                 |
| Endocarditis                                  | 162.25<br>(106.85 to<br>223.51)                               | 313.86<br>(166.73 to<br>557.72)                                | 299.11<br>(162.52 to<br>518.15)                               | 329.02<br>(174.41 to<br>581.34)                                | 3.94<br>(2.56 to<br>5.53)                              | 12.66<br>(7.43 to<br>21.12)                                | 12.31<br>(7.31 to<br>19.88)                                | 12.89<br>(7.57 to<br>21.30)                                |
| Other cardiovascular and circulatory diseases | 1,186.13<br>(802.39 to<br>1,677.13)                           | 2,489.03<br>(1,362.10 to<br>4,300.18)                          | 1,920.03<br>(1,068.69 to<br>3,236.06)                         | 3,063.78<br>(1,650.95 to<br>5,360.10)                          | 32.03<br>(21.78 to<br>47.44)                           | 120.76<br>(73.74 to<br>190.48)                             | 97.06<br>(60.52 to<br>150.57)                              | 142.32<br>(86.73 to<br>226.91)                             |
| <b>Chronic respiratory diseases</b>           | <b>1,244.14</b><br><b>(912.48 to</b><br><b>1,652.09)</b>      | <b>4,097.86</b><br><b>(2,030.11 to</b><br><b>8,047.82)</b>     | <b>3,345.68</b><br><b>(1,725.97 to</b><br><b>6,377.22)</b>    | <b>5,531.92</b><br><b>(2,551.49 to</b><br><b>11,124.62)</b>    | <b>42.17</b><br><b>(30.49 to</b><br><b>57.11)</b>      | <b>227.87</b><br><b>(120.88 to</b><br><b>420.44)</b>       | <b>189.08</b><br><b>(104.43 to</b><br><b>334.10)</b>       | <b>298.89</b><br><b>(151.98 to</b><br><b>562.91)</b>       |
| Chronic obstructive pulmonary disease         | 784.41<br>(565.35 to<br>1,068.35)                             | 3,129.98<br>(1,366.81 to<br>6,711.15)                          | 2,359.26<br>(1,056.46 to<br>4,920.42)                         | 4,518.36<br>(1,856.77 to<br>10,030.57)                         | 30.37<br>(21.77 to<br>41.66)                           | 185.46<br>(87.05 to<br>363.95)                             | 144.39<br>(69.90 to<br>272.31)                             | 256.49<br>(118.37 to<br>524.41)                            |

|                                                                |                                                            |                                                             |                                                            |                                                             |                                                    |                                                      |                                                      |                                                      |
|----------------------------------------------------------------|------------------------------------------------------------|-------------------------------------------------------------|------------------------------------------------------------|-------------------------------------------------------------|----------------------------------------------------|------------------------------------------------------|------------------------------------------------------|------------------------------------------------------|
| Pneumoconiosis                                                 | 6.95<br>(4.79 to<br>9.69)                                  | 17.72<br>(11.71 to<br>26.24)                                | 16.96<br>(10.99 to<br>25.38)                               | 18.80<br>(12.71 to<br>27.50)                                | 0.31<br>(0.21 to<br>0.44)                          | 1.15<br>(0.81 to<br>1.60)                            | 1.12<br>(0.76 to<br>1.59)                            | 1.19<br>(0.84 to<br>1.63)                            |
| Silicosis                                                      | 0.37<br>(0.21 to<br>0.59)                                  | 0.77<br>(0.44 to<br>1.28)                                   | 0.59<br>(0.34 to<br>1.02)                                  | 0.98<br>(0.54 to<br>1.64)                                   | 0.02<br>(0.01 to<br>0.03)                          | 0.05<br>(0.03 to<br>0.09)                            | 0.04<br>(0.02 to<br>0.07)                            | 0.07<br>(0.04 to<br>0.11)                            |
| Asbestosis                                                     | 2.23<br>(1.54 to<br>3.15)                                  | 5.98<br>(3.47 to<br>9.96)                                   | 6.49<br>(3.74 to<br>10.96)                                 | 5.51<br>(3.26 to<br>9.07)                                   | 0.07<br>(0.05 to<br>0.10)                          | 0.26<br>(0.16 to<br>0.41)                            | 0.29<br>(0.18 to<br>0.46)                            | 0.24<br>(0.15 to<br>0.37)                            |
| Coal workers pneumoconiosis                                    | 0.12<br>(0.06 to<br>0.21)                                  | 0.35<br>(0.17 to<br>0.64)                                   | 0.31<br>(0.14 to<br>0.61)                                  | 0.40<br>(0.20 to<br>0.73)                                   | 0.01<br>(0.00 to<br>0.01)                          | 0.02<br>(0.01 to<br>0.04)                            | 0.02<br>(0.01 to<br>0.04)                            | 0.03<br>(0.01 to<br>0.05)                            |
| Other pneumoconiosis                                           | 4.21<br>(2.90 to<br>5.91)                                  | 10.63<br>(6.99 to<br>15.80)                                 | 9.56<br>(6.20 to<br>14.36)                                 | 11.91<br>(7.91 to<br>17.24)                                 | 0.22<br>(0.15 to<br>0.31)                          | 0.81<br>(0.55 to<br>1.18)                            | 0.76<br>(0.51 to<br>1.15)                            | 0.86<br>(0.59 to<br>1.23)                            |
| Asthma                                                         | 193.40<br>(134.63 to<br>266.81)                            | 165.31<br>(99.28 to<br>322.42)                              | 112.36<br>(53.54 to<br>216.29)                             | 264.61<br>(118.72 to<br>516.09)                             | 4.78<br>(3.33 to<br>6.76)                          | 6.69<br>(3.37 to<br>12.60)                           | 4.70<br>(2.36 to<br>8.79)                            | 10.22<br>(4.94 to<br>18.78)                          |
| Interstitial lung disease and pulmonary sarcoidosis            | 111.37<br>(75.04 to<br>161.19)                             | 508.62<br>(309.57 to<br>814.11)                             | 589.36<br>(354.07 to<br>941.67)                            | 439.96<br>(266.87 to<br>696.11)                             | 3.52<br>(2.37 to<br>5.17)                          | 24.33<br>(15.02 to<br>38.12)                         | 28.66<br>(17.61 to<br>45.83)                         | 20.57<br>(12.74 to<br>33.28)                         |
| Other chronic respiratory diseases                             | 148.01<br>(89.50 to<br>219.36)                             | 276.23<br>(146.40 to<br>518.75)                             | 267.75<br>(142.16 to<br>496.34)                            | 290.19<br>(152.90 to<br>535.99)                             | 3.18<br>(1.97 to<br>4.74)                          | 10.24<br>(5.75 to<br>17.84)                          | 10.21<br>(5.66 to<br>17.87)                          | 10.42<br>(5.74 to<br>18.29)                          |
| <b>Cirrhosis and other chronic liver diseases</b>              | <b>2,989.62</b><br><b>(2,048.56 to</b><br><b>4,155.25)</b> | <b>6,417.45</b><br><b>(3,787.14 to</b><br><b>10,500.53)</b> | <b>5,923.27</b><br><b>(3,480.13 to</b><br><b>9,640.90)</b> | <b>6,924.41</b><br><b>(4,132.38 to</b><br><b>11,038.19)</b> | <b>88.06</b><br><b>(60.27 to</b><br><b>122.63)</b> | <b>269.23</b><br><b>(175.15 to</b><br><b>403.94)</b> | <b>251.74</b><br><b>(159.88 to</b><br><b>384.87)</b> | <b>284.78</b><br><b>(188.16 to</b><br><b>416.12)</b> |
| Cirrhosis and other chronic liver diseases due to hepatitis B  | 1,039.29<br>(656.70 to<br>1,566.53)                        | 2,289.80<br>(1,233.29 to<br>3,867.24)                       | 2,134.46<br>(1,136.24 to<br>3,615.39)                      | 2,450.38<br>(1,349.35 to<br>4,141.58)                       | 31.44<br>(20.24 to<br>46.92)                       | 96.29<br>(57.61 to<br>152.23)                        | 90.82<br>(53.30 to<br>144.29)                        | 101.10<br>(61.11 to<br>156.93)                       |
| Cirrhosis and other chronic liver diseases due to hepatitis C  | 1,089.87<br>(649.01 to<br>1,617.87)                        | 2,509.45<br>(1,370.56 to<br>4,284.28)                       | 2,323.34<br>(1,241.42 to<br>4,098.10)                      | 2,703.17<br>(1,486.79 to<br>4,681.80)                       | 32.97<br>(20.09 to<br>48.97)                       | 103.63<br>(60.27 to<br>168.92)                       | 96.99<br>(55.04 to<br>159.25)                        | 109.71<br>(64.90 to<br>174.23)                       |
| Cirrhosis and other chronic liver diseases due to alcohol use  | 219.40<br>(142.74 to<br>314.50)                            | 489.59<br>(281.35 to<br>799.20)                             | 423.27<br>(239.17 to<br>692.13)                            | 554.26<br>(323.42 to<br>907.34)                             | 6.82<br>(4.45 to<br>9.57)                          | 21.02<br>(13.41 to<br>31.59)                         | 18.52<br>(11.62 to<br>28.32)                         | 23.21<br>(14.99 to<br>34.95)                         |
| Cirrhosis and other chronic liver diseases due to other causes | 641.07<br>(469.34 to<br>865.21)                            | 1,128.61<br>(728.07 to<br>1,696.98)                         | 1,042.20<br>(666.10 to<br>1,587.81)                        | 1,216.61<br>(790.18 to<br>1,821.00)                         | 16.83<br>(12.15 to<br>22.90)                       | 48.29<br>(33.22 to<br>68.54)                         | 45.41<br>(30.97 to<br>64.77)                         | 50.76<br>(35.74 to<br>72.14)                         |
| <b>Digestive diseases</b>                                      | <b>1,330.68</b><br><b>(964.88 to</b><br><b>1,770.16)</b>   | <b>2,529.82</b><br><b>(1,580.71 to</b><br><b>4,065.09)</b>  | <b>2,277.87</b><br><b>(1,426.83 to</b><br><b>3,604.83)</b> | <b>2,820.74</b><br><b>(1,770.64 to</b><br><b>4,535.73)</b>  | <b>36.93</b><br><b>(26.68 to</b><br><b>50.42)</b>  | <b>131.26</b><br><b>(92.17 to</b><br><b>181.82)</b>  | <b>122.59</b><br><b>(86.44 to</b><br><b>170.45)</b>  | <b>139.92</b><br><b>(99.44 to</b><br><b>194.14)</b>  |
| Peptic ulcer disease                                           | 137.57<br>(97.99 to<br>186.27)                             | 193.24<br>(120.75 to<br>293.93)                             | 158.52<br>(99.46 to<br>242.01)                             | 233.12<br>(151.37 to<br>356.82)                             | 4.14<br>(2.94 to<br>5.79)                          | 10.78<br>(7.45 to<br>15.18)                          | 9.14<br>(6.29 to<br>12.86)                           | 12.48<br>(8.80 to<br>17.39)                          |

**Qatar**

| Cause                                      | YLLs (actual counts)            |                                 |                                 |                                 | Deaths (actual counts)    |                              |                              |                              |
|--------------------------------------------|---------------------------------|---------------------------------|---------------------------------|---------------------------------|---------------------------|------------------------------|------------------------------|------------------------------|
|                                            | 2016                            | 2040 Forecast                   | 2040 Better Scenario            | 2040 Worse Scenario             | 2016                      | 2040 Forecast                | 2040 Better Scenario         | 2040 Worse Scenario          |
| Gastritis and duodenitis                   | 45.73<br>(29.70 to<br>67.76)    | 72.77<br>(42.53 to<br>118.86)   | 65.23<br>(37.49 to<br>107.74)   | 80.57<br>(47.34 to<br>130.29)   | 1.54<br>(1.04 to<br>2.25) | 3.76<br>(2.50 to<br>5.41)    | 3.44<br>(2.23 to<br>5.02)    | 4.03<br>(2.72 to<br>5.76)    |
| Appendicitis                               | 71.75<br>(49.58 to<br>98.92)    | 88.32<br>(53.28 to<br>135.96)   | 75.09<br>(44.73 to<br>116.34)   | 102.44<br>(63.01 to<br>155.79)  | 1.83<br>(1.24 to<br>2.55) | 4.43<br>(2.59 to<br>6.24)    | 3.87<br>(2.22 to<br>5.51)    | 4.97<br>(3.04 to<br>6.91)    |
| Paralytic ileus and intestinal obstruction | 286.03<br>(194.01 to<br>425.82) | 514.55<br>(334.34 to<br>778.48) | 518.76<br>(331.95 to<br>792.29) | 508.25<br>(336.41 to<br>759.36) | 6.98<br>(4.88 to<br>9.51) | 26.75<br>(18.69 to<br>36.95) | 27.81<br>(19.17 to<br>38.67) | 25.38<br>(17.88 to<br>34.08) |
| Inguinal, femoral, and abdominal hernia    | 39.09<br>(27.43 to<br>54.45)    | 53.01<br>(34.41 to<br>81.30)    | 48.60<br>(31.08 to<br>75.28)    | 57.10<br>(37.60 to<br>86.90)    | 1.12<br>(0.78 to<br>1.60) | 3.37<br>(2.26 to<br>4.67)    | 3.19<br>(2.08 to<br>4.44)    | 3.47<br>(2.34 to<br>4.85)    |
| Inflammatory bowel disease                 | 86.31<br>(53.76 to<br>147.08)   | 149.30<br>(87.82 to<br>261.82)  | 148.22<br>(86.51 to<br>258.46)  | 150.19<br>(89.13 to<br>263.63)  | 2.12<br>(1.37 to<br>3.64) | 6.50<br>(4.25 to<br>10.09)   | 6.60<br>(4.25 to<br>10.26)   | 6.34<br>(4.22 to<br>9.85)    |

|                                         |                                                            |                                                              |                                                              |                                                              |                                                     |                                                        |                                                          |                                                          |
|-----------------------------------------|------------------------------------------------------------|--------------------------------------------------------------|--------------------------------------------------------------|--------------------------------------------------------------|-----------------------------------------------------|--------------------------------------------------------|----------------------------------------------------------|----------------------------------------------------------|
| Vascular intestinal disorders           | 82.89<br>(54.81 to<br>126.50)                              | 265.15<br>(167.78 to<br>404.38)                              | 254.97<br>(159.50 to<br>397.29)                              | 273.12<br>(177.82 to<br>410.92)                              | 2.97<br>(2.04 to<br>4.36)                           | 15.59<br>(10.98 to<br>21.39)                           | 15.29<br>(10.66 to<br>21.19)                             | 15.60<br>(11.15 to<br>21.26)                             |
| Gallbladder and biliary diseases        | 91.90<br>(64.61 to<br>133.72)                              | 223.32<br>(101.21 to<br>464.04)                              | 176.02<br>(79.22 to<br>367.72)                               | 305.71<br>(139.15 to<br>646.99)                              | 2.80<br>(1.91 to<br>4.45)                           | 13.27<br>(6.13 to<br>26.90)                            | 10.88<br>(5.10 to<br>22.06)                              | 17.16<br>(7.97 to<br>34.84)                              |
| Pancreatitis                            | 272.94<br>(176.50 to<br>403.10)                            | 518.41<br>(222.21 to<br>1,142.08)                            | 399.02<br>(184.71 to<br>857.06)                              | 643.77<br>(262.53 to<br>1,460.37)                            | 7.06<br>(4.62 to<br>10.32)                          | 19.99<br>(9.95 to<br>40.00)                            | 15.90<br>(8.45 to<br>30.99)                              | 23.95<br>(11.25 to<br>49.55)                             |
| Other digestive diseases                | 216.47<br>(153.64 to<br>302.66)                            | 451.75<br>(293.48 to<br>666.19)                              | 433.43<br>(277.96 to<br>646.26)                              | 466.46<br>(310.40 to<br>680.91)                              | 6.36<br>(4.47 to<br>9.01)                           | 26.81<br>(19.00 to<br>35.04)                           | 26.48<br>(18.51 to<br>35.20)                             | 26.55<br>(19.34 to<br>34.80)                             |
| <b>Neurological disorders</b>           | <b>2,908.20</b><br><b>(2,199.33 to</b><br><b>3,795.01)</b> | <b>13,238.57</b><br><b>(8,335.95 to</b><br><b>20,366.31)</b> | <b>12,965.82</b><br><b>(8,136.91 to</b><br><b>19,873.20)</b> | <b>14,353.05</b><br><b>(8,950.89 to</b><br><b>22,974.68)</b> | <b>131.15</b><br><b>(97.42 to</b><br><b>172.02)</b> | <b>995.53</b><br><b>(669.49 to</b><br><b>1,516.96)</b> | <b>1,001.48</b><br><b>(673.16 to</b><br><b>1,516.94)</b> | <b>1,047.63</b><br><b>(679.01 to</b><br><b>1,666.20)</b> |
| Alzheimer's disease and other dementias | 1,319.36<br>(940.42 to<br>1,790.54)                        | 9,900.87<br>(5,806.66 to<br>16,653.62)                       | 9,637.67<br>(5,674.98 to<br>15,925.68)                       | 11,015.96<br>(6,293.25 to<br>19,083.26)                      | 93.10<br>(67.79 to<br>124.14)                       | 843.75<br>(532.27 to<br>1,347.13)                      | 842.39<br>(543.73 to<br>1,337.58)                        | 904.51<br>(541.30 to<br>1,509.73)                        |
| Parkinson's disease                     | 187.77<br>(121.60 to<br>274.08)                            | 1,269.92<br>(818.89 to<br>1,769.32)                          | 1,364.60<br>(856.78 to<br>1,942.95)                          | 1,164.42<br>(771.23 to<br>1,604.67)                          | 10.74<br>(7.04 to<br>15.59)                         | 97.07<br>(66.82 to<br>131.22)                          | 106.08<br>(71.78 to<br>144.85)                           | 86.87<br>(61.66 to<br>116.41)                            |
| Epilepsy                                | 592.75<br>(443.69 to<br>776.42)                            | 878.32<br>(502.95 to<br>1,527.46)                            | 777.96<br>(446.87 to<br>1,350.72)                            | 975.07<br>(551.90 to<br>1,679.86)                            | 11.49<br>(8.49 to<br>15.33)                         | 21.09<br>(12.24 to<br>35.68)                           | 18.84<br>(11.09 to<br>31.34)                             | 23.15<br>(13.22 to<br>39.52)                             |
| Multiple sclerosis                      | 118.17<br>(73.29 to<br>186.11)                             | 190.04<br>(96.23 to<br>375.54)                               | 188.27<br>(96.04 to<br>361.06)                               | 192.68<br>(97.38 to<br>376.05)                               | 2.80<br>(1.74 to<br>4.40)                           | 5.62<br>(3.00 to<br>10.11)                             | 5.62<br>(2.99 to<br>10.10)                               | 5.62<br>(3.04 to<br>10.16)                               |
| Motor neuron disease                    | 78.54<br>(54.26 to<br>109.98)                              | 195.31<br>(109.85 to<br>353.08)                              | 195.89<br>(108.66 to<br>358.12)                              | 195.70<br>(111.36 to<br>355.00)                              | 2.01<br>(1.39 to<br>2.83)                           | 6.18<br>(3.65 to<br>10.56)                             | 6.24<br>(3.66 to<br>10.69)                               | 6.13<br>(3.68 to<br>10.31)                               |
| Other neurological disorders            | 611.61<br>(461.11 to<br>805.41)                            | 804.10<br>(528.17 to<br>1,215.71)                            | 801.42<br>(524.20 to<br>1,234.30)                            | 809.21<br>(540.00 to<br>1,210.86)                            | 11.01<br>(8.32 to<br>14.43)                         | 21.83<br>(14.87 to<br>32.32)                           | 22.32<br>(14.91 to<br>33.76)                             | 21.35<br>(14.55 to<br>31.07)                             |
| <b>Mental disorders</b>                 | <b>728.86</b><br><b>(431.21 to</b><br><b>1,415.34)</b>     | <b>1,677.33</b><br><b>(855.56 to</b><br><b>3,220.90)</b>     | <b>1,795.24</b><br><b>(915.30 to</b><br><b>3,451.23)</b>     | <b>1,581.06</b><br><b>(816.50 to</b><br><b>3,033.21)</b>     | <b>16.20</b><br><b>(9.70 to</b><br><b>29.83)</b>    | <b>52.55</b><br><b>(30.56 to</b><br><b>90.43)</b>      | <b>57.11</b><br><b>(33.50 to</b><br><b>97.81)</b>        | <b>48.32</b><br><b>(28.73 to</b><br><b>82.88)</b>        |
| Alcohol use disorders                   | 290.20<br>(166.15 to<br>505.44)                            | 499.06<br>(227.40 to<br>1,045.11)                            | 521.63<br>(238.43 to<br>1,091.90)                            | 480.67<br>(222.56 to<br>1,014.29)                            | 6.74<br>(3.84 to<br>11.79)                          | 15.43<br>(7.78 to<br>30.32)                            | 16.33<br>(8.23 to<br>31.74)                              | 14.60<br>(7.40 to<br>28.23)                              |
| Drug use disorders                      | 431.48<br>(240.27 to<br>916.62)                            | 1,168.41<br>(603.98 to<br>2,294.64)                          | 1,263.76<br>(653.15 to<br>2,451.53)                          | 1,090.42<br>(562.48 to<br>2,115.72)                          | 9.32<br>(5.28 to<br>18.82)                          | 36.92<br>(21.32 to<br>63.46)                           | 40.57<br>(23.26 to<br>69.42)                             | 33.71<br>(19.94 to<br>57.59)                             |
| Opioid use disorders                    | 338.07<br>(177.70 to<br>800.28)                            | 868.94<br>(429.54 to<br>1,745.54)                            | 903.65<br>(446.37 to<br>1,842.34)                            | 838.13<br>(417.90 to<br>1,697.28)                            | 7.22<br>(3.87 to<br>16.06)                          | 27.44<br>(15.46 to<br>48.43)                           | 29.00<br>(16.04 to<br>51.64)                             | 25.89<br>(14.82 to<br>45.25)                             |
| Cocaine use disorders                   | 19.93<br>(8.79 to<br>32.54)                                | 55.09<br>(19.42 to<br>117.97)                                | 62.97<br>(22.29 to<br>136.71)                                | 48.78<br>(17.66 to<br>102.96)                                | 0.43<br>(0.18 to<br>0.71)                           | 1.46<br>(0.52 to<br>3.05)                              | 1.68<br>(0.60 to<br>3.51)                                | 1.28<br>(0.46 to<br>2.59)                                |
| Amphetamine use disorders               | 11.70<br>(6.45 to<br>18.87)                                | 49.30<br>(21.38 to<br>96.62)                                 | 60.38<br>(26.94 to<br>119.78)                                | 40.88<br>(18.38 to<br>79.42)                                 | 0.25<br>(0.14 to<br>0.39)                           | 1.27<br>(0.55 to<br>2.46)                              | 1.56<br>(0.69 to<br>2.96)                                | 1.04<br>(0.46 to<br>1.96)                                |
| Other drug use disorders                | 61.78<br>(35.44 to<br>96.10)                               | 195.09<br>(88.35 to<br>370.01)                               | 236.76<br>(107.88 to<br>446.65)                              | 162.63<br>(75.44 to<br>293.49)                               | 1.41<br>(0.80 to<br>2.17)                           | 6.75<br>(3.05 to<br>11.50)                             | 8.33<br>(3.74 to<br>14.14)                               | 5.49<br>(2.51 to<br>9.26)                                |
| Eating disorders                        | 7.18<br>(4.21 to<br>10.31)                                 | 9.86<br>(4.39 to<br>20.03)                                   | 9.85<br>(4.46 to<br>20.24)                                   | 9.97<br>(4.48 to<br>20.24)                                   | 0.15<br>(0.08 to<br>0.21)                           | 0.21<br>(0.09 to<br>0.43)                              | 0.21<br>(0.09 to<br>0.44)                                | 0.21<br>(0.09 to<br>0.43)                                |

**Qatar**

| Cause                                               | YLLs (actual counts)                   |                                           |                                          |                                           | Deaths (actual counts)          |                                       |                                       |                                       |
|-----------------------------------------------------|----------------------------------------|-------------------------------------------|------------------------------------------|-------------------------------------------|---------------------------------|---------------------------------------|---------------------------------------|---------------------------------------|
|                                                     | 2016                                   | 2040 Forecast                             | 2040 Better Scenario                     | 2040 Worse Scenario                       | 2016                            | 2040 Forecast                         | 2040 Better Scenario                  | 2040 Worse Scenario                   |
| Diabetes, urogenital, blood, and endocrine diseases | 9,831.36<br>(7,258.36 to<br>13,062.26) | 47,175.28<br>(22,969.84 to<br>103,409.45) | 39,236.38<br>(18,859.25 to<br>92,195.90) | 57,383.54<br>(29,027.93 to<br>119,714.64) | 384.19<br>(280.48 to<br>516.39) | 2,843.06<br>(1,504.56 to<br>5,871.32) | 2,427.27<br>(1,267.16 to<br>5,348.71) | 3,329.18<br>(1,823.33 to<br>6,476.71) |

|                                                            |                                       |                                          |                                          |                                          |                                 |                                     |                                     |                                       |
|------------------------------------------------------------|---------------------------------------|------------------------------------------|------------------------------------------|------------------------------------------|---------------------------------|-------------------------------------|-------------------------------------|---------------------------------------|
| Diabetes mellitus                                          | 5,760.95<br>(4,120.85 to<br>7,882.39) | 21,610.13<br>(12,738.55 to<br>32,962.80) | 17,752.62<br>(10,399.02 to<br>27,265.35) | 26,218.33<br>(15,786.60 to<br>39,489.09) | 254.40<br>(184.33 to<br>343.41) | 1,371.39<br>(905.79 to<br>1,949.30) | 1,164.16<br>(765.33 to<br>1,663.25) | 1,592.99<br>(1,054.93 to<br>2,223.58) |
| Acute glomerulonephritis                                   | 13.62<br>(10.63 to<br>17.29)          | 13.17<br>(8.00 to<br>21.55)              | 11.78<br>(7.07 to<br>19.55)              | 14.70<br>(9.09 to<br>23.54)              | 0.24<br>(0.19 to<br>0.31)       | 0.27<br>(0.16 to<br>0.43)           | 0.24<br>(0.15 to<br>0.39)           | 0.29<br>(0.18 to<br>0.47)             |
| Chronic kidney disease                                     | 2,647.17<br>(1,932.12 to<br>3,571.42) | 22,741.96<br>(4,170.29 to<br>76,472.00)  | 18,681.07<br>(3,390.73 to<br>66,559.38)  | 28,319.66<br>(5,537.01 to<br>85,761.54)  | 97.48<br>(70.05 to<br>130.80)   | 1,346.64<br>(259.34 to<br>4,365.16) | 1,135.49<br>(210.49 to<br>3,930.77) | 1,614.86<br>(333.13 to<br>4,628.67)   |
| Chronic kidney disease due to diabetes mellitus            | 1,118.43<br>(762.42 to<br>1,594.24)   | 11,282.96<br>(1,855.69 to<br>40,846.90)  | 9,231.97<br>(1,499.87 to<br>35,125.68)   | 14,167.23<br>(2,502.13 to<br>45,268.45)  | 41.96<br>(28.80 to<br>59.45)    | 606.26<br>(100.99 to<br>2,083.88)   | 506.72<br>(79.96 to<br>1,909.68)    | 737.88<br>(133.25 to<br>2,336.42)     |
| Chronic kidney disease due to hypertension                 | 347.85<br>(246.19 to<br>493.18)       | 4,617.02<br>(822.60 to<br>15,791.25)     | 3,936.78<br>(658.31 to<br>14,629.41)     | 5,481.37<br>(1,058.87 to<br>16,863.16)   | 18.51<br>(12.58 to<br>25.81)    | 354.88<br>(66.04 to<br>1,118.53)    | 310.87<br>(55.07 to<br>1,047.71)    | 404.88<br>(82.69 to<br>1,154.26)      |
| Chronic kidney disease due to glomerulonephritis           | 394.05<br>(274.77 to<br>551.76)       | 1,793.24<br>(401.92 to<br>6,013.84)      | 1,422.14<br>(317.38 to<br>5,026.72)      | 2,307.44<br>(546.43 to<br>6,908.48)      | 11.18<br>(7.86 to<br>15.49)     | 95.10<br>(19.73 to<br>312.23)       | 77.01<br>(15.18 to<br>276.34)       | 118.58<br>(26.29 to<br>355.86)        |
| Chronic kidney disease due to other and unspecified causes | 786.83<br>(562.89 to<br>1,073.08)     | 5,048.74<br>(1,022.07 to<br>17,062.97)   | 4,090.18<br>(797.11 to<br>14,643.24)     | 6,363.63<br>(1,326.24 to<br>19,491.13)   | 25.83<br>(18.07 to<br>35.54)    | 290.40<br>(57.91 to<br>935.26)      | 240.89<br>(44.74 to<br>838.78)      | 353.53<br>(74.61 to<br>1,051.54)      |
| Urinary diseases and male infertility                      | 147.66<br>(110.79 to<br>189.21)       | 412.84<br>(292.91 to<br>575.70)          | 373.78<br>(264.54 to<br>521.21)          | 449.73<br>(327.32 to<br>618.73)          | 5.41<br>(4.10 to<br>6.99)       | 27.73<br>(21.09 to<br>35.36)        | 25.83<br>(19.44 to<br>33.36)        | 29.04<br>(22.64 to<br>36.86)          |
| Urinary tract infections                                   | 73.27<br>(53.91 to<br>99.14)          | 249.78<br>(157.83 to<br>374.09)          | 229.78<br>(144.20 to<br>343.79)          | 268.13<br>(174.58 to<br>400.75)          | 2.46<br>(1.62 to<br>3.85)       | 16.11<br>(10.30 to<br>24.76)        | 15.23<br>(9.66 to<br>23.33)         | 16.66<br>(10.86 to<br>25.54)          |
| Urolithiasis                                               | 11.13<br>(7.91 to<br>15.09)           | 16.99<br>(10.47 to<br>26.59)             | 14.40<br>(8.88 to<br>22.90)              | 19.89<br>(12.38 to<br>31.88)             | 0.26<br>(0.19 to<br>0.35)       | 0.63<br>(0.41 to<br>0.95)           | 0.55<br>(0.36 to<br>0.83)           | 0.72<br>(0.48 to<br>1.06)             |
| Other urinary diseases                                     | 63.26<br>(43.74 to<br>85.96)          | 146.07<br>(72.97 to<br>233.15)           | 129.59<br>(64.34 to<br>200.95)           | 161.71<br>(85.21 to<br>244.39)           | 2.69<br>(1.58 to<br>3.82)       | 10.99<br>(5.43 to<br>16.41)         | 10.05<br>(4.84 to<br>15.27)         | 11.66<br>(5.75 to<br>17.35)           |
| Gynecological diseases                                     | 2.06<br>(1.12 to<br>3.26)             | 1.70<br>(0.76 to<br>3.24)                | 1.29<br>(0.57 to<br>2.48)                | 2.21<br>(0.98 to<br>4.19)                | 0.05<br>(0.03 to<br>0.08)       | 0.05<br>(0.02 to<br>0.09)           | 0.04<br>(0.02 to<br>0.07)           | 0.06<br>(0.03 to<br>0.11)             |
| Uterine fibroids                                           | 0.27<br>(0.07 to<br>0.48)             | 0.26<br>(0.05 to<br>0.64)                | 0.21<br>(0.05 to<br>0.51)                | 0.32<br>(0.06 to<br>0.80)                | 0.01<br>(0.00 to<br>0.01)       | 0.01<br>(0.00 to<br>0.02)           | 0.01<br>(0.00 to<br>0.02)           | 0.01<br>(0.00 to<br>0.02)             |
| Polycystic ovarian syndrome                                | 0.38<br>(0.16 to<br>0.71)             | 0.15<br>(0.04 to<br>0.37)                | 0.10<br>(0.03 to<br>0.25)                | 0.23<br>(0.07 to<br>0.54)                | 0.01<br>(0.00 to<br>0.02)       | 0.00<br>(0.00 to<br>0.01)           | 0.00<br>(0.00 to<br>0.01)           | 0.01<br>(0.00 to<br>0.01)             |
| Endometriosis                                              | 0.08<br>(0.03 to<br>0.14)             | 0.07<br>(0.02 to<br>0.20)                | 0.05<br>(0.02 to<br>0.15)                | 0.09<br>(0.02 to<br>0.26)                | 0.00<br>(0.00 to<br>0.00)       | 0.00<br>(0.00 to<br>0.00)           | 0.00<br>(0.00 to<br>0.00)           | 0.00<br>(0.00 to<br>0.01)             |
| Genital prolapse                                           | 0.08<br>(0.04 to<br>0.15)             | 0.09<br>(0.03 to<br>0.19)                | 0.07<br>(0.02 to<br>0.14)                | 0.11<br>(0.04 to<br>0.23)                | 0.00<br>(0.00 to<br>0.00)       | 0.00<br>(0.00 to<br>0.01)           | 0.00<br>(0.00 to<br>0.01)           | 0.00<br>(0.00 to<br>0.01)             |
| Other gynecological diseases                               | 1.25<br>(0.68 to<br>2.02)             | 1.12<br>(0.49 to<br>2.21)                | 0.86<br>(0.37 to<br>1.72)                | 1.46<br>(0.67 to<br>2.91)                | 0.03<br>(0.01 to<br>0.04)       | 0.03<br>(0.01 to<br>0.06)           | 0.02<br>(0.01 to<br>0.05)           | 0.04<br>(0.02 to<br>0.08)             |
| Hemoglobinopathies and hemolytic anemias                   | 192.09<br>(131.36 to<br>287.31)       | 217.97<br>(130.97 to<br>356.26)          | 186.91<br>(111.71 to<br>299.10)          | 252.11<br>(154.04 to<br>403.88)          | 3.92<br>(2.80 to<br>5.54)       | 7.74<br>(4.85 to<br>11.76)          | 6.81<br>(4.16 to<br>10.26)          | 8.68<br>(5.48 to<br>13.12)            |
| Thalassemias                                               | 7.40<br>(1.03 to<br>19.38)            | 2.95<br>(0.48 to<br>7.96)                | 2.73<br>(0.46 to<br>7.28)                | 3.19<br>(0.50 to<br>8.59)                | 0.09<br>(0.01 to<br>0.24)       | 0.04<br>(0.01 to<br>0.10)           | 0.04<br>(0.01 to<br>0.09)           | 0.04<br>(0.01 to<br>0.11)             |
| Sickle cell disorders                                      | 133.70<br>(71.87 to<br>223.30)        | 111.74<br>(50.14 to<br>203.81)           | 94.65<br>(41.58 to<br>176.38)            | 131.19<br>(59.86 to<br>240.32)           | 2.35<br>(1.28 to<br>3.75)       | 2.49<br>(1.02 to<br>4.82)           | 2.13<br>(0.85 to<br>4.08)           | 2.89<br>(1.21 to<br>5.47)             |
| G6PD deficiency                                            | 36.23<br>(12.39 to<br>73.54)          | 61.00<br>(27.15 to<br>116.00)            | 51.80<br>(23.35 to<br>97.91)             | 71.16<br>(32.27 to<br>136.34)            | 0.83<br>(0.34 to<br>1.60)       | 2.26<br>(1.15 to<br>4.05)           | 1.94<br>(0.95 to<br>3.47)           | 2.60<br>(1.34 to<br>4.58)             |
| Other hemoglobinopathies and hemolytic anemias             | 14.75<br>(8.00 to<br>24.37)           | 42.28<br>(24.88 to<br>66.85)             | 37.73<br>(21.98 to<br>59.85)             | 46.57<br>(27.73 to<br>74.12)             | 0.65<br>(0.39 to<br>0.96)       | 2.95<br>(1.84 to<br>4.12)           | 2.71<br>(1.67 to<br>3.80)           | 3.15<br>(1.97 to<br>4.39)             |

|                                                   |                                            |                                           |                                           |                                            |                                    |                                    |                                    |                                     |
|---------------------------------------------------|--------------------------------------------|-------------------------------------------|-------------------------------------------|--------------------------------------------|------------------------------------|------------------------------------|------------------------------------|-------------------------------------|
| Endocrine, metabolic, blood, and immune disorders | 1,067.83<br>(801.39 to 1,443.30)           | 2,177.50<br>(1,438.27 to 3,284.67)        | 2,228.93<br>(1,459.73 to 3,414.69)        | 2,126.79<br>(1,420.81 to 3,160.89)         | 22.69<br>(16.77 to 30.54)          | 89.25<br>(59.69 to 125.33)         | 94.70<br>(61.83 to 132.87)         | 83.26<br>(57.10 to 115.24)          |
| <b>Qatar</b>                                      |                                            |                                           |                                           |                                            |                                    |                                    |                                    |                                     |
| Cause                                             | YLLs (actual counts)                       |                                           |                                           |                                            | Deaths (actual counts)             |                                    |                                    |                                     |
|                                                   | 2016                                       | 2040 Forecast                             | 2040 Better Scenario                      | 2040 Worse Scenario                        | 2016                               | 2040 Forecast                      | 2040 Better Scenario               | 2040 Worse Scenario                 |
| <b>Musculoskeletal disorders</b>                  | <b>154.46</b><br>(110.99 to 214.35)        | <b>250.49</b><br>(152.95 to 396.56)       | <b>238.69</b><br>(143.92 to 377.62)       | <b>263.78</b><br>(163.81 to 415.09)        | <b>3.47</b><br>(2.47 to 4.67)      | <b>8.15</b><br>(5.15 to 12.13)     | <b>7.86</b><br>(4.90 to 11.74)     | <b>8.46</b><br>(5.34 to 12.50)      |
| Rheumatoid arthritis                              | 20.63<br>(13.60 to 28.90)                  | 29.14<br>(17.66 to 45.53)                 | 23.54<br>(14.28 to 37.69)                 | 35.68<br>(22.41 to 55.07)                  | 0.49<br>(0.33 to 0.69)             | 1.25<br>(0.79 to 1.84)             | 1.03<br>(0.66 to 1.55)             | 1.49<br>(0.96 to 2.17)              |
| Other musculoskeletal disorders                   | 133.83<br>(95.90 to 187.28)                | 221.35<br>(133.60 to 357.82)              | 215.15<br>(129.25 to 347.95)              | 228.10<br>(139.88 to 368.53)               | 2.98<br>(2.11 to 4.09)             | 6.91<br>(4.24 to 10.50)            | 6.83<br>(4.18 to 10.31)            | 6.97<br>(4.28 to 10.51)             |
| <b>Other non-communicable diseases</b>            | <b>9,287.96</b><br>(5,906.95 to 13,662.85) | <b>6,266.89</b><br>(4,011.96 to 9,135.55) | <b>4,976.87</b><br>(3,246.07 to 7,222.49) | <b>7,868.68</b><br>(5,087.30 to 11,472.41) | <b>116.80</b><br>(77.58 to 168.05) | <b>151.57</b><br>(92.72 to 208.61) | <b>134.98</b><br>(80.97 to 188.86) | <b>169.98</b><br>(105.53 to 233.82) |
| Congenital birth defects                          | 8,845.05<br>(5,551.14 to 13,181.04)        | 4,907.02<br>(2,990.08 to 7,446.96)        | 3,690.89<br>(2,288.17 to 5,562.34)        | 6,445.02<br>(4,065.13 to 9,717.15)         | 106.72<br>(68.62 to 157.41)        | 62.59<br>(39.08 to 93.52)          | 47.64<br>(29.92 to 70.48)          | 81.48<br>(52.40 to 120.64)          |
| Neural tube defects                               | 112.75<br>(62.72 to 201.60)                | 26.79<br>(13.33 to 51.83)                 | 18.47<br>(9.39 to 34.55)                  | 38.07<br>(18.94 to 72.03)                  | 1.39<br>(0.81 to 2.41)             | 0.37<br>(0.20 to 0.66)             | 0.26<br>(0.14 to 0.46)             | 0.52<br>(0.27 to 0.94)              |
| Congenital heart anomalies                        | 3,652.19<br>(2,189.26 to 5,675.66)         | 1,684.84<br>(962.92 to 2,630.60)          | 1,163.75<br>(670.40 to 1,786.62)          | 2,379.28<br>(1,350.70 to 3,758.91)         | 44.20<br>(27.21 to 67.85)          | 21.38<br>(12.43 to 33.05)          | 14.88<br>(8.76 to 22.68)           | 30.01<br>(17.68 to 46.53)           |
| Orofacial clefts                                  | 1.40<br>(0.76 to 2.43)                     | 0.50<br>(0.23 to 0.92)                    | 0.32<br>(0.15 to 0.61)                    | 0.75<br>(0.34 to 1.43)                     | 0.02<br>(0.01 to 0.03)             | 0.01<br>(0.00 to 0.01)             | 0.00<br>(0.00 to 0.01)             | 0.01<br>(0.00 to 0.02)              |
| Down syndrome                                     | 381.84<br>(244.90 to 588.98)               | 356.70<br>(218.50 to 551.04)              | 346.99<br>(215.03 to 548.37)              | 366.61<br>(223.23 to 568.87)               | 5.06<br>(3.34 to 7.60)             | 5.51<br>(3.47 to 8.81)             | 5.44<br>(3.39 to 8.59)             | 5.60<br>(3.53 to 8.88)              |
| Other chromosomal abnormalities                   | 790.17<br>(71.82 to 1,359.61)              | 677.13<br>(61.13 to 1,237.38)             | 557.84<br>(51.00 to 1,020.38)             | 807.31<br>(71.12 to 1,481.89)              | 9.20<br>(0.84 to 15.82)            | 7.90<br>(0.75 to 14.40)            | 6.51<br>(0.62 to 11.88)            | 9.42<br>(0.86 to 17.27)             |
| Congenital musculoskeletal and limb anomalies     | 325.85<br>(84.10 to 551.80)                | 153.66<br>(45.26 to 269.17)               | 111.82<br>(33.42 to 193.49)               | 205.96<br>(59.47 to 352.96)                | 3.80<br>(1.01 to 6.42)             | 1.92<br>(0.59 to 3.15)             | 1.33<br>(0.44 to 2.27)             | 2.43<br>(0.77 to 4.12)              |
| Urogenital congenital anomalies                   | 180.52<br>(108.89 to 284.03)               | 112.87<br>(69.51 to 174.55)               | 88.84<br>(55.97 to 137.54)                | 141.63<br>(87.30 to 224.42)                | 2.35<br>(1.50 to 3.57)             | 1.98<br>(1.21 to 2.95)             | 1.61<br>(1.01 to 2.44)             | 2.42<br>(1.53 to 3.54)              |
| Digestive congenital anomalies                    | 95.22<br>(56.18 to 155.87)                 | 55.14<br>(29.88 to 96.19)                 | 39.21<br>(21.56 to 69.72)                 | 75.68<br>(40.40 to 133.46)                 | 1.12<br>(0.67 to 1.82)             | 0.66<br>(0.37 to 1.15)             | 0.47<br>(0.27 to 0.83)             | 0.91<br>(0.50 to 1.60)              |
| Other congenital birth defects                    | 3,305.10<br>(2,100.85 to 4,910.16)         | 1,839.39<br>(1,105.44 to 2,898.86)        | 1,363.65<br>(830.14 to 2,144.08)          | 2,429.72<br>(1,486.85 to 3,839.91)         | 39.58<br>(25.73 to 58.28)          | 22.96<br>(14.24 to 35.39)          | 17.14<br>(10.86 to 26.16)          | 30.17<br>(19.06 to 46.37)           |
| Skin and subcutaneous diseases                    | 184.16<br>(102.00 to 281.26)               | 1,244.40<br>(549.30 to 1,913.02)          | 1,195.88<br>(528.09 to 1,880.28)          | 1,275.08<br>(574.81 to 1,942.90)           | 7.08<br>(3.57 to 10.41)            | 87.64<br>(38.26 to 128.55)         | 86.29<br>(37.06 to 127.59)         | 86.78<br>(37.71 to 126.64)          |
| Cellulitis                                        | 28.88<br>(12.17 to 46.38)                  | 159.13<br>(36.44 to 333.24)               | 158.65<br>(36.00 to 342.52)               | 158.13<br>(36.73 to 320.91)                | 0.85<br>(0.28 to 1.47)             | 8.78<br>(1.55 to 15.57)            | 8.99<br>(1.52 to 19.49)            | 8.43<br>(1.55 to 17.46)             |
| Pyoderma                                          | 123.52<br>(67.79 to 189.13)                | 1,028.05<br>(470.67 to 1,550.63)          | 985.03<br>(456.39 to 1,502.78)            | 1,054.59<br>(492.49 to 1,563.68)           | 5.50<br>(2.74 to 8.16)             | 76.29<br>(33.95 to 111.61)         | 74.87<br>(33.37 to 109.55)         | 75.68<br>(33.49 to 108.63)          |
| Decubitus ulcer                                   | 16.08<br>(10.00 to 29.03)                  | 30.90<br>(16.60 to 49.30)                 | 27.71<br>(14.86 to 46.01)                 | 34.14<br>(17.76 to 54.43)                  | 0.41<br>(0.25 to 0.70)             | 1.71<br>(0.85 to 2.82)             | 1.60<br>(0.78 to 2.61)             | 1.78<br>(0.90 to 2.98)              |
| Other skin and subcutaneous diseases              | 15.69<br>(9.93 to 28.16)                   | 26.31<br>(14.29 to 44.40)                 | 24.48<br>(13.09 to 41.34)                 | 28.22<br>(15.20 to 46.94)                  | 0.32<br>(0.19 to 0.58)             | 0.86<br>(0.46 to 1.43)             | 0.83<br>(0.44 to 1.38)             | 0.89<br>(0.47 to 1.46)              |



|                                      |                                                               |                                                                |                                                               |                                                                |                                                          |                                                          |                                                        |                                                          |
|--------------------------------------|---------------------------------------------------------------|----------------------------------------------------------------|---------------------------------------------------------------|----------------------------------------------------------------|----------------------------------------------------------|----------------------------------------------------------|--------------------------------------------------------|----------------------------------------------------------|
| Sudden infant death syndrome         | 258.75<br>(137.45 to<br>462.28)                               | 115.47<br>(53.81 to<br>219.47)                                 | 90.09<br>(41.11 to<br>169.81)                                 | 148.58<br>(69.37 to<br>285.77)                                 | 3.00<br>(1.60 to<br>5.37)                                | 1.34<br>(0.62 to<br>2.55)                                | 1.05<br>(0.48 to<br>1.97)                              | 1.72<br>(0.80 to<br>3.32)                                |
| <b>Injuries</b>                      | <b>55,543.99</b><br><b>(40,073.41 to</b><br><b>75,064.14)</b> | <b>57,791.36</b><br><b>(31,250.68 to</b><br><b>109,338.08)</b> | <b>30,031.60</b><br><b>(16,034.72 to</b><br><b>57,046.90)</b> | <b>74,882.57</b><br><b>(40,398.11 to</b><br><b>142,619.55)</b> | <b>1,086.75</b><br><b>(773.12 to</b><br><b>1,487.60)</b> | <b>1,397.18</b><br><b>(783.58 to</b><br><b>2,492.34)</b> | <b>759.19</b><br><b>(426.25 to</b><br><b>1,335.53)</b> | <b>1,773.80</b><br><b>(983.56 to</b><br><b>3,203.08)</b> |
| <b>Transport injuries</b>            | <b>34,892.26</b><br><b>(25,234.44 to</b><br><b>48,022.01)</b> | <b>37,216.73</b><br><b>(19,546.17 to</b><br><b>72,333.54)</b>  | <b>12,440.70</b><br><b>(6,411.91 to</b><br><b>23,769.35)</b>  | <b>51,205.43</b><br><b>(26,924.72 to</b><br><b>99,735.68)</b>  | <b>684.41</b><br><b>(486.93 to</b><br><b>949.54)</b>     | <b>897.89</b><br><b>(488.64 to</b><br><b>1,645.82)</b>   | <b>323.63</b><br><b>(169.93 to</b><br><b>601.84)</b>   | <b>1,209.00</b><br><b>(653.24 to</b><br><b>2,241.18)</b> |
| Road injuries                        | 32,803.48<br>(23,710.18 to<br>45,180.57)                      | 35,024.49<br>(18,294.20 to<br>68,530.86)                       | 10,730.48<br>(5,484.81 to<br>20,742.15)                       | 48,494.32<br>(25,305.78 to<br>94,820.00)                       | 642.91<br>(457.90 to<br>895.10)                          | 841.93<br>(451.93 to<br>1,540.26)                        | 279.29<br>(147.99 to<br>521.10)                        | 1,140.72<br>(613.50 to<br>2,114.77)                      |
| Pedestrian road injuries             | 7,495.56<br>(5,144.67 to<br>10,510.08)                        | 6,470.45<br>(3,400.50 to<br>12,653.20)                         | 2,166.28<br>(1,089.83 to<br>4,193.76)                         | 9,707.71<br>(5,048.95 to<br>19,240.56)                         | 151.89<br>(102.45 to<br>214.41)                          | 171.79<br>(91.73 to<br>322.43)                           | 60.95<br>(31.43 to<br>112.08)                          | 252.19<br>(133.54 to<br>476.87)                          |
| <b>Qatar</b>                         |                                                               |                                                                |                                                               |                                                                |                                                          |                                                          |                                                        |                                                          |
| <b>Cause</b>                         | <b>YLLs (actual counts)</b>                                   |                                                                |                                                               |                                                                | <b>Deaths (actual counts)</b>                            |                                                          |                                                        |                                                          |
|                                      | <b>2016</b>                                                   | <b>2040 Forecast</b>                                           | <b>2040 Better Scenario</b>                                   | <b>2040 Worse Scenario</b>                                     | <b>2016</b>                                              | <b>2040 Forecast</b>                                     | <b>2040 Better Scenario</b>                            | <b>2040 Worse Scenario</b>                               |
| Cyclist road injuries                | 813.07<br>(521.65 to<br>1,206.58)                             | 1,310.75<br>(651.24 to<br>2,639.04)                            | 563.06<br>(267.17 to<br>1,154.07)                             | 1,646.87<br>(820.67 to<br>3,320.15)                            | 17.52<br>(11.07 to<br>26.29)                             | 34.67<br>(17.07 to<br>68.79)                             | 16.66<br>(7.93 to<br>34.18)                            | 42.17<br>(20.90 to<br>83.73)                             |
| Motorcyclist road injuries           | 1,607.99<br>(1,027.44 to<br>2,431.86)                         | 1,578.99<br>(687.00 to<br>3,506.88)                            | 781.54<br>(317.06 to<br>1,819.91)                             | 1,913.34<br>(836.43 to<br>4,247.31)                            | 27.79<br>(17.95 to<br>41.94)                             | 29.11<br>(12.94 to<br>62.88)                             | 15.12<br>(6.53 to<br>33.93)                            | 34.86<br>(15.71 to<br>75.08)                             |
| Motor vehicle road injuries          | 22,454.21<br>(16,068.23 to<br>30,963.10)                      | 25,146.79<br>(12,826.56 to<br>49,027.49)                       | 7,064.61<br>(3,520.38 to<br>14,082.25)                        | 34,525.74<br>(17,715.22 to<br>67,191.00)                       | 437.15<br>(308.14 to<br>608.50)                          | 593.41<br>(312.19 to<br>1,120.05)                        | 182.19<br>(96.20 to<br>343.24)                         | 794.53<br>(416.08 to<br>1,493.24)                        |
| Other road injuries                  | 432.64<br>(176.23 to<br>609.38)                               | 517.51<br>(188.93 to<br>1,028.94)                              | 154.99<br>(59.63 to<br>316.55)                                | 700.65<br>(252.75 to<br>1,407.17)                              | 8.55<br>(3.53 to<br>12.83)                               | 12.95<br>(5.74 to<br>24.82)                              | 4.38<br>(2.10 to<br>8.55)                              | 16.96<br>(7.32 to<br>32.89)                              |
| Other transport injuries             | 2,088.78<br>(1,395.69 to<br>3,012.90)                         | 2,192.24<br>(1,132.65 to<br>4,081.36)                          | 1,710.22<br>(859.89 to<br>3,241.50)                           | 2,711.11<br>(1,397.67 to<br>5,285.52)                          | 41.51<br>(27.55 to<br>60.78)                             | 55.95<br>(29.86 to<br>102.50)                            | 44.24<br>(22.88 to<br>82.56)                           | 88.28<br>(36.77 to<br>125.46)                            |
| <b>Unintentional injuries</b>        | <b>12,515.72</b><br><b>(8,296.78 to</b><br><b>17,217.35)</b>  | <b>10,628.01</b><br><b>(5,977.55 to</b><br><b>18,723.71)</b>   | <b>9,238.83</b><br><b>(5,220.56 to</b><br><b>16,129.68)</b>   | <b>12,054.91</b><br><b>(6,814.48 to</b><br><b>21,130.38)</b>   | <b>243.15</b><br><b>(160.84 to</b><br><b>339.72)</b>     | <b>273.29</b><br><b>(166.57 to</b><br><b>444.31)</b>     | <b>243.72</b><br><b>(146.58 to</b><br><b>404.96)</b>   | <b>302.98</b><br><b>(186.68 to</b><br><b>501.25)</b>     |
| Falls                                | 3,974.82<br>(2,069.95 to<br>5,826.42)                         | 4,273.86<br>(2,203.57 to<br>7,750.36)                          | 3,902.00<br>(1,966.21 to<br>7,230.78)                         | 4,607.93<br>(2,398.54 to<br>8,386.75)                          | 79.90<br>(43.64 to<br>116.38)                            | 116.22<br>(68.79 to<br>191.41)                           | 108.43<br>(64.06 to<br>183.04)                         | 122.83<br>(73.15 to<br>204.43)                           |
| Drowning                             | 2,127.46<br>(1,529.74 to<br>2,868.44)                         | 1,498.93<br>(839.43 to<br>2,664.48)                            | 1,284.70<br>(704.56 to<br>2,320.44)                           | 1,715.67<br>(950.68 to<br>3,029.66)                            | 38.24<br>(26.67 to<br>52.22)                             | 32.42<br>(17.98 to<br>58.04)                             | 28.12<br>(15.40 to<br>49.76)                           | 36.80<br>(20.36 to<br>64.49)                             |
| Fire, heat, and hot substances       | 977.46<br>(682.40 to<br>1,356.19)                             | 742.64<br>(417.52 to<br>1,284.37)                              | 608.46<br>(338.29 to<br>1,052.35)                             | 888.36<br>(506.14 to<br>1,543.26)                              | 19.13<br>(13.07 to<br>26.92)                             | 20.00<br>(11.97 to<br>32.26)                             | 16.75<br>(10.01 to<br>27.34)                           | 23.45<br>(13.98 to<br>37.84)                             |
| Poisonings                           | 446.90<br>(305.27 to<br>692.92)                               | 171.37<br>(80.84 to<br>328.27)                                 | 131.52<br>(62.27 to<br>262.17)                                | 216.63<br>(102.46 to<br>426.87)                                | 7.78<br>(3.75 to<br>12.05)                               | 3.57<br>(1.84 to<br>6.65)                                | 2.79<br>(1.45 to<br>5.32)                              | 4.45<br>(2.30 to<br>8.43)                                |
| Exposure to mechanical forces        | 2,720.09<br>(1,414.32 to<br>4,027.90)                         | 2,051.52<br>(926.66 to<br>3,907.33)                            | 1,707.92<br>(780.82 to<br>3,357.37)                           | 2,410.40<br>(1,116.34 to<br>4,608.85)                          | 53.64<br>(27.37 to<br>80.24)                             | 46.53<br>(22.68 to<br>86.99)                             | 39.20<br>(19.24 to<br>74.84)                           | 54.17<br>(26.50 to<br>101.77)                            |
| Unintentional firearm injuries       | 79.97<br>(45.64 to<br>171.17)                                 | 63.27<br>(32.76 to<br>126.83)                                  | 55.32<br>(28.37 to<br>113.45)                                 | 71.53<br>(38.05 to<br>144.34)                                  | 1.55<br>(0.91 to<br>3.25)                                | 1.71<br>(1.00 to<br>3.08)                                | 1.53<br>(0.89 to<br>2.78)                              | 1.89<br>(1.11 to<br>3.41)                                |
| Unintentional suffocation            | 72.25<br>(48.84 to<br>109.04)                                 | 54.96<br>(32.83 to<br>90.38)                                   | 46.28<br>(27.90 to<br>74.43)                                  | 63.77<br>(38.01 to<br>103.39)                                  | 1.02<br>(0.71 to<br>1.49)                                | 0.91<br>(0.55 to<br>1.46)                                | 0.78<br>(0.47 to<br>1.26)                              | 1.04<br>(0.63 to<br>1.65)                                |
| Other exposure to mechanical forces  | 2,567.87<br>(1,223.45 to<br>3,863.70)                         | 1,933.29<br>(816.47 to<br>3,781.27)                            | 1,606.33<br>(684.59 to<br>3,210.02)                           | 2,275.10<br>(992.44 to<br>4,458.60)                            | 51.08<br>(24.17 to<br>77.49)                             | 43.91<br>(20.33 to<br>84.16)                             | 36.88<br>(17.29 to<br>72.17)                           | 51.25<br>(23.93 to<br>98.01)                             |
| Adverse effects of medical treatment | 441.41<br>(273.16 to<br>772.86)                               | 741.72<br>(438.34 to<br>1,242.90)                              | 691.90<br>(400.78 to<br>1,169.60)                             | 787.26<br>(471.66 to<br>1,331.38)                              | 9.73<br>(6.18 to<br>16.16)                               | 26.50<br>(17.45 to<br>38.75)                             | 25.44<br>(16.36 to<br>37.77)                           | 27.29<br>(18.30 to<br>39.85)                             |

|                                                 |                                                             |                                                             |                                                             |                                                              |                                                      |                                                      |                                                      |                                                      |
|-------------------------------------------------|-------------------------------------------------------------|-------------------------------------------------------------|-------------------------------------------------------------|--------------------------------------------------------------|------------------------------------------------------|------------------------------------------------------|------------------------------------------------------|------------------------------------------------------|
| Animal contact                                  | 28.78<br>(20.37 to<br>44.86)                                | 45.31<br>(29.13 to<br>72.75)                                | 40.22<br>(25.30 to<br>65.74)                                | 50.46<br>(32.46 to<br>80.85)                                 | 0.59<br>(0.41 to<br>0.87)                            | 1.49<br>(0.99 to<br>2.21)                            | 1.37<br>(0.89 to<br>2.06)                            | 1.40<br>(1.08 to<br>2.38)                            |
| Venomous animal contact                         | 12.24<br>(8.43 to<br>19.04)                                 | 17.27<br>(10.28 to<br>30.07)                                | 15.73<br>(8.97 to<br>27.46)                                 | 18.78<br>(11.19 to<br>32.59)                                 | 0.24<br>(0.16 to<br>0.37)                            | 0.28<br>(0.28 to<br>0.77)                            | 0.43<br>(0.26 to<br>0.72)                            | 0.49<br>(0.30 to<br>0.80)                            |
| Non-venomous animal contact                     | 16.54<br>(11.84 to<br>26.04)                                | 28.04<br>(18.02 to<br>44.13)                                | 24.49<br>(15.58 to<br>39.17)                                | 31.68<br>(20.40 to<br>49.01)                                 | 0.35<br>(0.24 to<br>0.52)                            | 1.03<br>(0.68 to<br>1.49)                            | 0.93<br>(0.62 to<br>1.34)                            | 1.11<br>(0.76 to<br>1.58)                            |
| Foreign body                                    | 281.49<br>(210.08 to<br>380.39)                             | 282.82<br>(191.19 to<br>429.15)                             | 260.52<br>(173.48 to<br>396.57)                             | 303.08<br>(204.46 to<br>451.34)                              | 4.81<br>(3.57 to<br>6.39)                            | 6.63<br>(4.45 to<br>9.91)                            | 6.31<br>(4.20 to<br>9.45)                            | 6.89<br>(4.66 to<br>10.11)                           |
| Pulmonary aspiration and foreign body in airway | 264.74<br>(195.56 to<br>361.49)                             | 260.93<br>(172.88 to<br>394.03)                             | 238.20<br>(155.97 to<br>364.38)                             | 281.72<br>(186.39 to<br>416.93)                              | 4.50<br>(3.32 to<br>6.03)                            | 6.02<br>(3.96 to<br>9.09)                            | 5.67<br>(3.69 to<br>8.57)                            | 6.33<br>(4.14 to<br>9.36)                            |
| Foreign body in other body part                 | 16.75<br>(11.29 to<br>31.03)                                | 21.89<br>(12.99 to<br>40.36)                                | 22.33<br>(13.10 to<br>42.03)                                | 21.36<br>(12.69 to<br>39.81)                                 | 0.31<br>(0.21 to<br>0.57)                            | 0.60<br>(0.40 to<br>0.92)                            | 0.63<br>(0.41 to<br>0.96)                            | 0.57<br>(0.37 to<br>0.89)                            |
| Environmental heat and cold exposure            | 111.76<br>(64.64 to<br>251.46)                              | 193.15<br>(97.04 to<br>421.34)                              | 162.80<br>(78.86 to<br>365.27)                              | 226.15<br>(114.69 to<br>510.81)                              | 2.45<br>(1.41 to<br>5.37)                            | 6.33<br>(3.69 to<br>11.58)                           | 5.49<br>(3.10 to<br>9.97)                            | 7.20<br>(4.25 to<br>13.09)                           |
| Other unintentional injuries                    | 1,405.53<br>(864.37 to<br>2,060.90)                         | 626.69<br>(306.15 to<br>1,242.36)                           | 448.79<br>(217.40 to<br>884.46)                             | 848.97<br>(423.72 to<br>1,673.59)                            | 26.90<br>(16.45 to<br>39.73)                         | 13.60<br>(6.83 to<br>25.61)                          | 9.82<br>(4.89 to<br>18.89)                           | 18.30<br>(9.40 to<br>34.77)                          |
| <b>Self-harm and interpersonal violence</b>     | <b>8,122.32</b><br><b>(5,669.33 to</b><br><b>11,429.18)</b> | <b>9,943.50</b><br><b>(5,029.66 to</b><br><b>19,587.07)</b> | <b>8,348.97</b><br><b>(4,248.86 to</b><br><b>16,435.54)</b> | <b>11,619.10</b><br><b>(5,695.99 to</b><br><b>22,900.46)</b> | <b>158.94</b><br><b>(110.25 to</b><br><b>226.59)</b> | <b>225.94</b><br><b>(117.21 to</b><br><b>427.73)</b> | <b>191.79</b><br><b>(101.13 to</b><br><b>359.50)</b> | <b>261.76</b><br><b>(134.38 to</b><br><b>493.89)</b> |

**Qatar**

| Cause                                                                               | YLLs (actual counts)                              |                                                 |                                                 |                                                 | Deaths (actual counts)                         |                                                |                                                |                                                |
|-------------------------------------------------------------------------------------|---------------------------------------------------|-------------------------------------------------|-------------------------------------------------|-------------------------------------------------|------------------------------------------------|------------------------------------------------|------------------------------------------------|------------------------------------------------|
|                                                                                     | 2016                                              | 2040 Forecast                                   | 2040 Better Scenario                            | 2040 Worse Scenario                             | 2016                                           | 2040 Forecast                                  | 2040 Better Scenario                           | 2040 Worse Scenario                            |
| Self-harm                                                                           | 6,856.41<br>(4,705.65 to<br>9,870.40)             | 9,073.01<br>(4,521.40 to<br>18,281.30)          | 7,620.95<br>(3,786.57 to<br>15,122.27)          | 10,595.34<br>(5,128.62 to<br>21,357.43)         | 134.56<br>(92.01 to<br>194.79)                 | 205.34<br>(106.08 to<br>392.06)                | 174.29<br>(90.17 to<br>327.40)                 | 237.85<br>(120.31 to<br>455.43)                |
| Self-harm by firearm                                                                | 150.06<br>(82.06 to<br>316.13)                    | 149.62<br>(63.04 to<br>324.10)                  | 119.56<br>(49.70 to<br>265.78)                  | 183.55<br>(76.32 to<br>393.53)                  | 3.00<br>(1.64 to<br>6.25)                      | 3.70<br>(1.63 to<br>7.47)                      | 3.01<br>(1.33 to<br>6.19)                      | 4.47<br>(1.96 to<br>9.11)                      |
| Self-harm by other specified means                                                  | 6,706.35<br>(4,601.90 to<br>9,666.84)             | 8,923.39<br>(4,436.50 to<br>17,999.99)          | 7,501.40<br>(3,718.38 to<br>14,877.36)          | 10,411.79<br>(5,046.86 to<br>20,980.25)         | 131.56<br>(90.04 to<br>189.47)                 | 201.64<br>(103.68 to<br>384.85)                | 171.28<br>(88.96 to<br>321.77)                 | 233.38<br>(117.56 to<br>447.89)                |
| Interpersonal violence                                                              | 1,265.91<br>(820.94 to<br>1,888.40)               | 870.50<br>(467.22 to<br>1,552.82)               | 728.02<br>(390.70 to<br>1,324.00)               | 1,023.76<br>(536.22 to<br>1,853.59)             | 24.38<br>(15.62 to<br>36.16)                   | 20.60<br>(10.82 to<br>36.40)                   | 17.50<br>(9.24 to<br>31.42)                    | 23.90<br>(12.54 to<br>41.75)                   |
| Physical violence by firearm                                                        | 200.65<br>(100.52 to<br>416.38)                   | 116.44<br>(51.65 to<br>256.83)                  | 93.53<br>(41.70 to<br>205.46)                   | 142.12<br>(64.87 to<br>314.35)                  | 3.82<br>(1.91 to<br>7.77)                      | 2.59<br>(1.20 to<br>5.55)                      | 2.10<br>(0.97 to<br>4.42)                      | 3.14<br>(1.46 to<br>6.70)                      |
| Physical violence by sharp object                                                   | 736.23<br>(427.79 to<br>1,121.83)                 | 488.35<br>(243.07 to<br>900.48)                 | 402.72<br>(202.16 to<br>771.73)                 | 582.71<br>(285.08 to<br>1,083.41)               | 14.37<br>(8.37 to<br>22.07)                    | 11.20<br>(5.43 to<br>20.33)                    | 9.34<br>(4.55 to<br>17.23)                     | 13.25<br>(6.43 to<br>23.91)                    |
| Physical violence by other means                                                    | 329.03<br>(186.21 to<br>476.34)                   | 265.70<br>(122.62 to<br>491.50)                 | 231.77<br>(109.73 to<br>429.27)                 | 298.93<br>(137.86 to<br>553.87)                 | 6.19<br>(3.43 to<br>9.01)                      | 6.81<br>(2.90 to<br>12.44)                     | 6.05<br>(2.59 to<br>11.12)                     | 7.53<br>(3.17 to<br>13.83)                     |
| <b>Forces of nature, conflict and terrorism, and executions and police conflict</b> | <b>13.70</b><br><b>(10.71 to</b><br><b>17.38)</b> | <b>3.11</b><br><b>(0.00 to</b><br><b>44.06)</b> | <b>3.10</b><br><b>(0.00 to</b><br><b>43.89)</b> | <b>3.13</b><br><b>(0.00 to</b><br><b>44.29)</b> | <b>0.25</b><br><b>(0.00 to</b><br><b>0.32)</b> | <b>0.06</b><br><b>(0.00 to</b><br><b>0.86)</b> | <b>0.06</b><br><b>(0.00 to</b><br><b>0.86)</b> | <b>0.06</b><br><b>(0.00 to</b><br><b>0.86)</b> |
| Exposure to forces of nature                                                        | 0.00<br>(0.00 to<br>0.00)                         | 0.00<br>(0.00 to<br>0.00)                       | 0.00<br>(0.00 to<br>0.00)                       | 0.00<br>(0.00 to<br>0.00)                       | 0.00<br>(0.00 to<br>0.00)                      | 0.00<br>(0.00 to<br>0.00)                      | 0.00<br>(0.00 to<br>0.00)                      | 0.00<br>(0.00 to<br>0.00)                      |
| Conflict and terrorism                                                              | 0.00<br>(0.00 to<br>0.00)                         | 3.11<br>(0.00 to<br>44.06)                      | 3.10<br>(0.00 to<br>43.89)                      | 3.13<br>(0.00 to<br>44.29)                      | 0.00<br>(0.00 to<br>0.00)                      | 0.06<br>(0.00 to<br>0.86)                      | 0.06<br>(0.00 to<br>0.86)                      | 0.06<br>(0.00 to<br>0.86)                      |
| Executions and police conflict                                                      | 13.70<br>(10.71 to<br>17.38)                      | 0.00<br>(0.00 to<br>0.00)                       | 0.00<br>(0.00 to<br>0.00)                       | 0.00<br>(0.00 to<br>0.00)                       | 0.25<br>(0.00 to<br>0.32)                      | 0.00<br>(0.00 to<br>0.00)                      | 0.00<br>(0.00 to<br>0.00)                      | 0.00<br>(0.00 to<br>0.00)                      |

| Saudi Arabia                                                      |                                    |                                    |                                    |                                    |                           |                              |                              |                              |
|-------------------------------------------------------------------|------------------------------------|------------------------------------|------------------------------------|------------------------------------|---------------------------|------------------------------|------------------------------|------------------------------|
| Cause                                                             | YLLs (in 1000s)                    |                                    |                                    |                                    | Deaths (in 1000s)         |                              |                              |                              |
|                                                                   | 2016                               | 2040 Forecast                      | 2040 Better Scenario               | 2040 Worse Scenario                | 2016                      | 2040 Forecast                | 2040 Better Scenario         | 2040 Worse Scenario          |
| All causes                                                        | 2,527.58<br>(2,341.62 to 2,724.55) | 3,957.45<br>(2,374.01 to 5,815.77) | 3,315.27<br>(2,015.02 to 4,870.62) | 5,367.09<br>(3,189.67 to 7,822.16) | 90.56<br>(84.46 to 96.82) | 221.38<br>(141.54 to 301.09) | 193.68<br>(125.25 to 266.74) | 279.32<br>(180.02 to 386.88) |
| Communicable, maternal, neonatal, and nutritional diseases        | 293.51<br>(239.16 to 342.83)       | 348.39<br>(200.04 to 507.41)       | 301.80<br>(170.76 to 444.19)       | 436.74<br>(253.81 to 640.34)       | 8.10<br>(6.10 to 9.43)    | 19.46<br>(11.73 to 27.16)    | 17.83<br>(10.79 to 25.07)    | 22.88<br>(13.88 to 32.19)    |
| HIV/AIDS and tuberculosis                                         | 36.59<br>(27.53 to 49.46)          | 24.71<br>(12.93 to 43.94)          | 21.27<br>(9.95 to 39.86)           | 43.10<br>(26.22 to 64.37)          | 1.13<br>(0.93 to 1.40)    | 1.10<br>(0.67 to 1.69)       | 0.97<br>(0.55 to 1.52)       | 1.82<br>(1.19 to 2.70)       |
| Tuberculosis                                                      | 22.69<br>(19.86 to 25.37)          | 15.75<br>(9.45 to 23.42)           | 13.25<br>(7.89 to 19.35)           | 26.32<br>(15.66 to 41.54)          | 0.84<br>(0.75 to 0.93)    | 0.90<br>(0.56 to 1.32)       | 0.79<br>(0.50 to 1.12)       | 1.44<br>(0.89 to 2.26)       |
| HIV/AIDS                                                          | 13.90<br>(5.90 to 26.62)           | 8.96<br>(0.55 to 27.23)            | 8.02<br>(0.14 to 26.67)            | 16.77<br>(5.02 to 33.65)           | 0.29<br>(0.12 to 0.55)    | 0.20<br>(0.01 to 0.62)       | 0.18<br>(0.00 to 0.60)       | 0.38<br>(0.09 to 0.76)       |
| Diarrhea, lower respiratory, and other common infectious diseases | 118.44<br>(86.38 to 139.47)        | 277.05<br>(149.63 to 424.07)       | 241.42<br>(129.56 to 371.44)       | 333.72<br>(177.83 to 508.29)       | 5.18<br>(3.41 to 6.33)    | 17.30<br>(10.10 to 24.83)    | 15.88<br>(9.18 to 22.72)     | 19.84<br>(11.41 to 28.66)    |
| Diarrheal diseases                                                | 8.86<br>(6.33 to 12.58)            | 17.40<br>(5.00 to 46.52)           | 19.83<br>(6.14 to 50.07)           | 16.76<br>(4.11 to 50.22)           | 0.28<br>(0.16 to 0.41)    | 1.23<br>(0.34 to 3.33)       | 1.45<br>(0.44 to 3.83)       | 1.11<br>(0.26 to 3.31)       |
| Intestinal infectious diseases                                    | 5.17<br>(1.63 to 11.90)            | 4.70<br>(1.60 to 10.16)            | 4.79<br>(1.66 to 10.37)            | 4.08<br>(1.31 to 9.27)             | 0.08<br>(0.03 to 0.18)    | 0.09<br>(0.03 to 0.20)       | 0.09<br>(0.03 to 0.20)       | 0.08<br>(0.02 to 0.18)       |
| Typhoid fever                                                     | 4.57<br>(1.45 to 10.40)            | 4.38<br>(1.44 to 9.58)             | 4.50<br>(1.58 to 9.70)             | 3.64<br>(1.16 to 8.43)             | 0.07<br>(0.02 to 0.16)    | 0.08<br>(0.03 to 0.19)       | 0.09<br>(0.03 to 0.19)       | 0.09<br>(0.02 to 0.16)       |
| Paratyphoid fever                                                 | 0.60<br>(0.18 to 1.54)             | 0.32<br>(0.09 to 0.83)             | 0.29<br>(0.08 to 0.75)             | 0.44<br>(0.12 to 1.14)             | 0.01<br>(0.00 to 0.02)    | 0.01<br>(0.00 to 0.02)       | 0.01<br>(0.00 to 0.02)       | 0.01<br>(0.00 to 0.02)       |
| Other intestinal infectious diseases                              | 0.00<br>(0.00 to 0.00)             | 0.00<br>(0.00 to 0.00)             | 0.00<br>(0.00 to 0.00)             | 0.00<br>(0.00 to 0.00)             | 0.00<br>(0.00 to 0.00)    | 0.00<br>(0.00 to 0.00)       | 0.00<br>(0.00 to 0.00)       | 0.00<br>(0.00 to 0.00)       |
| Lower respiratory infections                                      | 95.08<br>(65.81 to 113.59)         | 247.25<br>(131.85 to 379.02)       | 209.50<br>(109.79 to 322.51)       | 303.54<br>(158.17 to 468.64)       | 4.61<br>(2.93 to 5.65)    | 15.70<br>(8.94 to 22.48)     | 14.05<br>(8.06 to 20.12)     | 18.34<br>(10.46 to 26.77)    |
| Upper respiratory infections                                      | 0.05<br>(0.04 to 0.06)             | 0.03<br>(0.01 to 0.05)             | 0.03<br>(0.01 to 0.05)             | 0.05<br>(0.02 to 0.09)             | 0.00<br>(0.00 to 0.00)    | 0.00<br>(0.00 to 0.00)       | 0.00<br>(0.00 to 0.00)       | 0.00<br>(0.00 to 0.00)       |
| Otitis media                                                      | 0.01<br>(0.00 to 0.02)             | 0.02<br>(0.00 to 0.05)             | 0.02<br>(0.00 to 0.06)             | 0.02<br>(0.00 to 0.05)             | 0.00<br>(0.00 to 0.00)    | 0.00<br>(0.00 to 0.01)       | 0.00<br>(0.00 to 0.01)       | 0.00<br>(0.00 to 0.00)       |
| Meningitis                                                        | 4.59<br>(3.10 to 6.34)             | 2.60<br>(1.45 to 3.86)             | 2.39<br>(1.35 to 3.57)             | 3.52<br>(1.95 to 5.37)             | 0.11<br>(0.07 to 0.15)    | 0.11<br>(0.06 to 0.15)       | 0.11<br>(0.06 to 0.15)       | 0.14<br>(0.08 to 0.20)       |
| Pneumococcal meningitis                                           | 0.04<br>(0.02 to 0.06)             | 0.04<br>(0.02 to 0.07)             | 0.04<br>(0.02 to 0.07)             | 0.04<br>(0.02 to 0.06)             | 0.00<br>(0.00 to 0.00)    | 0.00<br>(0.00 to 0.00)       | 0.00<br>(0.00 to 0.00)       | 0.00<br>(0.00 to 0.00)       |
| H influenzae type B meningitis                                    | 0.32<br>(0.21 to 0.43)             | 0.33<br>(0.18 to 0.53)             | 0.32<br>(0.18 to 0.50)             | 0.37<br>(0.19 to 0.68)             | 0.01<br>(0.00 to 0.01)    | 0.01<br>(0.01 to 0.02)       | 0.01<br>(0.01 to 0.02)       | 0.01<br>(0.01 to 0.02)       |
| Meningococcal meningitis                                          | 1.82<br>(1.24 to 2.50)             | 0.98<br>(0.54 to 1.48)             | 0.90<br>(0.49 to 1.37)             | 1.34<br>(0.74 to 2.05)             | 0.05<br>(0.03 to 0.06)    | 0.04<br>(0.02 to 0.06)       | 0.04<br>(0.02 to 0.06)       | 0.06<br>(0.03 to 0.08)       |
| Other meningitis                                                  | 2.41<br>(1.64 to 3.28)             | 1.25<br>(0.71 to 1.84)             | 1.13<br>(0.65 to 1.68)             | 1.77<br>(1.00 to 2.70)             | 0.06<br>(0.04 to 0.08)    | 0.05<br>(0.03 to 0.07)       | 0.05<br>(0.03 to 0.07)       | 0.07<br>(0.04 to 0.10)       |
| Encephalitis                                                      | 3.24<br>(1.25 to 4.89)             | 4.72<br>(1.56 to 8.18)             | 4.66<br>(1.54 to 8.09)             | 4.88<br>(1.63 to 8.40)             | 0.07<br>(0.03 to 0.11)    | 0.16<br>(0.05 to 0.28)       | 0.16<br>(0.05 to 0.28)       | 0.16<br>(0.05 to 0.28)       |

|                                         |                                  |                                  |                                  |                                  |                                  |                                  |                                  |                                  |
|-----------------------------------------|----------------------------------|----------------------------------|----------------------------------|----------------------------------|----------------------------------|----------------------------------|----------------------------------|----------------------------------|
| Diphtheria                              | 0.01<br>(0.01 to<br>0.02)        | 0.00<br>(0.00 to<br>0.00)        | 0.00<br>(0.00 to<br>0.00)        | 0.00<br>(0.00 to<br>0.01)        | 0.00<br>(0.00 to<br>0.00)        | 0.00<br>(0.00 to<br>0.00)        | 0.00<br>(0.00 to<br>0.00)        | 0.00<br>(0.00 to<br>0.00)        |
| Whooping cough                          | 0.65<br>(0.06 to<br>2.04)        | 0.17<br>(0.01 to<br>0.74)        | 0.06<br>(0.00 to<br>0.25)        | 0.66<br>(0.04 to<br>2.74)        | 0.01<br>(0.00 to<br>0.02)        | 0.00<br>(0.00 to<br>0.01)        | 0.00<br>(0.00 to<br>0.00)        | 0.01<br>(0.00 to<br>0.03)        |
| Tetanus                                 | 0.35<br>(0.17 to<br>0.53)        | 0.04<br>(0.01 to<br>0.07)        | 0.03<br>(0.01 to<br>0.06)        | 0.05<br>(0.02 to<br>0.12)        | 0.01<br>(0.00 to<br>0.01)        | 0.00<br>(0.00 to<br>0.00)        | 0.00<br>(0.00 to<br>0.00)        | 0.00<br>(0.00 to<br>0.00)        |
| Measles                                 | 0.23<br>(0.06 to<br>0.64)        | 0.01<br>(0.00 to<br>0.07)        | 0.01<br>(0.00 to<br>0.05)        | 0.05<br>(0.00 to<br>0.36)        | 0.00<br>(0.00 to<br>0.01)        | 0.00<br>(0.00 to<br>0.00)        | 0.00<br>(0.00 to<br>0.00)        | 0.00<br>(0.00 to<br>0.00)        |
| <b>Saudi Arabia</b>                     |                                  |                                  |                                  |                                  |                                  |                                  |                                  |                                  |
| Cause                                   | YLLs (in 1000s)                  |                                  |                                  |                                  | Deaths (in 1000s)                |                                  |                                  |                                  |
|                                         | 2016                             | 2040 Forecast                    | 2040 Better Scenario             | 2040 Worse Scenario              | 2016                             | 2040 Forecast                    | 2040 Better Scenario             | 2040 Worse Scenario              |
| Varicella and herpes zoster             | 0.20<br>(0.15 to<br>0.26)        | 0.09<br>(0.06 to<br>0.15)        | 0.09<br>(0.05 to<br>0.14)        | 0.12<br>(0.07 to<br>0.19)        | 0.00<br>(0.00 to<br>0.01)        | 0.00<br>(0.00 to<br>0.01)        | 0.00<br>(0.00 to<br>0.01)        | 0.01<br>(0.00 to<br>0.01)        |
| Neglected tropical diseases and malaria | <b>1.38</b><br>(0.65 to<br>1.78) | <b>2.06</b><br>(0.85 to<br>3.34) | <b>2.06</b><br>(0.85 to<br>3.36) | <b>2.07</b><br>(0.86 to<br>3.33) | <b>0.03</b><br>(0.02 to<br>0.04) | <b>0.08</b><br>(0.03 to<br>0.14) | <b>0.08</b><br>(0.03 to<br>0.14) | <b>0.08</b><br>(0.03 to<br>0.13) |
| Malaria                                 | 0.80<br>(0.12 to<br>1.18)        | 0.63<br>(0.11 to<br>1.02)        | 0.63<br>(0.12 to<br>1.02)        | 0.64<br>(0.12 to<br>1.03)        | 0.02<br>(0.00 to<br>0.02)        | 0.02<br>(0.00 to<br>0.03)        | 0.00<br>(0.00 to<br>0.03)        | 0.02<br>(0.00 to<br>0.03)        |
| Chagas disease                          | 0.00<br>(0.00 to<br>0.00)        | 0.00<br>(0.00 to<br>0.00)        | 0.00<br>(0.00 to<br>0.00)        | 0.00<br>(0.00 to<br>0.00)        | 0.00<br>(0.00 to<br>0.00)        | 0.00<br>(0.00 to<br>0.00)        | 0.00<br>(0.00 to<br>0.00)        | 0.00<br>(0.00 to<br>0.00)        |
| Leishmaniasis                           | 0.09<br>(0.05 to<br>0.13)        | 0.08<br>(0.04 to<br>0.15)        | 0.08<br>(0.03 to<br>0.15)        | 0.09<br>(0.04 to<br>0.17)        | 0.00<br>(0.00 to<br>0.00)        | 0.00<br>(0.00 to<br>0.01)        | 0.00<br>(0.00 to<br>0.01)        | 0.00<br>(0.00 to<br>0.01)        |
| African trypanosomiasis                 | 0.00<br>(0.00 to<br>0.00)        | 0.00<br>(0.00 to<br>0.00)        | 0.00<br>(0.00 to<br>0.00)        | 0.00<br>(0.00 to<br>0.00)        | 0.00<br>(0.00 to<br>0.00)        | 0.00<br>(0.00 to<br>0.00)        | 0.00<br>(0.00 to<br>0.00)        | 0.00<br>(0.00 to<br>0.00)        |
| Schistosomiasis                         | 0.22<br>(0.16 to<br>0.31)        | 0.42<br>(0.19 to<br>0.81)        | 0.42<br>(0.19 to<br>0.81)        | 0.43<br>(0.20 to<br>0.80)        | 0.01<br>(0.01 to<br>0.01)        | 0.02<br>(0.01 to<br>0.04)        | 0.02<br>(0.01 to<br>0.04)        | 0.02<br>(0.01 to<br>0.04)        |
| Cysticercosis                           | 0.02<br>(0.01 to<br>0.02)        | 0.01<br>(0.01 to<br>0.02)        | 0.01<br>(0.01 to<br>0.02)        | 0.01<br>(0.01 to<br>0.02)        | 0.00<br>(0.00 to<br>0.00)        | 0.00<br>(0.00 to<br>0.00)        | 0.00<br>(0.00 to<br>0.00)        | 0.00<br>(0.00 to<br>0.00)        |
| Cystic echinococcosis                   | 0.00<br>(0.00 to<br>0.00)        | 0.00<br>(0.00 to<br>0.00)        | 0.00<br>(0.00 to<br>0.00)        | 0.00<br>(0.00 to<br>0.00)        | 0.00<br>(0.00 to<br>0.00)        | 0.00<br>(0.00 to<br>0.00)        | 0.00<br>(0.00 to<br>0.00)        | 0.00<br>(0.00 to<br>0.00)        |
| Dengue                                  | 0.06<br>(0.00 to<br>0.14)        | 0.69<br>(0.01 to<br>1.73)        | 0.69<br>(0.01 to<br>1.76)        | 0.68<br>(0.01 to<br>1.73)        | 0.00<br>(0.00 to<br>0.01)        | 0.03<br>(0.00 to<br>0.09)        | 0.03<br>(0.00 to<br>0.09)        | 0.03<br>(0.00 to<br>0.08)        |
| Yellow fever                            | 0.00<br>(0.00 to<br>0.00)        | 0.00<br>(0.00 to<br>0.00)        | 0.00<br>(0.00 to<br>0.00)        | 0.00<br>(0.00 to<br>0.00)        | 0.00<br>(0.00 to<br>0.00)        | 0.00<br>(0.00 to<br>0.00)        | 0.00<br>(0.00 to<br>0.00)        | 0.00<br>(0.00 to<br>0.00)        |
| Rabies                                  | 0.00<br>(0.00 to<br>0.01)        | 0.00<br>(0.00 to<br>0.01)        | 0.00<br>(0.00 to<br>0.01)        | 0.00<br>(0.00 to<br>0.01)        | 0.00<br>(0.00 to<br>0.00)        | 0.00<br>(0.00 to<br>0.00)        | 0.00<br>(0.00 to<br>0.00)        | 0.00<br>(0.00 to<br>0.00)        |
| Intestinal nematode infections          | 0.02<br>(0.01 to<br>0.03)        | 0.02<br>(0.01 to<br>0.04)        | 0.02<br>(0.01 to<br>0.04)        | 0.02<br>(0.01 to<br>0.04)        | 0.00<br>(0.00 to<br>0.00)        | 0.00<br>(0.00 to<br>0.00)        | 0.00<br>(0.00 to<br>0.00)        | 0.00<br>(0.00 to<br>0.00)        |
| Other neglected tropical diseases       | 0.18<br>(0.15 to<br>0.20)        | 0.21<br>(0.15 to<br>0.27)        | 0.21<br>(0.15 to<br>0.27)        | 0.20<br>(0.14 to<br>0.26)        | 0.00<br>(0.00 to<br>0.00)        | 0.00<br>(0.00 to<br>0.01)        | 0.01<br>(0.00 to<br>0.01)        | 0.00<br>(0.00 to<br>0.01)        |
| Maternal disorders                      | <b>2.30</b><br>(1.76 to<br>2.94) | <b>1.80</b><br>(1.07 to<br>2.91) | <b>1.69</b><br>(0.96 to<br>2.74) | <b>2.22</b><br>(1.24 to<br>3.69) | <b>0.04</b><br>(0.03 to<br>0.05) | <b>0.04</b><br>(0.02 to<br>0.06) | <b>0.03</b><br>(0.02 to<br>0.05) | <b>0.04</b><br>(0.02 to<br>0.07) |
| Maternal hemorrhage                     | 0.49<br>(0.33 to<br>0.69)        | 0.37<br>(0.19 to<br>0.65)        | 0.35<br>(0.17 to<br>0.60)        | 0.45<br>(0.23 to<br>0.79)        | 0.01<br>(0.01 to<br>0.01)        | 0.01<br>(0.00 to<br>0.01)        | 0.01<br>(0.01 to<br>0.01)        | 0.01<br>(0.00 to<br>0.02)        |

|                                                       |                           |                           |                           |                           |                           |                           |                           |                           |
|-------------------------------------------------------|---------------------------|---------------------------|---------------------------|---------------------------|---------------------------|---------------------------|---------------------------|---------------------------|
| Maternal sepsis and other maternal infections         | 0.16<br>(0.11 to<br>0.25) | 0.11<br>(0.06 to<br>0.20) | 0.11<br>(0.05 to<br>0.19) | 0.14<br>(0.07 to<br>0.26) | 0.00<br>(0.00 to<br>0.00) | 0.00<br>(0.00 to<br>0.00) | 0.00<br>(0.00 to<br>0.00) | 0.00<br>(0.00 to<br>0.01) |
| Maternal hypertensive disorders                       | 0.28<br>(0.19 to<br>0.41) | 0.20<br>(0.10 to<br>0.35) | 0.19<br>(0.09 to<br>0.33) | 0.25<br>(0.12 to<br>0.45) | 0.01<br>(0.00 to<br>0.01) | 0.00<br>(0.00 to<br>0.01) | 0.00<br>(0.00 to<br>0.01) | 0.00<br>(0.00 to<br>0.01) |
| Maternal obstructed labor and uterine rupture         | 0.18<br>(0.11 to<br>0.26) | 0.12<br>(0.06 to<br>0.22) | 0.11<br>(0.05 to<br>0.20) | 0.15<br>(0.07 to<br>0.28) | 0.00<br>(0.00 to<br>0.00) | 0.00<br>(0.00 to<br>0.00) | 0.00<br>(0.00 to<br>0.00) | 0.00<br>(0.00 to<br>0.01) |
| Maternal abortion, miscarriage, and ectopic pregnancy | 0.19<br>(0.12 to<br>0.28) | 0.18<br>(0.09 to<br>0.35) | 0.17<br>(0.08 to<br>0.33) | 0.23<br>(0.11 to<br>0.45) | 0.00<br>(0.00 to<br>0.01) | 0.00<br>(0.00 to<br>0.01) | 0.00<br>(0.00 to<br>0.01) | 0.00<br>(0.00 to<br>0.01) |
| Indirect maternal deaths                              | 0.24<br>(0.16 to<br>0.34) | 0.18<br>(0.09 to<br>0.32) | 0.17<br>(0.08 to<br>0.30) | 0.23<br>(0.11 to<br>0.41) | 0.00<br>(0.00 to<br>0.01) | 0.00<br>(0.00 to<br>0.01) | 0.00<br>(0.00 to<br>0.01) | 0.00<br>(0.00 to<br>0.01) |
| Late maternal deaths                                  | 0.07<br>(0.04 to<br>0.12) | 0.04<br>(0.02 to<br>0.08) | 0.04<br>(0.02 to<br>0.07) | 0.05<br>(0.02 to<br>0.10) | 0.00<br>(0.00 to<br>0.00) | 0.00<br>(0.00 to<br>0.00) | 0.00<br>(0.00 to<br>0.00) | 0.00<br>(0.00 to<br>0.00) |
| Maternal deaths aggravated by HIV/AIDS                | 0.00<br>(0.00 to<br>0.00) | 0.00<br>(0.00 to<br>0.00) | 0.00<br>(0.00 to<br>0.00) | 0.00<br>(0.00 to<br>0.00) | 0.00<br>(0.00 to<br>0.00) | 0.00<br>(0.00 to<br>0.00) | 0.00<br>(0.00 to<br>0.00) | 0.00<br>(0.00 to<br>0.00) |
| Other maternal disorders                              | 0.70<br>(0.49 to<br>0.93) | 0.60<br>(0.31 to<br>1.02) | 0.57<br>(0.29 to<br>0.97) | 0.72<br>(0.37 to<br>1.24) | 0.01<br>(0.01 to<br>0.02) | 0.01<br>(0.01 to<br>0.02) | 0.01<br>(0.01 to<br>0.02) | 0.01<br>(0.01 to<br>0.02) |

**Saudi Arabia**

| Cause                                                                   | YLLs (in 1000s)                       |                                    |                                    |                                     | Deaths (in 1000s)                |                                  |                                  |                                  |
|-------------------------------------------------------------------------|---------------------------------------|------------------------------------|------------------------------------|-------------------------------------|----------------------------------|----------------------------------|----------------------------------|----------------------------------|
|                                                                         | 2016                                  | 2040 Forecast                      | 2040 Better Scenario               | 2040 Worse Scenario                 | 2016                             | 2040 Forecast                    | 2040 Better Scenario             | 2040 Worse Scenario              |
| <b>Neonatal disorders</b>                                               | <b>127.52</b><br>(96.84 to<br>166.01) | <b>33.14</b><br>(7.67 to<br>71.41) | <b>25.86</b><br>(5.76 to<br>56.83) | <b>44.72</b><br>(16.39 to<br>96.95) | <b>1.48</b><br>(1.12 to<br>1.92) | <b>0.38</b><br>(0.09 to<br>0.83) | <b>0.30</b><br>(0.07 to<br>0.66) | <b>0.52</b><br>(0.12 to<br>1.12) |
| Neonatal preterm birth                                                  | 59.70<br>(40.40 to<br>80.25)          | 14.20<br>(3.26 to<br>32.54)        | 9.84<br>(2.23 to<br>22.52)         | 20.22<br>(4.38 to<br>47.40)         | 0.69<br>(0.47 to<br>0.93)        | 0.16<br>(0.04 to<br>0.38)        | 0.11<br>(0.03 to<br>0.26)        | 0.23<br>(0.05 to<br>0.55)        |
| Neonatal encephalopathy due to birth asphyxia and trauma                | 17.75<br>(12.01 to<br>24.53)          | 3.39<br>(0.76 to<br>8.17)          | 2.80<br>(0.61 to<br>6.82)          | 4.89<br>(1.07 to<br>12.34)          | 0.21<br>(0.14 to<br>0.28)        | 0.04<br>(0.01 to<br>0.09)        | 0.03<br>(0.01 to<br>0.08)        | 0.06<br>(0.01 to<br>0.14)        |
| Neonatal sepsis and other neonatal infections                           | 40.71<br>(28.97 to<br>58.74)          | 12.02<br>(2.60 to<br>26.66)        | 10.11<br>(2.05 to<br>22.31)        | 15.74<br>(3.34 to<br>35.98)         | 0.47<br>(0.34 to<br>0.68)        | 0.14<br>(0.03 to<br>0.31)        | 0.12<br>(0.02 to<br>0.26)        | 0.18<br>(0.04 to<br>0.42)        |
| Hemolytic disease and other neonatal jaundice                           | 0.35<br>(0.24 to<br>0.49)             | 0.07<br>(0.01 to<br>0.18)          | 0.06<br>(0.01 to<br>0.15)          | 0.09<br>(0.02 to<br>0.25)           | 0.00<br>(0.00 to<br>0.01)        | 0.00<br>(0.00 to<br>0.00)        | 0.00<br>(0.00 to<br>0.00)        | 0.00<br>(0.00 to<br>0.00)        |
| Other neonatal disorders                                                | 9.01<br>(4.39 to<br>14.07)            | 3.46<br>(0.78 to<br>8.96)          | 3.05<br>(0.68 to<br>7.93)          | 3.78<br>(0.83 to<br>9.65)           | 0.10<br>(0.05 to<br>0.16)        | 0.04<br>(0.01 to<br>0.10)        | 0.04<br>(0.01 to<br>0.09)        | 0.04<br>(0.01 to<br>0.11)        |
| <b>Nutritional deficiencies</b>                                         | <b>1.39</b><br>(1.21 to<br>1.63)      | <b>2.10</b><br>(1.51 to<br>2.67)   | <b>2.24</b><br>(1.59 to<br>2.84)   | <b>1.81</b><br>(1.32 to<br>2.31)    | <b>0.05</b><br>(0.05 to<br>0.06) | <b>0.17</b><br>(0.13 to<br>0.20) | <b>0.18</b><br>(0.14 to<br>0.23) | <b>0.13</b><br>(0.10 to<br>0.16) |
| Protein-energy malnutrition                                             | 1.10<br>(0.96 to<br>1.31)             | 1.79<br>(1.29 to<br>2.30)          | 1.93<br>(1.37 to<br>2.47)          | 1.49<br>(1.10 to<br>1.93)           | 0.05<br>(0.04 to<br>0.05)        | 0.15<br>(0.11 to<br>0.19)        | 0.17<br>(0.12 to<br>0.21)        | 0.12<br>(0.09 to<br>0.15)        |
| Iodine deficiency                                                       | 0.03<br>(0.02 to<br>0.06)             | 0.10<br>(0.01 to<br>0.37)          | 0.11<br>(0.01 to<br>0.39)          | 0.10<br>(0.01 to<br>0.32)           | 0.00<br>(0.00 to<br>0.00)        | 0.01<br>(0.00 to<br>0.03)        | 0.01<br>(0.00 to<br>0.03)        | 0.01<br>(0.00 to<br>0.03)        |
| Dietary iron deficiency                                                 | 0.12<br>(0.10 to<br>0.14)             | 0.11<br>(0.07 to<br>0.15)          | 0.11<br>(0.07 to<br>0.15)          | 0.10<br>(0.07 to<br>0.14)           | 0.00<br>(0.00 to<br>0.00)        | 0.00<br>(0.00 to<br>0.00)        | 0.00<br>(0.00 to<br>0.00)        | 0.00<br>(0.00 to<br>0.00)        |
| Other nutritional deficiencies                                          | 0.13<br>(0.11 to<br>0.15)             | 0.10<br>(0.06 to<br>0.13)          | 0.09<br>(0.06 to<br>0.13)          | 0.11<br>(0.07 to<br>0.15)           | 0.00<br>(0.00 to<br>0.00)        | 0.01<br>(0.00 to<br>0.01)        | 0.01<br>(0.00 to<br>0.01)        | 0.01<br>(0.00 to<br>0.01)        |
| <b>Other communicable, maternal, neonatal, and nutritional diseases</b> | <b>5.89</b><br>(5.07 to<br>6.99)      | <b>7.53</b><br>(4.94 to<br>10.11)  | <b>7.26</b><br>(4.48 to<br>10.05)  | <b>9.09</b><br>(5.88 to<br>12.26)   | <b>0.19</b><br>(0.17 to<br>0.21) | <b>0.39</b><br>(0.27 to<br>0.50) | <b>0.38</b><br>(0.25 to<br>0.50) | <b>0.45</b><br>(0.30 to<br>0.58) |

|                                               |                                       |                                       |                                       |                                       |                              |                                 |                                 |                                 |
|-----------------------------------------------|---------------------------------------|---------------------------------------|---------------------------------------|---------------------------------------|------------------------------|---------------------------------|---------------------------------|---------------------------------|
| Sexually transmitted infections excluding HIV | 0.43<br>(0.28 to<br>0.68)             | 0.11<br>(0.06 to<br>0.17)             | 0.10<br>(0.05 to<br>0.16)             | 0.13<br>(0.07 to<br>0.20)             | 0.01<br>(0.00 to<br>0.01)    | 0.00<br>(0.00 to<br>0.00)       | 0.00<br>(0.00 to<br>0.00)       | 0.00<br>(0.00 to<br>0.00)       |
| Syphilis                                      | 0.32<br>(0.19 to<br>0.56)             | 0.04<br>(0.02 to<br>0.08)             | 0.04<br>(0.02 to<br>0.07)             | 0.05<br>(0.03 to<br>0.11)             | 0.00<br>(0.00 to<br>0.01)    | 0.00<br>(0.00 to<br>0.00)       | 0.00<br>(0.00 to<br>0.00)       | 0.00<br>(0.00 to<br>0.00)       |
| Chlamydia infection                           | 0.02<br>(0.01 to<br>0.03)             | 0.01<br>(0.01 to<br>0.02)             | 0.01<br>(0.01 to<br>0.02)             | 0.01<br>(0.01 to<br>0.02)             | 0.00<br>(0.00 to<br>0.00)    | 0.00<br>(0.00 to<br>0.00)       | 0.00<br>(0.00 to<br>0.00)       | 0.00<br>(0.00 to<br>0.00)       |
| Gonococcal infection                          | 0.06<br>(0.03 to<br>0.07)             | 0.04<br>(0.02 to<br>0.06)             | 0.04<br>(0.02 to<br>0.06)             | 0.04<br>(0.02 to<br>0.06)             | 0.00<br>(0.00 to<br>0.00)    | 0.00<br>(0.00 to<br>0.00)       | 0.00<br>(0.00 to<br>0.00)       | 0.00<br>(0.00 to<br>0.00)       |
| Other sexually transmitted infections         | 0.03<br>(0.02 to<br>0.04)             | 0.02<br>(0.01 to<br>0.03)             | 0.02<br>(0.01 to<br>0.03)             | 0.02<br>(0.01 to<br>0.03)             | 0.00<br>(0.00 to<br>0.00)    | 0.00<br>(0.00 to<br>0.00)       | 0.00<br>(0.00 to<br>0.00)       | 0.00<br>(0.00 to<br>0.00)       |
| Acute hepatitis                               | 3.78<br>(3.34 to<br>4.26)             | 4.72<br>(2.98 to<br>6.73)             | 4.43<br>(2.66 to<br>6.47)             | 6.29<br>(3.89 to<br>8.87)             | 0.14<br>(0.12 to<br>0.16)    | 0.23<br>(0.15 to<br>0.32)       | 0.22<br>(0.14 to<br>0.32)       | 0.30<br>(0.19 to<br>0.42)       |
| Acute hepatitis A                             | 0.04<br>(0.03 to<br>0.06)             | 0.06<br>(0.02 to<br>0.13)             | 0.05<br>(0.02 to<br>0.12)             | 0.07<br>(0.03 to<br>0.15)             | 0.00<br>(0.00 to<br>0.00)    | 0.00<br>(0.00 to<br>0.01)       | 0.00<br>(0.00 to<br>0.01)       | 0.00<br>(0.00 to<br>0.01)       |
| Acute hepatitis B                             | 3.16<br>(2.75 to<br>3.63)             | 3.90<br>(2.44 to<br>5.57)             | 3.64<br>(2.12 to<br>5.34)             | 5.23<br>(3.22 to<br>7.33)             | 0.11<br>(0.10 to<br>0.13)    | 0.18<br>(0.11 to<br>0.26)       | 0.17<br>(0.10 to<br>0.25)       | 0.24<br>(0.15 to<br>0.34)       |
| Acute hepatitis C                             | 0.07<br>(0.05 to<br>0.09)             | 0.11<br>(0.06 to<br>0.18)             | 0.11<br>(0.06 to<br>0.18)             | 0.15<br>(0.08 to<br>0.24)             | 0.00<br>(0.00 to<br>0.00)    | 0.01<br>(0.00 to<br>0.01)       | 0.01<br>(0.00 to<br>0.01)       | 0.01<br>(0.00 to<br>0.01)       |
| Acute hepatitis E                             | 0.50<br>(0.39 to<br>0.64)             | 0.66<br>(0.36 to<br>1.03)             | 0.63<br>(0.33 to<br>0.99)             | 0.84<br>(0.45 to<br>1.30)             | 0.02<br>(0.01 to<br>0.03)    | 0.04<br>(0.02 to<br>0.06)       | 0.04<br>(0.02 to<br>0.06)       | 0.05<br>(0.03 to<br>0.08)       |
| Other unspecified infectious diseases         | 1.68<br>(1.08 to<br>2.54)             | 2.70<br>(1.66 to<br>3.60)             | 2.73<br>(1.66 to<br>3.60)             | 2.68<br>(1.71 to<br>3.51)             | 0.05<br>(0.03 to<br>0.06)    | 0.15<br>(0.09 to<br>0.20)       | 0.16<br>(0.10 to<br>0.21)       | 0.14<br>(0.09 to<br>0.18)       |
| Non-communicable diseases                     | 1,523.90<br>(1,407.06 to<br>1,659.46) | 3,067.49<br>(1,713.55 to<br>4,609.14) | 2,602.04<br>(1,501.19 to<br>3,867.00) | 4,052.47<br>(2,226.96 to<br>6,180.17) | 66.91<br>(62.41 to<br>72.20) | 184.66<br>(114.22 to<br>260.51) | 162.11<br>(102.21 to<br>229.21) | 230.40<br>(140.27 to<br>328.13) |

**Saudi Arabia**

| Cause                      | YLLs (in 1000s)                 |                                   |                                   |                                   | Deaths (in 1000s)            |                              |                              |                              |
|----------------------------|---------------------------------|-----------------------------------|-----------------------------------|-----------------------------------|------------------------------|------------------------------|------------------------------|------------------------------|
|                            | 2016                            | 2040 Forecast                     | 2040 Better Scenario              | 2040 Worse Scenario               | 2016                         | 2040 Forecast                | 2040 Better Scenario         | 2040 Worse Scenario          |
| Neoplasms                  | 303.64<br>(274.88 to<br>331.45) | 798.63<br>(500.02 to<br>1,114.41) | 740.12<br>(456.81 to<br>1,055.00) | 882.59<br>(558.26 to<br>1,207.84) | 11.64<br>(10.67 to<br>12.58) | 43.24<br>(27.57 to<br>57.70) | 40.61<br>(25.61 to<br>55.15) | 46.18<br>(30.34 to<br>61.13) |
| Lip and oral cavity cancer | 3.95<br>(3.48 to<br>4.53)       | 9.73<br>(6.00 to<br>14.15)        | 8.81<br>(5.37 to<br>12.72)        | 11.60<br>(7.06 to<br>16.80)       | 0.17<br>(0.15 to<br>0.19)    | 0.52<br>(0.32 to<br>0.75)    | 0.46<br>(0.29 to<br>0.67)    | 0.60<br>(0.38 to<br>0.86)    |
| Nasopharynx cancer         | 3.36<br>(2.71 to<br>4.19)       | 7.35<br>(4.51 to<br>11.49)        | 6.61<br>(4.02 to<br>10.26)        | 9.41<br>(5.65 to<br>14.50)        | 0.11<br>(0.09 to<br>0.13)    | 0.31<br>(0.19 to<br>0.48)    | 0.28<br>(0.17 to<br>0.43)    | 0.39<br>(0.24 to<br>0.60)    |
| Other pharynx cancer       | 2.36<br>(1.97 to<br>2.76)       | 5.97<br>(3.48 to<br>8.99)         | 5.90<br>(3.42 to<br>8.89)         | 5.72<br>(3.41 to<br>8.57)         | 0.09<br>(0.08 to<br>0.11)    | 0.31<br>(0.18 to<br>0.45)    | 0.31<br>(0.18 to<br>0.45)    | 0.28<br>(0.17 to<br>0.41)    |
| Esophageal cancer          | 5.34<br>(4.81 to<br>5.94)       | 17.21<br>(9.40 to<br>28.71)       | 15.46<br>(8.65 to<br>25.33)       | 18.65<br>(10.07 to<br>31.19)      | 0.25<br>(0.23 to<br>0.27)    | 0.98<br>(0.56 to<br>1.58)    | 0.88<br>(0.52 to<br>1.40)    | 1.03<br>(0.59 to<br>1.67)    |
| Stomach cancer             | 11.69<br>(10.37 to<br>13.14)    | 20.90<br>(11.97 to<br>30.86)      | 19.13<br>(11.21 to<br>27.94)      | 25.22<br>(14.97 to<br>36.94)      | 0.52<br>(0.47 to<br>0.58)    | 1.22<br>(0.75 to<br>1.72)    | 1.13<br>(0.71 to<br>1.60)    | 1.42<br>(0.89 to<br>2.00)    |
| Colon and rectum cancer    | 30.99<br>(24.14 to<br>36.76)    | 69.46<br>(39.91 to<br>110.56)     | 66.32<br>(37.19 to<br>104.56)     | 81.69<br>(46.95 to<br>128.04)     | 1.23<br>(0.97 to<br>1.44)    | 3.73<br>(2.20 to<br>5.80)    | 3.62<br>(2.12 to<br>5.59)    | 4.24<br>(2.54 to<br>6.66)    |
| Liver cancer               | 30.69<br>(26.89 to<br>34.62)    | 180.34<br>(94.37 to<br>317.52)    | 159.06<br>(85.72 to<br>270.13)    | 174.37<br>(90.92 to<br>298.64)    | 1.53<br>(1.33 to<br>1.70)    | 11.08<br>(6.23 to<br>18.37)  | 10.02<br>(5.79 to<br>16.42)  | 10.36<br>(5.75 to<br>17.54)  |

|                                      |                              |                               |                               |                                |                           |                           |                           |                            |
|--------------------------------------|------------------------------|-------------------------------|-------------------------------|--------------------------------|---------------------------|---------------------------|---------------------------|----------------------------|
| Liver cancer due to hepatitis B      | 9.74<br>(7.28 to<br>12.24)   | 49.33<br>(24.58 to<br>88.34)  | 43.45<br>(22.06 to<br>76.57)  | 48.01<br>(23.87 to<br>84.22)   | 0.43<br>(0.31 to<br>0.55) | 2.74<br>(1.41 to<br>4.77) | 2.47<br>(1.29 to<br>4.15) | 2.58<br>(1.32 to<br>4.41)  |
| Liver cancer due to hepatitis C      | 9.04<br>(7.45 to<br>10.68)   | 53.59<br>(27.93 to<br>92.12)  | 48.20<br>(25.28 to<br>80.87)  | 51.46<br>(26.77 to<br>88.18)   | 0.53<br>(0.43 to<br>0.62) | 3.58<br>(1.98 to<br>5.90) | 3.30<br>(1.86 to<br>5.30) | 3.31<br>(1.86 to<br>5.45)  |
| Liver cancer due to alcohol use      | 1.72<br>(1.38 to<br>2.15)    | 10.58<br>(5.23 to<br>20.34)   | 9.26<br>(4.78 to<br>16.76)    | 10.34<br>(5.11 to<br>19.72)    | 0.09<br>(0.07 to<br>0.11) | 0.62<br>(0.33 to<br>1.11) | 0.56<br>(0.30 to<br>0.98) | 0.59<br>(0.31 to<br>1.07)  |
| Liver cancer due to other causes     | 10.19<br>(8.52 to<br>12.02)  | 66.84<br>(33.69 to<br>124.91) | 58.15<br>(30.87 to<br>103.94) | 64.55<br>(31.58 to<br>119.12)  | 0.49<br>(0.41 to<br>0.57) | 4.14<br>(2.19 to<br>7.51) | 3.70<br>(2.05 to<br>6.37) | 3.87<br>(1.99 to<br>6.82)  |
| Gallbladder and biliary tract cancer | 4.95<br>(4.07 to<br>5.98)    | 10.51<br>(6.04 to<br>15.16)   | 10.73<br>(6.04 to<br>15.68)   | 10.39<br>(6.20 to<br>14.54)    | 0.24<br>(0.20 to<br>0.29) | 0.63<br>(0.39 to<br>0.86) | 0.65<br>(0.40 to<br>0.92) | 0.60<br>(0.38 to<br>0.79)  |
| Pancreatic cancer                    | 15.94<br>(14.32 to<br>17.69) | 54.71<br>(33.12 to<br>80.24)  | 55.01<br>(32.65 to<br>81.26)  | 54.62<br>(33.60 to<br>80.56)   | 0.71<br>(0.64 to<br>0.78) | 3.03<br>(1.88 to<br>4.36) | 3.08<br>(1.89 to<br>4.45) | 2.94<br>(1.86 to<br>4.23)  |
| Larynx cancer                        | 2.71<br>(2.32 to<br>3.20)    | 5.85<br>(3.43 to<br>9.28)     | 4.86<br>(2.91 to<br>7.61)     | 8.28<br>(4.51 to<br>13.49)     | 0.11<br>(0.09 to<br>0.12) | 0.30<br>(0.18 to<br>0.48) | 0.25<br>(0.15 to<br>0.38) | 0.42<br>(0.24 to<br>0.70)  |
| Tracheal, bronchus, and lung cancer  | 27.34<br>(23.51 to<br>30.82) | 79.22<br>(43.63 to<br>128.27) | 61.30<br>(33.78 to<br>97.88)  | 115.33<br>(60.72 to<br>187.87) | 1.19<br>(1.03 to<br>1.33) | 4.31<br>(2.37 to<br>6.77) | 3.26<br>(1.81 to<br>5.07) | 6.23<br>(3.37 to<br>10.01) |
| Malignant skin melanoma              | 1.27<br>(0.93 to<br>1.68)    | 3.29<br>(2.07 to<br>4.89)     | 3.52<br>(2.19 to<br>5.29)     | 2.76<br>(1.78 to<br>4.05)      | 0.04<br>(0.03 to<br>0.05) | 0.16<br>(0.10 to<br>0.23) | 0.17<br>(0.11 to<br>0.26) | 0.13<br>(0.08 to<br>0.18)  |
| Non-melanoma skin cancer             | 1.08<br>(0.94 to<br>1.22)    | 2.79<br>(1.90 to<br>3.68)     | 2.75<br>(1.78 to<br>3.76)     | 3.24<br>(2.18 to<br>4.28)      | 0.05<br>(0.04 to<br>0.05) | 0.17<br>(0.12 to<br>0.21) | 0.17<br>(0.12 to<br>0.22) | 0.19<br>(0.14 to<br>0.23)  |
| Breast cancer                        | 26.64<br>(18.78 to<br>34.92) | 43.89<br>(23.50 to<br>69.20)  | 41.79<br>(21.65 to<br>67.95)  | 52.37<br>(27.71 to<br>84.88)   | 0.90<br>(0.64 to<br>1.15) | 1.86<br>(0.96 to<br>2.94) | 1.79<br>(0.93 to<br>2.87) | 2.15<br>(1.13 to<br>3.52)  |
| Cervical cancer                      | 3.02<br>(2.33 to<br>4.26)    | 4.52<br>(2.46 to<br>7.22)     | 4.29<br>(2.28 to<br>6.87)     | 5.48<br>(3.03 to<br>8.63)      | 0.11<br>(0.09 to<br>0.16) | 0.21<br>(0.11 to<br>0.32) | 0.20<br>(0.10 to<br>0.31) | 0.25<br>(0.13 to<br>0.37)  |
| Uterine cancer                       | 2.01<br>(1.65 to<br>2.50)    | 4.88<br>(2.41 to<br>7.53)     | 4.77<br>(2.28 to<br>7.51)     | 5.41<br>(2.74 to<br>8.29)      | 0.09<br>(0.07 to<br>0.11) | 0.24<br>(0.12 to<br>0.36) | 0.24<br>(0.12 to<br>0.36) | 0.26<br>(0.13 to<br>0.38)  |
| Ovarian cancer                       | 6.23<br>(5.23 to<br>7.61)    | 13.24<br>(6.60 to<br>21.38)   | 12.64<br>(6.23 to<br>20.42)   | 14.84<br>(7.41 to<br>24.53)    | 0.24<br>(0.21 to<br>0.28) | 0.62<br>(0.30 to<br>1.01) | 0.60<br>(0.28 to<br>0.98) | 0.68<br>(0.33 to<br>1.13)  |
| Prostate cancer                      | 6.59<br>(4.91 to<br>8.27)    | 30.93<br>(19.37 to<br>42.07)  | 31.55<br>(19.47 to<br>44.36)  | 32.38<br>(21.14 to<br>42.45)   | 0.40<br>(0.30 to<br>0.49) | 2.20<br>(1.52 to<br>2.87) | 2.28<br>(1.55 to<br>3.01) | 2.22<br>(1.58 to<br>2.81)  |
| Testicular cancer                    | 0.74<br>(0.59 to<br>0.94)    | 0.61<br>(0.40 to<br>0.89)     | 0.58<br>(0.37 to<br>0.87)     | 0.71<br>(0.47 to<br>1.06)      | 0.02<br>(0.01 to<br>0.02) | 0.02<br>(0.01 to<br>0.02) | 0.02<br>(0.01 to<br>0.02) | 0.02<br>(0.01 to<br>0.03)  |
| <b>Saudi Arabia</b>                  |                              |                               |                               |                                |                           |                           |                           |                            |
| Cause                                | YLLs (in 1000s)              |                               |                               |                                | Deaths (in 1000s)         |                           |                           |                            |
|                                      | 2016                         | 2040 Forecast                 | 2040 Better Scenario          | 2040 Worse Scenario            | 2016                      | 2040 Forecast             | 2040 Better Scenario      | 2040 Worse Scenario        |
| Kidney cancer                        | 5.76<br>(4.71 to<br>7.08)    | 16.14<br>(10.70 to<br>22.65)  | 16.45<br>(10.68 to<br>23.30)  | 15.78<br>(10.56 to<br>21.94)   | 0.20<br>(0.17 to<br>0.25) | 0.80<br>(0.53 to<br>1.14) | 0.83<br>(0.54 to<br>1.17) | 0.76<br>(0.52 to<br>1.06)  |
| Bladder cancer                       | 6.09<br>(4.95 to<br>7.00)    | 18.68<br>(11.58 to<br>28.53)  | 18.24<br>(11.22 to<br>28.12)  | 20.40<br>(12.93 to<br>31.11)   | 0.30<br>(0.25 to<br>0.35) | 1.20<br>(0.81 to<br>1.75) | 1.18<br>(0.79 to<br>1.74) | 1.27<br>(0.85 to<br>1.84)  |
| Brain and nervous system cancer      | 25.89<br>(20.02 to<br>36.70) | 47.63<br>(30.09 to<br>72.09)  | 47.67<br>(29.25 to<br>72.12)  | 49.70<br>(31.89 to<br>74.77)   | 0.73<br>(0.58 to<br>1.00) | 2.19<br>(1.32 to<br>3.35) | 2.24<br>(1.30 to<br>3.50) | 2.20<br>(1.34 to<br>3.27)  |
| Thyroid cancer                       | 3.57<br>(2.32 to<br>4.43)    | 8.22<br>(4.10 to<br>14.05)    | 7.22<br>(3.73 to<br>11.90)    | 9.28<br>(4.69 to<br>15.55)     | 0.14<br>(0.09 to<br>0.17) | 0.43<br>(0.22 to<br>0.71) | 0.39<br>(0.20 to<br>0.61) | 0.46<br>(0.24 to<br>0.75)  |

|                                |                                                      |                                                          |                                                        |                                                          |                                                   |                                                    |                                                   |                                                    |
|--------------------------------|------------------------------------------------------|----------------------------------------------------------|--------------------------------------------------------|----------------------------------------------------------|---------------------------------------------------|----------------------------------------------------|---------------------------------------------------|----------------------------------------------------|
| Mesothelioma                   | 0.56<br>(0.45 to<br>0.66)                            | 1.17<br>(0.74 to<br>1.63)                                | 1.19<br>(0.75 to<br>1.69)                              | 1.13<br>(0.73 to<br>1.54)                                | 0.02<br>(0.01 to<br>0.02)                         | 0.05<br>(0.03 to<br>0.07)                          | 0.05<br>(0.03 to<br>0.07)                         | 0.05<br>(0.03 to<br>0.06)                          |
| Hodgkin lymphoma               | 2.30<br>(0.59 to<br>3.66)                            | 1.86<br>(0.48 to<br>3.28)                                | 1.75<br>(0.44 to<br>3.04)                              | 2.40<br>(0.63 to<br>4.25)                                | 0.05<br>(0.01 to<br>0.08)                         | 0.06<br>(0.02 to<br>0.10)                          | 0.05<br>(0.02 to<br>0.09)                         | 0.07<br>(0.02 to<br>0.12)                          |
| Non-Hodgkin lymphoma           | 20.17<br>(14.92 to<br>25.29)                         | 39.20<br>(21.54 to<br>60.27)                             | 36.57<br>(20.03 to<br>55.13)                           | 43.37<br>(24.42 to<br>65.92)                             | 0.64<br>(0.46 to<br>0.80)                         | 1.84<br>(0.98 to<br>2.83)                          | 1.75<br>(0.93 to<br>2.66)                         | 1.96<br>(1.10 to<br>2.97)                          |
| Multiple myeloma               | 4.98<br>(3.88 to<br>6.52)                            | 14.09<br>(7.67 to<br>22.42)                              | 13.27<br>(7.30 to<br>21.16)                            | 14.86<br>(8.27 to<br>23.46)                              | 0.20<br>(0.16 to<br>0.25)                         | 0.70<br>(0.39 to<br>1.10)                          | 0.67<br>(0.38 to<br>1.07)                         | 0.72<br>(0.41 to<br>1.10)                          |
| Leukemia                       | 26.88<br>(23.36 to<br>31.86)                         | 48.75<br>(31.00 to<br>71.06)                             | 44.73<br>(28.28 to<br>64.68)                           | 55.62<br>(35.67 to<br>80.27)                             | 0.79<br>(0.67 to<br>0.91)                         | 2.42<br>(1.54 to<br>3.45)                          | 2.27<br>(1.40 to<br>3.22)                         | 2.66<br>(1.73 to<br>3.70)                          |
| Acute lymphoid leukemia        | 4.87<br>(3.84 to<br>6.06)                            | 4.43<br>(2.85 to<br>6.41)                                | 4.01<br>(2.59 to<br>5.80)                              | 5.17<br>(3.35 to<br>7.46)                                | 0.09<br>(0.08 to<br>0.12)                         | 0.15<br>(0.09 to<br>0.22)                          | 0.13<br>(0.09 to<br>0.20)                         | 0.16<br>(0.11 to<br>0.24)                          |
| Chronic lymphoid leukemia      | 0.72<br>(0.58 to<br>0.91)                            | 2.04<br>(1.15 to<br>3.13)                                | 1.92<br>(1.10 to<br>2.94)                              | 2.15<br>(1.24 to<br>3.24)                                | 0.03<br>(0.02 to<br>0.04)                         | 0.11<br>(0.06 to<br>0.17)                          | 0.11<br>(0.06 to<br>0.16)                         | 0.11<br>(0.07 to<br>0.17)                          |
| Acute myeloid leukemia         | 6.14<br>(4.96 to<br>8.11)                            | 10.83<br>(6.75 to<br>16.45)                              | 10.05<br>(6.28 to<br>15.28)                            | 11.40<br>(7.11 to<br>17.26)                              | 0.15<br>(0.12 to<br>0.19)                         | 0.41<br>(0.25 to<br>0.63)                          | 0.39<br>(0.24 to<br>0.60)                         | 0.42<br>(0.26 to<br>0.64)                          |
| Chronic myeloid leukemia       | 1.62<br>(1.30 to<br>2.13)                            | 1.70<br>(1.03 to<br>2.62)                                | 1.48<br>(0.89 to<br>2.22)                              | 2.33<br>(1.38 to<br>3.57)                                | 0.06<br>(0.05 to<br>0.08)                         | 0.09<br>(0.05 to<br>0.13)                          | 0.08<br>(0.05 to<br>0.11)                         | 0.11<br>(0.07 to<br>0.17)                          |
| Other leukemia                 | 13.54<br>(10.82 to<br>16.31)                         | 29.75<br>(17.36 to<br>43.83)                             | 27.28<br>(15.83 to<br>40.74)                           | 34.57<br>(20.84 to<br>50.58)                             | 0.46<br>(0.36 to<br>0.54)                         | 1.66<br>(0.98 to<br>2.40)                          | 1.56<br>(0.90 to<br>2.24)                         | 1.85<br>(1.13 to<br>2.64)                          |
| Other neoplasms                | 20.53<br>(17.90 to<br>23.15)                         | 37.49<br>(25.39 to<br>49.86)                             | 37.95<br>(25.24 to<br>51.49)                           | 37.58<br>(26.21 to<br>48.93)                             | 0.58<br>(0.51 to<br>0.67)                         | 1.68<br>(1.15 to<br>2.21)                          | 1.74<br>(1.16 to<br>2.33)                         | 1.62<br>(1.13 to<br>2.08)                          |
| <b>Cardiovascular diseases</b> | <b>676.40</b><br><b>(617.16 to</b><br><b>743.99)</b> | <b>1,012.81</b><br><b>(439.42 to</b><br><b>1,867.21)</b> | <b>704.30</b><br><b>(334.28 to</b><br><b>1,278.65)</b> | <b>1,687.21</b><br><b>(724.08 to</b><br><b>3,049.16)</b> | <b>32.97</b><br><b>(30.44 to</b><br><b>36.06)</b> | <b>59.99</b><br><b>(29.10 to</b><br><b>106.61)</b> | <b>44.74</b><br><b>(23.49 to</b><br><b>77.51)</b> | <b>93.43</b><br><b>(45.40 to</b><br><b>167.40)</b> |
| Rheumatic heart disease        | 5.13<br>(4.34 to<br>5.99)                            | 4.40<br>(2.42 to<br>7.37)                                | 4.08<br>(2.21 to<br>6.69)                              | 5.42<br>(2.97 to<br>8.99)                                | 0.16<br>(0.14 to<br>0.19)                         | 0.21<br>(0.12 to<br>0.35)                          | 0.20<br>(0.11 to<br>0.33)                         | 0.25<br>(0.14 to<br>0.41)                          |
| Ischemic heart disease         | 444.55<br>(401.49 to<br>497.89)                      | 612.58<br>(240.13 to<br>1,256.81)                        | 411.56<br>(172.23 to<br>816.34)                        | 1,104.19<br>(419.86 to<br>2,231.14)                      | 21.23<br>(19.42 to<br>23.55)                      | 35.04<br>(14.99 to<br>69.17)                       | 25.17<br>(11.66 to<br>48.92)                      | 59.18<br>(24.84 to<br>118.40)                      |
| Stroke                         | 158.18<br>(141.99 to<br>176.33)                      | 244.35<br>(104.52 to<br>494.95)                          | 156.45<br>(72.37 to<br>298.08)                         | 394.29<br>(175.02 to<br>801.79)                          | 8.54<br>(7.73 to<br>9.45)                         | 15.60<br>(7.65 to<br>31.07)                        | 11.03<br>(5.73 to<br>20.95)                       | 23.53<br>(11.74 to<br>45.57)                       |
| Ischemic stroke                | 86.93<br>(78.14 to<br>96.92)                         | 143.16<br>(57.36 to<br>315.54)                           | 95.36<br>(41.15 to<br>199.09)                          | 221.96<br>(88.92 to<br>486.70)                           | 5.44<br>(4.91 to<br>6.02)                         | 10.08<br>(4.59 to<br>22.09)                        | 7.36<br>(3.44 to<br>15.88)                        | 14.67<br>(6.53 to<br>31.90)                        |
| Intracerebral hemorrhage       | 71.26<br>(63.67 to<br>79.95)                         | 101.20<br>(41.74 to<br>198.74)                           | 61.10<br>(28.44 to<br>112.95)                          | 172.33<br>(69.37 to<br>345.39)                           | 3.10<br>(2.77 to<br>3.45)                         | 5.51<br>(2.56 to<br>10.14)                         | 3.67<br>(1.89 to<br>6.44)                         | 8.86<br>(3.99 to<br>16.98)                         |
| Hypertensive heart disease     | 7.44<br>(5.50 to<br>9.64)                            | 21.65<br>(8.38 to<br>53.11)                              | 16.85<br>(7.38 to<br>35.66)                            | 26.12<br>(9.92 to<br>63.05)                              | 0.35<br>(0.28 to<br>0.45)                         | 1.24<br>(0.52 to<br>2.87)                          | 1.01<br>(0.47 to<br>1.99)                         | 1.44<br>(0.60 to<br>3.39)                          |
| Cardiomyopathy and myocarditis | 17.45<br>(13.39 to<br>21.83)                         | 28.08<br>(13.79 to<br>48.16)                             | 25.55<br>(12.76 to<br>43.42)                           | 35.93<br>(17.38 to<br>63.81)                             | 0.66<br>(0.48 to<br>0.84)                         | 1.52<br>(0.74 to<br>2.59)                          | 1.42<br>(0.71 to<br>2.37)                         | 1.87<br>(0.92 to<br>3.29)                          |
| Myocarditis                    | 1.95<br>(1.09 to<br>2.94)                            | 3.03<br>(1.17 to<br>5.39)                                | 3.05<br>(1.18 to<br>5.47)                              | 3.09<br>(1.20 to<br>5.43)                                | 0.05<br>(0.03 to<br>0.09)                         | 0.14<br>(0.05 to<br>0.26)                          | 0.15<br>(0.05 to<br>0.27)                         | 0.14<br>(0.05 to<br>0.25)                          |

**Saudi Arabia**

| Cause | YLLs (in 1000s) |               |                      |                     | Deaths (in 1000s) |               |                      |                     |
|-------|-----------------|---------------|----------------------|---------------------|-------------------|---------------|----------------------|---------------------|
|       | 2016            | 2040 Forecast | 2040 Better Scenario | 2040 Worse Scenario | 2016              | 2040 Forecast | 2040 Better Scenario | 2040 Worse Scenario |





|                                            |                                                   |                                                      |                                                      |                                                      |                                                |                                                   |                                                   |                                                   |
|--------------------------------------------|---------------------------------------------------|------------------------------------------------------|------------------------------------------------------|------------------------------------------------------|------------------------------------------------|---------------------------------------------------|---------------------------------------------------|---------------------------------------------------|
|                                            | 15.87<br>(12.93 to<br>17.89)                      | 36.53<br>(21.81 to<br>53.84)                         | 34.42<br>(20.59 to<br>50.56)                         | 41.24<br>(24.56 to<br>60.41)                         | 0.70<br>(0.57 to<br>0.78)                      | 2.27<br>(1.43 to<br>3.18)                         | 2.19<br>(1.38 to<br>3.10)                         | 2.45<br>(1.56 to<br>3.47)                         |
| Digestive diseases                         |                                                   |                                                      |                                                      |                                                      |                                                |                                                   |                                                   |                                                   |
| Peptic ulcer disease                       | 2.21<br>(1.67 to<br>2.64)                         | 3.17<br>(1.76 to<br>4.68)                            | 2.85<br>(1.58 to<br>4.22)                            | 4.06<br>(2.35 to<br>6.01)                            | 0.10<br>(0.08 to<br>0.12)                      | 0.20<br>(0.12 to<br>0.28)                         | 0.19<br>(0.11 to<br>0.26)                         | 0.24<br>(0.15 to<br>0.34)                         |
| <b>Saudi Arabia</b>                        |                                                   |                                                      |                                                      |                                                      |                                                |                                                   |                                                   |                                                   |
| Cause                                      | YLLs (in 1000s)                                   |                                                      |                                                      |                                                      | Deaths (in 1000s)                              |                                                   |                                                   |                                                   |
|                                            | 2016                                              | 2040 Forecast                                        | 2040 Better Scenario                                 | 2040 Worse Scenario                                  | 2016                                           | 2040 Forecast                                     | 2040 Better Scenario                              | 2040 Worse Scenario                               |
| Gastritis and duodenitis                   | 0.09<br>(0.07 to<br>0.11)                         | 0.15<br>(0.09 to<br>0.21)                            | 0.14<br>(0.09 to<br>0.21)                            | 0.18<br>(0.12 to<br>0.25)                            | 0.00<br>(0.00 to<br>0.00)                      | 0.01<br>(0.01 to<br>0.01)                         | 0.01<br>(0.00 to<br>0.01)                         | 0.01<br>(0.01 to<br>0.01)                         |
| Appendicitis                               | 1.15<br>(0.94 to<br>1.37)                         | 1.59<br>(0.91 to<br>2.27)                            | 1.52<br>(0.84 to<br>2.22)                            | 2.04<br>(1.18 to<br>2.92)                            | 0.04<br>(0.03 to<br>0.05)                      | 0.09<br>(0.06 to<br>0.13)                         | 0.09<br>(0.05 to<br>0.13)                         | 0.11<br>(0.07 to<br>0.16)                         |
| Paralytic ileus and intestinal obstruction | 3.51<br>(2.20 to<br>4.28)                         | 9.70<br>(5.16 to<br>13.99)                           | 10.04<br>(5.24 to<br>14.80)                          | 9.30<br>(5.08 to<br>13.10)                           | 0.16<br>(0.09 to<br>0.19)                      | 0.62<br>(0.35 to<br>0.85)                         | 0.65<br>(0.36 to<br>0.91)                         | 0.57<br>(0.32 to<br>0.76)                         |
| Inguinal, femoral, and abdominal hernia    | 0.30<br>(0.22 to<br>0.36)                         | 0.41<br>(0.22 to<br>0.59)                            | 0.41<br>(0.22 to<br>0.60)                            | 0.47<br>(0.26 to<br>0.65)                            | 0.01<br>(0.01 to<br>0.02)                      | 0.03<br>(0.02 to<br>0.04)                         | 0.03<br>(0.02 to<br>0.04)                         | 0.03<br>(0.02 to<br>0.04)                         |
| Inflammatory bowel disease                 | 0.56<br>(0.42 to<br>0.67)                         | 1.04<br>(0.66 to<br>1.44)                            | 1.06<br>(0.65 to<br>1.50)                            | 1.05<br>(0.69 to<br>1.43)                            | 0.02<br>(0.01 to<br>0.02)                      | 0.05<br>(0.03 to<br>0.07)                         | 0.05<br>(0.03 to<br>0.07)                         | 0.05<br>(0.03 to<br>0.06)                         |
| Vascular intestinal disorders              | 1.08<br>(0.83 to<br>1.29)                         | 3.34<br>(1.95 to<br>4.76)                            | 3.38<br>(1.91 to<br>4.92)                            | 3.52<br>(2.14 to<br>4.90)                            | 0.05<br>(0.04 to<br>0.06)                      | 0.21<br>(0.13 to<br>0.29)                         | 0.22<br>(0.13 to<br>0.30)                         | 0.22<br>(0.14 to<br>0.29)                         |
| Gallbladder and biliary diseases           | 2.74<br>(2.20 to<br>3.23)                         | 8.12<br>(3.39 to<br>16.39)                           | 6.20<br>(2.63 to<br>12.50)                           | 10.46<br>(4.25 to<br>20.51)                          | 0.14<br>(0.12 to<br>0.16)                      | 0.53<br>(0.24 to<br>1.01)                         | 0.42<br>(0.20 to<br>0.82)                         | 0.65<br>(0.31 to<br>1.20)                         |
| Pancreatitis                               | 2.42<br>(1.72 to<br>3.04)                         | 4.91<br>(2.67 to<br>8.00)                            | 4.67<br>(2.51 to<br>7.30)                            | 5.85<br>(3.22 to<br>9.61)                            | 0.09<br>(0.07 to<br>0.12)                      | 0.26<br>(0.15 to<br>0.41)                         | 0.26<br>(0.14 to<br>0.40)                         | 0.30<br>(0.17 to<br>0.48)                         |
| Other digestive diseases                   | 1.81<br>(1.50 to<br>2.31)                         | 4.10<br>(2.45 to<br>6.00)                            | 4.14<br>(2.42 to<br>6.25)                            | 4.31<br>(2.66 to<br>6.29)                            | 0.08<br>(0.07 to<br>0.10)                      | 0.26<br>(0.18 to<br>0.38)                         | 0.27<br>(0.18 to<br>0.40)                         | 0.26<br>(0.18 to<br>0.38)                         |
| <b>Neurological disorders</b>              | <b>68.47</b><br><b>(60.43 to</b><br><b>78.77)</b> | <b>293.98</b><br><b>(173.05 to</b><br><b>440.34)</b> | <b>274.28</b><br><b>(163.63 to</b><br><b>399.19)</b> | <b>286.36</b><br><b>(171.27 to</b><br><b>432.75)</b> | <b>4.88</b><br><b>(4.22 to</b><br><b>5.74)</b> | <b>24.42</b><br><b>(16.29 to</b><br><b>35.73)</b> | <b>23.40</b><br><b>(15.69 to</b><br><b>32.93)</b> | <b>22.73</b><br><b>(15.17 to</b><br><b>33.68)</b> |
| Alzheimer's disease and other dementias    | 45.80<br>(38.53 to<br>55.02)                      | 245.34<br>(136.55 to<br>389.66)                      | 224.10<br>(125.16 to<br>341.04)                      | 239.97<br>(131.58 to<br>379.44)                      | 4.15<br>(3.52 to<br>4.98)                      | 21.64<br>(13.77 to<br>32.93)                      | 20.43<br>(13.24 to<br>29.97)                      | 20.25<br>(12.80 to<br>31.05)                      |
| Parkinson's disease                        | 4.61<br>(3.60 to<br>5.84)                         | 25.16<br>(16.23 to<br>35.66)                         | 26.93<br>(17.07 to<br>38.84)                         | 22.08<br>(14.86 to<br>30.21)                         | 0.34<br>(0.26 to<br>0.43)                      | 2.01<br>(1.44 to<br>2.75)                         | 2.19<br>(1.51 to<br>3.04)                         | 1.70<br>(1.24 to<br>2.27)                         |
| Epilepsy                                   | 10.28<br>(8.83 to<br>12.57)                       | 12.13<br>(8.42 to<br>17.07)                          | 11.85<br>(8.09 to<br>16.72)                          | 13.14<br>(9.19 to<br>18.49)                          | 0.21<br>(0.18 to<br>0.25)                      | 0.38<br>(0.26 to<br>0.52)                         | 0.38<br>(0.26 to<br>0.52)                         | 0.40<br>(0.28 to<br>0.53)                         |
| Multiple sclerosis                         | 0.94<br>(0.78 to<br>1.23)                         | 1.52<br>(1.08 to<br>2.10)                            | 1.49<br>(1.05 to<br>2.07)                            | 1.47<br>(1.07 to<br>2.01)                            | 0.02<br>(0.02 to<br>0.03)                      | 0.05<br>(0.03 to<br>0.07)                         | 0.05<br>(0.03 to<br>0.07)                         | 0.05<br>(0.03 to<br>0.07)                         |
| Motor neuron disease                       | 1.50<br>(1.12 to<br>1.81)                         | 2.83<br>(1.87 to<br>3.92)                            | 2.85<br>(1.88 to<br>4.00)                            | 2.83<br>(1.92 to<br>3.84)                            | 0.04<br>(0.03 to<br>0.05)                      | 0.10<br>(0.07 to<br>0.14)                         | 0.10<br>(0.07 to<br>0.15)                         | 0.10<br>(0.07 to<br>0.14)                         |
| Other neurological disorders               | 5.34<br>(4.45 to<br>6.00)                         | 7.00<br>(4.96 to<br>9.21)                            | 7.07<br>(4.95 to<br>9.40)                            | 6.86<br>(4.94 to<br>8.82)                            | 0.11<br>(0.10 to<br>0.13)                      | 0.24<br>(0.17 to<br>0.32)                         | 0.25<br>(0.17 to<br>0.33)                         | 0.23<br>(0.16 to<br>0.29)                         |
| <b>Mental disorders</b>                    | <b>13.71</b><br><b>(9.08 to</b><br><b>17.45)</b>  | <b>29.59</b><br><b>(18.12 to</b><br><b>40.84)</b>    | <b>31.14</b><br><b>(19.34 to</b><br><b>43.61)</b>    | <b>25.70</b><br><b>(16.12 to</b><br><b>35.33)</b>    | <b>0.32</b><br><b>(0.21 to</b><br><b>0.40)</b> | <b>1.01</b><br><b>(0.58 to</b><br><b>1.38)</b>    | <b>1.09</b><br><b>(0.63 to</b><br><b>1.50)</b>    | <b>0.84</b><br><b>(0.50 to</b><br><b>1.13)</b>    |
| Alcohol use disorders                      | 2.78<br>(1.87 to<br>3.47)                         | 4.10<br>(2.58 to<br>5.89)                            | 4.24<br>(2.63 to<br>6.06)                            | 3.76<br>(2.35 to<br>5.25)                            | 0.07<br>(0.05 to<br>0.09)                      | 0.14<br>(0.09 to<br>0.20)                         | 0.15<br>(0.09 to<br>0.21)                         | 0.13<br>(0.08 to<br>0.18)                         |



|                                                   |                           |                           |                           |                           |                        |                        |                        |                        |
|---------------------------------------------------|---------------------------|---------------------------|---------------------------|---------------------------|------------------------|------------------------|------------------------|------------------------|
| Polycystic ovarian syndrome                       | 0.00<br>(0.00 to 0.01)    | 0.00<br>(0.00 to 0.00)    | 0.00<br>(0.00 to 0.00)    | 0.00<br>(0.00 to 0.01)    | 0.00<br>(0.00 to 0.00) | 0.00<br>(0.00 to 0.00) | 0.00<br>(0.00 to 0.00) | 0.00<br>(0.00 to 0.00) |
| Endometriosis                                     | 0.00<br>(0.00 to 0.00)    | 0.00<br>(0.00 to 0.00)    | 0.00<br>(0.00 to 0.00)    | 0.00<br>(0.00 to 0.00)    | 0.00<br>(0.00 to 0.00) | 0.00<br>(0.00 to 0.00) | 0.00<br>(0.00 to 0.00) | 0.00<br>(0.00 to 0.00) |
| Genital prolapse                                  | 0.00<br>(0.00 to 0.00)    | 0.00<br>(0.00 to 0.00)    | 0.00<br>(0.00 to 0.00)    | 0.00<br>(0.00 to 0.00)    | 0.00<br>(0.00 to 0.00) | 0.00<br>(0.00 to 0.00) | 0.00<br>(0.00 to 0.00) | 0.00<br>(0.00 to 0.00) |
| Other gynecological diseases                      | 0.06<br>(0.04 to 0.07)    | 0.04<br>(0.02 to 0.06)    | 0.03<br>(0.02 to 0.05)    | 0.06<br>(0.03 to 0.09)    | 0.00<br>(0.00 to 0.00) | 0.00<br>(0.00 to 0.00) | 0.00<br>(0.00 to 0.00) | 0.00<br>(0.00 to 0.00) |
| Hemoglobinopathies and hemolytic anemias          | 4.85<br>(2.75 to 6.20)    | 5.30<br>(2.69 to 8.56)    | 5.01<br>(2.46 to 7.89)    | 6.74<br>(3.28 to 10.62)   | 0.10<br>(0.06 to 0.12) | 0.20<br>(0.11 to 0.31) | 0.25<br>(0.10 to 0.30) | 0.25<br>(0.14 to 0.37) |
| Thalassemias                                      | 0.16<br>(0.08 to 0.23)    | 0.03<br>(0.01 to 0.07)    | 0.03<br>(0.01 to 0.06)    | 0.03<br>(0.01 to 0.07)    | 0.00<br>(0.00 to 0.00) | 0.00<br>(0.00 to 0.00) | 0.00<br>(0.00 to 0.00) | 0.00<br>(0.00 to 0.00) |
| Sickle cell disorders                             | 4.01<br>(2.15 to 5.23)    | 4.32<br>(2.05 to 6.92)    | 4.07<br>(1.90 to 6.56)    | 5.51<br>(2.54 to 8.93)    | 0.07<br>(0.04 to 0.10) | 0.15<br>(0.07 to 0.24) | 0.14<br>(0.07 to 0.23) | 0.19<br>(0.09 to 0.29) |
| G6PD deficiency                                   | 0.55<br>(0.36 to 0.69)    | 0.64<br>(0.33 to 0.96)    | 0.60<br>(0.31 to 0.91)    | 0.84<br>(0.45 to 1.30)    | 0.01<br>(0.01 to 0.01) | 0.03<br>(0.01 to 0.04) | 0.02<br>(0.01 to 0.04) | 0.03<br>(0.02 to 0.05) |
| Other hemoglobinopathies and hemolytic anemias    | 0.13<br>(0.10 to 0.16)    | 0.31<br>(0.19 to 0.42)    | 0.31<br>(0.19 to 0.42)    | 0.35<br>(0.23 to 0.47)    | 0.01<br>(0.01 to 0.01) | 0.03<br>(0.02 to 0.04) | 0.03<br>(0.02 to 0.04) | 0.03<br>(0.02 to 0.04) |
| Endocrine, metabolic, blood, and immune disorders | 19.27<br>(15.92 to 25.97) | 42.70<br>(26.53 to 60.26) | 44.17<br>(26.96 to 64.13) | 40.03<br>(25.85 to 54.66) | 0.62<br>(0.52 to 0.76) | 2.20<br>(1.41 to 2.99) | 2.34<br>(1.47 to 3.21) | 1.96<br>(1.30 to 2.56) |

**Saudi Arabia**

| Cause                                  | YLLs (in 1000s)                     |                                   |                                   |                                    | Deaths (in 1000s)             |                               |                               |                               |
|----------------------------------------|-------------------------------------|-----------------------------------|-----------------------------------|------------------------------------|-------------------------------|-------------------------------|-------------------------------|-------------------------------|
|                                        | 2016                                | 2040 Forecast                     | 2040 Better Scenario              | 2040 Worse Scenario                | 2016                          | 2040 Forecast                 | 2040 Better Scenario          | 2040 Worse Scenario           |
| <b>Musculoskeletal disorders</b>       | <b>5.28</b><br>(3.69 to 6.65)       | <b>6.94</b><br>(4.17 to 9.64)     | <b>6.81</b><br>(4.10 to 9.56)     | <b>7.58</b><br>(4.64 to 10.64)     | <b>0.12</b><br>(0.09 to 0.15) | <b>0.25</b><br>(0.16 to 0.36) | <b>0.25</b><br>(0.16 to 0.36) | <b>0.27</b><br>(0.17 to 0.37) |
| Rheumatoid arthritis                   | 0.33<br>(0.19 to 0.52)              | 0.50<br>(0.25 to 0.85)            | 0.46<br>(0.22 to 0.77)            | 0.69<br>(0.34 to 1.16)             | 0.01<br>(0.01 to 0.02)        | 0.03<br>(0.01 to 0.04)        | 0.02<br>(0.01 to 0.04)        | 0.03<br>(0.02 to 0.06)        |
| Other musculoskeletal disorders        | 4.95<br>(3.44 to 6.13)              | 6.44<br>(3.86 to 8.91)            | 6.35<br>(3.80 to 8.83)            | 6.89<br>(4.14 to 9.52)             | 0.11<br>(0.08 to 0.14)        | 0.23<br>(0.14 to 0.32)        | 0.23<br>(0.14 to 0.32)        | 0.23<br>(0.14 to 0.32)        |
| <b>Other non-communicable diseases</b> | <b>142.16</b><br>(115.76 to 181.12) | <b>79.22</b><br>(43.42 to 120.54) | <b>74.48</b><br>(39.79 to 115.44) | <b>101.28</b><br>(53.13 to 158.21) | <b>2.38</b><br>(1.91 to 2.88) | <b>3.50</b><br>(1.84 to 4.88) | <b>3.50</b><br>(1.80 to 5.00) | <b>3.93</b><br>(2.07 to 5.52) |
| Congenital birth defects               | 127.09<br>(101.25 to 166.13)        | 40.71<br>(18.54 to 73.27)         | 35.94<br>(15.96 to 65.54)         | 59.00<br>(26.18 to 106.37)         | 1.66<br>(1.35 to 2.11)        | 0.69<br>(0.35 to 1.14)        | 0.62<br>(0.31 to 1.03)        | 0.98<br>(0.47 to 1.62)        |
| Neural tube defects                    | 1.64<br>(0.94 to 2.80)              | 0.25<br>(0.11 to 0.49)            | 0.21<br>(0.09 to 0.42)            | 0.40<br>(0.16 to 0.81)             | 0.02<br>(0.01 to 0.04)        | 0.00<br>(0.00 to 0.01)        | 0.00<br>(0.00 to 0.01)        | 0.01<br>(0.00 to 0.01)        |
| Congenital heart anomalies             | 43.35<br>(32.52 to 62.60)           | 10.86<br>(4.68 to 20.25)          | 9.16<br>(3.64 to 16.91)           | 18.30<br>(7.43 to 34.94)           | 0.56<br>(0.43 to 0.80)        | 0.18<br>(0.09 to 0.30)        | 0.15<br>(0.07 to 0.26)        | 0.29<br>(0.14 to 0.51)        |
| Orofacial clefts                       | 0.05<br>(0.02 to 0.19)              | 0.01<br>(0.00 to 0.03)            | 0.00<br>(0.00 to 0.02)            | 0.01<br>(0.00 to 0.05)             | 0.00<br>(0.00 to 0.00)        | 0.00<br>(0.00 to 0.00)        | 0.00<br>(0.00 to 0.00)        | 0.00<br>(0.00 to 0.00)        |
| Down syndrome                          | 9.96<br>(7.59 to 14.56)             | 6.74<br>(3.78 to 11.55)           | 6.57<br>(3.71 to 11.12)           | 6.74<br>(3.79 to 11.71)            | 0.14<br>(0.11 to 0.20)        | 0.11<br>(0.07 to 0.18)        | 0.11<br>(0.07 to 0.18)        | 0.11<br>(0.07 to 0.18)        |
| Other chromosomal abnormalities        | 2.37<br>(1.27 to 6.13)              | 1.17<br>(0.42 to 3.25)            | 1.06<br>(0.37 to 2.89)            | 1.44<br>(0.49 to 4.00)             | 0.03<br>(0.02 to 0.08)        | 0.02<br>(0.01 to 0.05)        | 0.02<br>(0.01 to 0.05)        | 0.02<br>(0.01 to 0.06)        |

|                                               |                                            |                                            |                                            |                                              |                                         |                                         |                                        |                                         |
|-----------------------------------------------|--------------------------------------------|--------------------------------------------|--------------------------------------------|----------------------------------------------|-----------------------------------------|-----------------------------------------|----------------------------------------|-----------------------------------------|
| Congenital musculoskeletal and limb anomalies | 1.06<br>(0.48 to 1.78)                     | 0.28<br>(0.10 to 0.60)                     | 0.25<br>(0.08 to 0.54)                     | 0.43<br>(0.14 to 0.94)                       | 0.01<br>(0.01 to 0.02)                  | 0.00<br>(0.00 to 0.01)                  | 0.00<br>(0.00 to 0.01)                 | 0.01<br>(0.00 to 0.01)                  |
| Urogenital congenital anomalies               | 3.80<br>(2.14 to 5.32)                     | 1.53<br>(0.66 to 2.76)                     | 1.38<br>(0.59 to 2.47)                     | 2.11<br>(0.85 to 3.79)                       | 0.05<br>(0.03 to 0.07)                  | 0.04<br>(0.02 to 0.06)                  | 0.03<br>(0.01 to 0.06)                 | 0.05<br>(0.02 to 0.08)                  |
| Digestive congenital anomalies                | 3.45<br>(1.57 to 6.36)                     | 0.90<br>(0.31 to 1.94)                     | 0.77<br>(0.25 to 1.66)                     | 1.43<br>(0.47 to 3.19)                       | 0.04<br>(0.02 to 0.08)                  | 0.01<br>(0.01 to 0.03)                  | 0.01<br>(0.00 to 0.02)                 | 0.02<br>(0.01 to 0.05)                  |
| Other congenital birth defects                | 61.41<br>(45.54 to 84.69)                  | 18.97<br>(7.79 to 36.95)                   | 16.53<br>(6.44 to 33.18)                   | 28.15<br>(11.00 to 55.37)                    | 0.80<br>(0.61 to 1.07)                  | 0.32<br>(0.15 to 0.56)                  | 0.28<br>(0.13 to 0.49)                 | 0.46<br>(0.21 to 0.81)                  |
| Skin and subcutaneous diseases                | 11.17<br>(6.49 to 15.96)                   | 37.93<br>(16.96 to 56.53)                  | 38.02<br>(17.04 to 56.99)                  | 41.52<br>(19.39 to 60.52)                    | 0.68<br>(0.35 to 0.88)                  | 2.81<br>(1.26 to 4.01)                  | 2.88<br>(1.28 to 4.18)                 | 2.95<br>(1.32 to 4.14)                  |
| Cellulitis                                    | 0.59<br>(0.36 to 1.23)                     | 2.24<br>(0.96 to 3.84)                     | 2.29<br>(0.96 to 3.98)                     | 2.23<br>(0.98 to 3.90)                       | 0.02<br>(0.01 to 0.04)                  | 0.13<br>(0.05 to 0.21)                  | 0.14<br>(0.05 to 0.22)                 | 0.12<br>(0.05 to 0.20)                  |
| Pyoderma                                      | 2.50<br>(1.62 to 4.63)                     | 10.56<br>(5.26 to 16.45)                   | 10.62<br>(5.28 to 16.94)                   | 11.20<br>(5.69 to 18.03)                     | 0.10<br>(0.06 to 0.18)                  | 0.69<br>(0.34 to 1.07)                  | 0.71<br>(0.34 to 1.11)                 | 0.69<br>(0.34 to 1.07)                  |
| Decubitus ulcer                               | 7.80<br>(3.89 to 10.21)                    | 24.84<br>(9.23 to 38.71)                   | 24.83<br>(9.12 to 39.07)                   | 27.75<br>(10.83 to 42.44)                    | 0.55<br>(0.26 to 0.71)                  | 1.98<br>(0.80 to 2.94)                  | 2.02<br>(0.80 to 3.09)                 | 2.12<br>(0.86 to 3.10)                  |
| Other skin and subcutaneous diseases          | 0.28<br>(0.17 to 0.55)                     | 0.29<br>(0.18 to 0.51)                     | 0.28<br>(0.17 to 0.49)                     | 0.33<br>(0.20 to 0.60)                       | 0.01<br>(0.00 to 0.01)                  | 0.01<br>(0.01 to 0.01)                  | 0.01<br>(0.01 to 0.01)                 | 0.01<br>(0.01 to 0.02)                  |
| Sudden infant death syndrome                  | 3.89<br>(2.24 to 5.75)                     | 0.59<br>(0.12 to 1.58)                     | 0.52<br>(0.10 to 1.40)                     | 0.76<br>(0.15 to 2.13)                       | 0.05<br>(0.03 to 0.07)                  | 0.01<br>(0.00 to 0.02)                  | 0.01<br>(0.00 to 0.02)                 | 0.01<br>(0.00 to 0.02)                  |
| <b>Injuries</b>                               | <b>710.16</b><br><b>(643.27 to 781.30)</b> | <b>541.57</b><br><b>(370.05 to 745.61)</b> | <b>411.42</b><br><b>(271.52 to 560.35)</b> | <b>877.88</b><br><b>(603.08 to 1,238.93)</b> | <b>15.54</b><br><b>(14.01 to 17.09)</b> | <b>17.26</b><br><b>(12.31 to 23.00)</b> | <b>13.74</b><br><b>(9.58 to 18.28)</b> | <b>26.04</b><br><b>(18.68 to 34.80)</b> |
| <b>Transport injuries</b>                     | <b>438.69</b><br><b>(391.38 to 483.52)</b> | <b>261.57</b><br><b>(184.54 to 350.84)</b> | <b>139.97</b><br><b>(97.54 to 190.40)</b>  | <b>556.01</b><br><b>(389.73 to 741.76)</b>   | <b>9.52</b><br><b>(8.45 to 10.54)</b>   | <b>8.85</b><br><b>(5.71 to 16.60)</b>   | <b>4.64</b><br><b>(3.24 to 6.17)</b>   | <b>15.79</b><br><b>(11.42 to 20.46)</b> |
| Road injuries                                 | 434.57<br>(387.89 to 479.35)               | 257.25<br>(181.40 to 343.93)               | 135.93<br>(94.74 to 183.78)                | 550.26<br>(386.87 to 732.75)                 | 9.41<br>(8.36 to 10.42)                 | 7.88<br>(5.57 to 10.37)                 | 4.47<br>(3.12 to 5.93)                 | 15.56<br>(11.22 to 20.20)               |
| Pedestrian road injuries                      | 75.23<br>(56.06 to 112.25)                 | 34.06<br>(19.56 to 55.21)                  | 19.40<br>(10.93 to 31.75)                  | 78.74<br>(43.86 to 131.14)                   | 1.77<br>(1.32 to 2.67)                  | 1.23<br>(0.71 to 1.96)                  | 0.74<br>(0.42 to 1.22)                 | 2.62<br>(1.51 to 4.28)                  |

**Saudi Arabia**

| Cause                         | YLLs (in 1000s)                            |                                            |                                            |                                            | Deaths (in 1000s)                    |                                      |                                      |                                       |
|-------------------------------|--------------------------------------------|--------------------------------------------|--------------------------------------------|--------------------------------------------|--------------------------------------|--------------------------------------|--------------------------------------|---------------------------------------|
|                               | 2016                                       | 2040 Forecast                              | 2040 Better Scenario                       | 2040 Worse Scenario                        | 2016                                 | 2040 Forecast                        | 2040 Better Scenario                 | 2040 Worse Scenario                   |
| Cyclist road injuries         | 7.89<br>(4.64 to 13.89)                    | 4.76<br>(2.50 to 9.12)                     | 2.81<br>(1.46 to 5.43)                     | 8.84<br>(4.72 to 17.00)                    | 0.16<br>(0.09 to 0.29)               | 0.13<br>(0.07 to 0.24)               | 0.08<br>(0.04 to 0.15)               | 0.21<br>(0.12 to 0.40)                |
| Motorcyclist road injuries    | 19.86<br>(13.33 to 29.46)                  | 14.91<br>(8.05 to 26.57)                   | 10.38<br>(5.58 to 18.15)                   | 22.82<br>(12.42 to 39.76)                  | 0.35<br>(0.24 to 0.52)               | 0.29<br>(0.17 to 0.50)               | 0.21<br>(0.12 to 0.36)               | 0.43<br>(0.25 to 0.74)                |
| Motor vehicle road injuries   | 331.28<br>(279.92 to 379.37)               | 203.29<br>(140.58 to 278.21)               | 103.19<br>(71.00 to 142.16)                | 439.43<br>(304.25 to 598.56)               | 7.12<br>(5.96 to 8.20)               | 6.22<br>(4.41 to 8.34)               | 3.42<br>(2.40 to 4.66)               | 12.28<br>(8.72 to 16.26)              |
| Other road injuries           | 0.30<br>(0.24 to 0.40)                     | 0.23<br>(0.15 to 0.33)                     | 0.14<br>(0.09 to 0.21)                     | 0.42<br>(0.27 to 0.61)                     | 0.01<br>(0.01 to 0.01)               | 0.01<br>(0.01 to 0.02)               | 0.01<br>(0.00 to 0.01)               | 0.02<br>(0.01 to 0.03)                |
| Other transport injuries      | 4.13<br>(3.06 to 6.42)                     | 4.32<br>(2.65 to 7.48)                     | 4.03<br>(2.38 to 7.19)                     | 5.75<br>(3.43 to 9.85)                     | 0.10<br>(0.08 to 0.16)               | 0.17<br>(0.11 to 0.31)               | 0.17<br>(0.11 to 0.29)               | 0.22<br>(0.14 to 0.38)                |
| <b>Unintentional injuries</b> | <b>216.51</b><br><b>(175.07 to 245.46)</b> | <b>212.67</b><br><b>(143.27 to 285.74)</b> | <b>206.64</b><br><b>(137.88 to 275.46)</b> | <b>246.82</b><br><b>(162.49 to 340.49)</b> | <b>4.90</b><br><b>(3.89 to 5.59)</b> | <b>7.60</b><br><b>(5.30 to 9.80)</b> | <b>7.54</b><br><b>(5.17 to 9.75)</b> | <b>8.47</b><br><b>(5.72 to 11.11)</b> |

|                                                 |                              |                               |                               |                               |                           |                           |                           |                           |
|-------------------------------------------------|------------------------------|-------------------------------|-------------------------------|-------------------------------|---------------------------|---------------------------|---------------------------|---------------------------|
| Falls                                           | 53.33<br>(42.56 to<br>64.52) | 80.69<br>(51.41 to<br>111.18) | 79.85<br>(50.78 to<br>109.12) | 89.21<br>(55.22 to<br>123.10) | 1.52<br>(1.13 to<br>1.86) | 3.58<br>(2.30 to<br>4.67) | 3.62<br>(2.32 to<br>4.69) | 3.82<br>(2.37 to<br>5.06) |
| Drowning                                        | 42.82<br>(34.56 to<br>49.20) | 30.43<br>(19.00 to<br>41.68)  | 29.03<br>(18.59 to<br>40.12)  | 36.65<br>(22.25 to<br>51.19)  | 0.82<br>(0.62 to<br>0.95) | 0.80<br>(0.49 to<br>1.09) | 0.77<br>(0.48 to<br>1.07) | 0.95<br>(0.56 to<br>1.32) |
| Fire, heat, and hot substances                  | 22.61<br>(16.87 to<br>27.64) | 15.77<br>(9.83 to<br>22.52)   | 14.77<br>(9.21 to<br>20.96)   | 20.48<br>(12.19 to<br>29.81)  | 0.51<br>(0.37 to<br>0.61) | 0.54<br>(0.35 to<br>0.74) | 0.52<br>(0.33 to<br>0.72) | 0.67<br>(0.42 to<br>0.93) |
| Poisonings                                      | 7.90<br>(4.87 to<br>10.76)   | 3.23<br>(1.77 to<br>5.08)     | 2.94<br>(1.62 to<br>4.69)     | 4.57<br>(2.35 to<br>7.51)     | 0.15<br>(0.09 to<br>0.21) | 0.09<br>(0.05 to<br>0.13) | 0.08<br>(0.04 to<br>0.12) | 0.12<br>(0.06 to<br>0.19) |
| Exposure to mechanical forces                   | 35.86<br>(25.89 to<br>42.44) | 26.47<br>(16.37 to<br>37.99)  | 25.06<br>(15.09 to<br>36.34)  | 33.51<br>(19.79 to<br>49.87)  | 0.75<br>(0.54 to<br>0.87) | 0.78<br>(0.50 to<br>1.08) | 0.75<br>(0.47 to<br>1.03) | 0.96<br>(0.58 to<br>1.33) |
| Unintentional firearm injuries                  | 9.55<br>(4.32 to<br>12.78)   | 6.60<br>(2.84 to<br>10.43)    | 6.31<br>(2.82 to<br>10.03)    | 8.01<br>(3.24 to<br>12.90)    | 0.19<br>(0.09 to<br>0.25) | 0.18<br>(0.08 to<br>0.26) | 0.17<br>(0.08 to<br>0.26) | 0.21<br>(0.09 to<br>0.32) |
| Unintentional suffocation                       | 2.25<br>(0.84 to<br>3.63)    | 0.69<br>(0.22 to<br>1.45)     | 0.62<br>(0.20 to<br>1.31)     | 0.88<br>(0.26 to<br>1.94)     | 0.03<br>(0.01 to<br>0.05) | 0.01<br>(0.00 to<br>0.02) | 0.01<br>(0.00 to<br>0.02) | 0.01<br>(0.00 to<br>0.03) |
| Other exposure to mechanical forces             | 24.06<br>(19.34 to<br>28.27) | 19.18<br>(12.13 to<br>27.29)  | 18.13<br>(11.52 to<br>25.95)  | 24.61<br>(14.81 to<br>35.27)  | 0.53<br>(0.42 to<br>0.62) | 0.59<br>(0.37 to<br>0.82) | 0.56<br>(0.36 to<br>0.78) | 0.74<br>(0.44 to<br>1.02) |
| Adverse effects of medical treatment            | 29.80<br>(21.13 to<br>34.75) | 35.14<br>(23.61 to<br>48.81)  | 34.63<br>(23.39 to<br>47.93)  | 38.80<br>(25.54 to<br>54.30)  | 0.68<br>(0.52 to<br>0.78) | 1.21<br>(0.85 to<br>1.64) | 1.22<br>(0.84 to<br>1.67) | 1.30<br>(0.91 to<br>1.72) |
| Animal contact                                  | 1.63<br>(0.98 to<br>2.00)    | 1.85<br>(1.03 to<br>2.78)     | 1.79<br>(1.00 to<br>2.66)     | 2.14<br>(1.14 to<br>3.21)     | 0.04<br>(0.02 to<br>0.04) | 0.07<br>(0.04 to<br>0.10) | 0.07<br>(0.04 to<br>0.10) | 0.08<br>(0.05 to<br>0.11) |
| Venomous animal contact                         | 0.62<br>(0.40 to<br>0.78)    | 0.70<br>(0.40 to<br>1.03)     | 0.69<br>(0.40 to<br>1.02)     | 0.78<br>(0.42 to<br>1.16)     | 0.01<br>(0.01 to<br>0.02) | 0.03<br>(0.02 to<br>0.04) | 0.03<br>(0.02 to<br>0.04) | 0.03<br>(0.02 to<br>0.04) |
| Non-venomous animal contact                     | 1.01<br>(0.52 to<br>1.29)    | 1.15<br>(0.53 to<br>1.76)     | 1.10<br>(0.51 to<br>1.67)     | 1.36<br>(0.61 to<br>2.10)     | 0.02<br>(0.01 to<br>0.03) | 0.04<br>(0.02 to<br>0.06) | 0.04<br>(0.02 to<br>0.06) | 0.05<br>(0.03 to<br>0.07) |
| Foreign body                                    | 15.66<br>(11.22 to<br>18.61) | 13.34<br>(8.40 to<br>18.27)   | 13.21<br>(8.42 to<br>17.76)   | 13.72<br>(8.29 to<br>19.26)   | 0.28<br>(0.20 to<br>0.33) | 0.35<br>(0.23 to<br>0.47) | 0.36<br>(0.24 to<br>0.48) | 0.35<br>(0.23 to<br>0.47) |
| Pulmonary aspiration and foreign body in airway | 9.06<br>(7.08 to<br>11.13)   | 6.60<br>(4.13 to<br>9.36)     | 6.41<br>(3.98 to<br>8.99)     | 7.18<br>(4.28 to<br>10.30)    | 0.16<br>(0.13 to<br>0.19) | 0.20<br>(0.13 to<br>0.27) | 0.20<br>(0.13 to<br>0.28) | 0.21<br>(0.13 to<br>0.28) |
| Foreign body in other body part                 | 6.60<br>(3.34 to<br>8.77)    | 6.75<br>(3.54 to<br>9.88)     | 6.79<br>(3.65 to<br>9.79)     | 6.54<br>(3.27 to<br>9.71)     | 0.12<br>(0.06 to<br>0.16) | 0.16<br>(0.09 to<br>0.22) | 0.16<br>(0.10 to<br>0.22) | 0.15<br>(0.08 to<br>0.21) |
| Environmental heat and cold exposure            | 5.63<br>(2.95 to<br>6.84)    | 5.26<br>(2.48 to<br>7.81)     | 4.92<br>(2.34 to<br>7.18)     | 6.93<br>(3.11 to<br>10.54)    | 0.13<br>(0.07 to<br>0.16) | 0.16<br>(0.08 to<br>0.25) | 0.15<br>(0.08 to<br>0.22) | 0.21<br>(0.10 to<br>0.31) |
| Other unintentional injuries                    | 1.28<br>(0.98 to<br>1.50)    | 0.49<br>(0.29 to<br>0.74)     | 0.44<br>(0.26 to<br>0.65)     | 0.81<br>(0.45 to<br>1.25)     | 0.03<br>(0.02 to<br>0.03) | 0.01<br>(0.01 to<br>0.02) | 0.01<br>(0.01 to<br>0.02) | 0.02<br>(0.01 to<br>0.03) |
| Self-harm and interpersonal violence            | 51.39<br>(40.52 to<br>61.66) | 46.34<br>(30.73 to<br>64.64)  | 43.88<br>(28.92 to<br>61.23)  | 54.02<br>(35.44 to<br>77.94)  | 1.06<br>(0.82 to<br>1.27) | 1.17<br>(0.80 to<br>1.60) | 1.12<br>(0.76 to<br>1.54) | 1.35<br>(0.90 to<br>1.89) |

**Saudi Arabia**

| Cause                | YLLs (in 1000s)              |                              |                              |                              | Deaths (in 1000s)         |                           |                           |                           |
|----------------------|------------------------------|------------------------------|------------------------------|------------------------------|---------------------------|---------------------------|---------------------------|---------------------------|
|                      | 2016                         | 2040 Forecast                | 2040 Better Scenario         | 2040 Worse Scenario          | 2016                      | 2040 Forecast             | 2040 Better Scenario      | 2040 Worse Scenario       |
| Self-harm            | 44.91<br>(34.51 to<br>54.82) | 42.21<br>(27.58 to<br>59.58) | 39.96<br>(26.19 to<br>56.23) | 48.96<br>(32.02 to<br>70.91) | 0.93<br>(0.71 to<br>1.13) | 1.06<br>(0.71 to<br>1.46) | 1.01<br>(0.69 to<br>1.40) | 1.21<br>(0.82 to<br>1.71) |
| Self-harm by firearm | 2.22<br>(1.01 to<br>4.01)    | 1.76<br>(0.72 to<br>3.34)    | 1.63<br>(0.66 to<br>2.98)    | 2.21<br>(0.88 to<br>4.16)    | 0.05<br>(0.02 to<br>0.09) | 0.05<br>(0.02 to<br>0.09) | 0.04<br>(0.02 to<br>0.08) | 0.06<br>(0.02 to<br>0.11) |

|                                                                              |                              |                              |                              |                              |                           |                           |                           |                           |
|------------------------------------------------------------------------------|------------------------------|------------------------------|------------------------------|------------------------------|---------------------------|---------------------------|---------------------------|---------------------------|
| Self-harm by other specified means                                           | 42.69<br>(32.81 to<br>51.98) | 40.45<br>(26.79 to<br>57.23) | 38.33<br>(25.24 to<br>54.18) | 46.75<br>(30.77 to<br>67.22) | 0.88<br>(0.67 to<br>1.08) | 1.01<br>(0.68 to<br>1.39) | 0.97<br>(0.67 to<br>1.34) | 1.15<br>(0.78 to<br>1.62) |
| Interpersonal violence                                                       | 6.47<br>(5.13 to<br>8.22)    | 4.12<br>(2.56 to<br>5.89)    | 3.92<br>(2.42 to<br>5.65)    | 5.06<br>(3.05 to<br>7.34)    | 0.13<br>(0.10 to<br>0.16) | 0.11<br>(0.07 to<br>0.16) | 0.11<br>(0.07 to<br>0.15) | 0.14<br>(0.08 to<br>0.19) |
| Physical violence by firearm                                                 | 1.98<br>(1.02 to<br>2.69)    | 1.04<br>(0.44 to<br>1.66)    | 0.96<br>(0.41 to<br>1.52)    | 1.39<br>(0.56 to<br>2.26)    | 0.04<br>(0.02 to<br>0.05) | 0.03<br>(0.01 to<br>0.04) | 0.02<br>(0.01 to<br>0.04) | 0.03<br>(0.01 to<br>0.06) |
| Physical violence by sharp object                                            | 1.73<br>(1.26 to<br>2.69)    | 1.07<br>(0.66 to<br>1.66)    | 1.01<br>(0.61 to<br>1.63)    | 1.36<br>(0.81 to<br>2.23)    | 0.03<br>(0.02 to<br>0.05) | 0.03<br>(0.02 to<br>0.04) | 0.03<br>(0.02 to<br>0.04) | 0.03<br>(0.02 to<br>0.05) |
| Physical violence by other means                                             | 2.76<br>(2.03 to<br>3.76)    | 2.01<br>(1.22 to<br>2.99)    | 1.94<br>(1.14 to<br>2.93)    | 2.31<br>(1.36 to<br>3.50)    | 0.06<br>(0.04 to<br>0.07) | 0.06<br>(0.04 to<br>0.09) | 0.06<br>(0.03 to<br>0.09) | 0.07<br>(0.04 to<br>0.10) |
| Forces of nature, conflict and terrorism, and executions and police conflict | 3.57<br>(2.53 to<br>4.73)    | 20.99<br>(0.00 to<br>13.62)  | 20.94<br>(0.00 to<br>13.60)  | 21.03<br>(0.00 to<br>13.64)  | 0.06<br>(0.04 to<br>0.08) | 0.44<br>(0.00 to<br>0.29) | 0.44<br>(0.00 to<br>0.30) | 0.44<br>(0.00 to<br>0.29) |
| Exposure to forces of nature                                                 | 0.00<br>(0.00 to<br>0.00)    | 0.07<br>(0.00 to<br>0.68)    | 0.07<br>(0.00 to<br>0.67)    | 0.07<br>(0.00 to<br>0.68)    | 0.00<br>(0.00 to<br>0.00) | 0.00<br>(0.00 to<br>0.02) | 0.00<br>(0.00 to<br>0.02) | 0.00<br>(0.00 to<br>0.02) |
| Conflict and terrorism                                                       | 3.40<br>(2.36 to<br>4.58)    | 0.01<br>(0.00 to<br>0.13)    | 0.01<br>(0.00 to<br>0.13)    | 0.01<br>(0.00 to<br>0.13)    | 0.06<br>(0.04 to<br>0.08) | 0.00<br>(0.00 to<br>0.00) | 0.00<br>(0.00 to<br>0.00) | 0.00<br>(0.00 to<br>0.00) |
| Executions and police conflict                                               | 0.17<br>(0.15 to<br>0.19)    | 20.90<br>(0.00 to<br>13.32)  | 20.86<br>(0.00 to<br>13.29)  | 20.95<br>(0.00 to<br>13.33)  | 0.00<br>(0.00 to<br>0.00) | 0.44<br>(0.00 to<br>0.29) | 0.44<br>(0.00 to<br>0.29) | 0.44<br>(0.00 to<br>0.28) |

**Sudan**

| Cause                                                                    | YLLs (in 1000s)                        |                                        |                                       |                                          | Deaths (in 1000s)               |                                 |                                 |                                 |
|--------------------------------------------------------------------------|----------------------------------------|----------------------------------------|---------------------------------------|------------------------------------------|---------------------------------|---------------------------------|---------------------------------|---------------------------------|
|                                                                          | 2016                                   | 2040 Forecast                          | 2040 Better Scenario                  | 2040 Worse Scenario                      | 2016                            | 2040 Forecast                   | 2040 Better Scenario            | 2040 Worse Scenario             |
| <b>All causes</b>                                                        | 9,875.50<br>(7,821.82 to<br>13,157.26) | 9,375.45<br>(7,719.11 to<br>11,830.99) | 7,270.93<br>(5,975.66 to<br>8,974.48) | 16,542.94<br>(12,530.37 to<br>22,357.00) | 216.10<br>(189.83 to<br>255.21) | 314.24<br>(270.19 to<br>369.89) | 348.91<br>(217.86 to<br>293.87) | 457.85<br>(385.56 to<br>545.71) |
| <b>Communicable, maternal, neonatal, and nutritional diseases</b>        | 3,868.73<br>(2,507.77 to<br>6,030.77)  | 2,002.28<br>(1,263.71 to<br>3,230.86)  | 1,457.62<br>(892.05 to<br>2,375.57)   | 5,169.23<br>(2,923.32 to<br>8,799.44)    | 57.44<br>(41.32 to<br>82.82)    | 38.98<br>(27.72 to<br>56.08)    | 29.42<br>(21.00 to<br>42.36)    | 83.60<br>(54.41 to<br>129.66)   |
| <b>HIV/AIDS and tuberculosis</b>                                         | 298.31<br>(216.15 to<br>383.62)        | 249.43<br>(163.43 to<br>380.00)        | 140.06<br>(75.02 to<br>234.70)        | 505.24<br>(356.04 to<br>708.00)          | 7.61<br>(5.35 to<br>10.43)      | 7.04<br>(4.46 to<br>10.96)      | 4.34<br>(2.42 to<br>7.49)       | 13.39<br>(8.88 to<br>20.23)     |
| Tuberculosis                                                             | 162.44<br>(92.04 to<br>233.04)         | 94.90<br>(42.70 to<br>166.63)          | 65.30<br>(30.28 to<br>109.11)         | 193.08<br>(88.39 to<br>343.50)           | 4.81<br>(2.60 to<br>7.48)       | 3.75<br>(1.57 to<br>7.06)       | 2.72<br>(1.16 to<br>5.06)       | 6.90<br>(2.91 to<br>13.28)      |
| HIV/AIDS                                                                 | 135.87<br>(100.25 to<br>182.61)        | 154.53<br>(85.18 to<br>257.42)         | 74.76<br>(18.15 to<br>160.66)         | 312.15<br>(215.27 to<br>440.70)          | 2.80<br>(2.15 to<br>3.62)       | 3.28<br>(1.85 to<br>5.25)       | 1.62<br>(0.45 to<br>3.26)       | 6.48<br>(4.58 to<br>8.95)       |
| <b>Diarrhea, lower respiratory, and other common infectious diseases</b> | 1,197.41<br>(758.20 to<br>1,951.53)    | 621.71<br>(311.77 to<br>1,158.94)      | 434.49<br>(238.81 to<br>791.08)       | 1,842.53<br>(793.80 to<br>3,592.39)      | 19.18<br>(13.62 to<br>27.90)    | 16.84<br>(10.29 to<br>26.27)    | 13.04<br>(8.05 to<br>20.22)     | 34.86<br>(18.98 to<br>59.69)    |
| Diarrheal diseases                                                       | 353.41<br>(165.68 to<br>656.18)        | 154.79<br>(50.74 to<br>337.79)         | 119.52<br>(34.75 to<br>272.62)        | 391.32<br>(135.19 to<br>837.85)          | 5.47<br>(2.71 to<br>9.55)       | 3.91<br>(1.03 to<br>10.13)      | 3.17<br>(0.78 to<br>8.36)       | 8.20<br>(2.63 to<br>19.14)      |
| Intestinal infectious diseases                                           | 19.79<br>(9.67 to<br>34.97)            | 14.05<br>(6.70 to<br>26.41)            | 13.08<br>(6.34 to<br>24.26)           | 22.24<br>(10.29 to<br>43.30)             | 0.28<br>(0.14 to<br>0.50)       | 0.22<br>(0.11 to<br>0.40)       | 0.20<br>(0.10 to<br>0.37)       | 0.33<br>(0.15 to<br>0.62)       |
| Typhoid fever                                                            | 17.62<br>(8.71 to<br>31.31)            | 12.25<br>(5.67 to<br>23.68)            | 11.43<br>(5.45 to<br>21.44)           | 19.38<br>(8.73 to<br>38.95)              | 0.25<br>(0.13 to<br>0.45)       | 0.19<br>(0.09 to<br>0.35)       | 0.18<br>(0.09 to<br>0.33)       | 0.28<br>(0.13 to<br>0.55)       |
| Paratyphoid fever                                                        | 2.14<br>(0.89 to<br>4.40)              | 1.79<br>(0.79 to<br>3.67)              | 1.65<br>(0.73 to<br>3.38)             | 2.84<br>(1.21 to<br>6.00)                | 0.03<br>(0.01 to<br>0.06)       | 0.03<br>(0.01 to<br>0.06)       | 0.03<br>(0.01 to<br>0.05)       | 0.04<br>(0.02 to<br>0.09)       |
| Other intestinal infectious diseases                                     | 0.03<br>(0.01 to<br>0.08)              | 0.01<br>(0.00 to<br>0.03)              | 0.01<br>(0.00 to<br>0.02)             | 0.02<br>(0.00 to<br>0.07)                | 0.00<br>(0.00 to<br>0.00)       | 0.00<br>(0.00 to<br>0.00)       | 0.00<br>(0.00 to<br>0.00)       | 0.00<br>(0.00 to<br>0.00)       |

|                                         |                                        |                                      |                                      |                                       |                                  |                                  |                                  |                                  |
|-----------------------------------------|----------------------------------------|--------------------------------------|--------------------------------------|---------------------------------------|----------------------------------|----------------------------------|----------------------------------|----------------------------------|
| Lower respiratory infections            | 652.83<br>(394.41 to<br>1,071.81)      | 344.13<br>(175.36 to<br>677.79)      | 231.36<br>(124.27 to<br>436.53)      | 1,135.95<br>(390.72 to<br>2,545.26)   | 11.15<br>(8.02 to<br>16.07)      | 11.10<br>(6.98 to<br>16.62)      | 8.50<br>(5.33 to<br>12.43)       | 22.53<br>(11.35 to<br>40.37)     |
| Upper respiratory infections            | 1.11<br>(0.37 to<br>2.93)              | 0.57<br>(0.23 to<br>1.38)            | 0.44<br>(0.18 to<br>1.02)            | 1.38<br>(0.45 to<br>4.07)             | 0.02<br>(0.01 to<br>0.04)        | 0.01<br>(0.01 to<br>0.02)        | 0.01<br>(0.00 to<br>0.02)        | 0.02<br>(0.01 to<br>0.06)        |
| Otitis media                            | 0.20<br>(0.06 to<br>0.55)              | 0.06<br>(0.02 to<br>0.14)            | 0.06<br>(0.02 to<br>0.14)            | 0.07<br>(0.02 to<br>0.18)             | 0.00<br>(0.00 to<br>0.01)        | 0.00<br>(0.00 to<br>0.01)        | 0.00<br>(0.00 to<br>0.01)        | 0.00<br>(0.00 to<br>0.01)        |
| Meningitis                              | 80.67<br>(36.36 to<br>166.26)          | 40.83<br>(17.57 to<br>88.02)         | 35.06<br>(16.19 to<br>73.09)         | 119.01<br>(37.49 to<br>286.47)        | 1.10<br>(0.55 to<br>2.19)        | 0.69<br>(0.37 to<br>1.35)        | 0.63<br>(0.36 to<br>1.16)        | 1.61<br>(0.62 to<br>3.60)        |
| Pneumococcal meningitis                 | 0.46<br>(0.19 to<br>1.07)              | 0.24<br>(0.12 to<br>0.53)            | 0.23<br>(0.11 to<br>0.50)            | 0.54<br>(0.21 to<br>1.40)             | 0.01<br>(0.00 to<br>0.01)        | 0.01<br>(0.00 to<br>0.01)        | 0.01<br>(0.00 to<br>0.01)        | 0.01<br>(0.00 to<br>0.02)        |
| H influenzae type B meningitis          | 5.81<br>(2.45 to<br>12.13)             | 9.28<br>(1.59 to<br>29.54)           | 6.10<br>(1.34 to<br>18.73)           | 61.22<br>(6.83 to<br>198.71)          | 0.08<br>(0.04 to<br>0.15)        | 0.13<br>(0.03 to<br>0.37)        | 0.09<br>(0.03 to<br>0.24)        | 0.73<br>(0.09 to<br>2.35)        |
| Meningococcal meningitis                | 9.13<br>(4.00 to<br>19.50)             | 5.81<br>(2.91 to<br>11.50)           | 5.35<br>(2.75 to<br>10.33)           | 9.92<br>(4.26 to<br>21.30)            | 0.13<br>(0.06 to<br>0.26)        | 0.12<br>(0.07 to<br>0.21)        | 0.11<br>(0.07 to<br>0.20)        | 0.16<br>(0.09 to<br>0.32)        |
| Other meningitis                        | 65.28<br>(29.74 to<br>133.25)          | 25.50<br>(11.86 to<br>53.67)         | 23.37<br>(11.26 to<br>48.77)         | 47.33<br>(18.31 to<br>109.34)         | 0.89<br>(0.45 to<br>1.77)        | 0.44<br>(0.25 to<br>0.82)        | 0.42<br>(0.25 to<br>0.77)        | 0.70<br>(0.34 to<br>1.43)        |
| Encephalitis                            | 13.41<br>(6.42 to<br>29.02)            | 11.53<br>(5.88 to<br>24.51)          | 10.33<br>(5.42 to<br>20.59)          | 19.79<br>(9.14 to<br>43.67)           | 0.20<br>(0.11 to<br>0.41)        | 0.20<br>(0.13 to<br>0.40)        | 0.20<br>(0.12 to<br>0.35)        | 0.33<br>(0.17 to<br>0.65)        |
| Diphtheria                              | 0.44<br>(0.19 to<br>0.87)              | 0.13<br>(0.06 to<br>0.32)            | 0.09<br>(0.04 to<br>0.17)            | 0.78<br>(0.19 to<br>2.23)             | 0.01<br>(0.00 to<br>0.01)        | 0.00<br>(0.00 to<br>0.00)        | 0.00<br>(0.00 to<br>0.00)        | 0.01<br>(0.00 to<br>0.03)        |
| Whooping cough                          | 62.08<br>(4.85 to<br>201.94)           | 48.38<br>(3.62 to<br>161.93)         | 20.04<br>(1.33 to<br>70.40)          | 120.53<br>(8.50 to<br>430.67)         | 0.74<br>(0.06 to<br>2.38)        | 0.57<br>(0.04 to<br>1.91)        | 0.24<br>(0.02 to<br>0.84)        | 1.42<br>(0.10 to<br>5.11)        |
| Tetanus                                 | 1.89<br>(0.73 to<br>4.10)              | 0.41<br>(0.12 to<br>0.94)            | 0.32<br>(0.10 to<br>0.68)            | 0.84<br>(0.24 to<br>2.53)             | 0.03<br>(0.01 to<br>0.07)        | 0.01<br>(0.00 to<br>0.02)        | 0.01<br>(0.00 to<br>0.02)        | 0.01<br>(0.00 to<br>0.03)        |
| Measles                                 | 6.67<br>(1.83 to<br>17.78)             | 4.76<br>(0.26 to<br>29.43)           | 2.55<br>(0.20 to<br>13.47)           | 25.73<br>(1.50 to<br>114.14)          | 0.08<br>(0.02 to<br>0.21)        | 0.06<br>(0.00 to<br>0.35)        | 0.03<br>(0.00 to<br>0.16)        | 0.30<br>(0.00 to<br>1.35)        |
| <b>Sudan</b>                            |                                        |                                      |                                      |                                       |                                  |                                  |                                  |                                  |
| Cause                                   | YLLs (in 1000s)                        |                                      |                                      |                                       | Deaths (in 1000s)                |                                  |                                  |                                  |
|                                         | 2016                                   | 2040 Forecast                        | 2040 Better Scenario                 | 2040 Worse Scenario                   | 2016                             | 2040 Forecast                    | 2040 Better Scenario             | 2040 Worse Scenario              |
| Varicella and herpes zoster             | 4.90<br>(2.68 to<br>8.76)              | 2.06<br>(1.06 to<br>3.93)            | 1.65<br>(0.86 to<br>3.07)            | 4.89<br>(2.14 to<br>10.33)            | 0.08<br>(0.05 to<br>0.13)        | 0.05<br>(0.03 to<br>0.08)        | 0.05<br>(0.03 to<br>0.07)        | 0.09<br>(0.05 to<br>0.16)        |
| Neglected tropical diseases and malaria | <b>300.37</b><br>(197.66 to<br>451.35) | <b>90.69</b><br>(52.71 to<br>176.02) | <b>81.41</b><br>(47.89 to<br>158.42) | <b>169.56</b><br>(93.63 to<br>326.52) | <b>5.22</b><br>(3.65 to<br>7.32) | <b>1.82</b><br>(1.13 to<br>3.71) | <b>1.66</b><br>(1.06 to<br>3.37) | <b>2.92</b><br>(1.74 to<br>5.74) |
| Malaria                                 | 182.56<br>(101.65 to<br>305.61)        | 49.98<br>(23.72 to<br>98.71)         | 48.10<br>(23.45 to<br>93.88)         | 36.91<br>(34.97 to<br>181.71)         | 2.64<br>(1.63 to<br>4.10)        | 0.92<br>(0.47 to<br>1.83)        | 0.91<br>(0.48 to<br>1.80)        | 1.35<br>(0.63 to<br>2.72)        |
| Chagas disease                          | 0.00<br>(0.00 to<br>0.00)              | 0.00<br>(0.00 to<br>0.00)            | 0.00<br>(0.00 to<br>0.00)            | 0.00<br>(0.00 to<br>0.00)             | 0.00<br>(0.00 to<br>0.00)        | 0.00<br>(0.00 to<br>0.00)        | 0.00<br>(0.00 to<br>0.00)        | 0.00<br>(0.00 to<br>0.00)        |
| Leishmaniasis                           | 79.59<br>(43.80 to<br>137.17)          | 28.84<br>(16.39 to<br>58.72)         | 22.98<br>(13.04 to<br>47.19)         | 62.53<br>(34.57 to<br>121.09)         | 1.87<br>(1.05 to<br>3.17)        | 0.65<br>(0.38 to<br>1.47)        | 0.53<br>(0.31 to<br>1.23)        | 1.19<br>(0.71 to<br>2.47)        |
| African trypanosomiasis                 | 0.00<br>(0.00 to<br>0.00)              | 0.00<br>(0.00 to<br>0.00)            | 0.00<br>(0.00 to<br>0.00)            | 0.00<br>(0.00 to<br>0.00)             | 0.00<br>(0.00 to<br>0.00)        | 0.00<br>(0.00 to<br>0.00)        | 0.00<br>(0.00 to<br>0.00)        | 0.00<br>(0.00 to<br>0.00)        |
| Schistosomiasis                         | 10.12<br>(7.54 to<br>13.40)            | 4.09<br>(2.21 to<br>8.65)            | 3.74<br>(2.11 to<br>7.96)            | 5.38<br>(2.93 to<br>11.16)            | 0.27<br>(0.20 to<br>0.36)        | 0.13<br>(0.07 to<br>0.28)        | 0.12<br>(0.07 to<br>0.26)        | 0.16<br>(0.08 to<br>0.33)        |



|                                                       |                                                      |                                                    |                                                   |                                                     |                                                |                                                |                                                |                                                |
|-------------------------------------------------------|------------------------------------------------------|----------------------------------------------------|---------------------------------------------------|-----------------------------------------------------|------------------------------------------------|------------------------------------------------|------------------------------------------------|------------------------------------------------|
| Cysticercosis                                         | 0.31<br>(0.19 to<br>0.46)                            | 0.08<br>(0.04 to<br>0.16)                          | 0.07<br>(0.04 to<br>0.16)                         | 0.10<br>(0.05 to<br>0.21)                           | 0.01<br>(0.00 to<br>0.01)                      | 0.00<br>(0.00 to<br>0.00)                      | 0.00<br>(0.00 to<br>0.00)                      | 0.00<br>(0.00 to<br>0.00)                      |
| Cystic echinococcosis                                 | 0.00<br>(0.00 to<br>0.00)                            | 0.00<br>(0.00 to<br>0.00)                          | 0.00<br>(0.00 to<br>0.00)                         | 0.00<br>(0.00 to<br>0.00)                           | 0.00<br>(0.00 to<br>0.00)                      | 0.00<br>(0.00 to<br>0.00)                      | 0.00<br>(0.00 to<br>0.00)                      | 0.00<br>(0.00 to<br>0.00)                      |
| Dengue                                                | 0.01<br>(0.00 to<br>0.03)                            | 0.04<br>(0.01 to<br>0.10)                          | 0.04<br>(0.01 to<br>0.09)                         | 0.06<br>(0.02 to<br>0.14)                           | 0.00<br>(0.00 to<br>0.00)                      | 0.00<br>(0.00 to<br>0.00)                      | 0.00<br>(0.00 to<br>0.00)                      | 0.00<br>(0.00 to<br>0.00)                      |
| Yellow fever                                          | 26.20<br>(4.69 to<br>78.79)                          | 6.52<br>(0.83 to<br>23.44)                         | 5.39<br>(0.68 to<br>19.56)                        | 12.44<br>(1.66 to<br>46.75)                         | 0.41<br>(0.07 to<br>1.24)                      | 0.10<br>(0.01 to<br>0.38)                      | 0.09<br>(0.01 to<br>0.31)                      | 0.19<br>(0.02 to<br>0.71)                      |
| Rabies                                                | 0.07<br>(0.03 to<br>0.17)                            | 0.02<br>(0.01 to<br>0.03)                          | 0.01<br>(0.00 to<br>0.02)                         | 0.05<br>(0.02 to<br>0.11)                           | 0.00<br>(0.00 to<br>0.00)                      | 0.00<br>(0.00 to<br>0.00)                      | 0.00<br>(0.00 to<br>0.00)                      | 0.00<br>(0.00 to<br>0.00)                      |
| Intestinal nematode infections                        | 1.12<br>(0.56 to<br>1.99)                            | 0.92<br>(0.36 to<br>1.98)                          | 0.91<br>(0.36 to<br>1.96)                         | 1.70<br>(0.63 to<br>3.70)                           | 0.01<br>(0.01 to<br>0.02)                      | 0.01<br>(0.01 to<br>0.05)                      | 0.01<br>(0.01 to<br>0.03)                      | 0.02<br>(0.01 to<br>0.05)                      |
| Other neglected tropical diseases                     | 0.39<br>(0.28 to<br>0.72)                            | 0.20<br>(0.11 to<br>0.35)                          | 0.17<br>(0.10 to<br>0.29)                         | 0.40<br>(0.22 to<br>0.79)                           | 0.01<br>(0.00 to<br>0.01)                      | 0.00<br>(0.00 to<br>0.01)                      | 0.00<br>(0.00 to<br>0.00)                      | 0.01<br>(0.00 to<br>0.01)                      |
| <b>Maternal disorders</b>                             | <b>158.24</b><br><b>(124.93 to</b><br><b>194.22)</b> | <b>78.24</b><br><b>(50.03 to</b><br><b>114.28)</b> | <b>59.24</b><br><b>(36.79 to</b><br><b>87.33)</b> | <b>145.59</b><br><b>(88.32 to</b><br><b>216.34)</b> | <b>2.87</b><br><b>(2.27 to</b><br><b>3.56)</b> | <b>1.47</b><br><b>(0.93 to</b><br><b>2.13)</b> | <b>1.11</b><br><b>(0.69 to</b><br><b>1.62)</b> | <b>2.71</b><br><b>(1.62 to</b><br><b>4.08)</b> |
| Maternal hemorrhage                                   | 28.91<br>(20.00 to<br>39.47)                         | 15.27<br>(8.57 to<br>25.04)                        | 11.57<br>(6.56 to<br>19.17)                       | 27.53<br>(14.77 to<br>45.22)                        | 0.53<br>(0.37 to<br>0.72)                      | 0.29<br>(0.16 to<br>0.48)                      | 0.22<br>(0.12 to<br>0.37)                      | 0.52<br>(0.28 to<br>0.85)                      |
| Maternal sepsis and other maternal infections         | 37.55<br>(26.73 to<br>52.28)                         | 15.94<br>(9.42 to<br>25.78)                        | 12.06<br>(6.94 to<br>19.56)                       | 29.56<br>(16.62 to<br>48.06)                        | 0.69<br>(0.50 to<br>0.93)                      | 0.30<br>(0.18 to<br>0.49)                      | 0.23<br>(0.13 to<br>0.37)                      | 0.56<br>(0.31 to<br>0.91)                      |
| Maternal hypertensive disorders                       | 16.61<br>(11.24 to<br>23.75)                         | 8.82<br>(4.73 to<br>14.76)                         | 6.66<br>(3.53 to<br>11.32)                        | 16.20<br>(8.08 to<br>28.06)                         | 0.30<br>(0.20 to<br>0.42)                      | 0.16<br>(0.09 to<br>0.27)                      | 0.12<br>(0.06 to<br>0.21)                      | 0.30<br>(0.15 to<br>0.50)                      |
| Maternal obstructed labor and uterine rupture         | 2.20<br>(1.08 to<br>4.08)                            | 1.19<br>(0.51 to<br>2.41)                          | 0.88<br>(0.36 to<br>1.77)                         | 2.27<br>(0.94 to<br>4.61)                           | 0.04<br>(0.02 to<br>0.07)                      | 0.02<br>(0.01 to<br>0.05)                      | 0.02<br>(0.01 to<br>0.03)                      | 0.04<br>(0.02 to<br>0.09)                      |
| Maternal abortion, miscarriage, and ectopic pregnancy | 11.36<br>(7.47 to<br>16.18)                          | 5.30<br>(2.77 to<br>9.41)                          | 4.03<br>(2.07 to<br>7.18)                         | 9.81<br>(4.89 to<br>17.13)                          | 0.22<br>(0.14 to<br>0.32)                      | 0.11<br>(0.05 to<br>0.19)                      | 0.08<br>(0.04 to<br>0.14)                      | 0.19<br>(0.10 to<br>0.34)                      |
| Indirect maternal deaths                              | 30.47<br>(21.04 to<br>42.10)                         | 15.92<br>(8.31 to<br>25.34)                        | 12.08<br>(6.40 to<br>19.16)                       | 30.83<br>(15.93 to<br>49.34)                        | 0.54<br>(0.37 to<br>0.73)                      | 0.29<br>(0.15 to<br>0.45)                      | 0.22<br>(0.12 to<br>0.35)                      | 0.55<br>(0.29 to<br>0.88)                      |
| Late maternal deaths                                  | 3.06<br>(1.62 to<br>5.24)                            | 1.21<br>(0.56 to<br>2.53)                          | 0.92<br>(0.41 to<br>1.78)                         | 2.33<br>(1.02 to<br>4.54)                           | 0.05<br>(0.03 to<br>0.09)                      | 0.02<br>(0.01 to<br>0.04)                      | 0.02<br>(0.01 to<br>0.03)                      | 0.04<br>(0.02 to<br>0.08)                      |
| Maternal deaths aggravated by HIV/AIDS                | 0.14<br>(0.07 to<br>0.22)                            | 0.52<br>(0.18 to<br>1.19)                          | 0.18<br>(0.00 to<br>0.73)                         | 1.04<br>(0.40 to<br>2.34)                           | 0.00<br>(0.00 to<br>0.00)                      | 0.01<br>(0.00 to<br>0.02)                      | 0.00<br>(0.00 to<br>0.01)                      | 0.02<br>(0.01 to<br>0.05)                      |
| Other maternal disorders                              | 27.93<br>(18.92 to<br>38.20)                         | 14.06<br>(8.03 to<br>22.87)                        | 10.85<br>(6.11 to<br>17.76)                       | 26.01<br>(14.24 to<br>43.39)                        | 0.50<br>(0.34 to<br>0.69)                      | 0.26<br>(0.15 to<br>0.43)                      | 0.20<br>(0.11 to<br>0.33)                      | 0.48<br>(0.26 to<br>0.81)                      |

**Sudan**

| Cause                                                    | YLLs (in 1000s)                                          |                                                        |                                                        |                                                            | Deaths (in 1000s)                                 |                                                  |                                                 |                                                   |
|----------------------------------------------------------|----------------------------------------------------------|--------------------------------------------------------|--------------------------------------------------------|------------------------------------------------------------|---------------------------------------------------|--------------------------------------------------|-------------------------------------------------|---------------------------------------------------|
|                                                          | 2016                                                     | 2040 Forecast                                          | 2040 Better Scenario                                   | 2040 Worse Scenario                                        | 2016                                              | 2040 Forecast                                    | 2040 Better Scenario                            | 2040 Worse Scenario                               |
| <b>Neonatal disorders</b>                                | <b>1,631.21</b><br><b>(874.06 to</b><br><b>2,822.11)</b> | <b>880.73</b><br><b>(383.27 to</b><br><b>1,647.17)</b> | <b>669.04</b><br><b>(292.76 to</b><br><b>1,252.96)</b> | <b>2,328.58</b><br><b>(1,023.34 to</b><br><b>4,366.59)</b> | <b>18.86</b><br><b>(10.10 to</b><br><b>32.65)</b> | <b>10.18</b><br><b>(4.43 to</b><br><b>19.05)</b> | <b>7.74</b><br><b>(3.39 to</b><br><b>14.49)</b> | <b>26.92</b><br><b>(11.84 to</b><br><b>50.49)</b> |
| Neonatal preterm birth                                   | 1,096.96<br>(574.94 to<br>1,959.40)                      | 575.65<br>(247.74 to<br>1,072.07)                      | 407.13<br>(171.66 to<br>772.37)                        | 1,479.34<br>(634.85 to<br>2,774.42)                        | 12.68<br>(6.64 to<br>22.65)                       | 6.65<br>(2.87 to<br>12.40)                       | 4.71<br>(1.98 to<br>8.92)                       | 17.10<br>(7.34 to<br>32.08)                       |
| Neonatal encephalopathy due to birth asphyxia and trauma | 207.09<br>(89.60 to<br>415.41)                           | 110.67<br>(37.93 to<br>249.91)                         | 96.98<br>(32.82 to<br>221.67)                          | 294.45<br>(101.13 to<br>679.52)                            | 2.40<br>(1.04 to<br>4.81)                         | 1.28<br>(0.44 to<br>2.89)                        | 1.12<br>(0.38 to<br>2.57)                       | 3.41<br>(1.17 to<br>7.86)                         |

|                                                                         |                                           |                                           |                                           |                                            |                                     |                                     |                                     |                                     |
|-------------------------------------------------------------------------|-------------------------------------------|-------------------------------------------|-------------------------------------------|--------------------------------------------|-------------------------------------|-------------------------------------|-------------------------------------|-------------------------------------|
| Neonatal sepsis and other neonatal infections                           | 136.70<br>(55.24 to 280.24)               | 96.75<br>(34.88 to 206.91)                | 83.80<br>(29.86 to 175.09)                | 263.67<br>(91.09 to 559.29)                | 1.58<br>(0.64 to 3.24)              | 1.12<br>(0.40 to 2.39)              | 0.97<br>(0.35 to 2.02)              | 3.05<br>(1.05 to 6.47)              |
| Hemolytic disease and other neonatal jaundice                           | 18.69<br>(7.31 to 37.57)                  | 4.95<br>(1.48 to 11.55)                   | 4.08<br>(1.23 to 9.83)                    | 15.11<br>(4.51 to 36.34)                   | 0.22<br>(0.08 to 0.43)              | 0.06<br>(0.02 to 0.13)              | 0.05<br>(0.01 to 0.11)              | 0.17<br>(0.05 to 0.42)              |
| Other neonatal disorders                                                | 171.77<br>(75.45 to 342.39)               | 92.71<br>(32.73 to 206.52)                | 77.05<br>(26.40 to 173.80)                | 276.01<br>(91.56 to 603.13)                | 1.99<br>(0.87 to 3.96)              | 1.07<br>(0.38 to 2.39)              | 0.89<br>(0.31 to 2.01)              | 3.19<br>(1.06 to 6.97)              |
| <b>Nutritional deficiencies</b>                                         | <b>30.64</b><br>(17.52 to 51.23)          | <b>9.87</b><br>(5.91 to 16.81)            | <b>8.70</b><br>(5.29 to 14.92)            | <b>21.81</b><br>(11.27 to 41.76)           | <b>0.49</b><br>(0.32 to 0.73)       | <b>0.28</b><br>(0.19 to 0.40)       | <b>0.27</b><br>(0.18 to 0.38)       | <b>0.43</b><br>(0.27 to 0.69)       |
| Protein-energy malnutrition                                             | 27.43<br>(14.94 to 47.68)                 | 7.64<br>(4.15 to 13.98)                   | 6.69<br>(3.64 to 12.37)                   | 18.03<br>(7.96 to 36.20)                   | 0.42<br>(0.26 to 0.66)              | 0.22<br>(0.14 to 0.31)              | 0.21<br>(0.13 to 0.30)              | 0.34<br>(0.20 to 0.58)              |
| Iodine deficiency                                                       | 0.82<br>(0.05 to 3.72)                    | 0.56<br>(0.04 to 2.51)                    | 0.48<br>(0.04 to 2.09)                    | 1.24<br>(0.07 to 6.77)                     | 0.01<br>(0.00 to 0.05)              | 0.02<br>(0.00 to 0.05)              | 0.01<br>(0.00 to 0.05)              | 0.03<br>(0.00 to 0.10)              |
| Dietary iron deficiency                                                 | 0.78<br>(0.49 to 1.12)                    | 0.56<br>(0.34 to 0.86)                    | 0.52<br>(0.31 to 0.79)                    | 0.82<br>(0.48 to 1.28)                     | 0.01<br>(0.01 to 0.02)              | 0.01<br>(0.01 to 0.02)              | 0.01<br>(0.01 to 0.02)              | 0.01<br>(0.01 to 0.02)              |
| Other nutritional deficiencies                                          | 1.61<br>(0.97 to 2.69)                    | 1.11<br>(0.64 to 1.77)                    | 1.02<br>(0.58 to 1.61)                    | 1.72<br>(0.96 to 2.87)                     | 0.04<br>(0.02 to 0.06)              | 0.04<br>(0.02 to 0.07)              | 0.04<br>(0.02 to 0.08)              | 0.05<br>(0.03 to 0.09)              |
| <b>Other communicable, maternal, neonatal, and nutritional diseases</b> | <b>252.56</b><br>(110.98 to 503.15)       | <b>71.62</b><br>(35.96 to 145.22)         | <b>64.66</b><br>(32.30 to 126.62)         | <b>155.93</b><br>(69.07 to 332.46)         | <b>3.22</b><br>(1.57 to 6.18)       | <b>1.34</b><br>(0.74 to 2.30)       | <b>1.25</b><br>(0.68 to 2.11)       | <b>2.38</b><br>(1.21 to 4.52)       |
| Sexually transmitted infections excluding HIV                           | 208.83<br>(79.99 to 426.57)               | 41.92<br>(13.20 to 95.57)                 | 37.93<br>(12.08 to 86.51)                 | 102.05<br>(31.31 to 227.26)                | 2.45<br>(0.95 to 4.99)              | 0.50<br>(0.16 to 1.12)              | 0.45<br>(0.15 to 1.02)              | 1.20<br>(0.37 to 2.66)              |
| Syphilis                                                                | 208.43<br>(79.50 to 426.12)               | 41.58<br>(12.89 to 95.23)                 | 37.62<br>(11.80 to 86.16)                 | 101.65<br>(30.95 to 226.84)                | 2.44<br>(0.94 to 4.98)              | 0.49<br>(0.15 to 1.11)              | 0.44<br>(0.14 to 1.01)              | 1.19<br>(0.56 to 2.65)              |
| Chlamydial infection                                                    | 0.08<br>(0.05 to 0.12)                    | 0.07<br>(0.04 to 0.10)                    | 0.06<br>(0.03 to 0.09)                    | 0.08<br>(0.04 to 0.12)                     | 0.00<br>(0.00 to 0.00)              | 0.00<br>(0.00 to 0.00)              | 0.00<br>(0.00 to 0.00)              | 0.00<br>(0.00 to 0.00)              |
| Gonococcal infection                                                    | 0.21<br>(0.12 to 0.31)                    | 0.18<br>(0.10 to 0.26)                    | 0.17<br>(0.10 to 0.25)                    | 0.21<br>(0.12 to 0.32)                     | 0.00<br>(0.00 to 0.01)              | 0.00<br>(0.00 to 0.01)              | 0.00<br>(0.00 to 0.01)              | 0.01<br>(0.00 to 0.01)              |
| Other sexually transmitted infections                                   | 0.12<br>(0.07 to 0.18)                    | 0.10<br>(0.05 to 0.14)                    | 0.09<br>(0.05 to 0.14)                    | 0.12<br>(0.07 to 0.18)                     | 0.00<br>(0.00 to 0.00)              | 0.00<br>(0.00 to 0.00)              | 0.00<br>(0.00 to 0.00)              | 0.00<br>(0.00 to 0.00)              |
| Acute hepatitis                                                         | 10.12<br>(6.98 to 13.90)                  | 7.32<br>(4.93 to 9.99)                    | 6.74<br>(4.52 to 9.20)                    | 10.03<br>(6.59 to 14.10)                   | 0.21<br>(0.16 to 0.28)              | 0.21<br>(0.16 to 0.29)              | 0.20<br>(0.14 to 0.27)              | 0.26<br>(0.18 to 0.36)              |
| Acute hepatitis A                                                       | 0.84<br>(0.15 to 2.06)                    | 0.26<br>(0.08 to 0.68)                    | 0.24<br>(0.07 to 0.60)                    | 0.57<br>(0.14 to 1.57)                     | 0.01<br>(0.00 to 0.03)              | 0.00<br>(0.00 to 0.01)              | 0.00<br>(0.00 to 0.01)              | 0.01<br>(0.00 to 0.02)              |
| Acute hepatitis B                                                       | 6.22<br>(4.49 to 8.36)                    | 5.69<br>(3.80 to 8.03)                    | 5.21<br>(3.47 to 7.28)                    | 7.27<br>(4.74 to 10.27)                    | 0.15<br>(0.11 to 0.20)              | 0.17<br>(0.12 to 0.23)              | 0.16<br>(0.11 to 0.22)              | 0.21<br>(0.14 to 0.29)              |
| Acute hepatitis C                                                       | 0.15<br>(0.10 to 0.22)                    | 0.18<br>(0.11 to 0.28)                    | 0.17<br>(0.11 to 0.28)                    | 0.20<br>(0.12 to 0.32)                     | 0.00<br>(0.00 to 0.01)              | 0.00<br>(0.00 to 0.01)              | 0.01<br>(0.00 to 0.01)              | 0.01<br>(0.00 to 0.01)              |
| Acute hepatitis E                                                       | 2.92<br>(1.63 to 4.98)                    | 1.19<br>(0.68 to 1.97)                    | 1.11<br>(0.64 to 1.83)                    | 1.99<br>(1.06 to 3.47)                     | 0.04<br>(0.03 to 0.07)              | 0.03<br>(0.02 to 0.05)              | 0.03<br>(0.02 to 0.05)              | 0.04<br>(0.02 to 0.06)              |
| Other unspecified infectious diseases                                   | 33.60<br>(8.67 to 112.83)                 | 22.38<br>(8.12 to 50.52)                  | 19.99<br>(7.25 to 45.40)                  | 43.85<br>(13.96 to 120.73)                 | 0.56<br>(0.18 to 1.51)              | 0.64<br>(0.26 to 1.15)              | 0.60<br>(0.24 to 1.10)              | 0.92<br>(0.34 to 1.81)              |
| <b>Non-communicable diseases</b>                                        | <b>4,313.64</b><br>(3,494.52 to 5,424.75) | <b>5,632.62</b><br>(4,494.21 to 7,151.07) | <b>4,325.51</b><br>(3,524.76 to 5,387.63) | <b>8,962.32</b><br>(6,915.30 to 11,496.57) | <b>129.69</b><br>(116.45 to 144.29) | <b>240.13</b><br>(196.37 to 295.86) | <b>188.76</b><br>(160.32 to 232.78) | <b>329.30</b><br>(269.09 to 401.20) |
| <b>Sudan</b>                                                            |                                           |                                           |                                           |                                            |                                     |                                     |                                     |                                     |
| <b>YLLs (in 1000s)</b>                                                  |                                           |                                           |                                           |                                            | <b>Deaths (in 1000s)</b>            |                                     |                                     |                                     |

| Cause                                | 2016                                | 2040 Forecast                           | 2040 Better Scenario                  | 2040 Worse Scenario                     | 2016                             | 2040 Forecast                    | 2040 Better Scenario             | 2040 Worse Scenario              |
|--------------------------------------|-------------------------------------|-----------------------------------------|---------------------------------------|-----------------------------------------|----------------------------------|----------------------------------|----------------------------------|----------------------------------|
| <b>Neoplasms</b>                     | <b>525.08</b><br>(427.27 to 621.63) | <b>1,013.48</b><br>(787.89 to 1,247.27) | <b>938.28</b><br>(758.28 to 1,116.75) | <b>1,147.17</b><br>(856.36 to 1,465.71) | <b>16.90</b><br>(14.36 to 19.62) | <b>39.63</b><br>(32.19 to 48.68) | <b>38.05</b><br>(31.69 to 44.95) | <b>41.54</b><br>(31.87 to 52.89) |
| Lip and oral cavity cancer           | 4.30<br>(3.45 to 5.78)              | 8.38<br>(4.78 to 15.45)                 | 6.14<br>(3.88 to 10.22)               | 12.89<br>(6.63 to 25.89)                | 0.16<br>(0.13 to 0.21)           | 0.34<br>(0.20 to 0.60)           | 0.26<br>(0.17 to 0.43)           | 0.48<br>(0.25 to 0.93)           |
| Nasopharynx cancer                   | 3.61<br>(2.62 to 4.73)              | 7.40<br>(3.85 to 13.46)                 | 5.22<br>(2.99 to 8.71)                | 12.05<br>(5.66 to 23.14)                | 0.10<br>(0.08 to 0.13)           | 0.23<br>(0.12 to 0.41)           | 0.17<br>(0.10 to 0.27)           | 0.36<br>(0.18 to 0.65)           |
| Other pharynx cancer                 | 2.30<br>(1.67 to 3.37)              | 4.02<br>(2.42 to 6.60)                  | 3.52<br>(2.22 to 5.72)                | 5.09<br>(2.86 to 8.61)                  | 0.08<br>(0.06 to 0.11)           | 0.16<br>(0.10 to 0.25)           | 0.14<br>(0.09 to 0.23)           | 0.19<br>(0.11 to 0.32)           |
| Esophageal cancer                    | 8.56<br>(7.29 to 9.82)              | 14.50<br>(8.84 to 23.68)                | 11.53<br>(7.39 to 17.91)              | 20.85<br>(11.97 to 35.65)               | 0.35<br>(0.29 to 0.40)           | 0.65<br>(0.40 to 1.02)           | 0.54<br>(0.36 to 0.82)           | 0.87<br>(0.50 to 1.42)           |
| Stomach cancer                       | 35.44<br>(30.71 to 40.92)           | 48.15<br>(37.09 to 61.76)               | 44.29<br>(35.35 to 55.22)             | 53.16<br>(40.81 to 69.16)               | 1.35<br>(1.17 to 1.56)           | 2.10<br>(1.62 to 2.66)           | 2.01<br>(1.60 to 2.48)           | 2.19<br>(1.66 to 2.81)           |
| Colon and rectum cancer              | 38.87<br>(30.15 to 49.53)           | 92.02<br>(62.08 to 136.73)              | 91.38<br>(61.91 to 133.81)            | 93.95<br>(62.30 to 142.86)              | 1.44<br>(1.16 to 1.78)           | 3.98<br>(2.70 to 5.87)           | 4.11<br>(2.80 to 6.05)           | 3.82<br>(2.52 to 5.73)           |
| Liver cancer                         | 49.15<br>(22.33 to 67.34)           | 120.31<br>(50.26 to 189.79)             | 104.80<br>(45.75 to 156.77)           | 133.74<br>(54.19 to 218.05)             | 1.87<br>(0.94 to 2.52)           | 5.29<br>(2.41 to 8.21)           | 4.81<br>(2.26 to 7.08)           | 5.51<br>(2.45 to 8.71)           |
| Liver cancer due to hepatitis B      | 23.77<br>(10.42 to 34.61)           | 57.71<br>(23.26 to 95.83)               | 50.16<br>(21.55 to 78.99)             | 63.48<br>(25.02 to 109.79)              | 0.86<br>(0.41 to 1.26)           | 2.35<br>(1.02 to 3.87)           | 2.13<br>(0.95 to 3.31)           | 2.44<br>(1.04 to 4.08)           |
| Liver cancer due to hepatitis C      | 7.38<br>(3.63 to 11.09)             | 20.32<br>(9.26 to 34.99)                | 18.38<br>(8.58 to 30.64)              | 21.27<br>(9.48 to 37.43)                | 0.35<br>(0.18 to 0.53)           | 1.10<br>(0.53 to 1.86)           | 1.04<br>(0.52 to 1.70)           | 1.08<br>(0.52 to 1.86)           |
| Liver cancer due to alcohol use      | 4.54<br>(1.86 to 7.72)              | 11.91<br>(4.38 to 22.71)                | 9.74<br>(3.79 to 17.49)               | 14.33<br>(5.18 to 27.45)                | 0.20<br>(0.08 to 0.34)           | 0.56<br>(0.22 to 1.01)           | 0.48<br>(0.20 to 0.84)           | 0.63<br>(0.25 to 1.16)           |
| Liver cancer due to other causes     | 13.47<br>(4.78 to 21.48)            | 30.36<br>(10.37 to 53.28)               | 26.51<br>(9.36 to 44.13)              | 34.66<br>(11.44 to 61.96)               | 0.46<br>(0.18 to 0.73)           | 1.29<br>(0.47 to 2.33)           | 1.16<br>(0.45 to 2.00)           | 1.35<br>(0.48 to 2.45)           |
| Gallbladder and biliary tract cancer | 6.34<br>(4.86 to 8.35)              | 10.31<br>(7.84 to 13.36)                | 10.86<br>(8.35 to 14.09)              | 9.57<br>(7.15 to 12.57)                 | 0.27<br>(0.21 to 0.34)           | 0.50<br>(0.38 to 0.63)           | 0.55<br>(0.42 to 0.68)           | 0.44<br>(0.32 to 0.56)           |
| Pancreatic cancer                    | 13.07<br>(11.18 to 15.33)           | 34.52<br>(26.27 to 45.35)               | 34.99<br>(27.08 to 45.08)             | 33.01<br>(24.33 to 44.06)               | 0.56<br>(0.48 to 0.64)           | 1.63<br>(1.24 to 2.13)           | 1.72<br>(1.33 to 2.19)           | 1.48<br>(1.08 to 1.96)           |
| Larynx cancer                        | 5.26<br>(3.72 to 6.78)              | 9.69<br>(4.48 to 20.30)                 | 6.34<br>(3.26 to 12.24)               | 15.43<br>(6.51 to 31.48)                | 0.20<br>(0.15 to 0.25)           | 0.39<br>(0.19 to 0.78)           | 0.27<br>(0.15 to 0.50)           | 0.58<br>(0.26 to 1.18)           |
| Tracheal, bronchus, and lung cancer  | 49.07<br>(34.91 to 66.03)           | 112.36<br>(51.57 to 207.53)             | 71.29<br>(37.79 to 120.60)            | 159.20<br>(66.49 to 296.83)             | 1.90<br>(1.42 to 2.48)           | 4.66<br>(2.43 to 8.17)           | 3.15<br>(1.84 to 5.06)           | 6.26<br>(2.92 to 11.39)          |
| Malignant skin melanoma              | 1.44<br>(1.07 to 2.18)              | 3.21<br>(2.35 to 4.80)                  | 3.49<br>(2.55 to 5.19)                | 2.82<br>(2.08 to 4.24)                  | 0.05<br>(0.03 to 0.07)           | 0.12<br>(0.09 to 0.17)           | 0.14<br>(0.10 to 0.19)           | 0.10<br>(0.07 to 0.14)           |
| Non-melanoma skin cancer             | 1.76<br>(1.18 to 2.15)              | 3.68<br>(2.54 to 4.40)                  | 3.70<br>(2.60 to 4.47)                | 3.83<br>(2.61 to 4.65)                  | 0.07<br>(0.05 to 0.09)           | 0.18<br>(0.14 to 0.23)           | 0.20<br>(0.14 to 0.24)           | 0.18<br>(0.13 to 0.22)           |
| Breast cancer                        | 65.32<br>(40.33 to 98.13)           | 139.08<br>(84.24 to 211.67)             | 133.59<br>(84.12 to 199.11)           | 147.53<br>(84.20 to 239.06)             | 1.93<br>(1.27 to 2.85)           | 4.56<br>(2.94 to 6.88)           | 4.47<br>(3.00 to 6.55)           | 4.68<br>(2.85 to 7.44)           |
| Cervical cancer                      | 10.72<br>(5.91 to 14.48)            | 16.41<br>(9.70 to 24.25)                | 15.48<br>(9.46 to 23.18)              | 18.70<br>(10.69 to 27.49)               | 0.34<br>(0.20 to 0.49)           | 0.57<br>(0.36 to 0.88)           | 0.55<br>(0.36 to 0.86)           | 0.62<br>(0.38 to 0.95)           |
| Uterine cancer                       | 5.43<br>(4.00 to 6.71)              | 9.86<br>(7.42 to 12.48)                 | 9.36<br>(7.09 to 11.70)               | 11.10<br>(8.19 to 14.18)                | 0.20<br>(0.16 to 0.24)           | 0.41<br>(0.32 to 0.51)           | 0.40<br>(0.30 to 0.50)           | 0.44<br>(0.34 to 0.55)           |

|                                 |                                                            |                                                            |                                                          |                                                            |                                                   |                                                     |                                                    |                                                      |
|---------------------------------|------------------------------------------------------------|------------------------------------------------------------|----------------------------------------------------------|------------------------------------------------------------|---------------------------------------------------|-----------------------------------------------------|----------------------------------------------------|------------------------------------------------------|
| Ovarian cancer                  | 7.69<br>(5.87 to<br>11.00)                                 | 19.69<br>(14.04 to<br>29.52)                               | 20.37<br>(14.87 to<br>29.67)                             | 17.90<br>(12.50 to<br>26.85)                               | 0.27<br>(0.21 to<br>0.35)                         | 0.77<br>(0.57 to<br>1.08)                           | 0.81<br>(0.60 to<br>1.10)                          | 0.67<br>(0.49 to<br>0.96)                            |
| Prostate cancer                 | 10.13<br>(8.05 to<br>13.40)                                | 30.84<br>(23.23 to<br>42.62)                               | 34.32<br>(26.77 to<br>46.10)                             | 26.48<br>(19.55 to<br>36.93)                               | 0.63<br>(0.50 to<br>0.84)                         | 2.14<br>(1.54 to<br>2.94)                           | 2.48<br>(1.84 to<br>3.34)                          | 1.73<br>(1.21 to<br>2.41)                            |
| Testicular cancer               | 1.70<br>(1.26 to<br>2.26)                                  | 2.12<br>(1.52 to<br>2.86)                                  | 2.05<br>(1.47 to<br>2.79)                                | 2.35<br>(1.68 to<br>3.19)                                  | 0.03<br>(0.03 to<br>0.05)                         | 0.05<br>(0.03 to<br>0.06)                           | 0.05<br>(0.03 to<br>0.06)                          | 0.05<br>(0.04 to<br>0.07)                            |
| <b>Sudan</b>                    |                                                            |                                                            |                                                          |                                                            |                                                   |                                                     |                                                    |                                                      |
| Cause                           | YLLs (in 1000s)                                            |                                                            |                                                          |                                                            | Deaths (in 1000s)                                 |                                                     |                                                    |                                                      |
|                                 | 2016                                                       | 2040 Forecast                                              | 2040 Better Scenario                                     | 2040 Worse Scenario                                        | 2016                                              | 2040 Forecast                                       | 2040 Better Scenario                               | 2040 Worse Scenario                                  |
| Kidney cancer                   | 5.61<br>(4.58 to<br>7.35)                                  | 11.93<br>(9.43 to<br>15.75)                                | 12.54<br>(10.03 to<br>16.22)                             | 11.85<br>(9.17 to<br>16.26)                                | 0.16<br>(0.13 to<br>0.20)                         | 0.45<br>(0.34 to<br>0.61)                           | 0.49<br>(0.37 to<br>0.65)                          | 0.40<br>(0.30 to<br>0.55)                            |
| Bladder cancer                  | 8.26<br>(6.77 to<br>10.09)                                 | 17.79<br>(12.45 to<br>25.06)                               | 17.20<br>(12.53 to<br>23.59)                             | 18.53<br>(12.43 to<br>26.89)                               | 0.40<br>(0.34 to<br>0.47)                         | 0.97<br>(0.71 to<br>1.34)                           | 0.99<br>(0.75 to<br>1.32)                          | 0.95<br>(0.66 to<br>1.35)                            |
| Brain and nervous system cancer | 35.28<br>(28.62 to<br>44.12)                               | 61.06<br>(50.13 to<br>71.61)                               | 63.42<br>(51.84 to<br>74.07)                             | 67.37<br>(54.22 to<br>83.47)                               | 0.77<br>(0.65 to<br>0.89)                         | 1.75<br>(1.41 to<br>2.05)                           | 1.87<br>(1.49 to<br>2.20)                          | 1.71<br>(1.39 to<br>1.98)                            |
| Thyroid cancer                  | 3.57<br>(2.71 to<br>4.54)                                  | 6.79<br>(4.62 to<br>9.93)                                  | 6.16<br>(4.30 to<br>8.64)                                | 7.72<br>(5.01 to<br>11.65)                                 | 0.14<br>(0.11 to<br>0.17)                         | 0.30<br>(0.21 to<br>0.43)                           | 0.28<br>(0.19 to<br>0.39)                          | 0.32<br>(0.22 to<br>0.48)                            |
| Mesothelioma                    | 0.98<br>(0.73 to<br>1.42)                                  | 1.69<br>(1.26 to<br>2.39)                                  | 1.70<br>(1.27 to<br>2.42)                                | 1.73<br>(1.29 to<br>2.44)                                  | 0.03<br>(0.02 to<br>0.04)                         | 0.06<br>(0.05 to<br>0.08)                           | 0.06<br>(0.05 to<br>0.08)                          | 0.06<br>(0.04 to<br>0.08)                            |
| Hodgkin lymphoma                | 8.70<br>(6.28 to<br>13.81)                                 | 8.44<br>(5.68 to<br>13.95)                                 | 7.65<br>(5.11 to<br>12.52)                               | 11.18<br>(7.43 to<br>18.52)                                | 0.19<br>(0.14 to<br>0.31)                         | 0.22<br>(0.14 to<br>0.37)                           | 0.20<br>(0.13 to<br>0.34)                          | 0.27<br>(0.18 to<br>0.46)                            |
| Non-Hodgkin lymphoma            | 23.50<br>(19.22 to<br>30.84)                               | 47.44<br>(36.90 to<br>62.37)                               | 48.29<br>(38.14 to<br>62.43)                             | 47.77<br>(36.18 to<br>63.83)                               | 0.65<br>(0.56 to<br>0.81)                         | 1.67<br>(1.32 to<br>2.21)                           | 1.76<br>(1.41 to<br>2.27)                          | 1.54<br>(1.18 to<br>2.06)                            |
| Multiple myeloma                | 4.97<br>(3.93 to<br>6.82)                                  | 13.79<br>(9.87 to<br>20.12)                                | 14.16<br>(10.25 to<br>20.42)                             | 12.66<br>(8.93 to<br>18.80)                                | 0.19<br>(0.15 to<br>0.26)                         | 0.59<br>(0.42 to<br>0.85)                           | 0.62<br>(0.45 to<br>0.89)                          | 0.52<br>(0.36 to<br>0.76)                            |
| Leukemia                        | 75.90<br>(53.60 to<br>107.54)                              | 94.64<br>(66.33 to<br>129.58)                              | 89.54<br>(64.22 to<br>120.89)                            | 118.19<br>(78.81 to<br>168.37)                             | 1.64<br>(1.26 to<br>2.10)                         | 2.87<br>(2.14 to<br>3.73)                           | 2.79<br>(2.13 to<br>3.53)                          | 3.17<br>(2.30 to<br>4.25)                            |
| Acute lymphoid leukemia         | 14.07<br>(8.93 to<br>24.20)                                | 15.15<br>(9.98 to<br>25.84)                                | 14.97<br>(9.96 to<br>25.56)                              | 19.70<br>(12.23 to<br>35.77)                               | 0.22<br>(0.15 to<br>0.36)                         | 0.29<br>(0.20 to<br>0.46)                           | 0.29<br>(0.20 to<br>0.45)                          | 0.35<br>(0.23 to<br>0.58)                            |
| Chronic lymphoid leukemia       | 1.34<br>(0.93 to<br>2.15)                                  | 2.55<br>(1.63 to<br>4.08)                                  | 2.44<br>(1.60 to<br>3.80)                                | 2.69<br>(1.65 to<br>4.48)                                  | 0.05<br>(0.03 to<br>0.07)                         | 0.10<br>(0.07 to<br>0.15)                           | 0.10<br>(0.07 to<br>0.15)                          | 0.10<br>(0.07 to<br>0.15)                            |
| Acute myeloid leukemia          | 11.25<br>(8.03 to<br>19.33)                                | 19.33<br>(13.80 to<br>30.40)                               | 19.45<br>(14.13 to<br>29.95)                             | 21.69<br>(15.12 to<br>36.54)                               | 0.22<br>(0.17 to<br>0.35)                         | 0.51<br>(0.37 to<br>0.77)                           | 0.52<br>(0.38 to<br>0.76)                          | 0.51<br>(0.36 to<br>0.80)                            |
| Chronic myeloid leukemia        | 4.25<br>(2.69 to<br>5.87)                                  | 5.38<br>(3.20 to<br>7.83)                                  | 5.04<br>(3.00 to<br>7.18)                                | 5.78<br>(3.39 to<br>8.73)                                  | 0.13<br>(0.08 to<br>0.17)                         | 0.19<br>(0.11 to<br>0.27)                           | 0.19<br>(0.11 to<br>0.26)                          | 0.19<br>(0.12 to<br>0.28)                            |
| Other leukemia                  | 44.99<br>(27.93 to<br>63.85)                               | 52.03<br>(33.63 to<br>72.57)                               | 47.65<br>(31.43 to<br>66.41)                             | 68.33<br>(41.91 to<br>100.76)                              | 1.02<br>(0.73 to<br>1.32)                         | 1.77<br>(1.24 to<br>2.37)                           | 1.69<br>(1.21 to<br>2.23)                          | 2.02<br>(1.36 to<br>2.79)                            |
| Other neoplasms                 | 38.17<br>(30.32 to<br>53.26)                               | 63.34<br>(51.92 to<br>82.26)                               | 64.90<br>(53.47 to<br>84.29)                             | 70.51<br>(56.46 to<br>97.00)                               | 0.92<br>(0.78 to<br>1.17)                         | 2.02<br>(1.70 to<br>2.44)                           | 2.15<br>(1.82 to<br>2.59)                          | 1.97<br>(1.63 to<br>2.44)                            |
| <b>Cardiovascular diseases</b>  | <b>1,629.54</b><br><b>(1,461.79 to</b><br><b>1,792.80)</b> | <b>2,165.76</b><br><b>(1,396.90 to</b><br><b>3,313.76)</b> | <b>1,248.35</b><br><b>(852.09 to</b><br><b>1,854.47)</b> | <b>3,836.78</b><br><b>(2,519.66 to</b><br><b>5,624.34)</b> | <b>65.57</b><br><b>(59.77 to</b><br><b>71.27)</b> | <b>108.90</b><br><b>(74.02 to</b><br><b>162.23)</b> | <b>69.61</b><br><b>(48.73 to</b><br><b>109.04)</b> | <b>172.02</b><br><b>(116.17 to</b><br><b>246.30)</b> |
| Rheumatic heart disease         | 51.45<br>(31.69 to<br>84.56)                               | 26.29<br>(14.52 to<br>48.47)                               | 22.31<br>(12.49 to<br>40.24)                             | 39.60<br>(21.37 to<br>73.56)                               | 1.10<br>(0.69 to<br>1.84)                         | 0.78<br>(0.44 to<br>1.41)                           | 0.68<br>(0.40 to<br>1.20)                          | 1.04<br>(0.59 to<br>1.87)                            |

|                                               |                                                      |                                                      |                                                      |                                                      |                                                |                                                 |                                                |                                                  |
|-----------------------------------------------|------------------------------------------------------|------------------------------------------------------|------------------------------------------------------|------------------------------------------------------|------------------------------------------------|-------------------------------------------------|------------------------------------------------|--------------------------------------------------|
| Ischemic heart disease                        | 981.31<br>(862.64 to<br>1,095.73)                    | 1,413.49<br>(782.49 to<br>2,477.89)                  | 746.31<br>(430.95 to<br>1,318.66)                    | 2,566.37<br>(1,410.13 to<br>4,270.85)                | 42.03<br>(37.51 to<br>46.68)                   | 70.64<br>(40.07 to<br>123.83)                   | 41.71<br>(24.67 to<br>75.69)                   | 116.01<br>(67.82 to<br>192.76)                   |
| Stroke                                        | 420.46<br>(347.35 to<br>502.37)                      | 459.34<br>(265.29 to<br>809.58)                      | 254.08<br>(155.09 to<br>480.41)                      | 875.43<br>(509.60 to<br>1,440.92)                    | 16.57<br>(14.06 to<br>19.35)                   | 24.82<br>(14.03 to<br>55.25)                    | 15.77<br>(9.22 to<br>37.10)                    | 40.28<br>(23.23 to<br>73.06)                     |
| Ischemic stroke                               | 165.47<br>(129.81 to<br>201.72)                      | 224.83<br>(112.26 to<br>530.74)                      | 135.88<br>(70.62 to<br>343.09)                       | 358.97<br>(179.56 to<br>766.25)                      | 8.73<br>(7.05 to<br>10.41)                     | 14.93<br>(7.04 to<br>41.19)                     | 10.28<br>(4.99 to<br>29.63)                    | 21.02<br>(10.13 to<br>53.23)                     |
| Intracerebral hemorrhage                      | 254.99<br>(206.15 to<br>314.10)                      | 234.51<br>(122.68 to<br>432.22)                      | 118.20<br>(68.57 to<br>198.75)                       | 516.46<br>(269.53 to<br>919.83)                      | 7.84<br>(6.37 to<br>9.26)                      | 7.84<br>(5.34 to<br>17.34)                      | 9.89<br>(3.24 to<br>9.09)                      | 19.27<br>(10.23 to<br>34.58)                     |
| Hypertensive heart disease                    | 36.34<br>(19.01 to<br>55.52)                         | 61.39<br>(27.61 to<br>128.37)                        | 43.39<br>(21.64 to<br>77.99)                         | 94.30<br>(38.56 to<br>202.28)                        | 1.56<br>(0.92 to<br>2.32)                      | 3.21<br>(1.46 to<br>6.98)                       | 2.44<br>(1.26 to<br>4.55)                      | 4.49<br>(1.92 to<br>9.85)                        |
| Cardiomyopathy and myocarditis                | 33.28<br>(21.94 to<br>49.00)                         | 38.61<br>(26.14 to<br>56.14)                         | 36.94<br>(24.98 to<br>52.96)                         | 48.92<br>(32.23 to<br>73.91)                         | 0.72<br>(0.54 to<br>0.94)                      | 1.27<br>(0.81 to<br>1.85)                       | 1.27<br>(0.81 to<br>1.82)                      | 1.35<br>(0.89 to<br>1.96)                        |
| Myocarditis                                   | 8.47<br>(4.10 to<br>17.63)                           | 6.13<br>(3.53 to<br>11.32)                           | 5.86<br>(3.43 to<br>10.64)                           | 9.25<br>(4.68 to<br>18.28)                           | 0.13<br>(0.08 to<br>0.25)                      | 0.14<br>(0.09 to<br>0.21)                       | 0.13<br>(0.09 to<br>0.20)                      | 0.17<br>(0.11 to<br>0.29)                        |
| <b>Sudan</b>                                  |                                                      |                                                      |                                                      |                                                      |                                                |                                                 |                                                |                                                  |
| Cause                                         | YLLs (in 1000s)                                      |                                                      |                                                      |                                                      | Deaths (in 1000s)                              |                                                 |                                                |                                                  |
|                                               | 2016                                                 | 2040 Forecast                                        | 2040 Better Scenario                                 | 2040 Worse Scenario                                  | 2016                                           | 2040 Forecast                                   | 2040 Better Scenario                           | 2040 Worse Scenario                              |
| Alcoholic cardiomyopathy                      | 2.53<br>(1.36 to<br>3.97)                            | 3.73<br>(2.05 to<br>6.05)                            | 3.42<br>(1.89 to<br>5.51)                            | 4.61<br>(2.45 to<br>7.54)                            | 0.09<br>(0.05 to<br>0.14)                      | 0.15<br>(0.08 to<br>0.26)                       | 0.14<br>(0.08 to<br>0.25)                      | 0.17<br>(0.09 to<br>0.30)                        |
| Other cardiomyopathy                          | 22.28<br>(14.65 to<br>33.48)                         | 28.75<br>(18.10 to<br>43.77)                         | 27.66<br>(17.82 to<br>41.17)                         | 35.07<br>(21.67 to<br>53.92)                         | 0.50<br>(0.38 to<br>0.67)                      | 0.98<br>(0.60 to<br>1.50)                       | 0.99<br>(0.60 to<br>1.48)                      | 1.00<br>(0.62 to<br>1.51)                        |
| Atrial fibrillation and flutter               | 5.81<br>(2.87 to<br>5.04)                            | 11.01<br>(7.52 to<br>14.96)                          | 10.96<br>(7.70 to<br>14.83)                          | 10.39<br>(6.90 to<br>14.33)                          | 0.32<br>(0.24 to<br>0.42)                      | 1.04<br>(0.65 to<br>1.46)                       | 1.10<br>(0.72 to<br>1.53)                      | 0.90<br>(0.53 to<br>1.30)                        |
| Aortic aneurysm                               | 5.49<br>(3.81 to<br>7.58)                            | 10.14<br>(6.83 to<br>14.84)                          | 9.18<br>(6.50 to<br>13.02)                           | 10.14<br>(6.60 to<br>14.88)                          | 0.22<br>(0.17 to<br>0.29)                      | 0.48<br>(0.34 to<br>0.69)                       | 0.47<br>(0.34 to<br>0.67)                      | 0.44<br>(0.31 to<br>0.65)                        |
| Peripheral artery disease                     | 0.17<br>(0.09 to<br>0.39)                            | 0.75<br>(0.36 to<br>1.54)                            | 0.75<br>(0.38 to<br>1.51)                            | 0.65<br>(0.31 to<br>1.36)                            | 0.01<br>(0.01 to<br>0.03)                      | 0.06<br>(0.03 to<br>0.12)                       | 0.07<br>(0.03 to<br>0.14)                      | 0.05<br>(0.02 to<br>0.10)                        |
| Endocarditis                                  | 12.94<br>(8.71 to<br>18.01)                          | 20.27<br>(13.48 to<br>28.77)                         | 19.09<br>(12.91 to<br>26.72)                         | 24.64<br>(16.16 to<br>35.78)                         | 0.38<br>(0.28 to<br>0.50)                      | 0.86<br>(0.56 to<br>1.35)                       | 0.86<br>(0.57 to<br>1.31)                      | 0.89<br>(0.58 to<br>1.39)                        |
| Other cardiovascular and circulatory diseases | 84.27<br>(51.76 to<br>126.36)                        | 124.47<br>(73.60 to<br>199.28)                       | 105.35<br>(64.85 to<br>163.46)                       | 166.34<br>(95.60 to<br>264.42)                       | 2.65<br>(1.64 to<br>4.02)                      | 5.75<br>(3.31 to<br>9.70)                       | 5.24<br>(3.05 to<br>8.58)                      | 6.57<br>(3.68 to<br>10.91)                       |
| <b>Chronic respiratory diseases</b>           | <b>179.58</b><br><b>(146.16 to</b><br><b>215.77)</b> | <b>192.67</b><br><b>(134.68 to</b><br><b>272.09)</b> | <b>141.68</b><br><b>(104.84 to</b><br><b>189.24)</b> | <b>298.08</b><br><b>(196.14 to</b><br><b>447.92)</b> | <b>7.06</b><br><b>(5.97 to</b><br><b>8.84)</b> | <b>9.49</b><br><b>(6.51 to</b><br><b>13.52)</b> | <b>7.39</b><br><b>(5.35 to</b><br><b>9.93)</b> | <b>13.45</b><br><b>(8.53 to</b><br><b>20.39)</b> |
| Chronic obstructive pulmonary disease         | 97.54<br>(75.99 to<br>125.46)                        | 117.21<br>(69.09 to<br>190.06)                       | 75.83<br>(48.55 to<br>116.73)                        | 201.96<br>(110.19 to<br>341.45)                      | 4.54<br>(3.60 to<br>5.95)                      | 6.21<br>(3.57 to<br>10.10)                      | 4.33<br>(2.72 to<br>6.58)                      | 9.81<br>(5.27 to<br>16.71)                       |
| Pneumoconiosis                                | 0.40<br>(0.27 to<br>0.67)                            | 0.48<br>(0.32 to<br>0.75)                            | 0.47<br>(0.32 to<br>0.74)                            | 0.51<br>(0.34 to<br>0.79)                            | 0.02<br>(0.01 to<br>0.03)                      | 0.03<br>(0.02 to<br>0.04)                       | 0.03<br>(0.02 to<br>0.04)                      | 0.03<br>(0.02 to<br>0.05)                        |
| Silicosis                                     | 0.06<br>(0.03 to<br>0.16)                            | 0.06<br>(0.03 to<br>0.15)                            | 0.06<br>(0.03 to<br>0.15)                            | 0.07<br>(0.03 to<br>0.16)                            | 0.00<br>(0.00 to<br>0.01)                      | 0.00<br>(0.00 to<br>0.01)                       | 0.00<br>(0.00 to<br>0.01)                      | 0.00<br>(0.00 to<br>0.01)                        |
| Asbestosis                                    | 0.09<br>(0.05 to<br>0.14)                            | 0.12<br>(0.07 to<br>0.19)                            | 0.12<br>(0.07 to<br>0.19)                            | 0.12<br>(0.08 to<br>0.19)                            | 0.00<br>(0.00 to<br>0.00)                      | 0.00<br>(0.00 to<br>0.01)                       | 0.01<br>(0.00 to<br>0.01)                      | 0.00<br>(0.00 to<br>0.01)                        |
| Coal workers pneumoconiosis                   | 0.03<br>(0.01 to<br>0.06)                            | 0.04<br>(0.01 to<br>0.07)                            | 0.03<br>(0.01 to<br>0.06)                            | 0.05<br>(0.02 to<br>0.10)                            | 0.00<br>(0.00 to<br>0.00)                      | 0.00<br>(0.00 to<br>0.00)                       | 0.00<br>(0.00 to<br>0.00)                      | 0.00<br>(0.00 to<br>0.01)                        |

|                                                                |                                         |                                          |                                          |                                          |                                    |                                     |                                     |                                     |
|----------------------------------------------------------------|-----------------------------------------|------------------------------------------|------------------------------------------|------------------------------------------|------------------------------------|-------------------------------------|-------------------------------------|-------------------------------------|
| Other pneumoconiosis                                           | 0.22<br>(0.14 to<br>0.34)               | 0.26<br>(0.16 to<br>0.41)                | 0.25<br>(0.15 to<br>0.40)                | 0.27<br>(0.16 to<br>0.42)                | 0.01<br>(0.01 to<br>0.02)          | 0.02<br>(0.01 to<br>0.03)           | 0.02<br>(0.01 to<br>0.03)           | 0.02<br>(0.01 to<br>0.03)           |
| Asthma                                                         | 67.32<br>(46.18 to<br>90.39)            | 48.39<br>(29.38 to<br>74.53)             | 37.49<br>(23.28 to<br>56.37)             | 69.01<br>(40.25 to<br>107.93)            | 2.01<br>(1.47 to<br>2.75)          | 1.98<br>(1.20 to<br>3.18)           | 1.61<br>(1.00 to<br>2.56)           | 2.50<br>(1.46 to<br>4.04)           |
| Interstitial lung disease and pulmonary sarcoidosis            | 6.95<br>(3.14 to<br>12.18)              | 17.71<br>(8.48 to<br>32.02)              | 19.50<br>(9.58 to<br>34.72)              | 15.21<br>(6.89 to<br>27.65)              | 0.31<br>(0.14 to<br>0.61)          | 0.96<br>(0.46 to<br>2.04)           | 1.10<br>(0.54 to<br>2.25)           | 0.76<br>(0.34 to<br>1.64)           |
| Other chronic respiratory diseases                             | 7.37<br>(3.37 to<br>13.93)              | 8.87<br>(4.44 to<br>16.00)               | 8.39<br>(4.39 to<br>14.84)               | 11.39<br>(5.48 to<br>21.25)              | 0.19<br>(0.10 to<br>0.33)          | 0.32<br>(0.17 to<br>0.56)           | 0.32<br>(0.18 to<br>0.55)           | 0.35<br>(0.18 to<br>0.65)           |
| <b>Cirrhosis and other chronic liver diseases</b>              | <b>118.71<br/>(64.69 to<br/>237.53)</b> | <b>222.54<br/>(122.30 to<br/>425.05)</b> | <b>215.06<br/>(120.39 to<br/>396.73)</b> | <b>250.68<br/>(135.99 to<br/>495.37)</b> | <b>3.78<br/>(2.14 to<br/>7.47)</b> | <b>8.53<br/>(4.83 to<br/>16.44)</b> | <b>8.53<br/>(4.91 to<br/>15.90)</b> | <b>8.95<br/>(4.94 to<br/>17.77)</b> |
| Cirrhosis and other chronic liver diseases due to hepatitis B  | 48.37<br>(25.32 to<br>93.64)            | 103.23<br>(54.49 to<br>197.53)           | 100.84<br>(53.33 to<br>183.50)           | 110.02<br>(56.58 to<br>218.04)           | 1.75<br>(0.95 to<br>3.32)          | 4.16<br>(2.26 to<br>8.26)           | 4.19<br>(2.32 to<br>7.91)           | 4.23<br>(2.23 to<br>8.74)           |
| Cirrhosis and other chronic liver diseases due to hepatitis C  | 24.08<br>(12.59 to<br>46.21)            | 53.32<br>(27.95 to<br>106.83)            | 51.79<br>(27.82 to<br>98.89)             | 57.32<br>(29.96 to<br>119.79)            | 0.85<br>(0.45 to<br>1.65)          | 2.07<br>(1.10 to<br>4.09)           | 2.07<br>(1.12 to<br>3.94)           | 2.13<br>(1.11 to<br>4.02)           |
| Cirrhosis and other chronic liver diseases due to alcohol use  | 7.49<br>(4.07 to<br>15.88)              | 15.11<br>(8.23 to<br>30.08)              | 13.50<br>(7.48 to<br>25.64)              | 18.92<br>(10.08 to<br>37.39)             | 0.28<br>(0.16 to<br>0.55)          | 0.62<br>(0.35 to<br>1.19)           | 0.58<br>(0.33 to<br>1.06)           | 0.74<br>(0.41 to<br>1.45)           |
| Cirrhosis and other chronic liver diseases due to other causes | 38.77<br>(20.54 to<br>82.85)            | 50.89<br>(28.02 to<br>92.18)             | 48.94<br>(26.77 to<br>86.57)             | 64.41<br>(34.39 to<br>128.16)            | 0.90<br>(0.52 to<br>1.56)          | 1.68<br>(0.96 to<br>2.73)           | 1.68<br>(0.96 to<br>2.68)           | 1.84<br>(1.03 to<br>3.00)           |
| <b>Digestive diseases</b>                                      | <b>89.18<br/>(61.54 to<br/>122.46)</b>  | <b>97.42<br/>(70.90 to<br/>140.93)</b>   | <b>89.32<br/>(65.07 to<br/>130.08)</b>   | <b>129.45<br/>(89.85 to<br/>181.30)</b>  | <b>2.72<br/>(2.11 to<br/>3.95)</b> | <b>4.45<br/>(3.09 to<br/>7.25)</b>  | <b>4.30<br/>(3.04 to<br/>7.07)</b>  | <b>5.01<br/>(3.40 to<br/>8.04)</b>  |
| Peptic ulcer disease                                           | 22.06<br>(14.66 to<br>36.30)            | 18.04<br>(11.18 to<br>33.14)             | 15.56<br>(9.43 to<br>28.82)              | 24.23<br>(15.05 to<br>43.52)             | 0.80<br>(0.54 to<br>1.36)          | 0.89<br>(0.53 to<br>1.66)           | 0.81<br>(0.48 to<br>1.53)           | 1.07<br>(0.64 to<br>1.99)           |

| Sudan                                      |                              |                              |                              |                              |                           |                           |                           |                           |
|--------------------------------------------|------------------------------|------------------------------|------------------------------|------------------------------|---------------------------|---------------------------|---------------------------|---------------------------|
| Cause                                      | YLLs (in 1000s)              |                              |                              |                              | Deaths (in 1000s)         |                           |                           |                           |
|                                            | 2016                         | 2040 Forecast                | 2040 Better Scenario         | 2040 Worse Scenario          | 2016                      | 2040 Forecast             | 2040 Better Scenario      | 2040 Worse Scenario       |
| Gastritis and duodenitis                   | 0.61<br>(0.32 to<br>0.99)    | 0.85<br>(0.48 to<br>1.46)    | 0.82<br>(0.46 to<br>1.44)    | 1.03<br>(0.55 to<br>1.68)    | 0.02<br>(0.01 to<br>0.03) | 0.04<br>(0.02 to<br>0.07) | 0.04<br>(0.02 to<br>0.08) | 0.04<br>(0.02 to<br>0.07) |
| Appendicitis                               | 10.66<br>(5.02 to<br>19.96)  | 7.71<br>(4.30 to<br>13.94)   | 7.06<br>(3.88 to<br>13.04)   | 11.27<br>(5.88 to<br>19.91)  | 0.23<br>(0.12 to<br>0.41) | 0.27<br>(0.15 to<br>0.61) | 0.26<br>(0.14 to<br>0.60) | 0.33<br>(0.18 to<br>0.69) |
| Paralytic ileus and intestinal obstruction | 21.09<br>(11.19 to<br>40.06) | 22.36<br>(13.85 to<br>36.53) | 22.29<br>(13.91 to<br>36.45) | 31.68<br>(17.00 to<br>60.83) | 0.51<br>(0.33 to<br>0.78) | 0.94<br>(0.60 to<br>1.47) | 1.00<br>(0.65 to<br>1.57) | 0.98<br>(0.61 to<br>1.51) |
| Inguinal, femoral, and abdominal hernia    | 1.83<br>(1.18 to<br>2.94)    | 2.03<br>(1.20 to<br>3.70)    | 2.02<br>(1.17 to<br>3.74)    | 2.26<br>(1.37 to<br>3.89)    | 0.08<br>(0.05 to<br>0.15) | 0.12<br>(0.06 to<br>0.25) | 0.13<br>(0.06 to<br>0.27) | 0.12<br>(0.06 to<br>0.24) |
| Inflammatory bowel disease                 | 2.57<br>(1.23 to<br>5.67)    | 3.40<br>(1.95 to<br>6.39)    | 3.42<br>(1.99 to<br>6.33)    | 3.75<br>(2.02 to<br>7.78)    | 0.07<br>(0.04 to<br>0.12) | 0.12<br>(0.07 to<br>0.20) | 0.12<br>(0.08 to<br>0.20) | 0.12<br>(0.07 to<br>0.21) |
| Vascular intestinal disorders              | 4.96<br>(3.52 to<br>7.19)    | 9.10<br>(6.67 to<br>13.24)   | 9.07<br>(6.67 to<br>12.99)   | 9.62<br>(6.84 to<br>14.20)   | 0.20<br>(0.15 to<br>0.30) | 0.47<br>(0.34 to<br>0.71) | 0.50<br>(0.35 to<br>0.74) | 0.46<br>(0.32 to<br>0.70) |
| Gallbladder and biliary diseases           | 6.43<br>(4.44 to<br>11.06)   | 10.92<br>(5.22 to<br>24.44)  | 8.50<br>(4.11 to<br>19.61)   | 14.55<br>(6.81 to<br>31.27)  | 0.27<br>(0.17 to<br>0.55) | 0.62<br>(0.26 to<br>1.55) | 0.52<br>(0.23 to<br>1.32) | 0.74<br>(0.31 to<br>1.85) |
| Pancreatitis                               | 5.67<br>(3.72 to<br>8.42)    | 9.63<br>(4.52 to<br>19.56)   | 8.00<br>(4.01 to<br>15.11)   | 13.35<br>(5.87 to<br>28.33)  | 0.19<br>(0.12 to<br>0.31) | 0.39<br>(0.18 to<br>0.86) | 0.34<br>(0.17 to<br>0.73) | 0.50<br>(0.21 to<br>1.12) |
| Other digestive diseases                   | 13.30<br>(7.96 to<br>20.38)  | 13.37<br>(8.61 to<br>21.96)  | 12.59<br>(8.13 to<br>21.40)  | 17.71<br>(11.02 to<br>27.75) | 0.36<br>(0.24 to<br>0.60) | 0.59<br>(0.36 to<br>1.19) | 0.59<br>(0.36 to<br>1.20) | 0.65<br>(0.39 to<br>1.25) |

|                                                            |                                     |                                       |                                       |                                         |                                  |                                  |                                  |                                   |
|------------------------------------------------------------|-------------------------------------|---------------------------------------|---------------------------------------|-----------------------------------------|----------------------------------|----------------------------------|----------------------------------|-----------------------------------|
| <b>Neurological disorders</b>                              | <b>106.18</b><br>(84.34 to 131.59)  | <b>232.83</b><br>(176.78 to 307.21)   | <b>232.26</b><br>(183.03 to 294.19)   | <b>239.29</b><br>(176.25 to 319.86)     | <b>5.38</b><br>(4.49 to 6.39)    | <b>17.46</b><br>(11.74 to 24.31) | <b>18.51</b><br>(13.54 to 24.38) | <b>15.13</b><br>(9.87 to 22.03)   |
| Alzheimer's disease and other dementias                    | 49.90<br>(40.72 to 60.73)           | 160.85<br>(110.35 to 231.83)          | 160.99<br>(117.95 to 222.79)          | 146.14<br>(95.40 to 221.28)             | 4.16<br>(3.42 to 5.08)           | 14.93<br>(9.56 to 21.70)         | 15.73<br>(10.95 to 21.58)        | 12.62<br>(7.67 to 19.59)          |
| Parkinson's disease                                        | 4.74<br>(3.60 to 6.11)              | 16.78<br>(12.40 to 21.67)             | 19.76<br>(14.99 to 25.40)             | 12.85<br>(9.10 to 17.14)                | 0.35<br>(0.26 to 0.45)           | 1.37<br>(0.95 to 1.86)           | 1.68<br>(1.22 to 2.21)           | 0.99<br>(0.65 to 1.38)            |
| Epilepsy                                                   | 38.17<br>(23.79 to 57.01)           | 35.64<br>(22.69 to 52.01)             | 31.25<br>(20.13 to 45.46)             | 56.76<br>(34.60 to 86.76)               | 0.63<br>(0.42 to 0.90)           | 0.71<br>(0.48 to 0.98)           | 0.63<br>(0.42 to 0.86)           | 1.04<br>(0.68 to 1.50)            |
| Multiple sclerosis                                         | 1.26<br>(0.86 to 1.89)              | 2.47<br>(1.73 to 3.77)                | 2.47<br>(1.73 to 3.72)                | 2.37<br>(1.62 to 3.65)                  | 0.03<br>(0.02 to 0.05)           | 0.07<br>(0.05 to 0.10)           | 0.07<br>(0.05 to 0.09)           | 0.06<br>(0.04 to 0.09)            |
| Motor neuron disease                                       | 1.75<br>(0.96 to 2.57)              | 3.14<br>(2.00 to 4.11)                | 3.29<br>(2.11 to 4.24)                | 3.24<br>(1.97 to 4.56)                  | 0.04<br>(0.02 to 0.05)           | 0.09<br>(0.06 to 0.11)           | 0.09<br>(0.07 to 0.12)           | 0.08<br>(0.06 to 0.11)            |
| Other neurological disorders                               | 10.37<br>(6.99 to 15.60)            | 13.96<br>(10.60 to 19.31)             | 14.49<br>(11.12 to 19.87)             | 17.93<br>(11.99 to 28.28)               | 0.17<br>(0.13 to 0.23)           | 0.29<br>(0.25 to 0.35)           | 0.31<br>(0.26 to 0.38)           | 0.33<br>(0.25 to 0.44)            |
| <b>Mental disorders</b>                                    | <b>17.39</b><br>(10.77 to 27.03)    | <b>35.67</b><br>(22.25 to 55.88)      | <b>35.57</b><br>(22.39 to 55.14)      | <b>37.06</b><br>(23.04 to 57.83)        | <b>0.39</b><br>(0.25 to 0.59)    | <b>0.88</b><br>(0.59 to 1.32)    | <b>0.90</b><br>(0.61 to 1.35)    | <b>0.89</b><br>(0.58 to 1.34)     |
| Alcohol use disorders                                      | 5.44<br>(2.34 to 11.92)             | 8.29<br>(3.30 to 19.92)               | 8.01<br>(3.25 to 18.82)               | 8.93<br>(3.51 to 22.00)                 | 0.13<br>(0.06 to 0.29)           | 0.22<br>(0.09 to 0.50)           | 0.21<br>(0.09 to 0.47)           | 0.23<br>(0.10 to 0.54)            |
| Drug use disorders                                         | 11.90<br>(6.86 to 20.20)            | 27.28<br>(16.82 to 45.29)             | 27.47<br>(17.02 to 45.32)             | 28.03<br>(17.14 to 46.38)               | 0.25<br>(0.15 to 0.42)           | 0.67<br>(0.43 to 1.06)           | 0.69<br>(0.44 to 1.07)           | 0.66<br>(0.42 to 1.05)            |
| Opioid use disorders                                       | 9.09<br>(4.97 to 15.99)             | 18.96<br>(10.68 to 33.33)             | 19.03<br>(10.88 to 33.31)             | 19.56<br>(11.02 to 34.66)               | 0.19<br>(0.10 to 0.32)           | 0.44<br>(0.26 to 0.75)           | 0.45<br>(0.26 to 0.76)           | 0.44<br>(0.25 to 0.76)            |
| Cocaine use disorders                                      | 0.46<br>(0.24 to 0.80)              | 1.29<br>(0.71 to 2.20)                | 1.25<br>(0.69 to 2.13)                | 1.40<br>(0.77 to 2.41)                  | 0.01<br>(0.01 to 0.02)           | 0.03<br>(0.02 to 0.05)           | 0.03<br>(0.02 to 0.05)           | 0.03<br>(0.02 to 0.05)            |
| Amphetamine use disorders                                  | 0.26<br>(0.14 to 0.44)              | 0.93<br>(0.51 to 1.61)                | 0.90<br>(0.49 to 1.53)                | 1.05<br>(0.57 to 1.80)                  | 0.01<br>(0.00 to 0.01)           | 0.02<br>(0.01 to 0.03)           | 0.02<br>(0.01 to 0.03)           | 0.02<br>(0.01 to 0.04)            |
| Other drug use disorders                                   | 2.08<br>(1.00 to 3.56)              | 6.10<br>(3.16 to 10.41)               | 6.28<br>(3.28 to 10.67)               | 6.02<br>(3.01 to 10.25)                 | 0.05<br>(0.03 to 0.08)           | 0.17<br>(0.10 to 0.27)           | 0.19<br>(0.11 to 0.28)           | 0.16<br>(0.09 to 0.25)            |
| Eating disorders                                           | 0.05<br>(0.03 to 0.09)              | 0.09<br>(0.05 to 0.15)                | 0.09<br>(0.05 to 0.16)                | 0.10<br>(0.05 to 0.17)                  | 0.00<br>(0.00 to 0.00)           | 0.00<br>(0.00 to 0.00)           | 0.00<br>(0.00 to 0.00)           | 0.00<br>(0.00 to 0.00)            |
| <b>Sudan</b>                                               |                                     |                                       |                                       |                                         |                                  |                                  |                                  |                                   |
| Cause                                                      | YLLs (in 1000s)                     |                                       |                                       |                                         | Deaths (in 1000s)                |                                  |                                  |                                   |
|                                                            | 2016                                | 2040 Forecast                         | 2040 Better Scenario                  | 2040 Worse Scenario                     | 2016                             | 2040 Forecast                    | 2040 Better Scenario             | 2040 Worse Scenario               |
| <b>Diabetes, urogenital, blood, and endocrine diseases</b> | <b>371.77</b><br>(325.46 to 428.87) | <b>785.90</b><br>(425.00 to 1,746.88) | <b>594.28</b><br>(342.95 to 1,329.81) | <b>1,066.91</b><br>(595.23 to 2,237.98) | <b>12.56</b><br>(11.19 to 14.21) | <b>39.02</b><br>(18.82 to 90.78) | <b>30.22</b><br>(15.72 to 74.71) | <b>48.16</b><br>(23.84 to 104.31) |
| Diabetes mellitus                                          | 110.75<br>(97.23 to 124.13)         | 199.31<br>(128.20 to 288.55)          | 164.18<br>(108.53 to 237.64)          | 278.71<br>(177.50 to 405.12)            | 4.79<br>(4.19 to 5.37)           | 10.78<br>(7.08 to 15.00)         | 9.35<br>(6.47 to 12.75)          | 13.78<br>(8.79 to 19.59)          |
| Acute glomerulonephritis                                   | 0.29<br>(0.25 to 0.35)              | 0.35<br>(0.27 to 0.45)                | 0.33<br>(0.25 to 0.43)                | 0.50<br>(0.38 to 0.63)                  | 0.01<br>(0.00 to 0.01)           | 0.01<br>(0.01 to 0.01)           | 0.01<br>(0.01 to 0.01)           | 0.01<br>(0.01 to 0.01)            |
| Chronic kidney disease                                     | 162.52<br>(131.14 to 202.54)        | 486.28<br>(133.55 to 1,462.93)        | 332.90<br>(101.84 to 1,093.79)        | 647.53<br>(197.01 to 1,827.03)          | 5.83<br>(4.77 to 7.45)           | 25.13<br>(5.18 to 78.29)         | 17.68<br>(3.71 to 63.80)         | 30.87<br>(6.88 to 89.37)          |
| Chronic kidney disease due to diabetes mellitus            | 55.26<br>(43.47 to 71.99)           | 218.88<br>(49.62 to 707.25)           | 146.06<br>(36.90 to 513.88)           | 286.01<br>(67.23 to 886.97)             | 2.25<br>(1.74 to 2.94)           | 10.63<br>(2.06 to 34.80)         | 7.29<br>(1.48 to 26.46)          | 13.27<br>(2.65 to 40.15)          |

|                                                            |                              |                                |                               |                                |                           |                            |                            |                            |
|------------------------------------------------------------|------------------------------|--------------------------------|-------------------------------|--------------------------------|---------------------------|----------------------------|----------------------------|----------------------------|
| Chronic kidney disease due to hypertension                 | 20.25<br>(15.95 to<br>26.68) | 86.93<br>(17.48 to<br>275.35)  | 60.45<br>(12.63 to<br>222.59) | 107.50<br>(22.30 to<br>325.03) | 1.16<br>(0.89 to<br>1.54) | 6.23<br>(1.06 to<br>19.98) | 4.60<br>(0.79 to<br>17.31) | 7.08<br>(1.23 to<br>21.23) |
| Chronic kidney disease due to glomerulonephritis           | 29.95<br>(22.89 to<br>38.61) | 55.01<br>(22.24 to<br>146.64)  | 39.13<br>(17.06 to<br>105.79) | 78.50<br>(34.15 to<br>193.02)  | 0.75<br>(0.58 to<br>0.97) | 2.29<br>(0.61 to<br>6.82)  | 1.60<br>(0.45 to<br>5.54)  | 2.96<br>(0.87 to<br>8.28)  |
| Chronic kidney disease due to other and unspecified causes | 57.05<br>(44.13 to<br>73.78) | 125.46<br>(41.55 to<br>345.12) | 87.26<br>(31.60 to<br>260.34) | 175.52<br>(64.26 to<br>452.16) | 1.67<br>(1.29 to<br>2.16) | 5.98<br>(1.37 to<br>17.21) | 4.19<br>(1.02 to<br>14.25) | 7.56<br>(1.88 to<br>20.93) |
| Urinary diseases and male infertility                      | 12.06<br>(9.21 to<br>16.44)  | 16.42<br>(12.86 to<br>21.92)   | 16.79<br>(13.19 to<br>22.25)  | 18.65<br>(13.95 to<br>25.64)   | 0.41<br>(0.32 to<br>0.53) | 0.97<br>(0.69 to<br>1.35)  | 1.07<br>(0.77 to<br>1.45)  | 0.88<br>(0.63 to<br>1.23)  |
| Urinary tract infections                                   | 6.05<br>(3.78 to<br>8.78)    | 11.45<br>(8.37 to<br>15.35)    | 12.07<br>(8.97 to<br>16.20)   | 11.86<br>(8.16 to<br>16.58)    | 0.23<br>(0.16 to<br>0.31) | 0.74<br>(0.51 to<br>1.05)  | 0.83<br>(0.60 to<br>1.16)  | 0.63<br>(0.42 to<br>0.90)  |
| Urolithiasis                                               | 0.38<br>(0.28 to<br>0.51)    | 0.65<br>(0.46 to<br>1.01)      | 0.67<br>(0.47 to<br>1.04)     | 0.72<br>(0.51 to<br>1.04)      | 0.01<br>(0.01 to<br>0.02) | 0.02<br>(0.01 to<br>0.05)  | 0.03<br>(0.02 to<br>0.05)  | 0.02<br>(0.01 to<br>0.04)  |
| Other urinary diseases                                     | 5.62<br>(3.16 to<br>8.95)    | 4.32<br>(2.23 to<br>7.79)      | 4.05<br>(2.09 to<br>7.35)     | 6.06<br>(3.14 to<br>10.63)     | 0.17<br>(0.09 to<br>0.27) | 0.20<br>(0.10 to<br>0.40)  | 0.21<br>(0.10 to<br>0.41)  | 0.23<br>(0.11 to<br>0.42)  |
| Gynecological diseases                                     | 0.30<br>(0.12 to<br>0.46)    | 0.40<br>(0.16 to<br>0.71)      | 0.36<br>(0.15 to<br>0.62)     | 0.52<br>(0.21 to<br>0.90)      | 0.01<br>(0.00 to<br>0.01) | 0.01<br>(0.00 to<br>0.02)  | 0.01<br>(0.00 to<br>0.01)  | 0.01<br>(0.00 to<br>0.02)  |
| Uterine fibroids                                           | 0.02<br>(0.00 to<br>0.04)    | 0.02<br>(0.00 to<br>0.05)      | 0.02<br>(0.00 to<br>0.05)     | 0.02<br>(0.00 to<br>0.07)      | 0.00<br>(0.00 to<br>0.00) | 0.00<br>(0.00 to<br>0.00)  | 0.00<br>(0.00 to<br>0.00)  | 0.00<br>(0.00 to<br>0.00)  |
| Polycystic ovarian syndrome                                | 0.05<br>(0.01 to<br>0.14)    | 0.04<br>(0.01 to<br>0.13)      | 0.03<br>(0.00 to<br>0.11)     | 0.06<br>(0.01 to<br>0.19)      | 0.00<br>(0.00 to<br>0.00) | 0.00<br>(0.00 to<br>0.00)  | 0.00<br>(0.00 to<br>0.00)  | 0.00<br>(0.00 to<br>0.00)  |
| Endometriosis                                              | 0.00<br>(0.00 to<br>0.01)    | 0.00<br>(0.00 to<br>0.01)      | 0.00<br>(0.00 to<br>0.01)     | 0.01<br>(0.00 to<br>0.02)      | 0.00<br>(0.00 to<br>0.00) | 0.00<br>(0.00 to<br>0.00)  | 0.00<br>(0.00 to<br>0.00)  | 0.00<br>(0.00 to<br>0.00)  |
| Genital prolapse                                           | 0.01<br>(0.00 to<br>0.01)    | 0.01<br>(0.00 to<br>0.02)      | 0.00<br>(0.00 to<br>0.01)     | 0.01<br>(0.00 to<br>0.02)      | 0.00<br>(0.00 to<br>0.00) | 0.00<br>(0.00 to<br>0.00)  | 0.00<br>(0.00 to<br>0.00)  | 0.00<br>(0.00 to<br>0.00)  |
| Other gynecological diseases                               | 0.22<br>(0.09 to<br>0.35)    | 0.33<br>(0.14 to<br>0.58)      | 0.30<br>(0.13 to<br>0.52)     | 0.42<br>(0.18 to<br>0.74)      | 0.00<br>(0.00 to<br>0.01) | 0.01<br>(0.00 to<br>0.01)  | 0.01<br>(0.00 to<br>0.01)  | 0.01<br>(0.00 to<br>0.02)  |
| Hemoglobinopathies and hemolytic anemias                   | 37.33<br>(22.52 to<br>68.82) | 34.64<br>(23.53 to<br>58.71)   | 33.25<br>(22.54 to<br>55.79)  | 46.89<br>(29.65 to<br>82.38)   | 0.62<br>(0.42 to<br>1.07) | 0.76<br>(0.54 to<br>1.23)  | 0.73<br>(0.52 to<br>1.17)  | 0.95<br>(0.65 to<br>1.57)  |
| Thalassemias                                               | 10.37<br>(4.00 to<br>24.58)  | 5.50<br>(2.11 to<br>13.28)     | 6.04<br>(2.41 to<br>14.51)    | 8.38<br>(3.00 to<br>20.92)     | 0.13<br>(0.05 to<br>0.30) | 0.07<br>(0.03 to<br>0.16)  | 0.07<br>(0.03 to<br>0.18)  | 0.10<br>(0.04 to<br>0.25)  |
| Sickle cell disorders                                      | 23.88<br>(15.45 to<br>41.37) | 25.00<br>(16.85 to<br>40.71)   | 23.37<br>(15.86 to<br>37.85)  | 33.41<br>(21.78 to<br>56.87)   | 0.38<br>(0.26 to<br>0.64) | 0.49<br>(0.34 to<br>0.80)  | 0.46<br>(0.32 to<br>0.73)  | 0.62<br>(0.42 to<br>1.02)  |
| G6PD deficiency                                            | 1.49<br>(1.00 to<br>2.45)    | 2.13<br>(1.35 to<br>3.53)      | 1.91<br>(1.21 to<br>3.14)     | 2.83<br>(1.76 to<br>4.78)      | 0.03<br>(0.02 to<br>0.05) | 0.06<br>(0.04 to<br>0.11)  | 0.06<br>(0.04 to<br>0.10)  | 0.08<br>(0.05 to<br>0.14)  |
| Other hemoglobinopathies and hemolytic anemias             | 1.60<br>(1.12 to<br>2.56)    | 2.01<br>(1.28 to<br>3.41)      | 1.92<br>(1.22 to<br>3.27)     | 2.77<br>(1.43 to<br>3.96)      | 0.08<br>(0.06 to<br>0.14) | 0.08<br>(0.08 to<br>0.24)  | 0.14<br>(0.09 to<br>0.24)  | 0.14<br>(0.09 to<br>0.26)  |
| Endocrine, metabolic, blood, and immune disorders          | 48.53<br>(32.48 to<br>71.04) | 48.49<br>(35.11 to<br>66.66)   | 46.48<br>(33.68 to<br>64.13)  | 74.11<br>(49.68 to<br>110.79)  | 0.90<br>(0.66 to<br>1.18) | 1.38<br>(1.00 to<br>1.99)  | 1.38<br>(1.01 to<br>2.00)  | 1.66<br>(1.19 to<br>2.29)  |

**Sudan**

| Cause | YLLs (in 1000s)           |                            |                              |                              | Deaths (in 1000s)            |                           |                           |                           |
|-------|---------------------------|----------------------------|------------------------------|------------------------------|------------------------------|---------------------------|---------------------------|---------------------------|
|       | 2016                      | 2040 Forecast              | 2040 Better Scenario         | 2040 Worse Scenario          | 2016                         | 2040 Forecast             | 2040 Better Scenario      | 2040 Worse Scenario       |
|       | Musculoskeletal disorders | 9.07<br>(6.14 to<br>11.35) | 17.02<br>(11.46 to<br>21.46) | 17.67<br>(11.73 to<br>22.30) | 17.51<br>(11.74 to<br>22.35) | 0.19<br>(0.13 to<br>0.22) | 0.44<br>(0.31 to<br>0.55) | 0.47<br>(0.32 to<br>0.60) |



|                                               |                                                            |                                                            |                                                            |                                                            |                                                   |                                                   |                                                   |                                                   |
|-----------------------------------------------|------------------------------------------------------------|------------------------------------------------------------|------------------------------------------------------------|------------------------------------------------------------|---------------------------------------------------|---------------------------------------------------|---------------------------------------------------|---------------------------------------------------|
| Rheumatoid arthritis                          | 1.38<br>(0.95 to<br>2.16)                                  | 1.88<br>(1.23 to<br>2.72)                                  | 1.75<br>(1.14 to<br>2.57)                                  | 2.48<br>(1.62 to<br>3.63)                                  | 0.03<br>(0.02 to<br>0.05)                         | 0.07<br>(0.05 to<br>0.11)                         | 0.07<br>(0.04 to<br>0.11)                         | 0.08<br>(0.05 to<br>0.12)                         |
| Other musculoskeletal disorders               | 7.69<br>(5.00 to<br>9.85)                                  | 15.14<br>(9.54 to<br>19.38)                                | 15.92<br>(10.18 to<br>20.39)                               | 15.04<br>(9.31 to<br>19.53)                                | 0.15<br>(0.10 to<br>0.19)                         | 0.37<br>(0.25 to<br>0.46)                         | 0.40<br>(0.26 to<br>0.50)                         | 0.34<br>(0.22 to<br>0.43)                         |
| <b>Other non-communicable diseases</b>        | <b>1,267.13</b><br><b>(555.31 to</b><br><b>2,239.51)</b>   | <b>869.32</b><br><b>(392.09 to</b><br><b>1,624.45)</b>     | <b>813.05</b><br><b>(373.94 to</b><br><b>1,523.47)</b>     | <b>1,939.39</b><br><b>(809.81 to</b><br><b>3,603.90)</b>   | <b>15.15</b><br><b>(6.78 to</b><br><b>26.48)</b>  | <b>11.33</b><br><b>(5.93 to</b><br><b>20.17)</b>  | <b>10.77</b><br><b>(5.78 to</b><br><b>18.94)</b>  | <b>23.73</b><br><b>(10.47 to</b><br><b>43.09)</b> |
| Congenital birth defects                      | 1,223.79<br>(521.62 to<br>2,179.86)                        | 822.91<br>(360.44 to<br>1,558.47)                          | 767.00<br>(335.25 to<br>1,463.03)                          | 1,855.79<br>(742.64 to<br>3,506.13)                        | 14.46<br>(6.24 to<br>25.59)                       | 9.91<br>(4.50 to<br>18.51)                        | 9.24<br>(4.18 to<br>17.33)                        | 22.01<br>(8.91 to<br>41.26)                       |
| Neural tube defects                           | 98.83<br>(34.92 to<br>227.34)                              | 28.29<br>(8.02 to<br>70.79)                                | 24.22<br>(6.97 to<br>60.98)                                | 77.04<br>(21.33 to<br>197.42)                              | 1.16<br>(0.41 to<br>2.65)                         | 0.34<br>(0.10 to<br>0.83)                         | 0.29<br>(0.09 to<br>0.72)                         | 0.90<br>(0.25 to<br>2.31)                         |
| Congenital heart anomalies                    | 508.84<br>(254.54 to<br>916.12)                            | 337.36<br>(160.19 to<br>633.44)                            | 314.68<br>(150.49 to<br>593.96)                            | 752.78<br>(338.91 to<br>1,494.20)                          | 6.04<br>(3.05 to<br>10.78)                        | 4.08<br>(2.00 to<br>7.52)                         | 3.81<br>(1.87 to<br>7.06)                         | 8.96<br>(4.12 to<br>17.53)                        |
| Orofacial clefts                              | 1.11<br>(0.21 to<br>3.95)                                  | 0.52<br>(0.09 to<br>2.03)                                  | 0.43<br>(0.07 to<br>1.68)                                  | 1.52<br>(0.25 to<br>5.98)                                  | 0.01<br>(0.00 to<br>0.05)                         | 0.01<br>(0.00 to<br>0.02)                         | 0.01<br>(0.00 to<br>0.02)                         | 0.02<br>(0.00 to<br>0.07)                         |
| Down syndrome                                 | 30.29<br>(10.50 to<br>75.51)                               | 23.37<br>(9.09 to<br>55.53)                                | 21.06<br>(8.14 to<br>49.73)                                | 53.65<br>(18.32 to<br>137.20)                              | 0.37<br>(0.13 to<br>0.90)                         | 0.30<br>(0.12 to<br>0.68)                         | 0.27<br>(0.11 to<br>0.62)                         | 0.66<br>(0.23 to<br>1.64)                         |
| Other chromosomal abnormalities               | 18.05<br>(5.95 to<br>57.75)                                | 20.89<br>(6.65 to<br>65.94)                                | 19.19<br>(5.99 to<br>61.15)                                | 49.19<br>(15.00 to<br>154.67)                              | 0.21<br>(0.07 to<br>0.68)                         | 0.25<br>(0.08 to<br>0.77)                         | 0.23<br>(0.07 to<br>0.72)                         | 0.58<br>(0.18 to<br>1.81)                         |
| Congenital musculoskeletal and limb anomalies | 26.94<br>(7.11 to<br>78.11)                                | 22.44<br>(5.78 to<br>60.18)                                | 21.43<br>(5.73 to<br>58.28)                                | 48.42<br>(11.43 to<br>130.61)                              | 0.32<br>(0.09 to<br>0.92)                         | 0.27<br>(0.07 to<br>0.71)                         | 0.26<br>(0.07 to<br>0.69)                         | 0.57<br>(0.14 to<br>1.54)                         |
| Urogenital congenital anomalies               | 35.73<br>(10.65 to<br>70.59)                               | 24.59<br>(8.00 to<br>52.29)                                | 23.06<br>(7.57 to<br>48.01)                                | 54.81<br>(16.68 to<br>118.45)                              | 0.43<br>(0.13 to<br>0.83)                         | 0.31<br>(0.11 to<br>0.62)                         | 0.29<br>(0.11 to<br>0.59)                         | 0.66<br>(0.22 to<br>1.40)                         |
| Digestive congenital anomalies                | 51.57<br>(12.00 to<br>129.75)                              | 38.03<br>(8.56 to<br>101.12)                               | 34.92<br>(7.98 to<br>93.43)                                | 90.61<br>(19.57 to<br>245.45)                              | 0.60<br>(0.14 to<br>1.51)                         | 0.45<br>(0.10 to<br>1.18)                         | 0.41<br>(0.09 to<br>1.09)                         | 1.06<br>(0.23 to<br>2.86)                         |
| Other congenital birth defects                | 452.44<br>(138.37 to<br>973.48)                            | 327.43<br>(100.81 to<br>693.52)                            | 308.01<br>(97.32 to<br>643.32)                             | 727.77<br>(204.44 to<br>1,579.17)                          | 5.33<br>(1.65 to<br>11.39)                        | 3.92<br>(1.24 to<br>8.23)                         | 3.69<br>(1.20 to<br>7.63)                         | 8.60<br>(2.46 to<br>18.56)                        |
| Skin and subcutaneous diseases                | 5.23<br>(2.42 to<br>7.24)                                  | 16.73<br>(7.97 to<br>22.97)                                | 17.57<br>(8.36 to<br>23.94)                                | 17.19<br>(8.04 to<br>24.19)                                | 0.25<br>(0.12 to<br>0.34)                         | 1.08<br>(0.50 to<br>1.55)                         | 1.20<br>(0.57 to<br>1.68)                         | 0.95<br>(0.42 to<br>1.41)                         |
| Cellulitis                                    | 0.32<br>(0.09 to<br>0.51)                                  | 1.10<br>(0.33 to<br>1.73)                                  | 1.18<br>(0.35 to<br>1.86)                                  | 1.13<br>(0.32 to<br>1.88)                                  | 0.01<br>(0.00 to<br>0.02)                         | 0.05<br>(0.01 to<br>0.09)                         | 0.06<br>(0.02 to<br>0.10)                         | 0.04<br>(0.01 to<br>0.08)                         |
| Pyoderma                                      | 2.80<br>(1.33 to<br>4.44)                                  | 9.54<br>(4.55 to<br>14.26)                                 | 9.80<br>(4.79 to<br>14.54)                                 | 10.37<br>(4.92 to<br>15.73)                                | 0.12<br>(0.06 to<br>0.18)                         | 0.59<br>(0.28 to<br>0.91)                         | 0.64<br>(0.32 to<br>0.98)                         | 0.55<br>(0.26 to<br>0.85)                         |
| Decubitus ulcer                               | 1.88<br>(0.51 to<br>3.08)                                  | 5.63<br>(1.35 to<br>9.69)                                  | 6.10<br>(1.56 to<br>10.38)                                 | 5.16<br>(1.22 to<br>9.09)                                  | 0.12<br>(0.03 to<br>0.19)                         | 0.43<br>(0.10 to<br>0.77)                         | 0.49<br>(0.12 to<br>0.86)                         | 0.35<br>(0.08 to<br>0.64)                         |
| Other skin and subcutaneous diseases          | 0.22<br>(0.08 to<br>0.35)                                  | 0.46<br>(0.16 to<br>0.74)                                  | 0.48<br>(0.17 to<br>0.77)                                  | 0.53<br>(0.18 to<br>0.88)                                  | 0.00<br>(0.00 to<br>0.01)                         | 0.01<br>(0.00 to<br>0.02)                         | 0.01<br>(0.00 to<br>0.02)                         | 0.01<br>(0.00 to<br>0.02)                         |
| Sudden infant death syndrome                  | 38.12<br>(13.81 to<br>78.22)                               | 29.68<br>(8.66 to<br>67.70)                                | 28.48<br>(8.16 to<br>66.02)                                | 66.41<br>(19.85 to<br>150.11)                              | 0.44<br>(0.16 to<br>0.91)                         | 0.34<br>(0.10 to<br>0.79)                         | 0.33<br>(0.09 to<br>0.77)                         | 0.77<br>(0.23 to<br>1.74)                         |
| <b>Injuries</b>                               | <b>1,693.13</b><br><b>(1,435.69 to</b><br><b>1,984.71)</b> | <b>1,740.55</b><br><b>(1,480.97 to</b><br><b>2,039.08)</b> | <b>1,487.80</b><br><b>(1,277.57 to</b><br><b>1,726.30)</b> | <b>2,411.38</b><br><b>(1,985.33 to</b><br><b>2,916.82)</b> | <b>28.97</b><br><b>(24.83 to</b><br><b>33.19)</b> | <b>35.13</b><br><b>(30.00 to</b><br><b>40.83)</b> | <b>30.73</b><br><b>(26.51 to</b><br><b>35.54)</b> | <b>44.94</b><br><b>(37.73 to</b><br><b>53.02)</b> |
| <b>Transport injuries</b>                     | <b>891.65</b><br><b>(758.69 to</b><br><b>1,054.60)</b>     | <b>1,203.85</b><br><b>(998.44 to</b><br><b>1,455.27)</b>   | <b>988.25</b><br><b>(825.41 to</b><br><b>1,183.81)</b>     | <b>1,679.86</b><br><b>(1,351.05 to</b><br><b>2,097.86)</b> | <b>15.43</b><br><b>(13.40 to</b><br><b>17.88)</b> | <b>23.67</b><br><b>(19.79 to</b><br><b>28.43)</b> | <b>19.84</b><br><b>(16.65 to</b><br><b>23.80)</b> | <b>30.69</b><br><b>(25.06 to</b><br><b>37.72)</b> |
| Road injuries                                 | 858.86<br>(734.63 to<br>1,015.20)                          | 1,166.19<br>(968.23 to<br>1,413.17)                        | 953.70<br>(794.47 to<br>1,144.94)                          | 1,626.70<br>(1,308.82 to<br>2,028.29)                      | 14.90<br>(12.96 to<br>17.18)                      | 22.96<br>(19.12 to<br>27.62)                      | 19.18<br>(16.05 to<br>23.02)                      | 29.75<br>(24.27 to<br>36.56)                      |

|                                      |                                          |                                          |                                          |                                          |                                     |                                     |                                    |                                      |
|--------------------------------------|------------------------------------------|------------------------------------------|------------------------------------------|------------------------------------------|-------------------------------------|-------------------------------------|------------------------------------|--------------------------------------|
|                                      | 167.86<br>(116.89 to<br>222.62)          | 184.81<br>(131.52 to<br>244.31)          | 156.49<br>(113.66 to<br>203.70)          | 246.35<br>(170.92 to<br>331.79)          | 3.06<br>(2.26 to<br>3.89)           | 4.16<br>(3.10 to<br>5.36)           | 3.59<br>(2.76 to<br>4.56)          | 5.14<br>(3.78 to<br>6.65)            |
| Pedestrian road injuries             |                                          |                                          |                                          |                                          |                                     |                                     |                                    |                                      |
| <b>Sudan</b>                         |                                          |                                          |                                          |                                          |                                     |                                     |                                    |                                      |
| Cause                                | YLLs (in 1000s)                          |                                          |                                          |                                          | Deaths (in 1000s)                   |                                     |                                    |                                      |
|                                      | 2016                                     | 2040 Forecast                            | 2040 Better Scenario                     | 2040 Worse Scenario                      | 2016                                | 2040 Forecast                       | 2040 Better Scenario               | 2040 Worse Scenario                  |
| Cyclist road injuries                | 38.83<br>(23.03 to<br>55.38)             | 52.32<br>(32.19 to<br>78.31)             | 42.21<br>(26.48 to<br>62.11)             | 78.89<br>(45.80 to<br>126.79)            | 0.62<br>(0.39 to<br>0.86)           | 0.94<br>(0.62 to<br>1.35)           | 0.78<br>(0.52 to<br>1.11)          | 1.31<br>(0.81 to<br>1.97)            |
| Motorcyclist road injuries           | 161.78<br>(108.27 to<br>213.57)          | 242.32<br>(155.96 to<br>339.83)          | 208.23<br>(135.95 to<br>288.56)          | 311.48<br>(194.45 to<br>445.08)          | 2.63<br>(1.77 to<br>3.46)           | 4.12<br>(2.68 to<br>5.76)           | 3.56<br>(2.36 to<br>4.92)          | 5.12<br>(3.26 to<br>7.25)            |
| Motor vehicle road injuries          | 482.23<br>(395.18 to<br>603.73)          | 675.94<br>(539.07 to<br>849.72)          | 538.12<br>(431.23 to<br>677.35)          | 973.38<br>(749.13 to<br>1,260.89)        | 8.46<br>(7.13 to<br>10.36)          | 13.53<br>(11.83 to<br>16.67)        | 11.07<br>(9.08 to<br>13.50)        | 17.89<br>(14.29 to<br>22.39)         |
| Other road injuries                  | 8.15<br>(4.11 to<br>12.89)               | 10.80<br>(5.53 to<br>16.89)              | 8.65<br>(4.47 to<br>13.58)               | 16.60<br>(8.09 to<br>26.47)              | 0.13<br>(0.07 to<br>0.21)           | 0.21<br>(0.12 to<br>0.33)           | 0.18<br>(0.10 to<br>0.28)          | 0.29<br>(0.15 to<br>0.46)            |
| Other transport injuries             | 32.79<br>(16.23 to<br>47.49)             | 37.66<br>(20.61 to<br>53.54)             | 34.55<br>(19.11 to<br>49.12)             | 53.16<br>(28.31 to<br>77.55)             | 0.53<br>(0.30 to<br>0.73)           | 0.72<br>(0.47 to<br>0.97)           | 0.66<br>(0.44 to<br>0.90)          | 0.95<br>(0.59 to<br>1.34)            |
| <b>Unintentional injuries</b>        | <b>511.85<br/>(404.89 to<br/>649.43)</b> | <b>366.45<br/>(276.58 to<br/>468.49)</b> | <b>339.68<br/>(259.13 to<br/>433.86)</b> | <b>533.93<br/>(390.70 to<br/>717.56)</b> | <b>8.54<br/>(6.90 to<br/>10.37)</b> | <b>8.04<br/>(6.06 to<br/>10.35)</b> | <b>7.67<br/>(5.79 to<br/>9.82)</b> | <b>10.37<br/>(7.82 to<br/>13.35)</b> |
| Falls                                | 79.73<br>(53.02 to<br>128.35)            | 82.00<br>(56.51 to<br>117.51)            | 79.74<br>(55.78 to<br>113.94)            | 102.36<br>(67.69 to<br>157.04)           | 1.57<br>(1.10 to<br>2.29)           | 2.25<br>(1.60 to<br>3.14)           | 2.28<br>(1.63 to<br>3.15)          | 2.46<br>(1.72 to<br>3.47)            |
| Drowning                             | 127.54<br>(83.05 to<br>172.90)           | 70.61<br>(46.54 to<br>95.48)             | 65.07<br>(42.51 to<br>88.59)             | 109.73<br>(66.30 to<br>163.72)           | 1.85<br>(1.24 to<br>2.43)           | 1.22<br>(0.83 to<br>1.60)           | 1.13<br>(0.77 to<br>1.47)          | 1.76<br>(1.13 to<br>2.45)            |
| Fire, heat, and hot substances       | 71.53<br>(43.85 to<br>94.91)             | 45.93<br>(29.65 to<br>61.81)             | 41.48<br>(26.57 to<br>56.00)             | 68.52<br>(40.58 to<br>97.95)             | 1.23<br>(0.81 to<br>1.54)           | 1.03<br>(0.70 to<br>1.42)           | 0.96<br>(0.65 to<br>1.33)          | 1.38<br>(0.90 to<br>1.86)            |
| Poisonings                           | 47.04<br>(17.07 to<br>98.31)             | 20.54<br>(7.72 to<br>41.30)              | 17.67<br>(6.74 to<br>35.35)              | 36.80<br>(12.44 to<br>80.41)             | 0.72<br>(0.27 to<br>1.37)           | 0.37<br>(0.15 to<br>0.68)           | 0.33<br>(0.13 to<br>0.61)          | 0.61<br>(0.24 to<br>1.19)            |
| Exposure to mechanical forces        | 82.08<br>(55.18 to<br>108.98)            | 59.61<br>(37.66 to<br>83.01)             | 53.99<br>(34.29 to<br>76.43)             | 89.09<br>(55.58 to<br>129.07)            | 1.36<br>(0.94 to<br>1.79)           | 1.19<br>(0.79 to<br>1.68)           | 1.09<br>(0.73 to<br>1.56)          | 1.63<br>(1.06 to<br>2.30)            |
| Unintentional firearm injuries       | 17.25<br>(9.62 to<br>26.22)              | 11.34<br>(6.22 to<br>19.02)              | 10.10<br>(5.57 to<br>17.06)              | 16.63<br>(8.99 to<br>27.32)              | 0.29<br>(0.17 to<br>0.45)           | 0.23<br>(0.13 to<br>0.38)           | 0.20<br>(0.12 to<br>0.35)          | 0.31<br>(0.18 to<br>0.52)            |
| Unintentional suffocation            | 18.94<br>(9.57 to<br>34.94)              | 9.48<br>(4.44 to<br>18.23)               | 8.55<br>(4.03 to<br>16.58)               | 19.82<br>(8.83 to<br>39.69)              | 0.24<br>(0.12 to<br>0.42)           | 0.12<br>(0.06 to<br>0.23)           | 0.11<br>(0.05 to<br>0.21)          | 0.25<br>(0.11 to<br>0.49)            |
| Other exposure to mechanical forces  | 45.89<br>(29.65 to<br>62.60)             | 38.80<br>(24.22 to<br>56.46)             | 35.34<br>(22.21 to<br>50.73)             | 52.64<br>(32.47 to<br>76.85)             | 0.83<br>(0.54 to<br>1.13)           | 0.84<br>(0.53 to<br>1.23)           | 0.78<br>(0.49 to<br>1.13)          | 1.07<br>(0.67 to<br>1.53)            |
| Adverse effects of medical treatment | 36.25<br>(22.56 to<br>49.98)             | 34.18<br>(20.73 to<br>50.09)             | 31.95<br>(19.26 to<br>47.63)             | 47.15<br>(28.29 to<br>69.84)             | 0.69<br>(0.44 to<br>0.98)           | 0.89<br>(0.50 to<br>1.39)           | 0.86<br>(0.48 to<br>1.36)          | 1.08<br>(0.63 to<br>1.63)            |
| Animal contact                       | 6.51<br>(3.00 to<br>9.95)                | 5.76<br>(2.70 to<br>8.83)                | 5.17<br>(2.38 to<br>8.00)                | 9.40<br>(4.01 to<br>15.51)               | 0.11<br>(0.05 to<br>0.16)           | 0.14<br>(0.07 to<br>0.20)           | 0.13<br>(0.06 to<br>0.19)          | 0.19<br>(0.09 to<br>0.28)            |
| Venomous animal contact              | 3.01<br>(1.28 to<br>4.90)                | 2.37<br>(1.00 to<br>3.92)                | 2.11<br>(0.89 to<br>3.51)                | 4.04<br>(1.60 to<br>7.11)                | 0.05<br>(0.02 to<br>0.08)           | 0.05<br>(0.02 to<br>0.09)           | 0.05<br>(0.02 to<br>0.08)          | 0.08<br>(0.03 to<br>0.13)            |
| Non-venomous animal contact          | 3.50<br>(1.68 to<br>5.71)                | 3.39<br>(1.63 to<br>5.40)                | 3.06<br>(1.47 to<br>5.01)                | 5.36<br>(2.43 to<br>9.35)                | 0.06<br>(0.03 to<br>0.09)           | 0.08<br>(0.04 to<br>0.12)           | 0.08<br>(0.04 to<br>0.12)          | 0.11<br>(0.05 to<br>0.17)            |
| Foreign body                         | 25.70<br>(14.95 to<br>42.58)             | 21.44<br>(12.51 to<br>35.54)             | 20.98<br>(12.25 to<br>34.67)             | 32.28<br>(17.62 to<br>57.50)             | 0.38<br>(0.23 to<br>0.60)           | 0.39<br>(0.25 to<br>0.58)           | 0.39<br>(0.25 to<br>0.57)          | 0.52<br>(0.31 to<br>0.84)            |

|                                                                                     |                                                     |                                                      |                                                      |                                                      |                                                |                                                |                                                |                                                |
|-------------------------------------------------------------------------------------|-----------------------------------------------------|------------------------------------------------------|------------------------------------------------------|------------------------------------------------------|------------------------------------------------|------------------------------------------------|------------------------------------------------|------------------------------------------------|
| Pulmonary aspiration and foreign body in airway                                     | 18.47<br>(10.26 to<br>32.86)                        | 15.26<br>(8.83 to<br>25.93)                          | 15.21<br>(8.94 to<br>25.67)                          | 23.39<br>(12.33 to<br>43.76)                         | 0.27<br>(0.16 to<br>0.44)                      | 0.28<br>(0.18 to<br>0.40)                      | 0.28<br>(0.19 to<br>0.40)                      | 0.37<br>(0.19 to<br>0.61)                      |
| Foreign body in other body part                                                     | 7.23<br>(2.77 to<br>13.01)                          | 6.18<br>(2.42 to<br>11.37)                           | 5.76<br>(2.22 to<br>10.59)                           | 8.89<br>(3.42 to<br>17.02)                           | 0.12<br>(0.05 to<br>0.21)                      | 0.12<br>(0.05 to<br>0.21)                      | 0.11<br>(0.05 to<br>0.20)                      | 0.15<br>(0.06 to<br>0.28)                      |
| Environmental heat and cold exposure                                                | 13.43<br>(6.90 to<br>19.74)                         | 11.37<br>(5.61 to<br>16.39)                          | 9.76<br>(4.84 to<br>14.08)                           | 18.04<br>(8.86 to<br>27.33)                          | 0.25<br>(0.13 to<br>0.35)                      | 0.26<br>(0.13 to<br>0.38)                      | 0.23<br>(0.12 to<br>0.34)                      | 0.38<br>(0.19 to<br>0.57)                      |
| Other unintentional injuries                                                        | 22.04<br>(14.46 to<br>33.40)                        | 15.01<br>(9.89 to<br>23.36)                          | 13.88<br>(9.08 to<br>21.91)                          | 20.56<br>(13.38 to<br>31.59)                         | 0.37<br>(0.24 to<br>0.56)                      | 0.29<br>(0.19 to<br>0.46)                      | 0.27<br>(0.18 to<br>0.44)                      | 0.38<br>(0.25 to<br>0.57)                      |
| <b>Self-harm and interpersonal violence</b>                                         | <b>124.93</b><br><b>(92.79 to</b><br><b>148.75)</b> | <b>162.15</b><br><b>(112.36 to</b><br><b>208.16)</b> | <b>151.73</b><br><b>(106.28 to</b><br><b>192.20)</b> | <b>188.31</b><br><b>(128.17 to</b><br><b>248.31)</b> | <b>2.33</b><br><b>(1.73 to</b><br><b>2.76)</b> | <b>3.27</b><br><b>(2.28 to</b><br><b>4.20)</b> | <b>3.07</b><br><b>(2.16 to</b><br><b>3.88)</b> | <b>3.72</b><br><b>(2.54 to</b><br><b>4.89)</b> |
| <b>Sudan</b>                                                                        |                                                     |                                                      |                                                      |                                                      |                                                |                                                |                                                |                                                |
| Cause                                                                               | YLLs (in 1000s)                                     |                                                      |                                                      |                                                      | Deaths (in 1000s)                              |                                                |                                                |                                                |
|                                                                                     | 2016                                                | 2040 Forecast                                        | 2040 Better Scenario                                 | 2040 Worse Scenario                                  | 2016                                           | 2040 Forecast                                  | 2040 Better Scenario                           | 2040 Worse Scenario                            |
| Self-harm                                                                           | 91.07<br>(65.71 to<br>113.61)                       | 127.72<br>(85.93 to<br>175.80)                       | 117.93<br>(81.23 to<br>158.81)                       | 148.92<br>(97.85 to<br>205.02)                       | 1.75<br>(1.28 to<br>2.17)                      | 2.63<br>(1.79 to<br>3.54)                      | 2.44<br>(1.71 to<br>3.23)                      | 3.01<br>(1.98 to<br>4.14)                      |
| Self-harm by firearm                                                                | 5.53<br>(2.64 to<br>10.31)                          | 6.59<br>(2.95 to<br>13.11)                           | 5.97<br>(2.72 to<br>11.82)                           | 7.87<br>(3.50 to<br>15.55)                           | 0.11<br>(0.05 to<br>0.20)                      | 0.14<br>(0.07 to<br>0.28)                      | 0.13<br>(0.06 to<br>0.25)                      | 0.17<br>(0.08 to<br>0.32)                      |
| Self-harm by other specified means                                                  | 85.54<br>(62.49 to<br>106.16)                       | 121.13<br>(82.10 to<br>163.54)                       | 111.95<br>(76.90 to<br>147.44)                       | 141.04<br>(93.59 to<br>194.63)                       | 1.64<br>(1.21 to<br>2.02)                      | 2.48<br>(1.71 to<br>3.35)                      | 2.31<br>(1.63 to<br>3.05)                      | 2.84<br>(1.89 to<br>3.92)                      |
| Interpersonal violence                                                              | 33.85<br>(9.73 to<br>48.11)                         | 34.43<br>(9.36 to<br>50.96)                          | 33.81<br>(9.22 to<br>49.63)                          | 39.39<br>(10.80 to<br>58.21)                         | 0.58<br>(0.17 to<br>0.94)                      | 0.64<br>(0.18 to<br>0.94)                      | 0.63<br>(0.18 to<br>0.92)                      | 0.71<br>(0.20 to<br>1.04)                      |
| Physical violence by firearm                                                        | 13.89<br>(3.40 to<br>24.67)                         | 13.43<br>(3.42 to<br>26.08)                          | 13.26<br>(3.45 to<br>25.89)                          | 14.56<br>(3.67 to<br>28.30)                          | 0.23<br>(0.06 to<br>0.43)                      | 0.25<br>(0.07 to<br>0.48)                      | 0.25<br>(0.07 to<br>0.47)                      | 0.27<br>(0.07 to<br>0.51)                      |
| Physical violence by sharp object                                                   | 9.03<br>(2.10 to<br>15.68)                          | 10.85<br>(2.45 to<br>19.04)                          | 10.90<br>(2.48 to<br>19.13)                          | 11.45<br>(2.65 to<br>20.09)                          | 0.16<br>(0.04 to<br>0.27)                      | 0.20<br>(0.05 to<br>0.35)                      | 0.21<br>(0.05 to<br>0.35)                      | 0.27<br>(0.05 to<br>0.36)                      |
| Physical violence by other means                                                    | 11.74<br>(3.18 to<br>19.93)                         | 10.14<br>(2.39 to<br>18.50)                          | 9.64<br>(2.30 to<br>17.63)                           | 13.38<br>(3.36 to<br>24.25)                          | 0.19<br>(0.05 to<br>0.32)                      | 0.19<br>(0.04 to<br>0.34)                      | 0.18<br>(0.04 to<br>0.32)                      | 0.23<br>(0.06 to<br>0.42)                      |
| <b>Forces of nature, conflict and terrorism, and executions and police conflict</b> | <b>164.70</b><br><b>(47.10 to</b><br><b>289.99)</b> | <b>8.09</b><br><b>(0.00 to</b><br><b>40.40)</b>      | <b>8.14</b><br><b>(0.00 to</b><br><b>40.61)</b>      | <b>9.29</b><br><b>(0.00 to</b><br><b>45.59)</b>      | <b>2.67</b><br><b>(0.76 to</b><br><b>4.70)</b> | <b>0.15</b><br><b>(0.00 to</b><br><b>0.73)</b> | <b>0.15</b><br><b>(0.00 to</b><br><b>0.74)</b> | <b>0.16</b><br><b>(0.00 to</b><br><b>0.80)</b> |
| Exposure to forces of nature                                                        | 6.57<br>(1.88 to<br>11.58)                          | 0.47<br>(0.00 to<br>4.25)                            | 0.48<br>(0.00 to<br>4.29)                            | 0.57<br>(0.00 to<br>5.12)                            | 0.11<br>(0.03 to<br>0.20)                      | 0.01<br>(0.00 to<br>0.08)                      | 0.01<br>(0.00 to<br>0.08)                      | 0.01<br>(0.00 to<br>0.09)                      |
| Conflict and terrorism                                                              | 157.83<br>(44.97 to<br>278.14)                      | 5.00<br>(0.00 to<br>17.50)                           | 5.03<br>(0.00 to<br>17.58)                           | 5.86<br>(0.00 to<br>20.56)                           | 2.55<br>(0.73 to<br>4.50)                      | 0.09<br>(0.00 to<br>0.30)                      | 0.09<br>(0.00 to<br>0.30)                      | 0.10<br>(0.00 to<br>0.34)                      |
| Executions and police conflict                                                      | 0.30<br>(0.25 to<br>0.38)                           | 2.62<br>(0.00 to<br>21.45)                           | 2.63<br>(0.00 to<br>21.56)                           | 2.85<br>(0.00 to<br>23.36)                           | 0.01<br>(0.00 to<br>0.01)                      | 0.05<br>(0.00 to<br>0.40)                      | 0.05<br>(0.00 to<br>0.40)                      | 0.05<br>(0.00 to<br>0.42)                      |
| <b>Syria</b>                                                                        |                                                     |                                                      |                                                      |                                                      |                                                |                                                |                                                |                                                |
| Cause                                                                               | YLLs (actual counts)                                |                                                      |                                                      |                                                      | Deaths (actual counts)                         |                                                |                                                |                                                |
|                                                                                     | 2016                                                | 2040 Forecast                                        | 2040 Better Scenario                                 | 2040 Worse Scenario                                  | 2016                                           | 2040 Forecast                                  | 2040 Better Scenario                           | 2040 Worse Scenario                            |
| All causes                                                                          | 5,036,631.57<br>(2,646,948.41 to<br>7,548,966.69)   | 3,099,551.91<br>(2,297,492.28 to<br>4,099,485.75)    | 2,251,519.40<br>(1,724,809.21 to<br>2,910,144.77)    | 4,012,644.18<br>(2,898,115.01 to<br>5,375,529.83)    | 118,020.99<br>(77,795.18 to<br>159,756.80)     | 153,637.86<br>(121,604.77 to<br>191,730.06)    | 119,350.82<br>(96,069.58 to<br>146,777.27)     | 186,765.17<br>(146,265.29 to<br>233,031.23)    |
| Communicable, maternal, neonatal, and nutritional diseases                          | 231,384.87<br>(177,723.82 to<br>304,262.37)         | 204,075.12<br>(129,004.62 to<br>326,150.02)          | 139,282.21<br>(91,034.85 to<br>214,708.31)           | 267,291.69<br>(161,044.39 to<br>439,316.03)          | 3,773.77<br>(3,087.32 to<br>4,712.76)          | 5,142.82<br>(3,944.74 to<br>7,043.64)          | 3,948.67<br>(3,122.57 to<br>5,167.52)          | 6,163.87<br>(4,572.45 to<br>8,758.78)          |

|                                                                          |                                                     |                                                     |                                                    |                                                     |                                                |                                                |                                                |                                                |
|--------------------------------------------------------------------------|-----------------------------------------------------|-----------------------------------------------------|----------------------------------------------------|-----------------------------------------------------|------------------------------------------------|------------------------------------------------|------------------------------------------------|------------------------------------------------|
|                                                                          | 2,894.62<br>(2,427.42 to<br>3,567.13)               | 2,021.57<br>(1,354.15 to<br>3,331.44)               | 1,360.45<br>(912.75 to<br>2,189.63)                | 3,130.48<br>(1,934.25 to<br>5,308.64)               | 70.49<br>(59.22 to<br>84.28)                   | 68.29<br>(47.98 to<br>104.00)                  | 47.46<br>(33.39 to<br>69.43)                   | 99.31<br>(64.62 to<br>157.73)                  |
| <b>HIV/AIDS and tuberculosis</b>                                         |                                                     |                                                     |                                                    |                                                     |                                                |                                                |                                                |                                                |
| Tuberculosis                                                             | 2,064.90<br>(1,734.82 to<br>2,427.82)               | 1,693.88<br>(1,177.15 to<br>2,358.70)               | 1,147.18<br>(777.89 to<br>1,670.87)                | 2,430.92<br>(1,586.02 to<br>3,716.63)               | 55.20<br>(46.49 to<br>63.54)                   | 61.37<br>(43.79 to<br>85.64)                   | 43.44<br>(30.24 to<br>60.04)                   | 83.31<br>(54.60 to<br>120.14)                  |
| HIV/AIDS                                                                 | 829.72<br>(568.91 to<br>1,395.37)                   | 327.68<br>(45.44 to<br>1,655.18)                    | 213.27<br>(37.86 to<br>935.58)                     | 699.57<br>(53.72 to<br>2,756.12)                    | 15.29<br>(10.29 to<br>26.67)                   | 6.93<br>(0.65 to<br>39.13)                     | 4.02<br>(0.56 to<br>20.82)                     | 16.00<br>(0.79 to<br>68.35)                    |
| <b>Diarrhea, lower respiratory, and other common infectious diseases</b> | <b>116,027.04<br/>(81,370.73 to<br/>166,173.02)</b> | <b>114,720.88<br/>(74,166.99 to<br/>192,855.62)</b> | <b>73,071.97<br/>(52,180.16 to<br/>108,424.94)</b> | <b>146,227.55<br/>(88,836.63 to<br/>264,815.94)</b> | <b>2,288.76<br/>(1,828.15 to<br/>2,925.34)</b> | <b>3,818.12<br/>(2,883.85 to<br/>5,139.72)</b> | <b>2,923.86<br/>(2,313.58 to<br/>3,843.85)</b> | <b>4,444.56<br/>(3,273.62 to<br/>6,186.66)</b> |
| Diarrheal diseases                                                       | 3,551.57<br>(2,234.97 to<br>5,381.21)               | 1,532.47<br>(471.24 to<br>3,854.49)                 | 1,063.29<br>(357.11 to<br>2,477.16)                | 3,023.39<br>(809.22 to<br>7,643.75)                 | 67.77<br>(44.84 to<br>103.85)                  | 63.70<br>(20.84 to<br>161.61)                  | 52.94<br>(16.75 to<br>132.89)                  | 104.21<br>(28.39 to<br>272.28)                 |
| Intestinal infectious diseases                                           | 7,124.23<br>(3,668.49 to<br>12,313.68)              | 4,896.01<br>(2,255.36 to<br>8,916.82)               | 4,325.42<br>(2,035.04 to<br>7,761.11)              | 5,766.28<br>(2,652.82 to<br>10,569.89)              | 104.17<br>(53.91 to<br>179.28)                 | 80.52<br>(38.58 to<br>144.14)                  | 72.17<br>(35.27 to<br>127.69)                  | 92.48<br>(44.17 to<br>167.19)                  |
| Typhoid fever                                                            | 6,344.96<br>(3,242.73 to<br>10,901.02)              | 4,227.77<br>(1,929.64 to<br>7,814.66)               | 3,744.96<br>(1,746.37 to<br>6,854.87)              | 4,974.79<br>(2,221.43 to<br>9,372.30)               | 92.46<br>(47.73 to<br>157.72)                  | 69.08<br>(32.68 to<br>123.26)                  | 62.09<br>(30.36 to<br>110.97)                  | 79.26<br>(37.48 to<br>143.73)                  |
| Paratyphoid fever                                                        | 778.20<br>(336.49 to<br>1,553.95)                   | 667.60<br>(271.55 to<br>1,387.00)                   | 579.95<br>(230.85 to<br>1,226.62)                  | 790.69<br>(307.19 to<br>1,651.31)                   | 11.69<br>(5.09 to<br>23.10)                    | 11.42<br>(4.70 to<br>23.38)                    | 10.06<br>(4.14 to<br>20.71)                    | 13.19<br>(5.36 to<br>27.12)                    |
| Other intestinal infectious diseases                                     | 1.07<br>(0.38 to<br>2.40)                           | 0.64<br>(0.21 to<br>1.58)                           | 0.51<br>(0.17 to<br>1.23)                          | 0.80<br>(0.26 to<br>1.94)                           | 0.02<br>(0.01 to<br>0.04)                      | 0.02<br>(0.01 to<br>0.05)                      | 0.02<br>(0.01 to<br>0.04)                      | 0.03<br>(0.01 to<br>0.06)                      |
| Lower respiratory infections                                             | 63,548.39<br>(40,041.33 to<br>87,539.27)            | 75,501.52<br>(47,508.61 to<br>129,509.17)           | 52,922.59<br>(36,023.40 to<br>81,223.97)           | 99,612.09<br>(58,826.79 to<br>183,046.69)           | 1,515.48<br>(1,157.58 to<br>1,870.59)          | 3,089.99<br>(2,274.81 to<br>4,201.88)          | 2,428.27<br>(1,875.66 to<br>3,259.04)          | 3,607.89<br>(2,600.55 to<br>5,065.53)          |
| Upper respiratory infections                                             | 100.39<br>(52.11 to<br>180.57)                      | 134.83<br>(56.11 to<br>273.96)                      | 101.12<br>(41.39 to<br>207.13)                     | 170.35<br>(66.46 to<br>362.82)                      | 2.31<br>(1.31 to<br>3.73)                      | 4.85<br>(2.05 to<br>9.73)                      | 3.81<br>(1.54 to<br>7.82)                      | 5.78<br>(2.20 to<br>12.17)                     |
| Otitis media                                                             | 19.98<br>(11.53 to<br>43.36)                        | 7.82<br>(4.46 to<br>13.29)                          | 8.28<br>(4.67 to<br>14.19)                         | 7.49<br>(4.28 to<br>12.79)                          | 0.61<br>(0.42 to<br>0.95)                      | 0.45<br>(0.24 to<br>0.80)                      | 0.51<br>(0.27 to<br>0.91)                      | 0.40<br>(0.21 to<br>0.72)                      |
| Meningitis                                                               | 14,978.69<br>(10,680.10 to<br>21,614.21)            | 10,456.11<br>(6,567.48 to<br>17,368.88)             | 8,696.69<br>(5,890.81 to<br>13,578.73)             | 11,553.64<br>(7,261.92 to<br>19,401.24)             | 256.22<br>(193.31 to<br>347.48)                | 255.78<br>(188.56 to<br>378.18)                | 238.38<br>(172.62 to<br>352.23)                | 263.43<br>(191.48 to<br>394.89)                |
| Pneumococcal meningitis                                                  | 96.80<br>(59.73 to<br>159.39)                       | 59.81<br>(36.39 to<br>102.25)                       | 54.25<br>(32.92 to<br>88.01)                       | 60.89<br>(37.10 to<br>102.43)                       | 1.91<br>(1.28 to<br>2.92)                      | 1.95<br>(1.19 to<br>3.31)                      | 1.90<br>(1.12 to<br>3.30)                      | 1.85<br>(1.14 to<br>3.15)                      |
| H influenzae type B meningitis                                           | 996.64<br>(691.29 to<br>1,464.90)                   | 2,152.27<br>(999.09 to<br>6,220.03)                 | 913.92<br>(393.44 to<br>2,223.71)                  | 2,421.31<br>(541.56 to<br>7,084.47)                 | 16.71<br>(12.37 to<br>23.14)                   | 32.71<br>(12.83 to<br>79.51)                   | 18.83<br>(11.43 to<br>34.01)                   | 35.22<br>(12.52 to<br>89.08)                   |
| Meningococcal meningitis                                                 | 6,304.00<br>(4,484.15 to<br>9,022.40)               | 3,626.02<br>(2,376.79 to<br>5,583.12)               | 3,388.06<br>(2,266.52 to<br>5,128.05)              | 3,993.00<br>(2,582.98 to<br>6,214.25)               | 110.15<br>(81.81 to<br>150.26)                 | 102.20<br>(74.95 to<br>154.80)                 | 100.74<br>(73.74 to<br>150.71)                 | 104.20<br>(75.41 to<br>157.96)                 |
| Other meningitis                                                         | 7,581.25<br>(5,406.44 to<br>10,977.05)              | 4,618.02<br>(3,142.96 to<br>6,897.48)               | 4,340.46<br>(2,936.36 to<br>6,650.41)              | 5,078.43<br>(3,409.31 to<br>7,659.02)               | 127.45<br>(97.06 to<br>175.05)                 | 118.92<br>(86.37 to<br>174.28)                 | 116.91<br>(85.48 to<br>172.47)                 | 122.17<br>(89.49 to<br>181.44)                 |
| Encephalitis                                                             | 3,735.71<br>(2,550.10 to<br>5,321.04)               | 4,210.12<br>(2,727.22 to<br>6,508.97)               | 3,707.98<br>(2,430.42 to<br>5,765.99)              | 4,799.01<br>(3,027.68 to<br>7,553.77)               | 64.87<br>(46.89 to<br>90.44)                   | 104.37<br>(74.88 to<br>150.76)                 | 95.57<br>(68.98 to<br>140.52)                  | 112.51<br>(79.22 to<br>166.68)                 |
| Diphtheria                                                               | 56.71<br>(31.84 to<br>99.66)                        | 14.26<br>(6.34 to<br>32.80)                         | 7.54<br>(4.40 to<br>12.69)                         | 15.45<br>(6.75 to<br>36.30)                         | 0.82<br>(0.48 to<br>1.35)                      | 0.23<br>(0.12 to<br>0.45)                      | 0.15<br>(0.09 to<br>0.26)                      | 0.24<br>(0.12 to<br>0.51)                      |
| Whooping cough                                                           | 21,862.43<br>(2,272.40 to<br>61,472.02)             | 17,595.11<br>(1,651.09 to<br>56,741.42)             | 2,063.75<br>(145.15 to<br>7,628.71)                | 20,748.14<br>(1,817.76 to<br>69,149.02)             | 260.83<br>(27.04 to<br>728.97)                 | 209.79<br>(19.83 to<br>673.95)                 | 26.30<br>(2.01 to<br>96.38)                    | 247.17<br>(21.94 to<br>820.00)                 |
| Tetanus                                                                  | 271.20<br>(180.79 to<br>464.64)                     | 56.96<br>(25.75 to<br>150.29)                       | 22.88<br>(14.01 to<br>40.63)                       | 62.92<br>(27.32 to<br>172.80)                       | 4.40<br>(3.00 to<br>7.35)                      | 0.98<br>(0.50 to<br>2.25)                      | 0.61<br>(0.32 to<br>1.31)                      | 1.03<br>(0.52 to<br>2.42)                      |
| Measles                                                                  | 520.86<br>(126.80 to<br>1,337.10)                   | 157.47<br>(3.86 to<br>1,282.93)                     | 31.18<br>(2.14 to<br>226.64)                       | 266.12<br>(6.22 to<br>1,971.32)                     | 6.28<br>(1.54 to<br>16.06)                     | 1.88<br>(0.05 to<br>15.26)                     | 0.38<br>(0.03 to<br>2.73)                      | 3.17<br>(0.08 to<br>23.58)                     |

| Syria                                                 |                                                            |                                                            |                                                            |                                                            |                                                   |                                                   |                                                   |                                                    |
|-------------------------------------------------------|------------------------------------------------------------|------------------------------------------------------------|------------------------------------------------------------|------------------------------------------------------------|---------------------------------------------------|---------------------------------------------------|---------------------------------------------------|----------------------------------------------------|
| Cause                                                 | YLLs (actual counts)                                       |                                                            |                                                            |                                                            | Deaths (actual counts)                            |                                                   |                                                   |                                                    |
|                                                       | 2016                                                       | 2040 Forecast                                              | 2040 Better Scenario                                       | 2040 Worse Scenario                                        | 2016                                              | 2040 Forecast                                     | 2040 Better Scenario                              | 2040 Worse Scenario                                |
| Varicella and herpes zoster                           | 256.88<br>(145.22 to<br>450.25)                            | 158.18<br>(74.77 to<br>304.48)                             | 121.26<br>(57.70 to<br>240.18)                             | 202.68<br>(88.98 to<br>403.15)                             | 5.02<br>(3.36 to<br>7.47)                         | 5.59<br>(3.19 to<br>9.24)                         | 4.77<br>(2.67 to<br>8.13)                         | 6.24<br>(3.36 to<br>10.64)                         |
| <b>Neglected tropical diseases and malaria</b>        | <b>514.72</b><br><b>(378.61 to</b><br><b>659.15)</b>       | <b>365.18</b><br><b>(217.39 to</b><br><b>584.06)</b>       | <b>304.60</b><br><b>(179.71 to</b><br><b>491.32)</b>       | <b>427.56</b><br><b>(257.84 to</b><br><b>680.60)</b>       | <b>13.25</b><br><b>(8.85 to</b><br><b>18.57)</b>  | <b>13.23</b><br><b>(5.85 to</b><br><b>24.33)</b>  | <b>11.14</b><br><b>(5.02 to</b><br><b>20.11)</b>  | <b>14.96</b><br><b>(6.82 to</b><br><b>27.16)</b>   |
| Malaria                                               | 0.00<br>(0.00 to<br>0.00)                                  | 0.00<br>(0.00 to<br>0.00)                                  | 0.00<br>(0.00 to<br>0.00)                                  | 0.00<br>(0.00 to<br>0.00)                                  | 0.00<br>(0.00 to<br>0.00)                         | 0.00<br>(0.00 to<br>0.00)                         | 0.00<br>(0.00 to<br>0.00)                         | 0.00<br>(0.00 to<br>0.00)                          |
| Chagas disease                                        | 0.00<br>(0.00 to<br>0.00)                                  | 0.00<br>(0.00 to<br>0.00)                                  | 0.00<br>(0.00 to<br>0.00)                                  | 0.00<br>(0.00 to<br>0.00)                                  | 0.00<br>(0.00 to<br>0.00)                         | 0.00<br>(0.00 to<br>0.00)                         | 0.00<br>(0.00 to<br>0.00)                         | 0.00<br>(0.00 to<br>0.00)                          |
| Leishmaniasis                                         | 159.86<br>(89.52 to<br>244.92)                             | 57.23<br>(29.01 to<br>149.02)                              | 44.76<br>(22.61 to<br>118.96)                              | 70.02<br>(34.48 to<br>186.42)                              | 3.80<br>(2.27 to<br>5.48)                         | 1.65<br>(0.82 to<br>4.45)                         | 1.33<br>(0.64 to<br>3.62)                         | 1.92<br>(0.95 to<br>5.04)                          |
| African trypanosomiasis                               | 0.00<br>(0.00 to<br>0.00)                                  | 0.00<br>(0.00 to<br>0.00)                                  | 0.00<br>(0.00 to<br>0.00)                                  | 0.00<br>(0.00 to<br>0.00)                                  | 0.00<br>(0.00 to<br>0.00)                         | 0.00<br>(0.00 to<br>0.00)                         | 0.00<br>(0.00 to<br>0.00)                         | 0.00<br>(0.00 to<br>0.00)                          |
| Schistosomiasis                                       | 119.51<br>(56.08 to<br>208.18)                             | 109.82<br>(45.19 to<br>206.15)                             | 97.38<br>(40.36 to<br>185.69)                              | 119.61<br>(48.32 to<br>226.34)                             | 3.93<br>(1.86 to<br>6.97)                         | 4.56<br>(1.75 to<br>8.97)                         | 4.17<br>(1.62 to<br>8.13)                         | 4.80<br>(1.87 to<br>9.51)                          |
| Cysticercosis                                         | 15.19<br>(10.57 to<br>21.20)                               | 5.72<br>(3.49 to<br>9.29)                                  | 5.48<br>(3.34 to<br>8.92)                                  | 5.98<br>(3.63 to<br>9.61)                                  | 0.35<br>(0.24 to<br>0.49)                         | 0.17<br>(0.10 to<br>0.28)                         | 0.16<br>(0.10 to<br>0.27)                         | 0.17<br>(0.10 to<br>0.28)                          |
| Cystic echinococcosis                                 | 0.00<br>(0.00 to<br>0.00)                                  | 0.00<br>(0.00 to<br>0.00)                                  | 0.00<br>(0.00 to<br>0.00)                                  | 0.00<br>(0.00 to<br>0.00)                                  | 0.00<br>(0.00 to<br>0.00)                         | 0.00<br>(0.00 to<br>0.00)                         | 0.00<br>(0.00 to<br>0.00)                         | 0.00<br>(0.00 to<br>0.00)                          |
| Dengue                                                | 0.00<br>(0.00 to<br>0.00)                                  | 0.00<br>(0.00 to<br>0.00)                                  | 0.00<br>(0.00 to<br>0.00)                                  | 0.00<br>(0.00 to<br>0.00)                                  | 0.00<br>(0.00 to<br>0.00)                         | 0.00<br>(0.00 to<br>0.00)                         | 0.00<br>(0.00 to<br>0.00)                         | 0.00<br>(0.00 to<br>0.00)                          |
| Yellow fever                                          | 0.00<br>(0.00 to<br>0.00)                                  | 0.00<br>(0.00 to<br>0.00)                                  | 0.00<br>(0.00 to<br>0.00)                                  | 0.00<br>(0.00 to<br>0.00)                                  | 0.00<br>(0.00 to<br>0.00)                         | 0.00<br>(0.00 to<br>0.00)                         | 0.00<br>(0.00 to<br>0.00)                         | 0.00<br>(0.00 to<br>0.00)                          |
| Rabies                                                | 62.09<br>(5.55 to<br>131.74)                               | 74.41<br>(2.15 to<br>193.53)                               | 55.47<br>(1.33 to<br>151.43)                               | 91.59<br>(3.18 to<br>237.37)                               | 2.68<br>(0.10 to<br>6.68)                         | 4.72<br>(0.05 to<br>13.30)                        | 3.60<br>(0.03 to<br>10.30)                        | 5.60<br>(0.07 to<br>16.11)                         |
| Intestinal nematode infections                        | 36.31<br>(6.32 to<br>92.31)                                | 31.56<br>(6.63 to<br>85.20)                                | 30.32<br>(6.69 to<br>81.79)                                | 35.08<br>(6.63 to<br>96.21)                                | 0.51<br>(0.15 to<br>1.19)                         | 0.53<br>(0.18 to<br>1.18)                         | 0.53<br>(0.19 to<br>1.17)                         | 0.56<br>(0.18 to<br>1.31)                          |
| Other neglected tropical diseases                     | 121.76<br>(107.68 to<br>137.76)                            | 86.44<br>(67.24 to<br>114.77)                              | 71.19<br>(54.46 to<br>94.96)                               | 105.28<br>(80.56 to<br>139.36)                             | 1.98<br>(1.77 to<br>2.20)                         | 1.60<br>(1.26 to<br>2.17)                         | 1.34<br>(1.01 to<br>1.81)                         | 1.90<br>(1.49 to<br>2.53)                          |
| <b>Maternal disorders</b>                             | <b>2,400.27</b><br><b>(1,755.94 to</b><br><b>3,159.07)</b> | <b>2,720.50</b><br><b>(1,631.43 to</b><br><b>4,326.15)</b> | <b>1,908.61</b><br><b>(1,073.25 to</b><br><b>3,483.64)</b> | <b>3,616.54</b><br><b>(2,050.92 to</b><br><b>5,905.82)</b> | <b>44.02</b><br><b>(32.50 to</b><br><b>57.91)</b> | <b>51.19</b><br><b>(30.63 to</b><br><b>79.82)</b> | <b>35.92</b><br><b>(20.62 to</b><br><b>57.53)</b> | <b>67.81</b><br><b>(38.02 to</b><br><b>109.95)</b> |
| Maternal hemorrhage                                   | 836.89<br>(572.79 to<br>1,183.02)                          | 961.91<br>(531.67 to<br>1,586.95)                          | 669.59<br>(345.36 to<br>1,131.92)                          | 1,274.58<br>(683.79 to<br>2,239.56)                        | 15.53<br>(10.73 to<br>21.97)                      | 18.24<br>(9.98 to<br>30.07)                       | 12.70<br>(6.48 to<br>21.57)                       | 21.12<br>(12.97 to<br>41.67)                       |
| Maternal sepsis and other maternal infections         | 208.68<br>(135.93 to<br>308.55)                            | 199.70<br>(107.97 to<br>327.88)                            | 138.73<br>(71.58 to<br>233.82)                             | 267.06<br>(141.01 to<br>458.49)                            | 3.86<br>(2.55 to<br>5.60)                         | 3.81<br>(2.11 to<br>6.19)                         | 2.65<br>(1.42 to<br>4.46)                         | 5.08<br>(2.69 to<br>8.65)                          |
| Maternal hypertensive disorders                       | 243.05<br>(158.64 to<br>357.91)                            | 266.43<br>(139.43 to<br>479.57)                            | 184.64<br>(91.64 to<br>340.60)                             | 356.14<br>(174.67 to<br>653.61)                            | 4.39<br>(2.87 to<br>6.45)                         | 4.94<br>(2.58 to<br>8.76)                         | 3.42<br>(1.72 to<br>6.18)                         | 6.58<br>(3.28 to<br>12.01)                         |
| Maternal obstructed labor and uterine rupture         | 38.22<br>(20.16 to<br>63.26)                               | 43.19<br>(18.53 to<br>83.59)                               | 29.26<br>(11.93 to<br>58.41)                               | 58.60<br>(23.92 to<br>117.57)                              | 0.71<br>(0.39 to<br>1.19)                         | 0.83<br>(0.36 to<br>1.58)                         | 0.56<br>(0.24 to<br>1.11)                         | 1.12<br>(0.46 to<br>2.27)                          |
| Maternal abortion, miscarriage, and ectopic pregnancy | 118.15<br>(73.08 to<br>175.58)                             | 165.55<br>(80.30 to<br>296.94)                             | 115.42<br>(56.02 to<br>212.04)                             | 224.02<br>(105.31 to<br>409.93)                            | 2.27<br>(1.44 to<br>3.32)                         | 3.28<br>(1.64 to<br>5.80)                         | 2.29<br>(1.11 to<br>4.09)                         | 4.43<br>(2.15 to<br>7.94)                          |

|                                                                  |                                           |                                           |                                           |                                            |                                     |                                   |                                   |                                     |
|------------------------------------------------------------------|-------------------------------------------|-------------------------------------------|-------------------------------------------|--------------------------------------------|-------------------------------------|-----------------------------------|-----------------------------------|-------------------------------------|
| Indirect maternal deaths                                         | 354.55<br>(227.35 to<br>521.44)           | 399.95<br>(205.87 to<br>680.97)           | 281.44<br>(135.47 to<br>496.79)           | 536.26<br>(258.62 to<br>940.64)            | 6.30<br>(4.10 to<br>9.20)           | 7.28<br>(3.77 to<br>12.11)        | 5.12<br>(2.51 to<br>8.88)         | 9.70<br>(4.81 to<br>16.93)          |
| Late maternal deaths                                             | 30.46<br>(13.79 to<br>59.59)              | 25.24<br>(10.20 to<br>51.41)              | 17.57<br>(7.12 to<br>37.41)               | 34.03<br>(13.10 to<br>75.19)               | 0.54<br>(0.25 to<br>1.02)           | 0.46<br>(0.19 to<br>0.93)         | 0.32<br>(0.13 to<br>0.67)         | 0.62<br>(0.24 to<br>1.34)           |
| Maternal deaths aggravated by HIV/AIDS                           | 0.05<br>(0.02 to<br>0.14)                 | 0.05<br>(0.00 to<br>0.24)                 | 0.02<br>(0.00 to<br>0.13)                 | 0.13<br>(0.00 to<br>0.77)                  | 0.00<br>(0.00 to<br>0.00)           | 0.00<br>(0.00 to<br>0.01)         | 0.00<br>(0.00 to<br>0.00)         | 0.00<br>(0.00 to<br>0.01)           |
| Other maternal disorders                                         | 570.20<br>(392.06 to<br>814.28)           | 658.49<br>(375.08 to<br>1,090.98)         | 471.95<br>(258.00 to<br>796.45)           | 865.70<br>(462.21 to<br>1,520.08)          | 10.42<br>(7.08 to<br>14.93)         | 12.36<br>(7.15 to<br>20.73)       | 8.86<br>(4.80 to<br>15.23)        | 16.17<br>(8.82 to<br>28.63)         |
| <b>Syria</b>                                                     |                                           |                                           |                                           |                                            |                                     |                                   |                                   |                                     |
| Cause                                                            | YLLs (actual counts)                      |                                           |                                           |                                            | Deaths (actual counts)              |                                   |                                   |                                     |
|                                                                  | 2016                                      | 2040 Forecast                             | 2040 Better Scenario                      | 2040 Worse Scenario                        | 2016                                | 2040 Forecast                     | 2040 Better Scenario              | 2040 Worse Scenario                 |
| Neonatal disorders                                               | 96,748.64<br>(72,474.55 to<br>127,399.23) | 75,080.09<br>(25,918.28 to<br>149,200.11) | 54,845.98<br>(19,326.91 to<br>111,464.00) | 103,150.12<br>(35,865.87 to<br>204,412.90) | 1,118.63<br>(837.72 to<br>1,473.11) | 868.25<br>(299.96 to<br>1,724.98) | 634.32<br>(223.73 to<br>1,288.93) | 1,192.77<br>(415.22 to<br>2,362.79) |
| Neonatal preterm birth                                           | 41,461.76<br>(27,652.68 to<br>57,955.05)  | 30,147.04<br>(9,583.04 to<br>60,611.83)   | 20,416.24<br>(6,267.68 to<br>41,338.34)   | 42,441.89<br>(13,357.12 to<br>86,456.17)   | 478.96<br>(319.41 to<br>669.61)     | 348.29<br>(110.73 to<br>700.29)   | 235.88<br>(72.43 to<br>477.59)    | 490.22<br>(154.48 to<br>998.86)     |
| Neonatal encephalopathy due to birth asphyxia and trauma         | 23,745.26<br>(14,444.66 to<br>37,781.25)  | 17,222.16<br>(5,275.22 to<br>40,521.96)   | 13,494.59<br>(4,339.98 to<br>32,185.32)   | 22,879.34<br>(7,014.59 to<br>54,632.64)    | 274.86<br>(167.17 to<br>437.67)     | 199.46<br>(61.52 to<br>468.35)    | 156.30<br>(50.31 to<br>372.40)    | 264.95<br>(81.51 to<br>632.23)      |
| Neonatal sepsis and other neonatal infections                    | 17,427.17<br>(9,089.82 to<br>29,004.73)   | 16,575.74<br>(5,461.01 to<br>36,699.99)   | 12,789.79<br>(4,201.68 to<br>28,999.47)   | 22,203.95<br>(6,876.68 to<br>48,104.66)    | 201.50<br>(105.11 to<br>335.35)     | 191.65<br>(63.13 to<br>424.29)    | 147.88<br>(48.62 to<br>335.04)    | 256.71<br>(79.50 to<br>555.77)      |
| Hemolytic disease and other neonatal jaundice                    | 440.93<br>(221.99 to<br>921.04)           | 246.34<br>(53.81 to<br>783.05)            | 180.23<br>(38.12 to<br>581.54)            | 347.23<br>(76.20 to<br>1,101.99)           | 5.10<br>(2.57 to<br>10.64)          | 2.85<br>(0.62 to<br>9.05)         | 2.08<br>(0.44 to<br>6.72)         | 4.01<br>(0.88 to<br>12.73)          |
| Other neonatal disorders                                         | 13,673.53<br>(7,679.24 to<br>23,088.17)   | 10,888.80<br>(3,373.57 to<br>27,013.51)   | 7,965.13<br>(2,398.66 to<br>19,407.61)    | 15,277.70<br>(4,649.83 to<br>37,751.50)    | 158.21<br>(88.86 to<br>267.29)      | 126.01<br>(39.06 to<br>312.15)    | 92.18<br>(27.35 to<br>224.37)     | 176.78<br>(53.86 to<br>436.37)      |
| Nutritional deficiencies                                         | 3,412.50<br>(2,400.28 to<br>5,063.17)     | 2,460.61<br>(1,762.95 to<br>3,514.73)     | 2,088.50<br>(1,483.50 to<br>2,960.32)     | 2,885.45<br>(1,944.80 to<br>4,366.12)      | 80.49<br>(66.28 to<br>101.57)       | 106.74<br>(81.83 to<br>138.95)    | 99.22<br>(75.76 to<br>131.26)     | 111.35<br>(82.57 to<br>148.67)      |
| Protein-energy malnutrition                                      | 2,996.38<br>(2,039.21 to<br>4,610.18)     | 2,029.81<br>(1,424.39 to<br>3,019.18)     | 1,719.18<br>(1,197.57 to<br>2,482.02)     | 2,384.82<br>(1,572.50 to<br>3,715.03)      | 72.18<br>(58.69 to<br>92.32)        | 92.23<br>(68.68 to<br>123.57)     | 86.07<br>(63.33 to<br>115.61)     | 95.78<br>(69.71 to<br>132.07)       |
| Iodine deficiency                                                | 71.02<br>(6.87 to<br>261.64)              | 135.86<br>(9.66 to<br>385.74)             | 112.25<br>(6.84 to<br>316.38)             | 160.52<br>(11.26 to<br>469.28)             | 1.72<br>(0.20 to<br>4.75)           | 6.49<br>(0.32 to<br>19.48)        | 5.79<br>(0.24 to<br>18.16)        | 6.95<br>(0.38 to<br>20.23)          |
| Dietary iron deficiency                                          | 164.50<br>(122.81 to<br>212.18)           | 144.60<br>(97.81 to<br>212.95)            | 127.20<br>(86.05 to<br>189.05)            | 166.67<br>(108.23 to<br>253.21)            | 2.78<br>(2.17 to<br>3.47)           | 3.02<br>(2.13 to<br>4.16)         | 2.73<br>(1.90 to<br>3.85)         | 3.34<br>(2.30 to<br>4.80)           |
| Other nutritional deficiencies                                   | 180.60<br>(135.08 to<br>238.11)           | 150.35<br>(103.91 to<br>217.57)           | 129.87<br>(88.25 to<br>190.01)            | 173.44<br>(116.48 to<br>261.98)            | 3.81<br>(2.97 to<br>4.73)           | 5.00<br>(3.24 to<br>7.05)         | 4.63<br>(3.02 to<br>6.54)         | 5.29<br>(3.42 to<br>7.59)           |
| Other communicable, maternal, neonatal, and nutritional diseases | 9,387.09<br>(5,567.14 to<br>17,626.54)    | 6,706.30<br>(4,541.70 to<br>10,862.80)    | 5,702.10<br>(3,834.65 to<br>9,157.18)     | 7,853.97<br>(5,000.27 to<br>12,924.99)     | 158.12<br>(110.19 to<br>258.43)     | 217.00<br>(167.83 to<br>303.10)   | 196.75<br>(150.18 to<br>270.92)   | 233.12<br>(174.78 to<br>329.64)     |
| Sexually transmitted infections excluding HIV                    | 4,876.31<br>(1,415.62 to<br>13,026.71)    | 1,358.19<br>(328.38 to<br>4,123.39)       | 1,120.01<br>(292.73 to<br>3,239.08)       | 1,679.76<br>(386.25 to<br>4,980.84)        | 58.78<br>(18.17 to<br>154.05)       | 18.65<br>(6.15 to<br>51.20)       | 15.68<br>(5.51 to<br>41.02)       | 22.50<br>(6.94 to<br>61.68)         |
| Syphilis                                                         | 4,783.02<br>(1,319.03 to<br>12,946.18)    | 1,242.92<br>(231.28 to<br>4,031.54)       | 1,016.22<br>(194.73 to<br>3,151.19)       | 1,554.17<br>(282.20 to<br>4,845.01)        | 56.55<br>(16.07 to<br>152.09)       | 15.26<br>(3.31 to<br>47.78)       | 12.54<br>(2.97 to<br>37.62)       | 18.94<br>(3.91 to<br>57.77)         |
| Chlamydia infection                                              | 17.67<br>(12.32 to<br>35.73)              | 22.48<br>(14.71 to<br>46.88)              | 20.22<br>(12.90 to<br>41.14)              | 24.55<br>(15.88 to<br>51.82)               | 0.43<br>(0.31 to<br>0.83)           | 0.66<br>(0.44 to<br>1.30)         | 0.62<br>(0.40 to<br>1.20)         | 0.70<br>(0.46 to<br>1.39)           |
| Gonococcal infection                                             | 49.07<br>(35.81 to<br>94.52)              | 61.22<br>(40.44 to<br>126.65)             | 55.29<br>(36.02 to<br>114.29)             | 66.40<br>(43.37 to<br>138.26)              | 1.22<br>(0.89 to<br>2.28)           | 1.89<br>(1.26 to<br>3.59)         | 1.76<br>(1.15 to<br>3.31)         | 1.98<br>(1.29 to<br>3.75)           |

|                                       |                                                   |                                                   |                                                   |                                                   |                                          |                                             |                                            |                                             |
|---------------------------------------|---------------------------------------------------|---------------------------------------------------|---------------------------------------------------|---------------------------------------------------|------------------------------------------|---------------------------------------------|--------------------------------------------|---------------------------------------------|
|                                       | 26.55<br>(18.89 to<br>52.43)                      | 31.57<br>(20.11 to<br>66.14)                      | 28.28<br>(18.00 to<br>57.86)                      | 34.64<br>(21.78 to<br>74.17)                      | 0.59<br>(0.43 to<br>1.14)                | 0.83<br>(0.53 to<br>1.64)                   | 0.76<br>(0.50 to<br>1.48)                  | 0.89<br>(0.57 to<br>1.78)                   |
| Other sexually transmitted infections |                                                   |                                                   |                                                   |                                                   |                                          |                                             |                                            |                                             |
| Acute hepatitis                       | 339.56<br>(280.81 to<br>416.75)                   | 457.56<br>(340.90 to<br>625.59)                   | 401.60<br>(292.26 to<br>544.57)                   | 510.72<br>(368.75 to<br>725.39)                   | 7.78<br>(6.64 to<br>9.16)                | 15.45<br>(11.75 to<br>20.06)                | 14.13<br>(10.66 to<br>18.56)               | 16.40<br>(12.31 to<br>22.05)                |
| Acute hepatitis A                     | 20.70<br>(5.77 to<br>46.39)                       | 14.05<br>(4.61 to<br>29.84)                       | 11.88<br>(4.02 to<br>26.12)                       | 16.83<br>(5.17 to<br>38.18)                       | 0.28<br>(0.10 to<br>0.60)                | 0.31<br>(0.13 to<br>0.62)                   | 0.28<br>(0.11 to<br>0.57)                  | 0.34<br>(0.14 to<br>0.68)                   |
| Acute hepatitis B                     | 232.60<br>(193.45 to<br>279.46)                   | 360.91<br>(266.94 to<br>491.31)                   | 315.23<br>(227.36 to<br>432.86)                   | 400.36<br>(286.75 to<br>556.25)                   | 5.93<br>(5.02 to<br>7.04)                | 12.34<br>(9.23 to<br>16.50)                 | 11.12<br>(8.11 to<br>15.09)                | 13.21<br>(9.82 to<br>17.99)                 |
| Acute hepatitis C                     | 6.39<br>(4.67 to<br>8.69)                         | 11.37<br>(7.62 to<br>16.26)                       | 10.82<br>(7.11 to<br>15.56)                       | 11.87<br>(7.85 to<br>17.08)                       | 0.17<br>(0.13 to<br>0.23)                | 0.45<br>(0.30 to<br>0.64)                   | 0.44<br>(0.29 to<br>0.63)                  | 0.45<br>(0.29 to<br>0.64)                   |
| Acute hepatitis E                     | 79.88<br>(52.45 to<br>122.17)                     | 71.23<br>(42.81 to<br>117.04)                     | 63.66<br>(39.22 to<br>101.50)                     | 81.67<br>(46.50 to<br>138.37)                     | 1.40<br>(0.99 to<br>1.95)                | 2.35<br>(1.44 to<br>3.55)                   | 2.29<br>(1.40 to<br>3.44)                  | 2.40<br>(1.45 to<br>3.66)                   |
| Other unspecified infectious diseases | 4,171.22<br>(3,064.06 to<br>5,625.09)             | 4,890.54<br>(3,605.13 to<br>6,953.73)             | 4,180.49<br>(3,010.22 to<br>5,962.31)             | 5,663.49<br>(3,975.30 to<br>8,261.15)             | 91.55<br>(75.12 to<br>119.65)            | 182.91<br>(143.08 to<br>258.30)             | 166.94<br>(128.03 to<br>237.12)            | 194.22<br>(148.11 to<br>276.31)             |
| Non-communicable diseases             | 1,293,463.69<br>(1,179,489.01 to<br>1,407,729.27) | 2,639,116.81<br>(1,910,646.95 to<br>3,630,554.62) | 1,898,926.11<br>(1,427,985.14 to<br>2,513,860.93) | 3,446,344.28<br>(2,445,802.71 to<br>4,714,608.57) | 55,063.55<br>(50,916.67 to<br>58,662.57) | 141,858.84<br>(110,801.93 to<br>179,666.53) | 109,598.36<br>(87,107.95 to<br>137,345.05) | 173,263.05<br>(133,813.34 to<br>219,260.85) |

Syria

| Cause                            | YLLs (actual counts)                        |                                             |                                             |                                             | Deaths (actual counts)                |                                          |                                          |                                          |
|----------------------------------|---------------------------------------------|---------------------------------------------|---------------------------------------------|---------------------------------------------|---------------------------------------|------------------------------------------|------------------------------------------|------------------------------------------|
|                                  | 2016                                        | 2040 Forecast                               | 2040 Better Scenario                        | 2040 Worse Scenario                         | 2016                                  | 2040 Forecast                            | 2040 Better Scenario                     | 2040 Worse Scenario                      |
| Neoplasms                        | 190,622.23<br>(170,946.85 to<br>214,589.08) | 427,630.15<br>(360,636.78 to<br>501,589.01) | 408,187.65<br>(340,754.44 to<br>475,313.23) | 465,218.06<br>(390,708.35 to<br>557,394.93) | 6,572.33<br>(5,950.63 to<br>7,269.29) | 18,794.37<br>(16,067.54 to<br>21,827.26) | 18,673.52<br>(16,125.05 to<br>21,414.71) | 19,549.27<br>(16,377.56 to<br>23,085.33) |
| Lip and oral cavity cancer       | 1,213.14<br>(1,155.53 to<br>1,468.99)       | 2,849.16<br>(2,069.68 to<br>3,894.91)       | 2,476.87<br>(1,849.97 to<br>3,273.42)       | 3,678.30<br>(2,486.85 to<br>5,391.61)       | 52.51<br>(46.73 to<br>57.98)          | 132.54<br>(99.91 to<br>174.44)           | 121.56<br>(94.53 to<br>155.90)           | 159.67<br>(112.26 to<br>223.75)          |
| Nasopharynx cancer               | 495.35<br>(428.80 to<br>576.52)             | 961.21<br>(629.33 to<br>1,416.72)           | 787.03<br>(525.59 to<br>1,102.78)           | 1,345.02<br>(836.09 to<br>2,126.51)         | 13.89<br>(12.05 to<br>16.14)          | 32.71<br>(21.99 to<br>47.41)             | 27.75<br>(19.20 to<br>38.55)             | 44.03<br>(27.65 to<br>67.43)             |
| Other pharynx cancer             | 595.97<br>(505.53 to<br>685.52)             | 1,084.93<br>(780.48 to<br>1,480.88)         | 1,065.51<br>(763.91 to<br>1,462.86)         | 1,183.84<br>(828.15 to<br>1,636.14)         | 21.63<br>(18.55 to<br>24.77)          | 46.37<br>(33.90 to<br>61.82)             | 46.99<br>(35.01 to<br>62.30)             | 48.57<br>(34.52 to<br>65.61)             |
| Esophageal cancer                | 1,670.18<br>(1,434.48 to<br>1,911.82)       | 3,773.02<br>(2,347.14 to<br>6,072.43)       | 3,159.58<br>(2,080.59 to<br>4,903.44)       | 4,670.43<br>(2,755.70 to<br>7,677.67)       | 69.25<br>(60.30 to<br>77.97)          | 176.76<br>(111.85 to<br>266.74)          | 155.37<br>(104.18 to<br>231.60)          | 206.84<br>(125.77 to<br>326.25)          |
| Stomach cancer                   | 8,243.75<br>(7,338.76 to<br>9,223.99)       | 13,919.18<br>(10,714.17 to<br>18,014.28)    | 12,815.86<br>(9,889.68 to<br>16,427.41)     | 14,463.64<br>(11,209.69 to<br>18,622.89)    | 346.04<br>(308.83 to<br>382.05)       | 696.08<br>(544.76 to<br>881.92)          | 666.14<br>(532.22 to<br>825.49)          | 691.78<br>(547.00 to<br>873.23)          |
| Colon and rectum cancer          | 11,890.97<br>(10,031.28 to<br>13,478.24)    | 32,609.20<br>(22,485.06 to<br>45,854.42)    | 32,788.86<br>(22,940.80 to<br>46,008.15)    | 32,236.95<br>(22,191.15 to<br>45,353.82)    | 477.75<br>(407.03 to<br>554.14)       | 1,577.68<br>(1,107.22 to<br>2,224.24)    | 1,643.09<br>(1,168.13 to<br>2,300.88)    | 1,498.59<br>(1,043.08 to<br>2,118.33)    |
| Liver cancer                     | 9,203.68<br>(7,885.04 to<br>10,636.28)      | 26,601.47<br>(17,834.62 to<br>39,145.77)    | 24,065.92<br>(16,623.75 to<br>34,159.93)    | 30,114.24<br>(19,433.27 to<br>45,548.87)    | 372.02<br>(320.47 to<br>439.33)       | 1,285.78<br>(894.26 to<br>1,877.15)      | 1,213.58<br>(879.34 to<br>1,714.28)      | 1,389.41<br>(921.14 to<br>2,084.07)      |
| Liver cancer due to hepatitis B  | 3,505.44<br>(2,631.56 to<br>4,563.70)       | 9,436.88<br>(5,799.22 to<br>14,491.14)      | 8,443.94<br>(5,383.30 to<br>12,617.69)      | 10,795.80<br>(6,373.09 to<br>17,198.55)     | 124.23<br>(91.21 to<br>163.08)        | 393.20<br>(245.08 to<br>595.19)          | 365.07<br>(232.96 to<br>532.73)          | 432.22<br>(263.05 to<br>673.04)          |
| Liver cancer due to hepatitis C  | 2,773.30<br>(2,008.99 to<br>3,615.76)       | 8,926.88<br>(5,586.63 to<br>13,946.28)      | 8,265.55<br>(5,346.30 to<br>12,515.20)      | 9,818.31<br>(5,932.96 to<br>15,750.85)      | 134.70<br>(100.00 to<br>181.14)       | 501.66<br>(315.77 to<br>782.24)          | 484.75<br>(315.79 to<br>733.10)          | 526.38<br>(320.90 to<br>842.17)          |
| Liver cancer due to alcohol use  | 610.34<br>(387.41 to<br>919.35)             | 1,891.95<br>(992.43 to<br>3,277.29)         | 1,696.17<br>(925.42 to<br>2,869.99)         | 2,222.24<br>(1,124.97 to<br>3,928.22)       | 26.46<br>(16.75 to<br>39.21)          | 91.66<br>(47.25 to<br>156.62)            | 85.39<br>(46.20 to<br>140.79)            | 102.85<br>(52.50 to<br>179.81)           |
| Liver cancer due to other causes | 2,314.60<br>(1,692.79 to<br>3,109.73)       | 6,345.77<br>(3,692.75 to<br>10,273.51)      | 5,660.26<br>(3,402.22 to<br>8,968.52)       | 7,277.89<br>(4,055.54 to<br>12,064.10)      | 86.63<br>(60.88 to<br>118.38)         | 299.26<br>(173.11 to<br>493.51)          | 278.37<br>(166.16 to<br>442.55)          | 327.96<br>(183.11 to<br>552.12)          |

|                                      |                                          |                                          |                                          |                                           |                                   |                                       |                                       |                                       |  |
|--------------------------------------|------------------------------------------|------------------------------------------|------------------------------------------|-------------------------------------------|-----------------------------------|---------------------------------------|---------------------------------------|---------------------------------------|--|
|                                      | 1,222.78<br>(983.85 to<br>1,447.48)      | 2,290.96<br>(1,799.15 to<br>2,753.07)    | 2,425.91<br>(1,883.70 to<br>2,920.52)    | 2,167.65<br>(1,718.84 to<br>2,596.59)     | 56.34<br>(45.94 to<br>65.62)      | 122.34<br>(97.79 to<br>145.56)        | 133.70<br>(106.11 to<br>159.42)       | 112.04<br>(89.40 to<br>133.29)        |  |
| Gallbladder and biliary tract cancer | 6,923.49<br>(6,171.69 to<br>7,675.90)    | 19,890.50<br>(15,770.77 to<br>25,089.25) | 20,597.19<br>(16,302.14 to<br>26,121.16) | 19,802.10<br>(15,495.32 to<br>25,203.31)  | 291.78<br>(262.13 to<br>321.24)   | 955.74<br>(773.78 to<br>1,202.88)     | 1,022.76<br>(827.11 to<br>1,274.70)   | 918.20<br>(732.59 to<br>1,173.70)     |  |
| Pancreatic cancer                    | 1,768.34<br>(1,516.84 to<br>2,038.20)    | 3,668.99<br>(2,135.49 to<br>6,174.21)    | 2,766.90<br>(1,706.80 to<br>4,271.09)    | 5,403.23<br>(2,881.50 to<br>9,605.79)     | 71.72<br>(61.94 to<br>81.57)      | 166.55<br>(99.32 to<br>268.19)        | 133.69<br>(86.23 to<br>198.73)        | 231.00<br>(124.35 to<br>407.49)       |  |
| Larynx cancer                        | 23,206.72<br>(20,166.67 to<br>26,470.65) | 57,546.27<br>(39,368.72 to<br>81,271.25) | 44,246.35<br>(31,745.82 to<br>59,702.68) | 80,301.85<br>(52,057.93 to<br>118,408.44) | 901.81<br>(791.66 to<br>1,020.13) | 2,590.41<br>(1,827.92 to<br>3,600.54) | 2,118.70<br>(1,561.12 to<br>2,793.49) | 3,416.56<br>(2,284.98 to<br>4,975.62) |  |
| Tracheal, bronchus, and lung cancer  | 563.76<br>(456.33 to<br>695.47)          | 1,253.51<br>(991.39 to<br>1,601.99)      | 1,388.88<br>(1,079.80 to<br>1,794.85)    | 1,157.92<br>(919.14 to<br>1,458.31)       | 20.02<br>(16.45 to<br>24.48)      | 56.60<br>(44.68 to<br>70.06)          | 65.58<br>(51.39 to<br>81.67)          | 49.89<br>(38.94 to<br>62.46)          |  |
| Malignant skin melanoma              | 472.37<br>(408.20 to<br>530.00)          | 1,333.50<br>(1,130.51 to<br>1,545.52)    | 1,339.19<br>(1,099.15 to<br>1,574.18)    | 1,311.33<br>(1,114.02 to<br>1,520.66)     | 22.77<br>(19.87 to<br>25.19)      | 76.35<br>(62.78 to<br>88.62)          | 80.38<br>(67.34 to<br>93.11)          | 71.67<br>(57.77 to<br>84.68)          |  |
| Non-melanoma skin cancer             | 14,522.57<br>(11,101.15 to<br>17,710.17) | 30,534.15<br>(21,408.28 to<br>41,363.22) | 30,320.90<br>(21,404.40 to<br>40,610.82) | 31,099.87<br>(21,533.31 to<br>42,718.25)  | 468.51<br>(353.18 to<br>569.89)   | 1,176.88<br>(829.62 to<br>1,578.19)   | 1,193.56<br>(845.47 to<br>1,579.01)   | 1,167.22<br>(807.23 to<br>1,585.64)   |  |
| Breast cancer                        | 1,879.57<br>(1,420.28 to<br>2,413.95)    | 3,320.38<br>(2,322.64 to<br>4,390.31)    | 3,083.09<br>(2,151.81 to<br>4,128.27)    | 3,514.15<br>(2,432.72 to<br>4,755.59)     | 62.18<br>(47.84 to<br>79.02)      | 130.06<br>(97.14 to<br>170.12)        | 123.86<br>(90.62 to<br>162.36)        | 133.59<br>(98.86 to<br>177.28)        |  |
| Cervical cancer                      | 1,316.76<br>(1,093.74 to<br>1,571.54)    | 3,088.34<br>(2,404.82 to<br>3,803.39)    | 2,859.10<br>(2,206.63 to<br>3,594.45)    | 3,233.99<br>(2,524.75 to<br>4,016.40)     | 51.97<br>(43.53 to<br>61.33)      | 148.20<br>(118.69 to<br>181.31)       | 140.85<br>(111.56 to<br>173.99)       | 150.63<br>(120.04 to<br>186.48)       |  |
| Uterine cancer                       | 3,071.97<br>(2,518.18 to<br>3,683.55)    | 7,485.34<br>(5,441.66 to<br>10,226.98)   | 7,786.92<br>(5,706.65 to<br>10,505.01)   | 7,402.36<br>(5,286.72 to<br>10,244.17)    | 104.38<br>(86.71 to<br>124.10)    | 297.34<br>(216.00 to<br>408.33)       | 314.12<br>(231.35 to<br>421.87)       | 288.99<br>(208.20 to<br>403.00)       |  |
| Ovarian cancer                       | 4,946.67<br>(3,404.31 to<br>8,969.70)    | 17,518.36<br>(11,931.65 to<br>32,970.96) | 19,584.03<br>(13,285.07 to<br>36,130.51) | 15,903.23<br>(10,691.00 to<br>30,207.51)  | 304.95<br>(205.49 to<br>388.09)   | 1,178.16<br>(720.58 to<br>2,365.26)   | 1,374.43<br>(899.29 to<br>2,051.48)   | 1,027.92<br>(611.56 to<br>2,112.58)   |  |
| Prostate cancer                      | 301.56<br>(159.76 to<br>257.49)          | 260.79<br>(183.60 to<br>368.62)          | 250.28<br>(172.31 to<br>354.22)          | 271.74<br>(191.00 to<br>383.15)           | 4.10<br>(3.35 to<br>5.15)         | 6.13<br>(4.62 to<br>8.12)             | 6.02<br>(4.46 to<br>8.14)             | 6.24<br>(4.68 to<br>8.29)             |  |
| Testicular cancer                    | <b>Syria</b>                             |                                          |                                          |                                           |                                   |                                       |                                       |                                       |  |

| Cause                           | YLLs (actual counts)                     |                                          |                                          |                                          | Deaths (actual counts)                |                                       |                                       |                                       |
|---------------------------------|------------------------------------------|------------------------------------------|------------------------------------------|------------------------------------------|---------------------------------------|---------------------------------------|---------------------------------------|---------------------------------------|
|                                 | 2016                                     | 2040 Forecast                            | 2040 Better Scenario                     | 2040 Worse Scenario                      | 2016                                  | 2040 Forecast                         | 2040 Better Scenario                  | 2040 Worse Scenario                   |
|                                 | Kidney cancer                            | 1,706.35<br>(1,457.43 to<br>1,977.18)    | 4,286.12<br>(3,364.12 to<br>5,420.90)    | 4,632.26<br>(3,606.42 to<br>5,842.60)    | 4,143.47<br>(3,218.63 to<br>5,317.00) | 58.62<br>(50.43 to<br>67.61)          | 182.51<br>(145.89 to<br>226.88)       | 204.85<br>(163.97 to<br>256.84)       |
| Bladder cancer                  | 2,780.67<br>(2,354.07 to<br>3,167.49)    | 6,692.41<br>(5,174.64 to<br>8,653.63)    | 6,662.24<br>(5,213.12 to<br>8,498.59)    | 6,958.98<br>(5,224.30 to<br>9,257.02)    | 136.94<br>(118.46 to<br>154.34)       | 378.33<br>(290.14 to<br>491.53)       | 394.83<br>(307.79 to<br>507.13)       | 374.48<br>(278.26 to<br>503.55)       |
| Brain and nervous system cancer | 18,745.42<br>(15,453.25 to<br>24,896.91) | 39,574.78<br>(30,730.14 to<br>51,152.35) | 41,327.56<br>(31,794.94 to<br>53,658.92) | 38,675.12<br>(30,211.56 to<br>50,701.83) | 501.90<br>(408.11 to<br>638.04)       | 1,436.92<br>(1,099.92 to<br>1,849.86) | 1,552.32<br>(1,172.78 to<br>1,999.85) | 1,346.51<br>(1,037.57 to<br>1,724.76) |
| Thyroid cancer                  | 395.99<br>(321.22 to<br>454.11)          | 934.24<br>(633.79 to<br>1,370.17)        | 848.44<br>(576.89 to<br>1,222.70)        | 1,022.02<br>(680.74 to<br>1,527.15)      | 15.27<br>(12.29 to<br>17.38)          | 43.86<br>(30.11 to<br>64.45)          | 41.09<br>(28.51 to<br>59.32)          | 46.36<br>(30.96 to<br>68.66)          |
| Mesothelioma                    | 410.99<br>(347.14 to<br>471.30)          | 859.81<br>(695.80 to<br>1,037.07)        | 862.93<br>(683.63 to<br>1,060.78)        | 854.70<br>(698.72 to<br>1,024.37)        | 13.71<br>(11.71 to<br>15.64)          | 34.17<br>(28.77 to<br>39.94)          | 35.29<br>(29.22 to<br>41.44)          | 33.93<br>(27.84 to<br>38.27)          |
| Hodgkin lymphoma                | 404.78<br>(279.18 to<br>489.34)          | 525.25<br>(312.57 to<br>714.51)          | 466.67<br>(264.90 to<br>639.82)          | 576.68<br>(339.58 to<br>802.59)          | 10.45<br>(6.57 to<br>12.83)           | 17.10<br>(9.56 to<br>23.10)           | 15.58<br>(8.44 to<br>21.19)           | 18.21<br>(10.21 to<br>24.96)          |
| Non-Hodgkin lymphoma            | 5,512.22<br>(4,796.67 to<br>6,585.50)    | 13,069.02<br>(10,207.58 to<br>17,350.75) | 13,362.60<br>(10,515.71 to<br>17,455.75) | 13,069.86<br>(10,068.73 to<br>17,447.88) | 164.75<br>(143.02 to<br>201.82)       | 508.86<br>(397.90 to<br>678.94)       | 536.98<br>(420.22 to<br>713.76)       | 490.79<br>(378.06 to<br>667.65)       |
| Multiple myeloma                | 1,600.71<br>(1,337.30 to<br>1,927.18)    | 4,520.19<br>(3,388.43 to<br>6,048.00)    | 4,688.64<br>(3,526.65 to<br>6,219.46)    | 4,452.06<br>(3,298.10 to<br>6,084.30)    | 60.92<br>(51.60 to<br>76.24)          | 202.00<br>(151.68 to<br>276.88)       | 215.65<br>(163.57 to<br>292.95)       | 193.03<br>(142.34 to<br>271.50)       |



|                                 |                                                      |                                                          |                                                        |                                                            |                                                   |                                                    |                                                   |                                                     |
|---------------------------------|------------------------------------------------------|----------------------------------------------------------|--------------------------------------------------------|------------------------------------------------------------|---------------------------------------------------|----------------------------------------------------|---------------------------------------------------|-----------------------------------------------------|
| Leukemia                        | 56,167.28<br>(47,172.35 to<br>71,363.88)             | 109,135.95<br>(85,037.33 to<br>140,973.45)               | 102,982.09<br>(79,868.40 to<br>132,023.62)             | 118,474.71<br>(90,856.12 to<br>155,574.45)                 | 1,623.64<br>(1,382.29 to<br>1,919.58)             | 4,407.29<br>(3,416.72 to<br>5,615.46)              | 4,311.75<br>(3,422.59 to<br>5,394.73)             | 4,578.82<br>(3,486.44 to<br>5,935.25)               |
| Acute lymphoid leukemia         | 8,583.40<br>(6,348.03 to<br>13,495.03)               | 11,143.30<br>(7,968.61 to<br>16,788.27)                  | 10,904.26<br>(7,859.67 to<br>16,081.96)                | 12,009.98<br>(8,491.48 to<br>18,375.37)                    | 161.07<br>(125.89 to<br>235.37)                   | 295.91<br>(218.59 to<br>416.46)                    | 295.01<br>(220.43 to<br>404.34)                   | 309.19<br>(224.46 to<br>443.87)                     |
| Chronic lymphoid leukemia       | 1,427.80<br>(1,109.07 to<br>1,846.82)                | 3,457.00<br>(2,409.94 to<br>4,940.79)                    | 3,353.34<br>(2,366.39 to<br>4,676.41)                  | 3,637.52<br>(2,490.81 to<br>5,296.80)                      | 57.67<br>(43.51 to<br>74.20)                      | 169.08<br>(115.68 to<br>244.07)                    | 170.27<br>(117.35 to<br>241.20)                   | 170.78<br>(113.60 to<br>251.03)                     |
| Acute myeloid leukemia          | 9,566.80<br>(7,241.52 to<br>14,870.62)               | 20,848.93<br>(15,209.87 to<br>30,142.69)                 | 21,040.29<br>(15,197.23 to<br>29,278.33)               | 21,633.79<br>(15,332.05 to<br>31,777.96)                   | 244.26<br>(194.46 to<br>349.03)                   | 733.14<br>(532.64 to<br>1,047.11)                  | 762.78<br>(556.98 to<br>1,069.45)                 | 732.68<br>(518.40 to<br>1,065.41)                   |
| Chronic myeloid leukemia        | 2,972.57<br>(1,824.35 to<br>4,274.46)                | 5,204.86<br>(2,814.06 to<br>8,099.57)                    | 4,970.56<br>(2,669.26 to<br>7,648.14)                  | 5,562.07<br>(2,997.99 to<br>8,890.70)                      | 106.49<br>(62.29 to<br>161.11)                    | 231.00<br>(120.77 to<br>370.79)                    | 228.83<br>(118.87 to<br>363.48)                   | 237.06<br>(122.99 to<br>382.80)                     |
| Other leukemia                  | 33,616.72<br>(27,711.20 to<br>41,838.67)             | 68,481.85<br>(51,687.10 to<br>89,686.92)                 | 62,713.65<br>(47,008.71 to<br>81,124.02)               | 75,631.35<br>(56,455.26 to<br>100,265.80)                  | 1,054.15<br>(887.24 to<br>1,265.34)               | 2,978.16<br>(2,273.12 to<br>3,820.54)              | 2,854.86<br>(2,202.85 to<br>3,645.58)             | 3,129.10<br>(2,342.42 to<br>4,104.22)               |
| Other neoplasms                 | 9,388.21<br>(8,204.07 to<br>10,626.13)               | 18,043.11<br>(14,973.66 to<br>20,954.35)                 | 18,546.24<br>(15,168.12 to<br>21,668.76)               | 17,818.61<br>(14,984.39 to<br>20,683.38)                   | 272.52<br>(237.09 to<br>306.76)                   | 730.64<br>(606.66 to<br>839.54)                    | 783.06<br>(643.50 to<br>908.37)                   | 685.92<br>(571.67 to<br>791.69)                     |
| <b>Cardiovascular diseases</b>  | <b>746,278.02<br/>(679,072.55 to<br/>817,877.21)</b> | <b>1,457,694.04<br/>(874,156.52 to<br/>2,343,992.63)</b> | <b>823,913.19<br/>(516,426.16 to<br/>1,290,891.27)</b> | <b>2,131,888.12<br/>(1,262,331.27 to<br/>3,356,774.71)</b> | <b>35,071.91<br/>(32,216.59 to<br/>37,542.53)</b> | <b>80,318.88<br/>(53,216.14 to<br/>116,342.75)</b> | <b>50,910.65<br/>(34,454.38 to<br/>73,232.20)</b> | <b>108,466.23<br/>(71,744.06 to<br/>157,439.12)</b> |
| Rheumatic heart disease         | 8,364.11<br>(7,052.55 to<br>10,082.86)               | 7,574.11<br>(5,252.26 to<br>10,811.53)                   | 6,245.69<br>(4,220.58 to<br>9,047.74)                  | 8,784.50<br>(5,879.48 to<br>12,998.61)                     | 200.09<br>(174.47 to<br>230.60)                   | 278.86<br>(202.77 to<br>386.68)                    | 239.86<br>(172.00 to<br>331.01)                   | 305.14<br>(214.51 to<br>429.92)                     |
| Ischemic heart disease          | 550,386.30<br>(497,065.29 to<br>605,868.58)          | 1,106,389.06<br>(614,795.23 to<br>1,931,224.44)          | 594,555.67<br>(331,822.31 to<br>1,031,402.51)          | 1,643,442.49<br>(878,322.13 to<br>2,774,315.23)            | 27,370.40<br>(25,045.02 to<br>29,482.94)          | 61,746.83<br>(37,847.84 to<br>94,814.38)           | 37,437.71<br>(22,889.76 to<br>58,647.39)          | 84,887.40<br>(52,371.78 to<br>132,401.58)           |
| Stroke                          | 133,823.81<br>(120,202.01 to<br>150,274.42)          | 221,190.70<br>(127,785.11 to<br>371,077.10)              | 120,160.42<br>(74,799.56 to<br>189,577.97)             | 344,353.27<br>(193,923.44 to<br>560,476.57)                | 5,305.14<br>(4,777.47 to<br>5,904.66)             | 11,290.99<br>(6,902.95 to<br>17,882.45)            | 6,941.13<br>(4,509.04 to<br>10,761.30)            | 16,053.81<br>(9,403.90 to<br>25,478.14)             |
| Ischemic stroke                 | 45,072.96<br>(40,880.85 to<br>52,017.51)             | 86,788.92<br>(46,072.59 to<br>155,330.84)                | 51,859.67<br>(28,223.92 to<br>90,504.32)               | 123,444.63<br>(62,728.09 to<br>222,621.19)                 | 2,446.98<br>(2,178.80 to<br>2,757.69)             | 5,519.41<br>(2,995.18 to<br>10,821.22)             | 3,696.61<br>(2,078.56 to<br>7,265.02)             | 7,255.52<br>(3,842.01 to<br>13,933.76)              |
| Intracerebral hemorrhage        | 87,850.85<br>(78,377.43 to<br>99,011.17)             | 134,401.77<br>(71,953.05 to<br>241,069.57)               | 68,300.75<br>(40,181.08 to<br>112,706.25)              | 220,908.65<br>(114,923.02 to<br>393,561.13)                | 2,858.17<br>(2,557.75 to<br>3,190.69)             | 5,771.59<br>(3,314.19 to<br>9,830.27)              | 3,244.52<br>(2,017.63 to<br>5,132.78)             | 8,798.29<br>(4,891.62 to<br>14,761.98)              |
| Hypertensive heart disease      | 7,257.30<br>(5,568.73 to<br>8,457.70)                | 20,316.40<br>(11,095.33 to<br>42,112.59)                 | 13,640.83<br>(8,296.01 to<br>24,613.06)                | 24,683.62<br>(13,101.37 to<br>52,345.57)                   | 370.54<br>(287.49 to<br>429.33)                   | 1,285.76<br>(722.12 to<br>2,805.76)                | 912.43<br>(565.82 to<br>1,705.38)                 | 1,469.78<br>(789.00 to<br>3,395.76)                 |
| Cardiomyopathy and myocarditis  | 10,032.06<br>(7,179.00 to<br>12,701.71)              | 18,726.27<br>(11,351.32 to<br>28,709.95)                 | 18,011.92<br>(10,861.30 to<br>27,059.59)               | 18,808.90<br>(11,409.17 to<br>28,870.83)                   | 315.22<br>(221.28 to<br>403.53)                   | 871.10<br>(503.87 to<br>1,387.06)                  | 880.64<br>(507.01 to<br>1,363.62)                 | 824.54<br>(481.52 to<br>1,315.98)                   |
| Myocarditis                     | 1,780.05<br>(1,260.55 to<br>2,619.04)                | 2,165.17<br>(1,482.86 to<br>3,238.49)                    | 2,066.46<br>(1,410.32 to<br>3,095.68)                  | 2,290.20<br>(1,568.87 to<br>3,463.51)                      | 39.70<br>(28.56 to<br>54.94)                      | 74.76<br>(52.04 to<br>103.72)                      | 75.35<br>(52.18 to<br>103.24)                     | 73.76<br>(51.33 to<br>104.29)                       |
| <b>Syria</b>                    |                                                      |                                                          |                                                        |                                                            |                                                   |                                                    |                                                   |                                                     |
| Cause                           | YLLs (actual counts)                                 |                                                          |                                                        |                                                            | Deaths (actual counts)                            |                                                    |                                                   |                                                     |
|                                 | 2016                                                 | 2040 Forecast                                            | 2040 Better Scenario                                   | 2040 Worse Scenario                                        | 2016                                              | 2040 Forecast                                      | 2040 Better Scenario                              | 2040 Worse Scenario                                 |
| Alcoholic cardiomyopathy        | 565.41<br>(332.83 to<br>775.57)                      | 1,120.14<br>(621.64 to<br>1,596.52)                      | 1,201.55<br>(636.49 to<br>1,726.82)                    | 1,094.10<br>(618.85 to<br>1,553.08)                        | 22.62<br>(13.19 to<br>31.62)                      | 54.77<br>(30.15 to<br>79.92)                       | 61.08<br>(32.74 to<br>89.24)                      | 51.02<br>(28.79 to<br>74.15)                        |
| Other cardiomyopathy            | 7,686.60<br>(5,374.57 to<br>9,823.86)                | 15,440.95<br>(8,868.77 to<br>24,917.54)                  | 14,743.91<br>(8,522.14 to<br>23,426.89)                | 15,424.60<br>(8,848.11 to<br>24,927.53)                    | 252.90<br>(173.84 to<br>326.20)                   | 741.57<br>(408.97 to<br>1,238.35)                  | 744.20<br>(410.02 to<br>1,207.06)                 | 699.76<br>(388.93 to<br>1,154.94)                   |
| Atrial fibrillation and flutter | 2,873.93<br>(2,256.86 to<br>3,549.34)                | 10,318.39<br>(7,736.34 to<br>13,393.06)                  | 10,282.76<br>(7,848.78 to<br>13,182.04)                | 9,963.39<br>(7,286.61 to<br>12,973.94)                     | 269.23<br>(208.60 to<br>335.54)                   | 1,014.22<br>(719.87 to<br>1,349.97)                | 1,065.71<br>(782.98 to<br>1,376.33)               | 930.67<br>(641.54 to<br>1,251.05)                   |
| Aortic aneurysm                 | 2,981.77<br>(2,594.15 to<br>3,393.73)                | 6,902.29<br>(5,220.33 to<br>9,006.28)                    | 6,382.81<br>(4,953.88 to<br>8,211.46)                  | 7,038.78<br>(5,282.69 to<br>9,167.04)                      | 146.66<br>(128.35 to<br>164.48)                   | 397.10<br>(304.04 to<br>501.51)                    | 394.47<br>(312.00 to<br>484.69)                   | 382.24<br>(292.45 to<br>480.50)                     |

|                                                                |                                                   |                                                     |                                                    |                                                     |                                                |                                                |                                                |                                                |
|----------------------------------------------------------------|---------------------------------------------------|-----------------------------------------------------|----------------------------------------------------|-----------------------------------------------------|------------------------------------------------|------------------------------------------------|------------------------------------------------|------------------------------------------------|
| Peripheral artery disease                                      | 154.22<br>(110.89 to<br>240.96)                   | 705.78<br>(478.03 to<br>1,045.00)                   | 730.28<br>(502.40 to<br>1,065.22)                  | 690.34<br>(453.09 to<br>1,044.51)                   | 12.41<br>(9.01 to<br>18.83)                    | 62.13<br>(39.85 to<br>93.37)                   | 68.94<br>(45.19 to<br>101.10)                  | 56.77<br>(35.62 to<br>85.84)                   |
| Endocarditis                                                   | 4,048.38<br>(3,279.48 to<br>4,739.20)             | 8,586.06<br>(5,970.06 to<br>11,658.61)              | 7,763.91<br>(5,408.24 to<br>10,301.26)             | 8,862.70<br>(6,173.82 to<br>12,108.02)              | 150.43<br>(119.74 to<br>173.37)                | 437.97<br>(301.68 to<br>620.71)                | 414.98<br>(292.25 to<br>569.69)                | 428.76<br>(295.63 to<br>608.21)                |
| Other cardiovascular and circulatory diseases                  | 26,356.14<br>(21,535.77 to<br>37,937.98)          | 56,984.98<br>(38,946.45 to<br>93,375.00)            | 46,138.90<br>(32,340.90 to<br>73,641.43)           | 65,260.11<br>(43,521.66 to<br>106,169.52)           | 931.78<br>(753.43 to<br>1,529.20)              | 2,933.92<br>(2,044.13 to<br>5,102.13)          | 2,554.77<br>(1,832.41 to<br>4,379.60)          | 3,127.12<br>(2,131.36 to<br>5,365.54)          |
| <b>Chronic respiratory diseases</b>                            | <b>59,385.39<br/>(51,993.31 to<br/>67,100.31)</b> | <b>104,223.09<br/>(79,230.33 to<br/>139,170.80)</b> | <b>85,981.82<br/>(66,512.05 to<br/>111,299.00)</b> | <b>131,446.24<br/>(96,164.18 to<br/>179,806.33)</b> | <b>2,581.19<br/>(2,294.07 to<br/>2,884.34)</b> | <b>5,895.03<br/>(4,464.74 to<br/>7,765.11)</b> | <b>5,199.21<br/>(4,092.27 to<br/>6,600.60)</b> | <b>6,954.30<br/>(5,080.77 to<br/>9,472.78)</b> |
| Chronic obstructive pulmonary disease                          | 26,128.27<br>(22,643.13 to<br>29,988.05)          | 56,894.54<br>(37,594.93 to<br>85,006.73)            | 42,722.82<br>(28,997.28 to<br>61,244.07)           | 78,694.23<br>(50,181.96 to<br>121,191.02)           | 1,338.38<br>(1,163.42 to<br>1,577.41)          | 3,407.43<br>(2,288.12 to<br>5,024.96)          | 2,783.84<br>(1,926.94 to<br>3,943.50)          | 4,359.76<br>(2,783.92 to<br>6,715.12)          |
| Pneumoconiosis                                                 | 107.83<br>(86.86 to<br>134.03)                    | 208.63<br>(160.07 to<br>272.95)                     | 199.39<br>(151.88 to<br>261.61)                    | 214.99<br>(162.11 to<br>285.85)                     | 6.16<br>(4.98 to<br>7.61)                      | 13.91<br>(10.15 to<br>19.09)                   | 13.85<br>(10.31 to<br>18.76)                   | 13.74<br>(9.83 to<br>19.03)                    |
| Silicosis                                                      | 10.38<br>(6.48 to<br>15.46)                       | 18.94<br>(9.90 to<br>33.84)                         | 16.25<br>(8.49 to<br>28.45)                        | 20.97<br>(10.58 to<br>38.42)                        | 0.62<br>(0.39 to<br>0.91)                      | 1.34<br>(0.68 to<br>2.42)                      | 1.20<br>(0.60 to<br>2.16)                      | 1.42<br>(0.70 to<br>2.63)                      |
| Asbestosis                                                     | 22.20<br>(16.83 to<br>31.32)                      | 46.48<br>(33.85 to<br>64.32)                        | 47.02<br>(34.09 to<br>65.06)                       | 46.08<br>(33.68 to<br>64.06)                        | 0.79<br>(0.60 to<br>1.10)                      | 1.94<br>(1.44 to<br>2.72)                      | 2.04<br>(1.50 to<br>2.84)                      | 1.86<br>(1.38 to<br>2.62)                      |
| Coal workers pneumoconiosis                                    | 9.69<br>(5.02 to<br>16.77)                        | 23.32<br>(11.32 to<br>41.33)                        | 18.49<br>(8.67 to<br>33.28)                        | 27.35<br>(12.78 to<br>47.55)                        | 0.55<br>(0.31 to<br>0.90)                      | 1.64<br>(0.78 to<br>3.10)                      | 1.35<br>(0.60 to<br>2.60)                      | 1.84<br>(0.84 to<br>3.43)                      |
| Other pneumoconiosis                                           | 65.57<br>(51.23 to<br>81.51)                      | 119.89<br>(89.80 to<br>159.86)                      | 117.63<br>(88.22 to<br>156.67)                     | 120.60<br>(89.88 to<br>163.51)                      | 4.20<br>(3.32 to<br>5.30)                      | 8.99<br>(6.28 to<br>12.51)                     | 9.26<br>(6.67 to<br>12.68)                     | 8.62<br>(5.85 to<br>12.32)                     |
| Asthma                                                         | 19,571.44<br>(16,135.39 to<br>23,479.97)          | 19,905.74<br>(12,157.36 to<br>31,320.98)            | 15,243.94<br>(9,489.03 to<br>23,355.56)            | 25,258.40<br>(15,116.31 to<br>40,819.84)            | 727.24<br>(587.99 to<br>859.86)                | 1,035.10<br>(626.77 to<br>1,631.80)            | 842.87<br>(510.75 to<br>1,310.26)              | 1,229.14<br>(715.19 to<br>1,967.46)            |
| Interstitial lung disease and pulmonary sarcoidosis            | 3,886.55<br>(2,387.73 to<br>5,475.26)             | 10,624.49<br>(6,661.36 to<br>14,882.22)             | 11,797.26<br>(7,667.27 to<br>16,004.54)            | 9,711.97<br>(5,925.69 to<br>13,964.08)              | 190.64<br>(118.66 to<br>269.27)                | 650.74<br>(404.58 to<br>940.93)                | 748.88<br>(485.18 to<br>1,035.09)              | 571.89<br>(336.47 to<br>857.55)                |
| Other chronic respiratory diseases                             | 9,691.29<br>(6,814.88 to<br>12,549.28)            | 16,589.70<br>(10,276.44 to<br>22,909.88)            | 16,018.42<br>(9,899.85 to<br>22,057.43)            | 17,566.65<br>(10,717.07 to<br>24,489.11)            | 318.76<br>(204.81 to<br>417.70)                | 787.85<br>(464.78 to<br>1,098.62)              | 809.77<br>(486.33 to<br>1,109.22)              | 779.77<br>(453.43 to<br>1,119.63)              |
| <b>Cirrhosis and other chronic liver diseases</b>              | <b>34,284.48<br/>(29,509.11 to<br/>39,893.69)</b> | <b>64,570.01<br/>(52,775.15 to<br/>79,634.25)</b>   | <b>62,548.82<br/>(50,294.25 to<br/>78,321.66)</b>  | <b>66,018.54<br/>(54,218.85 to<br/>81,664.20)</b>   | <b>1,195.49<br/>(1,039.48 to<br/>1,408.96)</b> | <b>2,861.01<br/>(2,394.04 to<br/>3,446.66)</b> | <b>2,870.91<br/>(2,395.01 to<br/>3,507.90)</b> | <b>2,810.74<br/>(2,335.86 to<br/>3,411.13)</b> |
| Cirrhosis and other chronic liver diseases due to hepatitis B  | 9,190.72<br>(7,134.00 to<br>12,020.64)            | 20,222.88<br>(15,177.33 to<br>27,195.05)            | 19,827.94<br>(14,681.48 to<br>26,927.76)           | 20,305.54<br>(15,369.36 to<br>27,398.48)            | 363.85<br>(285.00 to<br>474.31)                | 922.81<br>(701.82 to<br>1,233.84)              | 934.33<br>(699.01 to<br>1,241.95)              | 897.08<br>(686.15 to<br>1,183.66)              |
| Cirrhosis and other chronic liver diseases due to hepatitis C  | 10,311.38<br>(7,769.26 to<br>13,660.24)           | 22,647.44<br>(16,302.77 to<br>30,270.03)            | 22,065.62<br>(15,852.43 to<br>29,992.73)           | 22,854.85<br>(16,659.93 to<br>30,521.35)            | 398.92<br>(300.56 to<br>527.57)                | 1,002.25<br>(742.37 to<br>1,320.38)            | 1,006.36<br>(730.87 to<br>1,322.24)            | 981.16<br>(731.05 to<br>1,290.25)              |
| Cirrhosis and other chronic liver diseases due to alcohol use  | 2,262.17<br>(1,828.82 to<br>2,862.46)             | 4,720.90<br>(3,686.59 to<br>6,123.37)               | 4,517.24<br>(3,448.61 to<br>5,864.57)              | 5,007.35<br>(3,922.77 to<br>6,520.97)               | 93.72<br>(75.89 to<br>118.33)                  | 226.69<br>(176.95 to<br>295.56)                | 234.56<br>(175.26 to<br>291.24)                | 230.49<br>(180.09 to<br>299.84)                |
| Cirrhosis and other chronic liver diseases due to other causes | 12,520.21<br>(10,108.39 to<br>15,385.09)          | 16,978.79<br>(13,218.24 to<br>21,764.01)            | 16,138.03<br>(12,441.74 to<br>20,830.89)           | 17,850.80<br>(13,787.54 to<br>23,239.67)            | 338.99<br>(284.64 to<br>399.34)                | 709.25<br>(552.29 to<br>886.65)                | 705.65<br>(554.20 to<br>888.50)                | 702.00<br>(550.81 to<br>882.02)                |
| <b>Digestive diseases</b>                                      | <b>17,328.41<br/>(15,035.49 to<br/>19,811.13)</b> | <b>33,208.96<br/>(26,263.10 to<br/>41,527.55)</b>   | <b>31,541.49<br/>(24,725.83 to<br/>39,796.59)</b>  | <b>34,911.20<br/>(27,286.41 to<br/>44,695.91)</b>   | <b>662.27<br/>(572.14 to<br/>837.22)</b>       | <b>1,816.78<br/>(1,430.73 to<br/>2,432.78)</b> | <b>1,813.11<br/>(1,424.57 to<br/>2,380.86)</b> | <b>1,799.24<br/>(1,388.19 to<br/>2,489.17)</b> |
| Peptic ulcer disease                                           | 1,673.11<br>(1,386.80 to<br>2,006.69)             | 2,074.97<br>(1,502.50 to<br>2,820.50)               | 1,722.64<br>(1,234.41 to<br>2,307.96)              | 2,347.01<br>(1,639.02 to<br>3,228.37)               | 68.97<br>(56.43 to<br>84.99)                   | 122.27<br>(87.48 to<br>165.38)                 | 107.39<br>(77.32 to<br>141.82)                 | 130.49<br>(90.31 to<br>178.71)                 |
| <b>Syria</b>                                                   |                                                   |                                                     |                                                    |                                                     |                                                |                                                |                                                |                                                |
| Cause                                                          | YLLs (actual counts)                              |                                                     |                                                    |                                                     | Deaths (actual counts)                         |                                                |                                                |                                                |
|                                                                | 2016                                              | 2040 Forecast                                       | 2040 Better Scenario                               | 2040 Worse Scenario                                 | 2016                                           | 2040 Forecast                                  | 2040 Better Scenario                           | 2040 Worse Scenario                            |



|                                                            |                                                   |                                                    |                                                    |                                                    |                                              |                                                 |                                                |                                                 |
|------------------------------------------------------------|---------------------------------------------------|----------------------------------------------------|----------------------------------------------------|----------------------------------------------------|----------------------------------------------|-------------------------------------------------|------------------------------------------------|-------------------------------------------------|
| Other drug use disorders                                   | 617.22<br>(449.61 to<br>984.79)                   | 1,939.86<br>(1,413.42 to<br>2,719.94)              | 2,051.87<br>(1,486.51 to<br>2,850.10)              | 1,865.63<br>(1,363.60 to<br>2,667.04)              | 19.77<br>(14.52 to<br>25.54)                 | 87.63<br>(58.54 to<br>114.54)                   | 98.25<br>(63.06 to<br>129.55)                  | 79.00<br>(53.35 to<br>102.57)                   |
| Eating disorders                                           | 16.08<br>(11.93 to<br>21.50)                      | 25.99<br>(17.41 to<br>37.70)                       | 25.50<br>(16.99 to<br>36.73)                       | 27.30<br>(18.26 to<br>40.02)                       | 0.29<br>(0.21 to<br>0.37)                    | 0.50<br>(0.34 to<br>0.71)                       | 0.49<br>(0.32 to<br>0.70)                      | 0.52<br>(0.35 to<br>0.74)                       |
| <b>Syria</b>                                               |                                                   |                                                    |                                                    |                                                    |                                              |                                                 |                                                |                                                 |
| Cause                                                      | YLLs (actual counts)                              |                                                    |                                                    |                                                    | Deaths (actual counts)                       |                                                 |                                                |                                                 |
|                                                            | 2016                                              | 2040 Forecast                                      | 2040 Better Scenario                               | 2040 Worse Scenario                                | 2016                                         | 2040 Forecast                                   | 2040 Better Scenario                           | 2040 Worse Scenario                             |
| <b>Diabetes, urogenital, blood, and endocrine diseases</b> | <b>106,910.99</b><br>(95,471.11 to<br>124,455.90) | <b>298,825.75</b><br>(188,546.70 to<br>541,219.85) | <b>244,840.00</b><br>(155,247.05 to<br>441,173.58) | <b>346,116.51</b><br>(213,267.74 to<br>624,523.61) | <b>4,208.69</b><br>(3,783.15 to<br>5,091.22) | <b>17,160.92</b><br>(10,291.20 to<br>33,699.11) | <b>14,579.03</b><br>(8,889.91 to<br>29,498.56) | <b>19,024.61</b><br>(11,253.75 to<br>36,824.16) |
| Diabetes mellitus                                          | 26,270.90<br>(23,288.08 to<br>29,123.47)          | 63,661.33<br>(41,263.84 to<br>94,090.67)           | 50,881.02<br>(33,857.82 to<br>76,263.07)           | 76,279.44<br>(49,410.37 to<br>114,479.06)          | 1,201.29<br>(1,069.55 to<br>1,324.77)        | 3,550.70<br>(2,426.12 to<br>4,986.15)           | 2,971.18<br>(2,085.48 to<br>4,223.87)          | 4,049.66<br>(2,707.08 to<br>5,839.86)           |
| Acute glomerulonephritis                                   | 121.38<br>(107.31 to<br>137.10)                   | 152.75<br>(113.05 to<br>206.18)                    | 137.87<br>(100.95 to<br>187.73)                    | 173.24<br>(126.74 to<br>242.48)                    | 1.99<br>(1.78 to<br>2.21)                    | 2.94<br>(2.26 to<br>3.82)                       | 2.70<br>(2.05 to<br>3.53)                      | 3.23<br>(2.46 to<br>4.30)                       |
| Chronic kidney disease                                     | 49,372.05<br>(43,180.58 to<br>64,166.04)          | 165,057.20<br>(70,426.33 to<br>407,500.71)         | 124,369.22<br>(53,990.10 to<br>323,623.00)         | 199,045.70<br>(82,502.60 to<br>488,549.23)         | 2,037.06<br>(1,757.83 to<br>2,936.51)        | 9,955.86<br>(3,631.89 to<br>26,463.29)          | 7,759.88<br>(2,785.63 to<br>23,238.93)         | 11,533.80<br>(4,196.60 to<br>29,695.86)         |
| Chronic kidney disease due to diabetes mellitus            | 19,281.55<br>(15,994.45 to<br>27,061.58)          | 77,350.45<br>(30,991.66 to<br>205,098.41)          | 57,574.66<br>(23,469.50 to<br>148,865.30)          | 93,585.15<br>(36,144.64 to<br>243,691.56)          | 839.13<br>(685.86 to<br>1,237.64)            | 4,348.37<br>(1,492.18 to<br>12,079.15)          | 3,336.98<br>(1,158.14 to<br>9,890.13)          | 5,088.13<br>(1,768.03 to<br>13,794.33)          |
| Chronic kidney disease due to hypertension                 | 6,730.08<br>(5,498.91 to<br>9,979.06)             | 31,716.90<br>(11,210.65 to<br>88,836.78)           | 24,535.60<br>(8,718.38 to<br>76,050.89)            | 37,043.80<br>(13,245.03 to<br>101,502.19)          | 444.02<br>(360.22 to<br>664.65)              | 2,633.38<br>(849.13 to<br>7,273.32)             | 2,127.56<br>(691.17 to<br>6,527.86)            | 2,948.36<br>(961.32 to<br>7,835.33)             |
| Chronic kidney disease due to glomerulonephritis           | 8,108.42<br>(6,593.47 to<br>9,945.99)             | 16,684.84<br>(8,741.39 to<br>36,008.39)            | 12,665.01<br>(6,778.37 to<br>28,413.61)            | 20,489.73<br>(10,413.75 to<br>42,245.75)           | 228.94<br>(183.30 to<br>295.24)              | 787.42<br>(323.07 to<br>2,115.27)               | 605.82<br>(255.71 to<br>1,743.22)              | 934.53<br>(386.02 to<br>2,315.82)               |
| Chronic kidney disease due to other and unspecified causes | 15,252.01<br>(12,709.00 to<br>18,614.19)          | 39,305.01<br>(18,025.23 to<br>90,404.19)           | 29,593.95<br>(13,633.56 to<br>73,056.67)           | 47,927.02<br>(21,566.98 to<br>106,644.02)          | 524.98<br>(428.17 to<br>749.44)              | 2,186.69<br>(815.52 to<br>5,819.61)             | 1,689.52<br>(633.16 to<br>4,955.92)            | 2,562.77<br>(949.72 to<br>6,401.92)             |
| Urinary diseases and male infertility                      | 10,409.37<br>(9,104.24 to<br>11,657.58)           | 41,310.85<br>(34,809.25 to<br>47,190.90)           | 42,681.11<br>(35,348.87 to<br>49,461.64)           | 39,902.62<br>(33,771.14 to<br>45,838.89)           | 463.36<br>(410.30 to<br>513.52)              | 2,335.70<br>(2,114.73 to<br>2,934.17)           | 2,754.59<br>(2,303.58 to<br>3,180.12)          | 2,314.82<br>(1,892.24 to<br>2,708.94)           |
| Urinary tract infections                                   | 9,932.64<br>(8,669.39 to<br>11,100.03)            | 40,482.62<br>(34,128.07 to<br>46,318.42)           | 41,891.85<br>(34,623.91 to<br>48,601.22)           | 39,033.07<br>(33,039.61 to<br>44,802.68)           | 448.18<br>(396.25 to<br>497.35)              | 2,499.10<br>(2,082.82 to<br>2,899.17)           | 2,718.04<br>(2,283.40 to<br>3,138.83)          | 2,278.83<br>(1,861.90 to<br>2,668.23)           |
| Urolithiasis                                               | 187.00<br>(138.66 to<br>242.15)                   | 399.62<br>(268.35 to<br>569.41)                    | 390.69<br>(258.23 to<br>561.67)                    | 416.09<br>(278.03 to<br>601.58)                    | 4.13<br>(3.01 to<br>5.44)                    | 11.52<br>(7.02 to<br>16.20)                     | 11.64<br>(6.99 to<br>16.45)                    | 11.49<br>(7.16 to<br>16.36)                     |
| Other urinary diseases                                     | 289.74<br>(205.43 to<br>379.60)                   | 428.62<br>(238.00 to<br>631.69)                    | 398.56<br>(208.81 to<br>612.76)                    | 453.46<br>(258.26 to<br>677.08)                    | 11.05<br>(5.93 to<br>16.43)                  | 25.07<br>(10.05 to<br>43.38)                    | 24.91<br>(9.21 to<br>44.36)                    | 24.50<br>(10.16 to<br>42.88)                    |
| Gynecological diseases                                     | 165.90<br>(127.90 to<br>217.79)                   | 229.77<br>(157.51 to<br>332.87)                    | 197.92<br>(132.41 to<br>293.82)                    | 257.29<br>(174.01 to<br>380.44)                    | 4.67<br>(3.67 to<br>5.92)                    | 8.74<br>(5.98 to<br>12.19)                      | 7.87<br>(5.23 to<br>11.05)                     | 9.33<br>(6.31 to<br>13.10)                      |
| Uterine fibroids                                           | 21.68<br>(12.45 to<br>31.67)                      | 26.34<br>(13.54 to<br>44.14)                       | 22.18<br>(11.09 to<br>37.41)                       | 30.03<br>(15.38 to<br>50.90)                       | 0.58<br>(0.35 to<br>0.82)                    | 0.84<br>(0.48 to<br>1.38)                       | 0.72<br>(0.40 to<br>1.20)                      | 0.93<br>(0.52 to<br>1.53)                       |
| Polycystic ovarian syndrome                                | 52.19<br>(31.75 to<br>79.13)                      | 44.02<br>(22.39 to<br>83.74)                       | 33.88<br>(16.54 to<br>66.35)                       | 53.58<br>(27.15 to<br>101.27)                      | 1.14<br>(0.69 to<br>1.76)                    | 0.98<br>(0.49 to<br>1.85)                       | 0.75<br>(0.36 to<br>1.45)                      | 1.19<br>(0.60 to<br>2.26)                       |
| Endometriosis                                              | 8.60<br>(3.32 to<br>16.89)                        | 11.53<br>(4.29 to<br>24.08)                        | 9.81<br>(3.66 to<br>20.87)                         | 13.26<br>(4.91 to<br>27.70)                        | 0.17<br>(0.06 to<br>0.32)                    | 0.25<br>(0.09 to<br>0.53)                       | 0.21<br>(0.07 to<br>0.46)                      | 0.28<br>(0.10 to<br>0.61)                       |
| Genital prolapse                                           | 8.82<br>(5.32 to<br>15.24)                        | 9.72<br>(5.07 to<br>23.76)                         | 8.02<br>(4.11 to<br>18.58)                         | 11.33<br>(6.02 to<br>26.50)                        | 0.26<br>(0.16 to<br>0.65)                    | 0.36<br>(0.18 to<br>1.16)                       | 0.30<br>(0.14 to<br>0.98)                      | 0.41<br>(0.20 to<br>1.26)                       |
| Other gynecological diseases                               | 74.61<br>(54.33 to<br>101.74)                     | 138.15<br>(88.32 to<br>200.32)                     | 124.02<br>(78.00 to<br>183.40)                     | 149.09<br>(96.55 to<br>225.38)                     | 2.53<br>(1.84 to<br>3.30)                    | 6.32<br>(3.97 to<br>9.04)                       | 5.88<br>(3.64 to<br>8.55)                      | 6.52<br>(4.03 to<br>9.45)                       |

|                                                   |                                         |                                          |                                          |                                          |                                 |                                 |                                 |                                 |
|---------------------------------------------------|-----------------------------------------|------------------------------------------|------------------------------------------|------------------------------------------|---------------------------------|---------------------------------|---------------------------------|---------------------------------|
| Hemoglobinopathies and hemolytic anemias          | 12,482.38<br>(9,799.31 to<br>17,389.26) | 15,611.01<br>(11,102.69 to<br>23,033.34) | 14,433.84<br>(10,082.92 to<br>21,544.09) | 16,851.01<br>(11,680.74 to<br>25,067.43) | 292.42<br>(246.71 to<br>365.93) | 558.21<br>(397.30 to<br>743.37) | 528.20<br>(376.01 to<br>710.96) | 577.50<br>(410.21 to<br>769.90) |
| Thalassemias                                      | 4,036.90<br>(2,496.76 to<br>6,719.39)   | 1,817.36<br>(917.08 to<br>3,298.20)      | 1,929.95<br>(980.42 to<br>3,449.96)      | 1,902.23<br>(933.98 to<br>3,551.02)      | 50.68<br>(31.76 to<br>83.07)    | 23.45<br>(12.37 to<br>41.65)    | 24.98<br>(13.22 to<br>44.36)    | 24.45<br>(12.52 to<br>45.11)    |
| Sickle cell disorders                             | 2,776.61<br>(2,058.95 to<br>4,057.43)   | 4,028.46<br>(2,674.71 to<br>6,200.86)    | 3,719.47<br>(2,414.45 to<br>5,730.66)    | 4,361.56<br>(2,882.67 to<br>6,770.88)    | 50.72<br>(39.02 to<br>71.09)    | 95.78<br>(66.26 to<br>137.37)   | 88.95<br>(60.24 to<br>131.33)   | 102.19<br>(69.79 to<br>149.37)  |
| G6PD deficiency                                   | 3,411.91<br>(2,662.09 to<br>4,769.56)   | 5,975.76<br>(3,900.05 to<br>9,213.22)    | 5,225.75<br>(3,350.83 to<br>8,233.25)    | 6,685.66<br>(4,304.32 to<br>10,711.77)   | 74.67<br>(60.03 to<br>99.37)    | 176.36<br>(119.44 to<br>250.35) | 156.91<br>(101.87 to<br>226.84) | 192.46<br>(128.04 to<br>281.23) |
| Other hemoglobinopathies and hemolytic anemias    | 2,256.95<br>(1,799.41 to<br>2,824.79)   | 3,789.43<br>(2,608.27 to<br>5,125.17)    | 3,558.67<br>(2,443.68 to<br>4,842.52)    | 3,901.56<br>(2,638.14 to<br>5,367.87)    | 116.35<br>(86.49 to<br>139.04)  | 262.62<br>(175.50 to<br>346.56) | 257.35<br>(174.49 to<br>332.90) | 258.40<br>(168.69 to<br>345.07) |
| Endocrine, metabolic, blood, and immune disorders | 8,089.02<br>(6,199.06 to<br>10,591.43)  | 12,802.84<br>(9,628.85 to<br>17,145.59)  | 12,139.03<br>(9,074.49 to<br>15,818.35)  | 13,607.21<br>(9,959.49 to<br>18,265.72)  | 207.90<br>(166.71 to<br>249.68) | 548.78<br>(420.35 to<br>676.08) | 554.61<br>(423.57 to<br>683.01) | 536.26<br>(413.76 to<br>667.96) |

**Syria**

| Cause                                         | YLLs (actual counts)                             |                                                  |                                                  |                                                  | Deaths (actual counts)                     |                                            |                                          |                                            |
|-----------------------------------------------|--------------------------------------------------|--------------------------------------------------|--------------------------------------------------|--------------------------------------------------|--------------------------------------------|--------------------------------------------|------------------------------------------|--------------------------------------------|
|                                               | 2016                                             | 2040 Forecast                                    | 2040 Better Scenario                             | 2040 Worse Scenario                              | 2016                                       | 2040 Forecast                              | 2040 Better Scenario                     | 2040 Worse Scenario                        |
| <b>Musculoskeletal disorders</b>              | <b>696.42</b><br>(568.68 to<br>924.46)           | <b>1,605.88</b><br>(1,121.08 to<br>1,981.25)     | <b>1,667.78</b><br>(1,148.75 to<br>2,058.44)     | <b>1,568.06</b><br>(1,118.99 to<br>1,930.07)     | <b>21.19</b><br>(15.48 to<br>25.14)        | <b>68.57</b><br>(37.14 to<br>86.69)        | <b>73.08</b><br>(39.13 to<br>92.52)      | <b>64.58</b><br>(35.62 to<br>81.87)        |
| Rheumatoid arthritis                          | 122.23<br>(80.49 to<br>161.16)                   | 351.90<br>(182.16 to<br>506.74)                  | 321.15<br>(160.65 to<br>471.95)                  | 373.01<br>(196.84 to<br>534.84)                  | 4.89<br>(2.64 to<br>6.84)                  | 20.01<br>(9.30 to<br>29.48)                | 18.96<br>(8.65 to<br>28.00)              | 20.32<br>(9.51 to<br>30.23)                |
| Other musculoskeletal disorders               | 574.19<br>(464.50 to<br>793.69)                  | 1,253.98<br>(913.10 to<br>1,551.76)              | 1,346.63<br>(970.79 to<br>1,696.80)              | 1,195.05<br>(874.85 to<br>1,486.70)              | 16.30<br>(12.51 to<br>19.34)               | 48.56<br>(26.87 to<br>62.03)               | 54.13<br>(29.43 to<br>68.45)             | 44.26<br>(24.70 to<br>56.71)               |
| <b>Other non-communicable diseases</b>        | <b>84,689.61</b><br>(55,514.43 to<br>123,971.53) | <b>82,555.72</b><br>(38,384.28 to<br>144,909.71) | <b>70,246.15</b><br>(32,424.19 to<br>121,601.21) | <b>99,726.49</b><br>(45,135.57 to<br>175,844.08) | <b>1,026.83</b><br>(684.81 to<br>1,483.28) | <b>1,074.50</b><br>(554.59 to<br>1,791.63) | <b>930.93</b><br>(493.61 to<br>1,525.17) | <b>1,274.94</b><br>(629.95 to<br>2,160.74) |
| Congenital birth defects                      | 80,136.02<br>(52,914.46 to<br>117,003.20)        | 78,341.71<br>(36,671.63 to<br>137,616.66)        | 66,473.01<br>(30,697.11 to<br>114,779.13)        | 94,851.87<br>(42,893.88 to<br>166,553.51)        | 966.51<br>(648.67 to<br>1,391.66)          | 977.72<br>(482.21 to<br>1,663.60)          | 834.69<br>(412.75 to<br>1,402.14)        | 1,175.09<br>(560.45 to<br>2,029.66)        |
| Neural tube defects                           | 434.84<br>(266.98 to<br>714.28)                  | 237.63<br>(118.27 to<br>470.63)                  | 185.50<br>(93.59 to<br>375.46)                   | 301.77<br>(141.62 to<br>621.32)                  | 5.69<br>(3.71 to<br>8.97)                  | 3.59<br>(2.04 to<br>6.48)                  | 2.85<br>(1.60 to<br>5.30)                | 4.47<br>(2.41 to<br>8.44)                  |
| Congenital heart anomalies                    | 53,291.26<br>(33,829.54 to<br>80,633.22)         | 50,053.12<br>(23,043.30 to<br>90,398.70)         | 42,401.27<br>(19,251.31 to<br>77,582.20)         | 60,739.71<br>(27,066.53 to<br>110,671.23)        | 642.55<br>(412.79 to<br>960.19)            | 620.87<br>(303.46 to<br>1,101.21)          | 528.87<br>(257.18 to<br>943.39)          | 748.72<br>(353.92 to<br>1,334.48)          |
| Orofacial clefts                              | 311.07<br>(105.00 to<br>899.12)                  | 244.46<br>(55.10 to<br>871.13)                   | 187.69<br>(40.99 to<br>702.56)                   | 318.85<br>(71.19 to<br>1,147.09)                 | 3.62<br>(1.22 to<br>10.59)                 | 2.86<br>(0.64 to<br>10.26)                 | 2.20<br>(0.48 to<br>8.22)                | 3.73<br>(0.83 to<br>13.51)                 |
| Down syndrome                                 | 1,735.45<br>(981.12 to<br>3,762.81)              | 2,381.10<br>(1,377.83 to<br>4,720.94)            | 2,017.03<br>(1,188.65 to<br>3,870.82)            | 2,825.76<br>(1,548.49 to<br>5,763.92)            | 24.43<br>(15.47 to<br>47.74)               | 37.94<br>(23.76 to<br>63.78)               | 32.59<br>(20.46 to<br>53.79)             | 44.13<br>(27.05 to<br>78.19)               |
| Other chromosomal abnormalities               | 457.72<br>(238.74 to<br>792.50)                  | 660.25<br>(223.13 to<br>1,457.69)                | 538.54<br>(190.20 to<br>1,184.69)                | 824.88<br>(285.29 to<br>1,794.27)                | 5.33<br>(2.82 to<br>9.20)                  | 7.70<br>(2.67 to<br>16.99)                 | 6.29<br>(3.25 to<br>13.81)               | 9.62<br>(3.35 to<br>20.86)                 |
| Congenital musculoskeletal and limb anomalies | 3,130.74<br>(667.12 to<br>5,301.44)              | 3,373.73<br>(613.79 to<br>7,753.47)              | 2,889.55<br>(527.76 to<br>6,708.54)              | 4,057.94<br>(723.47 to<br>9,491.86)              | 36.33<br>(7.96 to<br>61.39)                | 39.31<br>(7.52 to<br>161.39)               | 33.70<br>(6.49 to<br>77.80)              | 47.24<br>(8.83 to<br>110.02)               |
| Urogenital congenital anomalies               | 1,130.18<br>(531.92 to<br>1,820.34)              | 1,169.51<br>(490.35 to<br>2,218.80)              | 1,018.19<br>(430.35 to<br>1,879.42)              | 1,382.11<br>(561.38 to<br>2,663.11)              | 14.29<br>(7.10 to<br>22.35)                | 16.54<br>(7.93 to<br>29.09)                | 14.63<br>(6.99 to<br>25.26)              | 19.12<br>(8.82 to<br>34.54)                |
| Digestive congenital anomalies                | 4,302.30<br>(703.16 to<br>6,875.61)              | 4,378.33<br>(599.22 to<br>8,958.27)              | 3,608.99<br>(508.63 to<br>7,511.15)              | 5,421.97<br>(716.63 to<br>11,050.54)             | 49.87<br>(8.30 to<br>79.67)                | 50.85<br>(7.19 to<br>103.73)               | 41.93<br>(6.25 to<br>86.99)              | 62.93<br>(8.64 to<br>128.16)               |
| Other congenital birth defects                | 15,342.46<br>(9,779.77 to<br>23,679.34)          | 15,843.58<br>(6,880.10 to<br>30,779.07)          | 13,626.24<br>(5,920.25 to<br>26,943.89)          | 18,978.89<br>(8,037.45 to<br>36,951.00)          | 184.39<br>(119.72 to<br>283.16)            | 198.07<br>(90.97 to<br>372.09)             | 171.64<br>(81.67 to<br>328.97)           | 235.15<br>(106.39 to<br>445.14)            |

|                                      |                                                       |                                                 |                                                 |                                                 |                                               |                                           |                                           |                                            |
|--------------------------------------|-------------------------------------------------------|-------------------------------------------------|-------------------------------------------------|-------------------------------------------------|-----------------------------------------------|-------------------------------------------|-------------------------------------------|--------------------------------------------|
| Skin and subcutaneous diseases       | 256.09<br>(206.34 to 358.82)                          | 970.04<br>(709.24 to 1,591.58)                  | 993.79<br>(718.68 to 1,653.46)                  | 950.27<br>(694.87 to 1,541.31)                  | 10.44<br>(7.74 to 18.20)                      | 59.14<br>(38.67 to 112.80)                | 63.99<br>(42.59 to 121.73)                | 54.31<br>(35.09 to 103.49)                 |
| Cellulitis                           | 35.62<br>(26.35 to 55.04)                             | 136.51<br>(90.49 to 263.84)                     | 150.39<br>(98.85 to 297.38)                     | 127.60<br>(84.66 to 241.09)                     | 1.33<br>(0.88 to 2.72)                        | 8.07<br>(4.67 to 19.01)                   | 9.43<br>(5.44 to 21.61)                   | 7.03<br>(4.03 to 16.51)                    |
| Pyoderma                             | 168.12<br>(128.36 to 243.49)                          | 722.85<br>(513.54 to 1,207.68)                  | 726.00<br>(510.16 to 1,227.13)                  | 714.37<br>(510.34 to 1,176.94)                  | 7.38<br>(5.39 to 13.25)                       | 44.98<br>(29.03 to 89.51)                 | 47.55<br>(31.08 to 94.82)                 | 41.91<br>(26.50 to 82.19)                  |
| Decubitus ulcer                      | 25.20<br>(19.16 to 32.30)                             | 52.97<br>(33.72 to 86.47)                       | 54.78<br>(33.44 to 90.44)                       | 52.53<br>(33.97 to 84.69)                       | 0.87<br>(0.53 to 1.54)                        | 3.19<br>(1.37 to 6.52)                    | 3.53<br>(1.52 to 7.19)                    | 2.87<br>(1.25 to 5.97)                     |
| Other skin and subcutaneous diseases | 27.15<br>(21.34 to 34.49)                             | 57.72<br>(41.93 to 85.94)                       | 62.62<br>(44.31 to 95.57)                       | 55.77<br>(41.39 to 81.39)                       | 0.86<br>(0.60 to 1.36)                        | 2.91<br>(1.68 to 5.55)                    | 3.48<br>(1.99 to 6.81)                    | 2.50<br>(1.45 to 4.69)                     |
| Sudden infant death syndrome         | 4,297.50<br>(1,520.97 to 9,138.67)                    | 3,243.98<br>(406.14 to 9,335.74)                | 2,779.35<br>(428.91 to 8,032.52)                | 3,924.35<br>(618.28 to 11,444.88)               | 49.88<br>(17.65 to 106.09)                    | 37.64<br>(5.75 to 108.56)                 | 52.25<br>(4.97 to 93.19)                  | 45.53<br>(7.16 to 132.78)                  |
| <b>Injuries</b>                      | <b>3,511,783.01</b><br>(1,130,573.38 to 5,998,054.48) | <b>256,359.98</b><br>(188,547.06 to 424,646.65) | <b>213,311.08</b><br>(154,686.84 to 377,254.08) | <b>299,008.21</b><br>(218,578.86 to 477,206.34) | <b>59,183.67</b><br>(19,493.83 to 100,515.77) | <b>6,636.20</b><br>(5,354.42 to 9,661.48) | <b>5,803.79</b><br>(4,626.23 to 8,812.68) | <b>7,338.25</b><br>(5,851.83 to 10,414.32) |
| <b>Transport injuries</b>            | <b>100,711.02</b><br>(87,264.20 to 116,342.24)        | <b>137,228.73</b><br>(105,547.99 to 181,092.70) | <b>100,668.43</b><br>(77,590.72 to 133,234.07)  | <b>170,901.03</b><br>(130,157.45 to 228,470.23) | <b>2,063.03</b><br>(1,824.35 to 2,340.40)     | <b>3,540.45</b><br>(2,918.35 to 4,362.62) | <b>2,783.21</b><br>(2,294.67 to 3,418.03) | <b>4,151.28</b><br>(3,389.73 to 5,201.48)  |
| Road injuries                        | 89,197.41<br>(76,896.55 to 103,781.72)                | 118,236.48<br>(89,649.26 to 155,685.28)         | 83,235.03<br>(63,554.73 to 109,774.90)          | 149,880.88<br>(112,688.32 to 200,099.49)        | 1,824.16<br>(1,611.82 to 2,072.19)            | 3,035.65<br>(2,505.68 to 3,713.36)        | 2,303.74<br>(1,901.08 to 2,809.55)        | 3,158.86<br>(2,948.13 to 4,540.35)         |
| Pedestrian road injuries             | 25,171.04<br>(19,554.19 to 30,559.41)                 | 32,350.12<br>(23,402.93 to 42,777.95)           | 24,353.95<br>(17,646.18 to 32,202.50)           | 39,141.46<br>(27,963.19 to 52,890.39)           | 573.18<br>(461.24 to 676.92)                  | 993.52<br>(666.84 to 1,238.20)            | 802.56<br>(624.66 to 995.76)              | 1,128.41<br>(857.04 to 1,422.17)           |
| <b>Syria</b>                         |                                                       |                                                 |                                                 |                                                 |                                               |                                           |                                           |                                            |
| Cause                                | YLLs (actual counts)                                  |                                                 |                                                 |                                                 | Deaths (actual counts)                        |                                           |                                           |                                            |
|                                      | 2016                                                  | 2040 Forecast                                   | 2040 Better Scenario                            | 2040 Worse Scenario                             | 2016                                          | 2040 Forecast                             | 2040 Better Scenario                      | 2040 Worse Scenario                        |
| Cyclist road injuries                | 1,210.65<br>(939.35 to 1,553.57)                      | 1,613.54<br>(1,156.54 to 2,213.55)              | 1,178.88<br>(850.40 to 1,612.07)                | 2,033.68<br>(1,427.42 to 2,836.78)              | 24.96<br>(19.35 to 31.20)                     | 42.65<br>(31.18 to 55.62)                 | 34.37<br>(24.99 to 44.91)                 | 49.72<br>(35.99 to 66.08)                  |
| Motorcyclist road injuries           | 9,068.68<br>(6,637.90 to 12,155.88)                   | 11,610.82<br>(7,118.02 to 18,605.13)            | 8,940.42<br>(5,468.33 to 14,414.07)             | 14,228.30<br>(8,741.08 to 22,825.33)            | 149.08<br>(110.88 to 199.02)                  | 205.33<br>(131.03 to 318.24)              | 162.87<br>(104.11 to 252.20)              | 245.72<br>(154.38 to 381.61)               |
| Motor vehicle road injuries          | 51,759.61<br>(43,070.76 to 62,729.56)                 | 69,985.61<br>(52,887.51 to 93,940.00)           | 46,899.51<br>(35,230.68 to 63,205.24)           | 91,043.53<br>(68,054.97 to 122,383.91)          | 1,035.39<br>(881.24 to 1,235.61)              | 1,718.10<br>(1,385.45 to 2,150.62)        | 1,243.99<br>(1,002.24 to 1,572.49)        | 2,103.52<br>(1,676.84 to 2,645.69)         |
| Other road injuries                  | 1,987.43<br>(1,184.61 to 2,760.37)                    | 2,676.41<br>(1,529.67 to 3,904.51)              | 1,862.28<br>(1,090.41 to 2,654.64)              | 3,433.91<br>(1,953.00 to 5,134.87)              | 41.55<br>(25.91 to 54.50)                     | 76.05<br>(47.77 to 102.07)                | 59.95<br>(39.31 to 78.58)                 | 88.50<br>(54.04 to 121.09)                 |
| Other transport injuries             | 11,513.62<br>(8,702.71 to 14,533.83)                  | 18,992.25<br>(13,251.01 to 26,760.37)           | 17,433.40<br>(12,212.57 to 24,524.49)           | 21,020.15<br>(14,506.11 to 29,736.55)           | 238.87<br>(184.94 to 291.01)                  | 504.80<br>(387.49 to 654.17)              | 479.48<br>(368.88 to 627.15)              | 535.41<br>(402.68 to 707.39)               |
| Unintentional injuries               | 52,341.09<br>(44,636.11 to 62,730.37)                 | 53,901.06<br>(41,346.20 to 72,928.60)           | 49,265.88<br>(37,287.46 to 66,537.42)           | 59,214.67<br>(44,136.66 to 84,208.47)           | 1,084.47<br>(961.01 to 1,237.66)              | 1,675.13<br>(1,400.72 to 2,059.29)        | 1,616.85<br>(1,337.76 to 1,983.41)        | 1,720.34<br>(1,414.74 to 2,179.79)         |
| Falls                                | 10,694.29<br>(8,808.62 to 12,975.70)                  | 13,789.14<br>(10,842.64 to 17,461.05)           | 13,289.61<br>(10,404.97 to 16,992.08)           | 14,350.08<br>(11,232.55 to 18,556.34)           | 263.87<br>(224.33 to 307.08)                  | 534.01<br>(445.95 to 635.91)              | 544.60<br>(456.57 to 650.93)              | 518.67<br>(425.73 to 624.68)               |
| Drowning                             | 10,122.43<br>(8,179.12 to 12,371.68)                  | 7,972.53<br>(5,571.36 to 12,213.41)             | 7,174.89<br>(5,060.17 to 11,028.24)             | 9,086.11<br>(6,230.29 to 14,377.38)             | 165.58<br>(136.90 to 199.97)                  | 166.85<br>(125.67 to 234.89)              | 154.19<br>(116.20 to 217.37)              | 182.86<br>(134.80 to 269.18)               |
| Fire, heat, and hot substances       | 7,244.16<br>(5,736.06 to 9,241.26)                    | 6,732.60<br>(4,750.40 to 9,973.21)              | 5,928.86<br>(4,121.51 to 8,969.94)              | 7,652.51<br>(5,249.62 to 11,978.11)             | 141.59<br>(115.18 to 181.50)                  | 184.61<br>(139.72 to 262.63)              | 170.76<br>(127.56 to 242.34)              | 197.60<br>(145.10 to 287.39)               |
| Poisonings                           | 3,208.97<br>(2,279.28 to 5,121.90)                    | 1,937.13<br>(1,246.63 to 3,249.33)              | 1,617.69<br>(1,026.75 to 2,656.13)              | 2,301.70<br>(1,403.14 to 3,926.66)              | 63.05<br>(47.55 to 90.20)                     | 60.80<br>(43.44 to 80.62)                 | 54.31<br>(36.98 to 72.73)                 | 66.34<br>(47.13 to 90.69)                  |

|                                                 |                                                 |                                                 |                                                 |                                                 |                                        |                                            |                                            |                                            |
|-------------------------------------------------|-------------------------------------------------|-------------------------------------------------|-------------------------------------------------|-------------------------------------------------|----------------------------------------|--------------------------------------------|--------------------------------------------|--------------------------------------------|
|                                                 | 5,722.82<br>(4,505.51 to<br>7,657.60)           | 5,486.60<br>(3,908.64 to<br>7,840.75)           | 4,823.22<br>(3,405.59 to<br>6,862.74)           | 6,192.43<br>(4,249.45 to<br>9,090.19)           | 114.80<br>(96.25 to<br>139.95)         | 159.35<br>(122.07 to<br>207.77)            | 147.95<br>(108.50 to<br>192.61)            | 168.22<br>(127.17 to<br>227.68)            |
| Exposure to mechanical forces                   | 1,927.45<br>(1,461.00 to<br>2,560.29)           | 1,900.77<br>(1,276.94 to<br>2,847.64)           | 1,661.04<br>(1,090.91 to<br>2,433.23)           | 2,136.83<br>(1,377.41 to<br>3,270.42)           | 42.91<br>(33.40 to<br>53.78)           | 60.29<br>(42.04 to<br>82.40)               | 55.50<br>(37.47 to<br>76.29)               | 63.66<br>(43.32 to<br>88.65)               |
| Unintentional firearm injuries                  | 1,304.61<br>(721.54 to<br>2,485.40)             | 794.83<br>(407.24 to<br>1,584.03)               | 670.21<br>(346.75 to<br>1,291.60)               | 973.20<br>(465.53 to<br>1,997.98)               | 17.78<br>(10.73 to<br>32.11)           | 12.43<br>(7.31 to<br>21.94)                | 10.69<br>(6.35 to<br>18.11)                | 14.80<br>(8.34 to<br>27.63)                |
| Unintentional suffocation                       | 2,490.77<br>(2,010.23 to<br>3,242.48)           | 2,791.00<br>(2,034.54 to<br>3,922.02)           | 2,491.97<br>(1,821.98 to<br>3,499.97)           | 3,082.40<br>(2,197.84 to<br>4,430.79)           | 54.11<br>(45.81 to<br>65.08)           | 86.63<br>(65.33 to<br>110.32)              | 81.77<br>(59.99 to<br>104.60)              | 89.76<br>(68.11 to<br>116.88)              |
| Other exposure to mechanical forces             | 5,598.19<br>(4,463.65 to<br>7,788.07)           | 7,932.95<br>(6,078.52 to<br>11,206.43)          | 7,339.29<br>(5,555.04 to<br>10,312.86)          | 8,483.79<br>(6,377.53 to<br>12,317.66)          | 149.13<br>(128.71 to<br>179.95)        | 311.04<br>(238.62 to<br>385.02)            | 302.97<br>(227.88 to<br>377.00)            | 312.78<br>(244.85 to<br>395.44)            |
| Adverse effects of medical treatment            | 834.27<br>(613.57 to<br>1,080.98)               | 972.41<br>(598.74 to<br>1,511.85)               | 831.46<br>(512.94 to<br>1,302.65)               | 1,136.94<br>(688.82 to<br>1,887.16)             | 15.81<br>(12.05 to<br>19.31)           | 27.10<br>(18.64 to<br>38.50)               | 24.39<br>(16.59 to<br>34.62)               | 29.56<br>(19.82 to<br>43.51)               |
| Animal contact                                  | 457.54<br>(330.92 to<br>610.45)                 | 483.69<br>(287.71 to<br>805.04)                 | 407.90<br>(239.26 to<br>674.64)                 | 575.16<br>(333.51 to<br>999.79)                 | 8.05<br>(6.00 to<br>10.20)             | 11.55<br>(7.59 to<br>17.72)                | 10.13<br>(6.45 to<br>15.67)                | 12.98<br>(8.23 to<br>20.65)                |
| Venomous animal contact                         | 376.73<br>(249.52 to<br>522.32)                 | 488.72<br>(297.32 to<br>760.82)                 | 423.56<br>(259.23 to<br>656.20)                 | 561.78<br>(339.78 to<br>895.16)                 | 7.76<br>(5.41 to<br>9.75)              | 15.55<br>(10.41 to<br>21.99)               | 14.26<br>(9.44 to<br>20.00)                | 16.58<br>(10.96 to<br>24.40)               |
| Non-venomous animal contact                     | 4,024.91<br>(3,160.40 to<br>5,681.88)           | 4,129.60<br>(3,018.31 to<br>5,610.47)           | 3,938.01<br>(2,863.66 to<br>5,282.01)           | 4,424.34<br>(3,196.17 to<br>6,147.98)           | 73.46<br>(61.07 to<br>92.78)           | 105.03<br>(73.34 to<br>133.22)             | 105.00<br>(72.80 to<br>132.58)             | 106.07<br>(75.08 to<br>135.10)             |
| Foreign body                                    | 2,592.82<br>(1,955.73 to<br>4,047.32)           | 2,522.04<br>(1,797.04 to<br>3,575.59)           | 2,460.24<br>(1,766.78 to<br>3,385.42)           | 2,677.82<br>(1,870.28 to<br>3,928.64)           | 44.29<br>(35.88 to<br>61.95)           | 59.91<br>(45.45 to<br>74.76)               | 61.51<br>(46.54 to<br>75.81)               | 59.74<br>(45.76 to<br>76.53)               |
| Pulmonary aspiration and foreign body in airway | 1,432.09<br>(1,080.59 to<br>2,054.01)           | 1,607.56<br>(1,050.15 to<br>2,290.04)           | 1,477.77<br>(952.30 to<br>2,094.09)             | 1,746.52<br>(1,142.65 to<br>2,504.86)           | 29.17<br>(20.32 to<br>37.10)           | 45.12<br>(25.06 to<br>62.34)               | 43.49<br>(22.99 to<br>60.51)               | 46.34<br>(26.39 to<br>64.00)               |
| Foreign body in other body part                 | 1,393.24<br>(1,086.15 to<br>2,260.64)           | 1,878.03<br>(1,256.78 to<br>3,131.53)           | 1,553.37<br>(1,022.49 to<br>2,614.83)           | 2,184.83<br>(1,426.19 to<br>3,669.34)           | 33.61<br>(27.12 to<br>51.13)           | 58.37<br>(40.57 to<br>87.15)               | 49.96<br>(33.47 to<br>75.52)               | 65.30<br>(44.48 to<br>100.07)              |
| Environmental heat and cold exposure            | 3,497.82<br>(2,758.48 to<br>4,377.34)           | 3,070.05<br>(2,061.17 to<br>4,448.06)           | 2,769.48<br>(1,825.60 to<br>4,075.69)           | 3,401.96<br>(2,248.19 to<br>5,128.92)           | 63.57<br>(50.32 to<br>78.43)           | 67.97<br>(48.22 to<br>93.29)               | 62.72<br>(43.73 to<br>86.83)               | 73.04<br>(50.52 to<br>102.95)              |
| Other unintentional injuries                    | <b>39,885.23</b><br>(29,549.88 to<br>49,412.21) | <b>48,683.36</b><br>(33,702.94 to<br>66,089.13) | <b>46,981.77</b><br>(32,591.11 to<br>63,648.92) | <b>51,631.24</b><br>(35,398.99 to<br>71,459.14) | <b>776.57</b><br>(564.49 to<br>950.99) | <b>1,116.18</b><br>(763.76 to<br>1,464.84) | <b>1,098.14</b><br>(753.73 to<br>1,428.66) | <b>1,155.41</b><br>(787.33 to<br>1,528.19) |
| <b>Self-harm and interpersonal violence</b>     |                                                 |                                                 |                                                 |                                                 |                                        |                                            |                                            |                                            |

**Syria**

| Cause                              | YLLs (actual counts)                     |                                          |                                          |                                          | Deaths (actual counts)          |                                 |                                 |                                 |
|------------------------------------|------------------------------------------|------------------------------------------|------------------------------------------|------------------------------------------|---------------------------------|---------------------------------|---------------------------------|---------------------------------|
|                                    | 2016                                     | 2040 Forecast                            | 2040 Better Scenario                     | 2040 Worse Scenario                      | 2016                            | 2040 Forecast                   | 2040 Better Scenario            | 2040 Worse Scenario             |
| Self-harm                          | 18,745.81<br>(14,968.64 to<br>23,600.39) | 26,706.55<br>(18,720.89 to<br>37,502.91) | 25,287.84<br>(17,756.12 to<br>35,293.14) | 28,951.77<br>(19,996.57 to<br>41,313.63) | 377.28<br>(306.78 to<br>468.13) | 614.82<br>(453.27 to<br>827.58) | 594.34<br>(438.10 to<br>795.60) | 650.83<br>(471.57 to<br>895.28) |
| Self-harm by firearm               | 1,625.63<br>(1,078.55 to<br>2,434.15)    | 2,032.97<br>(1,266.54 to<br>3,211.31)    | 1,892.08<br>(1,166.24 to<br>3,017.56)    | 2,275.07<br>(1,346.19 to<br>3,543.36)    | 35.30<br>(23.72 to<br>50.42)    | 52.79<br>(33.19 to<br>76.12)    | 50.82<br>(32.29 to<br>73.94)    | 55.72<br>(35.18 to<br>81.73)    |
| Self-harm by other specified means | 17,120.18<br>(13,586.58 to<br>21,581.37) | 24,673.58<br>(17,301.18 to<br>34,621.07) | 23,394.76<br>(16,449.08 to<br>32,691.75) | 26,726.70<br>(18,392.38 to<br>38,216.64) | 341.99<br>(274.88 to<br>423.35) | 562.03<br>(413.40 to<br>755.40) | 543.53<br>(401.29 to<br>727.80) | 595.11<br>(432.76 to<br>817.39) |
| Interpersonal violence             | 21,139.43<br>(12,199.86 to<br>27,576.87) | 21,976.80<br>(11,505.34 to<br>31,165.03) | 21,693.93<br>(11,464.52 to<br>30,515.10) | 22,679.46<br>(11,779.07 to<br>32,415.44) | 399.28<br>(219.35 to<br>511.55) | 501.36<br>(245.49 to<br>676.28) | 503.79<br>(248.33 to<br>679.52) | 504.58<br>(247.10 to<br>684.03) |
| Physical violence by firearm       | 11,850.44<br>(5,208.50 to<br>17,154.79)  | 11,652.37<br>(4,761.31 to<br>18,154.27)  | 11,422.76<br>(4,660.82 to<br>17,767.78)  | 12,099.18<br>(4,906.62 to<br>19,035.80)  | 213.71<br>(94.90 to<br>304.24)  | 235.94<br>(98.06 to<br>356.93)  | 233.04<br>(98.25 to<br>350.29)  | 241.48<br>(98.97 to<br>367.47)  |
| Physical violence by sharp object  | 6,278.79<br>(3,388.85 to<br>12,297.97)   | 7,619.49<br>(3,842.57 to<br>14,085.60)   | 7,689.59<br>(3,928.09 to<br>14,100.26)   | 7,673.47<br>(3,872.71 to<br>14,321.56)   | 125.70<br>(62.54 to<br>231.70)  | 182.88<br>(82.32 to<br>304.58)  | 188.14<br>(84.90 to<br>308.58)  | 179.68<br>(81.07 to<br>303.22)  |

|                                                                              |                                                   |                                                   |                                                   |                                                   |                                          |                                            |                                           |                                             |
|------------------------------------------------------------------------------|---------------------------------------------------|---------------------------------------------------|---------------------------------------------------|---------------------------------------------------|------------------------------------------|--------------------------------------------|-------------------------------------------|---------------------------------------------|
|                                                                              | 3,010.20<br>(2,091.21 to<br>4,333.77)             | 2,704.94<br>(1,795.64 to<br>4,119.44)             | 2,581.58<br>(1,698.85 to<br>3,868.97)             | 2,906.81<br>(1,894.79 to<br>4,467.62)             | 59.88<br>(38.85 to<br>81.29)             | 82.54<br>(41.82 to<br>112.25)              | 82.61<br>(40.69 to<br>111.68)             | 83.42<br>(42.95 to<br>113.64)               |
| Physical violence by other means                                             |                                                   |                                                   |                                                   |                                                   |                                          |                                            |                                           |                                             |
| Forces of nature, conflict and terrorism, and executions and police conflict | 3,318,845.66<br>(923,478.80 to<br>5,812,844.17)   | 16,546.83<br>(0.00 to<br>168,792.48)              | 16,395.00<br>(0.00 to<br>167,916.42)              | 17,261.27<br>(0.00 to<br>178,084.24)              | 55,259.61<br>(15,375.39 to<br>96,802.14) | 304.44<br>(0.00 to<br>3,020.94)            | 305.58<br>(0.00 to<br>3,042.00)           | 311.22<br>(0.00 to<br>3,116.33)             |
| Exposure to forces of nature                                                 | 0.00<br>(0.00 to<br>0.00)                         | 47.75<br>(0.00 to<br>562.87)                      | 47.35<br>(0.00 to<br>555.56)                      | 49.59<br>(0.00 to<br>581.06)                      | 0.00<br>(0.00 to<br>0.00)                | 1.03<br>(0.00 to<br>12.18)                 | 1.04<br>(0.00 to<br>12.32)                | 1.04<br>(0.00 to<br>12.23)                  |
| Conflict and terrorism                                                       | 3,318,229.92<br>(922,728.63 to<br>5,812,899.19)   | 16,495.43<br>(0.00 to<br>168,792.48)              | 16,344.00<br>(0.00 to<br>167,916.42)              | 17,207.95<br>(0.00 to<br>178,084.24)              | 55,249.49<br>(15,363.70 to<br>96,786.45) | 303.34<br>(0.00 to<br>3,019.32)            | 304.47<br>(0.00 to<br>3,037.22)           | 310.11<br>(0.00 to<br>3,114.03)             |
| Executions and police conflict                                               | 615.74<br>(181.34 to<br>1,290.40)                 | 3.65<br>(0.00 to<br>76.88)                        | 3.65<br>(0.00 to<br>76.74)                        | 3.73<br>(0.00 to<br>78.10)                        | 10.12<br>(3.04 to<br>20.69)              | 0.07<br>(0.00 to<br>1.55)                  | 0.07<br>(0.00 to<br>1.55)                 | 0.07<br>(0.00 to<br>1.55)                   |
| <b>Tunisia</b>                                                               |                                                   |                                                   |                                                   |                                                   |                                          |                                            |                                           |                                             |
| Cause                                                                        | YLLs (actual counts)                              |                                                   |                                                   |                                                   | Deaths (actual counts)                   |                                            |                                           |                                             |
|                                                                              | 2016                                              | 2040 Forecast                                     | 2040 Better Scenario                              | 2040 Worse Scenario                               | 2016                                     | 2040 Forecast                              | 2040 Better Scenario                      | 2040 Worse Scenario                         |
| All causes                                                                   | 1,380,039.33<br>(1,182,582.76 to<br>1,591,166.86) | 1,868,661.51<br>(1,478,732.77 to<br>2,349,695.17) | 1,353,551.44<br>(1,086,912.44 to<br>1,703,479.20) | 2,272,401.13<br>(1,785,182.41 to<br>2,879,134.01) | 62,425.47<br>(53,655.79 to<br>71,161.65) | 115,686.61<br>(96,213.07 to<br>139,795.12) | 89,507.33<br>(74,782.17 to<br>109,977.35) | 133,982.59<br>(111,140.99 to<br>159,956.52) |
| Communicable, maternal, neonatal, and nutritional diseases                   | 155,062.83<br>(125,052.75 to<br>189,077.21)       | 121,629.72<br>(87,660.65 to<br>161,489.49)        | 85,424.91<br>(61,307.18 to<br>111,695.93)         | 148,266.80<br>(106,528.33 to<br>198,189.09)       | 4,130.02<br>(3,145.96 to<br>5,143.07)    | 5,831.21<br>(3,839.66 to<br>7,947.72)      | 4,552.62<br>(2,968.68 to<br>6,163.65)     | 6,766.56<br>(4,375.40 to<br>9,376.91)       |
| HIV/AIDS and tuberculosis                                                    | 10,319.46<br>(8,225.31 to<br>12,974.68)           | 9,952.59<br>(7,067.38 to<br>13,657.33)            | 4,965.68<br>(3,277.14 to<br>7,226.97)             | 13,369.24<br>(9,882.44 to<br>17,889.98)           | 379.11<br>(293.84 to<br>491.81)          | 442.68<br>(308.32 to<br>635.52)            | 245.97<br>(166.30 to<br>364.34)           | 554.07<br>(387.03 to<br>796.47)             |
| Tuberculosis                                                                 | 6,664.84<br>(4,965.26 to<br>8,740.24)             | 5,574.70<br>(3,669.65 to<br>8,491.04)             | 3,151.34<br>(2,008.42 to<br>4,751.45)             | 6,883.70<br>(4,430.40 to<br>10,509.08)            | 299.89<br>(220.40 to<br>404.42)          | 341.20<br>(216.09 to<br>533.80)            | 204.24<br>(131.20 to<br>316.10)           | 403.31<br>(251.33 to<br>643.19)             |
| HIV/AIDS                                                                     | 3,654.63<br>(2,497.29 to<br>5,212.33)             | 4,377.88<br>(2,373.67 to<br>7,044.19)             | 1,814.55<br>(657.49 to<br>3,427.07)               | 6,485.51<br>(4,237.08 to<br>9,111.03)             | 79.22<br>(52.07 to<br>115.88)            | 101.48<br>(51.54 to<br>169.85)             | 41.74<br>(12.38 to<br>84.58)              | 150.76<br>(92.85 to<br>222.06)              |
| Diarrhea, lower respiratory, and other common infectious diseases            | 55,901.37<br>(43,288.65 to<br>68,728.47)          | 68,701.54<br>(44,001.42 to<br>95,506.10)          | 51,883.85<br>(33,443.09 to<br>71,034.27)          | 85,621.97<br>(54,177.71 to<br>120,592.36)         | 2,611.29<br>(1,765.76 to<br>3,510.69)    | 4,237.93<br>(2,791.98 to<br>6,770.72)      | 3,830.84<br>(2,297.63 to<br>5,355.28)     | 5,487.56<br>(3,137.29 to<br>7,962.00)       |
| Diarrheal diseases                                                           | 4,437.21<br>(2,767.36 to<br>7,906.38)             | 3,070.35<br>(745.74 to<br>9,380.45)               | 3,157.01<br>(825.46 to<br>9,373.87)               | 4,609.86<br>(978.93 to<br>14,741.52)              | 186.93<br>(97.51 to<br>389.31)           | 241.47<br>(52.56 to<br>741.45)             | 265.00<br>(63.63 to<br>772.20)            | 338.95<br>(65.80 to<br>1,080.83)            |
| Intestinal infectious diseases                                               | 2,434.38<br>(1,136.68 to<br>4,448.96)             | 1,400.99<br>(612.53 to<br>2,624.23)               | 1,439.40<br>(659.63 to<br>2,661.56)               | 1,505.42<br>(645.75 to<br>2,837.13)               | 39.26<br>(18.45 to<br>71.19)             | 25.73<br>(11.93 to<br>48.44)               | 27.08<br>(12.85 to<br>48.88)              | 27.12<br>(12.42 to<br>50.66)                |
| Typhoid fever                                                                | 2,154.05<br>(985.04 to<br>3,966.57)               | 1,205.66<br>(522.72 to<br>2,288.66)               | 1,290.80<br>(583.82 to<br>2,364.73)               | 1,294.34<br>(551.63 to<br>2,440.99)               | 34.58<br>(15.97 to<br>62.55)             | 22.02<br>(10.10 to<br>40.71)               | 24.19<br>(11.38 to<br>43.09)              | 23.17<br>(10.44 to<br>42.97)                |
| Paratyphoid fever                                                            | 279.42<br>(114.17 to<br>572.86)                   | 194.94<br>(82.47 to<br>409.47)                    | 148.28<br>(62.10 to<br>312.13)                    | 210.64<br>(88.74 to<br>439.79)                    | 4.66<br>(1.91 to<br>9.59)                | 3.70<br>(1.59 to<br>6.01)                  | 2.88<br>(1.22 to<br>6.01)                 | 3.93<br>(1.68 to<br>8.15)                   |
| Other intestinal infectious diseases                                         | 0.91<br>(0.35 to<br>2.01)                         | 0.40<br>(0.14 to<br>0.89)                         | 0.32<br>(0.12 to<br>0.71)                         | 0.44<br>(0.16 to<br>0.98)                         | 0.02<br>(0.01 to<br>0.05)                | 0.02<br>(0.01 to<br>0.05)                  | 0.02<br>(0.01 to<br>0.04)                 | 0.02<br>(0.01 to<br>0.05)                   |
| Lower respiratory infections                                                 | 42,976.12<br>(29,867.39 to<br>56,472.04)          | 60,348.16<br>(36,450.41 to<br>86,631.77)          | 44,086.92<br>(26,546.08 to<br>62,752.09)          | 74,112.55<br>(44,861.20 to<br>108,015.89)         | 2,246.87<br>(1,407.94 to<br>3,157.83)    | 4,331.34<br>(2,461.78 to<br>6,382.85)      | 3,418.00<br>(1,999.50 to<br>4,932.16)     | 4,967.19<br>(2,806.11 to<br>7,389.50)       |
| Upper respiratory infections                                                 | 46.53<br>(25.30 to<br>80.65)                      | 50.18<br>(21.18 to<br>100.48)                     | 31.45<br>(13.06 to<br>64.65)                      | 56.93<br>(24.01 to<br>113.53)                     | 1.36<br>(0.73 to<br>2.16)                | 2.31<br>(0.88 to<br>4.82)                  | 1.52<br>(0.57 to<br>3.17)                 | 2.51<br>(0.96 to<br>5.17)                   |
| Otitis media                                                                 | 8.50<br>(2.46 to<br>33.57)                        | 3.00<br>(0.97 to<br>8.59)                         | 3.15<br>(1.03 to<br>9.15)                         | 2.88<br>(0.93 to<br>8.59)                         | 0.28<br>(0.11 to<br>0.73)                | 0.20<br>(0.06 to<br>0.56)                  | 0.23<br>(0.07 to<br>0.64)                 | 0.18<br>(0.06 to<br>0.50)                   |
| Meningitis                                                                   | 3,715.82<br>(2,419.23 to<br>6,111.21)             | 2,183.91<br>(1,436.69 to<br>3,792.34)             | 1,698.71<br>(1,111.67 to<br>2,884.32)             | 2,318.14<br>(1,496.05 to<br>4,018.77)             | 89.45<br>(61.23 to<br>145.97)            | 84.43<br>(57.69 to<br>136.00)              | 69.94<br>(47.14 to<br>114.05)             | 83.06<br>(56.66 to<br>134.09)               |





|                                                       |                                                            |                                                          |                                                        |                                                          |                                                   |                                                   |                                                  |                                                   |
|-------------------------------------------------------|------------------------------------------------------------|----------------------------------------------------------|--------------------------------------------------------|----------------------------------------------------------|---------------------------------------------------|---------------------------------------------------|--------------------------------------------------|---------------------------------------------------|
| Rabies                                                | 1.86<br>(0.94 to<br>3.54)                                  | 0.63<br>(0.21 to<br>1.70)                                | 0.46<br>(0.14 to<br>1.34)                              | 0.77<br>(0.26 to<br>1.98)                                | 0.07<br>(0.02 to<br>0.15)                         | 0.03<br>(0.01 to<br>0.11)                         | 0.02<br>(0.00 to<br>0.09)                        | 0.04<br>(0.01 to<br>0.12)                         |
| Intestinal nematode infections                        | 8.23<br>(2.12 to<br>17.88)                                 | 4.05<br>(0.93 to<br>9.61)                                | 3.52<br>(0.86 to<br>8.39)                              | 4.29<br>(0.95 to<br>10.32)                               | 0.14<br>(0.06 to<br>0.27)                         | 0.14<br>(0.03 to<br>0.17)                         | 0.08<br>(0.03 to<br>0.17)                        | 0.09<br>(0.03 to<br>0.18)                         |
| Other neglected tropical diseases                     | 69.25<br>(58.84 to<br>82.20)                               | 25.64<br>(17.74 to<br>41.77)                             | 21.57<br>(14.87 to<br>37.49)                           | 29.29<br>(20.02 to<br>47.25)                             | 1.30<br>(1.10 to<br>1.53)                         | 0.53<br>(0.36 to<br>0.96)                         | 0.46<br>(0.32 to<br>0.87)                        | 0.60<br>(0.41 to<br>1.05)                         |
| <b>Maternal disorders</b>                             | <b>2,640.21</b><br><b>(1,726.62 to</b><br><b>3,755.50)</b> | <b>1,262.85</b><br><b>(729.75 to</b><br><b>2,008.40)</b> | <b>930.71</b><br><b>(533.75 to</b><br><b>1,486.65)</b> | <b>1,507.53</b><br><b>(877.62 to</b><br><b>2,379.14)</b> | <b>46.86</b><br><b>(30.61 to</b><br><b>66.62)</b> | <b>22.45</b><br><b>(13.06 to</b><br><b>35.53)</b> | <b>16.56</b><br><b>(9.68 to</b><br><b>26.36)</b> | <b>26.79</b><br><b>(15.55 to</b><br><b>42.09)</b> |
| Maternal hemorrhage                                   | 932.21<br>(589.32 to<br>1,425.16)                          | 420.21<br>(225.74 to<br>698.79)                          | 310.47<br>(166.33 to<br>523.45)                        | 501.10<br>(267.68 to<br>833.74)                          | 16.71<br>(10.50 to<br>25.53)                      | 7.54<br>(4.08 to<br>12.58)                        | 5.58<br>(2.99 to<br>9.58)                        | 8.99<br>(4.87 to<br>15.15)                        |
| Maternal sepsis and other maternal infections         | 270.87<br>(164.65 to<br>413.72)                            | 115.32<br>(59.66 to<br>198.95)                           | 84.13<br>(43.55 to<br>142.76)                          | 138.04<br>(71.27 to<br>232.63)                           | 4.75<br>(2.90 to<br>7.10)                         | 2.03<br>(1.06 to<br>3.48)                         | 1.48<br>(0.78 to<br>2.50)                        | 2.42<br>(1.26 to<br>4.10)                         |
| Maternal hypertensive disorders                       | 323.59<br>(191.88 to<br>504.81)                            | 150.52<br>(73.01 to<br>279.18)                           | 109.26<br>(52.98 to<br>200.48)                         | 179.96<br>(87.86 to<br>325.50)                           | 5.67<br>(3.39 to<br>8.85)                         | 2.64<br>(1.29 to<br>4.89)                         | 1.92<br>(0.94 to<br>3.50)                        | 3.15<br>(1.54 to<br>5.72)                         |
| Maternal obstructed labor and uterine rupture         | 22.56<br>(10.80 to<br>41.90)                               | 10.78<br>(4.37 to<br>21.93)                              | 7.57<br>(3.10 to<br>15.62)                             | 13.03<br>(5.25 to<br>26.81)                              | 0.40<br>(0.19 to<br>0.75)                         | 0.19<br>(0.08 to<br>0.39)                         | 0.14<br>(0.06 to<br>0.28)                        | 0.23<br>(0.10 to<br>0.47)                         |
| Maternal abortion, miscarriage, and ectopic pregnancy | 409.57<br>(245.38 to<br>608.99)                            | 208.21<br>(101.36 to<br>370.64)                          | 151.48<br>(75.33 to<br>263.16)                         | 250.90<br>(126.51 to<br>442.99)                          | 7.36<br>(4.50 to<br>11.01)                        | 3.76<br>(1.89 to<br>6.60)                         | 2.74<br>(1.39 to<br>4.69)                        | 4.53<br>(2.32 to<br>7.94)                         |
| Indirect maternal deaths                              | 143.28<br>(79.39 to<br>228.25)                             | 81.99<br>(38.82 to<br>146.61)                            | 59.37<br>(28.37 to<br>103.88)                          | 97.97<br>(46.12 to<br>170.55)                            | 2.49<br>(1.40 to<br>4.01)                         | 1.42<br>(0.67 to<br>2.50)                         | 1.03<br>(0.49 to<br>1.79)                        | 1.70<br>(0.81 to<br>2.96)                         |
| Late maternal deaths                                  | 22.91<br>(10.99 to<br>41.82)                               | 9.75<br>(4.01 to<br>19.82)                               | 7.04<br>(2.92 to<br>14.10)                             | 11.69<br>(4.81 to<br>23.46)                              | 0.40<br>(0.19 to<br>0.74)                         | 0.17<br>(0.07 to<br>0.34)                         | 0.12<br>(0.05 to<br>0.25)                        | 0.20<br>(0.09 to<br>0.41)                         |
| Maternal deaths aggravated by HIV/AIDS                | 0.38<br>(0.13 to<br>0.85)                                  | 0.64<br>(0.17 to<br>1.62)                                | 0.47<br>(0.10 to<br>1.22)                              | 0.77<br>(0.21 to<br>1.95)                                | 0.01<br>(0.00 to<br>0.01)                         | 0.01<br>(0.00 to<br>0.03)                         | 0.01<br>(0.00 to<br>0.02)                        | 0.01<br>(0.00 to<br>0.04)                         |
| Other maternal disorders                              | 514.86<br>(313.38 to<br>784.22)                            | 265.42<br>(140.11 to<br>452.14)                          | 200.91<br>(105.50 to<br>341.91)                        | 314.09<br>(166.98 to<br>529.74)                          | 9.08<br>(5.50 to<br>13.84)                        | 4.69<br>(2.47 to<br>7.91)                         | 3.55<br>(1.88 to<br>5.96)                        | 5.54<br>(2.94 to<br>9.32)                         |

**Tunisia**

| Cause                                                    | YLLs (actual counts)                                           |                                                               |                                                               |                                                               | Deaths (actual counts)                                 |                                                      |                                                      |                                                      |
|----------------------------------------------------------|----------------------------------------------------------------|---------------------------------------------------------------|---------------------------------------------------------------|---------------------------------------------------------------|--------------------------------------------------------|------------------------------------------------------|------------------------------------------------------|------------------------------------------------------|
|                                                          | 2016                                                           | 2040 Forecast                                                 | 2040 Better Scenario                                          | 2040 Worse Scenario                                           | 2016                                                   | 2040 Forecast                                        | 2040 Better Scenario                                 | 2040 Worse Scenario                                  |
| <b>Neonatal disorders</b>                                | <b>81,395.98</b><br><b>(59,436.79 to</b><br><b>109,126.60)</b> | <b>37,802.19</b><br><b>(18,451.47 to</b><br><b>62,786.51)</b> | <b>24,262.78</b><br><b>(11,784.62 to</b><br><b>40,161.01)</b> | <b>43,649.22</b><br><b>(21,552.23 to</b><br><b>72,464.32)</b> | <b>941.20</b><br><b>(687.18 to</b><br><b>1,261.85)</b> | <b>437.25</b><br><b>(213.55 to</b><br><b>726.41)</b> | <b>280.70</b><br><b>(136.41 to</b><br><b>464.71)</b> | <b>504.86</b><br><b>(249.32 to</b><br><b>837.70)</b> |
| Neonatal preterm birth                                   | 50,565.79<br>(35,099.36 to<br>70,359.70)                       | 22,407.48<br>(10,553.79 to<br>38,737.33)                      | 13,046.04<br>(6,187.58 to<br>22,851.38)                       | 26,006.45<br>(12,255.59 to<br>45,159.49)                      | 584.48<br>(405.67 to<br>813.02)                        | 259.04<br>(122.00 to<br>447.68)                      | 150.85<br>(71.57 to<br>264.13)                       | 300.63<br>(141.70 to<br>521.96)                      |
| Neonatal encephalopathy due to birth asphyxia and trauma | 10,463.77<br>(6,353.40 to<br>16,076.00)                        | 4,413.93<br>(1,941.19 to<br>8,748.40)                         | 3,024.20<br>(1,341.33 to<br>5,802.56)                         | 5,000.91<br>(2,234.42 to<br>9,845.34)                         | 121.17<br>(73.71 to<br>186.08)                         | 51.19<br>(22.53 to<br>101.54)                        | 35.07<br>(15.59 to<br>67.35)                         | 57.99<br>(25.94 to<br>114.08)                        |
| Neonatal sepsis and other neonatal infections            | 12,453.34<br>(7,107.66 to<br>19,328.54)                        | 7,215.57<br>(2,942.42 to<br>13,754.99)                        | 5,199.51<br>(2,123.83 to<br>9,871.76)                         | 8,231.34<br>(3,338.90 to<br>15,660.74)                        | 143.98<br>(82.16 to<br>223.46)                         | 83.43<br>(34.01 to<br>158.94)                        | 60.12<br>(24.56 to<br>114.17)                        | 95.17<br>(38.60 to<br>181.08)                        |
| Hemolytic disease and other neonatal jaundice            | 320.15<br>(181.02 to<br>538.09)                                | 101.10<br>(37.15 to<br>228.79)                                | 69.69<br>(26.37 to<br>153.08)                                 | 119.46<br>(43.69 to<br>271.37)                                | 3.70<br>(2.09 to<br>6.22)                              | 1.17<br>(0.43 to<br>2.64)                            | 0.81<br>(0.31 to<br>1.77)                            | 1.38<br>(0.51 to<br>3.14)                            |
| Other neonatal disorders                                 | 7,592.93<br>(4,440.92 to<br>11,725.47)                         | 3,664.12<br>(1,618.71 to<br>7,172.90)                         | 2,923.34<br>(1,334.90 to<br>5,635.26)                         | 4,291.06<br>(1,937.79 to<br>8,272.35)                         | 87.87<br>(51.41 to<br>135.66)                          | 42.42<br>(18.75 to<br>83.00)                         | 33.85<br>(15.47 to<br>65.20)                         | 49.68<br>(22.46 to<br>95.67)                         |
| <b>Nutritional deficiencies</b>                          | <b>668.46</b><br><b>(524.24 to</b><br><b>859.58)</b>           | <b>547.60</b><br><b>(395.35 to</b><br><b>733.12)</b>          | <b>548.34</b><br><b>(400.67 to</b><br><b>731.26)</b>          | <b>564.03</b><br><b>(407.92 to</b><br><b>760.98)</b>          | <b>33.38</b><br><b>(26.33 to</b><br><b>41.14)</b>      | <b>45.13</b><br><b>(29.22 to</b><br><b>64.46)</b>    | <b>48.55</b><br><b>(32.80 to</b><br><b>68.97)</b>    | <b>44.19</b><br><b>(28.32 to</b><br><b>64.52)</b>    |

|                                                                         |                                                                         |                                                                        |                                                                      |                                                                        |                                                               |                                                                 |                                                                |                                                                 |
|-------------------------------------------------------------------------|-------------------------------------------------------------------------|------------------------------------------------------------------------|----------------------------------------------------------------------|------------------------------------------------------------------------|---------------------------------------------------------------|-----------------------------------------------------------------|----------------------------------------------------------------|-----------------------------------------------------------------|
| Protein-energy malnutrition                                             | 476.02<br>(367.66 to<br>617.16)                                         | 368.39<br>(248.27 to<br>506.75)                                        | 385.06<br>(268.76 to<br>522.79)                                      | 377.70<br>(254.76 to<br>517.45)                                        | 26.41<br>(20.61 to<br>32.72)                                  | 34.08<br>(20.08 to<br>51.50)                                    | 37.94<br>(22.87 to<br>55.77)                                   | 33.29<br>(19.35 to<br>51.13)                                    |
| Iodine deficiency                                                       | 21.70<br>(2.58 to<br>64.62)                                             | 36.93<br>(2.82 to<br>110.10)                                           | 34.24<br>(2.24 to<br>108.68)                                         | 38.84<br>(3.01 to<br>114.08)                                           | 0.76<br>(0.08 to<br>2.46)                                     | 0.76<br>(0.08 to<br>11.27)                                      | 2.76<br>(0.07 to<br>12.01)                                     | 2.84<br>(0.09 to<br>11.05)                                      |
| Dietary iron deficiency                                                 | 66.35<br>(48.57 to<br>88.75)                                            | 45.49<br>(31.15 to<br>65.73)                                           | 43.83<br>(29.99 to<br>61.94)                                         | 48.26<br>(32.86 to<br>68.55)                                           | 1.32<br>(0.98 to<br>1.74)                                     | 1.13<br>(0.74 to<br>1.71)                                       | 1.14<br>(0.74 to<br>1.75)                                      | 1.17<br>(0.77 to<br>1.75)                                       |
| Other nutritional deficiencies                                          | 104.39<br>(75.51 to<br>139.94)                                          | 96.78<br>(63.94 to<br>140.15)                                          | 85.21<br>(55.75 to<br>125.95)                                        | 99.24<br>(66.96 to<br>143.38)                                          | 4.90<br>(3.36 to<br>6.98)                                     | 7.10<br>(4.10 to<br>11.42)                                      | 6.71<br>(3.91 to<br>10.88)                                     | 6.89<br>(3.95 to<br>11.10)                                      |
| <b>Other communicable, maternal, neonatal, and nutritional diseases</b> | <b>3,777.30</b><br><b>(2,906.11 to</b><br><b>5,014.32)</b>              | <b>3,300.66</b><br><b>(2,502.40 to</b><br><b>4,316.32)</b>             | <b>2,783.25</b><br><b>(2,097.82 to</b><br><b>3,630.76)</b>           | <b>3,483.87</b><br><b>(2,628.46 to</b><br><b>4,549.52)</b>             | <b>109.92</b><br><b>(87.04 to</b><br><b>138.05)</b>           | <b>144.22</b><br><b>(111.77 to</b><br><b>185.01)</b>            | <b>128.72</b><br><b>(100.30 to</b><br><b>165.08)</b>           | <b>147.38</b><br><b>(114.86 to</b><br><b>189.09)</b>            |
| Sexually transmitted infections excluding HIV                           | 715.87<br>(229.90 to<br>1,793.21)                                       | 155.96<br>(57.18 to<br>425.80)                                         | 116.91<br>(45.25 to<br>312.88)                                       | 167.50<br>(60.21 to<br>459.98)                                         | 9.60<br>(3.87 to<br>22.27)                                    | 2.94<br>(1.48 to<br>6.34)                                       | 2.40<br>(1.26 to<br>4.95)                                      | 3.08<br>(1.53 to<br>6.65)                                       |
| Syphilis                                                                | 665.63<br>(182.71 to<br>1,742.69)                                       | 127.11<br>(31.03 to<br>388.76)                                         | 91.10<br>(22.21 to<br>275.32)                                        | 137.45<br>(33.51 to<br>423.30)                                         | 8.21<br>(2.54 to<br>20.81)                                    | 8.21<br>(0.66 to<br>5.01)                                       | 1.34<br>(0.51 to<br>3.67)                                      | 1.93<br>(0.68 to<br>5.36)                                       |
| Chlamydial infection                                                    | 9.31<br>(5.88 to<br>14.05)                                              | 5.57<br>(3.40 to<br>8.61)                                              | 5.01<br>(3.03 to<br>7.75)                                            | 5.81<br>(3.55 to<br>8.96)                                              | 0.26<br>(0.16 to<br>0.40)                                     | 0.23<br>(0.13 to<br>0.37)                                       | 0.21<br>(0.12 to<br>0.35)                                      | 0.23<br>(0.13 to<br>0.37)                                       |
| Gonococcal infection                                                    | 26.98<br>(17.72 to<br>40.12)                                            | 15.72<br>(9.50 to<br>24.35)                                            | 14.10<br>(8.49 to<br>22.03)                                          | 16.33<br>(9.93 to<br>25.52)                                            | 0.77<br>(0.49 to<br>1.17)                                     | 0.66<br>(0.38 to<br>1.09)                                       | 0.62<br>(0.35 to<br>1.04)                                      | 0.66<br>(0.39 to<br>1.10)                                       |
| Other sexually transmitted infections                                   | 13.96<br>(9.08 to<br>20.59)                                             | 7.55<br>(4.64 to<br>12.01)                                             | 6.69<br>(4.05 to<br>10.64)                                           | 7.91<br>(4.90 to<br>12.72)                                             | 0.35<br>(0.23 to<br>0.53)                                     | 0.25<br>(0.15 to<br>0.41)                                       | 0.23<br>(0.14 to<br>0.38)                                      | 0.26<br>(0.16 to<br>0.42)                                       |
| Acute hepatitis                                                         | 1,401.12<br>(1,097.09 to<br>1,815.07)                                   | 1,312.57<br>(931.23 to<br>1,794.50)                                    | 999.93<br>(692.85 to<br>1,380.74)                                    | 1,377.46<br>(981.41 to<br>1,874.15)                                    | 46.20<br>(35.30 to<br>60.83)                                  | 56.06<br>(40.73 to<br>75.23)                                    | 44.21<br>(31.16 to<br>60.31)                                   | 57.34<br>(42.01 to<br>76.71)                                    |
| Acute hepatitis A                                                       | 48.53<br>(17.14 to<br>90.38)                                            | 30.61<br>(11.29 to<br>62.84)                                           | 24.31<br>(9.04 to<br>50.22)                                          | 32.17<br>(11.82 to<br>65.89)                                           | 0.87<br>(0.41 to<br>1.44)                                     | 1.04<br>(0.36 to<br>2.29)                                       | 0.88<br>(0.28 to<br>1.94)                                      | 1.06<br>(0.37 to<br>2.34)                                       |
| Acute hepatitis B                                                       | 1,148.04<br>(866.70 to<br>1,520.20)                                     | 1,108.26<br>(766.11 to<br>1,542.49)                                    | 839.05<br>(570.89 to<br>1,179.45)                                    | 1,167.37<br>(809.93 to<br>1,625.90)                                    | 38.94<br>(28.93 to<br>52.12)                                  | 45.92<br>(31.89 to<br>62.88)                                    | 35.66<br>(24.26 to<br>50.09)                                   | 47.42<br>(33.24 to<br>64.84)                                    |
| Acute hepatitis C                                                       | 32.00<br>(21.49 to<br>47.08)                                            | 36.68<br>(22.92 to<br>57.83)                                           | 29.15<br>(17.89 to<br>46.49)                                         | 37.12<br>(23.23 to<br>59.08)                                           | 1.18<br>(0.78 to<br>1.79)                                     | 1.68<br>(1.07 to<br>2.62)                                       | 1.38<br>(0.86 to<br>2.14)                                      | 1.66<br>(1.06 to<br>2.59)                                       |
| Acute hepatitis E                                                       | 172.55<br>(121.10 to<br>236.64)                                         | 137.01<br>(84.01 to<br>212.64)                                         | 107.42<br>(64.55 to<br>167.82)                                       | 140.80<br>(85.87 to<br>219.22)                                         | 5.21<br>(3.39 to<br>7.55)                                     | 7.41<br>(4.20 to<br>11.92)                                      | 6.28<br>(3.54 to<br>10.10)                                     | 7.19<br>(4.04 to<br>11.52)                                      |
| Other unspecified infectious diseases                                   | 1,660.31<br>(1,243.86 to<br>2,248.99)                                   | 1,832.13<br>(1,321.64 to<br>2,454.64)                                  | 1,666.41<br>(1,223.35 to<br>2,217.70)                                | 1,938.90<br>(1,392.29 to<br>2,588.36)                                  | 54.12<br>(41.44 to<br>69.50)                                  | 85.21<br>(64.71 to<br>112.96)                                   | 82.11<br>(63.44 to<br>108.16)                                  | 86.96<br>(65.84 to<br>114.92)                                   |
| <b>Non-communicable diseases</b>                                        | <b>10,172,218.90</b><br><b>(8,639,710.4 to</b><br><b>11,840,669.63)</b> | <b>1,579,738.37</b><br><b>(1,218,209.82 to</b><br><b>2,055,237.98)</b> | <b>1,159,497.85</b><br><b>(915,638.18 to</b><br><b>1,508,489.29)</b> | <b>1,923,477.16</b><br><b>(1,473,291.69 to</b><br><b>2,501,754.73)</b> | <b>53,482.43</b><br><b>(45,796.35 to</b><br><b>61,264.61)</b> | <b>104,663.71</b><br><b>(85,295.87 to</b><br><b>128,287.75)</b> | <b>81,229.51</b><br><b>(66,493.79 to</b><br><b>101,360.36)</b> | <b>121,347.54</b><br><b>(99,231.46 to</b><br><b>147,656.55)</b> |
| <b>Tunisia</b>                                                          |                                                                         |                                                                        |                                                                      |                                                                        |                                                               |                                                                 |                                                                |                                                                 |
| Cause                                                                   | YLLs (actual counts)                                                    |                                                                        |                                                                      |                                                                        | Deaths (actual counts)                                        |                                                                 |                                                                |                                                                 |
|                                                                         | 2016                                                                    | 2040 Forecast                                                          | 2040 Better Scenario                                                 | 2040 Worse Scenario                                                    | 2016                                                          | 2040 Forecast                                                   | 2040 Better Scenario                                           | 2040 Worse Scenario                                             |
| Neoplasms                                                               | 269,969.99<br>(223,173.21 to<br>322,058.39)                             | 420,519.53<br>(314,167.82 to<br>546,263.85)                            | 351,538.01<br>(270,065.73 to<br>442,847.26)                          | 480,171.06<br>(345,894.44 to<br>644,788.34)                            | 10,691.79<br>(8,846.80 to<br>12,628.56)                       | 20,507.51<br>(15,826.84 to<br>25,981.60)                        | 17,889.18<br>(14,317.10 to<br>21,786.20)                       | 22,682.17<br>(16,727.45 to<br>29,755.37)                        |
| Lip and oral cavity cancer                                              | 3,542.55<br>(2,802.25 to<br>4,479.24)                                   | 5,429.05<br>(3,247.47 to<br>9,086.99)                                  | 3,887.65<br>(2,504.04 to<br>6,013.23)                                | 7,155.79<br>(4,026.28 to<br>12,678.95)                                 | 150.01<br>(118.98 to<br>185.07)                               | 262.89<br>(166.06 to<br>416.18)                                 | 200.81<br>(137.39 to<br>301.11)                                | 331.96<br>(195.29 to<br>551.55)                                 |
| Nasopharynx cancer                                                      | 5,890.01<br>(4,690.77 to<br>7,544.41)                                   | 9,222.58<br>(4,932.53 to<br>16,995.27)                                 | 5,892.41<br>(3,380.56 to<br>10,156.12)                               | 12,548.06<br>(6,248.99 to<br>24,195.82)                                | 186.95<br>(145.36 to<br>236.68)                               | 326.87<br>(174.23 to<br>594.92)                                 | 212.63<br>(122.01 to<br>365.33)                                | 441.18<br>(218.20 to<br>839.38)                                 |

|                                      |                                          |                                           |                                          |                                            |                                       |                                       |                                       |                                       |
|--------------------------------------|------------------------------------------|-------------------------------------------|------------------------------------------|--------------------------------------------|---------------------------------------|---------------------------------------|---------------------------------------|---------------------------------------|
|                                      | 1,614.96<br>(1,254.12 to<br>1,982.54)    | 2,120.04<br>(1,530.61 to<br>2,887.86)     | 2,030.09<br>(1,507.11 to<br>2,712.53)    | 2,223.42<br>(1,577.27 to<br>3,117.62)      | 64.19<br>(50.79 to<br>78.44)          | 101.61<br>(75.46 to<br>137.62)        | 101.12<br>(76.83 to<br>133.06)        | 103.35<br>(75.24 to<br>143.84)        |
| Other pharynx cancer                 | 1,934.22<br>(1,536.35 to<br>2,387.66)    | 2,844.33<br>(1,582.13 to<br>4,915.37)     | 2,183.25<br>(1,330.23 to<br>3,607.19)    | 3,697.53<br>(1,908.54 to<br>6,654.80)      | 88.11<br>(70.42 to<br>107.66)         | 146.73<br>(84.73 to<br>241.32)        | 118.98<br>(75.55 to<br>182.62)        | 183.71<br>(99.34 to<br>320.29)        |
| Esophageal cancer                    | 12,509.27<br>(10,233.81 to<br>15,017.44) | 13,917.44<br>(10,045.85 to<br>18,606.32)  | 10,956.99<br>(8,136.54 to<br>14,284.00)  | 14,772.94<br>(10,499.23 to<br>19,953.79)   | 540.19<br>(444.61 to<br>638.97)       | 736.11<br>(541.53 to<br>957.57)       | 602.66<br>(458.19 to<br>759.16)       | 755.01<br>(550.33 to<br>990.27)       |
| Stomach cancer                       | 26,906.69<br>(21,676.19 to<br>32,593.43) | 47,562.36<br>(32,664.36 to<br>67,527.89)  | 42,125.81<br>(29,423.97 to<br>58,483.68) | 49,498.44<br>(33,717.61 to<br>71,607.21)   | 1,124.69<br>(914.07 to<br>1,343.00)   | 2,480.20<br>(1,714.29 to<br>3,519.76) | 2,280.24<br>(1,599.82 to<br>3,205.22) | 2,502.08<br>(1,694.41 to<br>3,655.05) |
| Colon and rectum cancer              | 4,635.52<br>(3,637.67 to<br>5,773.81)    | 9,017.59<br>(5,816.25 to<br>13,946.20)    | 8,184.88<br>(5,561.22 to<br>11,897.29)   | 10,242.26<br>(6,200.53 to<br>16,650.49)    | 214.20<br>(170.07 to<br>262.35)       | 488.71<br>(329.82 to<br>715.54)       | 462.90<br>(328.65 to<br>645.02)       | 535.32<br>(342.22 to<br>816.58)       |
| Liver cancer                         | 1,492.71<br>(1,055.65 to<br>2,029.75)    | 2,636.58<br>(1,548.69 to<br>4,325.15)     | 2,362.34<br>(1,454.80 to<br>3,706.54)    | 3,031.76<br>(1,651.98 to<br>5,237.91)      | 60.02<br>(42.65 to<br>83.25)          | 125.04<br>(74.44 to<br>198.33)        | 116.45<br>(72.50 to<br>178.16)        | 139.27<br>(80.12 to<br>230.89)        |
| Liver cancer due to hepatitis B      | 2,319.37<br>(1,752.63 to<br>2,974.36)    | 4,803.30<br>(2,939.16 to<br>7,307.80)     | 4,423.10<br>(2,908.86 to<br>6,449.27)    | 5,360.64<br>(3,156.86 to<br>8,474.45)      | 117.61<br>(90.72 to<br>148.19)        | 280.97<br>(181.52 to<br>409.69)       | 269.81<br>(183.08 to<br>377.80)       | 302.37<br>(185.22 to<br>461.74)       |
| Liver cancer due to hepatitis C      | 173.75<br>(114.62 to<br>257.66)          | 343.77<br>(184.62 to<br>592.53)           | 300.19<br>(172.27 to<br>493.55)          | 406.83<br>(205.40 to<br>749.93)            | 8.09<br>(5.33 to<br>11.83)            | 17.96<br>(9.93 to<br>30.15)           | 16.41<br>(9.59 to<br>26.14)           | 20.49<br>(10.77 to<br>35.99)          |
| Liver cancer due to alcohol use      | 649.70<br>(439.18 to<br>944.40)          | 1,233.95<br>(661.82 to<br>2,229.88)       | 1,099.25<br>(632.43 to<br>1,849.47)      | 1,443.03<br>(738.62 to<br>2,711.65)        | 28.48<br>(19.30 to<br>41.53)          | 64.74<br>(35.78 to<br>114.19)         | 60.23<br>(35.27 to<br>100.90)         | 73.19<br>(37.96 to<br>135.95)         |
| Liver cancer due to other causes     | 5,398.69<br>(3,728.73 to<br>6,734.97)    | 6,793.54<br>(4,906.91 to<br>8,324.88)     | 6,781.35<br>(4,979.73 to<br>8,260.65)    | 6,551.15<br>(4,634.44 to<br>8,003.05)      | 251.62<br>(187.70 to<br>307.26)       | 371.12<br>(295.42 to<br>443.12)       | 379.87<br>(304.03 to<br>451.45)       | 350.39<br>(273.34 to<br>422.08)       |
| Gallbladder and biliary tract cancer | 8,107.84<br>(6,544.08 to<br>9,794.69)    | 15,447.39<br>(11,216.64 to<br>21,513.30)  | 14,859.68<br>(10,964.62 to<br>20,992.95) | 16,115.57<br>(11,406.15 to<br>22,967.69)   | 364.75<br>(296.40 to<br>436.63)       | 807.85<br>(594.49 to<br>1,101.00)     | 806.78<br>(605.98 to<br>1,065.54)     | 816.00<br>(585.04 to<br>1,137.33)     |
| Pancreatic cancer                    | 7,069.05<br>(5,191.67 to<br>9,290.62)    | 9,915.54<br>(4,259.10 to<br>20,976.12)    | 5,935.18<br>(2,747.07 to<br>11,721.97)   | 14,288.53<br>(5,894.27 to<br>30,692.21)    | 304.53<br>(227.69 to<br>396.11)       | 467.08<br>(211.48 to<br>944.68)       | 292.32<br>(144.79 to<br>559.36)       | 659.63<br>(282.37 to<br>1,356.11)     |
| Larynx cancer                        | 54,168.97<br>(40,667.56 to<br>69,521.98) | 87,487.55<br>(44,954.14 to<br>146,086.54) | 54,561.09<br>(30,401.61 to<br>87,741.80) | 129,848.81<br>(64,103.94 to<br>221,975.80) | 2,241.18<br>(1,086.64 to<br>2,849.03) | 4,056.59<br>(2,166.27 to<br>6,611.90) | 2,619.18<br>(1,540.45 to<br>4,135.63) | 5,906.31<br>(3,016.22 to<br>9,901.16) |
| Tracheal, bronchus, and lung cancer  | 1,096.83<br>(844.95 to<br>1,386.45)      | 1,773.44<br>(1,314.15 to<br>2,525.84)     | 2,070.36<br>(1,531.36 to<br>2,653.60)    | 1,649.54<br>(1,226.17 to<br>2,088.09)      | 49.01<br>(35.83 to<br>61.61)          | 102.26<br>(70.61 to<br>130.51)        | 123.47<br>(85.29 to<br>157.08)        | 92.20<br>(62.72 to<br>118.02)         |
| Malignant skin melanoma              | 737.77<br>(534.60 to<br>1,008.32)        | 1,452.02<br>(1,084.23 to<br>1,963.48)     | 1,300.42<br>(961.72 to<br>1,766.61)      | 1,412.66<br>(1,047.49 to<br>1,903.68)      | 40.41<br>(29.41 to<br>54.66)          | 97.10<br>(69.26 to<br>130.59)         | 91.10<br>(66.94 to<br>121.57)         | 91.02<br>(62.66 to<br>123.68)         |
| Non-melanoma skin cancer             | 30,911.71<br>(21,999.55 to<br>41,021.25) | 43,803.28<br>(29,671.65 to<br>62,553.16)  | 38,788.86<br>(26,353.24 to<br>54,533.68) | 44,551.30<br>(29,721.45 to<br>64,903.46)   | 1,038.76<br>(741.75 to<br>1,369.92)   | 1,889.08<br>(1,308.94 to<br>2,658.87) | 1,708.33<br>(1,185.60 to<br>2,367.27) | 1,883.35<br>(1,279.77 to<br>2,688.84) |
| Breast cancer                        | 4,202.90<br>(2,682.25 to<br>5,764.43)    | 5,278.55<br>(3,224.47 to<br>7,482.03)     | 4,427.98<br>(2,735.54 to<br>6,301.88)    | 5,425.94<br>(3,252.76 to<br>7,641.23)      | 160.39<br>(104.84 to<br>215.87)       | 243.42<br>(159.18 to<br>328.64)       | 208.36<br>(138.82 to<br>282.70)       | 245.36<br>(158.18 to<br>332.34)       |
| Cervical cancer                      | 2,714.68<br>(1,926.55 to<br>3,615.19)    | 4,831.46<br>(3,452.87 to<br>6,550.53)     | 4,282.46<br>(3,063.66 to<br>5,748.18)    | 4,945.73<br>(3,544.41 to<br>6,638.19)      | 123.51<br>(89.96 to<br>161.78)        | 266.42<br>(199.37 to<br>345.92)       | 241.43<br>(181.31 to<br>312.79)       | 267.27<br>(199.05 to<br>347.06)       |
| Uterine cancer                       | 4,598.45<br>(3,653.25 to<br>6,583.12)    | 8,143.64<br>(5,444.53 to<br>11,904.13)    | 7,550.04<br>(5,129.63 to<br>10,903.46)   | 8,079.39<br>(5,377.51 to<br>12,059.65)     | 185.74<br>(138.97 to<br>243.04)       | 367.54<br>(248.08 to<br>530.20)       | 345.90<br>(236.85 to<br>493.93)       | 359.91<br>(241.15 to<br>529.11)       |
| Ovarian cancer                       | 7,843.93<br>(4,143.70 to<br>11,008.10)   | 19,353.57<br>(10,225.63 to<br>26,689.04)  | 19,367.45<br>(10,553.30 to<br>26,690.19) | 18,034.45<br>(9,401.79 to<br>25,007.98)    | 558.00<br>(301.85 to<br>775.69)       | 1,475.70<br>(781.93 to<br>2,006.85)   | 1,537.74<br>(840.96 to<br>2,060.03)   | 1,332.84<br>(687.49 to<br>1,842.44)   |
| Prostate cancer                      | 566.62<br>(405.18 to<br>798.87)          | 474.12<br>(329.43 to<br>659.73)           | 415.52<br>(286.53 to<br>576.17)          | 480.95<br>(332.55 to<br>673.60)            | 12.71<br>(9.21 to<br>17.50)           | 13.18<br>(9.62 to<br>17.62)           | 12.03<br>(8.71 to<br>15.99)           | 12.98<br>(9.47 to<br>17.31)           |
| Testicular cancer                    | <b>Tunisia</b>                           |                                           |                                          |                                            |                                       |                                       |                                       |                                       |
|                                      | <b>YLLs (actual counts)</b>              |                                           |                                          |                                            | <b>Deaths (actual counts)</b>         |                                       |                                       |                                       |

| Cause                           | 2016                                            | 2040 Forecast                                   | 2040 Better Scenario                            | 2040 Worse Scenario                               | 2016                                         | 2040 Forecast                                | 2040 Better Scenario                         | 2040 Worse Scenario                          |
|---------------------------------|-------------------------------------------------|-------------------------------------------------|-------------------------------------------------|---------------------------------------------------|----------------------------------------------|----------------------------------------------|----------------------------------------------|----------------------------------------------|
| Kidney cancer                   | 3,286.68<br>(2,640.14 to 4,038.73)              | 6,119.29<br>(4,174.48 to 9,130.15)              | 6,116.35<br>(4,274.76 to 8,759.83)              | 6,224.25<br>(4,142.30 to 9,704.95)                | 139.39<br>(111.80 to 171.62)                 | 313.30<br>(220.17 to 444.20)                 | 327.15<br>(236.47 to 448.54)                 | 308.51<br>(210.51 to 455.10)                 |
| Bladder cancer                  | 12,089.05<br>(9,257.68 to 15,384.50)            | 22,100.42<br>(14,434.90 to 33,345.82)           | 19,150.44<br>(12,926.50 to 27,635.93)           | 24,645.22<br>(15,354.67 to 38,516.46)             | 666.93<br>(517.49 to 841.98)                 | 1,385.86<br>(938.09 to 2,009.15)             | 1,267.28<br>(904.40 to 1,775.16)             | 1,486.82<br>(972.95 to 2,257.65)             |
| Brain and nervous system cancer | 10,009.71<br>(7,197.48 to 12,957.54)            | 13,889.35<br>(10,715.90 to 18,129.70)           | 13,375.47<br>(10,244.26 to 17,221.47)           | 13,553.75<br>(10,377.32 to 17,656.26)             | 273.03<br>(212.71 to 352.83)                 | 499.08<br>(371.11 to 682.98)                 | 495.19<br>(357.39 to 690.99)                 | 475.94<br>(359.38 to 637.33)                 |
| Thyroid cancer                  | 2,661.75<br>(2,135.16 to 3,293.61)              | 3,979.20<br>(2,764.54 to 5,844.90)              | 3,343.79<br>(2,350.63 to 4,812.13)              | 4,232.90<br>(2,876.51 to 6,317.04)                | 103.81<br>(83.08 to 129.53)                  | 195.15<br>(134.71 to 286.86)                 | 167.99<br>(117.83 to 244.09)                 | 202.63<br>(136.34 to 299.72)                 |
| Mesothelioma                    | 414.59<br>(309.77 to 627.71)                    | 564.98<br>(418.51 to 852.05)                    | 578.98<br>(428.89 to 920.67)                    | 554.11<br>(413.64 to 810.96)                      | 15.51<br>(11.53 to 22.97)                    | 26.08<br>(19.64 to 38.74)                    | 27.58<br>(20.91 to 41.79)                    | 24.94<br>(18.71 to 37.15)                    |
| Hodgkin lymphoma                | 3,934.22<br>(1,293.77 to 5,958.55)              | 3,353.20<br>(1,216.90 to 5,106.71)              | 2,637.31<br>(985.94 to 4,039.92)                | 3,564.08<br>(1,262.57 to 5,452.48)                | 91.83<br>(36.09 to 135.61)                   | 92.77<br>(43.55 to 134.18)                   | 92.77<br>(36.08 to 107.99)                   | 97.33<br>(44.50 to 140.37)                   |
| Non-Hodgkin lymphoma            | 16,216.63<br>(12,918.82 to 19,852.88)           | 25,474.17<br>(19,289.37 to 33,174.38)           | 23,546.89<br>(18,086.54 to 30,328.65)           | 25,129.92<br>(18,895.39 to 33,026.09)             | 560.84<br>(458.39 to 689.58)                 | 1,165.52<br>(883.62 to 1,515.53)             | 1,110.37<br>(847.28 to 1,426.80)             | 1,120.79<br>(841.75 to 1,460.58)             |
| Multiple myeloma                | 4,562.39<br>(3,143.84 to 5,899.82)              | 9,302.19<br>(6,251.83 to 12,796.54)             | 8,920.99<br>(6,150.87 to 12,051.54)             | 9,129.46<br>(6,021.63 to 12,663.57)               | 194.50<br>(142.13 to 248.19)                 | 465.44<br>(339.76 to 625.80)                 | 458.72<br>(342.66 to 609.72)                 | 446.66<br>(319.81 to 607.95)                 |
| Leukemia                        | 13,835.88<br>(10,554.31 to 16,718.44)           | 17,544.31<br>(12,689.18 to 24,061.52)           | 15,156.13<br>(11,170.18 to 20,162.88)           | 18,726.75<br>(13,210.98 to 26,437.03)             | 409.37<br>(331.83 to 499.23)                 | 716.28<br>(514.02 to 1,012.74)               | 638.87<br>(466.58 to 914.12)                 | 746.21<br>(523.64 to 1,069.09)               |
| Acute lymphoid leukemia         | 3,383.47<br>(2,415.57 to 4,320.35)              | 3,080.83<br>(2,179.08 to 4,137.26)              | 2,648.20<br>(1,894.22 to 3,553.40)              | 3,229.37<br>(2,240.72 to 4,403.71)                | 67.12<br>(52.13 to 83.16)                    | 84.77<br>(59.72 to 115.27)                   | 74.10<br>(53.43 to 98.93)                    | 88.01<br>(61.05 to 122.55)                   |
| Chronic lymphoid leukemia       | 597.14<br>(440.66 to 761.48)                    | 922.39<br>(629.52 to 1,319.85)                  | 838.54<br>(578.64 to 1,178.53)                  | 969.43<br>(646.36 to 1,430.72)                    | 25.17<br>(19.11 to 33.86)                    | 49.00<br>(33.28 to 72.00)                    | 46.50<br>(32.28 to 67.97)                    | 49.91<br>(32.93 to 75.14)                    |
| Acute myeloid leukemia          | 4,102.40<br>(3,273.40 to 5,338.59)              | 5,728.72<br>(4,089.05 to 8,424.51)              | 5,355.27<br>(3,864.51 to 7,127.76)              | 5,957.25<br>(4,167.93 to 8,954.00)                | 108.87<br>(83.00 to 151.70)                  | 211.44<br>(142.69 to 334.24)                 | 204.59<br>(140.72 to 317.95)                 | 214.65<br>(141.41 to 341.48)                 |
| Chronic myeloid leukemia        | 1,422.04<br>(855.17 to 2,058.48)                | 1,483.48<br>(890.85 to 2,312.60)                | 1,116.09<br>(681.47 to 1,723.72)                | 1,583.01<br>(921.93 to 2,505.23)                  | 50.81<br>(35.12 to 72.92)                    | 69.77<br>(44.03 to 111.75)                   | 54.76<br>(35.52 to 87.01)                    | 71.89<br>(44.43 to 117.33)                   |
| Other leukemia                  | 4,330.84<br>(2,785.56 to 5,532.82)              | 6,328.90<br>(4,103.02 to 9,089.29)              | 5,198.03<br>(3,455.77 to 7,352.14)              | 6,987.70<br>(4,371.44 to 10,365.73)               | 157.39<br>(114.61 to 204.58)                 | 301.29<br>(206.58 to 445.20)                 | 258.93<br>(180.35 to 378.76)                 | 321.75<br>(214.50 to 479.33)                 |
| Other neoplasms                 | 18,108.43<br>(15,129.74 to 21,245.07)           | 23,324.92<br>(19,412.95 to 28,011.90)           | 23,110.17<br>(19,098.89 to 28,213.05)           | 22,888.15<br>(19,030.44 to 27,124.34)             | 537.62<br>(442.30 to 658.32)                 | 947.58<br>(774.56 to 1,230.75)               | 975.99<br>(803.42 to 1,286.60)               | 902.47<br>(745.23 to 1,157.62)               |
| <b>Cardiovascular diseases</b>  | <b>423,801.82</b><br>(349,402.88 to 505,754.41) | <b>560,620.08</b><br>(363,434.24 to 863,856.51) | <b>318,661.71</b><br>(215,474.97 to 481,610.50) | <b>784,640.06</b><br>(496,644.92 to 1,211,867.37) | <b>25,807.55</b><br>(21,671.96 to 30,167.83) | <b>40,669.00</b><br>(28,168.41 to 60,709.31) | <b>25,569.68</b><br>(17,990.29 to 37,733.63) | <b>52,281.75</b><br>(35,738.13 to 77,443.58) |
| Rheumatic heart disease         | 2,788.15<br>(2,149.68 to 3,563.01)              | 2,029.15<br>(1,440.79 to 2,882.79)              | 1,599.24<br>(1,151.85 to 2,212.53)              | 2,150.36<br>(1,517.27 to 3,021.76)                | 110.40<br>(86.50 to 138.81)                  | 119.07<br>(85.49 to 165.72)                  | 98.58<br>(72.62 to 133.71)                   | 121.45<br>(86.65 to 168.68)                  |
| Ischemic heart disease          | 280,183.23<br>(225,563.13 to 340,538.11)        | 354,284.29<br>(193,645.67 to 626,289.61)        | 185,019.85<br>(105,302.10 to 327,164.65)        | 524,890.44<br>(282,421.19 to 920,494.96)          | 16,954.35<br>(13,902.83 to 20,158.18)        | 24,930.15<br>(14,909.25 to 43,042.11)        | 14,453.16<br>(8,520.50 to 24,798.26)         | 34,099.32<br>(20,290.16 to 57,424.30)        |
| Stroke                          | 94,543.75<br>(74,751.18 to 117,493.46)          | 117,586.61<br>(70,928.74 to 209,765.27)         | 64,150.05<br>(39,649.37 to 115,478.07)          | 163,909.70<br>(97,742.38 to 286,792.03)           | 5,959.29<br>(4,729.02 to 7,332.87)           | 8,934.54<br>(5,302.56 to 17,384.19)          | 5,465.41<br>(3,316.93 to 10,334.92)          | 11,417.11<br>(6,703.59 to 21,309.13)         |
| Ischemic stroke                 | 47,793.11<br>(37,596.86 to 59,182.06)           | 63,330.22<br>(32,941.11 to 145,599.53)          | 37,189.53<br>(19,950.38 to 84,192.23)           | 83,597.66<br>(42,401.84 to 197,745.60)            | 3,580.51<br>(2,830.85 to 4,389.37)           | 5,468.64<br>(2,872.86 to 13,606.10)          | 3,529.30<br>(1,901.30 to 7,798.49)           | 6,719.30<br>(3,461.15 to 16,586.41)          |
| Intracerebral hemorrhage        | 46,750.64<br>(36,266.47 to 60,214.22)           | 54,256.40<br>(30,039.85 to 88,648.63)           | 26,960.52<br>(16,142.02 to 43,026.06)           | 80,312.05<br>(43,729.27 to 136,456.72)            | 2,378.77<br>(1,830.51 to 3,032.08)           | 3,465.71<br>(2,012.07 to 5,744.36)           | 1,936.11<br>(1,178.32 to 3,084.37)           | 4,697.81<br>(2,673.88 to 7,814.23)           |









|                                                   |                                          |                                          |                                          |                                          |                                   |                                     |                                     |                                     |
|---------------------------------------------------|------------------------------------------|------------------------------------------|------------------------------------------|------------------------------------------|-----------------------------------|-------------------------------------|-------------------------------------|-------------------------------------|
| Urinary tract infections                          | 2,109.69<br>(1,472.82 to<br>3,133.26)    | 5,918.38<br>(4,080.43 to<br>8,795.62)    | 5,592.14<br>(3,915.99 to<br>8,284.84)    | 5,548.86<br>(3,726.08 to<br>8,252.83)    | 162.33<br>(113.40 to<br>240.63)   | 571.35<br>(355.27 to<br>872.55)     | 561.97<br>(370.87 to<br>837.64)     | 517.95<br>(313.35 to<br>797.80)     |
| Urolithiasis                                      | 67.81<br>(46.57 to<br>98.45)             | 106.36<br>(68.19 to<br>170.29)           | 90.52<br>(57.09 to<br>144.93)            | 103.15<br>(66.86 to<br>162.92)           | 2.77<br>(1.80 to<br>4.33)         | 6.21<br>(3.72 to<br>10.39)          | 5.60<br>(3.38 to<br>9.46)           | 5.74<br>(3.36 to<br>9.49)           |
| Other urinary diseases                            | 328.12<br>(201.99 to<br>542.88)          | 434.79<br>(252.45 to<br>755.29)          | 368.50<br>(208.85 to<br>666.12)          | 431.38<br>(254.32 to<br>744.40)          | 21.53<br>(12.58 to<br>36.47)      | 35.95<br>(19.37 to<br>64.79)        | 32.11<br>(17.23 to<br>58.67)        | 34.24<br>(18.21 to<br>60.96)        |
| Gynecological diseases                            | 35.20<br>(22.07 to<br>54.61)             | 33.15<br>(20.33 to<br>52.33)             | 22.86<br>(13.92 to<br>37.08)             | 35.18<br>(21.58 to<br>55.98)             | 0.94<br>(0.61 to<br>1.46)         | 1.20<br>(0.78 to<br>2.04)           | 0.87<br>(0.56 to<br>1.43)           | 1.23<br>(0.79 to<br>2.10)           |
| Uterine fibroids                                  | 1.80<br>(0.74 to<br>3.84)                | 1.77<br>(0.65 to<br>3.87)                | 1.33<br>(0.50 to<br>2.86)                | 1.90<br>(0.68 to<br>4.11)                | 0.07<br>(0.03 to<br>0.15)         | 0.08<br>(0.03 to<br>0.17)           | 0.06<br>(0.02 to<br>0.14)           | 0.09<br>(0.03 to<br>0.18)           |
| Polycystic ovarian syndrome                       | 3.93<br>(1.62 to<br>8.05)                | 2.07<br>(0.76 to<br>4.31)                | 1.14<br>(0.40 to<br>2.59)                | 2.35<br>(0.87 to<br>4.94)                | 0.09<br>(0.04 to<br>0.18)         | 0.05<br>(0.02 to<br>0.10)           | 0.03<br>(0.01 to<br>0.06)           | 0.05<br>(0.02 to<br>0.12)           |
| Endometriosis                                     | 0.47<br>(0.20 to<br>0.93)                | 0.49<br>(0.18 to<br>1.09)                | 0.34<br>(0.13 to<br>0.76)                | 0.53<br>(0.20 to<br>1.16)                | 0.01<br>(0.00 to<br>0.02)         | 0.01<br>(0.00 to<br>0.03)           | 0.01<br>(0.00 to<br>0.02)           | 0.01<br>(0.00 to<br>0.03)           |
| Genital prolapse                                  | 0.89<br>(0.38 to<br>1.70)                | 0.83<br>(0.32 to<br>1.70)                | 0.58<br>(0.22 to<br>1.21)                | 0.90<br>(0.35 to<br>1.86)                | 0.04<br>(0.01 to<br>0.08)         | 0.04<br>(0.01 to<br>0.09)           | 0.03<br>(0.01 to<br>0.07)           | 0.04<br>(0.02 to<br>0.10)           |
| Other gynecological diseases                      | 28.11<br>(17.50 to<br>44.27)             | 27.99<br>(16.92 to<br>45.18)             | 19.47<br>(11.83 to<br>31.99)             | 29.51<br>(17.74 to<br>48.06)             | 0.74<br>(0.48 to<br>1.18)         | 1.02<br>(0.65 to<br>1.75)           | 0.74<br>(0.47 to<br>1.23)           | 1.04<br>(0.65 to<br>1.78)           |
| Hemoglobinopathies and hemolytic anemias          | 3,336.94<br>(2,396.56 to<br>5,062.31)    | 3,689.70<br>(2,497.72 to<br>5,721.32)    | 3,021.35<br>(2,012.94 to<br>4,693.80)    | 3,785.74<br>(2,585.13 to<br>5,866.14)    | 96.17<br>(70.22 to<br>145.22)     | 158.21<br>(109.80 to<br>250.15)     | 134.28<br>(92.88 to<br>214.26)      | 158.00<br>(108.92 to<br>249.00)     |
| Thalassemias                                      | 553.76<br>(326.12 to<br>1,070.64)        | 174.09<br>(86.39 to<br>373.03)           | 166.66<br>(83.82 to<br>352.81)           | 170.23<br>(84.66 to<br>366.60)           | 6.87<br>(4.07 to<br>13.08)        | 2.23<br>(1.12 to<br>4.68)           | 2.14<br>(1.08 to<br>4.48)           | 2.17<br>(1.10 to<br>4.58)           |
| Sickle cell disorders                             | 1,736.54<br>(1,235.78 to<br>2,607.00)    | 2,048.01<br>(1,347.00 to<br>3,233.49)    | 1,645.95<br>(1,067.21 to<br>2,586.77)    | 2,118.34<br>(1,407.55 to<br>3,338.56)    | 35.94<br>(25.52 to<br>54.31)      | 58.86<br>(38.49 to<br>95.42)        | 47.92<br>(30.84 to<br>77.92)        | 60.44<br>(39.75 to<br>97.88)        |
| G6PD deficiency                                   | 455.30<br>(313.15 to<br>707.98)          | 628.20<br>(387.29 to<br>1,015.53)        | 489.14<br>(300.48 to<br>777.77)          | 663.18<br>(412.53 to<br>1,060.67)        | 11.74<br>(8.10 to<br>18.08)       | 24.00<br>(15.20 to<br>39.07)        | 19.12<br>(12.08 to<br>30.88)        | 24.86<br>(15.96 to<br>40.06)        |
| Other hemoglobinopathies and hemolytic anemias    | 591.35<br>(413.65 to<br>921.72)          | 839.39<br>(556.92 to<br>1,394.55)        | 719.60<br>(478.70 to<br>1,187.28)        | 833.99<br>(554.13 to<br>1,372.14)        | 41.63<br>(29.38 to<br>64.34)      | 73.12<br>(49.11 to<br>118.04)       | 65.10<br>(44.20 to<br>104.55)       | 70.53<br>(46.32 to<br>116.23)       |
| Endocrine, metabolic, blood, and immune disorders | 7,729.00<br>(5,346.73 to<br>11,287.20)   | 10,420.54<br>(7,065.37 to<br>14,919.47)  | 10,489.90<br>(7,255.63 to<br>14,881.50)  | 10,439.19<br>(7,048.02 to<br>15,071.97)  | 284.90<br>(193.91 to<br>410.21)   | 585.73<br>(386.92 to<br>832.09)     | 621.63<br>(419.09 to<br>879.04)     | 563.10<br>(367.52 to<br>818.18)     |
| <b>Tunisia</b>                                    |                                          |                                          |                                          |                                          |                                   |                                     |                                     |                                     |
| Cause                                             | YLLs (actual counts)                     |                                          |                                          |                                          | Deaths (actual counts)            |                                     |                                     |                                     |
|                                                   | 2016                                     | 2040 Forecast                            | 2040 Better Scenario                     | 2040 Worse Scenario                      | 2016                              | 2040 Forecast                       | 2040 Better Scenario                | 2040 Worse Scenario                 |
| Musculoskeletal disorders                         | 1,932.76<br>(1,300.85 to<br>2,839.09)    | 2,789.11<br>(1,767.99 to<br>4,351.91)    | 2,614.65<br>(1,670.99 to<br>4,043.15)    | 2,709.00<br>(1,721.52 to<br>4,255.92)    | 57.91<br>(37.25 to<br>88.40)      | 129.91<br>(78.09 to<br>214.08)      | 125.31<br>(77.99 to<br>206.06)      | 123.32<br>(73.47 to<br>204.05)      |
| Rheumatoid arthritis                              | 230.67<br>(130.93 to<br>464.65)          | 472.69<br>(236.73 to<br>1,048.56)        | 357.56<br>(176.21 to<br>816.68)          | 488.79<br>(246.12 to<br>1,073.43)        | 10.01<br>(5.22 to<br>21.62)       | 29.13<br>(14.24 to<br>68.50)        | 27.76<br>(10.99 to<br>54.49)        | 29.31<br>(14.23 to<br>69.32)        |
| Other musculoskeletal disorders                   | 1,702.09<br>(1,125.97 to<br>2,397.40)    | 2,316.42<br>(1,448.56 to<br>3,434.95)    | 2,257.09<br>(1,432.85 to<br>3,342.18)    | 2,220.21<br>(1,376.02 to<br>3,289.08)    | 47.90<br>(31.08 to<br>67.86)      | 100.78<br>(59.70 to<br>156.26)      | 102.55<br>(62.02 to<br>156.53)      | 93.01<br>(54.61 to<br>145.24)       |
| Other non-communicable diseases                   | 64,501.20<br>(48,085.13 to<br>85,855.47) | 46,943.90<br>(29,612.20 to<br>70,057.78) | 35,069.28<br>(22,375.61 to<br>52,466.51) | 49,386.83<br>(30,755.79 to<br>74,127.93) | 972.87<br>(738.17 to<br>1,253.90) | 1,294.40<br>(765.22 to<br>1,784.26) | 1,139.69<br>(662.71 to<br>1,567.12) | 1,266.59<br>(762.40 to<br>1,765.22) |
| Congenital birth defects                          | 59,444.69<br>(43,336.77 to<br>79,492.12) | 36,575.75<br>(21,076.83 to<br>58,187.23) | 25,358.76<br>(14,658.20 to<br>40,305.66) | 39,424.09<br>(22,703.14 to<br>62,491.77) | 734.54<br>(541.28 to<br>974.95)   | 484.09<br>(296.45 to<br>742.69)     | 340.15<br>(208.11 to<br>521.83)     | 519.09<br>(314.00 to<br>797.65)     |

|                                               |                                                        |                                                        |                                                       |                                                        |                                                  |                                                  |                                                  |                                                  |
|-----------------------------------------------|--------------------------------------------------------|--------------------------------------------------------|-------------------------------------------------------|--------------------------------------------------------|--------------------------------------------------|--------------------------------------------------|--------------------------------------------------|--------------------------------------------------|
| Neural tube defects                           | 630.62<br>(320.41 to 1,141.34)                         | 171.16<br>(73.47 to 379.06)                            | 105.38<br>(45.74 to 233.16)                           | 193.88<br>(83.30 to 429.62)                            | 7.77<br>(4.09 to 13.71)                          | 2.37<br>(1.12 to 5.01)                           | 1.48<br>(0.70 to 3.09)                           | 2.67<br>(1.25 to 5.60)                           |
| Congenital heart anomalies                    | 26,238.94<br>(18,458.30 to 35,765.39)                  | 15,765.11<br>(8,697.87 to 25,467.26)                   | 10,158.12<br>(5,552.49 to 16,728.73)                  | 17,002.08<br>(9,423.98 to 27,444.94)                   | 324.41<br>(231.00 to 442.63)                     | 207.61<br>(122.13 to 328.80)                     | 135.15<br>(79.32 to 216.88)                      | 222.83<br>(131.52 to 350.66)                     |
| Orofacial clefts                              | 19.12<br>(7.30 to 51.47)                               | 7.94<br>(2.35 to 22.34)                                | 4.49<br>(1.30 to 12.74)                               | 9.11<br>(2.70 to 25.97)                                | 0.22<br>(0.08 to 0.60)                           | 0.09<br>(0.03 to 0.26)                           | 0.05<br>(0.02 to 0.15)                           | 0.11<br>(0.03 to 0.30)                           |
| Down syndrome                                 | 3,308.16<br>(1,902.54 to 5,197.06)                     | 2,187.82<br>(1,103.39 to 3,874.18)                     | 1,999.03<br>(1,022.66 to 3,480.98)                    | 2,382.84<br>(1,201.68 to 4,303.14)                     | 43.55<br>(25.26 to 67.44)                        | 32.11<br>(17.03 to 54.72)                        | 29.77<br>(15.97 to 49.59)                        | 34.74<br>(18.48 to 59.67)                        |
| Other chromosomal abnormalities               | 2,418.85<br>(1,047.79 to 5,750.62)                     | 2,087.33<br>(790.50 to 5,108.36)                       | 1,633.21<br>(622.66 to 4,046.46)                      | 2,284.12<br>(862.57 to 5,531.61)                       | 28.82<br>(12.71 to 68.65)                        | 25.67<br>(10.11 to 62.90)                        | 20.19<br>(8.05 to 49.55)                         | 28.03<br>(11.02 to 68.78)                        |
| Congenital musculoskeletal and limb anomalies | 1,219.18<br>(824.85 to 1,757.67)                       | 745.56<br>(403.30 to 1,238.24)                         | 522.81<br>(281.15 to 862.01)                          | 795.41<br>(424.81 to 1,329.55)                         | 14.82<br>(10.10 to 21.22)                        | 9.55<br>(5.32 to 15.36)                          | 6.74<br>(3.72 to 10.75)                          | 10.13<br>(5.63 to 16.36)                         |
| Urogenital congenital anomalies               | 1,841.95<br>(1,139.90 to 2,764.21)                     | 1,183.12<br>(636.79 to 1,972.60)                       | 876.48<br>(486.47 to 1,477.88)                        | 1,258.35<br>(678.29 to 2,114.23)                       | 25.00<br>(15.87 to 36.42)                        | 19.89<br>(11.87 to 30.51)                        | 15.15<br>(9.13 to 23.29)                         | 20.88<br>(12.37 to 32.14)                        |
| Digestive congenital anomalies                | 2,192.29<br>(881.18 to 3,882.11)                       | 1,302.15<br>(460.15 to 2,755.23)                       | 860.08<br>(312.68 to 1,811.82)                        | 1,421.75<br>(502.97 to 2,992.93)                       | 26.04<br>(10.48 to 45.64)                        | 16.02<br>(5.82 to 33.16)                         | 10.65<br>(3.97 to 22.06)                         | 17.45<br>(6.34 to 36.17)                         |
| Other congenital birth defects                | 21,575.59<br>(14,402.94 to 29,990.14)                  | 13,125.57<br>(7,096.49 to 22,287.84)                   | 9,199.17<br>(5,018.45 to 15,375.07)                   | 14,076.54<br>(7,567.84 to 23,789.11)                   | 263.90<br>(175.62 to 366.17)                     | 170.78<br>(97.46 to 277.71)                      | 120.95<br>(68.97 to 193.30)                      | 182.26<br>(103.07 to 295.86)                     |
| Skin and subcutaneous diseases                | 3,034.24<br>(1,400.40 to 4,230.46)                     | 9,540.67<br>(4,353.25 to 13,730.31)                    | 9,109.35<br>(4,189.33 to 12,967.61)                   | 9,069.44<br>(4,131.05 to 13,049.98)                    | 214.86<br>(98.60 to 305.05)                      | 800.71<br>(358.89 to 1,199.21)                   | 792.56<br>(353.45 to 1,168.30)                   | 737.14<br>(324.02 to 1,119.46)                   |
| Cellulitis                                    | 208.02<br>(77.46 to 310.59)                            | 681.03<br>(220.02 to 1,049.25)                         | 701.30<br>(229.07 to 1,083.62)                        | 635.52<br>(206.69 to 987.12)                           | 10.47<br>(3.31 to 16.40)                         | 46.00<br>(13.14 to 74.89)                        | 49.55<br>(14.22 to 79.97)                        | 41.43<br>(11.83 to 68.81)                        |
| Pyoderma                                      | 1,475.30<br>(696.83 to 2,165.46)                       | 5,379.97<br>(2,511.57 to 7,991.73)                     | 5,173.20<br>(2,391.70 to 7,706.89)                    | 5,188.85<br>(2,431.28 to 7,767.26)                     | 95.63<br>(45.66 to 144.64)                       | 431.85<br>(196.78 to 659.78)                     | 431.85<br>(198.46 to 648.70)                     | 403.76<br>(182.72 to 624.91)                     |
| Decubitus ulcer                               | 1,260.18<br>(441.85 to 1,908.39)                       | 3,346.00<br>(1,182.94 to 5,352.20)                     | 3,109.10<br>(1,080.58 to 4,906.68)                    | 3,116.28<br>(1,092.02 to 4,978.59)                     | 105.92<br>(37.62 to 160.10)                      | 316.61<br>(101.80 to 515.14)                     | 304.86<br>(101.31 to 493.56)                     | 286.22<br>(99.03 to 475.30)                      |
| Other skin and subcutaneous diseases          | 90.73<br>(41.71 to 127.37)                             | 133.67<br>(60.28 to 196.50)                            | 125.75<br>(57.01 to 185.11)                           | 128.80<br>(57.63 to 190.55)                            | 2.84<br>(1.22 to 4.28)                           | 6.25<br>(2.66 to 10.20)                          | 6.29<br>(2.72 to 10.14)                          | 5.72<br>(2.40 to 9.39)                           |
| Sudden infant death syndrome                  | 2,022.26<br>(1,034.97 to 3,603.17)                     | 827.48<br>(266.07 to 2,033.12)                         | 601.17<br>(187.20 to 1,445.41)                        | 893.30<br>(290.67 to 2,156.57)                         | 23.47<br>(12.01 to 41.83)                        | 9.60<br>(3.09 to 23.59)                          | 6.97<br>(2.17 to 16.77)                          | 10.36<br>(3.37 to 25.03)                         |
| <b>Injuries</b>                               | <b>207,757.60</b><br><b>(172,183.50 to 256,608.97)</b> | <b>167,293.42</b><br><b>(130,488.01 to 215,415.38)</b> | <b>108,628.68</b><br><b>(83,927.86 to 142,257.78)</b> | <b>200,657.16</b><br><b>(156,910.79 to 259,320.28)</b> | <b>4,813.01</b><br><b>(3,887.91 to 5,930.98)</b> | <b>5,191.69</b><br><b>(4,081.54 to 6,462.52)</b> | <b>3,725.20</b><br><b>(2,913.46 to 4,660.68)</b> | <b>5,868.49</b><br><b>(4,641.34 to 7,367.45)</b> |
| <b>Transport injuries</b>                     | <b>120,686.30</b><br><b>(99,272.86 to 151,531.92)</b>  | <b>98,915.22</b><br><b>(76,206.73 to 129,612.19)</b>   | <b>50,553.77</b><br><b>(38,778.88 to 66,252.00)</b>   | <b>129,901.59</b><br><b>(100,342.13 to 171,060.03)</b> | <b>2,760.08</b><br><b>(2,244.48 to 3,429.53)</b> | <b>2,897.24</b><br><b>(2,288.43 to 3,705.88)</b> | <b>1,671.40</b><br><b>(1,323.03 to 2,150.89)</b> | <b>3,580.87</b><br><b>(2,816.59 to 4,573.12)</b> |
| Road injuries                                 | 118,711.34<br>(97,588.37 to 149,124.66)                | 96,686.00<br>(74,396.08 to 127,228.42)                 | 48,825.45<br>(37,207.39 to 63,899.82)                 | 127,583.24<br>(98,671.19 to 167,903.05)                | 2,708.02<br>(2,201.36 to 3,377.50)               | 2,806.54<br>(2,210.08 to 3,589.10)               | 1,596.34<br>(1,248.36 to 2,054.66)               | 3,491.45<br>(2,741.68 to 4,477.68)               |
| Pedestrian road injuries                      | 36,234.36<br>(27,496.07 to 46,293.23)                  | 27,883.26<br>(20,027.10 to 37,745.52)                  | 12,974.09<br>(9,372.57 to 17,324.06)                  | 35,458.88<br>(25,187.87 to 48,391.48)                  | 850.81<br>(648.22 to 1,086.03)                   | 851.75<br>(656.29 to 1,116.07)                   | 434.66<br>(332.96 to 564.22)                     | 1,032.86<br>(790.99 to 1,361.48)                 |
| <b>Tunisia</b>                                |                                                        |                                                        |                                                       |                                                        |                                                  |                                                  |                                                  |                                                  |
| Cause                                         | YLLs (actual counts)                                   |                                                        |                                                       |                                                        | Deaths (actual counts)                           |                                                  |                                                  |                                                  |
|                                               | 2016                                                   | 2040 Forecast                                          | 2040 Better Scenario                                  | 2040 Worse Scenario                                    | 2016                                             | 2040 Forecast                                    | 2040 Better Scenario                             | 2040 Worse Scenario                              |
| Cyclist road injuries                         | 3,337.09<br>(2,538.23 to 4,423.79)                     | 2,873.18<br>(2,044.86 to 4,028.14)                     | 1,629.13<br>(1,146.21 to 2,290.74)                    | 3,717.10<br>(2,632.88 to 5,190.04)                     | 77.65<br>(58.40 to 103.07)                       | 86.06<br>(63.05 to 116.33)                       | 57.55<br>(41.58 to 78.79)                        | 103.18<br>(76.05 to 141.22)                      |



|                                                                              | 25,056.72<br>(18,710.99 to<br>32,665.82) | 22,518.12<br>(15,391.89 to<br>30,703.78) | 18,869.20<br>(13,378.05 to<br>25,488.27) | 23,448.30<br>(15,883.58 to<br>32,408.38) | 543.56<br>(405.62 to<br>702.00) | 580.72<br>(407.69 to<br>768.11) | 502.00<br>(361.29 to<br>665.96) | 592.78<br>(413.70 to<br>790.23)   |
|------------------------------------------------------------------------------|------------------------------------------|------------------------------------------|------------------------------------------|------------------------------------------|---------------------------------|---------------------------------|---------------------------------|-----------------------------------|
| Self-harm and interpersonal violence                                         |                                          |                                          |                                          |                                          |                                 |                                 |                                 |                                   |
| <b>Tunisia</b>                                                               |                                          |                                          |                                          |                                          |                                 |                                 |                                 |                                   |
| Cause                                                                        | YLLs (actual counts)                     |                                          |                                          |                                          | Deaths (actual counts)          |                                 |                                 |                                   |
|                                                                              | 2016                                     | 2040 Forecast                            | 2040 Better Scenario                     | 2040 Worse Scenario                      | 2016                            | 2040 Forecast                   | 2040 Better Scenario            | 2040 Worse Scenario               |
| Self-harm                                                                    | 19,502.74<br>(14,058.71 to<br>26,374.51) | 18,793.24<br>(12,764.93 to<br>26,263.11) | 15,843.46<br>(10,885.68 to<br>22,345.64) | 19,675.17<br>(13,159.05 to<br>27,549.62) | 435.73<br>(312.75 to<br>583.35) | 498.08<br>(342.95 to<br>672.29) | 433.32<br>(304.56 to<br>589.31) | 510.00<br>(346.58 to<br>693.12)   |
| Self-harm by firearm                                                         | 833.79<br>(466.14 to<br>1,521.20)        | 670.72<br>(369.91 to<br>1,268.55)        | 528.63<br>(296.50 to<br>991.78)          | 709.55<br>(385.96 to<br>1,350.19)        | 19.40<br>(11.20 to<br>33.98)    | 19.18<br>(11.22 to<br>33.58)    | 15.75<br>(9.15 to<br>28.25)     | 19.73<br>(11.36 to<br>34.78)      |
| Self-harm by other specified means                                           | 18,668.95<br>(13,484.05 to<br>25,212.72) | 18,122.52<br>(12,231.24 to<br>25,370.97) | 15,314.83<br>(10,536.59 to<br>21,589.57) | 18,965.62<br>(12,595.81 to<br>26,618.16) | 416.32<br>(298.78 to<br>558.18) | 478.91<br>(327.35 to<br>644.77) | 417.57<br>(294.13 to<br>565.56) | 490.27<br>(332.15 to<br>670.00)   |
| Interpersonal violence                                                       | 5,553.98<br>(3,234.75 to<br>7,905.99)    | 3,724.87<br>(2,079.15 to<br>5,368.38)    | 3,025.75<br>(1,724.19 to<br>4,361.31)    | 3,773.13<br>(2,086.87 to<br>5,436.84)    | 107.83<br>(64.66 to<br>150.12)  | 82.64<br>(49.97 to<br>113.50)   | 68.68<br>(43.18 to<br>94.70)    | 82.78<br>(49.61 to<br>113.74)     |
| Physical violence by firearm                                                 | 2,437.79<br>(1,341.91 to<br>4,222.67)    | 1,570.75<br>(848.51 to<br>2,866.17)      | 1,225.92<br>(660.89 to<br>2,225.42)      | 1,587.59<br>(851.71 to<br>2,901.33)      | 46.39<br>(26.09 to<br>79.69)    | 32.34<br>(18.19 to<br>58.24)    | 25.50<br>(14.33 to<br>46.58)    | 32.50<br>(18.37 to<br>58.54)      |
| Physical violence by sharp object                                            | 1,654.20<br>(701.13 to<br>2,619.84)      | 1,189.19<br>(509.93 to<br>1,901.59)      | 968.36<br>(428.59 to<br>1,538.77)        | 1,187.43<br>(505.68 to<br>1,891.10)      | 31.96<br>(14.27 to<br>49.78)    | 25.99<br>(12.53 to<br>39.33)    | 21.63<br>(10.80 to<br>32.67)    | 25.64<br>(12.30 to<br>39.18)      |
| Physical violence by other means                                             | 1,461.99<br>(702.88 to<br>2,241.45)      | 964.93<br>(437.02 to<br>1,552.43)        | 831.46<br>(388.12 to<br>1,308.20)        | 998.11<br>(452.64 to<br>1,621.01)        | 29.47<br>(14.54 to<br>44.12)    | 24.31<br>(12.07 to<br>36.42)    | 21.55<br>(11.10 to<br>31.83)    | 24.64<br>(12.01 to<br>37.29)      |
| Forces of nature, conflict and terrorism, and executions and police conflict | 8,257.17<br>(2,993.51 to<br>13,244.67)   | 1,839.91<br>(627.00 to<br>14,514.91)     | 1,828.47<br>(0.00 to<br>14,441.92)       | 1,842.13<br>(0.00 to<br>14,528.18)       | 152.22<br>(55.23 to<br>244.04)  | 40.25<br>(0.00 to<br>320.23)    | 40.56<br>(0.00 to<br>321.16)    | 39.89<br>(0.00 to<br>319.15)      |
| Exposure to forces of nature                                                 | 0.00<br>(0.00 to<br>0.00)                | 253.95<br>(0.00 to<br>2,117.78)          | 253.95<br>(0.00 to<br>2,100.74)          | 256.13<br>(0.00 to<br>2,124.41)          | 0.00<br>(0.00 to<br>0.00)       | 6.40<br>(0.00 to<br>51.19)      | 6.51<br>(0.00 to<br>51.87)      | 6.28<br>(0.00 to<br>50.61)        |
| Conflict and terrorism                                                       | 8,188.87<br>(2,922.41 to<br>13,166.94)   | 300.37<br>(0.00 to<br>2,705.79)          | 297.33<br>(0.00 to<br>2,675.95)          | 301.30<br>(0.00 to<br>2,716.68)          | 150.84<br>(53.83 to<br>242.53)  | 6.50<br>(0.00 to<br>58.73)      | 6.58<br>(0.00 to<br>59.36)      | 6.42<br>(0.00 to<br>58.10)        |
| Executions and police conflict                                               | 68.30<br>(58.43 to<br>79.90)             | 1,283.58<br>(0.00 to<br>14,028.56)       | 1,277.19<br>(0.00 to<br>13,960.67)       | 1,284.69<br>(0.00 to<br>14,040.32)       | 1.39<br>(1.15 to<br>1.74)       | 27.35<br>(0.00 to<br>300.80)    | 27.47<br>(0.00 to<br>301.73)    | 27.19<br>(0.00 to<br>298.97)      |
| <b>Turkey</b>                                                                |                                          |                                          |                                          |                                          |                                 |                                 |                                 |                                   |
| Cause                                                                        | YLLs (in 1000s)                          |                                          |                                          |                                          | Deaths (in 1000s)               |                                 |                                 |                                   |
|                                                                              | 2016                                     | 2040 Forecast                            | 2040 Better Scenario                     | 2040 Worse Scenario                      | 2016                            | 2040 Forecast                   | 2040 Better Scenario            | 2040 Worse Scenario               |
| All causes                                                                   | 8,626.20<br>(7,378.61 to<br>9,964.56)    | 8,914.69<br>(6,627.09 to<br>11,902.09)   | 7,696.14<br>(5,782.09 to<br>10,048.66)   | 13,423.55<br>(9,868.60 to<br>17,758.31)  | 364.82<br>(318.06 to<br>420.13) | 586.29<br>(446.37 to<br>787.21) | 526.20<br>(398.17 to<br>696.81) | 796.27<br>(606.63 to<br>1,030.60) |
| Communicable, maternal, neonatal, and nutritional diseases                   | 1,128.04<br>(838.13 to<br>1,517.30)      | 469.56<br>(305.09 to<br>715.14)          | 389.12<br>(256.29 to<br>581.90)          | 794.20<br>(496.93 to<br>1,242.02)        | 19.73<br>(15.79 to<br>24.69)    | 16.96<br>(11.72 to<br>24.28)    | 15.34<br>(10.75 to<br>22.65)    | 25.12<br>(17.31 to<br>35.52)      |
| HIV/AIDS and tuberculosis                                                    | 32.32<br>(27.78 to<br>37.37)             | 15.45<br>(10.51 to<br>22.27)             | 11.38<br>(7.67 to<br>16.65)              | 36.29<br>(24.02 to<br>54.14)             | 0.98<br>(0.84 to<br>1.15)       | 0.60<br>(0.40 to<br>0.90)       | 0.46<br>(0.30 to<br>0.69)       | 1.38<br>(0.88 to<br>2.19)         |
| Tuberculosis                                                                 | 23.54<br>(19.23 to<br>28.11)             | 9.60<br>(5.55 to<br>16.31)               | 7.32<br>(4.28 to<br>12.02)               | 25.52<br>(13.80 to<br>44.05)             | 0.80<br>(0.67 to<br>0.95)       | 0.47<br>(0.28 to<br>0.75)       | 0.36<br>(0.22 to<br>0.60)       | 1.14<br>(0.66 to<br>1.93)         |
| HIV/AIDS                                                                     | 8.78<br>(7.10 to<br>10.50)               | 5.86<br>(3.26 to<br>8.36)                | 4.06<br>(1.86 to<br>6.47)                | 10.77<br>(7.59 to<br>14.07)              | 0.18<br>(0.15 to<br>0.21)       | 0.13<br>(0.07 to<br>0.19)       | 0.09<br>(0.04 to<br>0.15)       | 0.24<br>(0.16 to<br>0.31)         |
| Diarrhea, lower respiratory, and other common infectious diseases            | 275.56<br>(221.01 to<br>351.57)          | 221.01<br>(139.01 to<br>363.83)          | 183.05<br>(119.32 to<br>294.85)          | 374.24<br>(221.99 to<br>662.23)          | 8.14<br>(6.68 to<br>10.17)      | 12.14<br>(7.89 to<br>18.63)     | 11.08<br>(7.16 to<br>17.41)     | 17.75<br>(11.43 to<br>26.97)      |

|                                         |                                |                                 |                                |                                 |                           |                            |                            |                             |
|-----------------------------------------|--------------------------------|---------------------------------|--------------------------------|---------------------------------|---------------------------|----------------------------|----------------------------|-----------------------------|
| Diarrheal diseases                      | 26.12<br>(17.17 to<br>38.34)   | 20.62<br>(5.20 to<br>64.85)     | 22.73<br>(6.18 to<br>65.77)    | 22.05<br>(4.36 to<br>77.27)     | 0.64<br>(0.43 to<br>1.03) | 1.35<br>(0.33 to<br>4.03)  | 1.64<br>(0.43 to<br>4.66)  | 1.17<br>(0.24 to<br>3.94)   |
| Intestinal infectious diseases          | 19.15<br>(9.04 to<br>34.13)    | 13.14<br>(5.59 to<br>24.67)     | 14.11<br>(6.46 to<br>25.66)    | 14.11<br>(4.60 to<br>23.16)     | 0.30<br>(0.15 to<br>0.54) | 0.25<br>(0.11 to<br>0.46)  | 0.27<br>(0.12 to<br>0.49)  | 0.21<br>(0.09 to<br>0.40)   |
| Typhoid fever                           | 16.98<br>(7.99 to<br>30.73)    | 12.13<br>(5.02 to<br>23.20)     | 13.22<br>(6.04 to<br>24.31)    | 9.86<br>(3.97 to<br>19.75)      | 0.27<br>(0.13 to<br>0.48) | 0.23<br>(0.10 to<br>0.42)  | 0.25<br>(0.12 to<br>0.46)  | 0.18<br>(0.08 to<br>0.35)   |
| Paratyphoid fever                       | 2.17<br>(0.90 to<br>4.47)      | 1.01<br>(0.38 to<br>2.15)       | 0.88<br>(0.33 to<br>1.85)      | 1.55<br>(0.55 to<br>3.38)       | 0.04<br>(0.02 to<br>0.07) | 0.02<br>(0.01 to<br>0.04)  | 0.02<br>(0.01 to<br>0.04)  | 0.03<br>(0.01 to<br>0.06)   |
| Other intestinal infectious diseases    | 0.01<br>(0.00 to<br>0.02)      | 0.00<br>(0.00 to<br>0.01)       | 0.00<br>(0.00 to<br>0.01)      | 0.01<br>(0.00 to<br>0.01)       | 0.00<br>(0.00 to<br>0.00) | 0.00<br>(0.00 to<br>0.00)  | 0.00<br>(0.00 to<br>0.00)  | 0.00<br>(0.00 to<br>0.00)   |
| Lower respiratory infections            | 178.31<br>(43.10 to<br>226.39) | 164.30<br>(100.03 to<br>272.09) | 128.05<br>(82.22 to<br>201.45) | 301.34<br>(176.90 to<br>548.65) | 6.31<br>(5.12 to<br>8.10) | 9.90<br>(6.44 to<br>15.18) | 8.60<br>(5.63 to<br>13.31) | 15.47<br>(9.85 to<br>23.72) |
| Upper respiratory infections            | 0.22<br>(0.12 to<br>0.40)      | 0.13<br>(0.06 to<br>0.24)       | 0.10<br>(0.05 to<br>0.20)      | 0.26<br>(0.12 to<br>0.49)       | 0.01<br>(0.00 to<br>0.01) | 0.01<br>(0.00 to<br>0.01)  | 0.00<br>(0.00 to<br>0.01)  | 0.01<br>(0.00 to<br>0.02)   |
| Otitis media                            | 0.01<br>(0.00 to<br>0.01)      | 0.00<br>(0.00 to<br>0.01)       | 0.00<br>(0.00 to<br>0.01)      | 0.00<br>(0.00 to<br>0.01)       | 0.00<br>(0.00 to<br>0.00) | 0.00<br>(0.00 to<br>0.00)  | 0.00<br>(0.00 to<br>0.00)  | 0.00<br>(0.00 to<br>0.00)   |
| Meningitis                              | 24.43<br>(17.81 to<br>33.95)   | 10.16<br>(6.23 to<br>17.64)     | 8.12<br>(5.11 to<br>13.60)     | 19.82<br>(10.91 to<br>38.81)    | 0.44<br>(0.34 to<br>0.61) | 0.28<br>(0.19 to<br>0.46)  | 0.24<br>(0.17 to<br>0.40)  | 0.45<br>(0.30 to<br>0.76)   |
| Pneumococcal meningitis                 | 0.59<br>(0.39 to<br>0.87)      | 0.37<br>(0.22 to<br>0.64)       | 0.36<br>(0.22 to<br>0.61)      | 0.45<br>(0.26 to<br>0.79)       | 0.01<br>(0.01 to<br>0.02) | 0.01<br>(0.01 to<br>0.02)  | 0.01<br>(0.01 to<br>0.02)  | 0.01<br>(0.01 to<br>0.02)   |
| H influenzae type B meningitis          | 2.79<br>(1.93 to<br>3.97)      | 3.54<br>(1.37 to<br>9.04)       | 2.54<br>(1.13 to<br>5.98)      | 9.11<br>(2.45 to<br>26.30)      | 0.05<br>(0.04 to<br>0.07) | 0.06<br>(0.05 to<br>0.13)  | 0.05<br>(0.03 to<br>0.10)  | 0.13<br>(0.05 to<br>0.33)   |
| Meningococcal meningitis                | 14.35<br>(10.31 to<br>19.74)   | 4.26<br>(2.60 to<br>6.90)       | 3.58<br>(2.26 to<br>5.77)      | 6.87<br>(4.22 to<br>10.65)      | 0.26<br>(0.20 to<br>0.37) | 0.14<br>(0.10 to<br>0.24)  | 0.13<br>(0.08 to<br>0.21)  | 0.21<br>(0.15 to<br>0.34)   |
| Other meningitis                        | 6.70<br>(4.90 to<br>9.34)      | 1.99<br>(1.25 to<br>3.21)       | 1.65<br>(1.04 to<br>2.55)      | 3.38<br>(2.07 to<br>5.38)       | 0.12<br>(0.09 to<br>0.16) | 0.06<br>(0.04 to<br>0.10)  | 0.05<br>(0.04 to<br>0.09)  | 0.10<br>(0.07 to<br>0.15)   |
| Encephalitis                            | 10.65<br>(8.47 to<br>13.24)    | 8.62<br>(6.06 to<br>11.87)      | 8.35<br>(5.86 to<br>11.51)     | 9.53<br>(6.63 to<br>13.05)      | 0.22<br>(0.18 to<br>0.27) | 0.28<br>(0.21 to<br>0.37)  | 0.28<br>(0.21 to<br>0.37)  | 0.30<br>(0.22 to<br>0.39)   |
| Diphtheria                              | 0.08<br>(0.04 to<br>0.12)      | 0.02<br>(0.01 to<br>0.03)       | 0.01<br>(0.01 to<br>0.02)      | 0.04<br>(0.02 to<br>0.11)       | 0.00<br>(0.00 to<br>0.00) | 0.00<br>(0.00 to<br>0.00)  | 0.00<br>(0.00 to<br>0.00)  | 0.00<br>(0.00 to<br>0.00)   |
| Whooping cough                          | 12.88<br>(9.90 to<br>41.92)    | 3.41<br>(0.16 to<br>13.48)      | 1.04<br>(0.05 to<br>4.05)      | 7.50<br>(0.38 to<br>28.96)      | 0.15<br>(0.10 to<br>0.50) | 0.04<br>(0.00 to<br>0.16)  | 0.01<br>(0.00 to<br>0.05)  | 0.09<br>(0.00 to<br>0.34)   |
| Tetanus                                 | 0.55<br>(0.46 to<br>0.65)      | 0.06<br>(0.04 to<br>0.09)       | 0.06<br>(0.04 to<br>0.08)      | 0.07<br>(0.05 to<br>0.11)       | 0.01<br>(0.01 to<br>0.02) | 0.00<br>(0.00 to<br>0.00)  | 0.00<br>(0.00 to<br>0.00)  | 0.00<br>(0.00 to<br>0.00)   |
| Measles                                 | 2.30<br>(0.71 to<br>5.79)      | 0.18<br>(0.02 to<br>0.81)       | 0.13<br>(0.01 to<br>0.56)      | 1.68<br>(0.06 to<br>9.03)       | 0.03<br>(0.01 to<br>0.07) | 0.00<br>(0.00 to<br>0.01)  | 0.00<br>(0.00 to<br>0.01)  | 0.02<br>(0.00 to<br>0.11)   |
| <b>Turkey</b>                           |                                |                                 |                                |                                 |                           |                            |                            |                             |
| Cause                                   | YLLs (in 1000s)                |                                 |                                |                                 | Deaths (in 1000s)         |                            |                            |                             |
|                                         | 2016                           | 2040 Forecast                   | 2040 Better Scenario           | 2040 Worse Scenario             | 2016                      | 2040 Forecast              | 2040 Better Scenario       | 2040 Worse Scenario         |
| Varicella and herpes zoster             | 0.86<br>(0.54 to<br>1.38)      | 0.37<br>(0.22 to<br>0.60)       | 0.33<br>(0.19 to<br>0.53)      | 0.53<br>(0.31 to<br>0.87)       | 0.03<br>(0.02 to<br>0.04) | 0.03<br>(0.01 to<br>0.05)  | 0.02<br>(0.01 to<br>0.04)  | 0.03<br>(0.02 to<br>0.05)   |
| Neglected tropical diseases and malaria | 2.95<br>(2.19 to<br>3.80)      | 2.25<br>(1.18 to<br>3.04)       | 2.28<br>(1.21 to<br>3.10)      | 2.30<br>(1.21 to<br>3.17)       | 0.07<br>(0.05 to<br>0.09) | 0.08<br>(0.04 to<br>0.11)  | 0.08<br>(0.04 to<br>0.11)  | 0.08<br>(0.04 to<br>0.11)   |

|                                                       |                                                  |                                                |                                                |                                                 |                                                |                                                |                                                |                                                |
|-------------------------------------------------------|--------------------------------------------------|------------------------------------------------|------------------------------------------------|-------------------------------------------------|------------------------------------------------|------------------------------------------------|------------------------------------------------|------------------------------------------------|
| Malaria                                               | 0.12<br>(0.10 to<br>0.15)                        | 0.06<br>(0.04 to<br>0.08)                      | 0.06<br>(0.04 to<br>0.08)                      | 0.06<br>(0.05 to<br>0.08)                       | 0.00<br>(0.00 to<br>0.00)                      | 0.00<br>(0.00 to<br>0.00)                      | 0.00<br>(0.00 to<br>0.00)                      | 0.00<br>(0.00 to<br>0.00)                      |
| Chagas disease                                        | 0.00<br>(0.00 to<br>0.00)                        | 0.00<br>(0.00 to<br>0.00)                      | 0.00<br>(0.00 to<br>0.00)                      | 0.00<br>(0.00 to<br>0.00)                       | 0.00<br>(0.00 to<br>0.00)                      | 0.00<br>(0.00 to<br>0.00)                      | 0.00<br>(0.00 to<br>0.00)                      | 0.00<br>(0.00 to<br>0.00)                      |
| Leishmaniasis                                         | 0.22<br>(0.12 to<br>0.33)                        | 0.07<br>(0.04 to<br>0.12)                      | 0.07<br>(0.04 to<br>0.11)                      | 0.10<br>(0.05 to<br>0.16)                       | 0.01<br>(0.00 to<br>0.01)                      | 0.00<br>(0.00 to<br>0.00)                      | 0.00<br>(0.00 to<br>0.00)                      | 0.00<br>(0.00 to<br>0.00)                      |
| African trypanosomiasis                               | 0.00<br>(0.00 to<br>0.00)                        | 0.00<br>(0.00 to<br>0.00)                      | 0.00<br>(0.00 to<br>0.00)                      | 0.00<br>(0.00 to<br>0.00)                       | 0.00<br>(0.00 to<br>0.00)                      | 0.00<br>(0.00 to<br>0.00)                      | 0.00<br>(0.00 to<br>0.00)                      | 0.00<br>(0.00 to<br>0.00)                      |
| Schistosomiasis                                       | 0.02<br>(0.01 to<br>0.05)                        | 0.02<br>(0.01 to<br>0.03)                      | 0.02<br>(0.01 to<br>0.03)                      | 0.02<br>(0.01 to<br>0.04)                       | 0.00<br>(0.00 to<br>0.00)                      | 0.00<br>(0.00 to<br>0.00)                      | 0.00<br>(0.00 to<br>0.00)                      | 0.00<br>(0.00 to<br>0.00)                      |
| Cysticercosis                                         | 0.04<br>(0.03 to<br>0.06)                        | 0.01<br>(0.01 to<br>0.02)                      | 0.01<br>(0.01 to<br>0.02)                      | 0.01<br>(0.01 to<br>0.02)                       | 0.00<br>(0.00 to<br>0.00)                      | 0.00<br>(0.00 to<br>0.00)                      | 0.00<br>(0.00 to<br>0.00)                      | 0.00<br>(0.00 to<br>0.00)                      |
| Cystic echinococcosis                                 | 0.00<br>(0.00 to<br>0.00)                        | 0.00<br>(0.00 to<br>0.00)                      | 0.00<br>(0.00 to<br>0.00)                      | 0.00<br>(0.00 to<br>0.00)                       | 0.00<br>(0.00 to<br>0.00)                      | 0.00<br>(0.00 to<br>0.00)                      | 0.00<br>(0.00 to<br>0.00)                      | 0.00<br>(0.00 to<br>0.00)                      |
| Dengue                                                | 0.00<br>(0.00 to<br>0.00)                        | 0.00<br>(0.00 to<br>0.00)                      | 0.00<br>(0.00 to<br>0.00)                      | 0.00<br>(0.00 to<br>0.00)                       | 0.00<br>(0.00 to<br>0.00)                      | 0.00<br>(0.00 to<br>0.00)                      | 0.00<br>(0.00 to<br>0.00)                      | 0.00<br>(0.00 to<br>0.00)                      |
| Yellow fever                                          | 0.00<br>(0.00 to<br>0.00)                        | 0.00<br>(0.00 to<br>0.00)                      | 0.00<br>(0.00 to<br>0.00)                      | 0.00<br>(0.00 to<br>0.00)                       | 0.00<br>(0.00 to<br>0.00)                      | 0.00<br>(0.00 to<br>0.00)                      | 0.00<br>(0.00 to<br>0.00)                      | 0.00<br>(0.00 to<br>0.00)                      |
| Rabies                                                | 0.04<br>(0.01 to<br>0.08)                        | 0.03<br>(0.00 to<br>0.09)                      | 0.03<br>(0.00 to<br>0.09)                      | 0.04<br>(0.00 to<br>0.11)                       | 0.00<br>(0.00 to<br>0.00)                      | 0.00<br>(0.00 to<br>0.01)                      | 0.00<br>(0.00 to<br>0.01)                      | 0.00<br>(0.00 to<br>0.01)                      |
| Intestinal nematode infections                        | 0.08<br>(0.02 to<br>0.18)                        | 0.04<br>(0.02 to<br>0.09)                      | 0.04<br>(0.02 to<br>0.09)                      | 0.05<br>(0.02 to<br>0.10)                       | 0.00<br>(0.00 to<br>0.00)                      | 0.00<br>(0.00 to<br>0.00)                      | 0.00<br>(0.00 to<br>0.00)                      | 0.00<br>(0.00 to<br>0.00)                      |
| Other neglected tropical diseases                     | 2.42<br>(1.68 to<br>3.18)                        | 2.01<br>(1.00 to<br>2.78)                      | 2.05<br>(1.00 to<br>2.83)                      | 2.02<br>(0.99 to<br>2.85)                       | 0.06<br>(0.03 to<br>0.08)                      | 0.07<br>(0.04 to<br>0.10)                      | 0.07<br>(0.04 to<br>0.10)                      | 0.07<br>(0.03 to<br>0.09)                      |
| <b>Maternal disorders</b>                             | <b>10.22</b><br><b>(7.12 to</b><br><b>14.47)</b> | <b>4.95</b><br><b>(2.40 to</b><br><b>8.36)</b> | <b>4.47</b><br><b>(2.16 to</b><br><b>7.64)</b> | <b>7.16</b><br><b>(3.50 to</b><br><b>12.52)</b> | <b>0.19</b><br><b>(0.13 to</b><br><b>0.26)</b> | <b>0.09</b><br><b>(0.04 to</b><br><b>0.15)</b> | <b>0.08</b><br><b>(0.04 to</b><br><b>0.14)</b> | <b>0.13</b><br><b>(0.06 to</b><br><b>0.23)</b> |
| Maternal hemorrhage                                   | 1.30<br>(0.74 to<br>1.99)                        | 0.58<br>(0.25 to<br>1.16)                      | 0.52<br>(0.22 to<br>1.07)                      | 0.81<br>(0.34 to<br>1.71)                       | 0.02<br>(0.01 to<br>0.04)                      | 0.01<br>(0.00 to<br>0.02)                      | 0.01<br>(0.00 to<br>0.02)                      | 0.01<br>(0.01 to<br>0.03)                      |
| Maternal sepsis and other maternal infections         | 1.19<br>(0.73 to<br>1.81)                        | 0.55<br>(0.25 to<br>0.98)                      | 0.49<br>(0.22 to<br>0.88)                      | 0.79<br>(0.36 to<br>1.45)                       | 0.02<br>(0.01 to<br>0.03)                      | 0.01<br>(0.00 to<br>0.02)                      | 0.01<br>(0.00 to<br>0.02)                      | 0.01<br>(0.01 to<br>0.03)                      |
| Maternal hypertensive disorders                       | 1.94<br>(1.21 to<br>2.90)                        | 0.95<br>(0.41 to<br>1.75)                      | 0.86<br>(0.37 to<br>1.60)                      | 1.38<br>(0.59 to<br>2.65)                       | 0.04<br>(0.02 to<br>0.05)                      | 0.02<br>(0.01 to<br>0.05)                      | 0.02<br>(0.01 to<br>0.03)                      | 0.03<br>(0.01 to<br>0.05)                      |
| Maternal obstructed labor and uterine rupture         | 0.08<br>(0.04 to<br>0.14)                        | 0.04<br>(0.01 to<br>0.08)                      | 0.03<br>(0.01 to<br>0.07)                      | 0.06<br>(0.02 to<br>0.12)                       | 0.00<br>(0.00 to<br>0.00)                      | 0.00<br>(0.00 to<br>0.00)                      | 0.00<br>(0.00 to<br>0.00)                      | 0.00<br>(0.00 to<br>0.00)                      |
| Maternal abortion, miscarriage, and ectopic pregnancy | 1.93<br>(1.18 to<br>2.89)                        | 1.09<br>(0.46 to<br>2.09)                      | 0.98<br>(0.42 to<br>1.92)                      | 1.60<br>(0.69 to<br>3.18)                       | 0.04<br>(0.02 to<br>0.05)                      | 0.02<br>(0.01 to<br>0.04)                      | 0.02<br>(0.01 to<br>0.04)                      | 0.03<br>(0.01 to<br>0.06)                      |
| Indirect maternal deaths                              | 2.45<br>(1.48 to<br>4.46)                        | 1.08<br>(0.41 to<br>2.25)                      | 0.97<br>(0.37 to<br>1.94)                      | 1.59<br>(0.61 to<br>3.33)                       | 0.04<br>(0.03 to<br>0.08)                      | 0.02<br>(0.01 to<br>0.04)                      | 0.02<br>(0.01 to<br>0.04)                      | 0.03<br>(0.01 to<br>0.06)                      |
| Late maternal deaths                                  | 0.08<br>(0.04 to<br>0.13)                        | 0.03<br>(0.01 to<br>0.06)                      | 0.03<br>(0.01 to<br>0.06)                      | 0.04<br>(0.02 to<br>0.09)                       | 0.00<br>(0.00 to<br>0.00)                      | 0.00<br>(0.00 to<br>0.00)                      | 0.00<br>(0.00 to<br>0.00)                      | 0.00<br>(0.00 to<br>0.00)                      |
| Maternal deaths aggravated by HIV/AIDS                | 0.00<br>(0.00 to<br>0.00)                        | 0.00<br>(0.00 to<br>0.00)                      | 0.00<br>(0.00 to<br>0.00)                      | 0.00<br>(0.00 to<br>0.00)                       | 0.00<br>(0.00 to<br>0.00)                      | 0.00<br>(0.00 to<br>0.00)                      | 0.00<br>(0.00 to<br>0.00)                      | 0.00<br>(0.00 to<br>0.00)                      |
| Other maternal disorders                              | 1.26<br>(0.77 to<br>1.93)                        | 0.64<br>(0.29 to<br>1.25)                      | 0.59<br>(0.26 to<br>1.10)                      | 0.88<br>(0.37 to<br>1.72)                       | 0.02<br>(0.01 to<br>0.04)                      | 0.01<br>(0.01 to<br>0.02)                      | 0.01<br>(0.01 to<br>0.02)                      | 0.02<br>(0.01 to<br>0.03)                      |

| Turkey                                                                  |                                       |                                    |                                    |                                     |                                |                               |                               |                               |
|-------------------------------------------------------------------------|---------------------------------------|------------------------------------|------------------------------------|-------------------------------------|--------------------------------|-------------------------------|-------------------------------|-------------------------------|
| Cause                                                                   | YLLs (in 1000s)                       |                                    |                                    |                                     | Deaths (in 1000s)              |                               |                               |                               |
|                                                                         | 2016                                  | 2040 Forecast                      | 2040 Better Scenario               | 2040 Worse Scenario                 | 2016                           | 2040 Forecast                 | 2040 Better Scenario          | 2040 Worse Scenario           |
| <b>Neonatal disorders</b>                                               | <b>759.00</b><br>(508.48 to 1,092.01) | <b>193.81</b><br>(88.37 to 337.21) | <b>157.18</b><br>(70.29 to 278.07) | <b>335.60</b><br>(155.12 to 589.91) | <b>8.78</b><br>(5.88 to 12.63) | <b>2.24</b><br>(1.02 to 3.90) | <b>1.82</b><br>(0.81 to 3.22) | <b>3.88</b><br>(1.80 to 6.82) |
| Neonatal preterm birth                                                  | 430.05<br>(277.70 to 629.00)          | 90.49<br>(40.00 to 160.55)         | 69.04<br>(30.90 to 123.32)         | 185.79<br>(87.20 to 328.22)         | 4.97<br>(3.21 to 7.27)         | 1.05<br>(0.46 to 1.86)        | 0.80<br>(0.36 to 1.42)        | 2.15<br>(1.01 to 3.79)        |
| Neonatal encephalopathy due to birth asphyxia and trauma                | 116.00<br>(70.48 to 182.54)           | 24.30<br>(10.00 to 47.37)          | 19.19<br>(7.57 to 37.98)           | 43.14<br>(17.42 to 87.02)           | 1.34<br>(0.82 to 2.11)         | 0.28<br>(0.12 to 0.55)        | 0.22<br>(0.09 to 0.44)        | 0.50<br>(0.20 to 1.01)        |
| Neonatal sepsis and other neonatal infections                           | 56.65<br>(19.77 to 94.79)             | 20.09<br>(6.11 to 41.87)           | 16.53<br>(4.95 to 34.49)           | 31.82<br>(9.27 to 66.93)            | 0.65<br>(0.23 to 1.10)         | 0.23<br>(0.07 to 0.48)        | 0.19<br>(0.06 to 0.40)        | 0.37<br>(0.11 to 0.77)        |
| Hemolytic disease and other neonatal jaundice                           | 5.57<br>(3.19 to 8.78)                | 1.21<br>(0.41 to 2.70)             | 0.97<br>(0.34 to 2.19)             | 2.00<br>(0.70 to 4.56)              | 0.06<br>(0.04 to 0.10)         | 0.06<br>(0.00 to 0.03)        | 0.01<br>(0.00 to 0.03)        | 0.02<br>(0.01 to 0.05)        |
| Other neonatal disorders                                                | 150.73<br>(94.60 to 232.27)           | 57.72<br>(24.75 to 109.82)         | 51.44<br>(22.14 to 95.51)          | 72.84<br>(30.95 to 141.02)          | 1.74<br>(1.09 to 2.69)         | 0.67<br>(0.29 to 1.27)        | 0.60<br>(0.26 to 1.10)        | 0.84<br>(0.36 to 1.63)        |
| <b>Nutritional deficiencies</b>                                         | <b>13.28</b><br>(10.78 to 16.63)      | <b>9.42</b><br>(7.03 to 12.31)     | <b>9.67</b><br>(7.20 to 12.68)     | <b>9.17</b><br>(6.85 to 12.06)      | <b>0.67</b><br>(0.57 to 0.80)  | <b>0.81</b><br>(0.58 to 1.09) | <b>0.86</b><br>(0.62 to 1.17) | <b>0.72</b><br>(0.52 to 0.98) |
| Protein-energy malnutrition                                             | 10.17<br>(8.14 to 13.08)              | 6.51<br>(4.64 to 8.91)             | 6.86<br>(4.98 to 9.31)             | 5.78<br>(4.13 to 7.95)              | 0.53<br>(0.44 to 0.63)         | 0.56<br>(0.38 to 0.82)        | 0.62<br>(0.42 to 0.90)        | 0.45<br>(0.30 to 0.66)        |
| Iodine deficiency                                                       | 0.23<br>(0.02 to 0.81)                | 0.43<br>(0.01 to 1.43)             | 0.43<br>(0.01 to 1.43)             | 0.48<br>(0.02 to 1.48)              | 0.01<br>(0.00 to 0.02)         | 0.03<br>(0.00 to 0.14)        | 0.03<br>(0.00 to 0.15)        | 0.03<br>(0.00 to 0.14)        |
| Dietary iron deficiency                                                 | 0.46<br>(0.37 to 0.58)                | 0.29<br>(0.19 to 0.41)             | 0.29<br>(0.20 to 0.42)             | 0.29<br>(0.19 to 0.41)              | 0.01<br>(0.01 to 0.01)         | 0.01<br>(0.01 to 0.01)        | 0.01<br>(0.01 to 0.01)        | 0.01<br>(0.01 to 0.01)        |
| Other nutritional deficiencies                                          | 2.43<br>(1.86 to 3.12)                | 2.19<br>(1.48 to 3.06)             | 2.08<br>(1.38 to 2.95)             | 2.62<br>(1.81 to 3.58)              | 0.13<br>(0.10 to 0.17)         | 0.20<br>(0.12 to 0.30)        | 0.20<br>(0.12 to 0.30)        | 0.22<br>(0.14 to 0.33)        |
| <b>Other communicable, maternal, neonatal, and nutritional diseases</b> | <b>34.72</b><br>(26.58 to 49.38)      | <b>22.67</b><br>(16.99 to 29.93)   | <b>21.11</b><br>(15.85 to 27.77)   | <b>29.44</b><br>(21.56 to 39.01)    | <b>0.90</b><br>(0.75 to 1.13)  | <b>1.00</b><br>(0.76 to 1.32) | <b>0.96</b><br>(0.72 to 1.27) | <b>1.19</b><br>(0.91 to 1.52) |
| Sexually transmitted infections excluding HIV                           | 5.23<br>(1.84 to 10.94)               | 0.73<br>(0.35 to 1.54)             | 0.65<br>(0.32 to 1.32)             | 1.08<br>(0.48 to 2.38)              | 0.07<br>(0.03 to 0.14)         | 0.02<br>(0.01 to 0.03)        | 0.02<br>(0.01 to 0.02)        | 0.02<br>(0.01 to 0.04)        |
| Syphilis                                                                | 4.79<br>(1.41 to 10.52)               | 0.48<br>(0.14 to 1.22)             | 0.40<br>(0.12 to 1.02)             | 0.79<br>(0.22 to 2.10)              | 0.06<br>(0.02 to 0.13)         | 0.01<br>(0.00 to 0.02)        | 0.01<br>(0.00 to 0.01)        | 0.01<br>(0.00 to 0.03)        |
| Chlamydial infection                                                    | 0.08<br>(0.05 to 0.11)                | 0.05<br>(0.03 to 0.07)             | 0.05<br>(0.03 to 0.07)             | 0.06<br>(0.03 to 0.09)              | 0.00<br>(0.00 to 0.00)         | 0.00<br>(0.00 to 0.00)        | 0.00<br>(0.00 to 0.00)        | 0.00<br>(0.00 to 0.00)        |
| Gonococcal infection                                                    | 0.23<br>(0.16 to 0.31)                | 0.14<br>(0.08 to 0.21)             | 0.13<br>(0.08 to 0.20)             | 0.15<br>(0.09 to 0.23)              | 0.01<br>(0.00 to 0.01)         | 0.01<br>(0.00 to 0.01)        | 0.01<br>(0.00 to 0.01)        | 0.01<br>(0.00 to 0.01)        |
| Other sexually transmitted infections                                   | 0.12<br>(0.08 to 0.16)                | 0.07<br>(0.04 to 0.10)             | 0.06<br>(0.04 to 0.10)             | 0.08<br>(0.05 to 0.12)              | 0.00<br>(0.00 to 0.00)         | 0.00<br>(0.00 to 0.00)        | 0.00<br>(0.00 to 0.00)        | 0.00<br>(0.00 to 0.00)        |
| Acute hepatitis                                                         | 13.77<br>(11.11 to 16.80)             | 9.53<br>(6.65 to 13.39)            | 8.25<br>(5.71 to 11.62)            | 14.72<br>(10.29 to 19.74)           | 0.49<br>(0.40 to 0.60)         | 0.41<br>(0.29 to 0.57)        | 0.36<br>(0.25 to 0.50)        | 0.60<br>(0.44 to 0.80)        |
| Acute hepatitis A                                                       | 0.27<br>(0.07 to 0.62)                | 0.15<br>(0.04 to 0.35)             | 0.13<br>(0.04 to 0.31)             | 0.20<br>(0.06 to 0.46)              | 0.01<br>(0.00 to 0.01)         | 0.01<br>(0.00 to 0.02)        | 0.01<br>(0.00 to 0.01)        | 0.01<br>(0.00 to 0.02)        |
| Acute hepatitis B                                                       | 11.14<br>(8.78 to 13.79)              | 8.01<br>(5.44 to 11.58)            | 6.90<br>(4.71 to 9.79)             | 12.48<br>(8.53 to 17.25)            | 0.40<br>(0.32 to 0.50)         | 0.33<br>(0.22 to 0.47)        | 0.29<br>(0.19 to 0.41)        | 0.49<br>(0.34 to 0.68)        |

|                                       |                                                            |                                                             |                                                            |                                                              |                                                      |                                                      |                                                      |                                                      |
|---------------------------------------|------------------------------------------------------------|-------------------------------------------------------------|------------------------------------------------------------|--------------------------------------------------------------|------------------------------------------------------|------------------------------------------------------|------------------------------------------------------|------------------------------------------------------|
| Acute hepatitis C                     | 0.26<br>(0.18 to<br>0.37)                                  | 0.22<br>(0.13 to<br>0.35)                                   | 0.20<br>(0.12 to<br>0.31)                                  | 0.33<br>(0.21 to<br>0.52)                                    | 0.01<br>(0.01 to<br>0.02)                            | 0.01<br>(0.01 to<br>0.02)                            | 0.01<br>(0.01 to<br>0.01)                            | 0.02<br>(0.01 to<br>0.02)                            |
| Acute hepatitis E                     | 2.09<br>(1.58 to<br>2.76)                                  | 1.15<br>(0.69 to<br>1.85)                                   | 1.02<br>(0.60 to<br>1.60)                                  | 1.70<br>(1.00 to<br>2.61)                                    | 0.07<br>(0.05 to<br>0.10)                            | 0.07<br>(0.04 to<br>0.11)                            | 0.06<br>(0.03 to<br>0.10)                            | 0.09<br>(0.05 to<br>0.14)                            |
| Other unspecified infectious diseases | 15.72<br>(10.18 to<br>28.40)                               | 12.41<br>(9.20 to<br>17.40)                                 | 12.21<br>(9.08 to<br>16.93)                                | 13.65<br>(9.89 to<br>19.83)                                  | 0.34<br>(0.27 to<br>0.49)                            | 0.57<br>(0.41 to<br>0.87)                            | 0.59<br>(0.42 to<br>0.90)                            | 0.56<br>(0.40 to<br>0.86)                            |
| <b>Non-communicable diseases</b>      | <b>6,404.92</b><br><b>(5,484.92 to</b><br><b>7,426.69)</b> | <b>7,939.07</b><br><b>(5,826.23 to</b><br><b>10,771.76)</b> | <b>6,903.36</b><br><b>(5,118.35 to</b><br><b>9,164.20)</b> | <b>11,746.03</b><br><b>(8,472.63 to</b><br><b>15,808.12)</b> | <b>321.29</b><br><b>(279.34 to</b><br><b>371.33)</b> | <b>550.93</b><br><b>(414.60 to</b><br><b>746.45)</b> | <b>495.02</b><br><b>(368.28 to</b><br><b>662.20)</b> | <b>743.94</b><br><b>(563.66 to</b><br><b>977.66)</b> |
| <b>Turkey</b>                         |                                                            |                                                             |                                                            |                                                              |                                                      |                                                      |                                                      |                                                      |
| Cause                                 | YLLs (in 1000s)                                            |                                                             |                                                            |                                                              | Deaths (in 1000s)                                    |                                                      |                                                      |                                                      |
|                                       | 2016                                                       | 2040 Forecast                                               | 2040 Better Scenario                                       | 2040 Worse Scenario                                          | 2016                                                 | 2040 Forecast                                        | 2040 Better Scenario                                 | 2040 Worse Scenario                                  |
| <b>Neoplasms</b>                      | <b>1,956.18</b><br><b>(1,649.14 to</b><br><b>2,291.79)</b> | <b>2,756.28</b><br><b>(1,956.44 to</b><br><b>3,774.89)</b>  | <b>2,454.21</b><br><b>(1,761.83 to</b><br><b>3,309.94)</b> | <b>3,787.26</b><br><b>(2,612.97 to</b><br><b>5,215.40)</b>   | <b>78.18</b><br><b>(66.69 to</b><br><b>92.25)</b>    | <b>141.63</b><br><b>(104.75 to</b><br><b>186.32)</b> | <b>129.38</b><br><b>(97.46 to</b><br><b>168.77)</b>  | <b>186.41</b><br><b>(135.68 to</b><br><b>247.89)</b> |
| Lip and oral cavity cancer            | 11.85<br>(9.67 to<br>14.17)                                | 14.20<br>(8.51 to<br>22.55)                                 | 12.53<br>(7.55 to<br>19.65)                                | 25.91<br>(13.99 to<br>44.26)                                 | 0.50<br>(0.42 to<br>0.59)                            | 0.79<br>(0.51 to<br>1.21)                            | 0.72<br>(0.47 to<br>1.10)                            | 1.33<br>(0.77 to<br>2.18)                            |
| Nasopharynx cancer                    | 11.81<br>(9.53 to<br>14.51)                                | 11.43<br>(6.09 to<br>20.31)                                 | 9.52<br>(5.08 to<br>16.89)                                 | 24.00<br>(11.78 to<br>44.93)                                 | 0.36<br>(0.29 to<br>0.44)                            | 0.41<br>(0.23 to<br>0.72)                            | 0.34<br>(0.19 to<br>0.59)                            | 0.84<br>(0.43 to<br>1.55)                            |
| Other pharynx cancer                  | 5.28<br>(4.39 to<br>6.40)                                  | 6.96<br>(4.55 to<br>10.50)                                  | 7.01<br>(4.63 to<br>10.52)                                 | 8.25<br>(4.95 to<br>13.56)                                   | 0.20<br>(0.17 to<br>0.24)                            | 0.34<br>(0.23 to<br>0.50)                            | 0.35<br>(0.24 to<br>0.51)                            | 0.38<br>(0.24 to<br>0.61)                            |
| Esophageal cancer                     | 23.44<br>(19.54 to<br>28.05)                               | 27.76<br>(15.93 to<br>47.92)                                | 25.18<br>(14.78 to<br>42.89)                               | 42.80<br>(22.80 to<br>78.79)                                 | 0.96<br>(0.80 to<br>1.14)                            | 1.37<br>(0.82 to<br>2.23)                            | 1.27<br>(0.78 to<br>2.01)                            | 2.01<br>(1.14 to<br>3.45)                            |
| Stomach cancer                        | 152.26<br>(127.11 to<br>181.18)                            | 147.86<br>(100.18 to<br>215.29)                             | 130.82<br>(89.36 to<br>182.89)                             | 211.60<br>(142.35 to<br>309.57)                              | 6.50<br>(5.44 to<br>7.70)                            | 7.90<br>(5.63 to<br>10.88)                           | 7.12<br>(5.15 to<br>9.60)                            | 10.76<br>(7.72 to<br>15.24)                          |
| Colon and rectum cancer               | 161.67<br>(135.00 to<br>193.02)                            | 264.97<br>(172.09 to<br>402.60)                             | 241.53<br>(158.08 to<br>365.18)                            | 339.58<br>(221.02 to<br>511.08)                              | 7.31<br>(6.09 to<br>8.69)                            | 16.04<br>(10.82 to<br>24.04)                         | 14.91<br>(10.11 to<br>22.53)                         | 19.37<br>(13.02 to<br>28.75)                         |
| Liver cancer                          | 65.08<br>(52.87 to<br>79.16)                               | 134.73<br>(76.10 to<br>220.27)                              | 121.52<br>(72.62 to<br>189.18)                             | 153.87<br>(81.38 to<br>265.97)                               | 2.90<br>(2.40 to<br>3.51)                            | 7.27<br>(4.37 to<br>11.42)                           | 6.75<br>(4.19 to<br>10.28)                           | 7.92<br>(4.55 to<br>12.97)                           |
| Liver cancer due to hepatitis B       | 31.17<br>(24.25 to<br>39.06)                               | 59.66<br>(32.95 to<br>100.29)                               | 53.44<br>(30.71 to<br>86.96)                               | 67.53<br>(34.15 to<br>119.28)                                | 1.24<br>(0.97 to<br>1.57)                            | 2.85<br>(1.64 to<br>4.56)                            | 2.62<br>(1.58 to<br>4.12)                            | 3.10<br>(1.69 to<br>5.28)                            |
| Liver cancer due to hepatitis C       | 16.23<br>(12.68 to<br>20.70)                               | 37.92<br>(21.64 to<br>61.11)                                | 34.86<br>(20.94 to<br>53.38)                               | 41.64<br>(22.86 to<br>70.05)                                 | 0.86<br>(0.67 to<br>1.08)                            | 2.39<br>(1.42 to<br>3.62)                            | 2.27<br>(1.40 to<br>3.40)                            | 2.49<br>(1.46 to<br>3.97)                            |
| Liver cancer due to alcohol use       | 9.90<br>(7.06 to<br>13.65)                                 | 21.41<br>(11.43 to<br>38.45)                                | 19.08<br>(10.60 to<br>32.80)                               | 26.74<br>(13.25 to<br>49.78)                                 | 0.46<br>(0.33 to<br>0.64)                            | 1.15<br>(0.64 to<br>2.00)                            | 1.06<br>(0.61 to<br>1.76)                            | 1.36<br>(0.71 to<br>2.47)                            |
| Liver cancer due to other causes      | 7.78<br>(5.92 to<br>10.30)                                 | 15.73<br>(8.57 to<br>26.58)                                 | 14.15<br>(8.04 to<br>22.95)                                | 17.95<br>(9.28 to<br>31.23)                                  | 0.35<br>(0.26 to<br>0.45)                            | 0.88<br>(0.48 to<br>1.44)                            | 0.81<br>(0.46 to<br>1.30)                            | 0.96<br>(0.50 to<br>1.63)                            |
| Gallbladder and biliary tract cancer  | 19.81<br>(16.22 to<br>24.98)                               | 26.67<br>(20.11 to<br>35.13)                                | 26.60<br>(19.98 to<br>35.29)                               | 26.93<br>(20.78 to<br>34.77)                                 | 0.95<br>(0.77 to<br>1.24)                            | 1.59<br>(1.24 to<br>2.13)                            | 1.61<br>(1.24 to<br>2.17)                            | 1.54<br>(1.23 to<br>2.03)                            |
| Pancreatic cancer                     | 100.02<br>(83.12 to<br>118.91)                             | 192.36<br>(130.22 to<br>275.93)                             | 187.27<br>(128.18 to<br>266.33)                            | 213.69<br>(139.76 to<br>313.03)                              | 4.48<br>(3.77 to<br>5.30)                            | 10.23<br>(7.17 to<br>14.32)                          | 10.13<br>(7.07 to<br>14.16)                          | 10.93<br>(7.51 to<br>15.45)                          |
| Larynx cancer                         | 28.68<br>(22.97 to<br>35.83)                               | 31.36<br>(13.59 to<br>63.15)                                | 24.61<br>(10.65 to<br>49.25)                               | 66.30<br>(27.27 to<br>135.51)                                | 1.24<br>(1.00 to<br>1.55)                            | 1.50<br>(0.70 to<br>2.88)                            | 1.19<br>(0.56 to<br>2.28)                            | 3.16<br>(1.37 to<br>6.31)                            |
| Tracheal, bronchus, and lung cancer   | 507.91<br>(407.99 to<br>619.56)                            | 665.40<br>(358.99 to<br>1,118.99)                           | 492.64<br>(274.20 to<br>807.95)                            | 1,253.26<br>(672.00 to<br>2,075.10)                          | 21.21<br>(17.23 to<br>25.83)                         | 31.31<br>(17.88 to<br>51.17)                         | 23.86<br>(13.97 to<br>38.09)                         | 59.17<br>(32.70 to<br>96.28)                         |



|                          |                             |                             |                             |                              |                        |                          |                         |                          |
|--------------------------|-----------------------------|-----------------------------|-----------------------------|------------------------------|------------------------|--------------------------|-------------------------|--------------------------|
| Malignant skin melanoma  | 17.42<br>(11.60 to 38.16)   | 33.09<br>(19.91 to 75.86)   | 35.78<br>(21.38 to 83.11)   | 26.36<br>(16.06 to 60.42)    | 0.67<br>(0.44 to 1.53) | 1.70<br>(1.04 to 4.27)   | 1.87<br>(1.13 to 4.62)  | 1.29<br>(0.80 to 3.10)   |
| Non-melanoma skin cancer | 9.77<br>(8.11 to 11.63)     | 17.43<br>(13.61 to 21.80)   | 16.33<br>(12.85 to 20.46)   | 21.23<br>(17.21 to 25.43)    | 0.57<br>(0.48 to 0.66) | 1.35<br>(1.08 to 1.71)   | 1.30<br>(1.02 to 1.68)  | 1.53<br>(1.26 to 1.85)   |
| Breast cancer            | 119.49<br>(89.33 to 165.13) | 149.63<br>(89.20 to 232.69) | 137.18<br>(83.00 to 213.88) | 199.99<br>(118.20 to 316.73) | 4.23<br>(3.16 to 5.95) | 7.09<br>(4.45 to 10.83)  | 6.60<br>(4.16 to 10.01) | 9.08<br>(5.79 to 14.18)  |
| Cervical cancer          | 18.96<br>(13.52 to 25.14)   | 17.86<br>(10.64 to 28.18)   | 16.13<br>(9.71 to 24.71)    | 24.66<br>(14.63 to 39.71)    | 0.68<br>(0.50 to 0.90) | 0.82<br>(0.54 to 1.23)   | 0.75<br>(0.48 to 1.11)  | 1.09<br>(0.71 to 1.65)   |
| Uterine cancer           | 17.12<br>(12.84 to 22.09)   | 28.32<br>(19.25 to 40.12)   | 26.89<br>(18.03 to 37.67)   | 33.56<br>(22.80 to 46.80)    | 0.77<br>(0.59 to 0.98) | 1.56<br>(1.10 to 2.12)   | 1.50<br>(1.04 to 2.06)  | 1.80<br>(1.29 to 2.44)   |
| Ovarian cancer           | 39.97<br>(29.40 to 52.08)   | 57.66<br>(34.71 to 90.21)   | 53.97<br>(32.77 to 84.18)   | 68.98<br>(41.06 to 107.75)   | 1.50<br>(1.13 to 1.97) | 2.66<br>(1.61 to 4.09)   | 2.51<br>(1.52 to 3.83)  | 3.14<br>(1.89 to 4.86)   |
| Prostate cancer          | 52.78<br>(38.23 to 70.15)   | 123.00<br>(88.08 to 165.95) | 120.20<br>(84.85 to 163.60) | 132.25<br>(97.98 to 173.89)  | 3.69<br>(2.74 to 4.81) | 10.02<br>(7.39 to 13.26) | 9.99<br>(7.20 to 13.57) | 10.14<br>(7.82 to 13.10) |
| Testicular cancer        | 9.05<br>(6.82 to 11.92)     | 6.48<br>(3.80 to 10.50)     | 6.01<br>(3.64 to 9.81)      | 8.18<br>(4.95 to 13.30)      | 0.18<br>(0.14 to 0.24) | 0.15<br>(0.10 to 0.23)   | 0.14<br>(0.09 to 0.22)  | 0.19<br>(0.12 to 0.28)   |

**Turkey**

| Cause                           | YLLs (in 1000s)              |                              |                              |                              | Deaths (in 1000s)      |                         |                        |                         |
|---------------------------------|------------------------------|------------------------------|------------------------------|------------------------------|------------------------|-------------------------|------------------------|-------------------------|
|                                 | 2016                         | 2040 Forecast                | 2040 Better Scenario         | 2040 Worse Scenario          | 2016                   | 2040 Forecast           | 2040 Better Scenario   | 2040 Worse Scenario     |
| Kidney cancer                   | 30.91<br>(25.07 to 37.05)    | 52.49<br>(34.09 to 78.46)    | 51.73<br>(33.85 to 76.21)    | 56.35<br>(34.99 to 88.30)    | 1.16<br>(0.96 to 1.40) | 2.55<br>(1.75 to 3.62)  | 2.56<br>(1.74 to 3.60) | 2.61<br>(1.73 to 3.93)  |
| Bladder cancer                  | 40.11<br>(32.39 to 49.78)    | 67.57<br>(41.78 to 101.46)   | 62.74<br>(39.64 to 94.04)    | 89.33<br>(52.82 to 143.85)   | 2.16<br>(1.77 to 2.64) | 4.33<br>(2.86 to 6.27)  | 4.13<br>(2.75 to 5.92) | 5.43<br>(3.43 to 8.37)  |
| Brain and nervous system cancer | 125.13<br>(96.60 to 152.15)  | 172.45<br>(125.70 to 226.20) | 167.91<br>(121.19 to 219.30) | 187.03<br>(136.85 to 241.23) | 3.69<br>(2.88 to 4.48) | 7.28<br>(5.51 to 9.22)  | 7.20<br>(5.42 to 9.21) | 7.52<br>(5.79 to 9.31)  |
| Thyroid cancer                  | 7.60<br>(6.17 to 10.57)      | 12.50<br>(7.68 to 20.14)     | 11.12<br>(7.14 to 17.48)     | 15.37<br>(9.52 to 24.84)     | 0.34<br>(0.27 to 0.51) | 0.70<br>(0.44 to 1.15)  | 0.63<br>(0.40 to 1.03) | 0.82<br>(0.52 to 1.36)  |
| Mesothelioma                    | 14.17<br>(10.16 to 17.60)    | 25.11<br>(16.49 to 33.34)    | 25.56<br>(16.53 to 34.28)    | 24.04<br>(16.32 to 30.87)    | 0.54<br>(0.40 to 0.66) | 1.16<br>(0.83 to 1.46)  | 1.20<br>(0.84 to 1.52) | 1.08<br>(0.79 to 1.32)  |
| Hodgkin lymphoma                | 8.63<br>(6.51 to 13.85)      | 6.28<br>(4.02 to 10.73)      | 5.60<br>(3.59 to 9.60)       | 8.95<br>(5.76 to 15.58)      | 0.23<br>(0.17 to 0.38) | 0.22<br>(0.15 to 0.39)  | 0.20<br>(0.13 to 0.35) | 0.31<br>(0.21 to 0.53)  |
| Non-Hodgkin lymphoma            | 69.51<br>(58.04 to 83.10)    | 96.30<br>(67.40 to 134.73)   | 89.20<br>(63.86 to 122.64)   | 111.87<br>(79.62 to 153.22)  | 2.33<br>(1.94 to 2.86) | 4.55<br>(3.27 to 6.26)  | 4.29<br>(3.05 to 5.85) | 5.04<br>(3.66 to 6.88)  |
| Multiple myeloma                | 32.61<br>(24.56 to 51.07)    | 69.94<br>(44.57 to 118.51)   | 66.10<br>(42.41 to 110.62)   | 75.70<br>(48.31 to 130.55)   | 1.42<br>(1.07 to 2.29) | 3.72<br>(2.43 to 6.47)  | 3.58<br>(2.34 to 6.15) | 3.87<br>(2.55 to 6.76)  |
| Leukemia                        | 148.56<br>(116.28 to 175.94) | 161.02<br>(112.28 to 228.70) | 147.75<br>(102.97 to 206.91) | 198.32<br>(135.78 to 288.09) | 4.25<br>(3.51 to 5.26) | 6.88<br>(4.85 to 10.07) | 6.42<br>(4.55 to 9.32) | 8.15<br>(5.59 to 12.11) |
| Acute lymphoid leukemia         | 39.48<br>(27.36 to 49.08)    | 24.61<br>(16.36 to 35.05)    | 22.19<br>(14.68 to 31.33)    | 32.36<br>(21.54 to 46.21)    | 0.70<br>(0.52 to 0.85) | 0.58<br>(0.40 to 0.83)  | 0.52<br>(0.36 to 0.75) | 0.75<br>(0.52 to 1.11)  |
| Chronic lymphoid leukemia       | 9.77<br>(7.65 to 12.52)      | 14.96<br>(9.79 to 22.14)     | 13.95<br>(9.19 to 20.69)     | 17.43<br>(11.20 to 26.75)    | 0.47<br>(0.37 to 0.61) | 0.89<br>(0.60 to 1.31)  | 0.85<br>(0.58 to 1.24) | 0.99<br>(0.66 to 1.50)  |
| Acute myeloid leukemia          | 58.70<br>(45.96 to 70.57)    | 77.53<br>(52.48 to 112.79)   | 72.71<br>(49.67 to 104.24)   | 88.15<br>(58.07 to 133.38)   | 1.60<br>(1.31 to 1.94) | 2.97<br>(2.04 to 4.48)  | 2.83<br>(1.96 to 4.26) | 3.26<br>(2.17 to 4.96)  |

|                                |                                                            |                                                            |                                                          |                                                            |                                                      |                                                      |                                                     |                                                      |
|--------------------------------|------------------------------------------------------------|------------------------------------------------------------|----------------------------------------------------------|------------------------------------------------------------|------------------------------------------------------|------------------------------------------------------|-----------------------------------------------------|------------------------------------------------------|
| Chronic myeloid leukemia       | 5.81<br>(4.50 to<br>7.58)                                  | 4.53<br>(2.81 to<br>6.99)                                  | 3.74<br>(2.38 to<br>5.66)                                | 7.39<br>(4.63 to<br>11.50)                                 | 0.24<br>(0.19 to<br>0.31)                            | 0.24<br>(0.15 to<br>0.36)                            | 0.20<br>(0.13 to<br>0.31)                           | 0.37<br>(0.24 to<br>0.56)                            |
| Other leukemia                 | 34.79<br>(27.76 to<br>43.12)                               | 39.39<br>(27.35 to<br>57.24)                               | 35.16<br>(24.48 to<br>51.49)                             | 52.99<br>(35.56 to<br>79.40)                               | 1.24<br>(1.01 to<br>1.60)                            | 2.20<br>(1.55 to<br>3.24)                            | 2.01<br>(1.44 to<br>2.98)                           | 2.78<br>(1.91 to<br>4.19)                            |
| Other neoplasms                | 106.61<br>(90.43 to<br>123.92)                             | 135.43<br>(107.68 to<br>168.36)                            | 134.78<br>(105.51 to<br>168.82)                          | 138.91<br>(111.70 to<br>170.35)                            | 3.16<br>(2.69 to<br>3.70)                            | 6.13<br>(4.99 to<br>7.56)                            | 6.23<br>(5.00 to<br>7.74)                           | 5.90<br>(4.90 to<br>7.07)                            |
| <b>Cardiovascular diseases</b> | <b>2,069.98</b><br><b>(1,764.04 to</b><br><b>2,423.50)</b> | <b>1,936.75</b><br><b>(1,240.67 to</b><br><b>3,074.52)</b> | <b>1,500.78</b><br><b>(978.92 to</b><br><b>2,258.36)</b> | <b>3,734.80</b><br><b>(2,275.30 to</b><br><b>6,077.90)</b> | <b>125.34</b><br><b>(108.52 to</b><br><b>144.57)</b> | <b>154.20</b><br><b>(100.41 to</b><br><b>248.76)</b> | <b>126.38</b><br><b>(83.66 to</b><br><b>193.43)</b> | <b>255.52</b><br><b>(167.36 to</b><br><b>395.46)</b> |
| Rheumatic heart disease        | 9.76<br>(8.12 to<br>11.57)                                 | 5.38<br>(3.77 to<br>7.66)                                  | 4.87<br>(3.44 to<br>6.77)                                | 7.29<br>(5.24 to<br>10.37)                                 | 0.37<br>(0.31 to<br>0.44)                            | 0.33<br>(0.24 to<br>0.47)                            | 0.31<br>(0.22 to<br>0.43)                           | 0.42<br>(0.31 to<br>0.58)                            |
| Ischemic heart disease         | 1,256.96<br>(1,062.65 to<br>1,493.27)                      | 1,061.94<br>(581.94 to<br>1,898.10)                        | 758.28<br>(421.04 to<br>1,302.42)                        | 2,348.58<br>(1,254.58 to<br>4,203.03)                      | 76.94<br>(66.54 to<br>89.31)                         | 80.10<br>(43.92 to<br>141.68)                        | 60.81<br>(33.41 to<br>109.32)                       | 152.38<br>(86.05 to<br>263.74)                       |
| Stroke                         | 439.62<br>(369.20 to<br>522.59)                            | 275.40<br>(168.67 to<br>442.17)                            | 201.22<br>(126.22 to<br>319.15)                          | 586.62<br>(347.94 to<br>949.84)                            | 25.49<br>(21.37 to<br>30.23)                         | 21.78<br>(13.39 to<br>37.45)                         | 17.03<br>(10.07 to<br>27.90)                        | 39.72<br>(23.90 to<br>64.47)                         |
| Ischemic stroke                | 180.24<br>(150.07 to<br>217.14)                            | 139.18<br>(75.71 to<br>259.02)                             | 105.61<br>(56.97 to<br>190.43)                           | 258.38<br>(139.55 to<br>473.08)                            | 13.55<br>(11.30 to<br>16.13)                         | 12.97<br>(6.69 to<br>25.99)                          | 10.37<br>(5.31 to<br>20.09)                         | 21.53<br>(11.26 to<br>44.33)                         |
| Intracerebral hemorrhage       | 259.38<br>(217.99 to<br>307.56)                            | 136.23<br>(83.11 to<br>219.93)                             | 95.61<br>(59.46 to<br>146.46)                            | 328.24<br>(186.21 to<br>561.25)                            | 8.82<br>(10.01 to<br>14.15)                          | 11.94<br>(5.57 to<br>13.87)                          | 6.66<br>(4.31 to<br>10.10)                          | 18.20<br>(11.26 to<br>29.11)                         |
| Hypertensive heart disease     | 118.41<br>(77.37 to<br>147.78)                             | 244.97<br>(115.80 to<br>474.39)                            | 217.04<br>(104.23 to<br>373.44)                          | 324.20<br>(152.96 to<br>667.17)                            | 9.78<br>(4.99 to<br>12.77)                           | 25.02<br>(10.09 to<br>51.56)                         | 22.66<br>(9.41 to<br>42.00)                         | 30.64<br>(12.18 to<br>66.17)                         |
| Cardiomyopathy and myocarditis | 35.17<br>(28.27 to<br>43.58)                               | 29.08<br>(17.31 to<br>50.45)                               | 25.42<br>(15.42 to<br>43.61)                             | 42.46<br>(26.18 to<br>72.25)                               | 1.11<br>(0.81 to<br>1.84)                            | 1.51<br>(0.84 to<br>3.15)                            | 1.35<br>(0.75 to<br>2.83)                           | 2.03<br>(1.17 to<br>4.01)                            |
| Myocarditis                    | 3.99<br>(2.83 to<br>5.38)                                  | 3.33<br>(2.22 to<br>5.21)                                  | 3.29<br>(2.16 to<br>5.22)                                | 3.53<br>(2.38 to<br>5.47)                                  | 0.11<br>(0.08 to<br>0.16)                            | 0.18<br>(0.12 to<br>0.32)                            | 0.19<br>(0.12 to<br>0.33)                           | 0.18<br>(0.12 to<br>0.29)                            |

**Turkey**

| Cause                                         | YLLs (in 1000s)                                      |                                                      |                                                      |                                                        | Deaths (in 1000s)                                 |                                                   |                                                   |                                                   |
|-----------------------------------------------|------------------------------------------------------|------------------------------------------------------|------------------------------------------------------|--------------------------------------------------------|---------------------------------------------------|---------------------------------------------------|---------------------------------------------------|---------------------------------------------------|
|                                               | 2016                                                 | 2040 Forecast                                        | 2040 Better Scenario                                 | 2040 Worse Scenario                                    | 2016                                              | 2040 Forecast                                     | 2040 Better Scenario                              | 2040 Worse Scenario                               |
| Alcoholic cardiomyopathy                      | 0.98<br>(0.68 to<br>1.38)                            | 1.35<br>(0.86 to<br>2.13)                            | 1.35<br>(0.86 to<br>2.16)                            | 1.46<br>(0.95 to<br>2.21)                              | 0.04<br>(0.03 to<br>0.06)                         | 0.07<br>(0.04 to<br>0.14)                         | 0.07<br>(0.04 to<br>0.15)                         | 0.07<br>(0.05 to<br>0.13)                         |
| Other cardiomyopathy                          | 30.20<br>(24.28 to<br>39.02)                         | 24.40<br>(13.61 to<br>44.40)                         | 20.78<br>(11.82 to<br>37.73)                         | 37.48<br>(21.93 to<br>65.50)                           | 0.96<br>(0.69 to<br>1.64)                         | 1.25<br>(0.63 to<br>2.75)                         | 1.09<br>(0.54 to<br>2.41)                         | 1.78<br>(0.98 to<br>3.65)                         |
| Atrial fibrillation and flutter               | 19.14<br>(14.61 to<br>24.35)                         | 47.19<br>(33.63 to<br>64.85)                         | 46.63<br>(33.26 to<br>63.88)                         | 50.19<br>(36.29 to<br>67.70)                           | 2.02<br>(1.52 to<br>2.60)                         | 5.44<br>(3.70 to<br>7.81)                         | 5.49<br>(3.73 to<br>7.91)                         | 5.44<br>(3.81 to<br>7.62)                         |
| Aortic aneurysm                               | 35.30<br>(29.13 to<br>42.60)                         | 46.54<br>(33.98 to<br>62.96)                         | 44.13<br>(31.96 to<br>59.53)                         | 58.00<br>(42.08 to<br>79.07)                           | 1.75<br>(1.48 to<br>2.08)                         | 3.08<br>(2.36 to<br>4.02)                         | 3.02<br>(2.28 to<br>3.92)                         | 3.43<br>(2.65 to<br>4.44)                         |
| Peripheral artery disease                     | 8.72<br>(6.71 to<br>11.50)                           | 26.20<br>(17.83 to<br>43.21)                         | 25.23<br>(17.11 to<br>42.36)                         | 28.96<br>(20.05 to<br>44.76)                           | 0.63<br>(0.47 to<br>1.03)                         | 2.37<br>(1.49 to<br>4.75)                         | 2.35<br>(1.46 to<br>4.71)                         | 2.37<br>(1.54 to<br>4.39)                         |
| Endocarditis                                  | 23.62<br>(18.87 to<br>29.20)                         | 39.97<br>(27.23 to<br>57.58)                         | 38.81<br>(26.44 to<br>55.43)                         | 42.14<br>(28.57 to<br>60.84)                           | 1.23<br>(0.98 to<br>1.56)                         | 2.96<br>(1.97 to<br>4.44)                         | 2.94<br>(1.95 to<br>4.42)                         | 2.94<br>(1.97 to<br>4.34)                         |
| Other cardiovascular and circulatory diseases | 123.29<br>(98.38 to<br>181.98)                       | 160.07<br>(105.20 to<br>258.32)                      | 139.14<br>(95.06 to<br>221.41)                       | 246.36<br>(168.05 to<br>398.89)                        | 6.02<br>(4.70 to<br>9.96)                         | 11.60<br>(7.71 to<br>20.71)                       | 10.42<br>(6.84 to<br>18.44)                       | 16.14<br>(11.23 to<br>28.41)                      |
| <b>Chronic respiratory diseases</b>           | <b>380.34</b><br><b>(313.20 to</b><br><b>453.15)</b> | <b>440.98</b><br><b>(275.14 to</b><br><b>677.42)</b> | <b>362.40</b><br><b>(234.98 to</b><br><b>543.60)</b> | <b>791.52</b><br><b>(478.02 to</b><br><b>1,254.68)</b> | <b>24.06</b><br><b>(19.43 to</b><br><b>28.66)</b> | <b>31.66</b><br><b>(21.09 to</b><br><b>46.45)</b> | <b>27.43</b><br><b>(18.31 to</b><br><b>39.84)</b> | <b>54.05</b><br><b>(34.79 to</b><br><b>81.15)</b> |

|                                                                |                                           |                                            |                                            |                                            |                                      |                                       |                                       |                                        |
|----------------------------------------------------------------|-------------------------------------------|--------------------------------------------|--------------------------------------------|--------------------------------------------|--------------------------------------|---------------------------------------|---------------------------------------|----------------------------------------|
| Chronic obstructive pulmonary disease                          | 318.71<br>(256.48 to 385.66)              | 366.98<br>(210.55 to 594.48)               | 287.89<br>(168.67 to 461.38)               | 711.81<br>(404.97 to 1,175.36)             | 21.05<br>(16.74 to 25.27)            | 26.94<br>(16.35 to 41.49)             | 22.62<br>(13.82 to 34.19)             | 49.15<br>(29.65 to 76.49)              |
| Pneumoconiosis                                                 | 1.99<br>(1.49 to 2.62)                    | 1.54<br>(1.12 to 2.08)                     | 1.49<br>(1.08 to 2.00)                     | 1.97<br>(1.42 to 2.62)                     | 0.09<br>(0.07 to 0.11)               | 0.11<br>(0.08 to 0.15)                | 0.12<br>(0.08 to 0.16)                | 0.12<br>(0.09 to 0.16)                 |
| Silicosis                                                      | 0.92<br>(0.65 to 1.32)                    | 0.35<br>(0.17 to 0.66)                     | 0.27<br>(0.13 to 0.54)                     | 0.71<br>(0.39 to 1.20)                     | 0.03<br>(0.02 to 0.05)               | 0.02<br>(0.01 to 0.04)                | 0.01<br>(0.01 to 0.03)                | 0.03<br>(0.02 to 0.06)                 |
| Asbestosis                                                     | 0.43<br>(0.25 to 0.63)                    | 0.75<br>(0.41 to 1.10)                     | 0.82<br>(0.46 to 1.18)                     | 0.61<br>(0.30 to 0.92)                     | 0.02<br>(0.01 to 0.03)               | 0.06<br>(0.03 to 0.09)                | 0.07<br>(0.03 to 0.10)                | 0.05<br>(0.02 to 0.07)                 |
| Coal workers pneumoconiosis                                    | 0.26<br>(0.05 to 0.43)                    | 0.18<br>(0.06 to 0.34)                     | 0.15<br>(0.05 to 0.30)                     | 0.31<br>(0.08 to 0.55)                     | 0.02<br>(0.00 to 0.03)               | 0.01<br>(0.01 to 0.05)                | 0.01<br>(0.00 to 0.02)                | 0.02<br>(0.01 to 0.04)                 |
| Other pneumoconiosis                                           | 0.37<br>(0.27 to 0.57)                    | 0.27<br>(0.17 to 0.43)                     | 0.25<br>(0.15 to 0.41)                     | 0.34<br>(0.22 to 0.55)                     | 0.02<br>(0.01 to 0.03)               | 0.02<br>(0.01 to 0.04)                | 0.02<br>(0.01 to 0.04)                | 0.02<br>(0.02 to 0.04)                 |
| Asthma                                                         | 28.63<br>(22.65 to 35.83)                 | 16.34<br>(8.76 to 28.10)                   | 12.37<br>(6.86 to 21.10)                   | 31.14<br>(17.36 to 53.23)                  | 1.60<br>(1.20 to 2.02)               | 1.25<br>(0.67 to 2.17)                | 0.98<br>(0.51 to 1.69)                | 2.16<br>(1.20 to 3.73)                 |
| Interstitial lung disease and pulmonary sarcoidosis            | 16.10<br>(12.19 to 21.93)                 | 37.36<br>(25.72 to 56.34)                  | 42.03<br>(29.79 to 62.26)                  | 26.26<br>(18.83 to 39.44)                  | 0.74<br>(0.53 to 1.19)               | 2.22<br>(1.43 to 3.93)                | 2.54<br>(1.68 to 4.41)                | 1.48<br>(0.99 to 2.61)                 |
| Other chronic respiratory diseases                             | 14.91<br>(10.14 to 20.62)                 | 18.76<br>(11.49 to 28.09)                  | 18.63<br>(11.28 to 27.66)                  | 20.34<br>(12.40 to 31.21)                  | 0.59<br>(0.36 to 0.82)               | 1.14<br>(0.62 to 1.77)                | 1.18<br>(0.63 to 1.83)                | 1.14<br>(0.62 to 1.74)                 |
| <b>Cirrhosis and other chronic liver diseases</b>              | <b>118.94</b><br><b>(98.57 to 146.10)</b> | <b>164.25</b><br><b>(126.88 to 214.12)</b> | <b>154.80</b><br><b>(117.67 to 202.67)</b> | <b>198.42</b><br><b>(155.00 to 254.24)</b> | <b>4.87</b><br><b>(4.06 to 5.96)</b> | <b>9.17</b><br><b>(7.27 to 11.53)</b> | <b>8.80</b><br><b>(6.93 to 11.39)</b> | <b>10.57</b><br><b>(8.64 to 13.10)</b> |
| Cirrhosis and other chronic liver diseases due to hepatitis B  | 53.67<br>(43.12 to 68.50)                 | 79.43<br>(60.04 to 109.08)                 | 75.04<br>(55.20 to 103.75)                 | 94.33<br>(71.30 to 125.74)                 | 2.31<br>(1.87 to 2.96)               | 4.37<br>(3.39 to 5.73)                | 4.19<br>(3.22 to 5.38)                | 4.97<br>(3.94 to 6.38)                 |
| Cirrhosis and other chronic liver diseases due to hepatitis C  | 26.94<br>(21.05 to 33.96)                 | 39.23<br>(29.00 to 52.53)                  | 36.83<br>(26.93 to 49.57)                  | 47.50<br>(35.68 to 63.40)                  | 1.12<br>(0.88 to 1.42)               | 2.10<br>(1.59 to 2.77)                | 2.00<br>(1.48 to 2.68)                | 2.44<br>(1.87 to 3.17)                 |
| Cirrhosis and other chronic liver diseases due to alcohol use  | 7.49<br>(5.89 to 9.78)                    | 10.26<br>(7.57 to 13.38)                   | 9.68<br>(7.06 to 13.04)                    | 13.62<br>(10.19 to 18.13)                  | 0.34<br>(0.27 to 0.43)               | 0.60<br>(0.46 to 0.77)                | 0.58<br>(0.45 to 0.75)                | 0.75<br>(0.60 to 0.96)                 |
| Cirrhosis and other chronic liver diseases due to other causes | 30.85<br>(25.95 to 37.64)                 | 35.33<br>(27.05 to 45.48)                  | 33.25<br>(25.14 to 43.62)                  | 42.96<br>(33.21 to 54.90)                  | 1.10<br>(0.91 to 1.36)               | 2.10<br>(1.62 to 2.69)                | 2.03<br>(1.53 to 2.67)                | 2.40<br>(1.90 to 3.04)                 |
| <b>Digestive diseases</b>                                      | <b>97.83</b><br><b>(81.20 to 117.41)</b>  | <b>132.23</b><br><b>(95.89 to 176.24)</b>  | <b>124.40</b><br><b>(88.63 to 167.23)</b>  | <b>159.26</b><br><b>(116.44 to 213.00)</b> | <b>4.73</b><br><b>(3.94 to 5.70)</b> | <b>9.49</b><br><b>(6.93 to 12.89)</b> | <b>9.11</b><br><b>(6.52 to 12.52)</b> | <b>10.73</b><br><b>(7.84 to 14.33)</b> |
| Peptic ulcer disease                                           | 10.83<br>(8.69 to 13.28)                  | 8.47<br>(5.85 to 11.79)                    | 7.46<br>(5.17 to 10.77)                    | 13.34<br>(9.30 to 18.33)                   | 0.58<br>(0.46 to 0.71)               | 0.65<br>(0.46 to 0.91)                | 0.59<br>(0.40 to 0.84)                | 0.95<br>(0.67 to 1.29)                 |
| <b>Turkey</b>                                                  |                                           |                                            |                                            |                                            |                                      |                                       |                                       |                                        |
| Cause                                                          | YLLs (in 1000s)                           |                                            |                                            |                                            | Deaths (in 1000s)                    |                                       |                                       |                                        |
|                                                                | 2016                                      | 2040 Forecast                              | 2040 Better Scenario                       | 2040 Worse Scenario                        | 2016                                 | 2040 Forecast                         | 2040 Better Scenario                  | 2040 Worse Scenario                    |
| Gastritis and duodenitis                                       | 0.55<br>(0.44 to 0.67)                    | 0.82<br>(0.59 to 1.10)                     | 0.76<br>(0.54 to 1.03)                     | 1.03<br>(0.77 to 1.36)                     | 0.03<br>(0.02 to 0.04)               | 0.06<br>(0.04 to 0.08)                | 0.06<br>(0.04 to 0.08)                | 0.07<br>(0.05 to 0.10)                 |
| Appendicitis                                                   | 2.10<br>(1.65 to 2.61)                    | 1.58<br>(1.10 to 2.27)                     | 1.39<br>(0.95 to 1.99)                     | 2.33<br>(1.67 to 3.20)                     | 0.07<br>(0.05 to 0.09)               | 0.08<br>(0.06 to 0.14)                | 0.08<br>(0.05 to 0.13)                | 0.12<br>(0.09 to 0.19)                 |
| Paralytic ileus and intestinal obstruction                     | 28.00<br>(21.05 to 39.33)                 | 37.78<br>(28.03 to 53.76)                  | 38.27<br>(28.11 to 54.25)                  | 36.93<br>(27.70 to 53.12)                  | 1.17<br>(0.91 to 1.69)               | 2.66<br>(1.93 to 4.18)                | 2.76<br>(1.98 to 4.33)                | 2.43<br>(1.78 to 3.87)                 |
| Inguinal, femoral, and abdominal hernia                        | 4.29<br>(3.19 to 6.76)                    | 4.95<br>(3.29 to 8.79)                     | 4.73<br>(3.10 to 8.50)                     | 5.79<br>(3.95 to 10.33)                    | 0.25<br>(0.17 to 0.44)               | 0.40<br>(0.25 to 0.79)                | 0.39<br>(0.24 to 0.76)                | 0.44<br>(0.27 to 0.84)                 |

|                                         |                                        |                                            |                                            |                                            |                                     |                                            |                                       |                                       |
|-----------------------------------------|----------------------------------------|--------------------------------------------|--------------------------------------------|--------------------------------------------|-------------------------------------|--------------------------------------------|---------------------------------------|---------------------------------------|
| Inflammatory bowel disease              | 8.47<br>(6.75 to<br>11.16)             | 10.54<br>(7.59 to<br>14.83)                | 10.52<br>(7.52 to<br>14.92)                | 10.76<br>(7.84 to<br>15.25)                | 0.30<br>(0.24 to<br>0.42)           | 0.59<br>(0.42 to<br>0.86)                  | 0.60<br>(0.43 to<br>0.87)             | 0.56<br>(0.42 to<br>0.82)             |
| Vascular intestinal disorders           | 9.70<br>(7.68 to<br>11.97)             | 17.19<br>(12.37 to<br>22.63)               | 16.80<br>(11.80 to<br>22.04)               | 18.65<br>(13.88 to<br>24.03)               | 0.55<br>(0.44 to<br>0.68)           | 1.25<br>(0.91 to<br>1.64)                  | 1.25<br>(0.88 to<br>1.66)             | 1.28<br>(0.98 to<br>1.66)             |
| Gallbladder and biliary diseases        | 13.47<br>(9.87 to<br>16.63)            | 24.29<br>(11.55 to<br>43.73)               | 19.35<br>(9.55 to<br>34.83)                | 36.08<br>(17.82 to<br>64.15)               | 0.86<br>(0.61 to<br>1.07)           | 2.01<br>(0.93 to<br>3.64)                  | 1.66<br>(0.78 to<br>3.01)             | 2.77<br>(1.33 to<br>4.94)             |
| Pancreatitis                            | 11.04<br>(7.82 to<br>14.13)            | 14.86<br>(8.51 to<br>23.14)                | 13.68<br>(7.66 to<br>21.00)                | 21.25<br>(12.02 to<br>36.62)               | 0.53<br>(0.36 to<br>0.69)           | 0.99<br>(0.55 to<br>1.44)                  | 0.93<br>(0.52 to<br>1.35)             | 1.31<br>(0.76 to<br>2.04)             |
| Other digestive diseases                | 9.38<br>(7.50 to<br>12.08)             | 11.75<br>(8.48 to<br>15.78)                | 11.43<br>(8.14 to<br>15.71)                | 13.09<br>(9.69 to<br>17.73)                | 0.39<br>(0.32 to<br>0.51)           | 0.79<br>(0.57 to<br>1.12)                  | 0.79<br>(0.56 to<br>1.14)             | 0.81<br>(0.60 to<br>1.14)             |
| <b>Neurological disorders</b>           | <b>503.97</b><br>(424.18 to<br>599.08) | <b>1,219.52</b><br>(812.93 to<br>1,842.52) | <b>1,173.05</b><br>(804.42 to<br>1,738.25) | <b>1,250.42</b><br>(827.96 to<br>1,906.37) | <b>40.17</b><br>(33.14 to<br>48.67) | <b>122.01</b><br>(80.71 to<br>189.25)      | <b>119.68</b><br>(79.50 to<br>183.71) | <b>117.67</b><br>(75.25 to<br>188.47) |
| Alzheimer's disease and other dementias | 355.47<br>(286.99 to<br>438.80)        | 1,024.50<br>(645.22 to<br>1,618.42)        | 975.69<br>(631.81 to<br>1,499.16)          | 1,054.00<br>(649.26 to<br>1,714.55)        | 110.43<br>(28.75 to<br>43.60)       | 35.36<br>(110.43 to<br>69.01 to<br>177.27) | 107.54<br>(67.37 to<br>169.37)        | 107.38<br>(65.78 to<br>177.34)        |
| Parkinson's disease                     | 25.16<br>(18.49 to<br>33.32)           | 81.53<br>(59.68 to<br>108.45)              | 86.21<br>(62.72 to<br>115.32)              | 68.77<br>(50.98 to<br>91.42)               | 2.16<br>(1.60 to<br>2.87)           | 7.77<br>(5.64 to<br>10.46)                 | 8.34<br>(5.98 to<br>11.34)            | 6.28<br>(4.64 to<br>8.40)             |
| Epilepsy                                | 64.68<br>(54.27 to<br>77.10)           | 49.95<br>(34.59 to<br>69.37)               | 47.69<br>(33.16 to<br>65.02)               | 63.43<br>(43.03 to<br>89.47)               | 1.32<br>(1.11 to<br>1.54)           | 1.64<br>(1.19 to<br>2.18)                  | 1.61<br>(1.16 to<br>2.17)             | 1.92<br>(1.36 to<br>2.57)             |
| Multiple sclerosis                      | 5.34<br>(3.72 to<br>6.79)              | 6.53<br>(4.25 to<br>9.29)                  | 6.54<br>(4.25 to<br>9.40)                  | 6.63<br>(4.32 to<br>9.35)                  | 0.15<br>(0.11 to<br>0.18)           | 0.21<br>(0.15 to<br>0.29)                  | 0.22<br>(0.15 to<br>0.29)             | 0.21<br>(0.15 to<br>0.29)             |
| Motor neuron disease                    | 18.34<br>(14.84 to<br>23.02)           | 23.56<br>(18.03 to<br>30.41)               | 23.40<br>(17.57 to<br>30.36)               | 23.87<br>(18.43 to<br>30.39)               | 0.47<br>(0.39 to<br>0.57)           | 0.88<br>(0.68 to<br>1.10)                  | 0.88<br>(0.68 to<br>1.12)             | 0.86<br>(0.68 to<br>1.07)             |
| Other neurological disorders            | 34.98<br>(28.46 to<br>43.03)           | 33.45<br>(25.79 to<br>43.14)               | 33.51<br>(25.83 to<br>43.28)               | 33.73<br>(26.06 to<br>43.21)               | 0.72<br>(0.60 to<br>0.87)           | 1.08<br>(0.86 to<br>1.31)                  | 1.10<br>(0.88 to<br>1.35)             | 1.02<br>(0.83 to<br>1.23)             |
| <b>Mental disorders</b>                 | <b>21.67</b><br>(16.90 to<br>28.84)    | <b>43.93</b><br>(31.41 to<br>59.65)        | <b>47.89</b><br>(34.85 to<br>64.13)        | <b>35.40</b><br>(25.91 to<br>47.34)        | <b>0.62</b><br>(0.50 to<br>0.77)    | <b>1.88</b><br>(1.35 to<br>2.42)           | <b>2.10</b><br>(1.50 to<br>2.67)      | <b>1.39</b><br>(1.05 to<br>1.74)      |
| Alcohol use disorders                   | 5.86<br>(3.91 to<br>7.90)              | 7.76<br>(4.64 to<br>12.00)                 | 8.03<br>(4.77 to<br>12.64)                 | 7.29<br>(4.43 to<br>11.03)                 | 0.16<br>(0.11 to<br>0.22)           | 0.26<br>(0.17 to<br>0.39)                  | 0.28<br>(0.18 to<br>0.41)             | 0.24<br>(0.16 to<br>0.34)             |
| Drug use disorders                      | 15.54<br>(11.84 to<br>22.00)           | 35.87<br>(25.85 to<br>48.94)               | 39.53<br>(28.67 to<br>53.26)               | 27.81<br>(20.64 to<br>37.42)               | 0.45<br>(0.36 to<br>0.57)           | 1.61<br>(1.13 to<br>2.09)                  | 1.82<br>(1.27 to<br>2.33)             | 1.15<br>(0.86 to<br>1.44)             |
| Opioid use disorders                    | 9.54<br>(7.11 to<br>14.12)             | 15.84<br>(10.93 to<br>22.72)               | 16.51<br>(11.34 to<br>23.42)               | 14.25<br>(10.01 to<br>20.60)               | 0.25<br>(0.19 to<br>0.33)           | 0.60<br>(0.42 to<br>0.81)                  | 0.64<br>(0.44 to<br>0.86)             | 0.51<br>(0.37 to<br>0.66)             |
| Cocaine use disorders                   | 1.02<br>(0.71 to<br>1.78)              | 3.00<br>(1.93 to<br>5.11)                  | 3.32<br>(2.16 to<br>5.70)                  | 2.27<br>(1.50 to<br>3.85)                  | 0.03<br>(0.02 to<br>0.04)           | 0.11<br>(0.07 to<br>0.16)                  | 0.12<br>(0.08 to<br>0.18)             | 0.08<br>(0.05 to<br>0.12)             |
| Amphetamine use disorders               | 0.58<br>(0.40 to<br>0.90)              | 2.47<br>(1.47 to<br>3.86)                  | 2.88<br>(1.78 to<br>4.30)                  | 1.62<br>(1.02 to<br>2.42)                  | 0.01<br>(0.01 to<br>0.02)           | 0.07<br>(0.05 to<br>0.11)                  | 0.09<br>(0.05 to<br>0.13)             | 0.05<br>(0.03 to<br>0.07)             |
| Other drug use disorders                | 4.39<br>(3.24 to<br>5.95)              | 14.55<br>(9.69 to<br>20.45)                | 16.82<br>(11.54 to<br>23.06)               | 9.67<br>(6.90 to<br>13.35)                 | 0.16<br>(0.11 to<br>0.20)           | 0.82<br>(0.51 to<br>1.14)                  | 0.97<br>(0.62 to<br>1.32)             | 0.51<br>(0.35 to<br>0.69)             |
| Eating disorders                        | 0.27<br>(0.19 to<br>0.38)              | 0.31<br>(0.19 to<br>0.48)                  | 0.32<br>(0.20 to<br>0.49)                  | 0.29<br>(0.18 to<br>0.44)                  | 0.00<br>(0.00 to<br>0.01)           | 0.01<br>(0.00 to<br>0.01)                  | 0.01<br>(0.00 to<br>0.01)             | 0.01<br>(0.00 to<br>0.01)             |

**Turkey**

| Cause | YLLs (in 1000s) |               |                      |                     | Deaths (in 1000s) |               |                      |                     |
|-------|-----------------|---------------|----------------------|---------------------|-------------------|---------------|----------------------|---------------------|
|       | 2016            | 2040 Forecast | 2040 Better Scenario | 2040 Worse Scenario | 2016              | 2040 Forecast | 2040 Better Scenario | 2040 Worse Scenario |

|                                                            |                                 |                                     |                                   |                                     |                              |                               |                               |                               |
|------------------------------------------------------------|---------------------------------|-------------------------------------|-----------------------------------|-------------------------------------|------------------------------|-------------------------------|-------------------------------|-------------------------------|
|                                                            | 699.11<br>(597.29 to<br>813.18) | 1,043.78<br>(686.03 to<br>1,762.04) | 911.76<br>(596.14 to<br>1,548.46) | 1,466.52<br>(961.89 to<br>2,431.39) | 35.62<br>(30.54 to<br>41.63) | 74.78<br>(47.93 to<br>140.65) | 66.39<br>(42.13 to<br>122.49) | 99.82<br>(65.03 to<br>183.93) |
| <b>Diabetes, urogenital, blood, and endocrine diseases</b> |                                 |                                     |                                   |                                     |                              |                               |                               |                               |
| Diabetes mellitus                                          | 304.24<br>(256.14 to<br>359.50) | 432.82<br>(275.95 to<br>665.54)     | 373.51<br>(237.01 to<br>551.46)   | 655.81<br>(415.40 to<br>1,010.02)   | 17.48<br>(14.74 to<br>20.53) | 31.31<br>(20.22 to<br>46.43)  | 27.75<br>(17.79 to<br>40.72)  | 44.54<br>(28.62 to<br>65.56)  |
| Acute glomerulonephritis                                   | 0.48<br>(0.41 to<br>0.56)       | 0.37<br>(0.27 to<br>0.49)           | 0.34<br>(0.25 to<br>0.46)         | 0.47<br>(0.35 to<br>0.61)           | 0.01<br>(0.01 to<br>0.01)    | 0.01<br>(0.01 to<br>0.02)     | 0.01<br>(0.01 to<br>0.02)     | 0.01<br>(0.01 to<br>0.02)     |
| Chronic kidney disease                                     | 246.29<br>(205.09 to<br>298.24) | 453.69<br>(215.25 to<br>1,207.47)   | 383.72<br>(187.88 to<br>988.36)   | 639.33<br>(296.42 to<br>1,600.79)   | 13.47<br>(11.35 to<br>16.19) | 34.75<br>(15.39 to<br>99.21)  | 29.87<br>(13.30 to<br>86.57)  | 46.36<br>(19.97 to<br>126.43) |
| Chronic kidney disease due to diabetes mellitus            | 120.64<br>(98.68 to<br>147.72)  | 228.88<br>(110.32 to<br>573.43)     | 192.39<br>(95.24 to<br>460.45)    | 327.92<br>(149.29 to<br>756.92)     | 6.08<br>(5.07 to<br>7.48)    | 15.07<br>(6.72 to<br>40.18)   | 12.83<br>(5.79 to<br>34.54)   | 20.69<br>(9.05 to<br>55.19)   |
| Chronic kidney disease due to hypertension                 | 45.43<br>(37.14 to<br>55.87)    | 114.52<br>(49.82 to<br>340.60)      | 98.82<br>(44.52 to<br>284.48)     | 149.48<br>(64.33 to<br>432.53)      | 3.81<br>(3.11 to<br>4.68)    | 11.83<br>(5.01 to<br>36.67)   | 10.41<br>(4.51 to<br>32.88)   | 14.70<br>(6.07 to<br>44.48)   |
| Chronic kidney disease due to glomerulonephritis           | 26.44<br>(21.58 to<br>31.93)    | 30.53<br>(15.88 to<br>74.28)        | 25.35<br>(13.43 to<br>61.21)      | 46.16<br>(23.23 to<br>107.29)       | 1.03<br>(0.83 to<br>1.29)    | 1.98<br>(0.88 to<br>5.86)     | 1.65<br>(0.74 to<br>4.63)     | 2.87<br>(1.25 to<br>7.72)     |
| Chronic kidney disease due to other and unspecified causes | 53.78<br>(44.66 to<br>64.55)    | 79.96<br>(39.45 to<br>206.07)       | 67.17<br>(33.42 to<br>181.25)     | 115.76<br>(55.38 to<br>292.63)      | 2.55<br>(2.09 to<br>3.13)    | 5.87<br>(2.50 to<br>18.31)    | 4.99<br>(2.18 to<br>15.17)    | 8.11<br>(3.57 to<br>23.48)    |
| Urinary diseases and male infertility                      | 21.70<br>(18.44 to<br>25.38)    | 38.91<br>(30.07 to<br>49.98)        | 36.76<br>(27.80 to<br>47.07)      | 46.61<br>(36.60 to<br>57.05)        | 1.26<br>(1.07 to<br>1.47)    | 3.23<br>(2.48 to<br>4.33)     | 3.14<br>(2.31 to<br>4.24)     | 3.59<br>(2.80 to<br>4.51)     |
| Urinary tract infections                                   | 16.65<br>(13.99 to<br>19.78)    | 33.74<br>(25.92 to<br>43.67)        | 32.09<br>(23.93 to<br>41.17)      | 39.57<br>(30.73 to<br>48.57)        | 1.03<br>(0.87 to<br>1.21)    | 2.88<br>(2.16 to<br>3.82)     | 2.81<br>(2.05 to<br>3.79)     | 3.15<br>(2.40 to<br>3.94)     |
| Urolithiasis                                               | 1.19<br>(0.91 to<br>1.47)       | 1.65<br>(1.08 to<br>2.52)           | 1.49<br>(0.96 to<br>2.09)         | 2.26<br>(1.50 to<br>3.02)           | 0.05<br>(0.04 to<br>0.07)    | 0.10<br>(0.06 to<br>0.14)     | 0.09<br>(0.06 to<br>0.13)     | 0.12<br>(0.08 to<br>0.17)     |
| Other urinary diseases                                     | 3.86<br>(2.94 to<br>4.95)       | 3.52<br>(2.30 to<br>5.03)           | 3.18<br>(2.14 to<br>4.58)         | 4.78<br>(3.30 to<br>6.66)           | 0.17<br>(0.13 to<br>0.23)    | 0.26<br>(0.16 to<br>0.40)     | 0.24<br>(0.15 to<br>0.38)     | 0.32<br>(0.21 to<br>0.48)     |
| Gynecological diseases                                     | 0.75<br>(0.56 to<br>1.01)       | 0.53<br>(0.31 to<br>0.83)           | 0.44<br>(0.26 to<br>0.67)         | 0.96<br>(0.58 to<br>1.42)           | 0.03<br>(0.02 to<br>0.04)    | 0.02<br>(0.02 to<br>0.04)     | 0.02<br>(0.01 to<br>0.03)     | 0.04<br>(0.03 to<br>0.06)     |
| Uterine fibroids                                           | 0.05<br>(0.02 to<br>0.08)       | 0.03<br>(0.01 to<br>0.06)           | 0.03<br>(0.01 to<br>0.06)         | 0.05<br>(0.02 to<br>0.10)           | 0.00<br>(0.00 to<br>0.00)    | 0.00<br>(0.00 to<br>0.00)     | 0.00<br>(0.00 to<br>0.00)     | 0.00<br>(0.00 to<br>0.00)     |
| Polycystic ovarian syndrome                                | 0.06<br>(0.03 to<br>0.10)       | 0.01<br>(0.01 to<br>0.03)           | 0.01<br>(0.00 to<br>0.02)         | 0.04<br>(0.01 to<br>0.08)           | 0.00<br>(0.00 to<br>0.00)    | 0.00<br>(0.00 to<br>0.00)     | 0.00<br>(0.00 to<br>0.00)     | 0.00<br>(0.00 to<br>0.00)     |
| Endometriosis                                              | 0.00<br>(0.00 to<br>0.00)       | 0.00<br>(0.00 to<br>0.00)           | 0.00<br>(0.00 to<br>0.00)         | 0.00<br>(0.00 to<br>0.01)           | 0.00<br>(0.00 to<br>0.00)    | 0.00<br>(0.00 to<br>0.00)     | 0.00<br>(0.00 to<br>0.00)     | 0.00<br>(0.00 to<br>0.00)     |
| Genital prolapse                                           | 0.02<br>(0.01 to<br>0.08)       | 0.02<br>(0.01 to<br>0.06)           | 0.02<br>(0.01 to<br>0.05)         | 0.03<br>(0.01 to<br>0.11)           | 0.00<br>(0.00 to<br>0.00)    | 0.00<br>(0.00 to<br>0.00)     | 0.00<br>(0.00 to<br>0.00)     | 0.00<br>(0.00 to<br>0.01)     |
| Other gynecological diseases                               | 0.61<br>(0.44 to<br>0.82)       | 0.46<br>(0.27 to<br>0.72)           | 0.38<br>(0.22 to<br>0.59)         | 0.83<br>(0.50 to<br>1.24)           | 0.02<br>(0.02 to<br>0.03)    | 0.02<br>(0.01 to<br>0.03)     | 0.02<br>(0.01 to<br>0.03)     | 0.04<br>(0.02 to<br>0.05)     |
| Hemoglobinopathies and hemolytic anemias                   | 27.45<br>(22.31 to<br>35.86)    | 19.03<br>(13.76 to<br>25.78)        | 17.23<br>(12.47 to<br>23.46)      | 26.22<br>(19.19 to<br>35.08)        | 0.73<br>(0.59 to<br>0.88)    | 0.91<br>(0.64 to<br>1.19)     | 0.84<br>(0.59 to<br>1.12)     | 1.16<br>(0.85 to<br>1.49)     |
| Thalassemias                                               | 6.25<br>(4.03 to<br>10.53)      | 1.63<br>(0.80 to<br>3.36)           | 1.54<br>(0.76 to<br>3.12)         | 1.85<br>(0.91 to<br>3.73)           | 0.08<br>(0.05 to<br>0.13)    | 0.02<br>(0.01 to<br>0.04)     | 0.02<br>(0.01 to<br>0.04)     | 0.02<br>(0.01 to<br>0.05)     |
| Sickle cell disorders                                      | 10.56<br>(8.33 to<br>13.65)     | 6.98<br>(4.63 to<br>10.24)          | 6.21<br>(4.11 to<br>9.13)         | 10.13<br>(6.79 to<br>14.69)         | 0.19<br>(0.15 to<br>0.25)    | 0.18<br>(0.12 to<br>0.26)     | 0.16<br>(0.11 to<br>0.24)     | 0.26<br>(0.17 to<br>0.37)     |
| G6PD deficiency                                            | 5.36<br>(4.10 to<br>7.01)       | 4.20<br>(2.75 to<br>6.20)           | 3.70<br>(2.41 to<br>5.40)         | 6.28<br>(4.09 to<br>9.20)           | 0.12<br>(0.09 to<br>0.16)    | 0.14<br>(0.10 to<br>0.20)     | 0.13<br>(0.09 to<br>0.18)     | 0.21<br>(0.14 to<br>0.29)     |

|                                                   |                                        |                                        |                                       |                                        |                                  |                                  |                                  |                                  |
|---------------------------------------------------|----------------------------------------|----------------------------------------|---------------------------------------|----------------------------------------|----------------------------------|----------------------------------|----------------------------------|----------------------------------|
| Other hemoglobinopathies and hemolytic anemias    | 5.28<br>(4.09 to<br>6.55)              | 6.22<br>(4.28 to<br>8.28)              | 5.78<br>(3.90 to<br>7.78)             | 7.96<br>(5.60 to<br>10.35)             | 0.34<br>(0.24 to<br>0.42)        | 0.56<br>(0.37 to<br>0.76)        | 0.53<br>(0.35 to<br>0.73)        | 0.68<br>(0.46 to<br>0.89)        |
| Endocrine, metabolic, blood, and immune disorders | 98.20<br>(69.73 to<br>122.76)          | 98.43<br>(72.79 to<br>128.84)          | 99.75<br>(73.71 to<br>130.19)         | 97.12<br>(72.14 to<br>126.54)          | 2.64<br>(2.16 to<br>3.22)        | 4.54<br>(3.51 to<br>6.21)        | 4.75<br>(3.61 to<br>6.51)        | 4.11<br>(3.29 to<br>5.46)        |
| <b>Turkey</b>                                     |                                        |                                        |                                       |                                        |                                  |                                  |                                  |                                  |
| Cause                                             | YLLs (in 1000s)                        |                                        |                                       |                                        | Deaths (in 1000s)                |                                  |                                  |                                  |
|                                                   | 2016                                   | 2040 Forecast                          | 2040 Better Scenario                  | 2040 Worse Scenario                    | 2016                             | 2040 Forecast                    | 2040 Better Scenario             | 2040 Worse Scenario              |
| <b>Musculoskeletal disorders</b>                  | <b>25.46</b><br>(20.43 to<br>35.96)    | <b>39.32</b><br>(28.82 to<br>52.00)    | <b>37.80</b><br>(27.48 to<br>49.12)   | <b>45.26</b><br>(33.71 to<br>58.01)    | <b>0.89</b><br>(0.70 to<br>1.10) | <b>2.21</b><br>(1.44 to<br>2.87) | <b>2.17</b><br>(1.39 to<br>2.84) | <b>2.42</b><br>(1.60 to<br>3.05) |
| Rheumatoid arthritis                              | 3.69<br>(2.45 to<br>4.70)              | 6.44<br>(4.22 to<br>9.26)              | 5.53<br>(3.41 to<br>7.78)             | 10.27<br>(6.51 to<br>14.06)            | 0.17<br>(0.11 to<br>0.23)        | 0.41<br>(0.26 to<br>0.58)        | 0.36<br>(0.22 to<br>0.51)        | 0.62<br>(0.40 to<br>0.84)        |
| Other musculoskeletal disorders                   | 21.77<br>(17.26 to<br>32.25)           | 32.88<br>(24.41 to<br>43.48)           | 32.28<br>(23.36 to<br>42.51)          | 34.99<br>(26.15 to<br>46.68)           | 0.72<br>(0.57 to<br>0.91)        | 1.81<br>(1.14 to<br>2.37)        | 1.82<br>(1.13 to<br>2.42)        | 1.80<br>(1.13 to<br>2.31)        |
| <b>Other non-communicable diseases</b>            | <b>531.43</b><br>(373.97 to<br>744.89) | <b>162.03</b><br>(103.83 to<br>243.56) | <b>136.25</b><br>(86.96 to<br>208.38) | <b>277.18</b><br>(172.61 to<br>431.99) | <b>6.81</b><br>(4.94 to<br>9.23) | <b>3.90</b><br>(2.55 to<br>6.43) | <b>3.58</b><br>(2.35 to<br>6.06) | <b>5.35</b><br>(3.57 to<br>8.17) |
| Congenital birth defects                          | 512.56<br>(358.62 to<br>719.04)        | 132.13<br>(76.56 to<br>211.34)         | 107.33<br>(62.76 to<br>173.12)        | 243.59<br>(141.75 to<br>392.85)        | 6.15<br>(4.34 to<br>8.56)        | 1.70<br>(1.02 to<br>2.65)        | 1.39<br>(0.84 to<br>2.18)        | 3.07<br>(1.86 to<br>4.80)        |
| Neural tube defects                               | 29.12<br>(15.86 to<br>50.01)           | 3.34<br>(1.25 to<br>7.09)              | 2.59<br>(0.97 to<br>5.54)             | 7.04<br>(2.58 to<br>15.23)             | 0.34<br>(0.19 to<br>0.58)        | 0.04<br>(0.02 to<br>0.08)        | 0.03<br>(0.01 to<br>0.06)        | 0.08<br>(0.03 to<br>0.18)        |
| Congenital heart anomalies                        | 245.23<br>(160.94 to<br>355.93)        | 53.87<br>(28.94 to<br>96.62)           | 41.16<br>(22.16 to<br>70.56)          | 114.04<br>(63.13 to<br>190.13)         | 2.95<br>(1.96 to<br>4.23)        | 0.68<br>(0.38 to<br>1.19)        | 0.53<br>(0.30 to<br>0.88)        | 1.44<br>(0.83 to<br>2.32)        |
| Orofacial clefts                                  | 3.49<br>(1.59 to<br>7.33)              | 0.54<br>(0.18 to<br>1.28)              | 0.39<br>(0.13 to<br>0.99)             | 1.41<br>(0.47 to<br>3.40)              | 0.04<br>(0.02 to<br>0.08)        | 0.01<br>(0.00 to<br>0.02)        | 0.00<br>(0.00 to<br>0.01)        | 0.02<br>(0.01 to<br>0.04)        |
| Down syndrome                                     | 25.69<br>(17.25 to<br>36.69)           | 13.26<br>(8.21 to<br>21.15)            | 12.99<br>(8.10 to<br>20.43)           | 14.19<br>(8.59 to<br>22.77)            | 0.33<br>(0.22 to<br>0.46)        | 0.19<br>(0.13 to<br>0.30)        | 0.19<br>(0.13 to<br>0.29)        | 0.20<br>(0.13 to<br>0.31)        |
| Other chromosomal abnormalities                   | 27.59<br>(15.34 to<br>57.16)           | 13.58<br>(6.52 to<br>28.28)            | 12.01<br>(5.85 to<br>24.99)           | 19.23<br>(9.24 to<br>41.59)            | 0.33<br>(0.19 to<br>0.67)        | 0.17<br>(0.09 to<br>0.34)        | 0.15<br>(0.08 to<br>0.30)        | 0.24<br>(0.12 to<br>0.50)        |
| Congenital musculoskeletal and limb anomalies     | 14.63<br>(9.44 to<br>21.85)            | 4.34<br>(2.46 to<br>7.23)              | 3.51<br>(2.06 to<br>5.93)             | 7.93<br>(4.53 to<br>13.30)             | 0.18<br>(0.12 to<br>0.26)        | 0.06<br>(0.03 to<br>0.09)        | 0.05<br>(0.03 to<br>0.07)        | 0.10<br>(0.06 to<br>0.16)        |
| Urogenital congenital anomalies                   | 16.50<br>(7.94 to<br>26.82)            | 4.80<br>(2.17 to<br>8.52)              | 3.99<br>(1.85 to<br>7.01)             | 8.04<br>(3.62 to<br>13.98)             | 0.21<br>(0.10 to<br>0.33)        | 0.07<br>(0.04 to<br>0.11)        | 0.06<br>(0.03 to<br>0.10)        | 0.12<br>(0.06 to<br>0.19)        |
| Digestive congenital anomalies                    | 51.96<br>(18.91 to<br>84.95)           | 12.52<br>(3.85 to<br>22.58)            | 9.80<br>(2.92 to<br>18.42)            | 24.72<br>(7.63 to<br>45.39)            | 0.61<br>(0.22 to<br>0.99)        | 0.15<br>(0.05 to<br>0.26)        | 0.12<br>(0.04 to<br>0.21)        | 0.29<br>(0.09 to<br>0.53)        |
| Other congenital birth defects                    | 98.36<br>(64.99 to<br>146.75)          | 25.87<br>(14.04 to<br>44.52)           | 20.90<br>(11.28 to<br>36.09)          | 47.01<br>(25.50 to<br>80.29)           | 1.18<br>(0.79 to<br>1.74)        | 0.33<br>(0.19 to<br>0.55)        | 0.27<br>(0.15 to<br>0.44)        | 0.59<br>(0.33 to<br>0.97)        |
| Skin and subcutaneous diseases                    | 9.46<br>(6.29 to<br>16.42)             | 27.94<br>(18.33 to<br>53.47)           | 27.25<br>(17.61 to<br>52.50)          | 30.37<br>(20.41 to<br>57.72)           | 0.55<br>(0.36 to<br>1.13)        | 2.18<br>(1.28 to<br>4.70)        | 2.17<br>(1.25 to<br>4.73)        | 2.24<br>(1.37 to<br>4.67)        |
| Cellulitis                                        | 2.08<br>(1.23 to<br>4.06)              | 7.80<br>(4.74 to<br>16.38)             | 7.79<br>(4.61 to<br>16.32)            | 7.82<br>(4.79 to<br>16.17)             | 0.11<br>(0.07 to<br>0.26)        | 0.55<br>(0.28 to<br>1.37)        | 0.56<br>(0.28 to<br>1.38)        | 0.52<br>(0.28 to<br>1.29)        |
| Pyoderma                                          | 4.72<br>(3.04 to<br>8.09)              | 14.88<br>(9.45 to<br>29.47)            | 14.46<br>(9.05 to<br>29.04)           | 16.35<br>(10.58 to<br>31.20)           | 0.26<br>(0.16 to<br>0.54)        | 1.14<br>(0.64 to<br>2.53)        | 1.14<br>(0.64 to<br>2.50)        | 1.17<br>(0.69 to<br>2.57)        |
| Decubitus ulcer                                   | 1.86<br>(1.17 to<br>3.57)              | 3.80<br>(2.23 to<br>7.46)              | 3.58<br>(2.08 to<br>6.99)             | 4.58<br>(2.70 to<br>8.73)              | 0.15<br>(0.09 to<br>0.31)        | 0.38<br>(0.20 to<br>0.83)        | 0.37<br>(0.19 to<br>0.80)        | 0.43<br>(0.24 to<br>0.93)        |

|                                      |                                                          |                                                      |                                                      |                                                        |                                                   |                                                   |                                                   |                                                   |
|--------------------------------------|----------------------------------------------------------|------------------------------------------------------|------------------------------------------------------|--------------------------------------------------------|---------------------------------------------------|---------------------------------------------------|---------------------------------------------------|---------------------------------------------------|
| Other skin and subcutaneous diseases | 0.80<br>(0.44 to<br>1.34)                                | 1.46<br>(0.85 to<br>2.67)                            | 1.41<br>(0.81 to<br>2.56)                            | 1.63<br>(0.95 to<br>2.94)                              | 0.04<br>(0.02 to<br>0.07)                         | 0.10<br>(0.06 to<br>0.21)                         | 0.10<br>(0.06 to<br>0.21)                         | 0.11<br>(0.06 to<br>0.21)                         |
| Sudden infant death syndrome         | 9.41<br>(5.44 to<br>15.72)                               | 1.96<br>(0.77 to<br>4.57)                            | 1.67<br>(0.65 to<br>4.02)                            | 3.21<br>(1.24 to<br>7.19)                              | 0.11<br>(0.06 to<br>0.18)                         | 0.02<br>(0.01 to<br>0.05)                         | 0.02<br>(0.01 to<br>0.05)                         | 0.04<br>(0.01 to<br>0.08)                         |
| <b>Injuries</b>                      | <b>1,093.24</b><br><b>(904.06 to</b><br><b>1,293.73)</b> | <b>506.05</b><br><b>(364.85 to</b><br><b>700.14)</b> | <b>403.66</b><br><b>(295.29 to</b><br><b>556.80)</b> | <b>883.32</b><br><b>(630.16 to</b><br><b>1,248.44)</b> | <b>23.80</b><br><b>(19.69 to</b><br><b>28.04)</b> | <b>18.41</b><br><b>(13.57 to</b><br><b>23.96)</b> | <b>15.84</b><br><b>(11.48 to</b><br><b>20.62)</b> | <b>27.21</b><br><b>(20.58 to</b><br><b>35.24)</b> |
| <b>Transport injuries</b>            | <b>453.40</b><br><b>(374.52 to</b><br><b>539.92)</b>     | <b>166.94</b><br><b>(110.81 to</b><br><b>261.78)</b> | <b>91.03</b><br><b>(59.92 to</b><br><b>143.39)</b>   | <b>433.05</b><br><b>(291.95 to</b><br><b>681.18)</b>   | <b>9.16</b><br><b>(7.53 to</b><br><b>10.82)</b>   | <b>4.71</b><br><b>(3.34 to</b><br><b>6.81)</b>    | <b>2.77</b><br><b>(1.95 to</b><br><b>3.96)</b>    | <b>10.80</b><br><b>(7.61 to</b><br><b>15.68)</b>  |
| Road injuries                        | 426.39<br>(351.48 to<br>506.59)                          | 147.64<br>(97.94 to<br>232.31)                       | 74.31<br>(48.46 to<br>117.61)                        | 402.03<br>(269.29 to<br>633.53)                        | 8.61<br>(7.08 to<br>10.14)                        | 4.19<br>(2.97 to<br>6.10)                         | 2.32<br>(1.65 to<br>3.52)                         | 10.00<br>(7.07 to<br>14.51)                       |
| Pedestrian road injuries             | 104.00<br>(79.63 to<br>132.81)                           | 26.65<br>(16.85 to<br>41.45)                         | 13.66<br>(8.80 to<br>21.00)                          | 81.20<br>(52.03 to<br>123.97)                          | 2.22<br>(1.71 to<br>2.78)                         | 0.88<br>(0.58 to<br>1.29)                         | 0.49<br>(0.33 to<br>0.72)                         | 2.36<br>(1.58 to<br>3.43)                         |
| <b>Turkey</b>                        |                                                          |                                                      |                                                      |                                                        |                                                   |                                                   |                                                   |                                                   |
| Cause                                | YLLs (in 1000s)                                          |                                                      |                                                      |                                                        | Deaths (in 1000s)                                 |                                                   |                                                   |                                                   |
|                                      | 2016                                                     | 2040 Forecast                                        | 2040 Better Scenario                                 | 2040 Worse Scenario                                    | 2016                                              | 2040 Forecast                                     | 2040 Better Scenario                              | 2040 Worse Scenario                               |
| Cyclist road injuries                | 12.35<br>(9.32 to<br>16.86)                              | 5.66<br>(3.56 to<br>8.86)                            | 3.33<br>(2.05 to<br>5.24)                            | 12.66<br>(7.90 to<br>20.22)                            | 0.25<br>(0.18 to<br>0.33)                         | 0.16<br>(0.10 to<br>0.24)                         | 0.11<br>(0.07 to<br>0.16)                         | 0.30<br>(0.20 to<br>0.46)                         |
| Motorcyclist road injuries           | 32.92<br>(23.10 to<br>46.86)                             | 17.53<br>(9.73 to<br>31.41)                          | 11.74<br>(6.30 to<br>21.00)                          | 32.31<br>(18.19 to<br>57.80)                           | 0.57<br>(0.40 to<br>0.81)                         | 0.35<br>(0.20 to<br>0.60)                         | 0.25<br>(0.14 to<br>0.43)                         | 0.61<br>(0.35 to<br>1.04)                         |
| Motor vehicle road injuries          | 272.15<br>(219.70 to<br>331.98)                          | 95.80<br>(64.23 to<br>148.67)                        | 44.60<br>(29.41 to<br>69.14)                         | 270.47<br>(179.92 to<br>422.15)                        | 5.48<br>(4.46 to<br>6.68)                         | 2.73<br>(1.93 to<br>3.93)                         | 1.43<br>(1.02 to<br>2.07)                         | 6.60<br>(4.65 to<br>9.75)                         |
| Other road injuries                  | 4.97<br>(2.81 to<br>6.97)                                | 2.00<br>(1.18 to<br>3.10)                            | 0.98<br>(0.62 to<br>1.52)                            | 5.40<br>(2.98 to<br>8.73)                              | 0.10<br>(0.07 to<br>0.13)                         | 0.06<br>(0.04 to<br>0.09)                         | 0.04<br>(0.02 to<br>0.06)                         | 0.13<br>(0.09 to<br>0.20)                         |
| Other transport injuries             | 27.01<br>(20.66 to<br>36.26)                             | 19.31<br>(12.17 to<br>31.24)                         | 16.72<br>(10.50 to<br>27.07)                         | 31.01<br>(19.76 to<br>49.02)                           | 0.55<br>(0.43 to<br>0.71)                         | 0.52<br>(0.35 to<br>0.77)                         | 0.45<br>(0.30 to<br>0.67)                         | 0.80<br>(0.54 to<br>1.17)                         |
| <b>Unintentional injuries</b>        | <b>287.65</b><br><b>(236.43 to</b><br><b>337.66)</b>     | <b>199.26</b><br><b>(152.22 to</b><br><b>258.33)</b> | <b>185.12</b><br><b>(140.55 to</b><br><b>235.77)</b> | <b>257.24</b><br><b>(197.43 to</b><br><b>327.67)</b>   | <b>7.80</b><br><b>(6.11 to</b><br><b>9.18)</b>    | <b>10.06</b><br><b>(6.51 to</b><br><b>13.09)</b>  | <b>9.69</b><br><b>(6.19 to</b><br><b>12.82)</b>   | <b>11.62</b><br><b>(7.73 to</b><br><b>14.80)</b>  |
| Falls                                | 85.16<br>(69.31 to<br>107.61)                            | 98.15<br>(76.39 to<br>123.24)                        | 93.56<br>(71.93 to<br>118.05)                        | 115.16<br>(92.35 to<br>141.24)                         | 3.87<br>(2.79 to<br>4.69)                         | 7.02<br>(3.93 to<br>9.53)                         | 6.86<br>(3.74 to<br>9.33)                         | 7.67<br>(4.34 to<br>10.26)                        |
| Drowning                             | 41.77<br>(32.61 to<br>51.99)                             | 19.36<br>(12.92 to<br>28.06)                         | 17.60<br>(11.88 to<br>25.36)                         | 27.03<br>(18.22 to<br>39.18)                           | 0.70<br>(0.56 to<br>0.87)                         | 0.42<br>(0.30 to<br>0.58)                         | 0.39<br>(0.27 to<br>0.54)                         | 0.56<br>(0.40 to<br>0.78)                         |
| Fire, heat, and hot substances       | 19.39<br>(13.61 to<br>24.92)                             | 8.74<br>(6.15 to<br>12.13)                           | 7.73<br>(5.42 to<br>10.75)                           | 13.15<br>(9.18 to<br>18.09)                            | 0.43<br>(0.33 to<br>0.52)                         | 0.36<br>(0.26 to<br>0.49)                         | 0.33<br>(0.24 to<br>0.44)                         | 0.50<br>(0.37 to<br>0.65)                         |
| Poisonings                           | 7.46<br>(5.00 to<br>11.07)                               | 2.09<br>(1.34 to<br>3.18)                            | 1.77<br>(1.13 to<br>2.66)                            | 3.61<br>(2.35 to<br>5.66)                              | 0.13<br>(0.10 to<br>0.18)                         | 0.06<br>(0.04 to<br>0.09)                         | 0.06<br>(0.04 to<br>0.08)                         | 0.10<br>(0.07 to<br>0.14)                         |
| Exposure to mechanical forces        | 73.43<br>(47.86 to<br>93.12)                             | 33.18<br>(19.70 to<br>49.15)                         | 29.80<br>(17.85 to<br>44.49)                         | 47.07<br>(28.33 to<br>69.87)                           | 1.39<br>(0.94 to<br>1.76)                         | 0.85<br>(0.60 to<br>1.17)                         | 0.77<br>(0.55 to<br>1.06)                         | 1.15<br>(0.78 to<br>1.56)                         |
| Unintentional firearm injuries       | 41.81<br>(20.15 to<br>57.81)                             | 17.00<br>(7.77 to<br>26.95)                          | 15.41<br>(7.22 to<br>24.83)                          | 23.59<br>(10.41 to<br>38.21)                           | 0.79<br>(0.41 to<br>1.08)                         | 0.42<br>(0.25 to<br>0.61)                         | 0.38<br>(0.23 to<br>0.56)                         | 0.55<br>(0.31 to<br>0.84)                         |
| Unintentional suffocation            | 7.80<br>(5.27 to<br>11.73)                               | 2.60<br>(1.59 to<br>4.20)                            | 2.33<br>(1.40 to<br>3.71)                            | 3.70<br>(2.21 to<br>6.07)                              | 0.10<br>(0.07 to<br>0.15)                         | 0.04<br>(0.03 to<br>0.06)                         | 0.04<br>(0.02 to<br>0.05)                         | 0.06<br>(0.04 to<br>0.09)                         |
| Other exposure to mechanical forces  | 23.83<br>(18.00 to<br>29.85)                             | 13.59<br>(9.09 to<br>19.39)                          | 12.05<br>(8.23 to<br>17.44)                          | 19.78<br>(13.47 to<br>27.99)                           | 0.49<br>(0.38 to<br>0.61)                         | 0.39<br>(0.28 to<br>0.52)                         | 0.35<br>(0.26 to<br>0.47)                         | 0.54<br>(0.40 to<br>0.70)                         |

|                                                                                     |                                                      |                                                     |                                                     |                                                      |                                                |                                                |                                                |                                                |
|-------------------------------------------------------------------------------------|------------------------------------------------------|-----------------------------------------------------|-----------------------------------------------------|------------------------------------------------------|------------------------------------------------|------------------------------------------------|------------------------------------------------|------------------------------------------------|
| Adverse effects of medical treatment                                                | 18.95<br>(14.59 to<br>23.03)                         | 14.82<br>(11.20 to<br>19.38)                        | 14.11<br>(10.60 to<br>18.80)                        | 17.65<br>(13.19 to<br>23.13)                         | 0.48<br>(0.39 to<br>0.61)                      | 0.64<br>(0.49 to<br>0.87)                      | 0.63<br>(0.47 to<br>0.85)                      | 0.71<br>(0.55 to<br>0.96)                      |
| Animal contact                                                                      | 2.44<br>(1.96 to<br>3.15)                            | 2.13<br>(1.53 to<br>2.85)                           | 1.99<br>(1.43 to<br>2.66)                           | 2.71<br>(1.94 to<br>3.69)                            | 0.06<br>(0.05 to<br>0.07)                      | 0.09<br>(0.07 to<br>0.13)                      | 0.09<br>(0.06 to<br>0.12)                      | 0.11<br>(0.08 to<br>0.15)                      |
| Venomous animal contact                                                             | 1.51<br>(1.20 to<br>1.91)                            | 1.23<br>(0.88 to<br>1.67)                           | 1.16<br>(0.83 to<br>1.58)                           | 1.54<br>(1.08 to<br>2.14)                            | 0.03<br>(0.03 to<br>0.04)                      | 0.04<br>(0.03 to<br>0.06)                      | 0.04<br>(0.03 to<br>0.06)                      | 0.05<br>(0.04 to<br>0.07)                      |
| Non-venomous animal contact                                                         | 0.93<br>(0.70 to<br>1.33)                            | 0.90<br>(0.61 to<br>1.29)                           | 0.83<br>(0.57 to<br>1.21)                           | 1.17<br>(0.80 to<br>1.70)                            | 0.03<br>(0.02 to<br>0.04)                      | 0.05<br>(0.03 to<br>0.07)                      | 0.05<br>(0.03 to<br>0.07)                      | 0.06<br>(0.04 to<br>0.08)                      |
| Foreign body                                                                        | 19.71<br>(14.41 to<br>26.47)                         | 11.23<br>(8.20 to<br>15.06)                         | 10.77<br>(7.84 to<br>14.29)                         | 13.00<br>(9.33 to<br>17.81)                          | 0.34<br>(0.27 to<br>0.43)                      | 0.34<br>(0.27 to<br>0.43)                      | 0.34<br>(0.27 to<br>0.43)                      | 0.35<br>(0.28 to<br>0.44)                      |
| Pulmonary aspiration and foreign body in airway                                     | 17.25<br>(12.11 to<br>23.76)                         | 9.42<br>(6.74 to<br>13.07)                          | 8.93<br>(6.34 to<br>12.30)                          | 11.22<br>(7.84 to<br>15.74)                          | 0.29<br>(0.22 to<br>0.38)                      | 0.27<br>(0.21 to<br>0.35)                      | 0.27<br>(0.21 to<br>0.35)                      | 0.30<br>(0.23 to<br>0.37)                      |
| Foreign body in other body part                                                     | 2.46<br>(1.83 to<br>3.61)                            | 1.81<br>(1.24 to<br>2.60)                           | 1.85<br>(1.28 to<br>2.65)                           | 1.78<br>(1.21 to<br>2.59)                            | 0.05<br>(0.04 to<br>0.07)                      | 0.07<br>(0.04 to<br>0.09)                      | 0.07<br>(0.04 to<br>0.09)                      | 0.06<br>(0.04 to<br>0.08)                      |
| Environmental heat and cold exposure                                                | 4.22<br>(2.92 to<br>5.57)                            | 2.85<br>(1.83 to<br>4.14)                           | 2.51<br>(1.62 to<br>3.68)                           | 4.33<br>(2.77 to<br>6.23)                            | 0.10<br>(0.07 to<br>0.13)                      | 0.09<br>(0.07 to<br>0.14)                      | 0.08<br>(0.06 to<br>0.12)                      | 0.14<br>(0.09 to<br>0.19)                      |
| Other unintentional injuries                                                        | 15.12<br>(11.75 to<br>19.17)                         | 6.69<br>(4.18 to<br>10.52)                          | 5.27<br>(3.38 to<br>8.13)                           | 13.52<br>(8.83 to<br>20.12)                          | 0.29<br>(0.23 to<br>0.36)                      | 0.14<br>(0.11 to<br>0.26)                      | 0.14<br>(0.09 to<br>0.20)                      | 0.34<br>(0.23 to<br>0.46)                      |
| <b>Self-harm and interpersonal violence</b>                                         | <b>228.31</b><br><b>(172.49 to</b><br><b>283.37)</b> | <b>130.95</b><br><b>(83.77 to</b><br><b>202.97)</b> | <b>118.62</b><br><b>(78.20 to</b><br><b>179.89)</b> | <b>183.95</b><br><b>(116.14 to</b><br><b>288.27)</b> | <b>4.58</b><br><b>(3.51 to</b><br><b>5.65)</b> | <b>3.43</b><br><b>(2.37 to</b><br><b>5.01)</b> | <b>3.16</b><br><b>(2.21 to</b><br><b>4.55)</b> | <b>4.57</b><br><b>(3.12 to</b><br><b>6.76)</b> |
| <b>Turkey</b>                                                                       |                                                      |                                                     |                                                     |                                                      |                                                |                                                |                                                |                                                |
| Cause                                                                               | YLLs (in 1000s)                                      |                                                     |                                                     |                                                      | Deaths (in 1000s)                              |                                                |                                                |                                                |
|                                                                                     | 2016                                                 | 2040 Forecast                                       | 2040 Better Scenario                                | 2040 Worse Scenario                                  | 2016                                           | 2040 Forecast                                  | 2040 Better Scenario                           | 2040 Worse Scenario                            |
| Self-harm                                                                           | 133.35<br>(102.31 to<br>166.33)                      | 90.17<br>(57.07 to<br>146.08)                       | 82.89<br>(53.15 to<br>133.03)                       | 123.01<br>(74.48 to<br>200.28)                       | 2.75<br>(2.14 to<br>3.43)                      | 2.49<br>(1.70 to<br>3.74)                      | 2.33<br>(1.60 to<br>3.46)                      | 3.21<br>(2.13 to<br>4.92)                      |
| Self-harm by firearm                                                                | 29.04<br>(15.87 to<br>40.41)                         | 14.68<br>(7.38 to<br>26.26)                         | 13.00<br>(6.79 to<br>22.52)                         | 22.19<br>(10.92 to<br>40.53)                         | 0.58<br>(0.35 to<br>0.80)                      | 0.38<br>(0.22 to<br>0.65)                      | 0.34<br>(0.21 to<br>0.58)                      | 0.55<br>(0.31 to<br>0.94)                      |
| Self-harm by other specified means                                                  | 104.31<br>(81.06 to<br>133.59)                       | 75.49<br>(48.03 to<br>121.88)                       | 69.89<br>(45.14 to<br>110.28)                       | 100.81<br>(61.45 to<br>165.83)                       | 2.17<br>(1.71 to<br>2.75)                      | 2.11<br>(1.45 to<br>3.12)                      | 1.99<br>(1.37 to<br>2.92)                      | 2.66<br>(1.76 to<br>4.02)                      |
| Interpersonal violence                                                              | 94.96<br>(51.20 to<br>123.80)                        | 40.78<br>(19.70 to<br>63.35)                        | 35.72<br>(17.76 to<br>54.00)                        | 60.94<br>(29.41 to<br>91.66)                         | 1.83<br>(1.00 to<br>2.41)                      | 0.94<br>(0.51 to<br>1.38)                      | 0.83<br>(0.46 to<br>1.19)                      | 1.36<br>(0.71 to<br>1.94)                      |
| Physical violence by firearm                                                        | 55.15<br>(29.45 to<br>75.51)                         | 22.30<br>(10.69 to<br>36.00)                        | 19.25<br>(9.17 to<br>30.69)                         | 34.43<br>(16.36 to<br>54.46)                         | 1.06<br>(0.57 to<br>1.45)                      | 0.48<br>(0.25 to<br>0.76)                      | 0.42<br>(0.22 to<br>0.64)                      | 0.73<br>(0.37 to<br>1.12)                      |
| Physical violence by sharp object                                                   | 31.90<br>(11.43 to<br>54.92)                         | 14.38<br>(5.21 to<br>24.88)                         | 12.63<br>(4.71 to<br>22.42)                         | 21.22<br>(7.19 to<br>38.36)                          | 0.61<br>(0.23 to<br>1.01)                      | 0.33<br>(0.15 to<br>0.53)                      | 0.29<br>(0.13 to<br>0.47)                      | 0.47<br>(0.19 to<br>0.79)                      |
| Physical violence by other means                                                    | 7.91<br>(5.76 to<br>12.86)                           | 4.11<br>(2.60 to<br>6.56)                           | 3.84<br>(2.45 to<br>6.21)                           | 5.29<br>(3.26 to<br>8.49)                            | 0.16<br>(0.12 to<br>0.24)                      | 0.13<br>(0.08 to<br>0.19)                      | 0.12<br>(0.08 to<br>0.18)                      | 0.16<br>(0.10 to<br>0.24)                      |
| <b>Forces of nature, conflict and terrorism, and executions and police conflict</b> | <b>123.89</b><br><b>(26.77 to</b><br><b>221.32)</b>  | <b>8.90</b><br><b>(0.00 to</b><br><b>68.15)</b>     | <b>8.89</b><br><b>(0.00 to</b><br><b>68.13)</b>     | <b>9.09</b><br><b>(0.00 to</b><br><b>69.38)</b>      | <b>2.25</b><br><b>(0.49 to</b><br><b>4.03)</b> | <b>0.22</b><br><b>(0.00 to</b><br><b>1.68)</b> | <b>0.22</b><br><b>(0.00 to</b><br><b>1.69)</b> | <b>0.21</b><br><b>(0.00 to</b><br><b>1.65)</b> |
| Exposure to forces of nature                                                        | 0.00<br>(0.00 to<br>0.00)                            | 7.33<br>(0.00 to<br>68.12)                          | 7.32<br>(0.00 to<br>68.11)                          | 7.48<br>(0.00 to<br>69.35)                           | 0.00<br>(0.00 to<br>0.00)                      | 0.18<br>(0.00 to<br>1.68)                      | 0.18<br>(0.00 to<br>1.69)                      | 0.18<br>(0.00 to<br>1.65)                      |
| Conflict and terrorism                                                              | 123.45<br>(26.35 to<br>220.86)                       | 1.57<br>(0.00 to<br>9.22)                           | 1.57<br>(0.00 to<br>9.18)                           | 1.61<br>(0.00 to<br>9.41)                            | 2.25<br>(0.48 to<br>4.02)                      | 0.03<br>(0.00 to<br>0.20)                      | 0.03<br>(0.00 to<br>0.20)                      | 0.03<br>(0.00 to<br>0.20)                      |



|                                                                          |                                                        |                                                        |                                                      |                                                          |                                                 |                                                 |                                                 |                                                 |
|--------------------------------------------------------------------------|--------------------------------------------------------|--------------------------------------------------------|------------------------------------------------------|----------------------------------------------------------|-------------------------------------------------|-------------------------------------------------|-------------------------------------------------|-------------------------------------------------|
| Executions and police conflict                                           | 0.44<br>(0.38 to<br>0.52)                              | 0.00<br>(0.00 to<br>0.00)                              | 0.00<br>(0.00 to<br>0.00)                            | 0.00<br>(0.00 to<br>0.00)                                | 0.01<br>(0.01 to<br>0.01)                       | 0.00<br>(0.00 to<br>0.00)                       | 0.00<br>(0.00 to<br>0.00)                       | 0.00<br>(0.00 to<br>0.00)                       |
| <b>United Arab Emirates</b>                                              |                                                        |                                                        |                                                      |                                                          |                                                 |                                                 |                                                 |                                                 |
| Cause                                                                    | YLLs (actual counts)                                   |                                                        |                                                      |                                                          | Deaths (actual counts)                          |                                                 |                                                 |                                                 |
|                                                                          | 2016                                                   | 2040 Forecast                                          | 2040 Better Scenario                                 | 2040 Worse Scenario                                      | 2016                                            | 2040 Forecast                                   | 2040 Better Scenario                            | 2040 Worse Scenario                             |
| <b>All causes</b>                                                        | <b>1,001,712.72</b><br>(782,473.37 to<br>1,242,279.10) | <b>1,292,451.52</b><br>(993,194.15 to<br>1,656,390.74) | <b>972,116.49</b><br>(764,657.08 to<br>1,231,164.52) | <b>1,747,967.95</b><br>(1,325,846.57 to<br>2,254,592.73) | <b>25,471.07</b><br>(19,996.52 to<br>31,433.29) | <b>57,163.24</b><br>(46,207.07 to<br>70,752.30) | <b>45,467.09</b><br>(37,494.36 to<br>56,704.51) | <b>73,410.00</b><br>(59,010.08 to<br>90,253.66) |
| <b>Communicable, maternal, neonatal, and nutritional diseases</b>        | <b>65,328.84</b><br>(44,871.83 to<br>99,851.60)        | <b>78,822.93</b><br>(52,655.26 to<br>122,827.75)       | <b>68,776.38</b><br>(45,691.12 to<br>113,379.99)     | <b>94,917.87</b><br>(64,821.28 to<br>140,023.45)         | <b>1,331.68</b><br>(1,008.91 to<br>1,875.06)    | <b>3,845.28</b><br>(2,202.96 to<br>6,117.48)    | <b>3,514.55</b><br>(1,986.90 to<br>5,884.83)    | <b>4,328.81</b><br>(2,511.49 to<br>6,648.87)    |
| <b>HIV/AIDS and tuberculosis</b>                                         | <b>7,475.31</b><br>(2,997.56 to<br>21,357.78)          | <b>9,567.37</b><br>(1,800.99 to<br>51,831.75)          | <b>9,229.90</b><br>(766.20 to<br>53,915.58)          | <b>13,571.64</b><br>(3,016.51 to<br>54,056.07)           | <b>186.85</b><br>(74.17 to<br>560.54)           | <b>420.11</b><br>(41.90 to<br>2,669.40)         | <b>418.32</b><br>(32.26 to<br>2,748.32)         | <b>504.65</b><br>(97.84 to<br>2,604.48)         |
| Tuberculosis                                                             | 2,890.22<br>(2,036.40 to<br>3,958.34)                  | 1,435.71<br>(812.69 to<br>2,400.66)                    | 1,022.23<br>(609.86 to<br>1,652.16)                  | 2,550.55<br>(1,412.35 to<br>4,399.86)                    | 72.01<br>(52.62 to<br>97.36)                    | 57.83<br>(34.50 to<br>95.10)                    | 43.21<br>(27.18 to<br>67.90)                    | 96.68<br>(56.84 to<br>162.88)                   |
| HIV/AIDS                                                                 | 4,585.09<br>(499.73 to<br>17,934.71)                   | 8,131.67<br>(9.83 to<br>50,461.99)                     | 8,207.67<br>(0.26 to<br>53,011.65)                   | 10,821.09<br>(890.76 to<br>52,253.36)                    | 114.83<br>(10.94 to<br>485.71)                  | 362.29<br>(0.17 to<br>2,616.03)                 | 375.11<br>(0.01 to<br>2,707.56)                 | 407.98<br>(20.88 to<br>2,500.13)                |
| <b>Diarrhea, lower respiratory, and other common infectious diseases</b> | <b>28,908.35</b><br>(20,792.70 to<br>42,150.77)        | <b>51,286.05</b><br>(33,818.65 to<br>72,492.40)        | <b>43,329.74</b><br>(28,934.64 to<br>60,932.92)      | <b>61,759.67</b><br>(40,037.83 to<br>88,098.41)          | <b>734.67</b><br>(564.03 to<br>988.54)          | <b>2,474.24</b><br>(1,472.60 to<br>4,064.57)    | <b>2,434.02</b><br>(1,290.67 to<br>3,548.79)    | <b>3,186.91</b><br>(1,720.58 to<br>4,759.57)    |
| Diarrheal diseases                                                       | 1,717.63<br>(1,008.58 to<br>2,667.67)                  | 7,672.32<br>(1,850.60 to<br>20,056.04)                 | 7,968.35<br>(2,183.93 to<br>19,609.30)               | 6,903.34<br>(1,494.36 to<br>20,513.01)                   | 43.69<br>(20.90 to<br>71.77)                    | 439.48<br>(93.11 to<br>1,253.62)                | 470.59<br>(110.89 to<br>1,273.74)               | 379.49<br>(69.04 to<br>1,187.35)                |
| Intestinal infectious diseases                                           | 1,812.81<br>(565.29 to<br>4,172.93)                    | 2,081.53<br>(712.43 to<br>4,577.19)                    | 2,242.34<br>(790.82 to<br>4,927.62)                  | 1,867.04<br>(591.85 to<br>4,353.85)                      | 30.05<br>(9.48 to<br>68.92)                     | 38.47<br>(13.36 to<br>86.04)                    | 41.82<br>(14.84 to<br>90.48)                    | 34.16<br>(10.85 to<br>78.15)                    |
| Typhoid fever                                                            | 1,583.40<br>(501.31 to<br>3,586.86)                    | 1,924.27<br>(647.48 to<br>4,237.17)                    | 2,104.86<br>(740.30 to<br>4,588.79)                  | 1,675.39<br>(515.61 to<br>3,895.17)                      | 26.08<br>(8.29 to<br>59.12)                     | 35.47<br>(12.01 to<br>78.40)                    | 39.19<br>(13.69 to<br>83.75)                    | 30.53<br>(9.48 to<br>70.42)                     |
| Paratyphoid fever                                                        | 228.42<br>(63.69 to<br>591.67)                         | 156.58<br>(41.86 to<br>386.75)                         | 136.84<br>(37.02 to<br>340.72)                       | 190.90<br>(46.87 to<br>481.95)                           | 3.95<br>(1.11 to<br>10.24)                      | 2.97<br>(0.78 to<br>7.31)                       | 2.61<br>(0.70 to<br>6.48)                       | 3.60<br>(0.90 to<br>9.06)                       |
| Other intestinal infectious diseases                                     | 0.99<br>(0.35 to<br>2.15)                              | 0.68<br>(0.23 to<br>1.57)                              | 0.64<br>(0.22 to<br>1.46)                            | 0.75<br>(0.26 to<br>1.74)                                | 0.02<br>(0.01 to<br>0.04)                       | 0.02<br>(0.01 to<br>0.05)                       | 0.02<br>(0.01 to<br>0.05)                       | 0.02<br>(0.01 to<br>0.05)                       |
| Lower respiratory infections                                             | 15,286.82<br>(10,740.09 to<br>23,805.70)               | 35,686.30<br>(21,505.02 to<br>52,991.72)               | 27,790.65<br>(16,413.05 to<br>42,345.99)             | 45,894.38<br>(28,219.72 to<br>69,780.03)                 | 448.14<br>(330.60 to<br>618.19)                 | 2,112.82<br>(1,060.03 to<br>3,260.32)           | 1,748.92<br>(852.88 to<br>2,739.59)             | 2,564.60<br>(1,305.57 to<br>4,022.98)           |
| Upper respiratory infections                                             | 19.14<br>(7.60 to<br>38.53)                            | 14.09<br>(4.02 to<br>35.78)                            | 11.25<br>(3.37 to<br>26.35)                          | 19.39<br>(5.95 to<br>48.70)                              | 0.41<br>(0.17 to<br>0.83)                       | 0.44<br>(0.13 to<br>1.02)                       | 0.36<br>(0.11 to<br>0.82)                       | 0.59<br>(0.18 to<br>1.34)                       |
| Otitis media                                                             | 1.57<br>(0.60 to<br>3.41)                              | 0.94<br>(0.33 to<br>2.13)                              | 0.98<br>(0.34 to<br>2.19)                            | 0.89<br>(0.31 to<br>1.99)                                | 0.04<br>(0.02 to<br>0.07)                       | 0.06<br>(0.02 to<br>0.14)                       | 0.06<br>(0.02 to<br>0.15)                       | 0.05<br>(0.02 to<br>0.13)                       |
| Meningitis                                                               | 6,760.90<br>(4,325.67 to<br>10,794.29)                 | 3,399.13<br>(1,977.38 to<br>5,279.59)                  | 2,995.74<br>(1,749.00 to<br>4,795.69)                | 4,215.35<br>(2,513.28 to<br>6,568.59)                    | 142.65<br>(91.20 to<br>224.51)                  | 115.57<br>(64.60 to<br>166.66)                  | 104.99<br>(58.97 to<br>149.62)                  | 136.69<br>(77.18 to<br>196.73)                  |
| Pneumococcal meningitis                                                  | 75.82<br>(38.49 to<br>144.60)                          | 66.24<br>(32.80 to<br>114.91)                          | 67.46<br>(33.43 to<br>117.47)                        | 67.17<br>(32.74 to<br>117.02)                            | 1.74<br>(0.87 to<br>3.32)                       | 2.52<br>(1.14 to<br>4.41)                       | 2.64<br>(1.17 to<br>4.75)                       | 2.46<br>(1.12 to<br>4.32)                       |
| H influenzae type B meningitis                                           | 513.10<br>(327.34 to<br>802.57)                        | 427.85<br>(256.97 to<br>703.50)                        | 412.46<br>(251.25 to<br>642.10)                      | 518.74<br>(281.71 to<br>927.43)                          | 10.78<br>(6.77 to<br>16.71)                     | 13.26<br>(7.81 to<br>18.79)                     | 13.61<br>(8.00 to<br>19.47)                     | 13.70<br>(8.10 to<br>20.06)                     |
| Meningococcal meningitis                                                 | 2,709.98<br>(1,705.26 to<br>4,301.10)                  | 1,340.10<br>(730.65 to<br>2,159.70)                    | 1,172.16<br>(638.89 to<br>1,915.51)                  | 1,648.25<br>(925.23 to<br>2,679.60)                      | 57.96<br>(36.06 to<br>89.82)                    | 47.92<br>(24.63 to<br>73.20)                    | 43.10<br>(23.19 to<br>64.39)                    | 56.88<br>(30.01 to<br>83.99)                    |
| Other meningitis                                                         | 3,462.00<br>(2,182.42 to<br>5,606.03)                  | 1,564.94<br>(897.24 to<br>2,567.01)                    | 1,343.65<br>(794.26 to<br>2,175.98)                  | 1,981.20<br>(1,167.68 to<br>3,169.01)                    | 72.18<br>(45.09 to<br>115.09)                   | 51.88<br>(29.24 to<br>75.80)                    | 45.64<br>(26.22 to<br>67.45)                    | 63.65<br>(36.94 to<br>94.19)                    |

|                                                |                                            |                                            |                                            |                                            |                                      |                                      |                                      |                                      |
|------------------------------------------------|--------------------------------------------|--------------------------------------------|--------------------------------------------|--------------------------------------------|--------------------------------------|--------------------------------------|--------------------------------------|--------------------------------------|
| Encephalitis                                   | 1,672.65<br>(1,020.06 to<br>2,851.41)      | 1,925.51<br>(1,226.19 to<br>3,086.06)      | 1,904.44<br>(1,194.43 to<br>3,091.21)      | 1,970.95<br>(1,256.87 to<br>3,179.20)      | 31.19<br>(19.87 to<br>51.62)         | 49.50<br>(32.21 to<br>77.75)         | 49.68<br>(31.51 to<br>79.09)         | 49.73<br>(33.12 to<br>78.08)         |
| Diphtheria                                     | 6.56<br>(3.80 to<br>10.01)                 | 1.78<br>(0.93 to<br>3.01)                  | 1.67<br>(0.85 to<br>2.91)                  | 2.35<br>(1.17 to<br>4.26)                  | 0.12<br>(0.07 to<br>0.19)            | 0.04<br>(0.02 to<br>0.06)            | 0.04<br>(0.02 to<br>0.06)            | 0.04<br>(0.02 to<br>0.08)            |
| Whooping cough                                 | 358.03<br>(30.01 to<br>1,150.29)           | 115.04<br>(7.64 to<br>449.80)              | 34.17<br>(2.33 to<br>138.68)               | 426.49<br>(37.28 to<br>1,457.11)           | 4.26<br>(0.36 to<br>13.67)           | 1.39<br>(0.10 to<br>5.35)            | 0.43<br>(0.03 to<br>1.75)            | 5.06<br>(0.44 to<br>17.29)           |
| Tetanus                                        | 1,054.05<br>(639.32 to<br>2,807.35)        | 301.27<br>(176.61 to<br>543.64)            | 308.66<br>(173.30 to<br>562.62)            | 306.21<br>(183.20 to<br>536.95)            | 31.01<br>(20.48 to<br>66.43)         | 14.10<br>(5.28 to<br>22.02)          | 14.95<br>(5.48 to<br>24.02)          | 13.29<br>(5.20 to<br>20.36)          |
| Measles                                        | 77.52<br>(18.27 to<br>233.46)              | 20.22<br>(0.75 to<br>140.61)               | 10.20<br>(0.59 to<br>64.34)                | 74.56<br>(1.72 to<br>501.48)               | 0.93<br>(0.22 to<br>2.79)            | 0.24<br>(0.01 to<br>1.68)            | 0.12<br>(0.01 to<br>0.77)            | 0.89<br>(0.02 to<br>5.92)            |
| <b>United Arab Emirates</b>                    |                                            |                                            |                                            |                                            |                                      |                                      |                                      |                                      |
| Cause                                          | YLLs (actual counts)                       |                                            |                                            |                                            | Deaths (actual counts)               |                                      |                                      |                                      |
|                                                | 2016                                       | 2040 Forecast                              | 2040 Better Scenario                       | 2040 Worse Scenario                        | 2016                                 | 2040 Forecast                        | 2040 Better Scenario                 | 2040 Worse Scenario                  |
| Varicella and herpes zoster                    | 140.68<br>(76.77 to<br>260.12)             | 67.91<br>(31.80 to<br>133.16)              | 61.30<br>(29.30 to<br>116.64)              | 78.72<br>(37.20 to<br>157.56)              | 2.17<br>(1.33 to<br>3.61)            | 2.15<br>(1.16 to<br>3.65)            | 2.05<br>(1.11 to<br>3.44)            | 2.34<br>(1.26 to<br>3.92)            |
| <b>Neglected tropical diseases and malaria</b> | <b>87.61<br/>(67.57 to<br/>113.66)</b>     | <b>76.16<br/>(58.24 to<br/>97.50)</b>      | <b>77.61<br/>(59.12 to<br/>99.83)</b>      | <b>74.40<br/>(57.24 to<br/>94.61)</b>      | <b>1.64<br/>(1.25 to<br/>2.13)</b>   | <b>1.68<br/>(1.30 to<br/>2.14)</b>   | <b>1.73<br/>(1.34 to<br/>2.23)</b>   | <b>1.62<br/>(1.26 to<br/>2.06)</b>   |
| Malaria                                        | 0.00<br>(0.00 to<br>0.00)                  | 0.00<br>(0.00 to<br>0.00)                  | 0.00<br>(0.00 to<br>0.00)                  | 0.00<br>(0.00 to<br>0.00)                  | 0.00<br>(0.00 to<br>0.00)            | 0.00<br>(0.00 to<br>0.00)            | 0.00<br>(0.00 to<br>0.00)            | 0.00<br>(0.00 to<br>0.00)            |
| Chagas disease                                 | 0.00<br>(0.00 to<br>0.00)                  | 0.00<br>(0.00 to<br>0.00)                  | 0.00<br>(0.00 to<br>0.00)                  | 0.00<br>(0.00 to<br>0.00)                  | 0.00<br>(0.00 to<br>0.00)            | 0.00<br>(0.00 to<br>0.00)            | 0.00<br>(0.00 to<br>0.00)            | 0.00<br>(0.00 to<br>0.00)            |
| Leishmaniasis                                  | 0.00<br>(0.00 to<br>0.00)                  | 0.00<br>(0.00 to<br>0.00)                  | 0.00<br>(0.00 to<br>0.00)                  | 0.00<br>(0.00 to<br>0.00)                  | 0.00<br>(0.00 to<br>0.00)            | 0.00<br>(0.00 to<br>0.00)            | 0.00<br>(0.00 to<br>0.00)            | 0.00<br>(0.00 to<br>0.00)            |
| African trypanosomiasis                        | 0.00<br>(0.00 to<br>0.00)                  | 0.00<br>(0.00 to<br>0.00)                  | 0.00<br>(0.00 to<br>0.00)                  | 0.00<br>(0.00 to<br>0.00)                  | 0.00<br>(0.00 to<br>0.00)            | 0.00<br>(0.00 to<br>0.00)            | 0.00<br>(0.00 to<br>0.00)            | 0.00<br>(0.00 to<br>0.00)            |
| Schistosomiasis                                | 0.00<br>(0.00 to<br>0.00)                  | 0.00<br>(0.00 to<br>0.00)                  | 0.00<br>(0.00 to<br>0.00)                  | 0.00<br>(0.00 to<br>0.00)                  | 0.00<br>(0.00 to<br>0.00)            | 0.00<br>(0.00 to<br>0.00)            | 0.00<br>(0.00 to<br>0.00)            | 0.00<br>(0.00 to<br>0.00)            |
| Cysticercosis                                  | 15.64<br>(9.78 to<br>23.82)                | 5.39<br>(3.12 to<br>8.73)                  | 5.31<br>(3.06 to<br>8.56)                  | 5.56<br>(3.22 to<br>8.97)                  | 0.34<br>(0.21 to<br>0.52)            | 0.14<br>(0.08 to<br>0.23)            | 0.14<br>(0.08 to<br>0.23)            | 0.15<br>(0.09 to<br>0.24)            |
| Cystic echinococcosis                          | 0.00<br>(0.00 to<br>0.00)                  | 0.00<br>(0.00 to<br>0.00)                  | 0.00<br>(0.00 to<br>0.00)                  | 0.00<br>(0.00 to<br>0.00)                  | 0.00<br>(0.00 to<br>0.00)            | 0.00<br>(0.00 to<br>0.00)            | 0.00<br>(0.00 to<br>0.00)            | 0.00<br>(0.00 to<br>0.00)            |
| Dengue                                         | 0.00<br>(0.00 to<br>0.00)                  | 0.00<br>(0.00 to<br>0.00)                  | 0.00<br>(0.00 to<br>0.00)                  | 0.00<br>(0.00 to<br>0.00)                  | 0.00<br>(0.00 to<br>0.00)            | 0.00<br>(0.00 to<br>0.00)            | 0.00<br>(0.00 to<br>0.00)            | 0.00<br>(0.00 to<br>0.00)            |
| Yellow fever                                   | 0.00<br>(0.00 to<br>0.00)                  | 0.00<br>(0.00 to<br>0.00)                  | 0.00<br>(0.00 to<br>0.00)                  | 0.00<br>(0.00 to<br>0.00)                  | 0.00<br>(0.00 to<br>0.00)            | 0.00<br>(0.00 to<br>0.00)            | 0.00<br>(0.00 to<br>0.00)            | 0.00<br>(0.00 to<br>0.00)            |
| Rabies                                         | 2.45<br>(0.87 to<br>6.01)                  | 2.70<br>(0.83 to<br>6.47)                  | 2.62<br>(0.80 to<br>6.50)                  | 2.88<br>(0.98 to<br>6.97)                  | 0.05<br>(0.02 to<br>0.12)            | 0.12<br>(0.03 to<br>0.33)            | 0.12<br>(0.03 to<br>0.34)            | 0.12<br>(0.03 to<br>0.32)            |
| Intestinal nematode infections                 | 1.06<br>(0.31 to<br>2.38)                  | 0.83<br>(0.34 to<br>1.54)                  | 0.82<br>(0.34 to<br>1.51)                  | 0.84<br>(0.34 to<br>1.57)                  | 0.02<br>(0.01 to<br>0.03)            | 0.02<br>(0.01 to<br>0.03)            | 0.02<br>(0.01 to<br>0.03)            | 0.02<br>(0.01 to<br>0.03)            |
| Other neglected tropical diseases              | 68.47<br>(52.94 to<br>87.58)               | 67.24<br>(51.27 to<br>86.29)               | 68.87<br>(52.12 to<br>88.78)               | 65.11<br>(49.70 to<br>82.90)               | 1.23<br>(0.94 to<br>1.56)            | 1.40<br>(1.09 to<br>1.78)            | 1.45<br>(1.12 to<br>1.84)            | 1.33<br>(1.05 to<br>1.68)            |
| <b>Maternal disorders</b>                      | <b>809.61<br/>(498.36 to<br/>1,281.29)</b> | <b>814.08<br/>(394.04 to<br/>1,429.40)</b> | <b>737.11<br/>(360.80 to<br/>1,267.49)</b> | <b>937.19<br/>(467.00 to<br/>1,606.73)</b> | <b>15.48<br/>(9.43 to<br/>24.38)</b> | <b>15.87<br/>(7.77 to<br/>27.72)</b> | <b>14.38<br/>(7.12 to<br/>25.07)</b> | <b>18.25<br/>(9.15 to<br/>31.41)</b> |

|                                                       |                                 |                                 |                                 |                                 |                           |                           |                           |                            |
|-------------------------------------------------------|---------------------------------|---------------------------------|---------------------------------|---------------------------------|---------------------------|---------------------------|---------------------------|----------------------------|
| Maternal hemorrhage                                   | 187.58<br>(106.25 to<br>321.20) | 186.86<br>(83.02 to<br>356.05)  | 169.94<br>(77.99 to<br>318.11)  | 214.22<br>(98.72 to<br>400.92)  | 3.61<br>(2.04 to<br>6.11) | 3.67<br>(1.64 to<br>7.00) | 3.34<br>(1.52 to<br>6.29) | 4.21<br>(1.95 to<br>7.93)  |
| Maternal sepsis and other maternal infections         | 29.03<br>(14.93 to<br>50.26)    | 28.24<br>(11.83 to<br>55.17)    | 25.52<br>(11.16 to<br>48.61)    | 32.67<br>(14.12 to<br>62.50)    | 0.56<br>(0.29 to<br>0.98) | 0.56<br>(0.24 to<br>1.10) | 0.51<br>(0.22 to<br>0.98) | 0.65<br>(0.28 to<br>1.25)  |
| Maternal hypertensive disorders                       | 178.42<br>(101.47 to<br>297.34) | 174.91<br>(74.12 to<br>333.67)  | 157.45<br>(69.93 to<br>290.34)  | 203.38<br>(89.44 to<br>386.26)  | 3.37<br>(1.90 to<br>5.70) | 3.36<br>(1.46 to<br>6.47) | 3.03<br>(1.35 to<br>5.62) | 3.91<br>(1.70 to<br>7.46)  |
| Maternal obstructed labor and uterine rupture         | 32.51<br>(16.35 to<br>57.34)    | 31.88<br>(12.23 to<br>66.67)    | 28.25<br>(11.44 to<br>56.99)    | 37.82<br>(14.85 to<br>77.13)    | 0.63<br>(0.31 to<br>1.10) | 0.63<br>(0.24 to<br>1.34) | 0.56<br>(0.22 to<br>1.14) | 0.75<br>(0.29 to<br>1.52)  |
| Maternal abortion, miscarriage, and ectopic pregnancy | 87.06<br>(46.28 to<br>147.69)   | 55.40<br>(23.34 to<br>112.02)   | 49.28<br>(21.27 to<br>98.70)    | 64.57<br>(27.73 to<br>130.16)   | 1.72<br>(0.92 to<br>2.93) | 1.13<br>(0.47 to<br>2.32) | 1.01<br>(0.42 to<br>2.03) | 1.32<br>(0.57 to<br>2.69)  |
| Indirect maternal deaths                              | 68.99<br>(37.98 to<br>116.82)   | 77.61<br>(31.21 to<br>157.44)   | 69.31<br>(28.43 to<br>135.01)   | 91.00<br>(37.56 to<br>173.49)   | 1.28<br>(0.71 to<br>2.16) | 1.46<br>(0.59 to<br>2.92) | 1.31<br>(0.54 to<br>2.52) | 1.72<br>(0.72 to<br>3.28)  |
| Late maternal deaths                                  | 13.35<br>(6.29 to<br>25.17)     | 11.29<br>(4.06 to<br>24.30)     | 10.10<br>(3.71 to<br>21.09)     | 13.22<br>(4.86 to<br>27.70)     | 0.25<br>(0.12 to<br>0.46) | 0.22<br>(0.08 to<br>0.45) | 0.20<br>(0.07 to<br>0.40) | 0.26<br>(0.09 to<br>0.53)  |
| Maternal deaths aggravated by HIV/AIDS                | 0.05<br>(0.00 to<br>0.17)       | 0.35<br>(0.00 to<br>1.70)       | 0.31<br>(0.00 to<br>1.59)       | 0.44<br>(0.01 to<br>1.99)       | 0.00<br>(0.00 to<br>0.00) | 0.01<br>(0.00 to<br>0.03) | 0.01<br>(0.00 to<br>0.03) | 0.01<br>(0.00 to<br>0.04)  |
| Other maternal disorders                              | 212.63<br>(126.33 to<br>357.31) | 247.55<br>(112.70 to<br>455.43) | 226.95<br>(103.53 to<br>411.74) | 279.88<br>(129.78 to<br>532.02) | 4.05<br>(2.40 to<br>6.84) | 4.82<br>(2.18 to<br>9.02) | 4.42<br>(1.99 to<br>8.33) | 5.44<br>(2.46 to<br>10.17) |

| United Arab Emirates                                     |                                                         |                                                       |                                                       |                                                       |                                                |                                                |                                                |                                                |
|----------------------------------------------------------|---------------------------------------------------------|-------------------------------------------------------|-------------------------------------------------------|-------------------------------------------------------|------------------------------------------------|------------------------------------------------|------------------------------------------------|------------------------------------------------|
| Cause                                                    | YLLs (actual counts)                                    |                                                       |                                                       |                                                       | Deaths (actual counts)                         |                                                |                                                |                                                |
|                                                          | 2016                                                    | 2040 Forecast                                         | 2040 Better Scenario                                  | 2040 Worse Scenario                                   | 2016                                           | 2040 Forecast                                  | 2040 Better Scenario                           | 2040 Worse Scenario                            |
| <b>Neonatal disorders</b>                                | <b>23,507.55</b><br>(11,810.50 to<br><b>45,455.80</b> ) | <b>7,597.08</b><br>(1,990.60 to<br><b>19,870.31</b> ) | <b>5,674.50</b><br>(1,540.47 to<br><b>14,646.25</b> ) | <b>9,510.83</b><br>(2,483.00 to<br><b>23,980.64</b> ) | <b>271.91</b><br>(136.59 to<br><b>525.84</b> ) | <b>65.67</b><br>(23.03 to<br><b>169.34</b> )   | <b>65.67</b><br>(17.83 to<br><b>169.34</b> )   | <b>110.03</b><br>(28.75 to<br><b>277.33</b> )  |
| Neonatal preterm birth                                   | 13,357.29<br>(6,599.12 to<br>25,498.66)                 | 3,974.33<br>(959.42 to<br>10,462.46)                  | 2,588.86<br>(635.97 to<br>6,769.89)                   | 5,061.19<br>(1,238.58 to<br>12,983.93)                | 154.44<br>(76.29 to<br>294.81)                 | 45.95<br>(11.11 to<br>120.94)                  | 29.94<br>(7.36 to<br>78.30)                    | 58.52<br>(14.33 to<br>150.08)                  |
| Neonatal encephalopathy due to birth asphyxia and trauma | 4,097.19<br>(1,571.15 to<br>10,225.12)                  | 1,006.83<br>(191.81 to<br>3,190.92)                   | 808.00<br>(160.08 to<br>2,469.17)                     | 1,339.54<br>(264.18 to<br>4,039.29)                   | 47.44<br>(18.19 to<br>118.39)                  | 11.67<br>(2.22 to<br>36.95)                    | 9.37<br>(1.86 to<br>28.61)                     | 15.53<br>(3.07 to<br>46.76)                    |
| Neonatal sepsis and other neonatal infections            | 3,593.75<br>(1,340.94 to<br>9,655.58)                   | 1,397.94<br>(317.25 to<br>4,243.00)                   | 1,170.20<br>(273.86 to<br>3,531.86)                   | 1,750.67<br>(398.52 to<br>5,184.56)                   | 41.56<br>(15.50 to<br>111.63)                  | 16.17<br>(3.67 to<br>49.07)                    | 13.53<br>(3.17 to<br>40.83)                    | 20.25<br>(4.61 to<br>59.97)                    |
| Hemolytic disease and other neonatal jaundice            | 49.44<br>(15.81 to<br>151.43)                           | 11.99<br>(1.99 to<br>47.16)                           | 9.95<br>(1.70 to<br>38.96)                            | 15.34<br>(2.52 to<br>58.46)                           | 0.57<br>(0.18 to<br>1.75)                      | 0.14<br>(0.02 to<br>0.55)                      | 0.12<br>(0.02 to<br>0.45)                      | 0.18<br>(0.03 to<br>0.68)                      |
| Other neonatal disorders                                 | 2,409.87<br>(939.68 to<br>5,810.09)                     | 1,206.00<br>(301.81 to<br>3,443.94)                   | 1,097.49<br>(281.60 to<br>3,048.02)                   | 1,344.09<br>(331.11 to<br>3,953.44)                   | 27.89<br>(10.88 to<br>67.28)                   | 13.97<br>(3.50 to<br>39.84)                    | 12.71<br>(3.27 to<br>35.30)                    | 15.56<br>(3.84 to<br>45.73)                    |
| <b>Nutritional deficiencies</b>                          | <b>1,790.63</b><br>(1,371.78 to<br><b>2,401.88</b> )    | <b>3,818.33</b><br>(3,029.64 to<br><b>4,766.73</b> )  | <b>4,054.45</b><br>(3,194.70 to<br><b>5,108.95</b> )  | <b>3,530.28</b><br>(2,790.94 to<br><b>4,464.42</b> )  | <b>46.75</b><br>(36.84 to<br><b>58.32</b> )    | <b>229.43</b><br>(174.40 to<br><b>286.91</b> ) | <b>251.98</b><br>(193.26 to<br><b>313.89</b> ) | <b>202.84</b><br>(150.77 to<br><b>255.51</b> ) |
| Protein-energy malnutrition                              | 924.25<br>(638.73 to<br>1,377.55)                       | 1,053.48<br>(652.01 to<br>2,334.94)                   | 1,132.04<br>(695.79 to<br>2,575.19)                   | 952.69<br>(593.28 to<br>2,085.41)                     | 18.97<br>(13.35 to<br>29.93)                   | 57.44<br>(30.29 to<br>162.02)                  | 64.72<br>(34.08 to<br>182.80)                  | 48.78<br>(25.80 to<br>138.80)                  |
| Iodine deficiency                                        | 43.90<br>(1.82 to<br>146.38)                            | 141.42<br>(2.56 to<br>670.08)                         | 142.98<br>(2.44 to<br>709.77)                         | 140.66<br>(3.08 to<br>636.51)                         | 0.92<br>(0.05 to<br>3.14)                      | 7.43<br>(0.10 to<br>46.02)                     | 7.75<br>(0.09 to<br>48.68)                     | 7.11<br>(0.11 to<br>40.99)                     |
| Dietary iron deficiency                                  | 669.78<br>(446.20 to<br>880.24)                         | 2,487.50<br>(1,014.37 to<br>3,506.77)                 | 2,651.65<br>(1,038.25 to<br>3,720.74)                 | 2,287.53<br>(961.63 to<br>3,240.55)                   | 23.93<br>(12.38 to<br>31.17)                   | 159.46<br>(49.38 to<br>227.24)                 | 174.49<br>(52.48 to<br>247.53)                 | 141.64<br>(45.04 to<br>202.71)                 |
| Other nutritional deficiencies                           | 152.71<br>(104.76 to<br>231.83)                         | 135.93<br>(76.00 to<br>292.76)                        | 127.79<br>(72.77 to<br>277.71)                        | 149.40<br>(85.90 to<br>314.72)                        | 2.94<br>(2.03 to<br>4.77)                      | 5.11<br>(2.65 to<br>16.18)                     | 5.02<br>(2.63 to<br>16.22)                     | 5.31<br>(2.80 to<br>16.72)                     |

|                                                                         |                                                 |                                                   |                                                   |                                                     |                                              |                                              |                                              |                                              |
|-------------------------------------------------------------------------|-------------------------------------------------|---------------------------------------------------|---------------------------------------------------|-----------------------------------------------------|----------------------------------------------|----------------------------------------------|----------------------------------------------|----------------------------------------------|
| <b>Other communicable, maternal, neonatal, and nutritional diseases</b> | <b>2,749.78</b><br>(2,052.45 to 3,702.22)       | <b>5,663.85</b><br>(3,161.79 to 7,621.39)         | <b>5,673.07</b><br>(3,092.69 to 7,578.28)         | <b>5,733.87</b><br>(3,265.87 to 7,664.02)           | <b>74.38</b><br>(56.18 to 98.74)             | <b>316.64</b><br>(137.12 to 438.61)          | <b>328.46</b><br>(140.02 to 459.30)          | <b>304.50</b><br>(135.27 to 425.49)          |
| Sexually transmitted infections excluding HIV                           | 98.34<br>(69.78 to 136.61)                      | 43.23<br>(24.01 to 69.21)                         | 40.75<br>(22.44 to 64.53)                         | 47.36<br>(26.83 to 74.92)                           | 1.82<br>(1.32 to 2.44)                       | 1.03<br>(0.59 to 1.61)                       | 0.98<br>(0.57 to 1.55)                       | 1.10<br>(0.65 to 1.71)                       |
| Syphilis                                                                | 60.79<br>(41.18 to 90.85)                       | 12.98<br>(6.68 to 21.60)                          | 11.44<br>(6.08 to 18.63)                          | 15.59<br>(8.08 to 25.86)                            | 1.06<br>(0.75 to 1.45)                       | 0.28<br>(0.16 to 0.45)                       | 0.26<br>(0.15 to 0.39)                       | 0.33<br>(0.19 to 0.52)                       |
| Chlamydia infection                                                     | 6.28<br>(3.66 to 9.87)                          | 5.82<br>(2.94 to 9.88)                            | 5.65<br>(2.89 to 9.70)                            | 6.08<br>(3.17 to 10.15)                             | 0.13<br>(0.07 to 0.20)                       | 0.14<br>(0.08 to 0.23)                       | 0.15<br>(0.08 to 0.23)                       | 0.15<br>(0.08 to 0.24)                       |
| Gonococcal infection                                                    | 20.39<br>(13.03 to 29.78)                       | 15.98<br>(8.43 to 26.84)                          | 15.48<br>(8.25 to 26.02)                          | 16.78<br>(9.15 to 27.88)                            | 0.41<br>(0.26 to 0.61)                       | 0.40<br>(0.23 to 0.66)                       | 0.39<br>(0.22 to 0.64)                       | 0.42<br>(0.24 to 0.67)                       |
| Other sexually transmitted infections                                   | 10.89<br>(6.93 to 16.26)                        | 8.46<br>(4.36 to 14.28)                           | 8.17<br>(4.17 to 13.89)                           | 8.91<br>(4.69 to 14.86)                             | 0.22<br>(0.14 to 0.33)                       | 0.20<br>(0.10 to 0.33)                       | 0.19<br>(0.10 to 0.32)                       | 0.21<br>(0.11 to 0.34)                       |
| Acute hepatitis                                                         | 1,387.14<br>(918.37 to 2,036.93)                | 970.68<br>(558.65 to 1,573.63)                    | 856.99<br>(507.91 to 1,355.63)                    | 1,174.20<br>(693.98 to 1,879.80)                    | 35.39<br>(23.44 to 51.81)                    | 33.61<br>(19.53 to 53.17)                    | 30.07<br>(18.08 to 47.78)                    | 39.96<br>(23.71 to 61.93)                    |
| Acute hepatitis A                                                       | 19.62<br>(8.00 to 37.60)                        | 18.41<br>(4.87 to 48.08)                          | 16.98<br>(4.41 to 43.80)                          | 20.75<br>(5.42 to 52.96)                            | 0.39<br>(0.15 to 0.77)                       | 0.65<br>(0.14 to 1.81)                       | 0.61<br>(0.14 to 1.68)                       | 0.72<br>(0.16 to 1.94)                       |
| Acute hepatitis B                                                       | 1,260.76<br>(814.76 to 1,866.77)                | 863.12<br>(481.63 to 1,396.02)                    | 759.93<br>(435.88 to 1,202.91)                    | 1,048.39<br>(611.35 to 1,683.27)                    | 32.28<br>(21.14 to 47.77)                    | 29.18<br>(16.55 to 46.18)                    | 25.98<br>(15.21 to 41.17)                    | 34.91<br>(20.32 to 53.93)                    |
| Acute hepatitis C                                                       | 23.90<br>(14.01 to 41.07)                       | 21.20<br>(10.99 to 37.15)                         | 18.95<br>(9.96 to 33.39)                          | 25.16<br>(13.56 to 43.81)                           | 0.68<br>(0.39 to 1.18)                       | 0.82<br>(0.42 to 1.45)                       | 0.74<br>(0.39 to 1.31)                       | 0.96<br>(0.51 to 1.67)                       |
| Acute hepatitis E                                                       | 82.86<br>(48.70 to 138.34)                      | 67.95<br>(31.43 to 128.92)                        | 61.14<br>(28.72 to 112.81)                        | 79.90<br>(36.83 to 147.72)                          | 2.03<br>(1.13 to 3.58)                       | 2.95<br>(1.41 to 5.59)                       | 2.73<br>(1.30 to 4.99)                       | 3.36<br>(1.58 to 6.29)                       |
| Other unspecified infectious diseases                                   | 1,264.30<br>(935.03 to 1,779.80)                | 4,649.94<br>(2,327.41 to 6,169.04)                | 4,775.32<br>(2,384.90 to 6,381.17)                | 4,512.31<br>(2,281.08 to 5,999.88)                  | 37.18<br>(26.21 to 47.67)                    | 281.41<br>(104.06 to 396.13)                 | 297.41<br>(109.23 to 422.50)                 | 263.44<br>(96.34 to 376.14)                  |
| <b>Non-communicable diseases</b>                                        | <b>633,325.50</b><br>(494,380.77 to 790,186.20) | <b>992,945.87</b><br>(744,663.46 to 1,318,341.96) | <b>775,455.98</b><br>(600,375.98 to 1,010,479.75) | <b>1,325,730.58</b><br>(977,579.46 to 1,758,434.20) | <b>17,794.45</b><br>(14,035.32 to 22,005.62) | <b>47,483.89</b><br>(37,489.09 to 60,771.53) | <b>38,531.44</b><br>(30,857.17 to 49,353.20) | <b>60,635.44</b><br>(47,450.50 to 76,578.59) |

**United Arab Emirates**

| Cause                      | YLLs (actual counts)                           |                                                 |                                                 |                                                 | Deaths (actual counts)                    |                                             |                                            |                                             |
|----------------------------|------------------------------------------------|-------------------------------------------------|-------------------------------------------------|-------------------------------------------------|-------------------------------------------|---------------------------------------------|--------------------------------------------|---------------------------------------------|
|                            | 2016                                           | 2040 Forecast                                   | 2040 Better Scenario                            | 2040 Worse Scenario                             | 2016                                      | 2040 Forecast                               | 2040 Better Scenario                       | 2040 Worse Scenario                         |
| <b>Neoplasms</b>           | <b>115,047.60</b><br>(87,380.76 to 150,691.51) | <b>233,983.50</b><br>(180,366.97 to 301,869.71) | <b>206,783.30</b><br>(162,545.80 to 261,223.54) | <b>271,317.28</b><br>(204,509.47 to 357,488.88) | <b>3,207.65</b><br>(2,476.77 to 4,106.76) | <b>10,314.46</b><br>(8,154.06 to 13,079.68) | <b>9,140.11</b><br>(7,375.47 to 11,329.72) | <b>11,741.92</b><br>(8,986.88 to 15,228.41) |
| Lip and oral cavity cancer | 1,738.82<br>(1,163.76 to 2,512.23)             | 3,071.44<br>(1,825.04 to 5,036.50)              | 2,250.54<br>(1,418.52 to 3,502.46)              | 4,486.34<br>(2,502.78 to 7,867.85)              | 48.15<br>(33.25 to 68.24)                 | 123.69<br>(75.43 to 195.95)                 | 90.90<br>(59.97 to 137.82)                 | 175.92<br>(101.25 to 298.34)                |
| Nasopharynx cancer         | 1,326.65<br>(864.78 to 1,919.41)               | 2,015.26<br>(1,151.16 to 3,477.17)              | 1,438.28<br>(867.03 to 2,344.97)                | 3,111.00<br>(1,662.89 to 5,468.63)              | 34.24<br>(22.40 to 49.73)                 | 68.23<br>(38.78 to 117.84)                  | 48.64<br>(28.77 to 78.14)                  | 103.34<br>(55.41 to 186.47)                 |
| Other pharynx cancer       | 982.98<br>(618.92 to 1,455.75)                 | 1,759.56<br>(1,081.33 to 2,753.01)              | 1,621.92<br>(1,008.07 to 2,474.56)              | 2,067.47<br>(1,209.95 to 3,350.15)              | 26.97<br>(17.62 to 39.78)                 | 69.05<br>(43.09 to 104.86)                  | 65.30<br>(41.47 to 97.10)                  | 78.32<br>(46.99 to 124.58)                  |
| Esophageal cancer          | 2,591.30<br>(1,827.52 to 3,564.23)             | 6,308.54<br>(3,986.94 to 9,853.06)              | 5,045.62<br>(3,425.31 to 7,420.68)              | 7,660.37<br>(4,677.03 to 12,364.37)             | 77.39<br>(55.89 to 105.01)                | 287.59<br>(183.55 to 450.90)                | 230.04<br>(157.40 to 334.92)               | 340.91<br>(207.47 to 551.82)                |
| Stomach cancer             | 5,926.85<br>(4,617.17 to 7,683.46)             | 8,540.21<br>(6,289.53 to 11,378.33)             | 7,438.56<br>(5,665.76 to 9,665.86)              | 9,762.02<br>(7,199.30 to 12,956.77)             | 188.32<br>(149.12 to 241.14)              | 430.61<br>(320.84 to 565.01)                | 379.18<br>(293.31 to 483.82)               | 480.29<br>(355.64 to 632.32)                |
| Colon and rectum cancer    | 10,072.92<br>(7,714.71 to 12,885.62)           | 20,926.47<br>(14,246.12 to 30,815.76)           | 18,900.85<br>(13,037.04 to 27,162.34)           | 25,035.82<br>(16,415.46 to 37,757.13)           | 305.78<br>(235.69 to 391.23)              | 1,040.08<br>(705.94 to 1,524.27)            | 964.79<br>(662.24 to 1,393.74)             | 1,199.27<br>(783.38 to 1,827.54)            |

|                                      |                                         |                                          |                                          |                                          |                                 |                                       |                                     |                                       |
|--------------------------------------|-----------------------------------------|------------------------------------------|------------------------------------------|------------------------------------------|---------------------------------|---------------------------------------|-------------------------------------|---------------------------------------|
| Liver cancer                         | 7,629.38<br>(5,404.45 to<br>10,523.21)  | 26,336.54<br>(16,475.38 to<br>41,848.37) | 24,185.48<br>(16,051.71 to<br>36,052.35) | 28,713.74<br>(16,903.07 to<br>46,649.80) | 238.85<br>(174.50 to<br>321.67) | 1,253.27<br>(803.96 to<br>1,941.61)   | 1,172.01<br>(790.29 to<br>1,729.38) | 1,329.14<br>(807.60 to<br>2,131.98)   |
| Liver cancer due to hepatitis B      | 3,391.65<br>(2,206.01 to<br>4,946.66)   | 9,626.96<br>(5,714.37 to<br>15,731.12)   | 8,833.15<br>(5,382.26 to<br>14,029.11)   | 10,379.56<br>(5,834.29 to<br>17,667.60)  | 98.76<br>(65.41 to<br>142.46)   | 403.82<br>(234.13 to<br>647.71)       | 376.79<br>(228.96 to<br>590.46)     | 424.38<br>(237.36 to<br>705.25)       |
| Liver cancer due to hepatitis C      | 1,678.55<br>(1,085.79 to<br>2,597.27)   | 7,609.28<br>(4,550.42 to<br>12,539.87)   | 7,098.77<br>(4,452.26 to<br>11,347.20)   | 8,007.23<br>(4,680.75 to<br>13,621.93)   | 59.24<br>(40.06 to<br>89.29)    | 408.20<br>(248.46 to<br>652.27)       | 387.68<br>(246.44 to<br>605.00)     | 417.65<br>(245.90 to<br>683.53)       |
| Liver cancer due to alcohol use      | 746.46<br>(427.56 to<br>1,255.72)       | 2,907.72<br>(1,451.04 to<br>5,213.56)    | 2,538.25<br>(1,320.11 to<br>4,427.21)    | 3,511.29<br>(1,707.88 to<br>6,553.75)    | 25.01<br>(14.63 to<br>41.38)    | 141.06<br>(70.65 to<br>249.65)        | 125.45<br>(64.74 to<br>213.75)      | 164.97<br>(80.77 to<br>302.09)        |
| Liver cancer due to other causes     | 1,812.73<br>(1,140.93 to<br>2,877.45)   | 6,192.59<br>(3,148.99 to<br>10,835.82)   | 5,715.31<br>(3,042.09 to<br>9,633.14)    | 6,815.66<br>(3,225.02 to<br>12,430.54)   | 55.84<br>(35.50 to<br>88.75)    | 300.19<br>(152.04 to<br>511.77)       | 282.09<br>(150.49 to<br>475.72)     | 322.14<br>(153.99 to<br>585.66)       |
| Gallbladder and biliary tract cancer | 1,241.57<br>(896.67 to<br>1,742.84)     | 2,144.86<br>(1,717.72 to<br>2,763.64)    | 2,168.83<br>(1,756.89 to<br>2,789.55)    | 2,136.08<br>(1,699.58 to<br>2,772.10)    | 37.97<br>(28.68 to<br>52.11)    | 99.49<br>(81.79 to<br>127.30)         | 102.44<br>(84.35 to<br>130.86)      | 96.63<br>(79.07 to<br>123.54)         |
| Pancreatic cancer                    | 4,797.64<br>(3,670.20 to<br>6,167.76)   | 13,430.88<br>(9,917.23 to<br>18,388.54)  | 13,285.41<br>(9,842.14 to<br>17,996.29)  | 13,866.74<br>(9,951.85 to<br>19,603.43)  | 148.33<br>(115.86 to<br>188.97) | 616.80<br>(455.57 to<br>844.59)       | 616.04<br>(460.60 to<br>842.25)     | 626.13<br>(452.49 to<br>880.22)       |
| Larynx cancer                        | 1,828.60<br>(1,230.63 to<br>2,550.47)   | 3,232.30<br>(1,749.57 to<br>5,802.53)    | 2,126.64<br>(1,271.37 to<br>3,572.06)    | 4,773.04<br>(2,412.03 to<br>8,726.07)    | 55.75<br>(38.55 to<br>76.71)    | 149.73<br>(80.44 to<br>270.59)        | 97.30<br>(57.69 to<br>162.50)       | 216.65<br>(108.81 to<br>396.47)       |
| Tracheal, bronchus, and lung cancer  | 10,159.18<br>(7,804.30 to<br>13,084.65) | 32,659.82<br>(19,937.99 to<br>50,774.25) | 20,253.50<br>(13,087.06 to<br>30,673.50) | 45,695.23<br>(26,756.92 to<br>73,533.96) | 354.01<br>(278.61 to<br>449.41) | 1,725.45<br>(1,065.70 to<br>2,708.21) | 1,058.50<br>(688.60 to<br>1,591.64) | 2,366.17<br>(1,368.60 to<br>3,802.66) |
| Malignant skin melanoma              | 858.59<br>(529.78 to<br>1,449.92)       | 1,587.10<br>(1,021.35 to<br>2,510.38)    | 1,735.95<br>(1,131.20 to<br>2,777.53)    | 1,400.05<br>(901.79 to<br>2,247.65)      | 21.49<br>(13.44 to<br>36.30)    | 57.40<br>(37.09 to<br>92.35)          | 64.18<br>(42.58 to<br>100.58)       | 49.14<br>(32.06 to<br>79.61)          |
| Non-melanoma skin cancer             | 532.63<br>(348.94 to<br>774.71)         | 903.22<br>(661.73 to<br>1,187.34)        | 854.66<br>(636.18 to<br>1,117.91)        | 996.21<br>(731.77 to<br>1,314.19)        | 15.19<br>(10.41 to<br>21.62)    | 43.67<br>(34.10 to<br>54.11)          | 42.42<br>(33.53 to<br>52.31)        | 46.53<br>(36.24 to<br>58.22)          |
| Breast cancer                        | 10,297.06<br>(6,756.15 to<br>14,732.67) | 18,329.02<br>(11,120.10 to<br>27,876.66) | 16,402.75<br>(10,154.75 to<br>24,790.84) | 22,253.92<br>(12,903.46 to<br>35,114.54) | 264.52<br>(174.23 to<br>370.69) | 599.32<br>(380.15 to<br>900.13)       | 547.13<br>(355.14 to<br>805.18)     | 720.58<br>(437.03 to<br>1,136.93)     |
| Cervical cancer                      | 1,663.72<br>(1,133.54 to<br>2,412.84)   | 3,145.61<br>(1,935.49 to<br>4,852.19)    | 2,836.73<br>(1,770.42 to<br>4,325.07)    | 3,676.92<br>(2,263.24 to<br>5,611.33)    | 45.81<br>(31.49 to<br>64.47)    | 114.34<br>(70.32 to<br>169.59)        | 103.86<br>(64.79 to<br>152.64)      | 132.00<br>(80.30 to<br>197.59)        |
| Uterine cancer                       | 535.45<br>(347.74 to<br>786.62)         | 1,594.20<br>(1,100.48 to<br>2,276.45)    | 1,519.65<br>(1,061.38 to<br>2,136.50)    | 1,723.11<br>(1,216.56 to<br>2,418.00)    | 15.37<br>(10.44 to<br>21.98)    | 62.48<br>(43.95 to<br>86.09)          | 60.16<br>(42.66 to<br>82.77)        | 66.57<br>(47.42 to<br>90.51)          |
| Ovarian cancer                       | 1,310.90<br>(790.26 to<br>2,545.84)     | 3,175.12<br>(1,935.16 to<br>5,603.09)    | 3,011.08<br>(1,881.23 to<br>5,271.80)    | 3,554.14<br>(2,132.22 to<br>6,408.44)    | 35.07<br>(21.98 to<br>65.72)    | 116.01<br>(74.90 to<br>192.54)        | 111.10<br>(71.83 to<br>181.85)      | 128.51<br>(80.99 to<br>217.77)        |
| Prostate cancer                      | 2,092.82<br>(1,495.28 to<br>2,975.62)   | 9,310.37<br>(7,011.20 to<br>12,535.74)   | 9,279.07<br>(6,958.61 to<br>12,448.89)   | 9,443.49<br>(7,106.05 to<br>12,884.36)   | 90.12<br>(65.65 to<br>125.10)   | 619.63<br>(470.62 to<br>831.52)       | 628.97<br>(483.76 to<br>844.70)     | 613.21<br>(456.64 to<br>832.21)       |
| Testicular cancer                    | 784.83<br>(502.34 to<br>1,200.16)       | 507.65<br>(302.96 to<br>801.86)          | 476.65<br>(289.73 to<br>763.99)          | 566.03<br>(342.35 to<br>876.86)          | 15.84<br>(10.14 to<br>23.90)    | 11.40<br>(7.15 to<br>17.48)           | 10.79<br>(6.81 to<br>16.70)         | 12.57<br>(7.97 to<br>19.08)           |

**United Arab Emirates**

| Cause                           | YLLs (actual counts)                    |                                          |                                         |                                          | Deaths (actual counts)          |                                 |                                 |                                 |
|---------------------------------|-----------------------------------------|------------------------------------------|-----------------------------------------|------------------------------------------|---------------------------------|---------------------------------|---------------------------------|---------------------------------|
|                                 | 2016                                    | 2040 Forecast                            | 2040 Better Scenario                    | 2040 Worse Scenario                      | 2016                            | 2040 Forecast                   | 2040 Better Scenario            | 2040 Worse Scenario             |
| Kidney cancer                   | 2,291.09<br>(1,398.75 to<br>3,866.00)   | 4,760.91<br>(2,975.49 to<br>7,911.93)    | 4,719.08<br>(3,010.51 to<br>7,691.21)   | 4,754.49<br>(2,908.99 to<br>8,018.49)    | 62.22<br>(38.72 to<br>105.89)   | 194.00<br>(123.32 to<br>316.44) | 194.26<br>(126.92 to<br>310.77) | 190.19<br>(117.99 to<br>312.09) |
| Bladder cancer                  | 2,225.15<br>(1,502.35 to<br>3,379.86)   | 5,718.09<br>(3,852.66 to<br>8,350.32)    | 5,306.98<br>(3,620.47 to<br>7,684.34)   | 6,327.02<br>(4,078.22 to<br>9,571.13)    | 74.51<br>(53.09 to<br>108.74)   | 313.90<br>(213.87 to<br>458.60) | 293.62<br>(203.74 to<br>420.55) | 340.92<br>(221.11 to<br>516.76) |
| Brain and nervous system cancer | 11,354.59<br>(7,227.20 to<br>19,084.05) | 15,525.07<br>(10,089.40 to<br>25,730.59) | 15,230.81<br>(9,984.92 to<br>24,909.67) | 16,130.15<br>(10,526.02 to<br>26,781.55) | 260.07<br>(162.92 to<br>447.17) | 503.18<br>(345.18 to<br>799.47) | 502.36<br>(344.57 to<br>792.81) | 510.90<br>(347.45 to<br>812.43) |

|                                |                                                                  |                                                                  |                                                                  |                                                                  |                                                             |                                                               |                                                              |                                                               |
|--------------------------------|------------------------------------------------------------------|------------------------------------------------------------------|------------------------------------------------------------------|------------------------------------------------------------------|-------------------------------------------------------------|---------------------------------------------------------------|--------------------------------------------------------------|---------------------------------------------------------------|
|                                | 814.37<br>(585.45 to<br>1,118.75)                                | 1,694.07<br>(1,060.35 to<br>2,407.78)                            | 1,454.05<br>(989.14 to<br>2,113.66)                              | 1,841.31<br>(1,175.69 to<br>2,777.46)                            | 22.76<br>(16.82 to<br>30.72)                                | 66.83<br>(45.74 to<br>98.52)                                  | 62.11<br>(44.33 to<br>88.54)                                 | 74.32<br>(49.14 to<br>111.82)                                 |
| Thyroid cancer                 | 420.74<br>(239.90 to<br>702.99)                                  | 611.83<br>(393.66 to<br>916.80)                                  | 627.33<br>(407.07 to<br>942.23)                                  | 596.41<br>(380.71 to<br>907.26)                                  | 10.84<br>(6.23 to<br>17.98)                                 | 21.03<br>(14.15 to<br>30.29)                                  | 21.89<br>(14.89 to<br>31.66)                                 | 20.07<br>(13.42 to<br>29.19)                                  |
| Mesothelioma                   | 1,459.38<br>(948.99 to<br>2,458.10)                              | 1,102.83<br>(686.81 to<br>1,916.46)                              | 995.69<br>(620.13 to<br>1,730.27)                                | 1,297.68<br>(818.20 to<br>2,221.72)                              | 32.34<br>(21.07 to<br>54.78)                                | 30.77<br>(19.88 to<br>52.39)                                  | 28.11<br>(18.23 to<br>48.24)                                 | 35.64<br>(23.45 to<br>60.56)                                  |
| Hodgkin lymphoma               | 8,644.70<br>(5,683.97 to<br>14,349.20)                           | 12,017.28<br>(7,930.74 to<br>19,251.62)                          | 11,257.22<br>(7,667.70 to<br>17,631.91)                          | 13,291.91<br>(8,788.07 to<br>21,552.52)                          | 209.82<br>(139.22 to<br>349.07)                             | 435.93<br>(304.43 to<br>673.53)                               | 417.32<br>(295.63 to<br>633.14)                              | 468.81<br>(324.00 to<br>723.86)                               |
| Non-Hodgkin lymphoma           | 2,188.05<br>(1,239.55 to<br>3,696.78)                            | 4,402.04<br>(2,726.30 to<br>7,098.30)                            | 4,222.19<br>(2,666.98 to<br>6,738.05)                            | 4,702.23<br>(2,843.70 to<br>7,780.52)                            | 62.89<br>(36.78 to<br>105.90)                               | 184.47<br>(119.99 to<br>294.23)                               | 180.52<br>(119.47 to<br>280.64)                              | 191.92<br>(122.19 to<br>308.57)                               |
| Multiple myeloma               | 9,658.35<br>(7,114.55 to<br>14,031.65)                           | 14,704.01<br>(10,871.28 to<br>20,286.94)                         | 13,322.10<br>(9,880.08 to<br>17,842.32)                          | 16,826.76<br>(12,098.54 to<br>23,746.00)                         | 232.14<br>(174.34 to<br>324.61)                             | 559.08<br>(416.92 to<br>756.63)                               | 515.69<br>(393.47 to<br>681.57)                              | 622.50<br>(461.08 to<br>861.08)                               |
| Leukemia                       | 1,285.68<br>(898.92 to<br>2,077.25)                              | 1,229.69<br>(798.95 to<br>1,891.86)                              | 1,100.17<br>(721.57 to<br>1,654.79)                              | 1,429.76<br>(927.47 to<br>2,270.66)                              | 25.34<br>(17.51 to<br>41.25)                                | 33.21<br>(22.65 to<br>49.10)                                  | 30.06<br>(20.93 to<br>43.71)                                 | 38.03<br>(26.02 to<br>57.47)                                  |
| Acute lymphoid leukemia        | 233.11<br>(153.07 to<br>343.40)                                  | 531.36<br>(360.89 to<br>756.47)                                  | 497.02<br>(342.79 to<br>697.52)                                  | 583.37<br>(390.00 to<br>851.10)                                  | 6.74<br>(4.68 to<br>9.52)                                   | 23.14<br>(16.03 to<br>32.40)                                  | 22.08<br>(15.44 to<br>30.41)                                 | 24.57<br>(16.82 to<br>34.69)                                  |
| Chronic lymphoid leukemia      | 2,480.57<br>(1,671.38 to<br>4,822.02)                            | 4,237.11<br>(2,863.09 to<br>7,130.97)                            | 3,967.66<br>(2,725.66 to<br>6,543.68)                            | 4,611.29<br>(3,040.19 to<br>7,869.26)                            | 56.12<br>(37.85 to<br>108.59)                               | 136.61<br>(92.45 to<br>216.75)                                | 129.98<br>(89.63 to<br>201.10)                               | 145.29<br>(95.96 to<br>238.02)                                |
| Acute myeloid leukemia         | 770.29<br>(493.09 to<br>1,084.86)                                | 585.82<br>(336.16 to<br>910.11)                                  | 482.37<br>(283.69 to<br>724.01)                                  | 776.89<br>(445.29 to<br>1,254.69)                                | 19.15<br>(12.42 to<br>26.82)                                | 20.50<br>(12.08 to<br>29.94)                                  | 17.20<br>(10.35 to<br>24.47)                                 | 26.43<br>(15.57 to<br>40.09)                                  |
| Chronic myeloid leukemia       | 4,888.70<br>(3,587.79 to<br>6,595.65)                            | 8,120.03<br>(5,754.91 to<br>11,048.89)                           | 7,274.89<br>(5,254.91 to<br>9,713.19)                            | 9,425.46<br>(6,636.17 to<br>12,988.28)                           | 124.78<br>(92.93 to<br>166.63)                              | 345.62<br>(248.17 to<br>456.64)                               | 316.36<br>(231.05 to<br>412.61)                              | 388.18<br>(279.32 to<br>521.82)                               |
| Other leukemia                 | 9,619.27<br>(6,868.40 to<br>14,136.27)                           | 14,559.20<br>(10,974.63 to<br>20,421.01)                         | 14,615.65<br>(10,903.24 to<br>20,460.96)                         | 14,627.59<br>(11,081.42 to<br>20,592.16)                         | 220.91<br>(157.14 to<br>330.90)                             | 517.02<br>(407.57 to<br>701.24)                               | 530.46<br>(417.80 to<br>717.54)                              | 504.75<br>(398.15 to<br>695.20)                               |
| Other neoplasms                | <b>304,196.76</b><br><b>(231,244.15 to</b><br><b>395,369.35)</b> | <b>352,095.05</b><br><b>(215,712.96 to</b><br><b>588,675.72)</b> | <b>211,061.18</b><br><b>(141,908.01 to</b><br><b>325,660.11)</b> | <b>567,567.88</b><br><b>(340,467.19 to</b><br><b>902,629.95)</b> | <b>9,016.26</b><br><b>(7,045.19 to</b><br><b>11,526.70)</b> | <b>16,893.75</b><br><b>(10,870.32 to</b><br><b>27,119.51)</b> | <b>11,078.78</b><br><b>(7,632.05 to</b><br><b>18,774.04)</b> | <b>25,513.44</b><br><b>(16,300.47 to</b><br><b>40,691.78)</b> |
| Cardiovascular diseases        | 6,852.25<br>(5,041.19 to<br>9,177.14)                            | 5,768.67<br>(3,565.78 to<br>8,845.18)                            | 5,125.36<br>(3,292.82 to<br>7,709.50)                            | 6,674.54<br>(4,172.55 to<br>10,072.87)                           | 189.18<br>(141.02 to<br>250.07)                             | 249.65<br>(160.32 to<br>369.25)                               | 226.42<br>(150.83 to<br>326.99)                              | 281.26<br>(183.39 to<br>414.73)                               |
| Rheumatic heart disease        | 185,698.20<br>(138,965.79 to<br>247,210.65)                      | 209,586.83<br>(115,443.76 to<br>385,785.53)                      | 116,025.63<br>(67,695.05 to<br>210,016.31)                       | 350,228.80<br>(184,439.61 to<br>649,661.25)                      | 5,648.75<br>(4,365.87 to<br>7,329.40)                       | 10,192.51<br>(5,746.14 to<br>19,505.92)                       | 6,235.39<br>(3,706.70 to<br>12,153.91)                       | 15,956.61<br>(8,840.33 to<br>30,448.51)                       |
| Ischemic heart disease         | 82,952.43<br>(63,346.28 to<br>107,772.84)                        | 87,910.82<br>(46,138.37 to<br>161,373.84)                        | 49,801.04<br>(29,159.91 to<br>93,012.17)                         | 152,029.81<br>(80,182.96 to<br>267,667.52)                       | 2,412.99<br>(1,892.12 to<br>3,051.22)                       | 4,165.25<br>(2,325.54 to<br>8,904.14)                         | 2,663.46<br>(1,603.23 to<br>6,052.19)                        | 6,648.46<br>(3,668.44 to<br>12,820.91)                        |
| Stroke                         | 32,268.91<br>(24,358.62 to<br>42,868.57)                         | 41,320.19<br>(19,887.93 to<br>109,850.94)                        | 25,702.21<br>(13,313.26 to<br>72,418.22)                         | 65,320.92<br>(31,830.79 to<br>156,761.79)                        | 1,071.47<br>(839.45 to<br>1,376.42)                         | 2,370.13<br>(1,135.79 to<br>6,749.58)                         | 1,633.93<br>(815.30 to<br>4,865.77)                          | 3,503.35<br>(1,639.48 to<br>9,418.79)                         |
| Ischemic stroke                | 50,683.52<br>(38,240.18 to<br>66,767.14)                         | 46,590.64<br>(22,727.17 to<br>92,759.00)                         | 24,098.83<br>(12,942.90 to<br>45,317.59)                         | 86,708.89<br>(41,312.83 to<br>173,375.99)                        | 1,341.53<br>(1,020.13 to<br>1,746.35)                       | 1,795.12<br>(927.95 to<br>3,556.24)                           | 1,029.53<br>(591.27 to<br>1,869.22)                          | 3,145.11<br>(1,581.66 to<br>6,333.72)                         |
| Intracerebral hemorrhage       | 6,754.35<br>(4,447.75 to<br>10,105.53)                           | 17,190.80<br>(8,881.79 to<br>34,008.10)                          | 12,637.95<br>(7,667.05 to<br>21,158.68)                          | 21,915.59<br>(10,631.15 to<br>44,879.66)                         | 199.71<br>(135.38 to<br>293.83)                             | 824.59<br>(432.89 to<br>1,642.73)                             | 631.24<br>(379.28 to<br>1,091.79)                            | 1,005.92<br>(496.59 to<br>2,140.46)                           |
| Hypertensive heart disease     | 10,085.39<br>(6,430.45 to<br>15,192.59)                          | 10,061.79<br>(5,867.30 to<br>16,337.10)                          | 8,720.90<br>(5,227.25 to<br>13,754.15)                           | 12,086.24<br>(6,817.31 to<br>19,668.10)                          | 240.90<br>(154.68 to<br>362.23)                             | 365.98<br>(227.89 to<br>570.87)                               | 323.42<br>(207.65 to<br>484.10)                              | 428.46<br>(263.86 to<br>671.15)                               |
| Cardiomyopathy and myocarditis | 1,873.39<br>(864.80 to<br>3,765.26)                              | 1,945.81<br>(972.96 to<br>3,767.70)                              | 1,898.37<br>(977.08 to<br>3,540.95)                              | 2,033.44<br>(984.48 to<br>4,028.76)                              | 39.26<br>(17.42 to<br>80.43)                                | 54.31<br>(29.56 to<br>102.67)                                 | 54.11<br>(30.37 to<br>99.21)                                 | 55.23<br>(29.01 to<br>106.45)                                 |
| Mycocarditis                   | <b>United Arab Emirates</b>                                      |                                                                  |                                                                  |                                                                  |                                                             |                                                               |                                                              |                                                               |
|                                | <b>YLLs (actual counts)</b>                                      |                                                                  |                                                                  |                                                                  | <b>Deaths (actual counts)</b>                               |                                                               |                                                              |                                                               |

| Cause                                                         | 2016                                                | 2040 Forecast                                        | 2040 Better Scenario                                | 2040 Worse Scenario                                  | 2016                                             | 2040 Forecast                                    | 2040 Better Scenario                             | 2040 Worse Scenario                              |
|---------------------------------------------------------------|-----------------------------------------------------|------------------------------------------------------|-----------------------------------------------------|------------------------------------------------------|--------------------------------------------------|--------------------------------------------------|--------------------------------------------------|--------------------------------------------------|
| Alcoholic cardiomyopathy                                      | 1,058.83<br>(333.38 to 2,109.47)                    | 1,338.93<br>(480.19 to 2,565.07)                     | 1,265.18<br>(440.91 to 2,411.22)                    | 1,563.72<br>(585.09 to 2,982.06)                     | 27.20<br>(8.46 to 53.81)                         | 51.17<br>(19.03 to 97.84)                        | 49.76<br>(18.21 to 95.34)                        | 57.25<br>(22.03 to 107.95)                       |
| Other cardiomyopathy                                          | 7,153.17<br>(4,706.35 to 10,373.60)                 | 6,777.04<br>(3,678.07 to 11,584.70)                  | 5,557.35<br>(3,133.21 to 8,950.40)                  | 8,489.09<br>(4,695.74 to 14,657.02)                  | 174.44<br>(115.81 to 251.85)                     | 260.50<br>(152.11 to 413.52)                     | 219.54<br>(132.71 to 333.82)                     | 315.98<br>(189.61 to 504.85)                     |
| Atrial fibrillation and flutter                               | 548.33<br>(411.11 to 718.72)                        | 2,980.52<br>(2,183.15 to 3,980.79)                   | 2,767.70<br>(2,081.41 to 3,616.35)                  | 3,181.72<br>(2,299.97 to 4,312.15)                   | 28.99<br>(22.49 to 36.82)                        | 238.49<br>(171.93 to 317.61)                     | 231.76<br>(169.66 to 304.62)                     | 241.96<br>(172.35 to 325.28)                     |
| Aortic aneurysm                                               | 2,891.62<br>(1,953.61 to 4,111.57)                  | 3,811.96<br>(2,542.43 to 5,358.22)                   | 3,290.12<br>(2,243.61 to 4,389.60)                  | 4,272.66<br>(2,843.09 to 6,042.45)                   | 79.39<br>(55.41 to 111.06)                       | 164.35<br>(113.62 to 217.62)                     | 148.13<br>(104.54 to 190.90)                     | 176.92<br>(122.59 to 259.29)                     |
| Peripheral artery disease                                     | 76.22<br>(49.37 to 127.98)                          | 390.93<br>(222.00 to 667.40)                         | 369.69<br>(210.02 to 635.82)                        | 436.61<br>(259.58 to 727.79)                         | 3.29<br>(3.09 to 5.41)                           | 27.90<br>(15.22 to 48.64)                        | 27.67<br>(15.17 to 48.39)                        | 29.50<br>(16.35 to 50.46)                        |
| Endocarditis                                                  | 3,104.06<br>(2,259.77 to 4,312.06)                  | 5,796.66<br>(3,939.61 to 8,392.89)                   | 5,390.88<br>(3,735.93 to 7,604.39)                  | 6,022.49<br>(4,113.17 to 8,782.93)                   | 73.71<br>(55.27 to 101.82)                       | 229.97<br>(160.56 to 326.15)                     | 219.72<br>(155.96 to 306.95)                     | 230.91<br>(161.14 to 327.60)                     |
| Other cardiovascular and circulatory diseases                 | 5,233.90<br>(3,260.82 to 11,655.42)                 | 8,596.08<br>(5,376.17 to 16,059.54)                  | 6,931.92<br>(4,607.61 to 12,426.15)                 | 10,719.42<br>(6,583.48 to 20,717.74)                 | 139.33<br>(91.00 to 302.08)                      | 435.06<br>(286.27 to 697.08)                     | 371.56<br>(252.24 to 571.27)                     | 513.44<br>(337.00 to 846.94)                     |
| <b>Chronic respiratory diseases</b>                           | <b>49,884.56</b><br><b>(36,950.65 to 64,961.67)</b> | <b>74,785.49</b><br><b>(47,775.82 to 115,683.81)</b> | <b>58,885.18</b><br><b>(39,076.18 to 86,517.08)</b> | <b>93,940.41</b><br><b>(59,124.83 to 151,919.60)</b> | <b>1,335.03</b><br><b>(1,011.10 to 1,726.16)</b> | <b>3,173.02</b><br><b>(2,124.76 to 4,709.43)</b> | <b>2,498.14</b><br><b>(1,747.49 to 3,505.39)</b> | <b>3,909.12</b><br><b>(2,544.42 to 6,026.65)</b> |
| Chronic obstructive pulmonary disease                         | 27,436.55<br>(19,101.21 to 38,949.90)               | 50,863.70<br>(27,774.98 to 89,882.74)                | 35,407.70<br>(19,140.10 to 59,934.26)               | 68,622.23<br>(37,372.79 to 124,955.66)               | 777.61<br>(564.52 to 1,069.64)                   | 2,270.58<br>(1,291.88 to 3,747.97)               | 1,579.49<br>(904.47 to 2,563.55)                 | 3,003.99<br>(1,720.21 to 4,948.59)               |
| Pneumoconiosis                                                | 198.85<br>(119.46 to 301.56)                        | 175.69<br>(114.03 to 252.84)                         | 179.66<br>(115.45 to 261.90)                        | 180.29<br>(119.70 to 256.42)                         | 5.18<br>(3.20 to 7.73)                           | 7.00<br>(4.95 to 9.44)                           | 7.24<br>(4.97 to 9.94)                           | 7.15<br>(5.09 to 9.70)                           |
| Silicosis                                                     | 7.86<br>(3.42 to 16.68)                             | 5.18<br>(2.40 to 9.47)                               | 4.59<br>(2.19 to 8.31)                              | 6.35<br>(3.04 to 11.95)                              | 0.26<br>(0.12 to 0.53)                           | 0.31<br>(0.14 to 0.58)                           | 0.29<br>(0.13 to 0.52)                           | 0.36<br>(0.18 to 0.67)                           |
| Asbestosis                                                    | 85.11<br>(50.12 to 129.88)                          | 107.41<br>(66.36 to 159.83)                          | 115.70<br>(66.55 to 177.84)                         | 97.57<br>(62.73 to 146.09)                           | 2.01<br>(1.21 to 3.07)                           | 3.38<br>(2.19 to 4.82)                           | 3.70<br>(2.29 to 5.28)                           | 3.01<br>(2.01 to 4.34)                           |
| Coal workers pneumoconiosis                                   | 3.77<br>(1.53 to 7.28)                              | 5.82<br>(2.73 to 10.22)                              | 5.64<br>(2.62 to 10.04)                             | 6.68<br>(3.08 to 11.50)                              | 0.13<br>(0.05 to 0.24)                           | 0.34<br>(0.16 to 0.60)                           | 0.34<br>(0.16 to 0.63)                           | 0.37<br>(0.17 to 0.63)                           |
| Other pneumoconiosis                                          | 102.11<br>(60.59 to 156.81)                         | 57.28<br>(36.65 to 85.19)                            | 53.73<br>(33.55 to 78.35)                           | 69.69<br>(45.42 to 102.60)                           | 2.78<br>(1.70 to 4.21)                           | 2.97<br>(1.97 to 4.25)                           | 2.91<br>(1.89 to 4.28)                           | 3.41<br>(2.30 to 4.91)                           |
| Asthma                                                        | 12,854.42<br>(8,008.01 to 18,406.52)                | 5,310.73<br>(2,622.24 to 9,834.38)                   | 3,686.80<br>(1,897.23 to 6,680.85)                  | 8,405.70<br>(4,232.79 to 15,184.77)                  | 312.36<br>(187.75 to 446.28)                     | 179.60<br>(93.71 to 319.23)                      | 129.23<br>(69.61 to 223.54)                      | 273.45<br>(140.07 to 482.90)                     |
| Interstitial lung disease and pulmonary sarcoidosis           | 4,993.77<br>(2,454.71 to 9,312.49)                  | 12,113.59<br>(6,861.63 to 19,958.82)                 | 13,477.34<br>(7,950.04 to 21,272.82)                | 10,270.01<br>(5,780.92 to 17,360.05)                 | 136.24<br>(88.55 to 247.99)                      | 511.54<br>(297.91 to 799.09)                     | 380.45<br>(238.62 to 578.46)                     | 421.04<br>(238.62 to 667.84)                     |
| Other chronic respiratory diseases                            | 4,900.96<br>(2,338.70 to 8,256.99)                  | 6,321.78<br>(3,412.87 to 11,837.71)                  | 6,133.68<br>(3,357.54 to 11,201.21)                 | 6,462.18<br>(3,409.03 to 12,332.65)                  | 103.63<br>(54.20 to 193.23)                      | 204.31<br>(115.80 to 380.07)                     | 201.73<br>(115.59 to 368.68)                     | 203.49<br>(113.44 to 384.25)                     |
| <b>Cirrhosis and other chronic liver diseases</b>             | <b>14,820.16</b><br><b>(10,270.85 to 19,339.58)</b> | <b>22,782.89</b><br><b>(14,985.61 to 29,880.24)</b>  | <b>21,736.51</b><br><b>(13,914.84 to 27,988.87)</b> | <b>24,930.24</b><br><b>(16,799.23 to 32,223.79)</b>  | <b>428.80</b><br><b>(290.66 to 562.71)</b>       | <b>945.42</b><br><b>(620.66 to 1,211.57)</b>     | <b>916.46</b><br><b>(571.78 to 1,175.68)</b>     | <b>1,011.99</b><br><b>(669.95 to 1,290.20)</b>   |
| Cirrhosis and other chronic liver diseases due to hepatitis B | 5,421.43<br>(3,440.17 to 7,824.24)                  | 8,302.16<br>(5,178.95 to 11,459.71)                  | 7,994.32<br>(4,893.35 to 11,030.30)                 | 8,913.13<br>(5,625.45 to 12,306.21)                  | 158.50<br>(98.69 to 227.75)                      | 347.53<br>(219.46 to 472.09)                     | 339.78<br>(205.17 to 461.24)                     | 365.44<br>(230.38 to 498.55)                     |
| Cirrhosis and other chronic liver diseases due to hepatitis C | 5,084.92<br>(3,182.67 to 7,424.96)                  | 7,327.00<br>(4,269.36 to 10,635.74)                  | 7,012.86<br>(4,014.61 to 10,086.96)                 | 7,934.15<br>(4,741.75 to 11,285.36)                  | 148.44<br>(90.63 to 214.59)                      | 297.83<br>(168.98 to 429.78)                     | 289.09<br>(161.68 to 410.83)                     | 316.37<br>(180.91 to 454.66)                     |
| Cirrhosis and other chronic liver diseases due to alcohol use | 1,456.01<br>(941.22 to 2,080.54)                    | 2,313.15<br>(1,461.27 to 3,180.68)                   | 2,099.57<br>(1,303.93 to 2,872.66)                  | 2,857.84<br>(1,856.62 to 3,831.57)                   | 43.19<br>(27.42 to 61.09)                        | 98.87<br>(61.67 to 134.15)                       | 91.71<br>(55.12 to 123.85)                       | 118.09<br>(75.44 to 158.50)                      |

|                                                                |                                                   |                                                   |                                                   |                                                   |                                          |                                                |                                                |                                                |
|----------------------------------------------------------------|---------------------------------------------------|---------------------------------------------------|---------------------------------------------------|---------------------------------------------------|------------------------------------------|------------------------------------------------|------------------------------------------------|------------------------------------------------|
|                                                                | 2,857.81<br>(2,103.51 to<br>3,894.90)             | 4,840.57<br>(3,388.22 to<br>6,457.03)             | 4,629.77<br>(3,281.57 to<br>6,208.07)             | 5,225.12<br>(3,721.89 to<br>7,037.85)             | 78.67<br>(56.36 to<br>107.20)            | 201.20<br>(141.70 to<br>268.81)                | 195.87<br>(138.00 to<br>261.71)                | 212.08<br>(148.07 to<br>282.12)                |
| Cirrhosis and other chronic liver diseases due to other causes |                                                   |                                                   |                                                   |                                                   |                                          |                                                |                                                |                                                |
| <b>Digestive diseases</b>                                      | <b>9,919.32<br/>(6,293.09 to<br/>13,660.34)</b>   | <b>14,301.89<br/>(9,309.52 to<br/>19,793.65)</b>  | <b>13,221.72<br/>(8,713.95 to<br/>17,923.94)</b>  | <b>16,521.65<br/>(10,647.95 to<br/>22,938.08)</b> | <b>263.91<br/>(167.94 to<br/>361.46)</b> | <b>669.56<br/>(447.84 to<br/>896.19)</b>       | <b>639.98<br/>(432.60 to<br/>849.90)</b>       | <b>736.84<br/>(494.77 to<br/>899.22)</b>       |
| Peptic ulcer disease                                           | 1,671.76<br>(1,002.33 to<br>2,359.79)             | 1,844.91<br>(1,148.12 to<br>2,699.27)             | 1,608.54<br>(1,018.45 to<br>2,267.92)             | 2,215.20<br>(1,368.11 to<br>3,228.45)             | 52.41<br>(32.21 to<br>72.46)             | 103.94<br>(65.84 to<br>150.43)                 | 93.92<br>(61.44 to<br>133.49)                  | 119.59<br>(75.14 to<br>173.74)                 |
| <b>United Arab Emirates</b>                                    |                                                   |                                                   |                                                   |                                                   |                                          |                                                |                                                |                                                |
| <b>Cause</b>                                                   | <b>YLLs (actual counts)</b>                       |                                                   |                                                   |                                                   | <b>Deaths (actual counts)</b>            |                                                |                                                |                                                |
|                                                                | <b>2016</b>                                       | <b>2040 Forecast</b>                              | <b>2040 Better Scenario</b>                       | <b>2040 Worse Scenario</b>                        | <b>2016</b>                              | <b>2040 Forecast</b>                           | <b>2040 Better Scenario</b>                    | <b>2040 Worse Scenario</b>                     |
|                                                                | 79.57<br>(35.35 to<br>134.79)                     | 91.05<br>(45.09 to<br>143.88)                     | 84.33<br>(42.81 to<br>132.15)                     | 103.59<br>(51.10 to<br>166.27)                    | 2.08<br>(0.95 to<br>3.43)                | 3.65<br>(2.02 to<br>5.50)                      | 3.47<br>(1.95 to<br>5.04)                      | 4.01<br>(2.19 to<br>6.04)                      |
| Gastritis and duodenitis                                       | 843.81<br>(531.80 to<br>1,205.58)                 | 697.94<br>(421.65 to<br>1,024.15)                 | 622.84<br>(386.54 to<br>902.28)                   | 835.80<br>(516.10 to<br>1,211.47)                 | 19.32<br>(12.27 to<br>26.93)             | 26.88<br>(16.71 to<br>39.08)                   | 24.65<br>(15.67 to<br>35.00)                   | 31.05<br>(19.58 to<br>44.71)                   |
| Appendicitis                                                   | 1,751.75<br>(1,067.99 to<br>2,852.37)             | 3,323.80<br>(2,131.32 to<br>5,282.27)             | 3,411.48<br>(2,217.30 to<br>5,325.38)             | 3,241.30<br>(2,036.94 to<br>5,254.74)             | 43.99<br>(27.30 to<br>73.01)             | 165.97<br>(108.32 to<br>255.46)                | 175.32<br>(113.84 to<br>268.09)                | 155.71<br>(101.37 to<br>247.34)                |
| Paralytic ileus and intestinal obstruction                     | 185.49<br>(116.07 to<br>271.68)                   | 204.16<br>(125.12 to<br>297.86)                   | 194.58<br>(123.00 to<br>280.66)                   | 222.48<br>(137.17 to<br>327.04)                   | 5.12<br>(3.19 to<br>7.65)                | 10.69<br>(6.75 to<br>15.76)                    | 10.52<br>(6.72 to<br>15.28)                    | 11.18<br>(7.15 to<br>16.61)                    |
| Inguinal, femoral, and abdominal hernia                        | 514.15<br>(275.92 to<br>909.81)                   | 640.08<br>(356.15 to<br>1,058.64)                 | 639.79<br>(359.46 to<br>1,037.25)                 | 648.64<br>(355.25 to<br>1,105.00)                 | 11.90<br>(6.31 to<br>21.46)              | 22.70<br>(13.37 to<br>36.89)                   | 23.21<br>(13.73 to<br>37.39)                   | 22.33<br>(13.05 to<br>36.52)                   |
| Inflammatory bowel disease                                     | 894.72<br>(542.52 to<br>1,400.87)                 | 1,746.96<br>(1,118.01 to<br>2,572.82)             | 1,717.56<br>(1,095.27 to<br>2,520.89)             | 1,818.71<br>(1,146.59 to<br>2,704.04)             | 25.88<br>(16.30 to<br>39.92)             | 85.52<br>(55.54 to<br>135.59)                  | 86.03<br>(56.34 to<br>124.29)                  | 86.29<br>(55.59 to<br>127.53)                  |
| Vascular intestinal disorders                                  | 928.34<br>(563.23 to<br>1,310.60)                 | 1,812.83<br>(888.43 to<br>3,103.01)               | 1,437.43<br>(720.49 to<br>2,415.43)               | 2,445.84<br>(1,166.75 to<br>4,240.26)             | 26.92<br>(17.00 to<br>36.58)             | 90.93<br>(45.76 to<br>154.36)                  | 75.31<br>(39.22 to<br>126.18)                  | 116.44<br>(57.60 to<br>200.44)                 |
| Gallbladder and biliary diseases                               | 1,732.68<br>(1,034.59 to<br>2,699.34)             | 2,043.60<br>(977.19 to<br>4,454.90)               | 1,651.05<br>(848.73 to<br>3,547.32)               | 3,003.30<br>(1,315.23 to<br>6,887.02)             | 42.98<br>(25.98 to<br>66.63)             | 75.02<br>(38.04 to<br>147.98)                  | 62.76<br>(33.89 to<br>118.14)                  | 105.30<br>(49.57 to<br>224.25)                 |
| Pancreatitis                                                   | 1,317.06<br>(847.35 to<br>2,004.26)               | 1,896.56<br>(1,275.17 to<br>2,746.84)             | 1,854.12<br>(1,255.24 to<br>2,650.66)             | 1,986.79<br>(1,328.55 to<br>2,898.77)             | 33.32<br>(21.19 to<br>50.77)             | 84.27<br>(58.28 to<br>121.12)                  | 84.80<br>(58.82 to<br>121.89)                  | 84.94<br>(59.23 to<br>124.48)                  |
| Other digestive diseases                                       | <b>15,951.55<br/>(12,269.31 to<br/>19,826.05)</b> | <b>60,923.55<br/>(45,902.89 to<br/>81,767.43)</b> | <b>60,194.73<br/>(46,241.05 to<br/>78,613.67)</b> | <b>63,738.72<br/>(46,061.24 to<br/>90,442.79)</b> | <b>564.70<br/>(458.34 to<br/>686.59)</b> | <b>4,240.18<br/>(3,104.37 to<br/>5,846.54)</b> | <b>4,319.93<br/>(3,267.80 to<br/>5,742.03)</b> | <b>4,257.25<br/>(2,955.85 to<br/>6,265.97)</b> |
| <b>Neurological disorders</b>                                  |                                                   |                                                   |                                                   |                                                   |                                          |                                                |                                                |                                                |
| Alzheimer's disease and other dementias                        | 4,942.44<br>(3,936.45 to<br>6,184.06)             | 43,486.06<br>(29,631.32 to<br>64,277.19)          | 42,777.45<br>(30,259.46 to<br>60,506.50)          | 45,714.36<br>(29,231.17 to<br>71,475.97)          | 317.64<br>(261.30 to<br>389.47)          | 3,526.40<br>(2,418.19 to<br>5,049.39)          | 3,569.37<br>(2,543.93 to<br>4,954.60)          | 3,573.57<br>(2,296.01 to<br>5,523.41)          |
| Parkinson's disease                                            | 797.26<br>(574.62 to<br>1,097.06)                 | 5,455.23<br>(4,067.51 to<br>6,984.71)             | 5,935.50<br>(4,441.25 to<br>7,631.48)             | 4,887.61<br>(3,547.03 to<br>6,353.91)             | 38.80<br>(28.88 to<br>50.78)             | 405.92<br>(296.47 to<br>529.90)                | 450.33<br>(332.64 to<br>587.93)                | 354.16<br>(250.46 to<br>464.60)                |
| Epilepsy                                                       | 5,886.71<br>(4,247.61 to<br>7,756.46)             | 6,522.79<br>(4,243.11 to<br>10,037.54)            | 5,984.16<br>(3,922.77 to<br>9,002.35)             | 7,707.32<br>(4,851.96 to<br>12,161.67)            | 115.18<br>(82.37 to<br>151.00)           | 155.84<br>(106.10 to<br>230.44)                | 145.04<br>(100.12 to<br>211.80)                | 180.91<br>(118.91 to<br>273.73)                |
| Multiple sclerosis                                             | 778.40<br>(453.60 to<br>1,310.00)                 | 910.05<br>(559.17 to<br>1,505.30)                 | 910.52<br>(555.57 to<br>1,465.65)                 | 910.18<br>(554.10 to<br>1,505.99)                 | 18.04<br>(10.59 to<br>30.46)             | 24.62<br>(15.91 to<br>39.61)                   | 24.60<br>(16.12 to<br>38.95)                   | 24.36<br>(15.54 to<br>39.32)                   |
| Motor neuron disease                                           | 1,025.15<br>(560.73 to<br>1,487.24)               | 1,487.04<br>(821.57 to<br>2,087.81)               | 1,497.66<br>(833.93 to<br>2,126.02)               | 1,489.81<br>(810.75 to<br>2,085.24)               | 25.53<br>(13.55 to<br>37.39)             | 44.51<br>(25.80 to<br>60.65)                   | 45.21<br>(26.61 to<br>61.99)                   | 44.09<br>(25.14 to<br>59.77)                   |
| Other neurological disorders                                   | 2,521.58<br>(1,868.51 to<br>3,378.71)             | 3,062.38<br>(2,280.43 to<br>4,018.43)             | 3,098.43<br>(2,307.11 to<br>4,019.27)             | 3,029.43<br>(2,240.30 to<br>3,995.04)             | 49.51<br>(35.81 to<br>68.07)             | 82.88<br>(64.05 to<br>107.29)                  | 85.38<br>(65.90 to<br>109.68)                  | 80.17<br>(62.03 to<br>104.00)                  |
| <b>Mental disorders</b>                                        | <b>9,776.09<br/>(6,402.52 to<br/>14,051.59)</b>   | <b>18,284.35<br/>(12,212.91 to<br/>25,824.88)</b> | <b>19,549.95<br/>(13,315.07 to<br/>27,257.47)</b> | <b>16,804.94<br/>(11,205.44 to<br/>23,782.47)</b> | <b>206.69<br/>(135.07 to<br/>295.78)</b> | <b>458.54<br/>(316.08 to<br/>633.66)</b>       | <b>496.93<br/>(347.84 to<br/>678.19)</b>       | <b>414.41<br/>(285.09 to<br/>574.33)</b>       |



|                           |                                        |                                          |                                          |                                         |                                |                                 |                                 |                                 |
|---------------------------|----------------------------------------|------------------------------------------|------------------------------------------|-----------------------------------------|--------------------------------|---------------------------------|---------------------------------|---------------------------------|
| Alcohol use disorders     | 2,504.08<br>(1,367.36 to<br>4,145.07)  | 2,820.02<br>(1,515.51 to<br>4,783.88)    | 2,886.24<br>(1,564.32 to<br>4,778.96)    | 2,800.43<br>(1,494.53 to<br>4,781.58)   | 58.04<br>(31.60 to<br>95.68)   | 75.81<br>(44.09 to<br>121.70)   | 78.45<br>(45.79 to<br>124.67)   | 74.15<br>(42.90 to<br>121.61)   |
| Drug use disorders        | 7,241.15<br>(4,665.48 to<br>10,444.89) | 15,419.82<br>(10,195.79 to<br>21,871.34) | 16,618.57<br>(11,105.00 to<br>23,457.95) | 13,960.37<br>(9,240.48 to<br>19,973.77) | 148.02<br>(96.61 to<br>212.63) | 381.81<br>(261.90 to<br>536.77) | 417.54<br>(288.23 to<br>573.57) | 339.34<br>(233.24 to<br>475.28) |
| Opioid use disorders      | 5,712.95<br>(3,695.11 to<br>8,264.03)  | 9,812.27<br>(6,445.18 to<br>13,971.72)   | 10,192.71<br>(6,788.47 to<br>14,350.07)  | 9,364.10<br>(6,203.97 to<br>13,265.96)  | 116.02<br>(75.73 to<br>166.76) | 234.97<br>(159.49 to<br>326.19) | 246.68<br>(169.44 to<br>339.45) | 221.31<br>(150.04 to<br>306.76) |
| Cocaine use disorders     | 260.20<br>(138.06 to<br>447.60)        | 886.25<br>(472.58 to<br>1,572.30)        | 975.95<br>(526.09 to<br>1,722.15)        | 771.16<br>(396.78 to<br>1,386.35)       | 5.45<br>(2.87 to<br>9.27)      | 21.17<br>(11.31 to<br>37.39)    | 23.44<br>(12.61 to<br>41.18)    | 18.28<br>(9.63 to<br>33.23)     |
| Amphetamine use disorders | 162.62<br>(84.03 to<br>302.04)         | 940.35<br>(448.01 to<br>1,901.66)        | 1,086.85<br>(535.88 to<br>2,147.01)      | 756.09<br>(358.81 to<br>1,557.78)       | 3.35<br>(1.72 to<br>6.20)      | 21.56<br>(10.46 to<br>44.22)    | 25.02<br>(12.56 to<br>49.58)    | 17.24<br>(8.21 to<br>36.17)     |
| Other drug use disorders  | 1,105.38<br>(560.73 to<br>1,709.20)    | 3,780.95<br>(2,015.28 to<br>5,888.22)    | 4,363.07<br>(2,365.58 to<br>6,618.27)    | 3,069.02<br>(1,662.07 to<br>4,903.32)   | 23.19<br>(12.07 to<br>35.31)   | 104.12<br>(57.67 to<br>155.96)  | 122.39<br>(68.12 to<br>176.65)  | 82.50<br>(46.21 to<br>125.54)   |
| Eating disorders          | 30.85<br>(16.51 to<br>48.46)           | 44.52<br>(23.14 to<br>72.33)             | 45.14<br>(23.65 to<br>74.09)             | 44.13<br>(22.96 to<br>71.26)            | 0.63<br>(0.32 to<br>0.99)      | 0.92<br>(0.47 to<br>1.51)       | 0.93<br>(0.48 to<br>1.53)       | 0.91<br>(0.46 to<br>1.48)       |

**United Arab Emirates**

| Cause                                                      | YLLs (actual counts)                            |                                                    |                                                   |                                                    | Deaths (actual counts)                       |                                                |                                               |                                                |
|------------------------------------------------------------|-------------------------------------------------|----------------------------------------------------|---------------------------------------------------|----------------------------------------------------|----------------------------------------------|------------------------------------------------|-----------------------------------------------|------------------------------------------------|
|                                                            | 2016                                            | 2040 Forecast                                      | 2040 Better Scenario                              | 2040 Worse Scenario                                | 2016                                         | 2040 Forecast                                  | 2040 Better Scenario                          | 2040 Worse Scenario                            |
| <b>Diabetes, urogenital, blood, and endocrine diseases</b> | <b>74,034.23</b><br>(56,725.13 to<br>94,745.88) | <b>195,984.25</b><br>(106,955.10 to<br>383,136.77) | <b>166,681.02</b><br>(92,322.95 to<br>338,876.39) | <b>246,984.57</b><br>(132,553.32 to<br>446,221.74) | <b>2,243.09</b><br>(1,758.31 to<br>2,849.12) | <b>10,253.76</b><br>(5,332.15 to<br>20,769.95) | <b>8,932.89</b><br>(4,783.70 to<br>19,450.34) | <b>12,462.48</b><br>(6,597.26 to<br>22,514.85) |
| Diabetes mellitus                                          | 26,589.06<br>(20,409.26 to<br>34,463.37)        | 57,103.62<br>(36,939.05 to<br>79,879.90)           | 47,594.94<br>(31,572.73 to<br>65,141.59)          | 71,097.59<br>(46,322.81 to<br>100,586.14)          | 941.92<br>(742.83 to<br>1,197.23)            | 3,205.28<br>(2,158.80 to<br>4,412.59)          | 2,775.28<br>(1,895.56 to<br>3,667.47)         | 3,823.78<br>(2,538.66 to<br>5,236.01)          |
| Acute glomerulonephritis                                   | 66.93<br>(52.12 to<br>84.98)                    | 62.52<br>(43.51 to<br>87.21)                       | 58.01<br>(40.88 to<br>80.17)                      | 70.25<br>(49.74 to<br>96.05)                       | 1.22<br>(0.95 to<br>1.54)                    | 1.35<br>(0.97 to<br>1.86)                      | 1.27<br>(0.91 to<br>1.73)                     | 1.49<br>(1.08 to<br>2.02)                      |
| Chronic kidney disease                                     | 35,961.78<br>(25,405.02 to<br>49,489.56)        | 119,913.17<br>(31,459.56 to<br>310,525.05)         | 100,262.38<br>(26,812.31 to<br>273,166.85)        | 156,398.20<br>(42,062.88 to<br>368,814.92)         | 1,042.12<br>(747.88 to<br>1,419.80)          | 6,266.86<br>(3,034.31 to<br>17,097.27)         | 5,361.37<br>(1,155.03 to<br>16,047.59)        | 7,862.34<br>(1,795.90 to<br>18,728.61)         |
| Chronic kidney disease due to diabetes mellitus            | 16,370.39<br>(11,145.12 to<br>23,368.29)        | 61,924.53<br>(15,344.97 to<br>164,047.88)          | 51,401.85<br>(13,096.15 to<br>145,455.79)         | 81,405.12<br>(20,478.89 to<br>197,291.52)          | 494.00<br>(346.93 to<br>695.99)              | 3,034.31<br>(624.03 to<br>8,606.53)            | 2,563.20<br>(534.81 to<br>7,663.42)           | 3,866.14<br>(850.21 to<br>9,442.49)            |
| Chronic kidney disease due to hypertension                 | 3,745.86<br>(2,616.99 to<br>5,293.37)           | 21,691.03<br>(4,677.95 to<br>59,134.36)            | 18,712.72<br>(4,034.55 to<br>55,589.05)           | 26,875.20<br>(6,034.20 to<br>65,147.06)            | 137.94<br>(100.42 to<br>191.95)              | 1,478.95<br>(279.54 to<br>4,098.28)            | 1,316.45<br>(250.89 to<br>3,946.43)           | 1,745.11<br>(357.99 to<br>4,220.06)            |
| Chronic kidney disease due to glomerulonephritis           | 5,412.35<br>(3,662.71 to<br>7,749.44)           | 9,838.61<br>(3,381.13 to<br>23,851.84)             | 8,116.20<br>(2,872.57 to<br>20,671.82)            | 13,229.74<br>(4,491.79 to<br>30,033.65)            | 130.76<br>(88.84 to<br>184.12)               | 434.56<br>(107.34 to<br>1,133.73)              | 362.71<br>(91.82 to<br>1,028.09)              | 569.89<br>(148.75 to<br>1,334.94)              |
| Chronic kidney disease due to other and unspecified causes | 10,433.18<br>(6,908.49 to<br>14,961.95)         | 26,458.99<br>(7,700.20 to<br>65,873.61)            | 22,031.61<br>(6,453.08 to<br>58,929.96)           | 34,888.14<br>(10,090.45 to<br>78,889.58)           | 279.42<br>(188.39 to<br>394.33)              | 1,319.05<br>(299.29 to<br>3,561.48)            | 1,119.01<br>(255.41 to<br>3,272.45)           | 1,681.20<br>(397.90 to<br>4,105.39)            |
| Urinary diseases and male infertility                      | 1,725.79<br>(1,312.49 to<br>2,273.50)           | 4,430.31<br>(3,142.58 to<br>5,985.83)              | 4,257.00<br>(3,063.15 to<br>5,706.37)             | 4,772.80<br>(3,361.40 to<br>6,386.12)              | 53.92<br>(41.93 to<br>70.02)                 | 272.48<br>(194.63 to<br>363.29)                | 270.44<br>(195.59 to<br>362.08)               | 281.01<br>(197.92 to<br>371.24)                |
| Urinary tract infections                                   | 1,336.49<br>(1,037.78 to<br>1,740.06)           | 3,953.01<br>(2,844.89 to<br>5,263.02)              | 3,818.40<br>(2,759.62 to<br>5,099.09)             | 4,222.79<br>(3,011.36 to<br>5,594.74)              | 43.29<br>(34.42 to<br>55.22)                 | 247.88<br>(180.82 to<br>325.61)                | 246.98<br>(179.67 to<br>322.72)               | 253.96<br>(180.72 to<br>332.52)                |
| Urolithiasis                                               | 99.56<br>(68.25 to<br>145.79)                   | 112.79<br>(67.78 to<br>186.54)                     | 100.87<br>(61.84 to<br>166.73)                    | 134.92<br>(83.61 to<br>223.19)                     | 2.27<br>(1.54 to<br>3.47)                    | 4.10<br>(2.45 to<br>7.35)                      | 3.77<br>(2.27 to<br>6.91)                     | 4.74<br>(2.82 to<br>8.66)                      |
| Other urinary diseases                                     | 289.73<br>(166.17 to<br>518.77)                 | 364.50<br>(174.54 to<br>717.50)                    | 337.72<br>(162.66 to<br>670.42)                   | 415.10<br>(202.68 to<br>824.00)                    | 8.36<br>(4.52 to<br>15.36)                   | 20.50<br>(9.05 to<br>43.09)                    | 19.69<br>(8.69 to<br>41.94)                   | 22.31<br>(10.08 to<br>47.58)                   |
| Gynecological diseases                                     | 24.79<br>(13.43 to<br>41.03)                    | 19.45<br>(8.34 to<br>36.60)                        | 15.87<br>(7.23 to<br>29.02)                       | 26.26<br>(11.63 to<br>49.62)                       | 0.51<br>(0.28 to<br>0.86)                    | 0.46<br>(0.21 to<br>0.85)                      | 0.38<br>(0.18 to<br>0.69)                     | 0.62<br>(0.28 to<br>1.14)                      |

|                                                   |                                                 |                                                |                                                |                                                 |                                        |                                        |                                        |                                        |
|---------------------------------------------------|-------------------------------------------------|------------------------------------------------|------------------------------------------------|-------------------------------------------------|----------------------------------------|----------------------------------------|----------------------------------------|----------------------------------------|
| Uterine fibroids                                  | 0.59<br>(0.22 to<br>1.35)                       | 0.78<br>(0.26 to<br>1.79)                      | 0.68<br>(0.24 to<br>1.50)                      | 0.94<br>(0.31 to<br>2.19)                       | 0.01<br>(0.01 to<br>0.03)              | 0.02<br>(0.01 to<br>0.05)              | 0.02<br>(0.01 to<br>0.05)              | 0.03<br>(0.01 to<br>0.07)              |
| Polycystic ovarian syndrome                       | 2.60<br>(0.97 to<br>6.02)                       | 1.09<br>(0.31 to<br>2.98)                      | 0.80<br>(0.24 to<br>2.19)                      | 1.73<br>(0.51 to<br>4.57)                       | 0.06<br>(0.02 to<br>0.13)              | 0.02<br>(0.01 to<br>0.07)              | 0.02<br>(0.01 to<br>0.05)              | 0.04<br>(0.01 to<br>0.10)              |
| Endometriosis                                     | 0.27<br>(0.11 to<br>0.60)                       | 0.31<br>(0.10 to<br>0.71)                      | 0.26<br>(0.08 to<br>0.59)                      | 0.40<br>(0.13 to<br>0.91)                       | 0.01<br>(0.00 to<br>0.01)              | 0.01<br>(0.00 to<br>0.02)              | 0.01<br>(0.00 to<br>0.01)              | 0.01<br>(0.00 to<br>0.02)              |
| Genital prolapse                                  | 0.21<br>(0.10 to<br>0.39)                       | 0.24<br>(0.10 to<br>0.49)                      | 0.20<br>(0.08 to<br>0.40)                      | 0.31<br>(0.13 to<br>0.62)                       | 0.01<br>(0.00 to<br>0.01)              | 0.01<br>(0.00 to<br>0.02)              | 0.01<br>(0.00 to<br>0.01)              | 0.01<br>(0.00 to<br>0.02)              |
| Other gynecological diseases                      | 21.13<br>(11.05 to<br>35.76)                    | 17.03<br>(7.16 to<br>32.25)                    | 13.94<br>(6.16 to<br>25.65)                    | 22.87<br>(9.82 to<br>43.57)                     | 0.43<br>(0.23 to<br>0.73)              | 0.40<br>(0.18 to<br>0.74)              | 0.33<br>(0.15 to<br>0.59)              | 0.53<br>(0.24 to<br>0.99)              |
| Hemoglobinopathies and hemolytic anemias          | 3,139.75<br>(2,121.81 to<br>4,877.46)           | 2,819.87<br>(1,608.08 to<br>4,257.87)          | 2,524.87<br>(1,452.29 to<br>4,212.93)          | 3,347.68<br>(1,941.64 to<br>5,465.59)           | 63.52<br>(42.88 to<br>99.01)           | 85.17<br>(51.98 to<br>139.70)          | 77.81<br>(48.60 to<br>125.47)          | 98.72<br>(60.77 to<br>157.45)          |
| Thalassemias                                      | 291.84<br>(143.40 to<br>616.07)                 | 79.51<br>(38.54 to<br>164.64)                  | 75.89<br>(37.52 to<br>156.13)                  | 83.54<br>(40.36 to<br>172.95)                   | 3.71<br>(1.89 to<br>7.59)              | 1.12<br>(0.58 to<br>2.19)              | 1.07<br>(0.57 to<br>2.09)              | 1.17<br>(0.60 to<br>2.30)              |
| Sickle cell disorders                             | 1,167.16<br>(780.62 to<br>1,825.89)             | 1,038.30<br>(554.49 to<br>1,802.02)            | 926.70<br>(507.37 to<br>1,551.31)              | 1,235.08<br>(689.10 to<br>2,087.30)             | 22.71<br>(15.18 to<br>35.30)           | 24.06<br>(13.13 to<br>41.30)           | 21.60<br>(12.15 to<br>36.19)           | 28.42<br>(16.24 to<br>47.48)           |
| G6PD deficiency                                   | 1,436.93<br>(925.36 to<br>2,314.98)             | 1,346.33<br>(731.03 to<br>2,330.56)            | 1,189.32<br>(667.64 to<br>1,994.09)            | 1,630.99<br>(908.16 to<br>2,765.47)             | 29.59<br>(19.28 to<br>47.52)           | 37.90<br>(22.14 to<br>63.68)           | 33.93<br>(20.24 to<br>56.17)           | 45.19<br>(27.06 to<br>74.65)           |
| Other hemoglobinopathies and hemolytic anemias    | 243.82<br>(167.30 to<br>374.67)                 | 355.74<br>(223.13 to<br>583.09)                | 332.96<br>(211.35 to<br>537.69)                | 398.07<br>(248.98 to<br>647.94)                 | 7.50<br>(5.26 to<br>11.53)             | 22.09<br>(14.41 to<br>35.82)           | 21.21<br>(13.87 to<br>34.08)           | 23.94<br>(15.40 to<br>38.02)           |
| Endocrine, metabolic, blood, and immune disorders | 6,526.12<br>(4,559.99 to<br>8,901.66)           | 11,635.31<br>(8,490.43 to<br>15,150.89)        | 11,967.94<br>(8,813.53 to<br>15,471.48)        | 11,271.80<br>(8,141.42 to<br>14,681.55)         | 139.87<br>(98.95 to<br>189.76)         | 422.16<br>(317.41 to<br>539.82)        | 446.35<br>(335.96 to<br>575.14)        | 394.51<br>(295.31 to<br>503.89)        |
| <b>United Arab Emirates</b>                       |                                                 |                                                |                                                |                                                 |                                        |                                        |                                        |                                        |
| Cause                                             | YLLs (actual counts)                            |                                                |                                                |                                                 | Deaths (actual counts)                 |                                        |                                        |                                        |
|                                                   | 2016                                            | 2040 Forecast                                  | 2040 Better Scenario                           | 2040 Worse Scenario                             | 2016                                   | 2040 Forecast                          | 2040 Better Scenario                   | 2040 Worse Scenario                    |
| <b>Musculoskeletal disorders</b>                  | <b>1,959.87</b><br>(1,260.00 to<br>2,767.44)    | <b>2,465.14</b><br>(1,508.34 to<br>3,561.61)   | <b>2,396.58</b><br>(1,495.29 to<br>3,412.10)   | <b>2,590.81</b><br>(1,556.29 to<br>3,764.50)    | <b>41.46</b><br>(26.81 to<br>58.70)    | <b>70.39</b><br>(45.60 to<br>97.18)    | <b>69.41</b><br>(45.12 to<br>94.93)    | <b>72.71</b><br>(46.92 to<br>100.59)   |
| Rheumatoid arthritis                              | 84.75<br>(47.37 to<br>138.41)                   | 123.21<br>(62.15 to<br>204.12)                 | 106.74<br>(54.47 to<br>176.31)                 | 152.22<br>(78.15 to<br>250.16)                  | 2.04<br>(1.12 to<br>3.41)              | 5.36<br>(2.73 to<br>8.67)              | 4.75<br>(2.46 to<br>7.81)              | 6.44<br>(3.35 to<br>10.38)             |
| Other musculoskeletal disorders                   | 1,875.12<br>(1,191.05 to<br>2,680.42)           | 2,341.93<br>(1,382.38 to<br>3,390.74)          | 2,289.84<br>(1,374.87 to<br>3,280.41)          | 2,438.59<br>(1,450.09 to<br>3,572.40)           | 39.42<br>(25.16 to<br>56.29)           | 65.03<br>(40.88 to<br>90.57)           | 64.66<br>(40.83 to<br>89.16)           | 66.27<br>(41.37 to<br>93.75)           |
| <b>Other non-communicable diseases</b>            | <b>37,735.36</b><br>(19,806.35 to<br>65,260.21) | <b>17,339.75</b><br>(8,304.64 to<br>31,245.83) | <b>14,945.82</b><br>(7,531.03 to<br>25,701.81) | <b>21,334.07</b><br>(10,098.21 to<br>38,701.40) | <b>486.85</b><br>(276.14 to<br>802.34) | <b>464.80</b><br>(245.59 to<br>692.32) | <b>438.82</b><br>(235.48 to<br>636.57) | <b>515.28</b><br>(276.65 to<br>792.93) |
| Congenital birth defects                          | 35,068.39<br>(18,163.46 to<br>60,328.05)        | 12,260.93<br>(4,796.59 to<br>25,375.45)        | 9,971.15<br>(4,344.78 to<br>19,478.01)         | 16,019.96<br>(6,543.97 to<br>32,545.61)         | 433.13<br>(240.88 to<br>725.55)        | 175.46<br>(80.94 to<br>332.36)         | 145.06<br>(73.04 to<br>259.68)         | 226.43<br>(108.46 to<br>427.69)        |
| Neural tube defects                               | 694.94<br>(232.46 to<br>1,647.08)               | 129.92<br>(37.09 to<br>350.28)                 | 103.60<br>(30.94 to<br>272.93)                 | 173.40<br>(49.87 to<br>478.84)                  | 8.58<br>(3.18 to<br>19.70)             | 2.07<br>(0.72 to<br>5.00)              | 1.68<br>(0.61 to<br>3.95)              | 2.73<br>(0.97 to<br>6.75)              |
| Congenital heart anomalies                        | 17,179.48<br>(9,231.46 to<br>31,182.75)         | 4,878.60<br>(1,912.04 to<br>10,713.67)         | 3,765.22<br>(1,545.25 to<br>7,906.66)          | 6,823.97<br>(2,744.52 to<br>14,826.70)          | 213.42<br>(121.98 to<br>373.10)        | 69.05<br>(30.97 to<br>138.74)          | 53.99<br>(25.42 to<br>103.92)          | 95.78<br>(43.43 to<br>191.05)          |
| Orofacial clefts                                  | 26.47<br>(5.84 to<br>117.73)                    | 5.29<br>(0.56 to<br>26.54)                     | 3.72<br>(0.43 to<br>19.40)                     | 8.22<br>(0.91 to<br>41.35)                      | 0.31<br>(0.07 to<br>1.36)              | 0.06<br>(0.01 to<br>0.31)              | 0.04<br>(0.00 to<br>0.22)              | 0.10<br>(0.01 to<br>0.48)              |
| Down syndrome                                     | 752.26<br>(384.62 to<br>1,480.88)               | 974.04<br>(571.47 to<br>1,629.62)              | 972.12<br>(581.52 to<br>1,618.93)              | 960.43<br>(556.19 to<br>1,647.85)               | 9.97<br>(5.52 to<br>18.37)             | 15.69<br>(9.81 to<br>24.65)            | 15.86<br>(10.05 to<br>24.77)           | 15.30<br>(9.54 to<br>24.17)            |

|                                               |                                             |                                             |                                            |                                             |                                       |                                       |                                       |                                        |
|-----------------------------------------------|---------------------------------------------|---------------------------------------------|--------------------------------------------|---------------------------------------------|---------------------------------------|---------------------------------------|---------------------------------------|----------------------------------------|
| Other chromosomal abnormalities               | 603.65<br>(185.04 to<br>1,795.43)           | 556.91<br>(132.39 to<br>1,697.29)           | 487.59<br>(121.34 to<br>1,485.30)          | 644.37<br>(159.81 to<br>1,921.34)           | 7.13<br>(2.28 to<br>21.01)            | 6.91<br>(1.92 to<br>20.35)            | 6.09<br>(1.70 to<br>17.91)            | 7.96<br>(2.22 to<br>22.99)             |
| Congenital musculoskeletal and limb anomalies | 906.35<br>(313.28 to<br>2,237.92)           | 305.02<br>(841.31)                          | 245.42<br>(78.97 to<br>641.54)             | 398.30<br>(125.88 to<br>1,067.56)           | 11.02<br>(4.44 to<br>26.34)           | 4.11<br>(1.43 to<br>10.41)            | 3.34<br>(1.26 to<br>7.98)             | 5.32<br>(1.95 to<br>13.19)             |
| Urogenital congenital anomalies               | 1,378.45<br>(511.33 to<br>2,950.15)         | 559.56<br>(217.51 to<br>1,259.97)           | 470.83<br>(192.62 to<br>1,041.06)          | 693.90<br>(269.46 to<br>1,550.31)           | 17.42<br>(7.43 to<br>35.56)           | 9.90<br>(4.83 to<br>18.61)            | 8.54<br>(4.30 to<br>15.38)            | 12.05<br>(5.86 to<br>22.40)            |
| Digestive congenital anomalies                | 1,905.77<br>(428.85 to<br>4,179.46)         | 596.18<br>(115.86 to<br>1,710.01)           | 465.62<br>(93.78 to<br>1,231.77)           | 803.22<br>(156.74 to<br>2,201.93)           | 22.59<br>(5.62 to<br>49.02)           | 7.58<br>(1.67 to<br>20.53)            | 5.97<br>(1.36 to<br>15.08)            | 10.15<br>(2.35 to<br>26.58)            |
| Other congenital birth defects                | 11,621.03<br>(5,066.89 to<br>22,691.89)     | 4,255.40<br>(1,427.75 to<br>9,943.15)       | 3,457.04<br>(1,222.56 to<br>7,922.99)      | 5,514.16<br>(1,902.66 to<br>12,821.48)      | 142.68<br>(66.33 to<br>273.38)        | 60.08<br>(23.84 to<br>131.67)         | 49.54<br>(20.75 to<br>104.57)         | 77.03<br>(30.65 to<br>167.52)          |
| Skin and subcutaneous diseases                | 1,161.39<br>(495.05 to<br>1,680.67)         | 4,698.02<br>(2,044.67 to<br>6,861.20)       | 4,651.92<br>(2,048.65 to<br>6,826.99)      | 4,846.20<br>(2,136.49 to<br>7,032.54)       | 36.25<br>(15.44 to<br>51.46)          | 284.92<br>(121.91 to<br>426.18)       | 290.02<br>(124.58 to<br>429.25)       | 283.42<br>(121.46 to<br>426.33)        |
| Cellulitis                                    | 177.67<br>(63.73 to<br>302.83)              | 902.76<br>(310.85 to<br>1,568.10)           | 925.91<br>(311.78 to<br>1,600.42)          | 883.14<br>(305.20 to<br>1,540.89)           | 5.30<br>(1.81 to<br>9.54)             | 49.05<br>(16.22 to<br>86.43)          | 51.62<br>(16.81 to<br>91.07)          | 46.39<br>(15.39 to<br>82.46)           |
| Pyoderma                                      | 590.83<br>(272.91 to<br>861.23)             | 2,650.40<br>(1,254.32 to<br>3,900.03)       | 2,613.53<br>(1,129.86 to<br>3,840.40)      | 2,748.52<br>(1,297.06 to<br>4,030.44)       | 17.16<br>(8.14 to<br>25.03)           | 158.92<br>(73.76 to<br>236.73)        | 161.22<br>(74.54 to<br>241.34)        | 158.70<br>(72.48 to<br>239.41)         |
| Decubitus ulcer                               | 307.60<br>(102.99 to<br>488.43)             | 1,035.89<br>(296.81 to<br>1,710.70)         | 1,007.74<br>(288.11 to<br>1,641.57)        | 1,097.74<br>(312.48 to<br>1,811.92)         | 12.11<br>(4.04 to<br>18.77)           | 73.60<br>(20.50 to<br>122.89)         | 73.85<br>(20.92 to<br>122.71)         | 74.89<br>(21.47 to<br>124.46)          |
| Other skin and subcutaneous diseases          | 85.28<br>(35.50 to<br>131.14)               | 108.97<br>(43.07 to<br>168.85)              | 104.74<br>(42.25 to<br>162.28)             | 116.80<br>(46.95 to<br>182.10)              | 1.68<br>(0.69 to<br>2.58)             | 3.35<br>(1.38 to<br>5.02)             | 3.34<br>(1.39 to<br>5.02)             | 3.43<br>(1.41 to<br>5.14)              |
| Sudden infant death syndrome                  | 1,505.58<br>(482.12 to<br>3,528.24)         | 380.80<br>(84.19 to<br>1,147.20)            | 322.75<br>(72.21 to<br>953.03)             | 467.91<br>(102.26 to<br>1,406.27)           | 17.48<br>(5.59 to<br>40.94)           | 4.42<br>(0.98 to<br>13.31)            | 3.74<br>(0.84 to<br>11.06)            | 5.43<br>(1.19 to<br>16.32)             |
| Injuries                                      | 303,058.38<br>(218,685.19 to<br>401,620.03) | 220,682.73<br>(152,738.66 to<br>303,340.65) | 127,884.13<br>(88,829.36 to<br>175,811.03) | 327,319.50<br>(224,763.46 to<br>459,217.14) | 6,344.94<br>(4,509.44 to<br>8,360.83) | 5,834.08<br>(4,112.29 to<br>8,073.22) | 3,421.10<br>(2,442.26 to<br>4,707.32) | 8,445.75<br>(5,879.08 to<br>12,003.13) |
| Transport injuries                            | 191,929.60<br>(127,484.50 to<br>262,024.85) | 130,148.99<br>(84,395.38 to<br>199,256.78)  | 42,494.90<br>(25,617.28 to<br>69,501.50)   | 223,960.39<br>(147,507.41 to<br>342,316.08) | 4,090.85<br>(2,687.86 to<br>5,633.48) | 3,613.40<br>(2,316.53 to<br>5,519.14) | 1,297.44<br>(777.54 to<br>2,132.74)   | 5,957.99<br>(3,855.37 to<br>9,265.33)  |
| Road injuries                                 | 186,729.05<br>(122,659.25 to<br>255,525.57) | 125,300.08<br>(81,464.35 to<br>187,508.37)  | 38,200.43<br>(22,445.10 to<br>61,649.74)   | 217,756.73<br>(142,404.85 to<br>333,223.96) | 3,982.22<br>(2,588.35 to<br>5,510.39) | 3,482.72<br>(2,240.06 to<br>5,305.70) | 1,180.64<br>(701.33 to<br>1,895.30)   | 5,792.77<br>(3,771.81 to<br>9,070.84)  |
| Pedestrian road injuries                      | 40,877.61<br>(20,044.01 to<br>78,992.28)    | 19,865.77<br>(8,547.05 to<br>38,057.40)     | 6,850.30<br>(3,115.78 to<br>13,217.22)     | 36,465.45<br>(16,043.66 to<br>69,243.77)    | 907.69<br>(441.38 to<br>1,774.09)     | 627.69<br>(273.12 to<br>1,214.87)     | 237.83<br>(107.83 to<br>458.67)       | 1,103.15<br>(495.39 to<br>2,117.30)    |
| <b>United Arab Emirates</b>                   |                                             |                                             |                                            |                                             |                                       |                                       |                                       |                                        |
| Cause                                         | YLLs (actual counts)                        |                                             |                                            |                                             | Deaths (actual counts)                |                                       |                                       |                                        |
|                                               | 2016                                        | 2040 Forecast                               | 2040 Better Scenario                       | 2040 Worse Scenario                         | 2016                                  | 2040 Forecast                         | 2040 Better Scenario                  | 2040 Worse Scenario                    |
| Cyclist road injuries                         | 4,896.72<br>(1,835.90 to<br>11,761.33)      | 3,589.42<br>(1,236.87 to<br>8,461.13)       | 1,380.00<br>(450.46 to<br>3,391.04)        | 5,587.05<br>(1,947.52 to<br>12,761.57)      | 108.02<br>(39.86 to<br>262.13)        | 94.95<br>(33.14 to<br>224.87)         | 42.58<br>(14.07 to<br>104.86)         | 139.66<br>(49.45 to<br>332.20)         |
| Motorcyclist road injuries                    | 11,986.74<br>(5,509.25 to<br>21,793.42)     | 10,313.81<br>(4,147.86 to<br>19,949.81)     | 5,327.41<br>(2,127.97 to<br>10,589.38)     | 14,273.14<br>(5,702.27 to<br>27,662.94)     | 225.19<br>(103.76 to<br>413.15)       | 212.02<br>(84.24 to<br>407.69)        | 116.57<br>(45.62 to<br>228.35)        | 287.31<br>(113.09 to<br>555.59)        |
| Motor vehicle road injuries                   | 128,642.11<br>(79,918.85 to<br>190,371.68)  | 91,217.75<br>(55,830.99 to<br>141,442.83)   | 24,537.62<br>(13,508.90 to<br>41,508.10)   | 160,921.69<br>(96,971.12 to<br>251,097.28)  | 2,734.09<br>(1,652.69 to<br>4,027.24) | 2,535.90<br>(1,548.80 to<br>4,013.44) | 778.55<br>(428.98 to<br>1,322.96)     | 4,244.71<br>(2,579.53 to<br>6,726.02)  |
| Other road injuries                           | 325.87<br>(181.60 to<br>585.19)             | 313.32<br>(167.18 to<br>540.18)             | 105.09<br>(54.15 to<br>178.31)             | 509.39<br>(270.65 to<br>899.71)             | 7.23<br>(4.00 to<br>13.34)            | 12.17<br>(6.31 to<br>21.76)           | 5.11<br>(2.52 to<br>9.19)             | 17.94<br>(9.31 to<br>32.22)            |
| Other transport injuries                      | 5,200.55<br>(2,913.17 to<br>10,191.04)      | 4,848.91<br>(2,543.78 to<br>10,054.91)      | 4,294.48<br>(2,289.58 to<br>9,176.50)      | 6,203.66<br>(3,278.14 to<br>12,644.59)      | 108.63<br>(61.59 to<br>216.15)        | 130.68<br>(69.45 to<br>275.69)        | 116.81<br>(62.23 to<br>255.56)        | 165.22<br>(87.99 to<br>345.16)         |

|                                                 |                                           |                                          |                                          |                                           |                                       |                                       |                                       |                                       |
|-------------------------------------------------|-------------------------------------------|------------------------------------------|------------------------------------------|-------------------------------------------|---------------------------------------|---------------------------------------|---------------------------------------|---------------------------------------|
|                                                 | 82,328.99<br>(57,991.20 to<br>112,667.65) | 65,734.79<br>(43,912.52 to<br>93,530.91) | 62,908.70<br>(43,042.01 to<br>87,024.29) | 73,100.48<br>(48,931.75 to<br>106,128.48) | 1,676.34<br>(1,174.75 to<br>2,306.90) | 1,672.31<br>(1,186.27 to<br>2,289.27) | 1,622.11<br>(1,167.99 to<br>2,146.91) | 1,825.10<br>(1,282.77 to<br>2,529.92) |
| <b>Unintentional injuries</b>                   |                                           |                                          |                                          |                                           |                                       |                                       |                                       |                                       |
| Falls                                           | 21,532.80<br>(10,771.33 to<br>31,856.55)  | 18,978.55<br>(10,314.96 to<br>27,854.34) | 18,546.00<br>(10,361.50 to<br>27,204.66) | 20,440.10<br>(10,871.48 to<br>29,912.10)  | 446.97<br>(228.79 to<br>654.36)       | 472.86<br>(304.00 to<br>659.82)       | 467.47<br>(313.19 to<br>658.65)       | 501.32<br>(314.38 to<br>706.31)       |
| Drowning                                        | 7,936.67<br>(5,677.60 to<br>10,706.54)    | 4,920.02<br>(3,125.97 to<br>7,186.00)    | 4,609.53<br>(2,969.73 to<br>6,584.73)    | 5,680.34<br>(3,731.07 to<br>8,446.98)     | 153.41<br>(109.84 to<br>208.06)       | 114.68<br>(74.76 to<br>164.28)        | 108.76<br>(72.57 to<br>155.54)        | 130.68<br>(88.15 to<br>190.26)        |
| Fire, heat, and hot substances                  | 6,786.08<br>(4,016.19 to<br>9,620.94)     | 4,680.10<br>(2,453.94 to<br>7,281.91)    | 4,209.83<br>(2,321.56 to<br>6,292.56)    | 5,683.82<br>(2,973.37 to<br>8,974.31)     | 145.51<br>(77.98 to<br>209.36)        | 143.44<br>(65.91 to<br>220.10)        | 131.04<br>(62.88 to<br>190.92)        | 168.56<br>(76.89 to<br>260.18)        |
| Poisonings                                      | 2,340.98<br>(1,415.46 to<br>3,283.29)     | 1,034.39<br>(568.46 to<br>1,570.55)      | 895.00<br>(524.34 to<br>1,332.84)        | 1,322.70<br>(721.10 to<br>2,018.05)       | 44.14<br>(24.73 to<br>60.93)          | 23.06<br>(12.86 to<br>34.17)          | 20.14<br>(12.01 to<br>28.86)          | 29.16<br>(16.24 to<br>44.01)          |
| Exposure to mechanical forces                   | 13,857.84<br>(7,722.19 to<br>21,198.27)   | 9,480.71<br>(4,966.00 to<br>15,635.94)   | 8,757.20<br>(4,446.67 to<br>14,189.41)   | 11,105.74<br>(5,865.53 to<br>18,004.45)   | 278.33<br>(150.51 to<br>435.20)       | 220.04<br>(115.49 to<br>354.97)       | 205.31<br>(102.57 to<br>329.54)       | 254.69<br>(135.17 to<br>403.81)       |
| Unintentional firearm injuries                  | 1,905.10<br>(1,001.31 to<br>3,061.32)     | 1,231.88<br>(602.58 to<br>2,115.69)      | 1,152.31<br>(601.72 to<br>1,893.56)      | 1,400.40<br>(678.72 to<br>2,437.16)       | 37.32<br>(19.53 to<br>59.14)          | 28.10<br>(14.16 to<br>46.30)          | 26.58<br>(14.07 to<br>42.31)          | 31.53<br>(15.89 to<br>52.61)          |
| Unintentional suffocation                       | 629.95<br>(277.77 to<br>1,446.99)         | 272.86<br>(123.53 to<br>584.06)          | 244.45<br>(115.60 to<br>507.27)          | 319.61<br>(139.39 to<br>694.94)           | 8.49<br>(4.06 to<br>18.36)            | 4.33<br>(2.23 to<br>8.43)             | 3.94<br>(2.10 to<br>7.39)             | 5.01<br>(2.51 to<br>9.74)             |
| Other exposure to mechanical forces             | 11,322.79<br>(5,683.41 to<br>17,802.19)   | 7,975.98<br>(3,858.25 to<br>13,352.97)   | 7,360.44<br>(3,423.70 to<br>12,351.14)   | 9,385.73<br>(4,691.07 to<br>15,587.88)    | 232.52<br>(114.68 to<br>370.86)       | 187.60<br>(90.19 to<br>306.27)        | 174.78<br>(82.81 to<br>287.90)        | 218.16<br>(107.55 to<br>354.67)       |
| Adverse effects of medical treatment            | 19,621.12<br>(9,912.35 to<br>29,609.01)   | 19,665.25<br>(10,508.60 to<br>29,397.70) | 19,326.59<br>(11,094.52 to<br>28,275.52) | 20,900.06<br>(10,903.55 to<br>31,829.86)  | 410.95<br>(205.90 to<br>618.66)       | 531.26<br>(326.12 to<br>759.17)       | 529.78<br>(348.15 to<br>750.93)       | 553.59<br>(325.08 to<br>793.29)       |
| Animal contact                                  | 467.45<br>(243.12 to<br>761.67)           | 534.75<br>(257.65 to<br>943.80)          | 505.42<br>(255.01 to<br>872.86)          | 593.43<br>(279.75 to<br>1,051.87)         | 8.96<br>(4.55 to<br>14.60)            | 14.95<br>(7.28 to<br>25.41)           | 14.48<br>(7.34 to<br>24.67)           | 16.12<br>(7.74 to<br>27.79)           |
| Venomous animal contact                         | 248.96<br>(107.43 to<br>461.08)           | 673.68<br>(111.09 to<br>521.94)          | 264.70<br>(111.26 to<br>483.53)          | 296.28<br>(118.23 to<br>579.93)           | 4.86<br>(2.07 to<br>8.87)             | 7.40<br>(3.05 to<br>13.48)            | 7.33<br>(3.10 to<br>12.94)            | 7.78<br>(3.18 to<br>14.50)            |
| Non-venomous animal contact                     | 218.49<br>(99.78 to<br>371.70)            | 261.07<br>(114.94 to<br>485.17)          | 240.72<br>(109.27 to<br>433.78)          | 297.15<br>(130.49 to<br>550.49)           | 4.10<br>(1.86 to<br>7.00)             | 7.56<br>(3.48 to<br>13.69)            | 7.15<br>(3.47 to<br>12.60)            | 8.34<br>(3.90 to<br>15.39)            |
| Foreign body                                    | 3,810.48<br>(2,652.64 to<br>5,138.60)     | 3,395.36<br>(2,195.45 to<br>4,988.51)    | 3,400.43<br>(2,288.13 to<br>4,870.88)    | 3,478.90<br>(2,217.68 to<br>5,158.78)     | 67.33<br>(45.71 to<br>94.78)          | 79.63<br>(52.84 to<br>116.24)         | 81.14<br>(55.50 to<br>115.97)         | 79.93<br>(52.43 to<br>116.98)         |
| Pulmonary aspiration and foreign body in airway | 2,698.48<br>(1,862.87 to<br>3,826.01)     | 2,054.11<br>(1,316.69 to<br>3,028.74)    | 1,999.57<br>(1,323.49 to<br>2,927.59)    | 2,185.85<br>(1,375.41 to<br>3,209.30)     | 46.27<br>(31.84 to<br>66.07)          | 50.03<br>(33.03 to<br>73.60)          | 49.87<br>(34.19 to<br>72.57)          | 51.77<br>(33.47 to<br>76.66)          |
| Foreign body in other body part                 | 1,112.00<br>(563.57 to<br>1,737.79)       | 1,341.25<br>(692.78 to<br>2,165.87)      | 1,400.86<br>(771.50 to<br>2,238.29)      | 1,293.05<br>(646.26 to<br>2,092.86)       | 21.06<br>(10.45 to<br>33.90)          | 29.60<br>(15.54 to<br>46.98)          | 31.27<br>(17.12 to<br>48.91)          | 28.16<br>(14.21 to<br>45.12)          |
| Environmental heat and cold exposure            | 1,853.98<br>(898.39 to<br>2,671.86)       | 1,653.15<br>(749.44 to<br>2,773.72)      | 1,511.53<br>(712.53 to<br>2,401.50)      | 1,962.98<br>(915.50 to<br>3,217.99)       | 40.62<br>(19.49 to<br>58.23)          | 42.42<br>(19.15 to<br>68.97)          | 39.14<br>(19.52 to<br>60.48)          | 49.78<br>(23.36 to<br>79.85)          |
| Other unintentional injuries                    | 4,051.59<br>(2,379.34 to<br>6,644.14)     | 1,392.50<br>(697.38 to<br>2,573.05)      | 1,147.15<br>(594.34 to<br>2,008.19)      | 1,932.42<br>(973.58 to<br>3,472.15)       | 80.12<br>(47.16 to<br>130.77)         | 29.97<br>(15.10 to<br>54.05)          | 24.85<br>(12.74 to<br>43.80)          | 41.28<br>(21.40 to<br>72.77)          |
| Self-harm and interpersonal violence            | 28,802.70<br>(19,528.40 to<br>43,429.15)  | 24,772.21<br>(15,227.06 to<br>38,010.33) | 22,453.82<br>(14,320.79 to<br>34,111.41) | 30,231.90<br>(17,999.22 to<br>48,263.14)  | 576.53<br>(392.65 to<br>868.50)       | 547.84<br>(337.65 to<br>828.90)       | 501.03<br>(321.55 to<br>751.35)       | 662.15<br>(405.26 to<br>1,031.42)     |

**United Arab Emirates**

| Cause     | YLLs (actual counts)                     |                                          |                                          |                                          | Deaths (actual counts)          |                                 |                                 |                                 |
|-----------|------------------------------------------|------------------------------------------|------------------------------------------|------------------------------------------|---------------------------------|---------------------------------|---------------------------------|---------------------------------|
|           | 2016                                     | 2040 Forecast                            | 2040 Better Scenario                     | 2040 Worse Scenario                      | 2016                            | 2040 Forecast                   | 2040 Better Scenario            | 2040 Worse Scenario             |
| Self-harm | 22,083.48<br>(14,315.75 to<br>34,722.22) | 21,244.23<br>(12,808.44 to<br>34,159.60) | 19,240.15<br>(12,051.69 to<br>29,878.64) | 25,999.79<br>(15,093.89 to<br>42,575.96) | 444.66<br>(291.37 to<br>696.80) | 471.52<br>(289.60 to<br>740.65) | 430.93<br>(274.35 to<br>668.27) | 571.39<br>(337.51 to<br>921.97) |

|                                                                              |                                          |                                          |                                          |                                          |                                 |                                 |                                 |                                 |
|------------------------------------------------------------------------------|------------------------------------------|------------------------------------------|------------------------------------------|------------------------------------------|---------------------------------|---------------------------------|---------------------------------|---------------------------------|
| Self-harm by firearm                                                         | 2,067.97<br>(781.19 to<br>4,343.86)      | 1,286.09<br>(447.60 to<br>2,845.17)      | 1,124.12<br>(414.50 to<br>2,400.03)      | 1,664.99<br>(551.55 to<br>3,801.10)      | 42.58<br>(16.03 to<br>87.78)    | 29.56<br>(10.64 to<br>63.78)    | 26.12<br>(9.90 to<br>55.48)     | 37.79<br>(13.07 to<br>83.83)    |
| Self-harm by other specified means                                           | 20,015.51<br>(13,143.72 to<br>32,045.34) | 19,958.14<br>(11,963.90 to<br>32,530.27) | 18,116.03<br>(11,121.80 to<br>28,360.73) | 24,334.79<br>(14,026.91 to<br>40,645.84) | 402.07<br>(263.62 to<br>637.29) | 441.95<br>(268.59 to<br>691.56) | 404.81<br>(252.82 to<br>625.82) | 533.60<br>(310.49 to<br>874.66) |
| Interpersonal violence                                                       | 6,719.22<br>(4,439.86 to<br>9,969.52)    | 3,527.98<br>(2,072.57 to<br>5,598.08)    | 3,213.67<br>(1,963.20 to<br>4,890.03)    | 4,232.11<br>(2,494.23 to<br>6,794.65)    | 131.87<br>(86.45 to<br>192.94)  | 76.33<br>(46.30 to<br>118.43)   | 70.10<br>(43.76 to<br>105.28)   | 90.76<br>(54.55 to<br>142.91)   |
| Physical violence by firearm                                                 | 2,828.34<br>(1,525.45 to<br>5,241.10)    | 1,247.14<br>(577.85 to<br>2,537.54)      | 1,111.97<br>(520.19 to<br>2,283.00)      | 1,543.66<br>(709.96 to<br>3,023.66)      | 55.56<br>(30.20 to<br>101.07)   | 26.01<br>(12.09 to<br>52.15)    | 23.30<br>(11.12 to<br>47.20)    | 32.05<br>(15.20 to<br>61.38)    |
| Physical violence by sharp object                                            | 2,127.39<br>(971.70 to<br>3,436.19)      | 1,097.06<br>(531.68 to<br>1,919.63)      | 989.84<br>(511.69 to<br>1,654.47)        | 1,322.20<br>(615.41 to<br>2,317.01)      | 41.64<br>(18.57 to<br>67.54)    | 22.96<br>(11.18 to<br>39.77)    | 20.83<br>(10.87 to<br>33.93)    | 27.53<br>(13.06 to<br>47.89)    |
| Physical violence by other means                                             | 1,765.49<br>(860.42 to<br>2,750.46)      | 1,183.78<br>(594.59 to<br>1,973.92)      | 1,111.86<br>(576.29 to<br>1,831.63)      | 1,366.25<br>(663.42 to<br>2,333.74)      | 34.67<br>(16.52 to<br>54.18)    | 27.35<br>(14.27 to<br>44.33)    | 25.97<br>(14.05 to<br>42.31)    | 31.18<br>(15.59 to<br>52.10)    |
| Forces of nature, conflict and terrorism, and executions and police conflict | 67.09<br>(52.13 to<br>84.91)             | 26.74<br>(0.00 to<br>71.12)              | 26.71<br>(0.00 to<br>71.08)              | 26.73<br>(0.00 to<br>71.08)              | 1.22<br>(0.94 to<br>1.54)       | 0.52<br>(0.00 to<br>1.40)       | 0.52<br>(0.00 to<br>1.41)       | 0.52<br>(0.00 to<br>1.39)       |
| Exposure to forces of nature                                                 | 0.00<br>(0.00 to<br>0.00)                | 0.00<br>(0.00 to<br>0.00)                | 0.00<br>(0.00 to<br>0.00)                | 0.00<br>(0.00 to<br>0.00)                | 0.00<br>(0.00 to<br>0.00)       | 0.00<br>(0.00 to<br>0.00)       | 0.00<br>(0.00 to<br>0.00)       | 0.00<br>(0.00 to<br>0.00)       |
| Conflict and terrorism                                                       | 0.00<br>(0.00 to<br>0.00)                | 26.74<br>(0.00 to<br>71.12)              | 26.71<br>(0.00 to<br>71.08)              | 26.73<br>(0.00 to<br>71.08)              | 0.00<br>(0.00 to<br>0.00)       | 0.52<br>(0.00 to<br>1.40)       | 0.52<br>(0.00 to<br>1.41)       | 0.52<br>(0.00 to<br>1.39)       |
| Executions and police conflict                                               | 67.09<br>(52.13 to<br>84.91)             | 0.00<br>(0.00 to<br>0.00)                | 0.00<br>(0.00 to<br>0.00)                | 0.00<br>(0.00 to<br>0.00)                | 1.22<br>(0.94 to<br>1.54)       | 0.00<br>(0.00 to<br>0.00)       | 0.00<br>(0.00 to<br>0.00)       | 0.00<br>(0.00 to<br>0.00)       |
| <b>Yemen</b>                                                                 |                                          |                                          |                                          |                                          |                                 |                                 |                                 |                                 |
| Cause                                                                        | YLLs (in 1000s)                          |                                          |                                          |                                          | Deaths (in 1000s)               |                                 |                                 |                                 |
|                                                                              | 2016                                     | 2040 Forecast                            | 2040 Better Scenario                     | 2040 Worse Scenario                      | 2016                            | 2040 Forecast                   | 2040 Better Scenario            | 2040 Worse Scenario             |
| All causes                                                                   | 8,043.92<br>(6,055.51 to<br>10,259.77)   | 6,690.64<br>(5,365.62 to<br>8,352.10)    | 4,567.86<br>(3,730.59 to<br>5,621.69)    | 10,697.73<br>(8,130.23 to<br>13,843.40)  | 163.03<br>(137.61 to<br>191.76) | 222.51<br>(188.67 to<br>261.97) | 162.04<br>(140.60 to<br>187.29) | 308.04<br>(256.10 to<br>376.05) |
| Communicable, maternal, neonatal, and nutritional diseases                   | 2,928.71<br>(1,426.57 to<br>4,690.68)    | 1,176.61<br>(649.71 to<br>1,938.35)      | 774.34<br>(435.93 to<br>1,270.53)        | 2,635.43<br>(1,285.84 to<br>4,511.53)    | 39.03<br>(21.59 to<br>59.53)    | 21.79<br>(14.41 to<br>31.34)    | 15.71<br>(10.59 to<br>22.18)    | 41.47<br>(24.28 to<br>64.38)    |
| HIV/AIDS and tuberculosis                                                    | 71.43<br>(34.62 to<br>110.40)            | 73.11<br>(34.97 to<br>130.77)            | 47.73<br>(20.29 to<br>99.88)             | 114.40<br>(54.59 to<br>195.62)           | 1.96<br>(0.92 to<br>2.94)       | 2.21<br>(1.03 to<br>3.78)       | 1.50<br>(0.67 to<br>2.75)       | 3.29<br>(1.49 to<br>5.38)       |
| Tuberculosis                                                                 | 63.52<br>(28.02 to<br>92.31)             | 54.78<br>(22.49 to<br>88.35)             | 34.38<br>(13.61 to<br>55.79)             | 91.11<br>(37.62 to<br>148.24)            | 1.81<br>(0.76 to<br>2.71)       | 1.85<br>(0.73 to<br>3.10)       | 1.24<br>(0.48 to<br>2.08)       | 2.85<br>(1.13 to<br>4.66)       |
| HIV/AIDS                                                                     | 7.91<br>(0.27 to<br>37.77)               | 18.33<br>(1.29 to<br>75.04)              | 13.36<br>(0.62 to<br>63.01)              | 23.29<br>(2.35 to<br>88.58)              | 0.15<br>(0.01 to<br>0.70)       | 0.36<br>(0.02 to<br>1.50)       | 0.26<br>(0.01 to<br>1.29)       | 0.44<br>(0.04 to<br>1.70)       |
| Diarrhea, lower respiratory, and other common infectious diseases            | 1,051.21<br>(554.91 to<br>1,634.17)      | 468.42<br>(263.48 to<br>774.51)          | 289.20<br>(172.68 to<br>455.96)          | 1,017.20<br>(500.58 to<br>1,732.10)      | 15.10<br>(9.19 to<br>21.96)     | 11.03<br>(7.41 to<br>15.90)     | 8.17<br>(5.63 to<br>11.44)      | 19.12<br>(11.74 to<br>28.80)    |
| Diarrheal diseases                                                           | 542.61<br>(221.06 to<br>932.93)          | 132.68<br>(46.77 to<br>260.51)           | 90.54<br>(24.14 to<br>188.77)            | 332.03<br>(127.36 to<br>659.06)          | 6.78<br>(3.03 to<br>11.28)      | 2.26<br>(0.80 to<br>4.92)       | 1.63<br>(0.44 to<br>3.79)       | 5.21<br>(1.91 to<br>10.51)      |
| Intestinal infectious diseases                                               | 22.23<br>(11.22 to<br>39.28)             | 20.48<br>(10.35 to<br>37.39)             | 17.78<br>(9.38 to<br>31.72)              | 30.47<br>(14.83 to<br>56.93)             | 0.32<br>(0.16 to<br>0.56)       | 0.31<br>(0.16 to<br>0.56)       | 0.28<br>(0.15 to<br>0.48)       | 0.45<br>(0.22 to<br>0.82)       |
| Typhoid fever                                                                | 19.76<br>(9.95 to<br>35.88)              | 17.75<br>(8.79 to<br>32.59)              | 15.46<br>(7.73 to<br>28.07)              | 26.40<br>(12.70 to<br>50.36)             | 0.28<br>(0.14 to<br>0.51)       | 0.27<br>(0.14 to<br>0.49)       | 0.24<br>(0.12 to<br>0.42)       | 0.39<br>(0.19 to<br>0.73)       |
| Paratyphoid fever                                                            | 2.41<br>(1.02 to<br>4.76)                | 2.72<br>(1.19 to<br>5.44)                | 2.31<br>(1.02 to<br>4.62)                | 4.03<br>(1.67 to<br>8.23)                | 0.04<br>(0.02 to<br>0.07)       | 0.04<br>(0.02 to<br>0.09)       | 0.04<br>(0.02 to<br>0.07)       | 0.06<br>(0.03 to<br>0.12)       |



|                                                       |                                                     |                                                    |                                                   |                                                     |                                                |                                                |                                                |                                                |
|-------------------------------------------------------|-----------------------------------------------------|----------------------------------------------------|---------------------------------------------------|-----------------------------------------------------|------------------------------------------------|------------------------------------------------|------------------------------------------------|------------------------------------------------|
| Schistosomiasis                                       | 4.04<br>(2.79 to<br>5.52)                           | 3.98<br>(2.58 to<br>5.73)                          | 3.45<br>(2.26 to<br>4.90)                         | 4.79<br>(3.12 to<br>6.84)                           | 0.11<br>(0.08 to<br>0.15)                      | 0.12<br>(0.08 to<br>0.17)                      | 0.11<br>(0.07 to<br>0.15)                      | 0.14<br>(0.09 to<br>0.20)                      |
| Cysticercosis                                         | 0.09<br>(0.06 to<br>0.13)                           | 0.05<br>(0.04 to<br>0.08)                          | 0.05<br>(0.03 to<br>0.07)                         | 0.06<br>(0.04 to<br>0.09)                           | 0.00<br>(0.00 to<br>0.00)                      | 0.00<br>(0.00 to<br>0.00)                      | 0.00<br>(0.00 to<br>0.00)                      | 0.00<br>(0.00 to<br>0.00)                      |
| Cystic echinococcosis                                 | 0.00<br>(0.00 to<br>0.00)                           | 0.00<br>(0.00 to<br>0.00)                          | 0.00<br>(0.00 to<br>0.00)                         | 0.00<br>(0.00 to<br>0.00)                           | 0.00<br>(0.00 to<br>0.00)                      | 0.00<br>(0.00 to<br>0.00)                      | 0.00<br>(0.00 to<br>0.00)                      | 0.00<br>(0.00 to<br>0.00)                      |
| Dengue                                                | 0.01<br>(0.00 to<br>0.02)                           | 0.05<br>(0.01 to<br>0.10)                          | 0.05<br>(0.01 to<br>0.10)                         | 0.05<br>(0.02 to<br>0.12)                           | 0.00<br>(0.00 to<br>0.00)                      | 0.00<br>(0.00 to<br>0.00)                      | 0.00<br>(0.00 to<br>0.00)                      | 0.00<br>(0.00 to<br>0.00)                      |
| Yellow fever                                          | 0.00<br>(0.00 to<br>0.00)                           | 0.00<br>(0.00 to<br>0.00)                          | 0.00<br>(0.00 to<br>0.00)                         | 0.00<br>(0.00 to<br>0.00)                           | 0.00<br>(0.00 to<br>0.00)                      | 0.00<br>(0.00 to<br>0.00)                      | 0.00<br>(0.00 to<br>0.00)                      | 0.00<br>(0.00 to<br>0.00)                      |
| Rabies                                                | 0.11<br>(0.04 to<br>0.24)                           | 0.07<br>(0.03 to<br>0.16)                          | 0.04<br>(0.01 to<br>0.10)                         | 0.16<br>(0.06 to<br>0.34)                           | 0.00<br>(0.00 to<br>0.00)                      | 0.00<br>(0.00 to<br>0.00)                      | 0.00<br>(0.00 to<br>0.00)                      | 0.00<br>(0.00 to<br>0.01)                      |
| Intestinal nematode infections                        | 0.38<br>(0.17 to<br>0.69)                           | 0.32<br>(0.13 to<br>0.56)                          | 0.30<br>(0.13 to<br>0.54)                         | 0.49<br>(0.18 to<br>0.88)                           | 0.01<br>(0.00 to<br>0.01)                      | 0.00<br>(0.00 to<br>0.01)                      | 0.00<br>(0.00 to<br>0.01)                      | 0.01<br>(0.00 to<br>0.01)                      |
| Other neglected tropical diseases                     | 0.24<br>(0.19 to<br>0.37)                           | 0.24<br>(0.19 to<br>0.31)                          | 0.19<br>(0.15 to<br>0.25)                         | 0.38<br>(0.29 to<br>0.51)                           | 0.00<br>(0.00 to<br>0.01)                      | 0.00<br>(0.00 to<br>0.01)                      | 0.00<br>(0.00 to<br>0.00)                      | 0.01<br>(0.00 to<br>0.01)                      |
| <b>Maternal disorders</b>                             | <b>116.00</b><br><b>(87.94 to</b><br><b>151.24)</b> | <b>92.87</b><br><b>(56.54 to</b><br><b>151.31)</b> | <b>59.93</b><br><b>(35.57 to</b><br><b>96.50)</b> | <b>160.68</b><br><b>(97.65 to</b><br><b>252.29)</b> | <b>2.01</b><br><b>(1.51 to</b><br><b>2.63)</b> | <b>1.67</b><br><b>(1.01 to</b><br><b>2.73)</b> | <b>1.08</b><br><b>(0.64 to</b><br><b>1.74)</b> | <b>2.86</b><br><b>(1.74 to</b><br><b>4.50)</b> |
| Maternal hemorrhage                                   | 29.57<br>(19.64 to<br>43.55)                        | 24.82<br>(13.46 to<br>43.87)                       | 15.88<br>(8.33 to<br>28.29)                       | 41.30<br>(21.74 to<br>73.24)                        | 0.52<br>(0.34 to<br>0.77)                      | 0.45<br>(0.24 to<br>0.80)                      | 0.29<br>(0.15 to<br>0.52)                      | 0.75<br>(0.39 to<br>1.31)                      |
| Maternal sepsis and other maternal infections         | 14.16<br>(8.42 to<br>21.94)                         | 9.94<br>(5.01 to<br>18.36)                         | 6.34<br>(3.15 to<br>11.59)                        | 17.08<br>(8.58 to<br>30.84)                         | 0.25<br>(0.15 to<br>0.39)                      | 0.18<br>(0.09 to<br>0.35)                      | 0.11<br>(0.06 to<br>0.21)                      | 0.31<br>(0.16 to<br>0.54)                      |
| Maternal hypertensive disorders                       | 17.82<br>(11.52 to<br>26.06)                        | 15.04<br>(7.95 to<br>26.20)                        | 9.57<br>(4.95 to<br>16.76)                        | 25.37<br>(13.43 to<br>43.44)                        | 0.31<br>(0.20 to<br>0.45)                      | 0.27<br>(0.14 to<br>0.46)                      | 0.17<br>(0.09 to<br>0.30)                      | 0.45<br>(0.24 to<br>0.78)                      |
| Maternal obstructed labor and uterine rupture         | 3.24<br>(1.62 to<br>5.69)                           | 2.77<br>(1.25 to<br>6.01)                          | 1.71<br>(0.76 to<br>3.61)                         | 4.81<br>(2.11 to<br>9.98)                           | 0.06<br>(0.03 to<br>0.10)                      | 0.05<br>(0.02 to<br>0.11)                      | 0.03<br>(0.01 to<br>0.06)                      | 0.09<br>(0.04 to<br>0.18)                      |
| Maternal abortion, miscarriage, and ectopic pregnancy | 5.59<br>(2.84 to<br>9.28)                           | 5.13<br>(2.29 to<br>9.94)                          | 3.32<br>(1.48 to<br>6.44)                         | 8.98<br>(3.93 to<br>17.46)                          | 0.10<br>(0.05 to<br>0.16)                      | 0.09<br>(0.04 to<br>0.18)                      | 0.06<br>(0.03 to<br>0.12)                      | 0.16<br>(0.07 to<br>0.33)                      |
| Indirect maternal deaths                              | 16.94<br>(10.76 to<br>24.71)                        | 13.39<br>(6.89 to<br>23.78)                        | 8.68<br>(4.41 to<br>15.72)                        | 24.67<br>(12.75 to<br>43.40)                        | 0.29<br>(0.19 to<br>0.42)                      | 0.23<br>(0.12 to<br>0.41)                      | 0.15<br>(0.08 to<br>0.27)                      | 0.43<br>(0.22 to<br>0.75)                      |
| Late maternal deaths                                  | 2.09<br>(1.03 to<br>3.74)                           | 1.28<br>(0.58 to<br>2.51)                          | 0.82<br>(0.36 to<br>1.64)                         | 2.32<br>(1.03 to<br>4.65)                           | 0.04<br>(0.02 to<br>0.06)                      | 0.02<br>(0.01 to<br>0.04)                      | 0.01<br>(0.01 to<br>0.03)                      | 0.04<br>(0.02 to<br>0.08)                      |
| Maternal deaths aggravated by HIV/AIDS                | 0.01<br>(0.00 to<br>0.05)                           | 0.08<br>(0.00 to<br>0.44)                          | 0.05<br>(0.00 to<br>0.29)                         | 0.15<br>(0.00 to<br>0.81)                           | 0.00<br>(0.00 to<br>0.00)                      | 0.00<br>(0.00 to<br>0.01)                      | 0.00<br>(0.00 to<br>0.00)                      | 0.00<br>(0.00 to<br>0.01)                      |
| Other maternal disorders                              | 26.58<br>(17.86 to<br>38.30)                        | 20.41<br>(10.96 to<br>34.07)                       | 13.54<br>(7.37 to<br>23.29)                       | 36.01<br>(20.33 to<br>60.56)                        | 0.46<br>(0.31 to<br>0.66)                      | 0.36<br>(0.20 to<br>0.61)                      | 0.24<br>(0.13 to<br>0.42)                      | 0.64<br>(0.35 to<br>1.07)                      |
| <b>Yemen</b>                                          |                                                     |                                                    |                                                   |                                                     |                                                |                                                |                                                |                                                |
| Cause                                                 | YLLs (in 1000s)                                     |                                                    |                                                   |                                                     | Deaths (in 1000s)                              |                                                |                                                |                                                |
|                                                       | 2016                                                | 2040 Forecast                                      | 2040 Better Scenario                              | 2040 Worse Scenario                                 | 2016                                           | 2040 Forecast                                  | 2040 Better Scenario                           | 2040 Worse Scenario                            |
| Neonatal disorders                                    | 1,358.78<br>(486.16 to<br>2,355.06)                 | 474.78<br>(133.54 to<br>984.02)                    | 322.30<br>(92.74 to<br>665.79)                    | 1,216.47<br>(326.94 to<br>2,477.95)                 | 15.71<br>(5.62 to<br>27.22)                    | 5.49<br>(1.54 to<br>11.37)                     | 3.73<br>(1.07 to<br>7.70)                      | 14.06<br>(3.78 to<br>28.64)                    |
| Neonatal preterm birth                                | 947.12<br>(338.87 to<br>1,686.21)                   | 320.16<br>(86.74 to<br>675.77)                     | 205.27<br>(55.86 to<br>426.90)                    | 812.55<br>(220.76 to<br>1,723.52)                   | 10.95<br>(3.92 to<br>19.49)                    | 3.70<br>(1.00 to<br>7.81)                      | 2.37<br>(0.65 to<br>4.93)                      | 9.39<br>(2.55 to<br>19.91)                     |

|                                                                         |                                                            |                                                            |                                                            |                                                            |                                                   |                                                      |                                                      |                                                      |
|-------------------------------------------------------------------------|------------------------------------------------------------|------------------------------------------------------------|------------------------------------------------------------|------------------------------------------------------------|---------------------------------------------------|------------------------------------------------------|------------------------------------------------------|------------------------------------------------------|
| Neonatal encephalopathy due to birth asphyxia and trauma                | 164.80<br>(53.60 to<br>336.32)                             | 55.63<br>(12.65 to<br>140.09)                              | 43.38<br>(10.45 to<br>108.33)                              | 140.06<br>(31.60 to<br>359.46)                             | 1.91<br>(0.62 to<br>3.89)                         | 0.64<br>(0.15 to<br>1.62)                            | 0.50<br>(0.12 to<br>1.25)                            | 1.62<br>(0.37 to<br>4.15)                            |
| Neonatal sepsis and other neonatal infections                           | 121.52<br>(33.36 to<br>269.08)                             | 53.68<br>(11.83 to<br>133.51)                              | 41.18<br>(9.13 to<br>102.34)                               | 138.11<br>(30.37 to<br>354.01)                             | 1.41<br>(0.39 to<br>3.11)                         | 0.62<br>(0.14 to<br>1.54)                            | 0.48<br>(0.11 to<br>1.18)                            | 1.60<br>(0.35 to<br>4.09)                            |
| Hemolytic disease and other neonatal jaundice                           | 11.77<br>(3.28 to<br>28.64)                                | 2.65<br>(0.47 to<br>7.22)                                  | 1.89<br>(0.34 to<br>5.37)                                  | 7.45<br>(1.31 to<br>20.98)                                 | 0.14<br>(0.04 to<br>0.33)                         | 0.03<br>(0.01 to<br>0.08)                            | 0.02<br>(0.00 to<br>0.06)                            | 0.09<br>(0.02 to<br>0.24)                            |
| Other neonatal disorders                                                | 113.57<br>(34.27 to<br>265.26)                             | 42.67<br>(9.55 to<br>119.02)                               | 30.57<br>(6.88 to<br>88.04)                                | 118.30<br>(26.93 to<br>328.23)                             | 1.31<br>(0.40 to<br>3.07)                         | 0.49<br>(0.11 to<br>1.38)                            | 0.35<br>(0.08 to<br>1.02)                            | 1.37<br>(0.31 to<br>3.80)                            |
| <b>Nutritional deficiencies</b>                                         | <b>19.16</b><br><b>(10.62 to</b><br><b>31.97)</b>          | <b>7.86</b><br><b>(4.82 to</b><br><b>12.62)</b>            | <b>6.13</b><br><b>(3.80 to</b><br><b>9.69)</b>             | <b>13.57</b><br><b>(7.62 to</b><br><b>24.35)</b>           | <b>0.32</b><br><b>(0.20 to</b><br><b>0.50)</b>    | <b>0.23</b><br><b>(0.14 to</b><br><b>0.36)</b>       | <b>0.21</b><br><b>(0.13 to</b><br><b>0.33)</b>       | <b>0.30</b><br><b>(0.18 to</b><br><b>0.48)</b>       |
| Protein-energy malnutrition                                             | 17.27<br>(8.97 to<br>29.82)                                | 5.91<br>(3.32 to<br>9.93)                                  | 4.51<br>(2.64 to<br>7.37)                                  | 10.72<br>(5.38 to<br>19.84)                                | 0.28<br>(0.17 to<br>0.44)                         | 0.17<br>(0.10 to<br>0.27)                            | 0.16<br>(0.10 to<br>0.24)                            | 0.23<br>(0.14 to<br>0.38)                            |
| Iodine deficiency                                                       | 0.39<br>(0.03 to<br>1.61)                                  | 0.42<br>(0.03 to<br>1.51)                                  | 0.32<br>(0.02 to<br>1.07)                                  | 0.72<br>(0.05 to<br>3.10)                                  | 0.01<br>(0.00 to<br>0.02)                         | 0.01<br>(0.00 to<br>0.04)                            | 0.01<br>(0.00 to<br>0.03)                            | 0.02<br>(0.00 to<br>0.05)                            |
| Dietary iron deficiency                                                 | 0.46<br>(0.27 to<br>0.77)                                  | 0.46<br>(0.26 to<br>0.80)                                  | 0.40<br>(0.22 to<br>0.70)                                  | 0.63<br>(0.34 to<br>1.12)                                  | 0.01<br>(0.00 to<br>0.01)                         | 0.01<br>(0.00 to<br>0.02)                            | 0.01<br>(0.00 to<br>0.02)                            | 0.01<br>(0.01 to<br>0.02)                            |
| Other nutritional deficiencies                                          | 1.04<br>(0.55 to<br>2.06)                                  | 1.06<br>(0.56 to<br>2.08)                                  | 0.90<br>(0.46 to<br>1.73)                                  | 1.49<br>(0.76 to<br>3.08)                                  | 0.02<br>(0.01 to<br>0.05)                         | 0.04<br>(0.02 to<br>0.08)                            | 0.03<br>(0.02 to<br>0.08)                            | 0.04<br>(0.02 to<br>0.09)                            |
| <b>Other communicable, maternal, neonatal, and nutritional diseases</b> | <b>306.78</b><br><b>(124.95 to</b><br><b>614.35)</b>       | <b>54.45</b><br><b>(26.82 to</b><br><b>104.29)</b>         | <b>44.60</b><br><b>(22.09 to</b><br><b>83.47)</b>          | <b>106.68</b><br><b>(45.85 to</b><br><b>216.71)</b>        | <b>3.79</b><br><b>(1.65 to</b><br><b>7.32)</b>    | <b>1.03</b><br><b>(0.57 to</b><br><b>1.71)</b>       | <b>0.90</b><br><b>(0.49 to</b><br><b>1.45)</b>       | <b>1.68</b><br><b>(0.85 to</b><br><b>2.97)</b>       |
| Sexually transmitted infections excluding HIV                           | 277.07<br>(100.98 to<br>572.19)                            | 32.32<br>(10.15 to<br>74.57)                               | 26.18<br>(8.12 to<br>59.93)                                | 73.24<br>(21.87 to<br>170.32)                              | 3.25<br>(1.20 to<br>6.69)                         | 0.39<br>(0.13 to<br>0.88)                            | 0.31<br>(0.10 to<br>0.71)                            | 0.87<br>(0.27 to<br>2.00)                            |
| Syphilis                                                                | 276.63<br>(100.58 to<br>571.69)                            | 31.83<br>(9.60 to<br>74.18)                                | 25.74<br>(7.82 to<br>59.61)                                | 72.67<br>(21.18 to<br>169.86)                              | 3.24<br>(1.19 to<br>6.68)                         | 0.38<br>(0.12 to<br>0.87)                            | 0.30<br>(0.09 to<br>0.70)                            | 0.85<br>(0.25 to<br>1.99)                            |
| Chlamydial infection                                                    | 0.09<br>(0.04 to<br>0.14)                                  | 0.10<br>(0.05 to<br>0.16)                                  | 0.09<br>(0.04 to<br>0.14)                                  | 0.11<br>(0.05 to<br>0.19)                                  | 0.00<br>(0.00 to<br>0.00)                         | 0.00<br>(0.00 to<br>0.00)                            | 0.00<br>(0.00 to<br>0.00)                            | 0.00<br>(0.00 to<br>0.00)                            |
| Gonococcal infection                                                    | 0.23<br>(0.11 to<br>0.37)                                  | 0.26<br>(0.13 to<br>0.42)                                  | 0.23<br>(0.12 to<br>0.37)                                  | 0.30<br>(0.15 to<br>0.49)                                  | 0.00<br>(0.00 to<br>0.01)                         | 0.00<br>(0.00 to<br>0.01)                            | 0.01<br>(0.00 to<br>0.01)                            | 0.01<br>(0.00 to<br>0.01)                            |
| Other sexually transmitted infections                                   | 0.13<br>(0.06 to<br>0.21)                                  | 0.14<br>(0.07 to<br>0.24)                                  | 0.12<br>(0.06 to<br>0.21)                                  | 0.17<br>(0.08 to<br>0.29)                                  | 0.00<br>(0.00 to<br>0.00)                         | 0.00<br>(0.00 to<br>0.01)                            | 0.00<br>(0.00 to<br>0.00)                            | 0.00<br>(0.00 to<br>0.01)                            |
| Acute hepatitis                                                         | 5.94<br>(4.63 to<br>7.73)                                  | 6.10<br>(4.27 to<br>8.55)                                  | 5.18<br>(3.62 to<br>7.31)                                  | 7.68<br>(5.36 to<br>10.81)                                 | 0.13<br>(0.10 to<br>0.17)                         | 0.17<br>(0.12 to<br>0.24)                            | 0.15<br>(0.10 to<br>0.21)                            | 0.20<br>(0.14 to<br>0.29)                            |
| Acute hepatitis A                                                       | 0.48<br>(0.11 to<br>1.10)                                  | 0.17<br>(0.06 to<br>0.34)                                  | 0.14<br>(0.05 to<br>0.28)                                  | 0.28<br>(0.10 to<br>0.61)                                  | 0.01<br>(0.00 to<br>0.01)                         | 0.00<br>(0.00 to<br>0.01)                            | 0.00<br>(0.00 to<br>0.01)                            | 0.01<br>(0.00 to<br>0.01)                            |
| Acute hepatitis B                                                       | 4.40<br>(3.25 to<br>5.88)                                  | 5.25<br>(3.64 to<br>7.53)                                  | 4.43<br>(3.05 to<br>6.39)                                  | 6.46<br>(4.42 to<br>9.33)                                  | 0.11<br>(0.08 to<br>0.15)                         | 0.15<br>(0.10 to<br>0.22)                            | 0.13<br>(0.09 to<br>0.18)                            | 0.18<br>(0.12 to<br>0.25)                            |
| Acute hepatitis C                                                       | 0.13<br>(0.09 to<br>0.18)                                  | 0.16<br>(0.10 to<br>0.24)                                  | 0.15<br>(0.09 to<br>0.23)                                  | 0.18<br>(0.11 to<br>0.27)                                  | 0.00<br>(0.00 to<br>0.01)                         | 0.00<br>(0.00 to<br>0.01)                            | 0.00<br>(0.00 to<br>0.01)                            | 0.01<br>(0.00 to<br>0.01)                            |
| Acute hepatitis E                                                       | 0.93<br>(0.59 to<br>1.45)                                  | 0.52<br>(0.34 to<br>0.80)                                  | 0.46<br>(0.30 to<br>0.70)                                  | 0.75<br>(0.48 to<br>1.17)                                  | 0.02<br>(0.01 to<br>0.02)                         | 0.01<br>(0.01 to<br>0.02)                            | 0.01<br>(0.01 to<br>0.02)                            | 0.02<br>(0.01 to<br>0.03)                            |
| Other unspecified infectious diseases                                   | 23.76<br>(6.75 to<br>82.63)                                | 16.04<br>(6.57 to<br>28.62)                                | 13.25<br>(5.41 to<br>23.61)                                | 25.76<br>(9.82 to<br>54.95)                                | 0.41<br>(0.14 to<br>1.13)                         | 0.48<br>(0.20 to<br>0.82)                            | 0.43<br>(0.18 to<br>0.75)                            | 0.61<br>(0.25 to<br>1.07)                            |
| <b>Non-communicable diseases</b>                                        | <b>2,620.04</b><br><b>(2,173.59 to</b><br><b>3,174.65)</b> | <b>4,292.39</b><br><b>(3,336.79 to</b><br><b>5,512.24)</b> | <b>2,911.76</b><br><b>(2,365.51 to</b><br><b>3,634.54)</b> | <b>6,344.09</b><br><b>(4,846.99 to</b><br><b>8,200.93)</b> | <b>82.22</b><br><b>(73.41 to</b><br><b>93.20)</b> | <b>175.77</b><br><b>(144.37 to</b><br><b>214.78)</b> | <b>127.63</b><br><b>(109.30 to</b><br><b>150.57)</b> | <b>233.44</b><br><b>(189.22 to</b><br><b>284.32)</b> |



| Yemen                                |                              |                              |                              |                                |                          |                           |                           |                           |
|--------------------------------------|------------------------------|------------------------------|------------------------------|--------------------------------|--------------------------|---------------------------|---------------------------|---------------------------|
| Cause                                | YLLs (in 1000s)              |                              |                              |                                | Deaths (in 1000s)        |                           |                           |                           |
|                                      | 2016                         | 2040 Forecast                | 2040 Better Scenario         | 2040 Worse Scenario            | 2016                     | 2040 Forecast             | 2040 Better Scenario      | 2040 Worse Scenario       |
| Neoplasms                            | 347.06<br>(285.84 to 409.22) | 723.64<br>(556.55 to 899.83) | 672.25<br>(538.00 to 817.61) | 810.66<br>(603.18 to 1,037.43) | 10.94<br>(9.30 to 12.80) | 25.61<br>(20.27 to 31.27) | 24.93<br>(20.69 to 29.32) | 27.10<br>(20.79 to 34.13) |
| Lip and oral cavity cancer           | 2.71<br>(2.19 to 3.47)       | 6.24<br>(4.12 to 10.57)      | 4.93<br>(3.46 to 7.73)       | 8.21<br>(5.08 to 14.74)        | 0.10<br>(0.08 to 0.12)   | 0.23<br>(0.16 to 0.35)    | 0.19<br>(0.14 to 0.28)    | 0.28<br>(0.18 to 0.47)    |
| Nasopharynx cancer                   | 2.64<br>(1.99 to 3.44)       | 6.99<br>(3.93 to 12.32)      | 5.19<br>(3.11 to 8.60)       | 9.80<br>(5.23 to 17.81)        | 0.07<br>(0.06 to 0.10)   | 0.21<br>(0.12 to 0.36)    | 0.16<br>(0.10 to 0.25)    | 0.28<br>(0.16 to 0.51)    |
| Other pharynx cancer                 | 1.54<br>(1.12 to 2.31)       | 3.08<br>(2.00 to 5.07)       | 2.94<br>(1.96 to 4.74)       | 5.24<br>(2.07 to 5.37)         | 0.05<br>(0.04 to 0.08)   | 0.11<br>(0.07 to 0.18)    | 0.11<br>(0.08 to 0.17)    | 0.11<br>(0.07 to 0.18)    |
| Esophageal cancer                    | 5.38<br>(4.42 to 6.65)       | 10.61<br>(6.27 to 17.40)     | 8.19<br>(5.13 to 12.91)      | 13.95<br>(7.67 to 23.69)       | 0.21<br>(0.17 to 0.26)   | 0.42<br>(0.25 to 0.68)    | 0.35<br>(0.22 to 0.54)    | 0.52<br>(0.30 to 0.88)    |
| Stomach cancer                       | 28.56<br>(24.24 to 33.48)    | 46.23<br>(35.15 to 59.54)    | 41.19<br>(32.26 to 52.00)    | 51.23<br>(38.51 to 66.60)      | 1.03<br>(0.88 to 1.20)   | 1.77<br>(1.37 to 2.26)    | 1.65<br>(1.31 to 2.06)    | 1.86<br>(1.41 to 2.41)    |
| Colon and rectum cancer              | 24.45<br>(17.96 to 32.61)    | 61.87<br>(38.33 to 95.84)    | 62.21<br>(39.68 to 91.83)    | 60.04<br>(36.72 to 93.74)      | 0.87<br>(0.68 to 1.12)   | 2.37<br>(1.51 to 3.58)    | 2.50<br>(1.70 to 3.63)    | 2.17<br>(1.38 to 3.31)    |
| Liver cancer                         | 18.57<br>(11.87 to 25.75)    | 47.72<br>(29.37 to 71.10)    | 43.74<br>(27.63 to 63.95)    | 53.37<br>(31.09 to 81.93)      | 0.73<br>(0.48 to 1.00)   | 2.03<br>(1.25 to 2.98)    | 1.97<br>(1.23 to 2.81)    | 2.14<br>(1.27 to 3.27)    |
| Liver cancer due to hepatitis B      | 8.62<br>(5.50 to 12.30)      | 22.07<br>(13.07 to 34.67)    | 19.95<br>(12.18 to 29.70)    | 25.01<br>(14.60 to 40.44)      | 0.31<br>(0.20 to 0.44)   | 0.84<br>(0.50 to 1.27)    | 0.79<br>(0.50 to 1.14)    | 0.90<br>(0.53 to 1.44)    |
| Liver cancer due to hepatitis C      | 5.78<br>(3.76 to 8.21)       | 15.41<br>(9.03 to 23.98)     | 14.63<br>(8.96 to 22.01)     | 16.65<br>(9.75 to 26.62)       | 0.27<br>(0.18 to 0.38)   | 0.77<br>(0.47 to 1.16)    | 0.78<br>(0.48 to 1.14)    | 0.78<br>(0.46 to 1.22)    |
| Liver cancer due to alcohol use      | 0.43<br>(0.25 to 0.68)       | 1.19<br>(0.62 to 2.07)       | 1.07<br>(0.58 to 1.77)       | 1.35<br>(0.67 to 2.37)         | 0.02<br>(0.01 to 0.03)   | 0.05<br>(0.03 to 0.09)    | 0.05<br>(0.03 to 0.08)    | 0.06<br>(0.03 to 0.10)    |
| Liver cancer due to other causes     | 3.74<br>(2.15 to 5.35)       | 9.05<br>(5.03 to 14.36)      | 8.08<br>(4.64 to 12.37)      | 10.36<br>(5.63 to 16.71)       | 0.13<br>(0.08 to 0.20)   | 0.38<br>(0.21 to 0.60)    | 0.35<br>(0.20 to 0.55)    | 0.40<br>(0.22 to 0.66)    |
| Gallbladder and biliary tract cancer | 4.89<br>(3.54 to 6.95)       | 8.37<br>(5.96 to 11.86)      | 8.96<br>(6.40 to 12.53)      | 7.78<br>(5.48 to 11.21)        | 0.20<br>(0.15 to 0.27)   | 0.36<br>(0.27 to 0.48)    | 0.40<br>(0.31 to 0.53)    | 0.31<br>(0.23 to 0.43)    |
| Pancreatic cancer                    | 8.68<br>(7.08 to 10.63)      | 24.15<br>(17.83 to 32.46)    | 24.56<br>(18.63 to 32.24)    | 23.73<br>(16.99 to 32.47)      | 0.35<br>(0.30 to 0.42)   | 1.01<br>(0.77 to 1.35)    | 1.09<br>(0.86 to 1.39)    | 0.94<br>(0.70 to 1.26)    |
| Larynx cancer                        | 3.74<br>(2.97 to 4.63)       | 8.57<br>(4.17 to 17.43)      | 5.61<br>(2.94 to 11.25)      | 12.90<br>(5.94 to 25.82)       | 0.14<br>(0.11 to 0.17)   | 0.31<br>(0.16 to 0.61)    | 0.21<br>(0.12 to 0.40)    | 0.45<br>(0.22 to 0.89)    |
| Tracheal, bronchus, and lung cancer  | 38.95<br>(30.16 to 51.13)    | 95.01<br>(50.32 to 167.77)   | 61.80<br>(36.02 to 103.39)   | 138.95<br>(69.48 to 248.09)    | 1.49<br>(1.21 to 1.92)   | 3.60<br>(2.07 to 6.10)    | 2.48<br>(1.55 to 3.88)    | 5.06<br>(2.78 to 8.75)    |
| Malignant skin melanoma              | 0.92<br>(0.65 to 1.53)       | 2.21<br>(1.50 to 3.71)       | 2.48<br>(1.68 to 4.06)       | 1.98<br>(1.34 to 3.37)         | 0.03<br>(0.02 to 0.04)   | 0.07<br>(0.05 to 0.11)    | 0.09<br>(0.06 to 0.13)    | 0.06<br>(0.04 to 0.10)    |
| Non-melanoma skin cancer             | 1.23<br>(0.90 to 1.52)       | 3.01<br>(2.21 to 3.74)       | 2.95<br>(2.19 to 3.65)       | 3.10<br>(2.26 to 3.85)         | 0.05<br>(0.04 to 0.06)   | 0.13<br>(0.10 to 0.16)    | 0.14<br>(0.10 to 0.17)    | 0.13<br>(0.09 to 0.16)    |
| Breast cancer                        | 44.46<br>(27.01 to 67.32)    | 102.98<br>(59.26 to 161.01)  | 101.10<br>(60.58 to 155.45)  | 104.01<br>(58.13 to 165.37)    | 1.30<br>(0.84 to 1.90)   | 3.11<br>(1.91 to 4.72)    | 3.13<br>(2.00 to 4.63)    | 3.05<br>(1.79 to 4.76)    |
| Cervical cancer                      | 9.90<br>(6.06 to 12.87)      | 18.86<br>(11.14 to 26.99)    | 17.21<br>(10.61 to 24.89)    | 21.27<br>(12.16 to 31.51)      | 0.30<br>(0.19 to 0.40)   | 0.59<br>(0.38 to 0.84)    | 0.56<br>(0.37 to 0.79)    | 0.64<br>(0.39 to 0.93)    |

|                                 |                                                            |                                                            |                                                          |                                                            |                                                   |                                                    |                                                   |                                                     |
|---------------------------------|------------------------------------------------------------|------------------------------------------------------------|----------------------------------------------------------|------------------------------------------------------------|---------------------------------------------------|----------------------------------------------------|---------------------------------------------------|-----------------------------------------------------|
| Uterine cancer                  | 4.43<br>(3.27 to<br>5.54)                                  | 9.19<br>(6.57 to<br>11.84)                                 | 8.49<br>(6.20 to<br>10.94)                               | 10.01<br>(6.90 to<br>12.99)                                | 0.16<br>(0.13 to<br>0.19)                         | 0.34<br>(0.26 to<br>0.43)                          | 0.33<br>(0.26 to<br>0.41)                         | 0.36<br>(0.26 to<br>0.45)                           |
| Ovarian cancer                  | 5.83<br>(4.43 to<br>8.57)                                  | 15.37<br>(10.71 to<br>23.75)                               | 16.56<br>(11.63 to<br>25.66)                             | 14.08<br>(9.67 to<br>22.26)                                | 0.20<br>(0.15 to<br>0.26)                         | 0.53<br>(0.38 to<br>0.78)                          | 0.59<br>(0.43 to<br>0.85)                         | 0.47<br>(0.33 to<br>0.70)                           |
| Prostate cancer                 | 5.88<br>(4.55 to<br>7.98)                                  | 17.68<br>(13.06 to<br>24.70)                               | 20.23<br>(15.47 to<br>27.62)                             | 15.45<br>(11.22 to<br>22.31)                               | 0.35<br>(0.27 to<br>0.47)                         | 1.16<br>(0.81 to<br>1.64)                          | 1.41<br>(1.04 to<br>1.93)                         | 0.95<br>(0.63 to<br>1.40)                           |
| Testicular cancer               | 1.39<br>(0.99 to<br>1.90)                                  | 2.06<br>(1.44 to<br>2.88)                                  | 1.93<br>(1.36 to<br>2.71)                                | 2.24<br>(1.57 to<br>3.16)                                  | 0.03<br>(0.02 to<br>0.04)                         | 0.04<br>(0.03 to<br>0.06)                          | 0.04<br>(0.03 to<br>0.06)                         | 0.05<br>(0.03 to<br>0.06)                           |
| <b>Yemen</b>                    |                                                            |                                                            |                                                          |                                                            |                                                   |                                                    |                                                   |                                                     |
| Cause                           | YLLs (in 1000s)                                            |                                                            |                                                          |                                                            | Deaths (in 1000s)                                 |                                                    |                                                   |                                                     |
|                                 | 2016                                                       | 2040 Forecast                                              | 2040 Better Scenario                                     | 2040 Worse Scenario                                        | 2016                                              | 2040 Forecast                                      | 2040 Better Scenario                              | 2040 Worse Scenario                                 |
| Kidney cancer                   | 2.97<br>(2.41 to<br>3.86)                                  | 6.64<br>(4.97 to<br>9.11)                                  | 7.10<br>(5.33 to<br>9.66)                                | 6.58<br>(4.87 to<br>9.19)                                  | 0.09<br>(0.07 to<br>0.11)                         | 0.23<br>(0.17 to<br>0.32)                          | 0.26<br>(0.19 to<br>0.36)                         | 0.21<br>(0.15 to<br>0.30)                           |
| Bladder cancer                  | 5.71<br>(4.59 to<br>7.46)                                  | 13.43<br>(9.23 to<br>19.33)                                | 12.67<br>(9.21 to<br>17.56)                              | 14.43<br>(9.54 to<br>21.50)                                | 0.26<br>(0.21 to<br>0.33)                         | 0.65<br>(0.46 to<br>0.92)                          | 0.66<br>(0.50 to<br>0.90)                         | 0.65<br>(0.44 to<br>0.95)                           |
| Brain and nervous system cancer | 21.32<br>(16.78 to<br>26.00)                               | 41.64<br>(32.93 to<br>50.57)                               | 43.46<br>(34.22 to<br>52.92)                             | 43.74<br>(34.51 to<br>53.44)                               | 0.47<br>(0.36 to<br>0.58)                         | 1.14<br>(0.86 to<br>1.40)                          | 1.24<br>(0.92 to<br>1.52)                         | 1.09<br>(0.84 to<br>1.34)                           |
| Thyroid cancer                  | 2.88<br>(2.06 to<br>3.80)                                  | 5.93<br>(3.92 to<br>8.63)                                  | 5.48<br>(3.74 to<br>7.86)                                | 6.68<br>(4.24 to<br>10.10)                                 | 0.10<br>(0.08 to<br>0.14)                         | 0.23<br>(0.16 to<br>0.33)                          | 0.23<br>(0.16 to<br>0.32)                         | 0.25<br>(0.17 to<br>0.36)                           |
| Mesothelioma                    | 0.86<br>(0.61 to<br>1.23)                                  | 1.80<br>(1.24 to<br>2.54)                                  | 1.77<br>(1.23 to<br>2.52)                                | 1.84<br>(1.26 to<br>2.63)                                  | 0.03<br>(0.02 to<br>0.04)                         | 0.06<br>(0.04 to<br>0.08)                          | 0.06<br>(0.04 to<br>0.09)                         | 0.06<br>(0.04 to<br>0.08)                           |
| Hodgkin lymphoma                | 6.35<br>(4.49 to<br>10.33)                                 | 8.28<br>(5.48 to<br>14.18)                                 | 7.02<br>(4.53 to<br>12.00)                               | 10.32<br>(6.82 to<br>17.47)                                | 0.14<br>(0.10 to<br>0.22)                         | 0.20<br>(0.13 to<br>0.35)                          | 0.17<br>(0.11 to<br>0.30)                         | 0.24<br>(0.16 to<br>0.40)                           |
| Non-Hodgkin lymphoma            | 15.16<br>(12.15 to<br>20.02)                               | 32.35<br>(24.74 to<br>43.34)                               | 34.05<br>(26.21 to<br>45.19)                             | 32.24<br>(24.44 to<br>43.92)                               | 0.41<br>(0.33 to<br>0.52)                         | 1.04<br>(0.79 to<br>1.36)                          | 1.14<br>(0.89 to<br>1.47)                         | 0.96<br>(0.72 to<br>1.28)                           |
| Multiple myeloma                | 3.00<br>(2.27 to<br>4.02)                                  | 8.32<br>(5.94 to<br>11.88)                                 | 9.00<br>(6.50 to<br>12.60)                               | 7.75<br>(5.45 to<br>11.08)                                 | 0.11<br>(0.09 to<br>0.15)                         | 0.32<br>(0.23 to<br>0.46)                          | 0.36<br>(0.27 to<br>0.50)                         | 0.29<br>(0.21 to<br>0.41)                           |
| Leukemia                        | 49.00<br>(36.58 to<br>63.50)                               | 67.99<br>(48.60 to<br>89.75)                               | 63.36<br>(46.33 to<br>82.22)                             | 81.77<br>(57.19 to<br>109.15)                              | 1.08<br>(0.83 to<br>1.35)                         | 1.95<br>(1.43 to<br>2.53)                          | 1.90<br>(1.43 to<br>2.41)                         | 2.15<br>(1.54 to<br>2.89)                           |
| Acute lymphoid leukemia         | 8.49<br>(5.78 to<br>12.94)                                 | 9.66<br>(6.54 to<br>15.30)                                 | 9.50<br>(6.49 to<br>14.73)                               | 11.82<br>(7.86 to<br>19.04)                                | 0.13<br>(0.09 to<br>0.21)                         | 0.19<br>(0.13 to<br>0.29)                          | 0.19<br>(0.13 to<br>0.28)                         | 0.21<br>(0.14 to<br>0.34)                           |
| Chronic lymphoid leukemia       | 0.94<br>(0.58 to<br>1.58)                                  | 1.82<br>(1.07 to<br>3.07)                                  | 1.77<br>(1.07 to<br>2.98)                                | 1.95<br>(1.10 to<br>3.34)                                  | 0.03<br>(0.02 to<br>0.05)                         | 0.06<br>(0.04 to<br>0.10)                          | 0.07<br>(0.04 to<br>0.10)                         | 0.06<br>(0.04 to<br>0.10)                           |
| Acute myeloid leukemia          | 6.25<br>(4.54 to<br>9.69)                                  | 10.96<br>(7.70 to<br>16.78)                                | 11.21<br>(7.98 to<br>17.04)                              | 11.94<br>(8.37 to<br>18.52)                                | 0.12<br>(0.09 to<br>0.18)                         | 0.27<br>(0.19 to<br>0.41)                          | 0.28<br>(0.20 to<br>0.42)                         | 0.27<br>(0.19 to<br>0.41)                           |
| Chronic myeloid leukemia        | 3.27<br>(2.00 to<br>4.57)                                  | 4.45<br>(2.82 to<br>6.52)                                  | 4.26<br>(2.70 to<br>6.08)                                | 4.84<br>(2.99 to<br>7.32)                                  | 0.09<br>(0.06 to<br>0.13)                         | 0.14<br>(0.09 to<br>0.19)                          | 0.14<br>(0.09 to<br>0.19)                         | 0.14<br>(0.09 to<br>0.21)                           |
| Other leukemia                  | 30.05<br>(21.23 to<br>40.48)                               | 41.10<br>(27.72 to<br>57.37)                               | 36.62<br>(25.08 to<br>51.09)                             | 51.23<br>(34.21 to<br>72.93)                               | 0.70<br>(0.51 to<br>0.92)                         | 1.29<br>(0.91 to<br>1.78)                          | 1.22<br>(0.87 to<br>1.67)                         | 1.46<br>(1.00 to<br>2.06)                           |
| Other neoplasms                 | 25.64<br>(21.18 to<br>31.93)                               | 47.06<br>(38.76 to<br>58.83)                               | 48.08<br>(39.77 to<br>59.89)                             | 49.97<br>(41.22 to<br>62.69)                               | 0.61<br>(0.51 to<br>0.74)                         | 1.39<br>(1.16 to<br>1.71)                          | 1.50<br>(1.26 to<br>1.82)                         | 1.34<br>(1.12 to<br>1.65)                           |
| <b>Cardiovascular diseases</b>  | <b>1,157.87</b><br><b>(1,027.13 to</b><br><b>1,310.93)</b> | <b>2,147.54</b><br><b>(1,374.58 to</b><br><b>3,139.72)</b> | <b>1,090.14</b><br><b>(745.33 to</b><br><b>1,597.24)</b> | <b>3,534.34</b><br><b>(2,242.51 to</b><br><b>5,068.22)</b> | <b>44.87</b><br><b>(40.29 to</b><br><b>50.25)</b> | <b>93.84</b><br><b>(65.40 to</b><br><b>129.42)</b> | <b>54.02</b><br><b>(38.98 to</b><br><b>73.20)</b> | <b>139.79</b><br><b>(95.51 to</b><br><b>189.16)</b> |

|                                               |                                                     |                                                      |                                                     |                                                      |                                                |                                                 |                                                |                                                  |
|-----------------------------------------------|-----------------------------------------------------|------------------------------------------------------|-----------------------------------------------------|------------------------------------------------------|------------------------------------------------|-------------------------------------------------|------------------------------------------------|--------------------------------------------------|
| Rheumatic heart disease                       | 33.34<br>(19.05 to<br>53.32)                        | 25.47<br>(13.73 to<br>45.96)                         | 19.85<br>(10.91 to<br>36.30)                        | 34.65<br>(18.76 to<br>62.53)                         | 0.77<br>(0.43 to<br>1.26)                      | 0.73<br>(0.40 to<br>1.29)                       | 0.60<br>(0.33 to<br>1.05)                      | 0.91<br>(0.50 to<br>1.63)                        |
| Ischemic heart disease                        | 693.87<br>(610.60 to<br>795.46)                     | 1,421.73<br>(774.21 to<br>2,380.93)                  | 667.25<br>(379.91 to<br>1,122.29)                   | 2,383.14<br>(1,337.49 to<br>3,800.67)                | 28.19<br>(25.08 to<br>31.78)                   | 61.83<br>(37.46 to<br>96.05)                    | 32.90<br>(20.41 to<br>51.70)                   | 94.86<br>(57.82 to<br>143.22)                    |
| Stroke                                        | 316.34<br>(260.09 to<br>375.28)                     | 488.27<br>(290.70 to<br>816.55)                      | 235.27<br>(144.19 to<br>386.13)                     | 853.25<br>(501.54 to<br>1,416.33)                    | 12.17<br>(10.24 to<br>14.12)                   | 22.23<br>(14.06 to<br>36.13)                    | 12.66<br>(8.28 to<br>20.33)                    | 34.00<br>(21.42 to<br>54.55)                     |
| Ischemic stroke                               | 123.61<br>(102.05 to<br>145.77)                     | 201.69<br>(109.84 to<br>365.52)                      | 109.84<br>(62.94 to<br>194.81)                      | 301.28<br>(159.48 to<br>530.31)                      | 6.05<br>(5.03 to<br>7.11)                      | 11.47<br>(6.32 to<br>22.66)                     | 7.35<br>(4.19 to<br>14.03)                     | 15.26<br>(8.30 to<br>28.27)                      |
| Intracerebral hemorrhage                      | 192.73<br>(156.11 to<br>231.49)                     | 286.59<br>(145.58 to<br>535.58)                      | 125.43<br>(72.69 to<br>222.14)                      | 551.97<br>(281.25 to<br>1,016.59)                    | 6.12<br>(5.04 to<br>7.22)                      | 10.76<br>(6.01 to<br>18.49)                     | 5.31<br>(3.30 to<br>8.64)                      | 18.74<br>(10.29 to<br>32.64)                     |
| Hypertensive heart disease                    | 26.29<br>(14.22 to<br>38.52)                        | 57.45<br>(24.45 to<br>121.75)                        | 36.60<br>(17.94 to<br>67.58)                        | 76.37<br>(30.35 to<br>166.57)                        | 1.07<br>(0.64 to<br>1.54)                      | 2.62<br>(1.23 to<br>5.71)                       | 1.82<br>(1.00 to<br>3.39)                      | 3.17<br>(1.41 to<br>7.17)                        |
| Cardiomyopathy and myocarditis                | 18.53<br>(12.99 to<br>25.52)                        | 25.92<br>(17.74 to<br>37.64)                         | 24.44<br>(16.91 to<br>35.06)                        | 29.03<br>(19.74 to<br>42.40)                         | 0.42<br>(0.32 to<br>0.55)                      | 0.83<br>(0.56 to<br>1.19)                       | 0.83<br>(0.56 to<br>1.19)                      | 0.82<br>(0.56 to<br>1.19)                        |
| Myocarditis                                   | 4.42<br>(2.81 to<br>6.91)                           | 4.29<br>(2.95 to<br>6.37)                            | 3.95<br>(2.71 to<br>5.78)                           | 5.41<br>(3.59 to<br>8.29)                            | 0.08<br>(0.05 to<br>0.11)                      | 0.10<br>(0.07 to<br>0.14)                       | 0.10<br>(0.07 to<br>0.14)                      | 0.11<br>(0.08 to<br>0.16)                        |
| <b>Yemen</b>                                  |                                                     |                                                      |                                                     |                                                      |                                                |                                                 |                                                |                                                  |
| Cause                                         | YLLs (in 1000s)                                     |                                                      |                                                     |                                                      | Deaths (in 1000s)                              |                                                 |                                                |                                                  |
|                                               | 2016                                                | 2040 Forecast                                        | 2040 Better Scenario                                | 2040 Worse Scenario                                  | 2016                                           | 2040 Forecast                                   | 2040 Better Scenario                           | 2040 Worse Scenario                              |
| Alcoholic cardiomyopathy                      | 1.25<br>(0.66 to<br>1.85)                           | 2.07<br>(1.10 to<br>3.04)                            | 2.10<br>(1.10 to<br>3.09)                           | 2.08<br>(1.09 to<br>3.07)                            | 0.04<br>(0.02 to<br>0.06)                      | 0.08<br>(0.04 to<br>0.12)                       | 0.08<br>(0.05 to<br>0.13)                      | 0.07<br>(0.04 to<br>0.11)                        |
| Other cardiomyopathy                          | 12.86<br>(8.67 to<br>18.36)                         | 19.56<br>(12.34 to<br>30.63)                         | 18.39<br>(12.01 to<br>27.89)                        | 21.54<br>(13.46 to<br>33.36)                         | 0.31<br>(0.23 to<br>0.41)                      | 0.65<br>(0.41 to<br>0.99)                       | 0.65<br>(0.42 to<br>0.97)                      | 0.63<br>(0.40 to<br>0.96)                        |
| Atrial fibrillation and flutter               | 2.29<br>(1.75 to<br>2.94)                           | 6.60<br>(4.60 to<br>8.76)                            | 6.98<br>(5.08 to<br>9.19)                           | 6.02<br>(4.13 to<br>8.09)                            | 0.18<br>(0.14 to<br>0.23)                      | 0.59<br>(0.36 to<br>0.81)                       | 0.68<br>(0.46 to<br>0.94)                      | 0.49<br>(0.29 to<br>0.69)                        |
| Aortic aneurysm                               | 3.77<br>(2.68 to<br>4.95)                           | 7.43<br>(5.05 to<br>10.43)                           | 6.72<br>(4.74 to<br>9.03)                           | 7.76<br>(5.13 to<br>11.04)                           | 0.14<br>(0.11 to<br>0.18)                      | 0.31<br>(0.21 to<br>0.41)                       | 0.31<br>(0.22 to<br>0.40)                      | 0.30<br>(0.20 to<br>0.40)                        |
| Peripheral artery disease                     | 0.09<br>(0.04 to<br>0.23)                           | 0.38<br>(0.16 to<br>0.92)                            | 0.39<br>(0.17 to<br>0.92)                           | 0.35<br>(0.14 to<br>0.86)                            | 0.01<br>(0.00 to<br>0.02)                      | 0.03<br>(0.01 to<br>0.07)                       | 0.03<br>(0.01 to<br>0.08)                      | 0.02<br>(0.01 to<br>0.06)                        |
| Endocarditis                                  | 8.27<br>(6.26 to<br>10.70)                          | 14.47<br>(10.48 to<br>20.17)                         | 13.16<br>(9.45 to<br>18.11)                         | 16.24<br>(11.67 to<br>22.59)                         | 0.23<br>(0.18 to<br>0.30)                      | 0.56<br>(0.37 to<br>0.80)                       | 0.55<br>(0.37 to<br>0.79)                      | 0.55<br>(0.37 to<br>0.76)                        |
| Other cardiovascular and circulatory diseases | 55.09<br>(34.88 to<br>77.82)                        | 99.81<br>(59.88 to<br>152.59)                        | 79.47<br>(49.48 to<br>118.47)                       | 128.54<br>(76.08 to<br>196.50)                       | 1.69<br>(1.09 to<br>2.44)                      | 4.13<br>(2.47 to<br>6.45)                       | 3.65<br>(2.25 to<br>5.60)                      | 4.67<br>(2.79 to<br>7.16)                        |
| <b>Chronic respiratory diseases</b>           | <b>128.74</b><br><b>(96.88 to</b><br><b>153.03)</b> | <b>171.20</b><br><b>(117.37 to</b><br><b>244.34)</b> | <b>121.37</b><br><b>(86.65 to</b><br><b>165.89)</b> | <b>272.50</b><br><b>(174.19 to</b><br><b>411.29)</b> | <b>4.91</b><br><b>(3.85 to</b><br><b>5.82)</b> | <b>7.41</b><br><b>(5.16 to</b><br><b>10.49)</b> | <b>5.71</b><br><b>(4.21 to</b><br><b>7.60)</b> | <b>10.92</b><br><b>(7.00 to</b><br><b>16.37)</b> |
| Chronic obstructive pulmonary disease         | 76.01<br>(52.82 to<br>94.03)                        | 113.20<br>(67.57 to<br>178.42)                       | 70.97<br>(44.71 to<br>107.08)                       | 198.59<br>(112.23 to<br>328.23)                      | 3.26<br>(2.36 to<br>3.99)                      | 5.18<br>(3.22 to<br>7.92)                       | 3.61<br>(2.36 to<br>5.25)                      | 8.35<br>(4.83 to<br>13.25)                       |
| Pneumoconiosis                                | 0.38<br>(0.25 to<br>0.54)                           | 0.47<br>(0.31 to<br>0.68)                            | 0.45<br>(0.29 to<br>0.65)                           | 0.50<br>(0.32 to<br>0.71)                            | 0.02<br>(0.01 to<br>0.02)                      | 0.02<br>(0.01 to<br>0.04)                       | 0.02<br>(0.01 to<br>0.04)                      | 0.02<br>(0.01 to<br>0.03)                        |
| Silicosis                                     | 0.08<br>(0.04 to<br>0.14)                           | 0.08<br>(0.04 to<br>0.16)                            | 0.08<br>(0.04 to<br>0.15)                           | 0.09<br>(0.04 to<br>0.16)                            | 0.00<br>(0.00 to<br>0.01)                      | 0.00<br>(0.00 to<br>0.01)                       | 0.00<br>(0.00 to<br>0.01)                      | 0.00<br>(0.00 to<br>0.01)                        |
| Asbestosis                                    | 0.08<br>(0.05 to<br>0.11)                           | 0.12<br>(0.07 to<br>0.17)                            | 0.11<br>(0.07 to<br>0.17)                           | 0.12<br>(0.08 to<br>0.17)                            | 0.00<br>(0.00 to<br>0.00)                      | 0.00<br>(0.00 to<br>0.01)                       | 0.00<br>(0.00 to<br>0.01)                      | 0.00<br>(0.00 to<br>0.01)                        |

|                                                                |                                     |                                       |                                       |                                       |                                  |                                  |                                  |                                  |
|----------------------------------------------------------------|-------------------------------------|---------------------------------------|---------------------------------------|---------------------------------------|----------------------------------|----------------------------------|----------------------------------|----------------------------------|
| Coal workers pneumoconiosis                                    | 0.03<br>(0.01 to<br>0.05)           | 0.04<br>(0.01 to<br>0.07)             | 0.03<br>(0.01 to<br>0.06)             | 0.05<br>(0.02 to<br>0.09)             | 0.00<br>(0.00 to<br>0.00)        | 0.00<br>(0.00 to<br>0.00)        | 0.00<br>(0.00 to<br>0.00)        | 0.00<br>(0.00 to<br>0.00)        |
| Other pneumoconiosis                                           | 0.19<br>(0.11 to<br>0.32)           | 0.23<br>(0.13 to<br>0.39)             | 0.23<br>(0.13 to<br>0.37)             | 0.24<br>(0.14 to<br>0.40)             | 0.01<br>(0.00 to<br>0.01)        | 0.01<br>(0.01 to<br>0.02)        | 0.01<br>(0.01 to<br>0.02)        | 0.01<br>(0.01 to<br>0.02)        |
| Asthma                                                         | 42.81<br>(29.46 to<br>57.53)        | 38.26<br>(22.53 to<br>58.77)          | 29.75<br>(17.79 to<br>44.72)          | 53.98<br>(30.56 to<br>86.76)          | 1.32<br>(0.94 to<br>1.77)        | 1.40<br>(0.84 to<br>2.20)        | 1.17<br>(0.71 to<br>1.80)        | 1.82<br>(1.04 to<br>2.95)        |
| Interstitial lung disease and pulmonary sarcoidosis            | 4.64<br>(1.77 to<br>10.04)          | 11.96<br>(4.84 to<br>24.77)           | 13.58<br>(5.78 to<br>26.47)           | 10.53<br>(4.01 to<br>22.94)           | 0.19<br>(0.07 to<br>0.37)        | 0.56<br>(0.22 to<br>1.07)        | 0.67<br>(0.28 to<br>1.23)        | 0.45<br>(0.17 to<br>0.91)        |
| Other chronic respiratory diseases                             | 4.90<br>(2.47 to<br>8.55)           | 7.31<br>(3.74 to<br>12.91)            | 6.63<br>(3.52 to<br>11.49)            | 8.90<br>(4.53 to<br>15.98)            | 0.12<br>(0.07 to<br>0.21)        | 0.24<br>(0.13 to<br>0.44)        | 0.24<br>(0.13 to<br>0.41)        | 0.27<br>(0.14 to<br>0.49)        |
| <b>Cirrhosis and other chronic liver diseases</b>              | <b>56.47</b><br>(42.28 to<br>75.26) | <b>118.04</b><br>(86.92 to<br>165.63) | <b>112.58</b><br>(83.38 to<br>155.79) | <b>126.75</b><br>(93.72 to<br>178.35) | <b>1.81</b><br>(1.36 to<br>2.40) | <b>4.21</b><br>(3.07 to<br>5.73) | <b>4.20</b><br>(3.10 to<br>5.70) | <b>4.29</b><br>(3.19 to<br>5.84) |
| Cirrhosis and other chronic liver diseases due to hepatitis B  | 24.31<br>(17.78 to<br>33.54)        | 57.68<br>(40.73 to<br>81.67)          | 55.55<br>(39.55 to<br>78.30)          | 60.17<br>(42.15 to<br>85.15)          | 0.86<br>(0.63 to<br>1.19)        | 2.13<br>(1.49 to<br>2.95)        | 2.14<br>(1.51 to<br>2.96)        | 2.14<br>(1.48 to<br>2.97)        |
| Cirrhosis and other chronic liver diseases due to hepatitis C  | 7.73<br>(5.29 to<br>11.34)          | 17.89<br>(11.84 to<br>27.41)          | 17.14<br>(11.42 to<br>26.01)          | 18.78<br>(12.31 to<br>29.03)          | 0.27<br>(0.18 to<br>0.39)        | 0.64<br>(0.42 to<br>0.96)        | 0.63<br>(0.42 to<br>0.95)        | 0.65<br>(0.42 to<br>0.98)        |
| Cirrhosis and other chronic liver diseases due to alcohol use  | 3.85<br>(2.79 to<br>5.32)           | 9.27<br>(6.51 to<br>13.14)            | 8.69<br>(6.10 to<br>12.21)            | 10.01<br>(6.90 to<br>14.24)           | 0.14<br>(0.10 to<br>0.19)        | 0.35<br>(0.25 to<br>0.49)        | 0.35<br>(0.24 to<br>0.48)        | 0.37<br>(0.25 to<br>0.51)        |
| Cirrhosis and other chronic liver diseases due to other causes | 20.57<br>(15.22 to<br>27.93)        | 33.19<br>(24.38 to<br>45.85)          | 31.21<br>(23.10 to<br>43.18)          | 37.80<br>(27.79 to<br>52.63)          | 0.54<br>(0.41 to<br>0.72)        | 1.09<br>(0.81 to<br>1.49)        | 1.08<br>(0.82 to<br>1.47)        | 1.13<br>(0.82 to<br>1.54)        |
| <b>Digestive diseases</b>                                      | <b>53.66</b><br>(39.78 to<br>74.46) | <b>68.11</b><br>(50.60 to<br>99.04)   | <b>60.70</b><br>(45.13 to<br>89.70)   | <b>83.13</b><br>(60.28 to<br>119.99)  | <b>1.64</b><br>(1.29 to<br>2.45) | <b>2.87</b><br>(2.06 to<br>4.68) | <b>2.77</b><br>(2.00 to<br>4.49) | <b>3.12</b><br>(2.19 to<br>5.00) |
| Peptic ulcer disease                                           | 14.74<br>(10.67 to<br>22.70)        | 16.34<br>(10.76 to<br>27.08)          | 12.98<br>(8.53 to<br>21.61)           | 21.18<br>(13.63 to<br>34.27)          | 0.52<br>(0.39 to<br>0.83)        | 0.70<br>(0.46 to<br>1.20)        | 0.61<br>(0.40 to<br>1.04)        | 0.84<br>(0.55 to<br>1.42)        |

**Yemen**

| Cause                                      | YLLs (in 1000s)             |                             |                             |                             | Deaths (in 1000s)         |                           |                           |                           |
|--------------------------------------------|-----------------------------|-----------------------------|-----------------------------|-----------------------------|---------------------------|---------------------------|---------------------------|---------------------------|
|                                            | 2016                        | 2040 Forecast               | 2040 Better Scenario        | 2040 Worse Scenario         | 2016                      | 2040 Forecast             | 2040 Better Scenario      | 2040 Worse Scenario       |
| Gastritis and duodenitis                   | 0.34<br>(0.20 to<br>0.54)   | 0.61<br>(0.37 to<br>0.96)   | 0.57<br>(0.34 to<br>0.91)   | 0.70<br>(0.40 to<br>1.05)   | 0.01<br>(0.01 to<br>0.02) | 0.02<br>(0.01 to<br>0.04) | 0.02<br>(0.02 to<br>0.04) | 0.02<br>(0.02 to<br>0.04) |
| Appendicitis                               | 5.78<br>(3.22 to<br>9.88)   | 6.15<br>(3.39 to<br>11.04)  | 5.28<br>(2.99 to<br>9.86)   | 7.87<br>(4.37 to<br>13.39)  | 0.14<br>(0.08 to<br>0.25) | 0.21<br>(0.12 to<br>0.45) | 0.19<br>(0.11 to<br>0.41) | 0.23<br>(0.13 to<br>0.46) |
| Paralytic ileus and intestinal obstruction | 12.70<br>(6.62 to<br>23.00) | 12.44<br>(8.39 to<br>18.51) | 12.30<br>(8.35 to<br>18.39) | 15.07<br>(9.39 to<br>23.76) | 0.30<br>(0.20 to<br>0.45) | 0.54<br>(0.36 to<br>0.83) | 0.59<br>(0.40 to<br>0.92) | 0.53<br>(0.34 to<br>0.80) |
| Inguinal, femoral, and abdominal hernia    | 1.12<br>(0.72 to<br>1.86)   | 1.49<br>(0.90 to<br>2.62)   | 1.45<br>(0.88 to<br>2.61)   | 1.59<br>(0.97 to<br>2.73)   | 0.05<br>(0.03 to<br>0.09) | 0.08<br>(0.04 to<br>0.16) | 0.09<br>(0.05 to<br>0.17) | 0.08<br>(0.04 to<br>0.15) |
| Inflammatory bowel disease                 | 1.55<br>(0.84 to<br>2.91)   | 2.37<br>(1.33 to<br>4.44)   | 2.37<br>(1.36 to<br>4.24)   | 2.49<br>(1.36 to<br>4.70)   | 0.04<br>(0.02 to<br>0.07) | 0.08<br>(0.05 to<br>0.13) | 0.08<br>(0.05 to<br>0.13) | 0.07<br>(0.04 to<br>0.13) |
| Vascular intestinal disorders              | 2.43<br>(1.71 to<br>3.46)   | 5.10<br>(3.58 to<br>7.20)   | 5.03<br>(3.52 to<br>7.16)   | 5.24<br>(3.64 to<br>7.36)   | 0.10<br>(0.07 to<br>0.14) | 0.24<br>(0.16 to<br>0.35) | 0.25<br>(0.17 to<br>0.37) | 0.23<br>(0.15 to<br>0.33) |
| Gallbladder and biliary diseases           | 4.11<br>(2.78 to<br>6.96)   | 6.96<br>(3.63 to<br>13.90)  | 5.66<br>(3.02 to<br>11.28)  | 9.49<br>(4.83 to<br>18.57)  | 0.16<br>(0.10 to<br>0.32) | 0.35<br>(0.17 to<br>0.84) | 0.31<br>(0.15 to<br>0.75) | 0.43<br>(0.20 to<br>1.02) |
| Pancreatitis                               | 3.44<br>(2.11 to<br>5.55)   | 6.61<br>(3.82 to<br>11.08)  | 6.03<br>(3.51 to<br>10.31)  | 7.47<br>(4.17 to<br>12.47)  | 0.11<br>(0.07 to<br>0.19) | 0.24<br>(0.14 to<br>0.44) | 0.24<br>(0.13 to<br>0.43) | 0.26<br>(0.14 to<br>0.46) |

|                                                     |                                                   |                                                      |                                                      |                                                      |                                                |                                                  |                                                  |                                                 |
|-----------------------------------------------------|---------------------------------------------------|------------------------------------------------------|------------------------------------------------------|------------------------------------------------------|------------------------------------------------|--------------------------------------------------|--------------------------------------------------|-------------------------------------------------|
| Other digestive diseases                            | 7.46<br>(4.78 to<br>11.48)                        | 10.03<br>(6.25 to<br>16.15)                          | 9.03<br>(5.53 to<br>14.87)                           | 12.03<br>(7.45 to<br>19.08)                          | 0.21<br>(0.14 to<br>0.36)                      | 0.41<br>(0.23 to<br>0.79)                        | 0.40<br>(0.23 to<br>0.79)                        | 0.43<br>(0.23 to<br>0.80)                       |
| <b>Neurological disorders</b>                       | <b>66.18</b><br><b>(55.01 to</b><br><b>80.95)</b> | <b>145.77</b><br><b>(111.47 to</b><br><b>185.19)</b> | <b>153.02</b><br><b>(123.35 to</b><br><b>187.05)</b> | <b>146.17</b><br><b>(110.24 to</b><br><b>189.74)</b> | <b>3.26</b><br><b>(2.74 to</b><br><b>3.90)</b> | <b>10.02</b><br><b>(6.77 to</b><br><b>13.72)</b> | <b>11.63</b><br><b>(8.50 to</b><br><b>14.94)</b> | <b>8.66</b><br><b>(5.64 to</b><br><b>12.39)</b> |
| Alzheimer's disease and other dementias             | 32.66<br>(26.63 to<br>40.43)                      | 96.10<br>(66.82 to<br>133.10)                        | 105.16<br>(79.92 to<br>136.72)                       | 86.99<br>(57.17 to<br>128.02)                        | 2.55<br>(2.09 to<br>3.12)                      | 8.49<br>(5.39 to<br>12.08)                       | 9.94<br>(7.04 to<br>13.24)                       | 7.15<br>(4.29 to<br>10.80)                      |
| Parkinson's disease                                 | 2.56<br>(1.95 to<br>3.29)                         | 8.35<br>(5.89 to<br>10.98)                           | 10.62<br>(7.78 to<br>13.78)                          | 6.47<br>(4.43 to<br>8.68)                            | 0.18<br>(0.13 to<br>0.23)                      | 0.65<br>(0.43 to<br>0.89)                        | 0.88<br>(0.61 to<br>1.17)                        | 0.48<br>(0.29 to<br>0.68)                       |
| Epilepsy                                            | 23.66<br>(15.98 to<br>33.59)                      | 29.71<br>(19.23 to<br>43.32)                         | 25.13<br>(16.17 to<br>36.76)                         | 40.13<br>(25.97 to<br>58.46)                         | 0.40<br>(0.27 to<br>0.57)                      | 0.60<br>(0.39 to<br>0.86)                        | 0.52<br>(0.34 to<br>0.75)                        | 0.76<br>(0.50 to<br>1.09)                       |
| Multiple sclerosis                                  | 0.85<br>(0.56 to<br>1.42)                         | 1.93<br>(1.27 to<br>3.41)                            | 1.96<br>(1.29 to<br>3.44)                            | 1.89<br>(1.24 to<br>3.34)                            | 0.02<br>(0.01 to<br>0.03)                      | 0.05<br>(0.03 to<br>0.08)                        | 0.05<br>(0.04 to<br>0.09)                        | 0.05<br>(0.03 to<br>0.08)                       |
| Motor neuron disease                                | 0.89<br>(0.57 to<br>1.27)                         | 1.94<br>(1.27 to<br>2.61)                            | 2.07<br>(1.37 to<br>2.77)                            | 1.88<br>(1.22 to<br>2.58)                            | 0.02<br>(0.01 to<br>0.03)                      | 0.06<br>(0.04 to<br>0.07)                        | 0.06<br>(0.04 to<br>0.08)                        | 0.05<br>(0.04 to<br>0.07)                       |
| Other neurological disorders                        | 5.57<br>(4.06 to<br>7.43)                         | 7.74<br>(6.10 to<br>9.65)                            | 8.09<br>(6.48 to<br>9.99)                            | 8.80<br>(6.73 to<br>11.25)                           | 0.09<br>(0.07 to<br>0.12)                      | 0.17<br>(0.14 to<br>0.21)                        | 0.18<br>(0.15 to<br>0.22)                        | 0.17<br>(0.14 to<br>0.21)                       |
| <b>Mental disorders</b>                             | <b>11.16</b><br><b>(7.54 to</b><br><b>18.01)</b>  | <b>27.46</b><br><b>(18.57 to</b><br><b>43.87)</b>    | <b>27.34</b><br><b>(18.45 to</b><br><b>43.51)</b>    | <b>28.11</b><br><b>(18.93 to</b><br><b>44.84)</b>    | <b>0.24</b><br><b>(0.16 to</b><br><b>0.37)</b> | <b>0.63</b><br><b>(0.44 to</b><br><b>0.97)</b>   | <b>0.64</b><br><b>(0.45 to</b><br><b>0.98)</b>   | <b>0.63</b><br><b>(0.43 to</b><br><b>0.97)</b>  |
| Alcohol use disorders                               | 2.50<br>(1.49 to<br>4.06)                         | 4.46<br>(2.51 to<br>7.64)                            | 4.36<br>(2.47 to<br>7.52)                            | 4.60<br>(2.57 to<br>7.88)                            | 0.06<br>(0.04 to<br>0.10)                      | 0.12<br>(0.07 to<br>0.19)                        | 0.11<br>(0.07 to<br>0.19)                        | 0.12<br>(0.07 to<br>0.20)                       |
| Drug use disorders                                  | 8.63<br>(5.27 to<br>15.01)                        | 22.93<br>(14.49 to<br>38.68)                         | 22.91<br>(14.41 to<br>38.46)                         | 23.44<br>(14.84 to<br>39.66)                         | 0.17<br>(0.11 to<br>0.30)                      | 0.51<br>(0.34 to<br>0.85)                        | 0.53<br>(0.35 to<br>0.86)                        | 0.51<br>(0.33 to<br>0.85)                       |
| Opioid use disorders                                | 6.73<br>(4.06 to<br>12.13)                        | 16.47<br>(9.88 to<br>29.13)                          | 16.40<br>(9.96 to<br>28.84)                          | 16.88<br>(10.00 to<br>29.89)                         | 0.13<br>(0.08 to<br>0.24)                      | 0.36<br>(0.22 to<br>0.62)                        | 0.36<br>(0.22 to<br>0.62)                        | 0.36<br>(0.21 to<br>0.63)                       |
| Cocaine use disorders                               | 0.30<br>(0.15 to<br>0.53)                         | 1.00<br>(0.53 to<br>1.69)                            | 0.94<br>(0.51 to<br>1.60)                            | 1.08<br>(0.57 to<br>1.84)                            | 0.01<br>(0.00 to<br>0.01)                      | 0.02<br>(0.01 to<br>0.04)                        | 0.02<br>(0.01 to<br>0.04)                        | 0.02<br>(0.01 to<br>0.04)                       |
| Amphetamine use disorders                           | 0.17<br>(0.09 to<br>0.29)                         | 0.72<br>(0.39 to<br>1.21)                            | 0.66<br>(0.36 to<br>1.12)                            | 0.81<br>(0.43 to<br>1.36)                            | 0.00<br>(0.00 to<br>0.01)                      | 0.02<br>(0.01 to<br>0.03)                        | 0.01<br>(0.01 to<br>0.02)                        | 0.02<br>(0.01 to<br>0.03)                       |
| Other drug use disorders                            | 1.43<br>(0.69 to<br>2.53)                         | 4.74<br>(2.46 to<br>8.14)                            | 4.90<br>(2.56 to<br>8.38)                            | 4.68<br>(2.43 to<br>8.04)                            | 0.03<br>(0.02 to<br>0.05)                      | 0.12<br>(0.06 to<br>0.19)                        | 0.13<br>(0.07 to<br>0.20)                        | 0.11<br>(0.06 to<br>0.18)                       |
| Eating disorders                                    | 0.03<br>(0.02 to<br>0.06)                         | 0.07<br>(0.04 to<br>0.13)                            | 0.07<br>(0.04 to<br>0.13)                            | 0.08<br>(0.04 to<br>0.14)                            | 0.00<br>(0.00 to<br>0.00)                      | 0.00<br>(0.00 to<br>0.00)                        | 0.00<br>(0.00 to<br>0.00)                        | 0.00<br>(0.00 to<br>0.00)                       |
| <b>Yemen</b>                                        |                                                   |                                                      |                                                      |                                                      |                                                |                                                  |                                                  |                                                 |
| Cause                                               | YLLs (in 1000s)                                   |                                                      |                                                      |                                                      | Deaths (in 1000s)                              |                                                  |                                                  |                                                 |
|                                                     | 2016                                              | 2040 Forecast                                        | 2040 Better Scenario                                 | 2040 Worse Scenario                                  | 2016                                           | 2040 Forecast                                    | 2040 Better Scenario                             | 2040 Worse Scenario                             |
| Diabetes, urogenital, blood, and endocrine diseases | 221.21<br>(187.91 to<br>266.61)                   | 591.11<br>(339.80 to<br>1,154.68)                    | 415.79<br>(254.67 to<br>807.48)                      | 739.63<br>(433.86 to<br>1,397.51)                    | 7.57<br>(6.49 to<br>9.04)                      | 26.84<br>(14.74 to<br>54.19)                     | 19.77<br>(11.60 to<br>40.43)                     | 31.12<br>(17.52 to<br>60.54)                    |
| Diabetes mellitus                                   | 75.51<br>(64.54 to<br>88.85)                      | 165.99<br>(104.71 to<br>244.84)                      | 127.78<br>(84.10 to<br>183.57)                       | 220.76<br>(140.64 to<br>330.84)                      | 3.12<br>(2.67 to<br>3.65)                      | 8.01<br>(5.11 to<br>11.49)                       | 6.67<br>(4.57 to<br>9.30)                        | 9.78<br>(6.12 to<br>14.08)                      |
| Acute glomerulonephritis                            | 0.21<br>(0.18 to<br>0.24)                         | 0.29<br>(0.24 to<br>0.36)                            | 0.26<br>(0.21 to<br>0.32)                            | 0.39<br>(0.31 to<br>0.48)                            | 0.00<br>(0.00 to<br>0.00)                      | 0.01<br>(0.00 to<br>0.01)                        | 0.01<br>(0.00 to<br>0.01)                        | 0.01<br>(0.01 to<br>0.01)                       |
| Chronic kidney disease                              | 98.64<br>(73.39 to<br>132.71)                     | 368.70<br>(122.18 to<br>963.73)                      | 236.01<br>(87.99 to<br>631.83)                       | 448.02<br>(155.09 to<br>1,115.80)                    | 3.49<br>(2.60 to<br>4.67)                      | 17.14<br>(5.02 to<br>45.54)                      | 11.40<br>(3.64 to<br>32.93)                      | 19.52<br>(5.84 to<br>49.99)                     |

|                                                            |                              |                                |                                |                                |                           |                            |                            |                            |
|------------------------------------------------------------|------------------------------|--------------------------------|--------------------------------|--------------------------------|---------------------------|----------------------------|----------------------------|----------------------------|
| Chronic kidney disease due to diabetes mellitus            | 36.94<br>(26.34 to<br>51.73) | 173.33<br>(51.32 to<br>479.62) | 108.79<br>(35.01 to<br>324.94) | 207.49<br>(61.30 to<br>567.87) | 1.45<br>(1.04 to<br>2.00) | 7.77<br>(2.08 to<br>22.09) | 5.04<br>(1.47 to<br>14.63) | 8.93<br>(2.39 to<br>24.83) |
| Chronic kidney disease due to hypertension                 | 12.18<br>(8.77 to<br>17.03)  | 58.85<br>(16.92 to<br>158.68)  | 38.82<br>(12.06 to<br>118.07)  | 67.22<br>(19.40 to<br>170.28)  | 0.64<br>(0.46 to<br>0.90) | 3.69<br>(1.07 to<br>10.16) | 2.62<br>(0.79 to<br>7.91)  | 3.93<br>(1.10 to<br>10.18) |
| Chronic kidney disease due to glomerulonephritis           | 17.38<br>(12.25 to<br>24.77) | 43.01<br>(18.84 to<br>103.35)  | 28.19<br>(13.30 to<br>66.24)   | 55.42<br>(24.96 to<br>127.23)  | 0.44<br>(0.31 to<br>0.64) | 1.62<br>(0.55 to<br>4.22)  | 1.07<br>(0.39 to<br>2.89)  | 1.94<br>(0.69 to<br>4.84)  |
| Chronic kidney disease due to other and unspecified causes | 32.14<br>(23.03 to<br>44.33) | 93.51<br>(34.43 to<br>225.95)  | 60.21<br>(24.10 to<br>146.28)  | 117.89<br>(45.18 to<br>277.25) | 0.96<br>(0.68 to<br>1.34) | 4.06<br>(1.21 to<br>10.35) | 2.68<br>(0.88 to<br>7.30)  | 4.73<br>(1.48 to<br>11.59) |
| Urinary diseases and male infertility                      | 5.56<br>(4.06 to<br>8.67)    | 8.80<br>(6.43 to<br>14.05)     | 9.00<br>(6.60 to<br>14.50)     | 9.33<br>(6.69 to<br>15.19)     | 0.19<br>(0.15 to<br>0.29) | 0.48<br>(0.32 to<br>0.76)  | 0.54<br>(0.38 to<br>0.86)  | 0.43<br>(0.29 to<br>0.69)  |
| Urinary tract infections                                   | 2.87<br>(1.79 to<br>4.85)    | 5.96<br>(4.01 to<br>9.95)      | 6.43<br>(4.46 to<br>10.62)     | 5.85<br>(3.88 to<br>9.83)      | 0.11<br>(0.07 to<br>0.18) | 0.35<br>(0.23 to<br>0.59)  | 0.42<br>(0.28 to<br>0.68)  | 0.30<br>(0.19 to<br>0.50)  |
| Urolithiasis                                               | 0.18<br>(0.13 to<br>0.26)    | 0.33<br>(0.23 to<br>0.51)      | 0.33<br>(0.23 to<br>0.53)      | 0.36<br>(0.26 to<br>0.55)      | 0.00<br>(0.00 to<br>0.01) | 0.01<br>(0.01 to<br>0.02)  | 0.01<br>(0.01 to<br>0.02)  | 0.01<br>(0.01 to<br>0.02)  |
| Other urinary diseases                                     | 2.52<br>(1.31 to<br>4.63)    | 2.51<br>(1.20 to<br>4.73)      | 2.25<br>(1.04 to<br>4.32)      | 3.12<br>(1.52 to<br>5.97)      | 0.08<br>(0.04 to<br>0.14) | 0.11<br>(0.05 to<br>0.21)  | 0.11<br>(0.05 to<br>0.22)  | 0.12<br>(0.06 to<br>0.22)  |
| Gynecological diseases                                     | 0.26<br>(0.14 to<br>0.39)    | 0.47<br>(0.23 to<br>0.80)      | 0.39<br>(0.19 to<br>0.67)      | 0.58<br>(0.28 to<br>0.99)      | 0.01<br>(0.00 to<br>0.01) | 0.01<br>(0.01 to<br>0.02)  | 0.01<br>(0.00 to<br>0.01)  | 0.01<br>(0.01 to<br>0.02)  |
| Uterine fibroids                                           | 0.01<br>(0.00 to<br>0.03)    | 0.02<br>(0.00 to<br>0.06)      | 0.02<br>(0.00 to<br>0.05)      | 0.03<br>(0.01 to<br>0.07)      | 0.00<br>(0.00 to<br>0.00) | 0.00<br>(0.00 to<br>0.00)  | 0.00<br>(0.00 to<br>0.00)  | 0.00<br>(0.00 to<br>0.00)  |
| Polycystic ovarian syndrome                                | 0.05<br>(0.01 to<br>0.13)    | 0.06<br>(0.01 to<br>0.18)      | 0.05<br>(0.01 to<br>0.14)      | 0.09<br>(0.02 to<br>0.25)      | 0.00<br>(0.00 to<br>0.00) | 0.00<br>(0.00 to<br>0.00)  | 0.00<br>(0.00 to<br>0.00)  | 0.00<br>(0.00 to<br>0.01)  |
| Endometriosis                                              | 0.00<br>(0.00 to<br>0.01)    | 0.01<br>(0.00 to<br>0.02)      | 0.00<br>(0.00 to<br>0.02)      | 0.01<br>(0.00 to<br>0.02)      | 0.00<br>(0.00 to<br>0.00) | 0.00<br>(0.00 to<br>0.00)  | 0.00<br>(0.00 to<br>0.00)  | 0.00<br>(0.00 to<br>0.00)  |
| Genital prolapse                                           | 0.01<br>(0.00 to<br>0.01)    | 0.01<br>(0.00 to<br>0.02)      | 0.01<br>(0.00 to<br>0.02)      | 0.01<br>(0.00 to<br>0.02)      | 0.00<br>(0.00 to<br>0.00) | 0.00<br>(0.00 to<br>0.00)  | 0.00<br>(0.00 to<br>0.00)  | 0.00<br>(0.00 to<br>0.00)  |
| Other gynecological diseases                               | 0.18<br>(0.08 to<br>0.30)    | 0.37<br>(0.17 to<br>0.66)      | 0.31<br>(0.15 to<br>0.56)      | 0.45<br>(0.20 to<br>0.81)      | 0.00<br>(0.00 to<br>0.01) | 0.01<br>(0.00 to<br>0.01)  | 0.01<br>(0.00 to<br>0.01)  | 0.01<br>(0.00 to<br>0.02)  |
| Hemoglobinopathies and hemolytic anemias                   | 21.61<br>(14.64 to<br>37.41) | 24.95<br>(15.07 to<br>43.72)   | 22.05<br>(13.45 to<br>37.86)   | 31.65<br>(19.62 to<br>55.30)   | 0.39<br>(0.27 to<br>0.64) | 0.57<br>(0.36 to<br>0.97)  | 0.51<br>(0.32 to<br>0.86)  | 0.68<br>(0.43 to<br>1.16)  |
| Thalassemias                                               | 6.17<br>(3.21 to<br>12.76)   | 2.75<br>(1.30 to<br>5.98)      | 3.00<br>(1.51 to<br>6.42)      | 3.81<br>(1.73 to<br>8.80)      | 0.08<br>(0.04 to<br>0.15) | 0.04<br>(0.02 to<br>0.08)  | 0.04<br>(0.02 to<br>0.08)  | 0.05<br>(0.02 to<br>0.11)  |
| Sickle cell disorders                                      | 6.67<br>(4.24 to<br>11.49)   | 8.53<br>(4.88 to<br>14.94)     | 7.56<br>(4.32 to<br>12.88)     | 10.67<br>(6.13 to<br>18.92)    | 0.10<br>(0.07 to<br>0.18) | 0.16<br>(0.09 to<br>0.27)  | 0.14<br>(0.08 to<br>0.23)  | 0.19<br>(0.11 to<br>0.33)  |
| G6PD deficiency                                            | 6.78<br>(4.56 to<br>11.11)   | 11.41<br>(6.52 to<br>20.26)    | 9.44<br>(5.40 to<br>16.31)     | 14.60<br>(8.42 to<br>25.89)    | 0.13<br>(0.09 to<br>0.21) | 0.26<br>(0.15 to<br>0.46)  | 0.22<br>(0.13 to<br>0.38)  | 0.33<br>(0.19 to<br>0.57)  |
| Other hemoglobinopathies and hemolytic anemias             | 1.98<br>(1.41 to<br>3.20)    | 2.27<br>(1.32 to<br>4.01)      | 2.04<br>(1.19 to<br>3.55)      | 2.58<br>(1.46 to<br>4.52)      | 0.07<br>(0.05 to<br>0.12) | 0.11<br>(0.07 to<br>0.20)  | 0.11<br>(0.07 to<br>0.20)  | 0.12<br>(0.07 to<br>0.21)  |
| Endocrine, metabolic, blood, and immune disorders          | 19.44<br>(12.83 to<br>28.05) | 21.90<br>(15.79 to<br>30.27)   | 20.30<br>(14.46 to<br>28.03)   | 28.90<br>(20.38 to<br>40.44)   | 0.37<br>(0.26 to<br>0.51) | 0.63<br>(0.45 to<br>0.89)  | 0.63<br>(0.44 to<br>0.90)  | 0.70<br>(0.50 to<br>0.97)  |

**Yemen**

| Cause | YLLs (in 1000s) |               |                      |                     | Deaths (in 1000s) |               |                      |                     |
|-------|-----------------|---------------|----------------------|---------------------|-------------------|---------------|----------------------|---------------------|
|       | 2016            | 2040 Forecast | 2040 Better Scenario | 2040 Worse Scenario | 2016              | 2040 Forecast | 2040 Better Scenario | 2040 Worse Scenario |

|                                               |                                                |                                                |                                            |                                                |                                       |                                       |                                       |                                       |
|-----------------------------------------------|------------------------------------------------|------------------------------------------------|--------------------------------------------|------------------------------------------------|---------------------------------------|---------------------------------------|---------------------------------------|---------------------------------------|
|                                               | 5.45<br>(3.96 to<br>6.82)                      | 11.28<br>(7.81 to<br>14.30)                    | 11.80<br>(8.14 to<br>15.15)                | 11.49<br>(8.01 to<br>14.39)                    | 0.11<br>(0.08 to<br>0.14)             | 0.28<br>(0.19 to<br>0.35)             | 0.30<br>(0.21 to<br>0.39)             | 0.27<br>(0.19 to<br>0.34)             |
| <b>Musculoskeletal disorders</b>              |                                                |                                                |                                            |                                                |                                       |                                       |                                       |                                       |
| Rheumatoid arthritis                          | 0.96<br>(0.68 to<br>1.41)                      | 1.59<br>(1.07 to<br>2.43)                      | 1.41<br>(0.94 to<br>2.15)                  | 1.99<br>(1.38 to<br>3.08)                      | 0.02<br>(0.02 to<br>0.03)             | 0.05<br>(0.03 to<br>0.08)             | 0.05<br>(0.03 to<br>0.08)             | 0.06<br>(0.04 to<br>0.09)             |
| Other musculoskeletal disorders               | 4.48<br>(3.05 to<br>5.71)                      | 9.69<br>(6.18 to<br>12.35)                     | 10.39<br>(6.75 to<br>13.49)                | 9.49<br>(6.05 to<br>12.12)                     | 0.09<br>(0.06 to<br>0.11)             | 0.22<br>(0.15 to<br>0.29)             | 0.25<br>(0.16 to<br>0.32)             | 0.21<br>(0.14 to<br>0.26)             |
| <b>Other non-communicable diseases</b>        | <b>572.24<br/>(220.84 to<br/>1,048.20)</b>     | <b>288.23<br/>(124.66 to<br/>527.84)</b>       | <b>246.76<br/>(108.70 to<br/>445.62)</b>   | <b>591.31<br/>(231.31 to<br/>1,115.78)</b>     | <b>6.87<br/>(2.72 to<br/>12.45)</b>   | <b>4.07<br/>(1.96 to<br/>7.04)</b>    | <b>3.65<br/>(1.87 to<br/>6.10)</b>    | <b>7.56<br/>(3.26 to<br/>13.84)</b>   |
| Congenital birth defects                      | 537.60<br>(208.26 to<br>1,004.93)              | 265.96<br>(106.94 to<br>501.67)                | 225.34<br>(93.41 to<br>418.35)             | 554.71<br>(210.50 to<br>1,075.80)              | 6.37<br>(2.48 to<br>11.84)            | 3.34<br>(1.43 to<br>6.18)             | 2.84<br>(1.25 to<br>5.17)             | 6.74<br>(2.63 to<br>12.81)            |
| Neural tube defects                           | 57.17<br>(18.13 to<br>118.11)                  | 12.47<br>(3.60 to<br>30.38)                    | 9.24<br>(2.72 to<br>22.32)                 | 30.67<br>(8.63 to<br>76.53)                    | 0.67<br>(0.22 to<br>0.37)             | 0.15<br>(0.05 to<br>0.37)             | 0.11<br>(0.03 to<br>0.27)             | 0.37<br>(0.11 to<br>0.91)             |
| Congenital heart anomalies                    | 232.86<br>(90.93 to<br>445.02)                 | 116.36<br>(49.65 to<br>220.35)                 | 99.31<br>(42.40 to<br>187.60)              | 237.96<br>(91.48 to<br>468.30)                 | 2.77<br>(1.12 to<br>5.24)             | 1.47<br>(0.66 to<br>2.72)             | 1.26<br>(0.57 to<br>2.32)             | 2.90<br>(1.17 to<br>5.61)             |
| Orofacial clefts                              | 0.56<br>(0.11 to<br>2.04)                      | 0.18<br>(0.03 to<br>0.68)                      | 0.13<br>(0.02 to<br>0.49)                  | 0.49<br>(0.07 to<br>1.80)                      | 0.01<br>(0.00 to<br>0.02)             | 0.00<br>(0.00 to<br>0.01)             | 0.00<br>(0.00 to<br>0.01)             | 0.01<br>(0.00 to<br>0.02)             |
| Down syndrome                                 | 13.49<br>(4.65 to<br>30.51)                    | 9.97<br>(3.96 to<br>20.95)                     | 8.15<br>(3.31 to<br>16.92)                 | 19.98<br>(7.29 to<br>46.41)                    | 0.16<br>(0.06 to<br>0.37)             | 0.14<br>(0.06 to<br>0.28)             | 0.11<br>(0.05 to<br>0.22)             | 0.26<br>(0.10 to<br>0.57)             |
| Other chromosomal abnormalities               | 7.48<br>(2.15 to<br>18.36)                     | 6.75<br>(1.88 to<br>17.31)                     | 5.59<br>(1.58 to<br>14.23)                 | 14.91<br>(4.06 to<br>37.78)                    | 0.09<br>(0.03 to<br>0.21)             | 0.08<br>(0.02 to<br>0.20)             | 0.07<br>(0.01 to<br>0.17)             | 0.18<br>(0.05 to<br>0.44)             |
| Congenital musculoskeletal and limb anomalies | 10.71<br>(3.54 to<br>23.21)                    | 6.11<br>(1.93 to<br>13.54)                     | 5.38<br>(1.75 to<br>11.77)                 | 12.35<br>(3.64 to<br>28.61)                    | 0.13<br>(0.04 to<br>0.27)             | 0.07<br>(0.03 to<br>0.16)             | 0.07<br>(0.02 to<br>0.14)             | 0.15<br>(0.05 to<br>0.34)             |
| Urogenital congenital anomalies               | 15.80<br>(5.02 to<br>32.13)                    | 7.96<br>(2.71 to<br>17.15)                     | 6.82<br>(2.38 to<br>14.71)                 | 16.42<br>(5.09 to<br>36.55)                    | 0.19<br>(0.06 to<br>0.38)             | 0.11<br>(0.04 to<br>0.22)             | 0.09<br>(0.04 to<br>0.19)             | 0.21<br>(0.07 to<br>0.45)             |
| Digestive congenital anomalies                | 19.28<br>(4.17 to<br>42.38)                    | 9.20<br>(2.01 to<br>20.99)                     | 7.65<br>(1.70 to<br>17.35)                 | 20.54<br>(4.26 to<br>46.93)                    | 0.23<br>(0.05 to<br>0.49)             | 0.11<br>(0.02 to<br>0.25)             | 0.09<br>(0.02 to<br>0.21)             | 0.24<br>(0.05 to<br>0.55)             |
| Other congenital birth defects                | 180.24<br>(55.59 to<br>386.95)                 | 96.95<br>(30.81 to<br>208.83)                  | 83.06<br>(26.90 to<br>174.86)              | 201.40<br>(59.89 to<br>447.93)                 | 2.13<br>(0.66 to<br>4.57)             | 1.20<br>(0.40 to<br>2.54)             | 1.03<br>(0.36 to<br>2.12)             | 2.43<br>(0.74 to<br>5.36)             |
| Skin and subcutaneous diseases                | 3.18<br>(1.48 to<br>4.47)                      | 10.00<br>(4.70 to<br>13.85)                    | 10.62<br>(5.08 to<br>14.62)                | 9.99<br>(4.67 to<br>13.90)                     | 0.14<br>(0.06 to<br>0.19)             | 0.59<br>(0.27 to<br>0.85)             | 0.68<br>(0.33 to<br>0.96)             | 0.51<br>(0.24 to<br>0.76)             |
| Cellulitis                                    | 0.18<br>(0.07 to<br>0.29)                      | 0.60<br>(0.21 to<br>0.93)                      | 0.65<br>(0.23 to<br>1.02)                  | 0.60<br>(0.21 to<br>0.93)                      | 0.00<br>(0.00 to<br>0.01)             | 0.02<br>(0.01 to<br>0.04)             | 0.03<br>(0.01 to<br>0.05)             | 0.02<br>(0.01 to<br>0.03)             |
| Pyoderma                                      | 1.68<br>(0.75 to<br>2.56)                      | 5.66<br>(2.65 to<br>8.47)                      | 5.82<br>(2.69 to<br>8.60)                  | 5.92<br>(2.78 to<br>8.84)                      | 0.06<br>(0.03 to<br>0.10)             | 0.32<br>(0.15 to<br>0.50)             | 0.36<br>(0.17 to<br>0.55)             | 0.29<br>(0.13 to<br>0.46)             |
| Decubitus ulcer                               | 1.18<br>(0.40 to<br>1.84)                      | 3.45<br>(1.10 to<br>5.65)                      | 3.84<br>(1.25 to<br>6.22)                  | 3.15<br>(0.97 to<br>5.27)                      | 0.07<br>(0.02 to<br>0.10)             | 0.19<br>(0.07 to<br>0.40)             | 0.28<br>(0.09 to<br>0.47)             | 0.19<br>(0.05 to<br>0.34)             |
| Other skin and subcutaneous diseases          | 0.14<br>(0.06 to<br>0.22)                      | 0.29<br>(0.12 to<br>0.46)                      | 0.31<br>(0.13 to<br>0.48)                  | 0.32<br>(0.14 to<br>0.50)                      | 0.00<br>(0.00 to<br>0.00)             | 0.00<br>(0.00 to<br>0.01)             | 0.01<br>(0.00 to<br>0.01)             | 0.01<br>(0.00 to<br>0.01)             |
| Sudden infant death syndrome                  | 31.46<br>(10.30 to<br>67.25)                   | 12.27<br>(3.24 to<br>28.02)                    | 10.80<br>(2.92 to<br>24.14)                | 26.62<br>(6.89 to<br>60.43)                    | 0.37<br>(0.12 to<br>0.78)             | 0.14<br>(0.04 to<br>0.33)             | 0.13<br>(0.03 to<br>0.28)             | 0.31<br>(0.08 to<br>0.70)             |
| <b>Injuries</b>                               | <b>2,495.17<br/>(2,194.71 to<br/>2,927.39)</b> | <b>1,221.63<br/>(1,041.30 to<br/>1,448.59)</b> | <b>881.76<br/>(749.03 to<br/>1,055.85)</b> | <b>1,718.21<br/>(1,462.94 to<br/>2,039.89)</b> | <b>41.79<br/>(36.88 to<br/>48.79)</b> | <b>24.95<br/>(21.41 to<br/>29.67)</b> | <b>18.70<br/>(15.98 to<br/>22.38)</b> | <b>33.12<br/>(28.39 to<br/>39.08)</b> |
| <b>Transport injuries</b>                     | <b>604.13<br/>(521.55 to<br/>713.25)</b>       | <b>739.71<br/>(617.36 to<br/>897.58)</b>       | <b>443.66<br/>(365.46 to<br/>547.50)</b>   | <b>1,132.92<br/>(950.71 to<br/>1,354.81)</b>   | <b>10.82<br/>(9.35 to<br/>12.81)</b>  | <b>14.90<br/>(12.57 to<br/>18.06)</b> | <b>9.34<br/>(7.78 to<br/>11.54)</b>   | <b>21.57<br/>(18.41 to<br/>26.20)</b> |

|                                      |                                                      |                                                      |                                                      |                                                      |                                                |                                                |                                                |                                                |
|--------------------------------------|------------------------------------------------------|------------------------------------------------------|------------------------------------------------------|------------------------------------------------------|------------------------------------------------|------------------------------------------------|------------------------------------------------|------------------------------------------------|
| Road injuries                        | 593.83<br>(511.90 to<br>702.78)                      | 722.48<br>(603.19 to<br>873.94)                      | 428.26<br>(353.28 to<br>525.60)                      | 1,111.89<br>(931.77 to<br>1,329.37)                  | 10.62<br>(9.19 to<br>12.58)                    | 14.51<br>(12.23 to<br>17.54)                   | 8.98<br>(7.50 to<br>11.08)                     | 21.12<br>(17.96 to<br>25.63)                   |
| Pedestrian road injuries             | 154.32<br>(110.89 to<br>251.04)                      | 170.66<br>(120.56 to<br>286.20)                      | 111.33<br>(79.04 to<br>183.30)                       | 248.18<br>(174.17 to<br>422.20)                      | 2.80<br>(2.05 to<br>4.59)                      | 3.66<br>(2.60 to<br>6.13)                      | 2.49<br>(1.78 to<br>4.04)                      | 5.01<br>(3.55 to<br>8.55)                      |
| <b>Yemen</b>                         |                                                      |                                                      |                                                      |                                                      |                                                |                                                |                                                |                                                |
| Cause                                | YLLs (in 1000s)                                      |                                                      |                                                      |                                                      | Deaths (in 1000s)                              |                                                |                                                |                                                |
|                                      | 2016                                                 | 2040 Forecast                                        | 2040 Better Scenario                                 | 2040 Worse Scenario                                  | 2016                                           | 2040 Forecast                                  | 2040 Better Scenario                           | 2040 Worse Scenario                            |
| Cyclist road injuries                | 8.34<br>(5.65 to<br>11.87)                           | 10.64<br>(7.03 to<br>15.47)                          | 6.42<br>(4.17 to<br>9.45)                            | 16.63<br>(11.00 to<br>23.92)                         | 0.15<br>(0.10 to<br>0.21)                      | 0.22<br>(0.14 to<br>0.31)                      | 0.14<br>(0.09 to<br>0.20)                      | 0.31<br>(0.21 to<br>0.45)                      |
| Motorcyclist road injuries           | 42.77<br>(29.40 to<br>63.91)                         | 62.39<br>(41.05 to<br>96.80)                         | 43.40<br>(28.22 to<br>67.33)                         | 84.83<br>(56.37 to<br>129.81)                        | 0.71<br>(0.50 to<br>1.07)                      | 1.09<br>(0.72 to<br>1.69)                      | 0.77<br>(0.51 to<br>1.20)                      | 1.45<br>(0.97 to<br>2.20)                      |
| Motor vehicle road injuries          | 386.57<br>(291.16 to<br>463.61)                      | 476.48<br>(353.54 to<br>587.97)                      | 265.74<br>(192.23 to<br>330.87)                      | 758.52<br>(574.75 to<br>930.05)                      | 6.93<br>(5.28 to<br>8.32)                      | 9.49<br>(7.17 to<br>11.56)                     | 5.55<br>(4.11 to<br>6.82)                      | 14.27<br>(10.95 to<br>17.22)                   |
| Other road injuries                  | 1.82<br>(0.93 to<br>3.77)                            | 2.32<br>(1.16 to<br>4.81)                            | 1.37<br>(0.69 to<br>2.81)                            | 3.73<br>(1.92 to<br>7.69)                            | 0.03<br>(0.02 to<br>0.07)                      | 0.05<br>(0.03 to<br>0.11)                      | 0.03<br>(0.02 to<br>0.07)                      | 0.07<br>(0.04 to<br>0.15)                      |
| Other transport injuries             | 10.30<br>(7.66 to<br>14.63)                          | 17.23<br>(12.48 to<br>24.34)                         | 15.41<br>(11.02 to<br>22.01)                         | 21.03<br>(15.03 to<br>30.09)                         | 0.19<br>(0.15 to<br>0.27)                      | 0.38<br>(0.28 to<br>0.55)                      | 0.36<br>(0.26 to<br>0.52)                      | 0.44<br>(0.32 to<br>0.62)                      |
| <b>Unintentional injuries</b>        | <b>300.83</b><br><b>(232.97 to</b><br><b>381.37)</b> | <b>288.13</b><br><b>(218.45 to</b><br><b>378.58)</b> | <b>253.31</b><br><b>(194.40 to</b><br><b>327.34)</b> | <b>373.85</b><br><b>(276.32 to</b><br><b>497.68)</b> | <b>5.22</b><br><b>(4.06 to</b><br><b>6.53)</b> | <b>6.29</b><br><b>(4.74 to</b><br><b>8.16)</b> | <b>5.75</b><br><b>(4.39 to</b><br><b>7.50)</b> | <b>7.53</b><br><b>(5.58 to</b><br><b>9.79)</b> |
| Falls                                | 48.59<br>(34.04 to<br>69.66)                         | 64.41<br>(45.06 to<br>90.90)                         | 60.99<br>(43.54 to<br>83.71)                         | 73.44<br>(50.68 to<br>104.12)                        | 1.00<br>(0.72 to<br>1.37)                      | 1.70<br>(1.25 to<br>2.32)                      | 1.70<br>(1.27 to<br>2.28)                      | 1.79<br>(1.27 to<br>2.46)                      |
| Drowning                             | 66.66<br>(51.50 to<br>84.41)                         | 52.88<br>(39.79 to<br>68.09)                         | 46.27<br>(35.82 to<br>58.73)                         | 71.21<br>(52.56 to<br>93.50)                         | 1.02<br>(0.80 to<br>1.26)                      | 0.95<br>(0.73 to<br>1.20)                      | 0.84<br>(0.67 to<br>1.05)                      | 1.21<br>(0.91 to<br>1.55)                      |
| Fire, heat, and hot substances       | 41.82<br>(26.02 to<br>59.24)                         | 37.01<br>(21.57 to<br>54.88)                         | 31.54<br>(18.42 to<br>46.72)                         | 48.93<br>(28.43 to<br>72.68)                         | 0.74<br>(0.47 to<br>1.05)                      | 0.82<br>(0.49 to<br>1.22)                      | 0.73<br>(0.44 to<br>1.10)                      | 1.00<br>(0.59 to<br>1.50)                      |
| Poisonings                           | 30.04<br>(13.68 to<br>54.54)                         | 17.74<br>(8.03 to<br>31.41)                          | 13.97<br>(6.35 to<br>24.67)                          | 26.67<br>(11.36 to<br>49.06)                         | 0.48<br>(0.22 to<br>0.84)                      | 0.34<br>(0.15 to<br>0.59)                      | 0.27<br>(0.13 to<br>0.48)                      | 0.47<br>(0.21 to<br>0.84)                      |
| Exposure to mechanical forces        | 49.41<br>(35.56 to<br>70.43)                         | 47.75<br>(31.03 to<br>69.95)                         | 40.44<br>(26.69 to<br>59.33)                         | 64.15<br>(41.36 to<br>95.36)                         | 0.83<br>(0.60 to<br>1.16)                      | 0.96<br>(0.63 to<br>1.40)                      | 0.83<br>(0.55 to<br>1.22)                      | 1.21<br>(0.79 to<br>1.77)                      |
| Unintentional firearm injuries       | 10.84<br>(6.41 to<br>19.18)                          | 9.87<br>(4.93 to<br>19.03)                           | 8.17<br>(4.08 to<br>16.11)                           | 13.31<br>(6.79 to<br>25.56)                          | 0.19<br>(0.11 to<br>0.32)                      | 0.19<br>(0.10 to<br>0.38)                      | 0.16<br>(0.09 to<br>0.32)                      | 0.25<br>(0.13 to<br>0.47)                      |
| Unintentional suffocation            | 10.95<br>(6.08 to<br>19.29)                          | 5.60<br>(2.82 to<br>10.27)                           | 4.57<br>(2.33 to<br>8.05)                            | 10.26<br>(5.05 to<br>19.07)                          | 0.14<br>(0.08 to<br>0.24)                      | 0.08<br>(0.04 to<br>0.14)                      | 0.06<br>(0.03 to<br>0.11)                      | 0.13<br>(0.07 to<br>0.24)                      |
| Other exposure to mechanical forces  | 27.62<br>(18.82 to<br>36.32)                         | 32.28<br>(20.84 to<br>44.67)                         | 27.70<br>(18.10 to<br>38.78)                         | 40.58<br>(25.73 to<br>56.34)                         | 0.51<br>(0.35 to<br>0.67)                      | 0.69<br>(0.45 to<br>0.95)                      | 0.60<br>(0.39 to<br>0.83)                      | 0.83<br>(0.53 to<br>1.14)                      |
| Adverse effects of medical treatment | 23.38<br>(14.41 to<br>33.10)                         | 28.49<br>(16.78 to<br>43.24)                         | 25.31<br>(14.92 to<br>38.63)                         | 35.71<br>(21.21 to<br>53.84)                         | 0.46<br>(0.28 to<br>0.67)                      | 0.71<br>(0.41 to<br>1.09)                      | 0.66<br>(0.38 to<br>1.01)                      | 0.82<br>(0.48 to<br>1.24)                      |
| Animal contact                       | 3.48<br>(1.90 to<br>5.10)                            | 3.95<br>(1.96 to<br>6.63)                            | 3.27<br>(1.64 to<br>5.36)                            | 5.76<br>(2.69 to<br>9.62)                            | 0.06<br>(0.03 to<br>0.09)                      | 0.09<br>(0.05 to<br>0.14)                      | 0.08<br>(0.04 to<br>0.12)                      | 0.12<br>(0.06 to<br>0.19)                      |
| Venomous animal contact              | 1.59<br>(0.75 to<br>2.64)                            | 1.59<br>(0.69 to<br>2.84)                            | 1.29<br>(0.58 to<br>2.26)                            | 2.42<br>(0.99 to<br>4.44)                            | 0.03<br>(0.01 to<br>0.04)                      | 0.03<br>(0.02 to<br>0.06)                      | 0.03<br>(0.01 to<br>0.05)                      | 0.05<br>(0.02 to<br>0.08)                      |
| Non-venomous animal contact          | 1.88<br>(0.97 to<br>2.87)                            | 2.36<br>(1.16 to<br>3.85)                            | 1.98<br>(0.98 to<br>3.19)                            | 3.34<br>(1.60 to<br>5.55)                            | 0.03<br>(0.02 to<br>0.05)                      | 0.05<br>(0.03 to<br>0.09)                      | 0.05<br>(0.03 to<br>0.08)                      | 0.07<br>(0.03 to<br>0.11)                      |



|                                                                                     |                                                    |                                                    |                                                    |                                                    |                                                 |                                                 |                                                 |                                                 |
|-------------------------------------------------------------------------------------|----------------------------------------------------|----------------------------------------------------|----------------------------------------------------|----------------------------------------------------|-------------------------------------------------|-------------------------------------------------|-------------------------------------------------|-------------------------------------------------|
| Foreign body                                                                        | 16.02<br>(10.78 to<br>22.72)                       | 14.62<br>(10.03 to<br>21.21)                       | 13.72<br>(9.50 to<br>19.51)                        | 19.64<br>(13.23 to<br>28.87)                       | 0.24<br>(0.17 to<br>0.34)                       | 0.28<br>(0.20 to<br>0.39)                       | 0.27<br>(0.19 to<br>0.38)                       | 0.34<br>(0.24 to<br>0.49)                       |
| Pulmonary aspiration and foreign body in airway                                     | 11.02<br>(7.30 to<br>15.61)                        | 9.17<br>(6.57 to<br>12.31)                         | 8.90<br>(6.42 to<br>11.92)                         | 12.55<br>(8.58 to<br>17.57)                        | 0.16<br>(0.11 to<br>0.22)                       | 0.17<br>(0.13 to<br>0.22)                       | 0.18<br>(0.13 to<br>0.22)                       | 0.21<br>(0.15 to<br>0.28)                       |
| Foreign body in other body part                                                     | 5.00<br>(2.29 to<br>8.81)                          | 5.45<br>(2.44 to<br>10.18)                         | 4.82<br>(2.17 to<br>8.92)                          | 7.09<br>(3.17 to<br>13.25)                         | 0.08<br>(0.04 to<br>0.15)                       | 0.11<br>(0.05 to<br>0.19)                       | 0.10<br>(0.04 to<br>0.18)                       | 0.13<br>(0.06 to<br>0.24)                       |
| Environmental heat and cold exposure                                                | 7.09<br>(4.05 to<br>9.68)                          | 8.80<br>(4.58 to<br>13.56)                         | 6.85<br>(3.64 to<br>10.51)                         | 12.53<br>(6.49 to<br>19.39)                        | 0.14<br>(0.08 to<br>0.19)                       | 0.20<br>(0.11 to<br>0.31)                       | 0.16<br>(0.08 to<br>0.25)                       | 0.27<br>(0.14 to<br>0.42)                       |
| Other unintentional injuries                                                        | 14.34<br>(9.27 to<br>22.89)                        | 12.48<br>(7.59 to<br>20.22)                        | 10.93<br>(6.64 to<br>17.92)                        | 15.82<br>(9.68 to<br>25.50)                        | 0.24<br>(0.16 to<br>0.39)                       | 0.25<br>(0.15 to<br>0.40)                       | 0.22<br>(0.13 to<br>0.36)                       | 0.30<br>(0.18 to<br>0.48)                       |
| <b>Self-harm and interpersonal violence</b>                                         | <b>129.38</b><br>(99.07 to<br>159.83)              | <b>183.60</b><br>(135.81 to<br>234.08)             | <b>174.66</b><br>(131.28 to<br>220.52)             | <b>199.45</b><br>(146.63 to<br>257.05)             | <b>2.36</b><br>(1.81 to<br>2.89)                | <b>3.58</b><br>(2.66 to<br>4.55)                | <b>3.43</b><br>(2.61 to<br>4.28)                | <b>3.83</b><br>(2.84 to<br>4.92)                |
| <b>Yemen</b>                                                                        |                                                    |                                                    |                                                    |                                                    |                                                 |                                                 |                                                 |                                                 |
| Cause                                                                               | YLLs (in 1000s)                                    |                                                    |                                                    |                                                    | Deaths (in 1000s)                               |                                                 |                                                 |                                                 |
|                                                                                     | 2016                                               | 2040 Forecast                                      | 2040 Better Scenario                               | 2040 Worse Scenario                                | 2016                                            | 2040 Forecast                                   | 2040 Better Scenario                            | 2040 Worse Scenario                             |
| Self-harm                                                                           | 76.97<br>(54.61 to<br>99.87)                       | 122.12<br>(84.35 to<br>163.34)                     | 114.81<br>(80.55 to<br>152.08)                     | 133.02<br>(91.42 to<br>177.23)                     | 1.45<br>(1.04 to<br>1.86)                       | 2.44<br>(1.72 to<br>3.20)                       | 2.31<br>(1.65 to<br>3.04)                       | 2.61<br>(1.82 to<br>3.46)                       |
| Self-harm by firearm                                                                | 4.27<br>(1.58 to<br>7.92)                          | 6.09<br>(2.09 to<br>11.74)                         | 5.59<br>(1.92 to<br>10.75)                         | 6.76<br>(2.31 to<br>13.23)                         | 0.08<br>(0.03 to<br>0.16)                       | 0.13<br>(0.05 to<br>0.24)                       | 0.12<br>(0.04 to<br>0.22)                       | 0.14<br>(0.05 to<br>0.27)                       |
| Self-harm by other specified means                                                  | 72.70<br>(52.11 to<br>93.64)                       | 116.03<br>(81.36 to<br>154.75)                     | 109.22<br>(77.20 to<br>143.83)                     | 126.26<br>(87.29 to<br>169.69)                     | 1.37<br>(0.99 to<br>1.76)                       | 2.31<br>(1.63 to<br>3.07)                       | 2.20<br>(1.58 to<br>2.87)                       | 2.47<br>(1.72 to<br>3.29)                       |
| Interpersonal violence                                                              | 52.41<br>(29.98 to<br>69.07)                       | 61.48<br>(33.01 to<br>84.28)                       | 59.85<br>(33.17 to<br>81.59)                       | 66.43<br>(35.69 to<br>90.83)                       | 0.91<br>(0.52 to<br>1.19)                       | 1.14<br>(0.63 to<br>1.55)                       | 1.12<br>(0.63 to<br>1.51)                       | 1.21<br>(0.66 to<br>1.65)                       |
| Physical violence by firearm                                                        | 22.85<br>(11.05 to<br>39.35)                       | 26.80<br>(12.22 to<br>48.77)                       | 26.18<br>(11.78 to<br>47.48)                       | 28.30<br>(12.87 to<br>52.40)                       | 0.40<br>(0.20 to<br>0.68)                       | 0.49<br>(0.23 to<br>0.89)                       | 0.48<br>(0.22 to<br>0.87)                       | 0.52<br>(0.24 to<br>0.92)                       |
| Physical violence by sharp object                                                   | 13.33<br>(5.59 to<br>22.78)                        | 17.97<br>(7.69 to<br>30.39)                        | 17.97<br>(7.63 to<br>30.10)                        | 18.60<br>(8.02 to<br>31.58)                        | 0.23<br>(0.10 to<br>0.39)                       | 0.33<br>(0.15 to<br>0.54)                       | 0.33<br>(0.15 to<br>0.55)                       | 0.34<br>(0.15 to<br>0.56)                       |
| Physical violence by other means                                                    | 16.23<br>(8.09 to<br>25.49)                        | 16.72<br>(7.18 to<br>27.47)                        | 15.69<br>(6.92 to<br>26.06)                        | 19.53<br>(8.68 to<br>31.90)                        | 0.27<br>(0.13 to<br>0.42)                       | 0.32<br>(0.14 to<br>0.52)                       | 0.30<br>(0.14 to<br>0.49)                       | 0.36<br>(0.16 to<br>0.58)                       |
| <b>Forces of nature, conflict and terrorism, and executions and police conflict</b> | <b>1,460.83</b><br>(1,203.42 to<br>1,884.70)       | <b>10.19</b><br>(0.00 to<br>46.91)                 | <b>10.13</b><br>(0.00 to<br>46.60)                 | <b>11.99</b><br>(0.00 to<br>54.71)                 | <b>23.39</b><br>(19.27 to<br>30.18)             | <b>0.18</b><br>(0.00 to<br>0.80)                | <b>0.18</b><br>(0.00 to<br>0.80)                | <b>0.20</b><br>(0.00 to<br>0.89)                |
| Exposure to forces of nature                                                        | 0.00<br>(0.00 to<br>0.00)                          | 3.18<br>(0.00 to<br>17.33)                         | 3.16<br>(0.00 to<br>17.22)                         | 3.82<br>(0.00 to<br>20.66)                         | 0.00<br>(0.00 to<br>0.00)                       | 0.06<br>(0.00 to<br>0.32)                       | 0.06<br>(0.00 to<br>0.32)                       | 0.07<br>(0.00 to<br>0.36)                       |
| Conflict and terrorism                                                              | 1,460.62<br>(1,203.22 to<br>1,884.50)              | 6.98<br>(0.00 to<br>46.00)                         | 6.94<br>(0.00 to<br>45.73)                         | 8.14<br>(0.00 to<br>53.63)                         | 23.39<br>(19.27 to<br>30.18)                    | 0.12<br>(0.00 to<br>0.79)                       | 0.12<br>(0.00 to<br>0.79)                       | 0.13<br>(0.00 to<br>0.88)                       |
| Executions and police conflict                                                      | 0.21<br>(0.17 to<br>0.25)                          | 0.03<br>(0.00 to<br>0.00)                          | 0.03<br>(0.00 to<br>0.00)                          | 0.03<br>(0.00 to<br>0.00)                          | 0.00<br>(0.00 to<br>0.00)                       | 0.00<br>(0.00 to<br>0.00)                       | 0.00<br>(0.00 to<br>0.00)                       | 0.00<br>(0.00 to<br>0.00)                       |
| <b>South Asia</b>                                                                   |                                                    |                                                    |                                                    |                                                    |                                                 |                                                 |                                                 |                                                 |
| Cause                                                                               | YLLs (in 1000s)                                    |                                                    |                                                    |                                                    | Deaths (in 1000s)                               |                                                 |                                                 |                                                 |
|                                                                                     | 2016                                               | 2040 Forecast                                      | 2040 Better Scenario                               | 2040 Worse Scenario                                | 2016                                            | 2040 Forecast                                   | 2040 Better Scenario                            | 2040 Worse Scenario                             |
| <b>All causes</b>                                                                   | <b>398,851.37</b><br>(388,316.72 to<br>409,059.43) | <b>356,432.20</b><br>(281,224.66 to<br>441,579.58) | <b>303,886.23</b><br>(242,131.60 to<br>378,229.08) | <b>514,122.72</b><br>(401,530.72 to<br>640,921.45) | <b>12,110.37</b><br>(11,815.60 to<br>12,398.12) | <b>16,194.59</b><br>(13,046.59 to<br>19,492.21) | <b>14,327.52</b><br>(11,572.05 to<br>17,211.48) | <b>21,141.41</b><br>(17,168.81 to<br>25,111.17) |



|                                                |                                                            |                                                            |                                                            |                                                            |                                                    |                                                     |                                                     |                                                     |
|------------------------------------------------|------------------------------------------------------------|------------------------------------------------------------|------------------------------------------------------------|------------------------------------------------------------|----------------------------------------------------|-----------------------------------------------------|-----------------------------------------------------|-----------------------------------------------------|
| Measles                                        | 1,748.42<br>(640.48 to<br>3,847.99)                        | 96.39<br>(9.31 to<br>430.02)                               | 32.42<br>(5.63 to<br>128.26)                               | 290.52<br>(26.04 to<br>1,034.51)                           | 20.95<br>(7.68 to<br>46.19)                        | 1.17<br>(0.12 to<br>5.11)                           | 0.42<br>(0.08 to<br>1.58)                           | 3.47<br>(0.32 to<br>12.37)                          |
| <b>South Asia</b>                              |                                                            |                                                            |                                                            |                                                            |                                                    |                                                     |                                                     |                                                     |
| Cause                                          | YLLs (in 1000s)                                            |                                                            |                                                            |                                                            | Deaths (in 1000s)                                  |                                                     |                                                     |                                                     |
|                                                | 2016                                                       | 2040 Forecast                                              | 2040 Better Scenario                                       | 2040 Worse Scenario                                        | 2016                                               | 2040 Forecast                                       | 2040 Better Scenario                                | 2040 Worse Scenario                                 |
| Varicella and herpes zoster                    | 222.54<br>(188.20 to<br>264.51)                            | 60.76<br>(42.66 to<br>78.77)                               | 56.83<br>(39.85 to<br>73.95)                               | 101.23<br>(70.60 to<br>137.24)                             | 4.71<br>(4.22 to<br>5.29)                          | 2.92<br>(2.13 to<br>3.80)                           | 2.98<br>(2.15 to<br>3.84)                           | 3.61<br>(2.68 to<br>4.62)                           |
| <b>Neglected tropical diseases and malaria</b> | <b>5,702.54</b><br><b>(3,011.11 to</b><br><b>7,516.55)</b> | <b>5,856.00</b><br><b>(2,842.19 to</b><br><b>7,728.08)</b> | <b>5,852.62</b><br><b>(2,855.98 to</b><br><b>7,711.51)</b> | <b>6,642.99</b><br><b>(3,177.57 to</b><br><b>8,857.44)</b> | <b>96.74</b><br><b>(51.51 to</b><br><b>123.34)</b> | <b>171.41</b><br><b>(82.95 to</b><br><b>219.98)</b> | <b>175.71</b><br><b>(85.50 to</b><br><b>226.53)</b> | <b>176.02</b><br><b>(84.57 to</b><br><b>226.36)</b> |
| Malaria                                        | 3,710.87<br>(1,726.84 to<br>5,218.79)                      | 1,054.44<br>(508.71 to<br>1,729.31)                        | 1,037.41<br>(569.94 to<br>1,734.75)                        | 1,309.00<br>(655.79 to<br>2,037.42)                        | 56.95<br>(27.37 to<br>76.04)                       | 27.16<br>(15.62 to<br>48.03)                        | 27.55<br>(15.78 to<br>49.81)                        | 29.44<br>(16.04 to<br>47.26)                        |
| Chagas disease                                 | 0.00<br>(0.00 to<br>0.00)                                  | 0.00<br>(0.00 to<br>0.00)                                  | 0.00<br>(0.00 to<br>0.00)                                  | 0.00<br>(0.00 to<br>0.00)                                  | 0.00<br>(0.00 to<br>0.00)                          | 0.00<br>(0.00 to<br>0.00)                           | 0.00<br>(0.00 to<br>0.00)                           | 0.00<br>(0.00 to<br>0.00)                           |
| Leishmaniasis                                  | 381.72<br>(210.87 to<br>645.17)                            | 108.94<br>(54.20 to<br>232.18)                             | 101.50<br>(50.76 to<br>220.77)                             | 203.39<br>(104.91 to<br>385.03)                            | 6.35<br>(3.49 to<br>10.78)                         | 2.26<br>(1.12 to<br>4.97)                           | 2.14<br>(1.07 to<br>4.82)                           | 3.85<br>(2.00 to<br>7.75)                           |
| African trypanosomiasis                        | 0.00<br>(0.00 to<br>0.00)                                  | 0.00<br>(0.00 to<br>0.00)                                  | 0.00<br>(0.00 to<br>0.00)                                  | 0.00<br>(0.00 to<br>0.00)                                  | 0.00<br>(0.00 to<br>0.00)                          | 0.00<br>(0.00 to<br>0.00)                           | 0.00<br>(0.00 to<br>0.00)                           | 0.00<br>(0.00 to<br>0.00)                           |
| Schistosomiasis                                | 0.00<br>(0.00 to<br>0.00)                                  | 0.00<br>(0.00 to<br>0.00)                                  | 0.00<br>(0.00 to<br>0.00)                                  | 0.00<br>(0.00 to<br>0.00)                                  | 0.00<br>(0.00 to<br>0.00)                          | 0.00<br>(0.00 to<br>0.00)                           | 0.00<br>(0.00 to<br>0.00)                           | 0.00<br>(0.00 to<br>0.00)                           |
| Cysticercosis                                  | 4.11<br>(3.39 to<br>4.94)                                  | 1.78<br>(1.17 to<br>3.85)                                  | 1.79<br>(1.15 to<br>3.97)                                  | 1.93<br>(1.32 to<br>3.74)                                  | 0.10<br>(0.08 to<br>0.12)                          | 0.05<br>(0.05 to<br>0.11)                           | 0.05<br>(0.03 to<br>0.12)                           | 0.05<br>(0.04 to<br>0.11)                           |
| Cystic echinococcosis                          | 8.51<br>(6.86 to<br>10.36)                                 | 3.30<br>(2.06 to<br>7.08)                                  | 3.07<br>(1.88 to<br>6.62)                                  | 5.97<br>(3.84 to<br>11.48)                                 | 0.23<br>(0.18 to<br>0.28)                          | 0.12<br>(0.08 to<br>0.26)                           | 0.12<br>(0.07 to<br>0.25)                           | 0.21<br>(0.13 to<br>0.41)                           |
| Dengue                                         | 1,172.24<br>(175.95 to<br>1,783.77)                        | 4,525.26<br>(1,278.24 to<br>6,247.58)                      | 4,560.50<br>(1,321.57 to<br>6,253.64)                      | 4,827.37<br>(1,216.71 to<br>6,827.09)                      | 24.81<br>(3.72 to<br>37.42)                        | 137.18<br>(39.37 to<br>187.63)                      | 141.45<br>(40.88 to<br>193.46)                      | 134.99<br>(35.58 to<br>185.91)                      |
| Yellow fever                                   | 0.00<br>(0.00 to<br>0.00)                                  | 0.00<br>(0.00 to<br>0.00)                                  | 0.00<br>(0.00 to<br>0.00)                                  | 0.00<br>(0.00 to<br>0.00)                                  | 0.00<br>(0.00 to<br>0.00)                          | 0.00<br>(0.00 to<br>0.00)                           | 0.00<br>(0.00 to<br>0.00)                           | 0.00<br>(0.00 to<br>0.00)                           |
| Rabies                                         | 290.94<br>(187.34 to<br>432.05)                            | 85.24<br>(48.14 to<br>208.57)                              | 73.65<br>(41.98 to<br>183.33)                              | 186.64<br>(111.05 to<br>405.25)                            | 5.92<br>(3.73 to<br>8.66)                          | 2.36<br>(1.34 to<br>5.67)                           | 2.11<br>(1.19 to<br>5.12)                           | 4.68<br>(2.84 to<br>10.00)                          |
| Intestinal nematode infections                 | 35.55<br>(28.77 to<br>43.96)                               | 20.85<br>(13.08 to<br>35.76)                               | 20.48<br>(12.87 to<br>35.48)                               | 26.90<br>(16.71 to<br>42.03)                               | 0.51<br>(0.42 to<br>0.61)                          | 0.46<br>(0.31 to<br>0.85)                           | 0.47<br>(0.31 to<br>0.86)                           | 0.50<br>(0.34 to<br>0.83)                           |
| Other neglected tropical diseases              | 98.60<br>(71.93 to<br>167.70)                              | 56.19<br>(33.51 to<br>142.31)                              | 54.22<br>(31.68 to<br>138.48)                              | 81.79<br>(50.94 to<br>189.89)                              | 1.88<br>(1.46 to<br>3.25)                          | 1.80<br>(1.03 to<br>4.74)                           | 1.80<br>(1.02 to<br>4.85)                           | 2.29<br>(1.39 to<br>5.78)                           |
| <b>Maternal disorders</b>                      | <b>3,841.11</b><br><b>(3,400.15 to</b><br><b>4,415.52)</b> | <b>1,335.51</b><br><b>(981.00 to</b><br><b>1,895.47)</b>   | <b>1,173.22</b><br><b>(828.46 to</b><br><b>1,686.20)</b>   | <b>2,376.69</b><br><b>(1,719.27 to</b><br><b>3,328.56)</b> | <b>66.60</b><br><b>(58.85 to</b><br><b>76.27)</b>  | <b>23.95</b><br><b>(17.58 to</b><br><b>33.79)</b>   | <b>21.05</b><br><b>(15.05 to</b><br><b>30.07)</b>   | <b>42.42</b><br><b>(30.71 to</b><br><b>59.43)</b>   |
| Maternal hemorrhage                            | 1,685.96<br>(1,345.83 to<br>2,098.56)                      | 570.18<br>(375.42 to<br>850.07)                            | 495.44<br>(323.91 to<br>725.75)                            | 984.52<br>(650.12 to<br>1,463.78)                          | 29.18<br>(23.46 to<br>36.07)                       | 10.16<br>(6.80 to<br>15.07)                         | 8.83<br>(5.84 to<br>12.90)                          | 17.49<br>(11.48 to<br>25.99)                        |
| Maternal sepsis and other maternal infections  | 420.92<br>(310.25 to<br>556.91)                            | 114.75<br>(69.12 to<br>176.17)                             | 104.19<br>(61.75 to<br>158.08)                             | 203.54<br>(122.90 to<br>318.41)                            | 7.23<br>(5.36 to<br>9.48)                          | 2.05<br>(1.26 to<br>3.10)                           | 1.87<br>(1.12 to<br>2.82)                           | 3.63<br>(2.22 to<br>5.66)                           |
| Maternal hypertensive disorders                | 251.40<br>(173.01 to<br>357.90)                            | 83.80<br>(50.18 to<br>129.79)                              | 73.24<br>(43.31 to<br>114.60)                              | 146.69<br>(87.95 to<br>230.06)                             | 4.26<br>(2.97 to<br>6.04)                          | 1.46<br>(0.88 to<br>2.27)                           | 1.28<br>(0.77 to<br>1.98)                           | 2.55<br>(1.53 to<br>3.96)                           |
| Maternal obstructed labor and uterine rupture  | 65.23<br>(43.36 to<br>99.41)                               | 22.10<br>(12.15 to<br>38.55)                               | 19.61<br>(10.41 to<br>34.74)                               | 39.94<br>(21.62 to<br>70.87)                               | 1.17<br>(0.78 to<br>1.74)                          | 0.41<br>(0.23 to<br>0.72)                           | 0.36<br>(0.19 to<br>0.64)                           | 0.74<br>(0.40 to<br>1.31)                           |

|                                                                         |                                                 |                                                |                                                |                                                 |                                        |                                        |                                       |                                        |
|-------------------------------------------------------------------------|-------------------------------------------------|------------------------------------------------|------------------------------------------------|-------------------------------------------------|----------------------------------------|----------------------------------------|---------------------------------------|----------------------------------------|
| Maternal abortion, miscarriage, and ectopic pregnancy                   | 260.09<br>(193.96 to<br>346.88)                 | 102.45<br>(55.65 to<br>173.16)                 | 91.54<br>(47.29 to<br>159.39)                  | 177.86<br>(92.94 to<br>309.95)                  | 4.76<br>(3.56 to<br>6.26)              | 1.97<br>(1.06 to<br>3.35)              | 1.76<br>(0.91 to<br>3.03)             | 3.42<br>(1.80 to<br>5.91)              |
| Indirect maternal deaths                                                | 252.90<br>(177.62 to<br>355.17)                 | 85.54<br>(49.40 to<br>132.36)                  | 76.48<br>(44.36 to<br>117.38)                  | 151.08<br>(87.20 to<br>242.90)                  | 4.32<br>(3.06 to<br>6.03)              | 1.51<br>(0.89 to<br>2.31)              | 1.35<br>(0.79 to<br>2.07)             | 2.65<br>(1.54 to<br>4.23)              |
| Late maternal deaths                                                    | 55.89<br>(33.28 to<br>90.79)                    | 15.35<br>(8.39 to<br>26.31)                    | 13.30<br>(7.11 to<br>22.94)                    | 27.18<br>(14.69 to<br>46.00)                    | 0.97<br>(0.59 to<br>1.55)              | 0.27<br>(0.15 to<br>0.47)              | 0.24<br>(0.13 to<br>0.41)             | 0.48<br>(0.26 to<br>0.82)              |
| Maternal deaths aggravated by HIV/AIDS                                  | 1.88<br>(0.97 to<br>2.89)                       | 57.27<br>(0.45 to<br>259.06)                   | 44.43<br>(0.26 to<br>224.14)                   | 157.77<br>(3.13 to<br>588.09)                   | 0.03<br>(0.02 to<br>0.05)              | 0.98<br>(0.01 to<br>4.53)              | 0.76<br>(0.00 to<br>3.67)             | 2.72<br>(0.05 to<br>10.08)             |
| Other maternal disorders                                                | 846.84<br>(629.62 to<br>1,099.27)               | 284.07<br>(180.91 to<br>425.52)                | 254.98<br>(162.13 to<br>386.73)                | 488.10<br>(305.12 to<br>732.37)                 | 14.68<br>(10.96 to<br>18.92)           | 5.12<br>(3.26 to<br>7.67)              | 4.60<br>(2.93 to<br>6.94)             | 8.75<br>(5.51 to<br>13.14)             |
| <b>South Asia</b>                                                       |                                                 |                                                |                                                |                                                 |                                        |                                        |                                       |                                        |
| Cause                                                                   | YLLs (in 1000s)                                 |                                                |                                                |                                                 | Deaths (in 1000s)                      |                                        |                                       |                                        |
|                                                                         | 2016                                            | 2040 Forecast                                  | 2040 Better Scenario                           | 2040 Worse Scenario                             | 2016                                   | 2040 Forecast                          | 2040 Better Scenario                  | 2040 Worse Scenario                    |
| <b>Neonatal disorders</b>                                               | <b>49,292.34</b><br>(45,603.31 to<br>53,295.54) | <b>12,993.66</b><br>(8,987.95 to<br>17,407.40) | <b>10,974.79</b><br>(7,545.38 to<br>14,795.95) | <b>26,956.24</b><br>(18,197.09 to<br>36,692.16) | <b>569.38</b><br>(526.76 to<br>615.65) | <b>150.11</b><br>(103.83 to<br>201.10) | <b>126.79</b><br>(87.19 to<br>170.92) | <b>311.40</b><br>(210.19 to<br>423.85) |
| Neonatal preterm birth                                                  | 16,273.82<br>(14,495.81 to<br>18,248.99)        | 4,283.05<br>(3,331.91 to<br>5,325.47)          | 3,265.10<br>(2,515.65 to<br>4,051.25)          | 8,920.22<br>(6,794.34 to<br>11,283.73)          | 187.97<br>(167.43 to<br>210.81)        | 49.50<br>(38.49 to<br>61.52)           | 37.72<br>(29.06 to<br>46.80)          | 103.04<br>(78.48 to<br>130.34)         |
| Neonatal encephalopathy due to birth asphyxia and trauma                | 13,976.05<br>(11,890.53 to<br>16,218.04)        | 3,707.81<br>(2,066.89 to<br>5,679.72)          | 3,288.64<br>(1,865.34 to<br>5,022.48)          | 7,285.18<br>(3,890.00 to<br>11,461.64)          | 161.44<br>(137.35 to<br>187.33)        | 42.84<br>(23.88 to<br>65.61)           | 37.99<br>(21.55 to<br>58.02)          | 84.16<br>(44.95 to<br>132.40)          |
| Neonatal sepsis and other neonatal infections                           | 3,406.40<br>(2,614.65 to<br>4,930.02)           | 1,216.03<br>(784.03 to<br>1,835.91)            | 1,092.71<br>(702.10 to<br>1,621.13)            | 2,457.36<br>(1,530.63 to<br>3,762.27)           | 39.35<br>(30.21 to<br>56.95)           | 14.05<br>(9.06 to<br>21.22)            | 12.62<br>(8.11 to<br>18.73)           | 28.39<br>(17.68 to<br>43.46)           |
| Hemolytic disease and other neonatal jaundice                           | 2,326.11<br>(1,945.10 to<br>2,721.29)           | 384.66<br>(246.03 to<br>545.15)                | 333.41<br>(214.60 to<br>475.25)                | 836.56<br>(536.19 to<br>1,192.74)               | 26.88<br>(22.47 to<br>31.44)           | 4.44<br>(2.84 to<br>6.30)              | 3.85<br>(2.48 to<br>5.49)             | 9.67<br>(6.20 to<br>13.78)             |
| Other neonatal disorders                                                | 13,309.95<br>(11,499.61 to<br>15,000.58)        | 3,400.12<br>(2,233.20 to<br>4,746.27)          | 2,994.94<br>(1,979.09 to<br>4,195.15)          | 7,456.93<br>(4,702.08 to<br>10,399.79)          | 153.74<br>(132.83 to<br>173.28)        | 39.28<br>(25.80 to<br>54.83)           | 34.60<br>(22.86 to<br>48.45)          | 86.14<br>(54.32 to<br>120.13)          |
| <b>Nutritional deficiencies</b>                                         | <b>3,283.37</b><br>(2,942.22 to<br>3,678.15)    | <b>954.20</b><br>(782.38 to<br>1,131.69)       | <b>919.53</b><br>(755.33 to<br>1,103.19)       | <b>1,352.72</b><br>(1,075.55 to<br>1,637.39)    | <b>65.14</b><br>(59.47 to<br>71.28)    | <b>43.44</b><br>(36.78 to<br>51.13)    | <b>44.13</b><br>(37.43 to<br>52.33)   | <b>49.88</b><br>(42.41 to<br>57.70)    |
| Protein-energy malnutrition                                             | 2,280.80<br>(1,993.46 to<br>2,617.12)           | 352.41<br>(258.34 to<br>441.00)                | 327.50<br>(241.66 to<br>411.65)                | 589.00<br>(398.31 to<br>775.63)                 | 36.35<br>(32.47 to<br>40.72)           | 15.30<br>(12.36 to<br>18.49)           | 15.24<br>(12.23 to<br>18.47)          | 18.94<br>(15.08 to<br>22.99)           |
| Iodine deficiency                                                       | 25.37<br>(12.10 to<br>55.65)                    | 25.68<br>(5.83 to<br>70.83)                    | 24.21<br>(5.47 to<br>65.03)                    | 39.85<br>(9.10 to<br>131.07)                    | 0.53<br>(0.30 to<br>0.92)              | 1.35<br>(0.24 to<br>3.50)              | 1.35<br>(0.23 to<br>3.62)             | 1.69<br>(0.34 to<br>4.31)              |
| Dietary iron deficiency                                                 | 24.59<br>(18.34 to<br>36.22)                    | 20.56<br>(14.44 to<br>43.45)                   | 20.63<br>(14.30 to<br>44.27)                   | 23.39<br>(16.62 to<br>45.99)                    | 0.78<br>(0.57 to<br>1.50)              | 1.15<br>(0.75 to<br>2.50)              | 1.21<br>(0.79 to<br>2.69)             | 1.13<br>(0.74 to<br>2.42)              |
| Other nutritional deficiencies                                          | 952.61<br>(834.99 to<br>1,088.54)               | 555.53<br>(455.72 to<br>678.57)                | 547.19<br>(444.22 to<br>674.93)                | 700.48<br>(573.50 to<br>846.52)                 | 27.48<br>(24.10 to<br>30.61)           | 25.64<br>(20.89 to<br>31.09)           | 26.32<br>(21.35 to<br>31.93)          | 28.12<br>(22.63 to<br>33.69)           |
| <b>Other communicable, maternal, neonatal, and nutritional diseases</b> | <b>5,858.05</b><br>(5,076.95 to<br>6,908.57)    | <b>2,788.29</b><br>(2,340.79 to<br>3,281.05)   | <b>2,716.83</b><br>(2,255.40 to<br>3,229.02)   | <b>3,609.16</b><br>(3,005.35 to<br>4,276.13)    | <b>121.90</b><br>(109.99 to<br>135.69) | <b>97.98</b><br>(83.28 to<br>115.03)   | <b>98.98</b><br>(82.71 to<br>118.13)  | <b>112.27</b><br>(96.41 to<br>129.58)  |
| Sexually transmitted infections excluding HIV                           | 1,358.60<br>(736.16 to<br>2,359.58)             | 236.96<br>(142.59 to<br>399.15)                | 220.88<br>(135.30 to<br>363.00)                | 370.57<br>(207.38 to<br>672.94)                 | 17.69<br>(10.40 to<br>29.38)           | 4.58<br>(3.21 to<br>6.53)              | 4.40<br>(3.08 to<br>6.14)             | 6.32<br>(4.19 to<br>9.86)              |
| Syphilis                                                                | 1,263.53<br>(632.01 to<br>2,264.78)             | 164.60<br>(76.41 to<br>321.58)                 | 149.81<br>(71.27 to<br>289.94)                 | 286.24<br>(127.43 to<br>573.14)                 | 15.23<br>(7.86 to<br>26.92)            | 2.35<br>(1.31 to<br>4.25)              | 2.18<br>(1.24 to<br>3.90)             | 3.83<br>(1.93 to<br>7.23)              |
| Chlamydial infection                                                    | 18.46<br>(13.36 to<br>22.39)                    | 13.85<br>(9.17 to<br>19.15)                    | 13.59<br>(8.98 to<br>18.86)                    | 16.16<br>(10.77 to<br>22.08)                    | 0.47<br>(0.33 to<br>0.57)              | 0.43<br>(0.30 to<br>0.57)              | 0.42<br>(0.29 to<br>0.57)             | 0.47<br>(0.32 to<br>0.64)              |

|                                       |                                          |                                          |                                          |                                          |                                    |                                      |                                      |                                       |
|---------------------------------------|------------------------------------------|------------------------------------------|------------------------------------------|------------------------------------------|------------------------------------|--------------------------------------|--------------------------------------|---------------------------------------|
| Gonococcal infection                  | 50.39<br>(36.59 to 61.10)                | 39.10<br>(26.37 to 53.68)                | 38.44<br>(25.31 to 53.16)                | 45.34<br>(30.40 to 61.90)                | 1.34<br>(0.96 to 1.61)             | 1.25<br>(0.85 to 1.67)               | 1.24<br>(0.84 to 1.67)               | 1.38<br>(0.93 to 1.84)                |
| Other sexually transmitted infections | 26.22<br>(19.29 to 31.74)                | 19.41<br>(13.01 to 26.76)                | 19.03<br>(12.73 to 26.40)                | 22.84<br>(15.25 to 31.86)                | 0.65<br>(0.47 to 0.78)             | 0.65<br>(0.37 to 0.75)               | 0.55<br>(0.37 to 0.74)               | 0.63<br>(0.42 to 0.86)                |
| Acute hepatitis                       | 3,423.23<br>(3,216.71 to 3,636.80)       | 1,873.30<br>(1,565.07 to 2,219.15)       | 1,843.07<br>(1,512.85 to 2,214.46)       | 2,313.49<br>(1,940.52 to 2,710.07)       | 80.56<br>(75.38 to 85.11)          | 64.66<br>(54.44 to 76.39)            | 65.47<br>(53.93 to 79.13)            | 73.25<br>(62.77 to 84.85)             |
| Acute hepatitis A                     | 276.28<br>(211.01 to 350.59)             | 48.50<br>(29.97 to 68.72)                | 45.97<br>(28.13 to 65.48)                | 3.67<br>(44.40 to 114.29)                | 1.16<br>(2.90 to 4.54)             | 1.16<br>(0.78 to 1.62)               | 1.14<br>(0.76 to 1.61)               | 1.53<br>(1.01 to 2.11)                |
| Acute hepatitis B                     | 2,061.59<br>(1,881.55 to 2,244.58)       | 1,331.28<br>(1,080.65 to 1,627.51)       | 1,310.14<br>(1,044.91 to 1,619.17)       | 1,627.24<br>(1,323.63 to 1,950.88)       | 56.30<br>(51.63 to 60.79)          | 47.08<br>(37.78 to 57.50)            | 47.37<br>(37.40 to 58.80)            | 54.32<br>(44.70 to 64.89)             |
| Acute hepatitis C                     | 35.20<br>(27.56 to 45.05)                | 37.70<br>(27.30 to 51.65)                | 38.08<br>(27.47 to 51.46)                | 40.10<br>(29.12 to 53.97)                | 1.18<br>(0.89 to 1.56)             | 1.67<br>(1.19 to 2.27)               | 1.74<br>(1.22 to 2.36)               | 1.65<br>(1.19 to 2.24)                |
| Acute hepatitis E                     | 1,050.16<br>(908.05 to 1,198.18)         | 455.82<br>(342.37 to 569.06)             | 448.88<br>(334.35 to 564.30)             | 569.27<br>(437.16 to 710.49)             | 19.41<br>(16.39 to 22.60)          | 14.76<br>(10.82 to 18.92)            | 15.23<br>(11.08 to 19.84)            | 15.75<br>(11.84 to 19.84)             |
| Other unspecified infectious diseases | 1,076.23<br>(658.81 to 1,541.80)         | 678.03<br>(467.56 to 870.97)             | 652.88<br>(455.33 to 841.09)             | 925.10<br>(621.57 to 1,220.56)           | 23.65<br>(14.47 to 30.41)          | 28.73<br>(18.83 to 36.57)            | 29.11<br>(19.22 to 37.23)            | 32.71<br>(21.41 to 40.96)             |
| Non-communicable diseases             | 187,766.30<br>(178,569.14 to 195,461.57) | 241,557.28<br>(180,568.25 to 306,578.68) | 200,940.23<br>(153,058.82 to 250,997.90) | 335,305.32<br>(247,283.23 to 429,937.68) | 7,589.71<br>(7,173.34 to 7,907.62) | 12,250.17<br>(9,710.09 to 14,795.35) | 10,654.64<br>(8,440.72 to 12,766.41) | 15,338.64<br>(12,188.99 to 18,977.18) |

**South Asia**

| Cause                           | YLLs (in 1000s)                       |                                       |                                       |                                       | Deaths (in 1000s)                |                                    |                                    |                                    |
|---------------------------------|---------------------------------------|---------------------------------------|---------------------------------------|---------------------------------------|----------------------------------|------------------------------------|------------------------------------|------------------------------------|
|                                 | 2016                                  | 2040 Forecast                         | 2040 Better Scenario                  | 2040 Worse Scenario                   | 2016                             | 2040 Forecast                      | 2040 Better Scenario               | 2040 Worse Scenario                |
| Neoplasms                       | 30,196.83<br>(28,692.01 to 31,562.51) | 53,342.21<br>(42,660.16 to 64,365.19) | 49,462.65<br>(39,258.25 to 59,870.13) | 55,497.34<br>(45,404.24 to 66,502.00) | 1,052.42<br>(998.29 to 1,101.08) | 2,209.78<br>(1,823.20 to 2,632.36) | 2,114.58<br>(1,722.27 to 2,516.43) | 2,170.64<br>(1,815.23 to 2,569.45) |
| Lip and oral cavity cancer      | 2,215.66<br>(2,042.46 to 2,355.23)    | 4,342.70<br>(3,078.89 to 5,994.55)    | 3,337.75<br>(2,458.44 to 4,503.42)    | 5,186.08<br>(3,548.49 to 7,225.82)    | 78.69<br>(72.56 to 83.66)        | 170.62<br>(121.56 to 232.13)       | 139.08<br>(101.83 to 185.20)       | 191.77<br>(134.84 to 264.45)       |
| Nasopharynx cancer              | 295.83<br>(276.62 to 321.98)          | 600.00<br>(419.86 to 844.74)          | 449.11<br>(320.12 to 613.66)          | 747.97<br>(509.20 to 1,073.24)        | 9.49<br>(8.88 to 10.31)          | 20.96<br>(14.61 to 29.17)          | 16.25<br>(11.59 to 22.29)          | 25.20<br>(17.31 to 36.05)          |
| Other pharynx cancer            | 1,807.08<br>(1,592.85 to 1,956.27)    | 3,274.86<br>(2,315.35 to 4,488.58)    | 2,814.44<br>(2,068.78 to 3,725.60)    | 3,254.04<br>(2,270.55 to 4,499.47)    | 66.27<br>(58.44 to 71.83)        | 137.00<br>(98.45 to 185.99)        | 121.31<br>(90.44 to 159.50)        | 129.78<br>(93.40 to 177.86)        |
| Esophageal cancer               | 1,311.03<br>(1,240.99 to 1,382.21)    | 2,253.65<br>(1,397.57 to 3,624.25)    | 1,870.04<br>(1,196.60 to 2,939.01)    | 2,751.76<br>(1,618.23 to 4,595.49)    | 49.23<br>(46.57 to 51.74)        | 93.32<br>(59.80 to 144.44)         | 81.23<br>(52.87 to 125.33)         | 107.38<br>(64.65 to 173.77)        |
| Stomach cancer                  | 2,447.95<br>(2,294.22 to 2,597.36)    | 3,065.03<br>(2,323.70 to 3,983.36)    | 3,004.60<br>(2,267.27 to 3,858.80)    | 3,242.73<br>(2,504.93 to 4,126.15)    | 90.50<br>(84.21 to 96.23)        | 133.05<br>(103.68 to 168.87)       | 133.77<br>(103.81 to 168.77)       | 132.57<br>(106.05 to 164.48)       |
| Colon and rectum cancer         | 1,822.95<br>(1,650.95 to 1,947.70)    | 4,259.12<br>(2,876.99 to 6,115.42)    | 4,230.21<br>(2,841.48 to 6,045.70)    | 3,974.77<br>(2,704.17 to 5,686.96)    | 70.30<br>(63.93 to 75.28)        | 194.01<br>(133.33 to 278.20)       | 198.10<br>(136.55 to 281.29)       | 170.43<br>(116.18 to 242.70)       |
| Liver cancer                    | 1,032.49<br>(952.39 to 1,090.68)      | 2,077.10<br>(1,582.42 to 2,735.89)    | 1,921.11<br>(1,491.79 to 2,438.70)    | 2,071.55<br>(1,576.14 to 2,742.41)    | 40.09<br>(37.13 to 42.26)        | 91.52<br>(71.10 to 119.66)         | 87.46<br>(68.90 to 111.03)         | 86.47<br>(67.45 to 112.34)         |
| Liver cancer due to hepatitis B | 422.43<br>(353.08 to 489.67)          | 825.29<br>(597.93 to 1,130.90)        | 769.24<br>(566.90 to 1,013.72)        | 815.96<br>(592.83 to 1,132.53)        | 15.32<br>(12.51 to 17.95)        | 34.14<br>(24.60 to 45.80)          | 32.83<br>(23.88 to 42.90)          | 32.06<br>(23.30 to 42.76)          |
| Liver cancer due to hepatitis C | 227.40<br>(192.92 to 261.20)          | 477.89<br>(353.73 to 637.45)          | 448.50<br>(339.33 to 581.87)          | 479.96<br>(354.56 to 639.88)          | 9.57<br>(8.23 to 10.89)          | 22.52<br>(17.19 to 30.04)          | 21.87<br>(16.96 to 28.04)          | 21.33<br>(16.02 to 28.32)          |
| Liver cancer due to alcohol use | 104.61<br>(85.47 to 126.92)           | 206.14<br>(146.62 to 288.51)          | 179.95<br>(128.98 to 245.51)          | 204.52<br>(145.65 to 285.08)          | 4.44<br>(3.68 to 5.36)           | 9.56<br>(6.79 to 13.31)            | 8.62<br>(6.21 to 11.56)            | 9.03<br>(6.54 to 12.54)            |

|                                      |                                       |                                       |                                       |                                       |                                 |                                 |                                 |                                 |
|--------------------------------------|---------------------------------------|---------------------------------------|---------------------------------------|---------------------------------------|---------------------------------|---------------------------------|---------------------------------|---------------------------------|
| Liver cancer due to other causes     | 278.04<br>(243.86 to<br>312.15)       | 567.78<br>(396.72 to<br>804.35)       | 523.43<br>(378.81 to<br>713.11)       | 571.11<br>(399.73 to<br>815.44)       | 10.75<br>(9.42 to<br>12.16)     | 25.31<br>(17.94 to<br>36.17)    | 24.14<br>(17.52 to<br>33.27)    | 24.06<br>(16.98 to<br>34.27)    |
| Gallbladder and biliary tract cancer | 894.18<br>(743.09 to<br>968.29)       | 1,082.10<br>(825.69 to<br>1,312.47)   | 1,127.27<br>(849.81 to<br>1,391.34)   | 984.51<br>(762.61 to<br>1,168.98)     | 32.03<br>(27.06 to<br>34.76)    | 44.09<br>(34.35 to<br>52.51)    | 46.67<br>(35.78 to<br>56.33)    | 38.43<br>(30.73 to<br>44.35)    |
| Pancreatic cancer                    | 699.53<br>(667.30 to<br>731.73)       | 1,814.37<br>(1,382.68 to<br>2,346.27) | 1,848.51<br>(1,400.49 to<br>2,390.35) | 1,635.37<br>(1,282.91 to<br>2,107.54) | 29.96<br>(28.39 to<br>31.41)    | 87.77<br>(68.51 to<br>112.36)   | 91.87<br>(71.17 to<br>117.42)   | 74.50<br>(59.31 to<br>95.72)    |
| Larynx cancer                        | 906.36<br>(853.16 to<br>968.17)       | 1,563.49<br>(1,005.52 to<br>2,357.44) | 1,151.12<br>(790.81 to<br>1,632.40)   | 2,082.31<br>(1,269.24 to<br>3,304.72) | 34.50<br>(32.38 to<br>36.81)    | 63.84<br>(42.13 to<br>95.75)    | 49.96<br>(34.85 to<br>70.37)    | 80.55<br>(49.38 to<br>127.46)   |
| Tracheal, bronchus, and lung cancer  | 2,697.46<br>(2,510.39 to<br>2,874.89) | 5,147.47<br>(3,676.21 to<br>7,020.15) | 3,497.09<br>(2,528.52 to<br>4,667.88) | 6,871.83<br>(4,806.84 to<br>9,605.07) | 109.09<br>(101.22 to<br>116.21) | 228.69<br>(164.38 to<br>307.48) | 165.37<br>(120.62 to<br>217.11) | 290.96<br>(204.18 to<br>401.65) |
| Malignant skin melanoma              | 80.30<br>(73.08 to<br>99.11)          | 166.82<br>(135.92 to<br>203.77)       | 177.35<br>(142.24 to<br>216.91)       | 139.11<br>(116.02 to<br>168.80)       | 2.73<br>(2.46 to<br>3.25)       | 6.94<br>(5.77 to<br>8.21)       | 7.58<br>(6.19 to<br>8.97)       | 5.40<br>(4.64 to<br>6.38)       |
| Non-melanoma skin cancer             | 59.18<br>(55.70 to<br>62.42)          | 128.15<br>(109.71 to<br>146.45)       | 135.01<br>(112.52 to<br>157.31)       | 123.88<br>(109.34 to<br>138.03)       | 2.81<br>(2.62 to<br>2.96)       | 7.32<br>(6.50 to<br>8.16)       | 7.98<br>(6.91 to<br>9.01)       | 6.48<br>(5.80 to<br>7.17)       |
| Breast cancer                        | 2,578.51<br>(2,220.17 to<br>3,239.92) | 4,959.35<br>(3,549.74 to<br>6,744.39) | 4,910.73<br>(3,513.40 to<br>6,601.87) | 4,743.53<br>(3,451.18 to<br>6,447.51) | 84.79<br>(72.47 to<br>105.97)   | 193.10<br>(141.30 to<br>259.90) | 194.46<br>(142.66 to<br>258.71) | 176.50<br>(130.10 to<br>240.83) |
| Cervical cancer                      | 1,374.40<br>(1,197.68 to<br>1,660.99) | 1,847.26<br>(1,312.13 to<br>2,491.61) | 1,849.70<br>(1,299.00 to<br>2,510.30) | 1,977.47<br>(1,434.09 to<br>2,670.98) | 44.01<br>(38.50 to<br>54.78)    | 66.61<br>(48.66 to<br>88.45)    | 67.49<br>(48.51 to<br>90.54)    | 68.86<br>(51.32 to<br>91.01)    |
| Uterine cancer                       | 290.83<br>(262.22 to<br>322.77)       | 521.64<br>(408.49 to<br>648.09)       | 519.46<br>(398.50 to<br>646.71)       | 563.94<br>(452.52 to<br>691.41)       | 11.18<br>(10.03 to<br>12.41)    | 22.78<br>(18.26 to<br>27.83)    | 23.05<br>(18.08 to<br>28.30)    | 23.63<br>(19.41 to<br>28.09)    |
| Ovarian cancer                       | 705.74<br>(646.41 to<br>762.34)       | 1,553.17<br>(1,141.28 to<br>2,051.73) | 1,574.16<br>(1,155.69 to<br>2,068.52) | 1,354.26<br>(1,011.41 to<br>1,799.06) | 23.62<br>(21.52 to<br>25.63)    | 60.12<br>(44.31 to<br>79.70)    | 61.58<br>(45.30 to<br>82.00)    | 50.63<br>(38.24 to<br>67.44)    |
| Prostate cancer                      | 434.66<br>(330.34 to<br>522.15)       | 1,330.01<br>(983.50 to<br>1,696.87)   | 1,459.56<br>(1,076.03 to<br>1,776.63) | 1,084.41<br>(787.78 to<br>1,316.61)   | 26.63<br>(20.07 to<br>32.16)    | 90.05<br>(66.93 to<br>108.10)   | 102.01<br>(76.04 to<br>122.70)  | 88.17<br>(50.09 to<br>84.18)    |
| Testicular cancer                    | 89.57<br>(80.05 to<br>101.00)         | 109.70<br>(89.95 to<br>132.55)        | 110.61<br>(89.06 to<br>134.29)        | 115.16<br>(95.43 to<br>139.26)        | 2.06<br>(1.88 to<br>2.28)       | 3.05<br>(2.56 to<br>3.58)       | 3.17<br>(2.62 to<br>3.77)       | 3.02<br>(2.56 to<br>3.50)       |

**South Asia**

| Cause                           | YLLs (in 1000s)                       |                                       |                                       |                                       | Deaths (in 1000s)               |                              |                              |                              |
|---------------------------------|---------------------------------------|---------------------------------------|---------------------------------------|---------------------------------------|---------------------------------|------------------------------|------------------------------|------------------------------|
|                                 | 2016                                  | 2040 Forecast                         | 2040 Better Scenario                  | 2040 Worse Scenario                   | 2016                            | 2040 Forecast                | 2040 Better Scenario         | 2040 Worse Scenario          |
|                                 | Kidney cancer                         | 197.80<br>(187.36 to<br>208.35)       | 498.22<br>(408.64 to<br>587.53)       | 516.57<br>(417.82 to<br>619.07)       | 427.35<br>(359.04 to<br>504.30) | 7.18<br>(6.81 to<br>7.58)    | 21.39<br>(18.08 to<br>25.02) | 22.82<br>(18.94 to<br>26.90) |
| Bladder cancer                  | 380.12<br>(350.06 to<br>408.50)       | 787.08<br>(618.05 to<br>1,027.28)     | 776.95<br>(610.42 to<br>1,008.16)     | 780.15<br>(612.28 to<br>1,025.71)     | 17.87<br>(16.43 to<br>19.11)    | 42.29<br>(33.29 to<br>54.51) | 43.60<br>(34.80 to<br>56.12) | 38.71<br>(30.19 to<br>50.71) |
| Brain and nervous system cancer | 1,104.93<br>(1,002.74 to<br>1,334.54) | 1,960.36<br>(1,569.81 to<br>2,430.94) | 2,030.12<br>(1,604.06 to<br>2,533.38) | 1,840.05<br>(1,514.53 to<br>2,241.98) | 27.62<br>(24.90 to<br>33.46)    | 62.31<br>(50.52 to<br>77.37) | 65.68<br>(52.46 to<br>82.37) | 55.25<br>(46.29 to<br>67.51) |
| Thyroid cancer                  | 313.00<br>(291.14 to<br>337.10)       | 480.13<br>(366.96 to<br>616.01)       | 460.61<br>(353.57 to<br>580.77)       | 505.28<br>(395.00 to<br>644.53)       | 10.33<br>(9.61 to<br>11.18)     | 18.94<br>(14.93 to<br>23.96) | 18.57<br>(14.63 to<br>23.05) | 18.97<br>(15.15 to<br>23.69) |
| Mesothelioma                    | 79.67<br>(67.50 to<br>97.08)          | 143.45<br>(106.41 to<br>188.75)       | 150.03<br>(109.39 to<br>200.37)       | 135.16<br>(103.49 to<br>173.35)       | 2.84<br>(2.36 to<br>3.45)       | 6.02<br>(4.50 to<br>7.78)    | 6.45<br>(4.75 to<br>8.45)    | 5.35<br>(4.13 to<br>6.77)    |
| Hodgkin lymphoma                | 316.53<br>(258.55 to<br>423.02)       | 260.79<br>(201.60 to<br>355.06)       | 254.77<br>(194.00 to<br>343.98)       | 321.46<br>(250.71 to<br>429.44)       | 7.14<br>(5.90 to<br>9.55)       | 7.52<br>(5.91 to<br>10.31)   | 7.51<br>(5.82 to<br>10.28)   | 8.76<br>(6.95 to<br>11.68)   |
| Non-Hodgkin lymphoma            | 1,080.02<br>(899.74 to<br>1,173.71)   | 1,926.93<br>(1,456.58 to<br>2,357.66) | 1,966.38<br>(1,474.52 to<br>2,395.17) | 1,754.65<br>(1,340.33 to<br>2,112.89) | 31.87<br>(26.67 to<br>34.33)    | 72.72<br>(57.25 to<br>87.16) | 76.01<br>(59.58 to<br>90.34) | 61.94<br>(48.88 to<br>72.76) |

|                                 |                                                     |                                                      |                                                     |                                                       |                                                  |                                                  |                                                  |                                                   |
|---------------------------------|-----------------------------------------------------|------------------------------------------------------|-----------------------------------------------------|-------------------------------------------------------|--------------------------------------------------|--------------------------------------------------|--------------------------------------------------|---------------------------------------------------|
|                                 | 296.27<br>(237.28 to 321.46)                        | 731.04<br>(529.28 to 913.90)                         | 749.32<br>(541.94 to 938.24)                        | 630.47<br>(467.36 to 786.21)                          | 11.19<br>(8.98 to 12.18)                         | 31.87<br>(23.96 to 39.12)                        | 33.40<br>(24.95 to 41.14)                        | 26.07<br>(19.88 to 31.76)                         |
| Multiple myeloma                | 1,572.71<br>(1,431.85 to 1,823.04)                  | 2,180.27<br>(1,742.41 to 2,664.69)                   | 2,135.50<br>(1,702.65 to 2,625.61)                  | 2,138.97<br>(1,731.08 to 2,601.41)                    | 38.05<br>(34.31 to 43.15)                        | 71.47<br>(57.03 to 86.47)                        | 71.79<br>(57.27 to 86.14)                        | 65.57<br>(53.54 to 79.15)                         |
| Leukemia                        | 526.92<br>(457.03 to 649.62)                        | 550.92<br>(430.66 to 692.48)                         | 538.16<br>(424.51 to 678.43)                        | 560.04<br>(438.79 to 706.67)                          | 9.84<br>(8.61 to 11.89)                          | 14.04<br>(10.94 to 17.49)                        | 13.89<br>(10.87 to 17.39)                        | 13.40<br>(10.61 to 16.77)                         |
| Acute lymphoid leukemia         | 74.69<br>(61.69 to 96.20)                           | 142.85<br>(106.23 to 190.03)                         | 142.28<br>(106.25 to 189.44)                        | 133.43<br>(100.93 to 178.81)                          | 3.06<br>(2.55 to 3.86)                           | 6.80<br>(5.23 to 8.84)                           | 6.97<br>(5.38 to 8.99)                           | 5.99<br>(4.65 to 7.82)                            |
| Chronic lymphoid leukemia       | 484.13<br>(417.12 to 551.39)                        | 897.66<br>(709.37 to 1,109.23)                       | 886.78<br>(699.93 to 1,096.74)                      | 821.12<br>(640.12 to 1,005.39)                        | 11.71<br>(10.07 to 13.20)                        | 28.83<br>(22.53 to 35.31)                        | 29.15<br>(22.83 to 35.71)                        | 24.77<br>(19.59 to 30.42)                         |
| Acute myeloid leukemia          | 175.16<br>(135.72 to 225.34)                        | 205.46<br>(146.74 to 281.56)                         | 199.35<br>(142.80 to 276.15)                        | 201.84<br>(144.81 to 275.99)                          | 5.16<br>(4.09 to 6.66)                           | 7.25<br>(5.22 to 9.86)                           | 7.22<br>(5.21 to 9.89)                           | 6.77<br>(4.97 to 9.30)                            |
| Chronic myeloid leukemia        | 311.82<br>(258.26 to 369.41)                        | 383.38<br>(294.30 to 488.66)                         | 368.93<br>(284.53 to 467.88)                        | 422.54<br>(325.70 to 534.60)                          | 8.28<br>(6.98 to 9.47)                           | 14.55<br>(11.31 to 17.88)                        | 14.55<br>(11.28 to 17.97)                        | 14.64<br>(11.62 to 18.12)                         |
| Other leukemia                  | 3,112.06<br>(2,238.53 to 3,339.87)                  | 4,277.92<br>(3,036.53 to 5,122.23)                   | 4,434.59<br>(3,133.27 to 5,357.99)                  | 4,059.11<br>(2,931.59 to 4,765.04)                    | 90.33<br>(65.29 to 96.62)                        | 160.44<br>(117.63 to 188.19)                     | 170.35<br>(123.53 to 202.82)                     | 141.98<br>(103.59 to 162.10)                      |
| Other neoplasms                 | <b>79,159.82</b><br><b>(75,445.63 to 82,213.84)</b> | <b>84,461.59</b><br><b>(50,290.25 to 129,128.78)</b> | <b>57,319.70</b><br><b>(35,774.86 to 85,880.06)</b> | <b>153,636.56</b><br><b>(90,851.67 to 230,819.35)</b> | <b>3,503.44</b><br><b>(3,318.35 to 3,642.86)</b> | <b>4,612.68</b><br><b>(3,024.12 to 6,788.14)</b> | <b>3,427.59</b><br><b>(2,310.02 to 4,925.46)</b> | <b>7,358.17</b><br><b>(4,732.65 to 10,594.55)</b> |
| Cardiovascular diseases         | 4,181.16<br>(3,832.40 to 4,630.79)                  | 2,315.10<br>(1,782.38 to 2,978.23)                   | 2,251.18<br>(1,718.26 to 2,878.22)                  | 2,888.88<br>(2,258.29 to 3,623.48)                    | 133.44<br>(122.27 to 147.15)                     | 102.25<br>(81.79 to 128.46)                      | 102.62<br>(80.66 to 127.54)                      | 117.05<br>(95.79 to 145.81)                       |
| Rheumatic heart disease         | 48,502.08<br>(46,122.65 to 50,509.46)               | 51,939.34<br>(26,941.78 to 91,668.30)                | 33,062.82<br>(17,722.00 to 56,623.34)               | 99,425.28<br>(50,937.64 to 169,483.69)                | 2,162.39<br>(2,044.64 to 2,251.68)               | 2,808.22<br>(1,583.41 to 4,734.93)               | 1,974.72<br>(1,161.59 to 3,225.36)               | 4,720.09<br>(2,637.38 to 7,865.38)                |
| Ischemic heart disease          | 20,934.98<br>(19,872.87 to 21,989.53)               | 20,571.02<br>(11,938.42 to 34,344.17)                | 13,623.66<br>(8,313.99 to 21,693.78)                | 39,764.43<br>(22,361.94 to 66,586.71)                 | 954.89<br>(901.60 to 1,007.62)                   | 1,124.55<br>(707.39 to 1,802.56)                 | 820.82<br>(537.77 to 1,289.82)                   | 1,900.79<br>(1,156.02 to 2,989.47)                |
| Stroke                          | 9,016.86<br>(8,254.50 to 9,877.67)                  | 9,750.29<br>(5,537.35 to 17,018.03)                  | 6,923.07<br>(4,112.59 to 11,874.60)                 | 16,364.63<br>(8,847.36 to 27,875.97)                  | 493.87<br>(454.67 to 537.48)                     | 632.97<br>(385.16 to 1,119.81)                   | 490.38<br>(305.99 to 841.58)                     | 938.78<br>(558.05 to 1,625.05)                    |
| Ischemic stroke                 | 11,918.11<br>(11,021.24 to 12,898.81)               | 10,820.73<br>(5,691.82 to 19,545.33)                 | 6,700.58<br>(3,741.69 to 11,483.00)                 | 23,399.80<br>(12,035.86 to 43,163.24)                 | 461.02<br>(422.32 to 503.46)                     | 491.58<br>(287.35 to 838.12)                     | 330.45<br>(201.16 to 526.91)                     | 962.01<br>(539.16 to 1,642.77)                    |
| Intracerebral hemorrhage        | 3,469.38<br>(2,894.97 to 3,887.53)                  | 6,013.85<br>(3,431.89 to 11,619.38)                  | 4,806.98<br>(2,971.23 to 8,234.65)                  | 7,994.26<br>(4,399.10 to 16,023.68)                   | 160.75<br>(132.58 to 179.32)                     | 353.01<br>(206.86 to 698.31)                     | 297.15<br>(186.95 to 527.22)                     | 424.73<br>(240.34 to 895.42)                      |
| Hypertensive heart disease      | 566.84<br>(399.09 to 645.00)                        | 620.56<br>(442.00 to 837.28)                         | 614.69<br>(436.90 to 819.56)                        | 614.60<br>(430.14 to 825.64)                          | 14.12<br>(11.53 to 15.50)                        | 23.25<br>(17.45 to 31.49)                        | 23.83<br>(17.95 to 31.91)                        | 20.95<br>(15.89 to 27.52)                         |
| Cardiomyopathy and myocarditis  | 201.18<br>(100.19 to 277.78)                        | 135.19<br>(71.49 to 200.23)                          | 136.36<br>(72.28 to 202.00)                         | 146.38<br>(76.13 to 214.47)                           | 3.88<br>(2.10 to 5.33)                           | 3.41<br>(2.09 to 4.96)                           | 3.51<br>(2.16 to 5.08)                           | 3.48<br>(2.09 to 5.06)                            |
| Mycocarditis                    | <b>South Asia</b>                                   |                                                      |                                                     |                                                       |                                                  |                                                  |                                                  |                                                   |
| Cause                           | YLLs (in 1000s)                                     |                                                      |                                                     |                                                       | Deaths (in 1000s)                                |                                                  |                                                  |                                                   |
|                                 | 2016                                                | 2040 Forecast                                        | 2040 Better Scenario                                | 2040 Worse Scenario                                   | 2016                                             | 2040 Forecast                                    | 2040 Better Scenario                             | 2040 Worse Scenario                               |
| Alcoholic cardiomyopathy        | 29.90<br>(22.82 to 40.43)                           | 45.73<br>(33.48 to 72.57)                            | 43.79<br>(31.62 to 69.74)                           | 40.38<br>(30.44 to 61.89)                             | 0.91<br>(0.74 to 1.32)                           | 1.72<br>(1.30 to 2.78)                           | 1.71<br>(1.27 to 2.79)                           | 1.43<br>(1.12 to 2.27)                            |
| Other cardiomyopathy            | 335.76<br>(248.07 to 401.83)                        | 439.64<br>(295.34 to 627.15)                         | 434.55<br>(295.06 to 610.11)                        | 427.84<br>(285.59 to 620.90)                          | 9.33<br>(7.76 to 10.65)                          | 18.12<br>(12.86 to 25.21)                        | 18.60<br>(13.38 to 25.95)                        | 16.03<br>(11.32 to 22.12)                         |
| Atrial fibrillation and flutter | 291.21<br>(234.65 to 357.68)                        | 868.11<br>(616.63 to 1,203.25)                       | 886.10<br>(631.51 to 1,221.87)                      | 738.54<br>(529.66 to 1,002.97)                        | 25.56<br>(20.28 to 31.96)                        | 83.82<br>(60.51 to 115.31)                       | 88.75<br>(64.40 to 122.07)                       | 64.97<br>(45.25 to 88.78)                         |

|                                                                |                                                     |                                                     |                                                     |                                                     |                                                  |                                                  |                                                  |                                                  |
|----------------------------------------------------------------|-----------------------------------------------------|-----------------------------------------------------|-----------------------------------------------------|-----------------------------------------------------|--------------------------------------------------|--------------------------------------------------|--------------------------------------------------|--------------------------------------------------|
| Aortic aneurysm                                                | 419.83<br>(395.22 to 445.77)                        | 709.44<br>(525.03 to 938.63)                        | 692.20<br>(519.37 to 898.56)                        | 692.72<br>(513.69 to 913.99)                        | 18.44<br>(1.81 to 19.66)                         | 38.01<br>(30.04 to 47.63)                        | 39.03<br>(31.13 to 48.54)                        | 33.42<br>(26.29 to 42.21)                        |
| Peripheral artery disease                                      | 26.51<br>(12.87 to 48.36)                           | 107.28<br>(51.23 to 190.91)                         | 106.42<br>(51.31 to 190.01)                         | 88.61<br>(41.16 to 165.74)                          | 1.81<br>(0.90 to 3.15)                           | 8.65<br>(4.31 to 14.56)                          | 9.03<br>(4.50 to 15.05)                          | 6.35<br>(3.04 to 11.16)                          |
| Endocarditis                                                   | 431.96<br>(371.55 to 532.60)                        | 723.70<br>(502.58 to 1,016.11)                      | 712.04<br>(495.09 to 976.36)                        | 738.58<br>(518.47 to 1,036.82)                      | 15.03<br>(12.57 to 18.12)                        | 34.70<br>(24.28 to 48.92)                        | 35.46<br>(25.15 to 49.39)                        | 32.16<br>(22.74 to 45.21)                        |
| Other cardiovascular and circulatory diseases                  | 335.87<br>(219.92 to 394.54)                        | 593.20<br>(354.50 to 827.38)                        | 563.62<br>(331.97 to 763.41)                        | 690.66<br>(411.75 to 956.60)                        | 17.01<br>(10.41 to 20.08)                        | 36.21<br>(21.18 to 47.44)                        | 36.18<br>(20.97 to 46.63)                        | 37.68<br>(22.03 to 49.38)                        |
| <b>Chronic respiratory diseases</b>                            | <b>24,960.96</b><br><b>(23,134.12 to 27,154.18)</b> | <b>31,329.19</b><br><b>(21,472.24 to 45,299.62)</b> | <b>25,337.89</b><br><b>(17,450.70 to 36,199.48)</b> | <b>43,554.99</b><br><b>(28,660.21 to 66,842.51)</b> | <b>1,249.87</b><br><b>(1,149.77 to 1,358.90)</b> | <b>1,774.52</b><br><b>(1,249.78 to 2,497.92)</b> | <b>1,523.60</b><br><b>(1,083.32 to 2,091.48)</b> | <b>2,277.52</b><br><b>(1,535.18 to 3,412.71)</b> |
| Chronic obstructive pulmonary disease                          | 18,492.36<br>(16,781.32 to 20,553.75)               | 24,716.81<br>(15,832.12 to 37,939.85)               | 19,101.73<br>(12,138.47 to 29,522.12)               | 36,542.27<br>(22,442.45 to 59,515.75)               | 988.09<br>(698.15 to 1,089.15)                   | 1,448.31<br>(957.59 to 2,134.81)                 | 1,205.53<br>(795.56 to 1,763.54)                 | 1,957.27<br>(1,232.45 to 3,057.13)               |
| Pneumoconiosis                                                 | 84.11<br>(66.06 to 117.62)                          | 104.53<br>(79.47 to 142.60)                         | 104.29<br>(77.69 to 144.42)                         | 103.14<br>(81.13 to 137.50)                         | 4.11<br>(3.29 to 5.57)                           | 6.00<br>(4.74 to 8.00)                           | 6.13<br>(4.74 to 8.26)                           | 5.56<br>(4.43 to 7.25)                           |
| Silicosis                                                      | 20.75<br>(13.06 to 31.72)                           | 20.00<br>(12.42 to 30.50)                           | 21.00<br>(12.64 to 32.54)                           | 19.86<br>(12.59 to 29.55)                           | 1.09<br>(0.69 to 1.63)                           | 1.22<br>(0.77 to 1.84)                           | 1.31<br>(0.82 to 2.01)                           | 1.15<br>(0.75 to 1.66)                           |
| Asbestosis                                                     | 13.66<br>(8.03 to 20.72)                            | 24.43<br>(13.83 to 39.17)                           | 25.79<br>(14.52 to 41.59)                           | 22.19<br>(12.71 to 33.67)                           | 0.55<br>(0.30 to 0.84)                           | 1.19<br>(0.63 to 1.90)                           | 1.29<br>(0.67 to 2.08)                           | 1.01<br>(0.56 to 1.56)                           |
| Coal workers pneumoconiosis                                    | 10.55<br>(3.68 to 16.88)                            | 10.37<br>(3.78 to 16.15)                            | 9.46<br>(3.45 to 15.06)                             | 13.20<br>(4.93 to 20.46)                            | 0.52<br>(0.19 to 0.81)                           | 0.59<br>(0.23 to 0.89)                           | 0.55<br>(0.21 to 0.85)                           | 0.71<br>(0.28 to 1.07)                           |
| Other pneumoconiosis                                           | 39.15<br>(25.95 to 58.03)                           | 49.74<br>(32.28 to 72.81)                           | 48.05<br>(30.73 to 72.18)                           | 47.89<br>(31.92 to 68.92)                           | 1.95<br>(1.31 to 2.92)                           | 3.00<br>(2.01 to 4.33)                           | 2.98<br>(1.97 to 4.34)                           | 2.98<br>(1.81 to 3.93)                           |
| Asthma                                                         | 5,370.47<br>(3,599.55 to 7,045.38)                  | 4,118.94<br>(2,546.15 to 6,086.87)                  | 3,607.26<br>(2,263.26 to 5,218.18)                  | 4,884.36<br>(2,961.84 to 7,289.20)                  | 216.38<br>(139.75 to 287.07)                     | 300.81<br>(124.45 to 297.40)                     | 182.25<br>(115.92 to 260.64)                     | 221.04<br>(132.70 to 332.75)                     |
| Interstitial lung disease and pulmonary sarcoidosis            | 690.15<br>(399.16 to 1,026.96)                      | 1,903.86<br>(1,125.86 to 2,863.38)                  | 2,040.58<br>(1,206.29 to 3,089.58)                  | 1,516.56<br>(882.92 to 2,284.22)                    | 30.97<br>(18.24 to 45.62)                        | 99.67<br>(59.75 to 147.97)                       | 109.23<br>(65.89 to 162.22)                      | 74.66<br>(44.11 to 110.96)                       |
| Other chronic respiratory diseases                             | 323.86<br>(175.94 to 433.21)                        | 485.05<br>(266.79 to 654.95)                        | 484.03<br>(266.49 to 657.76)                        | 508.67<br>(272.14 to 688.94)                        | 10.32<br>(5.84 to 13.28)                         | 19.74<br>(11.19 to 25.39)                        | 20.46<br>(11.55 to 26.53)                        | 19.00<br>(10.60 to 24.80)                        |
| <b>Cirrhosis and other chronic liver diseases</b>              | <b>9,289.88</b><br><b>(8,518.06 to 10,915.82)</b>   | <b>12,690.00</b><br><b>(10,417.87 to 15,322.70)</b> | <b>12,503.39</b><br><b>(10,157.14 to 15,462.25)</b> | <b>13,416.98</b><br><b>(11,316.37 to 16,091.69)</b> | <b>270.20</b><br><b>(248.68 to 312.74)</b>       | <b>437.23</b><br><b>(370.69 to 519.79)</b>       | <b>439.80</b><br><b>(366.18 to 528.22)</b>       | <b>442.17</b><br><b>(384.99 to 520.61)</b>       |
| Cirrhosis and other chronic liver diseases due to hepatitis B  | 3,016.51<br>(2,687.93 to 3,580.79)                  | 4,325.89<br>(3,537.60 to 5,334.49)                  | 4,402.24<br>(3,544.97 to 5,484.43)                  | 4,465.42<br>(3,718.57 to 5,407.29)                  | 90.41<br>(80.78 to 106.10)                       | 149.70<br>(125.34 to 182.46)                     | 155.15<br>(127.44 to 189.68)                     | 148.41<br>(127.66 to 177.22)                     |
| Cirrhosis and other chronic liver diseases due to hepatitis C  | 2,319.22<br>(2,050.64 to 2,678.99)                  | 3,343.63<br>(2,711.60 to 4,054.58)                  | 3,383.80<br>(2,695.64 to 4,192.03)                  | 3,490.20<br>(2,894.29 to 4,232.12)                  | 67.57<br>(60.22 to 79.06)                        | 110.18<br>(91.73 to 132.72)                      | 113.33<br>(93.14 to 137.47)                      | 111.19<br>(94.59 to 137.47)                      |
| Cirrhosis and other chronic liver diseases due to alcohol use  | 2,169.85<br>(1,899.68 to 2,567.86)                  | 3,196.83<br>(2,542.67 to 3,982.68)                  | 2,887.77<br>(2,269.45 to 3,629.61)                  | 3,468.20<br>(2,811.01 to 4,314.17)                  | 69.27<br>(61.07 to 81.95)                        | 116.27<br>(94.97 to 141.57)                      | 108.45<br>(87.27 to 132.81)                      | 120.66<br>(100.94 to 145.24)                     |
| Cirrhosis and other chronic liver diseases due to other causes | 1,784.30<br>(1,547.93 to 2,220.66)                  | 1,823.65<br>(1,469.20 to 2,290.01)                  | 1,829.58<br>(1,459.77 to 2,317.42)                  | 1,993.17<br>(1,626.38 to 2,480.03)                  | 42.95<br>(37.24 to 51.41)                        | 61.09<br>(49.28 to 75.93)                        | 62.88<br>(50.36 to 78.38)                        | 61.91<br>(51.29 to 75.64)                        |
| <b>Digestive diseases</b>                                      | <b>7,913.62</b><br><b>(7,380.96 to 8,649.05)</b>    | <b>9,213.39</b><br><b>(7,493.69 to 11,274.61)</b>   | <b>9,099.40</b><br><b>(7,291.99 to 11,206.90)</b>   | <b>10,123.22</b><br><b>(8,324.88 to 12,161.78)</b>  | <b>262.67</b><br><b>(243.59 to 288.73)</b>       | <b>407.03</b><br><b>(337.90 to 488.65)</b>       | <b>414.50</b><br><b>(337.07 to 506.26)</b>       | <b>414.10</b><br><b>(349.23 to 490.38)</b>       |
| Peptic ulcer disease                                           | 1,726.08<br>(1,525.92 to 2,131.72)                  | 1,472.59<br>(1,073.63 to 2,007.93)                  | 1,409.71<br>(1,015.51 to 1,938.97)                  | 1,891.48<br>(1,388.03 to 2,567.98)                  | 63.79<br>(56.38 to 77.73)                        | 70.28<br>(52.06 to 94.79)                        | 69.41<br>(50.86 to 94.63)                        | 83.78<br>(62.46 to 112.77)                       |
| <b>South Asia</b>                                              |                                                     |                                                     |                                                     |                                                     |                                                  |                                                  |                                                  |                                                  |
| <b>YLLs (in 1000s)</b>                                         |                                                     |                                                     |                                                     |                                                     | <b>Deaths (in 1000s)</b>                         |                                                  |                                                  |                                                  |



| Cause                                      | 2016                                             | 2040 Forecast                                      | 2040 Better Scenario                               | 2040 Worse Scenario                               | 2016                                       | 2040 Forecast                                | 2040 Better Scenario                         | 2040 Worse Scenario                        |
|--------------------------------------------|--------------------------------------------------|----------------------------------------------------|----------------------------------------------------|---------------------------------------------------|--------------------------------------------|----------------------------------------------|----------------------------------------------|--------------------------------------------|
| Gastritis and duodenitis                   | 256.30<br>(218.30 to 314.67)                     | 401.38<br>(310.30 to 536.61)                       | 409.67<br>(311.47 to 556.93)                       | 427.35<br>(338.55 to 564.87)                      | 9.44<br>(8.00 to 11.59)                    | 19.29<br>(15.23 to 25.24)                    | 20.33<br>(15.70 to 27.09)                    | 18.88<br>(15.19 to 24.48)                  |
| Appendicitis                               | 870.64<br>(702.03 to 1,059.15)                   | 724.78<br>(555.40 to 960.37)                       | 716.12<br>(541.29 to 960.64)                       | 879.54<br>(686.74 to 1,145.89)                    | 22.40<br>(18.04 to 27.49)                  | 25.63<br>(19.84 to 33.77)                    | 26.02<br>(19.69 to 34.49)                    | 28.87<br>(22.58 to 37.24)                  |
| Paralytic ileus and intestinal obstruction | 2,725.39<br>(2,027.63 to 3,054.82)               | 3,370.47<br>(2,366.14 to 4,171.07)                 | 3,452.37<br>(2,426.40 to 4,320.57)                 | 3,469.49<br>(2,467.57 to 4,220.54)                | 79.02<br>(57.65 to 88.70)                  | 136.54<br>(95.82 to 166.47)                  | 143.40<br>(99.64 to 176.46)                  | 129.86<br>(92.50 to 154.77)                |
| Inguinal, femoral, and abdominal hernia    | 364.47<br>(283.14 to 499.01)                     | 392.14<br>(292.20 to 551.86)                       | 404.34<br>(295.77 to 572.24)                       | 410.53<br>(310.71 to 574.63)                      | 14.59<br>(11.18 to 19.50)                  | 20.39<br>(15.40 to 28.14)                    | 21.78<br>(16.11 to 30.03)                    | 19.35<br>(14.59 to 26.67)                  |
| Inflammatory bowel disease                 | 217.46<br>(181.01 to 301.24)                     | 315.43<br>(243.90 to 437.97)                       | 327.84<br>(250.21 to 458.98)                       | 300.85<br>(236.91 to 410.58)                      | 7.44<br>(6.30 to 9.78)                     | 14.37<br>(11.42 to 19.25)                    | 15.34<br>(11.97 to 20.69)                    | 12.69<br>(10.32 to 16.69)                  |
| Vascular intestinal disorders              | 394.83<br>(284.77 to 494.25)                     | 705.51<br>(506.72 to 928.85)                       | 736.26<br>(522.27 to 990.27)                       | 688.98<br>(502.48 to 882.77)                      | 19.24<br>(14.39 to 23.88)                  | 41.02<br>(30.38 to 53.42)                    | 43.88<br>(32.46 to 57.72)                    | 37.37<br>(27.76 to 47.55)                  |
| Gallbladder and biliary diseases           | 329.19<br>(275.62 to 481.63)                     | 433.87<br>(265.08 to 739.09)                       | 367.17<br>(234.30 to 610.05)                       | 515.69<br>(317.15 to 881.66)                      | 12.45<br>(10.47 to 18.10)                  | 21.66<br>(13.45 to 36.48)                    | 19.09<br>(12.46 to 30.92)                    | 23.57<br>(14.69 to 39.47)                  |
| Pancreatitis                               | 914.73<br>(756.67 to 1,067.21)                   | 1,212.02<br>(866.29 to 1,667.60)                   | 1,085.03<br>(793.91 to 1,465.96)                   | 1,342.68<br>(966.09 to 1,879.84)                  | 28.81<br>(23.83 to 34.10)                  | 46.54<br>(34.05 to 63.26)                    | 43.24<br>(32.59 to 58.02)                    | 48.75<br>(35.45 to 66.98)                  |
| Other digestive diseases                   | 114.54<br>(100.59 to 139.12)                     | 185.20<br>(149.72 to 232.16)                       | 190.90<br>(149.97 to 242.34)                       | 196.62<br>(162.33 to 242.74)                      | 5.50<br>(4.82 to 6.61)                     | 11.30<br>(9.31 to 14.14)                     | 12.02<br>(9.69 to 15.15)                     | 10.97<br>(9.04 to 13.61)                   |
| <b>Neurological disorders</b>              | <b>4,888.63</b><br><b>(4,430.21 to 5,438.69)</b> | <b>10,103.29</b><br><b>(8,020.49 to 13,080.24)</b> | <b>10,249.87</b><br><b>(8,151.09 to 13,036.50)</b> | <b>9,016.37</b><br><b>(7,399.67 to 11,494.42)</b> | <b>256.21</b><br><b>(222.65 to 306.63)</b> | <b>783.08</b><br><b>(605.34 to 1,054.54)</b> | <b>825.94</b><br><b>(648.60 to 1,067.72)</b> | <b>604.20</b><br><b>(445.26 to 823.80)</b> |
| Alzheimer's disease and other dementias    | 1,971.47<br>(1,630.27 to 2,422.87)               | 6,229.48<br>(4,446.06 to 8,946.93)                 | 6,373.85<br>(4,624.93 to 8,893.76)                 | 5,033.56<br>(3,549.31 to 7,415.30)                | 178.66<br>(147.25 to 221.99)               | 613.95<br>(444.06 to 880.33)                 | 646.42<br>(476.98 to 887.41)                 | 458.12<br>(300.91 to 678.10)               |
| Parkinson's disease                        | 283.76<br>(216.87 to 361.65)                     | 1,039.12<br>(771.64 to 1,371.46)                   | 1,159.74<br>(848.94 to 1,574.51)                   | 747.66<br>(551.47 to 976.36)                      | 21.01<br>(15.94 to 27.12)                  | 84.19<br>(62.64 to 111.58)                   | 96.01<br>(70.86 to 128.83)                   | 56.70<br>(40.96 to 74.46)                  |
| Epilepsy                                   | 2,085.42<br>(1,875.46 to 2,351.44)               | 1,992.27<br>(1,607.05 to 2,444.95)                 | 1,842.15<br>(1,468.88 to 2,272.17)                 | 2,460.92<br>(1,982.58 to 3,028.52)                | 43.01<br>(39.13 to 47.85)                  | 57.07<br>(46.14 to 69.92)                    | 54.00<br>(43.30 to 66.26)                    | 65.37<br>(53.76 to 79.18)                  |
| Multiple sclerosis                         | 87.06<br>(74.42 to 107.98)                       | 150.43<br>(114.78 to 201.11)                       | 153.57<br>(115.21 to 206.38)                       | 138.92<br>(108.13 to 183.33)                      | 2.48<br>(2.13 to 3.03)                     | 4.83<br>(3.74 to 6.28)                       | 4.99<br>(3.81 to 6.54)                       | 4.33<br>(3.41 to 5.59)                     |
| Motor neuron disease                       | 88.33<br>(74.20 to 103.40)                       | 184.23<br>(139.12 to 235.25)                       | 193.62<br>(143.75 to 248.79)                       | 161.06<br>(124.04 to 201.02)                      | 2.71<br>(2.23 to 3.28)                     | 6.95<br>(5.27 to 8.99)                       | 7.40<br>(5.57 to 9.66)                       | 5.86<br>(4.54 to 7.45)                     |
| Other neurological disorders               | 372.58<br>(316.58 to 427.14)                     | 507.77<br>(393.92 to 618.38)                       | 526.94<br>(404.47 to 646.21)                       | 474.24<br>(379.11 to 573.44)                      | 8.34<br>(7.28 to 9.39)                     | 16.09<br>(12.26 to 19.41)                    | 17.11<br>(12.93 to 20.97)                    | 13.81<br>(10.95 to 16.34)                  |
| <b>Mental disorders</b>                    | <b>1,657.69</b><br><b>(1,230.84 to 1,881.69)</b> | <b>2,632.81</b><br><b>(1,872.82 to 3,205.30)</b>   | <b>2,644.10</b><br><b>(1,861.34 to 3,263.78)</b>   | <b>2,579.10</b><br><b>(1,851.93 to 3,092.08)</b>  | <b>42.70</b><br><b>(31.18 to 48.32)</b>    | <b>79.65</b><br><b>(56.73 to 95.77)</b>      | <b>81.57</b><br><b>(57.24 to 99.73)</b>      | <b>74.74</b><br><b>(53.62 to 87.44)</b>    |
| Alcohol use disorders                      | 1,116.46<br>(716.71 to 1,305.95)                 | 1,449.53<br>(858.05 to 1,816.22)                   | 1,426.65<br>(837.06 to 1,820.90)                   | 1,434.86<br>(858.38 to 1,774.66)                  | 29.67<br>(18.98 to 34.41)                  | 44.35<br>(26.60 to 55.35)                    | 44.45<br>(26.59 to 56.07)                    | 42.42<br>(26.05 to 51.53)                  |
| Drug use disorders                         | 537.23<br>(460.97 to 618.60)                     | 1,178.17<br>(913.59 to 1,433.97)                   | 1,212.25<br>(933.51 to 1,490.36)                   | 1,139.23<br>(895.38 to 1,363.14)                  | 12.96<br>(10.75 to 14.52)                  | 35.20<br>(27.06 to 41.57)                    | 37.01<br>(28.04 to 44.65)                    | 32.23<br>(25.12 to 37.39)                  |
| Opioid use disorders                       | 355.67<br>(310.98 to 428.48)                     | 676.12<br>(526.89 to 830.74)                       | 692.65<br>(532.50 to 853.69)                       | 660.61<br>(523.15 to 811.53)                      | 8.00<br>(6.73 to 9.38)                     | 18.31<br>(13.95 to 22.22)                    | 19.07<br>(14.38 to 23.34)                    | 17.18<br>(13.24 to 20.76)                  |
| Cocaine use disorders                      | 28.88<br>(10.70 to 48.82)                        | 74.31<br>(27.40 to 129.26)                         | 75.70<br>(27.89 to 133.35)                         | 76.89<br>(28.59 to 131.60)                        | 0.74<br>(0.27 to 1.25)                     | 2.14<br>(0.80 to 3.72)                       | 2.21<br>(0.82 to 3.89)                       | 2.16<br>(0.80 to 3.70)                     |

|                                                            |                                          |                                          |                                          |                                          |                                 |                                       |                                       |                                       |
|------------------------------------------------------------|------------------------------------------|------------------------------------------|------------------------------------------|------------------------------------------|---------------------------------|---------------------------------------|---------------------------------------|---------------------------------------|
| Amphetamine use disorders                                  | 18.46<br>(9.09 to<br>30.34)              | 58.22<br>(27.43 to<br>96.23)             | 58.79<br>(27.00 to<br>98.18)             | 62.47<br>(29.66 to<br>103.91)            | 0.44<br>(0.21 to<br>0.73)       | 1.55<br>(0.74 to<br>2.56)             | 1.58<br>(0.75 to<br>2.64)             | 1.63<br>(0.77 to<br>2.72)             |
| Other drug use disorders                                   | 134.21<br>(97.93 to<br>156.03)           | 369.52<br>(253.07 to<br>455.88)          | 385.10<br>(262.20 to<br>477.12)          | 339.25<br>(234.84 to<br>415.15)          | 3.78<br>(2.70 to<br>4.29)       | 13.19<br>(9.13 to<br>15.84)           | 14.15<br>(9.72 to<br>17.15)           | 11.25<br>(7.92 to<br>13.28)           |
| Eating disorders                                           | 3.99<br>(2.67 to<br>5.70)                | 5.11<br>(3.30 to<br>7.74)                | 5.20<br>(3.35 to<br>7.89)                | 5.02<br>(3.28 to<br>7.47)                | 0.07<br>(0.05 to<br>0.10)       | 0.10<br>(0.07 to<br>0.15)             | 0.10<br>(0.07 to<br>0.16)             | 0.10<br>(0.06 to<br>0.15)             |
| <b>South Asia</b>                                          |                                          |                                          |                                          |                                          |                                 |                                       |                                       |                                       |
| Cause                                                      | YLLs (in 1000s)                          |                                          |                                          |                                          | Deaths (in 1000s)               |                                       |                                       |                                       |
|                                                            | 2016                                     | 2040 Forecast                            | 2040 Better Scenario                     | 2040 Worse Scenario                      | 2016                            | 2040 Forecast                         | 2040 Better Scenario                  | 2040 Worse Scenario                   |
|                                                            | 19,082.11<br>(18,234.58 to<br>20,272.62) | 31,517.66<br>(22,998.10 to<br>42,970.80) | 28,095.67<br>(20,535.07 to<br>37,942.88) | 39,163.36<br>(28,733.50 to<br>52,927.20) | 800.06<br>(755.32 to<br>842.03) | 1,763.26<br>(1,325.93 to<br>2,345.70) | 1,635.84<br>(1,231.10 to<br>2,165.20) | 2,004.68<br>(1,537.75 to<br>2,664.37) |
| Diabetes, urogenital, blood, and endocrine diseases        |                                          |                                          |                                          |                                          |                                 |                                       |                                       |                                       |
| Diabetes mellitus                                          | 7,478.28<br>(7,067.40 to<br>7,851.17)    | 12,633.32<br>(9,002.78 to<br>17,611.14)  | 11,651.02<br>(8,321.69 to<br>16,048.22)  | 15,870.10<br>(11,182.76 to<br>22,212.20) | 386.01<br>(361.52 to<br>406.91) | 818.33<br>(606.92 to<br>1,088.16)     | 789.47<br>(592.00 to<br>1,034.14)     | 925.95<br>(678.00 to<br>1,247.98)     |
| Acute glomerulonephritis                                   | 35.45<br>(31.38 to<br>40.36)             | 44.48<br>(35.33 to<br>55.97)             | 45.22<br>(35.18 to<br>57.65)             | 48.78<br>(39.20 to<br>60.63)             | 1.11<br>(0.99 to<br>1.27)       | 1.96<br>(1.63 to<br>2.36)             | 2.08<br>(1.71 to<br>2.54)             | 1.86<br>(1.56 to<br>2.23)             |
| Chronic kidney disease                                     | 7,840.30<br>(7,390.65 to<br>8,740.09)    | 13,384.33<br>(6,907.24 to<br>23,681.72)  | 10,751.81<br>(5,912.65 to<br>18,892.93)  | 17,785.15<br>(9,356.81 to<br>30,776.87)  | 287.79<br>(269.75 to<br>317.44) | 657.82<br>(331.65 to<br>1,204.62)     | 537.26<br>(281.46 to<br>992.62)       | 815.23<br>(414.23 to<br>1,455.86)     |
| Chronic kidney disease due to diabetes mellitus            | 2,811.61<br>(2,441.26 to<br>3,182.85)    | 5,961.91<br>(2,913.24 to<br>11,046.74)   | 4,698.85<br>(2,433.53 to<br>8,562.55)    | 7,895.46<br>(3,880.31 to<br>14,409.66)   | 115.59<br>(100.44 to<br>130.61) | 291.42<br>(140.52 to<br>542.62)       | 234.10<br>(116.94 to<br>442.86)       | 366.09<br>(177.31 to<br>673.07)       |
| Chronic kidney disease due to hypertension                 | 1,397.91<br>(1,217.08 to<br>1,627.08)    | 2,794.67<br>(1,346.38 to<br>5,181.48)    | 2,244.00<br>(1,142.63 to<br>4,179.38)    | 3,601.52<br>(1,757.01 to<br>6,538.65)    | 63.31<br>(55.07 to<br>72.76)    | 163.19<br>(79.29 to<br>308.40)        | 134.71<br>(68.08 to<br>257.42)        | 194.24<br>(92.76 to<br>357.28)        |
| Chronic kidney disease due to glomerulonephritis           | 1,233.97<br>(1,137.32 to<br>1,604.69)    | 1,460.06<br>(885.12 to<br>2,421.29)      | 1,219.64<br>(760.67 to<br>1,931.73)      | 2,008.95<br>(1,216.31 to<br>3,295.82)    | 34.55<br>(29.35 to<br>40.67)    | 51.81<br>(29.66 to<br>95.92)          | 45.82<br>(26.00 to<br>79.08)          | 70.16<br>(38.22 to<br>120.18)         |
| Chronic kidney disease due to other and unspecified causes | 2,296.81<br>(2,000.26 to<br>2,654.62)    | 3,167.68<br>(1,731.36 to<br>5,500.01)    | 2,589.32<br>(1,489.43 to<br>4,434.09)    | 4,279.22<br>(2,352.83 to<br>7,227.01)    | 74.34<br>(64.73 to<br>86.07)    | 148.41<br>(78.19 to<br>273.59)        | 122.62<br>(66.51 to<br>225.73)        | 184.75<br>(95.93 to<br>323.70)        |
| Urinary diseases and male infertility                      | 2,129.31<br>(1,995.15 to<br>2,254.31)    | 3,808.64<br>(3,163.39 to<br>4,433.99)    | 3,984.29<br>(3,231.89 to<br>4,714.44)    | 3,621.64<br>(3,133.85 to<br>4,094.64)    | 80.67<br>(75.48 to<br>85.29)    | 209.71<br>(180.24 to<br>237.56)       | 227.51<br>(190.65 to<br>260.28)       | 177.82<br>(157.87 to<br>197.88)       |
| Urinary tract infections                                   | 1,324.14<br>(1,164.42 to<br>1,444.37)    | 2,833.70<br>(2,295.44 to<br>3,372.54)    | 2,979.35<br>(2,362.49 to<br>3,589.34)    | 2,600.29<br>(2,183.14 to<br>3,006.79)    | 51.72<br>(45.19 to<br>56.61)    | 162.12<br>(136.11 to<br>188.50)       | 176.53<br>(144.78 to<br>206.44)       | 132.97<br>(114.02 to<br>151.75)       |
| Urolithiasis                                               | 187.71<br>(140.49 to<br>289.26)          | 416.06<br>(294.23 to<br>641.05)          | 434.83<br>(304.46 to<br>675.18)          | 388.83<br>(281.64 to<br>601.13)          | 6.96<br>(5.16 to<br>10.90)      | 20.04<br>(14.39 to<br>31.30)          | 21.68<br>(15.25 to<br>34.25)          | 16.95<br>(12.37 to<br>26.61)          |
| Other urinary diseases                                     | 617.47<br>(520.12 to<br>738.60)          | 558.87<br>(414.84 to<br>725.98)          | 570.11<br>(415.50 to<br>754.14)          | 632.51<br>(482.79 to<br>804.12)          | 22.00<br>(18.26 to<br>26.24)    | 27.55<br>(21.10 to<br>34.99)          | 29.30<br>(21.82 to<br>38.31)          | 27.90<br>(21.66 to<br>35.23)          |
| Gynecological diseases                                     | 69.78<br>(61.79 to<br>78.56)             | 78.12<br>(56.04 to<br>102.51)            | 78.13<br>(54.66 to<br>103.83)            | 90.56<br>(67.02 to<br>118.63)            | 2.80<br>(2.40 to<br>3.15)       | 4.39<br>(3.25 to<br>5.72)             | 4.57<br>(3.30 to<br>6.04)             | 4.49<br>(3.30 to<br>5.78)             |
| Uterine fibroids                                           | 24.40<br>(6.74 to<br>36.01)              | 24.64<br>(6.38 to<br>42.46)              | 24.41<br>(6.41 to<br>42.35)              | 29.78<br>(8.13 to<br>50.22)              | 0.93<br>(0.26 to<br>1.38)       | 1.17<br>(0.31 to<br>1.95)             | 1.19<br>(0.31 to<br>2.08)             | 1.29<br>(0.34 to<br>2.14)             |
| Polycystic ovarian syndrome                                | 6.02<br>(1.82 to<br>15.07)               | 3.23<br>(0.76 to<br>9.26)                | 3.05<br>(0.70 to<br>8.59)                | 4.73<br>(1.13 to<br>12.65)               | 0.14<br>(0.04 to<br>0.33)       | 0.08<br>(0.02 to<br>0.21)             | 0.07<br>(0.02 to<br>0.20)             | 0.11<br>(0.03 to<br>0.30)             |
| Endometriosis                                              | 0.52<br>(0.15 to<br>1.15)                | 0.58<br>(0.15 to<br>1.53)                | 0.57<br>(0.15 to<br>1.46)                | 0.74<br>(0.19 to<br>1.91)                | 0.01<br>(0.00 to<br>0.02)       | 0.01<br>(0.00 to<br>0.03)             | 0.01<br>(0.00 to<br>0.03)             | 0.02<br>(0.00 to<br>0.04)             |
| Genital prolapse                                           | 7.42<br>(2.21 to<br>12.80)               | 7.81<br>(2.26 to<br>14.78)               | 7.87<br>(2.15 to<br>14.98)               | 9.04<br>(2.66 to<br>16.80)               | 0.56<br>(0.18 to<br>0.92)       | 0.66<br>(0.19 to<br>1.25)             | 0.68<br>(0.19 to<br>1.30)             | 0.70<br>(0.19 to<br>1.27)             |

|                                                   |                                                |                                              |                                              |                                              |                                        |                                        |                                        |                                        |
|---------------------------------------------------|------------------------------------------------|----------------------------------------------|----------------------------------------------|----------------------------------------------|----------------------------------------|----------------------------------------|----------------------------------------|----------------------------------------|
| Other gynecological diseases                      | 31.43<br>(17.48 to<br>49.71)                   | 41.85<br>(23.81 to<br>64.82)                 | 42.23<br>(24.02 to<br>65.74)                 | 46.27<br>(25.61 to<br>72.10)                 | 1.17<br>(0.65 to<br>1.92)              | 2.48<br>(1.49 to<br>3.67)              | 2.62<br>(1.57 to<br>3.92)              | 2.38<br>(1.39 to<br>3.59)              |
| Hemoglobinopathies and hemolytic anemias          | 1,094.69<br>(956.66 to<br>1,321.17)            | 1,100.23<br>(882.28 to<br>1,444.80)          | 1,111.43<br>(873.97 to<br>1,467.09)          | 1,233.02<br>(1,003.50 to<br>1,580.29)        | 30.56<br>(26.21 to<br>37.72)           | 50.95<br>(41.74 to<br>64.50)           | 53.71<br>(43.65 to<br>68.01)           | 50.10<br>(40.73 to<br>62.96)           |
| Thalassemias                                      | 120.03<br>(86.91 to<br>167.88)                 | 41.20<br>(24.39 to<br>62.29)                 | 42.86<br>(25.61 to<br>64.38)                 | 49.80<br>(27.97 to<br>78.28)                 | 1.46<br>(1.06 to<br>2.02)              | 0.52<br>(0.31 to<br>0.78)              | 0.54<br>(0.33 to<br>0.81)              | 0.62<br>(0.35 to<br>0.97)              |
| Sickle cell disorders                             | 646.80<br>(550.84 to<br>792.92)                | 547.36<br>(409.62 to<br>740.48)              | 544.35<br>(402.00 to<br>738.66)              | 636.60<br>(483.11 to<br>854.00)              | 11.11<br>(9.49 to<br>13.74)            | 11.85<br>(8.74 to<br>16.26)            | 11.85<br>(8.61 to<br>16.40)            | 13.41<br>(9.99 to<br>18.36)            |
| G6PD deficiency                                   | 145.06<br>(120.12 to<br>193.18)                | 225.90<br>(169.28 to<br>315.74)              | 223.43<br>(165.77 to<br>316.58)              | 268.08<br>(206.75 to<br>371.04)              | 4.16<br>(3.52 to<br>5.58)              | 9.23<br>(7.05 to<br>13.00)             | 9.41<br>(7.05 to<br>13.43)             | 10.22<br>(8.05 to<br>13.99)            |
| Other hemoglobinopathies and hemolytic anemias    | 182.80<br>(154.11 to<br>234.88)                | 285.77<br>(231.49 to<br>363.47)              | 300.80<br>(240.40 to<br>387.06)              | 278.54<br>(217.40 to<br>355.24)              | 13.83<br>(11.34 to<br>17.32)           | 29.35<br>(22.53 to<br>36.89)           | 31.90<br>(25.14 to<br>40.24)           | 25.85<br>(17.38 to<br>34.28)           |
| Endocrine, metabolic, blood, and immune disorders | 434.29<br>(387.90 to<br>612.36)                | 468.55<br>(385.90 to<br>639.82)              | 473.77<br>(383.14 to<br>636.95)              | 514.12<br>(429.71 to<br>715.01)              | 11.11<br>(10.16 to<br>14.38)           | 20.10<br>(16.88 to<br>24.69)           | 21.24<br>(17.63 to<br>25.80)           | 19.23<br>(16.40 to<br>23.93)           |
| <b>South Asia</b>                                 |                                                |                                              |                                              |                                              |                                        |                                        |                                        |                                        |
| Cause                                             | YLLs (in 1000s)                                |                                              |                                              |                                              | Deaths (in 1000s)                      |                                        |                                        |                                        |
|                                                   | 2016                                           | 2040 Forecast                                | 2040 Better Scenario                         | 2040 Worse Scenario                          | 2016                                   | 2040 Forecast                          | 2040 Better Scenario                   | 2040 Worse Scenario                    |
| <b>Musculoskeletal disorders</b>                  | <b>223.46</b><br>(182.69 to<br>266.20)         | <b>528.32</b><br>(377.71 to<br>663.37)       | <b>550.27</b><br>(388.29 to<br>693.77)       | <b>492.31</b><br>(360.25 to<br>602.45)       | <b>9.01</b><br>(6.72 to<br>10.64)      | <b>28.05</b><br>(19.33 to<br>33.97)    | <b>30.00</b><br>(20.29 to<br>36.34)    | <b>24.42</b><br>(16.84 to<br>29.34)    |
| Rheumatoid arthritis                              | 85.24<br>(60.31 to<br>115.85)                  | 213.09<br>(142.90 to<br>299.85)              | 217.00<br>(143.08 to<br>312.02)              | 225.97<br>(153.19 to<br>311.68)              | 4.34<br>(2.93 to<br>5.81)              | 13.35<br>(8.82 to<br>18.40)            | 13.94<br>(9.01 to<br>19.49)            | 13.16<br>(8.90 to<br>17.84)            |
| Other musculoskeletal disorders                   | 138.22<br>(110.47 to<br>170.13)                | 315.23<br>(220.14 to<br>390.78)              | 333.27<br>(231.37 to<br>417.67)              | 266.34<br>(189.35 to<br>327.44)              | 4.68<br>(3.44 to<br>5.50)              | 14.70<br>(9.31 to<br>18.28)            | 16.05<br>(10.23 to<br>20.02)           | 11.25<br>(7.37 to<br>13.94)            |
| <b>Other non-communicable diseases</b>            | <b>10,393.31</b><br>(8,554.33 to<br>12,649.61) | <b>5,738.79</b><br>(4,320.01 to<br>7,168.24) | <b>5,677.28</b><br>(4,240.28 to<br>7,068.65) | <b>7,825.09</b><br>(5,827.42 to<br>9,949.23) | <b>143.13</b><br>(117.80 to<br>169.13) | <b>154.88</b><br>(101.35 to<br>191.78) | <b>161.23</b><br>(102.90 to<br>202.31) | <b>168.01</b><br>(118.08 to<br>205.78) |
| Congenital birth defects                          | 8,893.47<br>(6,966.29 to<br>11,169.92)         | 3,444.46<br>(2,560.38 to<br>4,607.54)        | 3,305.01<br>(2,436.67 to<br>4,428.45)        | 5,435.08<br>(3,957.96 to<br>7,380.28)        | 109.75<br>(85.98 to<br>137.43)         | 49.55<br>(37.30 to<br>65.86)           | 47.97<br>(36.02 to<br>64.05)           | 73.56<br>(54.28 to<br>98.24)           |
| Neural tube defects                               | 95.43<br>(56.76 to<br>153.73)                  | 17.23<br>(10.41 to<br>28.07)                 | 15.88<br>(9.65 to<br>25.50)                  | 32.21<br>(18.40 to<br>54.54)                 | 1.17<br>(0.71 to<br>1.86)              | 0.27<br>(0.17 to<br>0.41)              | 0.25<br>(0.16 to<br>0.38)              | 0.46<br>(0.28 to<br>0.74)              |
| Congenital heart anomalies                        | 4,458.27<br>(3,125.26 to<br>6,017.83)          | 1,701.14<br>(1,162.20 to<br>2,397.97)        | 1,637.24<br>(1,123.17 to<br>2,281.13)        | 2,571.51<br>(1,692.90 to<br>3,727.15)        | 55.89<br>(39.60 to<br>74.67)           | 24.88<br>(17.49 to<br>34.29)           | 24.13<br>(17.31 to<br>33.11)           | 35.59<br>(24.33 to<br>50.15)           |
| Orofacial clefts                                  | 31.19<br>(14.65 to<br>59.39)                   | 6.31<br>(2.94 to<br>12.57)                   | 5.74<br>(2.63 to<br>11.22)                   | 13.23<br>(5.78 to<br>26.12)                  | 0.36<br>(0.17 to<br>0.69)              | 0.07<br>(0.03 to<br>0.15)              | 0.07<br>(0.03 to<br>0.13)              | 0.15<br>(0.07 to<br>0.30)              |
| Down syndrome                                     | 154.11<br>(112.38 to<br>242.40)                | 113.22<br>(79.64 to<br>172.16)               | 110.04<br>(76.51 to<br>165.83)               | 156.48<br>(110.32 to<br>237.75)              | 2.29<br>(1.71 to<br>3.40)              | 2.42<br>(1.70 to<br>3.69)              | 2.38<br>(1.67 to<br>3.61)              | 3.06<br>(2.18 to<br>4.66)              |
| Other chromosomal abnormalities                   | 180.92<br>(94.35 to<br>361.48)                 | 107.45<br>(54.07 to<br>213.61)               | 101.16<br>(51.04 to<br>199.12)               | 191.62<br>(93.52 to<br>382.65)               | 2.12<br>(1.11 to<br>4.22)              | 1.31<br>(0.68 to<br>2.58)              | 1.24<br>(0.57 to<br>2.40)              | 2.30<br>(1.14 to<br>4.54)              |
| Congenital musculoskeletal and limb anomalies     | 218.44<br>(100.45 to<br>498.20)                | 104.55<br>(45.15 to<br>247.59)               | 100.52<br>(43.35 to<br>239.89)               | 169.71<br>(70.90 to<br>414.27)               | 2.60<br>(1.20 to<br>5.87)              | 1.33<br>(0.59 to<br>3.07)              | 1.28<br>(0.57 to<br>2.94)              | 2.09<br>(0.89 to<br>4.96)              |
| Urogenital congenital anomalies                   | 242.16<br>(163.63 to<br>361.64)                | 113.00<br>(78.79 to<br>166.05)               | 110.45<br>(76.50 to<br>161.69)               | 165.41<br>(110.75 to<br>251.00)              | 3.29<br>(2.30 to<br>4.77)              | 2.22<br>(1.55 to<br>3.21)              | 2.22<br>(1.54 to<br>3.17)              | 2.85<br>(1.98 to<br>4.16)              |
| Digestive congenital anomalies                    | 765.62<br>(466.70 to<br>1,503.08)              | 255.75<br>(145.17 to<br>524.72)              | 241.61<br>(138.26 to<br>493.66)              | 452.17<br>(247.39 to<br>920.97)              | 8.96<br>(5.48 to<br>17.53)             | 3.11<br>(1.80 to<br>6.29)              | 2.95<br>(1.72 to<br>5.91)              | 5.40<br>(3.01 to<br>10.92)             |



|                                                 |                                                               |                                                               |                                                               |                                                               |                                                      |                                                      |                                                      |                                                      |
|-------------------------------------------------|---------------------------------------------------------------|---------------------------------------------------------------|---------------------------------------------------------------|---------------------------------------------------------------|------------------------------------------------------|------------------------------------------------------|------------------------------------------------------|------------------------------------------------------|
| Poisonings                                      | 423.80<br>(305.90 to<br>538.63)                               | 131.01<br>(94.51 to<br>172.11)                                | 121.92<br>(87.55 to<br>159.04)                                | 191.05<br>(136.34 to<br>254.67)                               | 7.13<br>(5.28 to<br>8.71)                            | 3.11<br>(2.36 to<br>3.86)                            | 2.98<br>(2.22 to<br>3.72)                            | 4.10<br>(3.04 to<br>5.17)                            |
| Exposure to mechanical forces                   | 1,321.65<br>(1,034.51 to<br>1,461.61)                         | 968.79<br>(723.98 to<br>1,177.07)                             | 951.04<br>(704.51 to<br>1,159.93)                             | 1,184.62<br>(879.23 to<br>1,432.45)                           | 27.84<br>(21.93 to<br>30.38)                         | 28.89<br>(21.64 to<br>34.51)                         | 29.08<br>(21.61 to<br>35.28)                         | 32.51<br>(24.54 to<br>38.33)                         |
| Unintentional firearm injuries                  | 76.02<br>(61.26 to<br>86.79)                                  | 53.61<br>(41.71 to<br>66.96)                                  | 52.64<br>(41.03 to<br>65.63)                                  | 65.35<br>(51.34 to<br>80.29)                                  | 1.86<br>(1.55 to<br>2.09)                            | 1.98<br>(1.60 to<br>2.37)                            | 2.02<br>(1.62 to<br>2.43)                            | 2.15<br>(1.74 to<br>2.54)                            |
| Unintentional suffocation                       | 134.35<br>(101.59 to<br>167.00)                               | 41.08<br>(28.94 to<br>54.94)                                  | 38.85<br>(27.46 to<br>51.76)                                  | 66.01<br>(44.43 to<br>91.67)                                  | 1.76<br>(1.36 to<br>2.14)                            | 0.73<br>(0.54 to<br>0.92)                            | 0.71<br>(0.52 to<br>0.89)                            | 1.04<br>(0.75 to<br>1.36)                            |
| Other exposure to mechanical forces             | 1,111.28<br>(849.04 to<br>1,236.28)                           | 874.10<br>(643.46 to<br>1,067.72)                             | 859.55<br>(624.15 to<br>1,054.63)                             | 1,053.26<br>(761.82 to<br>1,278.00)                           | 24.22<br>(18.62 to<br>26.61)                         | 26.18<br>(19.21 to<br>31.61)                         | 26.36<br>(19.22 to<br>32.25)                         | 29.32<br>(21.71 to<br>34.87)                         |
| Adverse effects of medical treatment            | 1,576.46<br>(1,271.81 to<br>1,718.92)                         | 1,567.48<br>(1,192.72 to<br>1,876.46)                         | 1,573.05<br>(1,190.45 to<br>1,887.94)                         | 1,764.50<br>(1,358.88 to<br>2,074.06)                         | 46.94<br>(37.36 to<br>51.29)                         | 69.21<br>(53.41 to<br>81.51)                         | 71.80<br>(55.08 to<br>85.60)                         | 70.54<br>(54.78 to<br>81.58)                         |
| Animal contact                                  | 2,815.93<br>(1,898.94 to<br>3,288.14)                         | 2,122.67<br>(1,409.56 to<br>2,675.74)                         | 2,071.11<br>(1,346.68 to<br>2,634.97)                         | 2,810.89<br>(1,806.35 to<br>3,584.22)                         | 60.01<br>(40.89 to<br>69.85)                         | 62.95<br>(40.87 to<br>79.33)                         | 62.86<br>(40.79 to<br>80.04)                         | 76.90<br>(49.95 to<br>97.75)                         |
| Venomous animal contact                         | 2,670.45<br>(1,771.44 to<br>3,142.32)                         | 1,989.67<br>(1,293.45 to<br>2,524.80)                         | 1,940.72<br>(1,246.60 to<br>2,479.53)                         | 2,642.31<br>(1,649.82 to<br>3,394.86)                         | 56.74<br>(38.19 to<br>66.55)                         | 58.55<br>(37.57 to<br>74.37)                         | 58.42<br>(36.73 to<br>74.91)                         | 71.86<br>(45.39 to<br>91.51)                         |
| Non-venomous animal contact                     | 145.48<br>(94.40 to<br>268.57)                                | 133.00<br>(82.01 to<br>244.33)                                | 130.39<br>(79.86 to<br>234.94)                                | 168.59<br>(105.17 to<br>305.80)                               | 3.27<br>(2.16 to<br>5.81)                            | 4.39<br>(2.75 to<br>7.74)                            | 4.44<br>(2.77 to<br>7.61)                            | 5.04<br>(3.19 to<br>8.86)                            |
| Foreign body                                    | 460.88<br>(343.11 to<br>535.64)                               | 365.19<br>(265.39 to<br>446.55)                               | 372.70<br>(268.47 to<br>459.40)                               | 390.55<br>(283.24 to<br>474.36)                               | 9.81<br>(7.40 to<br>11.23)                           | 15.49<br>(11.01 to<br>18.93)                         | 16.54<br>(11.76 to<br>20.40)                         | 13.61<br>(9.93 to<br>16.22)                          |
| Pulmonary aspiration and foreign body in airway | 361.20<br>(257.89 to<br>423.86)                               | 296.62<br>(211.64 to<br>356.00)                               | 305.21<br>(217.67 to<br>367.99)                               | 309.40<br>(215.35 to<br>370.89)                               | 7.89<br>(5.80 to<br>8.91)                            | 13.62<br>(9.59 to<br>16.66)                          | 14.65<br>(10.20 to<br>18.03)                         | 11.60<br>(8.32 to<br>13.93)                          |
| Foreign body in other body part                 | 99.69<br>(61.35 to<br>141.41)                                 | 68.57<br>(40.35 to<br>101.55)                                 | 67.49<br>(39.57 to<br>100.26)                                 | 81.15<br>(48.25 to<br>119.47)                                 | 1.93<br>(1.23 to<br>2.69)                            | 1.86<br>(1.12 to<br>2.66)                            | 1.89<br>(1.13 to<br>2.72)                            | 2.01<br>(1.23 to<br>2.84)                            |
| Environmental heat and cold exposure            | 561.99<br>(181.67 to<br>708.21)                               | 489.77<br>(156.73 to<br>670.20)                               | 483.63<br>(153.82 to<br>679.59)                               | 637.89<br>(200.61 to<br>879.59)                               | 17.00<br>(5.46 to<br>21.47)                          | 20.88<br>(6.56 to<br>28.64)                          | 21.34<br>(6.69 to<br>29.62)                          | 24.84<br>(7.82 to<br>33.95)                          |
| Other unintentional injuries                    | 1,549.96<br>(1,309.91 to<br>1,676.69)                         | 1,038.59<br>(831.17 to<br>1,252.42)                           | 1,027.44<br>(820.87 to<br>1,238.82)                           | 1,213.82<br>(978.12 to<br>1,444.19)                           | 32.27<br>(26.45 to<br>34.84)                         | 27.13<br>(21.14 to<br>32.04)                         | 27.40<br>(21.11 to<br>32.52)                         | 30.10<br>(23.54 to<br>34.99)                         |
| <b>Self-harm and interpersonal violence</b>     | <b>15,854.63</b><br><b>(13,857.37 to</b><br><b>17,137.23)</b> | <b>17,053.94</b><br><b>(13,408.11 to</b><br><b>20,710.09)</b> | <b>16,111.71</b><br><b>(12,745.96 to</b><br><b>19,295.71)</b> | <b>18,214.16</b><br><b>(14,183.38 to</b><br><b>22,155.21)</b> | <b>315.24</b><br><b>(269.77 to</b><br><b>340.12)</b> | <b>401.66</b><br><b>(310.20 to</b><br><b>489.93)</b> | <b>383.94</b><br><b>(299.81 to</b><br><b>460.08)</b> | <b>413.79</b><br><b>(319.46 to</b><br><b>504.69)</b> |
| <b>South Asia</b>                               |                                                               |                                                               |                                                               |                                                               |                                                      |                                                      |                                                      |                                                      |
| Cause                                           | <b>YLLs (in 1000s)</b>                                        |                                                               |                                                               |                                                               | <b>Deaths (in 1000s)</b>                             |                                                      |                                                      |                                                      |
|                                                 | <b>2016</b>                                                   | <b>2040 Forecast</b>                                          | <b>2040 Better Scenario</b>                                   | <b>2040 Worse Scenario</b>                                    | <b>2016</b>                                          | <b>2040 Forecast</b>                                 | <b>2040 Better Scenario</b>                          | <b>2040 Worse Scenario</b>                           |
| Self-harm                                       | 12,635.85<br>(10,923.07 to<br>13,691.77)                      | 14,141.53<br>(10,764.04 to<br>17,471.89)                      | 13,243.21<br>(10,254.84 to<br>16,083.85)                      | 15,189.12<br>(11,524.02 to<br>18,802.26)                      | 251.94<br>(213.80 to<br>272.78)                      | 334.57<br>(253.34 to<br>416.89)                      | 317.28<br>(242.20 to<br>383.96)                      | 346.11<br>(262.72 to<br>429.86)                      |
| Self-harm by firearm                            | 808.41<br>(455.24 to<br>1,149.94)                             | 700.41<br>(354.23 to<br>1,112.33)                             | 646.55<br>(333.20 to<br>1,019.46)                             | 781.11<br>(393.61 to<br>1,246.12)                             | 15.43<br>(8.82 to<br>22.00)                          | 15.27<br>(7.78 to<br>24.72)                          | 14.23<br>(7.44 to<br>22.56)                          | 16.57<br>(8.47 to<br>26.87)                          |
| Self-harm by other specified means              | 11,827.43<br>(10,176.21 to<br>13,039.00)                      | 13,441.12<br>(10,264.82 to<br>16,596.11)                      | 12,596.65<br>(9,673.97 to<br>15,382.88)                       | 14,408.00<br>(10,984.82 to<br>17,829.45)                      | 236.51<br>(199.14 to<br>260.26)                      | 319.30<br>(239.88 to<br>395.80)                      | 303.05<br>(228.02 to<br>368.03)                      | 329.53<br>(247.03 to<br>407.69)                      |
| Interpersonal violence                          | 3,218.79<br>(2,545.78 to<br>3,734.01)                         | 2,912.41<br>(2,136.04 to<br>3,614.60)                         | 2,868.50<br>(2,129.84 to<br>3,560.00)                         | 3,025.04<br>(2,187.01 to<br>3,781.62)                         | 63.31<br>(50.04 to<br>73.40)                         | 67.09<br>(49.83 to<br>82.92)                         | 66.66<br>(49.29 to<br>82.00)                         | 67.68<br>(49.50 to<br>82.96)                         |
| Physical violence by firearm                    | 672.43<br>(341.57 to<br>871.51)                               | 632.78<br>(304.06 to<br>861.67)                               | 635.86<br>(306.09 to<br>866.51)                               | 643.27<br>(311.05 to<br>871.41)                               | 13.59<br>(6.94 to<br>17.51)                          | 14.53<br>(7.16 to<br>19.67)                          | 14.73<br>(7.27 to<br>20.10)                          | 14.41<br>(7.09 to<br>19.53)                          |

|                                                                                     |                                                      |                                                      |                                                      |                                                      |                                                   |                                                   |                                                   |                                                   |
|-------------------------------------------------------------------------------------|------------------------------------------------------|------------------------------------------------------|------------------------------------------------------|------------------------------------------------------|---------------------------------------------------|---------------------------------------------------|---------------------------------------------------|---------------------------------------------------|
| Physical violence by sharp object                                                   | 686.97<br>(396.68 to<br>855.74)                      | 768.99<br>(437.04 to<br>989.19)                      | 779.14<br>(445.46 to<br>1,000.68)                    | 748.78<br>(418.74 to<br>962.61)                      | 14.29<br>(8.23 to<br>17.60)                       | 18.11<br>(10.28 to<br>22.90)                      | 18.48<br>(10.53 to<br>23.39)                      | 17.28<br>(9.64 to<br>21.80)                       |
| Physical violence by other means                                                    | 1,859.38<br>(1,551.71 to<br>2,344.09)                | 1,510.64<br>(1,139.08 to<br>2,043.21)                | 1,453.51<br>(1,097.18 to<br>1,963.48)                | 1,633.99<br>(1,227.91 to<br>2,195.35)                | 35.42<br>(29.62 to<br>44.95)                      | 34.46<br>(26.49 to<br>46.58)                      | 33.45<br>(25.82 to<br>45.04)                      | 35.99<br>(27.33 to<br>47.58)                      |
| <b>Forces of nature, conflict and terrorism, and executions and police conflict</b> | <b>123.73<br/>(65.91 to<br/>180.81)</b>              | <b>633.08<br/>(24.02 to<br/>3,879.52)</b>            | <b>630.13<br/>(23.99 to<br/>3,852.16)</b>            | <b>668.43<br/>(25.11 to<br/>4,097.41)</b>            | <b>2.40<br/>(1.34 to<br/>3.43)</b>                | <b>14.55<br/>(0.57 to<br/>93.29)</b>              | <b>14.71<br/>(0.58 to<br/>94.77)</b>              | <b>14.67<br/>(0.57 to<br/>93.55)</b>              |
| Exposure to forces of nature                                                        | 80.12<br>(40.69 to<br>119.93)                        | 572.90<br>(5.68 to<br>3,855.41)                      | 569.98<br>(5.71 to<br>3,836.97)                      | 605.80<br>(5.94 to<br>4,075.74)                      | 1.50<br>(0.76 to<br>2.25)                         | 13.32<br>(0.13 to<br>92.98)                       | 13.47<br>(0.14 to<br>94.47)                       | 13.43<br>(0.13 to<br>93.23)                       |
| Conflict and terrorism                                                              | 30.15<br>(12.25 to<br>48.31)                         | 27.11<br>(0.00 to<br>46.00)                          | 26.96<br>(0.00 to<br>45.90)                          | 28.78<br>(0.00 to<br>49.92)                          | 0.50<br>(0.20 to<br>0.81)                         | 0.54<br>(0.00 to<br>0.87)                         | 0.54<br>(0.00 to<br>0.88)                         | 0.55<br>(0.00 to<br>0.91)                         |
| Executions and police conflict                                                      | 13.46<br>(11.72 to<br>15.34)                         | 33.07<br>(0.00 to<br>154.44)                         | 33.19<br>(0.00 to<br>155.14)                         | 33.85<br>(0.00 to<br>157.95)                         | 0.39<br>(0.23 to<br>0.51)                         | 0.69<br>(0.00 to<br>3.24)                         | 0.70<br>(0.00 to<br>3.26)                         | 0.69<br>(0.00 to<br>3.23)                         |
| <b>South Asia</b>                                                                   |                                                      |                                                      |                                                      |                                                      |                                                   |                                                   |                                                   |                                                   |
| Cause                                                                               | YLLs (in 1000s)                                      |                                                      |                                                      |                                                      | Deaths (in 1000s)                                 |                                                   |                                                   |                                                   |
|                                                                                     | 2016                                                 | 2040 Forecast                                        | 2040 Better Scenario                                 | 2040 Worse Scenario                                  | 2016                                              | 2040 Forecast                                     | 2040 Better Scenario                              | 2040 Worse Scenario                               |
| <b>All causes</b>                                                                   | <b>398,851.37<br/>(388,316.72 to<br/>409,659.43)</b> | <b>356,432.20<br/>(281,224.66 to<br/>441,579.58)</b> | <b>303,886.23<br/>(242,131.60 to<br/>378,229.08)</b> | <b>514,122.72<br/>(401,530.72 to<br/>640,921.45)</b> | <b>12,110.37<br/>(11,815.60 to<br/>12,398.12)</b> | <b>16,194.59<br/>(13,046.59 to<br/>19,492.21)</b> | <b>14,327.52<br/>(11,572.05 to<br/>17,211.48)</b> | <b>21,141.41<br/>(17,168.81 to<br/>25,111.17)</b> |
| <b>Communicable, maternal, neonatal, and nutritional diseases</b>                   | <b>157,536.95<br/>(148,358.75 to<br/>169,077.56)</b> | <b>65,423.75<br/>(47,644.35 to<br/>95,286.84)</b>    | <b>56,098.40<br/>(41,347.81 to<br/>81,468.91)</b>    | <b>118,854.86<br/>(84,812.32 to<br/>176,432.14)</b>  | <b>3,296.02<br/>(3,048.56 to<br/>3,732.35)</b>    | <b>2,366.52<br/>(1,497.86 to<br/>4,004.47)</b>    | <b>2,113.01<br/>(1,351.39 to<br/>3,598.27)</b>    | <b>3,875.54<br/>(2,367.76 to<br/>6,659.71)</b>    |
| <b>HIV/AIDS and tuberculosis</b>                                                    | <b>21,110.05<br/>(20,093.26 to<br/>22,147.54)</b>    | <b>10,887.04<br/>(8,908.37 to<br/>13,408.16)</b>     | <b>8,856.11<br/>(7,272.80 to<br/>10,734.42)</b>      | <b>18,801.58<br/>(14,550.61 to<br/>23,600.82)</b>    | <b>604.28<br/>(570.28 to<br/>636.92)</b>          | <b>366.14<br/>(291.39 to<br/>460.66)</b>          | <b>304.51<br/>(241.68 to<br/>377.70)</b>          | <b>597.59<br/>(460.84 to<br/>768.50)</b>          |
| Tuberculosis                                                                        | 16,270.19<br>(15,292.97 to<br>17,231.52)             | 7,531.18<br>(5,591.83 to<br>9,827.22)                | 5,974.11<br>(4,562.70 to<br>7,707.10)                | 13,247.97<br>(9,699.47 to<br>17,894.60)              | 508.00<br>(474.02 to<br>538.33)                   | 295.58<br>(220.12 to<br>385.70)                   | 244.43<br>(184.68 to<br>316.61)                   | 486.87<br>(354.78 to<br>649.02)                   |
| HIV/AIDS                                                                            | 4,839.86<br>(4,496.26 to<br>5,385.14)                | 3,355.85<br>(2,743.36 to<br>4,283.25)                | 2,882.00<br>(2,138.47 to<br>3,784.49)                | 5,453.61<br>(4,049.61 to<br>7,411.65)                | 96.28<br>(89.52 to<br>107.82)                     | 70.56<br>(57.49 to<br>89.11)                      | 60.08<br>(45.71 to<br>78.29)                      | 110.72<br>(80.85 to<br>150.26)                    |
| <b>Diarrhea, lower respiratory, and other common infectious diseases</b>            | <b>68,449.50<br/>(61,265.98 to<br/>80,338.55)</b>    | <b>30,609.06<br/>(16,539.07 to<br/>57,796.44)</b>    | <b>25,605.31<br/>(13,716.65 to<br/>47,593.02)</b>    | <b>59,115.48<br/>(29,968.23 to<br/>114,777.87)</b>   | <b>1,771.98<br/>(1,528.51 to<br/>2,234.36)</b>    | <b>1,513.49<br/>(721.92 to<br/>3,063.67)</b>      | <b>1,341.85<br/>(644.31 to<br/>2,768.13)</b>      | <b>2,585.95<br/>(1,153.81 to<br/>5,499.07)</b>    |
| Diarrheal diseases                                                                  | 24,100.29<br>(18,487.06 to<br>34,889.35)             | 11,491.49<br>(2,238.19 to<br>34,435.24)              | 9,584.36<br>(1,878.29 to<br>28,379.98)               | 26,544.62<br>(5,533.92 to<br>79,117.32)              | 873.87<br>(605.18 to<br>1,356.36)                 | 732.22<br>(125.21 to<br>2,232.33)                 | 640.06<br>(188.749 to<br>1,887.49)                | 1,507.32<br>(269.62 to<br>4,331.29)               |
| Intestinal infectious diseases                                                      | 7,013.89<br>(3,995.87 to<br>11,291.40)               | 3,057.22<br>(1,644.73 to<br>5,133.49)                | 2,941.86<br>(1,604.00 to<br>4,912.98)                | 4,151.82<br>(2,195.18 to<br>6,918.79)                | 105.03<br>(59.65 to<br>170.23)                    | 54.46<br>(29.51 to<br>91.72)                      | 53.15<br>(29.22 to<br>88.80)                      | 69.49<br>(36.93 to<br>115.28)                     |
| Typhoid fever                                                                       | 5,834.59<br>(3,278.96 to<br>9,419.69)                | 2,372.51<br>(1,250.93 to<br>3,963.64)                | 2,280.28<br>(1,208.67 to<br>3,804.38)                | 3,238.12<br>(1,672.11 to<br>5,489.82)                | 86.01<br>(48.19 to<br>139.20)                     | 41.17<br>(22.03 to<br>69.60)                      | 40.15<br>(21.78 to<br>67.53)                      | 52.77<br>(27.29 to<br>89.68)                      |
| Paratyphoid fever                                                                   | 1,162.10<br>(548.73 to<br>2,246.13)                  | 680.57<br>(303.54 to<br>1,302.15)                    | 657.68<br>(296.57 to<br>1,226.03)                    | 906.86<br>(407.85 to<br>1,744.73)                    | 18.72<br>(8.82 to<br>35.90)                       | 13.14<br>(5.90 to<br>25.18)                       | 12.87<br>(5.79 to<br>24.34)                       | 16.53<br>(7.44 to<br>31.99)                       |
| Other intestinal infectious diseases                                                | 17.20<br>(5.30 to<br>44.87)                          | 4.15<br>(1.18 to<br>11.30)                           | 3.90<br>(1.14 to<br>10.38)                           | 6.83<br>(2.05 to<br>18.91)                           | 0.30<br>(0.10 to<br>0.73)                         | 0.14<br>(0.04 to<br>0.38)                         | 0.14<br>(0.04 to<br>0.37)                         | 0.19<br>(0.06 to<br>0.46)                         |
| Lower respiratory infections                                                        | 25,483.46<br>(22,879.23 to<br>27,784.52)             | 11,214.50<br>(7,314.35 to<br>16,133.75)              | 8,684.15<br>(5,772.91 to<br>12,236.51)               | 21,471.24<br>(12,638.75 to<br>31,164.49)             | 589.65<br>(496.20 to<br>642.84)                   | 571.52<br>(388.30 to<br>782.47)                   | 493.50<br>(335.77 to<br>661.28)                   | 831.72<br>(551.50 to<br>1,186.36)                 |
| Upper respiratory infections                                                        | 28.82<br>(23.27 to<br>35.50)                         | 10.93<br>(7.48 to<br>14.78)                          | 10.07<br>(6.61 to<br>14.16)                          | 18.43<br>(12.58 to<br>25.61)                         | 0.59<br>(0.50 to<br>0.68)                         | 0.36<br>(0.25 to<br>0.48)                         | 0.34<br>(0.23 to<br>0.47)                         | 0.54<br>(0.38 to<br>0.74)                         |
| Otitis media                                                                        | 16.51<br>(10.18 to<br>26.18)                         | 4.36<br>(2.47 to<br>8.19)                            | 4.48<br>(2.55 to<br>8.40)                            | 4.26<br>(2.48 to<br>7.86)                            | 0.38<br>(0.25 to<br>0.58)                         | 0.16<br>(0.10 to<br>0.27)                         | 0.17<br>(0.10 to<br>0.29)                         | 0.14<br>(0.09 to<br>0.25)                         |

|                                                |                                                |                                                |                                                |                                                |                                        |                                         |                                         |                                         |
|------------------------------------------------|------------------------------------------------|------------------------------------------------|------------------------------------------------|------------------------------------------------|----------------------------------------|-----------------------------------------|-----------------------------------------|-----------------------------------------|
| Meningitis                                     | 4,766.58<br>(3,834.97 to<br>6,457.28)          | 1,921.58<br>(1,339.00 to<br>3,032.55)          | 1,840.19<br>(1,280.31 to<br>2,924.48)          | 2,713.65<br>(1,825.41 to<br>4,250.77)          | 81.96<br>(66.47 to<br>116.92)          | 53.34<br>(36.21 to<br>92.05)            | 53.87<br>(36.15 to<br>93.53)            | 61.01<br>(43.20 to<br>98.84)            |
| Pneumococcal meningitis                        | 290.20<br>(227.48 to<br>411.48)                | 131.26<br>(89.11 to<br>217.57)                 | 129.79<br>(86.31 to<br>219.86)                 | 163.00<br>(112.59 to<br>263.37)                | 5.95<br>(4.66 to<br>8.82)              | 4.30<br>(2.78 to<br>7.68)               | 4.41<br>(2.84 to<br>7.93)               | 4.72<br>(3.19 to<br>8.21)               |
| H influenzae type B meningitis                 | 431.37<br>(334.72 to<br>598.80)                | 248.70<br>(116.93 to<br>521.94)                | 175.44<br>(99.44 to<br>319.02)                 | 664.69<br>(210.46 to<br>1,591.64)              | 6.79<br>(5.39 to<br>9.58)              | 4.94<br>(2.86 to<br>8.69)               | 4.22<br>(2.67 to<br>7.01)               | 9.52<br>(4.05 to<br>20.62)              |
| Meningococcal meningitis                       | 2,518.61<br>(2,026.13 to<br>3,470.33)          | 910.72<br>(624.90 to<br>1,455.84)              | 899.20<br>(617.78 to<br>1,430.21)              | 1,117.28<br>(772.47 to<br>1,732.48)            | 42.85<br>(34.47 to<br>61.02)           | 25.70<br>(17.52 to<br>44.25)            | 26.32<br>(17.74 to<br>45.71)            | 27.49<br>(19.73 to<br>45.19)            |
| Other meningitis                               | 1,526.41<br>(1,209.65 to<br>2,089.66)          | 640.90<br>(446.65 to<br>1,041.81)              | 635.75<br>(442.24 to<br>1,040.70)              | 768.68<br>(543.23 to<br>1,205.65)              | 26.37<br>(21.07 to<br>38.04)           | 18.40<br>(12.42 to<br>32.30)            | 18.92<br>(12.57 to<br>33.65)            | 19.28<br>(13.90 to<br>32.17)            |
| Encephalitis                                   | 3,025.28<br>(2,048.84 to<br>4,610.38)          | 2,307.17<br>(1,462.39 to<br>3,623.53)          | 2,299.08<br>(1,441.90 to<br>3,583.84)          | 2,812.60<br>(1,830.34 to<br>4,378.18)          | 68.19<br>(49.98 to<br>100.96)          | 91.60<br>(60.21 to<br>138.96)           | 94.91<br>(61.48 to<br>145.09)           | 96.26<br>(66.43 to<br>146.14)           |
| Diphtheria                                     | 7.53<br>(5.83 to<br>9.80)                      | 1.19<br>(0.76 to<br>1.85)                      | 0.99<br>(0.67 to<br>1.41)                      | 2.75<br>(1.31 to<br>5.13)                      | 0.11<br>(0.09 to<br>0.13)              | 0.02<br>(0.01 to<br>0.03)               | 0.02<br>(0.01 to<br>0.03)               | 0.04<br>(0.02 to<br>0.07)               |
| Whooping cough                                 | 1,329.21<br>(360.28 to<br>3,334.91)            | 371.39<br>(61.33 to<br>937.65)                 | 110.72<br>(19.32 to<br>333.35)                 | 870.69<br>(156.59 to<br>2,244.82)              | 15.77<br>(4.26 to<br>39.54)            | 4.45<br>(0.76 to<br>11.27)              | 1.38<br>(0.24 to<br>4.12)               | 10.33<br>(1.88 to<br>26.64)             |
| Tetanus                                        | 708.99<br>(330.43 to<br>999.23)                | 62.06<br>(28.70 to<br>105.43)                  | 40.15<br>(18.07 to<br>60.55)                   | 133.68<br>(57.15 to<br>237.94)                 | 10.77<br>(5.31 to<br>14.27)            | 1.26<br>(0.61 to<br>1.84)               | 1.05<br>(0.48 to<br>1.48)               | 2.03<br>(0.94 to<br>3.31)               |
| Measles                                        | 1,748.42<br>(640.48 to<br>3,847.99)            | 96.39<br>(9.31 to<br>430.02)                   | 32.42<br>(5.63 to<br>128.26)                   | 290.52<br>(26.04 to<br>1,034.51)               | 20.95<br>(7.68 to<br>46.19)            | 1.17<br>(0.12 to<br>5.11)               | 0.42<br>(0.08 to<br>1.58)               | 3.47<br>(0.32 to<br>12.37)              |
| <b>South Asia</b>                              |                                                |                                                |                                                |                                                |                                        |                                         |                                         |                                         |
| Cause                                          | YLLs (in 1000s)                                |                                                |                                                |                                                | Deaths (in 1000s)                      |                                         |                                         |                                         |
|                                                | 2016                                           | 2040 Forecast                                  | 2040 Better Scenario                           | 2040 Worse Scenario                            | 2016                                   | 2040 Forecast                           | 2040 Better Scenario                    | 2040 Worse Scenario                     |
| Varicella and herpes zoster                    | 222.54<br>(188.20 to<br>264.51)                | 60.76<br>(42.66 to<br>78.77)                   | 56.83<br>(39.85 to<br>73.95)                   | 101.23<br>(70.60 to<br>137.24)                 | 4.71<br>(4.22 to<br>5.29)              | 2.92<br>(2.13 to<br>3.80)               | 2.98<br>(2.15 to<br>3.84)               | 3.61<br>(2.68 to<br>4.62)               |
| <b>Neglected tropical diseases and malaria</b> | <b>5,702.54<br/>(3,011.11 to<br/>7,516.55)</b> | <b>5,856.00<br/>(2,842.19 to<br/>7,728.08)</b> | <b>5,852.62<br/>(2,855.98 to<br/>7,711.31)</b> | <b>6,642.99<br/>(3,177.57 to<br/>8,857.44)</b> | <b>96.74<br/>(51.51 to<br/>123.34)</b> | <b>171.41<br/>(82.95 to<br/>219.98)</b> | <b>175.71<br/>(85.50 to<br/>226.53)</b> | <b>176.02<br/>(84.57 to<br/>226.36)</b> |
| Malaria                                        | 3,710.87<br>(1,726.84 to<br>5,218.79)          | 1,054.44<br>(568.71 to<br>1,729.31)            | 1,037.41<br>(569.94 to<br>1,734.75)            | 1,309.00<br>(655.79 to<br>2,037.42)            | 56.95<br>(27.37 to<br>76.04)           | 27.16<br>(15.62 to<br>48.03)            | 27.55<br>(15.78 to<br>49.81)            | 29.44<br>(16.04 to<br>47.36)            |
| Chagas disease                                 | 0.00<br>(0.00 to<br>0.00)                      | 0.00<br>(0.00 to<br>0.00)                      | 0.00<br>(0.00 to<br>0.00)                      | 0.00<br>(0.00 to<br>0.00)                      | 0.00<br>(0.00 to<br>0.00)              | 0.00<br>(0.00 to<br>0.00)               | 0.00<br>(0.00 to<br>0.00)               | 0.00<br>(0.00 to<br>0.00)               |
| Leishmaniasis                                  | 381.72<br>(210.87 to<br>645.17)                | 108.94<br>(54.20 to<br>232.18)                 | 101.50<br>(50.76 to<br>220.77)                 | 203.39<br>(104.91 to<br>385.03)                | 6.35<br>(3.49 to<br>10.78)             | 2.26<br>(1.12 to<br>4.97)               | 2.14<br>(1.07 to<br>4.82)               | 3.85<br>(2.00 to<br>7.25)               |
| African trypanosomiasis                        | 0.00<br>(0.00 to<br>0.00)                      | 0.00<br>(0.00 to<br>0.00)                      | 0.00<br>(0.00 to<br>0.00)                      | 0.00<br>(0.00 to<br>0.00)                      | 0.00<br>(0.00 to<br>0.00)              | 0.00<br>(0.00 to<br>0.00)               | 0.00<br>(0.00 to<br>0.00)               | 0.00<br>(0.00 to<br>0.00)               |
| Schistosomiasis                                | 0.00<br>(0.00 to<br>0.00)                      | 0.00<br>(0.00 to<br>0.00)                      | 0.00<br>(0.00 to<br>0.00)                      | 0.00<br>(0.00 to<br>0.00)                      | 0.00<br>(0.00 to<br>0.00)              | 0.00<br>(0.00 to<br>0.00)               | 0.00<br>(0.00 to<br>0.00)               | 0.00<br>(0.00 to<br>0.00)               |
| Cysticercosis                                  | 4.11<br>(3.39 to<br>4.94)                      | 1.78<br>(1.17 to<br>3.85)                      | 1.79<br>(1.15 to<br>3.97)                      | 1.93<br>(1.32 to<br>3.74)                      | 0.10<br>(0.08 to<br>0.12)              | 0.05<br>(0.03 to<br>0.11)               | 0.05<br>(0.03 to<br>0.12)               | 0.05<br>(0.04 to<br>0.11)               |
| Cystic echinococcosis                          | 8.51<br>(6.86 to<br>10.36)                     | 3.30<br>(2.06 to<br>7.08)                      | 3.07<br>(1.88 to<br>6.62)                      | 5.97<br>(3.84 to<br>11.48)                     | 0.23<br>(0.18 to<br>0.28)              | 0.12<br>(0.08 to<br>0.26)               | 0.12<br>(0.07 to<br>0.25)               | 0.21<br>(0.13 to<br>0.41)               |
| Dengue                                         | 1,172.24<br>(175.95 to<br>1,783.77)            | 4,525.26<br>(1,278.24 to<br>6,247.58)          | 4,560.50<br>(1,321.57 to<br>6,253.64)          | 4,827.37<br>(1,216.71 to<br>6,827.09)          | 24.81<br>(3.72 to<br>37.42)            | 137.18<br>(39.37 to<br>187.63)          | 141.45<br>(40.88 to<br>193.46)          | 134.99<br>(35.58 to<br>185.91)          |

|                                                       |                                                  |                                                |                                                |                                                  |                                         |                                         |                                         |                                         |
|-------------------------------------------------------|--------------------------------------------------|------------------------------------------------|------------------------------------------------|--------------------------------------------------|-----------------------------------------|-----------------------------------------|-----------------------------------------|-----------------------------------------|
| Yellow fever                                          | 0.00<br>(0.00 to 0.00)                           | 0.00<br>(0.00 to 0.00)                         | 0.00<br>(0.00 to 0.00)                         | 0.00<br>(0.00 to 0.00)                           | 0.00<br>(0.00 to 0.00)                  | 0.00<br>(0.00 to 0.00)                  | 0.00<br>(0.00 to 0.00)                  | 0.00<br>(0.00 to 0.00)                  |
| Rabies                                                | 290.94<br>(187.34 to 432.05)                     | 85.24<br>(48.14 to 208.57)                     | 73.65<br>(41.98 to 183.33)                     | 186.64<br>(111.05 to 405.25)                     | 5.92<br>(3.73 to 8.66)                  | 2.36<br>(1.34 to 5.67)                  | 2.11<br>(1.19 to 5.12)                  | 4.68<br>(2.84 to 10.00)                 |
| Intestinal nematode infections                        | 35.55<br>(28.77 to 43.96)                        | 20.85<br>(13.08 to 35.76)                      | 20.48<br>(12.87 to 35.48)                      | 26.90<br>(16.71 to 42.03)                        | 0.51<br>(0.42 to 0.61)                  | 0.46<br>(0.31 to 0.83)                  | 0.47<br>(0.31 to 0.86)                  | 0.50<br>(0.34 to 0.83)                  |
| Other neglected tropical diseases                     | 98.60<br>(71.93 to 167.70)                       | 56.19<br>(33.51 to 142.31)                     | 54.22<br>(31.68 to 138.48)                     | 81.79<br>(50.94 to 189.89)                       | 1.88<br>(1.46 to 3.25)                  | 1.80<br>(1.03 to 4.74)                  | 1.80<br>(1.02 to 4.85)                  | 2.29<br>(1.39 to 5.78)                  |
| <b>Maternal disorders</b>                             | <b>3,841.11</b><br><b>(3,400.15 to 4,415.52)</b> | <b>1,335.51</b><br><b>(981.00 to 1,895.47)</b> | <b>1,173.22</b><br><b>(828.46 to 1,686.20)</b> | <b>2,376.69</b><br><b>(1,719.27 to 3,328.56)</b> | <b>66.60</b><br><b>(58.85 to 76.27)</b> | <b>23.95</b><br><b>(17.58 to 33.79)</b> | <b>21.05</b><br><b>(15.05 to 30.07)</b> | <b>42.42</b><br><b>(30.71 to 59.45)</b> |
| Maternal hemorrhage                                   | 1,685.96<br>(1,345.83 to 2,098.56)               | 570.18<br>(375.42 to 850.07)                   | 495.44<br>(323.91 to 850.07)                   | 984.52<br>(650.12 to 1,463.78)                   | 29.18<br>(23.46 to 36.07)               | 10.16<br>(6.80 to 15.07)                | 8.83<br>(5.84 to 12.90)                 | 17.49<br>(11.48 to 25.99)               |
| Maternal sepsis and other maternal infections         | 420.92<br>(310.25 to 556.91)                     | 114.75<br>(69.12 to 176.17)                    | 104.19<br>(61.75 to 158.08)                    | 203.54<br>(122.90 to 318.41)                     | 7.23<br>(5.36 to 9.48)                  | 2.05<br>(1.26 to 3.10)                  | 1.87<br>(1.12 to 2.82)                  | 3.63<br>(2.22 to 5.66)                  |
| Maternal hypertensive disorders                       | 251.40<br>(173.01 to 357.90)                     | 83.80<br>(50.18 to 129.79)                     | 73.24<br>(43.31 to 114.60)                     | 146.69<br>(87.95 to 230.06)                      | 4.26<br>(2.97 to 6.04)                  | 1.46<br>(0.88 to 2.27)                  | 1.28<br>(0.77 to 1.98)                  | 2.55<br>(1.53 to 3.96)                  |
| Maternal obstructed labor and uterine rupture         | 65.23<br>(43.36 to 99.41)                        | 22.10<br>(12.15 to 38.55)                      | 19.61<br>(10.41 to 34.74)                      | 39.94<br>(21.62 to 70.87)                        | 1.17<br>(0.78 to 1.74)                  | 0.91<br>(0.23 to 0.72)                  | 0.36<br>(0.19 to 0.64)                  | 0.74<br>(0.40 to 1.31)                  |
| Maternal abortion, miscarriage, and ectopic pregnancy | 260.09<br>(193.96 to 346.88)                     | 102.45<br>(55.65 to 173.16)                    | 91.54<br>(47.29 to 159.39)                     | 177.86<br>(92.94 to 309.95)                      | 4.76<br>(3.56 to 6.26)                  | 1.97<br>(1.06 to 3.35)                  | 1.76<br>(0.91 to 3.03)                  | 3.42<br>(1.80 to 5.91)                  |
| Indirect maternal deaths                              | 252.90<br>(177.62 to 355.17)                     | 85.54<br>(49.40 to 132.36)                     | 76.48<br>(44.36 to 117.38)                     | 151.08<br>(87.20 to 242.90)                      | 4.32<br>(3.06 to 6.03)                  | 1.51<br>(0.89 to 2.31)                  | 1.35<br>(0.79 to 2.07)                  | 2.65<br>(1.54 to 4.23)                  |
| Late maternal deaths                                  | 55.89<br>(33.28 to 90.79)                        | 15.35<br>(8.39 to 26.31)                       | 13.30<br>(7.11 to 22.94)                       | 27.18<br>(14.69 to 46.00)                        | 0.97<br>(0.59 to 1.55)                  | 0.27<br>(0.15 to 0.47)                  | 0.24<br>(0.13 to 0.41)                  | 0.48<br>(0.26 to 0.82)                  |
| Maternal deaths aggravated by HIV/AIDS                | 1.88<br>(0.97 to 2.89)                           | 57.27<br>(0.45 to 259.06)                      | 44.43<br>(0.26 to 224.14)                      | 157.77<br>(3.13 to 588.09)                       | 0.03<br>(0.02 to 0.05)                  | 0.98<br>(0.01 to 4.53)                  | 0.76<br>(0.00 to 3.67)                  | 2.72<br>(0.05 to 10.08)                 |
| Other maternal disorders                              | 846.84<br>(629.62 to 1,099.27)                   | 284.07<br>(180.91 to 425.52)                   | 254.98<br>(162.13 to 386.73)                   | 488.10<br>(305.12 to 732.37)                     | 14.68<br>(10.96 to 18.92)               | 5.12<br>(3.26 to 7.67)                  | 4.60<br>(2.93 to 6.94)                  | 8.75<br>(5.51 to 13.14)                 |

**South Asia**

| Cause                                                    | YLLs (in 1000s)                                     |                                                     |                                                    |                                                     | Deaths (in 1000s)                          |                                            |                                           |                                            |
|----------------------------------------------------------|-----------------------------------------------------|-----------------------------------------------------|----------------------------------------------------|-----------------------------------------------------|--------------------------------------------|--------------------------------------------|-------------------------------------------|--------------------------------------------|
|                                                          | 2016                                                | 2040 Forecast                                       | 2040 Better Scenario                               | 2040 Worse Scenario                                 | 2016                                       | 2040 Forecast                              | 2040 Better Scenario                      | 2040 Worse Scenario                        |
| <b>Neonatal disorders</b>                                | <b>49,292.34</b><br><b>(45,603.31 to 53,385.54)</b> | <b>12,993.66</b><br><b>(12,407.40 to 13,407.40)</b> | <b>10,974.79</b><br><b>(7,545.38 to 14,795.95)</b> | <b>26,956.24</b><br><b>(18,197.09 to 36,692.16)</b> | <b>569.38</b><br><b>(526.76 to 615.65)</b> | <b>150.11</b><br><b>(201.10 to 201.10)</b> | <b>126.79</b><br><b>(87.19 to 176.92)</b> | <b>311.40</b><br><b>(210.19 to 423.85)</b> |
| Neonatal preterm birth                                   | 16,273.82<br>(14,495.81 to 18,248.99)               | 4,285.05<br>(3,331.91 to 5,325.47)                  | 3,265.10<br>(2,515.65 to 4,051.25)                 | 8,920.22<br>(6,794.34 to 11,283.73)                 | 187.97<br>(167.43 to 210.81)               | 49.50<br>(38.49 to 61.52)                  | 37.72<br>(29.06 to 46.80)                 | 103.04<br>(78.48 to 130.34)                |
| Neonatal encephalopathy due to birth asphyxia and trauma | 13,976.05<br>(11,890.53 to 16,218.04)               | 3,707.81<br>(2,066.89 to 5,679.72)                  | 3,288.64<br>(1,865.34 to 5,022.48)                 | 7,285.18<br>(3,890.00 to 11,461.64)                 | 161.44<br>(137.35 to 187.33)               | 42.84<br>(23.88 to 65.61)                  | 37.99<br>(21.55 to 58.02)                 | 84.16<br>(44.95 to 132.40)                 |
| Neonatal sepsis and other neonatal infections            | 3,406.40<br>(2,614.65 to 4,930.02)                  | 1,216.03<br>(784.03 to 1,836.91)                    | 1,092.71<br>(702.10 to 1,621.13)                   | 2,457.36<br>(1,530.63 to 3,762.27)                  | 39.35<br>(30.21 to 56.95)                  | 14.05<br>(9.06 to 21.22)                   | 12.62<br>(8.11 to 18.73)                  | 28.39<br>(17.68 to 43.46)                  |
| Hemolytic disease and other neonatal jaundice            | 2,326.11<br>(1,945.10 to 2,721.29)                  | 384.66<br>(246.03 to 545.15)                        | 333.41<br>(214.60 to 475.25)                       | 836.56<br>(536.19 to 1,192.74)                      | 26.88<br>(22.47 to 31.44)                  | 4.44<br>(2.84 to 6.30)                     | 3.85<br>(2.48 to 5.49)                    | 9.67<br>(6.20 to 13.78)                    |
| Other neonatal disorders                                 | 13,309.95<br>(11,499.61 to 15,000.58)               | 3,400.12<br>(2,233.20 to 4,746.27)                  | 2,994.94<br>(1,979.09 to 4,195.15)                 | 7,456.93<br>(4,702.08 to 10,399.79)                 | 153.74<br>(132.83 to 173.28)               | 39.28<br>(25.80 to 54.83)                  | 34.60<br>(22.86 to 48.45)                 | 86.14<br>(54.32 to 120.13)                 |



|                                                                         |                                          |                                          |                                          |                                          |                                    |                                      |                                      |                                       |
|-------------------------------------------------------------------------|------------------------------------------|------------------------------------------|------------------------------------------|------------------------------------------|------------------------------------|--------------------------------------|--------------------------------------|---------------------------------------|
| <b>Nutritional deficiencies</b>                                         | 3,283.37<br>(2,942.22 to 3,678.15)       | 954.20<br>(782.38 to 1,131.69)           | 919.53<br>(755.33 to 1,103.19)           | 1,352.72<br>(1,075.55 to 1,637.39)       | 65.14<br>(59.47 to 71.28)          | 43.44<br>(36.78 to 51.13)            | 44.13<br>(37.43 to 52.33)            | 49.88<br>(42.41 to 57.70)             |
| Protein-energy malnutrition                                             | 2,280.80<br>(1,993.46 to 2,617.12)       | 352.41<br>(258.34 to 441.00)             | 327.50<br>(241.66 to 411.65)             | 589.00<br>(398.31 to 775.63)             | 36.35<br>(32.47 to 40.72)          | 15.30<br>(12.36 to 18.49)            | 15.24<br>(12.23 to 18.47)            | 18.94<br>(15.08 to 22.99)             |
| Iodine deficiency                                                       | 25.37<br>(12.10 to 55.65)                | 25.68<br>(5.83 to 70.83)                 | 24.21<br>(5.47 to 65.03)                 | 39.85<br>(9.10 to 131.07)                | 0.53<br>(0.30 to 0.92)             | 1.35<br>(0.24 to 3.50)               | 1.35<br>(0.23 to 3.62)               | 1.69<br>(0.34 to 4.31)                |
| Dietary iron deficiency                                                 | 24.59<br>(18.34 to 36.22)                | 20.56<br>(14.44 to 43.45)                | 20.63<br>(14.30 to 44.27)                | 23.39<br>(16.62 to 45.99)                | 0.78<br>(0.57 to 1.50)             | 1.15<br>(0.75 to 2.50)               | 1.21<br>(0.79 to 2.69)               | 1.13<br>(0.74 to 2.42)                |
| Other nutritional deficiencies                                          | 952.61<br>(834.99 to 1,088.54)           | 555.53<br>(455.72 to 678.57)             | 547.19<br>(444.22 to 674.93)             | 700.48<br>(573.50 to 846.52)             | 27.48<br>(24.10 to 30.61)          | 25.64<br>(20.89 to 31.09)            | 26.32<br>(21.35 to 31.93)            | 28.12<br>(22.63 to 33.69)             |
| <b>Other communicable, maternal, neonatal, and nutritional diseases</b> | 5,858.05<br>(5,076.95 to 6,908.57)       | 2,788.29<br>(2,340.79 to 3,281.05)       | 2,716.83<br>(2,255.40 to 3,229.02)       | 3,609.16<br>(3,005.35 to 4,276.13)       | 121.90<br>(109.99 to 135.69)       | 97.98<br>(83.28 to 115.03)           | 98.98<br>(82.71 to 118.13)           | 112.27<br>(96.41 to 129.58)           |
| Sexually transmitted infections excluding HIV                           | 1,258.60<br>(736.16 to 2,359.58)         | 236.96<br>(142.59 to 399.15)             | 220.88<br>(135.30 to 363.00)             | 370.57<br>(207.38 to 672.94)             | 17.69<br>(10.40 to 29.38)          | 4.58<br>(3.21 to 6.53)               | 4.40<br>(3.08 to 6.14)               | 6.32<br>(4.19 to 9.86)                |
| Syphilis                                                                | 1,263.53<br>(632.01 to 2,264.78)         | 164.60<br>(76.41 to 321.58)              | 149.81<br>(71.27 to 289.94)              | 286.24<br>(127.43 to 573.14)             | 15.23<br>(7.86 to 26.92)           | 2.35<br>(1.31 to 4.25)               | 2.18<br>(1.24 to 3.90)               | 3.83<br>(1.93 to 7.23)                |
| Chlamydial infection                                                    | 18.46<br>(13.36 to 22.39)                | 13.85<br>(9.17 to 19.15)                 | 13.59<br>(8.98 to 18.86)                 | 16.16<br>(10.77 to 22.08)                | 0.47<br>(0.33 to 0.57)             | 0.43<br>(0.30 to 0.57)               | 0.42<br>(0.29 to 0.57)               | 0.47<br>(0.32 to 0.64)                |
| Gonococcal infection                                                    | 50.39<br>(36.59 to 61.10)                | 39.10<br>(26.37 to 53.68)                | 38.44<br>(25.31 to 53.16)                | 45.34<br>(30.40 to 61.90)                | 1.34<br>(0.96 to 1.61)             | 1.25<br>(0.85 to 1.67)               | 1.24<br>(0.84 to 1.67)               | 1.38<br>(0.93 to 1.84)                |
| Other sexually transmitted infections                                   | 26.22<br>(19.29 to 31.74)                | 19.41<br>(13.01 to 26.76)                | 19.03<br>(12.73 to 26.40)                | 22.84<br>(15.25 to 31.86)                | 0.65<br>(0.47 to 0.78)             | 0.55<br>(0.37 to 0.75)               | 0.55<br>(0.37 to 0.74)               | 0.63<br>(0.42 to 0.86)                |
| Acute hepatitis                                                         | 3,423.23<br>(3,216.71 to 3,636.80)       | 1,873.30<br>(1,565.07 to 2,219.15)       | 1,843.07<br>(1,512.85 to 2,214.46)       | 2,313.49<br>(1,940.52 to 2,710.07)       | 80.56<br>(75.38 to 85.11)          | 64.66<br>(54.44 to 76.39)            | 65.47<br>(53.93 to 79.13)            | 73.25<br>(62.77 to 84.85)             |
| Acute hepatitis A                                                       | 276.28<br>(211.01 to 350.59)             | 48.50<br>(29.97 to 68.72)                | 45.97<br>(28.13 to 65.48)                | 76.88<br>(44.40 to 114.29)               | 3.67<br>(2.90 to 4.54)             | 1.16<br>(0.78 to 1.62)               | 1.14<br>(0.76 to 1.61)               | 1.53<br>(1.01 to 2.11)                |
| Acute hepatitis B                                                       | 2,061.59<br>(1,881.55 to 2,244.58)       | 1,331.28<br>(1,080.65 to 1,627.51)       | 1,310.14<br>(1,044.91 to 1,619.17)       | 1,627.24<br>(1,323.63 to 1,950.88)       | 56.30<br>(51.63 to 60.79)          | 47.08<br>(37.78 to 57.50)            | 47.37<br>(37.40 to 58.80)            | 54.32<br>(44.70 to 64.89)             |
| Acute hepatitis C                                                       | 35.20<br>(27.56 to 45.05)                | 37.70<br>(27.30 to 51.65)                | 38.08<br>(27.47 to 51.46)                | 40.10<br>(29.12 to 53.97)                | 1.18<br>(0.89 to 1.56)             | 1.67<br>(1.19 to 2.27)               | 1.74<br>(1.22 to 2.36)               | 1.65<br>(1.19 to 2.24)                |
| Acute hepatitis E                                                       | 1,050.16<br>(908.05 to 1,198.18)         | 455.82<br>(342.37 to 569.06)             | 448.88<br>(334.35 to 564.30)             | 569.27<br>(437.16 to 710.49)             | 19.41<br>(16.39 to 22.60)          | 14.76<br>(10.82 to 18.92)            | 15.23<br>(11.08 to 19.84)            | 15.75<br>(11.84 to 19.84)             |
| Other unspecified infectious diseases                                   | 1,076.23<br>(658.81 to 1,541.80)         | 678.03<br>(467.56 to 870.97)             | 652.88<br>(455.33 to 841.09)             | 925.10<br>(621.57 to 1,220.56)           | 23.65<br>(14.47 to 30.41)          | 28.73<br>(18.83 to 36.57)            | 29.11<br>(19.22 to 37.23)            | 32.71<br>(21.41 to 40.96)             |
| <b>Non-communicable diseases</b>                                        | 187,766.30<br>(178,569.14 to 195,461.57) | 241,557.28<br>(180,568.25 to 306,578.68) | 200,940.23<br>(153,058.82 to 250,997.90) | 335,305.32<br>(247,283.23 to 429,937.68) | 7,589.71<br>(7,173.34 to 7,907.62) | 12,250.17<br>(9,710.09 to 14,795.35) | 10,654.64<br>(8,440.72 to 12,766.41) | 15,538.64<br>(12,188.99 to 18,977.18) |

| South Asia                 |                                       |                                       |                                       |                                       |                                  |                                    |                                    |                                    |
|----------------------------|---------------------------------------|---------------------------------------|---------------------------------------|---------------------------------------|----------------------------------|------------------------------------|------------------------------------|------------------------------------|
| Cause                      | YLLs (in 1000s)                       |                                       |                                       |                                       | Deaths (in 1000s)                |                                    |                                    |                                    |
|                            | 2016                                  | 2040 Forecast                         | 2040 Better Scenario                  | 2040 Worse Scenario                   | 2016                             | 2040 Forecast                      | 2040 Better Scenario               | 2040 Worse Scenario                |
| <b>Neoplasms</b>           | 30,196.83<br>(28,692.01 to 31,562.51) | 53,342.21<br>(42,660.16 to 64,365.19) | 49,462.65<br>(39,258.25 to 59,870.13) | 55,497.34<br>(45,404.24 to 66,502.00) | 1,052.42<br>(998.29 to 1,101.08) | 2,209.78<br>(1,823.20 to 2,632.36) | 2,114.58<br>(1,722.27 to 2,516.43) | 2,170.64<br>(1,815.23 to 2,569.45) |
| Lip and oral cavity cancer | 2,215.66<br>(2,042.46 to 2,355.23)    | 4,342.70<br>(3,078.89 to 5,994.55)    | 3,337.75<br>(2,458.44 to 4,503.42)    | 5,186.08<br>(3,548.49 to 7,225.82)    | 78.69<br>(72.56 to 83.66)        | 170.62<br>(121.56 to 232.13)       | 139.08<br>(101.83 to 185.20)       | 191.77<br>(134.84 to 264.45)       |



| South Asia                      |                                                     |                                                      |                                        |                                                       |                                                  |                                                  |                                                  |                                                   |
|---------------------------------|-----------------------------------------------------|------------------------------------------------------|----------------------------------------|-------------------------------------------------------|--------------------------------------------------|--------------------------------------------------|--------------------------------------------------|---------------------------------------------------|
| Cause                           | YLLs (in 1000s)                                     |                                                      |                                        |                                                       | Deaths (in 1000s)                                |                                                  |                                                  |                                                   |
|                                 | 2016                                                | 2040 Forecast                                        | 2040 Better Scenario                   | 2040 Worse Scenario                                   | 2016                                             | 2040 Forecast                                    | 2040 Better Scenario                             | 2040 Worse Scenario                               |
| Kidney cancer                   | 197.80<br>(187.36 to 208.35)                        | 498.22<br>(408.64 to 587.53)                         | 516.57<br>(417.82 to 619.07)           | 427.35<br>(359.04 to 504.30)                          | 7.18<br>(6.81 to 7.58)                           | 21.39<br>(18.08 to 25.02)                        | 22.82<br>(18.94 to 26.90)                        | 17.28<br>(14.83 to 20.20)                         |
| Bladder cancer                  | 380.12<br>(350.06 to 408.50)                        | 787.08<br>(618.05 to 1,027.28)                       | 776.95<br>(610.42 to 1,008.16)         | 780.15<br>(612.28 to 1,025.71)                        | 17.87<br>(16.43 to 19.11)                        | 42.29<br>(33.29 to 54.51)                        | 43.60<br>(34.80 to 56.12)                        | 38.71<br>(30.19 to 50.71)                         |
| Brain and nervous system cancer | 1,104.93<br>(1,002.74 to 1,334.54)                  | 1,960.36<br>(1,569.81 to 2,430.94)                   | 2,030.12<br>(1,604.06 to 2,533.38)     | 1,840.05<br>(1,514.53 to 2,241.98)                    | 27.62<br>(24.90 to 33.46)                        | 62.31<br>(50.52 to 77.37)                        | 65.68<br>(52.46 to 82.37)                        | 55.25<br>(46.29 to 67.51)                         |
| Thyroid cancer                  | 313.00<br>(291.14 to 337.10)                        | 480.13<br>(386.96 to 616.01)                         | 460.61<br>(353.57 to 580.77)           | 505.28<br>(395.00 to 644.53)                          | 10.33<br>(9.61 to 11.18)                         | 18.94<br>(14.93 to 23.96)                        | 18.57<br>(14.63 to 23.05)                        | 18.97<br>(15.15 to 23.69)                         |
| Mesothelioma                    | 79.67<br>(67.50 to 97.08)                           | 143.45<br>(106.41 to 188.75)                         | 150.03<br>(109.39 to 200.37)           | 135.16<br>(103.49 to 173.35)                          | 2.84<br>(2.36 to 3.45)                           | 6.02<br>(4.50 to 7.78)                           | 6.45<br>(4.75 to 8.45)                           | 5.35<br>(4.13 to 6.77)                            |
| Hodgkin lymphoma                | 316.53<br>(258.55 to 423.02)                        | 260.79<br>(201.60 to 355.06)                         | 254.77<br>(194.00 to 343.98)           | 321.46<br>(250.71 to 429.44)                          | 7.14<br>(5.90 to 9.55)                           | 7.52<br>(5.91 to 10.31)                          | 7.51<br>(5.82 to 10.28)                          | 8.76<br>(6.95 to 11.68)                           |
| Non-Hodgkin lymphoma            | 1,080.02<br>(899.74 to 1,173.71)                    | 1,926.93<br>(1,456.58 to 2,357.66)                   | 1,966.38<br>(1,474.52 to 2,395.17)     | 1,754.65<br>(1,340.33 to 2,112.89)                    | 31.87<br>(26.67 to 34.33)                        | 72.72<br>(57.25 to 87.16)                        | 76.01<br>(59.58 to 90.34)                        | 61.94<br>(48.88 to 72.76)                         |
| Multiple myeloma                | 296.27<br>(237.28 to 321.46)                        | 731.04<br>(529.28 to 913.90)                         | 749.32<br>(541.94 to 938.24)           | 630.47<br>(467.36 to 786.21)                          | 11.19<br>(8.98 to 12.18)                         | 31.87<br>(23.96 to 39.12)                        | 33.40<br>(24.95 to 41.14)                        | 26.07<br>(19.88 to 31.76)                         |
| Leukemia                        | 1,572.71<br>(1,431.85 to 1,823.04)                  | 2,180.27<br>(1,742.41 to 2,664.69)                   | 2,135.50<br>(1,702.65 to 2,625.61)     | 2,138.97<br>(1,731.08 to 2,601.41)                    | 38.05<br>(34.31 to 43.15)                        | 71.47<br>(57.03 to 86.47)                        | 71.79<br>(57.27 to 86.14)                        | 65.57<br>(53.54 to 79.15)                         |
| Acute lymphoid leukemia         | 526.92<br>(457.03 to 649.62)                        | 550.92<br>(430.66 to 692.48)                         | 538.16<br>(424.51 to 678.43)           | 560.04<br>(438.79 to 706.67)                          | 9.84<br>(8.61 to 11.89)                          | 14.04<br>(10.94 to 17.49)                        | 13.89<br>(10.87 to 17.39)                        | 13.40<br>(10.61 to 16.77)                         |
| Chronic lymphoid leukemia       | 74.69<br>(61.69 to 96.20)                           | 142.85<br>(106.23 to 190.03)                         | 142.28<br>(106.25 to 189.44)           | 133.43<br>(100.93 to 178.81)                          | 3.06<br>(2.55 to 3.86)                           | 6.80<br>(5.23 to 8.84)                           | 6.97<br>(5.38 to 8.99)                           | 5.99<br>(4.65 to 7.82)                            |
| Acute myeloid leukemia          | 484.13<br>(417.12 to 551.39)                        | 897.66<br>(709.37 to 1,109.23)                       | 886.78<br>(699.93 to 1,096.74)         | 821.12<br>(640.12 to 1,005.39)                        | 11.71<br>(10.07 to 13.20)                        | 28.83<br>(22.53 to 35.31)                        | 29.15<br>(22.83 to 35.71)                        | 24.77<br>(19.59 to 30.42)                         |
| Chronic myeloid leukemia        | 175.16<br>(135.72 to 225.34)                        | 205.46<br>(146.74 to 281.56)                         | 199.35<br>(142.80 to 276.15)           | 201.84<br>(144.81 to 275.99)                          | 5.16<br>(4.09 to 6.66)                           | 7.25<br>(5.22 to 9.86)                           | 7.22<br>(5.21 to 9.89)                           | 6.77<br>(4.97 to 9.30)                            |
| Other leukemia                  | 311.82<br>(258.26 to 369.41)                        | 383.38<br>(294.30 to 488.66)                         | 368.93<br>(284.53 to 467.88)           | 422.54<br>(325.70 to 534.60)                          | 8.28<br>(6.98 to 9.47)                           | 14.55<br>(11.31 to 17.88)                        | 14.55<br>(11.28 to 17.97)                        | 14.64<br>(11.62 to 18.12)                         |
| Other neoplasms                 | 3,112.06<br>(2,238.53 to 3,339.87)                  | 4,277.92<br>(3,036.53 to 5,122.23)                   | 4,434.59<br>(3,133.27 to 5,357.99)     | 4,059.11<br>(2,931.59 to 4,765.04)                    | 90.33<br>(65.29 to 96.62)                        | 160.44<br>(117.63 to 188.19)                     | 170.35<br>(123.53 to 202.82)                     | 141.98<br>(103.59 to 162.10)                      |
| <b>Cardiovascular diseases</b>  | <b>79,159.82</b><br><b>(75,445.63 to 82,213.84)</b> | <b>84,461.59</b><br><b>(80,290.25 to 129,128.78)</b> | <b>85,319.70</b><br><b>(85,880.06)</b> | <b>153,636.56</b><br><b>(90,851.67 to 230,819.35)</b> | <b>3,503.44</b><br><b>(3,318.35 to 3,642.86)</b> | <b>4,612.68</b><br><b>(4,024.12 to 6,788.14)</b> | <b>3,427.59</b><br><b>(2,310.02 to 4,925.46)</b> | <b>7,358.17</b><br><b>(4,732.65 to 10,594.55)</b> |
| Rheumatic heart disease         | 4,181.16<br>(3,832.40 to 4,630.79)                  | 2,315.10<br>(1,782.38 to 2,978.23)                   | 2,251.18<br>(1,718.26 to 2,878.22)     | 2,888.88<br>(2,258.29 to 3,623.48)                    | 133.44<br>(122.27 to 147.15)                     | 102.25<br>(81.79 to 128.46)                      | 102.62<br>(80.66 to 127.54)                      | 117.05<br>(95.79 to 145.81)                       |
| Ischemic heart disease          | 48,502.08<br>(46,122.65 to 50,509.46)               | 51,939.34<br>(26,941.78 to 91,668.30)                | 33,062.82<br>(17,722.00 to 56,623.34)  | 99,425.28<br>(50,937.64 to 169,483.69)                | 2,162.39<br>(2,044.64 to 2,251.68)               | 2,808.22<br>(1,583.41 to 4,734.93)               | 1,974.72<br>(1,161.59 to 3,225.36)               | 4,720.09<br>(2,637.38 to 7,865.28)                |
| Stroke                          | 20,934.98<br>(19,872.87 to 21,989.55)               | 20,571.02<br>(11,938.42 to 34,344.17)                | 13,623.66<br>(8,313.99 to 21,693.78)   | 39,764.43<br>(22,361.94 to 66,586.71)                 | 954.89<br>(901.60 to 1,007.62)                   | 1,124.55<br>(707.39 to 1,802.56)                 | 820.82<br>(537.77 to 1,289.82)                   | 1,005.79<br>(1,156.02 to 2,989.47)                |
| Ischemic stroke                 | 9,016.86<br>(8,254.50 to 9,877.67)                  | 9,750.29<br>(5,537.35 to 17,018.03)                  | 6,923.07<br>(4,112.59 to 11,874.60)    | 16,364.63<br>(8,847.36 to 27,875.97)                  | 493.87<br>(454.67 to 537.48)                     | 632.97<br>(385.16 to 1,119.81)                   | 490.38<br>(305.99 to 841.58)                     | 938.78<br>(558.05 to 1,625.05)                    |

|                                                     |                                                               |                                                               |                                                               |                                                               |                                                            |                                                            |                                                            |                                                            |
|-----------------------------------------------------|---------------------------------------------------------------|---------------------------------------------------------------|---------------------------------------------------------------|---------------------------------------------------------------|------------------------------------------------------------|------------------------------------------------------------|------------------------------------------------------------|------------------------------------------------------------|
| Intracerebral hemorrhage                            | 11,918.11<br>(11,021.24 to<br>12,898.81)                      | 10,820.73<br>(5,691.82 to<br>19,545.33)                       | 6,700.58<br>(3,741.69 to<br>11,483.00)                        | 23,399.80<br>(12,035.86 to<br>43,163.24)                      | 461.02<br>(422.32 to<br>503.46)                            | 491.58<br>(287.35 to<br>838.12)                            | 330.45<br>(201.16 to<br>526.91)                            | 962.01<br>(539.16 to<br>1,642.77)                          |
| Hypertensive heart disease                          | 3,469.38<br>(2,894.97 to<br>3,887.53)                         | 6,013.85<br>(3,431.89 to<br>11,619.38)                        | 4,806.98<br>(2,971.23 to<br>8,234.65)                         | 7,994.26<br>(4,399.10 to<br>16,023.68)                        | 160.75<br>(132.58 to<br>179.32)                            | 353.01<br>(206.86 to<br>698.31)                            | 297.15<br>(186.95 to<br>527.22)                            | 424.73<br>(240.34 to<br>895.42)                            |
| Cardiomyopathy and myocarditis                      | 566.84<br>(399.09 to<br>645.00)                               | 620.56<br>(442.00 to<br>837.28)                               | 614.69<br>(436.90 to<br>819.56)                               | 614.60<br>(430.14 to<br>825.64)                               | 14.12<br>(11.53 to<br>15.50)                               | 23.25<br>(17.45 to<br>31.49)                               | 23.83<br>(17.95 to<br>31.91)                               | 20.95<br>(15.89 to<br>27.52)                               |
| Myocarditis                                         | 201.18<br>(100.19 to<br>277.78)                               | 135.19<br>(71.49 to<br>202.25)                                | 136.36<br>(72.28 to<br>202.00)                                | 146.38<br>(76.13 to<br>214.47)                                | 3.88<br>(2.10 to<br>5.33)                                  | 3.41<br>(2.09 to<br>4.96)                                  | 3.51<br>(2.16 to<br>5.08)                                  | 3.48<br>(2.09 to<br>5.06)                                  |
| <b>South Asia</b>                                   |                                                               |                                                               |                                                               |                                                               |                                                            |                                                            |                                                            |                                                            |
| Cause                                               | YLLs (in 1000s)                                               |                                                               |                                                               |                                                               | Deaths (in 1000s)                                          |                                                            |                                                            |                                                            |
|                                                     | 2016                                                          | 2040 Forecast                                                 | 2040 Better Scenario                                          | 2040 Worse Scenario                                           | 2016                                                       | 2040 Forecast                                              | 2040 Better Scenario                                       | 2040 Worse Scenario                                        |
| Alcoholic cardiomyopathy                            | 29.90<br>(22.82 to<br>40.43)                                  | 45.73<br>(33.48 to<br>72.57)                                  | 43.79<br>(31.62 to<br>69.74)                                  | 40.38<br>(30.44 to<br>61.89)                                  | 0.91<br>(0.74 to<br>1.32)                                  | 1.72<br>(1.30 to<br>2.78)                                  | 1.71<br>(1.27 to<br>2.79)                                  | 1.43<br>(1.12 to<br>2.27)                                  |
| Other cardiomyopathy                                | 335.76<br>(248.07 to<br>401.83)                               | 439.64<br>(295.34 to<br>627.15)                               | 434.55<br>(295.06 to<br>610.11)                               | 427.84<br>(285.59 to<br>620.90)                               | 9.33<br>(7.76 to<br>10.65)                                 | 18.12<br>(12.86 to<br>25.21)                               | 18.60<br>(13.38 to<br>25.95)                               | 16.03<br>(11.32 to<br>22.12)                               |
| Atrial fibrillation and flutter                     | 291.21<br>(234.65 to<br>357.68)                               | 868.11<br>(616.63 to<br>1,203.25)                             | 886.10<br>(631.51 to<br>1,221.87)                             | 738.54<br>(529.66 to<br>1,002.97)                             | 25.56<br>(20.28 to<br>31.96)                               | 83.82<br>(60.51 to<br>115.31)                              | 88.75<br>(64.40 to<br>122.07)                              | 64.97<br>(45.25 to<br>88.78)                               |
| Aortic aneurysm                                     | 419.83<br>(395.22 to<br>445.77)                               | 709.44<br>(525.03 to<br>938.63)                               | 692.20<br>(519.37 to<br>898.56)                               | 692.72<br>(513.69 to<br>913.99)                               | 18.44<br>(17.24 to<br>19.66)                               | 38.01<br>(30.04 to<br>47.63)                               | 39.03<br>(31.13 to<br>48.54)                               | 33.42<br>(26.29 to<br>42.21)                               |
| Peripheral artery disease                           | 26.51<br>(12.87 to<br>48.36)                                  | 107.28<br>(51.23 to<br>190.91)                                | 106.42<br>(51.31 to<br>190.01)                                | 88.61<br>(41.16 to<br>165.74)                                 | 1.81<br>(0.90 to<br>3.15)                                  | 8.65<br>(4.31 to<br>14.56)                                 | 9.03<br>(4.50 to<br>15.05)                                 | 6.35<br>(3.04 to<br>11.16)                                 |
| Endocarditis                                        | 431.96<br>(371.55 to<br>532.60)                               | 723.70<br>(502.58 to<br>1,016.11)                             | 712.04<br>(495.09 to<br>976.56)                               | 738.58<br>(518.47 to<br>1,036.82)                             | 15.03<br>(12.57 to<br>18.12)                               | 34.70<br>(24.28 to<br>48.92)                               | 35.46<br>(25.15 to<br>49.39)                               | 32.16<br>(22.74 to<br>45.21)                               |
| Other cardiovascular and circulatory diseases       | 335.87<br>(219.92 to<br>394.54)                               | 593.20<br>(354.50 to<br>827.38)                               | 563.62<br>(331.97 to<br>763.41)                               | 690.66<br>(411.75 to<br>956.60)                               | 17.01<br>(10.41 to<br>20.08)                               | 36.21<br>(21.18 to<br>47.44)                               | 36.18<br>(20.97 to<br>46.63)                               | 37.68<br>(22.03 to<br>49.38)                               |
| <b>Chronic respiratory diseases</b>                 | <b>24,960.96</b><br><b>(23,134.12 to</b><br><b>27,154.18)</b> | <b>31,329.19</b><br><b>(21,472.24 to</b><br><b>45,299.62)</b> | <b>25,337.89</b><br><b>(17,450.70 to</b><br><b>36,199.48)</b> | <b>43,554.99</b><br><b>(28,660.21 to</b><br><b>66,842.51)</b> | <b>1,249.87</b><br><b>(1,149.77 to</b><br><b>1,358.90)</b> | <b>1,774.52</b><br><b>(1,249.78 to</b><br><b>2,497.92)</b> | <b>1,523.60</b><br><b>(1,083.32 to</b><br><b>2,091.48)</b> | <b>2,277.52</b><br><b>(1,535.18 to</b><br><b>3,412.71)</b> |
| Chronic obstructive pulmonary disease               | 18,492.36<br>(16,781.32 to<br>20,553.75)                      | 24,716.81<br>(15,832.12 to<br>37,939.85)                      | 19,101.73<br>(12,138.47 to<br>29,522.12)                      | 36,542.27<br>(22,442.45 to<br>59,515.75)                      | 988.09<br>(898.15 to<br>1,089.15)                          | 1,448.31<br>(957.59 to<br>2,134.81)                        | 1,205.53<br>(795.56 to<br>1,763.54)                        | 1,957.27<br>(1,232.45 to<br>3,057.13)                      |
| Pneumoconiosis                                      | 84.11<br>(66.06 to<br>117.62)                                 | 104.53<br>(79.47 to<br>142.60)                                | 104.29<br>(77.69 to<br>144.42)                                | 103.14<br>(81.13 to<br>137.50)                                | 4.11<br>(3.29 to<br>5.57)                                  | 6.00<br>(4.74 to<br>8.00)                                  | 6.13<br>(4.74 to<br>8.26)                                  | 5.56<br>(4.43 to<br>7.25)                                  |
| Silicosis                                           | 20.75<br>(13.06 to<br>31.72)                                  | 20.00<br>(12.42 to<br>30.50)                                  | 21.00<br>(12.64 to<br>32.54)                                  | 19.86<br>(12.59 to<br>29.55)                                  | 1.09<br>(0.69 to<br>1.63)                                  | 1.22<br>(0.77 to<br>1.84)                                  | 1.31<br>(0.82 to<br>2.01)                                  | 1.15<br>(0.75 to<br>1.66)                                  |
| Asbestosis                                          | 13.66<br>(8.03 to<br>20.72)                                   | 24.43<br>(13.83 to<br>39.17)                                  | 25.79<br>(14.52 to<br>41.59)                                  | 22.19<br>(12.71 to<br>33.67)                                  | 0.55<br>(0.30 to<br>0.84)                                  | 1.19<br>(0.63 to<br>1.90)                                  | 1.29<br>(0.67 to<br>2.08)                                  | 1.01<br>(0.56 to<br>1.56)                                  |
| Coal workers pneumoconiosis                         | 10.55<br>(3.68 to<br>16.88)                                   | 10.37<br>(3.78 to<br>16.15)                                   | 9.46<br>(3.45 to<br>15.06)                                    | 13.20<br>(4.93 to<br>20.46)                                   | 0.52<br>(0.19 to<br>0.81)                                  | 0.59<br>(0.23 to<br>0.89)                                  | 0.55<br>(0.21 to<br>0.85)                                  | 0.71<br>(0.28 to<br>1.07)                                  |
| Other pneumoconiosis                                | 39.15<br>(25.95 to<br>58.03)                                  | 49.74<br>(32.28 to<br>72.81)                                  | 48.05<br>(30.73 to<br>72.18)                                  | 47.89<br>(31.92 to<br>68.92)                                  | 1.95<br>(1.31 to<br>2.92)                                  | 3.00<br>(2.01 to<br>4.33)                                  | 2.98<br>(1.97 to<br>4.34)                                  | 2.70<br>(1.81 to<br>3.93)                                  |
| Asthma                                              | 5,370.47<br>(3,599.55 to<br>7,045.38)                         | 4,118.94<br>(2,546.15 to<br>6,086.87)                         | 3,607.26<br>(2,263.26 to<br>5,218.18)                         | 4,884.36<br>(2,961.84 to<br>7,289.20)                         | 216.38<br>(139.75 to<br>287.07)                            | 200.81<br>(124.45 to<br>297.40)                            | 182.25<br>(115.92 to<br>260.64)                            | 212.04<br>(132.70 to<br>332.75)                            |
| Interstitial lung disease and pulmonary sarcoidosis | 690.15<br>(399.16 to<br>1,026.96)                             | 1,903.86<br>(1,125.86 to<br>2,863.38)                         | 2,040.58<br>(1,206.29 to<br>3,089.58)                         | 1,516.56<br>(882.92 to<br>2,284.22)                           | 30.97<br>(18.24 to<br>45.62)                               | 99.67<br>(59.75 to<br>147.97)                              | 109.23<br>(65.89 to<br>162.22)                             | 74.66<br>(44.11 to<br>110.96)                              |

|                                                                |                                                             |                                                               |                                                               |                                                               |                                                      |                                                        |                                                        |                                                      |
|----------------------------------------------------------------|-------------------------------------------------------------|---------------------------------------------------------------|---------------------------------------------------------------|---------------------------------------------------------------|------------------------------------------------------|--------------------------------------------------------|--------------------------------------------------------|------------------------------------------------------|
| Other chronic respiratory diseases                             | 323.86<br>(175.94 to<br>433.21)                             | 485.05<br>(266.79 to<br>654.95)                               | 484.03<br>(266.49 to<br>657.76)                               | 508.67<br>(272.14 to<br>688.94)                               | 10.32<br>(5.84 to<br>13.28)                          | 19.74<br>(11.19 to<br>25.39)                           | 20.46<br>(11.55 to<br>26.53)                           | 19.00<br>(10.60 to<br>24.80)                         |
| <b>Cirrhosis and other chronic liver diseases</b>              | <b>9,289.88</b><br><b>(8,518.06 to</b><br><b>10,915.82)</b> | <b>12,690.00</b><br><b>(10,417.87 to</b><br><b>15,322.70)</b> | <b>12,503.39</b><br><b>(10,157.14 to</b><br><b>15,462.25)</b> | <b>13,416.98</b><br><b>(11,316.37 to</b><br><b>16,091.69)</b> | <b>270.20</b><br><b>(248.68 to</b><br><b>312.74)</b> | <b>437.23</b><br><b>(370.69 to</b><br><b>519.79)</b>   | <b>439.80</b><br><b>(366.18 to</b><br><b>528.22)</b>   | <b>442.17</b><br><b>(384.99 to</b><br><b>520.61)</b> |
| Cirrhosis and other chronic liver diseases due to hepatitis B  | 3,016.51<br>(2,687.93 to<br>3,580.79)                       | 4,325.89<br>(3,537.60 to<br>5,334.49)                         | 4,402.24<br>(3,544.97 to<br>5,484.43)                         | 4,465.42<br>(3,718.57 to<br>5,407.29)                         | 90.41<br>(80.78 to<br>106.10)                        | 149.70<br>(125.34 to<br>182.46)                        | 155.15<br>(127.44 to<br>189.68)                        | 148.41<br>(127.66 to<br>177.22)                      |
| Cirrhosis and other chronic liver diseases due to hepatitis C  | 2,319.22<br>(2,050.64 to<br>2,678.99)                       | 3,343.63<br>(2,711.60 to<br>4,054.58)                         | 3,383.80<br>(2,695.64 to<br>4,192.03)                         | 3,490.20<br>(2,894.29 to<br>4,232.12)                         | 67.57<br>(60.22 to<br>79.06)                         | 110.18<br>(91.73 to<br>132.72)                         | 113.33<br>(93.14 to<br>137.47)                         | 111.19<br>(94.59 to<br>132.74)                       |
| Cirrhosis and other chronic liver diseases due to alcohol use  | 2,169.85<br>(1,899.68 to<br>2,567.86)                       | 3,196.83<br>(2,542.67 to<br>3,982.68)                         | 2,887.77<br>(2,269.45 to<br>3,629.61)                         | 3,468.20<br>(2,811.01 to<br>4,314.17)                         | 69.27<br>(61.07 to<br>81.95)                         | 116.27<br>(94.97 to<br>141.57)                         | 108.45<br>(87.27 to<br>132.81)                         | 120.66<br>(100.94 to<br>145.24)                      |
| Cirrhosis and other chronic liver diseases due to other causes | 1,784.30<br>(1,547.93 to<br>2,220.66)                       | 1,823.65<br>(1,469.20 to<br>2,290.01)                         | 1,829.58<br>(1,459.77 to<br>2,317.42)                         | 1,993.17<br>(1,626.38 to<br>2,480.03)                         | 42.95<br>(37.24 to<br>51.41)                         | 61.09<br>(49.28 to<br>75.93)                           | 62.88<br>(50.36 to<br>78.38)                           | 61.91<br>(51.29 to<br>75.64)                         |
| <b>Digestive diseases</b>                                      | <b>7,913.62</b><br><b>(7,380.96 to</b><br><b>8,649.05)</b>  | <b>9,213.39</b><br><b>(7,493.69 to</b><br><b>11,274.61)</b>   | <b>9,099.40</b><br><b>(7,291.99 to</b><br><b>11,206.90)</b>   | <b>10,123.22</b><br><b>(8,324.88 to</b><br><b>12,161.78)</b>  | <b>262.67</b><br><b>(243.59 to</b><br><b>288.73)</b> | <b>407.63</b><br><b>(337.90 to</b><br><b>488.65)</b>   | <b>414.50</b><br><b>(337.07 to</b><br><b>506.26)</b>   | <b>414.10</b><br><b>(349.23 to</b><br><b>490.38)</b> |
| Peptic ulcer disease                                           | 1,726.08<br>(1,525.92 to<br>2,131.72)                       | 1,472.59<br>(1,073.63 to<br>2,007.93)                         | 1,409.71<br>(1,015.51 to<br>1,938.97)                         | 1,891.48<br>(1,388.03 to<br>2,567.98)                         | 63.79<br>(56.38 to<br>77.73)                         | 70.28<br>(52.06 to<br>94.79)                           | 69.41<br>(50.86 to<br>94.63)                           | 83.78<br>(62.46 to<br>112.77)                        |
| <b>South Asia</b>                                              |                                                             |                                                               |                                                               |                                                               |                                                      |                                                        |                                                        |                                                      |
| Cause                                                          | YLLs (in 1000s)                                             |                                                               |                                                               |                                                               | Deaths (in 1000s)                                    |                                                        |                                                        |                                                      |
|                                                                | 2016                                                        | 2040 Forecast                                                 | 2040 Better Scenario                                          | 2040 Worse Scenario                                           | 2016                                                 | 2040 Forecast                                          | 2040 Better Scenario                                   | 2040 Worse Scenario                                  |
| Gastritis and duodenitis                                       | 256.30<br>(218.30 to<br>314.67)                             | 401.38<br>(310.30 to<br>536.61)                               | 409.67<br>(311.47 to<br>556.93)                               | 427.35<br>(338.55 to<br>564.87)                               | 9.44<br>(8.00 to<br>11.59)                           | 19.29<br>(15.23 to<br>25.24)                           | 20.33<br>(15.70 to<br>27.09)                           | 18.88<br>(15.19 to<br>24.48)                         |
| Appendicitis                                                   | 870.64<br>(702.03 to<br>1,059.15)                           | 724.78<br>(555.40 to<br>960.37)                               | 716.12<br>(541.29 to<br>960.64)                               | 879.54<br>(686.74 to<br>1,145.89)                             | 22.40<br>(18.04 to<br>27.49)                         | 25.63<br>(19.84 to<br>33.77)                           | 26.02<br>(19.69 to<br>34.49)                           | 28.87<br>(22.58 to<br>37.24)                         |
| Paralytic ileus and intestinal obstruction                     | 2,725.39<br>(2,027.63 to<br>3,054.82)                       | 3,370.47<br>(2,366.14 to<br>4,171.07)                         | 3,452.37<br>(2,426.40 to<br>4,320.57)                         | 3,469.49<br>(2,467.57 to<br>4,220.54)                         | 79.02<br>(57.65 to<br>88.70)                         | 136.54<br>(95.82 to<br>166.47)                         | 143.40<br>(99.64 to<br>176.46)                         | 129.86<br>(92.50 to<br>154.77)                       |
| Inguinal, femoral, and abdominal hernia                        | 364.47<br>(283.14 to<br>499.01)                             | 392.14<br>(292.20 to<br>551.86)                               | 404.34<br>(295.77 to<br>572.24)                               | 410.53<br>(310.71 to<br>574.63)                               | 14.59<br>(11.18 to<br>19.50)                         | 30.39<br>(15.40 to<br>28.14)                           | 21.78<br>(16.11 to<br>30.03)                           | 19.35<br>(14.59 to<br>26.67)                         |
| Inflammatory bowel disease                                     | 217.46<br>(181.01 to<br>301.24)                             | 315.43<br>(243.90 to<br>437.97)                               | 327.84<br>(250.21 to<br>458.98)                               | 300.85<br>(236.91 to<br>410.58)                               | 7.44<br>(6.30 to<br>9.78)                            | 14.37<br>(11.42 to<br>19.25)                           | 15.34<br>(11.97 to<br>20.69)                           | 12.69<br>(10.32 to<br>16.69)                         |
| Vascular intestinal disorders                                  | 394.83<br>(284.77 to<br>494.25)                             | 705.51<br>(506.72 to<br>928.85)                               | 736.26<br>(522.27 to<br>990.27)                               | 688.98<br>(502.48 to<br>882.77)                               | 19.24<br>(14.39 to<br>23.88)                         | 41.02<br>(30.38 to<br>53.42)                           | 43.88<br>(32.46 to<br>57.72)                           | 37.37<br>(27.76 to<br>47.55)                         |
| Gallbladder and biliary diseases                               | 329.19<br>(275.62 to<br>481.63)                             | 433.87<br>(265.08 to<br>739.09)                               | 367.17<br>(234.30 to<br>610.05)                               | 515.69<br>(317.15 to<br>881.66)                               | 12.45<br>(10.47 to<br>18.10)                         | 21.66<br>(13.45 to<br>36.48)                           | 19.09<br>(12.46 to<br>30.92)                           | 23.57<br>(14.69 to<br>39.47)                         |
| Pancreatitis                                                   | 914.73<br>(756.67 to<br>1,067.21)                           | 1,212.02<br>(866.29 to<br>1,667.60)                           | 1,085.03<br>(793.91 to<br>1,465.96)                           | 1,342.68<br>(966.09 to<br>1,879.84)                           | 28.81<br>(23.83 to<br>34.10)                         | 46.54<br>(34.05 to<br>63.26)                           | 43.24<br>(32.59 to<br>58.02)                           | 48.75<br>(35.45 to<br>66.98)                         |
| Other digestive diseases                                       | 114.54<br>(100.59 to<br>139.12)                             | 185.20<br>(149.72 to<br>232.16)                               | 190.90<br>(149.97 to<br>242.34)                               | 196.62<br>(162.33 to<br>242.74)                               | 5.50<br>(4.82 to<br>6.61)                            | 11.30<br>(9.31 to<br>14.14)                            | 12.02<br>(9.69 to<br>15.15)                            | 10.97<br>(9.04 to<br>13.61)                          |
| <b>Neurological disorders</b>                                  | <b>4,888.63</b><br><b>(4,430.21 to</b><br><b>5,438.69)</b>  | <b>10,103.29</b><br><b>(8,020.49 to</b><br><b>13,080.24)</b>  | <b>10,249.87</b><br><b>(8,151.09 to</b><br><b>13,036.50)</b>  | <b>9,016.37</b><br><b>(7,399.67 to</b><br><b>11,494.42)</b>   | <b>256.21</b><br><b>(222.65 to</b><br><b>300.63)</b> | <b>783.08</b><br><b>(605.34 to</b><br><b>1,054.54)</b> | <b>825.94</b><br><b>(648.60 to</b><br><b>1,067.72)</b> | <b>604.20</b><br><b>(445.26 to</b><br><b>823.80)</b> |
| Alzheimer's disease and other dementias                        | 1,971.47<br>(1,630.27 to<br>2,422.87)                       | 6,229.48<br>(4,446.06 to<br>8,946.93)                         | 6,373.85<br>(4,624.93 to<br>8,893.76)                         | 5,033.56<br>(3,549.31 to<br>7,415.30)                         | 178.66<br>(147.25 to<br>221.99)                      | 613.95<br>(444.06 to<br>880.33)                        | 646.42<br>(476.98 to<br>887.41)                        | 458.12<br>(300.91 to<br>678.10)                      |
| Parkinson's disease                                            | 283.76<br>(216.87 to<br>361.65)                             | 1,039.12<br>(771.64 to<br>1,371.46)                           | 1,159.74<br>(848.94 to<br>1,574.51)                           | 747.66<br>(551.47 to<br>976.36)                               | 21.01<br>(15.94 to<br>27.12)                         | 84.19<br>(62.64 to<br>111.58)                          | 96.01<br>(70.86 to<br>128.83)                          | 56.70<br>(40.96 to<br>74.46)                         |

|                              |                                                            |                                                            |                                                            |                                                            |                                                   |                                                   |                                                   |                                                   |
|------------------------------|------------------------------------------------------------|------------------------------------------------------------|------------------------------------------------------------|------------------------------------------------------------|---------------------------------------------------|---------------------------------------------------|---------------------------------------------------|---------------------------------------------------|
| Epilepsy                     | 2,085.42<br>(1,875.46 to<br>2,351.44)                      | 1,992.27<br>(1,607.05 to<br>2,444.95)                      | 1,842.15<br>(1,468.88 to<br>2,272.17)                      | 2,460.92<br>(1,982.58 to<br>3,028.52)                      | 43.01<br>(39.13 to<br>47.85)                      | 57.07<br>(46.14 to<br>69.92)                      | 54.00<br>(43.30 to<br>66.26)                      | 63.37<br>(53.76 to<br>79.18)                      |
| Multiple sclerosis           | 87.06<br>(74.42 to<br>107.98)                              | 150.43<br>(114.78 to<br>201.11)                            | 153.57<br>(115.21 to<br>206.38)                            | 138.92<br>(108.13 to<br>183.33)                            | 2.48<br>(2.13 to<br>3.03)                         | 4.83<br>(3.74 to<br>6.28)                         | 4.99<br>(3.81 to<br>6.54)                         | 4.33<br>(3.41 to<br>5.59)                         |
| Motor neuron disease         | 88.33<br>(74.20 to<br>103.40)                              | 184.23<br>(139.12 to<br>235.25)                            | 193.62<br>(143.75 to<br>248.79)                            | 161.06<br>(124.04 to<br>201.02)                            | 2.71<br>(2.23 to<br>3.28)                         | 6.95<br>(5.27 to<br>8.99)                         | 7.40<br>(5.57 to<br>9.66)                         | 5.86<br>(4.54 to<br>7.45)                         |
| Other neurological disorders | 372.58<br>(316.58 to<br>427.14)                            | 507.77<br>(393.92 to<br>618.38)                            | 526.94<br>(404.47 to<br>646.21)                            | 474.24<br>(379.11 to<br>573.44)                            | 8.34<br>(7.28 to<br>9.39)                         | 16.09<br>(12.26 to<br>19.41)                      | 17.11<br>(12.93 to<br>20.97)                      | 13.81<br>(10.95 to<br>16.34)                      |
| <b>Mental disorders</b>      | <b>1,657.69</b><br><b>(1,230.84 to</b><br><b>1,881.69)</b> | <b>2,632.81</b><br><b>(1,872.82 to</b><br><b>3,205.30)</b> | <b>2,644.10</b><br><b>(1,861.34 to</b><br><b>3,263.78)</b> | <b>2,579.10</b><br><b>(1,851.93 to</b><br><b>3,092.08)</b> | <b>42.70</b><br><b>(31.18 to</b><br><b>48.32)</b> | <b>79.65</b><br><b>(56.73 to</b><br><b>95.77)</b> | <b>81.57</b><br><b>(57.24 to</b><br><b>99.73)</b> | <b>74.74</b><br><b>(53.62 to</b><br><b>87.44)</b> |
| Alcohol use disorders        | 1,116.46<br>(716.71 to<br>1,305.95)                        | 1,449.53<br>(858.05 to<br>1,816.22)                        | 1,426.65<br>(837.06 to<br>1,820.90)                        | 1,434.86<br>(858.38 to<br>1,774.66)                        | 29.67<br>(18.98 to<br>34.41)                      | 44.35<br>(26.60 to<br>55.35)                      | 44.45<br>(26.59 to<br>56.07)                      | 42.42<br>(26.05 to<br>51.53)                      |
| Drug use disorders           | 537.23<br>(460.97 to<br>618.60)                            | 1,178.17<br>(913.59 to<br>1,433.97)                        | 1,212.25<br>(933.51 to<br>1,490.36)                        | 1,139.23<br>(895.38 to<br>1,363.14)                        | 12.96<br>(10.75 to<br>14.52)                      | 35.20<br>(27.06 to<br>41.57)                      | 37.01<br>(28.04 to<br>44.65)                      | 32.23<br>(25.12 to<br>37.39)                      |
| Opioid use disorders         | 355.67<br>(310.98 to<br>428.48)                            | 676.12<br>(526.89 to<br>830.74)                            | 692.65<br>(532.50 to<br>853.69)                            | 660.61<br>(523.15 to<br>811.53)                            | 8.00<br>(6.73 to<br>9.38)                         | 18.31<br>(13.95 to<br>22.22)                      | 19.07<br>(14.38 to<br>23.34)                      | 17.18<br>(13.24 to<br>20.76)                      |
| Cocaine use disorders        | 28.88<br>(10.70 to<br>48.82)                               | 74.31<br>(27.40 to<br>129.26)                              | 75.70<br>(27.89 to<br>133.35)                              | 76.89<br>(28.59 to<br>131.60)                              | 0.74<br>(0.27 to<br>1.25)                         | 2.14<br>(0.80 to<br>3.72)                         | 2.21<br>(0.82 to<br>3.89)                         | 2.16<br>(0.80 to<br>3.70)                         |
| Amphetamine use disorders    | 18.46<br>(9.09 to<br>30.34)                                | 58.22<br>(27.43 to<br>96.23)                               | 58.79<br>(27.00 to<br>98.18)                               | 62.47<br>(29.66 to<br>103.91)                              | 0.44<br>(0.21 to<br>0.73)                         | 1.55<br>(0.74 to<br>2.56)                         | 1.58<br>(0.75 to<br>2.64)                         | 1.63<br>(0.77 to<br>2.72)                         |
| Other drug use disorders     | 134.21<br>(97.93 to<br>156.03)                             | 369.52<br>(253.07 to<br>455.88)                            | 385.10<br>(262.20 to<br>477.12)                            | 339.25<br>(234.84 to<br>415.15)                            | 3.78<br>(2.70 to<br>4.29)                         | 13.19<br>(9.13 to<br>15.84)                       | 14.15<br>(9.72 to<br>17.15)                       | 11.25<br>(7.92 to<br>13.28)                       |
| Eating disorders             | 3.99<br>(2.67 to<br>5.70)                                  | 5.11<br>(3.30 to<br>7.74)                                  | 5.20<br>(3.35 to<br>7.89)                                  | 5.02<br>(3.28 to<br>7.47)                                  | 0.07<br>(0.05 to<br>0.10)                         | 0.10<br>(0.07 to<br>0.15)                         | 0.10<br>(0.07 to<br>0.16)                         | 0.10<br>(0.06 to<br>0.15)                         |

**South Asia**

| Cause                                               | YLLs (in 1000s)                                               |                                                               |                                                               |                                                               | Deaths (in 1000s)                                    |                                                            |                                                            |                                                            |
|-----------------------------------------------------|---------------------------------------------------------------|---------------------------------------------------------------|---------------------------------------------------------------|---------------------------------------------------------------|------------------------------------------------------|------------------------------------------------------------|------------------------------------------------------------|------------------------------------------------------------|
|                                                     | 2016                                                          | 2040 Forecast                                                 | 2040 Better Scenario                                          | 2040 Worse Scenario                                           | 2016                                                 | 2040 Forecast                                              | 2040 Better Scenario                                       | 2040 Worse Scenario                                        |
|                                                     | <b>19,082.11</b><br><b>(18,234.58 to</b><br><b>20,272.62)</b> | <b>31,517.66</b><br><b>(22,998.10 to</b><br><b>42,970.80)</b> | <b>28,095.67</b><br><b>(20,535.07 to</b><br><b>37,942.88)</b> | <b>39,163.36</b><br><b>(28,733.50 to</b><br><b>52,927.20)</b> | <b>800.06</b><br><b>(755.32 to</b><br><b>842.03)</b> | <b>1,763.26</b><br><b>(1,325.93 to</b><br><b>2,345.70)</b> | <b>1,635.84</b><br><b>(1,231.10 to</b><br><b>2,165.20)</b> | <b>2,004.68</b><br><b>(1,537.75 to</b><br><b>2,664.37)</b> |
| Diabetes, urogenital, blood, and endocrine diseases | 7,478.28<br>(7,067.40 to<br>7,851.17)                         | 12,633.32<br>(9,002.78 to<br>17,611.14)                       | 11,651.02<br>(8,321.69 to<br>16,048.22)                       | 15,870.10<br>(11,182.76 to<br>22,212.20)                      | 386.01<br>(361.52 to<br>406.91)                      | 818.33<br>(606.92 to<br>1,088.16)                          | 789.47<br>(592.00 to<br>1,034.14)                          | 935.59<br>(678.00 to<br>1,247.98)                          |
| Diabetes mellitus                                   | 35.45<br>(31.38 to<br>40.36)                                  | 44.48<br>(35.33 to<br>55.97)                                  | 45.22<br>(35.18 to<br>57.65)                                  | 48.78<br>(39.20 to<br>60.63)                                  | 1.11<br>(0.99 to<br>1.27)                            | 1.96<br>(1.63 to<br>2.36)                                  | 2.08<br>(1.71 to<br>2.54)                                  | 1.86<br>(1.56 to<br>2.23)                                  |
| Acute glomerulonephritis                            | 7,840.30<br>(7,390.65 to<br>8,740.09)                         | 13,384.33<br>(6,907.24 to<br>23,681.72)                       | 10,751.81<br>(5,912.65 to<br>18,892.93)                       | 17,785.15<br>(9,356.81 to<br>30,776.87)                       | 287.79<br>(269.75 to<br>317.44)                      | 657.82<br>(331.65 to<br>1,204.62)                          | 537.26<br>(281.46 to<br>992.62)                            | 815.23<br>(414.23 to<br>1,455.86)                          |
| Chronic kidney disease                              | 2,811.61<br>(2,441.26 to<br>3,182.85)                         | 5,961.91<br>(2,913.24 to<br>11,046.74)                        | 4,698.85<br>(2,433.53 to<br>8,562.55)                         | 7,895.46<br>(3,880.31 to<br>14,409.66)                        | 115.59<br>(100.44 to<br>130.61)                      | 291.42<br>(140.52 to<br>542.62)                            | 234.10<br>(116.94 to<br>442.86)                            | 366.09<br>(177.31 to<br>673.07)                            |
| Chronic kidney disease due to diabetes mellitus     | 1,397.91<br>(1,217.08 to<br>1,627.08)                         | 2,794.67<br>(1,346.38 to<br>5,181.48)                         | 2,344.00<br>(1,142.63 to<br>4,179.38)                         | 3,601.52<br>(1,757.01 to<br>6,538.65)                         | 63.31<br>(55.07 to<br>72.76)                         | 163.19<br>(79.29 to<br>308.40)                             | 134.71<br>(68.08 to<br>257.42)                             | 194.24<br>(92.76 to<br>357.28)                             |
| Chronic kidney disease due to hypertension          | 1,333.97<br>(1,137.32 to<br>1,604.69)                         | 1,460.06<br>(883.12 to<br>2,421.29)                           | 1,219.64<br>(760.67 to<br>1,931.73)                           | 2,008.95<br>(1,216.31 to<br>3,295.82)                         | 34.55<br>(29.35 to<br>40.67)                         | 54.81<br>(29.66 to<br>95.92)                               | 45.82<br>(26.00 to<br>79.08)                               | 70.16<br>(38.22 to<br>120.18)                              |
| Chronic kidney disease due to glomerulonephritis    | 2,296.81<br>(2,000.26 to<br>2,654.62)                         | 3,167.68<br>(1,731.36 to<br>5,500.01)                         | 2,589.32<br>(1,489.43 to<br>4,334.09)                         | 4,279.22<br>(2,352.83 to<br>7,227.01)                         | 74.34<br>(64.73 to<br>86.07)                         | 148.41<br>(78.19 to<br>273.59)                             | 122.62<br>(66.51 to<br>225.73)                             | 184.75<br>(95.93 to<br>323.70)                             |

|                                                   |                                         |                                       |                                       |                                       |                                 |                                 |                                 |                                 |
|---------------------------------------------------|-----------------------------------------|---------------------------------------|---------------------------------------|---------------------------------------|---------------------------------|---------------------------------|---------------------------------|---------------------------------|
| Urinary diseases and male infertility             | 2,129.31<br>(1,995.15 to<br>2,254.31)   | 3,808.64<br>(3,163.39 to<br>4,433.99) | 3,984.29<br>(3,231.89 to<br>4,714.44) | 3,621.64<br>(3,133.85 to<br>4,094.64) | 80.67<br>(75.48 to<br>85.29)    | 209.71<br>(180.24 to<br>237.56) | 227.51<br>(190.65 to<br>260.28) | 177.82<br>(157.87 to<br>197.88) |
| Urinary tract infections                          | 1,324.14<br>(1,164.42 to<br>1,444.37)   | 2,833.70<br>(2,295.44 to<br>3,372.54) | 2,979.35<br>(2,362.49 to<br>3,589.34) | 2,600.29<br>(2,183.14 to<br>3,006.79) | 51.72<br>(45.19 to<br>56.61)    | 162.12<br>(136.11 to<br>188.50) | 176.53<br>(144.78 to<br>206.44) | 132.97<br>(114.02 to<br>151.75) |
| Urolithiasis                                      | 187.71<br>(140.49 to<br>289.26)         | 416.06<br>(294.23 to<br>641.05)       | 434.83<br>(304.46 to<br>675.18)       | 388.83<br>(281.64 to<br>601.13)       | 6.96<br>(5.16 to<br>10.90)      | 20.04<br>(14.39 to<br>31.30)    | 21.68<br>(15.25 to<br>34.25)    | 16.95<br>(12.37 to<br>26.61)    |
| Other urinary diseases                            | 617.47<br>(520.12 to<br>738.60)         | 558.87<br>(414.84 to<br>725.98)       | 570.11<br>(415.50 to<br>754.14)       | 632.51<br>(482.79 to<br>804.12)       | 22.00<br>(18.26 to<br>26.24)    | 27.55<br>(21.10 to<br>34.99)    | 29.30<br>(21.82 to<br>38.31)    | 27.90<br>(21.66 to<br>35.23)    |
| Gynecological diseases                            | 69.78<br>(61.79 to<br>78.56)            | 78.12<br>(56.04 to<br>102.51)         | 78.13<br>(54.66 to<br>103.83)         | 90.56<br>(67.02 to<br>118.63)         | 2.80<br>(2.40 to<br>3.15)       | 4.39<br>(3.25 to<br>5.72)       | 4.57<br>(3.30 to<br>6.04)       | 4.49<br>(3.30 to<br>5.78)       |
| Uterine fibroids                                  | 24.40<br>(6.74 to<br>36.01)             | 24.64<br>(6.38 to<br>42.46)           | 24.41<br>(6.41 to<br>42.35)           | 29.78<br>(8.13 to<br>50.22)           | 0.93<br>(0.26 to<br>1.38)       | 1.17<br>(0.31 to<br>1.95)       | 1.19<br>(0.31 to<br>2.08)       | 1.29<br>(0.34 to<br>2.14)       |
| Polycystic ovarian syndrome                       | 6.02<br>(1.82 to<br>15.07)              | 3.23<br>(0.76 to<br>9.26)             | 3.05<br>(0.70 to<br>8.59)             | 4.73<br>(1.13 to<br>12.65)            | 0.14<br>(0.04 to<br>0.33)       | 0.08<br>(0.02 to<br>0.21)       | 0.07<br>(0.02 to<br>0.20)       | 0.11<br>(0.03 to<br>0.30)       |
| Endometriosis                                     | 0.52<br>(0.15 to<br>1.15)               | 0.58<br>(0.15 to<br>1.53)             | 0.57<br>(0.15 to<br>1.46)             | 0.74<br>(0.19 to<br>1.91)             | 0.01<br>(0.00 to<br>0.02)       | 0.01<br>(0.00 to<br>0.03)       | 0.01<br>(0.00 to<br>0.03)       | 0.02<br>(0.00 to<br>0.04)       |
| Genital prolapse                                  | 7.42<br>(2.21 to<br>12.80)              | 7.81<br>(2.26 to<br>14.78)            | 7.87<br>(2.15 to<br>14.98)            | 9.04<br>(2.66 to<br>16.80)            | 0.56<br>(0.18 to<br>0.92)       | 0.66<br>(0.19 to<br>1.25)       | 0.68<br>(0.19 to<br>1.30)       | 0.70<br>(0.19 to<br>1.27)       |
| Other gynecological diseases                      | 31.43<br>(17.48 to<br>49.71)            | 41.85<br>(23.81 to<br>64.82)          | 42.23<br>(24.02 to<br>65.74)          | 46.27<br>(25.61 to<br>72.10)          | 1.17<br>(0.65 to<br>1.92)       | 2.48<br>(1.49 to<br>3.67)       | 2.62<br>(1.57 to<br>3.92)       | 2.38<br>(1.39 to<br>3.59)       |
| Hemoglobinopathies and hemolytic anemias          | 1,094.69<br>(956.66 to<br>1,321.17)     | 1,100.23<br>(882.28 to<br>1,444.80)   | 1,111.43<br>(873.97 to<br>1,467.09)   | 1,233.02<br>(1,003.50 to<br>1,580.29) | 30.56<br>(26.21 to<br>37.72)    | 50.95<br>(41.74 to<br>64.50)    | 53.71<br>(43.65 to<br>68.01)    | 50.10<br>(40.73 to<br>62.96)    |
| Thalassemias                                      | 120.03<br>(86.91 to<br>167.88)          | 41.20<br>(24.39 to<br>62.29)          | 42.86<br>(25.61 to<br>64.38)          | 49.80<br>(27.97 to<br>78.28)          | 1.46<br>(1.06 to<br>2.02)       | 1.66<br>(0.31 to<br>0.78)       | 0.52<br>(0.33 to<br>0.81)       | 0.54<br>(0.35 to<br>0.97)       |
| Sickle cell disorders                             | 646.80<br>(550.84 to<br>792.92)         | 547.36<br>(409.62 to<br>740.48)       | 544.35<br>(402.00 to<br>738.66)       | 636.60<br>(483.11 to<br>854.00)       | 11.11<br>(9.49 to<br>13.74)     | 11.85<br>(8.74 to<br>16.26)     | 11.85<br>(8.61 to<br>16.40)     | 13.41<br>(9.99 to<br>18.36)     |
| G6PD deficiency                                   | 145.06<br>(120.12 to<br>193.18)         | 225.90<br>(169.28 to<br>315.74)       | 223.43<br>(165.77 to<br>316.58)       | 268.08<br>(206.75 to<br>371.04)       | 4.16<br>(3.52 to<br>5.58)       | 9.23<br>(7.05 to<br>13.00)      | 9.41<br>(7.05 to<br>13.43)      | 10.22<br>(8.05 to<br>13.99)     |
| Other hemoglobinopathies and hemolytic anemias    | 182.80<br>(154.11 to<br>234.88)         | 285.77<br>(231.49 to<br>363.47)       | 300.80<br>(240.40 to<br>387.06)       | 278.54<br>(217.40 to<br>355.24)       | 13.83<br>(11.34 to<br>17.32)    | 29.35<br>(22.53 to<br>36.89)    | 31.90<br>(25.14 to<br>40.24)    | 25.85<br>(17.38 to<br>34.28)    |
| Endocrine, metabolic, blood, and immune disorders | 434.29<br>(387.90 to<br>612.36)         | 468.55<br>(385.90 to<br>639.82)       | 473.77<br>(383.14 to<br>636.95)       | 514.12<br>(429.71 to<br>715.01)       | 11.11<br>(10.16 to<br>14.38)    | 20.10<br>(16.88 to<br>24.69)    | 21.24<br>(17.63 to<br>25.80)    | 19.23<br>(16.40 to<br>23.93)    |
| <b>South Asia</b>                                 |                                         |                                       |                                       |                                       |                                 |                                 |                                 |                                 |
| Cause                                             | YLLs (in 1000s)                         |                                       |                                       |                                       | Deaths (in 1000s)               |                                 |                                 |                                 |
|                                                   | 2016                                    | 2040 Forecast                         | 2040 Better Scenario                  | 2040 Worse Scenario                   | 2016                            | 2040 Forecast                   | 2040 Better Scenario            | 2040 Worse Scenario             |
| Musculoskeletal disorders                         | 223.46<br>(182.69 to<br>266.20)         | 528.32<br>(377.71 to<br>663.37)       | 550.27<br>(388.29 to<br>693.77)       | 492.31<br>(360.25 to<br>602.45)       | 9.01<br>(6.72 to<br>10.64)      | 28.65<br>(19.33 to<br>33.97)    | 30.00<br>(20.29 to<br>36.34)    | 24.42<br>(16.84 to<br>29.34)    |
| Rheumatoid arthritis                              | 85.24<br>(60.31 to<br>115.85)           | 213.09<br>(142.90 to<br>299.85)       | 217.00<br>(143.08 to<br>312.02)       | 225.97<br>(153.19 to<br>311.68)       | 4.34<br>(2.93 to<br>5.81)       | 13.35<br>(8.82 to<br>18.40)     | 13.94<br>(9.01 to<br>19.49)     | 13.16<br>(8.90 to<br>17.84)     |
| Other musculoskeletal disorders                   | 138.22<br>(110.47 to<br>170.13)         | 315.23<br>(220.14 to<br>390.78)       | 333.27<br>(231.37 to<br>417.67)       | 266.34<br>(189.35 to<br>327.44)       | 4.68<br>(3.44 to<br>5.50)       | 14.70<br>(9.31 to<br>18.28)     | 16.05<br>(10.23 to<br>20.02)    | 11.25<br>(7.37 to<br>13.94)     |
| Other non-communicable diseases                   | 10,393.31<br>(8,554.33 to<br>12,649.61) | 5,738.79<br>(4,320.01 to<br>7,168.24) | 5,677.28<br>(4,240.28 to<br>7,068.65) | 7,825.09<br>(5,827.42 to<br>9,949.23) | 143.13<br>(117.80 to<br>169.13) | 154.88<br>(101.35 to<br>191.78) | 161.23<br>(102.90 to<br>202.31) | 168.01<br>(118.08 to<br>205.78) |

|                                               |                                          |                                          |                                          |                                          |                                       |                                       |                                       |                                       |
|-----------------------------------------------|------------------------------------------|------------------------------------------|------------------------------------------|------------------------------------------|---------------------------------------|---------------------------------------|---------------------------------------|---------------------------------------|
| Congenital birth defects                      | 8,893.47<br>(6,966.29 to<br>11,169.92)   | 3,444.46<br>(2,560.38 to<br>4,607.54)    | 3,305.01<br>(2,436.67 to<br>4,428.45)    | 5,435.08<br>(3,957.96 to<br>7,380.28)    | 109.75<br>(85.98 to<br>137.43)        | 49.55<br>(37.30 to<br>65.86)          | 47.97<br>(36.02 to<br>64.05)          | 73.56<br>(54.28 to<br>98.24)          |
| Neural tube defects                           | 95.43<br>(56.76 to<br>153.73)            | 17.23<br>(10.41 to<br>28.07)             | 15.88<br>(9.65 to<br>25.50)              | 32.21<br>(18.40 to<br>54.54)             | 1.17<br>(0.71 to<br>1.86)             | 0.27<br>(0.17 to<br>0.41)             | 0.25<br>(0.16 to<br>0.38)             | 0.46<br>(0.28 to<br>0.74)             |
| Congenital heart anomalies                    | 4,458.27<br>(3,125.26 to<br>6,017.83)    | 1,701.14<br>(1,162.20 to<br>2,397.97)    | 1,637.24<br>(1,123.17 to<br>2,281.13)    | 2,571.51<br>(1,692.90 to<br>3,727.15)    | 55.89<br>(39.60 to<br>74.67)          | 24.88<br>(17.49 to<br>34.29)          | 24.13<br>(17.31 to<br>33.11)          | 35.59<br>(24.33 to<br>50.15)          |
| Orofacial clefts                              | 31.19<br>(14.65 to<br>59.39)             | 6.31<br>(2.84 to<br>12.57)               | 5.74<br>(2.63 to<br>11.32)               | 13.23<br>(5.78 to<br>26.12)              | 0.36<br>(0.17 to<br>0.69)             | 0.07<br>(0.03 to<br>0.15)             | 0.07<br>(0.03 to<br>0.13)             | 0.15<br>(0.07 to<br>0.30)             |
| Down syndrome                                 | 154.11<br>(112.38 to<br>242.40)          | 113.22<br>(79.64 to<br>172.16)           | 110.04<br>(76.51 to<br>165.83)           | 156.48<br>(110.32 to<br>237.75)          | 2.29<br>(1.71 to<br>3.40)             | 2.42<br>(1.70 to<br>3.69)             | 2.38<br>(1.67 to<br>3.61)             | 3.06<br>(2.18 to<br>4.66)             |
| Other chromosomal abnormalities               | 180.92<br>(94.35 to<br>361.48)           | 107.45<br>(54.07 to<br>213.61)           | 101.16<br>(51.04 to<br>199.12)           | 191.62<br>(93.52 to<br>382.65)           | 2.12<br>(1.11 to<br>4.22)             | 1.31<br>(0.68 to<br>2.58)             | 1.24<br>(0.64 to<br>2.40)             | 2.30<br>(1.14 to<br>4.54)             |
| Congenital musculoskeletal and limb anomalies | 218.44<br>(100.45 to<br>498.20)          | 104.55<br>(45.15 to<br>247.59)           | 100.52<br>(43.25 to<br>239.89)           | 169.71<br>(70.90 to<br>414.27)           | 2.60<br>(1.20 to<br>5.87)             | 1.33<br>(0.59 to<br>3.07)             | 1.28<br>(0.57 to<br>2.94)             | 2.09<br>(0.89 to<br>4.96)             |
| Urogenital congenital anomalies               | 242.16<br>(163.63 to<br>361.64)          | 113.00<br>(78.79 to<br>166.05)           | 110.45<br>(76.50 to<br>161.69)           | 165.41<br>(110.75 to<br>251.00)          | 3.29<br>(2.30 to<br>4.77)             | 2.22<br>(1.55 to<br>3.21)             | 2.22<br>(1.54 to<br>3.17)             | 2.85<br>(1.98 to<br>4.16)             |
| Digestive congenital anomalies                | 765.62<br>(466.70 to<br>1,503.08)        | 255.75<br>(145.17 to<br>524.72)          | 241.61<br>(138.26 to<br>493.66)          | 452.17<br>(247.39 to<br>920.97)          | 8.96<br>(5.48 to<br>17.53)            | 3.11<br>(1.80 to<br>6.29)             | 2.95<br>(1.72 to<br>5.91)             | 5.40<br>(3.01 to<br>10.92)            |
| Other congenital birth defects                | 2,747.32<br>(1,952.22 to<br>3,756.37)    | 1,025.81<br>(695.73 to<br>1,451.64)      | 982.38<br>(668.56 to<br>1,386.81)        | 1,682.74<br>(1,115.34 to<br>2,447.60)    | 33.07<br>(23.73 to<br>44.89)          | 13.93<br>(9.83 to<br>19.18)           | 13.45<br>(9.55 to<br>18.41)           | 21.66<br>(14.75 to<br>30.84)          |
| Skin and subcutaneous diseases                | 784.28<br>(365.38 to<br>1,001.59)        | 2,113.32<br>(1,022.20 to<br>2,820.29)    | 2,201.01<br>(1,060.66 to<br>2,987.42)    | 2,084.20<br>(1,012.26 to<br>2,743.06)    | 25.07<br>(11.64 to<br>31.34)          | 103.23<br>(49.54 to<br>135.25)        | 111.27<br>(52.83 to<br>146.32)        | 90.90<br>(43.56 to<br>118.28)         |
| Cellulitis                                    | 100.61<br>(25.56 to<br>148.59)           | 414.39<br>(107.98 to<br>651.82)          | 443.41<br>(113.31 to<br>709.15)          | 348.21<br>(90.22 to<br>540.46)           | 3.71<br>(0.88 to<br>5.48)             | 21.06<br>(5.21 to<br>32.55)           | 23.28<br>(5.72 to<br>36.32)           | 16.04<br>(3.93 to<br>24.73)           |
| Pyoderma                                      | 633.02<br>(306.16 to<br>810.51)          | 1,588.51<br>(827.87 to<br>2,132.22)      | 1,640.65<br>(843.46 to<br>2,217.30)      | 1,636.20<br>(844.41 to<br>2,173.78)      | 19.25<br>(9.52 to<br>24.17)           | 75.33<br>(39.13 to<br>99.04)          | 80.43<br>(41.22 to<br>106.31)         | 69.49<br>(35.59 to<br>91.26)          |
| Decubitus ulcer                               | 28.39<br>(14.49 to<br>38.77)             | 68.40<br>(32.71 to<br>95.30)             | 73.07<br>(34.93 to<br>102.56)            | 60.23<br>(28.67 to<br>83.37)             | 1.47<br>(0.67 to<br>1.95)             | 4.99<br>(2.21 to<br>6.96)             | 5.53<br>(2.42 to<br>7.65)             | 3.87<br>(1.65 to<br>5.46)             |
| Other skin and subcutaneous diseases          | 22.27<br>(12.44 to<br>31.20)             | 42.02<br>(24.06 to<br>60.14)             | 43.88<br>(25.17 to<br>63.14)             | 39.57<br>(21.90 to<br>55.60)             | 0.65<br>(0.36 to<br>0.91)             | 1.85<br>(1.04 to<br>2.68)             | 2.03<br>(1.13 to<br>2.93)             | 1.51<br>(0.84 to<br>2.18)             |
| Sudden infant death syndrome                  | 715.56<br>(485.93 to<br>992.58)          | 181.01<br>(78.64 to<br>296.26)           | 171.26<br>(73.94 to<br>279.27)           | 305.81<br>(134.83 to<br>510.86)          | 8.30<br>(5.64 to<br>11.52)            | 2.10<br>(0.91 to<br>3.44)             | 1.99<br>(0.86 to<br>3.24)             | 3.55<br>(1.56 to<br>5.93)             |
| Injuries                                      | 53,548.12<br>(48,809.07 to<br>56,656.79) | 49,451.17<br>(41,205.22 to<br>59,519.14) | 46,847.61<br>(38,655.26 to<br>56,509.67) | 59,962.53<br>(50,321.64 to<br>71,865.56) | 1,224.64<br>(1,104.95 to<br>1,293.36) | 1,577.91<br>(1,335.24 to<br>1,839.54) | 1,559.87<br>(1,305.79 to<br>1,820.26) | 1,727.23<br>(1,474.20 to<br>1,984.16) |
| Transport injuries                            | 16,521.49<br>(15,609.31 to<br>17,940.43) | 13,745.02<br>(11,191.04 to<br>17,041.43) | 11,997.11<br>(9,884.94 to<br>14,629.25)  | 20,797.19<br>(17,035.04 to<br>25,630.40) | 357.33<br>(338.57 to<br>384.82)       | 361.72<br>(296.82 to<br>439.14)       | 323.93<br>(268.82 to<br>389.21)       | 511.97<br>(423.78 to<br>617.63)       |
| Road injuries                                 | 14,722.42<br>(13,884.86 to<br>16,078.17) | 11,546.46<br>(9,344.67 to<br>14,320.75)  | 9,917.78<br>(8,135.10 to<br>12,193.76)   | 18,272.44<br>(14,794.00 to<br>22,589.96) | 318.00<br>(301.62 to<br>342.66)       | 301.41<br>(245.75 to<br>366.77)       | 265.79<br>(220.41 to<br>321.32)       | 446.22<br>(367.75 to<br>539.40)       |
| Pedestrian road injuries                      | 4,726.73<br>(4,315.10 to<br>5,216.18)    | 3,158.93<br>(2,540.17 to<br>3,962.78)    | 2,711.88<br>(2,193.74 to<br>3,344.34)    | 5,089.24<br>(4,086.72 to<br>6,352.06)    | 109.79<br>(100.16 to<br>119.85)       | 96.22<br>(78.62 to<br>118.77)         | 85.42<br>(70.53 to<br>104.12)         | 142.48<br>(117.40 to<br>174.07)       |

**South Asia**

| Cause | YLLs (in 1000s) |               |                      |                     | Deaths (in 1000s) |               |                      |                     |
|-------|-----------------|---------------|----------------------|---------------------|-------------------|---------------|----------------------|---------------------|
|       | 2016            | 2040 Forecast | 2040 Better Scenario | 2040 Worse Scenario | 2016              | 2040 Forecast | 2040 Better Scenario | 2040 Worse Scenario |





|                                                                                     |                                                               |                                                               |                                                               |                                                               |                                                      |                                                      |                                                      |                                                      |
|-------------------------------------------------------------------------------------|---------------------------------------------------------------|---------------------------------------------------------------|---------------------------------------------------------------|---------------------------------------------------------------|------------------------------------------------------|------------------------------------------------------|------------------------------------------------------|------------------------------------------------------|
| Other unintentional injuries                                                        | 1,549.96<br>(1,309.91 to<br>1,676.69)                         | 1,038.59<br>(831.17 to<br>1,252.42)                           | 1,027.44<br>(820.87 to<br>1,238.82)                           | 1,213.82<br>(978.12 to<br>1,444.19)                           | 32.27<br>(26.45 to<br>34.84)                         | 27.13<br>(21.14 to<br>32.04)                         | 27.40<br>(21.11 to<br>32.52)                         | 30.10<br>(23.54 to<br>34.99)                         |
| <b>Self-harm and interpersonal violence</b>                                         | <b>15,854.63</b><br><b>(13,857.37 to</b><br><b>17,137.23)</b> | <b>17,053.94</b><br><b>(13,408.11 to</b><br><b>20,710.09)</b> | <b>16,111.71</b><br><b>(12,745.96 to</b><br><b>19,295.71)</b> | <b>18,214.16</b><br><b>(14,183.38 to</b><br><b>22,155.21)</b> | <b>315.24</b><br><b>(269.77 to</b><br><b>340.12)</b> | <b>401.66</b><br><b>(310.20 to</b><br><b>489.93)</b> | <b>383.94</b><br><b>(299.81 to</b><br><b>460.08)</b> | <b>413.79</b><br><b>(319.46 to</b><br><b>504.69)</b> |
| <b>South Asia</b>                                                                   |                                                               |                                                               |                                                               |                                                               |                                                      |                                                      |                                                      |                                                      |
| <b>Cause</b>                                                                        | <b>YLLs (in 1000s)</b>                                        |                                                               |                                                               |                                                               | <b>Deaths (in 1000s)</b>                             |                                                      |                                                      |                                                      |
|                                                                                     | <b>2016</b>                                                   | <b>2040 Forecast</b>                                          | <b>2040 Better Scenario</b>                                   | <b>2040 Worse Scenario</b>                                    | <b>2016</b>                                          | <b>2040 Forecast</b>                                 | <b>2040 Better Scenario</b>                          | <b>2040 Worse Scenario</b>                           |
| Self-harm                                                                           | 12,635.85<br>(10,923.07 to<br>13,691.77)                      | 14,141.53<br>(10,764.04 to<br>17,471.89)                      | 13,243.21<br>(10,254.84 to<br>16,083.85)                      | 15,189.12<br>(11,524.02 to<br>18,802.26)                      | 251.94<br>(213.80 to<br>272.78)                      | 334.57<br>(253.34 to<br>416.89)                      | 317.28<br>(242.20 to<br>383.96)                      | 346.11<br>(262.72 to<br>429.86)                      |
| Self-harm by firearm                                                                | 808.41<br>(455.24 to<br>1,149.94)                             | 700.41<br>(354.23 to<br>1,112.33)                             | 646.55<br>(333.20 to<br>1,019.46)                             | 781.11<br>(393.61 to<br>1,246.12)                             | 15.43<br>(8.82 to<br>22.00)                          | 15.27<br>(7.78 to<br>24.72)                          | 14.23<br>(7.44 to<br>22.56)                          | 16.57<br>(8.47 to<br>26.87)                          |
| Self-harm by other specified means                                                  | 11,827.43<br>(10,176.21 to<br>13,039.00)                      | 13,441.12<br>(10,264.82 to<br>16,596.11)                      | 12,596.65<br>(9,673.97 to<br>15,382.88)                       | 14,408.00<br>(10,984.82 to<br>17,829.45)                      | 236.51<br>(199.14 to<br>260.26)                      | 319.30<br>(239.88 to<br>395.80)                      | 303.05<br>(228.02 to<br>368.03)                      | 329.53<br>(247.03 to<br>407.69)                      |
| Interpersonal violence                                                              | 3,218.79<br>(2,545.78 to<br>3,734.01)                         | 2,912.41<br>(2,136.04 to<br>3,614.60)                         | 2,868.50<br>(2,129.84 to<br>3,560.00)                         | 3,025.04<br>(2,187.01 to<br>3,781.62)                         | 63.31<br>(50.04 to<br>73.40)                         | 67.09<br>(49.83 to<br>82.92)                         | 66.66<br>(49.29 to<br>82.00)                         | 67.68<br>(49.50 to<br>82.96)                         |
| Physical violence by firearm                                                        | 672.43<br>(341.57 to<br>871.51)                               | 632.78<br>(304.06 to<br>861.67)                               | 635.86<br>(306.09 to<br>866.51)                               | 643.27<br>(311.05 to<br>871.41)                               | 13.59<br>(6.94 to<br>17.51)                          | 14.53<br>(7.16 to<br>19.67)                          | 14.73<br>(7.27 to<br>20.10)                          | 14.41<br>(7.09 to<br>19.33)                          |
| Physical violence by sharp object                                                   | 686.97<br>(396.68 to<br>855.74)                               | 768.99<br>(437.04 to<br>989.19)                               | 779.14<br>(445.46 to<br>1,000.68)                             | 748.78<br>(418.74 to<br>962.61)                               | 14.29<br>(8.23 to<br>17.60)                          | 18.11<br>(10.28 to<br>22.90)                         | 18.48<br>(10.53 to<br>23.39)                         | 17.28<br>(9.64 to<br>21.80)                          |
| Physical violence by other means                                                    | 1,859.38<br>(1,551.71 to<br>2,344.09)                         | 1,510.64<br>(1,139.08 to<br>2,042.21)                         | 1,453.51<br>(1,097.18 to<br>1,963.48)                         | 1,632.99<br>(1,227.91 to<br>2,195.35)                         | 35.42<br>(29.62 to<br>44.95)                         | 34.46<br>(26.49 to<br>46.58)                         | 33.45<br>(25.82 to<br>45.04)                         | 35.99<br>(27.33 to<br>47.58)                         |
| <b>Forces of nature, conflict and terrorism, and executions and police conflict</b> | <b>123.73</b><br><b>(65.91 to</b><br><b>180.81)</b>           | <b>633.08</b><br><b>(240.2 to</b><br><b>3,879.52)</b>         | <b>630.13</b><br><b>(23.99 to</b><br><b>3,852.16)</b>         | <b>668.43</b><br><b>(25.11 to</b><br><b>4,097.41)</b>         | <b>2.40</b><br><b>(1.34 to</b><br><b>3.43)</b>       | <b>14.55</b><br><b>(0.57 to</b><br><b>93.29)</b>     | <b>14.71</b><br><b>(0.58 to</b><br><b>94.77)</b>     | <b>14.67</b><br><b>(0.57 to</b><br><b>93.55)</b>     |
| Exposure to forces of nature                                                        | 80.12<br>(40.69 to<br>119.93)                                 | 572.90<br>(5.68 to<br>3,855.41)                               | 569.98<br>(5.71 to<br>3,836.97)                               | 605.80<br>(5.94 to<br>4,075.74)                               | 1.50<br>(0.76 to<br>2.25)                            | 13.32<br>(0.13 to<br>92.98)                          | 13.47<br>(0.14 to<br>94.47)                          | 13.43<br>(0.13 to<br>93.23)                          |
| Conflict and terrorism                                                              | 30.15<br>(12.25 to<br>48.31)                                  | 27.11<br>(0.00 to<br>46.00)                                   | 26.96<br>(0.00 to<br>45.90)                                   | 28.78<br>(0.00 to<br>49.92)                                   | 0.50<br>(0.20 to<br>0.81)                            | 0.54<br>(0.00 to<br>0.87)                            | 0.54<br>(0.00 to<br>0.88)                            | 0.55<br>(0.00 to<br>0.91)                            |
| Executions and police conflict                                                      | 13.46<br>(11.72 to<br>15.34)                                  | 33.07<br>(0.00 to<br>154.44)                                  | 33.19<br>(0.00 to<br>155.14)                                  | 33.85<br>(0.00 to<br>157.95)                                  | 0.39<br>(0.23 to<br>0.51)                            | 0.69<br>(0.00 to<br>3.24)                            | 0.70<br>(0.00 to<br>3.26)                            | 0.69<br>(0.00 to<br>3.23)                            |
| <b>Bangladesh</b>                                                                   |                                                               |                                                               |                                                               |                                                               |                                                      |                                                      |                                                      |                                                      |
| <b>Cause</b>                                                                        | <b>YLLs (in 1000s)</b>                                        |                                                               |                                                               |                                                               | <b>Deaths (in 1000s)</b>                             |                                                      |                                                      |                                                      |
|                                                                                     | <b>2016</b>                                                   | <b>2040 Forecast</b>                                          | <b>2040 Better Scenario</b>                                   | <b>2040 Worse Scenario</b>                                    | <b>2016</b>                                          | <b>2040 Forecast</b>                                 | <b>2040 Better Scenario</b>                          | <b>2040 Worse Scenario</b>                           |
| All causes                                                                          | 27,807.99<br>(25,496.19 to<br>30,275.60)                      | 24,041.44<br>(18,841.42 to<br>31,656.89)                      | 19,523.39<br>(15,514.01 to<br>25,503.37)                      | 34,089.44<br>(26,745.34 to<br>44,148.76)                      | 847.89<br>(778.59 to<br>923.54)                      | 1,123.45<br>(923.11 to<br>1,371.04)                  | 929.48<br>(774.91 to<br>1,143.25)                    | 1,495.75<br>(1,229.25 to<br>1,814.01)                |
| Communicable, maternal, neonatal, and nutritional diseases                          | 9,732.03<br>(8,656.57 to<br>11,008.72)                        | 3,549.09<br>(2,374.47 to<br>4,846.04)                         | 2,797.51<br>(1,949.94 to<br>4,045.68)                         | 6,085.83<br>(4,071.05 to<br>9,069.30)                         | 177.56<br>(157.87 to<br>204.80)                      | 125.95<br>(73.95 to<br>226.65)                       | 99.22<br>(61.69 to<br>166.24)                        | 187.43<br>(107.71 to<br>326.63)                      |
| HIV/AIDS and tuberculosis                                                           | 517.65<br>(432.18 to<br>618.51)                               | 303.44<br>(206.48 to<br>451.62)                               | 243.99<br>(166.58 to<br>357.25)                               | 501.70<br>(337.06 to<br>729.98)                               | 19.12<br>(16.49 to<br>22.17)                         | 13.36<br>(9.27 to<br>19.14)                          | 11.10<br>(7.82 to<br>15.56)                          | 21.18<br>(14.50 to<br>30.32)                         |
| Tuberculosis                                                                        | 501.78<br>(425.74 to<br>587.11)                               | 285.54<br>(192.59 to<br>408.79)                               | 230.65<br>(157.18 to<br>326.36)                               | 480.17<br>(324.61 to<br>703.35)                               | 18.80<br>(16.19 to<br>21.68)                         | 12.97<br>(9.07 to<br>18.11)                          | 10.81<br>(7.57 to<br>15.11)                          | 20.71<br>(14.09 to<br>29.91)                         |
| HIV/AIDS                                                                            | 15.87<br>(0.37 to<br>72.02)                                   | 17.90<br>(0.82 to<br>80.35)                                   | 13.34<br>(0.31 to<br>71.33)                                   | 21.53<br>(0.98 to<br>89.68)                                   | 0.31<br>(0.01 to<br>1.38)                            | 0.40<br>(0.01 to<br>1.87)                            | 0.29<br>(0.01 to<br>1.71)                            | 0.47<br>(0.02 to<br>2.02)                            |

|                                                                          |                                           |                                         |                                         |                                           |                                   |                                   |                                   |                                    |
|--------------------------------------------------------------------------|-------------------------------------------|-----------------------------------------|-----------------------------------------|-------------------------------------------|-----------------------------------|-----------------------------------|-----------------------------------|------------------------------------|
| <b>Diarrhea, lower respiratory, and other common infectious diseases</b> | <b>3,680.77</b><br>(3,018.91 to 4,551.02) | <b>1,549.99</b><br>(715.69 to 3,191.32) | <b>1,080.90</b><br>(523.23 to 2,111.86) | <b>2,715.87</b><br>(1,236.75 to 5,175.38) | <b>79.05</b><br>(65.35 to 103.65) | <b>71.72</b><br>(27.66 to 167.28) | <b>49.77</b><br>(20.41 to 111.32) | <b>110.88</b><br>(40.58 to 243.05) |
| Diarrheal diseases                                                       | 771.87<br>(481.12 to 1,338.75)            | 518.87<br>(65.01 to 1,828.69)           | 321.38<br>(43.67 to 1,090.78)           | 926.45<br>(128.92 to 3,006.04)            | 29.20<br>(18.67 to 53.69)         | 35.08<br>(4.11 to 121.82)         | 22.33<br>(2.97 to 76.10)          | 58.36<br>(7.02 to 181.18)          |
| Intestinal infectious diseases                                           | 762.26<br>(430.39 to 1,219.85)            | 284.12<br>(132.40 to 529.74)            | 258.77<br>(124.45 to 468.72)            | 386.36<br>(177.76 to 726.25)              | 11.02<br>(6.22 to 17.79)          | 4.90<br>(2.31 to 9.07)            | 4.51<br>(2.21 to 8.19)            | 6.37<br>(2.99 to 11.88)            |
| Typhoid fever                                                            | 710.40<br>(394.23 to 1,151.38)            | 258.54<br>(119.25 to 491.45)            | 235.60<br>(110.57 to 434.68)            | 351.56<br>(161.32 to 663.70)              | 10.22<br>(5.65 to 16.62)          | 4.42<br>(2.05 to 8.33)            | 4.07<br>(1.92 to 7.51)            | 5.75<br>(2.68 to 10.84)            |
| Paratyphoid fever                                                        | 51.37<br>(23.31 to 100.16)                | 25.49<br>(11.12 to 50.80)               | 23.09<br>(10.07 to 45.16)               | 34.64<br>(15.02 to 69.01)                 | 0.79<br>(0.36 to 1.52)            | 0.47<br>(0.21 to 0.95)            | 0.43<br>(0.19 to 0.84)            | 0.62<br>(0.27 to 1.21)             |
| Other intestinal infectious diseases                                     | 0.49<br>(0.14 to 1.31)                    | 0.09<br>(0.03 to 0.27)                  | 0.08<br>(0.02 to 0.23)                  | 0.16<br>(0.04 to 0.46)                    | 0.01<br>(0.00 to 0.02)            | 0.00<br>(0.00 to 0.01)            | 0.00<br>(0.00 to 0.01)            | 0.00<br>(0.00 to 0.01)             |
| Lower respiratory infections                                             | 1,826.18<br>(1,399.37 to 2,352.11)        | 662.51<br>(354.37 to 1,136.35)          | 431.26<br>(234.54 to 730.88)            | 1,215.09<br>(601.66 to 2,181.93)          | 33.61<br>(28.21 to 39.90)         | 28.82<br>(16.81 to 46.83)         | 20.21<br>(11.63 to 32.18)         | 41.15<br>(23.38 to 67.43)          |
| Upper respiratory infections                                             | 2.45<br>(1.09 to 5.00)                    | 1.13<br>(0.47 to 2.23)                  | 0.95<br>(0.40 to 1.90)                  | 1.91<br>(0.79 to 3.75)                    | 0.05<br>(0.02 to 0.08)            | 0.04<br>(0.02 to 0.07)            | 0.03<br>(0.01 to 0.06)            | 0.06<br>(0.02 to 0.11)             |
| Otitis media                                                             | 0.38<br>(0.24 to 0.59)                    | 0.18<br>(0.07 to 0.33)                  | 0.19<br>(0.07 to 0.35)                  | 0.17<br>(0.07 to 0.29)                    | 0.02<br>(0.01 to 0.04)            | 0.00<br>(0.00 to 0.03)            | 0.02<br>(0.00 to 0.03)            | 0.01<br>(0.00 to 0.02)             |
| Meningitis                                                               | 91.37<br>(37.08 to 156.07)                | 25.11<br>(8.99 to 44.27)                | 22.92<br>(8.05 to 40.30)                | 37.44<br>(13.00 to 69.32)                 | 1.40<br>(0.58 to 2.25)            | 0.60<br>(0.22 to 1.02)            | 0.57<br>(0.21 to 0.96)            | 0.76<br>(0.28 to 1.31)             |
| Pneumococcal meningitis                                                  | 5.13<br>(2.02 to 8.46)                    | 1.61<br>(0.54 to 2.91)                  | 1.53<br>(0.52 to 2.74)                  | 1.99<br>(0.69 to 3.61)                    | 0.09<br>(0.04 to 0.14)            | 0.05<br>(0.02 to 0.08)            | 0.05<br>(0.02 to 0.08)            | 0.05<br>(0.02 to 0.09)             |
| H influenzae type B meningitis                                           | 8.47<br>(3.44 to 15.50)                   | 3.13<br>(0.87 to 7.16)                  | 2.61<br>(0.77 to 5.79)                  | 9.38<br>(2.00 to 24.67)                   | 0.12<br>(0.05 to 0.21)            | 0.06<br>(0.02 to 0.11)            | 0.05<br>(0.02 to 0.09)            | 0.13<br>(0.03 to 0.31)             |
| Meningococcal meningitis                                                 | 48.64<br>(19.60 to 83.46)                 | 11.98<br>(4.26 to 21.16)                | 11.02<br>(3.87 to 19.49)                | 15.46<br>(5.33 to 28.35)                  | 0.74<br>(0.30 to 1.20)            | 0.29<br>(0.11 to 0.50)            | 0.28<br>(0.10 to 0.46)            | 0.34<br>(0.12 to 0.58)             |
| Other meningitis                                                         | 29.13<br>(11.65 to 49.83)                 | 8.39<br>(2.85 to 14.92)                 | 7.76<br>(2.65 to 13.75)                 | 10.61<br>(3.65 to 19.52)                  | 0.45<br>(0.18 to 0.72)            | 0.21<br>(0.07 to 0.35)            | 0.20<br>(0.07 to 0.34)            | 0.24<br>(0.09 to 0.41)             |
| Encephalitis                                                             | 55.00<br>(39.72 to 72.41)                 | 35.45<br>(22.63 to 50.27)               | 33.08<br>(21.00 to 47.19)               | 44.47<br>(29.02 to 64.17)                 | 1.35<br>(0.82 to 1.75)            | 1.82<br>(0.80 to 3.07)            | 1.79<br>(0.76 to 3.06)            | 1.96<br>(0.94 to 3.23)             |
| Diphtheria                                                               | 0.29<br>(0.15 to 0.50)                    | 0.04<br>(0.02 to 0.06)                  | 0.03<br>(0.01 to 0.05)                  | 0.12<br>(0.04 to 0.32)                    | 0.00<br>(0.00 to 0.01)            | 0.00<br>(0.00 to 0.00)            | 0.00<br>(0.00 to 0.00)            | 0.00<br>(0.00 to 0.00)             |
| Whooping cough                                                           | 106.08<br>(9.20 to 333.97)                | 14.57<br>(1.05 to 53.29)                | 6.20<br>(0.47 to 23.38)                 | 80.47<br>(7.16 to 268.14)                 | 1.26<br>(0.11 to 3.95)            | 0.18<br>(0.01 to 0.64)            | 0.08<br>(0.01 to 0.29)            | 0.95<br>(0.09 to 3.18)             |
| Tetanus                                                                  | 41.32<br>(14.08 to 76.10)                 | 2.98<br>(0.67 to 6.60)                  | 2.18<br>(0.43 to 5.34)                  | 11.78<br>(3.21 to 28.55)                  | 0.74<br>(0.20 to 1.29)            | 0.08<br>(0.01 to 0.18)            | 0.07<br>(0.01 to 0.16)            | 0.18<br>(0.04 to 0.38)             |
| Measles                                                                  | 8.38<br>(2.66 to 19.99)                   | 1.04<br>(0.09 to 6.45)                  | 0.51<br>(0.07 to 2.52)                  | 4.72<br>(0.27 to 24.24)                   | 0.10<br>(0.03 to 0.24)            | 0.01<br>(0.00 to 0.08)            | 0.01<br>(0.00 to 0.03)            | 0.06<br>(0.00 to 0.29)             |

**Bangladesh**

| Cause                       | YLLs (in 1000s)          |                        |                        |                         | Deaths (in 1000s)      |                        |                        |                        |
|-----------------------------|--------------------------|------------------------|------------------------|-------------------------|------------------------|------------------------|------------------------|------------------------|
|                             | 2016                     | 2040 Forecast          | 2040 Better Scenario   | 2040 Worse Scenario     | 2016                   | 2040 Forecast          | 2040 Better Scenario   | 2040 Worse Scenario    |
| Varicella and herpes zoster | 15.20<br>(8.86 to 25.11) | 4.00<br>(2.28 to 6.51) | 3.43<br>(1.90 to 5.67) | 6.88<br>(3.75 to 11.79) | 0.30<br>(0.21 to 0.43) | 0.17<br>(0.10 to 0.27) | 0.15<br>(0.09 to 0.24) | 0.23<br>(0.14 to 0.36) |

|                                                       |                                                      |                                                     |                                                     |                                                     |                                                |                                                |                                                |                                                |
|-------------------------------------------------------|------------------------------------------------------|-----------------------------------------------------|-----------------------------------------------------|-----------------------------------------------------|------------------------------------------------|------------------------------------------------|------------------------------------------------|------------------------------------------------|
| <b>Neglected tropical diseases and malaria</b>        | <b>206.02</b><br><b>(127.02 to</b><br><b>329.84)</b> | <b>152.19</b><br><b>(82.06 to</b><br><b>251.52)</b> | <b>144.94</b><br><b>(78.49 to</b><br><b>237.21)</b> | <b>182.07</b><br><b>(98.88 to</b><br><b>311.03)</b> | <b>3.85</b><br><b>(2.34 to</b><br><b>6.09)</b> | <b>4.74</b><br><b>(2.69 to</b><br><b>7.72)</b> | <b>4.47</b><br><b>(2.66 to</b><br><b>7.45)</b> | <b>5.16</b><br><b>(2.66 to</b><br><b>8.46)</b> |
| Malaria                                               | 100.92<br>(38.93 to<br>160.91)                       | 40.43<br>(12.23 to<br>78.44)                        | 38.72<br>(11.78 to<br>74.92)                        | 46.36<br>(12.85 to<br>90.23)                        | 1.83<br>(0.69 to<br>2.81)                      | 0.95<br>(0.36 to<br>1.79)                      | 0.92<br>(0.36 to<br>1.78)                      | 1.03<br>(0.36 to<br>1.89)                      |
| Chagas disease                                        | 0.00<br>(0.00 to<br>0.00)                            | 0.00<br>(0.00 to<br>0.00)                           | 0.00<br>(0.00 to<br>0.00)                           | 0.00<br>(0.00 to<br>0.00)                           | 0.00<br>(0.00 to<br>0.00)                      | 0.00<br>(0.00 to<br>0.00)                      | 0.00<br>(0.00 to<br>0.00)                      | 0.00<br>(0.00 to<br>0.00)                      |
| Leishmaniasis                                         | 16.42<br>(8.68 to<br>28.40)                          | 3.08<br>(1.31 to<br>6.56)                           | 2.61<br>(1.10 to<br>5.67)                           | 5.56<br>(2.55 to<br>11.57)                          | 0.26<br>(0.14 to<br>0.45)                      | 0.07<br>(0.03 to<br>0.14)                      | 0.06<br>(0.02 to<br>0.12)                      | 0.11<br>(0.05 to<br>0.22)                      |
| African trypanosomiasis                               | 0.00<br>(0.00 to<br>0.00)                            | 0.00<br>(0.00 to<br>0.00)                           | 0.00<br>(0.00 to<br>0.00)                           | 0.00<br>(0.00 to<br>0.00)                           | 0.00<br>(0.00 to<br>0.00)                      | 0.00<br>(0.00 to<br>0.00)                      | 0.00<br>(0.00 to<br>0.00)                      | 0.00<br>(0.00 to<br>0.00)                      |
| Schistosomiasis                                       | 0.00<br>(0.00 to<br>0.00)                            | 0.00<br>(0.00 to<br>0.00)                           | 0.00<br>(0.00 to<br>0.00)                           | 0.00<br>(0.00 to<br>0.00)                           | 0.00<br>(0.00 to<br>0.00)                      | 0.00<br>(0.00 to<br>0.00)                      | 0.00<br>(0.00 to<br>0.00)                      | 0.00<br>(0.00 to<br>0.00)                      |
| Cysticercosis                                         | 0.07<br>(0.03 to<br>0.15)                            | 0.02<br>(0.01 to<br>0.06)                           | 0.02<br>(0.01 to<br>0.06)                           | 0.02<br>(0.01 to<br>0.06)                           | 0.00<br>(0.00 to<br>0.00)                      | 0.00<br>(0.00 to<br>0.00)                      | 0.00<br>(0.00 to<br>0.00)                      | 0.00<br>(0.00 to<br>0.00)                      |
| Cystic echinococcosis                                 | 0.77<br>(0.60 to<br>0.97)                            | 0.25<br>(0.13 to<br>0.44)                           | 0.21<br>(0.10 to<br>0.37)                           | 0.44<br>(0.23 to<br>0.73)                           | 0.02<br>(0.01 to<br>0.02)                      | 0.01<br>(0.01 to<br>0.02)                      | 0.01<br>(0.00 to<br>0.02)                      | 0.02<br>(0.01 to<br>0.03)                      |
| Dengue                                                | 60.38<br>(8.23 to<br>161.67)                         | 97.06<br>(29.38 to<br>200.95)                       | 93.42<br>(29.09 to<br>191.76)                       | 111.49<br>(30.21 to<br>234.74)                      | 1.09<br>(0.14 to<br>2.77)                      | 3.17<br>(0.92 to<br>6.50)                      | 3.17<br>(0.99 to<br>6.36)                      | 3.24<br>(0.89 to<br>6.84)                      |
| Yellow fever                                          | 0.00<br>(0.00 to<br>0.00)                            | 0.00<br>(0.00 to<br>0.00)                           | 0.00<br>(0.00 to<br>0.00)                           | 0.00<br>(0.00 to<br>0.00)                           | 0.00<br>(0.00 to<br>0.00)                      | 0.00<br>(0.00 to<br>0.00)                      | 0.00<br>(0.00 to<br>0.00)                      | 0.00<br>(0.00 to<br>0.00)                      |
| Rabies                                                | 17.00<br>(6.05 to<br>107.52)                         | 6.97<br>(1.78 to<br>44.94)                          | 5.82<br>(1.48 to<br>37.31)                          | 12.62<br>(3.35 to<br>85.79)                         | 0.49<br>(0.26 to<br>2.18)                      | 0.42<br>(0.15 to<br>1.29)                      | 0.38<br>(0.12 to<br>1.09)                      | 0.63<br>(0.24 to<br>2.36)                      |
| Intestinal nematode infections                        | 5.52<br>(3.50 to<br>8.45)                            | 2.05<br>(1.02 to<br>4.07)                           | 1.97<br>(0.97 to<br>3.97)                           | 2.57<br>(1.32 to<br>5.13)                           | 0.07<br>(0.05 to<br>0.11)                      | 0.05<br>(0.02 to<br>0.10)                      | 0.05<br>(0.02 to<br>0.10)                      | 0.05<br>(0.03 to<br>0.09)                      |
| Other neglected tropical diseases                     | 4.95<br>(2.89 to<br>9.44)                            | 2.32<br>(1.00 to<br>4.58)                           | 2.16<br>(0.90 to<br>4.31)                           | 3.01<br>(1.34 to<br>5.74)                           | 0.09<br>(0.06 to<br>0.15)                      | 0.08<br>(0.03 to<br>0.15)                      | 0.08<br>(0.03 to<br>0.15)                      | 0.09<br>(0.04 to<br>0.17)                      |
| <b>Maternal disorders</b>                             | <b>296.15</b><br><b>(220.41 to</b><br><b>390.55)</b> | <b>84.64</b><br><b>(45.40 to</b><br><b>152.54)</b>  | <b>72.27</b><br><b>(38.64 to</b><br><b>128.88)</b>  | <b>146.20</b><br><b>(77.50 to</b><br><b>253.91)</b> | <b>5.28</b><br><b>(3.95 to</b><br><b>6.94)</b> | <b>1.56</b><br><b>(0.84 to</b><br><b>2.80)</b> | <b>1.34</b><br><b>(0.72 to</b><br><b>2.39)</b> | <b>2.69</b><br><b>(1.43 to</b><br><b>4.70)</b> |
| Maternal hemorrhage                                   | 109.89<br>(75.97 to<br>153.22)                       | 28.80<br>(14.29 to<br>51.09)                        | 24.52<br>(12.09 to<br>44.06)                        | 50.11<br>(24.68 to<br>89.33)                        | 1.96<br>(1.36 to<br>2.74)                      | 0.53<br>(0.27 to<br>0.95)                      | 0.45<br>(0.23 to<br>0.80)                      | 0.92<br>(0.46 to<br>1.64)                      |
| Maternal sepsis and other maternal infections         | 9.06<br>(4.71 to<br>15.55)                           | 2.20<br>(0.83 to<br>4.42)                           | 1.88<br>(0.68 to<br>3.76)                           | 3.87<br>(1.47 to<br>7.89)                           | 0.16<br>(0.08 to<br>0.28)                      | 0.04<br>(0.02 to<br>0.08)                      | 0.04<br>(0.01 to<br>0.07)                      | 0.07<br>(0.03 to<br>0.14)                      |
| Maternal hypertensive disorders                       | 40.55<br>(26.25 to<br>60.70)                         | 11.86<br>(5.52 to<br>22.96)                         | 10.07<br>(4.59 to<br>18.99)                         | 20.86<br>(9.86 to<br>39.04)                         | 0.70<br>(0.46 to<br>1.05)                      | 0.21<br>(0.10 to<br>0.40)                      | 0.18<br>(0.08 to<br>0.34)                      | 0.37<br>(0.17 to<br>0.70)                      |
| Maternal obstructed labor and uterine rupture         | 4.14<br>(1.64 to<br>8.45)                            | 1.31<br>(0.40 to<br>3.25)                           | 1.10<br>(0.33 to<br>2.84)                           | 2.37<br>(0.71 to<br>5.94)                           | 0.08<br>(0.03 to<br>0.16)                      | 0.02<br>(0.01 to<br>0.06)                      | 0.02<br>(0.01 to<br>0.05)                      | 0.04<br>(0.01 to<br>0.11)                      |
| Maternal abortion, miscarriage, and ectopic pregnancy | 5.43<br>(2.24 to<br>11.35)                           | 2.39<br>(0.71 to<br>6.00)                           | 2.02<br>(0.60 to<br>5.14)                           | 4.18<br>(1.22 to<br>10.11)                          | 0.10<br>(0.04 to<br>0.21)                      | 0.05<br>(0.01 to<br>0.11)                      | 0.04<br>(0.01 to<br>0.10)                      | 0.08<br>(0.02 to<br>0.19)                      |
| Indirect maternal deaths                              | 21.77<br>(13.05 to<br>33.64)                         | 6.09<br>(2.49 to<br>12.06)                          | 5.22<br>(2.14 to<br>10.23)                          | 10.62<br>(4.31 to<br>20.52)                         | 0.38<br>(0.23 to<br>0.59)                      | 0.11<br>(0.05 to<br>0.22)                      | 0.09<br>(0.04 to<br>0.18)                      | 0.19<br>(0.08 to<br>0.37)                      |
| Late maternal deaths                                  | 10.95<br>(5.73 to<br>18.11)                          | 2.64<br>(1.09 to<br>5.54)                           | 2.25<br>(0.91 to<br>4.65)                           | 4.63<br>(1.98 to<br>9.47)                           | 0.19<br>(0.10 to<br>0.32)                      | 0.05<br>(0.02 to<br>0.10)                      | 0.04<br>(0.02 to<br>0.09)                      | 0.08<br>(0.04 to<br>0.17)                      |
| Maternal deaths aggravated by HIV/AIDS                | 0.01<br>(0.00 to<br>0.03)                            | 2.83<br>(0.00 to<br>24.96)                          | 2.34<br>(0.00 to<br>22.87)                          | 4.85<br>(0.00 to<br>45.24)                          | 0.00<br>(0.00 to<br>0.00)                      | 0.05<br>(0.00 to<br>0.46)                      | 0.04<br>(0.00 to<br>0.41)                      | 0.09<br>(0.00 to<br>0.81)                      |

|                                                                         | 94.34<br>(61.88 to<br>132.76)                | 26.51<br>(12.46 to<br>48.91)               | 22.88<br>(10.66 to<br>42.14)             | 44.72<br>(20.93 to<br>80.06)                 | 1.69<br>(1.12 to<br>2.39)           | 0.50<br>(0.24 to<br>0.91)          | 0.43<br>(0.20 to<br>0.77)          | 0.83<br>(0.39 to<br>1.48)           |
|-------------------------------------------------------------------------|----------------------------------------------|--------------------------------------------|------------------------------------------|----------------------------------------------|-------------------------------------|------------------------------------|------------------------------------|-------------------------------------|
| Other maternal disorders                                                |                                              |                                            |                                          |                                              |                                     |                                    |                                    |                                     |
| <b>Bangladesh</b>                                                       |                                              |                                            |                                          |                                              |                                     |                                    |                                    |                                     |
| Cause                                                                   | YLLs (in 1000s)                              |                                            |                                          |                                              | Deaths (in 1000s)                   |                                    |                                    |                                     |
|                                                                         | 2016                                         | 2040 Forecast                              | 2040 Better Scenario                     | 2040 Worse Scenario                          | 2016                                | 2040 Forecast                      | 2040 Better Scenario               | 2040 Worse Scenario                 |
| <b>Neonatal disorders</b>                                               | <b>4,140.91</b><br>(3,492.28 to<br>4,905.86) | <b>1,083.57</b><br>(737.31 to<br>1,492.03) | <b>902.57</b><br>(618.11 to<br>1,231.47) | <b>2,059.46</b><br>(1,372.90 to<br>2,868.41) | <b>47.83</b><br>(40.34 to<br>56.66) | <b>12.52</b><br>(8.52 to<br>17.23) | <b>10.43</b><br>(7.14 to<br>14.22) | <b>23.79</b><br>(15.86 to<br>33.13) |
| Neonatal preterm birth                                                  | 843.78<br>(538.95 to<br>1,731.60)            | 195.85<br>(119.52 to<br>398.98)            | 169.29<br>(103.64 to<br>343.48)          | 438.68<br>(262.76 to<br>854.28)              | 9.75<br>(6.23 to<br>20.00)          | 2.26<br>(1.38 to<br>4.61)          | 1.96<br>(1.20 to<br>3.97)          | 5.07<br>(3.04 to<br>9.87)           |
| Neonatal encephalopathy due to birth asphyxia and trauma                | 1,598.32<br>(653.80 to<br>2,155.75)          | 374.27<br>(136.83 to<br>617.43)            | 313.87<br>(113.59 to<br>511.87)          | 650.28<br>(230.69 to<br>1,077.82)            | 18.46<br>(7.55 to<br>24.90)         | 4.32<br>(1.58 to<br>7.15)          | 3.63<br>(1.31 to<br>5.91)          | 7.51<br>(2.66 to<br>12.45)          |
| Neonatal sepsis and other neonatal infections                           | 274.65<br>(156.40 to<br>485.50)              | 101.34<br>(51.62 to<br>184.01)             | 84.39<br>(42.77 to<br>152.66)            | 179.83<br>(88.54 to<br>330.29)               | 3.17<br>(1.81 to<br>5.61)           | 1.17<br>(0.60 to<br>2.13)          | 0.97<br>(0.49 to<br>1.76)          | 2.08<br>(1.02 to<br>3.82)           |
| Hemolytic disease and other neonatal jaundice                           | 224.37<br>(145.44 to<br>337.29)              | 41.89<br>(22.21 to<br>72.07)               | 34.19<br>(17.98 to<br>58.95)             | 79.97<br>(42.26 to<br>138.48)                | 2.59<br>(1.68 to<br>3.90)           | 0.48<br>(0.26 to<br>0.83)          | 0.39<br>(0.21 to<br>0.68)          | 0.92<br>(0.49 to<br>1.60)           |
| Other neonatal disorders                                                | 1,199.79<br>(764.45 to<br>1,723.30)          | 370.22<br>(204.92 to<br>581.87)            | 300.84<br>(165.01 to<br>471.79)          | 710.70<br>(382.49 to<br>1,121.76)            | 13.86<br>(8.83 to<br>19.90)         | 4.28<br>(2.37 to<br>6.72)          | 3.47<br>(1.91 to<br>5.45)          | 8.21<br>(4.42 to<br>12.96)          |
| <b>Nutritional deficiencies</b>                                         | <b>366.32</b><br>(290.08 to<br>462.91)       | <b>133.94</b><br>(103.75 to<br>168.92)     | <b>125.39</b><br>(95.14 to<br>160.39)    | <b>179.34</b><br>(136.11 to<br>229.03)       | <b>10.09</b><br>(8.83 to<br>11.46)  | <b>9.13</b><br>(7.13 to<br>11.41)  | <b>9.11</b><br>(7.07 to<br>11.42)  | <b>10.27</b><br>(7.84 to<br>12.90)  |
| Protein-energy malnutrition                                             | 310.72<br>(238.76 to<br>402.48)              | 104.07<br>(78.87 to<br>131.91)             | 97.45<br>(73.17 to<br>124.10)            | 140.87<br>(104.63 to<br>184.40)              | 8.31<br>(7.15 to<br>9.55)           | 7.55<br>(5.70 to<br>9.59)          | 7.55<br>(5.71 to<br>9.59)          | 8.45<br>(6.31 to<br>10.71)          |
| Iodine deficiency                                                       | 1.35<br>(0.07 to<br>6.88)                    | 3.85<br>(0.07 to<br>13.35)                 | 3.49<br>(0.06 to<br>12.31)               | 5.62<br>(0.11 to<br>21.78)                   | 0.03<br>(0.00 to<br>0.11)           | 0.24<br>(0.00 to<br>1.05)          | 0.23<br>(0.00 to<br>1.01)          | 0.30<br>(0.00 to<br>1.26)           |
| Dietary iron deficiency                                                 | 3.17<br>(1.52 to<br>12.59)                   | 3.16<br>(1.09 to<br>6.82)                  | 2.99<br>(1.04 to<br>6.39)                | 3.94<br>(1.29 to<br>8.90)                    | 0.14<br>(0.05 to<br>0.29)           | 0.16<br>(0.06 to<br>0.37)          | 0.16<br>(0.06 to<br>0.38)          | 0.17<br>(0.06 to<br>0.40)           |
| Other nutritional deficiencies                                          | 49.08<br>(36.75 to<br>68.65)                 | 22.86<br>(15.49 to<br>34.40)               | 21.46<br>(14.65 to<br>32.52)             | 28.91<br>(19.59 to<br>43.82)                 | 1.61<br>(1.25 to<br>2.23)           | 1.19<br>(0.82 to<br>1.78)          | 1.17<br>(0.81 to<br>1.77)          | 1.35<br>(0.91 to<br>2.04)           |
| <b>Other communicable, maternal, neonatal, and nutritional diseases</b> | <b>524.21</b><br>(355.84 to<br>819.77)       | <b>241.31</b><br>(175.26 to<br>317.50)     | <b>227.45</b><br>(166.80 to<br>299.59)   | <b>301.18</b><br>(224.26 to<br>399.15)       | <b>12.37</b><br>(8.91 to<br>15.88)  | <b>12.92</b><br>(7.11 to<br>17.65) | <b>12.81</b><br>(7.00 to<br>17.82) | <b>14.25</b><br>(8.18 to<br>19.49)  |
| Sexually transmitted infections excluding HIV                           | 295.05<br>(124.80 to<br>588.53)              | 32.84<br>(13.85 to<br>67.67)               | 29.43<br>(12.76 to<br>59.88)             | 51.44<br>(21.09 to<br>109.46)                | 3.58<br>(1.55 to<br>6.99)           | 0.59<br>(0.31 to<br>1.12)          | 0.54<br>(0.29 to<br>1.02)          | 0.82<br>(0.40 to<br>1.57)           |
| Syphilis                                                                | 289.45<br>(120.70 to<br>584.62)              | 27.59<br>(10.72 to<br>60.07)               | 24.42<br>(9.50 to<br>55.18)              | 45.29<br>(16.70 to<br>103.37)                | 3.43<br>(1.44 to<br>6.87)           | 0.38<br>(0.17 to<br>0.77)          | 0.34<br>(0.15 to<br>0.69)          | 0.59<br>(0.24 to<br>1.27)           |
| Chlamydial infection                                                    | 1.09<br>(0.60 to<br>3.79)                    | 1.02<br>(0.49 to<br>3.13)                  | 0.97<br>(0.47 to<br>3.01)                | 1.19<br>(0.56 to<br>3.79)                    | 0.03<br>(0.02 to<br>0.09)           | 0.04<br>(0.02 to<br>0.10)          | 0.04<br>(0.02 to<br>0.10)          | 0.05<br>(0.02 to<br>0.12)           |
| Gonococcal infection                                                    | 2.95<br>(1.63 to<br>10.59)                   | 2.87<br>(1.38 to<br>8.88)                  | 2.74<br>(1.34 to<br>8.37)                | 3.35<br>(1.58 to<br>10.70)                   | 0.08<br>(0.05 to<br>0.27)           | 0.12<br>(0.06 to<br>0.30)          | 0.12<br>(0.06 to<br>0.29)          | 0.13<br>(0.07 to<br>0.34)           |
| Other sexually transmitted infections                                   | 1.56<br>(0.85 to<br>5.58)                    | 1.36<br>(0.65 to<br>4.39)                  | 1.29<br>(0.62 to<br>4.10)                | 1.61<br>(0.76 to<br>5.24)                    | 0.04<br>(0.02 to<br>0.13)           | 0.05<br>(0.03 to<br>0.13)          | 0.05<br>(0.02 to<br>0.12)          | 0.05<br>(0.03 to<br>0.15)           |
| Acute hepatitis                                                         | 143.31<br>(122.37 to<br>167.18)              | 123.83<br>(90.93 to<br>166.65)             | 116.66<br>(85.56 to<br>157.64)           | 149.68<br>(110.26 to<br>202.42)              | 4.28<br>(3.72 to<br>4.88)           | 5.21<br>(3.93 to<br>6.82)          | 5.11<br>(3.85 to<br>6.65)          | 5.84<br>(4.44 to<br>7.62)           |
| Acute hepatitis A                                                       | 5.40<br>(1.90 to<br>9.79)                    | 2.33<br>(1.09 to<br>4.09)                  | 2.16<br>(1.02 to<br>3.84)                | 3.05<br>(1.44 to<br>5.25)                    | 0.09<br>(0.04 to<br>0.15)           | 0.10<br>(0.04 to<br>0.19)          | 0.09<br>(0.04 to<br>0.19)          | 0.11<br>(0.05 to<br>0.21)           |

|                                       |                                                 |                                                 |                                                 |                                                 |                                        |                                          |                                        |                                            |
|---------------------------------------|-------------------------------------------------|-------------------------------------------------|-------------------------------------------------|-------------------------------------------------|----------------------------------------|------------------------------------------|----------------------------------------|--------------------------------------------|
| Acute hepatitis B                     | 90.76<br>(74.37 to<br>110.99)                   | 87.80<br>(62.59 to<br>121.02)                   | 82.10<br>(57.97 to<br>113.67)                   | 107.23<br>(76.22 to<br>148.69)                  | 2.86<br>(2.39 to<br>3.41)              | 3.45<br>(2.49 to<br>4.75)                | 3.31<br>(2.39 to<br>4.60)              | 4.02<br>(2.39 to<br>5.45)                  |
| Acute hepatitis C                     | 2.02<br>(1.51 to<br>2.64)                       | 2.67<br>(1.78 to<br>3.90)                       | 2.60<br>(1.73 to<br>3.81)                       | 2.87<br>(1.92 to<br>4.16)                       | 0.09<br>(0.06 to<br>0.12)              | 0.14<br>(0.09 to<br>0.21)                | 0.14<br>(0.09 to<br>0.21)              | 0.14<br>(0.09 to<br>0.21)                  |
| Acute hepatitis E                     | 45.13<br>(34.27 to<br>58.07)                    | 31.04<br>(21.19 to<br>44.30)                    | 29.80<br>(20.45 to<br>42.35)                    | 36.54<br>(25.11 to<br>51.81)                    | 1.24<br>(0.92 to<br>1.62)              | 1.52<br>(0.95 to<br>2.31)                | 1.56<br>(0.96 to<br>2.33)              | 1.58<br>(0.99 to<br>2.41)                  |
| Other unspecified infectious diseases | 85.85<br>(66.02 to<br>127.06)                   | 84.63<br>(43.40 to<br>118.39)                   | 81.36<br>(40.14 to<br>114.19)                   | 100.05<br>(58.33 to<br>135.93)                  | 4.50<br>(1.63 to<br>5.89)              | 7.12<br>(1.60 to<br>10.92)               | 7.16<br>(1.53 to<br>11.05)             | 7.59<br>(1.92 to<br>11.46)                 |
| <b>Non-communicable diseases</b>      | <b>14,445.18</b><br>(12,945.81 to<br>16,041.00) | <b>17,498.27</b><br>(13,430.87 to<br>21,997.44) | <b>13,800.53</b><br>(10,816.76 to<br>17,140.53) | <b>24,693.22</b><br>(18,821.93 to<br>31,187.46) | <b>598.64</b><br>(543.62 to<br>658.64) | <b>914.00</b><br>(742.62 to<br>1,112.44) | <b>746.10</b><br>(618.53 to<br>891.52) | <b>1,221.11</b><br>(982.20 to<br>1,484.38) |
| <b>Bangladesh</b>                     |                                                 |                                                 |                                                 |                                                 |                                        |                                          |                                        |                                            |
| Cause                                 | YLLs (in 1000s)                                 |                                                 |                                                 |                                                 | Deaths (in 1000s)                      |                                          |                                        |                                            |
|                                       | 2016                                            | 2040 Forecast                                   | 2040 Better Scenario                            | 2040 Worse Scenario                             | 2016                                   | 2040 Forecast                            | 2040 Better Scenario                   | 2040 Worse Scenario                        |
| Neoplasms                             | 2,446.12<br>(2,149.26 to<br>2,802.70)           | 3,880.95<br>(2,997.90 to<br>4,955.91)           | 3,394.87<br>(2,670.24 to<br>4,268.80)           | 4,552.14<br>(3,469.75 to<br>5,975.15)           | 89.01<br>(78.18 to<br>101.33)          | 168.84<br>(133.85 to<br>211.27)          | 150.41<br>(121.59 to<br>184.18)        | 192.28<br>(149.51 to<br>247.97)            |
| Lip and oral cavity cancer            | 181.72<br>(156.73 to<br>208.51)                 | 265.91<br>(182.61 to<br>381.84)                 | 214.22<br>(150.17 to<br>296.05)                 | 357.00<br>(238.90 to<br>519.25)                 | 6.91<br>(6.09 to<br>7.83)              | 11.79<br>(8.42 to<br>16.21)              | 10.10<br>(7.43 to<br>13.54)            | 14.71<br>(10.16 to<br>20.29)               |
| Nasopharynx cancer                    | 24.86<br>(16.52 to<br>37.03)                    | 39.44<br>(20.14 to<br>72.39)                    | 30.74<br>(16.26 to<br>55.44)                    | 57.07<br>(27.73 to<br>108.30)                   | 0.78<br>(0.53 to<br>1.14)              | 1.38<br>(0.72 to<br>2.50)                | 1.10<br>(0.59 to<br>1.95)              | 1.95<br>(0.97 to<br>3.62)                  |
| Other pharynx cancer                  | 84.34<br>(62.90 to<br>123.24)                   | 137.99<br>(91.76 to<br>216.00)                  | 141.40<br>(94.08 to<br>219.08)                  | 138.36<br>(90.99 to<br>217.79)                  | 3.08<br>(2.32 to<br>4.42)              | 5.80<br>(3.90 to<br>8.89)                | 6.04<br>(4.08 to<br>9.30)              | 5.64<br>(3.79 to<br>8.73)                  |
| Esophageal cancer                     | 61.21<br>(52.10 to<br>70.95)                    | 88.43<br>(48.99 to<br>159.50)                   | 73.76<br>(42.46 to<br>127.51)                   | 124.65<br>(63.93 to<br>238.89)                  | 2.36<br>(2.06 to<br>2.69)              | 3.94<br>(2.29 to<br>6.75)                | 3.38<br>(2.02 to<br>5.63)              | 5.23<br>(2.82 to<br>9.35)                  |
| Stomach cancer                        | 165.55<br>(139.52 to<br>194.91)                 | 214.15<br>(157.10 to<br>283.37)                 | 196.94<br>(145.82 to<br>259.11)                 | 245.08<br>(180.95 to<br>329.48)                 | 6.12<br>(5.23 to<br>7.18)              | 9.22<br>(6.99 to<br>12.22)               | 8.63<br>(6.62 to<br>11.21)             | 10.17<br>(7.73 to<br>13.45)                |
| Colon and rectum cancer               | 202.36<br>(175.51 to<br>231.48)                 | 410.17<br>(281.60 to<br>596.10)                 | 421.30<br>(290.07 to<br>610.72)                 | 395.26<br>(268.51 to<br>566.65)                 | 7.53<br>(6.60 to<br>8.56)              | 18.82<br>(13.17 to<br>26.65)             | 19.80<br>(13.86 to<br>28.05)           | 17.40<br>(12.09 to<br>24.74)               |
| Liver cancer                          | 73.42<br>(51.58 to<br>90.63)                    | 145.70<br>(94.97 to<br>204.72)                  | 131.90<br>(87.59 to<br>178.16)                  | 160.08<br>(101.02 to<br>232.90)                 | 2.83<br>(1.99 to<br>3.47)              | 6.52<br>(4.29 to<br>9.03)                | 6.05<br>(4.11 to<br>8.10)              | 6.91<br>(4.40 to<br>9.88)                  |
| Liver cancer due to hepatitis B       | 30.99<br>(21.67 to<br>39.94)                    | 56.87<br>(35.44 to<br>82.43)                    | 51.13<br>(32.54 to<br>70.42)                    | 62.52<br>(38.47 to<br>92.96)                    | 1.07<br>(0.76 to<br>1.38)              | 2.33<br>(1.49 to<br>3.29)                | 2.15<br>(1.39 to<br>2.99)              | 2.47<br>(1.53 to<br>3.67)                  |
| Liver cancer due to hepatitis C       | 21.04<br>(14.08 to<br>27.01)                    | 46.44<br>(28.94 to<br>66.06)                    | 42.67<br>(27.19 to<br>59.09)                    | 49.89<br>(30.45 to<br>73.05)                    | 0.92<br>(0.64 to<br>1.17)              | 2.28<br>(1.45 to<br>3.17)                | 2.15<br>(1.42 to<br>2.89)              | 2.36<br>(1.48 to<br>3.37)                  |
| Liver cancer due to alcohol use       | 4.05<br>(2.83 to<br>5.27)                       | 8.42<br>(5.25 to<br>12.32)                      | 7.61<br>(4.90 to<br>10.90)                      | 9.29<br>(5.59 to<br>14.09)                      | 0.17<br>(0.12 to<br>0.22)              | 0.39<br>(0.24 to<br>0.56)                | 0.36<br>(0.23 to<br>0.50)              | 0.41<br>(0.25 to<br>0.61)                  |
| Liver cancer due to other causes      | 17.35<br>(12.09 to<br>21.84)                    | 33.96<br>(20.87 to<br>49.97)                    | 30.50<br>(19.68 to<br>43.35)                    | 38.38<br>(22.75 to<br>59.10)                    | 0.66<br>(0.47 to<br>0.83)              | 1.53<br>(0.95 to<br>2.26)                | 1.40<br>(0.91 to<br>2.02)              | 1.67<br>(0.98 to<br>2.54)                  |
| Gallbladder and biliary tract cancer  | 59.76<br>(39.29 to<br>83.06)                    | 74.02<br>(45.52 to<br>107.88)                   | 77.13<br>(47.11 to<br>112.50)                   | 70.00<br>(42.90 to<br>101.48)                   | 2.07<br>(1.37 to<br>2.86)              | 3.00<br>(1.93 to<br>4.24)                | 3.18<br>(2.02 to<br>4.52)              | 2.77<br>(1.77 to<br>3.91)                  |
| Pancreatic cancer                     | 55.01<br>(44.42 to<br>66.07)                    | 118.62<br>(85.38 to<br>160.73)                  | 115.63<br>(83.56 to<br>155.12)                  | 120.94<br>(85.41 to<br>168.32)                  | 2.34<br>(1.93 to<br>2.77)              | 5.67<br>(4.19 to<br>7.60)                | 5.66<br>(4.21 to<br>7.50)              | 5.54<br>(4.01 to<br>7.58)                  |
| Larynx cancer                         | 58.20<br>(44.04 to<br>94.09)                    | 86.22<br>(40.77 to<br>168.99)                   | 61.14<br>(30.38 to<br>118.74)                   | 129.97<br>(60.12 to<br>261.48)                  | 2.34<br>(1.80 to<br>3.78)              | 3.77<br>(1.82 to<br>7.35)                | 2.72<br>(1.41 to<br>5.25)              | 5.52<br>(2.59 to<br>11.04)                 |

|                                     |                                 |                                   |                                 |                                     |                              |                              |                              |                              |
|-------------------------------------|---------------------------------|-----------------------------------|---------------------------------|-------------------------------------|------------------------------|------------------------------|------------------------------|------------------------------|
| Tracheal, bronchus, and lung cancer | 563.43<br>(485.40 to<br>648.00) | 921.92<br>(587.40 to<br>1,388.61) | 549.22<br>(360.22 to<br>822.33) | 1,379.35<br>(865.68 to<br>2,137.84) | 24.36<br>(21.31 to<br>28.01) | 43.75<br>(28.60 to<br>64.70) | 27.05<br>(18.09 to<br>40.00) | 63.79<br>(41.26 to<br>98.50) |
| Malignant skin melanoma             | 5.28<br>(3.36 to<br>9.05)       | 9.07<br>(5.89 to<br>15.38)        | 9.71<br>(6.23 to<br>16.61)      | 7.91<br>(5.13 to<br>13.38)          | 0.17<br>(0.11 to<br>0.29)    | 0.37<br>(0.26 to<br>0.62)    | 0.41<br>(0.28 to<br>0.68)    | 0.31<br>(0.21 to<br>0.51)    |
| Non-melanoma skin cancer            | 3.98<br>(2.93 to<br>5.53)       | 7.47<br>(5.41 to<br>10.56)        | 7.72<br>(5.54 to<br>11.11)      | 7.53<br>(5.47 to<br>10.64)          | 0.19<br>(0.15 to<br>0.26)    | 0.43<br>(0.33 to<br>0.57)    | 0.46<br>(0.35 to<br>0.62)    | 0.40<br>(0.31 to<br>0.55)    |
| Breast cancer                       | 159.95<br>(128.46 to<br>202.05) | 268.59<br>(183.65 to<br>375.31)   | 260.75<br>(180.71 to<br>358.66) | 271.03<br>(184.71 to<br>381.59)     | 5.07<br>(4.14 to<br>6.25)    | 10.22<br>(7.25 to<br>13.92)  | 10.16<br>(7.32 to<br>13.47)  | 9.99<br>(7.07 to<br>13.68)   |
| Cervical cancer                     | 92.54<br>(49.41 to<br>140.57)   | 118.34<br>(55.81 to<br>197.41)    | 110.55<br>(53.03 to<br>180.62)  | 136.11<br>(62.28 to<br>230.78)      | 2.84<br>(1.53 to<br>4.28)    | 4.19<br>(2.05 to<br>6.81)    | 4.00<br>(1.99 to<br>6.39)    | 4.71<br>(2.28 to<br>7.86)    |
| Uterine cancer                      | 12.82<br>(9.24 to<br>18.28)     | 22.16<br>(14.75 to<br>32.99)      | 21.84<br>(14.55 to<br>32.48)    | 24.80<br>(16.64 to<br>36.88)        | 0.48<br>(0.35 to<br>0.69)    | 0.97<br>(0.68 to<br>1.44)    | 0.98<br>(0.68 to<br>1.43)    | 1.06<br>(0.74 to<br>1.57)    |
| Ovarian cancer                      | 39.81<br>(25.49 to<br>61.13)    | 75.82<br>(43.89 to<br>114.84)     | 77.26<br>(45.17 to<br>115.77)   | 68.73<br>(39.84 to<br>104.23)       | 1.31<br>(0.85 to<br>1.99)    | 2.95<br>(1.74 to<br>4.46)    | 3.04<br>(1.82 to<br>4.53)    | 2.62<br>(1.53 to<br>3.99)    |
| Prostate cancer                     | 29.47<br>(21.62 to<br>42.20)    | 76.83<br>(56.02 to<br>108.09)     | 82.53<br>(60.15 to<br>114.98)   | 67.72<br>(48.71 to<br>95.14)        | 1.95<br>(1.50 to<br>2.76)    | 5.30<br>(3.97 to<br>7.39)    | 5.84<br>(4.42 to<br>8.07)    | 4.45<br>(3.30 to<br>6.25)    |
| Testicular cancer                   | 4.63<br>(3.74 to<br>5.68)       | 4.79<br>(3.86 to<br>5.93)         | 5.01<br>(3.98 to<br>6.27)       | 4.68<br>(3.74 to<br>5.74)           | 0.20<br>(0.17 to<br>0.23)    | 0.31<br>(0.23 to<br>0.42)    | 0.34<br>(0.25 to<br>0.47)    | 0.27<br>(0.20 to<br>0.37)    |

**Bangladesh**

| Cause                           | YLLs (in 1000s)               |                                |                                |                                | Deaths (in 1000s)         |                           |                           |                           |
|---------------------------------|-------------------------------|--------------------------------|--------------------------------|--------------------------------|---------------------------|---------------------------|---------------------------|---------------------------|
|                                 | 2016                          | 2040 Forecast                  | 2040 Better Scenario           | 2040 Worse Scenario            | 2016                      | 2040 Forecast             | 2040 Better Scenario      | 2040 Worse Scenario       |
| Kidney cancer                   | 13.25<br>(8.26 to<br>17.91)   | 27.66<br>(15.10 to<br>41.94)   | 27.85<br>(15.38 to<br>41.45)   | 26.34<br>(14.12 to<br>41.06)   | 0.48<br>(0.29 to<br>0.65) | 1.21<br>(0.67 to<br>1.84) | 1.25<br>(0.70 to<br>1.85) | 1.11<br>(0.60 to<br>1.73) |
| Bladder cancer                  | 25.44<br>(14.89 to<br>36.66)  | 44.97<br>(22.73 to<br>76.31)   | 41.78<br>(21.49 to<br>69.22)   | 50.70<br>(24.74 to<br>89.22)   | 1.32<br>(0.76 to<br>1.93) | 2.62<br>(1.33 to<br>4.46) | 2.50<br>(1.29 to<br>4.21) | 2.79<br>(1.38 to<br>4.89) |
| Brain and nervous system cancer | 85.21<br>(52.43 to<br>117.00) | 118.94<br>(71.28 to<br>162.19) | 122.94<br>(73.94 to<br>167.87) | 114.64<br>(68.66 to<br>155.67) | 2.00<br>(1.23 to<br>2.72) | 3.69<br>(2.24 to<br>4.95) | 3.89<br>(2.36 to<br>5.22) | 3.43<br>(2.07 to<br>4.57) |
| Thyroid cancer                  | 20.15<br>(15.20 to<br>26.81)  | 27.40<br>(19.09 to<br>38.27)   | 26.33<br>(18.75 to<br>36.45)   | 29.48<br>(20.45 to<br>41.83)   | 0.65<br>(0.50 to<br>0.86) | 1.09<br>(0.79 to<br>1.50) | 1.07<br>(0.79 to<br>1.46) | 1.14<br>(0.81 to<br>1.58) |
| Mesothelioma                    | 5.21<br>(3.26 to<br>7.51)     | 9.41<br>(5.51 to<br>13.98)     | 9.79<br>(5.72 to<br>14.60)     | 9.13<br>(5.46 to<br>13.42)     | 0.18<br>(0.11 to<br>0.27) | 0.39<br>(0.23 to<br>0.58) | 0.42<br>(0.24 to<br>0.62) | 0.37<br>(0.22 to<br>0.54) |
| Hodgkin lymphoma                | 21.39<br>(15.89 to<br>32.57)  | 14.72<br>(10.82 to<br>22.81)   | 14.07<br>(10.25 to<br>22.09)   | 18.15<br>(13.42 to<br>28.52)   | 0.45<br>(0.35 to<br>0.70) | 0.42<br>(0.31 to<br>0.64) | 0.41<br>(0.31 to<br>0.63) | 0.50<br>(0.37 to<br>0.77) |
| Non-Hodgkin lymphoma            | 67.97<br>(41.27 to<br>92.77)  | 110.10<br>(68.17 to<br>145.63) | 113.22<br>(71.48 to<br>149.85) | 102.73<br>(63.27 to<br>136.57) | 1.93<br>(1.21 to<br>2.58) | 4.26<br>(2.72 to<br>5.57) | 4.49<br>(2.92 to<br>5.89) | 3.79<br>(2.39 to<br>4.99) |
| Multiple myeloma                | 16.17<br>(10.55 to<br>23.18)  | 38.51<br>(24.24 to<br>55.20)   | 39.96<br>(25.34 to<br>57.62)   | 34.70<br>(21.75 to<br>50.21)   | 0.60<br>(0.40 to<br>0.86) | 1.68<br>(1.09 to<br>2.38) | 1.78<br>(1.15 to<br>2.53) | 1.46<br>(0.93 to<br>2.10) |
| Leukemia                        | 84.30<br>(67.07 to<br>133.53) | 103.05<br>(81.09 to<br>135.13) | 106.05<br>(79.76 to<br>130.42) | 106.27<br>(82.58 to<br>143.45) | 2.19<br>(1.85 to<br>2.92) | 3.78<br>(2.98 to<br>4.68) | 3.76<br>(2.98 to<br>4.64) | 3.73<br>(2.92 to<br>4.73) |
| Acute lymphoid leukemia         | 28.62<br>(19.76 to<br>53.83)  | 26.13<br>(18.16 to<br>40.02)   | 25.30<br>(17.73 to<br>38.15)   | 27.33<br>(18.79 to<br>43.12)   | 0.56<br>(0.40 to<br>0.91) | 0.72<br>(0.52 to<br>0.98) | 0.71<br>(0.52 to<br>0.95) | 0.72<br>(0.51 to<br>1.01) |
| Chronic lymphoid leukemia       | 4.48<br>(3.33 to<br>5.76)     | 8.58<br>(6.18 to<br>11.69)     | 8.44<br>(6.05 to<br>11.38)     | 8.62<br>(6.18 to<br>11.92)     | 0.20<br>(0.15 to<br>0.26) | 0.45<br>(0.31 to<br>0.61) | 0.46<br>(0.32 to<br>0.62) | 0.44<br>(0.30 to<br>0.60) |

|                                               |                                                  |                                                  |                                                  |                                                    |                                            |                                            |                                            |                                            |
|-----------------------------------------------|--------------------------------------------------|--------------------------------------------------|--------------------------------------------------|----------------------------------------------------|--------------------------------------------|--------------------------------------------|--------------------------------------------|--------------------------------------------|
| Acute myeloid leukemia                        | 25.50<br>(18.73 to 39.30)                        | 40.89<br>(29.43 to 57.58)                        | 40.31<br>(29.16 to 56.56)                        | 39.74<br>(28.16 to 56.88)                          | 0.65<br>(0.49 to 0.90)                     | 1.44<br>(1.02 to 1.92)                     | 1.45<br>(1.04 to 1.91)                     | 1.34<br>(0.94 to 1.84)                     |
| Chronic myeloid leukemia                      | 9.02<br>(6.43 to 13.44)                          | 9.95<br>(6.66 to 15.19)                          | 9.57<br>(6.54 to 14.63)                          | 10.41<br>(6.91 to 16.34)                           | 0.28<br>(0.21 to 0.41)                     | 0.39<br>(0.27 to 0.60)                     | 0.39<br>(0.27 to 0.58)                     | 0.40<br>(0.27 to 0.62)                     |
| Other leukemia                                | 16.68<br>(11.22 to 28.70)                        | 17.50<br>(11.66 to 25.21)                        | 16.43<br>(11.17 to 23.72)                        | 20.16<br>(13.35 to 29.21)                          | 0.49<br>(0.36 to 0.69)                     | 0.78<br>(0.55 to 1.08)                     | 0.75<br>(0.54 to 1.04)                     | 0.84<br>(0.58 to 1.18)                     |
| Other neoplasms                               | 228.70<br>(147.48 to 282.87)                     | 300.55<br>(186.37 to 387.29)                     | 310.13<br>(191.56 to 402.58)                     | 293.73<br>(182.84 to 374.54)                       | 6.26<br>(4.08 to 7.70)                     | 11.27<br>(7.23 to 14.21)                   | 11.91<br>(7.61 to 15.15)                   | 10.51<br>(6.73 to 13.22)                   |
| <b>Cardiovascular diseases</b>                | <b>6,190.44</b><br><b>(5,496.28 to 6,908.72)</b> | <b>6,345.14</b><br><b>(5,897.12 to 6,972.10)</b> | <b>4,145.13</b><br><b>(2,663.77 to 6,270.74)</b> | <b>10,759.24</b><br><b>(6,844.16 to 15,848.30)</b> | <b>277.94</b><br><b>(251.41 to 305.91)</b> | <b>349.41</b><br><b>(232.03 to 515.83)</b> | <b>246.50</b><br><b>(172.16 to 360.45)</b> | <b>548.00</b><br><b>(369.07 to 780.03)</b> |
| Rheumatic heart disease                       | 254.91<br>(206.51 to 308.25)                     | 137.29<br>(98.52 to 189.39)                      | 127.52<br>(92.61 to 173.97)                      | 175.18<br>(125.52 to 238.16)                       | 7.30<br>(6.03 to 8.82)                     | 6.02<br>(4.52 to 7.97)                     | 5.78<br>(4.39 to 7.60)                     | 7.23<br>(5.46 to 9.48)                     |
| Ischemic heart disease                        | 2,854.09<br>(2,514.77 to 3,217.22)               | 2,981.58<br>(1,614.57 to 4,968.20)               | 1,827.92<br>(992.87 to 3,168.16)                 | 5,142.68<br>(2,867.03 to 8,253.23)                 | 128.56<br>(115.29 to 142.22)               | 161.00<br>(92.42 to 259.82)                | 106.79<br>(61.83 to 174.93)                | 260.75<br>(151.93 to 414.90)               |
| Stroke                                        | 2,731.67<br>(2,428.51 to 3,070.67)               | 2,679.19<br>(1,472.43 to 4,661.60)               | 1,744.96<br>(1,009.14 to 2,987.48)               | 4,795.95<br>(2,661.64 to 8,073.54)                 | 126.37<br>(113.89 to 139.53)               | 149.53<br>(90.83 to 246.13)                | 105.89<br>(65.97 to 167.14)                | 244.14<br>(149.62 to 397.27)               |
| Ischemic stroke                               | 1,137.61<br>(958.93 to 1,352.96)                 | 1,276.75<br>(679.61 to 2,261.85)                 | 881.00<br>(483.77 to 1,526.06)                   | 2,034.36<br>(1,082.73 to 3,538.72)                 | 66.57<br>(57.60 to 76.54)                  | 85.61<br>(48.94 to 152.07)                 | 63.67<br>(38.07 to 111.94)                 | 126.10<br>(70.92 to 221.51)                |
| Intracerebral hemorrhage                      | 1,594.06<br>(1,376.19 to 1,837.84)               | 1,402.44<br>(669.45 to 2,673.09)                 | 863.96<br>(424.74 to 1,644.01)                   | 2,761.59<br>(1,391.49 to 5,039.25)                 | 59.80<br>(50.98 to 68.91)                  | 63.92<br>(34.56 to 113.73)                 | 42.22<br>(23.83 to 72.37)                  | 118.04<br>(63.03 to 204.75)                |
| Hypertensive heart disease                    | 207.35<br>(154.67 to 302.50)                     | 331.93<br>(154.52 to 779.41)                     | 241.17<br>(123.16 to 537.19)                     | 422.53<br>(192.59 to 985.69)                       | 9.40<br>(7.23 to 12.98)                    | 19.45<br>(9.14 to 48.18)                   | 14.67<br>(7.70 to 32.49)                   | 23.03<br>(10.55 to 57.84)                  |
| Cardiomyopathy and myocarditis                | 38.69<br>(23.19 to 54.81)                        | 34.10<br>(21.57 to 51.24)                        | 33.10<br>(20.92 to 48.84)                        | 34.57<br>(21.75 to 52.16)                          | 0.92<br>(0.63 to 1.26)                     | 1.23<br>(0.82 to 1.80)                     | 1.23<br>(0.84 to 1.78)                     | 1.16<br>(0.78 to 1.71)                     |
| Myocarditis                                   | 14.83<br>(5.89 to 24.78)                         | 8.46<br>(3.15 to 15.24)                          | 8.39<br>(3.18 to 15.11)                          | 9.25<br>(3.50 to 16.39)                            | 0.28<br>(0.12 to 0.47)                     | 0.21<br>(0.09 to 0.40)                     | 0.22<br>(0.10 to 0.40)                     | 0.22<br>(0.10 to 0.40)                     |
| <b>Bangladesh</b>                             |                                                  |                                                  |                                                  |                                                    |                                            |                                            |                                            |                                            |
| Cause                                         | YLLs (in 1000s)                                  |                                                  |                                                  |                                                    | Deaths (in 1000s)                          |                                            |                                            |                                            |
|                                               | 2016                                             | 2040 Forecast                                    | 2040 Better Scenario                             | 2040 Worse Scenario                                | 2016                                       | 2040 Forecast                              | 2040 Better Scenario                       | 2040 Worse Scenario                        |
| Alcoholic cardiomyopathy                      | 1.54<br>(0.66 to 2.72)                           | 1.85<br>(0.77 to 3.68)                           | 1.96<br>(0.82 to 3.84)                           | 1.67<br>(0.72 to 3.23)                             | 0.05<br>(0.02 to 0.08)                     | 0.07<br>(0.03 to 0.14)                     | 0.08<br>(0.04 to 0.15)                     | 0.06<br>(0.03 to 0.12)                     |
| Other cardiomyopathy                          | 22.32<br>(12.66 to 33.69)                        | 23.80<br>(14.32 to 38.25)                        | 22.75<br>(13.70 to 35.33)                        | 23.65<br>(13.92 to 38.11)                          | 0.60<br>(0.38 to 0.82)                     | 0.94<br>(0.60 to 1.42)                     | 0.93<br>(0.60 to 1.37)                     | 0.88<br>(0.56 to 1.33)                     |
| Atrial fibrillation and flutter               | 21.12<br>(16.55 to 26.33)                        | 48.94<br>(33.96 to 68.34)                        | 48.59<br>(34.05 to 67.33)                        | 46.22<br>(31.82 to 63.45)                          | 1.98<br>(1.53 to 2.51)                     | 4.83<br>(3.40 to 6.62)                     | 5.02<br>(3.57 to 6.87)                     | 4.28<br>(3.01 to 5.81)                     |
| Aortic aneurysm                               | 25.09<br>(19.33 to 34.23)                        | 39.47<br>(25.43 to 59.58)                        | 36.70<br>(24.44 to 54.50)                        | 39.76<br>(25.66 to 61.22)                          | 1.10<br>(0.87 to 1.43)                     | 2.18<br>(1.52 to 3.04)                     | 2.14<br>(1.55 to 2.96)                     | 2.03<br>(1.41 to 2.87)                     |
| Peripheral artery disease                     | 1.47<br>(0.65 to 2.72)                           | 5.00<br>(2.11 to 9.42)                           | 4.85<br>(2.09 to 9.00)                           | 4.55<br>(1.89 to 8.86)                             | 0.11<br>(0.05 to 0.20)                     | 0.42<br>(0.19 to 0.76)                     | 0.44<br>(0.20 to 0.78)                     | 0.35<br>(0.15 to 0.66)                     |
| Endocarditis                                  | 33.24<br>(25.68 to 40.96)                        | 44.57<br>(29.91 to 63.72)                        | 41.87<br>(28.69 to 58.59)                        | 46.49<br>(31.20 to 64.79)                          | 1.06<br>(0.80 to 1.32)                     | 1.99<br>(1.31 to 2.88)                     | 1.94<br>(1.29 to 2.77)                     | 1.95<br>(1.28 to 2.77)                     |
| Other cardiovascular and circulatory diseases | 22.83<br>(13.82 to 31.94)                        | 43.06<br>(23.69 to 68.26)                        | 38.44<br>(21.70 to 60.91)                        | 51.31<br>(28.02 to 81.12)                          | 1.13<br>(0.68 to 1.57)                     | 2.77<br>(1.56 to 4.16)                     | 2.62<br>(1.50 to 3.89)                     | 3.06<br>(1.72 to 4.64)                     |



|                                                                |                                                      |                                                      |                                                    |                                                      |                                             |                                               |                                              |                                                |
|----------------------------------------------------------------|------------------------------------------------------|------------------------------------------------------|----------------------------------------------------|------------------------------------------------------|---------------------------------------------|-----------------------------------------------|----------------------------------------------|------------------------------------------------|
| <b>Chronic respiratory diseases</b>                            | <b>1,653.60</b><br>(1,469.78 to<br><b>1,860.05</b> ) | <b>2,044.81</b><br>(1,363.97 to<br><b>3,200.85</b> ) | <b>1,295.44</b><br>(922.24 to<br><b>1,902.02</b> ) | <b>3,271.79</b><br>(2,083.28 to<br><b>5,350.43</b> ) | <b>86.61</b><br>(77.95 to<br><b>96.70</b> ) | <b>118.00</b><br>(79.62 to<br><b>180.50</b> ) | <b>77.28</b><br>(55.50 to<br><b>111.02</b> ) | <b>179.41</b><br>(116.30 to<br><b>288.60</b> ) |
| Chronic obstructive pulmonary disease                          | 1,172.69<br>(889.37 to<br>1,366.79)                  | 1,598.10<br>(925.54 to<br>2,766.93)                  | 899.35<br>(532.48 to<br>1,500.46)                  | 2,759.15<br>(1,564.90 to<br>4,777.24)                | 67.78<br>(54.67 to<br>77.38)                | 96.72<br>(58.16 to<br>160.03)                 | 57.68<br>(35.49 to<br>91.01)                 | 156.27<br>(91.10 to<br>265.25)                 |
| Pneumoconiosis                                                 | 5.75<br>(3.71 to<br>8.96)                            | 6.55<br>(4.33 to<br>10.08)                           | 6.36<br>(4.11 to<br>9.86)                          | 6.87<br>(4.60 to<br>10.55)                           | 0.31<br>(0.21 to<br>0.50)                   | 0.39<br>(0.26 to<br>0.61)                     | 0.39<br>(0.26 to<br>0.60)                    | 0.39<br>(0.26 to<br>0.62)                      |
| Silicosis                                                      | 2.13<br>(0.96 to<br>3.39)                            | 1.91<br>(0.84 to<br>3.12)                            | 1.93<br>(0.81 to<br>3.17)                          | 1.97<br>(0.90 to<br>3.15)                            | 0.13<br>(0.06 to<br>0.20)                   | 0.12<br>(0.06 to<br>0.19)                     | 0.12<br>(0.06 to<br>0.20)                    | 0.12<br>(0.06 to<br>0.19)                      |
| Asbestosis                                                     | 0.73<br>(0.42 to<br>1.26)                            | 1.14<br>(0.65 to<br>2.01)                            | 1.16<br>(0.65 to<br>2.05)                          | 1.12<br>(0.65 to<br>1.96)                            | 0.03<br>(0.01 to<br>0.05)                   | 0.05<br>(0.03 to<br>0.10)                     | 0.05<br>(0.03 to<br>0.10)                    | 0.05<br>(0.03 to<br>0.09)                      |
| Coal workers pneumoconiosis                                    | 0.47<br>(0.17 to<br>0.92)                            | 0.48<br>(0.18 to<br>0.95)                            | 0.41<br>(0.16 to<br>0.82)                          | 0.65<br>(0.26 to<br>1.25)                            | 0.02<br>(0.01 to<br>0.04)                   | 0.03<br>(0.01 to<br>0.05)                     | 0.02<br>(0.01 to<br>0.04)                    | 0.04<br>(0.01 to<br>0.07)                      |
| Other pneumoconiosis                                           | 2.43<br>(1.23 to<br>4.74)                            | 3.02<br>(1.60 to<br>5.53)                            | 2.85<br>(1.50 to<br>5.24)                          | 3.13<br>(1.68 to<br>5.71)                            | 0.14<br>(0.07 to<br>0.27)                   | 0.19<br>(0.10 to<br>0.34)                     | 0.18<br>(0.10 to<br>0.33)                    | 0.19<br>(0.10 to<br>0.33)                      |
| Asthma                                                         | 406.69<br>(271.67 to<br>663.74)                      | 302.65<br>(172.66 to<br>550.00)                      | 248.42<br>(145.00 to<br>424.66)                    | 378.45<br>(209.86 to<br>729.88)                      | 15.77<br>(9.92 to<br>26.82)                 | 14.04<br>(7.93 to<br>25.21)                   | 11.99<br>(6.94 to<br>19.88)                  | 179.41<br>(92.4 to<br>320.8)                   |
| Interstitial lung disease and pulmonary sarcoidosis            | 44.12<br>(18.69 to<br>74.90)                         | 108.25<br>(47.34 to<br>179.91)                       | 113.89<br>(52.20 to<br>184.01)                     | 93.64<br>(40.67 to<br>158.56)                        | 2.00<br>(0.86 to<br>3.35)                   | 2.00<br>(2.52 to<br>9.49)                     | 6.07<br>(2.80 to<br>9.94)                    | 4.70<br>(2.08 to<br>8.00)                      |
| Other chronic respiratory diseases                             | 24.36<br>(14.52 to<br>36.18)                         | 29.25<br>(17.39 to<br>44.31)                         | 27.42<br>(16.57 to<br>41.49)                       | 33.68<br>(19.49 to<br>52.04)                         | 0.75<br>(0.46 to<br>1.07)                   | 1.20<br>(0.71 to<br>1.74)                     | 1.15<br>(0.69 to<br>1.67)                    | 1.31<br>(0.77 to<br>1.92)                      |
| <b>Cirrhosis and other chronic liver diseases</b>              | <b>928.74</b><br>(775.55 to<br><b>1,127.26</b> )     | <b>1,193.94</b><br>(982.81 to<br><b>1,451.67</b> )   | <b>1,193.35</b><br>(968.31 to<br><b>1,445.12</b> ) | <b>1,273.38</b><br>(1,046.23 to<br><b>1,540.58</b> ) | <b>28.29</b><br>(23.99 to<br><b>33.33</b> ) | <b>44.73</b><br>(37.59 to<br><b>51.31</b> )   | <b>45.85</b><br>(37.94 to<br><b>52.97</b> )  | <b>45.66</b><br>(38.75 to<br><b>52.58</b> )    |
| Cirrhosis and other chronic liver diseases due to hepatitis B  | 363.89<br>(290.71 to<br>433.93)                      | 504.70<br>(403.51 to<br>628.78)                      | 507.59<br>(400.26 to<br>631.46)                    | 529.43<br>(426.71 to<br>663.11)                      | 11.47<br>(9.44 to<br>14.14)                 | 19.01<br>(15.65 to<br>22.78)                  | 19.59<br>(16.02 to<br>23.35)                 | 19.12<br>(15.80 to<br>22.98)                   |
| Cirrhosis and other chronic liver diseases due to hepatitis C  | 156.33<br>(118.92 to<br>198.34)                      | 225.51<br>(173.02 to<br>286.91)                      | 225.94<br>(173.92 to<br>288.78)                    | 238.61<br>(183.60 to<br>302.16)                      | 4.77<br>(3.78 to<br>5.91)                   | 8.05<br>(6.35 to<br>9.97)                     | 8.23<br>(6.47 to<br>10.21)                   | 8.23<br>(6.48 to<br>10.18)                     |
| Cirrhosis and other chronic liver diseases due to alcohol use  | 207.48<br>(161.83 to<br>266.39)                      | 277.53<br>(211.54 to<br>357.83)                      | 275.87<br>(207.18 to<br>356.27)                    | 299.87<br>(228.92 to<br>389.11)                      | 7.15<br>(5.68 to<br>8.84)                   | 11.14<br>(8.73 to<br>13.79)                   | 11.37<br>(8.85 to<br>14.13)                  | 11.54<br>(9.02 to<br>14.32)                    |
| Cirrhosis and other chronic liver diseases due to other causes | 203.03<br>(164.53 to<br>259.85)                      | 186.20<br>(143.05 to<br>239.37)                      | 183.95<br>(140.57 to<br>236.18)                    | 205.47<br>(156.51 to<br>263.44)                      | 4.89<br>(4.06 to<br>5.96)                   | 6.52<br>(5.14 to<br>8.22)                     | 6.66<br>(5.19 to<br>8.39)                    | 6.77<br>(5.37 to<br>8.54)                      |
| <b>Digestive diseases</b>                                      | <b>597.19</b><br>(511.94 to<br><b>712.75</b> )       | <b>684.58</b><br>(545.56 to<br><b>849.79</b> )       | <b>662.45</b><br>(525.21 to<br><b>823.16</b> )     | <b>779.01</b><br>(621.37 to<br><b>965.87</b> )       | <b>18.90</b><br>(16.27 to<br><b>22.87</b> ) | <b>27.08</b><br>(22.02 to<br><b>33.97</b> )   | <b>26.75</b><br>(21.52 to<br><b>33.58</b> )  | <b>29.73</b><br>(24.26 to<br><b>37.19</b> )    |
| Peptic ulcer disease                                           | 150.52<br>(104.96 to<br>209.09)                      | 126.17<br>(71.62 to<br>201.87)                       | 112.51<br>(64.52 to<br>183.21)                     | 164.67<br>(95.57 to<br>264.75)                       | 5.23<br>(3.71 to<br>7.08)                   | 5.19<br>(3.05 to<br>8.01)                     | 4.72<br>(2.80 to<br>7.35)                    | 6.56<br>(3.80 to<br>10.09)                     |
| <b>Bangladesh</b>                                              |                                                      |                                                      |                                                    |                                                      |                                             |                                               |                                              |                                                |
| <b>Cause</b>                                                   | <b>YLLs (in 1000s)</b>                               |                                                      |                                                    |                                                      | <b>Deaths (in 1000s)</b>                    |                                               |                                              |                                                |
|                                                                | <b>2016</b>                                          | <b>2040 Forecast</b>                                 | <b>2040 Better Scenario</b>                        | <b>2040 Worse Scenario</b>                           | <b>2016</b>                                 | <b>2040 Forecast</b>                          | <b>2040 Better Scenario</b>                  | <b>2040 Worse Scenario</b>                     |
| Gastritis and duodenitis                                       | 27.67<br>(16.77 to<br>43.60)                         | 37.21<br>(20.33 to<br>62.07)                         | 36.98<br>(19.99 to<br>61.99)                       | 40.91<br>(22.68 to<br>68.24)                         | 0.95<br>(0.61 to<br>1.43)                   | 1.53<br>(0.93 to<br>2.41)                     | 1.56<br>(0.93 to<br>2.43)                    | 1.62<br>(0.98 to<br>2.54)                      |
| Appendicitis                                                   | 53.06<br>(36.69 to<br>77.24)                         | 48.85<br>(32.19 to<br>70.59)                         | 46.83<br>(30.56 to<br>67.36)                       | 59.45<br>(39.50 to<br>85.81)                         | 1.35<br>(0.95 to<br>1.94)                   | 1.66<br>(1.16 to<br>2.36)                     | 1.62<br>(1.11 to<br>2.31)                    | 1.95<br>(1.35 to<br>2.80)                      |
| Paralytic ileus and intestinal obstruction                     | 190.26<br>(137.33 to<br>320.79)                      | 226.23<br>(152.23 to<br>380.98)                      | 225.99<br>(150.97 to<br>382.83)                    | 242.14<br>(163.31 to<br>410.45)                      | 5.19<br>(3.66 to<br>9.06)                   | 8.15<br>(5.40 to<br>14.49)                    | 8.31<br>(5.48 to<br>14.84)                   | 8.37<br>(5.60 to<br>14.84)                     |

|                                         |                                                      |                                                      |                                                      |                                                      |                                                   |                                                   |                                                   |                                                   |
|-----------------------------------------|------------------------------------------------------|------------------------------------------------------|------------------------------------------------------|------------------------------------------------------|---------------------------------------------------|---------------------------------------------------|---------------------------------------------------|---------------------------------------------------|
|                                         | 24.62<br>(15.87 to<br>33.06)                         | 24.65<br>(15.83 to<br>33.25)                         | 24.53<br>(15.50 to<br>32.91)                         | 27.52<br>(17.85 to<br>36.97)                         | 0.99<br>(0.61 to<br>1.31)                         | 1.25<br>(0.79 to<br>1.69)                         | 1.29<br>(0.81 to<br>1.73)                         | 1.31<br>(0.83 to<br>1.78)                         |
| Inguinal, femoral, and abdominal hernia |                                                      |                                                      |                                                      |                                                      |                                                   |                                                   |                                                   |                                                   |
|                                         | 20.08<br>(13.54 to<br>26.29)                         | 29.55<br>(17.90 to<br>41.02)                         | 30.22<br>(17.96 to<br>42.12)                         | 29.47<br>(18.16 to<br>40.54)                         | 0.65<br>(0.43 to<br>0.86)                         | 1.22<br>(0.76 to<br>1.63)                         | 1.27<br>(0.79 to<br>1.71)                         | 1.18<br>(0.74 to<br>1.58)                         |
| Inflammatory bowel disease              |                                                      |                                                      |                                                      |                                                      |                                                   |                                                   |                                                   |                                                   |
|                                         | 23.25<br>(15.79 to<br>31.62)                         | 46.94<br>(30.15 to<br>64.25)                         | 47.69<br>(30.24 to<br>65.66)                         | 48.58<br>(31.57 to<br>66.49)                         | 1.08<br>(0.75 to<br>1.42)                         | 2.47<br>(1.66 to<br>3.28)                         | 2.56<br>(1.70 to<br>3.40)                         | 2.46<br>(1.68 to<br>3.27)                         |
| Vascular intestinal disorders           |                                                      |                                                      |                                                      |                                                      |                                                   |                                                   |                                                   |                                                   |
|                                         | 24.67<br>(17.73 to<br>33.38)                         | 31.24<br>(17.33 to<br>51.98)                         | 26.01<br>(15.11 to<br>41.49)                         | 38.80<br>(21.03 to<br>65.47)                         | 0.87<br>(0.63 to<br>1.16)                         | 1.32<br>(0.78 to<br>2.17)                         | 1.14<br>(0.70 to<br>1.76)                         | 1.58<br>(0.91 to<br>2.61)                         |
| Gallbladder and biliary diseases        |                                                      |                                                      |                                                      |                                                      |                                                   |                                                   |                                                   |                                                   |
|                                         | 73.89<br>(44.53 to<br>102.30)                        | 100.97<br>(57.99 to<br>143.28)                       | 99.02<br>(56.64 to<br>140.41)                        | 113.04<br>(64.76 to<br>160.46)                       | 2.19<br>(1.37 to<br>2.97)                         | 3.62<br>(2.23 to<br>4.96)                         | 3.60<br>(2.21 to<br>4.98)                         | 3.97<br>(2.44 to<br>5.40)                         |
| Pancreatitis                            |                                                      |                                                      |                                                      |                                                      |                                                   |                                                   |                                                   |                                                   |
|                                         | 9.18<br>(5.86 to<br>15.00)                           | 12.79<br>(7.70 to<br>21.27)                          | 12.66<br>(7.51 to<br>21.54)                          | 14.43<br>(8.69 to<br>24.38)                          | 0.41<br>(0.28 to<br>0.65)                         | 0.67<br>(0.43 to<br>1.06)                         | 0.68<br>(0.44 to<br>1.07)                         | 0.72<br>(0.45 to<br>1.14)                         |
| Other digestive diseases                |                                                      |                                                      |                                                      |                                                      |                                                   |                                                   |                                                   |                                                   |
| <b>Neurological disorders</b>           | <b>469.38</b><br><b>(396.95 to</b><br><b>560.82)</b> | <b>724.79</b><br><b>(586.68 to</b><br><b>921.21)</b> | <b>727.93</b><br><b>(592.02 to</b><br><b>910.95)</b> | <b>720.02</b><br><b>(582.87 to</b><br><b>913.97)</b> | <b>23.31</b><br><b>(19.90 to</b><br><b>27.64)</b> | <b>52.28</b><br><b>(39.69 to</b><br><b>69.70)</b> | <b>55.01</b><br><b>(43.04 to</b><br><b>71.36)</b> | <b>46.21</b><br><b>(34.25 to</b><br><b>62.43)</b> |
|                                         | 171.56<br>(140.49 to<br>212.91)                      | 415.60<br>(297.81 to<br>586.47)                      | 421.61<br>(315.13 to<br>576.34)                      | 378.69<br>(263.02 to<br>546.12)                      | 16.46<br>(13.58 to<br>20.47)                      | 41.35<br>(29.07 to<br>59.06)                      | 43.51<br>(31.94 to<br>59.13)                      | 35.66<br>(24.12 to<br>51.86)                      |
| Alzheimer's disease and other dementias |                                                      |                                                      |                                                      |                                                      |                                                   |                                                   |                                                   |                                                   |
|                                         | 19.04<br>(14.27 to<br>24.45)                         | 58.24<br>(43.15 to<br>75.08)                         | 64.70<br>(47.88 to<br>82.89)                         | 46.81<br>(34.89 to<br>60.24)                         | 1.50<br>(1.14 to<br>1.95)                         | 4.73<br>(3.52 to<br>6.07)                         | 5.38<br>(4.05 to<br>6.93)                         | 3.65<br>(2.68 to<br>4.75)                         |
| Parkinson's disease                     |                                                      |                                                      |                                                      |                                                      |                                                   |                                                   |                                                   |                                                   |
|                                         | 239.20<br>(189.67 to<br>308.46)                      | 199.26<br>(153.49 to<br>260.70)                      | 188.41<br>(145.48 to<br>246.82)                      | 245.17<br>(188.55 to<br>321.80)                      | 4.45<br>(3.56 to<br>5.65)                         | 4.55<br>(3.61 to<br>5.85)                         | 4.38<br>(3.48 to<br>5.63)                         | 5.40<br>(4.28 to<br>6.95)                         |
| Epilepsy                                |                                                      |                                                      |                                                      |                                                      |                                                   |                                                   |                                                   |                                                   |
|                                         | 6.05<br>(3.95 to<br>7.96)                            | 9.22<br>(5.66 to<br>12.62)                           | 9.28<br>(5.73 to<br>12.66)                           | 8.84<br>(5.40 to<br>12.14)                           | 0.16<br>(0.11 to<br>0.22)                         | 0.29<br>(0.18 to<br>0.40)                         | 0.30<br>(0.18 to<br>0.41)                         | 0.28<br>(0.17 to<br>0.38)                         |
| Multiple sclerosis                      |                                                      |                                                      |                                                      |                                                      |                                                   |                                                   |                                                   |                                                   |
|                                         | 5.12<br>(3.69 to<br>7.95)                            | 9.92<br>(6.95 to<br>17.05)                           | 10.41<br>(7.28 to<br>18.01)                          | 9.06<br>(6.31 to<br>15.61)                           | 0.15<br>(0.10 to<br>0.24)                         | 0.37<br>(0.26 to<br>0.64)                         | 0.39<br>(0.28 to<br>0.68)                         | 0.33<br>(0.23 to<br>0.57)                         |
| Motor neuron disease                    |                                                      |                                                      |                                                      |                                                      |                                                   |                                                   |                                                   |                                                   |
|                                         | 28.41<br>(20.55 to<br>35.38)                         | 32.54<br>(20.16 to<br>43.01)                         | 33.51<br>(20.63 to<br>44.42)                         | 31.45<br>(19.73 to<br>41.25)                         | 0.58<br>(0.40 to<br>0.75)                         | 0.99<br>(0.60 to<br>1.33)                         | 1.05<br>(0.63 to<br>1.41)                         | 0.90<br>(0.55 to<br>1.20)                         |
| Other neurological disorders            |                                                      |                                                      |                                                      |                                                      |                                                   |                                                   |                                                   |                                                   |
| <b>Mental disorders</b>                 | <b>56.17</b><br><b>(43.67 to</b><br><b>75.18)</b>    | <b>92.37</b><br><b>(72.12 to</b><br><b>123.94)</b>   | <b>94.04</b><br><b>(73.24 to</b><br><b>126.37)</b>   | <b>92.27</b><br><b>(72.19 to</b><br><b>123.13)</b>   | <b>1.47</b><br><b>(1.18 to</b><br><b>1.87)</b>    | <b>3.04</b><br><b>(2.50 to</b><br><b>3.86)</b>    | <b>3.16</b><br><b>(2.59 to</b><br><b>4.00)</b>    | <b>2.92</b><br><b>(2.39 to</b><br><b>3.69)</b>    |
|                                         | 20.38<br>(16.26 to<br>30.10)                         | 28.22<br>(21.67 to<br>41.13)                         | 28.73<br>(22.05 to<br>41.63)                         | 28.45<br>(21.99 to<br>41.37)                         | 0.65<br>(0.54 to<br>0.87)                         | 1.17<br>(0.93 to<br>1.51)                         | 1.22<br>(0.97 to<br>1.58)                         | 1.14<br>(0.91 to<br>1.48)                         |
| Alcohol use disorders                   |                                                      |                                                      |                                                      |                                                      |                                                   |                                                   |                                                   |                                                   |
|                                         | 35.54<br>(25.02 to<br>51.98)                         | 63.84<br>(46.60 to<br>91.13)                         | 65.00<br>(47.16 to<br>92.59)                         | 63.51<br>(46.39 to<br>90.97)                         | 0.81<br>(0.59 to<br>1.15)                         | 1.86<br>(1.41 to<br>2.54)                         | 1.93<br>(1.47 to<br>2.65)                         | 1.77<br>(1.35 to<br>2.43)                         |
| Drug use disorders                      |                                                      |                                                      |                                                      |                                                      |                                                   |                                                   |                                                   |                                                   |
|                                         | 23.53<br>(15.42 to<br>36.10)                         | 37.20<br>(24.60 to<br>57.67)                         | 37.72<br>(24.98 to<br>58.74)                         | 37.23<br>(24.34 to<br>58.01)                         | 0.50<br>(0.33 to<br>0.76)                         | 0.98<br>(0.67 to<br>1.47)                         | 1.01<br>(0.69 to<br>1.51)                         | 0.95<br>(0.64 to<br>1.44)                         |
| Opioid use disorders                    |                                                      |                                                      |                                                      |                                                      |                                                   |                                                   |                                                   |                                                   |
|                                         | 1.98<br>(0.67 to<br>3.52)                            | 4.31<br>(1.51 to<br>7.59)                            | 4.31<br>(1.50 to<br>7.60)                            | 4.56<br>(1.59 to<br>8.00)                            | 0.05<br>(0.02 to<br>0.08)                         | 0.12<br>(0.04 to<br>0.22)                         | 0.12<br>(0.04 to<br>0.22)                         | 0.13<br>(0.05 to<br>0.22)                         |
| Cocaine use disorders                   |                                                      |                                                      |                                                      |                                                      |                                                   |                                                   |                                                   |                                                   |
|                                         | 1.28<br>(0.49 to<br>2.37)                            | 3.29<br>(1.30 to<br>6.01)                            | 3.24<br>(1.24 to<br>5.93)                            | 3.65<br>(1.44 to<br>6.72)                            | 0.03<br>(0.01 to<br>0.05)                         | 0.09<br>(0.04 to<br>0.16)                         | 0.09<br>(0.04 to<br>0.15)                         | 0.09<br>(0.04 to<br>0.17)                         |
| Amphetamine use disorders               |                                                      |                                                      |                                                      |                                                      |                                                   |                                                   |                                                   |                                                   |
|                                         | 8.75<br>(5.52 to<br>13.25)                           | 19.04<br>(12.97 to<br>28.35)                         | 19.74<br>(13.41 to<br>29.33)                         | 18.08<br>(12.18 to<br>27.19)                         | 0.23<br>(0.16 to<br>0.34)                         | 0.67<br>(0.48 to<br>0.94)                         | 0.72<br>(0.52 to<br>1.00)                         | 0.60<br>(0.42 to<br>0.85)                         |
| Other drug use disorders                |                                                      |                                                      |                                                      |                                                      |                                                   |                                                   |                                                   |                                                   |
|                                         | 0.25<br>(0.15 to<br>0.37)                            | 0.30<br>(0.19 to<br>0.48)                            | 0.31<br>(0.19 to<br>0.49)                            | 0.31<br>(0.19 to<br>0.48)                            | 0.00<br>(0.00 to<br>0.01)                         | 0.01<br>(0.00 to<br>0.01)                         | 0.01<br>(0.00 to<br>0.01)                         | 0.01<br>(0.00 to<br>0.01)                         |
| Eating disorders                        |                                                      |                                                      |                                                      |                                                      |                                                   |                                                   |                                                   |                                                   |
| <b>Bangladesh</b>                       |                                                      |                                                      |                                                      |                                                      |                                                   |                                                   |                                                   |                                                   |
| <b>YLLs (in 1000s)</b>                  |                                                      |                                                      |                                                      |                                                      | <b>Deaths (in 1000s)</b>                          |                                                   |                                                   |                                                   |

| Cause                                                      | 2016                                      | 2040 Forecast                             | 2040 Better Scenario                      | 2040 Worse Scenario                       | 2016                             | 2040 Forecast                       | 2040 Better Scenario               | 2040 Worse Scenario                 |
|------------------------------------------------------------|-------------------------------------------|-------------------------------------------|-------------------------------------------|-------------------------------------------|----------------------------------|-------------------------------------|------------------------------------|-------------------------------------|
| <b>Diabetes, urogenital, blood, and endocrine diseases</b> | <b>1,349.32</b><br>(1,209.62 to 1,515.14) | <b>2,130.52</b><br>(1,610.40 to 2,810.51) | <b>1,898.19</b><br>(1,454.12 to 2,528.66) | <b>2,739.22</b><br>(2,096.28 to 3,602.64) | <b>61.49</b><br>(55.59 to 67.94) | <b>135.29</b><br>(106.65 to 185.63) | <b>124.95</b><br>(99.27 to 165.34) | <b>161.39</b><br>(126.93 to 215.82) |
| Diabetes mellitus                                          | 539.51<br>(478.52 to 608.35)              | 998.94<br>(652.02 to 1,498.39)            | 900.32<br>(597.58 to 1,365.87)            | 1,304.86<br>(840.75 to 1,995.45)          | 31.46<br>(28.02 to 35.28)        | 69.75<br>(48.29 to 98.31)           | 65.63<br>(46.40 to 90.31)          | 84.91<br>(57.97 to 120.10)          |
| Acute glomerulonephritis                                   | 2.21<br>(1.69 to 3.21)                    | 2.14<br>(1.60 to 2.91)                    | 2.10<br>(1.56 to 2.87)                    | 2.45<br>(1.84 to 3.42)                    | 0.06<br>(0.05 to 0.08)           | 0.09<br>(0.07 to 0.12)              | 0.09<br>(0.07 to 0.12)             | 0.09<br>(0.07 to 0.12)              |
| Chronic kidney disease                                     | 518.11<br>(450.19 to 593.80)              | 763.27<br>(449.68 to 1,374.90)            | 623.14<br>(385.04 to 1,141.22)            | 1,051.50<br>(618.54 to 1,808.25)          | 19.31<br>(17.17 to 22.10)        | 43.14<br>(23.25 to 99.06)           | 35.31<br>(19.95 to 79.98)          | 55.44<br>(30.11 to 117.84)          |
| Chronic kidney disease due to diabetes mellitus            | 142.57<br>(118.70 to 177.22)              | 288.83<br>(163.22 to 532.21)              | 233.86<br>(139.86 to 432.07)              | 398.43<br>(223.02 to 713.64)              | 6.38<br>(5.36 to 7.69)           | 16.27<br>(8.49 to 36.22)            | 13.25<br>(7.37 to 29.18)           | 21.17<br>(11.12 to 45.40)           |
| Chronic kidney disease due to hypertension                 | 98.63<br>(81.98 to 120.29)                | 189.25<br>(102.41 to 396.90)              | 153.23<br>(86.79 to 308.52)               | 253.74<br>(137.26 to 506.50)              | 5.13<br>(4.31 to 6.14)           | 13.21<br>(6.68 to 31.46)            | 10.83<br>(5.66 to 25.28)           | 16.49<br>(8.37 to 37.32)            |
| Chronic kidney disease due to glomerulonephritis           | 107.20<br>(83.73 to 129.82)               | 95.68<br>(61.69 to 158.13)                | 79.93<br>(53.22 to 129.89)                | 134.55<br>(87.03 to 219.55)               | 2.60<br>(2.14 to 3.13)           | 3.90<br>(2.19 to 8.93)              | 3.21<br>(1.87 to 7.36)             | 5.10<br>(2.90 to 11.06)             |
| Chronic kidney disease due to other and unspecified causes | 169.70<br>(139.80 to 201.41)              | 189.51<br>(115.87 to 329.45)              | 156.13<br>(98.05 to 263.91)               | 264.78<br>(160.20 to 455.22)              | 5.21<br>(4.35 to 6.22)           | 9.76<br>(5.32 to 21.14)             | 8.02<br>(4.53 to 17.27)            | 12.68<br>(6.85 to 26.37)            |
| Urinary diseases and male infertility                      | 134.82<br>(118.55 to 152.10)              | 237.27<br>(202.96 to 274.83)              | 243.97<br>(206.76 to 286.21)              | 236.81<br>(203.38 to 273.16)              | 5.91<br>(5.26 to 6.59)           | 14.48<br>(12.41 to 16.66)           | 15.64<br>(13.44 to 17.96)          | 13.20<br>(11.27 to 15.27)           |
| Urinary tract infections                                   | 89.11<br>(69.87 to 107.64)                | 179.40<br>(144.35 to 214.60)              | 186.06<br>(149.20 to 221.88)              | 174.22<br>(139.88 to 207.58)              | 4.09<br>(3.54 to 4.75)           | 11.47<br>(9.47 to 13.53)            | 12.48<br>(10.45 to 14.66)          | 10.20<br>(8.31 to 12.19)            |
| Urolithiasis                                               | 13.67<br>(9.22 to 21.20)                  | 25.31<br>(16.88 to 39.48)                 | 26.04<br>(17.27 to 40.05)                 | 24.94<br>(16.70 to 38.96)                 | 0.57<br>(0.40 to 0.88)           | 1.34<br>(0.94 to 2.08)              | 1.45<br>(1.02 to 2.25)             | 1.22<br>(0.85 to 1.89)              |
| Other urinary diseases                                     | 32.04<br>(22.63 to 45.40)                 | 32.56<br>(21.32 to 49.79)                 | 31.87<br>(20.69 to 48.56)                 | 37.65<br>(24.91 to 57.49)                 | 1.25<br>(0.90 to 1.75)           | 1.67<br>(1.12 to 2.49)              | 1.71<br>(1.13 to 2.54)             | 1.78<br>(1.19 to 2.65)              |
| Gynecological diseases                                     | 5.72<br>(4.40 to 8.35)                    | 7.37<br>(4.82 to 11.30)                   | 7.49<br>(4.92 to 11.32)                   | 8.11<br>(5.17 to 12.35)                   | 0.50<br>(0.39 to 0.62)           | 0.84<br>(0.47 to 1.26)              | 0.89<br>(0.53 to 1.31)             | 0.86<br>(0.45 to 1.33)              |
| Uterine fibroids                                           | 1.49<br>(0.38 to 3.15)                    | 1.49<br>(0.33 to 3.40)                    | 1.47<br>(0.32 to 3.31)                    | 1.73<br>(0.39 to 4.07)                    | 0.11<br>(0.03 to 0.24)           | 0.14<br>(0.03 to 0.33)              | 0.15<br>(0.03 to 0.35)             | 0.15<br>(0.03 to 0.37)              |
| Polycystic ovarian syndrome                                | 0.27<br>(0.05 to 0.79)                    | 0.11<br>(0.02 to 0.31)                    | 0.10<br>(0.01 to 0.30)                    | 0.16<br>(0.02 to 0.48)                    | 0.01<br>(0.00 to 0.02)           | 0.00<br>(0.00 to 0.01)              | 0.00<br>(0.00 to 0.01)             | 0.00<br>(0.00 to 0.01)              |
| Endometriosis                                              | 0.01<br>(0.00 to 0.05)                    | 0.01<br>(0.00 to 0.05)                    | 0.01<br>(0.00 to 0.05)                    | 0.02<br>(0.00 to 0.06)                    | 0.00<br>(0.00 to 0.00)           | 0.00<br>(0.00 to 0.00)              | 0.00<br>(0.00 to 0.00)             | 0.00<br>(0.00 to 0.00)              |
| Genital prolapse                                           | 1.46<br>(0.38 to 2.43)                    | 1.43<br>(0.34 to 3.15)                    | 1.43<br>(0.34 to 3.15)                    | 1.65<br>(0.39 to 3.71)                    | 0.17<br>(0.04 to 0.29)           | 0.18<br>(0.03 to 0.42)              | 0.18<br>(0.03 to 0.42)             | 0.19<br>(0.04 to 0.46)              |
| Other gynecological diseases                               | 2.47<br>(1.13 to 4.37)                    | 4.33<br>(2.17 to 7.45)                    | 4.47<br>(2.24 to 7.55)                    | 4.55<br>(2.17 to 8.13)                    | 0.21<br>(0.10 to 0.33)           | 0.52<br>(0.24 to 0.88)              | 0.56<br>(0.26 to 0.92)             | 0.51<br>(0.23 to 0.89)              |
| Hemoglobinopathies and hemolytic anemias                   | 80.78<br>(60.44 to 109.57)                | 46.00<br>(32.11 to 59.85)                 | 44.35<br>(31.04 to 57.51)                 | 56.02<br>(38.73 to 73.37)                 | 1.75<br>(1.34 to 2.17)           | 2.08<br>(1.54 to 2.53)              | 2.12<br>(1.58 to 2.59)             | 2.28<br>(1.67 to 2.81)              |
| Thalassemias                                               | 13.72<br>(0.97 to 42.02)                  | 2.84<br>(0.22 to 9.05)                    | 2.76<br>(0.22 to 8.65)                    | 3.42<br>(0.22 to 11.60)                   | 0.16<br>(0.01 to 0.51)           | 0.42<br>(0.00 to 0.11)              | 0.03<br>(0.00 to 0.11)             | 0.04<br>(0.00 to 0.14)              |
| Sickle cell disorders                                      | 42.81<br>(5.78 to 74.67)                  | 14.45<br>(1.57 to 27.53)                  | 13.49<br>(1.44 to 25.97)                  | 18.97<br>(2.40 to 35.63)                  | 0.57<br>(0.07 to 0.99)           | 0.22<br>(0.02 to 0.47)              | 0.21<br>(0.02 to 0.44)             | 0.29<br>(0.03 to 0.58)              |

|                                                   |                                   |                                 |                                 |                                 |                             |                             |                             |                             |
|---------------------------------------------------|-----------------------------------|---------------------------------|---------------------------------|---------------------------------|-----------------------------|-----------------------------|-----------------------------|-----------------------------|
| G6PD deficiency                                   | 14.65<br>(6.79 to<br>25.88)       | 15.97<br>(8.32 to<br>26.00)     | 15.18<br>(7.74 to<br>24.71)     | 19.67<br>(10.21 to<br>32.18)    | 0.36<br>(0.19 to<br>0.55)   | 0.54<br>(0.34 to<br>0.76)   | 0.52<br>(0.33 to<br>0.74)   | 0.64<br>(0.40 to<br>0.92)   |
| Other hemoglobinopathies and hemolytic anemias    | 9.60<br>(6.62 to<br>13.03)        | 12.75<br>(9.42 to<br>16.18)     | 12.92<br>(9.66 to<br>16.66)     | 13.96<br>(10.08 to<br>17.80)    | 0.67<br>(0.51 to<br>0.83)   | 1.29<br>(0.90 to<br>1.69)   | 1.36<br>(0.98 to<br>1.76)   | 1.31<br>(0.88 to<br>1.76)   |
| Endocrine, metabolic, blood, and immune disorders | 68.18<br>(51.00 to<br>128.90)     | 75.52<br>(62.30 to<br>104.39)   | 76.81<br>(62.96 to<br>103.52)   | 79.47<br>(64.42 to<br>117.95)   | 2.50<br>(2.02 to<br>2.90)   | 4.90<br>(2.73 to<br>6.27)   | 5.27<br>(2.79 to<br>6.77)   | 4.60<br>(2.83 to<br>5.90)   |
| <b>Bangladesh</b>                                 |                                   |                                 |                                 |                                 |                             |                             |                             |                             |
| Cause                                             | YLLs (in 1000s)                   |                                 |                                 |                                 | Deaths (in 1000s)           |                             |                             |                             |
|                                                   | 2016                              | 2040 Forecast                   | 2040 Better Scenario            | 2040 Worse Scenario             | 2016                        | 2040 Forecast               | 2040 Better Scenario        | 2040 Worse Scenario         |
|                                                   | 14.19<br>(10.40 to<br>19.22)      | 25.96<br>(17.79 to<br>35.65)    | 26.44<br>(17.87 to<br>36.24)    | 26.11<br>(17.73 to<br>36.02)    | 0.55<br>(0.38 to<br>0.74)   | 1.37<br>(0.89 to<br>1.83)   | 1.43<br>(0.93 to<br>1.92)   | 1.32<br>(0.86 to<br>1.79)   |
| Musculoskeletal disorders                         |                                   |                                 |                                 |                                 |                             |                             |                             |                             |
| Rheumatoid arthritis                              | 5.57<br>(3.30 to<br>8.34)         | 11.42<br>(6.23 to<br>17.88)     | 11.13<br>(5.92 to<br>17.64)     | 12.93<br>(7.22 to<br>19.81)     | 0.28<br>(0.17 to<br>0.41)   | 0.70<br>(0.39 to<br>1.04)   | 0.70<br>(0.38 to<br>1.06)   | 0.76<br>(0.43 to<br>1.11)   |
| Other musculoskeletal disorders                   | 8.62<br>(6.43 to<br>12.49)        | 14.53<br>(10.20 to<br>21.75)    | 15.30<br>(10.67 to<br>22.73)    | 13.18<br>(9.23 to<br>19.79)     | 0.27<br>(0.20 to<br>0.40)   | 0.66<br>(0.44 to<br>0.99)   | 0.73<br>(0.49 to<br>1.08)   | 0.56<br>(0.37 to<br>0.85)   |
| Other non-communicable diseases                   | 740.03<br>(526.58 to<br>1,097.86) | 375.23<br>(275.74 to<br>531.49) | 362.71<br>(263.60 to<br>507.27) | 480.04<br>(337.43 to<br>712.58) | 11.08<br>(8.31 to<br>15.10) | 13.97<br>(8.11 to<br>18.46) | 14.76<br>(8.15 to<br>19.67) | 14.19<br>(9.00 to<br>18.57) |
| Congenital birth defects                          | 586.38<br>(377.48 to<br>958.04)   | 192.67<br>(120.21 to<br>318.19) | 176.21<br>(110.16 to<br>293.60) | 285.97<br>(173.60 to<br>474.88) | 7.11<br>(4.59 to<br>11.72)  | 2.63<br>(1.66 to<br>4.45)   | 2.43<br>(1.53 to<br>4.12)   | 3.75<br>(2.30 to<br>6.33)   |
| Neural tube defects                               | 8.82<br>(3.78 to<br>19.11)        | 1.27<br>(0.53 to<br>2.78)       | 1.10<br>(0.46 to<br>2.42)       | 2.24<br>(0.88 to<br>5.13)       | 0.11<br>(0.05 to<br>0.23)   | 0.02<br>(0.01 to<br>0.04)   | 0.02<br>(0.01 to<br>0.03)   | 0.03<br>(0.01 to<br>0.06)   |
| Congenital heart anomalies                        | 381.65<br>(155.81 to<br>473.80)   | 90.03<br>(48.30 to<br>154.58)   | 82.75<br>(44.13 to<br>141.04)   | 129.82<br>(66.79 to<br>225.34)  | 3.47<br>(1.93 to<br>5.88)   | 1.26<br>(0.69 to<br>2.19)   | 1.17<br>(0.64 to<br>2.03)   | 1.75<br>(0.92 to<br>3.03)   |
| Orofacial clefts                                  | 3.63<br>(0.98 to<br>13.26)        | 0.78<br>(0.18 to<br>2.69)       | 0.66<br>(0.15 to<br>2.21)       | 1.53<br>(0.34 to<br>5.34)       | 0.04<br>(0.01 to<br>0.15)   | 0.01<br>(0.00 to<br>0.03)   | 0.01<br>(0.00 to<br>0.03)   | 0.02<br>(0.00 to<br>0.06)   |
| Down syndrome                                     | 9.74<br>(5.37 to<br>19.40)        | 5.05<br>(2.89 to<br>9.54)       | 4.70<br>(2.68 to<br>8.92)       | 6.98<br>(3.95 to<br>13.29)      | 0.13<br>(0.08 to<br>0.26)   | 0.10<br>(0.06 to<br>0.19)   | 0.10<br>(0.05 to<br>0.18)   | 0.13<br>(0.07 to<br>0.25)   |
| Other chromosomal abnormalities                   | 11.82<br>(4.88 to<br>24.75)       | 5.98<br>(2.38 to<br>12.94)      | 5.35<br>(2.11 to<br>11.51)      | 9.62<br>(3.67 to<br>21.03)      | 0.14<br>(0.06 to<br>0.29)   | 0.07<br>(0.03 to<br>0.16)   | 0.06<br>(0.03 to<br>0.14)   | 0.11<br>(0.04 to<br>0.25)   |
| Congenital musculoskeletal and limb anomalies     | 15.43<br>(6.89 to<br>35.52)       | 6.55<br>(2.85 to<br>15.60)      | 6.01<br>(2.62 to<br>14.40)      | 9.70<br>(4.10 to<br>23.00)      | 0.18<br>(0.08 to<br>0.41)   | 0.08<br>(0.04 to<br>0.19)   | 0.07<br>(0.03 to<br>0.17)   | 0.12<br>(0.05 to<br>0.27)   |
| Urogenital congenital anomalies                   | 17.84<br>(10.44 to<br>29.85)      | 6.91<br>(4.05 to<br>11.73)      | 6.46<br>(3.78 to<br>10.94)      | 9.70<br>(5.50 to<br>16.88)      | 0.23<br>(0.14 to<br>0.38)   | 0.12<br>(0.07 to<br>0.21)   | 0.12<br>(0.07 to<br>0.21)   | 0.16<br>(0.09 to<br>0.27)   |
| Digestive congenital anomalies                    | 54.16<br>(27.73 to<br>106.64)     | 16.14<br>(7.76 to<br>32.32)     | 14.46<br>(7.00 to<br>29.00)     | 25.90<br>(11.93 to<br>52.81)    | 0.63<br>(0.33 to<br>1.24)   | 0.19<br>(0.09 to<br>0.38)   | 0.17<br>(0.09 to<br>0.34)   | 0.31<br>(0.14 to<br>0.62)   |
| Other congenital birth defects                    | 183.31<br>(117.72 to<br>318.92)   | 59.98<br>(37.21 to<br>101.47)   | 54.74<br>(33.95 to<br>91.52)    | 90.48<br>(54.46 to<br>158.11)   | 2.17<br>(1.41 to<br>3.82)   | 0.78<br>(0.49 to<br>1.33)   | 0.71<br>(0.46 to<br>1.23)   | 1.13<br>(0.70 to<br>2.01)   |
| Skin and subcutaneous diseases                    | 70.08<br>(46.75 to<br>140.03)     | 162.90<br>(106.88 to<br>256.42) | 168.76<br>(109.02 to<br>260.16) | 163.91<br>(110.86 to<br>272.79) | 3.00<br>(1.63 to<br>3.98)   | 11.11<br>(5.14 to<br>15.40) | 12.12<br>(5.34 to<br>16.74) | 10.09<br>(4.94 to<br>14.03) |
| Cellulitis                                        | 4.66<br>(2.64 to<br>9.65)         | 15.10<br>(6.99 to<br>27.66)     | 16.43<br>(7.46 to<br>29.14)     | 13.13<br>(6.39 to<br>25.25)     | 0.24<br>(0.09 to<br>0.37)   | 1.15<br>(0.37 to<br>1.81)   | 1.32<br>(0.40 to<br>2.09)   | 0.91<br>(0.31 to<br>1.45)   |
| Pyoderma                                          | 58.95<br>(38.34 to<br>119.05)     | 135.72<br>(90.00 to<br>217.06)  | 139.40<br>(90.96 to<br>216.65)  | 139.69<br>(95.79 to<br>234.76)  | 2.39<br>(1.38 to<br>3.31)   | 8.96<br>(4.30 to<br>12.45)  | 9.67<br>(4.46 to<br>13.51)  | 8.35<br>(4.24 to<br>11.66)  |



|                                                                                     |                                                      |                                                      |                                                      |                                                      |                                                   |                                                   |                                                   |                                                   |
|-------------------------------------------------------------------------------------|------------------------------------------------------|------------------------------------------------------|------------------------------------------------------|------------------------------------------------------|---------------------------------------------------|---------------------------------------------------|---------------------------------------------------|---------------------------------------------------|
| Other exposure to mechanical forces                                                 | 41.26<br>(27.97 to<br>51.04)                         | 23.50<br>(16.51 to<br>29.65)                         | 22.32<br>(15.53 to<br>28.38)                         | 28.72<br>(20.25 to<br>36.82)                         | 0.82<br>(0.57 to<br>0.99)                         | 0.69<br>(0.48 to<br>0.86)                         | 0.67<br>(0.46 to<br>0.85)                         | 0.79<br>(0.56 to<br>0.98)                         |
| Adverse effects of medical treatment                                                | 103.79<br>(84.46 to<br>127.91)                       | 97.10<br>(76.01 to<br>120.59)                        | 94.63<br>(73.75 to<br>118.05)                        | 111.65<br>(87.71 to<br>139.17)                       | 2.84<br>(2.34 to<br>3.39)                         | 4.15<br>(3.31 to<br>4.99)                         | 4.20<br>(3.38 to<br>5.06)                         | 4.44<br>(3.57 to<br>5.33)                         |
| Animal contact                                                                      | 29.99<br>(24.29 to<br>37.75)                         | 24.06<br>(18.23 to<br>31.27)                         | 22.31<br>(16.68 to<br>29.36)                         | 31.54<br>(23.78 to<br>41.33)                         | 0.59<br>(0.47 to<br>0.74)                         | 0.59<br>(0.46 to<br>0.77)                         | 0.56<br>(0.43 to<br>0.73)                         | 0.74<br>(0.56 to<br>0.96)                         |
| Venomous animal contact                                                             | 26.38<br>(21.03 to<br>33.88)                         | 21.45<br>(15.99 to<br>28.32)                         | 19.89<br>(14.75 to<br>26.46)                         | 28.11<br>(20.91 to<br>37.44)                         | 0.52<br>(0.42 to<br>0.67)                         | 0.53<br>(0.41 to<br>0.69)                         | 0.51<br>(0.38 to<br>0.67)                         | 0.66<br>(0.50 to<br>0.87)                         |
| Non-venomous animal contact                                                         | 3.62<br>(2.14 to<br>6.21)                            | 2.61<br>(1.45 to<br>4.78)                            | 2.42<br>(1.35 to<br>4.38)                            | 3.44<br>(1.89 to<br>6.17)                            | 0.06<br>(0.04 to<br>0.11)                         | 0.06<br>(0.04 to<br>0.11)                         | 0.06<br>(0.03 to<br>0.10)                         | 0.08<br>(0.04 to<br>0.14)                         |
| Foreign body                                                                        | 35.21<br>(23.37 to<br>47.54)                         | 22.31<br>(14.64 to<br>30.19)                         | 22.17<br>(14.55 to<br>30.12)                         | 24.72<br>(16.10 to<br>33.91)                         | 0.68<br>(0.47 to<br>0.89)                         | 0.83<br>(0.58 to<br>1.07)                         | 0.88<br>(0.61 to<br>1.14)                         | 0.80<br>(0.56 to<br>1.04)                         |
| Pulmonary aspiration and foreign body in airway                                     | 26.63<br>(16.51 to<br>37.99)                         | 17.43<br>(11.51 to<br>24.47)                         | 17.50<br>(11.61 to<br>24.52)                         | 18.92<br>(12.33 to<br>27.00)                         | 0.52<br>(0.35 to<br>0.71)                         | 0.70<br>(0.50 to<br>0.94)                         | 0.75<br>(0.53 to<br>0.99)                         | 0.65<br>(0.46 to<br>0.89)                         |
| Foreign body in other body part                                                     | 8.58<br>(4.95 to<br>11.97)                           | 4.88<br>(2.41 to<br>7.27)                            | 4.67<br>(2.26 to<br>7.03)                            | 5.80<br>(2.94 to<br>8.63)                            | 0.16<br>(0.09 to<br>0.22)                         | 0.13<br>(0.06 to<br>0.19)                         | 0.13<br>(0.06 to<br>0.19)                         | 0.14<br>(0.07 to<br>0.21)                         |
| Environmental heat and cold exposure                                                | 4.33<br>(2.57 to<br>5.31)                            | 3.58<br>(1.83 to<br>4.82)                            | 3.43<br>(1.71 to<br>4.74)                            | 4.53<br>(2.42 to<br>6.06)                            | 0.15<br>(0.07 to<br>0.20)                         | 0.20<br>(0.08 to<br>0.29)                         | 0.20<br>(0.07 to<br>0.29)                         | 0.22<br>(0.09 to<br>0.32)                         |
| Other unintentional injuries                                                        | 80.18<br>(60.81 to<br>177.74)                        | 59.18<br>(45.87 to<br>112.02)                        | 58.35<br>(45.20 to<br>105.86)                        | 66.51<br>(50.96 to<br>129.43)                        | 2.36<br>(1.97 to<br>3.32)                         | 2.86<br>(2.13 to<br>3.70)                         | 3.04<br>(2.22 to<br>3.97)                         | 2.82<br>(2.10 to<br>3.79)                         |
| <b>Self-harm and interpersonal violence</b>                                         | <b>817.16</b><br><b>(691.81 to</b><br><b>969.64)</b> | <b>704.59</b><br><b>(556.59 to</b><br><b>887.83)</b> | <b>689.53</b><br><b>(546.06 to</b><br><b>868.69)</b> | <b>758.42</b><br><b>(599.00 to</b><br><b>958.43)</b> | <b>15.82</b><br><b>(13.47 to</b><br><b>18.64)</b> | <b>16.52</b><br><b>(13.50 to</b><br><b>20.08)</b> | <b>16.55</b><br><b>(13.41 to</b><br><b>19.99)</b> | <b>17.12</b><br><b>(14.01 to</b><br><b>20.85)</b> |
| <b>Bangladesh</b>                                                                   |                                                      |                                                      |                                                      |                                                      |                                                   |                                                   |                                                   |                                                   |
| Cause                                                                               | YLLs (in 1000s)                                      |                                                      |                                                      |                                                      | Deaths (in 1000s)                                 |                                                   |                                                   |                                                   |
|                                                                                     | 2016                                                 | 2040 Forecast                                        | 2040 Better Scenario                                 | 2040 Worse Scenario                                  | 2016                                              | 2040 Forecast                                     | 2040 Better Scenario                              | 2040 Worse Scenario                               |
| Self-harm                                                                           | 583.83<br>(486.52 to<br>711.32)                      | 542.32<br>(423.07 to<br>686.90)                      | 530.33<br>(414.49 to<br>670.70)                      | 585.12<br>(452.42 to<br>749.43)                      | 11.57<br>(9.69 to<br>13.70)                       | 13.11<br>(10.52 to<br>15.95)                      | 13.17<br>(10.46 to<br>16.00)                      | 13.54<br>(11.04 to<br>16.60)                      |
| Self-harm by firearm                                                                | 43.16<br>(19.83 to<br>79.02)                         | 32.90<br>(14.21 to<br>62.57)                         | 31.80<br>(13.65 to<br>61.04)                         | 36.54<br>(15.71 to<br>69.74)                         | 0.82<br>(0.38 to<br>1.53)                         | 0.72<br>(0.31 to<br>1.47)                         | 0.71<br>(0.30 to<br>1.45)                         | 0.78<br>(0.34 to<br>1.58)                         |
| Self-harm by other specified means                                                  | 540.67<br>(444.25 to<br>650.35)                      | 509.42<br>(395.88 to<br>651.07)                      | 498.52<br>(390.34 to<br>630.87)                      | 548.58<br>(425.38 to<br>700.32)                      | 10.75<br>(8.89 to<br>12.66)                       | 12.39<br>(9.76 to<br>15.03)                       | 12.47<br>(9.77 to<br>15.14)                       | 12.76<br>(10.10 to<br>15.49)                      |
| Interpersonal violence                                                              | 233.33<br>(177.11 to<br>322.70)                      | 162.27<br>(118.70 to<br>233.57)                      | 159.20<br>(116.88 to<br>229.08)                      | 173.30<br>(126.80 to<br>250.79)                      | 4.25<br>(3.22 to<br>5.95)                         | 3.41<br>(2.52 to<br>5.15)                         | 3.37<br>(2.50 to<br>5.08)                         | 3.58<br>(2.64 to<br>5.33)                         |
| Physical violence by firearm                                                        | 13.38<br>(7.10 to<br>23.80)                          | 10.80<br>(5.40 to<br>18.35)                          | 10.69<br>(5.33 to<br>18.03)                          | 11.22<br>(5.60 to<br>18.96)                          | 0.26<br>(0.14 to<br>0.45)                         | 0.24<br>(0.12 to<br>0.40)                         | 0.24<br>(0.12 to<br>0.39)                         | 0.25<br>(0.12 to<br>0.40)                         |
| Physical violence by sharp object                                                   | 17.94<br>(12.19 to<br>28.53)                         | 16.13<br>(10.59 to<br>27.03)                         | 16.13<br>(10.57 to<br>27.06)                         | 16.21<br>(10.62 to<br>27.08)                         | 0.33<br>(0.23 to<br>0.56)                         | 0.34<br>(0.23 to<br>0.61)                         | 0.34<br>(0.23 to<br>0.62)                         | 0.34<br>(0.23 to<br>0.61)                         |
| Physical violence by other means                                                    | 202.01<br>(152.89 to<br>283.63)                      | 135.34<br>(97.26 to<br>197.61)                       | 132.38<br>(95.43 to<br>193.86)                       | 145.86<br>(105.37 to<br>211.80)                      | 3.66<br>(2.75 to<br>5.14)                         | 2.83<br>(2.10 to<br>4.36)                         | 2.79<br>(2.07 to<br>4.28)                         | 2.99<br>(2.21 to<br>4.55)                         |
| <b>Forces of nature, conflict and terrorism, and executions and police conflict</b> | <b>4.04</b><br><b>(2.20 to</b><br><b>5.72)</b>       | <b>463.96</b><br><b>(0.00 to</b><br><b>3,793.37)</b> | <b>460.90</b><br><b>(0.00 to</b><br><b>3,774.70)</b> | <b>487.36</b><br><b>(0.00 to</b><br><b>3,988.42)</b> | <b>0.21</b><br><b>(0.05 to</b><br><b>0.33)</b>    | <b>10.94</b><br><b>(0.00 to</b><br><b>91.58)</b>  | <b>11.05</b><br><b>(0.00 to</b><br><b>93.04)</b>  | <b>11.00</b><br><b>(0.00 to</b><br><b>91.81)</b>  |
| Exposure to forces of nature                                                        | 0.00<br>(0.00 to<br>0.00)                            | 448.19<br>(0.00 to<br>3,793.01)                      | 445.26<br>(0.00 to<br>3,774.35)                      | 470.83<br>(0.00 to<br>3,988.05)                      | 0.00<br>(0.00 to<br>0.00)                         | 10.62<br>(0.00 to<br>91.57)                       | 10.73<br>(0.00 to<br>93.03)                       | 10.67<br>(0.00 to<br>91.80)                       |

|                                                                          |                                                    |                                                    |                                                   |                                                    |                                              |                                              |                                              |                                              |
|--------------------------------------------------------------------------|----------------------------------------------------|----------------------------------------------------|---------------------------------------------------|----------------------------------------------------|----------------------------------------------|----------------------------------------------|----------------------------------------------|----------------------------------------------|
|                                                                          | 0.00<br>(0.00 to<br>0.00)                          | 15.33<br>(0.00 to<br>0.66)                         | 15.20<br>(0.00 to<br>0.65)                        | 16.08<br>(0.00 to<br>0.68)                         | 0.00<br>(0.00 to<br>0.00)                    | 0.31<br>(0.00 to<br>0.01)                    | 0.32<br>(0.00 to<br>0.01)                    | 0.32<br>(0.00 to<br>0.01)                    |
| Conflict and terrorism                                                   |                                                    |                                                    |                                                   |                                                    |                                              |                                              |                                              |                                              |
|                                                                          | 4.04<br>(2.20 to<br>5.72)                          | 0.44<br>(0.00 to<br>2.17)                          | 0.44<br>(0.00 to<br>2.16)                         | 0.45<br>(0.00 to<br>2.23)                          | 0.21<br>(0.05 to<br>0.33)                    | 0.01<br>(0.00 to<br>0.05)                    | 0.01<br>(0.00 to<br>0.05)                    | 0.01<br>(0.00 to<br>0.05)                    |
| Executions and police conflict                                           |                                                    |                                                    |                                                   |                                                    |                                              |                                              |                                              |                                              |
| <b>Bhutan</b>                                                            |                                                    |                                                    |                                                   |                                                    |                                              |                                              |                                              |                                              |
| Cause                                                                    | YLLs (actual counts)                               |                                                    |                                                   |                                                    | Deaths (actual counts)                       |                                              |                                              |                                              |
|                                                                          | 2016                                               | 2040 Forecast                                      | 2040 Better Scenario                              | 2040 Worse Scenario                                | 2016                                         | 2040 Forecast                                | 2040 Better Scenario                         | 2040 Worse Scenario                          |
| <b>All causes</b>                                                        | <b>130,194.23</b><br>(114,988.93 to<br>148,097.72) | <b>125,595.15</b><br>(100,418.48 to<br>154,724.01) | <b>105,744.46</b><br>(86,581.71 to<br>128,209.77) | <b>171,377.66</b><br>(137,416.69 to<br>215,006.23) | <b>3,881.03</b><br>(3,472.06 to<br>4,358.12) | <b>6,127.47</b><br>(5,147.43 to<br>7,258.63) | <b>5,312.70</b><br>(4,570.31 to<br>6,190.35) | <b>7,737.50</b><br>(6,467.82 to<br>9,191.01) |
| <b>Communicable, maternal, neonatal, and nutritional diseases</b>        | <b>50,013.95</b><br>(40,975.79 to<br>60,440.98)    | <b>18,415.92</b><br>(12,058.17 to<br>27,074.61)    | <b>15,612.70</b><br>(10,174.94 to<br>23,099.01)   | <b>29,768.15</b><br>(19,445.77 to<br>42,958.91)    | <b>842.37</b><br>(681.25 to<br>1,047.63)     | <b>585.70</b><br>(393.20 to<br>873.19)       | <b>521.91</b><br>(349.86 to<br>772.45)       | <b>857.14</b><br>(566.71 to<br>1,273.27)     |
| <b>HIV/AIDS and tuberculosis</b>                                         | <b>3,602.76</b><br>(1,444.85 to<br>9,488.75)       | <b>2,647.71</b><br>(649.50 to<br>8,496.13)         | <b>2,107.94</b><br>(498.90 to<br>7,676.69)        | <b>4,773.36</b><br>(1,873.14 to<br>11,910.43)      | <b>92.52</b><br>(43.04 to<br>203.80)         | <b>79.09</b><br>(25.54 to<br>213.01)         | <b>64.33</b><br>(20.66 to<br>197.80)         | <b>139.68</b><br>(61.57 to<br>314.17)        |
| <b>Tuberculosis</b>                                                      | <b>1,658.44</b><br>(986.59 to<br>2,691.66)         | <b>974.62</b><br>(482.92 to<br>1,784.42)           | <b>790.40</b><br>(392.44 to<br>1,427.62)          | <b>1,773.93</b><br>(856.34 to<br>3,243.97)         | <b>53.10</b><br>(31.71 to<br>85.91)          | <b>41.21</b><br>(19.36 to<br>75.11)          | <b>34.44</b><br>(17.00 to<br>63.17)          | <b>71.76</b><br>(32.88 to<br>132.22)         |
| <b>HIV/AIDS</b>                                                          | <b>1,944.32</b><br>(143.60 to<br>7,562.85)         | <b>1,673.09</b><br>(16.59 to<br>7,363.96)          | <b>1,317.54</b><br>(12.29 to<br>6,845.02)         | <b>2,999.43</b><br>(423.35 to<br>10,678.85)        | <b>39.42</b><br>(2.82 to<br>152.39)          | <b>37.87</b><br>(0.25 to<br>173.22)          | <b>29.89</b><br>(0.19 to<br>168.21)          | <b>67.93</b><br>(8.48 to<br>253.14)          |
| <b>Diarrhea, lower respiratory, and other common infectious diseases</b> | <b>19,191.38</b><br>(14,954.51 to<br>23,675.68)    | <b>8,994.33</b><br>(5,498.28 to<br>13,636.34)      | <b>7,574.03</b><br>(4,678.33 to<br>11,354.74)     | <b>13,997.62</b><br>(8,158.88 to<br>22,038.34)     | <b>406.51</b><br>(300.37 to<br>524.62)       | <b>395.48</b><br>(233.17 to<br>627.73)       | <b>356.49</b><br>(213.66 to<br>557.61)       | <b>553.10</b><br>(309.87 to<br>920.69)       |
| <b>Diarrheal diseases</b>                                                | <b>2,506.45</b><br>(1,044.02 to<br>4,355.40)       | <b>1,056.37</b><br>(77.98 to<br>3,502.21)          | <b>869.73</b><br>(56.39 to<br>2,917.55)           | <b>2,216.63</b><br>(211.62 to<br>6,063.52)         | <b>78.47</b><br>(16.91 to<br>170.47)         | <b>71.64</b><br>(2.97 to<br>237.58)          | <b>63.11</b><br>(2.40 to<br>209.43)          | <b>134.26</b><br>(6.31 to<br>438.22)         |
| <b>Intestinal infectious diseases</b>                                    | <b>3,533.86</b><br>(1,928.62 to<br>5,683.29)       | <b>1,507.94</b><br>(777.33 to<br>2,514.69)         | <b>1,430.63</b><br>(738.22 to<br>2,373.78)        | <b>1,964.36</b><br>(985.30 to<br>3,350.32)         | <b>52.18</b><br>(28.41 to<br>83.78)          | <b>26.91</b><br>(14.17 to<br>44.45)          | <b>25.82</b><br>(13.59 to<br>42.55)          | <b>33.50</b><br>(17.17 to<br>57.47)          |
| <b>Typhoid fever</b>                                                     | <b>2,974.53</b><br>(1,608.14 to<br>4,901.30)       | <b>1,198.33</b><br>(597.92 to<br>2,066.84)         | <b>1,137.66</b><br>(573.65 to<br>1,955.20)        | <b>1,563.66</b><br>(759.65 to<br>2,755.01)         | <b>43.37</b><br>(23.46 to<br>70.64)          | <b>30.91</b><br>(10.74 to<br>35.74)          | <b>20.08</b><br>(10.48 to<br>34.20)          | <b>26.06</b><br>(13.08 to<br>45.94)          |
| <b>Paratyphoid fever</b>                                                 | <b>554.71</b><br>(246.04 to<br>1,055.85)           | <b>308.68</b><br>(137.59 to<br>583.01)             | <b>292.13</b><br>(130.68 to<br>552.21)            | <b>399.23</b><br>(176.48 to<br>791.62)             | <b>8.73</b><br>(3.95 to<br>16.77)            | <b>5.97</b><br>(2.62 to<br>11.49)            | <b>5.71</b><br>(2.54 to<br>10.90)            | <b>7.40</b><br>(3.35 to<br>14.39)            |
| <b>Other intestinal infectious diseases</b>                              | <b>4.62</b><br>(1.24 to<br>12.71)                  | <b>0.94</b><br>(0.26 to<br>2.73)                   | <b>0.83</b><br>(0.23 to<br>2.42)                  | <b>1.47</b><br>(0.39 to<br>4.51)                   | <b>0.07</b><br>(0.02 to<br>0.18)             | <b>0.03</b><br>(0.01 to<br>0.08)             | <b>0.03</b><br>(0.01 to<br>0.07)             | <b>0.04</b><br>(0.01 to<br>0.11)             |
| <b>Lower respiratory infections</b>                                      | <b>9,447.36</b><br>(7,039.49 to<br>12,331.65)      | <b>4,729.46</b><br>(2,914.60 to<br>7,219.96)       | <b>3,666.22</b><br>(2,310.87 to<br>5,410.91)      | <b>7,338.04</b><br>(4,195.84 to<br>11,864.41)      | <b>212.64</b><br>(160.69 to<br>266.76)       | <b>242.13</b><br>(157.18 to<br>343.92)       | <b>213.26</b><br>(140.94 to<br>298.83)       | <b>319.64</b><br>(199.45 to<br>477.02)       |
| <b>Upper respiratory infections</b>                                      | <b>8.70</b><br>(3.54 to<br>17.88)                  | <b>4.19</b><br>(1.63 to<br>8.66)                   | <b>3.73</b><br>(1.46 to<br>7.53)                  | <b>6.54</b><br>(2.46 to<br>13.11)                  | <b>0.16</b><br>(0.08 to<br>0.27)             | <b>0.15</b><br>(0.06 to<br>0.27)             | <b>0.13</b><br>(0.05 to<br>0.27)             | <b>0.21</b><br>(0.09 to<br>0.42)             |
| <b>Otitis media</b>                                                      | <b>3.68</b><br>(1.50 to<br>8.83)                   | <b>1.18</b><br>(0.37 to<br>3.82)                   | <b>1.20</b><br>(0.37 to<br>3.84)                  | <b>1.16</b><br>(0.37 to<br>3.58)                   | <b>0.09</b><br>(0.04 to<br>0.22)             | <b>0.05</b><br>(0.02 to<br>0.14)             | <b>0.05</b><br>(0.02 to<br>0.14)             | <b>0.04</b><br>(0.01 to<br>0.13)             |
| <b>Meningitis</b>                                                        | <b>1,695.09</b><br>(886.18 to<br>2,574.04)         | <b>722.34</b><br>(309.11 to<br>1,193.84)           | <b>693.77</b><br>(302.03 to<br>1,151.52)          | <b>944.18</b><br>(422.09 to<br>1,534.58)           | <b>27.97</b><br>(13.58 to<br>42.38)          | <b>20.39</b><br>(8.28 to<br>33.48)           | <b>20.38</b><br>(8.47 to<br>33.62)           | <b>23.07</b><br>(9.69 to<br>37.09)           |
| <b>Pneumococcal meningitis</b>                                           | <b>98.37</b><br>(47.53 to<br>156.10)               | <b>42.25</b><br>(16.87 to<br>76.39)                | <b>42.28</b><br>(17.01 to<br>76.03)               | <b>47.12</b><br>(18.83 to<br>84.44)                | <b>1.91</b><br>(0.87 to<br>3.00)             | <b>1.45</b><br>(0.57 to<br>2.55)             | <b>1.49</b><br>(0.59 to<br>2.61)             | <b>1.50</b><br>(0.58 to<br>2.66)             |
| <b>H influenzae type B meningitis</b>                                    | <b>155.78</b><br>(84.10 to<br>248.64)              | <b>82.80</b><br>(33.16 to<br>162.46)               | <b>74.78</b><br>(31.21 to<br>143.94)              | <b>187.70</b><br>(60.80 to<br>441.66)              | <b>2.36</b><br>(1.21 to<br>3.61)             | <b>1.73</b><br>(0.74 to<br>2.95)             | <b>1.68</b><br>(0.73 to<br>2.75)             | <b>2.91</b><br>(1.08 to<br>6.06)             |
| <b>Meningococcal meningitis</b>                                          | <b>901.54</b><br>(473.46 to<br>1,393.93)           | <b>355.88</b><br>(151.59 to<br>595.55)             | <b>342.97</b><br>(146.66 to<br>578.45)            | <b>425.78</b><br>(178.34 to<br>709.24)             | <b>14.75</b><br>(7.22 to<br>22.16)           | <b>10.17</b><br>(4.11 to<br>16.87)           | <b>10.15</b><br>(4.11 to<br>17.04)           | <b>11.10</b><br>(4.47 to<br>18.26)           |

|                                         |                                                          |                                                        |                                                        |                                                        |                                                  |                                                  |                                                  |                                                  |
|-----------------------------------------|----------------------------------------------------------|--------------------------------------------------------|--------------------------------------------------------|--------------------------------------------------------|--------------------------------------------------|--------------------------------------------------|--------------------------------------------------|--------------------------------------------------|
| Other meningitis                        | 539.41<br>(279.22 to<br>835.74)                          | 241.41<br>(100.65 to<br>404.64)                        | 233.75<br>(98.59 to<br>389.68)                         | 283.58<br>(121.12 to<br>476.94)                        | 8.95<br>(4.33 to<br>13.57)                       | 7.04<br>(2.84 to<br>11.73)                       | 7.06<br>(2.91 to<br>11.89)                       | 7.56<br>(3.04 to<br>12.32)                       |
| Encephalitis                            | 1,319.36<br>(557.03 to<br>2,101.77)                      | 897.50<br>(383.19 to<br>1,496.96)                      | 860.91<br>(377.45 to<br>1,429.77)                      | 1,105.60<br>(464.61 to<br>1,811.66)                    | 26.03<br>(11.53 to<br>39.17)                     | 32.39<br>(14.91 to<br>51.68)                     | 32.23<br>(15.12 to<br>51.50)                     | 36.31<br>(16.35 to<br>57.16)                     |
| Diphtheria                              | 1.46<br>(0.74 to<br>2.51)                                | 0.19<br>(0.10 to<br>0.35)                              | 0.16<br>(0.09 to<br>0.28)                              | 0.72<br>(0.22 to<br>1.86)                              | 0.02<br>(0.01 to<br>0.03)                        | 0.00<br>(0.00 to<br>0.01)                        | 0.00<br>(0.00 to<br>0.01)                        | 0.01<br>(0.00 to<br>0.02)                        |
| Whooping cough                          | 210.42<br>(22.21 to<br>697.86)                           | 36.46<br>(2.72 to<br>155.46)                           | 16.63<br>(1.31 to<br>69.22)                            | 291.89<br>(27.76 to<br>989.08)                         | 2.49<br>(0.26 to<br>8.26)                        | 0.44<br>(0.03 to<br>1.85)                        | 0.20<br>(0.02 to<br>0.83)                        | 3.45<br>(0.33 to<br>11.68)                       |
| Tetanus                                 | 67.40<br>(31.65 to<br>133.13)                            | 4.57<br>(2.16 to<br>9.84)                              | 3.40<br>(1.81 to<br>6.85)                              | 25.46<br>(6.65 to<br>70.92)                            | 0.98<br>(0.51 to<br>1.82)                        | 0.11<br>(0.06 to<br>0.21)                        | 0.10<br>(0.05 to<br>0.19)                        | 0.34<br>(0.12 to<br>0.86)                        |
| Measles                                 | 313.17<br>(101.21 to<br>742.06)                          | 9.00<br>(0.82 to<br>46.91)                             | 4.90<br>(0.60 to<br>21.89)                             | 63.56<br>(3.59 to<br>318.61)                           | 3.74<br>(1.21 to<br>8.85)                        | 0.11<br>(0.01 to<br>0.56)                        | 0.06<br>(0.01 to<br>0.26)                        | 0.75<br>(0.04 to<br>3.78)                        |
| <b>Bhutan</b>                           |                                                          |                                                        |                                                        |                                                        |                                                  |                                                  |                                                  |                                                  |
| Cause                                   | YLLs (actual counts)                                     |                                                        |                                                        |                                                        | Deaths (actual counts)                           |                                                  |                                                  |                                                  |
|                                         | 2016                                                     | 2040 Forecast                                          | 2040 Better Scenario                                   | 2040 Worse Scenario                                    | 2016                                             | 2040 Forecast                                    | 2040 Better Scenario                             | 2040 Worse Scenario                              |
| Varicella and herpes zoster             | 84.43<br>(49.26 to<br>146.78)                            | 25.12<br>(14.69 to<br>44.23)                           | 22.75<br>(13.46 to<br>40.79)                           | 39.47<br>(21.81 to<br>73.17)                           | 1.74<br>(1.21 to<br>2.56)                        | 1.17<br>(0.67 to<br>1.85)                        | 1.14<br>(0.66 to<br>1.81)                        | 1.52<br>(0.89 to<br>2.46)                        |
| Neglected tropical diseases and malaria | <b>1,528.21</b><br><b>(560.47 to</b><br><b>3,276.60)</b> | <b>571.24</b><br><b>(271.51 to</b><br><b>1,082.24)</b> | <b>554.35</b><br><b>(266.43 to</b><br><b>1,042.12)</b> | <b>684.06</b><br><b>(309.78 to</b><br><b>1,363.43)</b> | <b>23.15</b><br><b>(9.71 to</b><br><b>46.34)</b> | <b>15.57</b><br><b>(8.47 to</b><br><b>28.96)</b> | <b>15.52</b><br><b>(8.52 to</b><br><b>28.86)</b> | <b>17.07</b><br><b>(9.01 to</b><br><b>31.81)</b> |
| Malaria                                 | 1,223.25<br>(343.39 to<br>2,950.25)                      | 305.46<br>(120.06 to<br>623.14)                        | 296.68<br>(118.40 to<br>601.87)                        | 365.83<br>(132.73 to<br>814.41)                        | 17.80<br>(5.97 to<br>39.24)                      | 7.82<br>(3.58 to<br>13.40)                       | 7.83<br>(3.52 to<br>13.13)                       | 8.45<br>(3.75 to<br>15.42)                       |
| Chagas disease                          | 0.00<br>(0.00 to<br>0.00)                                | 0.00<br>(0.00 to<br>0.00)                              | 0.00<br>(0.00 to<br>0.00)                              | 0.00<br>(0.00 to<br>0.00)                              | 0.00<br>(0.00 to<br>0.00)                        | 0.00<br>(0.00 to<br>0.00)                        | 0.00<br>(0.00 to<br>0.00)                        | 0.00<br>(0.00 to<br>0.00)                        |
| Leishmaniasis                           | 67.25<br>(28.04 to<br>119.82)                            | 16.53<br>(7.43 to<br>29.65)                            | 14.76<br>(6.53 to<br>26.14)                            | 26.02<br>(12.10 to<br>48.14)                           | 1.07<br>(0.55 to<br>1.75)                        | 0.35<br>(0.16 to<br>0.59)                        | 0.32<br>(0.14 to<br>0.53)                        | 0.52<br>(0.26 to<br>0.87)                        |
| African trypanosomiasis                 | 0.00<br>(0.00 to<br>0.00)                                | 0.00<br>(0.00 to<br>0.00)                              | 0.00<br>(0.00 to<br>0.00)                              | 0.00<br>(0.00 to<br>0.00)                              | 0.00<br>(0.00 to<br>0.00)                        | 0.00<br>(0.00 to<br>0.00)                        | 0.00<br>(0.00 to<br>0.00)                        | 0.00<br>(0.00 to<br>0.00)                        |
| Schistosomiasis                         | 0.00<br>(0.00 to<br>0.00)                                | 0.00<br>(0.00 to<br>0.00)                              | 0.00<br>(0.00 to<br>0.00)                              | 0.00<br>(0.00 to<br>0.00)                              | 0.00<br>(0.00 to<br>0.00)                        | 0.00<br>(0.00 to<br>0.00)                        | 0.00<br>(0.00 to<br>0.00)                        | 0.00<br>(0.00 to<br>0.00)                        |
| Cysticercosis                           | 2.39<br>(1.74 to<br>3.06)                                | 1.03<br>(0.40 to<br>1.59)                              | 1.03<br>(0.38 to<br>1.59)                              | 1.09<br>(0.47 to<br>1.63)                              | 0.05<br>(0.04 to<br>0.07)                        | 0.03<br>(0.01 to<br>0.05)                        | 0.03<br>(0.01 to<br>0.05)                        | 0.03<br>(0.01 to<br>0.05)                        |
| Cystic echinococcosis                   | 2.45<br>(1.82 to<br>3.25)                                | 1.23<br>(0.44 to<br>1.95)                              | 1.08<br>(0.38 to<br>1.75)                              | 1.96<br>(0.79 to<br>3.04)                              | 0.06<br>(0.05 to<br>0.08)                        | 0.05<br>(0.02 to<br>0.07)                        | 0.04<br>(0.02 to<br>0.07)                        | 0.07<br>(0.03 to<br>0.11)                        |
| Dengue                                  | 105.73<br>(7.08 to<br>558.04)                            | 191.84<br>(34.62 to<br>725.47)                         | 189.84<br>(34.58 to<br>713.65)                         | 208.97<br>(33.83 to<br>812.13)                         | 1.96<br>(0.13 to<br>10.45)                       | 5.78<br>(1.09 to<br>22.02)                       | 5.85<br>(1.10 to<br>22.30)                       | 5.93<br>(1.04 to<br>23.09)                       |
| Yellow fever                            | 0.00<br>(0.00 to<br>0.00)                                | 0.00<br>(0.00 to<br>0.00)                              | 0.00<br>(0.00 to<br>0.00)                              | 0.00<br>(0.00 to<br>0.00)                              | 0.00<br>(0.00 to<br>0.00)                        | 0.00<br>(0.00 to<br>0.00)                        | 0.00<br>(0.00 to<br>0.00)                        | 0.00<br>(0.00 to<br>0.00)                        |
| Rabies                                  | 58.29<br>(27.29 to<br>127.80)                            | 18.52<br>(5.23 to<br>47.00)                            | 15.65<br>(4.24 to<br>39.11)                            | 34.50<br>(10.74 to<br>80.32)                           | 1.10<br>(0.54 to<br>2.26)                        | 0.49<br>(0.14 to<br>1.19)                        | 0.42<br>(0.11 to<br>1.01)                        | 0.87<br>(0.27 to<br>1.94)                        |
| Intestinal nematode infections          | 27.57<br>(4.37 to<br>69.92)                              | 12.84<br>(3.62 to<br>31.02)                            | 12.67<br>(3.61 to<br>29.89)                            | 15.32<br>(3.81 to<br>38.22)                            | 0.37<br>(0.09 to<br>0.88)                        | 0.27<br>(0.10 to<br>0.52)                        | 0.27<br>(0.11 to<br>0.53)                        | 0.29<br>(0.10 to<br>0.59)                        |
| Other neglected tropical diseases       | 41.29<br>(22.38 to<br>70.60)                             | 23.79<br>(9.84 to<br>40.59)                            | 22.65<br>(9.19 to<br>39.12)                            | 30.36<br>(13.33 to<br>51.12)                           | 0.74<br>(0.43 to<br>1.19)                        | 0.78<br>(0.30 to<br>1.29)                        | 0.76<br>(0.28 to<br>1.26)                        | 0.91<br>(0.39 to<br>1.45)                        |



|                                                          |                                          |                                       |                                       |                                        |                                 |                              |                              |                               |
|----------------------------------------------------------|------------------------------------------|---------------------------------------|---------------------------------------|----------------------------------------|---------------------------------|------------------------------|------------------------------|-------------------------------|
|                                                          | 1470.30<br>(925.73 to<br>2,196.07)       | 463.27<br>(220.26 to<br>884.36)       | 400.90<br>(199.27 to<br>742.12)       | 759.00<br>(386.72 to<br>1,386.83)      | 25.62<br>(16.13 to<br>38.09)    | 8.37<br>(4.09 to<br>15.72)   | 7.25<br>(3.66 to<br>13.06)   | 13.66<br>(7.08 to<br>24.41)   |
| <b>Maternal disorders</b>                                |                                          |                                       |                                       |                                        |                                 |                              |                              |                               |
| Maternal hemorrhage                                      | 649.93<br>(376.15 to<br>1,014.18)        | 177.07<br>(55.83 to<br>362.06)        | 153.50<br>(48.34 to<br>300.71)        | 289.77<br>(94.36 to<br>565.77)         | 11.35<br>(6.57 to<br>17.69)     | 3.19<br>(0.98 to<br>6.36)    | 2.77<br>(0.88 to<br>5.42)    | 5.20<br>(1.63 to<br>10.09)    |
| Maternal sepsis and other maternal infections            | 119.54<br>(52.26 to<br>225.48)           | 29.95<br>(8.13 to<br>69.44)           | 25.93<br>(6.99 to<br>58.44)           | 49.40<br>(14.57 to<br>108.35)          | 2.09<br>(0.92 to<br>3.94)       | 0.55<br>(0.15 to<br>1.24)    | 0.47<br>(0.13 to<br>1.07)    | 0.90<br>(0.27 to<br>1.96)     |
| Maternal hypertensive disorders                          | 126.83<br>(71.01 to<br>214.05)           | 38.95<br>(11.74 to<br>82.21)          | 33.65<br>(10.18 to<br>69.96)          | 64.40<br>(19.87 to<br>130.25)          | 2.16<br>(1.22 to<br>3.62)       | 0.68<br>(0.20 to<br>1.41)    | 0.59<br>(0.18 to<br>1.22)    | 1.13<br>(0.36 to<br>2.21)     |
| Maternal obstructed labor and uterine rupture            | 21.40<br>(9.80 to<br>39.96)              | 6.76<br>(1.50 to<br>16.29)            | 5.80<br>(1.32 to<br>13.59)            | 11.38<br>(2.71 to<br>26.54)            | 0.39<br>(0.18 to<br>0.73)       | 0.13<br>(0.05 to<br>0.30)    | 0.11<br>(0.03 to<br>0.26)    | 0.21<br>(0.05 to<br>0.48)     |
| Maternal abortion, miscarriage, and ectopic pregnancy    | 33.83<br>(13.91 to<br>66.24)             | 15.28<br>(3.34 to<br>37.25)           | 13.34<br>(2.93 to<br>31.94)           | 25.30<br>(5.81 to<br>59.53)            | 0.62<br>(0.26 to<br>1.21)       | 0.29<br>(0.07 to<br>0.72)    | 0.26<br>(0.06 to<br>0.63)    | 0.48<br>(0.11 to<br>1.13)     |
| Indirect maternal deaths                                 | 125.93<br>(67.81 to<br>204.97)           | 36.31<br>(10.44 to<br>79.46)          | 31.58<br>(8.94 to<br>70.03)           | 59.69<br>(17.53 to<br>128.80)          | 2.16<br>(1.15 to<br>3.54)       | 0.64<br>(0.18 to<br>1.43)    | 0.56<br>(0.16 to<br>1.22)    | 1.05<br>(0.32 to<br>2.25)     |
| Late maternal deaths                                     | 29.28<br>(13.31 to<br>53.45)             | 7.29<br>(2.12 to<br>16.52)            | 6.33<br>(1.85 to<br>14.14)            | 12.07<br>(3.53 to<br>26.08)            | 0.51<br>(0.24 to<br>0.92)       | 0.13<br>(0.04 to<br>0.30)    | 0.11<br>(0.03 to<br>0.25)    | 0.22<br>(0.06 to<br>0.47)     |
| Maternal deaths aggravated by HIV/AIDS                   | 0.46<br>(0.05 to<br>1.61)                | 47.16<br>(0.00 to<br>285.78)          | 39.03<br>(0.00 to<br>246.11)          | 79.83<br>(0.00 to<br>453.86)           | 0.01<br>(0.00 to<br>0.03)       | 0.86<br>(0.00 to<br>5.18)    | 0.71<br>(0.00 to<br>4.49)    | 1.45<br>(0.00 to<br>8.38)     |
| Other maternal disorders                                 | 363.09<br>(214.26 to<br>567.16)          | 104.51<br>(33.63 to<br>213.85)        | 91.74<br>(28.69 to<br>182.58)         | 167.15<br>(54.33 to<br>329.61)         | 6.33<br>(3.74 to<br>9.85)       | 1.90<br>(0.59 to<br>3.81)    | 1.67<br>(0.52 to<br>3.32)    | 3.02<br>(0.97 to<br>5.92)     |
| <b>Bhutan</b>                                            |                                          |                                       |                                       |                                        |                                 |                              |                              |                               |
| Cause                                                    | YLLs (actual counts)                     |                                       |                                       |                                        | Deaths (actual counts)          |                              |                              |                               |
|                                                          | 2016                                     | 2040 Forecast                         | 2040 Better Scenario                  | 2040 Worse Scenario                    | 2016                            | 2040 Forecast                | 2040 Better Scenario         | 2040 Worse Scenario           |
| <b>Neonatal disorders</b>                                | 21,659.61<br>(16,520.82 to<br>27,542.88) | 4,845.23<br>(1,816.73 to<br>7,873.63) | 4,134.84<br>(1,545.50 to<br>6,700.33) | 8,379.13<br>(3,051.45 to<br>13,884.01) | 250.19<br>(190.83 to<br>318.17) | 55.98<br>(21.00 to<br>90.97) | 47.77<br>(17.86 to<br>77.40) | 96.80<br>(35.28 to<br>160.39) |
| Neonatal preterm birth                                   | 8,042.55<br>(5,133.72 to<br>11,640.34)   | 1,574.20<br>(549.32 to<br>2,764.76)   | 1,303.63<br>(457.79 to<br>2,294.65)   | 2,932.33<br>(1,021.34 to<br>5,125.69)  | 92.90<br>(59.30 to<br>134.45)   | 18.19<br>(6.35 to<br>31.94)  | 33.88<br>(5.29 to<br>26.51)  | 33.88<br>(11.81 to<br>59.20)  |
| Neonatal encephalopathy due to birth asphyxia and trauma | 5,302.20<br>(3,353.55 to<br>8,025.99)    | 1,235.89<br>(346.19 to<br>2,361.75)   | 1,083.48<br>(302.19 to<br>2,069.07)   | 1,962.72<br>(547.00 to<br>3,852.14)    | 61.25<br>(38.74 to<br>92.70)    | 14.28<br>(4.00 to<br>27.29)  | 12.52<br>(3.49 to<br>23.90)  | 22.68<br>(6.32 to<br>44.50)   |
| Neonatal sepsis and other neonatal infections            | 1,791.45<br>(1,002.58 to<br>2,823.85)    | 538.12<br>(199.51 to<br>979.45)       | 469.90<br>(178.22 to<br>864.86)       | 874.37<br>(323.63 to<br>1,646.37)      | 20.70<br>(11.58 to<br>32.62)    | 6.22<br>(2.31 to<br>11.32)   | 5.43<br>(2.06 to<br>9.99)    | 10.10<br>(3.74 to<br>19.02)   |
| Hemolytic disease and other neonatal jaundice            | 999.23<br>(571.95 to<br>1,557.51)        | 155.59<br>(53.50 to<br>301.88)        | 133.19<br>(46.43 to<br>301.88)        | 269.92<br>(93.38 to<br>531.14)         | 11.54<br>(6.61 to<br>17.99)     | 1.80<br>(0.62 to<br>3.49)    | 1.54<br>(0.54 to<br>3.00)    | 3.12<br>(1.08 to<br>6.14)     |
| Other neonatal disorders                                 | 5,524.18<br>(3,168.90 to<br>8,273.26)    | 1,341.45<br>(439.57 to<br>2,469.38)   | 1,144.63<br>(374.28 to<br>2,115.27)   | 2,339.78<br>(749.71 to<br>4,348.21)    | 63.81<br>(36.60 to<br>95.57)    | 15.50<br>(5.08 to<br>28.53)  | 13.22<br>(4.33 to<br>24.43)  | 27.03<br>(8.66 to<br>50.23)   |
| <b>Nutritional deficiencies</b>                          | 676.80<br>(444.88 to<br>1,031.17)        | 211.17<br>(146.48 to<br>303.21)       | 195.31<br>(135.76 to<br>280.30)       | 294.55<br>(198.18 to<br>434.10)        | 12.03<br>(8.85 to<br>16.58)     | 8.76<br>(6.48 to<br>12.19)   | 8.64<br>(6.40 to<br>11.99)   | 10.29<br>(7.52 to<br>14.15)   |
| Protein-energy malnutrition                              | 378.03<br>(218.64 to<br>626.48)          | 64.13<br>(33.11 to<br>110.96)         | 56.42<br>(29.34 to<br>98.34)          | 100.72<br>(48.91 to<br>183.57)         | 5.27<br>(3.31 to<br>8.23)       | 2.02<br>(1.26 to<br>3.05)    | 1.95<br>(1.22 to<br>2.99)    | 2.58<br>(1.60 to<br>4.01)     |
| Iodine deficiency                                        | 10.11<br>(0.14 to<br>68.23)              | 9.81<br>(0.26 to<br>42.25)            | 8.89<br>(0.26 to<br>34.77)            | 14.82<br>(0.37 to<br>72.44)            | 0.15<br>(0.00 to<br>0.81)       | 0.40<br>(0.01 to<br>1.36)    | 0.39<br>(0.01 to<br>1.39)    | 0.51<br>(0.02 to<br>1.60)     |
| Dietary iron deficiency                                  | 9.58<br>(4.76 to<br>16.25)               | 7.56<br>(3.47 to<br>13.95)            | 7.46<br>(3.38 to<br>13.81)            | 8.72<br>(4.01 to<br>16.05)             | 0.31<br>(0.13 to<br>0.55)       | 0.46<br>(0.17 to<br>0.92)    | 0.48<br>(0.18 to<br>0.95)    | 0.48<br>(0.18 to<br>0.96)     |

|                                                                         |                                                               |                                                                |                                                               |                                                                 |                                                            |                                                            |                                                            |                                                            |
|-------------------------------------------------------------------------|---------------------------------------------------------------|----------------------------------------------------------------|---------------------------------------------------------------|-----------------------------------------------------------------|------------------------------------------------------------|------------------------------------------------------------|------------------------------------------------------------|------------------------------------------------------------|
| Other nutritional deficiencies                                          | 279.08<br>(171.91 to<br>450.16)                               | 129.66<br>(90.68 to<br>184.77)                                 | 122.54<br>(86.69 to<br>176.93)                                | 170.29<br>(115.64 to<br>247.62)                                 | 6.29<br>(4.52 to<br>8.79)                                  | 5.87<br>(4.22 to<br>8.04)                                  | 5.83<br>(4.17 to<br>7.99)                                  | 6.73<br>(4.81 to<br>9.08)                                  |
| <b>Other communicable, maternal, neonatal, and nutritional diseases</b> | <b>1,884.89</b><br><b>(1,157.97 to</b><br><b>3,041.24)</b>    | <b>682.97</b><br><b>(456.99 to</b><br><b>968.84)</b>           | <b>645.34</b><br><b>(437.93 to</b><br><b>901.78)</b>          | <b>880.45</b><br><b>(590.72 to</b><br><b>1,279.17)</b>          | <b>32.35</b><br><b>(21.91 to</b><br><b>48.36)</b>          | <b>22.47</b><br><b>(15.26 to</b><br><b>32.10)</b>          | <b>21.91</b><br><b>(14.83 to</b><br><b>31.12)</b>          | <b>26.54</b><br><b>(18.28 to</b><br><b>37.61)</b>          |
| Sexually transmitted infections excluding HIV                           | 865.63<br>(275.26 to<br>1,909.89)                             | 122.89<br>(47.11 to<br>270.92)                                 | 113.61<br>(44.10 to<br>249.23)                                | 179.05<br>(64.89 to<br>406.06)                                  | 10.64<br>(3.73 to<br>22.88)                                | 2.01<br>(1.03 to<br>3.90)                                  | 1.89<br>(0.98 to<br>3.63)                                  | 2.73<br>(1.26 to<br>5.57)                                  |
| Syphilis                                                                | 837.06<br>(243.28 to<br>1,888.79)                             | 101.65<br>(28.04 to<br>250.26)                                 | 93.18<br>(25.97 to<br>224.11)                                 | 154.51<br>(41.22 to<br>381.82)                                  | 9.93<br>(2.97 to<br>22.18)                                 | 1.34<br>(0.46 to<br>3.07)                                  | 1.23<br>(0.42 to<br>2.82)                                  | 1.97<br>(0.63 to<br>4.61)                                  |
| Chlamydial infection                                                    | 5.50<br>(3.29 to<br>8.95)                                     | 4.06<br>(2.09 to<br>7.07)                                      | 3.91<br>(2.04 to<br>6.71)                                     | 4.70<br>(2.43 to<br>8.11)                                       | 0.14<br>(0.08 to<br>0.21)                                  | 0.13<br>(0.07 to<br>0.22)                                  | 0.13<br>(0.07 to<br>0.21)                                  | 0.15<br>(0.08 to<br>0.24)                                  |
| Gonococcal infection                                                    | 15.14<br>(8.97 to<br>24.44)                                   | 11.51<br>(6.28 to<br>19.91)                                    | 11.09<br>(6.08 to<br>19.08)                                   | 13.25<br>(7.17 to<br>23.04)                                     | 0.39<br>(0.24 to<br>0.61)                                  | 0.38<br>(0.22 to<br>0.63)                                  | 0.37<br>(0.21 to<br>0.62)                                  | 0.42<br>(0.24 to<br>0.69)                                  |
| Other sexually transmitted infections                                   | 7.92<br>(4.73 to<br>12.90)                                    | 5.67<br>(3.04 to<br>9.94)                                      | 5.44<br>(2.93 to<br>9.57)                                     | 6.59<br>(3.52 to<br>11.49)                                      | 0.19<br>(0.12 to<br>0.30)                                  | 0.17<br>(0.09 to<br>0.29)                                  | 0.16<br>(0.09 to<br>0.28)                                  | 0.19<br>(0.11 to<br>0.33)                                  |
| Acute hepatitis                                                         | 772.86<br>(565.39 to<br>1,029.90)                             | 424.99<br>(267.92 to<br>656.65)                                | 404.07<br>(256.05 to<br>625.72)                               | 524.80<br>(333.41 to<br>792.66)                                 | 16.88<br>(11.93 to<br>23.78)                               | 15.02<br>(9.22 to<br>23.63)                                | 14.64<br>(9.01 to<br>22.92)                                | 17.48<br>(10.87 to<br>27.09)                               |
| Acute hepatitis A                                                       | 108.65<br>(31.16 to<br>206.26)                                | 21.52<br>(8.68 to<br>39.86)                                    | 19.82<br>(8.16 to<br>36.61)                                   | 31.16<br>(11.41 to<br>59.41)                                    | 1.38<br>(0.46 to<br>2.51)                                  | 0.49<br>(0.21 to<br>0.86)                                  | 0.46<br>(0.20 to<br>0.82)                                  | 0.62<br>(0.28 to<br>1.10)                                  |
| Acute hepatitis B                                                       | 518.15<br>(348.36 to<br>742.67)                               | 341.73<br>(208.00 to<br>542.67)                                | 324.46<br>(198.06 to<br>508.53)                               | 418.19<br>(257.25 to<br>655.78)                                 | 12.70<br>(8.63 to<br>18.63)                                | 12.01<br>(7.29 to<br>19.19)                                | 11.61<br>(7.00 to<br>18.49)                                | 14.15<br>(8.60 to<br>22.29)                                |
| Acute hepatitis C                                                       | 12.11<br>(8.22 to<br>17.79)                                   | 10.48<br>(6.16 to<br>17.17)                                    | 10.31<br>(6.05 to<br>16.85)                                   | 11.59<br>(6.85 to<br>18.38)                                     | 0.34<br>(0.22 to<br>0.51)                                  | 0.45<br>(0.25 to<br>0.75)                                  | 0.45<br>(0.25 to<br>0.75)                                  | 0.47<br>(0.27 to<br>0.78)                                  |
| Acute hepatitis E                                                       | 133.94<br>(89.69 to<br>189.88)                                | 51.26<br>(31.30 to<br>80.09)                                   | 49.48<br>(30.23 to<br>77.18)                                  | 63.86<br>(38.92 to<br>101.31)                                   | 2.46<br>(1.71 to<br>3.41)                                  | 2.07<br>(1.16 to<br>3.55)                                  | 2.11<br>(1.15 to<br>3.66)                                  | 2.24<br>(1.28 to<br>3.80)                                  |
| Other unspecified infectious diseases                                   | 246.41<br>(103.76 to<br>727.92)                               | 135.09<br>(68.99 to<br>252.31)                                 | 127.66<br>(65.71 to<br>233.63)                                | 176.60<br>(89.80 to<br>335.04)                                  | 4.83<br>(2.36 to<br>10.46)                                 | 3.45<br>(2.92 to<br>10.08)                                 | 3.38<br>(2.86 to<br>9.81)                                  | 6.33<br>(3.37 to<br>11.68)                                 |
| <b>Non-communicable diseases</b>                                        | <b>65,621.70</b><br><b>(56,447.31 to</b><br><b>76,516.16)</b> | <b>94,418.11</b><br><b>(73,291.97 to</b><br><b>120,745.48)</b> | <b>78,363.06</b><br><b>(62,419.53 to</b><br><b>98,693.24)</b> | <b>126,453.44</b><br><b>(96,351.05 to</b><br><b>166,666.35)</b> | <b>2,709.44</b><br><b>(2,374.84 to</b><br><b>3,106.18)</b> | <b>5,097.52</b><br><b>(4,182.32 to</b><br><b>6,161.01)</b> | <b>4,358.89</b><br><b>(3,636.05 to</b><br><b>5,181.34)</b> | <b>6,394.29</b><br><b>(5,180.59 to</b><br><b>7,837.45)</b> |

| Bhutan                     |                                         |                                          |                                          |                                          |                                 |                                   |                                   |                                   |
|----------------------------|-----------------------------------------|------------------------------------------|------------------------------------------|------------------------------------------|---------------------------------|-----------------------------------|-----------------------------------|-----------------------------------|
| Cause                      | YLLs (actual counts)                    |                                          |                                          |                                          | Deaths (actual counts)          |                                   |                                   |                                   |
|                            | 2016                                    | 2040 Forecast                            | 2040 Better Scenario                     | 2040 Worse Scenario                      | 2016                            | 2040 Forecast                     | 2040 Better Scenario              | 2040 Worse Scenario               |
| Neoplasms                  | 10,942.59<br>(9,162.33 to<br>13,121.04) | 20,603.20<br>(16,522.17 to<br>26,307.38) | 19,552.91<br>(15,822.36 to<br>24,257.97) | 22,653.29<br>(17,667.86 to<br>29,543.31) | 385.79<br>(327.66 to<br>457.18) | 887.91<br>(732.17 to<br>1,106.36) | 862.13<br>(720.38 to<br>1,046.88) | 936.95<br>(750.66 to<br>1,190.36) |
| Lip and oral cavity cancer | 684.44<br>(518.98 to<br>968.29)         | 1,305.41<br>(744.31 to<br>2,268.77)      | 1,165.33<br>(687.37 to<br>1,939.85)      | 1,877.89<br>(947.15 to<br>3,578.14)      | 25.34<br>(19.92 to<br>34.42)    | 54.79<br>(31.37 to<br>95.07)      | 50.43<br>(29.99 to<br>82.56)      | 75.26<br>(37.97 to<br>137.89)     |
| Nasopharynx cancer         | 126.00<br>(85.27 to<br>206.58)          | 247.79<br>(121.38 to<br>523.11)          | 216.63<br>(110.12 to<br>440.36)          | 370.17<br>(162.82 to<br>827.93)          | 4.03<br>(2.75 to<br>6.53)       | 9.06<br>(4.42 to<br>18.68)        | 8.07<br>(4.08 to<br>15.87)        | 13.16<br>(5.69 to<br>29.10)       |
| Other pharynx cancer       | 574.94<br>(366.64 to<br>872.80)         | 1,002.08<br>(547.30 to<br>1,678.55)      | 971.16<br>(542.57 to<br>1,599.13)        | 1,268.00<br>(643.14 to<br>2,245.65)      | 21.84<br>(14.08 to<br>32.33)    | 42.78<br>(23.45 to<br>72.33)      | 42.13<br>(23.73 to<br>69.41)      | 52.62<br>(26.75 to<br>93.71)      |
| Esophageal cancer          | 564.59<br>(439.17 to<br>722.98)         | 1,068.91<br>(619.59 to<br>1,774.80)      | 980.20<br>(590.52 to<br>1,572.85)        | 1,447.64<br>(766.97 to<br>2,549.21)      | 22.45<br>(17.89 to<br>27.90)    | 46.63<br>(28.64 to<br>74.44)      | 43.96<br>(27.90 to<br>68.34)      | 60.47<br>(34.15 to<br>102.57)     |
| Stomach cancer             | 767.53<br>(609.32 to<br>944.99)         | 1,156.02<br>(842.48 to<br>1,554.65)      | 1,099.95<br>(806.73 to<br>1,473.48)      | 1,248.66<br>(923.88 to<br>1,651.65)      | 29.92<br>(24.35 to<br>36.38)    | 52.00<br>(38.94 to<br>68.48)      | 50.35<br>(38.20 to<br>66.09)      | 54.16<br>(40.83 to<br>70.50)      |

|                                      |                                   |                                       |                                       |                                       |                              |                               |                               |                                |
|--------------------------------------|-----------------------------------|---------------------------------------|---------------------------------------|---------------------------------------|------------------------------|-------------------------------|-------------------------------|--------------------------------|
| Colon and rectum cancer              | 618.75<br>(469.00 to<br>847.07)   | 1,527.83<br>(978.68 to<br>2,439.35)   | 1,516.44<br>(986.83 to<br>2,342.54)   | 1,554.23<br>(970.05 to<br>2,480.02)   | 25.58<br>(19.95 to<br>33.67) | 74.58<br>(48.90 to<br>115.21) | 75.62<br>(51.06 to<br>114.21) | 72.80<br>(46.06 to<br>111.61)  |
| Liver cancer                         | 607.67<br>(407.63 to<br>826.31)   | 1,502.97<br>(920.19 to<br>2,282.56)   | 1,342.69<br>(859.07 to<br>1,916.31)   | 1,528.76<br>(927.43 to<br>2,324.85)   | 23.90<br>(16.42 to<br>32.00) | 66.22<br>(41.65 to<br>98.32)  | 60.57<br>(40.07 to<br>85.52)  | 65.40<br>(40.35 to<br>98.42)   |
| Liver cancer due to hepatitis B      | 258.63<br>(164.17 to<br>361.60)   | 592.89<br>(338.00 to<br>928.31)       | 532.28<br>(312.83 to<br>795.12)       | 598.27<br>(337.71 to<br>944.30)       | 9.20<br>(5.89 to<br>12.88)   | 24.14<br>(14.19 to<br>37.50)  | 22.17<br>(13.35 to<br>32.75)  | 23.69<br>(13.62 to<br>37.32)   |
| Liver cancer due to hepatitis C      | 153.38<br>(103.03 to<br>214.01)   | 422.34<br>(252.89 to<br>651.34)       | 383.26<br>(240.92 to<br>555.81)       | 420.83<br>(246.61 to<br>651.97)       | 6.91<br>(4.77 to<br>9.49)    | 20.28<br>(12.54 to<br>30.81)  | 18.88<br>(12.07 to<br>27.03)  | 19.60<br>(12.00 to<br>30.11)   |
| Liver cancer due to alcohol use      | 42.75<br>(28.09 to<br>59.70)      | 109.66<br>(64.98 to<br>172.85)        | 96.27<br>(59.46 to<br>144.29)         | 127.46<br>(74.76 to<br>202.25)        | 1.82<br>(1.23 to<br>2.52)    | 4.95<br>(3.00 to<br>7.75)     | 4.44<br>(2.82 to<br>6.52)     | 5.58<br>(3.38 to<br>8.83)      |
| Liver cancer due to other causes     | 152.91<br>(98.25 to<br>215.22)    | 378.07<br>(219.75 to<br>598.38)       | 330.88<br>(199.66 to<br>492.99)       | 382.20<br>(219.37 to<br>609.37)       | 5.98<br>(3.91 to<br>8.23)    | 16.86<br>(9.74 to<br>26.62)   | 15.08<br>(9.21 to<br>22.50)   | 16.53<br>(9.49 to<br>26.42)    |
| Gallbladder and biliary tract cancer | 302.65<br>(215.71 to<br>424.54)   | 429.68<br>(290.83 to<br>607.60)       | 441.58<br>(296.44 to<br>629.36)       | 410.78<br>(284.30 to<br>574.79)       | 10.96<br>(8.00 to<br>15.20)  | 17.78<br>(12.53 to<br>24.37)  | 18.54<br>(12.89 to<br>25.58)  | 16.56<br>(11.93 to<br>22.45)   |
| Pancreatic cancer                    | 311.15<br>(254.15 to<br>375.46)   | 846.69<br>(630.95 to<br>1,161.55)     | 846.35<br>(633.88 to<br>1,133.71)     | 789.60<br>(591.62 to<br>1,081.35)     | 13.62<br>(11.33 to<br>16.17) | 41.22<br>(31.41 to<br>55.76)  | 42.02<br>(32.42 to<br>55.39)  | 37.08<br>(28.32 to<br>50.46)   |
| Larynx cancer                        | 242.57<br>(184.54 to<br>354.65)   | 485.85<br>(277.78 to<br>890.32)       | 393.06<br>(243.62 to<br>663.79)       | 705.83<br>(358.64 to<br>1,373.76)     | 9.88<br>(7.69 to<br>14.03)   | 21.07<br>(12.64 to<br>36.59)  | 17.78<br>(11.33 to<br>29.56)  | 29.24<br>(15.98 to<br>54.11)   |
| Tracheal, bronchus, and lung cancer  | 777.95<br>(614.07 to<br>970.70)   | 1,814.90<br>(1,142.17 to<br>2,829.55) | 1,362.88<br>(907.26 to<br>1,976.44)   | 2,356.92<br>(1,399.56 to<br>3,864.70) | 32.26<br>(25.95 to<br>39.55) | 83.62<br>(54.10 to<br>125.10) | 65.74<br>(45.36 to<br>91.55)  | 102.98<br>(62.56 to<br>164.54) |
| Malignant skin melanoma              | 35.88<br>(22.47 to<br>64.46)      | 68.23<br>(43.77 to<br>117.73)         | 71.85<br>(46.32 to<br>122.48)         | 60.36<br>(38.70 to<br>105.99)         | 1.19<br>(0.80 to<br>2.08)    | 2.92<br>(1.95 to<br>4.86)     | 3.15<br>(2.13 to<br>5.19)     | 2.47<br>(1.66 to<br>4.17)      |
| Non-melanoma skin cancer             | 22.53<br>(17.74 to<br>28.75)      | 51.27<br>(40.40 to<br>65.21)          | 52.51<br>(41.50 to<br>67.47)          | 51.85<br>(40.76 to<br>65.71)          | 1.16<br>(0.94 to<br>1.42)    | 3.12<br>(2.51 to<br>3.76)     | 3.29<br>(2.70 to<br>4.02)     | 2.98<br>(2.39 to<br>3.63)      |
| Breast cancer                        | 768.83<br>(519.76 to<br>1,462.08) | 1,623.87<br>(1,055.47 to<br>3,013.19) | 1,589.37<br>(1,052.13 to<br>2,930.42) | 1,659.74<br>(1,054.33 to<br>3,083.18) | 25.05<br>(17.36 to<br>46.82) | 63.41<br>(42.42 to<br>115.29) | 62.89<br>(42.69 to<br>113.71) | 62.98<br>(41.55 to<br>116.43)  |
| Cervical cancer                      | 431.06<br>(240.33 to<br>629.06)   | 646.90<br>(336.86 to<br>1,004.05)     | 627.64<br>(323.16 to<br>961.01)       | 722.08<br>(381.85 to<br>1,136.37)     | 13.60<br>(7.77 to<br>19.79)  | 23.26<br>(12.98 to<br>34.65)  | 22.83<br>(12.67 to<br>33.90)  | 25.41<br>(14.37 to<br>38.27)   |
| Uterine cancer                       | 67.00<br>(50.62 to<br>91.34)      | 137.55<br>(97.04 to<br>195.62)        | 134.59<br>(96.04 to<br>192.00)        | 153.07<br>(109.92 to<br>215.71)       | 2.66<br>(2.04 to<br>3.59)    | 6.18<br>(4.49 to<br>8.55)     | 6.13<br>(4.47 to<br>8.45)     | 6.70<br>(4.92 to<br>9.19)      |
| Ovarian cancer                       | 218.54<br>(141.42 to<br>344.57)   | 490.01<br>(300.46 to<br>783.93)       | 480.56<br>(298.02 to<br>756.68)       | 451.46<br>(278.03 to<br>732.07)       | 7.38<br>(5.01 to<br>11.51)   | 19.41<br>(12.13 to<br>30.77)  | 19.21<br>(12.31 to<br>29.42)  | 17.52<br>(11.04 to<br>28.07)   |
| Prostate cancer                      | 211.79<br>(141.51 to<br>329.34)   | 666.40<br>(456.66 to<br>976.62)       | 713.71<br>(488.25 to<br>1,032.97)     | 590.25<br>(400.27 to<br>890.43)       | 14.12<br>(10.09 to<br>21.14) | 46.41<br>(34.24 to<br>67.02)  | 51.04<br>(38.02 to<br>73.00)  | 39.30<br>(27.90 to<br>57.87)   |
| Testicular cancer                    | 33.06<br>(21.79 to<br>48.87)      | 33.98<br>(23.17 to<br>49.45)          | 33.99<br>(23.34 to<br>49.68)          | 35.59<br>(24.24 to<br>51.77)          | 0.77<br>(0.53 to<br>1.10)    | 1.07<br>(0.76 to<br>1.48)     | 1.10<br>(0.79 to<br>1.53)     | 1.07<br>(0.76 to<br>1.48)      |

**Bhutan**

| Cause          | YLLs (actual counts)           |                                 |                                 |                                 | Deaths (actual counts)    |                              |                              |                             |
|----------------|--------------------------------|---------------------------------|---------------------------------|---------------------------------|---------------------------|------------------------------|------------------------------|-----------------------------|
|                | 2016                           | 2040 Forecast                   | 2040 Better Scenario            | 2040 Worse Scenario             | 2016                      | 2040 Forecast                | 2040 Better Scenario         | 2040 Worse Scenario         |
| Kidney cancer  | 91.04<br>(64.63 to<br>119.25)  | 237.98<br>(154.47 to<br>328.89) | 248.94<br>(160.43 to<br>342.66) | 212.24<br>(137.96 to<br>295.29) | 3.33<br>(2.37 to<br>4.31) | 10.48<br>(7.15 to<br>14.14)  | 11.19<br>(7.56 to<br>14.98)  | 9.02<br>(6.17 to<br>12.23)  |
| Bladder cancer | 108.93<br>(77.25 to<br>143.86) | 251.67<br>(168.10 to<br>369.62) | 248.05<br>(169.45 to<br>356.71) | 247.63<br>(164.27 to<br>366.84) | 5.71<br>(4.18 to<br>7.28) | 14.73<br>(10.19 to<br>21.25) | 14.93<br>(10.59 to<br>20.82) | 13.80<br>(9.36 to<br>20.09) |



| Bhutan                                                        |                                                            |                                                              |                                                             |                                                              |                                                      |                                                      |                                                      |                                                        |
|---------------------------------------------------------------|------------------------------------------------------------|--------------------------------------------------------------|-------------------------------------------------------------|--------------------------------------------------------------|------------------------------------------------------|------------------------------------------------------|------------------------------------------------------|--------------------------------------------------------|
| Cause                                                         | YLLs (actual counts)                                       |                                                              |                                                             |                                                              | Deaths (actual counts)                               |                                                      |                                                      |                                                        |
|                                                               | 2016                                                       | 2040 Forecast                                                | 2040 Better Scenario                                        | 2040 Worse Scenario                                          | 2016                                                 | 2040 Forecast                                        | 2040 Better Scenario                                 | 2040 Worse Scenario                                    |
| Alcoholic cardiomyopathy                                      | 12.07<br>(6.28 to<br>23.89)                                | 17.25<br>(8.84 to<br>39.72)                                  | 17.71<br>(9.15 to<br>40.76)                                 | 17.72<br>(9.19 to<br>39.63)                                  | 0.39<br>(0.22 to<br>0.81)                            | 0.73<br>(0.39 to<br>1.62)                            | 0.77<br>(0.42 to<br>1.68)                            | 0.72<br>(0.38 to<br>1.57)                              |
| Other cardiomyopathy                                          | 161.34<br>(101.90 to<br>220.88)                            | 189.56<br>(121.59 to<br>276.55)                              | 183.13<br>(119.42 to<br>263.09)                             | 192.63<br>(122.34 to<br>284.80)                              | 4.54<br>(3.25 to<br>5.80)                            | 8.51<br>(5.68 to<br>12.16)                           | 8.48<br>(5.82 to<br>11.92)                           | 8.13<br>(5.42 to<br>11.69)                             |
| Atrial fibrillation and flutter                               | 159.67<br>(120.56 to<br>208.09)                            | 428.57<br>(289.64 to<br>597.87)                              | 427.33<br>(294.70 to<br>591.93)                             | 424.89<br>(284.20 to<br>590.92)                              | 15.52<br>(11.72 to<br>20.55)                         | 43.57<br>(29.10 to<br>60.15)                         | 44.92<br>(30.65 to<br>61.42)                         | 40.88<br>(26.41 to<br>57.19)                           |
| Aortic aneurysm                                               | 203.91<br>(150.67 to<br>269.36)                            | 366.76<br>(252.71 to<br>533.08)                              | 353.69<br>(247.34 to<br>506.47)                             | 364.21<br>(252.30 to<br>524.42)                              | 9.92<br>(7.57 to<br>12.73)                           | 21.52<br>(15.33 to<br>29.72)                         | 21.73<br>(15.73 to<br>29.57)                         | 20.04<br>(14.27 to<br>27.87)                           |
| Peripheral artery disease                                     | 18.93<br>(9.86 to<br>31.67)                                | 77.11<br>(40.98 to<br>132.39)                                | 71.29<br>(37.62 to<br>119.20)                               | 67.91<br>(35.53 to<br>118.77)                                | 1.48<br>(0.81 to<br>2.39)                            | 6.50<br>(3.58 to<br>10.54)                           | 6.35<br>(3.47 to<br>10.10)                           | 5.35<br>(2.99 to<br>8.73)                              |
| Endocarditis                                                  | 235.12<br>(173.41 to<br>322.61)                            | 362.42<br>(234.69 to<br>541.78)                              | 344.39<br>(224.79 to<br>507.99)                             | 386.22<br>(253.65 to<br>575.03)                              | 7.96<br>(6.09 to<br>10.59)                           | 17.63<br>(11.88 to<br>26.40)                         | 17.29<br>(11.74 to<br>25.40)                         | 17.72<br>(11.97 to<br>26.21)                           |
| Other cardiovascular and circulatory diseases                 | 134.96<br>(84.56 to<br>178.94)                             | 276.34<br>(162.69 to<br>391.58)                              | 253.75<br>(149.77 to<br>359.64)                             | 322.32<br>(190.70 to<br>462.00)                              | 7.44<br>(4.61 to<br>9.62)                            | 18.50<br>(10.88 to<br>25.25)                         | 17.80<br>(10.68 to<br>23.98)                         | 20.13<br>(11.96 to<br>27.49)                           |
| <b>Chronic respiratory diseases</b>                           | <b>7,154.56</b><br><b>(5,801.17 to</b><br><b>8,757.42)</b> | <b>11,086.02</b><br><b>(7,681.54 to</b><br><b>15,529.28)</b> | <b>8,813.58</b><br><b>(6,329.11 to</b><br><b>11,789.97)</b> | <b>15,097.02</b><br><b>(9,962.32 to</b><br><b>22,030.71)</b> | <b>379.43</b><br><b>(315.72 to</b><br><b>452.74)</b> | <b>659.29</b><br><b>(474.68 to</b><br><b>896.88)</b> | <b>557.19</b><br><b>(415.72 to</b><br><b>735.82)</b> | <b>843.61</b><br><b>(579.86 to</b><br><b>1,211.77)</b> |
| Chronic obstructive pulmonary disease                         | 5,294.35<br>(4,307.42 to<br>6,507.61)                      | 8,889.26<br>(5,892.85 to<br>13,061.56)                       | 6,833.50<br>(4,687.07 to<br>9,644.79)                       | 12,712.78<br>(7,977.72 to<br>19,495.33)                      | 310.10<br>(258.70 to<br>369.81)                      | 310.10<br>(384.73 to<br>771.60)                      | 456.53<br>(327.83 to<br>620.54)                      | 732.61<br>(486.11 to<br>1,079.94)                      |
| Pneumoconiosis                                                | 29.20<br>(17.41 to<br>43.82)                               | 42.99<br>(26.42 to<br>64.81)                                 | 41.75<br>(25.41 to<br>62.69)                                | 43.70<br>(27.23 to<br>65.83)                                 | 1.56<br>(0.95 to<br>2.39)                            | 2.62<br>(1.61 to<br>3.99)                            | 2.61<br>(1.59 to<br>4.01)                            | 2.57<br>(1.58 to<br>3.84)                              |
| Silicosis                                                     | 7.71<br>(3.59 to<br>13.23)                                 | 9.21<br>(4.32 to<br>16.08)                                   | 9.39<br>(4.26 to<br>16.13)                                  | 9.46<br>(4.49 to<br>16.12)                                   | 0.45<br>(0.22 to<br>0.76)                            | 0.60<br>(0.28 to<br>1.02)                            | 0.63<br>(0.30 to<br>1.07)                            | 0.60<br>(0.29 to<br>0.99)                              |
| Asbestosis                                                    | 6.15<br>(3.54 to<br>10.30)                                 | 11.52<br>(6.18 to<br>20.01)                                  | 11.90<br>(6.40 to<br>20.18)                                 | 11.00<br>(5.99 to<br>19.22)                                  | 0.25<br>(0.13 to<br>0.46)                            | 0.59<br>(0.29 to<br>1.08)                            | 0.62<br>(0.31 to<br>1.13)                            | 0.54<br>(0.27 to<br>0.98)                              |
| Coal workers pneumoconiosis                                   | 2.74<br>(1.02 to<br>5.77)                                  | 3.60<br>(1.30 to<br>7.28)                                    | 3.04<br>(1.11 to<br>6.17)                                   | 4.36<br>(1.68 to<br>8.49)                                    | 0.15<br>(0.06 to<br>0.31)                            | 0.22<br>(0.08 to<br>0.44)                            | 0.19<br>(0.07 to<br>0.38)                            | 0.25<br>(0.10 to<br>0.50)                              |
| Other pneumoconiosis                                          | 12.60<br>(6.58 to<br>22.61)                                | 18.66<br>(9.65 to<br>33.12)                                  | 17.43<br>(8.91 to<br>30.72)                                 | 18.89<br>(10.10 to<br>32.61)                                 | 0.70<br>(0.36 to<br>1.26)                            | 1.22<br>(0.63 to<br>2.15)                            | 1.17<br>(0.61 to<br>2.02)                            | 1.18<br>(0.63 to<br>2.04)                              |
| Asthma                                                        | 1,372.74<br>(939.19 to<br>2,065.19)                        | 1,273.57<br>(746.71 to<br>2,254.41)                          | 1,024.21<br>(617.19 to<br>1,731.63)                         | 1,520.73<br>(892.63 to<br>2,730.61)                          | 51.15<br>(33.25 to<br>79.14)                         | 61.95<br>(36.46 to<br>107.11)                        | 51.82<br>(31.15 to<br>86.42)                         | 70.31<br>(41.01 to<br>121.42)                          |
| Interstitial lung disease and pulmonary sarcoidosis           | 246.72<br>(132.59 to<br>386.72)                            | 637.28<br>(345.67 to<br>992.56)                              | 674.61<br>(370.85 to<br>1,037.70)                           | 556.58<br>(302.82 to<br>876.13)                              | 10.96<br>(5.98 to<br>17.09)                          | 33.54<br>(18.89 to<br>51.54)                         | 36.29<br>(20.34 to<br>55.22)                         | 28.19<br>(15.71 to<br>43.79)                           |
| Other chronic respiratory diseases                            | 211.54<br>(122.68 to<br>329.20)                            | 242.92<br>(140.33 to<br>371.12)                              | 239.51<br>(139.96 to<br>359.02)                             | 263.23<br>(149.59 to<br>407.02)                              | 5.67<br>(3.36 to<br>8.43)                            | 9.77<br>(5.61 to<br>14.94)                           | 9.94<br>(5.82 to<br>15.07)                           | 9.92<br>(5.71 to<br>15.43)                             |
| <b>Cirrhosis and other chronic liver diseases</b>             | <b>4,159.98</b><br><b>(2,855.73 to</b><br><b>6,268.26)</b> | <b>5,588.46</b><br><b>(3,973.35 to</b><br><b>8,126.89)</b>   | <b>5,529.71</b><br><b>(3,910.98 to</b><br><b>8,099.62)</b>  | <b>6,139.75</b><br><b>(4,377.49 to</b><br><b>9,061.50)</b>   | <b>118.48</b><br><b>(84.51 to</b><br><b>177.82)</b>  | <b>201.59</b><br><b>(149.79 to</b><br><b>288.33)</b> | <b>202.49</b><br><b>(149.12 to</b><br><b>288.50)</b> | <b>215.77</b><br><b>(160.79 to</b><br><b>311.88)</b>   |
| Cirrhosis and other chronic liver diseases due to hepatitis B | 1,733.27<br>(1,127.91 to<br>2,637.96)                      | 2,533.63<br>(1,715.54 to<br>3,798.59)                        | 2,529.28<br>(1,698.53 to<br>3,765.45)                       | 2,662.14<br>(1,819.67 to<br>4,038.09)                        | 51.39<br>(35.07 to<br>79.03)                         | 91.81<br>(65.01 to<br>136.42)                        | 92.99<br>(65.57 to<br>137.96)                        | 94.21<br>(66.63 to<br>141.79)                          |
| Cirrhosis and other chronic liver diseases due to hepatitis C | 851.89<br>(557.10 to<br>1,306.18)                          | 1,199.61<br>(810.68 to<br>1,813.15)                          | 1,194.12<br>(799.10 to<br>1,809.56)                         | 1,269.30<br>(865.21 to<br>1,926.32)                          | 24.68<br>(16.70 to<br>36.81)                         | 41.92<br>(29.78 to<br>62.67)                         | 42.25<br>(29.94 to<br>61.88)                         | 43.46<br>(30.96 to<br>65.58)                           |

|                                                                |                                                            |                                                            |                                                            |                                                            |                                                      |                                                      |                                                      |                                                      |
|----------------------------------------------------------------|------------------------------------------------------------|------------------------------------------------------------|------------------------------------------------------------|------------------------------------------------------------|------------------------------------------------------|------------------------------------------------------|------------------------------------------------------|------------------------------------------------------|
| Cirrhosis and other chronic liver diseases due to alcohol use  | 755.91<br>(498.48 to<br>1,164.81)                          | 1,082.97<br>(725.13 to<br>1,636.29)                        | 1,044.67<br>(697.93 to<br>1,570.34)                        | 1,355.87<br>(907.62 to<br>2,098.03)                        | 24.17<br>(16.64 to<br>35.77)                         | 41.37<br>(28.55 to<br>60.77)                         | 40.57<br>(28.12 to<br>58.36)                         | 50.22<br>(34.41 to<br>74.42)                         |
| Cirrhosis and other chronic liver diseases due to other causes | 818.91<br>(579.83 to<br>1,273.83)                          | 772.25<br>(535.80 to<br>1,107.02)                          | 761.65<br>(529.95 to<br>1,094.48)                          | 852.43<br>(594.68 to<br>1,237.59)                          | 18.24<br>(13.29 to<br>26.68)                         | 26.50<br>(19.47 to<br>36.71)                         | 26.67<br>(19.30 to<br>36.82)                         | 27.87<br>(20.23 to<br>38.99)                         |
| <b>Digestive diseases</b>                                      | <b>2,827.67</b><br><b>(2,185.44 to</b><br><b>3,866.31)</b> | <b>3,417.77</b><br><b>(2,517.36 to</b><br><b>4,857.29)</b> | <b>3,312.00</b><br><b>(2,450.40 to</b><br><b>4,671.11)</b> | <b>3,906.03</b><br><b>(2,827.55 to</b><br><b>5,686.66)</b> | <b>92.71</b><br><b>(74.45 to</b><br><b>122.81)</b>   | <b>155.07</b><br><b>(116.86 to</b><br><b>215.12)</b> | <b>154.01</b><br><b>(117.18 to</b><br><b>208.98)</b> | <b>168.77</b><br><b>(126.58 to</b><br><b>236.36)</b> |
| Peptic ulcer disease                                           | 493.65<br>(348.77 to<br>688.97)                            | 462.01<br>(308.23 to<br>669.18)                            | 435.05<br>(290.65 to<br>615.00)                            | 573.82<br>(389.38 to<br>828.35)                            | 19.22<br>(13.98 to<br>26.63)                         | 23.52<br>(15.84 to<br>33.19)                         | 22.79<br>(15.56 to<br>31.92)                         | 27.84<br>(19.07 to<br>39.13)                         |
| <b>Bhutan</b>                                                  |                                                            |                                                            |                                                            |                                                            |                                                      |                                                      |                                                      |                                                      |
| Cause                                                          | YLLs (actual counts)                                       |                                                            |                                                            |                                                            | Deaths (actual counts)                               |                                                      |                                                      |                                                      |
|                                                                | 2016                                                       | 2040 Forecast                                              | 2040 Better Scenario                                       | 2040 Worse Scenario                                        | 2016                                                 | 2040 Forecast                                        | 2040 Better Scenario                                 | 2040 Worse Scenario                                  |
| Gastritis and duodenitis                                       | 86.92<br>(38.54 to<br>153.47)                              | 133.57<br>(55.56 to<br>242.23)                             | 133.13<br>(55.20 to<br>238.68)                             | 144.24<br>(62.00 to<br>260.15)                             | 3.24<br>(1.52 to<br>5.43)                            | 6.69<br>(3.09 to<br>11.18)                           | 6.87<br>(3.15 to<br>11.50)                           | 6.87<br>(3.23 to<br>11.60)                           |
| Appendicitis                                                   | 241.12<br>(162.61 to<br>360.04)                            | 213.41<br>(140.09 to<br>329.82)                            | 204.96<br>(133.99 to<br>309.83)                            | 256.95<br>(167.09 to<br>397.76)                            | 6.09<br>(4.22 to<br>8.77)                            | 7.89<br>(5.39 to<br>11.56)                           | 7.77<br>(5.29 to<br>11.34)                           | 9.04<br>(6.09 to<br>13.49)                           |
| Paralytic ileus and intestinal obstruction                     | 1,123.67<br>(835.30 to<br>1,532.64)                        | 1,295.08<br>(944.21 to<br>1,815.62)                        | 1,292.17<br>(943.74 to<br>1,803.35)                        | 1,378.39<br>(993.35 to<br>1,924.75)                        | 31.06<br>(23.78 to<br>41.13)                         | 52.90<br>(38.79 to<br>73.24)                         | 54.01<br>(39.78 to<br>74.73)                         | 53.66<br>(38.91 to<br>74.51)                         |
| Inguinal, femoral, and abdominal hernia                        | 101.59<br>(61.31 to<br>157.17)                             | 121.22<br>(72.98 to<br>188.58)                             | 120.59<br>(72.96 to<br>186.37)                             | 132.57<br>(80.52 to<br>205.88)                             | 4.20<br>(2.62 to<br>6.44)                            | 6.51<br>(4.06 to<br>10.03)                           | 6.69<br>(4.25 to<br>10.31)                           | 6.73<br>(4.18 to<br>10.40)                           |
| Inflammatory bowel disease                                     | 102.31<br>(73.78 to<br>153.32)                             | 148.41<br>(105.22 to<br>228.34)                            | 150.98<br>(107.35 to<br>230.23)                            | 148.38<br>(107.28 to<br>226.02)                            | 3.42<br>(2.55 to<br>5.08)                            | 6.82<br>(4.93 to<br>10.47)                           | 7.11<br>(5.14 to<br>10.55)                           | 6.52<br>(4.75 to<br>9.73)                            |
| Vascular intestinal disorders                                  | 128.67<br>(92.33 to<br>189.26)                             | 269.22<br>(188.16 to<br>384.16)                            | 273.07<br>(191.12 to<br>389.27)                            | 276.53<br>(194.97 to<br>398.31)                            | 6.78<br>(4.97 to<br>9.47)                            | 16.11<br>(11.50 to<br>22.39)                         | 16.74<br>(11.98 to<br>23.18)                         | 15.89<br>(11.34 to<br>22.20)                         |
| Gallbladder and biliary diseases                               | 123.54<br>(83.32 to<br>183.51)                             | 197.62<br>(99.06 to<br>373.67)                             | 152.33<br>(81.80 to<br>275.17)                             | 236.69<br>(117.52 to<br>452.30)                            | 4.69<br>(3.27 to<br>6.80)                            | 10.09<br>(5.19 to<br>18.78)                          | 8.09<br>(4.50 to<br>14.06)                           | 11.46<br>(5.82 to<br>21.14)                          |
| Pancreatitis                                                   | 384.58<br>(251.93 to<br>635.84)                            | 508.52<br>(266.46 to<br>1,059.64)                          | 481.34<br>(259.26 to<br>970.46)                            | 682.68<br>(319.44 to<br>1,560.33)                          | 11.89<br>(8.13 to<br>18.67)                          | 20.16<br>(10.84 to<br>41.61)                         | 19.47<br>(10.68 to<br>38.79)                         | 26.21<br>(12.47 to<br>58.37)                         |
| Other digestive diseases                                       | 41.63<br>(28.02 to<br>73.39)                               | 68.73<br>(42.26 to<br>125.23)                              | 68.38<br>(42.43 to<br>123.62)                              | 75.78<br>(46.36 to<br>137.58)                              | 2.11<br>(1.47 to<br>3.47)                            | 4.37<br>(2.88 to<br>7.13)                            | 4.48<br>(2.98 to<br>7.25)                            | 4.56<br>(2.98 to<br>7.52)                            |
| <b>Neurological disorders</b>                                  | <b>2,382.34</b><br><b>(1,984.74 to</b><br><b>2,853.07)</b> | <b>4,629.52</b><br><b>(3,539.28 to</b><br><b>6,252.08)</b> | <b>4,484.76</b><br><b>(3,579.29 to</b><br><b>5,655.17)</b> | <b>4,462.57</b><br><b>(3,416.41 to</b><br><b>6,025.06)</b> | <b>135.71</b><br><b>(113.73 to</b><br><b>162.14)</b> | <b>384.95</b><br><b>(281.10 to</b><br><b>549.75)</b> | <b>382.32</b><br><b>(290.04 to</b><br><b>509.67)</b> | <b>337.70</b><br><b>(244.03 to</b><br><b>487.94)</b> |
| Alzheimer's disease and other dementias                        | 1,004.65<br>(806.57 to<br>1,253.86)                        | 3,046.32<br>(2,084.06 to<br>4,607.98)                      | 2,890.42<br>(2,075.95 to<br>4,084.47)                      | 2,746.36<br>(1,847.94 to<br>4,191.15)                      | 99.59<br>(79.71 to<br>123.01)                        | 313.10<br>(210.47 to<br>473.47)                      | 306.35<br>(216.11 to<br>430.18)                      | 269.25<br>(178.15 to<br>430.18)                      |
| Parkinson's disease                                            | 137.75<br>(101.86 to<br>180.46)                            | 455.51<br>(333.82 to<br>596.45)                            | 497.90<br>(369.26 to<br>652.60)                            | 375.22<br>(270.18 to<br>495.39)                            | 11.05<br>(8.12 to<br>14.61)                          | 37.85<br>(27.78 to<br>50.05)                         | 42.21<br>(31.33 to<br>55.21)                         | 30.05<br>(21.61 to<br>39.43)                         |
| Epilepsy                                                       | 947.29<br>(680.35 to<br>1,248.30)                          | 738.34<br>(489.85 to<br>1,050.16)                          | 696.87<br>(468.02 to<br>987.13)                            | 967.40<br>(640.85 to<br>1,394.19)                          | 18.41<br>(13.32 to<br>23.97)                         | 21.19<br>(14.20 to<br>29.63)                         | 20.39<br>(13.84 to<br>28.30)                         | 26.65<br>(17.56 to<br>37.72)                         |
| Multiple sclerosis                                             | 39.35<br>(27.70 to<br>54.05)                               | 65.05<br>(45.04 to<br>90.38)                               | 65.87<br>(45.87 to<br>91.67)                               | 62.30<br>(43.64 to<br>86.09)                               | 1.08<br>(0.77 to<br>1.48)                            | 2.14<br>(1.50 to<br>2.93)                            | 2.18<br>(1.53 to<br>3.00)                            | 2.01<br>(1.40 to<br>2.76)                            |
| Motor neuron disease                                           | 37.04<br>(28.40 to<br>53.57)                               | 70.61<br>(52.66 to<br>117.11)                              | 73.17<br>(54.20 to<br>120.85)                              | 65.38<br>(49.06 to<br>107.68)                              | 1.05<br>(0.81 to<br>1.64)                            | 2.68<br>(2.02 to<br>4.43)                            | 2.80<br>(2.09 to<br>4.62)                            | 2.42<br>(1.83 to<br>3.98)                            |
| Other neurological disorders                                   | 216.25<br>(166.31 to<br>276.50)                            | 253.69<br>(167.51 to<br>331.25)                            | 260.54<br>(170.59 to<br>340.71)                            | 245.92<br>(166.19 to<br>318.02)                            | 4.52<br>(3.28 to<br>5.78)                            | 8.00<br>(5.18 to<br>10.30)                           | 8.39<br>(5.41 to<br>10.78)                           | 7.32<br>(4.85 to<br>9.41)                            |

|                                                            |                                       |                                          |                                         |                                          |                                 |                                   |                                   |                                     |
|------------------------------------------------------------|---------------------------------------|------------------------------------------|-----------------------------------------|------------------------------------------|---------------------------------|-----------------------------------|-----------------------------------|-------------------------------------|
|                                                            | 721.42<br>(441.08 to<br>1,593.82)     | 1,023.16<br>(644.31 to<br>2,350.67)      | 1,027.60<br>(650.83 to<br>2,334.07)     | 1,056.40<br>(661.41 to<br>2,451.89)      | 17.65<br>(11.17 to<br>38.44)    | 31.49<br>(20.34 to<br>69.33)      | 32.09<br>(20.96 to<br>69.48)      | 31.72<br>(20.41 to<br>70.99)        |
| <b>Mental disorders</b>                                    |                                       |                                          |                                         |                                          |                                 |                                   |                                   |                                     |
| Alcohol use disorders                                      | 469.45<br>(244.74 to<br>1,306.83)     | 601.76<br>(305.60 to<br>1,838.88)        | 601.18<br>(308.12 to<br>1,798.17)       | 635.67<br>(321.48 to<br>1,950.91)        | 12.00<br>(6.52 to<br>32.57)     | 18.89<br>(10.20 to<br>53.85)      | 19.09<br>(10.33 to<br>53.83)      | 19.60<br>(10.58 to<br>56.23)        |
| Drug use disorders                                         | 250.41<br>(163.33 to<br>360.65)       | 419.69<br>(285.36 to<br>586.80)          | 424.70<br>(287.27 to<br>589.01)         | 419.03<br>(285.41 to<br>586.91)          | 5.62<br>(3.81 to<br>7.97)       | 12.56<br>(9.07 to<br>17.21)       | 12.97<br>(9.40 to<br>17.78)       | 12.09<br>(8.75 to<br>16.64)         |
| Opioid use disorders                                       | 169.42<br>(112.32 to<br>252.05)       | 244.03<br>(164.73 to<br>367.93)          | 245.92<br>(165.46 to<br>368.75)         | 245.49<br>(165.13 to<br>372.56)          | 3.55<br>(2.41 to<br>5.36)       | 6.56<br>(4.49 to<br>9.98)         | 6.70<br>(4.60 to<br>10.17)        | 6.41<br>(4.35 to<br>9.77)           |
| Cocaine use disorders                                      | 13.20<br>(4.49 to<br>24.36)           | 27.31<br>(10.08 to<br>48.68)             | 27.21<br>(9.98 to<br>48.77)             | 28.77<br>(10.64 to<br>50.75)             | 0.31<br>(0.11 to<br>0.58)       | 0.80<br>(0.31 to<br>1.41)         | 0.81<br>(0.31 to<br>1.42)         | 0.83<br>(0.32 to<br>1.46)           |
| Amphetamine use disorders                                  | 8.69<br>(3.21 to<br>16.68)            | 21.05<br>(8.79 to<br>39.34)              | 20.71<br>(8.68 to<br>38.32)             | 23.09<br>(9.41 to<br>42.33)              | 0.19<br>(0.07 to<br>0.36)       | 0.57<br>(0.24 to<br>1.06)         | 0.57<br>(0.24 to<br>1.04)         | 0.62<br>(0.26 to<br>1.13)           |
| Other drug use disorders                                   | 59.11<br>(36.18 to<br>87.72)          | 127.31<br>(83.60 to<br>184.58)           | 130.85<br>(85.82 to<br>190.24)          | 121.69<br>(79.64 to<br>178.34)           | 1.57<br>(1.02 to<br>2.27)       | 4.63<br>(3.28 to<br>6.40)         | 4.89<br>(3.48 to<br>6.69)         | 4.22<br>(2.97 to<br>5.89)           |
| Eating disorders                                           | 1.57<br>(1.03 to<br>2.35)             | 1.71<br>(1.05 to<br>2.56)                | 1.72<br>(1.04 to<br>2.61)               | 1.70<br>(1.06 to<br>2.51)                | 0.03<br>(0.02 to<br>0.04)       | 0.03<br>(0.02 to<br>0.05)         | 0.03<br>(0.02 to<br>0.05)         | 0.03<br>(0.02 to<br>0.05)           |
| <b>Bhutan</b>                                              |                                       |                                          |                                         |                                          |                                 |                                   |                                   |                                     |
| Cause                                                      | YLLs (actual counts)                  |                                          |                                         |                                          | Deaths (actual counts)          |                                   |                                   |                                     |
|                                                            | 2016                                  | 2040 Forecast                            | 2040 Better Scenario                    | 2040 Worse Scenario                      | 2016                            | 2040 Forecast                     | 2040 Better Scenario              | 2040 Worse Scenario                 |
| <b>Diabetes, urogenital, blood, and endocrine diseases</b> | 7,864.54<br>(6,311.26 to<br>9,565.32) | 15,081.17<br>(10,533.85 to<br>22,971.63) | 12,640.95<br>(8,980.71 to<br>18,790.22) | 18,429.43<br>(12,903.97 to<br>28,210.31) | 355.44<br>(294.88 to<br>424.59) | 921.25<br>(666.37 to<br>1,455.69) | 801.02<br>(585.03 to<br>1,250.25) | 1,064.12<br>(774.15 to<br>1,662.46) |
| Diabetes mellitus                                          | 3,209.28<br>(2,615.25 to<br>3,862.54) | 5,862.45<br>(3,985.80 to<br>8,569.19)    | 5,429.28<br>(3,692.72 to<br>7,794.76)   | 7,611.84<br>(5,077.52 to<br>11,047.65)   | 184.16<br>(153.41 to<br>218.06) | 404.02<br>(286.37 to<br>556.40)   | 387.49<br>(280.51 to<br>527.14)   | 490.40<br>(341.78 to<br>676.05)     |
| Acute glomerulonephritis                                   | 12.56<br>(9.36 to<br>17.38)           | 13.73<br>(10.10 to<br>18.62)             | 13.46<br>(9.92 to<br>18.37)             | 15.43<br>(11.34 to<br>21.12)             | 0.37<br>(0.29 to<br>0.47)       | 0.62<br>(0.46 to<br>0.80)         | 0.64<br>(0.48 to<br>0.83)         | 0.63<br>(0.47 to<br>0.82)           |
| Chronic kidney disease                                     | 3,055.41<br>(2,248.05 to<br>3,943.38) | 6,880.30<br>(3,346.93 to<br>14,870.22)   | 4,869.09<br>(2,486.38 to<br>11,078.37)  | 8,397.32<br>(4,072.11 to<br>17,723.84)   | 116.40<br>(88.70 to<br>147.89)  | 383.02<br>(168.84 to<br>970.89)   | 273.89<br>(127.51 to<br>760.63)   | 445.71<br>(200.40 to<br>1,101.25)   |
| Chronic kidney disease due to diabetes mellitus            | 981.92<br>(714.61 to<br>1,305.31)     | 3,021.76<br>(1,358.76 to<br>6,438.47)    | 2,097.33<br>(998.17 to<br>4,863.32)     | 3,666.21<br>(1,638.05 to<br>7,789.09)    | 42.48<br>(31.56 to<br>55.93)    | 161.10<br>(68.54 to<br>423.78)    | 113.51<br>(50.78 to<br>309.86)    | 188.56<br>(81.50 to<br>473.77)      |
| Chronic kidney disease due to hypertension                 | 600.90<br>(442.96 to<br>797.44)       | 1,706.17<br>(755.38 to<br>4,273.88)      | 1,203.75<br>(565.25 to<br>3,054.73)     | 2,043.26<br>(922.50 to<br>4,920.90)      | 29.85<br>(22.52 to<br>38.58)    | 112.28<br>(48.33 to<br>312.93)    | 80.95<br>(36.44 to<br>236.60)     | 128.03<br>(55.72 to<br>351.18)      |
| Chronic kidney disease due to glomerulonephritis           | 565.00<br>(378.96 to<br>775.96)       | 652.19<br>(346.96 to<br>1,264.04)        | 485.47<br>(270.33 to<br>918.96)         | 824.98<br>(439.18 to<br>1,563.86)        | 14.37<br>(10.26 to<br>19.26)    | 28.85<br>(13.64 to<br>68.85)      | 21.11<br>(10.54 to<br>52.83)      | 34.38<br>(16.70 to<br>78.98)        |
| Chronic kidney disease due to other and unspecified causes | 907.58<br>(645.38 to<br>1,196.20)     | 1,500.18<br>(765.41 to<br>3,119.76)      | 1,082.54<br>(577.65 to<br>2,370.70)     | 1,862.87<br>(958.17 to<br>3,725.53)      | 29.70<br>(21.74 to<br>38.91)    | 80.79<br>(36.23 to<br>206.61)     | 58.32<br>(27.43 to<br>154.43)     | 94.75<br>(42.31 to<br>231.06)       |
| Urinary diseases and male infertility                      | 953.24<br>(666.53 to<br>1,201.69)     | 1,754.65<br>(1,222.14 to<br>2,239.39)    | 1,772.89<br>(1,236.45 to<br>2,254.29)   | 1,755.98<br>(1,224.04 to<br>2,254.36)    | 37.58<br>(27.15 to<br>46.48)    | 104.87<br>(75.08 to<br>131.47)    | 97.57<br>(61.27 to<br>138.05)     | 97.57<br>(68.84 to<br>122.95)       |
| Urinary tract infections                                   | 683.31<br>(462.86 to<br>910.75)       | 1,386.97<br>(943.98 to<br>1,816.96)      | 1,407.36<br>(956.05 to<br>1,841.31)     | 1,364.31<br>(924.45 to<br>1,791.05)      | 27.24<br>(19.23 to<br>34.88)    | 84.65<br>(58.44 to<br>107.42)     | 89.01<br>(61.27 to<br>112.75)     | 77.43<br>(53.01 to<br>99.25)        |
| Urolithiasis                                               | 82.83<br>(53.48 to<br>137.87)         | 171.48<br>(109.61 to<br>295.01)          | 173.83<br>(111.17 to<br>296.15)         | 168.25<br>(107.43 to<br>288.50)          | 3.27<br>(2.14 to<br>5.19)       | 9.12<br>(5.82 to<br>14.91)        | 9.56<br>(6.16 to<br>15.53)        | 8.39<br>(5.34 to<br>13.73)          |
| Other urinary diseases                                     | 187.11<br>(127.74 to<br>298.36)       | 196.21<br>(127.17 to<br>326.69)          | 191.71<br>(123.83 to<br>314.46)         | 223.43<br>(145.52 to<br>370.32)          | 7.07<br>(4.89 to<br>11.01)      | 11.11<br>(7.29 to<br>18.05)       | 11.27<br>(7.35 to<br>18.39)       | 11.74<br>(7.75 to<br>19.31)         |

|                                                   |                                 |                                 |                                 |                                 |                            |                              |                              |                              |
|---------------------------------------------------|---------------------------------|---------------------------------|---------------------------------|---------------------------------|----------------------------|------------------------------|------------------------------|------------------------------|
| Gynecological diseases                            | 14.45<br>(9.75 to<br>23.72)     | 18.39<br>(10.82 to<br>33.81)    | 17.48<br>(10.29 to<br>30.85)    | 21.94<br>(12.91 to<br>38.84)    | 0.59<br>(0.88)             | 1.00<br>(0.61 to<br>1.65)    | 0.99<br>(0.61 to<br>1.63)    | 1.10<br>(0.67 to<br>1.83)    |
| Uterine fibroids                                  | 4.33<br>(1.46 to<br>7.99)       | 5.72<br>(1.76 to<br>11.76)      | 5.34<br>(1.66 to<br>11.04)      | 7.07<br>(2.21 to<br>14.34)      | 0.17<br>(0.05 to<br>0.31)  | 0.25<br>(0.08 to<br>0.51)    | 0.24<br>(0.07 to<br>0.49)    | 0.30<br>(0.09 to<br>0.60)    |
| Polycystic ovarian syndrome                       | 1.26<br>(0.37 to<br>3.21)       | 0.93<br>(0.19 to<br>3.10)       | 0.83<br>(0.18 to<br>2.80)       | 1.31<br>(0.28 to<br>4.33)       | 0.03<br>(0.01 to<br>0.07)  | 0.02<br>(0.00 to<br>0.08)    | 0.02<br>(0.00 to<br>0.07)    | 0.03<br>(0.01 to<br>0.11)    |
| Endometriosis                                     | 0.13<br>(0.04 to<br>0.38)       | 0.14<br>(0.03 to<br>0.45)       | 0.13<br>(0.03 to<br>0.40)       | 0.18<br>(0.04 to<br>0.53)       | 0.00<br>(0.00 to<br>0.01)  | 0.00<br>(0.00 to<br>0.01)    | 0.00<br>(0.00 to<br>0.01)    | 0.00<br>(0.00 to<br>0.01)    |
| Genital prolapse                                  | 1.45<br>(0.53 to<br>2.60)       | 1.83<br>(0.56 to<br>3.78)       | 1.74<br>(0.53 to<br>3.58)       | 2.20<br>(0.67 to<br>4.53)       | 0.12<br>(0.04 to<br>0.22)  | 0.15<br>(0.05 to<br>0.31)    | 0.15<br>(0.04 to<br>0.31)    | 0.17<br>(0.05 to<br>0.35)    |
| Other gynecological diseases                      | 7.29<br>(3.56 to<br>13.48)      | 9.77<br>(4.67 to<br>19.27)      | 9.44<br>(4.52 to<br>18.45)      | 11.17<br>(5.32 to<br>21.98)     | 0.27<br>(0.13 to<br>0.49)  | 0.57<br>(0.28 to<br>1.05)    | 0.57<br>(0.29 to<br>1.05)    | 0.59<br>(0.29 to<br>1.10)    |
| Hemoglobinopathies and hemolytic anemias          | 311.70<br>(224.27 to<br>471.78) | 256.40<br>(183.76 to<br>398.41) | 248.90<br>(179.51 to<br>382.31) | 298.44<br>(214.05 to<br>469.73) | 9.26<br>(7.15 to<br>13.65) | 15.26<br>(11.22 to<br>22.86) | 15.49<br>(11.55 to<br>24.22) | 16.08<br>(11.55 to<br>24.22) |
| Thalassemias                                      | 10.04<br>(0.38 to<br>53.55)     | 2.35<br>(0.14 to<br>12.33)      | 2.37<br>(0.14 to<br>12.45)      | 2.59<br>(0.13 to<br>14.28)      | 0.12<br>(0.01 to<br>0.65)  | 0.03<br>(0.00 to<br>0.15)    | 0.03<br>(0.00 to<br>0.16)    | 0.03<br>(0.00 to<br>0.18)    |
| Sickle cell disorders                             | 176.19<br>(61.41 to<br>313.40)  | 72.55<br>(13.73 to<br>145.73)   | 68.95<br>(12.94 to<br>138.28)   | 90.82<br>(18.70 to<br>183.60)   | 2.44<br>(0.78 to<br>4.35)  | 1.21<br>(0.18 to<br>2.62)    | 1.15<br>(0.18 to<br>2.47)    | 1.48<br>(0.24 to<br>3.15)    |
| G6PD deficiency                                   | 59.09<br>(25.31 to<br>124.42)   | 76.17<br>(36.55 to<br>137.65)   | 72.06<br>(34.76 to<br>128.93)   | 91.94<br>(44.36 to<br>166.47)   | 1.47<br>(0.75 to<br>2.70)  | 2.62<br>(1.50 to<br>4.39)    | 2.52<br>(1.46 to<br>4.22)    | 3.06<br>(1.80 to<br>5.14)    |
| Other hemoglobinopathies and hemolytic anemias    | 66.38<br>(45.38 to<br>105.73)   | 105.33<br>(75.79 to<br>158.72)  | 105.53<br>(77.38 to<br>159.56)  | 113.10<br>(79.03 to<br>174.41)  | 5.22<br>(4.08 to<br>7.54)  | 11.40<br>(8.01 to<br>16.75)  | 11.80<br>(8.58 to<br>17.13)  | 11.50<br>(7.65 to<br>17.35)  |
| Endocrine, metabolic, blood, and immune disorders | 307.91<br>(213.60 to<br>602.24) | 295.35<br>(205.05 to<br>555.66) | 289.83<br>(201.10 to<br>538.86) | 328.48<br>(228.11 to<br>624.58) | 7.07<br>(5.10 to<br>13.39) | 12.46<br>(8.88 to<br>22.56)  | 12.67<br>(8.92 to<br>23.16)  | 12.63<br>(9.08 to<br>23.18)  |

**Bhutan**

| Cause                                  | YLLs (actual counts)                        |                                             |                                              |                                              | Deaths (actual counts)                 |                                      |                                      |                                      |
|----------------------------------------|---------------------------------------------|---------------------------------------------|----------------------------------------------|----------------------------------------------|----------------------------------------|--------------------------------------|--------------------------------------|--------------------------------------|
|                                        | 2016                                        | 2040 Forecast                               | 2040 Better Scenario                         | 2040 Worse Scenario                          | 2016                                   | 2040 Forecast                        | 2040 Better Scenario                 | 2040 Worse Scenario                  |
|                                        | <b>Musculoskeletal disorders</b>            | <b>90.21</b><br>(65.98 to<br>123.13)        | <b>195.24</b><br>(128.89 to<br>265.23)       | <b>199.14</b><br>(128.89 to<br>269.77)       | <b>194.40</b><br>(129.80 to<br>263.38) | <b>3.74</b><br>(2.51 to<br>4.93)     | <b>10.97</b><br>(7.07 to<br>14.37)   | <b>11.47</b><br>(7.37 to<br>15.04)   |
| Rheumatoid arthritis                   | 31.26<br>(18.57 to<br>51.32)                | 82.46<br>(45.94 to<br>136.03)               | 81.36<br>(45.63 to<br>135.51)                | 91.34<br>(52.86 to<br>147.15)                | 1.71<br>(0.98 to<br>2.75)              | 5.35<br>(2.97 to<br>8.51)            | 5.41<br>(3.02 to<br>8.68)            | 5.67<br>(3.23 to<br>8.85)            |
| Other musculoskeletal disorders        | 58.95<br>(44.11 to<br>80.52)                | 112.78<br>(77.71 to<br>149.70)              | 117.78<br>(80.78 to<br>157.18)               | 103.06<br>(70.97 to<br>137.90)               | 2.03<br>(1.44 to<br>2.69)              | 5.62<br>(3.63 to<br>7.37)            | 6.07<br>(3.97 to<br>7.99)            | 4.83<br>(3.17 to<br>6.45)            |
| <b>Other non-communicable diseases</b> | <b>6097.59</b><br>(4,153.63 to<br>9,150.38) | <b>2873.21</b><br>(2,002.59 to<br>4,250.45) | <b>2,763.84</b><br>(1,949.41 to<br>4,053.21) | <b>3,726.18</b><br>(2,472.79 to<br>5,637.90) | <b>79.95</b><br>(56.28 to<br>119.88)   | <b>67.18</b><br>(49.68 to<br>101.12) | <b>67.48</b><br>(50.43 to<br>100.36) | <b>75.88</b><br>(54.31 to<br>113.15) |
| Congenital birth defects               | 5,387.76<br>(3,525.78 to<br>8,270.49)       | 2,024.46<br>(1,218.32 to<br>3,225.01)       | 1,909.66<br>(1,147.13 to<br>3,006.56)        | 2,812.00<br>(1,653.46 to<br>4,508.17)        | 65.60<br>(43.14 to<br>101.03)          | 28.28<br>(17.70 to<br>44.19)         | 26.86<br>(16.85 to<br>41.67)         | 37.95<br>(23.10 to<br>60.54)         |
| Neural tube defects                    | 37.74<br>(21.63 to<br>65.19)                | 5.56<br>(2.94 to<br>10.19)                  | 5.06<br>(2.70 to<br>9.23)                    | 8.55<br>(4.33 to<br>15.59)                   | 0.47<br>(0.28 to<br>0.80)              | 0.09<br>(0.05 to<br>0.16)            | 0.09<br>(0.05 to<br>0.15)            | 0.13<br>(0.07 to<br>0.24)            |
| Congenital heart anomalies             | 2,589.07<br>(1,548.80 to<br>4,148.17)       | 985.09<br>(594.90 to<br>1,566.54)           | 930.29<br>(566.90 to<br>1,477.70)            | 1,349.10<br>(797.33 to<br>2,218.48)          | 32.05<br>(19.67 to<br>51.28)           | 13.76<br>(8.31 to<br>22.26)          | 13.07<br>(8.02 to<br>20.76)          | 18.30<br>(11.02 to<br>30.13)         |
| Orofacial clefts                       | 12.31<br>(5.11 to<br>25.29)                 | 2.84<br>(1.07 to<br>6.65)                   | 2.53<br>(0.93 to<br>5.77)                    | 4.90<br>(1.79 to<br>11.22)                   | 0.14<br>(0.06 to<br>0.29)              | 0.03<br>(0.01 to<br>0.08)            | 0.03<br>(0.01 to<br>0.07)            | 0.06<br>(0.02 to<br>0.13)            |



|                                               |                                                     |                                                     |                                                    |                                                     |                                            |                                            |                                            |                                            |
|-----------------------------------------------|-----------------------------------------------------|-----------------------------------------------------|----------------------------------------------------|-----------------------------------------------------|--------------------------------------------|--------------------------------------------|--------------------------------------------|--------------------------------------------|
| Down syndrome                                 | 133.90<br>(81.95 to 241.14)                         | 79.23<br>(50.14 to 133.16)                          | 75.04<br>(47.41 to 125.08)                         | 104.36<br>(65.09 to 176.21)                         | 1.84<br>(1.17 to 3.19)                     | 1.63<br>(1.04 to 2.88)                     | 1.56<br>(1.01 to 2.70)                     | 2.03<br>(1.29 to 3.54)                     |
| Other chromosomal abnormalities               | 158.68<br>(71.66 to 311.26)                         | 78.71<br>(34.46 to 162.34)                          | 73.03<br>(32.45 to 145.17)                         | 117.39<br>(49.84 to 240.80)                         | 1.86<br>(0.84 to 3.63)                     | 1.86<br>(0.43 to 1.92)                     | 0.89<br>(0.41 to 1.74)                     | 1.41<br>(0.62 to 2.88)                     |
| Congenital musculoskeletal and limb anomalies | 121.91<br>(52.34 to 281.64)                         | 52.08<br>(19.25 to 122.48)                          | 49.43<br>(18.51 to 114.43)                         | 71.82<br>(26.23 to 171.48)                          | 1.44<br>(0.63 to 3.29)                     | 0.66<br>(0.27 to 1.47)                     | 0.63<br>(0.26 to 1.38)                     | 0.89<br>(0.35 to 2.06)                     |
| Urogenital congenital anomalies               | 125.61<br>(66.20 to 211.16)                         | 60.05<br>(30.69 to 104.93)                          | 57.93<br>(29.89 to 99.85)                          | 77.08<br>(39.02 to 137.72)                          | 1.64<br>(0.89 to 2.68)                     | 1.20<br>(0.66 to 2.02)                     | 1.18<br>(0.64 to 1.97)                     | 1.42<br>(0.77 to 2.33)                     |
| Digestive congenital anomalies                | 507.80<br>(246.80 to 982.71)                        | 165.01<br>(76.19 to 333.98)                         | 153.56<br>(70.39 to 306.95)                        | 244.14<br>(108.82 to 499.31)                        | 5.92<br>(2.89 to 11.44)                    | 1.99<br>(0.95 to 3.95)                     | 1.86<br>(0.89 to 3.66)                     | 2.92<br>(1.34 to 5.91)                     |
| Other congenital birth defects                | 1,700.75<br>(910.38 to 2,747.78)                    | 595.91<br>(295.29 to 1,010.70)                      | 562.81<br>(279.32 to 948.06)                       | 834.66<br>(402.29 to 1,435.60)                      | 20.24<br>(10.97 to 32.44)                  | 7.95<br>(4.17 to 12.96)                    | 7.56<br>(4.00 to 12.15)                    | 10.80<br>(5.48 to 18.12)                   |
| Skin and subcutaneous diseases                | 313.44<br>(204.99 to 542.19)                        | 747.93<br>(508.67 to 1,302.48)                      | 759.63<br>(516.18 to 1,337.03)                     | 770.22<br>(523.55 to 1,347.25)                      | 9.75<br>(6.46 to 16.96)                    | 9.75<br>(25.16 to 64.76)                   | 37.72<br>(26.18 to 67.09)                  | 36.26<br>(24.06 to 63.30)                  |
| Cellulitis                                    | 23.38<br>(12.46 to 50.75)                           | 78.43<br>(39.86 to 172.14)                          | 82.99<br>(41.80 to 185.08)                         | 70.45<br>(34.98 to 153.08)                          | 0.82<br>(0.41 to 1.81)                     | 4.17<br>(2.08 to 9.28)                     | 4.56<br>(2.29 to 10.22)                    | 3.50<br>(1.70 to 7.84)                     |
| Pyoderma                                      | 265.72<br>(173.00 to 458.68)                        | 630.24<br>(416.25 to 1,092.60)                      | 635.87<br>(416.31 to 1,102.32)                     | 661.80<br>(439.44 to 1,141.40)                      | 8.07<br>(5.35 to 14.17)                    | 31.21<br>(20.46 to 54.19)                  | 32.42<br>(21.08 to 55.86)                  | 30.70<br>(20.34 to 53.56)                  |
| Decubitus ulcer                               | 11.77<br>(7.51 to 21.28)                            | 20.47<br>(12.44 to 35.50)                           | 21.36<br>(12.78 to 37.21)                          | 19.68<br>(11.78 to 34.95)                           | 0.52<br>(0.31 to 0.93)                     | 1.51<br>(0.86 to 2.68)                     | 1.64<br>(0.94 to 2.92)                     | 1.32<br>(0.75 to 2.32)                     |
| Other skin and subcutaneous diseases          | 12.57<br>(7.74 to 22.34)                            | 18.80<br>(11.77 to 32.40)                           | 19.41<br>(12.11 to 33.58)                          | 18.30<br>(11.33 to 31.40)                           | 0.34<br>(0.21 to 0.57)                     | 0.84<br>(0.50 to 1.40)                     | 0.90<br>(0.54 to 1.48)                     | 0.74<br>(0.45 to 1.23)                     |
| Sudden infant death syndrome                  | 396.39<br>(212.63 to 622.51)                        | 100.82<br>(47.73 to 178.73)                         | 94.56<br>(44.34 to 167.04)                         | 143.97<br>(67.48 to 260.45)                         | 4.60<br>(2.47 to 7.23)                     | 1.17<br>(0.55 to 2.07)                     | 1.10<br>(0.51 to 1.94)                     | 1.67<br>(0.78 to 3.02)                     |
| <b>Injuries</b>                               | <b>14,558.57</b><br><b>(11,729.12 to 17,503.22)</b> | <b>12,761.11</b><br><b>(10,116.97 to 16,213.20)</b> | <b>11,768.69</b><br><b>(9,307.31 to 14,817.83)</b> | <b>15,156.06</b><br><b>(12,022.65 to 19,242.52)</b> | <b>329.21</b><br><b>(265.77 to 400.15)</b> | <b>444.24</b><br><b>(357.65 to 538.76)</b> | <b>431.89</b><br><b>(347.12 to 524.39)</b> | <b>486.07</b><br><b>(391.82 to 591.12)</b> |
| <b>Transport injuries</b>                     | <b>4,601.05</b><br><b>(3,555.43 to 5,803.85)</b>    | <b>3,929.65</b><br><b>(2,923.45 to 5,109.12)</b>    | <b>3,103.13</b><br><b>(2,303.37 to 4,040.41)</b>   | <b>5,238.30</b><br><b>(3,824.56 to 6,886.50)</b>    | <b>89.78</b><br><b>(69.57 to 113.07)</b>   | <b>97.25</b><br><b>(73.78 to 124.94)</b>   | <b>79.07</b><br><b>(59.95 to 101.84)</b>   | <b>124.94</b><br><b>(93.71 to 162.75)</b>  |
| Road injuries                                 | 4,202.61<br>(3,236.21 to 5,325.60)                  | 3,512.49<br>(2,559.70 to 4,595.15)                  | 2,705.72<br>(1,951.90 to 3,560.25)                 | 4,733.36<br>(3,413.55 to 6,255.77)                  | 82.10<br>(63.50 to 104.16)                 | 86.91<br>(65.31 to 113.08)                 | 69.09<br>(51.76 to 90.39)                  | 112.75<br>(83.55 to 148.54)                |
| Pedestrian road injuries                      | 1,360.76<br>(956.40 to 1,869.08)                    | 1,013.91<br>(676.07 to 1,434.21)                    | 787.81<br>(527.13 to 1,115.54)                     | 1,377.58<br>(910.13 to 1,973.22)                    | 27.60<br>(19.70 to 37.73)                  | 28.88<br>(19.55 to 40.74)                  | 23.24<br>(15.64 to 32.53)                  | 37.40<br>(24.95 to 53.42)                  |
| <b>Bhutan</b>                                 |                                                     |                                                     |                                                    |                                                     |                                            |                                            |                                            |                                            |
| Cause                                         | YLLs (actual counts)                                |                                                     |                                                    |                                                     | Deaths (actual counts)                     |                                            |                                            |                                            |
|                                               | 2016                                                | 2040 Forecast                                       | 2040 Better Scenario                               | 2040 Worse Scenario                                 | 2016                                       | 2040 Forecast                              | 2040 Better Scenario                       | 2040 Worse Scenario                        |
| Cyclist road injuries                         | 225.83<br>(159.91 to 312.56)                        | 211.90<br>(143.75 to 304.48)                        | 161.98<br>(109.66 to 233.19)                       | 288.86<br>(194.45 to 415.65)                        | 4.63<br>(3.28 to 6.39)                     | 5.62<br>(3.80 to 8.04)                     | 4.54<br>(3.07 to 6.50)                     | 7.19<br>(4.79 to 10.41)                    |
| Motorcyclist road injuries                    | 1,307.20<br>(862.88 to 1,909.27)                    | 1,194.94<br>(750.36 to 1,730.07)                    | 988.51<br>(616.84 to 1,435.57)                     | 1,497.19<br>(930.73 to 2,181.94)                    | 24.45<br>(16.11 to 35.06)                  | 25.92<br>(16.43 to 37.14)                  | 21.95<br>(13.96 to 31.59)                  | 31.68<br>(19.81 to 46.31)                  |
| Motor vehicle road injuries                   | 1,274.22<br>(840.46 to 1,717.16)                    | 1,060.49<br>(674.35 to 1,477.83)                    | 744.18<br>(467.11 to 1,037.22)                     | 1,526.43<br>(968.59 to 2,176.61)                    | 24.68<br>(16.64 to 33.44)                  | 25.50<br>(16.64 to 34.89)                  | 18.57<br>(12.14 to 25.44)                  | 35.21<br>(23.02 to 49.23)                  |
| Other road injuries                           | 34.59<br>(22.21 to 57.51)                           | 31.25<br>(19.96 to 51.66)                           | 23.25<br>(14.88 to 38.52)                          | 43.30<br>(27.25 to 72.08)                           | 0.74<br>(0.50 to 1.25)                     | 1.00<br>(0.65 to 1.64)                     | 0.80<br>(0.53 to 1.30)                     | 1.27<br>(0.82 to 2.09)                     |

|                                                 |                                                            |                                                            |                                                            |                                                            |                                                      |                                                      |                                                      |                                                      |
|-------------------------------------------------|------------------------------------------------------------|------------------------------------------------------------|------------------------------------------------------------|------------------------------------------------------------|------------------------------------------------------|------------------------------------------------------|------------------------------------------------------|------------------------------------------------------|
| Other transport injuries                        | 398.44<br>(281.28 to<br>670.65)                            | 417.16<br>(282.52 to<br>689.33)                            | 397.41<br>(269.84 to<br>649.22)                            | 504.94<br>(339.29 to<br>835.75)                            | 7.67<br>(5.45 to<br>13.03)                           | 10.34<br>(7.16 to<br>17.43)                          | 9.98<br>(6.92 to<br>16.70)                           | 12.18<br>(8.30 to<br>20.37)                          |
| <b>Unintentional injuries</b>                   | <b>7,029.26</b><br><b>(5,460.47 to</b><br><b>8,623.07)</b> | <b>5,888.73</b><br><b>(4,337.72 to</b><br><b>7,568.99)</b> | <b>5,803.25</b><br><b>(4,309.40 to</b><br><b>7,367.63)</b> | <b>6,599.54</b><br><b>(4,861.91 to</b><br><b>8,436.13)</b> | <b>178.23</b><br><b>(135.22 to</b><br><b>217.32)</b> | <b>269.94</b><br><b>(197.95 to</b><br><b>329.37)</b> | <b>276.94</b><br><b>(204.42 to</b><br><b>337.02)</b> | <b>275.81</b><br><b>(200.45 to</b><br><b>337.62)</b> |
| Falls                                           | 2,320.58<br>(1,431.29 to<br>3,185.30)                      | 3,022.68<br>(1,948.18 to<br>3,941.48)                      | 3,050.40<br>(1,992.30 to<br>3,979.40)                      | 3,144.82<br>(1,976.57 to<br>4,119.74)                      | 85.78<br>(53.24 to<br>110.38)                        | 180.50<br>(116.24 to<br>230.00)                      | 188.51<br>(121.67 to<br>239.61)                      | 175.42<br>(110.12 to<br>226.15)                      |
| Drowning                                        | 1,469.73<br>(1,144.77 to<br>1,833.24)                      | 684.74<br>(496.62 to<br>895.76)                            | 654.81<br>(472.26 to<br>859.13)                            | 841.52<br>(608.77 to<br>1,102.75)                          | 24.60<br>(19.44 to<br>30.61)                         | 16.58<br>(12.75 to<br>21.01)                         | 16.15<br>(12.46 to<br>20.57)                         | 19.39<br>(14.87 to<br>24.80)                         |
| Fire, heat, and hot substances                  | 479.37<br>(320.70 to<br>644.56)                            | 250.99<br>(165.46 to<br>361.13)                            | 238.13<br>(155.56 to<br>354.70)                            | 310.51<br>(200.81 to<br>444.14)                            | 9.67<br>(6.66 to<br>12.58)                           | 7.86<br>(5.55 to<br>10.58)                           | 7.68<br>(5.44 to<br>10.22)                           | 9.14<br>(6.34 to<br>12.46)                           |
| Poisonings                                      | 174.10<br>(102.72 to<br>323.47)                            | 51.10<br>(29.93 to<br>89.14)                               | 47.06<br>(27.71 to<br>81.82)                               | 72.02<br>(41.03 to<br>129.01)                              | 2.80<br>(1.72 to<br>4.79)                            | 1.20<br>(0.78 to<br>1.99)                            | 1.13<br>(0.74 to<br>1.89)                            | 1.57<br>(1.00 to<br>2.64)                            |
| Exposure to mechanical forces                   | 558.07<br>(387.43 to<br>853.86)                            | 375.44<br>(241.56 to<br>632.50)                            | 359.28<br>(231.93 to<br>598.45)                            | 450.72<br>(288.31 to<br>755.43)                            | 11.25<br>(7.79 to<br>17.47)                          | 11.25<br>(7.47 to<br>18.27)                          | 11.01<br>(7.40 to<br>17.86)                          | 12.78<br>(8.52 to<br>20.97)                          |
| Unintentional firearm injuries                  | 38.02<br>(21.54 to<br>68.34)                               | 23.65<br>(13.55 to<br>44.50)                               | 22.60<br>(12.99 to<br>41.74)                               | 28.50<br>(16.20 to<br>52.68)                               | 0.91<br>(0.55 to<br>1.56)                            | 0.90<br>(0.56 to<br>1.51)                            | 0.89<br>(0.56 to<br>1.49)                            | 1.01<br>(0.62 to<br>1.75)                            |
| Unintentional suffocation                       | 49.23<br>(23.52 to<br>100.23)                              | 14.81<br>(6.91 to<br>31.93)                                | 13.77<br>(6.47 to<br>29.70)                                | 0.64<br>(0.41 to<br>46.28)                                 | 0.24<br>(0.13 to<br>1.30)                            | 0.24<br>(0.12 to<br>0.52)                            | 0.24<br>(0.12 to<br>0.50)                            | 0.33<br>(0.17 to<br>0.70)                            |
| Other exposure to mechanical forces             | 470.82<br>(294.73 to<br>756.05)                            | 336.98<br>(204.15 to<br>576.36)                            | 322.92<br>(197.09 to<br>548.72)                            | 401.07<br>(238.22 to<br>680.80)                            | 9.70<br>(6.22 to<br>15.65)                           | 10.10<br>(6.49 to<br>16.80)                          | 9.88<br>(6.37 to<br>16.21)                           | 11.45<br>(7.25 to<br>18.87)                          |
| Adverse effects of medical treatment            | 598.78<br>(461.85 to<br>798.21)                            | 582.43<br>(438.86 to<br>790.51)                            | 570.85<br>(432.41 to<br>764.85)                            | 657.28<br>(492.53 to<br>886.78)                            | 17.05<br>(13.56 to<br>22.07)                         | 26.21<br>(20.75 to<br>33.76)                         | 26.50<br>(20.94 to<br>33.75)                         | 27.64<br>(21.62 to<br>35.67)                         |
| Animal contact                                  | 594.89<br>(419.29 to<br>811.76)                            | 371.74<br>(253.58 to<br>514.19)                            | 348.30<br>(241.54 to<br>480.99)                            | 492.81<br>(340.25 to<br>690.75)                            | 10.20<br>(7.55 to<br>13.18)                          | 9.55<br>(6.73 to<br>13.08)                           | 9.13<br>(6.47 to<br>12.59)                           | 11.84<br>(8.38 to<br>16.22)                          |
| Venomous animal contact                         | 483.33<br>(325.74 to<br>696.51)                            | 290.01<br>(195.96 to<br>422.75)                            | 271.32<br>(182.88 to<br>394.12)                            | 386.94<br>(260.72 to<br>568.13)                            | 8.21<br>(5.90 to<br>11.19)                           | 7.31<br>(5.03 to<br>10.32)                           | 6.98<br>(4.83 to<br>9.84)                            | 9.12<br>(6.39 to<br>12.76)                           |
| Non-venomous animal contact                     | 111.55<br>(54.58 to<br>169.17)                             | 81.72<br>(34.16 to<br>138.51)                              | 76.99<br>(32.37 to<br>129.24)                              | 105.87<br>(46.58 to<br>175.35)                             | 1.99<br>(0.90 to<br>3.07)                            | 2.24<br>(0.93 to<br>3.79)                            | 2.15<br>(0.91 to<br>3.58)                            | 2.71<br>(1.15 to<br>4.58)                            |
| Foreign body                                    | 216.89<br>(152.59 to<br>297.96)                            | 149.87<br>(105.17 to<br>198.43)                            | 150.05<br>(105.75 to<br>199.36)                            | 162.49<br>(113.32 to<br>219.83)                            | 4.29<br>(3.12 to<br>5.61)                            | 5.76<br>(4.28 to<br>7.47)                            | 6.03<br>(4.56 to<br>7.80)                            | 5.52<br>(4.08 to<br>7.10)                            |
| Pulmonary aspiration and foreign body in airway | 172.40<br>(113.99 to<br>247.25)                            | 123.75<br>(86.22 to<br>169.30)                             | 124.82<br>(87.29 to<br>170.48)                             | 131.85<br>(90.44 to<br>186.64)                             | 3.46<br>(2.46 to<br>4.68)                            | 5.04<br>(3.77 to<br>6.61)                            | 5.32<br>(4.04 to<br>6.94)                            | 4.73<br>(3.50 to<br>6.23)                            |
| Foreign body in other body part                 | 44.49<br>(28.45 to<br>60.50)                               | 26.12<br>(14.87 to<br>38.22)                               | 25.23<br>(14.28 to<br>36.78)                               | 30.65<br>(17.77 to<br>44.58)                               | 0.83<br>(0.53 to<br>1.15)                            | 0.72<br>(0.42 to<br>1.04)                            | 0.72<br>(0.42 to<br>1.04)                            | 0.79<br>(0.46 to<br>1.14)                            |
| Environmental heat and cold exposure            | 64.67<br>(22.81 to<br>98.08)                               | 58.76<br>(20.18 to<br>96.80)                               | 55.50<br>(19.05 to<br>90.85)                               | 74.74<br>(25.54 to<br>123.28)                              | 1.88<br>(0.69 to<br>2.78)                            | 2.57<br>(0.92 to<br>4.02)                            | 2.50<br>(0.90 to<br>3.84)                            | 3.08<br>(1.08 to<br>4.83)                            |
| Other unintentional injuries                    | 552.18<br>(347.87 to<br>810.01)                            | 340.97<br>(209.38 to<br>528.44)                            | 328.87<br>(203.34 to<br>513.15)                            | 392.63<br>(240.97 to<br>616.32)                            | 10.72<br>(6.80 to<br>15.99)                          | 8.45<br>(5.41 to<br>13.21)                           | 8.28<br>(5.40 to<br>12.85)                           | 9.42<br>(5.98 to<br>14.78)                           |
| Self-harm and interpersonal violence            | 2,922.48<br>(2,186.00 to<br>3,793.71)                      | 2,881.13<br>(2,130.02 to<br>3,814.27)                      | 2,800.78<br>(2,092.53 to<br>3,674.01)                      | 3,253.80<br>(2,358.37 to<br>4,457.12)                      | 61.10<br>(46.24 to<br>78.14)                         | 75.61<br>(55.82 to<br>99.21)                         | 74.41<br>(55.51 to<br>97.59)                         | 83.86<br>(60.30 to<br>113.41)                        |
| <b>Bhutan</b>                                   |                                                            |                                                            |                                                            |                                                            |                                                      |                                                      |                                                      |                                                      |
| Cause                                           | YLLs (actual counts)                                       |                                                            |                                                            |                                                            | Deaths (actual counts)                               |                                                      |                                                      |                                                      |
|                                                 | 2016                                                       | 2040 Forecast                                              | 2040 Better Scenario                                       | 2040 Worse Scenario                                        | 2016                                                 | 2040 Forecast                                        | 2040 Better Scenario                                 | 2040 Worse Scenario                                  |

|                                                                              |                                             |                                             |                                             |                                             |                                        |                                          |                                         |                                          |
|------------------------------------------------------------------------------|---------------------------------------------|---------------------------------------------|---------------------------------------------|---------------------------------------------|----------------------------------------|------------------------------------------|-----------------------------------------|------------------------------------------|
| Self-harm                                                                    | 2,328.46<br>(1,707.91 to<br>3,236.95)       | 2,497.34<br>(1,825.38 to<br>3,349.35)       | 2,423.05<br>(1,789.65 to<br>3,240.09)       | 2,839.83<br>(2,028.15 to<br>3,917.38)       | 50.30<br>(37.54 to<br>66.43)           | 67.46<br>(49.09 to<br>89.41)             | 66.34<br>(49.01 to<br>87.72)            | 75.20<br>(53.14 to<br>103.10)            |
| Self-harm by firearm                                                         | 275.10<br>(129.61 to<br>524.56)             | 208.49<br>(91.76 to<br>404.27)              | 199.96<br>(88.40 to<br>390.02)              | 245.03<br>(103.29 to<br>481.70)             | 5.51<br>(2.65 to<br>10.56)             | 5.04<br>(2.19 to<br>10.14)               | 4.88<br>(2.13 to<br>9.83)               | 5.84<br>(2.46 to<br>11.91)               |
| Self-harm by other specified means                                           | 2,053.35<br>(1,515.86 to<br>2,818.55)       | 2,288.85<br>(1,673.75 to<br>3,048.69)       | 2,223.09<br>(1,646.18 to<br>2,957.25)       | 2,594.81<br>(1,844.47 to<br>3,543.46)       | 44.78<br>(33.81 to<br>59.11)           | 62.42<br>(45.83 to<br>81.55)             | 61.47<br>(45.42 to<br>80.03)            | 69.35<br>(49.23 to<br>94.24)             |
| Interpersonal violence                                                       | 594.03<br>(340.65 to<br>825.83)             | 383.79<br>(224.00 to<br>537.98)             | 377.73<br>(223.92 to<br>526.68)             | 413.96<br>(242.28 to<br>582.36)             | 10.80<br>(6.45 to<br>15.09)            | 8.15<br>(5.35 to<br>11.24)               | 8.07<br>(5.35 to<br>11.12)              | 8.67<br>(5.64 to<br>11.94)               |
| Physical violence by firearm                                                 | 90.59<br>(30.14 to<br>149.60)               | 61.33<br>(21.53 to<br>100.15)               | 60.77<br>(21.44 to<br>99.17)                | 63.67<br>(21.77 to<br>103.20)               | 1.67<br>(0.59 to<br>2.70)              | 1.27<br>(0.49 to<br>2.02)                | 1.26<br>(0.50 to<br>2.00)               | 1.30<br>(0.49 to<br>2.08)                |
| Physical violence by sharp object                                            | 115.96<br>(38.28 to<br>194.72)              | 91.97<br>(34.30 to<br>151.02)               | 92.24<br>(34.83 to<br>152.04)               | 91.71<br>(33.56 to<br>150.19)               | 2.18<br>(0.77 to<br>3.66)              | 1.98<br>(0.82 to<br>3.22)                | 1.99<br>(0.84 to<br>3.24)               | 1.95<br>(0.79 to<br>3.18)                |
| Physical violence by other means                                             | 387.48<br>(252.35 to<br>541.03)             | 230.49<br>(151.01 to<br>333.10)             | 224.73<br>(148.42 to<br>324.64)             | 258.59<br>(167.89 to<br>374.83)             | 6.94<br>(4.66 to<br>9.77)              | 4.90<br>(3.31 to<br>7.37)                | 4.81<br>(3.28 to<br>7.27)               | 5.41<br>(3.64 to<br>8.02)                |
| Forces of nature, conflict and terrorism, and executions and police conflict | 5.78<br>(4.48 to<br>7.48)                   | 61.60<br>(0.00 to<br>721.78)                | 61.53<br>(0.00 to<br>720.29)                | 64.43<br>(0.00 to<br>756.89)                | 0.11<br>(0.08 to<br>0.14)              | 1.45<br>(0.00 to<br>16.97)               | 1.47<br>(0.00 to<br>17.13)              | 1.46<br>(0.00 to<br>17.02)               |
| Exposure to forces of nature                                                 | 0.00<br>(0.00 to<br>0.00)                   | 61.29<br>(0.00 to<br>721.78)                | 61.22<br>(0.00 to<br>720.29)                | 64.11<br>(0.00 to<br>756.89)                | 0.00<br>(0.00 to<br>0.00)              | 1.45<br>(0.00 to<br>16.97)               | 1.46<br>(0.00 to<br>17.13)              | 1.46<br>(0.00 to<br>17.02)               |
| Conflict and terrorism                                                       | 0.00<br>(0.00 to<br>0.00)                   | 0.30<br>(0.00 to<br>6.72)                   | 0.30<br>(0.00 to<br>6.71)                   | 0.32<br>(0.00 to<br>6.99)                   | 0.00<br>(0.00 to<br>0.00)              | 0.01<br>(0.00 to<br>0.14)                | 0.01<br>(0.00 to<br>0.14)               | 0.01<br>(0.00 to<br>0.14)                |
| Executions and police conflict                                               | 5.78<br>(4.48 to<br>7.48)                   | 0.00<br>(0.00 to<br>0.00)                   | 0.00<br>(0.00 to<br>0.00)                   | 0.00<br>(0.00 to<br>0.00)                   | 0.11<br>(0.08 to<br>0.14)              | 0.00<br>(0.00 to<br>0.00)                | 0.00<br>(0.00 to<br>0.00)               | 0.00<br>(0.00 to<br>0.00)                |
| <b>India</b>                                                                 |                                             |                                             |                                             |                                             |                                        |                                          |                                         |                                          |
| Cause                                                                        | YLLs (in 1000s)                             |                                             |                                             |                                             | Deaths (in 1000s)                      |                                          |                                         |                                          |
|                                                                              | 2016                                        | 2040 Forecast                               | 2040 Better Scenario                        | 2040 Worse Scenario                         | 2016                                   | 2040 Forecast                            | 2040 Better Scenario                    | 2040 Worse Scenario                      |
| All causes                                                                   | 313,324.46<br>(305,296.03 to<br>321,319.67) | 284,199.52<br>(219,084.92 to<br>359,156.63) | 246,989.06<br>(190,686.83 to<br>311,171.87) | 408,825.75<br>(311,748.43 to<br>524,393.90) | 9,795.34<br>(9,551.84 to<br>10,042.51) | 13,223.30<br>(10,450.73 to<br>16,012.86) | 11,919.23<br>(9,394.22 to<br>14,525.36) | 17,184.19<br>(13,692.34 to<br>20,629.20) |
| Communicable, maternal, neonatal, and nutritional diseases                   | 119,854.74<br>(112,857.66 to<br>129,424.11) | 51,488.10<br>(37,175.06 to<br>76,752.83)    | 45,302.66<br>(32,655.31 to<br>67,605.93)    | 92,957.90<br>(64,989.19 to<br>144,793.00)   | 2,692.89<br>(2,472.68 to<br>3,072.48)  | 2,018.28<br>(1,260.47 to<br>3,500.21)    | 1,835.01<br>(1,151.28 to<br>3,154.32)   | 3,309.68<br>(1,963.47 to<br>5,881.55)    |
| HIV/AIDS and tuberculosis                                                    | 18,514.21<br>(17,614.26 to<br>19,394.22)    | 9,345.23<br>(7,529.03 to<br>11,623.90)      | 7,731.83<br>(6,324.92 to<br>9,408.79)       | 16,340.37<br>(12,565.87 to<br>21,019.35)    | 527.72<br>(497.22 to<br>557.63)        | 314.52<br>(245.41 to<br>402.40)          | 264.79<br>(208.03 to<br>335.47)         | 518.08<br>(393.06 to<br>672.48)          |
| Tuberculosis                                                                 | 13,877.03<br>(12,979.11 to<br>14,782.09)    | 6,348.71<br>(4,612.19 to<br>8,536.82)       | 5,068.70<br>(3,708.89 to<br>6,727.79)       | 11,343.91<br>(8,009.33 to<br>15,698.80)     | 435.45<br>(404.18 to<br>464.48)        | 251.71<br>(184.83 to<br>337.11)          | 209.35<br>(154.46 to<br>277.49)         | 417.01<br>(299.71 to<br>567.38)          |
| HIV/AIDS                                                                     | 4,637.18<br>(4,400.74 to<br>4,893.99)       | 2,996.52<br>(2,551.48 to<br>3,414.22)       | 2,663.14<br>(2,065.16 to<br>3,144.12)       | 4,996.46<br>(3,697.14 to<br>6,745.59)       | 92.27<br>(87.75 to<br>97.43)           | 62.81<br>(51.80 to<br>71.86)             | 55.44<br>(43.45 to<br>65.35)            | 101.08<br>(74.27 to<br>134.90)           |
| Diarrhea, lower respiratory, and other common infectious diseases            | 54,637.30<br>(48,409.03 to<br>65,329.86)    | 25,325.47<br>(13,373.74 to<br>49,305.61)    | 21,974.02<br>(11,459.39 to<br>43,185.09)    | 49,223.37<br>(24,946.99 to<br>98,191.11)    | 1,522.05<br>(1,292.89 to<br>1,948.69)  | 1,335.30<br>(624.06 to<br>2,758.43)      | 1,209.18<br>(569.31 to<br>2,499.97)     | 2,296.94<br>(1,019.84 to<br>4,911.83)    |
| Diarrheal diseases                                                           | 19,776.43<br>(14,704.25 to<br>29,467.12)    | 9,939.37<br>(1,736.08 to<br>31,154.30)      | 8,563.00<br>(1,554.75 to<br>26,183.20)      | 23,399.20<br>(4,353.29 to<br>71,548.12)     | 777.99<br>(533.27 to<br>1,227.90)      | 657.70<br>(110.54 to<br>1,977.91)        | 588.00<br>(106.00 to<br>1,767.61)       | 1,373.74<br>(240.64 to<br>3,928.91)      |
| Intestinal infectious diseases                                               | 5,420.09<br>(3,080.94 to<br>8,712.39)       | 2,312.06<br>(1,266.53 to<br>3,829.10)       | 2,263.49<br>(1,244.27 to<br>3,734.30)       | 3,109.04<br>(1,651.33 to<br>5,131.89)       | 82.16<br>(46.36 to<br>132.03)          | 42.33<br>(22.85 to<br>70.42)             | 42.00<br>(22.95 to<br>70.45)            | 53.24<br>(28.36 to<br>88.58)             |
| Typhoid fever                                                                | 4,457.40<br>(2,506.22 to<br>7,058.51)       | 1,768.57<br>(944.14 to<br>2,922.70)         | 1,729.79<br>(928.42 to<br>2,834.88)         | 2,392.14<br>(1,232.92 to<br>3,956.72)       | 66.44<br>(37.25 to<br>106.46)          | 31.49<br>(16.97 to<br>51.74)             | 31.23<br>(16.95 to<br>51.65)            | 39.78<br>(20.93 to<br>65.58)             |

|                                         |                                          |                                        |                                        |                                          |                                 |                                 |                                 |                                   |
|-----------------------------------------|------------------------------------------|----------------------------------------|----------------------------------------|------------------------------------------|---------------------------------|---------------------------------|---------------------------------|-----------------------------------|
| Paratyphoid fever                       | 948.50<br>(449.65 to<br>1,821.11)        | 540.04<br>(242.18 to<br>1,018.12)      | 530.38<br>(236.11 to<br>991.81)        | 711.35<br>(322.94 to<br>1,360.86)        | 15.46<br>(7.27 to<br>29.43)     | 10.72<br>(4.75 to<br>20.33)     | 10.65<br>(4.76 to<br>20.06)     | 13.30<br>(4.76 to<br>26.11)       |
| Other intestinal infectious diseases    | 14.18<br>(4.32 to<br>36.51)              | 3.44<br>(0.98 to<br>9.00)              | 3.32<br>(0.96 to<br>8.81)              | 5.55<br>(1.62 to<br>15.53)               | 0.26<br>(0.09 to<br>0.62)       | 0.12<br>(0.04 to<br>0.33)       | 0.12<br>(0.04 to<br>0.33)       | 0.16<br>(0.05 to<br>0.41)         |
| Lower respiratory infections            | 20,118.43<br>(18,070.99 to<br>21,864.15) | 9,186.38<br>(6,069.99 to<br>12,912.86) | 7,391.80<br>(4,946.37 to<br>10,276.26) | 17,336.56<br>(10,687.90 to<br>24,885.32) | 495.51<br>(410.36 to<br>540.79) | 499.62<br>(334.45 to<br>677.12) | 440.06<br>(293.27 to<br>588.93) | 719.74<br>(477.65 to<br>1,019.68) |
| Upper respiratory infections            | 21.86<br>(17.88 to<br>27.21)             | 7.76<br>(5.03 to<br>10.97)             | 7.49<br>(4.66 to<br>11.06)             | 12.89<br>(8.43 to<br>18.95)              | 0.46<br>(0.39 to<br>0.54)       | 0.26<br>(0.17 to<br>0.37)       | 0.26<br>(0.17 to<br>0.38)       | 0.39<br>(0.26 to<br>0.57)         |
| Otitis media                            | 11.35<br>(6.78 to<br>19.80)              | 3.12<br>(1.65 to<br>6.34)              | 3.22<br>(1.70 to<br>6.51)              | 2.97<br>(1.62 to<br>5.88)                | 0.26<br>(0.16 to<br>0.44)       | 0.11<br>(0.06 to<br>0.22)       | 0.12<br>(0.07 to<br>0.23)       | 0.10<br>(0.06 to<br>0.19)         |
| Meningitis                              | 3,440.02<br>(2,730.71 to<br>4,986.70)    | 1,477.82<br>(973.22 to<br>2,549.32)    | 1,473.17<br>(949.58 to<br>2,536.54)    | 2,019.04<br>(1,333.39 to<br>3,349.66)    | 63.00<br>(49.50 to<br>96.60)    | 44.51<br>(28.08 to<br>84.41)    | 46.00<br>(28.82 to<br>86.92)    | 49.27<br>(33.36 to<br>87.71)      |
| Pneumococcal meningitis                 | 219.99<br>(167.34 to<br>334.45)          | 106.76<br>(66.61 to<br>197.81)         | 108.01<br>(67.18 to<br>202.61)         | 131.87<br>(86.02 to<br>233.88)           | 4.81<br>(3.61 to<br>7.74)       | 3.68<br>(2.18 to<br>7.12)       | 3.81<br>(2.26 to<br>7.35)       | 4.03<br>(2.55 to<br>7.55)         |
| H influenzae type B meningitis          | 301.00<br>(234.80 to<br>431.70)          | 142.80<br>(77.84 to<br>266.90)         | 129.00<br>(73.64 to<br>232.12)         | 466.42<br>(161.00 to<br>1,060.18)        | 5.04<br>(3.92 to<br>7.53)       | 3.48<br>(2.11 to<br>6.22)       | 3.44<br>(2.11 to<br>6.12)       | 6.99<br>(3.10 to<br>14.53)        |
| Meningococcal meningitis                | 1,814.27<br>(1,439.66 to<br>2,624.39)    | 718.53<br>(470.95 to<br>1,245.48)      | 722.18<br>(473.54 to<br>1,253.10)      | 838.77<br>(570.29 to<br>1,416.79)        | 21.72<br>(25.69 to<br>50.22)    | 32.83<br>(13.63 to<br>40.73)    | 31.77<br>(14.05 to<br>42.52)    | 22.42<br>(15.06 to<br>40.23)      |
| Other meningitis                        | 1,104.76<br>(860.86 to<br>1,622.02)      | 509.74<br>(330.62 to<br>908.95)        | 513.98<br>(330.45 to<br>922.16)        | 581.98<br>(400.01 to<br>1,015.02)        | 20.32<br>(15.82 to<br>31.79)    | 15.64<br>(9.76 to<br>29.51)     | 16.25<br>(10.08 to<br>30.79)    | 15.83<br>(10.75 to<br>28.86)      |
| Encephalitis                            | 2,715.98<br>(1,790.68 to<br>4,312.89)    | 2,091.84<br>(1,286.38 to<br>3,406.00)  | 2,100.61<br>(1,269.10 to<br>3,389.12)  | 2,522.33<br>(1,592.89 to<br>4,107.19)    | 62.24<br>(44.56 to<br>95.34)    | 84.89<br>(53.94 to<br>133.77)   | 88.35<br>(54.72 to<br>139.15)   | 88.47<br>(59.03 to<br>139.54)     |
| Diphtheria                              | 4.64<br>(3.75 to<br>5.77)                | 0.72<br>(0.48 to<br>1.07)              | 0.67<br>(0.45 to<br>0.94)              | 1.99<br>(0.91 to<br>3.91)                | 0.07<br>(0.06 to<br>0.08)       | 0.01<br>(0.01 to<br>0.02)       | 0.01<br>(0.01 to<br>0.02)       | 0.03<br>(0.02 to<br>0.05)         |
| Whooping cough                          | 827.41<br>(75.73 to<br>2,620.94)         | 153.67<br>(13.18 to<br>544.56)         | 77.54<br>(6.10 to<br>284.83)           | 454.81<br>(39.34 to<br>1,557.72)         | 9.82<br>(0.90 to<br>31.14)      | 1.86<br>(0.16 to<br>6.57)       | 0.96<br>(0.08 to<br>3.49)       | 3.40<br>(0.47 to<br>18.43)        |
| Tetanus                                 | 465.44<br>(182.68 to<br>704.48)          | 33.92<br>(14.90 to<br>58.39)           | 26.97<br>(11.98 to<br>42.98)           | 79.59<br>(27.65 to<br>153.96)            | 6.91<br>(3.08 to<br>9.92)       | 0.76<br>(0.37 to<br>1.19)       | 0.71<br>(0.34 to<br>1.09)       | 1.23<br>(0.54 to<br>2.19)         |
| Measles                                 | 1,674.18<br>(611.42 to<br>3,684.06)      | 76.37<br>(6.42 to<br>347.00)           | 24.50<br>(4.05 to<br>92.10)            | 217.15<br>(17.64 to<br>810.47)           | 20.06<br>(7.33 to<br>44.17)     | 0.93<br>(0.09 to<br>4.17)       | 0.32<br>(0.06 to<br>1.13)       | 2.60<br>(0.23 to<br>9.70)         |
| <b>India</b>                            |                                          |                                        |                                        |                                          |                                 |                                 |                                 |                                   |
| Cause                                   | YLLs (in 1000s)                          |                                        |                                        |                                          | Deaths (in 1000s)               |                                 |                                 |                                   |
|                                         | 2016                                     | 2040 Forecast                          | 2040 Better Scenario                   | 2040 Worse Scenario                      | 2016                            | 2040 Forecast                   | 2040 Better Scenario            | 2040 Worse Scenario               |
| Varicella and herpes zoster             | 161.47<br>(135.70 to<br>191.45)          | 42.44<br>(30.51 to<br>53.95)           | 41.55<br>(29.33 to<br>53.74)           | 67.81<br>(48.48 to<br>89.08)             | 3.58<br>(3.19 to<br>4.02)       | 2.29<br>(1.63 to<br>3.02)       | 2.40<br>(1.70 to<br>3.16)       | 2.72<br>(1.92 to<br>3.61)         |
| Neglected tropical diseases and malaria | 4,882.17<br>(2,471.58 to<br>6,495.35)    | 5,350.07<br>(2,487.53 to<br>7,090.18)  | 5,375.22<br>(2,531.15 to<br>7,102.97)  | 5,990.43<br>(2,688.45 to<br>7,993.72)    | 83.18<br>(41.96 to<br>106.53)   | 158.79<br>(75.35 to<br>203.26)  | 163.34<br>(78.33 to<br>209.47)  | 161.41<br>(74.94 to<br>207.50)    |
| Malaria                                 | 3,146.85<br>(1,406.58 to<br>4,518.43)    | 842.72<br>(470.12 to<br>1,427.61)      | 836.27<br>(465.87 to<br>1,445.06)      | 1,037.29<br>(528.00 to<br>1,615.24)      | 48.00<br>(22.39 to<br>65.38)    | 22.49<br>(13.13 to<br>41.66)    | 22.95<br>(13.48 to<br>43.68)    | 24.07<br>(13.34 to<br>40.40)      |
| Chagas disease                          | 0.00<br>(0.00 to<br>0.00)                | 0.00<br>(0.00 to<br>0.00)              | 0.00<br>(0.00 to<br>0.00)              | 0.00<br>(0.00 to<br>0.00)                | 0.00<br>(0.00 to<br>0.00)       | 0.00<br>(0.00 to<br>0.00)       | 0.00<br>(0.00 to<br>0.00)       | 0.00<br>(0.00 to<br>0.00)         |
| Leishmaniasis                           | 359.65<br>(198.15 to<br>606.03)          | 104.57<br>(52.13 to<br>224.63)         | 97.89<br>(48.96 to<br>212.00)          | 195.63<br>(100.66 to<br>371.20)          | 6.00<br>(3.30 to<br>10.16)      | 2.17<br>(1.08 to<br>4.82)       | 2.06<br>(1.04 to<br>4.63)       | 3.70<br>(1.93 to<br>7.51)         |

|                                                       |                                                  |                                              |                                              |                                                  |                                         |                                         |                                        |                                         |                                         |
|-------------------------------------------------------|--------------------------------------------------|----------------------------------------------|----------------------------------------------|--------------------------------------------------|-----------------------------------------|-----------------------------------------|----------------------------------------|-----------------------------------------|-----------------------------------------|
| African trypanosomiasis                               | 0.00<br>(0.00 to 0.00)                           | 0.00<br>(0.00 to 0.00)                       | 0.00<br>(0.00 to 0.00)                       | 0.00<br>(0.00 to 0.00)                           | 0.00<br>(0.00 to 0.00)                  | 0.00<br>(0.00 to 0.00)                  | 0.00<br>(0.00 to 0.00)                 | 0.00<br>(0.00 to 0.00)                  | 0.00<br>(0.00 to 0.00)                  |
| Schistosomiasis                                       | 0.00<br>(0.00 to 0.00)                           | 0.00<br>(0.00 to 0.00)                       | 0.00<br>(0.00 to 0.00)                       | 0.00<br>(0.00 to 0.00)                           | 0.00<br>(0.00 to 0.00)                  | 0.00<br>(0.00 to 0.00)                  | 0.00<br>(0.00 to 0.00)                 | 0.00<br>(0.00 to 0.00)                  | 0.00<br>(0.00 to 0.00)                  |
| Cysticercosis                                         | 3.81<br>(3.21 to 4.47)                           | 1.67<br>(1.10 to 3.66)                       | 1.68<br>(1.10 to 3.77)                       | 1.80<br>(1.24 to 3.57)                           | 0.09<br>(0.08 to 0.11)                  | 0.05<br>(0.03 to 0.11)                  | 0.05<br>(0.03 to 0.11)                 | 0.05<br>(0.03 to 0.11)                  | 0.05<br>(0.04 to 0.10)                  |
| Cystic echinococcosis                                 | 7.33<br>(5.94 to 8.89)                           | 2.89<br>(1.78 to 6.25)                       | 2.74<br>(1.68 to 6.23)                       | 5.28<br>(3.34 to 10.50)                          | 0.20<br>(0.16 to 0.24)                  | 0.11<br>(0.07 to 0.23)                  | 0.10<br>(0.07 to 0.23)                 | 0.18<br>(0.12 to 0.37)                  | 0.18<br>(0.12 to 0.37)                  |
| Dengue                                                | 1,042.85<br>(160.18 to 1,525.05)                 | 4,276.93<br>(1,185.88 to 5,870.89)           | 4,321.41<br>(1,244.97 to 5,874.59)           | 4,531.24<br>(1,136.25 to 6,327.22)               | 22.53<br>(3.36 to 32.84)                | 130.51<br>(36.74 to 175.58)             | 134.79<br>(38.50 to 182.44)            | 127.82<br>(32.75 to 174.00)             | 127.82<br>(32.75 to 174.00)             |
| Yellow fever                                          | 0.00<br>(0.00 to 0.00)                           | 0.00<br>(0.00 to 0.00)                       | 0.00<br>(0.00 to 0.00)                       | 0.00<br>(0.00 to 0.00)                           | 0.00<br>(0.00 to 0.00)                  | 0.00<br>(0.00 to 0.00)                  | 0.00<br>(0.00 to 0.00)                 | 0.00<br>(0.00 to 0.00)                  | 0.00<br>(0.00 to 0.00)                  |
| Rabies                                                | 213.00<br>(112.10 to 278.06)                     | 57.34<br>(34.15 to 147.20)                   | 52.54<br>(30.70 to 139.05)                   | 129.45<br>(76.06 to 272.92)                      | 4.38<br>(2.28 to 5.50)                  | 1.52<br>(0.90 to 3.86)                  | 1.42<br>(0.85 to 3.72)                 | 3.19<br>(1.94 to 7.00)                  | 3.19<br>(1.94 to 7.00)                  |
| Intestinal nematode infections                        | 25.64<br>(20.84 to 31.82)                        | 15.79<br>(10.12 to 27.65)                    | 15.60<br>(10.05 to 27.81)                    | 20.08<br>(12.77 to 32.35)                        | 0.37<br>(0.31 to 0.45)                  | 0.36<br>(0.24 to 0.68)                  | 0.37<br>(0.25 to 0.72)                 | 0.39<br>(0.27 to 0.67)                  | 0.39<br>(0.27 to 0.67)                  |
| Other neglected tropical diseases                     | 83.04<br>(60.95 to 150.73)                       | 48.16<br>(27.67 to 131.50)                   | 47.09<br>(26.94 to 129.30)                   | 69.65<br>(41.63 to 175.88)                       | 1.62<br>(1.23 to 2.97)                  | 1.59<br>(0.89 to 4.52)                  | 1.60<br>(0.88 to 4.63)                 | 2.01<br>(1.19 to 5.46)                  | 2.01<br>(1.19 to 5.46)                  |
| <b>Maternal disorders</b>                             | <b>2,620.72</b><br><b>(2,316.94 to 2,979.98)</b> | <b>836.60</b><br><b>(593.06 to 1,190.54)</b> | <b>776.75</b><br><b>(523.03 to 1,117.86)</b> | <b>1,523.52</b><br><b>(1,037.25 to 2,188.00)</b> | <b>45.16</b><br><b>(39.92 to 51.32)</b> | <b>14.98</b><br><b>(10.58 to 21.33)</b> | <b>13.91</b><br><b>(9.41 to 20.03)</b> | <b>27.14</b><br><b>(18.53 to 39.18)</b> | <b>27.14</b><br><b>(18.53 to 39.18)</b> |
| Maternal hemorrhage                                   | 1,024.74<br>(805.37 to 1,292.04)                 | 306.98<br>(187.38 to 478.52)                 | 287.52<br>(172.85 to 448.47)                 | 535.89<br>(314.48 to 856.93)                     | 17.59<br>(13.82 to 22.02)               | 5.46<br>(3.37 to 8.49)                  | 5.11<br>(3.11 to 7.91)                 | 9.50<br>(5.66 to 15.08)                 | 9.50<br>(5.66 to 15.08)                 |
| Maternal sepsis and other maternal infections         | 361.13<br>(269.36 to 471.95)                     | 93.37<br>(54.55 to 141.84)                   | 87.37<br>(49.93 to 135.62)                   | 166.53<br>(96.76 to 263.66)                      | 6.18<br>(4.64 to 8.07)                  | 1.67<br>(0.99 to 2.55)                  | 1.56<br>(0.90 to 2.39)                 | 2.96<br>(1.73 to 4.65)                  | 2.96<br>(1.73 to 4.65)                  |
| Maternal hypertensive disorders                       | 151.02<br>(105.10 to 221.02)                     | 45.46<br>(23.97 to 74.00)                    | 42.55<br>(22.69 to 70.31)                    | 80.39<br>(42.83 to 133.88)                       | 2.54<br>(1.79 to 3.71)                  | 0.79<br>(0.43 to 1.28)                  | 0.74<br>(0.40 to 1.21)                 | 1.39<br>(0.75 to 2.30)                  | 1.39<br>(0.75 to 2.30)                  |
| Maternal obstructed labor and uterine rupture         | 49.67<br>(33.90 to 72.75)                        | 15.52<br>(8.09 to 27.07)                     | 14.48<br>(7.39 to 25.98)                     | 28.39<br>(14.68 to 51.02)                        | 0.88<br>(0.61 to 1.27)                  | 0.29<br>(0.15 to 0.51)                  | 0.27<br>(0.14 to 0.48)                 | 0.53<br>(0.27 to 0.95)                  | 0.53<br>(0.27 to 0.95)                  |
| Maternal abortion, miscarriage, and ectopic pregnancy | 231.86<br>(173.04 to 307.33)                     | 90.47<br>(47.21 to 157.66)                   | 82.04<br>(41.52 to 143.52)                   | 157.35<br>(81.27 to 272.53)                      | 4.22<br>(3.17 to 5.52)                  | 1.74<br>(0.91 to 3.06)                  | 1.58<br>(0.78 to 2.76)                 | 3.01<br>(1.55 to 5.29)                  | 3.01<br>(1.55 to 5.29)                  |
| Indirect maternal deaths                              | 182.19<br>(128.97 to 250.85)                     | 58.51<br>(31.61 to 93.71)                    | 54.91<br>(29.81 to 89.81)                    | 104.37<br>(56.60 to 173.32)                      | 3.09<br>(2.18 to 4.26)                  | 1.03<br>(0.56 to 1.65)                  | 0.96<br>(0.53 to 1.58)                 | 1.82<br>(1.01 to 3.02)                  | 1.82<br>(1.01 to 3.02)                  |
| Late maternal deaths                                  | 29.38<br>(18.01 to 45.96)                        | 7.35<br>(3.92 to 12.62)                      | 6.87<br>(3.70 to 11.77)                      | 13.16<br>(6.80 to 22.43)                         | 0.50<br>(0.31 to 0.78)                  | 0.13<br>(0.07 to 0.22)                  | 0.12<br>(0.07 to 0.21)                 | 0.23<br>(0.12 to 0.39)                  | 0.23<br>(0.12 to 0.39)                  |
| Maternal deaths aggravated by HIV/AIDS                | 1.70<br>(0.90 to 2.59)                           | 32.80<br>(0.01 to 229.42)                    | 25.82<br>(0.00 to 184.97)                    | 116.10<br>(0.41 to 508.16)                       | 0.03<br>(0.02 to 0.05)                  | 0.54<br>(0.00 to 3.57)                  | 0.42<br>(0.00 to 2.98)                 | 1.96<br>(0.01 to 8.62)                  | 1.96<br>(0.01 to 8.62)                  |
| Other maternal disorders                              | 589.03<br>(436.20 to 771.35)                     | 186.13<br>(111.12 to 284.90)                 | 175.18<br>(105.02 to 266.71)                 | 321.33<br>(189.99 to 493.35)                     | 10.12<br>(7.59 to 13.11)                | 3.34<br>(2.05 to 5.11)                  | 3.15<br>(1.89 to 4.82)                 | 5.73<br>(3.46 to 8.90)                  | 5.73<br>(3.46 to 8.90)                  |
| <b>India</b>                                          |                                                  |                                              |                                              |                                                  |                                         |                                         |                                        |                                         |                                         |
| Cause                                                 | YLLs (in 1000s)                                  |                                              |                                              |                                                  | Deaths (in 1000s)                       |                                         |                                        |                                         |                                         |
|                                                       | 2016                                             | 2040 Forecast                                | 2040 Better Scenario                         | 2040 Worse Scenario                              | 2016                                    | 2040 Forecast                           | 2040 Better Scenario                   | 2040 Worse Scenario                     |                                         |
| Neonatal disorders                                    | 32,576.59<br>(30,494.21 to 34,916.33)            | 7,804.11<br>(5,918.62 to 10,143.17)          | 6,646.79<br>(4,985.69 to 8,706.74)           | 16,198.80<br>(12,110.19 to 20,900.02)            | 376.28<br>(352.22 to 403.31)            | 90.15<br>(68.37 to 117.17)              | 76.78<br>(57.60 to 100.57)             | 187.12<br>(139.90 to 241.41)            |                                         |

|                                                                         |                                              |                                              |                                              |                                              |                                     |                                     |                                     |                                     |
|-------------------------------------------------------------------------|----------------------------------------------|----------------------------------------------|----------------------------------------------|----------------------------------------------|-------------------------------------|-------------------------------------|-------------------------------------|-------------------------------------|
| Neonatal preterm birth                                                  | 12,497.52<br>(11,104.66 to<br>14,044.12)     | 3,189.09<br>(2,556.65 to<br>3,957.42)        | 2,255.07<br>(1,846.77 to<br>2,933.11)        | 6,345.48<br>(4,995.94 to<br>7,866.36)        | 144.35<br>(128.26 to<br>162.22)     | 36.84<br>(29.53 to<br>45.71)        | 27.20<br>(21.33 to<br>33.88)        | 73.20<br>(57.71 to<br>90.86)        |
| Neonatal encephalopathy due to birth asphyxia and trauma                | 6,781.94<br>(5,884.61 to<br>8,466.75)        | 1,590.44<br>(1,029.18 to<br>2,404.47)        | 1,490.61<br>(972.42 to<br>2,232.74)          | 3,191.95<br>(2,033.79 to<br>4,779.58)        | 78.34<br>(67.97 to<br>97.80)        | 18.37<br>(11.89 to<br>27.77)        | 17.22<br>(11.23 to<br>25.79)        | 36.87<br>(23.50 to<br>55.21)        |
| Neonatal sepsis and other neonatal infections                           | 2,391.27<br>(1,808.18 to<br>3,485.74)        | 746.24<br>(486.84 to<br>1,144.97)            | 696.71<br>(452.55 to<br>1,060.43)            | 1,536.79<br>(1,001.40 to<br>2,349.40)        | 27.62<br>(20.89 to<br>40.27)        | 8.62<br>(5.62 to<br>13.23)          | 8.05<br>(5.23 to<br>12.25)          | 17.75<br>(11.57 to<br>27.14)        |
| Hemolytic disease and other neonatal jaundice                           | 1,371.81<br>(1,142.30 to<br>1,599.78)        | 180.37<br>(122.58 to<br>258.68)              | 166.95<br>(113.08 to<br>236.61)              | 403.56<br>(269.82 to<br>576.20)              | 15.85<br>(13.20 to<br>18.48)        | 2.08<br>(1.42 to<br>2.99)           | 1.93<br>(1.31 to<br>2.73)           | 4.66<br>(3.12 to<br>6.66)           |
| Other neonatal disorders                                                | 9,534.05<br>(8,087.96 to<br>10,905.79)       | 2,097.97<br>(1,427.37 to<br>2,941.11)        | 1,937.44<br>(1,294.23 to<br>2,716.91)        | 4,721.03<br>(3,120.72 to<br>6,608.30)        | 110.12<br>(93.42 to<br>125.96)      | 24.23<br>(16.49 to<br>33.97)        | 22.38<br>(14.95 to<br>31.38)        | 54.53<br>(36.05 to<br>76.35)        |
| <b>Nutritional deficiencies</b>                                         | <b>2,559.23</b><br>(2,275.08 to<br>2,903.08) | <b>684.70</b><br>(551.11 to<br>817.78)       | <b>672.81</b><br>(538.43 to<br>812.73)       | <b>976.73</b><br>(762.12 to<br>1,214.18)     | <b>47.95</b><br>(43.25 to<br>53.01) | <b>29.31</b><br>(24.86 to<br>34.59) | <b>30.11</b><br>(24.84 to<br>35.87) | <b>33.69</b><br>(28.25 to<br>39.46) |
| Protein-energy malnutrition                                             | 1,759.54<br>(1,518.31 to<br>2,058.66)        | 205.20<br>(138.81 to<br>271.89)              | 193.70<br>(132.53 to<br>258.04)              | 373.09<br>(236.39 to<br>528.79)              | 24.89<br>(21.71 to<br>28.84)        | 6.45<br>(4.98 to<br>8.12)           | 6.45<br>(4.93 to<br>8.12)           | 8.75<br>(6.53 to<br>11.16)          |
| Iodine deficiency                                                       | 19.31<br>(9.43 to<br>43.18)                  | 15.78<br>(1.16 to<br>59.27)                  | 15.42<br>(1.07 to<br>56.37)                  | 24.99<br>(1.90 to<br>116.20)                 | 0.41<br>(0.23 to<br>0.72)           | 0.87<br>(0.06 to<br>3.00)           | 0.89<br>(0.05 to<br>3.10)           | 1.09<br>(0.08 to<br>3.72)           |
| Dietary iron deficiency                                                 | 14.61<br>(11.74 to<br>29.00)                 | 12.46<br>(8.08 to<br>37.86)                  | 12.73<br>(8.16 to<br>38.25)                  | 13.91<br>(9.49 to<br>39.24)                  | 0.45<br>(0.32 to<br>1.23)           | 0.39<br>(0.40 to<br>2.15)           | 0.73<br>(0.43 to<br>2.30)           | 0.67<br>(0.40 to<br>2.02)           |
| Other nutritional deficiencies                                          | 765.77<br>(663.05 to<br>874.93)              | 451.26<br>(365.65 to<br>550.85)              | 450.95<br>(358.81 to<br>556.43)              | 564.74<br>(452.93 to<br>685.41)              | 22.21<br>(19.16 to<br>24.74)        | 21.29<br>(17.11 to<br>26.26)        | 22.03<br>(17.45 to<br>27.41)        | 23.18<br>(18.47 to<br>28.25)        |
| <b>Other communicable, maternal, neonatal, and nutritional diseases</b> | <b>4,064.52</b><br>(3,706.23 to<br>4,423.49) | <b>2,141.93</b><br>(1,790.94 to<br>2,529.31) | <b>2,125.24</b><br>(1,741.47 to<br>2,542.82) | <b>2,704.68</b><br>(2,269.15 to<br>3,170.83) | <b>90.54</b><br>(83.82 to<br>96.64) | <b>75.24</b><br>(62.91 to<br>89.26) | <b>76.90</b><br>(62.52 to<br>93.17) | <b>85.30</b><br>(72.38 to<br>98.71) |
| Sexually transmitted infections excluding HIV                           | 336.49<br>(216.26 to<br>537.18)              | 318.71<br>(72.11 to<br>150.87)               | 106.08<br>(69.86 to<br>147.01)               | 1,483.93<br>(96.45 to<br>2,181.01)           | 5.47<br>(3.84 to<br>7.87)           | 2.75<br>(1.78 to<br>3.66)           | 2.73<br>(1.75 to<br>3.67)           | 3.36<br>(2.18 to<br>4.53)           |
| Syphilis                                                                | 252.49<br>(134.45 to<br>457.41)              | 46.34<br>(25.98 to<br>78.25)                 | 44.48<br>(25.25 to<br>76.10)                 | 76.18<br>(40.52 to<br>138.18)                | 3.31<br>(1.92 to<br>5.67)           | 0.88<br>(0.59 to<br>1.29)           | 0.86<br>(0.57 to<br>1.26)           | 1.27<br>(0.81 to<br>2.01)           |
| Chlamydial infection                                                    | 16.32<br>(9.68 to<br>19.87)                  | 11.92<br>(7.02 to<br>16.86)                  | 11.77<br>(6.89 to<br>16.72)                  | 13.92<br>(7.86 to<br>19.58)                  | 0.41<br>(0.24 to<br>0.50)           | 0.36<br>(0.21 to<br>0.49)           | 0.36<br>(0.21 to<br>0.49)           | 0.40<br>(0.23 to<br>0.54)           |
| Gonococcal infection                                                    | 44.50<br>(26.01 to<br>54.24)                 | 33.65<br>(19.74 to<br>47.85)                 | 33.28<br>(19.88 to<br>47.67)                 | 39.05<br>(22.61 to<br>55.40)                 | 1.17<br>(0.68 to<br>1.43)           | 1.05<br>(0.63 to<br>1.45)           | 1.05<br>(0.63 to<br>1.46)           | 1.16<br>(0.68 to<br>1.60)           |
| Other sexually transmitted infections                                   | 23.17<br>(13.69 to<br>28.38)                 | 16.79<br>(9.54 to<br>23.88)                  | 16.55<br>(9.47 to<br>23.45)                  | 19.77<br>(10.72 to<br>28.42)                 | 0.57<br>(0.33 to<br>0.69)           | 0.47<br>(0.27 to<br>0.66)           | 0.47<br>(0.27 to<br>0.66)           | 0.54<br>(0.30 to<br>0.75)           |
| Acute hepatitis                                                         | 2,982.36<br>(2,772.88 to<br>3,177.30)        | 1,588.34<br>(1,304.60 to<br>1,897.94)        | 1,579.39<br>(1,272.92 to<br>1,925.78)        | 1,954.12<br>(1,620.73 to<br>2,294.79)        | 70.06<br>(65.14 to<br>74.39)        | 54.78<br>(45.30 to<br>65.42)        | 55.94<br>(45.36 to<br>68.51)        | 61.81<br>(52.14 to<br>72.05)        |
| Acute hepatitis A                                                       | 227.30<br>(169.96 to<br>291.56)              | 36.14<br>(21.66 to<br>54.58)                 | 34.84<br>(20.66 to<br>53.05)                 | 57.47<br>(32.00 to<br>90.04)                 | 3.01<br>(2.33 to<br>3.74)           | 0.87<br>(0.57 to<br>1.26)           | 0.87<br>(0.56 to<br>1.28)           | 1.14<br>(0.73 to<br>1.66)           |
| Acute hepatitis B                                                       | 1,819.00<br>(1,655.39 to<br>1,982.11)        | 1,140.24<br>(904.39 to<br>1,404.95)          | 1,134.23<br>(884.83 to<br>1,417.01)          | 1,390.53<br>(1,110.55 to<br>1,692.41)        | 49.58<br>(45.35 to<br>53.72)        | 40.42<br>(31.77 to<br>50.12)        | 41.06<br>(31.90 to<br>51.81)        | 46.46<br>(37.63 to<br>56.08)        |
| Acute hepatitis C                                                       | 26.38<br>(20.12 to<br>34.22)                 | 30.14<br>(21.72 to<br>41.76)                 | 30.81<br>(22.05 to<br>42.86)                 | 31.51<br>(22.85 to<br>42.99)                 | 0.93<br>(0.69 to<br>1.26)           | 1.37<br>(0.96 to<br>1.90)           | 1.44<br>(1.01 to<br>1.98)           | 1.33<br>(0.96 to<br>1.85)           |
| Acute hepatitis E                                                       | 909.68<br>(782.35 to<br>1,045.96)            | 381.82<br>(285.28 to<br>483.47)              | 379.52<br>(280.96 to<br>485.08)              | 474.61<br>(357.94 to<br>602.95)              | 16.54<br>(13.95 to<br>19.32)        | 12.12<br>(8.77 to<br>15.80)         | 12.58<br>(8.95 to<br>16.62)         | 12.87<br>(9.52 to<br>16.76)         |
| Other unspecified infectious diseases                                   | 745.68<br>(484.48 to<br>986.57)              | 444.88<br>(344.86 to<br>570.62)              | 439.76<br>(340.12 to<br>570.61)              | 601.63<br>(453.62 to<br>758.75)              | 15.02<br>(11.08 to<br>18.46)        | 17.70<br>(13.73 to<br>22.70)        | 18.22<br>(13.89 to<br>24.00)        | 20.12<br>(15.80 to<br>25.31)        |

|                                      | 148,839.40<br>(140,985.02 to<br>155,158.39)     | 191,447.03<br>(139,333.19 to<br>245,595.32)     | 162,539.93<br>(120,406.52 to<br>205,087.67)     | 265,523.97<br>(190,149.12 to<br>348,185.87)     | 6,053.65<br>(5,672.09 to<br>6,335.24)  | 9,834.57<br>(7,695.37 to<br>12,007.31)       | 8,727.36<br>(6,779.42 to<br>10,603.30)       | 12,374.63<br>(9,514.41 to<br>15,382.26)      |
|--------------------------------------|-------------------------------------------------|-------------------------------------------------|-------------------------------------------------|-------------------------------------------------|----------------------------------------|----------------------------------------------|----------------------------------------------|----------------------------------------------|
| India                                |                                                 |                                                 |                                                 |                                                 |                                        |                                              |                                              |                                              |
| Cause                                | YLLs (in 1000s)                                 |                                                 |                                                 |                                                 | Deaths (in 1000s)                      |                                              |                                              |                                              |
|                                      | 2016                                            | 2040 Forecast                                   | 2040 Better Scenario                            | 2040 Worse Scenario                             | 2016                                   | 2040 Forecast                                | 2040 Better Scenario                         | 2040 Worse Scenario                          |
| <b>Non-communicable diseases</b>     | <b>22,973.48</b><br>(21,811.98 to<br>24,000.06) | <b>41,564.06</b><br>(32,555.51 to<br>51,125.87) | <b>38,831.20</b><br>(30,098.17 to<br>47,995.26) | <b>42,140.64</b><br>(33,629.48 to<br>51,287.42) | <b>812.75</b><br>(767.06 to<br>850.01) | <b>1,759.19</b><br>(1,409.04 to<br>2,126.68) | <b>1,697.48</b><br>(1,342.51 to<br>2,059.77) | <b>1,677.71</b><br>(1,370.16 to<br>2,005.35) |
| <b>Neoplasms</b>                     | <b>22,973.48</b><br>(21,811.98 to<br>24,000.06) | <b>41,564.06</b><br>(32,555.51 to<br>51,125.87) | <b>38,831.20</b><br>(30,098.17 to<br>47,995.26) | <b>42,140.64</b><br>(33,629.48 to<br>51,287.42) | <b>812.75</b><br>(767.06 to<br>850.01) | <b>1,759.19</b><br>(1,409.04 to<br>2,126.68) | <b>1,697.48</b><br>(1,342.51 to<br>2,059.77) | <b>1,677.71</b><br>(1,370.16 to<br>2,005.35) |
| Lip and oral cavity cancer           | 1,642.85<br>(1,506.64 to<br>1,747.75)           | 3,425.58<br>(2,289.74 to<br>4,857.77)           | 2,591.54<br>(1,829.69 to<br>3,563.40)           | 3,983.06<br>(2,626.54 to<br>5,675.34)           | 59.21<br>(54.15 to<br>63.01)           | 136.73<br>(91.98 to<br>191.26)               | 110.02<br>(78.57 to<br>150.72)               | 149.59<br>(100.32 to<br>210.55)              |
| Nasopharynx cancer                   | 233.35<br>(214.59 to<br>251.11)                 | 496.16<br>(338.40 to<br>719.72)                 | 367.40<br>(252.16 to<br>507.83)                 | 603.78<br>(403.13 to<br>891.71)                 | 7.60<br>(7.00 to<br>8.18)              | 17.55<br>(11.95 to<br>24.79)                 | 13.50<br>(9.38 to<br>18.94)                  | 20.60<br>(13.90 to<br>29.81)                 |
| Other pharynx cancer                 | 1,565.76<br>(1,384.52 to<br>1,708.07)           | 2,899.10<br>(2,005.08 to<br>4,027.15)           | 2,436.57<br>(1,745.39 to<br>3,299.10)           | 2,872.24<br>(1,980.01 to<br>4,068.05)           | 57.49<br>(50.69 to<br>62.86)           | 121.88<br>(85.74 to<br>168.44)               | 105.74<br>(76.20 to<br>141.25)               | 114.91<br>(81.24 to<br>159.97)               |
| Esophageal cancer                    | 1,001.04<br>(946.67 to<br>1,049.64)             | 1,802.26<br>(1,096.39 to<br>2,892.19)           | 1,496.71<br>(946.87 to<br>2,351.91)             | 2,143.55<br>(1,242.20 to<br>3,585.93)           | 38.44<br>(36.19 to<br>40.33)           | 76.34<br>(48.25 to<br>118.48)                | 66.58<br>(43.08 to<br>103.31)                | 85.57<br>(50.61 to<br>139.13)                |
| Stomach cancer                       | 2,079.49<br>(1,938.28 to<br>2,219.97)           | 2,619.31<br>(1,947.77 to<br>3,443.19)           | 2,594.73<br>(1,917.49 to<br>3,380.57)           | 2,739.98<br>(2,084.17 to<br>3,536.28)           | 77.14<br>(71.36 to<br>82.43)           | 114.43<br>(86.93 to<br>147.19)               | 116.13<br>(88.11 to<br>148.23)               | 112.53<br>(88.63 to<br>141.26)               |
| Colon and rectum cancer              | 1,339.56<br>(1,218.19 to<br>1,434.93)           | 3,280.11<br>(2,132.13 to<br>4,787.07)           | 3,257.15<br>(2,110.61 to<br>4,715.26)           | 3,029.77<br>(1,995.98 to<br>4,399.74)           | 53.73<br>(48.73 to<br>57.90)           | 154.26<br>(104.18 to<br>222.56)              | 157.32<br>(106.25 to<br>224.65)              | 133.73<br>(90.30 to<br>190.55)               |
| Liver cancer                         | 798.37<br>(745.57 to<br>847.47)                 | 1,624.05<br>(1,233.82 to<br>2,177.16)           | 1,515.34<br>(1,165.82 to<br>1,964.77)           | 1,567.56<br>(1,191.08 to<br>2,088.44)           | 31.51<br>(29.36 to<br>33.46)           | 73.09<br>(56.42 to<br>96.43)                 | 70.39<br>(54.62 to<br>90.66)                 | 66.81<br>(51.79 to<br>86.95)                 |
| Liver cancer due to hepatitis B      | 346.15<br>(285.51 to<br>403.57)                 | 686.33<br>(488.83 to<br>942.84)                 | 645.33<br>(462.76 to<br>857.08)                 | 660.97<br>(476.54 to<br>906.58)                 | 12.80<br>(10.40 to<br>15.11)           | 28.97<br>(20.54 to<br>39.34)                 | 28.07<br>(19.95 to<br>36.92)                 | 26.50<br>(19.10 to<br>35.25)                 |
| Liver cancer due to hepatitis C      | 132.32<br>(111.66 to<br>154.16)                 | 284.24<br>(208.81 to<br>392.96)                 | 272.61<br>(200.37 to<br>362.84)                 | 267.08<br>(199.92 to<br>366.96)                 | 5.79<br>(4.95 to<br>6.72)              | 14.17<br>(10.45 to<br>19.16)                 | 14.02<br>(10.48 to<br>18.51)                 | 12.54<br>(9.45 to<br>16.79)                  |
| Liver cancer due to alcohol use      | 93.30<br>(75.75 to<br>113.62)                   | 184.15<br>(129.22 to<br>261.22)                 | 160.34<br>(112.33 to<br>220.20)                 | 180.15<br>(128.23 to<br>253.34)                 | 3.99<br>(3.28 to<br>4.84)              | 8.62<br>(6.07 to<br>12.07)                   | 7.76<br>(5.51 to<br>10.49)                   | 8.03<br>(5.77 to<br>11.21)                   |
| Liver cancer due to other causes     | 226.60<br>(197.14 to<br>256.97)                 | 469.32<br>(328.32 to<br>674.52)                 | 437.07<br>(310.23 to<br>605.68)                 | 459.36<br>(321.53 to<br>659.19)                 | 8.92<br>(7.73 to<br>10.22)             | 21.33<br>(14.87 to<br>30.56)                 | 20.54<br>(14.55 to<br>28.65)                 | 19.73<br>(13.80 to<br>28.12)                 |
| Gallbladder and biliary tract cancer | 724.50<br>(620.91 to<br>799.51)                 | 872.94<br>(659.87 to<br>1,086.97)               | 912.14<br>(678.58 to<br>1,150.96)               | 783.72<br>(606.25 to<br>948.37)                 | 26.09<br>(22.38 to<br>28.85)           | 36.00<br>(27.97 to<br>43.79)                 | 38.19<br>(29.08 to<br>47.47)                 | 30.88<br>(24.61 to<br>36.31)                 |
| Pancreatic cancer                    | 562.94<br>(533.68 to<br>590.91)                 | 1,503.46<br>(1,115.37 to<br>1,964.91)           | 1,543.06<br>(1,137.05 to<br>2,027.42)           | 1,329.91<br>(1,021.67 to<br>1,725.26)           | 24.11<br>(22.69 to<br>25.38)           | 73.13<br>(55.97 to<br>94.35)                 | 76.95<br>(58.43 to<br>100.13)                | 60.85<br>(47.91 to<br>78.98)                 |
| Larynx cancer                        | 692.30<br>(647.81 to<br>736.06)                 | 1,235.53<br>(783.78 to<br>1,889.20)             | 923.69<br>(619.58 to<br>1,327.06)               | 1,586.24<br>(953.81 to<br>2,549.17)             | 26.50<br>(24.67 to<br>28.17)           | 51.05<br>(32.89 to<br>76.25)                 | 40.60<br>(27.55 to<br>57.63)                 | 62.01<br>(37.89 to<br>97.01)                 |
| Tracheal, bronchus, and lung cancer  | 1,744.53<br>(1,612.89 to<br>1,885.24)           | 3,544.57<br>(2,456.91 to<br>4,869.23)           | 2,525.42<br>(1,786.90 to<br>3,421.47)           | 4,481.10<br>(3,004.55 to<br>6,416.29)           | 69.60<br>(64.14 to<br>75.13)           | 157.49<br>(109.32 to<br>214.99)              | 120.06<br>(84.18 to<br>159.55)               | 188.05<br>(128.93 to<br>265.72)              |
| Malignant skin melanoma              | 60.16<br>(54.62 to<br>74.44)                    | 129.65<br>(101.98 to<br>160.25)                 | 137.59<br>(105.33 to<br>171.85)                 | 106.15<br>(86.44 to<br>130.53)                  | 2.09<br>(1.84 to<br>2.49)              | 5.55<br>(4.44 to<br>6.55)                    | 6.03<br>(4.73 to<br>7.28)                    | 4.22<br>(3.54 to<br>4.96)                    |
| Non-melanoma skin cancer             | 49.86<br>(47.12 to<br>52.48)                    | 110.39<br>(92.16 to<br>127.31)                  | 116.74<br>(95.33 to<br>137.64)                  | 105.98<br>(92.60 to<br>119.26)                  | 2.36<br>(2.21 to<br>2.49)              | 6.32<br>(5.51 to<br>7.15)                    | 6.90<br>(5.88 to<br>7.87)                    | 5.55<br>(4.97 to<br>6.18)                    |
| Breast cancer                        | 1,867.05<br>(1,618.21 to<br>2,121.23)           | 3,639.68<br>(2,530.99 to<br>4,992.57)           | 3,633.88<br>(2,503.24 to<br>5,004.33)           | 3,421.37<br>(2,409.41 to<br>4,689.48)           | 62.04<br>(53.19 to<br>70.35)           | 144.31<br>(101.80 to<br>195.74)              | 146.04<br>(102.40 to<br>198.50)              | 129.37<br>(94.06 to<br>174.76)               |

|                                 |                                       |                                       |                                       |                                       |                              |                                |                                |                                |
|---------------------------------|---------------------------------------|---------------------------------------|---------------------------------------|---------------------------------------|------------------------------|--------------------------------|--------------------------------|--------------------------------|
| Cervical cancer                 | 1,181.98<br>(1,039.16 to<br>1,509.15) | 1,589.79<br>(1,098.64 to<br>2,211.23) | 1,606.98<br>(1,095.20 to<br>2,246.31) | 1,686.51<br>(1,191.62 to<br>2,334.38) | 37.80<br>(33.39 to<br>49.47) | 57.38<br>(40.81 to<br>78.84)   | 58.59<br>(40.92 to<br>81.32)   | 58.72<br>(42.60 to<br>80.18)   |
| Uterine cancer                  | 187.57<br>(169.33 to<br>205.16)       | 348.81<br>(249.54 to<br>456.17)       | 354.89<br>(249.92 to<br>470.97)       | 369.29<br>(272.77 to<br>478.18)       | 7.46<br>(6.70 to<br>8.20)    | 15.89<br>(11.68 to<br>20.32)   | 16.35<br>(11.86 to<br>21.11)   | 16.10<br>(12.27 to<br>20.20)   |
| Ovarian cancer                  | 500.18<br>(443.89 to<br>550.83)       | 1,137.24<br>(793.00 to<br>1,549.09)   | 1,160.17<br>(805.67 to<br>1,579.66)   | 970.22<br>(695.21 to<br>1,325.25)     | 17.29<br>(15.28 to<br>19.03) | 45.82<br>(32.22 to<br>62.06)   | 47.18<br>(32.93 to<br>64.18)   | 37.71<br>(27.14 to<br>51.62)   |
| Prostate cancer                 | 341.19<br>(265.58 to<br>423.25)       | 1,095.55<br>(825.05 to<br>1,354.74)   | 1,203.11<br>(900.48 to<br>1,510.85)   | 878.76<br>(655.62 to<br>1,090.44)     | 20.95<br>(16.14 to<br>25.84) | 74.90<br>(56.20 to<br>91.89)   | 84.76<br>(63.12 to<br>104.17)  | 55.61<br>(41.13 to<br>70.25)   |
| Testicular cancer               | 55.42<br>(49.30 to<br>61.16)          | 72.35<br>(57.13 to<br>89.10)          | 74.05<br>(57.18 to<br>91.39)          | 74.93<br>(60.59 to<br>91.18)          | 1.32<br>(1.17 to<br>1.45)    | 2.10<br>(1.67 to<br>2.55)      | 2.20<br>(1.72 to<br>2.73)      | 2.06<br>(1.69 to<br>2.44)      |
| <b>India</b>                    |                                       |                                       |                                       |                                       |                              |                                |                                |                                |
| Cause                           | YLLs (in 1000s)                       |                                       |                                       |                                       | Deaths (in 1000s)            |                                |                                |                                |
|                                 | 2016                                  | 2040 Forecast                         | 2040 Better Scenario                  | 2040 Worse Scenario                   | 2016                         | 2040 Forecast                  | 2040 Better Scenario           | 2040 Worse Scenario            |
| Kidney cancer                   | 152.01<br>(144.52 to<br>160.41)       | 401.62<br>(324.34 to<br>481.97)       | 417.87<br>(329.71 to<br>508.83)       | 335.88<br>(279.48 to<br>399.10)       | 5.61<br>(5.30 to<br>5.94)    | 17.51<br>(14.54 to<br>20.68)   | 18.72<br>(15.15 to<br>22.31)   | 13.80<br>(11.78 to<br>16.12)   |
| Bladder cancer                  | 246.52<br>(232.32 to<br>259.01)       | 541.80<br>(417.13 to<br>713.04)       | 550.55<br>(417.08 to<br>732.07)       | 514.38<br>(400.94 to<br>677.00)       | 11.91<br>(11.16 to<br>12.55) | 30.44<br>(24.00 to<br>39.99)   | 32.09<br>(24.88 to<br>42.13)   | 26.64<br>(21.11 to<br>34.93)   |
| Brain and nervous system cancer | 803.89<br>(724.84 to<br>999.64)       | 1,496.53<br>(1,174.02 to<br>1,912.11) | 1,555.78<br>(1,196.68 to<br>1,997.95) | 1,373.61<br>(1,112.59 to<br>1,742.38) | 21.04<br>(18.85 to<br>25.99) | 49.93<br>(39.53 to<br>63.21)   | 52.74<br>(40.81 to<br>67.59)   | 43.42<br>(35.46 to<br>54.49)   |
| Thyroid cancer                  | 228.29<br>(210.64 to<br>256.29)       | 364.39<br>(271.84 to<br>481.01)       | 354.34<br>(264.98 to<br>461.80)       | 374.33<br>(284.25 to<br>489.18)       | 7.88<br>(7.28 to<br>8.79)    | 15.06<br>(11.48 to<br>19.43)   | 14.94<br>(11.37 to<br>18.96)   | 14.72<br>(11.59 to<br>18.66)   |
| Mesothelioma                    | 67.06<br>(56.66 to<br>81.88)          | 121.65<br>(90.08 to<br>162.54)        | 127.62<br>(92.60 to<br>173.26)        | 113.67<br>(87.39 to<br>148.30)        | 2.40<br>(2.02 to<br>2.93)    | 5.15<br>(3.85 to<br>6.72)      | 5.53<br>(4.03 to<br>7.35)      | 4.53<br>(3.54 to<br>5.75)      |
| Hodgkin lymphoma                | 215.47<br>(183.17 to<br>307.60)       | 182.48<br>(140.19 to<br>263.60)       | 182.80<br>(137.98 to<br>260.75)       | 220.79<br>(169.80 to<br>312.47)       | 5.15<br>(4.40 to<br>7.27)    | 5.66<br>(4.42 to<br>8.04)      | 5.77<br>(4.43 to<br>8.27)      | 6.48<br>(5.10 to<br>8.98)      |
| Non-Hodgkin lymphoma            | 730.92<br>(617.77 to<br>784.09)       | 1,347.62<br>(1,003.46 to<br>1,662.62) | 1,379.77<br>(1,017.02 to<br>1,701.77) | 1,188.80<br>(912.47 to<br>1,442.90)   | 22.80<br>(19.09 to<br>24.48) | 54.42<br>(41.11 to<br>65.80)   | 57.00<br>(42.61 to<br>69.45)   | 44.91<br>(35.14 to<br>53.32)   |
| Multiple myeloma                | 227.88<br>(183.30 to<br>250.37)       | 577.73<br>(410.70 to<br>736.46)       | 592.03<br>(418.85 to<br>761.57)       | 488.83<br>(357.14 to<br>614.34)       | 8.72<br>(6.99 to<br>9.60)    | 25.65<br>(18.84 to<br>31.98)   | 26.83<br>(19.46 to<br>33.86)   | 20.56<br>(15.63 to<br>25.40)   |
| Leukemia                        | 1,199.02<br>(1,093.04 to<br>1,397.66) | 1,719.65<br>(1,348.93 to<br>2,111.98) | 1,693.52<br>(1,325.51 to<br>2,080.89) | 1,643.52<br>(1,321.05 to<br>2,001.49) | 29.93<br>(27.19 to<br>34.70) | 58.60<br>(45.65 to<br>71.64)   | 59.19<br>(46.37 to<br>72.13)   | 52.43<br>(42.02 to<br>63.83)   |
| Acute lymphoid leukemia         | 389.89<br>(341.16 to<br>474.56)       | 415.19<br>(324.95 to<br>527.13)       | 406.76<br>(317.70 to<br>516.60)       | 410.91<br>(323.44 to<br>522.72)       | 7.48<br>(6.60 to<br>9.12)    | 11.10<br>(8.61 to<br>14.11)    | 11.03<br>(8.56 to<br>14.04)    | 10.31<br>(8.14 to<br>13.12)    |
| Chronic lymphoid leukemia       | 60.04<br>(49.79 to<br>79.95)          | 117.20<br>(86.84 to<br>160.81)        | 117.48<br>(86.22 to<br>160.39)        | 107.28<br>(80.37 to<br>146.48)        | 2.48<br>(2.08 to<br>3.24)    | 5.65<br>(4.28 to<br>7.48)      | 5.81<br>(4.38 to<br>7.70)      | 4.87<br>(3.78 to<br>6.48)      |
| Acute myeloid leukemia          | 376.29<br>(322.78 to<br>433.07)       | 722.08<br>(561.54 to<br>906.90)       | 714.78<br>(556.43 to<br>899.18)       | 643.74<br>(507.71 to<br>798.25)       | 9.35<br>(8.03 to<br>10.73)   | 23.97<br>(18.74 to<br>29.66)   | 24.30<br>(18.73 to<br>30.27)   | 20.10<br>(15.92 to<br>24.72)   |
| Chronic myeloid leukemia        | 136.27<br>(104.61 to<br>176.92)       | 163.12<br>(114.64 to<br>226.84)       | 159.72<br>(111.59 to<br>220.10)       | 156.79<br>(111.70 to<br>218.71)       | 4.10<br>(3.22 to<br>5.24)    | 5.90<br>(4.23 to<br>8.12)      | 5.93<br>(4.21 to<br>8.11)      | 5.39<br>(3.94 to<br>7.39)      |
| Other leukemia                  | 236.55<br>(197.89 to<br>278.10)       | 302.07<br>(226.89 to<br>384.68)       | 294.78<br>(224.55 to<br>377.77)       | 324.80<br>(247.68 to<br>413.83)       | 6.51<br>(5.57 to<br>7.58)    | 11.98<br>(9.19 to<br>14.95)    | 12.12<br>(9.28 to<br>15.31)    | 11.77<br>(9.24 to<br>14.55)    |
| Other neoplasms                 | 2,474.30<br>(1,748.17 to<br>2,650.68) | 3,384.07<br>(2,326.06 to<br>4,092.24) | 3,525.76<br>(2,424.42 to<br>4,327.17) | 3,152.74<br>(2,194.14 to<br>3,721.25) | 74.58<br>(51.77 to<br>79.97) | 132.56<br>(92.38 to<br>157.56) | 141.14<br>(97.45 to<br>170.35) | 115.35<br>(79.91 to<br>132.71) |



|                                               |                                                        |                                                         |                                                        |                                                          |                                                     |                                                     |                                                     |                                                     |
|-----------------------------------------------|--------------------------------------------------------|---------------------------------------------------------|--------------------------------------------------------|----------------------------------------------------------|-----------------------------------------------------|-----------------------------------------------------|-----------------------------------------------------|-----------------------------------------------------|
| <b>Cardiovascular diseases</b>                | <b>62,503.05</b><br>(59,198.38 to<br><b>65,146.15)</b> | <b>65,105.68</b><br>(37,976.43 to<br><b>101,633.28)</b> | <b>45,756.23</b><br>(27,702.70 to<br><b>69,595.80)</b> | <b>121,312.93</b><br>(69,475.42 to<br><b>189,040.73)</b> | <b>2,751.97</b><br>(2,586.84 to<br><b>2,879.68)</b> | <b>3,588.35</b><br>(2,313.27 to<br><b>5,317.56)</b> | <b>2,752.54</b><br>(1,814.67 to<br><b>3,939.73)</b> | <b>5,792.89</b><br>(3,674.85 to<br><b>8,545.40)</b> |
| Rheumatic heart disease                       | 3,378.55<br>(3,094.94 to<br>3,747.88)                  | 1,859.00<br>(1,394.92 to<br>2,413.14)                   | 1,844.50<br>(1,365.80 to<br>2,387.50)                  | 2,300.75<br>(1,761.66 to<br>2,952.83)                    | 109.66<br>(99.43 to<br>120.91)                      | 83.87<br>(65.72 to<br>105.90)                       | 85.43<br>(65.38 to<br>107.69)                       | 95.02<br>(76.53 to<br>120.35)                       |
| Ischemic heart disease                        | 39,269.05<br>(37,170.93 to<br>41,003.46)               | 40,724.85<br>(20,524.50 to<br>73,429.71)                | 26,900.95<br>(14,349.26 to<br>46,019.06)               | 80,424.28<br>(39,946.13 to<br>141,000.15)                | 1,743.32<br>(1,637.91 to<br>1,824.93)               | 2,227.01<br>(1,256.73 to<br>3,801.67)               | 1,620.08<br>(943.94 to<br>2,667.92)                 | 3,810.87<br>(2,099.67 to<br>6,434.24)               |
| Stroke                                        | 15,374.92<br>(14,449.97 to<br>16,266.50)               | 14,632.59<br>(8,374.11 to<br>24,378.55)                 | 10,046.92<br>(6,142.07 to<br>15,897.68)                | 29,163.91<br>(15,946.93 to<br>49,989.56)                 | 694.14<br>(647.98 to<br>737.24)                     | 800.06<br>(505.19 to<br>1,289.36)                   | 604.06<br>(389.98 to<br>927.73)                     | 1,378.31<br>(831.21 to<br>2,217.84)                 |
| Ischemic stroke                               | 6,707.08<br>(6,096.22 to<br>7,370.69)                  | 7,042.32<br>(3,999.63 to<br>12,158.56)                  | 5,160.27<br>(3,051.92 to<br>8,590.69)                  | 12,133.64<br>(6,447.20 to<br>21,130.21)                  | 359.46<br>(328.18 to<br>392.56)                     | 453.87<br>(275.26 to<br>793.80)                     | 362.53<br>(219.75 to<br>616.07)                     | 682.09<br>(394.93 to<br>1,194.51)                   |
| Intracerebral hemorrhage                      | 8,667.84<br>(7,928.58 to<br>9,519.30)                  | 7,590.27<br>(4,039.33 to<br>13,515.86)                  | 4,886.65<br>(2,748.80 to<br>8,299.59)                  | 17,030.27<br>(8,600.22 to<br>32,065.79)                  | 534.69<br>(302.44 to<br>372.24)                     | 346.19<br>(201.85 to<br>585.61)                     | 241.53<br>(144.87 to<br>381.06)                     | 696.23<br>(382.24 to<br>1,212.80)                   |
| Hypertensive heart disease                    | 2,806.47<br>(2,334.87 to<br>3,116.48)                  | 4,911.63<br>(2,807.08 to<br>9,475.75)                   | 4,002.68<br>(2,479.01 to<br>6,625.02)                  | 6,536.72<br>(3,597.24 to<br>13,143.55)                   | 130.43<br>(107.39 to<br>144.42)                     | 290.35<br>(171.36 to<br>559.16)                     | 249.03<br>(157.48 to<br>428.95)                     | 348.95<br>(195.71 to<br>723.96)                     |
| Cardiomyopathy and myocarditis                | 456.62<br>(314.02 to<br>515.84)                        | 497.34<br>(349.53 to<br>670.46)                         | 496.31<br>(353.45 to<br>667.49)                        | 487.79<br>(342.34 to<br>658.73)                          | 11.44<br>(9.09 to<br>12.56)                         | 19.18<br>(14.16 to<br>26.03)                        | 19.75<br>(14.54 to<br>26.72)                        | 17.06<br>(12.74 to<br>22.65)                        |
| Myocarditis                                   | 159.59<br>(79.06 to<br>215.73)                         | 103.22<br>(55.25 to<br>147.92)                          | 105.37<br>(56.31 to<br>151.70)                         | 110.77<br>(58.20 to<br>159.30)                           | 3.09<br>(1.68 to<br>4.12)                           | 2.67<br>(1.67 to<br>3.72)                           | 2.78<br>(1.74 to<br>3.90)                           | 2.69<br>(1.60 to<br>3.76)                           |
| <b>India</b>                                  |                                                        |                                                         |                                                        |                                                          |                                                     |                                                     |                                                     |                                                     |
| <b>Cause</b>                                  | <b>YLLs (in 1000s)</b>                                 |                                                         |                                                        |                                                          | <b>Deaths (in 1000s)</b>                            |                                                     |                                                     |                                                     |
|                                               | <b>2016</b>                                            | <b>2040 Forecast</b>                                    | <b>2040 Better Scenario</b>                            | <b>2040 Worse Scenario</b>                               | <b>2016</b>                                         | <b>2040 Forecast</b>                                | <b>2040 Better Scenario</b>                         | <b>2040 Worse Scenario</b>                          |
| Alcoholic cardiomyopathy                      | 24.76<br>(19.48 to<br>33.09)                           | 38.74<br>(28.41 to<br>62.53)                            | 36.42<br>(26.27 to<br>58.84)                           | 33.93<br>(25.64 to<br>53.13)                             | 0.75<br>(0.63 to<br>1.09)                           | 1.47<br>(1.11 to<br>2.38)                           | 1.43<br>(1.06 to<br>2.35)                           | 1.21<br>(0.94 to<br>1.94)                           |
| Other cardiomyopathy                          | 272.26<br>(201.61 to<br>318.10)                        | 355.38<br>(238.17 to<br>509.47)                         | 354.52<br>(240.59 to<br>498.66)                        | 343.10<br>(230.69 to<br>496.07)                          | 7.60<br>(6.26 to<br>8.62)                           | 15.04<br>(10.66 to<br>21.16)                        | 15.53<br>(11.14 to<br>22.03)                        | 13.16<br>(9.28 to<br>18.22)                         |
| Atrial fibrillation and flutter               | 234.24<br>(188.67 to<br>288.17)                        | 733.80<br>(512.53 to<br>1,026.91)                       | 748.59<br>(519.87 to<br>1,044.33)                      | 612.70<br>(438.65 to<br>837.10)                          | 20.40<br>(16.13 to<br>25.54)                        | 70.69<br>(50.37 to<br>97.92)                        | 74.58<br>(53.27 to<br>103.24)                       | 53.56<br>(36.98 to<br>73.49)                        |
| Aortic aneurysm                               | 344.35<br>(320.69 to<br>368.88)                        | 590.80<br>(427.96 to<br>790.29)                         | 579.63<br>(425.28 to<br>758.96)                        | 568.70<br>(417.09 to<br>759.90)                          | 15.13<br>(14.07 to<br>16.26)                        | 31.80<br>(24.79 to<br>40.40)                        | 32.72<br>(25.74 to<br>41.00)                        | 27.50<br>(21.44 to<br>34.75)                        |
| Peripheral artery disease                     | 21.56<br>(10.07 to<br>40.49)                           | 90.40<br>(40.33 to<br>169.10)                           | 90.09<br>(41.21 to<br>166.34)                          | 73.55<br>(33.52 to<br>141.48)                            | 1.46<br>(0.70 to<br>2.59)                           | 7.27<br>(3.36 to<br>12.59)                          | 7.60<br>(3.58 to<br>13.06)                          | 5.24<br>(2.41 to<br>9.55)                           |
| Endocarditis                                  | 344.86<br>(295.75 to<br>429.62)                        | 585.74<br>(403.09 to<br>828.51)                         | 583.86<br>(404.16 to<br>828.51)                        | 592.88<br>(408.21 to<br>830.06)                          | 12.15<br>(10.23 to<br>14.80)                        | 28.84<br>(20.22 to<br>40.74)                        | 29.72<br>(20.88 to<br>41.44)                        | 26.42<br>(18.57 to<br>37.05)                        |
| Other cardiovascular and circulatory diseases | 272.44<br>(175.18 to<br>317.60)                        | 479.52<br>(280.62 to<br>669.34)                         | 462.71<br>(271.02 to<br>625.37)                        | 551.63<br>(329.92 to<br>764.90)                          | 13.83<br>(8.35 to<br>16.31)                         | 29.27<br>(17.02 to<br>38.51)                        | 29.57<br>(17.19 to<br>37.96)                        | 29.97<br>(17.53 to<br>39.32)                        |
| <b>Chronic respiratory diseases</b>           | <b>21,371.29</b><br>(19,617.16 to<br><b>23,417.94)</b> | <b>27,252.41</b><br>(18,370.44 to<br><b>39,836.50)</b>  | <b>22,579.51</b><br>(15,344.74 to<br><b>32,637.38)</b> | <b>37,171.68</b><br>(23,933.80 to<br><b>57,268.59)</b>   | <b>1,070.50</b><br>(974.98 to<br><b>1,175.79)</b>   | <b>1,546.78</b><br>(1,076.69 to<br><b>2,186.53)</b> | <b>1,360.07</b><br>(952.66 to<br><b>1,871.76)</b>   | <b>1,943.68</b><br>(1,298.53 to<br><b>2,905.18)</b> |
| Chronic obstructive pulmonary disease         | 15,962.01<br>(14,464.20 to<br>17,767.12)               | 21,562.44<br>(13,512.81 to<br>33,293.19)                | 17,162.76<br>(10,751.76 to<br>26,626.91)               | 31,244.83<br>(18,848.68 to<br>51,041.91)                 | 848.17<br>(765.40 to<br>939.41)                     | 1,262.62<br>(820.86 to<br>1,867.23)                 | 1,081.13<br>(702.26 to<br>1,580.47)                 | 1,669.54<br>(1,033.18 to<br>2,622.79)               |
| Pneumoconiosis                                | 71.49<br>(56.39 to<br>100.84)                          | 90.66<br>(67.91 to<br>124.58)                           | 90.88<br>(66.68 to<br>125.96)                          | 88.99<br>(69.12 to<br>119.92)                            | 3.47<br>(2.76 to<br>4.74)                           | 5.20<br>(4.05 to<br>6.92)                           | 5.34<br>(4.04 to<br>7.19)                           | 4.79<br>(3.81 to<br>6.28)                           |
| Silicosis                                     | 16.69<br>(10.25 to<br>26.02)                           | 16.45<br>(9.62 to<br>25.88)                             | 17.41<br>(10.19 to<br>27.76)                           | 16.23<br>(9.95 to<br>24.56)                              | 0.87<br>(0.55 to<br>1.32)                           | 1.00<br>(0.61 to<br>1.56)                           | 1.09<br>(0.66 to<br>1.72)                           | 0.94<br>(0.60 to<br>1.38)                           |

|                                                                |                                       |                                        |                                        |                                         |                                 |                                 |                                 |                                 |
|----------------------------------------------------------------|---------------------------------------|----------------------------------------|----------------------------------------|-----------------------------------------|---------------------------------|---------------------------------|---------------------------------|---------------------------------|
|                                                                | 11.91<br>(6.90 to<br>18.30)           | 21.77<br>(12.17 to<br>34.91)           | 23.04<br>(12.75 to<br>37.82)           | 19.62<br>(11.24 to<br>30.32)            | 0.48<br>(0.26 to<br>0.75)       | 1.07<br>(0.56 to<br>1.74)       | 1.16<br>(0.61 to<br>1.89)       | 0.90<br>(0.49 to<br>1.40)       |
| Asbestosis                                                     | 9.32<br>(3.15 to<br>14.99)            | 9.15<br>(3.15 to<br>14.44)             | 8.45<br>(2.93 to<br>13.49)             | 11.67<br>(4.24 to<br>18.14)             | 0.46<br>(0.16 to<br>0.71)       | 0.52<br>(0.20 to<br>0.80)       | 0.49<br>(0.19 to<br>0.76)       | 0.62<br>(0.24 to<br>0.95)       |
| Coal workers pneumoconiosis                                    | 33.58<br>(22.54 to<br>49.99)          | 43.28<br>(28.04 to<br>63.51)           | 41.99<br>(26.61 to<br>63.31)           | 41.47<br>(27.52 to<br>59.46)            | 1.66<br>(1.13 to<br>2.47)       | 2.61<br>(1.74 to<br>3.73)       | 2.60<br>(1.73 to<br>3.77)       | 2.33<br>(1.57 to<br>3.38)       |
| Other pneumoconiosis                                           | 4,476.97<br>(2,948.76 to<br>6,016.87) | 3,497.91<br>(2,110.47 to<br>5,256.59)  | 3,099.64<br>(1,915.92 to<br>4,594.88)  | 4,083.06<br>(2,436.18 to<br>6,187.36)   | 183.27<br>(118.40 to<br>247.36) | 173.03<br>(105.20 to<br>258.68) | 158.52<br>(97.89 to<br>228.85)  | 187.42<br>(111.83 to<br>283.31) |
| Asthma                                                         | 600.59<br>(350.46 to<br>887.70)       | 1,691.85<br>(1,002.94 to<br>2,540.36)  | 1,812.86<br>(1,067.39 to<br>2,727.85)  | 1,334.17<br>(783.17 to<br>2,008.66)     | 27.01<br>(16.10 to<br>39.34)    | 88.90<br>(53.66 to<br>131.79)   | 97.28<br>(59.05 to<br>144.81)   | 65.85<br>(39.19 to<br>97.56)    |
| Interstitial lung disease and pulmonary sarcoidosis            | 260.22<br>(141.08 to<br>344.53)       | 409.55<br>(222.09 to<br>560.24)        | 413.37<br>(226.14 to<br>567.05)        | 420.62<br>(222.73 to<br>569.83)         | 8.59<br>(4.83 to<br>11.14)      | 17.03<br>(9.38 to<br>22.22)     | 17.81<br>(9.82 to<br>23.34)     | 16.08<br>(8.78 to<br>21.17)     |
| Other chronic respiratory diseases                             | 6,980.13<br>(6,388.25 to<br>8,148.60) | 9,698.80<br>(7,654.10 to<br>11,986.95) | 9,571.03<br>(7,502.78 to<br>12,046.57) | 10,169.64<br>(8,352.95 to<br>12,400.83) | 204.20<br>(186.91 to<br>239.63) | 335.13<br>(272.57 to<br>416.60) | 336.83<br>(269.01 to<br>416.43) | 336.31<br>(281.38 to<br>403.87) |
| Cirrhosis and other chronic liver diseases                     | 2,260.64<br>(2,011.82 to<br>2,616.66) | 3,257.36<br>(2,568.85 to<br>4,104.51)  | 3,343.51<br>(2,591.34 to<br>4,271.88)  | 3,333.68<br>(2,674.45 to<br>4,131.87)   | 67.23<br>(59.88 to<br>79.20)    | 112.00<br>(90.02 to<br>139.15)  | 116.77<br>(92.20 to<br>146.45)  | 110.06<br>(91.23 to<br>134.53)  |
| Cirrhosis and other chronic liver diseases due to hepatitis B  | 1,664.04<br>(1,469.33 to<br>1,943.55) | 2,407.58<br>(1,888.60 to<br>3,035.60)  | 2,466.95<br>(1,908.60 to<br>3,146.30)  | 2,483.97<br>(1,985.40 to<br>3,054.21)   | 48.36<br>(42.94 to<br>57.32)    | 79.38<br>(63.26 to<br>97.50)    | 82.44<br>(64.44 to<br>103.03)   | 79.16<br>(64.77 to<br>95.99)    |
| Cirrhosis and other chronic liver diseases due to hepatitis C  | 1,820.08<br>(1,596.06 to<br>2,147.24) | 2,715.73<br>(2,125.13 to<br>3,434.23)  | 2,419.70<br>(1,850.53 to<br>3,097.05)  | 2,943.46<br>(2,366.81 to<br>3,693.07)   | 57.51<br>(50.41 to<br>68.09)    | 97.81<br>(78.31 to<br>120.74)   | 89.94<br>(70.39 to<br>112.77)   | 101.37<br>(83.52 to<br>125.21)  |
| Cirrhosis and other chronic liver diseases due to alcohol use  | 1,235.37<br>(1,066.94 to<br>1,526.29) | 1,318.13<br>(1,022.18 to<br>1,679.21)  | 1,340.86<br>(1,027.94 to<br>1,724.05)  | 1,408.53<br>(1,114.15 to<br>1,768.24)   | 31.10<br>(27.00 to<br>37.14)    | 45.94<br>(36.18 to<br>58.02)    | 47.68<br>(36.70 to<br>60.71)    | 45.71<br>(36.81 to<br>56.46)    |
| Cirrhosis and other chronic liver diseases due to other causes | 6,305.55<br>(5,851.67 to<br>6,961.54) | 7,429.61<br>(5,878.67 to<br>9,266.76)  | 7,405.42<br>(5,764.20 to<br>9,316.13)  | 8,050.48<br>(6,459.87 to<br>9,943.05)   | 210.90<br>(194.84 to<br>237.62) | 334.58<br>(270.11 to<br>409.96) | 343.18<br>(270.92 to<br>425.84) | 334.65<br>(277.43 to<br>403.43) |
| Digestive diseases                                             | 1,296.61<br>(1,116.94 to<br>1,713.95) | 1,118.52<br>(758.95 to<br>1,621.67)    | 1,096.60<br>(731.09 to<br>1,612.83)    | 1,419.33<br>(992.13 to<br>2,019.09)     | 48.67<br>(41.90 to<br>63.08)    | 34.99<br>(38.83 to<br>78.23)    | 55.37<br>(38.02 to<br>79.16)    | 64.48<br>(45.64 to<br>91.75)    |
| Peptic ulcer disease                                           | <b>India</b>                          |                                        |                                        |                                         |                                 |                                 |                                 |                                 |
| Cause                                                          | YLLs (in 1000s)                       |                                        |                                        |                                         | Deaths (in 1000s)               |                                 |                                 |                                 |
|                                                                | 2016                                  | 2040 Forecast                          | 2040 Better Scenario                   | 2040 Worse Scenario                     | 2016                            | 2040 Forecast                   | 2040 Better Scenario            | 2040 Worse Scenario             |
| Gastritis and duodenitis                                       | 189.92<br>(153.14 to<br>257.26)       | 308.09<br>(222.59 to<br>458.25)        | 318.57<br>(225.09 to<br>483.97)        | 323.41<br>(238.65 to<br>472.59)         | 7.11<br>(5.65 to<br>9.60)       | 15.26<br>(11.29 to<br>21.61)    | 16.22<br>(11.76 to<br>23.62)    | 14.65<br>(11.01 to<br>20.97)    |
| Appendicitis                                                   | 686.94<br>(558.56 to<br>891.19)       | 570.42<br>(425.94 to<br>821.03)        | 573.39<br>(421.66 to<br>830.24)        | 686.02<br>(517.65 to<br>954.92)         | 17.97<br>(14.62 to<br>23.31)    | 20.76<br>(15.52 to<br>29.30)    | 21.37<br>(15.73 to<br>30.22)    | 23.09<br>(17.76 to<br>31.54)    |
| Paralytic ileus and intestinal obstruction                     | 2,297.25<br>(1,619.07 to<br>2,621.97) | 2,853.73<br>(1,911.75 to<br>3,611.80)  | 2,940.45<br>(1,960.50 to<br>3,767.27)  | 2,909.82<br>(1,949.19 to<br>3,630.71)   | 67.21<br>(46.69 to<br>76.77)    | 117.73<br>(79.18 to<br>147.10)  | 124.12<br>(83.08 to<br>156.66)  | 110.74<br>(75.36 to<br>135.20)  |
| Inguinal, femoral, and abdominal hernia                        | 298.80<br>(236.70 to<br>420.83)       | 323.94<br>(238.52 to<br>475.45)        | 337.08<br>(244.69 to<br>498.58)        | 335.28<br>(254.41 to<br>487.37)         | 12.08<br>(9.46 to<br>16.76)     | 17.16<br>(12.95 to<br>24.90)    | 18.43<br>(13.59 to<br>26.47)    | 16.06<br>(12.39 to<br>22.83)    |
| Inflammatory bowel disease                                     | 164.70<br>(134.03 to<br>244.03)       | 242.91<br>(178.91 to<br>360.22)        | 253.94<br>(183.22 to<br>379.76)        | 228.04<br>(170.92 to<br>332.38)         | 5.71<br>(4.74 to<br>7.87)       | 11.34<br>(8.54 to<br>16.16)     | 12.14<br>(9.05 to<br>17.52)     | 9.82<br>(7.69 to<br>13.77)      |
| Vascular intestinal disorders                                  | 317.68<br>(214.06 to<br>416.62)       | 573.02<br>(387.18 to<br>803.03)        | 602.19<br>(400.06 to<br>854.59)        | 552.54<br>(375.61 to<br>759.50)         | 15.54<br>(10.90 to<br>20.13)    | 33.68<br>(23.27 to<br>46.27)    | 36.17<br>(24.77 to<br>49.67)    | 30.20<br>(21.04 to<br>40.67)    |
| Gallbladder and biliary diseases                               | 250.14<br>(203.83 to<br>397.79)       | 333.23<br>(197.18 to<br>615.05)        | 288.14<br>(175.60 to<br>514.57)        | 385.76<br>(228.46 to<br>718.84)         | 9.57<br>(7.86 to<br>15.07)      | 17.09<br>(10.24 to<br>30.76)    | 15.32<br>(9.63 to<br>26.63)     | 18.05<br>(10.86 to<br>32.64)    |

|                                                     |                                                  |                                                   |                                                   |                                                  |                                            |                                            |                                            |                                            |
|-----------------------------------------------------|--------------------------------------------------|---------------------------------------------------|---------------------------------------------------|--------------------------------------------------|--------------------------------------------|--------------------------------------------|--------------------------------------------|--------------------------------------------|
|                                                     | 713.22<br>(597.25 to 872.09)                     | 955.40<br>(646.58 to 1,401.06)                    | 838.38<br>(584.08 to 1,208.68)                    | 1,052.53<br>(712.59 to 1,570.81)                 | 22.68<br>(4.36 to 27.91)                   | 37.26<br>(25.55 to 54.37)                  | 34.07<br>(24.24 to 48.39)                  | 38.64<br>(26.51 to 56.60)                  |
| Pancreatitis                                        |                                                  |                                                   |                                                   |                                                  |                                            |                                            |                                            |                                            |
|                                                     | 90.29<br>(76.95 to 118.71)                       | 150.34<br>(113.50 to 203.44)                      | 156.68<br>(115.75 to 215.37)                      | 157.77<br>(122.29 to 210.37)                     | 4.36<br>(3.70 to 5.65)                     | 9.32<br>(7.20 to 12.42)                    | 9.98<br>(7.58 to 13.33)                    | 8.91<br>(6.88 to 11.72)                    |
| Other digestive diseases                            |                                                  |                                                   |                                                   |                                                  |                                            |                                            |                                            |                                            |
|                                                     | <b>3,877.95</b><br><b>(3,502.98 to 4,303.00)</b> | <b>8,415.34</b><br><b>(6,556.49 to 11,010.48)</b> | <b>8,550.55</b><br><b>(6,656.58 to 10,928.69)</b> | <b>7,355.18</b><br><b>(5,995.98 to 9,386.77)</b> | <b>205.79</b><br><b>(178.36 to 243.24)</b> | <b>659.28</b><br><b>(507.82 to 883.59)</b> | <b>693.95</b><br><b>(541.51 to 906.14)</b> | <b>497.47</b><br><b>(366.03 to 673.88)</b> |
| Neurological disorders                              |                                                  |                                                   |                                                   |                                                  |                                            |                                            |                                            |                                            |
|                                                     | 1,588.19<br>(1,308.35 to 1,959.35)               | 5,241.04<br>(3,714.02 to 7,593.43)                | 5,368.49<br>(3,879.42 to 7,528.39)                | 4,149.41<br>(2,927.08 to 6,083.67)               | 142.93<br>(117.02 to 177.85)               | 515.24<br>(370.93 to 736.50)               | 541.32<br>(401.18 to 744.63)               | 375.32<br>(247.43 to 549.29)               |
| Alzheimer's disease and other dementias             |                                                  |                                                   |                                                   |                                                  |                                            |                                            |                                            |                                            |
|                                                     | 238.75<br>(182.34 to 305.08)                     | 903.89<br>(668.19 to 1,201.69)                    | 1,004.56<br>(718.36 to 1,372.29)                  | 641.20<br>(474.82 to 843.23)                     | 17.54<br>(13.32 to 22.64)                  | 73.15<br>(54.25 to 98.21)                  | 82.93<br>(60.69 to 112.08)                 | 48.42<br>(35.14 to 64.10)                  |
| Parkinson's disease                                 |                                                  |                                                   |                                                   |                                                  |                                            |                                            |                                            |                                            |
|                                                     | 1,614.95<br>(1,457.73 to 1,808.08)               | 1,582.13<br>(1,234.44 to 1,989.37)                | 1,462.23<br>(1,122.12 to 1,844.23)                | 1,942.77<br>(1,526.26 to 2,434.43)               | 34.25<br>(31.15 to 37.75)                  | 47.50<br>(37.35 to 59.39)                  | 44.93<br>(34.79 to 56.56)                  | 53.90<br>(43.17 to 66.58)                  |
| Epilepsy                                            |                                                  |                                                   |                                                   |                                                  |                                            |                                            |                                            |                                            |
|                                                     | 70.63<br>(59.73 to 88.09)                        | 123.36<br>(91.53 to 167.32)                       | 126.18<br>(91.84 to 173.09)                       | 112.59<br>(85.13 to 150.85)                      | 2.02<br>(1.73 to 2.51)                     | 4.00<br>(3.01 to 5.29)                     | 4.14<br>(3.09 to 5.51)                     | 3.54<br>(2.74 to 4.62)                     |
| Multiple sclerosis                                  |                                                  |                                                   |                                                   |                                                  |                                            |                                            |                                            |                                            |
|                                                     | 73.89<br>(61.29 to 85.63)                        | 158.05<br>(116.51 to 201.20)                      | 166.16<br>(120.54 to 213.12)                      | 136.63<br>(103.70 to 171.23)                     | 2.31<br>(1.89 to 2.73)                     | 6.01<br>(4.47 to 7.70)                     | 6.39<br>(4.67 to 8.30)                     | 5.01<br>(3.86 to 6.24)                     |
| Motor neuron disease                                |                                                  |                                                   |                                                   |                                                  |                                            |                                            |                                            |                                            |
|                                                     | 291.54<br>(241.99 to 335.86)                     | 406.87<br>(311.73 to 499.59)                      | 422.94<br>(319.55 to 525.16)                      | 372.57<br>(293.55 to 455.68)                     | 6.74<br>(5.81 to 7.65)                     | 13.38<br>(10.14 to 16.40)                  | 14.23<br>(10.62 to 17.67)                  | 11.28<br>(8.91 to 13.42)                   |
| Other neurological disorders                        |                                                  |                                                   |                                                   |                                                  |                                            |                                            |                                            |                                            |
|                                                     | <b>1,467.35</b><br><b>(1,082.62 to 1,667.40)</b> | <b>2,310.29</b><br><b>(1,603.93 to 2,846.51)</b>  | <b>2,319.83</b><br><b>(1,605.50 to 2,900.17)</b>  | <b>2,252.15</b><br><b>(1,600.66 to 2,739.62)</b> | <b>38.07</b><br><b>(27.68 to 43.24)</b>    | <b>70.68</b><br><b>(49.37 to 85.91)</b>    | <b>72.32</b><br><b>(49.85 to 89.29)</b>    | <b>65.98</b><br><b>(46.72 to 77.97)</b>    |
| Mental disorders                                    |                                                  |                                                   |                                                   |                                                  |                                            |                                            |                                            |                                            |
|                                                     | 1,019.63<br>(654.18 to 1,179.32)                 | 1,316.32<br>(781.09 to 1,663.76)                  | 1,293.45<br>(755.95 to 1,671.18)                  | 1,299.17<br>(780.48 to 1,610.75)                 | 27.10<br>(17.50 to 31.22)                  | 40.32<br>(24.16 to 50.27)                  | 40.32<br>(23.88 to 51.26)                  | 38.44<br>(23.57 to 46.95)                  |
| Alcohol use disorders                               |                                                  |                                                   |                                                   |                                                  |                                            |                                            |                                            |                                            |
|                                                     | 444.47<br>(378.11 to 516.02)                     | 989.91<br>(757.52 to 1,226.66)                    | 1,022.23<br>(771.78 to 1,276.63)                  | 949.03<br>(740.86 to 1,147.69)                   | 10.90<br>(9.08 to 12.48)                   | 30.28<br>(22.96 to 36.36)                  | 31.92<br>(23.88 to 39.14)                  | 27.46<br>(21.27 to 32.34)                  |
| Drug use disorders                                  |                                                  |                                                   |                                                   |                                                  |                                            |                                            |                                            |                                            |
|                                                     | 293.44<br>(253.49 to 354.54)                     | 363.76<br>(436.54 to 693.58)                      | 579.74<br>(444.77 to 716.22)                      | 546.39<br>(432.65 to 665.57)                     | 6.71<br>(5.66 to 7.85)                     | 15.64<br>(11.83 to 19.02)                  | 16.34<br>(12.33 to 20.03)                  | 14.55<br>(11.12 to 17.39)                  |
| Opioid use disorders                                |                                                  |                                                   |                                                   |                                                  |                                            |                                            |                                            |                                            |
|                                                     | 24.16<br>(8.79 to 41.75)                         | 63.05<br>(22.96 to 112.61)                        | 64.60<br>(23.36 to 116.92)                        | 64.88<br>(23.83 to 114.15)                       | 0.63<br>(0.22 to 1.09)                     | 1.85<br>(0.69 to 3.29)                     | 1.91<br>(0.70 to 3.46)                     | 1.85<br>(0.68 to 3.24)                     |
| Cocaine use disorders                               |                                                  |                                                   |                                                   |                                                  |                                            |                                            |                                            |                                            |
|                                                     | 15.36<br>(7.53 to 25.39)                         | 49.17<br>(23.37 to 82.92)                         | 50.02<br>(23.42 to 84.71)                         | 52.39<br>(88.52)                                 | 0.37<br>(0.18 to 0.63)                     | 1.33<br>(0.64 to 2.25)                     | 1.37<br>(0.64 to 2.33)                     | 1.39<br>(0.67 to 2.35)                     |
| Amphetamine use disorders                           |                                                  |                                                   |                                                   |                                                  |                                            |                                            |                                            |                                            |
|                                                     | 111.50<br>(82.08 to 130.40)                      | 313.93<br>(211.98 to 388.47)                      | 327.87<br>(220.54 to 410.30)                      | 285.36<br>(195.26 to 347.94)                     | 3.20<br>(2.26 to 3.65)                     | 11.45<br>(7.79 to 13.93)                   | 12.29<br>(8.33 to 15.01)                   | 9.66<br>(6.75 to 11.49)                    |
| Other drug use disorders                            |                                                  |                                                   |                                                   |                                                  |                                            |                                            |                                            |                                            |
|                                                     | 3.25<br>(2.16 to 4.63)                           | 4.07<br>(2.58 to 6.22)                            | 4.14<br>(2.63 to 6.35)                            | 3.96<br>(2.55 to 6.00)                           | 0.06<br>(0.04 to 0.09)                     | 0.08<br>(0.05 to 0.12)                     | 0.08<br>(0.05 to 0.13)                     | 0.08<br>(0.05 to 0.12)                     |
| Eating disorders                                    |                                                  |                                                   |                                                   |                                                  |                                            |                                            |                                            |                                            |
| <b>India</b>                                        |                                                  |                                                   |                                                   |                                                  |                                            |                                            |                                            |                                            |
| Cause                                               | YLLs (in 1000s)                                  |                                                   |                                                   |                                                  | Deaths (in 1000s)                          |                                            |                                            |                                            |
|                                                     | 2016                                             | 2040 Forecast                                     | 2040 Better Scenario                              | 2040 Worse Scenario                              | 2016                                       | 2040 Forecast                              | 2040 Better Scenario                       | 2040 Worse Scenario                        |
| Diabetes, urogenital, blood, and endocrine diseases | 15,222.66<br>(14,425.89 to 16,267.29)            | 24,733.56<br>(17,858.07 to 33,480.01)             | 22,558.21<br>(16,300.76 to 30,101.90)             | 30,684.31<br>(22,386.00 to 41,451.87)            | 641.23<br>(601.67 to 678.89)               | 1,390.19<br>(1,046.80 to 1,807.17)         | 1,312.95<br>(981.25 to 1,703.05)           | 1,571.66<br>(1,209.63 to 2,060.50)         |
| Diabetes mellitus                                   | 5,955.02<br>(5,577.51 to 6,262.32)               | 10,029.48<br>(7,000.55 to 14,054.88)              | 9,367.94<br>(6,556.76 to 12,930.57)               | 12,497.86<br>(8,717.63 to 17,731.11)             | 304.46<br>(281.90 to 322.33)               | 649.12<br>(480.29 to 875.43)               | 632.25<br>(465.08 to 829.69)               | 733.22<br>(525.07 to 985.19)               |
| Acute glomerulonephritis                            | 29.08<br>(25.74 to 33.41)                        | 37.40<br>(28.61 to 48.20)                         | 38.40<br>(28.92 to 50.18)                         | 40.35<br>(31.80 to 51.18)                        | 0.94<br>(0.83 to 1.09)                     | 1.69<br>(1.38 to 2.09)                     | 1.81<br>(1.44 to 2.25)                     | 1.58<br>(1.31 to 1.95)                     |

|                                                            |                                       |                                         |                                        |                                         |                                 |                                 |                                 |                                   |
|------------------------------------------------------------|---------------------------------------|-----------------------------------------|----------------------------------------|-----------------------------------------|---------------------------------|---------------------------------|---------------------------------|-----------------------------------|
| Chronic kidney disease                                     | 6,291.01<br>(5,902.70 to<br>7,164.69) | 10,090.68<br>(5,389.22 to<br>16,919.28) | 8,383.60<br>(4,736.87 to<br>13,736.00) | 13,641.67<br>(7,165.08 to<br>22,790.57) | 224.35<br>(218.55 to<br>263.80) | 498.00<br>(264.98 to<br>843.30) | 418.47<br>(228.90 to<br>690.39) | 627.15<br>(330.19 to<br>1,039.55) |
| Chronic kidney disease due to diabetes mellitus            | 2,360.17<br>(2,049.52 to<br>2,708.82) | 4,602.98<br>(2,350.53 to<br>8,081.36)   | 3,753.75<br>(2,000.17 to<br>6,456.69)  | 6,212.74<br>(3,117.02 to<br>10,914.20)  | 96.88<br>(84.11 to<br>111.02)   | 225.17<br>(111.26 to<br>398.96) | 186.12<br>(96.70 to<br>328.97)  | 287.85<br>(144.30 to<br>503.65)   |
| Chronic kidney disease due to hypertension                 | 1,111.18<br>(966.36 to<br>1,309.83)   | 2,028.20<br>(1,032.42 to<br>3,522.14)   | 1,691.22<br>(902.63 to<br>2,840.64)    | 2,667.77<br>(1,340.06 to<br>4,541.80)   | 49.99<br>(43.38 to<br>58.42)    | 117.82<br>(61.17 to<br>202.68)  | 100.31<br>(53.90 to<br>174.13)  | 142.54<br>(73.44 to<br>244.61)    |
| Chronic kidney disease due to glomerulonephritis           | 1,017.37<br>(861.84 to<br>1,246.47)   | 1,072.50<br>(644.49 to<br>1,736.58)     | 925.61<br>(565.32 to<br>1,453.25)      | 1,493.05<br>(884.12 to<br>2,409.90)     | 27.34<br>(23.22 to<br>32.66)    | 41.47<br>(22.66 to<br>70.84)    | 35.71<br>(20.43 to<br>60.34)    | 53.67<br>(29.66 to<br>89.25)      |
| Chronic kidney disease due to other and unspecified causes | 1,802.30<br>(1,570.04 to<br>2,133.72) | 2,387.00<br>(1,299.88 to<br>4,051.71)   | 2,013.02<br>(1,169.93 to<br>3,268.18)  | 3,268.11<br>(1,796.08 to<br>5,365.95)   | 60.14<br>(51.83 to<br>70.40)    | 113.54<br>(61.35 to<br>197.40)  | 96.34<br>(53.62 to<br>161.69)   | 143.09<br>(77.22 to<br>242.03)    |
| Urinary diseases and male infertility                      | 1,800.38<br>(1,668.99 to<br>1,920.99) | 3,292.86<br>(2,677.99 to<br>3,887.14)   | 3,459.90<br>(2,751.38 to<br>4,137.29)  | 3,092.89<br>(2,629.20 to<br>3,545.30)   | 68.66<br>(63.69 to<br>73.11)    | 182.81<br>(154.36 to<br>210.00) | 198.47<br>(162.47 to<br>230.78) | 153.13<br>(134.18 to<br>172.30)   |
| Urinary tract infections                                   | 1,110.50<br>(973.88 to<br>1,217.68)   | 2,451.62<br>(1,938.60 to<br>2,956.84)   | 2,586.37<br>(2,000.14 to<br>3,171.73)  | 2,220.21<br>(1,836.56 to<br>2,620.74)   | 43.63<br>(37.89 to<br>48.22)    | 141.24<br>(116.55 to<br>166.67) | 153.75<br>(123.44 to<br>182.80) | 114.33<br>(96.68 to<br>132.24)    |
| Urolithiasis                                               | 156.96<br>(114.34 to<br>249.03)       | 359.43<br>(245.51 to<br>569.09)         | 377.18<br>(254.51 to<br>603.05)        | 331.71<br>(229.84 to<br>527.86)         | 5.85<br>(4.23 to<br>9.45)       | 17.50<br>(12.16 to<br>28.05)    | 18.95<br>(12.96 to<br>30.59)    | 14.61<br>(10.38 to<br>23.61)      |
| Other urinary diseases                                     | 532.91<br>(450.27 to<br>639.52)       | 481.81<br>(356.98 to<br>635.06)         | 496.35<br>(358.28 to<br>660.32)        | 540.98<br>(410.96 to<br>690.09)         | 19.17<br>(16.01 to<br>22.89)    | 24.08<br>(18.15 to<br>31.14)    | 25.77<br>(18.86 to<br>34.25)    | 24.18<br>(18.70 to<br>30.67)      |
| Gynecological diseases                                     | 57.12<br>(47.75 to<br>66.10)          | 62.73<br>(41.27 to<br>86.76)            | 63.30<br>(40.70 to<br>89.12)           | 72.63<br>(49.34 to<br>100.32)           | 2.05<br>(1.65 to<br>2.39)       | 3.20<br>(2.19 to<br>4.43)       | 3.33<br>(2.21 to<br>4.71)       | 3.24<br>(2.22 to<br>4.41)         |
| Uterine fibroids                                           | 20.64<br>(5.69 to<br>30.99)           | 20.63<br>(5.14 to<br>37.19)             | 20.69<br>(5.21 to<br>37.10)            | 24.87<br>(6.47 to<br>44.37)             | 0.74<br>(0.20 to<br>1.12)       | 0.92<br>(0.23 to<br>1.63)       | 0.94<br>(0.23 to<br>1.74)       | 1.01<br>(0.26 to<br>1.77)         |
| Polycystic ovarian syndrome                                | 4.95<br>(1.44 to<br>11.90)            | 2.59<br>(0.56 to<br>7.09)               | 2.50<br>(0.52 to<br>6.91)              | 3.79<br>(0.84 to<br>10.18)              | 0.11<br>(0.03 to<br>0.17)       | 0.06<br>(0.01 to<br>0.27)       | 0.06<br>(0.01 to<br>0.16)       | 0.09<br>(0.02 to<br>0.24)         |
| Endometriosis                                              | 0.45<br>(0.12 to<br>0.97)             | 0.49<br>(0.12 to<br>1.32)               | 0.48<br>(0.12 to<br>1.31)              | 0.62<br>(0.15 to<br>1.66)               | 0.01<br>(0.00 to<br>0.02)       | 0.01<br>(0.00 to<br>0.03)       | 0.01<br>(0.00 to<br>0.03)       | 0.01<br>(0.00 to<br>0.04)         |
| Genital prolapse                                           | 5.20<br>(1.53 to<br>9.53)             | 5.59<br>(1.49 to<br>11.17)              | 5.70<br>(1.47 to<br>11.67)             | 6.44<br>(1.74 to<br>12.91)              | 0.33<br>(0.11 to<br>0.59)       | 0.42<br>(0.12 to<br>0.86)       | 0.44<br>(0.12 to<br>0.91)       | 0.44<br>(0.12 to<br>0.90)         |
| Other gynecological diseases                               | 25.88<br>(13.90 to<br>40.72)          | 33.43<br>(17.28 to<br>53.86)            | 33.93<br>(17.34 to<br>54.37)           | 36.92<br>(18.73 to<br>60.12)            | 0.86<br>(0.46 to<br>1.44)       | 1.78<br>(0.97 to<br>2.83)       | 1.88<br>(1.01 to<br>2.98)       | 1.68<br>(0.88 to<br>2.65)         |
| Hemoglobinopathies and hemolytic anemias                   | 814.64<br>(698.62 to<br>1,002.66)     | 915.89<br>(708.04 to<br>1,214.22)       | 933.19<br>(708.13 to<br>1,255.21)      | 1,011.49<br>(803.51 to<br>1,308.54)     | 24.05<br>(20.40 to<br>29.91)    | 43.03<br>(34.82 to<br>54.52)    | 45.57<br>(35.89 to<br>58.06)    | 41.71<br>(33.60 to<br>52.75)      |
| Thalassemias                                               | 19.83<br>(13.80 to<br>25.17)          | 4.44<br>(2.52 to<br>6.51)               | 4.45<br>(2.50 to<br>6.46)              | 5.60<br>(3.07 to<br>8.38)               | 0.23<br>(0.16 to<br>0.30)       | 0.05<br>(0.03 to<br>0.08)       | 0.05<br>(0.03 to<br>0.08)       | 0.07<br>(0.04 to<br>0.10)         |
| Sickle cell disorders                                      | 584.11<br>(499.11 to<br>717.97)       | 519.19<br>(390.33 to<br>706.97)         | 518.20<br>(383.81 to<br>709.78)        | 600.64<br>(452.48 to<br>803.89)         | 10.25<br>(8.67 to<br>12.67)     | 11.39<br>(8.35 to<br>15.64)     | 11.43<br>(8.25 to<br>15.90)     | 12.84<br>(9.57 to<br>17.46)       |
| G6PD deficiency                                            | 89.58<br>(74.10 to<br>122.13)         | 169.48<br>(123.15 to<br>242.95)         | 172.21<br>(121.58 to<br>249.25)        | 195.85<br>(145.34 to<br>273.96)         | 2.98<br>(2.45 to<br>4.08)       | 7.72<br>(5.76 to<br>10.93)      | 8.01<br>(5.84 to<br>11.56)      | 8.35<br>(6.39 to<br>11.63)        |
| Other hemoglobinopathies and hemolytic anemias             | 121.13<br>(99.70 to<br>151.86)        | 222.77<br>(173.23 to<br>281.97)         | 238.34<br>(183.14 to<br>303.47)        | 209.40<br>(156.10 to<br>263.15)         | 10.59<br>(8.52 to<br>13.06)     | 23.87<br>(18.03 to<br>30.19)    | 26.08<br>(19.96 to<br>32.79)    | 20.45<br>(13.26 to<br>27.15)      |
| Endocrine, metabolic, blood, and immune disorders          | 275.41<br>(237.16 to<br>325.37)       | 304.51<br>(236.42 to<br>384.00)         | 311.88<br>(236.98 to<br>397.52)        | 327.40<br>(261.71 to<br>408.93)         | 6.73<br>(5.84 to<br>8.16)       | 12.34<br>(9.88 to<br>15.81)     | 13.05<br>(10.22 to<br>16.98)    | 11.63<br>(9.60 to<br>14.81)       |
| <b>India</b>                                               |                                       |                                         |                                        |                                         |                                 |                                 |                                 |                                   |
| <b>YLLs (in 1000s)</b>                                     |                                       |                                         |                                        |                                         | <b>Deaths (in 1000s)</b>        |                                 |                                 |                                   |

| Cause                                         | 2016                                         | 2040 Forecast                                | 2040 Better Scenario                         | 2040 Worse Scenario                          | 2016                                    | 2040 Forecast                             | 2040 Better Scenario                      | 2040 Worse Scenario                       |
|-----------------------------------------------|----------------------------------------------|----------------------------------------------|----------------------------------------------|----------------------------------------------|-----------------------------------------|-------------------------------------------|-------------------------------------------|-------------------------------------------|
| <b>Musculoskeletal disorders</b>              | <b>181.63</b><br>(149.78 to 216.78)          | <b>445.04</b><br>(316.79 to 552.21)          | <b>465.11</b><br>(326.12 to 584.92)          | <b>408.91</b><br>(301.93 to 498.75)          | <b>7.42</b><br>(5.63 to 8.54)           | <b>23.95</b><br>(16.44 to 28.85)          | <b>25.63</b><br>(17.19 to 31.16)          | <b>20.50</b><br>(14.42 to 24.27)          |
| Rheumatoid arthritis                          | 69.05<br>(49.31 to 90.80)                    | 178.41<br>(120.39 to 246.31)                 | 183.35<br>(121.12 to 260.75)                 | 187.07<br>(128.82 to 256.98)                 | 3.53<br>(2.44 to 4.63)                  | 11.26<br>(7.41 to 15.25)                  | 11.82<br>(7.80 to 16.32)                  | 10.95<br>(7.47 to 14.66)                  |
| Other musculoskeletal disorders               | 112.58<br>(89.41 to 137.24)                  | 266.63<br>(182.46 to 335.60)                 | 281.76<br>(190.89 to 360.45)                 | 221.83<br>(156.73 to 277.71)                 | 3.89<br>(2.86 to 4.55)                  | 12.69<br>(8.06 to 15.91)                  | 13.81<br>(8.71 to 17.39)                  | 9.56<br>(6.30 to 11.92)                   |
| <b>Other non-communicable diseases</b>        | <b>7,956.31</b><br>(6,731.01 to 9,358.04)    | <b>4,492.23</b><br>(3,293.94 to 5,612.87)    | <b>4,502.83</b><br>(3,246.12 to 5,635.51)    | <b>5,978.05</b><br>(4,456.91 to 7,588.74)    | <b>110.80</b><br>(91.00 to 129.27)      | <b>126.44</b><br>(91.00 to 158.11)        | <b>132.39</b><br>(81.65 to 167.44)        | <b>133.78</b><br>(92.00 to 165.37)        |
| Congenital birth defects                      | 6,829.45<br>(5,550.12 to 8,184.31)           | 2,571.18<br>(1,941.71 to 3,255.76)           | 2,503.78<br>(1,900.92 to 3,170.38)           | 4,030.88<br>(2,986.34 to 5,227.46)           | 84.73<br>(69.15 to 101.09)              | 37.97<br>(29.33 to 47.70)                 | 57.29<br>(28.79 to 47.15)                 | 55.61<br>(42.37 to 70.80)                 |
| Neural tube defects                           | 63.24<br>(38.90 to 104.08)                   | 11.36<br>(7.24 to 18.39)                     | 10.86<br>(6.76 to 17.50)                     | 20.90<br>(12.39 to 36.21)                    | 0.79<br>(0.50 to 1.27)                  | 0.19<br>(0.13 to 0.28)                    | 0.18<br>(0.12 to 0.28)                    | 0.31<br>(0.20 to 0.50)                    |
| Congenital heart anomalies                    | 3,488.96<br>(2,554.46 to 4,646.75)           | 1,295.48<br>(913.06 to 1,776.75)             | 1,263.91<br>(887.72 to 1,709.81)             | 1,945.89<br>(1,321.28 to 2,751.12)           | 43.91<br>(32.54 to 57.85)               | 19.36<br>(14.11 to 25.62)                 | 19.01<br>(13.78 to 25.14)                 | 27.37<br>(19.36 to 37.77)                 |
| Orofacial clefts                              | 23.27<br>(11.63 to 43.28)                    | 4.28<br>(2.00 to 8.16)                       | 4.03<br>(1.86 to 7.74)                       | 9.11<br>(4.22 to 17.71)                      | 0.27<br>(0.13 to 0.50)                  | 0.11<br>(0.02 to 0.09)                    | 0.05<br>(0.02 to 0.09)                    | 0.11<br>(0.05 to 0.20)                    |
| Down syndrome                                 | 117.00<br>(88.48 to 168.95)                  | 86.19<br>(62.61 to 122.32)                   | 85.32<br>(61.61 to 121.18)                   | 115.82<br>(84.42 to 165.41)                  | 1.78<br>(1.37 to 2.50)                  | 1.93<br>(1.40 to 2.75)                    | 1.93<br>(1.37 to 2.77)                    | 2.39<br>(1.77 to 3.35)                    |
| Other chromosomal abnormalities               | 137.63<br>(76.45 to 269.75)                  | 74.29<br>(40.22 to 138.55)                   | 71.31<br>(38.46 to 133.51)                   | 133.05<br>(70.34 to 251.44)                  | 1.62<br>(0.90 to 3.05)                  | 0.92<br>(0.51 to 1.66)                    | 0.88<br>(0.49 to 1.61)                    | 1.60<br>(0.86 to 3.00)                    |
| Congenital musculoskeletal and limb anomalies | 165.56<br>(76.77 to 356.50)                  | 76.82<br>(33.38 to 166.60)                   | 74.77<br>(32.72 to 161.88)                   | 124.67<br>(52.94 to 279.36)                  | 1.98<br>(0.93 to 4.22)                  | 0.99<br>(0.45 to 2.08)                    | 0.97<br>(0.44 to 2.02)                    | 1.55<br>(0.68 to 3.38)                    |
| Urogenital congenital anomalies               | 187.17<br>(122.45 to 286.84)                 | 88.58<br>(61.45 to 128.69)                   | 87.71<br>(60.72 to 126.14)                   | 127.66<br>(84.01 to 191.13)                  | 2.59<br>(1.76 to 3.84)                  | 1.83<br>(1.30 to 2.57)                    | 1.84<br>(1.30 to 2.59)                    | 2.29<br>(1.59 to 3.31)                    |
| Digestive congenital anomalies                | 560.52<br>(350.78 to 1,021.97)               | 179.72<br>(104.40 to 334.59)                 | 173.01<br>(99.70 to 321.54)                  | 318.12<br>(183.82 to 600.54)                 | 6.57<br>(4.13 to 11.94)                 | 2.21<br>(1.33 to 4.05)                    | 2.14<br>(1.26 to 3.93)                    | 3.83<br>(2.23 to 7.22)                    |
| Other congenital birth defects                | 2,086.08<br>(1,513.69 to 2,717.31)           | 754.45<br>(528.70 to 1,039.03)               | 732.86<br>(517.47 to 1,015.66)               | 1,235.66<br>(839.35 to 1,755.72)             | 25.22<br>(18.53 to 32.80)               | 10.50<br>(7.69 to 14.04)                  | 10.29<br>(7.52 to 13.75)                  | 16.16<br>(11.44 to 22.48)                 |
| Skin and subcutaneous diseases                | 632.52<br>(271.48 to 823.45)                 | 1,807.07<br>(823.77 to 2,483.01)             | 1,889.25<br>(853.39 to 2,638.68)             | 1,753.06<br>(804.40 to 2,372.72)             | 20.33<br>(9.00 to 25.85)                | 37.14<br>(40.75 to 116.71)                | 93.83<br>(43.39 to 126.39)                | 75.92<br>(35.43 to 101.03)                |
| Cellulitis                                    | 90.15<br>(20.82 to 136.43)                   | 384.49<br>(93.52 to 620.82)                  | 411.21<br>(97.09 to 674.08)                  | 320.24<br>(77.49 to 512.17)                  | 3.33<br>(0.72 to 5.03)                  | 19.36<br>(4.52 to 30.65)                  | 21.33<br>(4.92 to 34.14)                  | 14.67<br>(3.41 to 23.18)                  |
| Pyoderma                                      | 505.28<br>(225.72 to 653.48)                 | 1,336.31<br>(654.59 to 1,827.45)             | 1,386.34<br>(670.68 to 1,910.88)             | 1,357.30<br>(660.85 to 1,822.65)             | 15.42<br>(7.33 to 19.44)                | 62.34<br>(32.15 to 83.17)                 | 66.52<br>(33.75 to 90.44)                 | 57.07<br>(28.65 to 75.66)                 |
| Decubitus ulcer                               | 21.76<br>(10.58 to 29.21)                    | 55.88<br>(25.58 to 79.70)                    | 59.85<br>(27.21 to 85.75)                    | 47.93<br>(21.94 to 67.55)                    | 1.13<br>(0.50 to 1.53)                  | 4.06<br>(1.80 to 5.81)                    | 4.49<br>(2.01 to 6.45)                    | 3.09<br>(1.31 to 4.47)                    |
| Other skin and subcutaneous diseases          | 15.33<br>(8.69 to 22.23)                     | 30.38<br>(17.36 to 45.87)                    | 31.85<br>(18.49 to 47.87)                    | 27.59<br>(15.56 to 41.12)                    | 0.46<br>(0.26 to 0.70)                  | 1.37<br>(0.79 to 2.14)                    | 1.49<br>(0.87 to 2.34)                    | 1.09<br>(0.64 to 1.70)                    |
| Sudden infant death syndrome                  | 494.34<br>(314.44 to 692.56)                 | 113.98<br>(48.05 to 195.89)                  | 109.80<br>(45.72 to 188.63)                  | 194.11<br>(81.14 to 335.44)                  | 5.74<br>(3.65 to 8.04)                  | 1.32<br>(0.56 to 2.27)                    | 1.27<br>(0.53 to 2.19)                    | 2.25<br>(0.94 to 3.89)                    |
| <b>Injuries</b>                               | <b>44,630.32</b><br>(40,460.16 to 47,235.94) | <b>41,264.38</b><br>(33,996.17 to 48,834.25) | <b>39,146.47</b><br>(31,941.40 to 46,350.85) | <b>50,343.88</b><br>(41,626.54 to 59,377.37) | <b>1,048.81</b><br>(936.78 to 1,109.16) | <b>1,370.45</b><br>(1,143.04 to 1,580.24) | <b>1,356.86</b><br>(1,122.44 to 1,578.11) | <b>1,499.87</b><br>(1,272.28 to 1,700.44) |



|                                                 |                                                               |                                                               |                                                               |                                                               |                                                      |                                                      |                                                      |                                                      |
|-------------------------------------------------|---------------------------------------------------------------|---------------------------------------------------------------|---------------------------------------------------------------|---------------------------------------------------------------|------------------------------------------------------|------------------------------------------------------|------------------------------------------------------|------------------------------------------------------|
| Non-venomous animal contact                     | 134.27<br>(80.37 to<br>230.80)                                | 114.77<br>(70.49 to<br>210.41)                                | 113.79<br>(68.11 to<br>213.25)                                | 144.34<br>(88.53 to<br>262.30)                                | 2.88<br>(1.91 to<br>5.24)                            | 3.95<br>(2.48 to<br>6.97)                            | 4.03<br>(2.51 to<br>7.10)                            | 4.51<br>(2.84 to<br>8.02)                            |
| Foreign body                                    | 364.26<br>(263.59 to<br>430.55)                               | 297.64<br>(207.42 to<br>368.91)                               | 305.49<br>(210.51 to<br>380.56)                               | 310.94<br>(217.85 to<br>381.99)                               | 8.01<br>(5.80 to<br>9.34)                            | 13.34<br>(9.11 to<br>16.78)                          | 14.26<br>(9.65 to<br>18.07)                          | 11.49<br>(8.07 to<br>14.08)                          |
| Pulmonary aspiration and foreign body in airway | 288.99<br>(195.66 to<br>346.51)                               | 245.59<br>(169.44 to<br>302.00)                               | 253.64<br>(174.27 to<br>314.59)                               | 250.12<br>(170.76 to<br>303.35)                               | 6.52<br>(4.61 to<br>7.47)                            | 11.86<br>(7.92 to<br>14.90)                          | 12.75<br>(8.46 to<br>16.16)                          | 9.92<br>(6.88 to<br>12.26)                           |
| Foreign body in other body part                 | 75.27<br>(47.09 to<br>108.11)                                 | 52.06<br>(30.97 to<br>77.76)                                  | 51.85<br>(30.74 to<br>77.79)                                  | 60.82<br>(36.74 to<br>90.31)                                  | 1.49<br>(0.97 to<br>2.10)                            | 1.48<br>(0.90 to<br>2.12)                            | 1.51<br>(0.91 to<br>2.19)                            | 1.58<br>(0.97 to<br>2.24)                            |
| Environmental heat and cold exposure            | 534.29<br>(169.50 to<br>676.07)                               | 466.92<br>(146.30 to<br>643.69)                               | 464.89<br>(142.27 to<br>657.95)                               | 607.30<br>(184.34 to<br>846.69)                               | 16.24<br>(5.08 to<br>20.64)                          | 20.02<br>(6.22 to<br>27.63)                          | 20.50<br>(6.28 to<br>28.73)                          | 23.81<br>(7.45 to<br>32.82)                          |
| Other unintentional injuries                    | 1,418.82<br>(1,074.17 to<br>1,546.09)                         | 944.53<br>(705.15 to<br>1,151.66)                             | 936.65<br>(693.48 to<br>1,143.63)                             | 1,105.26<br>(811.67 to<br>1,333.64)                           | 28.96<br>(21.70 to<br>31.47)                         | 23.49<br>(17.43 to<br>28.27)                         | 23.61<br>(17.39 to<br>28.64)                         | 26.38<br>(19.50 to<br>31.35)                         |
| <b>Self-harm and interpersonal violence</b>     | <b>13,894.91</b><br><b>(12,099.40 to</b><br><b>15,059.75)</b> | <b>15,095.43</b><br><b>(11,823.93 to</b><br><b>18,520.77)</b> | <b>14,207.24</b><br><b>(11,284.14 to</b><br><b>17,178.37)</b> | <b>16,092.60</b><br><b>(12,470.24 to</b><br><b>19,821.36)</b> | <b>278.89</b><br><b>(238.51 to</b><br><b>302.02)</b> | <b>360.78</b><br><b>(277.07 to</b><br><b>443.51)</b> | <b>343.58</b><br><b>(267.35 to</b><br><b>416.33)</b> | <b>370.73</b><br><b>(284.13 to</b><br><b>457.67)</b> |

| India                                                                        |                                         |                                         |                                         |                                          |                                 |                                 |                                 |                                 |
|------------------------------------------------------------------------------|-----------------------------------------|-----------------------------------------|-----------------------------------------|------------------------------------------|---------------------------------|---------------------------------|---------------------------------|---------------------------------|
| Cause                                                                        | YLLs (in 1000s)                         |                                         |                                         |                                          | Deaths (in 1000s)               |                                 |                                 |                                 |
|                                                                              | 2016                                    | 2040 Forecast                           | 2040 Better Scenario                    | 2040 Worse Scenario                      | 2016                            | 2040 Forecast                   | 2040 Better Scenario            | 2040 Worse Scenario             |
| Self-harm                                                                    | 11,509.51<br>(9,875.74 to<br>12,533.80) | 12,927.06<br>(9,685.62 to<br>16,138.06) | 12,069.38<br>(9,153.96 to<br>14,825.07) | 13,866.03<br>(10,398.22 to<br>17,397.34) | 230.31<br>(194.06 to<br>250.26) | 307.93<br>(227.56 to<br>386.47) | 291.00<br>(219.29 to<br>356.20) | 318.07<br>(236.64 to<br>400.08) |
| Self-harm by firearm                                                         | 702.34<br>(397.05 to<br>1,029.05)       | 602.02<br>(301.69 to<br>985.98)         | 552.58<br>(285.01 to<br>889.30)         | 671.27<br>(355.21 to<br>1,100.90)        | 13.45<br>(7.70 to<br>19.83)     | 13.27<br>(6.75 to<br>21.91)     | 12.30<br>(6.40 to<br>20.01)     | 14.39<br>(7.29 to<br>23.69)     |
| Self-harm by other specified means                                           | 10,807.18<br>(9,221.59 to<br>11,961.41) | 12,325.03<br>(9,223.83 to<br>15,289.25) | 11,516.80<br>(8,710.07 to<br>14,137.35) | 13,194.76<br>(9,857.21 to<br>16,472.31)  | 216.87<br>(181.71 to<br>239.04) | 294.66<br>(218.57 to<br>367.65) | 278.71<br>(209.22 to<br>343.12) | 303.68<br>(224.84 to<br>382.80) |
| Interpersonal violence                                                       | 2,385.40<br>(1,983.20 to<br>2,859.78)   | 2,168.38<br>(1,648.58 to<br>2,690.99)   | 2,137.86<br>(1,618.24 to<br>2,642.85)   | 2,226.57<br>(1,694.49 to<br>2,769.92)    | 48.58<br>(39.65 to<br>56.50)    | 52.85<br>(39.45 to<br>64.89)    | 52.58<br>(38.94 to<br>64.56)    | 52.66<br>(39.23 to<br>64.22)    |
| Physical violence by firearm                                                 | 560.96<br>(301.52 to<br>744.82)         | 518.04<br>(264.45 to<br>715.30)         | 522.34<br>(269.96 to<br>722.31)         | 523.50<br>(265.57 to<br>728.90)          | 11.56<br>(6.19 to<br>15.42)     | 12.35<br>(6.39 to<br>16.84)     | 12.56<br>(6.56 to<br>17.11)     | 12.16<br>(6.16 to<br>16.67)     |
| Physical violence by sharp object                                            | 566.47<br>(347.54 to<br>705.43)         | 629.93<br>(369.86 to<br>799.44)         | 639.12<br>(380.43 to<br>813.57)         | 608.73<br>(354.60 to<br>766.74)          | 12.10<br>(7.20 to<br>15.02)     | 15.43<br>(9.00 to<br>19.34)     | 15.77<br>(9.25 to<br>19.92)     | 14.61<br>(8.46 to<br>18.21)     |
| Physical violence by other means                                             | 1,257.96<br>(1,059.41 to<br>1,680.68)   | 1,020.41<br>(777.07 to<br>1,426.84)     | 976.40<br>(747.55 to<br>1,377.00)       | 1,094.35<br>(834.34 to<br>1,502.32)      | 24.92<br>(20.92 to<br>33.16)    | 25.07<br>(19.06 to<br>34.30)    | 24.25<br>(18.60 to<br>33.51)    | 25.88<br>(19.86 to<br>35.09)    |
| Forces of nature, conflict and terrorism, and executions and police conflict | 65.51<br>(36.63 to<br>94.79)            | 87.34<br>(1.18 to<br>354.55)            | 87.74<br>(1.19 to<br>355.80)            | 90.87<br>(1.24 to<br>373.14)             | 1.25<br>(0.70 to<br>1.81)       | 1.96<br>(0.83 to<br>8.53)       | 1.99<br>(0.83 to<br>8.65)       | 1.95<br>(0.83 to<br>8.49)       |
| Exposure to forces of nature                                                 | 57.64<br>(28.72 to<br>87.05)            | 50.96<br>(0.00 to<br>307.15)            | 51.24<br>(0.00 to<br>308.30)            | 53.53<br>(0.00 to<br>323.50)             | 1.10<br>(0.55 to<br>1.66)       | 1.21<br>(0.00 to<br>7.47)       | 1.23<br>(0.00 to<br>7.58)       | 1.19<br>(0.00 to<br>7.45)       |
| Conflict and terrorism                                                       | 0.00<br>(0.00 to<br>0.00)               | 4.08<br>(0.00 to<br>21.12)              | 4.10<br>(0.00 to<br>21.16)              | 4.30<br>(0.00 to<br>22.17)               | 0.00<br>(0.00 to<br>0.00)       | 0.08<br>(0.00 to<br>0.44)       | 0.09<br>(0.00 to<br>0.45)       | 0.09<br>(0.00 to<br>0.44)       |
| Executions and police conflict                                               | 7.87<br>(7.35 to<br>8.44)               | 32.29<br>(0.00 to<br>152.87)            | 32.41<br>(0.00 to<br>153.59)            | 33.05<br>(0.00 to<br>156.36)             | 0.15<br>(0.14 to<br>0.16)       | 0.67<br>(0.00 to<br>3.21)       | 0.68<br>(0.00 to<br>3.23)       | 0.67<br>(0.00 to<br>3.20)       |

| Nepal |                 |               |                      |                     |                   |               |                      |                     |
|-------|-----------------|---------------|----------------------|---------------------|-------------------|---------------|----------------------|---------------------|
| Cause | YLLs (in 1000s) |               |                      |                     | Deaths (in 1000s) |               |                      |                     |
|       | 2016            | 2040 Forecast | 2040 Better Scenario | 2040 Worse Scenario | 2016              | 2040 Forecast | 2040 Better Scenario | 2040 Worse Scenario |

|                                                                   |                                       |                                       |                                       |                                       |                                 |                                 |                                 |                                 |
|-------------------------------------------------------------------|---------------------------------------|---------------------------------------|---------------------------------------|---------------------------------------|---------------------------------|---------------------------------|---------------------------------|---------------------------------|
| All causes                                                        | 6,203.29<br>(5,618.18 to<br>6,936.62) | 4,867.75<br>(4,108.45 to<br>5,751.81) | 3,895.48<br>(3,341.37 to<br>4,547.24) | 6,921.88<br>(5,755.35 to<br>8,218.20) | 181.75<br>(169.78 to<br>195.14) | 230.68<br>(200.05 to<br>259.80) | 192.83<br>(168.72 to<br>217.57) | 298.96<br>(259.93 to<br>336.41) |
| Communicable, maternal, neonatal, and nutritional diseases        | 2,684.59<br>(2,176.07 to<br>3,315.92) | 835.03<br>(558.81 to<br>1,279.01)     | 667.17<br>(439.28 to<br>1,073.96)     | 1,481.30<br>(960.06 to<br>2,292.30)   | 48.75<br>(40.93 to<br>58.25)    | 29.36<br>(17.72 to<br>50.65)    | 24.95<br>(14.91 to<br>44.10)    | 48.42<br>(27.76 to<br>85.49)    |
| HIV/AIDS and tuberculosis                                         | 197.52<br>(107.75 to<br>447.50)       | 154.19<br>(53.99 to<br>540.49)        | 122.27<br>(35.96 to<br>484.80)        | 223.66<br>(94.47 to<br>631.36)        | 5.73<br>(3.45 to<br>10.99)      | 4.82<br>(2.17 to<br>13.30)      | 3.76<br>(1.51 to<br>11.95)      | 6.86<br>(3.38 to<br>16.09)      |
| Tuberculosis                                                      | 129.82<br>(91.40 to<br>217.55)        | 77.43<br>(45.75 to<br>139.07)         | 51.16<br>(30.85 to<br>95.47)          | 125.74<br>(73.37 to<br>226.77)        | 4.34<br>(3.10 to<br>7.32)       | 3.17<br>(1.92 to<br>5.95)       | 2.21<br>(1.38 to<br>4.26)       | 4.81<br>(2.91 to<br>9.26)       |
| HIV/AIDS                                                          | 67.70<br>(2.20 to<br>322.87)          | 76.76<br>(0.53 to<br>472.48)          | 71.11<br>(0.19 to<br>444.58)          | 97.92<br>(3.11 to<br>495.91)          | 1.39<br>(0.04 to<br>6.45)       | 1.65<br>(0.01 to<br>9.85)       | 1.54<br>(0.00 to<br>9.85)       | 2.05<br>(0.05 to<br>10.79)      |
| Diarrhea, lower respiratory, and other common infectious diseases | 1,117.76<br>(880.17 to<br>1,393.02)   | 385.34<br>(197.08 to<br>718.04)       | 310.42<br>(158.65 to<br>574.81)       | 756.56<br>(366.24 to<br>1,485.65)     | 25.15<br>(19.28 to<br>31.75)    | 18.96<br>(8.55 to<br>37.24)     | 16.43<br>(7.37 to<br>32.96)     | 33.35<br>(13.97 to<br>69.66)    |
| Diarrheal diseases                                                | 236.24<br>(151.53 to<br>372.73)       | 108.16<br>(15.77 to<br>343.36)        | 91.80<br>(13.83 to<br>290.27)         | 261.53<br>(39.25 to<br>826.97)        | 8.89<br>(4.93 to<br>14.79)      | 7.62<br>(1.11 to<br>23.98)      | 6.89<br>(1.03 to<br>21.45)      | 16.39<br>(2.34 to<br>49.50)     |
| Intestinal infectious diseases                                    | 126.48<br>(68.85 to<br>207.20)        | 50.18<br>(24.76 to<br>86.22)          | 44.80<br>(22.38 to<br>76.36)          | 66.74<br>(32.25 to<br>115.12)         | 1.86<br>(1.02 to<br>3.02)       | 0.89<br>(0.46 to<br>1.55)       | 0.82<br>(0.42 to<br>1.39)       | 1.13<br>(0.56 to<br>1.98)       |
| Typhoid fever                                                     | 103.32<br>(54.39 to<br>174.23)        | 37.75<br>(18.42 to<br>65.04)          | 33.68<br>(16.59 to<br>56.79)          | 50.51<br>(24.45 to<br>89.94)          | 1.49<br>(0.80 to<br>2.51)       | 0.66<br>(0.33 to<br>1.12)       | 0.60<br>(0.30 to<br>1.03)       | 0.83<br>(0.41 to<br>1.45)       |
| Paratyphoid fever                                                 | 22.93<br>(10.08 to<br>42.59)          | 12.38<br>(5.45 to<br>24.22)           | 11.08<br>(4.92 to<br>21.42)           | 16.16<br>(6.98 to<br>31.16)           | 0.36<br>(0.16 to<br>0.68)       | 0.24<br>(0.11 to<br>0.45)       | 0.22<br>(0.10 to<br>0.41)       | 0.30<br>(0.13 to<br>0.56)       |
| Other intestinal infectious diseases                              | 0.23<br>(0.06 to<br>0.63)             | 0.05<br>(0.01 to<br>0.13)             | 0.04<br>(0.01 to<br>0.11)             | 0.07<br>(0.02 to<br>0.20)             | 0.00<br>(0.00 to<br>0.01)       | 0.00<br>(0.00 to<br>0.00)       | 0.00<br>(0.00 to<br>0.00)       | 0.00<br>(0.00 to<br>0.01)       |
| Lower respiratory infections                                      | 541.94<br>(398.30 to<br>723.93)       | 163.23<br>(95.18 to<br>260.90)        | 117.50<br>(69.87 to<br>187.01)        | 330.00<br>(177.85 to<br>569.27)       | 10.93<br>(8.20 to<br>13.66)     | 8.40<br>(4.96 to<br>12.88)      | 6.73<br>(4.06 to<br>9.91)       | 13.34<br>(7.88 to<br>20.91)     |
| Upper respiratory infections                                      | 0.65<br>(0.31 to<br>1.33)             | 0.29<br>(0.13 to<br>0.56)             | 0.23<br>(0.10 to<br>0.45)             | 0.45<br>(0.20 to<br>0.87)             | 0.01<br>(0.01 to<br>0.02)       | 0.01<br>(0.00 to<br>0.02)       | 0.01<br>(0.00 to<br>0.02)       | 0.01<br>(0.01 to<br>0.03)       |
| Otitis media                                                      | 0.44<br>(0.18 to<br>1.06)             | 0.12<br>(0.04 to<br>0.35)             | 0.13<br>(0.04 to<br>0.36)             | 0.12<br>(0.04 to<br>0.33)             | 0.01<br>(0.00 to<br>0.03)       | 0.01<br>(0.00 to<br>0.01)       | 0.01<br>(0.00 to<br>0.01)       | 0.00<br>(0.00 to<br>0.01)       |
| Meningitis                                                        | 68.69<br>(35.83 to<br>118.89)         | 25.22<br>(10.35 to<br>40.86)          | 23.59<br>(9.86 to<br>38.19)           | 34.18<br>(15.02 to<br>56.54)          | 1.20<br>(0.61 to<br>1.88)       | 0.75<br>(0.31 to<br>1.16)       | 0.74<br>(0.31 to<br>1.15)       | 0.85<br>(0.36 to<br>1.31)       |
| Pneumococcal meningitis                                           | 4.10<br>(2.03 to<br>6.82)             | 1.77<br>(0.70 to<br>2.87)             | 1.77<br>(0.72 to<br>2.89)             | 2.09<br>(0.85 to<br>3.39)             | 0.09<br>(0.04 to<br>0.13)       | 0.06<br>(0.02 to<br>0.10)       | 0.06<br>(0.03 to<br>0.10)       | 0.07<br>(0.03 to<br>0.10)       |
| H influenzae type B meningitis                                    | 6.24<br>(3.37 to<br>11.59)            | 2.58<br>(0.99 to<br>5.23)             | 2.16<br>(0.92 to<br>3.90)             | 6.70<br>(2.07 to<br>17.83)            | 0.10<br>(0.05 to<br>0.17)       | 0.06<br>(0.03 to<br>0.10)       | 0.06<br>(0.02 to<br>0.09)       | 0.10<br>(0.04 to<br>0.24)       |
| Meningococcal meningitis                                          | 36.38<br>(19.01 to<br>62.97)          | 12.36<br>(5.10 to<br>20.36)           | 11.59<br>(4.79 to<br>19.02)           | 15.14<br>(6.51 to<br>24.45)           | 0.63<br>(0.32 to<br>0.98)       | 0.37<br>(0.15 to<br>0.58)       | 0.36<br>(0.15 to<br>0.57)       | 0.40<br>(0.17 to<br>0.62)       |
| Other meningitis                                                  | 21.98<br>(11.38 to<br>38.02)          | 8.52<br>(3.43 to<br>13.91)            | 8.07<br>(3.34 to<br>13.09)            | 10.25<br>(4.23 to<br>16.64)           | 0.39<br>(0.19 to<br>0.60)       | 0.26<br>(0.11 to<br>0.40)       | 0.26<br>(0.11 to<br>0.40)       | 0.28<br>(0.11 to<br>0.43)       |
| Encephalitis                                                      | 49.84<br>(21.02 to<br>81.41)          | 31.06<br>(13.19 to<br>50.88)          | 28.78<br>(12.56 to<br>46.78)          | 38.62<br>(16.59 to<br>64.45)          | 1.02<br>(0.47 to<br>1.53)       | 1.15<br>(0.51 to<br>1.88)       | 1.14<br>(0.51 to<br>1.85)       | 1.27<br>(0.57 to<br>2.02)       |
| Diphtheria                                                        | 0.07<br>(0.04 to<br>0.12)             | 0.01<br>(0.00 to<br>0.02)             | 0.02<br>(0.00 to<br>0.01)             | 0.00<br>(0.01 to<br>0.05)             | 0.00<br>(0.00 to<br>0.00)       | 0.00<br>(0.00 to<br>0.00)       | 0.00<br>(0.00 to<br>0.00)       | 0.00<br>(0.00 to<br>0.00)       |
| Whooping cough                                                    | 41.81<br>(3.43 to<br>139.67)          | 3.92<br>(0.23 to<br>15.84)            | 1.38<br>(0.09 to<br>5.22)             | 15.10<br>(1.02 to<br>60.37)           | 0.49<br>(0.04 to<br>1.65)       | 0.05<br>(0.00 to<br>0.19)       | 0.02<br>(0.00 to<br>0.07)       | 0.18<br>(0.01 to<br>0.72)       |



| Tetanus                                       | 42.02<br>(17.88 to<br>87.27)          | 2.07<br>(0.73 to<br>4.78)           | 1.38<br>(0.54 to<br>2.52)           | 6.57<br>(1.99 to<br>17.80)           | 0.59<br>(0.27 to<br>1.12)        | 0.05<br>(0.02 to<br>0.08)        | 0.04<br>(0.02 to<br>0.06)        | 0.10<br>(0.03 to<br>0.23)        |
|-----------------------------------------------|---------------------------------------|-------------------------------------|-------------------------------------|--------------------------------------|----------------------------------|----------------------------------|----------------------------------|----------------------------------|
| Measles                                       | 6.20<br>(2.01 to<br>15.96)            | 0.28<br>(0.03 to<br>1.42)           | 0.18<br>(0.02 to<br>0.83)           | 2.00<br>(0.13 to<br>9.54)            | 0.07<br>(0.02 to<br>0.19)        | 0.00<br>(0.00 to<br>0.02)        | 0.00<br>(0.00 to<br>0.01)        | 0.02<br>(0.00 to<br>0.11)        |
| <b>Nepal</b>                                  |                                       |                                     |                                     |                                      |                                  |                                  |                                  |                                  |
| Cause                                         | YLLs (in 1000s)                       |                                     |                                     |                                      | Deaths (in 1000s)                |                                  |                                  |                                  |
|                                               | 2016                                  | 2040 Forecast                       | 2040 Better Scenario                | 2040 Worse Scenario                  | 2016                             | 2040 Forecast                    | 2040 Better Scenario             | 2040 Worse Scenario              |
| Varicella and herpes zoster                   | 3.38<br>(1.86 to<br>5.84)             | 0.79<br>(0.46 to<br>1.28)           | 0.65<br>(0.38 to<br>1.06)           | 1.24<br>(0.72 to<br>2.14)            | 0.07<br>(0.04 to<br>0.10)        | 0.04<br>(0.02 to<br>0.07)        | 0.04<br>(0.02 to<br>0.06)        | 0.05<br>(0.03 to<br>0.08)        |
| Neglected tropical diseases and malaria       | <b>68.47</b><br>(31.36 to<br>131.85)  | <b>24.94</b><br>(15.55 to<br>48.70) | <b>24.94</b><br>(14.55 to<br>43.69) | <b>35.54</b><br>(19.07 to<br>64.74)  | <b>1.12</b><br>(0.59 to<br>1.99) | <b>0.78</b><br>(0.47 to<br>1.32) | <b>0.75</b><br>(0.46 to<br>1.27) | <b>0.90</b><br>(0.53 to<br>1.50) |
| Malaria                                       | 45.17<br>(13.78 to<br>105.98)         | 9.49<br>(3.64 to<br>17.83)          | 8.72<br>(3.40 to<br>15.80)          | 12.35<br>(4.36 to<br>25.68)          | 0.68<br>(0.26 to<br>1.42)        | 0.25<br>(0.11 to<br>0.42)        | 0.25<br>(0.10 to<br>0.40)        | 0.28<br>(0.12 to<br>0.49)        |
| Chagas disease                                | 0.00<br>(0.00 to<br>0.00)             | 0.00<br>(0.00 to<br>0.00)           | 0.00<br>(0.00 to<br>0.00)           | 0.00<br>(0.00 to<br>0.00)            | 0.00<br>(0.00 to<br>0.00)        | 0.00<br>(0.00 to<br>0.00)        | 0.00<br>(0.00 to<br>0.00)        | 0.00<br>(0.00 to<br>0.00)        |
| Leishmaniasis                                 | 5.35<br>(2.80 to<br>9.50)             | 1.18<br>(0.51 to<br>2.25)           | 0.91<br>(0.38 to<br>1.78)           | 2.00<br>(0.91 to<br>3.77)            | 0.09<br>(0.05 to<br>0.15)        | 0.03<br>(0.01 to<br>0.05)        | 0.02<br>(0.01 to<br>0.04)        | 0.04<br>(0.02 to<br>0.07)        |
| African trypanosomiasis                       | 0.00<br>(0.00 to<br>0.00)             | 0.00<br>(0.00 to<br>0.00)           | 0.00<br>(0.00 to<br>0.00)           | 0.00<br>(0.00 to<br>0.00)            | 0.00<br>(0.00 to<br>0.00)        | 0.00<br>(0.00 to<br>0.00)        | 0.00<br>(0.00 to<br>0.00)        | 0.00<br>(0.00 to<br>0.00)        |
| Schistosomiasis                               | 0.00<br>(0.00 to<br>0.00)             | 0.00<br>(0.00 to<br>0.00)           | 0.00<br>(0.00 to<br>0.00)           | 0.00<br>(0.00 to<br>0.00)            | 0.00<br>(0.00 to<br>0.00)        | 0.00<br>(0.00 to<br>0.00)        | 0.00<br>(0.00 to<br>0.00)        | 0.00<br>(0.00 to<br>0.00)        |
| Cysticercosis                                 | 0.11<br>(0.09 to<br>0.13)             | 0.04<br>(0.02 to<br>0.06)           | 0.04<br>(0.02 to<br>0.06)           | 0.04<br>(0.02 to<br>0.07)            | 0.00<br>(0.00 to<br>0.00)        | 0.00<br>(0.00 to<br>0.00)        | 0.00<br>(0.00 to<br>0.00)        | 0.00<br>(0.00 to<br>0.00)        |
| Cystic echinococcosis                         | 0.42<br>(0.31 to<br>0.55)             | 0.15<br>(0.07 to<br>0.26)           | 0.11<br>(0.05 to<br>0.19)           | 0.25<br>(0.12 to<br>0.41)            | 0.01<br>(0.01 to<br>0.02)        | 0.01<br>(0.00 to<br>0.01)        | 0.00<br>(0.00 to<br>0.01)        | 0.01<br>(0.00 to<br>0.02)        |
| Dengue                                        | 8.49<br>(0.93 to<br>34.15)            | 13.87<br>(3.59 to<br>37.00)         | 13.09<br>(3.58 to<br>34.07)         | 16.25<br>(3.83 to<br>45.72)          | 0.17<br>(0.02 to<br>0.65)        | 0.42<br>(0.11 to<br>1.12)        | 0.42<br>(0.12 to<br>1.09)        | 0.45<br>(0.11 to<br>1.20)        |
| Yellow fever                                  | 0.00<br>(0.00 to<br>0.00)             | 0.00<br>(0.00 to<br>0.00)           | 0.00<br>(0.00 to<br>0.00)           | 0.00<br>(0.00 to<br>0.00)            | 0.00<br>(0.00 to<br>0.00)        | 0.00<br>(0.00 to<br>0.00)        | 0.00<br>(0.00 to<br>0.00)        | 0.00<br>(0.00 to<br>0.00)        |
| Rabies                                        | 6.56<br>(3.18 to<br>14.25)            | 1.70<br>(0.61 to<br>4.78)           | 1.18<br>(0.40 to<br>3.40)           | 3.28<br>(1.33 to<br>8.65)            | 0.13<br>(0.07 to<br>0.27)        | 0.04<br>(0.02 to<br>0.12)        | 0.03<br>(0.01 to<br>0.09)        | 0.08<br>(0.03 to<br>0.21)        |
| Intestinal nematode infections                | 0.80<br>(0.45 to<br>1.27)             | 0.34<br>(0.15 to<br>0.60)           | 0.32<br>(0.14 to<br>0.57)           | 0.43<br>(0.19 to<br>0.81)            | 0.01<br>(0.01 to<br>0.02)        | 0.01<br>(0.00 to<br>0.02)        | 0.01<br>(0.00 to<br>0.02)        | 0.01<br>(0.00 to<br>0.02)        |
| Other neglected tropical diseases             | 1.57<br>(0.82 to<br>2.68)             | 0.67<br>(0.31 to<br>1.10)           | 0.58<br>(0.25 to<br>0.97)           | 0.94<br>(0.44 to<br>1.54)            | 0.03<br>(0.02 to<br>0.05)        | 0.02<br>(0.01 to<br>0.04)        | 0.02<br>(0.01 to<br>0.03)        | 0.03<br>(0.01 to<br>0.04)        |
| Maternal disorders                            | <b>110.11</b><br>(82.45 to<br>137.53) | <b>44.71</b><br>(29.23 to<br>64.54) | <b>34.14</b><br>(22.15 to<br>48.95) | <b>71.03</b><br>(47.00 to<br>101.25) | <b>2.00</b><br>(1.51 to<br>2.50) | <b>0.86</b><br>(0.56 to<br>1.24) | <b>0.66</b><br>(0.43 to<br>0.94) | <b>1.36</b><br>(0.91 to<br>1.95) |
| Maternal hemorrhage                           | 33.43<br>(23.18 to<br>45.22)          | 12.55<br>(4.58 to<br>20.06)         | 9.51<br>(3.40 to<br>15.19)          | 19.86<br>(7.29 to<br>31.83)          | 0.60<br>(0.42 to<br>0.81)        | 0.24<br>(0.09 to<br>0.38)        | 0.18<br>(0.06 to<br>0.29)        | 0.38<br>(0.13 to<br>0.61)        |
| Maternal sepsis and other maternal infections | 6.58<br>(3.96 to<br>10.05)            | 2.25<br>(0.82 to<br>3.82)           | 1.71<br>(0.60 to<br>2.95)           | 3.59<br>(1.37 to<br>6.18)            | 0.12<br>(0.07 to<br>0.18)        | 0.04<br>(0.02 to<br>0.07)        | 0.03<br>(0.01 to<br>0.06)        | 0.07<br>(0.03 to<br>0.12)        |
| Maternal hypertensive disorders               | 6.30<br>(3.86 to<br>9.51)             | 2.25<br>(0.78 to<br>4.01)           | 1.70<br>(0.58 to<br>3.03)           | 3.59<br>(1.28 to<br>6.33)            | 0.11<br>(0.07 to<br>0.17)        | 0.04<br>(0.01 to<br>0.07)        | 0.03<br>(0.01 to<br>0.06)        | 0.07<br>(0.02 to<br>0.12)        |

|                                                                         |                                            |                                       |                                       |                                        |                                    |                                  |                                  |                                  |
|-------------------------------------------------------------------------|--------------------------------------------|---------------------------------------|---------------------------------------|----------------------------------------|------------------------------------|----------------------------------|----------------------------------|----------------------------------|
| Maternal obstructed labor and uterine rupture                           | 2.39<br>(1.25 to<br>4.10)                  | 1.01<br>(0.29 to<br>2.08)             | 0.75<br>(0.22 to<br>1.52)             | 1.64<br>(0.50 to<br>3.32)              | 0.05<br>(0.02 to<br>0.08)          | 0.02<br>(0.01 to<br>0.04)        | 0.01<br>(0.00 to<br>0.03)        | 0.03<br>(0.01 to<br>0.07)        |
| Maternal abortion, miscarriage, and ectopic pregnancy                   | 13.30<br>(8.84 to<br>18.91)                | 3.97<br>(1.35 to<br>7.69)             | 3.04<br>(1.04 to<br>5.99)             | 6.34<br>(2.34 to<br>12.33)             | 0.26<br>(0.17 to<br>0.37)          | 0.08<br>(0.03 to<br>0.16)        | 0.06<br>(0.02 to<br>0.13)        | 0.13<br>(0.05 to<br>0.27)        |
| Indirect maternal deaths                                                | 21.24<br>(13.87 to<br>30.25)               | 8.42<br>(3.15 to<br>14.23)            | 6.45<br>(2.32 to<br>11.03)            | 13.53<br>(4.89 to<br>22.77)            | 0.38<br>(0.25 to<br>0.53)          | 0.16<br>(0.06 to<br>0.26)        | 0.12<br>(0.04 to<br>0.20)        | 0.25<br>(0.09 to<br>0.42)        |
| Late maternal deaths                                                    | 3.25<br>(1.77 to<br>5.39)                  | 1.04<br>(0.36 to<br>1.93)             | 0.79<br>(0.27 to<br>1.46)             | 1.67<br>(0.55 to<br>3.06)              | 0.06<br>(0.03 to<br>0.10)          | 0.02<br>(0.01 to<br>0.04)        | 0.01<br>(0.01 to<br>0.03)        | 0.03<br>(0.01 to<br>0.06)        |
| Maternal deaths aggravated by HIV/AIDS                                  | 0.05<br>(0.01 to<br>0.15)                  | 3.63<br>(0.00 to<br>23.10)            | 2.73<br>(0.00 to<br>17.78)            | 5.87<br>(0.00 to<br>37.68)             | 0.00<br>(0.00 to<br>0.00)          | 0.07<br>(0.00 to<br>0.45)        | 0.05<br>(0.00 to<br>0.36)        | 0.11<br>(0.00 to<br>0.72)        |
| Other maternal disorders                                                | 23.56<br>(15.91 to<br>32.67)               | 9.59<br>(3.78 to<br>15.69)            | 7.46<br>(2.95 to<br>12.35)            | 14.93<br>(6.02 to<br>24.68)            | 0.43<br>(0.29 to<br>0.59)          | 0.19<br>(0.07 to<br>0.31)        | 0.15<br>(0.06 to<br>0.24)        | 0.29<br>(0.12 to<br>0.48)        |
| <b>Nepal</b>                                                            |                                            |                                       |                                       |                                        |                                    |                                  |                                  |                                  |
| Cause                                                                   | YLLs (in 1000s)                            |                                       |                                       |                                        | Deaths (in 1000s)                  |                                  |                                  |                                  |
|                                                                         | 2016                                       | 2040 Forecast                         | 2040 Better Scenario                  | 2040 Worse Scenario                    | 2016                               | 2040 Forecast                    | 2040 Better Scenario             | 2040 Worse Scenario              |
| <b>Neonatal disorders</b>                                               | <b>1,017.82</b><br>(726.91 to<br>1,382.10) | <b>172.51</b><br>(93.54 to<br>266.45) | <b>129.86</b><br>(69.17 to<br>201.06) | <b>328.73</b><br>(178.72 to<br>509.73) | <b>11.76</b><br>(8.40 to<br>15.96) | <b>1.99</b><br>(1.08 to<br>3.08) | <b>1.50</b><br>(0.80 to<br>2.32) | <b>3.80</b><br>(2.06 to<br>5.89) |
| Neonatal preterm birth                                                  | 149.84<br>(86.29 to<br>243.73)             | 21.80<br>(11.26 to<br>38.61)          | 16.29<br>(8.40 to<br>28.64)           | 46.97<br>(23.74 to<br>83.09)           | 1.73<br>(1.00 to<br>2.81)          | 0.25<br>(0.13 to<br>0.45)        | 0.19<br>(0.10 to<br>0.33)        | 0.54<br>(0.27 to<br>0.96)        |
| Neonatal encephalopathy due to birth asphyxia and trauma                | 431.92<br>(282.51 to<br>632.07)            | 71.45<br>(33.73 to<br>122.48)         | 55.11<br>(25.85 to<br>93.51)          | 128.42<br>(60.87 to<br>224.90)         | 4.99<br>(3.26 to<br>7.30)          | 0.83<br>(0.39 to<br>1.41)        | 0.64<br>(0.30 to<br>1.08)        | 1.48<br>(0.70 to<br>2.60)        |
| Neonatal sepsis and other neonatal infections                           | 80.55<br>(41.87 to<br>146.38)              | 17.50<br>(7.89 to<br>33.92)           | 13.33<br>(5.96 to<br>25.54)           | 32.14<br>(14.44 to<br>64.02)           | 0.93<br>(0.48 to<br>1.69)          | 0.20<br>(0.09 to<br>0.39)        | 0.15<br>(0.07 to<br>0.29)        | 0.37<br>(0.17 to<br>0.74)        |
| Hemolytic disease and other neonatal jaundice                           | 59.57<br>(31.70 to<br>107.37)              | 7.21<br>(2.99 to<br>14.24)            | 5.27<br>(2.23 to<br>10.57)            | 14.14<br>(5.72 to<br>28.04)            | 0.69<br>(0.37 to<br>1.24)          | 0.08<br>(0.03 to<br>0.16)        | 0.06<br>(0.03 to<br>0.12)        | 0.16<br>(0.07 to<br>0.32)        |
| Other neonatal disorders                                                | 295.94<br>(176.50 to<br>445.11)            | 54.56<br>(24.79 to<br>94.22)          | 39.87<br>(18.40 to<br>68.87)          | 107.06<br>(49.67 to<br>185.39)         | 3.42<br>(2.04 to<br>5.14)          | 0.63<br>(0.29 to<br>1.09)        | 0.46<br>(0.21 to<br>0.80)        | 1.24<br>(0.57 to<br>2.14)        |
| <b>Nutritional deficiencies</b>                                         | <b>42.74</b><br>(29.80 to<br>62.75)        | <b>14.58</b><br>(11.53 to<br>19.16)   | <b>13.16</b><br>(10.36 to<br>17.31)   | <b>18.78</b><br>(14.43 to<br>25.77)    | <b>0.90</b><br>(0.70 to<br>1.18)   | <b>0.73</b><br>(0.58 to<br>0.92) | <b>0.72</b><br>(0.57 to<br>0.90) | <b>0.78</b><br>(0.61 to<br>0.99) |
| Protein-energy malnutrition                                             | 29.37<br>(18.11 to<br>45.74)               | 4.07<br>(2.65 to<br>6.36)             | 3.47<br>(2.31 to<br>5.41)             | 6.49<br>(3.87 to<br>10.72)             | 0.43<br>(0.30 to<br>0.63)          | 0.17<br>(0.12 to<br>0.24)        | 0.17<br>(0.12 to<br>0.23)        | 0.20<br>(0.14 to<br>0.28)        |
| Iodine deficiency                                                       | 0.29<br>(0.02 to<br>1.11)                  | 0.64<br>(0.03 to<br>1.91)             | 0.56<br>(0.02 to<br>1.71)             | 0.84<br>(0.04 to<br>2.61)              | 0.01<br>(0.00 to<br>0.05)          | 0.04<br>(0.00 to<br>0.12)        | 0.03<br>(0.00 to<br>0.11)        | 0.04<br>(0.00 to<br>0.12)        |
| Dietary iron deficiency                                                 | 0.63<br>(0.31 to<br>0.99)                  | 0.77<br>(0.33 to<br>1.22)             | 0.77<br>(0.33 to<br>1.23)             | 0.80<br>(0.35 to<br>1.29)              | 0.03<br>(0.01 to<br>0.05)          | 0.05<br>(0.02 to<br>0.09)        | 0.06<br>(0.02 to<br>0.10)        | 0.05<br>(0.02 to<br>0.09)        |
| Other nutritional deficiencies                                          | 12.45<br>(9.66 to<br>17.07)                | 9.08<br>(6.91 to<br>12.08)            | 8.36<br>(6.33 to<br>11.14)            | 10.65<br>(8.04 to<br>14.22)            | 0.43<br>(0.34 to<br>0.55)          | 0.47<br>(0.35 to<br>0.62)        | 0.46<br>(0.34 to<br>0.61)        | 0.49<br>(0.36 to<br>0.65)        |
| <b>Other communicable, maternal, neonatal, and nutritional diseases</b> | <b>130.17</b><br>(69.41 to<br>236.71)      | <b>36.27</b><br>(27.18 to<br>47.89)   | <b>32.38</b><br>(24.58 to<br>42.64)   | <b>47.00</b><br>(33.52 to<br>65.29)    | <b>2.10</b><br>(1.37 to<br>3.36)   | <b>1.21</b><br>(0.94 to<br>1.55) | <b>1.14</b><br>(0.89 to<br>1.46) | <b>1.38</b><br>(1.06 to<br>1.75) |
| Sexually transmitted infections excluding HIV                           | 86.41<br>(27.69 to<br>190.39)              | 6.85<br>(2.73 to<br>15.01)            | 5.76<br>(2.39 to<br>12.21)            | 11.13<br>(3.84 to<br>26.37)            | 1.04<br>(0.36 to<br>2.25)          | 0.11<br>(0.06 to<br>0.21)        | 0.10<br>(0.06 to<br>0.18)        | 0.17<br>(0.08 to<br>0.34)        |
| Syphilis                                                                | 84.93<br>(26.12 to<br>188.89)              | 5.53<br>(1.53 to<br>13.52)            | 4.54<br>(1.29 to<br>10.98)            | 9.64<br>(2.43 to<br>24.82)             | 1.00<br>(0.31 to<br>2.21)          | 0.07<br>(0.03 to<br>0.17)        | 0.06<br>(0.02 to<br>0.14)        | 0.12<br>(0.04 to<br>0.30)        |

|                                       |                                              |                                              |                                              |                                              |                                        |                                        |                                        |                                        |
|---------------------------------------|----------------------------------------------|----------------------------------------------|----------------------------------------------|----------------------------------------------|----------------------------------------|----------------------------------------|----------------------------------------|----------------------------------------|
| Chlamydial infection                  | 0.28<br>(0.20 to<br>0.40)                    | 0.25<br>(0.16 to<br>0.39)                    | 0.23<br>(0.15 to<br>0.36)                    | 0.28<br>(0.18 to<br>0.44)                    | 0.01<br>(0.01 to<br>0.01)              | 0.01<br>(0.00 to<br>0.01)              | 0.01<br>(0.00 to<br>0.01)              | 0.01<br>(0.01 to<br>0.01)              |
| Gonococcal infection                  | 0.79<br>(0.57 to<br>1.10)                    | 0.72<br>(0.47 to<br>1.08)                    | 0.67<br>(0.44 to<br>1.00)                    | 0.80<br>(0.53 to<br>1.21)                    | 0.02<br>(0.02 to<br>0.03)              | 0.02<br>(0.02 to<br>0.03)              | 0.02<br>(0.01 to<br>0.03)              | 0.02<br>(0.02 to<br>0.04)              |
| Other sexually transmitted infections | 0.41<br>(0.30 to<br>0.58)                    | 0.35<br>(0.23 to<br>0.52)                    | 0.33<br>(0.21 to<br>0.48)                    | 0.40<br>(0.26 to<br>0.59)                    | 0.01<br>(0.01 to<br>0.01)              | 0.01<br>(0.01 to<br>0.02)              | 0.01<br>(0.01 to<br>0.01)              | 0.01<br>(0.01 to<br>0.02)              |
| Acute hepatitis                       | 29.39<br>(23.56 to<br>37.29)                 | 21.45<br>(15.84 to<br>28.99)                 | 19.49<br>(14.34 to<br>26.04)                 | 25.63<br>(19.20 to<br>34.13)                 | 0.78<br>(0.63 to<br>0.97)              | 0.77<br>(0.57 to<br>1.03)              | 0.72<br>(0.54 to<br>0.98)              | 0.86<br>(0.64 to<br>1.14)              |
| Acute hepatitis A                     | 2.90<br>(0.62 to<br>5.84)                    | 0.68<br>(0.32 to<br>1.21)                    | 0.59<br>(0.28 to<br>1.04)                    | 0.96<br>(0.44 to<br>1.83)                    | 0.04<br>(0.01 to<br>0.07)              | 0.02<br>(0.01 to<br>0.04)              | 0.02<br>(0.01 to<br>0.04)              | 0.02<br>(0.01 to<br>0.04)              |
| Acute hepatitis B                     | 19.17<br>(14.74 to<br>25.41)                 | 15.78<br>(11.49 to<br>21.76)                 | 14.25<br>(10.31 to<br>19.73)                 | 18.85<br>(13.73 to<br>25.93)                 | 0.56<br>(0.44 to<br>0.73)              | 0.56<br>(0.40 to<br>0.77)              | 0.52<br>(0.37 to<br>0.72)              | 0.64<br>(0.46 to<br>0.87)              |
| Acute hepatitis C                     | 0.50<br>(0.35 to<br>0.67)                    | 0.54<br>(0.36 to<br>0.76)                    | 0.52<br>(0.35 to<br>0.74)                    | 0.58<br>(0.38 to<br>0.82)                    | 0.02<br>(0.01 to<br>0.02)              | 0.02<br>(0.01 to<br>0.03)              | 0.02<br>(0.01 to<br>0.03)              | 0.02<br>(0.01 to<br>0.03)              |
| Acute hepatitis E                     | 6.82<br>(4.89 to<br>9.51)                    | 4.46<br>(2.88 to<br>6.47)                    | 4.14<br>(2.68 to<br>6.04)                    | 5.23<br>(3.40 to<br>7.57)                    | 0.15<br>(0.11 to<br>0.22)              | 0.17<br>(0.10 to<br>0.26)              | 0.17<br>(0.10 to<br>0.26)              | 0.17<br>(0.11 to<br>0.26)              |
| Other unspecified infectious diseases | 14.37<br>(8.20 to<br>32.02)                  | 7.97<br>(5.68 to<br>11.26)                   | 7.12<br>(5.11 to<br>10.00)                   | 10.24<br>(7.22 to<br>14.75)                  | 0.28<br>(0.19 to<br>0.49)              | 0.26<br>(0.24 to<br>0.47)              | 0.32<br>(0.23 to<br>0.45)              | 0.36<br>(0.26 to<br>0.51)              |
| <b>Non-communicable diseases</b>      | <b>2,810.41</b><br>(2,549.70 to<br>3,077.58) | <b>3,340.46</b><br>(2,724.22 to<br>4,048.53) | <b>2,605.80</b><br>(2,172.83 to<br>3,078.56) | <b>4,644.83</b><br>(3,682.59 to<br>5,674.28) | <b>117.09</b><br>(107.10 to<br>126.31) | <b>180.62</b><br>(153.67 to<br>209.34) | <b>148.21</b><br>(127.75 to<br>169.50) | <b>228.67</b><br>(191.00 to<br>268.25) |
| <b>Nepal</b>                          |                                              |                                              |                                              |                                              |                                        |                                        |                                        |                                        |
| Cause                                 | YLLs (in 1000s)                              |                                              |                                              |                                              | Deaths (in 1000s)                      |                                        |                                        |                                        |
|                                       | 2016                                         | 2040 Forecast                                | 2040 Better Scenario                         | 2040 Worse Scenario                          | 2016                                   | 2040 Forecast                          | 2040 Better Scenario                   | 2040 Worse Scenario                    |
| Neoplasms                             | 464.32<br>(410.28 to<br>515.25)              | 718.53<br>(591.04 to<br>865.75)              | 670.68<br>(558.43 to<br>789.08)              | 775.99<br>(623.33 to<br>963.18)              | 16.58<br>(14.70 to<br>18.36)           | 30.07<br>(25.20 to<br>35.71)           | 29.21<br>(24.88 to<br>33.80)           | 30.59<br>(24.75 to<br>37.60)           |
| Lip and oral cavity cancer            | 24.43<br>(20.51 to<br>30.87)                 | 42.43<br>(28.11 to<br>66.72)                 | 33.53<br>(23.87 to<br>48.54)                 | 54.90<br>(34.46 to<br>91.45)                 | 0.91<br>(0.78 to<br>1.14)              | 1.73<br>(1.18 to<br>2.64)              | 1.46<br>(1.06 to<br>2.09)              | 2.07<br>(1.34 to<br>3.32)              |
| Nasopharynx cancer                    | 4.99<br>(3.86 to<br>6.77)                    | 8.46<br>(5.02 to<br>14.14)                   | 6.36<br>(4.02 to<br>9.88)                    | 11.55<br>(6.48 to<br>20.02)                  | 0.16<br>(0.13 to<br>0.22)              | 0.30<br>(0.18 to<br>0.50)              | 0.23<br>(0.15 to<br>0.36)              | 0.39<br>(0.22 to<br>0.67)              |
| Other pharynx cancer                  | 21.76<br>(17.01 to<br>28.75)                 | 32.88<br>(22.10 to<br>48.86)                 | 29.10<br>(20.37 to<br>42.03)                 | 34.90<br>(23.06 to<br>52.01)                 | 0.81<br>(0.64 to<br>1.07)              | 1.35<br>(0.92 to<br>1.97)              | 1.24<br>(0.88 to<br>1.77)              | 1.37<br>(0.90 to<br>2.02)              |
| Esophageal cancer                     | 24.44<br>(20.40 to<br>28.08)                 | 34.78<br>(21.07 to<br>55.23)                 | 28.97<br>(18.15 to<br>44.51)                 | 45.60<br>(25.39 to<br>74.93)                 | 0.96<br>(0.80 to<br>1.09)              | 1.49<br>(0.93 to<br>2.29)              | 1.32<br>(0.86 to<br>1.96)              | 1.83<br>(1.04 to<br>2.91)              |
| Stomach cancer                        | 45.43<br>(38.90 to<br>52.69)                 | 51.71<br>(40.52 to<br>65.39)                 | 48.28<br>(38.31 to<br>60.51)                 | 54.97<br>(43.36 to<br>68.44)                 | 1.75<br>(1.51 to<br>2.02)              | 2.28<br>(1.81 to<br>2.87)              | 2.19<br>(1.76 to<br>2.72)              | 2.28<br>(1.84 to<br>2.86)              |
| Colon and rectum cancer               | 24.88<br>(19.95 to<br>30.99)                 | 51.23<br>(34.41 to<br>74.52)                 | 51.28<br>(34.87 to<br>73.61)                 | 49.33<br>(32.76 to<br>71.81)                 | 1.02<br>(0.82 to<br>1.26)              | 2.44<br>(1.67 to<br>3.56)              | 2.55<br>(1.77 to<br>3.65)              | 2.20<br>(1.49 to<br>3.19)              |
| Liver cancer                          | 18.27<br>(13.65 to<br>22.10)                 | 30.30<br>(21.44 to<br>41.52)                 | 27.28<br>(19.81 to<br>35.36)                 | 30.28<br>(21.04 to<br>41.66)                 | 0.73<br>(0.56 to<br>0.87)              | 1.36<br>(0.99 to<br>1.87)              | 1.28<br>(0.94 to<br>1.64)              | 1.29<br>(0.90 to<br>1.76)              |
| Liver cancer due to hepatitis B       | 7.10<br>(5.02 to<br>9.17)                    | 11.44<br>(7.55 to<br>16.42)                  | 10.33<br>(7.08 to<br>14.17)                  | 11.51<br>(7.45 to<br>16.64)                  | 0.26<br>(0.19 to<br>0.34)              | 0.47<br>(0.31 to<br>0.66)              | 0.44<br>(0.30 to<br>0.59)              | 0.45<br>(0.30 to<br>0.63)              |
| Liver cancer due to hepatitis C       | 4.67<br>(3.50 to<br>5.84)                    | 8.06<br>(5.45 to<br>11.32)                   | 7.48<br>(5.29 to<br>9.91)                    | 7.86<br>(5.26 to<br>11.10)                   | 0.21<br>(0.15 to<br>0.25)              | 0.40<br>(0.28 to<br>0.55)              | 0.39<br>(0.28 to<br>0.51)              | 0.37<br>(0.25 to<br>0.52)              |

|                                      |                              |                               |                               |                               |                           |                           |                           |                           |
|--------------------------------------|------------------------------|-------------------------------|-------------------------------|-------------------------------|---------------------------|---------------------------|---------------------------|---------------------------|
| Liver cancer due to alcohol use      | 1.93<br>(1.45 to<br>2.45)    | 3.10<br>(2.11 to<br>4.43)     | 2.67<br>(1.88 to<br>3.62)     | 3.19<br>(2.18 to<br>4.60)     | 0.08<br>(0.06 to<br>0.11) | 0.14<br>(0.10 to<br>0.20) | 0.13<br>(0.09 to<br>0.17) | 0.14<br>(0.09 to<br>0.20) |
| Liver cancer due to other causes     | 4.56<br>(3.24 to<br>5.74)    | 7.70<br>(5.06 to<br>11.25)    | 6.81<br>(4.66 to<br>9.27)     | 7.72<br>(4.99 to<br>11.17)    | 0.18<br>(0.13 to<br>0.23) | 0.35<br>(0.23 to<br>0.51) | 0.32<br>(0.23 to<br>0.44) | 0.33<br>(0.22 to<br>0.49) |
| Gallbladder and biliary tract cancer | 15.53<br>(12.02 to<br>18.63) | 17.07<br>(12.52 to<br>20.99)  | 17.84<br>(13.01 to<br>21.96)  | 15.90<br>(11.90 to<br>19.55)  | 0.57<br>(0.45 to<br>0.68) | 0.69<br>(0.52 to<br>0.84) | 0.74<br>(0.56 to<br>0.91) | 0.62<br>(0.47 to<br>0.75) |
| Pancreatic cancer                    | 12.09<br>(10.10 to<br>14.45) | 25.89<br>(19.35 to<br>34.69)  | 26.52<br>(20.30 to<br>34.52)  | 23.95<br>(17.73 to<br>32.07)  | 0.53<br>(0.44 to<br>0.63) | 1.28<br>(0.97 to<br>1.75) | 1.36<br>(1.05 to<br>1.81) | 1.11<br>(0.83 to<br>1.52) |
| Larynx cancer                        | 11.25<br>(9.55 to<br>14.49)  | 16.89<br>(8.50 to<br>35.82)   | 11.89<br>(6.94 to<br>23.13)   | 24.52<br>(11.05 to<br>51.50)  | 0.45<br>(0.38 to<br>0.57) | 0.72<br>(0.38 to<br>1.44) | 0.55<br>(0.33 to<br>0.97) | 1.00<br>(0.47 to<br>2.08) |
| Tracheal, bronchus, and lung cancer  | 39.85<br>(30.94 to<br>49.53) | 63.06<br>(35.70 to<br>103.29) | 44.79<br>(27.67 to<br>68.60)  | 94.92<br>(50.11 to<br>162.32) | 1.63<br>(1.27 to<br>2.03) | 2.86<br>(1.64 to<br>4.59) | 2.18<br>(1.36 to<br>3.27) | 4.02<br>(2.14 to<br>6.67) |
| Malignant skin melanoma              | 1.10<br>(0.79 to<br>1.93)    | 1.99<br>(1.42 to<br>3.41)     | 2.16<br>(1.55 to<br>3.69)     | 1.73<br>(1.23 to<br>3.00)     | 0.04<br>(0.03 to<br>0.07) | 0.08<br>(0.06 to<br>0.14) | 0.09<br>(0.07 to<br>0.16) | 0.07<br>(0.05 to<br>0.12) |
| Non-melanoma skin cancer             | 0.91<br>(0.73 to<br>1.16)    | 1.66<br>(1.31 to<br>2.11)     | 1.69<br>(1.34 to<br>2.16)     | 1.61<br>(1.28 to<br>2.07)     | 0.04<br>(0.04 to<br>0.06) | 0.10<br>(0.08 to<br>0.13) | 0.11<br>(0.09 to<br>0.14) | 0.09<br>(0.07 to<br>0.12) |
| Breast cancer                        | 38.34<br>(28.36 to<br>65.74) | 75.83<br>(51.54 to<br>125.38) | 74.75<br>(52.26 to<br>122.62) | 73.99<br>(49.17 to<br>123.70) | 1.28<br>(0.96 to<br>2.21) | 2.85<br>(1.97 to<br>4.73) | 2.88<br>(2.03 to<br>4.74) | 2.66<br>(1.81 to<br>4.46) |
| Cervical cancer                      | 29.29<br>(16.96 to<br>40.72) | 40.86<br>(21.65 to<br>60.10)  | 38.82<br>(20.52 to<br>56.43)  | 44.33<br>(23.37 to<br>65.46)  | 0.97<br>(0.57 to<br>1.35) | 1.44<br>(0.79 to<br>2.09) | 1.39<br>(0.76 to<br>1.99) | 1.51<br>(0.82 to<br>2.20) |
| Uterine cancer                       | 4.48<br>(3.56 to<br>5.57)    | 7.67<br>(5.87 to<br>10.13)    | 7.40<br>(5.66 to<br>9.88)     | 8.09<br>(6.14 to<br>10.86)    | 0.18<br>(0.14 to<br>0.22) | 0.34<br>(0.26 to<br>0.44) | 0.33<br>(0.26 to<br>0.43) | 0.34<br>(0.26 to<br>0.45) |
| Ovarian cancer                       | 10.65<br>(6.52 to<br>17.17)  | 23.18<br>(13.10 to<br>36.58)  | 23.90<br>(13.92 to<br>36.09)  | 20.48<br>(11.31 to<br>32.04)  | 0.38<br>(0.23 to<br>0.62) | 0.91<br>(0.51 to<br>1.41) | 0.95<br>(0.55 to<br>1.44) | 0.77<br>(0.43 to<br>1.22) |
| Prostate cancer                      | 6.68<br>(4.98 to<br>9.77)    | 16.01<br>(12.01 to<br>22.41)  | 17.81<br>(13.49 to<br>24.63)  | 13.52<br>(9.94 to<br>19.78)   | 0.41<br>(0.31 to<br>0.59) | 1.20<br>(0.89 to<br>1.66) | 1.39<br>(1.06 to<br>1.88) | 0.94<br>(0.67 to<br>1.38) |
| Testicular cancer                    | 0.96<br>(0.70 to<br>1.23)    | 1.27<br>(0.92 to<br>1.67)     | 1.24<br>(0.89 to<br>1.62)     | 1.33<br>(0.96 to<br>1.76)     | 0.02<br>(0.02 to<br>0.03) | 0.04<br>(0.03 to<br>0.05) | 0.04<br>(0.03 to<br>0.05) | 0.04<br>(0.03 to<br>0.05) |

Nepal

| Cause                           | YLLs (in 1000s)             |                              |                              |                              | Deaths (in 1000s)         |                           |                           |                           |
|---------------------------------|-----------------------------|------------------------------|------------------------------|------------------------------|---------------------------|---------------------------|---------------------------|---------------------------|
|                                 | 2016                        | 2040 Forecast                | 2040 Better Scenario         | 2040 Worse Scenario          | 2016                      | 2040 Forecast             | 2040 Better Scenario      | 2040 Worse Scenario       |
| Kidney cancer                   | 2.89<br>(1.85 to<br>3.88)   | 5.64<br>(3.30 to<br>7.85)    | 6.08<br>(3.58 to<br>8.41)    | 5.05<br>(2.97 to<br>7.18)    | 0.11<br>(0.07 to<br>0.14) | 0.25<br>(0.15 to<br>0.35) | 0.28<br>(0.17 to<br>0.39) | 0.21<br>(0.13 to<br>0.30) |
| Bladder cancer                  | 4.72<br>(3.69 to<br>5.85)   | 8.33<br>(5.74 to<br>11.66)   | 8.25<br>(5.79 to<br>11.21)   | 8.15<br>(5.56 to<br>11.52)   | 0.23<br>(0.18 to<br>0.29) | 0.49<br>(0.34 to<br>0.69) | 0.51<br>(0.37 to<br>0.70) | 0.44<br>(0.30 to<br>0.63) |
| Brain and nervous system cancer | 16.32<br>(8.38 to<br>25.52) | 25.26<br>(13.68 to<br>38.27) | 26.16<br>(14.18 to<br>39.74) | 24.25<br>(13.08 to<br>36.73) | 0.41<br>(0.22 to<br>0.62) | 0.79<br>(0.44 to<br>1.17) | 0.84<br>(0.47 to<br>1.24) | 0.73<br>(0.40 to<br>1.08) |
| Thyroid cancer                  | 5.22<br>(4.33 to<br>6.23)   | 7.55<br>(5.70 to<br>9.97)    | 6.87<br>(5.34 to<br>8.84)    | 7.83<br>(5.93 to<br>10.35)   | 0.18<br>(0.15 to<br>0.22) | 0.30<br>(0.24 to<br>0.40) | 0.29<br>(0.23 to<br>0.36) | 0.30<br>(0.23 to<br>0.40) |
| Mesothelioma                    | 1.12<br>(0.80 to<br>1.43)   | 1.75<br>(1.20 to<br>2.25)    | 1.79<br>(1.21 to<br>2.32)    | 1.69<br>(1.17 to<br>2.18)    | 0.04<br>(0.03 to<br>0.05) | 0.07<br>(0.05 to<br>0.10) | 0.08<br>(0.05 to<br>0.10) | 0.07<br>(0.05 to<br>0.09) |
| Hodgkin lymphoma                | 4.56<br>(3.37 to<br>7.41)   | 3.49<br>(2.56 to<br>5.59)    | 3.17<br>(2.31 to<br>5.04)    | 4.17<br>(3.07 to<br>6.68)    | 0.10<br>(0.08 to<br>0.17) | 0.10<br>(0.08 to<br>0.16) | 0.09<br>(0.07 to<br>0.15) | 0.11<br>(0.09 to<br>0.18) |

|                                |                                                          |                                                          |                                                        |                                                            |                                                   |                                                   |                                                   |                                                     |
|--------------------------------|----------------------------------------------------------|----------------------------------------------------------|--------------------------------------------------------|------------------------------------------------------------|---------------------------------------------------|---------------------------------------------------|---------------------------------------------------|-----------------------------------------------------|
| Non-Hodgkin lymphoma           | 14.55<br>(9.48 to<br>20.32)                              | 22.88<br>(15.68 to<br>29.75)                             | 23.36<br>(16.12 to<br>30.37)                           | 21.19<br>(14.20 to<br>27.88)                               | 0.44<br>(0.30 to<br>0.60)                         | 0.90<br>(0.62 to<br>1.15)                         | 0.95<br>(0.67 to<br>1.22)                         | 0.78<br>(0.53 to<br>1.00)                           |
| Multiple myeloma               | 4.10<br>(2.62 to<br>6.08)                                | 8.98<br>(5.57 to<br>13.29)                               | 9.28<br>(5.80 to<br>13.75)                             | 7.97<br>(4.94 to<br>11.93)                                 | 0.16<br>(0.10 to<br>0.24)                         | 0.40<br>(0.25 to<br>0.60)                         | 0.43<br>(0.27 to<br>0.63)                         | 0.34<br>(0.21 to<br>0.50)                           |
| Leukemia                       | 27.32<br>(20.91 to<br>33.92)                             | 31.37<br>(22.96 to<br>39.79)                             | 30.24<br>(22.35 to<br>37.62)                           | 31.63<br>(23.22 to<br>39.92)                               | 0.65<br>(0.51 to<br>0.78)                         | 1.01<br>(0.76 to<br>1.26)                         | 1.00<br>(0.76 to<br>1.23)                         | 0.95<br>(0.72 to<br>1.19)                           |
| Acute lymphoid leukemia        | 9.86<br>(7.11 to<br>12.93)                               | 8.52<br>(5.78 to<br>11.71)                               | 8.20<br>(5.64 to<br>11.20)                             | 8.83<br>(6.01 to<br>11.99)                                 | 0.18<br>(0.13 to<br>0.23)                         | 0.21<br>(0.14 to<br>0.28)                         | 0.21<br>(0.14 to<br>0.27)                         | 0.21<br>(0.14 to<br>0.27)                           |
| Chronic lymphoid leukemia      | 1.36<br>(0.99 to<br>1.77)                                | 2.17<br>(1.52 to<br>2.94)                                | 2.12<br>(1.51 to<br>2.85)                              | 2.07<br>(1.45 to<br>2.79)                                  | 0.06<br>(0.04 to<br>0.07)                         | 0.10<br>(0.07 to<br>0.14)                         | 0.11<br>(0.08 to<br>0.14)                         | 0.09<br>(0.07 to<br>0.12)                           |
| Acute myeloid leukemia         | 7.57<br>(5.20 to<br>10.05)                               | 11.46<br>(7.82 to<br>15.24)                              | 11.39<br>(7.75 to<br>15.04)                            | 10.94<br>(7.46 to<br>14.62)                                | 0.18<br>(0.12 to<br>0.23)                         | 0.35<br>(0.25 to<br>0.47)                         | 0.36<br>(0.25 to<br>0.47)                         | 0.32<br>(0.22 to<br>0.42)                           |
| Chronic myeloid leukemia       | 2.86<br>(2.04 to<br>4.11)                                | 3.22<br>(2.14 to<br>4.91)                                | 3.06<br>(2.07 to<br>4.61)                              | 3.21<br>(2.13 to<br>4.90)                                  | 0.09<br>(0.06 to<br>0.12)                         | 0.11<br>(0.08 to<br>0.17)                         | 0.11<br>(0.08 to<br>0.16)                         | 0.11<br>(0.07 to<br>0.16)                           |
| Other leukemia                 | 5.67<br>(3.76 to<br>7.82)                                | 6.01<br>(3.89 to<br>8.23)                                | 5.48<br>(3.59 to<br>7.49)                              | 6.59<br>(4.24 to<br>9.04)                                  | 0.15<br>(0.11 to<br>0.20)                         | 0.23<br>(0.16 to<br>0.30)                         | 0.22<br>(0.15 to<br>0.29)                         | 0.23<br>(0.16 to<br>0.31)                           |
| Other neoplasms                | 48.21<br>(32.73 to<br>58.65)                             | 60.12<br>(41.34 to<br>73.67)                             | 61.86<br>(42.49 to<br>76.12)                           | 58.16<br>(40.01 to<br>71.01)                               | 1.41<br>(0.99 to<br>1.71)                         | 2.28<br>(1.60 to<br>2.74)                         | 2.43<br>(1.70 to<br>2.92)                         | 2.06<br>(1.45 to<br>2.50)                           |
| <b>Cardiovascular diseases</b> | <b>1,095.68</b><br><b>(977.24 to</b><br><b>1,218.50)</b> | <b>1,146.58</b><br><b>(735.20 to</b><br><b>1,757.81)</b> | <b>683.69</b><br><b>(461.85 to</b><br><b>1,026.15)</b> | <b>2,057.49</b><br><b>(1,328.54 to</b><br><b>2,988.21)</b> | <b>51.03</b><br><b>(45.92 to</b><br><b>56.21)</b> | <b>68.34</b><br><b>(46.73 to</b><br><b>98.54)</b> | <b>45.43</b><br><b>(32.11 to</b><br><b>64.08)</b> | <b>106.32</b><br><b>(72.40 to</b><br><b>147.97)</b> |
| Rheumatic heart disease        | 47.67<br>(34.72 to<br>58.86)                             | 27.80<br>(19.17 to<br>37.31)                             | 24.28<br>(16.73 to<br>32.55)                           | 33.53<br>(23.52 to<br>44.83)                               | 1.53<br>(1.11 to<br>1.92)                         | 1.23<br>(0.86 to<br>1.67)                         | 1.13<br>(0.79 to<br>1.51)                         | 1.36<br>(0.95 to<br>1.83)                           |
| Ischemic heart disease         | 673.54<br>(592.40 to<br>759.86)                          | 712.53<br>(396.78 to<br>1,205.99)                        | 399.51<br>(230.54 to<br>680.06)                        | 1,324.25<br>(742.98 to<br>2,106.79)                        | 31.56<br>(28.00 to<br>35.32)                      | 42.10<br>(25.09 to<br>66.29)                      | 26.49<br>(16.23 to<br>41.09)                      | 68.10<br>(41.61 to<br>104.07)                       |
| Stroke                         | 308.98<br>(267.11 to<br>357.04)                          | 297.53<br>(181.97 to<br>475.57)                          | 175.37<br>(111.28 to<br>272.46)                        | 570.20<br>(334.12 to<br>921.96)                            | 14.92<br>(12.89 to<br>17.15)                      | 18.05<br>(11.71 to<br>28.10)                      | 11.98<br>(8.03 to<br>18.23)                       | 29.50<br>(18.85 to<br>45.47)                        |
| Ischemic stroke                | 134.19<br>(113.16 to<br>159.35)                          | 139.70<br>(82.72 to<br>236.21)                           | 89.89<br>(54.97 to<br>146.37)                          | 228.84<br>(132.03 to<br>384.74)                            | 7.68<br>(6.51 to<br>9.04)                         | 10.18<br>(6.14 to<br>17.75)                       | 7.25<br>(4.54 to<br>12.27)                        | 14.56<br>(8.56 to<br>25.02)                         |
| Intracerebral hemorrhage       | 174.79<br>(149.03 to<br>201.79)                          | 157.83<br>(87.75 to<br>271.58)                           | 85.48<br>(50.74 to<br>141.74)                          | 341.36<br>(183.76 to<br>586.57)                            | 7.24<br>(6.18 to<br>8.37)                         | 7.87<br>(4.72 to<br>12.42)                        | 4.73<br>(3.02 to<br>7.22)                         | 14.94<br>(8.71 to<br>24.14)                         |
| Hypertensive heart disease     | 41.32<br>(30.97 to<br>55.38)                             | 69.10<br>(33.92 to<br>164.04)                            | 47.38<br>(25.73 to<br>101.26)                          | 89.58<br>(41.77 to<br>215.08)                              | 1.93<br>(1.44 to<br>2.59)                         | 4.34<br>(2.00 to<br>11.09)                        | 3.19<br>(1.44 to<br>7.48)                         | 5.02<br>(2.34 to<br>12.97)                          |
| Cardiomyopathy and myocarditis | 6.08<br>(3.92 to<br>8.53)                                | 6.71<br>(4.20 to<br>10.68)                               | 6.39<br>(4.07 to<br>9.92)                              | 6.74<br>(4.19 to<br>10.86)                                 | 0.15<br>(0.11 to<br>0.21)                         | 0.25<br>(0.16 to<br>0.37)                         | 0.25<br>(0.17 to<br>0.37)                         | 0.23<br>(0.15 to<br>0.33)                           |
| Myocarditis                    | 2.16<br>(0.82 to<br>3.86)                                | 1.58<br>(0.59 to<br>3.27)                                | 1.52<br>(0.57 to<br>3.22)                              | 1.71<br>(0.64 to<br>3.42)                                  | 0.04<br>(0.02 to<br>0.08)                         | 0.04<br>(0.02 to<br>0.09)                         | 0.04<br>(0.02 to<br>0.09)                         | 0.04<br>(0.02 to<br>0.09)                           |
| <b>Nepal</b>                   |                                                          |                                                          |                                                        |                                                            |                                                   |                                                   |                                                   |                                                     |
| Cause                          | YLLs (in 1000s)                                          |                                                          |                                                        |                                                            | Deaths (in 1000s)                                 |                                                   |                                                   |                                                     |
|                                | 2016                                                     | 2040 Forecast                                            | 2040 Better Scenario                                   | 2040 Worse Scenario                                        | 2016                                              | 2040 Forecast                                     | 2040 Better Scenario                              | 2040 Worse Scenario                                 |
| Alcoholic cardiomyopathy       | 0.29<br>(0.12 to<br>0.69)                                | 0.41<br>(0.16 to<br>1.08)                                | 0.41<br>(0.16 to<br>1.08)                              | 0.39<br>(0.15 to<br>0.99)                                  | 0.01<br>(0.00 to<br>0.02)                         | 0.02<br>(0.01 to<br>0.04)                         | 0.02<br>(0.01 to<br>0.04)                         | 0.01<br>(0.01 to<br>0.04)                           |
| Other cardiomyopathy           | 3.62<br>(1.90 to<br>5.67)                                | 4.72<br>(2.60 to<br>7.96)                                | 4.46<br>(2.51 to<br>7.35)                              | 4.64<br>(2.47 to<br>8.00)                                  | 0.10<br>(0.06 to<br>0.14)                         | 0.19<br>(0.12 to<br>0.30)                         | 0.19<br>(0.12 to<br>0.30)                         | 0.17<br>(0.10 to<br>0.27)                           |

|                                                                |                                        |                                        |                                        |                                          |                                     |                                     |                                     |                                     |
|----------------------------------------------------------------|----------------------------------------|----------------------------------------|----------------------------------------|------------------------------------------|-------------------------------------|-------------------------------------|-------------------------------------|-------------------------------------|
| Atrial fibrillation and flutter                                | 4.08<br>(3.17 to<br>5.22)              | 10.70<br>(7.63 to<br>14.68)            | 10.62<br>(7.57 to<br>14.61)            | 9.67<br>(6.80 to<br>13.24)               | 0.35<br>(0.26 to<br>0.45)           | 1.10<br>(0.76 to<br>1.54)           | 1.16<br>(0.81 to<br>1.60)           | 0.91<br>(0.62 to<br>1.30)           |
| Aortic aneurysm                                                | 4.51<br>(3.42 to<br>6.36)              | 6.73<br>(4.59 to<br>9.98)              | 6.26<br>(4.41 to<br>9.05)              | 6.87<br>(4.70 to<br>10.34)               | 0.20<br>(0.15 to<br>0.28)           | 0.39<br>(0.28 to<br>0.55)           | 0.39<br>(0.28 to<br>0.53)           | 0.35<br>(0.25 to<br>0.51)           |
| Peripheral artery disease                                      | 0.34<br>(0.17 to<br>0.61)              | 1.06<br>(0.52 to<br>1.88)              | 1.01<br>(0.50 to<br>1.75)              | 0.93<br>(0.44 to<br>1.68)                | 0.02<br>(0.01 to<br>0.04)           | 0.09<br>(0.04 to<br>0.16)           | 0.09<br>(0.05 to<br>0.16)           | 0.07<br>(0.03 to<br>0.12)           |
| Endocarditis                                                   | 5.28<br>(4.10 to<br>6.74)              | 8.02<br>(5.42 to<br>11.42)             | 7.41<br>(5.09 to<br>10.55)             | 8.19<br>(5.49 to<br>11.61)               | 0.17<br>(0.14 to<br>0.22)           | 0.37<br>(0.24 to<br>0.54)           | 0.36<br>(0.24 to<br>0.52)           | 0.34<br>(0.23 to<br>0.49)           |
| Other cardiovascular and circulatory diseases                  | 3.90<br>(2.44 to<br>5.38)              | 6.41<br>(3.71 to<br>9.49)              | 5.46<br>(3.21 to<br>7.92)              | 7.54<br>(4.34 to<br>11.23)               | 0.20<br>(0.12 to<br>0.27)           | 0.42<br>(0.24 to<br>0.61)           | 0.39<br>(0.22 to<br>0.56)           | 0.44<br>(0.25 to<br>0.64)           |
| <b>Chronic respiratory diseases</b>                            | <b>423.57</b><br>(349.19 to<br>502.71) | <b>422.93</b><br>(286.62 to<br>621.06) | <b>307.73</b><br>(219.54 to<br>436.46) | <b>632.29</b><br>(392.13 to<br>1,010.92) | <b>21.19</b><br>(17.72 to<br>24.84) | <b>25.05</b><br>(17.53 to<br>36.66) | <b>19.66</b><br>(14.41 to<br>26.76) | <b>34.41</b><br>(22.35 to<br>53.53) |
| Chronic obstructive pulmonary disease                          | 301.68<br>(232.94 to<br>363.28)        | 321.66<br>(203.24 to<br>506.71)        | 222.51<br>(144.94 to<br>355.71)        | 518.28<br>(299.32 to<br>900.23)          | 16.30<br>(12.94 to<br>19.29)        | 20.09<br>(13.08 to<br>29.88)        | 15.26<br>(10.39 to<br>21.93)        | 29.24<br>(17.67 to<br>48.66)        |
| Pneumoconiosis                                                 | 1.18<br>(0.78 to<br>1.78)              | 1.33<br>(0.91 to<br>1.95)              | 1.22<br>(0.82 to<br>1.82)              | 1.33<br>(0.93 to<br>1.93)                | 0.06<br>(0.04 to<br>0.09)           | 0.08<br>(0.06 to<br>0.12)           | 0.08<br>(0.05 to<br>0.12)           | 0.08<br>(0.05 to<br>0.11)           |
| Silicosis                                                      | 0.37<br>(0.15 to<br>0.59)              | 0.33<br>(0.15 to<br>0.52)              | 0.33<br>(0.14 to<br>0.52)              | 0.33<br>(0.15 to<br>0.51)                | 0.02<br>(0.01 to<br>0.03)           | 0.02<br>(0.01 to<br>0.04)           | 0.02<br>(0.01 to<br>0.04)           | 0.02<br>(0.01 to<br>0.03)           |
| Asbestosis                                                     | 0.19<br>(0.11 to<br>0.30)              | 0.26<br>(0.16 to<br>0.41)              | 0.26<br>(0.16 to<br>0.42)              | 0.25<br>(0.16 to<br>0.40)                | 0.01<br>(0.00 to<br>0.01)           | 0.01<br>(0.01 to<br>0.02)           | 0.01<br>(0.01 to<br>0.02)           | 0.01<br>(0.01 to<br>0.02)           |
| Coal workers pneumoconiosis                                    | 0.15<br>(0.06 to<br>0.28)              | 0.14<br>(0.06 to<br>0.26)              | 0.11<br>(0.05 to<br>0.20)              | 0.17<br>(0.08 to<br>0.30)                | 0.01<br>(0.00 to<br>0.01)           | 0.01<br>(0.00 to<br>0.02)           | 0.01<br>(0.00 to<br>0.02)           | 0.01<br>(0.00 to<br>0.02)           |
| Other pneumoconiosis                                           | 0.48<br>(0.25 to<br>0.82)              | 0.60<br>(0.34 to<br>0.95)              | 0.52<br>(0.28 to<br>0.85)              | 0.59<br>(0.34 to<br>0.91)                | 0.02<br>(0.01 to<br>0.04)           | 0.04<br>(0.02 to<br>0.06)           | 0.04<br>(0.02 to<br>0.06)           | 0.04<br>(0.02 to<br>0.06)           |
| Asthma                                                         | 105.92<br>(74.32 to<br>177.54)         | 73.37<br>(44.46 to<br>139.35)          | 55.62<br>(35.09 to<br>101.28)          | 88.63<br>(51.88 to<br>168.51)            | 4.26<br>(2.87 to<br>7.57)           | 3.53<br>(2.09 to<br>6.80)           | 2.82<br>(1.73 to<br>5.31)           | 3.98<br>(2.31 to<br>7.78)           |
| Interstitial lung disease and pulmonary sarcoidosis            | 9.05<br>(3.03 to<br>16.02)             | 20.20<br>(7.04 to<br>34.48)            | 22.19<br>(7.89 to<br>37.58)            | 17.22<br>(5.94 to<br>30.01)              | 0.40<br>(0.14 to<br>0.71)           | 1.22<br>(0.38 to<br>1.86)           | 1.23<br>(0.45 to<br>2.06)           | 0.86<br>(0.30 to<br>1.51)           |
| Other chronic respiratory diseases                             | 5.75<br>(3.62 to<br>9.08)              | 6.37<br>(4.06 to<br>9.47)              | 6.20<br>(3.98 to<br>9.13)              | 6.82<br>(4.24 to<br>10.15)               | 0.16<br>(0.10 to<br>0.24)           | 0.26<br>(0.16 to<br>0.38)           | 0.26<br>(0.17 to<br>0.39)           | 0.25<br>(0.15 to<br>0.37)           |
| <b>Cirrhosis and other chronic liver diseases</b>              | <b>149.55</b><br>(120.17 to<br>186.75) | <b>193.61</b><br>(155.01 to<br>245.30) | <b>184.03</b><br>(147.56 to<br>231.72) | <b>205.64</b><br>(162.98 to<br>256.92)   | <b>4.51</b><br>(3.71 to<br>5.56)    | <b>6.69</b><br>(5.52 to<br>8.16)    | <b>6.54</b><br>(5.40 to<br>8.02)    | <b>6.78</b><br>(5.55 to<br>8.24)    |
| Cirrhosis and other chronic liver diseases due to hepatitis B  | 60.23<br>(46.94 to<br>78.16)           | 84.22<br>(64.53 to<br>108.92)          | 82.59<br>(63.65 to<br>107.22)          | 87.26<br>(67.00 to<br>113.81)            | 1.88<br>(1.48 to<br>2.40)           | 2.89<br>(2.30 to<br>3.69)           | 2.91<br>(2.32 to<br>3.70)           | 2.88<br>(2.26 to<br>3.69)           |
| Cirrhosis and other chronic liver diseases due to hepatitis C  | 13.37<br>(10.03 to<br>17.29)           | 19.55<br>(14.68 to<br>25.18)           | 19.10<br>(14.46 to<br>24.68)           | 20.38<br>(15.47 to<br>26.33)             | 0.41<br>(0.32 to<br>0.53)           | 0.65<br>(0.51 to<br>0.82)           | 0.65<br>(0.50 to<br>0.82)           | 0.66<br>(0.51 to<br>0.83)           |
| Cirrhosis and other chronic liver diseases due to alcohol use  | 41.65<br>(32.22 to<br>52.94)           | 55.55<br>(43.28 to<br>71.23)           | 49.24<br>(38.43 to<br>63.34)           | 61.17<br>(47.08 to<br>77.56)             | 1.37<br>(1.08 to<br>1.72)           | 1.99<br>(1.60 to<br>2.51)           | 1.84<br>(1.46 to<br>2.31)           | 2.09<br>(1.68 to<br>2.62)           |
| Cirrhosis and other chronic liver diseases due to other causes | 34.31<br>(27.20 to<br>44.18)           | 34.29<br>(26.08 to<br>43.51)           | 33.09<br>(25.24 to<br>42.20)           | 36.83<br>(27.97 to<br>47.16)             | 0.86<br>(0.69 to<br>1.09)           | 1.15<br>(0.90 to<br>1.46)           | 1.15<br>(0.91 to<br>1.46)           | 1.16<br>(0.90 to<br>1.48)           |
| <b>Digestive diseases</b>                                      | <b>123.21</b><br>(101.92 to<br>164.63) | <b>129.97</b><br>(99.92 to<br>178.91)  | <b>120.55</b><br>(92.92 to<br>164.81)  | <b>144.63</b><br>(110.73 to<br>200.51)   | <b>4.17</b><br>(3.46 to<br>5.40)    | <b>5.82</b><br>(4.50 to<br>7.79)    | <b>5.64</b><br>(4.34 to<br>7.54)    | <b>6.01</b><br>(4.58 to<br>8.06)    |
| Peptic ulcer disease                                           | 32.48<br>(21.37 to<br>44.56)           | 26.69<br>(14.64 to<br>42.35)           | 22.69<br>(12.53 to<br>35.52)           | 34.09<br>(18.89 to<br>54.21)             | 1.26<br>(0.81 to<br>1.70)           | 1.34<br>(0.72 to<br>2.07)           | 1.18<br>(0.64 to<br>1.85)           | 1.59<br>(0.87 to<br>2.48)           |

| Nepal                                      |                            |                              |                              |                              |                        |                          |                           |                          |
|--------------------------------------------|----------------------------|------------------------------|------------------------------|------------------------------|------------------------|--------------------------|---------------------------|--------------------------|
| Cause                                      | YLLs (in 1000s)            |                              |                              |                              | Deaths (in 1000s)      |                          |                           |                          |
|                                            | 2016                       | 2040 Forecast                | 2040 Better Scenario         | 2040 Worse Scenario          | 2016                   | 2040 Forecast            | 2040 Better Scenario      | 2040 Worse Scenario      |
| Gastritis and duodenitis                   | 5.34<br>(3.79 to 8.88)     | 7.45<br>(5.05 to 12.16)      | 7.25<br>(4.87 to 12.04)      | 7.84<br>(5.36 to 12.86)      | 0.20<br>(0.15 to 0.32) | 0.37<br>(0.26 to 0.58)   | 0.38<br>(0.26 to 0.60)    | 0.36<br>(0.25 to 0.56)   |
| Appendicitis                               | 10.86<br>(8.04 to 16.18)   | 9.43<br>(6.63 to 13.82)      | 8.59<br>(6.00 to 12.56)      | 11.12<br>(7.84 to 16.43)     | 0.29<br>(0.22 to 0.41) | 0.33<br>(0.24 to 0.47)   | 0.31<br>(0.22 to 0.45)    | 0.36<br>(0.26 to 0.52)   |
| Paralytic ileus and intestinal obstruction | 40.26<br>(28.99 to 57.02)  | 40.84<br>(29.51 to 56.94)    | 40.33<br>(29.20 to 55.59)    | 42.48<br>(30.56 to 59.52)    | 1.12<br>(0.80 to 1.51) | 1.61<br>(1.15 to 2.16)   | 1.66<br>(1.18 to 2.23)    | 1.55<br>(1.10 to 2.09)   |
| Inguinal, femoral, and abdominal hernia    | 4.21<br>(2.59 to 6.44)     | 4.33<br>(2.62 to 6.67)       | 4.25<br>(2.53 to 6.50)       | 4.51<br>(2.74 to 7.06)       | 0.17<br>(0.10 to 0.25) | 0.23<br>(0.14 to 0.35)   | 0.23<br>(0.14 to 0.36)    | 0.22<br>(0.14 to 0.34)   |
| Inflammatory bowel disease                 | 3.73<br>(2.76 to 5.29)     | 4.89<br>(3.63 to 6.86)       | 5.02<br>(3.71 to 7.08)       | 4.73<br>(3.53 to 6.65)       | 0.13<br>(0.10 to 0.17) | 0.22<br>(0.17 to 0.30)   | 0.24<br>(0.18 to 0.33)    | 0.20<br>(0.15 to 0.27)   |
| Vascular intestinal disorders              | 5.12<br>(3.91 to 7.29)     | 8.37<br>(6.35 to 11.82)      | 8.49<br>(6.40 to 11.86)      | 8.20<br>(6.17 to 11.57)      | 0.25<br>(0.20 to 0.35) | 0.50<br>(0.38 to 0.70)   | 0.53<br>(0.40 to 0.73)    | 0.46<br>(0.34 to 0.64)   |
| Gallbladder and biliary diseases           | 5.82<br>(4.40 to 8.13)     | 7.53<br>(4.36 to 12.88)      | 5.58<br>(3.48 to 9.05)       | 8.59<br>(4.94 to 14.65)      | 0.22<br>(0.17 to 0.31) | 0.38<br>(0.22 to 0.64)   | 0.30<br>(0.18 to 0.49)    | 0.39<br>(0.23 to 0.65)   |
| Pancreatitis                               | 13.65<br>(9.85 to 19.44)   | 17.99<br>(11.41 to 29.40)    | 15.97<br>(10.44 to 24.57)    | 20.51<br>(12.88 to 34.39)    | 0.45<br>(0.33 to 0.62) | 0.69<br>(0.46 to 1.09)   | 0.64<br>(0.45 to 0.95)    | 0.73<br>(0.48 to 1.21)   |
| Other digestive diseases                   | 1.74<br>(1.52 to 2.49)     | 2.45<br>(1.75 to 3.56)       | 2.39<br>(1.71 to 3.47)       | 2.56<br>(1.84 to 3.77)       | 0.08<br>(0.06 to 0.12) | 0.16<br>(0.11 to 0.22)   | 0.16<br>(0.12 to 0.23)    | 0.15<br>(0.11 to 0.22)   |
| Neurological disorders                     | 85.35<br>(72.65 to 100.20) | 161.03<br>(128.84 to 208.41) | 159.01<br>(130.17 to 198.58) | 146.23<br>(114.89 to 188.40) | 4.53<br>(3.84 to 5.37) | 13.53<br>(9.63 to 18.51) | 14.15<br>(10.49 to 18.66) | 10.73<br>(7.37 to 15.00) |
| Alzheimer's disease and other dementias    | 37.42<br>(30.33 to 46.26)  | 106.63<br>(74.38 to 149.34)  | 106.18<br>(78.39 to 143.96)  | 88.65<br>(60.25 to 126.13)   | 3.29<br>(2.68 to 4.08) | 11.22<br>(7.37 to 16.09) | 11.68<br>(8.23 to 16.17)  | 8.66<br>(5.46 to 12.88)  |
| Parkinson's disease                        | 4.35<br>(3.20 to 5.65)     | 12.90<br>(9.56 to 17.06)     | 15.12<br>(11.39 to 19.78)    | 9.81<br>(7.11 to 13.31)      | 0.32<br>(0.24 to 0.42) | 1.11<br>(0.80 to 1.50)   | 1.34<br>(0.99 to 1.79)    | 0.79<br>(0.56 to 1.10)   |
| Epilepsy                                   | 35.12<br>(26.77 to 46.33)  | 30.60<br>(22.13 to 42.07)    | 26.37<br>(19.22 to 35.74)    | 37.33<br>(26.98 to 51.58)    | 0.71<br>(0.57 to 0.90) | 0.85<br>(0.64 to 1.14)   | 0.76<br>(0.59 to 0.99)    | 0.97<br>(0.73 to 1.30)   |
| Multiple sclerosis                         | 1.42<br>(0.90 to 1.89)     | 2.28<br>(1.42 to 3.13)       | 2.31<br>(1.45 to 3.17)       | 2.22<br>(1.37 to 3.05)       | 0.04<br>(0.03 to 0.05) | 0.07<br>(0.04 to 0.10)   | 0.07<br>(0.05 to 0.10)    | 0.07<br>(0.04 to 0.09)   |
| Motor neuron disease                       | 1.07<br>(0.74 to 1.83)     | 1.86<br>(1.29 to 3.26)       | 1.97<br>(1.37 to 3.44)       | 1.69<br>(1.18 to 2.97)       | 0.03<br>(0.02 to 0.06) | 0.07<br>(0.05 to 0.12)   | 0.08<br>(0.05 to 0.13)    | 0.06<br>(0.04 to 0.11)   |
| Other neurological disorders               | 5.97<br>(4.03 to 7.63)     | 6.77<br>(4.39 to 8.55)       | 7.05<br>(4.56 to 8.92)       | 6.53<br>(4.22 to 8.29)       | 0.13<br>(0.09 to 0.16) | 0.21<br>(0.13 to 0.26)   | 0.22<br>(0.15 to 0.28)    | 0.19<br>(0.12 to 0.23)   |
| Mental disorders                           | 19.44<br>(12.96 to 30.39)  | 29.09<br>(19.50 to 45.11)    | 28.77<br>(19.35 to 44.63)    | 29.26<br>(19.51 to 45.35)    | 0.49<br>(0.32 to 0.77) | 0.83<br>(0.57 to 1.24)   | 0.84<br>(0.58 to 1.24)    | 0.80<br>(0.54 to 1.20)   |
| Alcohol use disorders                      | 11.86<br>(6.42 to 22.60)   | 14.52<br>(7.25 to 29.21)     | 14.05<br>(6.97 to 27.83)     | 14.77<br>(7.36 to 29.81)     | 0.31<br>(0.17 to 0.59) | 0.42<br>(0.23 to 0.81)   | 0.42<br>(0.22 to 0.79)    | 0.41<br>(0.22 to 0.80)   |
| Drug use disorders                         | 7.53<br>(5.53 to 10.01)    | 14.51<br>(10.68 to 19.50)    | 14.66<br>(10.77 to 19.61)    | 14.43<br>(10.59 to 19.40)    | 0.17<br>(0.13 to 0.23) | 0.40<br>(0.31 to 0.55)   | 0.42<br>(0.32 to 0.55)    | 0.38<br>(0.29 to 0.50)   |
| Opioid use disorders                       | 5.03<br>(3.60 to 6.96)     | 8.53<br>(5.89 to 12.07)      | 8.57<br>(5.92 to 12.06)      | 8.56<br>(5.84 to 12.09)      | 0.11<br>(0.08 to 0.15) | 0.21<br>(0.15 to 0.30)   | 0.22<br>(0.15 to 0.31)    | 0.20<br>(0.14 to 0.29)   |

|                                                            |                                 |                                 |                                 |                                 |                              |                              |                              |                              |
|------------------------------------------------------------|---------------------------------|---------------------------------|---------------------------------|---------------------------------|------------------------------|------------------------------|------------------------------|------------------------------|
| Cocaine use disorders                                      | 0.38<br>(0.14 to<br>0.65)       | 0.86<br>(0.32 to<br>1.50)       | 0.84<br>(0.31 to<br>1.48)       | 0.90<br>(0.34 to<br>1.57)       | 0.01<br>(0.00 to<br>0.02)    | 0.02<br>(0.01 to<br>0.04)    | 0.02<br>(0.01 to<br>0.04)    | 0.02<br>(0.01 to<br>0.04)    |
| Amphetamine use disorders                                  | 0.24<br>(0.09 to<br>0.44)       | 0.65<br>(0.26 to<br>1.22)       | 0.62<br>(0.26 to<br>1.17)       | 0.71<br>(0.29 to<br>1.35)       | 0.01<br>(0.00 to<br>0.01)    | 0.02<br>(0.01 to<br>0.03)    | 0.02<br>(0.01 to<br>0.03)    | 0.02<br>(0.01 to<br>0.03)    |
| Other drug use disorders                                   | 1.88<br>(1.21 to<br>2.68)       | 4.47<br>(3.02 to<br>6.34)       | 4.63<br>(3.19 to<br>6.56)       | 4.26<br>(2.88 to<br>6.09)       | 0.05<br>(0.03 to<br>0.07)    | 0.15<br>(0.11 to<br>0.21)    | 0.16<br>(0.12 to<br>0.22)    | 0.13<br>(0.09 to<br>0.19)    |
| Eating disorders                                           | 0.05<br>(0.03 to<br>0.08)       | 0.06<br>(0.04 to<br>0.11)       | 0.06<br>(0.04 to<br>0.11)       | 0.06<br>(0.04 to<br>0.11)       | 0.00<br>(0.00 to<br>0.00)    | 0.00<br>(0.00 to<br>0.00)    | 0.00<br>(0.00 to<br>0.00)    | 0.00<br>(0.00 to<br>0.00)    |
| <b>Nepal</b>                                               |                                 |                                 |                                 |                                 |                              |                              |                              |                              |
| Cause                                                      | YLLs (in 1000s)                 |                                 |                                 |                                 | Deaths (in 1000s)            |                              |                              |                              |
|                                                            | 2016                            | 2040 Forecast                   | 2040 Better Scenario            | 2040 Worse Scenario             | 2016                         | 2040 Forecast                | 2040 Better Scenario         | 2040 Worse Scenario          |
| <b>Diabetes, urogenital, blood, and endocrine diseases</b> | 290.50<br>(251.29 to<br>342.50) | 476.07<br>(354.87 to<br>690.39) | 392.97<br>(296.99 to<br>552.16) | 571.76<br>(432.46 to<br>811.00) | 12.41<br>(10.84 to<br>14.38) | 28.36<br>(21.60 to<br>40.52) | 24.77<br>(19.16 to<br>34.84) | 31.02<br>(23.44 to<br>43.09) |
| Diabetes mellitus                                          | 116.13<br>(97.86 to<br>136.11)  | 197.42<br>(135.05 to<br>282.90) | 170.90<br>(119.92 to<br>245.89) | 246.96<br>(163.01 to<br>358.23) | 6.05<br>(5.12 to<br>7.05)    | 13.58<br>(9.49 to<br>18.82)  | 12.47<br>(8.96 to<br>16.98)  | 15.32<br>(10.52 to<br>21.73) |
| Acute glomerulonephritis                                   | 0.49<br>(0.36 to<br>0.70)       | 0.51<br>(0.38 to<br>0.67)       | 0.49<br>(0.37 to<br>0.65)       | 0.56<br>(0.42 to<br>0.75)       | 0.01<br>(0.01 to<br>0.02)    | 0.02<br>(0.02 to<br>0.03)    | 0.02<br>(0.02 to<br>0.03)    | 0.02<br>(0.02 to<br>0.03)    |
| Chronic kidney disease                                     | 117.43<br>(93.06 to<br>147.11)  | 210.49<br>(114.12 to<br>435.62) | 153.33<br>(88.14 to<br>315.04)  | 256.57<br>(141.91 to<br>503.09) | 4.44<br>(3.60 to<br>5.52)    | 10.91<br>(5.53 to<br>24.42)  | 8.14<br>(4.34 to<br>19.91)   | 12.30<br>(6.35 to<br>26.68)  |
| Chronic kidney disease due to diabetes mellitus            | 36.48<br>(28.22 to<br>46.62)    | 77.49<br>(40.28 to<br>173.41)   | 55.71<br>(30.63 to<br>126.73)   | 94.04<br>(48.78 to<br>209.30)   | 1.54<br>(1.20 to<br>1.95)    | 3.97<br>(1.95 to<br>9.30)    | 2.93<br>(1.49 to<br>7.44)    | 4.54<br>(2.28 to<br>10.23)   |
| Chronic kidney disease due to hypertension                 | 30.69<br>(23.52 to<br>39.44)    | 62.70<br>(32.42 to<br>136.51)   | 45.62<br>(24.63 to<br>103.00)   | 74.64<br>(38.67 to<br>159.17)   | 1.38<br>(1.06 to<br>1.76)    | 3.75<br>(1.85 to<br>8.48)    | 2.82<br>(1.47 to<br>6.88)    | 4.11<br>(2.08 to<br>8.99)    |
| Chronic kidney disease due to glomerulonephritis           | 18.51<br>(13.57 to<br>24.80)    | 22.98<br>(13.68 to<br>39.92)    | 17.19<br>(10.67 to<br>28.87)    | 29.13<br>(17.50 to<br>50.16)    | 0.49<br>(0.37 to<br>0.65)    | 0.89<br>(0.48 to<br>1.81)    | 0.67<br>(0.37 to<br>1.36)    | 1.04<br>(0.57 to<br>2.03)    |
| Chronic kidney disease due to other and unspecified causes | 31.75<br>(24.08 to<br>41.24)    | 47.33<br>(26.63 to<br>90.28)    | 34.81<br>(20.24 to<br>64.47)    | 58.76<br>(33.41 to<br>108.69)   | 1.04<br>(0.80 to<br>1.34)    | 2.30<br>(1.19 to<br>4.88)    | 1.72<br>(0.93 to<br>3.74)    | 2.62<br>(1.38 to<br>5.37)    |
| Urinary diseases and male infertility                      | 31.48<br>(25.96 to<br>36.67)    | 47.59<br>(39.01 to<br>56.51)    | 49.03<br>(40.45 to<br>58.50)    | 45.69<br>(37.33 to<br>54.40)    | 1.22<br>(1.02 to<br>1.41)    | 2.78<br>(2.24 to<br>3.34)    | 3.04<br>(2.47 to<br>3.65)    | 2.38<br>(1.86 to<br>2.93)    |
| Urinary tract infections                                   | 22.04<br>(17.63 to<br>26.67)    | 36.13<br>(29.35 to<br>43.16)    | 37.73<br>(30.34 to<br>44.94)    | 33.79<br>(27.13 to<br>40.89)    | 0.87<br>(0.71 to<br>1.03)    | 2.17<br>(1.73 to<br>2.65)    | 2.41<br>(1.93 to<br>2.93)    | 1.81<br>(1.39 to<br>2.26)    |
| Urolithiasis                                               | 2.54<br>(1.82 to<br>3.67)       | 4.94<br>(3.52 to<br>7.10)       | 5.12<br>(3.64 to<br>7.34)       | 4.71<br>(3.28 to<br>6.74)       | 0.10<br>(0.07 to<br>0.14)    | 0.25<br>(0.18 to<br>0.35)    | 0.27<br>(0.19 to<br>0.39)    | 0.21<br>(0.15 to<br>0.31)    |
| Other urinary diseases                                     | 6.90<br>(4.76 to<br>11.06)      | 6.52<br>(4.21 to<br>10.72)      | 6.18<br>(3.95 to<br>10.23)      | 7.19<br>(4.64 to<br>11.43)      | 0.25<br>(0.17 to<br>0.40)    | 0.36<br>(0.22 to<br>0.59)    | 0.36<br>(0.22 to<br>0.61)    | 0.35<br>(0.21 to<br>0.59)    |
| Gynecological diseases                                     | 0.91<br>(0.60 to<br>1.60)       | 0.99<br>(0.57 to<br>1.79)       | 0.91<br>(0.52 to<br>1.66)       | 1.12<br>(0.65 to<br>2.03)       | 0.03<br>(0.02 to<br>0.06)    | 0.05<br>(0.03 to<br>0.09)    | 0.05<br>(0.03 to<br>0.09)    | 0.05<br>(0.03 to<br>0.09)    |
| Uterine fibroids                                           | 0.29<br>(0.09 to<br>0.56)       | 0.30<br>(0.09 to<br>0.69)       | 0.27<br>(0.08 to<br>0.63)       | 0.35<br>(0.11 to<br>0.83)       | 0.01<br>(0.00 to<br>0.02)    | 0.01<br>(0.00 to<br>0.03)    | 0.01<br>(0.00 to<br>0.03)    | 0.01<br>(0.00 to<br>0.03)    |
| Polycystic ovarian syndrome                                | 0.11<br>(0.03 to<br>0.25)       | 0.07<br>(0.01 to<br>0.18)       | 0.06<br>(0.01 to<br>0.16)       | 0.10<br>(0.02 to<br>0.24)       | 0.00<br>(0.00 to<br>0.01)    | 0.00<br>(0.00 to<br>0.00)    | 0.00<br>(0.00 to<br>0.00)    | 0.00<br>(0.00 to<br>0.01)    |
| Endometriosis                                              | 0.01<br>(0.00 to<br>0.03)       | 0.01<br>(0.00 to<br>0.05)       | 0.01<br>(0.00 to<br>0.04)       | 0.01<br>(0.00 to<br>0.05)       | 0.00<br>(0.00 to<br>0.00)    | 0.00<br>(0.00 to<br>0.00)    | 0.00<br>(0.00 to<br>0.00)    | 0.00<br>(0.00 to<br>0.00)    |



|                                                   |                              |                             |                             |                             |                           |                           |                           |                           |
|---------------------------------------------------|------------------------------|-----------------------------|-----------------------------|-----------------------------|---------------------------|---------------------------|---------------------------|---------------------------|
| Genital prolapse                                  | 0.14<br>(0.04 to<br>0.25)    | 0.14<br>(0.04 to<br>0.31)   | 0.13<br>(0.03 to<br>0.28)   | 0.15<br>(0.04 to<br>0.33)   | 0.01<br>(0.00 to<br>0.02) | 0.01<br>(0.00 to<br>0.02) | 0.01<br>(0.00 to<br>0.02) | 0.01<br>(0.00 to<br>0.02) |
| Other gynecological diseases                      | 0.37<br>(0.16 to<br>0.73)    | 0.47<br>(0.20 to<br>0.91)   | 0.44<br>(0.19 to<br>0.87)   | 0.51<br>(0.22 to<br>1.01)   | 0.01<br>(0.00 to<br>0.02) | 0.03<br>(0.01 to<br>0.05) | 0.03<br>(0.01 to<br>0.05) | 0.02<br>(0.01 to<br>0.05) |
| Hemoglobinopathies and hemolytic anemias          | 15.01<br>(10.85 to<br>23.75) | 11.22<br>(8.40 to<br>16.93) | 10.66<br>(7.99 to<br>15.84) | 12.37<br>(9.23 to<br>18.76) | 0.44<br>(0.34 to<br>0.66) | 0.67<br>(0.49 to<br>1.00) | 0.69<br>(0.51 to<br>1.02) | 0.63<br>(0.43 to<br>0.96) |
| Thalassemias                                      | 0.34<br>(0.01 to<br>1.93)    | 0.07<br>(0.00 to<br>0.36)   | 0.07<br>(0.00 to<br>0.35)   | 0.08<br>(0.00 to<br>0.46)   | 0.00<br>(0.00 to<br>0.02) | 0.00<br>(0.00 to<br>0.00) | 0.00<br>(0.00 to<br>0.00) | 0.00<br>(0.00 to<br>0.01) |
| Sickle cell disorders                             | 8.12<br>(2.53 to<br>15.10)   | 3.51<br>(0.61 to<br>6.68)   | 3.18<br>(0.53 to<br>6.11)   | 4.37<br>(0.88 to<br>8.27)   | 0.11<br>(0.03 to<br>0.22) | 0.06<br>(0.01 to<br>0.12) | 0.06<br>(0.01 to<br>0.11) | 0.07<br>(0.01 to<br>0.15) |
| G6PD deficiency                                   | 2.20<br>(0.91 to<br>4.48)    | 2.35<br>(0.94 to<br>4.74)   | 2.12<br>(0.84 to<br>4.29)   | 2.78<br>(1.10 to<br>5.58)   | 0.05<br>(0.03 to<br>0.10) | 0.07<br>(0.04 to<br>0.15) | 0.07<br>(0.04 to<br>0.11) | 0.08<br>(0.04 to<br>0.14) |
| Other hemoglobinopathies and hemolytic anemias    | 4.36<br>(2.91 to<br>7.16)    | 5.29<br>(3.63 to<br>8.19)   | 5.29<br>(3.69 to<br>8.05)   | 5.15<br>(3.36 to<br>8.24)   | 0.27<br>(0.20 to<br>0.41) | 0.54<br>(0.37 to<br>0.81) | 0.57<br>(0.41 to<br>0.84) | 0.47<br>(0.29 to<br>0.76) |
| Endocrine, metabolic, blood, and immune disorders | 9.06<br>(6.13 to<br>18.43)   | 7.86<br>(5.62 to<br>15.05)  | 7.65<br>(5.44 to<br>14.39)  | 8.49<br>(6.00 to<br>16.41)  | 0.21<br>(0.15 to<br>0.41) | 0.34<br>(0.25 to<br>0.62) | 0.35<br>(0.26 to<br>0.63) | 0.32<br>(0.23 to<br>0.60) |

**Nepal**

| Cause                                         | YLLs (in 1000s)                       |                                     |                                     |                                      | Deaths (in 1000s)                |                                  |                                  |                                  |
|-----------------------------------------------|---------------------------------------|-------------------------------------|-------------------------------------|--------------------------------------|----------------------------------|----------------------------------|----------------------------------|----------------------------------|
|                                               | 2016                                  | 2040 Forecast                       | 2040 Better Scenario                | 2040 Worse Scenario                  | 2016                             | 2040 Forecast                    | 2040 Better Scenario             | 2040 Worse Scenario              |
| <b>Musculoskeletal disorders</b>              | <b>3.56</b><br>(2.69 to<br>5.07)      | <b>7.22</b><br>(5.06 to<br>10.46)   | <b>7.34</b><br>(5.16 to<br>10.68)   | <b>7.06</b><br>(4.96 to<br>10.24)    | <b>0.15</b><br>(0.10 to<br>0.21) | <b>0.40</b><br>(0.26 to<br>0.57) | <b>0.42</b><br>(0.28 to<br>0.59) | <b>0.36</b><br>(0.24 to<br>0.52) |
| Rheumatoid arthritis                          | 1.74<br>(1.15 to<br>2.81)             | 3.69<br>(2.15 to<br>6.09)           | 3.52<br>(2.07 to<br>5.87)           | 3.95<br>(2.33 to<br>6.47)            | 0.09<br>(0.06 to<br>0.14)        | 0.24<br>(0.13 to<br>0.38)        | 0.23<br>(0.13 to<br>0.37)        | 0.23<br>(0.13 to<br>0.38)        |
| Other musculoskeletal disorders               | 1.82<br>(1.35 to<br>2.64)             | 3.53<br>(2.43 to<br>5.01)           | 3.82<br>(2.61 to<br>5.36)           | 3.11<br>(2.15 to<br>4.46)            | 0.06<br>(0.04 to<br>0.08)        | 0.16<br>(0.10 to<br>0.23)        | 0.18<br>(0.12 to<br>0.26)        | 0.13<br>(0.08 to<br>0.18)        |
| <b>Other non-communicable diseases</b>        | <b>155.24</b><br>(99.98 to<br>252.98) | <b>55.43</b><br>(39.46 to<br>88.01) | <b>51.04</b><br>(36.85 to<br>80.57) | <b>74.47</b><br>(50.77 to<br>119.57) | <b>2.05</b><br>(1.38 to<br>3.28) | <b>1.54</b><br>(1.09 to<br>2.35) | <b>1.56</b><br>(1.10 to<br>2.39) | <b>1.66</b><br>(1.20 to<br>2.48) |
| Congenital birth defects                      | 121.04<br>(70.54 to<br>226.17)        | 30.08<br>(17.51 to<br>61.28)        | 26.06<br>(15.30 to<br>52.78)        | 46.30<br>(26.33 to<br>92.01)         | 1.45<br>(0.86 to<br>2.73)        | 0.42<br>(0.25 to<br>0.87)        | 0.37<br>(0.22 to<br>0.77)        | 0.61<br>(0.35 to<br>1.24)        |
| Neural tube defects                           | 1.50<br>(0.62 to<br>3.53)             | 0.16<br>(0.07 to<br>0.37)           | 0.13<br>(0.06 to<br>0.30)           | 0.29<br>(0.12 to<br>0.68)            | 0.02<br>(0.01 to<br>0.04)        | 0.00<br>(0.00 to<br>0.01)        | 0.00<br>(0.00 to<br>0.00)        | 0.00<br>(0.00 to<br>0.01)        |
| Congenital heart anomalies                    | 55.80<br>(27.61 to<br>112.44)         | 14.56<br>(7.65 to<br>30.41)         | 12.73<br>(6.86 to<br>26.85)         | 21.61<br>(10.84 to<br>45.21)         | 0.68<br>(0.35 to<br>1.37)        | 0.21<br>(0.11 to<br>0.45)        | 0.18<br>(0.10 to<br>0.40)        | 0.29<br>(0.15 to<br>0.62)        |
| Orofacial clefts                              | 0.64<br>(0.17 to<br>1.64)             | 0.10<br>(0.02 to<br>0.25)           | 0.08<br>(0.02 to<br>0.19)           | 0.19<br>(0.04 to<br>0.49)            | 0.01<br>(0.00 to<br>0.02)        | 0.00<br>(0.00 to<br>0.00)        | 0.00<br>(0.00 to<br>0.00)        | 0.00<br>(0.00 to<br>0.01)        |
| Down syndrome                                 | 1.94<br>(1.02 to<br>4.59)             | 0.87<br>(0.51 to<br>2.16)           | 0.78<br>(0.46 to<br>1.96)           | 1.18<br>(0.68 to<br>2.97)            | 0.03<br>(0.01 to<br>0.06)        | 0.02<br>(0.01 to<br>0.04)        | 0.02<br>(0.01 to<br>0.04)        | 0.02<br>(0.01 to<br>0.06)        |
| Other chromosomal abnormalities               | 2.60<br>(0.89 to<br>5.63)             | 0.93<br>(0.29 to<br>2.03)           | 0.77<br>(0.24 to<br>1.67)           | 1.57<br>(0.47 to<br>3.56)            | 0.03<br>(0.01 to<br>0.07)        | 0.01<br>(0.00 to<br>0.02)        | 0.01<br>(0.00 to<br>0.02)        | 0.02<br>(0.01 to<br>0.04)        |
| Congenital musculoskeletal and limb anomalies | 3.41<br>(1.39 to<br>7.72)             | 0.96<br>(0.36 to<br>2.26)           | 0.84<br>(0.32 to<br>1.97)           | 1.51<br>(0.56 to<br>3.61)            | 0.04<br>(0.02 to<br>0.09)        | 0.01<br>(0.00 to<br>0.05)        | 0.01<br>(0.00 to<br>0.02)        | 0.02<br>(0.01 to<br>0.04)        |
| Urogenital congenital anomalies               | 3.84<br>(1.97 to<br>7.54)             | 0.97<br>(0.53 to<br>1.96)           | 0.86<br>(0.48 to<br>1.72)           | 1.42<br>(0.74 to<br>2.82)            | 0.05<br>(0.03 to<br>0.09)        | 0.02<br>(0.01 to<br>0.04)        | 0.02<br>(0.01 to<br>0.04)        | 0.02<br>(0.01 to<br>0.05)        |

|                                      |                                        |                                        |                                        |                                        |                                     |                                     |                                     |                                     |
|--------------------------------------|----------------------------------------|----------------------------------------|----------------------------------------|----------------------------------------|-------------------------------------|-------------------------------------|-------------------------------------|-------------------------------------|
| Digestive congenital anomalies       | 11.95<br>(5.56 to<br>23.85)            | 2.44<br>(1.12 to<br>5.05)              | 2.04<br>(0.95 to<br>4.20)              | 4.11<br>(1.85 to<br>8.66)              | 0.14<br>(0.06 to<br>0.28)           | 0.03<br>(0.01 to<br>0.06)           | 0.02<br>(0.01 to<br>0.05)           | 0.05<br>(0.02 to<br>0.10)           |
| Other congenital birth defects       | 39.36<br>(20.72 to<br>73.20)           | 9.09<br>(4.57 to<br>17.63)             | 7.84<br>(4.01 to<br>15.15)             | 14.42<br>(7.11 to<br>27.38)            | 0.46<br>(0.25 to<br>0.87)           | 0.12<br>(0.06 to<br>0.23)           | 0.10<br>(0.05 to<br>0.21)           | 0.18<br>(0.09 to<br>0.36)           |
| Skin and subcutaneous diseases       | 10.39<br>(6.93 to<br>17.53)            | 21.30<br>(13.98 to<br>34.50)           | 21.53<br>(14.30 to<br>35.30)           | 21.45<br>(14.24 to<br>35.01)           | 0.32<br>(0.21 to<br>0.52)           | 1.08<br>(0.69 to<br>1.75)           | 1.15<br>(0.73 to<br>1.86)           | 0.97<br>(0.63 to<br>1.56)           |
| Cellulitis                           | 0.58<br>(0.31 to<br>1.22)              | 1.66<br>(0.87 to<br>3.65)              | 1.80<br>(0.94 to<br>3.97)              | 1.48<br>(0.78 to<br>3.22)              | 0.02<br>(0.01 to<br>0.04)           | 0.09<br>(0.04 to<br>0.19)           | 0.10<br>(0.05 to<br>0.22)           | 0.07<br>(0.03 to<br>0.15)           |
| Pyoderma                             | 8.94<br>(5.94 to<br>15.24)             | 18.10<br>(11.96 to<br>28.95)           | 18.09<br>(12.05 to<br>28.75)           | 18.55<br>(12.21 to<br>29.62)           | 0.26<br>(0.17 to<br>0.43)           | 0.89<br>(0.57 to<br>1.40)           | 0.94<br>(0.60 to<br>1.49)           | 0.82<br>(0.53 to<br>1.31)           |
| Decubitus ulcer                      | 0.44<br>(0.26 to<br>0.87)              | 0.85<br>(0.48 to<br>1.59)              | 0.91<br>(0.52 to<br>1.73)              | 0.76<br>(0.44 to<br>1.43)              | 0.02<br>(0.01 to<br>0.04)           | 0.06<br>(0.03 to<br>0.12)           | 0.07<br>(0.04 to<br>0.14)           | 0.05<br>(0.03 to<br>0.09)           |
| Other skin and subcutaneous diseases | 0.43<br>(0.25 to<br>0.77)              | 0.69<br>(0.41 to<br>1.18)              | 0.72<br>(0.43 to<br>1.24)              | 0.65<br>(0.38 to<br>1.12)              | 0.01<br>(0.01 to<br>0.02)           | 0.03<br>(0.02 to<br>0.05)           | 0.03<br>(0.02 to<br>0.06)           | 0.03<br>(0.01 to<br>0.04)           |
| Sudden infant death syndrome         | 23.80<br>(9.76 to<br>46.04)            | 4.05<br>(1.36 to<br>8.86)              | 3.44<br>(1.13 to<br>7.64)              | 6.72<br>(2.31 to<br>14.77)             | 0.28<br>(0.11 to<br>0.53)           | 0.05<br>(0.02 to<br>0.10)           | 0.04<br>(0.01 to<br>0.09)           | 0.08<br>(0.03 to<br>0.17)           |
| <b>Injuries</b>                      | <b>708.29</b><br>(606.15 to<br>804.40) | <b>692.25</b><br>(559.11 to<br>831.56) | <b>622.51</b><br>(507.51 to<br>739.80) | <b>795.76</b><br>(642.51 to<br>959.61) | <b>15.90</b><br>(13.49 to<br>17.91) | <b>20.70</b><br>(17.36 to<br>23.99) | <b>19.67</b><br>(16.31 to<br>22.60) | <b>21.87</b><br>(18.27 to<br>25.46) |
| <b>Transport injuries</b>            | <b>230.87</b><br>(179.99 to<br>299.42) | <b>250.70</b><br>(182.90 to<br>336.73) | <b>208.11</b><br>(152.73 to<br>278.82) | <b>312.11</b><br>(228.08 to<br>415.68) | <b>5.03</b><br>(3.94 to<br>6.49)    | <b>6.35</b><br>(4.70 to<br>8.41)    | <b>5.46</b><br>(4.07 to<br>7.27)    | <b>7.51</b><br>(5.57 to<br>9.82)    |
| Road injuries                        | 219.21<br>(170.89 to<br>283.05)        | 234.60<br>(170.38 to<br>314.08)        | 193.61<br>(142.18 to<br>259.75)        | 293.79<br>(215.31 to<br>393.56)        | 4.78<br>(3.76 to<br>6.15)           | 5.93<br>(4.39 to<br>7.84)           | 5.07<br>(3.81 to<br>6.75)           | 7.05<br>(5.28 to<br>9.26)           |
| Pedestrian road injuries             | 71.89<br>(48.03 to<br>100.58)          | 65.04<br>(43.04 to<br>91.77)           | 53.87<br>(36.24 to<br>76.41)           | 81.45<br>(53.58 to<br>115.07)          | 1.71<br>(1.19 to<br>2.29)           | 1.92<br>(1.32 to<br>2.66)           | 1.66<br>(1.15 to<br>2.27)           | 2.25<br>(1.54 to<br>3.13)           |
| <b>Nepal</b>                         |                                        |                                        |                                        |                                        |                                     |                                     |                                     |                                     |
| Cause                                | YLLs (in 1000s)                        |                                        |                                        |                                        | Deaths (in 1000s)                   |                                     |                                     |                                     |
|                                      | 2016                                   | 2040 Forecast                          | 2040 Better Scenario                   | 2040 Worse Scenario                    | 2016                                | 2040 Forecast                       | 2040 Better Scenario                | 2040 Worse Scenario                 |
| Cyclist road injuries                | 18.05<br>(7.95 to<br>48.54)            | 20.84<br>(9.15 to<br>50.09)            | 17.17<br>(7.60 to<br>41.86)            | 26.16<br>(11.52 to<br>63.68)           | 0.42<br>(0.18 to<br>1.16)           | 0.57<br>(0.24 to<br>1.47)           | 0.49<br>(0.21 to<br>1.27)           | 0.66<br>(0.29 to<br>1.71)           |
| Motorcyclist road injuries           | 66.36<br>(41.39 to<br>91.98)           | 80.00<br>(47.27 to<br>115.30)          | 68.27<br>(40.87 to<br>97.55)           | 95.15<br>(55.74 to<br>135.55)          | 1.31<br>(0.83 to<br>1.80)           | 1.73<br>(1.04 to<br>2.47)           | 1.50<br>(0.91 to<br>2.11)           | 2.00<br>(1.20 to<br>2.81)           |
| Motor vehicle road injuries          | 60.14<br>(37.72 to<br>81.46)           | 65.61<br>(39.98 to<br>92.81)           | 51.66<br>(31.51 to<br>71.80)           | 87.16<br>(52.70 to<br>124.56)          | 1.28<br>(0.82 to<br>1.72)           | 1.61<br>(1.01 to<br>2.23)           | 1.32<br>(0.83 to<br>1.81)           | 2.02<br>(1.26 to<br>2.81)           |
| Other road injuries                  | 2.78<br>(0.92 to<br>10.06)             | 3.11<br>(1.03 to<br>11.16)             | 2.63<br>(0.86 to<br>9.21)              | 3.86<br>(1.28 to<br>14.19)             | 0.07<br>(0.02 to<br>0.24)           | 0.11<br>(0.04 to<br>0.39)           | 0.10<br>(0.03 to<br>0.35)           | 0.12<br>(0.04 to<br>0.44)           |
| Other transport injuries             | 11.65<br>(6.77 to<br>19.51)            | 16.10<br>(9.29 to<br>26.95)            | 14.50<br>(8.49 to<br>24.34)            | 18.32<br>(10.56 to<br>30.36)           | 0.25<br>(0.15 to<br>0.40)           | 0.42<br>(0.25 to<br>0.67)           | 0.39<br>(0.24 to<br>0.63)           | 0.45<br>(0.27 to<br>0.74)           |
| <b>Unintentional injuries</b>        | <b>281.79</b><br>(211.45 to<br>342.12) | <b>224.21</b><br>(160.24 to<br>266.17) | <b>212.96</b><br>(154.85 to<br>253.25) | <b>248.76</b><br>(177.50 to<br>297.24) | <b>7.12</b><br>(5.27 to<br>8.36)    | <b>9.58</b><br>(6.81 to<br>11.28)   | <b>9.71</b><br>(6.98 to<br>11.41)   | <b>9.36</b><br>(6.69 to<br>11.21)   |
| Falls                                | 78.83<br>(47.00 to<br>105.14)          | 97.75<br>(60.35 to<br>123.17)          | 97.55<br>(60.57 to<br>122.20)          | 98.48<br>(59.74 to<br>125.77)          | 3.01<br>(1.80 to<br>3.79)           | 5.77<br>(3.54 to<br>7.19)           | 6.07<br>(3.81 to<br>7.49)           | 5.22<br>(3.16 to<br>6.64)           |
| Drowning                             | 71.01<br>(54.72 to<br>102.22)          | 32.62<br>(24.91 to<br>43.21)           | 29.49<br>(22.71 to<br>38.81)           | 39.30<br>(29.67 to<br>53.40)           | 1.21<br>(0.96 to<br>1.68)           | 0.82<br>(0.67 to<br>1.04)           | 0.77<br>(0.63 to<br>0.97)           | 0.91<br>(0.73 to<br>1.17)           |

|                                                 |                                                      |                                                      |                                                      |                                                      |                                                |                                                |                                                |                                                |
|-------------------------------------------------|------------------------------------------------------|------------------------------------------------------|------------------------------------------------------|------------------------------------------------------|------------------------------------------------|------------------------------------------------|------------------------------------------------|------------------------------------------------|
| Fire, heat, and hot substances                  | 21.10<br>(15.49 to<br>31.13)                         | 11.81<br>(8.48 to<br>17.08)                          | 10.60<br>(7.66 to<br>15.11)                          | 14.15<br>(10.15 to<br>20.51)                         | 0.44<br>(0.34 to<br>0.63)                      | 0.35<br>(0.26 to<br>0.49)                      | 0.33<br>(0.25 to<br>0.46)                      | 0.39<br>(0.29 to<br>0.55)                      |
| Poisonings                                      | 6.74<br>(3.98 to<br>13.80)                           | 2.05<br>(1.33 to<br>3.80)                            | 1.73<br>(1.13 to<br>3.17)                            | 2.82<br>(1.78 to<br>5.37)                            | 0.11<br>(0.07 to<br>0.21)                      | 0.05<br>(0.03 to<br>0.09)                      | 0.04<br>(0.03 to<br>0.07)                      | 0.06<br>(0.04 to<br>0.11)                      |
| Exposure to mechanical forces                   | 18.01<br>(14.07 to<br>25.40)                         | 12.93<br>(9.18 to<br>18.39)                          | 11.83<br>(8.44 to<br>16.65)                          | 15.31<br>(10.66 to<br>22.11)                         | 0.37<br>(0.28 to<br>0.52)                      | 0.37<br>(0.26 to<br>0.52)                      | 0.35<br>(0.26 to<br>0.49)                      | 0.41<br>(0.29 to<br>0.58)                      |
| Unintentional firearm injuries                  | 1.31<br>(0.90 to<br>2.04)                            | 0.93<br>(0.60 to<br>1.47)                            | 0.85<br>(0.55 to<br>1.33)                            | 1.09<br>(0.70 to<br>1.74)                            | 0.03<br>(0.02 to<br>0.05)                      | 0.03<br>(0.02 to<br>0.05)                      | 0.03<br>(0.02 to<br>0.05)                      | 0.04<br>(0.02 to<br>0.05)                      |
| Unintentional suffocation                       | 2.21<br>(1.00 to<br>4.55)                            | 0.52<br>(0.26 to<br>1.11)                            | 0.45<br>(0.22 to<br>0.95)                            | 0.78<br>(0.36 to<br>1.72)                            | 0.03<br>(0.01 to<br>0.06)                      | 0.01<br>(0.01 to<br>0.02)                      | 0.01<br>(0.00 to<br>0.02)                      | 0.01<br>(0.01 to<br>0.03)                      |
| Other exposure to mechanical forces             | 14.50<br>(10.12 to<br>20.81)                         | 11.48<br>(7.71 to<br>16.38)                          | 10.54<br>(7.21 to<br>15.01)                          | 13.43<br>(8.93 to<br>19.31)                          | 0.31<br>(0.22 to<br>0.43)                      | 0.33<br>(0.23 to<br>0.46)                      | 0.31<br>(0.22 to<br>0.44)                      | 0.36<br>(0.24 to<br>0.51)                      |
| Adverse effects of medical treatment            | 24.75<br>(20.89 to<br>29.78)                         | 22.37<br>(18.43 to<br>26.72)                         | 21.19<br>(17.45 to<br>25.42)                         | 24.80<br>(20.52 to<br>29.50)                         | 0.72<br>(0.61 to<br>0.87)                      | 0.97<br>(0.79 to<br>1.20)                      | 0.97<br>(0.78 to<br>1.19)                      | 0.98<br>(0.80 to<br>1.20)                      |
| Animal contact                                  | 30.97<br>(18.67 to<br>40.90)                         | 22.89<br>(13.58 to<br>31.90)                         | 20.17<br>(11.96 to<br>27.80)                         | 29.00<br>(16.81 to<br>40.03)                         | 0.62<br>(0.38 to<br>0.82)                      | 0.62<br>(0.37 to<br>0.85)                      | 0.56<br>(0.33 to<br>0.76)                      | 0.73<br>(0.42 to<br>1.00)                      |
| Venomous animal contact                         | 26.32<br>(15.11 to<br>35.27)                         | 19.07<br>(10.69 to<br>27.59)                         | 16.75<br>(9.46 to<br>24.28)                          | 24.27<br>(13.40 to<br>35.16)                         | 0.53<br>(0.30 to<br>0.71)                      | 0.52<br>(0.29 to<br>0.73)                      | 0.47<br>(0.27 to<br>0.66)                      | 0.61<br>(0.34 to<br>0.86)                      |
| Non-venomous animal contact                     | 4.65<br>(1.77 to<br>7.58)                            | 3.83<br>(1.43 to<br>6.69)                            | 3.41<br>(1.29 to<br>5.88)                            | 4.73<br>(1.72 to<br>8.33)                            | 0.09<br>(0.04 to<br>0.15)                      | 0.10<br>(0.04 to<br>0.17)                      | 0.09<br>(0.04 to<br>0.15)                      | 0.12<br>(0.05 to<br>0.19)                      |
| Foreign body                                    | 7.89<br>(4.44 to<br>11.57)                           | 4.76<br>(3.07 to<br>6.39)                            | 4.72<br>(3.10 to<br>6.28)                            | 5.17<br>(3.21 to<br>7.23)                            | 0.15<br>(0.10 to<br>0.21)                      | 0.19<br>(0.13 to<br>0.24)                      | 0.20<br>(0.14 to<br>0.26)                      | 0.17<br>(0.12 to<br>0.22)                      |
| Pulmonary aspiration and foreign body in airway | 6.17<br>(3.13 to<br>9.76)                            | 3.65<br>(2.34 to<br>5.10)                            | 3.69<br>(2.39 to<br>5.12)                            | 3.89<br>(2.38 to<br>5.70)                            | 0.12<br>(0.07 to<br>0.18)                      | 0.16<br>(0.11 to<br>0.21)                      | 0.17<br>(0.12 to<br>0.22)                      | 0.14<br>(0.09 to<br>0.19)                      |
| Foreign body in other body part                 | 1.72<br>(0.95 to<br>2.44)                            | 1.11<br>(0.58 to<br>1.63)                            | 1.04<br>(0.54 to<br>1.52)                            | 1.28<br>(0.69 to<br>1.88)                            | 0.03<br>(0.02 to<br>0.05)                      | 0.03<br>(0.02 to<br>0.04)                      | 0.03<br>(0.02 to<br>0.04)                      | 0.03<br>(0.02 to<br>0.05)                      |
| Environmental heat and cold exposure            | 2.68<br>(1.12 to<br>3.81)                            | 2.29<br>(0.90 to<br>3.30)                            | 2.02<br>(0.78 to<br>2.88)                            | 2.85<br>(1.11 to<br>4.07)                            | 0.08<br>(0.03 to<br>0.11)                      | 0.10<br>(0.04 to<br>0.14)                      | 0.09<br>(0.04 to<br>0.13)                      | 0.11<br>(0.05 to<br>0.16)                      |
| Other unintentional injuries                    | 19.82<br>(13.88 to<br>27.83)                         | 14.73<br>(9.96 to<br>21.55)                          | 13.67<br>(9.25 to<br>19.91)                          | 16.89<br>(11.37 to<br>24.74)                         | 0.39<br>(0.28 to<br>0.55)                      | 0.35<br>(0.24 to<br>0.50)                      | 0.33<br>(0.23 to<br>0.47)                      | 0.38<br>(0.26 to<br>0.56)                      |
| <b>Self-harm and interpersonal violence</b>     | <b>188.78</b><br><b>(135.41 to</b><br><b>226.30)</b> | <b>209.50</b><br><b>(139.52 to</b><br><b>272.33)</b> | <b>193.71</b><br><b>(131.91 to</b><br><b>245.32)</b> | <b>226.51</b><br><b>(148.48 to</b><br><b>299.26)</b> | <b>3.63</b><br><b>(2.62 to</b><br><b>4.32)</b> | <b>4.59</b><br><b>(3.14 to</b><br><b>5.92)</b> | <b>4.32</b><br><b>(3.00 to</b><br><b>5.41)</b> | <b>4.83</b><br><b>(3.24 to</b><br><b>6.29)</b> |

**Nepal**

| Cause                              | YLLs (in 1000s)                 |                                 |                                 |                                 | Deaths (in 1000s)         |                           |                           |                           |
|------------------------------------|---------------------------------|---------------------------------|---------------------------------|---------------------------------|---------------------------|---------------------------|---------------------------|---------------------------|
|                                    | 2016                            | 2040 Forecast                   | 2040 Better Scenario            | 2040 Worse Scenario             | 2016                      | 2040 Forecast             | 2040 Better Scenario      | 2040 Worse Scenario       |
| Self-harm                          | 152.50<br>(117.19 to<br>182.56) | 177.60<br>(122.02 to<br>234.50) | 163.24<br>(114.51 to<br>209.67) | 192.88<br>(131.04 to<br>259.50) | 2.97<br>(2.27 to<br>3.54) | 3.95<br>(2.75 to<br>5.16) | 3.70<br>(2.64 to<br>4.71) | 4.16<br>(2.85 to<br>5.50) |
| Self-harm by firearm               | 11.91<br>(6.76 to<br>20.49)     | 11.34<br>(6.06 to<br>21.03)     | 10.13<br>(5.51 to<br>18.78)     | 12.65<br>(6.68 to<br>23.53)     | 0.22<br>(0.13 to<br>0.39) | 0.23<br>(0.13 to<br>0.44) | 0.21<br>(0.12 to<br>0.39) | 0.26<br>(0.14 to<br>0.47) |
| Self-harm by other specified means | 140.58<br>(105.92 to<br>167.71) | 166.26<br>(114.21 to<br>219.31) | 153.10<br>(108.00 to<br>195.66) | 180.23<br>(122.46 to<br>240.36) | 2.75<br>(2.07 to<br>3.27) | 3.72<br>(2.60 to<br>4.82) | 3.49<br>(2.49 to<br>4.41) | 3.91<br>(2.68 to<br>5.14) |
| Interpersonal violence             | 36.28<br>(14.75 to<br>49.48)    | 31.90<br>(12.40 to<br>44.74)    | 30.48<br>(12.16 to<br>42.52)    | 33.63<br>(12.79 to<br>47.63)    | 0.66<br>(0.29 to<br>0.88) | 0.64<br>(0.29 to<br>0.87) | 0.62<br>(0.28 to<br>0.83) | 0.67<br>(0.29 to<br>0.92) |

|                                                                                     |                                                               |                                                               |                                                               |                                                               |                                                            |                                                            |                                                            |                                                            |
|-------------------------------------------------------------------------------------|---------------------------------------------------------------|---------------------------------------------------------------|---------------------------------------------------------------|---------------------------------------------------------------|------------------------------------------------------------|------------------------------------------------------------|------------------------------------------------------------|------------------------------------------------------------|
| Physical violence by firearm                                                        | 6.00<br>(1.39 to<br>10.35)                                    | 5.71<br>(1.35 to<br>10.11)                                    | 5.61<br>(1.38 to<br>9.83)                                     | 5.90<br>(1.34 to<br>10.51)                                    | 0.11<br>(0.03 to<br>0.19)                                  | 0.11<br>(0.03 to<br>0.19)                                  | 0.11<br>(0.03 to<br>0.19)                                  | 0.12<br>(0.03 to<br>0.20)                                  |
| Physical violence by sharp object                                                   | 7.10<br>(1.75 to<br>11.57)                                    | 7.82<br>(1.98 to<br>12.58)                                    | 7.85<br>(2.05 to<br>12.57)                                    | 7.79<br>(1.92 to<br>12.67)                                    | 0.13<br>(0.04 to<br>0.21)                                  | 0.16<br>(0.05 to<br>0.25)                                  | 0.16<br>(0.05 to<br>0.25)                                  | 0.16<br>(0.04 to<br>0.25)                                  |
| Physical violence by other means                                                    | 23.18<br>(10.96 to<br>33.74)                                  | 18.37<br>(8.44 to<br>27.79)                                   | 17.01<br>(8.00 to<br>25.46)                                   | 19.94<br>(9.01 to<br>30.03)                                   | 0.42<br>(0.21 to<br>0.59)                                  | 0.37<br>(0.19 to<br>0.54)                                  | 0.35<br>(0.18 to<br>0.50)                                  | 0.39<br>(0.20 to<br>0.58)                                  |
| <b>Forces of nature, conflict and terrorism, and executions and police conflict</b> | <b>6.85</b><br><b>(2.62 to</b><br><b>11.08)</b>               | <b>7.84</b><br><b>(0.00 to</b><br><b>39.66)</b>               | <b>7.73</b><br><b>(0.00 to</b><br><b>39.07)</b>               | <b>8.38</b><br><b>(0.00 to</b><br><b>42.39)</b>               | <b>0.13</b><br><b>(0.05 to</b><br><b>0.20)</b>             | <b>0.17</b><br><b>(0.00 to</b><br><b>0.85)</b>             | <b>0.17</b><br><b>(0.00 to</b><br><b>0.85)</b>             | <b>0.17</b><br><b>(0.00 to</b><br><b>0.86)</b>             |
| Exposure to forces of nature                                                        | 6.66<br>(2.42 to<br>10.88)                                    | 7.37<br>(0.00 to<br>39.65)                                    | 7.26<br>(0.00 to<br>39.06)                                    | 7.87<br>(0.00 to<br>42.38)                                    | 0.12<br>(0.04 to<br>0.20)                                  | 0.16<br>(0.00 to<br>0.85)                                  | 0.16<br>(0.00 to<br>0.85)                                  | 0.16<br>(0.00 to<br>0.86)                                  |
| Conflict and terrorism                                                              | 0.00<br>(0.00 to<br>0.00)                                     | 0.45<br>(0.00 to<br>5.65)                                     | 0.44<br>(0.00 to<br>5.56)                                     | 0.48<br>(0.00 to<br>6.02)                                     | 0.00<br>(0.00 to<br>0.00)                                  | 0.01<br>(0.00 to<br>0.11)                                  | 0.01<br>(0.00 to<br>0.11)                                  | 0.01<br>(0.00 to<br>0.11)                                  |
| Executions and police conflict                                                      | 0.19<br>(0.15 to<br>0.26)                                     | 0.03<br>(0.00 to<br>0.62)                                     | 0.02<br>(0.00 to<br>0.61)                                     | 0.03<br>(0.00 to<br>0.63)                                     | 0.00<br>(0.00 to<br>0.01)                                  | 0.00<br>(0.00 to<br>0.01)                                  | 0.00<br>(0.00 to<br>0.01)                                  | 0.00<br>(0.00 to<br>0.01)                                  |
| <b>Pakistan</b>                                                                     |                                                               |                                                               |                                                               |                                                               |                                                            |                                                            |                                                            |                                                            |
| Cause                                                                               | YLLs (in 1000s)                                               |                                                               |                                                               |                                                               | Deaths (in 1000s)                                          |                                                            |                                                            |                                                            |
|                                                                                     | 2016                                                          | 2040 Forecast                                                 | 2040 Better Scenario                                          | 2040 Worse Scenario                                           | 2016                                                       | 2040 Forecast                                              | 2040 Better Scenario                                       | 2040 Worse Scenario                                        |
| <b>All causes</b>                                                                   | <b>51,385.44</b><br><b>(45,129.68 to</b><br><b>57,752.47)</b> | <b>43,197.90</b><br><b>(33,571.18 to</b><br><b>53,902.77)</b> | <b>33,372.55</b><br><b>(26,674.72 to</b><br><b>40,584.06)</b> | <b>64,114.26</b><br><b>(50,453.59 to</b><br><b>79,159.42)</b> | <b>1,281.51</b><br><b>(1,149.20 to</b><br><b>1,418.11)</b> | <b>1,611.03</b><br><b>(1,331.17 to</b><br><b>1,899.28)</b> | <b>1,280.67</b><br><b>(1,088.77 to</b><br><b>1,503.06)</b> | <b>2,154.77</b><br><b>(1,801.37 to</b><br><b>2,497.16)</b> |
| <b>Communicable, maternal, neonatal, and nutritional diseases</b>                   | <b>25,215.58</b><br><b>(20,604.05 to</b><br><b>30,365.87)</b> | <b>9,533.11</b><br><b>(6,167.27 to</b><br><b>13,551.25)</b>   | <b>7,315.43</b><br><b>(4,726.72 to</b><br><b>10,223.40)</b>   | <b>18,300.06</b><br><b>(11,249.26 to</b><br><b>26,893.35)</b> | <b>375.98</b><br><b>(317.68 to</b><br><b>438.97)</b>       | <b>192.34</b><br><b>(134.34 to</b><br><b>270.18)</b>       | <b>153.31</b><br><b>(108.93 to</b><br><b>212.21)</b>       | <b>329.15</b><br><b>(222.04 to</b><br><b>471.02)</b>       |
| <b>HIV/AIDS and tuberculosis</b>                                                    | <b>1,877.07</b><br><b>(1,487.99 to</b><br><b>2,451.78)</b>    | <b>1,081.53</b><br><b>(701.58 to</b><br><b>1,761.06)</b>      | <b>755.91</b><br><b>(491.11 to</b><br><b>1,318.22)</b>        | <b>1,731.07</b><br><b>(1,162.48 to</b><br><b>2,644.63)</b>    | <b>51.62</b><br><b>(41.18 to</b><br><b>66.25)</b>          | <b>33.36</b><br><b>(22.95 to</b><br><b>49.15)</b>          | <b>34.80</b><br><b>(17.38 to</b><br><b>38.32)</b>          | <b>51.33</b><br><b>(36.09 to</b><br><b>74.71)</b>          |
| <b>Tuberculosis</b>                                                                 | <b>1,759.91</b><br><b>(1,413.42 to</b><br><b>2,179.69)</b>    | <b>818.54</b><br><b>(577.84 to</b><br><b>1,117.98)</b>        | <b>622.82</b><br><b>(443.64 to</b><br><b>852.64)</b>          | <b>1,396.38</b><br><b>(987.52 to</b><br><b>1,913.32)</b>      | <b>49.36</b><br><b>(39.66 to</b><br><b>62.15)</b>          | <b>27.70</b><br><b>(20.02 to</b><br><b>38.21)</b>          | <b>22.03</b><br><b>(16.05 to</b><br><b>30.08)</b>          | <b>44.27</b><br><b>(31.97 to</b><br><b>60.60)</b>          |
| <b>HIV/AIDS</b>                                                                     | <b>117.16</b><br><b>(3.59 to</b><br><b>488.86)</b>            | <b>262.99</b><br><b>(19.44 to</b><br><b>849.32)</b>           | <b>133.09</b><br><b>(4.78 to</b><br><b>667.05)</b>            | <b>334.70</b><br><b>(43.33 to</b><br><b>1,058.14)</b>         | <b>2.26</b><br><b>(0.06 to</b><br><b>9.39)</b>             | <b>5.66</b><br><b>(0.33 to</b><br><b>18.55)</b>            | <b>2.77</b><br><b>(0.08 to</b><br><b>14.29)</b>            | <b>7.06</b><br><b>(0.81 to</b><br><b>22.88)</b>            |
| <b>Diarrhea, lower respiratory, and other common infectious diseases</b>            | <b>8,994.48</b><br><b>(7,423.70 to</b><br><b>10,821.93)</b>   | <b>3,339.27</b><br><b>(1,778.00 to</b><br><b>5,232.42)</b>    | <b>2,232.39</b><br><b>(1,241.90 to</b><br><b>3,541.10)</b>    | <b>6,405.68</b><br><b>(3,117.98 to</b><br><b>10,146.81)</b>   | <b>145.33</b><br><b>(121.44 to</b><br><b>180.99)</b>       | <b>87.11</b><br><b>(47.78 to</b><br><b>152.03)</b>         | <b>66.11</b><br><b>(36.76 to</b><br><b>115.44)</b>         | <b>145.03</b><br><b>(74.68 to</b><br><b>252.36)</b>        |
| <b>Diarrheal diseases</b>                                                           | <b>3,313.24</b><br><b>(2,368.33 to</b><br><b>4,436.71)</b>    | <b>924.04</b><br><b>(266.35 to</b><br><b>2,077.98)</b>        | <b>607.31</b><br><b>(151.76 to</b><br><b>1,448.94)</b>        | <b>1,955.22</b><br><b>(642.38 to</b><br><b>4,171.51)</b>      | <b>57.70</b><br><b>(39.12 to</b><br><b>90.22)</b>          | <b>31.74</b><br><b>(7.01 to</b><br><b>93.29)</b>           | <b>22.76</b><br><b>(4.67 to</b><br><b>67.36)</b>           | <b>58.69</b><br><b>(14.95 to</b><br><b>161.28)</b>         |
| <b>Intestinal infectious diseases</b>                                               | <b>701.53</b><br><b>(373.60 to</b><br><b>1,178.45)</b>        | <b>409.36</b><br><b>(191.61 to</b><br><b>725.06)</b>          | <b>373.37</b><br><b>(80.55 to</b><br><b>654.65)</b>           | <b>587.71</b><br><b>(264.60 to</b><br><b>1,057.99)</b>        | <b>9.94</b><br><b>(5.29 to</b><br><b>16.74)</b>            | <b>6.30</b><br><b>(3.06 to</b><br><b>11.24)</b>            | <b>5.80</b><br><b>(2.89 to</b><br><b>10.17)</b>            | <b>8.71</b><br><b>(4.14 to</b><br><b>15.61)</b>            |
| <b>Typhoid fever</b>                                                                | <b>560.50</b><br><b>(290.86 to</b><br><b>958.13)</b>          | <b>306.44</b><br><b>(137.62 to</b><br><b>549.35)</b>          | <b>280.07</b><br><b>(127.10 to</b><br><b>485.12)</b>          | <b>442.36</b><br><b>(189.70 to</b><br><b>817.76)</b>          | <b>7.81</b><br><b>(4.05 to</b><br><b>13.62)</b>            | <b>4.58</b><br><b>(2.17 to</b><br><b>8.01)</b>             | <b>4.22</b><br><b>(2.05 to</b><br><b>7.32)</b>             | <b>6.38</b><br><b>(2.87 to</b><br><b>11.51)</b>            |
| <b>Paratyphoid fever</b>                                                            | <b>138.74</b><br><b>(64.53 to</b><br><b>272.14)</b>           | <b>102.35</b><br><b>(45.28 to</b><br><b>199.05)</b>           | <b>92.84</b><br><b>(41.55 to</b><br><b>177.58)</b>            | <b>144.31</b><br><b>(63.21 to</b><br><b>288.84)</b>           | <b>2.10</b><br><b>(0.97 to</b><br><b>4.11)</b>             | <b>1.71</b><br><b>(0.76 to</b><br><b>3.30)</b>             | <b>1.57</b><br><b>(0.71 to</b><br><b>3.02)</b>             | <b>2.31</b><br><b>(1.02 to</b><br><b>4.57)</b>             |
| <b>Other intestinal infectious diseases</b>                                         | <b>2.29</b><br><b>(0.64 to</b><br><b>6.19)</b>                | <b>0.56</b><br><b>(0.15 to</b><br><b>1.60)</b>                | <b>0.46</b><br><b>(0.13 to</b><br><b>1.34)</b>                | <b>1.04</b><br><b>(0.25 to</b><br><b>3.17)</b>                | <b>0.03</b><br><b>(0.01 to</b><br><b>0.08)</b>             | <b>0.01</b><br><b>(0.00 to</b><br><b>0.03)</b>             | <b>0.01</b><br><b>(0.00 to</b><br><b>0.03)</b>             | <b>0.02</b><br><b>(0.00 to</b><br><b>0.05)</b>             |
| <b>Lower respiratory infections</b>                                                 | <b>2,987.46</b><br><b>(2,294.42 to</b><br><b>3,791.30)</b>    | <b>1,197.65</b><br><b>(592.20 to</b><br><b>2,062.22)</b>      | <b>739.92</b><br><b>(413.34 to</b><br><b>1,216.31)</b>        | <b>2,582.25</b><br><b>(1,070.72 to</b><br><b>4,416.44)</b>    | <b>49.39</b><br><b>(40.40 to</b><br><b>59.64)</b>          | <b>34.43</b><br><b>(22.08 to</b><br><b>49.99)</b>          | <b>26.29</b><br><b>(17.86 to</b><br><b>37.10)</b>          | <b>57.17</b><br><b>(33.03 to</b><br><b>85.54)</b>          |
| <b>Upper respiratory infections</b>                                                 | <b>3.85</b><br><b>(1.62 to</b><br><b>7.78)</b>                | <b>1.74</b><br><b>(0.73 to</b><br><b>3.52)</b>                | <b>1.40</b><br><b>(0.59 to</b><br><b>2.80)</b>                | <b>3.17</b><br><b>(1.27 to</b><br><b>6.90)</b>                | <b>0.07</b><br><b>(0.03 to</b><br><b>0.12)</b>             | <b>0.04</b><br><b>(0.02 to</b><br><b>0.08)</b>             | <b>0.04</b><br><b>(0.02 to</b><br><b>0.07)</b>             | <b>0.07</b><br><b>(0.03 to</b><br><b>0.14)</b>             |



|                                                          |                                                  |                                                |                                                |                                                  |                                             |                                           |                                          |                                            |
|----------------------------------------------------------|--------------------------------------------------|------------------------------------------------|------------------------------------------------|--------------------------------------------------|---------------------------------------------|-------------------------------------------|------------------------------------------|--------------------------------------------|
| Dengue                                                   | 60.42<br>(6.78 to<br>219.16)                     | 137.21<br>(37.21 to<br>326.22)                 | 132.38<br>(37.03 to<br>312.54)                 | 168.19<br>(40.32 to<br>412.00)                   | 1.02<br>(0.12 to<br>3.69)                   | 3.08<br>(0.79 to<br>7.30)                 | 3.07<br>(0.84 to<br>7.19)                | 3.47<br>(0.85 to<br>8.42)                  |
| Yellow fever                                             | 0.00<br>(0.00 to<br>0.00)                        | 0.00<br>(0.00 to<br>0.00)                      | 0.00<br>(0.00 to<br>0.00)                      | 0.00<br>(0.00 to<br>0.00)                        | 0.00<br>(0.00 to<br>0.00)                   | 0.00<br>(0.00 to<br>0.00)                 | 0.00<br>(0.00 to<br>0.00)                | 0.00<br>(0.00 to<br>0.00)                  |
| Rabies                                                   | 54.33<br>(27.18 to<br>113.96)                    | 19.21<br>(6.63 to<br>46.10)                    | 14.11<br>(4.44 to<br>34.70)                    | 41.26<br>(15.74 to<br>87.75)                     | 0.93<br>(0.51 to<br>1.87)                   | 0.38<br>(0.14 to<br>0.86)                 | 0.29<br>(0.10 to<br>0.67)                | 0.78<br>(0.32 to<br>1.60)                  |
| Intestinal nematode infections                           | 3.56<br>(2.23 to<br>5.29)                        | 2.66<br>(1.10 to<br>5.08)                      | 2.58<br>(1.02 to<br>4.95)                      | 3.80<br>(1.51 to<br>7.52)                        | 0.05<br>(0.03 to<br>0.07)                   | 0.04<br>(0.02 to<br>0.07)                 | 0.04<br>(0.02 to<br>0.07)                | 0.05<br>(0.02 to<br>0.10)                  |
| Other neglected tropical diseases                        | 9.01<br>(4.65 to<br>16.00)                       | 5.00<br>(2.51 to<br>8.91)                      | 4.36<br>(2.12 to<br>7.72)                      | 8.16<br>(4.09 to<br>15.08)                       | 0.14<br>(0.08 to<br>0.23)                   | 0.11<br>(0.06 to<br>0.18)                 | 0.10<br>(0.05 to<br>0.17)                | 0.16<br>(0.09 to<br>0.26)                  |
| <b>Maternal disorders</b>                                | <b>812.66</b><br>(583.98 to<br><b>1,080.24</b> ) | <b>369.11</b><br>(223.74 to<br><b>603.41</b> ) | <b>289.66</b><br>(171.10 to<br><b>472.51</b> ) | <b>635.18</b><br>(386.44 to<br><b>1,027.46</b> ) | <b>14.13</b><br>(10.26 to<br><b>18.64</b> ) | <b>6.54</b><br>(4.00 to<br><b>10.67</b> ) | <b>5.14</b><br>(3.08 to<br><b>8.28</b> ) | <b>11.21</b><br>(6.87 to<br><b>17.94</b> ) |
| Maternal hemorrhage                                      | 517.25<br>(363.56 to<br>697.78)                  | 221.67<br>(114.41 to<br>365.86)                | 173.73<br>(89.97 to<br>283.37)                 | 378.37<br>(197.71 to<br>609.17)                  | 9.01<br>(6.38 to<br>12.09)                  | 3.93<br>(2.06 to<br>6.38)                 | 3.08<br>(1.62 to<br>4.99)                | 6.68<br>(3.52 to<br>10.52)                 |
| Maternal sepsis and other maternal infections            | 44.03<br>(26.77 to<br>67.91)                     | 16.89<br>(7.90 to<br>30.94)                    | 13.21<br>(6.15 to<br>24.13)                    | 29.51<br>(13.87 to<br>53.81)                     | 0.77<br>(0.48 to<br>1.17)                   | 0.30<br>(0.15 to<br>0.55)                 | 0.23<br>(0.11 to<br>0.43)                | 0.52<br>(0.25 to<br>0.94)                  |
| Maternal hypertensive disorders                          | 53.41<br>(32.22 to<br>81.61)                     | 24.19<br>(11.44 to<br>42.90)                   | 18.89<br>(9.02 to<br>34.27)                    | 41.78<br>(20.32 to<br>74.05)                     | 0.91<br>(0.55 to<br>1.38)                   | 0.42<br>(0.20 to<br>0.72)                 | 0.33<br>(0.16 to<br>0.57)                | 0.72<br>(0.35 to<br>1.22)                  |
| Maternal obstructed labor and uterine rupture            | 9.01<br>(4.46 to<br>15.90)                       | 4.26<br>(1.63 to<br>9.14)                      | 3.28<br>(1.27 to<br>6.94)                      | 7.53<br>(2.82 to<br>15.89)                       | 0.16<br>(0.08 to<br>0.28)                   | 0.08<br>(0.03 to<br>0.17)                 | 0.06<br>(0.02 to<br>0.13)                | 0.14<br>(0.05 to<br>0.29)                  |
| Maternal abortion, miscarriage, and ectopic pregnancy    | 9.47<br>(4.86 to<br>16.48)                       | 5.61<br>(2.02 to<br>12.21)                     | 4.43<br>(1.61 to<br>9.72)                      | 9.96<br>(3.59 to<br>22.00)                       | 0.17<br>(0.09 to<br>0.29)                   | 0.11<br>(0.04 to<br>0.23)                 | 0.08<br>(0.03 to<br>0.18)                | 0.19<br>(0.07 to<br>0.41)                  |
| Indirect maternal deaths                                 | 27.57<br>(15.70 to<br>43.85)                     | 12.49<br>(5.38 to<br>23.46)                    | 9.87<br>(4.24 to<br>18.91)                     | 22.50<br>(9.62 to<br>42.79)                      | 0.47<br>(0.27 to<br>0.75)                   | 0.22<br>(0.10 to<br>0.40)                 | 0.17<br>(0.07 to<br>0.32)                | 0.39<br>(0.17 to<br>0.74)                  |
| Late maternal deaths                                     | 12.28<br>(6.38 to<br>21.53)                      | 4.32<br>(1.83 to<br>8.26)                      | 3.39<br>(1.42 to<br>6.46)                      | 7.71<br>(3.30 to<br>14.57)                       | 0.21<br>(0.11 to<br>0.37)                   | 0.08<br>(0.03 to<br>0.14)                 | 0.06<br>(0.03 to<br>0.11)                | 0.13<br>(0.06 to<br>0.25)                  |
| Maternal deaths aggravated by HIV/AIDS                   | 0.12<br>(0.01 to<br>0.40)                        | 17.96<br>(0.00 to<br>152.32)                   | 13.50<br>(0.00 to<br>121.04)                   | 30.86<br>(0.00 to<br>257.64)                     | 0.00<br>(0.00 to<br>0.01)                   | 0.32<br>(0.00 to<br>2.77)                 | 0.24<br>(0.00 to<br>2.08)                | 0.55<br>(0.00 to<br>4.41)                  |
| Other maternal disorders                                 | 139.54<br>(86.94 to<br>204.53)                   | 61.73<br>(31.71 to<br>105.64)                  | 49.37<br>(25.25 to<br>84.47)                   | 106.95<br>(54.24 to<br>182.39)                   | 2.43<br>(1.52 to<br>3.53)                   | 1.10<br>(0.56 to<br>1.86)                 | 0.88<br>(0.44 to<br>1.49)                | 1.89<br>(0.96 to<br>3.18)                  |
| <b>Pakistan</b>                                          |                                                  |                                                |                                                |                                                  |                                             |                                           |                                          |                                            |
| Cause                                                    | YLLs (in 1000s)                                  |                                                |                                                |                                                  | Deaths (in 1000s)                           |                                           |                                          |                                            |
|                                                          | 2016                                             | 2040 Forecast                                  | 2040 Better Scenario                           | 2040 Worse Scenario                              | 2016                                        | 2040 Forecast                             | 2040 Better Scenario                     | 2040 Worse Scenario                        |
| Neonatal disorders                                       | 11,535.36<br>(8,677.03 to<br>14,980.02)          | 3,928.62<br>(1,754.07 to<br>6,495.87)          | 3,291.43<br>(1,458.53 to<br>5,402.44)          | 8,360.86<br>(3,760.99 to<br>14,108.02)           | 133.27<br>(100.26 to<br>173.08)             | 45.39<br>(20.27 to<br>75.05)              | 38.03<br>(16.86 to<br>62.42)             | 96.60<br>(43.47 to<br>163.00)              |
| Neonatal preterm birth                                   | 2,774.63<br>(1,787.32 to<br>4,061.26)            | 876.74<br>(403.23 to<br>1,482.34)              | 723.14<br>(333.34 to<br>1,212.91)              | 2,086.17<br>(946.65 to<br>3,597.72)              | 32.06<br>(20.65 to<br>46.93)                | 10.13<br>(4.66 to<br>17.12)               | 8.36<br>(3.85 to<br>14.02)               | 24.10<br>(10.94 to<br>41.56)               |
| Neonatal encephalopathy due to birth asphyxia and trauma | 5,158.57<br>(3,392.45 to<br>7,259.02)            | 1,670.41<br>(636.82 to<br>3,103.69)            | 1,427.96<br>(537.41 to<br>2,595.85)            | 3,312.57<br>(1,231.84 to<br>6,227.21)            | 59.59<br>(39.19 to<br>83.84)                | 19.30<br>(7.37 to<br>35.85)               | 16.50<br>(6.21 to<br>29.99)              | 38.27<br>(14.24 to<br>71.93)               |
| Neonatal sepsis and other neonatal infections            | 658.13<br>(404.42 to<br>1,036.55)                | 350.41<br>(168.92 to<br>623.03)                | 297.81<br>(142.72 to<br>527.69)                | 707.72<br>(335.67 to<br>1,301.30)                | 7.60<br>(4.67 to<br>11.97)                  | 4.05<br>(1.95 to<br>7.20)                 | 3.44<br>(1.65 to<br>6.10)                | 8.18<br>(3.88 to<br>15.04)                 |
| Hemolytic disease and other neonatal jaundice            | 669.37<br>(442.25 to<br>998.27)                  | 155.04<br>(77.53 to<br>263.87)                 | 126.87<br>(62.74 to<br>214.45)                 | 338.62<br>(163.12 to<br>576.30)                  | 7.74<br>(5.11 to<br>11.53)                  | 1.79<br>(0.90 to<br>3.05)                 | 1.47<br>(0.73 to<br>2.48)                | 3.91<br>(1.89 to<br>6.66)                  |

|                                                                         |                                                               |                                                               |                                                               |                                                               |                                                      |                                                            |                                                          |                                                            |
|-------------------------------------------------------------------------|---------------------------------------------------------------|---------------------------------------------------------------|---------------------------------------------------------------|---------------------------------------------------------------|------------------------------------------------------|------------------------------------------------------------|----------------------------------------------------------|------------------------------------------------------------|
| Other neonatal disorders                                                | 2,274.66<br>(1,432.14 to<br>3,424.79)                         | 876.03<br>(368.17 to<br>1,545.40)                             | 715.65<br>(299.30 to<br>1,256.32)                             | 1,915.79<br>(792.11 to<br>3,468.57)                           | 26.28<br>(16.55 to<br>39.56)                         | 10.12<br>(4.26 to<br>17.86)                                | 8.27<br>(3.46 to<br>14.51)                               | 22.13<br>(9.15 to<br>40.08)                                |
| <b>Nutritional deficiencies</b>                                         | <b>314.40</b><br><b>(231.05 to</b><br><b>429.31)</b>          | <b>120.77</b><br><b>(88.09 to</b><br><b>166.79)</b>           | <b>107.98</b><br><b>(79.73 to</b><br><b>147.35)</b>           | <b>177.57</b><br><b>(121.51 to</b><br><b>256.65)</b>          | <b>6.19</b><br><b>(4.93 to</b><br><b>7.82)</b>       | <b>4.26</b><br><b>(3.29 to</b><br><b>5.46)</b>             | <b>4.18</b><br><b>(3.26 to</b><br><b>5.38)</b>           | <b>5.14</b><br><b>(3.85 to</b><br><b>6.73)</b>             |
| Protein-energy malnutrition                                             | 180.79<br>(115.63 to<br>276.60)                               | 39.01<br>(21.36 to<br>64.79)                                  | 32.83<br>(18.54 to<br>52.91)                                  | 68.44<br>(33.78 to<br>122.14)                                 | 2.72<br>(1.87 to<br>3.86)                            | 1.12<br>(0.73 to<br>1.58)                                  | 1.07<br>(0.71 to<br>1.47)                                | 1.53<br>(0.94 to<br>2.28)                                  |
| Iodine deficiency                                                       | 4.41<br>(0.22 to<br>19.19)                                    | 5.40<br>(0.24 to<br>16.37)                                    | 4.72<br>(0.20 to<br>13.98)                                    | 8.39<br>(0.43 to<br>28.50)                                    | 0.08<br>(0.01 to<br>0.29)                            | 0.21<br>(0.01 to<br>0.65)                                  | 0.20<br>(0.01 to<br>0.64)                                | 0.27<br>(0.02 to<br>0.79)                                  |
| Dietary iron deficiency                                                 | 4.16<br>(2.43 to<br>7.20)                                     | 4.16<br>(2.19 to<br>6.60)                                     | 4.13<br>(2.16 to<br>6.53)                                     | 4.73<br>(2.52 to<br>7.68)                                     | 0.16<br>(0.08 to<br>0.26)                            | 0.24<br>(0.11 to<br>0.42)                                  | 0.26<br>(0.12 to<br>0.45)                                | 0.24<br>(0.11 to<br>0.41)                                  |
| Other nutritional deficiencies                                          | 125.03<br>(95.03 to<br>164.87)                                | 72.20<br>(53.48 to<br>98.22)                                  | 66.30<br>(49.35 to<br>89.84)                                  | 96.01<br>(68.88 to<br>132.63)                                 | 3.23<br>(2.56 to<br>4.15)                            | 2.69<br>(2.00 to<br>3.57)                                  | 2.66<br>(1.98 to<br>3.52)                                | 3.10<br>(2.27 to<br>4.16)                                  |
| <b>Other communicable, maternal, neonatal, and nutritional diseases</b> | <b>1,137.27</b><br><b>(704.47 to</b><br><b>1,847.17)</b>      | <b>368.10</b><br><b>(237.08 to</b><br><b>555.41)</b>          | <b>331.11</b><br><b>(215.95 to</b><br><b>489.36)</b>          | <b>555.42</b><br><b>(341.85 to</b><br><b>874.91)</b>          | <b>16.86</b><br><b>(11.64 to</b><br><b>25.22)</b>    | <b>8.58</b><br><b>(5.95 to</b><br><b>11.60)</b>            | <b>8.12</b><br><b>(5.64 to</b><br><b>10.82)</b>          | <b>11.32</b><br><b>(7.67 to</b><br><b>15.90)</b>           |
| Sexually transmitted infections excluding HIV                           | 639.80<br>(264.26 to<br>1,291.80)                             | 88.43<br>(31.09 to<br>209.64)                                 | 79.49<br>(28.25 to<br>186.76)                                 | 158.90<br>(51.46 to<br>375.71)                                | 7.59<br>(3.21 to<br>15.24)                           | 1.13<br>(0.44 to<br>2.55)                                  | 1.02<br>(0.41 to<br>2.29)                                | 1.96<br>(0.71 to<br>4.58)                                  |
| Syphilis                                                                | 635.83<br>(260.00 to<br>1,288.20)                             | 85.03<br>(27.66 to<br>206.26)                                 | 76.29<br>(24.90 to<br>183.01)                                 | 154.97<br>(48.34 to<br>371.04)                                | 7.48<br>(3.08 to<br>15.13)                           | 1.02<br>(0.35 to<br>2.45)                                  | 0.92<br>(0.31 to<br>2.17)                                | 1.85<br>(0.58 to<br>4.42)                                  |
| Chlamydia infection                                                     | 0.76<br>(0.48 to<br>1.09)                                     | 0.65<br>(0.40 to<br>1.00)                                     | 0.61<br>(0.38 to<br>0.95)                                     | 0.75<br>(0.46 to<br>1.16)                                     | 0.02<br>(0.01 to<br>0.03)                            | 0.02<br>(0.01 to<br>0.03)                                  | 0.02<br>(0.01 to<br>0.03)                                | 0.02<br>(0.01 to<br>0.03)                                  |
| Gonococcal infection                                                    | 2.13<br>(1.38 to<br>3.01)                                     | 1.85<br>(1.11 to<br>2.80)                                     | 1.75<br>(1.06 to<br>2.66)                                     | 2.12<br>(1.29 to<br>3.24)                                     | 0.06<br>(0.04 to<br>0.09)                            | 0.06<br>(0.04 to<br>0.09)                                  | 0.06<br>(0.03 to<br>0.10)                                | 0.07<br>(0.04 to<br>0.10)                                  |
| Other sexually transmitted infections                                   | 1.48<br>(0.70 to<br>1.53)                                     | 0.90<br>(0.54 to<br>1.41)                                     | 0.85<br>(0.50 to<br>1.33)                                     | 1.05<br>(0.63 to<br>1.66)                                     | 0.03<br>(0.02 to<br>0.04)                            | 0.03<br>(0.02 to<br>0.04)                                  | 0.03<br>(0.02 to<br>0.04)                                | 0.03<br>(0.02 to<br>0.05)                                  |
| Acute hepatitis                                                         | 267.40<br>(216.44 to<br>320.81)                               | 139.26<br>(101.64 to<br>188.95)                               | 127.12<br>(93.53 to<br>172.06)                                | 183.54<br>(132.98 to<br>249.70)                               | 5.42<br>(4.33 to<br>6.53)                            | 3.89<br>(2.91 to<br>5.11)                                  | 3.68<br>(2.76 to<br>4.82)                                | 4.72<br>(3.57 to<br>6.19)                                  |
| Acute hepatitis A                                                       | 40.57<br>(18.92 to<br>64.54)                                  | 9.34<br>(4.33 to<br>16.32)                                    | 8.36<br>(3.85 to<br>14.41)                                    | 15.37<br>(6.24 to<br>27.87)                                   | 0.53<br>(0.27 to<br>0.81)                            | 0.17<br>(0.09 to<br>0.29)                                  | 0.16<br>(0.08 to<br>0.27)                                | 0.25<br>(0.12 to<br>0.43)                                  |
| Acute hepatitis B                                                       | 132.14<br>(97.69 to<br>169.26)                                | 87.13<br>(61.35 to<br>122.67)                                 | 79.25<br>(55.07 to<br>111.84)                                 | 110.20<br>(77.19 to<br>155.03)                                | 3.28<br>(2.45 to<br>4.16)                            | 2.64<br>(1.89 to<br>3.58)                                  | 2.47<br>(1.77 to<br>3.39)                                | 3.19<br>(2.28 to<br>4.29)                                  |
| Acute hepatitis C                                                       | 6.29<br>(4.37 to<br>8.78)                                     | 4.34<br>(2.86 to<br>6.12)                                     | 4.14<br>(2.74 to<br>5.86)                                     | 5.14<br>(3.35 to<br>7.33)                                     | 0.15<br>(0.10 to<br>0.20)                            | 0.13<br>(0.09 to<br>0.19)                                  | 0.13<br>(0.09 to<br>0.19)                                | 0.15<br>(0.10 to<br>0.21)                                  |
| Acute hepatitis E                                                       | 88.39<br>(65.40 to<br>114.75)                                 | 38.45<br>(24.53 to<br>57.13)                                  | 35.37<br>(22.57 to<br>52.34)                                  | 52.83<br>(32.89 to<br>80.45)                                  | 1.47<br>(1.11 to<br>1.89)                            | 0.94<br>(0.63 to<br>1.36)                                  | 0.92<br>(0.62 to<br>1.33)                                | 1.13<br>(0.76 to<br>1.62)                                  |
| Other unspecified infectious diseases                                   | 230.08<br>(73.08 to<br>616.05)                                | 140.40<br>(54.48 to<br>264.86)                                | 124.50<br>(48.75 to<br>232.81)                                | 212.99<br>(80.15 to<br>430.46)                                | 3.85<br>(1.33 to<br>8.70)                            | 3.57<br>(1.49 to<br>5.60)                                  | 3.41<br>(1.42 to<br>5.28)                                | 4.63<br>(1.90 to<br>7.65)                                  |
| <b>Non-communicable diseases</b>                                        | <b>21,605.69</b><br><b>(19,038.90 to</b><br><b>24,641.96)</b> | <b>29,177.09</b><br><b>(21,620.67 to</b><br><b>37,442.45)</b> | <b>21,915.61</b><br><b>(16,930.91 to</b><br><b>27,545.03)</b> | <b>40,316.85</b><br><b>(29,826.13 to</b><br><b>50,752.19)</b> | <b>817.62</b><br><b>(723.91 to</b><br><b>923.35)</b> | <b>1,315.88</b><br><b>(1,053.96 to</b><br><b>1,605.40)</b> | <b>1,028.61</b><br><b>(850.66 to</b><br><b>1,247.14)</b> | <b>1,707.84</b><br><b>(1,381.87 to</b><br><b>2,037.63)</b> |

**Pakistan**

| Cause | YLLs (in 1000s) |                                       |                                       |                                       | Deaths (in 1000s)                      |                                 |                                 |                                 |
|-------|-----------------|---------------------------------------|---------------------------------------|---------------------------------------|----------------------------------------|---------------------------------|---------------------------------|---------------------------------|
|       | 2016            | 2040 Forecast                         | 2040 Better Scenario                  | 2040 Worse Scenario                   | 2016                                   | 2040 Forecast                   | 2040 Better Scenario            | 2040 Worse Scenario             |
|       | Neoplasms       | 4,301.97<br>(3,706.70 to<br>4,997.66) | 7,158.07<br>(5,631.24 to<br>8,926.57) | 6,546.35<br>(5,232.42 to<br>7,995.00) | 8,005.92<br>(6,266.78 to<br>10,099.51) | 133.70<br>(115.34 to<br>154.45) | 250.79<br>(203.56 to<br>305.51) | 236.62<br>(194.51 to<br>282.48) |

|                                      |                                 |                                   |                                   |                                   |                              |                              |                              |                              |
|--------------------------------------|---------------------------------|-----------------------------------|-----------------------------------|-----------------------------------|------------------------------|------------------------------|------------------------------|------------------------------|
| Lip and oral cavity cancer           | 365.98<br>(300.14 to<br>442.13) | 607.48<br>(406.56 to<br>925.44)   | 497.29<br>(347.98 to<br>719.01)   | 789.25<br>(501.95 to<br>1,233.45) | 11.63<br>(9.58 to<br>13.71)  | 20.31<br>(14.09 to<br>29.42) | 17.46<br>(12.67 to<br>24.33) | 25.33<br>(16.95 to<br>37.94) |
| Nasopharynx cancer                   | 32.50<br>(26.79 to<br>39.41)    | 55.70<br>(35.05 to<br>89.29)      | 44.40<br>(29.44 to<br>67.68)      | 75.21<br>(45.70 to<br>123.74)     | 0.94<br>(0.77 to<br>1.14)    | 1.72<br>(1.10 to<br>2.71)    | 1.42<br>(0.94 to<br>2.13)    | 2.25<br>(1.39 to<br>3.67)    |
| Other pharynx cancer                 | 134.65<br>(105.33 to<br>166.21) | 203.88<br>(149.84 to<br>273.80)   | 206.40<br>(149.34 to<br>277.99)   | 207.28<br>(152.52 to<br>275.97)   | 4.86<br>(3.79 to<br>5.97)    | 7.93<br>(5.83 to<br>10.67)   | 8.23<br>(6.07 to<br>10.97)   | 7.81<br>(5.71 to<br>10.34)   |
| Esophageal cancer                    | 223.78<br>(188.72 to<br>269.38) | 327.12<br>(181.06 to<br>560.50)   | 269.61<br>(156.22 to<br>452.30)   | 436.52<br>(225.71 to<br>783.94)   | 7.46<br>(6.33 to<br>8.88)    | 11.50<br>(6.74 to<br>19.26)  | 9.91<br>(6.06 to<br>16.26)   | 14.69<br>(8.10 to<br>25.26)  |
| Stomach cancer                       | 156.71<br>(132.11 to<br>184.47) | 178.70<br>(134.72 to<br>231.10)   | 163.55<br>(125.27 to<br>209.24)   | 201.45<br>(151.75 to<br>260.61)   | 5.47<br>(4.66 to<br>6.36)    | 7.08<br>(5.53 to<br>8.87)    | 6.77<br>(5.37 to<br>8.34)    | 7.54<br>(5.84 to<br>9.48)    |
| Colon and rectum cancer              | 255.53<br>(204.47 to<br>310.52) | 516.08<br>(350.07 to<br>767.94)   | 498.96<br>(340.43 to<br>724.01)   | 498.85<br>(338.99 to<br>734.16)   | 8.00<br>(6.49 to<br>9.62)    | 18.41<br>(12.67 to<br>26.95) | 18.35<br>(12.85 to<br>26.38) | 17.03<br>(11.70 to<br>24.89) |
| Liver cancer                         | 141.82<br>(111.24 to<br>173.13) | 275.55<br>(192.36 to<br>387.69)   | 245.24<br>(174.94 to<br>330.10)   | 312.10<br>(208.74 to<br>457.35)   | 5.00<br>(4.00 to<br>6.07)    | 10.48<br>(7.52 to<br>14.40)  | 9.68<br>(7.23 to<br>12.67)   | 11.40<br>(7.84 to<br>16.32)  |
| Liver cancer due to hepatitis B      | 37.92<br>(28.70 to<br>48.67)    | 70.06<br>(46.94 to<br>101.14)     | 61.92<br>(42.72 to<br>85.69)      | 80.37<br>(51.92 to<br>121.11)     | 1.18<br>(0.90 to<br>1.48)    | 2.35<br>(1.63 to<br>3.36)    | 2.15<br>(1.53 to<br>2.94)    | 2.61<br>(1.74 to<br>3.86)    |
| Liver cancer due to hepatitis C      | 69.22<br>(52.05 to<br>85.84)    | 138.72<br>(94.94 to<br>196.17)    | 125.36<br>(87.82 to<br>170.86)    | 154.70<br>(101.08 to<br>227.61)   | 2.65<br>(2.08 to<br>3.23)    | 5.64<br>(4.06 to<br>7.81)    | 5.30<br>(3.91 to<br>7.05)    | 6.04<br>(4.19 to<br>8.70)    |
| Liver cancer due to alcohol use      | 5.30<br>(3.76 to<br>6.95)       | 10.35<br>(6.72 to<br>15.09)       | 9.24<br>(6.13 to<br>12.92)        | 11.77<br>(7.40 to<br>17.81)       | 0.20<br>(0.15 to<br>0.25)    | 0.40<br>(0.27 to<br>0.58)    | 0.37<br>(0.26 to<br>0.51)    | 0.44<br>(0.29 to<br>0.66)    |
| Liver cancer due to other causes     | 29.38<br>(23.27 to<br>35.79)    | 56.42<br>(37.27 to<br>81.34)      | 48.72<br>(33.86 to<br>67.64)      | 65.27<br>(41.51 to<br>98.52)      | 0.98<br>(0.79 to<br>1.18)    | 2.08<br>(1.39 to<br>3.05)    | 1.86<br>(1.31 to<br>2.59)    | 2.31<br>(1.47 to<br>3.51)    |
| Gallbladder and biliary tract cancer | 94.08<br>(62.04 to<br>120.94)   | 117.64<br>(75.86 to<br>150.99)    | 119.72<br>(77.33 to<br>154.84)    | 114.47<br>(75.14 to<br>146.33)    | 3.29<br>(2.21 to<br>4.17)    | 4.38<br>(3.03 to<br>5.43)    | 4.54<br>(3.18 to<br>5.66)    | 4.15<br>(2.84 to<br>5.19)    |
| Pancreatic cancer                    | 69.18<br>(58.04 to<br>80.95)    | 165.54<br>(120.08 to<br>222.18)   | 162.46<br>(121.63 to<br>211.26)   | 159.77<br>(115.26 to<br>217.54)   | 2.97<br>(2.51 to<br>3.48)    | 7.65<br>(5.67 to<br>10.36)   | 7.87<br>(5.99 to<br>10.31)   | 6.96<br>(5.08 to<br>9.53)    |
| Larynx cancer                        | 144.36<br>(115.99 to<br>176.21) | 224.37<br>(113.98 to<br>407.15)   | 154.01<br>(86.89 to<br>260.57)    | 340.88<br>(161.05 to<br>646.77)   | 5.20<br>(4.28 to<br>6.26)    | 8.27<br>(4.52 to<br>14.59)   | 6.08<br>(3.68 to<br>9.79)    | 11.99<br>(5.98 to<br>22.22)  |
| Tracheal, bronchus, and lung cancer  | 348.86<br>(281.59 to<br>439.19) | 616.11<br>(357.33 to<br>984.64)   | 376.30<br>(234.32 to<br>574.84)   | 914.11<br>(518.77 to<br>1,496.02) | 13.46<br>(11.03 to<br>16.66) | 24.51<br>(14.71 to<br>38.91) | 16.01<br>(10.39 to<br>23.56) | 34.99<br>(20.34 to<br>56.00) |
| Malignant skin melanoma              | 13.72<br>(10.45 to<br>17.45)    | 26.05<br>(19.20 to<br>33.35)      | 27.82<br>(20.59 to<br>35.80)      | 23.25<br>(17.20 to<br>29.70)      | 0.43<br>(0.33 to<br>0.54)    | 0.93<br>(0.72 to<br>1.15)    | 1.04<br>(0.81 to<br>1.29)    | 0.79<br>(0.61 to<br>0.98)    |
| Non-melanoma skin cancer             | 4.41<br>(3.75 to<br>5.20)       | 8.58<br>(7.20 to<br>10.05)        | 8.81<br>(7.41 to<br>10.34)        | 8.71<br>(7.29 to<br>10.25)        | 0.21<br>(0.18 to<br>0.24)    | 0.47<br>(0.37 to<br>0.55)    | 0.51<br>(0.41 to<br>0.60)    | 0.44<br>(0.33 to<br>0.53)    |
| Breast cancer                        | 512.39<br>(359.67 to<br>958.43) | 973.62<br>(625.51 to<br>1,817.65) | 939.76<br>(610.98 to<br>1,707.68) | 975.48<br>(627.25 to<br>1,836.91) | 16.37<br>(11.32 to<br>31.15) | 35.65<br>(23.43 to<br>67.30) | 35.31<br>(23.92 to<br>65.03) | 34.41<br>(22.15 to<br>65.61) |
| Cervical cancer                      | 70.16<br>(46.75 to<br>94.64)    | 97.62<br>(61.60 to<br>140.39)     | 92.72<br>(57.49 to<br>130.46)     | 109.79<br>(70.21 to<br>160.11)    | 2.39<br>(1.52 to<br>3.22)    | 3.58<br>(2.15 to<br>4.89)    | 3.48<br>(2.06 to<br>4.74)    | 3.90<br>(2.39 to<br>5.40)    |
| Uterine cancer                       | 85.89<br>(64.67 to<br>111.24)   | 142.87<br>(105.20 to<br>189.78)   | 135.20<br>(98.98 to<br>178.92)    | 161.62<br>(121.49 to<br>211.79)   | 3.05<br>(2.26 to<br>3.96)    | 5.57<br>(4.22 to<br>7.14)    | 5.39<br>(4.05 to<br>6.94)    | 6.12<br>(4.66 to<br>7.89)    |
| Ovarian cancer                       | 154.89<br>(116.27 to<br>197.13) | 316.44<br>(219.88 to<br>454.12)   | 312.35<br>(220.54 to<br>435.51)   | 294.38<br>(202.64 to<br>426.09)   | 4.64<br>(3.56 to<br>5.91)    | 10.42<br>(7.40 to<br>15.05)  | 10.39<br>(7.51 to<br>14.47)  | 9.51<br>(6.75 to<br>13.88)   |
| Prostate cancer                      | 57.11<br>(28.72 to<br>77.33)    | 140.96<br>(72.84 to<br>192.97)    | 155.38<br>(83.87 to<br>208.44)    | 123.82<br>(61.46 to<br>173.13)    | 3.31<br>(1.86 to<br>4.31)    | 8.60<br>(4.74 to<br>11.63)   | 9.97<br>(5.90 to<br>13.03)   | 7.12<br>(3.79 to<br>9.97)    |



|                                 |                                                             |                                                              |                                                             |                                                               |                                                      |                                                      |                                                      |                                                        |
|---------------------------------|-------------------------------------------------------------|--------------------------------------------------------------|-------------------------------------------------------------|---------------------------------------------------------------|------------------------------------------------------|------------------------------------------------------|------------------------------------------------------|--------------------------------------------------------|
| Testicular cancer               | 28.53<br>(20.11 to<br>39.71)                                | 31.26<br>(20.78 to<br>48.14)                                 | 30.28<br>(19.88 to<br>47.19)                                | 34.18<br>(22.75 to<br>52.04)                                  | 0.53<br>(0.37 to<br>0.73)                            | 0.60<br>(0.41 to<br>0.90)                            | 0.59<br>(0.39 to<br>0.88)                            | 0.65<br>(0.44 to<br>0.98)                              |
| <b>Pakistan</b>                 |                                                             |                                                              |                                                             |                                                               |                                                      |                                                      |                                                      |                                                        |
| Cause                           | YLLs (in 1000s)                                             |                                                              |                                                             |                                                               | Deaths (in 1000s)                                    |                                                      |                                                      |                                                        |
|                                 | 2016                                                        | 2040 Forecast                                                | 2040 Better Scenario                                        | 2040 Worse Scenario                                           | 2016                                                 | 2040 Forecast                                        | 2040 Better Scenario                                 | 2040 Worse Scenario                                    |
| Kidney cancer                   | 29.56<br>(24.74 to<br>35.53)                                | 63.06<br>(47.63 to<br>85.12)                                 | 64.51<br>(49.40 to<br>85.10)                                | 59.87<br>(44.64 to<br>81.47)                                  | 0.99<br>(0.82 to<br>1.20)                            | 2.40<br>(1.86 to<br>3.20)                            | 2.57<br>(2.00 to<br>3.37)                            | 2.15<br>(1.62 to<br>2.91)                              |
| Bladder cancer                  | 103.33<br>(85.42 to<br>125.28)                              | 191.74<br>(137.66 to<br>270.47)                              | 176.13<br>(130.63 to<br>257.70)                             | 206.69<br>(145.73 to<br>298.68)                               | 4.40<br>(3.69 to<br>5.26)                            | 8.72<br>(6.32 to<br>12.08)                           | 8.48<br>(6.42 to<br>11.35)                           | 8.82<br>(6.26 to<br>12.60)                             |
| Brain and nervous system cancer | 199.00<br>(145.39 to<br>261.24)                             | 318.82<br>(228.33 to<br>439.27)                              | 324.39<br>(232.40 to<br>446.90)                             | 326.76<br>(229.49 to<br>452.78)                               | 4.15<br>(3.19 to<br>5.45)                            | 7.87<br>(6.08 to<br>10.59)                           | 8.18<br>(6.26 to<br>11.08)                           | 7.66<br>(5.87 to<br>10.36)                             |
| Thyroid cancer                  | 59.24<br>(42.73 to<br>75.60)                                | 80.59<br>(56.75 to<br>111.82)                                | 72.89<br>(51.82 to<br>98.97)                                | 93.44<br>(65.01 to<br>129.79)                                 | 1.61<br>(1.24 to<br>2.03)                            | 2.46<br>(1.82 to<br>3.39)                            | 2.26<br>(1.70 to<br>3.02)                            | 2.79<br>(2.05 to<br>3.87)                              |
| Mesothelioma                    | 6.24<br>(4.71 to<br>8.34)                                   | 10.57<br>(7.86 to<br>14.22)                                  | 10.76<br>(7.96 to<br>14.44)                                 | 10.59<br>(7.88 to<br>14.15)                                   | 0.21<br>(0.16 to<br>0.28)                            | 0.40<br>(0.29 to<br>0.53)                            | 0.42<br>(0.31 to<br>0.56)                            | 0.38<br>(0.28 to<br>0.50)                              |
| Hodgkin lymphoma                | 74.99<br>(45.77 to<br>99.14)                                | 60.02<br>(34.27 to<br>84.91)                                 | 54.64<br>(31.63 to<br>77.29)                                | 78.24<br>(44.56 to<br>111.87)                                 | 1.43<br>(0.88 to<br>1.86)                            | 1.24<br>(0.83 to<br>1.79)                            | 1.24<br>(0.77 to<br>1.65)                            | 1.66<br>(1.01 to<br>2.24)                              |
| Non-Hodgkin lymphoma            | 266.15<br>(173.67 to<br>335.69)                             | 445.56<br>(268.75 to<br>591.92)                              | 449.26<br>(276.50 to<br>598.20)                             | 441.21<br>(269.26 to<br>585.86)                               | 6.69<br>(4.51 to<br>8.36)                            | 13.12<br>(8.91 to<br>16.71)                          | 13.54<br>(9.46 to<br>17.25)                          | 12.44<br>(8.17 to<br>15.93)                            |
| Multiple myeloma                | 48.02<br>(29.10 to<br>63.40)                                | 105.53<br>(62.72 to<br>145.23)                               | 107.77<br>(65.89 to<br>146.97)                              | 98.71<br>(58.38 to<br>136.86)                                 | 1.71<br>(1.08 to<br>2.24)                            | 4.12<br>(2.65 to<br>5.56)                            | 4.34<br>(2.85 to<br>5.78)                            | 3.70<br>(2.34 to<br>5.00)                              |
| Leukemia                        | 261.33<br>(206.76 to<br>316.69)                             | 325.26<br>(231.65 to<br>424.34)                              | 310.76<br>(222.17 to<br>402.04)                             | 356.60<br>(255.04 to<br>470.13)                               | 5.27<br>(4.13 to<br>6.31)                            | 8.04<br>(6.02 to<br>10.21)                           | 7.81<br>(5.95 to<br>9.82)                            | 8.42<br>(6.22 to<br>10.87)                             |
| Acute lymphoid leukemia         | 98.28<br>(74.78 to<br>125.03)                               | 100.83<br>(69.57 to<br>139.64)                               | 97.65<br>(67.49 to<br>135.29)                               | 112.71<br>(76.68 to<br>155.50)                                | 1.61<br>(1.26 to<br>2.00)                            | 2.00<br>(1.39 to<br>2.68)                            | 1.94<br>(1.36 to<br>2.59)                            | 2.15<br>(1.48 to<br>2.90)                              |
| Chronic lymphoid leukemia       | 8.78<br>(6.29 to<br>11.58)                                  | 14.84<br>(10.18 to<br>20.44)                                 | 14.17<br>(9.80 to<br>19.27)                                 | 15.40<br>(10.50 to<br>21.52)                                  | 0.32<br>(0.23 to<br>0.41)                            | 0.60<br>(0.41 to<br>0.81)                            | 0.59<br>(0.42 to<br>0.80)                            | 0.59<br>(0.40 to<br>0.81)                              |
| Acute myeloid leukemia          | 74.52<br>(54.13 to<br>94.31)                                | 122.82<br>(81.53 to<br>165.75)                               | 119.90<br>(80.27 to<br>158.72)                              | 126.30<br>(83.81 to<br>172.84)                                | 1.52<br>(1.08 to<br>1.93)                            | 3.05<br>(2.09 to<br>4.06)                            | 3.02<br>(2.12 to<br>3.97)                            | 3.00<br>(2.03 to<br>4.05)                              |
| Chronic myeloid leukemia        | 26.96<br>(17.40 to<br>36.82)                                | 29.10<br>(18.16 to<br>42.35)                                 | 26.94<br>(17.28 to<br>38.79)                                | 31.36<br>(19.29 to<br>46.21)                                  | 0.69<br>(0.46 to<br>0.95)                            | 0.84<br>(0.55 to<br>1.22)                            | 0.79<br>(0.53 to<br>1.13)                            | 0.87<br>(0.56 to<br>1.28)                              |
| Other leukemia                  | 52.79<br>(39.00 to<br>66.85)                                | 57.66<br>(40.12 to<br>79.54)                                 | 52.10<br>(36.82 to<br>71.25)                                | 70.83<br>(48.80 to<br>98.92)                                  | 1.13<br>(0.85 to<br>1.41)                            | 1.56<br>(1.15 to<br>2.05)                            | 1.46<br>(1.10 to<br>1.91)                            | 1.80<br>(1.31 to<br>2.41)                              |
| Other neoplasms                 | 359.55<br>(276.98 to<br>436.43)                             | 531.35<br>(403.80 to<br>689.78)                              | 534.97<br>(406.77 to<br>694.77)                             | 552.69<br>(417.78 to<br>709.20)                               | 8.05<br>(6.63 to<br>9.88)                            | 14.27<br>(11.70 to<br>17.89)                         | 14.80<br>(12.01 to<br>18.56)                         | 14.00<br>(11.45 to<br>17.37)                           |
| <b>Cardiovascular diseases</b>  | <b>9,347.27</b><br><b>(8,095.22 to</b><br><b>10,834.81)</b> | <b>11,834.27</b><br><b>(7,220.50 to</b><br><b>17,955.76)</b> | <b>6,714.62</b><br><b>(4,241.92 to</b><br><b>10,243.39)</b> | <b>19,456.11</b><br><b>(12,307.55 to</b><br><b>27,577.80)</b> | <b>421.36</b><br><b>(370.59 to</b><br><b>478.19)</b> | <b>604.80</b><br><b>(403.66 to</b><br><b>859.41)</b> | <b>381.83</b><br><b>(261.44 to</b><br><b>555.12)</b> | <b>908.26</b><br><b>(620.59 to</b><br><b>1,232.12)</b> |
| Rheumatic heart disease         | 498.96<br>(395.44 to<br>612.16)                             | 290.36<br>(211.29 to<br>390.55)                              | 254.26<br>(188.25 to<br>340.71)                             | 378.59<br>(279.60 to<br>501.55)                               | 14.91<br>(12.02 to<br>18.33)                         | 11.10<br>(8.65 to<br>14.25)                          | 10.25<br>(8.01 to<br>12.91)                          | 13.41<br>(10.57 to<br>17.18)                           |
| Ischemic heart disease          | 5,691.24<br>(4,880.19 to<br>6,626.21)                       | 7,502.57<br>(3,868.30 to<br>12,728.18)                       | 3,923.31<br>(2,036.68 to<br>6,895.13)                       | 12,502.39<br>(6,919.60 to<br>19,259.30)                       | 258.26<br>(225.67 to<br>293.84)                      | 377.08<br>(210.66 to<br>619.68)                      | 220.65<br>(126.51 to<br>370.55)                      | 578.72<br>(340.69 to<br>888.79)                        |
| Stroke                          | 2,513.59<br>(2,126.09 to<br>2,941.79)                       | 2,954.47<br>(1,656.53 to<br>5,208.21)                        | 1,651.74<br>(973.40 to<br>2,868.71)                         | 5,221.30<br>(2,951.58 to<br>8,641.83)                         | 119.16<br>(101.97 to<br>137.54)                      | 156.47<br>(94.01 to<br>278.29)                       | 98.59<br>(62.76 to<br>173.53)                        | 248.13<br>(152.20 to<br>407.60)                        |

|                                               |                                                            |                                                            |                                                          |                                                            |                                                   |                                                    |                                                   |                                                     |
|-----------------------------------------------|------------------------------------------------------------|------------------------------------------------------------|----------------------------------------------------------|------------------------------------------------------------|---------------------------------------------------|----------------------------------------------------|---------------------------------------------------|-----------------------------------------------------|
| Ischemic stroke                               | 1,035.70<br>(857.28 to<br>1,235.64)                        | 1,288.36<br>(681.80 to<br>2,640.37)                        | 789.75<br>(443.48 to<br>1,635.43)                        | 1,962.92<br>(1,063.99 to<br>3,718.07)                      | 60.02<br>(50.27 to<br>70.91)                      | 83.07<br>(45.37 to<br>183.85)                      | 56.76<br>(32.94 to<br>128.09)                     | 115.71<br>(64.61 to<br>238.89)                      |
| Intracerebral hemorrhage                      | 1,477.89<br>(1,242.53 to<br>1,749.26)                      | 1,666.11<br>(806.03 to<br>3,207.55)                        | 861.98<br>(445.09 to<br>1,589.07)                        | 3,258.38<br>(1,596.07 to<br>5,832.63)                      | 59.15<br>(49.84 to<br>69.41)                      | 73.40<br>(39.36 to<br>132.77)                      | 41.83<br>(24.36 to<br>70.79)                      | 132.43<br>(70.97 to<br>229.78)                      |
| Hypertensive heart disease                    | 412.94<br>(310.85 to<br>535.81)                            | 698.74<br>(363.77 to<br>1,496.54)                          | 513.83<br>(296.12 to<br>997.58)                          | 942.05<br>(481.67 to<br>2,012.47)                          | 18.92<br>(14.16 to<br>24.42)                      | 38.73<br>(19.58 to<br>92.95)                       | 30.14<br>(17.02 to<br>66.89)                      | 47.53<br>(23.74 to<br>111.74)                       |
| Cardiomyopathy and myocarditis                | 65.19<br>(44.42 to<br>83.45)                               | 82.15<br>(54.29 to<br>122.37)                              | 78.64<br>(52.58 to<br>117.04)                            | 85.23<br>(55.83 to<br>126.83)                              | 1.60<br>(1.21 to<br>2.01)                         | 2.58<br>(1.83 to<br>3.64)                          | 2.59<br>(1.86 to<br>3.60)                         | 2.49<br>(1.76 to<br>3.51)                           |
| Myocarditis                                   | 24.50<br>(11.77 to<br>38.75)                               | 21.88<br>(10.11 to<br>38.76)                               | 21.02<br>(9.77 to<br>37.42)                              | 24.59<br>(11.43 to<br>43.15)                               | 0.47<br>(0.23 to<br>0.75)                         | 0.49<br>(0.25 to<br>0.84)                          | 0.48<br>(0.25 to<br>0.82)                         | 0.52<br>(0.27 to<br>0.90)                           |
| <b>Pakistan</b>                               |                                                            |                                                            |                                                          |                                                            |                                                   |                                                    |                                                   |                                                     |
| Cause                                         | YLLs (in 1000s)                                            |                                                            |                                                          |                                                            | Deaths (in 1000s)                                 |                                                    |                                                   |                                                     |
|                                               | 2016                                                       | 2040 Forecast                                              | 2040 Better Scenario                                     | 2040 Worse Scenario                                        | 2016                                              | 2040 Forecast                                      | 2040 Better Scenario                              | 2040 Worse Scenario                                 |
| Alcoholic cardiomyopathy                      | 3.30<br>(2.02 to<br>4.94)                                  | 4.71<br>(2.73 to<br>7.72)                                  | 4.98<br>(2.95 to<br>8.21)                                | 4.38<br>(2.60 to<br>7.01)                                  | 0.10<br>(0.06 to<br>0.16)                         | 0.17<br>(0.10 to<br>0.28)                          | 0.18<br>(0.11 to<br>0.32)                         | 0.15<br>(0.09 to<br>0.24)                           |
| Other cardiomyopathy                          | 37.40<br>(26.53 to<br>52.72)                               | 55.55<br>(35.39 to<br>87.10)                               | 52.64<br>(34.07 to<br>81.76)                             | 56.26<br>(35.67 to<br>88.90)                               | 1.03<br>(0.79 to<br>1.36)                         | 1.93<br>(1.32 to<br>2.89)                          | 1.93<br>(1.34 to<br>2.87)                         | 1.82<br>(1.23 to<br>2.78)                           |
| Atrial fibrillation and flutter               | 31.61<br>(24.58 to<br>40.33)                               | 74.24<br>(51.58 to<br>101.19)                              | 77.87<br>(55.70 to<br>106.44)                            | 69.52<br>(47.44 to<br>94.40)                               | 2.82<br>(2.16 to<br>3.63)                         | 7.14<br>(4.64 to<br>10.02)                         | 7.95<br>(5.41 to<br>10.91)                        | 6.17<br>(3.79 to<br>8.87)                           |
| Aortic aneurysm                               | 45.68<br>(36.79 to<br>56.31)                               | 72.07<br>(52.58 to<br>95.32)                               | 69.27<br>(51.28 to<br>90.38)                             | 77.03<br>(55.08 to<br>102.80)                              | 2.00<br>(1.61 to<br>2.45)                         | 3.63<br>(2.63 to<br>4.84)                          | 3.76<br>(2.81 to<br>4.89)                         | 3.51<br>(2.50 to<br>4.69)                           |
| Peripheral artery disease                     | 3.13<br>(1.74 to<br>5.15)                                  | 10.74<br>(5.71 to<br>18.07)                                | 10.39<br>(5.55 to<br>17.20)                              | 9.51<br>(4.86 to<br>16.27)                                 | 0.22<br>(0.13 to<br>0.35)                         | 0.85<br>(0.44 to<br>1.40)                          | 0.90<br>(0.47 to<br>1.45)                         | 0.68<br>(0.34 to<br>1.16)                           |
| Endocarditis                                  | 48.35<br>(38.17 to<br>60.06)                               | 85.00<br>(58.73 to<br>122.08)                              | 78.55<br>(55.52 to<br>111.68)                            | 90.63<br>(62.05 to<br>129.27)                              | 1.63<br>(1.30 to<br>2.02)                         | 3.49<br>(2.37 to<br>5.09)                          | 3.42<br>(2.34 to<br>4.94)                         | 3.43<br>(2.35 to<br>4.95)                           |
| Other cardiovascular and circulatory diseases | 36.58<br>(23.35 to<br>47.65)                               | 63.93<br>(39.40 to<br>88.38)                               | 56.76<br>(34.84 to<br>77.46)                             | 79.86<br>(49.99 to<br>111.36)                              | 1.84<br>(1.13 to<br>2.37)                         | 3.73<br>(2.22 to<br>5.14)                          | 3.59<br>(2.14 to<br>4.91)                         | 4.19<br>(2.49 to<br>5.83)                           |
| <b>Chronic respiratory diseases</b>           | <b>1,595.34</b><br><b>(1,274.88 to</b><br><b>1,750.08)</b> | <b>1,597.96</b><br><b>(1,129.19 to</b><br><b>2,360.19)</b> | <b>1,146.39</b><br><b>(855.00 to</b><br><b>1,566.90)</b> | <b>2,464.13</b><br><b>(1,614.00 to</b><br><b>3,875.48)</b> | <b>71.20</b><br><b>(61.20 to</b><br><b>81.49)</b> | <b>84.03</b><br><b>(59.04 to</b><br><b>118.26)</b> | <b>66.03</b><br><b>(49.19 to</b><br><b>88.33)</b> | <b>119.18</b><br><b>(78.33 to</b><br><b>180.54)</b> |
| Chronic obstructive pulmonary disease         | 1,050.69<br>(851.30 to<br>1,276.69)                        | 1,225.72<br>(782.12 to<br>1,966.89)                        | 810.27<br>(542.41 to<br>1,220.77)                        | 2,007.29<br>(1,196.71 to<br>3,357.91)                      | 55.53<br>(46.21 to<br>65.42)                      | 68.33<br>(43.42 to<br>102.99)                      | 51.00<br>(34.39 to<br>73.14)                      | 101.48<br>(61.21 to<br>163.70)                      |
| Pneumoconiosis                                | 3.66<br>(3.81 to<br>8.35)                                  | 5.96<br>(4.17 to<br>8.57)                                  | 5.79<br>(4.04 to<br>8.44)                                | 5.91<br>(4.12 to<br>8.32)                                  | 0.27<br>(0.19 to<br>0.39)                         | 0.32<br>(0.22 to<br>0.47)                          | 0.33<br>(0.23 to<br>0.48)                         | 0.30<br>(0.20 to<br>0.43)                           |
| Silicosis                                     | 1.55<br>(0.77 to<br>2.82)                                  | 1.30<br>(0.64 to<br>2.36)                                  | 1.33<br>(0.64 to<br>2.45)                                | 1.32<br>(0.67 to<br>2.36)                                  | 0.08<br>(0.04 to<br>0.13)                         | 0.07<br>(0.04 to<br>0.13)                          | 0.08<br>(0.04 to<br>0.14)                         | 0.07<br>(0.03 to<br>0.12)                           |
| Asbestosis                                    | 0.84<br>(0.46 to<br>1.34)                                  | 1.25<br>(0.70 to<br>2.01)                                  | 1.31<br>(0.73 to<br>2.15)                                | 1.19<br>(0.68 to<br>1.87)                                  | 0.03<br>(0.02 to<br>0.05)                         | 0.03<br>(0.03 to<br>0.10)                          | 0.06<br>(0.03 to<br>0.11)                         | 0.05<br>(0.03 to<br>0.09)                           |
| Coal workers pneumoconiosis                   | 0.62<br>(0.14 to<br>1.12)                                  | 0.60<br>(0.15 to<br>1.08)                                  | 0.49<br>(0.12 to<br>0.89)                                | 0.71<br>(0.19 to<br>1.29)                                  | 0.03<br>(0.01 to<br>0.06)                         | 0.03<br>(0.01 to<br>0.06)                          | 0.03<br>(0.01 to<br>0.05)                         | 0.04<br>(0.01 to<br>0.07)                           |
| Other pneumoconiosis                          | 2.66<br>(1.50 to<br>4.26)                                  | 2.81<br>(1.64 to<br>4.36)                                  | 2.67<br>(1.58 to<br>4.16)                                | 2.69<br>(1.58 to<br>4.18)                                  | 0.13<br>(0.07 to<br>0.21)                         | 0.16<br>(0.09 to<br>0.26)                          | 0.16<br>(0.09 to<br>0.26)                         | 0.14<br>(0.08 to<br>0.23)                           |
| Asthma                                        | 379.52<br>(248.37 to<br>507.50)                            | 243.73<br>(142.97 to<br>379.33)                            | 202.55<br>(121.09 to<br>303.12)                          | 332.70<br>(188.18 to<br>534.02)                            | 13.03<br>(8.28 to<br>17.66)                       | 10.14<br>(5.87 to<br>15.77)                        | 8.87<br>(5.21 to<br>13.34)                        | 12.83<br>(7.29 to<br>20.84)                         |

|                                                                |                                                          |                                                            |                                                            |                                                            |                                                   |                                                   |                                                   |                                                   |
|----------------------------------------------------------------|----------------------------------------------------------|------------------------------------------------------------|------------------------------------------------------------|------------------------------------------------------------|---------------------------------------------------|---------------------------------------------------|---------------------------------------------------|---------------------------------------------------|
| Interstitial lung disease and pulmonary sarcoidosis            | 36.15<br>(16.85 to<br>62.79)                             | 82.91<br>(40.48 to<br>137.55)                              | 90.97<br>(44.94 to<br>149.52)                              | 70.97<br>(34.49 to<br>119.28)                              | 1.55<br>(0.75 to<br>2.61)                         | 4.00<br>(1.96 to<br>6.50)                         | 4.61<br>(2.29 to<br>7.46)                         | 3.22<br>(1.55 to<br>5.34)                         |
| Other chronic respiratory diseases                             | 33.32<br>(14.66 to<br>58.28)                             | 39.64<br>(19.94 to<br>63.18)                               | 36.80<br>(18.96 to<br>57.66)                               | 47.27<br>(22.96 to<br>75.88)                               | 0.82<br>(0.41 to<br>1.24)                         | 1.24<br>(0.67 to<br>1.82)                         | 1.22<br>(0.68 to<br>1.77)                         | 1.35<br>(0.70 to<br>2.03)                         |
| <b>Cirrhosis and other chronic liver diseases</b>              | <b>1,227.30</b><br><b>(986.92 to</b><br><b>1,584.64)</b> | <b>1,598.07</b><br><b>(1,253.25 to</b><br><b>2,143.05)</b> | <b>1,549.47</b><br><b>(1,207.11 to</b><br><b>2,071.84)</b> | <b>1,762.17</b><br><b>(1,377.13 to</b><br><b>2,364.21)</b> | <b>33.08</b><br><b>(26.82 to</b><br><b>42.32)</b> | <b>50.48</b><br><b>(41.03 to</b><br><b>65.18)</b> | <b>50.38</b><br><b>(40.83 to</b><br><b>64.57)</b> | <b>53.20</b><br><b>(43.14 to</b><br><b>68.92)</b> |
| Cirrhosis and other chronic liver diseases due to hepatitis B  | 332.01<br>(252.19 to<br>454.68)                          | 477.08<br>(354.27 to<br>664.91)                            | 466.03<br>(344.98 to<br>656.85)                            | 512.39<br>(385.58 to<br>711.32)                            | 9.77<br>(7.57 to<br>12.85)                        | 15.70<br>(12.28 to<br>20.70)                      | 15.79<br>(12.30 to<br>20.77)                      | 16.25<br>(12.70 to<br>21.65)                      |
| Cirrhosis and other chronic liver diseases due to hepatitis C  | 484.62<br>(373.49 to<br>652.69)                          | 689.79<br>(527.04 to<br>939.00)                            | 670.61<br>(509.43 to<br>901.06)                            | 745.97<br>(569.68 to<br>1,019.75)                          | 14.00<br>(11.03 to<br>18.66)                      | 22.05<br>(17.47 to<br>28.91)                      | 21.97<br>(17.35 to<br>28.30)                      | 23.09<br>(18.09 to<br>30.08)                      |
| Cirrhosis and other chronic liver diseases due to alcohol use  | 99.88<br>(72.68 to<br>138.00)                            | 146.94<br>(107.39 to<br>198.45)                            | 141.91<br>(103.68 to<br>191.68)                            | 162.34<br>(119.33 to<br>221.13)                            | 3.22<br>(2.42 to<br>4.29)                         | 5.28<br>(3.99 to<br>6.82)                         | 5.26<br>(3.98 to<br>6.80)                         | 5.61<br>(4.24 to<br>7.31)                         |
| Cirrhosis and other chronic liver diseases due to other causes | 310.78<br>(244.73 to<br>398.19)                          | 284.26<br>(204.64 to<br>395.27)                            | 270.92<br>(195.15 to<br>375.95)                            | 341.48<br>(238.84 to<br>478.70)                            | 6.08<br>(4.87 to<br>7.59)                         | 7.45<br>(5.73 to<br>9.64)                         | 7.36<br>(5.68 to<br>9.53)                         | 8.25<br>(6.25 to<br>10.83)                        |
| <b>Digestive diseases</b>                                      | <b>884.84</b><br><b>(674.78 to</b><br><b>1,106.30)</b>   | <b>965.81</b><br><b>(657.69 to</b><br><b>1,282.94)</b>     | <b>907.67</b><br><b>(615.35 to</b><br><b>1,202.56)</b>     | <b>1,145.19</b><br><b>(791.85 to</b><br><b>1,531.20)</b>   | <b>28.59</b><br><b>(19.87 to</b><br><b>37.14)</b> | <b>39.38</b><br><b>(25.08 to</b><br><b>52.73)</b> | <b>38.78</b><br><b>(25.10 to</b><br><b>51.51)</b> | <b>43.54</b><br><b>(27.50 to</b><br><b>58.41)</b> |
| Peptic ulcer disease                                           | 245.98<br>(178.21 to<br>315.22)                          | 200.74<br>(127.85 to<br>279.73)                            | 177.47<br>(114.92 to<br>247.57)                            | 272.82<br>(173.88 to<br>382.99)                            | 8.60<br>(5.83 to<br>11.23)                        | 8.74<br>(5.40 to<br>12.32)                        | 8.12<br>(5.03 to<br>11.48)                        | 11.13<br>(6.67 to<br>16.00)                       |

| Pakistan                                   |                                                      |                                                        |                                                        |                                                        |                                                   |                                                   |                                                   |                                                   |
|--------------------------------------------|------------------------------------------------------|--------------------------------------------------------|--------------------------------------------------------|--------------------------------------------------------|---------------------------------------------------|---------------------------------------------------|---------------------------------------------------|---------------------------------------------------|
| Cause                                      | YLLs (in 1000s)                                      |                                                        |                                                        |                                                        | Deaths (in 1000s)                                 |                                                   |                                                   |                                                   |
|                                            | 2016                                                 | 2040 Forecast                                          | 2040 Better Scenario                                   | 2040 Worse Scenario                                    | 2016                                              | 2040 Forecast                                     | 2040 Better Scenario                              | 2040 Worse Scenario                               |
| Gastritis and duodenitis                   | 33.29<br>(22.87 to<br>48.00)                         | 48.50<br>(30.19 to<br>72.80)                           | 46.73<br>(29.31 to<br>69.37)                           | 55.05<br>(34.25 to<br>82.34)                           | 1.18<br>(0.74 to<br>1.78)                         | 2.13<br>(1.26 to<br>3.26)                         | 2.16<br>(1.31 to<br>3.26)                         | 2.24<br>(1.31 to<br>3.43)                         |
| Appendicitis                               | 119.54<br>(84.60 to<br>161.49)                       | 95.88<br>(60.48 to<br>138.21)                          | 87.11<br>(55.16 to<br>126.14)                          | 122.71<br>(77.66 to<br>178.20)                         | 2.80<br>(1.83 to<br>3.82)                         | 2.87<br>(1.76 to<br>4.10)                         | 2.70<br>(1.69 to<br>3.82)                         | 3.45<br>(2.10 to<br>4.90)                         |
| Paralytic ileus and intestinal obstruction | 196.50<br>(147.07 to<br>260.95)                      | 248.39<br>(158.07 to<br>334.52)                        | 244.31<br>(154.61 to<br>326.99)                        | 273.68<br>(177.58 to<br>369.33)                        | 5.46<br>(3.65 to<br>7.11)                         | 9.00<br>(5.19 to<br>12.13)                        | 9.27<br>(5.25 to<br>12.38)                        | 9.14<br>(5.36 to<br>12.22)                        |
| Inguinal, femoral, and abdominal hernia    | 36.73<br>(20.80 to<br>52.65)                         | 39.09<br>(19.84 to<br>58.10)                           | 38.37<br>(19.31 to<br>57.42)                           | 43.09<br>(22.70 to<br>63.43)                           | 1.35<br>(0.72 to<br>1.95)                         | 1.75<br>(0.88 to<br>2.59)                         | 1.82<br>(0.91 to<br>2.70)                         | 1.76<br>(0.90 to<br>2.60)                         |
| Inflammatory bowel disease                 | 28.84<br>(17.48 to<br>43.02)                         | 37.94<br>(22.20 to<br>54.53)                           | 38.50<br>(22.52 to<br>56.00)                           | 38.46<br>(22.33 to<br>55.65)                           | 0.94<br>(0.55 to<br>1.35)                         | 1.58<br>(0.90 to<br>2.26)                         | 1.68<br>(0.96 to<br>2.40)                         | 1.49<br>(0.84 to<br>2.10)                         |
| Vascular intestinal disorders              | 48.65<br>(29.18 to<br>71.23)                         | 76.91<br>(45.61 to<br>112.53)                          | 77.61<br>(46.54 to<br>112.73)                          | 79.38<br>(46.87 to<br>117.08)                          | 2.36<br>(1.39 to<br>3.47)                         | 4.36<br>(2.52 to<br>6.45)                         | 4.61<br>(2.70 to<br>6.80)                         | 4.23<br>(2.38 to<br>6.37)                         |
| Gallbladder and biliary diseases           | 48.44<br>(35.13 to<br>61.81)                         | 61.67<br>(34.28 to<br>104.75)                          | 47.28<br>(28.43 to<br>75.93)                           | 82.30<br>(45.74 to<br>140.39)                          | 1.78<br>(1.16 to<br>2.35)                         | 2.86<br>(1.46 to<br>5.10)                         | 2.32<br>(1.26 to<br>3.90)                         | 3.54<br>(1.80 to<br>6.37)                         |
| Pancreatitis                               | 113.58<br>(75.00 to<br>149.02)                       | 137.16<br>(88.12 to<br>186.83)                         | 131.18<br>(84.53 to<br>179.91)                         | 155.92<br>(100.37 to<br>210.92)                        | 3.48<br>(2.23 to<br>4.63)                         | 4.95<br>(3.08 to<br>6.69)                         | 4.91<br>(3.08 to<br>6.59)                         | 5.38<br>(3.30 to<br>7.33)                         |
| Other digestive diseases                   | 13.28<br>(8.03 to<br>19.87)                          | 19.55<br>(10.86 to<br>30.38)                           | 19.11<br>(10.61 to<br>29.74)                           | 21.79<br>(12.24 to<br>34.32)                           | 0.64<br>(0.36 to<br>0.98)                         | 1.15<br>(0.62 to<br>1.86)                         | 1.19<br>(0.64 to<br>1.89)                         | 1.18<br>(0.63 to<br>1.95)                         |
| <b>Neurological disorders</b>              | <b>453.57</b><br><b>(387.75 to</b><br><b>527.92)</b> | <b>797.50</b><br><b>(614.75 to</b><br><b>1,072.91)</b> | <b>807.91</b><br><b>(638.88 to</b><br><b>1,030.57)</b> | <b>790.49</b><br><b>(599.20 to</b><br><b>1,062.95)</b> | <b>22.45</b><br><b>(18.72 to</b><br><b>26.78)</b> | <b>57.61</b><br><b>(38.01 to</b><br><b>83.78)</b> | <b>62.44</b><br><b>(43.84 to</b><br><b>85.22)</b> | <b>49.44</b><br><b>(31.37 to</b><br><b>74.52)</b> |
| Alzheimer's disease and other dementias    | 173.30<br>(138.62 to<br>216.16)                      | 463.16<br>(298.60 to<br>703.15)                        | 474.68<br>(333.60 to<br>672.01)                        | 414.06<br>(255.85 to<br>660.09)                        | 15.88<br>(12.81 to<br>19.87)                      | 45.83<br>(27.23 to<br>71.75)                      | 49.61<br>(32.42 to<br>71.95)                      | 38.22<br>(21.35 to<br>62.63)                      |

|                              |                                       |                                        |                                        |                                        |                                  |                                  |                                  |                                  |
|------------------------------|---------------------------------------|----------------------------------------|----------------------------------------|----------------------------------------|----------------------------------|----------------------------------|----------------------------------|----------------------------------|
| Parkinson's disease          | 21.48<br>(15.82 to<br>27.96)          | 63.63<br>(45.38 to<br>84.52)           | 74.86<br>(54.79 to<br>97.04)           | 49.47<br>(34.30 to<br>66.55)           | 1.64<br>(1.21 to<br>2.15)        | 5.16<br>(3.48 to<br>7.08)        | 6.31<br>(4.46 to<br>8.41)        | 3.81<br>(2.45 to<br>5.35)        |
| Epilepsy                     | 195.20<br>(155.60 to<br>233.21)       | 179.55<br>(125.44 to<br>246.51)        | 164.44<br>(113.32 to<br>226.59)        | 234.69<br>(164.73 to<br>324.42)        | 3.58<br>(2.85 to<br>4.29)        | 4.15<br>(3.02 to<br>5.49)        | 3.91<br>(2.83 to<br>5.12)        | 5.08<br>(3.74 to<br>6.63)        |
| Multiple sclerosis           | 8.92<br>(6.77 to<br>12.97)            | 15.50<br>(11.14 to<br>22.78)           | 15.74<br>(11.21 to<br>23.12)           | 15.21<br>(10.94 to<br>22.34)           | 0.24<br>(0.18 to<br>0.35)        | 0.46<br>(0.33 to<br>0.65)        | 0.47<br>(0.34 to<br>0.67)        | 0.44<br>(0.32 to<br>0.63)        |
| Motor neuron disease         | 8.22<br>(6.48 to<br>11.69)            | 14.33<br>(10.93 to<br>20.10)           | 15.01<br>(11.32 to<br>20.95)           | 13.60<br>(10.46 to<br>19.09)           | 0.22<br>(0.18 to<br>0.31)        | 0.50<br>(0.38 to<br>0.71)        | 0.53<br>(0.40 to<br>0.76)        | 0.45<br>(0.35 to<br>0.64)        |
| Other neurological disorders | 46.44<br>(36.91 to<br>57.14)          | 61.33<br>(48.18 to<br>78.22)           | 63.18<br>(49.25 to<br>80.37)           | 63.46<br>(48.52 to<br>82.55)           | 0.89<br>(0.75 to<br>1.06)        | 1.50<br>(1.21 to<br>1.82)        | 1.60<br>(1.27 to<br>1.93)        | 1.44<br>(1.18 to<br>1.76)        |
| <b>Mental disorders</b>      | <b>114.01</b><br>(67.19 to<br>177.81) | <b>200.04</b><br>(113.81 to<br>318.43) | <b>200.43</b><br>(113.30 to<br>318.51) | <b>204.36</b><br>(116.29 to<br>324.06) | <b>2.66</b><br>(1.54 to<br>4.15) | <b>5.07</b><br>(2.93 to<br>7.76) | <b>5.21</b><br>(3.01 to<br>7.97) | <b>5.02</b><br>(2.89 to<br>7.67) |
| Alcohol use disorders        | 64.12<br>(21.05 to<br>116.79)         | 89.87<br>(24.61 to<br>177.32)          | 89.82<br>(24.89 to<br>178.62)          | 91.84<br>(25.38 to<br>178.70)          | 1.58<br>(0.55 to<br>2.85)        | 2.42<br>(0.73 to<br>4.54)        | 2.47<br>(0.76 to<br>4.63)        | 2.41<br>(0.72 to<br>4.49)        |
| Drug use disorders           | 49.44<br>(37.29 to<br>65.30)          | 109.49<br>(78.84 to<br>152.58)         | 109.92<br>(78.70 to<br>153.02)         | 111.83<br>(80.74 to<br>154.96)         | 1.07<br>(0.82 to<br>1.39)        | 2.64<br>(1.99 to<br>3.47)        | 2.73<br>(2.06 to<br>3.58)        | 2.60<br>(1.96 to<br>3.43)        |
| Opioid use disorders         | 33.50<br>(23.57 to<br>46.73)          | 66.40<br>(44.40 to<br>96.90)           | 66.38<br>(44.53 to<br>97.17)           | 68.18<br>(45.54 to<br>99.31)           | 0.68<br>(0.48 to<br>0.93)        | 1.47<br>(1.02 to<br>2.05)        | 1.50<br>(1.04 to<br>2.09)        | 1.47<br>(1.01 to<br>2.06)        |
| Cocaine use disorders        | 2.35<br>(0.89 to<br>4.29)             | 6.05<br>(2.19 to<br>11.02)             | 5.91<br>(2.14 to<br>10.86)             | 6.52<br>(2.39 to<br>11.86)             | 0.05<br>(0.02 to<br>0.10)        | 0.15<br>(0.05 to<br>0.27)        | 0.14<br>(0.05 to<br>0.26)        | 0.15<br>(0.06 to<br>0.28)        |
| Amphetamine use disorders    | 1.57<br>(0.74 to<br>3.08)             | 5.09<br>(2.23 to<br>9.51)              | 4.90<br>(2.14 to<br>8.93)              | 5.69<br>(2.51 to<br>10.85)             | 0.03<br>(0.02 to<br>0.06)        | 0.11<br>(0.05 to<br>0.21)        | 0.11<br>(0.05 to<br>0.20)        | 0.13<br>(0.06 to<br>0.23)        |
| Other drug use disorders     | 12.02<br>(8.32 to<br>16.20)           | 31.95<br>(20.79 to<br>44.91)           | 32.73<br>(21.29 to<br>46.21)           | 31.44<br>(20.46 to<br>44.54)           | 0.30<br>(0.22 to<br>0.39)        | 0.91<br>(0.65 to<br>1.20)        | 0.97<br>(0.69 to<br>1.27)        | 0.85<br>(0.60 to<br>1.13)        |
| Eating disorders             | 0.45<br>(0.26 to<br>0.78)             | 0.68<br>(0.38 to<br>1.19)              | 0.68<br>(0.39 to<br>1.21)              | 0.69<br>(0.40 to<br>1.19)              | 0.01<br>(0.00 to<br>0.01)        | 0.01<br>(0.01 to<br>0.02)        | 0.01<br>(0.01 to<br>0.02)        | 0.01<br>(0.01 to<br>0.02)        |

| Pakistan                                                   |                                              |                                              |                                              |                                              |                                     |                                        |                                        |                                        |
|------------------------------------------------------------|----------------------------------------------|----------------------------------------------|----------------------------------------------|----------------------------------------------|-------------------------------------|----------------------------------------|----------------------------------------|----------------------------------------|
| Cause                                                      | YLLs (in 1000s)                              |                                              |                                              |                                              | Deaths (in 1000s)                   |                                        |                                        |                                        |
|                                                            | 2016                                         | 2040 Forecast                                | 2040 Better Scenario                         | 2040 Worse Scenario                          | 2016                                | 2040 Forecast                          | 2040 Better Scenario                   | 2040 Worse Scenario                    |
| <b>Diabetes, urogenital, blood, and endocrine diseases</b> | <b>2,211.76</b><br>(1,902.66 to<br>2,625.81) | <b>4,162.44</b><br>(2,622.13 to<br>8,241.90) | <b>3,233.66</b><br>(2,092.94 to<br>6,242.93) | <b>5,149.64</b><br>(3,387.76 to<br>9,953.08) | <b>84.57</b><br>(72.98 to<br>99.06) | <b>208.50</b><br>(133.44 to<br>399.08) | <b>172.36</b><br>(113.26 to<br>328.35) | <b>239.55</b><br>(155.28 to<br>449.72) |
| Diabetes mellitus                                          | 864.41<br>(722.58 to<br>1,024.47)            | 1,401.61<br>(961.70 to<br>1,972.61)          | 1,206.44<br>(844.41 to<br>1,689.70)          | 1,812.82<br>(1,223.90 to<br>2,522.48)        | 43.86<br>(36.54 to<br>51.93)        | 85.47<br>(59.44 to<br>115.21)          | 78.73<br>(56.02 to<br>104.33)          | 102.01<br>(68.50 to<br>139.75)         |
| Acute glomerulonephritis                                   | 3.66<br>(2.60 to<br>5.53)                    | 4.41<br>(3.14 to<br>6.35)                    | 4.21<br>(3.01 to<br>5.98)                    | 5.40<br>(3.75 to<br>8.05)                    | 0.10<br>(0.07 to<br>0.13)           | 0.15<br>(0.11 to<br>0.21)              | 0.16<br>(0.11 to<br>0.21)              | 0.16<br>(0.12 to<br>0.22)              |
| Chronic kidney disease                                     | 910.70<br>(692.60 to<br>1,240.18)            | 2,313.01<br>(854.69 to<br>6,510.87)          | 1,586.87<br>(623.46 to<br>4,665.69)          | 2,827.01<br>(1,104.99 to<br>7,743.81)        | 29.58<br>(22.57 to<br>41.22)        | 105.39<br>(31.70 to<br>305.54)         | 75.05<br>(22.86 to<br>238.51)          | 119.89<br>(38.44 to<br>340.45)         |
| Chronic kidney disease due to diabetes mellitus            | 271.41<br>(199.85 to<br>385.94)              | 989.60<br>(303.67 to<br>3,266.37)            | 653.43<br>(208.97 to<br>2,251.06)            | 1,186.59<br>(374.66 to<br>3,972.41)          | 10.76<br>(8.10 to<br>15.50)         | 45.85<br>(12.35 to<br>143.51)          | 31.70<br>(8.56 to<br>112.42)           | 52.35<br>(14.84 to<br>160.16)          |
| Chronic kidney disease due to hypertension                 | 156.81<br>(115.45 to<br>220.18)              | 512.82<br>(158.37 to<br>1,545.37)            | 352.73<br>(110.62 to<br>1,105.83)            | 603.32<br>(196.82 to<br>1,723.87)            | 6.77<br>(5.00 to<br>9.46)           | 28.30<br>(7.60 to<br>81.88)            | 20.67<br>(5.51 to<br>69.85)            | 30.97<br>(8.76 to<br>86.34)            |
| Chronic kidney disease due to glomerulonephritis           | 190.32<br>(137.56 to<br>265.77)              | 268.25<br>(143.28 to<br>532.02)              | 196.43<br>(106.53 to<br>382.56)              | 351.39<br>(193.38 to<br>661.88)              | 4.11<br>(3.04 to<br>5.78)           | 8.52<br>(3.56 to<br>20.11)             | 6.21<br>(2.65 to<br>15.63)             | 10.30<br>(4.62 to<br>23.57)            |

|                                                            |                              |                                |                              |                                |                         |                          |                          |                          |
|------------------------------------------------------------|------------------------------|--------------------------------|------------------------------|--------------------------------|-------------------------|--------------------------|--------------------------|--------------------------|
| Chronic kidney disease due to other and unspecified causes | 292.16<br>(219.08 to 394.47) | 542.35<br>(233.28 to 1,344.41) | 384.28<br>(173.18 to 952.60) | 685.71<br>(309.23 to 1,641.68) | 7.93<br>(5.96 to 10.84) | 22.73<br>(7.53 to 64.62) | 16.48<br>(5.58 to 55.00) | 26.27<br>(9.50 to 69.10) |
| Urinary diseases and male infertility                      | 161.68<br>(135.93 to 195.36) | 229.17<br>(184.01 to 283.19)   | 229.61<br>(185.01 to 284.75) | 244.48<br>(193.53 to 305.55)   | 4.85<br>(4.02 to 5.86)  | 9.53<br>(7.46 to 11.71)  | 10.26<br>(8.12 to 12.48) | 9.01<br>(6.97 to 11.18)  |
| Urinary tract infections                                   | 101.80<br>(79.79 to 131.48)  | 165.17<br>(130.05 to 211.02)   | 167.78<br>(132.89 to 215.15) | 170.71<br>(133.19 to 220.90)   | 3.10<br>(2.43 to 4.00)  | 7.15<br>(5.44 to 9.10)   | 7.80<br>(6.02 to 9.81)   | 6.55<br>(4.91 to 8.43)   |
| Urolithiasis                                               | 14.45<br>(10.30 to 19.83)    | 26.21<br>(18.26 to 35.98)      | 26.32<br>(18.05 to 36.27)    | 27.31<br>(18.78 to 37.74)      | 0.44<br>(0.32 to 0.58)  | 0.94<br>(0.66 to 1.27)   | 1.00<br>(0.70 to 1.36)   | 0.89<br>(0.63 to 1.21)   |
| Other urinary diseases                                     | 45.43<br>(32.57 to 60.99)    | 37.79<br>(24.43 to 55.67)      | 35.51<br>(22.38 to 52.75)    | 46.47<br>(29.54 to 68.48)      | 1.31<br>(0.94 to 1.80)  | 1.44<br>(0.91 to 2.16)   | 1.46<br>(0.92 to 2.19)   | 1.57<br>(1.00 to 2.32)   |
| Gynecological diseases                                     | 6.02<br>(4.38 to 8.31)       | 7.01<br>(4.53 to 11.09)        | 6.41<br>(4.15 to 10.24)      | 8.67<br>(5.55 to 14.07)        | 0.21<br>(0.15 to 0.29)  | 0.30<br>(0.19 to 0.48)   | 0.30<br>(0.19 to 0.48)   | 0.33<br>(0.21 to 0.54)   |
| Uterine fibroids                                           | 1.97<br>(0.49 to 3.45)       | 2.22<br>(0.48 to 4.41)         | 1.98<br>(0.43 to 3.96)       | 2.82<br>(0.62 to 5.54)         | 0.07<br>(0.02 to 0.13)  | 0.09<br>(0.02 to 0.18)   | 0.08<br>(0.02 to 0.17)   | 0.11<br>(0.02 to 0.20)   |
| Polycystic ovarian syndrome                                | 0.69<br>(0.15 to 1.77)       | 0.46<br>(0.08 to 1.33)         | 0.38<br>(0.06 to 1.10)       | 0.68<br>(0.12 to 1.93)         | 0.01<br>(0.00 to 0.04)  | 0.01<br>(0.00 to 0.03)   | 0.01<br>(0.00 to 0.03)   | 0.02<br>(0.00 to 0.04)   |
| Endometriosis                                              | 0.05<br>(0.01 to 0.17)       | 0.07<br>(0.01 to 0.23)         | 0.06<br>(0.01 to 0.20)       | 0.09<br>(0.02 to 0.30)         | 0.00<br>(0.00 to 0.00)  | 0.00<br>(0.00 to 0.00)   | 0.00<br>(0.00 to 0.00)   | 0.00<br>(0.00 to 0.01)   |
| Genital prolapse                                           | 0.61<br>(0.17 to 1.21)       | 0.65<br>(0.14 to 1.46)         | 0.61<br>(0.13 to 1.36)       | 0.79<br>(0.18 to 1.77)         | 0.04<br>(0.01 to 0.08)  | 0.05<br>(0.01 to 0.11)   | 0.05<br>(0.01 to 0.11)   | 0.05<br>(0.01 to 0.12)   |
| Other gynecological diseases                               | 2.69<br>(1.24 to 4.82)       | 3.61<br>(1.71 to 6.97)         | 3.38<br>(1.62 to 6.62)       | 4.28<br>(1.97 to 8.20)         | 0.08<br>(0.04 to 0.16)  | 0.15<br>(0.07 to 0.28)   | 0.15<br>(0.08 to 0.29)   | 0.16<br>(0.08 to 0.30)   |
| Hemoglobinopathies and hemolytic anemias                   | 183.95<br>(148.38 to 238.49) | 126.86<br>(94.29 to 183.46)    | 122.98<br>(91.00 to 175.10)  | 152.84<br>(113.34 to 217.82)   | 4.31<br>(3.40 to 6.02)  | 5.15<br>(3.62 to 8.25)   | 5.31<br>(3.79 to 8.42)   | 5.47<br>(3.83 to 8.74)   |
| Thalassemias                                               | 86.13<br>(62.71 to 118.61)   | 33.85<br>(19.34 to 51.57)      | 35.57<br>(20.01 to 53.87)    | 40.70<br>(22.35 to 64.43)      | 1.06<br>(0.77 to 1.45)  | 0.43<br>(0.25 to 0.65)   | 0.45<br>(0.26 to 0.68)   | 0.51<br>(0.28 to 0.80)   |
| Sickle cell disorders                                      | 11.60<br>(8.73 to 16.32)     | 10.13<br>(6.17 to 16.38)       | 9.41<br>(5.71 to 15.10)      | 12.53<br>(7.59 to 20.21)       | 0.18<br>(0.14 to 0.26)  | 0.17<br>(0.10 to 0.27)   | 0.16<br>(0.10 to 0.25)   | 0.21<br>(0.13 to 0.33)   |
| G6PD deficiency                                            | 38.57<br>(28.82 to 55.88)    | 38.02<br>(24.96 to 60.91)      | 33.85<br>(22.34 to 54.41)    | 49.69<br>(33.22 to 80.23)      | 0.77<br>(0.57 to 1.15)  | 0.90<br>(0.61 to 1.46)   | 0.82<br>(0.55 to 1.33)   | 1.15<br>(0.78 to 1.88)   |
| Other hemoglobinopathies and hemolytic anemias             | 47.65<br>(35.01 to 73.37)    | 44.86<br>(31.79 to 72.90)      | 44.15<br>(31.68 to 70.03)    | 49.92<br>(34.91 to 81.66)      | 2.30<br>(1.70 to 3.56)  | 3.64<br>(2.22 to 6.26)   | 3.88<br>(2.49 to 6.57)   | 3.60<br>(2.09 to 6.35)   |
| Endocrine, metabolic, blood, and immune disorders          | 81.34<br>(50.98 to 158.88)   | 80.37<br>(51.17 to 152.38)     | 77.15<br>(49.84 to 144.51)   | 98.43<br>(61.82 to 189.69)     | 1.66<br>(1.09 to 3.11)  | 2.51<br>(1.69 to 4.43)   | 2.56<br>(1.72 to 4.42)   | 2.67<br>(1.79 to 4.83)   |

**Pakistan**

| Cause                           | YLLs (in 1000s)                  |                                  |                                  |                                  | Deaths (in 1000s)                |                               |                               |                               |
|---------------------------------|----------------------------------|----------------------------------|----------------------------------|----------------------------------|----------------------------------|-------------------------------|-------------------------------|-------------------------------|
|                                 | 2016                             | 2040 Forecast                    | 2040 Better Scenario             | 2040 Worse Scenario              | 2016                             | 2040 Forecast                 | 2040 Better Scenario          | 2040 Worse Scenario           |
|                                 | <b>Musculoskeletal disorders</b> | <b>23.99</b><br>(17.61 to 34.53) | <b>49.91</b><br>(33.47 to 73.43) | <b>51.19</b><br>(34.22 to 75.62) | <b>50.03</b><br>(34.13 to 74.15) | <b>0.89</b><br>(0.59 to 1.29) | <b>2.33</b><br>(1.43 to 3.46) | <b>2.51</b><br>(1.54 to 3.70) |
| Rheumatoid arthritis            | 8.85<br>(5.68 to 14.71)          | 19.48<br>(12.14 to 32.51)        | 18.92<br>(11.59 to 32.20)        | 21.93<br>(13.75 to 36.64)        | 0.44<br>(0.27 to 0.73)           | 1.15<br>(0.67 to 1.88)        | 1.18<br>(0.68 to 1.92)        | 1.22<br>(0.72 to 1.98)        |
| Other musculoskeletal disorders | 15.14<br>(11.34 to 20.52)        | 30.43<br>(20.26 to 41.50)        | 32.27<br>(21.39 to 44.14)        | 28.10<br>(18.81 to 37.86)        | 0.45<br>(0.31 to 0.59)           | 1.18<br>(0.71 to 1.58)        | 1.33<br>(0.80 to 1.77)        | 1.00<br>(0.60 to 1.34)        |

|                                               |                                                      |                                                      |                                                      |                                                      |                                              |                                               |                                              |                                               |
|-----------------------------------------------|------------------------------------------------------|------------------------------------------------------|------------------------------------------------------|------------------------------------------------------|----------------------------------------------|-----------------------------------------------|----------------------------------------------|-----------------------------------------------|
| <b>Other non-communicable diseases</b>        | <b>1,535.64</b><br>(949.07 to<br><b>2,729.83</b> )   | <b>813.03</b><br>(479.96 to<br><b>1,425.55</b> )     | <b>757.94</b><br>(449.74 to<br><b>1,320.82</b> )     | <b>1,288.81</b><br>(702.77 to<br><b>2,347.78</b> )   | <b>19.13</b><br>(12.09 to<br><b>33.60</b> )  | <b>12.87</b><br>(8.20 to<br><b>21.36</b> )    | <b>12.46</b><br>(8.06 to<br><b>20.91</b> )   | <b>18.31</b><br>(10.82 to<br><b>31.91</b> )   |
| Congenital birth defects                      | 1,351.20<br>(771.79 to<br>2,597.84)                  | 648.50<br>(342.73 to<br>1,256.01)                    | 597.05<br>(316.60 to<br>1,150.66)                    | 1,069.12<br>(538.59 to<br>2,106.89)                  | 16.39<br>(9.42 to<br>31.28)                  | 8.51<br>(4.60 to<br>16.33)                    | 7.86<br>(4.28 to<br>15.03)                   | 13.55<br>(7.14 to<br>26.28)                   |
| Neural tube defects                           | 21.83<br>(9.37 to<br>45.49)                          | 4.44<br>(1.83 to<br>9.40)                            | 3.79<br>(1.57 to<br>7.96)                            | 8.78<br>(3.31 to<br>19.04)                           | 0.26<br>(0.11 to<br>0.54)                    | 0.06<br>(0.03 to<br>0.12)                     | 0.05<br>(0.02 to<br>0.10)                    | 0.11<br>(0.05 to<br>0.24)                     |
| Congenital heart anomalies                    | 629.27<br>(307.05 to<br>1,137.04)                    | 300.08<br>(148.09 to<br>559.34)                      | 276.92<br>(136.75 to<br>513.34)                      | 472.85<br>(223.50 to<br>903.18)                      | 7.79<br>(3.88 to<br>14.03)                   | 4.05<br>(2.05 to<br>7.54)                     | 3.75<br>(1.91 to<br>6.95)                    | 6.16<br>(3.00 to<br>11.56)                    |
| Orofacial clefts                              | 3.64<br>(1.12 to<br>7.98)                            | 1.14<br>(0.32 to<br>2.72)                            | 0.97<br>(0.27 to<br>2.31)                            | 2.40<br>(0.63 to<br>5.76)                            | 0.04<br>(0.01 to<br>0.09)                    | 0.01<br>(0.00 to<br>0.05)                     | 0.01<br>(0.00 to<br>0.03)                    | 0.03<br>(0.01 to<br>0.07)                     |
| Down syndrome                                 | 25.30<br>(14.11 to<br>57.81)                         | 21.03<br>(11.25 to<br>41.07)                         | 19.17<br>(10.37 to<br>37.72)                         | 32.39<br>(16.99 to<br>68.20)                         | 0.34<br>(0.20 to<br>0.75)                    | 0.37<br>(0.20 to<br>0.70)                     | 0.34<br>(0.19 to<br>0.64)                    | 0.52<br>(0.28 to<br>1.01)                     |
| Other chromosomal abnormalities               | 28.71<br>(8.69 to<br>73.47)                          | 26.17<br>(7.79 to<br>63.76)                          | 23.65<br>(7.07 to<br>57.55)                          | 47.26<br>(13.24 to<br>116.39)                        | 0.34<br>(0.10 to<br>0.86)                    | 0.31<br>(0.09 to<br>0.76)                     | 0.28<br>(0.09 to<br>0.69)                    | 0.56<br>(0.16 to<br>1.36)                     |
| Congenital musculoskeletal and limb anomalies | 33.91<br>(10.38 to<br>119.23)                        | 20.17<br>(5.37 to<br>70.69)                          | 18.85<br>(5.07 to<br>66.04)                          | 33.76<br>(8.57 to<br>115.42)                         | 0.40<br>(0.12 to<br>1.39)                    | 0.24<br>(0.07 to<br>0.84)                     | 0.23<br>(0.07 to<br>0.78)                    | 0.40<br>(0.11 to<br>1.36)                     |
| Urogenital congenital anomalies               | 33.18<br>(16.39 to<br>63.97)                         | 16.48<br>(7.74 to<br>32.29)                          | 15.37<br>(7.29 to<br>29.71)                          | 26.55<br>(11.94 to<br>55.17)                         | 0.42<br>(0.22 to<br>0.80)                    | 0.26<br>(0.13 to<br>0.48)                     | 0.24<br>(0.12 to<br>0.45)                    | 0.38<br>(0.18 to<br>0.74)                     |
| Digestive congenital anomalies                | 138.48<br>(57.02 to<br>410.26)                       | 57.29<br>(19.45 to<br>164.93)                        | 51.94<br>(17.69 to<br>148.34)                        | 103.79<br>(34.61 to<br>314.39)                       | 1.61<br>(0.67 to<br>4.77)                    | 0.68<br>(0.23 to<br>1.93)                     | 0.62<br>(0.21 to<br>1.74)                    | 1.22<br>(0.41 to<br>3.66)                     |
| Other congenital birth defects                | 436.87<br>(220.75 to<br>822.70)                      | 201.70<br>(92.24 to<br>374.12)                       | 186.38<br>(85.90 to<br>346.21)                       | 341.34<br>(154.95 to<br>660.99)                      | 5.19<br>(2.65 to<br>9.84)                    | 2.53<br>(1.21 to<br>4.58)                     | 2.34<br>(1.13 to<br>4.23)                    | 4.17<br>(1.95 to<br>8.02)                     |
| Skin and subcutaneous diseases                | 70.97<br>(24.54 to<br>125.13)                        | 421.29<br>(64.03 to<br>180.96)                       | 120.70<br>(64.52 to<br>180.78)                       | 145.02<br>(68.30 to<br>234.19)                       | 1.42<br>(0.69 to<br>2.11)                    | 3.86<br>(2.54 to<br>6.52)                     | 4.13<br>(2.73 to<br>7.03)                    | 3.90<br>(2.40 to<br>6.20)                     |
| Cellulitis                                    | 5.20<br>(1.61 to<br>9.96)                            | 13.05<br>(5.76 to<br>22.98)                          | 13.88<br>(6.24 to<br>24.96)                          | 13.28<br>(5.15 to<br>24.21)                          | 0.12<br>(0.05 to<br>0.21)                    | 0.45<br>(0.22 to<br>0.99)                     | 0.53<br>(0.26 to<br>1.15)                    | 0.39<br>(0.18 to<br>0.79)                     |
| Pyoderma                                      | 59.58<br>(20.51 to<br>107.88)                        | 97.74<br>(52.40 to<br>149.48)                        | 96.18<br>(51.71 to<br>145.65)                        | 120.00<br>(58.10 to<br>197.02)                       | 1.16<br>(0.57 to<br>1.75)                    | 3.10<br>(1.99 to<br>5.40)                     | 3.27<br>(2.12 to<br>5.72)                    | 3.22<br>(1.94 to<br>5.24)                     |
| Decubitus ulcer                               | 2.65<br>(1.04 to<br>4.53)                            | 4.60<br>(2.10 to<br>7.57)                            | 4.68<br>(2.27 to<br>7.54)                            | 5.11<br>(2.09 to<br>8.89)                            | 0.07<br>(0.04 to<br>0.12)                    | 0.17<br>(0.10 to<br>0.31)                     | 0.19<br>(0.11 to<br>0.36)                    | 0.15<br>(0.09 to<br>0.27)                     |
| Other skin and subcutaneous diseases          | 3.54<br>(1.11 to<br>7.04)                            | 5.90<br>(2.24 to<br>11.13)                           | 5.96<br>(2.31 to<br>10.99)                           | 6.63<br>(2.31 to<br>13.20)                           | 0.06<br>(0.03 to<br>0.11)                    | 0.14<br>(0.07 to<br>0.22)                     | 0.15<br>(0.08 to<br>0.23)                    | 0.13<br>(0.06 to<br>0.22)                     |
| Sudden infant death syndrome                  | 113.47<br>(56.94 to<br>200.95)                       | 43.23<br>(13.94 to<br>86.59)                         | 40.19<br>(12.82 to<br>80.14)                         | 74.67<br>(24.04 to<br>152.94)                        | 1.32<br>(0.66 to<br>2.33)                    | 0.50<br>(0.16 to<br>1.00)                     | 0.47<br>(0.15 to<br>0.93)                    | 0.87<br>(0.28 to<br>1.77)                     |
| <b>Injuries</b>                               | <b>4,544.17</b><br>(3,900.95 to<br><b>5,401.90</b> ) | <b>4,487.69</b><br>(3,423.29 to<br><b>6,061.94</b> ) | <b>4,141.51</b><br>(3,158.32 to<br><b>5,639.10</b> ) | <b>5,497.35</b><br>(4,154.96 to<br><b>7,363.70</b> ) | <b>87.91</b><br>(74.82 to<br><b>104.58</b> ) | <b>102.82</b><br>(81.93 to<br><b>132.77</b> ) | <b>98.76</b><br>(78.97 to<br><b>126.93</b> ) | <b>117.77</b><br>(93.85 to<br><b>151.05</b> ) |
| <b>Transport injuries</b>                     | <b>2,113.52</b><br>(1,626.98 to<br><b>2,886.52</b> ) | <b>2,280.96</b><br>(1,655.12 to<br><b>3,260.50</b> ) | <b>2,003.78</b><br>(1,452.62 to<br><b>2,894.62</b> ) | <b>2,930.64</b><br>(2,132.64 to<br><b>4,121.35</b> ) | <b>40.75</b><br>(31.63 to<br><b>55.92</b> )  | <b>48.99</b><br>(36.62 to<br><b>69.30</b> )   | <b>44.26</b><br>(32.84 to<br><b>62.72</b> )  | <b>59.93</b><br>(45.03 to<br><b>83.27</b> )   |
| Road injuries                                 | 1,992.50<br>(1,540.41 to<br>2,682.78)                | 2,110.49<br>(1,532.55 to<br>3,004.95)                | 1,842.07<br>(1,336.87 to<br>2,629.06)                | 2,729.77<br>(1,992.97 to<br>3,834.45)                | 38.41<br>(29.85 to<br>52.12)                 | 45.23<br>(33.97 to<br>63.10)                  | 40.62<br>(30.59 to<br>56.92)                 | 55.69<br>(41.94 to<br>76.68)                  |
| Pedestrian road injuries                      | 676.08<br>(491.57 to<br>920.41)                      | 558.42<br>(378.47 to<br>831.30)                      | 489.10<br>(333.05 to<br>729.16)                      | 733.34<br>(498.13 to<br>1,092.28)                    | 13.40<br>(9.82 to<br>18.40)                  | 13.36<br>(9.58 to<br>19.19)                   | 12.16<br>(8.74 to<br>17.34)                  | 16.38<br>(11.66 to<br>23.25)                  |
| <b>Pakistan</b>                               |                                                      |                                                      |                                                      |                                                      |                                              |                                               |                                              |                                               |
|                                               | <b>YLLs (in 1000s)</b>                               |                                                      |                                                      |                                                      | <b>Deaths (in 1000s)</b>                     |                                               |                                              |                                               |

| Cause                                           | 2016                                                       | 2040 Forecast                                            | 2040 Better Scenario                                     | 2040 Worse Scenario                                        | 2016                                              | 2040 Forecast                                     | 2040 Better Scenario                              | 2040 Worse Scenario                               |
|-------------------------------------------------|------------------------------------------------------------|----------------------------------------------------------|----------------------------------------------------------|------------------------------------------------------------|---------------------------------------------------|---------------------------------------------------|---------------------------------------------------|---------------------------------------------------|
| Cyclist road injuries                           | 157.69<br>(68.29 to<br>364.76)                             | 176.93<br>(78.16 to<br>399.59)                           | 153.21<br>(67.36 to<br>340.01)                           | 233.82<br>(103.63 to<br>540.54)                            | 3.17<br>(1.35 to<br>7.56)                         | 4.00<br>(1.73 to<br>9.48)                         | 3.62<br>(1.55 to<br>8.53)                         | 4.91<br>(2.14 to<br>11.63)                        |
| Motorcyclist road injuries                      | 578.66<br>(393.27 to<br>884.75)                            | 722.12<br>(472.59 to<br>1,115.32)                        | 651.73<br>(426.70 to<br>1,013.27)                        | 871.74<br>(575.34 to<br>1,325.84)                          | 10.64<br>(7.24 to<br>16.28)                       | 13.97<br>(9.21 to<br>21.32)                       | 12.79<br>(8.40 to<br>19.54)                       | 16.45<br>(10.97 to<br>24.72)                      |
| Motor vehicle road injuries                     | 561.63<br>(382.44 to<br>778.51)                            | 631.01<br>(398.56 to<br>932.29)                          | 528.87<br>(333.66 to<br>784.38)                          | 861.33<br>(545.27 to<br>1,263.08)                          | 10.80<br>(7.42 to<br>14.90)                       | 13.30<br>(8.73 to<br>18.93)                       | 11.49<br>(7.52 to<br>16.27)                       | 17.24<br>(11.29 to<br>24.54)                      |
| Other road injuries                             | 18.44<br>(7.71 to<br>64.02)                                | 22.01<br>(8.78 to<br>74.57)                              | 19.17<br>(7.63 to<br>64.19)                              | 29.54<br>(11.68 to<br>101.20)                              | 0.39<br>(0.17 to<br>1.40)                         | 0.60<br>(0.25 to<br>1.98)                         | 0.56<br>(0.23 to<br>1.83)                         | 0.71<br>(0.30 to<br>2.35)                         |
| Other transport injuries                        | 121.03<br>(66.88 to<br>220.87)                             | 170.47<br>(88.73 to<br>306.44)                           | 161.70<br>(84.37 to<br>291.22)                           | 200.88<br>(105.05 to<br>360.89)                            | 2.34<br>(1.30 to<br>4.31)                         | 3.75<br>(2.06 to<br>6.84)                         | 3.64<br>(2.01 to<br>6.76)                         | 4.24<br>(2.34 to<br>7.62)                         |
| <b>Unintentional injuries</b>                   | <b>1,452.47</b><br><b>(1,209.69 to</b><br><b>1,685.15)</b> | <b>1,091.31</b><br><b>(838.95 to</b><br><b>1,399.14)</b> | <b>1,045.62</b><br><b>(807.94 to</b><br><b>1,334.33)</b> | <b>1,351.58</b><br><b>(1,019.43 to</b><br><b>1,748.61)</b> | <b>29.51</b><br><b>(25.05 to</b><br><b>34.15)</b> | <b>32.67</b><br><b>(26.20 to</b><br><b>39.26)</b> | <b>33.59</b><br><b>(27.08 to</b><br><b>39.95)</b> | <b>35.26</b><br><b>(27.86 to</b><br><b>42.66)</b> |
| Falls                                           | 334.88<br>(250.08 to<br>415.89)                            | 371.22<br>(275.99 to<br>475.40)                          | 376.78<br>(281.63 to<br>478.35)                          | 398.91<br>(291.12 to<br>512.91)                            | 9.21<br>(7.20 to<br>11.18)                        | 14.65<br>(11.10 to<br>18.17)                      | 16.03<br>(12.27 to<br>19.58)                      | 13.87<br>(10.52 to<br>17.27)                      |
| Drowning                                        | 324.94<br>(239.36 to<br>454.30)                            | 149.32<br>(99.72 to<br>216.76)                           | 137.87<br>(92.82 to<br>200.08)                           | 208.64<br>(132.70 to<br>313.65)                            | 4.88<br>(3.79 to<br>6.72)                         | 2.93<br>(2.16 to<br>4.01)                         | 2.79<br>(2.07 to<br>3.80)                         | 3.74<br>(2.65 to<br>5.31)                         |
| Fire, heat, and hot substances                  | 139.16<br>(96.72 to<br>201.72)                             | 79.77<br>(53.88 to<br>123.23)                            | 73.86<br>(50.13 to<br>113.38)                            | 105.53<br>(68.38 to<br>165.10)                             | 2.40<br>(1.78 to<br>3.42)                         | 1.78<br>(1.31 to<br>2.75)                         | 1.72<br>(1.26 to<br>2.62)                         | 2.15<br>(1.54 to<br>3.29)                         |
| Poisonings                                      | 84.55<br>(52.15 to<br>152.94)                              | 30.26<br>(17.15 to<br>53.58)                             | 26.63<br>(15.36 to<br>46.80)                             | 46.89<br>(25.52 to<br>89.59)                               | 1.27<br>(0.83 to<br>2.10)                         | 0.56<br>(0.36 to<br>0.92)                         | 0.51<br>(0.33 to<br>0.83)                         | 0.80<br>(0.48 to<br>1.37)                         |
| Exposure to mechanical forces                   | 150.21<br>(124.37 to<br>178.41)                            | 114.85<br>(79.62 to<br>159.42)                           | 106.37<br>(74.52 to<br>145.85)                           | 148.22<br>(103.92 to<br>206.22)                            | 2.72<br>(2.19 to<br>3.27)                         | 2.62<br>(1.85 to<br>3.49)                         | 2.50<br>(1.77 to<br>3.31)                         | 3.13<br>(2.23 to<br>4.19)                         |
| Unintentional firearm injuries                  | 9.27<br>(6.58 to<br>13.01)                                 | 6.86<br>(4.44 to<br>10.59)                               | 6.32<br>(4.14 to<br>9.60)                                | 8.67<br>(5.66 to<br>13.21)                                 | 0.20<br>(0.15 to<br>0.27)                         | 0.19<br>(0.13 to<br>0.26)                         | 0.19<br>(0.13 to<br>0.25)                         | 0.22<br>(0.15 to<br>0.30)                         |
| Unintentional suffocation                       | 18.27<br>(9.23 to<br>36.62)                                | 7.86<br>(3.52 to<br>16.99)                               | 7.10<br>(3.19 to<br>15.43)                               | 13.06<br>(5.57 to<br>28.39)                                | 0.23<br>(0.12 to<br>0.46)                         | 0.11<br>(0.05 to<br>0.24)                         | 0.10<br>(0.05 to<br>0.22)                         | 0.18<br>(0.08 to<br>0.38)                         |
| Other exposure to mechanical forces             | 122.66<br>(89.50 to<br>151.10)                             | 100.13<br>(64.66 to<br>141.28)                           | 92.95<br>(60.11 to<br>129.86)                            | 126.49<br>(81.65 to<br>179.75)                             | 2.29<br>(1.66 to<br>2.82)                         | 2.31<br>(1.54 to<br>3.13)                         | 2.21<br>(1.47 to<br>2.98)                         | 2.73<br>(1.83 to<br>3.72)                         |
| Adverse effects of medical treatment            | 177.65<br>(146.68 to<br>215.32)                            | 159.34<br>(120.20 to<br>203.67)                          | 152.51<br>(115.74 to<br>193.19)                          | 191.37<br>(144.80 to<br>246.47)                            | 4.50<br>(3.64 to<br>5.51)                         | 5.55<br>(4.39 to<br>6.91)                         | 5.62<br>(4.44 to<br>7.00)                         | 6.00<br>(4.79 to<br>7.48)                         |
| Animal contact                                  | 136.57<br>(65.79 to<br>181.07)                             | 109.50<br>(48.49 to<br>165.09)                           | 97.74<br>(43.93 to<br>146.56)                            | 154.55<br>(68.15 to<br>237.01)                             | 2.50<br>(1.16 to<br>3.31)                         | 2.46<br>(1.05 to<br>3.52)                         | 2.26<br>(0.98 to<br>3.23)                         | 3.21<br>(1.39 to<br>4.65)                         |
| Venomous animal contact                         | 123.74<br>(60.10 to<br>164.05)                             | 97.80<br>(42.93 to<br>147.89)                            | 87.05<br>(38.54 to<br>129.41)                            | 138.58<br>(59.60 to<br>213.05)                             | 2.26<br>(1.05 to<br>2.99)                         | 2.18<br>(0.92 to<br>3.14)                         | 1.99<br>(0.86 to<br>2.86)                         | 2.87<br>(1.23 to<br>4.18)                         |
| Non-venomous animal contact                     | 12.83<br>(5.70 to<br>24.65)                                | 11.71<br>(4.56 to<br>22.24)                              | 10.69<br>(4.15 to<br>20.22)                              | 15.97<br>(6.30 to<br>31.02)                                | 0.23<br>(0.10 to<br>0.43)                         | 0.28<br>(0.11 to<br>0.51)                         | 0.26<br>(0.10 to<br>0.48)                         | 0.34<br>(0.13 to<br>0.65)                         |
| Foreign body                                    | 53.31<br>(39.61 to<br>69.46)                               | 40.33<br>(28.48 to<br>53.97)                             | 40.16<br>(28.45 to<br>53.22)                             | 49.57<br>(32.79 to<br>68.90)                               | 0.96<br>(0.75 to<br>1.18)                         | 1.12<br>(0.87 to<br>1.37)                         | 1.20<br>(0.95 to<br>1.46)                         | 1.15<br>(0.86 to<br>1.43)                         |
| Pulmonary aspiration and foreign body in airway | 39.23<br>(29.39 to<br>52.17)                               | 29.82<br>(21.14 to<br>40.19)                             | 30.25<br>(21.65 to<br>40.03)                             | 36.35<br>(23.95 to<br>51.85)                               | 0.72<br>(0.57 to<br>0.92)                         | 0.90<br>(0.71 to<br>1.12)                         | 0.98<br>(0.79 to<br>1.23)                         | 0.89<br>(0.67 to<br>1.13)                         |
| Foreign body in other body part                 | 14.08<br>(7.21 to<br>21.43)                                | 10.51<br>(5.35 to<br>17.12)                              | 9.91<br>(5.03 to<br>16.22)                               | 13.21<br>(6.57 to<br>21.76)                                | 0.24<br>(0.13 to<br>0.37)                         | 0.22<br>(0.12 to<br>0.35)                         | 0.22<br>(0.12 to<br>0.34)                         | 0.26<br>(0.14 to<br>0.41)                         |

|                                                                                     |                                              |                                                |                                                |                                                |                                         |                                         |                                         |                                         |
|-------------------------------------------------------------------------------------|----------------------------------------------|------------------------------------------------|------------------------------------------------|------------------------------------------------|-----------------------------------------|-----------------------------------------|-----------------------------------------|-----------------------------------------|
| Environmental heat and cold exposure                                                | 20.62<br>(8.26 to 29.41)                     | 16.92<br>(6.38 to 26.85)                       | 15.24<br>(5.87 to 23.84)                       | 23.13<br>(8.64 to 36.30)                       | 0.53<br>(0.21 to 0.74)                  | 0.57<br>(0.22 to 0.86)                  | 0.54<br>(0.21 to 0.81)                  | 0.70<br>(0.27 to 1.05)                  |
| Other unintentional injuries                                                        | 30.58<br>(22.89 to 56.78)                    | 19.80<br>(13.38 to 40.97)                      | 18.45<br>(12.54 to 39.22)                      | 24.77<br>(16.87 to 49.62)                      | 0.55<br>(0.42 to 1.00)                  | 0.43<br>(0.30 to 0.82)                  | 0.41<br>(0.29 to 0.79)                  | 0.51<br>(0.36 to 0.95)                  |
| <b>Self-harm and interpersonal violence</b>                                         | <b>950.86</b><br><b>(713.43 to 1,182.53)</b> | <b>1,041.53</b><br><b>(701.66 to 1,483.70)</b> | <b>1,018.43</b><br><b>(694.66 to 1,446.27)</b> | <b>1,133.37</b><br><b>(762.28 to 1,626.27)</b> | <b>16.84</b><br><b>(12.72 to 20.94)</b> | <b>19.69</b><br><b>(13.70 to 27.13)</b> | <b>19.41</b><br><b>(13.73 to 26.72)</b> | <b>21.03</b><br><b>(14.57 to 29.27)</b> |
| <b>Pakistan</b>                                                                     |                                              |                                                |                                                |                                                |                                         |                                         |                                         |                                         |
| Cause                                                                               | YLLs (in 1000s)                              |                                                |                                                |                                                | Deaths (in 1000s)                       |                                         |                                         |                                         |
|                                                                                     | 2016                                         | 2040 Forecast                                  | 2040 Better Scenario                           | 2040 Worse Scenario                            | 2016                                    | 2040 Forecast                           | 2040 Better Scenario                    | 2040 Worse Scenario                     |
| Self-harm                                                                           | 387.67<br>(309.14 to 483.32)                 | 492.05<br>(352.36 to 685.68)                   | 477.84<br>(345.55 to 665.92)                   | 542.25<br>(385.67 to 751.87)                   | 7.04<br>(5.65 to 8.72)                  | 9.50<br>(7.05 to 12.79)                 | 9.33<br>(6.94 to 12.63)                 | 10.26<br>(7.53 to 13.86)                |
| Self-harm by firearm                                                                | 50.72<br>(21.71 to 84.37)                    | 53.94<br>(20.95 to 99.35)                      | 51.83<br>(20.17 to 95.51)                      | 60.41<br>(23.60 to 112.63)                     | 0.93<br>(0.40 to 1.54)                  | 1.04<br>(0.42 to 1.89)                  | 1.01<br>(0.40 to 1.82)                  | 1.15<br>(0.46 to 2.09)                  |
| Self-harm by other specified means                                                  | 336.95<br>(263.39 to 421.70)                 | 438.11<br>(307.75 to 611.73)                   | 426.00<br>(298.94 to 590.84)                   | 481.84<br>(339.07 to 672.69)                   | 6.11<br>(4.83 to 7.57)                  | 8.46<br>(6.15 to 11.47)                 | 8.33<br>(6.08 to 11.26)                 | 9.11<br>(6.57 to 12.42)                 |
| Interpersonal violence                                                              | 563.19<br>(325.53 to 754.72)                 | 549.48<br>(286.00 to 815.15)                   | 540.59<br>(285.49 to 800.98)                   | 591.12<br>(306.91 to 875.95)                   | 9.80<br>(5.83 to 13.10)                 | 10.18<br>(5.67 to 14.86)                | 10.08<br>(5.72 to 14.56)                | 10.77<br>(5.93 to 15.72)                |
| Physical violence by firearm                                                        | 92.01<br>(25.00 to 155.40)                   | 98.17<br>(26.71 to 177.63)                     | 97.16<br>(26.88 to 175.28)                     | 102.58<br>(27.42 to 185.99)                    | 1.65<br>(0.47 to 2.76)                  | 1.83<br>(0.54 to 3.28)                  | 1.81<br>(0.54 to 3.26)                  | 1.89<br>(0.54 to 3.41)                  |
| Physical violence by sharp object                                                   | 95.34<br>(35.24 to 159.11)                   | 115.02<br>(37.49 to 190.13)                    | 115.94<br>(38.31 to 190.98)                    | 115.96<br>(37.29 to 191.35)                    | 1.72<br>(0.63 to 2.68)                  | 2.17<br>(0.78 to 3.50)                  | 2.20<br>(0.80 to 3.54)                  | 2.17<br>(0.76 to 3.50)                  |
| Physical violence by other means                                                    | 375.84<br>(249.37 to 517.35)                 | 336.29<br>(199.10 to 517.65)                   | 327.48<br>(195.60 to 503.52)                   | 372.59<br>(220.18 to 571.92)                   | 6.43<br>(4.36 to 8.84)                  | 6.18<br>(3.89 to 9.37)                  | 6.06<br>(3.86 to 9.20)                  | 6.71<br>(4.22 to 10.12)                 |
| <b>Forces of nature, conflict and terrorism, and executions and police conflict</b> | <b>47.32</b><br><b>(20.10 to 75.07)</b>      | <b>73.89</b><br><b>(0.00 to 954.44)</b>        | <b>73.69</b><br><b>(0.00 to 951.64)</b>        | <b>81.76</b><br><b>(0.00 to 1,050.45)</b>      | <b>0.81</b><br><b>(0.34 to 1.28)</b>    | <b>1.47</b><br><b>(0.00 to 18.96)</b>   | <b>1.49</b><br><b>(0.00 to 19.14)</b>   | <b>1.55</b><br><b>(0.00 to 19.96)</b>   |
| Exposure to forces of nature                                                        | 15.82<br>(6.44 to 25.34)                     | 66.32<br>(0.00 to 941.90)                      | 66.15<br>(0.00 to 939.14)                      | 73.50<br>(0.00 to 1,036.82)                    | 0.28<br>(0.11 to 0.45)                  | 1.33<br>(0.00 to 18.73)                 | 1.35<br>(0.00 to 18.91)                 | 1.40<br>(0.00 to 19.71)                 |
| Conflict and terrorism                                                              | 30.15<br>(12.25 to 48.31)                    | 7.25<br>(0.00 to 37.12)                        | 7.22<br>(0.00 to 37.10)                        | 7.92<br>(0.00 to 40.22)                        | 0.50<br>(0.20 to 0.81)                  | 0.13<br>(0.00 to 0.69)                  | 0.13<br>(0.00 to 0.70)                  | 0.14<br>(0.00 to 0.72)                  |
| Executions and police conflict                                                      | 1.35<br>(1.15 to 1.75)                       | 0.32<br>(0.00 to 8.84)                         | 0.32<br>(0.00 to 8.85)                         | 0.33<br>(0.00 to 9.24)                         | 0.02<br>(0.02 to 0.03)                  | 0.01<br>(0.00 to 0.17)                  | 0.01<br>(0.00 to 0.17)                  | 0.01<br>(0.00 to 0.17)                  |
| <b>Sub-Saharan Africa</b>                                                           |                                              |                                                |                                                |                                                |                                         |                                         |                                         |                                         |
| Cause                                                                               | YLLs (in 1000s)                              |                                                |                                                |                                                | Deaths (in 1000s)                       |                                         |                                         |                                         |
|                                                                                     | 2016                                         | 2040 Forecast                                  | 2040 Better Scenario                           | 2040 Worse Scenario                            | 2016                                    | 2040 Forecast                           | 2040 Better Scenario                    | 2040 Worse Scenario                     |
| All causes                                                                          | 408,075.18<br>(390,777.41 to 428,085.61)     | 355,603.16<br>(295,671.70 to 438,658.80)       | 248,202.76<br>(208,684.00 to 304,917.39)       | 579,853.61<br>(481,546.11 to 692,810.56)       | 7,699.33<br>(7,474.42 to 7,968.83)      | 9,380.20<br>(8,135.31 to 11,030.16)     | 7,148.87<br>(6,267.14 to 8,330.09)      | 13,578.59<br>(11,700.94 to 15,726.41)   |
| Communicable, maternal, neonatal, and nutritional diseases                          | 300,313.25<br>(283,569.91 to 319,477.43)     | 190,261.64<br>(145,461.35 to 244,284.54)       | 115,668.51<br>(91,384.20 to 148,794.57)        | 371,660.22<br>(294,411.24 to 455,926.64)       | 4,651.40<br>(4,426.10 to 4,903.05)      | 3,657.07<br>(2,796.97 to 4,778.86)      | 2,348.12<br>(1,838.79 to 3,096.77)      | 6,717.84<br>(5,286.08 to 8,362.81)      |
| HIV/AIDS and tuberculosis                                                           | 57,082.66<br>(54,483.99 to 60,063.99)        | 40,911.45<br>(32,844.09 to 50,315.66)          | 25,713.29<br>(18,275.82 to 33,563.25)          | 123,771.68<br>(94,536.57 to 157,735.21)        | 1,184.99<br>(1,135.51 to 1,243.86)      | 892.52<br>(734.03 to 1,084.77)          | 556.32<br>(427.87 to 688.99)            | 2,544.51<br>(1,921.43 to 3,227.47)      |
| Tuberculosis                                                                        | 15,508.03<br>(14,413.55 to 16,871.85)        | 11,114.60<br>(7,570.53 to 17,596.86)           | 5,918.12<br>(4,155.50 to 9,135.65)             | 18,839.45<br>(12,838.81 to 29,114.70)          | 402.31<br>(374.03 to 438.81)            | 315.02<br>(224.82 to 468.01)            | 175.51<br>(127.92 to 258.69)            | 514.91<br>(358.72 to 763.14)            |



|                                                                          |                                                    |                                                    |                                                   |                                                     |                                                |                                                |                                              |                                                |
|--------------------------------------------------------------------------|----------------------------------------------------|----------------------------------------------------|---------------------------------------------------|-----------------------------------------------------|------------------------------------------------|------------------------------------------------|----------------------------------------------|------------------------------------------------|
| HIV/AIDS                                                                 | 41,574.62<br>(39,126.95 to<br>44,266.95)           | 29,796.85<br>(23,256.37 to<br>36,427.06)           | 19,795.17<br>(12,788.85 to<br>27,366.25)          | 104,932.23<br>(76,504.20 to<br>140,126.68)          | 782.68<br>(739.62 to<br>828.36)                | 577.50<br>(459.99 to<br>699.09)                | 380.81<br>(261.58 to<br>497.63)              | 2,029.60<br>(1,444.28 to<br>2,713.57)          |
| <b>Diarrhea, lower respiratory, and other common infectious diseases</b> | <b>96,820.42<br/>(87,032.40 to<br/>107,287.00)</b> | <b>72,270.02<br/>(43,938.69 to<br/>113,544.20)</b> | <b>39,994.45<br/>(24,239.53 to<br/>64,965.76)</b> | <b>124,102.29<br/>(78,167.90 to<br/>185,755.73)</b> | <b>1,587.65<br/>(1,427.76 to<br/>1,768.84)</b> | <b>1,660.68<br/>(1,017.38 to<br/>2,623.62)</b> | <b>1,026.90<br/>(637.35 to<br/>1,660.03)</b> | <b>2,497.80<br/>(1,579.73 to<br/>3,758.99)</b> |
| Diarrheal diseases                                                       | 35,714.17<br>(29,618.77 to<br>43,307.32)           | 24,246.21<br>(10,083.49 to<br>51,563.86)           | 13,651.22<br>(5,164.16 to<br>31,322.92)           | 37,560.34<br>(17,480.80 to<br>73,981.14)            | 606.02<br>(469.71 to<br>798.31)                | 582.95<br>(183.94 to<br>1,438.24)              | 348.13<br>(103.12 to<br>892.91)              | 850.53<br>(291.98 to<br>1,840.37)              |
| Intestinal infectious diseases                                           | 1,643.89<br>(836.30 to<br>2,902.93)                | 1,617.99<br>(805.04 to<br>2,922.17)                | 1,281.84<br>(643.39 to<br>2,304.40)               | 2,149.10<br>(1,042.92 to<br>3,899.40)               | 22.72<br>(11.69 to<br>39.45)                   | 23.45<br>(11.78 to<br>41.74)                   | 18.94<br>(9.65 to<br>33.67)                  | 30.43<br>(15.02 to<br>54.62)                   |
| Typhoid fever                                                            | 1,317.94<br>(626.56 to<br>2,417.43)                | 1,319.01<br>(616.75 to<br>2,507.37)                | 1,065.14<br>(513.08 to<br>2,021.51)               | 1,740.90<br>(810.17 to<br>3,289.02)                 | 18.29<br>(8.90 to<br>33.02)                    | 19.06<br>(9.02 to<br>35.90)                    | 15.67<br>(7.73 to<br>29.23)                  | 24.61<br>(11.65 to<br>45.97)                   |
| Paratyphoid fever                                                        | 199.08<br>(77.88 to<br>440.47)                     | 250.52<br>(99.94 to<br>531.86)                     | 187.89<br>(75.68 to<br>383.12)                    | 324.40<br>(130.46 to<br>688.69)                     | 2.78<br>(1.10 to<br>6.12)                      | 3.64<br>(1.49 to<br>7.55)                      | 2.79<br>(1.17 to<br>5.69)                    | 4.64<br>(1.93 to<br>9.71)                      |
| Other intestinal infectious diseases                                     | 126.87<br>(32.54 to<br>355.08)                     | 48.46<br>(13.13 to<br>140.89)                      | 28.82<br>(7.83 to<br>82.97)                       | 83.80<br>(21.64 to<br>246.45)                       | 1.64<br>(0.46 to<br>4.43)                      | 0.74<br>(0.23 to<br>1.97)                      | 0.48<br>(0.15 to<br>1.25)                    | 1.19<br>(0.35 to<br>3.23)                      |
| Lower respiratory infections                                             | 36,999.83<br>(32,711.14 to<br>41,543.65)           | 32,090.05<br>(18,534.91 to<br>51,310.91)           | 16,333.35<br>(10,230.17 to<br>25,691.18)          | 60,112.31<br>(33,317.11 to<br>94,775.64)            | 650.64<br>(582.18 to<br>720.96)                | 833.76<br>(568.94 to<br>1,196.45)              | 506.11<br>(365.10 to<br>695.73)              | 1,278.50<br>(837.43 to<br>1,891.05)            |
| Upper respiratory infections                                             | 68.83<br>(50.00 to<br>94.86)                       | 49.96<br>(34.50 to<br>72.54)                       | 28.87<br>(20.45 to<br>39.47)                      | 89.50<br>(62.23 to<br>122.10)                       | 0.98<br>(0.76 to<br>1.30)                      | 0.56<br>(0.67 to<br>1.22)                      | 0.56<br>(0.42 to<br>0.73)                    | 1.47<br>(1.10 to<br>1.94)                      |
| Otitis media                                                             | 19.91<br>(12.61 to<br>31.86)                       | 4.59<br>(2.63 to<br>7.62)                          | 4.34<br>(2.53 to<br>7.29)                         | 5.18<br>(2.98 to<br>8.65)                           | 0.33<br>(0.22 to<br>0.50)                      | 0.12<br>(0.07 to<br>0.20)                      | 0.13<br>(0.07 to<br>0.21)                    | 0.12<br>(0.07 to<br>0.19)                      |
| Meningitis                                                               | 12,603.05<br>(9,838.98 to<br>17,250.31)            | 8,846.96<br>(5,870.54 to<br>13,159.93)             | 6,190.45<br>(4,368.28 to<br>8,838.87)             | 14,885.14<br>(9,105.05 to<br>23,466.30)             | 185.15<br>(147.99 to<br>244.55)                | 150.52<br>(106.10 to<br>214.85)                | 118.68<br>(85.68 to<br>167.68)               | 221.71<br>(145.33 to<br>331.70)                |
| Pneumococcal meningitis                                                  | 831.51<br>(621.39 to<br>1,149.95)                  | 539.81<br>(359.38 to<br>845.55)                    | 432.25<br>(297.15 to<br>647.08)                   | 794.66<br>(512.63 to<br>1,280.63)                   | 13.80<br>(10.41 to<br>19.21)                   | 11.30<br>(7.85 to<br>16.90)                    | 10.05<br>(7.07 to<br>14.97)                  | 14.52<br>(9.73 to<br>22.53)                    |
| H influenzae type B meningitis                                           | 1,473.20<br>(1,111.89 to<br>2,039.81)              | 2,383.37<br>(666.33 to<br>5,923.24)                | 966.96<br>(403.18 to<br>2,100.57)                 | 6,404.66<br>(1,622.36 to<br>15,253.60)              | 20.24<br>(15.49 to<br>27.57)                   | 31.22<br>(10.79 to<br>72.37)                   | 14.83<br>(7.83 to<br>28.27)                  | 78.08<br>(21.58 to<br>181.35)                  |
| Meningococcal meningitis                                                 | 4,497.16<br>(3,483.60 to<br>6,031.18)              | 2,634.59<br>(1,816.97 to<br>3,819.88)              | 2,121.54<br>(1,464.61 to<br>3,084.61)             | 3,376.95<br>(2,292.34 to<br>4,897.08)               | 64.90<br>(50.75 to<br>86.02)                   | 46.86<br>(32.43 to<br>68.41)                   | 40.35<br>(28.17 to<br>59.07)                 | 55.76<br>(39.21 to<br>81.16)                   |
| Other meningitis                                                         | 5,801.18<br>(4,490.11 to<br>8,223.48)              | 3,289.19<br>(2,321.85 to<br>4,670.42)              | 2,669.69<br>(1,917.28 to<br>3,767.35)             | 4,308.86<br>(3,016.06 to<br>6,286.51)               | 86.20<br>(68.14 to<br>115.74)                  | 61.14<br>(44.35 to<br>85.50)                   | 53.45<br>(38.94 to<br>74.80)                 | 73.35<br>(53.01 to<br>101.23)                  |
| Encephalitis                                                             | 708.25<br>(530.61 to<br>842.80)                    | 668.87<br>(462.01 to<br>887.69)                    | 493.51<br>(338.40 to<br>669.36)                   | 969.13<br>(677.15 to<br>1,246.45)                   | 9.59<br>(7.26 to<br>11.26)                     | 10.38<br>(7.40 to<br>13.64)                    | 8.09<br>(5.68 to<br>10.79)                   | 14.07<br>(10.11 to<br>17.98)                   |
| Diphtheria                                                               | 70.29<br>(46.25 to<br>106.76)                      | 33.42<br>(15.90 to<br>64.69)                       | 10.42<br>(6.43 to<br>16.38)                       | 31.41<br>(25.26 to<br>91.51)                        | 0.87<br>(0.58 to<br>1.30)                      | 0.42<br>(0.21 to<br>0.80)                      | 0.15<br>(0.10 to<br>0.22)                    | 0.63<br>(0.33 to<br>1.11)                      |
| Whooping cough                                                           | 3,919.49<br>(1,843.16 to<br>7,051.34)              | 3,754.33<br>(1,633.50 to<br>7,133.58)              | 1,586.06<br>(679.41 to<br>2,879.54)               | 6,282.16<br>(2,874.85 to<br>11,558.28)              | 46.29<br>(21.76 to<br>83.32)                   | 44.50<br>(19.37 to<br>84.71)                   | 18.96<br>(8.14 to<br>34.25)                  | 74.27<br>(34.04 to<br>136.31)                  |
| Tetanus                                                                  | 1,354.08<br>(940.58 to<br>1,931.34)                | 333.29<br>(184.31 to<br>570.82)                    | 217.83<br>(119.82 to<br>393.98)                   | 591.05<br>(332.57 to<br>989.28)                     | 19.88<br>(13.96 to<br>28.77)                   | 5.00<br>(2.85 to<br>8.46)                      | 3.70<br>(2.11 to<br>6.73)                    | 7.94<br>(4.58 to<br>12.99)                     |
| Measles                                                                  | 3,478.46<br>(1,275.31 to<br>7,399.65)              | 485.85<br>(47.66 to<br>1,737.04)                   | 109.45<br>(18.82 to<br>424.98)                    | 1,164.13<br>(134.03 to<br>3,694.32)                 | 41.47<br>(15.19 to<br>88.21)                   | 5.80<br>(0.59 to<br>20.74)                     | 1.35<br>(0.24 to<br>5.09)                    | 13.83<br>(1.60 to<br>43.69)                    |
| <b>Sub-Saharan Africa</b>                                                |                                                    |                                                    |                                                   |                                                     |                                                |                                                |                                              |                                                |
| Cause                                                                    | YLLs (in 1000s)                                    |                                                    |                                                   |                                                     | Deaths (in 1000s)                              |                                                |                                              |                                                |
|                                                                          | 2016                                               | 2040 Forecast                                      | 2040 Better Scenario                              | 2040 Worse Scenario                                 | 2016                                           | 2040 Forecast                                  | 2040 Better Scenario                         | 2040 Worse Scenario                            |

|                                                       |                                                               |                                                               |                                                               |                                                               |                                                      |                                                      |                                                      |                                                      |
|-------------------------------------------------------|---------------------------------------------------------------|---------------------------------------------------------------|---------------------------------------------------------------|---------------------------------------------------------------|------------------------------------------------------|------------------------------------------------------|------------------------------------------------------|------------------------------------------------------|
|                                                       | 240.16<br>(203.51 to<br>282.85)                               | 138.51<br>(102.26 to<br>180.61)                               | 87.09<br>(64.99 to<br>114.19)                                 | 242.83<br>(183.77 to<br>312.36)                               | 3.72<br>(3.27 to<br>4.27)                            | 2.89<br>(2.33 to<br>3.55)                            | 2.12<br>(1.73 to<br>2.55)                            | 4.28<br>(3.46 to<br>5.24)                            |
| Varicella and herpes zoster                           |                                                               |                                                               |                                                               |                                                               |                                                      |                                                      |                                                      |                                                      |
|                                                       | <b>53,087.21</b><br><b>(43,294.65 to</b><br><b>64,447.41)</b> | <b>20,705.40</b><br><b>(15,259.32 to</b><br><b>27,143.70)</b> | <b>15,550.27</b><br><b>(11,886.94 to</b><br><b>19,960.45)</b> | <b>27,852.41</b><br><b>(21,068.07 to</b><br><b>36,255.14)</b> | <b>694.89</b><br><b>(574.98 to</b><br><b>831.97)</b> | <b>330.96</b><br><b>(257.10 to</b><br><b>420.69)</b> | <b>268.83</b><br><b>(213.85 to</b><br><b>336.72)</b> | <b>416.25</b><br><b>(326.59 to</b><br><b>526.89)</b> |
| <b>Neglected tropical diseases and malaria</b>        |                                                               |                                                               |                                                               |                                                               |                                                      |                                                      |                                                      |                                                      |
| Malaria                                               | 49,614.24<br>(39,837.31 to<br>61,021.76)                      | 18,234.31<br>(13,146.85 to<br>24,411.71)                      | 13,834.93<br>(10,456.07 to<br>18,043.69)                      | 24,020.96<br>(17,679.97 to<br>32,384.56)                      | 640.99<br>(519.96 to<br>779.94)                      | 289.72<br>(220.28 to<br>375.43)                      | 238.32<br>(185.17 to<br>303.41)                      | 356.40<br>(270.27 to<br>461.94)                      |
| Chagas disease                                        | 0.00<br>(0.00 to<br>0.00)                                     | 0.00<br>(0.00 to<br>0.00)                                     | 0.00<br>(0.00 to<br>0.00)                                     | 0.00<br>(0.00 to<br>0.00)                                     | 0.00<br>(0.00 to<br>0.00)                            | 0.00<br>(0.00 to<br>0.00)                            | 0.00<br>(0.00 to<br>0.00)                            | 0.00<br>(0.00 to<br>0.00)                            |
| Leishmaniasis                                         | 187.19<br>(104.60 to<br>319.87)                               | 110.84<br>(65.81 to<br>201.21)                                | 82.51<br>(46.97 to<br>147.86)                                 | 197.02<br>(118.53 to<br>329.06)                               | 4.36<br>(2.44 to<br>7.39)                            | 2.07<br>(1.24 to<br>4.15)                            | 1.60<br>(0.91 to<br>3.30)                            | 3.39<br>(2.07 to<br>6.23)                            |
| African trypanosomiasis                               | 126.51<br>(63.55 to<br>212.07)                                | 15.84<br>(6.73 to<br>33.30)                                   | 15.50<br>(6.99 to<br>31.59)                                   | 16.95<br>(7.32 to<br>35.11)                                   | 2.29<br>(1.16 to<br>3.83)                            | 0.30<br>(0.13 to<br>0.62)                            | 0.30<br>(0.13 to<br>0.61)                            | 0.31<br>(0.13 to<br>0.66)                            |
| Schistosomiasis                                       | 307.73<br>(276.98 to<br>340.41)                               | 253.79<br>(205.19 to<br>318.33)                               | 214.43<br>(171.53 to<br>271.24)                               | 296.06<br>(241.73 to<br>370.32)                               | 8.13<br>(7.38 to<br>8.92)                            | 7.51<br>(6.35 to<br>9.02)                            | 6.58<br>(5.50 to<br>7.95)                            | 8.41<br>(7.14 to<br>10.06)                           |
| Cysticercosis                                         | 30.12<br>(23.46 to<br>38.18)                                  | 15.68<br>(11.27 to<br>22.69)                                  | 14.06<br>(10.01 to<br>20.62)                                  | 17.20<br>(12.33 to<br>24.42)                                  | 0.58<br>(0.45 to<br>0.73)                            | 0.34<br>(0.25 to<br>0.48)                            | 0.31<br>(0.23 to<br>0.45)                            | 0.36<br>(0.27 to<br>0.51)                            |
| Cystic echinococcosis                                 | 32.36<br>(23.64 to<br>43.42)                                  | 13.77<br>(9.74 to<br>19.37)                                   | 8.62<br>(5.94 to<br>12.19)                                    | 26.15<br>(18.55 to<br>36.24)                                  | 0.60<br>(0.45 to<br>0.80)                            | 0.32<br>(0.23 to<br>0.45)                            | 0.21<br>(0.15 to<br>0.29)                            | 0.56<br>(0.40 to<br>0.77)                            |
| Dengue                                                | 20.44<br>(1.55 to<br>77.69)                                   | 68.86<br>(5.59 to<br>233.95)                                  | 52.80<br>(4.35 to<br>180.29)                                  | 85.45<br>(6.91 to<br>304.78)                                  | 0.28<br>(0.02 to<br>1.04)                            | 1.22<br>(0.10 to<br>4.10)                            | 1.04<br>(0.09 to<br>3.43)                            | 1.40<br>(0.12 to<br>4.64)                            |
| Yellow fever                                          | 339.50<br>(74.49 to<br>950.85)                                | 142.56<br>(27.03 to<br>437.77)                                | 105.67<br>(19.84 to<br>329.10)                                | 225.59<br>(44.49 to<br>675.65)                                | 5.25<br>(1.13 to<br>15.10)                           | 2.33<br>(0.43 to<br>7.32)                            | 1.75<br>(0.33 to<br>5.71)                            | 3.58<br>(0.72 to<br>11.12)                           |
| Rabies                                                | 376.56<br>(148.90 to<br>685.62)                               | 191.17<br>(76.80 to<br>346.25)                                | 94.31<br>(37.38 to<br>176.11)                                 | 413.09<br>(171.85 to<br>735.56)                               | 5.66<br>(2.36 to<br>10.17)                           | 3.07<br>(1.26 to<br>5.55)                            | 1.56<br>(0.62 to<br>2.81)                            | 6.51<br>(2.71 to<br>11.55)                           |
| Intestinal nematode infections                        | 310.88<br>(241.64 to<br>404.45)                               | 383.86<br>(269.85 to<br>517.23)                               | 299.66<br>(212.66 to<br>390.15)                               | 498.80<br>(362.49 to<br>656.47)                               | 3.81<br>(2.99 to<br>4.92)                            | 4.85<br>(3.48 to<br>6.45)                            | 3.86<br>(2.80 to<br>4.98)                            | 6.21<br>(4.56 to<br>8.09)                            |
| Other neglected tropical diseases                     | 1,741.48<br>(1,144.89 to<br>2,300.18)                         | 1,274.72<br>(817.82 to<br>1,741.81)                           | 827.78<br>(521.79 to<br>1,083.88)                             | 2,055.13<br>(1,331.67 to<br>2,690.68)                         | 22.94<br>(15.19 to<br>29.67)                         | 19.22<br>(12.82 to<br>25.01)                         | 29.12<br>(8.73 to<br>16.82)                          | 29.12<br>(19.44 to<br>37.17)                         |
| <b>Maternal disorders</b>                             | <b>6,426.81</b><br><b>(5,700.38 to</b><br><b>7,262.11)</b>    | <b>5,366.16</b><br><b>(4,085.93 to</b><br><b>7,795.28)</b>    | <b>3,280.23</b><br><b>(2,468.46 to</b><br><b>4,732.04)</b>    | <b>8,622.12</b><br><b>(6,688.77 to</b><br><b>12,157.52)</b>   | <b>117.59</b><br><b>(104.39 to</b><br><b>132.83)</b> | <b>100.59</b><br><b>(76.33 to</b><br><b>144.07)</b>  | <b>61.51</b><br><b>(46.29 to</b><br><b>88.38)</b>    | <b>160.77</b><br><b>(124.81 to</b><br><b>225.28)</b> |
| Maternal hemorrhage                                   | 1,601.96<br>(1,243.80 to<br>2,059.50)                         | 1,203.61<br>(829.16 to<br>1,765.87)                           | 756.29<br>(517.62 to<br>1,114.99)                             | 1,890.34<br>(1,314.30 to<br>2,717.33)                         | 29.87<br>(23.20 to<br>38.21)                         | 22.87<br>(15.84 to<br>33.47)                         | 14.37<br>(9.87 to<br>21.31)                          | 35.76<br>(24.94 to<br>51.45)                         |
| Maternal sepsis and other maternal infections         | 439.89<br>(283.41 to<br>631.88)                               | 305.06<br>(177.03 to<br>501.32)                               | 184.40<br>(107.98 to<br>299.90)                               | 466.66<br>(278.06 to<br>744.07)                               | 8.04<br>(5.28 to<br>11.48)                           | 5.68<br>(3.32 to<br>9.25)                            | 3.43<br>(2.05 to<br>5.68)                            | 8.64<br>(5.20 to<br>13.63)                           |
| Maternal hypertensive disorders                       | 1,153.59<br>(873.63 to<br>1,477.03)                           | 908.73<br>(614.43 to<br>1,336.06)                             | 549.90<br>(369.62 to<br>820.33)                               | 1,386.22<br>(949.53 to<br>2,032.54)                           | 20.61<br>(15.71 to<br>26.39)                         | 16.55<br>(11.26 to<br>24.26)                         | 10.02<br>(6.81 to<br>14.81)                          | 25.13<br>(17.36 to<br>36.74)                         |
| Maternal obstructed labor and uterine rupture         | 411.10<br>(273.65 to<br>582.14)                               | 304.18<br>(178.16 to<br>478.36)                               | 190.12<br>(112.66 to<br>295.82)                               | 505.41<br>(301.31 to<br>786.07)                               | 7.66<br>(5.08 to<br>10.90)                           | 5.78<br>(3.37 to<br>9.17)                            | 3.61<br>(2.13 to<br>5.61)                            | 9.57<br>(5.65 to<br>14.80)                           |
| Maternal abortion, miscarriage, and ectopic pregnancy | 582.69<br>(397.25 to<br>822.77)                               | 408.96<br>(228.59 to<br>766.81)                               | 273.21<br>(151.38 to<br>500.19)                               | 686.46<br>(380.55 to<br>1,261.33)                             | 10.47<br>(7.16 to<br>14.58)                          | 7.53<br>(4.26 to<br>13.73)                           | 5.03<br>(2.82 to<br>9.17)                            | 12.56<br>(7.01 to<br>22.73)                          |
| Indirect maternal deaths                              | 1,398.58<br>(1,025.47 to<br>1,842.96)                         | 1,159.05<br>(757.52 to<br>1,821.53)                           | 708.08<br>(456.79 to<br>1,124.82)                             | 1,858.60<br>(1,208.20 to<br>2,871.52)                         | 25.45<br>(18.84 to<br>33.58)                         | 21.37<br>(14.08 to<br>33.05)                         | 13.07<br>(8.50 to<br>20.74)                          | 34.01<br>(22.48 to<br>51.93)                         |
| Late maternal deaths                                  | 108.68<br>(54.78 to<br>188.06)                                | 69.18<br>(33.60 to<br>124.96)                                 | 41.47<br>(19.98 to<br>76.65)                                  | 111.16<br>(54.58 to<br>200.25)                                | 1.99<br>(0.98 to<br>3.40)                            | 1.29<br>(0.63 to<br>2.29)                            | 0.78<br>(0.37 to<br>1.42)                            | 2.06<br>(1.00 to<br>3.71)                            |



|                                       |                                                 |                                                    |                                                   |                                                    |                                              |                                              |                                              |                                              |
|---------------------------------------|-------------------------------------------------|----------------------------------------------------|---------------------------------------------------|----------------------------------------------------|----------------------------------------------|----------------------------------------------|----------------------------------------------|----------------------------------------------|
| Acute hepatitis A                     | 46.77<br>(27.26 to<br>69.50)                    | 24.87<br>(15.18 to<br>40.01)                       | 17.15<br>(11.57 to<br>24.65)                      | 36.93<br>(22.91 to<br>55.42)                       | 0.60<br>(0.37 to<br>0.87)                    | 0.40<br>(0.27 to<br>0.59)                    | 0.30<br>(0.22 to<br>0.42)                    | 0.56<br>(0.38 to<br>0.79)                    |
| Acute hepatitis B                     | 750.50<br>(677.50 to<br>828.48)                 | 757.59<br>(614.45 to<br>968.04)                    | 629.40<br>(507.76 to<br>806.67)                   | 917.34<br>(750.78 to<br>1,158.37)                  | 17.33<br>(15.70 to<br>18.97)                 | 19.45<br>(16.13 to<br>23.99)                 | 16.54<br>(13.64 to<br>20.42)                 | 22.86<br>(19.14 to<br>28.14)                 |
| Acute hepatitis C                     | 20.10<br>(15.42 to<br>25.67)                    | 26.33<br>(18.47 to<br>36.66)                       | 24.06<br>(16.99 to<br>33.42)                      | 28.86<br>(20.33 to<br>39.85)                       | 0.52<br>(0.39 to<br>0.68)                    | 0.77<br>(0.55 to<br>1.06)                    | 0.72<br>(0.52 to<br>0.99)                    | 0.81<br>(0.58 to<br>1.12)                    |
| Acute hepatitis E                     | 221.60<br>(182.46 to<br>267.64)                 | 165.31<br>(119.32 to<br>221.88)                    | 133.22<br>(96.91 to<br>179.54)                    | 214.75<br>(159.25 to<br>284.68)                    | 3.56<br>(2.93 to<br>4.37)                    | 3.39<br>(2.54 to<br>4.50)                    | 2.96<br>(2.20 to<br>3.93)                    | 4.03<br>(3.06 to<br>5.25)                    |
| Other unspecified infectious diseases | 2,086.99<br>(1,100.63 to<br>3,484.91)           | 1,743.57<br>(1,166.73 to<br>2,484.17)              | 1,175.18<br>(770.04 to<br>1,690.43)               | 2,647.20<br>(1,728.93 to<br>3,811.64)              | 29.07<br>(16.49 to<br>46.75)                 | 30.56<br>(21.62 to<br>41.05)                 | 22.71<br>(16.02 to<br>30.64)                 | 41.67<br>(29.10 to<br>57.25)                 |
| <b>Non-communicable diseases</b>      | <b>78,967.87</b><br>(72,588.01 to<br>85,223.66) | <b>128,167.44</b><br>(107,182.06 to<br>155,633.17) | <b>101,887.58</b><br>(86,093.00 to<br>122,524.14) | <b>163,886.95</b><br>(135,796.14 to<br>202,440.65) | <b>2,503.77</b><br>(2,379.74 to<br>2,625.74) | <b>4,884.75</b><br>(4,230.82 to<br>5,661.07) | <b>4,068.32</b><br>(3,557.89 to<br>4,680.11) | <b>5,920.54</b><br>(5,056.20 to<br>6,958.33) |
| <b>Sub-Saharan Africa</b>             |                                                 |                                                    |                                                   |                                                    |                                              |                                              |                                              |                                              |
| <b>Cause</b>                          | <b>YLLs (in 1000s)</b>                          |                                                    |                                                   |                                                    | <b>Deaths (in 1000s)</b>                     |                                              |                                              |                                              |
|                                       | <b>2016</b>                                     | <b>2040 Forecast</b>                               | <b>2040 Better Scenario</b>                       | <b>2040 Worse Scenario</b>                         | <b>2016</b>                                  | <b>2040 Forecast</b>                         | <b>2040 Better Scenario</b>                  | <b>2040 Worse Scenario</b>                   |
| <b>Neoplasms</b>                      | <b>16,197.53</b><br>(14,767.42 to<br>17,263.53) | <b>34,322.35</b><br>(28,491.24 to<br>41,097.29)    | <b>32,539.02</b><br>(26,987.35 to<br>39,420.21)   | <b>36,633.83</b><br>(30,471.39 to<br>43,919.28)    | <b>529.28</b><br>(480.05 to<br>564.03)       | <b>1,229.61</b><br>(1,036.41 to<br>1,403.96) | <b>1,210.26</b><br>(1,027.83 to<br>1,387.37) | <b>1,259.10</b><br>(1,061.87 to<br>1,446.51) |
| Lip and oral cavity cancer            | 200.20<br>(187.21 to<br>212.22)                 | 431.03<br>(313.72 to<br>590.24)                    | 329.08<br>(251.15 to<br>436.01)                   | 597.60<br>(411.48 to<br>856.01)                    | 7.29<br>(6.81 to<br>7.73)                    | 15.78<br>(11.66 to<br>21.09)                 | 12.73<br>(9.89 to<br>16.21)                  | 20.89<br>(14.79 to<br>29.29)                 |
| Nasopharynx cancer                    | 105.58<br>(90.91 to<br>123.87)                  | 248.77<br>(178.61 to<br>343.59)                    | 183.83<br>(135.51 to<br>249.55)                   | 362.35<br>(250.73 to<br>524.69)                    | 3.04<br>(2.63 to<br>3.54)                    | 7.32<br>(5.34 to<br>10.09)                   | 5.55<br>(4.10 to<br>7.50)                    | 10.38<br>(7.34 to<br>14.95)                  |
| Other pharynx cancer                  | 106.10<br>(95.95 to<br>117.74)                  | 192.12<br>(134.71 to<br>268.43)                    | 167.21<br>(119.34 to<br>229.79)                   | 237.26<br>(160.82 to<br>344.99)                    | 3.60<br>(3.26 to<br>3.97)                    | 6.79<br>(4.82 to<br>9.52)                    | 6.06<br>(4.43 to<br>8.25)                    | 8.16<br>(5.61 to<br>11.60)                   |
| Esophageal cancer                     | 673.71<br>(628.66 to<br>719.96)                 | 1,427.09<br>(880.77 to<br>2,255.64)                | 1,131.15<br>(744.37 to<br>1,769.86)               | 1,871.92<br>(1,102.87 to<br>3,063.70)              | 26.67<br>(24.93 to<br>28.39)                 | 55.21<br>(34.90 to<br>84.93)                 | 45.94<br>(30.81 to<br>69.24)                 | 69.70<br>(42.29 to<br>110.26)                |
| Stomach cancer                        | 796.16<br>(741.96 to<br>849.68)                 | 1,201.79<br>(1,004.57 to<br>1,543.35)              | 1,119.89<br>(937.46 to<br>1,432.15)               | 1,287.66<br>(1,073.38 to<br>1,673.31)              | 31.21<br>(29.23 to<br>33.20)                 | 49.49<br>(42.59 to<br>61.64)                 | 47.77<br>(41.11 to<br>59.43)                 | 51.08<br>(43.57 to<br>64.47)                 |
| Colon and rectum cancer               | 821.11<br>(761.20 to<br>884.87)                 | 2,136.46<br>(1,578.78 to<br>2,867.57)              | 2,145.30<br>(1,592.21 to<br>2,896.55)             | 2,124.87<br>(1,547.34 to<br>2,879.51)              | 32.82<br>(30.42 to<br>35.25)                 | 92.55<br>(68.88 to<br>124.49)                | 96.67<br>(72.93 to<br>128.76)                | 87.70<br>(64.80 to<br>118.75)                |
| Liver cancer                          | 1,914.85<br>(1,690.93 to<br>2,152.07)           | 4,587.32<br>(3,413.60 to<br>6,151.38)              | 4,179.73<br>(3,200.16 to<br>5,417.64)             | 5,185.45<br>(3,733.75 to<br>7,273.16)              | 60.54<br>(53.62 to<br>66.96)                 | 155.03<br>(118.51 to<br>202.40)              | 145.98<br>(113.85 to<br>185.97)              | 169.25<br>(124.71 to<br>230.41)              |
| Liver cancer due to hepatitis B       | 971.41<br>(822.16 to<br>1,141.25)               | 2,336.42<br>(1,696.30 to<br>3,253.97)              | 2,143.73<br>(1,608.96 to<br>2,902.17)             | 2,544.97<br>(1,775.20 to<br>3,662.36)              | 28.69<br>(24.35 to<br>33.64)                 | 74.27<br>(55.19 to<br>100.19)                | 70.24<br>(53.33 to<br>91.78)                 | 78.46<br>(56.47 to<br>109.29)                |
| Liver cancer due to hepatitis C       | 244.51<br>(193.49 to<br>296.62)                 | 594.61<br>(430.16 to<br>823.87)                    | 565.83<br>(415.65 to<br>769.03)                   | 626.38<br>(444.22 to<br>901.27)                    | 9.68<br>(7.75 to<br>11.63)                   | 24.67<br>(18.39 to<br>33.29)                 | 24.40<br>(18.50 to<br>32.20)                 | 24.93<br>(18.20 to<br>34.24)                 |
| Liver cancer due to alcohol use       | 259.57<br>(213.06 to<br>310.35)                 | 628.62<br>(442.46 to<br>878.39)                    | 538.26<br>(392.21 to<br>729.48)                   | 880.35<br>(595.80 to<br>1,275.22)                  | 9.17<br>(7.61 to<br>10.78)                   | 23.05<br>(16.62 to<br>30.97)                 | 20.48<br>(15.15 to<br>26.90)                 | 30.70<br>(21.35 to<br>42.98)                 |
| Liver cancer due to other causes      | 439.36<br>(376.26 to<br>506.24)                 | 1,027.68<br>(739.97 to<br>1,411.47)                | 931.91<br>(691.42 to<br>1,235.93)                 | 1,133.75<br>(799.45 to<br>1,620.28)                | 13.00<br>(11.20 to<br>14.85)                 | 33.03<br>(24.14 to<br>45.37)                 | 30.86<br>(23.18 to<br>41.03)                 | 35.16<br>(25.09 to<br>49.78)                 |
| Gallbladder and biliary tract cancer  | 135.23<br>(119.24 to<br>162.62)                 | 217.01<br>(184.20 to<br>271.27)                    | 228.58<br>(191.72 to<br>289.33)                   | 202.21<br>(173.78 to<br>249.99)                    | 5.64<br>(4.99 to<br>6.77)                    | 9.61<br>(8.38 to<br>11.78)                   | 10.43<br>(8.97 to<br>12.95)                  | 8.68<br>(7.66 to<br>10.61)                   |
| Pancreatic cancer                     | 423.01<br>(398.13 to<br>452.77)                 | 1,142.73<br>(961.95 to<br>1,385.34)                | 1,186.26<br>(994.36 to<br>1,445.31)               | 1,080.33<br>(911.39 to<br>1,298.95)                | 17.54<br>(16.54 to<br>18.71)                 | 48.93<br>(41.92 to<br>58.62)                 | 52.39<br>(44.96 to<br>62.39)                 | 44.84<br>(38.76 to<br>53.48)                 |

|                                     |                                       |                                       |                                       |                                       |                              |                                |                                 |                                |
|-------------------------------------|---------------------------------------|---------------------------------------|---------------------------------------|---------------------------------------|------------------------------|--------------------------------|---------------------------------|--------------------------------|
| Larynx cancer                       | 144.09<br>(130.23 to<br>155.91)       | 289.08<br>(195.35 to<br>425.53)       | 202.66<br>(148.50 to<br>279.92)       | 419.26<br>(263.89 to<br>646.28)       | 5.40<br>(4.91 to<br>5.84)    | 10.75<br>(7.52 to<br>15.40)    | 7.88<br>(5.94 to<br>10.67)      | 15.11<br>(9.86 to<br>22.51)    |
| Tracheal, bronchus, and lung cancer | 782.53<br>(738.38 to<br>830.36)       | 1,788.56<br>(1,297.42 to<br>2,462.99) | 1,178.28<br>(891.43 to<br>1,567.64)   | 2,383.28<br>(1,684.84 to<br>3,338.18) | 31.78<br>(29.93 to<br>33.66) | 73.53<br>(54.66 to<br>98.82)   | 51.04<br>(39.73 to<br>66.70)    | 95.37<br>(69.75 to<br>130.36)  |
| Malignant skin melanoma             | 109.39<br>(94.88 to<br>128.74)        | 260.23<br>(215.67 to<br>316.84)       | 294.13<br>(241.82 to<br>364.09)       | 225.97<br>(188.37 to<br>271.75)       | 4.10<br>(3.47 to<br>4.71)    | 10.42<br>(8.62 to<br>11.95)    | 12.20<br>(10.05 to<br>14.20)    | 8.73<br>(7.20 to<br>9.95)      |
| Non-melanoma skin cancer            | 87.30<br>(78.16 to<br>94.94)          | 208.91<br>(173.81 to<br>249.88)       | 198.25<br>(162.56 to<br>243.22)       | 204.37<br>(172.56 to<br>238.56)       | 3.67<br>(3.24 to<br>4.08)    | 9.35<br>(7.99 to<br>10.60)     | 9.27<br>(7.81 to<br>10.76)      | 8.72<br>(7.58 to<br>9.77)      |
| Breast cancer                       | 1,375.75<br>(1,195.48 to<br>1,542.32) | 3,087.68<br>(2,346.57 to<br>4,156.85) | 2,986.51<br>(2,265.02 to<br>4,015.35) | 3,249.32<br>(2,437.65 to<br>4,377.10) | 43.51<br>(38.11 to<br>48.44) | 104.08<br>(81.91 to<br>136.06) | 102.70<br>(81.38 to<br>133.34)  | 107.04<br>(83.17 to<br>139.77) |
| Cervical cancer                     | 1,746.69<br>(1,208.33 to<br>2,026.46) | 2,824.65<br>(1,858.02 to<br>3,694.49) | 2,589.86<br>(1,705.82 to<br>3,416.69) | 3,052.87<br>(1,992.78 to<br>3,912.06) | 56.55<br>(38.67 to<br>65.57) | 92.39<br>(60.30 to<br>115.71)  | 86.28<br>(56.94 to<br>109.18)   | 97.74<br>(64.18 to<br>121.14)  |
| Uterine cancer                      | 197.21<br>(177.26 to<br>217.34)       | 396.04<br>(333.06 to<br>470.76)       | 362.69<br>(304.05 to<br>436.61)       | 428.35<br>(365.28 to<br>502.06)       | 7.58<br>(6.82 to<br>8.32)    | 15.86<br>(13.73 to<br>18.18)   | 14.88<br>(12.82 to<br>17.32)    | 16.64<br>(14.54 to<br>18.88)   |
| Ovarian cancer                      | 340.80<br>(278.69 to<br>381.40)       | 820.21<br>(616.36 to<br>1,069.25)     | 869.22<br>(658.87 to<br>1,134.87)     | 748.78<br>(559.53 to<br>973.27)       | 11.40<br>(9.29 to<br>12.69)  | 28.54<br>(21.53 to<br>36.14)   | 30.78<br>(23.65 to<br>39.10)    | 25.52<br>(19.00 to<br>32.56)   |
| Prostate cancer                     | 928.10<br>(487.42 to<br>1,152.10)     | 2,805.41<br>(1,520.33 to<br>3,493.07) | 3,058.55<br>(1,697.13 to<br>3,806.48) | 2,516.05<br>(1,328.15 to<br>3,125.88) | 50.65<br>(26.97 to<br>62.25) | 163.24<br>(91.51 to<br>197.82) | 183.71<br>(105.63 to<br>222.87) | 141.60<br>(74.78 to<br>174.25) |
| Testicular cancer                   | 34.63<br>(31.16 to<br>38.32)          | 58.89<br>(48.56 to<br>73.05)          | 55.61<br>(45.63 to<br>69.55)          | 61.91<br>(51.43 to<br>76.49)          | 0.78<br>(0.70 to<br>0.86)    | 1.41<br>(1.19 to<br>1.67)      | 1.36<br>(1.14 to<br>1.63)       | 1.44<br>(1.23 to<br>1.70)      |
| <b>Sub-Saharan Africa</b>           |                                       |                                       |                                       |                                       |                              |                                |                                 |                                |
| Cause                               | YLLs (in 1000s)                       |                                       |                                       |                                       | Deaths (in 1000s)            |                                |                                 |                                |
|                                     | 2016                                  | 2040 Forecast                         | 2040 Better Scenario                  | 2040 Worse Scenario                   | 2016                         | 2040 Forecast                  | 2040 Better Scenario            | 2040 Worse Scenario            |
| Kidney cancer                       | 170.84<br>(151.18 to<br>190.61)       | 353.01<br>(299.39 to<br>410.70)       | 371.30<br>(313.87 to<br>434.17)       | 344.23<br>(291.45 to<br>400.08)       | 4.37<br>(3.99 to<br>4.71)    | 11.16<br>(9.86 to<br>12.56)    | 12.35<br>(10.89 to<br>13.98)    | 10.11<br>(8.98 to<br>11.40)    |
| Bladder cancer                      | 220.96<br>(199.24 to<br>235.59)       | 479.70<br>(393.91 to<br>588.42)       | 463.14<br>(379.85 to<br>566.29)       | 488.75<br>(399.77 to<br>599.99)       | 9.72<br>(8.77 to<br>10.32)   | 21.85<br>(18.49 to<br>26.44)   | 22.09<br>(18.81 to<br>26.45)    | 21.26<br>(17.83 to<br>25.96)   |
| Brain and nervous system cancer     | 567.84<br>(479.38 to<br>664.39)       | 1,184.05<br>(952.88 to<br>1,471.54)   | 1,182.22<br>(953.18 to<br>1,471.39)   | 1,191.53<br>(957.08 to<br>1,457.04)   | 12.49<br>(10.81 to<br>14.72) | 30.29<br>(25.43 to<br>37.08)   | 31.56<br>(26.35 to<br>38.85)    | 28.81<br>(24.36 to<br>34.71)   |
| Thyroid cancer                      | 111.03<br>(77.41 to<br>127.95)        | 206.89<br>(146.65 to<br>269.81)       | 189.97<br>(134.75 to<br>245.12)       | 229.02<br>(161.57 to<br>300.78)       | 3.66<br>(2.55 to<br>4.18)    | 7.08<br>(5.13 to<br>9.00)      | 6.67<br>(4.85 to<br>8.38)       | 7.60<br>(5.42 to<br>9.77)      |
| Mesothelioma                        | 30.93<br>(26.66 to<br>35.13)          | 68.95<br>(53.70 to<br>85.83)          | 69.81<br>(53.50 to<br>88.57)          | 66.51<br>(52.79 to<br>81.13)          | 1.08<br>(0.92 to<br>1.22)    | 2.55<br>(2.01 to<br>3.05)      | 2.66<br>(2.06 to<br>3.25)       | 2.37<br>(1.91 to<br>2.79)      |
| Hodgkin lymphoma                    | 190.45<br>(123.02 to<br>222.82)       | 220.79<br>(143.95 to<br>303.68)       | 188.69<br>(115.16 to<br>246.01)       | 279.45<br>(172.14 to<br>361.02)       | 4.03<br>(2.53 to<br>4.69)    | 5.61<br>(3.33 to<br>7.15)      | 4.74<br>(2.80 to<br>6.04)       | 6.50<br>(3.86 to<br>8.14)      |
| Non-Hodgkin lymphoma                | 1,143.10<br>(898.85 to<br>1,301.12)   | 2,054.80<br>(1,565.87 to<br>2,572.49) | 2,052.16<br>(1,576.83 to<br>2,578.28) | 2,112.46<br>(1,589.18 to<br>2,641.77) | 23.85<br>(19.38 to<br>26.64) | 50.59<br>(40.12 to<br>61.31)   | 52.56<br>(42.09 to<br>63.45)    | 48.83<br>(38.28 to<br>59.18)   |
| Multiple myeloma                    | 171.99<br>(137.52 to<br>189.47)       | 465.91<br>(346.78 to<br>584.45)       | 492.48<br>(369.05 to<br>612.96)       | 428.96<br>(321.93 to<br>538.52)       | 6.30<br>(5.01 to<br>6.92)    | 17.57<br>(13.40 to<br>21.43)   | 18.97<br>(14.62 to<br>22.97)    | 15.81<br>(12.00 to<br>19.47)   |
| Leukemia                            | 734.53<br>(651.61 to<br>828.39)       | 1,247.75<br>(980.98 to<br>1,586.78)   | 1,189.47<br>(942.02 to<br>1,506.69)   | 1,322.59<br>(1,035.65 to<br>1,672.79) | 16.33<br>(14.29 to<br>18.19) | 33.29<br>(27.29 to<br>40.16)   | 32.78<br>(27.09 to<br>39.37)    | 33.61<br>(27.25 to<br>40.48)   |
| Acute lymphoid leukemia             | 192.84<br>(169.87 to<br>225.04)       | 300.70<br>(227.74 to<br>387.10)       | 289.23<br>(221.53 to<br>372.17)       | 321.52<br>(243.37 to<br>412.70)       | 3.36<br>(2.93 to<br>3.99)    | 6.12<br>(4.80 to<br>7.65)      | 6.06<br>(4.78 to<br>7.55)       | 6.25<br>(4.89 to<br>7.85)      |

|                                 |                                                 |                                                 |                                                 |                                                 |                                          |                                              |                                            |                                              |
|---------------------------------|-------------------------------------------------|-------------------------------------------------|-------------------------------------------------|-------------------------------------------------|------------------------------------------|----------------------------------------------|--------------------------------------------|----------------------------------------------|
| Chronic lymphoid leukemia       | 25.33<br>(19.60 to<br>28.85)                    | 53.55<br>(39.56 to<br>65.53)                    | 53.28<br>(39.79 to<br>64.56)                    | 52.95<br>(38.44 to<br>65.77)                    | 1.10<br>(0.82 to<br>1.26)                | 2.45<br>(1.77 to<br>2.95)                    | 2.49<br>(1.84 to<br>2.98)                  | 2.36<br>(1.70 to<br>2.90)                    |
| Acute myeloid leukemia          | 214.75<br>(189.19 to<br>249.78)                 | 449.26<br>(351.62 to<br>575.98)                 | 452.53<br>(358.27 to<br>584.08)                 | 451.06<br>(350.61 to<br>583.30)                 | 4.39<br>(3.89 to<br>5.15)                | 11.00<br>(8.92 to<br>13.87)                  | 11.49<br>(9.37 to<br>14.46)                | 10.55<br>(8.54 to<br>13.22)                  |
| Chronic myeloid leukemia        | 69.23<br>(58.27 to<br>80.54)                    | 92.61<br>(69.63 to<br>121.37)                   | 87.94<br>(66.33 to<br>114.13)                   | 95.56<br>(71.42 to<br>125.23)                   | 1.75<br>(1.49 to<br>2.06)                | 2.58<br>(2.02 to<br>3.27)                    | 2.50<br>(1.98 to<br>3.17)                  | 2.59<br>(2.01 to<br>3.31)                    |
| Other leukemia                  | 232.37<br>(187.70 to<br>257.20)                 | 351.63<br>(263.06 to<br>449.76)                 | 306.49<br>(230.57 to<br>390.02)                 | 401.50<br>(299.80 to<br>509.91)                 | 5.72<br>(4.56 to<br>6.21)                | 11.15<br>(8.32 to<br>13.39)                  | 10.24<br>(7.69 to<br>12.24)                | 11.86<br>(8.79 to<br>14.09)                  |
| Other neoplasms                 | 1,933.41<br>(1,779.31 to<br>2,099.27)           | 3,906.55<br>(3,191.63 to<br>4,962.36)           | 3,873.01<br>(3,153.87 to<br>4,940.24)           | 3,930.53<br>(3,232.07 to<br>4,926.74)           | 43.68<br>(40.17 to<br>47.12)             | 99.33<br>(84.65 to<br>120.02)                | 102.25<br>(86.70 to<br>124.09)             | 95.60<br>(81.98 to<br>113.77)                |
| <b>Cardiovascular diseases</b>  | <b>22,057.50</b><br>(20,865.34 to<br>23,376.76) | <b>36,226.36</b><br>(26,251.38 to<br>50,035.96) | <b>22,178.27</b><br>(16,840.25 to<br>29,481.18) | <b>56,331.58</b><br>(39,206.26 to<br>80,484.89) | <b>952.70</b><br>(902.40 to<br>1,009.57) | <b>1,726.28</b><br>(1,322.29 to<br>2,284.24) | <b>1,155.32</b><br>(919.39 to<br>1,487.05) | <b>2,482.70</b><br>(1,836.92 to<br>3,368.07) |
| Rheumatic heart disease         | 588.93<br>(536.02 to<br>654.56)                 | 487.74<br>(384.60 to<br>661.07)                 | 382.04<br>(300.02 to<br>519.07)                 | 599.40<br>(474.62 to<br>804.76)                 | 17.29<br>(15.75 to<br>19.22)             | 17.30<br>(14.51 to<br>22.17)                 | 14.40<br>(12.00 to<br>18.33)               | 20.01<br>(16.83 to<br>25.66)                 |
| Ischemic heart disease          | 8,429.02<br>(7,884.46 to<br>9,135.45)           | 14,367.24<br>(8,647.63 to<br>23,482.73)         | 7,524.88<br>(4,681.61 to<br>12,222.69)          | 24,165.29<br>(14,398.99 to<br>38,553.27)        | 402.18<br>(377.35 to<br>435.93)          | 731.24<br>(475.60 to<br>1,127.20)            | 431.60<br>(288.41 to<br>658.91)            | 1,125.28<br>(711.56 to<br>1,762.27)          |
| Stroke                          | 7,549.92<br>(7,120.80 to<br>8,048.91)           | 10,707.40<br>(6,805.26 to<br>17,237.82)         | 5,379.87<br>(3,559.29 to<br>8,514.16)           | 18,762.59<br>(11,579.45 to<br>30,083.95)        | 320.54<br>(300.34 to<br>342.89)          | 499.34<br>(343.67 to<br>773.70)              | 284.41<br>(201.25 to<br>428.12)            | 800.72<br>(535.91 to<br>1,230.22)            |
| Ischemic stroke                 | 2,095.25<br>(1,904.91 to<br>2,280.43)           | 3,010.59<br>(1,869.82 to<br>5,466.04)           | 1,794.70<br>(1,155.88 to<br>3,142.53)           | 4,495.37<br>(2,723.64 to<br>7,825.80)           | 119.11<br>(108.96 to<br>129.08)          | 190.01<br>(121.50 to<br>362.44)              | 126.01<br>(83.45 to<br>230.51)             | 260.41<br>(163.55 to<br>485.83)              |
| Intracerebral hemorrhage        | 5,454.67<br>(5,101.70 to<br>5,858.98)           | 7,696.81<br>(4,538.38 to<br>12,968.74)          | 3,585.17<br>(2,233.64 to<br>5,920.32)           | 14,267.23<br>(8,219.23 to<br>24,326.96)         | 201.44<br>(187.55 to<br>218.00)          | 309.33<br>(196.03 to<br>499.05)              | 158.40<br>(105.82 to<br>239.11)            | 540.30<br>(332.81 to<br>884.93)              |
| Hypertensive heart disease      | 1,408.68<br>(1,037.07 to<br>1,690.68)           | 2,707.50<br>(1,624.96 to<br>4,791.40)           | 1,964.71<br>(1,243.57 to<br>3,203.55)           | 3,658.21<br>(2,021.97 to<br>6,998.59)           | 67.07<br>(49.51 to<br>80.39)             | 141.16<br>(87.42 to<br>245.74)               | 108.68<br>(71.68 to<br>173.46)             | 178.47<br>(103.17 to<br>339.61)              |
| Cardiomyopathy and myocarditis  | 693.01<br>(602.29 to<br>844.24)                 | 1,274.67<br>(920.64 to<br>1,788.88)             | 1,202.85<br>(870.67 to<br>1,682.57)             | 1,316.44<br>(947.39 to<br>1,859.09)             | 19.72<br>(17.33 to<br>23.37)             | 43.58<br>(32.50 to<br>57.84)                 | 42.96<br>(32.14 to<br>57.53)               | 42.13<br>(31.30 to<br>56.61)                 |
| Myocarditis                     | 113.50<br>(89.60 to<br>164.92)                  | 161.87<br>(106.19 to<br>261.45)                 | 148.50<br>(95.43 to<br>240.88)                  | 176.65<br>(118.42 to<br>279.33)                 | 2.27<br>(1.70 to<br>3.47)                | 3.95<br>(2.58 to<br>6.60)                    | 3.86<br>(2.48 to<br>6.57)                  | 4.03<br>(2.65 to<br>6.68)                    |
| <b>Sub-Saharan Africa</b>       |                                                 |                                                 |                                                 |                                                 |                                          |                                              |                                            |                                              |
| Cause                           | YLLs (in 1000s)                                 |                                                 |                                                 |                                                 | Deaths (in 1000s)                        |                                              |                                            |                                              |
|                                 | 2016                                            | 2040 Forecast                                   | 2040 Better Scenario                            | 2040 Worse Scenario                             | 2016                                     | 2040 Forecast                                | 2040 Better Scenario                       | 2040 Worse Scenario                          |
| Alcoholic cardiomyopathy        | 47.86<br>(36.20 to<br>75.54)                    | 96.78<br>(67.30 to<br>162.16)                   | 94.65<br>(64.12 to<br>159.76)                   | 108.46<br>(75.63 to<br>175.14)                  | 1.63<br>(1.27 to<br>2.56)                | 3.39<br>(2.46 to<br>5.60)                    | 3.38<br>(2.39 to<br>5.69)                  | 3.70<br>(2.72 to<br>5.98)                    |
| Other cardiomyopathy            | 531.65<br>(452.09 to<br>633.80)                 | 1,016.02<br>(707.36 to<br>1,470.91)             | 959.70<br>(670.74 to<br>1,368.24)               | 1,031.33<br>(717.17 to<br>1,490.58)             | 15.82<br>(13.73 to<br>18.48)             | 36.24<br>(26.08 to<br>48.89)                 | 35.72<br>(25.90 to<br>48.39)               | 34.39<br>(24.56 to<br>46.76)                 |
| Atrial fibrillation and flutter | 94.19<br>(74.57 to<br>116.29)                   | 249.34<br>(190.49 to<br>319.04)                 | 259.86<br>(199.60 to<br>331.11)                 | 240.70<br>(180.63 to<br>312.58)                 | 7.80<br>(6.06 to<br>9.73)                | 22.67<br>(16.95 to<br>29.20)                 | 25.08<br>(19.01 to<br>32.20)               | 20.46<br>(14.98 to<br>26.64)                 |
| Aortic aneurysm                 | 168.81<br>(148.90 to<br>200.10)                 | 358.04<br>(271.55 to<br>494.68)                 | 346.48<br>(265.29 to<br>478.24)                 | 357.64<br>(266.00 to<br>501.83)                 | 7.22<br>(6.42 to<br>8.41)                | 16.41<br>(13.15 to<br>21.41)                 | 16.86<br>(13.50 to<br>21.78)               | 15.49<br>(12.24 to<br>20.58)                 |
| Peripheral artery disease       | 24.10<br>(16.76 to<br>28.11)                    | 77.87<br>(45.51 to<br>116.90)                   | 79.38<br>(46.05 to<br>117.68)                   | 72.85<br>(42.96 to<br>109.94)                   | 1.37<br>(0.94 to<br>1.62)                | 5.01<br>(3.13 to<br>6.73)                    | 5.51<br>(3.40 to<br>7.43)                  | 4.37<br>(2.71 to<br>5.86)                    |
| Endocarditis                    | 374.36<br>(304.74 to<br>440.46)                 | 725.86<br>(499.99 to<br>1,010.47)               | 669.04<br>(461.55 to<br>915.65)                 | 793.46<br>(547.46 to<br>1,115.00)               | 10.14<br>(8.20 to<br>11.79)              | 23.50<br>(16.53 to<br>31.51)                 | 23.01<br>(16.25 to<br>30.40)               | 23.85<br>(16.66 to<br>31.92)                 |

|                                                                |                                                            |                                                             |                                                            |                                                             |                                                      |                                                      |                                                      |                                                      |
|----------------------------------------------------------------|------------------------------------------------------------|-------------------------------------------------------------|------------------------------------------------------------|-------------------------------------------------------------|------------------------------------------------------|------------------------------------------------------|------------------------------------------------------|------------------------------------------------------|
| Other cardiovascular and circulatory diseases                  | 2,726.49<br>(2,359.18 to<br>3,518.18)                      | 5,270.69<br>(4,142.28 to<br>7,095.67)                       | 4,369.15<br>(3,438.83 to<br>5,793.29)                      | 6,364.99<br>(4,969.77 to<br>8,661.01)                       | 99.37<br>(83.55 to<br>127.91)                        | 226.08<br>(184.57 to<br>299.34)                      | 202.81<br>(165.31 to<br>263.78)                      | 251.93<br>(199.83 to<br>339.57)                      |
| <b>Chronic respiratory diseases</b>                            | <b>3,933.90</b><br><b>(3,638.12 to</b><br><b>4,291.19)</b> | <b>5,024.40</b><br><b>(3,768.50 to</b><br><b>7,297.47)</b>  | <b>3,399.72</b><br><b>(2,666.56 to</b><br><b>4,481.57)</b> | <b>6,872.54</b><br><b>(4,994.02 to</b><br><b>10,313.75)</b> | <b>153.60</b><br><b>(142.65 to</b><br><b>168.30)</b> | <b>221.60</b><br><b>(167.00 to</b><br><b>317.55)</b> | <b>157.43</b><br><b>(127.79 to</b><br><b>206.78)</b> | <b>288.25</b><br><b>(211.07 to</b><br><b>419.39)</b> |
| Chronic obstructive pulmonary disease                          | 2,101.41<br>(1,864.58 to<br>2,369.20)                      | 3,206.17<br>(2,150.78 to<br>5,188.28)                       | 1,883.33<br>(1,359.32 to<br>2,726.34)                      | 4,705.90<br>(3,096.21 to<br>7,786.50)                       | 99.47<br>(88.53 to<br>111.85)                        | 158.60<br>(111.40 to<br>249.71)                      | 101.53<br>(76.85 to<br>141.71)                       | 217.91<br>(147.93 to<br>345.41)                      |
| Pneumoconiosis                                                 | 13.92<br>(11.72 to<br>17.22)                               | 20.89<br>(17.00 to<br>26.34)                                | 20.91<br>(16.55 to<br>26.71)                               | 20.21<br>(16.82 to<br>25.34)                                | 0.61<br>(0.52 to<br>0.76)                            | 1.04<br>(0.89 to<br>1.27)                            | 1.08<br>(0.90 to<br>1.32)                            | 0.97<br>(0.83 to<br>1.18)                            |
| Silicosis                                                      | 2.78<br>(2.01 to<br>3.58)                                  | 2.59<br>(1.79 to<br>3.72)                                   | 2.27<br>(1.47 to<br>3.40)                                  | 2.50<br>(1.74 to<br>3.53)                                   | 0.13<br>(0.09 to<br>0.17)                            | 0.13<br>(0.09 to<br>0.18)                            | 0.12<br>(0.08 to<br>0.17)                            | 0.12<br>(0.08 to<br>0.17)                            |
| Asbestosis                                                     | 4.69<br>(3.57 to<br>5.76)                                  | 9.49<br>(6.53 to<br>12.49)                                  | 10.88<br>(7.33 to<br>14.82)                                | 8.34<br>(5.90 to<br>10.86)                                  | 0.20<br>(0.15 to<br>0.25)                            | 0.46<br>(0.33 to<br>0.58)                            | 0.55<br>(0.38 to<br>0.71)                            | 0.39<br>(0.28 to<br>0.49)                            |
| Coal workers pneumoconiosis                                    | 0.92<br>(0.66 to<br>1.36)                                  | 1.18<br>(0.78 to<br>1.82)                                   | 0.89<br>(0.56 to<br>1.42)                                  | 1.39<br>(0.94 to<br>2.16)                                   | 0.04<br>(0.03 to<br>0.06)                            | 0.06<br>(0.04 to<br>0.08)                            | 0.04<br>(0.03 to<br>0.07)                            | 0.06<br>(0.04 to<br>0.10)                            |
| Other pneumoconiosis                                           | 5.53<br>(4.27 to<br>7.91)                                  | 7.64<br>(5.64 to<br>10.69)                                  | 6.88<br>(4.90 to<br>10.08)                                 | 7.97<br>(6.02 to<br>10.69)                                  | 0.24<br>(0.19 to<br>0.35)                            | 0.39<br>(0.30 to<br>0.54)                            | 0.37<br>(0.28 to<br>0.53)                            | 0.40<br>(0.30 to<br>0.54)                            |
| Asthma                                                         | 1,460.20<br>(1,293.39 to<br>1,744.41)                      | 1,160.34<br>(830.60 to<br>1,725.16)                         | 879.73<br>(650.00 to<br>1,281.14)                          | 1,474.37<br>(1,029.22 to<br>2,225.61)                       | 44.03<br>(38.43 to<br>57.05)                         | 41.08<br>(30.06 to<br>59.58)                         | 32.86<br>(24.61 to<br>46.52)                         | 48.97<br>(34.76 to<br>73.03)                         |
| Interstitial lung disease and pulmonary sarcoidosis            | 66.36<br>(49.81 to<br>85.08)                               | 157.09<br>(106.45 to<br>213.07)                             | 189.38<br>(130.10 to<br>257.32)                            | 135.63<br>(92.12 to<br>182.34)                              | 2.70<br>(1.99 to<br>3.40)                            | 7.02<br>(4.87 to<br>9.11)                            | 8.90<br>(6.24 to<br>11.41)                           | 5.81<br>(4.08 to<br>7.46)                            |
| Other chronic respiratory diseases                             | 292.01<br>(200.20 to<br>367.40)                            | 479.90<br>(339.50 to<br>627.20)                             | 426.37<br>(308.33 to<br>558.20)                            | 536.44<br>(373.75 to<br>699.21)                             | 6.79<br>(4.68 to<br>8.59)                            | 13.87<br>(9.75 to<br>18.09)                          | 13.06<br>(9.42 to<br>16.93)                          | 14.58<br>(10.08 to<br>19.22)                         |
| <b>Cirrhosis and other chronic liver diseases</b>              | <b>4,499.11</b><br><b>(3,816.49 to</b><br><b>5,377.67)</b> | <b>8,614.88</b><br><b>(6,878.73 to</b><br><b>10,665.01)</b> | <b>7,873.97</b><br><b>(6,282.95 to</b><br><b>9,694.72)</b> | <b>9,666.73</b><br><b>(7,776.72 to</b><br><b>11,885.24)</b> | <b>131.54</b><br><b>(112.09 to</b><br><b>155.62)</b> | <b>272.04</b><br><b>(226.31 to</b><br><b>327.15)</b> | <b>255.45</b><br><b>(210.00 to</b><br><b>307.96)</b> | <b>296.35</b><br><b>(245.96 to</b><br><b>353.81)</b> |
| Cirrhosis and other chronic liver diseases due to hepatitis B  | 1,633.78<br>(1,338.41 to<br>2,011.68)                      | 3,386.31<br>(2,648.44 to<br>4,320.96)                       | 3,204.16<br>(2,498.44 to<br>4,076.06)                      | 3,524.31<br>(2,759.42 to<br>4,432.45)                       | 50.06<br>(41.21 to<br>61.71)                         | 109.83<br>(88.39 to<br>136.48)                       | 106.29<br>(85.65 to<br>132.46)                       | 111.45<br>(89.88 to<br>138.33)                       |
| Cirrhosis and other chronic liver diseases due to hepatitis C  | 805.97<br>(595.16 to<br>1,068.91)                          | 1,672.50<br>(1,197.62 to<br>2,310.69)                       | 1,588.27<br>(1,128.88 to<br>2,195.22)                      | 1,758.78<br>(1,260.72 to<br>2,429.87)                       | 25.15<br>(18.60 to<br>33.00)                         | 53.63<br>(39.10 to<br>72.12)                         | 52.02<br>(37.55 to<br>70.08)                         | 55.06<br>(40.15 to<br>74.29)                         |
| Cirrhosis and other chronic liver diseases due to alcohol use  | 1,047.05<br>(850.76 to<br>1,279.06)                        | 2,010.03<br>(1,573.64 to<br>2,549.02)                       | 1,695.74<br>(1,325.84 to<br>2,152.46)                      | 2,656.46<br>(2,099.42 to<br>3,357.06)                       | 33.94<br>(27.77 to<br>40.97)                         | 68.45<br>(55.60 to<br>83.73)                         | 59.54<br>(47.88 to<br>73.39)                         | 87.27<br>(70.53 to<br>106.85)                        |
| Cirrhosis and other chronic liver diseases due to other causes | 1,012.31<br>(855.51 to<br>1,199.85)                        | 1,546.04<br>(1,209.30 to<br>1,961.54)                       | 1,385.80<br>(1,085.59 to<br>1,772.27)                      | 1,727.18<br>(1,360.24 to<br>2,178.95)                       | 22.38<br>(18.93 to<br>26.14)                         | 40.14<br>(32.61 to<br>49.46)                         | 37.60<br>(30.45 to<br>46.46)                         | 42.56<br>(34.72 to<br>51.97)                         |
| <b>Digestive diseases</b>                                      | <b>5,471.66</b><br><b>(5,007.23 to</b><br><b>6,078.29)</b> | <b>7,450.67</b><br><b>(6,306.78 to</b><br><b>8,862.57)</b>  | <b>6,568.82</b><br><b>(5,578.80 to</b><br><b>7,910.73)</b> | <b>8,615.85</b><br><b>(7,204.25 to</b><br><b>10,196.39)</b> | <b>153.70</b><br><b>(141.95 to</b><br><b>168.26)</b> | <b>255.37</b><br><b>(227.01 to</b><br><b>290.71)</b> | <b>239.12</b><br><b>(211.55 to</b><br><b>273.59)</b> | <b>274.59</b><br><b>(244.72 to</b><br><b>311.13)</b> |
| Peptic ulcer disease                                           | 907.78<br>(762.84 to<br>1,065.20)                          | 840.66<br>(669.28 to<br>1,042.12)                           | 662.03<br>(522.77 to<br>836.10)                            | 1,055.81<br>(846.70 to<br>1,298.35)                         | 30.70<br>(25.43 to<br>36.37)                         | 32.94<br>(26.61 to<br>40.18)                         | 27.37<br>(21.86 to<br>33.77)                         | 38.92<br>(31.63 to<br>47.43)                         |

**Sub-Saharan Africa**

| Cause                    | YLLs (in 1000s)                 |                                 |                                 |                                 | Deaths (in 1000s)          |                              |                              |                              |
|--------------------------|---------------------------------|---------------------------------|---------------------------------|---------------------------------|----------------------------|------------------------------|------------------------------|------------------------------|
|                          | 2016                            | 2040 Forecast                   | 2040 Better Scenario            | 2040 Worse Scenario             | 2016                       | 2040 Forecast                | 2040 Better Scenario         | 2040 Worse Scenario          |
| Gastritis and duodenitis | 269.32<br>(221.77 to<br>319.53) | 462.55<br>(348.86 to<br>608.45) | 417.61<br>(307.84 to<br>559.06) | 497.92<br>(380.82 to<br>639.89) | 8.04<br>(6.34 to<br>10.16) | 15.66<br>(11.73 to<br>20.52) | 14.88<br>(10.96 to<br>19.79) | 16.01<br>(12.06 to<br>20.77) |
| Appendicitis             | 440.04<br>(349.25 to<br>571.67) | 461.60<br>(358.52 to<br>589.59) | 375.36<br>(292.07 to<br>470.00) | 573.05<br>(443.09 to<br>726.65) | 9.43<br>(7.57 to<br>11.28) | 13.01<br>(10.23 to<br>15.44) | 11.32<br>(8.76 to<br>13.49)  | 14.91<br>(11.76 to<br>17.64) |





| Sub-Saharan Africa                                         |                                             |                                              |                                              |                                              |                                     |                                     |                                     |                                     |
|------------------------------------------------------------|---------------------------------------------|----------------------------------------------|----------------------------------------------|----------------------------------------------|-------------------------------------|-------------------------------------|-------------------------------------|-------------------------------------|
| Cause                                                      | YLLs (in 1000s)                             |                                              |                                              |                                              | Deaths (in 1000s)                   |                                     |                                     |                                     |
|                                                            | 2016                                        | 2040 Forecast                                | 2040 Better Scenario                         | 2040 Worse Scenario                          | 2016                                | 2040 Forecast                       | 2040 Better Scenario                | 2040 Worse Scenario                 |
| <b>Diabetes, urogenital, blood, and endocrine diseases</b> | <b>10,244.93</b><br>(9,596.55 to 11,046.38) | <b>17,617.03</b><br>(13,898.59 to 23,713.33) | <b>13,958.98</b><br>(10,986.67 to 18,927.66) | <b>21,689.94</b><br>(17,302.89 to 28,310.10) | <b>288.73</b><br>(273.71 to 307.07) | <b>653.43</b><br>(517.82 to 869.25) | <b>537.33</b><br>(428.25 to 712.97) | <b>764.95</b><br>(608.25 to 992.99) |
| Diabetes mellitus                                          | 3,280.32<br>(3,120.73 to 3,462.87)          | 7,291.21<br>(4,869.12 to 11,369.92)          | 5,584.23<br>(3,778.44 to 8,687.44)           | 9,219.49<br>(6,000.35 to 14,334.03)          | 136.59<br>(130.21 to 144.29)        | 332.65<br>(240.86 to 472.51)        | 268.67<br>(197.25 to 381.23)        | 398.89<br>(280.43 to 571.16)        |
| Acute glomerulonephritis                                   | 11.67<br>(10.27 to 13.49)                   | 19.00<br>(13.81 to 28.14)                    | 15.80<br>(11.55 to 23.45)                    | 22.73<br>(16.90 to 32.52)                    | 0.20<br>(0.18 to 0.23)              | 0.35<br>(0.26 to 0.49)              | 0.30<br>(0.23 to 0.43)              | 0.40<br>(0.31 to 0.54)              |
| Chronic kidney disease                                     | 1,973.85<br>(1,821.33 to 2,193.94)          | 4,071.88<br>(2,459.25 to 7,290.22)           | 2,998.71<br>(1,887.52 to 5,740.40)           | 5,176.20<br>(3,204.94 to 9,192.69)           | 60.14<br>(56.04 to 66.34)           | 166.81<br>(83.83 to 370.79)         | 125.94<br>(67.12 to 286.43)         | 200.27<br>(103.09 to 416.17)        |
| Chronic kidney disease due to diabetes mellitus            | 444.36<br>(379.72 to 515.72)                | 1,227.15<br>(640.29 to 2,641.51)             | 901.93<br>(499.59 to 1,914.31)               | 1,500.17<br>(791.62 to 3,043.08)             | 16.80<br>(14.48 to 19.31)           | 55.03<br>(25.39 to 129.50)          | 41.38<br>(20.29 to 98.10)           | 65.00<br>(30.29 to 142.54)          |
| Chronic kidney disease due to hypertension                 | 242.03<br>(205.38 to 281.92)                | 674.78<br>(327.80 to 1,551.32)               | 502.85<br>(257.95 to 1,187.42)               | 820.38<br>(396.23 to 1,786.04)               | 11.87<br>(10.10 to 13.79)           | 39.23<br>(17.57 to 94.28)           | 30.47<br>(14.60 to 76.46)           | 45.50<br>(20.38 to 104.12)          |
| Chronic kidney disease due to glomerulonephritis           | 608.65<br>(530.32 to 708.12)                | 994.38<br>(671.48 to 1,626.58)               | 730.13<br>(497.76 to 1,180.07)               | 1,317.35<br>(908.43 to 2,077.81)             | 14.21<br>(12.30 to 16.60)           | 31.20<br>(17.37 to 62.62)           | 23.12<br>(13.44 to 46.28)           | 39.04<br>(22.25 to 73.67)           |
| Chronic kidney disease due to other and unspecified causes | 678.81<br>(593.48 to 780.65)                | 1,175.57<br>(752.75 to 2,031.25)             | 863.80<br>(569.20 to 1,487.69)               | 1,538.31<br>(1,020.49 to 2,497.36)           | 17.26<br>(15.00 to 20.11)           | 41.36<br>(22.62 to 87.09)           | 30.97<br>(17.77 to 66.02)           | 50.74<br>(28.41 to 98.61)           |
| Urinary diseases and male infertility                      | 935.51<br>(858.86 to 1,013.91)              | 1,661.82<br>(1,445.82 to 1,961.13)           | 1,523.54<br>(1,317.25 to 1,807.04)           | 1,806.81<br>(1,585.77 to 2,103.61)           | 24.84<br>(23.06 to 26.61)           | 57.82<br>(52.99 to 63.47)           | 57.42<br>(52.39 to 63.71)           | 57.73<br>(53.15 to 62.97)           |
| Urinary tract infections                                   | 527.94<br>(439.60 to 617.15)                | 1,136.29<br>(946.09 to 1,369.62)             | 1,069.72<br>(887.54 to 1,297.46)             | 1,189.40<br>(987.57 to 1,426.96)             | 13.28<br>(11.18 to 15.66)           | 40.44<br>(34.80 to 46.73)           | 41.56<br>(35.79 to 47.97)           | 38.81<br>(33.43 to 44.74)           |
| Urolithiasis                                               | 19.90<br>(14.16 to 26.03)                   | 44.18<br>(30.21 to 61.76)                    | 40.41<br>(27.52 to 56.63)                    | 48.52<br>(32.93 to 66.86)                    | 0.42<br>(0.28 to 0.62)              | 1.00<br>(0.67 to 1.53)              | 0.96<br>(0.63 to 1.49)              | 1.05<br>(0.70 to 1.57)              |
| Other urinary diseases                                     | 387.67<br>(306.65 to 457.56)                | 481.35<br>(345.47 to 619.08)                 | 413.41<br>(292.68 to 543.34)                 | 568.89<br>(414.10 to 725.59)                 | 11.04<br>(8.81 to 12.85)            | 16.37<br>(11.80 to 20.51)           | 14.90<br>(10.47 to 19.04)           | 17.87<br>(13.12 to 22.17)           |
| Gynecological diseases                                     | 70.15<br>(61.28 to 80.22)                   | 107.47<br>(84.01 to 143.62)                  | 90.09<br>(69.63 to 120.49)                   | 131.35<br>(104.04 to 171.45)                 | 1.67<br>(1.46 to 1.91)              | 2.60<br>(2.07 to 3.42)              | 2.20<br>(1.74 to 2.89)              | 3.13<br>(2.52 to 3.99)              |
| Uterine fibroids                                           | 19.04<br>(10.67 to 29.47)                   | 24.62<br>(12.35 to 42.72)                    | 20.12<br>(9.84 to 36.27)                     | 30.87<br>(15.51 to 54.00)                    | 0.51<br>(0.29 to 0.77)              | 0.67<br>(0.36 to 1.12)              | 0.55<br>(0.28 to 0.96)              | 0.82<br>(0.44 to 1.40)              |
| Polycystic ovarian syndrome                                | 8.05<br>(1.71 to 15.26)                     | 7.90<br>(1.41 to 17.13)                      | 5.85<br>(1.01 to 12.85)                      | 11.23<br>(2.02 to 23.57)                     | 0.18<br>(0.04 to 0.33)              | 0.18<br>(0.03 to 0.37)              | 0.13<br>(0.02 to 0.28)              | 0.25<br>(0.05 to 0.52)              |
| Endometriosis                                              | 0.41<br>(0.20 to 0.75)                      | 0.96<br>(0.39 to 2.28)                       | 0.73<br>(0.30 to 1.82)                       | 1.07<br>(0.45 to 2.63)                       | 0.01<br>(0.00 to 0.02)              | 0.02<br>(0.01 to 0.05)              | 0.02<br>(0.01 to 0.04)              | 0.02<br>(0.01 to 0.05)              |
| Genital prolapse                                           | 2.35<br>(0.85 to 4.79)                      | 2.82<br>(0.94 to 6.00)                       | 2.29<br>(0.73 to 5.02)                       | 3.68<br>(1.12 to 7.96)                       | 0.08<br>(0.03 to 0.14)              | 0.08<br>(0.04 to 0.17)              | 0.07<br>(0.03 to 0.14)              | 0.11<br>(0.04 to 0.22)              |
| Other gynecological diseases                               | 40.30<br>(25.85 to 51.57)                   | 71.17<br>(46.86 to 97.49)                    | 61.09<br>(40.66 to 83.19)                    | 84.49<br>(53.81 to 114.74)                   | 0.90<br>(0.58 to 1.15)              | 1.65<br>(1.09 to 2.23)              | 1.44<br>(0.97 to 1.93)              | 1.93<br>(1.25 to 2.57)              |
| Hemoglobinopathies and hemolytic anemias                   | 3,190.20<br>(2,714.91 to 3,743.12)          | 3,323.48<br>(2,642.80 to 4,133.43)           | 2,704.55<br>(2,174.13 to 3,374.18)           | 4,107.86<br>(3,315.46 to 5,034.05)           | 48.68<br>(42.15 to 57.41)           | 62.86<br>(51.77 to 77.05)           | 53.26<br>(43.88 to 66.15)           | 74.18<br>(61.58 to 91.42)           |
| Thalassemias                                               | 73.50<br>(47.55 to 127.05)                  | 33.98<br>(20.46 to 60.58)                    | 34.24<br>(20.85 to 60.50)                    | 47.36<br>(27.51 to 91.33)                    | 0.87<br>(0.56 to 1.49)              | 0.40<br>(0.24 to 0.71)              | 0.41<br>(0.25 to 0.72)              | 0.56<br>(0.33 to 1.07)              |

|                                                   |                                                              |                                                              |                                                             |                                                               |                                                      |                                                      |                                                      |                                                      |
|---------------------------------------------------|--------------------------------------------------------------|--------------------------------------------------------------|-------------------------------------------------------------|---------------------------------------------------------------|------------------------------------------------------|------------------------------------------------------|------------------------------------------------------|------------------------------------------------------|
| Sickle cell disorders                             | 2,804.22<br>(2,336.50 to<br>3,319.19)                        | 2,773.65<br>(2,182.99 to<br>3,475.08)                        | 2,228.03<br>(1,771.45 to<br>2,797.33)                       | 3,448.35<br>(2,734.98 to<br>4,250.81)                         | 37.95<br>(32.18 to<br>44.61)                         | 42.44<br>(33.58 to<br>52.96)                         | 34.87<br>(27.80 to<br>43.62)                         | 51.58<br>(41.38 to<br>63.80)                         |
| G6PD deficiency                                   | 215.74<br>(180.39 to<br>258.01)                              | 392.87<br>(309.36 to<br>515.69)                              | 329.94<br>(256.97 to<br>436.57)                             | 478.64<br>(379.58 to<br>623.30)                               | 4.87<br>(4.14 to<br>6.02)                            | 11.88<br>(9.61 to<br>15.62)                          | 10.19<br>(8.16 to<br>13.49)                          | 13.74<br>(11.34 to<br>17.71)                         |
| Other hemoglobinopathies and hemolytic anemias    | 96.74<br>(82.72 to<br>120.27)                                | 122.98<br>(103.72 to<br>161.14)                              | 112.35<br>(93.33 to<br>147.30)                              | 133.50<br>(113.13 to<br>174.29)                               | 4.99<br>(4.26 to<br>6.41)                            | 8.13<br>(6.88 to<br>10.94)                           | 7.79<br>(6.60 to<br>10.50)                           | 8.29<br>(6.89 to<br>11.33)                           |
| Endocrine, metabolic, blood, and immune disorders | 783.23<br>(666.80 to<br>931.61)                              | 1,142.17<br>(802.66 to<br>1,920.77)                          | 1,042.06<br>(712.31 to<br>1,792.12)                         | 1,225.49<br>(890.56 to<br>1,966.81)                           | 16.61<br>(14.16 to<br>19.55)                         | 30.35<br>(23.13 to<br>46.08)                         | 29.53<br>(22.34 to<br>44.84)                         | 30.35<br>(23.58 to<br>44.34)                         |
| <b>Sub-Saharan Africa</b>                         |                                                              |                                                              |                                                             |                                                               |                                                      |                                                      |                                                      |                                                      |
| Cause                                             | YLLs (in 1000s)                                              |                                                              |                                                             |                                                               | Deaths (in 1000s)                                    |                                                      |                                                      |                                                      |
|                                                   | 2016                                                         | 2040 Forecast                                                | 2040 Better Scenario                                        | 2040 Worse Scenario                                           | 2016                                                 | 2040 Forecast                                        | 2040 Better Scenario                                 | 2040 Worse Scenario                                  |
| <b>Musculoskeletal disorders</b>                  | <b>208.08</b><br><b>(164.12 to</b><br><b>248.91)</b>         | <b>480.94</b><br><b>(353.82 to</b><br><b>686.97)</b>         | <b>485.93</b><br><b>(357.23 to</b><br><b>695.81)</b>        | <b>463.07</b><br><b>(340.48 to</b><br><b>642.78)</b>          | <b>5.32</b><br><b>(4.29 to</b><br><b>6.31)</b>       | <b>14.32</b><br><b>(10.98 to</b><br><b>18.67)</b>    | <b>14.81</b><br><b>(11.38 to</b><br><b>19.45)</b>    | <b>13.33</b><br><b>(10.26 to</b><br><b>17.10)</b>    |
| Rheumatoid arthritis                              | 36.18<br>(27.58 to<br>46.01)                                 | 84.40<br>(61.20 to<br>113.49)                                | 72.10<br>(51.76 to<br>98.95)                                | 90.86<br>(67.08 to<br>120.35)                                 | 1.42<br>(1.07 to<br>1.84)                            | 3.88<br>(2.83 to<br>4.96)                            | 3.46<br>(2.49 to<br>4.53)                            | 3.98<br>(2.90 to<br>5.06)                            |
| Other musculoskeletal disorders                   | 171.90<br>(135.83 to<br>206.27)                              | 396.54<br>(288.14 to<br>575.85)                              | 413.83<br>(302.90 to<br>601.86)                             | 372.21<br>(266.85 to<br>529.21)                               | 3.89<br>(3.12 to<br>4.65)                            | 10.44<br>(7.93 to<br>14.14)                          | 11.35<br>(8.65 to<br>15.34)                          | 9.36<br>(7.08 to<br>12.47)                           |
| <b>Other non-communicable diseases</b>            | <b>13,235.02</b><br><b>(8,223.86 to</b><br><b>17,823.60)</b> | <b>12,123.30</b><br><b>(7,902.34 to</b><br><b>16,777.57)</b> | <b>8,821.05</b><br><b>(6,039.27 to</b><br><b>11,828.60)</b> | <b>16,933.99</b><br><b>(10,972.68 to</b><br><b>23,289.66)</b> | <b>168.23</b><br><b>(108.70 to</b><br><b>225.32)</b> | <b>196.98</b><br><b>(141.68 to</b><br><b>264.90)</b> | <b>160.72</b><br><b>(121.35 to</b><br><b>213.79)</b> | <b>249.94</b><br><b>(175.74 to</b><br><b>332.08)</b> |
| Congenital birth defects                          | 11,558.44<br>(6,713.80 to<br>16,164.70)                      | 9,337.74<br>(5,392.00 to<br>13,887.44)                       | 6,330.79<br>(3,763.16 to<br>8,907.88)                       | 13,565.05<br>(7,842.58 to<br>19,084.65)                       | 137.24<br>(80.60 to<br>191.31)                       | 115.17<br>(68.54 to<br>169.11)                       | 79.45<br>(48.63 to<br>111.36)                        | 164.95<br>(97.20 to<br>236.82)                       |
| Neural tube defects                               | 2,292.66<br>(1,343.73 to<br>4,017.90)                        | 733.51<br>(356.60 to<br>1,453.23)                            | 442.81<br>(224.02 to<br>869.96)                             | 1,232.82<br>(641.26 to<br>2,304.74)                           | 26.78<br>(15.69 to<br>46.97)                         | 8.73<br>(4.28 to<br>17.24)                           | 5.31<br>(2.70 to<br>10.52)                           | 14.58<br>(7.61 to<br>27.19)                          |
| Congenital heart anomalies                        | 3,004.52<br>(1,704.84 to<br>4,693.34)                        | 2,749.89<br>(1,643.42 to<br>4,308.14)                        | 1,939.08<br>(1,219.69 to<br>2,952.03)                       | 3,894.42<br>(2,348.69 to<br>6,062.74)                         | 36.25<br>(20.85 to<br>56.28)                         | 34.77<br>(21.29 to<br>53.37)                         | 24.97<br>(16.02 to<br>37.14)                         | 48.39<br>(29.74 to<br>74.01)                         |
| Orofacial clefts                                  | 98.39<br>(23.49 to<br>220.45)                                | 64.75<br>(15.09 to<br>150.86)                                | 38.03<br>(8.58 to<br>86.32)                                 | 114.69<br>(26.77 to<br>267.02)                                | 1.14<br>(0.27 to<br>2.55)                            | 0.75<br>(0.18 to<br>1.75)                            | 0.44<br>(0.10 to<br>1.00)                            | 1.33<br>(0.31 to<br>3.10)                            |
| Down syndrome                                     | 159.81<br>(90.62 to<br>337.25)                               | 177.93<br>(101.45 to<br>353.75)                              | 124.46<br>(75.44 to<br>227.61)                              | 243.64<br>(136.36 to<br>493.37)                               | 2.01<br>(1.19 to<br>4.10)                            | 2.49<br>(1.53 to<br>4.66)                            | 1.83<br>(1.18 to<br>3.11)                            | 3.30<br>(1.97 to<br>6.28)                            |
| Other chromosomal abnormalities                   | 498.08<br>(175.88 to<br>858.20)                              | 679.48<br>(233.75 to<br>1,211.28)                            | 428.28<br>(154.05 to<br>754.41)                             | 976.82<br>(332.60 to<br>1,706.91)                             | 5.84<br>(2.06 to<br>10.03)                           | 8.09<br>(2.78 to<br>14.37)                           | 5.15<br>(1.84 to<br>8.72)                            | 11.56<br>(3.92 to<br>20.15)                          |
| Congenital musculoskeletal and limb anomalies     | 108.10<br>(52.30 to<br>268.51)                               | 108.91<br>(49.15 to<br>271.49)                               | 76.59<br>(36.23 to<br>191.73)                               | 153.99<br>(70.57 to<br>398.11)                                | 1.27<br>(0.62 to<br>3.14)                            | 1.30<br>(0.60 to<br>3.22)                            | 0.92<br>(0.45 to<br>2.28)                            | 1.85<br>(0.84 to<br>4.69)                            |
| Urogenital congenital anomalies                   | 147.78<br>(86.70 to<br>235.21)                               | 147.63<br>(90.66 to<br>238.13)                               | 111.59<br>(68.75 to<br>175.64)                              | 199.35<br>(122.76 to<br>315.17)                               | 1.88<br>(1.15 to<br>2.92)                            | 2.15<br>(1.39 to<br>3.31)                            | 1.71<br>(1.12 to<br>2.56)                            | 2.75<br>(1.79 to<br>4.17)                            |
| Digestive congenital anomalies                    | 722.76<br>(443.16 to<br>1,291.01)                            | 651.36<br>(389.63 to<br>1,205.59)                            | 435.36<br>(264.36 to<br>782.58)                             | 976.16<br>(588.65 to<br>1,789.78)                             | 8.46<br>(5.21 to<br>15.09)                           | 7.74<br>(4.67 to<br>14.21)                           | 5.20<br>(3.20 to<br>9.25)                            | 11.52<br>(7.02 to<br>21.03)                          |
| Other congenital birth defects                    | 4,526.35<br>(1,580.97 to<br>8,738.65)                        | 4,024.28<br>(1,562.15 to<br>7,647.50)                        | 2,734.59<br>(1,134.23 to<br>4,969.70)                       | 5,773.15<br>(2,203.87 to<br>10,737.47)                        | 53.62<br>(19.02 to<br>103.14)                        | 49.14<br>(19.94 to<br>92.44)                         | 33.92<br>(14.79 to<br>61.23)                         | 69.70<br>(27.54 to<br>129.14)                        |
| Skin and subcutaneous diseases                    | 809.28<br>(523.33 to<br>1,271.94)                            | 2,188.57<br>(1,466.82 to<br>3,407.53)                        | 2,060.12<br>(1,390.76 to<br>3,197.50)                       | 2,440.75<br>(1,624.08 to<br>3,764.42)                         | 20.92<br>(13.69 to<br>33.75)                         | 74.89<br>(49.71 to<br>119.50)                        | 76.29<br>(51.13 to<br>120.49)                        | 74.21<br>(49.43 to<br>117.87)                        |
| Cellulitis                                        | 75.59<br>(38.67 to<br>124.16)                                | 298.21<br>(151.72 to<br>477.37)                              | 313.09<br>(160.50 to<br>502.27)                             | 286.39<br>(141.56 to<br>460.17)                               | 2.28<br>(1.19 to<br>3.75)                            | 10.75<br>(5.47 to<br>17.20)                          | 11.91<br>(6.11 to<br>19.21)                          | 9.62<br>(4.89 to<br>15.29)                           |



|                                                 |                                       |                                        |                                        |                                         |                                 |                                 |                                 |                                 |
|-------------------------------------------------|---------------------------------------|----------------------------------------|----------------------------------------|-----------------------------------------|---------------------------------|---------------------------------|---------------------------------|---------------------------------|
|                                                 | 454.91<br>(325.16 to<br>633.20)       | 360.07<br>(247.90 to<br>518.36)        | 259.81<br>(184.57 to<br>357.16)        | 498.69<br>(346.26 to<br>689.99)         | 5.97<br>(4.42 to<br>8.06)       | 5.20<br>(3.74 to<br>7.16)       | 3.91<br>(2.87 to<br>5.24)       | 6.90<br>(5.00 to<br>9.35)       |
| Unintentional suffocation                       | 973.08<br>(836.35 to<br>1,098.63)     | 997.40<br>(807.03 to<br>1,237.49)      | 813.54<br>(660.42 to<br>1,007.15)      | 1,238.18<br>(1,014.43 to<br>1,509.70)   | 17.08<br>(15.00 to<br>18.83)    | 21.38<br>(17.60 to<br>25.40)    | 18.48<br>(15.11 to<br>22.13)    | 24.84<br>(20.67 to<br>29.21)    |
| Other exposure to mechanical forces             | 1,244.12<br>(864.11 to<br>1,641.62)   | 1,284.45<br>(928.56 to<br>1,684.41)    | 1,053.97<br>(788.22 to<br>1,340.44)    | 1,612.16<br>(1,133.57 to<br>2,123.75)   | 21.42<br>(16.49 to<br>26.48)    | 27.56<br>(22.37 to<br>33.01)    | 24.34<br>(19.82 to<br>28.67)    | 31.81<br>(25.31 to<br>38.64)    |
| Adverse effects of medical treatment            | 970.77<br>(782.61 to<br>1,099.54)     | 1,240.46<br>(983.30 to<br>1,508.19)    | 980.36<br>(778.65 to<br>1,194.56)      | 1,648.71<br>(1,301.20 to<br>1,974.68)   | 19.46<br>(15.99 to<br>21.58)    | 29.67<br>(23.98 to<br>34.67)    | 24.89<br>(20.29 to<br>29.18)    | 36.39<br>(29.33 to<br>42.55)    |
| Animal contact                                  | 714.97<br>(531.59 to<br>832.35)       | 887.88<br>(657.39 to<br>1,096.86)      | 702.12<br>(529.96 to<br>867.48)        | 1,187.80<br>(864.19 to<br>1,465.04)     | 15.07<br>(11.76 to<br>17.16)    | 22.49<br>(17.45 to<br>26.30)    | 18.94<br>(14.85 to<br>22.12)    | 27.61<br>(21.35 to<br>32.39)    |
| Venomous animal contact                         | 255.80<br>(162.58 to<br>372.36)       | 352.58<br>(220.77 to<br>499.89)        | 278.24<br>(176.87 to<br>392.25)        | 460.92<br>(284.93 to<br>660.49)         | 4.39<br>(2.91 to<br>6.11)       | 7.17<br>(4.70 to<br>9.70)       | 5.94<br>(3.89 to<br>8.03)       | 8.77<br>(5.70 to<br>12.08)      |
| Non-venomous animal contact                     | 1,253.31<br>(878.71 to<br>1,749.00)   | 1,385.95<br>(987.12 to<br>1,903.98)    | 1,210.06<br>(887.37 to<br>1,571.19)    | 1,667.30<br>(1,165.43 to<br>2,332.74)   | 18.50<br>(13.67 to<br>23.87)    | 24.88<br>(19.02 to<br>30.89)    | 23.40<br>(17.94 to<br>28.99)    | 27.51<br>(20.70 to<br>34.65)    |
| Foreign body                                    | 1,145.28<br>(799.90 to<br>1,651.56)   | 1,262.43<br>(899.14 to<br>1,790.70)    | 1,104.17<br>(821.76 to<br>1,480.60)    | 1,517.26<br>(1,059.08 to<br>2,177.85)   | 16.78<br>(12.50 to<br>22.45)    | 22.64<br>(17.93 to<br>28.71)    | 21.39<br>(16.88 to<br>26.35)    | 24.92<br>(19.23 to<br>32.49)    |
| Pulmonary aspiration and foreign body in airway | 108.03<br>(40.35 to<br>186.69)        | 123.52<br>(41.72 to<br>244.31)         | 105.88<br>(36.18 to<br>216.65)         | 150.04<br>(50.29 to<br>293.17)          | 1.72<br>(0.64 to<br>3.13)       | 2.24<br>(0.77 to<br>4.64)       | 2.00<br>(0.66 to<br>4.27)       | 2.59<br>(0.90 to<br>5.23)       |
| Foreign body in other body part                 | 335.60<br>(197.35 to<br>394.58)       | 334.58<br>(197.03 to<br>431.63)        | 246.98<br>(139.69 to<br>320.87)        | 445.33<br>(262.07 to<br>564.27)         | 6.28<br>(3.73 to<br>7.19)       | 7.37<br>(4.49 to<br>9.19)       | 5.72<br>(3.34 to<br>7.15)       | 9.20<br>(5.56 to<br>11.27)      |
| Environmental heat and cold exposure            | 687.65<br>(611.40 to<br>765.33)       | 594.21<br>(490.37 to<br>721.98)        | 494.67<br>(409.31 to<br>604.43)        | 730.84<br>(607.03 to<br>880.97)         | 11.61<br>(10.50 to<br>12.71)    | 11.81<br>(10.01 to<br>13.99)    | 10.26<br>(8.74 to<br>12.21)     | 13.76<br>(11.76 to<br>16.15)    |
| Other unintentional injuries                    | 5,996.60<br>(5,363.25 to<br>6,810.65) | 9,318.74<br>(6,854.16 to<br>13,476.69) | 8,513.04<br>(6,372.06 to<br>12,263.50) | 10,124.11<br>(7,492.51 to<br>14,546.20) | 122.79<br>(110.21 to<br>138.32) | 209.99<br>(160.34 to<br>289.40) | 195.56<br>(151.22 to<br>266.51) | 223.47<br>(168.84 to<br>310.05) |

**Sub-Saharan Africa**

| Cause                                                                        | YLLs (in 1000s)                          |                                       |                                       |                                       | Deaths (in 1000s)                  |                                   |                                   |                                   |
|------------------------------------------------------------------------------|------------------------------------------|---------------------------------------|---------------------------------------|---------------------------------------|------------------------------------|-----------------------------------|-----------------------------------|-----------------------------------|
|                                                                              | 2016                                     | 2040 Forecast                         | 2040 Better Scenario                  | 2040 Worse Scenario                   | 2016                               | 2040 Forecast                     | 2040 Better Scenario              | 2040 Worse Scenario               |
| Self-harm                                                                    | 2,538.10<br>(2,236.47 to<br>2,998.56)    | 4,922.71<br>(3,567.42 to<br>7,200.64) | 4,466.47<br>(3,313.41 to<br>6,344.21) | 5,493.04<br>(3,894.68 to<br>8,017.74) | 60.92<br>(53.70 to<br>70.56)       | 126.18<br>(94.10 to<br>172.57)    | 117.85<br>(90.66 to<br>159.14)    | 136.91<br>(99.93 to<br>190.94)    |
| Self-harm by firearm                                                         | 244.55<br>(177.34 to<br>382.50)          | 365.83<br>(226.58 to<br>602.60)       | 324.59<br>(204.75 to<br>513.84)       | 417.62<br>(257.20 to<br>688.85)       | 5.63<br>(4.06 to<br>8.34)          | 9.17<br>(5.74 to<br>14.33)        | 8.37<br>(5.31 to<br>12.71)        | 10.17<br>(6.27 to<br>16.15)       |
| Self-harm by other specified means                                           | 2,293.54<br>(1,958.66 to<br>2,670.69)    | 4,556.87<br>(3,305.80 to<br>6,558.62) | 4,141.88<br>(3,063.13 to<br>5,865.73) | 5,075.43<br>(3,587.94 to<br>7,279.01) | 55.28<br>(47.74 to<br>64.05)       | 117.01<br>(87.88 to<br>160.13)    | 109.48<br>(83.84 to<br>147.33)    | 126.74<br>(92.83 to<br>176.31)    |
| Interpersonal violence                                                       | 3,458.50<br>(2,931.16 to<br>4,099.76)    | 4,396.03<br>(3,099.05 to<br>6,710.54) | 4,046.57<br>(2,863.26 to<br>6,114.31) | 4,631.07<br>(3,254.44 to<br>6,888.09) | 61.87<br>(52.73 to<br>73.75)       | 83.81<br>(60.20 to<br>125.60)     | 77.71<br>(56.06 to<br>116.28)     | 86.56<br>(62.20 to<br>129.58)     |
| Physical violence by firearm                                                 | 767.37<br>(511.69 to<br>1,142.95)        | 1,009.59<br>(643.78 to<br>1,572.66)   | 956.31<br>(610.95 to<br>1,478.42)     | 1,032.82<br>(657.71 to<br>1,625.57)   | 13.68<br>(9.23 to<br>20.60)        | 18.84<br>(12.07 to<br>29.48)      | 17.91<br>(11.53 to<br>27.78)      | 18.98<br>(12.16 to<br>29.71)      |
| Physical violence by sharp object                                            | 933.28<br>(691.14 to<br>1,148.48)        | 1,191.12<br>(738.36 to<br>2,043.79)   | 1,102.10<br>(682.45 to<br>1,911.87)   | 1,145.64<br>(724.57 to<br>1,927.54)   | 17.18<br>(12.78 to<br>21.08)       | 23.35<br>(14.94 to<br>39.09)      | 21.74<br>(13.89 to<br>36.35)      | 22.07<br>(14.36 to<br>36.33)      |
| Physical violence by other means                                             | 1,757.86<br>(1,402.37 to<br>2,153.52)    | 2,195.32<br>(1,455.08 to<br>3,300.39) | 1,988.15<br>(1,327.16 to<br>2,964.07) | 2,452.61<br>(1,628.76 to<br>3,709.77) | 31.00<br>(24.73 to<br>38.35)       | 41.63<br>(28.00 to<br>62.28)      | 38.05<br>(25.84 to<br>56.69)      | 45.51<br>(30.73 to<br>68.18)      |
| Forces of nature, conflict and terrorism, and executions and police conflict | <b>722.99</b><br>(459.84 to<br>1,002.69) | <b>481.40</b><br>(294 to<br>5,345.70) | <b>456.92</b><br>(291 to<br>4,928.20) | <b>514.79</b><br>(287 to<br>5,439.39) | <b>11.48</b><br>(7.31 to<br>15.91) | <b>8.15</b><br>(0.05 to<br>88.38) | <b>7.91</b><br>(0.05 to<br>83.60) | <b>8.50</b><br>(0.06 to<br>88.92) |

|                                                                   |                                          |                                          |                                          |                                          |                                   |                                     |                                 |                                       |
|-------------------------------------------------------------------|------------------------------------------|------------------------------------------|------------------------------------------|------------------------------------------|-----------------------------------|-------------------------------------|---------------------------------|---------------------------------------|
| Exposure to forces of nature                                      | 14.30<br>(8.66 to<br>19.92)              | 30.64<br>(0.00 to<br>132.05)             | 29.68<br>(0.00 to<br>129.58)             | 33.84<br>(0.00 to<br>145.45)             | 0.23<br>(0.14 to<br>0.33)         | 0.55<br>(0.00 to<br>2.49)           | 0.54<br>(0.00 to<br>2.49)       | 0.58<br>(0.00 to<br>2.61)             |
| Conflict and terrorism                                            | 687.45<br>(429.10 to<br>962.34)          | 415.23<br>(0.00 to<br>5,303.84)          | 392.48<br>(0.00 to<br>4,917.39)          | 445.40<br>(0.00 to<br>5,431.01)          | 10.88<br>(6.79 to<br>15.23)       | 6.94<br>(0.00 to<br>87.51)          | 6.71<br>(0.00 to<br>83.40)      | 7.27<br>(0.00 to<br>88.77)            |
| Executions and police conflict                                    | 21.24<br>(14.19 to<br>28.37)             | 35.53<br>(0.00 to<br>202.27)             | 34.76<br>(0.00 to<br>199.55)             | 35.56<br>(0.00 to<br>214.93)             | 0.37<br>(0.24 to<br>0.48)         | 0.66<br>(0.00 to<br>3.58)           | 0.66<br>(0.00 to<br>3.58)       | 0.65<br>(0.00 to<br>3.73)             |
| <b>Central Sub-Saharan Africa</b>                                 |                                          |                                          |                                          |                                          |                                   |                                     |                                 |                                       |
| Cause                                                             | YLLs (in 1000s)                          |                                          |                                          |                                          | Deaths (in 1000s)                 |                                     |                                 |                                       |
|                                                                   | 2016                                     | 2040 Forecast                            | 2040 Better Scenario                     | 2040 Worse Scenario                      | 2016                              | 2040 Forecast                       | 2040 Better Scenario            | 2040 Worse Scenario                   |
| All causes                                                        | 51,913.13<br>(42,066.53 to<br>63,614.20) | 41,611.56<br>(33,807.57 to<br>50,525.46) | 28,306.12<br>(23,305.99 to<br>34,635.14) | 66,548.17<br>(53,240.34 to<br>82,764.70) | 980.43<br>(861.20 to<br>1,114.41) | 1,129.55<br>(957.32 to<br>1,328.32) | 822.57<br>(708.56 to<br>965.21) | 1,558.25<br>(1,325.17 to<br>1,851.23) |
| Communicable, maternal, neonatal, and nutritional diseases        | 38,247.38<br>(29,575.25 to<br>48,568.51) | 21,357.77<br>(15,827.08 to<br>28,233.14) | 12,800.29<br>(9,490.29 to<br>16,963.50)  | 40,508.74<br>(29,923.62 to<br>53,470.66) | 604.69<br>(498.44 to<br>731.64)   | 449.68<br>(339.03 to<br>593.82)     | 279.92<br>(212.28 to<br>376.40) | 740.49<br>(553.44 to<br>957.26)       |
| HIV/AIDS and tuberculosis                                         | 6,187.96<br>(5,321.91 to<br>7,074.05)    | 5,631.68<br>(3,910.73 to<br>7,919.74)    | 2,963.71<br>(1,850.52 to<br>4,331.86)    | 10,395.01<br>(7,209.18 to<br>14,351.02)  | 146.33<br>(124.30 to<br>167.72)   | 139.36<br>(97.69 to<br>200.55)      | 73.09<br>(48.28 to<br>101.75)   | 238.90<br>(166.19 to<br>332.95)       |
| Tuberculosis                                                      | 3,609.82<br>(2,872.82 to<br>4,337.62)    | 2,969.15<br>(1,709.56 to<br>5,080.98)    | 1,244.38<br>(759.95 to<br>1,955.47)      | 4,413.46<br>(2,684.19 to<br>7,235.24)    | 97.11<br>(76.82 to<br>117.02)     | 85.44<br>(49.74 to<br>143.75)       | 37.98<br>(23.51 to<br>58.34)    | 121.31<br>(73.50 to<br>191.71)        |
| HIV/AIDS                                                          | 2,578.14<br>(2,168.83 to<br>3,070.98)    | 2,662.53<br>(1,599.79 to<br>3,865.24)    | 1,719.33<br>(807.95 to<br>2,937.39)      | 5,981.55<br>(3,630.45 to<br>9,073.50)    | 49.22<br>(42.40 to<br>58.52)      | 53.92<br>(32.24 to<br>79.06)        | 35.11<br>(17.65 to<br>57.98)    | 117.59<br>(70.07 to<br>178.59)        |
| Diarrhea, lower respiratory, and other common infectious diseases | 11,152.13<br>(8,529.09 to<br>14,377.42)  | 6,766.63<br>(4,001.74 to<br>10,919.77)   | 3,757.05<br>(2,160.74 to<br>6,313.32)    | 13,638.89<br>(7,797.95 to<br>21,319.21)  | 181.30<br>(146.65 to<br>222.98)   | 165.06<br>(97.13 to<br>269.54)      | 101.38<br>(58.61 to<br>171.20)  | 265.91<br>(160.44 to<br>410.85)       |
| Diarrheal diseases                                                | 3,888.70<br>(2,870.17 to<br>5,205.00)    | 2,329.33<br>(818.79 to<br>5,146.95)      | 1,413.76<br>(446.08 to<br>3,197.59)      | 3,847.51<br>(1,637.75 to<br>7,458.89)    | 68.60<br>(50.15 to<br>93.56)      | 62.25<br>(16.25 to<br>150.17)       | 39.45<br>(9.89 to<br>104.32)    | 90.64<br>(28.82 to<br>188.29)         |
| Intestinal infectious diseases                                    | 134.93<br>(68.32 to<br>242.37)           | 95.57<br>(46.12 to<br>170.43)            | 71.89<br>(35.03 to<br>127.76)            | 137.11<br>(65.24 to<br>247.80)           | 1.83<br>(0.95 to<br>3.24)         | 1.42<br>(0.70 to<br>2.48)           | 1.09<br>(0.54 to<br>1.92)       | 1.95<br>(0.97 to<br>3.45)             |
| Typhoid fever                                                     | 90.58<br>(42.79 to<br>166.87)            | 76.26<br>(35.10 to<br>144.33)            | 59.83<br>(27.86 to<br>112.52)            | 105.03<br>(47.71 to<br>197.39)           | 1.26<br>(0.60 to<br>2.31)         | 1.12<br>(0.53 to<br>2.14)           | 0.90<br>(0.42 to<br>1.68)       | 1.50<br>(0.69 to<br>2.81)             |
| Paratyphoid fever                                                 | 7.26<br>(2.96 to<br>15.35)               | 7.25<br>(2.95 to<br>15.94)               | 5.45<br>(2.23 to<br>11.90)               | 10.15<br>(4.12 to<br>22.47)              | 0.10<br>(0.04 to<br>0.21)         | 0.11<br>(0.04 to<br>0.23)           | 0.08<br>(0.18 to<br>0.18)       | 0.15<br>(0.06 to<br>0.32)             |
| Other intestinal infectious diseases                              | 37.10<br>(8.68 to<br>118.79)             | 12.06<br>(2.86 to<br>38.30)              | 6.62<br>(1.55 to<br>21.24)               | 21.93<br>(4.84 to<br>74.98)              | 0.48<br>(0.13 to<br>1.44)         | 0.19<br>(0.05 to<br>0.55)           | 0.11<br>(0.03 to<br>0.31)       | 0.31<br>(0.08 to<br>0.94)             |
| Lower respiratory infections                                      | 4,683.32<br>(3,398.40 to<br>6,364.57)    | 2,983.41<br>(1,725.47 to<br>4,988.98)    | 1,529.24<br>(927.74 to<br>2,497.32)      | 7,077.62<br>(3,353.40 to<br>12,349.88)   | 78.09<br>(61.10 to<br>99.63)      | 81.13<br>(52.94 to<br>122.02)       | 48.09<br>(32.61 to<br>69.35)    | 138.58<br>(82.57 to<br>220.47)        |
| Upper respiratory infections                                      | 11.15<br>(4.41 to<br>24.75)              | 7.73<br>(3.35 to<br>16.82)               | 3.72<br>(1.76 to<br>7.37)                | 13.07<br>(5.29 to<br>30.47)              | 0.16<br>(0.07 to<br>0.32)         | 0.14<br>(0.07 to<br>0.27)           | 0.08<br>(0.04 to<br>0.14)       | 0.22<br>(0.11 to<br>0.44)             |
| Otitis media                                                      | 2.02<br>(1.06 to<br>4.19)                | 0.37<br>(0.19 to<br>0.74)                | 0.37<br>(0.19 to<br>0.75)                | 0.45<br>(0.23 to<br>0.92)                | 0.04<br>(0.02 to<br>0.07)         | 0.04<br>(0.01 to<br>0.02)           | 0.02<br>(0.01 to<br>0.03)       | 0.01<br>(0.01 to<br>0.02)             |
| Meningitis                                                        | 1,387.42<br>(970.02 to<br>2,108.00)      | 741.35<br>(482.56 to<br>1,124.96)        | 540.46<br>(362.52 to<br>789.89)          | 1,476.95<br>(853.69 to<br>2,556.69)      | 19.66<br>(14.55 to<br>28.21)      | 12.40<br>(8.53 to<br>18.20)         | 9.86<br>(7.02 to<br>14.22)      | 21.14<br>(13.17 to<br>33.98)          |
| Pneumococcal meningitis                                           | 77.79<br>(53.11 to<br>115.70)            | 41.00<br>(25.47 to<br>62.68)             | 34.41<br>(21.97 to<br>51.19)             | 74.30<br>(42.85 to<br>130.19)            | 1.23<br>(0.89 to<br>1.72)         | 0.81<br>(0.55 to<br>1.20)           | 0.74<br>(0.50 to<br>1.09)       | 1.24<br>(0.78 to<br>1.94)             |
| H influenzae type B meningitis                                    | 139.05<br>(90.99 to<br>230.07)           | 151.95<br>(42.70 to<br>398.38)           | 71.18<br>(29.53 to<br>161.87)            | 618.77<br>(132.26 to<br>1,577.00)        | 1.87<br>(1.28 to<br>2.91)         | 2.00<br>(0.69 to<br>4.89)           | 1.07<br>(0.55 to<br>2.13)       | 7.45<br>(1.76 to<br>18.59)            |

|                          |                                   |                                  |                                 |                                   |                            |                            |                           |                            |
|--------------------------|-----------------------------------|----------------------------------|---------------------------------|-----------------------------------|----------------------------|----------------------------|---------------------------|----------------------------|
| Meningococcal meningitis | 594.98<br>(411.68 to<br>910.54)   | 258.94<br>(175.37 to<br>381.28)  | 203.38<br>(139.83 to<br>298.93) | 373.17<br>(240.54 to<br>577.03)   | 8.29<br>(5.95 to<br>11.98) | 4.42<br>(3.13 to<br>6.56)  | 3.67<br>(2.61 to<br>5.35) | 5.82<br>(3.97 to<br>8.57)  |
| Other meningitis         | 575.61<br>(396.18 to<br>891.48)   | 289.47<br>(192.00 to<br>429.73)  | 231.50<br>(158.78 to<br>340.78) | 410.71<br>(265.54 to<br>624.24)   | 8.27<br>(6.05 to<br>12.01) | 5.17<br>(3.67 to<br>7.60)  | 4.39<br>(3.14 to<br>6.42) | 6.64<br>(4.56 to<br>9.64)  |
| Encephalitis             | 62.40<br>(36.26 to<br>112.01)     | 53.92<br>(30.99 to<br>94.17)     | 38.63<br>(23.06 to<br>62.97)    | 82.05<br>(45.46 to<br>149.80)     | 0.86<br>(0.55 to<br>1.44)  | 0.87<br>(0.58 to<br>1.34)  | 0.66<br>(0.44 to<br>0.97) | 1.22<br>(0.77 to<br>2.00)  |
| Diphtheria               | 3.56<br>(2.03 to<br>6.26)         | 1.03<br>(0.45 to<br>2.39)        | 0.43<br>(0.25 to<br>0.73)       | 2.96<br>(1.03 to<br>7.24)         | 0.04<br>(0.03 to<br>0.08)  | 0.01<br>(0.01 to<br>0.03)  | 0.01<br>(0.00 to<br>0.01) | 0.04<br>(0.01 to<br>0.09)  |
| Whooping cough           | 584.29<br>(101.53 to<br>1,686.63) | 497.20<br>(83.36 to<br>1,296.61) | 133.11<br>(20.88 to<br>401.96)  | 835.04<br>(139.52 to<br>2,270.46) | 6.89<br>(1.20 to<br>19.84) | 5.89<br>(0.98 to<br>15.38) | 1.60<br>(0.26 to<br>4.83) | 9.87<br>(1.65 to<br>26.95) |
| Tetanus                  | 59.61<br>(27.39 to<br>111.32)     | 11.43<br>(4.45 to<br>24.49)      | 6.69<br>(2.35 to<br>14.63)      | 17.68<br>(7.02 to<br>38.88)       | 0.99<br>(0.45 to<br>1.99)  | 0.21<br>(0.08 to<br>0.45)  | 0.16<br>(0.06 to<br>0.36) | 0.28<br>(0.11 to<br>0.60)  |
| Measles                  | 293.80<br>(103.91 to<br>645.70)   | 26.48<br>(2.33 to<br>119.37)     | 8.23<br>(1.31 to<br>36.31)      | 114.61<br>(10.40 to<br>443.11)    | 3.50<br>(1.24 to<br>7.70)  | 3.32<br>(0.03 to<br>1.41)  | 0.10<br>(0.02 to<br>0.43) | 1.36<br>(0.13 to<br>5.24)  |

**Central Sub-Saharan Africa**

| Cause                                          | YLLs (in 1000s)                                             |                                                            |                                                            |                                                            | Deaths (in 1000s)                                   |                                                   |                                                   |                                                   |
|------------------------------------------------|-------------------------------------------------------------|------------------------------------------------------------|------------------------------------------------------------|------------------------------------------------------------|-----------------------------------------------------|---------------------------------------------------|---------------------------------------------------|---------------------------------------------------|
|                                                | 2016                                                        | 2040 Forecast                                              | 2040 Better Scenario                                       | 2040 Worse Scenario                                        | 2016                                                | 2040 Forecast                                     | 2040 Better Scenario                              | 2040 Worse Scenario                               |
| Varicella and herpes zoster                    | 40.75<br>(25.72 to<br>62.12)                                | 18.80<br>(11.12 to<br>31.95)                               | 10.49<br>(6.50 to<br>16.71)                                | 33.86<br>(19.49 to<br>57.84)                               | 0.62<br>(0.43 to<br>0.88)                           | 0.39<br>(0.27 to<br>0.59)                         | 0.26<br>(0.18 to<br>0.37)                         | 0.58<br>(0.38 to<br>0.88)                         |
| <b>Neglected tropical diseases and malaria</b> | <b>7,611.65</b><br><b>(5,002.34 to</b><br><b>11,044.82)</b> | <b>2,535.15</b><br><b>(1,754.18 to</b><br><b>3,574.59)</b> | <b>2,072.59</b><br><b>(1,479.82 to</b><br><b>2,810.36)</b> | <b>3,785.26</b><br><b>(2,499.74 to</b><br><b>5,466.23)</b> | <b>101.73</b><br><b>(69.56 to</b><br><b>143.73)</b> | <b>43.34</b><br><b>(31.38 to</b><br><b>57.55)</b> | <b>37.66</b><br><b>(27.87 to</b><br><b>48.92)</b> | <b>58.07</b><br><b>(41.04 to</b><br><b>79.18)</b> |
| Malaria                                        | 7,059.82<br>(4,539.89 to<br>10,489.98)                      | 2,231.51<br>(1,505.36 to<br>3,159.66)                      | 1,817.61<br>(1,284.74 to<br>2,555.70)                      | 3,205.67<br>(2,147.56 to<br>4,857.81)                      | 92.96<br>(62.16 to<br>133.94)                       | 37.92<br>(26.87 to<br>51.23)                      | 33.47<br>(23.95 to<br>44.53)                      | 50.33<br>(34.54 to<br>69.87)                      |
| Chagas disease                                 | 0.00<br>(0.00 to<br>0.00)                                   | 0.00<br>(0.00 to<br>0.00)                                  | 0.00<br>(0.00 to<br>0.00)                                  | 0.00<br>(0.00 to<br>0.00)                                  | 0.00<br>(0.00 to<br>0.00)                           | 0.00<br>(0.00 to<br>0.00)                         | 0.00<br>(0.00 to<br>0.00)                         | 0.00<br>(0.00 to<br>0.00)                         |
| Leishmaniasis                                  | 0.24<br>(0.14 to<br>0.36)                                   | 0.20<br>(0.11 to<br>0.31)                                  | 0.11<br>(0.06 to<br>0.17)                                  | 0.25<br>(0.15 to<br>0.38)                                  | 0.01<br>(0.00 to<br>0.01)                           | 0.01<br>(0.00 to<br>0.01)                         | 0.00<br>(0.00 to<br>0.01)                         | 0.01<br>(0.00 to<br>0.01)                         |
| African trypanosomiasis                        | 97.63<br>(49.63 to<br>161.81)                               | 11.98<br>(5.09 to<br>25.30)                                | 11.65<br>(4.87 to<br>23.92)                                | 12.91<br>(5.52 to<br>26.71)                                | 1.78<br>(0.91 to<br>2.95)                           | 0.23<br>(0.10 to<br>0.48)                         | 0.23<br>(0.10 to<br>0.47)                         | 0.24<br>(0.10 to<br>0.50)                         |
| Schistosomiasis                                | 40.35<br>(31.67 to<br>50.41)                                | 33.90<br>(23.91 to<br>46.00)                               | 27.06<br>(19.21 to<br>36.61)                               | 39.11<br>(28.53 to<br>52.56)                               | 1.09<br>(0.85 to<br>1.36)                           | 1.01<br>(0.74 to<br>1.35)                         | 0.84<br>(0.62 to<br>1.11)                         | 1.11<br>(0.83 to<br>1.45)                         |
| Cysticercosis                                  | 6.89<br>(5.55 to<br>8.46)                                   | 3.53<br>(2.64 to<br>4.64)                                  | 3.08<br>(2.28 to<br>4.15)                                  | 3.99<br>(3.01 to<br>5.22)                                  | 0.13<br>(0.11 to<br>0.16)                           | 0.08<br>(0.06 to<br>0.10)                         | 0.07<br>(0.05 to<br>0.09)                         | 0.09<br>(0.07 to<br>0.11)                         |
| Cystic echinococcosis                          | 3.59<br>(2.47 to<br>4.99)                                   | 1.86<br>(1.21 to<br>2.82)                                  | 0.81<br>(0.53 to<br>1.20)                                  | 2.87<br>(1.87 to<br>4.27)                                  | 0.07<br>(0.05 to<br>0.09)                           | 0.04<br>(0.03 to<br>0.07)                         | 0.02<br>(0.01 to<br>0.03)                         | 0.06<br>(0.04 to<br>0.09)                         |
| Dengue                                         | 1.37<br>(0.08 to<br>5.35)                                   | 4.12<br>(0.27 to<br>14.78)                                 | 3.51<br>(0.24 to<br>11.93)                                 | 5.89<br>(0.37 to<br>21.73)                                 | 0.02<br>(0.00 to<br>0.07)                           | 0.08<br>(0.01 to<br>0.27)                         | 0.07<br>(0.01 to<br>0.23)                         | 0.10<br>(0.01 to<br>0.35)                         |
| Yellow fever                                   | 121.82<br>(26.42 to<br>329.94)                              | 43.33<br>(7.22 to<br>139.95)                               | 34.61<br>(5.60 to<br>114.69)                               | 76.22<br>(13.97 to<br>239.24)                              | 1.87<br>(0.41 to<br>5.13)                           | 0.73<br>(0.12 to<br>2.35)                         | 0.59<br>(0.10 to<br>1.97)                         | 1.23<br>(0.22 to<br>3.93)                         |
| Rabies                                         | 7.13<br>(2.66 to<br>16.00)                                  | 3.57<br>(1.06 to<br>9.58)                                  | 1.18<br>(0.40 to<br>2.97)                                  | 7.12<br>(2.35 to<br>17.92)                                 | 0.11<br>(0.04 to<br>0.25)                           | 0.06<br>(0.02 to<br>0.17)                         | 0.02<br>(0.01 to<br>0.05)                         | 0.11<br>(0.04 to<br>0.29)                         |
| Intestinal nematode infections                 | 67.49<br>(39.01 to<br>108.46)                               | 67.76<br>(38.88 to<br>113.88)                              | 58.69<br>(33.52 to<br>96.96)                               | 106.16<br>(59.39 to<br>178.81)                             | 0.83<br>(0.49 to<br>1.32)                           | 0.87<br>(0.52 to<br>1.43)                         | 0.77<br>(0.46 to<br>1.23)                         | 1.33<br>(0.77 to<br>2.20)                         |

|                                                          |                                                             |                                                            |                                                            |                                                             |                                                    |                                                   |                                                   |                                                    |
|----------------------------------------------------------|-------------------------------------------------------------|------------------------------------------------------------|------------------------------------------------------------|-------------------------------------------------------------|----------------------------------------------------|---------------------------------------------------|---------------------------------------------------|----------------------------------------------------|
|                                                          | 205.33<br>(66.01 to<br>437.86)                              | 133.39<br>(41.14 to<br>275.91)                             | 84.29<br>(24.70 to<br>166.77)                              | 225.05<br>(71.50 to<br>461.88)                              | 2.86<br>(0.89 to<br>6.02)                          | 2.31<br>(0.63 to<br>4.68)                         | 1.58<br>(0.41 to<br>3.08)                         | 3.45<br>(1.04 to<br>7.00)                          |
| Other neglected tropical diseases                        |                                                             |                                                            |                                                            |                                                             |                                                    |                                                   |                                                   |                                                    |
| <b>Maternal disorders</b>                                | <b>1,009.26</b><br><b>(846.81 to</b><br><b>1,181.02)</b>    | <b>838.73</b><br><b>(589.80 to</b><br><b>1,179.09)</b>     | <b>421.08</b><br><b>(287.25 to</b><br><b>593.44)</b>       | <b>1,180.63</b><br><b>(840.41 to</b><br><b>1,668.25)</b>    | <b>19.00</b><br><b>(15.95 to</b><br><b>22.32)</b>  | <b>16.27</b><br><b>(11.47 to</b><br><b>23.19)</b> | <b>8.18</b><br><b>(5.57 to</b><br><b>11.51)</b>   | <b>22.69</b><br><b>(16.06 to</b><br><b>32.06)</b>  |
| Maternal hemorrhage                                      | 268.66<br>(193.69 to<br>359.66)                             | 207.76<br>(127.14 to<br>318.25)                            | 104.19<br>(61.99 to<br>162.22)                             | 281.70<br>(169.16 to<br>435.14)                             | 5.10<br>(3.69 to<br>6.77)                          | 4.04<br>(2.45 to<br>6.25)                         | 2.03<br>(1.19 to<br>3.14)                         | 5.45<br>(3.28 to<br>8.48)                          |
| Maternal sepsis and other maternal infections            | 42.93<br>(22.44 to<br>68.60)                                | 30.71<br>(15.22 to<br>54.46)                               | 15.39<br>(7.42 to<br>27.26)                                | 42.56<br>(20.25 to<br>74.34)                                | 0.87<br>(0.44 to<br>1.29)                          | 0.61<br>(0.31 to<br>1.08)                         | 0.31<br>(0.15 to<br>0.55)                         | 0.84<br>(0.41 to<br>1.47)                          |
| Maternal hypertensive disorders                          | 213.46<br>(152.16 to<br>283.63)                             | 167.98<br>(105.72 to<br>255.54)                            | 83.53<br>(51.28 to<br>128.62)                              | 231.45<br>(145.59 to<br>359.19)                             | 3.86<br>(2.79 to<br>5.15)                          | 3.13<br>(1.97 to<br>4.71)                         | 1.56<br>(0.95 to<br>2.40)                         | 4.27<br>(2.67 to<br>6.63)                          |
| Maternal obstructed labor and uterine rupture            | 45.19<br>(23.68 to<br>73.69)                                | 37.79<br>(18.10 to<br>69.61)                               | 17.84<br>(8.88 to<br>32.13)                                | 52.22<br>(26.25 to<br>93.12)                                | 0.87<br>(0.46 to<br>1.42)                          | 0.75<br>(0.36 to<br>1.40)                         | 0.35<br>(0.18 to<br>0.64)                         | 1.02<br>(0.52 to<br>1.87)                          |
| Maternal abortion, miscarriage, and ectopic pregnancy    | 31.74<br>(15.83 to<br>56.37)                                | 31.15<br>(12.71 to<br>63.14)                               | 15.37<br>(6.15 to<br>31.58)                                | 43.29<br>(17.59 to<br>88.53)                                | 0.61<br>(0.31 to<br>1.08)                          | 0.62<br>(0.26 to<br>1.21)                         | 0.30<br>(0.13 to<br>0.62)                         | 0.85<br>(0.35 to<br>1.73)                          |
| Indirect maternal deaths                                 | 229.77<br>(169.13 to<br>306.36)                             | 184.98<br>(118.43 to<br>282.21)                            | 93.78<br>(59.09 to<br>144.44)                              | 268.21<br>(170.44 to<br>419.97)                             | 4.38<br>(3.20 to<br>5.78)                          | 3.60<br>(2.28 to<br>5.44)                         | 1.83<br>(1.13 to<br>2.82)                         | 5.15<br>(3.26 to<br>8.09)                          |
| Late maternal deaths                                     | 30.50<br>(14.87 to<br>53.97)                                | 19.27<br>(8.61 to<br>36.45)                                | 9.55<br>(4.40 to<br>18.70)                                 | 27.47<br>(12.31 to<br>52.92)                                | 0.57<br>(0.27 to<br>1.01)                          | 0.70<br>(0.16 to<br>1.70)                         | 0.18<br>(0.08 to<br>0.35)                         | 0.52<br>(0.23 to<br>1.00)                          |
| Maternal deaths aggravated by HIV/AIDS                   | 7.45<br>(3.99 to<br>11.08)                                  | 51.21<br>(26.11 to<br>90.73)                               | 24.65<br>(10.66 to<br>45.60)                               | 80.46<br>(42.71 to<br>137.02)                               | 0.15<br>(0.08 to<br>0.22)                          | 1.06<br>(0.53 to<br>1.85)                         | 0.52<br>(0.23 to<br>0.95)                         | 1.65<br>(0.88 to<br>2.85)                          |
| Other maternal disorders                                 | 139.56<br>(93.35 to<br>195.92)                              | 107.88<br>(63.13 to<br>170.07)                             | 56.77<br>(33.82 to<br>88.94)                               | 153.28<br>(89.65 to<br>241.07)                              | 2.63<br>(1.77 to<br>3.68)                          | 2.10<br>(1.22 to<br>3.30)                         | 1.11<br>(0.66 to<br>1.71)                         | 2.94<br>(1.79 to<br>4.64)                          |
| <b>Central Sub-Saharan Africa</b>                        |                                                             |                                                            |                                                            |                                                             |                                                    |                                                   |                                                   |                                                    |
| Cause                                                    | YLLs (in 1000s)                                             |                                                            |                                                            |                                                             | Deaths (in 1000s)                                  |                                                   |                                                   |                                                    |
|                                                          | 2016                                                        | 2040 Forecast                                              | 2040 Better Scenario                                       | 2040 Worse Scenario                                         | 2016                                               | 2040 Forecast                                     | 2040 Better Scenario                              | 2040 Worse Scenario                                |
| <b>Neonatal disorders</b>                                | <b>7,825.81</b><br><b>(5,236.75 to</b><br><b>10,948.51)</b> | <b>3,787.10</b><br><b>(2,215.55 to</b><br><b>6,118.56)</b> | <b>2,327.76</b><br><b>(1,402.38 to</b><br><b>3,612.58)</b> | <b>8,590.10</b><br><b>(5,125.35 to</b><br><b>13,481.30)</b> | <b>90.41</b><br><b>(60.50 to</b><br><b>126.49)</b> | <b>43.76</b><br><b>(25.60 to</b><br><b>70.69)</b> | <b>26.90</b><br><b>(16.21 to</b><br><b>41.74)</b> | <b>99.26</b><br><b>(59.24 to</b><br><b>155.76)</b> |
| Neonatal preterm birth                                   | 2,389.86<br>(1,433.22 to<br>3,690.82)                       | 827.50<br>(460.43 to<br>1,383.52)                          | 516.60<br>(287.31 to<br>856.39)                            | 2,257.06<br>(1,291.17 to<br>3,734.04)                       | 27.61<br>(16.56 to<br>42.64)                       | 9.56<br>(5.32 to<br>15.99)                        | 5.97<br>(3.32 to<br>9.89)                         | 26.08<br>(14.92 to<br>43.14)                       |
| Neonatal encephalopathy due to birth asphyxia and trauma | 2,177.81<br>(1,260.54 to<br>3,459.81)                       | 989.43<br>(475.70 to<br>1,825.58)                          | 629.51<br>(310.01 to<br>1,146.21)                          | 2,071.39<br>(1,013.39 to<br>3,779.08)                       | 25.16<br>(14.57 to<br>39.97)                       | 11.43<br>(5.50 to<br>21.10)                       | 7.28<br>(3.58 to<br>13.25)                        | 23.94<br>(11.71 to<br>43.66)                       |
| Neonatal sepsis and other neonatal infections            | 1,822.77<br>(1,106.56 to<br>2,836.58)                       | 1,196.45<br>(664.15 to<br>1,981.84)                        | 747.18<br>(426.31 to<br>1,215.55)                          | 2,550.29<br>(1,442.91 to<br>4,157.87)                       | 21.06<br>(12.79 to<br>32.77)                       | 13.82<br>(7.68 to<br>22.89)                       | 8.63<br>(4.93 to<br>14.04)                        | 29.47<br>(16.67 to<br>48.03)                       |
| Hemolytic disease and other neonatal jaundice            | 173.27<br>(83.75 to<br>313.01)                              | 57.61<br>(23.60 to<br>122.75)                              | 32.04<br>(13.82 to<br>65.08)                               | 126.14<br>(52.61 to<br>257.97)                              | 2.00<br>(0.97 to<br>3.62)                          | 0.67<br>(0.27 to<br>1.42)                         | 0.37<br>(0.16 to<br>0.75)                         | 1.46<br>(0.61 to<br>2.98)                          |
| Other neonatal disorders                                 | 1,262.11<br>(749.19 to<br>2,005.62)                         | 716.12<br>(350.64 to<br>1,306.36)                          | 402.44<br>(206.63 to<br>714.00)                            | 1,585.22<br>(788.19 to<br>2,856.75)                         | 14.58<br>(8.66 to<br>23.17)                        | 8.28<br>(4.05 to<br>15.10)                        | 4.65<br>(2.39 to<br>8.25)                         | 18.32<br>(9.12 to<br>33.01)                        |
| <b>Nutritional deficiencies</b>                          | <b>2,672.34</b><br><b>(1,548.39 to</b><br><b>4,951.57)</b>  | <b>1,104.95</b><br><b>(616.82 to</b><br><b>2,520.14)</b>   | <b>766.37</b><br><b>(423.14 to</b><br><b>1,784.96)</b>     | <b>1,769.09</b><br><b>(967.40 to</b><br><b>3,732.86)</b>    | <b>42.26</b><br><b>(25.14 to</b><br><b>85.47)</b>  | <b>28.90</b><br><b>(15.86 to</b><br><b>75.27)</b> | <b>22.86</b><br><b>(12.68 to</b><br><b>60.03)</b> | <b>37.04</b><br><b>(20.47 to</b><br><b>90.51)</b>  |
| Protein-energy malnutrition                              | 2,510.41<br>(1,432.54 to<br>4,628.20)                       | 840.91<br>(455.63 to<br>1,888.27)                          | 568.94<br>(309.49 to<br>1,327.05)                          | 1,448.67<br>(764.88 to<br>3,046.62)                         | 37.63<br>(21.95 to<br>75.15)                       | 20.04<br>(10.96 to<br>50.57)                      | 15.59<br>(8.64 to<br>39.28)                       | 27.37<br>(14.92 to<br>65.47)                       |
| Iodine deficiency                                        | 9.76<br>(2.05 to<br>34.96)                                  | 30.37<br>(4.21 to<br>120.91)                               | 19.77<br>(2.97 to<br>74.49)                                | 46.07<br>(5.75 to<br>184.43)                                | 0.20<br>(0.05 to<br>0.63)                          | 0.86<br>(0.14 to<br>3.37)                         | 0.62<br>(0.10 to<br>2.21)                         | 1.08<br>(0.18 to<br>4.16)                          |

|                                                                         |                                                             |                                                               |                                                              |                                                               |                                                      |                                                      |                                                      |                                                      |
|-------------------------------------------------------------------------|-------------------------------------------------------------|---------------------------------------------------------------|--------------------------------------------------------------|---------------------------------------------------------------|------------------------------------------------------|------------------------------------------------------|------------------------------------------------------|------------------------------------------------------|
| Dietary iron deficiency                                                 | 5.48<br>(3.36 to<br>12.32)                                  | 7.35<br>(3.84 to<br>18.53)                                    | 5.96<br>(3.15 to<br>14.87)                                   | 8.49<br>(4.46 to<br>21.20)                                    | 0.10<br>(0.06 to<br>0.23)                            | 0.14<br>(0.08 to<br>0.35)                            | 0.12<br>(0.06 to<br>0.28)                            | 0.16<br>(0.09 to<br>0.39)                            |
| Other nutritional deficiencies                                          | 146.69<br>(74.23 to<br>344.05)                              | 226.32<br>(106.53 to<br>670.51)                               | 171.70<br>(79.50 to<br>495.94)                               | 265.85<br>(123.36 to<br>749.91)                               | 4.32<br>(2.10 to<br>11.36)                           | 7.86<br>(3.49 to<br>24.88)                           | 6.54<br>(2.94 to<br>20.35)                           | 8.43<br>(3.72 to<br>26.00)                           |
| <b>Other communicable, maternal, neonatal, and nutritional diseases</b> | <b>1,788.23</b><br><b>(1,038.87 to</b><br><b>2,995.32)</b>  | <b>693.52</b><br><b>(445.42 to</b><br><b>1,080.37)</b>        | <b>491.72</b><br><b>(318.37 to</b><br><b>744.35)</b>         | <b>1,149.75</b><br><b>(702.29 to</b><br><b>1,873.92)</b>      | <b>23.66</b><br><b>(14.52 to</b><br><b>37.82)</b>    | <b>12.98</b><br><b>(8.40 to</b><br><b>18.29)</b>     | <b>9.85</b><br><b>(6.50 to</b><br><b>13.90)</b>      | <b>18.63</b><br><b>(12.00 to</b><br><b>27.89)</b>    |
| Sexually transmitted infections excluding HIV                           | 1,221.96<br>(619.61 to<br>2,147.49)                         | 243.20<br>(104.57 to<br>455.94)                               | 168.83<br>(75.84 to<br>313.30)                               | 474.55<br>(203.74 to<br>909.01)                               | 14.43<br>(7.40 to<br>25.26)                          | 3.01<br>(1.36 to<br>5.51)                            | 2.12<br>(1.00 to<br>3.82)                            | 5.72<br>(2.52 to<br>10.81)                           |
| Syphilis                                                                | 1,213.64<br>(606.77 to<br>2,137.63)                         | 233.29<br>(95.87 to<br>446.21)                                | 160.49<br>(69.24 to<br>302.93)                               | 463.46<br>(195.03 to<br>896.00)                               | 14.23<br>(7.16 to<br>25.04)                          | 2.77<br>(1.15 to<br>5.26)                            | 1.92<br>(0.84 to<br>3.59)                            | 5.46<br>(2.32 to<br>10.51)                           |
| Chlamydial infection                                                    | 1.62<br>(1.11 to<br>2.47)                                   | 1.94<br>(1.17 to<br>3.25)                                     | 1.62<br>(0.95 to<br>2.80)                                    | 2.17<br>(1.31 to<br>3.69)                                     | 0.04<br>(0.03 to<br>0.06)                            | 0.04<br>(0.03 to<br>0.07)                            | 0.04<br>(0.02 to<br>0.07)                            | 0.05<br>(0.03 to<br>0.08)                            |
| Gonococcal infection                                                    | 4.32<br>(3.00 to<br>6.64)                                   | 5.16<br>(3.05 to<br>8.70)                                     | 4.36<br>(2.56 to<br>7.48)                                    | 5.75<br>(3.47 to<br>9.69)                                     | 0.10<br>(0.07 to<br>0.16)                            | 0.12<br>(0.08 to<br>0.20)                            | 0.11<br>(0.07 to<br>0.18)                            | 0.13<br>(0.08 to<br>0.22)                            |
| Other sexually transmitted infections                                   | 2.38<br>(1.63 to<br>3.65)                                   | 2.81<br>(1.68 to<br>4.83)                                     | 2.35<br>(1.38 to<br>4.07)                                    | 3.16<br>(1.90 to<br>5.46)                                     | 0.05<br>(0.04 to<br>0.08)                            | 0.06<br>(0.04 to<br>0.11)                            | 0.05<br>(0.03 to<br>0.09)                            | 0.07<br>(0.04 to<br>0.12)                            |
| Acute hepatitis                                                         | 129.85<br>(106.95 to<br>159.93)                             | 115.78<br>(85.79 to<br>150.81)                                | 90.29<br>(64.51 to<br>120.74)                                | 140.06<br>(104.61 to<br>184.10)                               | 2.66<br>(2.21 to<br>3.22)                            | 2.34<br>(2.18 to<br>3.68)                            | 2.37<br>(1.67 to<br>3.06)                            | 3.25<br>(2.52 to<br>4.20)                            |
| Acute hepatitis A                                                       | 7.93<br>(2.07 to<br>19.11)                                  | 3.13<br>(1.11 to<br>7.06)                                     | 2.16<br>(0.83 to<br>4.63)                                    | 5.45<br>(1.79 to<br>12.04)                                    | 0.10<br>(0.03 to<br>0.23)                            | 0.05<br>(0.02 to<br>0.10)                            | 0.04<br>(0.02 to<br>0.07)                            | 0.08<br>(0.03 to<br>0.16)                            |
| Acute hepatitis B                                                       | 92.19<br>(73.40 to<br>116.62)                               | 92.21<br>(67.36 to<br>123.46)                                 | 71.67<br>(50.11 to<br>96.72)                                 | 107.50<br>(79.15 to<br>145.45)                                | 2.07<br>(1.69 to<br>2.57)                            | 2.35<br>(1.76 to<br>3.09)                            | 1.90<br>(1.34 to<br>2.51)                            | 2.64<br>(2.02 to<br>3.50)                            |
| Acute hepatitis C                                                       | 2.36<br>(1.68 to<br>3.26)                                   | 3.08<br>(2.01 to<br>4.65)                                     | 2.79<br>(1.78 to<br>4.20)                                    | 3.34<br>(2.17 to<br>4.97)                                     | 0.06<br>(0.04 to<br>0.09)                            | 0.09<br>(0.06 to<br>0.14)                            | 0.08<br>(0.05 to<br>0.13)                            | 0.09<br>(0.06 to<br>0.14)                            |
| Acute hepatitis E                                                       | 27.37<br>(19.19 to<br>39.16)                                | 17.36<br>(11.36 to<br>26.15)                                  | 13.66<br>(8.86 to<br>20.36)                                  | 23.79<br>(15.31 to<br>35.72)                                  | 0.43<br>(0.31 to<br>0.59)                            | 0.37<br>(0.24 to<br>0.53)                            | 0.32<br>(0.21 to<br>0.46)                            | 0.45<br>(0.30 to<br>0.65)                            |
| Other unspecified infectious diseases                                   | 436.42<br>(146.10 to<br>1,119.67)                           | 334.54<br>(137.50 to<br>636.89)                               | 232.60<br>(93.75 to<br>418.64)                               | 535.14<br>(221.55 to<br>1,086.87)                             | 6.58<br>(2.15 to<br>14.93)                           | 7.11<br>(2.64 to<br>12.08)                           | 5.40<br>(1.94 to<br>9.06)                            | 9.66<br>(3.85 to<br>17.06)                           |
| <b>Non-communicable diseases</b>                                        | <b>9,466.57</b><br><b>(8,103.25 to</b><br><b>10,854.77)</b> | <b>14,877.21</b><br><b>(12,166.88 to</b><br><b>18,233.00)</b> | <b>11,069.38</b><br><b>(9,242.02 to</b><br><b>13,288.53)</b> | <b>19,424.93</b><br><b>(15,638.82 to</b><br><b>23,918.89)</b> | <b>303.85</b><br><b>(274.58 to</b><br><b>331.60)</b> | <b>571.35</b><br><b>(483.13 to</b><br><b>682.27)</b> | <b>449.79</b><br><b>(384.88 to</b><br><b>526.53)</b> | <b>692.80</b><br><b>(572.32 to</b><br><b>835.78)</b> |
| <b>Central Sub-Saharan Africa</b>                                       |                                                             |                                                               |                                                              |                                                               |                                                      |                                                      |                                                      |                                                      |
| Cause                                                                   | <b>YLLs (in 1000s)</b>                                      |                                                               |                                                              |                                                               | <b>Deaths (in 1000s)</b>                             |                                                      |                                                      |                                                      |
|                                                                         | <b>2016</b>                                                 | <b>2040 Forecast</b>                                          | <b>2040 Better Scenario</b>                                  | <b>2040 Worse Scenario</b>                                    | <b>2016</b>                                          | <b>2040 Forecast</b>                                 | <b>2040 Better Scenario</b>                          | <b>2040 Worse Scenario</b>                           |
| Neoplasms                                                               | 1,600.70<br>(1,412.20 to<br>1,806.57)                       | 3,382.04<br>(2,778.15 to<br>4,131.37)                         | 3,134.32<br>(2,606.72 to<br>3,813.07)                        | 3,666.13<br>(2,994.44 to<br>4,482.10)                         | 53.54<br>(47.68 to<br>60.30)                         | 122.99<br>(101.92 to<br>145.47)                      | 119.87<br>(100.69 to<br>141.77)                      | 126.30<br>(104.39 to<br>149.55)                      |
| Lip and oral cavity cancer                                              | 22.55<br>(19.63 to<br>25.91)                                | 63.31<br>(36.69 to<br>108.06)                                 | 40.03<br>(26.39 to<br>61.86)                                 | 82.08<br>(45.21 to<br>142.51)                                 | 0.82<br>(0.72 to<br>0.93)                            | 2.24<br>(1.37 to<br>3.68)                            | 1.52<br>(1.04 to<br>2.29)                            | 2.76<br>(1.59 to<br>4.67)                            |
| Nasopharynx cancer                                                      | 7.79<br>(6.25 to<br>9.86)                                   | 22.51<br>(13.15 to<br>38.26)                                  | 13.59<br>(8.52 to<br>21.95)                                  | 30.53<br>(17.15 to<br>51.64)                                  | 0.22<br>(0.18 to<br>0.28)                            | 0.66<br>(0.40 to<br>1.11)                            | 0.41<br>(0.26 to<br>0.64)                            | 0.87<br>(0.50 to<br>1.44)                            |
| Other pharynx cancer                                                    | 9.08<br>(7.88 to<br>10.70)                                  | 20.21<br>(12.02 to<br>32.64)                                  | 15.28<br>(9.97 to<br>23.36)                                  | 22.32<br>(13.06 to<br>36.82)                                  | 0.32<br>(0.28 to<br>0.37)                            | 0.72<br>(0.45 to<br>1.15)                            | 0.56<br>(0.38 to<br>0.83)                            | 0.77<br>(0.47 to<br>1.23)                            |
| Esophageal cancer                                                       | 71.87<br>(63.02 to<br>82.44)                                | 169.73<br>(97.55 to<br>272.97)                                | 119.52<br>(74.68 to<br>182.98)                               | 216.33<br>(118.92 to<br>362.48)                               | 2.82<br>(2.47 to<br>3.29)                            | 6.61<br>(3.90 to<br>10.25)                           | 4.95<br>(3.19 to<br>7.32)                            | 8.02<br>(4.59 to<br>12.88)                           |



|                                      |                                 |                                 |                                 |                                 |                           |                             |                             |                             |
|--------------------------------------|---------------------------------|---------------------------------|---------------------------------|---------------------------------|---------------------------|-----------------------------|-----------------------------|-----------------------------|
| Stomach cancer                       | 100.49<br>(87.81 to<br>112.49)  | 152.42<br>(120.58 to<br>202.47) | 137.42<br>(109.65 to<br>179.83) | 163.19<br>(126.83 to<br>217.78) | 3.84<br>(3.35 to<br>4.29) | 5.97<br>(4.79 to<br>7.75)   | 5.63<br>(4.58 to<br>7.23)   | 6.15<br>(4.84 to<br>8.10)   |
| Colon and rectum cancer              | 91.60<br>(80.35 to<br>105.04)   | 249.72<br>(175.43 to<br>349.92) | 248.02<br>(176.94 to<br>345.99) | 245.97<br>(171.66 to<br>347.07) | 3.58<br>(3.16 to<br>4.10) | 10.17<br>(7.28 to<br>14.08) | 10.64<br>(7.78 to<br>14.69) | 9.58<br>(6.84 to<br>13.28)  |
| Liver cancer                         | 144.79<br>(115.61 to<br>174.96) | 345.17<br>(246.81 to<br>480.76) | 317.21<br>(231.48 to<br>431.31) | 379.34<br>(260.56 to<br>547.10) | 5.26<br>(4.13 to<br>6.31) | 13.13<br>(9.54 to<br>18.06) | 12.61<br>(9.38 to<br>16.80) | 13.80<br>(9.62 to<br>19.92) |
| Liver cancer due to hepatitis B      | 55.59<br>(43.12 to<br>70.04)    | 130.77<br>(89.94 to<br>190.11)  | 122.03<br>(87.50 to<br>170.44)  | 143.22<br>(95.03 to<br>216.58)  | 1.83<br>(1.40 to<br>2.31) | 4.48<br>(3.12 to<br>6.24)   | 4.34<br>(3.12 to<br>5.91)   | 4.73<br>(3.22 to<br>6.89)   |
| Liver cancer due to hepatitis C      | 43.22<br>(33.70 to<br>53.44)    | 104.25<br>(73.27 to<br>143.82)  | 100.08<br>(71.56 to<br>135.76)  | 110.63<br>(76.15 to<br>157.45)  | 1.82<br>(1.41 to<br>2.22) | 4.58<br>(3.30 to<br>6.22)   | 4.61<br>(3.37 to<br>6.08)   | 4.64<br>(3.26 to<br>6.59)   |
| Liver cancer due to alcohol use      | 16.25<br>(12.32 to<br>20.05)    | 41.89<br>(28.14 to<br>59.37)    | 32.40<br>(22.53 to<br>44.59)    | 49.15<br>(31.80 to<br>72.63)    | 0.63<br>(0.48 to<br>0.79) | 1.63<br>(1.14 to<br>2.30)   | 1.33<br>(0.95 to<br>1.82)   | 1.83<br>(1.24 to<br>2.68)   |
| Liver cancer due to other causes     | 29.73<br>(23.50 to<br>36.82)    | 68.27<br>(47.02 to<br>98.32)    | 62.70<br>(44.37 to<br>87.25)    | 76.34<br>(50.41 to<br>114.61)   | 0.98<br>(0.76 to<br>1.21) | 2.43<br>(1.68 to<br>3.42)   | 2.33<br>(1.67 to<br>3.21)   | 2.60<br>(1.74 to<br>3.83)   |
| Gallbladder and biliary tract cancer | 15.28<br>(12.03 to<br>19.06)    | 22.83<br>(17.71 to<br>29.43)    | 24.59<br>(18.94 to<br>32.02)    | 21.32<br>(16.72 to<br>27.24)    | 0.64<br>(0.51 to<br>0.78) | 0.98<br>(0.80 to<br>1.22)   | 1.10<br>(0.90 to<br>1.38)   | 0.88<br>(0.72 to<br>1.10)   |
| Pancreatic cancer                    | 45.06<br>(39.87 to<br>50.31)    | 120.07<br>(98.43 to<br>147.21)  | 126.68<br>(104.23 to<br>154.49) | 115.43<br>(93.86 to<br>142.05)  | 1.88<br>(1.68 to<br>2.08) | 5.09<br>(4.21 to<br>6.17)   | 5.60<br>(4.71 to<br>6.72)   | 4.69<br>(3.88 to<br>5.68)   |
| Larynx cancer                        | 15.25<br>(12.87 to<br>17.77)    | 35.94<br>(21.15 to<br>61.14)    | 21.25<br>(14.02 to<br>33.87)    | 50.08<br>(27.77 to<br>86.62)    | 0.58<br>(0.49 to<br>0.66) | 1.34<br>(0.82 to<br>2.23)   | 0.84<br>(0.58 to<br>1.26)   | 1.79<br>(1.04 to<br>3.04)   |
| Tracheal, bronchus, and lung cancer  | 101.93<br>(89.43 to<br>119.24)  | 231.38<br>(152.11 to<br>349.00) | 143.32<br>(102.18 to<br>201.79) | 323.24<br>(202.46 to<br>504.53) | 4.00<br>(3.54 to<br>4.61) | 9.16<br>(6.19 to<br>13.15)  | 5.99<br>(4.37 to<br>8.31)   | 12.17<br>(7.80 to<br>18.26) |
| Malignant skin melanoma              | 9.35<br>(7.83 to<br>11.55)      | 21.94<br>(17.91 to<br>27.21)    | 25.23<br>(20.49 to<br>31.22)    | 19.77<br>(15.98 to<br>24.28)    | 0.30<br>(0.25 to<br>0.37) | 0.74<br>(0.61 to<br>0.90)   | 0.89<br>(0.74 to<br>1.09)   | 0.64<br>(0.53 to<br>0.79)   |
| Non-melanoma skin cancer             | 10.20<br>(8.66 to<br>11.86)     | 24.08<br>(20.32 to<br>28.26)    | 22.93<br>(19.19 to<br>27.01)    | 24.26<br>(20.49 to<br>28.26)    | 0.41<br>(0.35 to<br>0.50) | 1.06<br>(0.88 to<br>1.28)   | 1.07<br>(0.89 to<br>1.30)   | 1.01<br>(0.84 to<br>1.22)   |
| Breast cancer                        | 145.98<br>(109.93 to<br>202.17) | 369.66<br>(251.55 to<br>543.52) | 348.07<br>(241.59 to<br>496.16) | 376.38<br>(252.93 to<br>550.70) | 4.69<br>(3.68 to<br>6.31) | 12.09<br>(8.51 to<br>17.02) | 11.73<br>(8.40 to<br>16.26) | 12.00<br>(8.36 to<br>17.14) |
| Cervical cancer                      | 206.28<br>(127.81 to<br>260.78) | 352.96<br>(210.24 to<br>483.27) | 311.95<br>(187.16 to<br>425.64) | 380.25<br>(224.52 to<br>529.72) | 6.46<br>(4.11 to<br>8.06) | 10.96<br>(6.69 to<br>14.50) | 9.94<br>(6.22 to<br>13.09)  | 11.54<br>(7.05 to<br>15.48) |
| Uterine cancer                       | 22.66<br>(18.92 to<br>27.31)    | 46.62<br>(37.19 to<br>59.33)    | 41.41<br>(32.45 to<br>54.22)    | 48.91<br>(39.22 to<br>61.59)    | 0.89<br>(0.74 to<br>1.08) | 1.85<br>(1.53 to<br>2.31)   | 1.70<br>(1.37 to<br>2.17)   | 1.88<br>(1.55 to<br>2.33)   |
| Ovarian cancer                       | 30.47<br>(23.43 to<br>38.34)    | 76.99<br>(54.07 to<br>108.19)   | 85.07<br>(60.57 to<br>118.45)   | 71.31<br>(49.95 to<br>98.62)    | 1.06<br>(0.83 to<br>1.27) | 2.70<br>(1.95 to<br>3.62)   | 3.06<br>(2.25 to<br>4.07)   | 2.44<br>(1.76 to<br>3.27)   |
| Prostate cancer                      | 66.32<br>(38.66 to<br>83.71)    | 186.25<br>(109.32 to<br>234.45) | 214.97<br>(131.33 to<br>267.89) | 164.85<br>(95.11 to<br>209.29)  | 3.84<br>(2.27 to<br>4.90) | 11.84<br>(7.08 to<br>15.03) | 14.38<br>(8.83 to<br>18.15) | 10.01<br>(5.81 to<br>13.05) |
| Testicular cancer                    | 5.82<br>(4.07 to<br>7.32)       | 10.13<br>(6.84 to<br>13.77)     | 9.26<br>(6.30 to<br>12.63)      | 10.72<br>(7.26 to<br>14.44)     | 0.11<br>(0.08 to<br>0.14) | 0.20<br>(0.14 to<br>0.27)   | 0.19<br>(0.13 to<br>0.25)   | 0.21<br>(0.15 to<br>0.28)   |

**Central Sub-Saharan Africa**

| Cause         | YLLs (in 1000s)              |                              |                              |                              | Deaths (in 1000s)         |                           |                           |                           |
|---------------|------------------------------|------------------------------|------------------------------|------------------------------|---------------------------|---------------------------|---------------------------|---------------------------|
|               | 2016                         | 2040 Forecast                | 2040 Better Scenario         | 2040 Worse Scenario          | 2016                      | 2040 Forecast             | 2040 Better Scenario      | 2040 Worse Scenario       |
| Kidney cancer | 16.38<br>(14.19 to<br>18.91) | 36.19<br>(28.36 to<br>44.76) | 40.10<br>(31.31 to<br>48.95) | 35.87<br>(28.70 to<br>43.75) | 0.47<br>(0.40 to<br>0.55) | 1.27<br>(0.96 to<br>1.59) | 1.47<br>(1.10 to<br>1.82) | 1.15<br>(0.88 to<br>1.43) |

|                                 |                                                            |                                                            |                                                            |                                                             |                                                      |                                                      |                                                      |                                                      |
|---------------------------------|------------------------------------------------------------|------------------------------------------------------------|------------------------------------------------------------|-------------------------------------------------------------|------------------------------------------------------|------------------------------------------------------|------------------------------------------------------|------------------------------------------------------|
| Bladder cancer                  | 23.93<br>(20.99 to<br>27.00)                               | 51.22<br>(41.26 to<br>63.73)                               | 49.76<br>(40.71 to<br>60.61)                               | 51.98<br>(41.16 to<br>65.67)                                | 1.13<br>(1.01 to<br>1.26)                            | 2.54<br>(2.08 to<br>3.14)                            | 2.63<br>(2.19 to<br>3.17)                            | 2.43<br>(1.95 to<br>3.08)                            |
| Brain and nervous system cancer | 57.76<br>(48.00 to<br>69.32)                               | 112.43<br>(84.56 to<br>143.88)                             | 115.89<br>(86.25 to<br>148.33)                             | 121.45<br>(93.93 to<br>153.04)                              | 1.21<br>(0.94 to<br>1.43)                            | 2.78<br>(1.96 to<br>3.51)                            | 2.98<br>(2.07 to<br>3.80)                            | 2.78<br>(2.02 to<br>3.45)                            |
| Thyroid cancer                  | 9.12<br>(7.48 to<br>10.63)                                 | 17.39<br>(13.65 to<br>22.15)                               | 15.67<br>(12.19 to<br>19.88)                               | 18.82<br>(14.54 to<br>24.53)                                | 0.33<br>(0.28 to<br>0.39)                            | 0.66<br>(0.53 to<br>0.82)                            | 0.62<br>(0.49 to<br>0.77)                            | 0.69<br>(0.54 to<br>0.87)                            |
| Mesothelioma                    | 3.21<br>(2.45 to<br>4.14)                                  | 7.12<br>(5.20 to<br>9.40)                                  | 7.07<br>(5.14 to<br>9.43)                                  | 7.09<br>(5.23 to<br>9.28)                                   | 0.11<br>(0.08 to<br>0.14)                            | 0.26<br>(0.18 to<br>0.32)                            | 0.26<br>(0.19 to<br>0.33)                            | 0.24<br>(0.18 to<br>0.30)                            |
| Hodgkin lymphoma                | 14.55<br>(9.93 to<br>17.43)                                | 18.51<br>(12.14 to<br>24.21)                               | 14.49<br>(9.48 to<br>19.04)                                | 21.94<br>(14.53 to<br>28.63)                                | 0.32<br>(0.22 to<br>0.38)                            | 0.44<br>(0.30 to<br>0.56)                            | 0.35<br>(0.24 to<br>0.46)                            | 0.50<br>(0.34 to<br>0.64)                            |
| Non-Hodgkin lymphoma            | 66.78<br>(57.55 to<br>75.99)                               | 133.68<br>(104.38 to<br>167.95)                            | 141.32<br>(110.42 to<br>176.03)                            | 135.94<br>(108.88 to<br>169.27)                             | 1.75<br>(1.45 to<br>2.02)                            | 4.08<br>(3.13 to<br>5.01)                            | 4.51<br>(3.45 to<br>5.53)                            | 3.86<br>(3.01 to<br>4.74)                            |
| Multiple myeloma                | 15.50<br>(12.62 to<br>18.22)                               | 42.02<br>(32.01 to<br>52.46)                               | 46.20<br>(35.45 to<br>57.89)                               | 39.18<br>(29.70 to<br>49.18)                                | 0.60<br>(0.49 to<br>0.70)                            | 1.66<br>(1.30 to<br>2.03)                            | 1.89<br>(1.47 to<br>2.33)                            | 1.50<br>(1.17 to<br>1.87)                            |
| Leukemia                        | 105.61<br>(82.27 to<br>133.50)                             | 144.48<br>(107.56 to<br>186.27)                            | 139.01<br>(104.03 to<br>179.29)                            | 168.80<br>(126.12 to<br>220.35)                             | 2.03<br>(1.63 to<br>2.38)                            | 3.50<br>(2.59 to<br>4.37)                            | 3.50<br>(2.59 to<br>4.39)                            | 3.75<br>(2.78 to<br>4.71)                            |
| Acute lymphoid leukemia         | 30.74<br>(23.37 to<br>44.40)                               | 36.26<br>(27.03 to<br>48.13)                               | 35.77<br>(26.53 to<br>47.39)                               | 44.02<br>(32.44 to<br>60.44)                                | 0.47<br>(0.38 to<br>0.62)                            | 0.66<br>(0.48 to<br>0.87)                            | 0.67<br>(0.49 to<br>0.88)                            | 0.75<br>(0.57 to<br>0.97)                            |
| Chronic lymphoid leukemia       | 1.80<br>(1.34 to<br>2.17)                                  | 3.60<br>(2.54 to<br>4.70)                                  | 3.65<br>(2.59 to<br>4.78)                                  | 3.61<br>(2.54 to<br>4.76)                                   | 0.07<br>(0.05 to<br>0.09)                            | 0.15<br>(0.10 to<br>0.20)                            | 0.16<br>(0.11 to<br>0.21)                            | 0.14<br>(0.10 to<br>0.19)                            |
| Acute myeloid leukemia          | 24.23<br>(19.69 to<br>31.55)                               | 45.68<br>(34.95 to<br>59.88)                               | 48.31<br>(37.27 to<br>62.85)                               | 49.27<br>(38.00 to<br>64.70)                                | 0.47<br>(0.39 to<br>0.59)                            | 1.09<br>(0.84 to<br>1.42)                            | 1.20<br>(0.92 to<br>1.55)                            | 1.09<br>(0.86 to<br>1.40)                            |
| Chronic myeloid leukemia        | 6.75<br>(5.17 to<br>8.74)                                  | 9.18<br>(6.44 to<br>12.94)                                 | 8.90<br>(6.27 to<br>12.46)                                 | 9.58<br>(6.73 to<br>13.60)                                  | 0.18<br>(0.14 to<br>0.23)                            | 0.26<br>(0.19 to<br>0.35)                            | 0.27<br>(0.19 to<br>0.36)                            | 0.27<br>(0.19 to<br>0.36)                            |
| Other leukemia                  | 42.08<br>(27.86 to<br>59.00)                               | 49.76<br>(31.69 to<br>68.05)                               | 42.39<br>(26.43 to<br>58.04)                               | 62.32<br>(39.74 to<br>88.66)                                | 0.83<br>(0.54 to<br>1.06)                            | 1.33<br>(0.82 to<br>1.72)                            | 1.21<br>(0.74 to<br>1.56)                            | 1.49<br>(0.94 to<br>1.97)                            |
| Other neoplasms                 | 165.11<br>(141.69 to<br>190.13)                            | 297.08<br>(237.13 to<br>368.73)                            | 299.02<br>(238.60 to<br>372.11)                            | 318.82<br>(260.51 to<br>389.21)                             | 3.86<br>(3.29 to<br>4.44)                            | 8.31<br>(6.43 to<br>10.00)                           | 8.84<br>(6.70 to<br>10.72)                           | 8.16<br>(6.41 to<br>9.77)                            |
| <b>Cardiovascular diseases</b>  | <b>2,836.36</b><br><b>(2,563.64 to</b><br><b>3,117.61)</b> | <b>4,858.69</b><br><b>(3,332.24 to</b><br><b>7,098.23)</b> | <b>2,592.29</b><br><b>(1,873.49 to</b><br><b>3,707.37)</b> | <b>7,249.71</b><br><b>(4,708.41 to</b><br><b>10,625.42)</b> | <b>124.71</b><br><b>(113.03 to</b><br><b>136.54)</b> | <b>224.21</b><br><b>(160.86 to</b><br><b>315.70)</b> | <b>134.15</b><br><b>(100.01 to</b><br><b>184.97)</b> | <b>312.70</b><br><b>(213.38 to</b><br><b>447.31)</b> |
| Rheumatic heart disease         | 99.76<br>(84.45 to<br>116.59)                              | 82.23<br>(61.77 to<br>115.09)                              | 59.78<br>(44.70 to<br>83.18)                               | 99.62<br>(74.45 to<br>140.86)                               | 2.93<br>(2.40 to<br>3.47)                            | 2.70<br>(2.03 to<br>3.70)                            | 2.08<br>(1.56 to<br>2.81)                            | 3.08<br>(2.35 to<br>4.19)                            |
| Ischemic heart disease          | 1,031.00<br>(925.16 to<br>1,159.33)                        | 1,885.32<br>(1,053.78 to<br>3,164.25)                      | 849.84<br>(491.33 to<br>1,492.39)                          | 2,989.47<br>(1,672.42 to<br>4,951.66)                       | 48.57<br>(43.51 to<br>54.29)                         | 89.68<br>(53.82 to<br>149.40)                        | 46.64<br>(28.31 to<br>79.40)                         | 133.10<br>(78.19 to<br>217.70)                       |
| Stroke                          | 1,069.84<br>(923.80 to<br>1,194.35)                        | 1,627.18<br>(944.20 to<br>2,730.47)                        | 702.06<br>(428.63 to<br>1,164.45)                          | 2,676.58<br>(1,538.38 to<br>4,480.76)                       | 47.43<br>(40.45 to<br>53.38)                         | 74.94<br>(46.46 to<br>126.15)                        | 37.88<br>(24.37 to<br>64.10)                         | 114.13<br>(70.19 to<br>184.92)                       |
| Ischemic stroke                 | 307.98<br>(256.35 to<br>353.59)                            | 433.77<br>(245.16 to<br>890.51)                            | 240.75<br>(139.38 to<br>488.97)                            | 626.06<br>(348.93 to<br>1,246.54)                           | 17.76<br>(14.73 to<br>20.44)                         | 26.78<br>(15.72 to<br>59.61)                         | 16.88<br>(9.58 to<br>38.07)                          | 35.78<br>(20.64 to<br>78.05)                         |
| Intracerebral hemorrhage        | 761.86<br>(664.81 to<br>859.84)                            | 1,193.42<br>(622.25 to<br>2,164.07)                        | 461.31<br>(258.06 to<br>788.53)                            | 2,050.52<br>(1,050.00 to<br>3,660.75)                       | 29.66<br>(25.20 to<br>33.55)                         | 48.16<br>(27.70 to<br>84.22)                         | 21.00<br>(12.81 to<br>33.84)                         | 78.35<br>(42.67 to<br>134.54)                        |
| Hypertensive heart disease      | 208.43<br>(139.61 to<br>279.22)                            | 431.74<br>(232.92 to<br>848.63)                            | 280.48<br>(164.37 to<br>493.56)                            | 552.86<br>(275.48 to<br>1,136.81)                           | 10.18<br>(6.83 to<br>13.57)                          | 21.90<br>(12.13 to<br>42.97)                         | 15.47<br>(9.42 to<br>27.58)                          | 26.41<br>(13.71 to<br>56.09)                         |
| Cardiomyopathy and myocarditis  | 83.53<br>(67.91 to<br>103.43)                              | 138.42<br>(97.71 to<br>197.00)                             | 133.02<br>(93.93 to<br>187.73)                             | 150.44<br>(106.35 to<br>215.07)                             | 2.26<br>(1.85 to<br>2.78)                            | 4.52<br>(3.20 to<br>6.25)                            | 4.59<br>(3.25 to<br>6.30)                            | 4.52<br>(3.21 to<br>6.30)                            |

|                                                               |                                                      |                                                          |                                                        |                                                            |                                                   |                                                   |                                                   |                                                   |
|---------------------------------------------------------------|------------------------------------------------------|----------------------------------------------------------|--------------------------------------------------------|------------------------------------------------------------|---------------------------------------------------|---------------------------------------------------|---------------------------------------------------|---------------------------------------------------|
| Mycocarditis                                                  | 12.96<br>(8.05 to<br>21.07)                          | 16.46<br>(8.47 to<br>31.80)                              | 14.95<br>(7.48 to<br>29.26)                            | 19.04<br>(10.20 to<br>35.55)                               | 0.26<br>(0.15 to<br>0.47)                         | 0.42<br>(0.20 to<br>0.89)                         | 0.41<br>(0.18 to<br>0.88)                         | 0.44<br>(0.22 to<br>0.90)                         |
| <b>Central Sub-Saharan Africa</b>                             |                                                      |                                                          |                                                        |                                                            |                                                   |                                                   |                                                   |                                                   |
| Cause                                                         | YLLs (in 1000s)                                      |                                                          |                                                        |                                                            | Deaths (in 1000s)                                 |                                                   |                                                   |                                                   |
|                                                               | 2016                                                 | 2040 Forecast                                            | 2040 Better Scenario                                   | 2040 Worse Scenario                                        | 2016                                              | 2040 Forecast                                     | 2040 Better Scenario                              | 2040 Worse Scenario                               |
| Alcoholic cardiomyopathy                                      | 5.05<br>(3.19 to<br>8.08)                            | 10.58<br>(6.27 to<br>17.53)                              | 9.45<br>(5.27 to<br>16.10)                             | 10.94<br>(6.72 to<br>18.03)                                | 0.16<br>(0.10 to<br>0.27)                         | 0.35<br>(0.20 to<br>0.59)                         | 0.32<br>(0.18 to<br>0.57)                         | 0.35<br>(0.21 to<br>0.58)                         |
| Other cardiomyopathy                                          | 65.52<br>(50.38 to<br>78.94)                         | 111.38<br>(76.23 to<br>166.36)                           | 108.62<br>(75.60 to<br>159.72)                         | 120.46<br>(82.08 to<br>181.33)                             | 1.83<br>(1.50 to<br>2.17)                         | 3.75<br>(2.62 to<br>5.38)                         | 3.86<br>(2.73 to<br>5.47)                         | 3.73<br>(2.59 to<br>5.40)                         |
| Atrial fibrillation and flutter                               | 12.02<br>(9.27 to<br>15.41)                          | 29.68<br>(21.79 to<br>39.20)                             | 30.86<br>(22.77 to<br>41.51)                           | 27.37<br>(19.89 to<br>36.25)                               | 0.94<br>(0.72 to<br>1.21)                         | 2.48<br>(1.78 to<br>3.29)                         | 2.80<br>(2.04 to<br>3.75)                         | 2.13<br>(1.53 to<br>2.88)                         |
| Aortic aneurysm                                               | 22.77<br>(17.91 to<br>30.90)                         | 49.03<br>(34.02 to<br>74.28)                             | 46.49<br>(32.32 to<br>69.89)                           | 48.41<br>(33.27 to<br>74.21)                               | 0.98<br>(0.79 to<br>1.30)                         | 2.18<br>(1.60 to<br>3.11)                         | 2.23<br>(1.62 to<br>3.24)                         | 2.05<br>(1.47 to<br>2.94)                         |
| Peripheral artery disease                                     | 1.58<br>(0.61 to<br>2.61)                            | 5.70<br>(2.12 to<br>10.47)                               | 6.11<br>(2.25 to<br>12.05)                             | 5.06<br>(1.86 to<br>9.21)                                  | 0.10<br>(0.04 to<br>0.16)                         | 0.38<br>(0.15 to<br>0.71)                         | 0.45<br>(0.17 to<br>0.92)                         | 0.31<br>(0.12 to<br>0.57)                         |
| Endocarditis                                                  | 36.83<br>(27.10 to<br>44.93)                         | 72.74<br>(46.89 to<br>107.47)                            | 67.41<br>(44.46 to<br>97.46)                           | 79.95<br>(51.41 to<br>119.35)                              | 1.17<br>(0.82 to<br>1.43)                         | 2.59<br>(1.63 to<br>3.62)                         | 2.57<br>(1.65 to<br>3.54)                         | 2.63<br>(1.68 to<br>3.71)                         |
| Other cardiovascular and circulatory diseases                 | 270.60<br>(221.97 to<br>352.12)                      | 536.64<br>(393.33 to<br>742.23)                          | 416.24<br>(311.73 to<br>568.28)                        | 619.95<br>(452.35 to<br>865.01)                            | 10.17<br>(8.28 to<br>13.19)                       | 22.84<br>(17.27 to<br>31.24)                      | 19.44<br>(14.87 to<br>26.14)                      | 24.33<br>(18.02 to<br>33.40)                      |
| <b>Chronic respiratory diseases</b>                           | <b>520.76</b><br><b>(443.08 to</b><br><b>591.58)</b> | <b>614.51</b><br><b>(440.93 to</b><br><b>930.21)</b>     | <b>372.60</b><br><b>(289.40 to</b><br><b>502.68)</b>   | <b>866.91</b><br><b>(606.76 to</b><br><b>1,359.33)</b>     | <b>20.49</b><br><b>(18.05 to</b><br><b>23.42)</b> | <b>27.27</b><br><b>(19.67 to</b><br><b>41.78)</b> | <b>17.60</b><br><b>(13.79 to</b><br><b>24.12)</b> | <b>35.72</b><br><b>(25.01 to</b><br><b>56.31)</b> |
| Chronic obstructive pulmonary disease                         | 255.41<br>(236.70 to<br>338.04)                      | 420.06<br>(267.05 to<br>709.22)                          | 216.99<br>(147.82 to<br>322.56)                        | 624.97<br>(384.67 to<br>1,097.68)                          | 13.60<br>(11.51 to<br>16.38)                      | 20.59<br>(13.69 to<br>35.09)                      | 11.86<br>(8.41 to<br>17.51)                       | 28.69<br>(17.82 to<br>47.88)                      |
| Pneumoconiosis                                                | 1.51<br>(1.07 to<br>2.09)                            | 2.14<br>(1.55 to<br>2.96)                                | 2.01<br>(1.44 to<br>2.86)                              | 2.21<br>(1.61 to<br>3.01)                                  | 0.07<br>(0.05 to<br>0.09)                         | 0.10<br>(0.07 to<br>0.14)                         | 0.10<br>(0.07 to<br>0.14)                         | 0.10<br>(0.07 to<br>0.14)                         |
| Silicosis                                                     | 0.31<br>(0.16 to<br>0.52)                            | 0.29<br>(0.15 to<br>0.47)                                | 0.27<br>(0.13 to<br>0.46)                              | 0.29<br>(0.15 to<br>0.48)                                  | 0.01<br>(0.01 to<br>0.02)                         | 0.02<br>(0.01 to<br>0.03)                         | 0.02<br>(0.01 to<br>0.03)                         | 0.01<br>(0.01 to<br>0.02)                         |
| Asbestosis                                                    | 0.32<br>(0.19 to<br>0.48)                            | 0.63<br>(0.37 to<br>0.94)                                | 0.66<br>(0.38 to<br>1.00)                              | 0.61<br>(0.36 to<br>0.90)                                  | 0.01<br>(0.01 to<br>0.02)                         | 0.03<br>(0.01 to<br>0.04)                         | 0.03<br>(0.02 to<br>0.05)                         | 0.02<br>(0.01 to<br>0.04)                         |
| Coal workers pneumoconiosis                                   | 0.13<br>(0.06 to<br>0.27)                            | 0.17<br>(0.08 to<br>0.35)                                | 0.12<br>(0.05 to<br>0.26)                              | 0.20<br>(0.10 to<br>0.39)                                  | 0.01<br>(0.00 to<br>0.01)                         | 0.01<br>(0.00 to<br>0.02)                         | 0.01<br>(0.00 to<br>0.01)                         | 0.01<br>(0.00 to<br>0.02)                         |
| Other pneumoconiosis                                          | 0.75<br>(0.49 to<br>1.14)                            | 1.05<br>(0.67 to<br>1.57)                                | 0.96<br>(0.61 to<br>1.52)                              | 1.11<br>(0.70 to<br>1.62)                                  | 0.03<br>(0.02 to<br>0.05)                         | 0.05<br>(0.03 to<br>0.08)                         | 0.05<br>(0.03 to<br>0.08)                         | 0.05<br>(0.03 to<br>0.08)                         |
| Asthma                                                        | 209.25<br>(160.99 to<br>260.60)                      | 151.45<br>(106.48 to<br>215.03)                          | 113.14<br>(81.57 to<br>156.22)                         | 195.40<br>(133.21 to<br>281.80)                            | 6.20<br>(4.86 to<br>8.69)                         | 5.26<br>(3.73 to<br>8.07)                         | 4.21<br>(3.01 to<br>6.29)                         | 6.25<br>(4.30 to<br>9.51)                         |
| Interstitial lung disease and pulmonary sarcoidosis           | 6.55<br>(2.86 to<br>12.14)                           | 15.62<br>(6.72 to<br>26.70)                              | 18.26<br>(7.86 to<br>31.04)                            | 14.09<br>(5.87 to<br>24.40)                                | 0.25<br>(0.10 to<br>0.43)                         | 0.66<br>(0.27 to<br>1.11)                         | 0.82<br>(0.34 to<br>1.35)                         | 0.56<br>(0.22 to<br>0.95)                         |
| Other chronic respiratory diseases                            | 18.03<br>(9.55 to<br>30.30)                          | 25.24<br>(15.38 to<br>35.73)                             | 22.21<br>(14.07 to<br>31.16)                           | 30.24<br>(17.42 to<br>44.75)                               | 0.38<br>(0.22 to<br>0.55)                         | 0.66<br>(0.41 to<br>0.90)                         | 0.62<br>(0.41 to<br>0.84)                         | 0.72<br>(0.44 to<br>0.99)                         |
| <b>Cirrhosis and other chronic liver diseases</b>             | <b>564.34</b><br><b>(491.37 to</b><br><b>648.66)</b> | <b>1,133.94</b><br><b>(957.21 to</b><br><b>1,350.90)</b> | <b>996.63</b><br><b>(835.80 to</b><br><b>1,204.41)</b> | <b>1,221.86</b><br><b>(1,041.28 to</b><br><b>1,454.86)</b> | <b>16.99</b><br><b>(14.79 to</b><br><b>19.48)</b> | <b>35.68</b><br><b>(30.79 to</b><br><b>41.51)</b> | <b>32.42</b><br><b>(27.75 to</b><br><b>38.46)</b> | <b>37.15</b><br><b>(32.29 to</b><br><b>42.97)</b> |
| Cirrhosis and other chronic liver diseases due to hepatitis B | 179.08<br>(153.05 to<br>209.38)                      | 372.54<br>(306.33 to<br>452.94)                          | 346.06<br>(282.62 to<br>425.44)                        | 386.07<br>(318.57 to<br>467.81)                            | 5.65<br>(4.83 to<br>6.60)                         | 11.98<br>(10.08 to<br>14.22)                      | 11.48<br>(9.60 to<br>13.81)                       | 12.07<br>(10.20 to<br>14.20)                      |

|                                                                |                                            |                                              |                                            |                                              |                                       |                                       |                                       |                                       |
|----------------------------------------------------------------|--------------------------------------------|----------------------------------------------|--------------------------------------------|----------------------------------------------|---------------------------------------|---------------------------------------|---------------------------------------|---------------------------------------|
| Cirrhosis and other chronic liver diseases due to hepatitis C  | 159.62<br>(135.36 to<br>190.26)            | 339.22<br>(281.47 to<br>412.48)              | 312.95<br>(257.06 to<br>385.30)            | 352.22<br>(293.56 to<br>425.95)              | 5.01<br>(4.28 to<br>5.89)             | 10.78<br>(9.20 to<br>12.84)           | 10.22<br>(8.58 to<br>12.37)           | 10.92<br>(9.29 to<br>12.90)           |
| Cirrhosis and other chronic liver diseases due to alcohol use  | 115.24<br>(96.71 to<br>138.25)             | 254.63<br>(208.92 to<br>310.24)              | 188.58<br>(153.65 to<br>234.16)            | 293.22<br>(239.87 to<br>359.71)              | 3.81<br>(3.19 to<br>4.50)             | 8.50<br>(7.16 to<br>10.16)            | 6.60<br>(5.50 to<br>8.00)             | 9.46<br>(7.95 to<br>11.23)            |
| Cirrhosis and other chronic liver diseases due to other causes | 110.40<br>(93.26 to<br>134.21)             | 167.54<br>(139.07 to<br>206.60)              | 149.04<br>(122.94 to<br>184.89)            | 190.35<br>(157.34 to<br>237.23)              | 2.52<br>(2.19 to<br>2.93)             | 4.42<br>(3.74 to<br>5.26)             | 4.11<br>(3.48 to<br>4.93)             | 4.70<br>(3.99 to<br>5.58)             |
| <b>Digestive diseases</b>                                      | <b>809.88<br/>(642.62 to<br/>1,009.15)</b> | <b>1,063.80<br/>(828.79 to<br/>1,356.56)</b> | <b>889.14<br/>(698.74 to<br/>1,113.08)</b> | <b>1,224.40<br/>(959.20 to<br/>1,551.96)</b> | <b>23.06<br/>(18.72 to<br/>27.48)</b> | <b>36.51<br/>(29.26 to<br/>44.26)</b> | <b>32.82<br/>(26.62 to<br/>39.55)</b> | <b>38.63<br/>(31.07 to<br/>47.16)</b> |
| Peptic ulcer disease                                           | 171.31<br>(127.31 to<br>219.72)            | 161.60<br>(113.80 to<br>218.87)              | 114.66<br>(80.73 to<br>155.14)             | 189.28<br>(134.53 to<br>256.74)              | 5.81<br>(4.28 to<br>7.35)             | 6.07<br>(4.30 to<br>8.10)             | 4.60<br>(3.27 to<br>6.06)             | 6.73<br>(4.82 to<br>8.93)             |
| <b>Central Sub-Saharan Africa</b>                              |                                            |                                              |                                            |                                              |                                       |                                       |                                       |                                       |
| Cause                                                          | YLLs (in 1000s)                            |                                              |                                            |                                              | Deaths (in 1000s)                     |                                       |                                       |                                       |
|                                                                | 2016                                       | 2040 Forecast                                | 2040 Better Scenario                       | 2040 Worse Scenario                          | 2016                                  | 2040 Forecast                         | 2040 Better Scenario                  | 2040 Worse Scenario                   |
| Gastritis and duodenitis                                       | 46.67<br>(30.51 to<br>64.44)               | 82.65<br>(53.57 to<br>120.65)                | 72.65<br>(46.48 to<br>105.77)              | 88.35<br>(56.16 to<br>126.88)                | 1.48<br>(1.02 to<br>2.12)             | 2.93<br>(1.96 to<br>4.27)             | 2.74<br>(1.82 to<br>3.97)             | 2.96<br>(1.98 to<br>4.29)             |
| Appendicitis                                                   | 77.36<br>(54.82 to<br>106.80)              | 81.20<br>(57.25 to<br>108.50)                | 62.38<br>(43.71 to<br>83.70)               | 100.40<br>(70.01 to<br>138.98)               | 1.57<br>(1.14 to<br>2.03)             | 2.04<br>(1.48 to<br>2.61)             | 1.65<br>(1.19 to<br>2.13)             | 2.34<br>(1.66 to<br>3.04)             |
| Paralytic ileus and intestinal obstruction                     | 266.08<br>(192.25 to<br>380.68)            | 333.58<br>(247.18 to<br>447.41)              | 307.07<br>(228.10 to<br>408.61)            | 383.59<br>(283.49 to<br>521.67)              | 6.58<br>(4.82 to<br>8.71)             | 11.49<br>(8.39 to<br>15.25)           | 11.55<br>(8.43 to<br>15.03)           | 11.56<br>(8.45 to<br>15.28)           |
| Inguinal, femoral, and abdominal hernia                        | 26.21<br>(16.68 to<br>38.26)               | 29.18<br>(18.14 to<br>42.02)                 | 24.91<br>(15.53 to<br>35.66)               | 32.60<br>(20.31 to<br>46.92)                 | 0.84<br>(0.53 to<br>1.15)             | 1.09<br>(0.68 to<br>1.52)             | 1.01<br>(0.65 to<br>1.41)             | 1.12<br>(0.71 to<br>1.56)             |
| Inflammatory bowel disease                                     | 36.78<br>(17.91 to<br>62.77)               | 57.44<br>(29.17 to<br>83.98)                 | 56.37<br>(28.91 to<br>81.93)               | 59.83<br>(29.83 to<br>91.48)                 | 0.97<br>(0.52 to<br>1.39)             | 1.79<br>(0.99 to<br>2.41)             | 1.87<br>(1.03 to<br>2.51)             | 1.74<br>(0.95 to<br>2.37)             |
| Vascular intestinal disorders                                  | 15.53<br>(11.12 to<br>20.51)               | 30.20<br>(21.68 to<br>40.13)                 | 28.74<br>(20.62 to<br>38.50)               | 30.64<br>(22.06 to<br>40.81)                 | 0.63<br>(0.46 to<br>0.82)             | 1.35<br>(1.00 to<br>1.75)             | 1.36<br>(1.02 to<br>1.77)             | 1.29<br>(0.96 to<br>1.68)             |
| Gallbladder and biliary diseases                               | 47.17<br>(36.71 to<br>62.82)               | 72.41<br>(47.23 to<br>106.92)                | 54.84<br>(35.82 to<br>80.17)               | 92.05<br>(57.48 to<br>141.16)                | 1.76<br>(1.40 to<br>2.42)             | 2.94<br>(1.91 to<br>4.32)             | 2.37<br>(1.56 to<br>3.47)             | 3.53<br>(2.23 to<br>5.40)             |
| Pancreatitis                                                   | 36.18<br>(27.51 to<br>54.15)               | 92.62<br>(48.27 to<br>189.48)                | 65.72<br>(37.83 to<br>123.43)              | 106.93<br>(55.26 to<br>215.50)               | 0.97<br>(0.73 to<br>1.49)             | 2.53<br>(1.40 to<br>5.07)             | 1.87<br>(1.14 to<br>3.30)             | 2.84<br>(1.55 to<br>5.66)             |
| Other digestive diseases                                       | 86.59<br>(62.46 to<br>121.81)              | 122.95<br>(90.19 to<br>163.24)               | 101.80<br>(73.23 to<br>136.54)             | 140.72<br>(102.33 to<br>189.96)              | 2.46<br>(1.89 to<br>3.17)             | 4.27<br>(3.16 to<br>5.62)             | 3.80<br>(2.77 to<br>5.00)             | 4.50<br>(3.35 to<br>5.80)             |
| <b>Neurological disorders</b>                                  | <b>303.61<br/>(258.54 to<br/>357.86)</b>   | <b>589.88<br/>(484.55 to<br/>729.57)</b>     | <b>569.61<br/>(475.21 to<br/>688.85)</b>   | <b>625.19<br/>(506.82 to<br/>786.13)</b>     | <b>13.72<br/>(11.55 to<br/>16.23)</b> | <b>33.98<br/>(26.52 to<br/>43.58)</b> | <b>38.70<br/>(31.29 to<br/>48.19)</b> | <b>30.48<br/>(22.75 to<br/>40.05)</b> |
| Alzheimer's disease and other dementias                        | 125.15<br>(101.98 to<br>153.89)            | 305.85<br>(234.07 to<br>406.54)              | 342.09<br>(269.64 to<br>442.00)            | 275.71<br>(199.32 to<br>386.02)              | 10.35<br>(8.43 to<br>12.70)           | 27.35<br>(20.13 to<br>36.85)          | 32.58<br>(25.18 to<br>41.90)          | 23.21<br>(15.81 to<br>32.98)          |
| Parkinson's disease                                            | 6.50<br>(4.79 to<br>8.44)                  | 19.81<br>(14.59 to<br>25.25)                 | 25.84<br>(19.43 to<br>33.01)               | 15.82<br>(11.47 to<br>20.59)                 | 0.47<br>(0.35 to<br>0.62)             | 1.55<br>(1.13 to<br>2.02)             | 2.12<br>(1.59 to<br>2.78)             | 1.18<br>(0.83 to<br>1.57)             |
| Epilepsy                                                       | 144.74<br>(111.09 to<br>189.28)            | 219.57<br>(149.67 to<br>313.02)              | 154.89<br>(107.99 to<br>212.01)            | 284.24<br>(194.03 to<br>403.32)              | 2.39<br>(1.87 to<br>3.01)             | 4.06<br>(2.81 to<br>5.75)             | 2.90<br>(2.03 to<br>3.97)             | 5.07<br>(3.49 to<br>7.15)             |
| Multiple sclerosis                                             | 1.61<br>(1.13 to<br>2.39)                  | 3.93<br>(2.65 to<br>5.95)                    | 4.11<br>(2.74 to<br>6.12)                  | 3.73<br>(2.53 to<br>5.67)                    | 0.04<br>(0.03 to<br>0.06)             | 0.11<br>(0.07 to<br>0.16)             | 0.12<br>(0.07 to<br>0.17)             | 0.10<br>(0.07 to<br>0.15)             |
| Motor neuron disease                                           | 1.78<br>(1.27 to<br>2.73)                  | 3.22<br>(2.24 to<br>5.31)                    | 3.49<br>(2.45 to<br>5.87)                  | 3.27<br>(2.29 to<br>5.48)                    | 0.04<br>(0.03 to<br>0.06)             | 0.10<br>(0.07 to<br>0.17)             | 0.11<br>(0.08 to<br>0.19)             | 0.09<br>(0.06 to<br>0.16)             |

|                              |                                                    |                                                      |                                                      |                                                      |                                                |                                                |                                                |                                                |
|------------------------------|----------------------------------------------------|------------------------------------------------------|------------------------------------------------------|------------------------------------------------------|------------------------------------------------|------------------------------------------------|------------------------------------------------|------------------------------------------------|
| Other neurological disorders | 23.83<br>(19.01 to<br>30.74)                       | 37.51<br>(28.91 to<br>46.96)                         | 39.19<br>(29.68 to<br>49.51)                         | 42.41<br>(33.99 to<br>52.78)                         | 0.41<br>(0.35 to<br>0.49)                      | 0.81<br>(0.59 to<br>1.01)                      | 0.88<br>(0.63 to<br>1.11)                      | 0.83<br>(0.64 to<br>1.02)                      |
| <b>Mental disorders</b>      | <b>73.71</b><br><b>(52.11 to</b><br><b>121.40)</b> | <b>184.09</b><br><b>(127.16 to</b><br><b>294.93)</b> | <b>176.67</b><br><b>(122.56 to</b><br><b>282.25)</b> | <b>188.59</b><br><b>(130.01 to</b><br><b>303.09)</b> | <b>1.69</b><br><b>(1.21 to</b><br><b>2.80)</b> | <b>4.21</b><br><b>(3.01 to</b><br><b>6.94)</b> | <b>4.09</b><br><b>(2.93 to</b><br><b>6.66)</b> | <b>4.26</b><br><b>(3.04 to</b><br><b>7.00)</b> |
| Alcohol use disorders        | 40.49<br>(26.74 to<br>89.01)                       | 80.60<br>(49.53 to<br>187.23)                        | 73.08<br>(44.76 to<br>170.62)                        | 84.03<br>(51.82 to<br>195.46)                        | 1.01<br>(0.68 to<br>2.23)                      | 2.03<br>(1.30 to<br>4.75)                      | 1.87<br>(1.20 to<br>4.44)                      | 2.09<br>(1.35 to<br>4.82)                      |
| Drug use disorders           | 32.97<br>(23.73 to<br>41.99)                       | 102.89<br>(70.53 to<br>140.67)                       | 102.99<br>(71.04 to<br>140.39)                       | 103.95<br>(71.14 to<br>142.31)                       | 0.67<br>(0.49 to<br>0.84)                      | 2.17<br>(1.54 to<br>2.86)                      | 2.21<br>(1.58 to<br>2.89)                      | 2.15<br>(1.52 to<br>2.83)                      |
| Opioid use disorders         | 26.29<br>(19.17 to<br>33.78)                       | 78.08<br>(53.63 to<br>107.42)                        | 77.67<br>(53.44 to<br>106.62)                        | 79.12<br>(54.40 to<br>109.15)                        | 0.53<br>(0.39 to<br>0.66)                      | 1.60<br>(1.13 to<br>2.15)                      | 1.61<br>(1.15 to<br>2.16)                      | 1.60<br>(1.13 to<br>2.15)                      |
| Cocaine use disorders        | 1.10<br>(0.47 to<br>1.79)                          | 3.88<br>(1.73 to<br>6.59)                            | 3.60<br>(1.62 to<br>5.79)                            | 4.09<br>(1.80 to<br>6.74)                            | 0.02<br>(0.01 to<br>0.04)                      | 0.08<br>(0.04 to<br>0.15)                      | 0.08<br>(0.04 to<br>0.12)                      | 0.09<br>(0.04 to<br>0.14)                      |
| Amphetamine use disorders    | 0.63<br>(0.31 to<br>1.07)                          | 3.12<br>(1.59 to<br>5.39)                            | 2.81<br>(1.42 to<br>4.76)                            | 3.37<br>(1.67 to<br>5.94)                            | 0.01<br>(0.01 to<br>0.02)                      | 0.06<br>(0.03 to<br>0.11)                      | 0.06<br>(0.03 to<br>0.10)                      | 0.07<br>(0.03 to<br>0.12)                      |
| Other drug use disorders     | 4.95<br>(3.11 to<br>7.14)                          | 17.81<br>(10.85 to<br>26.88)                         | 18.91<br>(11.47 to<br>28.81)                         | 17.36<br>(10.51 to<br>26.31)                         | 0.11<br>(0.07 to<br>0.16)                      | 0.41<br>(0.27 to<br>0.60)                      | 0.45<br>(0.30 to<br>0.65)                      | 0.39<br>(0.25 to<br>0.56)                      |
| Eating disorders             | 0.25<br>(0.14 to<br>0.47)                          | 0.60<br>(0.31 to<br>1.09)                            | 0.61<br>(0.32 to<br>1.12)                            | 0.61<br>(0.32 to<br>1.09)                            | 0.00<br>(0.00 to<br>0.01)                      | 0.01<br>(0.01 to<br>0.02)                      | 0.01<br>(0.01 to<br>0.02)                      | 0.01<br>(0.01 to<br>0.02)                      |

| Central Sub-Saharan Africa                                 |                                                        |                                                            |                                                          |                                                            |                                                   |                                                   |                                                   |                                                    |
|------------------------------------------------------------|--------------------------------------------------------|------------------------------------------------------------|----------------------------------------------------------|------------------------------------------------------------|---------------------------------------------------|---------------------------------------------------|---------------------------------------------------|----------------------------------------------------|
| Cause                                                      | YLLs (in 1000s)                                        |                                                            |                                                          |                                                            | Deaths (in 1000s)                                 |                                                   |                                                   |                                                    |
|                                                            | 2016                                                   | 2040 Forecast                                              | 2040 Better Scenario                                     | 2040 Worse Scenario                                        | 2016                                              | 2040 Forecast                                     | 2040 Better Scenario                              | 2040 Worse Scenario                                |
| <b>Diabetes, urogenital, blood, and endocrine diseases</b> | <b>896.69</b><br><b>(782.42 to</b><br><b>1,102.44)</b> | <b>1,651.57</b><br><b>(1,271.33 to</b><br><b>2,186.56)</b> | <b>1,232.02</b><br><b>(940.61 to</b><br><b>1,644.90)</b> | <b>2,060.72</b><br><b>(1,582.05 to</b><br><b>2,727.86)</b> | <b>25.87</b><br><b>(23.19 to</b><br><b>29.21)</b> | <b>62.23</b><br><b>(47.24 to</b><br><b>88.43)</b> | <b>48.85</b><br><b>(37.18 to</b><br><b>69.07)</b> | <b>73.04</b><br><b>(55.23 to</b><br><b>103.96)</b> |
| Diabetes mellitus                                          | 330.28<br>(293.58 to<br>370.04)                        | 814.71<br>(552.04 to<br>1,217.25)                          | 574.84<br>(391.83 to<br>842.90)                          | 980.95<br>(643.24 to<br>1,456.93)                          | 13.40<br>(11.84 to<br>15.09)                      | 35.02<br>(25.19 to<br>48.96)                      | 26.52<br>(19.27 to<br>36.77)                      | 39.97<br>(27.58 to<br>56.14)                       |
| Acute glomerulonephritis                                   | 1.40<br>(1.03 to<br>2.00)                              | 2.11<br>(1.48 to<br>3.11)                                  | 1.74<br>(1.24 to<br>2.49)                                | 2.75<br>(1.88 to<br>4.12)                                  | 0.02<br>(0.02 to<br>0.03)                         | 0.04<br>(0.03 to<br>0.06)                         | 0.04<br>(0.03 to<br>0.05)                         | 0.05<br>(0.04 to<br>0.07)                          |
| Chronic kidney disease                                     | 167.24<br>(146.02 to<br>189.99)                        | 381.18<br>(207.05 to<br>919.31)                            | 273.29<br>(146.93 to<br>658.55)                          | 512.03<br>(264.30 to<br>1,153.71)                          | 5.19<br>(4.60 to<br>5.87)                         | 15.65<br>(6.49 to<br>44.97)                       | 11.88<br>(4.95 to<br>34.23)                       | 20.22<br>(8.29 to<br>55.59)                        |
| Chronic kidney disease due to diabetes mellitus            | 38.27<br>(31.83 to<br>45.15)                           | 113.49<br>(52.63 to<br>303.67)                             | 82.69<br>(38.94 to<br>224.00)                            | 151.05<br>(64.88 to<br>384.19)                             | 1.45<br>(1.21 to<br>1.72)                         | 5.04<br>(1.93 to<br>15.65)                        | 3.84<br>(1.48 to<br>11.61)                        | 6.52<br>(2.38 to<br>18.24)                         |
| Chronic kidney disease due to hypertension                 | 21.02<br>(17.31 to<br>25.45)                           | 64.20<br>(25.40 to<br>197.03)                              | 47.62<br>(19.07 to<br>145.04)                            | 84.42<br>(32.26 to<br>239.68)                              | 1.02<br>(0.83 to<br>1.23)                         | 3.67<br>(1.23 to<br>11.54)                        | 2.91<br>(0.99 to<br>9.10)                         | 4.60<br>(1.51 to<br>13.50)                         |
| Chronic kidney disease due to glomerulonephritis           | 51.01<br>(42.22 to<br>60.49)                           | 93.81<br>(57.69 to<br>182.62)                              | 65.61<br>(41.02 to<br>128.52)                            | 127.48<br>(78.03 to<br>236.55)                             | 1.23<br>(1.02 to<br>1.47)                         | 3.02<br>(1.45 to<br>7.72)                         | 2.20<br>(1.07 to<br>5.65)                         | 3.97<br>(1.87 to<br>9.68)                          |
| Chronic kidney disease due to other and unspecified causes | 56.95<br>(46.82 to<br>67.60)                           | 109.68<br>(62.93 to<br>220.45)                             | 77.37<br>(44.80 to<br>157.85)                            | 149.07<br>(85.49 to<br>299.20)                             | 1.49<br>(1.23 to<br>1.76)                         | 3.92<br>(1.81 to<br>10.42)                        | 2.92<br>(1.32 to<br>7.78)                         | 5.12<br>(2.30 to<br>12.82)                         |
| Urinary diseases and male infertility                      | 73.21<br>(58.66 to<br>92.22)                           | 98.15<br>(80.70 to<br>120.19)                              | 89.48<br>(73.11 to<br>111.14)                            | 112.66<br>(92.23 to<br>138.69)                             | 1.92<br>(1.62 to<br>2.30)                         | 3.67<br>(3.10 to<br>4.38)                         | 3.68<br>(3.08 to<br>4.44)                         | 3.67<br>(3.07 to<br>4.36)                          |
| Urinary tract infections                                   | 35.16<br>(21.24 to<br>51.01)                           | 59.77<br>(39.28 to<br>78.93)                               | 57.97<br>(38.76 to<br>76.67)                             | 66.14<br>(43.08 to<br>87.81)                               | 0.91<br>(0.58 to<br>1.23)                         | 2.27<br>(1.50 to<br>3.01)                         | 2.41<br>(1.61 to<br>3.19)                         | 2.17<br>(1.43 to<br>2.86)                          |
| Urolithiasis                                               | 1.15<br>(0.62 to<br>1.82)                              | 2.52<br>(1.35 to<br>4.15)                                  | 2.33<br>(1.29 to<br>3.84)                                | 2.74<br>(1.47 to<br>4.45)                                  | 0.03<br>(0.01 to<br>0.06)                         | 0.07<br>(0.04 to<br>0.14)                         | 0.07<br>(0.04 to<br>0.14)                         | 0.07<br>(0.04 to<br>0.14)                          |

|                                                   |                                      |                                     |                                     |                                       |                              |                              |                              |                              |
|---------------------------------------------------|--------------------------------------|-------------------------------------|-------------------------------------|---------------------------------------|------------------------------|------------------------------|------------------------------|------------------------------|
| Other urinary diseases                            | 36.89<br>(25.37 to<br>49.64)         | 35.86<br>(24.22 to<br>48.60)        | 29.18<br>(19.51 to<br>41.14)        | 43.77<br>(29.67 to<br>59.83)          | 0.98<br>(0.73 to<br>1.21)    | 1.33<br>(0.89 to<br>1.79)    | 1.20<br>(0.79 to<br>1.67)    | 1.42<br>(0.98 to<br>1.89)    |
| Gynecological diseases                            | 6.03<br>(4.10 to<br>7.60)            | 10.02<br>(6.36 to<br>14.08)         | 7.68<br>(4.80 to<br>10.80)          | 11.62<br>(7.18 to<br>15.92)           | 0.15<br>(0.11 to<br>0.19)    | 0.25<br>(0.17 to<br>0.34)    | 0.19<br>(0.13 to<br>0.26)    | 0.28<br>(0.18 to<br>0.38)    |
| Uterine fibroids                                  | 2.08<br>(0.94 to<br>3.48)            | 2.90<br>(1.10 to<br>5.34)           | 2.15<br>(0.78 to<br>4.03)           | 3.41<br>(1.34 to<br>6.18)             | 0.06<br>(0.03 to<br>0.09)    | 0.08<br>(0.03 to<br>0.14)    | 0.06<br>(0.02 to<br>0.11)    | 0.09<br>(0.04 to<br>0.16)    |
| Polycystic ovarian syndrome                       | 0.62<br>(0.07 to<br>1.54)            | 0.71<br>(0.07 to<br>1.91)           | 0.45<br>(0.05 to<br>1.23)           | 0.91<br>(0.10 to<br>2.41)             | 0.01<br>(0.00 to<br>0.03)    | 0.02<br>(0.00 to<br>0.04)    | 0.01<br>(0.00 to<br>0.03)    | 0.02<br>(0.00 to<br>0.05)    |
| Endometriosis                                     | 0.02<br>(0.01 to<br>0.05)            | 0.05<br>(0.02 to<br>0.16)           | 0.04<br>(0.01 to<br>0.12)           | 0.06<br>(0.02 to<br>0.19)             | 0.00<br>(0.00 to<br>0.00)    | 0.00<br>(0.00 to<br>0.00)    | 0.00<br>(0.00 to<br>0.00)    | 0.00<br>(0.00 to<br>0.00)    |
| Genital prolapse                                  | 0.19<br>(0.09 to<br>0.35)            | 0.23<br>(0.10 to<br>0.44)           | 0.17<br>(0.07 to<br>0.33)           | 0.26<br>(0.12 to<br>0.51)             | 0.01<br>(0.00 to<br>0.02)    | 0.01<br>(0.00 to<br>0.02)    | 0.01<br>(0.00 to<br>0.01)    | 0.01<br>(0.00 to<br>0.02)    |
| Other gynecological diseases                      | 3.12<br>(1.62 to<br>4.66)            | 6.13<br>(3.27 to<br>9.00)           | 4.88<br>(2.71 to<br>7.09)           | 6.98<br>(3.71 to<br>10.31)            | 0.07<br>(0.04 to<br>0.11)    | 0.14<br>(0.08 to<br>0.20)    | 0.12<br>(0.07 to<br>0.16)    | 0.16<br>(0.08 to<br>0.23)    |
| Hemoglobinopathies and hemolytic anemias          | 262.88<br>(188.18 to<br>461.46)      | 272.88<br>(201.88 to<br>397.82)     | 221.69<br>(166.23 to<br>319.38)     | 347.98<br>(256.11 to<br>533.12)       | 4.19<br>(3.17 to<br>6.74)    | 5.76<br>(4.45 to<br>7.96)    | 4.82<br>(3.72 to<br>6.45)    | 6.79<br>(5.19 to<br>9.62)    |
| Thalassemias                                      | 0.18<br>(0.11 to<br>0.39)            | 0.07<br>(0.04 to<br>0.15)           | 0.08<br>(0.04 to<br>0.17)           | 0.10<br>(0.06 to<br>0.23)             | 0.00<br>(0.00 to<br>0.00)    | 0.00<br>(0.00 to<br>0.00)    | 0.00<br>(0.00 to<br>0.00)    | 0.00<br>(0.00 to<br>0.00)    |
| Sickle cell disorders                             | 242.07<br>(170.15 to<br>435.29)      | 230.00<br>(167.36 to<br>343.18)     | 186.67<br>(136.14 to<br>274.51)     | 300.40<br>(215.78 to<br>468.40)       | 3.35<br>(2.42 to<br>5.73)    | 3.83<br>(2.82 to<br>5.46)    | 3.15<br>(2.33 to<br>4.46)    | 4.78<br>(3.50 to<br>7.04)    |
| G6PD deficiency                                   | 13.28<br>(10.49 to<br>18.56)         | 31.88<br>(24.59 to<br>43.51)        | 25.30<br>(19.29 to<br>34.32)        | 36.26<br>(28.16 to<br>49.32)          | 0.40<br>(0.32 to<br>0.53)    | 1.19<br>(0.92 to<br>1.60)    | 0.97<br>(0.74 to<br>1.30)    | 1.29<br>(1.01 to<br>1.74)    |
| Other hemoglobinopathies and hemolytic anemias    | 7.36<br>(5.92 to<br>9.77)            | 10.92<br>(8.54 to<br>14.75)         | 9.65<br>(7.52 to<br>13.11)          | 11.21<br>(8.68 to<br>15.30)           | 0.45<br>(0.36 to<br>0.61)    | 0.74<br>(0.57 to<br>1.02)    | 0.70<br>(0.54 to<br>0.96)    | 0.72<br>(0.54 to<br>1.01)    |
| Endocrine, metabolic, blood, and immune disorders | 55.65<br>(25.04 to<br>109.42)        | 72.52<br>(27.31 to<br>155.48)       | 63.30<br>(23.58 to<br>138.72)       | 92.73<br>(37.02 to<br>193.77)         | 0.99<br>(0.40 to<br>1.98)    | 1.84<br>(0.63 to<br>3.99)    | 1.72<br>(0.58 to<br>3.80)    | 2.05<br>(0.74 to<br>4.38)    |
| <b>Central Sub-Saharan Africa</b>                 |                                      |                                     |                                     |                                       |                              |                              |                              |                              |
| Cause                                             | YLLs (in 1000s)                      |                                     |                                     |                                       | Deaths (in 1000s)            |                              |                              |                              |
|                                                   | 2016                                 | 2040 Forecast                       | 2040 Better Scenario                | 2040 Worse Scenario                   | 2016                         | 2040 Forecast                | 2040 Better Scenario         | 2040 Worse Scenario          |
| Musculoskeletal disorders                         | 23.68<br>(17.19 to<br>29.93)         | 57.09<br>(39.47 to<br>75.39)        | 59.22<br>(40.98 to<br>78.67)        | 56.88<br>(39.74 to<br>74.85)          | 0.61<br>(0.45 to<br>0.75)    | 1.62<br>(1.16 to<br>2.06)    | 1.71<br>(1.21 to<br>2.21)    | 1.56<br>(1.13 to<br>1.96)    |
| Rheumatoid arthritis                              | 4.93<br>(3.29 to<br>7.19)            | 11.58<br>(7.82 to<br>17.02)         | 9.84<br>(6.43 to<br>14.65)          | 12.50<br>(8.31 to<br>18.53)           | 0.19<br>(0.13 to<br>0.26)    | 0.50<br>(0.34 to<br>0.71)    | 0.45<br>(0.30 to<br>0.65)    | 0.51<br>(0.35 to<br>0.72)    |
| Other musculoskeletal disorders                   | 18.75<br>(13.56 to<br>24.40)         | 45.51<br>(30.92 to<br>62.41)        | 49.38<br>(33.71 to<br>66.95)        | 44.38<br>(30.42 to<br>60.87)          | 0.42<br>(0.31 to<br>0.54)    | 1.12<br>(0.77 to<br>1.50)    | 1.26<br>(0.87 to<br>1.67)    | 1.04<br>(0.72 to<br>1.39)    |
| Other non-communicable diseases                   | 1836.85<br>(1,065.64 to<br>2,803.37) | 1341.59<br>(860.76 to<br>1,938.37)  | 1,046.88<br>(703.11 to<br>1,463.67) | 2,264.55<br>(1,378.33 to<br>3,331.18) | 23.19<br>(14.07 to<br>34.70) | 22.64<br>(16.38 to<br>30.88) | 19.59<br>(14.74 to<br>26.39) | 32.96<br>(22.18 to<br>46.51) |
| Congenital birth defects                          | 1,625.52<br>(876.36 to<br>2,537.49)  | 1,011.12<br>(551.31 to<br>1,574.00) | 741.61<br>(417.58 to<br>1,119.31)   | 1,843.66<br>(982.14 to<br>2,890.18)   | 19.19<br>(10.47 to<br>29.77) | 12.42<br>(7.07 to<br>18.93)  | 9.19<br>(5.42 to<br>13.65)   | 22.18<br>(12.22 to<br>34.42) |
| Neural tube defects                               | 309.84<br>(148.96 to<br>588.04)      | 79.02<br>(32.53 to<br>159.76)       | 47.99<br>(20.03 to<br>98.31)        | 158.60<br>(67.87 to<br>320.56)        | 3.62<br>(1.74 to<br>6.88)    | 0.94<br>(0.40 to<br>1.90)    | 0.58<br>(0.24 to<br>1.17)    | 1.87<br>(0.81 to<br>3.76)    |
| Congenital heart anomalies                        | 462.60<br>(229.89 to<br>808.93)      | 313.88<br>(173.38 to<br>551.24)     | 237.00<br>(135.88 to<br>396.87)     | 553.10<br>(296.99 to<br>970.82)       | 5.52<br>(2.79 to<br>9.58)    | 3.97<br>(2.26 to<br>6.72)    | 3.03<br>(1.82 to<br>4.94)    | 6.79<br>(3.76 to<br>11.78)   |



|                                                 |                                                            |                                                            |                                                            |                                                            |                                                   |                                                   |                                                   |                                                   |
|-------------------------------------------------|------------------------------------------------------------|------------------------------------------------------------|------------------------------------------------------------|------------------------------------------------------------|---------------------------------------------------|---------------------------------------------------|---------------------------------------------------|---------------------------------------------------|
| Other road injuries                             | 4.94<br>(3.61 to<br>7.28)                                  | 9.30<br>(6.21 to<br>14.08)                                 | 7.52<br>(5.12 to<br>11.21)                                 | 11.46<br>(7.64 to<br>17.20)                                | 0.08<br>(0.06 to<br>0.11)                         | 0.17<br>(0.12 to<br>0.26)                         | 0.14<br>(0.10 to<br>0.21)                         | 0.20<br>(0.14 to<br>0.30)                         |
| Other transport injuries                        | 57.27<br>(38.36 to<br>77.20)                               | 111.84<br>(72.64 to<br>168.58)                             | 89.08<br>(59.46 to<br>132.95)                              | 134.72<br>(88.63 to<br>200.20)                             | 0.97<br>(0.69 to<br>1.27)                         | 2.12<br>(1.41 to<br>3.17)                         | 1.71<br>(1.17 to<br>2.51)                         | 2.47<br>(1.66 to<br>3.66)                         |
| <b>Unintentional injuries</b>                   | <b>2,077.65</b><br><b>(1,595.72 to</b><br><b>2,642.56)</b> | <b>1,720.07</b><br><b>(1,396.86 to</b><br><b>2,094.21)</b> | <b>1,387.27</b><br><b>(1,127.41 to</b><br><b>1,700.96)</b> | <b>2,319.90</b><br><b>(1,837.50 to</b><br><b>2,908.89)</b> | <b>34.64</b><br><b>(28.96 to</b><br><b>41.60)</b> | <b>37.90</b><br><b>(32.45 to</b><br><b>44.18)</b> | <b>32.78</b><br><b>(27.97 to</b><br><b>38.29)</b> | <b>45.27</b><br><b>(38.07 to</b><br><b>53.21)</b> |
| Falls                                           | 206.54<br>(161.36 to<br>279.87)                            | 271.12<br>(219.67 to<br>343.46)                            | 248.38<br>(200.32 to<br>315.02)                            | 309.82<br>(247.23 to<br>403.83)                            | 5.44<br>(4.47 to<br>6.74)                         | 9.64<br>(7.92 to<br>11.76)                        | 9.59<br>(7.96 to<br>11.67)                        | 9.65<br>(7.94 to<br>11.83)                        |
| Drowning                                        | 747.27<br>(519.80 to<br>1,040.57)                          | 489.91<br>(364.94 to<br>666.31)                            | 383.92<br>(284.98 to<br>514.13)                            | 696.09<br>(490.96 to<br>983.62)                            | 10.35<br>(7.76 to<br>13.85)                       | 7.94<br>(6.14 to<br>10.31)                        | 6.36<br>(4.90 to<br>8.19)                         | 10.61<br>(7.93 to<br>14.31)                       |
| Fire, heat, and hot substances                  | 246.15<br>(167.89 to<br>376.18)                            | 174.15<br>(117.60 to<br>273.07)                            | 134.05<br>(92.29 to<br>205.40)                             | 238.52<br>(158.22 to<br>384.48)                            | 4.38<br>(3.18 to<br>6.22)                         | 4.20<br>(2.95 to<br>6.15)                         | 3.46<br>(2.42 to<br>4.99)                         | 5.06<br>(3.54 to<br>7.61)                         |
| Poisonings                                      | 111.09<br>(62.96 to<br>207.18)                             | 61.70<br>(38.61 to<br>101.33)                              | 42.30<br>(26.42 to<br>67.01)                               | 92.66<br>(54.16 to<br>162.31)                              | 1.82<br>(1.14 to<br>2.98)                         | 1.26<br>(0.84 to<br>1.90)                         | 0.91<br>(0.61 to<br>1.33)                         | 1.70<br>(1.07 to<br>2.66)                         |
| Exposure to mechanical forces                   | 271.56<br>(190.93 to<br>396.51)                            | 234.19<br>(173.53 to<br>316.12)                            | 181.61<br>(134.47 to<br>239.49)                            | 323.58<br>(232.58 to<br>447.31)                            | 4.20<br>(3.15 to<br>5.75)                         | 4.35<br>(3.27 to<br>5.67)                         | 3.51<br>(2.66 to<br>4.52)                         | 5.53<br>(4.14 to<br>7.23)                         |
| Unintentional firearm injuries                  | 31.65<br>(23.11 to<br>41.59)                               | 31.58<br>(21.70 to<br>45.08)                               | 24.25<br>(16.55 to<br>35.32)                               | 39.04<br>(26.80 to<br>55.14)                               | 0.55<br>(0.40 to<br>0.71)                         | 0.60<br>(0.42 to<br>0.84)                         | 0.47<br>(0.33 to<br>0.67)                         | 0.71<br>(0.50 to<br>0.99)                         |
| Unintentional suffocation                       | 97.89<br>(47.22 to<br>193.41)                              | 58.29<br>(31.22 to<br>107.50)                              | 42.25<br>(23.05 to<br>75.16)                               | 100.85<br>(50.12 to<br>187.63)                             | 1.20<br>(0.60 to<br>2.34)                         | 0.77<br>(0.44 to<br>1.37)                         | 0.57<br>(0.33 to<br>0.97)                         | 1.28<br>(0.68 to<br>2.31)                         |
| Other exposure to mechanical forces             | 142.02<br>(103.40 to<br>182.36)                            | 144.32<br>(106.67 to<br>192.17)                            | 115.12<br>(84.17 to<br>156.67)                             | 183.69<br>(135.75 to<br>241.41)                            | 2.45<br>(1.86 to<br>3.05)                         | 2.98<br>(2.24 to<br>3.98)                         | 2.48<br>(1.84 to<br>3.39)                         | 3.53<br>(2.66 to<br>4.62)                         |
| Adverse effects of medical treatment            | 123.26<br>(83.66 to<br>185.69)                             | 116.55<br>(92.77 to<br>153.38)                             | 95.49<br>(76.92 to<br>123.04)                              | 155.51<br>(116.96 to<br>218.79)                            | 2.18<br>(1.75 to<br>2.93)                         | 2.71<br>(2.25 to<br>3.36)                         | 2.37<br>(1.93 to<br>2.99)                         | 3.18<br>(2.65 to<br>4.02)                         |
| Animal contact                                  | 115.48<br>(86.06 to<br>155.97)                             | 137.71<br>(103.16 to<br>188.23)                            | 102.23<br>(76.60 to<br>141.04)                             | 186.06<br>(135.39 to<br>251.79)                            | 2.21<br>(1.74 to<br>2.89)                         | 3.24<br>(2.55 to<br>4.41)                         | 2.55<br>(2.00 to<br>3.51)                         | 3.94<br>(3.06 to<br>5.26)                         |
| Venomous animal contact                         | 82.54<br>(58.85 to<br>117.04)                              | 94.78<br>(70.04 to<br>136.95)                              | 70.18<br>(52.06 to<br>98.83)                               | 128.17<br>(90.02 to<br>179.70)                             | 1.64<br>(1.28 to<br>2.23)                         | 2.33<br>(1.81 to<br>3.28)                         | 1.84<br>(1.42 to<br>2.56)                         | 2.82<br>(2.15 to<br>3.89)                         |
| Non-venomous animal contact                     | 32.94<br>(16.66 to<br>53.53)                               | 42.93<br>(22.73 to<br>65.28)                               | 32.05<br>(17.62 to<br>48.63)                               | 57.89<br>(31.04 to<br>90.46)                               | 0.57<br>(0.30 to<br>0.87)                         | 0.91<br>(0.49 to<br>1.34)                         | 0.71<br>(0.39 to<br>1.07)                         | 1.12<br>(0.60 to<br>1.66)                         |
| Foreign body                                    | 145.11<br>(81.96 to<br>233.84)                             | 124.57<br>(80.72 to<br>177.20)                             | 115.33<br>(76.15 to<br>162.45)                             | 176.80<br>(107.37 to<br>274.06)                            | 2.07<br>(1.28 to<br>3.06)                         | 2.24<br>(1.56 to<br>3.01)                         | 2.19<br>(1.53 to<br>2.94)                         | 2.80<br>(1.88 to<br>3.87)                         |
| Pulmonary aspiration and foreign body in airway | 133.70<br>(74.76 to<br>220.66)                             | 112.66<br>(73.49 to<br>165.58)                             | 105.25<br>(70.25 to<br>149.66)                             | 161.37<br>(97.19 to<br>237.37)                             | 1.89<br>(1.18 to<br>2.85)                         | 2.01<br>(1.45 to<br>2.63)                         | 1.99<br>(1.43 to<br>2.57)                         | 2.53<br>(1.71 to<br>3.58)                         |
| Foreign body in other body part                 | 11.41<br>(3.47 to<br>22.99)                                | 11.92<br>(3.57 to<br>26.40)                                | 10.08<br>(2.82 to<br>22.82)                                | 15.43<br>(4.75 to<br>33.15)                                | 0.18<br>(0.06 to<br>0.38)                         | 0.23<br>(0.07 to<br>0.52)                         | 0.20<br>(0.05 to<br>0.47)                         | 0.27<br>(0.08 to<br>0.60)                         |
| Environmental heat and cold exposure            | 43.38<br>(27.17 to<br>57.39)                               | 48.32<br>(28.20 to<br>67.06)                               | 33.31<br>(18.79 to<br>45.58)                               | 63.37<br>(37.02 to<br>87.13)                               | 0.83<br>(0.51 to<br>1.05)                         | 1.10<br>(0.63 to<br>1.46)                         | 0.79<br>(0.44 to<br>1.04)                         | 1.34<br>(0.77 to<br>1.78)                         |
| Other unintentional injuries                    | 67.81<br>(50.96 to<br>88.90)                               | 61.85<br>(45.92 to<br>84.13)                               | 50.64<br>(37.02 to<br>69.75)                               | 77.48<br>(56.98 to<br>104.26)                              | 1.16<br>(0.88 to<br>1.48)                         | 1.23<br>(0.92 to<br>1.65)                         | 1.04<br>(0.78 to<br>1.40)                         | 1.45<br>(1.09 to<br>1.91)                         |
| <b>Self-harm and interpersonal violence</b>     | <b>560.24</b><br><b>(472.15 to</b><br><b>677.77)</b>       | <b>1,038.54</b><br><b>(765.21 to</b><br><b>1,438.12)</b>   | <b>932.30</b><br><b>(709.43 to</b><br><b>1,259.04)</b>     | <b>1,118.12</b><br><b>(825.16 to</b><br><b>1,543.10)</b>   | <b>11.47</b><br><b>(9.57 to</b><br><b>13.65)</b>  | <b>22.88</b><br><b>(16.97 to</b><br><b>31.31)</b> | <b>20.85</b><br><b>(15.93 to</b><br><b>27.67)</b> | <b>24.01</b><br><b>(17.73 to</b><br><b>32.84)</b> |
| <b>Central Sub-Saharan Africa</b>               |                                                            |                                                            |                                                            |                                                            |                                                   |                                                   |                                                   |                                                   |
| <b>YLLs (in 1000s)</b>                          |                                                            |                                                            |                                                            |                                                            | <b>Deaths (in 1000s)</b>                          |                                                   |                                                   |                                                   |



| Cause                                                                        | 2016                                | 2040 Forecast                      | 2040 Better Scenario               | 2040 Worse Scenario                  | 2016                           | 2040 Forecast                | 2040 Better Scenario         | 2040 Worse Scenario          |
|------------------------------------------------------------------------------|-------------------------------------|------------------------------------|------------------------------------|--------------------------------------|--------------------------------|------------------------------|------------------------------|------------------------------|
|                                                                              | Self-harm                           | 275.41<br>(207.96 to 373.74)       | 628.72<br>(408.28 to 947.33)       | 544.64<br>(367.63 to 789.45)         | 676.63<br>(432.74 to 1,016.09) | 6.63<br>(5.08 to 8.70)       | 15.54<br>(10.43 to 22.27)    | 13.88<br>(9.63 to 19.23)     |
| Self-harm by firearm                                                         | 22.44<br>(12.34 to 34.96)           | 38.75<br>(18.53 to 68.17)          | 32.30<br>(16.34 to 55.14)          | 42.56<br>(20.61 to 75.13)            | 0.52<br>(0.29 to 0.78)         | 0.95<br>(0.48 to 1.59)       | 0.81<br>(0.43 to 1.32)       | 1.01<br>(0.51 to 1.70)       |
| Self-harm by other specified means                                           | 252.98<br>(191.05 to 339.16)        | 589.97<br>(378.80 to 885.74)       | 512.35<br>(347.41 to 745.01)       | 634.07<br>(400.20 to 950.62)         | 6.10<br>(4.70 to 7.98)         | 14.60<br>(9.67 to 20.94)     | 13.06<br>(9.08 to 18.18)     | 15.22<br>(9.88 to 22.09)     |
| Interpersonal violence                                                       | 284.83<br>(224.79 to 352.68)        | 409.82<br>(290.70 to 566.84)       | 387.66<br>(278.61 to 535.13)       | 441.49<br>(312.81 to 606.01)         | 4.84<br>(3.85 to 5.96)         | 7.34<br>(5.26 to 10.01)      | 6.97<br>(5.08 to 9.50)       | 7.77<br>(5.53 to 10.59)      |
| Physical violence by firearm                                                 | 88.28<br>(43.26 to 130.88)          | 131.82<br>(63.51 to 210.17)        | 127.80<br>(62.04 to 204.45)        | 137.77<br>(66.42 to 219.95)          | 1.52<br>(0.75 to 2.27)         | 2.53<br>(1.14 to 3.72)       | 2.27<br>(1.13 to 3.62)       | 2.41<br>(1.18 to 3.86)       |
| Physical violence by sharp object                                            | 75.04<br>(48.68 to 102.81)          | 124.24<br>(72.14 to 185.14)        | 125.43<br>(73.50 to 186.36)        | 126.97<br>(73.70 to 189.34)          | 1.30<br>(0.85 to 1.78)         | 2.23<br>(1.32 to 3.33)       | 2.26<br>(1.34 to 3.35)       | 2.25<br>(1.34 to 3.35)       |
| Physical violence by other means                                             | 121.51<br>(88.88 to 175.87)         | 153.76<br>(96.58 to 243.23)        | 134.42<br>(85.22 to 211.51)        | 176.75<br>(112.10 to 281.08)         | 2.01<br>(1.49 to 2.95)         | 2.78<br>(1.76 to 4.38)       | 2.44<br>(1.57 to 3.78)       | 3.10<br>(1.98 to 4.92)       |
| Forces of nature, conflict and terrorism, and executions and police conflict | 72.85<br>(12.33 to 138.55)          | 65.85<br>(0.00 to 641.69)          | 64.47<br>(0.00 to 621.01)          | 74.70<br>(0.00 to 726.27)            | 1.15<br>(0.20 to 2.19)         | 1.13<br>(0.00 to 10.84)      | 1.12<br>(0.00 to 10.68)      | 1.23<br>(0.00 to 11.80)      |
| Exposure to forces of nature                                                 | 3.52<br>(0.56 to 6.74)              | 2.67<br>(0.00 to 24.67)            | 2.59<br>(0.00 to 23.68)            | 3.11<br>(0.00 to 28.55)              | 0.06<br>(0.01 to 0.11)         | 0.05<br>(0.00 to 0.44)       | 0.05<br>(0.01 to 0.43)       | 0.05<br>(0.00 to 0.48)       |
| Conflict and terrorism                                                       | 68.39<br>(10.85 to 131.08)          | 54.74<br>(0.00 to 641.24)          | 53.57<br>(0.00 to 620.56)          | 62.62<br>(0.00 to 725.81)            | 1.08<br>(0.17 to 2.07)         | 0.93<br>(0.00 to 10.83)      | 0.92<br>(0.00 to 10.67)      | 1.02<br>(0.00 to 11.79)      |
| Executions and police conflict                                               | 0.94<br>(0.74 to 1.43)              | 8.44<br>(0.00 to 191.15)           | 8.32<br>(0.00 to 188.29)           | 8.97<br>(0.00 to 203.44)             | 0.02<br>(0.01 to 0.02)         | 0.15<br>(0.00 to 3.38)       | 0.15<br>(0.00 to 3.36)       | 0.16<br>(0.00 to 3.53)       |
| <b>Angola</b>                                                                |                                     |                                    |                                    |                                      |                                |                              |                              |                              |
| Cause                                                                        | YLLs (in 1000s)                     |                                    |                                    |                                      | Deaths (in 1000s)              |                              |                              |                              |
|                                                                              | 2016                                | 2040 Forecast                      | 2040 Better Scenario               | 2040 Worse Scenario                  | 2016                           | 2040 Forecast                | 2040 Better Scenario         | 2040 Worse Scenario          |
| All causes                                                                   | 8,965.00<br>(7,017.41 to 11,483.26) | 6,842.99<br>(4,994.47 to 9,514.20) | 5,520.54<br>(3,992.56 to 7,783.80) | 12,796.49<br>(9,399.62 to 17,800.18) | 167.65<br>(136.22 to 208.84)   | 204.11<br>(158.42 to 265.45) | 169.64<br>(133.25 to 220.71) | 311.60<br>(245.59 to 402.62) |
| Communicable, maternal, neonatal, and nutritional diseases                   | 6,185.99<br>(4,622.45 to 8,134.43)  | 2,871.98<br>(1,792.08 to 4,363.00) | 2,167.03<br>(1,292.35 to 3,370.56) | 7,221.05<br>(4,806.46 to 10,704.54)  | 95.18<br>(74.04 to 119.99)     | 64.80<br>(41.60 to 99.09)    | 48.75<br>(30.82 to 75.76)    | 134.72<br>(93.12 to 194.32)  |
| HIV/AIDS and tuberculosis                                                    | 982.11<br>(721.13 to 1,366.66)      | 989.22<br>(367.87 to 1,839.82)     | 622.17<br>(177.51 to 1,430.87)     | 2,006.76<br>(1,163.48 to 3,103.69)   | 21.39<br>(16.13 to 29.00)      | 22.50<br>(9.73 to 39.42)     | 14.15<br>(4.84 to 31.33)     | 44.41<br>(26.77 to 66.16)    |
| Tuberculosis                                                                 | 436.54<br>(327.36 to 587.18)        | 288.14<br>(140.98 to 545.47)       | 170.39<br>(91.85 to 307.82)        | 632.88<br>(317.40 to 1,196.91)       | 11.19<br>(8.43 to 15.15)       | 8.49<br>(4.49 to 15.07)      | 5.20<br>(3.06 to 8.88)       | 17.51<br>(9.30 to 31.47)     |
| HIV/AIDS                                                                     | 545.58<br>(312.45 to 910.94)        | 701.08<br>(120.66 to 1,569.21)     | 451.78<br>(35.19 to 1,281.01)      | 1,373.88<br>(593.89 to 2,309.60)     | 10.20<br>(5.82 to 16.90)       | 14.01<br>(2.09 to 30.98)     | 8.95<br>(0.56 to 25.74)      | 26.90<br>(11.41 to 45.36)    |
| Diarrhea, lower respiratory, and other common infectious diseases            | 2,207.07<br>(1,600.41 to 3,001.81)  | 971.73<br>(475.16 to 1,827.13)     | 736.75<br>(353.04 to 1,377.37)     | 2,753.61<br>(1,345.20 to 4,933.69)   | 34.91<br>(26.87 to 45.76)      | 26.71<br>(13.48 to 51.39)    | 20.40<br>(10.65 to 38.35)    | 55.58<br>(28.98 to 97.02)    |
| Diarrheal diseases                                                           | 933.02<br>(625.77 to 1,378.74)      | 436.16<br>(116.27 to 1,114.07)     | 307.16<br>(67.92 to 793.63)        | 1,019.23<br>(384.26 to 2,137.93)     | 15.21<br>(10.35 to 22.39)      | 11.96<br>(2.60 to 33.39)     | 8.21<br>(1.74 to 23.97)      | 23.04<br>(6.97 to 52.88)     |
| Intestinal infectious diseases                                               | 26.04<br>(12.37 to 47.98)           | 13.27<br>(4.86 to 26.85)           | 12.25<br>(4.45 to 24.57)           | 23.74<br>(8.64 to 48.57)             | 0.35<br>(0.17 to 0.64)         | 0.20<br>(0.08 to 0.41)       | 0.19<br>(0.07 to 0.38)       | 0.34<br>(0.13 to 0.70)       |



|                                                       |                                                     |                                                    |                                                   |                                                     |                                                |                                                |                                                |                                                |                                                |
|-------------------------------------------------------|-----------------------------------------------------|----------------------------------------------------|---------------------------------------------------|-----------------------------------------------------|------------------------------------------------|------------------------------------------------|------------------------------------------------|------------------------------------------------|------------------------------------------------|
| Leishmaniasis                                         | 0.00<br>(0.00 to<br>0.00)                           | 0.00<br>(0.00 to<br>0.00)                          | 0.00<br>(0.00 to<br>0.00)                         | 0.00<br>(0.00 to<br>0.00)                           | 0.00<br>(0.00 to<br>0.00)                      | 0.00<br>(0.00 to<br>0.00)                      | 0.00<br>(0.00 to<br>0.00)                      | 0.00<br>(0.00 to<br>0.00)                      | 0.00<br>(0.00 to<br>0.00)                      |
| African trypanosomiasis                               | 1.44<br>(0.63 to<br>2.56)                           | 0.14<br>(0.06 to<br>0.29)                          | 0.14<br>(0.06 to<br>0.29)                         | 0.15<br>(0.06 to<br>0.30)                           | 0.03<br>(0.01 to<br>0.04)                      | 0.00<br>(0.00 to<br>0.01)                      | 0.00<br>(0.00 to<br>0.01)                      | 0.00<br>(0.00 to<br>0.01)                      | 0.00<br>(0.00 to<br>0.01)                      |
| Schistosomiasis                                       | 9.51<br>(6.26 to<br>13.73)                          | 7.18<br>(4.37 to<br>11.41)                         | 6.63<br>(4.01 to<br>10.74)                        | 9.46<br>(5.80 to<br>14.45)                          | 0.25<br>(0.16 to<br>0.36)                      | 0.22<br>(0.14 to<br>0.33)                      | 0.21<br>(0.13 to<br>0.32)                      | 0.28<br>(0.18 to<br>0.41)                      | 0.28<br>(0.18 to<br>0.41)                      |
| Cysticercosis                                         | 1.12<br>(0.82 to<br>1.52)                           | 0.52<br>(0.33 to<br>0.82)                          | 0.50<br>(0.31 to<br>0.79)                         | 0.63<br>(0.42 to<br>0.94)                           | 0.02<br>(0.02 to<br>0.03)                      | 0.01<br>(0.01 to<br>0.02)                      | 0.01<br>(0.01 to<br>0.02)                      | 0.01<br>(0.01 to<br>0.02)                      | 0.01<br>(0.01 to<br>0.02)                      |
| Cystic echinococcosis                                 | 0.34<br>(0.24 to<br>0.48)                           | 0.10<br>(0.06 to<br>0.17)                          | 0.08<br>(0.05 to<br>0.13)                         | 0.26<br>(0.16 to<br>0.42)                           | 0.01<br>(0.00 to<br>0.01)                      | 0.00<br>(0.00 to<br>0.00)                      | 0.00<br>(0.00 to<br>0.00)                      | 0.01<br>(0.00 to<br>0.01)                      | 0.01<br>(0.00 to<br>0.01)                      |
| Dengue                                                | 0.19<br>(0.01 to<br>0.66)                           | 0.44<br>(0.04 to<br>1.58)                          | 0.43<br>(0.03 to<br>1.36)                         | 0.75<br>(0.06 to<br>2.52)                           | 0.00<br>(0.00 to<br>0.01)                      | 0.01<br>(0.00 to<br>0.05)                      | 0.01<br>(0.00 to<br>0.03)                      | 0.01<br>(0.00 to<br>0.04)                      | 0.01<br>(0.00 to<br>0.04)                      |
| Yellow fever                                          | 100.04<br>(21.98 to<br>273.79)                      | 33.06<br>(5.19 to<br>111.07)                       | 28.48<br>(4.51 to<br>95.21)                       | 62.10<br>(10.96 to<br>190.89)                       | 1.53<br>(0.33 to<br>4.10)                      | 0.56<br>(0.09 to<br>1.85)                      | 0.48<br>(0.08 to<br>1.62)                      | 1.01<br>(0.18 to<br>3.23)                      | 1.01<br>(0.18 to<br>3.23)                      |
| Rabies                                                | 1.18<br>(0.50 to<br>2.36)                           | 0.23<br>(0.08 to<br>0.51)                          | 0.16<br>(0.06 to<br>0.35)                         | 0.95<br>(0.31 to<br>2.06)                           | 0.02<br>(0.01 to<br>0.03)                      | 0.00<br>(0.00 to<br>0.01)                      | 0.00<br>(0.00 to<br>0.01)                      | 0.02<br>(0.01 to<br>0.03)                      | 0.02<br>(0.01 to<br>0.03)                      |
| Intestinal nematode infections                        | 4.58<br>(2.61 to<br>7.57)                           | 2.74<br>(1.08 to<br>5.23)                          | 2.71<br>(1.05 to<br>5.22)                         | 5.35<br>(2.11 to<br>10.76)                          | 0.06<br>(0.03 to<br>0.09)                      | 0.04<br>(0.02 to<br>0.07)                      | 0.04<br>(0.02 to<br>0.07)                      | 0.07<br>(0.03 to<br>0.13)                      | 0.07<br>(0.03 to<br>0.13)                      |
| Other neglected tropical diseases                     | 29.72<br>(8.58 to<br>73.95)                         | 12.20<br>(3.04 to<br>29.69)                        | 10.87<br>(2.60 to<br>25.48)                       | 28.90<br>(7.98 to<br>70.24)                         | 0.40<br>(0.11 to<br>0.99)                      | 0.23<br>(0.05 to<br>0.52)                      | 0.21<br>(0.05 to<br>0.46)                      | 0.45<br>(0.12 to<br>1.04)                      | 0.45<br>(0.12 to<br>1.04)                      |
| <b>Maternal disorders</b>                             | <b>115.20</b><br><b>(77.86 to</b><br><b>170.64)</b> | <b>60.11</b><br><b>(34.17 to</b><br><b>102.51)</b> | <b>46.73</b><br><b>(25.65 to</b><br><b>82.04)</b> | <b>136.57</b><br><b>(76.38 to</b><br><b>231.90)</b> | <b>2.04</b><br><b>(1.58 to</b><br><b>3.05)</b> | <b>1.10</b><br><b>(0.62 to</b><br><b>1.91)</b> | <b>0.86</b><br><b>(0.47 to</b><br><b>1.51)</b> | <b>2.48</b><br><b>(1.39 to</b><br><b>4.30)</b> | <b>2.48</b><br><b>(1.39 to</b><br><b>4.30)</b> |
| Maternal hemorrhage                                   | 27.72<br>(16.45 to<br>44.78)                        | 13.76<br>(6.62 to<br>25.34)                        | 10.77<br>(5.10 to<br>19.97)                       | 29.95<br>(14.63 to<br>55.02)                        | 0.50<br>(0.29 to<br>0.80)                      | 0.25<br>(0.12 to<br>0.47)                      | 0.20<br>(0.09 to<br>0.37)                      | 0.55<br>(0.27 to<br>1.03)                      | 0.55<br>(0.27 to<br>1.03)                      |
| Maternal sepsis and other maternal infections         | 3.10<br>(2.38 to<br>9.50)                           | 2.31<br>(0.96 to<br>4.49)                          | 1.80<br>(0.75 to<br>3.61)                         | 5.15<br>(2.16 to<br>9.88)                           | 0.09<br>(0.04 to<br>0.17)                      | 0.04<br>(0.02 to<br>0.08)                      | 0.03<br>(0.01 to<br>0.07)                      | 0.10<br>(0.04 to<br>0.18)                      | 0.10<br>(0.04 to<br>0.18)                      |
| Maternal hypertensive disorders                       | 23.34<br>(13.72 to<br>36.92)                        | 11.58<br>(5.99 to<br>21.35)                        | 9.03<br>(4.60 to<br>17.06)                        | 25.73<br>(13.01 to<br>46.36)                        | 0.40<br>(0.24 to<br>0.64)                      | 0.21<br>(0.11 to<br>0.39)                      | 0.16<br>(0.08 to<br>0.30)                      | 0.46<br>(0.23 to<br>0.81)                      | 0.46<br>(0.23 to<br>0.81)                      |
| Maternal obstructed labor and uterine rupture         | 4.59<br>(2.14 to<br>8.23)                           | 2.36<br>(0.98 to<br>4.73)                          | 1.81<br>(0.73 to<br>3.59)                         | 5.45<br>(2.21 to<br>10.90)                          | 0.08<br>(0.04 to<br>0.15)                      | 0.04<br>(0.02 to<br>0.09)                      | 0.03<br>(0.01 to<br>0.07)                      | 0.10<br>(0.04 to<br>0.20)                      | 0.10<br>(0.04 to<br>0.20)                      |
| Maternal abortion, miscarriage, and ectopic pregnancy | 2.62<br>(0.82 to<br>5.64)                           | 1.62<br>(0.45 to<br>3.72)                          | 1.27<br>(0.36 to<br>3.06)                         | 3.72<br>(0.98 to<br>8.88)                           | 0.05<br>(0.02 to<br>0.10)                      | 0.03<br>(0.01 to<br>0.07)                      | 0.02<br>(0.01 to<br>0.05)                      | 0.07<br>(0.02 to<br>0.16)                      | 0.07<br>(0.02 to<br>0.16)                      |
| Indirect maternal deaths                              | 29.28<br>(18.17 to<br>45.35)                        | 15.11<br>(7.93 to<br>27.70)                        | 11.85<br>(5.88 to<br>22.01)                       | 35.78<br>(18.45 to<br>66.15)                        | 0.52<br>(0.32 to<br>0.81)                      | 0.28<br>(0.14 to<br>0.52)                      | 0.22<br>(0.11 to<br>0.41)                      | 0.65<br>(0.34 to<br>1.18)                      | 0.65<br>(0.34 to<br>1.18)                      |
| Late maternal deaths                                  | 3.41<br>(1.39 to<br>6.94)                           | 1.39<br>(0.52 to<br>3.07)                          | 1.08<br>(0.40 to<br>2.36)                         | 3.25<br>(1.22 to<br>7.05)                           | 0.06<br>(0.02 to<br>0.12)                      | 0.03<br>(0.01 to<br>0.05)                      | 0.02<br>(0.01 to<br>0.04)                      | 0.06<br>(0.02 to<br>0.12)                      | 0.06<br>(0.02 to<br>0.12)                      |
| Maternal deaths aggravated by HIV/AIDS                | 1.20<br>(0.51 to<br>2.27)                           | 2.89<br>(0.39 to<br>6.94)                          | 1.90<br>(0.03 to<br>5.30)                         | 7.03<br>(2.31 to<br>15.35)                          | 0.02<br>(0.01 to<br>0.04)                      | 0.06<br>(0.01 to<br>0.13)                      | 0.04<br>(0.00 to<br>0.10)                      | 0.13<br>(0.04 to<br>0.29)                      | 0.13<br>(0.04 to<br>0.29)                      |
| Other maternal disorders                              | 17.93<br>(10.17 to<br>29.46)                        | 9.09<br>(4.18 to<br>17.46)                         | 7.21<br>(3.19 to<br>14.09)                        | 20.52<br>(9.33 to<br>38.91)                         | 0.32<br>(0.18 to<br>0.51)                      | 0.17<br>(0.08 to<br>0.32)                      | 0.13<br>(0.06 to<br>0.25)                      | 0.37<br>(0.17 to<br>0.70)                      | 0.37<br>(0.17 to<br>0.70)                      |
| <b>Angola</b>                                         |                                                     |                                                    |                                                   |                                                     |                                                |                                                |                                                |                                                |                                                |
| Cause                                                 | YLLs (in 1000s)                                     |                                                    |                                                   |                                                     | Deaths (in 1000s)                              |                                                |                                                |                                                |                                                |
|                                                       | 2016                                                | 2040 Forecast                                      | 2040 Better Scenario                              | 2040 Worse Scenario                                 | 2016                                           | 2040 Forecast                                  | 2040 Better Scenario                           | 2040 Worse Scenario                            |                                                |

|                                                                         |                                                |                                               |                                               |                                                |                                           |                                          |                                          |                                           |
|-------------------------------------------------------------------------|------------------------------------------------|-----------------------------------------------|-----------------------------------------------|------------------------------------------------|-------------------------------------------|------------------------------------------|------------------------------------------|-------------------------------------------|
|                                                                         | 1,378.51<br>(900.96 to<br>1,980.96)            | 437.95<br>(238.35 to<br>706.94)               | 380.27<br>(205.27 to<br>630.88)               | 1,498.79<br>(802.06 to<br>2,498.39)            | 15.93<br>(10.41 to<br>22.89)              | 5.06<br>(2.75 to<br>8.17)                | 4.39<br>(2.37 to<br>7.29)                | 17.32<br>(9.27 to<br>28.87)               |
| <b>Neonatal disorders</b>                                               |                                                |                                               |                                               |                                                |                                           |                                          |                                          |                                           |
| Neonatal preterm birth                                                  | 440.09<br>(226.74 to<br>750.07)                | 101.76<br>(46.58 to<br>184.86)                | 92.17<br>(42.53 to<br>165.12)                 | 414.10<br>(192.73 to<br>736.23)                | 5.08<br>(2.62 to<br>8.67)                 | 1.18<br>(0.54 to<br>2.14)                | 1.06<br>(0.49 to<br>1.91)                | 4.78<br>(2.23 to<br>8.51)                 |
| Neonatal encephalopathy due to birth asphyxia and trauma                | 344.16<br>(195.29 to<br>556.13)                | 109.36<br>(49.19 to<br>204.89)                | 95.12<br>(42.60 to<br>177.57)                 | 335.91<br>(147.50 to<br>645.80)                | 3.98<br>(2.26 to<br>6.43)                 | 1.26<br>(0.57 to<br>2.37)                | 1.10<br>(0.49 to<br>2.05)                | 3.88<br>(1.70 to<br>7.46)                 |
| Neonatal sepsis and other neonatal infections                           | 366.24<br>(206.90 to<br>609.81)                | 149.35<br>(73.91 to<br>266.43)                | 128.62<br>(63.27 to<br>228.06)                | 474.22<br>(237.07 to<br>856.29)                | 4.23<br>(2.39 to<br>7.05)                 | 1.73<br>(0.85 to<br>3.08)                | 1.49<br>(0.73 to<br>2.63)                | 5.48<br>(2.74 to<br>9.89)                 |
| Hemolytic disease and other neonatal jaundice                           | 21.63<br>(10.83 to<br>44.17)                   | 4.84<br>(1.94 to<br>10.81)                    | 4.03<br>(1.64 to<br>9.02)                     | 17.11<br>(6.95 to<br>38.48)                    | 0.25<br>(0.13 to<br>0.51)                 | 0.06<br>(0.02 to<br>0.12)                | 0.05<br>(0.02 to<br>0.10)                | 0.20<br>(0.08 to<br>0.44)                 |
| Other neonatal disorders                                                | 206.41<br>(114.26 to<br>341.53)                | 72.64<br>(32.36 to<br>142.22)                 | 60.33<br>(27.13 to<br>117.87)                 | 257.45<br>(115.63 to<br>508.15)                | 2.39<br>(1.32 to<br>3.95)                 | 0.84<br>(0.37 to<br>1.64)                | 0.70<br>(0.31 to<br>1.36)                | 2.98<br>(1.34 to<br>5.87)                 |
| <b>Nutritional deficiencies</b>                                         | <b>411.49</b><br>(214.93 to<br><b>845.70</b> ) | <b>115.27</b><br>(56.53 to<br><b>296.73</b> ) | <b>103.37</b><br>(51.48 to<br><b>264.88</b> ) | <b>248.57</b><br>(117.57 to<br><b>577.41</b> ) | <b>6.17</b><br>(3.39 to<br><b>13.23</b> ) | <b>3.47</b><br>(1.86 to<br><b>9.52</b> ) | <b>3.27</b><br>(1.76 to<br><b>8.94</b> ) | <b>5.38</b><br>(2.78 to<br><b>14.28</b> ) |
| Protein-energy malnutrition                                             | 389.09<br>(199.97 to<br>808.64)                | 85.33<br>(40.73 to<br>215.18)                 | 76.38<br>(36.03 to<br>184.21)                 | 203.57<br>(92.25 to<br>469.49)                 | 5.57<br>(3.00 to<br>11.90)                | 2.40<br>(1.25 to<br>6.47)                | 2.26<br>(1.19 to<br>6.01)                | 4.00<br>(2.00 to<br>10.01)                |
| Iodine deficiency                                                       | 1.75<br>(0.08 to<br>7.55)                      | 3.46<br>(0.09 to<br>14.16)                    | 3.00<br>(0.08 to<br>12.09)                    | 7.50<br>(0.16 to<br>40.32)                     | 0.04<br>(0.00 to<br>0.13)                 | 0.11<br>(0.00 to<br>0.42)                | 0.10<br>(0.00 to<br>0.40)                | 0.17<br>(0.01 to<br>0.68)                 |
| Dietary iron deficiency                                                 | 1.02<br>(0.51 to<br>2.70)                      | 1.03<br>(0.44 to<br>2.86)                     | 0.95<br>(0.41 to<br>2.60)                     | 1.39<br>(0.61 to<br>3.89)                      | 0.02<br>(0.01 to<br>0.05)                 | 0.02<br>(0.01 to<br>0.05)                | 0.02<br>(0.01 to<br>0.05)                | 0.03<br>(0.01 to<br>0.07)                 |
| Other nutritional deficiencies                                          | 19.64<br>(9.63 to<br>48.35)                    | 25.44<br>(10.89 to<br>81.54)                  | 23.04<br>(9.94 to<br>72.38)                   | 36.10<br>(15.64 to<br>112.67)                  | 0.54<br>(0.26 to<br>1.49)                 | 0.95<br>(0.40 to<br>3.12)                | 0.90<br>(0.38 to<br>2.93)                | 1.18<br>(0.49 to<br>3.87)                 |
| <b>Other communicable, maternal, neonatal, and nutritional diseases</b> | <b>365.74</b><br>(178.37 to<br><b>690.60</b> ) | <b>97.07</b><br>(54.68 to<br><b>166.56</b> )  | <b>88.84</b><br>(49.43 to<br><b>151.14</b> )  | <b>222.16</b><br>(110.93 to<br><b>410.24</b> ) | <b>4.71</b><br>(2.47 to<br><b>8.52</b> )  | <b>1.92</b><br>(1.17 to<br><b>3.01</b> ) | <b>1.78</b><br>(1.07 to<br><b>2.83</b> ) | <b>3.56</b><br>(2.06 to<br><b>5.95</b> )  |
| Sexually transmitted infections excluding HIV                           | 254.36<br>(105.46 to<br>533.88)                | 34.27<br>(11.68 to<br>75.49)                  | 31.42<br>(10.73 to<br>70.14)                  | 95.46<br>(29.72 to<br>223.04)                  | 3.00<br>(1.26 to<br>6.27)                 | 0.43<br>(0.16 to<br>0.92)                | 0.40<br>(0.15 to<br>0.86)                | 1.15<br>(0.38 to<br>2.65)                 |
| Syphilis                                                                | 252.45<br>(104.15 to<br>531.57)                | 32.26<br>(9.95 to<br>73.56)                   | 29.55<br>(9.07 to<br>67.46)                   | 92.89<br>(27.48 to<br>220.41)                  | 2.96<br>(1.23 to<br>6.22)                 | 0.38<br>(0.12 to<br>0.87)                | 0.35<br>(0.11 to<br>0.80)                | 1.09<br>(0.33 to<br>2.59)                 |
| Chlamydial infection                                                    | 0.37<br>(0.22 to<br>0.64)                      | 0.39<br>(0.21 to<br>0.72)                     | 0.36<br>(0.19 to<br>0.66)                     | 0.50<br>(0.26 to<br>0.91)                      | 0.01<br>(0.00 to<br>0.01)                 | 0.01<br>(0.00 to<br>0.02)                | 0.01<br>(0.00 to<br>0.02)                | 0.01<br>(0.00 to<br>0.02)                 |
| Gonococcal infection                                                    | 0.98<br>(0.58 to<br>1.68)                      | 1.05<br>(0.55 to<br>1.87)                     | 0.98<br>(0.51 to<br>1.76)                     | 1.33<br>(0.68 to<br>2.41)                      | 0.02<br>(0.01 to<br>0.04)                 | 0.03<br>(0.01 to<br>0.04)                | 0.02<br>(0.01 to<br>0.04)                | 0.03<br>(0.02 to<br>0.05)                 |
| Other sexually transmitted infections                                   | 0.54<br>(0.32 to<br>0.93)                      | 0.57<br>(0.29 to<br>1.05)                     | 0.53<br>(0.27 to<br>0.96)                     | 0.73<br>(0.38 to<br>1.35)                      | 0.01<br>(0.01 to<br>0.02)                 | 0.01<br>(0.00 to<br>0.02)                | 0.01<br>(0.00 to<br>0.02)                | 0.02<br>(0.01 to<br>0.03)                 |
| Acute hepatitis                                                         | 20.33<br>(14.75 to<br>27.43)                   | 16.76<br>(11.05 to<br>24.51)                  | 15.37<br>(10.01 to<br>23.00)                  | 24.14<br>(16.10 to<br>35.59)                   | 0.42<br>(0.31 to<br>0.56)                 | 0.45<br>(0.31 to<br>0.63)                | 0.43<br>(0.29 to<br>0.61)                | 0.59<br>(0.42 to<br>0.83)                 |
| Acute hepatitis A                                                       | 1.41<br>(0.10 to<br>3.99)                      | 0.36<br>(0.09 to<br>0.87)                     | 0.32<br>(0.08 to<br>0.77)                     | 0.90<br>(0.15 to<br>2.49)                      | 0.02<br>(0.00 to<br>0.05)                 | 0.01<br>(0.00 to<br>0.01)                | 0.01<br>(0.00 to<br>0.01)                | 0.01<br>(0.00 to<br>0.03)                 |
| Acute hepatitis B                                                       | 14.29<br>(9.93 to<br>19.89)                    | 13.53<br>(8.62 to<br>20.24)                   | 12.33<br>(7.74 to<br>19.08)                   | 18.83<br>(12.32 to<br>28.06)                   | 0.32<br>(0.23 to<br>0.45)                 | 0.37<br>(0.25 to<br>0.53)                | 0.34<br>(0.23 to<br>0.50)                | 0.48<br>(0.33 to<br>0.70)                 |
| Acute hepatitis C                                                       | 0.40<br>(0.26 to<br>0.60)                      | 0.56<br>(0.32 to<br>0.89)                     | 0.54<br>(0.30 to<br>0.89)                     | 0.65<br>(0.38 to<br>1.03)                      | 0.01<br>(0.01 to<br>0.02)                 | 0.02<br>(0.01 to<br>0.03)                | 0.02<br>(0.01 to<br>0.03)                | 0.02<br>(0.01 to<br>0.03)                 |
| Acute hepatitis E                                                       | 4.23<br>(2.76 to<br>6.34)                      | 2.32<br>(1.31 to<br>3.73)                     | 2.18<br>(1.23 to<br>3.49)                     | 3.77<br>(2.00 to<br>6.25)                      | 0.07<br>(0.05 to<br>0.09)                 | 0.06<br>(0.04 to<br>0.09)                | 0.06<br>(0.04 to<br>0.09)                | 0.08<br>(0.05 to<br>0.12)                 |

|                                       |                                              |                                              |                                              |                                              |                                     |                                       |                                       |                                        |
|---------------------------------------|----------------------------------------------|----------------------------------------------|----------------------------------------------|----------------------------------------------|-------------------------------------|---------------------------------------|---------------------------------------|----------------------------------------|
|                                       | 91.05<br>(24.22 to<br>308.02)                | 46.04<br>(15.61 to<br>103.59)                | 41.24<br>(13.88 to<br>93.68)                 | 102.56<br>(35.95 to<br>259.84)               | 1.29<br>(0.35 to<br>3.95)           | 1.04<br>(0.35 to<br>2.11)             | 0.96<br>(0.31 to<br>1.97)             | 1.81<br>(0.62 to<br>4.05)              |
| Other unspecified infectious diseases |                                              |                                              |                                              |                                              |                                     |                                       |                                       |                                        |
| <b>Non-communicable diseases</b>      | <b>1,863.42</b><br>(1,463.91 to<br>2,412.53) | <b>2,845.30</b><br>(2,057.84 to<br>3,940.64) | <b>2,409.38</b><br>(1,740.66 to<br>3,304.93) | <b>4,039.21</b><br>(2,920.83 to<br>5,650.89) | <b>57.09</b><br>(45.27 to<br>74.16) | <b>115.53</b><br>(91.66 to<br>146.36) | <b>100.37</b><br>(79.86 to<br>126.06) | <b>147.25</b><br>(116.25 to<br>188.26) |
| <b>Angola</b>                         |                                              |                                              |                                              |                                              |                                     |                                       |                                       |                                        |
| Cause                                 | YLLs (in 1000s)                              |                                              |                                              |                                              | Deaths (in 1000s)                   |                                       |                                       |                                        |
|                                       | 2016                                         | 2040 Forecast                                | 2040 Better Scenario                         | 2040 Worse Scenario                          | 2016                                | 2040 Forecast                         | 2040 Better Scenario                  | 2040 Worse Scenario                    |
| <b>Neoplasms</b>                      | <b>360.33</b><br>(271.00 to<br>487.58)       | <b>859.24</b><br>(578.72 to<br>1,292.11)     | <b>771.46</b><br>(531.57 to<br>1,127.92)     | <b>930.15</b><br>(625.23 to<br>1,404.85)     | <b>11.39</b><br>(8.72 to<br>15.40)  | <b>31.89</b><br>(23.57 to<br>43.61)   | <b>29.47</b><br>(22.25 to<br>39.33)   | <b>32.07</b><br>(23.41 to<br>44.52)    |
| Lip and oral cavity cancer            | 5.12<br>(3.69 to<br>7.09)                    | 16.97<br>(7.27 to<br>36.31)                  | 9.97<br>(5.11 to<br>19.26)                   | 22.66<br>(9.30 to<br>49.06)                  | 0.18<br>(0.13 to<br>0.24)           | 0.61<br>(0.29 to<br>1.21)             | 0.38<br>(0.22 to<br>0.66)             | 0.76<br>(0.35 to<br>1.51)              |
| Nasopharynx cancer                    | 1.92<br>(1.35 to<br>2.66)                    | 6.04<br>(2.58 to<br>12.50)                   | 3.53<br>(1.70 to<br>6.83)                    | 8.66<br>(3.51 to<br>18.75)                   | 0.05<br>(0.04 to<br>0.07)           | 0.18<br>(0.08 to<br>0.36)             | 0.11<br>(0.06 to<br>0.20)             | 0.25<br>(0.11 to<br>0.51)              |
| Other pharynx cancer                  | 2.25<br>(1.55 to<br>3.24)                    | 5.77<br>(2.77 to<br>10.93)                   | 4.26<br>(2.22 to<br>7.74)                    | 6.44<br>(3.07 to<br>12.01)                   | 0.08<br>(0.05 to<br>0.11)           | 0.21<br>(0.10 to<br>0.37)             | 0.16<br>(0.09 to<br>0.27)             | 0.22<br>(0.11 to<br>0.40)              |
| Esophageal cancer                     | 16.10<br>(11.73 to<br>22.13)                 | 41.99<br>(21.73 to<br>82.07)                 | 27.91<br>(16.13 to<br>49.98)                 | 55.83<br>(27.03 to<br>112.58)                | 0.61<br>(0.45 to<br>0.83)           | 1.68<br>(0.92 to<br>2.99)             | 1.17<br>(0.72 to<br>1.90)             | 2.10<br>(1.09 to<br>3.96)              |
| Stomach cancer                        | 17.96<br>(13.17 to<br>24.92)                 | 30.25<br>(20.24 to<br>46.55)                 | 28.55<br>(19.04 to<br>43.29)                 | 34.36<br>(22.89 to<br>51.90)                 | 0.66<br>(0.49 to<br>0.89)           | 1.22<br>(0.88 to<br>1.73)             | 1.18<br>(0.86 to<br>1.67)             | 1.30<br>(0.94 to<br>1.84)              |
| Colon and rectum cancer               | 20.61<br>(14.90 to<br>29.27)                 | 67.96<br>(41.97 to<br>108.69)                | 63.06<br>(39.97 to<br>98.33)                 | 64.03<br>(39.39 to<br>102.58)                | 0.77<br>(0.57 to<br>1.09)           | 2.81<br>(1.84 to<br>4.22)             | 2.71<br>(1.81 to<br>4.03)             | 2.49<br>(1.62 to<br>3.73)              |
| Liver cancer                          | 33.89<br>(24.26 to<br>47.13)                 | 99.06<br>(58.48 to<br>160.30)                | 81.11<br>(51.16 to<br>121.22)                | 105.30<br>(61.97 to<br>172.57)               | 1.18<br>(0.87 to<br>1.59)           | 3.82<br>(2.41 to<br>5.78)             | 3.23<br>(2.14 to<br>4.57)             | 3.83<br>(2.42 to<br>5.95)              |
| Liver cancer due to hepatitis B       | 13.29<br>(9.16 to<br>18.99)                  | 37.55<br>(21.37 to<br>62.98)                 | 31.56<br>(19.03 to<br>49.32)                 | 39.79<br>(22.47 to<br>67.66)                 | 0.42<br>(0.29 to<br>0.59)           | 1.31<br>(0.78 to<br>2.09)             | 1.13<br>(0.71 to<br>1.69)             | 1.32<br>(0.78 to<br>2.16)              |
| Liver cancer due to hepatitis C       | 9.31<br>(6.58 to<br>12.83)                   | 28.73<br>(17.21 to<br>44.43)                 | 24.58<br>(15.54 to<br>36.26)                 | 29.22<br>(17.40 to<br>46.16)                 | 0.38<br>(0.27 to<br>0.51)           | 1.28<br>(0.82 to<br>1.91)             | 1.14<br>(0.76 to<br>1.60)             | 1.23<br>(0.79 to<br>1.84)              |
| Liver cancer due to alcohol use       | 4.58<br>(3.22 to<br>6.40)                    | 14.34<br>(8.20 to<br>23.34)                  | 9.62<br>(5.84 to<br>14.78)                   | 16.30<br>(9.13 to<br>27.32)                  | 0.17<br>(0.12 to<br>0.24)           | 0.56<br>(0.34 to<br>0.85)             | 0.39<br>(0.26 to<br>0.57)             | 0.60<br>(0.36 to<br>0.94)              |
| Liver cancer due to other causes      | 6.71<br>(4.74 to<br>9.36)                    | 18.45<br>(10.75 to<br>30.30)                 | 15.34<br>(9.41 to<br>23.78)                  | 19.98<br>(11.52 to<br>32.92)                 | 0.21<br>(0.15 to<br>0.29)           | 0.68<br>(0.41 to<br>1.04)             | 0.58<br>(0.37 to<br>0.84)             | 0.69<br>(0.41 to<br>1.07)              |
| Gallbladder and biliary tract cancer  | 3.25<br>(2.23 to<br>4.79)                    | 5.83<br>(4.13 to<br>8.55)                    | 6.10<br>(4.25 to<br>9.02)                    | 5.30<br>(3.80 to<br>7.73)                    | 0.13<br>(0.09 to<br>0.19)           | 0.25<br>(0.20 to<br>0.36)             | 0.27<br>(0.21 to<br>0.39)             | 0.22<br>(0.17 to<br>0.30)              |
| Pancreatic cancer                     | 10.47<br>(7.74 to<br>14.25)                  | 32.94<br>(22.60 to<br>48.58)                 | 32.34<br>(22.77 to<br>46.86)                 | 30.10<br>(20.62 to<br>44.78)                 | 0.42<br>(0.32 to<br>0.56)           | 1.42<br>(1.06 to<br>1.91)             | 1.43<br>(1.08 to<br>1.92)             | 1.22<br>(0.92 to<br>1.66)              |
| Larynx cancer                         | 3.33<br>(2.45 to<br>4.54)                    | 9.37<br>(3.99 to<br>19.62)                   | 5.11<br>(2.60 to<br>10.10)                   | 12.94<br>(5.30 to<br>26.74)                  | 0.12<br>(0.09 to<br>0.16)           | 0.36<br>(0.17 to<br>0.70)             | 0.20<br>(0.12 to<br>0.37)             | 0.47<br>(0.21 to<br>0.90)              |
| Tracheal, bronchus, and lung cancer   | 23.42<br>(17.32 to<br>32.01)                 | 60.74<br>(30.52 to<br>117.83)                | 38.39<br>(21.53 to<br>68.47)                 | 85.59<br>(39.23 to<br>171.76)                | 0.90<br>(0.67 to<br>1.22)           | 2.48<br>(1.34 to<br>4.40)             | 1.62<br>(1.00 to<br>2.63)             | 3.26<br>(1.61 to<br>6.15)              |
| Malignant skin melanoma               | 2.34<br>(1.60 to<br>3.41)                    | 6.42<br>(4.25 to<br>9.48)                    | 6.89<br>(4.54 to<br>10.23)                   | 5.41<br>(3.63 to<br>7.79)                    | 0.07<br>(0.05 to<br>0.10)           | 0.22<br>(0.16 to<br>0.30)             | 0.24<br>(0.17 to<br>0.33)             | 0.17<br>(0.13 to<br>0.23)              |
| Non-melanoma skin cancer              | 1.97<br>(1.42 to<br>2.76)                    | 4.96<br>(3.62 to<br>6.71)                    | 4.99<br>(3.57 to<br>6.85)                    | 5.24<br>(3.85 to<br>6.98)                    | 0.08<br>(0.06 to<br>0.11)           | 0.23<br>(0.18 to<br>0.30)             | 0.24<br>(0.18 to<br>0.32)             | 0.22<br>(0.17 to<br>0.29)              |

|                                 |                              |                                |                               |                                |                           |                           |                           |                           |
|---------------------------------|------------------------------|--------------------------------|-------------------------------|--------------------------------|---------------------------|---------------------------|---------------------------|---------------------------|
| Breast cancer                   | 34.18<br>(21.09 to<br>51.18) | 101.91<br>(54.42 to<br>179.98) | 92.28<br>(50.64 to<br>159.38) | 101.57<br>(54.12 to<br>179.29) | 1.05<br>(0.67 to<br>1.53) | 3.30<br>(1.90 to<br>5.43) | 3.05<br>(1.79 to<br>4.88) | 3.17<br>(1.80 to<br>5.28) |
| Cervical cancer                 | 47.04<br>(27.17 to<br>73.48) | 84.63<br>(43.82 to<br>149.37)  | 79.13<br>(41.10 to<br>137.77) | 98.90<br>(51.54 to<br>174.47)  | 1.40<br>(0.84 to<br>2.12) | 2.59<br>(1.44 to<br>4.29) | 2.46<br>(1.37 to<br>3.97) | 2.93<br>(1.62 to<br>4.86) |
| Uterine cancer                  | 4.71<br>(3.18 to<br>6.68)    | 9.79<br>(6.26 to<br>14.51)     | 9.47<br>(6.02 to<br>14.29)    | 11.22<br>(7.43 to<br>16.19)    | 0.18<br>(0.12 to<br>0.24) | 0.39<br>(0.27 to<br>0.54) | 0.39<br>(0.27 to<br>0.54) | 0.43<br>(0.30 to<br>0.58) |
| Ovarian cancer                  | 7.61<br>(4.92 to<br>11.72)   | 23.90<br>(13.99 to<br>41.28)   | 24.18<br>(14.45 to<br>41.37)  | 20.56<br>(12.05 to<br>35.00)   | 0.25<br>(0.16 to<br>0.37) | 0.83<br>(0.51 to<br>1.33) | 0.85<br>(0.54 to<br>1.36) | 0.69<br>(0.42 to<br>1.10) |
| Prostate cancer                 | 11.92<br>(6.39 to<br>17.15)  | 44.26<br>(25.05 to<br>59.72)   | 47.98<br>(27.71 to<br>64.91)  | 36.88<br>(20.33 to<br>48.80)   | 0.68<br>(0.37 to<br>0.96) | 2.92<br>(1.71 to<br>3.78) | 3.27<br>(1.97 to<br>4.22) | 2.28<br>(1.27 to<br>3.01) |
| Testicular cancer               | 0.96<br>(0.56 to<br>1.44)    | 1.91<br>(1.12 to<br>2.94)      | 1.86<br>(1.07 to<br>2.91)     | 2.14<br>(1.26 to<br>3.33)      | 0.02<br>(0.01 to<br>0.03) | 0.04<br>(0.02 to<br>0.06) | 0.04<br>(0.02 to<br>0.06) | 0.04<br>(0.03 to<br>0.06) |
| <b>Angola</b>                   |                              |                                |                               |                                |                           |                           |                           |                           |
| Cause                           | YLLs (in 1000s)              |                                |                               |                                | Deaths (in 1000s)         |                           |                           |                           |
|                                 | 2016                         | 2040 Forecast                  | 2040 Better Scenario          | 2040 Worse Scenario            | 2016                      | 2040 Forecast             | 2040 Better Scenario      | 2040 Worse Scenario       |
| Kidney cancer                   | 4.36<br>(3.28 to<br>5.93)    | 10.11<br>(7.04 to<br>14.30)    | 10.43<br>(7.36 to<br>14.54)   | 9.44<br>(6.74 to<br>13.06)     | 0.12<br>(0.09 to<br>0.16) | 0.37<br>(0.26 to<br>0.50) | 0.39<br>(0.28 to<br>0.52) | 0.31<br>(0.22 to<br>0.41) |
| Bladder cancer                  | 4.93<br>(3.71 to<br>6.72)    | 12.29<br>(8.35 to<br>17.55)    | 11.49<br>(8.12 to<br>15.84)   | 12.37<br>(8.41 to<br>18.07)    | 0.22<br>(0.17 to<br>0.30) | 0.63<br>(0.47 to<br>0.84) | 0.61<br>(0.46 to<br>0.79) | 0.58<br>(0.43 to<br>0.78) |
| Brain and nervous system cancer | 14.01<br>(10.56 to<br>18.66) | 25.68<br>(17.49 to<br>37.41)   | 26.50<br>(17.96 to<br>38.88)  | 27.70<br>(18.67 to<br>38.58)   | 0.28<br>(0.20 to<br>0.36) | 0.66<br>(0.45 to<br>0.93) | 0.69<br>(0.47 to<br>0.99) | 0.64<br>(0.45 to<br>0.88) |
| Thyroid cancer                  | 1.85<br>(1.32 to<br>2.56)    | 4.08<br>(2.67 to<br>5.99)      | 3.63<br>(2.42 to<br>5.21)     | 4.56<br>(3.03 to<br>6.65)      | 0.06<br>(0.05 to<br>0.09) | 0.16<br>(0.11 to<br>0.22) | 0.14<br>(0.10 to<br>0.20) | 0.17<br>(0.12 to<br>0.23) |
| Mesothelioma                    | 0.72<br>(0.49 to<br>1.04)    | 1.67<br>(1.10 to<br>2.47)      | 1.69<br>(1.09 to<br>2.51)     | 1.71<br>(1.14 to<br>2.48)      | 0.02<br>(0.02 to<br>0.03) | 0.06<br>(0.04 to<br>0.08) | 0.06<br>(0.04 to<br>0.09) | 0.06<br>(0.04 to<br>0.08) |
| Hodgkin lymphoma                | 2.85<br>(1.84 to<br>4.03)    | 3.25<br>(1.86 to<br>5.03)      | 3.01<br>(1.70 to<br>4.77)     | 4.51<br>(2.60 to<br>6.92)      | 0.06<br>(0.04 to<br>0.09) | 0.08<br>(0.05 to<br>0.12) | 0.07<br>(0.04 to<br>0.11) | 0.10<br>(0.06 to<br>0.16) |
| Non-Hodgkin lymphoma            | 16.39<br>(12.31 to<br>21.85) | 35.39<br>(24.17 to<br>50.56)   | 35.46<br>(24.53 to<br>51.04)  | 34.59<br>(24.36 to<br>47.42)   | 0.40<br>(0.30 to<br>0.55) | 1.11<br>(0.80 to<br>1.50) | 1.14<br>(0.83 to<br>1.54) | 0.99<br>(0.73 to<br>1.30) |
| Multiple myeloma                | 3.58<br>(2.52 to<br>5.11)    | 12.14<br>(7.96 to<br>17.87)    | 12.14<br>(8.02 to<br>17.87)   | 10.57<br>(7.03 to<br>15.23)    | 0.13<br>(0.10 to<br>0.19) | 0.49<br>(0.34 to<br>0.67) | 0.50<br>(0.35 to<br>0.69) | 0.40<br>(0.29 to<br>0.54) |
| Leukemia                        | 24.35<br>(18.41 to<br>32.51) | 32.90<br>(21.51 to<br>47.19)   | 31.53<br>(20.47 to<br>44.70)  | 38.61<br>(25.71 to<br>53.94)   | 0.45<br>(0.34 to<br>0.58) | 0.84<br>(0.55 to<br>1.18) | 0.81<br>(0.54 to<br>1.13) | 0.88<br>(0.60 to<br>1.21) |
| Acute lymphoid leukemia         | 7.39<br>(5.25 to<br>10.77)   | 7.92<br>(4.92 to<br>11.59)     | 7.79<br>(4.82 to<br>11.29)    | 9.75<br>(6.03 to<br>14.17)     | 0.11<br>(0.08 to<br>0.15) | 0.15<br>(0.10 to<br>0.23) | 0.15<br>(0.09 to<br>0.22) | 0.17<br>(0.11 to<br>0.24) |
| Chronic lymphoid leukemia       | 0.38<br>(0.25 to<br>0.55)    | 0.92<br>(0.55 to<br>1.39)      | 0.87<br>(0.52 to<br>1.29)     | 0.90<br>(0.55 to<br>1.34)      | 0.01<br>(0.01 to<br>0.02) | 0.04<br>(0.02 to<br>0.06) | 0.04<br>(0.02 to<br>0.06) | 0.04<br>(0.02 to<br>0.05) |
| Acute myeloid leukemia          | 6.28<br>(4.60 to<br>8.66)    | 12.15<br>(8.10 to<br>17.80)    | 11.97<br>(8.05 to<br>17.29)   | 12.50<br>(8.45 to<br>17.97)    | 0.12<br>(0.09 to<br>0.16) | 0.31<br>(0.21 to<br>0.43) | 0.30<br>(0.21 to<br>0.43) | 0.28<br>(0.20 to<br>0.40) |
| Chronic myeloid leukemia        | 1.47<br>(1.00 to<br>2.17)    | 2.34<br>(1.37 to<br>3.57)      | 2.16<br>(1.29 to<br>3.28)     | 2.42<br>(1.44 to<br>3.65)      | 0.04<br>(0.03 to<br>0.06) | 0.07<br>(0.04 to<br>0.10) | 0.06<br>(0.04 to<br>0.09) | 0.07<br>(0.04 to<br>0.10) |
| Other leukemia                  | 8.83<br>(5.96 to<br>12.33)   | 9.58<br>(5.41 to<br>14.24)     | 8.73<br>(4.91 to<br>12.95)    | 13.05<br>(7.46 to<br>19.27)    | 0.17<br>(0.11 to<br>0.22) | 0.28<br>(0.16 to<br>0.40) | 0.26<br>(0.15 to<br>0.37) | 0.33<br>(0.19 to<br>0.46) |

|                                               |                                                      |                                                        |                                                      |                                                          |                                                   |                                                   |                                                   |                                                   |
|-----------------------------------------------|------------------------------------------------------|--------------------------------------------------------|------------------------------------------------------|----------------------------------------------------------|---------------------------------------------------|---------------------------------------------------|---------------------------------------------------|---------------------------------------------------|
| Other neoplasms                               | 38.25<br>(28.94 to<br>49.60)                         | 67.01<br>(46.50 to<br>92.79)                           | 68.40<br>(47.09 to<br>95.10)                         | 72.90<br>(51.61 to<br>99.98)                             | 0.83<br>(0.63 to<br>1.10)                         | 1.94<br>(1.38 to<br>2.55)                         | 2.04<br>(1.43 to<br>2.72)                         | 1.88<br>(1.38 to<br>2.42)                         |
| <b>Cardiovascular diseases</b>                | <b>526.01</b><br><b>(400.96 to</b><br><b>704.86)</b> | <b>745.60</b><br><b>(480.04 to</b><br><b>1,170.98)</b> | <b>522.83</b><br><b>(350.60 to</b><br><b>790.56)</b> | <b>1,387.37</b><br><b>(851.95 to</b><br><b>2,235.01)</b> | <b>22.21</b><br><b>(17.19 to</b><br><b>29.13)</b> | <b>37.07</b><br><b>(26.67 to</b><br><b>53.97)</b> | <b>27.79</b><br><b>(20.59 to</b><br><b>38.38)</b> | <b>61.08</b><br><b>(41.69 to</b><br><b>90.40)</b> |
| Rheumatic heart disease                       | 16.65<br>(11.48 to<br>23.88)                         | 12.67<br>(7.88 to<br>20.17)                            | 11.37<br>(6.89 to<br>18.16)                          | 18.64<br>(11.42 to<br>29.50)                             | 0.48<br>(0.33 to<br>0.69)                         | 0.44<br>(0.29 to<br>0.66)                         | 0.41<br>(0.26 to<br>0.60)                         | 0.60<br>(0.39 to<br>0.89)                         |
| Ischemic heart disease                        | 197.97<br>(150.08 to<br>267.87)                      | 263.31<br>(148.81 to<br>460.81)                        | 164.51<br>(93.53 to<br>289.75)                       | 562.24<br>(300.77 to<br>992.77)                          | 9.10<br>(7.05 to<br>12.03)                        | 13.87<br>(8.67 to<br>22.07)                       | 9.49<br>(6.03 to<br>14.80)                        | 25.85<br>(15.41 to<br>41.93)                      |
| Stroke                                        | 180.60<br>(134.90 to<br>243.02)                      | 198.41<br>(112.27 to<br>334.76)                        | 119.61<br>(71.36 to<br>188.11)                       | 463.68<br>(236.84 to<br>814.10)                          | 7.66<br>(5.80 to<br>10.19)                        | 10.02<br>(6.32 to<br>15.49)                       | 6.74<br>(4.51 to<br>9.82)                         | 20.02<br>(12.06 to<br>32.41)                      |
| Ischemic stroke                               | 48.32<br>(36.15 to<br>65.30)                         | 59.00<br>(33.77 to<br>98.33)                           | 41.18<br>(25.00 to<br>67.68)                         | 106.22<br>(57.92 to<br>183.39)                           | 2.70<br>(2.04 to<br>3.60)                         | 3.93<br>(2.46 to<br>6.56)                         | 3.00<br>(1.95 to<br>4.88)                         | 6.18<br>(3.70 to<br>10.26)                        |
| Intracerebral hemorrhage                      | 132.28<br>(97.35 to<br>178.79)                       | 139.41<br>(72.18 to<br>249.25)                         | 78.43<br>(44.09 to<br>130.49)                        | 357.46<br>(169.93 to<br>669.64)                          | 4.96<br>(3.67 to<br>6.64)                         | 6.08<br>(3.59 to<br>10.15)                        | 3.74<br>(2.34 to<br>5.76)                         | 13.84<br>(7.46 to<br>24.17)                       |
| Hypertensive heart disease                    | 41.85<br>(26.71 to<br>60.99)                         | 93.48<br>(47.03 to<br>196.01)                          | 65.11<br>(35.11 to<br>124.44)                        | 131.78<br>(61.99 to<br>285.76)                           | 1.94<br>(1.26 to<br>2.75)                         | 4.91<br>(2.70 to<br>10.07)                        | 3.62<br>(2.08 to<br>6.48)                         | 6.34<br>(3.36 to<br>13.28)                        |
| Cardiomyopathy and myocarditis                | 20.12<br>(14.56 to<br>27.99)                         | 36.61<br>(23.13 to<br>56.41)                           | 35.10<br>(22.45 to<br>53.41)                         | 39.28<br>(25.02 to<br>60.37)                             | 0.52<br>(0.37 to<br>0.74)                         | 1.23<br>(0.82 to<br>1.82)                         | 1.23<br>(0.83 to<br>1.77)                         | 1.20<br>(0.81 to<br>1.75)                         |
| Myocarditis                                   | 3.08<br>(1.65 to<br>5.56)                            | 3.78<br>(1.60 to<br>8.32)                              | 3.70<br>(1.55 to<br>8.21)                            | 4.65<br>(2.08 to<br>9.54)                                | 0.06<br>(0.03 to<br>0.12)                         | 0.10<br>(0.04 to<br>0.23)                         | 0.10<br>(0.04 to<br>0.24)                         | 0.11<br>(0.05 to<br>0.24)                         |
| <b>Angola</b>                                 |                                                      |                                                        |                                                      |                                                          |                                                   |                                                   |                                                   |                                                   |
| Cause                                         | YLLs (in 1000s)                                      |                                                        |                                                      |                                                          | Deaths (in 1000s)                                 |                                                   |                                                   |                                                   |
|                                               | 2016                                                 | 2040 Forecast                                          | 2040 Better Scenario                                 | 2040 Worse Scenario                                      | 2016                                              | 2040 Forecast                                     | 2040 Better Scenario                              | 2040 Worse Scenario                               |
| Alcoholic cardiomyopathy                      | 1.43<br>(0.78 to<br>2.44)                            | 3.50<br>(1.91 to<br>6.40)                              | 2.85<br>(1.51 to<br>5.30)                            | 3.50<br>(1.95 to<br>6.14)                                | 0.04<br>(0.02 to<br>0.08)                         | 0.12<br>(0.06 to<br>0.21)                         | 0.10<br>(0.05 to<br>0.18)                         | 0.11<br>(0.06 to<br>0.20)                         |
| Other cardiomyopathy                          | 15.61<br>(11.33 to<br>21.34)                         | 29.33<br>(18.43 to<br>46.69)                           | 28.54<br>(18.03 to<br>44.92)                         | 31.14<br>(19.59 to<br>49.97)                             | 0.42<br>(0.31 to<br>0.57)                         | 1.03<br>(0.69 to<br>1.54)                         | 1.03<br>(0.70 to<br>1.53)                         | 0.98<br>(0.65 to<br>1.47)                         |
| Atrial fibrillation and flutter               | 2.13<br>(1.50 to<br>2.98)                            | 7.41<br>(5.15 to<br>10.03)                             | 7.25<br>(5.06 to<br>9.90)                            | 6.52<br>(4.59 to<br>8.84)                                | 0.16<br>(0.11 to<br>0.22)                         | 0.64<br>(0.45 to<br>0.87)                         | 0.67<br>(0.47 to<br>0.90)                         | 0.51<br>(0.35 to<br>0.71)                         |
| Aortic aneurysm                               | 4.64<br>(3.29 to<br>6.44)                            | 12.06<br>(8.22 to<br>18.59)                            | 11.27<br>(7.68 to<br>17.04)                          | 11.63<br>(7.92 to<br>17.55)                              | 0.19<br>(0.14 to<br>0.26)                         | 0.56<br>(0.41 to<br>0.81)                         | 0.55<br>(0.41 to<br>0.79)                         | 0.50<br>(0.36 to<br>0.71)                         |
| Peripheral artery disease                     | 0.38<br>(0.16 to<br>0.59)                            | 1.95<br>(0.76 to<br>3.28)                              | 1.87<br>(0.73 to<br>3.11)                            | 1.52<br>(0.60 to<br>2.46)                                | 0.02<br>(0.01 to<br>0.03)                         | 0.13<br>(0.06 to<br>0.22)                         | 0.14<br>(0.06 to<br>0.23)                         | 0.10<br>(0.04 to<br>0.15)                         |
| Endocarditis                                  | 8.10<br>(5.62 to<br>11.19)                           | 16.74<br>(9.93 to<br>26.88)                            | 15.93<br>(9.47 to<br>25.41)                          | 18.83<br>(11.35 to<br>29.92)                             | 0.24<br>(0.16 to<br>0.33)                         | 0.63<br>(0.39 to<br>0.91)                         | 0.62<br>(0.39 to<br>0.90)                         | 0.63<br>(0.40 to<br>0.94)                         |
| Other cardiovascular and circulatory diseases | 53.57<br>(37.86 to<br>75.61)                         | 102.95<br>(68.30 to<br>152.26)                         | 90.81<br>(60.71 to<br>132.94)                        | 133.25<br>(87.94 to<br>198.04)                           | 1.89<br>(1.32 to<br>2.71)                         | 4.63<br>(3.24 to<br>6.60)                         | 4.32<br>(3.09 to<br>6.16)                         | 5.34<br>(3.75 to<br>7.67)                         |
| <b>Chronic respiratory diseases</b>           | <b>88.86</b><br><b>(66.48 to</b><br><b>120.97)</b>   | <b>107.16</b><br><b>(69.29 to</b><br><b>173.82)</b>    | <b>75.86</b><br><b>(51.37 to</b><br><b>115.26)</b>   | <b>173.79</b><br><b>(103.86 to</b><br><b>312.13)</b>     | <b>3.29</b><br><b>(2.55 to</b><br><b>4.38)</b>    | <b>4.91</b><br><b>(3.45 to</b><br><b>7.22)</b>    | <b>3.68</b><br><b>(2.69 to</b><br><b>5.17)</b>    | <b>7.21</b><br><b>(4.66 to</b><br><b>11.77)</b>   |
| Chronic obstructive pulmonary disease         | 49.60<br>(36.81 to<br>67.81)                         | 67.53<br>(39.50 to<br>119.06)                          | 43.77<br>(27.03 to<br>70.65)                         | 122.34<br>(64.30 to<br>237.74)                           | 2.24<br>(1.73 to<br>2.99)                         | 3.47<br>(2.25 to<br>5.41)                         | 2.47<br>(1.66 to<br>3.59)                         | 5.55<br>(3.31 to<br>9.73)                         |
| Pneumoconiosis                                | 0.26<br>(0.18 to<br>0.38)                            | 0.45<br>(0.31 to<br>0.61)                              | 0.44<br>(0.30 to<br>0.61)                            | 0.48<br>(0.34 to<br>0.64)                                | 0.01<br>(0.01 to<br>0.02)                         | 0.02<br>(0.02 to<br>0.03)                         | 0.02<br>(0.02 to<br>0.03)                         | 0.02<br>(0.02 to<br>0.03)                         |

|                                                                |                                                      |                                                      |                                                      |                                                      |                                                |                                                 |                                                 |                                                 |
|----------------------------------------------------------------|------------------------------------------------------|------------------------------------------------------|------------------------------------------------------|------------------------------------------------------|------------------------------------------------|-------------------------------------------------|-------------------------------------------------|-------------------------------------------------|
|                                                                | 0.05<br>(0.02 to<br>0.08)                            | 0.05<br>(0.03 to<br>0.10)                            | 0.06<br>(0.03 to<br>0.10)                            | 0.06<br>(0.03 to<br>0.10)                            | 0.00<br>(0.00 to<br>0.00)                      | 0.00<br>(0.00 to<br>0.01)                       | 0.00<br>(0.00 to<br>0.01)                       | 0.00<br>(0.00 to<br>0.01)                       |
| Silicosis                                                      | 0.07<br>(0.04 to<br>0.11)                            | 0.15<br>(0.09 to<br>0.24)                            | 0.16<br>(0.09 to<br>0.25)                            | 0.14<br>(0.09 to<br>0.23)                            | 0.00<br>(0.00 to<br>0.00)                      | 0.01<br>(0.00 to<br>0.01)                       | 0.01<br>(0.00 to<br>0.01)                       | 0.01<br>(0.00 to<br>0.01)                       |
| Asbestosis                                                     | 0.02<br>(0.01 to<br>0.03)                            | 0.02<br>(0.01 to<br>0.05)                            | 0.02<br>(0.01 to<br>0.04)                            | 0.04<br>(0.02 to<br>0.07)                            | 0.00<br>(0.00 to<br>0.00)                      | 0.00<br>(0.00 to<br>0.00)                       | 0.00<br>(0.00 to<br>0.00)                       | 0.00<br>(0.00 to<br>0.00)                       |
| Coal workers pneumoconiosis                                    | 0.13<br>(0.09 to<br>0.19)                            | 0.22<br>(0.14 to<br>0.31)                            | 0.21<br>(0.13 to<br>0.31)                            | 0.24<br>(0.16 to<br>0.34)                            | 0.01<br>(0.00 to<br>0.01)                      | 0.01<br>(0.01 to<br>0.02)                       | 0.01<br>(0.01 to<br>0.02)                       | 0.01<br>(0.01 to<br>0.02)                       |
| Other pneumoconiosis                                           | 33.32<br>(22.28 to<br>46.94)                         | 29.90<br>(16.73 to<br>51.26)                         | 22.25<br>(12.62 to<br>37.37)                         | 40.97<br>(22.60 to<br>70.95)                         | 0.91<br>(0.62 to<br>1.34)                      | 1.09<br>(0.64 to<br>1.89)                       | 0.84<br>(0.52 to<br>1.44)                       | 1.33<br>(0.78 to<br>2.33)                       |
| Asthma                                                         | 1.52<br>(0.77 to<br>2.75)                            | 4.30<br>(2.11 to<br>7.16)                            | 4.66<br>(2.28 to<br>7.74)                            | 3.58<br>(1.74 to<br>6.01)                            | 0.05<br>(0.03 to<br>0.09)                      | 0.19<br>(0.09 to<br>0.30)                       | 0.21<br>(0.10 to<br>0.34)                       | 0.14<br>(0.07 to<br>0.23)                       |
| Interstitial lung disease and pulmonary sarcoidosis            | 4.15<br>(2.12 to<br>8.08)                            | 4.99<br>(2.92 to<br>7.88)                            | 4.74<br>(2.80 to<br>7.45)                            | 6.42<br>(3.61 to<br>11.00)                           | 0.08<br>(0.05 to<br>0.13)                      | 0.14<br>(0.09 to<br>0.21)                       | 0.14<br>(0.09 to<br>0.20)                       | 0.16<br>(0.10 to<br>0.24)                       |
| Other chronic respiratory diseases                             | <b>139.28</b><br><b>(93.90 to</b><br><b>206.07)</b>  | <b>284.51</b><br><b>(189.82 to</b><br><b>417.17)</b> | <b>261.91</b><br><b>(172.89 to</b><br><b>388.39)</b> | <b>327.24</b><br><b>(217.44 to</b><br><b>473.05)</b> | <b>4.03</b><br><b>(2.77 to</b><br><b>5.85)</b> | <b>9.06</b><br><b>(6.34 to</b><br><b>12.80)</b> | <b>8.51</b><br><b>(5.93 to</b><br><b>12.07)</b> | <b>9.96</b><br><b>(6.99 to</b><br><b>13.87)</b> |
| <b>Cirrhosis and other chronic liver diseases</b>              | 44.39<br>(29.07 to<br>66.51)                         | 94.01<br>(60.81 to<br>140.16)                        | 92.20<br>(60.04 to<br>137.24)                        | 103.05<br>(67.66 to<br>152.98)                       | 1.35<br>(0.91 to<br>1.99)                      | 3.05<br>(2.10 to<br>4.43)                       | 3.05<br>(2.08 to<br>4.33)                       | 3.22<br>(2.19 to<br>4.58)                       |
| Cirrhosis and other chronic liver diseases due to hepatitis B  | 36.21<br>(23.58 to<br>55.56)                         | 79.13<br>(50.73 to<br>119.99)                        | 77.44<br>(49.21 to<br>118.24)                        | 87.26<br>(55.60 to<br>129.80)                        | 1.09<br>(0.72 to<br>1.65)                      | 2.53<br>(1.70 to<br>3.63)                       | 2.52<br>(1.68 to<br>3.64)                       | 2.70<br>(1.82 to<br>3.84)                       |
| Cirrhosis and other chronic liver diseases due to hepatitis C  | 30.69<br>(20.24 to<br>45.74)                         | 71.13<br>(46.14 to<br>107.77)                        | 53.31<br>(34.54 to<br>80.54)                         | 87.66<br>(57.25 to<br>130.70)                        | 0.97<br>(0.65 to<br>1.43)                      | 2.38<br>(1.65 to<br>3.35)                       | 1.85<br>(1.28 to<br>2.63)                       | 2.80<br>(1.94 to<br>3.99)                       |
| Cirrhosis and other chronic liver diseases due to alcohol use  | 27.99<br>(19.78 to<br>39.78)                         | 40.24<br>(27.00 to<br>58.90)                         | 38.97<br>(25.81 to<br>57.31)                         | 49.27<br>(33.09 to<br>71.15)                         | 0.62<br>(0.44 to<br>0.88)                      | 1.10<br>(0.78 to<br>1.55)                       | 1.09<br>(0.77 to<br>1.54)                       | 1.24<br>(0.88 to<br>1.72)                       |
| Cirrhosis and other chronic liver diseases due to other causes | <b>144.39</b><br><b>(108.19 to</b><br><b>192.00)</b> | <b>193.28</b><br><b>(135.24 to</b><br><b>275.19)</b> | <b>176.63</b><br><b>(123.45 to</b><br><b>247.90)</b> | <b>245.17</b><br><b>(171.71 to</b><br><b>347.10)</b> | <b>3.92</b><br><b>(3.04 to</b><br><b>5.14)</b> | <b>6.99</b><br><b>(5.47 to</b><br><b>8.88)</b>  | <b>6.65</b><br><b>(5.16 to</b><br><b>8.45)</b>  | <b>7.91</b><br><b>(6.11 to</b><br><b>10.16)</b> |
| <b>Digestive diseases</b>                                      | 28.04<br>(19.50 to<br>39.51)                         | 24.79<br>(16.33 to<br>35.27)                         | 21.56<br>(14.04 to<br>31.80)                         | 35.42<br>(23.79 to<br>50.79)                         | 0.91<br>(0.65 to<br>1.26)                      | 0.97<br>(0.71 to<br>1.27)                       | 0.88<br>(0.63 to<br>1.19)                       | 1.28<br>(0.94 to<br>1.69)                       |
| Peptic ulcer disease                                           | <b>Angola</b>                                        |                                                      |                                                      |                                                      |                                                |                                                 |                                                 |                                                 |
| Cause                                                          | YLLs (in 1000s)                                      |                                                      |                                                      |                                                      | Deaths (in 1000s)                              |                                                 |                                                 |                                                 |
|                                                                | 2016                                                 | 2040 Forecast                                        | 2040 Better Scenario                                 | 2040 Worse Scenario                                  | 2016                                           | 2040 Forecast                                   | 2040 Better Scenario                            | 2040 Worse Scenario                             |
| Gastritis and duodenitis                                       | 7.49<br>(5.05 to<br>10.53)                           | 12.83<br>(8.59 to<br>18.56)                          | 12.46<br>(8.20 to<br>18.33)                          | 15.06<br>(10.14 to<br>21.71)                         | 0.23<br>(0.15 to<br>0.32)                      | 0.47<br>(0.34 to<br>0.65)                       | 0.48<br>(0.33 to<br>0.66)                       | 0.51<br>(0.37 to<br>0.70)                       |
| Appendicitis                                                   | 13.32<br>(9.09 to<br>19.99)                          | 12.37<br>(7.61 to<br>18.34)                          | 11.45<br>(6.93 to<br>16.91)                          | 18.16<br>(11.47 to<br>26.78)                         | 0.26<br>(0.18 to<br>0.37)                      | 0.33<br>(0.22 to<br>0.47)                       | 0.31<br>(0.20 to<br>0.45)                       | 0.44<br>(0.29 to<br>0.61)                       |
| Paralytic ileus and intestinal obstruction                     | 49.62<br>(34.15 to<br>70.07)                         | 61.98<br>(45.11 to<br>84.73)                         | 61.57<br>(44.18 to<br>85.06)                         | 76.23<br>(56.14 to<br>104.86)                        | 1.18<br>(0.89 to<br>1.56)                      | 2.30<br>(1.76 to<br>2.96)                       | 2.38<br>(1.81 to<br>3.08)                       | 2.37<br>(1.84 to<br>3.08)                       |
| Inguinal, femoral, and abdominal hernia                        | 4.58<br>(2.63 to<br>6.93)                            | 5.24<br>(2.78 to<br>7.45)                            | 5.07<br>(2.72 to<br>7.32)                            | 6.49<br>(3.52 to<br>9.19)                            | 0.14<br>(0.08 to<br>0.20)                      | 0.21<br>(0.12 to<br>0.29)                       | 0.21<br>(0.12 to<br>0.29)                       | 0.24<br>(0.13 to<br>0.31)                       |
| Inflammatory bowel disease                                     | 7.16<br>(3.32 to<br>11.58)                           | 11.53<br>(5.43 to<br>17.57)                          | 11.64<br>(5.44 to<br>17.77)                          | 12.25<br>(5.75 to<br>18.66)                          | 0.18<br>(0.09 to<br>0.26)                      | 0.38<br>(0.20 to<br>0.53)                       | 0.39<br>(0.20 to<br>0.56)                       | 0.36<br>(0.19 to<br>0.51)                       |
| Vascular intestinal disorders                                  | 2.87<br>(1.99 to<br>3.93)                            | 6.12<br>(4.12 to<br>8.32)                            | 6.13<br>(4.12 to<br>8.40)                            | 6.53<br>(4.46 to<br>8.67)                            | 0.11<br>(0.08 to<br>0.15)                      | 0.29<br>(0.21 to<br>0.37)                       | 0.30<br>(0.21 to<br>0.38)                       | 0.28<br>(0.21 to<br>0.35)                       |



|                                                            |                                          |                                          |                                          |                                          |                                    |                                      |                                     |                                       |
|------------------------------------------------------------|------------------------------------------|------------------------------------------|------------------------------------------|------------------------------------------|------------------------------------|--------------------------------------|-------------------------------------|---------------------------------------|
|                                                            | 8.34<br>(5.82 to<br>11.78)               | 16.11<br>(8.67 to<br>28.31)              | 11.40<br>(6.39 to<br>19.41)              | 21.30<br>(11.62 to<br>37.34)             | 0.29<br>(0.21 to<br>0.41)          | 0.67<br>(0.39 to<br>1.12)            | 0.50<br>(0.30 to<br>0.81)           | 0.82<br>(0.47 to<br>1.36)             |
| Gallbladder and biliary diseases                           |                                          |                                          |                                          |                                          |                                    |                                      |                                     |                                       |
|                                                            | 7.47<br>(4.69 to<br>11.80)               | 21.26<br>(7.28 to<br>55.41)              | 15.34<br>(6.16 to<br>36.47)              | 26.52<br>(8.83 to<br>70.65)              | 0.19<br>(0.12 to<br>0.31)          | 0.58<br>(0.23 to<br>1.48)            | 0.44<br>(0.20 to<br>1.01)           | 0.70<br>(0.26 to<br>1.76)             |
| Pancreatitis                                               |                                          |                                          |                                          |                                          |                                    |                                      |                                     |                                       |
|                                                            | 15.49<br>(10.49 to<br>22.41)             | 21.05<br>(13.10 to<br>30.72)             | 20.02<br>(12.53 to<br>29.89)             | 27.20<br>(17.55 to<br>38.87)             | 0.42<br>(0.29 to<br>0.59)          | 0.78<br>(0.53 to<br>1.05)            | 0.77<br>(0.52 to<br>1.07)           | 0.91<br>(0.63 to<br>1.20)             |
| Other digestive diseases                                   |                                          |                                          |                                          |                                          |                                    |                                      |                                     |                                       |
| <b>Neurological disorders</b>                              | <b>63.09<br/>(49.02 to<br/>81.69)</b>    | <b>145.95<br/>(112.73 to<br/>191.64)</b> | <b>135.45<br/>(106.69 to<br/>170.78)</b> | <b>149.52<br/>(115.32 to<br/>193.33)</b> | <b>2.54<br/>(1.97 to<br/>3.23)</b> | <b>9.60<br/>(7.32 to<br/>13.02)</b>  | <b>9.55<br/>(7.59 to<br/>12.53)</b> | <b>7.68<br/>(5.67 to<br/>10.61)</b>   |
|                                                            | 22.24<br>(16.48 to<br>29.36)             | 87.23<br>(62.58 to<br>123.24)            | 83.63<br>(63.77 to<br>112.53)            | 70.35<br>(48.58 to<br>101.15)            | 1.80<br>(1.35 to<br>2.34)          | 8.09<br>(5.63 to<br>11.64)           | 8.10<br>(6.13 to<br>11.10)          | 5.99<br>(3.84 to<br>8.94)             |
| Alzheimer's disease and other dementias                    |                                          |                                          |                                          |                                          |                                    |                                      |                                     |                                       |
|                                                            | 1.25<br>(0.87 to<br>1.72)                | 5.58<br>(4.16 to<br>7.27)                | 6.43<br>(4.76 to<br>8.38)                | 3.93<br>(2.84 to<br>5.10)                | 0.09<br>(0.06 to<br>0.12)          | 0.45<br>(0.33 to<br>0.59)            | 0.54<br>(0.40 to<br>0.70)           | 0.30<br>(0.21 to<br>0.40)             |
| Parkinson's disease                                        |                                          |                                          |                                          |                                          |                                    |                                      |                                     |                                       |
|                                                            | 32.49<br>(23.17 to<br>42.71)             | 41.99<br>(24.76 to<br>67.74)             | 33.86<br>(20.79 to<br>53.54)             | 62.98<br>(37.15 to<br>100.03)            | 0.53<br>(0.38 to<br>0.71)          | 0.79<br>(0.47 to<br>1.28)            | 0.64<br>(0.39 to<br>1.02)           | 1.14<br>(0.67 to<br>1.80)             |
| Epilepsy                                                   |                                          |                                          |                                          |                                          |                                    |                                      |                                     |                                       |
|                                                            | 0.42<br>(0.28 to<br>0.67)                | 1.15<br>(0.73 to<br>1.88)                | 1.17<br>(0.73 to<br>1.92)                | 1.06<br>(0.67 to<br>1.73)                | 0.01<br>(0.01 to<br>0.02)          | 0.03<br>(0.02 to<br>0.05)            | 0.03<br>(0.02 to<br>0.05)           | 0.03<br>(0.02 to<br>0.04)             |
| Multiple sclerosis                                         |                                          |                                          |                                          |                                          |                                    |                                      |                                     |                                       |
|                                                            | 0.44<br>(0.28 to<br>0.74)                | 0.81<br>(0.48 to<br>1.44)                | 0.85<br>(0.50 to<br>1.50)                | 0.80<br>(0.49 to<br>1.37)                | 0.01<br>(0.01 to<br>0.02)          | 0.03<br>(0.02 to<br>0.05)            | 0.03<br>(0.02 to<br>0.05)           | 0.02<br>(0.01 to<br>0.04)             |
| Motor neuron disease                                       |                                          |                                          |                                          |                                          |                                    |                                      |                                     |                                       |
|                                                            | 6.24<br>(4.55 to<br>8.62)                | 9.18<br>(6.24 to<br>12.75)               | 9.52<br>(6.48 to<br>13.36)               | 10.39<br>(7.26 to<br>14.29)              | 0.10<br>(0.08 to<br>0.13)          | 0.21<br>(0.14 to<br>0.28)            | 0.22<br>(0.15 to<br>0.30)           | 0.21<br>(0.15 to<br>0.28)             |
| Other neurological disorders                               |                                          |                                          |                                          |                                          |                                    |                                      |                                     |                                       |
| <b>Mental disorders</b>                                    | <b>14.80<br/>(10.23 to<br/>21.55)</b>    | <b>37.19<br/>(24.33 to<br/>54.98)</b>    | <b>35.90<br/>(23.30 to<br/>53.25)</b>    | <b>38.83<br/>(25.65 to<br/>57.18)</b>    | <b>0.33<br/>(0.23 to<br/>0.48)</b> | <b>0.86<br/>(0.57 to<br/>1.24)</b>   | <b>0.83<br/>(0.55 to<br/>1.20)</b>  | <b>0.88<br/>(0.59 to<br/>1.25)</b>    |
|                                                            | 8.13<br>(5.36 to<br>12.42)               | 16.32<br>(10.20 to<br>26.12)             | 14.88<br>(9.16 to<br>23.93)              | 17.53<br>(11.08 to<br>27.57)             | 0.20<br>(0.13 to<br>0.31)          | 0.42<br>(0.27 to<br>0.65)            | 0.39<br>(0.25 to<br>0.60)           | 0.44<br>(0.29 to<br>0.68)             |
| Alcohol use disorders                                      |                                          |                                          |                                          |                                          |                                    |                                      |                                     |                                       |
|                                                            | 6.61<br>(4.42 to<br>9.63)                | 20.73<br>(12.85 to<br>31.84)             | 20.88<br>(12.93 to<br>32.27)             | 21.16<br>(13.33 to<br>32.11)             | 0.13<br>(0.09 to<br>0.19)          | 0.44<br>(0.28 to<br>0.65)            | 0.44<br>(0.29 to<br>0.66)           | 0.43<br>(0.28 to<br>0.64)             |
| Drug use disorders                                         |                                          |                                          |                                          |                                          |                                    |                                      |                                     |                                       |
|                                                            | 5.23<br>(3.40 to<br>7.60)                | 15.49<br>(9.67 to<br>24.23)              | 15.56<br>(9.69 to<br>24.45)              | 15.88<br>(9.98 to<br>24.56)              | 0.10<br>(0.07 to<br>0.15)          | 0.32<br>(0.20 to<br>0.47)            | 0.32<br>(0.20 to<br>0.48)           | 0.32<br>(0.20 to<br>0.48)             |
| Opioid use disorders                                       |                                          |                                          |                                          |                                          |                                    |                                      |                                     |                                       |
|                                                            | 0.24<br>(0.09 to<br>0.45)                | 0.86<br>(0.33 to<br>1.62)                | 0.84<br>(0.33 to<br>1.58)                | 0.96<br>(0.38 to<br>1.81)                | 0.01<br>(0.00 to<br>0.01)          | 0.02<br>(0.01 to<br>0.03)            | 0.02<br>(0.01 to<br>0.03)           | 0.02<br>(0.01 to<br>0.04)             |
| Cocaine use disorders                                      |                                          |                                          |                                          |                                          |                                    |                                      |                                     |                                       |
|                                                            | 0.14<br>(0.06 to<br>0.26)                | 0.63<br>(0.29 to<br>1.18)                | 0.60<br>(0.28 to<br>1.14)                | 0.74<br>(0.33 to<br>1.42)                | 0.00<br>(0.00 to<br>0.01)          | 0.01<br>(0.01 to<br>0.02)            | 0.01<br>(0.01 to<br>0.02)           | 0.02<br>(0.01 to<br>0.03)             |
| Amphetamine use disorders                                  |                                          |                                          |                                          |                                          |                                    |                                      |                                     |                                       |
|                                                            | 1.00<br>(0.60 to<br>1.58)                | 3.76<br>(2.18 to<br>6.05)                | 3.87<br>(2.25 to<br>6.24)                | 3.59<br>(2.10 to<br>5.82)                | 0.02<br>(0.01 to<br>0.03)          | 0.09<br>(0.06 to<br>0.13)            | 0.09<br>(0.06 to<br>0.14)           | 0.08<br>(0.05 to<br>0.12)             |
| Other drug use disorders                                   |                                          |                                          |                                          |                                          |                                    |                                      |                                     |                                       |
|                                                            | 0.06<br>(0.03 to<br>0.12)                | 0.14<br>(0.07 to<br>0.28)                | 0.14<br>(0.07 to<br>0.29)                | 0.14<br>(0.07 to<br>0.27)                | 0.00<br>(0.00 to<br>0.00)          | 0.00<br>(0.00 to<br>0.01)            | 0.00<br>(0.00 to<br>0.01)           | 0.00<br>(0.00 to<br>0.00)             |
| Eating disorders                                           |                                          |                                          |                                          |                                          |                                    |                                      |                                     |                                       |
| <b>Angola</b>                                              |                                          |                                          |                                          |                                          |                                    |                                      |                                     |                                       |
| Cause                                                      | YLLs (in 1000s)                          |                                          |                                          |                                          | Deaths (in 1000s)                  |                                      |                                     |                                       |
|                                                            | 2016                                     | 2040 Forecast                            | 2040 Better Scenario                     | 2040 Worse Scenario                      | 2016                               | 2040 Forecast                        | 2040 Better Scenario                | 2040 Worse Scenario                   |
| <b>Diabetes, urogenital, blood, and endocrine diseases</b> | <b>175.15<br/>(133.05 to<br/>222.37)</b> | <b>269.38<br/>(187.35 to<br/>371.96)</b> | <b>232.32<br/>(160.06 to<br/>324.17)</b> | <b>384.37<br/>(271.63 to<br/>529.70)</b> | <b>4.86<br/>(3.77 to<br/>6.26)</b> | <b>10.87<br/>(8.11 to<br/>14.57)</b> | <b>9.58<br/>(7.11 to<br/>12.91)</b> | <b>14.00<br/>(10.53 to<br/>18.64)</b> |
| Diabetes mellitus                                          | 59.93<br>(44.55 to<br>81.73)             | 129.14<br>(79.84 to<br>205.35)           | 106.67<br>(66.33 to<br>170.51)           | 183.91<br>(114.51 to<br>297.65)          | 2.37<br>(1.79 to<br>3.16)          | 6.01<br>(4.09 to<br>8.68)            | 5.23<br>(3.56 to<br>7.55)           | 7.87<br>(5.36 to<br>11.61)            |

|                                                            |                              |                               |                              |                               |                           |                           |                           |                           |
|------------------------------------------------------------|------------------------------|-------------------------------|------------------------------|-------------------------------|---------------------------|---------------------------|---------------------------|---------------------------|
| Acute glomerulonephritis                                   | 0.32<br>(0.21 to<br>0.52)    | 0.38<br>(0.24 to<br>0.61)     | 0.36<br>(0.22 to<br>0.58)    | 0.57<br>(0.34 to<br>0.95)     | 0.01<br>(0.00 to<br>0.01) | 0.01<br>(0.01 to<br>0.01) | 0.01<br>(0.01 to<br>0.01) | 0.01<br>(0.01 to<br>0.02) |
| Chronic kidney disease                                     | 35.61<br>(26.89 to<br>47.98) | 61.53<br>(37.35 to<br>104.90) | 49.80<br>(31.14 to<br>84.94) | 90.78<br>(56.18 to<br>151.47) | 1.05<br>(0.81 to<br>1.41) | 2.60<br>(1.53 to<br>5.78) | 2.10<br>(1.28 to<br>4.45) | 3.47<br>(2.01 to<br>7.18) |
| Chronic kidney disease due to diabetes mellitus            | 8.08<br>(5.84 to<br>11.38)   | 18.77<br>(10.67 to<br>34.11)  | 14.97<br>(8.76 to<br>26.26)  | 26.29<br>(14.71 to<br>47.57)  | 0.29<br>(0.22 to<br>0.41) | 0.85<br>(0.47 to<br>1.91) | 0.68<br>(0.40 to<br>1.52) | 1.11<br>(0.61 to<br>2.37) |
| Chronic kidney disease due to hypertension                 | 4.21<br>(2.98 to<br>6.00)    | 10.34<br>(5.74 to<br>21.63)   | 8.22<br>(4.70 to<br>16.76)   | 14.01<br>(7.79 to<br>27.37)   | 0.19<br>(0.14 to<br>0.27) | 1.01<br>(0.34 to<br>1.54) | 0.50<br>(0.29 to<br>1.20) | 0.77<br>(0.42 to<br>1.71) |
| Chronic kidney disease due to glomerulonephritis           | 11.07<br>(8.15 to<br>14.95)  | 14.98<br>(9.21 to<br>24.36)   | 12.33<br>(7.65 to<br>19.55)  | 23.52<br>(14.90 to<br>37.03)  | 0.26<br>(0.19 to<br>0.35) | 0.49<br>(0.28 to<br>0.99) | 0.40<br>(0.24 to<br>0.75) | 0.70<br>(0.42 to<br>1.29) |
| Chronic kidney disease due to other and unspecified causes | 12.25<br>(9.02 to<br>16.42)  | 17.45<br>(10.66 to<br>28.58)  | 14.29<br>(8.76 to<br>23.09)  | 26.96<br>(16.55 to<br>42.57)  | 0.30<br>(0.22 to<br>0.41) | 0.64<br>(0.37 to<br>1.36) | 0.52<br>(0.31 to<br>1.08) | 0.89<br>(0.53 to<br>1.72) |
| Urinary diseases and male infertility                      | 17.04<br>(12.63 to<br>22.51) | 20.59<br>(15.46 to<br>27.32)  | 20.51<br>(15.22 to<br>27.61) | 25.43<br>(19.19 to<br>33.59)  | 0.42<br>(0.32 to<br>0.54) | 0.85<br>(0.70 to<br>1.02) | 0.89<br>(0.72 to<br>1.08) | 0.86<br>(0.72 to<br>1.03) |
| Urinary tract infections                                   | 9.12<br>(5.74 to<br>13.19)   | 13.55<br>(9.63 to<br>18.48)   | 13.79<br>(9.73 to<br>18.91)  | 15.54<br>(10.76 to<br>21.93)  | 0.22<br>(0.15 to<br>0.30) | 0.56<br>(0.43 to<br>0.73) | 0.60<br>(0.45 to<br>0.78) | 0.53<br>(0.40 to<br>0.68) |
| Urolithiasis                                               | 0.23<br>(0.15 to<br>0.33)    | 0.44<br>(0.28 to<br>0.66)     | 0.44<br>(0.28 to<br>0.66)    | 0.50<br>(0.32 to<br>0.76)     | 0.01<br>(0.00 to<br>0.01) | 0.01<br>(0.01 to<br>0.02) | 0.01<br>(0.01 to<br>0.02) | 0.01<br>(0.01 to<br>0.02) |
| Other urinary diseases                                     | 7.68<br>(4.99 to<br>11.01)   | 6.61<br>(4.13 to<br>9.23)     | 6.27<br>(3.85 to<br>8.93)    | 9.39<br>(5.95 to<br>13.22)    | 0.20<br>(0.14 to<br>0.26) | 0.27<br>(0.18 to<br>0.37) | 0.27<br>(0.17 to<br>0.37) | 0.32<br>(0.22 to<br>0.42) |
| Gynecological diseases                                     | 1.27<br>(0.76 to<br>1.96)    | 1.89<br>(1.00 to<br>3.23)     | 1.72<br>(0.90 to<br>2.98)    | 2.59<br>(1.40 to<br>4.45)     | 0.03<br>(0.02 to<br>0.05) | 0.05<br>(0.03 to<br>0.08) | 0.04<br>(0.02 to<br>0.07) | 0.06<br>(0.03 to<br>0.10) |
| Uterine fibroids                                           | 0.45<br>(0.18 to<br>0.82)    | 0.54<br>(0.19 to<br>1.10)     | 0.48<br>(0.17 to<br>0.98)    | 0.77<br>(0.28 to<br>1.52)     | 0.01<br>(0.00 to<br>0.02) | 0.01<br>(0.01 to<br>0.03) | 0.01<br>(0.00 to<br>0.03) | 0.02<br>(0.01 to<br>0.04) |
| Polycystic ovarian syndrome                                | 0.12<br>(0.02 to<br>0.32)    | 0.11<br>(0.01 to<br>0.33)     | 0.09<br>(0.01 to<br>0.28)    | 0.19<br>(0.02 to<br>0.55)     | 0.00<br>(0.00 to<br>0.01) | 0.00<br>(0.00 to<br>0.01) | 0.00<br>(0.00 to<br>0.01) | 0.00<br>(0.00 to<br>0.01) |
| Endometriosis                                              | 0.00<br>(0.00 to<br>0.01)    | 0.01<br>(0.00 to<br>0.04)     | 0.01<br>(0.00 to<br>0.04)    | 0.01<br>(0.00 to<br>0.05)     | 0.00<br>(0.00 to<br>0.00) | 0.00<br>(0.00 to<br>0.00) | 0.00<br>(0.00 to<br>0.00) | 0.00<br>(0.00 to<br>0.00) |
| Genital prolapse                                           | 0.04<br>(0.02 to<br>0.07)    | 0.04<br>(0.02 to<br>0.09)     | 0.04<br>(0.01 to<br>0.08)    | 0.06<br>(0.02 to<br>0.12)     | 0.00<br>(0.00 to<br>0.00) | 0.00<br>(0.00 to<br>0.00) | 0.00<br>(0.00 to<br>0.00) | 0.00<br>(0.00 to<br>0.00) |
| Other gynecological diseases                               | 0.66<br>(0.31 to<br>1.15)    | 1.19<br>(0.56 to<br>2.19)     | 1.10<br>(0.51 to<br>2.02)    | 1.57<br>(0.73 to<br>2.83)     | 0.01<br>(0.01 to<br>0.03) | 0.03<br>(0.01 to<br>0.05) | 0.03<br>(0.01 to<br>0.05) | 0.04<br>(0.02 to<br>0.06) |
| Hemoglobinopathies and hemolytic anemias                   | 45.37<br>(32.90 to<br>60.73) | 40.68<br>(26.31 to<br>59.54)  | 38.56<br>(24.90 to<br>56.05) | 59.04<br>(38.76 to<br>85.53)  | 0.72<br>(0.53 to<br>0.95) | 0.94<br>(0.65 to<br>1.34) | 0.90<br>(0.62 to<br>1.29) | 1.24<br>(0.87 to<br>1.75) |
| Thalassemias                                               | 0.05<br>(0.03 to<br>0.08)    | 0.02<br>(0.01 to<br>0.03)     | 0.02<br>(0.01 to<br>0.03)    | 0.03<br>(0.01 to<br>0.05)     | 0.00<br>(0.00 to<br>0.00) | 0.00<br>(0.00 to<br>0.00) | 0.00<br>(0.00 to<br>0.00) | 0.00<br>(0.00 to<br>0.00) |
| Sickle cell disorders                                      | 41.43<br>(29.86 to<br>55.95) | 33.06<br>(20.80 to<br>49.26)  | 31.34<br>(19.75 to<br>46.97) | 49.24<br>(31.28 to<br>72.22)  | 0.58<br>(0.42 to<br>0.76) | 0.58<br>(0.36 to<br>0.88) | 0.55<br>(0.34 to<br>0.83) | 0.81<br>(0.51 to<br>1.21) |
| G6PD deficiency                                            | 2.59<br>(1.84 to<br>3.54)    | 5.42<br>(3.60 to<br>7.82)     | 5.05<br>(3.27 to<br>7.49)    | 7.28<br>(4.99 to<br>10.47)    | 0.07<br>(0.05 to<br>0.10) | 0.21<br>(0.14 to<br>0.29) | 0.20<br>(0.13 to<br>0.28) | 0.26<br>(0.18 to<br>0.37) |
| Other hemoglobinopathies and hemolytic anemias             | 1.30<br>(0.94 to<br>1.87)    | 2.18<br>(1.66 to<br>3.06)     | 2.14<br>(1.58 to<br>3.02)    | 2.49<br>(1.93 to<br>3.43)     | 0.07<br>(0.05 to<br>0.11) | 0.16<br>(0.12 to<br>0.21) | 0.16<br>(0.12 to<br>0.22) | 0.16<br>(0.12 to<br>0.23) |
| Endocrine, metabolic, blood, and immune disorders          | 15.61<br>(6.59 to<br>31.70)  | 15.17<br>(5.37 to<br>34.18)   | 14.69<br>(5.23 to<br>32.70)  | 22.05<br>(8.03 to<br>47.80)   | 0.26<br>(0.11 to<br>0.54) | 0.41<br>(0.14 to<br>0.92) | 0.41<br>(0.14 to<br>0.92) | 0.49<br>(0.17 to<br>1.07) |

| Angola                                        |                                     |                                     |                                     |                                     |                               |                               |                               |                               |
|-----------------------------------------------|-------------------------------------|-------------------------------------|-------------------------------------|-------------------------------------|-------------------------------|-------------------------------|-------------------------------|-------------------------------|
| Cause                                         | YLLs (in 1000s)                     |                                     |                                     |                                     | Deaths (in 1000s)             |                               |                               |                               |
|                                               | 2016                                | 2040 Forecast                       | 2040 Better Scenario                | 2040 Worse Scenario                 | 2016                          | 2040 Forecast                 | 2040 Better Scenario          | 2040 Worse Scenario           |
| <b>Musculoskeletal disorders</b>              | <b>5.44</b><br>(3.55 to 7.73)       | <b>14.35</b><br>(8.82 to 21.51)     | <b>14.82</b><br>(9.05 to 22.28)     | <b>13.91</b><br>(8.76 to 20.33)     | <b>0.13</b><br>(0.09 to 0.19) | <b>0.41</b><br>(0.27 to 0.59) | <b>0.43</b><br>(0.28 to 0.62) | <b>0.38</b><br>(0.25 to 0.53) |
| Rheumatoid arthritis                          | 0.90<br>(0.58 to 1.39)              | 2.13<br>(1.41 to 3.31)              | 2.03<br>(1.32 to 3.17)              | 2.54<br>(1.71 to 3.83)              | 0.03<br>(0.02 to 0.05)        | 0.10<br>(0.07 to 0.15)        | 0.10<br>(0.06 to 0.14)        | 0.11<br>(0.07 to 0.15)        |
| Other musculoskeletal disorders               | 4.54<br>(2.86 to 6.58)              | 12.22<br>(7.15 to 18.55)            | 12.79<br>(7.51 to 19.55)            | 11.36<br>(6.75 to 17.14)            | 0.10<br>(0.06 to 0.14)        | 0.31<br>(0.19 to 0.46)        | 0.33<br>(0.21 to 0.49)        | 0.27<br>(0.17 to 0.40)        |
| <b>Other non-communicable diseases</b>        | <b>346.08</b><br>(214.59 to 527.49) | <b>188.63</b><br>(126.88 to 274.76) | <b>182.19</b><br>(124.41 to 267.42) | <b>388.87</b><br>(242.72 to 615.37) | <b>4.39</b><br>(2.84 to 6.51) | <b>3.86</b><br>(2.83 to 5.36) | <b>3.88</b><br>(2.84 to 5.38) | <b>6.08</b><br>(4.26 to 8.99) |
| Congenital birth defects                      | 294.42<br>(176.69 to 461.36)        | 116.20<br>(67.62 to 189.22)         | 109.96<br>(63.71 to 181.42)         | 287.84<br>(160.04 to 492.48)        | 3.48<br>(2.10 to 5.41)        | 1.46<br>(0.87 to 2.34)        | 1.38<br>(0.82 to 2.23)        | 3.48<br>(1.96 to 5.87)        |
| Neural tube defects                           | 45.52<br>(22.26 to 81.56)           | 7.08<br>(3.03 to 15.03)             | 6.29<br>(2.69 to 13.53)             | 22.18<br>(9.29 to 45.47)            | 0.53<br>(0.26 to 0.95)        | 0.09<br>(0.04 to 0.18)        | 0.08<br>(0.03 to 0.16)        | 0.26<br>(0.11 to 0.54)        |
| Congenital heart anomalies                    | 97.48<br>(54.61 to 167.16)          | 42.04<br>(23.78 to 72.83)           | 39.89<br>(22.54 to 69.31)           | 98.21<br>(52.32 to 178.80)          | 1.16<br>(0.66 to 1.97)        | 0.54<br>(0.32 to 0.92)        | 0.52<br>(0.30 to 0.86)        | 1.21<br>(0.67 to 2.16)        |
| Orofacial clefts                              | 2.41<br>(0.49 to 6.79)              | 0.64<br>(0.12 to 1.80)              | 0.56<br>(0.10 to 1.59)              | 2.18<br>(0.42 to 6.04)              | 0.03<br>(0.01 to 0.08)        | 0.01<br>(0.00 to 0.02)        | 0.01<br>(0.00 to 0.02)        | 0.03<br>(0.00 to 0.07)        |
| Down syndrome                                 | 4.06<br>(2.08 to 7.22)              | 2.22<br>(1.27 to 3.88)              | 2.08<br>(1.17 to 3.63)              | 4.92<br>(2.54 to 9.37)              | 0.05<br>(0.03 to 0.09)        | 0.03<br>(0.02 to 0.06)        | 0.03<br>(0.02 to 0.05)        | 0.07<br>(0.04 to 0.12)        |
| Other chromosomal abnormalities               | 9.40<br>(1.85 to 19.39)             | 6.02<br>(1.14 to 12.64)             | 5.62<br>(1.06 to 11.89)             | 16.38<br>(3.03 to 34.58)            | 0.11<br>(0.02 to 0.23)        | 0.07<br>(0.01 to 0.15)        | 0.07<br>(0.01 to 0.14)        | 0.19<br>(0.04 to 0.40)        |
| Congenital musculoskeletal and limb anomalies | 3.54<br>(1.62 to 7.75)              | 1.73<br>(0.82 to 3.54)              | 1.67<br>(0.80 to 3.45)              | 4.11<br>(1.87 to 8.90)              | 0.04<br>(0.02 to 0.09)        | 0.02<br>(0.01 to 0.04)        | 0.02<br>(0.01 to 0.04)        | 0.05<br>(0.02 to 0.10)        |
| Urogenital congenital anomalies               | 5.97<br>(3.18 to 10.71)             | 2.72<br>(1.51 to 4.92)              | 2.63<br>(1.44 to 4.80)              | 6.17<br>(3.18 to 11.33)             | 0.07<br>(0.04 to 0.13)        | 0.04<br>(0.02 to 0.07)        | 0.04<br>(0.02 to 0.06)        | 0.08<br>(0.04 to 0.14)        |
| Digestive congenital anomalies                | 27.48<br>(14.17 to 47.90)           | 10.75<br>(5.32 to 20.71)            | 10.11<br>(5.00 to 19.70)            | 29.01<br>(13.91 to 56.78)           | 0.32<br>(0.17 to 0.56)        | 0.13<br>(0.06 to 0.24)        | 0.12<br>(0.06 to 0.23)        | 0.34<br>(0.16 to 0.66)        |
| Other congenital birth defects                | 98.35<br>(46.80 to 174.17)          | 43.00<br>(21.71 to 76.56)           | 41.12<br>(20.73 to 73.71)           | 104.67<br>(49.98 to 196.85)         | 1.16<br>(0.56 to 2.05)        | 0.53<br>(0.28 to 0.94)        | 0.51<br>(0.26 to 0.90)        | 1.25<br>(0.61 to 2.34)        |
| Skin and subcutaneous diseases                | 27.86<br>(14.98 to 42.91)           | 63.80<br>(38.23 to 94.78)           | 64.02<br>(38.34 to 95.05)           | 78.44<br>(45.05 to 118.90)          | 0.63<br>(0.37 to 0.97)        | 2.31<br>(1.48 to 3.44)        | 2.41<br>(1.54 to 3.60)        | 2.34<br>(1.46 to 3.49)        |
| Cellulitis                                    | 2.50<br>(0.90 to 4.57)              | 9.09<br>(3.52 to 14.94)             | 9.56<br>(3.71 to 15.65)             | 9.05<br>(3.39 to 15.44)             | 0.06<br>(0.02 to 0.10)        | 0.31<br>(0.13 to 0.49)        | 0.33<br>(0.14 to 0.53)        | 0.27<br>(0.11 to 0.43)        |
| Pyoderma                                      | 21.87<br>(12.09 to 34.46)           | 46.08<br>(27.30 to 69.34)           | 45.50<br>(26.99 to 69.17)           | 60.48<br>(34.63 to 92.67)           | 0.46<br>(0.27 to 0.70)        | 1.61<br>(1.03 to 2.44)        | 1.65<br>(1.05 to 2.49)        | 1.73<br>(1.08 to 2.52)        |
| Decubitus ulcer                               | 2.27<br>(1.16 to 4.02)              | 6.18<br>(3.44 to 10.61)             | 6.45<br>(3.61 to 11.11)             | 6.11<br>(3.26 to 10.60)             | 0.09<br>(0.05 to 0.15)        | 0.33<br>(0.19 to 0.60)        | 0.36<br>(0.21 to 0.64)        | 0.28<br>(0.16 to 0.51)        |
| Other skin and subcutaneous diseases          | 1.22<br>(0.57 to 2.06)              | 2.45<br>(1.26 to 4.01)              | 2.52<br>(1.29 to 4.11)              | 2.81<br>(1.39 to 4.76)              | 0.02<br>(0.01 to 0.04)        | 0.07<br>(0.03 to 0.10)        | 0.07<br>(0.04 to 0.11)        | 0.06<br>(0.03 to 0.10)        |
| Sudden infant death syndrome                  | 23.81<br>(9.75 to 44.43)            | 8.63<br>(3.25 to 16.83)             | 8.21<br>(3.07 to 15.91)             | 22.58<br>(8.02 to 43.93)            | 0.28<br>(0.11 to 0.52)        | 0.10<br>(0.04 to 0.20)        | 0.10<br>(0.04 to 0.18)        | 0.26<br>(0.09 to 0.51)        |

|                                      |                                   |                                     |                                     |                                       |                              |                              |                              |                              |
|--------------------------------------|-----------------------------------|-------------------------------------|-------------------------------------|---------------------------------------|------------------------------|------------------------------|------------------------------|------------------------------|
| Injuries                             | 915.59<br>(704.97 to<br>1,155.64) | 1,125.71<br>(784.49 to<br>1,635.62) | 944.13<br>(664.36 to<br>1,356.68)   | 1,536.23<br>(1,080.14 to<br>2,220.13) | 15.38<br>(12.01 to<br>19.41) | 23.78<br>(17.40 to<br>33.24) | 20.52<br>(15.39 to<br>28.37) | 29.63<br>(21.72 to<br>41.10) |
| Transport injuries                   | 336.96<br>(250.70 to<br>443.97)   | 546.68<br>(340.24 to<br>881.82)     | 409.07<br>(258.46 to<br>661.03)     | 742.83<br>(470.74 to<br>1,188.41)     | 5.52<br>(4.16 to<br>7.20)    | 10.31<br>(6.49 to<br>16.66)  | 7.79<br>(5.02 to<br>12.54)   | 13.26<br>(8.40 to<br>21.25)  |
| Road injuries                        | 325.20<br>(240.46 to<br>427.57)   | 525.96<br>(326.00 to<br>848.60)     | 390.90<br>(246.74 to<br>630.15)     | 714.95<br>(449.45 to<br>1,142.76)     | 5.32<br>(4.01 to<br>6.91)    | 9.91<br>(6.23 to<br>16.05)   | 7.44<br>(4.78 to<br>11.98)   | 12.75<br>(8.06 to<br>20.44)  |
| Pedestrian road injuries             | 133.93<br>(92.60 to<br>187.26)    | 143.13<br>(84.71 to<br>231.11)      | 111.33<br>(66.57 to<br>175.35)      | 204.01<br>(121.58 to<br>327.15)       | 2.13<br>(1.49 to<br>2.87)    | 2.88<br>(1.74 to<br>4.64)    | 2.25<br>(1.40 to<br>3.53)    | 3.78<br>(2.32 to<br>5.95)    |
| <b>Angola</b>                        |                                   |                                     |                                     |                                       |                              |                              |                              |                              |
| Cause                                | YLLs (in 1000s)                   |                                     |                                     |                                       | Deaths (in 1000s)            |                              |                              |                              |
|                                      | 2016                              | 2040 Forecast                       | 2040 Better Scenario                | 2040 Worse Scenario                   | 2016                         | 2040 Forecast                | 2040 Better Scenario         | 2040 Worse Scenario          |
| Cyclist road injuries                | 5.46<br>(3.37 to<br>8.06)         | 9.55<br>(5.30 to<br>16.29)          | 7.08<br>(3.97 to<br>11.94)          | 13.26<br>(7.42 to<br>22.24)           | 0.09<br>(0.06 to<br>0.13)    | 0.18<br>(0.10 to<br>0.32)    | 0.14<br>(0.08 to<br>0.23)    | 0.24<br>(0.13 to<br>0.40)    |
| Motorcyclist road injuries           | 26.09<br>(16.53 to<br>40.74)      | 60.41<br>(31.26 to<br>113.30)       | 47.83<br>(25.54 to<br>87.31)        | 74.12<br>(39.08 to<br>137.20)         | 0.43<br>(0.27 to<br>0.68)    | 1.06<br>(0.54 to<br>1.96)    | 0.84<br>(0.44 to<br>1.52)    | 1.26<br>(0.66 to<br>2.37)    |
| Motor vehicle road injuries          | 158.67<br>(110.83 to<br>214.62)   | 311.10<br>(186.60 to<br>516.00)     | 223.36<br>(134.41 to<br>362.21)     | 421.09<br>(256.57 to<br>679.98)       | 2.65<br>(1.91 to<br>3.56)    | 5.76<br>(3.51 to<br>9.51)    | 4.18<br>(2.56 to<br>6.80)    | 7.43<br>(4.59 to<br>12.10)   |
| Other road injuries                  | 1.05<br>(0.67 to<br>1.57)         | 1.76<br>(0.99 to<br>3.18)           | 1.29<br>(0.74 to<br>2.27)           | 2.47<br>(1.39 to<br>4.33)             | 0.02<br>(0.01 to<br>0.03)    | 0.03<br>(0.02 to<br>0.06)    | 0.03<br>(0.01 to<br>0.04)    | 0.04<br>(0.03 to<br>0.08)    |
| Other transport injuries             | 11.76<br>(7.76 to<br>17.21)       | 20.73<br>(12.18 to<br>34.86)        | 18.17<br>(10.83 to<br>30.84)        | 27.88<br>(16.86 to<br>45.93)          | 0.19<br>(0.13 to<br>0.28)    | 0.40<br>(0.25 to<br>0.67)    | 0.35<br>(0.21 to<br>0.58)    | 0.51<br>(0.30 to<br>0.84)    |
| Unintentional injuries               | 457.12<br>(335.49 to<br>601.71)   | 1,306.27<br>(831.50 to<br>1,981.04) | 1,048.20<br>(684.82 to<br>1,411.58) | 1,515.92<br>(988.40 to<br>2,043.44)   | 7.45<br>(5.74 to<br>9.38)    | 19.98<br>(12.40 to<br>27.56) | 14.69<br>(9.87 to<br>20.11)  | 22.46<br>(15.56 to<br>29.36) |
| Falls                                | 49.07<br>(34.03 to<br>68.84)      | 63.09<br>(46.11 to<br>85.13)        | 61.97<br>(45.71 to<br>83.60)        | 76.99<br>(55.79 to<br>103.81)         | 1.23<br>(0.92 to<br>1.63)    | 2.44<br>(1.96 to<br>3.00)    | 2.50<br>(2.00 to<br>3.09)    | 2.50<br>(2.03 to<br>3.05)    |
| Drowning                             | 160.17<br>(105.96 to<br>238.14)   | 87.24<br>(53.16 to<br>135.20)       | 79.50<br>(47.88 to<br>121.64)       | 146.98<br>(83.59 to<br>239.71)        | 2.20<br>(1.53 to<br>3.14)    | 1.47<br>(0.94 to<br>2.20)    | 1.35<br>(0.87 to<br>2.00)    | 2.28<br>(1.38 to<br>3.52)    |
| Fire, heat, and hot substances       | 54.77<br>(37.26 to<br>79.71)      | 33.00<br>(21.77 to<br>49.17)        | 29.73<br>(19.65 to<br>44.53)        | 53.46<br>(33.59 to<br>83.25)          | 0.95<br>(0.71 to<br>1.29)    | 0.87<br>(0.63 to<br>1.18)    | 0.81<br>(0.57 to<br>1.09)    | 1.18<br>(0.83 to<br>1.62)    |
| Poisonings                           | 22.34<br>(11.80 to<br>44.47)      | 9.89<br>(5.97 to<br>16.90)          | 8.57<br>(5.16 to<br>14.40)          | 18.92<br>(10.12 to<br>36.60)          | 0.36<br>(0.22 to<br>0.62)    | 0.22<br>(0.15 to<br>0.35)    | 0.20<br>(0.13 to<br>0.29)    | 0.36<br>(0.23 to<br>0.60)    |
| Exposure to mechanical forces        | 58.01<br>(40.03 to<br>85.07)      | 43.80<br>(28.44 to<br>64.70)        | 40.39<br>(25.68 to<br>61.12)        | 71.98<br>(45.59 to<br>110.13)         | 0.88<br>(0.63 to<br>1.23)    | 0.87<br>(0.58 to<br>1.25)    | 0.81<br>(0.54 to<br>1.18)    | 1.27<br>(0.83 to<br>1.84)    |
| Unintentional firearm injuries       | 6.43<br>(4.19 to<br>9.18)         | 6.31<br>(3.68 to<br>10.04)          | 5.74<br>(3.29 to<br>9.17)           | 9.21<br>(5.48 to<br>14.29)            | 0.11<br>(0.07 to<br>0.16)    | 0.12<br>(0.08 to<br>0.19)    | 0.11<br>(0.07 to<br>0.17)    | 0.17<br>(0.11 to<br>0.26)    |
| Unintentional suffocation            | 21.59<br>(10.36 to<br>44.16)      | 9.00<br>(4.41 to<br>17.26)          | 8.25<br>(4.00 to<br>15.69)          | 20.63<br>(9.75 to<br>42.94)           | 0.26<br>(0.13 to<br>0.53)    | 0.12<br>(0.06 to<br>0.22)    | 0.11<br>(0.06 to<br>0.20)    | 0.26<br>(0.13 to<br>0.53)    |
| Other exposure to mechanical forces  | 29.99<br>(21.56 to<br>41.90)      | 28.48<br>(18.19 to<br>42.60)        | 26.41<br>(16.76 to<br>40.03)        | 42.14<br>(26.84 to<br>62.21)          | 0.51<br>(0.37 to<br>0.71)    | 0.62<br>(0.42 to<br>0.92)    | 0.59<br>(0.39 to<br>0.88)    | 0.83<br>(0.56 to<br>1.21)    |
| Adverse effects of medical treatment | 27.64<br>(18.79 to<br>41.09)      | 22.38<br>(15.58 to<br>31.62)        | 21.06<br>(14.47 to<br>30.19)        | 34.59<br>(23.75 to<br>49.59)          | 0.47<br>(0.35 to<br>0.65)    | 0.56<br>(0.39 to<br>0.78)    | 0.54<br>(0.37 to<br>0.77)    | 0.73<br>(0.52 to<br>1.00)    |
| Animal contact                       | 22.20<br>(14.20 to<br>31.66)      | 22.72<br>(14.41 to<br>33.11)        | 20.68<br>(12.89 to<br>30.62)        | 37.75<br>(23.22 to<br>55.77)          | 0.41<br>(0.28 to<br>0.56)    | 0.58<br>(0.40 to<br>0.80)    | 0.54<br>(0.37 to<br>0.77)    | 0.83<br>(0.57 to<br>1.16)    |

|                                                                                     |                                         |                                          |                                          |                                          |                                    |                                    |                                    |                                    |
|-------------------------------------------------------------------------------------|-----------------------------------------|------------------------------------------|------------------------------------------|------------------------------------------|------------------------------------|------------------------------------|------------------------------------|------------------------------------|
| Venomous animal contact                                                             | 16.31<br>(9.98 to<br>24.21)             | 16.36<br>(10.46 to<br>24.93)             | 14.87<br>(9.32 to<br>22.90)              | 26.97<br>(16.47 to<br>42.12)             | 0.31<br>(0.21 to<br>0.45)          | 0.44<br>(0.30 to<br>0.63)          | 0.41<br>(0.28 to<br>0.59)          | 0.62<br>(0.43 to<br>0.89)          |
| Non-venomous animal contact                                                         | 5.89<br>(3.30 to<br>9.86)               | 6.36<br>(3.57 to<br>9.84)                | 5.81<br>(3.26 to<br>9.16)                | 10.77<br>(6.06 to<br>17.60)              | 0.09<br>(0.06 to<br>0.15)          | 0.14<br>(0.08 to<br>0.21)          | 0.13<br>(0.08 to<br>0.20)          | 0.21<br>(0.12 to<br>0.31)          |
| Foreign body                                                                        | 41.18<br>(22.00 to<br>69.49)            | 29.34<br>(17.89 to<br>44.85)             | 29.11<br>(17.83 to<br>44.46)             | 46.66<br>(26.28 to<br>77.75)             | 0.57<br>(0.33 to<br>0.91)          | 0.55<br>(0.36 to<br>0.82)          | 0.56<br>(0.37 to<br>0.83)          | 0.74<br>(0.46 to<br>1.13)          |
| Pulmonary aspiration and foreign body in airway                                     | 38.36<br>(19.83 to<br>66.96)            | 26.91<br>(16.41 to<br>41.43)             | 26.80<br>(16.40 to<br>40.92)             | 43.06<br>(23.65 to<br>73.14)             | 0.52<br>(0.30 to<br>0.85)          | 0.51<br>(0.34 to<br>0.73)          | 0.52<br>(0.34 to<br>0.75)          | 0.68<br>(0.42 to<br>1.04)          |
| Foreign body in other body part                                                     | 2.82<br>(0.89 to<br>6.05)               | 2.43<br>(0.70 to<br>5.73)                | 2.31<br>(0.66 to<br>5.46)                | 3.60<br>(1.11 to<br>8.09)                | 0.04<br>(0.01 to<br>0.10)          | 0.05<br>(0.01 to<br>0.12)          | 0.05<br>(0.01 to<br>0.11)          | 0.06<br>(0.02 to<br>0.15)          |
| Environmental heat and cold exposure                                                | 6.90<br>(3.97 to<br>9.80)               | 6.15<br>(3.02 to<br>9.96)                | 5.43<br>(2.57 to<br>8.77)                | 10.40<br>(5.25 to<br>16.29)              | 0.13<br>(0.07 to<br>0.19)          | 0.15<br>(0.07 to<br>0.26)          | 0.13<br>(0.07 to<br>0.21)          | 0.22<br>(0.12 to<br>0.35)          |
| Other unintentional injuries                                                        | 14.83<br>(10.90 to<br>20.46)            | 12.67<br>(8.64 to<br>18.00)              | 11.85<br>(8.03 to<br>16.83)              | 18.18<br>(12.27 to<br>25.67)             | 0.25<br>(0.19 to<br>0.34)          | 0.26<br>(0.19 to<br>0.36)          | 0.25<br>(0.18 to<br>0.35)          | 0.35<br>(0.25 to<br>0.48)          |
| <b>Self-harm and interpersonal violence</b>                                         | <b>115.76<br/>(78.32 to<br/>178.30)</b> | <b>234.00<br/>(146.81 to<br/>385.17)</b> | <b>211.93<br/>(136.17 to<br/>338.54)</b> | <b>260.02<br/>(160.47 to<br/>433.69)</b> | <b>2.32<br/>(1.62 to<br/>3.45)</b> | <b>5.24<br/>(3.42 to<br/>8.14)</b> | <b>4.77<br/>(3.20 to<br/>7.26)</b> | <b>5.62<br/>(3.62 to<br/>8.93)</b> |
| <b>Angola</b>                                                                       |                                         |                                          |                                          |                                          |                                    |                                    |                                    |                                    |
| Cause                                                                               | YLLs (in 1000s)                         |                                          |                                          |                                          | Deaths (in 1000s)                  |                                    |                                    |                                    |
|                                                                                     | 2016                                    | 2040 Forecast                            | 2040 Better Scenario                     | 2040 Worse Scenario                      | 2016                               | 2040 Forecast                      | 2040 Better Scenario               | 2040 Worse Scenario                |
| Self-harm                                                                           | 51.21<br>(36.30 to<br>75.10)            | 135.79<br>(80.55 to<br>228.52)           | 118.00<br>(74.12 to<br>187.14)           | 150.98<br>(88.83 to<br>255.52)           | 1.23<br>(0.90 to<br>1.74)          | 3.47<br>(2.21 to<br>5.46)          | 3.08<br>(2.08 to<br>4.62)          | 3.70<br>(2.52 to<br>5.88)          |
| Self-harm by firearm                                                                | 3.61<br>(2.17 to<br>6.20)               | 8.03<br>(3.92 to<br>15.55)               | 6.87<br>(3.45 to<br>13.19)               | 9.33<br>(4.53 to<br>18.02)               | 0.09<br>(0.05 to<br>0.14)          | 0.20<br>(0.11 to<br>0.38)          | 0.18<br>(0.10 to<br>0.32)          | 0.23<br>(0.12 to<br>0.42)          |
| Self-harm by other specified means                                                  | 47.60<br>(33.49 to<br>69.36)            | 127.76<br>(76.28 to<br>215.32)           | 111.13<br>(69.58 to<br>176.80)           | 141.65<br>(84.32 to<br>242.27)           | 1.15<br>(0.84 to<br>1.62)          | 3.27<br>(2.09 to<br>5.17)          | 2.91<br>(1.96 to<br>4.37)          | 3.47<br>(2.18 to<br>5.52)          |
| Interpersonal violence                                                              | 64.56<br>(38.64 to<br>110.00)           | 98.21<br>(55.12 to<br>181.54)            | 93.93<br>(53.93 to<br>168.51)            | 109.05<br>(61.46 to<br>202.04)           | 1.09<br>(0.65 to<br>1.88)          | 1.77<br>(1.00 to<br>3.26)          | 1.69<br>(0.98 to<br>3.06)          | 1.92<br>(1.09 to<br>3.60)          |
| Physical violence by firearm                                                        | 16.21<br>(7.55 to<br>31.16)             | 26.02<br>(11.45 to<br>49.97)             | 25.62<br>(11.40 to<br>49.55)             | 27.95<br>(12.25 to<br>53.48)             | 0.28<br>(0.13 to<br>0.54)          | 0.46<br>(0.20 to<br>0.89)          | 0.45<br>(0.20 to<br>0.88)          | 0.49<br>(0.22 to<br>0.93)          |
| Physical violence by sharp object                                                   | 17.69<br>(9.89 to<br>32.47)             | 32.52<br>(16.81 to<br>63.00)             | 32.52<br>(17.10 to<br>62.00)             | 33.15<br>(17.22 to<br>62.83)             | 0.31<br>(0.17 to<br>0.57)          | 0.59<br>(0.31 to<br>1.12)          | 0.59<br>(0.31 to<br>1.10)          | 0.59<br>(0.31 to<br>1.11)          |
| Physical violence by other means                                                    | 30.66<br>(17.67 to<br>55.17)            | 39.66<br>(20.42 to<br>82.36)             | 35.79<br>(18.60 to<br>73.85)             | 47.94<br>(24.92 to<br>96.67)             | 0.50<br>(0.29 to<br>0.94)          | 0.72<br>(0.38 to<br>1.52)          | 0.65<br>(0.34 to<br>1.35)          | 0.84<br>(0.44 to<br>1.75)          |
| <b>Forces of nature, conflict and terrorism, and executions and police conflict</b> | <b>5.75<br/>(1.12 to<br/>10.86)</b>     | <b>14.75<br/>(0.00 to<br/>38.18)</b>     | <b>14.83<br/>(0.00 to<br/>38.35)</b>     | <b>17.46<br/>(0.00 to<br/>45.33)</b>     | <b>0.09<br/>(0.02 to<br/>0.17)</b> | <b>0.26<br/>(0.00 to<br/>0.66)</b> | <b>0.26<br/>(0.00 to<br/>0.66)</b> | <b>0.29<br/>(0.00 to<br/>0.74)</b> |
| Exposure to forces of nature                                                        | 3.52<br>(0.56 to<br>6.74)               | 0.33<br>(0.00 to<br>3.48)                | 0.33<br>(0.00 to<br>3.51)                | 0.40<br>(0.00 to<br>4.28)                | 0.06<br>(0.01 to<br>0.11)          | 0.01<br>(0.00 to<br>0.06)          | 0.01<br>(0.00 to<br>0.07)          | 0.01<br>(0.00 to<br>0.07)          |
| Conflict and terrorism                                                              | 2.01<br>(0.32 to<br>3.84)               | 14.25<br>(0.00 to<br>37.33)              | 14.33<br>(0.00 to<br>37.51)              | 16.87<br>(0.00 to<br>44.31)              | 0.03<br>(0.00 to<br>0.06)          | 0.25<br>(0.00 to<br>0.65)          | 0.25<br>(0.00 to<br>0.65)          | 0.28<br>(0.00 to<br>0.73)          |
| Executions and police conflict                                                      | 0.23<br>(0.16 to<br>0.37)               | 0.17<br>(0.00 to<br>1.18)                | 0.17<br>(0.00 to<br>1.18)                | 0.19<br>(0.00 to<br>1.28)                | 0.00<br>(0.00 to<br>0.01)          | 0.00<br>(0.00 to<br>0.02)          | 0.00<br>(0.00 to<br>0.02)          | 0.00<br>(0.00 to<br>0.02)          |
| <b>Central African Republic</b>                                                     |                                         |                                          |                                          |                                          |                                    |                                    |                                    |                                    |
|                                                                                     | YLLs (actual counts)                    |                                          |                                          |                                          | Deaths (actual counts)             |                                    |                                    |                                    |

| Cause                                                                    | 2016                                              | 2040 Forecast                                     | 2040 Better Scenario                              | 2040 Worse Scenario                               | 2016                                     | 2040 Forecast                            | 2040 Better Scenario                     | 2040 Worse Scenario                       |
|--------------------------------------------------------------------------|---------------------------------------------------|---------------------------------------------------|---------------------------------------------------|---------------------------------------------------|------------------------------------------|------------------------------------------|------------------------------------------|-------------------------------------------|
| <b>All causes</b>                                                        | 3,924,266.66<br>(3,292,121.61 to<br>4,739,270.30) | 2,735,847.95<br>(2,027,879.24 to<br>3,584,505.08) | 1,754,724.27<br>(1,298,036.25 to<br>2,275,448.49) | 4,385,767.51<br>(3,232,541.93 to<br>5,678,900.93) | 78,872.88<br>(67,765.44 to<br>91,023.90) | 67,670.16<br>(54,096.45 to<br>84,006.39) | 46,100.52<br>(37,181.71 to<br>56,766.26) | 96,258.67<br>(77,254.91 to<br>119,612.61) |
| <b>Communicable, maternal, neonatal, and nutritional diseases</b>        | 2,987,973.21<br>(2,452,889.74 to<br>3,677,358.87) | 1,546,896.41<br>(1,038,451.65 to<br>2,155,043.51) | 859,670.51<br>(576,348.28 to<br>1,197,504.16)     | 2,879,401.31<br>(1,969,428.30 to<br>3,979,410.72) | 51,958.79<br>(44,004.47 to<br>61,702.94) | 32,091.75<br>(22,543.50 to<br>43,951.39) | 18,564.61<br>(13,053.32 to<br>25,659.69) | 53,669.27<br>(38,045.25 to<br>72,925.23)  |
| <b>HIV/AIDS and tuberculosis</b>                                         | 851,221.78<br>(695,579.65 to<br>1,009,886.08)     | 570,525.49<br>(349,933.23 to<br>860,972.09)       | 301,456.68<br>(174,577.52 to<br>479,518.90)       | 1,170,818.02<br>(772,483.84 to<br>1,741,698.22)   | 20,441.63<br>(16,749.68 to<br>24,293.11) | 13,575.79<br>(8,924.75 to<br>19,980.41)  | 7,353.62<br>(4,601.50 to<br>11,199.37)   | 26,281.95<br>(17,823.77 to<br>38,130.90)  |
| <b>Tuberculosis</b>                                                      | 478,302.16<br>(362,418.70 to<br>611,497.47)       | 286,693.62<br>(132,777.77 to<br>525,784.00)       | 130,282.05<br>(61,295.83 to<br>245,049.05)        | 490,596.17<br>(227,378.60 to<br>908,918.31)       | 12,989.40<br>(9,873.78 to<br>16,629.56)  | 7,593.99<br>(3,770.13 to<br>13,729.18)   | 3,659.32<br>(1,868.47 to<br>6,666.11)    | 12,400.30<br>(5,985.66 to<br>22,425.47)   |
| <b>HIV/AIDS</b>                                                          | 372,919.62<br>(286,770.82 to<br>477,692.64)       | 283,831.87<br>(136,015.71 to<br>469,619.16)       | 171,174.62<br>(68,901.51 to<br>334,828.21)        | 680,221.84<br>(403,984.52 to<br>1,133,915.13)     | 7,452.23<br>(5,993.59 to<br>9,267.53)    | 5,981.80<br>(3,310.99 to<br>9,854.05)    | 3,694.30<br>(1,684.23 to<br>6,419.45)    | 13,881.64<br>(6,228.99 to<br>23,167.42)   |
| <b>Diarrhea, lower respiratory, and other common infectious diseases</b> | 1,051,724.24<br>(794,035.12 to<br>1,398,865.32)   | 530,736.40<br>(271,929.66 to<br>897,913.84)       | 255,418.98<br>(127,659.23 to<br>441,917.52)       | 910,049.64<br>(432,382.05 to<br>1,591,760.75)     | 16,849.19<br>(13,051.32 to<br>21,890.49) | 11,416.91<br>(6,078.29 to<br>18,240.08)  | 6,160.59<br>(3,278.50 to<br>10,632.50)   | 15,918.98<br>(8,596.31 to<br>26,245.04)   |
| <b>Diarrheal diseases</b>                                                | 360,912.50<br>(237,855.98 to<br>516,846.30)       | 187,287.06<br>(58,477.91 to<br>402,133.35)        | 102,865.52<br>(28,791.62 to<br>240,718.23)        | 260,813.03<br>(93,111.26 to<br>534,820.64)        | 6,618.44<br>(4,310.49 to<br>9,659.49)    | 4,749.68<br>(1,148.44 to<br>10,479.31)   | 2,705.10<br>(632.38 to<br>6,764.67)      | 5,608.40<br>(1,656.08 to<br>12,137.82)    |
| <b>Intestinal infectious diseases</b>                                    | 6,380.27<br>(3,123.30 to<br>12,253.24)            | 4,002.82<br>(1,708.22 to<br>7,677.96)             | 3,053.26<br>(1,301.97 to<br>5,899.53)             | 6,066.09<br>(2,543.55 to<br>12,150.98)            | 87.99<br>(45.22 to<br>160.79)            | 59.75<br>(26.51 to<br>116.34)            | 46.50<br>(20.49 to<br>88.80)             | 85.90<br>(36.94 to<br>170.01)             |
| <b>Typhoid fever</b>                                                     | 3,720.13<br>(1,780.56 to<br>6,945.81)             | 2,935.38<br>(1,141.73 to<br>6,208.38)             | 2,364.28<br>(940.46 to<br>4,858.10)               | 4,162.95<br>(1,618.42 to<br>8,908.44)             | 52.74<br>(25.54 to<br>97.72)             | 43.55<br>(14.89 to<br>89.98)             | 35.58<br>(14.89 to<br>71.67)             | 59.42<br>(23.88 to<br>123.71)             |
| <b>Paratyphoid fever</b>                                                 | 300.66<br>(123.32 to<br>640.88)                   | 278.67<br>(103.52 to<br>633.57)                   | 212.49<br>(78.22 to<br>471.77)                    | 401.02<br>(142.11 to<br>916.03)                   | 4.27<br>(1.77 to<br>9.09)                | 4.18<br>(1.57 to<br>9.55)                | 3.23<br>(1.21 to<br>7.10)                | 5.79<br>(2.12 to<br>12.95)                |
| <b>Other intestinal infectious diseases</b>                              | 2,359.48<br>(558.62 to<br>7,215.71)               | 788.77<br>(177.96 to<br>2,407.02)                 | 476.49<br>(99.20 to<br>1,464.85)                  | 1,502.11<br>(313.69 to<br>4,796.64)               | 30.98<br>(8.32 to<br>87.55)              | 12.02<br>(3.12 to<br>33.12)              | 7.68<br>(1.99 to<br>20.79)               | 20.69<br>(4.94 to<br>60.13)               |
| <b>Lower respiratory infections</b>                                      | 368,298.45<br>(260,211.71 to<br>514,867.01)       | 234,982.21<br>(100,770.40 to<br>453,948.56)       | 100,430.80<br>(49,223.94 to<br>185,509.17)        | 467,983.57<br>(167,129.10 to<br>916,173.57)       | 6,028.43<br>(4,489.51 to<br>7,993.77)    | 5,127.07<br>(2,817.32 to<br>8,448.87)    | 2,587.85<br>(1,538.38 to<br>4,105.53)    | 7,915.38<br>(3,632.57 to<br>13,963.62)    |
| <b>Upper respiratory infections</b>                                      | 858.21<br>(270.74 to<br>2,101.06)                 | 585.81<br>(209.33 to<br>1,418.36)                 | 311.07<br>(107.19 to<br>761.67)                   | 1,055.23<br>(321.18 to<br>2,812.16)               | 12.89<br>(5.34 to<br>28.13)              | 11.01<br>(4.47 to<br>24.07)              | 6.16<br>(2.44 to<br>13.77)               | 17.49<br>(6.47 to<br>40.01)               |
| <b>Otitis media</b>                                                      | 274.70<br>(95.63 to<br>674.55)                    | 43.49<br>(14.56 to<br>96.05)                      | 45.77<br>(15.47 to<br>100.98)                     | 49.72<br>(16.24 to<br>116.13)                     | 5.19<br>(2.12 to<br>10.41)               | 1.21<br>(0.43 to<br>2.56)                | 1.47<br>(0.52 to<br>3.08)                | 1.16<br>(0.42 to<br>2.41)                 |
| <b>Meningitis</b>                                                        | 86,920.83<br>(58,366.06 to<br>125,996.94)         | 47,294.19<br>(25,107.14 to<br>83,596.50)          | 32,075.08<br>(17,927.19 to<br>52,067.88)          | 75,364.40<br>(37,116.06 to<br>141,162.25)         | 1,270.51<br>(867.54 to<br>1,810.19)      | 762.52<br>(436.74 to<br>1,265.55)        | 578.95<br>(340.93 to<br>896.77)          | 1,088.37<br>(596.12 to<br>1,908.02)       |
| <b>Pneumococcal meningitis</b>                                           | 4,990.59<br>(3,257.49 to<br>7,354.25)             | 2,516.28<br>(1,307.46 to<br>4,316.82)             | 1,907.71<br>(1,029.75 to<br>3,239.51)             | 3,468.70<br>(1,769.91 to<br>6,322.78)             | 82.65<br>(54.91 to<br>119.47)            | 48.06<br>(26.46 to<br>80.29)             | 40.53<br>(23.10 to<br>67.91)             | 58.19<br>(31.33 to<br>98.83)              |
| <b>H influenzae type B meningitis</b>                                    | 8,691.21<br>(5,531.65 to<br>13,075.97)            | 13,112.54<br>(2,700.25 to<br>40,353.92)           | 3,674.64<br>(1,389.35 to<br>9,370.91)             | 26,747.41<br>(4,845.18 to<br>80,967.31)           | 119.41<br>(79.18 to<br>175.07)           | 165.01<br>(43.15 to<br>481.06)           | 56.09<br>(25.90 to<br>122.16)            | 323.47<br>(65.80 to<br>960.01)            |
| <b>Meningococcal meningitis</b>                                          | 37,340.65<br>(24,790.34 to<br>54,121.47)          | 15,163.17<br>(8,622.96 to<br>24,984.72)           | 12,559.22<br>(7,070.27 to<br>20,841.20)           | 21,806.49<br>(12,395.31 to<br>36,202.55)          | 534.53<br>(362.49 to<br>775.67)          | 258.48<br>(149.06 to<br>412.85)          | 223.99<br>(130.74 to<br>354.25)          | 336.87<br>(200.00 to<br>533.52)           |
| <b>Other meningitis</b>                                                  | 35,898.38<br>(23,909.78 to<br>52,797.40)          | 16,502.20<br>(9,210.11 to<br>26,259.24)           | 13,933.51<br>(7,818.71 to<br>21,966.98)           | 23,341.79<br>(13,136.89 to<br>37,131.55)          | 533.92<br>(361.22 to<br>769.82)          | 290.96<br>(170.67 to<br>461.53)          | 258.34<br>(152.63 to<br>398.88)          | 369.84<br>(218.20 to<br>579.38)           |
| <b>Encephalitis</b>                                                      | 3,144.06<br>(1,294.94 to<br>6,812.34)             | 2,817.68<br>(1,127.74 to<br>6,324.50)             | 2,163.94<br>(859.39 to<br>4,987.33)               | 4,473.97<br>(1,614.76 to<br>10,792.56)            | 44.55<br>(20.55 to<br>90.32)             | 44.57<br>(20.85 to<br>91.50)             | 35.52<br>(16.63 to<br>72.89)             | 64.54<br>(26.44 to<br>144.81)             |
| <b>Diphtheria</b>                                                        | 801.67<br>(346.83 to<br>1,667.07)                 | 252.91<br>(85.20 to<br>679.90)                    | 77.13<br>(36.10 to<br>146.00)                     | 442.78<br>(133.79 to<br>1,274.03)                 | 10.22<br>(4.81 to<br>20.39)              | 3.41<br>(1.32 to<br>8.47)                | 1.36<br>(0.63 to<br>2.47)                | 5.64<br>(1.88 to<br>15.50)                |

|                                               |                                                                  |                                                                |                                                                |                                                                 |                                                            |                                                          |                                                          |                                                            |
|-----------------------------------------------|------------------------------------------------------------------|----------------------------------------------------------------|----------------------------------------------------------------|-----------------------------------------------------------------|------------------------------------------------------------|----------------------------------------------------------|----------------------------------------------------------|------------------------------------------------------------|
| Whooping cough                                | 51,728.73<br>(5,416.51 to<br>166,756.56)                         | 41,601.20<br>(3,874.80 to<br>129,767.60)                       | 11,123.72<br>(815.22 to<br>37,850.20)                          | 72,273.92<br>(6,348.56 to<br>231,627.53)                        | 611.15<br>(64.07 to<br>1,969.57)                           | 492.92<br>(46.05 to<br>1,548.89)                         | 134.11<br>(10.24 to<br>449.66)                           | 854.31<br>(74.58 to<br>2,748.84)                           |
| Tetanus                                       | 15,331.79<br>(5,879.68 to<br>36,507.81)                          | 2,516.32<br>(767.42 to<br>6,129.47)                            | 1,247.19<br>(350.12 to<br>3,678.94)                            | 3,690.00<br>(1,106.23 to<br>9,129.45)                           | 268.09<br>(99.77 to<br>651.10)                             | 41.69<br>(13.33 to<br>109.84)                            | 28.68<br>(7.23 to<br>88.54)                              | 54.04<br>(16.88 to<br>134.76)                              |
| Measles                                       | 153,392.65<br>(51,484.45 to<br>339,006.82)                       | 7,608.58<br>(488.32 to<br>34,463.16)                           | 1,015.48<br>(125.26 to<br>4,507.69)                            | 14,540.43<br>(881.31 to<br>65,578.15)                           | 1,830.22<br>(616.54 to<br>4,048.80)                        | 90.72<br>(6.16 to<br>410.53)                             | 12.69<br>(1.68 to<br>54.96)                              | 172.80<br>(11.14 to<br>780.08)                             |
| <b>Central African Republic</b>               |                                                                  |                                                                |                                                                |                                                                 |                                                            |                                                          |                                                          |                                                            |
| Cause                                         | YLLs (actual counts)                                             |                                                                |                                                                |                                                                 | Deaths (actual counts)                                     |                                                          |                                                          |                                                            |
|                                               | 2016                                                             | 2040 Forecast                                                  | 2040 Better Scenario                                           | 2040 Worse Scenario                                             | 2016                                                       | 2040 Forecast                                            | 2040 Better Scenario                                     | 2040 Worse Scenario                                        |
| Varicella and herpes zoster                   | 3,680.38<br>(2,099.33 to<br>6,198.27)                            | 1,744.13<br>(845.91 to<br>3,285.85)                            | 1,010.01<br>(488.90 to<br>1,966.57)                            | 3,296.52<br>(1,470.63 to<br>6,800.91)                           | 61.49<br>(40.14 to<br>92.57)                               | 32.39<br>(19.81 to<br>53.34)                             | 22.20<br>(13.43 to<br>36.14)                             | 50.95<br>(26.84 to<br>94.59)                               |
| Neglected tropical diseases and malaria       | <b>270,998.83</b><br><b>(161,850.02 to</b><br><b>406,863.58)</b> | <b>88,236.39</b><br><b>(55,427.79 to</b><br><b>136,598.84)</b> | <b>77,884.56</b><br><b>(48,825.46 to</b><br><b>121,686.13)</b> | <b>130,926.46</b><br><b>(76,577.55 to</b><br><b>210,548.05)</b> | <b>3,703.72</b><br><b>(2,371.48 to</b><br><b>5,362.52)</b> | <b>1,456.16</b><br><b>(882.21 to</b><br><b>2,163.41)</b> | <b>1,341.96</b><br><b>(905.99 to</b><br><b>1,971.40)</b> | <b>1,945.42</b><br><b>(1,255.64 to</b><br><b>2,934.07)</b> |
| Malaria                                       | 242,321.99<br>(131,900.05 to<br>375,504.48)                      | 72,761.70<br>(43,642.35 to<br>115,417.25)                      | 65,548.33<br>(39,206.37 to<br>103,924.86)                      | 106,800.26<br>(58,996.36 to<br>175,735.45)                      | 3,236.39<br>(1,922.25 to<br>4,813.11)                      | 1,197.27<br>(774.33 to<br>1,798.41)                      | 1,130.94<br>(733.68 to<br>1,684.94)                      | 1,579.31<br>(950.76 to<br>2,444.26)                        |
| Chagas disease                                | 0.00<br>(0.00 to<br>0.00)                                        | 0.00<br>(0.00 to<br>0.00)                                      | 0.00<br>(0.00 to<br>0.00)                                      | 0.00<br>(0.00 to<br>0.00)                                       | 0.00<br>(0.00 to<br>0.00)                                  | 0.00<br>(0.00 to<br>0.00)                                | 0.00<br>(0.00 to<br>0.00)                                | 0.00<br>(0.00 to<br>0.00)                                  |
| Leishmaniasis                                 | 12.17<br>(6.75 to<br>19.09)                                      | 9.88<br>(5.31 to<br>17.03)                                     | 5.62<br>(3.04 to<br>9.51)                                      | 13.38<br>(7.22 to<br>22.07)                                     | 0.38<br>(0.21 to<br>0.60)                                  | 0.27<br>(0.14 to<br>0.46)                                | 0.16<br>(0.09 to<br>0.27)                                | 0.34<br>(0.18 to<br>0.56)                                  |
| African trypanosomiasis                       | 9,083.02<br>(4,291.30 to<br>16,834.42)                           | 1,155.88<br>(384.29 to<br>2,951.98)                            | 1,145.76<br>(377.95 to<br>2,918.22)                            | 1,231.53<br>(419.25 to<br>3,149.22)                             | 168.09<br>(81.91 to<br>305.50)                             | 22.26<br>(7.20 to<br>57.13)                              | 22.53<br>(7.33 to<br>56.84)                              | 22.81<br>(7.77 to<br>57.22)                                |
| Schistosomiasis                               | 1,586.88<br>(1,015.94 to<br>2,373.08)                            | 1,254.82<br>(748.11 to<br>2,015.73)                            | 992.87<br>(576.45 to<br>1,601.18)                              | 1,295.07<br>(832.60 to<br>2,212.47)                             | 43.31<br>(28.07 to<br>62.45)                               | 33.91<br>(20.85 to<br>51.22)                             | 28.16<br>(16.99 to<br>43.11)                             | 35.95<br>(22.39 to<br>53.54)                               |
| Cysticercosis                                 | 614.39<br>(464.01 to<br>820.26)                                  | 309.37<br>(196.59 to<br>464.26)                                | 275.01<br>(170.22 to<br>428.13)                                | 340.02<br>(219.16 to<br>513.80)                                 | 12.39<br>(9.29 to<br>16.55)                                | 6.83<br>(4.48 to<br>10.14)                               | 6.23<br>(3.98 to<br>9.41)                                | 7.18<br>(4.70 to<br>10.60)                                 |
| Cystic echinococcosis                         | 416.47<br>(286.17 to<br>598.36)                                  | 235.75<br>(135.50 to<br>401.52)                                | 102.81<br>(60.08 to<br>164.38)                                 | 376.31<br>(222.78 to<br>611.79)                                 | 8.30<br>(5.76 to<br>11.81)                                 | 5.46<br>(3.21 to<br>9.10)                                | 2.49<br>(1.52 to<br>3.85)                                | 8.09<br>(4.88 to<br>12.89)                                 |
| Dengue                                        | 103.49<br>(3.55 to<br>441.65)                                    | 306.96<br>(12.77 to<br>1,154.78)                               | 277.64<br>(11.55 to<br>1,002.70)                               | 432.57<br>(1,763.21)                                            | 1.52<br>(0.06 to<br>6.01)                                  | 5.62<br>(0.25 to<br>19.96)                               | 5.40<br>(0.24 to<br>18.47)                               | 6.97<br>(0.30 to<br>26.88)                                 |
| Yellow fever                                  | 893.35<br>(170.14 to<br>2,761.11)                                | 407.02<br>(71.73 to<br>1,352.12)                               | 244.41<br>(42.19 to<br>822.81)                                 | 599.90<br>(105.60 to<br>2,045.18)                               | 14.25<br>(2.74 to<br>43.67)                                | 6.83<br>(1.25 to<br>22.63)                               | 4.17<br>(0.75 to<br>14.09)                               | 9.64<br>(1.76 to<br>32.66)                                 |
| Rabies                                        | 834.79<br>(334.57 to<br>1,882.24)                                | 457.07<br>(159.34 to<br>1,101.28)                              | 145.81<br>(52.90 to<br>323.13)                                 | 1,003.38<br>(349.29 to<br>2,501.09)                             | 12.95<br>(5.41 to<br>26.81)                                | 7.77<br>(2.89 to<br>17.70)                               | 2.55<br>(0.97 to<br>7.52)                                | 15.78<br>(5.81 to<br>37.52)                                |
| Intestinal nematode infections                | 5,880.88<br>(3,279.55 to<br>9,853.97)                            | 5,230.02<br>(2,746.36 to<br>9,494.71)                          | 5,130.87<br>(2,581.07 to<br>9,594.83)                          | 8,179.88<br>(4,150.26 to<br>15,194.45)                          | 72.95<br>(41.91 to<br>120.07)                              | 67.89<br>(37.69 to<br>118.87)                            | 67.47<br>(36.25 to<br>121.67)                            | 102.75<br>(54.82 to<br>184.62)                             |
| Other neglected tropical diseases             | 9,251.40<br>(3,772.99 to<br>19,032.48)                           | 6,107.93<br>(2,267.35 to<br>12,840.61)                         | 4,015.44<br>(1,400.35 to<br>8,393.65)                          | 10,554.16<br>(4,106.08 to<br>22,407.61)                         | 133.20<br>(52.25 to<br>271.06)                             | 102.06<br>(36.70 to<br>216.72)                           | 71.86<br>(24.41 to<br>150.24)                            | 156.61<br>(58.61 to<br>327.40)                             |
| Maternal disorders                            | <b>78,024.50</b><br><b>(51,953.29 to</b><br><b>114,475.45)</b>   | <b>81,443.37</b><br><b>(38,871.04 to</b><br><b>158,656.89)</b> | <b>39,144.39</b><br><b>(16,813.91 to</b><br><b>78,836.77)</b>  | <b>122,220.54</b><br><b>(53,817.79 to</b><br><b>233,674.33)</b> | <b>1,447.14</b><br><b>(957.38 to</b><br><b>2,142.19)</b>   | <b>1,580.44</b><br><b>(748.93 to</b><br><b>3,109.69)</b> | <b>763.21</b><br><b>(329.85 to</b><br><b>1,534.58)</b>   | <b>2,347.99</b><br><b>(1,026.29 to</b><br><b>4,440.46)</b> |
| Maternal hemorrhage                           | 19,766.96<br>(11,684.64 to<br>30,993.93)                         | 17,920.26<br>(7,484.44 to<br>37,925.00)                        | 8,595.58<br>(3,408.24 to<br>18,890.24)                         | 25,751.78<br>(10,388.14 to<br>52,653.75)                        | 369.37<br>(217.60 to<br>584.06)                            | 346.44<br>(146.04 to<br>724.19)                          | 166.68<br>(64.63 to<br>362.63)                           | 494.28<br>(196.80 to<br>1,006.22)                          |
| Maternal sepsis and other maternal infections | 3,413.16<br>(1,663.80 to<br>6,063.61)                            | 2,802.99<br>(1,028.48 to<br>6,151.42)                          | 1,344.19<br>(457.33 to<br>3,004.76)                            | 4,086.39<br>(1,428.04 to<br>8,844.59)                           | 64.47<br>(31.49 to<br>114.88)                              | 55.16<br>(20.39 to<br>122.81)                            | 26.55<br>(9.16 to<br>60.16)                              | 79.70<br>(28.56 to<br>176.56)                              |

|                                                                         |                                                    |                                                   |                                                   |                                                    |                                              |                                              |                                            |                                              |
|-------------------------------------------------------------------------|----------------------------------------------------|---------------------------------------------------|---------------------------------------------------|----------------------------------------------------|----------------------------------------------|----------------------------------------------|--------------------------------------------|----------------------------------------------|
| Maternal hypertensive disorders                                         | 15,879.82<br>(9,703.33 to<br>25,338.26)            | 14,415.71<br>(6,234.28 to<br>29,459.05)           | 6,829.22<br>(2,684.12 to<br>14,161.62)            | 21,071.76<br>(8,473.97 to<br>44,223.10)            | 284.72<br>(171.80 to<br>463.33)              | 267.91<br>(116.27 to<br>549.08)              | 127.28<br>(50.51 to<br>269.46)             | 388.25<br>(156.83 to<br>803.27)              |
| Maternal obstructed labor and uterine rupture                           | 3,410.23<br>(1,631.35 to<br>6,347.89)              | 3,357.73<br>(1,199.19 to<br>8,058.87)             | 1,520.09<br>(495.50 to<br>3,629.88)               | 4,951.31<br>(1,667.82 to<br>11,358.68)             | 64.24<br>(30.33 to<br>120.00)                | 65.66<br>(23.01 to<br>159.08)                | 29.83<br>(9.48 to<br>71.65)                | 96.06<br>(31.55 to<br>228.05)                |
| Maternal abortion, miscarriage, and ectopic pregnancy                   | 2,654.59<br>(1,138.85 to<br>5,153.49)              | 2,941.71<br>(931.96 to<br>7,288.52)               | 1,381.18<br>(415.75 to<br>3,582.29)               | 4,245.68<br>(1,343.70 to<br>9,981.71)              | 50.00<br>(20.81 to<br>94.58)                 | 57.60<br>(17.94 to<br>136.65)                | 27.14<br>(7.93 to<br>65.96)                | 82.41<br>(25.37 to<br>189.07)                |
| Indirect maternal deaths                                                | 17,968.70<br>(10,267.72 to<br>28,141.98)           | 16,975.45<br>(7,387.61 to<br>34,119.06)           | 8,428.44<br>(3,294.99 to<br>17,516.51)            | 25,943.53<br>(10,717.53 to<br>52,415.23)           | 336.35<br>(192.80 to<br>537.09)              | 327.61<br>(140.73 to<br>654.46)              | 163.28<br>(63.40 to<br>337.61)             | 494.22<br>(197.84 to<br>987.64)              |
| Late maternal deaths                                                    | 2,509.36<br>(1,060.74 to<br>4,872.57)              | 1,787.66<br>(603.18 to<br>4,295.34)               | 863.81<br>(279.21 to<br>2,078.13)                 | 2,699.32<br>(889.93 to<br>6,262.29)                | 46.16<br>(19.35 to<br>89.86)                 | 34.16<br>(11.18 to<br>82.40)                 | 16.57<br>(5.35 to<br>39.92)                | 51.01<br>(16.96 to<br>120.98)                |
| Maternal deaths aggravated by HIV/AIDS                                  | 1,426.52<br>(690.95 to<br>2,461.80)                | 11,487.30<br>(4,176.38 to<br>24,059.66)           | 5,168.95<br>(1,320.56 to<br>12,666.26)            | 18,938.57<br>(7,230.29 to<br>40,191.81)            | 27.62<br>(13.25 to<br>47.58)                 | 237.59<br>(90.73 to<br>506.07)               | 108.69<br>(30.30 to<br>258.96)             | 385.20<br>(148.30 to<br>804.05)              |
| Other maternal disorders                                                | 10,995.16<br>(6,393.81 to<br>18,285.11)            | 9,754.55<br>(4,171.59 to<br>20,271.66)            | 5,012.94<br>(2,034.27 to<br>10,664.73)            | 14,532.19<br>(5,915.34 to<br>29,894.23)            | 204.22<br>(118.03 to<br>338.02)              | 188.31<br>(79.37 to<br>385.43)               | 97.17<br>(40.06 to<br>204.97)              | 276.86<br>(114.63 to<br>568.87)              |
| <b>Central African Republic</b>                                         |                                                    |                                                   |                                                   |                                                    |                                              |                                              |                                            |                                              |
| Cause                                                                   | YLLs (actual counts)                               |                                                   |                                                   |                                                    | Deaths (actual counts)                       |                                              |                                            |                                              |
|                                                                         | 2016                                               | 2040 Forecast                                     | 2040 Better Scenario                              | 2040 Worse Scenario                                | 2016                                         | 2040 Forecast                                | 2040 Better Scenario                       | 2040 Worse Scenario                          |
| <b>Neonatal disorders</b>                                               | <b>415,061.70</b><br>(298,995.76 to<br>566,134.24) | <b>174,444.20</b><br>(98,185.78 to<br>288,804.33) | <b>111,344.37</b><br>(61,524.68 to<br>186,763.19) | <b>383,321.61</b><br>(207,923.57 to<br>673,758.38) | <b>4,794.82</b><br>(3,454.29 to<br>6,540.57) | <b>2,015.75</b><br>(1,134.59 to<br>3,336.81) | <b>1,286.67</b><br>(711.08 to<br>2,158.35) | <b>4,429.17</b><br>(2,402.40 to<br>7,783.04) |
| Neonatal preterm birth                                                  | 130,162.67<br>(78,747.43 to<br>204,419.03)         | 43,993.29<br>(21,710.77 to<br>77,097.90)          | 25,438.31<br>(12,310.46 to<br>44,778.10)          | 105,314.49<br>(50,122.65 to<br>190,992.01)         | 1,503.48<br>(909.56 to<br>2,361.28)          | 508.28<br>(250.83 to<br>800.72)              | 293.93<br>(142.26 to<br>517.30)            | 1,216.67<br>(579.06 to<br>2,206.86)          |
| Neonatal encephalopathy due to birth asphyxia and trauma                | 106,430.94<br>(63,362.02 to<br>168,442.78)         | 38,789.77<br>(18,343.76 to<br>76,356.42)          | 26,878.61<br>(12,675.15 to<br>52,854.46)          | 80,528.32<br>(35,805.98 to<br>156,895.13)          | 1,229.52<br>(732.04 to<br>1,945.82)          | 448.29<br>(212.15 to<br>882.27)              | 310.64<br>(146.57 to<br>610.65)            | 930.60<br>(414.97 to<br>1,812.80)            |
| Neonatal sepsis and other neonatal infections                           | 91,213.44<br>(55,572.27 to<br>136,622.03)          | 52,138.03<br>(27,719.85 to<br>89,956.30)          | 35,180.54<br>(18,408.90 to<br>60,194.32)          | 109,682.20<br>(55,905.09 to<br>189,627.72)         | 1,053.71<br>(641.88 to<br>1,578.34)          | 602.42<br>(320.23 to<br>1,039.21)            | 406.50<br>(192.72 to<br>695.47)            | 1,267.29<br>(646.04 to<br>2,191.59)          |
| Hemolytic disease and other neonatal jaundice                           | 13,862.42<br>(7,064.67 to<br>26,097.11)            | 3,411.04<br>(1,417.80 to<br>7,713.27)             | 2,062.48<br>(849.44 to<br>4,602.28)               | 7,570.84<br>(3,015.80 to<br>16,534.56)             | 160.13<br>(81.60 to<br>301.41)               | 39.41<br>(16.38 to<br>89.09)                 | 23.83<br>(9.82 to<br>53.16)                | 87.47<br>(34.85 to<br>191.00)                |
| Other neonatal disorders                                                | 73,392.22<br>(42,175.24 to<br>113,431.45)          | 36,112.07<br>(17,035.82 to<br>66,440.66)          | 21,784.44<br>(9,455.26 to<br>40,163.83)           | 80,225.76<br>(36,612.79 to<br>156,927.22)          | 847.97<br>(487.39 to<br>1,310.56)            | 417.35<br>(196.86 to<br>767.70)              | 251.78<br>(109.29 to<br>464.07)            | 927.14<br>(423.16 to<br>1,813.05)            |
| <b>Nutritional deficiencies</b>                                         | <b>159,947.88</b><br>(97,369.31 to<br>260,485.66)  | <b>57,683.17</b><br>(33,822.61 to<br>113,352.28)  | <b>41,831.39</b><br>(23,775.02 to<br>84,084.39)   | <b>90,801.78</b><br>(51,491.22 to<br>167,281.20)   | <b>2,637.20</b><br>(1,660.51 to<br>4,640.84) | <b>1,292.00</b><br>(786.81 to<br>2,762.61)   | <b>1,066.59</b><br>(626.90 to<br>2,354.01) | <b>1,664.95</b><br>(998.64 to<br>3,281.34)   |
| Protein-energy malnutrition                                             | 150,045.51<br>(90,791.99 to<br>244,613.20)         | 44,482.14<br>(24,776.38 to<br>85,921.94)          | 31,688.78<br>(17,185.23 to<br>62,666.53)          | 75,119.94<br>(40,678.52 to<br>135,557.55)          | 2,344.79<br>(1,474.39 to<br>3,987.76)        | 917.77<br>(548.35 to<br>1,896.28)            | 745.61<br>(440.90 to<br>1,544.84)          | 1,264.96<br>(731.46 to<br>2,396.73)          |
| Iodine deficiency                                                       | 596.55<br>(30.52 to<br>2,394.21)                   | 1,754.43<br>(47.15 to<br>8,053.31)                | 1,172.54<br>(24.06 to<br>5,218.13)                | 2,550.96<br>(67.54 to<br>13,530.42)                | 12.98<br>(0.74 to<br>43.88)                  | 44.14<br>(1.31 to<br>167.49)                 | 32.94<br>(0.69 to<br>132.18)               | 54.33<br>(1.79 to<br>239.69)                 |
| Dietary iron deficiency                                                 | 188.54<br>(101.95 to<br>464.40)                    | 245.48<br>(105.36 to<br>677.63)                   | 200.73<br>(85.15 to<br>555.92)                    | 279.35<br>(122.53 to<br>759.90)                    | 3.52<br>(1.88 to<br>8.70)                    | 4.70<br>(2.07 to<br>12.37)                   | 3.92<br>(1.72 to<br>10.49)                 | 5.21<br>(2.36 to<br>13.75)                   |
| Other nutritional deficiencies                                          | 9,117.29<br>(4,977.69 to<br>18,797.13)             | 11,201.12<br>(5,488.00 to<br>27,914.52)           | 8,769.34<br>(4,099.24 to<br>21,902.11)            | 12,851.54<br>(6,468.53 to<br>29,872.34)            | 275.92<br>(141.99 to<br>651.90)              | 325.40<br>(159.35 to<br>864.88)              | 284.12<br>(133.04 to<br>779.09)            | 340.45<br>(170.90 to<br>855.55)              |
| <b>Other communicable, maternal, neonatal, and nutritional diseases</b> | <b>160,994.28</b><br>(88,988.47 to<br>268,880.92)  | <b>43,827.39</b><br>(25,669.92 to<br>68,161.06)   | <b>32,590.14</b><br>(19,214.21 to<br>51,076.44)   | <b>71,263.26</b><br>(39,280.60 to<br>119,048.28)   | <b>2,085.08</b><br>(1,241.38 to<br>3,374.08) | <b>754.69</b><br>(488.05 to<br>1,073.32)     | <b>591.96</b><br>(384.02 to<br>838.57)     | <b>1,080.82</b><br>(655.66 to<br>1,658.67)   |
| Sexually transmitted infections excluding HIV                           | 130,787.60<br>(64,673.61 to<br>222,799.48)         | 20,350.28<br>(8,064.15 to<br>38,725.35)           | 15,081.80<br>(6,039.84 to<br>28,766.56)           | 38,499.33<br>(14,447.38 to<br>74,120.20)           | 1,539.97<br>(768.85 to<br>2,609.29)          | 248.32<br>(104.55 to<br>460.90)              | 185.52<br>(78.98 to<br>343.37)             | 460.68<br>(180.71 to<br>874.17)              |



|                                       |                                                                  |                                                                    |                                                                  |                                                                      |                                                               |                                                               |                                                               |                                                               |
|---------------------------------------|------------------------------------------------------------------|--------------------------------------------------------------------|------------------------------------------------------------------|----------------------------------------------------------------------|---------------------------------------------------------------|---------------------------------------------------------------|---------------------------------------------------------------|---------------------------------------------------------------|
| Syphilis                              | 130,173.12<br>(63,896.96 to<br>222,298.21)                       | 19,696.19<br>(7,485.05 to<br>38,195.37)                            | 14,543.32<br>(5,677.75 to<br>28,419.57)                          | 37,784.54<br>(13,678.93 to<br>73,229.15)                             | 1,525.56<br>(755.58 to<br>2,597.83)                           | 233.47<br>(90.80 to<br>448.42)                                | 172.88<br>(68.47 to<br>333.75)                                | 444.90<br>(162.48 to<br>860.74)                               |
| Chlamydial infection                  | 116.32<br>(54.80 to<br>200.17)                                   | 126.44<br>(51.86 to<br>252.50)                                     | 103.43<br>(41.91 to<br>213.62)                                   | 138.99<br>(55.02 to<br>277.62)                                       | 2.68<br>(1.30 to<br>4.58)                                     | 2.84<br>(1.26 to<br>5.45)                                     | 2.40<br>(1.07 to<br>4.61)                                     | 3.03<br>(1.31 to<br>5.78)                                     |
| Gonococcal infection                  | 321.94<br>(152.91 to<br>568.40)                                  | 341.48<br>(139.28 to<br>709.20)                                    | 282.56<br>(114.98 to<br>582.39)                                  | 371.18<br>(147.94 to<br>735.21)                                      | 7.75<br>(3.82 to<br>13.48)                                    | 7.90<br>(3.48 to<br>15.34)                                    | 6.77<br>(3.03 to<br>13.26)                                    | 8.34<br>(3.61 to<br>16.11)                                    |
| Other sexually transmitted infections | 176.22<br>(83.01 to<br>310.60)                                   | 186.17<br>(74.01 to<br>386.41)                                     | 152.49<br>(61.15 to<br>324.96)                                   | 204.62<br>(78.64 to<br>418.25)                                       | 3.98<br>(1.93 to<br>7.07)                                     | 4.12<br>(1.77 to<br>8.20)                                     | 3.46<br>(1.49 to<br>6.90)                                     | 4.42<br>(1.83 to<br>8.95)                                     |
| Acute hepatitis                       | 10,577.23<br>(8,067.55 to<br>13,529.89)                          | 8,549.15<br>(5,787.83 to<br>12,100.04)                             | 6,788.26<br>(4,440.18 to<br>9,919.07)                            | 9,891.91<br>(6,786.65 to<br>13,940.80)                               | 226.13<br>(171.96 to<br>292.66)                               | 201.45<br>(139.91 to<br>280.08)                               | 167.74<br>(114.56 to<br>236.14)                               | 219.85<br>(152.89 to<br>301.25)                               |
| Acute hepatitis A                     | 480.14<br>(43.95 to<br>1,250.08)                                 | 190.54<br>(43.04 to<br>489.05)                                     | 139.89<br>(32.52 to<br>358.56)                                   | 322.60<br>(55.74 to<br>894.85)                                       | 6.03<br>(0.85 to<br>15.24)                                    | 3.00<br>(0.84 to<br>7.02)                                     | 2.34<br>(0.66 to<br>5.63)                                     | 4.55<br>(1.02 to<br>11.67)                                    |
| Acute hepatitis B                     | 7,869.65<br>(5,744.81 to<br>10,544.84)                           | 7,064.12<br>(4,682.53 to<br>10,238.40)                             | 5,558.48<br>(3,558.27 to<br>8,296.38)                            | 7,901.89<br>(5,243.40 to<br>11,408.29)                               | 182.21<br>(134.40 to<br>241.84)                               | 171.54<br>(117.20 to<br>244.64)                               | 140.58<br>(93.81 to<br>200.24)                                | 184.42<br>(125.96 to<br>256.86)                               |
| Acute hepatitis C                     | 178.09<br>(112.26 to<br>266.41)                                  | 205.13<br>(120.33 to<br>328.52)                                    | 194.25<br>(113.64 to<br>316.85)                                  | 208.83<br>(124.11 to<br>323.58)                                      | 4.80<br>(3.05 to<br>7.29)                                     | 5.65<br>(3.43 to<br>8.98)                                     | 5.61<br>(3.40 to<br>9.03)                                     | 5.49<br>(3.32 to<br>8.57)                                     |
| Acute hepatitis E                     | 2,049.35<br>(1,386.93 to<br>2,967.66)                            | 1,089.36<br>(658.92 to<br>1,705.25)                                | 895.64<br>(537.31 to<br>1,407.21)                                | 1,458.59<br>(882.07 to<br>2,297.75)                                  | 33.09<br>(23.21 to<br>46.29)                                  | 21.26<br>(13.22 to<br>32.21)                                  | 25.39<br>(11.90 to<br>38.25)                                  | 25.39<br>(16.06 to<br>38.25)                                  |
| Other unspecified infectious diseases | 19,629.45<br>(7,483.93 to<br>56,475.59)                          | 14,927.96<br>(6,953.75 to<br>29,495.65)                            | 10,720.08<br>(4,695.39 to<br>21,220.35)                          | 22,872.02<br>(10,234.52 to<br>49,061.64)                             | 318.98<br>(128.16 to<br>811.64)                               | 304.92<br>(134.70 to<br>551.33)                               | 238.71<br>(99.72 to<br>435.05)                                | 400.29<br>(186.80 to<br>751.09)                               |
| Non-communicable diseases             | <b>641,615.69</b><br><b>(494,760.97 to</b><br><b>783,488.12)</b> | <b>866,511.34</b><br><b>(637,086.52 to</b><br><b>1,158,057.17)</b> | <b>596,858.68</b><br><b>(444,288.75 to</b><br><b>786,274.95)</b> | <b>1,121,530.53</b><br><b>(810,859.28 to</b><br><b>1,508,049.13)</b> | <b>21,703.05</b><br><b>(17,421.75 to</b><br><b>25,816.28)</b> | <b>29,242.93</b><br><b>(23,103.48 to</b><br><b>36,742.82)</b> | <b>21,492.83</b><br><b>(17,461.13 to</b><br><b>26,389.89)</b> | <b>35,437.02</b><br><b>(27,293.07 to</b><br><b>45,418.63)</b> |

| Central African Republic        |                                                                |                                                                 |                                                                 |                                                                  |                                                            |                                                            |                                                            |                                                            |
|---------------------------------|----------------------------------------------------------------|-----------------------------------------------------------------|-----------------------------------------------------------------|------------------------------------------------------------------|------------------------------------------------------------|------------------------------------------------------------|------------------------------------------------------------|------------------------------------------------------------|
| Cause                           | YLLs (actual counts)                                           |                                                                 |                                                                 |                                                                  | Deaths (actual counts)                                     |                                                            |                                                            |                                                            |
|                                 | 2016                                                           | 2040 Forecast                                                   | 2040 Better Scenario                                            | 2040 Worse Scenario                                              | 2016                                                       | 2040 Forecast                                              | 2040 Better Scenario                                       | 2040 Worse Scenario                                        |
| <b>Neoplasms</b>                | <b>95,868.44</b><br><b>(67,962.66 to</b><br><b>123,320.04)</b> | <b>155,229.63</b><br><b>(94,605.20 to</b><br><b>224,771.90)</b> | <b>149,600.68</b><br><b>(97,704.98 to</b><br><b>215,230.61)</b> | <b>171,965.17</b><br><b>(100,752.49 to</b><br><b>254,790.76)</b> | <b>3,286.57</b><br><b>(2,427.99 to</b><br><b>4,148.04)</b> | <b>4,997.88</b><br><b>(3,365.21 to</b><br><b>6,786.69)</b> | <b>5,160.30</b><br><b>(3,777.63 to</b><br><b>6,806.94)</b> | <b>5,261.15</b><br><b>(3,344.65 to</b><br><b>7,386.65)</b> |
| Lip and oral cavity cancer      | 1,448.35<br>(888.03 to<br>2,418.21)                            | 2,662.95<br>(924.43 to<br>6,739.52)                             | 1,893.44<br>(752.38 to<br>4,525.89)                             | 4,408.46<br>(1,295.98 to<br>11,810.10)                           | 52.33<br>(34.26 to<br>84.43)                               | 84.86<br>(33.43 to<br>205.20)                              | 65.26<br>(29.91 to<br>144.14)                              | 132.98<br>(43.63 to<br>337.83)                             |
| Nasopharynx cancer              | 517.88<br>(295.30 to<br>826.49)                                | 1,046.33<br>(350.24 to<br>2,520.17)                             | 701.08<br>(256.48 to<br>1,579.29)                               | 1,793.42<br>(521.69 to<br>4,631.11)                              | 15.09<br>(8.95 to<br>23.62)                                | 28.75<br>(10.13 to<br>66.48)                               | 19.93<br>(7.96 to<br>43.32)                                | 48.04<br>(14.62 to<br>121.07)                              |
| Other pharynx cancer            | 545.77<br>(302.04 to<br>874.40)                                | 824.98<br>(335.62 to<br>1,632.74)                               | 742.00<br>(313.68 to<br>1,436.09)                               | 1,022.41<br>(394.28 to<br>2,040.66)                              | 19.27<br>(11.29 to<br>30.26)                               | 27.01<br>(11.81 to<br>51.76)                               | 25.40<br>(11.88 to<br>47.01)                               | 32.42<br>(13.37 to<br>63.27)                               |
| Esophageal cancer               | 5,129.79<br>(3,378.36 to<br>6,992.89)                          | 8,131.48<br>(3,154.54 to<br>17,677.30)                          | 5,961.72<br>(2,617.52 to<br>11,972.61)                          | 11,978.88<br>(4,092.06 to<br>28,690.39)                          | 200.13<br>(138.99 to<br>264.39)                            | 280.84<br>(121.52 to<br>570.13)                            | 222.51<br>(111.53 to<br>413.41)                            | 390.46<br>(150.19 to<br>859.22)                            |
| Stomach cancer                  | 8,262.31<br>(6,380.62 to<br>10,158.72)                         | 9,294.52<br>(6,542.81 to<br>12,906.97)                          | 8,646.28<br>(6,070.50 to<br>12,149.90)                          | 9,848.88<br>(6,823.85 to<br>13,881.97)                           | 317.89<br>(244.60 to<br>381.71)                            | 317.90<br>(239.81 to<br>417.51)                            | 316.12<br>(237.04 to<br>419.53)                            | 322.27<br>(239.14 to<br>434.30)                            |
| Colon and rectum cancer         | 6,449.46<br>(3,806.17 to<br>9,300.42)                          | 12,355.10<br>(6,132.91 to<br>20,086.08)                         | 13,494.21<br>(7,109.23 to<br>21,654.23)                         | 12,379.95<br>(6,104.08 to<br>20,285.03)                          | 249.80<br>(159.14 to<br>351.01)                            | 435.20<br>(247.15 to<br>680.74)                            | 510.75<br>(299.70 to<br>780.94)                            | 415.11<br>(231.36 to<br>651.53)                            |
| Liver cancer                    | 6,373.70<br>(4,541.23 to<br>8,709.20)                          | 10,409.52<br>(6,979.78 to<br>15,762.53)                         | 10,621.76<br>(7,315.81 to<br>15,845.99)                         | 11,852.21<br>(7,405.39 to<br>19,001.30)                          | 240.81<br>(176.51 to<br>319.54)                            | 360.14<br>(257.53 to<br>516.82)                            | 395.49<br>(293.59 to<br>550.93)                            | 387.69<br>(255.69 to<br>595.56)                            |
| Liver cancer due to hepatitis B | 2,427.60<br>(1,686.78 to<br>3,500.71)                          | 4,133.07<br>(2,691.38 to<br>6,367.34)                           | 4,191.23<br>(2,751.41 to<br>6,293.47)                           | 4,636.39<br>(2,823.91 to<br>7,612.34)                            | 83.00<br>(58.56 to<br>117.48)                              | 130.80<br>(90.77 to<br>194.86)                             | 141.16<br>(99.81 to<br>203.67)                             | 140.04<br>(89.00 to<br>222.84)                             |

|                                      |                                         |                                         |                                         |                                         |                                 |                                   |                                   |                                   |
|--------------------------------------|-----------------------------------------|-----------------------------------------|-----------------------------------------|-----------------------------------------|---------------------------------|-----------------------------------|-----------------------------------|-----------------------------------|
| Liver cancer due to hepatitis C      | 1,900.07<br>(1,348.84 to<br>2,633.67)   | 3,023.42<br>(2,053.55 to<br>4,602.51)   | 3,225.34<br>(2,261.54 to<br>4,742.35)   | 3,205.96<br>(2,027.91 to<br>4,929.71)   | 82.51<br>(61.14 to<br>110.39)   | 119.64<br>(86.50 to<br>170.38)    | 137.90<br>(102.52 to<br>189.55)   | 119.77<br>(79.54 to<br>176.63)    |
| Liver cancer due to alcohol use      | 685.68<br>(470.32 to<br>961.71)         | 1,062.52<br>(682.35 to<br>1,712.93)     | 1,009.84<br>(662.84 to<br>1,567.50)     | 1,480.21<br>(865.96 to<br>2,533.35)     | 27.71<br>(19.72 to<br>37.48)    | 38.60<br>(26.39 to<br>57.98)      | 39.60<br>(27.97 to<br>57.58)      | 50.26<br>(31.67 to<br>81.82)      |
| Liver cancer due to other causes     | 1,360.34<br>(961.09 to<br>1,929.52)     | 2,190.51<br>(1,444.47 to<br>3,470.53)   | 2,195.34<br>(1,487.67 to<br>3,363.44)   | 2,529.64<br>(1,553.53 to<br>4,216.48)   | 47.58<br>(34.38 to<br>63.86)    | 71.11<br>(48.83 to<br>108.38)     | 76.84<br>(54.01 to<br>113.91)     | 77.63<br>(48.97 to<br>127.91)     |
| Gallbladder and biliary tract cancer | 901.28<br>(514.99 to<br>1,481.04)       | 1,048.93<br>(604.73 to<br>1,771.74)     | 1,206.37<br>(689.92 to<br>2,035.76)     | 935.47<br>(541.46 to<br>1,556.69)       | 38.13<br>(23.23 to<br>59.79)    | 39.74<br>(24.95 to<br>62.07)      | 48.69<br>(31.16 to<br>75.55)      | 34.07<br>(21.07 to<br>52.87)      |
| Pancreatic cancer                    | 2,197.56<br>(1,606.38 to<br>2,852.40)   | 4,274.81<br>(2,880.82 to<br>6,137.31)   | 4,893.62<br>(3,400.65 to<br>7,016.58)   | 4,080.51<br>(2,694.60 to<br>5,894.53)   | 93.36<br>(70.68 to<br>117.82)   | 162.22<br>(117.24 to<br>219.79)   | 199.19<br>(148.22 to<br>268.30)   | 147.48<br>(103.83 to<br>206.24)   |
| Larynx cancer                        | 1,350.46<br>(777.83 to<br>1,824.45)     | 1,973.29<br>(706.40 to<br>4,410.80)     | 1,248.53<br>(521.96 to<br>2,636.94)     | 3,327.28<br>(1,062.81 to<br>7,903.70)   | 49.91<br>(30.24 to<br>65.72)    | 65.40<br>(26.48 to<br>137.75)     | 44.20<br>(20.52 to<br>86.58)      | 105.55<br>(36.99 to<br>232.75)    |
| Tracheal, bronchus, and lung cancer  | 7,568.17<br>(4,502.84 to<br>11,471.26)  | 13,974.55<br>(4,557.21 to<br>30,501.84) | 7,909.90<br>(3,076.60 to<br>16,146.35)  | 19,024.12<br>(5,779.67 to<br>39,939.53) | 289.69<br>(181.91 to<br>422.44) | 475.77<br>(178.76 to<br>979.89)   | 288.34<br>(133.22 to<br>547.97)   | 626.60<br>(213.51 to<br>1,285.04) |
| Malignant skin melanoma              | 469.05<br>(301.37 to<br>782.78)         | 903.54<br>(549.64 to<br>1,556.23)       | 1,124.01<br>(681.96 to<br>1,908.34)     | 788.06<br>(494.60 to<br>1,340.86)       | 15.40<br>(10.43 to<br>24.58)    | 27.12<br>(18.30 to<br>43.47)      | 35.91<br>(24.52 to<br>56.52)      | 22.71<br>(15.32 to<br>36.42)      |
| Non-melanoma skin cancer             | 688.94<br>(419.35 to<br>1,004.42)       | 1,202.11<br>(725.44 to<br>1,771.66)     | 1,208.51<br>(730.75 to<br>1,796.20)     | 1,152.89<br>(698.31 to<br>1,690.01)     | 27.82<br>(18.50 to<br>37.80)    | 43.01<br>(28.03 to<br>59.05)      | 47.41<br>(32.19 to<br>63.78)      | 39.06<br>(24.82 to<br>53.75)      |
| Breast cancer                        | 9,398.57<br>(4,564.28 to<br>16,490.08)  | 19,346.41<br>(8,388.85 to<br>37,893.19) | 19,886.07<br>(9,199.29 to<br>37,875.79) | 20,095.65<br>(8,542.35 to<br>39,567.44) | 302.46<br>(158.30 to<br>505.48) | 590.07<br>(290.89 to<br>1,077.83) | 630.04<br>(330.27 to<br>1,135.29) | 597.21<br>(287.83 to<br>1,101.48) |
| Cervical cancer                      | 13,302.61<br>(6,153.12 to<br>21,728.83) | 20,860.83<br>(8,994.07 to<br>38,127.95) | 18,468.25<br>(8,253.73 to<br>33,584.20) | 21,720.29<br>(9,161.36 to<br>39,525.29) | 417.35<br>(207.03 to<br>649.90) | 609.87<br>(292.38 to<br>1,043.84) | 558.99<br>(278.81 to<br>947.02)   | 620.11<br>(293.39 to<br>1,064.84) |
| Uterine cancer                       | 1,386.13<br>(787.40 to<br>2,063.19)     | 2,454.31<br>(1,369.96 to<br>3,848.77)   | 2,201.13<br>(1,240.73 to<br>3,543.47)   | 2,475.62<br>(1,376.25 to<br>3,802.95)   | 54.53<br>(32.92 to<br>79.92)    | 89.30<br>(54.68 to<br>128.79)     | 83.90<br>(53.22 to<br>123.01)     | 87.30<br>(53.17 to<br>123.14)     |
| Ovarian cancer                       | 1,458.98<br>(865.76 to<br>2,596.53)     | 3,041.72<br>(1,700.51 to<br>5,695.06)   | 3,673.41<br>(1,984.47 to<br>7,069.92)   | 2,722.11<br>(1,538.09 to<br>5,024.34)   | 51.71<br>(32.03 to<br>84.70)    | 99.85<br>(62.26 to<br>171.66)     | 125.48<br>(76.69 to<br>220.20)    | 87.05<br>(53.84 to<br>148.09)     |
| Prostate cancer                      | 3,698.98<br>(1,930.28 to<br>6,236.81)   | 5,489.48<br>(2,940.87 to<br>9,535.51)   | 7,430.10<br>(4,231.21 to<br>12,203.91)  | 4,506.58<br>(2,283.55 to<br>8,281.16)   | 216.06<br>(116.73 to<br>340.35) | 291.42<br>(156.70 to<br>478.24)   | 432.74<br>(250.91 to<br>663.13)   | 226.82<br>(112.64 to<br>400.91)   |
| Testicular cancer                    | 525.42<br>(314.84 to<br>752.43)         | 706.74<br>(391.55 to<br>1,056.63)       | 653.12<br>(362.67 to<br>1,000.43)       | 733.16<br>(406.71 to<br>1,080.43)       | 10.41<br>(6.39 to<br>14.86)     | 14.00<br>(8.09 to<br>20.46)       | 13.23<br>(7.68 to<br>19.63)       | 14.26<br>(8.30 to<br>20.53)       |
| <b>Central African Republic</b>      |                                         |                                         |                                         |                                         |                                 |                                   |                                   |                                   |
| Cause                                | YLLs (actual counts)                    |                                         |                                         |                                         | Deaths (actual counts)          |                                   |                                   |                                   |
|                                      | 2016                                    | 2040 Forecast                           | 2040 Better Scenario                    | 2040 Worse Scenario                     | 2016                            | 2040 Forecast                     | 2040 Better Scenario              | 2040 Worse Scenario               |
| Kidney cancer                        | 811.15<br>(579.53 to<br>1,164.67)       | 1,378.04<br>(971.62 to<br>1,977.05)     | 1,666.58<br>(1,179.55 to<br>2,364.88)   | 1,373.97<br>(923.92 to<br>2,082.95)     | 24.72<br>(19.10 to<br>31.38)    | 42.88<br>(33.00 to<br>56.69)      | 55.68<br>(43.40 to<br>71.41)      | 39.28<br>(28.31 to<br>55.74)      |
| Bladder cancer                       | 1,520.77<br>(996.93 to<br>2,189.17)     | 2,247.07<br>(1,268.07 to<br>3,732.49)   | 2,311.18<br>(1,370.70 to<br>3,670.30)   | 2,336.36<br>(1,221.76 to<br>4,074.97)   | 71.00<br>(49.76 to<br>97.72)    | 92.34<br>(58.17 to<br>141.41)     | 104.98<br>(70.23 to<br>154.43)    | 89.59<br>(51.34 to<br>146.86)     |
| Brain and nervous system cancer      | 2,445.95<br>(1,874.59 to<br>3,099.79)   | 4,151.65<br>(3,043.33 to<br>5,866.31)   | 4,563.12<br>(3,269.35 to<br>6,259.03)   | 4,341.89<br>(3,174.35 to<br>5,737.02)   | 53.64<br>(42.16 to<br>66.20)    | 99.06<br>(74.63 to<br>127.96)     | 114.38<br>(83.12 to<br>152.36)    | 95.28<br>(74.18 to<br>121.21)     |
| Thyroid cancer                       | 553.30<br>(343.14 to<br>800.12)         | 839.85<br>(511.17 to<br>1,293.57)       | 794.91<br>(493.76 to<br>1,217.65)       | 875.05<br>(536.37 to<br>1,352.82)       | 20.45<br>(13.38 to<br>28.66)    | 28.64<br>(19.41 to<br>40.46)      | 28.72<br>(20.06 to<br>40.66)      | 28.59<br>(18.79 to<br>41.11)      |
| Mesothelioma                         | 203.58<br>(128.48 to<br>332.79)         | 369.54<br>(228.67 to<br>636.97)         | 381.23<br>(237.39 to<br>684.22)         | 352.64<br>(218.54 to<br>591.68)         | 7.05<br>(4.69 to<br>11.14)      | 11.57<br>(7.78 to<br>18.95)       | 12.59<br>(8.49 to<br>21.23)       | 10.67<br>(7.07 to<br>16.97)       |

|                                |                                                      |                                                      |                                                      |                                                      |                                                  |                                                  |                                                 |                                                   |
|--------------------------------|------------------------------------------------------|------------------------------------------------------|------------------------------------------------------|------------------------------------------------------|--------------------------------------------------|--------------------------------------------------|-------------------------------------------------|---------------------------------------------------|
| Hodgkin lymphoma               | 1,195.46<br>(786.55 to<br>1,544.94)                  | 1,308.30<br>(793.45 to<br>1,919.94)                  | 1,024.08<br>(608.89 to<br>1,543.06)                  | 1,513.51<br>(948.10 to<br>2,208.17)                  | 26.99<br>(18.17 to<br>35.09)                     | 30.02<br>(18.74 to<br>41.65)                     | 24.50<br>(15.18 to<br>35.39)                    | 33.12<br>(21.47 to<br>46.26)                      |
| Non-Hodgkin lymphoma           | 3,055.77<br>(2,281.75 to<br>4,070.35)                | 4,963.91<br>(3,584.09 to<br>6,655.35)                | 5,712.55<br>(4,075.24 to<br>7,717.18)                | 4,917.69<br>(3,530.22 to<br>6,645.03)                | 83.86<br>(65.00 to<br>104.33)                    | 137.99<br>(108.32 to<br>172.78)                  | 170.29<br>(134.72 to<br>215.25)                 | 126.69<br>(99.86 to<br>158.93)                    |
| Multiple myeloma               | 951.89<br>(610.24 to<br>1,429.00)                    | 1,920.60<br>(1,232.27 to<br>2,876.75)                | 2,354.97<br>(1,509.46 to<br>3,485.68)                | 1,717.64<br>(1,072.85 to<br>2,588.45)                | 36.74<br>(24.93 to<br>54.07)                     | 67.71<br>(46.73 to<br>97.47)                     | 87.31<br>(60.45 to<br>125.95)                   | 58.53<br>(39.15 to<br>85.69)                      |
| Leukemia                       | 5,623.49<br>(3,628.50 to<br>8,558.11)                | 6,101.89<br>(3,905.85 to<br>9,158.00)                | 6,150.61<br>(4,073.59 to<br>9,101.08)                | 7,224.61<br>(4,450.74 to<br>11,227.80)               | 113.15<br>(79.93 to<br>154.68)                   | 137.59<br>(98.88 to<br>188.47)                   | 146.80<br>(107.64 to<br>199.45)                 | 149.35<br>(102.72 to<br>215.33)                   |
| Acute lymphoid leukemia        | 1,394.48<br>(849.95 to<br>2,670.30)                  | 1,383.12<br>(817.62 to<br>2,503.79)                  | 1,447.36<br>(878.09 to<br>2,506.24)                  | 1,705.44<br>(977.25 to<br>3,213.55)                  | 21.79<br>(14.30 to<br>39.18)                     | 24.45<br>(15.74 to<br>41.32)                     | 26.41<br>(17.36 to<br>43.10)                    | 28.22<br>(17.77 to<br>50.41)                      |
| Chronic lymphoid leukemia      | 101.92<br>(72.70 to<br>153.45)                       | 138.55<br>(95.33 to<br>211.99)                       | 151.14<br>(105.69 to<br>225.36)                      | 135.40<br>(92.56 to<br>206.33)                       | 4.13<br>(2.99 to<br>5.73)                        | 5.13<br>(3.83 to<br>7.23)                        | 6.07<br>(4.66 to<br>8.40)                       | 4.74<br>(3.42 to<br>6.82)                         |
| Acute myeloid leukemia         | 1,060.23<br>(738.39 to<br>1,778.80)                  | 1,640.88<br>(1,095.33 to<br>2,525.46)                | 1,885.87<br>(1,265.31 to<br>2,842.75)                | 1,780.28<br>(1,141.82 to<br>2,824.15)                | 21.52<br>(15.94 to<br>32.92)                     | 36.70<br>(26.33 to<br>54.23)                     | 44.54<br>(32.23 to<br>63.68)                    | 37.01<br>(25.44 to<br>56.18)                      |
| Chronic myeloid leukemia       | 504.25<br>(324.92 to<br>746.55)                      | 511.78<br>(296.97 to<br>779.74)                      | 522.54<br>(316.74 to<br>805.93)                      | 536.57<br>(303.07 to<br>827.88)                      | 13.56<br>(9.21 to<br>19.53)                      | 13.50<br>(8.70 to<br>19.68)                      | 14.52<br>(9.85 to<br>20.93)                     | 13.63<br>(8.52 to<br>20.49)                       |
| Other leukemia                 | 2,562.61<br>(1,431.26 to<br>4,245.56)                | 2,427.56<br>(1,384.62 to<br>3,937.31)                | 2,143.70<br>(1,247.98 to<br>3,441.14)                | 3,066.91<br>(1,645.59 to<br>5,180.51)                | 52.15<br>(32.99 to<br>76.85)                     | 57.81<br>(37.83 to<br>83.12)                     | 55.25<br>(37.23 to<br>78.07)                    | 65.75<br>(41.13 to<br>98.90)                      |
| Other neoplasms                | 7,833.66<br>(5,836.51 to<br>12,101.19)               | 11,947.19<br>(8,457.87 to<br>17,939.57)              | 12,677.94<br>(8,847.90 to<br>18,763.38)              | 12,465.86<br>(8,729.24 to<br>19,334.36)              | 192.80<br>(147.94 to<br>255.34)                  | 307.61<br>(241.05 to<br>404.85)                  | 351.44<br>(276.97 to<br>458.89)                 | 292.86<br>(228.18 to<br>401.49)                   |
| <b>Cardiovascular diseases</b> | <b>237,018.72<br/>(188,564.04 to<br/>286,022.25)</b> | <b>368,889.36<br/>(235,889.59 to<br/>569,353.67)</b> | <b>169,702.60<br/>(111,833.29 to<br/>258,649.24)</b> | <b>518,459.24<br/>(325,668.94 to<br/>787,306.18)</b> | <b>10,181.22<br/>(8,151.01 to<br/>12,253.45)</b> | <b>14,113.90<br/>(9,869.43 to<br/>20,114.47)</b> | <b>7,415.00<br/>(5,343.89 to<br/>10,496.89)</b> | <b>18,705.50<br/>(12,834.88 to<br/>27,004.99)</b> |
| Rheumatic heart disease        | 9,634.71<br>(7,161.07 to<br>12,463.79)               | 6,476.12<br>(4,199.53 to<br>9,955.15)                | 4,699.02<br>(2,970.00 to<br>7,179.97)                | 7,696.91<br>(4,948.55 to<br>11,728.03)               | 280.76<br>(204.66 to<br>365.60)                  | 280.76<br>(129.49 to<br>274.67)                  | 188.54<br>(100.24 to<br>212.29)                 | 145.98<br>(144.22 to<br>303.22)                   |
| Ischemic heart disease         | 89,392.10<br>(69,155.93 to<br>111,677.48)            | 159,790.10<br>(84,833.66 to<br>276,041.90)           | 60,445.26<br>(31,694.17 to<br>109,484.49)            | 224,783.40<br>(118,673.52 to<br>382,494.23)          | 4,033.57<br>(3,221.31 to<br>4,918.76)            | 6,185.96<br>(3,652.57 to<br>10,191.68)           | 2,735.24<br>(1,574.21 to<br>4,595.38)           | 8,268.16<br>(4,711.68 to<br>13,580.96)            |
| Stroke                         | 94,997.01<br>(73,828.81 to<br>117,836.36)            | 134,033.89<br>(72,407.11 to<br>237,047.70)           | 51,173.80<br>(28,560.26 to<br>92,246.60)             | 206,690.08<br>(110,084.92 to<br>369,463.74)          | 4,110.35<br>(3,178.37 to<br>5,044.62)            | 5,139.49<br>(3,037.59 to<br>8,366.50)            | 2,304.96<br>(1,448.14 to<br>3,703.70)           | 7,419.20<br>(4,327.07 to<br>12,283.79)            |
| Ischemic stroke                | 28,447.60<br>(21,387.80 to<br>36,052.90)             | 30,971.15<br>(17,264.57 to<br>54,843.31)             | 15,643.91<br>(9,059.29 to<br>28,075.57)              | 40,131.90<br>(22,265.42 to<br>69,600.67)             | 1,583.83<br>(1,176.79 to<br>1,999.53)            | 1,563.48<br>(909.28 to<br>2,701.68)              | 922.78<br>(578.14 to<br>1,670.40)               | 1,890.45<br>(1,103.14 to<br>3,257.63)             |
| Intracerebral hemorrhage       | 66,549.41<br>(50,979.15 to<br>83,169.61)             | 103,062.74<br>(49,937.34 to<br>203,011.87)           | 35,529.89<br>(18,083.76 to<br>71,541.92)             | 166,558.18<br>(79,482.11 to<br>320,206.73)           | 2,526.53<br>(1,942.57 to<br>3,135.78)            | 3,576.01<br>(1,922.94 to<br>6,574.12)            | 1,382.18<br>(781.11 to<br>2,494.26)             | 5,528.76<br>(2,889.19 to<br>10,081.08)            |
| Hypertensive heart disease     | 16,206.55<br>(8,426.08 to<br>23,343.83)              | 25,774.45<br>(10,949.22 to<br>55,572.64)             | 17,024.19<br>(8,841.67 to<br>33,122.12)              | 32,813.51<br>(12,596.52 to<br>71,881.17)             | 773.50<br>(424.41 to<br>1,094.18)                | 1,108.68<br>(505.39 to<br>2,242.98)              | 808.49<br>(419.93 to<br>1,459.44)               | 1,316.89<br>(553.36 to<br>2,830.80)               |
| Cardiomyopathy and myocarditis | 5,052.04<br>(3,185.19 to<br>7,170.44)                | 7,041.15<br>(4,190.43 to<br>11,363.87)               | 7,097.85<br>(4,463.84 to<br>11,633.70)               | 7,397.32<br>(4,324.77 to<br>11,896.80)               | 136.77<br>(95.70 to<br>191.50)                   | 198.93<br>(131.51 to<br>308.19)                  | 215.40<br>(147.69 to<br>339.45)                 | 193.77<br>(124.56 to<br>295.94)                   |
| Myocarditis                    | 832.01<br>(424.38 to<br>1,650.70)                    | 920.53<br>(488.44 to<br>1,888.68)                    | 847.48<br>(460.35 to<br>1,762.07)                    | 1,034.19<br>(532.92 to<br>2,160.71)                  | 16.67<br>(9.55 to<br>32.41)                      | 20.85<br>(11.64 to<br>42.30)                     | 20.37<br>(11.08 to<br>41.60)                    | 21.65<br>(12.00 to<br>43.64)                      |

**Central African Republic**

| Cause                    | YLLs (actual counts)            |                                 |                                 |                                   | Deaths (actual counts)      |                             |                             |                              |
|--------------------------|---------------------------------|---------------------------------|---------------------------------|-----------------------------------|-----------------------------|-----------------------------|-----------------------------|------------------------------|
|                          | 2016                            | 2040 Forecast                   | 2040 Better Scenario            | 2040 Worse Scenario               | 2016                        | 2040 Forecast               | 2040 Better Scenario        | 2040 Worse Scenario          |
| Alcoholic cardiomyopathy | 375.16<br>(215.59 to<br>608.20) | 521.94<br>(287.28 to<br>933.53) | 550.22<br>(295.26 to<br>989.82) | 625.28<br>(354.86 to<br>1,062.76) | 12.11<br>(7.11 to<br>18.56) | 15.45<br>(8.95 to<br>25.85) | 17.02<br>(9.73 to<br>28.24) | 17.88<br>(10.78 to<br>28.73) |



|                                            |                                                               |                                                               |                                                               |                                                               |                                                      |                                                        |                                                          |                                                        |
|--------------------------------------------|---------------------------------------------------------------|---------------------------------------------------------------|---------------------------------------------------------------|---------------------------------------------------------------|------------------------------------------------------|--------------------------------------------------------|----------------------------------------------------------|--------------------------------------------------------|
| Peptic ulcer disease                       | 16,850.11<br>(11,074.63 to<br>22,373.36)                      | 13,049.18<br>(8,137.92 to<br>18,584.98)                       | 9,257.87<br>(5,666.25 to<br>13,577.08)                        | 14,790.49<br>(9,215.59 to<br>21,083.94)                       | 564.03<br>(372.91 to<br>736.29)                      | 423.85<br>(282.07 to<br>568.18)                        | 324.73<br>(213.23 to<br>442.46)                          | 454.62<br>(299.91 to<br>610.48)                        |
| <b>Central African Republic</b>            |                                                               |                                                               |                                                               |                                                               |                                                      |                                                        |                                                          |                                                        |
| Cause                                      | YLLs (actual counts)                                          |                                                               |                                                               |                                                               | Deaths (actual counts)                               |                                                        |                                                          |                                                        |
|                                            | 2016                                                          | 2040 Forecast                                                 | 2040 Better Scenario                                          | 2040 Worse Scenario                                           | 2016                                                 | 2040 Forecast                                          | 2040 Better Scenario                                     | 2040 Worse Scenario                                    |
| Gastritis and duodenitis                   | 3,175.93<br>(1,487.91 to<br>5,310.14)                         | 4,686.97<br>(2,136.51 to<br>8,051.82)                         | 4,217.08<br>(2,011.60 to<br>7,197.51)                         | 4,855.85<br>(2,204.51 to<br>8,383.66)                         | 100.96<br>(53.82 to<br>151.60)                       | 142.67<br>(76.26 to<br>224.22)                         | 138.59<br>(77.80 to<br>214.37)                           | 139.72<br>(73.44 to<br>221.01)                         |
| Appendicitis                               | 5,885.94<br>(3,068.44 to<br>8,888.35)                         | 5,420.01<br>(2,671.86 to<br>8,568.99)                         | 4,216.32<br>(2,187.08 to<br>6,616.66)                         | 6,534.00<br>(3,223.04 to<br>10,693.23)                        | 123.94<br>(63.61 to<br>178.36)                       | 129.58<br>(65.71 to<br>194.58)                         | 106.63<br>(55.63 to<br>160.32)                           | 145.01<br>(72.55 to<br>222.11)                         |
| Paralytic ileus and intestinal obstruction | 13,914.54<br>(8,705.14 to<br>22,165.28)                       | 13,748.58<br>(8,894.41 to<br>20,819.24)                       | 13,228.66<br>(8,739.80 to<br>19,479.48)                       | 15,510.01<br>(9,920.69 to<br>23,511.91)                       | 553.28<br>(231.90 to<br>506.20)                      | 404.94<br>(274.72 to<br>572.05)                        | 437.55<br>(308.72 to<br>601.50)                          | 396.75<br>(266.85 to<br>564.14)                        |
| Inguinal, femoral, and abdominal hernia    | 2,443.67<br>(1,395.43 to<br>3,899.35)                         | 2,152.15<br>(1,204.17 to<br>3,381.03)                         | 1,874.02<br>(1,067.68 to<br>2,926.42)                         | 2,312.31<br>(1,287.79 to<br>3,689.05)                         | 81.24<br>(47.74 to<br>121.98)                        | 68.52<br>(40.61 to<br>100.86)                          | 65.85<br>(38.47 to<br>93.92)                             | 68.00<br>(39.60 to<br>100.68)                          |
| Inflammatory bowel disease                 | 1,985.37<br>(840.08 to<br>4,656.96)                           | 2,661.82<br>(1,126.96 to<br>5,646.79)                         | 2,701.88<br>(1,144.06 to<br>5,648.27)                         | 2,692.14<br>(1,106.80 to<br>5,984.19)                         | 53.55<br>(25.10 to<br>106.77)                        | 74.04<br>(34.78 to<br>143.63)                          | 81.15<br>(39.19 to<br>150.82)                            | 69.62<br>(32.27 to<br>140.63)                          |
| Vascular intestinal disorders              | 1,130.26<br>(592.93 to<br>1,719.77)                           | 1,754.95<br>(965.30 to<br>2,639.46)                           | 1,739.00<br>(995.77 to<br>2,605.43)                           | 1,704.28<br>(913.30 to<br>2,606.60)                           | 45.30<br>(25.92 to<br>66.04)                         | 65.85<br>(38.44 to<br>95.36)                           | 71.02<br>(44.43 to<br>99.53)                             | 60.19<br>(34.47 to<br>88.30)                           |
| Gallbladder and biliary diseases           | 3,287.17<br>(1,858.72 to<br>4,576.94)                         | 3,624.31<br>(1,906.76 to<br>5,785.39)                         | 2,968.52<br>(1,678.18 to<br>4,561.83)                         | 4,493.02<br>(2,221.30 to<br>7,642.02)                         | 122.66<br>(74.65 to<br>165.43)                       | 125.15<br>(73.45 to<br>186.90)                         | 112.32<br>(70.45 to<br>161.68)                           | 145.76<br>(79.64 to<br>230.68)                         |
| Pancreatitis                               | 2,637.12<br>(1,386.53 to<br>4,085.54)                         | 4,994.72<br>(1,633.11 to<br>13,872.74)                        | 3,918.71<br>(1,394.57 to<br>10,342.18)                        | 6,597.74<br>(1,920.62 to<br>19,065.97)                        | 70.06<br>(39.28 to<br>107.14)                        | 127.55<br>(47.96 to<br>332.62)                         | 104.70<br>(44.34 to<br>259.71)                           | 163.14<br>(53.09 to<br>444.65)                         |
| Other digestive diseases                   | 6,843.89<br>(3,320.89 to<br>10,668.25)                        | 7,972.01<br>(4,153.46 to<br>12,029.33)                        | 6,682.17<br>(3,564.93 to<br>10,122.20)                        | 8,856.19<br>(4,444.70 to<br>13,792.89)                        | 197.01<br>(112.32 to<br>274.62)                      | 239.37<br>(143.65 to<br>327.76)                        | 218.39<br>(137.87 to<br>297.14)                          | 245.27<br>(138.20 to<br>347.81)                        |
| <b>Neurological disorders</b>              | <b>17,161.01</b><br><b>(11,980.25 to</b><br><b>22,804.99)</b> | <b>21,517.55</b><br><b>(14,863.47 to</b><br><b>29,680.63)</b> | <b>22,049.53</b><br><b>(16,439.57 to</b><br><b>28,509.70)</b> | <b>24,579.62</b><br><b>(15,745.79 to</b><br><b>35,783.37)</b> | <b>753.74</b><br><b>(568.71 to</b><br><b>947.16)</b> | <b>898.88</b><br><b>(642.34 to</b><br><b>1,176.63)</b> | <b>1,204.93</b><br><b>(917.05 to</b><br><b>1,515.32)</b> | <b>823.93</b><br><b>(568.30 to</b><br><b>1,117.31)</b> |
| Alzheimer's disease and other dementias    | 6,745.86<br>(5,009.28 to<br>8,722.79)                         | 7,887.43<br>(5,535.62 to<br>10,574.59)                        | 10,876.06<br>(8,191.34 to<br>13,863.29)                       | 6,568.19<br>(4,175.31 to<br>9,303.14)                         | 556.97<br>(418.43 to<br>721.66)                      | 617.81<br>(378.83 to<br>899.23)                        | 944.53<br>(662.64 to<br>1,264.02)                        | 481.73<br>(258.52 to<br>733.38)                        |
| Parkinson's disease                        | 317.58<br>(224.55 to<br>424.01)                               | 469.97<br>(333.40 to<br>627.71)                               | 753.54<br>(558.75 to<br>976.98)                               | 346.75<br>(231.99 to<br>486.71)                               | 23.55<br>(16.74 to<br>31.99)                         | 32.12<br>(20.29 to<br>46.46)                           | 56.72<br>(39.27 to<br>77.58)                             | 22.33<br>(12.71 to<br>33.71)                           |
| Epilepsy                                   | 8,820.69<br>(5,152.41 to<br>13,322.81)                        | 11,335.29<br>(5,452.77 to<br>19,419.99)                       | 8,385.43<br>(4,169.20 to<br>14,477.77)                        | 15,695.78<br>(7,577.46 to<br>27,167.79)                       | 148.96<br>(89.64 to<br>218.65)                       | 208.96<br>(103.60 to<br>359.02)                        | 156.93<br>(78.85 to<br>263.41)                           | 280.51<br>(135.13 to<br>486.76)                        |
| Multiple sclerosis                         | 91.37<br>(54.09 to<br>176.24)                                 | 196.35<br>(111.18 to<br>374.69)                               | 215.03<br>(122.78 to<br>406.81)                               | 180.28<br>(102.54 to<br>346.97)                               | 2.51<br>(1.53 to<br>4.69)                            | 5.17<br>(3.07 to<br>9.86)                              | 5.82<br>(3.47 to<br>11.14)                               | 4.66<br>(2.78 to<br>8.76)                              |
| Motor neuron disease                       | 93.83<br>(57.44 to<br>150.28)                                 | 151.12<br>(104.16 to<br>240.73)                               | 178.47<br>(120.34 to<br>285.76)                               | 145.30<br>(97.67 to<br>229.21)                                | 2.23<br>(1.58 to<br>3.65)                            | 4.26<br>(3.04 to<br>7.10)                              | 5.23<br>(3.66 to<br>8.64)                                | 3.83<br>(2.73 to<br>6.51)                              |
| Other neurological disorders               | 1,091.68<br>(684.38 to<br>1,708.22)                           | 1,477.38<br>(1,009.63 to<br>2,040.24)                         | 1,641.00<br>(1,127.36 to<br>2,221.97)                         | 1,643.31<br>(1,084.73 to<br>2,416.37)                         | 19.53<br>(13.90 to<br>26.70)                         | 30.55<br>(23.06 to<br>39.14)                           | 35.71<br>(26.86 to<br>46.35)                             | 30.88<br>(22.53 to<br>41.11)                           |
| <b>Mental disorders</b>                    | <b>3,893.02</b><br><b>(2,089.52 to</b><br><b>6,591.04)</b>    | <b>7,910.90</b><br><b>(4,003.25 to</b><br><b>13,855.77)</b>   | <b>7,787.95</b><br><b>(4,014.33 to</b><br><b>13,738.81)</b>   | <b>8,137.18</b><br><b>(4,161.58 to</b><br><b>14,165.62)</b>   | <b>90.81</b><br><b>(49.30 to</b><br><b>152.97)</b>   | <b>178.68</b><br><b>(94.13 to</b><br><b>303.95)</b>    | <b>179.57</b><br><b>(97.40 to</b><br><b>303.77)</b>      | <b>180.96</b><br><b>(95.67 to</b><br><b>307.52)</b>    |
| Alcohol use disorders                      | 2,441.61<br>(1,109.52 to<br>4,628.34)                         | 4,025.29<br>(1,627.61 to<br>8,238.48)                         | 3,849.76<br>(1,561.75 to<br>8,007.83)                         | 4,277.15<br>(1,752.76 to<br>8,673.69)                         | 61.01<br>(28.97 to<br>115.14)                        | 98.71<br>(42.79 to<br>197.06)                          | 96.61<br>(42.49 to<br>195.34)                            | 103.07<br>(44.74 to<br>203.21)                         |
| Drug use disorders                         | 1,439.47<br>(754.29 to<br>3,135.40)                           | 3,860.86<br>(2,003.29 to<br>8,243.71)                         | 3,912.65<br>(2,025.75 to<br>8,227.34)                         | 3,835.05<br>(1,975.12 to<br>8,264.99)                         | 29.58<br>(16.00 to<br>62.80)                         | 79.51<br>(43.22 to<br>163.61)                          | 82.47<br>(45.64 to<br>167.57)                            | 77.43<br>(41.69 to<br>161.10)                          |

|                                                            |                                                 |                                                   |                                                  |                                                   |                                              |                                              |                                              |                                              |
|------------------------------------------------------------|-------------------------------------------------|---------------------------------------------------|--------------------------------------------------|---------------------------------------------------|----------------------------------------------|----------------------------------------------|----------------------------------------------|----------------------------------------------|
| Opioid use disorders                                       | 1,111.00<br>(517.96 to<br>2,543.73)             | 2,789.02<br>(1,253.77 to<br>6,436.34)             | 2,821.30<br>(1,296.40 to<br>6,359.72)            | 2,777.06<br>(1,249.18 to<br>6,484.39)             | 22.24<br>(10.44 to<br>49.81)                 | 56.48<br>(26.15 to<br>127.84)                | 58.19<br>(28.18 to<br>129.18)                | 55.25<br>(25.18 to<br>125.83)                |
| Cocaine use disorders                                      | 71.47<br>(19.94 to<br>171.87)                   | 232.07<br>(67.15 to<br>554.00)                    | 217.25<br>(61.82 to<br>522.57)                   | 235.93<br>(69.27 to<br>554.73)                    | 1.53<br>(0.45 to<br>3.55)                    | 4.93<br>(1.48 to<br>11.32)                   | 4.70<br>(1.40 to<br>10.90)                   | 4.93<br>(1.49 to<br>11.21)                   |
| Amphetamine use disorders                                  | 41.18<br>(13.06 to<br>102.53)                   | 183.43<br>(56.53 to<br>435.83)                    | 161.44<br>(50.13 to<br>378.07)                   | 193.47<br>(60.40 to<br>449.11)                    | 0.84<br>(0.28 to<br>2.03)                    | 3.75<br>(1.20 to<br>8.74)                    | 3.34<br>(1.09 to<br>7.77)                    | 3.90<br>(1.25 to<br>8.94)                    |
| Other drug use disorders                                   | 215.83<br>(110.51 to<br>506.11)                 | 656.34<br>(317.02 to<br>1,582.99)                 | 712.66<br>(349.55 to<br>1,680.38)                | 628.60<br>(301.68 to<br>1,531.44)                 | 4.98<br>(2.74 to<br>10.90)                   | 14.35<br>(7.66 to<br>32.58)                  | 16.24<br>(8.84 to<br>35.59)                  | 13.35<br>(6.96 to<br>30.95)                  |
| Eating disorders                                           | 11.94<br>(5.15 to<br>25.82)                     | 24.75<br>(9.03 to<br>51.30)                       | 25.53<br>(9.38 to<br>56.89)                      | 24.98<br>(9.19 to<br>50.31)                       | 0.22<br>(0.09 to<br>0.47)                    | 0.47<br>(0.17 to<br>0.97)                    | 0.48<br>(0.18 to<br>1.06)                    | 0.46<br>(0.17 to<br>0.93)                    |
| <b>Central African Republic</b>                            |                                                 |                                                   |                                                  |                                                   |                                              |                                              |                                              |                                              |
| Cause                                                      | YLLs (actual counts)                            |                                                   |                                                  |                                                   | Deaths (actual counts)                       |                                              |                                              |                                              |
|                                                            | 2016                                            | 2040 Forecast                                     | 2040 Better Scenario                             | 2040 Worse Scenario                               | 2016                                         | 2040 Forecast                                | 2040 Better Scenario                         | 2040 Worse Scenario                          |
| <b>Diabetes, urogenital, blood, and endocrine diseases</b> | <b>63,135.00</b><br>(50,660.33 to<br>85,263.41) | <b>101,522.42</b><br>(71,673.83 to<br>139,160.19) | <b>74,620.18</b><br>(51,485.02 to<br>104,290.20) | <b>123,157.55</b><br>(86,755.40 to<br>168,228.72) | <b>1,875.15</b><br>(1,524.89 to<br>2,278.08) | <b>3,299.88</b><br>(2,450.77 to<br>4,627.50) | <b>2,581.57</b><br>(1,879.15 to<br>3,699.21) | <b>3,760.65</b><br>(2,762.76 to<br>5,255.81) |
| Diabetes mellitus                                          | 24,944.99<br>(19,562.68 to<br>30,792.27)        | 52,316.81<br>(32,909.47 to<br>81,406.57)          | 36,856.29<br>(23,582.21 to<br>56,636.61)         | 62,525.86<br>(38,960.89 to<br>95,518.76)          | 996.98<br>(791.32 to<br>1,212.12)            | 1,897.67<br>(1,280.91 to<br>2,816.00)        | 1,451.64<br>(1,007.44 to<br>2,072.56)        | 2,149.26<br>(1,420.13 to<br>3,105.92)        |
| Acute glomerulonephritis                                   | 70.05<br>(45.83 to<br>117.50)                   | 94.03<br>(59.19 to<br>157.32)                     | 80.01<br>(49.98 to<br>134.68)                    | 120.70<br>(73.27 to<br>210.06)                    | 1.44<br>(0.99 to<br>2.14)                    | 1.95<br>(1.31 to<br>2.98)                    | 1.77<br>(1.19 to<br>2.65)                    | 2.25<br>(1.47 to<br>3.55)                    |
| Chronic kidney disease                                     | 12,331.80<br>(9,811.50 to<br>15,348.87)         | 24,836.02<br>(12,923.79 to<br>57,370.35)          | 16,965.70<br>(8,880.72 to<br>37,972.61)          | 30,707.83<br>(16,096.14 to<br>66,380.47)          | 383.30<br>(301.19 to<br>473.85)              | 843.85<br>(577.25 to<br>2,200.75)            | 619.60<br>(277.77 to<br>1,704.38)            | 992.53<br>(446.39 to<br>2,511.95)            |
| Chronic kidney disease due to diabetes mellitus            | 2,981.63<br>(2,220.61 to<br>3,884.43)           | 7,710.05<br>(3,433.47 to<br>19,738.16)            | 5,292.39<br>(2,439.29 to<br>13,468.94)           | 9,225.77<br>(4,095.70 to<br>22,567.04)            | 110.99<br>(83.79 to<br>144.97)               | 284.17<br>(114.15 to<br>801.97)              | 207.89<br>(85.88 to<br>604.48)               | 329.50<br>(132.40 to<br>925.91)              |
| Chronic kidney disease due to hypertension                 | 1,583.82<br>(1,187.79 to<br>2,090.38)           | 3,700.37<br>(1,475.67 to<br>9,958.10)             | 2,644.56<br>(1,084.66 to<br>7,540.33)            | 4,367.14<br>(1,752.92 to<br>11,568.04)            | 74.28<br>(55.49 to<br>97.70)                 | 167.74<br>(63.66 to<br>481.05)               | 132.58<br>(51.16 to<br>418.32)               | 188.53<br>(71.01 to<br>545.57)               |
| Chronic kidney disease due to glomerulonephritis           | 3,658.94<br>(2,819.97 to<br>4,652.74)           | 6,203.15<br>(3,525.50 to<br>11,552.34)            | 4,160.79<br>(2,361.87 to<br>7,645.13)            | 7,950.93<br>(4,554.17 to<br>14,525.37)            | 89.50<br>(68.14 to<br>115.38)                | 173.46<br>(86.78 to<br>397.85)               | 122.36<br>(60.67 to<br>302.13)               | 212.00<br>(108.08 to<br>483.46)              |
| Chronic kidney disease due to other and unspecified causes | 4,107.41<br>(3,155.79 to<br>5,190.86)           | 7,222.45<br>(3,953.32 to<br>14,685.74)            | 4,867.97<br>(2,646.09 to<br>9,743.62)            | 9,163.98<br>(5,011.66 to<br>17,888.56)            | 108.52<br>(82.82 to<br>137.60)               | 218.47<br>(103.95 to<br>523.45)              | 156.78<br>(74.19 to<br>403.65)               | 262.51<br>(125.67 to<br>612.13)              |
| Urinary diseases and male infertility                      | 5,192.89<br>(4,004.06 to<br>6,707.95)           | 4,998.25<br>(3,805.52 to<br>6,437.63)             | 4,578.44<br>(3,450.65 to<br>6,107.59)            | 5,632.67<br>(4,324.29 to<br>7,392.85)             | 143.24<br>(113.22 to<br>175.92)              | 149.62<br>(124.02 to<br>183.05)              | 154.28<br>(127.19 to<br>189.52)              | 149.00<br>(121.93 to<br>183.88)              |
| Urinary tract infections                                   | 1,621.92<br>(783.55 to<br>2,791.72)             | 2,233.78<br>(1,340.91 to<br>3,381.19)             | 2,281.31<br>(1,404.45 to<br>3,395.12)            | 2,397.90<br>(1,382.76 to<br>3,748.62)             | 43.42<br>(24.94 to<br>68.48)                 | 68.77<br>(45.42 to<br>97.61)                 | 79.25<br>(53.84 to<br>110.01)                | 64.60<br>(41.59 to<br>94.13)                 |
| Urolithiasis                                               | 56.80<br>(35.32 to<br>101.26)                   | 100.13<br>(61.69 to<br>174.58)                    | 96.54<br>(59.59 to<br>166.64)                    | 105.59<br>(64.48 to<br>178.88)                    | 1.68<br>(0.98 to<br>3.50)                    | 2.73<br>(1.67 to<br>5.22)                    | 2.87<br>(1.77 to<br>5.41)                    | 2.66<br>(1.62 to<br>4.91)                    |
| Other urinary diseases                                     | 3,514.18<br>(2,308.13 to<br>4,712.01)           | 2,664.34<br>(1,616.53 to<br>3,658.53)             | 2,200.59<br>(1,296.91 to<br>3,177.27)            | 3,129.17<br>(1,928.73 to<br>4,348.10)             | 98.14<br>(69.75 to<br>123.99)                | 78.13<br>(51.34 to<br>102.72)                | 72.17<br>(45.40 to<br>97.14)                 | 81.75<br>(53.33 to<br>108.34)                |
| Gynecological diseases                                     | 454.56<br>(204.09 to<br>777.71)                 | 708.99<br>(288.17 to<br>1,397.60)                 | 521.38<br>(214.01 to<br>1,024.38)                | 811.01<br>(329.02 to<br>1,579.40)                 | 11.43<br>(5.67 to<br>19.15)                  | 16.79<br>(7.41 to<br>31.57)                  | 12.64<br>(5.83 to<br>24.03)                  | 18.85<br>(8.18 to<br>35.43)                  |
| Uterine fibroids                                           | 176.66<br>(41.95 to<br>354.57)                  | 250.93<br>(47.24 to<br>619.35)                    | 180.07<br>(35.40 to<br>441.08)                   | 286.78<br>(57.47 to<br>687.30)                    | 4.80<br>(1.21 to<br>9.11)                    | 6.49<br>(1.33 to<br>15.17)                   | 4.74<br>(1.03 to<br>10.82)                   | 7.32<br>(1.55 to<br>16.38)                   |
| Polycystic ovarian syndrome                                | 54.51<br>(3.28 to<br>182.99)                    | 66.38<br>(3.01 to<br>233.95)                      | 39.86<br>(1.66 to<br>141.35)                     | 83.57<br>(3.74 to<br>297.25)                      | 1.15<br>(0.08 to<br>3.81)                    | 1.43<br>(0.07 to<br>4.94)                    | 0.86<br>(0.04 to<br>3.14)                    | 1.80<br>(0.09 to<br>6.31)                    |

|                                                   |                                          |                                         |                                         |                                          |                                 |                                 |                                 |                                 |
|---------------------------------------------------|------------------------------------------|-----------------------------------------|-----------------------------------------|------------------------------------------|---------------------------------|---------------------------------|---------------------------------|---------------------------------|
|                                                   | 1.34<br>(0.24 to<br>5.06)                | 3.53<br>(0.52 to<br>14.31)              | 2.62<br>(0.38 to<br>10.86)              | 4.07<br>(0.60 to<br>16.45)               | 0.03<br>(0.01 to<br>0.10)       | 0.07<br>(0.01 to<br>0.28)       | 0.05<br>(0.01 to<br>0.22)       | 0.08<br>(0.01 to<br>0.32)       |
| Endometriosis                                     |                                          |                                         |                                         |                                          |                                 |                                 |                                 |                                 |
| Genital prolapse                                  | 20.32<br>(3.31 to<br>46.61)              | 20.09<br>(2.61 to<br>53.79)             | 14.46<br>(1.94 to<br>38.45)             | 22.77<br>(2.92 to<br>61.14)              | 0.92<br>(0.17 to<br>1.99)       | 0.73<br>(0.11 to<br>1.72)       | 0.57<br>(0.09 to<br>1.31)       | 0.79<br>(0.11 to<br>1.90)       |
| Other gynecological diseases                      | 201.74<br>(58.57 to<br>414.75)           | 368.06<br>(97.27 to<br>838.64)          | 284.37<br>(78.97 to<br>632.11)          | 413.83<br>(106.38 to<br>920.28)          | 4.53<br>(1.29 to<br>9.36)       | 8.06<br>(2.22 to<br>17.63)      | 6.41<br>(1.89 to<br>13.47)      | 8.87<br>(2.36 to<br>19.32)      |
| Hemoglobinopathies and hemolytic anemias          | 17,303.40<br>(11,010.83 to<br>36,990.39) | 15,388.88<br>(9,782.36 to<br>24,427.09) | 12,742.30<br>(8,019.68 to<br>20,197.42) | 19,438.19<br>(11,955.69 to<br>33,985.71) | 285.10<br>(194.85 to<br>536.38) | 315.29<br>(213.19 to<br>467.35) | 268.65<br>(183.63 to<br>403.41) | 367.65<br>(242.87 to<br>573.70) |
| Thalassemias                                      | 12.80<br>(5.10 to<br>41.00)              | 4.07<br>(1.47 to<br>13.44)              | 5.14<br>(1.84 to<br>17.22)              | 5.91<br>(2.07 to<br>20.09)               | 0.15<br>(0.06 to<br>0.48)       | 0.05<br>(0.02 to<br>0.16)       | 0.06<br>(0.02 to<br>0.20)       | 0.07<br>(0.02 to<br>0.24)       |
| Sickle cell disorders                             | 15,411.95<br>(9,398.18 to<br>34,369.08)  | 12,244.35<br>(7,254.22 to<br>20,381.47) | 10,161.56<br>(6,041.50 to<br>16,733.35) | 16,052.76<br>(9,273.94 to<br>29,676.41)  | 212.48<br>(137.04 to<br>439.22) | 200.32<br>(119.14 to<br>318.27) | 167.30<br>(101.24 to<br>271.15) | 250.76<br>(147.66 to<br>431.01) |
| G6PD deficiency                                   | 1,270.13<br>(894.39 to<br>1,969.85)      | 2,567.34<br>(1,817.04 to<br>3,698.62)   | 2,049.42<br>(1,375.61 to<br>3,018.90)   | 2,816.90<br>(1,929.63 to<br>4,115.17)    | 37.64<br>(26.64 to<br>55.47)    | 83.35<br>(61.08 to<br>115.77)   | 69.36<br>(49.10 to<br>99.89)    | 87.65<br>(63.08 to<br>123.83)   |
| Other hemoglobinopathies and hemolytic anemias    | 608.52<br>(410.80 to<br>864.68)          | 573.12<br>(408.76 to<br>794.15)         | 526.18<br>(377.27 to<br>744.86)         | 562.63<br>(387.06 to<br>792.78)          | 34.84<br>(23.90 to<br>50.52)    | 31.57<br>(21.87 to<br>46.07)    | 31.92<br>(23.26 to<br>45.63)    | 29.17<br>(19.46 to<br>43.75)    |
| Endocrine, metabolic, blood, and immune disorders | 2,837.30<br>(1,512.74 to<br>4,853.01)    | 3,179.45<br>(1,426.18 to<br>6,221.65)   | 2,876.07<br>(1,234.73 to<br>5,905.64)   | 3,921.30<br>(1,863.40 to<br>7,345.03)    | 53.66<br>(25.78 to<br>96.16)    | 74.72<br>(31.19 to<br>146.63)   | 72.98<br>(28.90 to<br>149.69)   | 81.11<br>(35.96 to<br>154.02)   |

**Central African Republic**

| Cause                                         | YLLs (actual counts)                             |                                                 |                                                 |                                                  | Deaths (actual counts)                     |                                          |                                          |                                            |
|-----------------------------------------------|--------------------------------------------------|-------------------------------------------------|-------------------------------------------------|--------------------------------------------------|--------------------------------------------|------------------------------------------|------------------------------------------|--------------------------------------------|
|                                               | 2016                                             | 2040 Forecast                                   | 2040 Better Scenario                            | 2040 Worse Scenario                              | 2016                                       | 2040 Forecast                            | 2040 Better Scenario                     | 2040 Worse Scenario                        |
| <b>Musculoskeletal disorders</b>              | <b>1,399.21</b><br>(863.76 to<br>2,114.05)       | <b>2,783.44</b><br>(1,655.38 to<br>4,595.05)    | <b>3,015.26</b><br>(1,775.15 to<br>4,845.08)    | <b>2,719.25</b><br>(1,617.45 to<br>4,367.93)     | <b>36.45</b><br>(24.50 to<br>53.06)        | <b>72.15</b><br>(48.75 to<br>108.47)     | <b>80.32</b><br>(53.49 to<br>119.91)     | <b>67.65</b><br>(44.64 to<br>101.59)       |
| Rheumatoid arthritis                          | 324.58<br>(184.84 to<br>537.91)                  | 605.10<br>(352.42 to<br>1,022.35)               | 528.31<br>(303.25 to<br>908.93)                 | 630.31<br>(358.54 to<br>1,060.16)                | 12.60<br>(8.27 to<br>18.90)                | 22.80<br>(15.05 to<br>34.49)             | 21.55<br>(14.16 to<br>32.99)             | 22.29<br>(14.24 to<br>33.81)               |
| Other musculoskeletal disorders               | 1,074.63<br>(651.89 to<br>1,763.21)              | 2,178.34<br>(1,208.54 to<br>3,786.88)           | 2,486.96<br>(1,389.54 to<br>4,183.77)           | 2,088.94<br>(1,150.55 to<br>3,718.09)            | 23.85<br>(15.67 to<br>38.45)               | 49.35<br>(29.18 to<br>83.55)             | 58.77<br>(35.52 to<br>96.85)             | 45.35<br>(26.80 to<br>79.52)               |
| <b>Other non-communicable diseases</b>        | <b>90,253.31</b><br>(44,540.64 to<br>150,674.41) | <b>54,550.03</b><br>(30,551.15 to<br>88,610.39) | <b>45,189.79</b><br>(25,869.39 to<br>72,240.11) | <b>91,502.32</b><br>(47,415.72 to<br>153,119.52) | <b>1,138.17</b><br>(602.39 to<br>1,836.38) | <b>844.72</b><br>(547.20 to<br>1,273.26) | <b>761.61</b><br>(505.14 to<br>1,126.06) | <b>1,257.30</b><br>(736.09 to<br>2,023.27) |
| Congenital birth defects                      | 80,904.44<br>(35,507.72 to<br>140,546.82)        | 42,829.58<br>(19,923.89 to<br>74,186.91)        | 33,899.77<br>(15,517.30 to<br>58,596.52)        | 76,743.58<br>(34,008.22 to<br>134,948.88)        | 956.99<br>(425.04 to<br>1,659.54)          | 532.95<br>(254.79 to<br>910.82)          | 424.45<br>(202.72 to<br>725.67)          | 931.21<br>(418.20 to<br>1,627.08)          |
| Neural tube defects                           | 23,533.22<br>(10,670.10 to<br>45,379.17)         | 4,812.42<br>(1,744.45 to<br>10,064.70)          | 3,176.80<br>(1,102.50 to<br>7,017.35)           | 9,607.94<br>(3,462.20 to<br>21,040.82)           | 275.07<br>(124.99 to<br>529.44)            | 58.13<br>(21.43 to<br>120.14)            | 38.49<br>(13.54 to<br>84.04)             | 114.34<br>(41.78 to<br>248.35)             |
| Congenital heart anomalies                    | 19,434.91<br>(8,252.54 to<br>38,761.41)          | 12,821.83<br>(5,977.01 to<br>24,811.58)         | 10,489.63<br>(4,939.95 to<br>20,155.22)         | 21,825.80<br>(9,469.95 to<br>43,294.67)          | 233.54<br>(100.97 to<br>460.60)            | 165.32<br>(79.73 to<br>310.07)           | 136.15<br>(67.77 to<br>254.45)           | 271.73<br>(123.21 to<br>524.39)            |
| Orofacial clefts                              | 732.28<br>(144.76 to<br>2,004.13)                | 345.45<br>(62.15 to<br>1,008.81)                | 213.78<br>(37.94 to<br>629.31)                  | 734.48<br>(128.61 to<br>2,162.46)                | 8.49<br>(1.68 to<br>23.22)                 | 4.01<br>(0.72 to<br>11.70)               | 2.48<br>(0.44 to<br>7.28)                | 8.52<br>(1.49 to<br>25.06)                 |
| Down syndrome                                 | 1,489.92<br>(350.92 to<br>5,933.31)              | 1,296.01<br>(390.20 to<br>4,500.57)             | 987.32<br>(298.00 to<br>3,250.14)               | 2,186.26<br>(565.78 to<br>7,995.12)              | 18.58<br>(4.74 to<br>71.54)                | 18.50<br>(6.31 to<br>59.41)              | 14.34<br>(4.97 to<br>42.03)              | 29.17<br>(8.63 to<br>102.80)               |
| Other chromosomal abnormalities               | 2,635.31<br>(650.83 to<br>6,309.60)              | 2,658.85<br>(635.04 to<br>6,557.62)             | 2,051.33<br>(471.33 to<br>5,140.44)             | 4,970.73<br>(1,164.69 to<br>12,593.98)           | 30.82<br>(7.62 to<br>73.64)                | 31.58<br>(7.63 to<br>77.37)              | 24.41<br>(5.63 to<br>60.65)              | 58.53<br>(13.83 to<br>147.71)              |
| Congenital musculoskeletal and limb anomalies | 796.67<br>(207.22 to<br>2,585.63)                | 553.90<br>(157.32 to<br>1,927.24)               | 474.92<br>(135.84 to<br>1,638.21)               | 969.85<br>(256.87 to<br>3,437.12)                | 9.38<br>(2.47 to<br>30.32)                 | 6.70<br>(1.97 to<br>23.01)               | 5.76<br>(1.71 to<br>19.72)               | 11.56<br>(3.15 to<br>40.55)                |

|                                      |                                                                  |                                                                  |                                                                  |                                                                  |                                                            |                                                            |                                                            |                                                            |
|--------------------------------------|------------------------------------------------------------------|------------------------------------------------------------------|------------------------------------------------------------------|------------------------------------------------------------------|------------------------------------------------------------|------------------------------------------------------------|------------------------------------------------------------|------------------------------------------------------------|
|                                      | 1,272.72<br>(489.03 to<br>2,377.18)                              | 801.27<br>(338.48 to<br>1,531.50)                                | 679.47<br>(297.43 to<br>1,306.68)                                | 1,360.59<br>(539.10 to<br>2,672.88)                              | 15.59<br>(6.14 to<br>28.82)                                | 10.99<br>(5.16 to<br>19.83)                                | 9.48<br>(4.56 to<br>17.56)                                 | 17.51<br>(7.41 to<br>33.33)                                |
| Urogenital congenital anomalies      | 6,127.44<br>(1,912.82 to<br>14,230.04)                           | 3,719.03<br>(1,208.97 to<br>9,000.81)                            | 2,909.97<br>(981.13 to<br>7,328.00)                              | 6,953.80<br>(2,143.44 to<br>16,798.01)                           | 71.43<br>(22.41 to<br>166.17)                              | 43.82<br>(14.49 to<br>105.71)                              | 34.34<br>(11.84 to<br>86.30)                               | 81.47<br>(25.27 to<br>196.58)                              |
| Digestive congenital anomalies       | 24,881.97<br>(5,745.13 to<br>59,239.82)                          | 15,820.82<br>(4,372.46 to<br>36,882.97)                          | 12,916.54<br>(3,773.54 to<br>28,917.41)                          | 28,134.12<br>(7,370.49 to<br>66,899.73)                          | 294.10<br>(68.80 to<br>696.63)                             | 193.91<br>(55.92 to<br>447.10)                             | 159.00<br>(47.99 to<br>356.46)                             | 338.40<br>(90.72 to<br>798.59)                             |
| Other congenital birth defects       | 4,027.85<br>(2,234.18 to<br>6,019.29)                            | 9,148.55<br>(5,217.83 to<br>13,638.93)                           | 9,134.08<br>(5,277.86 to<br>13,675.47)                           | 10,038.01<br>(5,719.64 to<br>15,034.78)                          | 119.44<br>(69.34 to<br>187.75)                             | 281.94<br>(169.80 to<br>430.66)                            | 312.15<br>(192.07 to<br>480.10)                            | 271.33<br>(163.56 to<br>411.03)                            |
| Skin and subcutaneous diseases       | 326.41<br>(96.68 to<br>649.46)                                   | 1,023.01<br>(300.88 to<br>1,939.59)                              | 1,145.87<br>(345.91 to<br>2,097.82)                              | 1,029.09<br>(296.43 to<br>2,042.26)                              | 9.21<br>(2.93 to<br>17.47)                                 | 29.91<br>(9.42 to<br>55.40)                                | 35.79<br>(11.89 to<br>62.93)                               | 27.49<br>(8.36 to<br>52.32)                                |
| Cellulitis                           | 3,029.52<br>(1,690.57 to<br>4,746.70)                            | 6,869.31<br>(3,099.46 to<br>10,664.75)                           | 6,574.75<br>(3,844.08 to<br>10,328.55)                           | 7,776.57<br>(4,462.37 to<br>12,292.50)                           | 82.47<br>(48.76 to<br>135.50)                              | 204.06<br>(123.29 to<br>323.99)                            | 215.52<br>(131.55 to<br>357.55)                            | 202.24<br>(120.49 to<br>323.86)                            |
| Pyoderma                             | 480.25<br>(228.76 to<br>834.83)                                  | 896.01<br>(389.90 to<br>1,636.71)                                | 1,025.51<br>(486.66 to<br>1,870.15)                              | 835.54<br>(365.22 to<br>1,518.91)                                | 23.37<br>(11.63 to<br>40.90)                               | 39.37<br>(19.14 to<br>71.71)                               | 50.89<br>(25.43 to<br>91.92)                               | 33.14<br>(15.21 to<br>61.15)                               |
| Decubitus ulcer                      | 191.67<br>(84.67 to<br>339.24)                                   | 360.22<br>(161.34 to<br>636.77)                                  | 387.95<br>(175.41 to<br>677.71)                                  | 396.80<br>(174.68 to<br>720.89)                                  | 4.39<br>(2.06 to<br>7.20)                                  | 8.60<br>(4.11 to<br>14.57)                                 | 9.95<br>(4.76 to<br>16.55)                                 | 8.46<br>(3.96 to<br>14.47)                                 |
| Other skin and subcutaneous diseases | 5,321.02<br>(2,474.06 to<br>9,691.55)                            | 2,571.90<br>(969.88 to<br>5,186.30)                              | 2,155.94<br>(813.08 to<br>4,393.12)                              | 4,720.73<br>(1,845.59 to<br>9,541.87)                            | 61.74<br>(28.69 to<br>112.47)                              | 29.84<br>(11.25 to<br>60.17)                               | 25.01<br>(9.43 to<br>50.98)                                | 54.76<br>(21.41 to<br>110.73)                              |
| Sudden infant death syndrome         | <b>294,671.76</b><br><b>(229,370.80 to</b><br><b>367,091.24)</b> | <b>322,440.20</b><br><b>(222,021.52 to</b><br><b>441,320.19)</b> | <b>298,495.08</b><br><b>(203,392.99 to</b><br><b>410,991.05)</b> | <b>384,835.67</b><br><b>(267,316.02 to</b><br><b>529,613.40)</b> | <b>5,211.03</b><br><b>(4,107.64 to</b><br><b>6,403.11)</b> | <b>6,335.47</b><br><b>(4,527.68 to</b><br><b>8,480.46)</b> | <b>6,043.07</b><br><b>(4,309.24 to</b><br><b>8,079.57)</b> | <b>7,152.39</b><br><b>(5,094.63 to</b><br><b>9,654.21)</b> |
| Injuries                             | <b>114,858.06</b><br><b>(88,786.47 to</b><br><b>150,802.86)</b>  | <b>170,102.29</b><br><b>(104,902.46 to</b><br><b>261,230.10)</b> | <b>164,186.96</b><br><b>(102,701.62 to</b><br><b>247,082.14)</b> | <b>197,880.44</b><br><b>(122,160.30 to</b><br><b>301,542.86)</b> | <b>1,963.92</b><br><b>(1,522.96 to</b><br><b>2,596.35)</b> | <b>3,121.98</b><br><b>(1,957.32 to</b><br><b>4,763.74)</b> | <b>3,064.58</b><br><b>(1,940.73 to</b><br><b>4,591.23)</b> | <b>3,505.77</b><br><b>(2,190.61 to</b><br><b>5,382.08)</b> |
| Transport injuries                   | 112,331.64<br>(86,838.68 to<br>147,900.28)                       | 165,812.66<br>(102,187.19 to<br>253,390.39)                      | 160,589.52<br>(101,081.44 to<br>241,557.75)                      | 192,597.02<br>(118,425.22 to<br>294,031.32)                      | 1,919.93<br>(1,490.13 to<br>2,544.09)                      | 3,040.24<br>(1,904.40 to<br>4,598.81)                      | 2,994.73<br>(1,895.23 to<br>4,483.47)                      | 3,408.49<br>(2,127.28 to<br>5,238.54)                      |
| Road injuries                        | 48,664.18<br>(34,422.70 to<br>68,025.47)                         | 49,971.83<br>(31,162.08 to<br>79,946.02)                         | 46,897.33<br>(29,205.11 to<br>75,170.19)                         | 60,649.77<br>(37,537.42 to<br>98,137.12)                         | 819.07<br>(599.90 to<br>1,147.43)                          | 954.39<br>(606.29 to<br>1,503.13)                          | 920.37<br>(585.48 to<br>1,456.57)                          | 1,097.62<br>(698.17 to<br>1,765.13)                        |
| Pedestrian road injuries             | <b>Central African Republic</b>                                  |                                                                  |                                                                  |                                                                  |                                                            |                                                            |                                                            |                                                            |
| Cause                                | YLLs (actual counts)                                             |                                                                  |                                                                  |                                                                  | Deaths (actual counts)                                     |                                                            |                                                            |                                                            |
|                                      | 2016                                                             | 2040 Forecast                                                    | 2040 Better Scenario                                             | 2040 Worse Scenario                                              | 2016                                                       | 2040 Forecast                                              | 2040 Better Scenario                                       | 2040 Worse Scenario                                        |
| Cyclist road injuries                | 2,690.62<br>(1,353.78 to<br>5,805.88)                            | 4,623.28<br>(2,120.23 to<br>10,773.48)                           | 4,556.00<br>(2,117.89 to<br>10,633.22)                           | 5,407.62<br>(2,448.67 to<br>12,413.72)                           | 47.42<br>(23.74 to<br>107.80)                              | 86.59<br>(39.36 to<br>206.87)                              | 87.07<br>(39.92 to<br>209.38)                              | 96.99<br>(43.28 to<br>231.20)                              |
| Motorcyclist road injuries           | 10,190.33<br>(6,805.34 to<br>15,953.59)                          | 19,108.14<br>(10,787.12 to<br>32,417.82)                         | 18,770.64<br>(10,601.66 to<br>30,849.43)                         | 21,487.03<br>(12,032.58 to<br>36,535.91)                         | 170.98<br>(115.04 to<br>267.74)                            | 331.97<br>(184.44 to<br>559.77)                            | 328.11<br>(186.32 to<br>539.18)                            | 366.97<br>(203.47 to<br>626.89)                            |
| Motor vehicle road injuries          | 50,380.47<br>(33,423.30 to<br>72,581.97)                         | 91,414.38<br>(50,707.39 to<br>147,221.40)                        | 89,680.27<br>(49,735.66 to<br>140,602.44)                        | 104,244.87<br>(56,727.14 to<br>171,802.66)                       | 875.26<br>(584.17 to<br>1,266.23)                          | 1,654.39<br>(926.95 to<br>2,651.50)                        | 1,646.16<br>(932.66 to<br>2,571.53)                        | 1,832.54<br>(1,008.69 to<br>3,027.33)                      |
| Other road injuries                  | 406.03<br>(199.39 to<br>1,038.24)                                | 695.02<br>(296.07 to<br>1,686.50)                                | 685.28<br>(298.32 to<br>1,640.08)                                | 807.73<br>(345.65 to<br>1,977.41)                                | 7.20<br>(3.54 to<br>18.43)                                 | 12.90<br>(5.56 to<br>31.56)                                | 13.02<br>(5.70 to<br>31.68)                                | 14.37<br>(6.16 to<br>35.27)                                |
| Other transport injuries             | 2,526.42<br>(1,441.27 to<br>4,420.47)                            | 4,289.63<br>(2,190.02 to<br>7,649.37)                            | 3,597.43<br>(1,826.99 to<br>6,564.53)                            | 5,283.42<br>(2,706.84 to<br>9,484.97)                            | 43.99<br>(26.13 to<br>76.54)                               | 81.74<br>(42.03 to<br>147.06)                              | 69.85<br>(36.37 to<br>126.98)                              | 97.28<br>(51.13 to<br>176.82)                              |
| Unintentional injuries               | <b>129,438.84</b><br><b>(92,074.56 to</b><br><b>169,297.28)</b>  | <b>95,535.17</b><br><b>(69,162.20 to</b><br><b>129,827.04)</b>   | <b>79,599.21</b><br><b>(55,720.60 to</b><br><b>109,739.40)</b>   | <b>124,307.26</b><br><b>(84,503.88 to</b><br><b>172,339.44)</b>  | <b>2,255.67</b><br><b>(1,731.00 to</b><br><b>2,834.86)</b> | <b>2,002.67</b><br><b>(1,558.17 to</b><br><b>2,611.41)</b> | <b>1,782.17</b><br><b>(1,367.48 to</b><br><b>2,322.04)</b> | <b>2,344.56</b><br><b>(1,751.17 to</b><br><b>3,060.84)</b> |
| Falls                                | 12,417.14<br>(8,168.02 to<br>19,521.04)                          | 13,943.15<br>(9,481.18 to<br>21,224.02)                          | 13,315.59<br>(9,068.14 to<br>20,370.79)                          | 15,353.83<br>(10,121.02 to<br>23,809.62)                         | 332.46<br>(238.71 to<br>481.70)                            | 415.87<br>(314.10 to<br>574.82)                            | 438.77<br>(331.01 to<br>599.69)                            | 405.94<br>(299.10 to<br>572.79)                            |



|                                                 |                                          |                                          |                                          |                                          |                                   |                                     |                                     |                                     |
|-------------------------------------------------|------------------------------------------|------------------------------------------|------------------------------------------|------------------------------------------|-----------------------------------|-------------------------------------|-------------------------------------|-------------------------------------|
| Drowning                                        | 46,032.31<br>(24,806.51 to<br>66,672.56) | 26,358.32<br>(15,944.56 to<br>38,936.80) | 21,723.52<br>(12,952.67 to<br>32,870.53) | 36,618.21<br>(20,753.81 to<br>56,800.60) | 656.41<br>(396.02 to<br>901.47)   | 439.58<br>(279.00 to<br>634.75)     | 370.05<br>(234.34 to<br>533.10)     | 573.54<br>(353.16 to<br>856.46)     |
| Fire, heat, and hot substances                  | 15,988.42<br>(8,757.35 to<br>25,443.57)  | 10,215.83<br>(5,616.53 to<br>16,802.69)  | 8,251.95<br>(4,625.33 to<br>13,548.82)   | 13,535.22<br>(7,407.29 to<br>22,483.30)  | 302.64<br>(176.00 to<br>443.37)   | 233.50<br>(130.23 to<br>356.88)     | 202.71<br>(115.81 to<br>307.42)     | 275.86<br>(156.36 to<br>429.24)     |
| Poisonings                                      | 8,353.39<br>(3,414.80 to<br>17,848.95)   | 4,258.85<br>(1,851.60 to<br>7,945.48)    | 3,031.06<br>(1,297.47 to<br>5,500.97)    | 6,198.07<br>(2,571.28 to<br>12,709.21)   | 144.92<br>(65.91 to<br>272.84)    | 86.53<br>(40.43 to<br>145.27)       | 64.33<br>(30.56 to<br>107.23)       | 113.84<br>(52.09 to<br>204.69)      |
| Exposure to mechanical forces                   | 17,913.81<br>(10,574.30 to<br>26,387.35) | 14,210.96<br>(8,805.29 to<br>20,649.72)  | 11,258.80<br>(6,950.58 to<br>16,255.10)  | 18,526.43<br>(11,107.21 to<br>26,703.69) | 291.60<br>(182.19 to<br>400.27)   | 266.83<br>(171.69 to<br>374.99)     | 218.80<br>(142.13 to<br>313.99)     | 322.87<br>(205.04 to<br>448.31)     |
| Unintentional firearm injuries                  | 2,568.99<br>(1,253.15 to<br>4,162.59)    | 2,201.36<br>(1,069.58 to<br>3,945.52)    | 1,664.49<br>(795.65 to<br>3,016.44)      | 2,645.61<br>(1,294.60 to<br>4,658.55)    | 45.64<br>(22.62 to<br>73.56)      | 41.48<br>(20.60 to<br>71.36)        | 32.12<br>(16.24 to<br>56.06)        | 48.23<br>(24.24 to<br>83.75)        |
| Unintentional suffocation                       | 5,312.42<br>(2,390.68 to<br>11,456.99)   | 2,876.50<br>(1,391.46 to<br>5,805.56)    | 2,215.16<br>(1,056.02 to<br>4,551.46)    | 4,802.95<br>(2,156.22 to<br>10,210.32)   | 65.90<br>(31.29 to<br>138.43)     | 38.85<br>(20.36 to<br>73.52)        | 30.17<br>(15.50 to<br>58.30)        | 62.15<br>(30.47 to<br>126.76)       |
| Other exposure to mechanical forces             | 10,032.40<br>(5,776.67 to<br>13,511.26)  | 9,133.10<br>(5,447.33 to<br>13,402.62)   | 7,379.14<br>(4,368.21 to<br>11,112.60)   | 11,077.87<br>(6,556.26 to<br>16,126.35)  | 180.06<br>(108.85 to<br>242.22)   | 186.51<br>(116.07 to<br>269.71)     | 156.50<br>(97.77 to<br>230.88)      | 212.49<br>(132.43 to<br>304.80)     |
| Adverse effects of medical treatment            | 7,022.48<br>(4,415.55 to<br>10,591.28)   | 6,090.19<br>(4,080.71 to<br>8,447.09)    | 5,154.79<br>(3,491.43 to<br>7,456.40)    | 7,744.65<br>(4,870.44 to<br>11,774.72)   | 132.13<br>(98.76 to<br>177.03)    | 135.65<br>(104.68 to<br>177.81)     | 123.25<br>(93.47 to<br>162.26)      | 153.48<br>(113.79 to<br>210.87)     |
| Animal contact                                  | 6,584.16<br>(2,871.16 to<br>10,289.22)   | 7,393.60<br>(3,377.34 to<br>11,877.09)   | 5,632.47<br>(2,608.17 to<br>9,319.87)    | 9,675.90<br>(4,289.79 to<br>16,007.66)   | 135.76<br>(61.60 to<br>216.68)    | 168.71<br>(80.50 to<br>265.11)      | 137.58<br>(66.21 to<br>220.31)      | 198.42<br>(91.57 to<br>314.09)      |
| Venomous animal contact                         | 4,871.35<br>(2,151.64 to<br>7,762.42)    | 5,388.87<br>(2,447.70 to<br>9,057.39)    | 4,107.11<br>(1,895.14 to<br>6,802.35)    | 6,982.47<br>(3,093.19 to<br>11,633.57)   | 105.15<br>(48.24 to<br>170.57)    | 127.77<br>(59.49 to<br>209.92)      | 104.62<br>(49.91 to<br>171.43)      | 148.52<br>(68.11 to<br>243.56)      |
| Non-venomous animal contact                     | 1,712.81<br>(600.47 to<br>3,233.11)      | 2,004.73<br>(735.23 to<br>3,595.62)      | 1,525.36<br>(572.48 to<br>2,732.65)      | 2,693.43<br>(964.35 to<br>4,997.48)      | 30.61<br>(11.42 to<br>52.89)      | 40.94<br>(15.76 to<br>69.06)        | 32.96<br>(12.87 to<br>55.12)        | 49.90<br>(19.24 to<br>88.79)        |
| Foreign body                                    | 5,945.14<br>(2,952.46 to<br>12,459.11)   | 4,927.32<br>(2,673.93 to<br>8,880.96)    | 4,897.69<br>(2,693.27 to<br>8,733.67)    | 6,655.32<br>(3,362.20 to<br>13,209.62)   | 88.56<br>(48.14 to<br>165.33)     | 85.76<br>(51.70 to<br>135.72)       | 89.98<br>(55.56 to<br>137.75)       | 103.42<br>(58.13 to<br>182.42)      |
| Pulmonary aspiration and foreign body in airway | 5,374.80<br>(2,603.78 to<br>11,636.90)   | 4,374.92<br>(2,349.77 to<br>8,172.46)    | 4,416.22<br>(2,444.32 to<br>8,123.68)    | 5,968.57<br>(2,924.82 to<br>12,368.52)   | 78.97<br>(43.22 to<br>151.13)     | 75.36<br>(46.25 to<br>123.03)       | 80.56<br>(51.48 to<br>126.82)       | 91.42<br>(51.40 to<br>167.93)       |
| Foreign body in other body part                 | 570.34<br>(143.38 to<br>1,036.94)        | 552.40<br>(140.67 to<br>1,001.46)        | 481.48<br>(118.29 to<br>891.10)          | 686.75<br>(176.39 to<br>1,251.85)        | 9.59<br>(2.55 to<br>16.12)        | 10.40<br>(2.69 to<br>18.86)         | 9.42<br>(2.38 to<br>17.48)          | 12.00<br>(3.13 to<br>21.44)         |
| Environmental heat and cold exposure            | 3,277.23<br>(2,022.08 to<br>4,540.91)    | 3,303.09<br>(1,896.32 to<br>4,876.31)    | 2,305.47<br>(1,297.28 to<br>3,493.71)    | 4,195.82<br>(2,386.54 to<br>6,264.15)    | 66.44<br>(42.27 to<br>89.13)      | 74.17<br>(45.38 to<br>105.54)       | 54.05<br>(32.08 to<br>78.78)        | 88.38<br>(53.02 to<br>128.70)       |
| Other unintentional injuries                    | 5,904.78<br>(3,529.61 to<br>8,473.01)    | 4,833.86<br>(2,837.94 to<br>7,354.55)    | 4,027.88<br>(2,367.16 to<br>6,178.57)    | 5,803.81<br>(3,490.11 to<br>8,645.06)    | 104.75<br>(63.42 to<br>146.27)    | 96.06<br>(57.41 to<br>141.88)       | 82.65<br>(49.41 to<br>123.46)       | 108.81<br>(65.85 to<br>159.16)      |
| Self-harm and interpersonal violence            | 38,425.83<br>(24,211.34 to<br>54,958.15) | 55,427.97<br>(30,563.36 to<br>86,842.76) | 53,324.02<br>(29,431.86 to<br>83,319.45) | 61,143.22<br>(33,027.35 to<br>97,055.78) | 797.26<br>(500.95 to<br>1,136.37) | 1,187.58<br>(651.94 to<br>1,813.55) | 1,172.60<br>(660.71 to<br>1,781.57) | 1,277.39<br>(686.96 to<br>1,958.93) |

**Central African Republic**

| Cause                              | YLLs (actual counts)                     |                                          |                                          |                                          | Deaths (actual counts)          |                                   |                                   |                                   |
|------------------------------------|------------------------------------------|------------------------------------------|------------------------------------------|------------------------------------------|---------------------------------|-----------------------------------|-----------------------------------|-----------------------------------|
|                                    | 2016                                     | 2040 Forecast                            | 2040 Better Scenario                     | 2040 Worse Scenario                      | 2016                            | 2040 Forecast                     | 2040 Better Scenario              | 2040 Worse Scenario               |
| Self-harm                          | 19,167.30<br>(11,315.28 to<br>28,350.14) | 32,451.79<br>(15,853.63 to<br>53,917.95) | 30,605.05<br>(15,333.55 to<br>50,854.48) | 36,624.95<br>(17,416.66 to<br>61,769.22) | 461.51<br>(275.90 to<br>670.55) | 766.43<br>(395.26 to<br>1,230.91) | 752.48<br>(398.55 to<br>1,206.83) | 836.51<br>(413.33 to<br>1,377.13) |
| Self-harm by firearm               | 2,004.53<br>(634.99 to<br>3,781.60)      | 2,542.89<br>(748.85 to<br>5,578.27)      | 2,291.95<br>(688.08 to<br>5,025.75)      | 2,932.77<br>(855.26 to<br>6,602.95)      | 46.89<br>(16.47 to<br>86.28)    | 59.87<br>(18.94 to<br>127.57)     | 56.12<br>(18.15 to<br>118.99)     | 66.84<br>(20.86 to<br>146.70)     |
| Self-harm by other specified means | 17,162.77<br>(10,297.88 to<br>25,327.68) | 29,908.90<br>(14,869.65 to<br>50,223.67) | 28,313.09<br>(14,425.22 to<br>47,146.60) | 33,692.18<br>(16,402.96 to<br>57,099.13) | 414.61<br>(251.78 to<br>605.87) | 706.57<br>(368.72 to<br>1,133.23) | 696.36<br>(367.36 to<br>1,121.77) | 769.67<br>(384.80 to<br>1,271.16) |

|                                                                                     |                                                                        |                                                                      |                                                                      |                                                                        |                                                               |                                                               |                                                               |                                                               |
|-------------------------------------------------------------------------------------|------------------------------------------------------------------------|----------------------------------------------------------------------|----------------------------------------------------------------------|------------------------------------------------------------------------|---------------------------------------------------------------|---------------------------------------------------------------|---------------------------------------------------------------|---------------------------------------------------------------|
| Interpersonal violence                                                              | 19,258.53<br>(11,591.88 to<br>28,465.15)                               | 22,976.18<br>(12,235.00 to<br>37,627.45)                             | 22,718.97<br>(12,157.96 to<br>36,851.74)                             | 24,518.26<br>(13,126.71 to<br>39,532.81)                               | 335.75<br>(199.80 to<br>498.66)                               | 421.44<br>(226.11 to<br>680.01)                               | 420.12<br>(224.81 to<br>676.63)                               | 440.88<br>(236.38 to<br>705.70)                               |
| Physical violence by firearm                                                        | 6,732.08<br>(3,016.46 to<br>12,338.01)                                 | 8,148.59<br>(3,674.98 to<br>15,770.38)                               | 8,121.74<br>(3,726.49 to<br>15,530.40)                               | 8,363.56<br>(3,766.69 to<br>16,066.90)                                 | 118.16<br>(52.81 to<br>216.83)                                | 147.61<br>(66.17 to<br>282.53)                                | 148.14<br>(67.87 to<br>281.05)                                | 149.51<br>(66.34 to<br>286.61)                                |
| Physical violence by sharp object                                                   | 5,003.65<br>(2,398.54 to<br>8,213.63)                                  | 6,794.59<br>(3,143.33 to<br>11,592.17)                               | 7,143.42<br>(3,262.33 to<br>12,299.09)                               | 6,801.38<br>(3,159.98 to<br>11,759.30)                                 | 88.46<br>(42.34 to<br>145.16)                                 | 124.64<br>(57.03 to<br>210.71)                                | 132.04<br>(60.76 to<br>224.78)                                | 122.93<br>(57.09 to<br>206.64)                                |
| Physical violence by other means                                                    | 7,522.80<br>(4,295.89 to<br>11,710.64)                                 | 8,033.00<br>(3,945.13 to<br>14,430.55)                               | 7,453.81<br>(3,651.58 to<br>13,533.84)                               | 9,353.32<br>(4,587.82 to<br>16,548.06)                                 | 129.12<br>(71.32 to<br>202.80)                                | 148.90<br>(72.12 to<br>266.57)                                | 139.94<br>(68.26 to<br>251.24)                                | 168.44<br>(82.25 to<br>297.05)                                |
| <b>Forces of nature, conflict and terrorism, and executions and police conflict</b> | <b>11,949.03</b><br><b>(1,935.95 to</b><br><b>22,844.24)</b>           | <b>1,374.77</b><br><b>(0.00 to</b><br><b>26,109.21)</b>              | <b>1,384.90</b><br><b>(0.00 to</b><br><b>26,580.59)</b>              | <b>1,504.75</b><br><b>(0.00 to</b><br><b>28,526.82)</b>                | <b>194.19</b><br><b>(31.57 to</b><br><b>371.09)</b>           | <b>23.24</b><br><b>(0.00 to</b><br><b>440.66)</b>             | <b>23.72</b><br><b>(0.00 to</b><br><b>450.72)</b>             | <b>24.66</b><br><b>(0.00 to</b><br><b>465.07)</b>             |
| Exposure to forces of nature                                                        | 0.00<br>(0.00 to<br>0.00)                                              | 17.81<br>(0.00 to<br>164.56)                                         | 18.01<br>(0.00 to<br>166.07)                                         | 20.39<br>(0.00 to<br>190.98)                                           | 0.00<br>(0.00 to<br>0.00)                                     | 0.32<br>(0.00 to<br>3.01)                                     | 0.33<br>(0.00 to<br>3.15)                                     | 0.35<br>(0.00 to<br>3.28)                                     |
| Conflict and terrorism                                                              | 11,897.09<br>(1,887.67 to<br>22,802.23)                                | 1,161.79<br>(0.00 to<br>22,592.68)                                   | 1,169.19<br>(0.00 to<br>22,851.28)                                   | 1,280.49<br>(0.00 to<br>24,788.63)                                     | 193.23<br>(30.66 to<br>370.35)                                | 19.51<br>(0.00 to<br>379.17)                                  | 19.89<br>(0.00 to<br>388.15)                                  | 20.82<br>(0.00 to<br>403.26)                                  |
| Executions and police conflict                                                      | 51.94<br>(30.63 to<br>93.91)                                           | 195.16<br>(0.00 to<br>3,323.43)                                      | 197.70<br>(0.00 to<br>3,347.64)                                      | 203.87<br>(0.00 to<br>3,479.16)                                        | 0.96<br>(0.57 to<br>1.64)                                     | 3.42<br>(0.00 to<br>58.05)                                    | 3.49<br>(0.00 to<br>59.31)                                    | 3.50<br>(0.00 to<br>59.59)                                    |
| <b>Congo</b>                                                                        |                                                                        |                                                                      |                                                                      |                                                                        |                                                               |                                                               |                                                               |                                                               |
| Cause                                                                               | YLLs (actual counts)                                                   |                                                                      |                                                                      |                                                                        | Deaths (actual counts)                                        |                                                               |                                                               |                                                               |
|                                                                                     | 2016                                                                   | 2040 Forecast                                                        | 2040 Better Scenario                                                 | 2040 Worse Scenario                                                    | 2016                                                          | 2040 Forecast                                                 | 2040 Better Scenario                                          | 2040 Worse Scenario                                           |
| <b>All causes</b>                                                                   | <b>1,701,043.80</b><br><b>(1,417,461.98 to</b><br><b>2,051,702.92)</b> | <b>1,398,608.46</b><br><b>(992,400.89 to</b><br><b>1,960,895.16)</b> | <b>1,079,911.44</b><br><b>(764,132.67 to</b><br><b>1,481,084.51)</b> | <b>2,180,744.71</b><br><b>(1,610,361.54 to</b><br><b>2,987,270.51)</b> | <b>38,286.58</b><br><b>(32,591.20 to</b><br><b>43,865.45)</b> | <b>43,726.45</b><br><b>(33,656.56 to</b><br><b>56,582.81)</b> | <b>35,446.03</b><br><b>(27,403.82 to</b><br><b>45,512.90)</b> | <b>60,004.10</b><br><b>(46,873.10 to</b><br><b>77,460.99)</b> |
| <b>Communicable, maternal, neonatal, and nutritional diseases</b>                   | <b>1,137,208.70</b><br><b>(936,006.70 to</b><br><b>1,419,782.28)</b>   | <b>594,851.61</b><br><b>(383,187.19 to</b><br><b>907,902.82)</b>     | <b>412,411.44</b><br><b>(259,330.20 to</b><br><b>634,318.19)</b>     | <b>1,184,016.29</b><br><b>(846,726.10 to</b><br><b>1,693,287.17)</b>   | <b>20,355.74</b><br><b>(17,097.23 to</b><br><b>24,152.84)</b> | <b>14,057.94</b><br><b>(9,163.25 to</b><br><b>21,351.62)</b>  | <b>9,954.55</b><br><b>(6,392.55 to</b><br><b>15,440.07)</b>   | <b>25,189.08</b><br><b>(18,119.93 to</b><br><b>35,718.78)</b> |
| <b>HIV/AIDS and tuberculosis</b>                                                    | <b>308,849.71</b><br><b>(256,595.55 to</b><br><b>371,412.57)</b>       | <b>192,277.37</b><br><b>(99,611.32 to</b><br><b>325,976.51)</b>      | <b>112,616.44</b><br><b>(49,365.51 to</b><br><b>234,954.41)</b>      | <b>521,733.15</b><br><b>(383,598.70 to</b><br><b>677,817.98)</b>       | <b>6,675.45</b><br><b>(5,704.66 to</b><br><b>7,849.57)</b>    | <b>4,612.49</b><br><b>(2,647.63 to</b><br><b>7,264.41)</b>    | <b>2,658.45</b><br><b>(1,305.59 to</b><br><b>4,963.94)</b>    | <b>11,405.45</b><br><b>(8,521.39 to</b><br><b>14,836.02)</b>  |
| Tuberculosis                                                                        | 73,504.68<br>(54,578.87 to<br>95,592.19)                               | 63,355.80<br>(29,249.93 to<br>123,622.48)                            | 33,065.54<br>(16,167.49 to<br>63,025.52)                             | 97,066.07<br>(45,637.09 to<br>197,438.28)                              | 2,101.38<br>(1,558.60 to<br>2,701.07)                         | 1,968.07<br>(1,008.58 to<br>3,567.27)                         | 1,073.71<br>(586.69 to<br>1,840.10)                           | 2,871.77<br>(1,445.12 to<br>5,269.22)                         |
| HIV/AIDS                                                                            | 235,345.02<br>(188,151.43 to<br>293,000.79)                            | 128,921.57<br>(46,308.06 to<br>249,446.15)                           | 79,550.90<br>(21,173.35 to<br>201,288.37)                            | 424,667.08<br>(303,864.24 to<br>583,677.10)                            | 4,574.07<br>(3,742.35 to<br>5,588.44)                         | 2,644.42<br>(1,049.17 to<br>4,806.94)                         | 1,584.73<br>(415.19 to<br>3,759.26)                           | 8,533.68<br>(6,240.99 to<br>11,486.85)                        |
| <b>Diarrhea, lower respiratory, and other common infectious diseases</b>            | <b>305,881.42</b><br><b>(230,974.05 to</b><br><b>408,969.45)</b>       | <b>183,290.44</b><br><b>(83,397.15 to</b><br><b>377,599.09)</b>      | <b>117,138.27</b><br><b>(53,970.28 to</b><br><b>242,489.32)</b>      | <b>324,278.50</b><br><b>(142,068.20 to</b><br><b>677,520.85)</b>       | <b>6,162.23</b><br><b>(4,708.10 to</b><br><b>7,911.79)</b>    | <b>5,445.32</b><br><b>(2,666.08 to</b><br><b>11,035.09)</b>   | <b>3,852.98</b><br><b>(1,964.75 to</b><br><b>7,534.48)</b>    | <b>8,317.93</b><br><b>(4,018.05 to</b><br><b>15,888.96)</b>   |
| Diarrheal diseases                                                                  | 120,157.33<br>(75,521.46 to<br>178,171.31)                             | 68,926.22<br>(15,825.62 to<br>219,163.53)                            | 43,975.80<br>(8,909.76 to<br>142,793.15)                             | 114,997.66<br>(26,972.42 to<br>336,612.77)                             | 2,757.41<br>(1,612.36 to<br>4,127.06)                         | 2,327.00<br>(429.54 to<br>7,302.80)                           | 1,555.36<br>(282.96 to<br>4,824.16)                           | 3,561.94<br>(673.21 to<br>10,129.37)                          |
| Intestinal infectious diseases                                                      | 2,839.54<br>(1,496.06 to<br>5,044.05)                                  | 1,691.54<br>(706.29 to<br>3,634.18)                                  | 1,482.58<br>(618.91 to<br>3,264.36)                                  | 2,330.23<br>(974.93 to<br>5,124.59)                                    | 39.96<br>(21.44 to<br>70.36)                                  | 26.00<br>(11.30 to<br>54.64)                                  | 22.99<br>(10.11 to<br>48.76)                                  | 31.40<br>(14.78 to<br>75.64)                                  |
| Typhoid fever                                                                       | 2,348.14<br>(1,135.44 to<br>4,224.33)                                  | 1,462.57<br>(576.81 to<br>3,211.77)                                  | 1,296.67<br>(526.28 to<br>2,890.57)                                  | 1,995.70<br>(788.56 to<br>4,479.62)                                    | 33.04<br>(16.44 to<br>59.35)                                  | 22.17<br>(9.15 to<br>47.77)                                   | 19.81<br>(8.26 to<br>43.08)                                   | 29.19<br>(12.01 to<br>65.55)                                  |
| Paratyphoid fever                                                                   | 187.07<br>(72.39 to<br>402.37)                                         | 132.31<br>(47.95 to<br>316.70)                                       | 114.93<br>(41.01 to<br>277.60)                                       | 184.19<br>(66.15 to<br>437.29)                                         | 2.64<br>(1.05 to<br>5.55)                                     | 2.03<br>(0.75 to<br>4.71)                                     | 1.77<br>(0.65 to<br>4.14)                                     | 2.72<br>(0.99 to<br>6.40)                                     |
| Other intestinal infectious diseases                                                | 304.34<br>(73.33 to<br>887.00)                                         | 96.66<br>(21.15 to<br>287.45)                                        | 70.97<br>(14.67 to<br>216.59)                                        | 150.34<br>(31.44 to<br>457.61)                                         | 4.28<br>(1.21 to<br>11.35)                                    | 1.80<br>(0.49 to<br>5.06)                                     | 1.40<br>(0.35 to<br>3.71)                                     | 2.49<br>(0.66 to<br>7.03)                                     |
| Lower respiratory infections                                                        | 121,971.39<br>(85,937.28 to<br>170,048.12)                             | 84,580.96<br>(42,509.14 to<br>172,416.60)                            | 52,299.61<br>(28,506.73 to<br>96,977.80)                             | 160,790.51<br>(71,399.83 to<br>370,507.59)                             | 2,493.28<br>(1,828.22 to<br>3,240.83)                         | 2,603.08<br>(1,600.31 to<br>4,262.05)                         | 1,893.02<br>(1,215.65 to<br>2,891.06)                         | 4,018.48<br>(2,233.02 to<br>7,253.65)                         |

|                                |                                          |                                          |                                         |                                          |                                 |                                 |                                 |                                 |
|--------------------------------|------------------------------------------|------------------------------------------|-----------------------------------------|------------------------------------------|---------------------------------|---------------------------------|---------------------------------|---------------------------------|
| Upper respiratory infections   | 135.29<br>(45.92 to<br>319.22)           | 93.47<br>(35.35 to<br>219.64)            | 64.75<br>(23.52 to<br>150.28)           | 144.77<br>(49.65 to<br>355.85)           | 2.19<br>(0.99 to<br>4.35)       | 2.10<br>(0.88 to<br>4.25)       | 1.51<br>(0.63 to<br>3.08)       | 2.94<br>(1.19 to<br>6.23)       |
| Otitis media                   | 31.14<br>(13.75 to<br>71.94)             | 8.36<br>(3.54 to<br>19.92)               | 8.65<br>(3.63 to<br>19.09)              | 8.79<br>(3.69 to<br>18.98)               | 0.68<br>(0.35 to<br>1.33)       | 0.39<br>(0.14 to<br>0.93)       | 0.44<br>(0.15 to<br>1.07)       | 0.35<br>(0.14 to<br>0.81)       |
| Meningitis                     | 36,888.93<br>(24,886.86 to<br>58,258.53) | 19,185.79<br>(10,871.53 to<br>33,088.07) | 15,993.80<br>(9,164.48 to<br>27,852.29) | 29,315.93<br>(16,138.24 to<br>54,250.19) | 570.33<br>(401.90 to<br>852.14) | 364.53<br>(220.88 to<br>598.79) | 323.69<br>(198.25 to<br>522.32) | 483.91<br>(287.81 to<br>839.82) |
| Pneumococcal meningitis        | 2,181.48<br>(1,484.74 to<br>3,377.04)    | 1,181.87<br>(644.46 to<br>2,053.16)      | 1,071.48<br>(584.54 to<br>1,803.39)     | 1,637.48<br>(901.43 to<br>2,853.47)      | 38.91<br>(26.87 to<br>56.46)    | 26.78<br>(15.36 to<br>43.69)    | 25.49<br>(14.45 to<br>41.51)    | 32.62<br>(19.08 to<br>56.34)    |
| H influenzae type B meningitis | 3,490.94<br>(2,167.62 to<br>5,907.15)    | 3,400.37<br>(1,030.00 to<br>8,663.49)    | 1,813.66<br>(759.76 to<br>4,147.04)     | 9,193.00<br>(2,136.13 to<br>24,347.31)   | 50.58<br>(33.99 to<br>79.64)    | 48.45<br>(18.86 to<br>112.74)   | 30.30<br>(15.58 to<br>59.72)    | 115.75<br>(31.56 to<br>294.51)  |
| Meningococcal meningitis       | 15,657.95<br>(10,530.21 to<br>24,113.85) | 6,837.18<br>(3,910.80 to<br>11,785.75)   | 6,114.00<br>(3,466.89 to<br>10,621.24)  | 8,738.44<br>(4,769.89 to<br>15,098.41)   | 236.24<br>(163.16 to<br>352.75) | 132.01<br>(78.48 to<br>216.12)  | 121.59<br>(73.06 to<br>201.73)  | 155.00<br>(92.88 to<br>261.99)  |
| Other meningitis               | 15,558.57<br>(10,367.61 to<br>24,885.91) | 7,766.37<br>(4,406.18 to<br>13,151.27)   | 6,994.66<br>(3,981.81 to<br>11,995.38)  | 9,747.00<br>(5,649.75 to<br>17,111.66)   | 244.60<br>(171.76 to<br>368.15) | 157.29<br>(94.77 to<br>258.38)  | 146.31<br>(88.73 to<br>240.16)  | 180.55<br>(110.17 to<br>302.00) |
| Encephalitis                   | 1,980.21<br>(1,290.59 to<br>3,104.29)    | 1,529.34<br>(869.53 to<br>2,692.49)      | 1,294.32<br>(750.36 to<br>2,352.07)     | 2,074.05<br>(1,142.86 to<br>3,690.19)    | 29.27<br>(20.40 to<br>42.19)    | 27.57<br>(17.67 to<br>43.44)    | 24.03<br>(15.26 to<br>38.98)    | 34.47<br>(21.93 to<br>54.82)    |
| Diphtheria                     | 66.88<br>(29.37 to<br>132.72)            | 16.06<br>(5.49 to<br>41.77)              | 8.24<br>(3.70 to<br>16.23)              | 44.49<br>(10.33 to<br>146.38)            | 0.87<br>(0.41 to<br>1.65)       | 0.24<br>(0.09 to<br>0.56)       | 0.15<br>(0.07 to<br>0.29)       | 0.58<br>(0.16 to<br>1.77)       |
| Whooping cough                 | 6,815.91<br>(473.28 to<br>22,726.79)     | 5,542.54<br>(298.89 to<br>21,754.04)     | 1,092.76<br>(53.28 to<br>4,536.10)      | 7,864.16<br>(417.62 to<br>31,314.94)     | 80.50<br>(5.60 to<br>268.81)    | 65.65<br>(3.53 to<br>257.22)    | 13.22<br>(0.65 to<br>54.42)     | 93.04<br>(4.93 to<br>373.30)    |
| Tetanus                        | 557.01<br>(189.58 to<br>1,342.31)        | 120.78<br>(30.50 to<br>352.79)           | 90.37<br>(18.03 to<br>312.27)           | 150.12<br>(41.83 to<br>408.17)           | 10.48<br>(3.23 to<br>27.09)     | 2.88<br>(0.65 to<br>9.30)       | 2.61<br>(0.48 to<br>8.84)       | 3.11<br>(0.78 to<br>9.31)       |
| Measles                        | 13,324.60<br>(4,305.36 to<br>32,279.94)  | 1,042.90<br>(55.86 to<br>8,011.60)       | 426.18<br>(36.86 to<br>2,732.32)        | 5,673.53<br>(316.31 to<br>28,091.86)     | 153.92<br>(51.41 to<br>384.39)  | 12.48<br>(0.71 to<br>94.87)     | 5.18<br>(0.48 to<br>32.56)      | 67.33<br>(3.91 to<br>333.31)    |

**Congo**

| Cause                                          | YLLs (actual counts)                                             |                                                                |                                                                |                                                                | Deaths (actual counts)                                     |                                                          |                                                          |                                                            |
|------------------------------------------------|------------------------------------------------------------------|----------------------------------------------------------------|----------------------------------------------------------------|----------------------------------------------------------------|------------------------------------------------------------|----------------------------------------------------------|----------------------------------------------------------|------------------------------------------------------------|
|                                                | 2016                                                             | 2040 Forecast                                                  | 2040 Better Scenario                                           | 2040 Worse Scenario                                            | 2016                                                       | 2040 Forecast                                            | 2040 Better Scenario                                     | 2040 Worse Scenario                                        |
| Varicella and herpes zoster                    | 1,103.19<br>(606.81 to<br>1,900.57)                              | 552.46<br>(277.65 to<br>1,053.72)                              | 401.21<br>(200.09 to<br>766.41)                                | 884.26<br>(425.42 to<br>1,785.40)                              | 18.35<br>(11.77 to<br>27.81)                               | 13.40<br>(8.25 to<br>21.23)                              | 10.78<br>(6.38 to<br>17.12)                              | 17.39<br>(10.17 to<br>28.95)                               |
| <b>Neglected tropical diseases and malaria</b> | <b>195,679.48</b><br><b>(129,663.17 to</b><br><b>287,823.74)</b> | <b>67,906.87</b><br><b>(42,175.22 to</b><br><b>107,939.22)</b> | <b>63,342.70</b><br><b>(39,301.44 to</b><br><b>100,698.75)</b> | <b>86,254.54</b><br><b>(52,956.65 to</b><br><b>138,545.81)</b> | <b>2,911.16</b><br><b>(2,044.47 to</b><br><b>4,059.09)</b> | <b>1,409.62</b><br><b>(927.26 to</b><br><b>2,196.52)</b> | <b>1,347.92</b><br><b>(886.03 to</b><br><b>2,116.45)</b> | <b>1,614.50</b><br><b>(1,058.83 to</b><br><b>2,474.85)</b> |
| Malaria                                        | 185,644.34<br>(118,498.97 to<br>275,559.90)                      | 61,864.84<br>(37,356.75 to<br>99,800.70)                       | 58,210.52<br>(35,347.72 to<br>93,601.95)                       | 77,847.25<br>(46,400.64 to<br>126,314.17)                      | 2,697.15<br>(1,836.58 to<br>3,840.96)                      | 1,278.34<br>(816.94 to<br>2,023.28)                      | 1,235.76<br>(798.82 to<br>1,961.08)                      | 1,450.53<br>(916.62 to<br>2,243.33)                        |
| Chagas disease                                 | 0.00<br>(0.00 to<br>0.00)                                        | 0.00<br>(0.00 to<br>0.00)                                      | 0.00<br>(0.00 to<br>0.00)                                      | 0.00<br>(0.00 to<br>0.00)                                      | 0.00<br>(0.00 to<br>0.00)                                  | 0.00<br>(0.00 to<br>0.00)                                | 0.00<br>(0.00 to<br>0.00)                                | 0.00<br>(0.00 to<br>0.00)                                  |
| Leishmaniasis                                  | 0.00<br>(0.00 to<br>0.00)                                        | 0.00<br>(0.00 to<br>0.00)                                      | 0.00<br>(0.00 to<br>0.00)                                      | 0.00<br>(0.00 to<br>0.00)                                      | 0.00<br>(0.00 to<br>0.00)                                  | 0.00<br>(0.00 to<br>0.00)                                | 0.00<br>(0.00 to<br>0.00)                                | 0.00<br>(0.00 to<br>0.00)                                  |
| African trypanosomiasis                        | 1,580.29<br>(728.41 to<br>2,941.10)                              | 131.73<br>(52.23 to<br>307.53)                                 | 131.30<br>(52.31 to<br>306.35)                                 | 141.89<br>(56.59 to<br>319.69)                                 | 29.39<br>(14.74 to<br>52.88)                               | 2.65<br>(1.06 to<br>5.83)                                | 2.67<br>(1.08 to<br>5.75)                                | 2.75<br>(1.15 to<br>5.99)                                  |
| Schistosomiasis                                | 1,820.91<br>(1,158.71 to<br>2,658.35)                            | 1,327.87<br>(789.18 to<br>2,194.15)                            | 1,146.41<br>(669.47 to<br>1,888.38)                            | 1,498.94<br>(889.24 to<br>2,409.57)                            | 52.88<br>(34.76 to<br>76.73)                               | 42.89<br>(26.70 to<br>66.00)                             | 38.00<br>(23.30 to<br>59.26)                             | 46.19<br>(29.13 to<br>70.22)                               |
| Cysticercosis                                  | 149.18<br>(110.85 to<br>195.17)                                  | 67.52<br>(41.50 to<br>112.50)                                  | 61.88<br>(36.80 to<br>102.83)                                  | 74.87<br>(46.27 to<br>121.79)                                  | 3.17<br>(2.35 to<br>4.16)                                  | 1.65<br>(1.05 to<br>2.60)                                | 1.53<br>(0.93 to<br>2.43)                                | 1.76<br>(1.13 to<br>2.70)                                  |

|                                                          |                                                               |                                                               |                                                              |                                                               |                                                      |                                                        |                                                      |                                                        |
|----------------------------------------------------------|---------------------------------------------------------------|---------------------------------------------------------------|--------------------------------------------------------------|---------------------------------------------------------------|------------------------------------------------------|--------------------------------------------------------|------------------------------------------------------|--------------------------------------------------------|
|                                                          | 51.87<br>(38.01 to<br>68.97)                                  | 25.75<br>(15.96 to<br>41.42)                                  | 16.16<br>(9.90 to<br>25.81)                                  | 39.58<br>(24.93 to<br>63.89)                                  | 1.19<br>(0.87 to<br>1.59)                            | 0.77<br>(0.50 to<br>1.14)                              | 0.50<br>(0.33 to<br>0.75)                            | 1.09<br>(0.73 to<br>1.65)                              |
| Cystic echinococcosis                                    |                                                               |                                                               |                                                              |                                                               |                                                      |                                                        |                                                      |                                                        |
|                                                          | 20.09<br>(2.75 to<br>61.28)                                   | 58.56<br>(7.91 to<br>164.80)                                  | 55.50<br>(7.47 to<br>157.02)                                 | 73.32<br>(9.68 to<br>205.52)                                  | 0.32<br>(0.05 to<br>0.92)                            | 1.31<br>(0.19 to<br>3.44)                              | 1.28<br>(0.18 to<br>3.35)                            | 1.45<br>(0.21 to<br>3.94)                              |
| Dengue                                                   |                                                               |                                                               |                                                              |                                                               |                                                      |                                                        |                                                      |                                                        |
|                                                          | 2,828.28<br>(570.15 to<br>8,320.53)                           | 988.63<br>(178.10 to<br>3,090.52)                             | 747.82<br>(133.53 to<br>2,285.76)                            | 1,436.91<br>(270.08 to<br>4,348.39)                           | 45.09<br>(9.30 to<br>133.10)                         | 17.17<br>(3.19 to<br>52.79)                            | 13.04<br>(2.31 to<br>40.65)                          | 23.95<br>(4.40 to<br>73.94)                            |
| Yellow fever                                             |                                                               |                                                               |                                                              |                                                               |                                                      |                                                        |                                                      |                                                        |
|                                                          | 63.81<br>(27.37 to<br>128.14)                                 | 25.43<br>(9.22 to<br>58.39)                                   | 13.76<br>(5.23 to<br>29.95)                                  | 51.48<br>(19.34 to<br>122.92)                                 | 1.04<br>(0.47 to<br>2.06)                            | 0.49<br>(0.18 to<br>1.08)                              | 0.27<br>(0.11 to<br>0.57)                            | 0.91<br>(0.35 to<br>2.01)                              |
| Rabies                                                   |                                                               |                                                               |                                                              |                                                               |                                                      |                                                        |                                                      |                                                        |
|                                                          | 724.12<br>(356.89 to<br>1,281.07)                             | 570.29<br>(283.59 to<br>1,057.45)                             | 564.36<br>(270.11 to<br>1,096.67)                            | 799.95<br>(392.54 to<br>1,514.39)                             | 9.15<br>(4.80 to<br>15.79)                           | 7.85<br>(4.16 to<br>13.68)                             | 7.85<br>(4.03 to<br>14.33)                           | 10.53<br>(5.49 to<br>19.24)                            |
| Intestinal nematode infections                           |                                                               |                                                               |                                                              |                                                               |                                                      |                                                        |                                                      |                                                        |
|                                                          | 4,796.59<br>(1,463.35 to<br>10,637.27)                        | 2,846.26<br>(826.87 to<br>6,341.59)                           | 2,295.00<br>(635.54 to<br>5,132.57)                          | 4,290.36<br>(1,304.53 to<br>9,686.26)                         | 71.78<br>(20.88 to<br>152.48)                        | 56.50<br>(15.34 to<br>120.31)                          | 47.02<br>(12.06 to<br>98.34)                         | 75.34<br>(21.30 to<br>160.67)                          |
| Other neglected tropical diseases                        |                                                               |                                                               |                                                              |                                                               |                                                      |                                                        |                                                      |                                                        |
|                                                          | <b>34,874.71</b><br><b>(22,944.06 to</b><br><b>49,124.79)</b> | <b>26,490.33</b><br><b>(11,876.29 to</b><br><b>55,817.32)</b> | <b>17,352.33</b><br><b>(7,540.90 to</b><br><b>36,610.24)</b> | <b>39,159.30</b><br><b>(17,783.96 to</b><br><b>83,552.06)</b> | <b>654.96</b><br><b>(427.14 to</b><br><b>932.60)</b> | <b>512.72</b><br><b>(232.14 to</b><br><b>1,048.18)</b> | <b>335.83</b><br><b>(146.48 to</b><br><b>701.29)</b> | <b>752.41</b><br><b>(341.97 to</b><br><b>1,557.97)</b> |
| Maternal disorders                                       |                                                               |                                                               |                                                              |                                                               |                                                      |                                                        |                                                      |                                                        |
|                                                          | 9,412.20<br>(5,596.53 to<br>14,550.61)                        | 6,274.52<br>(2,673.48 to<br>13,712.76)                        | 4,160.08<br>(1,695.31 to<br>9,251.32)                        | 8,936.88<br>(3,829.34 to<br>19,421.61)                        | 178.13<br>(105.90 to<br>272.45)                      | 121.39<br>(51.79 to<br>259.19)                         | 80.56<br>(32.78 to<br>176.65)                        | 171.99<br>(73.72 to<br>370.11)                         |
| Maternal hemorrhage                                      |                                                               |                                                               |                                                              |                                                               |                                                      |                                                        |                                                      |                                                        |
|                                                          | 1,401.38<br>(684.88 to<br>2,427.08)                           | 886.88<br>(315.84 to<br>2,083.19)                             | 588.04<br>(208.26 to<br>1,390.21)                            | 1,271.65<br>(466.97 to<br>2,848.93)                           | 17.54<br>(13.12 to<br>46.89)                         | 26.99<br>(6.49 to<br>40.62)                            | 11.64<br>(4.11 to<br>27.03)                          | 24.98<br>(9.35 to<br>56.80)                            |
| Maternal sepsis and other maternal infections            |                                                               |                                                               |                                                              |                                                               |                                                      |                                                        |                                                      |                                                        |
|                                                          | 7,396.72<br>(4,560.59 to<br>11,401.77)                        | 5,008.02<br>(2,170.09 to<br>10,744.72)                        | 3,305.61<br>(1,400.06 to<br>7,299.72)                        | 7,252.51<br>(3,060.09 to<br>15,671.46)                        | 134.10<br>(83.08 to<br>206.99)                       | 93.30<br>(41.10 to<br>200.66)                          | 61.64<br>(25.93 to<br>134.76)                        | 134.22<br>(56.27 to<br>288.41)                         |
| Maternal hypertensive disorders                          |                                                               |                                                               |                                                              |                                                               |                                                      |                                                        |                                                      |                                                        |
|                                                          | 1,456.35<br>(712.59 to<br>2,572.84)                           | 1,055.96<br>(371.59 to<br>2,493.53)                           | 679.15<br>(228.15 to<br>1,610.22)                            | 1,549.22<br>(533.40 to<br>3,612.31)                           | 27.89<br>(13.41 to<br>49.73)                         | 20.71<br>(7.36 to<br>48.28)                            | 13.33<br>(4.56 to<br>31.91)                          | 30.19<br>(10.27 to<br>69.12)                           |
| Maternal obstructed labor and uterine rupture            |                                                               |                                                               |                                                              |                                                               |                                                      |                                                        |                                                      |                                                        |
|                                                          | 975.34<br>(406.00 to<br>1,899.37)                             | 820.53<br>(245.18 to<br>1,995.39)                             | 543.21<br>(155.52 to<br>1,299.07)                            | 1,206.39<br>(365.43 to<br>3,034.07)                           | 18.63<br>(7.89 to<br>36.17)                          | 16.98<br>(4.98 to<br>39.17)                            | 10.65<br>(3.22 to<br>24.94)                          | 23.48<br>(7.38 to<br>57.13)                            |
| Maternal abortion, miscarriage, and ectopic pregnancy    |                                                               |                                                               |                                                              |                                                               |                                                      |                                                        |                                                      |                                                        |
|                                                          | 7,985.16<br>(4,772.35 to<br>12,236.82)                        | 5,959.86<br>(2,508.25 to<br>13,290.69)                        | 4,028.61<br>(1,632.80 to<br>9,007.34)                        | 8,694.35<br>(3,674.56 to<br>19,400.88)                        | 151.53<br>(92.26 to<br>230.14)                       | 115.00<br>(47.54 to<br>257.07)                         | 77.85<br>(31.96 to<br>169.99)                        | 166.24<br>(70.62 to<br>357.00)                         |
| Indirect maternal deaths                                 |                                                               |                                                               |                                                              |                                                               |                                                      |                                                        |                                                      |                                                        |
|                                                          | 944.56<br>(427.55 to<br>1,799.00)                             | 522.41<br>(184.03 to<br>1,248.30)                             | 349.18<br>(116.14 to<br>865.89)                              | 765.24<br>(269.73 to<br>1,802.84)                             | 17.57<br>(7.91 to<br>33.55)                          | 10.00<br>(3.54 to<br>23.82)                            | 6.69<br>(2.23 to<br>16.43)                           | 14.52<br>(5.16 to<br>34.32)                            |
| Late maternal deaths                                     |                                                               |                                                               |                                                              |                                                               |                                                      |                                                        |                                                      |                                                        |
|                                                          | 503.38<br>(253.31 to<br>815.47)                               | 2,572.21<br>(592.78 to<br>6,420.70)                           | 1,358.43<br>(96.23 to<br>3,980.09)                           | 4,623.97<br>(1,715.42 to<br>10,553.30)                        | 9.85<br>(4.97 to<br>15.84)                           | 53.15<br>(14.02 to<br>128.57)                          | 28.13<br>(1.67 to<br>78.93)                          | 93.73<br>(35.77 to<br>212.79)                          |
| Maternal deaths aggravated by HIV/AIDS                   |                                                               |                                                               |                                                              |                                                               |                                                      |                                                        |                                                      |                                                        |
|                                                          | 4,799.64<br>(2,654.08 to<br>7,634.65)                         | 3,389.94<br>(1,274.80 to<br>7,369.20)                         | 2,340.01<br>(910.47 to<br>5,388.52)                          | 4,859.08<br>(1,847.21 to<br>10,886.05)                        | 90.26<br>(49.14 to<br>145.30)                        | 65.57<br>(25.29 to<br>143.79)                          | 45.33<br>(17.86 to<br>102.46)                        | 93.07<br>(36.39 to<br>206.33)                          |
| Other maternal disorders                                 |                                                               |                                                               |                                                              |                                                               |                                                      |                                                        |                                                      |                                                        |
| <b>Congo</b>                                             |                                                               |                                                               |                                                              |                                                               |                                                      |                                                        |                                                      |                                                        |
| Cause                                                    | YLLs (actual counts)                                          |                                                               |                                                              |                                                               | Deaths (actual counts)                               |                                                        |                                                      |                                                        |
|                                                          | 2016                                                          | 2040 Forecast                                                 | 2040 Better Scenario                                         | 2040 Worse Scenario                                           | 2016                                                 | 2040 Forecast                                          | 2040 Better Scenario                                 | 2040 Worse Scenario                                    |
| Neonatal disorders                                       | 216,197.93<br>(147,269.32 to<br>306,300.27)                   | 88,014.32<br>(47,943.05 to<br>155,705.47)                     | 71,482.20<br>(38,801.17 to<br>128,050.39)                    | 162,496.63<br>(90,180.30 to<br>281,022.28)                    | 2,497.52<br>(1,701.26 to<br>3,539.01)                | 1,016.98<br>(554.01 to<br>1,798.91)                    | 825.97<br>(448.41 to<br>1,479.22)                    | 1,877.53<br>(1,042.08 to<br>3,246.77)                  |
| Neonatal preterm birth                                   | 71,298.66<br>(43,161.89 to<br>111,715.52)                     | 21,349.09<br>(10,873.38 to<br>37,450.32)                      | 17,697.61<br>(8,815.46 to<br>31,398.46)                      | 47,424.50<br>(24,476.31 to<br>85,158.92)                      | 823.55<br>(498.58 to<br>1,290.30)                    | 246.66<br>(125.66 to<br>432.75)                        | 204.47<br>(101.83 to<br>362.72)                      | 547.87<br>(282.83 to<br>983.62)                        |
| Neonatal encephalopathy due to birth asphyxia and trauma | 55,930.91<br>(31,177.52 to<br>89,521.00)                      | 21,521.37<br>(8,830.46 to<br>44,235.06)                       | 17,837.42<br>(7,211.95 to<br>35,938.72)                      | 36,285.61<br>(15,047.04 to<br>75,108.49)                      | 646.14<br>(360.28 to<br>1,034.07)                    | 248.70<br>(102.03 to<br>511.04)                        | 206.13<br>(83.38 to<br>415.15)                       | 1,877.53<br>(173.91 to<br>867.61)                      |
| Neonatal sepsis and other neonatal infections            | 52,344.13<br>(29,156.73 to<br>83,353.24)                      | 27,579.30<br>(13,831.99 to<br>49,438.20)                      | 22,480.26<br>(11,152.13 to<br>41,159.65)                     | 47,078.90<br>(23,962.46 to<br>86,683.84)                      | 604.68<br>(336.86 to<br>962.92)                      | 318.65<br>(159.86 to<br>571.29)                        | 259.74<br>(128.90 to<br>475.47)                      | 543.94<br>(276.82 to<br>1,001.42)                      |

|                                                                         |                                                      |                                                      |                                                      |                                                        |                                                   |                                                   |                                                   |                                                   |
|-------------------------------------------------------------------------|------------------------------------------------------|------------------------------------------------------|------------------------------------------------------|--------------------------------------------------------|---------------------------------------------------|---------------------------------------------------|---------------------------------------------------|---------------------------------------------------|
|                                                                         | 3,428.90<br>(1,619.50 to<br>6,024.87)                | 893.22<br>(327.26 to<br>1,909.53)                    | 687.98<br>(247.84 to<br>1,432.27)                    | 1,602.34<br>(582.08 to<br>3,432.23)                    | 39.61<br>(18.71 to<br>69.58)                      | 10.32<br>(3.78 to<br>22.06)                       | 7.95<br>(2.86 to<br>16.54)                        | 18.51<br>(6.73 to<br>39.65)                       |
| Hemolytic disease and other neonatal jaundice                           |                                                      |                                                      |                                                      |                                                        |                                                   |                                                   |                                                   |                                                   |
|                                                                         | 33,195.34<br>(18,261.02 to<br>55,081.75)             | 16,671.34<br>(7,134.61 to<br>35,309.70)              | 12,778.92<br>(5,392.56 to<br>26,529.23)              | 30,105.27<br>(12,796.82 to<br>63,213.61)               | 383.54<br>(211.01 to<br>636.21)                   | 192.65<br>(82.54 to<br>408.00)                    | 147.08<br>(62.32 to<br>306.52)                    | 347.89<br>(147.92 to<br>730.49)                   |
| Other neonatal disorders                                                |                                                      |                                                      |                                                      |                                                        |                                                   |                                                   |                                                   |                                                   |
| <b>Nutritional deficiencies</b>                                         | <b>54,680.50<br/>(29,056.93 to<br/>108,705.34)</b>   | <b>23,970.39<br/>(11,588.70 to<br/>57,129.70)</b>    | <b>19,601.58<br/>(9,307.45 to<br/>48,379.95)</b>     | <b>32,462.14<br/>(15,290.39 to<br/>75,645.99)</b>      | <b>1,011.45<br/>(570.72 to<br/>2,132.97)</b>      | <b>762.28<br/>(386.26 to<br/>2,017.85)</b>        | <b>673.25<br/>(344.33 to<br/>1,772.99)</b>        | <b>860.36<br/>(436.62 to<br/>2,233.99)</b>        |
|                                                                         | 49,752.37<br>(26,522.30 to<br>100,443.91)            | 17,687.37<br>(8,061.53 to<br>44,352.28)              | 14,284.82<br>(6,416.13 to<br>36,471.87)              | 25,058.59<br>(11,210.25 to<br>59,028.33)               | 858.34<br>(477.90 to<br>1,841.88)                 | 531.90<br>(264.35 to<br>1,457.12)                 | 467.07<br>(230.49 to<br>1,280.50)                 | 616.20<br>(299.15 to<br>1,644.24)                 |
| Protein-energy malnutrition                                             |                                                      |                                                      |                                                      |                                                        |                                                   |                                                   |                                                   |                                                   |
|                                                                         | 354.16<br>(19.44 to<br>1,373.65)                     | 797.27<br>(14.54 to<br>3,297.69)                     | 625.08<br>(11.08 to<br>2,670.01)                     | 1,076.37<br>(18.75 to<br>4,851.70)                     | 8.28<br>(0.49 to<br>30.11)                        | 25.71<br>(0.57 to<br>102.44)                      | 21.39<br>(0.41 to<br>84.31)                       | 30.04<br>(0.69 to<br>121.27)                      |
| Iodine deficiency                                                       |                                                      |                                                      |                                                      |                                                        |                                                   |                                                   |                                                   |                                                   |
|                                                                         | 241.39<br>(118.72 to<br>541.75)                      | 229.05<br>(89.62 to<br>578.98)                       | 201.20<br>(77.93 to<br>509.95)                       | 266.04<br>(107.55 to<br>666.28)                        | 4.55<br>(2.17 to<br>10.03)                        | 4.59<br>(1.80 to<br>11.30)                        | 4.06<br>(1.60 to<br>9.87)                         | 5.19<br>(2.14 to<br>12.93)                        |
| Dietary iron deficiency                                                 |                                                      |                                                      |                                                      |                                                        |                                                   |                                                   |                                                   |                                                   |
|                                                                         | 4,332.59<br>(1,969.56 to<br>8,722.79)                | 5,256.68<br>(2,089.05 to<br>13,408.20)               | 4,490.48<br>(1,777.08 to<br>11,174.82)               | 6,061.13<br>(2,471.27 to<br>15,230.23)                 | 140.28<br>(59.92 to<br>311.62)                    | 200.08<br>(85.75 to<br>531.46)                    | 180.72<br>(76.47 to<br>479.77)                    | 208.93<br>(87.90 to<br>557.71)                    |
| Other nutritional deficiencies                                          |                                                      |                                                      |                                                      |                                                        |                                                   |                                                   |                                                   |                                                   |
| <b>Other communicable, maternal, neonatal, and nutritional diseases</b> | <b>21,044.95<br/>(10,765.58 to<br/>48,168.55)</b>    | <b>12,901.89<br/>(6,691.14 to<br/>25,637.64)</b>     | <b>10,877.92<br/>(5,657.71 to<br/>22,312.97)</b>     | <b>17,632.05<br/>(8,805.40 to<br/>37,379.40)</b>       | <b>342.97<br/>(192.82 to<br/>656.42)</b>          | <b>298.52<br/>(169.72 to<br/>519.29)</b>          | <b>260.17<br/>(146.86 to<br/>460.92)</b>          | <b>360.90<br/>(199.63 to<br/>668.45)</b>          |
|                                                                         | 5,234.43<br>(2,436.85 to<br>10,602.63)               | 1,578.26<br>(689.76 to<br>3,200.40)                  | 1,378.71<br>(619.85 to<br>2,841.07)                  | 2,306.66<br>(976.23 to<br>5,124.12)                    | 67.14<br>(33.25 to<br>131.77)                     | 24.54<br>(12.48 to<br>45.07)                      | 21.70<br>(10.89 to<br>39.03)                      | 33.32<br>(15.89 to<br>67.03)                      |
| Sexually transmitted infections excluding HIV                           |                                                      |                                                      |                                                      |                                                        |                                                   |                                                   |                                                   |                                                   |
|                                                                         | 4,853.26<br>(2,016.26 to<br>10,296.90)               | 1,187.49<br>(411.99 to<br>2,789.64)                  | 1,031.34<br>(373.70 to<br>2,471.11)                  | 1,875.52<br>(624.13 to<br>4,555.20)                    | 58.14<br>(25.16 to<br>121.26)                     | 15.23<br>(5.98 to<br>33.89)                       | 13.27<br>(5.39 to<br>30.33)                       | 23.35<br>(8.65 to<br>54.97)                       |
| Syphilis                                                                |                                                      |                                                      |                                                      |                                                        |                                                   |                                                   |                                                   |                                                   |
|                                                                         | 74.38<br>(37.15 to<br>129.19)                        | 75.53<br>(31.69 to<br>154.91)                        | 67.08<br>(28.87 to<br>137.20)                        | 83.59<br>(36.11 to<br>169.17)                          | 1.74<br>(0.90 to<br>2.97)                         | 1.79<br>(0.84 to<br>3.49)                         | 1.62<br>(0.76 to<br>3.12)                         | 1.92<br>(0.90 to<br>3.70)                         |
| Chlamydial infection                                                    |                                                      |                                                      |                                                      |                                                        |                                                   |                                                   |                                                   |                                                   |
|                                                                         | 198.97<br>(98.97 to<br>346.51)                       | 205.67<br>(87.33 to<br>440.50)                       | 183.24<br>(77.85 to<br>389.63)                       | 225.88<br>(94.71 to<br>478.22)                         | 4.83<br>(2.54 to<br>8.25)                         | 5.01<br>(2.34 to<br>9.87)                         | 4.56<br>(2.15 to<br>9.02)                         | 5.34<br>(2.48 to<br>10.57)                        |
| Gonococcal infection                                                    |                                                      |                                                      |                                                      |                                                        |                                                   |                                                   |                                                   |                                                   |
|                                                                         | 107.82<br>(53.27 to<br>188.16)                       | 109.57<br>(44.85 to<br>226.43)                       | 97.05<br>(39.82 to<br>202.27)                        | 121.67<br>(50.34 to<br>251.39)                         | 2.44<br>(1.25 to<br>4.26)                         | 2.51<br>(1.12 to<br>4.96)                         | 2.26<br>(1.01 to<br>4.45)                         | 2.73<br>(1.23 to<br>5.38)                         |
| Other sexually transmitted infections                                   |                                                      |                                                      |                                                      |                                                        |                                                   |                                                   |                                                   |                                                   |
|                                                                         | 4,043.79<br>(2,830.21 to<br>5,709.90)                | 3,392.57<br>(1,951.75 to<br>5,674.43)                | 2,930.41<br>(1,680.19 to<br>4,917.30)                | 3,955.22<br>(2,288.74 to<br>6,547.64)                  | 90.12<br>(63.50 to<br>125.37)                     | 94.77<br>(57.00 to<br>146.98)                     | 84.01<br>(50.60 to<br>133.85)                     | 104.34<br>(63.89 to<br>162.08)                    |
| Acute hepatitis                                                         |                                                      |                                                      |                                                      |                                                        |                                                   |                                                   |                                                   |                                                   |
|                                                                         | 188.00<br>(17.33 to<br>500.88)                       | 71.68<br>(15.53 to<br>192.97)                        | 60.87<br>(13.27 to<br>167.61)                        | 107.00<br>(20.94 to<br>313.02)                         | 2.38<br>(0.34 to<br>6.01)                         | 1.24<br>(0.37 to<br>3.04)                         | 1.08<br>(0.31 to<br>2.68)                         | 1.67<br>(0.42 to<br>4.27)                         |
| Acute hepatitis A                                                       |                                                      |                                                      |                                                      |                                                        |                                                   |                                                   |                                                   |                                                   |
|                                                                         | 2,940.46<br>(1,962.72 to<br>4,204.60)                | 2,777.82<br>(1,535.17 to<br>4,717.72)                | 2,377.11<br>(1,296.95 to<br>4,082.67)                | 3,178.27<br>(1,796.62 to<br>5,431.93)                  | 71.28<br>(49.18 to<br>101.88)                     | 78.33<br>(45.42 to<br>124.64)                     | 68.47<br>(39.98 to<br>111.44)                     | 86.26<br>(51.60 to<br>136.46)                     |
| Acute hepatitis B                                                       |                                                      |                                                      |                                                      |                                                        |                                                   |                                                   |                                                   |                                                   |
|                                                                         | 89.75<br>(56.48 to<br>139.90)                        | 109.85<br>(59.81 to<br>197.24)                       | 103.55<br>(54.84 to<br>187.55)                       | 116.68<br>(64.87 to<br>207.09)                         | 2.40<br>(1.49 to<br>3.78)                         | 3.45<br>(1.90 to<br>5.85)                         | 3.31<br>(1.80 to<br>5.87)                         | 3.52<br>(1.97 to<br>5.97)                         |
| Acute hepatitis C                                                       |                                                      |                                                      |                                                      |                                                        |                                                   |                                                   |                                                   |                                                   |
|                                                                         | 825.58<br>(536.66 to<br>1,217.33)                    | 433.22<br>(237.16 to<br>709.94)                      | 389.07<br>(215.53 to<br>646.50)                      | 553.27<br>(302.20 to<br>904.20)                        | 14.07<br>(9.22 to<br>20.50)                       | 11.75<br>(6.70 to<br>18.97)                       | 11.14<br>(6.30 to<br>17.88)                       | 12.89<br>(7.55 to<br>20.26)                       |
| Acute hepatitis E                                                       |                                                      |                                                      |                                                      |                                                        |                                                   |                                                   |                                                   |                                                   |
|                                                                         | 11,766.73<br>(3,123.29 to<br>38,536.03)              | 7,931.06<br>(2,741.41 to<br>20,206.28)               | 6,568.81<br>(2,227.49 to<br>16,243.96)               | 11,370.16<br>(3,865.54 to<br>30,519.89)                | 185.70<br>(54.93 to<br>509.33)                    | 179.22<br>(64.11 to<br>375.96)                    | 154.46<br>(55.24 to<br>323.55)                    | 223.24<br>(79.25 to<br>495.76)                    |
| Other unspecified infectious diseases                                   |                                                      |                                                      |                                                      |                                                        |                                                   |                                                   |                                                   |                                                   |
| <b>Non-communicable diseases</b>                                        | <b>418,154.88<br/>(336,291.33 to<br/>505,093.42)</b> | <b>618,073.25<br/>(425,161.34 to<br/>899,207.58)</b> | <b>512,056.56<br/>(357,114.19 to<br/>725,329.50)</b> | <b>784,724.54<br/>(528,487.42 to<br/>1,148,527.07)</b> | <b>15,289.82<br/>(12,438.75 to<br/>18,312.64)</b> | <b>25,509.66<br/>(19,490.78 to<br/>33,183.59)</b> | <b>21,894.95<br/>(16,880.84 to<br/>28,026.42)</b> | <b>30,349.36<br/>(22,704.84 to<br/>40,504.39)</b> |

**Congo**

| Cause | YLLs (actual counts) |               |                      |                     | Deaths (actual counts) |               |                      |                     |
|-------|----------------------|---------------|----------------------|---------------------|------------------------|---------------|----------------------|---------------------|
|       | 2016                 | 2040 Forecast | 2040 Better Scenario | 2040 Worse Scenario | 2016                   | 2040 Forecast | 2040 Better Scenario | 2040 Worse Scenario |

|                                      |                                                  |                                                    |                                                    |                                                    |                                              |                                              |                                              |                                              |
|--------------------------------------|--------------------------------------------------|----------------------------------------------------|----------------------------------------------------|----------------------------------------------------|----------------------------------------------|----------------------------------------------|----------------------------------------------|----------------------------------------------|
| <b>Neoplasms</b>                     | <b>87,536.76</b><br>(66,994.89 to<br>111,138.24) | <b>173,695.17</b><br>(115,105.03 to<br>258,675.69) | <b>160,113.20</b><br>(106,409.13 to<br>231,846.33) | <b>188,714.49</b><br>(121,367.68 to<br>281,929.50) | <b>3,044.87</b><br>(2,398.47 to<br>3,765.59) | <b>6,532.81</b><br>(4,746.64 to<br>8,771.63) | <b>6,235.59</b><br>(4,615.08 to<br>8,257.70) | <b>6,725.69</b><br>(4,755.00 to<br>9,129.32) |
| Lip and oral cavity cancer           | 1,143.69<br>(849.56 to<br>1,522.77)              | 2,790.68<br>(1,230.63 to<br>5,878.09)              | 1,656.96<br>(824.25 to<br>3,227.92)                | 3,739.66<br>(1,591.40 to<br>8,201.79)              | 42.67<br>(32.61 to<br>55.16)                 | 102.74<br>(51.79 to<br>201.16)               | 65.05<br>(37.02 to<br>117.73)                | 129.42<br>(61.75 to<br>264.39)               |
| Nasopharynx cancer                   | 369.53<br>(258.54 to<br>482.91)                  | 920.31<br>(401.40 to<br>1,880.18)                  | 533.04<br>(255.57 to<br>1,010.60)                  | 1,300.31<br>(536.56 to<br>2,740.68)                | 10.99<br>(7.94 to<br>14.14)                  | 28.40<br>(13.47 to<br>53.95)                 | 16.94<br>(8.96 to<br>30.13)                  | 38.46<br>(16.97 to<br>75.62)                 |
| Other pharynx cancer                 | 511.12<br>(371.24 to<br>673.80)                  | 1,057.20<br>(494.88 to<br>1,945.07)                | 782.23<br>(398.36 to<br>1,414.22)                  | 1,161.41<br>(528.53 to<br>2,155.92)                | 18.31<br>(13.64 to<br>23.56)                 | 38.77<br>(20.19 to<br>69.08)                 | 29.61<br>(16.46 to<br>50.81)                 | 41.31<br>(20.94 to<br>74.58)                 |
| Esophageal cancer                    | 4,072.59<br>(3,134.17 to<br>5,284.69)            | 8,483.55<br>(4,036.97 to<br>15,356.29)             | 5,594.72<br>(2,901.55 to<br>9,482.23)              | 10,976.39<br>(4,935.73 to<br>20,994.31)            | 165.97<br>(129.16 to<br>211.63)              | 348.33<br>(179.28 to<br>605.86)              | 242.46<br>(136.59 to<br>396.93)              | 425.16<br>(206.14 to<br>764.50)              |
| Stomach cancer                       | 4,197.68<br>(3,214.46 to<br>5,537.95)            | 6,267.48<br>(3,955.39 to<br>9,740.65)              | 5,771.78<br>(3,652.40 to<br>8,820.26)              | 6,641.62<br>(4,162.06 to<br>10,388.45)             | 165.18<br>(129.42 to<br>205.93)              | 253.91<br>(177.74 to<br>363.66)              | 241.63<br>(170.25 to<br>344.28)              | 256.92<br>(177.82 to<br>372.43)              |
| Colon and rectum cancer              | 5,468.26<br>(4,011.38 to<br>7,060.98)            | 13,912.50<br>(8,263.42 to<br>22,114.90)            | 13,208.75<br>(7,978.89 to<br>20,216.70)            | 13,717.62<br>(8,063.91 to<br>21,761.60)            | 220.70<br>(167.32 to<br>278.13)              | 587.82<br>(378.48 to<br>866.27)              | 582.32<br>(385.51 to<br>859.93)              | 550.61<br>(353.41 to<br>824.42)              |
| Liver cancer                         | 9,037.21<br>(6,315.68 to<br>12,126.74)           | 18,659.92<br>(11,230.26 to<br>28,576.04)           | 17,178.19<br>(10,400.14 to<br>25,867.04)           | 21,022.93<br>(12,307.06 to<br>33,245.64)           | 334.02<br>(243.77 to<br>433.97)              | 733.84<br>(479.61 to<br>1,062.75)            | 697.39<br>(454.44 to<br>994.97)              | 787.04<br>(497.73 to<br>1,182.73)            |
| Liver cancer due to hepatitis B      | 3,592.86<br>(2,437.23 to<br>5,055.61)            | 7,201.73<br>(4,185.20 to<br>11,223.52)             | 6,771.86<br>(3,964.93 to<br>10,346.63)             | 8,081.31<br>(4,554.65 to<br>13,005.86)             | 119.61<br>(83.85 to<br>165.41)               | 255.27<br>(160.12 to<br>378.19)              | 246.35<br>(156.58 to<br>358.98)              | 274.43<br>(168.00 to<br>427.31)              |
| Liver cancer due to hepatitis C      | 2,690.00<br>(1,929.29 to<br>3,562.52)            | 5,760.46<br>(3,528.37 to<br>8,752.69)              | 5,502.34<br>(3,400.48 to<br>8,256.74)              | 6,238.06<br>(3,688.66 to<br>9,926.41)              | 115.38<br>(84.72 to<br>148.56)               | 258.73<br>(171.18 to<br>369.35)              | 255.79<br>(169.53 to<br>355.49)              | 266.13<br>(172.51 to<br>392.38)              |
| Liver cancer due to alcohol use      | 1,011.19<br>(693.85 to<br>1,383.08)              | 2,305.75<br>(1,333.74 to<br>3,631.61)              | 1,741.07<br>(1,014.19 to<br>2,709.58)              | 2,833.04<br>(1,582.96 to<br>4,740.91)              | 39.93<br>(27.78 to<br>53.15)                 | 92.59<br>(57.61 to<br>137.50)                | 73.37<br>(46.62 to<br>107.67)                | 108.31<br>(64.87 to<br>171.43)               |
| Liver cancer due to other causes     | 1,743.17<br>(1,161.52 to<br>2,397.45)            | 3,391.98<br>(1,917.75 to<br>5,452.12)              | 3,162.91<br>(1,816.01 to<br>4,984.26)              | 3,870.51<br>(2,112.00 to<br>6,341.12)              | 59.09<br>(41.41 to<br>79.82)                 | 127.26<br>(76.29 to<br>194.09)               | 121.88<br>(74.65 to<br>180.93)               | 138.18<br>(79.32 to<br>221.19)               |
| Gallbladder and biliary tract cancer | 784.93<br>(486.58 to<br>1,159.42)                | 1,142.75<br>(694.16 to<br>1,758.89)                | 1,213.22<br>(735.19 to<br>1,880.81)                | 1,046.89<br>(643.45 to<br>1,601.40)                | 33.48<br>(21.65 to<br>48.16)                 | 49.44<br>(33.28 to<br>69.63)                 | 54.03<br>(36.12 to<br>76.42)                 | 43.39<br>(29.54 to<br>60.60)                 |
| Pancreatic cancer                    | 2,866.03<br>(2,084.41 to<br>3,892.60)            | 6,847.84<br>(4,389.27 to<br>10,428.87)             | 6,922.48<br>(4,497.55 to<br>10,365.33)             | 6,644.35<br>(4,219.03 to<br>10,284.98)             | 122.35<br>(91.39 to<br>162.28)               | 295.27<br>(208.23 to<br>410.75)              | 308.69<br>(219.11 to<br>426.52)              | 273.22<br>(187.96 to<br>387.66)              |
| Larynx cancer                        | 742.90<br>(556.22 to<br>956.44)                  | 1,548.31<br>(645.26 to<br>3,028.64)                | 919.57<br>(415.23 to<br>1,808.47)                  | 2,033.79<br>(857.25 to<br>4,111.54)                | 29.15<br>(22.29 to<br>37.39)                 | 61.37<br>(28.56 to<br>113.02)                | 38.01<br>(19.62 to<br>69.00)                 | 77.30<br>(35.14 to<br>148.84)                |
| Tracheal, bronchus, and lung cancer  | 6,066.00<br>(4,643.95 to<br>8,026.23)            | 11,841.28<br>(5,831.72 to<br>24,022.61)            | 7,643.60<br>(4,122.75 to<br>14,462.15)             | 18,632.66<br>(8,466.35 to<br>39,458.95)            | 244.13<br>(187.85 to<br>315.54)              | 473.15<br>(249.87 to<br>888.54)              | 320.77<br>(188.12 to<br>554.34)              | 704.87<br>(348.23 to<br>1,354.35)            |
| Malignant skin melanoma              | 533.66<br>(384.05 to<br>723.87)                  | 1,108.88<br>(713.13 to<br>1,604.73)                | 1,235.21<br>(792.66 to<br>1,804.08)                | 991.03<br>(648.87 to<br>1,405.98)                  | 17.77<br>(13.17 to<br>23.44)                 | 39.08<br>(27.96 to<br>51.90)                 | 44.90<br>(31.64 to<br>60.94)                 | 33.35<br>(24.05 to<br>43.93)                 |
| Non-melanoma skin cancer             | 441.43<br>(327.26 to<br>585.00)                  | 1,004.73<br>(704.97 to<br>1,369.07)                | 985.79<br>(679.10 to<br>1,364.26)                  | 987.61<br>(709.58 to<br>1,319.21)                  | 19.33<br>(14.63 to<br>25.69)                 | 48.72<br>(38.07 to<br>61.91)                 | 49.68<br>(37.81 to<br>63.65)                 | 45.16<br>(35.71 to<br>56.86)                 |
| Breast cancer                        | 10,397.63<br>(6,435.66 to<br>16,070.92)          | 24,203.02<br>(13,211.06 to<br>44,358.49)           | 22,320.50<br>(12,289.37 to<br>39,398.86)           | 24,708.86<br>(13,148.70 to<br>45,217.17)           | 328.38<br>(216.13 to<br>493.47)              | 777.52<br>(463.20 to<br>1,288.67)            | 734.84<br>(447.51 to<br>1,187.95)            | 769.81<br>(445.98 to<br>1,290.13)            |
| Cervical cancer                      | 11,060.90<br>(5,723.64 to<br>16,991.26)          | 18,565.76<br>(8,378.93 to<br>34,892.63)            | 16,614.32<br>(7,659.36 to<br>30,838.10)            | 20,216.77<br>(8,769.11 to<br>39,213.32)            | 342.18<br>(185.95 to<br>505.03)              | 567.91<br>(279.19 to<br>988.66)              | 519.15<br>(265.90 to<br>883.52)              | 599.68<br>(282.77 to<br>1,086.32)            |
| Uterine cancer                       | 1,335.82<br>(872.02 to<br>1,863.16)              | 2,629.32<br>(1,646.75 to<br>3,887.81)              | 2,463.07<br>(1,551.32 to<br>3,675.26)              | 2,680.83<br>(1,673.21 to<br>3,872.16)              | 52.03<br>(35.55 to<br>71.18)                 | 102.67<br>(70.33 to<br>141.04)               | 98.47<br>(67.61 to<br>136.59)                | 101.11<br>(68.96 to<br>137.56)               |
| Ovarian cancer                       | 2,167.43<br>(1,263.39 to<br>4,163.65)            | 4,969.85<br>(2,688.56 to<br>10,078.99)             | 5,374.26<br>(2,873.95 to<br>10,748.12)             | 4,635.51<br>(2,493.43 to<br>9,383.86)              | 74.76<br>(45.03 to<br>135.37)                | 171.64<br>(97.52 to<br>326.14)               | 188.96<br>(107.41 to<br>351.41)              | 155.93<br>(88.93 to<br>296.66)               |

| Prostate cancer                 | 3,314.40<br>(1,774.50 to<br>4,857.62)                            | 8,926.83<br>(4,911.34 to<br>12,466.55)                           | 9,828.22<br>(5,379.57 to<br>15,915.99)                          | 7,797.71<br>(4,258.99 to<br>10,956.62)                           | 203.98<br>(111.06 to<br>297.82)                            | 598.24<br>(344.73 to<br>799.84)                             | 679.62<br>(393.21 to<br>903.27)                            | 498.53<br>(280.73 to<br>670.08)                              |
|---------------------------------|------------------------------------------------------------------|------------------------------------------------------------------|-----------------------------------------------------------------|------------------------------------------------------------------|------------------------------------------------------------|-------------------------------------------------------------|------------------------------------------------------------|--------------------------------------------------------------|
| Testicular cancer               | 187.21<br>(113.20 to<br>283.59)                                  | 284.89<br>(164.18 to<br>465.34)                                  | 271.87<br>(155.22 to<br>444.79)                                 | 297.98<br>(169.28 to<br>480.11)                                  | 3.81<br>(2.39 to<br>5.65)                                  | 6.19<br>(3.86 to<br>9.60)                                   | 6.00<br>(3.69 to<br>9.23)                                  | 6.33<br>(3.87 to<br>9.75)                                    |
| <b>Congo</b>                    |                                                                  |                                                                  |                                                                 |                                                                  |                                                            |                                                             |                                                            |                                                              |
| Cause                           | YLLs (actual counts)                                             |                                                                  |                                                                 |                                                                  | Deaths (actual counts)                                     |                                                             |                                                            |                                                              |
|                                 | 2016                                                             | 2040 Forecast                                                    | 2040 Better Scenario                                            | 2040 Worse Scenario                                              | 2016                                                       | 2040 Forecast                                               | 2040 Better Scenario                                       | 2040 Worse Scenario                                          |
| Kidney cancer                   | 1,010.78<br>(732.06 to<br>1,349.97)                              | 2,059.32<br>(1,392.41 to<br>2,887.24)                            | 2,223.36<br>(1,501.98 to<br>3,124.15)                           | 1,973.31<br>(1,354.43 to<br>2,806.22)                            | 31.98<br>(24.29 to<br>40.06)                               | 76.76<br>(56.34 to<br>100.51)                               | 85.26<br>(62.44 to<br>111.90)                              | 68.63<br>(51.26 to<br>90.39)                                 |
| Bladder cancer                  | 1,321.60<br>(1,012.60 to<br>1,713.92)                            | 2,657.63<br>(1,768.76 to<br>3,833.65)                            | 2,522.69<br>(1,718.88 to<br>3,596.74)                           | 2,700.41<br>(1,781.62 to<br>3,953.16)                            | 64.96<br>(51.17 to<br>81.91)                               | 136.95<br>(100.95 to<br>181.28)                             | 136.63<br>(101.43 to<br>178.80)                            | 130.17<br>(95.28 to<br>178.31)                               |
| Brain and nervous system cancer | 3,207.55<br>(2,082.82 to<br>5,647.26)                            | 5,597.92<br>(3,407.97 to<br>9,612.28)                            | 5,874.61<br>(3,553.34 to<br>10,062.93)                          | 5,749.92<br>(3,525.75 to<br>10,010.71)                           | 70.86<br>(47.97 to<br>120.19)                              | 148.22<br>(95.54 to<br>238.39)                              | 158.52<br>(101.96 to<br>255.72)                            | 142.00<br>(92.78 to<br>233.34)                               |
| Thyroid cancer                  | 465.40<br>(330.74 to<br>631.96)                                  | 815.53<br>(512.58 to<br>1,211.62)                                | 759.93<br>(484.78 to<br>1,140.31)                               | 882.79<br>(558.61 to<br>1,340.31)                                | 17.39<br>(12.74 to<br>23.04)                               | 31.65<br>(22.31 to<br>42.99)                                | 30.34<br>(21.18 to<br>41.58)                               | 32.77<br>(23.10 to<br>45.46)                                 |
| Mesothelioma                    | 193.10<br>(139.25 to<br>262.27)                                  | 390.62<br>(251.94 to<br>578.48)                                  | 388.62<br>(247.83 to<br>580.72)                                 | 383.94<br>(250.87 to<br>562.92)                                  | 6.74<br>(4.95 to<br>9.15)                                  | 14.18<br>(10.01 to<br>19.90)                                | 14.48<br>(10.03 to<br>20.75)                               | 13.43<br>(9.57 to<br>18.72)                                  |
| Hodgkin lymphoma                | 523.80<br>(336.02 to<br>695.09)                                  | 644.13<br>(362.27 to<br>1,016.17)                                | 561.60<br>(312.70 to<br>905.84)                                 | 736.59<br>(424.85 to<br>1,164.13)                                | 12.16<br>(7.76 to<br>16.23)                                | 16.62<br>(9.78 to<br>25.24)                                 | 14.77<br>(8.52 to<br>22.70)                                | 18.21<br>(10.95 to<br>27.06)                                 |
| Non-Hodgkin lymphoma            | 3,364.23<br>(2,544.43 to<br>4,547.39)                            | 6,197.71<br>(4,171.58 to<br>8,972.58)                            | 6,559.30<br>(4,415.48 to<br>9,566.75)                           | 6,147.91<br>(4,202.31 to<br>8,360.23)                            | 94.31<br>(72.25 to<br>125.20)                              | 202.98<br>(148.04 to<br>275.74)                             | 220.87<br>(159.67 to<br>299.39)                            | 188.89<br>(137.66 to<br>257.11)                              |
| Multiple myeloma                | 966.74<br>(638.80 to<br>1,430.67)                                | 2,414.87<br>(1,454.20 to<br>3,780.43)                            | 2,602.75<br>(1,535.55 to<br>4,066.48)                           | 2,262.41<br>(1,257.02 to<br>3,511.55)                            | 38.22<br>(26.07 to<br>55.32)                               | 97.41<br>(63.41 to<br>143.39)                               | 107.45<br>(68.96 to<br>157.78)                             | 88.11<br>(56.97 to<br>129.97)                                |
| Leukemia                        | 4,250.45<br>(3,143.01 to<br>5,693.55)                            | 5,518.05<br>(3,635.41 to<br>8,270.83)                            | 5,508.98<br>(3,650.56 to<br>8,156.17)                           | 6,157.22<br>(4,119.07 to<br>9,151.24)                            | 89.80<br>(68.28 to<br>114.56)                              | 150.73<br>(104.02 to<br>208.63)                             | 153.33<br>(104.35 to<br>212.83)                            | 155.62<br>(108.57 to<br>217.26)                              |
| Acute lymphoid leukemia         | 1,195.20<br>(856.30 to<br>1,822.60)                              | 1,215.25<br>(798.05 to<br>1,832.52)                              | 1,241.57<br>(814.77 to<br>1,865.43)                             | 1,417.40<br>(923.05 to<br>2,152.47)                              | 19.36<br>(14.53 to<br>27.51)                               | 34.46<br>(16.41 to<br>35.57)                                | 25.17<br>(16.66 to<br>36.54)                               | 26.75<br>(17.80 to<br>39.29)                                 |
| Chronic lymphoid leukemia       | 93.21<br>(64.29 to<br>129.59)                                    | 170.50<br>(110.10 to<br>257.39)                                  | 170.66<br>(107.17 to<br>259.44)                                 | 171.25<br>(107.73 to<br>259.54)                                  | 3.84<br>(2.68 to<br>5.16)                                  | 7.44<br>(5.03 to<br>10.27)                                  | 7.73<br>(5.11 to<br>10.64)                                 | 7.07<br>(4.80 to<br>9.81)                                    |
| Acute myeloid leukemia          | 1,224.57<br>(865.43 to<br>1,726.68)                              | 2,086.40<br>(1,337.52 to<br>3,172.86)                            | 2,200.41<br>(1,428.19 to<br>3,306.64)                           | 2,195.96<br>(1,410.19 to<br>3,353.76)                            | 26.01<br>(19.07 to<br>34.99)                               | 55.52<br>(37.55 to<br>80.26)                                | 59.79<br>(40.64 to<br>85.92)                               | 54.53<br>(36.53 to<br>78.58)                                 |
| Chronic myeloid leukemia        | 293.83<br>(201.61 to<br>428.66)                                  | 377.70<br>(214.53 to<br>604.07)                                  | 368.06<br>(207.33 to<br>590.73)                                 | 396.33<br>(222.06 to<br>642.85)                                  | 8.27<br>(5.68 to<br>11.84)                                 | 11.69<br>(7.11 to<br>17.96)                                 | 11.71<br>(7.08 to<br>17.92)                                | 11.76<br>(7.15 to<br>18.19)                                  |
| Other leukemia                  | 1,443.63<br>(924.33 to<br>2,122.62)                              | 1,668.21<br>(929.76 to<br>2,515.28)                              | 1,528.27<br>(847.56 to<br>2,320.33)                             | 1,976.28<br>(1,110.79 to<br>3,013.04)                            | 32.33<br>(20.55 to<br>42.73)                               | 51.62<br>(30.47 to<br>71.36)                                | 48.93<br>(28.35 to<br>67.90)                               | 55.52<br>(33.11 to<br>77.51)                                 |
| Other neoplasms                 | 7,534.72<br>(5,647.38 to<br>10,292.85)                           | 12,234.29<br>(8,469.65 to<br>17,709.81)                          | 12,593.57<br>(8,597.21 to<br>18,280.27)                         | 12,486.04<br>(8,745.06 to<br>17,986.04)                          | 189.27<br>(145.97 to<br>241.16)                            | 372.30<br>(283.55 to<br>485.08)                             | 395.44<br>(295.81 to<br>519.02)                            | 350.27<br>(270.08 to<br>455.52)                              |
| <b>Cardiovascular diseases</b>  | <b>135,280.26</b><br><b>(107,856.18 to</b><br><b>164,742.98)</b> | <b>177,122.24</b><br><b>(106,698.12 to</b><br><b>292,432.15)</b> | <b>117,348.27</b><br><b>(73,611.42 to</b><br><b>185,808.96)</b> | <b>277,297.56</b><br><b>(158,982.21 to</b><br><b>481,632.46)</b> | <b>6,403.54</b><br><b>(5,206.47 to</b><br><b>7,632.63)</b> | <b>8,763.92</b><br><b>(5,965.73 to</b><br><b>13,063.63)</b> | <b>6,281.18</b><br><b>(4,365.43 to</b><br><b>9,086.36)</b> | <b>12,496.75</b><br><b>(8,097.74 to</b><br><b>19,395.12)</b> |
| Rheumatic heart disease         | 3,407.37<br>(2,433.29 to<br>4,556.12)                            | 2,711.42<br>(1,606.85 to<br>4,429.01)                            | 2,255.31<br>(1,321.25 to<br>3,693.70)                           | 3,164.62<br>(1,903.78 to<br>5,184.65)                            | 109.22<br>(78.85 to<br>144.19)                             | 97.27<br>(64.12 to<br>145.40)                               | 83.56<br>(53.78 to<br>124.58)                              | 107.01<br>(70.94 to<br>161.20)                               |
| Ischemic heart disease          | 55,067.87<br>(43,661.39 to<br>67,490.66)                         | 65,886.23<br>(34,089.14 to<br>118,972.58)                        | 39,054.90<br>(20,422.08 to<br>72,620.46)                        | 115,889.91<br>(58,333.83 to<br>214,932.81)                       | 2,781.48<br>(2,250.78 to<br>3,350.07)                      | 3,420.62<br>(1,994.09 to<br>6,086.04)                       | 2,234.59<br>(1,295.20 to<br>3,833.35)                      | 5,419.87<br>(2,979.50 to<br>9,485.45)                        |

|                                               |                                                               |                                                               |                                                               |                                                               |                                                        |                                                          |                                                        |                                                          |
|-----------------------------------------------|---------------------------------------------------------------|---------------------------------------------------------------|---------------------------------------------------------------|---------------------------------------------------------------|--------------------------------------------------------|----------------------------------------------------------|--------------------------------------------------------|----------------------------------------------------------|
| Stroke                                        | 45,501.07<br>(35,321.01 to<br>56,557.88)                      | 49,204.61<br>(25,474.15 to<br>90,452.76)                      | 27,107.07<br>(14,976.87 to<br>48,362.07)                      | 90,214.17<br>(44,462.42 to<br>177,304.27)                     | 2,138.86<br>(1,678.22 to<br>2,634.78)                  | 2,427.11<br>(1,446.29 to<br>4,259.31)                    | 1,518.75<br>(936.25 to<br>2,637.41)                    | 3,965.80<br>(2,240.47 to<br>7,154.90)                    |
| Ischemic stroke                               | 14,520.47<br>(11,303.73 to<br>18,037.81)                      | 14,852.16<br>(8,026.65 to<br>29,313.14)                       | 9,919.52<br>(5,417.37 to<br>20,861.94)                        | 23,061.22<br>(12,188.75 to<br>45,613.24)                      | 876.09<br>(689.39 to<br>1,086.17)                      | 958.82<br>(552.00 to<br>2,028.65)                        | 705.69<br>(412.05 to<br>1,548.14)                      | 1,335.21<br>(749.35 to<br>2,905.11)                      |
| Intracerebral hemorrhage                      | 30,980.60<br>(23,810.06 to<br>38,814.21)                      | 34,352.45<br>(15,675.07 to<br>69,131.45)                      | 17,187.55<br>(8,741.38 to<br>31,946.78)                       | 67,152.95<br>(29,615.30 to<br>140,867.93)                     | 1,262.76<br>(984.43 to<br>1,559.83)                    | 1,468.29<br>(785.12 to<br>2,687.59)                      | 813.06<br>(473.96 to<br>1,400.68)                      | 2,630.60<br>(1,334.09 to<br>5,134.67)                    |
| Hypertensive heart disease                    | 11,558.45<br>(7,246.01 to<br>15,567.11)                       | 22,426.21<br>(10,932.01 to<br>48,039.05)                      | 15,607.75<br>(7,991.01 to<br>31,003.56)                       | 28,478.51<br>(12,869.47 to<br>62,572.36)                      | 583.06<br>(373.35 to<br>766.62)                        | 1,156.79<br>(616.91 to<br>2,286.79)                      | 856.76<br>(488.89 to<br>1,525.46)                      | 1,366.91<br>(685.56 to<br>2,885.96)                      |
| Cardiomyopathy and myocarditis                | 4,049.77<br>(2,931.77 to<br>5,551.63)                         | 6,632.38<br>(4,011.86 to<br>10,690.78)                        | 6,452.47<br>(3,930.71 to<br>10,322.39)                        | 6,889.87<br>(4,227.40 to<br>11,237.08)                        | 123.18<br>(91.07 to<br>166.97)                         | 236.67<br>(157.41 to<br>351.71)                          | 239.62<br>(160.30 to<br>354.17)                        | 228.29<br>(150.69 to<br>345.37)                          |
| Myocarditis                                   | 524.28<br>(305.62 to<br>1,001.21)                             | 655.39<br>(337.75 to<br>1,225.14)                             | 608.91<br>(324.34 to<br>1,169.16)                             | 691.69<br>(376.71 to<br>1,325.71)                             | 11.81<br>(7.21 to<br>21.56)                            | 17.77<br>(9.64 to<br>32.91)                              | 17.66<br>(9.49 to<br>32.39)                            | 17.77<br>(9.96 to<br>32.84)                              |
| <b>Congo</b>                                  |                                                               |                                                               |                                                               |                                                               |                                                        |                                                          |                                                        |                                                          |
| Cause                                         | YLLs (actual counts)                                          |                                                               |                                                               |                                                               | Deaths (actual counts)                                 |                                                          |                                                        |                                                          |
|                                               | 2016                                                          | 2040 Forecast                                                 | 2040 Better Scenario                                          | 2040 Worse Scenario                                           | 2016                                                   | 2040 Forecast                                            | 2040 Better Scenario                                   | 2040 Worse Scenario                                      |
| Alcoholic cardiomyopathy                      | 310.80<br>(191.56 to<br>510.54)                               | 586.26<br>(319.09 to<br>1,002.12)                             | 480.10<br>(259.60 to<br>811.23)                               | 623.38<br>(343.85 to<br>1,055.21)                             | 10.28<br>(6.36 to<br>16.60)                            | 19.92<br>(11.60 to<br>32.50)                             | 17.09<br>(9.74 to<br>28.57)                            | 20.29<br>(12.00 to<br>32.77)                             |
| Other cardiomyopathy                          | 3,214.68<br>(2,341.23 to<br>4,308.61)                         | 5,410.73<br>(3,235.60 to<br>9,238.03)                         | 5,363.45<br>(3,219.83 to<br>8,943.36)                         | 5,574.80<br>(3,271.19 to<br>9,581.25)                         | 101.08<br>(74.97 to<br>135.04)                         | 198.99<br>(128.71 to<br>304.81)                          | 204.87<br>(133.95 to<br>307.80)                        | 190.23<br>(121.40 to<br>292.82)                          |
| Atrial fibrillation and flutter               | 632.77<br>(460.26 to<br>844.99)                               | 1,382.69<br>(980.82 to<br>1,890.84)                           | 1,391.29<br>(997.86 to<br>1,887.49)                           | 1,241.06<br>(852.77 to<br>1,685.86)                           | 51.49<br>(36.88 to<br>69.38)                           | 119.11<br>(83.09 to<br>162.20)                           | 127.28<br>(89.91 to<br>172.37)                         | 99.03<br>(66.10 to<br>137.77)                            |
| Aortic aneurysm                               | 1,233.12<br>(868.53 to<br>1,654.60)                           | 2,443.48<br>(1,492.47 to<br>4,027.50)                         | 2,379.66<br>(1,472.28 to<br>3,891.22)                         | 2,385.44<br>(1,443.57 to<br>3,976.76)                         | 56.13<br>(41.30 to<br>75.08)                           | 117.79<br>(81.05 to<br>173.83)                           | 120.86<br>(84.16 to<br>175.94)                         | 108.45<br>(72.67 to<br>162.15)                           |
| Peripheral artery disease                     | 132.22<br>(58.62 to<br>198.06)                                | 409.87<br>(175.06 to<br>641.23)                               | 442.98<br>(185.60 to<br>698.48)                               | 365.89<br>(155.87 to<br>579.55)                               | 8.51<br>(3.84 to<br>12.65)                             | 28.48<br>(12.54 to<br>42.88)                             | 32.82<br>(14.36 to<br>49.39)                           | 23.52<br>(10.10 to<br>35.96)                             |
| Endocarditis                                  | 1,846.87<br>(1,327.16 to<br>2,394.34)                         | 3,285.76<br>(1,933.73 to<br>5,481.65)                         | 3,124.70<br>(1,821.58 to<br>5,103.13)                         | 3,470.44<br>(2,031.70 to<br>5,817.43)                         | 63.33<br>(46.03 to<br>82.24)                           | 126.52<br>(82.37 to<br>186.29)                           | 125.77<br>(81.20 to<br>183.90)                         | 123.19<br>(79.56 to<br>186.93)                           |
| Other cardiovascular and circulatory diseases | 11,860.75<br>(8,048.09 to<br>17,085.42)                       | 22,739.59<br>(13,609.64 to<br>36,833.98)                      | 19,532.14<br>(11,920.60 to<br>31,220.58)                      | 25,197.65<br>(15,094.91 to<br>41,306.64)                      | 488.30<br>(334.49 to<br>694.40)                        | 1,033.55<br>(692.13 to<br>1,512.07)                      | 941.17<br>(637.61 to<br>1,370.16)                      | 1,054.69<br>(691.75 to<br>1,574.54)                      |
| <b>Chronic respiratory diseases</b>           | <b>21,235.45</b><br><b>(16,042.49 to</b><br><b>26,771.51)</b> | <b>22,975.93</b><br><b>(14,209.98 to</b><br><b>36,106.68)</b> | <b>15,698.14</b><br><b>(10,396.82 to</b><br><b>23,086.09)</b> | <b>35,935.00</b><br><b>(20,509.48 to</b><br><b>62,042.26)</b> | <b>920.03</b><br><b>(716.61 to</b><br><b>1,137.76)</b> | <b>1,068.84</b><br><b>(740.52 to</b><br><b>1,539.85)</b> | <b>773.73</b><br><b>(565.22 to</b><br><b>1,046.09)</b> | <b>1,550.59</b><br><b>(973.11 to</b><br><b>2,427.48)</b> |
| Chronic obstructive pulmonary disease         | 13,295.70<br>(10,010.44 to<br>16,846.20)                      | 15,745.58<br>(8,864.16 to<br>26,927.52)                       | 9,352.60<br>(5,643.07 to<br>14,952.66)                        | 27,167.75<br>(13,877.70 to<br>41,551.21)                      | 665.59<br>(512.77 to<br>830.86)                        | 797.57<br>(507.52 to<br>1,228.81)                        | 524.97<br>(360.60 to<br>757.66)                        | 1,247.86<br>(715.97 to<br>2,126.82)                      |
| Pneumoconiosis                                | 58.42<br>(40.08 to<br>80.02)                                  | 91.23<br>(62.33 to<br>125.27)                                 | 86.83<br>(57.63 to<br>120.64)                                 | 93.21<br>(64.44 to<br>127.32)                                 | 2.71<br>(1.87 to<br>3.69)                              | 4.65<br>(3.35 to<br>6.04)                                | 4.58<br>(3.27 to<br>6.00)                              | 4.48<br>(3.16 to<br>5.84)                                |
| Silicosis                                     | 7.62<br>(4.09 to<br>12.55)                                    | 8.67<br>(4.45 to<br>14.54)                                    | 8.33<br>(4.02 to<br>14.42)                                    | 8.61<br>(4.53 to<br>14.40)                                    | 0.40<br>(0.21 to<br>0.65)                              | 0.49<br>(0.26 to<br>0.82)                                | 0.49<br>(0.25 to<br>0.83)                              | 0.47<br>(0.25 to<br>0.77)                                |
| Asbestosis                                    | 16.04<br>(8.68 to<br>24.93)                                   | 30.69<br>(16.11 to<br>50.01)                                  | 31.75<br>(16.60 to<br>52.50)                                  | 29.14<br>(15.41 to<br>46.51)                                  | 0.64<br>(0.29 to<br>1.07)                              | 1.40<br>(0.69 to<br>2.26)                                | 1.51<br>(0.72 to<br>2.48)                              | 1.25<br>(0.61 to<br>1.96)                                |
| Coal workers pneumoconiosis                   | 3.77<br>(1.72 to<br>6.69)                                     | 5.33<br>(2.43 to<br>10.23)                                    | 4.24<br>(1.88 to<br>8.04)                                     | 6.32<br>(2.82 to<br>12.06)                                    | 0.19<br>(0.09 to<br>0.33)                              | 0.28<br>(0.14 to<br>0.51)                                | 0.23<br>(0.11 to<br>0.42)                              | 0.32<br>(0.15 to<br>0.58)                                |
| Other pneumoconiosis                          | 30.99<br>(20.48 to<br>44.18)                                  | 46.55<br>(29.22 to<br>68.66)                                  | 42.50<br>(26.05 to<br>63.42)                                  | 49.14<br>(30.53 to<br>71.30)                                  | 1.48<br>(0.97 to<br>2.10)                              | 2.48<br>(1.57 to<br>3.56)                                | 2.36<br>(1.48 to<br>3.39)                              | 2.45<br>(1.58 to<br>3.47)                                |



|                                                                |                                                               |                                                               |                                                               |                                                               |                                                          |                                                            |                                                            |                                                            |
|----------------------------------------------------------------|---------------------------------------------------------------|---------------------------------------------------------------|---------------------------------------------------------------|---------------------------------------------------------------|----------------------------------------------------------|------------------------------------------------------------|------------------------------------------------------------|------------------------------------------------------------|
| Asthma                                                         | 6,771.50<br>(4,549.75 to<br>9,019.84)                         | 5,323.29<br>(3,168.99 to<br>8,509.38)                         | 4,371.64<br>(2,675.51 to<br>6,831.51)                         | 6,845.63<br>(3,981.66 to<br>11,006.44)                        | 218.73<br>(155.23 to<br>288.19)                          | 199.69<br>(131.12 to<br>295.56)                            | 171.00<br>(114.84 to<br>247.57)                            | 237.23<br>(150.45 to<br>364.47)                            |
| Interstitial lung disease and pulmonary sarcoidosis            | 442.43<br>(266.00 to<br>657.19)                               | 938.88<br>(565.87 to<br>1,397.37)                             | 1,062.11<br>(638.45 to<br>1,574.70)                           | 828.19<br>(482.59 to<br>1,217.81)                             | 17.78<br>(10.95 to<br>25.44)                             | 41.02<br>(25.78 to<br>56.20)                               | 48.05<br>(29.80 to<br>66.43)                               | 34.07<br>(20.86 to<br>46.84)                               |
| Other chronic respiratory diseases                             | 667.39<br>(379.61 to<br>1,056.50)                             | 876.94<br>(508.23 to<br>1,359.93)                             | 824.97<br>(477.12 to<br>1,263.38)                             | 1,000.22<br>(581.57 to<br>1,543.95)                           | 15.23<br>(9.28 to<br>22.26)                              | 25.91<br>(15.43 to<br>39.08)                               | 25.12<br>(15.26 to<br>37.56)                               | 26.94<br>(15.96 to<br>40.23)                               |
| <b>Cirrhosis and other chronic liver diseases</b>              | <b>30,451.61</b><br><b>(21,710.04 to</b><br><b>42,494.72)</b> | <b>55,115.75</b><br><b>(35,500.59 to</b><br><b>84,695.46)</b> | <b>49,760.73</b><br><b>(32,005.08 to</b><br><b>77,224.46)</b> | <b>58,209.37</b><br><b>(38,017.07 to</b><br><b>87,813.73)</b> | <b>954.36</b><br><b>(687.68 to</b><br><b>1,304.64)</b>   | <b>1,831.54</b><br><b>(1,268.68 to</b><br><b>2,632.63)</b> | <b>1,694.75</b><br><b>(1,166.62 to</b><br><b>2,455.01)</b> | <b>1,863.70</b><br><b>(1,300.99 to</b><br><b>2,633.04)</b> |
| Cirrhosis and other chronic liver diseases due to hepatitis B  | 10,410.25<br>(7,177.53 to<br>15,156.83)                       | 19,211.29<br>(12,177.57 to<br>30,483.76)                      | 18,426.26<br>(11,621.94 to<br>29,504.78)                      | 19,491.00<br>(12,688.86 to<br>30,232.88)                      | 337.47<br>(238.33 to<br>478.42)                          | 648.63<br>(442.96 to<br>950.98)                            | 636.02<br>(431.34 to<br>944.30)                            | 636.72<br>(438.15 to<br>926.69)                            |
| Cirrhosis and other chronic liver diseases due to hepatitis C  | 8,437.76<br>(5,731.98 to<br>11,912.89)                        | 15,870.94<br>(9,913.68 to<br>24,403.06)                       | 15,188.25<br>(9,484.58 to<br>23,537.71)                       | 16,143.94<br>(10,251.62 to<br>24,833.47)                      | 270.41<br>(188.20 to<br>375.84)                          | 528.55<br>(351.94 to<br>764.61)                            | 515.87<br>(340.27 to<br>752.71)                            | 521.96<br>(352.09 to<br>750.32)                            |
| Cirrhosis and other chronic liver diseases due to alcohol use  | 6,373.01<br>(4,472.16 to<br>8,897.81)                         | 12,592.96<br>(7,989.48 to<br>19,209.53)                       | 9,122.76<br>(5,751.27 to<br>14,094.66)                        | 14,548.08<br>(9,309.18 to<br>22,163.44)                       | 215.09<br>(153.48 to<br>298.25)                          | 436.92<br>(299.29 to<br>629.68)                            | 332.11<br>(226.36 to<br>481.27)                            | 484.70<br>(334.37 to<br>688.95)                            |
| Cirrhosis and other chronic liver diseases due to other causes | 5,230.60<br>(3,845.24 to<br>7,038.67)                         | 7,440.57<br>(4,848.61 to<br>11,171.50)                        | 7,023.46<br>(4,561.02 to<br>10,556.26)                        | 8,026.34<br>(5,322.10 to<br>12,074.78)                        | 131.39<br>(96.22 to<br>175.76)                           | 217.44<br>(152.11 to<br>307.83)                            | 210.75<br>(146.06 to<br>298.10)                            | 220.33<br>(153.83 to<br>311.28)                            |
| <b>Digestive diseases</b>                                      | <b>31,771.75</b><br><b>(22,391.24 to</b><br><b>42,345.69)</b> | <b>41,682.37</b><br><b>(26,148.51 to</b><br><b>63,386.74)</b> | <b>37,292.99</b><br><b>(23,268.46 to</b><br><b>55,839.23)</b> | <b>46,047.94</b><br><b>(28,537.55 to</b><br><b>69,421.93)</b> | <b>1,021.65</b><br><b>(716.58 to</b><br><b>1,329.95)</b> | <b>1,592.65</b><br><b>(1,093.00 to</b><br><b>2,151.37)</b> | <b>1,494.08</b><br><b>(1,022.29 to</b><br><b>2,025.02)</b> | <b>1,624.90</b><br><b>(1,116.15 to</b><br><b>2,201.92)</b> |
| Peptic ulcer disease                                           | 6,142.53<br>(4,145.79 to<br>9,268.69)                         | 5,936.57<br>(3,675.93 to<br>9,039.15)                         | 4,835.60<br>(2,987.23 to<br>7,510.85)                         | 6,788.68<br>(4,233.72 to<br>10,314.14)                        | 227.34<br>(155.03 to<br>333.50)                          | 241.92<br>(161.99 to<br>346.47)                            | 205.46<br>(136.35 to<br>299.14)                            | 259.77<br>(174.54 to<br>369.01)                            |
| <b>Congo</b>                                                   |                                                               |                                                               |                                                               |                                                               |                                                          |                                                            |                                                            |                                                            |
| Cause                                                          | YLLs (actual counts)                                          |                                                               |                                                               |                                                               | Deaths (actual counts)                                   |                                                            |                                                            |                                                            |
|                                                                | 2016                                                          | 2040 Forecast                                                 | 2040 Better Scenario                                          | 2040 Worse Scenario                                           | 2016                                                     | 2040 Forecast                                              | 2040 Better Scenario                                       | 2040 Worse Scenario                                        |
| Gastritis and duodenitis                                       | 1,735.73<br>(1,069.39 to<br>2,462.11)                         | 2,787.84<br>(1,624.54 to<br>4,256.00)                         | 2,605.89<br>(1,526.02 to<br>4,027.48)                         | 2,905.81<br>(1,691.18 to<br>4,436.21)                         | 59.84<br>(38.53 to<br>86.04)                             | 109.61<br>(70.20 to<br>158.62)                             | 106.50<br>(68.36 to<br>155.94)                             | 107.05<br>(67.84 to<br>152.08)                             |
| Appendicitis                                                   | 2,714.89<br>(1,698.74 to<br>4,096.27)                         | 2,850.65<br>(1,540.76 to<br>4,689.62)                         | 2,471.69<br>(1,314.17 to<br>4,142.94)                         | 3,351.63<br>(1,818.88 to<br>5,466.17)                         | 62.16<br>(38.99 to<br>87.84)                             | 81.60<br>(47.53 to<br>123.54)                              | 72.83<br>(42.33 to<br>112.06)                              | 89.20<br>(52.61 to<br>134.82)                              |
| Paralytic ileus and intestinal obstruction                     | 9,962.95<br>(6,709.68 to<br>13,947.62)                        | 12,485.32<br>(7,699.15 to<br>18,399.16)                       | 12,202.45<br>(7,527.65 to<br>18,075.02)                       | 13,162.62<br>(8,212.36 to<br>19,298.65)                       | 292.28<br>(189.07 to<br>395.62)                          | 494.57<br>(324.00 to<br>676.86)                            | 506.50<br>(331.23 to<br>683.56)                            | 467.46<br>(303.58 to<br>644.25)                            |
| Inguinal, femoral, and abdominal hernia                        | 864.82<br>(523.25 to<br>1,244.49)                             | 1,026.70<br>(557.63 to<br>1,527.49)                           | 952.96<br>(514.51 to<br>1,429.91)                             | 1,087.97<br>(599.66 to<br>1,618.60)                           | 32.29<br>(19.47 to<br>45.13)                             | 45.14<br>(26.24 to<br>63.25)                               | 43.62<br>(25.45 to<br>60.60)                               | 44.32<br>(26.04 to<br>61.93)                               |
| Inflammatory bowel disease                                     | 1,595.89<br>(829.61 to<br>2,553.02)                           | 2,308.74<br>(1,149.79 to<br>3,672.46)                         | 2,327.75<br>(1,154.95 to<br>3,752.17)                         | 2,306.12<br>(1,156.61 to<br>3,666.36)                         | 46.10<br>(25.41 to<br>66.83)                             | 78.57<br>(43.84 to<br>115.16)                              | 82.15<br>(45.61 to<br>121.72)                              | 73.15<br>(40.86 to<br>106.34)                              |
| Vascular intestinal disorders                                  | 871.66<br>(555.90 to<br>1,251.23)                             | 1,634.19<br>(1,033.20 to<br>2,433.44)                         | 1,604.24<br>(1,004.60 to<br>2,424.17)                         | 1,601.53<br>(1,001.50 to<br>2,353.14)                         | 38.45<br>(25.10 to<br>53.66)                             | 78.06<br>(52.62 to<br>108.34)                              | 79.48<br>(53.66 to<br>111.91)                              | 72.10<br>(47.87 to<br>100.98)                              |
| Gallbladder and biliary diseases                               | 2,399.79<br>(1,550.67 to<br>3,352.26)                         | 3,449.94<br>(1,782.91 to<br>5,817.76)                         | 2,781.55<br>(1,459.22 to<br>4,595.97)                         | 4,531.87<br>(2,237.51 to<br>7,762.57)                         | 93.66<br>(63.29 to<br>129.07)                            | 147.15<br>(85.13 to<br>235.15)                             | 123.97<br>(74.19 to<br>194.62)                             | 180.42<br>(98.42 to<br>298.37)                             |
| Pancreatitis                                                   | 1,813.76<br>(1,213.98 to<br>2,793.35)                         | 4,217.62<br>(1,342.98 to<br>11,512.31)                        | 2,998.66<br>(1,102.74 to<br>7,375.26)                         | 4,884.02<br>(1,553.45 to<br>13,416.02)                        | 51.05<br>(35.00 to<br>79.37)                             | 122.54<br>(47.46 to<br>299.49)                             | 91.17<br>(40.27 to<br>202.41)                              | 136.85<br>(49.75 to<br>352.56)                             |
| Other digestive diseases                                       | 3,669.72<br>(2,321.27 to<br>5,360.41)                         | 4,984.82<br>(3,023.26 to<br>7,722.71)                         | 4,512.19<br>(2,730.08 to<br>6,970.32)                         | 5,427.69<br>(3,238.15 to<br>8,383.97)                         | 118.49<br>(79.22 to<br>160.48)                           | 193.49<br>(133.59 to<br>271.79)                            | 182.40<br>(125.12 to<br>258.42)                            | 194.59<br>(132.07 to<br>271.17)                            |
| <b>Neurological disorders</b>                                  | <b>14,339.53</b><br><b>(11,309.62 to</b><br><b>17,543.49)</b> | <b>25,774.47</b><br><b>(19,741.21 to</b><br><b>33,828.67)</b> | <b>25,487.41</b><br><b>(19,837.87 to</b><br><b>32,489.59)</b> | <b>26,121.04</b><br><b>(19,793.38 to</b><br><b>35,070.58)</b> | <b>749.97</b><br><b>(604.31 to</b><br><b>913.76)</b>     | <b>1,657.88</b><br><b>(1,273.82 to</b><br><b>2,179.88)</b> | <b>1,817.53</b><br><b>(1,433.48 to</b><br><b>2,338.61)</b> | <b>1,453.75</b><br><b>(1,060.93 to</b><br><b>1,961.97)</b> |



|                                                            |                                        |                                        |                                        |                                        |                                |                                 |                                 |                                 |
|------------------------------------------------------------|----------------------------------------|----------------------------------------|----------------------------------------|----------------------------------------|--------------------------------|---------------------------------|---------------------------------|---------------------------------|
| Chronic kidney disease due to glomerulonephritis           | 2,343.36<br>(1,743.40 to<br>3,087.92)  | 4,028.32<br>(1,809.90 to<br>10,298.69) | 3,244.60<br>(1,449.42 to<br>8,357.65)  | 5,452.22<br>(2,388.36 to<br>14,081.59) | 65.38<br>(47.73 to<br>85.95)   | 151.69<br>(54.24 to<br>485.53)  | 125.17<br>(44.52 to<br>424.54)  | 198.56<br>(69.11 to<br>608.56)  |
| Chronic kidney disease due to other and unspecified causes | 2,632.04<br>(1,958.56 to<br>3,398.00)  | 4,835.73<br>(2,121.22 to<br>12,687.31) | 3,922.33<br>(1,704.05 to<br>10,260.37) | 6,524.79<br>(2,868.69 to<br>16,808.11) | 80.08<br>(58.45 to<br>104.13)  | 199.94<br>(71.88 to<br>626.38)  | 167.18<br>(60.24 to<br>528.07)  | 258.41<br>(91.88 to<br>768.98)  |
| Urinary diseases and male infertility                      | 3,618.73<br>(2,802.21 to<br>4,593.44)  | 5,448.79<br>(3,913.93 to<br>7,322.56)  | 5,354.12<br>(3,762.17 to<br>7,291.29)  | 5,650.42<br>(4,086.82 to<br>7,503.96)  | 115.76<br>(91.23 to<br>142.71) | 230.60<br>(186.67 to<br>280.64) | 237.64<br>(189.24 to<br>293.59) | 214.71<br>(175.17 to<br>259.40) |
| Urinary tract infections                                   | 2,029.30<br>(1,495.00 to<br>2,692.17)  | 3,702.28<br>(2,587.51 to<br>5,101.00)  | 3,773.39<br>(2,627.97 to<br>5,296.95)  | 3,712.83<br>(2,637.07 to<br>5,009.21)  | 62.92<br>(47.39 to<br>81.20)   | 152.53<br>(117.76 to<br>194.57) | 163.43<br>(124.80 to<br>210.85) | 137.21<br>(106.35 to<br>176.00) |
| Urolithiasis                                               | 70.44<br>(42.90 to<br>118.11)          | 125.86<br>(70.00 to<br>229.70)         | 125.66<br>(69.59 to<br>230.85)         | 130.61<br>(73.71 to<br>231.68)         | 1.94<br>(1.11 to<br>3.86)      | 4.06<br>(2.18 to<br>8.19)       | 4.20<br>(2.23 to<br>8.71)       | 3.87<br>(2.12 to<br>7.66)       |
| Other urinary diseases                                     | 1,518.99<br>(996.23 to<br>2,039.73)    | 1,620.65<br>(963.16 to<br>2,367.72)    | 1,455.07<br>(829.33 to<br>2,162.97)    | 1,806.98<br>(1,090.38 to<br>2,669.91)  | 50.90<br>(34.38 to<br>68.70)   | 74.02<br>(46.99 to<br>102.36)   | 70.01<br>(42.00 to<br>98.88)    | 73.63<br>(46.74 to<br>101.47)   |
| Gynecological diseases                                     | 300.15<br>(165.61 to<br>458.64)        | 476.48<br>(219.99 to<br>930.92)        | 406.66<br>(185.26 to<br>799.76)        | 538.69<br>(243.17 to<br>1,034.67)      | 7.64<br>(4.41 to<br>11.51)     | 11.85<br>(6.17 to<br>21.44)     | 10.27<br>(5.42 to<br>18.67)     | 13.08<br>(6.43 to<br>23.59)     |
| Uterine fibroids                                           | 101.39<br>(35.35 to<br>186.03)         | 132.89<br>(40.99 to<br>289.44)         | 110.43<br>(33.16 to<br>241.59)         | 152.31<br>(47.31 to<br>321.22)         | 2.82<br>(1.00 to<br>4.90)      | 3.68<br>(1.18 to<br>7.50)       | 3.10<br>(1.01 to<br>6.24)       | 4.14<br>(1.33 to<br>8.28)       |
| Polycystic ovarian syndrome                                | 23.19<br>(2.82 to<br>79.68)            | 26.15<br>(2.62 to<br>98.99)            | 19.61<br>(1.93 to<br>77.34)            | 32.85<br>(3.22 to<br>128.18)           | 0.51<br>(0.06 to<br>1.71)      | 11.85<br>(0.06 to<br>2.13)      | 0.43<br>(0.04 to<br>1.65)       | 0.72<br>(0.07 to<br>2.75)       |
| Endometriosis                                              | 1.10<br>(0.29 to<br>3.76)              | 2.72<br>(0.53 to<br>10.76)             | 2.30<br>(0.45 to<br>9.18)              | 3.11<br>(0.62 to<br>12.01)             | 0.02<br>(0.01 to<br>0.07)      | 0.06<br>(0.01 to<br>0.22)       | 0.05<br>(0.01 to<br>0.18)       | 0.06<br>(0.01 to<br>0.24)       |
| Genital prolapse                                           | 6.26<br>(2.69 to<br>13.10)             | 6.80<br>(2.70 to<br>15.37)             | 5.68<br>(2.31 to<br>12.54)             | 7.58<br>(3.10 to<br>16.30)             | 0.31<br>(0.14 to<br>0.63)      | 0.30<br>(0.13 to<br>0.64)       | 0.26<br>(0.11 to<br>0.54)       | 0.32<br>(0.14 to<br>0.66)       |
| Other gynecological diseases                               | 168.20<br>(69.24 to<br>280.55)         | 307.92<br>(121.33 to<br>652.30)        | 268.65<br>(107.86 to<br>571.47)        | 342.83<br>(132.22 to<br>735.05)        | 3.99<br>(1.64 to<br>6.55)      | 5.24<br>(3.14 to<br>14.46)      | 6.43<br>(2.77 to<br>12.82)      | 7.84<br>(3.39 to<br>15.74)      |
| Hemoglobinopathies and hemolytic anemias                   | 6,784.91<br>(4,369.70 to<br>10,418.52) | 7,391.62<br>(4,462.39 to<br>11,688.58) | 6,668.63<br>(4,024.92 to<br>10,603.59) | 8,715.18<br>(5,214.59 to<br>13,618.53) | 125.84<br>(84.68 to<br>180.40) | 189.51<br>(127.50 to<br>274.69) | 173.12<br>(116.09 to<br>253.44) | 207.33<br>(137.87 to<br>303.85) |
| Thalassemias                                               | 9.85<br>(4.56 to<br>20.97)             | 3.60<br>(1.53 to<br>8.38)              | 4.17<br>(1.76 to<br>9.82)              | 4.58<br>(1.85 to<br>11.35)             | 0.12<br>(0.05 to<br>0.25)      | 0.04<br>(0.02 to<br>0.10)       | 0.05<br>(0.02 to<br>0.12)       | 0.05<br>(0.02 to<br>0.13)       |
| Sickle cell disorders                                      | 5,585.12<br>(3,517.02 to<br>8,842.99)  | 5,121.19<br>(2,837.13 to<br>8,576.96)  | 4,666.23<br>(2,585.15 to<br>7,849.82)  | 6,232.91<br>(3,479.85 to<br>10,207.24) | 80.36<br>(50.71 to<br>123.25)  | 90.74<br>(49.63 to<br>149.87)   | 82.76<br>(44.99 to<br>139.09)   | 106.38<br>(57.92 to<br>175.00)  |
| G6PD deficiency                                            | 812.66<br>(554.09 to<br>1,196.25)      | 1,743.44<br>(1,128.65 to<br>2,545.54)  | 1,512.51<br>(958.14 to<br>2,298.01)    | 1,957.23<br>(1,269.02 to<br>2,875.85)  | 22.54<br>(15.87 to<br>30.44)   | 63.42<br>(43.15 to<br>88.12)    | 56.04<br>(37.24 to<br>80.73)    | 68.09<br>(47.31 to<br>95.97)    |
| Other hemoglobinopathies and hemolytic anemias             | 377.28<br>(265.89 to<br>514.36)        | 523.38<br>(378.27 to<br>706.82)        | 485.72<br>(350.86 to<br>671.93)        | 520.46<br>(377.11 to<br>709.11)        | 22.82<br>(16.58 to<br>30.50)   | 35.31<br>(26.87 to<br>47.01)    | 34.28<br>(26.49 to<br>45.38)    | 32.80<br>(23.63 to<br>44.65)    |
| Endocrine, metabolic, blood, and immune disorders          | 2,417.39<br>(1,108.75 to<br>4,584.16)  | 3,144.51<br>(1,203.91 to<br>6,787.01)  | 2,974.63<br>(1,140.42 to<br>6,484.06)  | 3,629.02<br>(1,455.98 to<br>7,575.24)  | 48.63<br>(21.08 to<br>93.97)   | 86.71<br>(32.34 to<br>183.81)   | 85.04<br>(31.36 to<br>183.89)   | 89.37<br>(35.10 to<br>186.57)   |

| Congo                     |                                     |                                       |                                       |                                       |                              |                               |                               |                               |
|---------------------------|-------------------------------------|---------------------------------------|---------------------------------------|---------------------------------------|------------------------------|-------------------------------|-------------------------------|-------------------------------|
| Cause                     | YLLs (actual counts)                |                                       |                                       |                                       | Deaths (actual counts)       |                               |                               |                               |
|                           | 2016                                | 2040 Forecast                         | 2040 Better Scenario                  | 2040 Worse Scenario                   | 2016                         | 2040 Forecast                 | 2040 Better Scenario          | 2040 Worse Scenario           |
| Musculoskeletal disorders | 1,378.59<br>(830.38 to<br>1,943.16) | 3,074.57<br>(1,731.18 to<br>5,049.00) | 3,246.18<br>(1,803.22 to<br>5,342.58) | 2,958.20<br>(1,673.86 to<br>4,789.93) | 36.78<br>(23.56 to<br>49.85) | 90.90<br>(56.68 to<br>130.75) | 97.23<br>(60.00 to<br>139.12) | 83.79<br>(52.28 to<br>119.96) |
| Rheumatoid arthritis      | 201.57<br>(124.33 to<br>358.91)     | 441.70<br>(276.69 to<br>777.63)       | 406.14<br>(248.11 to<br>734.92)       | 457.06<br>(285.76 to<br>792.15)       | 8.62<br>(5.79 to<br>13.64)   | 21.01<br>(13.99 to<br>32.20)  | 20.00<br>(12.91 to<br>31.57)  | 20.50<br>(13.80 to<br>31.14)  |

|                                               |                                                                  |                                                                  |                                                                 |                                                                  |                                                            |                                                            |                                                            |                                                            |
|-----------------------------------------------|------------------------------------------------------------------|------------------------------------------------------------------|-----------------------------------------------------------------|------------------------------------------------------------------|------------------------------------------------------------|------------------------------------------------------------|------------------------------------------------------------|------------------------------------------------------------|
|                                               | 1,177.02<br>(682.48 to<br>1,698.63)                              | 2,632.88<br>(1,347.28 to<br>4,462.93)                            | 2,840.04<br>(1,474.20 to<br>4,786.14)                           | 2,501.14<br>(1,316.74 to<br>4,197.23)                            | 28.16<br>(16.91 to<br>39.58)                               | 69.89<br>(39.67 to<br>106.59)                              | 77.22<br>(43.84 to<br>117.09)                              | 63.29<br>(36.05 to<br>97.45)                               |
| Other musculoskeletal disorders               |                                                                  |                                                                  |                                                                 |                                                                  |                                                            |                                                            |                                                            |                                                            |
|                                               | <b>53,411.78</b><br><b>(32,999.17 to</b><br><b>80,785.43)</b>    | <b>41,244.25</b><br><b>(25,905.59 to</b><br><b>63,233.01)</b>    | <b>38,818.61</b><br><b>(24,618.14 to</b><br><b>59,388.75)</b>   | <b>56,580.06</b><br><b>(34,077.56 to</b><br><b>90,498.41)</b>    | <b>719.58</b><br><b>(469.43 to</b><br><b>1,044.83)</b>     | <b>829.97</b><br><b>(576.05 to</b><br><b>1,171.62)</b>     | <b>822.59</b><br><b>(564.43 to</b><br><b>1,165.68)</b>     | <b>973.02</b><br><b>(668.78 to</b><br><b>1,428.62)</b>     |
| Other non-communicable diseases               |                                                                  |                                                                  |                                                                 |                                                                  |                                                            |                                                            |                                                            |                                                            |
| Congenital birth defects                      | 45,998.52<br>(26,649.71 to<br>71,096.07)                         | 27,135.26<br>(14,999.22 to<br>46,473.37)                         | 24,783.82<br>(13,590.05 to<br>43,055.19)                        | 41,082.68<br>(21,399.85 to<br>69,914.39)                         | 545.95<br>(320.89 to<br>837.76)                            | 338.97<br>(193.09 to<br>570.19)                            | 309.91<br>(174.69 to<br>527.84)                            | 503.59<br>(270.54 to<br>846.60)                            |
| Neural tube defects                           | 6,152.98<br>(2,780.41 to<br>12,345.38)                           | 1,374.96<br>(574.62 to<br>2,846.32)                              | 1,122.24<br>(458.53 to<br>2,399.37)                             | 2,318.29<br>(947.70 to<br>4,906.18)                              | 71.82<br>(32.63 to<br>143.86)                              | 16.55<br>(7.17 to<br>33.76)                                | 13.51<br>(5.67 to<br>28.50)                                | 27.63<br>(11.76 to<br>57.55)                               |
| Congenital heart anomalies                    | 13,969.22<br>(7,805.09 to<br>23,851.16)                          | 8,906.12<br>(4,648.20 to<br>15,749.53)                           | 8,169.57<br>(4,245.77 to<br>14,377.82)                          | 13,182.01<br>(6,574.21 to<br>24,774.39)                          | 167.91<br>(95.56 to<br>282.54)                             | 114.48<br>(62.12 to<br>197.52)                             | 105.15<br>(56.43 to<br>182.61)                             | 165.32<br>(84.70 to<br>302.28)                             |
| Orofacial clefts                              | 228.40<br>(52.19 to<br>590.53)                                   | 106.79<br>(23.38 to<br>322.47)                                   | 85.48<br>(18.11 to<br>249.37)                                   | 187.15<br>(40.51 to<br>566.77)                                   | 2.65<br>(0.61 to<br>6.84)                                  | 1.24<br>(0.27 to<br>3.74)                                  | 0.99<br>(0.21 to<br>2.89)                                  | 2.17<br>(0.47 to<br>6.56)                                  |
| Down syndrome                                 | 826.36<br>(433.53 to<br>1,527.37)                                | 688.00<br>(350.88 to<br>1,338.12)                                | 615.60<br>(312.58 to<br>1,208.49)                               | 986.23<br>(465.54 to<br>1,937.94)                                | 10.52<br>(5.72 to<br>19.34)                                | 10.32<br>(5.56 to<br>18.97)                                | 9.30<br>(5.01 to<br>16.97)                                 | 13.96<br>(7.20 to<br>26.16)                                |
| Other chromosomal abnormalities               | 2,182.03<br>(831.33 to<br>4,055.77)                              | 2,030.66<br>(759.26 to<br>3,989.93)                              | 1,811.93<br>(683.89 to<br>3,593.72)                             | 3,189.05<br>(1,215.18 to<br>6,365.16)                            | 25.52<br>(9.75 to<br>47.28)                                | 24.11<br>(9.08 to<br>47.32)                                | 21.52<br>(8.22 to<br>42.23)                                | 37.65<br>(14.32 to<br>74.61)                               |
| Congenital musculoskeletal and limb anomalies | 603.71<br>(283.21 to<br>1,265.28)                                | 404.16<br>(183.50 to<br>870.59)                                  | 382.95<br>(175.00 to<br>810.53)                                 | 599.18<br>(264.61 to<br>1,313.98)                                | 7.11<br>(3.35 to<br>14.94)                                 | 4.90<br>(2.32 to<br>10.45)                                 | 4.65<br>(2.21 to<br>9.75)                                  | 7.18<br>(3.28 to<br>15.72)                                 |
| Urogenital congenital anomalies               | 980.86<br>(539.58 to<br>1,723.57)                                | 604.21<br>(339.88 to<br>1,026.31)                                | 571.41<br>(315.61 to<br>971.89)                                 | 872.66<br>(461.91 to<br>1,487.14)                                | 11.99<br>(6.85 to<br>20.59)                                | 8.40<br>(5.03 to<br>13.80)                                 | 7.94<br>(4.68 to<br>13.03)                                 | 11.57<br>(6.51 to<br>19.29)                                |
| Digestive congenital anomalies                | 4,392.59<br>(2,242.28 to<br>7,934.55)                            | 2,659.19<br>(1,255.21 to<br>5,244.03)                            | 2,398.58<br>(1,124.82 to<br>4,777.89)                           | 4,169.73<br>(1,856.79 to<br>8,366.71)                            | 51.21<br>(26.19 to<br>92.41)                               | 31.37<br>(14.89 to<br>61.49)                               | 28.31<br>(13.40 to<br>56.24)                               | 48.97<br>(22.06 to<br>97.81)                               |
| Other congenital birth defects                | 16,662.38<br>(7,820.17 to<br>27,788.73)                          | 10,361.18<br>(4,889.10 to<br>19,678.90)                          | 9,626.05<br>(4,559.53 to<br>18,459.85)                          | 15,578.39<br>(7,078.76 to<br>29,846.62)                          | 197.22<br>(93.96 to<br>327.16)                             | 127.59<br>(62.68 to<br>236.67)                             | 118.53<br>(58.21 to<br>221.87)                             | 189.13<br>(87.73 to<br>356.62)                             |
| Skin and subcutaneous diseases                | 5,014.52<br>(2,812.83 to<br>7,458.12)                            | 12,750.54<br>(7,195.98 to<br>19,017.68)                          | 12,778.37<br>(7,248.48 to<br>19,069.16)                         | 13,405.36<br>(7,534.36 to<br>20,201.46)                          | 145.79<br>(84.72 to<br>221.28)                             | 475.24<br>(289.34 to<br>711.04)                            | 498.10<br>(303.69 to<br>748.38)                            | 445.15<br>(270.98 to<br>670.70)                            |
| Cellulitis                                    | 769.81<br>(264.35 to<br>1,405.22)                                | 2,677.87<br>(948.74 to<br>4,806.98)                              | 2,862.52<br>(1,035.23 to<br>5,098.78)                           | 2,594.96<br>(900.61 to<br>4,711.89)                              | 21.87<br>(8.08 to<br>37.68)                                | 89.33<br>(33.56 to<br>149.18)                              | 89.41<br>(38.22 to<br>162.76)                              | 80.93<br>(30.19 to<br>138.23)                              |
| Pyoderma                                      | 3,574.17<br>(1,984.29 to<br>5,478.73)                            | 8,554.44<br>(4,763.70 to<br>13,322.36)                           | 8,312.84<br>(4,572.88 to<br>13,052.03)                          | 9,345.68<br>(5,159.66 to<br>14,592.79)                           | 95.52<br>(55.08 to<br>154.42)                              | 310.59<br>(188.01 to<br>485.47)                            | 315.83<br>(189.05 to<br>487.20)                            | 299.82<br>(178.75 to<br>462.00)                            |
| Decubitus ulcer                               | 468.04<br>(213.06 to<br>786.72)                                  | 1,102.08<br>(535.43 to<br>1,828.71)                              | 1,168.14<br>(570.71 to<br>1,939.20)                             | 1,030.69<br>(501.05 to<br>1,697.27)                              | 23.51<br>(11.93 to<br>40.43)                               | 63.68<br>(33.52 to<br>110.96)                              | 71.26<br>(37.55 to<br>124.43)                              | 53.44<br>(27.40 to<br>90.62)                               |
| Other skin and subcutaneous diseases          | 202.50<br>(96.05 to<br>347.33)                                   | 416.15<br>(183.82 to<br>723.70)                                  | 434.88<br>(193.77 to<br>753.35)                                 | 434.03<br>(193.33 to<br>768.21)                                  | 4.88<br>(2.37 to<br>8.02)                                  | 11.63<br>(5.51 to<br>18.89)                                | 12.60<br>(6.08 to<br>20.56)                                | 10.96<br>(5.29 to<br>18.22)                                |
| Sudden infant death syndrome                  | 2,398.74<br>(1,249.49 to<br>4,435.67)                            | 1,358.45<br>(518.23 to<br>3,003.89)                              | 1,256.42<br>(483.27 to<br>2,796.53)                             | 2,092.02<br>(791.50 to<br>4,647.54)                              | 27.84<br>(14.50 to<br>51.49)                               | 15.76<br>(6.01 to<br>34.86)                                | 14.58<br>(5.61 to<br>32.46)                                | 21.27<br>(9.18 to<br>53.94)                                |
| Injuries                                      | <b>145,680.23</b><br><b>(115,443.20 to</b><br><b>181,057.65)</b> | <b>185,683.59</b><br><b>(117,842.32 to</b><br><b>291,317.84)</b> | <b>155,443.45</b><br><b>(99,976.85 to</b><br><b>243,764.14)</b> | <b>212,003.88</b><br><b>(137,966.76 to</b><br><b>328,132.15)</b> | <b>2,741.02</b><br><b>(2,185.95 to</b><br><b>3,355.71)</b> | <b>4,358.85</b><br><b>(2,826.02 to</b><br><b>6,269.34)</b> | <b>3,596.53</b><br><b>(2,454.84 to</b><br><b>5,286.37)</b> | <b>4,465.65</b><br><b>(3,021.19 to</b><br><b>6,706.98)</b> |
| Transport injuries                            | 54,064.75<br>(40,537.19 to<br>70,480.03)                         | 88,412.02<br>(49,405.19 to<br>150,681.01)                        | 67,746.60<br>(38,515.95 to<br>115,402.65)                       | 99,867.72<br>(56,661.83 to<br>170,472.02)                        | 953.84<br>(723.75 to<br>1,213.79)                          | 1,738.55<br>(1,002.41 to<br>2,938.25)                      | 1,350.72<br>(788.72 to<br>2,222.61)                        | 1,894.18<br>(1,092.18 to<br>3,252.74)                      |
| Road injuries                                 | 51,791.03<br>(38,931.23 to<br>67,354.89)                         | 84,545.61<br>(47,385.43 to<br>145,250.00)                        | 64,493.22<br>(36,513.82 to<br>109,668.73)                       | 95,305.95<br>(54,043.76 to<br>164,160.59)                        | 913.26<br>(692.57 to<br>1,163.88)                          | 1,660.97<br>(957.05 to<br>2,824.17)                        | 1,285.27<br>(749.36 to<br>2,111.65)                        | 1,805.51<br>(1,043.99 to<br>3,101.76)                      |
| Pedestrian road injuries                      | 20,271.82<br>(14,228.23 to<br>27,436.63)                         | 23,859.80<br>(13,432.23 to<br>40,113.86)                         | 18,825.09<br>(10,850.80 to<br>30,811.25)                        | 27,678.84<br>(15,916.28 to<br>46,099.63)                         | 355.60<br>(258.07 to<br>462.26)                            | 510.01<br>(295.52 to<br>852.83)                            | 407.36<br>(242.67 to<br>674.55)                            | 560.04<br>(326.19 to<br>930.21)                            |

| Congo                                           |                                                               |                                                               |                                                               |                                                               |                                                          |                                                            |                                                            |                                                            |
|-------------------------------------------------|---------------------------------------------------------------|---------------------------------------------------------------|---------------------------------------------------------------|---------------------------------------------------------------|----------------------------------------------------------|------------------------------------------------------------|------------------------------------------------------------|------------------------------------------------------------|
| Cause                                           | YLLs (actual counts)                                          |                                                               |                                                               |                                                               | Deaths (actual counts)                                   |                                                            |                                                            |                                                            |
|                                                 | 2016                                                          | 2040 Forecast                                                 | 2040 Better Scenario                                          | 2040 Worse Scenario                                           | 2016                                                     | 2040 Forecast                                              | 2040 Better Scenario                                       | 2040 Worse Scenario                                        |
| Cyclist road injuries                           | 977.08<br>(626.48 to<br>1,363.41)                             | 1,697.89<br>(923.32 to<br>2,981.96)                           | 1,297.38<br>(712.69 to<br>2,228.76)                           | 1,944.68<br>(1,061.07 to<br>3,397.09)                         | 17.43<br>(11.36 to<br>24.10)                             | 33.73<br>(18.20 to<br>59.34)                               | 26.38<br>(14.38 to<br>45.48)                               | 36.95<br>(19.94 to<br>64.86)                               |
| Motorcyclist road injuries                      | 4,062.43<br>(2,571.76 to<br>6,188.93)                         | 8,168.11<br>(3,839.98 to<br>16,518.36)                        | 6,562.22<br>(3,165.90 to<br>12,817.92)                        | 8,962.20<br>(4,193.91 to<br>17,939.00)                        | 69.15<br>(44.33 to<br>106.74)                            | 145.61<br>(68.42 to<br>294.13)                             | 117.76<br>(56.73 to<br>231.85)                             | 157.22<br>(73.00 to<br>318.97)                             |
| Motor vehicle road injuries                     | 26,312.41<br>(19,186.69 to<br>35,179.61)                      | 50,539.17<br>(27,429.72 to<br>89,123.69)                      | 37,594.52<br>(20,781.62 to<br>65,481.84)                      | 56,400.64<br>(30,888.54 to<br>98,912.15)                      | 468.08<br>(343.98 to<br>617.82)                          | 966.07<br>(527.18 to<br>1,700.34)                          | 729.43<br>(412.33 to<br>1,243.20)                          | 1,045.28<br>(571.82 to<br>1,831.87)                        |
| Other road injuries                             | 167.28<br>(112.96 to<br>257.34)                               | 280.65<br>(150.34 to<br>511.16)                               | 214.00<br>(116.94 to<br>375.12)                               | 319.60<br>(174.64 to<br>579.71)                               | 3.00<br>(2.07 to<br>4.39)                                | 5.55<br>(3.02 to<br>10.09)                                 | 4.34<br>(2.41 to<br>7.68)                                  | 6.02<br>(3.32 to<br>10.99)                                 |
| Other transport injuries                        | 2,273.72<br>(1,568.73 to<br>3,234.14)                         | 3,866.41<br>(2,010.45 to<br>7,031.14)                         | 3,253.38<br>(1,733.79 to<br>5,859.53)                         | 4,561.77<br>(2,387.53 to<br>8,214.10)                         | 40.58<br>(28.44 to<br>57.21)                             | 77.58<br>(40.75 to<br>139.78)                              | 65.46<br>(34.91 to<br>115.32)                              | 88.67<br>(46.84 to<br>158.76)                              |
| <b>Unintentional injuries</b>                   | <b>65,067.60</b><br><b>(49,407.22 to</b><br><b>83,629.27)</b> | <b>56,365.97</b><br><b>(38,959.32 to</b><br><b>79,918.40)</b> | <b>50,877.66</b><br><b>(34,979.77 to</b><br><b>71,560.08)</b> | <b>68,362.22</b><br><b>(47,134.80 to</b><br><b>96,631.39)</b> | <b>1,236.58</b><br><b>(980.82 to</b><br><b>1,522.46)</b> | <b>1,463.58</b><br><b>(1,127.73 to</b><br><b>1,876.34)</b> | <b>1,377.73</b><br><b>(1,054.68 to</b><br><b>1,769.18)</b> | <b>1,575.80</b><br><b>(1,201.05 to</b><br><b>2,064.12)</b> |
| Falls                                           | 9,115.17<br>(6,819.48 to<br>11,876.37)                        | 12,408.42<br>(9,247.75 to<br>16,655.24)                       | 11,925.44<br>(8,739.19 to<br>16,009.06)                       | 13,068.46<br>(9,609.29 to<br>17,368.33)                       | 290.10<br>(221.29 to<br>364.84)                          | 508.08<br>(401.98 to<br>635.24)                            | 515.00<br>(402.91 to<br>638.35)                            | 474.90<br>(371.83 to<br>589.40)                            |
| Drowning                                        | 21,562.55<br>(14,171.76 to<br>30,723.29)                      | 14,104.11<br>(8,587.58 to<br>21,882.87)                       | 12,387.47<br>(7,609.62 to<br>18,993.29)                       | 18,367.99<br>(10,978.11 to<br>29,079.99)                      | 313.43<br>(219.29 to<br>426.44)                          | 249.22<br>(156.73 to<br>378.35)                            | 219.82<br>(139.16 to<br>327.06)                            | 305.95<br>(189.84 to<br>465.29)                            |
| Fire, heat, and hot substances                  | 7,538.97<br>(5,378.53 to<br>10,681.82)                        | 5,814.82<br>(3,691.93 to<br>9,034.80)                         | 5,000.26<br>(3,142.79 to<br>7,704.83)                         | 7,177.09<br>(4,450.74 to<br>11,055.77)                        | 152.88<br>(110.30 to<br>202.75)                          | 161.67<br>(106.13 to<br>231.90)                            | 143.70<br>(94.72 to<br>206.18)                             | 178.69<br>(118.44 to<br>260.01)                            |
| Poisonings                                      | 2,820.55<br>(1,441.06 to<br>5,719.43)                         | 1,730.78<br>(857.35 to<br>3,201.94)                           | 1,399.23<br>(688.14 to<br>2,667.08)                           | 2,309.53<br>(1,092.87 to<br>4,500.81)                         | 50.92<br>(29.09 to<br>89.06)                             | 39.35<br>(20.95 to<br>65.15)                               | 32.33<br>(17.34 to<br>53.03)                               | 48.09<br>(25.40 to<br>79.90)                               |
| Exposure to mechanical forces                   | 7,314.02<br>(4,859.01 to<br>10,467.36)                        | 6,205.55<br>(3,843.93 to<br>9,776.15)                         | 5,460.00<br>(3,377.08 to<br>8,536.52)                         | 7,792.25<br>(4,809.17 to<br>12,218.77)                        | 121.51<br>(84.82 to<br>167.41)                           | 127.50<br>(83.16 to<br>193.39)                             | 114.75<br>(75.27 to<br>172.29)                             | 148.04<br>(97.84 to<br>222.55)                             |
| Unintentional firearm injuries                  | 808.26<br>(486.53 to<br>1,244.47)                             | 772.40<br>(412.40 to<br>1,344.91)                             | 660.27<br>(359.14 to<br>1,134.81)                             | 917.12<br>(496.66 to<br>1,562.95)                             | 14.86<br>(9.13 to<br>22.83)                              | 15.81<br>(8.78 to<br>25.60)                                | 13.75<br>(7.90 to<br>22.25)                                | 18.04<br>(10.13 to<br>29.45)                               |
| Unintentional suffocation                       | 2,501.44<br>(1,190.54 to<br>5,136.19)                         | 1,491.33<br>(700.78 to<br>2,996.29)                           | 1,304.88<br>(606.50 to<br>2,597.61)                           | 2,205.26<br>(1,023.62 to<br>4,611.65)                         | 31.29<br>(15.66 to<br>62.15)                             | 20.41<br>(10.26 to<br>37.67)                               | 17.91<br>(8.93 to<br>33.68)                                | 29.17<br>(14.14 to<br>56.90)                               |
| Other exposure to mechanical forces             | 4,004.32<br>(2,759.11 to<br>5,706.79)                         | 3,941.83<br>(2,434.81 to<br>6,481.96)                         | 3,494.86<br>(2,125.23 to<br>5,664.37)                         | 4,669.87<br>(2,870.96 to<br>7,370.06)                         | 75.36<br>(53.25 to<br>108.48)                            | 91.28<br>(60.57 to<br>146.53)                              | 83.10<br>(53.79 to<br>131.96)                              | 100.83<br>(66.93 to<br>160.22)                             |
| Adverse effects of medical treatment            | 4,214.32<br>(3,014.19 to<br>5,958.87)                         | 4,264.94<br>(2,901.02 to<br>6,142.54)                         | 3,861.87<br>(2,611.39 to<br>5,568.93)                         | 5,054.68<br>(3,426.75 to<br>7,329.09)                         | 85.32<br>(66.04 to<br>111.35)                            | 113.18<br>(83.77 to<br>149.34)                             | 106.18<br>(77.89 to<br>142.13)                             | 121.10<br>(90.62 to<br>160.47)                             |
| Animal contact                                  | 3,223.26 to<br>4,461.19)                                      | 3,391.99<br>(2,139.00 to<br>5,102.70)                         | 2,889.70<br>(1,765.97 to<br>4,386.32)                         | 4,287.58<br>(2,684.23 to<br>6,537.65)                         | 66.44<br>(48.45 to<br>89.81)                             | 87.18<br>(59.43 to<br>126.90)                              | 76.33<br>(50.76 to<br>112.09)                              | 100.39<br>(68.72 to<br>144.03)                             |
| Venomous animal contact                         | 2,341.77<br>(1,628.93 to<br>3,330.17)                         | 2,458.84<br>(1,557.82 to<br>3,762.91)                         | 2,084.59<br>(1,280.84 to<br>3,216.65)                         | 3,090.21<br>(1,945.76 to<br>4,878.05)                         | 50.46<br>(36.00 to<br>69.81)                             | 65.91<br>(45.20 to<br>97.70)                               | 57.51<br>(37.77 to<br>86.22)                               | 75.52<br>(51.32 to<br>111.86)                              |
| Non-venomous animal contact                     | 887.18<br>(496.02 to<br>1,504.53)                             | 933.15<br>(485.33 to<br>1,610.18)                             | 805.11<br>(416.41 to<br>1,399.00)                             | 1,197.37<br>(620.48 to<br>2,109.12)                           | 15.98<br>(9.49 to<br>25.12)                              | 21.27<br>(12.19 to<br>34.09)                               | 18.82<br>(10.69 to<br>30.18)                               | 24.87<br>(14.20 to<br>40.97)                               |
| Foreign body                                    | 5,701.87<br>(3,208.47 to<br>9,675.84)                         | 4,965.83<br>(2,740.65 to<br>8,359.99)                         | 4,956.04<br>(2,758.42 to<br>8,224.14)                         | 6,105.12<br>(3,237.03 to<br>10,690.80)                        | 86.00<br>(53.26 to<br>133.81)                            | 95.17<br>(59.00 to<br>139.06)                              | 97.50<br>(60.74 to<br>141.09)                              | 105.24<br>(62.56 to<br>160.82)                             |
| Pulmonary aspiration and foreign body in airway | 5,339.08<br>(2,988.12 to<br>9,284.25)                         | 4,610.21<br>(2,555.42 to<br>8,041.92)                         | 4,628.91<br>(2,570.97 to<br>7,934.88)                         | 5,678.55<br>(3,012.97 to<br>10,303.97)                        | 79.82<br>(49.17 to<br>126.66)                            | 87.89<br>(54.96 to<br>130.76)                              | 90.67<br>(57.15 to<br>131.99)                              | 97.11<br>(58.44 to<br>153.27)                              |

|                                                                              |                                                 |                                                 |                                                 |                                                 |                                        |                                          |                                          |                                          |
|------------------------------------------------------------------------------|-------------------------------------------------|-------------------------------------------------|-------------------------------------------------|-------------------------------------------------|----------------------------------------|------------------------------------------|------------------------------------------|------------------------------------------|
|                                                                              | 362.79<br>(135.93 to<br>646.29)                 | 355.62<br>(120.60 to<br>669.54)                 | 327.13<br>(110.01 to<br>624.14)                 | 426.58<br>(149.17 to<br>804.52)                 | 6.18<br>(2.31 to<br>11.24)             | 7.28<br>(2.44 to<br>14.08)               | 6.83<br>(2.26 to<br>13.31)               | 8.13<br>(2.79 to<br>15.32)               |
| Foreign body in other body part                                              | 1,350.60<br>(753.07 to<br>1,913.28)             | 1,411.97<br>(660.59 to<br>2,245.62)             | 1,145.54<br>(533.62 to<br>1,853.34)             | 1,764.45<br>(865.28 to<br>2,821.64)             | 28.34<br>(15.79 to<br>39.54)           | 35.65<br>(17.88 to<br>53.81)             | 29.60<br>(14.76 to<br>44.75)             | 41.87<br>(21.42 to<br>63.09)             |
| Environmental heat and cold exposure                                         | 2,220.40<br>(1,503.22 to<br>3,030.08)           | 2,067.56<br>(1,262.81 to<br>3,077.85)           | 1,852.11<br>(1,131.91 to<br>2,859.03)           | 2,435.08<br>(1,481.78 to<br>3,661.97)           | 41.63<br>(27.74 to<br>55.04)           | 46.56<br>(29.65 to<br>67.59)             | 42.52<br>(26.97 to<br>62.62)             | 51.53<br>(32.82 to<br>75.66)             |
| Other unintentional injuries                                                 | <b>23,478.12</b><br>(16,496.66 to<br>33,035.62) | <b>39,309.74</b><br>(21,992.23 to<br>65,908.43) | <b>35,208.28</b><br>(20,538.53 to<br>57,603.05) | <b>42,037.33</b><br>(23,729.19 to<br>71,745.32) | <b>501.12</b><br>(352.33 to<br>687.32) | <b>927.41</b><br>(539.51 to<br>1,536.00) | <b>838.28</b><br>(509.24 to<br>1,347.96) | <b>964.92</b><br>(557.38 to<br>1,597.83) |
| <b>Self-harm and interpersonal violence</b>                                  |                                                 |                                                 |                                                 |                                                 |                                        |                                          |                                          |                                          |
| <b>Congo</b>                                                                 |                                                 |                                                 |                                                 |                                                 |                                        |                                          |                                          |                                          |
| Cause                                                                        | YLLs (actual counts)                            |                                                 |                                                 |                                                 | Deaths (actual counts)                 |                                          |                                          |                                          |
|                                                                              | 2016                                            | 2040 Forecast                                   | 2040 Better Scenario                            | 2040 Worse Scenario                             | 2016                                   | 2040 Forecast                            | 2040 Better Scenario                     | 2040 Worse Scenario                      |
| Self-harm                                                                    | 11,611.04<br>(7,696.12 to<br>18,016.92)         | 24,832.44<br>(13,082.84 to<br>45,110.07)        | 21,410.66<br>(11,838.74 to<br>37,147.13)        | 26,686.41<br>(13,738.46 to<br>47,784.54)        | 291.56<br>(197.57 to<br>429.62)        | 655.26<br>(362.64 to<br>1,132.20)        | 578.52<br>(339.32 to<br>964.72)          | 681.00<br>(369.66 to<br>1,186.33)        |
| Self-harm by firearm                                                         | 718.03<br>(395.88 to<br>1,223.49)               | 1,112.89<br>(480.57 to<br>2,336.08)             | 935.18<br>(425.18 to<br>1,912.14)               | 1,218.99<br>(523.64 to<br>2,584.88)             | 17.65<br>(10.15 to<br>29.47)           | 29.31<br>(13.39 to<br>59.51)             | 25.25<br>(12.17 to<br>49.85)             | 31.04<br>(14.11 to<br>63.12)             |
| Self-harm by other specified means                                           | 10,893.02<br>(7,218.74 to<br>16,823.17)         | 23,719.55<br>(12,395.41 to<br>42,542.23)        | 20,475.48<br>(11,340.33 to<br>35,315.09)        | 25,467.43<br>(13,090.19 to<br>45,785.13)        | 273.91<br>(184.30 to<br>404.30)        | 625.96<br>(343.48 to<br>1,085.72)        | 553.27<br>(323.53 to<br>921.87)          | 649.97<br>(349.41 to<br>1,128.56)        |
| Interpersonal violence                                                       | 11,867.08<br>(7,934.38 to<br>17,651.50)         | 14,477.30<br>(8,098.95 to<br>25,053.63)         | 13,797.61<br>(7,760.89 to<br>23,847.78)         | 15,350.92<br>(8,640.29 to<br>26,723.72)         | 209.56<br>(141.60 to<br>312.30)        | 272.15<br>(152.69 to<br>459.97)          | 259.76<br>(146.97 to<br>434.04)          | 283.92<br>(160.71 to<br>482.05)          |
| Physical violence by firearm                                                 | 3,341.61<br>(1,445.91 to<br>5,920.32)           | 4,056.07<br>(1,590.16 to<br>8,186.37)           | 3,987.48<br>(1,565.93 to<br>7,988.15)           | 4,191.28<br>(1,635.59 to<br>8,410.77)           | 59.21<br>(25.85 to<br>105.30)          | 74.64<br>(29.13 to<br>147.56)            | 73.55<br>(28.91 to<br>143.84)            | 76.31<br>(29.79 to<br>151.93)            |
| Physical violence by sharp object                                            | 3,282.10<br>(1,928.83 to<br>5,060.28)           | 4,534.26<br>(2,370.28 to<br>7,596.32)           | 4,558.30<br>(2,385.03 to<br>7,655.05)           | 4,591.26<br>(2,376.68 to<br>7,708.98)           | 58.94<br>(34.98 to<br>90.34)           | 85.04<br>(45.49 to<br>141.42)            | 85.72<br>(46.33 to<br>142.80)            | 85.11<br>(45.24 to<br>141.20)            |
| Physical violence by other means                                             | 5,243.38<br>(3,421.46 to<br>8,263.46)           | 5,886.98<br>(3,001.54 to<br>11,120.55)          | 5,251.83<br>(2,707.60 to<br>9,867.68)           | 6,568.38<br>(3,389.85 to<br>12,312.60)          | 91.42<br>(59.95 to<br>144.96)          | 112.47<br>(58.60 to<br>209.51)           | 100.49<br>(52.96 to<br>187.01)           | 122.89<br>(62.96 to<br>226.96)           |
| Forces of nature, conflict and terrorism, and executions and police conflict | <b>3,069.75</b><br>(519.02 to<br>5,849.51)      | <b>1,598.86</b><br>(0.00 to<br>21,673.07)       | <b>1,610.91</b><br>(0.00 to<br>21,901.51)       | <b>1,736.60</b><br>(0.00 to<br>23,292.67)       | <b>49.47</b><br>(8.40 to<br>94.23)     | <b>29.32</b><br>(0.00 to<br>385.85)      | <b>29.79</b><br>(0.00 to<br>393.82)      | <b>30.75</b><br>(0.00 to<br>401.19)      |
| Exposure to forces of nature                                                 | 0.00<br>(0.00 to<br>0.00)                       | 194.89<br>(0.00 to<br>408.85)                   | 197.71<br>(0.00 to<br>413.70)                   | 213.53<br>(0.00 to<br>449.19)                   | 0.00<br>(0.00 to<br>0.00)              | 4.00<br>(8.13 to<br>0.00)                | 4.11<br>(8.33 to<br>0.00)                | 4.13<br>(8.46 to<br>0.00)                |
| Conflict and terrorism                                                       | 3,031.98<br>(481.07 to<br>5,811.16)             | 1,375.55<br>(0.00 to<br>21,673.07)              | 1,387.55<br>(0.00 to<br>21,901.51)              | 1,496.61<br>(0.00 to<br>23,292.67)              | 48.83<br>(7.75 to<br>93.58)            | 24.84<br>(0.00 to<br>385.85)             | 25.20<br>(0.00 to<br>393.82)             | 26.13<br>(0.00 to<br>401.19)             |
| Executions and police conflict                                               | 37.77<br>(27.74 to<br>55.85)                    | 25.42<br>(0.00 to<br>366.89)                    | 25.65<br>(0.00 to<br>370.25)                    | 26.47<br>(0.00 to<br>383.08)                    | 0.64<br>(0.47 to<br>0.96)              | 0.48<br>(0.00 to<br>6.90)                | 0.48<br>(0.00 to<br>6.98)                | 0.49<br>(0.00 to<br>7.04)                |
| <b>Democratic Republic of the Congo</b>                                      |                                                 |                                                 |                                                 |                                                 |                                        |                                          |                                          |                                          |
| Cause                                                                        | YLLs (in 1000s)                                 |                                                 |                                                 |                                                 | Deaths (in 1000s)                      |                                          |                                          |                                          |
|                                                                              | 2016                                            | 2040 Forecast                                   | 2040 Better Scenario                            | 2040 Worse Scenario                             | 2016                                   | 2040 Forecast                            | 2040 Better Scenario                     | 2040 Worse Scenario                      |
| All causes                                                                   | 36,534.31<br>(27,205.69 to<br>47,568.29)        | 29,926.64<br>(23,430.00 to<br>37,201.76)        | 19,404.97<br>(15,370.03 to<br>23,955.54)        | 46,074.15<br>(35,505.85 to<br>58,519.83)        | 676.10<br>(563.93 to<br>801.75)        | 790.38<br>(659.06 to<br>939.42)          | 552.21<br>(473.21 to<br>649.44)          | 1,058.16<br>(877.26 to<br>1,274.53)      |
| Communicable, maternal, neonatal, and nutritional diseases                   | 27,434.71<br>(19,199.06 to<br>37,236.77)        | 16,064.18<br>(11,432.06 to<br>21,760.38)        | 9,146.59<br>(6,439.39 to<br>12,418.82)          | 28,639.93<br>(19,602.33 to<br>39,477.33)        | 428.08<br>(328.36 to<br>547.53)        | 332.24<br>(246.34 to<br>442.62)          | 197.51<br>(144.54 to<br>268.08)          | 514.75<br>(375.52 to<br>681.04)          |
| HIV/AIDS and tuberculosis                                                    | 3,902.01<br>(3,175.22 to<br>4,726.15)           | 3,797.95<br>(2,324.28 to<br>5,932.84)           | 1,864.01<br>(1,067.08 to<br>2,822.07)           | 6,445.63<br>(3,988.73 to<br>9,851.62)           | 94.59<br>(75.60 to<br>115.28)          | 96.80<br>(59.40 to<br>153.93)            | 47.51<br>(28.60 to<br>69.30)             | 151.46<br>(93.91 to<br>233.63)           |

|                                                                          |                                                 |                                                |                                                |                                                 |                                         |                                         |                                        |                                          |
|--------------------------------------------------------------------------|-------------------------------------------------|------------------------------------------------|------------------------------------------------|-------------------------------------------------|-----------------------------------------|-----------------------------------------|----------------------------------------|------------------------------------------|
| Tuberculosis                                                             | 2,599.21<br>(1,947.07 to<br>3,287.67)           | 2,314.46<br>(1,142.88 to<br>4,331.43)          | 902.95<br>(469.76 to<br>1,530.43)              | 3,163.32<br>(1,619.23 to<br>5,620.41)           | 70.15<br>(51.99 to<br>90.73)            | 66.85<br>(34.00 to<br>122.55)           | 27.78<br>(14.88 to<br>45.86)           | 87.61<br>(44.34 to<br>152.81)            |
| HIV/AIDS                                                                 | 1,302.80<br>(1,009.16 to<br>1,661.52)           | 1,483.49<br>(663.27 to<br>2,483.46)            | 961.06<br>(331.62 to<br>1,798.24)              | 3,283.31<br>(1,492.08 to<br>5,709.61)           | 24.44<br>(19.51 to<br>30.40)            | 29.95<br>(13.17 to<br>48.97)            | 19.73<br>(7.17 to<br>35.04)            | 63.85<br>(28.22 to<br>111.17)            |
| <b>Diarrhea, lower respiratory, and other common infectious diseases</b> | <b>7,488.32<br/>(5,036.00 to<br/>10,631.79)</b> | <b>5,008.92<br/>(2,898.55 to<br/>8,057.26)</b> | <b>2,600.32<br/>(1,514.41 to<br/>4,302.38)</b> | <b>9,520.37<br/>(5,248.26 to<br/>15,114.26)</b> | <b>121.08<br/>(90.77 to<br/>159.14)</b> | <b>119.12<br/>(69.73 to<br/>192.38)</b> | <b>69.19<br/>(39.70 to<br/>117.82)</b> | <b>182.44<br/>(107.10 to<br/>274.84)</b> |
| Diarrheal diseases                                                       | 2,450.46<br>(1,617.55 to<br>3,653.00)           | 1,624.78<br>(559.97 to<br>3,578.71)            | 948.25<br>(300.23 to<br>2,174.61)              | 2,428.39<br>(944.29 to<br>4,603.94)             | 43.37<br>(29.56 to<br>62.22)            | 42.77<br>(11.15 to<br>102.16)           | 26.50<br>(6.65 to<br>68.15)            | 57.60<br>(17.95 to<br>117.28)            |
| Intestinal infectious diseases                                           | 98.90<br>(48.94 to<br>181.92)                   | 75.96<br>(36.24 to<br>136.78)                  | 54.46<br>(26.48 to<br>98.36)                   | 104.15<br>(49.03 to<br>187.50)                  | 1.35<br>(0.69 to<br>2.38)               | 1.12<br>(0.55 to<br>1.97)               | 0.82<br>(0.41 to<br>1.48)              | 1.48<br>(0.74 to<br>2.65)                |
| Typhoid fever                                                            | 66.23<br>(31.17 to<br>123.55)                   | 60.36<br>(27.28 to<br>114.87)                  | 45.38<br>(20.75 to<br>84.97)                   | 79.77<br>(35.87 to<br>150.61)                   | 0.92<br>(0.44 to<br>1.69)               | 0.88<br>(0.41 to<br>1.65)               | 0.68<br>(0.32 to<br>1.25)              | 1.14<br>(0.51 to<br>2.14)                |
| Paratyphoid fever                                                        | 5.33<br>(2.13 to<br>11.43)                      | 5.75<br>(2.32 to<br>12.44)                     | 4.13<br>(1.67 to<br>9.05)                      | 7.68<br>(3.12 to<br>16.59)                      | 0.07<br>(0.03 to<br>0.16)               | 0.08<br>(0.04 to<br>0.18)               | 0.06<br>(0.03 to<br>0.13)              | 0.11<br>(0.05 to<br>0.24)                |
| Other intestinal infectious diseases                                     | 27.34<br>(6.33 to<br>87.25)                     | 9.85<br>(2.10 to<br>32.00)                     | 4.95<br>(1.11 to<br>16.75)                     | 16.70<br>(3.40 to<br>57.36)                     | 0.35<br>(0.09 to<br>1.08)               | 0.15<br>(0.04 to<br>0.44)               | 0.08<br>(0.02 to<br>0.25)              | 0.23<br>(0.06 to<br>0.77)                |
| Lower respiratory infections                                             | 3,265.22<br>(2,062.48 to<br>4,963.11)           | 2,235.82<br>(1,211.60 to<br>3,937.47)          | 1,058.93<br>(609.48 to<br>1,822.18)            | 5,060.99<br>(2,286.43 to<br>9,013.38)           | 53.98<br>(38.82 to<br>73.98)            | 59.66<br>(37.09 to<br>92.88)            | 32.79<br>(21.24 to<br>48.76)           | 97.69<br>(55.43 to<br>156.80)            |
| Upper respiratory infections                                             | 9.24<br>(2.61 to<br>22.60)                      | 6.70<br>(2.52 to<br>15.73)                     | 3.06<br>(1.23 to<br>6.69)                      | 10.93<br>(3.56 to<br>28.01)                     | 0.13<br>(0.05 to<br>0.29)               | 0.12<br>(0.06 to<br>0.25)               | 0.06<br>(0.03 to<br>0.12)              | 0.18<br>(0.08 to<br>0.40)                |
| Otitis media                                                             | 1.28<br>(0.50 to<br>3.35)                       | 0.23<br>(0.09 to<br>0.53)                      | 0.22<br>(0.09 to<br>0.52)                      | 0.27<br>(0.11 to<br>0.64)                       | 0.02<br>(0.01 to<br>0.05)               | 0.01<br>(0.00 to<br>0.02)               | 0.01<br>(0.00 to<br>0.02)              | 0.01<br>(0.00 to<br>0.02)                |
| Meningitis                                                               | 988.81<br>(621.22 to<br>1,644.03)               | 554.83<br>(340.95 to<br>882.09)                | 382.79<br>(251.87 to<br>564.56)                | 1,051.33<br>(566.64 to<br>1,918.86)             | 13.92<br>(9.48 to<br>21.50)             | 13.92<br>(6.08 to<br>13.48)             | 6.89<br>(4.82 to<br>9.95)              | 14.93<br>(8.80 to<br>25.15)              |
| Pneumococcal meningitis                                                  | 55.16<br>(35.29 to<br>88.86)                    | 29.65<br>(17.75 to<br>47.85)                   | 24.01<br>(14.93 to<br>36.21)                   | 52.73<br>(29.52 to<br>99.69)                    | 0.87<br>(0.60 to<br>1.27)               | 0.56<br>(0.37 to<br>0.85)               | 0.50<br>(0.34 to<br>0.75)              | 0.86<br>(0.53 to<br>1.43)                |
| H influenzae type B meningitis                                           | 99.57<br>(56.62 to<br>175.89)                   | 115.50<br>(28.80 to<br>307.51)                 | 48.86<br>(19.70 to<br>112.36)                  | 430.77<br>(79.79 to<br>1,161.17)                | 1.33<br>(0.81 to<br>2.22)               | 1.50<br>(0.47 to<br>3.78)               | 0.73<br>(0.36 to<br>1.49)              | 5.18<br>(1.05 to<br>13.70)               |
| Meningococcal meningitis                                                 | 424.35<br>(265.65 to<br>698.76)                 | 193.70<br>(127.25 to<br>301.32)                | 144.86<br>(97.73 to<br>217.93)                 | 270.43<br>(165.28 to<br>423.25)                 | 5.87<br>(3.92 to<br>8.98)               | 3.23<br>(2.27 to<br>4.78)               | 2.57<br>(1.82 to<br>3.80)              | 4.15<br>(2.75 to<br>6.20)                |
| Other meningitis                                                         | 409.73<br>(254.83 to<br>675.71)                 | 215.98<br>(138.86 to<br>325.29)                | 165.05<br>(108.68 to<br>244.09)                | 297.40<br>(182.91 to<br>464.65)                 | 5.85<br>(3.99 to<br>8.93)               | 3.77<br>(2.61 to<br>5.42)               | 3.08<br>(2.16 to<br>4.51)              | 4.73<br>(3.13 to<br>6.99)                |
| Encephalitis                                                             | 42.51<br>(21.52 to<br>84.60)                    | 41.10<br>(22.36 to<br>75.77)                   | 27.47<br>(15.68 to<br>48.10)                   | 59.75<br>(31.02 to<br>118.16)                   | 0.59<br>(0.34 to<br>1.08)               | 0.65<br>(0.41 to<br>1.06)               | 0.46<br>(0.30 to<br>0.71)              | 0.88<br>(0.52 to<br>1.56)                |
| Diphtheria                                                               | 2.19<br>(0.88 to<br>4.55)                       | 0.65<br>(0.21 to<br>1.91)                      | 0.27<br>(0.13 to<br>0.51)                      | 2.02<br>(0.48 to<br>6.20)                       | 0.03<br>(0.01 to<br>0.06)               | 0.03<br>(0.00 to<br>0.02)               | 0.00<br>(0.00 to<br>0.01)              | 0.03<br>(0.01 to<br>0.07)                |
| Whooping cough                                                           | 482.93<br>(30.47 to<br>1,584.10)                | 434.12<br>(39.51 to<br>1,230.07)               | 109.37<br>(8.14 to<br>377.97)                  | 704.55<br>(55.94 to<br>2,158.50)                | 5.70<br>(0.36 to<br>18.66)              | 5.15<br>(0.47 to<br>14.59)              | 1.32<br>(0.10 to<br>4.55)              | 8.33<br>(0.66 to<br>25.46)               |
| Tetanus                                                                  | 34.69<br>(14.00 to<br>73.53)                    | 7.30<br>(2.52 to<br>17.26)                     | 3.97<br>(1.37 to<br>8.74)                      | 10.86<br>(3.65 to<br>26.16)                     | 0.57<br>(0.23 to<br>1.13)               | 0.13<br>(0.05 to<br>0.29)               | 0.10<br>(0.03 to<br>0.21)              | 0.17<br>(0.06 to<br>0.39)                |
| Measles                                                                  | 86.32<br>(25.75 to<br>216.41)                   | 13.63<br>(1.10 to<br>75.93)                    | 4.68<br>(0.64 to<br>22.06)                     | 64.53<br>(5.97 to<br>248.66)                    | 1.03<br>(0.31 to<br>2.57)               | 0.16<br>(0.01 to<br>0.91)               | 0.06<br>(0.01 to<br>0.26)              | 0.77<br>(0.07 to<br>2.94)                |
| <b>Democratic Republic of the Congo</b>                                  |                                                 |                                                |                                                |                                                 |                                         |                                         |                                        |                                          |
| <b>YLLs (in 1000s)</b>                                                   |                                                 |                                                |                                                |                                                 | <b>Deaths (in 1000s)</b>                |                                         |                                        |                                          |

| Cause                                                 | 2016                                                       | 2040 Forecast                                              | 2040 Better Scenario                                       | 2040 Worse Scenario                                        | 2016                                               | 2040 Forecast                                     | 2040 Better Scenario                              | 2040 Worse Scenario                               |
|-------------------------------------------------------|------------------------------------------------------------|------------------------------------------------------------|------------------------------------------------------------|------------------------------------------------------------|----------------------------------------------------|---------------------------------------------------|---------------------------------------------------|---------------------------------------------------|
| Varicella and herpes zoster                           | 25.77<br>(12.44 to<br>46.98)                               | 13.80<br>(6.81 to<br>26.84)                                | 6.83<br>(3.66 to<br>12.50)                                 | 22.58<br>(10.37 to<br>44.71)                               | 0.39<br>(0.23 to<br>0.65)                          | 0.28<br>(0.17 to<br>0.47)                         | 0.17<br>(0.11 to<br>0.27)                         | 0.39<br>(0.22 to<br>0.66)                         |
| <b>Neglected tropical diseases and malaria</b>        | <b>6,296.53</b><br><b>(3,802.79 to</b><br><b>9,531.65)</b> | <b>2,128.31</b><br><b>(1,420.38 to</b><br><b>3,097.32)</b> | <b>1,695.75</b><br><b>(1,155.56 to</b><br><b>2,393.80)</b> | <b>3,144.12</b><br><b>(1,952.27 to</b><br><b>4,717.59)</b> | <b>83.30</b><br><b>(53.23 to</b><br><b>122.41)</b> | <b>35.49</b><br><b>(25.40 to</b><br><b>48.40)</b> | <b>30.17</b><br><b>(22.06 to</b><br><b>39.87)</b> | <b>47.34</b><br><b>(32.10 to</b><br><b>67.33)</b> |
| Malaria                                               | 5,939.39<br>(3,511.08 to<br>9,116.82)                      | 1,905.78<br>(1,244.24 to<br>2,807.57)                      | 1,540.74<br>(1,029.25 to<br>2,184.58)                      | 2,809.42<br>(1,726.00 to<br>4,312.66)                      | 77.63<br>(48.56 to<br>116.47)                      | 31.60<br>(21.77 to<br>43.81)                      | 27.33<br>(19.28 to<br>36.64)                      | 42.06<br>(27.70 to<br>59.99)                      |
| Chagas disease                                        | 0.00<br>(0.00 to<br>0.00)                                  | 0.00<br>(0.00 to<br>0.00)                                  | 0.00<br>(0.00 to<br>0.00)                                  | 0.00<br>(0.00 to<br>0.00)                                  | 0.00<br>(0.00 to<br>0.00)                          | 0.00<br>(0.00 to<br>0.00)                         | 0.00<br>(0.00 to<br>0.00)                         | 0.00<br>(0.00 to<br>0.00)                         |
| Leishmaniasis                                         | 0.25<br>(0.14 to<br>0.34)                                  | 0.19<br>(0.11 to<br>0.30)                                  | 0.10<br>(0.06 to<br>0.16)                                  | 0.24<br>(0.14 to<br>0.36)                                  | 0.01<br>(0.00 to<br>0.01)                          | 0.01<br>(0.00 to<br>0.01)                         | 0.00<br>(0.00 to<br>0.01)                         | 0.01<br>(0.00 to<br>0.01)                         |
| African trypanosomiasis                               | 83.61<br>(41.63 to<br>142.74)                              | 10.34<br>(4.34 to<br>22.77)                                | 10.03<br>(4.16 to<br>21.36)                                | 11.17<br>(4.73 to<br>23.96)                                | 1.52<br>(0.78 to<br>2.59)                          | 0.20<br>(0.08 to<br>0.42)                         | 0.20<br>(0.08 to<br>0.41)                         | 0.21<br>(0.09 to<br>0.44)                         |
| Schistosomiasis                                       | 26.66<br>(19.03 to<br>36.23)                               | 23.52<br>(15.42 to<br>33.65)                               | 17.76<br>(11.63 to<br>25.68)                               | 26.07<br>(17.37 to<br>37.41)                               | 0.72<br>(0.52 to<br>0.96)                          | 0.69<br>(0.46 to<br>0.96)                         | 0.54<br>(0.36 to<br>0.77)                         | 0.73<br>(0.49 to<br>1.01)                         |
| Cysticercosis                                         | 4.94<br>(3.94 to<br>6.23)                                  | 2.60<br>(1.92 to<br>3.47)                                  | 2.21<br>(1.61 to<br>2.98)                                  | 2.91<br>(2.17 to<br>3.82)                                  | 0.10<br>(0.08 to<br>0.12)                          | 0.06<br>(0.04 to<br>0.08)                         | 0.05<br>(0.04 to<br>0.07)                         | 0.06<br>(0.05 to<br>0.08)                         |
| Cystic echinococcosis                                 | 2.77<br>(1.86 to<br>3.94)                                  | 1.50<br>(0.92 to<br>2.36)                                  | 0.61<br>(0.37 to<br>0.94)                                  | 2.19<br>(1.35 to<br>3.34)                                  | 0.05<br>(0.04 to<br>0.07)                          | 0.04<br>(0.02 to<br>0.06)                         | 0.02<br>(0.01 to<br>0.02)                         | 0.05<br>(0.03 to<br>0.07)                         |
| Dengue                                                | 1.03<br>(0.05 to<br>4.26)                                  | 3.23<br>(0.19 to<br>12.29)                                 | 2.68<br>(0.16 to<br>9.71)                                  | 4.55<br>(0.25 to<br>18.28)                                 | 0.01<br>(0.00 to<br>0.06)                          | 0.06<br>(0.00 to<br>0.22)                         | 0.06<br>(0.00 to<br>0.19)                         | 0.08<br>(0.00 to<br>0.28)                         |
| Yellow fever                                          | 16.89<br>(3.23 to<br>48.96)                                | 8.41<br>(1.57 to<br>25.67)                                 | 4.79<br>(0.91 to<br>14.89)                                 | 11.46<br>(2.11 to<br>34.02)                                | 0.26<br>(0.05 to<br>0.77)                          | 0.14<br>(0.03 to<br>0.43)                         | 0.08<br>(0.02 to<br>0.25)                         | 0.18<br>(0.03 to<br>0.55)                         |
| Rabies                                                | 5.02<br>(1.38 to<br>13.23)                                 | 2.84<br>(0.68 to<br>8.37)                                  | 0.85<br>(0.22 to<br>2.45)                                  | 5.10<br>(1.21 to<br>14.38)                                 | 0.08<br>(0.02 to<br>0.21)                          | 0.05<br>(0.01 to<br>0.14)                         | 0.02<br>(0.00 to<br>0.04)                         | 0.08<br>(0.02 to<br>0.23)                         |
| Intestinal nematode infections                        | 56.04<br>(28.84 to<br>95.55)                               | 58.91<br>(30.38 to<br>104.60)                              | 50.00<br>(26.23 to<br>87.66)                               | 91.42<br>(44.26 to<br>163.70)                              | 0.69<br>(0.36 to<br>1.16)                          | 0.76<br>(0.41 to<br>1.31)                         | 0.65<br>(0.37 to<br>1.11)                         | 1.14<br>(0.58 to<br>2.01)                         |
| Other neglected tropical diseases                     | 159.93<br>(47.20 to<br>365.01)                             | 110.98<br>(31.60 to<br>235.84)                             | 65.97<br>(18.08 to<br>138.63)                              | 179.59<br>(54.20 to<br>382.02)                             | 2.23<br>(0.64 to<br>4.87)                          | 1.90<br>(0.50 to<br>3.99)                         | 1.23<br>(0.30 to<br>2.48)                         | 2.74<br>(0.78 to<br>5.66)                         |
| <b>Maternal disorders</b>                             | <b>772.24</b><br><b>(630.14 to</b><br><b>930.31)</b>       | <b>663.00</b><br><b>(451.14 to</b><br><b>971.29)</b>       | <b>312.58</b><br><b>(203.08 to</b><br><b>455.46)</b>       | <b>870.98</b><br><b>(589.93 to</b><br><b>1,282.30)</b>     | <b>14.69</b><br><b>(11.99 to</b><br><b>17.74)</b>  | <b>12.92</b><br><b>(8.63 to</b><br><b>18.89)</b>  | <b>6.12</b><br><b>(3.90 to</b><br><b>8.93)</b>    | <b>16.87</b><br><b>(11.45 to</b><br><b>24.77)</b> |
| Maternal hemorrhage                                   | 209.57<br>(147.18 to<br>283.99)                            | 168.05<br>(98.92 to<br>260.24)                             | 79.45<br>(45.42 to<br>127.05)                              | 214.57<br>(127.34 to<br>341.69)                            | 4.01<br>(2.84 to<br>5.43)                          | 3.29<br>(1.92 to<br>5.15)                         | 1.56<br>(0.88 to<br>2.49)                         | 4.18<br>(2.48 to<br>6.80)                         |
| Maternal sepsis and other maternal infections         | 32.63<br>(16.95 to<br>52.99)                               | 24.43<br>(11.58 to<br>44.36)                               | 11.46<br>(5.28 to<br>21.51)                                | 31.65<br>(14.84 to<br>57.90)                               | 0.64<br>(0.34 to<br>1.02)                          | 0.49<br>(0.23 to<br>0.89)                         | 0.23<br>(0.11 to<br>0.43)                         | 0.63<br>(0.30 to<br>1.13)                         |
| Maternal hypertensive disorders                       | 165.10<br>(117.01 to<br>221.57)                            | 135.57<br>(82.43 to<br>209.18)                             | 63.41<br>(36.71 to<br>100.46)                              | 175.38<br>(103.93 to<br>286.12)                            | 3.01<br>(2.12 to<br>4.01)                          | 2.53<br>(1.53 to<br>3.92)                         | 1.19<br>(0.69 to<br>1.90)                         | 3.26<br>(1.96 to<br>5.27)                         |
| Maternal obstructed labor and uterine rupture         | 35.38<br>(18.53 to<br>59.17)                               | 30.72<br>(13.96 to<br>57.90)                               | 13.63<br>(6.49 to<br>25.09)                                | 39.83<br>(19.39 to<br>74.24)                               | 0.69<br>(0.36 to<br>1.15)                          | 0.61<br>(0.27 to<br>1.19)                         | 0.27<br>(0.13 to<br>0.51)                         | 0.79<br>(0.39 to<br>1.51)                         |
| Maternal abortion, miscarriage, and ectopic pregnancy | 25.22<br>(12.75 to<br>45.07)                               | 25.52<br>(10.33 to<br>52.30)                               | 12.00<br>(4.86 to<br>24.48)                                | 33.74<br>(13.86 to<br>71.51)                               | 0.49<br>(0.26 to<br>0.88)                          | 0.51<br>(0.21 to<br>1.02)                         | 0.24<br>(0.10 to<br>0.48)                         | 0.67<br>(0.28 to<br>1.39)                         |
| Indirect maternal deaths                              | 172.32<br>(123.86 to<br>231.15)                            | 145.01<br>(89.57 to<br>223.80)                             | 68.15<br>(41.22 to<br>107.87)                              | 194.99<br>(119.72 to<br>310.88)                            | 3.33<br>(2.39 to<br>4.48)                          | 2.84<br>(1.73 to<br>4.41)                         | 1.34<br>(0.80 to<br>2.13)                         | 3.78<br>(2.30 to<br>6.11)                         |



|                                                                  |                                       |                                       |                                     |                                        |                               |                              |                              |                               |
|------------------------------------------------------------------|---------------------------------------|---------------------------------------|-------------------------------------|----------------------------------------|-------------------------------|------------------------------|------------------------------|-------------------------------|
| Late maternal deaths                                             | 23.40<br>(11.32 to<br>41.61)          | 15.41<br>(6.63 to<br>29.82)           | 7.14<br>(3.21 to<br>14.13)          | 20.53<br>(8.83 to<br>40.64)            | 0.44<br>(0.20 to<br>0.79)     | 0.30<br>(0.12 to<br>0.57)    | 0.14<br>(0.06 to<br>0.27)    | 0.39<br>(0.17 to<br>0.77)     |
| Maternal deaths aggravated by HIV/AIDS                           | 4.12<br>(2.21 to<br>6.39)             | 33.76<br>(15.46 to<br>63.89)          | 15.92<br>(5.46 to<br>31.85)         | 48.51<br>(22.75 to<br>90.74)           | 0.08<br>(0.04 to<br>0.13)     | 0.71<br>(0.31 to<br>1.35)    | 0.34<br>(0.12 to<br>0.68)    | 1.00<br>(0.47 to<br>1.86)     |
| Other maternal disorders                                         | 104.50<br>(67.68 to<br>149.02)        | 84.53<br>(47.24 to<br>135.60)         | 41.41<br>(23.31 to<br>66.70)        | 111.77<br>(65.11 to<br>181.34)         | 2.00<br>(1.30 to<br>2.87)     | 1.65<br>(0.94 to<br>2.66)    | 0.81<br>(0.45 to<br>1.32)    | 2.17<br>(1.26 to<br>3.54)     |
| <b>Democratic Republic of the Congo</b>                          |                                       |                                       |                                     |                                        |                               |                              |                              |                               |
| Cause                                                            | YLLs (in 1000s)                       |                                       |                                     |                                        | Deaths (in 1000s)             |                              |                              |                               |
|                                                                  | 2016                                  | 2040 Forecast                         | 2040 Better Scenario                | 2040 Worse Scenario                    | 2016                          | 2040 Forecast                | 2040 Better Scenario         | 2040 Worse Scenario           |
|                                                                  | 5716.18<br>(3,158.17 to<br>8,685.52)  | 3,035.55<br>(1,595.94 to<br>5,135.32) | 1,727.01<br>(905.54 to<br>2,858.76) | 6,446.14<br>(3,345.57 to<br>10,833.45) | 66.04<br>(36.49 to<br>100.35) | 35.08<br>(18.44 to<br>59.34) | 19.96<br>(10.47 to<br>33.03) | 74.48<br>(38.66 to<br>125.16) |
| Neonatal disorders                                               |                                       |                                       |                                     |                                        |                               |                              |                              |                               |
| Neonatal preterm birth                                           | 1,714.19<br>(867.87 to<br>2,908.33)   | 649.11<br>(311.18 to<br>1,193.36)     | 373.26<br>(169.12 to<br>692.52)     | 1,663.75<br>(792.12 to<br>2,993.77)    | 19.80<br>(10.03 to<br>33.60)  | 7.50<br>(3.60 to<br>13.79)   | 4.31<br>(1.95 to<br>8.00)    | 19.22<br>(9.15 to<br>34.59)   |
| Neonatal encephalopathy due to birth asphyxia and trauma         | 1,648.12<br>(809.84 to<br>2,796.59)   | 808.09<br>(339.86 to<br>1,594.54)     | 481.41<br>(198.06 to<br>924.20)     | 1,597.26<br>(668.86 to<br>3,111.47)    | 19.04<br>(9.35 to<br>32.31)   | 9.34<br>(3.93 to<br>18.43)   | 5.56<br>(2.29 to<br>10.68)   | 18.46<br>(7.73 to<br>35.94)   |
| Neonatal sepsis and other neonatal infections                    | 1,286.33<br>(655.58 to<br>2,207.35)   | 949.29<br>(466.21 to<br>1,659.91)     | 547.74<br>(265.62 to<br>947.96)     | 1,887.29<br>(912.38 to<br>3,322.57)    | 14.86<br>(7.57 to<br>25.51)   | 10.97<br>(5.39 to<br>19.18)  | 6.33<br>(3.07 to<br>10.95)   | 21.81<br>(10.55 to<br>38.39)  |
| Hemolytic disease and other neonatal jaundice                    | 132.87<br>(51.24 to<br>261.88)        | 47.94<br>(16.21 to<br>108.45)         | 24.88<br>(8.70 to<br>56.60)         | 98.82<br>(34.12 to<br>219.13)          | 1.53<br>(0.59 to<br>3.03)     | 0.55<br>(0.19 to<br>1.25)    | 0.29<br>(0.10 to<br>0.65)    | 1.14<br>(0.39 to<br>2.53)     |
| Other neonatal disorders                                         | 934.68<br>(447.78 to<br>1,658.60)     | 581.11<br>(245.98 to<br>1,114.75)     | 299.73<br>(127.20 to<br>583.42)     | 1,199.02<br>(483.57 to<br>2,331.51)    | 10.80<br>(5.17 to<br>19.16)   | 6.72<br>(2.84 to<br>12.89)   | 3.46<br>(1.47 to<br>6.75)    | 13.86<br>(5.59 to<br>26.94)   |
| Nutritional deficiencies                                         | 2,028.13<br>(1,053.29 to<br>3,954.91) | 897.54<br>(471.45 to<br>2,113.64)     | 592.12<br>(309.58 to<br>1,441.01)   | 1,383.30<br>(699.60 to<br>3,059.31)    | 32.03<br>(17.72 to<br>67.39)  | 23.00<br>(11.98 to<br>61.87) | 17.48<br>(9.19 to<br>47.65)  | 28.72<br>(14.71 to<br>72.65)  |
| Protein-energy malnutrition                                      | 1,905.42<br>(965.92 to<br>3,725.71)   | 685.67<br>(340.87 to<br>1,578.38)     | 439.41<br>(225.13 to<br>1,048.56)   | 1,134.28<br>(545.23 to<br>2,508.58)    | 28.52<br>(15.45 to<br>59.37)  | 15.94<br>(8.19 to<br>41.33)  | 11.85<br>(6.21 to<br>31.71)  | 21.19<br>(10.76 to<br>51.41)  |
| Iodine deficiency                                                | 6.89<br>(0.37 to<br>30.39)            | 23.96<br>(0.50 to<br>110.86)          | 14.65<br>(0.28 to<br>65.44)         | 34.41<br>(0.74 to<br>168.70)           | 0.14<br>(0.01 to<br>0.52)     | 0.67<br>(0.02 to<br>2.97)    | 0.46<br>(0.01 to<br>1.99)    | 0.81<br>(0.02 to<br>3.76)     |
| Dietary iron deficiency                                          | 3.91<br>(2.29 to<br>9.26)             | 5.72<br>(2.91 to<br>14.87)            | 4.50<br>(2.29 to<br>11.66)          | 6.42<br>(3.26 to<br>16.77)             | 0.07<br>(0.04 to<br>0.17)     | 0.11<br>(0.06 to<br>0.28)    | 0.09<br>(0.05 to<br>0.22)    | 0.12<br>(0.06 to<br>0.31)     |
| Other nutritional deficiencies                                   | 111.91<br>(54.61 to<br>277.40)        | 182.19<br>(82.28 to<br>567.97)        | 133.57<br>(59.13 to<br>405.22)      | 208.19<br>(91.63 to<br>609.25)         | 3.30<br>(1.56 to<br>9.24)     | 6.28<br>(2.70 to<br>20.93)   | 5.08<br>(1.69 to<br>16.91)   | 6.59<br>(2.79 to<br>21.77)    |
| Other communicable, maternal, neonatal, and nutritional diseases | 1,231.31<br>(642.07 to<br>2,327.40)   | 532.91<br>(323.47 to<br>891.44)       | 354.79<br>(217.28 to<br>575.42)     | 829.38<br>(469.82 to<br>1,431.08)      | 16.36<br>(9.18 to<br>29.14)   | 9.84<br>(6.27 to<br>14.71)   | 7.09<br>(4.46 to<br>10.04)   | 13.43<br>(8.26 to<br>21.08)   |
| Sexually transmitted infections excluding HIV                    | 829.31<br>(373.62 to<br>1,639.38)     | 186.14<br>(71.75 to<br>375.92)        | 120.28<br>(47.05 to<br>237.47)      | 336.86<br>(123.97 to<br>685.76)        | 9.79<br>(4.46 to<br>19.23)    | 2.29<br>(0.93 to<br>4.47)    | 1.50<br>(0.63 to<br>2.90)    | 4.05<br>(1.55 to<br>8.12)     |
| Syphilis                                                         | 824.04<br>(369.48 to<br>1,635.41)     | 179.45<br>(66.47 to<br>371.45)        | 114.84<br>(42.98 to<br>231.12)      | 329.66<br>(118.53 to<br>677.55)        | 9.66<br>(4.35 to<br>19.13)    | 2.13<br>(0.80 to<br>4.36)    | 1.37<br>(0.52 to<br>2.73)    | 3.89<br>(1.42 to<br>7.98)     |
| Chlamydial infection                                             | 1.03<br>(0.69 to<br>1.58)             | 1.31<br>(0.75 to<br>2.26)             | 1.06<br>(0.60 to<br>1.89)           | 1.42<br>(0.83 to<br>2.42)              | 0.02<br>(0.02 to<br>0.04)     | 0.03<br>(0.02 to<br>0.05)    | 0.03<br>(0.01 to<br>0.04)    | 0.03<br>(0.01 to<br>0.05)     |
| Gonococcal infection                                             | 2.74<br>(1.86 to<br>4.27)             | 3.48<br>(1.98 to<br>6.15)             | 2.84<br>(1.61 to<br>5.10)           | 3.73<br>(2.19 to<br>6.43)              | 0.07<br>(0.05 to<br>0.10)     | 0.08<br>(0.05 to<br>0.14)    | 0.07<br>(0.04 to<br>0.12)    | 0.09<br>(0.05 to<br>0.15)     |
| Other sexually transmitted infections                            | 1.51<br>(1.01 to<br>2.35)             | 1.91<br>(1.06 to<br>3.34)             | 1.54<br>(0.85 to<br>2.76)           | 2.06<br>(1.18 to<br>3.64)              | 0.03<br>(0.02 to<br>0.05)     | 0.04<br>(0.02 to<br>0.07)    | 0.04<br>(0.02 to<br>0.06)    | 0.05<br>(0.03 to<br>0.08)     |





|                                         |                                                            |                                                            |                                                            |                                                            |                                                   |                                                      |                                                    |                                                      |
|-----------------------------------------|------------------------------------------------------------|------------------------------------------------------------|------------------------------------------------------------|------------------------------------------------------------|---------------------------------------------------|------------------------------------------------------|----------------------------------------------------|------------------------------------------------------|
| Acute lymphoid leukemia                 | 20.20<br>(14.31 to<br>30.10)                               | 25.03<br>(17.67 to<br>34.90)                               | 24.68<br>(17.35 to<br>34.07)                               | 30.37<br>(21.43 to<br>44.01)                               | 0.31<br>(0.23 to<br>0.42)                         | 0.44<br>(0.32 to<br>0.60)                            | 0.46<br>(0.32 to<br>0.62)                          | 0.51<br>(0.37 to<br>0.68)                            |
| Chronic lymphoid leukemia               | 1.17<br>(0.85 to<br>1.45)                                  | 2.27<br>(1.57 to<br>3.02)                                  | 2.36<br>(1.62 to<br>3.20)                                  | 2.30<br>(1.58 to<br>3.09)                                  | 0.05<br>(0.03 to<br>0.06)                         | 0.09<br>(0.06 to<br>0.13)                            | 0.10<br>(0.07 to<br>0.14)                          | 0.09<br>(0.06 to<br>0.12)                            |
| Acute myeloid leukemia                  | 14.92<br>(11.35 to<br>20.48)                               | 28.31<br>(20.61 to<br>38.61)                               | 30.82<br>(22.78 to<br>41.51)                               | 31.28<br>(22.83 to<br>42.79)                               | 0.29<br>(0.23 to<br>0.38)                         | 0.65<br>(0.47 to<br>0.89)                            | 0.75<br>(0.55 to<br>1.01)                          | 0.68<br>(0.50 to<br>0.91)                            |
| Chronic myeloid leukemia                | 4.33<br>(2.94 to<br>5.94)                                  | 5.75<br>(3.71 to<br>8.60)                                  | 5.69<br>(3.69 to<br>8.47)                                  | 6.01<br>(3.84 to<br>9.21)                                  | 0.12<br>(0.08 to<br>0.16)                         | 0.16<br>(0.11 to<br>0.23)                            | 0.17<br>(0.11 to<br>0.24)                          | 0.17<br>(0.11 to<br>0.24)                            |
| Other leukemia                          | 28.60<br>(18.20 to<br>42.90)                               | 35.19<br>(21.94 to<br>50.79)                               | 29.24<br>(18.05 to<br>42.18)                               | 43.20<br>(26.93 to<br>64.98)                               | 0.57<br>(0.36 to<br>0.76)                         | 0.91<br>(0.56 to<br>1.24)                            | 0.82<br>(0.49 to<br>1.12)                          | 1.01<br>(0.63 to<br>1.40)                            |
| Other neoplasms                         | 107.27<br>(89.20 to<br>128.00)                             | 198.64<br>(155.04 to<br>248.85)                            | 198.21<br>(152.84 to<br>249.24)                            | 213.68<br>(168.21 to<br>265.39)                            | 2.53<br>(2.01 to<br>2.98)                         | 5.45<br>(4.00 to<br>6.65)                            | 5.81<br>(4.19 to<br>7.15)                          | 5.42<br>(4.09 to<br>6.58)                            |
| <b>Cardiovascular diseases</b>          | <b>1,875.04</b><br><b>(1,673.00 to</b><br><b>2,090.22)</b> | <b>3,484.58</b><br><b>(2,335.54 to</b><br><b>5,123.35)</b> | <b>1,731.68</b><br><b>(1,220.51 to</b><br><b>2,495.68)</b> | <b>4,941.51</b><br><b>(3,152.19 to</b><br><b>7,425.28)</b> | <b>82.55</b><br><b>(73.91 to</b><br><b>91.54)</b> | <b>159.73</b><br><b>(111.66 to</b><br><b>227.29)</b> | <b>89.61</b><br><b>(65.17 to</b><br><b>129.91)</b> | <b>214.03</b><br><b>(142.54 to</b><br><b>311.41)</b> |
| Rheumatic heart disease                 | 68.87<br>(54.63 to<br>84.85)                               | 59.37<br>(42.29 to<br>84.35)                               | 40.68<br>(28.32 to<br>59.25)                               | 68.93<br>(48.80 to<br>100.80)                              | 2.02<br>(1.55 to<br>2.52)                         | 1.93<br>(1.38 to<br>2.72)                            | 1.41<br>(0.99 to<br>1.99)                          | 2.12<br>(1.51 to<br>3.03)                            |
| Ischemic heart disease                  | 663.85<br>(583.34 to<br>757.39)                            | 1,368.59<br>(757.05 to<br>2,347.08)                        | 571.45<br>(319.57 to<br>1,020.93)                          | 2,038.72<br>(1,118.41 to<br>3,394.38)                      | 31.24<br>(27.38 to<br>35.21)                      | 64.59<br>(37.50 to<br>109.38)                        | 31.23<br>(18.15 to<br>55.88)                       | 91.02<br>(51.83 to<br>153.42)                        |
| Stroke                                  | 729.35<br>(604.46 to<br>837.20)                            | 1,223.87<br>(683.64 to<br>2,126.56)                        | 493.34<br>(283.86 to<br>876.15)                            | 1,877.93<br>(1,038.53 to<br>3,201.65)                      | 32.50<br>(26.64 to<br>37.31)                      | 56.17<br>(33.08 to<br>96.26)                         | 26.64<br>(15.81 to<br>47.90)                       | 80.84<br>(47.59 to<br>137.19)                        |
| Ischemic stroke                         | 210.34<br>(167.45 to<br>248.42)                            | 321.91<br>(173.85 to<br>686.77)                            | 169.78<br>(90.53 to<br>375.95)                             | 446.00<br>(237.94 to<br>951.25)                            | 12.18<br>(9.72 to<br>14.50)                       | 19.82<br>(11.14 to<br>45.47)                         | 11.93<br>(6.31 to<br>28.66)                        | 25.68<br>(13.95 to<br>60.86)                         |
| Intracerebral hemorrhage                | 519.01<br>(436.81 to<br>603.79)                            | 901.96<br>(447.50 to<br>1,661.21)                          | 323.56<br>(173.24 to<br>573.91)                            | 1,431.93<br>(696.94 to<br>2,605.67)                        | 20.32<br>(16.62 to<br>23.82)                      | 36.35<br>(19.81 to<br>65.31)                         | 14.71<br>(8.38 to<br>24.77)                        | 53.17<br>(28.76 to<br>96.60)                         |
| Hypertensive heart disease              | 132.79<br>(85.13 to<br>188.05)                             | 279.32<br>(142.32 to<br>558.69)                            | 175.00<br>(95.72 to<br>322.30)                             | 345.16<br>(159.43 to<br>725.46)                            | 6.53<br>(4.15 to<br>9.37)                         | 14.10<br>(7.33 to<br>28.05)                          | 9.70<br>(5.60 to<br>17.45)                         | 16.59<br>(7.86 to<br>35.25)                          |
| Cardiomyopathy and myocarditis          | 51.70<br>(39.93 to<br>65.06)                               | 83.82<br>(57.09 to<br>122.97)                              | 80.90<br>(54.57 to<br>118.05)                              | 92.23<br>(62.66 to<br>136.45)                              | 1.39<br>(1.07 to<br>1.76)                         | 2.67<br>(1.81 to<br>3.86)                            | 2.76<br>(1.87 to<br>3.98)                          | 2.72<br>(1.84 to<br>4.03)                            |
| Myocarditis                             | 8.25<br>(4.73 to<br>13.74)                                 | 10.75<br>(5.19 to<br>21.35)                                | 9.44<br>(4.32 to<br>19.30)                                 | 12.26<br>(6.11 to<br>23.37)                                | 0.17<br>(0.08 to<br>0.31)                         | 0.27<br>(0.12 to<br>0.60)                            | 0.25<br>(0.10 to<br>0.60)                          | 0.28<br>(0.13 to<br>0.61)                            |
| <b>Democratic Republic of the Congo</b> |                                                            |                                                            |                                                            |                                                            |                                                   |                                                      |                                                    |                                                      |
| Cause                                   | YLLs (in 1000s)                                            |                                                            |                                                            |                                                            | Deaths (in 1000s)                                 |                                                      |                                                    |                                                      |
|                                         | 2016                                                       | 2040 Forecast                                              | 2040 Better Scenario                                       | 2040 Worse Scenario                                        | 2016                                              | 2040 Forecast                                        | 2040 Better Scenario                               | 2040 Worse Scenario                                  |
| Alcoholic cardiomyopathy                | 2.67<br>(1.32 to<br>4.63)                                  | 5.53<br>(2.54 to<br>9.62)                                  | 5.19<br>(2.22 to<br>9.15)                                  | 5.67<br>(2.66 to<br>9.63)                                  | 0.09<br>(0.04 to<br>0.16)                         | 0.18<br>(0.08 to<br>0.32)                            | 0.18<br>(0.08 to<br>0.33)                          | 0.18<br>(0.08 to<br>0.32)                            |
| Other cardiomyopathy                    | 40.78<br>(30.20 to<br>51.45)                               | 67.53<br>(43.76 to<br>104.25)                              | 66.27<br>(43.34 to<br>100.68)                              | 74.30<br>(47.93 to<br>115.87)                              | 1.13<br>(0.87 to<br>1.43)                         | 2.22<br>(1.45 to<br>3.31)                            | 2.33<br>(1.56 to<br>3.45)                          | 2.26<br>(1.46 to<br>3.44)                            |
| Atrial fibrillation and flutter         | 8.13<br>(6.22 to<br>10.67)                                 | 19.08<br>(13.99 to<br>25.47)                               | 20.26<br>(14.84 to<br>27.62)                               | 17.90<br>(12.90 to<br>24.18)                               | 0.64<br>(0.48 to<br>0.84)                         | 1.56<br>(1.10 to<br>2.10)                            | 1.83<br>(1.30 to<br>2.46)                          | 1.39<br>(0.97 to<br>1.89)                            |
| Aortic aneurysm                         | 14.40<br>(10.60 to<br>20.65)                               | 30.37<br>(20.06 to<br>47.64)                               | 28.86<br>(19.20 to<br>45.80)                               | 30.41<br>(19.78 to<br>48.13)                               | 0.62<br>(0.46 to<br>0.88)                         | 1.33<br>(0.91 to<br>2.00)                            | 1.38<br>(0.96 to<br>2.11)                          | 1.27<br>(0.86 to<br>1.92)                            |
| Peripheral artery disease               | 0.83<br>(0.28 to<br>1.56)                                  | 2.75<br>(0.88 to<br>5.85)                                  | 3.15<br>(1.03 to<br>7.70)                                  | 2.64<br>(0.79 to<br>5.53)                                  | 0.05<br>(0.02 to<br>0.10)                         | 0.18<br>(0.06 to<br>0.40)                            | 0.23<br>(0.07 to<br>0.58)                          | 0.16<br>(0.05 to<br>0.35)                            |

|                                                                |                                          |                                          |                                          |                                            |                                       |                                       |                                       |                                       |
|----------------------------------------------------------------|------------------------------------------|------------------------------------------|------------------------------------------|--------------------------------------------|---------------------------------------|---------------------------------------|---------------------------------------|---------------------------------------|
| Endocarditis                                                   | 23.98<br>(16.77 to<br>30.53)             | 47.78<br>(30.22 to<br>71.19)             | 43.73<br>(27.93 to<br>63.55)             | 52.47<br>(32.81 to<br>78.55)               | 0.76<br>(0.51 to<br>0.99)             | 1.67<br>(1.04 to<br>2.37)             | 1.65<br>(1.05 to<br>2.29)             | 1.71<br>(1.05 to<br>2.46)             |
| Other cardiovascular and circulatory diseases                  | 181.13<br>(144.13 to<br>237.03)          | 369.64<br>(261.36 to<br>522.75)          | 274.30<br>(198.57 to<br>378.37)          | 415.12<br>(289.87 to<br>592.21)            | 6.82<br>(5.38 to<br>8.85)             | 15.53<br>(11.21 to<br>21.48)          | 12.79<br>(9.36 to<br>17.48)           | 16.21<br>(11.48 to<br>22.79)          |
| <b>Chronic respiratory diseases</b>                            | <b>361.77<br/>(296.08 to<br/>425.21)</b> | <b>437.15<br/>(300.36 to<br/>701.81)</b> | <b>252.47<br/>(191.40 to<br/>352.58)</b> | <b>590.98<br/>(399.80 to<br/>990.61)</b>   | <b>14.27<br/>(12.13 to<br/>17.42)</b> | <b>19.36<br/>(13.26 to<br/>32.18)</b> | <b>11.87<br/>(8.97 to<br/>17.20)</b>  | <b>24.44<br/>(16.27 to<br/>41.44)</b> |
| Chronic obstructive pulmonary disease                          | 194.64<br>(153.82 to<br>246.24)          | 304.17<br>(184.31 to<br>557.37)          | 147.23<br>(96.91 to<br>237.47)           | 427.00<br>(250.70 to<br>802.21)            | 9.34<br>(7.60 to<br>12.22)            | 14.86<br>(9.16 to<br>27.81)           | 8.01<br>(5.36 to<br>12.89)            | 19.30<br>(11.54 to<br>36.57)          |
| Pneumoconiosis                                                 | 1.03<br>(0.67 to<br>1.53)                | 1.44<br>(0.96 to<br>2.15)                | 1.32<br>(0.87 to<br>2.03)                | 1.48<br>(0.99 to<br>2.17)                  | 0.05<br>(0.03 to<br>0.07)             | 0.07<br>(0.04 to<br>0.10)             | 0.07<br>(0.04 to<br>0.10)             | 0.07<br>(0.04 to<br>0.10)             |
| Silicosis                                                      | 0.23<br>(0.11 to<br>0.41)                | 0.21<br>(0.09 to<br>0.36)                | 0.19<br>(0.08 to<br>0.34)                | 0.21<br>(0.09 to<br>0.37)                  | 0.01<br>(0.00 to<br>0.02)             | 0.01<br>(0.00 to<br>0.02)             | 0.01<br>(0.00 to<br>0.02)             | 0.01<br>(0.00 to<br>0.02)             |
| Asbestosis                                                     | 0.21<br>(0.11 to<br>0.34)                | 0.40<br>(0.23 to<br>0.65)                | 0.42<br>(0.23 to<br>0.70)                | 0.39<br>(0.22 to<br>0.63)                  | 0.01<br>(0.00 to<br>0.01)             | 0.02<br>(0.01 to<br>0.03)             | 0.02<br>(0.01 to<br>0.03)             | 0.02<br>(0.01 to<br>0.03)             |
| Coal workers pneumoconiosis                                    | 0.09<br>(0.04 to<br>0.22)                | 0.13<br>(0.05 to<br>0.28)                | 0.09<br>(0.03 to<br>0.20)                | 0.14<br>(0.06 to<br>0.32)                  | 0.00<br>(0.00 to<br>0.01)             | 0.01<br>(0.00 to<br>0.01)             | 0.00<br>(0.00 to<br>0.01)             | 0.01<br>(0.00 to<br>0.01)             |
| Other pneumoconiosis                                           | 0.50<br>(0.29 to<br>0.84)                | 0.70<br>(0.40 to<br>1.15)                | 0.63<br>(0.34 to<br>1.10)                | 0.73<br>(0.42 to<br>1.17)                  | 0.02<br>(0.01 to<br>0.04)             | 0.04<br>(0.02 to<br>0.06)             | 0.03<br>(0.02 to<br>0.06)             | 0.04<br>(0.02 to<br>0.06)             |
| Asthma                                                         | 150.22<br>(111.24 to<br>199.27)          | 104.72<br>(71.27 to<br>155.90)           | 77.85<br>(53.88 to<br>112.19)            | 133.06<br>(86.93 to<br>199.16)             | 4.47<br>(3.30 to<br>6.87)             | 3.60<br>(2.40 to<br>6.16)             | 2.90<br>(1.96 to<br>4.73)             | 4.25<br>(2.78 to<br>7.08)             |
| Interstitial lung disease and pulmonary sarcoidosis            | 3.94<br>(1.30 to<br>7.85)                | 9.14<br>(2.92 to<br>17.29)               | 10.97<br>(3.62 to<br>20.22)              | 8.62<br>(2.75 to<br>16.31)                 | 0.15<br>(0.05 to<br>0.29)             | 0.38<br>(0.11 to<br>0.72)             | 0.49<br>(0.15 to<br>0.92)             | 0.34<br>(0.10 to<br>0.65)             |
| Other chronic respiratory diseases                             | 11.94<br>(5.97 to<br>23.14)              | 17.67<br>(10.30 to<br>26.29)             | 15.10<br>(9.36 to<br>21.97)              | 20.81<br>(11.86 to<br>33.41)               | 0.25<br>(0.14 to<br>0.41)             | 0.45<br>(0.28 to<br>0.63)             | 0.41<br>(0.27 to<br>0.57)             | 0.49<br>(0.29 to<br>0.70)             |
| <b>Cirrhosis and other chronic liver diseases</b>              | <b>340.91<br/>(285.82 to<br/>401.97)</b> | <b>704.41<br/>(574.64 to<br/>846.85)</b> | <b>605.42<br/>(495.75 to<br/>737.31)</b> | <b>738.71<br/>(606.27 to<br/>900.63)</b>   | <b>10.32<br/>(8.65 to<br/>11.95)</b>  | <b>22.01<br/>(18.34 to<br/>25.85)</b> | <b>19.66<br/>(16.46 to<br/>23.40)</b> | <b>22.40<br/>(18.73 to<br/>26.55)</b> |
| Cirrhosis and other chronic liver diseases due to hepatitis B  | 107.44<br>(87.29 to<br>128.78)           | 229.57<br>(183.05 to<br>283.13)          | 208.08<br>(165.58 to<br>256.44)          | 233.62<br>(185.55 to<br>289.27)            | 3.42<br>(2.80 to<br>4.06)             | 7.35<br>(5.97 to<br>8.82)             | 6.91<br>(5.55 to<br>8.34)             | 7.31<br>(5.91 to<br>8.81)             |
| Cirrhosis and other chronic liver diseases due to hepatitis C  | 99.41<br>(80.84 to<br>119.24)            | 216.39<br>(172.58 to<br>267.76)          | 194.97<br>(155.55 to<br>240.93)          | 220.79<br>(176.35 to<br>274.67)            | 3.14<br>(2.57 to<br>3.74)             | 6.85<br>(5.58 to<br>8.32)             | 6.38<br>(5.19 to<br>7.79)             | 6.85<br>(5.54 to<br>8.38)             |
| Cirrhosis and other chronic liver diseases due to alcohol use  | 66.40<br>(54.03 to<br>78.36)             | 151.65<br>(120.58 to<br>183.84)          | 110.90<br>(88.02 to<br>135.42)           | 165.54<br>(131.80 to<br>202.79)            | 2.22<br>(1.82 to<br>2.59)             | 5.05<br>(4.13 to<br>6.01)             | 3.89<br>(3.16 to<br>4.69)             | 5.37<br>(4.37 to<br>6.48)             |
| Cirrhosis and other chronic liver diseases due to other causes | 67.65<br>(55.38 to<br>84.65)             | 106.79<br>(85.80 to<br>134.02)           | 91.47<br>(72.85 to<br>114.71)            | 118.76<br>(94.54 to<br>151.05)             | 1.54<br>(1.29 to<br>1.81)             | 2.75<br>(2.28 to<br>3.27)             | 2.48<br>(2.05 to<br>2.99)             | 2.87<br>(2.37 to<br>3.48)             |
| <b>Digestive diseases</b>                                      | <b>561.74<br/>(410.87 to<br/>756.94)</b> | <b>749.23<br/>(551.65 to<br/>996.35)</b> | <b>608.01<br/>(444.97 to<br/>794.93)</b> | <b>843.00<br/>(609.39 to<br/>1,131.33)</b> | <b>15.90<br/>(12.31 to<br/>20.19)</b> | <b>25.31<br/>(19.35 to<br/>32.65)</b> | <b>22.29<br/>(16.98 to<br/>27.76)</b> | <b>26.36<br/>(19.94 to<br/>33.89)</b> |
| Peptic ulcer disease                                           | 117.98<br>(80.43 to<br>158.42)           | 115.55<br>(74.81 to<br>165.81)           | 77.46<br>(49.17 to<br>111.23)            | 129.65<br>(82.98 to<br>185.76)             | 4.01<br>(2.70 to<br>5.32)             | 4.33<br>(2.85 to<br>6.09)             | 3.11<br>(2.00 to<br>4.41)             | 4.62<br>(2.94 to<br>6.52)             |

**Democratic Republic of the Congo**

| Cause                    | YLLs (in 1000s)              |                              |                              |                               | Deaths (in 1000s)         |                           |                           |                           |
|--------------------------|------------------------------|------------------------------|------------------------------|-------------------------------|---------------------------|---------------------------|---------------------------|---------------------------|
|                          | 2016                         | 2040 Forecast                | 2040 Better Scenario         | 2040 Worse Scenario           | 2016                      | 2040 Forecast             | 2040 Better Scenario      | 2040 Worse Scenario       |
| Gastritis and duodenitis | 33.51<br>(19.52 to<br>50.35) | 61.07<br>(35.19 to<br>97.12) | 52.31<br>(30.07 to<br>84.01) | 64.17<br>(36.42 to<br>102.39) | 1.06<br>(0.65 to<br>1.68) | 2.15<br>(1.27 to<br>3.42) | 1.97<br>(1.16 to<br>3.12) | 2.15<br>(1.26 to<br>3.40) |



|                                                            |                                        |                                            |                                          |                                              |                                     |                                     |                                     |                                     |
|------------------------------------------------------------|----------------------------------------|--------------------------------------------|------------------------------------------|----------------------------------------------|-------------------------------------|-------------------------------------|-------------------------------------|-------------------------------------|
| Eating disorders                                           | 0.15<br>(0.07 to<br>0.29)              | 0.39<br>(0.17 to<br>0.74)                  | 0.38<br>(0.19 to<br>0.75)                | 0.40<br>(0.18 to<br>0.76)                    | 0.00<br>(0.00 to<br>0.01)           | 0.01<br>(0.00 to<br>0.01)           | 0.01<br>(0.00 to<br>0.01)           | 0.01<br>(0.00 to<br>0.01)           |
| <b>Democratic Republic of the Congo</b>                    |                                        |                                            |                                          |                                              |                                     |                                     |                                     |                                     |
| Cause                                                      | YLLs (in 1000s)                        |                                            |                                          |                                              | Deaths (in 1000s)                   |                                     |                                     |                                     |
|                                                            | 2016                                   | 2040 Forecast                              | 2040 Better Scenario                     | 2040 Worse Scenario                          | 2016                                | 2040 Forecast                       | 2040 Better Scenario                | 2040 Worse Scenario                 |
| <b>Diabetes, urogenital, blood, and endocrine diseases</b> | <b>596.30</b><br>(501.45 to<br>773.78) | <b>1,171.79</b><br>(866.48 to<br>1,606.13) | <b>838.53</b><br>(629.25 to<br>1,145.86) | <b>1,419.79</b><br>(1,060.92 to<br>1,962.04) | <b>16.85</b><br>(14.73 to<br>19.46) | <b>43.25</b><br>(31.72 to<br>65.39) | <b>32.72</b><br>(24.17 to<br>49.15) | <b>49.70</b><br>(36.08 to<br>75.91) |
| Diabetes mellitus                                          | 216.09<br>(185.15 to<br>248.05)        | 579.35<br>(377.12 to<br>869.92)            | 391.28<br>(261.14 to<br>585.77)          | 669.20<br>(422.12 to<br>1,002.12)            | 8.72<br>(7.39 to<br>10.03)          | 24.55<br>(17.16 to<br>34.63)        | 17.84<br>(12.62 to<br>25.30)        | 27.05<br>(18.32 to<br>38.98)        |
| Acute glomerulonephritis                                   | 0.93<br>(0.52 to<br>1.52)              | 1.54<br>(1.00 to<br>2.44)                  | 1.21<br>(0.79 to<br>1.82)                | 1.94<br>(1.22 to<br>3.16)                    | 0.02<br>(0.01 to<br>0.02)           | 0.03<br>(0.02 to<br>0.04)           | 0.02<br>(0.02 to<br>0.03)           | 0.05<br>(0.02 to<br>0.05)           |
| Chronic kidney disease                                     | 106.24<br>(89.53 to<br>123.91)         | 265.58<br>(133.30 to<br>686.66)            | 183.34<br>(91.64 to<br>507.68)           | 351.42<br>(171.17 to<br>878.79)              | 3.27<br>(2.82 to<br>3.77)           | 10.79<br>(3.98 to<br>34.29)         | 8.00<br>(2.83 to<br>24.96)          | 13.95<br>(4.90 to<br>40.83)         |
| Chronic kidney disease due to diabetes mellitus            | 23.73<br>(19.07 to<br>28.69)           | 77.13<br>(32.63 to<br>226.56)              | 54.57<br>(22.94 to<br>162.63)            | 102.34<br>(40.18 to<br>294.91)               | 0.90<br>(0.72 to<br>1.10)           | 3.41<br>(1.12 to<br>11.65)          | 2.55<br>(0.83 to<br>8.59)           | 4.45<br>(1.38 to<br>14.03)          |
| Chronic kidney disease due to hypertension                 | 13.24<br>(10.60 to<br>16.39)           | 44.41<br>(15.19 to<br>152.17)              | 32.09<br>(10.85 to<br>110.65)            | 58.47<br>(18.89 to<br>184.05)                | 0.64<br>(0.51 to<br>0.79)           | 2.53<br>(0.69 to<br>9.06)           | 1.97<br>(0.53 to<br>7.02)           | 3.20<br>(0.83 to<br>10.26)          |
| Chronic kidney disease due to glomerulonephritis           | 32.71<br>(26.29 to<br>39.86)           | 66.51<br>(38.80 to<br>136.58)              | 44.36<br>(25.80 to<br>93.11)             | 87.73<br>(50.57 to<br>176.35)                | 0.78<br>(0.64 to<br>0.94)           | 2.11<br>(0.92 to<br>6.08)           | 1.49<br>(0.64 to<br>4.48)           | 2.75<br>(1.19 to<br>7.54)           |
| Chronic kidney disease due to other and unspecified causes | 36.55<br>(29.10 to<br>44.16)           | 77.53<br>(43.13 to<br>170.59)              | 52.32<br>(28.86 to<br>117.57)            | 102.88<br>(56.90 to<br>226.95)               | 0.94<br>(0.76 to<br>1.12)           | 2.74<br>(1.12 to<br>7.98)           | 1.98<br>(0.79 to<br>5.77)           | 3.55<br>(1.43 to<br>9.78)           |
| Urinary diseases and male infertility                      | 45.17<br>(33.95 to<br>60.46)           | 63.54<br>(51.27 to<br>80.84)               | 55.96<br>(44.57 to<br>71.65)             | 72.23<br>(56.79 to<br>92.85)                 | 1.16<br>(0.94 to<br>1.44)           | 3.27<br>(1.84 to<br>2.85)           | 2.24<br>(1.80 to<br>2.86)           | 2.28<br>(1.83 to<br>2.83)           |
| Urinary tract infections                                   | 20.92<br>(10.60 to<br>33.48)           | 37.56<br>(21.48 to<br>52.63)               | 35.70<br>(21.04 to<br>49.65)             | 41.71<br>(23.64 to<br>59.12)                 | 0.53<br>(0.28 to<br>0.77)           | 1.36<br>(0.76 to<br>1.91)           | 1.44<br>(0.83 to<br>2.07)           | 1.32<br>(0.73 to<br>1.85)           |
| Urolithiasis                                               | 0.76<br>(0.31 to<br>1.28)              | 1.78<br>(0.80 to<br>3.19)                  | 1.61<br>(0.77 to<br>2.88)                | 1.93<br>(0.87 to<br>3.33)                    | 0.02<br>(0.01 to<br>0.04)           | 0.05<br>(0.02 to<br>0.11)           | 0.05<br>(0.02 to<br>0.11)           | 0.05<br>(0.02 to<br>0.10)           |
| Other urinary diseases                                     | 23.49<br>(14.62 to<br>34.83)           | 24.20<br>(14.71 to<br>35.64)               | 18.65<br>(10.86 to<br>29.24)             | 28.59<br>(17.15 to<br>43.28)                 | 0.61<br>(0.41 to<br>0.82)           | 0.87<br>(0.51 to<br>1.27)           | 0.75<br>(0.42 to<br>1.17)           | 0.90<br>(0.55 to<br>1.32)           |
| Gynecological diseases                                     | 3.90<br>(2.47 to<br>5.19)              | 6.79<br>(4.12 to<br>9.86)                  | 4.93<br>(2.93 to<br>7.28)                | 7.50<br>(4.28 to<br>10.97)                   | 0.10<br>(0.07 to<br>0.13)           | 0.17<br>(0.11 to<br>0.24)           | 0.13<br>(0.08 to<br>0.18)           | 0.18<br>(0.11 to<br>0.26)           |
| Uterine fibroids                                           | 1.32<br>(0.56 to<br>2.40)              | 1.94<br>(0.72 to<br>3.72)                  | 1.34<br>(0.47 to<br>2.70)                | 2.15<br>(0.78 to<br>4.21)                    | 0.04<br>(0.02 to<br>0.07)           | 0.05<br>(0.02 to<br>0.10)           | 0.04<br>(0.01 to<br>0.07)           | 0.06<br>(0.02 to<br>0.11)           |
| Polycystic ovarian syndrome                                | 0.41<br>(0.04 to<br>1.04)              | 0.51<br>(0.05 to<br>1.41)                  | 0.29<br>(0.03 to<br>0.83)                | 0.60<br>(0.06 to<br>1.65)                    | 0.01<br>(0.00 to<br>0.02)           | 0.01<br>(0.00 to<br>0.03)           | 0.01<br>(0.00 to<br>0.02)           | 0.01<br>(0.00 to<br>0.04)           |
| Endometriosis                                              | 0.01<br>(0.00 to<br>0.04)              | 0.04<br>(0.01 to<br>0.13)                  | 0.03<br>(0.01 to<br>0.09)                | 0.04<br>(0.01 to<br>0.14)                    | 0.00<br>(0.00 to<br>0.00)           | 0.00<br>(0.00 to<br>0.00)           | 0.00<br>(0.00 to<br>0.00)           | 0.00<br>(0.00 to<br>0.00)           |
| Genital prolapse                                           | 0.13<br>(0.05 to<br>0.28)              | 0.16<br>(0.06 to<br>0.36)                  | 0.11<br>(0.04 to<br>0.24)                | 0.17<br>(0.06 to<br>0.39)                    | 0.01<br>(0.00 to<br>0.01)           | 0.01<br>(0.00 to<br>0.02)           | 0.00<br>(0.00 to<br>0.01)           | 0.01<br>(0.00 to<br>0.02)           |
| Other gynecological diseases                               | 2.03<br>(1.04 to<br>3.04)              | 4.16<br>(2.11 to<br>6.37)                  | 3.16<br>(1.57 to<br>4.82)                | 4.54<br>(2.27 to<br>7.13)                    | 0.05<br>(0.02 to<br>0.07)           | 0.10<br>(0.05 to<br>0.15)           | 0.08<br>(0.04 to<br>0.11)           | 0.10<br>(0.05 to<br>0.16)           |
| Hemoglobinopathies and hemolytic anemias                   | 190.80<br>(125.36 to<br>372.05)        | 206.14<br>(147.77 to<br>309.81)            | 161.13<br>(116.99 to<br>239.97)          | 256.83<br>(179.71 to<br>420.58)              | 3.00<br>(2.12 to<br>5.26)           | 4.22<br>(3.21 to<br>6.02)           | 3.40<br>(2.55 to<br>4.72)           | 4.88<br>(3.61 to<br>7.22)           |

|                                                   |                                     |                                     |                                   |                                     |                             |                              |                             |                              |
|---------------------------------------------------|-------------------------------------|-------------------------------------|-----------------------------------|-------------------------------------|-----------------------------|------------------------------|-----------------------------|------------------------------|
| Thalassemias                                      | 0.11<br>(0.05 to<br>0.28)           | 0.04<br>(0.02 to<br>0.12)           | 0.05<br>(0.02 to<br>0.13)         | 0.07<br>(0.03 to<br>0.18)           | 0.00<br>(0.00 to<br>0.00)   | 0.00<br>(0.00 to<br>0.00)    | 0.00<br>(0.00 to<br>0.00)   | 0.00<br>(0.00 to<br>0.00)    |
| Sickle cell disorders                             | 177.56<br>(114.62 to<br>354.22)     | 177.26<br>(124.38 to<br>275.95)     | 138.65<br>(98.46 to<br>211.76)    | 225.98<br>(154.41 to<br>384.02)     | 2.45<br>(1.64 to<br>4.56)   | 2.92<br>(2.11 to<br>4.31)    | 2.32<br>(1.69 to<br>3.39)   | 3.56<br>(2.53 to<br>5.57)    |
| G6PD deficiency                                   | 8.26<br>(6.26 to<br>12.17)          | 21.45<br>(15.93 to<br>30.19)        | 16.17<br>(11.71 to<br>22.49)      | 23.42<br>(17.21 to<br>33.02)        | 0.25<br>(0.19 to<br>0.35)   | 0.81<br>(0.60 to<br>1.12)    | 0.63<br>(0.46 to<br>0.87)   | 0.85<br>(0.63 to<br>1.16)    |
| Other hemoglobinopathies and hemolytic anemias    | 4.87<br>(3.79 to<br>6.51)           | 7.38<br>(5.46 to<br>10.20)          | 6.27<br>(4.66 to<br>8.64)         | 7.36<br>(5.42 to<br>10.23)          | 0.30<br>(0.23 to<br>0.40)   | 0.50<br>(0.36 to<br>0.70)    | 0.46<br>(0.34 to<br>0.64)   | 0.48<br>(0.34 to<br>0.68)    |
| Endocrine, metabolic, blood, and immune disorders | 33.18<br>(12.45 to<br>71.06)        | 48.86<br>(16.74 to<br>110.26)       | 40.68<br>(13.99 to<br>93.31)      | 60.68<br>(21.51 to<br>133.14)       | 0.59<br>(0.20 to<br>1.27)   | 1.20<br>(0.37 to<br>2.75)    | 1.09<br>(0.33 to<br>2.52)   | 1.33<br>(0.43 to<br>2.98)    |
| <b>Democratic Republic of the Congo</b>           |                                     |                                     |                                   |                                     |                             |                              |                             |                              |
| Cause                                             | YLLs (in 1000s)                     |                                     |                                   |                                     | Deaths (in 1000s)           |                              |                             |                              |
|                                                   | 2016                                | 2040 Forecast                       | 2040 Better Scenario              | 2040 Worse Scenario                 | 2016                        | 2040 Forecast                | 2040 Better Scenario        | 2040 Worse Scenario          |
| Musculoskeletal disorders                         | 14.72<br>(10.62 to<br>19.07)        | 35.27<br>(24.42 to<br>47.69)        | 36.63<br>(25.43 to<br>49.58)      | 35.73<br>(24.85 to<br>48.08)        | 0.38<br>(0.27 to<br>0.48)   | 1.00<br>(0.70 to<br>1.29)    | 1.05<br>(0.74 to<br>1.39)   | 0.98<br>(0.69 to<br>1.25)    |
| Rheumatoid arthritis                              | 3.41<br>(2.12 to<br>5.45)           | 8.21<br>(5.01 to<br>13.08)          | 6.73<br>(4.08 to<br>11.15)        | 8.66<br>(5.27 to<br>14.03)          | 0.13<br>(0.08 to<br>0.20)   | 0.35<br>(0.22 to<br>0.53)    | 0.31<br>(0.19 to<br>0.48)   | 0.35<br>(0.22 to<br>0.53)    |
| Other musculoskeletal disorders                   | 11.32<br>(8.08 to<br>15.49)         | 27.06<br>(18.39 to<br>37.71)        | 29.89<br>(20.40 to<br>41.41)      | 27.07<br>(18.41 to<br>37.71)        | 0.25<br>(0.18 to<br>0.34)   | 0.65<br>(0.45 to<br>0.92)    | 0.75<br>(0.52 to<br>1.03)   | 0.62<br>(0.43 to<br>0.88)    |
| Other non-communicable diseases                   | 1,320.41<br>(651.37 to<br>2,206.80) | 1,031.79<br>(600.75 to<br>1,585.28) | 760.91<br>(462.64 to<br>1,134.43) | 1,691.92<br>(909.89 to<br>2,686.81) | 16.56<br>(8.69 to<br>26.78) | 16.56<br>(11.09 to<br>23.70) | 13.65<br>(9.71 to<br>19.13) | 24.01<br>(14.44 to<br>35.84) |
| Congenital birth defects                          | 1,181.74<br>(539.22 to<br>2,017.36) | 808.36<br>(399.43 to<br>1,343.81)   | 561.17<br>(279.38 to<br>905.56)   | 1,411.78<br>(659.01 to<br>2,367.50) | 13.94<br>(6.48 to<br>23.75) | 9.89<br>(5.12 to<br>16.10)   | 6.93<br>(3.67 to<br>11.01)  | 16.96<br>(8.21 to<br>28.15)  |
| Neural tube defects                               | 232.14<br>(89.88 to<br>486.36)      | 65.04<br>(23.23 to<br>138.58)       | 36.95<br>(12.75 to<br>80.55)      | 123.13<br>(43.08 to<br>270.51)      | 2.71<br>(1.05 to<br>5.66)   | 0.77<br>(0.28 to<br>1.64)    | 0.44<br>(0.16 to<br>0.96)   | 1.45<br>(0.52 to<br>3.16)    |
| Congenital heart anomalies                        | 325.13<br>(131.19 to<br>622.96)     | 245.14<br>(123.82 to<br>445.23)     | 175.18<br>(89.68 to<br>314.96)    | 412.26<br>(194.24 to<br>763.65)     | 3.88<br>(1.61 to<br>7.39)   | 3.08<br>(1.64 to<br>5.44)    | 2.23<br>(1.20 to<br>3.85)   | 5.05<br>(2.50 to<br>9.26)    |
| Orofacial clefts                                  | 13.05<br>(2.23 to<br>39.25)         | 7.47<br>(1.15 to<br>23.86)          | 3.96<br>(0.61 to<br>12.12)        | 14.81<br>(2.27 to<br>45.75)         | 0.15<br>(0.03 to<br>0.45)   | 0.09<br>(0.01 to<br>0.28)    | 0.05<br>(0.01 to<br>0.14)   | 0.17<br>(0.03 to<br>0.53)    |
| Down syndrome                                     | 22.26<br>(7.61 to<br>54.93)         | 20.90<br>(9.17 to<br>45.07)         | 14.29<br>(6.51 to<br>30.35)       | 34.40<br>(13.51 to<br>80.94)        | 0.27<br>(0.10 to<br>0.66)   | 0.29<br>(0.14 to<br>0.58)    | 0.20<br>(0.11 to<br>0.40)   | 0.45<br>(0.20 to<br>1.00)    |
| Other chromosomal abnormalities                   | 47.68<br>(9.83 to<br>115.87)        | 55.88<br>(11.98 to<br>129.81)       | 36.94<br>(7.94 to<br>86.68)       | 101.86<br>(21.53 to<br>242.81)      | 0.56<br>(0.11 to<br>1.35)   | 0.66<br>(0.14 to<br>1.52)    | 0.44<br>(0.09 to<br>1.02)   | 1.20<br>(0.25 to<br>2.82)    |
| Congenital musculoskeletal and limb anomalies     | 13.69<br>(4.02 to<br>41.18)         | 11.56<br>(3.79 to<br>34.89)         | 8.40<br>(2.89 to<br>25.25)        | 20.10<br>(6.18 to<br>62.44)         | 0.16<br>(0.05 to<br>0.48)   | 0.14<br>(0.05 to<br>0.41)    | 0.10<br>(0.04 to<br>0.30)   | 0.24<br>(0.08 to<br>0.73)    |
| Urogenital congenital anomalies                   | 22.23<br>(8.63 to<br>40.83)         | 16.47<br>(7.98 to<br>29.89)         | 12.28<br>(6.01 to<br>22.89)       | 27.85<br>(12.80 to<br>51.70)        | 0.27<br>(0.11 to<br>0.49)   | 0.22<br>(0.12 to<br>0.38)    | 0.17<br>(0.09 to<br>0.29)   | 0.35<br>(0.17 to<br>0.63)    |
| Digestive congenital anomalies                    | 100.81<br>(37.83 to<br>216.83)      | 75.43<br>(29.30 to<br>161.76)       | 50.72<br>(19.82 to<br>108.40)     | 137.52<br>(51.23 to<br>299.95)      | 1.17<br>(0.44 to<br>2.52)   | 0.89<br>(0.35 to<br>1.90)    | 0.60<br>(0.24 to<br>1.27)   | 1.61<br>(0.61 to<br>3.51)    |
| Other congenital birth defects                    | 404.75<br>(121.52 to<br>837.18)     | 310.48<br>(116.25 to<br>609.42)     | 222.26<br>(86.57 to<br>420.78)    | 539.85<br>(189.90 to<br>1,065.29)   | 4.77<br>(1.45 to<br>9.84)   | 3.75<br>(1.47 to<br>7.28)    | 2.70<br>(1.11 to<br>5.05)   | 6.44<br>(2.34 to<br>12.59)   |
| Skin and subcutaneous diseases                    | 67.77<br>(37.76 to<br>104.16)       | 183.91<br>(110.47 to<br>263.93)     | 171.50<br>(105.31 to<br>247.01)   | 208.34<br>(121.25 to<br>304.83)     | 1.80<br>(1.09 to<br>2.75)   | 6.22<br>(3.92 to<br>9.42)    | 6.39<br>(4.16 to<br>9.71)   | 6.22<br>(3.77 to<br>9.37)    |



|                                      |                                       |                                       |                                       |                                       |                              |                              |                              |                               |
|--------------------------------------|---------------------------------------|---------------------------------------|---------------------------------------|---------------------------------------|------------------------------|------------------------------|------------------------------|-------------------------------|
| Cellulitis                           | 7.23<br>(2.84 to<br>13.76)            | 28.07<br>(11.98 to<br>47.87)          | 30.27<br>(13.71 to<br>50.13)          | 29.11<br>(12.00 to<br>51.26)          | 0.21<br>(0.08 to<br>0.35)    | 0.92<br>(0.42 to<br>1.53)    | 1.06<br>(0.50 to<br>1.73)    | 0.88<br>(0.38 to<br>1.48)     |
| Pyoderma                             | 52.58<br>(28.99 to<br>84.07)          | 136.00<br>(83.59 to<br>199.93)        | 120.58<br>(74.92 to<br>177.50)        | 158.53<br>(93.30 to<br>237.84)        | 1.30<br>(0.78 to<br>2.02)    | 4.46<br>(2.78 to<br>6.85)    | 4.36<br>(2.78 to<br>6.91)    | 4.56<br>(2.84 to<br>6.88)     |
| Decubitus ulcer                      | 5.09<br>(2.44 to<br>9.64)             | 13.47<br>(6.66 to<br>25.71)           | 14.20<br>(7.17 to<br>26.60)           | 13.44<br>(6.63 to<br>25.78)           | 0.23<br>(0.11 to<br>0.45)    | 0.68<br>(0.31 to<br>1.37)    | 0.80<br>(0.38 to<br>1.58)    | 0.62<br>(0.28 to<br>1.24)     |
| Other skin and subcutaneous diseases | 2.87<br>(1.43 to<br>5.20)             | 6.38<br>(3.46 to<br>10.23)            | 6.45<br>(3.64 to<br>10.13)            | 7.26<br>(3.79 to<br>12.22)            | 0.06<br>(0.03 to<br>0.10)    | 0.16<br>(0.09 to<br>0.24)    | 0.17<br>(0.10 to<br>0.26)    | 0.16<br>(0.09 to<br>0.25)     |
| Sudden infant death syndrome         | 70.90<br>(28.05 to<br>142.34)         | 39.52<br>(14.34 to<br>83.51)          | 28.24<br>(10.58 to<br>58.51)          | 71.80<br>(25.81 to<br>154.83)         | 0.82<br>(0.33 to<br>1.65)    | 0.46<br>(0.17 to<br>0.97)    | 0.33<br>(0.12 to<br>0.68)    | 0.83<br>(0.30 to<br>1.80)     |
| Injuries                             | 2,772.85<br>(2,189.85 to<br>3,488.15) | 3,646.02<br>(2,857.18 to<br>4,804.80) | 2,966.43<br>(2,352.19 to<br>3,890.25) | 4,367.73<br>(3,424.29 to<br>5,769.34) | 47.09<br>(39.72 to<br>55.73) | 71.98<br>(58.82 to<br>93.21) | 60.93<br>(49.92 to<br>77.77) | 81.18<br>(65.43 to<br>105.16) |
| Transport injuries                   | 954.52<br>(740.43 to<br>1,213.81)     | 1,700.32<br>(1,190.68 to<br>2,510.03) | 1,380.33<br>(988.58 to<br>1,989.48)   | 2,006.41<br>(1,402.29 to<br>2,944.83) | 15.66<br>(12.69 to<br>19.16) | 30.52<br>(21.40 to<br>44.66) | 25.26<br>(18.34 to<br>36.27) | 34.72<br>(24.29 to<br>50.77)  |
| Road injuries                        | 914.86<br>(714.30 to<br>1,168.41)     | 1,619.13<br>(1,133.04 to<br>2,371.57) | 1,317.54<br>(940.43 to<br>1,902.10)   | 1,911.61<br>(1,333.34 to<br>2,777.82) | 14.99<br>(12.14 to<br>18.30) | 28.99<br>(20.28 to<br>42.33) | 24.06<br>(17.43 to<br>34.52) | 32.99<br>(23.14 to<br>48.47)  |
| Pedestrian road injuries             | 373.43<br>(251.23 to<br>523.63)       | 439.67<br>(282.13 to<br>644.98)       | 350.38<br>(228.08 to<br>506.69)       | 542.23<br>(351.02 to<br>804.56)       | 5.92<br>(4.25 to<br>7.88)    | 8.18<br>(5.38 to<br>11.96)   | 6.71<br>(4.54 to<br>9.52)    | 9.53<br>(6.29 to<br>13.83)    |

**Democratic Republic of the Congo**

| Cause                          | YLLs (in 1000s)                       |                                     |                                   |                                       | Deaths (in 1000s)            |                              |                              |                              |
|--------------------------------|---------------------------------------|-------------------------------------|-----------------------------------|---------------------------------------|------------------------------|------------------------------|------------------------------|------------------------------|
|                                | 2016                                  | 2040 Forecast                       | 2040 Better Scenario              | 2040 Worse Scenario                   | 2016                         | 2040 Forecast                | 2040 Better Scenario         | 2040 Worse Scenario          |
| Cyclist road injuries          | 13.50<br>(8.78 to<br>19.54)           | 27.50<br>(16.99 to<br>44.28)        | 22.43<br>(14.07 to<br>35.40)      | 33.17<br>(20.31 to<br>53.52)          | 0.23<br>(0.15 to<br>0.32)    | 0.49<br>(0.31 to<br>0.78)    | 0.41<br>(0.26 to<br>0.64)    | 0.57<br>(0.36 to<br>0.91)    |
| Motorcyclist road injuries     | 76.77<br>(51.56 to<br>118.80)         | 181.03<br>(100.84 to<br>319.42)     | 155.02<br>(89.38 to<br>267.62)    | 202.49<br>(115.92 to<br>356.92)       | 1.26<br>(0.85 to<br>1.94)    | 3.07<br>(1.73 to<br>5.40)    | 2.65<br>(1.53 to<br>4.51)    | 3.38<br>(1.90 to<br>5.93)    |
| Motor vehicle road injuries    | 447.93<br>(348.34 to<br>577.51)       | 964.52<br>(638.69 to<br>1,470.47)   | 784.48<br>(528.14 to<br>1,168.87) | 1,126.03<br>(756.30 to<br>1,688.02)   | 7.54<br>(5.97 to<br>9.55)    | 17.13<br>(11.32 to<br>26.26) | 14.19<br>(9.55 to<br>20.85)  | 19.38<br>(12.86 to<br>29.49) |
| Other road injuries            | 3.23<br>(2.21 to<br>5.06)             | 6.42<br>(3.97 to<br>10.24)          | 5.23<br>(3.29 to<br>8.21)         | 7.70<br>(4.75 to<br>12.44)            | 0.05<br>(0.04 to<br>0.08)    | 0.12<br>(0.07 to<br>0.18)    | 0.10<br>(0.06 to<br>0.15)    | 0.13<br>(0.08 to<br>0.21)    |
| Other transport injuries       | 39.66<br>(24.55 to<br>57.47)          | 81.19<br>(48.06 to<br>133.10)       | 62.79<br>(38.41 to<br>101.12)     | 94.80<br>(56.50 to<br>154.16)         | 0.67<br>(0.44 to<br>0.94)    | 1.53<br>(0.93 to<br>2.52)    | 1.20<br>(0.76 to<br>1.94)    | 1.73<br>(1.05 to<br>2.83)    |
| Unintentional injuries         | 1,396.70<br>(1,001.06 to<br>1,941.51) | 1,208.29<br>(952.21 to<br>1,525.18) | 924.24<br>(731.09 to<br>1,162.15) | 1,575.66<br>(1,196.27 to<br>2,088.88) | 23.05<br>(18.48 to<br>29.62) | 25.61<br>(21.28 to<br>30.65) | 21.20<br>(17.65 to<br>25.38) | 29.97<br>(24.34 to<br>37.27) |
| Falls                          | 130.94<br>(93.34 to<br>197.66)        | 174.47<br>(132.94 to<br>238.11)     | 154.85<br>(118.21 to<br>212.49)   | 196.75<br>(147.13 to<br>277.83)       | 3.39<br>(2.55 to<br>4.54)    | 5.95<br>(4.51 to<br>7.82)    | 5.82<br>(4.42 to<br>7.64)    | 5.95<br>(4.47 to<br>7.93)    |
| Drowning                       | 510.92<br>(328.91 to<br>788.82)       | 355.29<br>(247.05 to<br>501.95)     | 264.82<br>(187.46 to<br>372.82)   | 485.28<br>(325.61 to<br>730.67)       | 7.04<br>(4.95 to<br>10.31)   | 5.65<br>(4.19 to<br>7.64)    | 4.32<br>(3.21 to<br>5.81)    | 7.30<br>(5.17 to<br>10.34)   |
| Fire, heat, and hot substances | 164.76<br>(95.63 to<br>272.33)        | 122.42<br>(74.00 to<br>204.88)      | 89.02<br>(54.10 to<br>149.07)     | 160.94<br>(93.54 to<br>278.51)        | 2.90<br>(1.85 to<br>4.50)    | 2.85<br>(1.84 to<br>4.54)    | 2.24<br>(1.44 to<br>3.55)    | 3.32<br>(2.08 to<br>5.44)    |
| Poisonings                     | 76.49<br>(35.98 to<br>168.68)         | 45.11<br>(25.00 to<br>82.60)        | 28.81<br>(16.02 to<br>53.89)      | 64.26<br>(31.96 to<br>132.29)         | 1.24<br>(0.67 to<br>2.36)    | 0.89<br>(0.54 to<br>1.47)    | 0.60<br>(0.37 to<br>1.00)    | 1.15<br>(0.64 to<br>2.02)    |
| Exposure to mechanical forces  | 184.76<br>(120.03 to<br>296.50)       | 166.56<br>(118.15 to<br>240.10)     | 121.82<br>(86.11 to<br>174.93)    | 220.99<br>(147.78 to<br>331.58)       | 2.84<br>(2.00 to<br>4.15)    | 3.01<br>(2.24 to<br>4.15)    | 2.31<br>(1.71 to<br>3.13)    | 3.71<br>(2.66 to<br>5.22)    |

|                                                 |                                          |                                            |                                          |                                            |                                    |                                       |                                      |                                       |
|-------------------------------------------------|------------------------------------------|--------------------------------------------|------------------------------------------|--------------------------------------------|------------------------------------|---------------------------------------|--------------------------------------|---------------------------------------|
| Unintentional firearm injuries                  | 21.43<br>(14.14 to<br>29.96)             | 21.89<br>(13.67 to<br>33.50)               | 15.86<br>(9.86 to<br>24.89)              | 25.78<br>(16.52 to<br>39.43)               | 0.37<br>(0.25 to<br>0.51)          | 0.41<br>(0.27 to<br>0.62)             | 0.31<br>(0.20 to<br>0.47)            | 0.47<br>(0.30 to<br>0.71)             |
| Unintentional suffocation                       | 67.53<br>(27.28 to<br>154.09)            | 44.24<br>(21.04 to<br>89.61)               | 29.95<br>(14.39 to<br>60.81)             | 72.22<br>(30.54 to<br>149.07)              | 0.83<br>(0.35 to<br>1.86)          | 0.58<br>(0.30 to<br>1.12)             | 0.40<br>(0.21 to<br>0.77)            | 0.92<br>(0.42 to<br>1.83)             |
| Other exposure to mechanical forces             | 95.80<br>(66.10 to<br>131.14)            | 100.43<br>(71.35 to<br>139.31)             | 76.01<br>(53.29 to<br>105.98)            | 122.99<br>(85.11 to<br>170.43)             | 1.64<br>(1.20 to<br>2.13)          | 2.02<br>(1.49 to<br>2.80)             | 1.60<br>(1.18 to<br>2.25)            | 2.32<br>(1.70 to<br>3.17)             |
| Adverse effects of medical treatment            | 82.47<br>(50.82 to<br>135.22)            | 81.71<br>(61.25 to<br>114.54)              | 63.61<br>(48.99 to<br>87.86)             | 105.65<br>(73.19 to<br>161.32)             | 1.45<br>(1.09 to<br>2.05)          | 1.84<br>(1.51 to<br>2.34)             | 1.55<br>(1.26 to<br>1.97)            | 2.12<br>(1.70 to<br>2.84)             |
| Animal contact                                  | 81.88<br>(56.15 to<br>118.50)            | 102.30<br>(74.20 to<br>148.57)             | 71.48<br>(50.73 to<br>105.15)            | 131.98<br>(90.92 to<br>191.68)             | 1.56<br>(1.15 to<br>2.21)          | 2.35<br>(1.74 to<br>3.45)             | 1.76<br>(1.29 to<br>2.58)            | 2.75<br>(2.01 to<br>3.93)             |
| Venomous animal contact                         | 57.85<br>(38.25 to<br>89.45)             | 69.21<br>(48.36 to<br>107.75)              | 47.98<br>(33.42 to<br>74.52)             | 89.43<br>(59.11 to<br>136.68)              | 1.14<br>(0.83 to<br>1.70)          | 1.66<br>(1.20 to<br>2.55)             | 1.24<br>(0.90 to<br>1.91)            | 1.93<br>(1.39 to<br>2.88)             |
| Non-venomous animal contact                     | 24.03<br>(10.38 to<br>41.21)             | 33.10<br>(15.06 to<br>53.80)               | 23.49<br>(10.58 to<br>38.47)             | 42.55<br>(18.92 to<br>70.20)               | 0.42<br>(0.19 to<br>0.68)          | 0.69<br>(0.31 to<br>1.08)             | 0.52<br>(0.23 to<br>0.84)            | 0.82<br>(0.37 to<br>1.30)             |
| Foreign body                                    | 89.29<br>(47.14 to<br>157.85)            | 82.22<br>(51.30 to<br>125.23)              | 73.53<br>(47.53 to<br>107.69)            | 113.64<br>(66.12 to<br>189.89)             | 1.28<br>(0.77 to<br>2.05)          | 1.44<br>(1.00 to<br>1.98)             | 1.38<br>(0.96 to<br>1.89)            | 1.78<br>(1.17 to<br>2.62)             |
| Pulmonary aspiration and foreign body in airway | 81.80<br>(42.96 to<br>147.34)            | 73.83<br>(46.53 to<br>116.11)              | 66.76<br>(43.50 to<br>100.38)            | 103.15<br>(60.03 to<br>177.20)             | 1.16<br>(0.70 to<br>1.90)          | 1.28<br>(0.91 to<br>1.75)             | 1.25<br>(0.91 to<br>1.67)            | 1.60<br>(1.06 to<br>2.42)             |
| Foreign body in other body part                 | 7.49<br>(2.11 to<br>16.12)               | 8.38<br>(2.33 to<br>19.32)                 | 6.78<br>(1.83 to<br>16.02)               | 10.49<br>(2.98 to<br>23.31)                | 0.12<br>(0.03 to<br>0.26)          | 0.16<br>(0.04 to<br>0.38)             | 0.13<br>(0.03 to<br>0.33)            | 0.18<br>(0.05 to<br>0.42)             |
| Environmental heat and cold exposure            | 31.39<br>(18.40 to<br>44.05)             | 36.94<br>(20.80 to<br>53.38)               | 24.06<br>(13.44 to<br>34.95)             | 46.36<br>(26.25 to<br>67.37)               | 0.60<br>(0.35 to<br>0.80)          | 0.83<br>(0.47 to<br>1.17)             | 0.56<br>(0.31 to<br>0.79)            | 0.97<br>(0.54 to<br>1.37)             |
| Other unintentional injuries                    | 43.80<br>(29.38 to<br>61.12)             | 41.27<br>(27.06 to<br>59.50)               | 32.24<br>(21.34 to<br>47.00)             | 49.81<br>(33.08 to<br>71.34)               | 0.74<br>(0.50 to<br>1.01)          | 0.80<br>(0.53 to<br>1.15)             | 0.65<br>(0.42 to<br>0.92)            | 0.92<br>(0.61 to<br>1.29)             |
| <b>Self-harm and interpersonal violence</b>     | <b>369.57<br/>(295.61 to<br/>446.84)</b> | <b>689.32<br/>(481.17 to<br/>1,000.38)</b> | <b>615.26<br/>(442.58 to<br/>871.28)</b> | <b>731.72<br/>(503.87 to<br/>1,068.05)</b> | <b>7.56<br/>(5.98 to<br/>9.09)</b> | <b>15.03<br/>(10.51 to<br/>21.54)</b> | <b>13.66<br/>(9.88 to<br/>19.07)</b> | <b>15.59<br/>(10.89 to<br/>22.47)</b> |

**Democratic Republic of the Congo**

| Cause                              | YLLs (in 1000s)                 |                                 |                                 |                                 | Deaths (in 1000s)         |                             |                            |                             |
|------------------------------------|---------------------------------|---------------------------------|---------------------------------|---------------------------------|---------------------------|-----------------------------|----------------------------|-----------------------------|
|                                    | 2016                            | 2040 Forecast                   | 2040 Better Scenario            | 2040 Worse Scenario             | 2016                      | 2040 Forecast               | 2040 Better Scenario       | 2040 Worse Scenario         |
| Self-harm                          | 186.79<br>(131.16 to<br>256.53) | 422.69<br>(249.02 to<br>666.17) | 364.16<br>(226.45 to<br>558.94) | 447.34<br>(260.50 to<br>716.65) | 4.46<br>(3.19 to<br>6.02) | 10.29<br>(6.32 to<br>15.99) | 9.17<br>(5.90 to<br>13.39) | 10.62<br>(6.37 to<br>16.68) |
| Self-harm by firearm               | 15.73<br>(7.42 to<br>25.53)     | 26.49<br>(11.11 to<br>50.35)    | 21.77<br>(9.39 to<br>39.38)     | 28.40<br>(11.85 to<br>54.03)    | 0.36<br>(0.18 to<br>0.57) | 0.64<br>(0.28 to<br>1.16)   | 0.54<br>(0.24 to<br>0.93)  | 0.67<br>(0.29 to<br>1.20)   |
| Self-harm by other specified means | 171.06<br>(119.37 to<br>233.96) | 396.20<br>(238.09 to<br>625.92) | 342.40<br>(212.04 to<br>520.44) | 418.94<br>(245.98 to<br>668.57) | 4.10<br>(2.90 to<br>5.46) | 9.66<br>(5.91 to<br>14.98)  | 8.63<br>(5.50 to<br>12.55) | 9.95<br>(5.98 to<br>15.70)  |
| Interpersonal violence             | 182.78<br>(134.10 to<br>233.06) | 266.64<br>(171.61 to<br>376.58) | 251.10<br>(162.92 to<br>356.33) | 284.38<br>(183.52 to<br>400.64) | 3.09<br>(2.29 to<br>3.93) | 4.73<br>(3.09 to<br>6.57)   | 4.49<br>(2.98 to<br>6.24)  | 4.97<br>(3.25 to<br>6.93)   |
| Physical violence by firearm       | 60.39<br>(28.66 to<br>91.78)    | 91.75<br>(42.96 to<br>154.19)   | 88.63<br>(41.83 to<br>147.22)   | 95.29<br>(43.91 to<br>161.74)   | 1.04<br>(0.50 to<br>1.58) | 1.62<br>(0.77 to<br>2.70)   | 1.57<br>(0.75 to<br>2.61)  | 1.67<br>(0.78 to<br>2.79)   |
| Physical violence by sharp object  | 47.12<br>(26.21 to<br>69.56)    | 77.83<br>(39.76 to<br>123.35)   | 79.11<br>(40.97 to<br>123.87)   | 79.77<br>(41.14 to<br>125.94)   | 0.81<br>(0.46 to<br>1.19) | 1.39<br>(0.72 to<br>2.16)   | 1.42<br>(0.74 to<br>2.20)  | 1.41<br>(0.74 to<br>2.20)   |
| Physical violence by other means   | 75.28<br>(50.81 to<br>108.63)   | 97.06<br>(55.31 to<br>155.55)   | 83.36<br>(48.15 to<br>135.45)   | 109.31<br>(63.76 to<br>173.14)  | 1.24<br>(0.86 to<br>1.81) | 1.73<br>(0.99 to<br>2.78)   | 1.50<br>(0.88 to<br>2.43)  | 1.90<br>(1.10 to<br>3.01)   |

|                                                                              |                                             |                                             |                                             |                                             |                                       |                                       |                                       |                                         |
|------------------------------------------------------------------------------|---------------------------------------------|---------------------------------------------|---------------------------------------------|---------------------------------------------|---------------------------------------|---------------------------------------|---------------------------------------|-----------------------------------------|
| Forces of nature, conflict and terrorism, and executions and police conflict | 52.06<br>(8.74 to<br>99.07)                 | 48.08<br>(0.00 to<br>640.96)                | 46.60<br>(0.00 to<br>620.28)                | 53.95<br>(0.00 to<br>725.49)                | 0.82<br>(0.14 to<br>1.56)             | 0.82<br>(0.00 to<br>10.83)            | 0.81<br>(0.00 to<br>10.67)            | 0.89<br>(0.00 to<br>11.78)              |
| Exposure to forces of nature                                                 | 0.00<br>(0.00 to<br>0.00)                   | 2.13<br>(0.00 to<br>24.67)                  | 2.04<br>(0.00 to<br>23.68)                  | 2.48<br>(0.00 to<br>28.55)                  | 0.00<br>(0.00 to<br>0.00)             | 0.04<br>(0.00 to<br>0.44)             | 0.04<br>(0.00 to<br>0.43)             | 0.04<br>(0.00 to<br>0.48)               |
| Conflict and terrorism                                                       | 51.46<br>(8.16 to<br>98.62)                 | 37.94<br>(0.00 to<br>640.96)                | 36.67<br>(0.00 to<br>620.28)                | 42.96<br>(0.00 to<br>725.49)                | 0.81<br>(0.13 to<br>1.55)             | 0.64<br>(0.00 to<br>10.83)            | 0.63<br>(0.00 to<br>10.67)            | 0.70<br>(0.00 to<br>11.78)              |
| Executions and police conflict                                               | 0.61<br>(0.44 to<br>0.98)                   | 8.01<br>(0.00 to<br>191.15)                 | 7.89<br>(0.00 to<br>188.29)                 | 8.52<br>(0.00 to<br>203.44)                 | 0.01<br>(0.01 to<br>0.02)             | 0.14<br>(0.00 to<br>3.38)             | 0.14<br>(0.00 to<br>3.36)             | 0.15<br>(0.00 to<br>3.53)               |
| <b>Equatorial Guinea</b>                                                     |                                             |                                             |                                             |                                             |                                       |                                       |                                       |                                         |
| Cause                                                                        | YLLs (actual counts)                        |                                             |                                             |                                             | Deaths (actual counts)                |                                       |                                       |                                         |
|                                                                              | 2016                                        | 2040 Forecast                               | 2040 Better Scenario                        | 2040 Worse Scenario                         | 2016                                  | 2040 Forecast                         | 2040 Better Scenario                  | 2040 Worse Scenario                     |
| All causes                                                                   | 271,561.93<br>(214,505.71 to<br>338,187.14) | 215,227.11<br>(141,333.62 to<br>318,685.66) | 185,813.42<br>(121,489.73 to<br>276,523.45) | 449,816.93<br>(323,851.47 to<br>608,296.12) | 5,807.05<br>(4,483.10 to<br>7,386.06) | 6,743.83<br>(5,036.92 to<br>8,804.11) | 5,962.18<br>(4,398.96 to<br>7,783.01) | 11,403.15<br>(8,934.00 to<br>14,350.12) |
| Communicable, maternal, neonatal, and nutritional diseases                   | 200,254.02<br>(158,072.46 to<br>252,767.99) | 100,097.56<br>(57,419.17 to<br>167,583.38)  | 84,938.85<br>(48,233.89 to<br>147,792.24)   | 292,716.58<br>(185,579.99 to<br>412,789.77) | 3,489.55<br>(2,828.14 to<br>4,244.90) | 2,084.50<br>(1,260.21 to<br>3,424.50) | 1,777.51<br>(1,071.90 to<br>3,019.96) | 5,552.52<br>(3,529.35 to<br>7,447.73)   |
| HIV/AIDS and tuberculosis                                                    | 72,911.71<br>(55,561.54 to<br>96,175.51)    | 31,051.15<br>(5,013.75 to<br>97,889.66)     | 26,351.91<br>(3,734.16 to<br>89,271.21)     | 146,870.08<br>(63,371.62 to<br>222,348.11)  | 1,563.21<br>(1,219.96 to<br>2,000.71) | 628.61<br>(133.04 to<br>1,923.53)     | 521.75<br>(96.67 to<br>1,711.19)      | 2,987.23<br>(1,378.52 to<br>4,436.42)   |
| Tuberculosis                                                                 | 6,533.16<br>(3,669.01 to<br>10,531.15)      | 3,738.22<br>(1,490.25 to<br>8,632.93)       | 2,503.76<br>(1,047.61 to<br>5,745.64)       | 10,386.45<br>(4,290.68 to<br>23,612.26)     | 191.88<br>(108.05 to<br>304.15)       | 117.98<br>(55.94 to<br>230.03)        | 82.16<br>(39.99 to<br>160.99)         | 308.45<br>(148.05 to<br>612.78)         |
| HIV/AIDS                                                                     | 66,378.54<br>(48,752.06 to<br>90,592.74)    | 27,312.93<br>(1,986.61 to<br>94,565.38)     | 23,848.15<br>(1,503.70 to<br>86,711.31)     | 136,483.64<br>(52,093.99 to<br>216,586.73)  | 1,371.32<br>(1,031.61 to<br>1,811.40) | 510.63<br>(33.84 to<br>1,814.27)      | 439.59<br>(24.22 to<br>1,646.75)      | 2,678.78<br>(1,043.87 to<br>4,259.82)   |
| Diarrhea, lower respiratory, and other common infectious diseases            | 25,064.17<br>(17,120.15 to<br>37,252.13)    | 20,053.30<br>(10,306.98 to<br>35,753.33)    | 12,977.64<br>(6,800.52 to<br>23,149.48)     | 44,124.26<br>(21,303.74 to<br>86,624.45)    | 522.38<br>(346.85 to<br>789.83)       | 623.79<br>(352.57 to<br>1,031.20)     | 458.20<br>(256.64 to<br>778.70)       | 1,086.98<br>(576.64 to<br>1,874.17)     |
| Diarrheal diseases                                                           | 3,240.63<br>(1,401.20 to<br>7,784.34)       | 2,541.45<br>(484.93 to<br>8,508.74)         | 2,209.86<br>(316.76 to<br>7,564.97)         | 5,162.74<br>(1,080.78 to<br>17,296.43)      | 87.21<br>(29.31 to<br>232.79)         | 97.23<br>(13.55 to<br>359.97)         | 93.31<br>(12.37 to<br>329.90)         | 174.40<br>(26.01 to<br>641.72)          |
| Intestinal infectious diseases                                               | 204.09<br>(70.03 to<br>473.53)              | 218.27<br>(65.78 to<br>544.46)              | 224.56<br>(68.31 to<br>558.73)              | 311.52<br>(97.71 to<br>766.41)              | 3.04<br>(1.06 to<br>6.97)             | 3.39<br>(1.06 to<br>8.18)             | 3.50<br>(1.12 to<br>8.50)             | 4.64<br>(1.51 to<br>11.34)              |
| Typhoid fever                                                                | 166.74<br>(48.34 to<br>417.63)              | 192.47<br>(53.39 to<br>490.25)              | 201.31<br>(56.72 to<br>514.99)              | 260.10<br>(69.04 to<br>659.41)              | 2.49<br>(0.72 to<br>6.15)             | 2.95<br>(0.85 to<br>7.43)             | 3.09<br>(0.91 to<br>7.89)             | 3.84<br>(1.05 to<br>9.72)               |
| Paratyphoid fever                                                            | 13.97<br>(3.46 to<br>36.87)                 | 15.16<br>(3.60 to<br>42.21)                 | 13.58<br>(3.33 to<br>39.12)                 | 26.01<br>(6.13 to<br>75.76)                 | 0.21<br>(0.05 to<br>0.53)             | 0.23<br>(0.06 to<br>0.65)             | 0.21<br>(0.05 to<br>0.61)             | 0.39<br>(0.09 to<br>1.09)               |
| Other intestinal infectious diseases                                         | 23.38<br>(5.85 to<br>69.25)                 | 10.64<br>(2.29 to<br>34.99)                 | 9.67<br>(2.09 to<br>31.19)                  | 25.42<br>(5.03 to<br>82.77)                 | 0.34<br>(0.10 to<br>0.90)             | 0.21<br>(0.06 to<br>0.61)             | 0.20<br>(0.05 to<br>0.57)             | 0.41<br>(0.11 to<br>1.19)               |
| Lower respiratory infections                                                 | 13,613.48<br>(8,992.32 to<br>20,293.93)     | 12,477.86<br>(5,925.45 to<br>24,401.70)     | 7,563.91<br>(3,747.69 to<br>14,414.80)      | 29,625.09<br>(12,446.06 to<br>62,921.48)    | 314.84<br>(206.26 to<br>489.28)       | 442.42<br>(247.16 to<br>761.89)       | 304.41<br>(171.09 to<br>513.75)       | 772.76<br>(385.53 to<br>1,383.37)       |
| Upper respiratory infections                                                 | 4.92<br>(1.76 to<br>13.42)                  | 3.70<br>(1.15 to<br>10.27)                  | 2.99<br>(0.91 to<br>7.63)                   | 10.54<br>(3.13 to<br>31.52)                 | 0.08<br>(0.04 to<br>0.18)             | 0.08<br>(0.03 to<br>0.19)             | 0.07<br>(0.02 to<br>0.16)             | 0.20<br>(0.06 to<br>0.49)               |
| Otitis media                                                                 | 2.44<br>(0.95 to<br>6.54)                   | 1.16<br>(0.48 to<br>3.41)                   | 1.15<br>(0.47 to<br>3.49)                   | 1.25<br>(0.51 to<br>3.54)                   | 0.06<br>(0.02 to<br>0.17)             | 0.07<br>(0.02 to<br>0.21)             | 0.07<br>(0.02 to<br>0.23)             | 0.06<br>(0.02 to<br>0.18)               |
| Meningitis                                                                   | 3,881.58<br>(2,540.02 to<br>6,023.69)       | 3,489.74<br>(1,855.59 to<br>5,877.20)       | 2,361.59<br>(1,282.85 to<br>4,075.30)       | 6,351.17<br>(3,267.71 to<br>10,890.24)      | 64.22<br>(40.86 to<br>99.68)          | 61.59<br>(35.94 to<br>104.75)         | 46.19<br>(26.48 to<br>79.90)          | 98.63<br>(55.02 to<br>163.35)           |
| Pneumococcal meningitis                                                      | 243.56<br>(150.25 to<br>380.77)             | 222.26<br>(114.98 to<br>406.38)             | 165.81<br>(86.21 to<br>305.62)              | 301.61<br>(164.82 to<br>544.46)             | 4.74<br>(2.82 to<br>7.82)             | 5.07<br>(2.78 to<br>9.26)             | 4.00<br>(2.15 to<br>7.20)             | 6.05<br>(3.36 to<br>10.77)              |

|                                         |                                          |                                          |                                          |                                          |                                   |                                 |                                 |                                 |
|-----------------------------------------|------------------------------------------|------------------------------------------|------------------------------------------|------------------------------------------|-----------------------------------|---------------------------------|---------------------------------|---------------------------------|
| H influenzae type B meningitis          | 367.65<br>(233.27 to<br>582.36)          | 1,182.35<br>(321.13 to<br>2,759.51)      | 390.99<br>(158.27 to<br>827.83)          | 2,601.11<br>(604.03 to<br>6,362.39)      | 5.66<br>(3.64 to<br>8.91)         | 15.53<br>(5.08 to<br>33.78)     | 6.27<br>(2.91 to<br>12.00)      | 32.00<br>(8.34 to<br>75.67)     |
| Meningococcal meningitis                | 1,661.51<br>(1,092.32 to<br>2,591.58)    | 1,005.51<br>(532.94 to<br>1,814.14)      | 876.37<br>(471.92 to<br>1,537.89)        | 1,663.66<br>(923.00 to<br>2,854.22)      | 26.75<br>(16.92 to<br>41.39)      | 19.18<br>(10.70 to<br>35.03)    | 16.90<br>(9.30 to<br>30.06)     | 28.52<br>(16.51 to<br>49.53)    |
| Other meningitis                        | 1,608.86<br>(1,033.82 to<br>2,585.98)    | 1,079.62<br>(580.73 to<br>1,920.15)      | 928.41<br>(498.24 to<br>1,645.97)        | 1,784.79<br>(994.50 to<br>3,075.84)      | 27.07<br>(17.12 to<br>41.74)      | 21.81<br>(12.11 to<br>39.65)    | 19.02<br>(10.38 to<br>33.38)    | 32.06<br>(18.67 to<br>55.08)    |
| Encephalitis                            | 184.92<br>(124.04 to<br>279.86)          | 227.10<br>(126.93 to<br>388.88)          | 214.28<br>(117.99 to<br>374.66)          | 379.59<br>(212.61 to<br>686.11)          | 3.05<br>(2.06 to<br>4.33)         | 19.18<br>(2.41 to<br>6.36)      | 3.87<br>(2.25 to<br>6.16)       | 6.09<br>(3.69 to<br>9.83)       |
| Diphtheria                              | 78.43<br>(37.05 to<br>157.16)            | 38.34<br>(14.15 to<br>91.80)             | 14.53<br>(6.75 to<br>26.88)              | 59.10<br>(19.60 to<br>153.44)            | 1.07<br>(0.55 to<br>2.01)         | 0.53<br>(0.21 to<br>1.16)       | 0.25<br>(0.11 to<br>0.46)       | 0.77<br>(0.28 to<br>1.94)       |
| Whooping cough                          | 398.15<br>(34.61 to<br>1,321.08)         | 503.10<br>(46.31 to<br>1,644.61)         | 194.16<br>(17.42 to<br>677.97)           | 831.89<br>(74.11 to<br>2,759.15)         | 4.73<br>(0.49 to<br>15.65)        | 5.98<br>(0.55 to<br>19.47)      | 2.34<br>(0.21 to<br>8.18)       | 9.84<br>(0.88 to<br>32.89)      |
| Tetanus                                 | 245.67<br>(49.88 to<br>1,016.94)         | 91.22<br>(11.10 to<br>480.04)            | 64.30<br>(4.88 to<br>419.78)             | 118.90<br>(17.55 to<br>515.76)           | 4.79<br>(0.73 to<br>24.17)        | 2.06<br>(0.18 to<br>12.56)      | 1.75<br>(0.10 to<br>11.96)      | 2.32<br>(0.26 to<br>12.76)      |
| Measles                                 | 3,142.89<br>(1,001.29 to<br>7,572.49)    | 416.91<br>(22.91 to<br>2,394.43)         | 86.26<br>(11.89 to<br>373.13)            | 1,167.63<br>(43.71 to<br>5,937.18)       | 37.86<br>(12.17 to<br>90.63)      | 5.01<br>(0.29 to<br>28.51)      | 1.09<br>(0.16 to<br>4.54)       | 13.90<br>(0.56 to<br>70.65)     |
| <b>Equatorial Guinea</b>                |                                          |                                          |                                          |                                          |                                   |                                 |                                 |                                 |
| Cause                                   | YLLs (actual counts)                     |                                          |                                          |                                          | Deaths (actual counts)            |                                 |                                 |                                 |
|                                         | 2016                                     | 2040 Forecast                            | 2040 Better Scenario                     | 2040 Worse Scenario                      | 2016                              | 2040 Forecast                   | 2040 Better Scenario            | 2040 Worse Scenario             |
| Varicella and herpes zoster             | 66.96<br>(38.55 to<br>106.44)            | 44.45<br>(22.14 to<br>82.11)             | 40.04<br>(20.44 to<br>72.41)             | 104.83<br>(50.14 to<br>199.29)           | 1.42<br>(0.91 to<br>2.06)         | 1.41<br>(0.78 to<br>2.27)       | 1.35<br>(0.74 to<br>2.23)       | 2.48<br>(1.37 to<br>3.98)       |
| Neglected tropical diseases and malaria | 64,166.63<br>(43,811.64 to<br>91,908.14) | 25,623.39<br>(16,090.80 to<br>38,359.72) | 24,489.75<br>(15,060.41 to<br>36,820.30) | 41,300.00<br>(25,281.78 to<br>62,813.85) | 892.56<br>(623.56 to<br>1,233.17) | 467.58<br>(301.48 to<br>671.78) | 456.24<br>(296.75 to<br>651.54) | 657.43<br>(422.08 to<br>962.60) |
| Malaria                                 | 63,473.49<br>(43,314.08 to<br>90,622.85) | 25,105.73<br>(15,756.49 to<br>37,675.30) | 23,980.36<br>(14,848.02 to<br>36,235.82) | 40,406.37<br>(24,558.02 to<br>61,735.63) | 880.13<br>(613.63 to<br>1,216.03) | 456.83<br>(294.21 to<br>658.47) | 445.38<br>(285.50 to<br>637.39) | 641.23<br>(407.54 to<br>945.87) |
| Chagas disease                          | 0.00<br>(0.00 to<br>0.00)                | 0.00<br>(0.00 to<br>0.00)                | 0.00<br>(0.00 to<br>0.00)                | 0.00<br>(0.00 to<br>0.00)                | 0.00<br>(0.00 to<br>0.00)         | 0.00<br>(0.00 to<br>0.00)       | 0.00<br>(0.00 to<br>0.00)       | 0.00<br>(0.00 to<br>0.00)       |
| Leishmaniasis                           | 0.00<br>(0.00 to<br>0.00)                | 0.00<br>(0.00 to<br>0.00)                | 0.00<br>(0.00 to<br>0.00)                | 0.00<br>(0.00 to<br>0.00)                | 0.00<br>(0.00 to<br>0.00)         | 0.00<br>(0.00 to<br>0.00)       | 0.00<br>(0.00 to<br>0.00)       | 0.00<br>(0.00 to<br>0.00)       |
| African trypanosomiasis                 | 0.00<br>(0.00 to<br>0.00)                | 0.00<br>(0.00 to<br>0.00)                | 0.00<br>(0.00 to<br>0.00)                | 0.00<br>(0.00 to<br>0.00)                | 0.00<br>(0.00 to<br>0.00)         | 0.00<br>(0.00 to<br>0.00)       | 0.00<br>(0.00 to<br>0.00)       | 0.00<br>(0.00 to<br>0.00)       |
| Schistosomiasis                         | 52.92<br>(19.79 to<br>111.75)            | 34.15<br>(12.18 to<br>73.38)             | 33.12<br>(11.67 to<br>70.89)             | 46.50<br>(16.77 to<br>97.28)             | 1.57<br>(0.59 to<br>3.36)         | 1.17<br>(0.40 to<br>2.28)       | 1.16<br>(0.40 to<br>2.30)       | 1.49<br>(0.54 to<br>2.88)       |
| Cysticercosis                           | 19.25<br>(11.60 to<br>29.46)             | 9.18<br>(5.12 to<br>14.85)               | 8.96<br>(4.91 to<br>14.45)               | 11.27<br>(6.40 to<br>17.96)              | 0.43<br>(0.25 to<br>0.67)         | 0.22<br>(0.12 to<br>0.34)       | 0.21<br>(0.12 to<br>0.33)       | 0.25<br>(0.15 to<br>0.39)       |
| Cystic echinococcosis                   | 1.89<br>(1.18 to<br>2.85)                | 0.75<br>(0.41 to<br>1.23)                | 0.68<br>(0.37 to<br>1.12)                | 1.91<br>(1.06 to<br>3.11)                | 0.05<br>(0.03 to<br>0.07)         | 0.02<br>(0.01 to<br>0.04)       | 0.02<br>(0.01 to<br>0.03)       | 0.05<br>(0.03 to<br>0.09)       |
| Dengue                                  | 4.11<br>(0.61 to<br>12.88)               | 16.48<br>(2.77 to<br>48.44)              | 16.06<br>(2.68 to<br>45.64)              | 23.21<br>(3.67 to<br>67.65)              | 0.07<br>(0.01 to<br>0.21)         | 0.40<br>(0.07 to<br>1.14)       | 0.40<br>(0.07 to<br>1.16)       | 0.47<br>(0.09 to<br>1.35)       |
| Yellow fever                            | 203.11<br>(38.60 to<br>619.84)           | 78.67<br>(13.89 to<br>266.61)            | 73.55<br>(13.17 to<br>255.57)            | 149.08<br>(26.92 to<br>496.85)           | 3.49<br>(0.64 to<br>11.09)        | 1.39<br>(0.24 to<br>4.88)       | 1.30<br>(0.23 to<br>4.48)       | 2.54<br>(0.45 to<br>8.64)       |
| Rabies                                  | 7.89<br>(2.57 to<br>18.34)               | 2.76<br>(0.81 to<br>6.80)                | 2.58<br>(0.76 to<br>6.40)                | 9.75<br>(2.68 to<br>25.00)               | 0.14<br>(0.05 to<br>0.33)         | 0.05<br>(0.02 to<br>0.14)       | 0.05<br>(0.02 to<br>0.13)       | 0.17<br>(0.05 to<br>0.42)       |

|                                                          |                                                               |                                                              |                                                              |                                                                |                                                      |                                                     |                                                     |                                                        |
|----------------------------------------------------------|---------------------------------------------------------------|--------------------------------------------------------------|--------------------------------------------------------------|----------------------------------------------------------------|------------------------------------------------------|-----------------------------------------------------|-----------------------------------------------------|--------------------------------------------------------|
|                                                          | 74.88<br>(23.71 to<br>153.61)                                 | 105.90<br>(34.40 to<br>234.66)                               | 102.44<br>(33.18 to<br>228.02)                               | 164.99<br>(44.24 to<br>381.64)                                 | 0.99<br>(0.39 to<br>1.93)                            | 1.50<br>(0.61 to<br>3.09)                           | 1.47<br>(0.60 to<br>3.03)                           | 2.19<br>(0.73 to<br>4.79)                              |
| Intestinal nematode infections                           |                                                               |                                                              |                                                              |                                                                |                                                      |                                                     |                                                     |                                                        |
|                                                          | 329.08<br>(72.74 to<br>874.81)                                | 269.76<br>(55.60 to<br>698.79)                               | 272.00<br>(55.67 to<br>697.37)                               | 486.92<br>(109.45 to<br>1,258.43)                              | 5.70<br>(1.20 to<br>14.64)                           | 6.00<br>(1.15 to<br>15.20)                          | 6.24<br>(1.19 to<br>15.61)                          | 9.03<br>(1.88 to<br>22.54)                             |
| Other neglected tropical diseases                        |                                                               |                                                              |                                                              |                                                                |                                                      |                                                     |                                                     |                                                        |
| <b>Maternal disorders</b>                                | <b>2,630.44</b><br><b>(1,241.58 to</b><br><b>4,359.54)</b>    | <b>1,483.11</b><br><b>(641.78 to</b><br><b>2,822.00)</b>     | <b>1,359.40</b><br><b>(589.30 to</b><br><b>2,531.33)</b>     | <b>3,486.40</b><br><b>(1,522.86 to</b><br><b>6,434.78)</b>     | <b>49.84</b><br><b>(23.65 to</b><br><b>82.42)</b>    | <b>28.38</b><br><b>(12.18 to</b><br><b>55.03)</b>   | <b>26.00</b><br><b>(10.97 to</b><br><b>48.40)</b>   | <b>66.57</b><br><b>(28.69 to</b><br><b>123.68)</b>     |
| Maternal hemorrhage                                      | 604.55<br>(274.44 to<br>1,054.51)                             | 333.09<br>(134.58 to<br>659.94)                              | 308.10<br>(124.87 to<br>609.56)                              | 721.73<br>(284.44 to<br>1,385.34)                              | 11.48<br>(5.25 to<br>20.19)                          | 6.41<br>(2.56 to<br>12.38)                          | 5.93<br>(2.40 to<br>11.73)                          | 13.83<br>(5.44 to<br>26.65)                            |
| Maternal sepsis and other maternal infections            | 113.13<br>(43.51 to<br>211.57)                                | 53.59<br>(19.49 to<br>113.49)                                | 49.46<br>(18.07 to<br>102.06)                                | 117.89<br>(43.87 to<br>236.20)                                 | 2.21<br>(0.88 to<br>4.19)                            | 1.05<br>(0.39 to<br>2.20)                           | 0.97<br>(0.35 to<br>2.01)                           | 2.30<br>(0.82 to<br>4.71)                              |
| Maternal hypertensive disorders                          | 484.99<br>(222.08 to<br>840.86)                               | 266.63<br>(109.88 to<br>525.28)                              | 245.15<br>(102.86 to<br>488.11)                              | 590.17<br>(248.27 to<br>1,096.04)                              | 8.76<br>(4.05 to<br>15.16)                           | 4.91<br>(2.06 to<br>9.78)                           | 4.51<br>(1.89 to<br>8.95)                           | 10.81<br>(4.53 to<br>20.08)                            |
| Maternal obstructed labor and uterine rupture            | 99.29<br>(36.88 to<br>199.15)                                 | 53.81<br>(18.49 to<br>120.19)                                | 49.03<br>(16.83 to<br>109.56)                                | 124.97<br>(42.67 to<br>273.92)                                 | 1.92<br>(0.71 to<br>3.81)                            | 1.05<br>(0.35 to<br>2.33)                           | 0.95<br>(0.32 to<br>2.11)                           | 2.42<br>(0.81 to<br>5.17)                              |
| Maternal abortion, miscarriage, and ectopic pregnancy    | 101.50<br>(38.89 to<br>200.62)                                | 64.75<br>(21.74 to<br>143.14)                                | 59.49<br>(20.02 to<br>131.50)                                | 145.58<br>(50.43 to<br>317.59)                                 | 1.96<br>(0.76 to<br>3.81)                            | 1.26<br>(0.43 to<br>2.75)                           | 1.16<br>(0.40 to<br>2.56)                           | 2.81<br>(0.96 to<br>6.19)                              |
| Indirect maternal deaths                                 | 679.39<br>(303.65 to<br>1,139.83)                             | 359.53<br>(141.31 to<br>714.10)                              | 330.51<br>(129.49 to<br>659.45)                              | 810.74<br>(310.95 to<br>1,567.04)                              | 13.07<br>(5.89 to<br>21.94)                          | 6.91<br>(2.74 to<br>13.71)                          | 6.35<br>(2.46 to<br>12.45)                          | 15.42<br>(5.99 to<br>29.61)                            |
| Late maternal deaths                                     | 70.01<br>(29.81 to<br>123.73)                                 | 30.02<br>(10.22 to<br>66.44)                                 | 27.57<br>(9.12 to<br>60.64)                                  | 68.10<br>(23.18 to<br>151.70)                                  | 1.25<br>(0.44 to<br>2.61)                            | 0.57<br>(0.19 to<br>1.21)                           | 0.52<br>(0.17 to<br>1.11)                           | 1.28<br>(0.43 to<br>2.70)                              |
| Maternal deaths aggravated by HIV/AIDS                   | 70.01<br>(29.81 to<br>123.73)                                 | 99.24<br>(1.58 to<br>309.66)                                 | 82.12<br>(1.22 to<br>276.43)                                 | 434.03<br>(157.14 to<br>845.12)                                | 1.36<br>(0.58 to<br>2.44)                            | 1.97<br>(0.03 to<br>6.12)                           | 1.61<br>(0.02 to<br>5.54)                           | 8.71<br>(3.19 to<br>16.94)                             |
| Other maternal disorders                                 | 410.52<br>(185.82 to<br>703.13)                               | 222.44<br>(90.84 to<br>438.89)                               | 207.98<br>(84.61 to<br>415.45)                               | 473.19<br>(189.59 to<br>916.92)                                | 7.82<br>(3.57 to<br>13.42)                           | 4.27<br>(1.78 to<br>8.51)                           | 3.99<br>(1.65 to<br>7.81)                           | 8.99<br>(3.67 to<br>17.49)                             |
| <b>Equatorial Guinea</b>                                 |                                                               |                                                              |                                                              |                                                                |                                                      |                                                     |                                                     |                                                        |
| Cause                                                    | YLLs (actual counts)                                          |                                                              |                                                              |                                                                | Deaths (actual counts)                               |                                                     |                                                     |                                                        |
|                                                          | 2016                                                          | 2040 Forecast                                                | 2040 Better Scenario                                         | 2040 Worse Scenario                                            | 2016                                                 | 2040 Forecast                                       | 2040 Better Scenario                                | 2040 Worse Scenario                                    |
| <b>Neonatal disorders</b>                                | <b>29,243.44</b><br><b>(19,448.45 to</b><br><b>42,130.28)</b> | <b>17,631.27</b><br><b>(6,712.20 to</b><br><b>39,933.30)</b> | <b>15,649.12</b><br><b>(6,100.07 to</b><br><b>34,646.97)</b> | <b>49,195.03</b><br><b>(19,408.59 to</b><br><b>109,577.70)</b> | <b>337.76</b><br><b>(224.62 to</b><br><b>486.63)</b> | <b>203.68</b><br><b>(77.55 to</b><br><b>461.28)</b> | <b>180.78</b><br><b>(70.48 to</b><br><b>400.19)</b> | <b>568.30</b><br><b>(224.25 to</b><br><b>1,265.65)</b> |
| Neonatal preterm birth                                   | 9,758.41<br>(5,642.31 to<br>15,285.60)                        | 3,444.78<br>(1,283.80 to<br>7,976.62)                        | 3,094.10<br>(1,171.87 to<br>6,983.81)                        | 12,218.91<br>(4,556.04 to<br>27,316.50)                        | 112.70<br>(65.17 to<br>176.54)                       | 39.79<br>(14.83 to<br>92.13)                        | 35.74<br>(13.54 to<br>80.68)                        | 141.14<br>(52.63 to<br>315.52)                         |
| Neonatal encephalopathy due to birth asphyxia and trauma | 7,371.07<br>(3,910.30 to<br>12,184.85)                        | 4,408.05<br>(1,304.96 to<br>11,772.97)                       | 3,775.53<br>(1,065.90 to<br>10,057.39)                       | 11,369.30<br>(3,263.49 to<br>31,232.43)                        | 85.14<br>(45.18 to<br>140.73)                        | 50.92<br>(15.08 to<br>135.99)                       | 43.62<br>(12.32 to<br>116.16)                       | 131.34<br>(37.71 to<br>360.75)                         |
| Neonatal sepsis and other neonatal infections            | 6,795.06<br>(3,736.99 to<br>11,444.44)                        | 5,772.51<br>(2,151.07 to<br>13,480.85)                       | 5,055.03<br>(1,909.06 to<br>11,266.85)                       | 14,911.75<br>(5,606.52 to<br>34,236.51)                        | 78.49<br>(43.16 to<br>132.18)                        | 66.68<br>(24.85 to<br>155.71)                       | 58.39<br>(22.06 to<br>131.29)                       | 172.26<br>(64.76 to<br>395.47)                         |
| Hemolytic disease and other neonatal jaundice            | 503.50<br>(243.71 to<br>916.15)                               | 208.57<br>(57.24 to<br>581.71)                               | 182.04<br>(51.38 to<br>499.45)                               | 594.02<br>(163.33 to<br>1,652.87)                              | 5.82<br>(2.81 to<br>10.58)                           | 2.41<br>(0.66 to<br>6.72)                           | 2.10<br>(0.59 to<br>5.77)                           | 6.86<br>(1.89 to<br>19.09)                             |
| Other neonatal disorders                                 | 4,815.40<br>(2,611.84 to<br>8,120.31)                         | 3,797.36<br>(1,195.59 to<br>10,054.21)                       | 3,542.41<br>(1,111.24 to<br>9,326.33)                        | 10,101.04<br>(3,241.15 to<br>25,905.58)                        | 55.62<br>(30.17 to<br>93.80)                         | 43.87<br>(13.82 to<br>116.14)                       | 40.92<br>(12.84 to<br>107.72)                       | 116.69<br>(37.45 to<br>299.24)                         |
| <b>Nutritional deficiencies</b>                          | <b>3,796.24</b><br><b>(1,820.45 to</b><br><b>8,721.88)</b>    | <b>2,648.10</b><br><b>(1,152.11 to</b><br><b>6,863.45)</b>   | <b>2,615.24</b><br><b>(1,138.48 to</b><br><b>6,803.93)</b>   | <b>4,642.91</b><br><b>(2,046.94 to</b><br><b>11,462.28)</b>    | <b>83.02</b><br><b>(39.37 to</b><br><b>224.84)</b>   | <b>95.84</b><br><b>(44.52 to</b><br><b>276.10)</b>  | <b>99.24</b><br><b>(46.50 to</b><br><b>279.38)</b>  | <b>128.47</b><br><b>(60.54 to</b><br><b>345.94)</b>    |
| Protein-energy malnutrition                              | 3,293.35<br>(1,539.72 to<br>7,100.92)                         | 1,956.78<br>(834.98 to<br>4,864.55)                          | 1,960.06<br>(835.47 to<br>4,852.36)                          | 3,605.83<br>(1,514.52 to<br>8,728.65)                          | 66.39<br>(31.38 to<br>170.31)                        | 66.00<br>(29.39 to<br>183.71)                       | 69.83<br>(31.80 to<br>191.39)                       | 89.79<br>(39.59 to<br>242.24)                          |

|                                                                         |                                                               |                                                                |                                                                |                                                                 |                                                            |                                                            |                                                            |                                                            |
|-------------------------------------------------------------------------|---------------------------------------------------------------|----------------------------------------------------------------|----------------------------------------------------------------|-----------------------------------------------------------------|------------------------------------------------------------|------------------------------------------------------------|------------------------------------------------------------|------------------------------------------------------------|
| Iodine deficiency                                                       | 39.38<br>(2.48 to<br>178.00)                                  | 80.48<br>(1.53 to<br>367.78)                                   | 77.04<br>(1.47 to<br>345.96)                                   | 151.70<br>(3.70 to<br>752.48)                                   | 0.92<br>(0.06 to<br>3.84)                                  | 3.15<br>(0.06 to<br>15.37)                                 | 3.16<br>(0.05 to<br>15.91)                                 | 4.70<br>(0.12 to<br>20.07)                                 |
| Dietary iron deficiency                                                 | 33.85<br>(13.19 to<br>90.90)                                  | 36.72<br>(13.40 to<br>98.62)                                   | 36.33<br>(13.31 to<br>97.31)                                   | 47.12<br>(17.48 to<br>124.28)                                   | 0.66<br>(0.25 to<br>1.75)                                  | 0.72<br>(0.27 to<br>1.87)                                  | 0.71<br>(0.27 to<br>1.87)                                  | 0.90<br>(0.34 to<br>2.29)                                  |
| Other nutritional deficiencies                                          | 429.66<br>(157.71 to<br>1,377.48)                             | 574.12<br>(205.18 to<br>1,877.29)                              | 541.81<br>(189.06 to<br>1,719.99)                              | 838.26<br>(315.41 to<br>2,594.23)                               | 15.05<br>(5.27 to<br>51.16)                                | 25.97<br>(9.27 to<br>86.34)                                | 25.54<br>(8.98 to<br>82.19)                                | 33.08<br>(12.22 to<br>107.45)                              |
| <b>Other communicable, maternal, neonatal, and nutritional diseases</b> | <b>2,441.40</b><br><b>(1,142.80 to</b><br><b>5,286.44)</b>    | <b>1,607.25</b><br><b>(756.72 to</b><br><b>3,266.25)</b>       | <b>1,495.79</b><br><b>(698.79 to</b><br><b>3,040.23)</b>       | <b>3,097.90</b><br><b>(1,348.43 to</b><br><b>6,903.21)</b>      | <b>40.77</b><br><b>(20.83 to</b><br><b>78.40)</b>          | <b>36.61</b><br><b>(19.16 to</b><br><b>66.39)</b>          | <b>35.30</b><br><b>(18.08 to</b><br><b>65.62)</b>          | <b>58.45</b><br><b>(29.94 to</b><br><b>109.98)</b>         |
| Sexually transmitted infections excluding HIV                           | 944.34<br>(340.31 to<br>2,243.94)                             | 353.39<br>(106.01 to<br>993.03)                                | 316.38<br>(96.83 to<br>892.58)                                 | 807.44<br>(216.01 to<br>2,418.39)                               | 11.68<br>(4.45 to<br>26.82)                                | 4.82<br>(1.85 to<br>12.50)                                 | 4.38<br>(1.69 to<br>11.01)                                 | 10.24<br>(3.28 to<br>29.00)                                |
| Syphilis                                                                | 907.67<br>(304.75 to<br>2,209.61)                             | 313.67<br>(75.70 to<br>943.56)                                 | 277.79<br>(61.98 to<br>853.75)                                 | 756.97<br>(173.27 to<br>2,362.39)                               | 10.80<br>(3.79 to<br>25.97)                                | 3.82<br>(1.02 to<br>11.21)                                 | 3.40<br>(0.86 to<br>10.17)                                 | 9.03<br>(2.19 to<br>27.78)                                 |
| Chlamydial infection                                                    | 7.16<br>(3.26 to<br>12.90)                                    | 7.70<br>(3.30 to<br>14.26)                                     | 7.50<br>(3.16 to<br>13.81)                                     | 9.78<br>(4.36 to<br>18.32)                                      | 0.17<br>(0.08 to<br>0.31)                                  | 0.19<br>(0.10 to<br>0.34)                                  | 0.19<br>(0.09 to<br>0.34)                                  | 0.23<br>(0.12 to<br>0.42)                                  |
| Gonococcal infection                                                    | 19.11<br>(8.76 to<br>34.34)                                   | 20.90<br>(9.38 to<br>38.06)                                    | 20.31<br>(8.90 to<br>37.42)                                    | 26.42<br>(12.08 to<br>48.00)                                    | 0.47<br>(0.22 to<br>0.84)                                  | 0.54<br>(0.27 to<br>0.93)                                  | 0.53<br>(0.26 to<br>0.92)                                  | 0.66<br>(0.33 to<br>1.12)                                  |
| Other sexually transmitted infections                                   | 10.39<br>(4.71 to<br>18.67)                                   | 11.13<br>(4.87 to<br>21.18)                                    | 10.78<br>(4.69 to<br>20.32)                                    | 14.28<br>(6.35 to<br>26.96)                                     | 0.24<br>(0.11 to<br>0.44)                                  | 0.26<br>(0.13 to<br>0.48)                                  | 0.25<br>(0.12 to<br>0.46)                                  | 0.32<br>(0.16 to<br>0.59)                                  |
| Acute hepatitis                                                         | 344.52<br>(217.18 to<br>534.18)                               | 308.22<br>(167.28 to<br>539.99)                                | 274.77<br>(150.95 to<br>494.41)                                | 472.08<br>(269.93 to<br>789.03)                                 | 8.76<br>(5.42 to<br>13.38)                                 | 8.94<br>(5.40 to<br>14.35)                                 | 8.18<br>(4.89 to<br>13.57)                                 | 12.58<br>(7.96 to<br>19.54)                                |
| Acute hepatitis A                                                       | 17.00<br>(2.34 to<br>44.59)                                   | 7.89<br>(1.54 to<br>21.37)                                     | 7.03<br>(1.39 to<br>18.14)                                     | 17.25<br>(2.99 to<br>50.28)                                     | 0.22<br>(0.05 to<br>0.55)                                  | 0.14<br>(0.04 to<br>0.37)                                  | 0.13<br>(0.03 to<br>0.33)                                  | 0.26<br>(0.06 to<br>0.68)                                  |
| Acute hepatitis B                                                       | 366.28<br>(155.65 to<br>431.37)                               | 247.01<br>(122.76 to<br>455.01)                                | 219.47<br>(113.95 to<br>413.22)                                | 373.13<br>(198.28 to<br>651.58)                                 | 7.09<br>(4.20 to<br>11.19)                                 | 7.02<br>(4.03 to<br>11.86)                                 | 6.37<br>(3.62 to<br>11.05)                                 | 10.04<br>(6.05 to<br>16.01)                                |
| Acute hepatitis C                                                       | 11.99<br>(6.67 to<br>20.26)                                   | 11.82<br>(6.11 to<br>22.39)                                    | 10.67<br>(5.42 to<br>19.92)                                    | 15.25<br>(8.17 to<br>27.19)                                     | 0.35<br>(0.19 to<br>0.59)                                  | 0.37<br>(0.20 to<br>0.65)                                  | 0.34<br>(0.18 to<br>0.61)                                  | 0.45<br>(0.26 to<br>0.75)                                  |
| Acute hepatitis E                                                       | 49.26<br>(31.79 to<br>73.30)                                  | 41.51<br>(23.72 to<br>68.22)                                   | 37.60<br>(21.34 to<br>62.66)                                   | 66.44<br>(38.84 to<br>109.33)                                   | 1.10<br>(0.69 to<br>1.64)                                  | 1.40<br>(0.79 to<br>2.28)                                  | 1.34<br>(0.72 to<br>2.23)                                  | 1.82<br>(1.09 to<br>2.83)                                  |
| Other unspecified infectious diseases                                   | 1,152.55<br>(323.17 to<br>3,765.36)                           | 945.64<br>(296.16 to<br>2,501.27)                              | 904.63<br>(286.02 to<br>2,345.63)                              | 1,818.39<br>(567.66 to<br>5,312.19)                             | 20.33<br>(5.89 to<br>53.58)                                | 22.85<br>(7.02 to<br>49.98)                                | 22.75<br>(7.04 to<br>48.84)                                | 35.63<br>(11.24 to<br>86.32)                               |
| <b>Non-communicable diseases</b>                                        | <b>52,996.35</b><br><b>(33,911.65 to</b><br><b>78,344.43)</b> | <b>82,196.94</b><br><b>(53,572.53 to</b><br><b>121,950.76)</b> | <b>71,928.70</b><br><b>(47,163.14 to</b><br><b>104,070.27)</b> | <b>115,312.60</b><br><b>(74,845.28 to</b><br><b>171,234.90)</b> | <b>1,940.38</b><br><b>(1,210.49 to</b><br><b>2,834.68)</b> | <b>3,928.07</b><br><b>(2,910.04 to</b><br><b>5,012.58)</b> | <b>3,528.30</b><br><b>(2,656.34 to</b><br><b>4,433.95)</b> | <b>4,976.13</b><br><b>(3,736.13 to</b><br><b>6,275.57)</b> |
| <b>Equatorial Guinea</b>                                                |                                                               |                                                                |                                                                |                                                                 |                                                            |                                                            |                                                            |                                                            |
| Cause                                                                   | YLLs (actual counts)                                          |                                                                |                                                                |                                                                 | Deaths (actual counts)                                     |                                                            |                                                            |                                                            |
|                                                                         | 2016                                                          | 2040 Forecast                                                  | 2040 Better Scenario                                           | 2040 Worse Scenario                                             | 2016                                                       | 2040 Forecast                                              | 2040 Better Scenario                                       | 2040 Worse Scenario                                        |
| Neoplasms                                                               | 14,104.28<br>(8,078.45 to<br>21,994.95)                       | 27,008.82<br>(15,898.02 to<br>44,725.91)                       | 23,873.78<br>(14,189.24 to<br>38,736.31)                       | 30,170.36<br>(17,328.26 to<br>52,305.95)                        | 499.24<br>(296.81 to<br>759.06)                            | 1,155.34<br>(787.49 to<br>1,675.70)                        | 1,051.24<br>(735.99 to<br>1,492.45)                        | 1,195.84<br>(793.10 to<br>1,828.02)                        |
| Lip and oral cavity cancer                                              | 268.87<br>(142.74 to<br>430.31)                               | 445.75<br>(169.31 to<br>1,028.61)                              | 291.44<br>(122.03 to<br>636.17)                                | 713.98<br>(252.27 to<br>1,890.31)                               | 9.67<br>(5.33 to<br>15.16)                                 | 17.88<br>(7.81 to<br>37.25)                                | 12.28<br>(6.01 to<br>22.99)                                | 26.28<br>(10.69 to<br>59.56)                               |
| Nasopharynx cancer                                                      | 73.11<br>(37.57 to<br>124.70)                                 | 127.56<br>(44.19 to<br>309.17)                                 | 81.83<br>(32.60 to<br>182.25)                                  | 224.49<br>(74.12 to<br>580.78)                                  | 2.23<br>(1.15 to<br>3.80)                                  | 3.90<br>(1.46 to<br>8.95)                                  | 2.55<br>(1.09 to<br>5.27)                                  | 6.48<br>(2.33 to<br>16.07)                                 |
| Other pharynx cancer                                                    | 125.38<br>(52.29 to<br>222.62)                                | 169.06<br>(60.15 to<br>344.83)                                 | 138.58<br>(51.62 to<br>279.94)                                 | 199.07<br>(73.08 to<br>400.64)                                  | 4.35<br>(1.83 to<br>7.57)                                  | 6.49<br>(2.59 to<br>12.36)                                 | 5.48<br>(2.24 to<br>10.51)                                 | 7.35<br>(3.03 to<br>13.91)                                 |

|                                      |                                     |                                       |                                       |                                       |                               |                                |                                |                                |
|--------------------------------------|-------------------------------------|---------------------------------------|---------------------------------------|---------------------------------------|-------------------------------|--------------------------------|--------------------------------|--------------------------------|
|                                      | 713.20<br>(392.14 to<br>1,165.70)   | 1,045.70<br>(454.90 to<br>2,356.75)   | 775.89<br>(371.57 to<br>1,582.35)     | 1,470.99<br>(604.77 to<br>3,633.51)   | 27.80<br>(15.60 to<br>44.04)  | 48.74<br>(24.81 to<br>94.72)   | 37.86<br>(20.81 to<br>65.87)   | 62.81<br>(30.00 to<br>127.56)  |
| Esophageal cancer                    | 493.18<br>(287.73 to<br>771.40)     | 630.79<br>(356.33 to<br>1,069.75)     | 582.46<br>(338.01 to<br>982.86)       | 770.20<br>(445.60 to<br>1,327.65)     | 19.27<br>(11.75 to<br>29.10)  | 29.44<br>(19.42 to<br>43.68)   | 27.90<br>(18.71 to<br>40.82)   | 33.77<br>(22.52 to<br>50.89)   |
| Stomach cancer                       | 954.80<br>(506.86 to<br>1,513.66)   | 2,254.45<br>(1,158.61 to<br>3,843.31) | 1,970.75<br>(1,048.94 to<br>3,363.06) | 2,357.44<br>(1,208.80 to<br>4,012.91) | 37.79<br>(20.60 to<br>59.14)  | 111.03<br>(65.23 to<br>172.98) | 100.49<br>(59.90 to<br>154.44) | 108.48<br>(61.82 to<br>166.13) |
| Colon and rectum cancer              | 1,797.18<br>(990.68 to<br>2,976.02) | 3,642.37<br>(1,754.87 to<br>7,024.64) | 3,031.06<br>(1,525.85 to<br>5,468.14) | 4,018.43<br>(1,879.30 to<br>7,996.83) | 64.83<br>(36.38 to<br>103.53) | 152.26<br>(81.44 to<br>255.98) | 132.18<br>(73.85 to<br>212.92) | 156.19<br>(81.73 to<br>274.32) |
| Liver cancer                         | 647.94<br>(345.96 to<br>1,070.53)   | 1,364.19<br>(590.62 to<br>2,748.31)   | 1,163.92<br>(547.07 to<br>2,222.55)   | 1,456.42<br>(614.25 to<br>3,080.62)   | 21.37<br>(11.61 to<br>34.67)  | 48.35<br>(24.72 to<br>88.17)   | 42.67<br>(22.79 to<br>73.15)   | 48.56<br>(24.23 to<br>92.35)   |
| Liver cancer due to hepatitis B      | 515.38<br>(285.71 to<br>847.74)     | 1,001.38<br>(511.23 to<br>1,821.11)   | 880.79<br>(468.25 to<br>1,528.80)     | 1,015.32<br>(507.57 to<br>1,884.93)   | 20.80<br>(11.94 to<br>32.81)  | 52.56<br>(29.89 to<br>84.89)   | 48.10<br>(28.22 to<br>74.84)   | 49.71<br>(28.17 to<br>82.21)   |
| Liver cancer due to hepatitis C      | 340.58<br>(178.19 to<br>571.59)     | 671.28<br>(300.76 to<br>1,347.46)     | 467.43<br>(222.12 to<br>875.28)       | 887.90<br>(389.97 to<br>1,834.20)     | 12.70<br>(6.89 to<br>20.71)   | 27.69<br>(14.21 to<br>49.66)   | 20.49<br>(10.97 to<br>34.36)   | 33.95<br>(17.04 to<br>62.96)   |
| Liver cancer due to alcohol use      | 293.27<br>(162.20 to<br>475.96)     | 605.52<br>(281.82 to<br>1,162.83)     | 518.92<br>(252.71 to<br>946.36)       | 658.79<br>(298.64 to<br>1,310.84)     | 9.96<br>(5.49 to<br>16.02)    | 23.66<br>(12.25 to<br>41.22)   | 20.91<br>(11.17 to<br>34.33)   | 23.97<br>(12.39 to<br>43.50)   |
| Liver cancer due to other causes     | 122.93<br>(62.71 to<br>210.73)      | 166.24<br>(93.79 to<br>259.93)        | 169.84<br>(94.97 to<br>269.83)        | 152.65<br>(88.57 to<br>237.41)        | 5.05<br>(2.64 to<br>8.28)     | 8.73<br>(5.52 to<br>12.25)     | 9.11<br>(5.65 to<br>12.94)     | 7.59<br>(4.97 to<br>10.64)     |
| Gallbladder and biliary tract cancer | 594.68<br>(333.50 to<br>954.71)     | 1,194.62<br>(688.45 to<br>1,955.12)   | 1,164.64<br>(683.87 to<br>1,883.35)   | 1,127.33<br>(647.98 to<br>1,909.64)   | 24.06<br>(13.95 to<br>37.11)  | 60.35<br>(39.75 to<br>86.90)   | 60.28<br>(40.09 to<br>84.79)   | 53.64<br>(34.80 to<br>78.89)   |
| Pancreatic cancer                    | 139.19<br>(79.95 to<br>221.81)      | 185.73<br>(68.18 to<br>414.79)        | 115.27<br>(48.31 to<br>260.24)        | 296.51<br>(104.96 to<br>696.92)       | 5.31<br>(3.14 to<br>8.30)     | 8.36<br>(3.67 to<br>16.64)     | 5.39<br>(2.70 to<br>10.41)     | 12.29<br>(5.20 to<br>25.39)    |
| Larynx cancer                        | 1,286.80<br>(731.96 to<br>2,117.70) | 2,282.67<br>(863.46 to<br>5,271.34)   | 1,359.03<br>(571.94 to<br>2,872.51)   | 3,253.13<br>(1,120.69 to<br>7,992.06) | 51.03<br>(29.67 to<br>82.23)  | 108.14<br>(46.34 to<br>225.61) | 67.11<br>(32.70 to<br>129.52)  | 143.39<br>(55.25 to<br>327.18) |
| Tracheal, bronchus, and lung cancer  | 127.71<br>(60.98 to<br>213.86)      | 289.36<br>(138.23 to<br>494.29)       | 310.42<br>(145.87 to<br>532.29)       | 229.70<br>(112.73 to<br>388.45)       | 4.21<br>(2.06 to<br>6.95)     | 10.73<br>(6.05 to<br>16.14)    | 11.80<br>(6.58 to<br>18.01)    | 8.05<br>(4.66 to<br>11.99)     |
| Malignant skin melanoma              | 75.97<br>(44.25 to<br>120.99)       | 133.56<br>(84.48 to<br>201.78)        | 130.80<br>(80.86 to<br>200.96)        | 148.38<br>(96.88 to<br>218.60)        | 3.27<br>(1.97 to<br>5.08)     | 7.53<br>(5.39 to<br>10.33)     | 7.62<br>(5.28 to<br>10.67)     | 7.77<br>(5.65 to<br>10.25)     |
| Non-melanoma skin cancer             | 1,375.98<br>(611.01 to<br>2,572.10) | 2,913.91<br>(1,197.67 to<br>5,904.34) | 2,588.05<br>(1,086.67 to<br>5,079.34) | 3,227.57<br>(1,292.39 to<br>6,823.85) | 43.71<br>(19.94 to<br>80.73)  | 103.21<br>(49.15 to<br>194.93) | 93.58<br>(45.01 to<br>170.72)  | 109.48<br>(51.74 to<br>216.75) |
| Breast cancer                        | 1,185.53<br>(560.52 to<br>2,151.01) | 1,693.87<br>(728.05 to<br>3,506.17)   | 1,549.69<br>(669.50 to<br>3,171.35)   | 2,130.81<br>(878.04 to<br>4,534.01)   | 37.04<br>(17.81 to<br>67.13)  | 56.53<br>(26.72 to<br>109.17)  | 52.58<br>(25.27 to<br>100.56)  | 68.35<br>(31.94 to<br>134.40)  |
| Cervical cancer                      | 139.24<br>(66.29 to<br>238.52)      | 220.77<br>(116.27 to<br>362.89)       | 216.80<br>(113.24 to<br>359.66)       | 260.04<br>(141.37 to<br>413.29)       | 5.27<br>(2.59 to<br>8.91)     | 10.37<br>(6.26 to<br>15.47)    | 10.36<br>(6.20 to<br>15.67)    | 11.65<br>(7.29 to<br>17.00)    |
| Uterine cancer                       | 365.25<br>(170.22 to<br>656.98)     | 762.60<br>(347.25 to<br>1,397.46)     | 726.21<br>(332.51 to<br>1,323.08)     | 695.44<br>(319.14 to<br>1,283.73)     | 12.19<br>(5.91 to<br>21.32)   | 29.48<br>(15.68 to<br>48.17)   | 28.49<br>(14.90 to<br>47.69)   | 25.91<br>(13.83 to<br>42.30)   |
| Ovarian cancer                       | 641.57<br>(304.32 to<br>1,079.94)   | 1,649.00<br>(867.81 to<br>2,371.66)   | 1,694.60<br>(892.84 to<br>2,432.03)   | 1,435.56<br>(742.99 to<br>2,103.92)   | 37.69<br>(18.31 to<br>61.52)  | 137.27<br>(72.44 to<br>193.36) | 143.72<br>(75.74 to<br>199.88) | 114.62<br>(58.45 to<br>166.84) |
| Prostate cancer                      | 23.61<br>(13.42 to<br>40.08)        | 51.85<br>(26.89 to<br>94.35)          | 49.58<br>(25.73 to<br>90.63)          | 60.17<br>(31.29 to<br>107.35)         | 0.50<br>(0.29 to<br>0.82)     | 1.11<br>(0.62 to<br>1.92)      | 1.07<br>(0.60 to<br>1.88)      | 1.26<br>(0.71 to<br>2.16)      |
| Testicular cancer                    |                                     |                                       |                                       |                                       |                               |                                |                                |                                |

**Equatorial Guinea**

| Cause | YLLs (actual counts) |               |                      |                     | Deaths (actual counts) |               |                      |                     |
|-------|----------------------|---------------|----------------------|---------------------|------------------------|---------------|----------------------|---------------------|
|       | 2016                 | 2040 Forecast | 2040 Better Scenario | 2040 Worse Scenario | 2016                   | 2040 Forecast | 2040 Better Scenario | 2040 Worse Scenario |





|                                                     |                                                |                                                 |                                                 |                                                 |                                         |                                          |                                          |                                          |
|-----------------------------------------------------|------------------------------------------------|-------------------------------------------------|-------------------------------------------------|-------------------------------------------------|-----------------------------------------|------------------------------------------|------------------------------------------|------------------------------------------|
| Cardiomyopathy and myocarditis                      | 695.53<br>(354.78 to<br>1,175.59)              | 1,166.63<br>(563.82 to<br>2,070.97)             | 1,046.80<br>(517.20 to<br>1,840.64)             | 1,367.49<br>(687.12 to<br>2,401.69)             | 22.10<br>(11.30 to<br>36.88)            | 45.11<br>(25.41 to<br>70.34)             | 41.79<br>(22.94 to<br>65.21)             | 48.01<br>(27.19 to<br>74.58)             |
| Myocarditis                                         | 69.88<br>(31.58 to<br>141.60)                  | 107.39<br>(42.94 to<br>224.23)                  | 107.20<br>(43.47 to<br>226.56)                  | 127.78<br>(52.26 to<br>275.43)                  | 1.68<br>(0.70 to<br>3.35)               | 3.20<br>(1.34 to<br>6.25)                | 3.30<br>(1.37 to<br>6.39)                | 3.38<br>(1.47 to<br>6.69)                |
| <b>Equatorial Guinea</b>                            |                                                |                                                 |                                                 |                                                 |                                         |                                          |                                          |                                          |
| Cause                                               | YLLs (actual counts)                           |                                                 |                                                 |                                                 | Deaths (actual counts)                  |                                          |                                          |                                          |
|                                                     | 2016                                           | 2040 Forecast                                   | 2040 Better Scenario                            | 2040 Worse Scenario                             | 2016                                    | 2040 Forecast                            | 2040 Better Scenario                     | 2040 Worse Scenario                      |
| Alcoholic cardiomyopathy                            | 88.88<br>(37.89 to<br>198.64)                  | 151.33<br>(60.94 to<br>362.22)                  | 123.46<br>(48.24 to<br>301.35)                  | 176.32<br>(75.80 to<br>402.73)                  | 2.90<br>(1.26 to<br>6.34)               | 5.09<br>(2.33 to<br>11.60)               | 4.31<br>(1.93 to<br>10.14)               | 5.66<br>(2.75 to<br>12.55)               |
| Other cardiomyopathy                                | 536.78<br>(277.71 to<br>886.57)                | 907.92<br>(455.41 to<br>1,616.71)               | 816.14<br>(409.49 to<br>1,461.74)               | 1,063.40<br>(537.02 to<br>1,877.39)             | 17.52<br>(9.04 to<br>29.18)             | 36.82<br>(20.98 to<br>60.19)             | 34.18<br>(19.21 to<br>54.38)             | 38.97<br>(22.48 to<br>60.92)             |
| Atrial fibrillation and flutter                     | 91.78<br>(52.37 to<br>140.81)                  | 330.50<br>(201.87 to<br>480.93)                 | 322.19<br>(199.54 to<br>464.44)                 | 319.07<br>(194.51 to<br>464.09)                 | 7.81<br>(4.59 to<br>11.60)              | 33.01<br>(20.48 to<br>48.08)             | 33.07<br>(20.66 to<br>47.19)             | 29.99<br>(18.28 to<br>44.25)             |
| Aortic aneurysm                                     | 206.64<br>(113.30 to<br>329.29)                | 391.50<br>(231.42 to<br>613.76)                 | 381.29<br>(230.93 to<br>586.74)                 | 385.57<br>(235.29 to<br>601.34)                 | 9.37<br>(5.43 to<br>14.11)              | 23.18<br>(15.57 to<br>33.21)             | 23.44<br>(15.79 to<br>33.37)             | 21.32<br>(14.27 to<br>30.46)             |
| Peripheral artery disease                           | 29.08<br>(11.18 to<br>52.65)                   | 120.68<br>(48.59 to<br>211.26)                  | 119.38<br>(48.24 to<br>207.54)                  | 96.44<br>(39.62 to<br>167.41)                   | 1.87<br>(0.76 to<br>3.25)               | 10.60<br>(4.11 to<br>18.36)              | 10.80<br>(4.20 to<br>18.54)              | 7.91<br>(3.12 to<br>13.64)               |
| Endocarditis                                        | 263.97<br>(145.80 to<br>421.16)                | 509.88<br>(273.75 to<br>862.79)                 | 503.12<br>(269.39 to<br>840.86)                 | 567.39<br>(308.23 to<br>947.98)                 | 9.33<br>(5.23 to<br>14.64)              | 22.91<br>(13.87 to<br>35.89)             | 23.31<br>(13.78 to<br>36.63)             | 23.15<br>(13.78 to<br>36.55)             |
| Other cardiovascular and circulatory diseases       | 1,607.65<br>(831.32 to<br>2,804.96)            | 2,734.18<br>(1,524.87 to<br>4,748.93)           | 2,502.56<br>(1,414.39 to<br>4,145.33)           | 3,735.21<br>(2,069.24 to<br>6,081.73)           | 67.05<br>(35.05 to<br>116.73)           | 153.38<br>(95.10 to<br>243.84)           | 145.94<br>(89.42 to<br>228.52)           | 189.43<br>(116.93 to<br>306.48)          |
| <b>Chronic respiratory diseases</b>                 | <b>2,659.22<br/>(1,235.05 to<br/>3,140.05)</b> | <b>2,725.33<br/>(1,468.95 to<br/>4,935.32)</b>  | <b>1,973.93<br/>(1,146.70 to<br/>3,236.82)</b>  | <b>4,550.07<br/>(2,227.95 to<br/>9,012.48)</b>  | <b>93.06<br/>(57.74 to<br/>140.34)</b>  | <b>157.28<br/>(95.07 to<br/>258.30)</b>  | <b>118.46<br/>(77.52 to<br/>177.19)</b>  | <b>243.65<br/>(134.78 to<br/>426.43)</b> |
| Chronic obstructive pulmonary disease               | 1,310.14<br>(777.03 to<br>1,993.78)            | 1,808.72<br>(874.42 to<br>3,638.10)             | 1,777.61<br>(646.40 to<br>2,110.65)             | 3,362.43<br>(1,443.79 to<br>7,379.87)           | 67.39<br>(42.16 to<br>99.51)            | 117.08<br>(65.07 to<br>206.40)           | 82.07<br>(49.76 to<br>132.30)            | 197.43<br>(99.95 to<br>377.42)           |
| Pneumoconiosis                                      | 7.16<br>(4.02 to<br>11.80)                     | 10.90<br>(7.06 to<br>15.99)                     | 11.10<br>(7.06 to<br>16.52)                     | 11.40<br>(7.47 to<br>16.65)                     | 0.33<br>(0.19 to<br>0.52)               | 0.70<br>(0.48 to<br>0.97)                | 0.72<br>(0.49 to<br>1.01)                | 0.69<br>(0.46 to<br>0.97)                |
| Silicosis                                           | 0.89<br>(0.38 to<br>1.79)                      | 0.79<br>(0.34 to<br>1.59)                       | 0.73<br>(0.31 to<br>1.45)                       | 0.98<br>(0.48 to<br>1.77)                       | 0.04<br>(0.02 to<br>0.09)               | 0.06<br>(0.02 to<br>0.12)                | 0.05<br>(0.02 to<br>0.11)                | 0.07<br>(0.03 to<br>0.13)                |
| Asbestosis                                          | 2.35<br>(1.17 to<br>4.24)                      | 4.58<br>(2.45 to<br>7.40)                       | 4.99<br>(2.78 to<br>8.05)                       | 4.03<br>(2.14 to<br>6.37)                       | 0.10<br>(0.04 to<br>0.18)               | 0.26<br>(0.13 to<br>0.43)                | 0.29<br>(0.15 to<br>0.47)                | 0.21<br>(0.10 to<br>0.35)                |
| Coal workers pneumoconiosis                         | 0.37<br>(0.14 to<br>0.74)                      | 0.36<br>(0.15 to<br>0.70)                       | 0.34<br>(0.14 to<br>0.67)                       | 0.55<br>(0.23 to<br>1.01)                       | 0.02<br>(0.01 to<br>0.04)               | 0.03<br>(0.01 to<br>0.05)                | 0.02<br>(0.01 to<br>0.05)                | 0.04<br>(0.02 to<br>0.07)                |
| Other pneumoconiosis                                | 3.55<br>(1.90 to<br>5.83)                      | 5.17<br>(3.09 to<br>7.92)                       | 5.04<br>(2.89 to<br>7.76)                       | 5.85<br>(3.54 to<br>8.79)                       | 0.17<br>(0.09 to<br>0.28)               | 0.35<br>(0.21 to<br>0.53)                | 0.35<br>(0.21 to<br>0.54)                | 0.37<br>(0.23 to<br>0.57)                |
| Asthma                                              | 577.22<br>(316.77 to<br>935.31)                | 562.61<br>(286.03 to<br>1,089.26)               | 420.58<br>(213.89 to<br>813.49)                 | 854.37<br>(442.42 to<br>1,615.05)               | 19.78<br>(11.08 to<br>33.47)            | 24.43<br>(13.13 to<br>46.29)             | 18.98<br>(10.41 to<br>35.58)             | 33.36<br>(18.60 to<br>62.72)             |
| Interstitial lung disease and pulmonary sarcoidosis | 81.58<br>(41.72 to<br>139.56)                  | 197.83<br>(109.38 to<br>314.39)                 | 221.16<br>(123.13 to<br>356.92)                 | 147.74<br>(84.65 to<br>230.47)                  | 3.31<br>(1.66 to<br>5.54)               | 10.57<br>(6.26 to<br>16.26)              | 12.11<br>(7.06 to<br>18.26)              | 7.34<br>(4.41 to<br>11.00)               |
| Other chronic respiratory diseases                  | 83.11<br>(47.91 to<br>129.30)                  | 145.27<br>(76.82 to<br>251.94)                  | 143.47<br>(76.75 to<br>249.29)                  | 174.12<br>(92.69 to<br>301.91)                  | 2.24<br>(1.25 to<br>3.68)               | 4.51<br>(2.53 to<br>7.15)                | 4.57<br>(2.56 to<br>7.17)                | 4.83<br>(2.65 to<br>7.77)                |
| <b>Cirrhosis and other chronic liver diseases</b>   | <b>4,145.73<br/>(1,924.59 to<br/>8,090.35)</b> | <b>6,406.29<br/>(2,928.53 to<br/>13,034.66)</b> | <b>5,856.01<br/>(2,668.90 to<br/>11,986.13)</b> | <b>8,009.54<br/>(3,723.82 to<br/>16,096.70)</b> | <b>130.61<br/>(61.62 to<br/>251.37)</b> | <b>212.40<br/>(109.96 to<br/>384.17)</b> | <b>198.38<br/>(104.18 to<br/>353.12)</b> | <b>253.55<br/>(133.66 to<br/>455.47)</b> |



|                                                            |                                                            |                                                             |                                                             |                                                              |                                                      |                                                      |                                                      |                                                      |
|------------------------------------------------------------|------------------------------------------------------------|-------------------------------------------------------------|-------------------------------------------------------------|--------------------------------------------------------------|------------------------------------------------------|------------------------------------------------------|------------------------------------------------------|------------------------------------------------------|
| Motor neuron disease                                       | 18.04<br>(10.84 to<br>29.56)                               | 38.32<br>(21.22 to<br>70.15)                                | 38.83<br>(21.24 to<br>69.86)                                | 36.37<br>(20.84 to<br>64.53)                                 | 0.49<br>(0.29 to<br>0.85)                            | 1.16<br>(0.67 to<br>2.03)                            | 1.19<br>(0.68 to<br>2.09)                            | 1.02<br>(0.61 to<br>1.74)                            |
| Other neurological disorders                               | 185.82<br>(108.81 to<br>279.98)                            | 386.69<br>(230.25 to<br>609.96)                             | 391.50<br>(234.16 to<br>616.88)                             | 403.18<br>(235.09 to<br>640.00)                              | 3.88<br>(2.35 to<br>5.80)                            | 9.05<br>(5.91 to<br>13.27)                           | 9.32<br>(6.09 to<br>13.84)                           | 8.53<br>(5.53 to<br>12.51)                           |
| <b>Mental disorders</b>                                    | <b>671.08</b><br><b>(366.22 to</b><br><b>1,132.29)</b>     | <b>1,655.67</b><br><b>(799.45 to</b><br><b>2,972.16)</b>    | <b>1,670.43</b><br><b>(817.26 to</b><br><b>3,009.70)</b>    | <b>1,653.06</b><br><b>(828.99 to</b><br><b>2,923.45)</b>     | <b>16.22</b><br><b>(8.96 to</b><br><b>27.43)</b>     | <b>37.83</b><br><b>(20.33 to</b><br><b>65.01)</b>    | <b>38.49</b><br><b>(20.82 to</b><br><b>66.50)</b>    | <b>37.12</b><br><b>(19.75 to</b><br><b>63.59)</b>    |
| Alcohol use disorders                                      | 388.31<br>(186.46 to<br>695.04)                            | 695.23<br>(286.15 to<br>1,403.72)                           | 668.05<br>(270.88 to<br>1,371.70)                           | 742.16<br>(316.85 to<br>1,486.71)                            | 10.19<br>(4.97 to<br>18.24)                          | 17.06<br>(7.41 to<br>33.15)                          | 16.56<br>(7.09 to<br>32.45)                          | 17.90<br>(7.97 to<br>34.48)                          |
| Drug use disorders                                         | 280.44<br>(136.97 to<br>515.52)                            | 953.70<br>(439.01 to<br>1,789.36)                           | 995.40<br>(458.32 to<br>1,841.70)                           | 904.60<br>(417.36 to<br>1,691.15)                            | 5.98<br>(2.90 to<br>11.01)                           | 20.64<br>(10.18 to<br>37.49)                         | 21.79<br>(11.02 to<br>39.31)                         | 19.10<br>(9.45 to<br>35.25)                          |
| Opioid use disorders                                       | 224.81<br>(106.18 to<br>412.68)                            | 699.76<br>(305.22 to<br>1,262.45)                           | 715.13<br>(319.12 to<br>1,393.82)                           | 685.19<br>(301.22 to<br>1,319.26)                            | 4.67<br>(2.19 to<br>8.68)                            | 14.58<br>(6.73 to<br>27.73)                          | 15.00<br>(7.00 to<br>28.22)                          | 14.04<br>(6.54 to<br>26.84)                          |
| Cocaine use disorders                                      | 7.69<br>(3.16 to<br>14.32)                                 | 29.48<br>(11.19 to<br>59.73)                                | 31.66<br>(11.91 to<br>63.66)                                | 29.30<br>(10.87 to<br>58.99)                                 | 0.17<br>(0.07 to<br>0.32)                            | 0.64<br>(0.25 to<br>1.26)                            | 0.69<br>(0.27 to<br>1.37)                            | 0.62<br>(0.24 to<br>1.25)                            |
| Amphetamine use disorders                                  | 4.64<br>(2.13 to<br>9.22)                                  | 28.07<br>(11.14 to<br>64.05)                                | 31.24<br>(12.49 to<br>68.54)                                | 26.27<br>(10.41 to<br>55.43)                                 | 0.10<br>(0.05 to<br>0.20)                            | 0.57<br>(0.23 to<br>1.31)                            | 0.64<br>(0.26 to<br>1.47)                            | 0.53<br>(0.21 to<br>1.14)                            |
| Other drug use disorders                                   | 43.30<br>(19.36 to<br>83.10)                               | 196.39<br>(84.64 to<br>404.78)                              | 217.36<br>(92.89 to<br>452.06)                              | 163.84<br>(72.05 to<br>333.10)                               | 1.04<br>(0.48 to<br>1.93)                            | 4.86<br>(2.46 to<br>9.16)                            | 5.47<br>(2.72 to<br>10.21)                           | 3.91<br>(1.99 to<br>7.31)                            |
| Eating disorders                                           | 2.33<br>(0.91 to<br>5.18)                                  | 6.74<br>(2.70 to<br>14.42)                                  | 6.98<br>(2.78 to<br>14.91)                                  | 6.29<br>(2.68 to<br>13.09)                                   | 0.04<br>(0.02 to<br>0.10)                            | 0.13<br>(0.05 to<br>0.28)                            | 0.13<br>(0.05 to<br>0.29)                            | 0.12<br>(0.05 to<br>0.25)                            |
| <b>Equatorial Guinea</b>                                   |                                                            |                                                             |                                                             |                                                              |                                                      |                                                      |                                                      |                                                      |
| Cause                                                      | YLLs (actual counts)                                       |                                                             |                                                             |                                                              | Deaths (actual counts)                               |                                                      |                                                      |                                                      |
|                                                            | 2016                                                       | 2040 Forecast                                               | 2040 Better Scenario                                        | 2040 Worse Scenario                                          | 2016                                                 | 2040 Forecast                                        | 2040 Better Scenario                                 | 2040 Worse Scenario                                  |
| <b>Diabetes, urogenital, blood, and endocrine diseases</b> | <b>5,609.46</b><br><b>(3,510.73 to</b><br><b>8,322.27)</b> | <b>8,729.55</b><br><b>(5,414.56 to</b><br><b>13,402.60)</b> | <b>7,808.43</b><br><b>(4,839.18 to</b><br><b>12,035.99)</b> | <b>12,868.10</b><br><b>(8,171.01 to</b><br><b>19,477.34)</b> | <b>203.80</b><br><b>(124.05 to</b><br><b>298.66)</b> | <b>442.97</b><br><b>(291.00 to</b><br><b>709.87)</b> | <b>408.02</b><br><b>(268.97 to</b><br><b>678.41)</b> | <b>601.58</b><br><b>(408.87 to</b><br><b>954.59)</b> |
| Diabetes mellitus                                          | 3,033.20<br>(1,788.93 to<br>4,740.16)                      | 4,093.38<br>(2,409.57 to<br>6,603.10)                       | 3,554.35<br>(2,106.20 to<br>5,574.29)                       | 6,221.29<br>(3,706.22 to<br>10,079.53)                       | 129.15<br>(78.39 to<br>194.37)                       | 231.91<br>(160.56 to<br>322.29)                      | 212.82<br>(146.47 to<br>291.06)                      | 322.34<br>(226.79 to<br>443.47)                      |
| Acute glomerulonephritis                                   | 6.52<br>(3.88 to<br>11.21)                                 | 10.22<br>(5.57 to<br>19.14)                                 | 9.74<br>(5.35 to<br>18.00)                                  | 14.53<br>(8.06 to<br>26.15)                                  | 0.12<br>(0.07 to<br>0.19)                            | 0.20<br>(0.12 to<br>0.34)                            | 0.20<br>(0.12 to<br>0.33)                            | 0.27<br>(0.16 to<br>0.45)                            |
| Chronic kidney disease                                     | 1,000.22<br>(591.72 to<br>1,573.58)                        | 2,161.57<br>(737.65 to<br>5,866.60)                         | 1,877.05<br>(644.93 to<br>5,346.24)                         | 3,341.52<br>(1,200.95 to<br>8,513.58)                        | 36.25<br>(21.87 to<br>55.76)                         | 127.45<br>(32.95 to<br>409.53)                       | 111.97<br>(29.03 to<br>370.35)                       | 183.57<br>(49.50 to<br>549.00)                       |
| Chronic kidney disease due to diabetes mellitus            | 279.46<br>(157.03 to<br>464.75)                            | 695.83<br>(216.05 to<br>2,106.16)                           | 597.83<br>(193.37 to<br>1,903.70)                           | 1,044.35<br>(329.03 to<br>2,953.47)                          | 11.26<br>(6.58 to<br>17.87)                          | 42.21<br>(10.33 to<br>142.18)                        | 36.76<br>(8.87 to<br>133.47)                         | 60.07<br>(14.99 to<br>189.88)                        |
| Chronic kidney disease due to hypertension                 | 148.90<br>(83.66 to<br>241.89)                             | 457.13<br>(112.38 to<br>1,482.42)                           | 401.09<br>(99.50 to<br>1,363.96)                            | 668.42<br>(170.23 to<br>2,037.80)                            | 7.82<br>(4.70 to<br>12.00)                           | 35.72<br>(8.01 to<br>120.43)                         | 31.94<br>(7.08 to<br>116.00)                         | 49.16<br>(11.24 to<br>157.14)                        |
| Chronic kidney disease due to glomerulonephritis           | 265.84<br>(161.01 to<br>413.06)                            | 443.81<br>(185.38 to<br>1,030.29)                           | 385.30<br>(162.22 to<br>914.68)                             | 728.96<br>(316.51 to<br>1,632.88)                            | 7.56<br>(4.46 to<br>11.79)                           | 20.14<br>(5.96 to<br>62.85)                          | 17.51<br>(5.23 to<br>54.83)                          | 30.95<br>(9.64 to<br>87.40)                          |
| Chronic kidney disease due to other and unspecified causes | 306.02<br>(184.77 to<br>487.09)                            | 564.79<br>(213.71 to<br>1,408.24)                           | 492.83<br>(192.57 to<br>1,242.33)                           | 899.79<br>(356.16 to<br>2,096.15)                            | 9.61<br>(5.78 to<br>15.12)                           | 29.38<br>(8.25 to<br>93.41)                          | 25.76<br>(7.12 to<br>84.81)                          | 43.40<br>(12.83 to<br>127.86)                        |
| Urinary diseases and male infertility                      | 434.20<br>(281.10 to<br>641.07)                            | 778.96<br>(523.36 to<br>1,200.63)                           | 778.96<br>(502.56 to<br>1,145.79)                           | 956.13<br>(655.10 to<br>1,402.05)                            | 15.30<br>(9.43 to<br>22.26)                          | 40.54<br>(29.65 to<br>51.76)                         | 40.82<br>(29.34 to<br>52.97)                         | 41.50<br>(31.86 to<br>52.20)                         |
| Urinary tract infections                                   | 303.81<br>(186.46 to<br>462.71)                            | 644.84<br>(405.97 to<br>987.90)                             | 628.63<br>(388.22 to<br>948.28)                             | 732.17<br>(481.48 to<br>1,080.53)                            | 10.52<br>(6.12 to<br>16.15)                          | 32.59<br>(22.11 to<br>43.21)                         | 32.96<br>(22.64 to<br>43.99)                         | 31.75<br>(22.50 to<br>41.79)                         |

|                                                   |                                   |                                     |                                   |                                     |                             |                              |                              |                              |
|---------------------------------------------------|-----------------------------------|-------------------------------------|-----------------------------------|-------------------------------------|-----------------------------|------------------------------|------------------------------|------------------------------|
| Urolithiasis                                      | 7.13<br>(4.29 to<br>11.55)        | 13.54<br>(7.70 to<br>22.77)         | 12.49<br>(7.00 to<br>20.81)       | 16.73<br>(9.75 to<br>27.14)         | 0.19<br>(0.11 to<br>0.34)   | 0.44<br>(0.27 to<br>0.75)    | 0.42<br>(0.25 to<br>0.71)    | 0.49<br>(0.31 to<br>0.80)    |
| Other urinary diseases                            | 123.27<br>(67.66 to<br>196.09)    | 144.91<br>(76.97 to<br>246.95)      | 137.84<br>(70.15 to<br>244.78)    | 207.23<br>(111.47 to<br>347.42)     | 4.59<br>(2.54 to<br>7.37)   | 7.52<br>(3.80 to<br>12.55)   | 7.45<br>(3.73 to<br>12.50)   | 9.27<br>(5.03 to<br>15.01)   |
| Gynecological diseases                            | 24.03<br>(10.58 to<br>42.51)      | 30.24<br>(12.21 to<br>57.25)        | 26.64<br>(11.06 to<br>49.76)      | 45.88<br>(19.54 to<br>84.77)        | 0.63<br>(0.29 to<br>1.10)   | 0.81<br>(0.38 to<br>1.46)    | 0.73<br>(0.34 to<br>1.25)    | 1.19<br>(0.57 to<br>2.02)    |
| Uterine fibroids                                  | 8.47<br>(3.29 to<br>15.08)        | 7.89<br>(2.71 to<br>16.27)          | 7.21<br>(2.46 to<br>14.79)        | 12.01<br>(4.10 to<br>24.17)         | 0.24<br>(0.10 to<br>0.43)   | 0.23<br>(0.09 to<br>0.44)    | 0.21<br>(0.08 to<br>0.41)    | 0.34<br>(0.13 to<br>0.64)    |
| Polycystic ovarian syndrome                       | 2.26<br>(0.32 to<br>5.49)         | 1.45<br>(0.17 to<br>4.02)           | 1.17<br>(0.14 to<br>3.55)         | 3.02<br>(0.38 to<br>8.08)           | 0.05<br>(0.01 to<br>0.13)   | 0.03<br>(0.00 to<br>0.09)    | 0.03<br>(0.00 to<br>0.07)    | 0.07<br>(0.01 to<br>0.17)    |
| Endometriosis                                     | 0.12<br>(0.03 to<br>0.40)         | 0.22<br>(0.04 to<br>0.83)           | 0.19<br>(0.03 to<br>0.72)         | 0.33<br>(0.06 to<br>1.28)           | 0.00<br>(0.00 to<br>0.01)   | 0.00<br>(0.00 to<br>0.02)    | 0.00<br>(0.00 to<br>0.01)    | 0.01<br>(0.00 to<br>0.02)    |
| Genital prolapse                                  | 0.51<br>(0.18 to<br>1.06)         | 0.45<br>(0.16 to<br>0.97)           | 0.41<br>(0.14 to<br>0.88)         | 0.71<br>(0.26 to<br>1.53)           | 0.03<br>(0.01 to<br>0.05)   | 0.03<br>(0.01 to<br>0.05)    | 0.02<br>(0.01 to<br>0.05)    | 0.04<br>(0.01 to<br>0.08)    |
| Other gynecological diseases                      | 12.68<br>(4.87 to<br>23.04)       | 20.23<br>(7.52 to<br>40.54)         | 17.66<br>(6.53 to<br>35.45)       | 29.81<br>(10.93 to<br>58.21)        | 0.31<br>(0.12 to<br>0.56)   | 0.52<br>(0.22 to<br>0.97)    | 0.46<br>(0.19 to<br>0.88)    | 0.74<br>(0.30 to<br>1.34)    |
| Hemoglobinopathies and hemolytic anemias          | 769.25<br>(509.75 to<br>1,114.04) | 1,057.92<br>(595.86 to<br>1,742.45) | 980.78<br>(555.48 to<br>1,605.34) | 1,547.74<br>(904.66 to<br>2,469.87) | 14.70<br>(9.45 to<br>21.65) | 25.08<br>(15.37 to<br>38.47) | 23.76<br>(14.71 to<br>37.55) | 33.95<br>(21.88 to<br>50.76) |
| Thalassemias                                      | 0.25<br>(0.13 to<br>0.45)         | 0.20<br>(0.10 to<br>0.38)           | 0.20<br>(0.10 to<br>0.38)         | 0.26<br>(0.13 to<br>0.50)           | 0.00<br>(0.00 to<br>0.01)   | 0.00<br>(0.00 to<br>0.00)    | 0.00<br>(0.00 to<br>0.00)    | 0.00<br>(0.00 to<br>0.01)    |
| Sickle cell disorders                             | 671.93<br>(449.07 to<br>966.35)   | 891.83<br>(488.80 to<br>1,533.75)   | 821.76<br>(446.71 to<br>1,383.30) | 1,324.64<br>(746.52 to<br>2,167.16) | 10.24<br>(6.63 to<br>14.92) | 15.06<br>(8.10 to<br>26.14)  | 13.91<br>(7.29 to<br>23.80)  | 21.53<br>(12.00 to<br>35.39) |
| G6PD deficiency                                   | 61.70<br>(35.72 to<br>99.48)      | 105.52<br>(59.23 to<br>167.46)      | 99.01<br>(57.28 to<br>163.55)     | 149.41<br>(90.34 to<br>231.14)      | 2.05<br>(1.20 to<br>3.35)   | 4.71<br>(2.94 to<br>7.12)    | 4.50<br>(2.82 to<br>6.98)    | 6.32<br>(4.17 to<br>9.29)    |
| Other hemoglobinopathies and hemolytic anemias    | 35.37<br>(20.91 to<br>57.37)      | 60.36<br>(42.56 to<br>89.33)        | 59.82<br>(41.05 to<br>88.76)      | 73.43<br>(53.28 to<br>106.19)       | 2.41<br>(1.50 to<br>3.79)   | 3.30<br>(3.90 to<br>7.76)    | 5.35<br>(3.89 to<br>7.85)    | 6.10<br>(4.34 to<br>9.06)    |
| Endocrine, metabolic, blood, and immune disorders | 342.02<br>(132.68 to<br>745.93)   | 572.94<br>(192.78 to<br>1,343.41)   | 580.90<br>(196.11 to<br>1,341.11) | 741.01<br>(260.94 to<br>1,744.32)   | 7.64<br>(2.41 to<br>17.40)  | 16.97<br>(5.22 to<br>39.16)  | 17.72<br>(5.45 to<br>40.93)  | 18.76<br>(6.06 to<br>42.95)  |

**Equatorial Guinea**

| Cause                                  | YLLs (actual counts)                          |                                               |                                               |                                                | Deaths (actual counts)               |                                        |                                        |                                        |
|----------------------------------------|-----------------------------------------------|-----------------------------------------------|-----------------------------------------------|------------------------------------------------|--------------------------------------|----------------------------------------|----------------------------------------|----------------------------------------|
|                                        | 2016                                          | 2040 Forecast                                 | 2040 Better Scenario                          | 2040 Worse Scenario                            | 2016                                 | 2040 Forecast                          | 2040 Better Scenario                   | 2040 Worse Scenario                    |
| <b>Musculoskeletal disorders</b>       | <b>178.44</b><br>(96.58 to<br>287.84)         | <b>419.27</b><br>(226.04 to<br>700.11)        | <b>411.89</b><br>(220.73 to<br>686.38)        | <b>408.09</b><br>(226.68 to<br>666.33)         | <b>4.90</b><br>(2.62 to<br>7.84)     | <b>13.56</b><br>(8.10 to<br>20.63)     | <b>13.58</b><br>(7.88 to<br>20.52)     | <b>12.63</b><br>(7.66 to<br>18.70)     |
| Rheumatoid arthritis                   | 21.30<br>(10.15 to<br>39.60)                  | 35.14<br>(17.21 to<br>63.57)                  | 32.48<br>(15.35 to<br>56.82)                  | 46.03<br>(24.12 to<br>76.42)                   | 0.89<br>(0.42 to<br>1.64)            | 2.20<br>(1.12 to<br>3.83)              | 2.08<br>(1.03 to<br>3.68)              | 2.69<br>(1.48 to<br>4.31)              |
| Other musculoskeletal disorders        | 157.14<br>(83.62 to<br>253.84)                | 384.13<br>(205.13 to<br>652.79)               | 379.41<br>(201.07 to<br>644.17)               | 362.07<br>(194.63 to<br>603.60)                | 4.01<br>(2.11 to<br>6.46)            | 11.36<br>(6.58 to<br>17.56)            | 9.94<br>(6.54 to<br>17.72)             | 9.94<br>(5.85 to<br>15.18)             |
| <b>Other non-communicable diseases</b> | <b>6,950.73</b><br>(3,865.39 to<br>10,732.30) | <b>7,849.26</b><br>(4,261.61 to<br>13,274.52) | <b>7,252.01</b><br>(3,988.19 to<br>12,071.29) | <b>15,113.69</b><br>(7,750.06 to<br>26,500.41) | <b>98.77</b><br>(57.95 to<br>145.70) | <b>166.79</b><br>(101.81 to<br>260.89) | <b>162.14</b><br>(100.27 to<br>251.76) | <b>246.41</b><br>(141.97 to<br>398.29) |
| Congenital birth defects               | 5,911.75<br>(3,066.68 to<br>9,589.03)         | 5,446.81<br>(2,482.39 to<br>10,130.52)        | 4,883.37<br>(2,322.47 to<br>9,003.22)         | 12,222.22<br>(5,520.97 to<br>22,403.45)        | 70.03<br>(37.01 to<br>112.54)        | 66.12<br>(31.72 to<br>122.06)          | 59.33<br>(29.21 to<br>108.49)          | 145.70<br>(69.17 to<br>264.33)         |
| Neural tube defects                    | 725.18<br>(310.96 to<br>1,431.71)             | 245.17<br>(81.69 to<br>608.92)                | 209.79<br>(71.25 to<br>521.38)                | 720.88<br>(241.12 to<br>1,773.93)              | 8.44<br>(3.64 to<br>16.62)           | 2.89<br>(0.99 to<br>7.10)              | 2.47<br>(0.86 to<br>6.06)              | 8.43<br>(2.85 to<br>20.62)             |

|                                               |                                                               |                                                               |                                                               |                                                               |                                                      |                                                        |                                                        |                                                        |
|-----------------------------------------------|---------------------------------------------------------------|---------------------------------------------------------------|---------------------------------------------------------------|---------------------------------------------------------------|------------------------------------------------------|--------------------------------------------------------|--------------------------------------------------------|--------------------------------------------------------|
| Congenital heart anomalies                    | 1,651.47<br>(881.18 to<br>2,809.08)                           | 1,460.78<br>(699.70 to<br>2,918.30)                           | 1,265.31<br>(605.11 to<br>2,477.89)                           | 3,264.03<br>(1,536.86 to<br>6,258.52)                         | 19.88<br>(10.88 to<br>33.25)                         | 18.40<br>(9.19 to<br>35.66)                            | 15.95<br>(7.91 to<br>30.50)                            | 39.89<br>(19.38 to<br>75.33)                           |
| Orofacial clefts                              | 26.92<br>(6.55 to<br>64.44)                                   | 15.22<br>(3.04 to<br>41.97)                                   | 12.69<br>(2.47 to<br>37.02)                                   | 49.33<br>(10.41 to<br>140.13)                                 | 0.31<br>(0.08 to<br>0.74)                            | 0.18<br>(0.04 to<br>0.49)                              | 0.15<br>(0.03 to<br>0.43)                              | 0.57<br>(0.12 to<br>1.62)                              |
| Down syndrome                                 | 101.87<br>(48.54 to<br>198.16)                                | 142.77<br>(64.95 to<br>310.97)                                | 146.72<br>(67.25 to<br>319.00)                                | 265.01<br>(109.06 to<br>603.28)                               | 1.33<br>(0.69 to<br>2.49)                            | 1.98<br>(0.96 to<br>3.98)                              | 2.04<br>(0.99 to<br>4.06)                              | 3.45<br>(1.54 to<br>7.63)                              |
| Other chromosomal abnormalities               | 384.49<br>(125.34 to<br>812.41)                               | 594.12<br>(175.05 to<br>1,349.67)                             | 567.90<br>(166.03 to<br>1,248.28)                             | 1,314.95<br>(378.82 to<br>2,957.52)                           | 4.49<br>(1.46 to<br>9.45)                            | 6.97<br>(2.08 to<br>15.82)                             | 6.67<br>(1.98 to<br>14.63)                             | 15.35<br>(4.46 to<br>34.35)                            |
| Congenital musculoskeletal and limb anomalies | 87.52<br>(37.24 to<br>175.16)                                 | 95.74<br>(35.09 to<br>222.45)                                 | 85.82<br>(31.72 to<br>195.90)                                 | 205.51<br>(72.80 to<br>475.33)                                | 1.03<br>(0.45 to<br>2.05)                            | 1.14<br>(0.44 to<br>2.61)                              | 1.02<br>(0.39 to<br>2.80)                              | 2.42<br>(0.87 to<br>5.55)                              |
| Urogenital congenital anomalies               | 140.57<br>(70.48 to<br>238.61)                                | 133.30<br>(59.41 to<br>272.74)                                | 122.22<br>(55.71 to<br>253.43)                                | 272.43<br>(114.70 to<br>558.05)                               | 1.72<br>(0.92 to<br>2.88)                            | 1.68<br>(0.81 to<br>3.35)                              | 1.54<br>(0.74 to<br>3.06)                              | 3.32<br>(1.49 to<br>6.62)                              |
| Digestive congenital anomalies                | 583.25<br>(263.90 to<br>1,046.11)                             | 507.86<br>(194.48 to<br>1,117.39)                             | 448.40<br>(170.41 to<br>955.73)                               | 1,231.75<br>(480.07 to<br>2,656.09)                           | 6.79<br>(3.08 to<br>12.16)                           | 5.94<br>(2.29 to<br>13.06)                             | 5.24<br>(2.03 to<br>11.13)                             | 14.35<br>(5.59 to<br>30.97)                            |
| Other congenital birth defects                | 2,210.46<br>(988.58 to<br>3,863.17)                           | 2,251.84<br>(893.09 to<br>4,591.34)                           | 2,024.52<br>(826.84 to<br>4,061.32)                           | 4,898.32<br>(1,890.14 to<br>10,117.59)                        | 26.04<br>(11.92 to<br>45.11)                         | 26.96<br>(11.02 to<br>54.40)                           | 24.25<br>(10.42 to<br>47.98)                           | 57.93<br>(22.94 to<br>118.51)                          |
| Skin and subcutaneous diseases                | 778.70<br>(402.63 to<br>1,332.83)                             | 2,197.34<br>(1,213.27 to<br>3,737.80)                         | 2,182.32<br>(1,222.95 to<br>3,821.93)                         | 2,431.82<br>(1,362.79 to<br>4,155.77)                         | 25.72<br>(13.41 to<br>44.20)                         | 98.28<br>(59.97 to<br>164.68)                          | 100.65<br>(61.19 to<br>169.68)                         | 95.37<br>(59.00 to<br>156.29)                          |
| Cellulitis                                    | 164.31<br>(63.38 to<br>296.87)                                | 567.68<br>(239.27 to<br>1,055.69)                             | 574.21<br>(243.40 to<br>1,072.24)                             | 521.44<br>(211.22 to<br>957.34)                               | 5.23<br>(2.04 to<br>9.57)                            | 22.41<br>(9.51 to<br>37.91)                            | 23.34<br>(10.01 to<br>39.47)                           | 18.58<br>(7.88 to<br>31.53)                            |
| Pyoderma                                      | 502.58<br>(259.15 to<br>879.08)                               | 1,334.72<br>(707.13 to<br>2,355.07)                           | 1,320.41<br>(693.55 to<br>2,317.65)                           | 1,604.73<br>(873.61 to<br>2,731.92)                           | 15.58<br>(7.85 to<br>28.55)                          | 58.16<br>(32.28 to<br>100.16)                          | 59.47<br>(32.59 to<br>102.19)                          | 60.44<br>(34.33 to<br>100.40)                          |
| Decubitus ulcer                               | 80.63<br>(37.36 to<br>157.83)                                 | 217.96<br>(115.04 to<br>416.87)                               | 213.03<br>(109.67 to<br>407.71)                               | 221.67<br>(117.61 to<br>413.92)                               | 4.12<br>(2.02 to<br>8.17)                            | 15.38<br>(8.37 to<br>30.22)                            | 15.52<br>(8.44 to<br>30.95)                            | 14.12<br>(7.88 to<br>27.74)                            |
| Other skin and subcutaneous diseases          | 31.17<br>(15.37 to<br>56.42)                                  | 76.99<br>(39.82 to<br>139.77)                                 | 74.67<br>(37.95 to<br>134.39)                                 | 83.99<br>(42.16 to<br>155.23)                                 | 0.79<br>(0.40 to<br>1.48)                            | 2.32<br>(1.27 to<br>4.02)                              | 2.32<br>(1.27 to<br>3.96)                              | 2.23<br>(1.23 to<br>3.85)                              |
| Sudden infant death syndrome                  | 260.28<br>(124.89 to<br>504.63)                               | 205.11<br>(83.05 to<br>425.11)                                | 186.32<br>(75.23 to<br>379.23)                                | 459.64<br>(183.89 to<br>959.48)                               | 3.02<br>(1.45 to<br>5.86)                            | 2.38<br>(0.96 to<br>4.95)                              | 2.16<br>(0.87 to<br>4.40)                              | 5.33<br>(2.13 to<br>11.13)                             |
| <b>Injuries</b>                               | <b>18,311.56</b><br><b>(12,258.93 to</b><br><b>26,484.15)</b> | <b>32,932.61</b><br><b>(18,183.24 to</b><br><b>59,413.93)</b> | <b>28,945.87</b><br><b>(16,174.73 to</b><br><b>51,118.61)</b> | <b>41,787.75</b><br><b>(23,565.08 to</b><br><b>75,515.82)</b> | <b>377.12</b><br><b>(245.24 to</b><br><b>555.29)</b> | <b>731.26</b><br><b>(429.29 to</b><br><b>1,213.58)</b> | <b>656.37</b><br><b>(398.98 to</b><br><b>1,065.03)</b> | <b>874.51</b><br><b>(515.43 to</b><br><b>1,481.43)</b> |
| <b>Transport injuries</b>                     | <b>7,304.55</b><br><b>(4,699.09 to</b><br><b>10,983.54)</b>   | <b>16,853.16</b><br><b>(7,870.24 to</b><br><b>34,185.71)</b>  | <b>14,322.01</b><br><b>(6,928.17 to</b><br><b>28,381.34)</b>  | <b>20,304.20</b><br><b>(9,713.45 to</b><br><b>42,070.05)</b>  | <b>137.41</b><br><b>(86.94 to</b><br><b>207.96)</b>  | <b>325.88</b><br><b>(154.54 to</b><br><b>669.68)</b>   | <b>277.88</b><br><b>(135.87 to</b><br><b>549.46)</b>   | <b>380.50</b><br><b>(180.33 to</b><br><b>805.14)</b>   |
| Road injuries                                 | 7,018.87<br>(4,510.07 to<br>10,436.27)                        | 16,285.46<br>(7,538.91 to<br>33,225.10)                       | 13,843.42<br>(6,675.08 to<br>27,668.50)                       | 19,481.25<br>(9,280.72 to<br>40,706.00)                       | 131.94<br>(83.13 to<br>199.78)                       | 314.79<br>(149.61 to<br>646.99)                        | 268.52<br>(131.56 to<br>529.73)                        | 364.93<br>(170.98 to<br>763.80)                        |
| Pedestrian road injuries                      | 2,621.41<br>(1,686.15 to<br>3,868.72)                         | 4,296.49<br>(2,037.83 to<br>8,606.45)                         | 3,475.07<br>(1,662.72 to<br>7,136.29)                         | 5,859.01<br>(2,796.24 to<br>11,758.74)                        | 50.44<br>(31.55 to<br>76.83)                         | 88.97<br>(43.14 to<br>173.69)                          | 72.37<br>(36.11 to<br>144.42)                          | 115.17<br>(56.93 to<br>236.86)                         |

**Equatorial Guinea**

| Cause                      | YLLs (actual counts)              |                                     |                                     |                                     | Deaths (actual counts)      |                              |                              |                              |
|----------------------------|-----------------------------------|-------------------------------------|-------------------------------------|-------------------------------------|-----------------------------|------------------------------|------------------------------|------------------------------|
|                            | 2016                              | 2040 Forecast                       | 2040 Better Scenario                | 2040 Worse Scenario                 | 2016                        | 2040 Forecast                | 2040 Better Scenario         | 2040 Worse Scenario          |
| Cyclist road injuries      | 182.08<br>(103.66 to<br>292.62)   | 451.08<br>(199.89 to<br>938.90)     | 395.00<br>(180.62 to<br>811.03)     | 523.26<br>(229.41 to<br>1,083.85)   | 3.53<br>(1.93 to<br>5.77)   | 8.63<br>(3.76 to<br>18.00)   | 7.60<br>(3.45 to<br>15.67)   | 9.64<br>(4.21 to<br>20.42)   |
| Motorcyclist road injuries | 591.80<br>(308.68 to<br>1,063.42) | 1,758.22<br>(643.13 to<br>4,644.53) | 1,558.16<br>(588.99 to<br>4,110.02) | 1,943.43<br>(702.78 to<br>5,195.40) | 10.44<br>(5.25 to<br>18.91) | 31.55<br>(11.40 to<br>81.51) | 27.99<br>(10.56 to<br>72.55) | 34.40<br>(12.11 to<br>91.65) |

|                                                 |                                                 |                                                 |                                                 |                                                  |                                          |                                          |                                          |                                          |
|-------------------------------------------------|-------------------------------------------------|-------------------------------------------------|-------------------------------------------------|--------------------------------------------------|------------------------------------------|------------------------------------------|------------------------------------------|------------------------------------------|
| Motor vehicle road injuries                     | 3,602.29<br>(2,189.09 to<br>5,526.44)           | 9,732.85<br>(4,432.03 to<br>20,589.78)          | 8,374.32<br>(3,939.11 to<br>17,044.42)          | 11,101.16<br>(5,063.33 to<br>23,686.53)          | 67.12<br>(39.66 to<br>103.09)            | 184.71<br>(85.34 to<br>388.83)           | 159.74<br>(75.71 to<br>323.58)           | 204.68<br>(92.86 to<br>440.51)           |
| Other road injuries                             | 21.29<br>(10.96 to<br>37.47)                    | 46.83<br>(19.76 to<br>106.87)                   | 40.87<br>(17.51 to<br>92.75)                    | 54.40<br>(23.05 to<br>126.99)                    | 0.41<br>(0.21 to<br>0.73)                | 0.93<br>(0.39 to<br>2.10)                | 0.82<br>(0.36 to<br>1.86)                | 1.03<br>(0.44 to<br>2.33)                |
| Other transport injuries                        | 285.68<br>(176.62 to<br>461.30)                 | 567.69<br>(261.69 to<br>1,254.42)               | 478.59<br>(221.28 to<br>1,050.43)               | 822.96<br>(381.40 to<br>1,783.55)                | 5.47<br>(3.26 to<br>9.16)                | 11.08<br>(5.08 to<br>24.63)              | 9.36<br>(4.31 to<br>20.60)               | 15.57<br>(7.10 to<br>34.72)              |
| <b>Unintentional injuries</b>                   | <b>7,455.56<br/>(5,096.86 to<br/>10,577.97)</b> | <b>8,952.22<br/>(5,595.06 to<br/>14,146.85)</b> | <b>8,420.09<br/>(5,225.21 to<br/>13,228.89)</b> | <b>12,953.56<br/>(7,955.59 to<br/>20,236.73)</b> | <b>160.33<br/>(108.11 to<br/>230.82)</b> | <b>241.60<br/>(169.00 to<br/>338.89)</b> | <b>234.20<br/>(164.56 to<br/>329.43)</b> | <b>303.59<br/>(213.51 to<br/>423.17)</b> |
| Falls                                           | 1,269.60<br>(743.95 to<br>1,978.00)             | 2,037.58<br>(1,180.92 to<br>3,107.51)           | 1,984.53<br>(1,142.10 to<br>3,064.24)           | 2,425.98<br>(1,428.12 to<br>3,658.66)            | 42.12<br>(24.73 to<br>63.61)             | 92.20<br>(58.99 to<br>123.67)            | 92.81<br>(59.53 to<br>123.88)            | 97.98<br>(63.85 to<br>130.98)            |
| Drowning                                        | 2,079.68<br>(1,318.25 to<br>3,006.95)           | 2,235.95<br>(1,207.86 to<br>3,851.10)           | 2,057.96<br>(1,129.91 to<br>3,536.63)           | 3,437.87<br>(1,814.73 to<br>6,809.43)            | 33.55<br>(22.02 to<br>47.88)             | 38.93<br>(21.95 to<br>66.82)             | 55.89<br>(20.41 to<br>60.71)             | 56.40<br>(31.34 to<br>95.54)             |
| Fire, heat, and hot substances                  | 872.51<br>(516.69 to<br>1,425.79)               | 825.02<br>(438.38 to<br>1,499.83)               | 742.23<br>(388.54 to<br>1,368.70)               | 1,295.28<br>(698.09 to<br>2,266.57)              | 20.48<br>(11.88 to<br>33.33)             | 23.75<br>(14.48 to<br>38.48)             | 21.96<br>(13.03 to<br>35.95)             | 32.67<br>(19.73 to<br>51.99)             |
| Poisonings                                      | 266.96<br>(125.75 to<br>515.86)                 | 186.97<br>(86.28 to<br>382.69)                  | 163.98<br>(74.78 to<br>340.75)                  | 351.10<br>(153.92 to<br>725.74)                  | 5.48<br>(2.73 to<br>9.56)                | 4.21<br>(2.13 to<br>8.01)                | 3.74<br>(1.96 to<br>6.75)                | 7.06<br>(3.57 to<br>13.47)               |
| Exposure to mechanical forces                   | 923.57<br>(584.51 to<br>1,383.29)               | 1,063.72<br>(585.79 to<br>1,837.78)             | 987.88<br>(547.41 to<br>1,689.19)               | 1,655.47<br>(925.62 to<br>2,789.45)              | 17.14<br>(10.43 to<br>26.15)             | 21.97<br>(12.82 to<br>36.85)             | 20.71<br>(12.30 to<br>34.68)             | 31.20<br>(18.55 to<br>50.31)             |
| Unintentional firearm injuries                  | 108.55<br>(50.74 to<br>202.53)                  | 128.12<br>(53.87 to<br>264.03)                  | 120.17<br>(50.71 to<br>248.20)                  | 185.82<br>(78.39 to<br>382.12)                   | 2.10<br>(0.96 to<br>3.90)                | 2.64<br>(1.15 to<br>5.27)                | 2.51<br>(1.12 to<br>4.95)                | 3.67<br>(1.59 to<br>7.21)                |
| Unintentional suffocation                       | 230.54<br>(110.95 to<br>465.68)                 | 210.74<br>(96.43 to<br>446.17)                  | 197.85<br>(91.56 to<br>407.10)                  | 408.27<br>(175.69 to<br>894.05)                  | 2.97<br>(1.50 to<br>5.71)                | 2.88<br>(1.40 to<br>5.72)                | 2.71<br>(1.34 to<br>5.36)                | 5.32<br>(2.46 to<br>11.17)               |
| Other exposure to mechanical forces             | 584.47<br>(345.12 to<br>943.94)                 | 724.86<br>(371.63 to<br>1,281.50)               | 669.85<br>(352.09 to<br>1,216.06)               | 1,061.38<br>(555.20 to<br>1,851.80)              | 12.08<br>(6.98 to<br>20.18)              | 16.45<br>(9.48 to<br>28.91)              | 15.48<br>(8.87 to<br>26.50)              | 22.21<br>(12.71 to<br>36.81)             |
| Adverse effects of medical treatment            | 472.87<br>(303.20 to<br>704.84)                 | 598.60<br>(348.35 to<br>982.18)                 | 580.66<br>(336.36 to<br>956.99)                 | 842.26<br>(501.38 to<br>1,349.73)                | 10.55<br>(6.51 to<br>16.47)              | 16.53<br>(10.14 to<br>26.47)             | 16.48<br>(10.07 to<br>26.56)             | 20.31<br>(13.03 to<br>31.15)             |
| Animal contact                                  | 391.11<br>(210.10 to<br>615.32)                 | 528.47<br>(268.93 to<br>922.40)                 | 507.79<br>(260.05 to<br>880.12)                 | 813.46<br>(422.56 to<br>1,390.29)                | 9.47<br>(4.96 to<br>15.17)               | 13.94<br>(7.50 to<br>22.44)              | 13.71<br>(7.39 to<br>22.01)              | 19.22<br>(10.75 to<br>30.88)             |
| Venomous animal contact                         | 292.70<br>(154.86 to<br>470.70)                 | 375.83<br>(183.75 to<br>644.08)                 | 364.43<br>(180.98 to<br>623.08)                 | 569.67<br>(284.33 to<br>984.19)                  | 7.44<br>(3.81 to<br>12.10)               | 10.39<br>(5.28 to<br>17.00)              | 10.31<br>(5.28 to<br>16.70)              | 14.12<br>(7.34 to<br>22.95)              |
| Non-venomous animal contact                     | 98.41<br>(47.32 to<br>163.22)                   | 152.65<br>(67.80 to<br>288.38)                  | 143.36<br>(62.69 to<br>277.34)                  | 243.78<br>(111.65 to<br>458.04)                  | 2.03<br>(0.93 to<br>3.53)                | 3.55<br>(1.60 to<br>6.22)                | 3.40<br>(1.54 to<br>6.04)                | 5.10<br>(2.43 to<br>8.94)                |
| Foreign body                                    | 768.93<br>(375.42 to<br>1,569.39)               | 1,061.15<br>(547.01 to<br>2,016.26)             | 1,055.12<br>(531.56 to<br>1,999.55)             | 1,467.29<br>(677.91 to<br>3,210.56)              | 12.98<br>(6.99 to<br>22.74)              | 20.78<br>(12.17 to<br>32.95)             | 20.69<br>(12.22 to<br>32.39)             | 24.84<br>(13.58 to<br>44.92)             |
| Pulmonary aspiration and foreign body in airway | 727.27<br>(350.23 to<br>1,531.96)               | 994.25<br>(506.91 to<br>1,921.55)               | 966.69<br>(496.28 to<br>1,851.15)               | 1,383.72<br>(626.47 to<br>3,093.37)              | 12.18<br>(6.52 to<br>21.92)              | 19.38<br>(11.44 to<br>31.57)             | 19.24<br>(11.44 to<br>30.82)             | 23.22<br>(12.67 to<br>43.24)             |
| Foreign body in other body part                 | 41.66<br>(16.40 to<br>71.40)                    | 66.90<br>(23.11 to<br>138.53)                   | 68.42<br>(23.90 to<br>141.34)                   | 83.57<br>(29.16 to<br>169.23)                    | 0.80<br>(0.31 to<br>1.40)                | 1.40<br>(0.49 to<br>2.87)                | 1.45<br>(0.51 to<br>2.97)                | 1.62<br>(0.59 to<br>3.20)                |
| Environmental heat and cold exposure            | 98.80<br>(44.49 to<br>190.04)                   | 105.12<br>(40.48 to<br>233.46)                  | 96.54<br>(37.39 to<br>208.45)                   | 177.14<br>(71.46 to<br>360.54)                   | 2.31<br>(0.99 to<br>4.69)                | 2.62<br>(1.08 to<br>5.43)                | 2.45<br>(1.01 to<br>5.33)                | 4.08<br>(1.71 to<br>7.98)                |
| Other unintentional injuries                    | 311.52<br>(188.27 to<br>483.59)                 | 309.62<br>(160.81 to<br>556.49)                 | 263.40<br>(139.64 to<br>481.34)                 | 487.71<br>(267.30 to<br>838.51)                  | 6.25<br>(3.56 to<br>9.88)                | 6.67<br>(3.60 to<br>11.40)               | 5.76<br>(3.09 to<br>9.96)                | 9.83<br>(5.53 to<br>16.65)               |
| <b>Self-harm and interpersonal violence</b>     | <b>3,546.51<br/>(1,937.83 to<br/>5,698.93)</b>  | <b>7,119.55<br/>(3,445.25 to<br/>13,174.98)</b> | <b>6,196.05<br/>(3,017.47 to<br/>11,177.18)</b> | <b>8,521.78<br/>(3,969.83 to<br/>15,668.66)</b>  | <b>79.30<br/>(43.57 to<br/>127.35)</b>   | <b>163.65<br/>(84.22 to<br/>287.19)</b>  | <b>144.15<br/>(75.66 to<br/>245.87)</b>  | <b>190.27<br/>(96.35 to<br/>332.61)</b>  |

| Equatorial Guinea                                                            |                                    |                                    |                                    |                                     |                           |                             |                             |                             |
|------------------------------------------------------------------------------|------------------------------------|------------------------------------|------------------------------------|-------------------------------------|---------------------------|-----------------------------|-----------------------------|-----------------------------|
| Cause                                                                        | YLLs (actual counts)               |                                    |                                    |                                     | Deaths (actual counts)    |                             |                             |                             |
|                                                                              | 2016                               | 2040 Forecast                      | 2040 Better Scenario               | 2040 Worse Scenario                 | 2016                      | 2040 Forecast               | 2040 Better Scenario        | 2040 Worse Scenario         |
| Self-harm                                                                    | 1,887.10<br>(1,040.99 to 3,150.99) | 4,556.36<br>(1,999.83 to 9,077.47) | 3,893.24<br>(1,758.61 to 7,371.46) | 5,544.93<br>(2,351.47 to 10,795.02) | 48.88<br>(26.96 to 79.95) | 115.76<br>(57.18 to 208.73) | 101.08<br>(51.96 to 177.21) | 135.48<br>(64.97 to 247.46) |
| Self-harm by firearm                                                         | 101.09<br>(40.01 to 209.12)        | 204.64<br>(67.41 to 475.32)        | 170.18<br>(55.39 to 386.11)        | 267.83<br>(84.89 to 629.49)         | 2.56<br>(1.04 to 5.38)    | 5.17<br>(1.81 to 11.65)     | 4.40<br>(1.55 to 9.89)      | 6.49<br>(2.20 to 14.78)     |
| Self-harm by other specified means                                           | 1,786.01<br>(977.01 to 2,980.49)   | 4,351.73<br>(1,914.53 to 8,600.46) | 3,723.05<br>(1,696.00 to 7,121.77) | 5,277.10<br>(2,281.66 to 10,283.76) | 46.32<br>(25.79 to 74.78) | 110.60<br>(55.26 to 201.70) | 96.68<br>(49.76 to 171.27)  | 128.99<br>(62.29 to 232.58) |
| Interpersonal violence                                                       | 1,659.41<br>(865.24 to 2,900.19)   | 2,563.19<br>(1,128.60 to 4,979.20) | 2,302.81<br>(1,011.19 to 4,525.25) | 2,976.85<br>(1,302.73 to 5,794.95)  | 30.42<br>(15.76 to 52.84) | 47.88<br>(21.22 to 93.25)   | 43.07<br>(19.04 to 86.22)   | 54.79<br>(23.98 to 108.43)  |
| Physical violence by firearm                                                 | 386.80<br>(125.61 to 915.97)       | 583.20<br>(175.87 to 1,435.04)     | 523.84<br>(160.26 to 1,311.79)     | 676.36<br>(206.22 to 1,685.64)      | 6.98<br>(2.28 to 16.37)   | 10.68<br>(3.28 to 26.91)    | 9.61<br>(2.94 to 23.87)     | 12.28<br>(3.79 to 30.33)    |
| Physical violence by sharp object                                            | 530.60<br>(196.63 to 1,001.10)     | 907.31<br>(300.85 to 1,969.64)     | 823.42<br>(273.69 to 1,747.71)     | 986.19<br>(314.86 to 2,109.85)      | 9.80<br>(3.53 to 18.44)   | 16.98<br>(5.66 to 36.53)    | 15.44<br>(5.26 to 32.48)    | 18.27<br>(5.94 to 39.25)    |
| Physical violence by other means                                             | 742.01<br>(366.42 to 1,383.35)     | 1,072.68<br>(426.58 to 2,394.49)   | 955.55<br>(383.63 to 2,063.34)     | 1,314.30<br>(523.89 to 2,920.91)    | 13.64<br>(6.53 to 25.37)  | 20.22<br>(8.12 to 45.63)    | 18.02<br>(7.23 to 38.80)    | 24.24<br>(9.78 to 53.79)    |
| Forces of nature, conflict and terrorism, and executions and police conflict | 4.93<br>(3.06 to 7.96)             | 7.69<br>(0.00 to 108.63)           | 7.73<br>(0.00 to 109.35)           | 8.21<br>(0.00 to 112.14)            | 0.09<br>(0.00 to 0.16)    | 0.14<br>(0.00 to 1.96)      | 0.14<br>(0.00 to 1.97)      | 0.14<br>(0.00 to 1.99)      |
| Exposure to forces of nature                                                 | 0.00<br>(0.00 to 0.00)             | 0.00<br>(0.00 to 0.00)             | 0.00<br>(0.00 to 0.00)             | 0.00<br>(0.00 to 0.00)              | 0.00<br>(0.00 to 0.00)    | 0.00<br>(0.00 to 0.00)      | 0.00<br>(0.00 to 0.00)      | 0.00<br>(0.00 to 0.00)      |
| Conflict and terrorism                                                       | 0.00<br>(0.00 to 0.00)             | 6.16<br>(0.00 to 2.98)             | 6.19<br>(0.00 to 3.00)             | 6.63<br>(0.00 to 3.25)              | 0.00<br>(0.00 to 0.00)    | 0.11<br>(0.00 to 0.05)      | 0.11<br>(0.00 to 0.05)      | 0.11<br>(0.00 to 0.06)      |
| Executions and police conflict                                               | 4.93<br>(3.06 to 7.96)             | 1.53<br>(0.00 to 0.00)             | 1.54<br>(0.00 to 0.00)             | 1.58<br>(0.00 to 0.00)              | 0.09<br>(0.00 to 0.16)    | 0.03<br>(0.00 to 0.00)      | 0.03<br>(0.00 to 0.00)      | 0.03<br>(0.00 to 0.00)      |

  

| Gabon                                                             |                                          |                                          |                                          |                                          |                                       |                                       |                                       |                                       |
|-------------------------------------------------------------------|------------------------------------------|------------------------------------------|------------------------------------------|------------------------------------------|---------------------------------------|---------------------------------------|---------------------------------------|---------------------------------------|
| Cause                                                             | YLLs (actual counts)                     |                                          |                                          |                                          | Deaths (actual counts)                |                                       |                                       |                                       |
|                                                                   | 2016                                     | 2040 Forecast                            | 2040 Better Scenario                     | 2040 Worse Scenario                      | 2016                                  | 2040 Forecast                         | 2040 Better Scenario                  | 2040 Worse Scenario                   |
| All causes                                                        | 516,962.25<br>(437,243.23 to 602,830.08) | 492,251.21<br>(373,117.09 to 654,798.39) | 360,164.76<br>(275,969.68 to 475,082.83) | 661,204.12<br>(509,136.73 to 877,737.28) | 13,708.90<br>(11,893.91 to 15,717.26) | 16,924.87<br>(13,859.95 to 20,929.88) | 13,206.21<br>(10,879.56 to 16,229.42) | 20,837.06<br>(17,016.91 to 25,860.63) |
| Communicable, maternal, neonatal, and nutritional diseases        | 301,252.88<br>(246,950.48 to 365,030.67) | 179,765.07<br>(126,130.83 to 248,532.90) | 129,647.64<br>(89,333.93 to 182,848.23)  | 291,615.45<br>(211,220.59 to 400,329.52) | 5,726.32<br>(4,860.31 to 6,760.91)    | 4,397.52<br>(3,194.42 to 5,974.78)    | 3,361.83<br>(2,353.39 to 4,692.16)    | 6,614.57<br>(4,913.73 to 9,075.71)    |
| HIV/AIDS and tuberculosis                                         | 70,852.56<br>(55,762.06 to 93,071.71)    | 50,663.91<br>(22,445.45 to 90,717.05)    | 37,105.34<br>(12,200.70 to 75,278.32)    | 103,198.63<br>(66,998.49 to 145,583.73)  | 1,670.74<br>(1,347.35 to 2,090.16)    | 1,247.39<br>(584.06 to 2,128.69)      | 887.14<br>(1,711.26)                  | 2,356.39<br>(1,500.50 to 3,290.39)    |
| Tuberculosis                                                      | 15,735.61<br>(11,669.84 to 21,211.21)    | 12,762.54<br>(6,817.83 to 21,702.51)     | 5,183.25<br>(2,745.37 to 9,228.08)       | 19,202.15<br>(10,429.31 to 34,241.79)    | 490.41<br>(370.05 to 642.68)          | 423.17<br>(243.93 to 685.77)          | 180.80<br>(103.42 to 298.09)          | 614.37<br>(350.57 to 1,030.57)        |
| HIV/AIDS                                                          | 55,116.95<br>(40,188.37 to 76,619.80)    | 37,901.37<br>(10,961.90 to 76,449.33)    | 31,922.09<br>(7,122.33 to 69,759.26)     | 83,996.49<br>(47,605.45 to 127,161.13)   | 1,180.33<br>(879.07 to 1,594.26)      | 824.22<br>(208.62 to 1,663.58)        | 706.34<br>(1,533.76)                  | 1,742.02<br>(930.28 to 2,680.18)      |
| Diarrhea, lower respiratory, and other common infectious diseases | 74,073.31<br>(56,911.67 to 95,413.63)    | 51,902.51<br>(30,524.23 to 86,930.46)    | 34,445.29<br>(20,046.70 to 61,816.72)    | 86,462.71<br>(47,068.14 to 152,736.31)   | 1,779.68<br>(1,378.74 to 2,237.71)    | 1,748.98<br>(1,129.95 to 2,743.39)    | 1,327.46<br>(834.19 to 2,146.15)      | 2,556.43<br>(1,553.84 to 4,176.32)    |
| Diarrheal diseases                                                | 20,907.57<br>(12,164.29 to 32,264.70)    | 9,624.05<br>(1,956.78 to 29,839.76)      | 9,299.49<br>(1,930.93 to 28,207.51)      | 18,909.00<br>(4,030.18 to 56,352.14)     | 552.36<br>(290.22 to 962.91)          | 353.08<br>(72.67 to 1,105.49)         | 389.56<br>(1,092.50)                  | 659.14<br>(132.25 to 1,957.00)        |

|                                      |                                          |                                          |                                          |                                          |                                   |                                     |                                   |                                       |
|--------------------------------------|------------------------------------------|------------------------------------------|------------------------------------------|------------------------------------------|-----------------------------------|-------------------------------------|-----------------------------------|---------------------------------------|
| Intestinal infectious diseases       | 569.77<br>(272.94 to<br>1,050.22)        | 432.61<br>(177.02 to<br>924.17)          | 425.83<br>(172.95 to<br>912.15)          | 503.71<br>(201.96 to<br>1,084.90)        | 8.24<br>(4.02 to<br>15.18)        | 6.63<br>(2.83 to<br>13.85)          | 6.64<br>(2.88 to<br>13.91)        | 7.56<br>(3.22 to<br>15.83)            |
| Typhoid fever                        | 494.63<br>(227.74 to<br>946.56)          | 380.62<br>(147.68 to<br>826.20)          | 391.36<br>(158.84 to<br>859.41)          | 440.87<br>(167.76 to<br>966.84)          | 7.13<br>(3.38 to<br>13.62)        | 5.76<br>(2.32 to<br>12.41)          | 6.03<br>(2.56 to<br>12.98)        | 6.55<br>(2.62 to<br>14.23)            |
| Paratyphoid fever                    | 39.92<br>(15.31 to<br>87.21)             | 35.62<br>(12.88 to<br>81.11)             | 23.41<br>(8.45 to<br>53.48)              | 42.01<br>(15.13 to<br>95.55)             | 0.57<br>(0.23 to<br>1.25)         | 0.54<br>(0.21 to<br>1.22)           | 0.36<br>(0.14 to<br>0.82)         | 0.63<br>(0.24 to<br>1.40)             |
| Other intestinal infectious diseases | 35.21<br>(9.22 to<br>99.04)              | 16.37<br>(3.63 to<br>47.43)              | 11.06<br>(2.37 to<br>31.88)              | 20.83<br>(4.49 to<br>62.20)              | 0.54<br>(0.17 to<br>1.32)         | 0.24<br>(0.09 to<br>0.82)           | 0.24<br>(0.06 to<br>0.64)         | 0.38<br>(0.10 to<br>0.96)             |
| Lower respiratory infections         | 36,753.27<br>(27,702.49 to<br>47,390.23) | 32,826.91<br>(20,403.74 to<br>52,591.94) | 19,265.54<br>(12,242.32 to<br>29,922.86) | 53,089.84<br>(30,978.08 to<br>89,504.07) | 973.39<br>(759.01 to<br>1,191.10) | 1,221.62<br>(863.66 to<br>1,702.86) | 819.19<br>(585.90 to<br>1,131.88) | 1,664.73<br>(1,134.96 to<br>2,454.10) |
| Upper respiratory infections         | 23.16<br>(9.48 to<br>52.86)              | 19.51<br>(7.08 to<br>45.29)              | 9.37<br>(3.29 to<br>22.32)               | 24.89<br>(8.92 to<br>58.68)              | 0.41<br>(0.21 to<br>0.78)         | 0.46<br>(0.19 to<br>0.98)           | 0.24<br>(0.10 to<br>0.51)         | 0.55<br>(0.23 to<br>1.17)             |
| Otitis media                         | 7.09<br>(2.81 to<br>21.50)               | 2.22<br>(0.72 to<br>6.54)                | 2.23<br>(0.72 to<br>6.28)                | 2.22<br>(0.76 to<br>6.25)                | 0.19<br>(0.07 to<br>0.54)         | 0.12<br>(0.03 to<br>0.35)           | 0.13<br>(0.03 to<br>0.37)         | 0.10<br>(0.03 to<br>0.31)             |
| Meningitis                           | 11,470.59<br>(7,758.99 to<br>19,608.30)  | 6,729.56<br>(4,013.36 to<br>11,463.27)   | 4,330.06<br>(2,634.04 to<br>7,087.51)    | 10,074.86<br>(5,519.32 to<br>18,995.69)  | 188.25<br>(132.66 to<br>297.82)   | 133.76<br>(83.44 to<br>205.24)      | 92.80<br>(58.43 to<br>144.18)     | 172.28<br>(103.06 to<br>289.97)       |
| Pneumococcal meningitis              | 699.26<br>(473.72 to<br>1,141.94)        | 350.08<br>(204.49 to<br>552.31)          | 312.72<br>(186.02 to<br>491.42)          | 495.34<br>(292.41 to<br>835.42)          | 13.56<br>(9.31 to<br>20.32)       | 8.86<br>(5.27 to<br>14.08)          | 8.38<br>(5.17 to<br>13.42)        | 11.23<br>(6.70 to<br>18.07)           |
| H influenzae type B meningitis       | 1,092.01<br>(708.84 to<br>1,950.22)      | 1,213.22<br>(373.55 to<br>3,316.38)      | 667.09<br>(284.62 to<br>1,572.30)        | 3,755.09<br>(840.76 to<br>10,483.04)     | 16.63<br>(11.32 to<br>27.48)      | 17.62<br>(7.02 to<br>42.12)         | 11.38<br>(5.94 to<br>22.80)       | 47.10<br>(12.87 to<br>126.92)         |
| Meningococcal meningitis             | 4,876.94<br>(3,256.41 to<br>8,175.20)    | 2,424.63<br>(1,433.54 to<br>4,076.15)    | 1,588.45<br>(962.32 to<br>2,537.41)      | 2,744.90<br>(1,605.36 to<br>4,692.62)    | 77.85<br>(54.36 to<br>125.30)     | 49.01<br>(30.11 to<br>76.47)        | 33.69<br>(21.13 to<br>54.27)      | 52.38<br>(32.10 to<br>83.81)          |
| Other meningitis                     | 4,802.38<br>(3,193.82 to<br>8,652.79)    | 2,741.63<br>(1,617.65 to<br>4,416.18)    | 1,761.29<br>(1,012.83 to<br>2,852.41)    | 3,079.53<br>(1,804.72 to<br>5,353.96)    | 80.21<br>(55.82 to<br>129.19)     | 58.28<br>(36.11 to<br>90.29)        | 39.36<br>(24.13 to<br>63.09)      | 61.58<br>(38.64 to<br>99.47)          |
| Encephalitis                         | 635.30<br>(458.09 to<br>891.83)          | 584.02<br>(365.71 to<br>923.36)          | 471.16<br>(294.12 to<br>758.50)          | 675.25<br>(419.73 to<br>1,064.49)        | 10.02<br>(7.57 to<br>13.16)       | 10.97<br>(7.21 to<br>15.86)         | 9.29<br>(6.27 to<br>13.54)        | 12.08<br>(8.22 to<br>17.42)           |
| Diphtheria                           | 20.11<br>(8.97 to<br>42.75)              | 6.39<br>(2.36 to<br>16.55)               | 3.39<br>(1.60 to<br>6.86)                | 14.98<br>(4.09 to<br>44.57)              | 0.27<br>(0.13 to<br>0.53)         | 0.10<br>(0.04 to<br>0.22)           | 0.06<br>(0.03 to<br>0.11)         | 0.20<br>(0.06 to<br>0.55)             |
| Whooping cough                       | 1,196.51<br>(88.07 to<br>3,852.14)       | 1,236.57<br>(95.67 to<br>4,194.28)       | 430.73<br>(31.02 to<br>1,480.77)         | 1,464.49<br>(104.74 to<br>5,049.41)      | 14.13<br>(1.04 to<br>45.44)       | 14.63<br>(1.14 to<br>49.75)         | 5.14<br>(0.37 to<br>17.63)        | 17.31<br>(1.24 to<br>59.90)           |
| Tetanus                              | 161.73<br>(50.20 to<br>390.51)           | 34.41<br>(9.34 to<br>86.97)              | 20.99<br>(5.36 to<br>53.90)              | 40.73<br>(11.00 to<br>105.19)            | 2.72<br>(0.89 to<br>5.85)         | 0.70<br>(0.17 to<br>1.79)           | 0.55<br>(0.12 to<br>1.48)         | 0.75<br>(0.21 to<br>1.90)             |
| Measles                              | 2,098.72<br>(696.03 to<br>5,034.85)      | 256.94<br>(14.24 to<br>1,708.37)         | 95.28<br>(9.10 to<br>541.47)             | 1,471.93<br>(67.08 to<br>7,306.25)       | 25.03<br>(8.31 to<br>60.22)       | 3.07<br>(0.19 to<br>20.33)          | 1.16<br>(0.12 to<br>6.45)         | 17.45<br>(0.81 to<br>86.85)           |

**Gabon**

| Cause                                          | YLLs (actual counts)                                          |                                                               |                                                               |                                                               | Deaths (actual counts)                                 |                                                      |                                                      |                                                      |
|------------------------------------------------|---------------------------------------------------------------|---------------------------------------------------------------|---------------------------------------------------------------|---------------------------------------------------------------|--------------------------------------------------------|------------------------------------------------------|------------------------------------------------------|------------------------------------------------------|
|                                                | 2016                                                          | 2040 Forecast                                                 | 2040 Better Scenario                                          | 2040 Worse Scenario                                           | 2016                                                   | 2040 Forecast                                        | 2040 Better Scenario                                 | 2040 Worse Scenario                                  |
| Varicella and herpes zoster                    | 229.49<br>(133.09 to<br>383.75)                               | 149.32<br>(72.92 to<br>285.53)                                | 91.21<br>(46.51 to<br>168.67)                                 | 190.78<br>(90.59 to<br>371.25)                                | 4.68<br>(3.17 to<br>6.74)                              | 3.84<br>(2.24 to<br>6.09)                            | 2.71<br>(1.59 to<br>4.29)                            | 4.28<br>(2.53 to<br>6.92)                            |
| <b>Neglected tropical diseases and malaria</b> | <b>58,419.76</b><br><b>(38,773.70 to</b><br><b>82,622.77)</b> | <b>24,437.21</b><br><b>(15,150.19 to</b><br><b>36,825.33)</b> | <b>21,417.24</b><br><b>(13,682.01 to</b><br><b>32,094.61)</b> | <b>28,057.51</b><br><b>(16,806.90 to</b><br><b>42,818.97)</b> | <b>894.31</b><br><b>(631.39 to</b><br><b>1,203.11)</b> | <b>488.68</b><br><b>(323.57 to</b><br><b>724.46)</b> | <b>448.40</b><br><b>(300.28 to</b><br><b>664.28)</b> | <b>529.50</b><br><b>(348.03 to</b><br><b>786.56)</b> |
| Malaria                                        | 53,259.68<br>(33,836.11 to<br>77,493.37)                      | 21,972.68<br>(13,285.83 to<br>34,149.08)                      | 19,325.25<br>(12,032.53 to<br>29,874.34)                      | 25,153.47<br>(14,544.53 to<br>39,502.72)                      | 793.32<br>(537.53 to<br>1,106.04)                      | 432.36<br>(272.77 to<br>654.57)                      | 398.37<br>(256.59 to<br>603.44)                      | 467.14<br>(290.58 to<br>714.75)                      |



|                                                       |                                                |                                                 |                                                |                                                 |                                         |                                         |                                        |                                         |                           |  |
|-------------------------------------------------------|------------------------------------------------|-------------------------------------------------|------------------------------------------------|-------------------------------------------------|-----------------------------------------|-----------------------------------------|----------------------------------------|-----------------------------------------|---------------------------|--|
| Chagas disease                                        | 0.00<br>(0.00 to<br>0.00)                      | 0.00<br>(0.00 to<br>0.00)                       | 0.00<br>(0.00 to<br>0.00)                      | 0.00<br>(0.00 to<br>0.00)                       | 0.00<br>(0.00 to<br>0.00)               | 0.00<br>(0.00 to<br>0.00)               | 0.00<br>(0.00 to<br>0.00)              | 0.00<br>(0.00 to<br>0.00)               | 0.00<br>(0.00 to<br>0.00) |  |
| Leishmaniasis                                         | 0.00<br>(0.00 to<br>0.00)                      | 0.00<br>(0.00 to<br>0.00)                       | 0.00<br>(0.00 to<br>0.00)                      | 0.00<br>(0.00 to<br>0.00)                       | 0.00<br>(0.00 to<br>0.00)               | 0.00<br>(0.00 to<br>0.00)               | 0.00<br>(0.00 to<br>0.00)              | 0.00<br>(0.00 to<br>0.00)               | 0.00<br>(0.00 to<br>0.00) |  |
| African trypanosomiasis                               | 1,915.57<br>(745.66 to<br>3,976.77)            | 206.83<br>(56.20 to<br>589.36)                  | 198.12<br>(54.63 to<br>540.50)                 | 214.67<br>(58.93 to<br>604.83)                  | 37.08<br>(13.98 to<br>78.20)            | 4.31<br>(1.20 to<br>11.57)              | 4.21<br>(1.20 to<br>11.20)             | 4.39<br>(1.20 to<br>11.82)              |                           |  |
| Schistosomiasis                                       | 715.61<br>(404.83 to<br>1,161.49)              | 590.41<br>(311.78 to<br>1,000.81)               | 499.68<br>(263.53 to<br>851.56)                | 631.81<br>(338.81 to<br>1,067.96)               | 22.96<br>(13.24 to<br>36.20)            | 20.12<br>(10.90 to<br>32.93)            | 17.60<br>(9.51 to<br>28.95)            | 20.89<br>(11.64 to<br>34.26)            |                           |  |
| Cysticercosis                                         | 39.02<br>(28.36 to<br>51.67)                   | 20.13<br>(13.22 to<br>30.69)                    | 18.15<br>(11.80 to<br>28.11)                   | 21.17<br>(14.05 to<br>31.85)                    | 0.88<br>(0.64 to<br>1.17)               | 0.51<br>(0.35 to<br>0.75)               | 0.47<br>(0.32 to<br>0.70)              | 0.53<br>(0.36 to<br>0.77)               |                           |  |
| Cystic echinococcosis                                 | 1.88<br>(1.20 to<br>2.28)                      | 1.06<br>(0.69 to<br>1.61)                       | 0.62<br>(0.40 to<br>0.95)                      | 1.37<br>(0.88 to<br>2.11)                       | 0.05<br>(0.03 to<br>0.06)               | 0.03<br>(0.02 to<br>0.05)               | 0.02<br>(0.01 to<br>0.03)              | 0.04<br>(0.03 to<br>0.06)               |                           |  |
| Dengue                                                | 15.53<br>(2.51 to<br>46.57)                    | 55.83<br>(9.84 to<br>154.53)                    | 50.57<br>(8.93 to<br>139.52)                   | 62.33<br>(10.75 to<br>176.21)                   | 0.27<br>(0.05 to<br>0.74)               | 0.27<br>(0.25 to<br>3.40)               | 1.27<br>(0.24 to<br>3.31)              | 1.36<br>(0.25 to<br>3.50)               |                           |  |
| Yellow fever                                          | 961.02<br>(181.17 to<br>2,968.90)              | 389.29<br>(71.86 to<br>1,278.62)                | 271.09<br>(49.27 to<br>909.28)                 | 481.69<br>(87.79 to<br>1,590.51)                | 15.77<br>(3.06 to<br>48.38)             | 6.85<br>(1.27 to<br>22.36)              | 4.86<br>(0.89 to<br>16.02)             | 8.29<br>(1.54 to<br>26.44)              |                           |  |
| Rabies                                                | 18.75<br>(7.96 to<br>40.44)                    | 10.11<br>(3.96 to<br>22.60)                     | 5.59<br>(2.21 to<br>12.81)                     | 15.29<br>(5.78 to<br>34.96)                     | 0.33<br>(0.15 to<br>0.67)               | 0.20<br>(0.08 to<br>0.44)               | 0.12<br>(0.05 to<br>0.25)              | 0.29<br>(0.12 to<br>0.65)               |                           |  |
| Intestinal nematode infections                        | 180.94<br>(44.57 to<br>388.82)                 | 206.17<br>(53.99 to<br>462.84)                  | 185.24<br>(48.97 to<br>413.44)                 | 244.48<br>(60.24 to<br>555.04)                  | 2.40<br>(0.76 to<br>4.84)               | 2.93<br>(1.03 to<br>6.00)               | 2.71<br>(1.02 to<br>5.30)              | 3.36<br>(1.13 to<br>7.13)               |                           |  |
| Other neglected tropical diseases                     | 1,311.97<br>(374.51 to<br>3,072.43)            | 984.70<br>(257.56 to<br>2,258.96)               | 862.92<br>(223.18 to<br>1,938.60)              | 1,231.23<br>(327.02 to<br>2,869.44)             | 21.23<br>(5.62 to<br>47.99)             | 20.04<br>(4.97 to<br>44.33)             | 18.78<br>(4.63 to<br>40.76)            | 23.22<br>(5.81 to<br>51.01)             |                           |  |
| <b>Maternal disorders</b>                             | <b>6,291.60<br/>(4,413.56 to<br/>8,847.14)</b> | <b>6,205.13<br/>(2,889.84 to<br/>12,892.10)</b> | <b>3,915.66<br/>(1,816.27 to<br/>8,137.21)</b> | <b>8,211.95<br/>(3,930.65 to<br/>16,304.65)</b> | <b>118.21<br/>(82.17 to<br/>164.94)</b> | <b>122.49<br/>(56.71 to<br/>254.00)</b> | <b>77.56<br/>(35.72 to<br/>163.06)</b> | <b>161.80<br/>(78.38 to<br/>320.83)</b> |                           |  |
| Maternal hemorrhage                                   | 1,588.03<br>(1,004.44 to<br>2,446.14)          | 1,421.40<br>(611.94 to<br>3,069.61)             | 908.62<br>(384.83 to<br>1,922.13)              | 1,774.18<br>(776.98 to<br>3,618.38)             | 29.99<br>(18.84 to<br>45.84)            | 28.11<br>(12.00 to<br>60.87)            | 18.01<br>(7.48 to<br>38.73)            | 35.00<br>(14.91 to<br>71.49)            |                           |  |
| Maternal sepsis and other maternal infections         | 263.49<br>(135.75 to<br>456.71)                | 231.67<br>(82.77 to<br>575.99)                  | 146.44<br>(52.41 to<br>356.30)                 | 290.25<br>(107.15 to<br>692.92)                 | 5.08<br>(2.63 to<br>8.70)               | 4.71<br>(1.70 to<br>11.53)              | 2.99<br>(1.05 to<br>7.31)              | 5.88<br>(2.19 to<br>13.72)              |                           |  |
| Maternal hypertensive disorders                       | 1,257.28<br>(797.08 to<br>1,955.39)            | 1,132.38<br>(510.60 to<br>2,448.89)             | 705.36<br>(307.05 to<br>1,503.27)              | 1,424.34<br>(648.67 to<br>2,975.61)             | 22.72<br>(14.47 to<br>35.30)            | 21.44<br>(9.62 to<br>46.32)             | 13.40<br>(5.86 to<br>28.33)            | 26.88<br>(12.36 to<br>55.48)            |                           |  |
| Maternal obstructed labor and uterine rupture         | 251.10<br>(122.31 to<br>448.44)                | 249.59<br>(88.26 to<br>596.84)                  | 149.15<br>(52.16 to<br>363.50)                 | 317.04<br>(114.65 to<br>762.58)                 | 4.82<br>(2.35 to<br>8.63)               | 5.03<br>(1.76 to<br>12.07)              | 3.02<br>(1.05 to<br>7.34)              | 6.37<br>(2.33 to<br>15.37)              |                           |  |
| Maternal abortion, miscarriage, and ectopic pregnancy | 166.62<br>(74.75 to<br>307.01)                 | 180.20<br>(61.59 to<br>431.44)                  | 113.28<br>(38.79 to<br>277.85)                 | 230.69<br>(80.57 to<br>561.95)                  | 3.19<br>(1.49 to<br>5.88)               | 3.62<br>(1.29 to<br>8.57)               | 2.28<br>(0.79 to<br>5.51)              | 4.62<br>(1.65 to<br>10.89)              |                           |  |
| Indirect maternal deaths                              | 1,536.57<br>(976.75 to<br>2,272.82)            | 1,567.54<br>(691.64 to<br>3,271.30)             | 988.48<br>(424.26 to<br>2,138.00)              | 1,978.83<br>(883.86 to<br>4,151.83)             | 29.20<br>(18.86 to<br>43.17)            | 30.99<br>(13.49 to<br>64.37)            | 19.64<br>(8.42 to<br>43.28)            | 38.92<br>(17.57 to<br>81.03)            |                           |  |
| Late maternal deaths                                  | 165.78<br>(72.48 to<br>323.63)                 | 127.79<br>(45.97 to<br>308.73)                  | 79.73<br>(28.23 to<br>193.90)                  | 161.53<br>(58.74 to<br>385.58)                  | 3.08<br>(1.38 to<br>5.90)               | 2.49<br>(0.87 to<br>5.99)               | 1.56<br>(0.54 to<br>3.72)              | 3.14<br>(1.13 to<br>7.41)               |                           |  |
| Maternal deaths aggravated by HIV/AIDS                | 137.94<br>(77.94 to<br>220.48)                 | 397.66<br>(5.82 to<br>1,297.14)                 | 225.64<br>(2.46 to<br>870.45)                  | 916.88<br>(246.61 to<br>1,977.92)               | 2.73<br>(1.55 to<br>4.42)               | 8.32<br>(0.10 to<br>27.59)              | 4.74<br>(0.04 to<br>18.39)             | 18.93<br>(4.56 to<br>40.94)             |                           |  |
| Other maternal disorders                              | 924.79<br>(553.04 to<br>1,435.34)              | 896.89<br>(404.96 to<br>1,967.02)               | 598.97<br>(265.16 to<br>1,318.91)              | 1,118.21<br>(506.33 to<br>2,401.80)             | 17.42<br>(10.62 to<br>26.89)            | 17.77<br>(7.85 to<br>38.31)             | 11.92<br>(5.17 to<br>26.45)            | 22.04<br>(9.94 to<br>47.81)             |                           |  |
| <b>Gabon</b>                                          |                                                |                                                 |                                                |                                                 |                                         |                                         |                                        |                                         |                           |  |
|                                                       | <b>YLLs (actual counts)</b>                    |                                                 |                                                |                                                 |                                         | <b>Deaths (actual counts)</b>           |                                        |                                         |                           |  |

| Cause                                                                   | 2016                                         | 2040 Forecast                                | 2040 Better Scenario                         | 2040 Worse Scenario                          | 2016                                  | 2040 Forecast                       | 2040 Better Scenario                | 2040 Worse Scenario                 |
|-------------------------------------------------------------------------|----------------------------------------------|----------------------------------------------|----------------------------------------------|----------------------------------------------|---------------------------------------|-------------------------------------|-------------------------------------|-------------------------------------|
| <b>Neonatal disorders</b>                                               | <b>70,615.23</b><br>(47,932.94 to 96,717.32) | <b>33,512.68</b><br>(17,196.49 to 58,190.99) | <b>21,997.88</b><br>(11,129.24 to 37,424.39) | <b>50,154.87</b><br>(25,552.92 to 86,434.56) | <b>815.73</b><br>(553.77 to 1,117.24) | <b>387.24</b><br>(198.80 to 672.21) | <b>254.19</b><br>(128.64 to 432.40) | <b>579.51</b><br>(295.23 to 998.58) |
| Neonatal preterm birth                                                  | 24,366.59<br>(14,544.73 to 36,822.47)        | 7,835.38<br>(3,719.30 to 14,241.11)          | 4,941.07<br>(2,319.45 to 8,976.37)           | 14,248.81<br>(6,695.74 to 26,235.60)         | 281.45<br>(167.99 to 425.37)          | 90.53<br>(42.98 to 164.53)          | 57.09<br>(26.81 to 103.70)          | 164.61<br>(77.37 to 303.09)         |
| Neonatal encephalopathy due to birth asphyxia and trauma                | 15,799.82<br>(9,198.37 to 26,530.25)         | 7,262.59<br>(3,124.06 to 14,573.37)          | 4,485.06<br>(1,922.89 to 8,886.75)           | 10,033.11<br>(4,286.02 to 19,410.23)         | 182.52<br>(106.28 to 306.46)          | 83.93<br>(36.15 to 168.36)          | 51.83<br>(22.26 to 102.66)          | 115.94<br>(49.56 to 224.30)         |
| Neonatal sepsis and other neonatal infections                           | 19,854.88<br>(12,082.91 to 29,866.01)        | 12,326.46<br>(5,844.65 to 21,824.51)         | 8,110.16<br>(3,843.30 to 14,519.28)          | 17,104.62<br>(8,102.38 to 30,504.49)         | 229.37<br>(139.57 to 344.99)          | 142.42<br>(67.53 to 252.14)         | 93.71<br>(44.41 to 167.74)          | 197.63<br>(93.64 to 352.44)         |
| Hemolytic disease and other neonatal jaundice                           | 979.38<br>(540.90 to 1,643.36)               | 309.77<br>(122.29 to 624.47)                 | 192.64<br>(76.72 to 398.28)                  | 444.47<br>(173.36 to 906.42)                 | 11.31<br>(6.25 to 18.98)              | 3.58<br>(1.41 to 7.21)              | 2.23<br>(0.89 to 4.60)              | 5.13<br>(2.00 to 10.47)             |
| Other neonatal disorders                                                | 9,614.56<br>(4,833.47 to 16,188.93)          | 5,778.48<br>(2,187.02 to 11,752.09)          | 4,268.95<br>(1,631.65 to 8,616.36)           | 8,323.85<br>(3,136.34 to 17,665.37)          | 111.08<br>(55.87 to 187.03)           | 66.78<br>(25.29 to 135.77)          | 49.33<br>(18.87 to 99.55)           | 96.19<br>(36.26 to 204.16)          |
| <b>Nutritional deficiencies</b>                                         | <b>14,299.88</b><br>(7,629.97 to 29,923.09)  | <b>7,845.60</b><br>(3,800.95 to 19,112.06)   | <b>6,834.58</b><br>(3,378.16 to 16,358.08)   | <b>9,314.60</b><br>(4,473.32 to 22,566.96)   | <b>325.52</b><br>(183.25 to 751.96)   | <b>275.89</b><br>(141.79 to 713.03) | <b>265.01</b><br>(140.44 to 663.98) | <b>290.61</b><br>(144.05 to 751.71) |
| Protein-energy malnutrition                                             | 12,813.62<br>(6,683.52 to 26,831.31)         | 5,783.19<br>(2,621.84 to 14,206.14)          | 5,219.32<br>(2,462.98 to 12,458.08)          | 7,043.57<br>(3,082.40 to 17,266.82)          | 269.71<br>(151.57 to 617.35)          | 191.72<br>(98.50 to 510.62)         | 194.20<br>(99.81 to 490.38)         | 204.61<br>(102.69 to 537.01)        |
| Iodine deficiency                                                       | 134.73<br>(7.69 to 519.97)                   | 314.03<br>(7.88 to 1,320.66)                 | 245.58<br>(5.89 to 1,017.39)                 | 375.53<br>(10.53 to 1,732.76)                | 3.28<br>(0.21 to 11.75)               | 11.37<br>(0.27 to 44.92)            | 9.73<br>(0.18 to 41.65)             | 12.28<br>(0.32 to 48.89)            |
| Dietary iron deficiency                                                 | 88.29<br>(46.14 to 203.98)                   | 83.20<br>(38.85 to 200.85)                   | 76.84<br>(36.09 to 177.32)                   | 90.83<br>(42.15 to 230.28)                   | 1.69<br>(0.87 to 3.96)                | 1.70<br>(0.80 to 4.08)              | 1.60<br>(0.76 to 3.63)              | 1.82<br>(0.86 to 4.36)              |
| Other nutritional deficiencies                                          | 1,263.24<br>(514.96 to 3,093.83)             | 1,665.18<br>(642.39 to 4,207.83)             | 1,292.84<br>(504.13 to 3,197.16)             | 1,884.66<br>(690.36 to 4,684.16)             | 50.84<br>(20.56 to 127.22)            | 71.10<br>(27.88 to 188.85)          | 59.48<br>(23.16 to 152.67)          | 71.90<br>(27.93 to 196.01)          |
| <b>Other communicable, maternal, neonatal, and nutritional diseases</b> | <b>6,700.53</b><br>(3,211.37 to 16,051.61)   | <b>5,198.03</b><br>(2,473.40 to 11,066.54)   | <b>3,931.66</b><br>(1,950.95 to 7,864.18)    | <b>6,215.18</b><br>(2,904.90 to 13,712.95)   | <b>122.14</b><br>(63.00 to 241.65)    | <b>126.85</b><br>(65.75 to 226.54)  | <b>102.08</b><br>(53.72 to 181.68)  | <b>140.33</b><br>(70.38 to 264.68)  |
| Sexually transmitted infections excluding HIV                           | 1,320.57<br>(640.47 to 2,506.93)             | 500.22<br>(234.65 to 962.94)                 | 348.95<br>(167.60 to 667.55)                 | 620.31<br>(280.58 to 1,245.45)               | 17.56<br>(9.29 to 31.26)              | 17.56<br>(4.33 to 14.07)            | 5.92<br>(3.20 to 10.31)             | 9.36<br>(4.86 to 16.82)             |
| Syphilis                                                                | 1,206.63<br>(525.29 to 2,364.68)             | 386.63<br>(149.47 to 863.85)                 | 250.39<br>(96.05 to 563.26)                  | 500.15<br>(187.91 to 1,113.33)               | 14.65<br>(6.70 to 28.12)              | 5.00<br>(2.14 to 10.62)             | 3.32<br>(1.43 to 6.98)              | 6.34<br>(2.65 to 13.52)             |
| Chlamydial infection                                                    | 22.17<br>(13.29 to 35.95)                    | 21.94<br>(10.73 to 44.11)                    | 19.04<br>(9.01 to 38.39)                     | 23.24<br>(11.48 to 47.20)                    | 0.56<br>(0.35 to 0.91)                | 0.56<br>(0.30 to 1.07)              | 0.50<br>(0.27 to 0.95)              | 0.58<br>(0.31 to 1.09)              |
| Gonococcal infection                                                    | 59.86<br>(36.04 to 96.92)                    | 59.95<br>(29.33 to 119.94)                   | 52.21<br>(25.45 to 106.05)                   | 63.24<br>(31.24 to 124.61)                   | 1.59<br>(1.00 to 2.55)                | 1.59<br>(0.87 to 2.94)              | 1.42<br>(0.76 to 2.70)              | 1.63<br>(0.90 to 3.01)              |
| Other sexually transmitted infections                                   | 31.91<br>(18.91 to 51.67)                    | 31.70<br>(15.46 to 64.83)                    | 27.31<br>(12.68 to 57.24)                    | 33.67<br>(16.71 to 67.38)                    | 0.77<br>(0.47 to 1.24)                | 0.77<br>(0.40 to 1.49)              | 0.68<br>(0.34 to 1.33)              | 0.81<br>(0.42 to 1.53)              |
| Acute hepatitis                                                         | 1,285.63<br>(851.49 to 1,824.86)             | 1,226.52<br>(779.67 to 1,827.06)             | 838.52<br>(520.56 to 1,294.22)               | 1,331.12<br>(850.70 to 1,984.00)             | 32.21<br>(21.82 to 46.06)             | 36.76<br>(24.42 to 52.95)           | 26.07<br>(17.00 to 38.76)           | 38.47<br>(25.68 to 54.69)           |
| Acute hepatitis A                                                       | 59.72<br>(6.51 to 162.83)                    | 27.99<br>(5.59 to 82.52)                     | 19.37<br>(3.92 to 57.10)                     | 35.16<br>(6.38 to 102.63)                    | 0.77<br>(0.13 to 1.94)                | 0.49<br>(0.13 to 1.23)              | 0.36<br>(0.10 to 0.91)              | 0.57<br>(0.15 to 1.48)              |
| Acute hepatitis B                                                       | 989.36<br>(633.20 to 1,452.67)               | 1,012.30<br>(630.21 to 1,528.02)             | 687.96<br>(416.85 to 1,063.03)               | 1,091.77<br>(683.06 to 1,651.96)             | 26.21<br>(17.29 to 37.85)             | 30.49<br>(19.77 to 44.76)           | 21.31<br>(13.51 to 32.20)           | 32.05<br>(20.83 to 47.20)           |
| Acute hepatitis C                                                       | 34.89<br>(21.14 to 54.93)                    | 46.53<br>(26.58 to 77.33)                    | 34.13<br>(19.13 to 59.25)                    | 47.84<br>(27.48 to 78.87)                    | 0.99<br>(0.60 to 1.58)                | 1.50<br>(0.88 to 2.49)              | 1.13<br>(0.64 to 1.91)              | 1.50<br>(0.89 to 2.47)              |

|                                       |                                          |                                          |                                          |                                          |                                    |                                      |                                     |                                      |
|---------------------------------------|------------------------------------------|------------------------------------------|------------------------------------------|------------------------------------------|------------------------------------|--------------------------------------|-------------------------------------|--------------------------------------|
| Acute hepatitis E                     | 201.65<br>(131.16 to 292.88)             | 139.70<br>(84.72 to 220.48)              | 97.06<br>(56.60 to 157.05)               | 156.35<br>(94.38 to 249.97)              | 4.23<br>(2.72 to 6.21)             | 4.28<br>(2.49 to 6.75)               | 3.27<br>(1.83 to 5.44)              | 4.35<br>(2.55 to 6.92)               |
| Other unspecified infectious diseases | 4,094.34<br>(1,035.77 to 13,131.81)      | 3,471.29<br>(1,001.87 to 9,347.75)       | 2,744.19<br>(853.57 to 6,768.18)         | 4,263.75<br>(1,177.32 to 11,700.06)      | 72.37<br>(19.46 to 186.64)         | 82.17<br>(24.39 to 182.37)           | 70.10<br>(22.58 to 148.37)          | 92.50<br>(26.83 to 217.52)           |
| Non-communicable diseases             | 163,638.21<br>(134,835.81 to 196,959.94) | 248,675.15<br>(182,352.88 to 339,985.00) | 187,507.00<br>(137,632.90 to 256,696.02) | 297,668.10<br>(214,159.94 to 415,368.72) | 6,893.00<br>(5,851.07 to 8,158.26) | 10,984.12<br>(8,833.46 to 13,848.56) | 8,728.58<br>(7,051.08 to 10,736.12) | 12,557.15<br>(9,884.10 to 16,105.69) |
| <b>Gabon</b>                          |                                          |                                          |                                          |                                          |                                    |                                      |                                     |                                      |
| Cause                                 | YLLs (actual counts)                     |                                          |                                          |                                          | Deaths (actual counts)             |                                      |                                     |                                      |
|                                       | 2016                                     | 2040 Forecast                            | 2040 Better Scenario                     | 2040 Worse Scenario                      | 2016                               | 2040 Forecast                        | 2040 Better Scenario                | 2040 Worse Scenario                  |
| Neoplasms                             | 36,374.33<br>(29,845.82 to 44,645.09)    | 70,723.22<br>(50,145.47 to 102,351.52)   | 61,913.76<br>(44,174.80 to 88,080.22)    | 77,079.13<br>(52,937.79 to 111,955.11)   | 1,421.61<br>(1,169.43 to 1,719.31) | 2,831.88<br>(2,152.50 to 3,754.11)   | 2,586.72<br>(1,982.99 to 3,383.96)  | 2,966.06<br>(2,218.97 to 4,008.37)   |
| Lip and oral cavity cancer            | 598.53<br>(430.12 to 787.09)             | 1,125.91<br>(546.53 to 2,175.30)         | 748.05<br>(391.60 to 1,378.08)           | 1,652.78<br>(738.06 to 3,344.24)         | 24.23<br>(17.77 to 31.06)          | 43.87<br>(22.76 to 79.38)            | 30.90<br>(17.43 to 52.74)           | 60.91<br>(29.31 to 115.27)           |
| Nasopharynx cancer                    | 165.29<br>(122.02 to 219.95)             | 334.08<br>(163.98 to 631.30)             | 198.39<br>(104.12 to 354.18)             | 502.25<br>(236.97 to 989.60)             | 5.29<br>(3.92 to 7.11)             | 10.94<br>(5.58 to 19.67)             | 6.75<br>(3.62 to 11.48)             | 15.87<br>(7.89 to 30.31)             |
| Other pharynx cancer                  | 261.47<br>(166.38 to 367.33)             | 467.72<br>(215.81 to 867.70)             | 399.45<br>(190.21 to 732.63)             | 576.25<br>(264.79 to 1,067.07)           | 9.97<br>(6.32 to 13.76)            | 17.81<br>(8.61 to 31.64)             | 15.67<br>(7.70 to 27.47)            | 21.41<br>(10.10 to 38.62)            |
| Esophageal cancer                     | 1,980.38<br>(1,507.57 to 2,573.65)       | 3,532.95<br>(1,965.55 to 6,259.39)       | 2,759.36<br>(1,632.86 to 4,685.29)       | 4,730.07<br>(2,533.11 to 8,866.64)       | 87.32<br>(67.86 to 112.53)         | 151.23<br>(90.49 to 252.71)          | 124.21<br>(78.92 to 191.53)         | 192.44<br>(108.50 to 336.65)         |
| Stomach cancer                        | 1,548.16<br>(1,189.64 to 1,962.87)       | 2,224.54<br>(1,436.83 to 3,386.39)       | 1,744.91<br>(1,138.19 to 2,590.80)       | 2,322.87<br>(1,493.09 to 3,535.87)       | 68.10<br>(54.20 to 84.67)          | 95.61<br>(68.39 to 136.58)           | 77.71<br>(55.44 to 109.85)          | 96.64<br>(68.37 to 138.87)           |
| Colon and rectum cancer               | 2,620.45<br>(1,956.46 to 3,341.38)       | 5,930.25<br>(3,711.82 to 9,286.84)       | 5,082.22<br>(3,222.80 to 7,800.82)       | 6,348.95<br>(3,893.46 to 10,211.28)      | 117.88<br>(90.02 to 147.36)        | 266.38<br>(175.49 to 388.94)         | 238.38<br>(160.62 to 347.92)        | 273.91<br>(177.20 to 413.32)         |
| Liver cancer                          | 4,264.38<br>(3,104.60 to 5,786.65)       | 8,732.68<br>(5,089.99 to 14,037.50)      | 8,112.58<br>(4,951.54 to 12,442.23)      | 9,947.82<br>(5,581.92 to 16,849.56)      | 173.76<br>(129.10 to 230.96)       | 360.55<br>(227.19 to 550.80)         | 348.55<br>(227.11 to 511.16)        | 394.32<br>(235.56 to 619.79)         |
| Liver cancer due to hepatitis B       | 1,449.29<br>(997.68 to 1,973.47)         | 2,918.95<br>(1,661.41 to 4,811.01)       | 2,749.41<br>(1,602.71 to 4,354.67)       | 3,236.30<br>(1,763.44 to 5,568.73)       | 52.02<br>(36.73 to 72.23)          | 107.70<br>(64.49 to 168.49)          | 104.87<br>(65.39 to 158.85)         | 115.41<br>(66.02 to 189.79)          |
| Liver cancer due to hepatitis C       | 1,486.56<br>(1,070.21 to 1,995.98)       | 3,156.59<br>(1,881.39 to 4,878.85)       | 3,023.02<br>(1,842.30 to 4,597.26)       | 3,397.56<br>(1,964.04 to 5,481.75)       | 69.28<br>(51.45 to 91.96)          | 145.76<br>(92.57 to 214.85)          | 145.49<br>(96.24 to 209.67)         | 150.76<br>(92.68 to 231.47)          |
| Liver cancer due to alcohol use       | 609.45<br>(425.55 to 854.43)             | 1,254.25<br>(717.57 to 2,109.73)         | 1,021.79<br>(612.91 to 1,636.58)         | 1,729.31<br>(940.30 to 3,021.38)         | 25.57<br>(18.29 to 34.85)          | 51.92<br>(31.21 to 82.55)            | 44.41<br>(28.17 to 66.49)           | 68.05<br>(38.88 to 113.18)           |
| Liver cancer due to other causes      | 719.08<br>(497.21 to 985.08)             | 1,402.90<br>(786.01 to 2,343.59)         | 1,318.56<br>(768.49 to 2,140.26)         | 1,584.65<br>(851.14 to 2,724.24)         | 26.89<br>(19.06 to 36.44)          | 55.17<br>(32.83 to 88.92)            | 53.78<br>(32.94 to 82.29)           | 60.09<br>(33.80 to 99.32)            |
| Gallbladder and biliary tract cancer  | 336.60<br>(250.59 to 472.33)             | 470.81<br>(328.51 to 692.99)             | 471.09<br>(329.77 to 697.99)             | 443.69<br>(314.43 to 643.45)             | 15.99<br>(12.08 to 22.11)          | 21.48<br>(16.46 to 29.59)            | 22.21<br>(16.83 to 30.52)           | 19.62<br>(15.13 to 26.84)            |
| Pancreatic cancer                     | 1,503.04<br>(1,174.71 to 1,911.65)       | 3,291.70<br>(2,316.92 to 4,588.36)       | 3,344.37<br>(2,358.24 to 4,646.99)       | 3,263.61<br>(2,274.11 to 4,630.11)       | 69.93<br>(56.26 to 86.45)          | 147.58<br>(112.17 to 195.52)         | 155.15<br>(118.86 to 202.29)        | 141.58<br>(105.09 to 193.51)         |
| Larynx cancer                         | 345.80<br>(252.45 to 462.69)             | 583.71<br>(268.64 to 1,194.48)           | 338.88<br>(175.76 to 660.78)             | 865.68<br>(377.44 to 1,768.99)           | 14.63<br>(11.01 to 19.41)          | 24.05<br>(12.35 to 46.55)            | 14.72<br>(8.53 to 26.13)            | 34.02<br>(16.13 to 66.94)            |
| Tracheal, bronchus, and lung cancer   | 2,107.75<br>(1,561.25 to 2,726.13)       | 4,298.08<br>(2,275.67 to 7,643.78)       | 3,048.77<br>(1,754.80 to 4,945.69)       | 6,123.26<br>(2,981.68 to 11,478.64)      | 91.02<br>(67.81 to 116.63)         | 179.66<br>(100.20 to 296.64)         | 134.27<br>(83.50 to 206.26)         | 244.66<br>(125.20 to 426.76)         |
| Malignant skin melanoma               | 282.12<br>(186.22 to 381.80)             | 561.77<br>(348.16 to 797.26)             | 674.19<br>(408.50 to 970.09)             | 518.86<br>(326.58 to 727.13)             | 10.29<br>(6.97 to 13.57)           | 20.92<br>(13.90 to 27.50)            | 26.03<br>(17.03 to 34.97)           | 18.70<br>(12.48 to 24.41)            |

|                          |                                    |                                     |                                     |                                     |                             |                              |                              |                              |
|--------------------------|------------------------------------|-------------------------------------|-------------------------------------|-------------------------------------|-----------------------------|------------------------------|------------------------------|------------------------------|
| Non-melanoma skin cancer | 203.88<br>(145.78 to 283.53)       | 421.19<br>(302.02 to 560.76)        | 349.90<br>(247.76 to 472.26)        | 412.37<br>(300.72 to 536.25)        | 10.09<br>(7.39 to 13.63)    | 21.44<br>(16.63 to 26.96)    | 18.66<br>(14.23 to 23.68)    | 20.15<br>(15.77 to 25.05)    |
| Breast cancer            | 3,830.25<br>(2,574.52 to 5,851.25) | 8,835.04<br>(4,807.31 to 15,851.86) | 7,423.86<br>(4,088.54 to 13,050.04) | 9,581.47<br>(5,004.54 to 17,931.32) | 133.23<br>(92.83 to 197.26) | 301.10<br>(178.01 to 512.01) | 259.40<br>(155.91 to 416.83) | 319.02<br>(182.37 to 564.19) |
| Cervical cancer          | 3,451.80<br>(2,052.47 to 4,879.33) | 5,936.76<br>(3,052.51 to 10,979.10) | 4,617.54<br>(2,342.18 to 8,431.62)  | 6,197.29<br>(3,119.10 to 11,276.45) | 117.47<br>(71.13 to 160.53) | 193.84<br>(104.59 to 323.96) | 154.11<br>(82.41 to 258.02)  | 197.99<br>(107.09 to 332.52) |
| Uterine cancer           | 487.24<br>(349.33 to 666.83)       | 982.71<br>(615.69 to 1,538.50)      | 833.92<br>(519.35 to 1,337.03)      | 997.78<br>(627.62 to 1,533.43)      | 21.00<br>(15.53 to 27.99)   | 40.37<br>(27.93 to 58.42)    | 35.14<br>(23.97 to 51.39)    | 39.96<br>(27.94 to 57.03)    |
| Ovarian cancer           | 907.12<br>(585.44 to 1,437.01)     | 2,158.77<br>(1,170.83 to 3,835.71)  | 2,042.53<br>(1,093.34 to 3,622.43)  | 2,106.37<br>(1,131.20 to 3,752.94)  | 33.85<br>(22.44 to 51.14)   | 77.78<br>(46.19 to 128.61)   | 75.15<br>(44.38 to 123.87)   | 74.62<br>(43.56 to 124.36)   |
| Prostate cancer          | 1,791.34<br>(884.84 to 2,704.37)   | 4,043.72<br>(2,096.77 to 5,563.16)  | 3,969.89<br>(2,045.29 to 5,512.40)  | 3,672.53<br>(1,882.77 to 5,060.30)  | 120.53<br>(60.99 to 176.17) | 277.45<br>(148.31 to 372.00) | 282.73<br>(151.84 to 377.29) | 243.82<br>(126.40 to 331.37) |
| Testicular cancer        | 71.41<br>(31.38 to 117.63)         | 93.70<br>(41.82 to 154.63)          | 77.50<br>(34.96 to 128.11)          | 95.69<br>(42.54 to 157.31)          | 1.51<br>(0.68 to 2.44)      | 2.14<br>(0.99 to 3.37)       | 1.81<br>(0.83 to 2.85)       | 2.15<br>(0.98 to 3.37)       |

**Gabon**

| Cause                           | YLLs (actual counts)               |                                    |                                    |                                    | Deaths (actual counts)    |                             |                            |                            |
|---------------------------------|------------------------------------|------------------------------------|------------------------------------|------------------------------------|---------------------------|-----------------------------|----------------------------|----------------------------|
|                                 | 2016                               | 2020 Forecast                      | 2040 Better Scenario               | 2040 Worse Scenario                | 2016                      | 2020 Forecast               | 2040 Better Scenario       | 2040 Worse Scenario        |
| Kidney cancer                   | 523.43<br>(381.17 to 702.54)       | 1,062.69<br>(741.77 to 1,488.17)   | 1,126.98<br>(789.90 to 1,565.19)   | 1,025.65<br>(705.40 to 1,457.82)   | 19.01<br>(14.18 to 24.38) | 41.59<br>(30.40 to 54.50)   | 45.80<br>(33.87 to 59.46)  | 38.52<br>(27.76 to 50.86)  |
| Bladder cancer                  | 631.48<br>(467.60 to 808.46)       | 1,134.82<br>(767.42 to 1,597.18)   | 1,040.74<br>(706.29 to 1,446.05)   | 1,160.27<br>(776.85 to 1,652.21)   | 34.91<br>(25.91 to 44.17) | 61.78<br>(43.79 to 82.90)   | 59.49<br>(41.95 to 78.67)  | 60.25<br>(41.71 to 82.73)  |
| Brain and nervous system cancer | 1,320.83<br>(849.89 to 2,394.72)   | 2,352.62<br>(1,439.41 to 4,064.55) | 2,212.23<br>(1,349.32 to 3,814.12) | 2,343.84<br>(1,432.72 to 4,084.41) | 31.90<br>(21.26 to 55.00) | 65.54<br>(42.46 to 108.40)  | 63.77<br>(40.88 to 105.95) | 62.78<br>(40.88 to 104.68) |
| Thyroid cancer                  | 178.40<br>(137.99 to 232.65)       | 334.69<br>(219.43 to 501.94)       | 269.24<br>(178.08 to 398.05)       | 354.49<br>(232.33 to 531.46)       | 7.42<br>(5.80 to 9.48)    | 13.75<br>(9.59 to 19.28)    | 11.46<br>(8.17 to 15.89)   | 14.10<br>(9.82 to 19.88)   |
| Mesothelioma                    | 78.37<br>(58.44 to 103.64)         | 153.91<br>(106.96 to 218.43)       | 155.26<br>(107.73 to 219.68)       | 150.63<br>(106.03 to 212.02)       | 2.98<br>(2.27 to 3.90)    | 5.90<br>(4.38 to 7.87)      | 6.14<br>(4.48 to 8.35)     | 5.62<br>(4.24 to 7.40)     |
| Hodgkin lymphoma                | 164.31<br>(102.21 to 223.26)       | 194.92<br>(113.65 to 297.58)       | 140.13<br>(79.65 to 215.34)        | 210.36<br>(123.41 to 317.99)       | 4.08<br>(2.55 to 5.49)    | 5.36<br>(3.18 to 7.79)      | 3.96<br>(2.30 to 5.79)     | 5.62<br>(3.36 to 8.06)     |
| Non-Hodgkin lymphoma            | 1,550.71<br>(1,188.91 to 2,035.23) | 2,911.40<br>(2,073.11 to 4,178.22) | 2,636.41<br>(1,872.38 to 3,741.17) | 2,875.64<br>(2,048.10 to 4,165.52) | 48.48<br>(37.86 to 61.27) | 101.15<br>(75.29 to 136.94) | 95.12<br>(70.39 to 127.42) | 96.12<br>(71.56 to 129.88) |
| Multiple myeloma                | 502.20<br>(323.34 to 729.01)       | 1,250.41<br>(727.79 to 1,963.46)   | 1,201.41<br>(697.51 to 1,885.95)   | 1,204.95<br>(695.33 to 1,903.28)   | 21.56<br>(14.41 to 30.41) | 52.16<br>(32.85 to 78.61)   | 51.53<br>(32.21 to 77.35)  | 48.98<br>(31.02 to 74.14)  |
| Leukemia                        | 1,586.93<br>(1,234.27 to 2,010.57) | 2,283.39<br>(1,550.13 to 3,149.02) | 2,001.42<br>(1,360.08 to 2,754.23) | 2,406.89<br>(1,644.52 to 3,357.21) | 38.01<br>(29.41 to 47.22) | 67.42<br>(47.71 to 90.44)   | 61.32<br>(43.49 to 81.79)  | 67.98<br>(48.51 to 90.97)  |
| Acute lymphoid leukemia         | 418.32<br>(287.26 to 609.20)       | 468.90<br>(302.89 to 681.74)       | 396.82<br>(253.61 to 579.22)       | 503.73<br>(325.33 to 739.76)       | 7.26<br>(5.32 to 9.78)    | 9.93<br>(6.66 to 13.99)     | 8.61<br>(5.73 to 12.16)    | 10.32<br>(6.93 to 14.59)   |
| Chronic lymphoid leukemia       | 40.75<br>(27.00 to 54.61)          | 73.64<br>(44.66 to 107.57)         | 67.76<br>(40.54 to 99.23)          | 73.97<br>(45.28 to 109.23)         | 1.89<br>(1.25 to 2.53)    | 3.45<br>(2.16 to 4.91)      | 3.32<br>(2.06 to 4.66)     | 3.33<br>(2.11 to 4.78)     |
| Acute myeloid leukemia          | 541.88<br>(382.64 to 734.45)       | 978.08<br>(648.98 to 1,435.88)     | 942.38<br>(634.85 to 1,354.23)     | 1,001.52<br>(658.05 to 1,491.33)   | 12.94<br>(9.44 to 17.09)  | 27.98<br>(19.33 to 39.37)   | 27.98<br>(19.76 to 38.87)  | 27.53<br>(18.76 to 38.95)  |
| Chronic myeloid leukemia        | 107.31<br>(75.56 to 155.24)        | 140.69<br>(86.89 to 220.52)        | 101.50<br>(61.71 to 158.26)        | 146.50<br>(90.34 to 233.00)        | 3.30<br>(2.37 to 4.82)    | 4.70<br>(3.14 to 7.06)      | 3.51<br>(2.30 to 5.36)     | 4.73<br>(3.15 to 7.16)     |

|                                               |                                                               |                                                                |                                                               |                                                                |                                                            |                                                            |                                                            |                                                            |
|-----------------------------------------------|---------------------------------------------------------------|----------------------------------------------------------------|---------------------------------------------------------------|----------------------------------------------------------------|------------------------------------------------------------|------------------------------------------------------------|------------------------------------------------------------|------------------------------------------------------------|
|                                               | 478.68<br>(299.42 to<br>666.04)                               | 622.09<br>(355.57 to<br>942.40)                                | 492.95<br>(277.42 to<br>748.48)                               | 681.17<br>(390.92 to<br>1,030.40)                              | 12.62<br>(7.78 to<br>17.11)                                | 21.37<br>(13.01 to<br>30.85)                               | 17.90<br>(10.79 to<br>26.40)                               | 22.07<br>(13.36 to<br>31.70)                               |
| Other leukemias                               | 3,080.66<br>(2,417.00 to<br>3,901.71)                         | 5,018.29<br>(3,678.30 to<br>6,851.99)                          | 4,892.53<br>(3,543.32 to<br>6,722.87)                         | 4,986.82<br>(3,686.65 to<br>6,721.79)                          | 87.17<br>(69.89 to<br>106.69)                              | 163.05<br>(128.56 to<br>203.89)                            | 166.60<br>(130.91 to<br>209.70)                            | 154.30<br>(122.28 to<br>190.69)                            |
| Other neoplasms                               | <b>48,711.58</b><br><b>(40,504.07 to</b><br><b>58,729.13)</b> | <b>65,877.06</b><br><b>(41,954.44 to</b><br><b>108,807.61)</b> | <b>37,831.52</b><br><b>(24,837.46 to</b><br><b>59,931.80)</b> | <b>94,451.88</b><br><b>(55,589.91 to</b><br><b>160,448.07)</b> | <b>2,687.37</b><br><b>(2,277.61 to</b><br><b>3,146.89)</b> | <b>3,491.50</b><br><b>(2,438.93 to</b><br><b>5,216.51)</b> | <b>2,195.55</b><br><b>(1,588.39 to</b><br><b>3,247.36)</b> | <b>4,651.03</b><br><b>(3,099.55 to</b><br><b>7,227.01)</b> |
| Cardiovascular diseases                       | 937.54<br>(678.47 to<br>1,270.78)                             | 803.86<br>(485.04 to<br>1,332.56)                              | 579.91<br>(344.59 to<br>961.05)                               | 881.75<br>(536.72 to<br>1,467.86)                              | 35.42<br>(25.89 to<br>47.05)                               | 32.13<br>(21.42 to<br>47.67)                               | 24.16<br>(15.71 to<br>35.97)                               | 33.87<br>(22.35 to<br>49.85)                               |
| Rheumatic heart disease                       | 18,793.64<br>(15,196.44 to<br>23,093.77)                      | 22,360.39<br>(12,192.21 to<br>44,262.39)                       | 10,807.38<br>(5,969.95 to<br>20,501.76)                       | 35,888.39<br>(18,534.56 to<br>70,842.97)                       | 1,114.73<br>(931.15 to<br>1,328.80)                        | 1,250.99<br>(735.05 to<br>2,275.98)                        | 681.17<br>(409.68 to<br>1,244.30)                          | 1,837.53<br>(1,035.61 to<br>3,423.50)                      |
| Ischemic heart disease                        | 15,345.79<br>(12,163.46 to<br>18,686.95)                      | 17,992.63<br>(9,740.44 to<br>33,896.26)                        | 8,319.24<br>(4,728.03 to<br>15,322.38)                        | 29,440.95<br>(14,991.49 to<br>55,736.17)                       | 834.29<br>(670.98 to<br>1,007.98)                          | 943.69<br>(566.91 to<br>1,308.68)                          | 497.62<br>(303.46 to<br>955.67)                            | 1,403.64<br>(805.05 to<br>2,569.82)                        |
| Stroke                                        | 5,168.46<br>(4,050.27 to<br>6,350.69)                         | 5,581.53<br>(2,959.67 to<br>12,471.55)                         | 3,114.57<br>(1,661.57 to<br>7,240.33)                         | 7,944.81<br>(4,032.21 to<br>17,885.65)                         | 356.86<br>(281.63 to<br>434.14)                            | 377.60<br>(205.17 to<br>928.20)                            | 233.14<br>(126.55 to<br>568.91)                            | 493.65<br>(258.00 to<br>1,194.94)                          |
| Ischemic stroke                               | 10,177.33<br>(7,970.09 to<br>12,670.44)                       | 12,411.10<br>(6,331.14 to<br>24,790.64)                        | 5,204.67<br>(2,792.32 to<br>9,886.59)                         | 21,496.14<br>(10,285.25 to<br>43,667.44)                       | 477.43<br>(382.51 to<br>582.87)                            | 566.09<br>(326.64 to<br>1,021.21)                          | 264.48<br>(158.19 to<br>472.01)                            | 910.00<br>(487.05 to<br>1,746.26)                          |
| Intracerebral hemorrhage                      | 4,858.98<br>(3,025.08 to<br>6,251.05)                         | 8,621.00<br>(4,178.87 to<br>18,534.35)                         | 5,988.46<br>(3,121.48 to<br>11,510.28)                        | 11,351.45<br>(5,144.67 to<br>25,611.73)                        | 287.16<br>(180.77 to<br>363.54)                            | 483.62<br>(259.42 to<br>972.15)                            | 359.40<br>(202.02 to<br>658.13)                            | 600.47<br>(301.67 to<br>1,303.16)                          |
| Hypertensive heart disease                    | 1,912.88<br>(1,347.63 to<br>2,717.16)                         | 3,160.74<br>(1,972.52 to<br>5,055.77)                          | 2,423.69<br>(1,521.76 to<br>3,825.86)                         | 3,275.64<br>(2,020.39 to<br>5,268.29)                          | 67.75<br>(48.69 to<br>95.50)                               | 121.86<br>(78.15 to<br>184.74)                             | 97.50<br>(62.64 to<br>146.87)                              | 120.40<br>(76.25 to<br>183.87)                             |
| Cardiomyopathy and myocarditis                | 211.16<br>(119.09 to<br>396.81)                               | 267.20<br>(157.93 to<br>505.76)                                | 244.30<br>(127.06 to<br>466.52)                               | 275.64<br>(141.92 to<br>520.69)                                | 5.55<br>(3.15 to<br>10.39)                                 | 8.16<br>(4.26 to<br>15.15)                                 | 7.92<br>(4.15 to<br>14.71)                                 | 7.97<br>(4.19 to<br>14.67)                                 |
| Mycocarditis                                  | <b>Gabon</b>                                                  |                                                                |                                                               |                                                                |                                                            |                                                            |                                                            |                                                            |
| Cause                                         | YLLs (actual counts)                                          |                                                                |                                                               |                                                                | Deaths (actual counts)                                     |                                                            |                                                            |                                                            |
|                                               | 2016                                                          | 2040 Forecast                                                  | 2040 Better Scenario                                          | 2040 Worse Scenario                                            | 2016                                                       | 2040 Forecast                                              | 2040 Better Scenario                                       | 2040 Worse Scenario                                        |
| Alcoholic cardiomyopathy                      | 175.40<br>(105.46 to<br>297.79)                               | 287.90<br>(167.25 to<br>519.89)                                | 250.98<br>(143.86 to<br>459.64)                               | 354.09<br>(207.49 to<br>624.57)                                | 6.20<br>(3.81 to<br>10.37)                                 | 10.22<br>(6.08 to<br>17.97)                                | 9.24<br>(5.49 to<br>16.55)                                 | 12.11<br>(7.31 to<br>20.84)                                |
| Other cardiomyopathy                          | 1,526.32<br>(1,079.14 to<br>2,188.56)                         | 2,605.65<br>(1,570.64 to<br>4,232.82)                          | 1,928.41<br>(1,156.57 to<br>3,182.17)                         | 2,645.92<br>(1,585.17 to<br>4,364.67)                          | 56.00<br>(41.00 to<br>78.26)                               | 103.47<br>(66.29 to<br>158.19)                             | 80.34<br>(51.35 to<br>121.81)                              | 100.31<br>(62.99 to<br>155.90)                             |
| Atrial fibrillation and flutter               | 395.34<br>(291.27 to<br>535.47)                               | 677.24<br>(468.75 to<br>936.90)                                | 642.12<br>(461.11 to<br>881.94)                               | 663.50<br>(450.85 to<br>943.57)                                | 36.31<br>(26.46 to<br>48.31)                               | 60.40<br>(41.80 to<br>81.23)                               | 60.99<br>(42.99 to<br>81.80)                               | 55.82<br>(37.57 to<br>77.71)                               |
| Aortic aneurysm                               | 623.80<br>(483.05 to<br>798.51)                               | 1,145.00<br>(780.29 to<br>1,733.08)                            | 989.89<br>(673.40 to<br>1,455.83)                             | 1,124.70<br>(748.91 to<br>1,713.05)                            | 32.26<br>(26.01 to<br>40.33)                               | 58.21<br>(43.28 to<br>80.42)                               | 53.63<br>(40.25 to<br>72.53)                               | 54.93<br>(39.94 to<br>76.71)                               |
| Peripheral artery disease                     | 114.47<br>(50.05 to<br>163.63)                                | 296.74<br>(124.12 to<br>442.00)                                | 306.25<br>(127.48 to<br>465.13)                               | 287.48<br>(121.34 to<br>440.03)                                | 8.43<br>(3.83 to<br>11.85)                                 | 21.52<br>(9.65 to<br>31.84)                                | 23.85<br>(10.44 to<br>35.33)                               | 19.64<br>(8.75 to<br>29.27)                                |
| Endocarditis                                  | 781.81<br>(580.17 to<br>1,009.79)                             | 1,367.64<br>(834.37 to<br>2,170.52)                            | 1,250.69<br>(762.04 to<br>1,978.86)                           | 1,414.48<br>(858.66 to<br>2,264.63)                            | 31.47<br>(23.44 to<br>39.54)                               | 57.10<br>(37.61 to<br>85.71)                               | 55.02<br>(36.14 to<br>81.74)                               | 56.13<br>(36.96 to<br>84.82)                               |
| Other cardiovascular and circulatory diseases | 4,947.32<br>(3,368.72 to<br>6,989.88)                         | 9,451.82<br>(5,714.89 to<br>15,674.33)                         | 6,523.88<br>(4,067.20 to<br>10,703.99)                        | 10,123.53<br>(6,034.51 to<br>17,155.24)                        | 239.55<br>(163.54 to<br>339.18)                            | 461.98<br>(313.32 to<br>701.12)                            | 342.22<br>(232.32 to<br>515.04)                            | 468.62<br>(314.02 to<br>720.14)                            |
| Chronic respiratory diseases                  | <b>6,328.33</b><br><b>(4,681.58 to</b><br><b>8,296.88)</b>    | <b>7,893.76</b><br><b>(5,173.63 to</b><br><b>12,328.64)</b>    | <b>5,409.70</b><br><b>(3,632.69 to</b><br><b>8,024.43)</b>    | <b>10,562.95</b><br><b>(6,623.26 to</b><br><b>17,299.79)</b>   | <b>322.64</b><br><b>(245.35 to</b><br><b>421.38)</b>       | <b>398.18</b><br><b>(281.90 to</b><br><b>581.90)</b>       | <b>295.06</b><br><b>(218.70 to</b><br><b>406.62)</b>       | <b>499.33</b><br><b>(334.95 to</b><br><b>772.34)</b>       |
| Chronic obstructive pulmonary disease         | 4,176.95<br>(3,115.02 to<br>5,491.78)                         | 5,520.89<br>(3,482.67 to<br>8,810.51)                          | 3,583.23<br>(2,400.30 to<br>5,387.70)                         | 7,933.20<br>(4,655.44 to<br>13,711.11)                         | 241.08<br>(183.21 to<br>312.89)                            | 302.24<br>(210.81 to<br>447.12)                            | 216.39<br>(159.27 to<br>300.90)                            | 398.72<br>(260.06 to<br>634.70)                            |

|                                                                |                                                              |                                                               |                                                               |                                                               |                                                      |                                                        |                                                        |                                                        |
|----------------------------------------------------------------|--------------------------------------------------------------|---------------------------------------------------------------|---------------------------------------------------------------|---------------------------------------------------------------|------------------------------------------------------|--------------------------------------------------------|--------------------------------------------------------|--------------------------------------------------------|
| Pneumoconiosis                                                 | 23.89<br>(16.12 to<br>33.51)                                 | 35.35<br>(24.66 to<br>49.81)                                  | 33.66<br>(23.19 to<br>47.71)                                  | 35.39<br>(24.85 to<br>49.95)                                  | 1.25<br>(0.86 to<br>1.76)                            | 1.91<br>(1.39 to<br>2.59)                              | 1.88<br>(1.35 to<br>2.56)                              | 1.84<br>(1.33 to<br>2.52)                              |
| Silicosis                                                      | 2.86<br>(1.52 to<br>5.12)                                    | 2.83<br>(1.44 to<br>5.24)                                     | 1.94<br>(0.93 to<br>3.79)                                     | 2.78<br>(1.43 to<br>5.02)                                     | 0.16<br>(0.09 to<br>0.29)                            | 0.17<br>(0.09 to<br>0.31)                              | 0.12<br>(0.06 to<br>0.24)                              | 0.16<br>(0.08 to<br>0.29)                              |
| Asbestosis                                                     | 7.20<br>(3.70 to<br>12.09)                                   | 13.14<br>(6.90 to<br>21.25)                                   | 15.21<br>(8.39 to<br>23.81)                                   | 12.49<br>(6.68 to<br>20.17)                                   | 0.33<br>(0.15 to<br>0.58)                            | 0.64<br>(0.31 to<br>1.05)                              | 0.77<br>(0.40 to<br>1.20)                              | 0.58<br>(0.28 to<br>0.95)                              |
| Coal workers pneumoconiosis                                    | 1.28<br>(0.68 to<br>2.14)                                    | 1.76<br>(0.87 to<br>3.19)                                     | 1.27<br>(0.58 to<br>2.38)                                     | 1.97<br>(0.97 to<br>3.58)                                     | 0.07<br>(0.04 to<br>0.12)                            | 0.10<br>(0.05 to<br>0.18)                              | 0.11<br>(0.03 to<br>0.14)                              | 0.11<br>(0.05 to<br>0.19)                              |
| Other pneumoconiosis                                           | 12.54<br>(8.30 to<br>17.72)                                  | 17.62<br>(11.61 to<br>25.95)                                  | 15.23<br>(9.64 to<br>23.14)                                   | 18.15<br>(11.96 to<br>26.81)                                  | 0.68<br>(0.45 to<br>0.97)                            | 1.00<br>(0.66 to<br>1.40)                              | 0.91<br>(0.58 to<br>1.32)                              | 0.99<br>(0.65 to<br>1.40)                              |
| Asthma                                                         | 1,648.56<br>(1,106.42 to<br>2,307.79)                        | 1,550.63<br>(843.94 to<br>2,795.13)                           | 884.21<br>(465.63 to<br>1,592.92)                             | 1,820.37<br>(964.09 to<br>3,278.27)                           | 63.42<br>(42.23 to<br>92.56)                         | 62.89<br>(34.83 to<br>106.14)                          | 58.01<br>(21.03 to<br>64.20)                           | 69.95<br>(38.20 to<br>120.83)                          |
| Interstitial lung disease and pulmonary sarcoidosis            | 220.44<br>(141.08 to<br>325.69)                              | 437.05<br>(274.22 to<br>647.60)                               | 581.76<br>(361.69 to<br>870.26)                               | 398.74<br>(252.64 to<br>589.08)                               | 10.08<br>(6.58 to<br>15.21)                          | 20.20<br>(13.17 to<br>29.43)                           | 27.98<br>(18.35 to<br>41.21)                           | 17.72<br>(11.70 to<br>25.67)                           |
| Other chronic respiratory diseases                             | 258.50<br>(148.75 to<br>407.43)                              | 349.85<br>(195.75 to<br>559.90)                               | 326.85<br>(184.17 to<br>516.25)                               | 375.24<br>(208.44 to<br>600.15)                               | 6.82<br>(4.02 to<br>10.29)                           | 10.94<br>(6.21 to<br>17.05)                            | 10.80<br>(6.20 to<br>16.73)                            | 11.09<br>(6.26 to<br>17.51)                            |
| <b>Cirrhosis and other chronic liver diseases</b>              | <b>15,328.18</b><br><b>(9,643.41 to</b><br><b>24,494.58)</b> | <b>26,053.92</b><br><b>(15,641.69 to</b><br><b>42,687.97)</b> | <b>21,091.97</b><br><b>(12,493.42 to</b><br><b>34,723.72)</b> | <b>28,108.42</b><br><b>(16,924.95 to</b><br><b>46,323.85)</b> | <b>522.03</b><br><b>(334.00 to</b><br><b>821.39)</b> | <b>912.57</b><br><b>(582.38 to</b><br><b>1,428.92)</b> | <b>760.16</b><br><b>(483.41 to</b><br><b>1,191.29)</b> | <b>958.15</b><br><b>(612.29 to</b><br><b>1,496.81)</b> |
| Cirrhosis and other chronic liver diseases due to hepatitis B  | 4,771.49<br>(2,938.27 to<br>8,029.67)                        | 8,388.73<br>(4,924.39 to<br>14,039.46)                        | 7,085.58<br>(4,099.46 to<br>12,006.20)                        | 8,426.86<br>(4,902.87 to<br>14,090.13)                        | 166.54<br>(104.46 to<br>269.81)                      | 297.14<br>(183.69 to<br>473.56)                        | 257.51<br>(158.80 to<br>413.89)                        | 291.52<br>(180.65 to<br>469.22)                        |
| Cirrhosis and other chronic liver diseases due to hepatitis C  | 4,733.28<br>(2,941.42 to<br>7,762.56)                        | 8,493.83<br>(5,087.05 to<br>13,990.92)                        | 7,096.56<br>(4,221.47 to<br>11,892.22)                        | 8,552.34<br>(5,104.46 to<br>14,243.32)                        | 161.85<br>(102.00 to<br>261.48)                      | 295.59<br>(186.52 to<br>466.51)                        | 292.64<br>(157.95 to<br>408.65)                        | 291.42<br>(183.59 to<br>464.10)                        |
| Cirrhosis and other chronic liver diseases due to alcohol use  | 3,502.04<br>(2,179.02 to<br>5,635.61)                        | 5,786.36<br>(3,457.94 to<br>9,456.71)                         | 4,120.66<br>(2,426.99 to<br>6,706.05)                         | 7,633.94<br>(4,580.50 to<br>12,555.09)                        | 127.60<br>(80.92 to<br>200.56)                       | 212.67<br>(132.96 to<br>327.56)                        | 158.29<br>(98.32 to<br>249.17)                         | 268.70<br>(167.31 to<br>413.81)                        |
| Cirrhosis and other chronic liver diseases due to other causes | 2,321.36<br>(1,592.66 to<br>3,488.47)                        | 3,385.00<br>(2,076.66 to<br>5,412.18)                         | 2,789.18<br>(1,724.11 to<br>4,495.43)                         | 3,495.29<br>(2,177.62 to<br>5,566.65)                         | 66.04<br>(44.94 to<br>98.12)                         | 107.16<br>(69.31 to<br>164.87)                         | 91.72<br>(59.11 to<br>141.11)                          | 106.51<br>(69.27 to<br>166.20)                         |
| <b>Digestive diseases</b>                                      | <b>10,749.03</b><br><b>(7,816.43 to</b><br><b>14,183.73)</b> | <b>14,952.15</b><br><b>(10,106.42 to</b><br><b>21,952.40)</b> | <b>12,090.83</b><br><b>(8,129.90 to</b><br><b>17,381.13)</b>  | <b>16,013.35</b><br><b>(10,661.50 to</b><br><b>23,522.24)</b> | <b>405.11</b><br><b>(292.88 to</b><br><b>515.75)</b> | <b>620.97</b><br><b>(446.94 to</b><br><b>826.18)</b>   | <b>532.68</b><br><b>(379.63 to</b><br><b>693.95)</b>   | <b>628.90</b><br><b>(447.85 to</b><br><b>833.33)</b>   |
| Peptic ulcer disease                                           | 1,811.94<br>(1,323.15 to<br>2,441.37)                        | 1,899.23<br>(1,265.74 to<br>2,833.85)                         | 1,206.54<br>(785.83 to<br>1,798.81)                           | 2,055.39<br>(1,379.12 to<br>2,990.40)                         | 78.01<br>(56.57 to<br>104.72)                        | 83.53<br>(58.60 to<br>112.74)                          | 55.76<br>(37.85 to<br>76.85)                           | 86.67<br>(61.50 to<br>115.52)                          |
| <b>Gabon</b>                                                   |                                                              |                                                               |                                                               |                                                               |                                                      |                                                        |                                                        |                                                        |
| Cause                                                          | YLLs (actual counts)                                         |                                                               |                                                               |                                                               | Deaths (actual counts)                               |                                                        |                                                        |                                                        |
|                                                                | 2016                                                         | 2040 Forecast                                                 | 2040 Better Scenario                                          | 2040 Worse Scenario                                           | 2016                                                 | 2040 Forecast                                          | 2040 Better Scenario                                   | 2040 Worse Scenario                                    |
| Gastritis and duodenitis                                       | 594.90<br>(371.60 to<br>892.79)                              | 992.79<br>(620.56 to<br>1,530.21)                             | 783.59<br>(484.95 to<br>1,210.42)                             | 1,008.10<br>(631.33 to<br>1,538.05)                           | 23.46<br>(14.84 to<br>34.98)                         | 41.56<br>(26.71 to<br>60.80)                           | 34.39<br>(21.58 to<br>51.63)                           | 40.44<br>(25.81 to<br>59.28)                           |
| Appendicitis                                                   | 726.17<br>(496.58 to<br>991.72)                              | 841.65<br>(506.58 to<br>1,346.65)                             | 579.53<br>(343.06 to<br>914.79)                               | 913.80<br>(557.40 to<br>1,452.89)                             | 19.27<br>(13.09 to<br>26.20)                         | 26.52<br>(17.04 to<br>38.68)                           | 19.09<br>(12.04 to<br>28.05)                           | 27.52<br>(17.61 to<br>39.85)                           |
| Paralytic ileus and intestinal obstruction                     | 3,593.42<br>(2,488.13 to<br>5,194.24)                        | 4,619.08<br>(3,052.75 to<br>6,542.00)                         | 4,420.67<br>(2,952.65 to<br>6,239.04)                         | 4,682.34<br>(3,088.65 to<br>6,654.13)                         | 125.48<br>(81.67 to<br>168.71)                       | 197.67<br>(129.88 to<br>265.48)                        | 201.61<br>(131.45 to<br>269.05)                        | 187.43<br>(123.74 to<br>254.94)                        |
| Inguinal, femoral, and abdominal hernia                        | 290.04<br>(171.69 to<br>431.66)                              | 348.57<br>(197.34 to<br>517.05)                               | 279.19<br>(154.29 to<br>417.78)                               | 356.12<br>(203.92 to<br>528.37)                               | 12.79<br>(7.79 to<br>18.14)                          | 16.40<br>(9.83 to<br>22.35)                            | 13.85<br>(8.25 to<br>19.27)                            | 15.96<br>(9.45 to<br>21.94)                            |
| Inflammatory bowel disease                                     | 566.82<br>(287.37 to<br>843.78)                              | 831.78<br>(417.96 to<br>1,304.16)                             | 805.54<br>(399.76 to<br>1,269.84)                             | 819.03<br>(415.06 to<br>1,270.97)                             | 19.09<br>(10.22 to<br>27.66)                         | 30.89<br>(16.85 to<br>45.20)                           | 31.33<br>(17.09 to<br>45.84)                           | 29.09<br>(15.83 to<br>42.71)                           |

|                                         |                                                            |                                                              |                                                              |                                                              |                                                      |                                                        |                                                        |                                                        |
|-----------------------------------------|------------------------------------------------------------|--------------------------------------------------------------|--------------------------------------------------------------|--------------------------------------------------------------|------------------------------------------------------|--------------------------------------------------------|--------------------------------------------------------|--------------------------------------------------------|
| Vascular intestinal disorders           | 315.86<br>(224.78 to<br>426.33)                            | 601.36<br>(410.83 to<br>821.39)                              | 545.99<br>(370.69 to<br>760.14)                              | 588.43<br>(406.66 to<br>809.87)                              | 16.11<br>(11.48 to<br>21.47)                         | 30.88<br>(22.07 to<br>40.27)                           | 29.26<br>(20.63 to<br>38.48)                           | 29.05<br>(20.71 to<br>38.34)                           |
| Gallbladder and biliary diseases        | 859.70<br>(591.76 to<br>1,156.49)                          | 1,504.03<br>(775.69 to<br>2,735.54)                          | 935.81<br>(497.41 to<br>1,664.12)                            | 1,787.05<br>(912.96 to<br>3,255.39)                          | 39.33<br>(27.54 to<br>51.67)                         | 69.24<br>(39.20 to<br>118.37)                          | 45.74<br>(26.83 to<br>76.22)                           | 78.18<br>(43.61 to<br>133.02)                          |
| Pancreatitis                            | 744.30<br>(485.79 to<br>1,086.73)                          | 1,475.01<br>(543.30 to<br>3,497.17)                          | 962.40<br>(382.56 to<br>2,229.05)                            | 1,893.96<br>(647.58 to<br>4,995.32)                          | 22.56<br>(15.23 to<br>32.91)                         | 46.20<br>(19.30 to<br>103.27)                          | 31.45<br>(14.14 to<br>66.68)                           | 57.31<br>(21.16 to<br>141.84)                          |
| Other digestive diseases                | 1,245.89<br>(868.62 to<br>1,716.34)                        | 1,838.66<br>(1,209.47 to<br>2,777.67)                        | 1,571.59<br>(1,027.05 to<br>2,389.96)                        | 1,909.14<br>(1,263.54 to<br>2,872.45)                        | 49.01<br>(34.72 to<br>66.55)                         | 78.09<br>(54.97 to<br>108.79)                          | 70.22<br>(48.95 to<br>97.57)                           | 77.25<br>(53.66 to<br>106.85)                          |
| <b>Neurological disorders</b>           | <b>6,997.76</b><br><b>(5,718.65 to</b><br><b>8,356.35)</b> | <b>11,501.43</b><br><b>(8,910.41 to</b><br><b>15,276.19)</b> | <b>11,137.32</b><br><b>(8,776.61 to</b><br><b>14,441.05)</b> | <b>11,594.78</b><br><b>(8,777.04 to</b><br><b>15,595.81)</b> | <b>475.27</b><br><b>(387.07 to</b><br><b>576.40)</b> | <b>839.04</b><br><b>(614.89 to</b><br><b>1,154.65)</b> | <b>885.05</b><br><b>(675.03 to</b><br><b>1,173.49)</b> | <b>773.56</b><br><b>(539.72 to</b><br><b>1,099.73)</b> |
| Alzheimer's disease and other dementias | 4,249.96<br>(3,391.94 to<br>5,268.53)                      | 7,712.19<br>(5,476.15 to<br>11,176.42)                       | 7,259.94<br>(5,371.85 to<br>10,783.49)                       | 7,337.18<br>(4,981.13 to<br>11,002.94)                       | 406.54<br>(326.21 to<br>503.55)                      | 722.79<br>(495.77 to<br>1,042.95)                      | 766.85<br>(564.16 to<br>1,063.50)                      | 655.81<br>(414.29 to<br>987.66)                        |
| Parkinson's disease                     | 251.27<br>(180.94 to<br>334.43)                            | 539.18<br>(405.91 to<br>690.78)                              | 646.59<br>(485.03 to<br>825.71)                              | 459.31<br>(340.81 to<br>594.35)                              | 20.87<br>(15.14 to<br>28.04)                         | 43.88<br>(31.88 to<br>58.38)                           | 54.61<br>(40.75 to<br>71.82)                           | 36.12<br>(25.19 to<br>48.67)                           |
| Epilepsy                                | 1,877.84<br>(1,421.90 to<br>2,432.13)                      | 2,295.20<br>(1,367.43 to<br>3,752.20)                        | 1,766.84<br>(1,066.68 to<br>2,857.31)                        | 2,844.07<br>(1,667.36 to<br>4,580.15)                        | 34.43<br>(26.07 to<br>44.58)                         | 47.28<br>(28.89 to<br>76.90)                           | 37.30<br>(23.08 to<br>60.21)                           | 57.64<br>(34.92 to<br>94.81)                           |
| Multiple sclerosis                      | 35.59<br>(24.17 to<br>64.71)                               | 72.53<br>(43.77 to<br>130.16)                                | 75.37<br>(45.02 to<br>136.73)                                | 69.79<br>(42.27 to<br>127.08)                                | 1.02<br>(0.70 to<br>1.83)                            | 2.23<br>(1.34 to<br>3.74)                              | 2.01<br>(1.40 to<br>3.94)                              | 2.01<br>(1.27 to<br>3.55)                              |
| Motor neuron disease                    | 45.15<br>(33.24 to<br>61.16)                               | 89.49<br>(58.57 to<br>133.42)                                | 91.46<br>(59.27 to<br>139.10)                                | 85.84<br>(57.38 to<br>125.73)                                | 1.25<br>(0.93 to<br>1.77)                            | 2.94<br>(2.00 to<br>4.41)                              | 3.07<br>(2.06 to<br>4.70)                              | 2.75<br>(1.91 to<br>4.09)                              |
| Other neurological disorders            | 537.86<br>(374.44 to<br>752.55)                            | 792.75<br>(566.22 to<br>1,095.22)                            | 797.13<br>(573.97 to<br>1,094.08)                            | 798.59<br>(558.30 to<br>1,108.04)                            | 11.15<br>(8.35 to<br>14.36)                          | 20.03<br>(15.05 to<br>26.33)                           | 20.99<br>(15.65 to<br>27.79)                           | 19.25<br>(14.31 to<br>25.25)                           |
| <b>Mental disorders</b>                 | <b>1,515.30</b><br><b>(1,004.61 to</b><br><b>2,170.45)</b> | <b>2,774.70</b><br><b>(1,767.66 to</b><br><b>4,184.35)</b>   | <b>2,902.60</b><br><b>(1,826.27 to</b><br><b>4,358.85)</b>   | <b>2,877.38</b><br><b>(1,851.41 to</b><br><b>4,347.25)</b>   | <b>36.36</b><br><b>(24.49 to</b><br><b>50.89)</b>    | <b>68.91</b><br><b>(46.02 to</b><br><b>101.37)</b>     | <b>73.16</b><br><b>(48.39 to</b><br><b>107.47)</b>     | <b>70.74</b><br><b>(47.62 to</b><br><b>103.86)</b>     |
| Alcohol use disorders                   | 800.42<br>(519.14 to<br>1,179.12)                          | 1,200.57<br>(737.59 to<br>1,862.28)                          | 1,192.28<br>(727.45 to<br>1,870.81)                          | 1,312.42<br>(825.58 to<br>2,008.49)                          | 21.01<br>(14.00 to<br>30.74)                         | 33.14<br>(21.41 to<br>50.48)                           | 33.42<br>(21.26 to<br>51.49)                           | 35.69<br>(23.33 to<br>53.72)                           |
| Drug use disorders                      | 708.42<br>(438.98 to<br>1,122.11)                          | 1,562.19<br>(920.38 to<br>2,549.56)                          | 1,697.15<br>(996.62 to<br>2,726.12)                          | 1,553.21<br>(913.85 to<br>2,538.80)                          | 15.22<br>(9.63 to<br>23.75)                          | 35.54<br>(22.13 to<br>55.53)                           | 39.48<br>(24.60 to<br>61.34)                           | 34.83<br>(21.65 to<br>54.44)                           |
| Opioid use disorders                    | 567.16<br>(349.58 to<br>903.03)                            | 1,179.70<br>(668.98 to<br>1,942.66)                          | 1,216.48<br>(685.35 to<br>1,984.93)                          | 1,176.41<br>(673.83 to<br>1,955.12)                          | 11.81<br>(7.36 to<br>18.58)                          | 25.96<br>(15.42 to<br>41.77)                           | 27.13<br>(16.37 to<br>43.34)                           | 25.61<br>(15.15 to<br>41.26)                           |
| Cocaine use disorders                   | 20.91<br>(9.45 to<br>34.86)                                | 57.58<br>(25.40 to<br>99.44)                                 | 65.76<br>(28.72 to<br>112.55)                                | 58.26<br>(26.00 to<br>100.61)                                | 0.46<br>(0.21 to<br>0.78)                            | 1.36<br>(0.60 to<br>2.28)                              | 1.57<br>(0.71 to<br>2.61)                              | 1.36<br>(0.60 to<br>2.30)                              |
| Amphetamine use disorders               | 12.55<br>(6.56 to<br>20.56)                                | 50.68<br>(25.45 to<br>93.30)                                 | 65.19<br>(32.86 to<br>120.34)                                | 51.11<br>(26.19 to<br>92.61)                                 | 0.26<br>(0.14 to<br>0.42)                            | 1.12<br>(0.59 to<br>2.01)                              | 1.45<br>(0.76 to<br>2.62)                              | 1.12<br>(0.59 to<br>2.01)                              |
| Other drug use disorders                | 107.79<br>(61.56 to<br>183.01)                             | 274.23<br>(152.62 to<br>464.83)                              | 349.72<br>(199.80 to<br>599.73)                              | 267.43<br>(147.52 to<br>455.88)                              | 2.68<br>(1.67 to<br>4.32)                            | 7.10<br>(4.41 to<br>11.23)                             | 9.33<br>(5.85 to<br>14.51)                             | 6.74<br>(4.18 to<br>10.74)                             |
| Eating disorders                        | 6.46<br>(3.08 to<br>11.09)                                 | 11.94<br>(5.18 to<br>23.09)                                  | 13.17<br>(5.58 to<br>25.90)                                  | 11.75<br>(5.03 to<br>22.55)                                  | 0.12<br>(0.06 to<br>0.21)                            | 0.23<br>(0.10 to<br>0.44)                              | 0.26<br>(0.11 to<br>0.50)                              | 0.23<br>(0.10 to<br>0.43)                              |

**Gabon**

| Cause | YLLs (actual counts)                                |                                          |                                          |                                          | Deaths (actual counts)                   |                                 |                                     |                                     |
|-------|-----------------------------------------------------|------------------------------------------|------------------------------------------|------------------------------------------|------------------------------------------|---------------------------------|-------------------------------------|-------------------------------------|
|       | 2016                                                | 2040 Forecast                            | 2040 Better Scenario                     | 2040 Worse Scenario                      | 2016                                     | 2040 Forecast                   | 2040 Better Scenario                | 2040 Worse Scenario                 |
|       | Diabetes, urogenital, blood, and endocrine diseases | 17,337.82<br>(14,221.81 to<br>20,808.11) | 30,173.54<br>(19,735.89 to<br>48,684.01) | 21,516.03<br>(13,908.64 to<br>35,584.31) | 35,262.88<br>(23,009.50 to<br>57,328.62) | 720.68<br>(596.97 to<br>852.67) | 1,405.04<br>(974.31 to<br>2,459.64) | 1,052.29<br>(715.80 to<br>1,906.98) |

|                                                            |                                        |                                         |                                        |                                          |                                 |                                   |                                  |                                   |
|------------------------------------------------------------|----------------------------------------|-----------------------------------------|----------------------------------------|------------------------------------------|---------------------------------|-----------------------------------|----------------------------------|-----------------------------------|
| Diabetes mellitus                                          | 8,670.41<br>(6,823.83 to<br>10,744.19) | 14,967.36<br>(9,491.10 to<br>23,411.72) | 9,894.61<br>(6,314.54 to<br>15,257.60) | 17,415.42<br>(10,843.23 to<br>27,218.88) | 422.90<br>(341.18 to<br>514.68) | 727.86<br>(516.93 to<br>1,020.09) | 512.76<br>(369.00 to<br>710.02)  | 802.26<br>(562.57 to<br>1,134.11) |
| Acute glomerulonephritis                                   | 19.31<br>(13.64 to<br>29.34)           | 24.91<br>(15.45 to<br>41.72)            | 19.20<br>(11.80 to<br>31.69)           | 27.86<br>(17.08 to<br>46.90)             | 0.36<br>(0.27 to<br>0.50)       | 0.50<br>(0.33 to<br>0.77)         | 0.40<br>(0.27 to<br>0.61)        | 0.53<br>(0.35 to<br>0.83)         |
| Chronic kidney disease                                     | 3,691.28<br>(2,613.26 to<br>4,839.50)  | 8,463.83<br>(2,889.42 to<br>26,209.58)  | 6,107.00<br>(2,067.00 to<br>19,501.63) | 10,808.60<br>(3,585.39 to<br>32,963.45)  | 155.58<br>(109.05 to<br>202.54) | 432.14<br>(115.16 to<br>1,447.53) | 326.32<br>(87.60 to<br>1,148.80) | 533.50<br>(142.47 to<br>1,684.14) |
| Chronic kidney disease due to diabetes mellitus            | 1,030.76<br>(710.44 to<br>1,399.78)    | 3,018.31<br>(923.25 to<br>9,954.88)     | 2,192.51<br>(685.07 to<br>7,292.85)    | 3,875.17<br>(1,158.20 to<br>12,526.72)   | 47.71<br>(33.19 to<br>63.64)    | 154.54<br>(38.69 to<br>526.42)    | 116.48<br>(29.68 to<br>417.96)   | 192.09<br>(47.99 to<br>637.35)    |
| Chronic kidney disease due to hypertension                 | 605.03<br>(408.37 to<br>808.15)        | 1,722.15<br>(451.16 to<br>6,223.49)     | 1,308.39<br>(340.98 to<br>4,644.78)    | 2,183.57<br>(560.66 to<br>7,222.33)      | 36.95<br>(25.28 to<br>48.33)    | 109.89<br>(26.12 to<br>390.57)    | 87.54<br>(21.10 to<br>312.07)    | 132.73<br>(31.63 to<br>446.22)    |
| Chronic kidney disease due to glomerulonephritis           | 954.83<br>(672.51 to<br>1,291.76)      | 1,645.25<br>(679.39 to<br>4,651.93)     | 1,132.01<br>(460.28 to<br>3,371.69)    | 2,103.15<br>(826.29 to<br>5,773.41)      | 30.97<br>(21.22 to<br>41.60)    | 70.05<br>(20.70 to<br>236.58)     | 50.00<br>(14.89 to<br>175.32)    | 87.84<br>(25.71 to<br>277.70)     |
| Chronic kidney disease due to other and unspecified causes | 1,100.65<br>(768.81 to<br>1,460.70)    | 2,078.11<br>(807.64 to<br>5,942.29)     | 1,474.09<br>(558.16 to<br>4,308.35)    | 2,646.70<br>(997.93 to<br>7,466.96)      | 39.95<br>(27.23 to<br>53.95)    | 97.65<br>(28.48 to<br>321.45)     | 72.29<br>(20.90 to<br>247.17)    | 120.84<br>(34.49 to<br>376.17)    |
| Urinary diseases and male infertility                      | 1,757.81<br>(1,398.70 to<br>2,161.09)  | 2,770.06<br>(2,154.56 to<br>3,538.77)   | 2,301.13<br>(1,739.26 to<br>3,001.49)  | 2,758.42<br>(2,146.82 to<br>3,514.74)    | 70.11<br>(56.81 to<br>84.27)    | 129.53<br>(107.53 to<br>151.77)   | 114.73<br>(93.11 to<br>137.63)   | 120.58<br>(99.74 to<br>141.60)    |
| Urinary tract infections                                   | 1,165.34<br>(921.58 to<br>1,457.24)    | 2,085.16<br>(1,589.81 to<br>2,717.03)   | 1,796.60<br>(1,341.30 to<br>2,363.41)  | 2,044.69<br>(1,564.05 to<br>2,661.26)    | 45.25<br>(35.98 to<br>56.57)    | 95.73<br>(76.94 to<br>117.27)     | 88.12<br>(69.62 to<br>107.96)    | 87.63<br>(69.59 to<br>105.91)     |
| Urolithiasis                                               | 33.93<br>(22.24 to<br>53.23)           | 58.23<br>(35.49 to<br>94.77)            | 44.41<br>(26.29 to<br>73.28)           | 58.81<br>(36.39 to<br>94.82)             | 1.04<br>(0.65 to<br>1.91)       | 1.95<br>(1.17 to<br>3.65)         | 1.58<br>(0.92 to<br>3.08)        | 1.86<br>(1.13 to<br>3.41)         |
| Other urinary diseases                                     | 558.53<br>(374.11 to<br>773.52)        | 626.67<br>(373.34 to<br>903.87)         | 460.12<br>(269.54 to<br>678.94)        | 654.93<br>(407.43 to<br>924.87)          | 23.81<br>(15.25 to<br>33.48)    | 31.86<br>(18.78 to<br>45.43)      | 25.04<br>(14.25 to<br>36.51)     | 31.09<br>(18.79 to<br>43.48)      |
| Gynecological diseases                                     | 76.15<br>(47.43 to<br>111.67)          | 123.61<br>(63.85 to<br>242.85)          | 76.53<br>(37.43 to<br>149.49)          | 133.58<br>(69.03 to<br>260.27)           | 2.13<br>(1.43 to<br>3.07)       | 3.32<br>(1.86 to<br>6.00)         | 2.11<br>(1.13 to<br>3.76)        | 3.51<br>(1.97 to<br>6.25)         |
| Uterine fibroids                                           | 23.11<br>(10.97 to<br>37.34)           | 33.80<br>(12.87 to<br>70.43)            | 22.47<br>(8.66 to<br>46.78)            | 37.01<br>(13.73 to<br>77.22)             | 0.69<br>(0.35 to<br>1.10)       | 0.98<br>(0.40 to<br>1.92)         | 0.66<br>(0.28 to<br>1.30)        | 1.06<br>(0.44 to<br>2.08)         |
| Polycystic ovarian syndrome                                | 5.03<br>(1.21 to<br>13.45)             | 5.77<br>(1.12 to<br>18.29)              | 2.57<br>(0.47 to<br>8.47)              | 6.72<br>(1.33 to<br>21.89)               | 0.11<br>(0.03 to<br>0.30)       | 0.13<br>(0.03 to<br>0.42)         | 0.06<br>(0.01 to<br>0.20)        | 0.15<br>(0.03 to<br>0.47)         |
| Endometriosis                                              | 0.36<br>(0.10 to<br>1.28)              | 0.76<br>(0.16 to<br>2.85)               | 0.47<br>(0.10 to<br>1.86)              | 0.84<br>(0.18 to<br>3.06)                | 0.01<br>(0.00 to<br>0.02)       | 0.02<br>(0.00 to<br>0.05)         | 0.01<br>(0.00 to<br>0.04)        | 0.02<br>(0.00 to<br>0.06)         |
| Genital prolapse                                           | 1.90<br>(0.85 to<br>3.92)              | 1.91<br>(0.78 to<br>4.16)               | 1.19<br>(0.47 to<br>2.63)              | 2.04<br>(0.84 to<br>4.43)                | 0.11<br>(0.05 to<br>0.22)       | 0.09<br>(0.04 to<br>0.20)         | 0.06<br>(0.03 to<br>0.13)        | 0.10<br>(0.04 to<br>0.20)         |
| Other gynecological diseases                               | 45.75<br>(22.49 to<br>71.95)           | 81.37<br>(35.25 to<br>165.06)           | 49.83<br>(20.28 to<br>101.51)          | 86.97<br>(37.13 to<br>177.69)            | 1.20<br>(0.61 to<br>1.87)       | 2.10<br>(0.97 to<br>3.85)         | 1.32<br>(0.59 to<br>2.44)        | 2.19<br>(0.99 to<br>4.08)         |
| Hemoglobinopathies and hemolytic anemias                   | 1,861.96<br>(1,421.52 to<br>2,399.03)  | 2,224.37<br>(1,480.85 to<br>3,346.39)   | 1,613.66<br>(1,055.76 to<br>2,454.25)  | 2,407.68<br>(1,606.31 to<br>3,636.62)    | 40.80<br>(32.00 to<br>51.70)    | 64.32<br>(45.93 to<br>90.74)      | 48.63<br>(34.25 to<br>69.66)     | 66.53<br>(47.66 to<br>94.40)      |
| Thalassemias                                               | 3.40<br>(2.03 to<br>5.39)              | 1.35<br>(0.73 to<br>2.24)               | 1.30<br>(0.69 to<br>2.23)              | 1.48<br>(0.79 to<br>2.49)                | 0.04<br>(0.02 to<br>0.06)       | 0.04<br>(0.01 to<br>0.03)         | 0.02<br>(0.01 to<br>0.03)        | 0.02<br>(0.01 to<br>0.03)         |
| Sickle cell disorders                                      | 1,413.35<br>(1,067.07 to<br>1,844.84)  | 1,425.46<br>(877.82 to<br>2,307.50)     | 1,030.78<br>(618.81 to<br>1,674.24)    | 1,569.49<br>(966.18 to<br>2,564.46)      | 21.16<br>(16.12 to<br>27.01)    | 27.03<br>(16.54 to<br>43.81)      | 19.91<br>(11.96 to<br>32.16)     | 29.19<br>(17.93 to<br>47.15)      |
| G6PD deficiency                                            | 286.36<br>(212.49 to<br>374.24)        | 596.48<br>(407.56 to<br>876.18)         | 420.70<br>(279.70 to<br>631.58)        | 638.07<br>(439.26 to<br>940.04)          | 8.30<br>(6.16 to<br>10.91)      | 22.55<br>(15.79 to<br>31.73)      | 16.36<br>(11.25 to<br>23.46)     | 23.43<br>(16.77 to<br>32.85)      |
| Other hemoglobinopathies and hemolytic anemias             | 158.84<br>(120.70 to<br>210.09)        | 201.08<br>(150.65 to<br>268.13)         | 160.87<br>(118.02 to<br>218.76)        | 198.63<br>(148.51 to<br>262.05)          | 11.31<br>(8.75 to<br>15.06)     | 14.73<br>(11.28 to<br>19.46)      | 12.34<br>(9.52 to<br>16.50)      | 13.90<br>(10.45 to<br>18.55)      |



|                                                   |                                              |                                              |                                             |                                              |                                     |                                     |                                     |                                     |
|---------------------------------------------------|----------------------------------------------|----------------------------------------------|---------------------------------------------|----------------------------------------------|-------------------------------------|-------------------------------------|-------------------------------------|-------------------------------------|
| Endocrine, metabolic, blood, and immune disorders | 1,260.90<br>(595.59 to 2,310.65)             | 1,599.40<br>(679.35 to 3,359.41)             | 1,503.91<br>(644.54 to 3,168.35)            | 1,711.32<br>(727.93 to 3,531.27)             | 28.80<br>(12.83 to 53.70)           | 47.37<br>(19.05 to 100.55)          | 47.33<br>(18.99 to 99.40)           | 47.34<br>(19.46 to 96.60)           |
| <b>Gabon</b>                                      |                                              |                                              |                                             |                                              |                                     |                                     |                                     |                                     |
| Cause                                             | YLLs (actual counts)                         |                                              |                                             |                                              | Deaths (actual counts)              |                                     |                                     |                                     |
|                                                   | 2016                                         | 2040 Forecast                                | 2040 Better Scenario                        | 2040 Worse Scenario                          | 2016                                | 2040 Forecast                       | 2040 Better Scenario                | 2040 Worse Scenario                 |
| <b>Musculoskeletal disorders</b>                  | <b>560.63</b><br>(333.20 to 742.99)          | <b>1,196.36</b><br>(628.17 to 1,855.46)      | <b>1,101.21</b><br>(570.85 to 1,724.45)     | <b>1,155.13</b><br>(613.78 to 1,774.33)      | <b>16.89</b><br>(10.44 to 21.82)    | <b>38.73</b><br>(21.78 to 54.18)    | <b>36.19</b><br>(20.55 to 50.97)    | <b>36.22</b><br>(20.53 to 50.48)    |
| Rheumatoid arthritis                              | 74.49<br>(46.14 to 119.27)                   | 159.48<br>(95.46 to 270.93)                  | 109.06<br>(62.01 to 193.66)                 | 162.01<br>(98.05 to 270.25)                  | 3.70<br>(2.29 to 5.57)              | 8.16<br>(4.96 to 12.31)             | 5.81<br>(3.38 to 9.07)              | 7.97<br>(4.89 to 12.12)             |
| Other musculoskeletal disorders                   | 486.15<br>(280.90 to 651.53)                 | 1,036.88<br>(518.25 to 1,651.39)             | 992.15<br>(492.16 to 1,585.41)              | 993.12<br>(497.59 to 1,572.81)               | 13.19<br>(7.79 to 16.99)            | 30.57<br>(16.33 to 44.75)           | 30.57<br>(16.48 to 44.40)           | 28.25<br>(15.14 to 41.13)           |
| <b>Other non-communicable diseases</b>            | <b>19,735.26</b><br>(12,586.80 to 28,626.52) | <b>17,529.01</b><br>(11,547.83 to 25,114.40) | <b>12,512.05</b><br>(8,182.78 to 18,014.46) | <b>20,562.19</b><br>(13,119.62 to 31,139.75) | <b>285.04</b><br>(194.67 to 398.66) | <b>377.30</b><br>(263.21 to 520.68) | <b>311.73</b><br>(212.07 to 428.11) | <b>398.90</b><br>(275.44 to 553.32) |
| Congenital birth defects                          | 16,544.67<br>(9,928.89 to 25,031.27)         | 11,145.20<br>(6,296.78 to 17,874.19)         | 6,910.50<br>(3,775.87 to 11,110.06)         | 13,990.74<br>(7,617.15 to 23,261.15)         | 196.00<br>(119.65 to 294.16)        | 137.77<br>(81.55 to 218.00)         | 86.12<br>(49.22 to 135.77)          | 171.24<br>(97.04 to 279.65)         |
| Neural tube defects                               | 1,763.71<br>(813.23 to 3,303.20)             | 472.24<br>(200.19 to 988.45)                 | 240.51<br>(98.45 to 513.56)                 | 638.86<br>(260.81 to 1,320.10)               | 20.54<br>(9.53 to 38.45)            | 5.62<br>(2.43 to 11.61)             | 2.87<br>(1.19 to 6.06)              | 7.57<br>(3.17 to 15.46)             |
| Congenital heart anomalies                        | 4,931.64<br>(2,802.86 to 7,845.40)           | 3,514.89<br>(1,933.00 to 5,945.86)           | 2,002.30<br>(1,064.46 to 3,476.76)          | 4,356.22<br>(2,310.47 to 7,488.67)           | 59.20<br>(34.63 to 93.48)           | 44.69<br>(25.34 to 73.29)           | 25.67<br>(14.07 to 43.26)           | 54.66<br>(30.01 to 92.26)           |
| Orofacial clefts                                  | 63.00<br>(13.55 to 148.59)                   | 34.67<br>(6.31 to 87.54)                     | 16.23<br>(2.97 to 40.31)                    | 47.75<br>(8.82 to 120.83)                    | 0.73<br>(0.16 to 1.72)              | 0.73<br>(0.07 to 1.01)              | 0.19<br>(0.03 to 0.47)              | 0.55<br>(0.10 to 1.40)              |
| Down syndrome                                     | 347.03<br>(192.12 to 564.88)                 | 286.94<br>(162.56 to 502.62)                 | 256.85<br>(146.11 to 453.41)                | 349.85<br>(191.60 to 629.99)                 | 4.42<br>(2.59 to 7.00)              | 4.31<br>(2.58 to 7.12)              | 3.95<br>(2.34 to 6.57)              | 5.09<br>(3.01 to 8.60)              |
| Other chromosomal abnormalities                   | 1,105.89<br>(405.57 to 1,962.59)             | 1,064.68<br>(390.14 to 1,910.74)             | 774.71<br>(287.01 to 1,401.94)              | 1,368.40<br>(505.31 to 2,482.48)             | 12.91<br>(4.75 to 22.86)            | 12.59<br>(4.67 to 22.63)            | 9.18<br>(3.44 to 16.42)             | 16.13<br>(6.03 to 29.19)            |
| Congenital musculoskeletal and limb anomalies     | 226.80<br>(120.07 to 413.52)                 | 173.29<br>(87.76 to 335.62)                  | 110.31<br>(55.18 to 214.69)                 | 214.91<br>(107.12 to 425.70)                 | 2.66<br>(1.43 to 4.82)              | 2.66<br>(1.08 to 3.96)              | 1.33<br>(0.69 to 2.56)              | 2.57<br>(1.30 to 5.00)              |
| Urogenital congenital anomalies                   | 354.89<br>(189.67 to 612.20)                 | 247.81<br>(128.79 to 439.37)                 | 168.31<br>(85.87 to 305.89)                 | 302.91<br>(152.80 to 538.35)                 | 4.33<br>(2.42 to 7.28)              | 3.38<br>(1.89 to 5.63)              | 2.33<br>(1.29 to 3.90)              | 4.03<br>(2.21 to 6.87)              |
| Digestive congenital anomalies                    | 1,666.87<br>(873.97 to 2,990.10)             | 1,140.18<br>(546.76 to 2,103.56)             | 670.26<br>(299.47 to 1,318.03)              | 1,462.99<br>(675.65 to 2,782.53)             | 19.41<br>(10.17 to 34.74)           | 13.40<br>(6.43 to 24.69)            | 7.89<br>(3.60 to 15.42)             | 17.16<br>(7.95 to 32.54)            |
| Other congenital birth defects                    | 6,084.84<br>(3,219.28 to 10,023.82)          | 4,210.51<br>(2,053.70 to 7,254.24)           | 2,671.04<br>(1,272.65 to 4,727.97)          | 5,248.85<br>(2,508.92 to 9,296.98)           | 71.78<br>(38.45 to 117.86)          | 51.29<br>(26.94 to 88.73)           | 32.70<br>(16.52 to 56.83)           | 63.48<br>(31.68 to 111.86)          |
| Skin and subcutaneous diseases                    | 2,300.99<br>(1,244.62 to 3,421.23)           | 5,880.24<br>(3,375.13 to 8,762.89)           | 5,277.88<br>(3,009.71 to 7,743.00)          | 5,934.48<br>(3,389.26 to 8,778.97)           | 78.72<br>(46.62 to 121.10)          | 233.69<br>(142.28 to 354.28)        | 221.86<br>(134.07 to 332.53)        | 220.27<br>(135.68 to 331.04)        |
| Cellulitis                                        | 402.60<br>(150.95 to 678.57)                 | 1,375.58<br>(543.02 to 2,256.53)             | 1,354.03<br>(549.73 to 2,205.30)            | 1,324.61<br>(518.09 to 2,218.43)             | 12.65<br>(4.98 to 19.94)            | 48.18<br>(19.32 to 74.39)           | 49.45<br>(20.58 to 76.42)           | 44.54<br>(18.16 to 69.86)           |
| Pyoderma                                          | 1,559.90<br>(871.07 to 2,416.37)             | 3,793.65<br>(2,119.59 to 5,849.13)           | 3,308.52<br>(1,878.70 to 5,116.51)          | 3,928.71<br>(2,215.92 to 6,073.40)           | 48.43<br>(28.53 to 78.07)           | 146.69<br>(90.07 to 230.73)         | 136.47<br>(84.48 to 218.13)         | 141.18<br>(85.79 to 222.44)         |
| Decubitus ulcer                                   | 249.70<br>(125.99 to 422.06)                 | 534.40<br>(279.15 to 892.39)                 | 459.80<br>(238.95 to 776.82)                | 503.71<br>(260.86 to 833.05)                 | 15.21<br>(8.05 to 26.73)            | 33.52<br>(18.34 to 61.27)           | 30.98<br>(16.98 to 56.97)           | 29.55<br>(15.75 to 53.15)           |
| Other skin and subcutaneous diseases              | 88.79<br>(43.15 to 140.14)                   | 176.62<br>(89.31 to 285.52)                  | 155.54<br>(79.44 to 247.95)                 | 177.45<br>(89.38 to 284.68)                  | 2.43<br>(1.25 to 3.83)              | 5.30<br>(2.80 to 8.27)              | 4.96<br>(2.73 to 7.75)              | 4.99<br>(2.62 to 7.87)              |

|                                      |                                                               |                                                               |                                                               |                                                                |                                                          |                                                            |                                                          |                                                            |
|--------------------------------------|---------------------------------------------------------------|---------------------------------------------------------------|---------------------------------------------------------------|----------------------------------------------------------------|----------------------------------------------------------|------------------------------------------------------------|----------------------------------------------------------|------------------------------------------------------------|
| Sudden infant death syndrome         | 889.60<br>(480.38 to<br>1,539.38)                             | 503.56<br>(220.43 to<br>1,016.71)                             | 323.67<br>(145.61 to<br>634.47)                               | 636.97<br>(274.34 to<br>1,300.22)                              | 10.32<br>(5.57 to<br>17.87)                              | 5.84<br>(2.56 to<br>11.80)                                 | 3.76<br>(1.69 to<br>7.36)                                | 7.39<br>(3.18 to<br>15.09)                                 |
| <b>Injuries</b>                      | <b>52,071.16</b><br><b>(40,761.75 to</b><br><b>65,519.48)</b> | <b>63,810.99</b><br><b>(44,140.13 to</b><br><b>92,670.03)</b> | <b>43,010.13</b><br><b>(29,840.03 to</b><br><b>61,182.95)</b> | <b>71,920.57</b><br><b>(49,484.25 to</b><br><b>105,119.48)</b> | <b>1,089.58</b><br><b>(861.57 to</b><br><b>1,345.93)</b> | <b>1,543.23</b><br><b>(1,121.30 to</b><br><b>2,143.60)</b> | <b>1,115.79</b><br><b>(816.58 to</b><br><b>1,524.09)</b> | <b>1,665.34</b><br><b>(1,189.96 to</b><br><b>2,360.03)</b> |
| <b>Transport injuries</b>            | <b>20,727.15</b><br><b>(15,625.27 to</b><br><b>26,944.62)</b> | <b>29,760.88</b><br><b>(18,337.16 to</b><br><b>47,654.58)</b> | <b>16,755.96</b><br><b>(10,263.35 to</b><br><b>26,859.63)</b> | <b>34,500.03</b><br><b>(20,753.59 to</b><br><b>56,571.42)</b>  | <b>389.01</b><br><b>(294.85 to</b><br><b>503.41)</b>     | <b>612.25</b><br><b>(379.71 to</b><br><b>974.48)</b>       | <b>357.70</b><br><b>(222.01 to</b><br><b>564.68)</b>     | <b>695.37</b><br><b>(419.97 to</b><br><b>1,143.08)</b>     |
| Road injuries                        | 19,967.46<br>(15,036.25 to<br>26,054.98)                      | 28,562.86<br>(17,493.06 to<br>45,718.03)                      | 15,963.89<br>(9,760.37 to<br>25,680.97)                       | 33,124.75<br>(19,900.44 to<br>53,900.70)                       | 374.76<br>(285.21 to<br>483.56)                          | 587.47<br>(364.36 to<br>934.25)                            | 341.07<br>(210.54 to<br>539.35)                          | 667.34<br>(403.06 to<br>1,093.43)                          |
| Pedestrian road injuries             | 7,329.45<br>(5,347.30 to<br>9,697.61)                         | 8,317.93<br>(4,973.28 to<br>13,251.52)                        | 4,180.59<br>(2,498.75 to<br>6,634.84)                         | 9,631.98<br>(5,734.46 to<br>15,723.84)                         | 141.99<br>(105.32 to<br>185.53)                          | 189.90<br>(117.76 to<br>305.15)                            | 99.69<br>(60.85 to<br>159.33)                            | 213.65<br>(130.54 to<br>349.88)                            |
| <b>Gabon</b>                         |                                                               |                                                               |                                                               |                                                                |                                                          |                                                            |                                                          |                                                            |
| Cause                                | YLLs (actual counts)                                          |                                                               |                                                               |                                                                | Deaths (actual counts)                                   |                                                            |                                                          |                                                            |
|                                      | 2016                                                          | 2040 Forecast                                                 | 2040 Better Scenario                                          | 2040 Worse Scenario                                            | 2016                                                     | 2040 Forecast                                              | 2040 Better Scenario                                     | 2040 Worse Scenario                                        |
| Cyclist road injuries                | 496.30<br>(327.89 to<br>720.69)                               | 786.86<br>(448.12 to<br>1,301.51)                             | 468.13<br>(268.75 to<br>778.33)                               | 915.31<br>(515.27 to<br>1,535.49)                              | 9.45<br>(6.27 to<br>13.81)                               | 16.29<br>(9.32 to<br>27.72)                                | 10.44<br>(5.98 to<br>17.65)                              | 18.49<br>(10.37 to<br>32.02)                               |
| Motorcyclist road injuries           | 1,704.56<br>(1,035.47 to<br>2,652.09)                         | 2,768.71<br>(1,347.64 to<br>5,097.92)                         | 1,919.97<br>(927.46 to<br>3,502.81)                           | 3,133.97<br>(1,498.92 to<br>5,806.29)                          | 29.65<br>(18.14 to<br>45.63)                             | 50.46<br>(24.78 to<br>92.12)                               | 35.86<br>(17.42 to<br>64.50)                             | 56.66<br>(27.40 to<br>104.91)                              |
| Motor vehicle road injuries          | 10,372.75<br>(7,529.94 to<br>13,879.57)                       | 16,594.55<br>(9,808.10 to<br>27,594.24)                       | 9,339.35<br>(5,485.16 to<br>15,594.23)                        | 19,333.07<br>(11,166.25 to<br>32,305.93)                       | 192.43<br>(140.73 to<br>255.06)                          | 328.85<br>(196.56 to<br>536.77)                            | 193.83<br>(116.11 to<br>316.91)                          | 376.32<br>(220.61 to<br>638.89)                            |
| Other road injuries                  | 64.41<br>(37.64 to<br>112.14)                                 | 94.81<br>(51.08 to<br>172.06)                                 | 55.85<br>(29.99 to<br>101.55)                                 | 110.43<br>(58.85 to<br>202.98)                                 | 1.23<br>(0.73 to<br>2.15)                                | 1.97<br>(1.06 to<br>3.58)                                  | 1.25<br>(0.68 to<br>2.30)                                | 2.23<br>(1.18 to<br>4.08)                                  |
| Other transport injuries             | 759.68<br>(521.20 to<br>1,058.94)                             | 1,198.02<br>(681.58 to<br>2,042.34)                           | 792.07<br>(448.00 to<br>1,391.39)                             | 1,375.27<br>(768.75 to<br>2,379.95)                            | 14.24<br>(9.80 to<br>20.15)                              | 24.78<br>(14.08 to<br>42.65)                               | 16.64<br>(9.56 to<br>28.58)                              | 26.03<br>(15.57 to<br>48.99)                               |
| Unintentional injuries               | <b>21,870.14</b><br><b>(16,948.48 to</b><br><b>27,810.18)</b> | <b>20,652.17</b><br><b>(15,018.39 to</b><br><b>28,284.80)</b> | <b>15,838.10</b><br><b>(11,438.49 to</b><br><b>21,636.03)</b> | <b>22,708.34</b><br><b>(16,403.12 to</b><br><b>31,436.65)</b>  | <b>489.01</b><br><b>(394.32 to</b><br><b>595.45)</b>     | <b>598.25</b><br><b>(469.03 to</b><br><b>761.22)</b>       | <b>492.15</b><br><b>(382.07 to</b><br><b>623.29)</b>     | <b>610.42</b><br><b>(474.55 to</b><br><b>777.79)</b>       |
| Falls                                | 3,729.87<br>(2,758.99 to<br>4,877.43)                         | 5,176.96<br>(3,799.62 to<br>6,839.46)                         | 4,342.88<br>(3,151.26 to<br>5,755.04)                         | 5,239.94<br>(3,806.90 to<br>6,928.80)                          | 148.62<br>(110.54 to<br>186.51)                          | 237.10<br>(177.22 to<br>298.48)                            | 211.64<br>(157.14 to<br>266.08)                          | 222.99<br>(163.94 to<br>282.27)                            |
| Drowning                             | 6,506.51<br>(4,720.50 to<br>8,847.77)                         | 4,681.33<br>(2,909.77 to<br>7,312.34)                         | 3,433.09<br>(2,158.12 to<br>5,255.00)                         | 5,407.25<br>(3,360.10 to<br>8,421.29)                          | 101.48<br>(75.68 to<br>133.90)                           | 87.66<br>(58.28 to<br>130.25)                              | 66.07<br>(44.57 to<br>97.78)                             | 98.36<br>(64.63 to<br>146.08)                              |
| Fire, heat, and hot substances       | 2,218.76<br>(1,604.63 to<br>2,913.26)                         | 1,875.86<br>(1,194.68 to<br>2,756.25)                         | 1,305.92<br>(820.45 to<br>1,879.86)                           | 2,119.31<br>(1,321.19 to<br>3,123.44)                          | 53.82<br>(37.42 to<br>68.64)                             | 58.16<br>(36.57 to<br>82.80)                               | 43.08<br>(26.69 to<br>61.88)                             | 61.76<br>(39.04 to<br>88.72)                               |
| Poisonings                           | 817.47<br>(406.76 to<br>1,615.68)                             | 517.99<br>(249.27 to<br>989.95)                               | 322.39<br>(158.57 to<br>608.67)                               | 619.03<br>(297.30 to<br>1,203.64)                              | 16.19<br>(8.64 to<br>29.23)                              | 12.64<br>(6.29 to<br>22.00)                                | 8.22<br>(4.16 to<br>14.45)                               | 14.39<br>(7.08 to<br>25.46)                                |
| Exposure to mechanical forces        | 2,629.64<br>(1,833.37 to<br>3,597.52)                         | 2,347.97<br>(1,525.75 to<br>3,488.33)                         | 1,689.67<br>(1,093.38 to<br>2,495.03)                         | 2,634.42<br>(1,727.22 to<br>3,889.64)                          | 48.08<br>(34.60 to<br>64.69)                             | 52.20<br>(35.61 to<br>75.29)                               | 39.29<br>(26.32 to<br>56.72)                             | 55.81<br>(37.92 to<br>79.14)                               |
| Unintentional firearm injuries       | 301.77<br>(176.24 to<br>454.71)                               | 273.21<br>(151.41 to<br>443.24)                               | 203.13<br>(112.93 to<br>329.04)                               | 301.59<br>(167.37 to<br>488.63)                                | 5.89<br>(3.48 to<br>8.69)                                | 5.94<br>(3.45 to<br>9.21)                                  | 4.58<br>(2.69 to<br>7.10)                                | 6.38<br>(3.69 to<br>9.95)                                  |
| Unintentional suffocation            | 721.28<br>(368.61 to<br>1,423.52)                             | 463.64<br>(229.32 to<br>879.94)                               | 328.50<br>(165.32 to<br>618.94)                               | 572.15<br>(274.44 to<br>1,112.52)                              | 9.11<br>(4.86 to<br>17.42)                               | 6.37<br>(3.39 to<br>11.45)                                 | 4.58<br>(2.48 to<br>8.23)                                | 7.71<br>(4.00 to<br>14.24)                                 |
| Other exposure to mechanical forces  | 1,606.59<br>(1,087.43 to<br>2,271.08)                         | 1,611.30<br>(1,032.85 to<br>2,502.11)                         | 1,158.04<br>(725.98 to<br>1,836.55)                           | 1,760.68<br>(1,138.73 to<br>2,713.06)                          | 33.08<br>(23.39 to<br>46.20)                             | 39.89<br>(26.89 to<br>58.84)                               | 30.13<br>(20.07 to<br>45.07)                             | 41.72<br>(28.25 to<br>61.32)                               |
| Adverse effects of medical treatment | 1,440.68<br>(1,057.19 to<br>1,961.46)                         | 1,499.72<br>(1,071.34 to<br>2,094.68)                         | 1,220.54<br>(866.88 to<br>1,688.75)                           | 1,635.93<br>(1,155.94 to<br>2,326.13)                          | 33.10<br>(26.33 to<br>42.27)                             | 43.02<br>(32.66 to<br>56.43)                               | 37.16<br>(28.16 to<br>49.09)                             | 43.99<br>(33.57 to<br>57.03)                               |

|                                                 |                                                             |                                                              |                                                              |                                                              |                                                      |                                                      |                                                      |                                                      |
|-------------------------------------------------|-------------------------------------------------------------|--------------------------------------------------------------|--------------------------------------------------------------|--------------------------------------------------------------|------------------------------------------------------|------------------------------------------------------|------------------------------------------------------|------------------------------------------------------|
| Animal contact                                  | 1,191.59<br>(811.36 to<br>1,684.70)                         | 1,374.21<br>(905.71 to<br>2,043.60)                          | 1,045.57<br>(690.50 to<br>1,559.54)                          | 1,551.93<br>(1,014.61 to<br>2,278.01)                        | 27.79<br>(19.39 to<br>38.79)                         | 37.93<br>(26.04 to<br>55.00)                         | 30.42<br>(20.65 to<br>43.64)                         | 40.60<br>(28.17 to<br>58.14)                         |
| Venomous animal contact                         | 864.43<br>(585.35 to<br>1,267.79)                           | 992.80<br>(628.85 to<br>1,571.75)                            | 769.05<br>(488.58 to<br>1,197.15)                            | 1,116.54<br>(704.17 to<br>1,724.97)                          | 21.30<br>(14.42 to<br>31.31)                         | 28.65<br>(18.65 to<br>43.83)                         | 23.34<br>(15.22 to<br>35.26)                         | 30.59<br>(20.05 to<br>45.99)                         |
| Non-venomous animal contact                     | 327.16<br>(190.03 to<br>504.59)                             | 381.41<br>(207.68 to<br>625.31)                              | 276.53<br>(149.70 to<br>456.17)                              | 435.39<br>(235.38 to<br>717.81)                              | 6.49<br>(3.88 to<br>10.11)                           | 9.29<br>(5.38 to<br>14.60)                           | 7.08<br>(4.00 to<br>11.26)                           | 10.01<br>(5.76 to<br>15.77)                          |
| Foreign body                                    | 2,222.67<br>(1,286.87 to<br>3,807.71)                       | 2,062.20<br>(1,229.73 to<br>3,306.25)                        | 1,798.20<br>(1,106.34 to<br>2,784.70)                        | 2,268.78<br>(1,304.47 to<br>3,764.73)                        | 36.14<br>(22.69 to<br>55.56)                         | 41.60<br>(27.44 to<br>58.69)                         | 38.52<br>(25.87 to<br>53.36)                         | 42.81<br>(27.53 to<br>62.49)                         |
| Pulmonary aspiration and foreign body in airway | 2,098.61<br>(1,193.20 to<br>3,635.22)                       | 1,938.55<br>(1,174.80 to<br>3,187.11)                        | 1,680.92<br>(1,044.55 to<br>2,668.54)                        | 2,132.83<br>(1,247.81 to<br>3,605.58)                        | 33.88<br>(21.33 to<br>52.80)                         | 38.98<br>(26.27 to<br>55.10)                         | 35.92<br>(24.16 to<br>49.83)                         | 40.05<br>(26.22 to<br>58.73)                         |
| Foreign body in other body part                 | 124.05<br>(45.40 to<br>216.52)                              | 123.65<br>(43.91 to<br>234.46)                               | 117.28<br>(42.41 to<br>225.58)                               | 135.95<br>(48.72 to<br>255.00)                               | 2.27<br>(0.87 to<br>4.18)                            | 2.62<br>(1.00 to<br>4.95)                            | 2.60<br>(0.97 to<br>4.96)                            | 2.76<br>(1.05 to<br>5.15)                            |
| Environmental heat and cold exposure            | 364.17<br>(196.33 to<br>508.68)                             | 411.95<br>(201.96 to<br>637.13)                              | 273.37<br>(135.17 to<br>417.06)                              | 467.58<br>(233.55 to<br>711.07)                              | 8.47<br>(4.76 to<br>11.84)                           | 11.06<br>(5.68 to<br>16.17)                          | 7.63<br>(3.95 to<br>11.34)                           | 12.08<br>(6.25 to<br>17.60)                          |
| Other unintentional injuries                    | 748.79<br>(503.77 to<br>1,018.86)                           | 703.97<br>(431.95 to<br>1,010.80)                            | 406.47<br>(245.40 to<br>588.16)                              | 764.17<br>(468.28 to<br>1,091.46)                            | 15.32<br>(10.45 to<br>20.44)                         | 16.87<br>(10.57 to<br>23.39)                         | 10.12<br>(6.12 to<br>14.09)                          | 17.63<br>(11.11 to<br>24.45)                         |
| <b>Self-harm and interpersonal violence</b>     | <b>9,459.67</b><br><b>(6,336.65 to</b><br><b>13,764.09)</b> | <b>13,362.60</b><br><b>(8,084.86 to</b><br><b>20,920.56)</b> | <b>10,381.38</b><br><b>(6,415.79 to</b><br><b>16,103.25)</b> | <b>14,676.12</b><br><b>(8,790.74 to</b><br><b>23,323.68)</b> | <b>211.31</b><br><b>(145.96 to</b><br><b>296.66)</b> | <b>332.07</b><br><b>(206.37 to</b><br><b>510.19)</b> | <b>265.28</b><br><b>(167.96 to</b><br><b>403.59)</b> | <b>358.88</b><br><b>(217.08 to</b><br><b>556.35)</b> |

**Gabon**

| Cause                                                                               | YLLs (actual counts)                              |                                                   |                                                   |                                                   | Deaths (actual counts)                         |                                                |                                                |                                                |
|-------------------------------------------------------------------------------------|---------------------------------------------------|---------------------------------------------------|---------------------------------------------------|---------------------------------------------------|------------------------------------------------|------------------------------------------------|------------------------------------------------|------------------------------------------------|
|                                                                                     | 2016                                              | 2040 Forecast                                     | 2040 Better Scenario                              | 2040 Worse Scenario                               | 2016                                           | 2040 Forecast                                  | 2040 Better Scenario                           | 2040 Worse Scenario                            |
| Self-harm                                                                           | 4,757.57<br>(3,232.48 to<br>6,969.58)             | 8,397.39<br>(4,784.00 to<br>13,918.32)            | 6,565.96<br>(3,801.08 to<br>10,675.32)            | 9,458.41<br>(5,231.11 to<br>15,813.68)            | 126.88<br>(88.13 to<br>181.94)                 | 236.78<br>(140.30 to<br>378.62)                | 191.25<br>(116.11 to<br>298.84)                | 259.54<br>(148.32 to<br>428.01)                |
| Self-harm by firearm                                                                | 279.29<br>(154.24 to<br>514.94)                   | 363.80<br>(158.40 to<br>732.59)                   | 261.41<br>(118.13 to<br>520.15)                   | 414.90<br>(178.32 to<br>849.41)                   | 7.31<br>(4.12 to<br>12.99)                     | 10.38<br>(4.73 to<br>20.75)                    | 7.73<br>(3.64 to<br>14.91)                     | 11.49<br>(5.00 to<br>23.15)                    |
| Self-harm by other specified means                                                  | 4,478.29<br>(3,025.08 to<br>6,588.94)             | 8,033.59<br>(4,605.89 to<br>13,287.52)            | 6,304.55<br>(3,672.37 to<br>10,242.94)            | 9,043.50<br>(5,001.77 to<br>15,199.80)            | 119.57<br>(81.95 to<br>172.11)                 | 226.40<br>(134.19 to<br>364.85)                | 183.52<br>(110.64 to<br>286.98)                | 248.05<br>(140.52 to<br>410.14)                |
| Interpersonal violence                                                              | 4,702.09<br>(2,806.86 to<br>7,374.62)             | 4,965.21<br>(2,706.31 to<br>8,240.96)             | 3,815.42<br>(2,065.55 to<br>6,264.87)             | 5,217.72<br>(2,828.39 to<br>8,741.54)             | 84.43<br>(50.87 to<br>131.16)                  | 95.28<br>(53.04 to<br>157.45)                  | 74.03<br>(41.26 to<br>121.51)                  | 99.34<br>(54.50 to<br>166.13)                  |
| Physical violence by firearm                                                        | 1,219.77<br>(505.96 to<br>2,309.32)               | 1,264.75<br>(522.30 to<br>2,493.36)               | 922.69<br>(388.68 to<br>1,822.23)                 | 1,288.56<br>(523.22 to<br>2,548.93)               | 21.72<br>(9.05 to<br>41.13)                    | 23.57<br>(9.92 to<br>45.50)                    | 17.34<br>(7.39 to<br>34.24)                    | 23.87<br>(9.90 to<br>46.25)                    |
| Physical violence by sharp object                                                   | 1,417.47<br>(693.40 to<br>2,397.83)               | 1,657.85<br>(793.01 to<br>2,780.66)               | 1,278.72<br>(611.18 to<br>2,111.71)               | 1,663.13<br>(792.81 to<br>2,818.86)               | 25.77<br>(12.57 to<br>42.87)                   | 31.79<br>(15.46 to<br>52.91)                   | 24.77<br>(12.14 to<br>40.33)                   | 31.68<br>(15.33 to<br>52.62)                   |
| Physical violence by other means                                                    | 2,064.86<br>(1,172.75 to<br>3,279.89)             | 2,042.63<br>(1,015.71 to<br>3,795.64)             | 1,614.00<br>(807.33 to<br>2,950.20)               | 2,266.02<br>(1,116.30 to<br>4,258.23)             | 36.95<br>(21.35 to<br>58.83)                   | 39.92<br>(20.08 to<br>73.49)                   | 31.92<br>(16.34 to<br>57.82)                   | 43.80<br>(21.76 to<br>81.69)                   |
| <b>Forces of nature, conflict and terrorism, and executions and police conflict</b> | <b>14.20</b><br><b>(10.70 to</b><br><b>20.32)</b> | <b>34.69</b><br><b>(0.00 to</b><br><b>494.23)</b> | <b>34.69</b><br><b>(0.00 to</b><br><b>482.61)</b> | <b>36.08</b><br><b>(0.00 to</b><br><b>507.26)</b> | <b>0.25</b><br><b>(0.00 to</b><br><b>0.37)</b> | <b>0.66</b><br><b>(0.00 to</b><br><b>8.97)</b> | <b>0.66</b><br><b>(0.00 to</b><br><b>8.88)</b> | <b>0.67</b><br><b>(0.00 to</b><br><b>9.08)</b> |
| Exposure to forces of nature                                                        | 0.00<br>(0.00 to<br>0.00)                         | 0.34<br>(0.00 to<br>0.00)                         | 0.33<br>(0.00 to<br>0.00)                         | 0.36<br>(0.00 to<br>0.00)                         | 0.00<br>(0.00 to<br>0.00)                      | 0.01<br>(0.00 to<br>0.00)                      | 0.01<br>(0.00 to<br>0.00)                      | 0.01<br>(0.00 to<br>0.00)                      |
| Conflict and terrorism                                                              | 0.00<br>(0.00 to<br>0.00)                         | 8.23<br>(0.00 to<br>45.55)                        | 8.09<br>(0.00 to<br>44.36)                        | 8.41<br>(0.00 to<br>47.16)                        | 0.00<br>(0.00 to<br>0.00)                      | 0.15<br>(0.00 to<br>0.84)                      | 0.15<br>(0.00 to<br>0.83)                      | 0.15<br>(0.00 to<br>0.85)                      |
| Executions and police conflict                                                      | 14.20<br>(10.70 to<br>20.32)                      | 26.77<br>(0.00 to<br>494.23)                      | 26.26<br>(0.00 to<br>482.61)                      | 27.31<br>(0.00 to<br>507.26)                      | 0.25<br>(0.18 to<br>0.37)                      | 0.50<br>(0.00 to<br>8.95)                      | 0.50<br>(0.00 to<br>8.80)                      | 0.51<br>(0.00 to<br>9.05)                      |

| Eastern Sub-Saharan Africa                                        |                                          |                                          |                                        |                                          |                                    |                                    |                                    |                                    |
|-------------------------------------------------------------------|------------------------------------------|------------------------------------------|----------------------------------------|------------------------------------------|------------------------------------|------------------------------------|------------------------------------|------------------------------------|
| Cause                                                             | YLLs (in 1000s)                          |                                          |                                        |                                          | Deaths (in 1000s)                  |                                    |                                    |                                    |
|                                                                   | 2016                                     | 2040 Forecast                            | 2040 Better Scenario                   | 2040 Worse Scenario                      | 2016                               | 2040 Forecast                      | 2040 Better Scenario               | 2040 Worse Scenario                |
| All causes                                                        | 141,184.00<br>(136,133.37 to 146,790.63) | 131,268.94<br>(109,181.33 to 158,505.95) | 97,484.13<br>(81,220.53 to 118,350.94) | 222,547.37<br>(185,669.36 to 264,793.85) | 2,863.62<br>(2,766.26 to 2,976.25) | 3,529.73<br>(3,027.60 to 4,140.68) | 2,805.03<br>(2,425.54 to 3,275.04) | 5,243.80<br>(4,452.81 to 6,106.77) |
| Communicable, maternal, neonatal, and nutritional diseases        | 102,043.35<br>(97,584.17 to 106,708.35)  | 68,932.23<br>(53,795.88 to 89,148.46)    | 45,046.21<br>(35,240.01 to 57,946.44)  | 142,841.31<br>(113,685.23 to 176,096.21) | 1,657.70<br>(1,586.34 to 1,741.35) | 1,361.97<br>(1,025.12 to 1,817.89) | 921.11<br>(698.54 to 1,244.58)     | 2,598.09<br>(1,999.13 to 3,262.94) |
| HIV/AIDS and tuberculosis                                         | 22,275.71<br>(20,888.96 to 23,772.60)    | 16,677.80<br>(12,752.74 to 21,035.93)    | 11,891.78<br>(8,216.13 to 15,994.97)   | 52,218.31<br>(39,362.76 to 69,009.90)    | 452.82<br>(425.84 to 480.28)       | 345.23<br>(268.26 to 436.58)       | 245.93<br>(181.51 to 319.10)       | 1,027.73<br>(769.67 to 1,352.60)   |
| Tuberculosis                                                      | 6,901.68<br>(6,207.53 to 7,706.29)       | 4,080.60<br>(2,703.98 to 6,241.12)       | 2,560.33<br>(1,689.61 to 3,795.86)     | 7,903.64<br>(5,172.73 to 12,261.47)      | 175.54<br>(157.58 to 196.71)       | 108.27<br>(73.89 to 161.38)        | 70.63<br>(48.26 to 103.09)         | 203.79<br>(137.63 to 308.65)       |
| HIV/AIDS                                                          | 15,374.03<br>(14,193.63 to 16,752.42)    | 12,597.20<br>(9,106.01 to 16,181.03)     | 9,331.45<br>(5,877.10 to 13,212.67)    | 44,314.67<br>(32,117.66 to 62,011.88)    | 277.27<br>(258.44 to 299.84)       | 236.95<br>(174.51 to 297.37)       | 175.29<br>(116.75 to 235.17)       | 823.94<br>(581.41 to 1,169.78)     |
| Diarrhea, lower respiratory, and other common infectious diseases | 36,188.93<br>(32,981.04 to 39,711.64)    | 27,860.54<br>(16,583.88 to 44,112.71)    | 16,142.27<br>(9,724.14 to 26,345.26)   | 48,138.12<br>(30,162.59 to 71,207.95)    | 633.54<br>(568.72 to 717.39)       | 663.40<br>(385.14 to 1,085.97)     | 414.54<br>(243.08 to 702.31)       | 993.16<br>(596.60 to 1,533.96)     |
| Diarrheal diseases                                                | 11,950.29<br>(9,477.38 to 15,281.31)     | 9,749.71<br>(3,200.65 to 22,436.64)      | 5,566.14<br>(1,671.20 to 13,928.00)    | 15,032.85<br>(5,569.32 to 31,623.67)     | 242.22<br>(174.67 to 330.02)       | 267.11<br>(65.29 to 645.87)        | 160.85<br>(39.56 to 420.12)        | 380.95<br>(105.03 to 844.97)       |
| Intestinal infectious diseases                                    | 621.37<br>(316.74 to 1,068.43)           | 543.97<br>(273.49 to 955.63)             | 455.41<br>(230.77 to 793.55)           | 756.15<br>(373.54 to 1,333.34)           | 8.52<br>(4.46 to 14.55)            | 7.86<br>(3.99 to 13.63)            | 6.68<br>(3.41 to 11.52)            | 10.63<br>(5.34 to 18.63)           |
| Typhoid fever                                                     | 524.31<br>(256.15 to 950.01)             | 485.80<br>(236.08 to 877.11)             | 412.31<br>(202.87 to 741.65)           | 663.97<br>(318.24 to 1,221.07)           | 7.23<br>(3.58 to 13.08)            | 6.99<br>(3.39 to 12.48)            | 6.02<br>(2.95 to 10.72)            | 9.32<br>(4.45 to 16.95)            |
| Paratyphoid fever                                                 | 27.13<br>(10.97 to 59.31)                | 30.28<br>(12.57 to 62.63)                | 25.16<br>(10.52 to 52.22)              | 42.72<br>(17.27 to 89.17)                | 0.38<br>(0.15 to 0.83)             | 0.44<br>(0.19 to 0.91)             | 0.37<br>(0.15 to 0.76)             | 0.61<br>(0.25 to 1.26)             |
| Other intestinal infectious diseases                              | 69.93<br>(17.79 to 196.38)               | 27.89<br>(7.37 to 81.03)                 | 17.93<br>(4.75 to 50.48)               | 49.46<br>(12.40 to 143.72)               | 0.91<br>(0.26 to 2.47)             | 0.43<br>(0.13 to 1.14)             | 0.30<br>(0.09 to 0.78)             | 0.70<br>(0.21 to 1.91)             |
| Lower respiratory infections                                      | 14,257.13<br>(12,596.34 to 15,862.48)    | 12,211.47<br>(7,277.32 to 19,222.93)     | 6,226.91<br>(3,920.75 to 9,654.88)     | 22,878.28<br>(13,014.11 to 36,637.47)    | 251.05<br>(224.56 to 279.64)       | 301.96<br>(204.71 to 442.17)       | 177.56<br>(128.73 to 249.94)       | 466.56<br>(300.71 to 689.53)       |
| Upper respiratory infections                                      | 28.24<br>(19.04 to 39.52)                | 20.07<br>(13.97 to 29.39)                | 12.72<br>(8.71 to 18.34)               | 36.94<br>(25.08 to 53.96)                | 0.41<br>(0.31 to 0.55)             | 0.37<br>(0.27 to 0.50)             | 0.25<br>(0.18 to 0.35)             | 0.63<br>(0.45 to 0.87)             |
| Otitis media                                                      | 15.70<br>(8.84 to 26.73)                 | 3.58<br>(2.05 to 6.08)                   | 3.36<br>(1.97 to 5.67)                 | 4.09<br>(2.32 to 7.14)                   | 0.25<br>(0.16 to 0.41)             | 0.09<br>(0.05 to 0.15)             | 0.10<br>(0.05 to 0.16)             | 0.09<br>(0.05 to 0.14)             |
| Meningitis                                                        | 4,468.35<br>(3,654.94 to 5,741.73)       | 3,157.47<br>(2,280.16 to 4,456.48)       | 2,559.67<br>(1,853.27 to 3,574.95)     | 5,137.60<br>(3,421.68 to 7,618.36)       | 70.11<br>(57.23 to 87.79)          | 58.48<br>(42.60 to 80.95)          | 51.69<br>(37.90 to 71.54)          | 81.75<br>(57.33 to 116.35)         |
| Pneumococcal meningitis                                           | 252.66<br>(195.75 to 340.74)             | 183.78<br>(126.65 to 270.72)             | 162.96<br>(112.69 to 235.43)           | 256.65<br>(170.42 to 383.31)             | 4.58<br>(3.54 to 6.01)             | 4.12<br>(2.91 to 5.92)             | 3.94<br>(2.80 to 5.63)             | 5.02<br>(3.52 to 7.38)             |
| H influenzae type B meningitis                                    | 423.04<br>(329.97 to 565.72)             | 660.45<br>(230.36 to 1,507.89)           | 360.64<br>(163.77 to 744.10)           | 1,881.30<br>(526.14 to 4,450.88)         | 6.13<br>(4.88 to 7.94)             | 9.06<br>(3.91 to 18.91)            | 5.64<br>(3.10 to 10.14)            | 23.22<br>(7.35 to 53.37)           |
| Meningococcal meningitis                                          | 1,635.73<br>(1,298.63 to 2,111.28)       | 972.12<br>(692.66 to 1,356.22)           | 836.81<br>(590.92 to 1,178.80)         | 1,260.16<br>(887.63 to 1,763.10)         | 24.49<br>(19.54 to 31.06)          | 18.03<br>(12.96 to 25.73)          | 16.39<br>(11.62 to 23.12)          | 21.47<br>(15.30 to 30.04)          |
| Other meningitis                                                  | 2,156.92<br>(1,729.75 to 2,859.72)       | 1,341.12<br>(977.88 to 1,890.27)         | 1,199.26<br>(869.20 to 1,717.42)       | 1,739.48<br>(1,234.95 to 2,443.99)       | 34.90<br>(28.15 to 44.48)          | 27.27<br>(19.93 to 38.15)          | 25.72<br>(18.64 to 35.93)          | 32.04<br>(23.52 to 44.84)          |
| Encephalitis                                                      | 322.31<br>(203.11 to 453.47)             | 265.27<br>(165.90 to 375.61)             | 206.35<br>(127.81 to 295.63)           | 429.58<br>(263.28 to 624.74)             | 4.05<br>(2.61 to 5.63)             | 3.64<br>(2.35 to 4.99)             | 2.92<br>(1.88 to 4.04)             | 5.63<br>(3.53 to 7.95)             |

|                                                |                                                             |                                                            |                                                            |                                                            |                                                     |                                                   |                                                   |                                                   |
|------------------------------------------------|-------------------------------------------------------------|------------------------------------------------------------|------------------------------------------------------------|------------------------------------------------------------|-----------------------------------------------------|---------------------------------------------------|---------------------------------------------------|---------------------------------------------------|
| Diphtheria                                     | 21.24<br>(13.78 to<br>31.78)                                | 11.37<br>(5.82 to<br>22.17)                                | 5.50<br>(3.10 to<br>9.88)                                  | 18.26<br>(9.45 to<br>33.76)                                | 0.27<br>(0.18 to<br>0.39)                           | 0.15<br>(0.08 to<br>0.28)                         | 0.08<br>(0.05 to<br>0.13)                         | 0.23<br>(0.13 to<br>0.41)                         |
| Whooping cough                                 | 1,825.87<br>(753.06 to<br>3,690.44)                         | 1,458.93<br>(588.92 to<br>2,720.77)                        | 854.70<br>(330.68 to<br>1,607.34)                          | 2,879.11<br>(1,178.07 to<br>5,503.65)                      | 21.57<br>(8.90 to<br>43.64)                         | 17.32<br>(6.98 to<br>32.20)                       | 10.20<br>(3.97 to<br>19.13)                       | 34.05<br>(13.95 to<br>65.01)                      |
| Tetanus                                        | 937.78<br>(657.09 to<br>1,460.38)                           | 229.85<br>(120.31 to<br>433.20)                            | 167.67<br>(89.21 to<br>324.50)                             | 440.70<br>(230.83 to<br>787.82)                            | 13.95<br>(9.92 to<br>22.17)                         | 3.47<br>(1.96 to<br>6.60)                         | 2.78<br>(1.56 to<br>5.38)                         | 5.88<br>(3.20 to<br>10.51)                        |
| Measles                                        | 1,633.97<br>(615.63 to<br>3,420.80)                         | 151.31<br>(19.27 to<br>562.91)                             | 45.10<br>(7.54 to<br>179.38)                               | 418.81<br>(48.43 to<br>1,444.87)                           | 19.48<br>(7.34 to<br>40.83)                         | 1.81<br>(0.24 to<br>6.71)                         | 0.55<br>(0.10 to<br>2.16)                         | 4.98<br>(0.58 to<br>17.10)                        |
| <b>Eastern Sub-Saharan Africa</b>              |                                                             |                                                            |                                                            |                                                            |                                                     |                                                   |                                                   |                                                   |
| Cause                                          | YLLs (in 1000s)                                             |                                                            |                                                            |                                                            | Deaths (in 1000s)                                   |                                                   |                                                   |                                                   |
|                                                | 2016                                                        | 2040 Forecast                                              | 2040 Better Scenario                                       | 2040 Worse Scenario                                        | 2016                                                | 2040 Forecast                                     | 2040 Better Scenario                              | 2040 Worse Scenario                               |
| Varicella and herpes zoster                    | 106.69<br>(85.19 to<br>135.30)                              | 57.54<br>(43.68 to<br>74.93)                               | 38.73<br>(28.81 to<br>51.90)                               | 105.74<br>(79.61 to<br>141.99)                             | 1.65<br>(1.38 to<br>2.00)                           | 1.14<br>(0.93 to<br>1.38)                         | 0.88<br>(0.71 to<br>1.09)                         | 1.79<br>(1.44 to<br>2.23)                         |
| <b>Neglected tropical diseases and malaria</b> | <b>8,470.09</b><br><b>(6,383.45 to</b><br><b>10,813.93)</b> | <b>3,594.14</b><br><b>(2,707.50 to</b><br><b>4,693.83)</b> | <b>3,048.69</b><br><b>(2,303.02 to</b><br><b>3,929.32)</b> | <b>4,885.61</b><br><b>(3,646.23 to</b><br><b>6,446.23)</b> | <b>117.95</b><br><b>(92.78 to</b><br><b>146.80)</b> | <b>61.94</b><br><b>(47.56 to</b><br><b>79.31)</b> | <b>55.44</b><br><b>(42.99 to</b><br><b>70.78)</b> | <b>77.43</b><br><b>(58.80 to</b><br><b>98.79)</b> |
| Malaria                                        | 7,442.22<br>(5,309.15 to<br>9,821.00)                       | 2,904.99<br>(2,088.62 to<br>3,926.23)                      | 2,523.79<br>(1,868.63 to<br>3,378.75)                      | 3,794.58<br>(2,675.49 to<br>5,209.16)                      | 99.94<br>(74.92 to<br>128.46)                       | 49.61<br>(36.55 to<br>65.60)                      | 45.57<br>(34.13 to<br>60.17)                      | 59.36<br>(43.34 to<br>79.72)                      |
| Chagas disease                                 | 0.00<br>(0.00 to<br>0.00)                                   | 0.00<br>(0.00 to<br>0.00)                                  | 0.00<br>(0.00 to<br>0.00)                                  | 0.00<br>(0.00 to<br>0.00)                                  | 0.00<br>(0.00 to<br>0.00)                           | 0.00<br>(0.00 to<br>0.00)                         | 0.00<br>(0.00 to<br>0.00)                         | 0.00<br>(0.00 to<br>0.00)                         |
| Leishmaniasis                                  | 186.38<br>(104.02 to<br>318.87)                             | 110.30<br>(65.41 to<br>200.00)                             | 82.14<br>(46.71 to<br>147.26)                              | 196.24<br>(117.65 to<br>328.14)                            | 4.34<br>(2.42 to<br>7.35)                           | 2.05<br>(1.25 to<br>4.13)                         | 1.59<br>(0.90 to<br>3.29)                         | 3.36<br>(2.04 to<br>6.21)                         |
| African trypanosomiasis                        | 11.58<br>(5.29 to<br>37.64)                                 | 1.98<br>(0.60 to<br>5.62)                                  | 2.90<br>(0.62 to<br>5.48)                                  | 1.98<br>(0.60 to<br>5.71)                                  | 0.25<br>(0.10 to<br>0.66)                           | 0.04<br>(0.01 to<br>0.10)                         | 0.04<br>(0.01 to<br>0.10)                         | 0.04<br>(0.01 to<br>0.10)                         |
| Schistosomiasis                                | 140.08<br>(121.78 to<br>159.66)                             | 115.48<br>(90.79 to<br>148.38)                             | 102.45<br>(79.77 to<br>132.94)                             | 134.39<br>(106.40 to<br>172.04)                            | 3.79<br>(3.30 to<br>4.32)                           | 3.32<br>(2.73 to<br>4.14)                         | 3.04<br>(2.46 to<br>3.81)                         | 3.72<br>(3.08 to<br>4.63)                         |
| Cysticercosis                                  | 13.08<br>(10.20 to<br>16.57)                                | 6.98<br>(5.09 to<br>9.66)                                  | 6.50<br>(4.70 to<br>9.08)                                  | 7.52<br>(5.54 to<br>10.41)                                 | 0.26<br>(0.20 to<br>0.32)                           | 0.15<br>(0.11 to<br>0.21)                         | 0.14<br>(0.11 to<br>0.20)                         | 0.16<br>(0.12 to<br>0.22)                         |
| Cystic echinococcosis                          | 16.08<br>(11.63 to<br>21.51)                                | 6.32<br>(4.37 to<br>8.93)                                  | 4.50<br>(3.04 to<br>6.34)                                  | 12.27<br>(8.34 to<br>17.21)                                | 0.32<br>(0.23 to<br>0.42)                           | 0.15<br>(0.10 to<br>0.21)                         | 0.11<br>(0.08 to<br>0.16)                         | 0.28<br>(0.19 to<br>0.38)                         |
| Dengue                                         | 5.28<br>(0.39 to<br>18.33)                                  | 18.32<br>(1.54 to<br>62.21)                                | 16.30<br>(1.35 to<br>54.02)                                | 23.28<br>(1.87 to<br>82.83)                                | 0.48<br>(0.01 to<br>0.26)                           | 0.34<br>(0.03 to<br>1.12)                         | 0.32<br>(0.03 to<br>1.05)                         | 0.39<br>(0.03 to<br>1.33)                         |
| Yellow fever                                   | 96.53<br>(19.68 to<br>278.23)                               | 40.89<br>(7.26 to<br>129.78)                               | 32.42<br>(5.57 to<br>103.41)                               | 62.65<br>(11.37 to<br>196.32)                              | 1.50<br>(0.31 to<br>4.37)                           | 0.66<br>(0.12 to<br>2.07)                         | 0.53<br>(0.09 to<br>1.71)                         | 0.98<br>(0.18 to<br>3.12)                         |
| Rabies                                         | 157.28<br>(73.32 to<br>296.11)                              | 75.98<br>(34.91 to<br>147.09)                              | 39.88<br>(18.26 to<br>77.33)                               | 158.95<br>(76.30 to<br>298.07)                             | 2.40<br>(1.21 to<br>4.26)                           | 1.24<br>(0.60 to<br>2.30)                         | 0.67<br>(0.33 to<br>1.23)                         | 2.55<br>(1.32 to<br>4.59)                         |
| Intestinal nematode infections                 | 85.37<br>(65.82 to<br>110.66)                               | 107.05<br>(81.55 to<br>142.87)                             | 91.31<br>(69.71 to<br>118.50)                              | 137.23<br>(102.27 to<br>182.55)                            | 1.06<br>(0.82 to<br>1.36)                           | 1.38<br>(1.07 to<br>1.81)                         | 1.20<br>(0.93 to<br>1.53)                         | 1.73<br>(1.31 to<br>2.29)                         |
| Other neglected tropical diseases              | 313.23<br>(147.03 to<br>504.77)                             | 205.85<br>(99.72 to<br>319.34)                             | 147.38<br>(69.10 to<br>234.54)                             | 356.52<br>(172.67 to<br>563.52)                            | 4.03<br>(1.86 to<br>6.42)                           | 3.00<br>(1.46 to<br>4.68)                         | 2.24<br>(1.04 to<br>3.57)                         | 4.87<br>(2.32 to<br>7.71)                         |
| <b>Maternal disorders</b>                      | <b>2,467.54</b><br><b>(2,096.67 to</b><br><b>2,902.05)</b>  | <b>2,029.40</b><br><b>(1,532.12 to</b><br><b>2,772.84)</b> | <b>1,343.23</b><br><b>(1,000.32 to</b><br><b>1,868.12)</b> | <b>3,512.70</b><br><b>(2,653.61 to</b><br><b>4,794.89)</b> | <b>45.01</b><br><b>(38.24 to</b><br><b>52.93)</b>   | <b>38.08</b><br><b>(28.91 to</b><br><b>51.91)</b> | <b>25.27</b><br><b>(18.67 to</b><br><b>34.84)</b> | <b>65.68</b><br><b>(49.53 to</b><br><b>89.44)</b> |
| Maternal hemorrhage                            | 542.06<br>(394.04 to<br>722.55)                             | 400.62<br>(266.99 to<br>605.94)                            | 267.26<br>(177.35 to<br>396.97)                            | 655.21<br>(440.58 to<br>979.26)                            | 10.16<br>(7.44 to<br>13.45)                         | 7.66<br>(5.12 to<br>11.64)                        | 5.12<br>(3.43 to<br>7.58)                         | 12.51<br>(8.43 to<br>18.80)                       |

|                                                       |                                 |                                 |                                 |                                   |                             |                            |                           |                             |
|-------------------------------------------------------|---------------------------------|---------------------------------|---------------------------------|-----------------------------------|-----------------------------|----------------------------|---------------------------|-----------------------------|
| Maternal sepsis and other maternal infections         | 193.55<br>(122.50 to<br>289.16) | 130.92<br>(76.25 to<br>206.98)  | 83.51<br>(49.36 to<br>135.28)   | 212.93<br>(126.06 to<br>332.94)   | 3.50<br>(2.25 to<br>5.12)   | 2.42<br>(1.41 to<br>3.82)  | 1.55<br>(0.92 to<br>2.47) | 3.92<br>(2.31 to<br>6.26)   |
| Maternal hypertensive disorders                       | 326.94<br>(231.70 to<br>451.64) | 243.42<br>(161.49 to<br>357.05) | 161.59<br>(107.70 to<br>235.76) | 403.10<br>(268.16 to<br>587.52)   | 5.82<br>(4.17 to<br>7.95)   | 4.43<br>(2.98 to<br>6.52)  | 2.95<br>(1.99 to<br>4.31) | 7.32<br>(4.94 to<br>10.64)  |
| Maternal obstructed labor and uterine rupture         | 228.34<br>(148.97 to<br>330.02) | 154.04<br>(91.49 to<br>242.64)  | 106.41<br>(62.88 to<br>167.51)  | 279.77<br>(167.08 to<br>433.87)   | 4.23<br>(2.76 to<br>6.10)   | 2.92<br>(1.73 to<br>4.57)  | 2.02<br>(1.20 to<br>3.21) | 5.29<br>(3.12 to<br>8.23)   |
| Maternal abortion, miscarriage, and ectopic pregnancy | 286.90<br>(190.05 to<br>406.44) | 208.04<br>(112.79 to<br>371.35) | 149.93<br>(81.26 to<br>265.65)  | 375.61<br>(202.83 to<br>668.20)   | 5.11<br>(3.45 to<br>7.17)   | 3.80<br>(2.08 to<br>6.64)  | 2.74<br>(1.51 to<br>4.79) | 6.83<br>(3.73 to<br>12.02)  |
| Indirect maternal deaths                              | 564.69<br>(374.94 to<br>797.23) | 455.34<br>(280.27 to<br>689.03) | 301.75<br>(182.84 to<br>455.50) | 783.70<br>(479.37 to<br>1,186.77) | 10.22<br>(6.81 to<br>14.29) | 8.38<br>(5.17 to<br>12.80) | 5.57<br>(3.43 to<br>8.45) | 14.34<br>(8.82 to<br>21.54) |
| Late maternal deaths                                  | 43.83<br>(21.55 to<br>77.61)    | 27.50<br>(12.95 to<br>50.41)    | 18.02<br>(8.57 to<br>34.14)     | 46.66<br>(22.94 to<br>86.73)      | 0.80<br>(0.39 to<br>1.38)   | 0.51<br>(0.24 to<br>0.93)  | 0.34<br>(0.16 to<br>0.63) | 0.86<br>(0.40 to<br>1.58)   |
| Maternal deaths aggravated by HIV/AIDS                | 45.23<br>(28.39 to<br>62.78)    | 215.88<br>(119.73 to<br>346.75) | 126.83<br>(59.17 to<br>216.42)  | 442.94<br>(271.67 to<br>670.83)   | 0.87<br>(0.55 to<br>1.20)   | 4.34<br>(2.40 to<br>6.96)  | 2.56<br>(1.25 to<br>4.36) | 8.80<br>(5.45 to<br>13.30)  |
| Other maternal disorders                              | 235.99<br>(138.87 to<br>354.87) | 193.64<br>(108.17 to<br>325.86) | 127.93<br>(72.06 to<br>214.61)  | 312.77<br>(174.99 to<br>524.90)   | 4.31<br>(2.57 to<br>6.53)   | 3.62<br>(1.96 to<br>6.01)  | 2.40<br>(1.33 to<br>4.04) | 5.82<br>(3.19 to<br>9.74)   |

**Eastern Sub-Saharan Africa**

| Cause                                                                   | YLLs (in 1000s)                                 |                                                |                                               |                                                 | Deaths (in 1000s)                      |                                        |                                       |                                        |
|-------------------------------------------------------------------------|-------------------------------------------------|------------------------------------------------|-----------------------------------------------|-------------------------------------------------|----------------------------------------|----------------------------------------|---------------------------------------|----------------------------------------|
|                                                                         | 2016                                            | 2040 Forecast                                  | 2040 Better Scenario                          | 2040 Worse Scenario                             | 2016                                   | 2040 Forecast                          | 2040 Better Scenario                  | 2040 Worse Scenario                    |
| <b>Neonatal disorders</b>                                               | <b>21,651.79</b><br>(20,079.70 to<br>23,236.25) | <b>13,894.02</b><br>(9,940.65 to<br>18,757.37) | <b>9,058.44</b><br>(6,490.58 to<br>12,282.58) | <b>26,453.04</b><br>(19,022.55 to<br>35,406.11) | <b>250.16</b><br>(231.98 to<br>268.47) | <b>160.57</b><br>(114.92 to<br>216.77) | <b>104.69</b><br>(75.05 to<br>141.92) | <b>305.69</b><br>(219.94 to<br>409.11) |
| Neonatal preterm birth                                                  | 5,988.53<br>(5,060.69 to<br>6,946.87)           | 3,899.54<br>(2,855.41 to<br>4,927.43)          | 2,225.10<br>(1,636.41 to<br>2,821.15)         | 7,254.76<br>(5,390.53 to<br>9,171.86)           | 69.19<br>(58.46 to<br>80.26)           | 69.19<br>(33.02 to<br>56.93)           | 35.71<br>(18.91 to<br>32.60)          | 83.83<br>(62.28 to<br>105.97)          |
| Neonatal encephalopathy due to birth asphyxia and trauma                | 7,454.19<br>(6,416.91 to<br>8,580.77)           | 4,088.15<br>(2,490.68 to<br>6,325.20)          | 2,892.65<br>(1,738.18 to<br>4,559.34)         | 7,713.84<br>(4,673.04 to<br>11,770.20)          | 86.11<br>(74.13 to<br>99.12)           | 47.24<br>(28.79 to<br>73.08)           | 33.43<br>(20.09 to<br>52.67)          | 89.13<br>(54.01 to<br>135.97)          |
| Neonatal sepsis and other neonatal infections                           | 4,517.79<br>(2,979.87 to<br>6,534.40)           | 3,481.60<br>(2,314.50 to<br>5,317.75)          | 2,384.38<br>(1,570.28 to<br>3,691.95)         | 6,567.98<br>(4,270.34 to<br>10,155.61)          | 49.90<br>(34.43 to<br>75.50)           | 40.24<br>(26.75 to<br>61.46)           | 27.56<br>(18.15 to<br>42.67)          | 75.91<br>(49.35 to<br>117.35)          |
| Hemolytic disease and other neonatal jaundice                           | 519.30<br>(349.18 to<br>726.35)                 | 201.68<br>(115.69 to<br>329.36)                | 130.17<br>(73.56 to<br>212.21)                | 409.75<br>(234.79 to<br>681.41)                 | 6.00<br>(4.03 to<br>8.39)              | 2.33<br>(1.34 to<br>3.80)              | 1.50<br>(0.85 to<br>2.45)             | 4.73<br>(2.71 to<br>7.87)              |
| Other neonatal disorders                                                | 3,371.98<br>(2,205.02 to<br>4,360.61)           | 2,223.04<br>(1,215.53 to<br>3,483.28)          | 1,426.13<br>(766.05 to<br>2,205.51)           | 4,506.70<br>(2,446.28 to<br>7,013.36)           | 38.97<br>(25.48 to<br>50.39)           | 25.70<br>(14.05 to<br>40.25)           | 16.48<br>(8.85 to<br>25.49)           | 52.09<br>(28.28 to<br>81.05)           |
| <b>Nutritional deficiencies</b>                                         | <b>6,036.69</b><br>(5,133.77 to<br>7,004.88)    | <b>2,696.33</b><br>(2,221.40 to<br>3,241.45)   | <b>1,917.50</b><br>(1,581.65 to<br>2,314.34)  | <b>4,264.94</b><br>(3,492.33 to<br>5,158.70)    | <b>93.29</b><br>(82.90 to<br>105.59)   | <b>57.65</b><br>(49.83 to<br>66.69)    | <b>47.17</b><br>(40.98 to<br>54.72)   | <b>78.28</b><br>(67.00 to<br>90.89)    |
| Protein-energy malnutrition                                             | 5,732.04<br>(4,861.91 to<br>6,718.92)           | 2,270.63<br>(1,843.71 to<br>2,769.25)          | 1,567.53<br>(1,269.31 to<br>1,917.26)         | 3,704.88<br>(2,988.40 to<br>4,514.04)           | 85.01<br>(74.34 to<br>96.89)           | 44.87<br>(37.83 to<br>52.46)           | 35.69<br>(29.93 to<br>41.65)          | 63.19<br>(52.89 to<br>74.69)           |
| Iodine deficiency                                                       | 24.43<br>(11.10 to<br>51.49)                    | 73.37<br>(27.63 to<br>167.27)                  | 51.85<br>(20.21 to<br>104.86)                 | 118.60<br>(39.67 to<br>288.15)                  | 0.50<br>(0.25 to<br>0.91)              | 1.83<br>(0.93 to<br>3.21)              | 1.47<br>(0.74 to<br>2.52)             | 2.53<br>(1.19 to<br>4.80)              |
| Dietary iron deficiency                                                 | 13.89<br>(11.64 to<br>17.22)                    | 16.07<br>(11.79 to<br>22.61)                   | 14.13<br>(10.30 to<br>19.95)                  | 18.89<br>(14.04 to<br>26.21)                    | 0.25<br>(0.21 to<br>0.32)              | 0.30<br>(0.22 to<br>0.44)              | 0.27<br>(0.20 to<br>0.39)             | 0.35<br>(0.26 to<br>0.49)              |
| Other nutritional deficiencies                                          | 266.33<br>(191.47 to<br>328.44)                 | 336.26<br>(236.31 to<br>441.44)                | 283.99<br>(197.70 to<br>375.20)               | 422.58<br>(294.52 to<br>549.63)                 | 7.53<br>(5.60 to<br>9.80)              | 10.65<br>(7.88 to<br>13.83)            | 9.75<br>(7.11 to<br>12.78)            | 12.21<br>(9.02 to<br>15.70)            |
| <b>Other communicable, maternal, neonatal, and nutritional diseases</b> | <b>4,952.60</b><br>(3,417.56 to<br>6,985.30)    | <b>2,180.01</b><br>(1,565.54 to<br>3,020.00)   | <b>1,644.31</b><br>(1,181.92 to<br>2,249.72)  | <b>3,368.60</b><br>(2,337.18 to<br>4,732.79)    | <b>64.92</b><br>(46.91 to<br>88.69)    | <b>35.10</b><br>(27.15 to<br>45.20)    | <b>28.07</b><br>(22.02 to<br>35.87)   | <b>50.11</b><br>(37.60 to<br>66.95)    |

|                                               |                                          |                                          |                                          |                                          |                                   |                                       |                                       |                                       |
|-----------------------------------------------|------------------------------------------|------------------------------------------|------------------------------------------|------------------------------------------|-----------------------------------|---------------------------------------|---------------------------------------|---------------------------------------|
| Sexually transmitted infections excluding HIV | 3,443.75<br>(1,881.31 to<br>5,513.60)    | 907.69<br>(443.30 to<br>1,577.87)        | 718.36<br>(359.10 to<br>1,213.69)        | 1,517.72<br>(714.12 to<br>2,680.27)      | 41.04<br>(22.72 to<br>65.22)      | 11.35<br>(5.86 to<br>19.28)           | 9.10<br>(4.80 to<br>14.92)            | 18.55<br>(9.08 to<br>32.09)           |
| Syphilis                                      | 3,400.89<br>(1,837.91 to<br>5,470.28)    | 864.00<br>(404.21 to<br>1,538.67)        | 678.79<br>(319.39 to<br>1,174.60)        | 1,467.15<br>(664.53 to<br>2,632.07)      | 40.14<br>(21.84 to<br>64.30)      | 10.40<br>(4.96 to<br>18.34)           | 8.22<br>(4.01 to<br>14.04)            | 17.48<br>(8.03 to<br>31.05)           |
| Chlamydial infection                          | 8.25<br>(6.36 to<br>10.18)               | 8.55<br>(6.21 to<br>11.12)               | 7.70<br>(5.63 to<br>10.09)               | 9.96<br>(7.21 to<br>12.97)               | 0.17<br>(0.13 to<br>0.21)         | 0.18<br>(0.14 to<br>0.24)             | 0.17<br>(0.13 to<br>0.22)             | 0.21<br>(0.16 to<br>0.27)             |
| Gonococcal infection                          | 22.03<br>(17.44 to<br>26.67)             | 22.46<br>(16.52 to<br>29.38)             | 20.42<br>(15.05 to<br>27.03)             | 25.83<br>(19.13 to<br>34.03)             | 0.47<br>(0.38 to<br>0.57)         | 0.50<br>(0.38 to<br>0.64)             | 0.47<br>(0.36 to<br>0.60)             | 0.56<br>(0.43 to<br>0.72)             |
| Other sexually transmitted infections         | 12.58<br>(9.89 to<br>15.31)              | 12.68<br>(9.34 to<br>16.80)              | 11.45<br>(8.43 to<br>15.19)              | 14.78<br>(10.87 to<br>19.52)             | 0.26<br>(0.20 to<br>0.31)         | 0.27<br>(0.20 to<br>0.34)             | 0.24<br>(0.18 to<br>0.32)             | 0.30<br>(0.23 to<br>0.39)             |
| Acute hepatitis                               | 421.04<br>(382.49 to<br>461.10)          | 402.26<br>(324.46 to<br>517.36)          | 351.85<br>(279.69 to<br>451.28)          | 496.55<br>(403.32 to<br>631.60)          | 9.78<br>(8.86 to<br>10.71)        | 10.62<br>(8.86 to<br>13.09)           | 9.59<br>(7.93 to<br>11.89)            | 12.51<br>(10.49 to<br>15.31)          |
| Acute hepatitis A                             | 16.84<br>(10.27 to<br>25.61)             | 9.03<br>(5.92 to<br>12.86)               | 7.16<br>(4.79 to<br>10.24)               | 13.65<br>(8.79 to<br>20.07)              | 0.22<br>(0.14 to<br>0.33)         | 0.16<br>(0.11 to<br>0.23)             | 0.14<br>(0.09 to<br>0.19)             | 0.23<br>(0.15 to<br>0.31)             |
| Acute hepatitis B                             | 327.15<br>(292.94 to<br>366.99)          | 329.11<br>(260.27 to<br>428.53)          | 287.60<br>(225.23 to<br>376.29)          | 402.16<br>(323.24 to<br>518.60)          | 8.02<br>(7.20 to<br>8.94)         | 8.80<br>(7.18 to<br>10.99)            | 7.87<br>(6.32 to<br>9.84)             | 10.42<br>(8.63 to<br>12.80)           |
| Acute hepatitis C                             | 8.39<br>(6.43 to<br>10.74)               | 11.16<br>(7.89 to<br>15.66)              | 10.62<br>(7.46 to<br>14.96)              | 12.15<br>(8.63 to<br>16.90)              | 0.24<br>(0.18 to<br>0.32)         | 0.25<br>(0.25 to<br>0.49)             | 0.34<br>(0.24 to<br>0.48)             | 0.36<br>(0.26 to<br>0.51)             |
| Acute hepatitis E                             | 68.66<br>(55.63 to<br>84.45)             | 52.96<br>(38.86 to<br>71.47)             | 46.47<br>(34.11 to<br>63.45)             | 68.59<br>(50.90 to<br>91.44)             | 1.29<br>(1.02 to<br>1.63)         | 1.31<br>(0.96 to<br>1.75)             | 1.25<br>(0.91 to<br>1.68)             | 1.50<br>(1.13 to<br>2.00)             |
| Other unspecified infectious diseases         | 1,087.81<br>(555.57 to<br>1,853.73)      | 870.06<br>(558.19 to<br>1,296.23)        | 574.10<br>(370.93 to<br>861.98)          | 1,354.33<br>(858.40 to<br>2,055.58)      | 14.10<br>(7.60 to<br>23.03)       | 13.12<br>(9.22 to<br>18.34)           | 9.38<br>(6.69 to<br>13.05)            | 19.04<br>(13.07 to<br>27.19)          |
| Non-communicable diseases                     | 28,461.41<br>(26,243.40 to<br>30,466.38) | 47,794.99<br>(39,697.74 to<br>57,240.26) | 39,283.03<br>(32,761.28 to<br>46,542.21) | 62,384.46<br>(50,980.41 to<br>75,779.13) | 990.78<br>(919.04 to<br>1,058.05) | 1,827.29<br>(1,583.06 to<br>2,087.02) | 1,562.41<br>(1,370.31 to<br>1,773.19) | 2,265.10<br>(1,919.15 to<br>2,656.62) |

**Eastern Sub-Saharan Africa**

| Cause                      | YLLs (in 1000s)                              |                                                 |                                                 |                                                 | Deaths (in 1000s)                      |                                        |                                        |                                        |
|----------------------------|----------------------------------------------|-------------------------------------------------|-------------------------------------------------|-------------------------------------------------|----------------------------------------|----------------------------------------|----------------------------------------|----------------------------------------|
|                            | 2016                                         | 2040 Forecast                                   | 2040 Better Scenario                            | 2040 Worse Scenario                             | 2016                                   | 2040 Forecast                          | 2040 Better Scenario                   | 2040 Worse Scenario                    |
| <b>Neoplasms</b>           | <b>6,939.88</b><br>(5,968.49 to<br>7,656.18) | <b>14,344.96</b><br>(11,604.53 to<br>17,149.88) | <b>13,830.09</b><br>(11,254.04 to<br>16,660.65) | <b>15,098.87</b><br>(12,151.60 to<br>18,066.15) | <b>221.10</b><br>(191.40 to<br>243.32) | <b>484.89</b><br>(400.85 to<br>562.80) | <b>482.20</b><br>(399.94 to<br>560.29) | <b>487.45</b><br>(401.91 to<br>564.35) |
| Lip and oral cavity cancer | 92.66<br>(84.03 to<br>100.37)                | 193.12<br>(137.71 to<br>265.30)                 | 155.68<br>(115.30 to<br>206.20)                 | 260.82<br>(175.68 to<br>374.41)                 | 3.41<br>(3.12 to<br>3.67)              | 7.00<br>(5.12 to<br>9.26)              | 5.96<br>(4.58 to<br>7.62)              | 8.94<br>(6.29 to<br>12.50)             |
| Nasopharynx cancer         | 73.80<br>(59.28 to<br>92.97)                 | 175.83<br>(117.63 to<br>259.19)                 | 134.00<br>(91.62 to<br>190.77)                  | 255.14<br>(164.50 to<br>388.64)                 | 2.15<br>(1.75 to<br>2.68)              | 5.21<br>(3.54 to<br>7.68)              | 4.09<br>(2.85 to<br>5.75)              | 7.34<br>(4.78 to<br>11.07)             |
| Other pharynx cancer       | 56.60<br>(47.99 to<br>67.04)                 | 104.02<br>(70.42 to<br>147.86)                  | 91.46<br>(63.28 to<br>132.37)                   | 130.33<br>(84.99 to<br>188.78)                  | 1.88<br>(1.60 to<br>2.19)              | 3.50<br>(2.38 to<br>4.99)              | 3.14<br>(2.17 to<br>4.40)              | 4.27<br>(2.83 to<br>6.22)              |
| Esophageal cancer          | 316.50<br>(288.38 to<br>343.54)              | 691.49<br>(435.29 to<br>1,069.99)               | 556.64<br>(366.42 to<br>847.09)                 | 877.14<br>(535.17 to<br>1,368.23)               | 12.57<br>(11.57 to<br>13.62)           | 26.03<br>(17.01 to<br>39.03)           | 22.02<br>(15.04 to<br>32.60)           | 31.68<br>(19.99 to<br>47.70)           |
| Stomach cancer             | 300.07<br>(267.18 to<br>330.46)              | 451.73<br>(374.50 to<br>568.96)                 | 432.46<br>(353.65 to<br>547.62)                 | 487.04<br>(400.06 to<br>627.51)                 | 11.92<br>(10.61 to<br>13.08)           | 18.10<br>(15.33 to<br>22.30)           | 17.88<br>(15.06 to<br>22.17)           | 18.87<br>(15.88 to<br>23.83)           |
| Colon and rectum cancer    | 346.62<br>(309.28 to<br>381.96)              | 917.15<br>(674.41 to<br>1,252.98)               | 932.23<br>(685.04 to<br>1,254.57)               | 895.86<br>(654.46 to<br>1,231.51)               | 14.47<br>(12.97 to<br>15.82)           | 39.97<br>(29.58 to<br>53.86)           | 42.43<br>(32.04 to<br>56.56)           | 36.73<br>(26.61 to<br>49.53)           |
| Liver cancer               | 461.65<br>(398.06 to<br>522.40)              | 1,030.36<br>(772.67 to<br>1,383.66)             | 964.42<br>(737.68 to<br>1,259.47)               | 1,126.63<br>(822.69 to<br>1,571.21)             | 15.54<br>(13.45 to<br>17.39)           | 35.50<br>(27.60 to<br>46.11)           | 34.24<br>(27.13 to<br>43.25)           | 37.26<br>(28.40 to<br>49.78)           |

|                                      |                                |                                  |                                  |                                  |                           |                           |                           |                           |
|--------------------------------------|--------------------------------|----------------------------------|----------------------------------|----------------------------------|---------------------------|---------------------------|---------------------------|---------------------------|
| Liver cancer due to hepatitis B      | 165.83<br>(132.17 to 205.41)   | 375.23<br>(262.17 to 524.10)     | 353.21<br>(250.50 to 482.25)     | 397.36<br>(269.16 to 568.08)     | 5.11<br>(4.05 to 6.31)    | 11.82<br>(8.45 to 16.13)  | 11.41<br>(8.36 to 15.16)  | 12.11<br>(8.48 to 17.12)  |
| Liver cancer due to hepatitis C      | 108.56<br>(81.13 to 136.87)    | 247.40<br>(169.52 to 350.25)     | 238.51<br>(164.80 to 332.16)     | 256.84<br>(172.22 to 374.64)     | 4.30<br>(3.21 to 5.36)    | 9.94<br>(7.16 to 13.69)   | 9.91<br>(7.19 to 13.32)   | 9.87<br>(6.96 to 13.90)   |
| Liver cancer due to alcohol use      | 63.28<br>(49.85 to 76.97)      | 141.28<br>(100.05 to 195.11)     | 124.38<br>(89.90 to 167.23)      | 184.09<br>(126.67 to 265.52)     | 2.35<br>(1.88 to 2.84)    | 5.17<br>(3.81 to 6.99)    | 4.71<br>(3.52 to 6.27)    | 6.40<br>(4.64 to 8.95)    |
| Liver cancer due to other causes     | 123.98<br>(100.96 to 148.32)   | 266.45<br>(187.99 to 369.02)     | 248.32<br>(180.07 to 336.19)     | 288.33<br>(198.63 to 408.63)     | 3.78<br>(3.13 to 4.50)    | 8.58<br>(6.19 to 11.65)   | 8.21<br>(6.11 to 10.99)   | 8.88<br>(6.29 to 12.36)   |
| Gallbladder and biliary tract cancer | 42.23<br>(36.09 to 50.24)      | 65.71<br>(54.01 to 80.27)        | 69.06<br>(56.48 to 86.72)        | 61.09<br>(50.86 to 73.76)        | 1.72<br>(1.48 to 2.04)    | 2.71<br>(2.29 to 3.27)    | 2.93<br>(2.47 to 3.60)    | 2.43<br>(2.06 to 2.90)    |
| Pancreatic cancer                    | 151.01<br>(137.70 to 164.26)   | 410.97<br>(341.04 to 490.76)     | 425.09<br>(351.53 to 510.76)     | 382.01<br>(320.03 to 451.64)     | 6.08<br>(5.57 to 6.60)    | 16.47<br>(14.94 to 19.42) | 17.55<br>(14.94 to 20.55) | 14.78<br>(12.63 to 17.39) |
| Larynx cancer                        | 61.30<br>(52.95 to 71.16)      | 129.42<br>(87.39 to 194.81)      | 93.85<br>(67.27 to 131.28)       | 180.87<br>(113.39 to 283.55)     | 2.28<br>(1.98 to 2.61)    | 4.68<br>(3.27 to 6.87)    | 3.55<br>(2.65 to 4.86)    | 6.30<br>(4.08 to 9.59)    |
| Tracheal, bronchus, and lung cancer  | 220.44<br>(201.14 to 241.26)   | 553.29<br>(380.67 to 783.06)     | 341.20<br>(252.83 to 449.30)     | 661.47<br>(440.77 to 969.50)     | 9.12<br>(8.37 to 9.96)    | 22.44<br>(16.04 to 30.95) | 14.57<br>(11.09 to 18.80) | 25.73<br>(17.71 to 36.22) |
| Malignant skin melanoma              | 59.53<br>(48.80 to 69.81)      | 140.36<br>(112.26 to 170.54)     | 154.46<br>(124.08 to 189.77)     | 120.98<br>(96.69 to 145.32)      | 2.26<br>(1.86 to 2.64)    | 5.44<br>(4.50 to 6.41)    | 6.16<br>(5.15 to 7.34)    | 4.52<br>(3.72 to 5.26)    |
| Non-melanoma skin cancer             | 35.81<br>(30.41 to 40.63)      | 82.31<br>(67.79 to 96.73)        | 81.26<br>(66.65 to 96.69)        | 84.80<br>(69.66 to 99.23)        | 1.51<br>(1.24 to 1.77)    | 3.59<br>(2.97 to 4.21)    | 3.72<br>(3.07 to 4.39)    | 3.50<br>(2.88 to 4.09)    |
| Breast cancer                        | 435.65<br>(358.03 to 526.53)   | 1,006.82<br>(756.99 to 1,306.66) | 984.56<br>(742.34 to 1,270.70)   | 1,065.42<br>(791.63 to 1,407.62) | 13.90<br>(11.46 to 16.61) | 33.20<br>(25.85 to 42.30) | 33.23<br>(26.14 to 41.86) | 34.05<br>(25.98 to 43.93) |
| Cervical cancer                      | 860.97<br>(539.78 to 1,195.49) | 1,379.72<br>(852.16 to 1,906.41) | 1,297.59<br>(818.20 to 1,797.01) | 1,522.88<br>(936.97 to 2,152.18) | 28.12<br>(17.59 to 38.71) | 44.76<br>(28.09 to 61.02) | 42.88<br>(27.11 to 58.78) | 48.25<br>(29.70 to 67.55) |
| Uterine cancer                       | 90.39<br>(74.59 to 106.20)     | 174.13<br>(139.37 to 212.44)     | 162.98<br>(128.26 to 200.92)     | 194.84<br>(155.21 to 235.88)     | 3.34<br>(2.76 to 3.91)    | 6.53<br>(5.35 to 7.73)    | 6.26<br>(5.08 to 7.49)    | 7.09<br>(5.78 to 8.34)    |
| Ovarian cancer                       | 178.46<br>(132.83 to 212.94)   | 429.61<br>(306.09 to 565.68)     | 454.80<br>(325.25 to 587.91)     | 386.82<br>(272.88 to 507.21)     | 6.01<br>(4.48 to 7.12)    | 14.90<br>(10.85 to 19.10) | 16.09<br>(11.73 to 20.41) | 13.03<br>(9.35 to 16.84)  |
| Prostate cancer                      | 394.06<br>(180.13 to 508.64)   | 1,097.70<br>(531.71 to 1,413.18) | 1,192.48<br>(592.60 to 1,538.49) | 971.19<br>(455.83 to 1,238.88)   | 21.16<br>(9.76 to 27.15)  | 59.18<br>(28.87 to 74.09) | 66.20<br>(33.11 to 83.06) | 50.46<br>(23.58 to 63.31) |
| Testicular cancer                    | 14.02<br>(12.01 to 16.50)      | 24.19<br>(18.62 to 31.23)        | 23.23<br>(17.88 to 30.24)        | 25.73<br>(19.82 to 32.95)        | 0.32<br>(0.27 to 0.37)    | 0.57<br>(0.46 to 0.72)    | 0.56<br>(0.45 to 0.71)    | 0.59<br>(0.47 to 0.74)    |
| <b>Eastern Sub-Saharan Africa</b>    |                                |                                  |                                  |                                  |                           |                           |                           |                           |
| Cause                                | YLLs (in 1000s)                |                                  |                                  |                                  | Deaths (in 1000s)         |                           |                           |                           |
|                                      | 2016                           | 2040 Forecast                    | 2040 Better Scenario             | 2040 Worse Scenario              | 2016                      | 2040 Forecast             | 2040 Better Scenario      | 2040 Worse Scenario       |
| Kidney cancer                        | 72.12<br>(55.87 to 88.62)      | 133.95<br>(107.92 to 159.96)     | 138.45<br>(113.05 to 164.44)     | 133.46<br>(104.65 to 162.55)     | 1.62<br>(1.38 to 1.86)    | 3.84<br>(3.32 to 4.38)    | 4.17<br>(3.62 to 4.81)    | 3.46<br>(2.96 to 3.95)    |
| Bladder cancer                       | 92.99<br>(78.59 to 103.41)     | 189.85<br>(148.66 to 236.04)     | 186.28<br>(147.11 to 231.15)     | 190.85<br>(149.18 to 238.97)     | 4.11<br>(3.53 to 4.53)    | 8.40<br>(6.73 to 10.19)   | 8.59<br>(6.99 to 10.39)   | 8.05<br>(6.45 to 9.86)    |
| Brain and nervous system cancer      | 216.27<br>(191.18 to 252.08)   | 446.24<br>(368.95 to 552.79)     | 454.13<br>(373.06 to 573.21)     | 454.24<br>(381.44 to 549.12)     | 4.87<br>(4.30 to 5.91)    | 11.61<br>(9.77 to 14.45)  | 12.21<br>(10.21 to 15.52) | 11.02<br>(9.38 to 13.44)  |
| Thyroid cancer                       | 77.08<br>(46.96 to 92.79)      | 137.30<br>(85.92 to 182.71)      | 127.67<br>(80.49 to 167.53)      | 153.93<br>(95.15 to 206.59)      | 2.48<br>(1.50 to 2.96)    | 4.53<br>(2.86 to 5.86)    | 4.31<br>(2.73 to 5.50)    | 4.93<br>(3.06 to 6.45)    |



|                                |                                                 |                                                   |                                                 |                                                   |                                          |                                          |                                          |                                              |
|--------------------------------|-------------------------------------------------|---------------------------------------------------|-------------------------------------------------|---------------------------------------------------|------------------------------------------|------------------------------------------|------------------------------------------|----------------------------------------------|
| Mesothelioma                   | 11.12<br>(8.49 to<br>13.72)                     | 25.03<br>(17.89 to<br>32.28)                      | 25.26<br>(17.87 to<br>33.04)                    | 24.90<br>(18.05 to<br>31.94)                      | 0.38<br>(0.28 to<br>0.48)                | 0.86<br>(0.61 to<br>1.12)                | 0.89<br>(0.62 to<br>1.17)                | 0.83<br>(0.59 to<br>1.06)                    |
| Hodgkin lymphoma               | 101.90<br>(53.00 to<br>132.95)                  | 112.18<br>(54.96 to<br>154.49)                    | 96.98<br>(47.44 to<br>135.02)                   | 143.94<br>(70.51 to<br>200.80)                    | 2.15<br>(1.12 to<br>2.75)                | 2.61<br>(1.30 to<br>3.46)                | 2.32<br>(1.17 to<br>3.13)                | 3.21<br>(1.60 to<br>4.29)                    |
| Non-Hodgkin lymphoma           | 717.84<br>(518.01 to<br>856.19)                 | 1,211.49<br>(853.39 to<br>1,550.56)               | 1,211.01<br>(858.51 to<br>1,547.44)             | 1,269.85<br>(888.50 to<br>1,631.29)               | 14.06<br>(10.31 to<br>16.53)             | 27.75<br>(20.02 to<br>34.25)             | 28.72<br>(20.91 to<br>35.31)             | 27.14<br>(19.43 to<br>33.59)                 |
| Multiple myeloma               | 84.06<br>(60.45 to<br>97.26)                    | 223.70<br>(153.97 to<br>283.82)                   | 235.76<br>(163.32 to<br>297.24)                 | 204.37<br>(138.08 to<br>260.65)                   | 2.96<br>(2.15 to<br>3.42)                | 7.96<br>(5.57 to<br>9.86)                | 8.53<br>(6.02 to<br>10.49)               | 7.12<br>(4.94 to<br>8.90)                    |
| Leukemia                       | 256.01<br>(216.25 to<br>292.42)                 | 428.63<br>(336.23 to<br>529.88)                   | 417.53<br>(328.96 to<br>519.17)                 | 454.00<br>(356.11 to<br>561.99)                   | 5.69<br>(4.94 to<br>6.48)                | 11.14<br>(9.16 to<br>13.36)              | 11.21<br>(9.24 to<br>13.57)              | 11.17<br>(9.10 to<br>13.42)                  |
| Acute lymphoid leukemia        | 84.61<br>(65.07 to<br>98.61)                    | 132.01<br>(98.19 to<br>165.77)                    | 129.61<br>(97.20 to<br>163.18)                  | 140.13<br>(102.86 to<br>176.84)                   | 1.54<br>(1.24 to<br>1.80)                | 2.85<br>(2.22 to<br>3.50)                | 2.87<br>(2.27 to<br>3.54)                | 2.87<br>(2.19 to<br>3.51)                    |
| Chronic lymphoid leukemia      | 8.86<br>(7.22 to<br>10.51)                      | 17.92<br>(14.03 to<br>21.94)                      | 18.15<br>(14.31 to<br>22.30)                    | 17.46<br>(13.60 to<br>21.29)                      | 0.38<br>(0.31 to<br>0.45)                | 0.78<br>(0.63 to<br>0.94)                | 0.81<br>(0.65 to<br>0.97)                | 0.73<br>(0.58 to<br>0.89)                    |
| Acute myeloid leukemia         | 55.96<br>(47.35 to<br>67.40)                    | 126.96<br>(100.09 to<br>161.33)                   | 129.90<br>(102.25 to<br>165.42)                 | 124.32<br>(98.08 to<br>158.11)                    | 1.21<br>(1.04 to<br>1.46)                | 3.21<br>(2.63 to<br>4.06)                | 3.40<br>(2.79 to<br>4.34)                | 2.97<br>(2.41 to<br>3.78)                    |
| Chronic myeloid leukemia       | 28.19<br>(22.74 to<br>35.42)                    | 38.30<br>(27.81 to<br>52.03)                      | 36.97<br>(26.87 to<br>49.87)                    | 39.44<br>(28.54 to<br>53.87)                      | 0.70<br>(0.57 to<br>0.88)                | 0.99<br>(0.75 to<br>1.33)                | 0.98<br>(0.73 to<br>1.29)                | 1.00<br>(0.75 to<br>1.34)                    |
| Other leukemia                 | 78.39<br>(63.34 to<br>94.09)                    | 113.44<br>(86.62 to<br>143.27)                    | 102.91<br>(78.94 to<br>129.38)                  | 132.66<br>(100.22 to<br>168.81)                   | 1.86<br>(1.54 to<br>2.20)                | 3.31<br>(2.68 to<br>3.98)                | 3.16<br>(2.57 to<br>3.83)                | 3.59<br>(2.87 to<br>4.35)                    |
| Other neoplasms                | 1,118.71<br>(954.71 to<br>1,257.30)             | 2,378.66<br>(1,879.03 to<br>2,982.02)             | 2,389.58<br>(1,870.20 to<br>3,012.60)           | 2,378.25<br>(1,888.59 to<br>2,973.82)             | 25.02<br>(21.53 to<br>27.95)             | 56.41<br>(45.89 to<br>68.92)             | 57.80<br>(46.92 to<br>71.07)             | 54.73<br>(44.53 to<br>65.51)                 |
| <b>Cardiovascular diseases</b> | <b>9,285.56<br/>(8,562.70 to<br/>10,071.34)</b> | <b>14,941.65<br/>(10,957.26 to<br/>19,963.77)</b> | <b>9,515.48<br/>(7,266.71 to<br/>12,487.24)</b> | <b>24,132.20<br/>(17,039.11 to<br/>34,497.05)</b> | <b>410.30<br/>(379.12 to<br/>443.96)</b> | <b>683.76<br/>(536.03 to<br/>870.28)</b> | <b>477.96<br/>(385.10 to<br/>596.05)</b> | <b>1,023.16<br/>(758.92 to<br/>1,371.49)</b> |
| Rheumatic heart disease        | 186.52<br>(157.48 to<br>219.90)                 | 150.04<br>(116.51 to<br>200.59)                   | 123.70<br>(94.97 to<br>167.08)                  | 194.40<br>(149.65 to<br>261.62)                   | 5.86<br>(4.92 to<br>6.92)                | 5.11<br>(4.04 to<br>6.68)                | 4.41<br>(3.44 to<br>5.85)                | 6.33<br>(4.97 to<br>8.34)                    |
| Ischemic heart disease         | 3,418.95<br>(3,120.32 to<br>3,819.12)           | 5,481.91<br>(3,276.40 to<br>8,807.62)             | 2,923.22<br>(1,784.94 to<br>4,809.29)           | 9,792.73<br>(5,814.41 to<br>15,637.34)            | 162.61<br>(148.99 to<br>181.87)          | 260.80<br>(167.48 to<br>403.12)          | 157.25<br>(102.07 to<br>243.03)          | 427.46<br>(269.47 to<br>667.29)              |
| Stroke                         | 3,042.79<br>(2,755.31 to<br>3,384.92)           | 4,337.39<br>(2,763.75 to<br>6,794.77)             | 2,200.14<br>(1,431.68 to<br>3,450.74)           | 8,002.66<br>(4,908.62 to<br>12,931.88)            | 133.53<br>(121.23 to<br>147.97)          | 193.29<br>(133.37 to<br>286.34)          | 110.71<br>(79.01 to<br>163.81)           | 330.47<br>(218.07 to<br>503.77)              |
| Ischemic stroke                | 803.15<br>(695.72 to<br>912.02)                 | 1,090.61<br>(686.93 to<br>1,774.64)               | 652.41<br>(415.66 to<br>1,097.72)               | 1,697.34<br>(1,029.80 to<br>2,758.84)             | 46.00<br>(39.97 to<br>51.92)             | 65.03<br>(42.61 to<br>111.41)            | 43.41<br>(29.14 to<br>72.99)             | 93.62<br>(58.87 to<br>156.98)                |
| Intracerebral hemorrhage       | 2,239.64<br>(2,023.54 to<br>2,520.53)           | 3,246.78<br>(1,909.69 to<br>5,561.42)             | 1,547.73<br>(939.03 to<br>2,583.59)             | 6,305.33<br>(3,594.38 to<br>10,976.25)            | 87.52<br>(78.64 to<br>99.40)             | 128.26<br>(81.32 to<br>203.36)           | 67.30<br>(43.96 to<br>105.26)            | 256.85<br>(142.76 to<br>389.02)              |
| Hypertensive heart disease     | 664.46<br>(449.91 to<br>856.29)                 | 1,209.54<br>(697.38 to<br>1,947.73)               | 924.33<br>(554.46 to<br>1,431.65)               | 1,716.23<br>(920.01 to<br>3,175.68)               | 32.27<br>(21.59 to<br>41.45)             | 62.21<br>(36.97 to<br>103.62)            | 50.64<br>(31.14 to<br>78.30)             | 82.33<br>(44.95 to<br>159.20)                |
| Cardiomyopathy and myocarditis | 285.39<br>(211.00 to<br>376.80)                 | 519.09<br>(327.46 to<br>776.51)                   | 506.78<br>(322.62 to<br>761.85)                 | 546.37<br>(347.33 to<br>812.56)                   | 7.62<br>(5.64 to<br>9.93)                | 15.82<br>(10.37 to<br>22.76)             | 16.14<br>(10.61 to<br>23.33)             | 15.68<br>(10.15 to<br>22.68)                 |
| Myocarditis                    | 41.63<br>(23.68 to<br>70.95)                    | 58.99<br>(26.41 to<br>111.70)                     | 54.89<br>(23.83 to<br>106.78)                   | 66.07<br>(30.74 to<br>120.69)                     | 0.86<br>(0.43 to<br>1.56)                | 1.44<br>(0.59 to<br>2.97)                | 1.41<br>(0.56 to<br>2.95)                | 1.52<br>(0.64 to<br>3.02)                    |

**Eastern Sub-Saharan Africa**

| Cause | YLLs (in 1000s) |               |                      |                     | Deaths (in 1000s) |               |                      |                     |
|-------|-----------------|---------------|----------------------|---------------------|-------------------|---------------|----------------------|---------------------|
|       | 2016            | 2040 Forecast | 2040 Better Scenario | 2040 Worse Scenario | 2016              | 2040 Forecast | 2040 Better Scenario | 2040 Worse Scenario |

|                                                                |                                                            |                                                            |                                                            |                                                            |                                                   |                                                    |                                                    |                                                     |
|----------------------------------------------------------------|------------------------------------------------------------|------------------------------------------------------------|------------------------------------------------------------|------------------------------------------------------------|---------------------------------------------------|----------------------------------------------------|----------------------------------------------------|-----------------------------------------------------|
| Alcoholic cardiomyopathy                                       | 18.67<br>(11.10 to<br>30.54)                               | 39.37<br>(22.53 to<br>69.06)                               | 39.17<br>(22.34 to<br>68.30)                               | 43.35<br>(24.56 to<br>75.86)                               | 0.57<br>(0.34 to<br>0.93)                         | 1.21<br>(0.70 to<br>2.08)                          | 1.23<br>(0.71 to<br>2.12)                          | 1.30<br>(0.75 to<br>2.22)                           |
| Other cardiomyopathy                                           | 225.08<br>(164.82 to<br>300.20)                            | 420.74<br>(256.39 to<br>653.16)                            | 412.72<br>(253.20 to<br>648.31)                            | 436.95<br>(266.38 to<br>682.26)                            | 6.19<br>(4.60 to<br>8.38)                         | 13.17<br>(8.41 to<br>19.83)                        | 13.50<br>(8.53 to<br>20.27)                        | 12.86<br>(8.14 to<br>19.65)                         |
| Atrial fibrillation and flutter                                | 40.44<br>(31.63 to<br>50.54)                               | 92.77<br>(70.52 to<br>118.44)                              | 97.79<br>(74.91 to<br>126.26)                              | 89.27<br>(66.82 to<br>114.72)                              | 3.40<br>(2.62 to<br>4.30)                         | 8.28<br>(6.15 to<br>10.85)                         | 9.29<br>(7.00 to<br>12.23)                         | 7.35<br>(5.41 to<br>9.69)                           |
| Aortic aneurysm                                                | 81.51<br>(68.34 to<br>103.90)                              | 172.35<br>(128.39 to<br>237.11)                            | 166.83<br>(124.95 to<br>228.65)                            | 174.56<br>(128.73 to<br>243.32)                            | 3.43<br>(2.90 to<br>4.27)                         | 7.42<br>(5.77 to<br>9.54)                          | 7.63<br>(5.97 to<br>9.87)                          | 7.08<br>(5.43 to<br>9.29)                           |
| Peripheral artery disease                                      | 5.56<br>(2.20 to<br>8.47)                                  | 19.64<br>(7.70 to<br>31.49)                                | 20.34<br>(8.09 to<br>31.68)                                | 17.46<br>(6.71 to<br>28.51)                                | 0.36<br>(0.14 to<br>0.54)                         | 1.36<br>(0.52 to<br>2.08)                          | 1.53<br>(0.62 to<br>2.33)                          | 1.11<br>(0.43 to<br>1.73)                           |
| Endocarditis                                                   | 156.64<br>(117.59 to<br>193.81)                            | 315.64<br>(201.37 to<br>442.98)                            | 297.06<br>(189.97 to<br>411.45)                            | 345.57<br>(219.61 to<br>496.40)                            | 4.51<br>(3.28 to<br>5.64)                         | 9.99<br>(6.59 to<br>13.65)                         | 9.91<br>(6.55 to<br>13.49)                         | 10.21<br>(6.59 to<br>14.25)                         |
| Other cardiovascular and circulatory diseases                  | 1,403.32<br>(1,137.20 to<br>1,791.24)                      | 2,643.29<br>(1,976.34 to<br>3,567.36)                      | 2,255.29<br>(1,698.79 to<br>3,014.41)                      | 3,252.95<br>(2,416.06 to<br>4,459.27)                      | 56.72<br>(44.26 to<br>71.94)                      | 119.49<br>(91.39 to<br>156.52)                     | 110.45<br>(85.24 to<br>144.42)                     | 135.16<br>(100.20 to<br>181.59)                     |
| <b>Chronic respiratory diseases</b>                            | <b>1,587.53</b><br><b>(1,389.99 to</b><br><b>1,763.37)</b> | <b>1,825.67</b><br><b>(1,331.79 to</b><br><b>2,710.67)</b> | <b>1,208.41</b><br><b>(948.54 to</b><br><b>1,605.60)</b>   | <b>2,510.09</b><br><b>(1,784.66 to</b><br><b>3,771.60)</b> | <b>60.73</b><br><b>(54.81 to</b><br><b>67.27)</b> | <b>78.03</b><br><b>(57.64 to</b><br><b>119.83)</b> | <b>53.47</b><br><b>(42.85 to</b><br><b>71.87)</b>  | <b>101.26</b><br><b>(72.45 to</b><br><b>155.34)</b> |
| Chronic obstructive pulmonary disease                          | 830.17<br>(693.81 to<br>957.89)                            | 1,216.73<br>(795.47 to<br>1,976.08)                        | 698.09<br>(491.29 to<br>1,013.54)                          | 1,750.93<br>(1,122.22 to<br>2,900.15)                      | 39.76<br>(33.29 to<br>45.06)                      | 58.32<br>(39.61 to<br>95.24)                       | 36.01<br>(26.13 to<br>51.18)                       | 78.24<br>(51.36 to<br>128.57)                       |
| Pneumoconiosis                                                 | 5.15<br>(3.63 to<br>7.08)                                  | 7.26<br>(5.32 to<br>10.00)                                 | 6.84<br>(4.86 to<br>9.56)                                  | 7.60<br>(5.65 to<br>10.33)                                 | 0.23<br>(0.16 to<br>0.32)                         | 0.34<br>(0.25 to<br>0.48)                          | 0.34<br>(0.24 to<br>0.48)                          | 0.34<br>(0.25 to<br>0.47)                           |
| Silicosis                                                      | 1.11<br>(0.56 to<br>1.63)                                  | 1.03<br>(0.52 to<br>1.57)                                  | 1.01<br>(0.49 to<br>1.56)                                  | 1.06<br>(0.56 to<br>1.67)                                  | 0.05<br>(0.03 to<br>0.08)                         | 0.05<br>(0.03 to<br>0.08)                          | 0.06<br>(0.03 to<br>0.08)                          | 0.05<br>(0.03 to<br>0.08)                           |
| Asbestosis                                                     | 1.23<br>(0.71 to<br>1.93)                                  | 2.37<br>(1.33 to<br>3.71)                                  | 2.46<br>(1.37 to<br>3.80)                                  | 2.25<br>(1.28 to<br>3.57)                                  | 0.05<br>(0.02 to<br>0.08)                         | 0.10<br>(0.05 to<br>0.17)                          | 0.11<br>(0.05 to<br>0.18)                          | 0.09<br>(0.04 to<br>0.15)                           |
| Coal workers pneumoconiosis                                    | 0.42<br>(0.23 to<br>0.71)                                  | 0.52<br>(0.28 to<br>0.90)                                  | 0.39<br>(0.20 to<br>0.70)                                  | 0.67<br>(0.37 to<br>1.15)                                  | 0.02<br>(0.01 to<br>0.03)                         | 0.02<br>(0.01 to<br>0.04)                          | 0.02<br>(0.01 to<br>0.03)                          | 0.03<br>(0.02 to<br>0.05)                           |
| Other pneumoconiosis                                           | 2.39<br>(1.54 to<br>3.76)                                  | 3.35<br>(2.13 to<br>5.23)                                  | 2.98<br>(1.81 to<br>4.95)                                  | 3.62<br>(2.36 to<br>5.40)                                  | 0.11<br>(0.07 to<br>0.17)                         | 0.17<br>(0.10 to<br>0.26)                          | 0.15<br>(0.09 to<br>0.26)                          | 0.17<br>(0.11 to<br>0.26)                           |
| Asthma                                                         | 634.84<br>(530.90 to<br>865.14)                            | 451.66<br>(321.53 to<br>687.80)                            | 359.41<br>(263.11 to<br>525.14)                            | 591.50<br>(407.61 to<br>920.93)                            | 18.58<br>(15.18 to<br>27.29)                      | 14.89<br>(10.64 to<br>23.55)                       | 12.49<br>(9.28 to<br>19.21)                        | 18.34<br>(12.69 to<br>29.70)                        |
| Interstitial lung disease and pulmonary sarcoidosis            | 19.77<br>(8.96 to<br>32.50)                                | 49.05<br>(21.93 to<br>79.33)                               | 54.30<br>(24.72 to<br>86.21)                               | 42.85<br>(19.10 to<br>69.52)                               | 0.75<br>(0.32 to<br>1.21)                         | 1.99<br>(0.86 to<br>3.18)                          | 2.30<br>(1.00 to<br>3.59)                          | 1.65<br>(0.69 to<br>2.62)                           |
| Other chronic respiratory diseases                             | 67.60<br>(36.40 to<br>97.29)                               | 100.97<br>(59.40 to<br>142.48)                             | 89.77<br>(53.85 to<br>126.10)                              | 117.21<br>(66.28 to<br>168.10)                             | 1.41<br>(0.81 to<br>1.99)                         | 2.48<br>(1.52 to<br>3.45)                          | 2.33<br>(1.46 to<br>3.26)                          | 2.69<br>(1.59 to<br>3.80)                           |
| <b>Cirrhosis and other chronic liver diseases</b>              | <b>1,615.13</b><br><b>(1,319.32 to</b><br><b>1,926.92)</b> | <b>3,097.06</b><br><b>(2,292.14 to</b><br><b>3,945.94)</b> | <b>2,903.74</b><br><b>(2,137.36 to</b><br><b>3,711.58)</b> | <b>3,536.18</b><br><b>(2,629.23 to</b><br><b>4,470.09)</b> | <b>49.84</b><br><b>(40.90 to</b><br><b>59.00)</b> | <b>98.58</b><br><b>(76.32 to</b><br><b>121.30)</b> | <b>94.88</b><br><b>(73.04 to</b><br><b>117.05)</b> | <b>108.93</b><br><b>(84.57 to</b><br><b>133.17)</b> |
| Cirrhosis and other chronic liver diseases due to hepatitis B  | 502.84<br>(385.71 to<br>634.98)                            | 1,036.87<br>(737.21 to<br>1,361.06)                        | 1,005.40<br>(710.74 to<br>1,319.34)                        | 1,098.09<br>(786.83 to<br>1,421.71)                        | 16.24<br>(12.54 to<br>20.34)                      | 33.58<br>(25.30 to<br>42.86)                       | 33.33<br>(24.82 to<br>42.98)                       | 34.57<br>(26.21 to<br>44.05)                        |
| Cirrhosis and other chronic liver diseases due to hepatitis C  | 332.15<br>(226.35 to<br>455.41)                            | 676.88<br>(441.79 to<br>1,001.16)                          | 655.76<br>(428.85 to<br>960.40)                            | 723.36<br>(469.13 to<br>1,054.52)                          | 10.78<br>(7.42 to<br>14.83)                       | 22.10<br>(14.85 to<br>31.33)                       | 21.87<br>(14.48 to<br>31.01)                       | 22.99<br>(15.29 to<br>32.77)                        |
| Cirrhosis and other chronic liver diseases due to alcohol use  | 406.60<br>(313.06 to<br>507.20)                            | 784.06<br>(561.13 to<br>1,031.10)                          | 684.24<br>(485.85 to<br>904.41)                            | 1,035.24<br>(742.93 to<br>1,362.52)                        | 13.79<br>(10.74 to<br>16.97)                      | 26.83<br>(20.19 to<br>33.90)                       | 24.17<br>(18.14 to<br>30.74)                       | 34.11<br>(25.45 to<br>43.14)                        |
| Cirrhosis and other chronic liver diseases due to other causes | 373.54<br>(305.09 to<br>448.48)                            | 599.25<br>(451.95 to<br>777.56)                            | 558.35<br>(421.89 to<br>724.08)                            | 679.48<br>(514.36 to<br>871.79)                            | 9.03<br>(7.42 to<br>10.76)                        | 16.07<br>(12.56 to<br>20.15)                       | 15.52<br>(12.08 to<br>19.54)                       | 17.26<br>(13.52 to<br>21.48)                        |

|                                            |                                          |                                              |                                              |                                              |                                     |                                      |                                       |                                      |
|--------------------------------------------|------------------------------------------|----------------------------------------------|----------------------------------------------|----------------------------------------------|-------------------------------------|--------------------------------------|---------------------------------------|--------------------------------------|
| Digestive diseases                         | 2,364.66<br>(2,082.99 to<br>2,645.31)    | 3,214.44<br>(2,670.95 to<br>3,818.67)        | 2,948.89<br>(2,433.46 to<br>3,523.03)        | 3,744.00<br>(3,129.68 to<br>4,430.29)        | 76.68<br>(63.49 to<br>77.06)        | 110.08<br>(96.96 to<br>124.41)       | 106.35<br>(93.68 to<br>121.03)        | 119.49<br>(105.62 to<br>133.82)      |
| Peptic ulcer disease                       | 386.72<br>(314.96 to<br>489.29)          | 348.49<br>(269.65 to<br>457.93)              | 289.27<br>(215.69 to<br>385.13)              | 452.85<br>(350.10 to<br>593.97)              | 14.44<br>(11.48 to<br>18.37)        | 14.27<br>(11.06 to<br>18.65)         | 12.51<br>(9.52 to<br>16.56)           | 17.46<br>(13.61 to<br>22.76)         |
| <b>Eastern Sub-Saharan Africa</b>          |                                          |                                              |                                              |                                              |                                     |                                      |                                       |                                      |
| Cause                                      | YLLs (in 1000s)                          |                                              |                                              |                                              | Deaths (in 1000s)                   |                                      |                                       |                                      |
|                                            | 2016                                     | 2040 Forecast                                | 2040 Better Scenario                         | 2040 Worse Scenario                          | 2016                                | 2040 Forecast                        | 2040 Better Scenario                  | 2040 Worse Scenario                  |
| Gastritis and duodenitis                   | 108.41<br>(78.94 to<br>145.00)           | 189.24<br>(131.38 to<br>263.56)              | 179.01<br>(121.90 to<br>251.18)              | 208.52<br>(147.13 to<br>287.80)              | 3.75<br>(2.63 to<br>5.26)           | 7.24<br>(5.05 to<br>10.24)           | 7.20<br>(4.97 to<br>10.28)            | 7.50<br>(5.26 to<br>10.64)           |
| Appendicitis                               | 173.30<br>(130.12 to<br>209.33)          | 180.77<br>(134.09 to<br>228.34)              | 154.41<br>(114.56 to<br>197.61)              | 232.80<br>(170.52 to<br>290.76)              | 3.71<br>(2.84 to<br>4.44)           | 4.63<br>(3.54 to<br>5.67)            | 4.16<br>(3.16 to<br>5.17)             | 5.57<br>(4.23 to<br>6.80)            |
| Paralytic ileus and intestinal obstruction | 1,048.85<br>(891.34 to<br>1,242.12)      | 1,519.28<br>(1,255.11 to<br>1,871.99)        | 1,443.76<br>(1,181.03 to<br>1,799.29)        | 1,687.07<br>(1,389.41 to<br>2,047.84)        | 27.63<br>(24.12 to<br>32.91)        | 48.34<br>(41.28 to<br>58.71)         | 48.60<br>(40.95 to<br>59.61)          | 49.37<br>(42.45 to<br>59.88)         |
| Inguinal, femoral, and abdominal hernia    | 103.07<br>(43.31 to<br>139.26)           | 120.15<br>(50.65 to<br>172.09)               | 108.28<br>(45.59 to<br>156.03)               | 141.48<br>(58.11 to<br>205.20)               | 3.01<br>(1.35 to<br>3.99)           | 3.72<br>(1.72 to<br>5.06)            | 3.50<br>(1.62 to<br>4.77)             | 4.16<br>(1.84 to<br>5.69)            |
| Inflammatory bowel disease                 | 93.13<br>(48.61 to<br>124.17)            | 145.56<br>(76.21 to<br>189.59)               | 144.83<br>(76.85 to<br>189.26)               | 149.45<br>(76.98 to<br>194.30)               | 2.63<br>(1.47 to<br>3.21)           | 4.81<br>(2.72 to<br>5.95)            | 5.04<br>(2.90 to<br>6.32)             | 4.59<br>(2.57 to<br>5.66)            |
| Vascular intestinal disorders              | 36.44<br>(26.52 to<br>47.84)             | 70.01<br>(50.91 to<br>94.44)                 | 69.44<br>(51.02 to<br>95.06)                 | 72.09<br>(52.52 to<br>97.28)                 | 1.65<br>(1.22 to<br>2.17)           | 3.43<br>(2.58 to<br>4.55)            | 3.57<br>(2.67 to<br>4.74)             | 3.32<br>(2.44 to<br>4.43)            |
| Gallbladder and biliary diseases           | 109.44<br>(86.22 to<br>139.65)           | 156.83<br>(104.29 to<br>225.69)              | 128.79<br>(87.98 to<br>186.86)               | 202.98<br>(130.41 to<br>311.66)              | 4.46<br>(3.53 to<br>5.92)           | 6.95<br>(4.67 to<br>10.47)           | 6.04<br>(4.17 to<br>8.90)             | 8.39<br>(5.42 to<br>13.12)           |
| Pancreatitis                               | 83.20<br>(64.19 to<br>124.05)            | 173.93<br>(107.99 to<br>283.59)              | 148.29<br>(94.39 to<br>239.71)               | 227.73<br>(134.61 to<br>387.61)              | 2.44<br>(1.76 to<br>3.53)           | 2.44<br>(3.15 to<br>8.19)            | 5.01<br>(2.83 to<br>7.10)             | 4.41<br>(3.82 to<br>10.72)           |
| Other digestive diseases                   | 217.10<br>(174.53 to<br>285.97)          | 310.19<br>(238.79 to<br>427.72)              | 282.80<br>(214.48 to<br>393.66)              | 369.03<br>(286.90 to<br>507.97)              | 6.95<br>(5.44 to<br>9.87)           | 11.69<br>(9.10 to<br>16.25)          | 11.33<br>(8.72 to<br>16.23)           | 12.82<br>(9.95 to<br>17.83)          |
| <b>Neurological disorders</b>              | <b>930.76</b><br>(844.24 to<br>1,045.25) | <b>1,721.72</b><br>(1,465.49 to<br>2,043.04) | <b>1,677.81</b><br>(1,441.53 to<br>1,978.87) | <b>1,888.10</b><br>(1,579.26 to<br>2,271.62) | <b>41.88</b><br>(36.22 to<br>49.38) | <b>97.72</b><br>(79.80 to<br>120.81) | <b>106.85</b><br>(88.41 to<br>129.20) | <b>87.53</b><br>(70.10 to<br>110.02) |
| Alzheimer's disease and other dementias    | 334.45<br>(274.85 to<br>417.68)          | 781.79<br>(601.37 to<br>1,024.01)            | 840.19<br>(668.07 to<br>1,059.80)            | 688.57<br>(510.69 to<br>938.29)              | 29.56<br>(24.41 to<br>36.84)        | 74.41<br>(55.68 to<br>97.10)         | 83.92<br>(65.53 to<br>106.01)         | 61.30<br>(43.47 to<br>84.17)         |
| Parkinson's disease                        | 25.26<br>(19.13 to<br>32.60)             | 72.95<br>(55.56 to<br>93.69)                 | 87.74<br>(67.13 to<br>111.30)                | 55.94<br>(42.17 to<br>71.42)                 | 1.98<br>(1.49 to<br>2.59)           | 5.94<br>(4.47 to<br>7.74)            | 7.42<br>(5.66 to<br>9.59)             | 4.33<br>(3.15 to<br>5.73)            |
| Epilepsy                                   | 474.42<br>(429.02 to<br>526.91)          | 695.79<br>(541.62 to<br>894.86)              | 577.31<br>(450.92 to<br>745.65)              | 966.09<br>(747.31 to<br>1,252.51)            | 8.58<br>(7.78 to<br>9.46)           | 13.63<br>(10.90 to<br>17.09)         | 11.61<br>(9.40 to<br>14.59)           | 18.29<br>(14.38 to<br>23.39)         |
| Multiple sclerosis                         | 6.05<br>(4.01 to<br>9.01)                | 14.14<br>(8.93 to<br>21.68)                  | 14.53<br>(9.28 to<br>22.37)                  | 13.27<br>(8.39 to<br>20.19)                  | 0.16<br>(0.10 to<br>0.24)           | 0.39<br>(0.24 to<br>0.60)            | 0.41<br>(0.25 to<br>0.63)             | 0.36<br>(0.22 to<br>0.54)            |
| Motor neuron disease                       | 5.67<br>(4.63 to<br>8.64)                | 11.01<br>(8.10 to<br>18.65)                  | 11.50<br>(8.38 to<br>19.78)                  | 10.61<br>(7.88 to<br>17.76)                  | 0.13<br>(0.10 to<br>0.21)           | 0.33<br>(0.24 to<br>0.59)            | 0.35<br>(0.25 to<br>0.64)             | 0.30<br>(0.22 to<br>0.52)            |
| Other neurological disorders               | 84.90<br>(75.28 to<br>96.15)             | 146.04<br>(114.84 to<br>179.96)              | 146.54<br>(112.91 to<br>183.27)              | 153.62<br>(125.30 to<br>186.00)              | 1.47<br>(1.27 to<br>1.65)           | 3.02<br>(2.21 to<br>3.75)            | 3.15<br>(2.34 to<br>3.94)             | 2.95<br>(2.25 to<br>3.60)            |
| <b>Mental disorders</b>                    | <b>179.27</b><br>(151.78 to<br>232.06)   | <b>362.95</b><br>(290.26 to<br>480.25)       | <b>357.66</b><br>(284.18 to<br>477.88)       | <b>379.32</b><br>(307.24 to<br>496.35)       | <b>5.08</b><br>(4.32 to<br>6.43)    | <b>10.47</b><br>(8.73 to<br>13.51)   | <b>10.54</b><br>(8.73 to<br>13.71)    | <b>10.66</b><br>(8.97 to<br>13.52)   |
| Alcohol use disorders                      | 132.38<br>(109.13 to<br>179.22)          | 231.60<br>(182.90 to<br>338.55)              | 225.36<br>(176.77 to<br>332.97)              | 248.14<br>(197.84 to<br>359.39)              | 4.05<br>(3.41 to<br>5.39)           | 7.39<br>(6.13 to<br>10.30)           | 7.37<br>(6.04 to<br>10.32)            | 7.68<br>(6.41 to<br>10.66)           |

|                                                            |                                              |                                              |                                              |                                              |                                      |                                        |                                        |                                        |
|------------------------------------------------------------|----------------------------------------------|----------------------------------------------|----------------------------------------------|----------------------------------------------|--------------------------------------|----------------------------------------|----------------------------------------|----------------------------------------|
| Drug use disorders                                         | 46.18<br>(37.00 to<br>55.78)                 | 129.72<br>(100.47 to<br>166.70)              | 130.67<br>(100.23 to<br>168.52)              | 129.54<br>(100.37 to<br>165.09)              | 1.02<br>(0.82 to<br>1.22)            | 3.05<br>(2.40 to<br>3.76)              | 3.14<br>(2.48 to<br>3.89)              | 2.95<br>(2.33 to<br>3.65)              |
| Opioid use disorders                                       | 34.68<br>(26.21 to<br>41.48)                 | 91.49<br>(66.50 to<br>117.92)                | 91.95<br>(66.21 to<br>119.15)                | 91.22<br>(66.36 to<br>117.55)                | 0.74<br>(0.55 to<br>0.88)            | 2.05<br>(1.50 to<br>2.61)              | 2.09<br>(1.53 to<br>2.67)              | 2.00<br>(1.46 to<br>2.53)              |
| Cocaine use disorders                                      | 2.73<br>(0.62 to<br>5.44)                    | 8.52<br>(2.25 to<br>17.41)                   | 8.35<br>(2.21 to<br>17.20)                   | 9.23<br>(2.41 to<br>18.77)                   | 0.06<br>(0.01 to<br>0.12)            | 0.20<br>(0.05 to<br>0.39)              | 0.19<br>(0.05 to<br>0.38)              | 0.21<br>(0.06 to<br>0.41)              |
| Amphetamine use disorders                                  | 1.54<br>(0.41 to<br>3.49)                    | 6.34<br>(1.98 to<br>13.85)                   | 6.09<br>(1.88 to<br>13.42)                   | 7.34<br>(2.23 to<br>15.98)                   | 0.03<br>(0.01 to<br>0.07)            | 0.14<br>(0.04 to<br>0.30)              | 0.13<br>(0.02 to<br>0.29)              | 0.16<br>(0.05 to<br>0.34)              |
| Other drug use disorders                                   | 7.23<br>(5.52 to<br>9.92)                    | 23.37<br>(16.57 to<br>33.01)                 | 24.29<br>(17.13 to<br>34.60)                 | 21.76<br>(15.58 to<br>30.70)                 | 0.19<br>(0.15 to<br>0.25)            | 0.66<br>(0.52 to<br>0.89)              | 0.71<br>(0.55 to<br>0.97)              | 0.58<br>(0.46 to<br>0.78)              |
| Eating disorders                                           | 0.72<br>(0.47 to<br>1.41)                    | 1.62<br>(1.01 to<br>2.88)                    | 1.63<br>(1.02 to<br>2.94)                    | 1.63<br>(1.00 to<br>2.81)                    | 0.01<br>(0.01 to<br>0.03)            | 0.03<br>(0.02 to<br>0.05)              | 0.03<br>(0.02 to<br>0.05)              | 0.03<br>(0.02 to<br>0.05)              |
| <b>Eastern Sub-Saharan Africa</b>                          |                                              |                                              |                                              |                                              |                                      |                                        |                                        |                                        |
| Cause                                                      | YLLs (in 1000s)                              |                                              |                                              |                                              | Deaths (in 1000s)                    |                                        |                                        |                                        |
|                                                            | 2016                                         | 2040 Forecast                                | 2040 Better Scenario                         | 2040 Worse Scenario                          | 2016                                 | 2040 Forecast                          | 2040 Better Scenario                   | 2040 Worse Scenario                    |
| <b>Diabetes, urogenital, blood, and endocrine diseases</b> | <b>3,066.61</b><br>(2,812.70 to<br>3,387.74) | <b>5,407.59</b><br>(4,244.63 to<br>7,039.21) | <b>4,456.08</b><br>(3,485.32 to<br>5,799.88) | <b>7,144.89</b><br>(5,638.13 to<br>9,295.95) | <b>95.14</b><br>(88.25 to<br>102.69) | <b>206.66</b><br>(166.11 to<br>265.14) | <b>177.49</b><br>(141.77 to<br>227.59) | <b>258.34</b><br>(206.23 to<br>332.56) |
| Diabetes mellitus                                          | 1,159.40<br>(1,063.62 to<br>1,263.38)        | 2,747.46<br>(1,806.31 to<br>4,139.11)        | 2,213.65<br>(1,464.02 to<br>3,349.87)        | 3,711.58<br>(2,425.23 to<br>5,693.61)        | 48.83<br>(44.83 to<br>53.17)         | 120.52<br>(85.05 to<br>171.05)         | 102.69<br>(73.82 to<br>143.37)         | 153.67<br>(105.99 to<br>216.66)        |
| Acute glomerulonephritis                                   | 5.14<br>(4.22 to<br>6.58)                    | 7.65<br>(5.94 to<br>9.90)                    | 6.65<br>(5.14 to<br>8.74)                    | 9.95<br>(7.75 to<br>12.96)                   | 0.09<br>(0.07 to<br>0.11)            | 0.14<br>(0.11 to<br>0.16)              | 0.13<br>(0.10 to<br>0.16)              | 0.17<br>(0.14 to<br>0.21)              |
| Chronic kidney disease                                     | 610.21<br>(552.29 to<br>701.77)              | 1,181.09<br>(795.59 to<br>1,976.94)          | 927.06<br>(640.38 to<br>1,541.20)            | 1,601.75<br>(1,075.06 to<br>2,595.45)        | 19.69<br>(17.92 to<br>22.53)         | 46.82<br>(27.15 to<br>94.50)           | 37.65<br>(23.02 to<br>73.82)           | 60.18<br>(34.90 to<br>117.81)          |
| Chronic kidney disease due to diabetes mellitus            | 137.70<br>(116.53 to<br>164.02)              | 338.46<br>(205.37 to<br>615.54)              | 265.40<br>(168.66 to<br>478.19)              | 445.14<br>(264.63 to<br>812.28)              | 5.43<br>(4.60 to<br>6.48)            | 14.88<br>(7.99 to<br>31.49)            | 11.91<br>(6.71 to<br>24.73)            | 18.87<br>(10.02 to<br>39.57)           |
| Chronic kidney disease due to hypertension                 | 78.24<br>(64.98 to<br>92.86)                 | 186.31<br>(103.84 to<br>386.16)              | 147.33<br>(86.55 to<br>299.92)               | 242.59<br>(134.46 to<br>494.86)              | 4.03<br>(3.37 to<br>4.77)            | 10.79<br>(5.68 to<br>24.20)            | 8.88<br>(4.92 to<br>19.57)             | 13.33<br>(6.88 to<br>28.85)            |
| Chronic kidney disease due to glomerulonephritis           | 186.63<br>(160.54 to<br>220.54)              | 304.46<br>(216.52 to<br>453.23)              | 238.79<br>(170.25 to<br>352.42)              | 426.40<br>(306.16 to<br>624.30)              | 4.61<br>(3.92 to<br>5.49)            | 9.19<br>(5.77 to<br>16.78)             | 7.31<br>(4.72 to<br>13.23)             | 12.31<br>(7.74 to<br>22.18)            |
| Chronic kidney disease due to other and unspecified causes | 207.64<br>(178.11 to<br>247.80)              | 351.85<br>(241.95 to<br>552.27)              | 275.54<br>(191.56 to<br>420.33)              | 487.63<br>(335.84 to<br>742.54)              | 5.62<br>(4.82 to<br>6.71)            | 11.95<br>(7.30 to<br>22.43)            | 9.55<br>(6.05 to<br>17.42)             | 15.68<br>(9.65 to<br>28.68)            |
| Urinary diseases and male infertility                      | 304.94<br>(271.20 to<br>337.15)              | 506.83<br>(417.88 to<br>606.31)              | 475.58<br>(390.42 to<br>569.68)              | 572.77<br>(476.36 to<br>679.33)              | 8.76<br>(7.77 to<br>9.65)            | 16.01<br>(13.84 to<br>18.13)           | 15.79<br>(13.62 to<br>18.06)           | 16.91<br>(14.67 to<br>19.10)           |
| Urinary tract infections                                   | 130.87<br>(91.15 to<br>167.45)               | 278.19<br>(199.27 to<br>361.12)              | 270.88<br>(194.00 to<br>351.77)              | 294.70<br>(210.44 to<br>384.96)              | 3.74<br>(2.57 to<br>4.97)            | 9.09<br>(6.68 to<br>11.65)             | 9.32<br>(6.85 to<br>11.94)             | 8.97<br>(6.56 to<br>11.65)             |
| Urolithiasis                                               | 8.70<br>(5.06 to<br>12.68)                   | 17.54<br>(10.58 to<br>27.28)                 | 16.37<br>(9.82 to<br>25.95)                  | 19.91<br>(11.71 to<br>30.44)                 | 0.19<br>(0.11 to<br>0.32)            | 0.41<br>(0.24 to<br>0.74)              | 0.40<br>(0.23 to<br>0.73)              | 0.44<br>(0.26 to<br>0.77)              |
| Other urinary diseases                                     | 165.37<br>(123.25 to<br>212.61)              | 211.10<br>(139.02 to<br>301.40)              | 188.33<br>(121.07 to<br>271.04)              | 258.17<br>(173.64 to<br>364.29)              | 4.84<br>(3.57 to<br>6.17)            | 6.51<br>(4.22 to<br>9.17)              | 6.08<br>(3.89 to<br>8.70)              | 7.50<br>(5.02 to<br>10.39)             |
| Gynecological diseases                                     | 38.96<br>(32.03 to<br>47.58)                 | 56.34<br>(42.37 to<br>76.14)                 | 47.99<br>(35.82 to<br>65.16)                 | 71.09<br>(53.63 to<br>96.28)                 | 0.92<br>(0.76 to<br>1.12)            | 1.34<br>(1.03 to<br>1.78)              | 1.15<br>(0.87 to<br>1.55)              | 1.68<br>(1.29 to<br>2.24)              |
| Uterine fibroids                                           | 14.19<br>(7.05 to<br>23.66)                  | 17.99<br>(8.33 to<br>33.06)                  | 15.05<br>(6.82 to<br>28.27)                  | 23.35<br>(10.89 to<br>42.74)                 | 0.37<br>(0.19 to<br>0.60)            | 0.47<br>(0.22 to<br>0.83)              | 0.39<br>(0.18 to<br>0.72)              | 0.60<br>(0.29 to<br>1.08)              |

|                                                   |                                    |                                    |                                    |                                    |                           |                           |                           |                           |
|---------------------------------------------------|------------------------------------|------------------------------------|------------------------------------|------------------------------------|---------------------------|---------------------------|---------------------------|---------------------------|
| Polycystic ovarian syndrome                       | 3.80<br>(0.62 to 7.91)             | 3.51<br>(0.52 to 8.05)             | 2.64<br>(0.37 to 6.11)             | 5.12<br>(0.77 to 11.29)            | 0.09<br>(0.01 to 0.17)    | 0.08<br>(0.01 to 0.18)    | 0.06<br>(0.01 to 0.14)    | 0.12<br>(0.02 to 0.25)    |
| Endometriosis                                     | 0.15<br>(0.06 to 0.41)             | 0.32<br>(0.11 to 0.89)             | 0.27<br>(0.09 to 0.78)             | 0.41<br>(0.14 to 1.18)             | 0.00<br>(0.00 to 0.01)    | 0.00<br>(0.00 to 0.02)    | 0.01<br>(0.00 to 0.02)    | 0.01<br>(0.00 to 0.02)    |
| Genital prolapse                                  | 1.27<br>(0.41 to 3.01)             | 1.35<br>(0.43 to 3.43)             | 1.14<br>(0.34 to 3.02)             | 1.85<br>(0.55 to 4.83)             | 0.04<br>(0.02 to 0.10)    | 0.04<br>(0.01 to 0.10)    | 0.04<br>(0.01 to 0.09)    | 0.06<br>(0.02 to 0.14)    |
| Other gynecological diseases                      | 19.56<br>(9.40 to 28.47)           | 33.17<br>(16.90 to 49.00)          | 28.89<br>(14.90 to 43.08)          | 40.36<br>(19.48 to 60.37)          | 0.42<br>(0.20 to 0.63)    | 0.74<br>(0.37 to 1.09)    | 0.65<br>(0.33 to 0.97)    | 0.89<br>(0.42 to 1.33)    |
| Hemoglobinopathies and hemolytic anemias          | 791.15<br>(643.35 to 1,057.88)     | 700.70<br>(556.14 to 891.81)       | 595.12<br>(472.55 to 761.50)       | 925.07<br>(739.18 to 1,203.15)     | 13.04<br>(10.88 to 16.30) | 15.45<br>(12.44 to 18.85) | 13.79<br>(11.03 to 16.92) | 18.85<br>(15.42 to 22.84) |
| Thalassemias                                      | 59.63<br>(35.38 to 117.52)         | 24.73<br>(13.15 to 52.05)          | 24.95<br>(13.20 to 51.83)          | 36.16<br>(18.48 to 80.50)          | 0.70<br>(0.42 to 1.38)    | 0.29<br>(0.16 to 0.61)    | 0.29<br>(0.16 to 0.61)    | 0.43<br>(0.22 to 0.94)    |
| Sickle cell disorders                             | 547.56<br>(443.41 to 735.08)       | 420.82<br>(329.66 to 558.02)       | 343.45<br>(266.41 to 454.62)       | 565.03<br>(437.81 to 762.12)       | 7.06<br>(5.79 to 9.29)    | 6.21<br>(4.85 to 8.09)    | 5.18<br>(4.03 to 6.74)    | 8.04<br>(6.27 to 10.59)   |
| G6PD deficiency                                   | 130.21<br>(104.09 to 160.72)       | 202.70<br>(154.00 to 256.95)       | 177.00<br>(133.60 to 227.69)       | 264.11<br>(202.25 to 332.74)       | 2.73<br>(2.20 to 3.26)    | 5.67<br>(4.41 to 7.03)    | 5.05<br>(3.92 to 6.36)    | 6.96<br>(5.40 to 8.62)    |
| Other hemoglobinopathies and hemolytic anemias    | 53.75<br>(44.41 to 63.19)          | 52.44<br>(42.47 to 63.07)          | 49.71<br>(40.49 to 61.04)          | 59.76<br>(48.37 to 71.56)          | 2.55<br>(2.09 to 3.07)    | 3.27<br>(2.69 to 4.02)    | 3.27<br>(2.68 to 4.01)    | 3.43<br>(2.79 to 4.25)    |
| Endocrine, metabolic, blood, and immune disorders | 156.81<br>(127.85 to 205.81)       | 207.53<br>(168.99 to 268.12)       | 190.04<br>(153.77 to 246.42)       | 252.68<br>(203.33 to 330.85)       | 3.80<br>(3.22 to 4.73)    | 6.39<br>(5.42 to 7.84)    | 6.30<br>(5.33 to 7.77)    | 6.87<br>(5.79 to 8.49)    |
| <b>Eastern Sub-Saharan Africa</b>                 |                                    |                                    |                                    |                                    |                           |                           |                           |                           |
| Cause                                             | YLLs (in 1000s)                    |                                    |                                    |                                    | Deaths (in 1000s)         |                           |                           |                           |
|                                                   | 2016                               | 2040 Forecast                      | 2040 Better Scenario               | 2040 Worse Scenario                | 2016                      | 2040 Forecast             | 2040 Better Scenario      | 2040 Worse Scenario       |
| Musculoskeletal disorders                         | 80.78<br>(60.73 to 97.55)          | 182.72<br>(130.83 to 238.16)       | 187.20<br>(133.88 to 247.60)       | 180.02<br>(129.89 to 233.79)       | 2.06<br>(1.54 to 2.58)    | 5.18<br>(3.77 to 6.74)    | 5.41<br>(3.94 to 7.11)    | 4.97<br>(3.68 to 6.41)    |
| Rheumatoid arthritis                              | 17.26<br>(12.36 to 22.78)          | 36.07<br>(25.31 to 48.83)          | 33.08<br>(23.18 to 45.04)          | 41.59<br>(29.72 to 55.79)          | 0.67<br>(0.46 to 0.91)    | 1.60<br>(1.07 to 2.21)    | 1.53<br>(1.02 to 2.14)    | 1.74<br>(1.18 to 2.38)    |
| Other musculoskeletal disorders                   | 63.52<br>(47.09 to 77.99)          | 146.66<br>(102.39 to 195.12)       | 154.12<br>(108.05 to 205.24)       | 138.44<br>(96.27 to 183.45)        | 1.39<br>(1.03 to 1.79)    | 3.58<br>(2.55 to 4.81)    | 3.88<br>(2.79 to 5.25)    | 3.23<br>(2.31 to 4.33)    |
| Other non-communicable diseases                   | 2,441.22<br>(1,983.09 to 2,869.25) | 2,696.22<br>(2,198.49 to 3,340.76) | 2,197.65<br>(1,771.02 to 2,757.22) | 3,770.79<br>(3,011.21 to 4,589.97) | 33.97<br>(27.72 to 40.81) | 51.92<br>(40.75 to 70.32) | 47.25<br>(36.23 to 65.59) | 63.32<br>(50.24 to 81.43) |
| Congenital birth defects                          | 1,628.34<br>(1,313.24 to 2,042.70) | 1,435.00<br>(1,110.16 to 1,890.72) | 1,045.01<br>(801.67 to 1,397.72)   | 2,195.30<br>(1,689.33 to 2,889.15) | 19.29<br>(15.55 to 24.34) | 17.54<br>(13.60 to 23.35) | 12.94<br>(9.93 to 17.40)  | 26.49<br>(20.46 to 35.02) |
| Neural tube defects                               | 317.57<br>(177.63 to 655.37)       | 119.82<br>(57.77 to 285.46)        | 76.80<br>(36.90 to 192.43)         | 210.06<br>(102.95 to 495.58)       | 3.71<br>(2.08 to 7.67)    | 1.42<br>(0.69 to 3.42)    | 0.92<br>(0.44 to 2.33)    | 2.48<br>(1.21 to 5.88)    |
| Congenital heart anomalies                        | 496.82<br>(355.20 to 754.47)       | 477.50<br>(340.71 to 739.28)       | 358.04<br>(254.68 to 560.41)       | 707.66<br>(498.36 to 1,098.21)     | 5.97<br>(4.28 to 9.06)    | 6.00<br>(4.32 to 9.42)    | 4.57<br>(3.27 to 7.24)    | 8.74<br>(6.22 to 13.64)   |
| Orofacial clefts                                  | 17.95<br>(3.32 to 46.92)           | 13.02<br>(2.29 to 34.35)           | 7.87<br>(1.36 to 20.82)            | 23.33<br>(4.20 to 60.88)           | 0.21<br>(0.04 to 0.54)    | 0.15<br>(0.03 to 0.40)    | 0.09<br>(0.02 to 0.24)    | 0.27<br>(0.05 to 0.70)    |
| Down syndrome                                     | 26.81<br>(16.78 to 45.42)          | 29.94<br>(18.75 to 50.97)          | 22.37<br>(13.87 to 38.08)          | 44.71<br>(27.13 to 74.96)          | 0.34<br>(0.21 to 0.57)    | 0.42<br>(0.27 to 0.71)    | 0.32<br>(0.20 to 0.56)    | 0.60<br>(0.37 to 1.01)    |
| Other chromosomal abnormalities                   | 70.31<br>(23.93 to 128.13)         | 99.70<br>(34.27 to 185.05)         | 69.47<br>(23.00 to 131.18)         | 159.09<br>(54.42 to 295.75)        | 0.82<br>(0.28 to 1.50)    | 1.17<br>(0.40 to 2.18)    | 0.82<br>(0.27 to 1.55)    | 1.87<br>(0.64 to 3.48)    |

|                                               |                                                |                                                 |                                                 |                                                 |                                        |                                        |                                        |                                        |
|-----------------------------------------------|------------------------------------------------|-------------------------------------------------|-------------------------------------------------|-------------------------------------------------|----------------------------------------|----------------------------------------|----------------------------------------|----------------------------------------|
| Congenital musculoskeletal and limb anomalies | 19.26<br>(11.66 to<br>41.13)                   | 21.03<br>(12.54 to<br>43.64)                    | 15.87<br>(9.63 to<br>32.25)                     | 30.96<br>(18.47 to<br>63.66)                    | 0.23<br>(0.14 to<br>0.48)              | 0.25<br>(0.15 to<br>0.52)              | 0.19<br>(0.12 to<br>0.39)              | 0.37<br>(0.22 to<br>0.75)              |
| Urogenital congenital anomalies               | 34.14<br>(22.81 to<br>54.79)                   | 32.18<br>(20.98 to<br>54.50)                    | 24.63<br>(15.79 to<br>41.01)                    | 47.13<br>(30.81 to<br>76.73)                    | 0.42<br>(0.28 to<br>0.67)              | 0.42<br>(0.28 to<br>0.70)              | 0.33<br>(0.21 to<br>0.56)              | 0.60<br>(0.39 to<br>0.97)              |
| Digestive congenital anomalies                | 135.57<br>(83.53 to<br>215.02)                 | 134.75<br>(76.08 to<br>215.50)                  | 94.79<br>(53.75 to<br>150.20)                   | 211.29<br>(119.82 to<br>332.89)                 | 1.58<br>(0.97 to<br>2.50)              | 1.58<br>(0.89 to<br>2.52)              | 1.11<br>(0.63 to<br>1.76)              | 2.47<br>(1.40 to<br>3.89)              |
| Other congenital birth defects                | 509.90<br>(328.90 to<br>770.61)                | 507.05<br>(335.36 to<br>753.62)                 | 375.17<br>(252.15 to<br>560.47)                 | 761.08<br>(501.88 to<br>1,145.81)               | 6.02<br>(3.89 to<br>9.08)              | 6.12<br>(4.10 to<br>9.11)              | 4.57<br>(3.09 to<br>6.82)              | 9.10<br>(6.07 to<br>13.72)             |
| Skin and subcutaneous diseases                | 418.42<br>(281.03 to<br>668.68)                | 1,009.21<br>(688.48 to<br>1,576.25)             | 955.77<br>(658.72 to<br>1,502.75)               | 1,162.20<br>(783.95 to<br>1,810.38)             | 10.10<br>(6.64 to<br>16.51)            | 31.45<br>(21.04 to<br>50.35)           | 32.03<br>(21.58 to<br>50.77)           | 32.04<br>(21.46 to<br>51.51)           |
| Cellulitis                                    | 31.60<br>(14.58 to<br>48.41)                   | 118.46<br>(55.52 to<br>183.72)                  | 123.20<br>(57.81 to<br>189.69)                  | 116.69<br>(53.51 to<br>181.19)                  | 0.81<br>(0.36 to<br>1.22)              | 3.58<br>(1.59 to<br>5.42)              | 3.91<br>(1.74 to<br>6.01)              | 3.26<br>(1.42 to<br>4.93)              |
| Pyoderma                                      | 335.51<br>(221.84 to<br>546.67)                | 770.96<br>(532.04 to<br>1,235.40)               | 710.55<br>(488.90 to<br>1,138.38)               | 923.59<br>(628.66 to<br>1,459.52)               | 7.49<br>(5.02 to<br>12.33)             | 23.02<br>(15.52 to<br>37.64)           | 22.82<br>(15.59 to<br>36.95)           | 24.38<br>(16.41 to<br>40.24)           |
| Decubitus ulcer                               | 33.81<br>(20.08 to<br>59.12)                   | 82.15<br>(50.19 to<br>146.01)                   | 84.78<br>(52.13 to<br>151.46)                   | 81.33<br>(48.64 to<br>145.46)                   | 1.45<br>(0.88 to<br>2.53)              | 3.98<br>(2.40 to<br>7.02)              | 4.40<br>(2.63 to<br>7.76)              | 3.55<br>(2.09 to<br>6.35)              |
| Other skin and subcutaneous diseases          | 17.50<br>(10.45 to<br>28.38)                   | 37.63<br>(23.27 to<br>61.79)                    | 37.25<br>(23.33 to<br>61.11)                    | 40.59<br>(24.72 to<br>68.00)                    | 0.35<br>(0.21 to<br>0.57)              | 0.87<br>(0.53 to<br>1.41)              | 0.90<br>(0.55 to<br>1.45)              | 0.85<br>(0.51 to<br>1.39)              |
| Sudden infant death syndrome                  | 394.45<br>(192.62 to<br>614.81)                | 252.01<br>(121.54 to<br>389.90)                 | 196.87<br>(93.40 to<br>306.04)                  | 413.29<br>(188.92 to<br>658.65)                 | 4.58<br>(2.24 to<br>7.14)              | 2.92<br>(1.41 to<br>4.52)              | 2.28<br>(1.08 to<br>3.55)              | 4.80<br>(2.19 to<br>7.64)              |
| <b>Injuries</b>                               | <b>10,679.25</b><br>(9,845.59 to<br>11,511.81) | <b>14,541.71</b><br>(11,845.27 to<br>18,573.28) | <b>13,154.90</b><br>(10,685.04 to<br>17,002.39) | <b>17,321.60</b><br>(14,143.43 to<br>21,892.62) | <b>215.14</b><br>(198.52 to<br>231.18) | <b>340.48</b><br>(290.46 to<br>413.44) | <b>321.51</b><br>(273.39 to<br>394.17) | <b>380.61</b><br>(322.65 to<br>461.36) |
| <b>Transport injuries</b>                     | <b>2,631.36</b><br>(2,397.11 to<br>2,930.95)   | <b>4,906.71</b><br>(3,807.75 to<br>6,343.88)    | <b>4,402.66</b><br>(3,438.62 to<br>5,679.12)    | <b>5,739.99</b><br>(4,413.15 to<br>7,515.90)    | <b>53.21</b><br>(48.79 to<br>59.06)    | <b>106.85</b><br>(84.50 to<br>135.88)  | <b>98.63</b><br>(78.81 to<br>124.25)   | <b>119.71</b><br>(93.26 to<br>155.07)  |
| Road injuries                                 | 2,477.58<br>(2,250.92 to<br>2,764.66)          | 4,600.64<br>(3,573.42 to<br>5,947.95)           | 4,134.05<br>(3,227.02 to<br>5,335.03)           | 5,362.52<br>(4,142.18 to<br>7,016.07)           | 50.51<br>(46.14 to<br>56.14)           | 101.08<br>(80.06 to<br>128.43)         | 93.51<br>(74.93 to<br>117.78)          | 112.73<br>(87.65 to<br>145.96)         |
| Pedestrian road injuries                      | 1,134.08<br>(984.76 to<br>1,285.35)            | 1,841.64<br>(1,381.91 to<br>2,463.04)           | 1,658.97<br>(1,253.97 to<br>2,185.87)           | 2,151.51<br>(1,607.62 to<br>2,897.51)           | 23.59<br>(20.58 to<br>26.73)           | 42.29<br>(32.55 to<br>54.84)           | 39.17<br>(30.45 to<br>50.24)           | 47.33<br>(36.01 to<br>62.61)           |

**Eastern Sub-Saharan Africa**

| Cause                         | YLLs (in 1000s)                              |                                              |                                              |                                              | Deaths (in 1000s)                     |                                        |                                        |                                        |
|-------------------------------|----------------------------------------------|----------------------------------------------|----------------------------------------------|----------------------------------------------|---------------------------------------|----------------------------------------|----------------------------------------|----------------------------------------|
|                               | 2016                                         | 2040 Forecast                                | 2040 Better Scenario                         | 2040 Worse Scenario                          | 2016                                  | 2040 Forecast                          | 2040 Better Scenario                   | 2040 Worse Scenario                    |
| Cyclist road injuries         | 115.16<br>(95.48 to<br>150.87)               | 231.63<br>(163.91 to<br>331.38)              | 207.72<br>(146.34 to<br>293.97)              | 271.53<br>(190.84 to<br>394.39)              | 2.33<br>(1.94 to<br>3.02)             | 4.94<br>(3.57 to<br>6.91)              | 4.58<br>(3.31 to<br>6.42)              | 5.55<br>(3.91 to<br>7.93)              |
| Motorcyclist road injuries    | 156.25<br>(136.07 to<br>193.43)              | 340.02<br>(250.42 to<br>466.77)              | 310.90<br>(228.91 to<br>425.31)              | 390.30<br>(285.91 to<br>540.75)              | 3.02<br>(2.63 to<br>3.66)             | 6.92<br>(5.14 to<br>9.32)              | 6.51<br>(4.86 to<br>8.75)              | 7.66<br>(5.62 to<br>10.53)             |
| Motor vehicle road injuries   | 1,058.86<br>(909.95 to<br>1,272.65)          | 2,162.01<br>(1,635.34 to<br>2,847.11)        | 1,933.59<br>(1,465.67 to<br>2,540.36)        | 2,519.87<br>(1,893.75 to<br>3,304.79)        | 21.32<br>(18.48 to<br>25.35)          | 46.39<br>(35.87 to<br>59.93)           | 42.74<br>(33.26 to<br>55.22)           | 51.60<br>(39.42 to<br>67.60)           |
| Other road injuries           | 13.12<br>(9.78 to<br>20.34)                  | 25.34<br>(17.28 to<br>40.30)                 | 22.88<br>(15.55 to<br>36.38)                 | 29.31<br>(19.81 to<br>47.05)                 | 0.26<br>(0.19 to<br>0.38)             | 0.53<br>(0.38 to<br>0.82)              | 0.50<br>(0.36 to<br>0.76)              | 0.59<br>(0.41 to<br>0.92)              |
| Other transport injuries      | 153.78<br>(125.24 to<br>194.22)              | 306.07<br>(215.57 to<br>433.16)              | 268.61<br>(188.99 to<br>381.48)              | 377.47<br>(264.76 to<br>535.65)              | 2.69<br>(2.18 to<br>3.41)             | 5.77<br>(4.05 to<br>8.13)              | 5.12<br>(3.60 to<br>7.26)              | 6.98<br>(4.87 to<br>9.96)              |
| <b>Unintentional injuries</b> | <b>5,187.19</b><br>(4,738.56 to<br>5,583.48) | <b>5,271.75</b><br>(4,517.15 to<br>6,236.63) | <b>4,621.33</b><br>(3,938.81 to<br>5,491.37) | <b>6,700.57</b><br>(5,746.27 to<br>7,894.82) | <b>104.50</b><br>(96.29 to<br>111.22) | <b>137.10</b><br>(123.73 to<br>153.12) | <b>129.98</b><br>(116.63 to<br>145.78) | <b>155.63</b><br>(139.90 to<br>174.26) |

|                                                 |                                       |                                       |                                       |                                       |                              |                               |                               |                               |
|-------------------------------------------------|---------------------------------------|---------------------------------------|---------------------------------------|---------------------------------------|------------------------------|-------------------------------|-------------------------------|-------------------------------|
| Falls                                           | 811.17<br>(728.63 to<br>904.80)       | 1,151.38<br>(1,009.16 to<br>1,318.52) | 1,110.60<br>(969.39 to<br>1,278.10)   | 1,271.90<br>(1,116.53 to<br>1,452.65) | 26.00<br>(23.57 to<br>28.41) | 48.11<br>(43.93 to<br>52.84)  | 50.31<br>(46.04 to<br>54.92)  | 47.02<br>(42.16 to<br>51.82)  |
| Drowning                                        | 1,024.07<br>(913.59 to<br>1,188.10)   | 906.84<br>(730.24 to<br>1,137.40)     | 782.09<br>(627.29 to<br>983.39)       | 1,183.43<br>(953.07 to<br>1,474.38)   | 17.15<br>(15.47 to<br>19.47) | 17.96<br>(14.88 to<br>22.05)  | 16.13<br>(13.32 to<br>19.85)  | 22.02<br>(18.05 to<br>26.97)  |
| Fire, heat, and hot substances                  | 726.48<br>(614.59 to<br>858.40)       | 579.30<br>(469.06 to<br>722.31)       | 485.44<br>(393.84 to<br>608.46)       | 778.93<br>(626.36 to<br>969.03)       | 14.46<br>(12.54 to<br>16.55) | 14.71<br>(12.47 to<br>17.76)  | 13.19<br>(11.16 to<br>15.97)  | 17.91<br>(15.00 to<br>21.70)  |
| Poisonings                                      | 379.55<br>(265.30 to<br>532.39)       | 225.74<br>(154.92 to<br>323.86)       | 171.27<br>(119.24 to<br>237.95)       | 341.12<br>(230.43 to<br>500.55)       | 6.42<br>(4.77 to<br>8.46)    | 4.52<br>(3.40 to<br>5.98)     | 3.63<br>(2.74 to<br>4.77)     | 6.31<br>(4.64 to<br>8.51)     |
| Exposure to mechanical forces                   | 536.79<br>(475.58 to<br>598.08)       | 557.28<br>(454.95 to<br>677.51)       | 478.80<br>(386.01 to<br>587.51)       | 713.48<br>(585.10 to<br>861.15)       | 9.89<br>(8.85 to<br>10.84)   | 12.05<br>(10.19 to<br>14.14)  | 10.83<br>(9.09 to<br>12.81)   | 14.44<br>(12.28 to<br>16.96)  |
| Unintentional firearm injuries                  | 112.45<br>(79.35 to<br>137.15)        | 108.17<br>(68.42 to<br>152.27)        | 92.63<br>(58.19 to<br>129.79)         | 133.96<br>(85.66 to<br>184.30)        | 2.15<br>(1.53 to<br>2.60)    | 2.23<br>(1.52 to<br>3.02)     | 1.97<br>(1.32 to<br>2.63)     | 2.67<br>(1.79 to<br>3.58)     |
| Unintentional suffocation                       | 73.01<br>(57.45 to<br>94.74)          | 63.31<br>(49.68 to<br>81.14)          | 51.15<br>(39.83 to<br>65.74)          | 91.26<br>(69.63 to<br>120.46)         | 1.09<br>(0.89 to<br>1.36)    | 1.14<br>(0.93 to<br>1.40)     | 0.98<br>(0.80 to<br>1.21)     | 1.50<br>(1.20 to<br>1.88)     |
| Other exposure to mechanical forces             | 351.33<br>(312.09 to<br>402.89)       | 385.81<br>(320.31 to<br>471.72)       | 335.03<br>(273.97 to<br>411.88)       | 488.25<br>(403.39 to<br>592.55)       | 6.65<br>(5.99 to<br>7.55)    | 8.68<br>(7.42 to<br>10.22)    | 7.89<br>(6.71 to<br>9.36)     | 10.27<br>(8.79 to<br>12.08)   |
| Adverse effects of medical treatment            | 397.31<br>(288.15 to<br>557.91)       | 402.80<br>(310.50 to<br>529.81)       | 347.93<br>(273.02 to<br>451.27)       | 524.63<br>(391.84 to<br>706.99)       | 7.20<br>(5.94 to<br>9.48)    | 9.06<br>(7.78 to<br>11.23)    | 8.35<br>(7.10 to<br>10.23)    | 10.71<br>(9.13 to<br>13.60)   |
| Animal contact                                  | 463.81<br>(380.99 to<br>543.63)       | 597.73<br>(479.31 to<br>735.94)       | 489.30<br>(394.16 to<br>601.62)       | 806.27<br>(650.19 to<br>996.49)       | 9.78<br>(8.19 to<br>11.39)   | 14.79<br>(12.20 to<br>17.82)  | 12.77<br>(10.63 to<br>15.43)  | 18.42<br>(15.23 to<br>21.92)  |
| Venomous animal contact                         | 340.39<br>(253.94 to<br>408.58)       | 425.81<br>(318.10 to<br>530.46)       | 347.54<br>(264.04 to<br>436.61)       | 574.60<br>(423.23 to<br>717.55)       | 7.61<br>(6.04 to<br>9.01)    | 11.25<br>(9.01 to<br>13.59)   | 9.73<br>(7.80 to<br>11.84)    | 13.93<br>(11.00 to<br>16.81)  |
| Non-venomous animal contact                     | 123.42<br>(70.17 to<br>181.00)        | 171.93<br>(98.92 to<br>247.32)        | 141.77<br>(85.44 to<br>204.84)        | 231.68<br>(135.95 to<br>334.54)       | 2.17<br>(1.30 to<br>3.07)    | 3.54<br>(2.16 to<br>4.93)     | 3.04<br>(1.88 to<br>4.20)     | 4.49<br>(2.77 to<br>6.32)     |
| Foreign body                                    | 504.65<br>(340.16 to<br>661.20)       | 526.62<br>(367.66 to<br>679.10)       | 478.38<br>(339.08 to<br>619.10)       | 662.67<br>(452.15 to<br>871.48)       | 7.32<br>(5.14 to<br>9.04)    | 9.10<br>(6.59 to<br>11.72)    | 8.72<br>(6.29 to<br>11.43)    | 10.49<br>(7.52 to<br>13.48)   |
| Pulmonary aspiration and foreign body in airway | 464.77<br>(311.52 to<br>623.98)       | 481.21<br>(340.85 to<br>627.76)       | 438.07<br>(315.39 to<br>561.97)       | 605.57<br>(417.73 to<br>814.67)       | 6.66<br>(4.71 to<br>8.38)    | 8.25<br>(6.21 to<br>10.41)    | 7.94<br>(5.89 to<br>10.15)    | 9.48<br>(6.89 to<br>12.05)    |
| Foreign body in other body part                 | 39.87<br>(12.71 to<br>78.51)          | 45.41<br>(13.48 to<br>100.13)         | 40.30<br>(11.48 to<br>90.21)          | 57.10<br>(17.74 to<br>122.12)         | 0.65<br>(0.20 to<br>1.32)    | 0.85<br>(0.24 to<br>1.90)     | 0.78<br>(0.21 to<br>1.79)     | 1.01<br>(0.29 to<br>2.20)     |
| Environmental heat and cold exposure            | 78.26<br>(59.94 to<br>99.41)          | 77.06<br>(54.29 to<br>100.59)         | 61.03<br>(43.20 to<br>80.23)          | 110.65<br>(79.68 to<br>145.14)        | 1.58<br>(1.21 to<br>1.96)    | 1.79<br>(1.29 to<br>2.28)     | 1.51<br>(1.90 to<br>1.90)     | 2.38<br>(1.74 to<br>3.00)     |
| Other unintentional injuries                    | 265.09<br>(233.60 to<br>306.94)       | 247.01<br>(199.33 to<br>308.68)       | 216.49<br>(173.68 to<br>272.34)       | 307.50<br>(249.07 to<br>381.53)       | 4.71<br>(4.20 to<br>5.37)    | 5.00<br>(4.17 to<br>6.07)     | 4.53<br>(3.74 to<br>5.53)     | 5.92<br>(4.94 to<br>7.17)     |
| Self-harm and interpersonal violence            | 2,506.39<br>(2,168.05 to<br>2,933.93) | 4,059.53<br>(3,123.76 to<br>5,256.62) | 3,843.06<br>(2,975.45 to<br>4,953.63) | 4,554.95<br>(3,451.54 to<br>6,015.86) | 51.80<br>(45.39 to<br>60.17) | 91.46<br>(71.60 to<br>116.19) | 87.99<br>(69.85 to<br>111.21) | 99.95<br>(76.98 to<br>129.13) |

**Eastern Sub-Saharan Africa**

| Cause                | YLLs (in 1000s)                   |                                       |                                       |                                       | Deaths (in 1000s)            |                              |                              |                              |
|----------------------|-----------------------------------|---------------------------------------|---------------------------------------|---------------------------------------|------------------------------|------------------------------|------------------------------|------------------------------|
|                      | 2016                              | 2040 Forecast                         | 2040 Better Scenario                  | 2040 Worse Scenario                   | 2016                         | 2040 Forecast                | 2040 Better Scenario         | 2040 Worse Scenario          |
| Self-harm            | 968.61<br>(848.16 to<br>1,111.21) | 1,944.66<br>(1,468.02 to<br>2,636.05) | 1,823.00<br>(1,392.55 to<br>2,450.08) | 2,208.77<br>(1,605.42 to<br>3,044.47) | 24.21<br>(21.46 to<br>27.55) | 50.99<br>(39.01 to<br>66.78) | 49.03<br>(38.47 to<br>63.40) | 55.95<br>(41.41 to<br>76.42) |
| Self-harm by firearm | 99.94<br>(73.76 to<br>144.01)     | 144.01<br>(93.33 to<br>212.90)        | 131.32<br>(86.14 to<br>195.26)        | 167.85<br>(105.67 to<br>255.80)       | 2.24<br>(1.61 to<br>3.24)    | 3.44<br>(2.29 to<br>5.15)    | 3.21<br>(2.15 to<br>4.75)    | 3.89<br>(2.51 to<br>5.95)    |

|                                                                              |                                       |                                       |                                       |                                       |                              |                              |                              |                              |
|------------------------------------------------------------------------------|---------------------------------------|---------------------------------------|---------------------------------------|---------------------------------------|------------------------------|------------------------------|------------------------------|------------------------------|
| Self-harm by other specified means                                           | 868.67<br>(752.79 to<br>998.81)       | 1,800.65<br>(1,350.36 to<br>2,428.23) | 1,691.67<br>(1,282.14 to<br>2,245.00) | 2,040.92<br>(1,472.69 to<br>2,799.19) | 21.97<br>(19.16 to<br>25.10) | 47.55<br>(36.50 to<br>62.04) | 45.82<br>(35.90 to<br>58.76) | 52.05<br>(38.55 to<br>70.24) |
| Interpersonal violence                                                       | 1,537.78<br>(1,262.62 to<br>1,910.18) | 2,114.87<br>(1,510.44 to<br>2,894.57) | 2,020.07<br>(1,450.80 to<br>2,741.34) | 2,346.18<br>(1,673.33 to<br>3,232.81) | 27.59<br>(22.75 to<br>34.24) | 40.47<br>(29.58 to<br>54.78) | 38.96<br>(28.64 to<br>52.44) | 44.00<br>(31.97 to<br>59.85) |
| Physical violence by firearm                                                 | 287.47<br>(185.77 to<br>476.64)       | 413.43<br>(250.25 to<br>660.99)       | 408.25<br>(249.03 to<br>655.16)       | 431.12<br>(264.94 to<br>703.46)       | 5.17<br>(3.33 to<br>8.65)    | 7.78<br>(4.83 to<br>12.53)   | 7.72<br>(4.83 to<br>12.46)   | 7.99<br>(4.98 to<br>13.19)   |
| Physical violence by sharp object                                            | 163.64<br>(118.53 to<br>223.85)       | 269.76<br>(177.85 to<br>370.29)       | 272.30<br>(179.46 to<br>373.68)       | 269.95<br>(179.12 to<br>371.66)       | 3.18<br>(2.38 to<br>4.32)    | 5.57<br>(3.82 to<br>7.51)    | 5.68<br>(3.89 to<br>7.68)    | 5.46<br>(3.78 to<br>7.42)    |
| Physical violence by other means                                             | 1,086.67<br>(851.18 to<br>1,346.38)   | 1,431.68<br>(964.68 to<br>2,027.91)   | 1,339.51<br>(901.52 to<br>1,885.51)   | 1,645.11<br>(1,102.80 to<br>2,381.25) | 19.24<br>(15.30 to<br>24.11) | 27.12<br>(18.59 to<br>38.19) | 25.56<br>(17.60 to<br>35.61) | 30.55<br>(20.83 to<br>43.62) |
| Forces of nature, conflict and terrorism, and executions and police conflict | 354.31<br>(226.22 to<br>487.33)       | 303.73<br>(0.00 to<br>5,232.85)       | 287.84<br>(0.00 to<br>4,845.96)       | 326.08<br>(0.00 to<br>5,350.30)       | 5.62<br>(3.61 to<br>7.74)    | 5.08<br>(0.00 to<br>86.29)   | 4.91<br>(0.00 to<br>82.18)   | 5.32<br>(0.00 to<br>87.40)   |
| Exposure to forces of nature                                                 | 10.77<br>(5.88 to<br>15.65)           | 20.71<br>(0.00 to<br>68.46)           | 20.12<br>(0.00 to<br>68.36)           | 22.93<br>(0.00 to<br>76.57)           | 0.18<br>(0.10 to<br>0.26)    | 0.36<br>(0.00 to<br>1.33)    | 0.39<br>(0.00 to<br>1.36)    | 0.39<br>(0.00 to<br>1.41)    |
| Conflict and terrorism                                                       | 327.85<br>(202.97 to<br>453.69)       | 277.07<br>(0.00 to<br>5,224.94)       | 261.87<br>(0.00 to<br>4,814.50)       | 297.00<br>(0.00 to<br>5,341.93)       | 5.17<br>(3.20 to<br>7.16)    | 4.61<br>(0.00 to<br>86.12)   | 4.45<br>(0.00 to<br>82.02)   | 4.82<br>(0.00 to<br>87.25)   |
| Executions and police conflict                                               | 15.69<br>(9.91 to<br>21.88)           | 5.94<br>(0.00 to<br>38.85)            | 5.85<br>(0.00 to<br>38.11)            | 6.16<br>(0.00 to<br>39.64)            | 0.27<br>(0.17 to<br>0.37)    | 0.11<br>(0.00 to<br>0.72)    | 0.11<br>(0.00 to<br>0.71)    | 0.11<br>(0.00 to<br>0.72)    |

**Burundi**

| Cause                                                             | YLLs (actual counts)                              |                                                   |                                                   |                                                    | Deaths (actual counts)                     |                                             |                                           |                                             |
|-------------------------------------------------------------------|---------------------------------------------------|---------------------------------------------------|---------------------------------------------------|----------------------------------------------------|--------------------------------------------|---------------------------------------------|-------------------------------------------|---------------------------------------------|
|                                                                   | 2016                                              | 2040 Forecast                                     | 2040 Better Scenario                              | 2040 Worse Scenario                                | 2016                                       | 2040 Forecast                               | 2040 Better Scenario                      | 2040 Worse Scenario                         |
| All causes                                                        | 5,601,369.76<br>(4,552,650.32 to<br>7,112,721.62) | 5,772,761.27<br>(4,294,070.87 to<br>8,099,364.12) | 3,221,254.76<br>(2,382,496.71 to<br>4,449,259.84) | 7,455,719.09<br>(5,488,867.22 to<br>10,660,820.67) | 102,910.58<br>(89,104.75 to<br>121,376.89) | 133,667.13<br>(104,153.30 to<br>177,009.67) | 85,566.46<br>(66,465.71 to<br>112,539.25) | 166,243.37<br>(127,981.79 to<br>226,279.08) |
| Communicable, maternal, neonatal, and nutritional diseases        | 4,277,122.45<br>(3,329,307.42 to<br>5,686,049.90) | 3,517,222.13<br>(2,469,353.09 to<br>4,867,007.66) | 1,607,984.44<br>(1,134,166.26 to<br>2,246,787.22) | 4,749,533.51<br>(3,315,366.36 to<br>6,599,481.20)  | 65,792.09<br>(54,239.60 to<br>82,621.28)   | 62,901.72<br>(44,006.13 to<br>88,360.21)    | 31,653.76<br>(22,101.49 to<br>46,001.39)  | 82,981.07<br>(57,834.58 to<br>116,322.14)   |
| HIV/AIDS and tuberculosis                                         | 609,079.13<br>(494,431.46 to<br>721,237.91)       | 591,617.31<br>(321,455.71 to<br>1,173,606.01)     | 296,642.54<br>(162,046.45 to<br>571,126.01)       | 972,571.57<br>(481,471.49 to<br>2,060,421.36)      | 14,001.91<br>(11,204.41 to<br>16,865.67)   | 14,078.97<br>(7,565.03 to<br>28,665.51)     | 7,078.29<br>(3,881.50 to<br>13,754.39)    | 22,577.95<br>(11,153.72 to<br>47,432.82)    |
| Tuberculosis                                                      | 452,376.42<br>(351,930.95 to<br>558,521.34)       | 433,081.71<br>(204,129.01 to<br>976,173.14)       | 177,635.36<br>(78,887.10 to<br>409,869.98)        | 674,536.14<br>(292,950.91 to<br>1,592,522.90)      | 11,134.70<br>(8,522.20 to<br>13,780.35)    | 11,129.36<br>(5,210.27 to<br>23,900.36)     | 4,817.14<br>(2,199.12 to<br>10,622.79)    | 17,102.38<br>(7,460.50 to<br>39,423.50)     |
| HIV/AIDS                                                          | 156,702.71<br>(119,787.04 to<br>212,576.27)       | 158,535.60<br>(57,027.62 to<br>371,514.87)        | 119,007.18<br>(46,026.31 to<br>250,412.15)        | 298,035.43<br>(87,882.42 to<br>925,050.11)         | 2,867.21<br>(2,235.53 to<br>3,778.08)      | 2,949.62<br>(1,016.75 to<br>7,181.61)       | 2,261.15<br>(790.47 to<br>4,739.21)       | 5,475.57<br>(1,635.57 to<br>16,889.49)      |
| Diarrhea, lower respiratory, and other common infectious diseases | 1,711,011.43<br>(1,293,469.90 to<br>2,332,040.44) | 1,391,188.58<br>(817,185.83 to<br>2,229,245.90)   | 598,416.10<br>(324,625.74 to<br>991,100.80)       | 1,945,628.17<br>(1,172,875.98 to<br>2,992,555.94)  | 26,543.30<br>(20,891.39 to<br>34,744.59)   | 27,801.22<br>(15,253.72 to<br>45,215.27)    | 13,786.88<br>(8,301.56 to<br>24,257.81)   | 35,825.05<br>(21,003.49 to<br>57,054.25)    |
| Diarrheal diseases                                                | 861,713.93<br>(615,016.34 to<br>1,252,274.03)     | 678,290.27<br>(309,475.01 to<br>1,253,050.75)     | 283,239.01<br>(88,896.36 to<br>599,383.62)        | 788,853.19<br>(386,120.25 to<br>1,431,328.82)      | 13,374.85<br>(9,504.23 to<br>19,359.06)    | 13,897.94<br>(4,992.11 to<br>28,274.47)     | 6,301.56<br>(1,701.72 to<br>15,304.60)    | 15,807.40<br>(5,831.45 to<br>31,528.66)     |
| Intestinal infectious diseases                                    | 15,521.89<br>(7,257.56 to<br>27,510.99)           | 15,963.45<br>(7,072.57 to<br>30,602.45)           | 10,223.17<br>(4,770.21 to<br>19,431.29)           | 17,351.37<br>(7,689.20 to<br>33,581.46)            | 210.04<br>(100.44 to<br>366.05)            | 221.02<br>(100.82 to<br>425.25)             | 145.81<br>(70.18 to<br>275.45)            | 238.72<br>(107.11 to<br>454.64)             |
| Typhoid fever                                                     | 12,901.10<br>(5,713.35 to<br>24,492.20)           | 13,966.99<br>(5,914.76 to<br>28,390.56)           | 9,223.07<br>(4,081.26 to<br>17,696.51)            | 15,058.14<br>(6,228.08 to<br>29,873.54)            | 176.16<br>(80.74 to<br>329.30)             | 193.48<br>(83.23 to<br>383.90)              | 131.17<br>(58.28 to<br>252.84)            | 207.52<br>(87.56 to<br>419.92)              |
| Paratyphoid fever                                                 | 653.03<br>(234.24 to<br>1,538.10)                 | 859.48<br>(307.96 to<br>1,976.35)                 | 540.81<br>(197.19 to<br>1,199.71)                 | 939.62<br>(333.55 to<br>2,131.97)                  | 9.00<br>(3.31 to<br>20.99)                 | 12.03<br>(4.44 to<br>27.03)                 | 7.76<br>(2.89 to<br>17.05)                | 13.09<br>(4.66 to<br>29.36)                 |
| Other intestinal infectious diseases                              | 1,967.76<br>(484.08 to<br>6,058.08)               | 1,136.98<br>(244.25 to<br>3,896.38)               | 459.29<br>(99.62 to<br>1,562.88)                  | 1,353.60<br>(273.55 to<br>4,229.56)                | 24.88<br>(6.60 to<br>73.98)                | 15.51<br>(3.85 to<br>49.12)                 | 6.88<br>(1.81 to<br>19.87)                | 18.11<br>(4.22 to<br>53.99)                 |



|                                         |                                             |                                             |                                             |                                               |                                        |                                         |                                       |                                         |
|-----------------------------------------|---------------------------------------------|---------------------------------------------|---------------------------------------------|-----------------------------------------------|----------------------------------------|-----------------------------------------|---------------------------------------|-----------------------------------------|
| Lower respiratory infections            | 567,140.59<br>(399,377.98 to<br>785,300.10) | 503,296.11<br>(243,097.27 to<br>969,901.51) | 201,727.77<br>(110,246.80 to<br>355,165.10) | 833,560.68<br>(389,043.81 to<br>1,576,955.82) | 9,211.95<br>(6,981.43 to<br>11,883.31) | 10,736.46<br>(6,121.54 to<br>17,843.01) | 5,479.37<br>(3,329.09 to<br>8,330.43) | 15,843.15<br>(8,643.30 to<br>26,090.19) |
| Upper respiratory infections            | 1,833.26<br>(493.00 to<br>4,599.61)         | 1,958.12<br>(630.61 to<br>5,231.39)         | 741.49<br>(258.99 to<br>1,774.29)           | 2,424.11<br>(716.79 to<br>6,836.97)           | 25.38<br>(9.22 to<br>57.87)            | 31.81<br>(12.43 to<br>72.98)            | 13.58<br>(5.69 to<br>28.12)           | 38.21<br>(13.92 to<br>93.93)            |
| Otitis media                            | 665.71<br>(215.81 to<br>1,661.06)           | 163.50<br>(61.61 to<br>360.68)              | 142.25<br>(57.92 to<br>301.40)              | 170.62<br>(61.97 to<br>386.48)                | 10.30<br>(4.41 to<br>22.50)            | 3.80<br>(1.81 to<br>7.07)               | 4.05<br>(2.01 to<br>7.24)             | 3.63<br>(1.67 to<br>6.90)               |
| Meningitis                              | 167,866.66<br>(118,320.46 to<br>243,375.53) | 125,227.43<br>(83,059.06 to<br>184,807.13)  | 82,146.06<br>(56,639.03 to<br>120,320.04)   | 176,395.76<br>(108,848.17 to<br>281,763.59)   | 2,489.16<br>(1,851.20 to<br>3,407.41)  | 2,069.22<br>(1,469.61 to<br>2,965.46)   | 1,552.19<br>(1,105.34 to<br>2,198.98) | 2,642.19<br>(1,767.11 to<br>3,998.30)   |
| Pneumococcal meningitis                 | 9,627.45<br>(6,637.75 to<br>13,961.14)      | 6,374.25<br>(4,157.27 to<br>10,205.75)      | 5,213.99<br>(3,447.45 to<br>7,941.24)       | 8,026.82<br>(4,971.75 to<br>13,230.19)        | 162.97<br>(118.59 to<br>218.82)        | 124.12<br>(84.98 to<br>186.90)          | 116.58<br>(79.50 to<br>168.67)        | 143.47<br>(96.93 to<br>218.64)          |
| H influenzae type B meningitis          | 16,931.53<br>(11,081.69 to<br>25,916.96)    | 25,746.66<br>(8,564.65 to<br>61,631.06)     | 12,663.18<br>(5,630.87 to<br>26,784.67)     | 67,875.91<br>(17,465.60 to<br>164,232.39)     | 234.70<br>(62.13 to<br>343.35)         | 334.85<br>(132.68 to<br>758.08)         | 386.31<br>(99.78 to<br>361.92)        | 825.11<br>(236.64 to<br>1,952.58)       |
| Meningococcal meningitis                | 72,621.02<br>(49,817.99 to<br>104,335.97)   | 44,144.69<br>(28,730.05 to<br>67,133.37)    | 30,126.79<br>(19,988.25 to<br>45,523.07)    | 47,750.71<br>(30,808.64 to<br>72,658.69)      | 1,051.28<br>(754.03 to<br>1,450.77)    | 743.19<br>(508.48 to<br>1,093.32)       | 566.73<br>(393.14 to<br>822.59)       | 776.33<br>(521.35 to<br>1,154.82)       |
| Other meningitis                        | 68,686.66<br>(48,242.24 to<br>101,229.67)   | 48,961.84<br>(32,500.05 to<br>74,636.22)    | 34,142.09<br>(23,347.94 to<br>50,839.62)    | 52,742.32<br>(34,144.16 to<br>80,271.13)      | 1,040.21<br>(779.68 to<br>1,425.83)    | 867.05<br>(608.76 to<br>1,256.82)       | 682.57<br>(473.59 to<br>975.18)       | 897.28<br>(616.02 to<br>1,305.37)       |
| Encephalitis                            | 11,664.23<br>(7,321.13 to<br>18,301.54)     | 13,072.34<br>(7,919.51 to<br>20,830.95)     | 7,005.61<br>(4,254.44 to<br>10,901.40)      | 14,567.02<br>(8,775.81 to<br>23,185.51)       | 144.78<br>(93.95 to<br>222.62)         | 170.26<br>(106.68 to<br>261.55)         | 96.36<br>(62.35 to<br>141.77)         | 187.79<br>(115.80 to<br>287.17)         |
| Diphtheria                              | 144.96<br>(62.57 to<br>286.19)              | 62.52<br>(17.53 to<br>197.57)               | 21.38<br>(8.82 to<br>48.76)                 | 257.34<br>(46.41 to<br>881.40)                | 1.80<br>(0.82 to<br>3.48)              | 0.80<br>(0.26 to<br>2.39)               | 0.31<br>(0.15 to<br>0.64)             | 3.09<br>(0.59 to<br>10.51)              |
| Whooping cough                          | 41,183.65<br>(3,574.77 to<br>140,371.37)    | 41,008.56<br>(3,096.11 to<br>160,144.27)    | 7,681.90<br>(563.98 to<br>30,150.29)        | 86,074.60<br>(7,432.58 to<br>291,239.25)      | 485.76<br>(42.18 to<br>1,653.49)       | 485.56<br>(36.80 to<br>1,894.56)        | 92.78<br>(6.78 to<br>359.98)          | 1,016.15<br>(87.70 to<br>3,446.21)      |
| Tetanus                                 | 23,019.03<br>(11,153.48 to<br>43,635.40)    | 5,220.44<br>(1,912.84 to<br>12,302.46)      | 2,666.14<br>(796.72 to<br>5,232.63)         | 11,496.50<br>(4,044.84 to<br>28,458.61)       | 335.13<br>(161.59 to<br>581.78)        | 335.13<br>(28.34 to<br>168.37)          | 77.85<br>(95.79 to<br>348.56)         | 49.32<br>(59.16 to<br>348.56)           |
| Measles                                 | 15,140.29<br>(4,914.93 to<br>35,343.24)     | 1,420.04<br>(148.41 to<br>8,023.05)         | 593.51<br>(86.41 to<br>2,618.28)            | 7,890.26<br>(511.07 to<br>38,765.62)          | 180.20<br>(58.38 to<br>420.22)         | 17.02<br>(1.82 to<br>94.54)             | 7.23<br>(1.10 to<br>31.45)            | 93.56<br>(6.15 to<br>457.05)            |
| <b>Burundi</b>                          |                                             |                                             |                                             |                                               |                                        |                                         |                                       |                                         |
| Cause                                   | YLLs (actual counts)                        |                                             |                                             |                                               | Deaths (actual counts)                 |                                         |                                       |                                         |
|                                         | 2016                                        | 2040 Forecast                               | 2040 Better Scenario                        | 2040 Worse Scenario                           | 2016                                   | 2040 Forecast                           | 2040 Better Scenario                  | 2040 Worse Scenario                     |
| Varicella and herpes zoster             | 5,117.23<br>(2,643.17 to<br>9,186.66)       | 5,505.82<br>(2,678.53 to<br>10,300.45)      | 2,227.82<br>(1,150.98 to<br>3,959.72)       | 6,586.72<br>(3,228.63 to<br>12,355.45)        | 73.95<br>(43.95 to<br>122.57)          | 89.48<br>(52.41 to<br>148.40)           | 44.33<br>(27.18 to<br>70.50)          | 101.32<br>(56.79 to<br>171.46)          |
| Neglected tropical diseases and malaria | 502,206.45<br>(310,259.00 to<br>760,123.04) | 249,988.22<br>(162,936.31 to<br>373,672.21) | 166,393.54<br>(110,926.80 to<br>236,069.77) | 267,764.95<br>(170,439.05 to<br>401,711.09)   | 6,814.09<br>(4,444.12 to<br>9,856.47)  | 3,913.70<br>(2,664.32 to<br>5,444.85)   | 2,923.32<br>(2,089.31 to<br>3,944.52) | 4,074.99<br>(2,764.23 to<br>5,812.35)   |
| Malaria                                 | 461,349.06<br>(272,494.53 to<br>705,388.14) | 214,037.56<br>(131,620.02 to<br>331,905.38) | 148,066.17<br>(97,256.19 to<br>213,245.78)  | 226,067.85<br>(136,623.50 to<br>356,437.03)   | 6,192.59<br>(3,974.11 to<br>9,044.59)  | 3,254.30<br>(2,211.84 to<br>4,773.72)   | 2,616.19<br>(1,814.67 to<br>3,595.31) | 3,437.25<br>(2,236.73 to<br>5,060.06)   |
| Chagas disease                          | 0.00<br>(0.00 to<br>0.00)                   | 0.00<br>(0.00 to<br>0.00)                   | 0.00<br>(0.00 to<br>0.00)                   | 0.00<br>(0.00 to<br>0.00)                     | 0.00<br>(0.00 to<br>0.00)              | 0.00<br>(0.00 to<br>0.00)               | 0.00<br>(0.00 to<br>0.00)             | 0.00<br>(0.00 to<br>0.00)               |
| Leishmaniasis                           | 0.00<br>(0.00 to<br>0.00)                   | 0.00<br>(0.00 to<br>0.00)                   | 0.00<br>(0.00 to<br>0.00)                   | 0.00<br>(0.00 to<br>0.00)                     | 0.00<br>(0.00 to<br>0.00)              | 0.00<br>(0.00 to<br>0.00)               | 0.00<br>(0.00 to<br>0.00)             | 0.00<br>(0.00 to<br>0.00)               |
| African trypanosomiasis                 | 0.00<br>(0.00 to<br>0.00)                   | 0.00<br>(0.00 to<br>0.00)                   | 0.00<br>(0.00 to<br>0.00)                   | 0.00<br>(0.00 to<br>0.00)                     | 0.00<br>(0.00 to<br>0.00)              | 0.00<br>(0.00 to<br>0.00)               | 0.00<br>(0.00 to<br>0.00)             | 0.00<br>(0.00 to<br>0.00)               |
| Schistosomiasis                         | 3,992.94<br>(2,737.16 to<br>5,515.24)       | 3,452.43<br>(2,267.73 to<br>5,258.94)       | 2,557.62<br>(1,631.37 to<br>3,926.21)       | 3,617.32<br>(2,383.32 to<br>5,422.22)         | 101.63<br>(70.86 to<br>136.41)         | 94.10<br>(63.32 to<br>136.56)           | 73.89<br>(47.78 to<br>110.76)         | 95.61<br>(64.00 to<br>136.91)           |

|                                                          |                                               |                                               |                                             |                                                 |                                         |                                         |                                       |                                         |
|----------------------------------------------------------|-----------------------------------------------|-----------------------------------------------|---------------------------------------------|-------------------------------------------------|-----------------------------------------|-----------------------------------------|---------------------------------------|-----------------------------------------|
|                                                          | 566.17<br>(462.73 to<br>686.95)               | 287.51<br>(212.96 to<br>377.70)               | 236.26<br>(172.27 to<br>319.19)             | 295.93<br>(223.02 to<br>387.61)                 | 10.59<br>(8.69 to<br>12.76)             | 5.93<br>(4.49 to<br>7.80)               | 5.10<br>(3.76 to<br>6.85)             | 6.00<br>(4.57 to<br>7.79)               |
| Cysticercosis                                            | 746.10<br>(500.67 to<br>1,055.74)             | 529.20<br>(321.05 to<br>823.49)               | 191.02<br>(122.10 to<br>284.82)             | 661.89<br>(412.90 to<br>999.85)                 | 13.32<br>(9.06 to<br>18.82)             | 11.19<br>(6.87 to<br>17.09)             | 4.38<br>(2.85 to<br>6.43)             | 13.57<br>(8.46 to<br>20.06)             |
| Cystic echinococcosis                                    | 200.83<br>(89.2 to<br>888.95)                 | 818.28<br>(40.41 to<br>3,339.14)              | 565.53<br>(28.64 to<br>2,168.67)            | 863.80<br>(42.02 to<br>3,583.82)                | 2.78<br>(0.14 to<br>11.85)              | 12.92<br>(0.67 to<br>50.34)             | 10.07<br>(0.53 to<br>37.11)           | 13.22<br>(0.69 to<br>52.92)             |
| Dengue                                                   | 13,917.75<br>(2,685.41 to<br>41,911.14)       | 8,984.91<br>(1,639.19 to<br>28,625.03)        | 4,723.74<br>(789.99 to<br>15,222.94)        | 10,366.01<br>(1,856.64 to<br>32,556.24)         | 212.27<br>(41.07 to<br>627.94)          | 138.57<br>(25.65 to<br>433.41)          | 74.97<br>(12.71 to<br>237.40)         | 158.72<br>(28.97 to<br>485.00)          |
| Yellow fever                                             | 7,597.48<br>(1,799.75 to<br>19,918.77)        | 6,644.66<br>(1,678.35 to<br>16,498.56)        | 1,860.46<br>(435.83 to<br>5,076.06)         | 8,807.95<br>(2,130.00 to<br>21,395.99)          | 109.36<br>(28.54 to<br>273.71)          | 100.93<br>(27.69 to<br>248.69)          | 29.15<br>(7.17 to<br>73.96)           | 132.99<br>(35.22 to<br>311.10)          |
| Rabies                                                   | 3,175.04<br>(1,828.19 to<br>5,104.55)         | 4,742.65<br>(2,666.90 to<br>7,807.90)         | 3,374.46<br>(1,894.17 to<br>5,519.41)       | 4,925.82<br>(2,785.22 to<br>8,000.96)           | 38.83<br>(22.82 to<br>61.74)            | 58.94<br>(33.79 to<br>94.92)            | 42.83<br>(24.77 to<br>68.53)          | 60.98<br>(35.26 to<br>97.64)            |
| Intestinal nematode infections                           | 10,655.08<br>(4,548.38 to<br>21,600.72)       | 10,491.02<br>(4,792.03 to<br>20,946.61)       | 4,818.28<br>(2,180.75 to<br>9,638.54)       | 12,158.37<br>(5,551.97 to<br>24,427.96)         | 132.72<br>(59.31 to<br>269.01)          | 136.83<br>(64.99 to<br>265.64)          | 66.75<br>(32.59 to<br>127.49)         | 156.66<br>(74.20 to<br>304.01)          |
| Other neglected tropical diseases                        | 93,777.26<br>(67,435.86 to<br>126,365.91)     | 112,992.51<br>(58,270.96 to<br>213,859.63)    | 49,161.51<br>(23,610.54 to<br>95,604.24)    | 142,930.28<br>(69,630.53 to<br>267,002.31)      | 1,712.15<br>(1,222.87 to<br>2,323.50)   | 2,321.30<br>(1,103.16 to<br>3,965.30)   | 927.57<br>(443.17 to<br>1,844.55)     | 2,677.79<br>(1,322.42 to<br>5,080.21)   |
| Maternal disorders                                       | 23,721.61<br>(15,038.28 to<br>36,960.45)      | 25,575.03<br>(11,847.07 to<br>51,807.80)      | 11,282.34<br>(4,949.18 to<br>23,707.58)     | 31,143.24<br>(13,665.77 to<br>63,760.23)        | 442.74<br>(278.70 to<br>690.00)         | 490.36<br>(228.84 to<br>996.90)         | 217.02<br>(95.83 to<br>463.28)        | 596.31<br>(260.80 to<br>1,200.50)       |
| Maternal hemorrhage                                      | 7,218.11<br>(3,024.20 to<br>13,396.99)        | 7,663.57<br>(2,669.43 to<br>16,321.70)        | 3,325.30<br>(1,100.87 to<br>7,335.59)       | 9,492.33<br>(3,121.41 to<br>20,009.86)          | 131.57<br>(56.99 to<br>240.23)          | 143.35<br>(51.13 to<br>300.68)          | 62.45<br>(20.91 to<br>137.87)         | 177.17<br>(59.98 to<br>367.65)          |
| Maternal sepsis and other maternal infections            | 13,382.75<br>(8,540.49 to<br>20,340.06)       | 14,991.17<br>(7,249.67 to<br>29,450.01)       | 6,508.16<br>(2,825.13 to<br>13,948.25)      | 18,347.91<br>(7,873.03 to<br>37,577.88)         | 238.96<br>(151.99 to<br>363.23)         | 274.18<br>(131.98 to<br>547.29)         | 119.46<br>(53.10 to<br>256.08)        | 335.04<br>(143.12 to<br>687.34)         |
| Maternal hypertensive disorders                          | 7,553.61<br>(4,102.34 to<br>13,198.97)        | 9,005.62<br>(3,621.78 to<br>19,665.15)        | 3,723.40<br>(1,472.59 to<br>8,450.97)       | 11,149.80<br>(4,263.71 to<br>24,565.85)         | 139.44<br>(76.97 to<br>242.53)          | 170.98<br>(68.31 to<br>366.41)          | 70.94<br>(27.89 to<br>161.64)         | 211.38<br>(82.32 to<br>464.06)          |
| Maternal obstructed labor and uterine rupture            | 8,942.28<br>(4,568.76 to<br>15,221.34)        | 11,220.86<br>(4,009.05 to<br>22,570.29)       | 4,868.60<br>(1,653.53 to<br>10,281.54)      | 14,054.27<br>(4,993.98 to<br>29,443.76)         | 160.04<br>(83.22 to<br>267.84)          | 205.50<br>(77.99 to<br>409.74)          | 89.53<br>(32.19 to<br>191.64)         | 256.82<br>(90.31 to<br>526.83)          |
| Maternal abortion, miscarriage, and ectopic pregnancy    | 21,524.98<br>(11,668.11 to<br>34,602.30)      | 25,456.64<br>(11,291.01 to<br>51,158.18)      | 10,977.81<br>(4,596.53 to<br>23,100.67)     | 33,176.32<br>(14,250.52 to<br>69,154.60)        | 389.64<br>(213.99 to<br>624.20)         | 469.07<br>(211.80 to<br>936.12)         | 203.49<br>(85.83 to<br>428.81)        | 609.24<br>(266.60 to<br>1,264.90)       |
| Indirect maternal deaths                                 | 1,684.14<br>(695.97 to<br>3,216.63)           | 1,697.52<br>(593.46 to<br>3,623.78)           | 726.89<br>(243.95 to<br>1,650.89)           | 2,163.35<br>(712.21 to<br>4,636.76)             | 30.64<br>(12.58 to<br>56.95)            | 31.82<br>(10.86 to<br>68.61)            | 13.71<br>(4.22 to<br>31.74)           | 40.39<br>(13.16 to<br>88.63)            |
| Late maternal deaths                                     | 695.53<br>(311.28 to<br>1,215.80)             | 6,805.57<br>(1,549.86 to<br>15,351.13)        | 2,951.82<br>(370.87 to<br>7,095.18)         | 9,926.58<br>(3,088.26 to<br>21,710.64)          | 13.77<br>(6.20 to<br>25.62)             | 137.46<br>(27.74 to<br>315.59)          | 60.32<br>(6.37 to<br>140.62)          | 199.29<br>(61.65 to<br>435.46)          |
| Maternal deaths aggravated by HIV/AIDS                   | 9,054.26<br>(4,230.40 to<br>16,162.19)        | 10,576.53<br>(4,188.01 to<br>22,338.58)       | 4,797.18<br>(1,786.99 to<br>10,658.78)      | 13,476.48<br>(5,078.61 to<br>29,365.96)         | 165.35<br>(78.88 to<br>294.66)          | 198.58<br>(79.64 to<br>418.35)          | 90.65<br>(33.38 to<br>202.71)         | 252.14<br>(93.38 to<br>554.42)          |
| Other maternal disorders                                 | <b>Burundi</b>                                |                                               |                                             |                                                 |                                         |                                         |                                       |                                         |
| Cause                                                    | YLLs (actual counts)                          |                                               |                                             |                                                 | Deaths (actual counts)                  |                                         |                                       |                                         |
|                                                          | 2016                                          | 2040 Forecast                                 | 2040 Better Scenario                        | 2040 Worse Scenario                             | 2016                                    | 2040 Forecast                           | 2040 Better Scenario                  | 2040 Worse Scenario                     |
| Neonatal disorders                                       | 978,731.51<br>(619,834.24 to<br>1,497,968.97) | 910,544.22<br>(539,962.74 to<br>1,429,274.86) | 365,386.42<br>(213,483.26 to<br>576,191.20) | 1,119,971.45<br>(657,441.12 to<br>1,782,047.36) | 11,308.24<br>(7,161.85 to<br>17,306.12) | 10,523.20<br>(6,243.04 to<br>16,520.14) | 4,233.15<br>(2,467.25 to<br>6,658.18) | 12,943.06<br>(7,599.07 to<br>20,591.01) |
| Neonatal preterm birth                                   | 284,222.73<br>(165,209.28 to<br>471,389.31)   | 244,973.63<br>(140,252.76 to<br>413,443.60)   | 89,414.47<br>(50,760.79 to<br>150,097.94)   | 306,768.16<br>(176,656.62 to<br>520,614.65)     | 3,283.68<br>(1,908.58 to<br>5,446.42)   | 2,830.88<br>(1,620.94 to<br>4,777.58)   | 1,033.45<br>(586.53 to<br>1,734.57)   | 3,544.78<br>(2,041.44 to<br>6,015.05)   |
| Neonatal encephalopathy due to birth asphyxia and trauma | 326,996.75<br>(190,185.32 to<br>546,539.85)   | 247,726.19<br>(125,812.46 to<br>429,807.92)   | 107,714.09<br>(54,384.32 to<br>189,372.29)  | 299,779.11<br>(150,599.07 to<br>552,559.11)     | 3,777.48<br>(2,197.24 to<br>6,312.73)   | 2,862.66<br>(1,454.14 to<br>4,966.38)   | 1,244.79<br>(628.65 to<br>2,188.01)   | 3,464.06<br>(1,740.21 to<br>6,152.34)   |

|                                                                         |                                                        |                                                            |                                                          |                                                            |                                                   |                                                   |                                                   |                                                   |
|-------------------------------------------------------------------------|--------------------------------------------------------|------------------------------------------------------------|----------------------------------------------------------|------------------------------------------------------------|---------------------------------------------------|---------------------------------------------------|---------------------------------------------------|---------------------------------------------------|
| Neonatal sepsis and other neonatal infections                           | 194,012.30<br>(106,744.99 to<br>325,153.11)            | 246,857.33<br>(133,706.20 to<br>416,726.21)                | 104,477.94<br>(57,265.46 to<br>174,649.97)               | 299,039.58<br>(161,326.03 to<br>502,875.25)                | 2,242.08<br>(1,233.88 to<br>3,757.26)             | 2,853.24<br>(1,544.95 to<br>4,815.18)             | 1,207.63<br>(661.79 to<br>2,019.13)               | 3,456.27<br>(1,864.76 to<br>5,810.28)             |
| Hemolytic disease and other neonatal jaundice                           | 27,767.74<br>(12,882.96 to<br>54,146.97)               | 16,901.90<br>(7,030.71 to<br>34,916.60)                    | 6,313.51<br>(2,695.42 to<br>13,297.54)                   | 21,195.99<br>(8,807.61 to<br>45,082.53)                    | 320.84<br>(148.86 to<br>625.49)                   | 195.31<br>(81.28 to<br>403.37)                    | 72.96<br>(31.15 to<br>153.69)                     | 244.92<br>(101.76 to<br>520.85)                   |
| Other neonatal disorders                                                | 145,731.99<br>(77,491.51 to<br>244,614.77)             | 154,085.17<br>(74,499.50 to<br>275,264.42)                 | 57,466.41<br>(26,924.54 to<br>101,377.08)                | 193,188.61<br>(90,832.75 to<br>338,334.09)                 | 1,684.16<br>(895.94 to<br>2,826.58)               | 1,781.12<br>(861.23 to<br>3,181.12)               | 664.32<br>(311.42 to<br>1,172.22)                 | 2,233.03<br>(1,049.72 to<br>3,909.56)             |
| <b>Nutritional deficiencies</b>                                         | <b>304,703.13<br/>(190,745.01 to<br/>461,864.98)</b>   | <b>172,189.60<br/>(110,324.72 to<br/>265,678.91)</b>       | <b>87,163.78<br/>(57,562.16 to<br/>130,171.84)</b>       | <b>198,677.42<br/>(122,139.11 to<br/>307,841.24)</b>       | <b>4,308.26<br/>(2,907.39 to<br/>6,196.41)</b>    | <b>3,099.01<br/>(2,249.78 to<br/>4,384.42)</b>    | <b>1,923.39<br/>(1,444.17 to<br/>2,597.77)</b>    | <b>3,365.54<br/>(2,363.11 to<br/>4,792.70)</b>    |
| Protein-energy malnutrition                                             | 294,235.66<br>(181,016.82 to<br>449,366.93)            | 153,599.99<br>(93,056.28 to<br>245,501.56)                 | 75,246.17<br>(46,700.85 to<br>114,130.23)                | 178,444.90<br>(104,714.59 to<br>288,658.26)                | 4,045.87<br>(2,648.98 to<br>5,933.22)             | 2,605.31<br>(1,802.65 to<br>3,812.69)             | 1,555.08<br>(1,127.07 to<br>2,153.26)             | 2,861.25<br>(1,911.40 to<br>4,221.84)             |
| Iodine deficiency                                                       | 742.12<br>(35.27 to<br>5,569.67)                       | 3,963.29<br>(77.15 to<br>23,087.89)                        | 1,907.38<br>(35.50 to<br>9,597.09)                       | 4,624.66<br>(85.89 to<br>27,130.94)                        | 14.22<br>(0.88 to<br>57.04)                       | 83.70<br>(2.22 to<br>340.65)                      | 49.19<br>(1.11 to<br>178.18)                      | 91.40<br>(2.42 to<br>383.19)                      |
| Dietary iron deficiency                                                 | 380.57<br>(272.41 to<br>537.60)                        | 486.34<br>(310.92 to<br>748.89)                            | 369.16<br>(226.29 to<br>584.73)                          | 512.53<br>(321.46 to<br>795.37)                            | 6.92<br>(4.95 to<br>9.78)                         | 9.03<br>(5.75 to<br>14.16)                        | 7.05<br>(4.35 to<br>11.06)                        | 9.41<br>(6.00 to<br>14.48)                        |
| Other nutritional deficiencies                                          | 9,344.78<br>(6,027.73 to<br>13,846.52)                 | 14,139.98<br>(8,904.57 to<br>21,638.85)                    | 9,641.07<br>(6,070.79 to<br>14,854.54)                   | 15,095.33<br>(9,293.76 to<br>23,349.22)                    | 241.24<br>(163.77 to<br>351.30)                   | 400.98<br>(268.33 to<br>596.56)                   | 312.07<br>(203.89 to<br>468.15)                   | 403.48<br>(264.13 to<br>605.48)                   |
| <b>Other communicable, maternal, neonatal, and nutritional diseases</b> | <b>77,619.53<br/>(37,636.90 to<br/>189,468.37)</b>     | <b>88,701.68<br/>(43,624.01 to<br/>215,327.28)</b>         | <b>44,820.56<br/>(24,338.15 to<br/>95,933.87)</b>        | <b>101,989.67<br/>(48,467.80 to<br/>264,221.02)</b>        | <b>1,104.14<br/>(619.03 to<br/>2,429.47)</b>      | <b>1,364.32<br/>(799.59 to<br/>2,841.54)</b>      | <b>791.15<br/>(517.08 to<br/>1,418.37)</b>        | <b>1,516.67<br/>(860.54 to<br/>3,314.61)</b>      |
| Sexually transmitted infections excluding HIV                           | 14,408.00<br>(6,458.76 to<br>27,684.69)                | 8,898.62<br>(3,676.77 to<br>18,441.64)                     | 4,950.46<br>(2,202.50 to<br>9,365.20)                    | 9,904.18<br>(3,904.56 to<br>20,474.32)                     | 188.15<br>(91.89 to<br>346.59)                    | 123.75<br>(57.62 to<br>232.36)                    | 74.73<br>(37.34 to<br>130.96)                     | 133.52<br>(60.59 to<br>261.46)                    |
| Syphilis                                                                | 13,161.64<br>(5,375.44 to<br>26,382.87)                | 7,542.73<br>(2,578.95 to<br>16,943.78)                     | 3,878.99<br>(1,486.23 to<br>8,147.51)                    | 8,492.97<br>(2,894.68 to<br>18,907.16)                     | 162.56<br>(70.89 to<br>318.00)                    | 95.11<br>(36.52 to<br>205.05)                     | 51.23<br>(21.75 to<br>102.62)                     | 106.25<br>(39.66 to<br>229.50)                    |
| Chlamydial infection                                                    | 244.55<br>(120.05 to<br>390.99)                        | 269.47<br>(109.81 to<br>511.21)                            | 211.05<br>(86.11 to<br>416.42)                           | 281.16<br>(113.18 to<br>538.88)                            | 4.93<br>(2.45 to<br>7.66)                         | 5.62<br>(2.45 to<br>10.31)                        | 4.58<br>(2.03 to<br>8.31)                         | 5.75<br>(2.45 to<br>10.41)                        |
| Gonococcal infection                                                    | 639.40<br>(329.24 to<br>996.87)                        | 693.49<br>(296.30 to<br>1,352.08)                          | 552.17<br>(238.24 to<br>1,071.78)                        | 719.98<br>(306.94 to<br>1,387.73)                          | 13.39<br>(7.00 to<br>20.35)                       | 15.00<br>(6.71 to<br>27.29)                       | 12.43<br>(5.64 to<br>22.33)                       | 15.26<br>(6.84 to<br>27.84)                       |
| Other sexually transmitted infections                                   | 362.41<br>(188.11 to<br>577.26)                        | 392.93<br>(166.19 to<br>757.27)                            | 308.25<br>(127.72 to<br>596.24)                          | 410.07<br>(172.30 to<br>795.18)                            | 7.27<br>(3.81 to<br>11.24)                        | 8.03<br>(3.54 to<br>14.57)                        | 6.49<br>(2.87 to<br>11.93)                        | 8.26<br>(3.57 to<br>15.26)                        |
| Acute hepatitis                                                         | 13,803.37<br>(10,714.16 to<br>17,199.63)               | 16,372.23<br>(11,629.31 to<br>23,151.16)                   | 11,720.02<br>(8,092.48 to<br>16,891.06)                  | 17,346.56<br>(12,342.57 to<br>24,187.21)                   | 304.83<br>(239.88 to<br>380.16)                   | 408.28<br>(296.97 to<br>565.20)                   | 310.72<br>(220.28 to<br>436.06)                   | 420.53<br>(305.71 to<br>574.76)                   |
| Acute hepatitis A                                                       | 589.10<br>(79.82 to<br>1,454.68)                       | 476.63<br>(107.08 to<br>1,176.80)                          | 265.55<br>(67.55 to<br>600.38)                           | 531.55<br>(113.95 to<br>1,341.17)                          | 7.73<br>(1.57 to<br>17.96)                        | 7.70<br>(2.39 to<br>16.08)                        | 4.88<br>(1.69 to<br>9.58)                         | 8.32<br>(2.47 to<br>17.50)                        |
| Acute hepatitis B                                                       | 10,027.44<br>(7,679.79 to<br>12,895.87)                | 12,598.40<br>(8,689.99 to<br>18,222.19)                    | 9,108.10<br>(6,075.84 to<br>13,538.89)                   | 13,319.67<br>(9,143.31 to<br>19,239.77)                    | 240.76<br>(185.75 to<br>304.65)                   | 330.55<br>(238.60 to<br>464.95)                   | 249.04<br>(174.54 to<br>353.88)                   | 341.45<br>(245.99 to<br>477.02)                   |
| Acute hepatitis C                                                       | 257.59<br>(178.36 to<br>369.53)                        | 380.56<br>(240.71 to<br>596.15)                            | 332.67<br>(208.47 to<br>527.46)                          | 381.36<br>(244.59 to<br>589.90)                            | 7.16<br>(4.84 to<br>10.44)                        | 11.41<br>(7.33 to<br>17.48)                       | 10.45<br>(6.53 to<br>16.26)                       | 11.15<br>(7.04 to<br>17.12)                       |
| Acute hepatitis E                                                       | 2,929.25<br>(2,019.49 to<br>3,992.35)                  | 2,916.64<br>(1,902.40 to<br>4,389.60)                      | 2,013.70<br>(1,314.49 to<br>3,037.64)                    | 3,113.98<br>(2,010.37 to<br>4,768.03)                      | 49.18<br>(35.34 to<br>66.55)                      | 58.62<br>(39.63 to<br>84.24)                      | 46.36<br>(30.55 to<br>67.56)                      | 59.62<br>(40.17 to<br>85.91)                      |
| Other unspecified infectious diseases                                   | 49,408.16<br>(14,938.95 to<br>163,856.01)              | 63,430.84<br>(22,059.30 to<br>186,922.97)                  | 28,150.07<br>(10,336.12 to<br>80,071.05)                 | 74,738.93<br>(24,768.97 to<br>233,196.44)                  | 611.16<br>(205.53 to<br>1,952.04)                 | 832.29<br>(342.13 to<br>2,262.10)                 | 405.70<br>(185.82 to<br>1,009.65)                 | 960.62<br>(371.75 to<br>2,782.71)                 |
| <b>Non-communicable diseases</b>                                        | <b>947,521.86<br/>(801,822.50 to<br/>1,103,345.93)</b> | <b>1,644,006.97<br/>(1,212,228.70 to<br/>2,201,919.30)</b> | <b>1,123,546.10<br/>(820,756.84 to<br/>1,498,547.61)</b> | <b>2,030,281.73<br/>(1,436,889.66 to<br/>2,793,123.67)</b> | <b>29,923.98<br/>(25,382.10 to<br/>34,665.48)</b> | <b>58,065.09<br/>(45,151.70 to<br/>74,225.53)</b> | <b>42,898.13<br/>(33,604.39 to<br/>53,697.04)</b> | <b>69,559.94<br/>(52,339.13 to<br/>91,337.32)</b> |
| <b>Burundi</b>                                                          |                                                        |                                                            |                                                          |                                                            |                                                   |                                                   |                                                   |                                                   |
| <b>YLLs (actual counts)</b>                                             |                                                        |                                                            |                                                          |                                                            | <b>Deaths (actual counts)</b>                     |                                                   |                                                   |                                                   |

| Cause                                | 2016                                            | 2040 Forecast                                   | 2040 Better Scenario                            | 2040 Worse Scenario                             | 2016                                      | 2040 Forecast                               | 2040 Better Scenario                        | 2040 Worse Scenario                         |
|--------------------------------------|-------------------------------------------------|-------------------------------------------------|-------------------------------------------------|-------------------------------------------------|-------------------------------------------|---------------------------------------------|---------------------------------------------|---------------------------------------------|
| <b>Neoplasms</b>                     | <b>200,762.64</b><br>(157,836.08 to 241,174.36) | <b>350,039.50</b><br>(243,728.58 to 476,555.02) | <b>333,730.25</b><br>(230,170.05 to 454,706.21) | <b>370,603.64</b><br>(258,951.78 to 499,819.73) | <b>6,165.81</b><br>(4,805.83 to 7,407.21) | <b>11,287.70</b><br>(8,270.06 to 14,539.26) | <b>11,494.22</b><br>(8,410.94 to 14,942.99) | <b>11,605.78</b><br>(8,462.60 to 14,998.10) |
| Lip and oral cavity cancer           | 2,679.02<br>(2,192.37 to 3,237.09)              | 4,590.09<br>(2,593.29 to 7,152.23)              | 3,611.01<br>(2,029.62 to 5,916.26)              | 6,827.00<br>(3,738.50 to 11,836.07)             | 92.01<br>(75.87 to 110.50)                | 158.67<br>(93.03 to 259.68)                 | 133.11<br>(78.49 to 214.82)                 | 226.20<br>(130.23 to 369.41)                |
| Nasopharynx cancer                   | 2,172.09<br>(1,750.63 to 2,633.87)              | 4,126.49<br>(2,374.61 to 6,680.29)              | 3,000.66<br>(1,741.59 to 4,955.58)              | 6,202.26<br>(3,445.82 to 10,194.23)             | 62.31<br>(50.61 to 75.27)                 | 119.64<br>(69.56 to 190.51)                 | 91.13<br>(54.21 to 146.71)                  | 175.38<br>(98.36 to 282.40)                 |
| Other pharynx cancer                 | 2,063.67<br>(1,606.92 to 2,635.65)              | 3,221.74<br>(1,733.54 to 5,704.90)              | 2,717.05<br>(1,411.93 to 4,846.84)              | 4,429.38<br>(2,303.86 to 7,860.14)              | 65.72<br>(51.50 to 83.63)                 | 104.34<br>(57.07 to 179.06)                 | 91.13<br>(48.90 to 155.13)                  | 140.38<br>(77.08 to 241.77)                 |
| Esophageal cancer                    | 9,813.32<br>(7,938.70 to 11,979.58)             | 17,486.79<br>(9,206.19 to 31,767.47)            | 14,252.54<br>(7,499.69 to 26,207.20)            | 22,684.55<br>(11,674.77 to 42,992.74)           | 383.64<br>(313.17 to 463.55)              | 680.89<br>(380.60 to 1,199.48)              | 584.71<br>(327.08 to 1,032.14)              | 849.69<br>(460.98 to 1,512.35)              |
| Stomach cancer                       | 9,939.79<br>(8,186.06 to 11,864.58)             | 13,940.35<br>(10,258.86 to 19,778.55)           | 12,509.69<br>(8,889.24 to 17,767.93)            | 14,223.07<br>(10,328.55 to 20,250.44)           | 370.91<br>(308.17 to 439.24)              | 529.18<br>(409.72 to 715.56)                | 499.93<br>(372.83 to 674.63)                | 523.36<br>(403.89 to 710.82)                |
| Colon and rectum cancer              | 9,780.74<br>(7,877.82 to 11,890.16)             | 19,983.80<br>(12,586.51 to 30,284.43)           | 21,255.54<br>(13,598.82 to 32,109.10)           | 21,437.20<br>(13,257.90 to 33,144.28)           | 371.88<br>(306.92 to 447.72)              | 791.03<br>(535.55 to 1,126.95)              | 904.02<br>(611.72 to 1,294.22)              | 810.88<br>(535.65 to 1,186.91)              |
| Liver cancer                         | 11,694.61<br>(8,675.31 to 15,302.28)            | 20,309.67<br>(13,340.56 to 30,299.48)           | 19,403.17<br>(12,689.27 to 29,259.95)           | 23,681.22<br>(15,015.17 to 36,331.49)           | 375.58<br>(281.72 to 490.61)              | 672.94<br>(470.78 to 964.58)                | 678.93<br>(478.14 to 956.02)                | 759.22<br>(513.66 to 1,113.67)              |
| Liver cancer due to hepatitis B      | 4,004.19<br>(2,742.29 to 5,625.50)              | 6,985.85<br>(4,138.12 to 11,017.84)             | 6,767.66<br>(3,991.54 to 10,701.39)             | 7,502.57<br>(4,400.40 to 12,126.85)             | 114.79<br>(78.80 to 160.55)               | 206.51<br>(128.70 to 319.29)                | 208.59<br>(129.72 to 316.98)                | 215.58<br>(130.46 to 337.26)                |
| Liver cancer due to hepatitis C      | 2,853.06<br>(1,805.64 to 4,116.00)              | 5,186.35<br>(3,041.57 to 8,069.71)              | 5,220.44<br>(3,061.70 to 8,140.55)              | 5,361.72<br>(3,057.15 to 8,615.95)              | 107.90<br>(70.49 to 153.87)               | 203.13<br>(128.58 to 298.56)                | 217.30<br>(139.66 to 318.16)                | 201.59<br>(125.28 to 306.07)                |
| Liver cancer due to alcohol use      | 2,346.88<br>(1,620.22 to 3,227.64)              | 3,768.41<br>(2,309.98 to 5,945.11)              | 3,202.31<br>(2,033.83 to 5,192.39)              | 6,118.81<br>(3,640.72 to 9,983.42)              | 81.87<br>(56.44 to 111.16)                | 133.04<br>(86.95 to 200.34)                 | 122.89<br>(80.66 to 186.67)                 | 206.27<br>(133.35 to 315.73)                |
| Liver cancer due to other causes     | 2,490.48<br>(1,724.44 to 3,453.72)              | 4,369.05<br>(2,741.50 to 6,802.31)              | 4,112.77<br>(2,578.62 to 6,304.79)              | 4,698.12<br>(2,901.28 to 7,486.71)              | 71.01<br>(50.31 to 96.53)                 | 130.26<br>(85.58 to 196.21)                 | 130.16<br>(87.39 to 196.21)                 | 135.79<br>(87.37 to 215.13)                 |
| Gallbladder and biliary tract cancer | 1,245.98<br>(982.36 to 1,546.51)                | 1,546.69<br>(1,138.61 to 2,098.58)              | 1,687.23<br>(1,212.10 to 2,342.26)              | 1,454.70<br>(1,082.92 to 1,919.32)              | 48.28<br>(38.20 to 59.89)                 | 61.40<br>(47.96 to 77.63)                   | 70.79<br>(54.91 to 93.18)                   | 55.86<br>(43.61 to 69.07)                   |
| Pancreatic cancer                    | 3,707.76<br>(3,096.40 to 4,358.00)              | 7,516.37<br>(5,520.83 to 10,150.41)             | 8,406.48<br>(6,030.90 to 11,646.11)             | 7,216.01<br>(5,399.21 to 9,635.89)              | 141.39<br>(119.69 to 165.59)              | 291.99<br>(226.26 to 375.48)                | 344.49<br>(263.85 to 453.08)                | 270.74<br>(213.34 to 341.80)                |
| Larynx cancer                        | 1,946.58<br>(1,524.91 to 2,505.65)              | 3,138.70<br>(1,644.67 to 5,712.02)              | 2,289.05<br>(1,275.71 to 3,992.48)              | 4,578.49<br>(2,122.25 to 8,935.32)              | 69.53<br>(55.41 to 87.90)                 | 113.02<br>(62.60 to 198.26)                 | 87.60<br>(51.84 to 144.90)                  | 158.55<br>(78.49 to 299.93)                 |
| Tracheal, bronchus, and lung cancer  | 5,737.42<br>(4,768.69 to 6,869.64)              | 9,725.28<br>(5,801.82 to 15,634.86)             | 6,845.74<br>(4,366.16 to 10,445.83)             | 12,075.67<br>(6,896.94 to 20,000.10)            | 225.42<br>(188.59 to 269.79)              | 389.28<br>(244.03 to 605.53)                | 294.91<br>(197.73 to 438.60)                | 464.23<br>(281.78 to 742.70)                |
| Malignant skin melanoma              | 1,673.82<br>(1,214.88 to 2,084.65)              | 2,868.01<br>(1,962.84 to 3,885.75)              | 3,481.29<br>(2,371.77 to 4,789.18)              | 2,637.70<br>(1,808.03 to 3,505.69)              | 61.53<br>(44.35 to 76.19)                 | 108.02<br>(77.04 to 137.49)                 | 138.56<br>(99.30 to 180.46)                 | 96.16<br>(68.45 to 121.74)                  |
| Non-melanoma skin cancer             | 1,061.38<br>(834.68 to 1,341.97)                | 2,297.50<br>(1,736.46 to 2,964.09)              | 2,142.62<br>(1,596.78 to 2,825.69)              | 2,237.23<br>(1,685.24 to 2,871.38)              | 42.08<br>(32.51 to 53.33)                 | 97.01<br>(77.49 to 118.43)                  | 97.89<br>(78.72 to 120.03)                  | 90.15<br>(70.71 to 110.11)                  |
| Breast cancer                        | 13,601.78<br>(9,281.26 to 18,642.42)            | 27,202.92<br>(13,533.60 to 51,700.96)           | 27,004.19<br>(13,531.32 to 50,188.58)           | 30,687.20<br>(13,984.43 to 63,212.00)           | 416.76<br>(284.55 to 565.21)              | 855.61<br>(456.31 to 1,579.66)              | 884.28<br>(484.32 to 1,586.06)              | 940.80<br>(459.55 to 1,907.78)              |
| Cervical cancer                      | 27,372.53<br>(16,732.14 to 37,053.73)           | 45,293.50<br>(23,873.05 to 69,540.49)           | 38,504.30<br>(20,022.26 to 60,409.10)           | 46,403.22<br>(24,474.61 to 71,829.37)           | 860.95<br>(538.63 to 1,160.00)            | 1,418.90<br>(793.08 to 2,103.22)            | 1,247.78<br>(686.50 to 1,895.21)            | 1,423.06<br>(785.29 to 2,095.52)            |
| Uterine cancer                       | 2,987.95<br>(2,166.45 to 3,905.99)              | 6,310.18<br>(4,069.27 to 9,212.61)              | 5,230.13<br>(3,288.28 to 7,883.74)              | 6,417.33<br>(4,189.31 to 9,332.28)              | 104.83<br>(77.36 to 135.97)               | 222.83<br>(152.89 to 304.91)                | 192.43<br>(129.19 to 274.48)                | 220.91<br>(153.64 to 302.74)                |

|                                 |                                                                  |                                                                  |                                                                  |                                                                    |                                                               |                                                               |                                                               |                                                               |
|---------------------------------|------------------------------------------------------------------|------------------------------------------------------------------|------------------------------------------------------------------|--------------------------------------------------------------------|---------------------------------------------------------------|---------------------------------------------------------------|---------------------------------------------------------------|---------------------------------------------------------------|
| Ovarian cancer                  | 4,429.62<br>(2,841.11 to<br>5,856.11)                            | 8,076.43<br>(4,625.09 to<br>12,053.71)                           | 9,488.94<br>(5,525.88 to<br>14,245.19)                           | 7,754.17<br>(4,454.69 to<br>11,563.21)                             | 143.47<br>(92.29 to<br>185.94)                                | 266.31<br>(156.07 to<br>378.27)                               | 327.33<br>(196.54 to<br>466.19)                               | 249.91<br>(146.35 to<br>353.83)                               |
| Prostate cancer                 | 11,959.19<br>(4,172.76 to<br>18,095.85)                          | 24,991.75<br>(9,161.90 to<br>36,297.95)                          | 29,414.93<br>(11,555.38 to<br>43,164.00)                         | 22,610.91<br>(8,198.22 to<br>32,514.09)                            | 608.88<br>(214.53 to<br>914.24)                               | 1,355.23<br>(516.75 to<br>1,864.28)                           | 1,683.48<br>(677.53 to<br>2,344.06)                           | 1,188.08<br>(440.43 to<br>1,663.54)                           |
| Testicular cancer               | 518.29<br>(362.77 to<br>710.03)                                  | 870.30<br>(590.53 to<br>1,261.17)                                | 775.94<br>(510.83 to<br>1,131.01)                                | 880.84<br>(596.63 to<br>1,278.65)                                  | 11.50<br>(8.04 to<br>16.09)                                   | 19.66<br>(13.30 to<br>28.71)                                  | 17.97<br>(11.81 to<br>26.78)                                  | 19.62<br>(13.34 to<br>28.72)                                  |
| <b>Burundi</b>                  |                                                                  |                                                                  |                                                                  |                                                                    |                                                               |                                                               |                                                               |                                                               |
| Cause                           | YLLs (actual counts)                                             |                                                                  |                                                                  |                                                                    | Deaths (actual counts)                                        |                                                               |                                                               |                                                               |
|                                 | 2016                                                             | 2040 Forecast                                                    | 2040 Better Scenario                                             | 2040 Worse Scenario                                                | 2016                                                          | 2040 Forecast                                                 | 2040 Better Scenario                                          | 2040 Worse Scenario                                           |
|                                 | 1,996.42<br>(1,338.10 to<br>2,899.64)                            | 2,962.94<br>(2,044.42 to<br>4,213.58)                            | 3,008.47<br>(2,149.69 to<br>4,161.21)                            | 2,894.55<br>(1,994.68 to<br>4,175.52)                              | 41.09<br>(30.48 to<br>54.03)                                  | 72.17<br>(53.94 to<br>94.41)                                  | 83.89<br>(63.89 to<br>109.70)                                 | 67.43<br>(50.23 to<br>88.06)                                  |
| Kidney cancer                   | 2,290.21<br>(1,914.79 to<br>2,718.55)                            | 4,054.37<br>(3,045.38 to<br>5,385.17)                            | 4,062.95<br>(2,952.71 to<br>5,541.11)                            | 3,985.29<br>(3,026.62 to<br>5,241.48)                              | 98.81<br>(83.67 to<br>117.25)                                 | 181.06<br>(145.11 to<br>228.63)                               | 195.07<br>(153.14 to<br>248.53)                               | 170.26<br>(137.50 to<br>218.09)                               |
| Bladder cancer                  | 5,774.58<br>(4,512.19 to<br>7,178.85)                            | 10,352.92<br>(7,792.22 to<br>13,510.25)                          | 10,122.41<br>(7,598.74 to<br>13,396.14)                          | 10,172.77<br>(7,702.29 to<br>13,147.19)                            | 125.18<br>(100.36 to<br>151.75)                               | 242.31<br>(188.38 to<br>307.50)                               | 257.77<br>(198.61 to<br>335.63)                               | 230.63<br>(182.05 to<br>290.26)                               |
| Brain and nervous system cancer | 2,363.27<br>(1,306.32 to<br>2,977.30)                            | 3,917.21<br>(2,067.82 to<br>5,751.59)                            | 3,390.12<br>(1,820.03 to<br>5,091.40)                            | 4,105.27<br>(2,164.43 to<br>6,121.70)                              | 73.24<br>(40.44 to<br>91.51)                                  | 124.80<br>(68.53 to<br>175.08)                                | 112.96<br>(63.96 to<br>160.51)                                | 127.58<br>(68.76 to<br>182.55)                                |
| Mesothelioma                    | 340.17<br>(221.29 to<br>474.40)                                  | 674.58<br>(416.09 to<br>1,015.90)                                | 657.27<br>(397.14 to<br>1,018.05)                                | 659.21<br>(408.57 to<br>973.25)                                    | 11.23<br>(7.06 to<br>15.66)                                   | 22.67<br>(13.87 to<br>32.41)                                  | 23.21<br>(13.67 to<br>33.66)                                  | 21.53<br>(13.37 to<br>30.60)                                  |
| Hodgkin lymphoma                | 3,681.53<br>(1,737.03 to<br>5,367.04)                            | 5,048.39<br>(2,167.28 to<br>7,817.19)                            | 3,448.70<br>(1,490.91 to<br>5,203.59)                            | 5,447.26<br>(2,291.31 to<br>8,290.37)                              | 75.84<br>(36.18 to<br>105.52)                                 | 110.48<br>(48.43 to<br>165.72)                                | 79.99<br>(35.04 to<br>120.15)                                 | 116.44<br>(50.24 to<br>172.51)                                |
| Non-Hodgkin lymphoma            | 21,823.82<br>(13,173.59 to<br>29,198.60)                         | 32,996.00<br>(19,226.39 to<br>46,487.37)                         | 31,457.36<br>(18,560.88 to<br>43,784.58)                         | 32,976.61<br>(19,156.55 to<br>46,452.70)                           | 414.41<br>(256.96 to<br>533.52)                               | 680.60<br>(416.04 to<br>922.43)                               | 709.73<br>(440.06 to<br>949.47)                               | 662.48<br>(396.27 to<br>898.61)                               |
| Multiple myeloma                | 2,214.91<br>(1,370.15 to<br>2,935.04)                            | 4,391.50<br>(2,500.89 to<br>6,356.94)                            | 5,051.93<br>(2,918.93 to<br>7,473.38)                            | 4,198.94<br>(2,366.75 to<br>5,997.83)                              | 75.61<br>(47.26 to<br>99.95)                                  | 151.76<br>(89.39 to<br>213.37)                                | 180.33<br>(109.02 to<br>256.60)                               | 142.09<br>(82.96 to<br>197.92)                                |
| Leukemia                        | 8,074.85<br>(6,372.73 to<br>9,932.33)                            | 11,282.56<br>(8,250.57 to<br>14,848.62)                          | 10,367.86<br>(7,526.64 to<br>13,903.41)                          | 11,526.79<br>(8,414.58 to<br>15,182.93)                            | 168.55<br>(134.99 to<br>201.06)                               | 265.75<br>(203.02 to<br>339.19)                               | 264.63<br>(199.38 to<br>337.61)                               | 263.49<br>(200.44 to<br>334.68)                               |
| Acute lymphoid leukemia         | 2,603.26<br>(1,940.48 to<br>3,386.00)                            | 3,392.37<br>(2,346.47 to<br>4,589.97)                            | 3,151.61<br>(2,171.44 to<br>4,217.07)                            | 3,436.22<br>(2,369.12 to<br>4,611.39)                              | 44.88<br>(34.68 to<br>55.86)                                  | 64.36<br>(45.96 to<br>84.36)                                  | 64.31<br>(46.59 to<br>86.12)                                  | 64.01<br>(45.76 to<br>84.62)                                  |
| Chronic lymphoid leukemia       | 222.90<br>(173.87 to<br>282.63)                                  | 357.42<br>(254.49 to<br>467.97)                                  | 377.90<br>(262.67 to<br>515.35)                                  | 347.06<br>(250.03 to<br>450.91)                                    | 9.13<br>(7.07 to<br>11.62)                                    | 14.97<br>(11.13 to<br>19.35)                                  | 16.61<br>(11.94 to<br>21.95)                                  | 14.08<br>(10.64 to<br>18.20)                                  |
| Acute myeloid leukemia          | 1,549.65<br>(1,192.69 to<br>1,985.22)                            | 2,596.66<br>(1,848.22 to<br>3,486.27)                            | 2,710.34<br>(1,954.33 to<br>3,586.92)                            | 2,574.59<br>(1,836.91 to<br>3,462.50)                              | 31.01<br>(24.52 to<br>38.16)                                  | 57.89<br>(44.15 to<br>74.24)                                  | 65.93<br>(50.06 to<br>85.60)                                  | 55.87<br>(42.21 to<br>71.97)                                  |
| Chronic myeloid leukemia        | 987.61<br>(759.55 to<br>1,247.11)                                | 1,103.55<br>(739.68 to<br>1,576.52)                              | 1,066.03<br>(701.57 to<br>1,544.91)                              | 1,130.67<br>(759.38 to<br>1,615.78)                                | 23.95<br>(18.66 to<br>30.08)                                  | 27.90<br>(19.20 to<br>39.19)                                  | 27.78<br>(18.89 to<br>39.27)                                  | 28.07<br>(19.39 to<br>39.21)                                  |
| Other leukemia                  | 2,711.43<br>(1,963.64 to<br>3,461.91)                            | 3,832.55<br>(2,644.94 to<br>5,172.23)                            | 3,061.98<br>(2,100.20 to<br>4,209.87)                            | 4,038.25<br>(2,748.68 to<br>5,439.99)                              | 59.58<br>(44.24 to<br>73.86)                                  | 100.64<br>(73.60 to<br>128.37)                                | 90.00<br>(65.61 to<br>116.21)                                 | 101.46<br>(73.18 to<br>129.08)                                |
| Other neoplasms                 | 27,817.35<br>(22,771.09 to<br>33,010.32)                         | 50,862.49<br>(37,659.06 to<br>67,868.01)                         | 50,162.69<br>(36,314.15 to<br>68,276.65)                         | 50,198.82<br>(37,461.20 to<br>65,491.20)                           | 625.21<br>(508.63 to<br>740.57)                               | 1,180.16<br>(895.23 to<br>1,526.48)                           | 1,216.17<br>(910.37 to<br>1,599.07)                           | 1,140.67<br>(864.39 to<br>1,472.85)                           |
| <b>Cardiovascular diseases</b>  | <b>300,650.71</b><br><b>(252,334.47 to</b><br><b>350,646.32)</b> | <b>608,643.07</b><br><b>(381,201.82 to</b><br><b>934,312.33)</b> | <b>306,821.71</b><br><b>(198,077.82 to</b><br><b>454,280.07)</b> | <b>879,476.43</b><br><b>(521,439.69 to</b><br><b>1,391,054.00)</b> | <b>12,297.08</b><br><b>(10,389.52 to</b><br><b>14,245.65)</b> | <b>26,022.02</b><br><b>(18,183.60 to</b><br><b>36,650.40)</b> | <b>14,821.43</b><br><b>(10,653.86 to</b><br><b>20,654.60)</b> | <b>35,280.84</b><br><b>(23,539.60 to</b><br><b>51,774.90)</b> |
| Rheumatic heart disease         | 7,562.44<br>(5,669.34 to<br>9,796.12)                            | 7,727.33<br>(5,051.50 to<br>11,606.27)                           | 5,078.63<br>(3,245.26 to<br>7,811.76)                            | 8,460.66<br>(5,377.44 to<br>12,888.45)                             | 220.92<br>(166.23 to<br>283.46)                               | 244.76<br>(168.98 to<br>359.26)                               | 173.07<br>(116.94 to<br>258.41)                               | 257.95<br>(174.55 to<br>382.83)                               |

|                                               | 103,000.63<br>(82,401.14 to<br>126,546.46)                    | 223,846.09<br>(119,292.54 to<br>395,551.43)                    | 93,804.02<br>(50,498.12 to<br>167,461.41)                     | 340,711.98<br>(174,107.32 to<br>605,463.79)                    | 4,587.20<br>(3,735.47 to<br>5,555.05)                      | 10,096.05<br>(6,029.09 to<br>16,477.14)                    | 4,913.17<br>(2,938.85 to<br>8,089.18)                      | 14,177.75<br>(8,065.92 to<br>24,151.02)                    |
|-----------------------------------------------|---------------------------------------------------------------|----------------------------------------------------------------|---------------------------------------------------------------|----------------------------------------------------------------|------------------------------------------------------------|------------------------------------------------------------|------------------------------------------------------------|------------------------------------------------------------|
| Ischemic heart disease                        | 106,974.37<br>(88,278.10 to<br>128,810.70)                    | 210,546.62<br>(113,451.62 to<br>392,165.46)                    | 82,992.27<br>(45,590.45 to<br>148,649.11)                     | 337,710.25<br>(178,232.67 to<br>617,043.24)                    | 4,421.11<br>(3,684.81 to<br>5,323.47)                      | 8,829.78<br>(5,366.91 to<br>14,788.36)                     | 3,997.41<br>(2,463.70 to<br>6,632.26)                      | 13,344.28<br>(7,653.40 to<br>22,777.21)                    |
| Stroke                                        | 25,837.94<br>(20,438.47 to<br>31,948.44)                      | 43,727.48<br>(25,127.85 to<br>79,551.60)                       | 22,471.23<br>(13,058.17 to<br>39,409.36)                      | 59,602.30<br>(32,791.35 to<br>109,009.70)                      | 1,415.68<br>(1,140.59 to<br>1,752.07)                      | 2,508.37<br>(1,547.09 to<br>4,297.66)                      | 1,462.92<br>(913.81 to<br>2,447.13)                        | 3,189.19<br>(1,857.15 to<br>5,622.08)                      |
| Ischemic stroke                               | 81,136.42<br>(65,189.76 to<br>98,065.80)                      | 166,819.14<br>(82,266.47 to<br>331,753.13)                     | 60,521.05<br>(30,597.76 to<br>118,661.66)                     | 278,107.95<br>(133,380.20 to<br>545,746.34)                    | 3,005.42<br>(2,407.22 to<br>3,671.77)                      | 6,321.41<br>(3,395.59 to<br>11,722.75)                     | 2,534.48<br>(1,419.33 to<br>4,739.23)                      | 10,155.08<br>(5,248.93 to<br>18,762.67)                    |
| Intracerebral hemorrhage                      | 19,929.94<br>(11,161.18 to<br>30,456.66)                      | 42,369.37<br>(17,437.52 to<br>89,863.22)                       | 28,069.19<br>(12,143.12 to<br>56,346.11)                      | 58,647.18<br>(21,559.18 to<br>144,794.89)                      | 897.94<br>(499.36 to<br>1,340.56)                          | 2,014.05<br>(902.30 to<br>4,040.30)                        | 1,462.29<br>(694.59 to<br>2,701.27)                        | 2,604.14<br>(1,039.76 to<br>6,127.82)                      |
| Hypertensive heart disease                    | 9,067.51<br>(6,642.32 to<br>12,296.01)                        | 13,619.45<br>(8,959.54 to<br>19,997.13)                        | 12,573.96<br>(7,944.05 to<br>18,924.48)                       | 14,572.03<br>(9,510.23 to<br>21,158.75)                        | 218.19<br>(163.04 to<br>285.33)                            | 373.29<br>(249.49 to<br>524.31)                            | 580.49<br>(250.99 to<br>547.66)                            | 386.13<br>(258.36 to<br>554.71)                            |
| Cardiomyopathy and myocarditis                | 1,460.46<br>(859.63 to<br>2,472.41)                           | 1,888.38<br>(974.16 to<br>3,454.62)                            | 1,517.01<br>(720.66 to<br>2,973.91)                           | 1,954.43<br>(1,022.82 to<br>3,476.24)                          | 27.02<br>(15.15 to<br>47.64)                               | 40.77<br>(19.05 to<br>81.05)                               | 36.27<br>(15.36 to<br>77.34)                               | 40.60<br>(19.55 to<br>78.46)                               |
| <b>Burundi</b>                                |                                                               |                                                                |                                                               |                                                                |                                                            |                                                            |                                                            |                                                            |
| Cause                                         | YLLs (actual counts)                                          |                                                                |                                                               |                                                                | Deaths (actual counts)                                     |                                                            |                                                            |                                                            |
|                                               | 2016                                                          | 2040 Forecast                                                  | 2040 Better Scenario                                          | 2040 Worse Scenario                                            | 2016                                                       | 2040 Forecast                                              | 2040 Better Scenario                                       | 2040 Worse Scenario                                        |
| Alcoholic cardiomyopathy                      | 791.27<br>(366.44 to<br>1,662.99)                             | 1,174.40<br>(489.69 to<br>2,751.95)                            | 1,153.57<br>(462.29 to<br>2,869.45)                           | 1,846.93<br>(822.19 to<br>3,919.45)                            | 23.97<br>(11.03 to<br>49.78)                               | 35.25<br>(15.25 to<br>84.04)                               | 35.51<br>(14.75 to<br>89.53)                               | 54.73<br>(24.81 to<br>113.97)                              |
| Other cardiomyopathy                          | 6,815.78<br>(4,680.46 to<br>9,338.34)                         | 10,556.68<br>(6,500.68 to<br>15,602.13)                        | 9,903.39<br>(6,047.29 to<br>14,847.05)                        | 10,770.67<br>(6,570.38 to<br>16,258.10)                        | 167.19<br>(118.16 to<br>222.11)                            | 297.28<br>(185.53 to<br>423.11)                            | 308.72<br>(192.44 to<br>452.87)                            | 290.80<br>(179.41 to<br>429.05)                            |
| Atrial fibrillation and flutter               | 953.44<br>(713.59 to<br>1,231.52)                             | 1,845.71<br>(1,316.43 to<br>2,490.93)                          | 2,088.31<br>(1,488.64 to<br>2,878.29)                         | 1,913.77<br>(1,327.07 to<br>2,666.64)                          | 77.04<br>(57.58 to<br>99.15)                               | 157.97<br>(110.91 to<br>217.86)                            | 196.47<br>(139.23 to<br>270.76)                            | 152.34<br>(102.42 to<br>216.78)                            |
| Aortic aneurysm                               | 2,241.56<br>(1,610.05 to<br>3,063.10)                         | 4,030.45<br>(2,587.01 to<br>6,007.75)                          | 4,100.01<br>(2,575.07 to<br>6,201.25)                         | 4,063.44<br>(2,584.62 to<br>6,242.96)                          | 89.75<br>(65.18 to<br>120.10)                              | 167.82<br>(114.87 to<br>236.14)                            | 186.58<br>(128.37 to<br>265.52)                            | 160.04<br>(109.87 to<br>230.37)                            |
| Peripheral artery disease                     | 130.50<br>(36.52 to<br>282.42)                                | 328.29<br>(92.42 to<br>805.25)                                 | 401.84<br>(113.78 to<br>1,065.02)                             | 316.06<br>(86.71 to<br>763.62)                                 | 7.51<br>(2.09 to<br>16.01)                                 | 20.63<br>(5.74 to<br>49.31)                                | 28.41<br>(8.05 to<br>75.44)                                | 18.55<br>(5.06 to<br>43.08)                                |
| Endocarditis                                  | 4,209.27<br>(2,870.65 to<br>5,561.11)                         | 7,814.29<br>(4,603.78 to<br>11,737.12)                         | 6,759.42<br>(4,049.48 to<br>10,214.05)                        | 8,110.54<br>(4,749.99 to<br>12,325.63)                         | 111.03<br>(77.23 to<br>148.14)                             | 219.74<br>(133.66 to<br>321.26)                            | 212.33<br>(130.43 to<br>304.97)                            | 217.02<br>(130.61 to<br>320.83)                            |
| Other cardiovascular and circulatory diseases | 46,581.05<br>(35,690.57 to<br>63,005.49)                      | 96,515.46<br>(67,569.14 to<br>140,087.76)                      | 70,954.05<br>(48,360.58 to<br>105,175.58)                     | 104,970.53<br>(71,862.48 to<br>155,212.37)                     | 1,666.39<br>(1,237.68 to<br>2,310.01)                      | 3,897.93<br>(2,823.17 to<br>5,490.82)                      | 3,271.21<br>(2,340.25 to<br>4,660.29)                      | 3,962.64<br>(2,806.69 to<br>5,716.28)                      |
| <b>Chronic respiratory diseases</b>           | <b>58,574.14</b><br><b>(48,794.06 to</b><br><b>69,333.05)</b> | <b>72,157.57</b><br><b>(48,389.14 to</b><br><b>112,903.66)</b> | <b>42,302.24</b><br><b>(30,054.28 to</b><br><b>61,361.05)</b> | <b>88,915.03</b><br><b>(57,340.56 to</b><br><b>142,477.40)</b> | <b>2,094.75</b><br><b>(1,765.36 to</b><br><b>2,429.55)</b> | <b>2,936.27</b><br><b>(2,045.92 to</b><br><b>4,765.75)</b> | <b>1,830.49</b><br><b>(1,343.12 to</b><br><b>2,651.91)</b> | <b>3,433.26</b><br><b>(2,308.41 to</b><br><b>5,845.54)</b> |
| Chronic obstructive pulmonary disease         | 30,394.98<br>(23,493.18 to<br>37,503.43)                      | 48,661.97<br>(28,060.65 to<br>88,923.09)                       | 24,907.17<br>(15,598.84 to<br>40,117.11)                      | 62,331.65<br>(34,667.18 to<br>113,406.25)                      | 631.65<br>(407.81 to<br>1,047.81)                          | 1,346.58<br>(1,409.85 to<br>4,096.77)                      | 1,265.13<br>(843.45 to<br>1,990.06)                        | 2,687.70<br>(1,621.39 to<br>4,979.29)                      |
| Pneumoconiosis                                | 188.04<br>(106.04 to<br>308.83)                               | 271.58<br>(159.66 to<br>430.81)                                | 235.29<br>(130.38 to<br>387.48)                               | 264.26<br>(156.26 to<br>413.27)                                | 7.91<br>(4.55 to<br>13.05)                                 | 12.42<br>(7.27 to<br>19.53)                                | 11.53<br>(6.61 to<br>18.86)                                | 11.53<br>(6.85 to<br>17.87)                                |
| Silicosis                                     | 45.90<br>(17.58 to<br>82.46)                                  | 44.51<br>(17.60 to<br>80.23)                                   | 41.14<br>(14.65 to<br>76.45)                                  | 43.01<br>(17.36 to<br>77.58)                                   | 2.11<br>(0.80 to<br>3.83)                                  | 2.25<br>(0.88 to<br>4.02)                                  | 2.23<br>(0.80 to<br>4.04)                                  | 2.08<br>(0.83 to<br>3.68)                                  |
| Asbestosis                                    | 39.04<br>(17.62 to<br>73.56)                                  | 66.49<br>(29.58 to<br>128.04)                                  | 69.70<br>(31.09 to<br>134.73)                                 | 63.20<br>(28.78 to<br>121.13)                                  | 1.44<br>(0.51 to<br>3.07)                                  | 2.72<br>(1.00 to<br>5.51)                                  | 3.10<br>(1.13 to<br>6.36)                                  | 2.46<br>(0.93 to<br>4.93)                                  |
| Coal workers pneumoconiosis                   | 18.26<br>(7.30 to<br>42.50)                                   | 29.11<br>(11.23 to<br>65.10)                                   | 17.35<br>(6.06 to<br>42.44)                                   | 30.30<br>(11.94 to<br>67.54)                                   | 0.78<br>(0.31 to<br>1.75)                                  | 1.30<br>(0.52 to<br>2.77)                                  | 0.81<br>(0.29 to<br>1.85)                                  | 1.30<br>(0.52 to<br>2.83)                                  |

|                                                                |                                                    |                                                     |                                                    |                                                     |                                                |                                                |                                                |                                                |
|----------------------------------------------------------------|----------------------------------------------------|-----------------------------------------------------|----------------------------------------------------|-----------------------------------------------------|------------------------------------------------|------------------------------------------------|------------------------------------------------|------------------------------------------------|
| Other pneumoconiosis                                           | 84.84<br>(41.05 to<br>163.59)                      | 131.47<br>(64.99 to<br>223.56)                      | 107.10<br>(48.65 to<br>204.12)                     | 127.75<br>(63.29 to<br>214.01)                      | 3.58<br>(1.71 to<br>6.95)                      | 6.15<br>(2.98 to<br>10.85)                     | 5.39<br>(2.44 to<br>10.50)                     | 5.69<br>(2.77 to<br>9.80)                      |
| Asthma                                                         | 25,032.99<br>(19,246.06 to<br>32,959.35)           | 18,611.46<br>(12,714.95 to<br>29,441.42)            | 13,146.59<br>(8,906.62 to<br>20,115.15)            | 21,581.97<br>(14,219.75 to<br>34,504.49)            | 674.63<br>(515.03 to<br>948.19)                | 557.44<br>(385.96 to<br>894.31)                | 435.00<br>(299.76 to<br>678.44)                | 619.32<br>(413.15 to<br>1,012.67)              |
| Interstitial lung disease and pulmonary sarcoidosis            | 520.01<br>(160.47 to<br>1,155.73)                  | 973.68<br>(288.55 to<br>2,042.65)                   | 1,169.12<br>(347.96 to<br>2,427.86)                | 896.09<br>(264.27 to<br>1,899.26)                   | 18.41<br>(5.29 to<br>38.64)                    | 36.83<br>(10.14 to<br>73.50)                   | 48.27<br>(13.67 to<br>95.60)                   | 32.34<br>(8.77 to<br>64.87)                    |
| Other chronic respiratory diseases                             | 2,438.11<br>(979.16 to<br>4,963.29)                | 3,638.88<br>(1,697.34 to<br>6,082.87)               | 2,844.06<br>(1,463.78 to<br>4,522.11)              | 3,841.06<br>(1,770.05 to<br>6,519.01)               | 47.22<br>(22.02 to<br>79.91)                   | 81.06<br>(41.69 to<br>123.22)                  | 70.55<br>(38.62 to<br>106.93)                  | 82.36<br>(40.58 to<br>126.91)                  |
| <b>Cirrhosis and other chronic liver diseases</b>              | <b>55,357.96<br/>(27,817.91 to<br/>85,900.57)</b>  | <b>103,146.43<br/>(47,988.48 to<br/>170,863.72)</b> | <b>86,196.14<br/>(40,003.56 to<br/>144,147.11)</b> | <b>122,336.85<br/>(56,968.26 to<br/>206,118.19)</b> | <b>1,621.92<br/>(818.02 to<br/>2,486.06)</b>   | <b>3,066.11<br/>(1,483.26 to<br/>4,906.79)</b> | <b>2,676.74<br/>(1,315.10 to<br/>4,285.63)</b> | <b>3,577.45<br/>(1,749.35 to<br/>5,706.76)</b> |
| Cirrhosis and other chronic liver diseases due to hepatitis B  | 14,651.01<br>(6,909.14 to<br>24,112.53)            | 29,524.96<br>(12,557.28 to<br>51,242.68)            | 26,566.11<br>(11,080.04 to<br>45,053.00)           | 29,591.95<br>(12,465.13 to<br>51,209.40)            | 446.99<br>(216.78 to<br>723.01)                | 897.31<br>(403.34 to<br>1,477.52)              | 831.56<br>(377.72 to<br>1,285.76)              | 877.72<br>(391.77 to<br>1,462.69)              |
| Cirrhosis and other chronic liver diseases due to hepatitis C  | 9,652.45<br>(3,857.94 to<br>18,481.69)             | 19,205.14<br>(6,994.96 to<br>38,640.73)             | 17,051.35<br>(6,449.05 to<br>33,940.15)            | 19,328.48<br>(6,841.85 to<br>39,650.21)             | 301.78<br>(124.89 to<br>565.25)                | 596.89<br>(235.22 to<br>1,136.43)              | 549.06<br>(225.42 to<br>1,026.65)              | 586.93<br>(231.27 to<br>1,123.29)              |
| Cirrhosis and other chronic liver diseases due to alcohol use  | 17,160.63<br>(8,225.69 to<br>27,112.06)            | 30,147.49<br>(13,278.89 to<br>51,199.74)            | 22,853.38<br>(10,085.02 to<br>39,137.06)           | 48,448.04<br>(21,732.69 to<br>80,160.52)            | 549.95<br>(267.99 to<br>855.75)                | 973.12<br>(454.68 to<br>1,596.15)              | 771.58<br>(365.29 to<br>1,293.13)              | 1,515.87<br>(706.71 to<br>2,457.47)            |
| Cirrhosis and other chronic liver diseases due to other causes | 13,893.87<br>(7,575.58 to<br>20,131.26)            | 24,268.84<br>(11,766.71 to<br>38,332.15)            | 19,925.30<br>(9,735.47 to<br>31,469.64)            | 24,968.38<br>(12,112.98 to<br>38,659.53)            | 323.20<br>(168.94 to<br>472.98)                | 598.79<br>(292.81 to<br>919.87)                | 524.54<br>(261.42 to<br>818.09)                | 596.93<br>(293.68 to<br>916.13)                |
| <b>Digestive diseases</b>                                      | <b>84,998.60<br/>(66,070.36 to<br/>111,434.05)</b> | <b>116,304.37<br/>(85,130.04 to<br/>154,391.47)</b> | <b>89,455.73<br/>(64,510.18 to<br/>122,818.06)</b> | <b>123,713.68<br/>(88,443.59 to<br/>170,668.97)</b> | <b>2,317.51<br/>(1,861.08 to<br/>2,871.28)</b> | <b>3,638.10<br/>(2,847.15 to<br/>4,624.53)</b> | <b>3,100.71<br/>(2,388.93 to<br/>4,018.74)</b> | <b>3,679.61<br/>(2,851.69 to<br/>4,839.26)</b> |
| Peptic ulcer disease                                           | 17,721.20<br>(12,497.95 to<br>23,583.65)           | 21,412.59<br>(13,836.00 to<br>31,222.21)            | 13,973.87<br>(8,814.61 to<br>20,964.33)            | 23,271.99<br>(14,870.79 to<br>33,442.90)            | 798.63<br>(424.86 to<br>791.12)                | 599.24<br>(525.68 to<br>1,105.13)              | 568.64<br>(367.54 to<br>801.51)                | 825.15<br>(539.65 to<br>1,126.76)              |

**Burundi**

| Cause                                      | YLLs (actual counts)                     |                                          |                                          |                                          | Deaths (actual counts)            |                                     |                                     |                                     |
|--------------------------------------------|------------------------------------------|------------------------------------------|------------------------------------------|------------------------------------------|-----------------------------------|-------------------------------------|-------------------------------------|-------------------------------------|
|                                            | 2016                                     | 2040 Forecast                            | 2040 Better Scenario                     | 2040 Worse Scenario                      | 2016                              | 2040 Forecast                       | 2040 Better Scenario                | 2040 Worse Scenario                 |
| Gastritis and duodenitis                   | 4,178.65<br>(2,594.02 to<br>6,689.91)    | 7,286.29<br>(4,287.37 to<br>12,010.79)   | 6,066.12<br>(3,514.78 to<br>10,155.38)   | 7,379.42<br>(4,390.63 to<br>12,242.22)   | 132.66<br>(81.02 to<br>223.03)    | 258.38<br>(157.21 to<br>432.82)     | 235.70<br>(140.09 to<br>390.07)     | 248.51<br>(150.45 to<br>411.14)     |
| Appendicitis                               | 7,027.08<br>(4,727.63 to<br>10,684.94)   | 8,689.67<br>(5,739.75 to<br>12,906.11)   | 5,790.34<br>(3,729.19 to<br>8,536.02)    | 9,429.64<br>(6,035.75 to<br>14,328.81)   | 135.92<br>(95.10 to<br>187.89)    | 198.42<br>(133.96 to<br>279.60)     | 145.52<br>(96.69 to<br>211.29)      | 206.93<br>(136.19 to<br>295.84)     |
| Paralytic ileus and intestinal obstruction | 34,269.75<br>(24,247.81 to<br>51,101.78) | 45,545.27<br>(32,281.97 to<br>64,583.65) | 37,583.99<br>(26,607.97 to<br>52,506.06) | 46,524.91<br>(32,906.14 to<br>65,668.53) | 809.41<br>(601.70 to<br>1,097.21) | 1,275.55<br>(954.95 to<br>1,720.12) | 1,197.10<br>(894.92 to<br>1,643.78) | 1,234.86<br>(924.32 to<br>1,672.57) |
| Inguinal, femoral, and abdominal hernia    | 3,889.76<br>(1,342.29 to<br>6,280.76)    | 5,189.88<br>(1,763.99 to<br>8,739.33)    | 3,915.03<br>(1,365.60 to<br>6,634.93)    | 5,425.17<br>(1,859.36 to<br>9,021.55)    | 104.08<br>(39.11 to<br>163.02)    | 148.65<br>(56.87 to<br>238.28)      | 120.56<br>(46.96 to<br>195.79)      | 149.71<br>(56.02 to<br>238.41)      |
| Inflammatory bowel disease                 | 2,943.69<br>(1,306.38 to<br>5,538.43)    | 3,927.82<br>(1,763.62 to<br>6,551.34)    | 3,639.73<br>(1,706.61 to<br>5,800.19)    | 3,899.17<br>(1,697.63 to<br>6,509.71)    | 73.74<br>(36.11 to<br>116.80)     | 113.92<br>(57.06 to<br>167.33)      | 117.98<br>(61.33 to<br>167.43)      | 107.28<br>(53.52 to<br>158.15)      |
| Vascular intestinal disorders              | 974.77<br>(645.90 to<br>1,523.74)        | 1,833.07<br>(1,185.68 to<br>2,909.48)    | 1,700.98<br>(1,089.65 to<br>2,753.06)    | 1,777.36<br>(1,156.73 to<br>2,803.34)    | 39.05<br>(25.67 to<br>62.87)      | 82.04<br>(55.60 to<br>132.57)       | 83.31<br>(55.66 to<br>135.31)       | 75.38<br>(50.78 to<br>120.00)       |
| Gallbladder and biliary diseases           | 3,496.34<br>(2,405.45 to<br>5,038.79)    | 5,177.80<br>(3,117.31 to<br>8,450.61)    | 3,933.60<br>(2,338.34 to<br>6,367.15)    | 5,959.43<br>(3,331.50 to<br>9,903.94)    | 128.38<br>(86.49 to<br>193.16)    | 211.27<br>(128.19 to<br>343.46)     | 177.47<br>(108.42 to<br>285.32)     | 229.22<br>(130.58 to<br>383.42)     |
| Pancreatitis                               | 2,673.46<br>(1,580.19 to<br>4,402.01)    | 5,177.08<br>(1,825.35 to<br>13,531.41)   | 3,778.25<br>(1,378.43 to<br>9,496.25)    | 7,503.13<br>(2,547.04 to<br>20,120.36)   | 70.95<br>(42.25 to<br>117.33)     | 144.57<br>(53.66 to<br>370.76)      | 111.03<br>(41.93 to<br>274.69)      | 203.87<br>(70.11 to<br>534.44)      |
| Other digestive diseases                   | 7,823.91<br>(4,978.73 to<br>11,598.54)   | 12,064.90<br>(7,703.01 to<br>17,892.81)  | 9,073.81<br>(5,732.31 to<br>13,878.78)   | 12,543.46<br>(7,774.54 to<br>18,886.52)  | 224.09<br>(148.25 to<br>328.27)   | 406.65<br>(266.37 to<br>604.30)     | 343.41<br>(226.81 to<br>517.16)     | 398.71<br>(264.23 to<br>580.98)     |

|                                                            |                                            |                                             |                                            |                                             |                                       |                                       |                                       |                                        |
|------------------------------------------------------------|--------------------------------------------|---------------------------------------------|--------------------------------------------|---------------------------------------------|---------------------------------------|---------------------------------------|---------------------------------------|----------------------------------------|
|                                                            | 26,770.47<br>(22,314.07 to<br>31,536.28)   | 45,693.59<br>(35,680.90 to<br>60,197.70)    | 40,497.07<br>(32,284.59 to<br>51,420.38)   | 51,024.17<br>(38,072.97 to<br>70,164.14)    | 1,006.66<br>(840.47 to<br>1,201.24)   | 1,891.10<br>(1,512.76 to<br>2,318.10) | 2,242.59<br>(1,838.96 to<br>2,702.53) | 1,811.08<br>(1,396.47 to<br>2,295.08)  |
| <b>Neurological disorders</b>                              |                                            |                                             |                                            |                                             |                                       |                                       |                                       |                                        |
| Alzheimer's disease and other dementias                    | 7,511.84<br>(5,936.85 to<br>9,445.02)      | 13,691.16<br>(10,578.15 to<br>17,622.55)    | 17,212.18<br>(13,623.65 to<br>21,641.61)   | 12,264.67<br>(9,005.64 to<br>16,418.26)     | 639.15<br>(511.25 to<br>819.60)       | 1,238.52<br>(874.61 to<br>1,637.52)   | 1,673.66<br>(1,277.28 to<br>2,144.19) | 1,047.32<br>(696.48 to<br>1,494.49)    |
| Parkinson's disease                                        | 550.00<br>(405.40 to<br>733.68)            | 1,171.43<br>(874.07 to<br>1,529.77)         | 1,714.30<br>(1,279.88 to<br>2,219.44)      | 963.01<br>(700.23 to<br>1,263.03)           | 41.57<br>(30.13 to<br>56.52)          | 93.05<br>(65.83 to<br>126.67)         | 145.54<br>(107.95 to<br>194.64)       | 73.48<br>(49.31 to<br>103.46)          |
| Epilepsy                                                   | 16,010.69<br>(12,732.25 to<br>19,764.05)   | 26,665.03<br>(17,119.70 to<br>40,124.08)    | 17,640.21<br>(11,168.34 to<br>27,330.89)   | 33,649.40<br>(20,756.14 to<br>53,060.81)    | 279.12<br>(224.57 to<br>341.68)       | 488.42<br>(315.92 to<br>732.46)       | 339.34<br>(221.17 to<br>506.55)       | 611.85<br>(384.49 to<br>961.96)        |
| Multiple sclerosis                                         | 149.87<br>(87.00 to<br>250.64)             | 276.05<br>(155.11 to<br>449.41)             | 296.47<br>(165.42 to<br>492.00)            | 269.35<br>(152.49 to<br>427.11)             | 3.96<br>(2.20 to<br>6.02)             | 7.42<br>(4.06 to<br>11.94)            | 8.18<br>(4.42 to<br>13.43)            | 7.13<br>(3.95 to<br>11.30)             |
| Motor neuron disease                                       | 187.19<br>(119.92 to<br>321.56)            | 279.56<br>(174.76 to<br>495.59)             | 286.01<br>(176.11 to<br>522.77)            | 271.18<br>(169.66 to<br>486.88)             | 3.95<br>(2.56 to<br>6.77)             | 7.46<br>(4.62 to<br>14.08)            | 8.33<br>(5.02 to<br>16.08)            | 7.01<br>(4.38 to<br>13.28)             |
| Other neurological disorders                               | 2,360.88<br>(1,842.57 to<br>3,038.45)      | 3,610.57<br>(2,648.45 to<br>4,654.03)       | 3,347.89<br>(2,402.36 to<br>4,361.23)      | 3,606.55<br>(2,639.78 to<br>4,687.60)       | 38.91<br>(29.92 to<br>48.22)          | 66.24<br>(47.01 to<br>85.80)          | 67.55<br>(45.02 to<br>90.45)          | 64.29<br>(45.70 to<br>83.45)           |
| <b>Mental disorders</b>                                    | 6,189.38<br>(4,160.06 to<br>8,781.17)      | 10,479.34<br>(6,487.66 to<br>15,562.71)     | 9,924.36<br>(6,109.95 to<br>14,963.35)     | 11,534.24<br>(7,287.10 to<br>16,960.76)     | 172.30<br>(115.85 to<br>242.88)       | 296.76<br>(193.42 to<br>433.04)       | 291.75<br>(189.60 to<br>427.53)       | 321.46<br>(209.79 to<br>457.89)        |
| Alcohol use disorders                                      | 4,901.44<br>(2,951.18 to<br>7,515.11)      | 7,403.44<br>(4,055.92 to<br>12,073.00)      | 6,902.63<br>(3,741.53 to<br>11,534.11)     | 8,471.72<br>(4,740.13 to<br>13,479.25)      | 144.04<br>(90.33 to<br>215.83)        | 226.53<br>(136.34 to<br>348.00)       | 220.04<br>(131.24 to<br>346.47)       | 252.93<br>(153.01 to<br>383.60)        |
| Drug use disorders                                         | 1,265.10<br>(763.34 to<br>1,750.87)        | 3,029.84<br>(1,794.73 to<br>4,424.03)       | 2,976.95<br>(1,795.53 to<br>4,395.72)      | 3,016.43<br>(1,769.95 to<br>4,376.00)       | 27.85<br>(16.91 to<br>38.03)          | 69.40<br>(42.10 to<br>98.85)          | 70.90<br>(44.68 to<br>100.92)         | 67.71<br>(39.82 to<br>95.99)           |
| Opioid use disorders                                       | 967.07<br>(521.70 to<br>1,423.99)          | 2,192.65<br>(1,139.00 to<br>3,431.02)       | 2,148.75<br>(1,158.92 to<br>3,424.17)      | 2,186.98<br>(1,110.56 to<br>3,453.49)       | 20.66<br>(11.12 to<br>30.05)          | 48.50<br>(25.46 to<br>74.14)          | 48.92<br>(26.47 to<br>76.32)          | 47.64<br>(24.42 to<br>73.07)           |
| Cocaine use disorders                                      | 64.07<br>(18.33 to<br>132.81)              | 185.09<br>(56.98 to<br>369.85)              | 167.73<br>(51.81 to<br>341.05)             | 187.14<br>(57.53 to<br>373.08)              | 1.41<br>(0.43 to<br>2.85)             | 4.17<br>(1.32 to<br>8.12)             | 3.84<br>(1.24 to<br>7.58)             | 4.17<br>(1.32 to<br>8.07)              |
| Amphetamine use disorders                                  | 33.99<br>(9.09 to<br>73.78)                | 142.01<br>(39.89 to<br>305.53)              | 120.53<br>(33.49 to<br>259.78)             | 146.32<br>(41.47 to<br>312.86)              | 0.72<br>(0.20 to<br>1.56)             | 3.05<br>(0.91 to<br>6.49)             | 2.63<br>(0.77 to<br>5.55)             | 3.12<br>(0.91 to<br>6.62)              |
| Other drug use disorders                                   | 199.98<br>(122.76 to<br>284.27)            | 510.09<br>(310.39 to<br>769.07)             | 539.94<br>(331.26 to<br>820.99)            | 495.99<br>(297.59 to<br>757.35)             | 5.07<br>(3.26 to<br>6.99)             | 13.68<br>(8.89 to<br>19.90)           | 15.51<br>(10.46 to<br>22.11)          | 12.79<br>(8.23 to<br>18.35)            |
| Eating disorders                                           | 22.83<br>(12.45 to<br>42.80)               | 46.06<br>(24.45 to<br>86.90)                | 44.78<br>(23.38 to<br>87.91)               | 46.09<br>(24.46 to<br>86.06)                | 0.41<br>(0.22 to<br>0.76)             | 0.82<br>(0.43 to<br>1.52)             | 0.81<br>(0.42 to<br>1.57)             | 0.82<br>(0.43 to<br>1.48)              |
| <b>Burundi</b>                                             |                                            |                                             |                                            |                                             |                                       |                                       |                                       |                                        |
| Cause                                                      | YLLs (actual counts)                       |                                             |                                            |                                             | Deaths (actual counts)                |                                       |                                       |                                        |
|                                                            | 2016                                       | 2040 Forecast                               | 2040 Better Scenario                       | 2040 Worse Scenario                         | 2016                                  | 2040 Forecast                         | 2040 Better Scenario                  | 2040 Worse Scenario                    |
| <b>Diabetes, urogenital, blood, and endocrine diseases</b> | 101,116.77<br>(84,493.98 to<br>122,528.65) | 197,444.87<br>(140,655.35 to<br>275,505.55) | 132,537.46<br>(90,496.25 to<br>187,674.68) | 227,787.50<br>(158,185.09 to<br>323,523.47) | 2,762.95<br>(2,349.14 to<br>3,196.62) | 6,793.20<br>(4,859.56 to<br>9,660.05) | 4,952.36<br>(3,531.82 to<br>7,129.52) | 7,582.77<br>(5,314.62 to<br>11,002.47) |
| Diabetes mellitus                                          | 35,104.97<br>(28,773.96 to<br>41,653.07)   | 98,842.22<br>(59,658.50 to<br>161,563.34)   | 66,100.09<br>(39,046.89 to<br>107,899.70)  | 118,460.69<br>(67,440.18 to<br>199,492.96)  | 1,381.64<br>(1,142.13 to<br>1,636.97) | 4,015.33<br>(2,597.00 to<br>6,102.73) | 2,895.51<br>(1,878.68 to<br>4,395.79) | 4,564.28<br>(2,793.26 to<br>7,153.76)  |
| Acute glomerulonephritis                                   | 154.39<br>(104.83 to<br>254.59)            | 278.30<br>(175.15 to<br>469.47)             | 189.19<br>(121.26 to<br>317.59)            | 299.88<br>(187.71 to<br>526.70)             | 2.54<br>(1.83 to<br>3.88)             | 4.54<br>(3.08 to<br>7.27)             | 3.32<br>(2.27 to<br>5.10)             | 4.80<br>(3.19 to<br>7.88)              |
| Chronic kidney disease                                     | 17,426.97<br>(13,898.02 to<br>21,401.71)   | 42,438.63<br>(26,300.83 to<br>79,894.65)    | 27,487.14<br>(16,757.14 to<br>52,347.21)   | 49,295.60<br>(30,092.12 to<br>91,895.33)    | 506.76<br>(409.19 to<br>615.77)       | 1,512.64<br>(798.01 to<br>3,803.65)   | 1,064.94<br>(560.01 to<br>2,834.17)   | 1,723.22<br>(886.05 to<br>4,084.41)    |
| Chronic kidney disease due to diabetes mellitus            | 3,565.79<br>(2,686.91 to<br>4,531.80)      | 10,554.62<br>(5,745.27 to<br>24,355.32)     | 7,205.18<br>(3,870.06 to<br>16,315.92)     | 12,335.40<br>(6,470.27 to<br>28,662.76)     | 131.10<br>(99.55 to<br>166.24)        | 444.10<br>(207.64 to<br>1,227.31)     | 319.51<br>(150.94 to<br>921.11)       | 508.22<br>(233.51 to<br>1,385.52)      |



|                                                            |                                       |                                       |                                       |                                       |                              |                                |                              |                                |
|------------------------------------------------------------|---------------------------------------|---------------------------------------|---------------------------------------|---------------------------------------|------------------------------|--------------------------------|------------------------------|--------------------------------|
| Chronic kidney disease due to hypertension                 | 2,047.23<br>(1,549.92 to 2,602.68)    | 6,125.63<br>(2,982.95 to 16,095.35)   | 4,286.93<br>(2,088.97 to 11,593.87)   | 7,083.50<br>(3,362.31 to 18,955.83)   | 96.41<br>(75.31 to 122.48)   | 331.02<br>(146.49 to 1,010.15) | 249.20<br>(114.36 to 727.18) | 369.33<br>(157.48 to 1,032.63) |
| Chronic kidney disease due to glomerulonephritis           | 5,602.93<br>(4,305.43 to 7,174.09)    | 12,078.32<br>(7,911.84 to 19,083.30)  | 7,452.77<br>(4,783.91 to 12,386.46)   | 14,012.87<br>(9,061.22 to 22,016.16)  | 127.04<br>(97.68 to 159.54)  | 325.23<br>(189.65 to 670.65)   | 215.90<br>(120.71 to 490.09) | 374.37<br>(213.34 to 794.92)   |
| Chronic kidney disease due to other and unspecified causes | 6,211.02<br>(4,802.14 to 7,827.67)    | 13,680.06<br>(8,753.42 to 22,118.49)  | 8,542.25<br>(5,349.91 to 14,407.36)   | 15,863.83<br>(10,010.20 to 25,949.86) | 152.21<br>(118.54 to 190.51) | 412.28<br>(231.61 to 895.13)   | 280.33<br>(153.91 to 662.49) | 471.30<br>(259.52 to 1,015.72) |
| Urinary diseases and male infertility                      | 8,507.88<br>(6,402.49 to 10,614.83)   | 14,701.20<br>(10,787.08 to 19,307.27) | 11,747.15<br>(8,442.48 to 15,782.30)  | 15,194.15<br>(11,063.65 to 20,190.87) | 225.29<br>(173.17 to 279.52) | 416.01<br>(320.29 to 523.44)   | 364.06<br>(279.51 to 469.94) | 412.13<br>(310.69 to 521.46)   |
| Urinary tract infections                                   | 3,336.93<br>(1,665.84 to 4,844.84)    | 6,311.63<br>(3,296.98 to 9,245.51)    | 5,597.53<br>(2,988.51 to 8,133.92)    | 6,340.19<br>(3,299.61 to 9,230.21)    | 87.19<br>(44.11 to 126.02)   | 183.05<br>(95.81 to 261.25)    | 179.38<br>(95.69 to 256.72)  | 175.65<br>(90.41 to 250.91)    |
| Urolithiasis                                               | 190.12<br>(94.24 to 296.78)           | 415.54<br>(209.25 to 707.70)          | 341.01<br>(177.56 to 589.99)          | 429.59<br>(215.52 to 734.73)          | 4.18<br>(2.09 to 7.18)       | 9.18<br>(4.65 to 16.20)        | 8.02<br>(4.20 to 14.44)      | 9.24<br>(4.65 to 16.14)        |
| Other urinary diseases                                     | 4,980.84<br>(3,108.98 to 6,994.84)    | 7,974.03<br>(4,599.62 to 12,275.01)   | 5,808.60<br>(3,248.06 to 9,183.81)    | 8,424.36<br>(4,856.35 to 12,833.26)   | 133.92<br>(85.28 to 186.24)  | 223.77<br>(130.23 to 337.25)   | 176.66<br>(101.70 to 270.34) | 227.24<br>(133.92 to 343.39)   |
| Gynecological diseases                                     | 1,426.60<br>(940.21 to 1,993.45)      | 2,270.93<br>(1,267.82 to 3,722.90)    | 1,533.90<br>(832.48 to 2,540.33)      | 2,491.18<br>(1,379.70 to 4,102.47)    | 33.18<br>(22.21 to 46.46)    | 53.12<br>(29.86 to 87.57)      | 36.16<br>(20.09 to 59.56)    | 57.97<br>(32.33 to 95.29)      |
| Uterine fibroids                                           | 524.09<br>(224.98 to 903.23)          | 775.54<br>(281.76 to 1,622.61)        | 506.17<br>(182.38 to 1,066.16)        | 855.05<br>(307.37 to 1,786.56)        | 13.48<br>(6.02 to 23.02)     | 20.11<br>(7.60 to 42.28)       | 13.21<br>(4.80 to 27.89)     | 22.07<br>(8.21 to 45.29)       |
| Polycystic ovarian syndrome                                | 155.00<br>(18.76 to 437.60)           | 190.45<br>(18.69 to 594.23)           | 102.13<br>(9.14 to 328.09)            | 221.50<br>(21.15 to 657.77)           | 3.45<br>(0.41 to 9.56)       | 4.38<br>(0.43 to 13.53)        | 2.35<br>(0.22 to 7.46)       | 5.08<br>(0.49 to 16.05)        |
| Endometriosis                                              | 4.92<br>(1.14 to 17.37)               | 12.61<br>(2.56 to 47.82)              | 8.53<br>(1.65 to 33.02)               | 13.84<br>(2.77 to 33.96)              | 0.11<br>(0.02 to 0.34)       | 0.27<br>(0.06 to 0.94)         | 0.18<br>(0.04 to 0.69)       | 0.29<br>(0.06 to 1.02)         |
| Genital prolapse                                           | 35.68<br>(11.42 to 85.40)             | 46.09<br>(12.17 to 122.61)            | 28.91<br>(7.52 to 73.07)              | 50.76<br>(13.26 to 131.82)            | 1.18<br>(0.41 to 2.72)       | 1.42<br>(0.42 to 3.46)         | 0.93<br>(0.28 to 2.26)       | 1.52<br>(0.44 to 3.82)         |
| Other gynecological diseases                               | 706.91<br>(285.77 to 1,181.29)        | 1,246.24<br>(487.82 to 2,271.82)      | 888.16<br>(371.07 to 1,642.40)        | 1,350.03<br>(520.11 to 2,489.07)      | 14.96<br>(5.69 to 25.04)     | 26.96<br>(10.14 to 49.20)      | 19.48<br>(7.88 to 35.71)     | 29.01<br>(10.82 to 54.67)      |
| Hemoglobinopathies and hemolytic anemias                   | 33,682.57<br>(23,888.72 to 47,970.31) | 31,797.27<br>(23,018.38 to 43,262.66) | 20,254.38<br>(14,569.27 to 27,554.31) | 34,582.18<br>(24,605.94 to 48,266.59) | 512.30<br>(385.55 to 686.80) | 617.28<br>(465.57 to 803.56)   | 437.37<br>(327.37 to 575.46) | 648.11<br>(484.85 to 851.57)   |
| Thalassemias                                               | 462.59<br>(106.46 to 1,350.59)        | 277.14<br>(59.53 to 836.21)           | 225.79<br>(50.78 to 664.59)           | 278.58<br>(834.74)                    | 5.42<br>(1.25 to 15.79)      | 3.26<br>(0.70 to 9.85)         | 2.66<br>(0.60 to 7.82)       | 3.28<br>(0.71 to 9.81)         |
| Sickle cell disorders                                      | 26,394.64<br>(17,841.75 to 38,862.76) | 20,295.17<br>(13,763.87 to 30,107.98) | 12,177.92<br>(8,402.50 to 17,407.34)  | 22,360.60<br>(14,903.59 to 33,660.53) | 327.80<br>(226.39 to 475.85) | 270.27<br>(187.81 to 392.67)   | 168.39<br>(118.62 to 238.73) | 296.20<br>(201.72 to 434.40)   |
| G6PD deficiency                                            | 5,179.45<br>(3,796.64 to 6,851.80)    | 9,464.72<br>(6,589.88 to 13,227.49)   | 6,426.28<br>(4,302.75 to 9,268.89)    | 10,202.54<br>(6,947.02 to 14,360.72)  | 106.49<br>(79.25 to 135.04)  | 245.61<br>(170.52 to 337.21)   | 178.00<br>(121.21 to 254.39) | 257.43<br>(178.30 to 359.91)   |
| Other hemoglobinopathies and hemolytic anemias             | 1,645.88<br>(1,295.86 to 2,060.71)    | 1,760.24<br>(1,290.31 to 2,340.72)    | 1,424.38<br>(1,033.01 to 1,952.98)    | 1,740.46<br>(1,249.08 to 2,315.83)    | 72.58<br>(57.04 to 90.83)    | 98.14<br>(75.76 to 126.85)     | 88.32<br>(68.50 to 115.25)   | 91.20<br>(68.61 to 118.54)     |
| Endocrine, metabolic, blood, and immune disorders          | 4,813.39<br>(3,041.34 to 7,526.59)    | 7,116.32<br>(4,524.08 to 10,868.01)   | 5,225.62<br>(3,341.15 to 7,864.08)    | 7,463.82<br>(4,679.19 to 11,380.92)   | 101.25<br>(69.58 to 144.43)  | 174.28<br>(116.88 to 251.62)   | 151.01<br>(100.07 to 217.59) | 172.25<br>(115.52 to 248.51)   |

**Burundi**

| Cause                     | YLLs (actual counts)               |                                    |                                    |                                    | Deaths (actual counts)    |                             |                             |                             |
|---------------------------|------------------------------------|------------------------------------|------------------------------------|------------------------------------|---------------------------|-----------------------------|-----------------------------|-----------------------------|
|                           | 2016                               | 2040 Forecast                      | 2040 Better Scenario               | 2040 Worse Scenario                | 2016                      | 2040 Forecast               | 2040 Better Scenario        | 2040 Worse Scenario         |
| Musculoskeletal disorders | 2,479.56<br>(1,599.47 to 3,298.43) | 4,790.99<br>(3,004.41 to 6,820.70) | 4,812.70<br>(2,966.54 to 6,990.90) | 4,705.35<br>(2,953.29 to 6,717.42) | 59.91<br>(38.47 to 79.41) | 127.28<br>(78.28 to 176.08) | 131.47<br>(80.69 to 185.57) | 121.64<br>(76.01 to 164.71) |

|                                               |                                                      |                                                        |                                                      |                                                        |                                                |                                                  |                                                  |                                                  |
|-----------------------------------------------|------------------------------------------------------|--------------------------------------------------------|------------------------------------------------------|--------------------------------------------------------|------------------------------------------------|--------------------------------------------------|--------------------------------------------------|--------------------------------------------------|
| Rheumatoid arthritis                          | 569.20<br>(336.49 to<br>901.29)                      | 1,143.49<br>(652.41 to<br>1,839.54)                    | 901.80<br>(501.56 to<br>1,500.91)                    | 1,169.24<br>(670.78 to<br>1,867.18)                    | 20.02<br>(12.12 to<br>30.28)                   | 45.63<br>(27.59 to<br>67.91)                     | 39.30<br>(22.88 to<br>60.83)                     | 44.42<br>(27.05 to<br>66.21)                     |
| Other musculoskeletal disorders               | 1,910.35<br>(1,228.33 to<br>2,666.84)                | 3,647.51<br>(2,170.97 to<br>5,419.66)                  | 3,910.90<br>(2,360.47 to<br>5,800.34)                | 3,536.11<br>(2,093.90 to<br>5,220.20)                  | 39.89<br>(25.40 to<br>56.35)                   | 81.65<br>(48.65 to<br>121.70)                    | 92.18<br>(55.80 to<br>136.00)                    | 77.22<br>(45.58 to<br>114.68)                    |
| <b>Other non-communicable diseases</b>        | <b>110,621.64<br/>(74,172.10 to<br/>163,057.81)</b>  | <b>135,307.24<br/>(88,981.74 to<br/>196,364.69)</b>    | <b>77,268.43<br/>(51,583.32 to<br/>112,154.37)</b>   | <b>150,184.85<br/>(97,483.06 to<br/>221,204.02)</b>    | <b>1,425.10<br/>(985.33 to<br/>2,017.23)</b>   | <b>2,006.55<br/>(1,420.04 to<br/>2,765.90)</b>   | <b>1,356.36<br/>(981.80 to<br/>1,869.44)</b>     | <b>2,146.05<br/>(1,468.44 to<br/>3,020.39)</b>   |
| Congenital birth defects                      | 83,226.26<br>(53,931.56 to<br>126,801.61)            | 92,286.20<br>(57,113.52 to<br>141,173.75)              | 47,365.46<br>(29,050.45 to<br>73,341.77)             | 104,392.53<br>(63,733.54 to<br>161,888.04)             | 981.56<br>(640.00 to<br>1,495.76)              | 1,106.30<br>(697.35 to<br>1,699.81)              | 577.61<br>(359.73 to<br>894.45)                  | 1,248.49<br>(769.46 to<br>1,933.42)              |
| Neural tube defects                           | 19,085.28<br>(8,526.69 to<br>38,095.95)              | 10,515.04<br>(3,867.62 to<br>23,403.66)                | 4,335.38<br>(1,548.72 to<br>10,094.76)               | 12,515.65<br>(4,581.02 to<br>28,019.03)                | 222.52<br>(99.51 to<br>443.49)                 | 123.92<br>(46.02 to<br>275.90)                   | 51.53<br>(18.65 to<br>120.02)                    | 147.34<br>(54.25 to<br>329.92)                   |
| Congenital heart anomalies                    | 23,461.09<br>(12,538.53 to<br>42,805.10)             | 27,734.89<br>(15,080.59 to<br>48,841.42)               | 15,043.08<br>(8,210.67 to<br>26,215.97)              | 30,985.19<br>(16,707.85 to<br>54,166.22)               | 280.25<br>(151.26 to<br>503.86)                | 339.40<br>(188.94 to<br>583.42)                  | 188.53<br>(105.55 to<br>327.83)                  | 377.94<br>(208.69 to<br>646.30)                  |
| Orofacial clefts                              | 1,255.23<br>(174.31 to<br>4,105.52)                  | 1,375.72<br>(162.09 to<br>4,718.29)                    | 517.91<br>(59.14 to<br>1,813.63)                     | 1,674.10<br>(194.04 to<br>6,015.85)                    | 14.55<br>(2.02 to<br>47.63)                    | 15.94<br>(1.88 to<br>54.69)                      | 6.00<br>(0.69 to<br>21.00)                       | 19.40<br>(2.25 to<br>69.71)                      |
| Down syndrome                                 | 1,262.40<br>(586.96 to<br>2,785.38)                  | 1,975.43<br>(902.67 to<br>4,219.46)                    | 1,024.56<br>(500.21 to<br>2,143.05)                  | 2,245.59<br>(1,023.66 to<br>4,862.83)                  | 15.66<br>(7.61 to<br>33.95)                    | 25.56<br>(12.52 to<br>52.54)                     | 13.92<br>(7.27 to<br>28.56)                      | 28.83<br>(13.67 to<br>60.87)                     |
| Other chromosomal abnormalities               | 3,109.02<br>(621.06 to<br>6,918.57)                  | 6,797.75<br>(1,379.92 to<br>15,678.14)                 | 3,276.70<br>(628.85 to<br>7,565.90)                  | 7,761.50<br>(1,549.77 to<br>17,770.84)                 | 36.26<br>(7.26 to<br>80.59)                    | 79.51<br>(16.13 to<br>182.66)                    | 38.50<br>(7.39 to<br>88.46)                      | 90.73<br>(18.25 to<br>207.24)                    |
| Congenital musculoskeletal and limb anomalies | 948.87<br>(362.29 to<br>2,580.08)                    | 1,231.27<br>(477.44 to<br>3,389.88)                    | 687.44<br>(271.95 to<br>1,916.17)                    | 1,358.64<br>(527.78 to<br>3,718.01)                    | 11.15<br>(4.31 to<br>30.32)                    | 14.63<br>(5.77 to<br>40.04)                      | 8.27<br>(3.38 to<br>22.91)                       | 16.12<br>(6.35 to<br>43.91)                      |
| Urogenital congenital anomalies               | 1,652.16<br>(847.12 to<br>3,069.37)                  | 1,831.51<br>(930.68 to<br>3,445.48)                    | 1,018.60<br>(512.34 to<br>1,924.95)                  | 2,036.34<br>(1,028.44 to<br>3,782.18)                  | 19.94<br>(10.45 to<br>36.56)                   | 22.95<br>(11.99 to<br>42.65)                     | 13.30<br>(7.05 to<br>24.48)                      | 25.35<br>(13.03 to<br>46.31)                     |
| Digestive congenital anomalies                | 6,880.52<br>(3,106.07 to<br>13,157.07)               | 8,896.55<br>(3,684.92 to<br>18,306.28)                 | 4,387.79<br>(1,821.74 to<br>9,242.10)                | 8,900.00<br>(4,131.01 to<br>21,186.70)                 | 80.07<br>(36.22 to<br>153.16)                  | 80.07<br>(43.19 to<br>213.47)                    | 51.42<br>(21.52 to<br>108.11)                    | 117.88<br>(48.30 to<br>246.94)                   |
| Other congenital birth defects                | 25,571.69<br>(10,389.61 to<br>46,493.97)             | 31,928.03<br>(14,373.35 to<br>56,542.25)               | 17,074.00<br>(7,875.12 to<br>29,995.72)              | 35,714.27<br>(15,807.89 to<br>64,258.79)               | 301.15<br>(123.04 to<br>544.15)                | 380.52<br>(172.28 to<br>668.40)                  | 206.13<br>(95.56 to<br>359.08)                   | 424.90<br>(190.33 to<br>756.79)                  |
| Skin and subcutaneous diseases                | 12,019.10<br>(7,321.32 to<br>19,446.77)              | 28,351.06<br>(17,178.41 to<br>46,006.07)               | 22,304.92<br>(13,958.34 to<br>36,504.25)             | 29,273.67<br>(17,608.71 to<br>47,722.33)               | 265.09<br>(165.92 to<br>428.00)                | 730.04<br>(467.72 to<br>1,196.86)                | 690.59<br>(446.05 to<br>1,146.35)                | 705.91<br>(447.98 to<br>1,163.89)                |
| Cellulitis                                    | 904.43<br>(357.44 to<br>1,794.86)                    | 2,745.02<br>(1,076.29 to<br>5,097.64)                  | 2,638.67<br>(1,084.71 to<br>4,550.84)                | 2,706.54<br>(1,076.39 to<br>5,129.75)                  | 21.94<br>(8.68 to<br>38.27)                    | 73.97<br>(29.60 to<br>131.42)                    | 80.50<br>(33.04 to<br>136.03)                    | 69.64<br>(27.08 to<br>125.40)                    |
| Pyoderma                                      | 9,618.58<br>(5,826.38 to<br>16,307.32)               | 22,436.92<br>(13,496.63 to<br>37,139.23)               | 16,618.18<br>(10,303.62 to<br>27,804.59)             | 23,487.82<br>(14,070.84 to<br>39,348.28)               | 195.38<br>(122.96 to<br>322.32)                | 544.14<br>(350.35 to<br>919.83)                  | 483.56<br>(313.41 to<br>815.06)                  | 535.43<br>(336.32 to<br>894.51)                  |
| Decubitus ulcer                               | 933.87<br>(449.62 to<br>1,966.84)                    | 2,052.20<br>(1,018.21 to<br>4,239.97)                  | 2,067.24<br>(1,050.89 to<br>4,191.41)                | 1,953.00<br>(955.47 to<br>4,011.04)                    | 37.32<br>(17.32 to<br>77.14)                   | 89.86<br>(44.74 to<br>185.74)                    | 104.51<br>(53.55 to<br>208.78)                   | 79.47<br>(37.67 to<br>164.61)                    |
| Other skin and subcutaneous diseases          | 562.22<br>(290.23 to<br>1,065.86)                    | 1,116.92<br>(582.12 to<br>2,084.50)                    | 980.83<br>(537.01 to<br>1,739.19)                    | 1,126.32<br>(583.01 to<br>2,114.14)                    | 10.46<br>(5.67 to<br>17.90)                    | 22.07<br>(12.15 to<br>37.90)                     | 22.03<br>(12.67 to<br>37.17)                     | 21.36<br>(11.57 to<br>36.82)                     |
| Sudden infant death syndrome                  | 15,376.28<br>(5,675.67 to<br>29,622.70)              | 14,669.98<br>(4,835.99 to<br>30,459.33)                | 7,598.05<br>(2,510.23 to<br>15,415.55)               | 16,518.65<br>(5,377.48 to<br>33,872.05)                | 178.45<br>(65.85 to<br>343.88)                 | 170.21<br>(56.10 to<br>353.46)                   | 88.16<br>(29.13 to<br>178.87)                    | 191.66<br>(62.40 to<br>393.03)                   |
| <b>Injuries</b>                               | <b>376,725.45<br/>(315,690.67 to<br/>450,961.21)</b> | <b>611,532.17<br/>(383,887.67 to<br/>1,084,375.28)</b> | <b>489,724.21<br/>(297,149.09 to<br/>927,067.94)</b> | <b>675,903.86<br/>(424,338.83 to<br/>1,168,450.78)</b> | <b>7,194.51<br/>(6,102.79 to<br/>8,425.50)</b> | <b>12,700.32<br/>(8,540.71 to<br/>20,027.19)</b> | <b>11,014.57<br/>(7,272.40 to<br/>18,080.59)</b> | <b>13,702.36<br/>(9,070.41 to<br/>21,431.83)</b> |
| <b>Transport injuries</b>                     | <b>118,532.04<br/>(94,047.92 to<br/>144,541.48)</b>  | <b>200,310.56<br/>(133,002.00 to<br/>297,068.31)</b>   | <b>167,690.58<br/>(110,120.03 to<br/>246,858.36)</b> | <b>231,291.17<br/>(146,474.18 to<br/>357,840.05)</b>   | <b>2,299.22<br/>(1,862.39 to<br/>2,792.75)</b> | <b>4,054.62<br/>(2,675.42 to<br/>6,005.53)</b>   | <b>3,603.59<br/>(2,383.54 to<br/>5,258.77)</b>   | <b>4,620.08<br/>(2,893.82 to<br/>7,137.51)</b>   |
| Road injuries                                 | 111,914.85<br>(88,734.55 to<br>136,633.11)           | 186,592.34<br>(120,748.13 to<br>274,228.94)            | 157,402.30<br>(101,402.99 to<br>229,720.14)          | 215,296.86<br>(133,756.52 to<br>332,151.38)            | 2,185.49<br>(1,776.95 to<br>2,662.08)          | 3,804.04<br>(2,454.09 to<br>5,636.04)            | 3,409.59<br>(2,203.33 to<br>4,970.52)            | 4,328.66<br>(2,665.14 to<br>6,723.16)            |

|                                      |                                                                  |                                                                  |                                                                  |                                                                  |                                                            |                                                            |                                                            |                                                            |
|--------------------------------------|------------------------------------------------------------------|------------------------------------------------------------------|------------------------------------------------------------------|------------------------------------------------------------------|------------------------------------------------------------|------------------------------------------------------------|------------------------------------------------------------|------------------------------------------------------------|
| Pedestrian road injuries             | 49,925.18<br>(38,033.67 to<br>64,536.57)                         | 73,935.27<br>(45,697.09 to<br>112,653.09)                        | 62,092.71<br>(37,668.72 to<br>93,595.05)                         | 85,395.58<br>(51,117.41 to<br>136,290.18)                        | 992.58<br>(753.97 to<br>1,276.58)                          | 1,595.60<br>(978.25 to<br>2,498.61)                        | 1,417.80<br>(874.34 to<br>2,186.51)                        | 1,815.83<br>(1,057.58 to<br>2,971.04)                      |
| <b>Burundi</b>                       |                                                                  |                                                                  |                                                                  |                                                                  |                                                            |                                                            |                                                            |                                                            |
| Cause                                | YLLs (actual counts)                                             |                                                                  |                                                                  |                                                                  | Deaths (actual counts)                                     |                                                            |                                                            |                                                            |
|                                      | 2016                                                             | 2040 Forecast                                                    | 2040 Better Scenario                                             | 2040 Worse Scenario                                              | 2016                                                       | 2040 Forecast                                              | 2040 Better Scenario                                       | 2040 Worse Scenario                                        |
| Cyclist road injuries                | 5,398.50<br>(3,644.45 to<br>8,056.26)                            | 9,448.79<br>(5,541.25 to<br>15,244.83)                           | 8,145.74<br>(4,757.86 to<br>13,148.92)                           | 10,831.39<br>(6,144.04 to<br>17,919.88)                          | 107.47<br>(74.29 to<br>161.76)                             | 190.26<br>(111.91 to<br>311.42)                            | 174.64<br>(103.46 to<br>286.22)                            | 215.05<br>(120.87 to<br>365.47)                            |
| Motorcyclist road injuries           | 7,848.81<br>(5,806.62 to<br>10,751.08)                           | 15,010.09<br>(9,376.53 to<br>23,825.26)                          | 13,044.70<br>(8,120.25 to<br>20,682.49)                          | 17,130.11<br>(10,407.84 to<br>28,367.88)                         | 148.93<br>(110.31 to<br>205.06)                            | 289.22<br>(177.93 to<br>469.77)                            | 265.44<br>(163.67 to<br>429.32)                            | 326.13<br>(193.08 to<br>546.56)                            |
| Motor vehicle road injuries          | 48,289.88<br>(33,776.13 to<br>63,818.44)                         | 87,399.36<br>(54,244.94 to<br>133,665.77)                        | 73,450.07<br>(45,301.71 to<br>112,189.80)                        | 101,026.15<br>(60,634.32 to<br>159,330.37)                       | 928.16<br>(651.00 to<br>1,220.86)                          | 1,713.87<br>(1,050.93 to<br>2,673.36)                      | 1,538.10<br>(945.69 to<br>2,361.68)                        | 1,954.61<br>(1,157.43 to<br>3,165.21)                      |
| Other road injuries                  | 452.48<br>(316.03 to<br>666.76)                                  | 798.83<br>(473.53 to<br>1,264.67)                                | 669.08<br>(403.33 to<br>1,075.32)                                | 913.64<br>(525.26 to<br>1,465.86)                                | 8.35<br>(6.00 to<br>11.77)                                 | 15.09<br>(9.31 to<br>23.30)                                | 13.62<br>(8.48 to<br>21.29)                                | 17.03<br>(10.10 to<br>27.58)                               |
| Other transport injuries             | 6,617.19<br>(3,819.77 to<br>12,160.70)                           | 13,718.22<br>(6,771.76 to<br>28,740.57)                          | 10,288.28<br>(4,904.19 to<br>22,443.73)                          | 15,994.30<br>(7,548.70 to<br>33,921.49)                          | 113.73<br>(64.59 to<br>226.04)                             | 250.58<br>(119.25 to<br>545.67)                            | 194.00<br>(89.65 to<br>441.84)                             | 291.42<br>(132.64 to<br>653.34)                            |
| Unintentional injuries               | <b>205,151.22</b><br><b>(165,793.50 to</b><br><b>258,120.09)</b> | <b>232,060.61</b><br><b>(177,829.11 to</b><br><b>298,881.09)</b> | <b>161,100.71</b><br><b>(123,318.87 to</b><br><b>207,896.27)</b> | <b>251,276.98</b><br><b>(187,849.66 to</b><br><b>327,856.73)</b> | <b>3,762.02</b><br><b>(3,124.74 to</b><br><b>4,513.79)</b> | <b>5,120.68</b><br><b>(4,129.53 to</b><br><b>6,338.44)</b> | <b>4,128.14</b><br><b>(3,320.72 to</b><br><b>5,168.47)</b> | <b>5,276.19</b><br><b>(4,173.18 to</b><br><b>6,602.20)</b> |
| Falls                                | 27,410.55<br>(20,484.95 to<br>36,894.41)                         | 38,856.30<br>(29,330.05 to<br>52,825.36)                         | 33,064.59<br>(24,985.69 to<br>44,509.74)                         | 39,033.62<br>(29,316.73 to<br>52,914.91)                         | 761.77<br>(597.68 to<br>975.97)                            | 1,358.19<br>(1,088.97 to<br>1,743.86)                      | 1,365.83<br>(1,099.02 to<br>1,746.63)                      | 1,600.28<br>(992.95 to<br>1,631.30)                        |
| Drowning                             | 45,597.05<br>(34,909.59 to<br>59,285.05)                         | 44,795.51<br>(32,127.30 to<br>62,422.31)                         | 31,310.88<br>(22,263.06 to<br>43,981.20)                         | 49,535.83<br>(34,650.08 to<br>69,093.60)                         | 736.55<br>(573.87 to<br>932.17)                            | 826.83<br>(591.45 to<br>1,143.24)                          | 626.87<br>(442.28 to<br>884.58)                            | 897.80<br>(651.68 to<br>1,259.53)                          |
| Fire, heat, and hot substances       | 31,483.35<br>(23,945.36 to<br>42,485.34)                         | 29,404.26<br>(20,878.88 to<br>41,237.60)                         | 19,039.85<br>(13,547.46 to<br>26,795.55)                         | 32,924.71<br>(23,279.59 to<br>46,662.06)                         | 577.46<br>(457.03 to<br>740.78)                            | 654.77<br>(483.55 to<br>922.17)                            | 488.24<br>(355.03 to<br>676.50)                            | 706.04<br>(504.08 to<br>992.65)                            |
| Poisonings                           | 18,405.38<br>(9,032.00 to<br>43,698.15)                          | 15,225.17<br>(7,458.73 to<br>33,874.93)                          | 7,949.65<br>(4,141.54 to<br>16,597.64)                           | 26,423.79<br>(18,646.78 to<br>36,153.73)                         | 288.57<br>(165.82 to<br>589.88)                            | 265.28<br>(152.51 to<br>503.37)                            | 155.57<br>(93.17 to<br>289.59)                             | 303.57<br>(160.06 to<br>578.33)                            |
| Exposure to mechanical forces        | 19,691.75<br>(14,913.55 to<br>25,330.31)                         | 24,406.58<br>(17,317.98 to<br>33,207.99)                         | 16,473.55<br>(11,464.52 to<br>22,785.17)                         | 26,423.79<br>(18,646.78 to<br>36,153.73)                         | 341.00<br>(257.50 to<br>432.34)                            | 474.29<br>(334.82 to<br>635.42)                            | 349.34<br>(240.50 to<br>472.82)                            | 499.26<br>(353.24 to<br>673.23)                            |
| Unintentional firearm injuries       | 3,736.00<br>(2,248.65 to<br>5,806.26)                            | 4,480.34<br>(2,394.99 to<br>7,494.52)                            | 3,138.60<br>(1,644.97 to<br>5,382.06)                            | 4,844.19<br>(2,617.22 to<br>8,081.47)                            | 69.74<br>(42.27 to<br>106.82)                              | 87.76<br>(49.08 to<br>143.43)                              | 63.84<br>(35.73 to<br>106.47)                              | 93.40<br>(51.51 to<br>153.77)                              |
| Unintentional suffocation            | 3,643.86<br>(2,143.94 to<br>6,430.77)                            | 3,859.34<br>(2,297.30 to<br>6,469.17)                            | 2,181.95<br>(1,329.64 to<br>3,532.74)                            | 4,323.15<br>(2,505.54 to<br>7,453.18)                            | 50.27<br>(31.82 to<br>82.22)                               | 58.19<br>(37.28 to<br>89.39)                               | 36.82<br>(24.47 to<br>53.91)                               | 63.47<br>(39.22 to<br>102.62)                              |
| Other exposure to mechanical forces  | 12,311.88<br>(8,159.12 to<br>16,466.79)                          | 16,066.90<br>(10,187.37 to<br>22,517.39)                         | 11,153.01<br>(6,798.08 to<br>16,074.72)                          | 17,256.46<br>(11,145.93 to<br>24,241.93)                         | 220.99<br>(146.93 to<br>294.17)                            | 328.34<br>(208.66 to<br>450.90)                            | 248.68<br>(155.04 to<br>345.84)                            | 342.39<br>(217.88 to<br>476.81)                            |
| Adverse effects of medical treatment | 15,561.60<br>(9,074.22 to<br>24,512.33)                          | 17,664.21<br>(11,040.61 to<br>26,734.81)                         | 11,642.91<br>(7,783.05 to<br>17,243.58)                          | 19,112.90<br>(11,686.81 to<br>28,991.63)                         | 257.60<br>(174.53 to<br>368.48)                            | 339.24<br>(251.30 to<br>462.77)                            | 256.03<br>(198.58 to<br>335.56)                            | 351.88<br>(253.01 to<br>485.71)                            |
| Animal contact                       | 15,434.31<br>(8,001.49 to<br>22,483.40)                          | 25,619.01<br>(13,269.48 to<br>38,000.65)                         | 15,999.44<br>(8,124.56 to<br>24,216.24)                          | 28,110.66<br>(14,303.05 to<br>44,216.10)                         | 309.55<br>(160.75 to<br>443.49)                            | 582.81<br>(302.04 to<br>849.85)                            | 407.11<br>(206.46 to<br>611.96)                            | 614.63<br>(312.46 to<br>908.60)                            |
| Venomous animal contact              | 11,810.72<br>(5,576.76 to<br>17,493.38)                          | 19,048.57<br>(8,972.88 to<br>29,500.04)                          | 11,849.17<br>(5,658.40 to<br>18,992.77)                          | 20,886.95<br>(9,767.39 to<br>32,563.53)                          | 247.22<br>(123.25 to<br>354.89)                            | 456.07<br>(228.55 to<br>689.33)                            | 320.29<br>(159.29 to<br>492.25)                            | 478.90<br>(233.16 to<br>737.17)                            |
| Non-venomous animal contact          | 3,623.59<br>(1,759.37 to<br>6,845.55)                            | 6,570.43<br>(3,285.74 to<br>13,250.25)                           | 4,150.27<br>(2,052.30 to<br>8,532.20)                            | 7,223.71<br>(3,603.63 to<br>14,295.02)                           | 62.34<br>(30.57 to<br>123.64)                              | 126.74<br>(60.65 to<br>275.25)                             | 86.82<br>(40.32 to<br>194.39)                              | 135.73<br>(66.62 to<br>296.86)                             |
| Foreign body                         | 17,450.07<br>(9,789.54 to<br>27,886.92)                          | 19,803.08<br>(11,610.65 to<br>29,710.32)                         | 14,551.91<br>(8,863.60 to<br>21,347.68)                          | 20,738.34<br>(11,973.55 to<br>31,542.69)                         | 247.23<br>(146.22 to<br>367.64)                            | 305.40<br>(189.66 to<br>440.67)                            | 250.24<br>(158.10 to<br>351.94)                            | 311.72<br>(193.07 to<br>451.54)                            |

|                                                 |                                                               |                                                                |                                                                |                                                                |                                                        |                                                            |                                                            |                                                            |
|-------------------------------------------------|---------------------------------------------------------------|----------------------------------------------------------------|----------------------------------------------------------------|----------------------------------------------------------------|--------------------------------------------------------|------------------------------------------------------------|------------------------------------------------------------|------------------------------------------------------------|
| Pulmonary aspiration and foreign body in airway | 15,946.96<br>(8,813.98 to<br>25,882.20)                       | 17,960.26<br>(10,521.07 to<br>27,589.53)                       | 13,253.55<br>(8,094.82 to<br>19,578.78)                        | 18,768.59<br>(10,747.87 to<br>29,238.18)                       | 223.53<br>(132.11 to<br>342.47)                        | 273.82<br>(171.34 to<br>397.60)                            | 226.14<br>(145.37 to<br>323.05)                            | 278.69<br>(173.30 to<br>413.07)                            |
| Foreign body in other body part                 | 1,503.12<br>(438.73 to<br>3,113.07)                           | 1,842.82<br>(500.65 to<br>4,079.83)                            | 1,298.36<br>(332.73 to<br>3,019.88)                            | 1,969.75<br>(534.00 to<br>4,367.03)                            | 23.70<br>(6.66 to<br>51.34)                            | 31.59<br>(8.21 to<br>72.89)                                | 24.10<br>(5.59 to<br>56.89)                                | 33.03<br>(8.74 to<br>75.09)                                |
| Environmental heat and cold exposure            | 2,581.86<br>(1,668.02 to<br>3,720.76)                         | 3,729.51<br>(2,239.34 to<br>5,476.31)                          | 2,116.97<br>(1,264.40 to<br>3,117.75)                          | 4,208.57<br>(2,490.68 to<br>6,217.31)                          | 47.90<br>(31.11 to<br>66.76)                           | 78.68<br>(47.74 to<br>111.68)                              | 49.96<br>(29.83 to<br>70.71)                               | 85.07<br>(50.08 to<br>120.04)                              |
| Other unintentional injuries                    | 11,535.31<br>(8,302.54 to<br>15,913.44)                       | 12,556.97<br>(8,745.24 to<br>17,381.55)                        | 8,950.96<br>(6,106.12 to<br>12,586.76)                         | 13,430.95<br>(9,365.32 to<br>18,574.58)                        | 194.39<br>(141.10 to<br>265.90)                        | 235.19<br>(167.46 to<br>321.56)                            | 178.94<br>(125.20 to<br>250.49)                            | 245.94<br>(173.79 to<br>339.09)                            |
| <b>Self-harm and interpersonal violence</b>     | <b>40,510.42</b><br><b>(31,014.03 to</b><br><b>51,682.62)</b> | <b>74,217.38</b><br><b>(46,035.98 to</b><br><b>116,846.58)</b> | <b>65,514.95</b><br><b>(40,839.37 to</b><br><b>101,337.42)</b> | <b>87,465.00</b><br><b>(52,425.50 to</b><br><b>141,178.94)</b> | <b>933.46</b><br><b>(731.62 to</b><br><b>1,174.39)</b> | <b>1,803.80</b><br><b>(1,151.35 to</b><br><b>2,823.33)</b> | <b>1,662.94</b><br><b>(1,068.62 to</b><br><b>2,563.84)</b> | <b>2,086.41</b><br><b>(1,268.84 to</b><br><b>3,570.82)</b> |

**Burundi**

| Cause                                                                               | YLLs (actual counts)                                         |                                                            |                                                           |                                                            | Deaths (actual counts)                               |                                                        |                                                        |                                                        |
|-------------------------------------------------------------------------------------|--------------------------------------------------------------|------------------------------------------------------------|-----------------------------------------------------------|------------------------------------------------------------|------------------------------------------------------|--------------------------------------------------------|--------------------------------------------------------|--------------------------------------------------------|
|                                                                                     | 2016                                                         | 2040 Forecast                                              | 2040 Better Scenario                                      | 2040 Worse Scenario                                        | 2016                                                 | 2040 Forecast                                          | 2040 Better Scenario                                   | 2040 Worse Scenario                                    |
| Self-harm                                                                           | 33,816.42<br>(25,984.01 to<br>43,049.35)                     | 65,860.92<br>(40,381.96 to<br>104,833.00)                  | 58,141.86<br>(35,960.82 to<br>91,603.94)                  | 78,358.35<br>(46,189.02 to<br>129,145.45)                  | 820.66<br>(635.93 to<br>1,033.29)                    | 1,658.85<br>(1,041.66 to<br>2,617.56)                  | 1,532.34<br>(960.99 to<br>2,399.86)                    | 1,929.02<br>(1,146.60 to<br>3,123.55)                  |
| Self-harm by firearm                                                                | 3,927.02<br>(1,631.58 to<br>9,587.73)                        | 5,550.15<br>(1,832.76 to<br>15,426.09)                     | 4,635.77<br>(1,523.85 to<br>12,807.99)                    | 6,729.40<br>(2,203.49 to<br>19,146.43)                     | 86.28<br>(37.27 to<br>214.94)                        | 127.08<br>(44.09 to<br>360.49)                         | 110.17<br>(37.76 to<br>308.50)                         | 151.10<br>(51.71 to<br>439.79)                         |
| Self-harm by other specified means                                                  | 29,889.40<br>(22,990.31 to<br>38,477.45)                     | 60,310.77<br>(37,127.15 to<br>97,093.38)                   | 53,506.09<br>(32,769.97 to<br>84,720.69)                  | 71,628.95<br>(41,617.31 to<br>119,813.30)                  | 734.37<br>(568.20 to<br>934.83)                      | 1,531.76<br>(966.14 to<br>2,459.57)                    | 1,422.17<br>(900.55 to<br>2,231.27)                    | 1,777.92<br>(1,053.58 to<br>2,930.56)                  |
| Interpersonal violence                                                              | 6,694.01<br>(3,249.56 to<br>11,494.34)                       | 8,356.46<br>(3,688.66 to<br>15,607.10)                     | 7,373.10<br>(3,263.38 to<br>13,728.64)                    | 9,106.65<br>(3,912.81 to<br>17,736.64)                     | 112.81<br>(57.75 to<br>189.39)                       | 144.95<br>(67.59 to<br>270.68)                         | 130.60<br>(61.53 to<br>241.27)                         | 157.40<br>(70.21 to<br>304.59)                         |
| Physical violence by firearm                                                        | 1,171.40<br>(488.91 to<br>2,140.54)                          | 1,513.82<br>(603.53 to<br>2,776.22)                        | 1,413.28<br>(571.61 to<br>2,549.29)                       | 1,532.26<br>(595.18 to<br>2,826.06)                        | 20.02<br>(8.70 to<br>35.66)                          | 26.32<br>(10.77 to<br>47.64)                           | 24.93<br>(10.34 to<br>44.80)                           | 26.53<br>(10.63 to<br>48.51)                           |
| Physical violence by sharp object                                                   | 764.27<br>(299.77 to<br>1,488.21)                            | 1,099.26<br>(403.10 to<br>2,176.45)                        | 1,095.69<br>(401.10 to<br>2,141.52)                       | 1,094.48<br>(396.02 to<br>2,173.76)                        | 13.61<br>(5.75 to<br>25.70)                          | 20.03<br>(8.07 to<br>38.24)                            | 20.34<br>(8.24 to<br>38.56)                            | 19.76<br>(7.84 to<br>38.14)                            |
| Physical violence by other means                                                    | 4,758.33<br>(2,358.70 to<br>8,180.78)                        | 5,743.38<br>(2,493.13 to<br>11,495.09)                     | 4,864.13<br>(2,105.76 to<br>9,603.74)                     | 6,479.91<br>(2,633.49 to<br>13,465.86)                     | 79.18<br>(40.96 to<br>135.48)                        | 98.60<br>(43.65 to<br>195.03)                          | 85.34<br>(38.41 to<br>165.12)                          | 111.11<br>(47.07 to<br>227.18)                         |
| <b>Forces of nature, conflict and terrorism, and executions and police conflict</b> | <b>12,531.77</b><br><b>(6,582.70 to</b><br><b>18,486.62)</b> | <b>104,943.62</b><br><b>(0.00 to</b><br><b>601,347.66)</b> | <b>95,417.96</b><br><b>(0.00 to</b><br><b>539,834.74)</b> | <b>105,870.71</b><br><b>(0.00 to</b><br><b>609,120.40)</b> | <b>199.81</b><br><b>(105.44 to</b><br><b>294.20)</b> | <b>1,721.22</b><br><b>(0.00 to</b><br><b>9,581.30)</b> | <b>1,619.90</b><br><b>(0.00 to</b><br><b>8,923.87)</b> | <b>1,719.68</b><br><b>(0.00 to</b><br><b>9,574.49)</b> |
| Exposure to forces of nature                                                        | 3,234.01<br>(1,660.44 to<br>4,803.85)                        | 361.57<br>(0.00 to<br>3,182.77)                            | 320.45<br>(0.00 to<br>2,829.00)                           | 365.84<br>(0.00 to<br>3,228.44)                            | 52.56<br>(26.99 to<br>78.07)                         | 6.23<br>(0.00 to<br>54.84)                             | 5.84<br>(0.00 to<br>51.30)                             | 6.20<br>(0.00 to<br>54.72)                             |
| Conflict and terrorism                                                              | 8,925.70<br>(4,551.82 to<br>13,289.19)                       | 103,602.49<br>(0.00 to<br>601,347.66)                      | 94,165.42<br>(0.00 to<br>539,834.74)                      | 104,524.06<br>(0.00 to<br>609,120.40)                      | 140.51<br>(71.56 to<br>209.20)                       | 1,698.29<br>(0.00 to<br>9,581.30)                      | 1,597.86<br>(0.00 to<br>8,923.87)                      | 1,696.86<br>(0.00 to<br>9,574.49)                      |
| Executions and police conflict                                                      | 372.06<br>(185.46 to<br>771.55)                              | 979.57<br>(0.00 to<br>3,930.61)                            | 932.09<br>(0.00 to<br>3,769.91)                           | 980.80<br>(0.00 to<br>3,936.06)                            | 6.74<br>(3.70 to<br>12.64)                           | 16.70<br>(0.00 to<br>69.33)                            | 16.20<br>(0.00 to<br>67.50)                            | 16.62<br>(0.00 to<br>69.07)                            |

**Comoros**

| Cause                                                             | YLLs (actual counts)                                             |                                                                  |                                                                  |                                                                  | Deaths (actual counts)                                     |                                                            |                                                            |                                                            |
|-------------------------------------------------------------------|------------------------------------------------------------------|------------------------------------------------------------------|------------------------------------------------------------------|------------------------------------------------------------------|------------------------------------------------------------|------------------------------------------------------------|------------------------------------------------------------|------------------------------------------------------------|
|                                                                   | 2016                                                             | 2040 Forecast                                                    | 2040 Better Scenario                                             | 2040 Worse Scenario                                              | 2016                                                       | 2040 Forecast                                              | 2040 Better Scenario                                       | 2040 Worse Scenario                                        |
| <b>All causes</b>                                                 | <b>193,340.62</b><br><b>(168,130.27 to</b><br><b>224,204.16)</b> | <b>196,254.54</b><br><b>(161,655.26 to</b><br><b>243,712.24)</b> | <b>148,967.27</b><br><b>(124,286.96 to</b><br><b>187,717.36)</b> | <b>262,897.81</b><br><b>(212,519.63 to</b><br><b>333,516.11)</b> | <b>4,276.92</b><br><b>(3,847.22 to</b><br><b>4,725.84)</b> | <b>6,669.54</b><br><b>(5,888.44 to</b><br><b>7,682.15)</b> | <b>5,354.64</b><br><b>(4,736.82 to</b><br><b>6,208.22)</b> | <b>8,187.28</b><br><b>(7,074.98 to</b><br><b>9,604.46)</b> |
| <b>Communicable, maternal, neonatal, and nutritional diseases</b> | <b>120,501.33</b><br><b>(99,402.82 to</b><br><b>146,473.65)</b>  | <b>71,459.96</b><br><b>(50,242.80 to</b><br><b>101,402.16)</b>   | <b>45,989.22</b><br><b>(32,228.45 to</b><br><b>65,293.07)</b>    | <b>113,035.12</b><br><b>(76,170.31 to</b><br><b>164,486.99)</b>  | <b>2,027.05</b><br><b>(1,717.71 to</b><br><b>2,351.73)</b> | <b>1,671.24</b><br><b>(1,173.30 to</b><br><b>2,497.31)</b> | <b>1,120.89</b><br><b>(800.71 to</b><br><b>1,665.12)</b>   | <b>2,451.53</b><br><b>(1,658.04 to</b><br><b>3,686.71)</b> |

|                                                                          |                                                 |                                                 |                                                 |                                                 |                                            |                                          |                                          |                                            |
|--------------------------------------------------------------------------|-------------------------------------------------|-------------------------------------------------|-------------------------------------------------|-------------------------------------------------|--------------------------------------------|------------------------------------------|------------------------------------------|--------------------------------------------|
| <b>HIV/AIDS and tuberculosis</b>                                         | <b>11,579.86</b><br>(8,593.55 to<br>15,554.35)  | <b>9,747.62</b><br>(5,588.60 to<br>19,137.03)   | <b>5,479.72</b><br>(2,873.33 to<br>11,333.80)   | <b>12,977.95</b><br>(7,738.50 to<br>23,988.37)  | <b>288.62</b><br>(215.94 to<br>376.58)     | <b>261.64</b><br>(157.63 to<br>459.94)   | <b>150.01</b><br>(84.77 to<br>292.01)    | <b>345.16</b><br>(215.25 to<br>569.76)     |
| Tuberculosis                                                             | 10,383.70<br>(7,808.43 to<br>12,954.04)         | 6,399.49<br>(4,193.75 to<br>9,344.07)           | 3,642.92<br>(2,338.06 to<br>5,295.86)           | 9,193.10<br>(5,953.07 to<br>13,488.94)          | 265.11<br>(198.05 to<br>332.34)            | 190.64<br>(125.49 to<br>274.80)          | 111.25<br>(72.09 to<br>159.13)           | 264.64<br>(169.54 to<br>381.98)            |
| HIV/AIDS                                                                 | 1,196.16<br>(36.22 to<br>4,871.47)              | 3,348.13<br>(242.48 to<br>12,461.19)            | 1,836.80<br>(72.78 to<br>7,963.92)              | 3,784.85<br>(388.01 to<br>14,361.58)            | 23.50<br>(0.68 to<br>95.48)                | 71.00<br>(4.54 to<br>260.42)             | 38.76<br>(1.08 to<br>172.95)             | 80.52<br>(7.78 to<br>298.11)               |
| <b>Diarrhea, lower respiratory, and other common infectious diseases</b> | <b>54,735.54</b><br>(42,565.22 to<br>69,643.69) | <b>34,286.39</b><br>(20,669.18 to<br>58,645.68) | <b>20,818.31</b><br>(12,449.28 to<br>36,017.13) | <b>58,029.06</b><br>(34,080.19 to<br>98,747.29) | <b>1,041.12</b><br>(809.11 to<br>1,304.16) | <b>991.61</b><br>(581.07 to<br>1,742.88) | <b>658.55</b><br>(395.32 to<br>1,131.67) | <b>1,511.72</b><br>(846.16 to<br>2,671.01) |
| Diarrheal diseases                                                       | 18,142.85<br>(10,952.01 to<br>28,141.31)        | 11,594.95<br>(3,223.40 to<br>31,979.26)         | 7,294.47<br>(2,010.35 to<br>20,128.73)          | 21,227.24<br>(5,727.11 to<br>55,636.32)         | 412.06<br>(239.10 to<br>680.95)            | 375.41<br>(95.41 to<br>1,060.58)         | 245.89<br>(63.49 to<br>691.98)           | 658.50<br>(160.83 to<br>1,766.03)          |
| Intestinal infectious diseases                                           | 745.55<br>(350.09 to<br>1,360.25)               | 479.50<br>(221.17 to<br>898.04)                 | 404.82<br>(184.89 to<br>743.95)                 | 625.62<br>(277.36 to<br>1,180.58)               | 10.47<br>(5.00 to<br>18.78)                | 7.20<br>(3.37 to<br>13.26)               | 6.14<br>(2.86 to<br>11.08)               | 9.14<br>(4.15 to<br>16.97)                 |
| Typhoid fever                                                            | 690.73<br>(318.77 to<br>1,285.22)               | 445.10<br>(196.49 to<br>846.99)                 | 377.65<br>(169.91 to<br>708.86)                 | 578.59<br>(246.94 to<br>1,114.72)               | 9.70<br>(4.56 to<br>17.88)                 | 9.70<br>(3.00 to<br>12.53)               | 5.71<br>(2.62 to<br>10.53)               | 8.43<br>(3.69 to<br>15.89)                 |
| Paratyphoid fever                                                        | 36.64<br>(13.27 to<br>84.93)                    | 27.58<br>(10.14 to<br>59.49)                    | 22.62<br>(8.40 to<br>49.83)                     | 36.80<br>(13.27 to<br>84.01)                    | 0.52<br>(0.19 to<br>1.19)                  | 0.42<br>(0.16 to<br>0.88)                | 0.34<br>(0.13 to<br>0.73)                | 0.54<br>(0.20 to<br>1.18)                  |
| Other intestinal infectious diseases                                     | 18.18<br>(4.56 to<br>55.61)                     | 6.81<br>(1.66 to<br>20.45)                      | 4.54<br>(1.35 to<br>13.45)                      | 10.22<br>(2.39 to<br>31.38)                     | 0.25<br>(0.07 to<br>0.70)                  | 0.12<br>(0.04 to<br>0.32)                | 0.09<br>(0.02 to<br>0.23)                | 0.17<br>(0.05 to<br>0.45)                  |
| Lower respiratory infections                                             | 21,715.15<br>(16,333.71 to<br>28,637.34)        | 14,513.05<br>(8,746.94 to<br>23,517.77)         | 8,634.18<br>(5,738.54 to<br>13,071.22)          | 25,613.83<br>(13,906.87 to<br>42,651.50)        | 414.92<br>(333.69 to<br>507.15)            | 472.82<br>(314.43 to<br>687.39)          | 309.35<br>(222.02 to<br>424.73)          | 674.63<br>(418.29 to<br>1,023.57)          |
| Upper respiratory infections                                             | 40.21<br>(14.78 to<br>89.90)                    | 32.00<br>(12.91 to<br>70.53)                    | 19.41<br>(7.92 to<br>43.70)                     | 47.85<br>(18.33 to<br>113.38)                   | 0.64<br>(0.30 to<br>1.24)                  | 0.72<br>(0.32 to<br>1.41)                | 0.46<br>(0.20 to<br>0.88)                | 0.99<br>(0.44 to<br>2.03)                  |
| Otitis media                                                             | 14.32<br>(5.92 to<br>33.44)                     | 3.54<br>(1.62 to<br>7.81)                       | 3.60<br>(1.65 to<br>7.82)                       | 3.92<br>(1.73 to<br>9.12)                       | 0.25<br>(0.12 to<br>0.54)                  | 0.12<br>(0.06 to<br>0.26)                | 0.14<br>(0.06 to<br>0.30)                | 0.12<br>(0.05 to<br>0.24)                  |
| Meningitis                                                               | 6,607.99<br>(4,708.23 to<br>9,884.41)           | 4,148.10<br>(2,744.15 to<br>6,306.27)           | 3,428.94<br>(2,325.56 to<br>5,158.85)           | 5,520.93<br>(3,511.93 to<br>8,556.00)           | 110.71<br>(82.69 to<br>157.25)             | 90.86<br>(64.45 to<br>134.25)            | 81.65<br>(58.09 to<br>116.68)            | 106.36<br>(73.78 to<br>159.86)             |
| Pneumococcal meningitis                                                  | 407.82<br>(293.12 to<br>609.09)                 | 225.15<br>(145.47 to<br>351.35)                 | 205.31<br>(134.30 to<br>314.30)                 | 270.01<br>(172.53 to<br>431.84)                 | 8.01<br>(5.92 to<br>11.57)                 | 6.20<br>(4.14 to<br>9.52)                | 5.98<br>(4.01 to<br>8.97)                | 6.75<br>(4.44 to<br>10.64)                 |
| H influenzae type B meningitis                                           | 608.58<br>(404.96 to<br>947.51)                 | 701.40<br>(257.77 to<br>1,709.26)               | 350.89<br>(186.61 to<br>672.66)                 | 1,427.25<br>(405.99 to<br>3,475.65)             | 9.47<br>(6.78 to<br>14.12)                 | 10.74<br>(5.16 to<br>22.46)              | 6.86<br>(4.35 to<br>10.91)               | 19.03<br>(7.04 to<br>42.95)                |
| Meningococcal meningitis                                                 | 2,845.10<br>(1,985.27 to<br>4,286.42)           | 1,505.34<br>(1,002.90 to<br>2,309.57)           | 1,334.54<br>(895.89 to<br>2,003.57)             | 1,802.65<br>(1,166.22 to<br>2,794.28)           | 46.17<br>(33.58 to<br>66.28)               | 33.46<br>(23.30 to<br>50.17)             | 30.92<br>(21.82 to<br>45.54)             | 36.85<br>(25.35 to<br>55.15)               |
| Other meningitis                                                         | 2,746.49<br>(1,968.81 to<br>4,012.83)           | 1,716.21<br>(1,169.29 to<br>2,600.37)           | 1,538.20<br>(1,050.90 to<br>2,306.62)           | 2,021.03<br>(1,340.04 to<br>3,109.26)           | 47.06<br>(35.64 to<br>66.78)               | 40.47<br>(28.62 to<br>59.29)             | 37.89<br>(26.64 to<br>56.04)             | 43.73<br>(31.01 to<br>65.49)               |
| Encephalitis                                                             | 493.78<br>(237.84 to<br>846.41)                 | 383.02<br>(180.17 to<br>687.73)                 | 303.85<br>(150.99 to<br>516.82)                 | 530.22<br>(247.98 to<br>985.13)                 | 6.40<br>(3.23 to<br>10.63)                 | 5.70<br>(2.98 to<br>9.51)                | 4.63<br>(2.52 to<br>7.52)                | 7.49<br>(3.78 to<br>13.21)                 |
| Diphtheria                                                               | 12.72<br>(6.24 to<br>23.51)                     | 3.47<br>(1.33 to<br>9.11)                       | 1.69<br>(0.82 to<br>3.01)                       | 7.06<br>(2.07 to<br>20.61)                      | 0.17<br>(0.09 to<br>0.29)                  | 0.05<br>(0.02 to<br>0.11)                | 0.03<br>(0.02 to<br>0.05)                | 0.09<br>(0.03 to<br>0.25)                  |
| Whooping cough                                                           | 3,388.43<br>(280.49 to<br>10,383.60)            | 2,792.62<br>(300.66 to<br>7,577.10)             | 573.17<br>(43.69 to<br>1,931.56)                | 3,817.15<br>(354.31 to<br>11,380.80)            | 40.13<br>(3.32 to<br>123.01)               | 33.11<br>(3.55 to<br>89.55)              | 6.98<br>(0.54 to<br>23.63)               | 45.20<br>(4.20 to<br>134.94)               |
| Tetanus                                                                  | 575.76<br>(316.37 to<br>1,126.14)               | 106.42<br>(50.65 to<br>237.07)                  | 56.99<br>(27.89 to<br>123.47)                   | 131.43<br>(59.78 to<br>297.23)                  | 8.83<br>(5.15 to<br>16.33)                 | 1.77<br>(0.93 to<br>3.55)                | 1.22<br>(0.62 to<br>2.52)                | 2.04<br>(1.03 to<br>4.26)                  |
| Measles                                                                  | 2,846.95<br>(953.39 to<br>6,384.93)             | 139.06<br>(9.30 to<br>759.72)                   | 38.58<br>(5.37 to<br>178.12)                    | 366.98<br>(27.50 to<br>1,378.01)                | 34.10<br>(11.47 to<br>76.55)               | 1.67<br>(0.12 to<br>8.99)                | 0.48<br>(0.07 to<br>2.14)                | 4.37<br>(0.34 to<br>16.29)                 |

| Comoros                                               |                                                  |                                                  |                                              |                                                  |                                         |                                         |                                         |                                         |
|-------------------------------------------------------|--------------------------------------------------|--------------------------------------------------|----------------------------------------------|--------------------------------------------------|-----------------------------------------|-----------------------------------------|-----------------------------------------|-----------------------------------------|
| Cause                                                 | YLLs (actual counts)                             |                                                  |                                              |                                                  | Deaths (actual counts)                  |                                         |                                         |                                         |
|                                                       | 2016                                             | 2040 Forecast                                    | 2040 Better Scenario                         | 2040 Worse Scenario                              | 2016                                    | 2040 Forecast                           | 2040 Better Scenario                    | 2040 Worse Scenario                     |
| Varicella and herpes zoster                           | 151.83<br>(85.86 to 263.58)                      | 90.67<br>(49.64 to 161.34)                       | 58.61<br>(34.54 to 97.93)                    | 136.82<br>(72.54 to 251.97)                      | 2.44<br>(1.60 to 3.77)                  | 2.19<br>(1.39 to 3.27)                  | 1.59<br>(1.02 to 2.32)                  | 2.79<br>(1.71 to 4.37)                  |
| <b>Neglected tropical diseases and malaria</b>        | <b>570.49</b><br><b>(288.95 to 1,019.61)</b>     | <b>384.94</b><br><b>(202.29 to 655.08)</b>       | <b>295.64</b><br><b>(150.72 to 508.82)</b>   | <b>552.87</b><br><b>(283.52 to 1,005.34)</b>     | <b>7.97</b><br><b>(4.31 to 13.47)</b>   | <b>6.48</b><br><b>(3.72 to 10.36)</b>   | <b>5.10</b><br><b>(2.92 to 8.15)</b>    | <b>8.73</b><br><b>(4.85 to 14.63)</b>   |
| Malaria                                               | 46.23<br>(29.41 to 82.60)                        | 30.01<br>(18.78 to 55.53)                        | 27.73<br>(16.90 to 48.85)                    | 33.49<br>(20.89 to 63.79)                        | 0.82<br>(0.55 to 1.52)                  | 0.65<br>(0.42 to 1.25)                  | 0.62<br>(0.38 to 1.10)                  | 0.70<br>(0.45 to 1.35)                  |
| Chagas disease                                        | 0.00<br>(0.00 to 0.00)                           | 0.00<br>(0.00 to 0.00)                           | 0.00<br>(0.00 to 0.00)                       | 0.00<br>(0.00 to 0.00)                           | 0.00<br>(0.00 to 0.00)                  | 0.00<br>(0.00 to 0.00)                  | 0.00<br>(0.00 to 0.00)                  | 0.00<br>(0.00 to 0.00)                  |
| Leishmaniasis                                         | 0.00<br>(0.00 to 0.00)                           | 0.00<br>(0.00 to 0.00)                           | 0.00<br>(0.00 to 0.00)                       | 0.00<br>(0.00 to 0.00)                           | 0.00<br>(0.00 to 0.00)                  | 0.00<br>(0.00 to 0.00)                  | 0.00<br>(0.00 to 0.00)                  | 0.00<br>(0.00 to 0.00)                  |
| African trypanosomiasis                               | 0.00<br>(0.00 to 0.00)                           | 0.00<br>(0.00 to 0.00)                           | 0.00<br>(0.00 to 0.00)                       | 0.00<br>(0.00 to 0.00)                           | 0.00<br>(0.00 to 0.00)                  | 0.00<br>(0.00 to 0.00)                  | 0.00<br>(0.00 to 0.00)                  | 0.00<br>(0.00 to 0.00)                  |
| Schistosomiasis                                       | 0.00<br>(0.00 to 0.00)                           | 0.00<br>(0.00 to 0.00)                           | 0.00<br>(0.00 to 0.00)                       | 0.00<br>(0.00 to 0.00)                           | 0.00<br>(0.00 to 0.00)                  | 0.00<br>(0.00 to 0.00)                  | 0.00<br>(0.00 to 0.00)                  | 0.00<br>(0.00 to 0.00)                  |
| Cysticercosis                                         | 0.00<br>(0.00 to 0.00)                           | 0.00<br>(0.00 to 0.00)                           | 0.00<br>(0.00 to 0.00)                       | 0.00<br>(0.00 to 0.00)                           | 0.00<br>(0.00 to 0.00)                  | 0.00<br>(0.00 to 0.00)                  | 0.00<br>(0.00 to 0.00)                  | 0.00<br>(0.00 to 0.00)                  |
| Cystic echinococcosis                                 | 4.80<br>(3.16 to 6.69)                           | 2.83<br>(1.70 to 4.45)                           | 1.51<br>(0.88 to 2.43)                       | 4.25<br>(2.56 to 6.64)                           | 0.11<br>(0.07 to 0.15)                  | 0.09<br>(0.05 to 0.15)                  | 0.05<br>(0.03 to 0.08)                  | 0.12<br>(0.07 to 0.19)                  |
| Dengue                                                | 10.46<br>(0.91 to 38.88)                         | 27.97<br>(3.64 to 86.39)                         | 24.80<br>(3.36 to 75.33)                     | 35.00<br>(4.20 to 111.03)                        | 0.16<br>(0.02 to 0.58)                  | 0.60<br>(0.08 to 1.77)                  | 0.56<br>(0.08 to 1.57)                  | 0.68<br>(0.10 to 2.09)                  |
| Yellow fever                                          | 0.00<br>(0.00 to 0.00)                           | 0.00<br>(0.00 to 0.00)                           | 0.00<br>(0.00 to 0.00)                       | 0.00<br>(0.00 to 0.00)                           | 0.00<br>(0.00 to 0.00)                  | 0.00<br>(0.00 to 0.00)                  | 0.00<br>(0.00 to 0.00)                  | 0.00<br>(0.00 to 0.00)                  |
| Rabies                                                | 95.38<br>(26.58 to 267.19)                       | 47.36<br>(12.38 to 128.70)                       | 23.34<br>(5.06 to 72.31)                     | 82.51<br>(22.82 to 229.56)                       | 1.46<br>(0.43 to 3.83)                  | 0.83<br>(0.23 to 2.30)                  | 0.41<br>(0.09 to 1.20)                  | 1.40<br>(0.42 to 3.74)                  |
| Intestinal nematode infections                        | 57.42<br>(8.62 to 144.10)                        | 54.41<br>(10.96 to 141.23)                       | 53.03<br>(10.32 to 136.64)                   | 70.03<br>(12.82 to 186.40)                       | 0.74<br>(0.15 to 1.78)                  | 0.77<br>(0.22 to 1.81)                  | 0.76<br>(0.22 to 1.76)                  | 0.95<br>(0.23 to 2.33)                  |
| Other neglected tropical diseases                     | 356.20<br>(142.29 to 733.84)                     | 222.36<br>(83.81 to 459.70)                      | 165.22<br>(59.61 to 334.77)                  | 327.59<br>(124.93 to 693.82)                     | 4.69<br>(1.98 to 9.29)                  | 3.55<br>(1.45 to 6.76)                  | 2.72<br>(1.09 to 5.09)                  | 4.87<br>(1.99 to 9.63)                  |
| <b>Maternal disorders</b>                             | <b>1,788.30</b><br><b>(1,245.14 to 2,421.50)</b> | <b>1,503.22</b><br><b>(1,007.94 to 2,168.21)</b> | <b>854.57</b><br><b>(572.26 to 1,226.94)</b> | <b>2,104.43</b><br><b>(1,389.71 to 3,067.88)</b> | <b>32.23</b><br><b>(22.42 to 43.40)</b> | <b>27.53</b><br><b>(18.38 to 39.65)</b> | <b>15.65</b><br><b>(10.42 to 22.52)</b> | <b>38.46</b><br><b>(25.63 to 55.94)</b> |
| Maternal hemorrhage                                   | 472.92<br>(275.16 to 731.33)                     | 376.45<br>(208.35 to 605.52)                     | 212.48<br>(113.31 to 345.18)                 | 524.81<br>(284.33 to 861.50)                     | 8.65<br>(5.01 to 13.31)                 | 7.00<br>(3.82 to 11.29)                 | 3.95<br>(2.11 to 6.42)                  | 9.74<br>(5.24 to 16.02)                 |
| Maternal sepsis and other maternal infections         | 140.64<br>(56.16 to 283.07)                      | 106.00<br>(38.65 to 210.91)                      | 59.71<br>(21.63 to 122.11)                   | 148.79<br>(54.45 to 298.74)                      | 2.53<br>(1.00 to 5.07)                  | 1.94<br>(0.71 to 3.81)                  | 1.09<br>(0.39 to 2.21)                  | 2.72<br>(0.99 to 5.48)                  |
| Maternal hypertensive disorders                       | 252.84<br>(145.44 to 399.02)                     | 208.83<br>(113.51 to 355.54)                     | 117.03<br>(63.27 to 199.06)                  | 293.57<br>(157.06 to 505.78)                     | 4.51<br>(2.57 to 7.14)                  | 3.79<br>(2.05 to 6.47)                  | 2.13<br>(1.14 to 3.65)                  | 5.32<br>(2.79 to 9.22)                  |
| Maternal obstructed labor and uterine rupture         | 147.16<br>(73.29 to 259.83)                      | 123.85<br>(59.07 to 229.63)                      | 66.88<br>(32.11 to 128.42)                   | 176.84<br>(83.53 to 335.81)                      | 2.67<br>(1.33 to 4.68)                  | 2.28<br>(1.08 to 4.28)                  | 1.23<br>(0.58 to 2.38)                  | 3.25<br>(1.54 to 6.15)                  |
| Maternal abortion, miscarriage, and ectopic pregnancy | 156.24<br>(73.18 to 275.37)                      | 138.88<br>(58.83 to 277.01)                      | 79.55<br>(33.64 to 161.20)                   | 194.91<br>(81.61 to 392.12)                      | 2.78<br>(1.31 to 4.89)                  | 2.51<br>(1.08 to 5.08)                  | 1.44<br>(0.61 to 2.87)                  | 3.52<br>(1.48 to 7.06)                  |

|                                                                         |                                                 |                                                 |                                                |                                                 |                                        |                                        |                                       |                                        |
|-------------------------------------------------------------------------|-------------------------------------------------|-------------------------------------------------|------------------------------------------------|-------------------------------------------------|----------------------------------------|----------------------------------------|---------------------------------------|----------------------------------------|
| Indirect maternal deaths                                                | 421.93<br>(212.95 to<br>698.52)                 | 378.05<br>(181.85 to<br>682.61)                 | 217.95<br>(104.57 to<br>387.60)                | 529.13<br>(254.83 to<br>937.13)                 | 7.56<br>(3.76 to<br>12.59)             | 6.87<br>(3.27 to<br>12.41)             | 3.96<br>(1.91 to<br>7.05)             | 9.59<br>(4.56 to<br>17.07)             |
| Late maternal deaths                                                    | 30.14<br>(11.96 to<br>62.36)                    | 20.64<br>(8.11 to<br>43.89)                     | 11.71<br>(4.42 to<br>24.67)                    | 29.14<br>(11.56 to<br>60.52)                    | 0.54<br>(0.22 to<br>1.11)              | 0.38<br>(0.15 to<br>0.80)              | 0.21<br>(0.08 to<br>0.45)             | 0.53<br>(0.21 to<br>1.10)              |
| Maternal deaths aggravated by HIV/AIDS                                  | 0.64<br>(0.06 to<br>2.27)                       | 3.08<br>(0.03 to<br>14.25)                      | 1.76<br>(0.00 to<br>8.79)                      | 4.18<br>(0.07 to<br>19.22)                      | 0.01<br>(0.00 to<br>0.04)              | 0.06<br>(0.00 to<br>0.26)              | 0.03<br>(0.00 to<br>0.16)             | 0.08<br>(0.00 to<br>0.35)              |
| Other maternal disorders                                                | 165.80<br>(71.52 to<br>309.38)                  | 147.46<br>(62.39 to<br>291.91)                  | 87.51<br>(37.21 to<br>176.59)                  | 203.06<br>(85.21 to<br>406.48)                  | 2.98<br>(1.28 to<br>5.65)              | 2.70<br>(1.13 to<br>5.40)              | 1.60<br>(0.67 to<br>3.23)             | 3.71<br>(1.54 to<br>7.47)              |
| <b>Comoros</b>                                                          |                                                 |                                                 |                                                |                                                 |                                        |                                        |                                       |                                        |
| Cause                                                                   | YLLs (actual counts)                            |                                                 |                                                |                                                 | Deaths (actual counts)                 |                                        |                                       |                                        |
|                                                                         | 2016                                            | 2040 Forecast                                   | 2040 Better Scenario                           | 2040 Worse Scenario                             | 2016                                   | 2040 Forecast                          | 2040 Better Scenario                  | 2040 Worse Scenario                    |
| <b>Neonatal disorders</b>                                               | <b>35,253.21</b><br>(27,617.36 to<br>44,783.56) | <b>18,753.45</b><br>(10,561.58 to<br>28,032.17) | <b>13,317.51</b><br>(7,457.37 to<br>19,977.27) | <b>29,928.90</b><br>(16,506.80 to<br>46,928.93) | <b>407.27</b><br>(319.03 to<br>517.43) | <b>216.71</b><br>(122.10 to<br>323.93) | <b>153.90</b><br>(86.22 to<br>230.85) | <b>345.85</b><br>(190.80 to<br>542.22) |
| Neonatal preterm birth                                                  | 10,635.62<br>(6,650.41 to<br>15,889.09)         | 5,610.03<br>(2,971.21 to<br>9,125.85)           | 3,469.60<br>(1,854.47 to<br>5,653.74)          | 8,722.27<br>(4,436.16 to<br>14,287.99)          | 122.86<br>(76.83 to<br>183.54)         | 64.82<br>(34.34 to<br>105.42)          | 40.09<br>(21.43 to<br>65.34)          | 100.77<br>(51.30 to<br>165.04)         |
| Neonatal encephalopathy due to birth asphyxia and trauma                | 11,488.57<br>(7,555.83 to<br>16,297.77)         | 5,114.56<br>(2,257.15 to<br>9,213.37)           | 3,966.75<br>(1,743.40 to<br>7,152.52)          | 8,102.74<br>(3,507.11 to<br>15,006.79)          | 132.71<br>(87.28 to<br>188.26)         | 59.10<br>(26.10 to<br>106.44)          | 45.84<br>(20.15 to<br>82.63)          | 93.62<br>(40.54 to<br>173.35)          |
| Neonatal sepsis and other neonatal infections                           | 6,963.73<br>(4,409.64 to<br>10,802.63)          | 4,740.60<br>(2,638.69 to<br>7,870.70)           | 3,591.01<br>(1,979.93 to<br>5,985.73)          | 7,569.88<br>(4,122.32 to<br>13,086.88)          | 80.47<br>(50.95 to<br>124.80)          | 54.79<br>(30.50 to<br>90.95)           | 41.51<br>(22.88 to<br>69.17)          | 87.49<br>(47.67 to<br>151.22)          |
| Hemolytic disease and other neonatal jaundice                           | 888.92<br>(478.31 to<br>1,502.83)               | 279.50<br>(108.70 to<br>596.76)                 | 195.76<br>(73.34 to<br>412.43)                 | 470.41<br>(174.06 to<br>1,006.58)               | 10.27<br>(5.53 to<br>17.36)            | 3.23<br>(1.26 to<br>6.89)              | 2.26<br>(0.85 to<br>4.27)             | 5.44<br>(2.01 to<br>11.63)             |
| Other neonatal disorders                                                | 5,276.37<br>(3,268.37 to<br>7,970.03)           | 3,008.76<br>(1,293.19 to<br>5,461.08)           | 2,094.39<br>(923.37 to<br>3,896.17)            | 5,063.60<br>(2,161.99 to<br>9,380.75)           | 60.97<br>(37.77 to<br>92.12)           | 34.77<br>(14.95 to<br>63.10)           | 24.21<br>(10.68 to<br>45.01)          | 58.52<br>(25.04 to<br>108.37)          |
| <b>Nutritional deficiencies</b>                                         | <b>8,051.49</b><br>(5,440.65 to<br>11,859.26)   | <b>3,690.41</b><br>(2,741.92 to<br>5,108.85)    | <b>2,827.15</b><br>(2,118.49 to<br>3,880.42)   | <b>5,071.17</b><br>(3,557.46 to<br>7,348.85)    | <b>138.91</b><br>(104.14 to<br>188.81) | <b>112.58</b><br>(88.07 to<br>146.64)  | <b>93.83</b><br>(74.07 to<br>121.12)  | <b>130.79</b><br>(99.90 to<br>173.10)  |
| Protein-energy malnutrition                                             | 7,457.64<br>(4,920.57 to<br>11,239.66)          | 2,833.63<br>(1,991.96 to<br>4,075.83)           | 2,144.95<br>(1,537.19 to<br>3,043.11)          | 4,060.77<br>(2,693.55 to<br>6,220.98)           | 121.82<br>(88.67 to<br>169.74)         | 81.45<br>(60.66 to<br>107.71)          | 67.42<br>(50.40 to<br>88.86)          | 97.15<br>(70.83 to<br>131.21)          |
| Iodine deficiency                                                       | 42.98<br>(2.52 to<br>153.62)                    | 127.75<br>(3.88 to<br>475.58)                   | 91.62<br>(2.56 to<br>334.39)                   | 173.42<br>(5.34 to<br>730.10)                   | 0.94<br>(0.07 to<br>2.94)              | 4.20<br>(0.10 to<br>12.44)             | 3.22<br>(0.07 to<br>9.71)             | 4.99<br>(0.15 to<br>15.28)             |
| Dietary iron deficiency                                                 | 42.02<br>(28.00 to<br>63.24)                    | 40.88<br>(24.77 to<br>67.06)                    | 34.76<br>(21.10 to<br>57.68)                   | 46.71<br>(28.37 to<br>76.05)                    | 0.77<br>(0.51 to<br>1.15)              | 0.81<br>(0.49 to<br>1.31)              | 0.70<br>(0.42 to<br>1.13)             | 0.91<br>(0.57 to<br>1.45)              |
| Other nutritional deficiencies                                          | 508.85<br>(350.34 to<br>699.83)                 | 688.15<br>(451.86 to<br>964.65)                 | 555.83<br>(365.25 to<br>788.03)                | 790.27<br>(513.60 to<br>1,131.17)               | 15.38<br>(10.40 to<br>20.95)           | 26.12<br>(17.33 to<br>36.39)           | 22.49<br>(15.06 to<br>31.12)          | 27.74<br>(18.23 to<br>39.21)           |
| <b>Other communicable, maternal, neonatal, and nutritional diseases</b> | <b>8,522.44</b><br>(4,356.10 to<br>15,134.89)   | <b>3,093.93</b><br>(1,818.27 to<br>5,306.14)    | <b>2,396.33</b><br>(1,421.28 to<br>4,022.46)   | <b>4,370.73</b><br>(2,387.80 to<br>7,941.79)    | <b>110.94</b><br>(62.45 to<br>188.39)  | <b>54.68</b><br>(38.35 to<br>79.89)    | <b>43.84</b><br>(31.25 to<br>62.31)   | <b>70.83</b><br>(45.91 to<br>111.37)   |
| Sexually transmitted infections excluding HIV                           | 5,933.99<br>(2,557.19 to<br>11,482.16)          | 1,305.35<br>(450.40 to<br>2,801.91)             | 1,033.27<br>(373.53 to<br>2,158.97)            | 1,909.33<br>(631.97 to<br>4,216.57)             | 70.77<br>(31.97 to<br>135.70)          | 16.59<br>(6.52 to<br>33.89)            | 13.27<br>(5.52 to<br>26.29)           | 23.73<br>(8.62 to<br>50.75)            |
| Syphilis                                                                | 5,846.36<br>(2,421.77 to<br>11,369.24)          | 1,232.29<br>(392.19 to<br>2,716.79)             | 971.25<br>(320.53 to<br>2,088.85)              | 1,827.36<br>(561.00 to<br>4,139.70)             | 68.95<br>(29.27 to<br>133.36)          | 14.89<br>(5.00 to<br>32.31)            | 11.78<br>(4.12 to<br>24.90)           | 21.88<br>(6.99 to<br>48.99)            |
| Chlamydia infection                                                     | 17.40<br>(10.11 to<br>27.41)                    | 14.43<br>(8.80 to<br>22.15)                     | 12.18<br>(7.54 to<br>18.30)                    | 16.24<br>(9.48 to<br>25.20)                     | 0.35<br>(0.21 to<br>0.55)              | 0.33<br>(0.21 to<br>0.51)              | 0.29<br>(0.18 to<br>0.43)             | 0.36<br>(0.22 to<br>0.56)              |
| Gonococcal infection                                                    | 44.65<br>(27.09 to<br>71.83)                    | 37.60<br>(22.97 to<br>59.05)                    | 32.04<br>(19.85 to<br>49.65)                   | 41.94<br>(25.01 to<br>67.01)                    | 0.95<br>(0.59 to<br>1.51)              | 0.91<br>(0.57 to<br>1.41)              | 0.80<br>(0.51 to<br>1.21)             | 0.98<br>(0.60 to<br>1.53)              |

|                                       |                                          |                                            |                                          |                                             |                                       |                                       |                                       |                                       |
|---------------------------------------|------------------------------------------|--------------------------------------------|------------------------------------------|---------------------------------------------|---------------------------------------|---------------------------------------|---------------------------------------|---------------------------------------|
| Other sexually transmitted infections | 25.58<br>(15.31 to<br>41.34)             | 21.04<br>(12.93 to<br>33.64)               | 17.80<br>(11.05 to<br>27.83)             | 23.80<br>(14.00 to<br>38.86)                | 0.52<br>(0.32 to<br>0.83)             | 0.47<br>(0.29 to<br>0.72)             | 0.40<br>(0.26 to<br>0.62)             | 0.51<br>(0.26 to<br>0.82)             |
| Acute hepatitis                       | 645.46<br>(505.54 to<br>808.29)          | 617.69<br>(472.19 to<br>853.06)            | 499.49<br>(379.32 to<br>680.23)          | 711.47<br>(541.67 to<br>968.50)             | 15.27<br>(11.99 to<br>18.87)          | 18.40<br>(14.44 to<br>23.94)          | 15.31<br>(11.87 to<br>19.77)          | 20.35<br>(15.82 to<br>26.58)          |
| Acute hepatitis A                     | 16.39<br>(3.60 to<br>38.33)              | 9.60<br>(3.67 to<br>19.26)                 | 7.65<br>(2.94 to<br>15.41)               | 12.52<br>(4.42 to<br>25.54)                 | 0.23<br>(0.07 to<br>0.48)             | 0.22<br>(0.09 to<br>0.47)             | 0.18<br>(0.07 to<br>0.39)             | 0.26<br>(0.10 to<br>0.54)             |
| Acute hepatitis B                     | 515.99<br>(398.05 to<br>658.85)          | 517.77<br>(389.62 to<br>710.49)            | 413.49<br>(308.35 to<br>573.20)          | 593.09<br>(444.97 to<br>825.73)             | 12.72<br>(9.92 to<br>15.96)           | 15.35<br>(11.84 to<br>20.44)          | 12.52<br>(9.58 to<br>16.69)           | 17.09<br>(13.09 to<br>22.66)          |
| Acute hepatitis C                     | 13.45<br>(9.29 to<br>18.80)              | 17.18<br>(11.38 to<br>25.61)               | 15.59<br>(10.40 to<br>23.28)             | 18.33<br>(12.25 to<br>27.52)                | 0.38<br>(0.26 to<br>0.54)             | 0.59<br>(0.39 to<br>0.87)             | 0.55<br>(0.36 to<br>0.81)             | 0.61<br>(0.40 to<br>0.90)             |
| Acute hepatitis E                     | 99.64<br>(70.61 to<br>138.72)            | 73.14<br>(46.94 to<br>108.07)              | 62.75<br>(40.35 to<br>91.55)             | 87.53<br>(56.75 to<br>126.29)               | 1.94<br>(1.38 to<br>2.66)             | 2.24<br>(1.44 to<br>3.34)             | 2.06<br>(1.32 to<br>3.03)             | 2.40<br>(1.56 to<br>3.54)             |
| Other unspecified infectious diseases | 1,942.99<br>(596.34 to<br>6,870.38)      | 1,170.89<br>(543.55 to<br>2,871.26)        | 863.57<br>(414.37 to<br>2,118.75)        | 1,749.94<br>(750.57 to<br>4,690.34)         | 24.90<br>(9.45 to<br>81.87)           | 19.69<br>(12.00 to<br>39.06)          | 15.26<br>(9.51 to<br>29.58)           | 26.74<br>(14.79 to<br>62.21)          |
| Non-communicable diseases             | 55,197.96<br>(48,031.13 to<br>62,362.61) | 102,141.79<br>(85,754.01 to<br>120,378.49) | 83,098.69<br>(70,275.77 to<br>96,920.60) | 124,038.11<br>(101,886.51 to<br>148,139.77) | 1,884.64<br>(1,649.40 to<br>2,108.68) | 4,378.76<br>(3,873.63 to<br>4,953.41) | 3,666.20<br>(3,242.44 to<br>4,093.46) | 5,077.09<br>(4,336.08 to<br>5,888.06) |
| <b>Comoros</b>                        |                                          |                                            |                                          |                                             |                                       |                                       |                                       |                                       |
| Cause                                 | YLLs (actual counts)                     |                                            |                                          |                                             | Deaths (actual counts)                |                                       |                                       |                                       |
|                                       | 2016                                     | 2040 Forecast                              | 2040 Better Scenario                     | 2040 Worse Scenario                         | 2016                                  | 2040 Forecast                         | 2040 Better Scenario                  | 2040 Worse Scenario                   |
| Neoplasms                             | 15,372.63<br>(12,623.42 to<br>18,065.52) | 31,490.41<br>(25,028.31 to<br>37,999.99)   | 31,171.77<br>(25,145.15 to<br>37,492.67) | 32,267.84<br>(25,484.08 to<br>39,288.99)    | 474.93<br>(388.81 to<br>557.59)       | 1,165.16<br>(947.83 to<br>1,377.21)   | 1,189.98<br>(971.64 to<br>1,390.83)   | 1,148.38<br>(915.12 to<br>1,577.62)   |
| Lip and oral cavity cancer            | 189.55<br>(154.18 to<br>236.58)          | 420.55<br>(309.12 to<br>581.99)            | 372.65<br>(280.51 to<br>509.53)          | 469.80<br>(335.31 to<br>661.55)             | 6.59<br>(5.40 to<br>8.08)             | 16.24<br>(12.06 to<br>21.94)          | 14.96<br>(11.46 to<br>20.04)          | 17.36<br>(12.61 to<br>23.70)          |
| Nasopharynx cancer                    | 155.72<br>(109.02 to<br>229.72)          | 364.27<br>(228.30 to<br>614.28)            | 311.17<br>(197.33 to<br>516.51)          | 427.17<br>(261.59 to<br>741.45)             | 4.50<br>(3.17 to<br>6.66)             | 11.77<br>(7.56 to<br>19.49)           | 10.32<br>(6.79 to<br>16.87)           | 13.35<br>(8.38 to<br>23.04)           |
| Other pharynx cancer                  | 110.82<br>(78.67 to<br>149.79)           | 220.61<br>(144.85 to<br>320.40)            | 205.56<br>(135.54 to<br>294.72)          | 226.55<br>(148.43 to<br>333.93)             | 3.58<br>(2.57 to<br>4.74)             | 7.91<br>(5.25 to<br>11.31)            | 7.52<br>(5.02 to<br>10.62)            | 7.95<br>(5.30 to<br>11.52)            |
| Esophageal cancer                     | 645.78<br>(523.58 to<br>797.08)          | 1,575.06<br>(947.37 to<br>2,571.48)        | 1,385.53<br>(875.55 to<br>2,283.44)      | 1,713.44<br>(1,001.59 to<br>2,844.96)       | 24.95<br>(20.66 to<br>30.03)          | 65.40<br>(40.38 to<br>102.54)         | 59.15<br>(37.99 to<br>94.10)          | 68.68<br>(40.88 to<br>110.89)         |
| Stomach cancer                        | 506.06<br>(414.10 to<br>606.99)          | 843.30<br>(666.87 to<br>1,062.87)          | 780.41<br>(607.97 to<br>989.96)          | 892.22<br>(700.66 to<br>1,156.27)           | 19.26<br>(15.91 to<br>22.76)          | 35.80<br>(29.00 to<br>44.37)          | 34.20<br>(27.61 to<br>42.68)          | 36.71<br>(29.44 to<br>47.29)          |
| Colon and rectum cancer               | 877.07<br>(656.38 to<br>1,127.91)        | 2,375.47<br>(1,589.94 to<br>3,415.33)      | 2,448.03<br>(1,636.53 to<br>3,492.07)    | 2,259.41<br>(1,493.91 to<br>3,260.88)       | 33.69<br>(25.73 to<br>42.15)          | 105.68<br>(72.44 to<br>149.68)        | 113.41<br>(83.73 to<br>159.61)        | 96.53<br>(65.11 to<br>136.81)         |
| Liver cancer                          | 937.37<br>(700.15 to<br>1,241.36)        | 1,970.05<br>(1,359.00 to<br>2,836.13)      | 1,890.28<br>(1,332.18 to<br>2,684.61)    | 2,110.93<br>(1,404.62 to<br>3,155.55)       | 29.44<br>(22.16 to<br>38.45)          | 71.56<br>(51.77 to<br>100.32)         | 70.89<br>(52.83 to<br>97.80)          | 73.77<br>(52.02 to<br>106.80)         |
| Liver cancer due to hepatitis B       | 353.16<br>(248.13 to<br>491.93)          | 708.06<br>(447.42 to<br>1,063.44)          | 679.49<br>(437.29 to<br>1,008.06)        | 762.88<br>(466.70 to<br>1,194.18)           | 10.14<br>(7.08 to<br>13.90)           | 23.13<br>(14.94 to<br>34.17)          | 22.78<br>(15.03 to<br>32.89)          | 24.13<br>(15.12 to<br>37.19)          |
| Liver cancer due to hepatitis C       | 230.27<br>(147.70 to<br>334.63)          | 537.37<br>(324.33 to<br>859.00)            | 524.18<br>(323.74 to<br>810.60)          | 559.83<br>(329.11 to<br>920.20)             | 8.62<br>(5.66 to<br>12.27)            | 22.68<br>(14.48 to<br>34.28)          | 22.95<br>(14.90 to<br>33.68)          | 22.72<br>(14.16 to<br>35.58)          |
| Liver cancer due to alcohol use       | 75.63<br>(52.07 to<br>108.34)            | 176.34<br>(115.28 to<br>265.77)            | 167.14<br>(111.95 to<br>248.05)          | 189.46<br>(118.35 to<br>298.03)             | 2.65<br>(1.89 to<br>3.75)             | 6.78<br>(4.58 to<br>9.89)             | 6.58<br>(4.59 to<br>9.45)             | 7.01<br>(4.56 to<br>10.62)            |
| Liver cancer due to other causes      | 278.30<br>(198.55 to<br>389.41)          | 548.28<br>(352.22 to<br>834.59)            | 519.48<br>(341.39 to<br>778.90)          | 598.76<br>(372.47 to<br>946.83)             | 8.02<br>(5.85 to<br>10.99)            | 19.01<br>(12.74 to<br>28.35)          | 18.58<br>(12.76 to<br>26.84)          | 19.92<br>(12.84 to<br>30.34)          |



|                                      |                                       |                                       |                                       |                                       |                              |                                |                                |                                |
|--------------------------------------|---------------------------------------|---------------------------------------|---------------------------------------|---------------------------------------|------------------------------|--------------------------------|--------------------------------|--------------------------------|
| Gallbladder and biliary tract cancer | 86.45<br>(67.22 to<br>108.42)         | 145.75<br>(113.06 to<br>184.67)       | 153.45<br>(119.86 to<br>196.24)       | 138.54<br>(108.34 to<br>173.33)       | 3.35<br>(2.62 to<br>4.18)    | 6.27<br>(5.00 to<br>7.83)      | 6.82<br>(5.44 to<br>8.62)      | 5.77<br>(4.64 to<br>7.06)      |
| Pancreatic cancer                    | 382.48<br>(318.79 to<br>452.22)       | 1,044.01<br>(841.14 to<br>1,304.91)   | 1,111.87<br>(888.56 to<br>1,394.06)   | 1,010.24<br>(814.31 to<br>1,265.77)   | 14.39<br>(12.07 to<br>16.97) | 43.24<br>(35.20 to<br>53.25)   | 47.40<br>(38.68 to<br>58.58)   | 40.53<br>(32.67 to<br>50.34)   |
| Larynx cancer                        | 107.72<br>(69.24 to<br>148.91)        | 223.34<br>(130.90 to<br>338.28)       | 186.18<br>(111.52 to<br>276.02)       | 277.93<br>(154.78 to<br>454.77)       | 3.92<br>(2.61 to<br>5.29)    | 8.86<br>(5.48 to<br>12.92)     | 7.66<br>(4.85 to<br>10.95)     | 10.60<br>(6.13 to<br>16.26)    |
| Tracheal, bronchus, and lung cancer  | 431.30<br>(346.80 to<br>524.90)       | 963.88<br>(628.83 to<br>1,438.13)     | 738.80<br>(523.03 to<br>1,038.99)     | 1,223.04<br>(738.67 to<br>1,987.61)   | 17.01<br>(13.71 to<br>20.43) | 41.77<br>(27.52 to<br>60.37)   | 33.29<br>(24.16 to<br>45.70)   | 51.14<br>(31.03 to<br>81.59)   |
| Malignant skin melanoma              | 133.54<br>(90.98 to<br>183.94)        | 317.26<br>(220.47 to<br>437.19)       | 361.15<br>(257.15 to<br>500.13)       | 288.88<br>(199.73 to<br>400.87)       | 4.88<br>(3.43 to<br>6.59)    | 13.01<br>(9.41 to<br>17.47)    | 15.29<br>(11.40 to<br>20.46)   | 11.48<br>(8.22 to<br>15.41)    |
| Non-melanoma skin cancer             | 78.22<br>(60.26 to<br>101.17)         | 204.87<br>(160.90 to<br>263.54)       | 193.72<br>(152.83 to<br>247.59)       | 207.09<br>(162.33 to<br>266.99)       | 3.11<br>(2.37 to<br>4.05)    | 9.66<br>(7.58 to<br>12.37)     | 9.57<br>(7.64 to<br>12.08)     | 9.34<br>(7.21 to<br>12.06)     |
| Breast cancer                        | 1,233.98<br>(775.05 to<br>1,681.96)   | 2,644.13<br>(1,635.48 to<br>3,715.91) | 2,608.86<br>(1,632.94 to<br>3,671.03) | 2,701.12<br>(1,665.72 to<br>3,864.52) | 37.90<br>(24.30 to<br>51.40) | 91.58<br>(58.27 to<br>128.19)  | 92.75<br>(59.71 to<br>129.93)  | 91.21<br>(56.77 to<br>129.78)  |
| Cervical cancer                      | 1,733.49<br>(1,073.26 to<br>2,634.67) | 2,952.04<br>(1,784.62 to<br>4,593.54) | 2,639.68<br>(1,598.39 to<br>4,011.89) | 3,119.29<br>(1,852.83 to<br>4,894.35) | 55.07<br>(33.89 to<br>83.49) | 100.28<br>(60.87 to<br>154.89) | 91.64<br>(55.72 to<br>139.40)  | 103.67<br>(62.43 to<br>162.05) |
| Uterine cancer                       | 205.79<br>(145.64 to<br>275.79)       | 449.64<br>(323.72 to<br>601.19)       | 394.79<br>(277.29 to<br>530.82)       | 476.45<br>(339.53 to<br>637.14)       | 7.28<br>(5.16 to<br>9.70)    | 17.54<br>(12.71 to<br>23.08)   | 15.81<br>(11.43 to<br>20.86)   | 18.11<br>(12.96 to<br>23.93)   |
| Ovarian cancer                       | 465.83<br>(324.67 to<br>609.11)       | 1,050.84<br>(715.77 to<br>1,398.75)   | 1,155.87<br>(799.65 to<br>1,516.01)   | 998.90<br>(672.99 to<br>1,341.35)     | 14.93<br>(10.31 to<br>19.35) | 37.72<br>(25.96 to<br>49.13)   | 42.54<br>(29.39 to<br>54.92)   | 34.98<br>(23.45 to<br>46.98)   |
| Prostate cancer                      | 968.84<br>(51.80 to<br>1,456.25)      | 3,272.27<br>(1,228.07 to<br>4,732.85) | 3,564.05<br>(1,408.23 to<br>5,104.55) | 3,030.50<br>(1,102.99 to<br>4,412.39) | 49.01<br>(17.96 to<br>73.34) | 180.53<br>(68.79 to<br>258.02) | 203.06<br>(81.80 to<br>286.45) | 162.36<br>(59.68 to<br>233.84) |
| Testicular cancer                    | 81.15<br>(21.91 to<br>46.43)          | 47.43<br>(31.76 to<br>73.68)          | 44.18<br>(29.37 to<br>68.09)          | 49.61<br>(33.71 to<br>75.57)          | 0.70<br>(0.49 to<br>1.06)    | 1.22<br>(0.82 to<br>1.83)      | 1.16<br>(0.77 to<br>1.74)      | 1.26<br>(0.86 to<br>1.91)      |

**Comoros**

| Cause                           | YLLs (actual counts)                  |                                       |                                       |                                       | Deaths (actual counts)       |                              |                              |                              |
|---------------------------------|---------------------------------------|---------------------------------------|---------------------------------------|---------------------------------------|------------------------------|------------------------------|------------------------------|------------------------------|
|                                 | 2016                                  | 2040 Forecast                         | 2040 Better Scenario                  | 2040 Worse Scenario                   | 2016                         | 2040 Forecast                | 2040 Better Scenario         | 2040 Worse Scenario          |
| Kidney cancer                   | 150.85<br>(105.63 to<br>202.85)       | 278.95<br>(220.29 to<br>348.21)       | 312.83<br>(246.75 to<br>387.48)       | 276.44<br>(211.83 to<br>352.44)       | 3.67<br>(2.88 to<br>4.44)    | 9.22<br>(7.46 to<br>11.02)   | 10.70<br>(8.65 to<br>12.93)  | 8.56<br>(6.94 to<br>10.18)   |
| Bladder cancer                  | 179.03<br>(131.24 to<br>220.12)       | 418.63<br>(302.46 to<br>541.16)       | 414.18<br>(302.15 to<br>532.36)       | 423.16<br>(299.57 to<br>556.34)       | 7.79<br>(5.89 to<br>9.41)    | 20.40<br>(15.18 to<br>26.13) | 21.03<br>(15.78 to<br>26.93) | 19.77<br>(14.42 to<br>25.28) |
| Brain and nervous system cancer | 493.14<br>(396.74 to<br>639.67)       | 912.99<br>(735.99 to<br>1,191.20)     | 959.89<br>(763.29 to<br>1,271.91)     | 920.52<br>(744.42 to<br>1,191.12)     | 11.43<br>(9.34 to<br>15.23)  | 26.87<br>(21.97 to<br>35.75) | 28.92<br>(23.48 to<br>39.37) | 25.77<br>(21.24 to<br>33.79) |
| Thyroid cancer                  | 182.89<br>(104.46 to<br>243.78)       | 330.33<br>(180.32 to<br>463.65)       | 294.46<br>(165.97 to<br>405.68)       | 358.72<br>(191.96 to<br>510.65)       | 5.66<br>(3.18 to<br>7.51)    | 11.57<br>(6.26 to<br>15.73)  | 10.60<br>(5.90 to<br>14.33)  | 12.22<br>(6.52 to<br>17.03)  |
| Mesothelioma                    | 24.73<br>(18.08 to<br>32.08)          | 54.54<br>(38.88 to<br>73.15)          | 53.94<br>(38.72 to<br>72.90)          | 54.29<br>(38.40 to<br>71.89)          | 0.80<br>(0.57 to<br>1.05)    | 2.00<br>(1.40 to<br>2.66)    | 2.04<br>(1.44 to<br>2.73)    | 1.94<br>(1.37 to<br>2.56)    |
| Hodgkin lymphoma                | 196.70<br>(94.38 to<br>296.99)        | 206.45<br>(97.51 to<br>311.23)        | 167.19<br>(80.79 to<br>248.27)        | 242.99<br>(114.62 to<br>365.20)       | 4.18<br>(2.03 to<br>6.07)    | 5.50<br>(2.66 to<br>8.02)    | 4.55<br>(2.24 to<br>6.52)    | 6.20<br>(2.96 to<br>8.98)    |
| Non-Hodgkin lymphoma            | 1,651.81<br>(1,113.56 to<br>2,213.12) | 2,325.44<br>(1,544.36 to<br>3,064.70) | 2,440.31<br>(1,658.62 to<br>3,197.65) | 2,445.05<br>(1,576.71 to<br>3,242.71) | 32.74<br>(22.55 to<br>42.16) | 60.48<br>(41.54 to<br>76.60) | 65.15<br>(45.36 to<br>82.09) | 59.83<br>(40.21 to<br>75.79) |
| Multiple myeloma                | 211.08<br>(148.67 to<br>268.22)       | 542.66<br>(372.63 to<br>711.71)       | 586.55<br>(406.95 to<br>769.10)       | 517.86<br>(353.42 to<br>681.93)       | 7.19<br>(5.11 to<br>9.12)    | 20.28<br>(14.17 to<br>26.10) | 22.32<br>(15.79 to<br>28.74) | 18.97<br>(12.96 to<br>24.61) |

|                                 |                                                     |                                                     |                                                     |                                                     |                                            |                                                  |                                                |                                                  |
|---------------------------------|-----------------------------------------------------|-----------------------------------------------------|-----------------------------------------------------|-----------------------------------------------------|--------------------------------------------|--------------------------------------------------|------------------------------------------------|--------------------------------------------------|
| Leukemia                        | 565.91<br>(438.35 to 706.32)                        | 816.77<br>(634.20 to 1,034.38)                      | 828.15<br>(646.65 to 1,044.85)                      | 867.14<br>(662.94 to 1,097.27)                      | 12.50<br>(10.10 to 15.32)                  | 24.34<br>(19.68 to 30.14)                        | 25.22<br>(20.62 to 31.52)                      | 24.49<br>(19.57 to 30.43)                        |
| Acute lymphoid leukemia         | 190.46<br>(137.21 to 245.43)                        | 236.06<br>(167.51 to 304.89)                        | 246.21<br>(179.17 to 326.67)                        | 254.03<br>(177.71 to 334.82)                        | 3.55<br>(2.63 to 4.51)                     | 5.77<br>(4.34 to 7.37)                           | 6.10<br>(4.67 to 7.75)                         | 5.90<br>(4.33 to 7.56)                           |
| Chronic lymphoid leukemia       | 18.84<br>(14.25 to 24.11)                           | 41.87<br>(30.80 to 55.02)                           | 42.90<br>(32.09 to 56.32)                           | 41.39<br>(30.06 to 54.48)                           | 0.77<br>(0.58 to 0.98)                     | 1.89<br>(1.42 to 2.46)                           | 1.98<br>(1.50 to 2.58)                         | 1.82<br>(1.33 to 2.39)                           |
| Acute myeloid leukemia          | 137.30<br>(104.54 to 183.56)                        | 245.82<br>(186.16 to 332.79)                        | 269.18<br>(204.12 to 366.49)                        | 249.14<br>(187.75 to 333.05)                        | 2.93<br>(2.28 to 3.85)                     | 6.98<br>(5.42 to 9.25)                           | 7.88<br>(6.10 to 10.54)                        | 6.70<br>(5.21 to 8.86)                           |
| Chronic myeloid leukemia        | 59.62<br>(40.05 to 89.88)                           | 70.98<br>(46.42 to 112.43)                          | 69.48<br>(45.52 to 109.13)                          | 74.17<br>(48.12 to 118.42)                          | 1.43<br>(1.00 to 2.13)                     | 1.98<br>(1.38 to 3.11)                           | 1.97<br>(1.34 to 3.08)                         | 2.02<br>(1.37 to 3.22)                           |
| Other leukemia                  | 159.69<br>(112.51 to 217.95)                        | 222.05<br>(158.41 to 295.11)                        | 200.39<br>(144.31 to 267.63)                        | 248.41<br>(175.57 to 331.75)                        | 3.82<br>(2.81 to 4.95)                     | 7.72<br>(5.75 to 9.84)                           | 7.29<br>(5.51 to 9.43)                         | 8.04<br>(5.92 to 10.31)                          |
| Other neoplasms                 | 2,435.34<br>(2,025.19 to 2,907.93)                  | 4,518.88<br>(3,644.48 to 5,612.05)                  | 4,568.03<br>(3,638.77 to 5,714.35)                  | 4,540.56<br>(3,695.73 to 5,642.82)                  | 55.42<br>(46.46 to 65.62)                  | 118.44<br>(98.53 to 142.42)                      | 122.02<br>(99.91 to 147.49)                    | 115.82<br>(97.06 to 137.92)                      |
| <b>Cardiovascular diseases</b>  | <b>18,007.27</b><br><b>(15,344.45 to 21,653.31)</b> | <b>34,123.35</b><br><b>(24,673.49 to 46,698.20)</b> | <b>20,778.91</b><br><b>(15,495.00 to 27,981.00)</b> | <b>49,632.94</b><br><b>(33,790.30 to 70,631.98)</b> | <b>760.63</b><br><b>(650.82 to 890.58)</b> | <b>1,703.23</b><br><b>(1,315.90 to 2,239.10)</b> | <b>1,125.24</b><br><b>(884.46 to 1,477.61)</b> | <b>2,298.64</b><br><b>(1,657.30 to 3,104.12)</b> |
| Rheumatic heart disease         | 307.95<br>(228.06 to 403.76)                        | 290.20<br>(203.84 to 410.59)                        | 223.75<br>(155.69 to 322.88)                        | 342.54<br>(237.48 to 497.67)                        | 9.48<br>(6.88 to 12.58)                    | 11.14<br>(8.00 to 15.76)                         | 8.87<br>(6.31 to 12.69)                        | 12.59<br>(8.92 to 17.85)                         |
| Ischemic heart disease          | 7,595.97<br>(6,284.04 to 9,501.49)                  | 13,738.31<br>(7,937.84 to 23,240.54)                | 6,807.33<br>(3,961.23 to 11,774.86)                 | 22,212.40<br>(12,334.03 to 38,269.95)               | 337.06<br>(284.34 to 411.88)               | 703.25<br>(438.85 to 1,154.53)                   | 390.40<br>(241.85 to 652.95)                   | 1,043.27<br>(629.74 to 1,755.41)                 |
| Stroke                          | 5,156.55<br>(4,137.86 to 6,459.45)                  | 8,931.27<br>(5,221.76 to 14,369.81)                 | 4,405.78<br>(2,653.11 to 7,356.10)                  | 14,183.39<br>(8,128.06 to 22,875.81)                | 218.54<br>(176.61 to 272.64)               | 435.00<br>(279.30 to 711.54)                     | 239.35<br>(153.44 to 395.76)                   | 641.92<br>(397.51 to 1,031.28)                   |
| Ischemic stroke                 | 1,420.21<br>(1,115.46 to 1,737.61)                  | 2,580.05<br>(1,450.87 to 4,863.64)                  | 1,495.08<br>(846.73 to 2,870.35)                    | 3,677.28<br>(2,049.10 to 7,129.94)                  | 79.22<br>(63.13 to 95.87)                  | 162.90<br>(97.04 to 318.46)                      | 103.69<br>(61.42 to 198.51)                    | 216.55<br>(124.21 to 449.43)                     |
| Intracerebral hemorrhage        | 3,736.34<br>(2,978.61 to 4,845.38)                  | 6,351.22<br>(3,549.54 to 10,959.42)                 | 2,910.70<br>(1,656.32 to 5,064.48)                  | 10,506.11<br>(5,636.21 to 18,149.04)                | 139.32<br>(111.86 to 181.15)               | 272.11<br>(163.48 to 445.44)                     | 135.65<br>(83.40 to 221.81)                    | 425.37<br>(248.81 to 720.02)                     |
| Hypertensive heart disease      | 1,249.90<br>(886.79 to 1,602.56)                    | 2,939.57<br>(1,893.48 to 4,690.95)                  | 2,176.97<br>(1,444.97 to 3,233.66)                  | 3,650.15<br>(2,122.71 to 6,668.51)                  | 58.69<br>(40.77 to 75.89)                  | 162.12<br>(103.75 to 258.09)                     | 125.83<br>(83.72 to 190.39)                    | 189.32<br>(112.31 to 347.96)                     |
| Cardiomyopathy and myocarditis  | 534.44<br>(373.33 to 801.60)                        | 1,004.48<br>(605.04 to 1,655.82)                    | 999.70<br>(602.05 to 1,642.21)                      | 1,031.34<br>(622.24 to 1,743.58)                    | 14.17<br>(9.99 to 21.16)                   | 33.98<br>(21.54 to 54.57)                        | 35.06<br>(22.19 to 56.65)                      | 33.18<br>(21.18 to 54.06)                        |
| Myocarditis                     | 69.47<br>(34.11 to 128.32)                          | 97.45<br>(40.71 to 199.55)                          | 91.43<br>(37.57 to 190.62)                          | 104.73<br>(45.17 to 207.93)                         | 1.46<br>(0.67 to 2.72)                     | 2.65<br>(1.05 to 5.55)                           | 2.58<br>(1.00 to 5.49)                         | 2.70<br>(1.10 to 5.55)                           |
| <b>Comoros</b>                  |                                                     |                                                     |                                                     |                                                     |                                            |                                                  |                                                |                                                  |
| Cause                           | YLLs (actual counts)                                |                                                     |                                                     |                                                     | Deaths (actual counts)                     |                                                  |                                                |                                                  |
|                                 | 2016                                                | 2040 Forecast                                       | 2040 Better Scenario                                | 2040 Worse Scenario                                 | 2016                                       | 2040 Forecast                                    | 2040 Better Scenario                           | 2040 Worse Scenario                              |
| Alcoholic cardiomyopathy        | 28.48<br>(17.64 to 45.08)                           | 58.73<br>(34.75 to 96.17)                           | 64.57<br>(38.21 to 108.21)                          | 55.31<br>(32.85 to 89.61)                           | 0.86<br>(0.53 to 1.36)                     | 1.94<br>(1.19 to 3.17)                           | 2.16<br>(1.31 to 3.60)                         | 1.79<br>(1.10 to 2.92)                           |
| Other cardiomyopathy            | 436.49<br>(308.13 to 680.43)                        | 848.31<br>(499.96 to 1,494.34)                      | 843.71<br>(491.55 to 1,470.06)                      | 871.30<br>(509.71 to 1,547.33)                      | 11.86<br>(8.45 to 18.61)                   | 29.39<br>(18.21 to 49.77)                        | 30.31<br>(18.62 to 51.24)                      | 28.69<br>(17.78 to 49.17)                        |
| Atrial fibrillation and flutter | 77.76<br>(58.26 to 101.02)                          | 243.43<br>(179.38 to 323.04)                        | 258.49<br>(189.77 to 345.28)                        | 230.90<br>(166.64 to 308.72)                        | 6.38<br>(4.73 to 8.36)                     | 21.39<br>(15.03 to 29.07)                        | 24.01<br>(17.36 to 32.83)                      | 19.11<br>(12.95 to 26.52)                        |
| Aortic aneurysm                 | 185.82<br>(138.81 to 250.47)                        | 414.32<br>(288.49 to 590.78)                        | 409.67<br>(282.30 to 594.69)                        | 434.17<br>(297.72 to 629.26)                        | 7.38<br>(5.61 to 9.65)                     | 19.35<br>(14.20 to 26.38)                        | 20.15<br>(14.62 to 27.63)                      | 19.19<br>(13.81 to 26.71)                        |

|                                                                |                                                            |                                                            |                                                            |                                                            |                                                      |                                                      |                                                      |                                                      |
|----------------------------------------------------------------|------------------------------------------------------------|------------------------------------------------------------|------------------------------------------------------------|------------------------------------------------------------|------------------------------------------------------|------------------------------------------------------|------------------------------------------------------|------------------------------------------------------|
| Peripheral artery disease                                      | 12.02<br>(5.06 to<br>19.68)                                | 48.57<br>(20.48 to<br>79.29)                               | 53.56<br>(23.73 to<br>85.69)                               | 46.55<br>(18.87 to<br>78.83)                               | 0.77<br>(0.32 to<br>1.23)                            | 3.47<br>(1.47 to<br>5.51)                            | 4.13<br>(1.80 to<br>6.45)                            | 3.11<br>(1.27 to<br>5.15)                            |
| Endocarditis                                                   | 339.96<br>(257.58 to<br>430.54)                            | 672.65<br>(452.40 to<br>965.40)                            | 627.03<br>(423.08 to<br>890.15)                            | 717.56<br>(475.88 to<br>1,039.72)                          | 9.26<br>(6.96 to<br>11.53)                           | 23.30<br>(15.95 to<br>32.28)                         | 22.72<br>(15.50 to<br>31.31)                         | 23.43<br>(15.91 to<br>33.07)                         |
| Other cardiovascular and circulatory diseases                  | 2,546.90<br>(1,875.06 to<br>3,528.62)                      | 5,840.54<br>(4,131.07 to<br>8,248.32)                      | 4,816.62<br>(3,456.34 to<br>6,772.50)                      | 6,783.95<br>(4,714.30 to<br>9,725.73)                      | 98.91<br>(71.28 to<br>134.70)                        | 290.21<br>(208.01 to<br>399.80)                      | 254.72<br>(184.08 to<br>342.19)                      | 313.52<br>(218.81 to<br>434.80)                      |
| <b>Chronic respiratory diseases</b>                            | <b>2,436.00</b><br><b>(2,018.18 to</b><br><b>2,956.92)</b> | <b>3,310.81</b><br><b>(2,435.12 to</b><br><b>4,598.24)</b> | <b>2,294.86</b><br><b>(1,792.41 to</b><br><b>2,967.46)</b> | <b>4,292.42</b><br><b>(2,990.06 to</b><br><b>6,204.66)</b> | <b>95.45</b><br><b>(80.16 to</b><br><b>113.72)</b>   | <b>161.06</b><br><b>(119.59 to</b><br><b>227.08)</b> | <b>115.32</b><br><b>(92.03 to</b><br><b>148.02)</b>  | <b>196.48</b><br><b>(138.27 to</b><br><b>284.49)</b> |
| Chronic obstructive pulmonary disease                          | 1,316.47<br>(1,023.71 to<br>1,603.12)                      | 2,257.77<br>(1,471.93 to<br>3,445.52)                      | 1,402.86<br>(1,002.03 to<br>1,945.28)                      | 3,050.25<br>(1,903.96 to<br>4,785.13)                      | 62.01<br>(49.22 to<br>74.75)                         | 120.93<br>(81.45 to<br>182.78)                       | 79.72<br>(58.41 to<br>110.86)                        | 152.03<br>(98.82 to<br>237.95)                       |
| Pneumoconiosis                                                 | 8.31<br>(5.42 to<br>12.11)                                 | 15.19<br>(10.46 to<br>21.79)                               | 13.65<br>(9.11 to<br>20.29)                                | 15.22<br>(10.56 to<br>21.57)                               | 0.35<br>(0.23 to<br>0.51)                            | 0.79<br>(0.54 to<br>1.11)                            | 0.74<br>(0.50 to<br>1.08)                            | 0.76<br>(0.52 to<br>1.06)                            |
| Silicosis                                                      | 1.46<br>(0.55 to<br>2.79)                                  | 1.84<br>(0.66 to<br>3.62)                                  | 1.72<br>(0.59 to<br>3.53)                                  | 1.86<br>(0.69 to<br>3.64)                                  | 0.07<br>(0.03 to<br>0.13)                            | 0.10<br>(0.04 to<br>0.20)                            | 0.10<br>(0.03 to<br>0.21)                            | 0.10<br>(0.04 to<br>0.20)                            |
| Asbestosis                                                     | 2.28<br>(1.24 to<br>3.76)                                  | 4.79<br>(2.47 to<br>8.24)                                  | 4.96<br>(2.59 to<br>8.59)                                  | 4.60<br>(2.40 to<br>7.88)                                  | 0.08<br>(0.04 to<br>0.15)                            | 0.22<br>(0.10 to<br>0.40)                            | 0.24<br>(0.11 to<br>0.43)                            | 0.20<br>(0.09 to<br>0.37)                            |
| Coal workers pneumoconiosis                                    | 0.63<br>(0.29 to<br>1.21)                                  | 1.17<br>(0.50 to<br>2.24)                                  | 0.79<br>(0.32 to<br>1.56)                                  | 1.32<br>(0.60 to<br>2.57)                                  | 0.03<br>(0.01 to<br>0.05)                            | 0.06<br>(0.03 to<br>0.12)                            | 0.04<br>(0.02 to<br>0.08)                            | 0.07<br>(0.03 to<br>0.13)                            |
| Other pneumoconiosis                                           | 3.94<br>(2.35 to<br>6.29)                                  | 7.39<br>(4.37 to<br>11.77)                                 | 6.19<br>(3.50 to<br>10.64)                                 | 7.44<br>(4.43 to<br>11.53)                                 | 0.17<br>(0.10 to<br>0.27)                            | 0.41<br>(0.23 to<br>0.64)                            | 0.36<br>(0.19 to<br>0.59)                            | 0.39<br>(0.22 to<br>0.61)                            |
| Asthma                                                         | 951.34<br>(738.65 to<br>1,303.99)                          | 759.07<br>(516.08 to<br>1,191.72)                          | 595.11<br>(418.31 to<br>895.31)                            | 938.15<br>(611.97 to<br>1,497.34)                          | 28.86<br>(22.40 to<br>40.70)                         | 29.39<br>(20.07 to<br>47.52)                         | 24.11<br>(16.97 to<br>37.39)                         | 34.15<br>(22.45 to<br>56.55)                         |
| Interstitial lung disease and pulmonary sarcoidosis            | 46.77<br>(24.20 to<br>72.56)                               | 113.80<br>(57.06 to<br>178.97)                             | 131.26<br>(68.25 to<br>201.28)                             | 103.28<br>(51.04 to<br>163.99)                             | 1.74<br>(0.86 to<br>2.71)                            | 5.08<br>(2.43 to<br>8.08)                            | 6.09<br>(3.04 to<br>9.47)                            | 4.41<br>(2.04 to<br>7.05)                            |
| Other chronic respiratory diseases                             | 113.11<br>(66.30 to<br>179.24)                             | 164.97<br>(102.49 to<br>252.37)                            | 151.98<br>(97.33 to<br>229.90)                             | 185.52<br>(110.83 to<br>290.02)                            | 2.48<br>(1.54 to<br>3.77)                            | 4.88<br>(3.05 to<br>7.62)                            | 4.66<br>(2.98 to<br>7.19)                            | 5.13<br>(3.10 to<br>7.98)                            |
| <b>Cirrhosis and other chronic liver diseases</b>              | <b>2,615.97</b><br><b>(1,478.77 to</b><br><b>4,138.57)</b> | <b>5,021.17</b><br><b>(2,762.03 to</b><br><b>8,010.96)</b> | <b>4,575.27</b><br><b>(2,516.09 to</b><br><b>7,353.89)</b> | <b>5,269.36</b><br><b>(2,870.94 to</b><br><b>8,496.82)</b> | <b>79.96</b><br><b>(45.16 to</b><br><b>125.68)</b>   | <b>178.57</b><br><b>(101.00 to</b><br><b>280.00)</b> | <b>167.16</b><br><b>(94.43 to</b><br><b>263.90)</b>  | <b>181.56</b><br><b>(102.27 to</b><br><b>283.51)</b> |
| Cirrhosis and other chronic liver diseases due to hepatitis B  | 805.65<br>(405.39 to<br>1,359.37)                          | 1,652.84<br>(832.41 to<br>2,814.40)                        | 1,530.48<br>(762.33 to<br>2,604.39)                        | 1,705.23<br>(861.65 to<br>2,883.14)                        | 25.66<br>(13.41 to<br>42.13)                         | 59.35<br>(30.47 to<br>97.30)                         | 56.40<br>(28.74 to<br>92.38)                         | 59.61<br>(30.60 to<br>97.16)                         |
| Cirrhosis and other chronic liver diseases due to hepatitis C  | 602.46<br>(287.11 to<br>1,095.20)                          | 1,279.28<br>(587.87 to<br>2,278.46)                        | 1,180.07<br>(544.53 to<br>2,099.17)                        | 1,322.39<br>(599.93 to<br>2,380.02)                        | 19.62<br>(9.52 to<br>35.08)                          | 46.48<br>(22.01 to<br>80.24)                         | 43.94<br>(20.93 to<br>77.14)                         | 46.84<br>(22.03 to<br>81.51)                         |
| Cirrhosis and other chronic liver diseases due to alcohol use  | 589.47<br>(308.71 to<br>978.74)                            | 1,208.28<br>(629.10 to<br>2,034.91)                        | 1,068.08<br>(549.46 to<br>1,794.29)                        | 1,283.10<br>(672.67 to<br>2,138.58)                        | 19.73<br>(10.69 to<br>31.62)                         | 45.17<br>(24.25 to<br>72.80)                         | 41.04<br>(21.99 to<br>66.50)                         | 46.67<br>(25.03 to<br>74.24)                         |
| Cirrhosis and other chronic liver diseases due to other causes | 618.28<br>(374.87 to<br>915.53)                            | 880.76<br>(503.97 to<br>1,352.57)                          | 796.64<br>(451.23 to<br>1,228.07)                          | 958.64<br>(551.86 to<br>1,467.54)                          | 14.95<br>(8.75 to<br>22.03)                          | 27.58<br>(15.69 to<br>41.45)                         | 25.78<br>(14.53 to<br>38.62)                         | 28.45<br>(16.15 to<br>42.44)                         |
| <b>Digestive diseases</b>                                      | <b>4,232.50</b><br><b>(3,518.87 to</b><br><b>5,119.67)</b> | <b>6,516.38</b><br><b>(5,302.35 to</b><br><b>7,980.90)</b> | <b>5,832.71</b><br><b>(4,749.42 to</b><br><b>7,139.33)</b> | <b>7,038.19</b><br><b>(5,692.10 to</b><br><b>8,670.79)</b> | <b>125.68</b><br><b>(107.12 to</b><br><b>147.02)</b> | <b>254.96</b><br><b>(216.54 to</b><br><b>294.91)</b> | <b>237.98</b><br><b>(202.06 to</b><br><b>277.65)</b> | <b>260.28</b><br><b>(220.37 to</b><br><b>306.57)</b> |
| Peptic ulcer disease                                           | 524.43<br>(400.92 to<br>687.19)                            | 598.20<br>(435.12 to<br>816.16)                            | 452.14<br>(324.18 to<br>624.53)                            | 703.01<br>(514.82 to<br>951.46)                            | 19.25<br>(14.76 to<br>25.35)                         | 27.76<br>(20.34 to<br>37.47)                         | 22.00<br>(15.81 to<br>30.02)                         | 30.89<br>(22.49 to<br>41.59)                         |

**Comoros**

| Cause | YLLs (actual counts) |               |                      |                     | Deaths (actual counts) |               |                      |                     |
|-------|----------------------|---------------|----------------------|---------------------|------------------------|---------------|----------------------|---------------------|
|       | 2016                 | 2040 Forecast | 2040 Better Scenario | 2040 Worse Scenario | 2016                   | 2040 Forecast | 2040 Better Scenario | 2040 Worse Scenario |



|                                                            |                                                      |                                                        |                                                       |                                                         |                                                |                                                |                                                |                                                |
|------------------------------------------------------------|------------------------------------------------------|--------------------------------------------------------|-------------------------------------------------------|---------------------------------------------------------|------------------------------------------------|------------------------------------------------|------------------------------------------------|------------------------------------------------|
| Other drug use disorders                                   | 14.83<br>(8.82 to<br>23.96)                          | 36.54<br>(22.12 to<br>57.27)                           | 38.71<br>(23.38 to<br>60.95)                          | 35.28<br>(21.34 to<br>55.25)                            | 0.35<br>(0.22 to<br>0.53)                      | 1.08<br>(0.73 to<br>1.51)                      | 1.19<br>(0.81 to<br>1.67)                      | 0.99<br>(0.67 to<br>1.41)                      |
| Eating disorders                                           | 1.93<br>(1.23 to<br>3.38)                            | 2.81<br>(1.72 to<br>4.86)                              | 2.86<br>(1.75 to<br>5.03)                             | 2.88<br>(1.75 to<br>4.90)                               | 0.03<br>(0.02 to<br>0.06)                      | 0.05<br>(0.03 to<br>0.09)                      | 0.05<br>(0.03 to<br>0.09)                      | 0.05<br>(0.03 to<br>0.09)                      |
| <b>Comoros</b>                                             |                                                      |                                                        |                                                       |                                                         |                                                |                                                |                                                |                                                |
| Cause                                                      | YLLs (actual counts)                                 |                                                        |                                                       |                                                         | Deaths (actual counts)                         |                                                |                                                |                                                |
|                                                            | 2016                                                 | 2040 Forecast                                          | 2040 Better Scenario                                  | 2040 Worse Scenario                                     | 2016                                           | 2040 Forecast                                  | 2040 Better Scenario                           | 2040 Worse Scenario                            |
| <b>Diabetes, urogenital, blood, and endocrine diseases</b> | <b>5,817.53</b><br>(4,970.85 to<br><b>6,841.48</b> ) | <b>11,996.81</b><br>(8,898.34 to<br><b>16,356.75</b> ) | <b>9,203.21</b><br>(6,868.67 to<br><b>12,504.88</b> ) | <b>14,564.70</b><br>(10,842.56 to<br><b>19,776.70</b> ) | <b>187.08</b><br>(160.07 to<br><b>219.27</b> ) | <b>533.51</b><br>(391.28 to<br><b>794.50</b> ) | <b>422.73</b><br>(314.17 to<br><b>620.11</b> ) | <b>621.07</b><br>(457.78 to<br><b>921.06</b> ) |
| Diabetes mellitus                                          | 2,522.82<br>(2,084.47 to<br>3,036.19)                | 6,599.85<br>(4,318.14 to<br>9,831.89)                  | 4,851.22<br>(3,218.24 to<br>7,355.59)                 | 8,069.64<br>(5,243.40 to<br>12,040.58)                  | 103.04<br>(86.03 to<br>121.92)                 | 312.26<br>(217.20 to<br>434.61)                | 241.04<br>(171.16 to<br>339.61)                | 363.09<br>(249.57 to<br>512.26)                |
| Acute glomerulonephritis                                   | 11.05<br>(7.41 to<br>17.49)                          | 13.06<br>(8.94 to<br>19.92)                            | 11.29<br>(7.69 to<br>17.43)                           | 16.09<br>(10.79 to<br>25.14)                            | 0.18<br>(0.13 to<br>0.27)                      | 0.25<br>(0.19 to<br>0.35)                      | 0.22<br>(0.16 to<br>0.31)                      | 0.29<br>(0.21 to<br>0.42)                      |
| Chronic kidney disease                                     | 1,061.65<br>(762.74 to<br>1,486.25)                  | 2,626.98<br>(1,233.45 to<br>6,864.90)                  | 1,925.24<br>(912.63 to<br>4,958.60)                   | 3,362.01<br>(1,556.10 to<br>8,338.42)                   | 34.25<br>(24.91 to<br>48.52)                   | 131.05<br>(44.85 to<br>408.05)                 | 99.07<br>(34.73 to<br>313.41)                  | 163.41<br>(55.46 to<br>497.24)                 |
| Chronic kidney disease due to diabetes mellitus            | 251.61<br>(175.81 to<br>357.45)                      | 842.22<br>(362.91 to<br>2,249.44)                      | 618.24<br>(268.62 to<br>1,686.27)                     | 1,068.37<br>(451.18 to<br>2,832.53)                     | 9.65<br>(6.82 to<br>13.67)                     | 43.52<br>(14.36 to<br>140.82)                  | 32.82<br>(11.02 to<br>107.10)                  | 54.09<br>(17.35 to<br>167.39)                  |
| Chronic kidney disease due to hypertension                 | 139.10<br>(95.30 to<br>204.82)                       | 519.92<br>(178.43 to<br>1,646.48)                      | 385.97<br>(136.78 to<br>1,242.15)                     | 659.46<br>(220.89 to<br>2,093.12)                       | 6.94<br>(4.78 to<br>10.14)                     | 33.89<br>(9.43 to<br>116.36)                   | 26.21<br>(7.56 to<br>93.99)                    | 41.53<br>(11.19 to<br>134.18)                  |
| Chronic kidney disease due to glomerulonephritis           | 317.88<br>(222.65 to<br>460.14)                      | 565.47<br>(311.81 to<br>1,190.60)                      | 411.57<br>(225.87 to<br>856.17)                       | 733.54<br>(401.02 to<br>1,548.19)                       | 7.97<br>(5.65 to<br>11.56)                     | 22.49<br>(8.73 to<br>62.22)                    | 16.72<br>(6.57 to<br>47.54)                    | 28.68<br>(11.11 to<br>77.89)                   |
| Chronic kidney disease due to other and unspecified causes | 353.06<br>(245.22 to<br>501.75)                      | 699.37<br>(355.65 to<br>1,616.36)                      | 509.46<br>(258.05 to<br>1,156.87)                     | 900.65<br>(451.63 to<br>1,997.27)                       | 9.69<br>(6.85 to<br>13.71)                     | 31.15<br>(11.60 to<br>93.21)                   | 23.31<br>(8.82 to<br>72.47)                    | 39.10<br>(14.37 to<br>107.97)                  |
| Urinary diseases and male infertility                      | 608.99<br>(508.08 to<br>736.33)                      | 1,072.02<br>(874.93 to<br>1,311.44)                    | 978.43<br>(794.03 to<br>1,201.23)                     | 1,141.34<br>(935.62 to<br>1,395.04)                     | 17.67<br>(15.03 to<br>20.97)                   | 39.07<br>(33.30 to<br>45.47)                   | 37.25<br>(31.99 to<br>43.45)                   | 39.45<br>(33.53 to<br>46.13)                   |
| Urinary tract infections                                   | 303.76<br>(225.77 to<br>396.41)                      | 616.57<br>(465.78 to<br>813.80)                        | 597.30<br>(452.37 to<br>778.35)                       | 632.76<br>(477.66 to<br>841.61)                         | 8.62<br>(6.46 to<br>11.36)                     | 22.78<br>(17.55 to<br>29.70)                   | 23.06<br>(17.94 to<br>29.49)                   | 22.13<br>(17.09 to<br>29.24)                   |
| Urolithiasis                                               | 20.21<br>(12.17 to<br>31.04)                         | 33.41<br>(19.26 to<br>56.01)                           | 30.74<br>(17.59 to<br>52.36)                          | 36.71<br>(21.16 to<br>59.47)                            | 0.42<br>(0.26 to<br>0.72)                      | 0.86<br>(0.50 to<br>1.66)                      | 0.82<br>(0.48 to<br>1.61)                      | 0.90<br>(0.53 to<br>1.70)                      |
| Other urinary diseases                                     | 285.01<br>(193.58 to<br>383.43)                      | 422.04<br>(266.19 to<br>597.72)                        | 350.39<br>(216.02 to<br>497.61)                       | 471.87<br>(295.66 to<br>662.04)                         | 8.62<br>(5.80 to<br>11.53)                     | 15.43<br>(9.56 to<br>21.46)                    | 13.37<br>(8.26 to<br>18.82)                    | 16.42<br>(10.32 to<br>22.44)                   |
| Gynecological diseases                                     | 76.10<br>(51.59 to<br>112.69)                        | 107.13<br>(69.38 to<br>160.78)                         | 82.78<br>(52.65 to<br>125.42)                         | 124.52<br>(80.40 to<br>188.34)                          | 1.79<br>(1.21 to<br>2.62)                      | 2.64<br>(1.74 to<br>3.97)                      | 2.05<br>(1.32 to<br>3.09)                      | 3.04<br>(1.98 to<br>4.61)                      |
| Uterine fibroids                                           | 28.81<br>(15.64 to<br>46.52)                         | 38.11<br>(18.00 to<br>67.16)                           | 28.51<br>(13.35 to<br>50.89)                          | 44.87<br>(21.52 to<br>77.66)                            | 0.75<br>(0.42 to<br>1.21)                      | 1.02<br>(0.50 to<br>1.77)                      | 0.77<br>(0.36 to<br>1.35)                      | 1.20<br>(0.59 to<br>2.03)                      |
| Polycystic ovarian syndrome                                | 6.63<br>(1.31 to<br>16.41)                           | 6.37<br>(1.08 to<br>17.50)                             | 4.16<br>(0.68 to<br>11.78)                            | 8.14<br>(1.40 to<br>21.80)                              | 0.15<br>(0.03 to<br>0.36)                      | 0.15<br>(0.03 to<br>0.39)                      | 0.10<br>(0.02 to<br>0.26)                      | 0.19<br>(0.03 to<br>0.51)                      |
| Endometriosis                                              | 0.35<br>(0.09 to<br>1.17)                            | 0.66<br>(0.15 to<br>2.52)                              | 0.51<br>(0.11 to<br>1.93)                             | 0.77<br>(0.17 to<br>2.88)                               | 0.01<br>(0.00 to<br>0.02)                      | 0.01<br>(0.00 to<br>0.05)                      | 0.01<br>(0.00 to<br>0.04)                      | 0.02<br>(0.00 to<br>0.06)                      |
| Genital prolapse                                           | 1.40<br>(0.42 to<br>3.82)                            | 1.85<br>(0.49 to<br>5.30)                              | 1.35<br>(0.37 to<br>3.86)                             | 2.19<br>(0.58 to<br>6.10)                               | 0.05<br>(0.02 to<br>0.13)                      | 0.07<br>(0.02 to<br>0.18)                      | 0.05<br>(0.01 to<br>0.14)                      | 0.08<br>(0.02 to<br>0.21)                      |
| Other gynecological diseases                               | 38.92<br>(19.56 to<br>64.91)                         | 60.14<br>(28.93 to<br>102.15)                          | 48.26<br>(23.72 to<br>80.08)                          | 68.56<br>(32.45 to<br>115.63)                           | 0.83<br>(0.39 to<br>1.39)                      | 1.38<br>(0.64 to<br>2.52)                      | 1.12<br>(0.54 to<br>1.88)                      | 1.56<br>(0.71 to<br>2.65)                      |

|                                                   |                                              |                                              |                                              |                                              |                                     |                                       |                                       |                                       |
|---------------------------------------------------|----------------------------------------------|----------------------------------------------|----------------------------------------------|----------------------------------------------|-------------------------------------|---------------------------------------|---------------------------------------|---------------------------------------|
| Hemoglobinopathies and hemolytic anemias          | 1,182.41<br>(882.93 to<br>1,696.45)          | 1,063.52<br>(798.55 to<br>1,412.24)          | 884.11<br>(660.20 to<br>1,180.79)            | 1,283.58<br>(937.76 to<br>1,736.50)          | 20.98<br>(16.53 to<br>27.65)        | 29.69<br>(23.51 to<br>37.63)          | 25.31<br>(20.13 to<br>32.07)          | 33.07<br>(25.80 to<br>42.20)          |
| Thalassemias                                      | 26.08<br>(8.08 to<br>77.21)                  | 11.27<br>(3.20 to<br>32.41)                  | 13.04<br>(3.72 to<br>37.63)                  | 13.49<br>(3.86 to<br>40.77)                  | 0.31<br>(0.09 to<br>0.91)           | 0.31<br>(0.04 to<br>0.38)             | 0.15<br>(0.04 to<br>0.44)             | 0.16<br>(0.05 to<br>0.48)             |
| Sickle cell disorders                             | 684.11<br>(469.58 to<br>1,082.76)            | 386.16<br>(263.52 to<br>567.70)              | 331.19<br>(226.41 to<br>483.64)              | 498.81<br>(327.09 to<br>758.67)              | 8.86<br>(6.24 to<br>13.49)          | 5.74<br>(4.03 to<br>8.07)             | 4.94<br>(3.48 to<br>6.90)             | 7.19<br>(4.87 to<br>10.41)            |
| G6PD deficiency                                   | 351.13<br>(256.72 to<br>488.71)              | 521.89<br>(379.19 to<br>718.87)              | 415.61<br>(296.98 to<br>577.38)              | 618.14<br>(439.61 to<br>849.07)              | 6.86<br>(5.18 to<br>9.02)           | 14.84<br>(11.10 to<br>19.71)          | 12.05<br>(8.94 to<br>16.31)           | 16.79<br>(12.44 to<br>22.16)          |
| Other hemoglobinopathies and hemolytic anemias    | 121.09<br>(96.00 to<br>153.84)               | 144.21<br>(112.48 to<br>190.05)              | 124.27<br>(96.27 to<br>164.73)               | 153.15<br>(118.10 to<br>200.80)              | 4.96<br>(3.96 to<br>6.24)           | 8.97<br>(7.00 to<br>11.86)            | 8.17<br>(6.40 to<br>10.78)            | 8.93<br>(6.78 to<br>11.97)            |
| Endocrine, metabolic, blood, and immune disorders | 354.51<br>(258.13 to<br>509.75)              | 514.25<br>(398.21 to<br>700.19)              | 470.14<br>(361.82 to<br>636.23)              | 567.53<br>(428.43 to<br>772.05)              | 9.17<br>(7.07 to<br>12.13)          | 18.56<br>(14.53 to<br>23.83)          | 17.78<br>(13.87 to<br>23.13)          | 18.73<br>(14.51 to<br>24.34)          |
| <b>Comoros</b>                                    |                                              |                                              |                                              |                                              |                                     |                                       |                                       |                                       |
| Cause                                             | YLLs (actual counts)                         |                                              |                                              |                                              | Deaths (actual counts)              |                                       |                                       |                                       |
|                                                   | 2016                                         | 2040 Forecast                                | 2040 Better Scenario                         | 2040 Worse Scenario                          | 2016                                | 2040 Forecast                         | 2040 Better Scenario                  | 2040 Worse Scenario                   |
| <b>Musculoskeletal disorders</b>                  | <b>196.61</b><br>(141.19 to<br>250.64)       | <b>372.02</b><br>(257.69 to<br>496.67)       | <b>382.60</b><br>(266.86 to<br>507.98)       | <b>374.16</b><br>(257.71 to<br>499.65)       | <b>4.76</b><br>(3.34 to<br>6.23)    | <b>11.89</b><br>(8.08 to<br>16.11)    | <b>12.30</b><br>(8.40 to<br>16.54)    | <b>11.55</b><br>(7.85 to<br>15.71)    |
| Rheumatoid arthritis                              | 37.11<br>(23.86 to<br>54.07)                 | 93.54<br>(55.40 to<br>147.33)                | 80.41<br>(47.66 to<br>128.47)                | 100.98<br>(60.90 to<br>157.05)               | 1.40<br>(0.86 to<br>2.08)           | 4.47<br>(2.67 to<br>7.05)             | 4.00<br>(2.35 to<br>6.39)             | 4.61<br>(2.76 to<br>7.26)             |
| Other musculoskeletal disorders                   | 159.50<br>(115.12 to<br>204.45)              | 278.48<br>(192.78 to<br>372.69)              | 302.19<br>(211.98 to<br>407.43)              | 273.18<br>(187.07 to<br>366.29)              | 3.36<br>(2.40 to<br>4.37)           | 7.42<br>(5.15 to<br>10.27)            | 8.30<br>(5.77 to<br>11.49)            | 6.95<br>(4.82 to<br>9.60)             |
| <b>Other non-communicable diseases</b>            | <b>4,267.12</b><br>(3,061.04 to<br>6,061.34) | <b>4,909.58</b><br>(3,626.81 to<br>6,635.10) | <b>4,427.35</b><br>(3,299.46 to<br>6,021.13) | <b>6,147.01</b><br>(4,369.27 to<br>8,544.50) | <b>62.48</b><br>(46.30 to<br>84.53) | <b>114.41</b><br>(85.15 to<br>166.96) | <b>110.42</b><br>(82.76 to<br>164.22) | <b>125.75</b><br>(92.58 to<br>178.31) |
| Congenital birth defects                          | 2,858.58<br>(1,975.84 to<br>4,176.52)        | 2,284.27<br>(1,431.42 to<br>3,427.09)        | 1,933.79<br>(1,216.03 to<br>2,882.68)        | 3,218.96<br>(2,036.94 to<br>5,011.35)        | 34.02<br>(23.90 to<br>49.22)        | 28.17<br>(17.88 to<br>41.56)          | 23.91<br>(15.28 to<br>35.18)          | 39.18<br>(25.10 to<br>59.84)          |
| Neural tube defects                               | 449.85<br>(198.00 to<br>918.62)              | 156.74<br>(60.42 to<br>377.11)               | 114.37<br>(42.00 to<br>281.63)               | 243.59<br>(89.67 to<br>594.89)               | 5.24<br>(2.32 to<br>10.68)          | 1.85<br>(0.72 to<br>4.46)             | 1.35<br>(0.50 to<br>3.30)             | 2.87<br>(1.07 to<br>6.97)             |
| Congenital heart anomalies                        | 812.00<br>(492.19 to<br>1,280.74)            | 683.72<br>(403.74 to<br>1,086.66)            | 587.97<br>(345.25 to<br>929.05)              | 937.45<br>(526.24 to<br>1,535.02)            | 9.87<br>(6.10 to<br>15.46)          | 8.74<br>(5.32 to<br>14.18)            | 7.54<br>(4.60 to<br>12.01)            | 11.77<br>(6.83 to<br>19.22)           |
| Orofacial clefts                                  | 22.39<br>(4.23 to<br>65.15)                  | 15.35<br>(2.57 to<br>47.63)                  | 10.83<br>(1.72 to<br>33.93)                  | 24.43<br>(4.00 to<br>76.04)                  | 0.26<br>(0.05 to<br>0.75)           | 0.18<br>(0.03 to<br>0.55)             | 0.13<br>(0.02 to<br>0.39)             | 0.28<br>(0.05 to<br>0.88)             |
| Down syndrome                                     | 60.29<br>(34.98 to<br>104.53)                | 62.75<br>(34.39 to<br>112.23)                | 52.10<br>(28.44 to<br>93.42)                 | 84.97<br>(44.29 to<br>152.63)                | 0.78<br>(0.47 to<br>1.37)           | 0.92<br>(0.53 to<br>1.65)             | 0.77<br>(0.44 to<br>1.38)             | 1.20<br>(0.66 to<br>2.18)             |
| Other chromosomal abnormalities                   | 186.29<br>(60.40 to<br>382.26)               | 233.49<br>(73.75 to<br>492.04)               | 191.09<br>(60.58 to<br>399.64)               | 339.49<br>(105.92 to<br>733.96)              | 2.18<br>(0.71 to<br>4.46)           | 2.75<br>(0.88 to<br>5.83)             | 2.25<br>(0.72 to<br>4.69)             | 3.99<br>(1.25 to<br>8.56)             |
| Congenital musculoskeletal and limb anomalies     | 36.19<br>(18.50 to<br>68.33)                 | 33.10<br>(15.66 to<br>61.33)                 | 29.59<br>(14.12 to<br>55.14)                 | 45.52<br>(20.33 to<br>86.74)                 | 0.43<br>(0.22 to<br>0.80)           | 0.40<br>(0.19 to<br>0.72)             | 0.35<br>(0.17 to<br>0.65)             | 0.54<br>(0.25 to<br>1.01)             |
| Urogenital congenital anomalies                   | 64.04<br>(37.67 to<br>103.11)                | 51.80<br>(28.98 to<br>87.00)                 | 45.86<br>(25.10 to<br>77.15)                 | 70.30<br>(37.72 to<br>118.89)                | 0.79<br>(0.47 to<br>1.27)           | 0.71<br>(0.42 to<br>1.12)             | 0.63<br>(0.37 to<br>1.01)             | 0.93<br>(0.53 to<br>1.52)             |
| Digestive congenital anomalies                    | 252.35<br>(128.12 to<br>447.77)              | 221.10<br>(107.45 to<br>432.10)              | 185.59<br>(90.14 to<br>362.55)               | 317.58<br>(148.59 to<br>628.99)              | 2.94<br>(1.50 to<br>5.20)           | 2.59<br>(1.27 to<br>5.04)             | 2.18<br>(1.06 to<br>4.25)             | 3.71<br>(1.75 to<br>7.35)             |
| Other congenital birth defects                    | 975.18<br>(542.60 to<br>1,570.20)            | 826.22<br>(450.28 to<br>1,354.10)            | 716.40<br>(393.51 to<br>1,176.28)            | 1,155.62<br>(606.94 to<br>1,912.57)          | 11.54<br>(6.50 to<br>18.43)         | 10.02<br>(5.59 to<br>16.23)           | 8.70<br>(4.93 to<br>14.11)            | 13.88<br>(7.48 to<br>22.78)           |

|                                      |                                          |                                          |                                          |                                          |                                 |                                 |                                 |                                 |
|--------------------------------------|------------------------------------------|------------------------------------------|------------------------------------------|------------------------------------------|---------------------------------|---------------------------------|---------------------------------|---------------------------------|
| Skin and subcutaneous diseases       | 885.52<br>(563.44 to<br>1,505.05)        | 2,305.62<br>(1,566.41 to<br>3,765.76)    | 2,213.05<br>(1,504.92 to<br>3,603.17)    | 2,477.49<br>(1,676.62 to<br>4,057.54)    | 22.39<br>(14.75 to<br>38.02)    | 82.53<br>(56.70 to<br>134.14)   | 83.25<br>(57.63 to<br>134.08)   | 81.34<br>(55.53 to<br>130.36)   |
| Cellulitis                           | 68.73<br>(29.31 to<br>118.79)            | 225.25<br>(92.43 to<br>367.30)           | 242.49<br>(102.58 to<br>394.61)          | 223.71<br>(91.19 to<br>373.72)           | 1.68<br>(0.69 to<br>2.81)       | 7.28<br>(2.83 to<br>11.98)      | 8.10<br>(3.25 to<br>13.09)      | 6.81<br>(2.60 to<br>10.99)      |
| Pyoderma                             | 700.50<br>(438.84 to<br>1,210.05)        | 1,793.99<br>(1,210.24 to<br>3,046.02)    | 1,671.88<br>(1,125.22 to<br>2,815.49)    | 1,969.68<br>(1,314.39 to<br>3,324.99)    | 16.61<br>(10.91 to<br>28.38)    | 61.78<br>(41.86 to<br>104.98)   | 60.35<br>(40.88 to<br>102.65)   | 62.23<br>(41.57 to<br>104.34)   |
| Decubitus ulcer                      | 78.40<br>(43.79 to<br>138.85)            | 213.25<br>(119.62 to<br>391.99)          | 222.35<br>(125.65 to<br>406.86)          | 207.24<br>(115.62 to<br>380.85)          | 3.31<br>(1.87 to<br>5.85)       | 11.50<br>(6.47 to<br>21.10)     | 12.67<br>(7.29 to<br>23.14)     | 10.39<br>(5.79 to<br>19.21)     |
| Other skin and subcutaneous diseases | 37.89<br>(21.31 to<br>64.21)             | 73.12<br>(42.11 to<br>121.41)            | 76.33<br>(43.81 to<br>127.48)            | 76.85<br>(43.58 to<br>128.71)            | 0.79<br>(0.46 to<br>1.33)       | 1.97<br>(1.11 to<br>3.25)       | 2.13<br>(1.23 to<br>3.49)       | 1.91<br>(1.08 to<br>3.14)       |
| Sudden infant death syndrome         | 523.02<br>(235.46 to<br>1,007.56)        | 319.70<br>(129.01 to<br>631.09)          | 280.51<br>(116.74 to<br>548.55)          | 450.57<br>(176.57 to<br>930.27)          | 6.07<br>(2.73 to<br>11.69)      | 3.71<br>(1.50 to<br>7.32)       | 3.25<br>(1.35 to<br>6.37)       | 5.23<br>(2.05 to<br>10.79)      |
| Injuries                             | 17,641.33<br>(14,745.95 to<br>21,013.36) | 22,652.79<br>(17,101.62 to<br>28,133.74) | 19,879.36<br>(14,907.92 to<br>24,485.54) | 25,824.59<br>(19,373.83 to<br>31,849.09) | 365.23<br>(309.19 to<br>431.16) | 619.53<br>(503.72 to<br>740.76) | 567.56<br>(459.74 to<br>677.16) | 658.66<br>(528.98 to<br>786.55) |
| Transport injuries                   | 4,769.82<br>(3,726.39 to<br>6,214.73)    | 7,272.12<br>(5,566.51 to<br>9,579.95)    | 5,803.30<br>(4,400.09 to<br>7,699.13)    | 8,642.41<br>(6,629.37 to<br>11,246.87)   | 97.95<br>(77.57 to<br>126.43)   | 184.22<br>(144.13 to<br>238.38) | 154.22<br>(119.46 to<br>198.66) | 206.21<br>(161.58 to<br>266.42) |
| Road injuries                        | 4,445.45<br>(3,512.30 to<br>5,671.57)    | 6,787.44<br>(5,197.64 to<br>8,909.27)    | 5,382.19<br>(4,091.50 to<br>7,127.30)    | 8,091.14<br>(6,221.57 to<br>10,505.43)   | 92.18<br>(73.13 to<br>116.86)   | 174.36<br>(136.39 to<br>223.18) | 145.55<br>(113.64 to<br>186.24) | 195.29<br>(154.00 to<br>250.49) |
| Pedestrian road injuries             | 759.09<br>(572.11 to<br>978.21)          | 1,074.01<br>(772.56 to<br>1,426.88)      | 870.73<br>(624.10 to<br>1,169.78)        | 1,252.00<br>(902.47 to<br>1,659.73)      | 15.95<br>(12.24 to<br>20.21)    | 28.84<br>(21.74 to<br>37.10)    | 24.38<br>(18.51 to<br>31.47)    | 31.83<br>(23.93 to<br>41.10)    |
| <b>Comoros</b>                       |                                          |                                          |                                          |                                          |                                 |                                 |                                 |                                 |
| Cause                                | YLLs (actual counts)                     |                                          |                                          |                                          | Deaths (actual counts)          |                                 |                                 |                                 |
|                                      | 2016                                     | 2040 Forecast                            | 2040 Better Scenario                     | 2040 Worse Scenario                      | 2016                            | 2040 Forecast                   | 2040 Better Scenario            | 2040 Worse Scenario             |
| Cyclist road injuries                | 137.41<br>(97.23 to<br>203.23)           | 224.98<br>(152.67 to<br>337.16)          | 183.71<br>(124.38 to<br>276.73)          | 264.51<br>(177.56 to<br>391.38)          | 2.95<br>(2.11 to<br>4.19)       | 6.11<br>(4.27 to<br>8.95)       | 5.32<br>(3.73 to<br>7.66)       | 6.68<br>(4.66 to<br>9.89)       |
| Motorcyclist road injuries           | 335.13<br>(243.28 to<br>468.67)          | 579.99<br>(408.01 to<br>825.19)          | 499.66<br>(344.30 to<br>705.37)          | 660.86<br>(466.01 to<br>934.63)          | 6.89<br>(5.09 to<br>9.16)       | 14.61<br>(10.50 to<br>19.92)    | 13.18<br>(9.38 to<br>17.90)     | 15.72<br>(11.43 to<br>21.43)    |
| Motor vehicle road injuries          | 3,196.65<br>(2,497.39 to<br>4,149.94)    | 4,883.27<br>(3,688.81 to<br>6,500.03)    | 3,807.71<br>(2,834.83 to<br>5,113.86)    | 5,883.72<br>(4,478.78 to<br>7,732.64)    | 66.04<br>(51.56 to<br>85.44)    | 124.14<br>(95.30 to<br>161.62)  | 102.09<br>(78.22 to<br>133.79)  | 140.35<br>(108.57 to<br>182.83) |
| Other road injuries                  | 17.17<br>(11.87 to<br>26.49)             | 25.19<br>(16.91 to<br>38.95)             | 20.37<br>(13.75 to<br>31.39)             | 30.05<br>(20.05 to<br>46.71)             | 0.35<br>(0.25 to<br>0.54)       | 0.65<br>(0.44 to<br>1.00)       | 0.57<br>(0.37 to<br>0.87)       | 0.72<br>(0.49 to<br>1.10)       |
| Other transport injuries             | 524.37<br>(188.58 to<br>608.63)          | 484.68<br>(267.65 to<br>895.37)          | 421.11<br>(229.98 to<br>780.80)          | 551.27<br>(303.43 to<br>1,019.42)        | 5.77<br>(3.34 to<br>10.91)      | 9.86<br>(5.43 to<br>18.32)      | 8.67<br>(4.76 to<br>16.26)      | 10.91<br>(6.00 to<br>20.01)     |
| Unintentional injuries               | 8,159.58<br>(6,809.81 to<br>9,790.80)    | 8,450.13<br>(6,735.37 to<br>10,345.87)   | 7,393.84<br>(5,934.07 to<br>9,017.43)    | 9,825.40<br>(7,626.21 to<br>12,179.72)   | 171.52<br>(148.92 to<br>196.63) | 271.57<br>(229.39 to<br>317.67) | 253.01<br>(216.16 to<br>294.34) | 284.39<br>(238.70 to<br>335.09) |
| Falls                                | 1,396.53<br>(1,107.43 to<br>1,720.23)    | 2,195.05<br>(1,764.78 to<br>2,684.95)    | 2,090.42<br>(1,668.84 to<br>2,526.20)    | 2,300.79<br>(1,829.72 to<br>2,813.30)    | 45.35<br>(37.42 to<br>53.57)    | 109.79<br>(89.08 to<br>133.35)  | 111.42<br>(91.64 to<br>134.17)  | 104.38<br>(82.39 to<br>128.08)  |
| Drowning                             | 1,680.20<br>(1,322.13 to<br>2,104.01)    | 1,295.10<br>(948.71 to<br>1,736.54)      | 1,116.45<br>(819.66 to<br>1,494.39)      | 1,566.23<br>(1,135.01 to<br>2,094.75)    | 28.73<br>(23.18 to<br>35.70)    | 30.44<br>(23.69 to<br>39.62)    | 27.14<br>(21.11 to<br>35.50)    | 34.09<br>(26.14 to<br>44.42)    |
| Fire, heat, and hot substances       | 1,117.70<br>(829.84 to<br>1,567.48)      | 981.61<br>(687.60 to<br>1,357.65)        | 818.14<br>(571.68 to<br>1,135.48)        | 1,168.22<br>(809.85 to<br>1,651.62)      | 23.76<br>(18.38 to<br>31.19)    | 31.04<br>(23.13 to<br>40.46)    | 27.10<br>(20.38 to<br>35.50)    | 33.75<br>(24.80 to<br>44.57)    |
| Poisonings                           | 532.70<br>(293.30 to<br>1,106.12)        | 352.11<br>(203.73 to<br>655.56)          | 267.24<br>(155.27 to<br>495.91)          | 460.76<br>(249.12 to<br>920.73)          | 9.52<br>(6.12 to<br>16.72)      | 8.43<br>(5.46 to<br>13.61)      | 6.58<br>(4.31 to<br>10.52)      | 10.17<br>(6.47 to<br>16.64)     |

|                                                 |                                              |                                              |                                              |                                              |                                      |                                       |                                       |                                       |
|-------------------------------------------------|----------------------------------------------|----------------------------------------------|----------------------------------------------|----------------------------------------------|--------------------------------------|---------------------------------------|---------------------------------------|---------------------------------------|
| Exposure to mechanical forces                   | 745.64<br>(610.27 to<br>926.90)              | 776.10<br>(565.67 to<br>1,041.07)            | 646.51<br>(469.11 to<br>873.66)              | 917.90<br>(664.42 to<br>1,228.16)            | 14.15<br>(11.76 to<br>17.35)         | 19.44<br>(15.20 to<br>25.09)          | 16.86<br>(13.08 to<br>21.68)          | 21.48<br>(16.69 to<br>27.60)          |
| Unintentional firearm injuries                  | 124.09<br>(86.15 to<br>173.79)               | 115.20<br>(71.64 to<br>177.69)               | 92.71<br>(57.49 to<br>143.06)                | 133.35<br>(82.48 to<br>204.28)               | 2.45<br>(1.73 to<br>3.37)            | 2.71<br>(1.82 to<br>3.93)             | 2.26<br>(1.54 to<br>3.24)             | 3.01<br>(2.02 to<br>4.39)             |
| Unintentional suffocation                       | 127.31<br>(82.85 to<br>201.81)               | 105.13<br>(65.52 to<br>162.94)               | 86.38<br>(54.16 to<br>132.98)                | 136.03<br>(83.18 to<br>217.96)               | 1.93<br>(1.36 to<br>2.81)            | 2.08<br>(1.43 to<br>2.98)             | 1.79<br>(1.22 to<br>2.51)             | 2.47<br>(1.66 to<br>3.61)             |
| Other exposure to mechanical forces             | 494.24<br>(388.67 to<br>650.77)              | 555.78<br>(402.04 to<br>768.94)              | 467.42<br>(338.21 to<br>651.13)              | 648.52<br>(469.43 to<br>896.11)              | 9.77<br>(7.91 to<br>12.53)           | 14.64<br>(11.24 to<br>19.50)          | 12.81<br>(9.82 to<br>17.06)           | 15.99<br>(12.32 to<br>21.42)          |
| Adverse effects of medical treatment            | 663.34<br>(499.68 to<br>941.08)              | 687.75<br>(514.46 to<br>933.95)              | 592.42<br>(442.69 to<br>809.71)              | 809.00<br>(596.20 to<br>1,115.77)            | 12.76<br>(10.52 to<br>16.71)         | 18.68<br>(14.27 to<br>24.50)          | 16.81<br>(12.68 to<br>22.34)          | 20.20<br>(15.65 to<br>26.61)          |
| Animal contact                                  | 652.08<br>(413.49 to<br>913.36)              | 865.92<br>(555.93 to<br>1,236.63)            | 681.41<br>(441.69 to<br>986.03)              | 1,066.51<br>(670.58 to<br>1,533.73)          | 14.05<br>(9.22 to<br>19.18)          | 25.05<br>(16.91 to<br>35.04)          | 20.57<br>(13.68 to<br>28.76)          | 28.67<br>(19.32 to<br>40.33)          |
| Venomous animal contact                         | 519.68<br>(318.38 to<br>736.86)              | 696.07<br>(438.13 to<br>1,011.92)            | 545.67<br>(347.38 to<br>802.15)              | 855.39<br>(530.79 to<br>1,242.73)            | 11.70<br>(7.62 to<br>16.04)          | 21.13<br>(14.22 to<br>29.81)          | 17.15<br>(11.51 to<br>24.46)          | 24.10<br>(16.17 to<br>34.11)          |
| Non-venomous animal contact                     | 132.40<br>(74.34 to<br>205.47)               | 169.86<br>(88.65 to<br>265.91)               | 135.74<br>(70.43 to<br>214.94)               | 211.12<br>(109.91 to<br>339.49)              | 2.55<br>(1.28 to<br>3.56)            | 3.92<br>(2.00 to<br>6.25)             | 3.22<br>(1.67 to<br>5.14)             | 4.57<br>(2.35 to<br>7.24)             |
| Foreign body                                    | 782.67<br>(527.25 to<br>1,134.84)            | 730.32<br>(512.28 to<br>1,012.95)            | 713.95<br>(505.49 to<br>986.32)              | 858.77<br>(570.24 to<br>1,241.47)            | 11.89<br>(8.67 to<br>16.07)          | 14.55<br>(10.54 to<br>19.53)          | 15.74<br>(10.67 to<br>19.69)          | 15.71<br>(11.37 to<br>21.30)          |
| Pulmonary aspiration and foreign body in airway | 716.53<br>(479.78 to<br>1,047.59)            | 661.22<br>(466.03 to<br>923.88)              | 653.15<br>(463.79 to<br>899.16)              | 777.85<br>(520.51 to<br>1,129.32)            | 10.76<br>(7.80 to<br>14.78)          | 13.09<br>(9.76 to<br>17.30)           | 13.43<br>(10.02 to<br>17.72)          | 14.10<br>(10.36 to<br>18.94)          |
| Foreign body in other body part                 | 66.14<br>(22.69 to<br>121.60)                | 69.11<br>(20.51 to<br>133.45)                | 60.80<br>(18.17 to<br>119.34)                | 80.92<br>(25.13 to<br>156.94)                | 1.13<br>(0.39 to<br>2.11)            | 1.45<br>(0.43 to<br>2.80)             | 1.31<br>(0.38 to<br>2.58)             | 1.61<br>(0.48 to<br>3.14)             |
| Environmental heat and cold exposure            | 120.81<br>(81.16 to<br>166.74)               | 133.56<br>(82.93 to<br>194.14)               | 98.86<br>(61.55 to<br>144.89)                | 168.99<br>(104.41 to<br>254.02)              | 2.51<br>(1.69 to<br>3.35)            | 3.77<br>(2.48 to<br>5.33)             | 2.92<br>(1.87 to<br>4.16)             | 4.41<br>(2.82 to<br>6.29)             |
| Other unintentional injuries                    | 467.89<br>(363.12 to<br>602.00)              | 432.60<br>(315.03 to<br>586.85)              | 368.44<br>(267.93 to<br>505.98)              | 508.22<br>(367.58 to<br>687.11)              | 8.80<br>(6.97 to<br>11.21)           | 10.39<br>(7.84 to<br>13.99)           | 9.07<br>(6.80 to<br>12.26)            | 11.53<br>(8.80 to<br>15.39)           |
| <b>Self-harm and interpersonal violence</b>     | <b>4,692.51</b><br>(2,895.84 to<br>6,971.59) | <b>5,786.73</b><br>(3,437.63 to<br>9,046.48) | <b>5,537.15</b><br>(3,337.79 to<br>8,560.43) | <b>6,084.99</b><br>(3,561.94 to<br>9,539.88) | <b>95.39</b><br>(58.66 to<br>145.26) | <b>141.29</b><br>(84.53 to<br>223.56) | <b>137.54</b><br>(84.30 to<br>216.92) | <b>144.27</b><br>(85.62 to<br>229.02) |

**Comoros**

| Cause                              | YLLs (actual counts)                  |                                       |                                       |                                       | Deaths (actual counts)       |                               |                               |                               |
|------------------------------------|---------------------------------------|---------------------------------------|---------------------------------------|---------------------------------------|------------------------------|-------------------------------|-------------------------------|-------------------------------|
|                                    | 2016                                  | 2040 Forecast                         | 2040 Better Scenario                  | 2040 Worse Scenario                   | 2016                         | 2040 Forecast                 | 2040 Better Scenario          | 2040 Worse Scenario           |
| Self-harm                          | 1,632.55<br>(983.55 to<br>3,158.73)   | 2,627.63<br>(1,546.71 to<br>5,109.72) | 2,503.23<br>(1,473.50 to<br>4,847.14) | 2,736.44<br>(1,614.40 to<br>5,356.61) | 39.02<br>(23.95 to<br>76.51) | 75.28<br>(46.16 to<br>147.13) | 73.58<br>(45.19 to<br>144.34) | 75.82<br>(46.34 to<br>147.42) |
| Self-harm by firearm               | 232.66<br>(79.73 to<br>687.98)        | 316.84<br>(106.99 to<br>1,000.95)     | 293.76<br>(98.45 to<br>928.28)        | 333.16<br>(112.21 to<br>1,057.33)     | 5.42<br>(1.93 to<br>16.12)   | 8.87<br>(3.10 to<br>28.89)    | 8.42<br>(2.97 to<br>27.08)    | 9.06<br>(3.17 to<br>29.63)    |
| Self-harm by other specified means | 1,399.89<br>(866.65 to<br>2,782.35)   | 2,310.78<br>(1,376.16 to<br>4,651.11) | 2,209.47<br>(1,314.63 to<br>4,454.26) | 2,403.28<br>(1,436.16 to<br>4,820.54) | 33.60<br>(21.23 to<br>67.38) | 66.41<br>(40.98 to<br>134.35) | 65.16<br>(40.70 to<br>130.49) | 66.77<br>(41.35 to<br>135.67) |
| Interpersonal violence             | 3,059.96<br>(1,514.18 to<br>4,123.95) | 3,159.10<br>(1,358.03 to<br>4,604.01) | 3,033.92<br>(1,313.63 to<br>4,414.15) | 3,348.54<br>(1,426.75 to<br>4,883.97) | 56.37<br>(27.50 to<br>75.91) | 66.01<br>(27.86 to<br>94.03)  | 63.96<br>(27.36 to<br>90.76)  | 68.45<br>(28.96 to<br>97.63)  |
| Physical violence by firearm       | 623.64<br>(248.50 to<br>969.56)       | 662.37<br>(239.34 to<br>1,097.38)     | 648.88<br>(240.07 to<br>1,074.45)     | 688.63<br>(246.93 to<br>1,129.61)     | 11.49<br>(4.52 to<br>17.83)  | 13.32<br>(4.77 to<br>21.96)   | 13.11<br>(4.76 to<br>21.72)   | 13.66<br>(4.85 to<br>22.21)   |
| Physical violence by sharp object  | 311.09<br>(136.45 to<br>453.71)       | 386.36<br>(157.54 to<br>573.01)       | 389.47<br>(159.89 to<br>574.99)       | 394.21<br>(162.10 to<br>585.16)       | 6.28<br>(2.75 to<br>8.89)    | 9.12<br>(3.81 to<br>13.04)    | 9.30<br>(3.92 to<br>13.23)    | 9.07<br>(3.77 to<br>12.97)    |



|                                                                                     |                                                      |                                                      |                                                      |                                                      |                                                |                                                 |                                                |                                                  |
|-------------------------------------------------------------------------------------|------------------------------------------------------|------------------------------------------------------|------------------------------------------------------|------------------------------------------------------|------------------------------------------------|-------------------------------------------------|------------------------------------------------|--------------------------------------------------|
| Physical violence by other means                                                    | 2,125.23<br>(979.84 to<br>2,965.82)                  | 2,110.37<br>(848.86 to<br>3,156.42)                  | 1,995.56<br>(812.71 to<br>2,993.33)                  | 2,265.70<br>(912.00 to<br>3,397.07)                  | 38.60<br>(17.53 to<br>53.69)                   | 43.56<br>(17.42 to<br>63.82)                    | 41.55<br>(60.72 to<br>60.72)                   | 45.72<br>(18.27 to<br>67.23)                     |
| <b>Forces of nature, conflict and terrorism, and executions and police conflict</b> | <b>19.41<br/>(10.76 to<br/>38.68)</b>                | <b>1,143.81<br/>(0.00 to<br/>1,964.75)</b>           | <b>1,145.07<br/>(0.00 to<br/>1,977.24)</b>           | <b>1,271.78<br/>(0.00 to<br/>2,160.43)</b>           | <b>0.36<br/>(0.21 to<br/>0.65)</b>             | <b>22.46<br/>(0.00 to<br/>40.83)</b>            | <b>22.80<br/>(0.00 to<br/>41.73)</b>           | <b>23.79<br/>(0.00 to<br/>41.91)</b>             |
| Exposure to forces of nature                                                        | 0.00<br>(0.00 to<br>0.00)                            | 1,137.79<br>(0.00 to<br>1,964.75)                    | 1,139.03<br>(0.00 to<br>1,977.24)                    | 1,265.24<br>(0.00 to<br>2,160.43)                    | 0.00<br>(0.00 to<br>0.00)                      | 22.34<br>(0.00 to<br>40.83)                     | 22.68<br>(0.00 to<br>41.73)                    | 23.67<br>(0.00 to<br>41.91)                      |
| Conflict and terrorism                                                              | 0.00<br>(0.00 to<br>0.00)                            | 6.03<br>(0.00 to<br>142.08)                          | 6.04<br>(0.00 to<br>142.21)                          | 6.54<br>(0.00 to<br>153.41)                          | 0.00<br>(0.00 to<br>0.00)                      | 0.11<br>(0.00 to<br>2.62)                       | 0.11<br>(0.00 to<br>2.66)                      | 0.12<br>(0.00 to<br>2.74)                        |
| Executions and police conflict                                                      | 19.41<br>(10.76 to<br>38.68)                         | 0.00<br>(0.00 to<br>0.00)                            | 0.00<br>(0.00 to<br>0.00)                            | 0.00<br>(0.00 to<br>0.00)                            | 0.36<br>(0.21 to<br>0.65)                      | 0.00<br>(0.00 to<br>0.00)                       | 0.00<br>(0.00 to<br>0.00)                      | 0.00<br>(0.00 to<br>0.00)                        |
| <b>Djibouti</b>                                                                     |                                                      |                                                      |                                                      |                                                      |                                                |                                                 |                                                |                                                  |
| Cause                                                                               | YLLs (actual counts)                                 |                                                      |                                                      |                                                      | Deaths (actual counts)                         |                                                 |                                                |                                                  |
|                                                                                     | 2016                                                 | 2040 Forecast                                        | 2040 Better Scenario                                 | 2040 Worse Scenario                                  | 2016                                           | 2040 Forecast                                   | 2040 Better Scenario                           | 2040 Worse Scenario                              |
| <b>All causes</b>                                                                   | <b>314,218.49<br/>(254,621.02 to<br/>391,629.69)</b> | <b>258,352.59<br/>(194,672.10 to<br/>334,431.13)</b> | <b>210,649.76<br/>(159,215.64 to<br/>272,278.54)</b> | <b>393,241.61<br/>(297,513.87 to<br/>510,623.30)</b> | <b>6,867.44<br/>(5,752.39 to<br/>8,071.72)</b> | <b>9,155.52<br/>(7,457.86 to<br/>11,059.43)</b> | <b>7,772.96<br/>(6,343.65 to<br/>9,369.49)</b> | <b>12,088.86<br/>(9,828.05 to<br/>14,777.33)</b> |
| <b>Communicable, maternal, neonatal, and nutritional diseases</b>                   | <b>211,771.30<br/>(161,153.42 to<br/>279,283.75)</b> | <b>100,827.77<br/>(62,693.00 to<br/>151,336.79)</b>  | <b>74,228.17<br/>(44,361.02 to<br/>115,887.50)</b>   | <b>200,262.22<br/>(131,278.64 to<br/>283,884.37)</b> | <b>3,574.49<br/>(2,900.24 to<br/>4,443.94)</b> | <b>2,511.16<br/>(1,600.35 to<br/>3,751.62)</b>  | <b>1,900.89<br/>(1,208.23 to<br/>2,840.33)</b> | <b>4,402.65<br/>(2,876.44 to<br/>6,259.69)</b>   |
| <b>HIV/AIDS and tuberculosis</b>                                                    | <b>52,830.12<br/>(36,213.66 to<br/>77,132.13)</b>    | <b>28,359.82<br/>(8,137.70 to<br/>67,043.18)</b>     | <b>21,577.20<br/>(5,609.70 to<br/>58,363.88)</b>     | <b>78,252.36<br/>(32,065.16 to<br/>137,093.86)</b>   | <b>1,150.67<br/>(817.60 to<br/>1,609.55)</b>   | <b>673.05<br/>(218.65 to<br/>1,482.57)</b>      | <b>505.82<br/>(154.63 to<br/>1,292.67)</b>     | <b>1,705.70<br/>(698.10 to<br/>2,888.27)</b>     |
| Tuberculosis                                                                        | 17,070.94<br>(11,904.56 to<br>21,916.45)             | 7,660.83<br>(3,913.38 to<br>13,849.30)               | 5,372.34<br>(2,891.10 to<br>9,441.15)                | 11,988.39<br>(6,312.39 to<br>20,953.77)              | 447.88<br>(313.14 to<br>572.99)                | 234.06<br>(127.85 to<br>397.98)                 | 167.06<br>(92.21 to<br>274.82)                 | 352.60<br>(190.61 to<br>606.06)                  |
| HIV/AIDS                                                                            | 35,759.18<br>(19,026.78 to<br>60,602.62)             | 20,698.98<br>(1,208.88 to<br>59,144.40)              | 16,304.85<br>(736.68 to<br>52,984.41)                | 66,263.97<br>(20,598.41 to<br>124,007.97)            | 702.79<br>(371.21 to<br>1,174.47)              | 438.99<br>(18.83 to<br>1,257.70)                | 338.77<br>(11.22 to<br>1,150.77)               | 1,253.10<br>(381.83 to<br>2,538.94)              |
| <b>Diarrhea, lower respiratory, and other common infectious diseases</b>            | <b>70,536.56<br/>(51,434.62 to<br/>96,039.95)</b>    | <b>42,731.49<br/>(24,137.62 to<br/>73,143.97)</b>    | <b>28,472.32<br/>(16,290.00 to<br/>48,027.46)</b>    | <b>72,158.93<br/>(39,761.73 to<br/>122,790.54)</b>   | <b>1,355.12<br/>(953.16 to<br/>1,620.62)</b>   | <b>1,325.33<br/>(744.00 to<br/>2,310.26)</b>    | <b>956.96<br/>(558.64 to<br/>1,615.33)</b>     | <b>1,927.31<br/>(1,065.74 to<br/>3,382.56)</b>   |
| Diarrheal diseases                                                                  | 14,322.06<br>(8,558.39 to<br>22,885.60)              | 9,666.14<br>(2,127.19 to<br>31,863.35)               | 5,930.84<br>(1,393.71 to<br>18,994.69)               | 16,550.10<br>(3,852.04 to<br>52,843.95)              | 319.41<br>(180.99 to<br>568.89)                | 347.20<br>(59.58 to<br>1,165.27)                | 215.66<br>(40.37 to<br>715.07)                 | 556.03<br>(98.81 to<br>1,725.53)                 |
| Intestinal infectious diseases                                                      | 915.06<br>(428.69 to<br>1,745.39)                    | 604.63<br>(258.17 to<br>1,150.89)                    | 546.54<br>(239.54 to<br>1,046.65)                    | 834.32<br>(342.13 to<br>1,600.42)                    | 12.64<br>(5.94 to<br>23.25)                    | 9.22<br>(4.01 to<br>17.45)                      | 8.42<br>(3.77 to<br>16.06)                     | 12.26<br>(5.16 to<br>23.25)                      |
| Typhoid fever                                                                       | 839.78<br>(377.94 to<br>1,615.96)                    | 560.95<br>(238.57 to<br>1,090.19)                    | 508.42<br>(221.10 to<br>987.19)                      | 769.99<br>(317.36 to<br>1,496.46)                    | 11.61<br>(5.26 to<br>21.46)                    | 8.52<br>(3.65 to<br>16.20)                      | 7.81<br>(3.43 to<br>15.02)                     | 11.28<br>(4.80 to<br>21.77)                      |
| Paratyphoid fever                                                                   | 41.47<br>(14.89 to<br>92.04)                         | 35.05<br>(12.92 to<br>81.22)                         | 31.36<br>(11.59 to<br>71.66)                         | 49.50<br>(17.96 to<br>118.93)                        | 0.58<br>(0.22 to<br>1.32)                      | 0.54<br>(0.20 to<br>1.21)                       | 0.48<br>(0.18 to<br>1.09)                      | 0.73<br>(0.27 to<br>1.69)                        |
| Other intestinal infectious diseases                                                | 33.81<br>(7.65 to<br>101.80)                         | 8.63<br>(1.76 to<br>27.05)                           | 6.76<br>(1.46 to<br>19.37)                           | 14.84<br>(2.96 to<br>47.57)                          | 0.44<br>(0.11 to<br>1.24)                      | 0.16<br>(0.04 to<br>0.41)                       | 0.14<br>(0.03 to<br>0.56)                      | 0.25<br>(0.06 to<br>0.65)                        |
| Lower respiratory infections                                                        | 36,329.85<br>(24,859.04 to<br>52,447.43)             | 23,717.47<br>(13,764.94 to<br>39,282.48)             | 16,282.53<br>(9,477.83 to<br>27,522.46)              | 41,718.62<br>(22,527.38 to<br>72,620.03)             | 648.96<br>(487.80 to<br>837.11)                | 803.62<br>(520.59 to<br>1,213.96)               | 602.50<br>(396.93 to<br>898.86)                | 1,143.04<br>(704.06 to<br>1,880.48)              |
| Upper respiratory infections                                                        | 51.21<br>(15.10 to<br>136.18)                        | 23.54<br>(7.31 to<br>58.07)                          | 17.90<br>(5.77 to<br>43.33)                          | 39.33<br>(11.71 to<br>102.98)                        | 0.75<br>(0.30 to<br>1.72)                      | 0.54<br>(0.19 to<br>1.18)                       | 0.43<br>(0.15 to<br>0.95)                      | 0.80<br>(0.28 to<br>1.86)                        |
| Otitis media                                                                        | 97.84<br>(21.14 to<br>354.51)                        | 13.72<br>(3.80 to<br>42.18)                          | 13.41<br>(3.78 to<br>40.35)                          | 17.02<br>(4.46 to<br>57.63)                          | 1.45<br>(0.41 to<br>4.60)                      | 0.39<br>(0.12 to<br>0.93)                       | 0.42<br>(0.15 to<br>0.95)                      | 0.40<br>(0.12 to<br>1.04)                        |
| Meningitis                                                                          | 10,436.82<br>(6,752.06 to<br>16,586.81)              | 5,253.10<br>(3,165.02 to<br>8,614.23)                | 4,569.15<br>(2,771.77 to<br>7,337.75)                | 7,543.17<br>(4,407.71 to<br>12,747.40)               | 167.22<br>(115.83 to<br>252.53)                | 119.33<br>(75.82 to<br>187.33)                  | 112.18<br>(69.18 to<br>171.78)                 | 145.82<br>(91.69 to<br>231.15)                   |



|                                                       |                                                            |                                                            |                                                            |                                                             |                                                     |                                                    |                                                   |                                                     |
|-------------------------------------------------------|------------------------------------------------------------|------------------------------------------------------------|------------------------------------------------------------|-------------------------------------------------------------|-----------------------------------------------------|----------------------------------------------------|---------------------------------------------------|-----------------------------------------------------|
| Rabies                                                | 446.79<br>(27.14 to<br>1,732.35)                           | 140.06<br>(6.31 to<br>619.91)                              | 103.10<br>(3.84 to<br>475.26)                              | 267.79<br>(14.60 to<br>1,156.20)                            | 6.57<br>(0.44 to<br>25.05)                          | 2.41<br>(0.11 to<br>9.94)                          | 1.78<br>(0.07 to<br>7.61)                         | 4.40<br>(0.25 to<br>17.85)                          |
| Intestinal nematode infections                        | 33.74<br>(2.34 to<br>102.00)                               | 18.63<br>(2.48 to<br>56.31)                                | 18.03<br>(2.60 to<br>55.96)                                | 26.32<br>(2.97 to<br>80.56)                                 | 0.42<br>(0.04 to<br>1.23)                           | 0.26<br>(0.06 to<br>0.73)                          | 0.25<br>(0.06 to<br>0.71)                         | 0.35<br>(0.06 to<br>0.99)                           |
| Other neglected tropical diseases                     | 685.71<br>(236.82 to<br>1,649.66)                          | 225.41<br>(73.71 to<br>516.06)                             | 194.76<br>(63.70 to<br>441.62)                             | 370.56<br>(120.52 to<br>857.44)                             | 8.71<br>(3.15 to<br>19.91)                          | 3.56<br>(1.31 to<br>7.49)                          | 3.15<br>(1.16 to<br>6.67)                         | 5.37<br>(1.94 to<br>11.57)                          |
| <b>Maternal disorders</b>                             | <b>5,957.53</b><br><b>(3,743.76 to</b><br><b>8,225.58)</b> | <b>3,565.95</b><br><b>(1,620.71 to</b><br><b>6,526.74)</b> | <b>2,689.67</b><br><b>(1,257.64 to</b><br><b>4,798.55)</b> | <b>5,637.66</b><br><b>(2,619.54 to</b><br><b>10,075.72)</b> | <b>105.90</b><br><b>(66.52 to</b><br><b>147.16)</b> | <b>64.50</b><br><b>(29.15 to</b><br><b>118.70)</b> | <b>48.65</b><br><b>(22.75 to</b><br><b>87.32)</b> | <b>101.45</b><br><b>(47.15 to</b><br><b>182.75)</b> |
| Maternal hemorrhage                                   | 1,596.37<br>(899.05 to<br>2,502.58)                        | 890.87<br>(353.19 to<br>1,780.00)                          | 673.38<br>(271.40 to<br>1,325.84)                          | 1,360.83<br>(558.34 to<br>2,635.15)                         | 29.10<br>(16.44 to<br>45.76)                        | 16.51<br>(6.58 to<br>33.05)                        | 12.48<br>(5.14 to<br>24.51)                       | 25.10<br>(10.44 to<br>49.05)                        |
| Maternal sepsis and other maternal infections         | 484.06<br>(203.92 to<br>895.77)                            | 250.05<br>(83.68 to<br>569.50)                             | 189.07<br>(62.09 to<br>423.68)                             | 388.48<br>(130.89 to<br>854.99)                             | 8.59<br>(3.88 to<br>15.85)                          | 4.50<br>(1.57 to<br>10.29)                         | 3.41<br>(1.14 to<br>7.73)                         | 6.96<br>(2.39 to<br>15.07)                          |
| Maternal hypertensive disorders                       | 958.10<br>(537.44 to<br>1,460.88)                          | 550.82<br>(233.08 to<br>1,079.59)                          | 414.63<br>(174.83 to<br>780.52)                            | 857.08<br>(379.76 to<br>1,598.47)                           | 16.60<br>(9.28 to<br>25.52)                         | 9.71<br>(3.99 to<br>18.99)                         | 7.31<br>(3.07 to<br>14.20)                        | 15.02<br>(6.40 to<br>28.12)                         |
| Maternal obstructed labor and uterine rupture         | 506.98<br>(250.73 to<br>850.04)                            | 290.11<br>(110.32 to<br>630.47)                            | 214.69<br>(82.80 to<br>474.03)                             | 458.49<br>(184.12 to<br>961.35)                             | 9.09<br>(4.47 to<br>15.38)                          | 5.30<br>(2.02 to<br>11.72)                         | 3.92<br>(1.49 to<br>8.73)                         | 8.33<br>(3.28 to<br>17.53)                          |
| Maternal abortion, miscarriage, and ectopic pregnancy | 177.43<br>(66.27 to<br>364.03)                             | 120.77<br>(34.07 to<br>308.37)                             | 91.64<br>(27.34 to<br>228.63)                              | 191.90<br>(57.16 to<br>466.24)                              | 3.09<br>(1.18 to<br>6.09)                           | 1.63<br>(0.63 to<br>5.37)                          | 1.63<br>(0.49 to<br>4.05)                         | 3.39<br>(1.02 to<br>8.31)                           |
| Indirect maternal deaths                              | 1,457.02<br>(763.40 to<br>2,404.31)                        | 907.29<br>(346.20 to<br>1,835.06)                          | 692.73<br>(271.05 to<br>1,398.59)                          | 1,433.78<br>(577.45 to<br>2,896.99)                         | 25.65<br>(13.65 to<br>41.96)                        | 16.17<br>(6.13 to<br>32.94)                        | 12.36<br>(4.82 to<br>24.74)                       | 25.39<br>(10.24 to<br>49.94)                        |
| Late maternal deaths                                  | 106.00<br>(44.59 to<br>206.85)                             | 50.05<br>(16.63 to<br>119.05)                              | 37.86<br>(12.54 to<br>88.29)                               | 79.60<br>(26.42 to<br>187.61)                               | 1.86<br>(0.78 to<br>3.59)                           | 0.89<br>(0.30 to<br>2.09)                          | 0.68<br>(0.22 to<br>1.59)                         | 1.41<br>(0.48 to<br>3.25)                           |
| Maternal deaths aggravated by HIV/AIDS                | 53.92<br>(19.66 to<br>109.01)                              | 127.96<br>(0.44 to<br>413.43)                              | 83.17<br>(0.13 to<br>320.51)                               | 284.14<br>(76.55 to<br>688.28)                              | 1.01<br>(0.37 to<br>2.01)                           | 2.44<br>(0.01 to<br>7.82)                          | 1.58<br>(0.11 to<br>6.11)                         | 5.40<br>(1.48 to<br>12.89)                          |
| Other maternal disorders                              | 617.66<br>(276.24 to<br>1,085.39)                          | 378.06<br>(132.40 to<br>829.94)                            | 292.50<br>(105.34 to<br>627.86)                            | 583.36<br>(211.28 to<br>1,217.81)                           | 10.91<br>(4.88 to<br>19.69)                         | 8.83<br>(2.35 to<br>14.80)                         | 5.28<br>(1.85 to<br>11.30)                        | 10.45<br>(3.74 to<br>21.77)                         |

**Djibouti**

| Cause                                                    | YLLs (actual counts)                                          |                                                              |                                                              |                                                               | Deaths (actual counts)                               |                                                      |                                                      |                                                      |
|----------------------------------------------------------|---------------------------------------------------------------|--------------------------------------------------------------|--------------------------------------------------------------|---------------------------------------------------------------|------------------------------------------------------|------------------------------------------------------|------------------------------------------------------|------------------------------------------------------|
|                                                          | 2016                                                          | 2040 Forecast                                                | 2040 Better Scenario                                         | 2040 Worse Scenario                                           | 2016                                                 | 2040 Forecast                                        | 2040 Better Scenario                                 | 2040 Worse Scenario                                  |
| <b>Neonatal disorders</b>                                | <b>50,554.00</b><br><b>(31,309.41 to</b><br><b>77,155.14)</b> | <b>16,748.58</b><br><b>(7,498.06 to</b><br><b>29,984.75)</b> | <b>13,463.01</b><br><b>(6,110.28 to</b><br><b>24,250.43)</b> | <b>29,799.44</b><br><b>(12,869.46 to</b><br><b>52,317.90)</b> | <b>584.21</b><br><b>(361.91 to</b><br><b>891.68)</b> | <b>193.60</b><br><b>(86.70 to</b><br><b>346.55)</b>  | <b>155.63</b><br><b>(70.68 to</b><br><b>280.51)</b>  | <b>344.45</b><br><b>(148.84 to</b><br><b>604.69)</b> |
| Neonatal preterm birth                                   | 18,077.27<br>(10,000.50 to<br>28,801.68)                      | 5,460.85<br>(2,276.88 to<br>9,907.18)                        | 3,950.77<br>(1,690.58 to<br>7,119.44)                        | 9,843.56<br>(3,908.18 to<br>17,804.34)                        | 208.88<br>(115.56 to<br>332.79)                      | 63.11<br>(26.34 to<br>114.50)                        | 45.67<br>(19.57 to<br>82.29)                         | 113.76<br>(45.22 to<br>205.77)                       |
| Neonatal encephalopathy due to birth asphyxia and trauma | 13,876.53<br>(7,159.44 to<br>23,262.14)                       | 4,101.98<br>(1,363.28 to<br>8,391.00)                        | 3,498.08<br>(1,202.01 to<br>7,204.16)                        | 7,090.26<br>(2,269.65 to<br>14,988.30)                        | 160.32<br>(82.71 to<br>268.77)                       | 47.41<br>(15.76 to<br>96.94)                         | 40.43<br>(13.90 to<br>83.29)                         | 81.95<br>(26.24 to<br>173.24)                        |
| Neonatal sepsis and other neonatal infections            | 11,692.58<br>(6,222.70 to<br>19,903.94)                       | 4,942.81<br>(2,383.33 to<br>8,711.31)                        | 4,196.03<br>(2,024.67 to<br>7,324.52)                        | 8,669.32<br>(3,944.57 to<br>15,143.67)                        | 135.15<br>(71.90 to<br>230.03)                       | 57.14<br>(27.57 to<br>100.67)                        | 48.51<br>(23.41 to<br>84.65)                         | 100.23<br>(45.62 to<br>175.02)                       |
| Hemolytic disease and other neonatal jaundice            | 846.99<br>(355.45 to<br>1,712.77)                             | 173.30<br>(53.78 to<br>412.14)                               | 141.91<br>(43.90 to<br>344.54)                               | 320.72<br>(96.67 to<br>779.48)                                | 9.79<br>(4.11 to<br>19.79)                           | 2.00<br>(0.62 to<br>4.76)                            | 1.64<br>(0.51 to<br>3.98)                            | 3.71<br>(1.12 to<br>9.00)                            |
| Other neonatal disorders                                 | 6,060.63<br>(2,970.95 to<br>11,844.25)                        | 2,069.65<br>(736.99 to<br>4,616.37)                          | 1,676.23<br>(594.20 to<br>3,783.35)                          | 3,875.58<br>(1,370.20 to<br>8,705.39)                         | 70.06<br>(34.32 to<br>136.87)                        | 23.93<br>(8.54 to<br>53.36)                          | 19.38<br>(6.88 to<br>43.72)                          | 44.81<br>(15.87 to<br>100.59)                        |
| <b>Nutritional deficiencies</b>                          | <b>20,482.65</b><br><b>(11,235.57 to</b><br><b>33,900.61)</b> | <b>6,054.52</b><br><b>(3,424.79 to</b><br><b>9,778.95)</b>   | <b>5,070.96</b><br><b>(3,033.33 to</b><br><b>7,955.62)</b>   | <b>9,334.11</b><br><b>(5,244.00 to</b><br><b>15,453.89)</b>   | <b>320.06</b><br><b>(196.06 to</b><br><b>495.32)</b> | <b>183.98</b><br><b>(118.58 to</b><br><b>271.70)</b> | <b>169.70</b><br><b>(111.07 to</b><br><b>248.28)</b> | <b>229.49</b><br><b>(145.83 to</b><br><b>344.37)</b> |

|                                                                         |                                                               |                                                                 |                                                                 |                                                                  |                                                            |                                                            |                                                            |                                                            |
|-------------------------------------------------------------------------|---------------------------------------------------------------|-----------------------------------------------------------------|-----------------------------------------------------------------|------------------------------------------------------------------|------------------------------------------------------------|------------------------------------------------------------|------------------------------------------------------------|------------------------------------------------------------|
| Protein-energy malnutrition                                             | 19,820.77<br>(10,719.15 to<br>33,210.95)                      | 5,097.03<br>(2,858.93 to<br>8,527.88)                           | 4,207.48<br>(2,444.59 to<br>6,828.33)                           | 8,160.64<br>(4,402.07 to<br>13,797.29)                           | 300.29<br>(181.41 to<br>470.03)                            | 147.84<br>(94.34 to<br>221.11)                             | 135.45<br>(85.97 to<br>200.27)                             | 189.09<br>(118.99 to<br>291.87)                            |
| Iodine deficiency                                                       | 55.30<br>(2.45 to<br>205.06)                                  | 165.98<br>(3.26 to<br>730.21)                                   | 140.19<br>(2.51 to<br>567.39)                                   | 238.76<br>(4.61 to<br>1,291.54)                                  | 1.25<br>(0.07 to<br>4.23)                                  | 5.73<br>(0.10 to<br>20.10)                                 | 5.14<br>(0.08 to<br>19.10)                                 | 7.12<br>(0.14 to<br>25.07)                                 |
| Dietary iron deficiency                                                 | 46.02<br>(21.96 to<br>93.01)                                  | 50.48<br>(21.45 to<br>112.64)                                   | 46.82<br>(19.74 to<br>102.93)                                   | 58.60<br>(24.91 to<br>129.18)                                    | 0.87<br>(0.41 to<br>1.74)                                  | 1.01<br>(0.44 to<br>2.16)                                  | 0.95<br>(0.41 to<br>2.00)                                  | 1.15<br>(0.50 to<br>2.49)                                  |
| Other nutritional deficiencies                                          | 560.57<br>(259.39 to<br>961.24)                               | 741.03<br>(312.46 to<br>1,416.41)                               | 676.47<br>(282.12 to<br>1,286.60)                               | 876.11<br>(370.53 to<br>1,656.94)                                | 17.66<br>(7.63 to<br>30.35)                                | 29.39<br>(12.01 to<br>52.86)                               | 28.15<br>(11.61 to<br>50.57)                               | 32.12<br>(13.42 to<br>57.18)                               |
| <b>Other communicable, maternal, neonatal, and nutritional diseases</b> | <b>9,704.68</b><br><b>(4,236.87 to</b><br><b>20,230.49)</b>   | <b>2,653.60</b><br><b>(1,423.01 to</b><br><b>4,755.86)</b>      | <b>2,343.93</b><br><b>(1,285.73 to</b><br><b>4,168.69)</b>      | <b>3,998.25</b><br><b>(1,974.66 to</b><br><b>7,658.44)</b>       | <b>129.48</b><br><b>(65.14 to</b><br><b>251.54)</b>        | <b>54.25</b><br><b>(35.34 to</b><br><b>82.14)</b>          | <b>49.54</b><br><b>(32.93 to</b><br><b>74.51)</b>          | <b>72.11</b><br><b>(44.69 to</b><br><b>116.63)</b>         |
| Sexually transmitted infections excluding HIV                           | 6,167.69<br>(1,753.44 to<br>14,617.91)                        | 903.86<br>(236.71 to<br>2,369.36)                               | 801.27<br>(221.89 to<br>2,106.18)                               | 1,470.41<br>(335.72 to<br>3,982.54)                              | 73.83<br>(22.00 to<br>173.16)                              | 12.08<br>(3.94 to<br>29.62)                                | 10.83<br>(3.60 to<br>26.44)                                | 18.82<br>(5.30 to<br>48.28)                                |
| Syphilis                                                                | 6,093.41<br>(1,705.05 to<br>14,482.85)                        | 837.73<br>(187.46 to<br>2,266.32)                               | 739.74<br>(174.80 to<br>1,955.12)                               | 1,395.57<br>(271.75 to<br>3,883.68)                              | 72.13<br>(20.83 to<br>170.21)                              | 10.35<br>(2.70 to<br>27.20)                                | 9.19<br>(2.46 to<br>23.89)                                 | 16.94<br>(3.73 to<br>45.92)                                |
| Chlamydial infection                                                    | 14.03<br>(5.50 to<br>25.53)                                   | 12.85<br>(4.70 to<br>26.50)                                     | 11.92<br>(4.40 to<br>24.44)                                     | 14.62<br>(5.44 to<br>29.83)                                      | 0.32<br>(0.13 to<br>0.58)                                  | 0.33<br>(0.13 to<br>0.64)                                  | 0.32<br>(0.13 to<br>0.61)                                  | 0.37<br>(0.14 to<br>0.70)                                  |
| Gonococcal infection                                                    | 38.70<br>(18.05 to<br>68.81)                                  | 34.64<br>(14.05 to<br>69.14)                                    | 32.31<br>(13.18 to<br>63.38)                                    | 38.97<br>(15.70 to<br>76.31)                                     | 0.91<br>(0.42 to<br>1.58)                                  | 0.94<br>(0.40 to<br>1.74)                                  | 0.90<br>(0.37 to<br>1.67)                                  | 1.01<br>(0.43 to<br>1.88)                                  |
| Other sexually transmitted infections                                   | 21.55<br>(10.00 to<br>38.54)                                  | 18.63<br>(7.54 to<br>37.26)                                     | 17.30<br>(7.04 to<br>34.48)                                     | 21.24<br>(8.52 to<br>43.59)                                      | 0.48<br>(0.23 to<br>0.83)                                  | 0.46<br>(0.19 to<br>0.86)                                  | 0.43<br>(0.18 to<br>0.82)                                  | 0.50<br>(0.21 to<br>0.96)                                  |
| Acute hepatitis                                                         | 824.25<br>(614.66 to<br>1,071.42)                             | 704.90<br>(461.36 to<br>1,028.31)                               | 642.75<br>(412.59 to<br>943.65)                                 | 835.47<br>(551.81 to<br>1,214.63)                                | 20.11<br>(14.92 to<br>25.81)                               | 21.44<br>(14.64 to<br>29.67)                               | 20.02<br>(13.69 to<br>27.60)                               | 24.30<br>(16.77 to<br>33.60)                               |
| Acute hepatitis A                                                       | 37.80<br>(6.20 to<br>88.29)                                   | 14.58<br>(4.95 to<br>31.31)                                     | 13.07<br>(4.49 to<br>27.75)                                     | 20.37<br>(6.55 to<br>44.31)                                      | 0.51<br>(0.13 to<br>1.10)                                  | 0.34<br>(0.12 to<br>0.76)                                  | 0.32<br>(0.11 to<br>0.71)                                  | 0.42<br>(0.15 to<br>0.89)                                  |
| Acute hepatitis B                                                       | 635.65<br>(458.59 to<br>837.46)                               | 580.14<br>(365.15 to<br>860.90)                                 | 525.79<br>(332.81 to<br>777.11)                                 | 682.36<br>(436.30 to<br>997.11)                                  | 16.38<br>(12.00 to<br>21.52)                               | 17.48<br>(11.61 to<br>24.70)                               | 16.12<br>(10.71 to<br>22.81)                               | 19.97<br>(13.71 to<br>27.97)                               |
| Acute hepatitis C                                                       | 17.72<br>(11.70 to<br>25.90)                                  | 22.54<br>(13.38 to<br>35.45)                                    | 21.80<br>(12.87 to<br>34.51)                                    | 24.17<br>(14.51 to<br>38.35)                                     | 0.54<br>(0.35 to<br>0.81)                                  | 0.79<br>(0.47 to<br>1.23)                                  | 0.78<br>(0.47 to<br>1.22)                                  | 0.82<br>(0.50 to<br>1.27)                                  |
| Acute hepatitis E                                                       | 133.08<br>(88.39 to<br>192.02)                                | 87.64<br>(53.74 to<br>140.36)                                   | 82.10<br>(50.63 to<br>132.67)                                   | 108.57<br>(65.87 to<br>171.36)                                   | 2.68<br>(1.85 to<br>3.74)                                  | 2.83<br>(1.75 to<br>4.36)                                  | 2.80<br>(1.71 to<br>4.36)                                  | 3.09<br>(1.96 to<br>4.72)                                  |
| Other unspecified infectious diseases                                   | 2,712.74<br>(979.91 to<br>8,362.41)                           | 1,044.83<br>(499.49 to<br>2,381.85)                             | 899.90<br>(452.98 to<br>2,039.07)                               | 1,692.37<br>(748.59 to<br>4,252.66)                              | 35.54<br>(14.93 to<br>101.34)                              | 20.73<br>(12.65 to<br>37.01)                               | 18.68<br>(11.78 to<br>32.43)                               | 28.99<br>(16.68 to<br>59.22)                               |
| <b>Non-communicable diseases</b>                                        | <b>78,341.82</b><br><b>(62,904.74 to</b><br><b>92,707.18)</b> | <b>132,612.19</b><br><b>(98,289.41 to</b><br><b>174,258.42)</b> | <b>113,379.37</b><br><b>(84,788.92 to</b><br><b>146,723.87)</b> | <b>161,770.54</b><br><b>(118,555.53 to</b><br><b>218,337.04)</b> | <b>2,792.90</b><br><b>(2,245.15 to</b><br><b>3,293.46)</b> | <b>5,936.60</b><br><b>(4,803.54 to</b><br><b>7,180.83)</b> | <b>5,192.34</b><br><b>(4,212.64 to</b><br><b>6,252.53)</b> | <b>6,875.77</b><br><b>(5,498.31 to</b><br><b>8,510.62)</b> |

**Djibouti**

| Cause                      | YLLs (actual counts)                     |                                          |                                          |                                          | Deaths (actual counts)          |                                       |                                       |                                       |
|----------------------------|------------------------------------------|------------------------------------------|------------------------------------------|------------------------------------------|---------------------------------|---------------------------------------|---------------------------------------|---------------------------------------|
|                            | 2016                                     | 2040 Forecast                            | 2040 Better Scenario                     | 2040 Worse Scenario                      | 2016                            | 2040 Forecast                         | 2040 Better Scenario                  | 2040 Worse Scenario                   |
| Neoplasms                  | 20,402.80<br>(14,874.85 to<br>25,736.25) | 42,076.35<br>(29,042.51 to<br>57,066.52) | 41,097.98<br>(28,585.50 to<br>55,688.89) | 43,413.79<br>(29,742.30 to<br>60,509.37) | 671.15<br>(485.89 to<br>851.41) | 1,602.33<br>(1,152.64 to<br>2,099.06) | 1,608.03<br>(1,178.19 to<br>2,081.21) | 1,583.98<br>(1,125.01 to<br>2,116.57) |
| Lip and oral cavity cancer | 281.58<br>(208.50 to<br>363.87)          | 597.85<br>(378.64 to<br>912.58)          | 536.23<br>(348.79 to<br>795.89)          | 719.10<br>(427.40 to<br>1,161.40)        | 10.34<br>(7.83 to<br>13.26)     | 23.52<br>(16.02 to<br>34.36)          | 21.92<br>(15.39 to<br>30.87)          | 26.86<br>(17.24 to<br>41.16)          |
| Nasopharynx cancer         | 237.04<br>(150.49 to<br>347.24)          | 527.76<br>(273.09 to<br>973.65)          | 447.22<br>(239.98 to<br>782.60)          | 689.23<br>(339.03 to<br>1,351.40)        | 7.20<br>(4.60 to<br>10.44)      | 17.14<br>(9.46 to<br>29.91)           | 14.94<br>(8.47 to<br>24.87)           | 21.54<br>(11.00 to<br>40.82)          |

|                                      |                                       |                                       |                                       |                                       |                               |                                |                                 |                                |
|--------------------------------------|---------------------------------------|---------------------------------------|---------------------------------------|---------------------------------------|-------------------------------|--------------------------------|---------------------------------|--------------------------------|
| Other pharynx cancer                 | 167.33<br>(101.87 to<br>228.26)       | 310.42<br>(174.18 to<br>505.66)       | 288.88<br>(162.90 to<br>462.02)       | 334.90<br>(185.29 to<br>563.68)       | 5.64<br>(3.51 to<br>7.61)     | 11.31<br>(6.51 to<br>17.76)    | 10.72<br>(6.22 to<br>16.70)     | 11.95<br>(6.82 to<br>19.30)    |
| Esophageal cancer                    | 1,036.95<br>(804.67 to<br>1,261.52)   | 2,123.48<br>(1,160.93 to<br>3,674.35) | 1,911.63<br>(1,073.17 to<br>3,257.37) | 2,554.52<br>(1,356.66 to<br>4,813.40) | 41.52<br>(32.65 to<br>50.05)  | 89.69<br>(52.53 to<br>151.09)  | 83.80<br>(49.68 to<br>139.80)   | 102.42<br>(56.92 to<br>177.01) |
| Stomach cancer                       | 740.26<br>(567.95 to<br>921.19)       | 1,089.90<br>(783.78 to<br>1,450.54)   | 1,063.88<br>(761.49 to<br>1,426.50)   | 1,168.52<br>(835.43 to<br>1,569.30)   | 29.39<br>(22.73 to<br>36.33)  | 47.40<br>(36.11 to<br>60.47)   | 47.50<br>(35.81 to<br>60.89)    | 49.17<br>(37.00 to<br>64.98)   |
| Colon and rectum cancer              | 1,204.80<br>(813.88 to<br>1,728.82)   | 3,081.91<br>(1,855.95 to<br>4,968.17) | 3,131.44<br>(1,899.66 to<br>5,037.61) | 2,968.11<br>(1,783.39 to<br>4,783.17) | 49.04<br>(34.05 to<br>69.10)  | 142.07<br>(91.94 to<br>219.08) | 148.98<br>(96.38 to<br>227.59)  | 131.07<br>(84.39 to<br>202.50) |
| Liver cancer                         | 1,309.02<br>(906.14 to<br>1,777.05)   | 3,147.38<br>(1,838.55 to<br>4,964.98) | 2,694.94<br>(1,640.95 to<br>4,042.70) | 3,237.74<br>(1,909.74 to<br>5,119.49) | 43.82<br>(30.97 to<br>58.38)  | 117.07<br>(72.85 to<br>178.66) | 103.40<br>(68.23 to<br>147.27)  | 116.08<br>(71.72 to<br>178.08) |
| Liver cancer due to hepatitis B      | 476.09<br>(306.09 to<br>672.87)       | 1,097.92<br>(620.34 to<br>1,817.40)   | 940.29<br>(546.59 to<br>1,489.35)     | 1,131.23<br>(634.82 to<br>1,868.18)   | 14.40<br>(9.29 to<br>20.42)   | 36.57<br>(21.19 to<br>58.94)   | 32.11<br>(19.20 to<br>49.31)    | 36.55<br>(21.21 to<br>59.59)   |
| Liver cancer due to hepatitis C      | 335.18<br>(205.07 to<br>496.43)       | 875.60<br>(471.62 to<br>1,479.75)     | 762.36<br>(424.79 to<br>1,241.28)     | 875.19<br>(468.61 to<br>1,481.28)     | 13.25<br>(8.33 to<br>19.14)   | 37.81<br>(21.80 to<br>60.41)   | 34.21<br>(20.84 to<br>52.38)    | 36.46<br>(21.12 to<br>58.23)   |
| Liver cancer due to alcohol use      | 129.89<br>(84.83 to<br>187.66)        | 331.74<br>(188.24 to<br>534.87)       | 275.11<br>(163.52 to<br>430.84)       | 351.47<br>(194.64 to<br>579.22)       | 4.78<br>(3.20 to<br>6.80)     | 12.97<br>(7.65 to<br>20.46)    | 11.13<br>(6.97 to<br>16.59)     | 13.28<br>(7.80 to<br>21.11)    |
| Liver cancer due to other causes     | 367.86<br>(249.03 to<br>527.60)       | 842.12<br>(484.38 to<br>1,366.81)     | 717.18<br>(432.68 to<br>1,092.46)     | 879.85<br>(507.61 to<br>1,435.95)     | 11.38<br>(7.90 to<br>15.92)   | 29.72<br>(17.70 to<br>46.69)   | 29.79<br>(16.51 to<br>38.32)    | 29.79<br>(17.84 to<br>47.35)   |
| Gallbladder and biliary tract cancer | 126.36<br>(79.10 to<br>176.36)        | 205.80<br>(127.96 to<br>296.13)       | 215.44<br>(134.35 to<br>309.18)       | 193.18<br>(122.01 to<br>273.80)       | 5.16<br>(3.29 to<br>7.18)     | 9.20<br>(6.23 to<br>12.51)     | 9.86<br>(6.56 to<br>13.45)      | 8.37<br>(5.70 to<br>11.20)     |
| Pancreatic cancer                    | 554.80<br>(412.09 to<br>698.19)       | 1,473.82<br>(1,041.19 to<br>2,016.81) | 1,517.34<br>(1,067.04 to<br>2,073.05) | 1,400.54<br>(987.26 to<br>1,896.43)   | 21.93<br>(16.49 to<br>27.37)  | 63.14<br>(46.97 to<br>83.69)   | 66.46<br>(50.02 to<br>87.84)    | 58.01<br>(43.51 to<br>76.72)   |
| Larynx cancer                        | 192.60<br>(116.82 to<br>291.54)       | 349.74<br>(177.99 to<br>633.22)       | 291.34<br>(156.68 to<br>503.60)       | 478.87<br>(225.48 to<br>949.20)       | 7.15<br>(4.53 to<br>10.45)    | 13.71<br>(7.63 to<br>23.34)    | 11.88<br>(6.94 to<br>19.49)     | 17.88<br>(9.03 to<br>34.00)    |
| Tracheal, bronchus, and lung cancer  | 685.93<br>(486.79 to<br>935.92)       | 1,627.16<br>(843.61 to<br>2,962.20)   | 1,309.73<br>(726.70 to<br>2,238.11)   | 2,175.21<br>(997.04 to<br>4,465.92)   | 27.43<br>(19.58 to<br>36.65)  | 69.41<br>(38.66 to<br>121.70)  | 58.54<br>(35.26 to<br>95.69)    | 88.06<br>(43.61 to<br>172.70)  |
| Malignant skin melanoma              | 187.24<br>(126.28 to<br>253.31)       | 466.62<br>(317.14 to<br>643.72)       | 506.85<br>(345.70 to<br>702.89)       | 414.06<br>(282.91 to<br>564.57)       | 7.22<br>(5.02 to<br>9.60)     | 19.79<br>(14.47 to<br>25.75)   | 22.00<br>(16.05 to<br>28.97)    | 17.02<br>(12.36 to<br>22.13)   |
| Non-melanoma skin cancer             | 110.89<br>(79.42 to<br>150.42)        | 248.45<br>(181.22 to<br>336.66)       | 247.55<br>(181.09 to<br>333.69)       | 253.39<br>(182.00 to<br>340.66)       | 4.69<br>(3.28 to<br>6.45)     | 12.03<br>(8.72 to<br>16.02)    | 12.46<br>(9.33 to<br>16.51)     | 11.71<br>(8.28 to<br>15.64)    |
| Breast cancer                        | 1,273.44<br>(694.99 to<br>2,136.68)   | 2,933.97<br>(1,434.81 to<br>5,272.28) | 2,865.19<br>(1,426.29 to<br>5,154.74) | 2,977.85<br>(1,461.97 to<br>5,420.48) | 42.05<br>(23.61 to<br>69.20)  | 108.51<br>(59.07 to<br>189.14) | 107.97<br>(59.17 to<br>186.01)  | 107.20<br>(58.47 to<br>187.55) |
| Cervical cancer                      | 2,179.91<br>(1,214.87 to<br>3,709.48) | 3,543.57<br>(1,756.48 to<br>6,358.40) | 3,403.00<br>(1,680.86 to<br>6,013.66) | 3,764.86<br>(1,881.00 to<br>6,824.26) | 72.54<br>(40.84 to<br>122.19) | 125.93<br>(66.32 to<br>217.07) | 122.79<br>(65.09 to<br>212.53)  | 130.93<br>(69.96 to<br>238.44) |
| Uterine cancer                       | 249.51<br>(152.00 to<br>365.09)       | 518.36<br>(292.86 to<br>841.38)       | 494.39<br>(281.42 to<br>797.01)       | 556.58<br>(320.11 to<br>899.45)       | 9.40<br>(5.89 to<br>13.52)    | 21.40<br>(13.40 to<br>32.48)   | 20.78<br>(12.85 to<br>31.42)    | 22.39<br>(14.03 to<br>34.12)   |
| Ovarian cancer                       | 609.62<br>(356.19 to<br>937.45)       | 1,666.08<br>(869.24 to<br>2,762.40)   | 1,695.37<br>(888.29 to<br>2,786.66)   | 1,509.42<br>(787.44 to<br>2,496.45)   | 20.88<br>(12.46 to<br>31.63)  | 63.28<br>(35.52 to<br>99.12)   | 65.38<br>(37.01 to<br>102.16)   | 55.98<br>(31.43 to<br>88.29)   |
| Prostate cancer                      | 1,440.61<br>(514.88 to<br>2,159.37)   | 4,213.76<br>(1,625.03 to<br>6,118.19) | 4,516.30<br>(1,824.86 to<br>6,509.53) | 3,851.38<br>(1,420.18 to<br>5,609.96) | 75.92<br>(27.48 to<br>112.84) | 236.60<br>(91.58 to<br>335.22) | 260.46<br>(104.14 to<br>365.24) | 209.72<br>(76.98 to<br>299.38) |
| Testicular cancer                    | 45.71<br>(29.07 to<br>84.41)          | 79.26<br>(47.07 to<br>154.69)         | 77.04<br>(46.10 to<br>151.16)         | 83.96<br>(49.49 to<br>162.58)         | 1.06<br>(0.67 to<br>2.01)     | 1.96<br>(1.19 to<br>3.86)      | 1.93<br>(1.16 to<br>3.80)       | 2.03<br>(1.23 to<br>4.05)      |
| <b>Djibouti</b>                      |                                       |                                       |                                       |                                       |                               |                                |                                 |                                |
| <b>YLLs (actual counts)</b>          |                                       |                                       |                                       |                                       | <b>Deaths (actual counts)</b> |                                |                                 |                                |

| Cause                           | 2016                                                          | 2040 Forecast                                                 | 2040 Better Scenario                                          | 2040 Worse Scenario                                           | 2016                                                     | 2040 Forecast                                              | 2040 Better Scenario                                       | 2040 Worse Scenario                                        |
|---------------------------------|---------------------------------------------------------------|---------------------------------------------------------------|---------------------------------------------------------------|---------------------------------------------------------------|----------------------------------------------------------|------------------------------------------------------------|------------------------------------------------------------|------------------------------------------------------------|
| Kidney cancer                   | 259.74<br>(172.75 to<br>385.51)                               | 396.34<br>(297.53 to<br>520.16)                               | 421.99<br>(316.19 to<br>558.65)                               | 394.50<br>(286.54 to<br>534.64)                               | 6.06<br>(4.52 to<br>7.98)                                | 13.41<br>(10.64 to<br>16.56)                               | 14.70<br>(11.70 to<br>18.21)                               | 12.28<br>(9.57 to<br>15.37)                                |
| Bladder cancer                  | 264.65<br>(180.63 to<br>350.14)                               | 582.17<br>(385.35 to<br>828.14)                               | 578.14<br>(386.28 to<br>810.29)                               | 587.21<br>(383.41 to<br>845.56)                               | 12.14<br>(8.57 to<br>15.76)                              | 29.27<br>(20.48 to<br>39.61)                               | 30.01<br>(21.26 to<br>39.65)                               | 28.22<br>(19.59 to<br>38.64)                               |
| Brain and nervous system cancer | 589.27<br>(437.39 to<br>754.93)                               | 1,106.14<br>(789.03 to<br>1,458.82)                           | 1,147.42<br>(817.51 to<br>1,528.89)                           | 1,113.57<br>(804.91 to<br>1,457.26)                           | 14.06<br>(10.58 to<br>17.59)                             | 33.41<br>(24.81 to<br>42.19)                               | 35.33<br>(25.79 to<br>45.51)                               | 31.69<br>(23.92 to<br>39.43)                               |
| Thyroid cancer                  | 224.32<br>(127.92 to<br>323.73)                               | 453.19<br>(233.55 to<br>748.25)                               | 392.26<br>(201.40 to<br>619.65)                               | 476.74<br>(242.70 to<br>795.21)                               | 7.40<br>(4.25 to<br>10.58)                               | 16.40<br>(8.59 to<br>26.19)                                | 14.52<br>(7.78 to<br>22.12)                                | 16.82<br>(8.68 to<br>26.50)                                |
| Mesothelioma                    | 33.60<br>(21.19 to<br>47.39)                                  | 69.95<br>(43.03 to<br>101.55)                                 | 70.95<br>(43.52 to<br>103.77)                                 | 69.14<br>(42.34 to<br>99.69)                                  | 1.16<br>(0.72 to<br>1.65)                                | 2.63<br>(1.63 to<br>3.79)                                  | 2.73<br>(1.68 to<br>3.93)                                  | 2.52<br>(1.57 to<br>3.62)                                  |
| Hodgkin lymphoma                | 239.85<br>(114.70 to<br>363.35)                               | 232.02<br>(101.96 to<br>392.83)                               | 210.82<br>(95.42 to<br>351.60)                                | 284.06<br>(125.25 to<br>480.31)                               | 5.43<br>(2.59 to<br>8.10)                                | 6.22<br>(2.83 to<br>10.09)                                 | 5.75<br>(2.68 to<br>9.26)                                  | 7.24<br>(3.23 to<br>11.52)                                 |
| Non-Hodgkin lymphoma            | 2,133.13<br>(1,338.41 to<br>2,957.13)                         | 3,289.59<br>(2,006.70 to<br>4,794.83)                         | 3,280.85<br>(2,044.99 to<br>4,712.23)                         | 3,421.00<br>(2,025.98 to<br>4,939.70)                         | 43.85<br>(28.02 to<br>59.12)                             | 88.62<br>(56.67 to<br>124.67)                              | 89.73<br>(59.28 to<br>124.47)                              | 85.56<br>(54.18 to<br>120.46)                              |
| Multiple myeloma                | 282.47<br>(188.99 to<br>374.61)                               | 789.93<br>(501.14 to<br>1,148.47)                             | 783.06<br>(510.24 to<br>1,117.33)                             | 724.46<br>(450.87 to<br>1,044.80)                             | 10.09<br>(6.85 to<br>13.28)                              | 30.39<br>(19.83 to<br>43.13)                               | 30.58<br>(20.28 to<br>42.46)                               | 27.37<br>(17.43 to<br>38.50)                               |
| Leukemia                        | 723.77<br>(505.77 to<br>948.99)                               | 1,153.26<br>(788.88 to<br>1,618.56)                           | 1,112.11<br>(769.68 to<br>1,536.99)                           | 1,206.41<br>(815.24 to<br>1,705.93)                           | 16.85<br>(12.11 to<br>21.92)                             | 34.98<br>(25.28 to<br>47.89)                               | 34.19<br>(25.07 to<br>45.65)                               | 34.55<br>(24.73 to<br>47.54)                               |
| Acute lymphoid leukemia         | 237.61<br>(154.75 to<br>324.15)                               | 331.54<br>(211.16 to<br>462.59)                               | 325.66<br>(212.23 to<br>451.85)                               | 351.97<br>(218.78 to<br>489.65)                               | 4.49<br>(3.06 to<br>5.93)                                | 8.28<br>(5.54 to<br>11.41)                                 | 8.13<br>(5.56 to<br>11.05)                                 | 8.26<br>(5.36 to<br>11.27)                                 |
| Chronic lymphoid leukemia       | 27.26<br>(17.65 to<br>37.42)                                  | 61.21<br>(38.08 to<br>89.09)                                  | 59.02<br>(37.59 to<br>85.06)                                  | 59.00<br>(36.52 to<br>85.46)                                  | 1.19<br>(0.78 to<br>1.64)                                | 2.84<br>(1.82 to<br>4.02)                                  | 2.78<br>(1.82 to<br>3.85)                                  | 2.67<br>(1.72 to<br>3.76)                                  |
| Acute myeloid leukemia          | 162.75<br>(118.23 to<br>230.72)                               | 338.26<br>(237.17 to<br>491.95)                               | 338.76<br>(240.82 to<br>487.56)                               | 332.49<br>(234.27 to<br>480.25)                               | 3.70<br>(2.72 to<br>5.18)                                | 9.82<br>(7.01 to<br>14.18)                                 | 10.02<br>(7.33 to<br>14.16)                                | 9.10<br>(6.56 to<br>12.90)                                 |
| Chronic myeloid leukemia        | 83.18<br>(51.50 to<br>135.77)                                 | 112.76<br>(63.52 to<br>198.70)                                | 105.96<br>(61.26 to<br>187.11)                                | 115.11<br>(63.74 to<br>205.29)                                | 2.09<br>(1.33 to<br>3.42)                                | 3.10<br>(1.85 to<br>5.40)                                  | 2.94<br>(1.78 to<br>5.13)                                  | 3.10<br>(1.81 to<br>5.41)                                  |
| Other leukemia                  | 212.97<br>(137.14 to<br>313.93)                               | 309.49<br>(196.30 to<br>473.09)                               | 282.71<br>(181.65 to<br>427.36)                               | 347.83<br>(217.26 to<br>531.76)                               | 5.37<br>(3.62 to<br>7.54)                                | 10.95<br>(7.37 to<br>15.72)                                | 10.32<br>(7.06 to<br>14.73)                                | 11.42<br>(7.52 to<br>16.43)                                |
| Other neoplasms                 | 3,018.39<br>(2,309.79 to<br>3,810.87)                         | 5,798.45<br>(4,153.07 to<br>7,777.27)                         | 5,886.14<br>(4,195.66 to<br>7,937.77)                         | 5,805.27<br>(4,207.22 to<br>7,731.11)                         | 71.76<br>(55.21 to<br>90.30)                             | 153.83<br>(114.73 to<br>198.93)                            | 158.72<br>(118.49 to<br>205.55)                            | 149.32<br>(112.17 to<br>192.43)                            |
| <b>Cardiovascular diseases</b>  | <b>25,363.13</b><br><b>(18,943.53 to</b><br><b>33,024.44)</b> | <b>43,102.69</b><br><b>(27,609.95 to</b><br><b>65,702.30)</b> | <b>39,485.65</b><br><b>(19,369.81 to</b><br><b>44,755.05)</b> | <b>63,358.91</b><br><b>(39,658.22 to</b><br><b>95,585.03)</b> | <b>1,136.90</b><br><b>(874.04 to</b><br><b>1,434.60)</b> | <b>2,224.82</b><br><b>(1,587.23 to</b><br><b>3,131.49)</b> | <b>1,629.83</b><br><b>(1,194.70 to</b><br><b>2,233.37)</b> | <b>3,041.82</b><br><b>(2,108.63 to</b><br><b>4,312.45)</b> |
| Rheumatic heart disease         | 383.01<br>(252.27 to<br>579.68)                               | 308.10<br>(179.47 to<br>491.68)                               | 275.28<br>(157.07 to<br>447.81)                               | 279.17<br>(222.16 to<br>604.67)                               | 12.61<br>(8.38 to<br>19.25)                              | 12.28<br>(7.60 to<br>19.27)                                | 11.25<br>(6.96 to<br>17.99)                                | 14.44<br>(8.97 to<br>22.60)                                |
| Ischemic heart disease          | 10,892.42<br>(7,941.56 to<br>14,390.11)                       | 17,158.54<br>(8,808.28 to<br>31,700.73)                       | 9,962.30<br>(5,285.43 to<br>18,229.67)                        | 28,021.95<br>(14,715.56 to<br>48,158.01)                      | 515.32<br>(384.75 to<br>670.76)                          | 904.97<br>(526.69 to<br>1,536.04)                          | 576.01<br>(342.50 to<br>984.10)                            | 1,364.88<br>(792.85 to<br>2,292.97)                        |
| Stroke                          | 7,353.71<br>(5,105.61 to<br>10,079.78)                        | 11,178.97<br>(6,087.08 to<br>20,117.40)                       | 6,742.94<br>(3,680.18 to<br>11,860.59)                        | 18,095.93<br>(9,329.80 to<br>32,381.87)                       | 326.85<br>(233.84 to<br>436.95)                          | 555.60<br>(337.17 to<br>955.15)                            | 363.58<br>(222.48 to<br>605.47)                            | 836.32<br>(483.92 to<br>1,396.08)                          |
| Ischemic stroke                 | 2,181.58<br>(1,504.57 to<br>2,867.68)                         | 3,406.77<br>(1,794.51 to<br>6,404.87)                         | 2,263.10<br>(1,217.14 to<br>4,064.52)                         | 4,882.22<br>(2,502.10 to<br>9,346.75)                         | 125.46<br>(87.96 to<br>162.42)                           | 217.50<br>(122.74 to<br>420.35)                            | 155.90<br>(90.31 to<br>284.67)                             | 291.78<br>(161.97 to<br>557.46)                            |
| Intracerebral hemorrhage        | 5,172.13<br>(3,609.38 to<br>7,371.08)                         | 7,772.19<br>(3,779.33 to<br>14,333.79)                        | 4,479.84<br>(2,237.13 to<br>8,224.76)                         | 13,213.71<br>(6,246.43 to<br>25,373.75)                       | 201.40<br>(141.18 to<br>280.50)                          | 338.10<br>(183.87 to<br>600.13)                            | 207.69<br>(115.17 to<br>361.85)                            | 544.54<br>(287.20 to<br>980.13)                            |

|                                                     |                                                            |                                                            |                                                            |                                                            |                                                     |                                                      |                                                      |                                                      |
|-----------------------------------------------------|------------------------------------------------------------|------------------------------------------------------------|------------------------------------------------------------|------------------------------------------------------------|-----------------------------------------------------|------------------------------------------------------|------------------------------------------------------|------------------------------------------------------|
| Hypertensive heart disease                          | 1,668.82<br>(1,129.65 to<br>2,256.45)                      | 3,685.33<br>(2,209.32 to<br>6,132.95)                      | 2,805.05<br>(1,765.49 to<br>4,412.70)                      | 4,669.40<br>(2,576.61 to<br>8,817.10)                      | 83.52<br>(56.31 to<br>113.43)                       | 214.42<br>(136.51 to<br>347.01)                      | 170.13<br>(110.81 to<br>258.14)                      | 256.03<br>(147.54 to<br>485.78)                      |
| Cardiomyopathy and myocarditis                      | 761.94<br>(532.42 to<br>1,100.40)                          | 1,332.67<br>(807.48 to<br>2,081.19)                        | 1,316.69<br>(804.50 to<br>2,060.74)                        | 1,358.30<br>(835.39 to<br>2,100.60)                        | 20.43<br>(14.24 to<br>28.90)                        | 46.30<br>(30.15 to<br>69.44)                         | 47.08<br>(30.50 to<br>71.36)                         | 44.71<br>(29.42 to<br>66.43)                         |
| Myocarditis                                         | 109.17<br>(48.97 to<br>220.68)                             | 138.14<br>(48.13 to<br>326.99)                             | 135.81<br>(46.87 to<br>326.72)                             | 150.27<br>(53.99 to<br>346.37)                             | 2.26<br>(0.93 to<br>4.87)                           | 3.87<br>(1.29 to<br>9.44)                            | 3.91<br>(1.28 to<br>9.69)                            | 3.95<br>(1.37 to<br>9.35)                            |
| <b>Djibouti</b>                                     |                                                            |                                                            |                                                            |                                                            |                                                     |                                                      |                                                      |                                                      |
| Cause                                               | YLLs (actual counts)                                       |                                                            |                                                            |                                                            | Deaths (actual counts)                              |                                                      |                                                      |                                                      |
|                                                     | 2016                                                       | 2040 Forecast                                              | 2040 Better Scenario                                       | 2040 Worse Scenario                                        | 2016                                                | 2040 Forecast                                        | 2040 Better Scenario                                 | 2040 Worse Scenario                                  |
| Alcoholic cardiomyopathy                            | 41.96<br>(24.36 to<br>69.08)                               | 83.61<br>(45.76 to<br>137.89)                              | 86.75<br>(48.62 to<br>146.38)                              | 78.66<br>(43.29 to<br>128.49)                              | 1.31<br>(0.78 to<br>2.14)                           | 2.79<br>(1.61 to<br>4.62)                            | 2.94<br>(1.71 to<br>4.98)                            | 2.58<br>(1.48 to<br>4.18)                            |
| Other cardiomyopathy                                | 610.80<br>(423.88 to<br>891.62)                            | 1,110.92<br>(658.65 to<br>1,797.23)                        | 1,094.13<br>(652.62 to<br>1,786.65)                        | 1,129.38<br>(670.61 to<br>1,851.23)                        | 16.86<br>(11.66 to<br>24.59)                        | 39.64<br>(24.93 to<br>61.76)                         | 40.22<br>(25.25 to<br>63.20)                         | 38.18<br>(24.29 to<br>59.82)                         |
| Atrial fibrillation and flutter                     | 114.22<br>(81.20 to<br>154.99)                             | 356.57<br>(255.62 to<br>478.66)                            | 362.82<br>(257.46 to<br>498.73)                            | 339.12<br>(240.36 to<br>459.01)                            | 9.63<br>(6.91 to<br>13.17)                          | 32.47<br>(23.05 to<br>44.18)                         | 34.64<br>(24.79 to<br>47.23)                         | 29.15<br>(20.34 to<br>39.75)                         |
| Aortic aneurysm                                     | 228.96<br>(164.45 to<br>317.29)                            | 541.15<br>(363.44 to<br>791.80)                            | 500.84<br>(341.94 to<br>735.28)                            | 548.84<br>(362.18 to<br>824.00)                            | 9.68<br>(6.95 to<br>13.00)                          | 25.41<br>(18.05 to<br>35.34)                         | 24.84<br>(17.84 to<br>34.53)                         | 24.55<br>(17.07 to<br>34.48)                         |
| Peripheral artery disease                           | 19.25<br>(8.56 to<br>30.74)                                | 79.37<br>(34.99 to<br>130.72)                              | 76.61<br>(34.20 to<br>126.85)                              | 71.78<br>(30.51 to<br>121.74)                              | 1.25<br>(0.56 to<br>1.95)                           | 5.86<br>(2.52 to<br>9.27)                            | 6.08<br>(2.70 to<br>9.58)                            | 4.96<br>(2.09 to<br>7.85)                            |
| Endocarditis                                        | 407.28<br>(291.91 to<br>528.08)                            | 839.29<br>(501.87 to<br>1,258.82)                          | 801.00<br>(482.82 to<br>1,202.19)                          | 896.02<br>(529.39 to<br>1,368.93)                          | 12.03<br>(8.22 to<br>15.66)                         | 30.63<br>(18.86 to<br>43.99)                         | 30.29<br>(18.85 to<br>43.11)                         | 30.69<br>(18.80 to<br>44.58)                         |
| Other cardiovascular and circulatory diseases       | 3,533.52<br>(2,493.30 to<br>4,977.48)                      | 7,622.69<br>(5,136.68 to<br>10,702.62)                     | 6,642.11<br>(4,441.97 to<br>9,434.13)                      | 8,978.39<br>(6,019.81 to<br>12,890.31)                     | 145.58<br>(100.94 to<br>201.14)                     | 396.88<br>(280.90 to<br>539.68)                      | 365.95<br>(260.25 to<br>502.48)                      | 436.10<br>(306.07 to<br>599.00)                      |
| <b>Chronic respiratory diseases</b>                 | <b>3,252.37</b><br><b>(2,432.27 to</b><br><b>4,272.35)</b> | <b>4,294.32</b><br><b>(2,917.05 to</b><br><b>6,547.81)</b> | <b>3,373.24</b><br><b>(2,326.65 to</b><br><b>5,108.13)</b> | <b>5,706.59</b><br><b>(3,666.88 to</b><br><b>9,388.11)</b> | <b>130.50</b><br><b>(99.28 to</b><br><b>165.86)</b> | <b>208.20</b><br><b>(149.21 to</b><br><b>302.58)</b> | <b>172.58</b><br><b>(126.36 to</b><br><b>241.22)</b> | <b>261.60</b><br><b>(179.86 to</b><br><b>411.75)</b> |
| Chronic obstructive pulmonary disease               | 1,763.74<br>(1,307.75 to<br>2,272.11)                      | 2,791.62<br>(1,775.66 to<br>4,453.47)                      | 2,182.57<br>(1,418.60 to<br>3,379.41)                      | 3,989.87<br>(2,347.31 to<br>6,973.98)                      | 85.88<br>(64.23 to<br>109.68)                       | 149.51<br>(103.01 to<br>226.78)                      | 124.63<br>(87.87 to<br>184.27)                       | 198.73<br>(127.59 to<br>333.30)                      |
| Pneumoconiosis                                      | 12.83<br>(8.37 to<br>18.57)                                | 19.81<br>(13.21 to<br>28.14)                               | 18.96<br>(12.60 to<br>26.85)                               | 19.82<br>(13.64 to<br>28.22)                               | 0.57<br>(0.38 to<br>0.85)                           | 1.05<br>(0.72 to<br>1.48)                            | 1.03<br>(0.71 to<br>1.46)                            | 1.01<br>(0.70 to<br>1.43)                            |
| Silicosis                                           | 2.60<br>(1.11 to<br>4.28)                                  | 2.44<br>(1.05 to<br>4.19)                                  | 2.45<br>(1.01 to<br>4.27)                                  | 2.50<br>(1.11 to<br>4.25)                                  | 0.12<br>(0.05 to<br>0.21)                           | 0.14<br>(0.06 to<br>0.24)                            | 0.14<br>(0.06 to<br>0.25)                            | 0.14<br>(0.06 to<br>0.23)                            |
| Asbestosis                                          | 3.21<br>(1.64 to<br>6.00)                                  | 6.50<br>(3.25 to<br>11.81)                                 | 6.80<br>(3.45 to<br>12.18)                                 | 6.16<br>(3.10 to<br>11.17)                                 | 0.13<br>(0.05 to<br>0.26)                           | 0.30<br>(0.14 to<br>0.60)                            | 0.33<br>(0.15 to<br>0.64)                            | 0.28<br>(0.13 to<br>0.55)                            |
| Coal workers pneumoconiosis                         | 1.03<br>(0.50 to<br>1.89)                                  | 1.37<br>(0.60 to<br>2.64)                                  | 1.11<br>(0.47 to<br>2.16)                                  | 1.61<br>(0.72 to<br>3.02)                                  | 0.05<br>(0.02 to<br>0.09)                           | 0.07<br>(0.03 to<br>0.14)                            | 0.06<br>(0.03 to<br>0.11)                            | 0.08<br>(0.04 to<br>0.16)                            |
| Other pneumoconiosis                                | 5.98<br>(3.81 to<br>9.00)                                  | 9.50<br>(5.97 to<br>14.52)                                 | 8.60<br>(5.28 to<br>13.42)                                 | 9.55<br>(6.25 to<br>14.34)                                 | 0.27<br>(0.17 to<br>0.43)                           | 0.53<br>(0.34 to<br>0.80)                            | 0.49<br>(0.31 to<br>0.75)                            | 0.52<br>(0.33 to<br>0.78)                            |
| Asthma                                              | 1,226.39<br>(828.19 to<br>2,041.62)                        | 1,095.37<br>(604.73 to<br>2,190.13)                        | 777.39<br>(449.81 to<br>1,548.75)                          | 1,291.93<br>(719.03 to<br>2,601.31)                        | 37.57<br>(24.81 to<br>67.49)                        | 43.58<br>(24.45 to<br>86.68)                         | 31.94<br>(18.59 to<br>64.08)                         | 48.46<br>(27.17 to<br>98.91)                         |
| Interstitial lung disease and pulmonary sarcoidosis | 66.64<br>(27.05 to<br>119.32)                              | 164.18<br>(64.79 to<br>276.11)                             | 179.79<br>(72.43 to<br>300.83)                             | 146.02<br>(57.04 to<br>250.36)                             | 2.57<br>(0.98 to<br>4.36)                           | 7.52<br>(2.89 to<br>12.63)                           | 8.48<br>(3.29 to<br>14.01)                           | 6.39<br>(2.42 to<br>11.18)                           |
| Other chronic respiratory diseases                  | 182.78<br>(91.50 to<br>319.18)                             | 223.33<br>(124.11 to<br>349.59)                            | 214.54<br>(122.77 to<br>331.58)                            | 258.95<br>(141.50 to<br>417.84)                            | 3.91<br>(2.20 to<br>6.21)                           | 6.54<br>(3.80 to<br>10.32)                           | 6.50<br>(3.88 to<br>10.12)                           | 7.01<br>(3.98 to<br>11.19)                           |





|                              |                                          |                                            |                                            |                                            |                                      |                                       |                                       |                                       |
|------------------------------|------------------------------------------|--------------------------------------------|--------------------------------------------|--------------------------------------------|--------------------------------------|---------------------------------------|---------------------------------------|---------------------------------------|
| Multiple sclerosis           | 19.14<br>(10.88 to<br>31.08)             | 41.09<br>(22.29 to<br>68.06)               | 41.24<br>(22.24 to<br>70.08)               | 39.14<br>(21.31 to<br>64.24)               | 0.53<br>(0.29 to<br>0.86)            | 1.24<br>(0.67 to<br>2.04)             | 1.26<br>(0.67 to<br>2.07)             | 1.16<br>(0.62 to<br>1.89)             |
| Motor neuron disease         | 20.57<br>(13.66 to<br>30.83)             | 34.22<br>(21.46 to<br>65.27)               | 36.09<br>(22.42 to<br>68.12)               | 32.86<br>(20.92 to<br>61.04)               | 0.48<br>(0.32 to<br>0.83)            | 1.14<br>(0.71 to<br>2.28)             | 1.22<br>(0.76 to<br>2.43)             | 1.05<br>(0.66 to<br>2.07)             |
| Other neurological disorders | 264.25<br>(202.05 to<br>346.09)          | 363.43<br>(250.98 to<br>501.59)            | 378.65<br>(262.02 to<br>522.18)            | 381.17<br>(268.46 to<br>514.77)            | 4.68<br>(3.56 to<br>5.82)            | 8.74<br>(5.75 to<br>12.01)            | 9.29<br>(6.13 to<br>12.85)            | 8.49<br>(5.68 to<br>11.50)            |
| <b>Mental disorders</b>      | <b>400.12<br/>(219.05 to<br/>605.83)</b> | <b>738.94<br/>(405.75 to<br/>1,136.10)</b> | <b>737.16<br/>(405.61 to<br/>1,130.33)</b> | <b>744.06<br/>(409.44 to<br/>1,144.88)</b> | <b>11.50<br/>(6.52 to<br/>17.26)</b> | <b>23.80<br/>(14.40 to<br/>34.92)</b> | <b>24.24<br/>(14.67 to<br/>35.95)</b> | <b>23.31<br/>(14.03 to<br/>34.20)</b> |
| Alcohol use disorders        | 276.15<br>(129.75 to<br>463.81)          | 462.25<br>(214.99 to<br>792.39)            | 458.05<br>(211.09 to<br>777.68)            | 467.47<br>(219.84 to<br>802.00)            | 8.80<br>(4.50 to<br>14.22)           | 17.05<br>(9.21 to<br>26.89)           | 17.29<br>(9.29 to<br>27.20)           | 16.76<br>(9.08 to<br>26.91)           |
| Drug use disorders           | 122.17<br>(71.21 to<br>181.19)           | 273.46<br>(160.14 to<br>409.80)            | 275.85<br>(163.37 to<br>411.15)            | 273.26<br>(158.36 to<br>412.95)            | 2.67<br>(1.61 to<br>3.81)            | 6.69<br>(4.19 to<br>9.45)             | 6.89<br>(4.38 to<br>9.63)             | 6.49<br>(4.02 to<br>9.13)             |
| Opioid use disorders         | 95.95<br>(56.49 to<br>142.94)            | 202.37<br>(115.11 to<br>308.45)            | 203.60<br>(116.68 to<br>309.75)            | 202.96<br>(114.06 to<br>307.65)            | 2.02<br>(1.22 to<br>2.90)            | 4.65<br>(2.77 to<br>6.66)             | 4.75<br>(2.85 to<br>6.80)             | 4.56<br>(2.72 to<br>6.51)             |
| Cocaine use disorders        | 4.88<br>(1.30 to<br>9.57)                | 12.20<br>(3.37 to<br>23.52)                | 11.82<br>(3.30 to<br>22.71)                | 12.86<br>(3.48 to<br>24.73)                | 0.11<br>(0.03 to<br>0.22)            | 0.31<br>(0.08 to<br>0.56)             | 0.30<br>(0.08 to<br>0.55)             | 0.32<br>(0.08 to<br>0.58)             |
| Amphetamine use disorders    | 2.80<br>(1.02 to<br>5.60)                | 9.29<br>(3.39 to<br>18.30)                 | 8.75<br>(3.24 to<br>17.38)                 | 10.25<br>(3.75 to<br>20.59)                | 0.06<br>(0.02 to<br>0.12)            | 0.22<br>(0.08 to<br>0.40)             | 0.21<br>(0.08 to<br>0.39)             | 0.23<br>(0.09 to<br>0.45)             |
| Other drug use disorders     | 18.53<br>(10.51 to<br>29.69)             | 49.60<br>(29.33 to<br>78.84)               | 51.69<br>(30.79 to<br>82.03)               | 47.19<br>(27.78 to<br>74.89)               | 0.47<br>(0.29 to<br>0.72)            | 1.52<br>(1.03 to<br>2.14)             | 1.64<br>(1.12 to<br>2.30)             | 1.38<br>(0.92 to<br>1.94)             |
| Eating disorders             | 1.80<br>(1.10 to<br>2.76)                | 3.24<br>(1.85 to<br>5.22)                  | 3.26<br>(1.85 to<br>5.33)                  | 3.33<br>(1.90 to<br>5.33)                  | 0.03<br>(0.02 to<br>0.05)            | 0.06<br>(0.05 to<br>0.10)             | 0.06<br>(0.03 to<br>0.10)             | 0.06<br>(0.04 to<br>0.10)             |

**Djibouti**

| Cause                                                      | YLLs (actual counts)                            |                                                   |                                                  |                                                   | Deaths (actual counts)                   |                                            |                                          |                                            |
|------------------------------------------------------------|-------------------------------------------------|---------------------------------------------------|--------------------------------------------------|---------------------------------------------------|------------------------------------------|--------------------------------------------|------------------------------------------|--------------------------------------------|
|                                                            | 2016                                            | 2040 Forecast                                     | 2040 Better Scenario                             | 2040 Worse Scenario                               | 2016                                     | 2040 Forecast                              | 2040 Better Scenario                     | 2040 Worse Scenario                        |
| <b>Diabetes, urogenital, blood, and endocrine diseases</b> | <b>8,950.63<br/>(7,111.80 to<br/>11,180.04)</b> | <b>14,757.67<br/>(10,063.60 to<br/>21,639.33)</b> | <b>12,337.31<br/>(8,478.83 to<br/>17,969.81)</b> | <b>17,972.16<br/>(12,641.73 to<br/>25,817.65)</b> | <b>289.61<br/>(231.63 to<br/>348.74)</b> | <b>687.38<br/>(489.27 to<br/>1,060.91)</b> | <b>585.55<br/>(417.57 to<br/>878.96)</b> | <b>795.56<br/>(575.77 to<br/>1,192.98)</b> |
| Diabetes mellitus                                          | 3,542.03<br>(2,688.56 to<br>4,399.36)           | 7,312.65<br>(4,600.61 to<br>11,333.80)            | 6,030.44<br>(3,811.60 to<br>9,465.98)            | 9,094.87<br>(5,716.52 to<br>13,809.93)            | 151.28<br>(116.57 to<br>186.29)          | 363.52<br>(249.13 to<br>524.69)            | 312.87<br>(217.24 to<br>453.14)          | 432.42<br>(295.60 to<br>616.43)            |
| Acute glomerulonephritis                                   | 13.16<br>(8.78 to<br>22.33)                     | 15.92<br>(10.10 to<br>27.52)                      | 14.89<br>(9.47 to<br>25.94)                      | 20.34<br>(12.85 to<br>36.92)                      | 0.22<br>(0.16 to<br>0.34)                | 0.32<br>(0.22 to<br>0.50)                  | 0.30<br>(0.21 to<br>0.47)                | 0.38<br>(0.26 to<br>0.61)                  |
| Chronic kidney disease                                     | 1,732.68<br>(1,269.66 to<br>2,273.56)           | 3,968.57<br>(1,855.43 to<br>9,526.42)             | 2,998.72<br>(1,480.46 to<br>7,239.56)            | 4,819.93<br>(2,291.73 to<br>11,038.23)            | 58.72<br>(43.07 to<br>77.38)             | 204.95<br>(84.65 to<br>537.28)             | 155.41<br>(68.13 to<br>427.95)           | 256.35<br>(99.44 to<br>611.02)             |
| Chronic kidney disease due to diabetes mellitus            | 435.32<br>(304.50 to<br>587.21)                 | 1,343.67<br>(571.66 to<br>3,507.57)               | 996.47<br>(454.67 to<br>2,631.54)                | 1,597.42<br>(691.67 to<br>3,957.84)               | 17.52<br>(12.30 to<br>23.55)             | 71.56<br>(27.17 to<br>199.98)              | 53.69<br>(21.76 to<br>159.24)            | 81.99<br>(31.41 to<br>220.28)              |
| Chronic kidney disease due to hypertension                 | 229.71<br>(159.38 to<br>320.93)                 | 786.98<br>(315.76 to<br>2,283.57)                 | 585.25<br>(244.13 to<br>1,727.68)                | 920.51<br>(373.93 to<br>2,530.05)                 | 12.20<br>(8.53 to<br>16.62)              | 52.76<br>(19.90 to<br>148.29)              | 40.38<br>(16.10 to<br>119.10)            | 59.14<br>(22.35 to<br>154.76)              |
| Chronic kidney disease due to glomerulonephritis           | 501.24<br>(364.34 to<br>665.71)                 | 814.45<br>(432.06 to<br>1,725.23)                 | 631.87<br>(346.92 to<br>1,226.02)                | 1,028.39<br>(554.51 to<br>2,041.95)               | 12.93<br>(9.21 to<br>17.57)              | 33.38<br>(15.23 to<br>84.53)               | 25.42<br>(11.92 to<br>64.66)             | 39.85<br>(18.44 to<br>97.43)               |
| Chronic kidney disease due to other and unspecified causes | 566.41<br>(414.60 to<br>773.02)                 | 1,023.47<br>(512.72 to<br>2,226.57)               | 785.14<br>(415.25 to<br>1,642.37)                | 1,273.60<br>(657.91 to<br>2,630.15)               | 16.08<br>(11.56 to<br>21.65)             | 47.24<br>(20.06 to<br>125.37)              | 35.92<br>(16.20 to<br>97.10)             | 55.37<br>(24.16 to<br>139.45)              |
| Urinary diseases and male infertility                      | 963.55<br>(771.05 to<br>1,183.51)               | 1,407.21<br>(1,048.43 to<br>1,798.53)             | 1,365.47<br>(1,019.19 to<br>1,760.35)            | 1,527.72<br>(1,144.94 to<br>1,938.92)             | 28.99<br>(23.04 to<br>35.28)             | 52.23<br>(41.86 to<br>62.96)               | 52.62<br>(42.39 to<br>63.56)             | 53.27<br>(42.57 to<br>64.16)               |

|                                                   |                                        |                                       |                                       |                                        |                               |                                 |                                 |                                 |
|---------------------------------------------------|----------------------------------------|---------------------------------------|---------------------------------------|----------------------------------------|-------------------------------|---------------------------------|---------------------------------|---------------------------------|
| Urinary tract infections                          | 451.65<br>(307.87 to<br>611.55)        | 831.42<br>(570.06 to<br>1,121.58)     | 830.78<br>(562.68 to<br>1,123.46)     | 862.39<br>(599.70 to<br>1,165.26)      | 13.23<br>(9.18 to<br>18.10)   | 31.77<br>(23.22 to<br>41.24)    | 32.93<br>(23.81 to<br>43.34)    | 30.90<br>(22.50 to<br>40.21)    |
| Urolithiasis                                      | 27.21<br>(14.39 to<br>42.66)           | 48.95<br>(26.74 to<br>79.25)          | 47.21<br>(26.14 to<br>77.67)          | 54.82<br>(30.03 to<br>88.35)           | 0.62<br>(0.34 to<br>1.07)     | 1.27<br>(0.72 to<br>2.25)       | 1.27<br>(0.71 to<br>2.32)       | 1.35<br>(0.76 to<br>2.31)       |
| Other urinary diseases                            | 484.70<br>(331.04 to<br>655.57)        | 526.84<br>(305.56 to<br>786.04)       | 487.48<br>(284.68 to<br>723.03)       | 610.50<br>(358.96 to<br>900.63)        | 15.14<br>(10.17 to<br>20.43)  | 19.19<br>(11.37 to<br>27.43)    | 18.42<br>(10.89 to<br>26.26)    | 21.02<br>(12.44 to<br>30.05)    |
| Gynecological diseases                            | 78.11<br>(42.85 to<br>129.34)          | 106.92<br>(51.19 to<br>198.61)        | 95.13<br>(45.35 to<br>173.53)         | 127.36<br>(61.92 to<br>230.99)         | 1.94<br>(1.07 to<br>3.19)     | 2.78<br>(1.41 to<br>5.06)       | 2.49<br>(1.26 to<br>4.42)       | 3.27<br>(1.66 to<br>5.82)       |
| Uterine fibroids                                  | 33.51<br>(15.85 to<br>59.86)           | 41.27<br>(16.35 to<br>82.27)          | 36.30<br>(14.27 to<br>71.08)          | 49.87<br>(20.16 to<br>98.40)           | 0.89<br>(0.42 to<br>1.57)     | 1.14<br>(0.46 to<br>2.26)       | 1.00<br>(0.41 to<br>1.94)       | 1.36<br>(0.57 to<br>2.66)       |
| Polycystic ovarian syndrome                       | 9.19<br>(1.25 to<br>20.73)             | 8.12<br>(1.02 to<br>21.91)            | 6.67<br>(0.81 to<br>18.80)            | 10.86<br>(1.37 to<br>28.56)            | 0.21<br>(0.03 to<br>0.49)     | 0.19<br>(0.02 to<br>0.53)       | 0.16<br>(0.02 to<br>0.44)       | 0.26<br>(0.03 to<br>0.67)       |
| Endometriosis                                     | 0.34<br>(0.08 to<br>1.28)              | 0.68<br>(0.14 to<br>2.46)             | 0.60<br>(0.12 to<br>2.08)             | 0.81<br>(0.17 to<br>2.93)              | 0.01<br>(0.00 to<br>0.03)     | 0.02<br>(0.00 to<br>0.05)       | 0.01<br>(0.00 to<br>0.05)       | 0.02<br>(0.00 to<br>0.07)       |
| Genital prolapse                                  | 1.70<br>(0.46 to<br>5.12)              | 2.14<br>(0.53 to<br>6.87)             | 1.86<br>(0.47 to<br>6.03)             | 2.63<br>(0.66 to<br>8.55)              | 0.07<br>(0.02 to<br>0.19)     | 0.08<br>(0.02 to<br>0.25)       | 0.07<br>(0.02 to<br>0.21)       | 0.10<br>(0.03 to<br>0.30)       |
| Other gynecological diseases                      | 33.38<br>(13.51 to<br>63.11)           | 54.71<br>(21.63 to<br>111.73)         | 49.70<br>(19.57 to<br>100.35)         | 63.18<br>(24.10 to<br>127.37)          | 0.76<br>(0.30 to<br>1.43)     | 1.35<br>(0.55 to<br>2.70)       | 1.24<br>(0.52 to<br>2.43)       | 1.53<br>(0.60 to<br>3.03)       |
| Hemoglobinopathies and hemolytic anemias          | 2,031.96<br>(1,321.36 to<br>3,877.41)  | 1,298.81<br>(852.64 to<br>1,965.37)   | 1,202.43<br>(797.65 to<br>1,813.58)   | 1,650.20<br>(1,078.08 to<br>2,639.32)  | 33.82<br>(24.19 to<br>55.97)  | 37.37<br>(26.95 to<br>51.68)    | 35.43<br>(25.59 to<br>48.11)    | 43.14<br>(31.29 to<br>59.79)    |
| Thalassemias                                      | 15.68<br>(1.52 to<br>62.55)            | 5.09<br>(0.48 to<br>19.66)            | 5.53<br>(0.54 to<br>21.62)            | 6.37<br>(0.60 to<br>25.96)             | 0.18<br>(0.02 to<br>0.73)     | 0.06<br>(0.01 to<br>0.23)       | 0.07<br>(0.01 to<br>0.26)       | 0.07<br>(0.01 to<br>0.30)       |
| Sickle cell disorders                             | 1,534.98<br>(862.49 to<br>3,144.99)    | 581.83<br>(325.03 to<br>1,062.64)     | 541.29<br>(302.19 to<br>972.71)       | 815.26<br>(450.34 to<br>1,546.55)      | 19.00<br>(10.98 to<br>37.80)  | 8.40<br>(4.57 to<br>14.65)      | 7.83<br>(4.36 to<br>13.51)      | 11.33<br>(6.32 to<br>20.46)     |
| G6PD deficiency                                   | 343.46<br>(207.19 to<br>601.59)        | 530.56<br>(321.91 to<br>827.23)       | 481.64<br>(294.58 to<br>743.23)       | 632.35<br>(388.92 to<br>1,007.56)      | 7.69<br>(5.18 to<br>11.52)    | 16.51<br>(10.68 to<br>24.69)    | 15.21<br>(9.88 to<br>22.26)     | 18.99<br>(12.48 to<br>28.00)    |
| Other hemoglobinopathies and hemolytic anemias    | 137.85<br>(96.76 to<br>207.61)         | 181.33<br>(130.32 to<br>258.97)       | 173.98<br>(124.70 to<br>248.75)       | 196.23<br>(141.52 to<br>277.81)        | 6.95<br>(5.06 to<br>9.47)     | 12.40<br>(9.57 to<br>16.44)     | 12.32<br>(9.50 to<br>16.65)     | 12.74<br>(9.67 to<br>17.10)     |
| Endocrine, metabolic, blood, and immune disorders | 589.12<br>(388.76 to<br>890.75)        | 647.60<br>(436.43 to<br>945.56)       | 630.24<br>(426.26 to<br>919.42)       | 731.74<br>(488.88 to<br>1,074.03)      | 14.65<br>(10.16 to<br>20.49)  | 26.22<br>(18.31 to<br>37.20)    | 26.42<br>(18.30 to<br>37.69)    | 26.75<br>(18.89 to<br>37.36)    |
| <b>Djibouti</b>                                   |                                        |                                       |                                       |                                        |                               |                                 |                                 |                                 |
| Cause                                             | YLLs (actual counts)                   |                                       |                                       |                                        | Deaths (actual counts)        |                                 |                                 |                                 |
|                                                   | 2016                                   | 2040 Forecast                         | 2040 Better Scenario                  | 2040 Worse Scenario                    | 2016                          | 2040 Forecast                   | 2040 Better Scenario            | 2040 Worse Scenario             |
| Musculoskeletal disorders                         | 207.26<br>(137.60 to<br>282.53)        | 457.59<br>(281.05 to<br>687.06)       | 467.35<br>(289.66 to<br>704.52)       | 456.15<br>(284.17 to<br>686.30)        | 5.71<br>(3.62 to<br>8.13)     | 15.70<br>(9.81 to<br>23.76)     | 16.25<br>(10.12 to<br>24.90)    | 15.14<br>(9.50 to<br>22.70)     |
| Rheumatoid arthritis                              | 45.95<br>(27.46 to<br>67.63)           | 118.68<br>(62.42 to<br>196.19)        | 110.42<br>(57.89 to<br>183.61)        | 130.97<br>(71.94 to<br>214.98)         | 1.90<br>(1.09 to<br>2.86)     | 5.93<br>(3.33 to<br>9.56)       | 5.68<br>(3.13 to<br>9.20)       | 6.26<br>(3.59 to<br>9.96)       |
| Other musculoskeletal disorders                   | 161.31<br>(108.75 to<br>219.43)        | 338.92<br>(211.87 to<br>508.31)       | 356.93<br>(221.36 to<br>536.51)       | 325.18<br>(201.58 to<br>490.48)        | 3.81<br>(2.46 to<br>5.54)     | 9.76<br>(6.03 to<br>15.07)      | 10.57<br>(6.57 to<br>16.31)     | 8.88<br>(5.57 to<br>13.79)      |
| Other non-communicable diseases                   | 6,909.67<br>(4,409.68 to<br>10,360.03) | 5,637.14<br>(3,780.00 to<br>8,375.20) | 5,438.68<br>(3,647.09 to<br>8,094.74) | 7,367.20<br>(4,800.34 to<br>10,964.97) | 98.96<br>(67.09 to<br>144.02) | 146.14<br>(102.58 to<br>223.66) | 147.65<br>(103.63 to<br>228.01) | 162.27<br>(113.80 to<br>243.75) |
| Congenital birth defects                          | 4,547.36<br>(2,499.92 to<br>7,474.73)  | 2,299.47<br>(1,184.29 to<br>3,900.41) | 2,132.21<br>(1,114.19 to<br>3,587.86) | 3,544.67<br>(1,813.17 to<br>6,154.88)  | 53.86<br>(29.89 to<br>88.45)  | 28.92<br>(15.09 to<br>48.30)    | 26.86<br>(14.21 to<br>44.82)    | 43.65<br>(22.52 to<br>74.66)    |

|                                               |                                                     |                                                     |                                                     |                                                     |                                            |                                            |                                            |                                              |
|-----------------------------------------------|-----------------------------------------------------|-----------------------------------------------------|-----------------------------------------------------|-----------------------------------------------------|--------------------------------------------|--------------------------------------------|--------------------------------------------|----------------------------------------------|
| Neural tube defects                           | 716.09<br>(256.12 to 1,674.75)                      | 136.79<br>(40.95 to 367.12)                         | 117.94<br>(35.81 to 317.83)                         | 238.98<br>(70.81 to 652.08)                         | 8.35<br>(3.00 to 19.54)                    | 1.64<br>(0.50 to 4.37)                     | 1.42<br>(0.44 to 3.81)                     | 2.85<br>(0.85 to 7.72)                       |
| Congenital heart anomalies                    | 1,252.25<br>(618.43 to 2,425.23)                    | 712.00<br>(326.05 to 1,344.59)                      | 664.50<br>(312.50 to 1,239.65)                      | 1,059.29<br>(483.00 to 2,028.46)                    | 15.03<br>(7.47 to 28.91)                   | 9.26<br>(4.41 to 17.39)                    | 8.65<br>(4.19 to 16.22)                    | 13.41<br>(6.29 to 25.55)                     |
| Orofacial clefts                              | 34.60<br>(4.92 to 111.51)                           | 13.18<br>(1.62 to 46.96)                            | 11.28<br>(1.43 to 40.30)                            | 23.71<br>(2.93 to 88.33)                            | 0.40<br>(0.06 to 1.29)                     | 0.15<br>(0.02 to 0.54)                     | 0.13<br>(0.02 to 0.47)                     | 0.27<br>(0.03 to 1.02)                       |
| Down syndrome                                 | 182.15<br>(74.99 to 457.84)                         | 109.06<br>(46.61 to 262.78)                         | 99.52<br>(42.98 to 237.80)                          | 160.68<br>(65.51 to 395.23)                         | 2.28<br>(0.98 to 5.54)                     | 1.64<br>(0.73 to 3.80)                     | 1.50<br>(0.68 to 3.53)                     | 2.28<br>(0.99 to 5.37)                       |
| Other chromosomal abnormalities               | 409.50<br>(104.18 to 871.83)                        | 282.24<br>(67.46 to 650.21)                         | 257.89<br>(61.43 to 588.03)                         | 454.65<br>(105.75 to 1,046.12)                      | 4.78<br>(1.22 to 10.17)                    | 3.36<br>(0.81 to 7.65)                     | 3.07<br>(0.74 to 6.90)                     | 5.37<br>(1.26 to 12.27)                      |
| Congenital musculoskeletal and limb anomalies | 44.71<br>(19.17 to 111.27)                          | 26.57<br>(10.68 to 60.31)                           | 25.34<br>(10.11 to 57.33)                           | 39.84<br>(15.48 to 97.51)                           | 0.53<br>(0.23 to 1.30)                     | 0.52<br>(0.13 to 0.72)                     | 0.31<br>(0.13 to 0.69)                     | 0.48<br>(0.19 to 1.16)                       |
| Urogenital congenital anomalies               | 80.79<br>(37.16 to 165.88)                          | 44.65<br>(19.33 to 90.35)                           | 42.62<br>(18.81 to 86.38)                           | 64.46<br>(28.01 to 135.02)                          | 0.99<br>(0.46 to 2.01)                     | 0.64<br>(0.30 to 1.28)                     | 0.62<br>(0.29 to 1.24)                     | 0.88<br>(0.41 to 1.80)                       |
| Digestive congenital anomalies                | 366.67<br>(150.59 to 725.64)                        | 197.28<br>(77.49 to 419.35)                         | 182.08<br>(72.16 to 384.38)                         | 315.81<br>(122.15 to 665.44)                        | 4.27<br>(1.76 to 8.43)                     | 2.32<br>(0.92 to 4.91)                     | 2.14<br>(0.86 to 4.49)                     | 3.70<br>(1.45 to 7.77)                       |
| Other congenital birth defects                | 1,460.59<br>(620.06 to 2,770.27)                    | 777.69<br>(317.84 to 1,532.38)                      | 731.04<br>(299.98 to 1,430.14)                      | 1,187.24<br>(471.94 to 2,435.12)                    | 17.23<br>(7.38 to 32.51)                   | 9.58<br>(4.03 to 18.62)                    | 14.40<br>(3.81 to 17.47)                   | 14.40<br>(5.86 to 29.22)                     |
| Skin and subcutaneous diseases                | 1,379.14<br>(844.83 to 2,419.05)                    | 2,979.33<br>(1,879.06 to 4,941.72)                  | 2,969.58<br>(1,858.21 to 4,926.80)                  | 3,262.25<br>(2,065.81 to 5,356.61)                  | 33.69<br>(20.90 to 55.90)                  | 113.06<br>(73.35 to 181.84)                | 116.88<br>(76.33 to 188.62)                | 112.12<br>(73.81 to 179.81)                  |
| Cellulitis                                    | 107.42<br>(48.38 to 179.95)                         | 348.27<br>(146.95 to 560.46)                        | 367.67<br>(159.91 to 598.29)                        | 340.29<br>(145.41 to 554.58)                        | 2.69<br>(1.14 to 4.21)                     | 11.96<br>(4.76 to 19.13)                   | 12.96<br>(5.26 to 20.81)                   | 10.95<br>(4.34 to 17.57)                     |
| Pyoderma                                      | 1,091.83<br>(671.53 to 1,942.10)                    | 2,228.00<br>(1,386.48 to 3,828.62)                  | 2,182.43<br>(1,358.96 to 3,766.16)                  | 2,518.99<br>(1,544.22 to 4,264.06)                  | 24.60<br>(15.28 to 41.68)                  | 81.39<br>(52.76 to 137.55)                 | 82.55<br>(52.95 to 138.86)                 | 83.16<br>(54.51 to 139.57)                   |
| Decubitus ulcer                               | 122.21<br>(69.75 to 226.28)                         | 302.64<br>(176.46 to 559.31)                        | 315.98<br>(181.42 to 588.20)                        | 296.34<br>(173.36 to 537.39)                        | 5.23<br>(3.02 to 9.49)                     | 16.87<br>(9.83 to 30.65)                   | 18.36<br>(10.74 to 33.35)                  | 15.26<br>(8.68 to 28.36)                     |
| Other skin and subcutaneous diseases          | 57.68<br>(32.16 to 104.24)                          | 100.42<br>(57.92 to 176.38)                         | 103.50<br>(59.49 to 181.57)                         | 106.63<br>(59.73 to 190.08)                         | 1.17<br>(0.65 to 1.98)                     | 2.84<br>(1.60 to 4.72)                     | 3.01<br>(1.70 to 5.03)                     | 2.74<br>(1.52 to 4.55)                       |
| Sudden infant death syndrome                  | 983.17<br>(428.58 to 1,843.60)                      | 358.33<br>(142.27 to 721.11)                        | 336.89<br>(136.30 to 681.70)                        | 560.28<br>(214.41 to 1,154.39)                      | 11.41<br>(4.98 to 21.40)                   | 4.16<br>(1.65 to 8.37)                     | 3.91<br>(1.58 to 7.91)                     | 6.50<br>(2.49 to 13.40)                      |
| <b>Injuries</b>                               | <b>24,105.37</b><br><b>(19,312.87 to 30,022.55)</b> | <b>24,912.63</b><br><b>(18,693.03 to 32,922.96)</b> | <b>23,042.21</b><br><b>(17,311.97 to 30,518.10)</b> | <b>31,208.84</b><br><b>(23,500.61 to 41,073.06)</b> | <b>500.04</b><br><b>(405.02 to 607.75)</b> | <b>707.77</b><br><b>(567.53 to 875.08)</b> | <b>679.73</b><br><b>(545.20 to 846.46)</b> | <b>810.43</b><br><b>(649.65 to 1,007.38)</b> |
| Transport injuries                            | 5,766.59<br>(4,417.88 to 7,465.33)                  | 6,808.31<br>(4,715.02 to 9,329.04)                  | 5,714.02<br>(3,970.77 to 7,750.32)                  | 10,275.08<br>(7,109.64 to 13,977.64)                | 121.97<br>(93.36 to 156.25)                | 175.89<br>(126.63 to 230.50)               | 152.94<br>(110.88 to 199.72)               | 244.97<br>(175.03 to 323.88)                 |
| Road injuries                                 | 5,421.29<br>(4,107.16 to 7,096.80)                  | 6,250.81<br>(4,313.91 to 8,568.05)                  | 5,201.79<br>(3,612.20 to 7,080.28)                  | 9,619.34<br>(6,669.39 to 13,073.27)                 | 115.83<br>(88.35 to 149.86)                | 164.93<br>(118.46 to 217.61)               | 142.80<br>(103.52 to 187.01)               | 223.38<br>(165.71 to 306.79)                 |
| Pedestrian road injuries                      | 2,377.60<br>(1,723.57 to 3,138.10)                  | 2,464.05<br>(1,659.45 to 3,453.62)                  | 2,083.35<br>(1,416.22 to 2,910.06)                  | 3,595.92<br>(2,389.55 to 5,072.17)                  | 50.89<br>(37.82 to 67.45)                  | 67.75<br>(48.09 to 91.68)                  | 59.41<br>(42.25 to 79.62)                  | 91.64<br>(64.40 to 124.02)                   |
| <b>Djibouti</b>                               |                                                     |                                                     |                                                     |                                                     |                                            |                                            |                                            |                                              |
| Cause                                         | YLLs (actual counts)                                |                                                     |                                                     |                                                     | Deaths (actual counts)                     |                                            |                                            |                                              |
|                                               | 2016                                                | 2040 Forecast                                       | 2040 Better Scenario                                | 2040 Worse Scenario                                 | 2016                                       | 2040 Forecast                              | 2040 Better Scenario                       | 2040 Worse Scenario                          |
| Cyclist road injuries                         | 246.52<br>(166.02 to 390.67)                        | 301.53<br>(183.28 to 505.32)                        | 253.10<br>(156.43 to 424.15)                        | 463.79<br>(286.44 to 773.56)                        | 5.32<br>(3.58 to 8.27)                     | 8.03<br>(5.16 to 12.94)                    | 7.09<br>(4.63 to 11.19)                    | 11.06<br>(7.04 to 17.99)                     |



|                                                                              | 5,457.42<br>(3,250.63 to<br>8,003.49)             | 7,202.20<br>(4,168.42 to<br>11,105.29)            | 6,981.23<br>(4,117.05 to<br>10,751.73)            | 7,728.84<br>(4,356.11 to<br>11,952.30)            | 112.45<br>(66.89 to<br>163.68)           | 170.81<br>(100.92 to<br>258.56)          | 167.93<br>(100.99 to<br>254.86)          | 177.95<br>(103.22 to<br>272.51)          |
|------------------------------------------------------------------------------|---------------------------------------------------|---------------------------------------------------|---------------------------------------------------|---------------------------------------------------|------------------------------------------|------------------------------------------|------------------------------------------|------------------------------------------|
| Self-harm and interpersonal violence                                         |                                                   |                                                   |                                                   |                                                   |                                          |                                          |                                          |                                          |
| <b>Djibouti</b>                                                              |                                                   |                                                   |                                                   |                                                   |                                          |                                          |                                          |                                          |
| Cause                                                                        | YLLs (actual counts)                              |                                                   |                                                   |                                                   | Deaths (actual counts)                   |                                          |                                          |                                          |
|                                                                              | 2016                                              | 2040 Forecast                                     | 2040 Better Scenario                              | 2040 Worse Scenario                               | 2016                                     | 2040 Forecast                            | 2040 Better Scenario                     | 2040 Worse Scenario                      |
| Self-harm                                                                    | 1,565.05<br>(907.37 to<br>2,778.06)               | 2,752.55<br>(1,541.43 to<br>5,215.91)             | 2,659.27<br>(1,497.59 to<br>4,916.43)             | 2,928.12<br>(1,615.91 to<br>5,610.70)             | 40.12<br>(23.40 to<br>71.04)             | 79.69<br>(47.04 to<br>143.64)            | 78.79<br>(46.84 to<br>140.02)            | 81.78<br>(47.73 to<br>149.57)            |
| Self-harm by firearm                                                         | 201.38<br>(65.82 to<br>485.20)                    | 268.40<br>(85.82 to<br>659.15)                    | 254.48<br>(81.37 to<br>621.68)                    | 292.00<br>(93.29 to<br>720.30)                    | 4.74<br>(1.71 to<br>11.16)               | 7.15<br>(2.54 to<br>16.58)               | 6.93<br>(2.46 to<br>15.94)               | 7.55<br>(2.68 to<br>17.72)               |
| Self-harm by other specified means                                           | 1,363.67<br>(819.41 to<br>2,428.29)               | 2,484.15<br>(1,412.49 to<br>4,662.03)             | 2,404.79<br>(1,380.94 to<br>4,440.72)             | 2,636.12<br>(1,485.56 to<br>4,890.97)             | 35.38<br>(21.49 to<br>62.55)             | 72.54<br>(43.17 to<br>130.02)            | 71.86<br>(43.08 to<br>128.27)            | 74.23<br>(43.83 to<br>134.21)            |
| Interpersonal violence                                                       | 3,892.37<br>(1,870.28 to<br>5,402.48)             | 4,449.65<br>(1,830.49 to<br>6,764.30)             | 4,321.97<br>(1,816.19 to<br>6,508.36)             | 4,800.72<br>(1,920.25 to<br>7,371.32)             | 72.33<br>(34.15 to<br>99.85)             | 91.12<br>(36.84 to<br>135.85)            | 89.14<br>(36.67 to<br>131.62)            | 96.17<br>(38.22 to<br>145.43)            |
| Physical violence by firearm                                                 | 738.60<br>(266.11 to<br>1,180.09)                 | 883.47<br>(294.56 to<br>1,539.33)                 | 877.09<br>(299.11 to<br>1,521.29)                 | 922.16<br>(301.74 to<br>1,617.78)                 | 13.75<br>(4.96 to<br>21.73)              | 17.38<br>(5.92 to<br>29.68)              | 17.32<br>(5.94 to<br>29.56)              | 17.88<br>(5.83 to<br>30.52)              |
| Physical violence by sharp object                                            | 364.54<br>(153.60 to<br>557.74)                   | 523.81<br>(199.13 to<br>858.46)                   | 530.85<br>(203.78 to<br>868.16)                   | 529.79<br>(195.40 to<br>873.70)                   | 7.47<br>(3.14 to<br>11.14)               | 12.10<br>(4.62 to<br>18.43)              | 12.37<br>(4.76 to<br>18.90)              | 11.95<br>(4.46 to<br>18.51)              |
| Physical violence by other means                                             | 2,789.22<br>(1,325.60 to<br>3,919.09)             | 3,042.37<br>(1,214.69 to<br>4,801.21)             | 2,914.02<br>(1,175.04 to<br>4,521.37)             | 3,348.78<br>(1,302.00 to<br>5,422.03)             | 51.11<br>(23.82 to<br>71.53)             | 61.64<br>(23.95 to<br>95.54)             | 59.44<br>(23.67 to<br>90.20)             | 66.34<br>(25.62 to<br>104.80)            |
| Forces of nature, conflict and terrorism, and executions and police conflict | 28.95<br>(13.68 to<br>64.50)                      | 267.50<br>(0.00 to<br>2,166.92)                   | 268.58<br>(0.00 to<br>2,172.84)                   | 293.47<br>(0.00 to<br>2,377.91)                   | 0.54<br>(0.29 to<br>1.09)                | 5.27<br>(0.00 to<br>44.71)               | 5.35<br>(0.00 to<br>45.50)               | 5.52<br>(0.00 to<br>46.64)               |
| Exposure to forces of nature                                                 | 0.00<br>(0.00 to<br>0.00)                         | 204.19<br>(0.00 to<br>2,121.47)                   | 205.10<br>(0.00 to<br>2,135.58)                   | 225.44<br>(0.00 to<br>2,332.47)                   | 0.00<br>(0.00 to<br>0.00)                | 4.11<br>(0.00 to<br>44.71)               | 4.18<br>(0.00 to<br>45.50)               | 4.31<br>(0.00 to<br>46.64)               |
| Conflict and terrorism                                                       | 0.00<br>(0.00 to<br>0.00)                         | 54.09<br>(0.00 to<br>357.73)                      | 54.23<br>(0.00 to<br>358.18)                      | 58.45<br>(0.00 to<br>386.83)                      | 0.00<br>(0.00 to<br>0.00)                | 0.98<br>(0.00 to<br>6.61)                | 0.99<br>(0.00 to<br>6.66)                | 1.03<br>(0.00 to<br>6.88)                |
| Executions and police conflict                                               | 28.95<br>(13.68 to<br>64.50)                      | 9.21<br>(0.00 to<br>128.80)                       | 9.25<br>(0.00 to<br>129.29)                       | 9.58<br>(0.00 to<br>134.06)                       | 0.54<br>(0.29 to<br>1.09)                | 0.17<br>(0.00 to<br>2.46)                | 0.18<br>(0.00 to<br>2.48)                | 0.18<br>(0.00 to<br>2.51)                |
| <b>Eritrea</b>                                                               |                                                   |                                                   |                                                   |                                                   |                                          |                                          |                                          |                                          |
| Cause                                                                        | YLLs (actual counts)                              |                                                   |                                                   |                                                   | Deaths (actual counts)                   |                                          |                                          |                                          |
|                                                                              | 2016                                              | 2040 Forecast                                     | 2040 Better Scenario                              | 2040 Worse Scenario                               | 2016                                     | 2040 Forecast                            | 2040 Better Scenario                     | 2040 Worse Scenario                      |
| All causes                                                                   | 1,649,007.76<br>(1,431,822.21 to<br>1,893,560.93) | 1,741,082.97<br>(1,288,040.75 to<br>2,217,017.93) | 1,408,885.05<br>(1,054,583.49 to<br>1,786,592.20) | 2,640,815.03<br>(1,955,448.84 to<br>3,392,105.37) | 34,771.08<br>(31,229.19 to<br>38,561.58) | 51,044.46<br>(40,567.26 to<br>61,726.03) | 42,603.78<br>(33,947.74 to<br>51,198.86) | 67,955.11<br>(53,332.50 to<br>83,355.37) |
| Communicable, maternal, neonatal, and nutritional diseases                   | 1,094,602.45<br>(920,046.53 to<br>1,309,818.90)   | 748,306.33<br>(466,576.55 to<br>1,128,150.01)     | 541,046.07<br>(337,237.35 to<br>801,733.45)       | 1,440,198.33<br>(934,178.89 to<br>2,035,420.80)   | 18,513.43<br>(16,114.49 to<br>21,494.35) | 16,880.97<br>(10,216.91 to<br>26,762.95) | 12,404.56<br>(7,582.73 to<br>19,279.73)  | 28,525.95<br>(18,191.74 to<br>42,224.18) |
| HIV/AIDS and tuberculosis                                                    | 191,834.30<br>(135,319.45 to<br>236,532.72)       | 136,281.63<br>(67,546.29 to<br>228,252.85)        | 84,852.38<br>(35,932.69 to<br>152,553.76)         | 306,204.83<br>(185,698.18 to<br>465,849.85)       | 4,435.23<br>(3,087.81 to<br>5,410.20)    | 3,370.09<br>(1,720.81 to<br>5,606.08)    | 2,115.78<br>(971.69 to<br>3,631.93)      | 6,858.77<br>(4,110.69 to<br>10,632.95)   |
| Tuberculosis                                                                 | 137,066.23<br>(88,939.40 to<br>170,181.11)        | 91,025.46<br>(37,770.72 to<br>170,955.15)         | 55,936.40<br>(24,373.98 to<br>102,228.61)         | 143,764.89<br>(59,526.46 to<br>279,220.89)        | 3,461.37<br>(2,198.82 to<br>4,319.80)    | 2,463.81<br>(1,071.23 to<br>4,625.95)    | 1,540.08<br>(688.91 to<br>2,794.31)      | 3,776.04<br>(1,676.50 to<br>7,284.30)    |
| HIV/AIDS                                                                     | 54,768.07<br>(33,075.37 to<br>87,651.74)          | 45,256.16<br>(6,843.12 to<br>100,255.83)          | 28,915.98<br>(2,199.94 to<br>83,278.09)           | 162,439.95<br>(84,106.49 to<br>268,605.29)        | 973.86<br>(598.69 to<br>1,537.02)        | 906.27<br>(143.78 to<br>1,987.02)        | 575.70<br>(34.71 to<br>1,646.90)         | 3,082.74<br>(1,571.30 to<br>5,147.82)    |
| Diarrhea, lower respiratory, and other common infectious diseases            | 457,133.19<br>(367,772.09 to<br>576,496.97)       | 343,092.02<br>(160,161.81 to<br>636,088.01)       | 249,358.22<br>(121,237.85 to<br>455,628.00)       | 678,847.99<br>(339,984.33 to<br>1,133,356.55)     | 7,926.42<br>(6,472.34 to<br>10,001.21)   | 9,899.56<br>(4,205.05 to<br>17,174.54)   | 6,712.61<br>(3,323.74 to<br>12,673.43)   | 14,746.64<br>(7,135.88 to<br>25,673.39)  |

|                                         |                                             |                                            |                                           |                                             |                                       |                                       |                                       |                                        |
|-----------------------------------------|---------------------------------------------|--------------------------------------------|-------------------------------------------|---------------------------------------------|---------------------------------------|---------------------------------------|---------------------------------------|----------------------------------------|
|                                         | 181,983.02<br>(127,753.71 to<br>260,880.56) | 146,671.62<br>(37,330.09 to<br>398,959.42) | 95,338.96<br>(23,147.05 to<br>261,222.12) | 240,854.19<br>(69,689.12 to<br>557,170.57)  | 3,314.92<br>(2,313.80 to<br>4,842.72) | 3,983.34<br>(796.65 to<br>11,682.41)  | 2,576.73<br>(518.28 to<br>7,754.11)   | 6,008.77<br>(1,423.81 to<br>14,991.94) |
| Diarrheal diseases                      |                                             |                                            |                                           |                                             |                                       |                                       |                                       |                                        |
|                                         | 8,629.28<br>(4,237.00 to<br>15,635.74)      | 7,266.35<br>(3,351.56 to<br>13,237.13)     | 6,571.83<br>(3,042.88 to<br>11,772.71)    | 10,346.30<br>(4,756.63 to<br>19,009.15)     | 119.01<br>(59.42 to<br>213.06)        | 110.75<br>(50.21 to<br>199.17)        | 100.51<br>(46.44 to<br>178.06)        | 150.91<br>(69.91 to<br>276.74)         |
| Intestinal infectious diseases          |                                             |                                            |                                           |                                             |                                       |                                       |                                       |                                        |
|                                         | 7,476.46<br>(3,412.87 to<br>14,152.79)      | 6,519.57<br>(2,873.37 to<br>12,021.85)     | 5,949.97<br>(2,633.89 to<br>10,992.63)    | 9,193.36<br>(4,057.85 to<br>17,307.92)      | 103.22<br>(48.68 to<br>193.59)        | 98.37<br>(43.31 to<br>180.94)         | 90.13<br>(39.84 to<br>164.07)         | 133.17<br>(58.73 to<br>246.38)         |
| Typhoid fever                           |                                             |                                            |                                           |                                             |                                       |                                       |                                       |                                        |
|                                         | 385.50<br>(144.16 to<br>871.64)             | 415.08<br>(156.72 to<br>894.79)            | 367.63<br>(137.96 to<br>785.35)           | 593.02<br>(218.72 to<br>1,320.32)           | 5.36<br>(2.05 to<br>12.03)            | 6.33<br>(2.45 to<br>13.55)            | 5.62<br>(2.15 to<br>11.97)            | 8.70<br>(3.28 to<br>19.11)             |
| Paratyphoid fever                       |                                             |                                            |                                           |                                             |                                       |                                       |                                       |                                        |
|                                         | 767.32<br>(193.88 to<br>2,229.45)           | 331.70<br>(74.20 to<br>983.79)             | 254.22<br>(54.99 to<br>766.68)            | 559.91<br>(120.61 to<br>1,825.96)           | 10.43<br>(2.90 to<br>29.18)           | 6.05<br>(1.53 to<br>15.84)            | 4.77<br>(1.20 to<br>12.46)            | 9.04<br>(2.23 to<br>26.41)             |
| Other intestinal infectious diseases    |                                             |                                            |                                           |                                             |                                       |                                       |                                       |                                        |
|                                         | 175,241.26<br>(123,683.60 to<br>237,170.43) | 136,891.09<br>(69,439.88 to<br>247,521.99) | 98,076.02<br>(52,822.39 to<br>166,105.22) | 300,532.68<br>(130,495.22 to<br>564,686.83) | 3,100.53<br>(2,281.43 to<br>3,983.36) | 3,827.44<br>(2,147.92 to<br>6,337.75) | 3,004.64<br>(1,730.96 to<br>4,723.31) | 6,638.40<br>(3,293.82 to<br>11,457.13) |
| Lower respiratory infections            |                                             |                                            |                                           |                                             |                                       |                                       |                                       |                                        |
|                                         | 422.32<br>(145.10 to<br>1,016.68)           | 362.81<br>(113.90 to<br>879.20)            | 254.01<br>(81.95 to<br>600.99)            | 584.74<br>(186.20 to<br>1,430.68)           | 6.52<br>(2.81 to<br>13.83)            | 7.98<br>(2.79 to<br>18.07)            | 5.68<br>(2.00 to<br>13.11)            | 11.65<br>(4.12 to<br>26.90)            |
| Upper respiratory infections            |                                             |                                            |                                           |                                             |                                       |                                       |                                       |                                        |
|                                         | 330.48<br>(101.48 to<br>914.17)             | 79.91<br>(28.02 to<br>186.17)              | 83.24<br>(28.92 to<br>196.76)             | 91.71<br>(31.83 to<br>213.10)               | 5.46<br>(2.14 to<br>13.08)            | 2.33<br>(0.89 to<br>4.83)             | 2.54<br>(0.98 to<br>5.21)             | 2.29<br>(0.87 to<br>4.84)              |
| Otitis media                            |                                             |                                            |                                           |                                             |                                       |                                       |                                       |                                        |
|                                         | 59,878.79<br>(41,984.91 to<br>90,176.48)    | 42,525.32<br>(26,395.14 to<br>65,070.02)   | 40,733.47<br>(24,931.03 to<br>61,368.29)  | 74,140.15<br>(44,145.51 to<br>122,098.95)   | 970.64<br>(715.07 to<br>1,376.59)     | 916.27<br>(573.80 to<br>1,382.28)     | 894.46<br>(558.70 to<br>1,353.76)     | 1,286.74<br>(813.45 to<br>1,968.65)    |
| Meningitis                              |                                             |                                            |                                           |                                             |                                       |                                       |                                       |                                        |
|                                         | 3,668.42<br>(2,574.27 to<br>5,393.26)       | 2,899.71<br>(1,765.58 to<br>4,678.64)      | 2,998.81<br>(1,805.34 to<br>4,701.91)     | 4,353.18<br>(2,561.60 to<br>7,249.23)       | 68.88<br>(50.68 to<br>96.58)          | 71.32<br>(44.35 to<br>112.23)         | 75.29<br>(45.97 to<br>116.15)         | 91.73<br>(56.98 to<br>146.47)          |
| Pneumococcal meningitis                 |                                             |                                            |                                           |                                             |                                       |                                       |                                       |                                        |
|                                         | 5,636.73<br>(3,663.99 to<br>9,243.29)       | 4,557.11<br>(2,366.08 to<br>8,312.52)      | 4,631.81<br>(2,436.39 to<br>8,239.18)     | 26,251.63<br>(8,378.23 to<br>64,301.08)     | 84.77<br>(59.21 to<br>127.93)         | 78.64<br>(46.77 to<br>128.52)         | 81.43<br>(48.80 to<br>130.05)         | 330.91<br>(120.25 to<br>778.98)        |
| H influenzae type B meningitis          |                                             |                                            |                                           |                                             |                                       |                                       |                                       |                                        |
|                                         | 26,018.01<br>(17,822.51 to<br>39,998.53)    | 16,374.22<br>(9,709.25 to<br>25,155.80)    | 15,372.33<br>(9,099.82 to<br>23,493.33)   | 20,582.39<br>(12,027.29 to<br>32,384.52)    | 407.36<br>(296.13 to<br>590.61)       | 347.33<br>(209.86 to<br>531.12)       | 332.30<br>(199.86 to<br>500.54)       | 397.15<br>(237.97 to<br>610.69)        |
| Meningococcal meningitis                |                                             |                                            |                                           |                                             |                                       |                                       |                                       |                                        |
|                                         | 24,555.63<br>(17,347.55 to<br>36,283.17)    | 18,694.28<br>(11,320.91 to<br>28,874.43)   | 17,730.53<br>(10,660.70 to<br>26,938.32)  | 22,952.95<br>(13,426.02 to<br>36,199.01)    | 409.63<br>(301.94 to<br>565.74)       | 418.98<br>(255.84 to<br>646.55)       | 405.44<br>(244.76 to<br>610.77)       | 466.95<br>(287.23 to<br>714.64)        |
| Other meningitis                        |                                             |                                            |                                           |                                             |                                       |                                       |                                       |                                        |
|                                         | 3,867.53<br>(1,979.38 to<br>6,319.12)       | 3,033.54<br>(1,597.01 to<br>4,971.54)      | 2,680.01<br>(1,375.20 to<br>4,458.23)     | 4,748.92<br>(2,348.77 to<br>8,431.24)       | 49.52<br>(26.75 to<br>79.80)          | 45.84<br>(25.86 to<br>71.20)          | 40.88<br>(22.68 to<br>64.45)          | 66.74<br>(35.25 to<br>112.53)          |
| Encephalitis                            |                                             |                                            |                                           |                                             |                                       |                                       |                                       |                                        |
|                                         | 29.08<br>(12.79 to<br>56.34)                | 8.95<br>(3.97 to<br>19.36)                 | 9.20<br>(4.11 to<br>19.61)                | 159.80<br>(59.04 to<br>519.04)              | 0.38<br>(0.18 to<br>0.70)             | 0.14<br>(0.07 to<br>0.28)             | 0.15<br>(0.07 to<br>0.29)             | 1.92<br>(0.37 to<br>6.24)              |
| Diphtheria                              |                                             |                                            |                                           |                                             |                                       |                                       |                                       |                                        |
|                                         | 5,689.92<br>(501.37 to<br>18,061.62)        | 2,576.89<br>(180.42 to<br>9,195.52)        | 2,607.88<br>(183.26 to<br>9,306.08)       | 31,653.48<br>(2,901.33 to<br>94,107.49)     | 67.32<br>(5.93 to<br>213.70)          | 30.82<br>(2.18 to<br>109.57)          | 31.19<br>(2.21 to<br>110.71)          | 373.30<br>(34.12 to<br>1,105.32)       |
| Whooping cough                          |                                             |                                            |                                           |                                             |                                       |                                       |                                       |                                        |
|                                         | 8,861.80<br>(3,393.29 to<br>17,044.96)      | 1,660.27<br>(438.91 to<br>3,598.78)        | 1,688.56<br>(450.27 to<br>3,522.75)       | 8,865.39<br>(2,936.70 to<br>22,621.89)      | 139.63<br>(46.49 to<br>243.16)        | 30.62<br>(7.67 to<br>60.60)           | 31.52<br>(8.04 to<br>61.74)           | 113.66<br>(8.04 to<br>270.89)          |
| Tetanus                                 |                                             |                                            |                                           |                                             |                                       |                                       |                                       |                                        |
|                                         | 9,750.62<br>(3,238.99 to<br>23,480.07)      | 982.01<br>(78.80 to<br>6,677.11)           | 543.86<br>(61.79 to<br>3,384.44)          | 5,036.93<br>(459.19 to<br>20,719.73)        | 116.42<br>(38.68 to<br>280.32)        | 11.80<br>(1.00 to<br>79.53)           | 6.63<br>(0.80 to<br>40.30)            | 59.76<br>(5.60 to<br>243.72)           |
| Measles                                 |                                             |                                            |                                           |                                             |                                       |                                       |                                       |                                        |
| <b>Eritrea</b>                          |                                             |                                            |                                           |                                             |                                       |                                       |                                       |                                        |
| Cause                                   | YLLs (actual counts)                        |                                            |                                           |                                             | Deaths (actual counts)                |                                       |                                       |                                        |
|                                         | 2016                                        | 2040 Forecast                              | 2040 Better Scenario                      | 2040 Worse Scenario                         | 2016                                  | 2040 Forecast                         | 2040 Better Scenario                  | 2040 Worse Scenario                    |
| Varicella and herpes zoster             | 2,449.08<br>(1,300.17 to<br>4,366.66)       | 1,033.25<br>(545.03 to<br>1,773.82)        | 771.19<br>(413.82 to<br>1,319.00)         | 1,833.70<br>(878.91 to<br>3,369.81)         | 36.07<br>(22.30 to<br>59.24)          | 22.23<br>(13.28 to<br>34.69)          | 17.68<br>(10.52 to<br>27.90)          | 32.50<br>(18.72 to<br>53.45)           |
| Neglected tropical diseases and malaria | 36,561.09<br>(23,097.17 to<br>58,720.05)    | 20,667.26<br>(12,589.56 to<br>33,165.89)   | 18,362.54<br>(11,177.60 to<br>29,615.66)  | 28,517.02<br>(17,082.14 to<br>46,767.01)    | 575.22<br>(383.06 to<br>875.80)       | 427.56<br>(257.39 to<br>697.75)       | 385.26<br>(233.04 to<br>629.40)       | 534.83<br>(327.63 to<br>856.19)        |

|                                                       |                                                   |                                                   |                                                   |                                                    |                                            |                                              |                                            |                                              |
|-------------------------------------------------------|---------------------------------------------------|---------------------------------------------------|---------------------------------------------------|----------------------------------------------------|--------------------------------------------|----------------------------------------------|--------------------------------------------|----------------------------------------------|
| Malaria                                               | 24,778.64<br>(12,787.30 to<br>45,943.10)          | 12,208.08<br>(5,771.42 to<br>23,061.82)           | 11,672.37<br>(5,695.91 to<br>21,283.98)           | 15,769.50<br>(7,296.59 to<br>30,552.74)            | 361.43<br>(187.94 to<br>638.10)            | 244.21<br>(106.06 to<br>485.28)              | 237.04<br>(108.06 to<br>459.89)            | 285.84<br>(128.87 to<br>560.88)              |
| Chagas disease                                        | 0.00<br>(0.00 to<br>0.00)                         | 0.00<br>(0.00 to<br>0.00)                         | 0.00<br>(0.00 to<br>0.00)                         | 0.00<br>(0.00 to<br>0.00)                          | 0.00<br>(0.00 to<br>0.00)                  | 0.00<br>(0.00 to<br>0.00)                    | 0.00<br>(0.00 to<br>0.00)                  | 0.00<br>(0.00 to<br>0.00)                    |
| Leishmaniasis                                         | 1,775.52<br>(964.70 to<br>2,982.23)               | 1,283.75<br>(685.56 to<br>2,186.30)               | 924.32<br>(486.44 to<br>1,614.20)                 | 2,011.26<br>(1,054.10 to<br>3,416.66)              | 40.59<br>(22.65 to<br>65.61)               | 31.17<br>(17.10 to<br>53.23)                 | 23.00<br>(12.25 to<br>40.87)               | 43.56<br>(23.68 to<br>75.39)                 |
| African trypanosomiasis                               | 0.00<br>(0.00 to<br>0.00)                         | 0.00<br>(0.00 to<br>0.00)                         | 0.00<br>(0.00 to<br>0.00)                         | 0.00<br>(0.00 to<br>0.00)                          | 0.00<br>(0.00 to<br>0.00)                  | 0.00<br>(0.00 to<br>0.00)                    | 0.00<br>(0.00 to<br>0.00)                  | 0.00<br>(0.00 to<br>0.00)                    |
| Schistosomiasis                                       | 2,601.14<br>(1,745.76 to<br>3,615.88)             | 2,834.91<br>(1,634.45 to<br>4,479.22)             | 2,484.81<br>(1,417.11 to<br>3,986.26)             | 3,212.35<br>(1,886.48 to<br>5,006.02)              | 67.88<br>(46.87 to<br>93.65)               | 79.82<br>(48.29 to<br>124.26)                | 70.83<br>(41.72 to<br>111.88)              | 87.83<br>(54.05 to<br>134.93)                |
| Cysticercosis                                         | 236.91<br>(154.80 to<br>343.60)                   | 154.44<br>(83.06 to<br>259.43)                    | 147.14<br>(78.41 to<br>247.02)                    | 167.69<br>(93.16 to<br>275.31)                     | 4.69<br>(3.99 to<br>6.86)                  | 3.55<br>(1.92 to<br>5.96)                    | 3.40<br>(1.83 to<br>5.64)                  | 3.75<br>(2.07 to<br>6.16)                    |
| Cystic echinococcosis                                 | 0.00<br>(0.00 to<br>0.00)                         | 0.00<br>(0.00 to<br>0.00)                         | 0.00<br>(0.00 to<br>0.00)                         | 0.00<br>(0.00 to<br>0.00)                          | 0.00<br>(0.00 to<br>0.00)                  | 0.00<br>(0.00 to<br>0.00)                    | 0.00<br>(0.00 to<br>0.00)                  | 0.00<br>(0.00 to<br>0.00)                    |
| Dengue                                                | 35.32<br>(2.11 to<br>118.82)                      | 136.95<br>(9.52 to<br>432.49)                     | 132.36<br>(9.44 to<br>417.87)                     | 178.52<br>(11.55 to<br>586.63)                     | 0.53<br>(0.04 to<br>1.70)                  | 2.79<br>(0.19 to<br>8.55)                    | 2.75<br>(0.19 to<br>8.55)                  | 3.25<br>(0.22 to<br>10.25)                   |
| Yellow fever                                          | 536.31<br>(108.97 to<br>1,611.81)                 | 240.14<br>(47.05 to<br>730.12)                    | 183.76<br>(35.97 to<br>560.92)                    | 352.75<br>(67.35 to<br>1,077.77)                   | 8.30<br>(1.70 to<br>25.00)                 | 4.11<br>(0.81 to<br>12.37)                   | 3.16<br>(0.62 to<br>9.63)                  | 5.81<br>(1.12 to<br>17.52)                   |
| Rabies                                                | 3,082.21<br>(1,254.29 to<br>6,897.09)             | 1,518.27<br>(628.38 to<br>3,039.11)               | 866.46<br>(334.91 to<br>1,827.79)                 | 2,942.79<br>(1,233.35 to<br>6,151.18)              | 46.63<br>(20.01 to<br>96.13)               | 27.41<br>(11.62 to<br>54.91)                 | 15.54<br>(6.25 to<br>33.80)                | 50.64<br>(22.00 to<br>96.84)                 |
| Intestinal nematode infections                        | 483.21<br>(207.70 to<br>898.78)                   | 460.08<br>(205.03 to<br>837.79)                   | 463.94<br>(207.26 to<br>845.91)                   | 703.25<br>(298.25 to<br>1,362.98)                  | 6.04<br>(2.71 to<br>10.97)                 | 6.29<br>(2.99 to<br>10.99)                   | 6.39<br>(3.11 to<br>11.09)                 | 9.15<br>(4.12 to<br>17.07)                   |
| Other neglected tropical diseases                     | 3,031.82<br>(1,127.15 to<br>6,506.15)             | 1,830.64<br>(735.95 to<br>3,781.96)               | 1,487.37<br>(592.01 to<br>3,131.21)               | 3,178.92<br>(1,214.81 to<br>6,897.43)              | 39.12<br>(15.01 to<br>82.72)               | 28.21<br>(11.69 to<br>56.88)                 | 23.14<br>(9.78 to<br>47.16)                | 45.01<br>(18.03 to<br>95.39)                 |
| <b>Maternal disorders</b>                             | <b>55,001.46<br/>(41,292.44 to<br/>70,198.07)</b> | <b>55,894.11<br/>(26,175.86 to<br/>93,241.58)</b> | <b>36,577.80<br/>(16,156.34 to<br/>60,882.86)</b> | <b>83,708.39<br/>(40,507.73 to<br/>138,880.30)</b> | <b>983.24<br/>(737.78 to<br/>1,253.56)</b> | <b>1,025.46<br/>(478.78 to<br/>1,725.97)</b> | <b>671.12<br/>(293.66 to<br/>1,136.08)</b> | <b>1,528.86<br/>(736.06 to<br/>2,567.26)</b> |
| Maternal hemorrhage                                   | 9,281.04<br>(5,704.30 to<br>13,782.52)            | 10,873.70<br>(4,493.49 to<br>20,723.68)           | 7,120.33<br>(2,890.07 to<br>13,710.85)            | 15,729.54<br>(6,642.91 to<br>29,717.01)            | 170.96<br>(106.53 to<br>253.87)            | 204.36<br>(84.69 to<br>386.10)               | 133.87<br>(54.52 to<br>256.34)             | 294.57<br>(124.90 to<br>560.42)              |
| Maternal sepsis and other maternal infections         | 3,329.64<br>(1,359.69 to<br>6,009.40)             | 3,470.18<br>(1,093.85 to<br>7,666.70)             | 2,269.66<br>(726.46 to<br>5,180.06)               | 5,114.93<br>(1,666.38 to<br>11,135.87)             | 59.86<br>(24.94 to<br>108.17)              | 63.67<br>(20.10 to<br>139.97)                | 41.67<br>(13.29 to<br>93.54)               | 93.44<br>(30.80 to<br>201.90)                |
| Maternal hypertensive disorders                       | 5,266.65<br>(3,260.46 to<br>8,013.01)             | 6,264.79<br>(2,541.07 to<br>11,416.27)            | 4,076.10<br>(1,672.54 to<br>7,381.80)             | 9,198.59<br>(3,878.44 to<br>16,255.98)             | 92.86<br>(57.75 to<br>142.34)              | 113.07<br>(45.61 to<br>208.23)               | 73.60<br>(30.34 to<br>134.25)              | 165.18<br>(69.88 to<br>294.37)               |
| Maternal obstructed labor and uterine rupture         | 2,976.77<br>(1,488.35 to<br>5,153.12)             | 3,587.85<br>(1,271.01 to<br>7,375.23)             | 2,270.52<br>(819.76 to<br>4,758.19)               | 5,361.65<br>(1,888.41 to<br>10,889.72)             | 54.16<br>(26.90 to<br>93.62)               | 66.64<br>(22.54 to<br>138.95)                | 42.20<br>(15.07 to<br>87.72)               | 99.18<br>(36.24 to<br>204.38)                |
| Maternal abortion, miscarriage, and ectopic pregnancy | 19,035.75<br>(12,352.50 to<br>26,367.26)          | 12,111.90<br>(4,503.67 to<br>23,142.64)           | 7,917.95<br>(2,930.49 to<br>15,331.42)            | 18,150.35<br>(6,819.72 to<br>34,345.38)            | 334.84<br>(219.14 to<br>463.74)            | 218.69<br>(81.98 to<br>419.64)               | 142.99<br>(52.40 to<br>276.70)             | 326.14<br>(122.82 to<br>609.49)              |
| Indirect maternal deaths                              | 9,959.60<br>(5,485.45 to<br>15,938.48)            | 12,165.26<br>(4,708.68 to<br>22,856.20)           | 8,141.56<br>(3,127.26 to<br>15,533.48)            | 18,550.28<br>(7,283.66 to<br>34,485.04)            | 178.00<br>(99.96 to<br>284.16)             | 220.90<br>(84.67 to<br>416.49)               | 147.92<br>(56.03 to<br>276.55)             | 335.21<br>(130.21 to<br>618.94)              |
| Late maternal deaths                                  | 766.29<br>(339.31 to<br>1,487.52)                 | 720.89<br>(234.18 to<br>1,642.57)                 | 475.14<br>(151.58 to<br>1,084.11)                 | 1,093.70<br>(370.64 to<br>2,414.93)                | 13.66<br>(6.13 to<br>26.64)                | 13.16<br>(4.34 to<br>29.46)                  | 8.68<br>(2.82 to<br>19.57)                 | 19.84<br>(6.69 to<br>43.79)                  |
| Maternal deaths aggravated by HIV/AIDS                | 246.68<br>(118.99 to<br>410.47)                   | 1,711.47<br>(144.83 to<br>3,719.05)               | 899.05<br>(4.03 to<br>2,453.85)                   | 3,100.91<br>(1,088.05 to<br>6,080.14)              | 4.63<br>(2.27 to<br>7.67)                  | 33.19<br>(2.99 to<br>71.59)                  | 17.47<br>(0.08 to<br>47.13)                | 59.77<br>(21.39 to<br>115.62)                |
| Other maternal disorders                              | 4,139.06<br>(1,830.57 to<br>7,417.19)             | 4,988.06<br>(1,626.89 to<br>10,720.17)            | 3,407.49<br>(1,103.97 to<br>7,431.19)             | 7,408.43<br>(2,515.78 to<br>15,928.86)             | 74.26<br>(32.37 to<br>135.79)              | 91.76<br>(28.88 to<br>200.86)                | 62.72<br>(20.44 to<br>137.65)              | 135.52<br>(45.98 to<br>293.58)               |

| Eritrea                                                                 |                                                 |                                                |                                               |                                                 |                                           |                                         |                                         |                                           |
|-------------------------------------------------------------------------|-------------------------------------------------|------------------------------------------------|-----------------------------------------------|-------------------------------------------------|-------------------------------------------|-----------------------------------------|-----------------------------------------|-------------------------------------------|
| Cause                                                                   | YLLs (actual counts)                            |                                                |                                               |                                                 | Deaths (actual counts)                    |                                         |                                         |                                           |
|                                                                         | 2016                                            | 2040 Forecast                                  | 2040 Better Scenario                          | 2040 Worse Scenario                             | 2016                                      | 2040 Forecast                           | 2040 Better Scenario                    | 2040 Worse Scenario                       |
| <b>Neonatal disorders</b>                                               | <b>210,928.37</b><br>(151,319.34 to 289,527.13) | <b>119,675.01</b><br>(69,668.56 to 181,211.56) | <b>91,677.06</b><br>(53,763.61 to 138,156.25) | <b>230,659.31</b><br>(133,438.84 to 362,959.07) | <b>2,437.40</b><br>(1,748.40 to 3,345.04) | <b>1,383.28</b><br>(805.16 to 2,094.75) | <b>1,059.73</b><br>(621.39 to 1,596.59) | <b>2,666.06</b><br>(1,542.80 to 4,195.69) |
| Neonatal preterm birth                                                  | 62,866.84<br>(36,794.87 to 97,576.40)           | 35,156.18<br>(17,979.06 to 58,770.92)          | 23,161.72<br>(11,940.67 to 39,256.81)         | 65,319.26<br>(33,440.66 to 113,266.33)          | 726.41<br>(425.26 to 1,127.39)            | 406.29<br>(207.76 to 679.21)            | 267.72<br>(138.09 to 453.58)            | 754.87<br>(386.61 to 1,309.09)            |
| Neonatal encephalopathy due to birth asphyxia and trauma                | 63,529.76<br>(35,882.21 to 99,711.34)           | 31,134.67<br>(13,561.78 to 59,102.33)          | 25,855.99<br>(11,287.10 to 49,571.54)         | 59,624.08<br>(26,336.29 to 119,698.89)          | 733.99<br>(414.54 to 1,152.07)            | 359.83<br>(156.74 to 682.82)            | 298.83<br>(130.45 to 572.64)            | 689.08<br>(304.57 to 1,382.98)            |
| Neonatal sepsis and other neonatal infections                           | 49,432.88<br>(25,750.55 to 79,178.71)           | 33,830.98<br>(16,785.76 to 57,134.53)          | 27,701.23<br>(13,801.90 to 45,906.76)         | 65,609.25<br>(31,186.15 to 113,946.05)          | 571.32<br>(297.56 to 915.06)              | 391.10<br>(194.06 to 660.44)            | 320.24<br>(159.51 to 530.68)            | 758.45<br>(369.53 to 1,317.11)            |
| Hemolytic disease and other neonatal jaundice                           | 3,978.13<br>(1,766.98 to 8,275.78)              | 1,323.24<br>(483.76 to 3,011.72)               | 1,020.60<br>(368.85 to 2,332.50)              | 2,710.22<br>(967.24 to 6,188.14)                | 45.97<br>(9.60 to 81.34)                  | 15.29<br>(5.59 to 34.79)                | 11.80<br>(4.26 to 26.95)                | 31.32<br>(11.18 to 71.48)                 |
| Other neonatal disorders                                                | 31,120.75<br>(15,047.65 to 59,546.99)           | 18,229.94<br>(7,656.09 to 37,175.04)           | 13,937.52<br>(5,950.30 to 28,703.68)          | 37,396.49<br>(16,119.88 to 78,343.96)           | 359.72<br>(174.03 to 688.37)              | 210.76<br>(88.64 to 429.66)             | 161.14<br>(68.78 to 331.96)             | 432.34<br>(186.39 to 905.75)              |
| <b>Nutritional deficiencies</b>                                         | <b>94,603.16</b><br>(61,622.71 to 139,946.46)   | <b>44,728.59</b><br>(29,958.08 to 63,206.21)   | <b>36,693.78</b><br>(24,463.09 to 51,915.21)  | <b>67,523.85</b><br>(43,081.28 to 100,572.60)   | <b>1,488.36</b><br>(1,064.90 to 2,020.24) | <b>1,162.96</b><br>(833.75 to 1,566.75) | <b>1,009.91</b><br>(731.34 to 1,378.51) | <b>1,458.72</b><br>(1,041.61 to 1,964.53) |
| Protein-energy malnutrition                                             | 89,033.78<br>(56,781.25 to 135,462.61)          | 34,336.61<br>(22,745.14 to 49,067.81)          | 27,857.26<br>(18,707.69 to 40,069.39)         | 55,067.90<br>(34,258.76 to 84,323.67)           | 1,337.43<br>(936.76 to 1,881.93)          | 846.67<br>(615.55 to 1,138.96)          | 730.64<br>(528.63 to 991.24)            | 1,108.11<br>(773.19 to 1,524.15)          |
| Iodine deficiency                                                       | 353.00<br>(18.47 to 1,219.65)                   | 1,364.59<br>(27.23 to 4,899.41)                | 1,068.34<br>(21.23 to 3,791.56)               | 1,943.51<br>(36.51 to 8,420.11)                 | 7.66<br>(0.47 to 22.97)                   | 39.50<br>(0.78 to 126.41)               | 32.43<br>(0.57 to 108.58)               | 48.85<br>(1.15 to 157.77)                 |
| Dietary iron deficiency                                                 | 236.26<br>(168.45 to 327.90)                    | 359.88<br>(205.13 to 588.10)                   | 324.66<br>(182.53 to 529.26)                  | 409.58<br>(237.70 to 670.65)                    | 4.34<br>(3.16 to 6.21)                    | 4.24<br>(4.12 to 4.34)                  | 6.48<br>(3.71 to 10.66)                 | 7.96<br>(4.70 to 12.95)                   |
| Other nutritional deficiencies                                          | 4,980.12<br>(3,389.55 to 6,744.57)              | 8,667.52<br>(4,706.72 to 13,704.91)            | 7,443.53<br>(4,008.06 to 11,961.24)           | 10,102.86<br>(5,706.19 to 15,989.70)            | 138.93<br>(94.97 to 192.43)               | 269.64<br>(157.27 to 417.91)            | 240.37<br>(137.00 to 374.80)            | 293.80<br>(173.63 to 453.44)              |
| <b>Other communicable, maternal, neonatal, and nutritional diseases</b> | <b>48,540.87</b><br>(25,304.59 to 99,389.54)    | <b>27,967.72</b><br>(16,113.95 to 49,676.33)   | <b>23,524.29</b><br>(13,661.26 to 41,887.80)  | <b>44,736.93</b><br>(22,714.87 to 92,594.68)    | <b>667.56</b><br>(391.20 to 1,259.65)     | <b>522.08</b><br>(341.08 to 794.58)     | <b>450.15</b><br>(298.00 to 664.04)     | <b>732.07</b><br>(437.10 to 1,308.32)     |
| Sexually transmitted infections excluding HIV                           | 19,921.09<br>(7,474.67 to 40,732.34)            | 5,837.76<br>(2,307.69 to 12,810.36)            | 5,083.36<br>(2,057.20 to 11,231.59)           | 9,571.87<br>(3,286.78 to 22,486.96)             | 246.18<br>(100.49 to 491.46)              | 84.95<br>(39.79 to 165.95)              | 74.97<br>(35.59 to 145.11)              | 129.52<br>(53.02 to 284.15)               |
| Syphilis                                                                | 19,218.60<br>(6,858.25 to 40,061.04)            | 4,921.94<br>(1,556.05 to 12,104.06)            | 4,254.34<br>(1,369.73 to 10,427.58)           | 8,558.03<br>(2,367.45 to 21,615.41)             | 231.33<br>(86.56 to 477.34)               | 64.12<br>(24.01 to 148.52)              | 55.86<br>(21.34 to 127.99)              | 107.04<br>(33.70 to 258.70)               |
| Chlamydial infection                                                    | 130.35<br>(92.36 to 184.34)                     | 175.58<br>(91.24 to 288.59)                    | 157.92<br>(80.01 to 260.55)                   | 195.49<br>(102.40 to 316.26)                    | 2.72<br>(1.96 to 3.77)                    | 3.96<br>(2.20 to 6.29)                  | 3.61<br>(1.97 to 5.75)                  | 4.29<br>(2.40 to 6.78)                    |
| Gonococcal infection                                                    | 367.32<br>(266.03 to 503.97)                    | 477.65<br>(251.13 to 762.85)                   | 433.71<br>(225.09 to 692.12)                  | 525.89<br>(280.61 to 840.56)                    | 7.89<br>(5.82 to 10.63)                   | 11.06<br>(6.26 to 17.21)                | 10.19<br>(5.68 to 15.95)                | 11.86<br>(6.72 to 18.49)                  |
| Other sexually transmitted infections                                   | 204.82<br>(146.98 to 283.77)                    | 262.58<br>(142.50 to 414.34)                   | 237.39<br>(125.14 to 380.07)                  | 292.46<br>(157.78 to 461.04)                    | 4.22<br>(3.12 to 5.75)                    | 5.82<br>(3.23 to 9.01)                  | 5.31<br>(2.92 to 8.33)                  | 6.34<br>(3.54 to 9.71)                    |
| Acute hepatitis                                                         | 6,288.90<br>(5,130.16 to 7,592.68)              | 7,907.39<br>(5,064.21 to 11,681.77)            | 6,834.59<br>(4,341.07 to 10,263.07)           | 9,190.84<br>(6,076.51 to 13,381.10)             | 140.77<br>(114.32 to 170.08)              | 209.88<br>(141.03 to 298.99)            | 184.12<br>(122.43 to 265.92)            | 234.97<br>(160.27 to 329.69)              |
| Acute hepatitis A                                                       | 186.87<br>(35.28 to 428.91)                     | 143.11<br>(47.72 to 309.75)                    | 123.53<br>(41.51 to 270.19)                   | 199.48<br>(63.14 to 442.94)                     | 2.61<br>(0.72 to 5.50)                    | 3.08<br>(1.06 to 6.71)                  | 2.72<br>(0.94 to 5.98)                  | 3.83<br>(1.32 to 8.18)                    |
| Acute hepatitis B                                                       | 4,903.24<br>(3,913.92 to 6,025.88)              | 6,664.93<br>(4,115.69 to 10,076.12)            | 5,708.71<br>(3,541.47 to 8,744.86)            | 7,652.45<br>(4,896.36 to 11,334.82)             | 116.00<br>(93.01 to 141.54)               | 177.66<br>(117.05 to 259.31)            | 153.88<br>(99.07 to 227.20)             | 199.17<br>(131.61 to 285.32)              |



|                                       |                                                                  |                                                                  |                                                                  |                                                                    |                                                               |                                                               |                                                               |                                                               |
|---------------------------------------|------------------------------------------------------------------|------------------------------------------------------------------|------------------------------------------------------------------|--------------------------------------------------------------------|---------------------------------------------------------------|---------------------------------------------------------------|---------------------------------------------------------------|---------------------------------------------------------------|
| Acute hepatitis C                     | 123.03<br>(87.29 to<br>166.22)                                   | 221.54<br>(130.74 to<br>352.25)                                  | 209.71<br>(121.54 to<br>338.72)                                  | 233.95<br>(137.67 to<br>370.28)                                    | 3.38<br>(2.30 to<br>4.72)                                     | 6.90<br>(4.09 to<br>11.07)                                    | 6.62<br>(3.86 to<br>10.69)                                    | 7.06<br>(4.27 to<br>11.26)                                    |
| Acute hepatitis E                     | 1,075.77<br>(774.25 to<br>1,436.81)                              | 877.81<br>(547.89 to<br>1,357.91)                                | 792.64<br>(488.82 to<br>1,220.13)                                | 1,104.96<br>(704.86 to<br>1,702.60)                                | 18.78<br>(13.55 to<br>25.33)                                  | 22.25<br>(13.73 to<br>34.12)                                  | 20.90<br>(12.82 to<br>32.08)                                  | 24.91<br>(15.83 to<br>38.25)                                  |
| Other unspecified infectious diseases | 22,330.88<br>(5,315.32 to<br>73,566.83)                          | 14,222.57<br>(5,552.88 to<br>34,964.16)                          | 11,606.33<br>(4,597.31 to<br>28,324.46)                          | 25,974.21<br>(8,837.73 to<br>71,335.48)                            | 280.62<br>(83.22 to<br>880.75)                                | 227.24<br>(118.77 to<br>470.36)                               | 191.05<br>(101.73 to<br>386.24)                               | 367.58<br>(162.78 to<br>895.47)                               |
| <b>Non-communicable diseases</b>      | <b>400,381.55</b><br><b>(346,425.90 to</b><br><b>453,347.01)</b> | <b>765,713.99</b><br><b>(594,442.80 to</b><br><b>952,915.06)</b> | <b>653,296.18</b><br><b>(512,185.45 to</b><br><b>800,823.91)</b> | <b>941,765.99</b><br><b>(722,313.51 to</b><br><b>1,209,059.81)</b> | <b>13,192.51</b><br><b>(11,508.68 to</b><br><b>14,922.65)</b> | <b>28,688.93</b><br><b>(23,715.92 to</b><br><b>34,027.91)</b> | <b>24,940.68</b><br><b>(20,746.42 to</b><br><b>29,298.12)</b> | <b>33,566.44</b><br><b>(27,219.37 to</b><br><b>41,186.78)</b> |

| Eritrea                              |                                                                 |                                                                  |                                                                  |                                                                  |                                                            |                                                            |                                                            |                                                            |
|--------------------------------------|-----------------------------------------------------------------|------------------------------------------------------------------|------------------------------------------------------------------|------------------------------------------------------------------|------------------------------------------------------------|------------------------------------------------------------|------------------------------------------------------------|------------------------------------------------------------|
| Cause                                | YLLs (actual counts)                                            |                                                                  |                                                                  |                                                                  | Deaths (actual counts)                                     |                                                            |                                                            |                                                            |
|                                      | 2016                                                            | 2040 Forecast                                                    | 2040 Better Scenario                                             | 2040 Worse Scenario                                              | 2016                                                       | 2040 Forecast                                              | 2040 Better Scenario                                       | 2040 Worse Scenario                                        |
| <b>Neoplasms</b>                     | <b>105,264.83</b><br><b>(90,051.11 to</b><br><b>120,814.36)</b> | <b>244,004.04</b><br><b>(187,383.84 to</b><br><b>295,081.88)</b> | <b>241,563.80</b><br><b>(184,284.34 to</b><br><b>294,072.83)</b> | <b>254,148.79</b><br><b>(196,673.65 to</b><br><b>311,389.66)</b> | <b>3,163.61</b><br><b>(2,684.51 to</b><br><b>3,629.85)</b> | <b>8,077.88</b><br><b>(6,449.97 to</b><br><b>9,567.89)</b> | <b>8,166.75</b><br><b>(6,499.67 to</b><br><b>9,709.70)</b> | <b>8,095.81</b><br><b>(6,475.04 to</b><br><b>9,632.06)</b> |
| Lip and oral cavity cancer           | 1,264.41<br>(1,006.37 to<br>1,664.69)                           | 3,250.47<br>(1,927.99 to<br>5,262.08)                            | 2,715.48<br>(1,725.06 to<br>4,208.62)                            | 4,142.53<br>(2,319.54 to<br>7,361.66)                            | 42.45<br>(34.19 to<br>55.07)                               | 111.91<br>(71.83 to<br>175.05)                             | 96.69<br>(64.93 to<br>144.85)                              | 135.90<br>(80.34 to<br>229.72)                             |
| Nasopharynx cancer                   | 1,104.02<br>(850.66 to<br>1,427.51)                             | 3,074.43<br>(1,843.81 to<br>5,320.98)                            | 2,428.58<br>(1,518.96 to<br>3,959.24)                            | 4,187.48<br>(2,338.89 to<br>7,726.69)                            | 31.06<br>(24.06 to<br>40.51)                               | 92.15<br>(56.11 to<br>159.30)                              | 74.22<br>(47.22 to<br>120.37)                              | 121.36<br>(69.49 to<br>220.49)                             |
| Other pharynx cancer                 | 792.55<br>(630.01 to<br>989.54)                                 | 1,822.34<br>(1,102.42 to<br>2,957.21)                            | 1,591.95<br>(1,002.32 to<br>2,441.61)                            | 2,053.28<br>(1,188.12 to<br>3,462.22)                            | 25.28<br>(20.23 to<br>31.27)                               | 60.19<br>(37.59 to<br>95.94)                               | 53.52<br>(34.54 to<br>81.51)                               | 66.30<br>(40.02 to<br>111.76)                              |
| Esophageal cancer                    | 3,914.75<br>(3,098.92 to<br>4,909.59)                           | 10,642.41<br>(5,811.63 to<br>18,618.13)                          | 8,870.62<br>(5,131.57 to<br>15,103.22)                           | 13,013.30<br>(6,793.65 to<br>24,849.98)                          | 147.99<br>(118.11 to<br>183.73)                            | 399.09<br>(224.56 to<br>674.62)                            | 343.00<br>(203.76 to<br>561.99)                            | 465.41<br>(249.84 to<br>831.49)                            |
| Stomach cancer                       | 4,268.00<br>(3,543.59 to<br>5,128.68)                           | 7,599.32<br>(5,723.85 to<br>9,885.82)                            | 7,208.06<br>(5,377.42 to<br>9,510.84)                            | 8,023.42<br>(6,046.29 to<br>10,768.50)                           | 155.81<br>(130.30 to<br>186.00)                            | 285.64<br>(222.41 to<br>364.07)                            | 277.26<br>(212.95 to<br>355.48)                            | 292.48<br>(226.66 to<br>385.50)                            |
| Colon and rectum cancer              | 5,734.74<br>(4,472.22 to<br>7,389.02)                           | 17,270.96<br>(11,340.34 to<br>24,926.00)                         | 17,573.00<br>(11,563.47 to<br>25,470.89)                         | 16,683.37<br>(10,986.25 to<br>24,265.58)                         | 211.37<br>(167.39 to<br>271.16)                            | 668.02<br>(455.38 to<br>954.40)                            | 701.33<br>(482.77 to<br>995.07)                            | 618.96<br>(425.52 to<br>889.71)                            |
| Liver cancer                         | 5,279.98<br>(3,703.05 to<br>7,051.00)                           | 13,310.27<br>(8,416.82 to<br>19,548.49)                          | 12,838.35<br>(8,167.65 to<br>18,666.92)                          | 14,145.91<br>(8,860.09 to<br>20,952.76)                          | 163.75<br>(116.26 to<br>217.29)                            | 441.36<br>(294.20 to<br>625.68)                            | 434.64<br>(292.04 to<br>610.28)                            | 453.19<br>(300.68 to<br>660.47)                            |
| Liver cancer due to hepatitis B      | 1,968.42<br>(1,309.80 to<br>2,748.46)                           | 4,863.41<br>(2,911.28 to<br>7,338.71)                            | 4,721.99<br>(2,862.01 to<br>7,138.98)                            | 5,148.45<br>(3,010.76 to<br>8,054.56)                            | 55.75<br>(36.56 to<br>77.60)                               | 147.13<br>(91.63 to<br>219.90)                             | 145.04<br>(91.18 to<br>214.93)                             | 151.62<br>(92.50 to<br>230.47)                             |
| Liver cancer due to hepatitis C      | 1,289.85<br>(786.82 to<br>1,924.47)                             | 3,498.09<br>(1,982.42 to<br>5,479.96)                            | 3,425.43<br>(1,970.33 to<br>5,336.62)                            | 3,588.73<br>(2,012.46 to<br>5,665.71)                            | 47.72<br>(29.65 to<br>69.35)                               | 133.71<br>(79.42 to<br>204.25)                             | 132.25<br>(81.61 to<br>200.90)                             | 132.25<br>(76.36 to<br>207.67)                             |
| Liver cancer due to alcohol use      | 520.27<br>(337.14 to<br>721.05)                                 | 1,418.28<br>(886.16 to<br>2,076.26)                              | 1,304.56<br>(813.33 to<br>1,911.95)                              | 1,596.60<br>(977.05 to<br>2,426.24)                              | 18.09<br>(11.98 to<br>24.83)                               | 49.93<br>(32.00 to<br>72.28)                               | 47.04<br>(30.43 to<br>67.78)                               | 54.30<br>(34.41 to<br>78.69)                               |
| Liver cancer due to other causes     | 1,501.44<br>(994.05 to<br>2,078.03)                             | 3,530.49<br>(2,176.09 to<br>5,293.75)                            | 3,386.37<br>(2,088.66 to<br>5,068.86)                            | 3,812.12<br>(2,311.23 to<br>5,802.20)                            | 42.19<br>(28.57 to<br>57.62)                               | 110.58<br>(70.05 to<br>161.48)                             | 108.09<br>(69.06 to<br>157.76)                             | 115.02<br>(71.71 to<br>171.70)                             |
| Gallbladder and biliary tract cancer | 618.72<br>(505.40 to<br>794.83)                                 | 1,141.95<br>(901.42 to<br>1,447.41)                              | 1,207.09<br>(940.49 to<br>1,550.54)                              | 1,060.99<br>(848.99 to<br>1,336.77)                              | 23.60<br>(19.45 to<br>30.22)                               | 44.28<br>(36.48 to<br>55.76)                               | 47.91<br>(38.96 to<br>60.83)                               | 39.92<br>(33.20 to<br>49.54)                               |
| Pancreatic cancer                    | 2,207.60<br>(1,763.96 to<br>2,817.96)                           | 6,938.42<br>(5,260.62 to<br>9,153.62)                            | 7,351.76<br>(5,492.97 to<br>9,838.59)                            | 6,602.61<br>(4,998.77 to<br>8,560.08)                            | 82.26<br>(66.04 to<br>104.33)                              | 261.72<br>(201.57 to<br>339.33)                            | 283.48<br>(216.46 to<br>372.35)                            | 240.95<br>(187.05 to<br>309.27)                            |
| Larynx cancer                        | 835.90<br>(598.16 to<br>1,092.56)                               | 1,991.50<br>(1,144.53 to<br>3,259.01)                            | 1,555.67<br>(936.58 to<br>2,480.62)                              | 2,869.48<br>(1,508.61 to<br>5,193.66)                            | 29.20<br>(21.37 to<br>37.62)                               | 70.23<br>(42.61 to<br>112.43)                              | 56.71<br>(35.72 to<br>86.36)                               | 96.87<br>(52.94 to<br>166.20)                              |
| Tracheal, bronchus, and lung cancer  | 3,046.36<br>(2,547.35 to<br>3,630.32)                           | 7,371.69<br>(4,681.47 to<br>11,543.02)                           | 5,927.52<br>(3,927.93 to<br>8,729.59)                            | 10,840.90<br>(6,080.46 to<br>18,021.36)                          | 116.37<br>(98.44 to<br>137.70)                             | 285.47<br>(188.24 to<br>428.84)                            | 238.42<br>(164.67 to<br>340.59)                            | 400.99<br>(236.83 to<br>664.37)                            |

|                                 |                                         |                                          |                                          |                                          |                                 |                                   |                                     |                                   |
|---------------------------------|-----------------------------------------|------------------------------------------|------------------------------------------|------------------------------------------|---------------------------------|-----------------------------------|-------------------------------------|-----------------------------------|
| Malignant skin melanoma         | 877.99<br>(686.74 to<br>1,264.67)       | 2,495.40<br>(1,925.43 to<br>3,491.73)    | 2,804.43<br>(2,128.42 to<br>3,944.67)    | 2,205.00<br>(1,721.85 to<br>3,062.84)    | 31.97<br>(25.08 to<br>45.68)    | 93.14<br>(73.34 to<br>126.88)     | 107.10<br>(84.50 to<br>147.19)      | 79.83<br>(63.41 to<br>107.15)     |
| Non-melanoma skin cancer        | 496.04<br>(399.75 to<br>605.46)         | 1,366.35<br>(1,106.20 to<br>1,673.80)    | 1,322.83<br>(1,058.65 to<br>1,638.74)    | 1,372.06<br>(1,106.82 to<br>1,661.03)    | 18.17<br>(14.75 to<br>22.33)    | 18.17<br>(14.75 to<br>22.33)      | 55.48<br>(45.79 to<br>67.31)        | 53.19<br>(43.71 to<br>65.16)      |
| Breast cancer                   | 8,690.18<br>(5,959.48 to<br>12,310.33)  | 22,618.37<br>(13,739.17 to<br>33,980.27) | 22,451.64<br>(13,535.72 to<br>33,444.34) | 23,072.93<br>(14,023.18 to<br>34,615.19) | 265.37<br>(182.97 to<br>371.57) | 714.85<br>(451.68 to<br>1,034.91) | 721.41<br>(450.69 to<br>1,037.71)   | 713.39<br>(446.93 to<br>1,065.29) |
| Cervical cancer                 | 14,988.01<br>(9,417.19 to<br>20,139.15) | 28,949.19<br>(16,916.92 to<br>42,423.54) | 27,006.88<br>(15,895.50 to<br>39,490.52) | 30,337.87<br>(17,544.05 to<br>44,168.94) | 473.77<br>(299.71 to<br>635.37) | 909.72<br>(543.37 to<br>1,299.28) | 860.11<br>(517.92 to<br>1,225.77)   | 935.86<br>(555.12 to<br>1,336.90) |
| Uterine cancer                  | 1,586.08<br>(1,192.98 to<br>2,109.41)   | 3,855.06<br>(2,662.64 to<br>5,421.10)    | 3,542.42<br>(2,406.40 to<br>5,065.91)    | 4,047.12<br>(2,828.54 to<br>5,692.91)    | 56.27<br>(42.54 to<br>74.20)    | 137.00<br>(98.24 to<br>187.26)    | 128.11<br>(90.33 to<br>177.70)      | 140.54<br>(103.23 to<br>190.51)   |
| Ovarian cancer                  | 2,751.10<br>(1,931.50 to<br>3,806.91)   | 8,028.71<br>(5,119.62 to<br>11,319.97)   | 8,773.52<br>(5,537.18 to<br>12,462.24)   | 7,359.69<br>(4,754.71 to<br>10,410.49)   | 89.99<br>(63.57 to<br>122.51)   | 266.27<br>(175.42 to<br>368.94)   | 295.43<br>(195.01 to<br>406.93)     | 239.06<br>(156.65 to<br>332.45)   |
| Prostate cancer                 | 5,591.32<br>(2,015.48 to<br>8,459.90)   | 19,557.10<br>(7,472.42 to<br>28,231.11)  | 21,250.58<br>(8,407.04 to<br>30,481.62)  | 17,645.65<br>(6,608.29 to<br>25,419.52)  | 269.15<br>(97.70 to<br>403.87)  | 991.23<br>(389.76 to<br>1,392.81) | 1,105.70<br>(443.55 to<br>1,541.43) | 866.33<br>(325.24 to<br>1,224.64) |
| Testicular cancer               | 266.11<br>(188.55 to<br>366.37)         | 473.01<br>(315.75 to<br>706.67)          | 453.37<br>(298.99 to<br>670.38)          | 491.42<br>(332.79 to<br>725.49)          | 5.75<br>(4.11 to<br>8.08)       | 11.23<br>(7.63 to<br>17.02)       | 10.85<br>(7.25 to<br>16.48)         | 11.47<br>(7.87 to<br>17.30)       |
| <b>Eritrea</b>                  |                                         |                                          |                                          |                                          |                                 |                                   |                                     |                                   |
| Cause                           | YLLs (actual counts)                    |                                          |                                          |                                          | Deaths (actual counts)          |                                   |                                     |                                   |
|                                 | 2016                                    | 2040 Forecast                            | 2040 Better Scenario                     | 2040 Worse Scenario                      | 2016                            | 2040 Forecast                     | 2040 Better Scenario                | 2040 Worse Scenario               |
| Kidney cancer                   | 932.85<br>(665.36 to<br>1,364.70)       | 1,873.10<br>(1,436.44 to<br>2,493.68)    | 2,073.10<br>(1,582.22 to<br>2,792.82)    | 1,919.61<br>(1,453.51 to<br>2,327.85)    | 20.45<br>(16.22 to<br>25.66)    | 55.60<br>(43.42 to<br>75.45)      | 62.95<br>(48.55 to<br>88.29)        | 51.95<br>(40.61 to<br>66.64)      |
| Bladder cancer                  | 1,142.83<br>(897.42 to<br>1,457.97)     | 2,867.71<br>(2,109.98 to<br>3,796.56)    | 2,848.14<br>(2,088.33 to<br>3,782.35)    | 2,895.16<br>(2,133.97 to<br>3,830.71)    | 47.72<br>(37.40 to<br>60.44)    | 122.86<br>(92.49 to<br>159.23)    | 126.06<br>(95.54 to<br>164.53)      | 118.58<br>(88.67 to<br>156.08)    |
| Brain and nervous system cancer | 3,244.42<br>(2,676.72 to<br>4,180.00)   | 7,047.92<br>(5,368.34 to<br>9,677.58)    | 7,460.41<br>(5,615.63 to<br>10,366.78)   | 7,122.10<br>(5,567.51 to<br>9,372.51)    | 73.00<br>(58.80 to<br>96.89)    | 192.53<br>(147.47 to<br>264.97)   | 207.13<br>(157.97 to<br>289.12)     | 183.04<br>(142.89 to<br>243.33)   |
| Thyroid cancer                  | 1,373.01<br>(762.46 to<br>1,736.56)     | 2,928.99<br>(1,573.02 to<br>4,048.36)    | 2,694.93<br>(1,486.84 to<br>3,737.43)    | 3,119.52<br>(1,662.60 to<br>4,318.98)    | 42.18<br>(23.21 to<br>52.73)    | 94.20<br>(50.73 to<br>126.46)     | 88.04<br>(48.91 to<br>117.22)       | 98.11<br>(51.79 to<br>132.48)     |
| Mesothelioma                    | 174.48<br>(131.96 to<br>225.16)         | 445.33<br>(319.46 to<br>596.88)          | 445.76<br>(315.82 to<br>603.56)          | 437.93<br>(318.21 to<br>580.68)          | 5.57<br>(4.12 to<br>7.09)       | 14.86<br>(10.79 to<br>19.33)      | 15.16<br>(10.87 to<br>19.76)        | 14.24<br>(10.34 to<br>18.37)      |
| Hodgkin lymphoma                | 1,801.11<br>(841.61 to<br>2,786.46)     | 1,982.63<br>(877.58 to<br>3,184.91)      | 1,707.46<br>(757.47 to<br>2,763.72)      | 2,365.42<br>(1,057.52 to<br>3,770.23)    | 38.13<br>(18.22 to<br>56.77)    | 49.05<br>(22.54 to<br>75.82)      | 42.79<br>(19.41 to<br>66.30)        | 55.87<br>(25.35 to<br>85.97)      |
| Non-Hodgkin lymphoma            | 11,127.12<br>(7,606.62 to<br>14,243.02) | 18,088.85<br>(12,111.25 to<br>23,319.50) | 19,116.12<br>(12,801.05 to<br>24,760.38) | 19,241.42<br>(12,628.66 to<br>25,099.90) | 213.29<br>(148.64 to<br>262.19) | 439.72<br>(299.13 to<br>547.33)   | 471.93<br>(319.68 to<br>587.67)     | 434.43<br>(292.27 to<br>543.43)   |
| Multiple myeloma                | 1,306.07<br>(839.31 to<br>1,724.56)     | 4,027.27<br>(2,494.21 to<br>5,557.67)    | 4,335.14<br>(2,696.28 to<br>5,997.16)    | 3,716.42<br>(2,320.44 to<br>5,125.77)    | 44.45<br>(28.49 to<br>58.85)    | 139.44<br>(87.36 to<br>191.94)    | 151.93<br>(96.05 to<br>208.41)      | 126.41<br>(79.49 to<br>172.86)    |
| Leukemia                        | 4,008.68<br>(3,211.36 to<br>4,921.72)   | 6,472.85<br>(5,024.95 to<br>8,079.88)    | 6,573.89<br>(5,077.30 to<br>8,201.99)    | 6,952.41<br>(5,444.21 to<br>8,735.73)    | 85.74<br>(70.86 to<br>103.61)   | 175.18<br>(141.08 to<br>216.74)   | 180.17<br>(144.00 to<br>223.87)     | 177.00<br>(142.05 to<br>217.19)   |
| Acute lymphoid leukemia         | 1,290.90<br>(962.93 to<br>1,662.16)     | 1,831.88<br>(1,371.37 to<br>2,361.63)    | 1,916.08<br>(1,433.06 to<br>2,480.13)    | 2,011.47<br>(1,499.65 to<br>2,594.31)    | 23.08<br>(18.14 to<br>28.65)    | 42.30<br>(33.02 to<br>53.68)      | 44.50<br>(34.67 to<br>56.82)        | 43.49<br>(33.77 to<br>55.00)      |
| Chronic lymphoid leukemia       | 125.31<br>(97.02 to<br>162.30)          | 282.20<br>(214.22 to<br>369.64)          | 288.81<br>(217.28 to<br>384.17)          | 273.27<br>(206.60 to<br>355.67)          | 5.16<br>(3.98 to<br>6.69)       | 11.79<br>(9.08 to<br>15.31)       | 12.30<br>(9.42 to<br>16.21)         | 11.08<br>(8.43 to<br>14.44)       |
| Acute myeloid leukemia          | 830.46<br>(650.18 to<br>1,068.41)       | 1,791.09<br>(1,373.28 to<br>2,346.89)    | 1,945.44<br>(1,480.89 to<br>2,560.67)    | 1,811.92<br>(1,395.54 to<br>2,355.92)    | 17.02<br>(13.50 to<br>21.71)    | 46.59<br>(36.06 to<br>61.63)      | 51.51<br>(40.08 to<br>68.48)        | 44.40<br>(34.84 to<br>57.44)      |

|                                               |                                                        |                                                        |                                                        |                                                        |                                                  |                                                    |                                                  |                                                    |
|-----------------------------------------------|--------------------------------------------------------|--------------------------------------------------------|--------------------------------------------------------|--------------------------------------------------------|--------------------------------------------------|----------------------------------------------------|--------------------------------------------------|----------------------------------------------------|
| Chronic myeloid leukemia                      | 482.20<br>(356.83 to 663.26)                           | 661.22<br>(433.02 to 976.28)                           | 656.09<br>(423.62 to 971.63)                           | 678.42<br>(447.63 to 1,005.93)                         | 11.49<br>(8.68 to 15.84)                         | 17.19<br>(11.75 to 24.96)                          | 17.21<br>(11.71 to 24.94)                        | 17.28<br>(11.80 to 25.01)                          |
| Other leukemia                                | 1,279.82<br>(940.12 to 1,690.44)                       | 1,906.47<br>(1,404.47 to 2,466.90)                     | 1,767.46<br>(1,276.19 to 2,307.30)                     | 2,177.33<br>(1,595.23 to 2,814.84)                     | 28.98<br>(22.15 to 36.39)                        | 57.31<br>(44.19 to 71.36)                          | 54.65<br>(41.69 to 68.90)                        | 60.74<br>(46.49 to 75.98)                          |
| Other neoplasms                               | 15,840.41<br>(12,961.65 to 19,163.91)                  | 36,512.44<br>(27,644.06 to 46,669.09)                  | 37,435.14<br>(28,012.74 to 48,340.90)                  | 36,223.81<br>(27,794.03 to 45,669.52)                  | 353.50<br>(291.78 to 432.04)                     | 895.45<br>(700.70 to 1,130.82)                     | 929.01<br>(717.74 to 1,184.10)                   | 864.18<br>(683.55 to 1,075.80)                     |
| <b>Cardiovascular diseases</b>                | <b>129,088.15</b><br><b>(109,322.40 to 158,148.72)</b> | <b>235,424.99</b><br><b>(159,583.80 to 334,528.67)</b> | <b>159,885.41</b><br><b>(111,472.90 to 221,398.33)</b> | <b>350,225.26</b><br><b>(221,654.97 to 524,676.12)</b> | <b>5,296.74</b><br><b>(4,561.62 to 6,297.52)</b> | <b>10,386.03</b><br><b>(7,590.35 to 13,849.14)</b> | <b>7,477.75</b><br><b>(5,633.18 to 9,808.66)</b> | <b>14,250.67</b><br><b>(9,962.94 to 20,186.43)</b> |
| Rheumatic heart disease                       | 3,210.67<br>(2,182.54 to 4,718.73)                     | 3,032.30<br>(1,798.14 to 5,042.44)                     | 2,499.11<br>(1,435.20 to 4,181.14)                     | 3,634.06<br>(2,198.19 to 6,039.03)                     | 98.21<br>(65.32 to 147.15)                       | 104.03<br>(63.72 to 170.74)                        | 87.76<br>(53.04 to 139.48)                       | 119.15<br>(73.58 to 193.55)                        |
| Ischemic heart disease                        | 43,007.06<br>(34,363.72 to 56,131.62)                  | 76,196.81<br>(40,637.22 to 130,663.96)                 | 44,004.08<br>(23,679.98 to 78,152.62)                  | 126,227.60<br>(64,754.20 to 222,018.01)                | 1,858.85<br>(1,510.16 to 2,384.12)               | 3,485.44<br>(2,019.50 to 5,742.14)                 | 2,186.82<br>(1,301.70 to 3,698.14)               | 5,254.13<br>(2,899.29 to 8,749.82)                 |
| Stroke                                        | 46,664.17<br>(37,365.53 to 58,433.60)                  | 73,993.94<br>(40,676.53 to 124,409.10)                 | 41,756.23<br>(23,589.54 to 71,052.16)                  | 125,086.59<br>(65,026.73 to 221,186.78)                | 3,225.21<br>(1,582.08 to 2,418.88)               | 1,949.47<br>(1,952.28 to 5,294.18)                 | 1,971.33<br>(1,220.26 to 3,235.58)               | 5,022.61<br>(2,886.28 to 8,254.48)                 |
| Ischemic stroke                               | 12,656.84<br>(9,525.80 to 15,701.00)                   | 18,988.13<br>(10,218.78 to 34,121.22)                  | 12,277.26<br>(6,797.83 to 21,552.70)                   | 27,802.49<br>(14,065.49 to 49,803.17)                  | 681.86<br>(520.40 to 845.09)                     | 1,081.29<br>(622.64 to 1,924.08)                   | 756.32<br>(444.60 to 1,302.04)                   | 1,456.58<br>(801.55 to 2,548.04)                   |
| Intracerebral hemorrhage                      | 34,007.33<br>(26,598.68 to 43,495.12)                  | 55,005.81<br>(27,399.88 to 100,287.56)                 | 29,478.97<br>(14,883.26 to 54,688.82)                  | 97,284.10<br>(46,115.84 to 183,517.64)                 | 1,267.61<br>(985.32 to 1,615.78)                 | 2,143.92<br>(1,171.31 to 3,649.98)                 | 1,215.01<br>(684.73 to 2,113.98)                 | 3,566.23<br>(1,840.11 to 6,289.84)                 |
| Hypertensive heart disease                    | 9,781.44<br>(5,872.98 to 14,413.58)                    | 22,314.99<br>(12,085.32 to 40,415.49)                  | 16,965.93<br>(9,469.08 to 28,958.40)                   | 28,170.48<br>(13,929.84 to 57,536.62)                  | 441.09<br>(261.85 to 651.28)                     | 1,071.67<br>(603.82 to 1,851.52)                   | 845.58<br>(495.48 to 1,382.82)                   | 1,260.14<br>(655.07 to 2,496.12)                   |
| Cardiomyopathy and myocarditis                | 3,632.75<br>(2,483.13 to 5,572.70)                     | 7,856.35<br>(4,614.79 to 13,068.01)                    | 7,846.75<br>(4,615.33 to 13,109.25)                    | 8,003.23<br>(4,707.22 to 13,468.09)                    | 94.70<br>(64.81 to 147.34)                       | 243.03<br>(148.39 to 402.04)                       | 248.32<br>(151.43 to 404.25)                     | 234.81<br>(144.30 to 388.66)                       |
| Myocarditis                                   | 522.58<br>(291.63 to 1,013.88)                         | 817.51<br>(371.66 to 1,509.44)                         | 787.59<br>(350.57 to 1,484.38)                         | 889.11<br>(426.22 to 1,636.30)                         | 10.60<br>(5.63 to 19.14)                         | 20.62<br>(9.29 to 37.25)                           | 20.29<br>(8.88 to 37.39)                         | 21.14<br>(9.96 to 37.73)                           |
| <b>Eritrea</b>                                |                                                        |                                                        |                                                        |                                                        |                                                  |                                                    |                                                  |                                                    |
| Cause                                         | YLLs (actual counts)                                   |                                                        |                                                        |                                                        | Deaths (actual counts)                           |                                                    |                                                  |                                                    |
|                                               | 2016                                                   | 2040 Forecast                                          | 2040 Better Scenario                                   | 2040 Worse Scenario                                    | 2016                                             | 2040 Forecast                                      | 2040 Better Scenario                             | 2040 Worse Scenario                                |
| Alcoholic cardiomyopathy                      | 223.24<br>(110.17 to 445.10)                           | 553.84<br>(253.21 to 1,122.88)                         | 575.71<br>(262.69 to 1,174.06)                         | 540.89<br>(251.39 to 1,104.06)                         | 6.66<br>(3.46 to 12.54)                          | 16.97<br>(8.22 to 33.45)                           | 17.86<br>(8.72 to 35.01)                         | 16.28<br>(7.84 to 31.95)                           |
| Other cardiomyopathy                          | 2,886.93<br>(1,967.93 to 4,401.33)                     | 6,485.00<br>(3,702.14 to 11,207.58)                    | 6,483.45<br>(3,705.29 to 11,124.41)                    | 6,573.23<br>(3,790.09 to 11,429.07)                    | 77.44<br>(52.90 to 119.71)                       | 205.44<br>(122.28 to 349.17)                       | 210.17<br>(127.82 to 353.14)                     | 197.39<br>(117.38 to 333.31)                       |
| Atrial fibrillation and flutter               | 440.22<br>(332.46 to 574.45)                           | 1,295.85<br>(951.12 to 1,729.37)                       | 1,393.51<br>(1,029.14 to 1,843.48)                     | 1,192.56<br>(839.62 to 1,605.42)                       | 33.07<br>(24.92 to 43.83)                        | 105.80<br>(73.38 to 140.63)                        | 120.27<br>(84.61 to 160.87)                      | 89.79<br>(59.03 to 134.03)                         |
| Aortic aneurysm                               | 1,149.89<br>(816.71 to 1,658.61)                       | 2,848.38<br>(1,964.68 to 4,232.33)                     | 2,901.46<br>(1,987.51 to 4,396.24)                     | 2,894.88<br>(1,957.78 to 4,371.85)                     | 43.64<br>(32.66 to 60.97)                        | 117.51<br>(86.88 to 164.44)                        | 124.67<br>(92.47 to 177.43)                      | 112.63<br>(81.11 to 160.17)                        |
| Peripheral artery disease                     | 50.08<br>(16.36 to 98.09)                              | 216.14<br>(68.06 to 434.26)                            | 235.92<br>(76.25 to 454.65)                            | 197.60<br>(60.95 to 415.60)                            | 2.87<br>(0.92 to 5.36)                           | 13.67<br>(4.25 to 26.06)                           | 16.00<br>(5.18 to 30.12)                         | 11.53<br>(3.46 to 22.94)                           |
| Endocarditis                                  | 2,218.52<br>(1,651.48 to 2,746.53)                     | 4,968.18<br>(3,259.23 to 7,022.14)                     | 4,731.82<br>(3,090.02 to 6,637.94)                     | 5,276.39<br>(3,465.07 to 7,555.40)                     | 60.45<br>(43.62 to 75.25)                        | 157.32<br>(103.72 to 215.34)                       | 154.66<br>(101.04 to 210.55)                     | 156.28<br>(102.69 to 220.19)                       |
| Other cardiovascular and circulatory diseases | 18,933.36<br>(14,249.68 to 26,945.24)                  | 42,702.04<br>(30,186.93 to 62,299.67)                  | 37,550.59<br>(26,518.78 to 53,805.82)                  | 49,541.86<br>(35,099.87 to 73,602.41)                  | 714.39<br>(524.09 to 980.94)                     | 1,862.37<br>(1,344.94 to 2,557.74)                 | 1,722.34<br>(1,255.64 to 2,391.07)               | 1,989.62<br>(1,415.84 to 2,780.75)                 |
| <b>Chronic respiratory diseases</b>           | <b>22,125.02</b><br><b>(18,161.74 to 26,815.90)</b>    | <b>27,351.69</b><br><b>(18,967.00 to 39,485.44)</b>    | <b>20,877.41</b><br><b>(15,130.96 to 28,755.43)</b>    | <b>40,074.07</b><br><b>(25,761.08 to 63,318.19)</b>    | <b>793.69</b><br><b>(655.42 to 945.32)</b>       | <b>1,106.65</b><br><b>(785.82 to 1,569.02)</b>     | <b>876.01</b><br><b>(655.49 to 1,176.84)</b>     | <b>1,533.45</b><br><b>(992.03 to 2,397.28)</b>     |

|                                                                |                                                               |                                                               |                                                               |                                                               |                                                          |                                                            |                                                            |                                                            |
|----------------------------------------------------------------|---------------------------------------------------------------|---------------------------------------------------------------|---------------------------------------------------------------|---------------------------------------------------------------|----------------------------------------------------------|------------------------------------------------------------|------------------------------------------------------------|------------------------------------------------------------|
| Chronic obstructive pulmonary disease                          | 11,984.92<br>(9,490.70 to<br>14,683.21)                       | 17,851.16<br>(10,889.75 to<br>28,222.95)                      | 12,548.04<br>(8,059.03 to<br>18,851.43)                       | 28,777.76<br>(15,491.16 to<br>50,098.67)                      | 515.61<br>(409.26 to<br>631.84)                          | 796.14<br>(502.87 to<br>1,221.99)                          | 595.85<br>(398.95 to<br>851.94)                            | 1,187.75<br>(671.27 to<br>2,033.89)                        |
| Pneumoconiosis                                                 | 82.12<br>(55.23 to<br>122.22)                                 | 145.83<br>(96.65 to<br>213.36)                                | 131.64<br>(86.56 to<br>196.26)                                | 146.01<br>(97.97 to<br>211.85)                                | 3.24<br>(2.16 to<br>4.77)                                | 6.45<br>(4.33 to<br>9.55)                                  | 6.00<br>(4.00 to<br>9.13)                                  | 6.16<br>(4.17 to<br>9.09)                                  |
| Silicosis                                                      | 16.99<br>(7.30 to<br>29.01)                                   | 19.21<br>(7.88 to<br>33.86)                                   | 18.38<br>(7.20 to<br>32.87)                                   | 19.44<br>(8.31 to<br>34.73)                                   | 0.74<br>(0.31 to<br>1.25)                                | 0.93<br>(0.38 to<br>1.67)                                  | 0.93<br>(0.37 to<br>1.65)                                  | 0.90<br>(0.38 to<br>1.58)                                  |
| Asbestosis                                                     | 19.05<br>(8.81 to<br>34.94)                                   | 43.30<br>(19.21 to<br>80.43)                                  | 44.76<br>(20.17 to<br>82.64)                                  | 41.22<br>(18.70 to<br>74.65)                                  | 0.64<br>(0.24 to<br>1.31)                                | 1.72<br>(0.67 to<br>3.35)                                  | 1.85<br>(0.73 to<br>3.59)                                  | 1.56<br>(0.62 to<br>2.99)                                  |
| Coal workers pneumoconiosis                                    | 7.11<br>(2.80 to<br>14.13)                                    | 12.07<br>(4.35 to<br>25.61)                                   | 8.48<br>(2.91 to<br>18.29)                                    | 13.81<br>(5.25 to<br>28.20)                                   | 0.30<br>(0.12 to<br>0.58)                                | 0.53<br>(0.20 to<br>1.06)                                  | 0.38<br>(0.14 to<br>0.79)                                  | 0.59<br>(0.23 to<br>1.14)                                  |
| Other pneumoconiosis                                           | 38.97<br>(24.04 to<br>65.22)                                  | 71.25<br>(42.09 to<br>114.54)                                 | 60.01<br>(34.39 to<br>102.79)                                 | 71.54<br>(43.01 to<br>113.87)                                 | 1.56<br>(0.96 to<br>2.60)                                | 3.26<br>(1.88 to<br>5.50)                                  | 2.84<br>(1.62 to<br>5.00)                                  | 3.11<br>(1.82 to<br>5.07)                                  |
| Asthma                                                         | 8,724.49<br>(6,721.91 to<br>11,683.74)                        | 7,010.63<br>(4,492.76 to<br>10,344.86)                        | 5,830.55<br>(3,828.32 to<br>8,275.17)                         | 8,624.03<br>(5,491.55 to<br>13,048.14)                        | 244.03<br>(179.82 to<br>330.18)                          | 232.85<br>(151.33 to<br>355.51)                            | 199.00<br>(131.79 to<br>295.65)                            | 269.60<br>(171.89 to<br>427.25)                            |
| Interstitial lung disease and pulmonary sarcoidosis            | 289.52<br>(130.89 to<br>537.24)                               | 803.75<br>(367.65 to<br>1,435.18)                             | 911.79<br>(424.15 to<br>1,614.76)                             | 716.89<br>(322.65 to<br>1,296.70)                             | 10.13<br>(4.48 to<br>18.41)                              | 31.29<br>(14.14 to<br>53.73)                               | 36.55<br>(16.68 to<br>62.38)                               | 26.54<br>(11.85 to<br>46.21)                               |
| Other chronic respiratory diseases                             | 1,043.97<br>(449.32 to<br>1,864.55)                           | 1,540.32<br>(779.42 to<br>2,353.01)                           | 1,455.38<br>(759.86 to<br>2,188.89)                           | 1,809.38<br>(875.56 to<br>2,842.15)                           | 20.69<br>(9.92 to<br>32.68)                              | 39.92<br>(21.11 to<br>59.02)                               | 38.60<br>(21.11 to<br>56.85)                               | 43.40<br>(22.00 to<br>65.72)                               |
| <b>Cirrhosis and other chronic liver diseases</b>              | <b>24,770.88</b><br><b>(19,096.11 to</b><br><b>31,679.69)</b> | <b>54,488.79</b><br><b>(38,959.88 to</b><br><b>73,140.29)</b> | <b>50,865.72</b><br><b>(36,375.89 to</b><br><b>68,730.15)</b> | <b>57,728.43</b><br><b>(41,440.25 to</b><br><b>77,539.74)</b> | <b>732.57</b><br><b>(574.76 to</b><br><b>923.91)</b>     | <b>1,729.34</b><br><b>(1,274.51 to</b><br><b>2,249.71)</b> | <b>1,643.80</b><br><b>(1,220.08 to</b><br><b>2,158.89)</b> | <b>1,779.18</b><br><b>(1,321.86 to</b><br><b>2,333.77)</b> |
| Cirrhosis and other chronic liver diseases due to hepatitis B  | 7,621.15<br>(5,467.06 to<br>10,073.45)                        | 17,813.45<br>(11,851.73 to<br>24,890.58)                      | 17,024.17<br>(11,225.40 to<br>23,850.14)                      | 18,189.66<br>(12,082.41 to<br>25,425.83)                      | 232.50<br>(168.56 to<br>306.80)                          | 569.85<br>(392.76 to<br>766.60)                            | 554.05<br>(383.06 to<br>722.67)                            | 568.05<br>(389.44 to<br>775.16)                            |
| Cirrhosis and other chronic liver diseases due to hepatitis C  | 5,507.59<br>(3,401.00 to<br>8,013.19)                         | 13,401.17<br>(7,625.42 to<br>21,102.99)                       | 12,774.50<br>(7,240.47 to<br>20,006.01)                       | 13,716.07<br>(7,849.24 to<br>21,340.98)                       | 173.14<br>(105.47 to<br>249.75)                          | 436.53<br>(259.04 to<br>670.28)                            | 422.73<br>(245.51 to<br>650.66)                            | 436.63<br>(259.44 to<br>666.11)                            |
| Cirrhosis and other chronic liver diseases due to alcohol use  | 5,869.40<br>(4,232.54 to<br>7,666.47)                         | 13,492.80<br>(9,176.18 to<br>19,249.08)                       | 11,881.52<br>(8,131.60 to<br>16,985.74)                       | 15,173.85<br>(10,628.62 to<br>21,387.62)                      | 188.85<br>(139.30 to<br>243.45)                          | 450.00<br>(322.41 to<br>613.05)                            | 405.17<br>(286.41 to<br>556.59)                            | 492.25<br>(354.75 to<br>666.60)                            |
| Cirrhosis and other chronic liver diseases due to other causes | 5,772.74<br>(4,494.47 to<br>7,173.16)                         | 9,775.37<br>(6,944.96 to<br>13,284.13)                        | 9,185.52<br>(6,394.53 to<br>12,466.39)                        | 10,648.85<br>(7,639.31 to<br>14,292.83)                       | 138.09<br>(107.27 to<br>171.25)                          | 272.96<br>(201.52 to<br>361.44)                            | 261.85<br>(191.46 to<br>350.10)                            | 282.25<br>(210.05 to<br>372.78)                            |
| <b>Digestive diseases</b>                                      | <b>36,424.93</b><br><b>(29,402.36 to</b><br><b>47,365.66)</b> | <b>54,939.11</b><br><b>(41,592.42 to</b><br><b>71,757.81)</b> | <b>50,505.95</b><br><b>(37,619.15 to</b><br><b>66,239.19)</b> | <b>60,379.74</b><br><b>(45,992.16 to</b><br><b>80,238.33)</b> | <b>1,026.95</b><br><b>(845.62 to</b><br><b>1,286.85)</b> | <b>1,850.75</b><br><b>(1,503.24 to</b><br><b>2,312.33)</b> | <b>1,753.82</b><br><b>(1,405.05 to</b><br><b>2,205.70)</b> | <b>1,911.46</b><br><b>(1,542.68 to</b><br><b>2,421.36)</b> |
| Peptic ulcer disease                                           | 6,312.05<br>(4,767.44 to<br>8,282.20)                         | 6,277.36<br>(4,361.28 to<br>8,509.42)                         | 5,135.67<br>(3,541.44 to<br>7,060.92)                         | 7,452.71<br>(5,236.93 to<br>10,149.89)                        | 214.57<br>(164.24 to<br>270.98)                          | 243.02<br>(179.78 to<br>318.96)                            | 206.37<br>(149.26 to<br>270.62)                            | 272.09<br>(201.29 to<br>357.57)                            |
| <b>Eritrea</b>                                                 |                                                               |                                                               |                                                               |                                                               |                                                          |                                                            |                                                            |                                                            |
| Cause                                                          | YLLs (actual counts)                                          |                                                               |                                                               |                                                               | Deaths (actual counts)                                   |                                                            |                                                            |                                                            |
|                                                                | 2016                                                          | 2040 Forecast                                                 | 2040 Better Scenario                                          | 2040 Worse Scenario                                           | 2016                                                     | 2040 Forecast                                              | 2040 Better Scenario                                       | 2040 Worse Scenario                                        |
| Gastritis and duodenitis                                       | 1,646.13<br>(1,179.54 to<br>2,316.06)                         | 3,207.05<br>(2,178.84 to<br>4,801.19)                         | 2,982.63<br>(2,003.67 to<br>4,428.92)                         | 3,387.44<br>(2,321.85 to<br>5,034.14)                         | 51.20<br>(36.51 to<br>72.57)                             | 116.35<br>(81.26 to<br>172.93)                             | 112.14<br>(77.15 to<br>165.25)                             | 116.24<br>(82.11 to<br>171.20)                             |
| Appendicitis                                                   | 2,938.46<br>(2,105.37 to<br>4,263.82)                         | 3,201.01<br>(2,109.87 to<br>4,760.97)                         | 2,749.27<br>(1,769.51 to<br>4,158.05)                         | 3,861.20<br>(2,577.58 to<br>5,797.40)                         | 62.01<br>(44.36 to<br>89.38)                             | 85.95<br>(58.17 to<br>126.82)                              | 75.66<br>(50.91 to<br>112.39)                              | 96.86<br>(65.74 to<br>143.10)                              |
| Paralytic ileus and intestinal obstruction                     | 15,333.10<br>(11,802.95 to<br>20,854.68)                      | 25,351.55<br>(18,957.72 to<br>33,056.84)                      | 24,469.43<br>(18,131.29 to<br>32,314.29)                      | 26,937.36<br>(20,428.38 to<br>35,543.79)                      | 394.20<br>(311.78 to<br>499.66)                          | 811.15<br>(636.46 to<br>1,022.67)                          | 808.21<br>(634.03 to<br>1,025.62)                          | 804.46<br>(632.26 to<br>1,018.34)                          |
| Inguinal, femoral, and abdominal hernia                        | 1,763.76<br>(665.92 to<br>2,720.89)                           | 2,098.45<br>(769.99 to<br>3,360.50)                           | 1,867.46<br>(691.66 to<br>3,036.79)                           | 2,340.95<br>(867.67 to<br>3,729.97)                           | 47.95<br>(18.91 to<br>73.64)                             | 64.65<br>(24.63 to<br>100.22)                              | 58.99<br>(10.25 to<br>90.95)                               | 68.81<br>(26.05 to<br>105.58)                              |

|                                         |                                          |                                          |                                          |                                          |                                 |                                     |                                       |                                     |
|-----------------------------------------|------------------------------------------|------------------------------------------|------------------------------------------|------------------------------------------|---------------------------------|-------------------------------------|---------------------------------------|-------------------------------------|
|                                         | 1,434.61<br>(746.26 to<br>2,201.59)      | 2,500.71<br>(1,307.72 to<br>3,509.27)    | 2,524.29<br>(1,321.87 to<br>3,551.84)    | 2,525.28<br>(1,308.64 to<br>3,585.99)    | 37.86<br>(20.80 to<br>51.37)    | 80.29<br>(44.58 to<br>105.62)       | 83.86<br>(46.61 to<br>110.74)         | 75.94<br>(41.63 to<br>100.25)       |
| Inflammatory bowel disease              |                                          |                                          |                                          |                                          |                                 |                                     |                                       |                                     |
|                                         | 542.38<br>(355.34 to<br>813.20)          | 1,246.90<br>(777.44 to<br>1,913.01)      | 1,216.98<br>(754.96 to<br>1,864.37)      | 1,243.00<br>(779.05 to<br>1,883.14)      | 22.20<br>(14.14 to<br>32.66)    | 56.35<br>(34.91 to<br>85.12)        | 57.14<br>(35.85 to<br>86.92)          | 53.13<br>(33.09 to<br>80.91)        |
| Vascular intestinal disorders           |                                          |                                          |                                          |                                          |                                 |                                     |                                       |                                     |
|                                         | 1,730.88<br>(1,247.58 to<br>2,484.12)    | 2,781.56<br>(1,659.95 to<br>4,556.00)    | 2,234.16<br>(1,379.12 to<br>3,543.75)    | 3,341.51<br>(1,930.43 to<br>5,591.09)    | 63.63<br>(45.28 to<br>96.55)    | 114.75<br>(71.16 to<br>193.54)      | 96.10<br>(61.68 to<br>155.99)         | 130.06<br>(77.64 to<br>224.46)      |
| Gallbladder and biliary diseases        |                                          |                                          |                                          |                                          |                                 |                                     |                                       |                                     |
|                                         | 1,364.10<br>(866.52 to<br>2,210.13)      | 2,941.15<br>(1,580.99 to<br>5,660.49)    | 2,549.69<br>(1,387.82 to<br>4,636.70)    | 3,344.06<br>(1,741.97 to<br>6,687.93)    | 35.61<br>(22.48 to<br>57.52)    | 84.39<br>(46.85 to<br>159.18)       | 74.68<br>(42.33 to<br>132.61)         | 93.30<br>(49.81 to<br>183.16)       |
| Pancreatitis                            |                                          |                                          |                                          |                                          |                                 |                                     |                                       |                                     |
|                                         | 3,359.46<br>(2,372.77 to<br>4,746.97)    | 5,333.37<br>(3,559.96 to<br>7,712.65)    | 4,776.37<br>(3,148.07 to<br>6,948.27)    | 5,946.24<br>(4,010.27 to<br>8,572.50)    | 97.72<br>(70.98 to<br>134.97)   | 193.85<br>(134.78 to<br>276.19)     | 180.66<br>(123.89 to<br>259.44)       | 200.58<br>(139.76 to<br>282.44)     |
| Other digestive diseases                |                                          |                                          |                                          |                                          |                                 |                                     |                                       |                                     |
|                                         | 12,709.71<br>(10,696.98 to<br>14,864.70) | 24,258.65<br>(20,164.10 to<br>28,907.76) | 23,929.52<br>(19,868.94 to<br>28,270.34) | 25,531.05<br>(21,005.86 to<br>31,182.68) | 474.41<br>(398.76 to<br>560.93) | 1,230.51<br>(950.79 to<br>1,533.17) | 1,356.01<br>(1,071.25 to<br>1,651.00) | 1,095.35<br>(823.23 to<br>1,412.69) |
| Neurological disorders                  |                                          |                                          |                                          |                                          |                                 |                                     |                                       |                                     |
|                                         | 3,722.55<br>(2,947.47 to<br>4,665.77)    | 10,311.93<br>(7,775.69 to<br>13,346.54)  | 11,273.76<br>(8,889.01 to<br>14,225.50)  | 9,036.01<br>(6,495.29 to<br>12,244.18)   | 296.07<br>(234.79 to<br>373.04) | 882.92<br>(611.13 to<br>1,166.43)   | 1,014.85<br>(739.67 to<br>1,310.54)   | 724.28<br>(457.55 to<br>1,034.74)   |
| Alzheimer's disease and other dementias |                                          |                                          |                                          |                                          |                                 |                                     |                                       |                                     |
|                                         | 280.21<br>(206.27 to<br>366.44)          | 1,005.36<br>(752.93 to<br>1,296.22)      | 1,230.93<br>(928.10 to<br>1,564.95)      | 794.82<br>(580.05 to<br>1,030.45)        | 19.49<br>(14.15 to<br>25.77)    | 75.44<br>(54.10 to<br>100.82)       | 96.02<br>(70.59 to<br>125.47)         | 56.66<br>(38.73 to<br>78.01)        |
| Parkinson's disease                     |                                          |                                          |                                          |                                          |                                 |                                     |                                       |                                     |
|                                         | 7,354.47<br>(5,740.67 to<br>8,987.82)    | 10,517.10<br>(7,151.29 to<br>14,411.89)  | 8,821.01<br>(6,073.25 to<br>12,030.48)   | 13,174.59<br>(8,960.54 to<br>18,261.02)  | 133.59<br>(104.87 to<br>161.59) | 214.77<br>(150.80 to<br>288.52)     | 182.62<br>(128.14 to<br>245.18)       | 258.68<br>(179.45 to<br>354.63)     |
| Epilepsy                                |                                          |                                          |                                          |                                          |                                 |                                     |                                       |                                     |
|                                         | 116.42<br>(79.27 to<br>181.91)           | 304.27<br>(200.86 to<br>466.54)          | 323.17<br>(210.44 to<br>498.26)          | 286.86<br>(189.11 to<br>440.02)          | 3.06<br>(2.03 to<br>4.68)       | 8.34<br>(5.49 to<br>12.61)          | 8.95<br>(5.84 to<br>13.54)            | 7.76<br>(5.10 to<br>11.84)          |
| Multiple sclerosis                      |                                          |                                          |                                          |                                          |                                 |                                     |                                       |                                     |
|                                         | 80.90<br>(59.93 to<br>126.42)            | 185.52<br>(132.04 to<br>222.81)          | 201.85<br>(142.99 to<br>248.34)          | 177.66<br>(128.55 to<br>207.14)          | 1.93<br>(1.44 to<br>2.27)       | 5.68<br>(4.04 to<br>10.36)          | 6.25<br>(4.41 to<br>11.20)            | 5.20<br>(3.75 to<br>9.35)           |
| Motor neuron disease                    |                                          |                                          |                                          |                                          |                                 |                                     |                                       |                                     |
|                                         | 1,155.15<br>(934.23 to<br>1,439.21)      | 1,934.47<br>(1,469.75 to<br>2,461.06)    | 2,078.80<br>(1,562.31 to<br>2,656.71)    | 2,061.11<br>(1,597.29 to<br>2,577.46)    | 20.27<br>(16.68 to<br>24.20)    | 43.35<br>(31.66 to<br>54.45)        | 47.33<br>(34.11 to<br>59.84)          | 42.77<br>(32.30 to<br>52.82)        |
| Other neurological disorders            |                                          |                                          |                                          |                                          |                                 |                                     |                                       |                                     |
|                                         | 2,548.98<br>(1,828.71 to<br>4,896.55)    | 5,536.68<br>(3,734.80 to<br>10,825.22)   | 5,480.06<br>(3,662.05 to<br>10,789.44)   | 5,548.62<br>(3,805.17 to<br>10,868.02)   | 68.96<br>(50.07 to<br>131.95)   | 159.07<br>(112.72 to<br>314.51)     | 159.90<br>(112.61 to<br>309.61)       | 155.63<br>(111.37 to<br>307.54)     |
| Mental disorders                        |                                          |                                          |                                          |                                          |                                 |                                     |                                       |                                     |
|                                         | 1,895.09<br>(1,248.00 to<br>4,326.77)    | 3,824.71<br>(2,363.32 to<br>9,199.21)    | 3,741.04<br>(2,276.17 to<br>9,117.40)    | 3,856.43<br>(2,394.51 to<br>9,103.10)    | 55.41<br>(37.47 to<br>119.05)   | 120.28<br>(78.18 to<br>273.36)      | 119.92<br>(77.62 to<br>268.38)        | 118.11<br>(77.26 to<br>267.13)      |
| Alcohol use disorders                   |                                          |                                          |                                          |                                          |                                 |                                     |                                       |                                     |
|                                         | 641.76<br>(458.01 to<br>863.82)          | 1,687.33<br>(1,177.15 to<br>2,299.43)    | 1,713.60<br>(1,186.45 to<br>2,354.84)    | 1,667.37<br>(1,164.19 to<br>2,251.83)    | 13.33<br>(9.62 to<br>17.44)     | 38.33<br>(27.56 to<br>50.73)        | 39.49<br>(28.16 to<br>52.21)          | 37.06<br>(26.48 to<br>48.71)        |
| Drug use disorders                      |                                          |                                          |                                          |                                          |                                 |                                     |                                       |                                     |
|                                         | 501.15<br>(355.24 to<br>662.90)          | 1,235.84<br>(836.67 to<br>1,688.39)      | 1,254.03<br>(842.87 to<br>1,723.57)      | 1,223.21<br>(830.36 to<br>1,659.11)      | 10.16<br>(7.14 to<br>13.30)     | 27.06<br>(18.67 to<br>36.23)        | 27.73<br>(18.80 to<br>37.26)          | 26.33<br>(18.16 to<br>35.01)        |
| Opioid use disorders                    |                                          |                                          |                                          |                                          |                                 |                                     |                                       |                                     |
|                                         | 28.29<br>(7.41 to<br>58.44)              | 92.45<br>(27.73 to<br>189.06)            | 88.61<br>(26.78 to<br>178.49)            | 95.23<br>(28.40 to<br>193.58)            | 0.62<br>(0.17 to<br>1.25)       | 2.15<br>(0.66 to<br>4.17)           | 2.07<br>(0.63 to<br>4.03)             | 2.19<br>(0.67 to<br>4.24)           |
| Cocaine use disorders                   |                                          |                                          |                                          |                                          |                                 |                                     |                                       |                                     |
|                                         | 16.19<br>(5.92 to<br>35.09)              | 71.39<br>(27.84 to<br>151.02)            | 65.99<br>(25.81 to<br>137.33)            | 76.30<br>(29.04 to<br>159.94)            | 0.34<br>(0.13 to<br>0.73)       | 1.58<br>(0.63 to<br>3.32)           | 1.47<br>(0.59 to<br>2.97)             | 1.68<br>(0.65 to<br>3.46)           |
| Amphetamine use disorders               |                                          |                                          |                                          |                                          |                                 |                                     |                                       |                                     |
|                                         | 96.14<br>(63.05 to<br>140.46)            | 287.64<br>(187.29 to<br>422.89)          | 304.96<br>(195.08 to<br>444.89)          | 272.63<br>(177.95 to<br>394.28)          | 2.22<br>(1.55 to<br>3.09)       | 7.54<br>(5.37 to<br>10.37)          | 8.22<br>(5.80 to<br>11.35)            | 6.86<br>(4.91 to<br>9.39)           |
| Other drug use disorders                |                                          |                                          |                                          |                                          |                                 |                                     |                                       |                                     |
|                                         | 12.13<br>(7.24 to<br>19.78)              | 24.65<br>(13.65 to<br>39.64)             | 25.42<br>(13.87 to<br>41.48)             | 24.81<br>(13.94 to<br>39.51)             | 0.22<br>(0.13 to<br>0.36)       | 0.46<br>(0.25 to<br>0.75)           | 0.48<br>(0.26 to<br>0.79)             | 0.46<br>(0.26 to<br>0.74)           |
| Eating disorders                        |                                          |                                          |                                          |                                          |                                 |                                     |                                       |                                     |
| <b>Eritrea</b>                          |                                          |                                          |                                          |                                          |                                 |                                     |                                       |                                     |
| Cause                                   | YLLs (actual counts)                     |                                          |                                          |                                          | Deaths (actual counts)          |                                     |                                       |                                     |
|                                         | 2016                                     | 2040 Forecast                            | 2040 Better Scenario                     | 2040 Worse Scenario                      | 2016                            | 2040 Forecast                       | 2040 Better Scenario                  | 2040 Worse Scenario                 |

|                                                            |                                          |                                           |                                           |                                            |                                       |                                       |                                       |                                       |
|------------------------------------------------------------|------------------------------------------|-------------------------------------------|-------------------------------------------|--------------------------------------------|---------------------------------------|---------------------------------------|---------------------------------------|---------------------------------------|
|                                                            | 41,932.61<br>(35,264.10 to<br>49,781.52) | 89,597.82<br>(64,442.56 to<br>125,932.61) | 71,507.65<br>(51,873.16 to<br>100,034.26) | 108,300.85<br>(78,685.29 to<br>151,274.49) | 1,252.06<br>(1,061.91 to<br>1,444.61) | 3,432.02<br>(2,482.74 to<br>5,096.03) | 2,790.53<br>(2,017.84 to<br>4,121.98) | 3,940.12<br>(2,852.67 to<br>5,965.48) |
| <b>Diabetes, urogenital, blood, and endocrine diseases</b> |                                          |                                           |                                           |                                            |                                       |                                       |                                       |                                       |
| Diabetes mellitus                                          | 17,883.63<br>(15,079.72 to<br>20,916.69) | 48,666.20<br>(30,311.70 to<br>74,271.16)  | 37,777.78<br>(23,960.70 to<br>57,753.01)  | 59,271.94<br>(36,816.44 to<br>90,646.27)   | 690.32<br>(584.63 to<br>800.01)       | 1,993.79<br>(1,319.04 to<br>2,860.55) | 1,611.14<br>(1,107.54 to<br>2,345.75) | 2,311.90<br>(1,518.16 to<br>3,384.75) |
| Acute glomerulonephritis                                   | 74.55<br>(51.85 to<br>121.61)            | 104.00<br>(70.12 to<br>161.39)            | 94.78<br>(63.37 to<br>147.97)             | 133.43<br>(87.40 to<br>215.57)             | 1.26<br>(0.92 to<br>1.92)             | 2.05<br>(1.49 to<br>2.93)             | 1.90<br>(1.37 to<br>2.74)             | 2.43<br>(1.73 to<br>3.57)             |
| Chronic kidney disease                                     | 7,955.68<br>(6,540.57 to<br>9,905.97)    | 20,663.18<br>(11,092.58 to<br>47,891.09)  | 15,414.61<br>(8,617.64 to<br>34,412.84)   | 25,227.08<br>(13,612.10 to<br>57,328.51)   | 236.37<br>(195.98 to<br>289.61)       | 877.89<br>(372.45 to<br>2,578.41)     | 657.69<br>(292.51 to<br>1,948.93)     | 1,020.42<br>(436.48 to<br>2,980.97)   |
| Chronic kidney disease due to diabetes mellitus            | 1,815.90<br>(1,437.05 to<br>2,348.63)    | 6,441.61<br>(3,162.61 to<br>16,080.00)    | 4,763.57<br>(2,444.89 to<br>11,532.14)    | 7,690.25<br>(3,750.77 to<br>18,871.11)     | 65.00<br>(51.53 to<br>82.77)          | 290.57<br>(115.44 to<br>851.79)       | 216.30<br>(91.22 to<br>650.75)        | 335.36<br>(134.14 to<br>1,009.70)     |
| Chronic kidney disease due to hypertension                 | 980.57<br>(754.77 to<br>1,256.75)        | 3,663.45<br>(1,522.55 to<br>11,218.31)    | 2,704.91<br>(1,183.19 to<br>7,918.64)     | 4,317.66<br>(1,778.00 to<br>13,098.25)     | 44.33<br>(34.61 to<br>55.74)          | 207.26<br>(70.59 to<br>720.19)        | 157.11<br>(57.09 to<br>548.20)        | 232.84<br>(79.08 to<br>806.39)        |
| Chronic kidney disease due to glomerulonephritis           | 2,455.42<br>(1,912.41 to<br>3,174.94)    | 4,807.86<br>(2,786.24 to<br>9,405.14)     | 3,629.72<br>(2,137.21 to<br>6,688.57)     | 6,056.64<br>(3,563.28 to<br>11,663.29)     | 58.22<br>(46.15 to<br>73.90)          | 163.40<br>(75.89 to<br>438.03)        | 122.22<br>(58.87 to<br>328.98)        | 196.41<br>(93.08 to<br>508.76)        |
| Chronic kidney disease due to other and unspecified causes | 2,703.99<br>(2,148.11 to<br>3,477.19)    | 5,750.26<br>(3,195.62 to<br>12,255.79)    | 4,316.40<br>(2,464.30 to<br>8,610.64)     | 7,162.53<br>(4,100.72 to<br>14,868.73)     | 68.82<br>(54.72 to<br>87.38)          | 216.65<br>(96.77 to<br>603.95)        | 162.06<br>(74.90 to<br>441.84)        | 258.81<br>(117.17 to<br>721.09)       |
| Urinary diseases and male infertility                      | 3,409.63<br>(2,710.14 to<br>4,334.16)    | 6,639.74<br>(4,992.12 to<br>8,647.14)     | 6,215.46<br>(4,627.16 to<br>8,196.10)     | 7,140.53<br>(5,447.70 to<br>9,237.28)      | 92.16<br>(73.50 to<br>116.16)         | 209.48<br>(163.88 to<br>266.77)       | 202.17<br>(157.12 to<br>258.48)       | 213.34<br>(169.82 to<br>269.20)       |
| Urinary tract infections                                   | 1,353.83<br>(991.00 to<br>1,857.72)      | 3,457.31<br>(2,481.45 to<br>4,746.97)     | 3,424.01<br>(2,442.36 to<br>4,718.95)     | 3,535.66<br>(2,543.94 to<br>4,850.64)      | 36.23<br>(26.17 to<br>50.58)          | 112.05<br>(81.34 to<br>153.98)        | 114.48<br>(82.32 to<br>158.14)        | 108.22<br>(78.92 to<br>147.45)        |
| Urolithiasis                                               | 92.63<br>(60.21 to<br>145.18)            | 201.62<br>(128.77 to<br>347.91)           | 191.34<br>(120.83 to<br>329.49)           | 221.44<br>(140.40 to<br>375.38)            | 1.96<br>(1.29 to<br>3.50)             | 4.94<br>(3.18 to<br>9.48)             | 4.79<br>(3.04 to<br>9.38)             | 5.16<br>(3.36 to<br>9.81)             |
| Other urinary diseases                                     | 1,963.18<br>(1,376.89 to<br>2,711.53)    | 2,980.82<br>(1,888.98 to<br>4,387.08)     | 2,690.11<br>(1,621.52 to<br>3,888.55)     | 3,383.43<br>(2,154.45 to<br>4,914.60)      | 53.98<br>(37.62 to<br>73.81)          | 53.98<br>(58.15 to<br>134.06)         | 82.91<br>(52.73 to<br>121.20)         | 99.97<br>(64.21 to<br>143.59)         |
| Gynecological diseases                                     | 724.39<br>(505.95 to<br>1,006.61)        | 1,295.13<br>(716.75 to<br>2,065.61)       | 1,079.51<br>(614.28 to<br>1,725.27)       | 1,500.65<br>(878.11 to<br>2,365.07)        | 17.13<br>(12.00 to<br>23.86)          | 31.03<br>(17.85 to<br>48.91)          | 25.92<br>(15.12 to<br>41.16)          | 35.77<br>(21.22 to<br>56.32)          |
| Uterine fibroids                                           | 291.30<br>(115.39 to<br>529.77)          | 470.42<br>(151.38 to<br>975.09)           | 383.62<br>(121.37 to<br>810.40)           | 551.78<br>(185.06 to<br>1,126.76)          | 7.42<br>(3.01 to<br>13.33)            | 12.20<br>(4.07 to<br>24.49)           | 9.97<br>(3.28 to<br>20.28)            | 14.26<br>(4.88 to<br>28.72)           |
| Polycystic ovarian syndrome                                | 70.68<br>(7.42 to<br>185.84)             | 84.72<br>(7.44 to<br>255.14)              | 62.11<br>(5.48 to<br>187.57)              | 109.05<br>(10.13 to<br>325.92)             | 1.58<br>(0.16 to<br>4.10)             | 1.96<br>(0.18 to<br>5.74)             | 1.44<br>(0.13 to<br>4.43)             | 2.52<br>(0.25 to<br>7.51)             |
| Endometriosis                                              | 2.24<br>(0.49 to<br>7.36)                | 6.05<br>(1.23 to<br>19.88)                | 5.06<br>(1.02 to<br>16.57)                | 7.01<br>(1.45 to<br>22.96)                 | 0.05<br>(0.01 to<br>0.15)             | 0.13<br>(0.03 to<br>0.44)             | 0.11<br>(0.02 to<br>0.37)             | 0.16<br>(0.03 to<br>0.52)             |
| Genital prolapse                                           | 25.95<br>(4.43 to<br>58.97)              | 39.13<br>(5.32 to<br>103.06)              | 31.15<br>(4.23 to<br>82.73)               | 46.66<br>(6.32 to<br>120.93)               | 0.88<br>(0.16 to<br>1.92)             | 1.21<br>(0.18 to<br>3.06)             | 0.98<br>(0.14 to<br>2.48)             | 1.41<br>(0.21 to<br>3.45)             |
| Other gynecological diseases                               | 334.22<br>(120.58 to<br>591.80)          | 694.81<br>(239.41 to<br>1,311.31)         | 597.57<br>(213.81 to<br>1,148.01)         | 786.16<br>(268.22 to<br>1,497.77)          | 7.20<br>(2.34 to<br>13.20)            | 15.53<br>(5.08 to<br>29.66)           | 13.42<br>(4.60 to<br>25.85)           | 17.42<br>(5.73 to<br>33.18)           |
| Hemoglobinopathies and hemolytic anemias                   | 10,108.69<br>(7,315.58 to<br>15,703.89)  | 9,371.87<br>(6,660.49 to<br>13,199.57)    | 8,299.33<br>(5,889.41 to<br>11,672.04)    | 11,853.98<br>(8,415.35 to<br>17,000.98)    | 172.78<br>(132.09 to<br>245.22)       | 232.37<br>(173.68 to<br>307.26)       | 207.99<br>(154.50 to<br>277.07)       | 268.33<br>(200.46 to<br>357.78)       |
| Thalassemias                                               | 45.88<br>(4.22 to<br>181.89)             | 22.16<br>(2.08 to<br>88.44)               | 25.87<br>(2.46 to<br>104.78)              | 30.42<br>(2.89 to<br>119.68)               | 0.54<br>(0.05 to<br>2.13)             | 0.26<br>(0.03 to<br>1.04)             | 0.31<br>(0.03 to<br>1.24)             | 0.36<br>(0.03 to<br>1.40)             |
| Sickle cell disorders                                      | 7,593.03<br>(5,051.88 to<br>12,579.03)   | 4,524.49<br>(2,797.46 to<br>7,028.45)     | 4,111.16<br>(2,584.87 to<br>6,386.77)     | 6,359.25<br>(3,834.18 to<br>10,390.90)     | 97.74<br>(66.13 to<br>158.10)         | 68.15<br>(41.48 to<br>103.56)         | 61.96<br>(38.33 to<br>94.03)          | 91.26<br>(55.32 to<br>144.83)         |
| G6PD deficiency                                            | 1,735.61<br>(1,097.53 to<br>2,704.98)    | 3,849.53<br>(2,446.41 to<br>5,697.76)     | 3,281.61<br>(2,056.23 to<br>4,849.00)     | 4,435.63<br>(2,866.38 to<br>6,625.18)      | 40.66<br>(28.48 to<br>57.12)          | 110.29<br>(75.68 to<br>155.47)        | 95.00<br>(64.66 to<br>135.16)         | 123.62<br>(86.86 to<br>174.70)        |



|                                      |                                                        |                                                        |                                                        |                                                        |                                                  |                                                  |                                                  |                                                  |
|--------------------------------------|--------------------------------------------------------|--------------------------------------------------------|--------------------------------------------------------|--------------------------------------------------------|--------------------------------------------------|--------------------------------------------------|--------------------------------------------------|--------------------------------------------------|
| Other skin and subcutaneous diseases | 234.85<br>(138.14 to 390.02)                           | 528.42<br>(307.48 to 828.52)                           | 556.24<br>(328.80 to 878.48)                           | 566.70<br>(325.17 to 898.00)                           | 4.84<br>(2.79 to 7.85)                           | 13.37<br>(7.90 to 21.35)                         | 14.41<br>(8.66 to 23.07)                         | 13.07<br>(7.56 to 20.57)                         |
| Sudden infant death syndrome         | 4,950.72<br>(1,612.41 to 10,207.54)                    | 2,585.35<br>(719.17 to 5,604.74)                       | 2,409.44<br>(684.17 to 5,172.57)                       | 4,378.42<br>(1,173.54 to 9,455.37)                     | 57.47<br>(18.71 to 118.50)                       | 30.00<br>(8.34 to 65.04)                         | 27.96<br>(7.94 to 60.03)                         | 50.80<br>(13.62 to 109.72)                       |
| <b>Injuries</b>                      | <b>154,023.75</b><br><b>(131,691.67 to 175,086.21)</b> | <b>227,062.64</b><br><b>(169,106.54 to 300,996.69)</b> | <b>214,242.81</b><br><b>(159,284.51 to 287,099.68)</b> | <b>258,850.72</b><br><b>(195,713.36 to 341,651.37)</b> | <b>3,065.14</b><br><b>(2,658.12 to 3,456.66)</b> | <b>5,474.56</b><br><b>(4,338.95 to 6,813.39)</b> | <b>5,258.54</b><br><b>(4,116.53 to 6,596.25)</b> | <b>5,862.72</b><br><b>(4,635.99 to 7,291.53)</b> |
| <b>Transport injuries</b>            | <b>36,993.28</b><br><b>(29,771.60 to 45,224.30)</b>    | <b>70,261.64</b><br><b>(51,541.88 to 92,702.38)</b>    | <b>67,077.41</b><br><b>(49,559.84 to 88,049.38)</b>    | <b>78,235.50</b><br><b>(57,710.64 to 103,248.84)</b>   | <b>739.86</b><br><b>(607.16 to 892.71)</b>       | <b>1,605.42</b><br><b>(1,218.55 to 2,061.80)</b> | <b>1,554.24</b><br><b>(1,184.21 to 1,994.29)</b> | <b>1,709.23</b><br><b>(1,294.94 to 2,222.94)</b> |
| Road injuries                        | 34,789.51<br>(28,056.78 to 42,683.51)                  | 66,114.07<br>(48,772.11 to 86,508.86)                  | 63,370.80<br>(46,636.99 to 82,709.62)                  | 73,403.33<br>(54,199.27 to 96,574.35)                  | 701.30<br>(571.17 to 850.86)                     | 1,525.28<br>(1,160.28 to 1,947.03)               | 1,482.40<br>(1,131.14 to 1,879.18)               | 1,617.87<br>(1,224.92 to 2,103.38)               |
| Pedestrian road injuries             | 15,380.61<br>(12,019.22 to 19,903.47)                  | 25,321.77<br>(17,747.32 to 35,523.72)                  | 23,905.71<br>(16,635.29 to 33,386.63)                  | 28,176.32<br>(19,699.56 to 39,483.80)                  | 514.96<br>(250.17 to 406.56)                     | 608.93<br>(443.28 to 818.09)                     | 583.21<br>(426.57 to 788.65)                     | 648.43<br>(464.14 to 881.02)                     |
| <b>Eritrea</b>                       |                                                        |                                                        |                                                        |                                                        |                                                  |                                                  |                                                  |                                                  |
| Cause                                | YLLs (actual counts)                                   |                                                        |                                                        |                                                        | Deaths (actual counts)                           |                                                  |                                                  |                                                  |
|                                      | 2016                                                   | 2040 Forecast                                          | 2040 Better Scenario                                   | 2040 Worse Scenario                                    | 2016                                             | 2040 Forecast                                    | 2040 Better Scenario                             | 2040 Worse Scenario                              |
| Cyclist road injuries                | 1,537.62<br>(1,067.82 to 2,284.96)                     | 3,061.97<br>(1,981.92 to 4,774.74)                     | 2,972.69<br>(1,912.34 to 4,604.50)                     | 3,396.17<br>(2,216.47 to 5,248.96)                     | 30.83<br>(21.48 to 45.23)                        | 69.53<br>(45.70 to 107.41)                       | 68.56<br>(45.40 to 104.85)                       | 73.34<br>(47.75 to 112.15)                       |
| Motorcyclist road injuries           | 2,675.91<br>(1,957.63 to 3,635.15)                     | 5,678.13<br>(3,816.22 to 8,312.90)                     | 5,544.05<br>(3,753.44 to 8,093.02)                     | 6,216.20<br>(4,237.56 to 9,103.86)                     | 52.12<br>(39.03 to 69.23)                        | 122.87<br>(86.24 to 176.17)                      | 121.41<br>(86.13 to 172.40)                      | 129.11<br>(89.68 to 186.83)                      |
| Motor vehicle road injuries          | 15,011.85<br>(11,048.12 to 19,613.85)                  | 31,689.32<br>(22,064.63 to 44,339.85)                  | 30,594.64<br>(21,177.78 to 42,301.65)                  | 35,207.58<br>(24,638.10 to 49,564.21)                  | 299.86<br>(221.26 to 386.22)                     | 715.99<br>(503.47 to 984.71)                     | 701.32<br>(497.65 to 955.67)                     | 758.55<br>(534.49 to 1,060.58)                   |
| Other road injuries                  | 183.53<br>(122.12 to 272.04)                           | 362.89<br>(229.65 to 575.66)                           | 353.70<br>(221.66 to 557.70)                           | 407.04<br>(258.07 to 634.33)                           | 3.54<br>(2.43 to 4.97)                           | 7.96<br>(5.33 to 12.00)                          | 7.89<br>(5.31 to 11.72)                          | 8.45<br>(5.64 to 12.84)                          |
| Other transport injuries             | 2,203.77<br>(1,610.39 to 3,008.21)                     | 4,147.57<br>(2,669.69 to 6,369.00)                     | 3,706.61<br>(2,352.97 to 5,589.61)                     | 4,832.17<br>(3,134.44 to 7,348.04)                     | 38.55<br>(28.50 to 52.68)                        | 80.14<br>(52.59 to 121.49)                       | 71.84<br>(46.67 to 108.70)                       | 91.36<br>(59.95 to 137.07)                       |
| <b>Unintentional injuries</b>        | <b>76,396.35</b><br><b>(63,981.61 to 91,364.87)</b>    | <b>77,728.84</b><br><b>(60,305.61 to 96,186.71)</b>    | <b>70,466.24</b><br><b>(55,044.42 to 87,272.87)</b>    | <b>95,247.11</b><br><b>(74,303.62 to 117,835.30)</b>   | <b>1,508.10</b><br><b>(1,288.78 to 1,742.74)</b> | <b>2,334.67</b><br><b>(1,747.64 to 2,528.70)</b> | <b>2,010.44</b><br><b>(1,643.17 to 2,392.47)</b> | <b>2,336.70</b><br><b>(1,924.07 to 2,785.54)</b> |
| Falls                                | 10,816.58<br>(8,861.98 to 13,253.50)                   | 16,679.92<br>(13,517.71 to 20,312.38)                  | 16,284.05<br>(13,105.45 to 19,944.68)                  | 17,804.28<br>(14,505.02 to 21,841.30)                  | 322.20<br>(271.70 to 378.94)                     | 688.81<br>(572.18 to 814.81)                     | 706.22<br>(588.46 to 840.40)                     | 656.56<br>(534.11 to 787.46)                     |
| Drowning                             | 13,822.43<br>(11,134.22 to 17,385.35)                  | 11,336.91<br>(8,341.06 to 14,862.62)                   | 10,202.70<br>(7,541.16 to 13,513.89)                   | 14,431.00<br>(10,537.95 to 18,945.51)                  | 229.16<br>(188.66 to 279.74)                     | 243.08<br>(184.68 to 315.47)                     | 222.37<br>(169.50 to 287.67)                     | 285.54<br>(215.18 to 368.72)                     |
| Fire, heat, and hot substances       | 10,874.82<br>(7,955.68 to 15,135.42)                   | 8,596.41<br>(6,000.62 to 11,828.47)                    | 7,514.60<br>(5,301.90 to 10,337.41)                    | 10,968.54<br>(7,606.81 to 15,647.12)                   | 215.28<br>(166.20 to 280.55)                     | 235.90<br>(173.59 to 308.68)                     | 212.02<br>(155.51 to 278.97)                     | 270.18<br>(197.22 to 360.90)                     |
| Poisonings                           | 6,055.80<br>(3,328.58 to 12,699.95)                    | 3,383.55<br>(1,965.13 to 6,165.68)                     | 2,765.29<br>(1,570.44 to 5,093.81)                     | 4,839.72<br>(2,680.97 to 9,838.08)                     | 104.05<br>(62.75 to 185.25)                      | 75.89<br>(46.50 to 118.83)                       | 62.77<br>(38.04 to 97.11)                        | 98.17<br>(59.42 to 163.66)                       |
| Exposure to mechanical forces        | 8,063.41<br>(6,138.55 to 11,301.11)                    | 8,707.07<br>(6,018.67 to 12,500.33)                    | 7,657.41<br>(5,305.02 to 11,158.71)                    | 10,515.81<br>(7,298.26 to 15,069.37)                   | 149.11<br>(117.39 to 202.05)                     | 198.15<br>(144.19 to 275.89)                     | 177.82<br>(128.91 to 247.13)                     | 224.79<br>(162.70 to 310.94)                     |
| Unintentional firearm injuries       | 1,714.78<br>(1,219.71 to 2,339.73)                     | 1,703.12<br>(1,085.39 to 2,547.08)                     | 1,456.39<br>(917.90 to 2,194.30)                       | 1,993.30<br>(1,271.09 to 2,917.47)                     | 32.63<br>(23.72 to 43.43)                        | 36.13<br>(24.43 to 52.03)                        | 31.42<br>(21.00 to 45.48)                        | 40.98<br>(27.62 to 58.37)                        |
| Unintentional suffocation            | 884.35<br>(515.57 to 1,583.56)                         | 756.29<br>(473.73 to 1,181.88)                         | 664.98<br>(420.50 to 1,029.65)                         | 1,042.38<br>(620.41 to 1,737.16)                       | 13.33<br>(8.42 to 21.67)                         | 14.74<br>(9.89 to 21.58)                         | 13.25<br>(8.91 to 19.17)                         | 18.36<br>(12.03 to 28.12)                        |
| Other exposure to mechanical forces  | 5,464.28<br>(3,904.82 to 8,290.11)                     | 6,247.66<br>(4,211.29 to 9,685.56)                     | 5,536.05<br>(3,713.84 to 8,549.53)                     | 7,480.12<br>(5,064.68 to 11,581.54)                    | 103.16<br>(76.40 to 151.78)                      | 147.27<br>(105.56 to 218.22)                     | 133.15<br>(95.32 to 197.23)                      | 165.45<br>(117.95 to 247.81)                     |



|                                                                                     |                                                               |                                                               |                                                               |                                                               |                                                      |                                                          |                                                          |                                                          |
|-------------------------------------------------------------------------------------|---------------------------------------------------------------|---------------------------------------------------------------|---------------------------------------------------------------|---------------------------------------------------------------|------------------------------------------------------|----------------------------------------------------------|----------------------------------------------------------|----------------------------------------------------------|
| Adverse effects of medical treatment                                                | 5,535.91<br>(4,366.45 to<br>7,572.30)                         | 5,814.53<br>(4,190.73 to<br>7,818.07)                         | 5,275.48<br>(3,783.92 to<br>7,085.50)                         | 7,145.75<br>(5,133.03 to<br>9,704.22)                         | 102.66<br>(83.25 to<br>130.43)                       | 142.77<br>(103.93 to<br>190.10)                          | 132.84<br>(95.41 to<br>177.44)                           | 159.34<br>(117.79 to<br>209.75)                          |
| Animal contact                                                                      | 9,665.69<br>(5,386.62 to<br>13,855.59)                        | 12,344.77<br>(6,900.70 to<br>18,436.70)                       | 10,462.22<br>(5,851.86 to<br>15,757.90)                       | 15,943.39<br>(8,945.50 to<br>23,918.04)                       | 196.16<br>(112.26 to<br>277.84)                      | 326.26<br>(185.76 to<br>481.49)                          | 282.03<br>(157.54 to<br>422.60)                          | 384.88<br>(216.93 to<br>559.66)                          |
| Venomous animal contact                                                             | 6,858.32<br>(3,741.64 to<br>10,404.44)                        | 8,568.34<br>(4,596.52 to<br>13,086.05)                        | 7,238.93<br>(3,834.02 to<br>11,078.48)                        | 11,068.39<br>(5,954.84 to<br>17,131.62)                       | 147.35<br>(80.89 to<br>219.29)                       | 243.05<br>(133.66 to<br>363.15)                          | 209.92<br>(114.22 to<br>313.69)                          | 284.94<br>(158.04 to<br>423.67)                          |
| Non-venomous animal contact                                                         | 2,807.37<br>(1,023.91 to<br>4,814.97)                         | 3,776.43<br>(1,498.81 to<br>6,431.62)                         | 3,223.29<br>(1,276.13 to<br>5,487.46)                         | 4,875.00<br>(1,875.51 to<br>8,208.63)                         | 48.81<br>(19.03 to<br>81.86)                         | 83.21<br>(34.36 to<br>140.31)                            | 72.11<br>(30.28 to<br>122.79)                            | 99.94<br>(40.64 to<br>167.58)                            |
| Foreign body                                                                        | 6,174.16<br>(4,101.08 to<br>9,081.44)                         | 5,798.52<br>(3,951.02 to<br>7,815.57)                         | 5,862.97<br>(4,020.31 to<br>7,905.58)                         | 7,372.31<br>(4,871.13 to<br>10,521.22)                        | 90.35<br>(61.83 to<br>124.61)                        | 109.99<br>(78.90 to<br>141.50)                           | 113.31<br>(81.41 to<br>146.24)                           | 125.66<br>(87.91 to<br>165.77)                           |
| Pulmonary aspiration and foreign body in airway                                     | 5,636.43<br>(3,678.13 to<br>8,503.66)                         | 5,224.89<br>(3,667.94 to<br>7,306.15)                         | 5,532.39<br>(3,757.22 to<br>7,453.93)                         | 6,671.24<br>(4,450.04 to<br>9,891.16)                         | 81.59<br>(56.54 to<br>116.93)                        | 98.63<br>(73.80 to<br>128.78)                            | 102.67<br>(76.56 to<br>132.77)                           | 112.66<br>(81.74 to<br>154.70)                           |
| Foreign body in other body part                                                     | 537.74<br>(169.26 to<br>960.37)                               | 573.64<br>(160.89 to<br>1,070.73)                             | 530.57<br>(144.50 to<br>994.02)                               | 701.07<br>(204.44 to<br>1,258.45)                             | 8.76<br>(2.79 to<br>15.40)                           | 11.36<br>(3.15 to<br>21.27)                              | 10.64<br>(2.88 to<br>19.92)                              | 13.00<br>(3.68 to<br>23.78)                              |
| Environmental heat and cold exposure                                                | 1,198.44<br>(758.74 to<br>1,757.23)                           | 1,254.99<br>(717.22 to<br>1,890.59)                           | 1,007.53<br>(573.64 to<br>1,536.59)                           | 1,648.97<br>(945.93 to<br>2,482.13)                           | 23.66<br>(15.48 to<br>33.25)                         | 30.87<br>(18.48 to<br>44.75)                             | 25.44<br>(15.17 to<br>36.57)                             | 37.50<br>(22.57 to<br>54.06)                             |
| Other unintentional injuries                                                        | 4,189.11<br>(3,149.47 to<br>5,566.27)                         | 3,812.16<br>(2,592.45 to<br>5,307.73)                         | 3,433.99<br>(2,318.75 to<br>4,793.59)                         | 4,577.34<br>(3,161.58 to<br>6,308.76)                         | 75.47<br>(57.21 to<br>111.02)                        | 82.96<br>(58.25 to<br>108.87)                            | 75.63<br>(52.39 to<br>102.50)                            | 94.09<br>(67.18 to<br>126.00)                            |
| <b>Self-harm and interpersonal violence</b>                                         | <b>39,258.20</b><br><b>(25,972.33 to</b><br><b>48,455.88)</b> | <b>63,108.32</b><br><b>(39,057.77 to</b><br><b>86,854.89)</b> | <b>60,625.20</b><br><b>(37,650.12 to</b><br><b>82,662.39)</b> | <b>67,390.07</b><br><b>(41,173.02 to</b><br><b>93,942.89)</b> | <b>794.68</b><br><b>(541.99 to</b><br><b>965.93)</b> | <b>1,456.86</b><br><b>(944.52 to</b><br><b>1,976.33)</b> | <b>1,413.11</b><br><b>(921.73 to</b><br><b>1,886.19)</b> | <b>1,515.68</b><br><b>(973.57 to</b><br><b>2,092.28)</b> |
| <b>Eritrea</b>                                                                      |                                                               |                                                               |                                                               |                                                               |                                                      |                                                          |                                                          |                                                          |
| <b>Cause</b>                                                                        | <b>YLLs (actual counts)</b>                                   |                                                               |                                                               |                                                               | <b>Deaths (actual counts)</b>                        |                                                          |                                                          |                                                          |
|                                                                                     | <b>2016</b>                                                   | <b>2040 Forecast</b>                                          | <b>2040 Better Scenario</b>                                   | <b>2040 Worse Scenario</b>                                    | <b>2016</b>                                          | <b>2040 Forecast</b>                                     | <b>2040 Better Scenario</b>                              | <b>2040 Worse Scenario</b>                               |
| Self-harm                                                                           | 15,064.35<br>(12,003.90 to<br>18,600.57)                      | 30,974.44<br>(21,626.12 to<br>43,484.04)                      | 29,416.60<br>(21,084.50 to<br>40,461.59)                      | 32,980.23<br>(22,841.93 to<br>47,284.90)                      | 353.00<br>(286.23 to<br>431.07)                      | 811.56<br>(597.01 to<br>1,123.61)                        | 783.73<br>(584.03 to<br>1,050.70)                        | 838.80<br>(603.90 to<br>1,194.89)                        |
| Self-harm by firearm                                                                | 2,004.57<br>(1,153.40 to<br>3,142.26)                         | 2,965.09<br>(1,537.92 to<br>5,129.33)                         | 2,734.16<br>(1,458.87 to<br>4,638.62)                         | 3,231.04<br>(1,667.61 to<br>5,710.96)                         | 43.35<br>(26.44 to<br>66.12)                         | 71.38<br>(40.06 to<br>118.73)                            | 66.73<br>(37.40 to<br>108.64)                            | 75.97<br>(42.22 to<br>129.72)                            |
| Self-harm by other specified means                                                  | 13,059.79<br>(10,338.54 to<br>16,087.25)                      | 28,009.35<br>(19,701.87 to<br>39,109.56)                      | 26,682.44<br>(19,009.13 to<br>36,483.22)                      | 29,749.19<br>(20,513.77 to<br>42,668.24)                      | 309.66<br>(250.36 to<br>378.93)                      | 740.18<br>(535.11 to<br>1,019.42)                        | 716.99<br>(526.76 to<br>960.04)                          | 762.83<br>(543.96 to<br>1,081.17)                        |
| Interpersonal violence                                                              | 24,193.85<br>(11,550.99 to<br>32,172.25)                      | 32,133.89<br>(13,382.73 to<br>47,439.04)                      | 31,208.60<br>(13,033.88 to<br>45,815.56)                      | 34,409.84<br>(14,342.05 to<br>51,168.69)                      | 441.68<br>(207.09 to<br>585.08)                      | 645.30<br>(266.56 to<br>937.56)                          | 629.38<br>(260.07 to<br>907.97)                          | 676.88<br>(280.78 to<br>990.54)                          |
| Physical violence by firearm                                                        | 5,158.23<br>(1,908.30 to<br>8,830.62)                         | 7,091.55<br>(2,505.22 to<br>12,375.27)                        | 7,107.04<br>(2,563.40 to<br>12,283.53)                        | 7,277.31<br>(2,531.87 to<br>12,753.26)                        | 93.85<br>(34.71 to<br>159.67)                        | 138.47<br>(49.10 to<br>238.92)                           | 139.12<br>(69.97 to<br>238.21)                           | 140.09<br>(48.92 to<br>245.56)                           |
| Physical violence by sharp object                                                   | 2,419.37<br>(941.75 to<br>3,653.88)                           | 3,897.35<br>(1,449.84 to<br>6,032.50)                         | 4,009.05<br>(1,491.21 to<br>6,218.31)                         | 3,906.27<br>(1,439.83 to<br>6,010.23)                         | 48.14<br>(19.41 to<br>69.52)                         | 85.53<br>(32.45 to<br>128.51)                            | 88.50<br>(33.22 to<br>133.59)                            | 83.74<br>(31.26 to<br>124.00)                            |
| Physical violence by other means                                                    | 16,616.25<br>(7,743.28 to<br>22,723.77)                       | 21,144.98<br>(8,385.04 to<br>32,493.61)                       | 20,092.51<br>(7,847.17 to<br>30,672.15)                       | 23,226.26<br>(9,124.39 to<br>35,746.04)                       | 299.69<br>(138.77 to<br>399.87)                      | 421.31<br>(164.06 to<br>633.31)                          | 401.77<br>(154.58 to<br>602.53)                          | 453.06<br>(176.44 to<br>687.58)                          |
| <b>Forces of nature, conflict and terrorism, and executions and police conflict</b> | <b>1,375.92</b><br><b>(783.37 to</b><br><b>1,979.92)</b>      | <b>15,963.83</b><br><b>(0.00 to</b><br><b>62,203.87)</b>      | <b>16,073.96</b><br><b>(0.00 to</b><br><b>62,584.87)</b>      | <b>17,078.04</b><br><b>(0.00 to</b><br><b>71,428.27)</b>      | <b>22.49</b><br><b>(13.14 to</b><br><b>32.07)</b>    | <b>277.60</b><br><b>(0.00 to</b><br><b>1,005.19)</b>     | <b>280.75</b><br><b>(0.00 to</b><br><b>1,015.11)</b>     | <b>301.10</b><br><b>(0.00 to</b><br><b>1,119.43)</b>     |
| Exposure to forces of nature                                                        | 0.00<br>(0.00 to<br>0.00)                                     | 1.66<br>(0.00 to<br>0.00)                                     | 1.67<br>(0.00 to<br>0.00)                                     | 2.04<br>(0.00 to<br>0.00)                                     | 0.00<br>(0.00 to<br>0.00)                            | 0.03<br>(0.00 to<br>0.00)                                | 0.03<br>(0.00 to<br>0.00)                                | 0.03<br>(0.00 to<br>0.00)                                |
| Conflict and terrorism                                                              | 1,142.62<br>(586.65 to<br>1,697.26)                           | 15,953.00<br>(0.00 to<br>62,169.02)                           | 16,063.05<br>(0.00 to<br>62,549.83)                           | 17,966.25<br>(0.00 to<br>71,390.66)                           | 18.19<br>(9.34 to<br>27.03)                          | 277.41<br>(0.00 to<br>1,004.60)                          | 280.56<br>(0.00 to<br>1,014.52)                          | 300.90<br>(0.00 to<br>1,118.80)                          |

|                                                                          |                                              |                                              |                                              |                                              |                                     |                                     |                                     |                                         |
|--------------------------------------------------------------------------|----------------------------------------------|----------------------------------------------|----------------------------------------------|----------------------------------------------|-------------------------------------|-------------------------------------|-------------------------------------|-----------------------------------------|
| Executions and police conflict                                           | 233.30<br>(96.74 to 491.06)                  | 9.18<br>(0.00 to 68.61)                      | 9.24<br>(0.00 to 69.01)                      | 9.75<br>(0.00 to 72.95)                      | 4.30<br>(0.00 to 8.19)              | 0.16<br>(0.00 to 1.17)              | 0.16<br>(0.00 to 1.18)              | 0.17<br>(0.00 to 1.22)                  |
| <b>Ethiopia</b>                                                          |                                              |                                              |                                              |                                              |                                     |                                     |                                     |                                         |
| Cause                                                                    | YLLs (in 1000s)                              |                                              |                                              |                                              | Deaths (in 1000s)                   |                                     |                                     |                                         |
|                                                                          | 2016                                         | 2040 Forecast                                | 2040 Better Scenario                         | 2040 Worse Scenario                          | 2016                                | 2040 Forecast                       | 2040 Better Scenario                | 2040 Worse Scenario                     |
| <b>All causes</b>                                                        | <b>29,285.07</b><br>(26,261.99 to 32,670.59) | <b>24,434.04</b><br>(19,335.34 to 31,008.34) | <b>21,024.14</b><br>(16,664.15 to 26,832.56) | <b>42,753.66</b><br>(33,609.83 to 55,082.83) | <b>677.27</b><br>(601.54 to 754.33) | <b>786.97</b><br>(662.11 to 948.35) | <b>698.62</b><br>(588.17 to 839.93) | <b>1,157.83</b><br>(952.70 to 1,412.89) |
| <b>Communicable, maternal, neonatal, and nutritional diseases</b>        | <b>18,693.90</b><br>(16,612.28 to 21,236.21) | <b>9,577.67</b><br>(6,675.96 to 13,273.33)   | <b>7,468.18</b><br>(5,315.99 to 10,256.96)   | <b>22,361.37</b><br>(15,667.92 to 30,381.63) | <b>324.20</b><br>(289.52 to 362.62) | <b>224.98</b><br>(157.08 to 312.37) | <b>177.12</b><br>(125.49 to 250.70) | <b>434.86</b><br>(306.66 to 591.52)     |
| <b>HIV/AIDS and tuberculosis</b>                                         | <b>2,873.71</b><br>(2,478.56 to 3,289.39)    | <b>1,909.87</b><br>(1,157.92 to 2,861.74)    | <b>1,524.81</b><br>(955.55 to 2,264.69)      | <b>4,847.27</b><br>(2,633.87 to 8,177.45)    | <b>68.91</b><br>(59.73 to 79.08)    | <b>45.50</b><br>(28.79 to 68.43)    | <b>37.33</b><br>(25.02 to 54.91)    | <b>109.83</b><br>(61.38 to 177.31)      |
| Tuberculosis                                                             | 1,795.78<br>(1,470.11 to 2,161.39)           | 800.41<br>(443.12 to 1,348.27)               | 683.91<br>(396.03 to 1,133.36)               | 1,994.95<br>(1,083.95 to 3,455.48)           | 48.91<br>(40.31 to 58.19)           | 24.03<br>(13.69 to 39.76)           | 21.07<br>(12.39 to 34.20)           | 56.34<br>(30.51 to 96.02)               |
| HIV/AIDS                                                                 | 1,077.92<br>(870.77 to 1,348.08)             | 1,109.45<br>(502.66 to 1,896.54)             | 840.90<br>(384.36 to 1,420.80)               | 2,852.32<br>(1,028.31 to 6,025.14)           | 20.00<br>(16.43 to 24.41)           | 21.47<br>(9.44 to 37.07)            | 16.27<br>(7.04 to 27.64)            | 53.49<br>(19.18 to 113.18)              |
| <b>Diarrhea, lower respiratory, and other common infectious diseases</b> | <b>8,202.68</b><br>(7,062.25 to 9,557.04)    | <b>4,995.12</b><br>(2,876.12 to 7,774.29)    | <b>3,449.33</b><br>(2,002.80 to 5,482.09)    | <b>10,154.05</b><br>(5,587.79 to 15,758.28)  | <b>152.52</b><br>(129.68 to 180.00) | <b>137.46</b><br>(80.19 to 213.35)  | <b>99.45</b><br>(57.67 to 166.27)   | <b>223.53</b><br>(129.32 to 336.83)     |
| Diarrheal diseases                                                       | 2,659.17<br>(1,957.41 to 3,692.62)           | 1,575.16<br>(457.00 to 3,260.90)             | 1,184.17<br>(347.35 to 2,911.03)             | 2,856.56<br>(955.06 to 5,735.68)             | 57.10<br>(38.90 to 83.13)           | 50.66<br>(11.08 to 111.79)          | 38.13<br>(8.92 to 104.58)           | 77.33<br>(20.07 to 162.44)              |
| Intestinal infectious diseases                                           | 140.56<br>(68.34 to 253.20)                  | 97.82<br>(46.17 to 175.82)                   | 97.06<br>(46.95 to 176.67)                   | 165.38<br>(77.98 to 309.14)                  | 1.98<br>(0.99 to 3.55)              | 1.46<br>(0.71 to 2.61)              | 1.45<br>(0.71 to 2.61)              | 2.36<br>(1.14 to 4.37)                  |
| Typhoid fever                                                            | 124.79<br>(58.70 to 231.50)                  | 89.86<br>(41.46 to 165.71)                   | 89.20<br>(41.33 to 166.08)                   | 149.50<br>(66.92 to 285.00)                  | 1.75<br>(0.84 to 3.25)              | 1.33<br>(0.62 to 2.41)              | 1.32<br>(0.63 to 2.40)              | 2.12<br>(0.97 to 4.02)                  |
| Paratyphoid fever                                                        | 6.53<br>(2.41 to 15.00)                      | 5.65<br>(2.13 to 13.23)                      | 5.62<br>(2.12 to 13.06)                      | 9.91<br>(3.73 to 23.67)                      | 0.09<br>(0.03 to 0.21)              | 0.08<br>(0.03 to 0.19)              | 0.08<br>(0.03 to 0.19)              | 0.14<br>(0.05 to 0.33)                  |
| Other intestinal infectious diseases                                     | 9.24<br>(2.48 to 24.45)                      | 2.31<br>(0.62 to 6.44)                       | 2.24<br>(0.59 to 6.23)                       | 5.96<br>(1.50 to 17.25)                      | 0.13<br>(0.04 to 0.33)              | 0.05<br>(0.01 to 0.12)              | 0.05<br>(0.01 to 0.12)              | 0.10<br>(0.03 to 0.25)                  |
| Lower respiratory infections                                             | 2,738.42<br>(2,182.97 to 3,300.53)           | 2,137.22<br>(1,220.12 to 3,469.04)           | 1,243.90<br>(773.76 to 1,951.35)             | 4,777.73<br>(2,485.93 to 7,875.42)           | 55.57<br>(46.20 to 64.89)           | 64.97<br>(42.94 to 95.40)           | 42.35<br>(30.24 to 60.55)           | 109.29<br>(67.69 to 163.87)             |
| Upper respiratory infections                                             | 5.24<br>(2.09 to 10.99)                      | 2.52<br>(1.10 to 5.18)                       | 2.47<br>(1.08 to 5.16)                       | 6.57<br>(2.56 to 14.72)                      | 0.09<br>(0.04 to 0.16)              | 0.06<br>(0.03 to 0.11)              | 0.06<br>(0.03 to 0.12)              | 0.13<br>(0.06 to 0.27)                  |
| Otitis media                                                             | 1.24<br>(0.61 to 2.80)                       | 0.40<br>(0.21 to 0.78)                       | 0.41<br>(0.22 to 0.80)                       | 0.44<br>(0.21 to 0.87)                       | 0.03<br>(0.02 to 0.06)              | 0.02<br>(0.01 to 0.05)              | 0.02<br>(0.01 to 0.05)              | 0.01<br>(0.01 to 0.02)                  |
| Meningitis                                                               | 996.47<br>(723.84 to 1,396.53)               | 601.85<br>(390.70 to 912.30)                 | 566.81<br>(376.70 to 843.21)                 | 1,140.26<br>(670.35 to 1,928.66)             | 17.31<br>(12.76 to 24.03)           | 13.02<br>(8.93 to 19.34)            | 12.81<br>(8.79 to 18.62)            | 19.66<br>(12.82 to 30.65)               |
| Pneumococcal meningitis                                                  | 51.29<br>(36.12 to 73.88)                    | 37.58<br>(24.58 to 57.72)                    | 35.08<br>(23.07 to 53.27)                    | 60.18<br>(38.14 to 94.15)                    | 1.05<br>(0.75 to 1.48)              | 1.00<br>(0.67 to 1.54)              | 0.96<br>(0.65 to 1.47)              | 1.33<br>(0.88 to 2.04)                  |
| H influenzae type B meningitis                                           | 74.69<br>(52.22 to 108.66)                   | 95.46<br>(34.72 to 229.38)                   | 64.39<br>(29.25 to 142.32)                   | 416.13<br>(105.04 to 1,057.51)               | 1.20<br>(0.87 to 1.69)              | 1.50<br>(0.73 to 3.12)              | 1.16<br>(0.67 to 2.07)              | 5.22<br>(1.54 to 12.72)                 |
| Meningococcal meningitis                                                 | 132.74<br>(95.39 to 186.79)                  | 107.21<br>(67.20 to 162.73)                  | 106.81<br>(67.66 to 159.16)                  | 154.10<br>(98.16 to 239.26)                  | 2.22<br>(1.60 to 3.11)              | 2.23<br>(1.45 to 3.41)              | 2.25<br>(1.49 to 3.39)              | 2.86<br>(1.88 to 4.32)                  |
| Other meningitis                                                         | 737.75<br>(540.32 to 1,039.50)               | 361.60<br>(235.45 to 554.10)                 | 360.52<br>(240.36 to 541.40)                 | 509.84<br>(339.84 to 775.21)                 | 12.85<br>(9.55 to 17.75)            | 8.29<br>(5.55 to 12.40)             | 8.44<br>(5.79 to 12.25)             | 10.25<br>(6.94 to 15.30)                |

|                                                |                                        |                                        |                                        |                                          |                                    |                                  |                                  |                                    |
|------------------------------------------------|----------------------------------------|----------------------------------------|----------------------------------------|------------------------------------------|------------------------------------|----------------------------------|----------------------------------|------------------------------------|
| Encephalitis                                   | 82.83<br>(32.65 to<br>161.51)          | 50.30<br>(21.01 to<br>103.42)          | 48.41<br>(20.29 to<br>98.80)           | 112.01<br>(41.71 to<br>242.08)           | 1.05<br>(0.45 to<br>1.98)          | 0.71<br>(0.34 to<br>1.33)        | 0.69<br>(0.34 to<br>1.29)        | 1.46<br>(0.62 to<br>2.99)          |
| Diphtheria                                     | 4.65<br>(2.16 to<br>8.14)              | 1.09<br>(0.53 to<br>2.03)              | 0.87<br>(0.46 to<br>1.50)              | 2.34<br>(0.89 to<br>5.52)                | 0.06<br>(0.03 to<br>0.10)          | 0.02<br>(0.01 to<br>0.03)        | 0.02<br>(0.01 to<br>0.03)        | 0.03<br>(0.01 to<br>0.07)          |
| Whooping cough                                 | 774.47<br>(78.63 to<br>2,085.70)       | 439.77<br>(44.46 to<br>1,203.54)       | 260.92<br>(25.12 to<br>741.44)         | 858.29<br>(70.67 to<br>2,451.33)         | 9.16<br>(0.93 to<br>24.68)         | 5.24<br>(0.53 to<br>14.29)       | 3.13<br>(0.30 to<br>8.85)        | 10.17<br>(0.83 to<br>29.10)        |
| Tetanus                                        | 133.50<br>(74.93 to<br>211.11)         | 23.73<br>(12.23 to<br>39.43)           | 18.22<br>(9.29 to<br>28.52)            | 35.59<br>(16.85 to<br>67.46)             | 2.09<br>(1.21 to<br>3.07)          | 0.41<br>(0.22 to<br>0.63)        | 0.35<br>(0.18 to<br>0.52)        | 0.54<br>(0.28 to<br>0.92)          |
| Measles                                        | 639.90<br>(227.25 to<br>1,344.57)      | 56.46<br>(3.93 to<br>269.49)           | 17.44<br>(2.14 to<br>74.77)            | 175.11<br>(13.51 to<br>711.66)           | 7.65<br>(2.72 to<br>16.10)         | 0.68<br>(0.05 to<br>3.22)        | 0.22<br>(0.03 to<br>0.90)        | 2.09<br>(0.17 to<br>8.48)          |
| <b>Ethiopia</b>                                |                                        |                                        |                                        |                                          |                                    |                                  |                                  |                                    |
| Cause                                          | YLLs (in 1000s)                        |                                        |                                        |                                          | Deaths (in 1000s)                  |                                  |                                  |                                    |
|                                                | 2016                                   | 2040 Forecast                          | 2040 Better Scenario                   | 2040 Worse Scenario                      | 2016                               | 2040 Forecast                    | 2040 Better Scenario             | 2040 Worse Scenario                |
| Varicella and herpes zoster                    | 26.23<br>(14.58 to<br>43.63)           | 8.81<br>(4.89 to<br>15.86)             | 8.65<br>(4.65 to<br>15.58)             | 23.78<br>(12.01 to<br>48.37)             | 0.43<br>(0.28 to<br>0.64)          | 0.23<br>(0.15 to<br>0.35)        | 0.24<br>(0.15 to<br>0.37)        | 0.45<br>(0.27 to<br>0.76)          |
| <b>Neglected tropical diseases and malaria</b> | <b>267.05</b><br>(193.95 to<br>378.92) | <b>103.37</b><br>(70.47 to<br>157.95)  | <b>103.15</b><br>(70.25 to<br>160.77)  | <b>164.10</b><br>(109.95 to<br>252.33)   | <b>4.94</b><br>(3.69 to<br>6.69)   | <b>2.39</b><br>(1.69 to<br>3.45) | <b>2.42</b><br>(1.73 to<br>3.52) | <b>3.37</b><br>(2.38 to<br>4.99)   |
| Malaria                                        | 86.48<br>(51.97 to<br>131.60)          | 29.23<br>(18.95 to<br>43.07)           | 29.46<br>(18.95 to<br>43.39)           | 35.07<br>(21.41 to<br>56.11)             | 1.34<br>(0.88 to<br>1.93)          | 0.67<br>(0.43 to<br>0.99)        | 0.68<br>(0.44 to<br>1.02)        | 0.70<br>(0.45 to<br>1.04)          |
| Chagas disease                                 | 0.00<br>(0.00 to<br>0.00)              | 0.00<br>(0.00 to<br>0.00)              | 0.00<br>(0.00 to<br>0.00)              | 0.00<br>(0.00 to<br>0.00)                | 0.00<br>(0.00 to<br>0.00)          | 0.00<br>(0.00 to<br>0.00)        | 0.00<br>(0.00 to<br>0.00)        | 0.00<br>(0.00 to<br>0.00)          |
| Leishmaniasis                                  | 29.28<br>(15.88 to<br>51.48)           | 10.17<br>(5.67 to<br>17.35)            | 10.06<br>(5.59 to<br>17.25)            | 20.66<br>(12.11 to<br>34.90)             | 0.68<br>(0.37 to<br>1.18)          | 0.26<br>(0.15 to<br>0.44)        | 0.26<br>(0.15 to<br>0.44)        | 0.46<br>(0.28 to<br>0.76)          |
| African trypanosomiasis                        | 0.00<br>(0.00 to<br>0.00)              | 0.00<br>(0.00 to<br>0.00)              | 0.00<br>(0.00 to<br>0.00)              | 0.00<br>(0.00 to<br>0.00)                | 0.00<br>(0.00 to<br>0.00)          | 0.00<br>(0.00 to<br>0.00)        | 0.00<br>(0.00 to<br>0.00)        | 0.00<br>(0.00 to<br>0.00)          |
| Schistosomiasis                                | 39.81<br>(28.15 to<br>53.18)           | 25.83<br>(16.74 to<br>37.23)           | 26.02<br>(17.03 to<br>37.85)           | 31.55<br>(20.42 to<br>45.21)             | 1.13<br>(0.79 to<br>1.52)          | 0.78<br>(0.51 to<br>1.10)        | 0.80<br>(0.53 to<br>1.13)        | 0.91<br>(0.60 to<br>1.28)          |
| Cysticercosis                                  | 3.48<br>(2.37 to<br>4.89)              | 1.61<br>(0.99 to<br>2.45)              | 1.62<br>(1.00 to<br>2.48)              | 1.70<br>(1.05 to<br>2.57)                | 0.07<br>(0.05 to<br>0.10)          | 0.04<br>(0.02 to<br>0.06)        | 0.04<br>(0.02 to<br>0.06)        | 0.04<br>(0.02 to<br>0.06)          |
| Cystic echinococcosis                          | 6.52<br>(4.52 to<br>8.94)              | 1.79<br>(1.10 to<br>2.80)              | 1.76<br>(1.10 to<br>2.69)              | 4.27<br>(2.63 to<br>6.55)                | 0.14<br>(0.10 to<br>0.19)          | 0.05<br>(0.03 to<br>0.07)        | 0.05<br>(0.03 to<br>0.07)        | 0.10<br>(0.07 to<br>0.16)          |
| Dengue                                         | 0.95<br>(0.04 to<br>3.32)              | 2.38<br>(0.12 to<br>7.76)              | 2.40<br>(0.12 to<br>7.81)              | 2.96<br>(0.13 to<br>9.87)                | 0.02<br>(0.00 to<br>0.05)          | 0.06<br>(0.00 to<br>0.18)        | 0.06<br>(0.00 to<br>0.19)        | 0.06<br>(0.00 to<br>0.19)          |
| Yellow fever                                   | 47.96<br>(8.47 to<br>146.66)           | 15.11<br>(2.06 to<br>55.65)            | 14.91<br>(2.08 to<br>54.92)            | 26.77<br>(3.80 to<br>92.48)              | 0.75<br>(0.13 to<br>2.27)          | 0.25<br>(0.04 to<br>0.92)        | 0.25<br>(0.04 to<br>0.91)        | 0.43<br>(0.06 to<br>1.48)          |
| Rabies                                         | 36.09<br>(13.34 to<br>67.14)           | 8.33<br>(2.96 to<br>16.20)             | 8.04<br>(2.99 to<br>14.97)             | 27.03<br>(11.07 to<br>50.47)             | 0.59<br>(0.23 to<br>1.02)          | 0.15<br>(0.06 to<br>0.28)        | 0.15<br>(0.06 to<br>0.27)        | 0.48<br>(0.21 to<br>0.86)          |
| Intestinal nematode infections                 | 10.99<br>(6.75 to<br>16.91)            | 6.92<br>(4.04 to<br>11.65)             | 6.90<br>(3.98 to<br>11.61)             | 10.31<br>(5.43 to<br>18.50)              | 0.14<br>(0.09 to<br>0.21)          | 0.11<br>(0.07 to<br>0.16)        | 0.11<br>(0.07 to<br>0.16)        | 0.14<br>(0.08 to<br>0.24)          |
| Other neglected tropical diseases              | 5.49<br>(2.54 to<br>10.99)             | 2.00<br>(1.01 to<br>3.81)              | 1.98<br>(1.00 to<br>3.74)              | 3.78<br>(1.80 to<br>7.62)                | 0.08<br>(0.04 to<br>0.15)          | 0.04<br>(0.02 to<br>0.07)        | 0.04<br>(0.02 to<br>0.07)        | 0.06<br>(0.03 to<br>0.12)          |
| <b>Maternal disorders</b>                      | <b>664.77</b><br>(464.02 to<br>911.03) | <b>315.15</b><br>(194.97 to<br>474.62) | <b>302.54</b><br>(181.26 to<br>457.36) | <b>764.40</b><br>(475.38 to<br>1,175.46) | <b>12.24</b><br>(8.52 to<br>16.70) | <b>6.02</b><br>(3.74 to<br>9.07) | <b>5.77</b><br>(3.45 to<br>8.80) | <b>14.50</b><br>(8.97 to<br>22.29) |

|                                                       |                                |                               |                               |                                |                           |                           |                           |                           |
|-------------------------------------------------------|--------------------------------|-------------------------------|-------------------------------|--------------------------------|---------------------------|---------------------------|---------------------------|---------------------------|
| Maternal hemorrhage                                   | 142.62<br>(89.71 to<br>219.76) | 63.79<br>(35.60 to<br>105.92) | 61.96<br>(33.71 to<br>104.70) | 148.20<br>(80.69 to<br>249.03) | 2.70<br>(1.68 to<br>4.17) | 1.24<br>(0.70 to<br>2.05) | 1.21<br>(0.66 to<br>2.04) | 2.88<br>(1.58 to<br>4.78) |
| Maternal sepsis and other maternal infections         | 30.19<br>(15.12 to<br>52.15)   | 12.22<br>(5.61 to<br>21.90)   | 11.84<br>(5.64 to<br>21.08)   | 29.27<br>(13.72 to<br>53.49)   | 0.55<br>(0.28 to<br>0.95) | 0.23<br>(0.11 to<br>0.42) | 0.22<br>(0.11 to<br>0.40) | 0.55<br>(0.26 to<br>1.01) |
| Maternal hypertensive disorders                       | 85.48<br>(52.88 to<br>130.93)  | 38.27<br>(21.62 to<br>62.89)  | 37.14<br>(20.23 to<br>61.60)  | 90.81<br>(49.33 to<br>151.98)  | 1.54<br>(0.96 to<br>2.34) | 0.71<br>(0.40 to<br>1.18) | 0.69<br>(0.37 to<br>1.14) | 1.68<br>(0.91 to<br>2.82) |
| Maternal obstructed labor and uterine rupture         | 93.39<br>(55.75 to<br>140.48)  | 41.61<br>(22.17 to<br>67.96)  | 40.33<br>(21.33 to<br>68.44)  | 103.34<br>(54.67 to<br>174.96) | 1.75<br>(1.04 to<br>2.65) | 0.80<br>(0.41 to<br>1.32) | 0.78<br>(0.40 to<br>1.31) | 1.98<br>(1.05 to<br>3.35) |
| Maternal abortion, miscarriage, and ectopic pregnancy | 104.00<br>(63.05 to<br>160.78) | 47.12<br>(23.22 to<br>88.38)  | 45.53<br>(22.95 to<br>84.92)  | 114.56<br>(57.19 to<br>213.40) | 1.87<br>(1.15 to<br>2.91) | 0.88<br>(0.44 to<br>1.65) | 0.85<br>(0.43 to<br>1.59) | 2.12<br>(1.05 to<br>3.99) |
| Indirect maternal deaths                              | 150.82<br>(86.69 to<br>242.84) | 68.52<br>(34.21 to<br>118.57) | 66.10<br>(33.14 to<br>115.45) | 170.59<br>(84.67 to<br>297.73) | 2.76<br>(1.59 to<br>4.38) | 1.29<br>(0.65 to<br>2.26) | 1.24<br>(0.63 to<br>2.14) | 3.18<br>(1.57 to<br>5.46) |
| Late maternal deaths                                  | 11.74<br>(5.08 to<br>22.70)    | 4.35<br>(1.77 to<br>8.66)     | 4.21<br>(1.73 to<br>8.44)     | 10.76<br>(4.40 to<br>21.69)    | 0.22<br>(0.09 to<br>0.41) | 0.08<br>(0.03 to<br>0.17) | 0.08<br>(0.03 to<br>0.16) | 0.20<br>(0.08 to<br>0.41) |
| Maternal deaths aggravated by HIV/AIDS                | 4.29<br>(2.11 to<br>7.14)      | 19.37<br>(5.69 to<br>38.89)   | 16.20<br>(3.80 to<br>35.75)   | 50.05<br>(20.41 to<br>92.77)   | 0.09<br>(0.04 to<br>0.14) | 0.40<br>(0.12 to<br>0.80) | 0.34<br>(0.08 to<br>0.73) | 1.03<br>(0.42 to<br>1.88) |
| Other maternal disorders                              | 42.24<br>(22.23 to<br>68.12)   | 19.89<br>(9.90 to<br>35.47)   | 19.22<br>(9.67 to<br>33.80)   | 46.82<br>(22.74 to<br>83.77)   | 0.78<br>(0.41 to<br>1.26) | 0.38<br>(0.19 to<br>0.69) | 0.37<br>(0.18 to<br>0.66) | 0.89<br>(0.42 to<br>1.59) |

| Ethiopia                                                 |                                       |                                       |                                       |                                       |                              |                              |                              |                              |
|----------------------------------------------------------|---------------------------------------|---------------------------------------|---------------------------------------|---------------------------------------|------------------------------|------------------------------|------------------------------|------------------------------|
| Cause                                                    | YLLs (in 1000s)                       |                                       |                                       |                                       | Deaths (in 1000s)            |                              |                              |                              |
|                                                          | 2016                                  | 2040 Forecast                         | 2040 Better Scenario                  | 2040 Worse Scenario                   | 2016                         | 2040 Forecast                | 2040 Better Scenario         | 2040 Worse Scenario          |
| <b>Neonatal disorders</b>                                | 4,691.97<br>(3,783.52 to<br>5,722.90) | 1,799.97<br>(1,171.81 to<br>2,415.53) | 1,561.09<br>(1,057.07 to<br>2,268.92) | 5,299.65<br>(3,653.69 to<br>7,417.75) | 54.20<br>(43.71 to<br>66.11) | 19.76<br>(13.54 to<br>27.91) | 18.04<br>(12.21 to<br>26.21) | 61.23<br>(42.21 to<br>85.68) |
| Neonatal preterm birth                                   | 1,053.32<br>(717.07 to<br>1,489.78)   | 444.09<br>(279.79 to<br>650.37)       | 337.71<br>(209.21 to<br>501.74)       | 1,290.24<br>(813.22 to<br>1,896.99)   | 12.17<br>(8.28 to<br>17.21)  | 5.13<br>(3.23 to<br>7.51)    | 3.90<br>(2.42 to<br>5.80)    | 14.90<br>(9.40 to<br>21.91)  |
| Neonatal encephalopathy due to birth asphyxia and trauma | 1,587.29<br>(1,120.09 to<br>2,196.03) | 523.74<br>(288.94 to<br>837.31)       | 507.29<br>(280.35 to<br>799.18)       | 1,575.66<br>(878.95 to<br>2,525.26)   | 18.33<br>(12.94 to<br>25.36) | 6.05<br>(3.34 to<br>9.67)    | 5.86<br>(3.24 to<br>9.23)    | 18.20<br>(10.16 to<br>29.17) |
| Neonatal sepsis and other neonatal infections            | 1,087.12<br>(651.91 to<br>1,698.82)   | 450.48<br>(234.12 to<br>786.20)       | 435.33<br>(225.82 to<br>764.07)       | 1,404.55<br>(722.91 to<br>2,457.27)   | 12.56<br>(7.53 to<br>19.63)  | 5.21<br>(2.71 to<br>9.08)    | 5.03<br>(2.61 to<br>8.83)    | 16.23<br>(8.35 to<br>28.39)  |
| Hemolytic disease and other neonatal jaundice            | 111.90<br>(63.74 to<br>191.11)        | 24.22<br>(11.78 to<br>50.92)          | 23.40<br>(11.35 to<br>47.66)          | 85.32<br>(42.47 to<br>174.34)         | 1.29<br>(0.74 to<br>2.21)    | 0.28<br>(0.14 to<br>0.59)    | 0.27<br>(0.13 to<br>0.55)    | 0.99<br>(0.49 to<br>2.01)    |
| Other neonatal disorders                                 | 852.34<br>(393.90 to<br>1,413.37)     | 267.43<br>(112.11 to<br>490.85)       | 257.35<br>(108.54 to<br>464.51)       | 943.89<br>(412.19 to<br>1,684.69)     | 9.85<br>(4.55 to<br>16.33)   | 3.09<br>(1.30 to<br>5.67)    | 2.97<br>(1.25 to<br>5.37)    | 10.91<br>(4.76 to<br>19.46)  |
| <b>Nutritional deficiencies</b>                          | 1,104.78<br>(786.16 to<br>1,479.70)   | 316.89<br>(222.15 to<br>460.45)       | 302.33<br>(213.72 to<br>437.20)       | 661.79<br>(404.04 to<br>1,103.37)     | 19.02<br>(14.92 to<br>23.38) | 9.88<br>(7.56 to<br>11.17)   | 9.27<br>(7.62 to<br>11.38)   | 14.27<br>(10.77 to<br>19.89) |
| Protein-energy malnutrition                              | 1,029.07<br>(716.23 to<br>1,401.96)   | 241.08<br>(156.70 to<br>383.65)       | 226.25<br>(147.83 to<br>347.57)       | 544.14<br>(306.28 to<br>947.76)       | 16.72<br>(12.78 to<br>21.04) | 6.39<br>(4.90 to<br>8.32)    | 6.47<br>(4.92 to<br>8.33)    | 10.71<br>(7.46 to<br>15.66)  |
| Iodine deficiency                                        | 6.43<br>(0.37 to<br>22.96)            | 10.68<br>(0.35 to<br>41.46)           | 10.40<br>(0.34 to<br>37.55)           | 23.21<br>(0.68 to<br>116.77)          | 0.15<br>(0.01 to<br>0.44)    | 0.34<br>(0.01 to<br>1.07)    | 0.35<br>(0.01 to<br>1.07)    | 0.56<br>(0.02 to<br>1.93)    |
| Dietary iron deficiency                                  | 3.58<br>(2.64 to<br>4.74)             | 2.80<br>(1.88 to<br>4.14)             | 2.79<br>(1.84 to<br>4.14)             | 3.77<br>(2.53 to<br>5.47)             | 0.07<br>(0.05 to<br>0.09)    | 0.06<br>(0.04 to<br>0.09)    | 0.06<br>(0.04 to<br>0.09)    | 0.07<br>(0.05 to<br>0.11)    |
| Other nutritional deficiencies                           | 65.70<br>(45.72 to<br>92.43)          | 62.33<br>(41.85 to<br>87.40)          | 62.89<br>(42.27 to<br>88.44)          | 90.66<br>(60.86 to<br>127.10)         | 2.09<br>(1.48 to<br>3.11)    | 2.29<br>(1.60 to<br>3.26)    | 2.40<br>(1.62 to<br>3.43)    | 2.92<br>(2.03 to<br>4.15)    |

|                                                                         |                                          |                                             |                                             |                                              |                                     |                                     |                                     |                                     |
|-------------------------------------------------------------------------|------------------------------------------|---------------------------------------------|---------------------------------------------|----------------------------------------------|-------------------------------------|-------------------------------------|-------------------------------------|-------------------------------------|
| <b>Other communicable, maternal, neonatal, and nutritional diseases</b> | <b>888.94</b><br>(512.59 to 1,442.03)    | <b>227.31</b><br>(148.40 to 348.53)         | <b>224.93</b><br>(146.29 to 350.33)         | <b>470.11</b><br>(272.51 to 795.42)          | <b>12.36</b><br>(7.82 to 19.00)     | <b>4.77</b><br>(3.65 to 6.39)       | <b>4.83</b><br>(3.69 to 6.55)       | <b>8.12</b><br>(5.62 to 12.12)      |
| Sexually transmitted infections excluding HIV                           | 649.07<br>(301.52 to 1,202.58)           | 91.25<br>(36.59 to 190.36)                  | 89.48<br>(36.63 to 184.14)                  | 224.03<br>(78.46 to 481.01)                  | 7.79<br>(3.70 to 14.24)             | 1.22<br>(0.57 to 2.38)              | 1.21<br>(0.58 to 2.31)              | 2.81<br>(1.08 to 5.82)              |
| Syphilis                                                                | 637.92<br>(291.72 to 1,192.20)           | 81.83<br>(27.73 to 178.91)                  | 80.06<br>(27.40 to 172.97)                  | 211.76<br>(65.06 to 467.85)                  | 7.56<br>(3.49 to 14.01)             | 1.02<br>(0.38 to 2.16)              | 1.00<br>(0.38 to 2.09)              | 2.55<br>(0.84 to 5.54)              |
| Chlamydial infection                                                    | 2.15<br>(1.39 to 3.13)                   | 1.83<br>(1.15 to 2.69)                      | 1.83<br>(1.14 to 2.69)                      | 2.41<br>(1.50 to 3.54)                       | 0.04<br>(0.03 to 0.06)              | 0.04<br>(0.03 to 0.06)              | 0.04<br>(0.03 to 0.06)              | 0.05<br>(0.03 to 0.07)              |
| Gonococcal infection                                                    | 5.72<br>(3.83 to 8.09)                   | 4.86<br>(3.07 to 7.00)                      | 4.86<br>(3.08 to 7.03)                      | 6.26<br>(3.94 to 9.24)                       | 0.12<br>(0.08 to 0.17)              | 0.11<br>(0.07 to 0.15)              | 0.11<br>(0.08 to 0.15)              | 0.14<br>(0.09 to 0.19)              |
| Other sexually transmitted infections                                   | 3.27<br>(2.17 to 4.70)                   | 2.74<br>(1.71 to 4.03)                      | 2.73<br>(1.72 to 4.03)                      | 3.59<br>(2.22 to 5.37)                       | 0.07<br>(0.05 to 0.09)              | 0.06<br>(0.04 to 0.08)              | 0.06<br>(0.04 to 0.08)              | 0.07<br>(0.05 to 0.11)              |
| Acute hepatitis                                                         | 115.36<br>(95.03 to 139.17)              | 87.76<br>(68.00 to 114.32)                  | 87.93<br>(67.52 to 116.07)                  | 125.78<br>(97.15 to 161.94)                  | 2.82<br>(2.34 to 3.40)              | 2.45<br>(1.97 to 3.09)              | 2.50<br>(2.01 to 3.19)              | 3.28<br>(2.65 to 4.09)              |
| Acute hepatitis A                                                       | 3.13<br>(0.49 to 7.31)                   | 1.35<br>(0.47 to 2.85)                      | 1.34<br>(0.46 to 2.78)                      | 2.54<br>(0.75 to 5.68)                       | 0.04<br>(0.01 to 0.09)              | 0.03<br>(0.01 to 0.06)              | 0.03<br>(0.01 to 0.06)              | 0.05<br>(0.02 to 0.09)              |
| Acute hepatitis B                                                       | 91.86<br>(74.11 to 113.88)               | 72.15<br>(55.17 to 96.20)                   | 72.21<br>(54.32 to 96.71)                   | 102.56<br>(79.07 to 134.41)                  | 2.33<br>(1.90 to 2.86)              | 2.04<br>(1.57 to 2.56)              | 2.04<br>(1.56 to 2.66)              | 2.72<br>(2.13 to 3.48)              |
| Acute hepatitis C                                                       | 2.22<br>(1.58 to 3.06)                   | 2.49<br>(1.71 to 3.56)                      | 2.53<br>(1.73 to 3.63)                      | 2.96<br>(2.05 to 4.23)                       | 0.07<br>(0.05 to 0.09)              | 0.08<br>(0.06 to 0.12)              | 0.09<br>(0.06 to 0.12)              | 0.09<br>(0.06 to 0.13)              |
| Acute hepatitis E                                                       | 18.14<br>(13.14 to 24.73)                | 11.76<br>(7.96 to 17.24)                    | 11.86<br>(8.05 to 17.48)                    | 17.72<br>(11.79 to 26.16)                    | 0.37<br>(0.27 to 0.52)              | 0.34<br>(0.25 to 0.48)              | 0.35<br>(0.24 to 0.50)              | 0.42<br>(0.29 to 0.60)              |
| Other unspecified infectious diseases                                   | 134.51<br>(50.21 to 417.42)              | 48.30<br>(26.82 to 102.18)                  | 47.52<br>(26.53 to 101.63)                  | 120.31<br>(58.71 to 285.07)                  | 1.75<br>(0.89 to 5.13)              | 1.09<br>(0.72 to 1.77)              | 1.12<br>(0.73 to 1.82)              | 2.03<br>(1.23 to 3.98)              |
| <b>Non-communicable diseases</b>                                        | <b>7906.55</b><br>(6,720.64 to 9,191.82) | <b>11,536.11</b><br>(9,151.18 to 14,519.76) | <b>10,330.72</b><br>(8,250.85 to 12,983.67) | <b>16,321.43</b><br>(12,558.24 to 21,330.02) | <b>294.79</b><br>(253.32 to 338.66) | <b>476.80</b><br>(403.22 to 564.48) | <b>436.81</b><br>(372.12 to 513.90) | <b>626.82</b><br>(519.22 to 768.29) |

**Ethiopia**

| Cause                      | YLLs (in 1000s)                           |                                           |                                           |                                           | Deaths (in 1000s)                |                                     |                                     |                                     |
|----------------------------|-------------------------------------------|-------------------------------------------|-------------------------------------------|-------------------------------------------|----------------------------------|-------------------------------------|-------------------------------------|-------------------------------------|
|                            | 2016                                      | 2040 Forecast                             | 2040 Better Scenario                      | 2040 Worse Scenario                       | 2016                             | 2040 Forecast                       | 2040 Better Scenario                | 2040 Worse Scenario                 |
| <b>Neoplasms</b>           | <b>1,989.11</b><br>(1,586.61 to 2,405.02) | <b>3,725.97</b><br>(2,824.27 to 4,807.48) | <b>3,604.12</b><br>(2,746.43 to 4,585.32) | <b>3,959.03</b><br>(2,989.11 to 5,097.34) | <b>65.71</b><br>(52.45 to 79.01) | <b>134.02</b><br>(104.92 to 164.36) | <b>132.01</b><br>(104.13 to 160.34) | <b>133.16</b><br>(103.03 to 163.38) |
| Lip and oral cavity cancer | 31.31<br>(25.91 to 36.99)                 | 52.92<br>(32.71 to 82.61)                 | 44.87<br>(29.75 to 65.99)                 | 70.49<br>(40.52 to 115.41)                | 1.19<br>(1.00 to 1.39)           | 2.06<br>(1.34 to 3.06)              | 1.81<br>(1.25 to 2.57)              | 2.55<br>(1.56 to 3.96)              |
| Nasopharynx cancer         | 24.79<br>(16.16 to 37.33)                 | 51.44<br>(25.70 to 98.36)                 | 40.31<br>(21.53 to 73.13)                 | 76.20<br>(35.80 to 152.89)                | 0.74<br>(0.50 to 1.09)           | 1.57<br>(0.82 to 2.91)              | 1.26<br>(0.70 to 2.21)              | 2.24<br>(1.10 to 4.26)              |
| Other pharynx cancer       | 16.93<br>(12.91 to 22.41)                 | 28.71<br>(16.32 to 48.85)                 | 24.72<br>(14.87 to 40.55)                 | 34.62<br>(19.33 to 59.54)                 | 0.57<br>(0.44 to 0.74)           | 0.99<br>(0.59 to 1.62)              | 0.87<br>(0.54 to 1.38)              | 1.15<br>(0.66 to 1.94)              |
| Esophageal cancer          | 60.74<br>(49.96 to 72.98)                 | 115.05<br>(60.30 to 204.68)               | 96.23<br>(53.42 to 168.40)                | 147.60<br>(74.08 to 276.19)               | 2.58<br>(2.15 to 3.05)           | 4.80<br>(2.60 to 8.25)              | 4.19<br>(2.39 to 7.28)              | 5.76<br>(2.97 to 10.16)             |
| Stomach cancer             | 80.98<br>(65.08 to 98.83)                 | 106.12<br>(78.48 to 143.08)               | 106.81<br>(78.54 to 144.69)               | 122.87<br>(91.36 to 170.92)               | 3.25<br>(2.66 to 3.88)           | 4.35<br>(3.36 to 5.65)              | 4.47<br>(3.45 to 5.84)              | 4.79<br>(3.71 to 6.39)              |
| Colon and rectum cancer    | 107.96<br>(89.33 to 127.07)               | 279.37<br>(198.28 to 387.11)              | 274.89<br>(198.77 to 377.87)              | 262.41<br>(183.72 to 369.13)              | 4.73<br>(4.00 to 5.50)           | 13.21<br>(9.78 to 17.95)            | 13.47<br>(10.03 to 18.14)           | 11.45<br>(8.34 to 15.78)            |

|                                      |                                 |                                 |                                 |                                 |                            |                             |                             |                             |
|--------------------------------------|---------------------------------|---------------------------------|---------------------------------|---------------------------------|----------------------------|-----------------------------|-----------------------------|-----------------------------|
| Liver cancer                         | 141.10<br>(104.45 to<br>179.89) | 276.48<br>(183.51 to<br>393.07) | 255.69<br>(176.10 to<br>354.28) | 297.13<br>(194.98 to<br>425.22) | 4.63<br>(3.50 to<br>5.84)  | 9.58<br>(6.70 to<br>13.16)  | 9.04<br>(6.53 to<br>11.99)  | 9.77<br>(6.67 to<br>13.55)  |
| Liver cancer due to hepatitis B      | 43.96<br>(30.34 to<br>60.39)    | 85.64<br>(52.64 to<br>130.83)   | 79.71<br>(50.54 to<br>118.16)   | 91.00<br>(54.56 to<br>141.34)   | 1.28<br>(0.88 to<br>1.76)  | 2.62<br>(1.62 to<br>3.90)   | 2.47<br>(1.59 to<br>3.62)   | 2.67<br>(1.66 to<br>4.07)   |
| Liver cancer due to hepatitis C      | 36.18<br>(24.57 to<br>48.41)    | 73.54<br>(45.95 to<br>107.03)   | 69.83<br>(45.19 to<br>98.70)    | 75.19<br>(46.66 to<br>111.46)   | 1.43<br>(0.98 to<br>1.89)  | 3.03<br>(2.04 to<br>4.32)   | 2.94<br>(2.01 to<br>4.03)   | 2.93<br>(1.94 to<br>4.18)   |
| Liver cancer due to alcohol use      | 18.91<br>(13.30 to<br>25.08)    | 39.09<br>(24.76 to<br>58.52)    | 33.47<br>(22.03 to<br>48.03)    | 45.47<br>(28.24 to<br>68.79)    | 0.69<br>(0.50 to<br>0.90)  | 1.43<br>(0.95 to<br>2.07)   | 1.25<br>(0.86 to<br>1.75)   | 1.58<br>(1.04 to<br>2.32)   |
| Liver cancer due to other causes     | 42.05<br>(29.45 to<br>56.97)    | 78.21<br>(48.65 to<br>116.64)   | 72.68<br>(45.93 to<br>104.02)   | 85.47<br>(51.94 to<br>127.47)   | 1.24<br>(0.90 to<br>1.65)  | 2.51<br>(1.59 to<br>3.65)   | 2.37<br>(1.54 to<br>3.55)   | 2.59<br>(1.64 to<br>3.76)   |
| Gallbladder and biliary tract cancer | 12.70<br>(10.09 to<br>16.04)    | 17.87<br>(14.12 to<br>22.89)    | 18.39<br>(14.37 to<br>23.95)    | 16.58<br>(13.27 to<br>20.96)    | 0.52<br>(0.42 to<br>0.66)  | 0.76<br>(0.63 to<br>0.97)   | 0.80<br>(0.65 to<br>1.03)   | 0.67<br>(0.56 to<br>0.83)   |
| Pancreatic cancer                    | 43.35<br>(36.26 to<br>51.26)    | 104.56<br>(81.51 to<br>130.44)  | 104.43<br>(81.78 to<br>130.10)  | 96.05<br>(75.47 to<br>119.73)   | 1.75<br>(1.48 to<br>2.04)  | 4.31<br>(3.50 to<br>5.23)   | 4.39<br>(3.54 to<br>5.33)   | 3.77<br>(3.05 to<br>4.59)   |
| Larynx cancer                        | 16.27<br>(12.30 to<br>21.92)    | 30.31<br>(16.29 to<br>53.43)    | 23.07<br>(13.60 to<br>37.81)    | 44.98<br>(22.32 to<br>82.76)    | 0.63<br>(0.48 to<br>0.82)  | 1.15<br>(0.66 to<br>1.92)   | 0.91<br>(0.56 to<br>1.41)   | 1.62<br>(0.85 to<br>2.86)   |
| Tracheal, bronchus, and lung cancer  | 65.00<br>(54.01 to<br>77.34)    | 149.84<br>(90.02 to<br>248.45)  | 88.80<br>(58.76 to<br>132.60)   | 181.30<br>(102.25 to<br>301.37) | 2.80<br>(2.32 to<br>3.32)  | 6.50<br>(4.08 to<br>10.16)  | 3.99<br>(2.76 to<br>5.65)   | 7.44<br>(4.45 to<br>11.92)  |
| Malignant skin melanoma              | 16.67<br>(12.92 to<br>20.66)    | 37.02<br>(28.20 to<br>46.39)    | 38.20<br>(29.17 to<br>48.20)    | 30.67<br>(23.28 to<br>38.29)    | 0.65<br>(0.50 to<br>0.79)  | 1.51<br>(1.19 to<br>1.81)   | 1.59<br>(1.26 to<br>1.92)   | 1.18<br>(0.94 to<br>1.41)   |
| Non-melanoma skin cancer             | 9.88<br>(7.48 to<br>12.48)      | 19.58<br>(14.72 to<br>24.78)    | 20.20<br>(15.27 to<br>25.88)    | 21.36<br>(16.18 to<br>26.90)    | 0.43<br>(0.32 to<br>0.55)  | 0.91<br>(0.72 to<br>1.11)   | 0.97<br>(0.76 to<br>1.20)   | 0.92<br>(0.71 to<br>1.12)   |
| Breast cancer                        | 130.17<br>(93.70 to<br>179.42)  | 277.22<br>(191.43 to<br>395.10) | 266.08<br>(185.81 to<br>380.35) | 291.66<br>(198.88 to<br>420.22) | 4.16<br>(3.06 to<br>5.62)  | 9.26<br>(6.63 to<br>12.87)  | 9.05<br>(6.58 to<br>12.58)  | 9.33<br>(6.60 to<br>13.15)  |
| Cervical cancer                      | 293.55<br>(170.77 to<br>480.38) | 407.86<br>(223.09 to<br>685.47) | 408.69<br>(227.68 to<br>679.46) | 484.43<br>(262.01 to<br>830.52) | 9.55<br>(5.65 to<br>15.31) | 13.31<br>(7.47 to<br>21.72) | 13.50<br>(7.71 to<br>21.60) | 15.31<br>(8.56 to<br>25.35) |
| Uterine cancer                       | 30.42<br>(20.49 to<br>40.81)    | 48.01<br>(32.97 to<br>64.68)    | 48.48<br>(32.98 to<br>66.15)    | 58.41<br>(39.80 to<br>78.48)    | 1.12<br>(0.77 to<br>1.47)  | 1.83<br>(1.30 to<br>2.36)   | 1.87<br>(1.31 to<br>2.43)   | 2.13<br>(1.49 to<br>2.75)   |
| Ovarian cancer                       | 58.82<br>(38.61 to<br>78.85)    | 126.82<br>(83.18 to<br>175.84)  | 127.25<br>(83.03 to<br>175.78)  | 110.34<br>(71.59 to<br>151.36)  | 1.99<br>(1.33 to<br>2.62)  | 4.48<br>(2.98 to<br>6.02)   | 4.56<br>(3.07 to<br>6.07)   | 3.75<br>(2.47 to<br>5.05)   |
| Prostate cancer                      | 129.39<br>(45.85 to<br>192.08)  | 341.54<br>(127.78 to<br>498.03) | 356.78<br>(137.62 to<br>518.80) | 297.33<br>(105.14 to<br>428.91) | 7.02<br>(2.50 to<br>10.35) | 19.13<br>(7.42 to<br>26.60) | 20.42<br>(8.16 to<br>28.41) | 15.85<br>(5.92 to<br>21.93) |
| Testicular cancer                    | 3.48<br>(2.45 to<br>4.77)       | 6.16<br>(4.03 to<br>9.21)       | 6.20<br>(4.05 to<br>9.36)       | 6.97<br>(4.61 to<br>10.39)      | 0.08<br>(0.06 to<br>0.11)  | 0.15<br>(0.10 to<br>0.22)   | 0.15<br>(0.10 to<br>0.23)   | 0.17<br>(0.12 to<br>0.24)   |

**Ethiopia**

| Cause                           | YLLs (in 1000s)              |                                |                                |                                | Deaths (in 1000s)         |                           |                           |                           |
|---------------------------------|------------------------------|--------------------------------|--------------------------------|--------------------------------|---------------------------|---------------------------|---------------------------|---------------------------|
|                                 | 2016                         | 2040 Forecast                  | 2040 Better Scenario           | 2040 Worse Scenario            | 2016                      | 2040 Forecast             | 2040 Better Scenario      | 2040 Worse Scenario       |
| Kidney cancer                   | 16.23<br>(10.54 to<br>22.75) | 28.71<br>(20.94 to<br>39.27)   | 28.91<br>(21.07 to<br>39.30)   | 28.13<br>(19.51 to<br>39.91)   | 0.40<br>(0.31 to<br>0.51) | 0.92<br>(0.73 to<br>1.18) | 0.95<br>(0.75 to<br>1.20) | 0.80<br>(0.61 to<br>1.02) |
| Bladder cancer                  | 23.58<br>(18.82 to<br>28.80) | 43.40<br>(32.55 to<br>56.02)   | 43.12<br>(32.46 to<br>55.31)   | 44.72<br>(33.53 to<br>58.70)   | 1.10<br>(0.89 to<br>1.32) | 2.11<br>(1.65 to<br>2.65) | 2.15<br>(1.68 to<br>2.68) | 2.03<br>(1.56 to<br>2.56) |
| Brain and nervous system cancer | 53.09<br>(43.02 to<br>68.98) | 102.91<br>(79.18 to<br>139.65) | 104.71<br>(80.25 to<br>143.35) | 105.18<br>(81.76 to<br>139.24) | 1.30<br>(1.06 to<br>1.72) | 2.95<br>(2.34 to<br>3.95) | 3.05<br>(2.41 to<br>4.12) | 2.75<br>(2.22 to<br>3.64) |

|                                |                                                           |                                                            |                                                            |                                                            |                                                      |                                                      |                                                      |                                                      |
|--------------------------------|-----------------------------------------------------------|------------------------------------------------------------|------------------------------------------------------------|------------------------------------------------------------|------------------------------------------------------|------------------------------------------------------|------------------------------------------------------|------------------------------------------------------|
| Thyroid cancer                 | 25.03<br>(13.31 to<br>32.72)                              | 37.66<br>(19.66 to<br>52.34)                               | 36.57<br>(19.27 to<br>50.35)                               | 44.08<br>(23.27 to<br>61.38)                               | 0.81<br>(0.43 to<br>1.04)                            | 1.28<br>(0.70 to<br>1.73)                            | 1.26<br>(0.69 to<br>1.66)                            | 1.44<br>(0.77 to<br>1.93)                            |
| Mesothelioma                   | 3.53<br>(2.38 to<br>4.95)                                 | 7.10<br>(4.43 to<br>10.49)                                 | 7.24<br>(4.49 to<br>10.73)                                 | 7.33<br>(4.72 to<br>10.56)                                 | 0.12<br>(0.08 to<br>0.18)                            | 0.25<br>(0.16 to<br>0.37)                            | 0.26<br>(0.16 to<br>0.39)                            | 0.25<br>(0.16 to<br>0.36)                            |
| Hodgkin lymphoma               | 28.01<br>(12.84 to<br>41.69)                              | 25.64<br>(11.56 to<br>39.19)                               | 25.63<br>(11.49 to<br>39.36)                               | 38.21<br>(17.06 to<br>58.93)                               | 0.62<br>(0.29 to<br>0.89)                            | 0.64<br>(0.29 to<br>0.93)                            | 0.64<br>(0.30 to<br>0.96)                            | 0.89<br>(0.41 to<br>1.32)                            |
| Non-Hodgkin lymphoma           | 194.41<br>(114.52 to<br>259.19)                           | 296.24<br>(172.02 to<br>412.42)                            | 296.46<br>(172.64 to<br>413.45)                            | 318.89<br>(179.20 to<br>450.43)                            | 3.97<br>(2.41 to<br>5.15)                            | 7.29<br>(4.47 to<br>9.75)                            | 7.38<br>(4.56 to<br>9.82)                            | 7.07<br>(4.19 to<br>9.48)                            |
| Multiple myeloma               | 24.07<br>(15.17 to<br>31.13)                              | 59.68<br>(36.22 to<br>79.91)                               | 59.70<br>(36.61 to<br>79.35)                               | 52.60<br>(31.43 to<br>70.46)                               | 0.86<br>(0.55 to<br>1.10)                            | 2.17<br>(1.35 to<br>2.85)                            | 2.20<br>(1.39 to<br>2.86)                            | 1.86<br>(1.13 to<br>2.44)                            |
| Leukemia                       | 60.55<br>(48.99 to<br>74.33)                              | 91.49<br>(70.26 to<br>120.01)                              | 89.48<br>(69.05 to<br>117.88)                              | 98.76<br>(75.01 to<br>128.17)                              | 1.44<br>(1.17 to<br>1.74)                            | 2.58<br>(2.26 to<br>3.27)                            | 2.57<br>(2.06 to<br>3.27)                            | 2.57<br>(2.05 to<br>3.18)                            |
| Acute lymphoid leukemia        | 19.84<br>(14.43 to<br>24.95)                              | 27.61<br>(19.65 to<br>36.71)                               | 27.02<br>(19.48 to<br>35.88)                               | 30.09<br>(21.29 to<br>40.07)                               | 0.39<br>(0.30 to<br>0.48)                            | 0.65<br>(0.49 to<br>0.85)                            | 0.64<br>(0.48 to<br>0.83)                            | 0.65<br>(0.48 to<br>0.84)                            |
| Chronic lymphoid leukemia      | 2.71<br>(2.03 to<br>3.45)                                 | 4.83<br>(3.51 to<br>6.39)                                  | 4.79<br>(3.46 to<br>6.35)                                  | 4.67<br>(3.42 to<br>6.05)                                  | 0.12<br>(0.09 to<br>0.15)                            | 0.22<br>(0.16 to<br>0.29)                            | 0.22<br>(0.17 to<br>0.29)                            | 0.20<br>(0.15 to<br>0.26)                            |
| Acute myeloid leukemia         | 12.95<br>(9.85 to<br>17.19)                               | 27.27<br>(20.16 to<br>37.35)                               | 26.70<br>(19.53 to<br>36.67)                               | 26.20<br>(19.02 to<br>35.67)                               | 0.30<br>(0.23 to<br>0.38)                            | 0.74<br>(0.57 to<br>1.01)                            | 0.74<br>(0.56 to<br>1.01)                            | 0.66<br>(0.49 to<br>0.88)                            |
| Chronic myeloid leukemia       | 7.42<br>(5.37 to<br>10.69)                                | 9.20<br>(6.24 to<br>13.57)                                 | 8.84<br>(6.07 to<br>13.00)                                 | 9.60<br>(6.52 to<br>14.02)                                 | 0.19<br>(0.14 to<br>0.27)                            | 0.25<br>(0.18 to<br>0.36)                            | 0.24<br>(0.17 to<br>0.35)                            | 0.25<br>(0.18 to<br>0.37)                            |
| Other leukemia                 | 17.64<br>(13.57 to<br>22.76)                              | 22.57<br>(16.64 to<br>30.72)                               | 22.14<br>(16.19 to<br>30.41)                               | 28.21<br>(20.92 to<br>38.59)                               | 0.45<br>(0.36 to<br>0.56)                            | 0.72<br>(0.57 to<br>0.91)                            | 0.72<br>(0.56 to<br>0.92)                            | 0.81<br>(0.64 to<br>1.02)                            |
| Other neoplasms                | 287.09<br>(216.81 to<br>365.40)                           | 556.25<br>(403.69 to<br>740.51)                            | 562.21<br>(408.51 to<br>746.55)                            | 569.72<br>(411.50 to<br>751.38)                            | 6.71<br>(5.19 to<br>8.49)                            | 13.94<br>(10.54 to<br>18.03)                         | 14.25<br>(10.80 to<br>18.42)                         | 13.67<br>(10.28 to<br>17.60)                         |
| <b>Cardiovascular diseases</b> | <b>2700.91</b><br><b>(2,304.13 to</b><br><b>3,143.57)</b> | <b>3,503.95</b><br><b>(2,482.70 to</b><br><b>5,055.64)</b> | <b>2,621.98</b><br><b>(1,887.60 to</b><br><b>3,653.58)</b> | <b>6,554.47</b><br><b>(4,406.03 to</b><br><b>9,793.86)</b> | <b>123.97</b><br><b>(107.66 to</b><br><b>142.62)</b> | <b>171.13</b><br><b>(131.37 to</b><br><b>225.98)</b> | <b>137.40</b><br><b>(107.59 to</b><br><b>177.86)</b> | <b>287.32</b><br><b>(209.90 to</b><br><b>397.27)</b> |
| Rheumatic heart disease        | 49.55<br>(37.70 to<br>67.54)                              | 31.26<br>(21.89 to<br>44.75)                               | 31.23<br>(21.14 to<br>45.25)                               | 48.67<br>(33.15 to<br>70.67)                               | 1.64<br>(1.26 to<br>2.25)                            | 1.15<br>(0.84 to<br>1.63)                            | 1.18<br>(0.84 to<br>1.68)                            | 1.67<br>(1.17 to<br>2.41)                            |
| Ischemic heart disease         | 1,122.20<br>(948.67 to<br>1,313.11)                       | 1,483.70<br>(877.08 to<br>2,442.13)                        | 967.57<br>(572.53 to<br>1,633.75)                          | 3,062.65<br>(1,739.11 to<br>5,062.68)                      | 53.78<br>(45.97 to<br>62.17)                         | 72.42<br>(46.19 to<br>108.74)                        | 51.85<br>(33.46 to<br>81.12)                         | 134.52<br>(83.21 to<br>207.00)                       |
| Stroke                         | 837.46<br>(696.21 to<br>992.07)                           | 912.23<br>(535.74 to<br>1,554.59)                          | 605.38<br>(363.88 to<br>999.07)                            | 2,013.95<br>(1,137.86 to<br>3,526.86)                      | 38.35<br>(32.25 to<br>45.10)                         | 43.93<br>(28.53 to<br>67.67)                         | 31.85<br>(21.70 to<br>47.14)                         | 86.95<br>(54.99 to<br>140.01)                        |
| Ischemic stroke                | 200.88<br>(158.01 to<br>256.12)                           | 225.09<br>(135.90 to<br>369.03)                            | 162.93<br>(100.87 to<br>258.04)                            | 390.88<br>(224.38 to<br>659.44)                            | 12.02<br>(9.61 to<br>15.11)                          | 14.53<br>(9.24 to<br>22.94)                          | 11.43<br>(7.49 to<br>17.55)                          | 22.81<br>(13.97 to<br>36.40)                         |
| Intracerebral hemorrhage       | 636.58<br>(526.05 to<br>749.97)                           | 687.13<br>(372.60 to<br>1,254.54)                          | 442.45<br>(246.23 to<br>796.40)                            | 1,623.06<br>(826.33 to<br>3,058.48)                        | 26.33<br>(21.82 to<br>31.00)                         | 29.40<br>(17.34 to<br>50.15)                         | 20.42<br>(12.38 to<br>33.61)                         | 64.14<br>(36.52 to<br>111.59)                        |
| Hypertensive heart disease     | 181.92<br>(112.99 to<br>260.66)                           | 282.07<br>(148.81 to<br>485.02)                            | 234.73<br>(128.89 to<br>386.10)                            | 418.29<br>(196.60 to<br>813.12)                            | 8.99<br>(5.48 to<br>12.67)                           | 15.46<br>(8.31 to<br>26.55)                          | 13.30<br>(7.43 to<br>21.40)                          | 20.69<br>(10.23 to<br>41.48)                         |
| Cardiomyopathy and myocarditis | 60.96<br>(43.21 to<br>79.64)                              | 102.56<br>(64.02 to<br>149.44)                             | 99.63<br>(62.59 to<br>145.01)                              | 107.13<br>(67.36 to<br>157.41)                             | 1.80<br>(1.29 to<br>2.36)                            | 3.48<br>(2.29 to<br>4.86)                            | 3.46<br>(2.30 to<br>4.85)                            | 3.34<br>(2.17 to<br>4.77)                            |
| Myocarditis                    | 8.48<br>(3.48 to<br>17.56)                                | 10.80<br>(3.84 to<br>25.54)                                | 10.85<br>(3.86 to<br>25.60)                                | 12.85<br>(4.76 to<br>28.53)                                | 0.20<br>(0.08 to<br>0.45)                            | 0.30<br>(0.10 to<br>0.74)                            | 0.31<br>(0.11 to<br>0.77)                            | 0.33<br>(0.12 to<br>0.76)                            |
| <b>Ethiopia</b>                |                                                           |                                                            |                                                            |                                                            |                                                      |                                                      |                                                      |                                                      |
| <b>YLLs (in 1000s)</b>         |                                                           |                                                            |                                                            |                                                            | <b>Deaths (in 1000s)</b>                             |                                                      |                                                      |                                                      |

| Cause                                                         | 2016                                     | 2040 Forecast                              | 2040 Better Scenario                       | 2040 Worse Scenario                          | 2016                                  | 2040 Forecast                         | 2040 Better Scenario                  | 2040 Worse Scenario                   |
|---------------------------------------------------------------|------------------------------------------|--------------------------------------------|--------------------------------------------|----------------------------------------------|---------------------------------------|---------------------------------------|---------------------------------------|---------------------------------------|
| Alcoholic cardiomyopathy                                      | 4.05<br>(2.04 to<br>7.24)                | 8.75<br>(4.05 to<br>17.27)                 | 8.06<br>(3.71 to<br>16.15)                 | 8.44<br>(4.09 to<br>16.02)                   | 0.13<br>(0.06 to<br>0.24)             | 0.28<br>(0.13 to<br>0.56)             | 0.26<br>(0.12 to<br>0.52)             | 0.26<br>(0.13 to<br>0.49)             |
| Other cardiomyopathy                                          | 48.42<br>(34.93 to<br>64.62)             | 83.01<br>(50.58 to<br>125.16)              | 80.72<br>(49.02 to<br>120.34)              | 85.84<br>(52.06 to<br>128.55)                | 1.48<br>(1.07 to<br>1.99)             | 2.90<br>(1.87 to<br>4.17)             | 2.89<br>(1.88 to<br>4.13)             | 2.75<br>(1.77 to<br>4.02)             |
| Atrial fibrillation and flutter                               | 10.94<br>(8.30 to<br>14.05)              | 22.99<br>(17.47 to<br>29.90)               | 23.99<br>(18.24 to<br>31.43)               | 20.97<br>(15.96 to<br>27.51)                 | 0.92<br>(0.69 to<br>1.20)             | 2.15<br>(1.60 to<br>2.89)             | 2.34<br>(1.75 to<br>3.10)             | 1.77<br>(1.31 to<br>2.39)             |
| Aortic aneurysm                                               | 18.97<br>(13.78 to<br>26.95)             | 36.57<br>(25.19 to<br>52.66)               | 36.09<br>(24.74 to<br>52.28)               | 36.84<br>(24.98 to<br>53.43)                 | 0.84<br>(0.62 to<br>1.14)             | 1.69<br>(1.23 to<br>2.31)             | 1.74<br>(1.27 to<br>2.37)             | 1.57<br>(1.14 to<br>2.16)             |
| Peripheral artery disease                                     | 1.29<br>(0.45 to<br>2.26)                | 4.43<br>(1.55 to<br>7.96)                  | 4.24<br>(1.49 to<br>7.53)                  | 3.63<br>(1.22 to<br>6.54)                    | 0.08<br>(0.03 to<br>0.14)             | 0.32<br>(0.11 to<br>0.58)             | 0.32<br>(0.11 to<br>0.60)             | 0.23<br>(0.08 to<br>0.42)             |
| Endocarditis                                                  | 38.98<br>(27.14 to<br>52.30)             | 64.67<br>(41.51 to<br>92.66)               | 63.06<br>(40.76 to<br>89.42)               | 73.60<br>(46.64 to<br>107.15)                | 1.19<br>(0.81 to<br>1.60)             | 2.29<br>(1.47 to<br>3.17)             | 2.30<br>(1.47 to<br>3.19)             | 2.35<br>(1.49 to<br>3.29)             |
| Other cardiovascular and circulatory diseases                 | 378.65<br>(287.27 to<br>496.33)          | 563.48<br>(412.20 to<br>808.88)            | 556.05<br>(404.31 to<br>783.55)            | 768.73<br>(553.47 to<br>1,112.49)            | 16.38<br>(12.13 to<br>21.57)          | 28.23<br>(21.07 to<br>38.57)          | 29.08<br>(21.90 to<br>38.97)          | 34.21<br>(24.94 to<br>47.54)          |
| <b>Chronic respiratory diseases</b>                           | <b>402.06<br/>(335.44 to<br/>475.80)</b> | <b>397.90<br/>(274.53 to<br/>612.72)</b>   | <b>289.36<br/>(212.81 to<br/>403.57)</b>   | <b>622.22<br/>(415.17 to<br/>1,009.18)</b>   | <b>16.97<br/>(14.27 to<br/>19.78)</b> | <b>18.30<br/>(12.84 to<br/>28.60)</b> | <b>13.48<br/>(10.30 to<br/>18.71)</b> | <b>26.56<br/>(18.14 to<br/>43.23)</b> |
| Chronic obstructive pulmonary disease                         | 234.09<br>(180.92 to<br>287.00)          | 275.01<br>(161.75 to<br>483.74)            | 175.89<br>(113.02 to<br>273.56)            | 459.13<br>(267.39 to<br>845.47)              | 11.57<br>(9.13 to<br>13.93)           | 13.83<br>(8.63 to<br>23.10)           | 9.27<br>(6.35 to<br>13.85)            | 21.16<br>(12.60 to<br>37.06)          |
| Pneumoconiosis                                                | 1.42<br>(0.75 to<br>2.24)                | 1.76<br>(0.95 to<br>2.74)                  | 1.74<br>(0.92 to<br>2.74)                  | 1.95<br>(1.09 to<br>2.98)                    | 0.07<br>(0.04 to<br>0.11)             | 0.09<br>(0.05 to<br>0.14)             | 0.09<br>(0.05 to<br>0.14)             | 0.09<br>(0.05 to<br>0.14)             |
| Silicosis                                                     | 0.34<br>(0.13 to<br>0.57)                | 0.28<br>(0.11 to<br>0.50)                  | 0.29<br>(0.11 to<br>0.53)                  | 0.31<br>(0.12 to<br>0.54)                    | 0.02<br>(0.01 to<br>0.03)             | 0.02<br>(0.01 to<br>0.03)             | 0.02<br>(0.01 to<br>0.03)             | 0.02<br>(0.01 to<br>0.03)             |
| Asbestosis                                                    | 0.33<br>(0.15 to<br>0.67)                | 0.58<br>(0.27 to<br>1.15)                  | 0.59<br>(0.28 to<br>1.15)                  | 0.55<br>(0.26 to<br>1.09)                    | 0.01<br>(0.00 to<br>0.03)             | 0.03<br>(0.01 to<br>0.06)             | 0.03<br>(0.01 to<br>0.06)             | 0.02<br>(0.01 to<br>0.05)             |
| Coal workers pneumoconiosis                                   | 0.12<br>(0.04 to<br>0.25)                | 0.11<br>(0.04 to<br>0.23)                  | 0.10<br>(0.03 to<br>0.22)                  | 0.18<br>(0.06 to<br>0.35)                    | 0.01<br>(0.00 to<br>0.01)             | 0.01<br>(0.00 to<br>0.01)             | 0.01<br>(0.00 to<br>0.01)             | 0.01<br>(0.00 to<br>0.02)             |
| Other pneumoconiosis                                          | 0.64<br>(0.30 to<br>1.16)                | 0.79<br>(0.35 to<br>1.51)                  | 0.75<br>(0.32 to<br>1.48)                  | 0.91<br>(0.44 to<br>1.52)                    | 0.03<br>(0.01 to<br>0.05)             | 0.04<br>(0.02 to<br>0.08)             | 0.04<br>(0.02 to<br>0.08)             | 0.04<br>(0.02 to<br>0.08)             |
| Asthma                                                        | 148.04<br>(109.68 to<br>212.05)          | 92.54<br>(59.50 to<br>149.78)              | 83.20<br>(56.04 to<br>129.22)              | 129.58<br>(81.12 to<br>209.49)               | 4.83<br>(3.43 to<br>7.40)             | 3.41<br>(2.20 to<br>5.68)             | 3.12<br>(2.10 to<br>4.98)             | 4.37<br>(2.76 to<br>7.39)             |
| Interstitial lung disease and pulmonary sarcoidosis           | 4.30<br>(1.46 to<br>7.90)                | 10.56<br>(3.49 to<br>19.27)                | 10.82<br>(3.66 to<br>19.51)                | 8.74<br>(2.85 to<br>16.10)                   | 0.17<br>(0.05 to<br>0.32)             | 0.46<br>(0.14 to<br>0.82)             | 0.48<br>(0.15 to<br>0.86)             | 0.35<br>(0.11 to<br>0.64)             |
| Other chronic respiratory diseases                            | 14.21<br>(8.13 to<br>22.92)              | 18.03<br>(10.38 to<br>28.40)               | 17.70<br>(10.27 to<br>27.93)               | 22.82<br>(12.53 to<br>36.22)                 | 0.33<br>(0.19 to<br>0.54)             | 0.51<br>(0.30 to<br>0.82)             | 0.52<br>(0.30 to<br>0.82)             | 0.59<br>(0.33 to<br>0.95)             |
| <b>Cirrhosis and other chronic liver diseases</b>             | <b>568.25<br/>(463.01 to<br/>678.50)</b> | <b>920.37<br/>(711.83 to<br/>1,172.94)</b> | <b>911.56<br/>(694.82 to<br/>1,172.94)</b> | <b>1,090.44<br/>(843.13 to<br/>1,386.94)</b> | <b>18.01<br/>(14.99 to<br/>21.40)</b> | <b>30.54<br/>(24.60 to<br/>37.55)</b> | <b>30.77<br/>(24.47 to<br/>37.99)</b> | <b>34.58<br/>(28.00 to<br/>42.39)</b> |
| Cirrhosis and other chronic liver diseases due to hepatitis B | 192.24<br>(148.75 to<br>242.21)          | 330.26<br>(242.00 to<br>437.06)            | 334.82<br>(242.84 to<br>443.85)            | 370.97<br>(270.16 to<br>488.33)              | 6.34<br>(5.01 to<br>7.91)             | 11.16<br>(8.52 to<br>14.32)           | 11.50<br>(8.72 to<br>14.88)           | 12.05<br>(9.19 to<br>15.32)           |
| Cirrhosis and other chronic liver diseases due to hepatitis C | 132.18<br>(96.40 to<br>175.44)           | 225.83<br>(160.09 to<br>317.35)            | 228.69<br>(161.65 to<br>324.37)            | 255.80<br>(178.13 to<br>358.88)              | 4.29<br>(3.13 to<br>5.61)             | 7.51<br>(5.47 to<br>10.15)            | 7.71<br>(5.62 to<br>10.46)            | 8.20<br>(5.96 to<br>11.04)            |
| Cirrhosis and other chronic liver diseases due to alcohol use | 128.84<br>(102.78 to<br>160.69)          | 213.95<br>(159.21 to<br>282.77)            | 196.54<br>(145.12 to<br>260.29)            | 278.22<br>(208.79 to<br>365.62)              | 4.47<br>(3.60 to<br>5.48)             | 7.58<br>(5.91 to<br>9.52)             | 7.14<br>(5.51 to<br>9.03)             | 9.41<br>(7.36 to<br>11.77)            |



|                                                                |                                                      |                                                      |                                                      |                                                        |                                                   |                                                   |                                                   |                                                   |
|----------------------------------------------------------------|------------------------------------------------------|------------------------------------------------------|------------------------------------------------------|--------------------------------------------------------|---------------------------------------------------|---------------------------------------------------|---------------------------------------------------|---------------------------------------------------|
|                                                                | 114.99<br>(93.43 to<br>140.64)                       | 150.34<br>(116.22 to<br>195.40)                      | 151.52<br>(116.24 to<br>198.35)                      | 185.45<br>(143.97 to<br>240.39)                        | 2.91<br>(2.39 to<br>3.53)                         | 4.30<br>(3.44 to<br>5.39)                         | 4.41<br>(3.49 to<br>5.54)                         | 4.92<br>(3.98 to<br>6.10)                         |
| Cirrhosis and other chronic liver diseases due to other causes |                                                      |                                                      |                                                      |                                                        |                                                   |                                                   |                                                   |                                                   |
| <b>Digestive diseases</b>                                      | <b>649.96</b><br><b>(538.32 to</b><br><b>766.20)</b> | <b>760.18</b><br><b>(604.07 to</b><br><b>941.09)</b> | <b>762.86</b><br><b>(599.73 to</b><br><b>958.08)</b> | <b>959.17</b><br><b>(751.52 to</b><br><b>1,187.29)</b> | <b>20.95</b><br><b>(17.53 to</b><br><b>24.61)</b> | <b>28.15</b><br><b>(23.92 to</b><br><b>33.02)</b> | <b>29.02</b><br><b>(24.34 to</b><br><b>34.33)</b> | <b>32.48</b><br><b>(27.42 to</b><br><b>37.86)</b> |
| Peptic ulcer disease                                           | 119.16<br>(80.66 to<br>162.70)                       | 85.39<br>(54.04 to<br>122.84)                        | 85.39<br>(54.62 to<br>125.72)                        | 129.72<br>(84.30 to<br>187.11)                         | 4.67<br>(3.06 to<br>6.40)                         | 3.73<br>(2.35 to<br>5.26)                         | 3.84<br>(2.43 to<br>5.58)                         | 5.21<br>(3.35 to<br>7.38)                         |
| <b>Ethiopia</b>                                                |                                                      |                                                      |                                                      |                                                        |                                                   |                                                   |                                                   |                                                   |
| <b>Cause</b>                                                   | <b>YLLs (in 1000s)</b>                               |                                                      |                                                      |                                                        | <b>Deaths (in 1000s)</b>                          |                                                   |                                                   |                                                   |
|                                                                | <b>2016</b>                                          | <b>2040 Forecast</b>                                 | <b>2040 Better Scenario</b>                          | <b>2040 Worse Scenario</b>                             | <b>2016</b>                                       | <b>2040 Forecast</b>                              | <b>2040 Better Scenario</b>                       | <b>2040 Worse Scenario</b>                        |
|                                                                | 32.40<br>(21.07 to<br>47.58)                         | 46.49<br>(29.33 to<br>69.93)                         | 47.50<br>(29.38 to<br>71.27)                         | 55.76<br>(35.46 to<br>82.49)                           | 1.17<br>(0.76 to<br>1.72)                         | 1.90<br>(1.24 to<br>2.77)                         | 2.00<br>(1.29 to<br>2.95)                         | 2.09<br>(1.37 to<br>3.02)                         |
| Gastritis and duodenitis                                       | 45.20<br>(33.89 to<br>58.75)                         | 40.01<br>(28.31 to<br>54.74)                         | 40.14<br>(28.32 to<br>55.14)                         | 59.51<br>(41.54 to<br>81.21)                           | 1.07<br>(0.80 to<br>1.41)                         | 1.13<br>(0.83 to<br>1.50)                         | 1.16<br>(0.84 to<br>1.55)                         | 1.54<br>(1.12 to<br>2.04)                         |
| Appendicitis                                                   | 263.48<br>(210.67 to<br>330.74)                      | 339.28<br>(260.57 to<br>436.23)                      | 344.90<br>(261.25 to<br>449.07)                      | 399.92<br>(306.63 to<br>511.53)                        | 7.48<br>(5.94 to<br>9.52)                         | 11.67<br>(9.02 to<br>14.87)                       | 12.18<br>(9.35 to<br>15.65)                       | 12.38<br>(9.80 to<br>15.74)                       |
| Paralytic ileus and intestinal obstruction                     | 28.68<br>(10.75 to<br>43.97)                         | 28.62<br>(10.42 to<br>45.89)                         | 28.96<br>(10.57 to<br>46.81)                         | 37.82<br>(13.36 to<br>60.71)                           | 0.89<br>(0.34 to<br>1.35)                         | 0.94<br>(0.39 to<br>1.44)                         | 0.97<br>(0.40 to<br>1.50)                         | 1.16<br>(0.45 to<br>1.79)                         |
| Inguinal, femoral, and abdominal hernia                        | 26.70<br>(14.32 to<br>35.47)                         | 37.45<br>(20.77 to<br>51.64)                         | 38.22<br>(21.29 to<br>52.85)                         | 39.32<br>(21.17 to<br>54.10)                           | 0.81<br>(0.46 to<br>1.08)                         | 1.34<br>(0.77 to<br>1.80)                         | 1.40<br>(0.82 to<br>1.88)                         | 1.28<br>(0.73 to<br>1.70)                         |
| Inflammatory bowel disease                                     | 11.42<br>(8.29 to<br>14.65)                          | 19.04<br>(13.92 to<br>24.46)                         | 19.72<br>(14.55 to<br>25.72)                         | 20.65<br>(14.71 to<br>26.62)                           | 0.53<br>(0.39 to<br>0.68)                         | 0.96<br>(0.73 to<br>1.20)                         | 1.03<br>(0.78 to<br>1.29)                         | 0.97<br>(0.72 to<br>1.22)                         |
| Vascular intestinal disorders                                  | 32.27<br>(23.20 to<br>44.49)                         | 37.77<br>(23.13 to<br>59.06)                         | 33.38<br>(21.32 to<br>49.36)                         | 51.02<br>(30.64 to<br>79.93)                           | 1.35<br>(0.97 to<br>1.90)                         | 1.78<br>(1.14 to<br>2.73)                         | 1.62<br>(1.07 to<br>2.38)                         | 2.20<br>(1.37 to<br>3.44)                         |
| Gallbladder and biliary diseases                               | 24.71<br>(15.57 to<br>39.55)                         | 39.64<br>(20.86 to<br>75.78)                         | 36.52<br>(20.08 to<br>66.21)                         | 52.03<br>(26.20 to<br>101.76)                          | 0.70<br>(0.45 to<br>1.14)                         | 1.19<br>(0.66 to<br>2.29)                         | 1.12<br>(0.65 to<br>2.04)                         | 1.50<br>(0.79 to<br>2.94)                         |
| Pancreatitis                                                   | 65.95<br>(43.67 to<br>107.04)                        | 86.48<br>(56.88 to<br>138.45)                        | 88.13<br>(56.96 to<br>142.76)                        | 113.42<br>(74.45 to<br>181.31)                         | 2.29<br>(1.53 to<br>3.87)                         | 3.50<br>(2.36 to<br>5.56)                         | 3.69<br>(2.47 to<br>5.89)                         | 4.15<br>(2.80 to<br>6.64)                         |
| Other digestive diseases                                       | <b>270.54</b><br><b>(223.33 to</b><br><b>320.15)</b> | <b>460.35</b><br><b>(378.26 to</b><br><b>566.19)</b> | <b>454.73</b><br><b>(379.21 to</b><br><b>555.03)</b> | <b>511.18</b><br><b>(403.08 to</b><br><b>645.54)</b>   | <b>12.31</b><br><b>(10.23 to</b><br><b>14.89)</b> | <b>28.41</b><br><b>(22.92 to</b><br><b>35.37)</b> | <b>29.59</b><br><b>(24.55 to</b><br><b>36.05)</b> | <b>24.07</b><br><b>(19.10 to</b><br><b>30.65)</b> |
| <b>Neurological disorders</b>                                  |                                                      |                                                      |                                                      |                                                        |                                                   |                                                   |                                                   |                                                   |
| Alzheimer's disease and other dementias                        | 99.98<br>(78.42 to<br>128.06)                        | 225.26<br>(175.05 to<br>295.54)                      | 229.69<br>(184.38 to<br>292.61)                      | 185.66<br>(138.46 to<br>253.74)                        | 8.66<br>(6.92 to<br>10.91)                        | 22.11<br>(16.25 to<br>29.20)                      | 23.27<br>(18.16 to<br>29.71)                      | 16.73<br>(11.54 to<br>23.21)                      |
| Parkinson's disease                                            | 7.12<br>(5.26 to<br>9.67)                            | 20.52<br>(15.73 to<br>26.93)                         | 22.42<br>(16.93 to<br>29.21)                         | 14.41<br>(10.67 to<br>18.95)                           | 0.56<br>(0.41 to<br>0.75)                         | 1.73<br>(1.29 to<br>2.29)                         | 1.94<br>(1.46 to<br>2.57)                         | 1.14<br>(0.81 to<br>1.55)                         |
| Epilepsy                                                       | 142.18<br>(110.83 to<br>175.43)                      | 178.67<br>(121.05 to<br>258.12)                      | 166.31<br>(115.14 to<br>235.97)                      | 273.96<br>(183.40 to<br>397.23)                        | 2.67<br>(2.12 to<br>3.24)                         | 3.70<br>(2.62 to<br>5.18)                         | 3.50<br>(2.56 to<br>4.78)                         | 5.38<br>(3.72 to<br>7.59)                         |
| Multiple sclerosis                                             | 1.73<br>(1.03 to<br>2.63)                            | 3.85<br>(2.26 to<br>6.05)                            | 3.87<br>(2.27 to<br>6.10)                            | 3.59<br>(2.11 to<br>5.60)                              | 0.05<br>(0.03 to<br>0.07)                         | 0.11<br>(0.06 to<br>0.17)                         | 0.11<br>(0.06 to<br>0.17)                         | 0.10<br>(0.06 to<br>0.15)                         |
| Motor neuron disease                                           | 1.17<br>(0.83 to<br>2.14)                            | 2.50<br>(1.66 to<br>5.01)                            | 2.55<br>(1.70 to<br>5.06)                            | 2.34<br>(1.57 to<br>4.56)                              | 0.03<br>(0.02 to<br>0.06)                         | 0.08<br>(0.05 to<br>0.17)                         | 0.08<br>(0.06 to<br>0.17)                         | 0.07<br>(0.05 to<br>0.14)                         |
| Other neurological disorders                                   | 18.37<br>(12.37 to<br>23.51)                         | 29.55<br>(17.77 to<br>40.66)                         | 29.90<br>(18.12 to<br>41.30)                         | 31.22<br>(19.26 to<br>42.40)                           | 0.34<br>(0.22 to<br>0.45)                         | 0.68<br>(0.40 to<br>0.92)                         | 0.69<br>(0.41 to<br>0.95)                         | 0.65<br>(0.39 to<br>0.87)                         |
| <b>Mental disorders</b>                                        | <b>63.27</b><br><b>(47.13 to</b><br><b>82.76)</b>    | <b>122.18</b><br><b>(90.80 to</b><br><b>167.15)</b>  | <b>121.43</b><br><b>(90.03 to</b><br><b>165.54)</b>  | <b>128.26</b><br><b>(95.30 to</b><br><b>174.23)</b>    | <b>1.77</b><br><b>(1.38 to</b><br><b>2.28)</b>    | <b>3.55</b><br><b>(2.79 to</b><br><b>4.62)</b>    | <b>3.59</b><br><b>(2.83 to</b><br><b>4.67)</b>    | <b>3.59</b><br><b>(2.81 to</b><br><b>4.59)</b>    |

|                                                            |                                          |                                              |                                              |                                                |                                       |                                       |                                       |                                       |
|------------------------------------------------------------|------------------------------------------|----------------------------------------------|----------------------------------------------|------------------------------------------------|---------------------------------------|---------------------------------------|---------------------------------------|---------------------------------------|
| Alcohol use disorders                                      | 42.15<br>(31.18 to<br>56.79)             | 67.65<br>(48.19 to<br>96.04)                 | 66.38<br>(47.40 to<br>94.41)                 | 72.71<br>(52.34 to<br>101.27)                  | 1.30<br>(0.99 to<br>1.73)             | 2.23<br>(1.70 to<br>2.99)             | 2.23<br>(1.70 to<br>3.03)             | 2.30<br>(1.76 to<br>3.05)             |
| Drug use disorders                                         | 20.97<br>(15.02 to<br>28.82)             | 54.23<br>(38.92 to<br>75.45)                 | 54.74<br>(39.27 to<br>76.21)                 | 55.24<br>(39.45 to<br>76.66)                   | 0.47<br>(0.34 to<br>0.63)             | 1.32<br>(1.00 to<br>1.77)             | 1.35<br>(1.03 to<br>1.82)             | 1.29<br>(0.97 to<br>1.71)             |
| Opioid use disorders                                       | 15.17<br>(10.48 to<br>20.67)             | 36.02<br>(23.58 to<br>51.55)                 | 36.31<br>(23.71 to<br>51.97)                 | 36.52<br>(23.79 to<br>52.55)                   | 0.33<br>(0.23 to<br>0.44)             | 0.83<br>(0.57 to<br>1.15)             | 0.85<br>(0.58 to<br>1.18)             | 0.82<br>(0.54 to<br>1.14)             |
| Cocaine use disorders                                      | 1.57<br>(0.28 to<br>3.63)                | 4.65<br>(0.94 to<br>10.69)                   | 4.67<br>(0.94 to<br>10.76)                   | 5.20<br>(1.07 to<br>11.76)                     | 0.04<br>(0.01 to<br>0.08)             | 0.11<br>(0.02 to<br>0.24)             | 0.11<br>(0.02 to<br>0.25)             | 0.12<br>(0.03 to<br>0.26)             |
| Amphetamine use disorders                                  | 0.88<br>(0.19 to<br>2.35)                | 3.33<br>(0.87 to<br>8.71)                    | 3.33<br>(0.89 to<br>8.74)                    | 4.07<br>(1.03 to<br>10.59)                     | 0.02<br>(0.00 to<br>0.05)             | 0.07<br>(0.02 to<br>0.19)             | 0.07<br>(0.02 to<br>0.19)             | 0.09<br>(0.02 to<br>0.23)             |
| Other drug use disorders                                   | 3.35<br>(2.26 to<br>5.07)                | 10.24<br>(6.73 to<br>16.19)                  | 10.44<br>(6.81 to<br>16.53)                  | 9.44<br>(6.26 to<br>14.97)                     | 0.09<br>(0.06 to<br>0.13)             | 0.30<br>(0.22 to<br>0.45)             | 0.32<br>(0.23 to<br>0.47)             | 0.26<br>(0.19 to<br>0.38)             |
| Eating disorders                                           | 0.15<br>(0.08 to<br>0.28)                | 0.31<br>(0.16 to<br>0.61)                    | 0.31<br>(0.16 to<br>0.61)                    | 0.31<br>(0.16 to<br>0.60)                      | 0.00<br>(0.00 to<br>0.01)             | 0.01<br>(0.00 to<br>0.01)             | 0.01<br>(0.00 to<br>0.01)             | 0.01<br>(0.00 to<br>0.01)             |
| <b>Ethiopia</b>                                            |                                          |                                              |                                              |                                                |                                       |                                       |                                       |                                       |
| Cause                                                      | YLLs (in 1000s)                          |                                              |                                              |                                                | Deaths (in 1000s)                     |                                       |                                       |                                       |
|                                                            | 2016                                     | 2040 Forecast                                | 2040 Better Scenario                         | 2040 Worse Scenario                            | 2016                                  | 2040 Forecast                         | 2040 Better Scenario                  | 2040 Worse Scenario                   |
| <b>Diabetes, urogenital, blood, and endocrine diseases</b> | <b>829.71<br/>(698.29 to<br/>988.16)</b> | <b>1,276.41<br/>(928.04 to<br/>1,743.56)</b> | <b>1,193.51<br/>(864.72 to<br/>1,664.47)</b> | <b>1,901.36<br/>(1,383.11 to<br/>2,643.99)</b> | <b>28.27<br/>(24.28 to<br/>32.95)</b> | <b>52.86<br/>(40.53 to<br/>70.14)</b> | <b>50.72<br/>(38.47 to<br/>68.08)</b> | <b>72.82<br/>(54.88 to<br/>97.11)</b> |
| Diabetes mellitus                                          | 344.14<br>(285.89 to<br>405.53)          | 717.96<br>(445.37 to<br>1,124.45)            | 655.55<br>(404.17 to<br>1,041.16)            | 1,078.03<br>(649.14 to<br>1,707.82)            | 14.78<br>(12.52 to<br>17.28)          | 32.95<br>(22.51 to<br>47.98)          | 31.47<br>(21.60 to<br>46.03)          | 45.90<br>(30.27 to<br>68.23)          |
| Acute glomerulonephritis                                   | 1.36<br>(0.95 to<br>2.20)                | 1.51<br>(1.00 to<br>2.45)                    | 1.51<br>(1.00 to<br>2.44)                    | 2.29<br>(1.50 to<br>3.91)                      | 0.02<br>(0.02 to<br>0.04)             | 0.03<br>(0.02 to<br>0.04)             | 0.03<br>(0.02 to<br>0.04)             | 0.04<br>(0.03 to<br>0.06)             |
| Chronic kidney disease                                     | 192.96<br>(160.15 to<br>230.30)          | 278.66<br>(196.29 to<br>413.12)              | 255.83<br>(183.30 to<br>365.70)              | 437.63<br>(301.05 to<br>644.90)                | 6.70<br>(5.64 to<br>7.92)             | 11.45<br>(7.96 to<br>17.65)           | 10.50<br>(7.43 to<br>15.13)           | 16.56<br>(10.98 to<br>25.42)          |
| Chronic kidney disease due to diabetes mellitus            | 46.58<br>(36.90 to<br>58.12)             | 81.40<br>(54.86 to<br>129.55)                | 73.49<br>(49.93 to<br>113.11)                | 122.51<br>(77.60 to<br>194.08)                 | 1.90<br>(1.52 to<br>2.32)             | 3.62<br>(2.36 to<br>5.72)             | 3.28<br>(2.24 to<br>5.02)             | 5.14<br>(3.22 to<br>8.32)             |
| Chronic kidney disease due to hypertension                 | 27.61<br>(21.58 to<br>34.18)             | 45.82<br>(29.96 to<br>71.12)                 | 41.41<br>(27.99 to<br>63.45)                 | 67.48<br>(43.22 to<br>106.33)                  | 1.45<br>(1.16 to<br>1.77)             | 2.72<br>(1.76 to<br>4.24)             | 2.50<br>(1.69 to<br>3.68)             | 3.69<br>(2.33 to<br>5.93)             |
| Chronic kidney disease due to glomerulonephritis           | 56.13<br>(44.38 to<br>70.07)             | 70.52<br>(49.02 to<br>100.21)                | 65.80<br>(45.64 to<br>92.02)                 | 116.25<br>(79.13 to<br>167.44)                 | 1.51<br>(1.19 to<br>1.87)             | 2.23<br>(1.53 to<br>3.45)             | 2.05<br>(1.41 to<br>3.05)             | 3.42<br>(2.27 to<br>5.39)             |
| Chronic kidney disease due to other and unspecified causes | 62.64<br>(50.27 to<br>77.54)             | 80.93<br>(55.69 to<br>116.31)                | 75.13<br>(51.86 to<br>108.70)                | 131.39<br>(89.27 to<br>192.30)                 | 1.85<br>(1.49 to<br>2.28)             | 2.89<br>(1.96 to<br>4.33)             | 2.66<br>(1.86 to<br>3.94)             | 4.31<br>(2.86 to<br>6.54)             |
| Urinary diseases and male infertility                      | 84.92<br>(66.69 to<br>104.05)            | 109.98<br>(84.20 to<br>141.12)               | 111.48<br>(84.03 to<br>145.30)               | 137.83<br>(105.09 to<br>178.51)                | 2.57<br>(2.05 to<br>3.15)             | 3.73<br>(3.04 to<br>4.48)             | 3.88<br>(3.10 to<br>4.75)             | 4.25<br>(3.46 to<br>5.16)             |
| Urinary tract infections                                   | 30.38<br>(17.99 to<br>45.29)             | 52.73<br>(32.00 to<br>76.62)                 | 53.71<br>(32.58 to<br>78.25)                 | 59.03<br>(35.24 to<br>87.00)                   | 0.92<br>(0.53 to<br>1.41)             | 1.87<br>(1.20 to<br>2.67)             | 1.96<br>(1.25 to<br>2.81)             | 1.90<br>(1.18 to<br>2.75)             |
| Urolithiasis                                               | 2.47<br>(1.14 to<br>4.34)                | 3.65<br>(1.73 to<br>6.59)                    | 3.67<br>(1.74 to<br>6.65)                    | 4.57<br>(2.15 to<br>8.12)                      | 0.05<br>(0.03 to<br>0.11)             | 0.09<br>(0.04 to<br>0.19)             | 0.09<br>(0.04 to<br>0.20)             | 0.11<br>(0.05 to<br>0.21)             |
| Other urinary diseases                                     | 52.07<br>(35.80 to<br>70.49)             | 53.60<br>(32.16 to<br>78.80)                 | 54.10<br>(32.07 to<br>80.50)                 | 74.23<br>(45.76 to<br>107.42)                  | 1.60<br>(1.09 to<br>2.15)             | 1.76<br>(1.06 to<br>2.55)             | 1.82<br>(1.09 to<br>2.64)             | 2.25<br>(1.41 to<br>3.17)             |
| Gynecological diseases                                     | 11.86<br>(7.81 to<br>16.21)              | 13.11<br>(8.25 to<br>19.74)                  | 12.95<br>(8.06 to<br>19.59)                  | 19.36<br>(12.30 to<br>29.18)                   | 0.28<br>(0.19 to<br>0.39)             | 0.31<br>(0.20 to<br>0.46)             | 0.31<br>(0.20 to<br>0.46)             | 0.46<br>(0.30 to<br>0.68)             |

|                                                   |                                 |                                |                                |                                 |                           |                           |                           |                           |
|---------------------------------------------------|---------------------------------|--------------------------------|--------------------------------|---------------------------------|---------------------------|---------------------------|---------------------------|---------------------------|
| Uterine fibroids                                  | 4.56<br>(1.54 to<br>9.42)       | 4.41<br>(1.25 to<br>10.07)     | 4.35<br>(1.22 to<br>10.10)     | 6.77<br>(1.95 to<br>15.53)      | 0.12<br>(0.03 to<br>0.24) | 0.11<br>(0.03 to<br>0.25) | 0.11<br>(0.03 to<br>0.25) | 0.17<br>(0.05 to<br>0.39) |
| Polycystic ovarian syndrome                       | 1.10<br>(0.12 to<br>2.59)       | 0.68<br>(0.06 to<br>1.75)      | 0.66<br>(0.06 to<br>1.71)      | 1.28<br>(0.12 to<br>3.19)       | 0.03<br>(0.00 to<br>0.06) | 0.02<br>(0.00 to<br>0.04) | 0.02<br>(0.00 to<br>0.04) | 0.03<br>(0.00 to<br>0.07) |
| Endometriosis                                     | 0.04<br>(0.01 to<br>0.17)       | 0.07<br>(0.01 to<br>0.29)      | 0.07<br>(0.01 to<br>0.29)      | 0.10<br>(0.02 to<br>0.44)       | 0.00<br>(0.00 to<br>0.00) | 0.00<br>(0.00 to<br>0.01) | 0.00<br>(0.00 to<br>0.01) | 0.00<br>(0.00 to<br>0.01) |
| Genital prolapse                                  | 0.53<br>(0.08 to<br>1.64)       | 0.43<br>(0.06 to<br>1.48)      | 0.43<br>(0.06 to<br>1.46)      | 0.70<br>(0.09 to<br>2.43)       | 0.02<br>(0.00 to<br>0.05) | 0.01<br>(0.00 to<br>0.04) | 0.01<br>(0.00 to<br>0.04) | 0.02<br>(0.00 to<br>0.07) |
| Other gynecological diseases                      | 5.63<br>(1.96 to<br>9.82)       | 7.51<br>(2.79 to<br>13.06)     | 7.43<br>(2.72 to<br>13.04)     | 10.52<br>(3.70 to<br>18.71)     | 0.12<br>(0.04 to<br>0.22) | 0.17<br>(0.06 to<br>0.30) | 0.17<br>(0.06 to<br>0.30) | 0.23<br>(0.08 to<br>0.42) |
| Hemoglobinopathies and hemolytic anemias          | 153.70<br>(111.05 to<br>253.56) | 108.07<br>(79.34 to<br>157.23) | 108.43<br>(79.23 to<br>159.24) | 165.25<br>(119.81 to<br>255.72) | 2.78<br>(2.12 to<br>3.98) | 2.71<br>(2.14 to<br>3.50) | 2.78<br>(2.16 to<br>3.63) | 3.74<br>(2.88 to<br>4.96) |
| Thalassemias                                      | 53.62<br>(31.05 to<br>109.61)   | 21.54<br>(11.16 to<br>47.05)   | 21.67<br>(11.27 to<br>47.65)   | 32.07<br>(15.89 to<br>74.04)    | 0.63<br>(0.37 to<br>1.28) | 0.25<br>(0.13 to<br>0.56) | 0.26<br>(0.13 to<br>0.56) | 0.38<br>(0.19 to<br>0.87) |
| Sickle cell disorders                             | 40.35<br>(25.48 to<br>73.04)    | 22.00<br>(14.10 to<br>36.01)   | 21.86<br>(13.88 to<br>36.23)   | 37.81<br>(23.07 to<br>68.96)    | 0.53<br>(0.34 to<br>0.93) | 0.32<br>(0.21 to<br>0.51) | 0.32<br>(0.21 to<br>0.51) | 0.53<br>(0.33 to<br>0.93) |
| G6PD deficiency                                   | 40.28<br>(30.04 to<br>54.50)    | 50.39<br>(36.29 to<br>67.69)   | 50.21<br>(35.13 to<br>68.41)   | 77.20<br>(54.71 to<br>106.67)   | 0.81<br>(0.61 to<br>1.03) | 1.29<br>(0.96 to<br>1.68) | 1.30<br>(0.93 to<br>1.75) | 1.87<br>(1.36 to<br>2.49) |
| Other hemoglobinopathies and hemolytic anemias    | 19.45<br>(15.36 to<br>24.10)    | 14.14<br>(11.23 to<br>17.81)   | 14.69<br>(11.45 to<br>18.78)   | 18.18<br>(14.34 to<br>22.63)    | 0.82<br>(0.65 to<br>1.00) | 0.84<br>(0.69 to<br>1.06) | 0.91<br>(0.73 to<br>1.13) | 0.96<br>(0.77 to<br>1.20) |
| Endocrine, metabolic, blood, and immune disorders | 40.77<br>(31.13 to<br>55.67)    | 47.11<br>(36.74 to<br>60.68)   | 47.77<br>(36.65 to<br>62.10)   | 60.96<br>(46.14 to<br>80.95)    | 1.12<br>(0.89 to<br>1.40) | 1.68<br>(1.34 to<br>2.05) | 1.75<br>(1.40 to<br>2.16) | 1.87<br>(1.49 to<br>2.30) |

| Ethiopia                               |                                        |                                        |                                        |                                        |                                  |                                   |                                   |                                    |
|----------------------------------------|----------------------------------------|----------------------------------------|----------------------------------------|----------------------------------------|----------------------------------|-----------------------------------|-----------------------------------|------------------------------------|
| Cause                                  | YLLs (in 1000s)                        |                                        |                                        |                                        | Deaths (in 1000s)                |                                   |                                   |                                    |
|                                        | 2016                                   | 2040 Forecast                          | 2040 Better Scenario                   | 2040 Worse Scenario                    | 2016                             | 2040 Forecast                     | 2040 Better Scenario              | 2040 Worse Scenario                |
| <b>Musculoskeletal disorders</b>       | <b>21.14</b><br>(14.37 to<br>29.83)    | <b>43.33</b><br>(28.60 to<br>63.47)    | <b>43.98</b><br>(28.92 to<br>64.70)    | <b>43.60</b><br>(28.80 to<br>63.72)    | <b>0.56</b><br>(0.37 to<br>0.81) | <b>1.28</b><br>(0.85 to<br>1.88)  | <b>1.33</b><br>(0.89 to<br>1.95)  | <b>1.24</b><br>(0.82 to<br>1.82)   |
| Rheumatoid arthritis                   | 5.47<br>(3.64 to<br>7.84)              | 9.00<br>(5.82 to<br>13.19)             | 9.15<br>(5.92 to<br>13.66)             | 11.46<br>(7.54 to<br>16.77)            | 0.21<br>(0.14 to<br>0.30)        | 0.41<br>(0.25 to<br>0.61)         | 0.43<br>(0.26 to<br>0.64)         | 0.48<br>(0.31 to<br>0.71)          |
| Other musculoskeletal disorders        | 15.68<br>(10.38 to<br>23.29)           | 34.33<br>(21.92 to<br>51.26)           | 34.83<br>(22.30 to<br>52.51)           | 32.14<br>(20.51 to<br>48.96)           | 0.35<br>(0.22 to<br>0.55)        | 0.87<br>(0.56 to<br>1.34)         | 0.90<br>(0.57 to<br>1.40)         | 0.76<br>(0.48 to<br>1.19)          |
| <b>Other non-communicable diseases</b> | <b>411.60</b><br>(199.92 to<br>611.37) | <b>325.47</b><br>(198.41 to<br>460.38) | <b>327.19</b><br>(206.74 to<br>469.23) | <b>551.71</b><br>(299.69 to<br>841.29) | <b>6.26</b><br>(3.54 to<br>8.73) | <b>8.57</b><br>(5.86 to<br>12.18) | <b>8.89</b><br>(6.13 to<br>12.69) | <b>11.00</b><br>(7.10 to<br>15.43) |
| Congenital birth defects               | 216.52<br>(83.85 to<br>386.51)         | 105.15<br>(39.18 to<br>200.52)         | 104.02<br>(39.19 to<br>198.73)         | 242.07<br>(91.32 to<br>466.90)         | 2.59<br>(1.01 to<br>4.58)        | 1.36<br>(0.51 to<br>2.56)         | 1.35<br>(0.51 to<br>2.51)         | 2.99<br>(1.14 to<br>5.69)          |
| Neural tube defects                    | 47.92<br>(15.72 to<br>142.71)          | 10.41<br>(2.94 to<br>38.71)            | 10.24<br>(2.84 to<br>38.06)            | 30.97<br>(8.75 to<br>109.48)           | 0.56<br>(0.18 to<br>1.67)        | 0.13<br>(0.04 to<br>0.46)         | 0.13<br>(0.03 to<br>0.47)         | 0.37<br>(0.11 to<br>1.31)          |
| Congenital heart anomalies             | 65.25<br>(25.88 to<br>128.59)          | 36.51<br>(13.77 to<br>73.93)           | 36.15<br>(13.59 to<br>72.31)           | 76.02<br>(28.54 to<br>152.66)          | 0.80<br>(0.32 to<br>1.55)        | 0.49<br>(0.19 to<br>0.97)         | 0.49<br>(0.19 to<br>0.95)         | 0.97<br>(0.37 to<br>1.94)          |
| Orofacial clefts                       | 2.49<br>(0.23 to<br>9.12)              | 0.79<br>(0.06 to<br>3.06)              | 0.77<br>(0.06 to<br>3.03)              | 2.53<br>(0.21 to<br>9.64)              | 0.03<br>(0.00 to<br>0.11)        | 0.01<br>(0.00 to<br>0.04)         | 0.01<br>(0.00 to<br>0.04)         | 0.03<br>(0.00 to<br>0.11)          |
| Down syndrome                          | 4.27<br>(1.45 to<br>8.69)              | 2.92<br>(0.98 to<br>6.23)              | 2.89<br>(0.98 to<br>6.22)              | 5.78<br>(1.92 to<br>11.65)             | 0.06<br>(0.02 to<br>0.11)        | 0.05<br>(0.02 to<br>0.10)         | 0.05<br>(0.02 to<br>0.10)         | 0.08<br>(0.03 to<br>0.17)          |

|                                               |                                       |                                       |                                       |                                       |                              |                               |                               |                               |
|-----------------------------------------------|---------------------------------------|---------------------------------------|---------------------------------------|---------------------------------------|------------------------------|-------------------------------|-------------------------------|-------------------------------|
| Other chromosomal abnormalities               | 11.63<br>(1.54 to<br>32.14)           | 7.71<br>(1.07 to<br>22.75)            | 7.40<br>(1.08 to<br>22.58)            | 19.92<br>(2.96 to<br>59.14)           | 0.14<br>(0.02 to<br>0.38)    | 0.09<br>(0.01 to<br>0.27)     | 0.09<br>(0.01 to<br>0.27)     | 0.24<br>(0.01 to<br>0.69)     |
| Congenital musculoskeletal and limb anomalies | 2.34<br>(0.95 to<br>4.25)             | 1.43<br>(0.57 to<br>2.77)             | 1.42<br>(0.57 to<br>2.75)             | 3.12<br>(1.24 to<br>5.98)             | 0.03<br>(0.01 to<br>0.05)    | 0.02<br>(0.01 to<br>0.03)     | 0.02<br>(0.01 to<br>0.03)     | 0.04<br>(0.02 to<br>0.07)     |
| Urogenital congenital anomalies               | 4.90<br>(1.63 to<br>10.21)            | 2.77<br>(0.92 to<br>6.12)             | 2.76<br>(0.92 to<br>5.96)             | 5.75<br>(1.87 to<br>12.46)            | 0.06<br>(0.02 to<br>0.13)    | 0.04<br>(0.01 to<br>0.08)     | 0.04<br>(0.01 to<br>0.08)     | 0.08<br>(0.03 to<br>0.16)     |
| Digestive congenital anomalies                | 16.98<br>(5.55 to<br>34.37)           | 8.40<br>(2.41 to<br>17.95)            | 8.29<br>(2.40 to<br>17.71)            | 21.16<br>(6.27 to<br>45.01)           | 0.20<br>(0.06 to<br>0.40)    | 0.10<br>(0.03 to<br>0.21)     | 0.10<br>(0.03 to<br>0.21)     | 0.25<br>(0.07 to<br>0.53)     |
| Other congenital birth defects                | 60.73<br>(22.34 to<br>110.80)         | 34.22<br>(12.87 to<br>63.53)          | 33.92<br>(12.66 to<br>62.69)          | 76.82<br>(28.70 to<br>141.27)         | 0.72<br>(0.27 to<br>1.32)    | 0.43<br>(0.16 to<br>0.81)     | 0.43<br>(0.16 to<br>0.79)     | 0.94<br>(0.35 to<br>1.73)     |
| Skin and subcutaneous diseases                | 95.97<br>(62.68 to<br>156.28)         | 187.03<br>(122.87 to<br>294.61)       | 190.51<br>(124.72 to<br>298.79)       | 228.94<br>(149.04 to<br>364.95)       | 2.52<br>(1.59 to<br>4.03)    | 6.82<br>(4.54 to<br>10.78)    | 7.16<br>(4.77 to<br>11.35)    | 7.07<br>(4.66 to<br>11.28)    |
| Cellulitis                                    | 5.13<br>(2.43 to<br>7.99)             | 16.44<br>(7.51 to<br>25.73)           | 16.82<br>(7.62 to<br>26.29)           | 16.04<br>(7.13 to<br>25.52)           | 0.14<br>(0.06 to<br>0.22)    | 0.56<br>(0.23 to<br>0.87)     | 0.59<br>(0.23 to<br>0.92)     | 0.49<br>(0.19 to<br>0.76)     |
| Pyoderma                                      | 77.67<br>(49.76 to<br>130.13)         | 143.08<br>(94.80 to<br>232.62)        | 145.22<br>(95.93 to<br>238.48)        | 185.01<br>(121.04 to<br>299.70)       | 1.88<br>(1.21 to<br>3.14)    | 4.98<br>(3.36 to<br>8.14)     | 5.21<br>(3.50 to<br>8.50)     | 5.45<br>(3.66 to<br>8.90)     |
| Decubitus ulcer                               | 9.31<br>(5.06 to<br>17.73)            | 20.15<br>(11.37 to<br>37.46)          | 21.00<br>(11.86 to<br>38.65)          | 19.93<br>(11.00 to<br>38.17)          | 0.42<br>(0.24 to<br>0.76)    | 1.08<br>(0.62 to<br>1.97)     | 1.17<br>(0.67 to<br>2.11)     | 0.94<br>(0.53 to<br>1.77)     |
| Other skin and subcutaneous diseases          | 3.86<br>(2.22 to<br>6.61)             | 7.37<br>(4.34 to<br>12.13)            | 7.47<br>(4.45 to<br>12.18)            | 7.95<br>(4.64 to<br>13.58)            | 0.09<br>(0.05 to<br>0.14)    | 0.20<br>(0.11 to<br>0.32)     | 0.20<br>(0.11 to<br>0.33)     | 0.19<br>(0.11 to<br>0.31)     |
| Sudden infant death syndrome                  | 99.11<br>(22.12 to<br>219.47)         | 33.28<br>(5.49 to<br>81.52)           | 32.66<br>(5.43 to<br>80.42)           | 80.70<br>(13.66 to<br>199.67)         | 1.15<br>(0.26 to<br>2.55)    | 0.39<br>(0.06 to<br>0.94)     | 0.38<br>(0.06 to<br>0.93)     | 0.94<br>(0.16 to<br>2.32)     |
| Injuries                                      | 2,684.62<br>(2,239.84 to<br>3,177.11) | 3,320.26<br>(2,518.97 to<br>4,425.54) | 3,235.23<br>(2,455.14 to<br>4,277.51) | 4,070.86<br>(3,094.47 to<br>5,417.12) | 58.28<br>(48.95 to<br>68.38) | 85.19<br>(68.15 to<br>108.01) | 84.69<br>(68.62 to<br>106.44) | 96.15<br>(76.86 to<br>123.48) |
| Transport injuries                            | 673.49<br>(552.16 to<br>813.01)       | 1,201.62<br>(865.69 to<br>1,704.54)   | 1,142.01<br>(827.71 to<br>1,585.95)   | 1,378.19<br>(984.83 to<br>1,949.37)   | 14.45<br>(11.99 to<br>17.32) | 28.04<br>(20.79 to<br>38.79)  | 26.98<br>(20.30 to<br>36.51)  | 30.43<br>(22.29 to<br>42.57)  |
| Road injuries                                 | 641.68<br>(522.23 to<br>780.47)       | 1,146.25<br>(817.76 to<br>1,635.14)   | 1,089.18<br>(784.74 to<br>1,522.75)   | 1,304.64<br>(919.79 to<br>1,857.48)   | 13.87<br>(11.45 to<br>16.68) | 26.96<br>(19.77 to<br>37.46)  | 25.94<br>(19.54 to<br>35.13)  | 29.02<br>(21.29 to<br>40.86)  |
| Pedestrian road injuries                      | 323.79<br>(250.69 to<br>400.35)       | 527.03<br>(359.95 to<br>766.39)       | 501.92<br>(346.85 to<br>712.12)       | 613.45<br>(418.63 to<br>900.60)       | 7.13<br>(5.59 to<br>8.75)    | 12.75<br>(9.07 to<br>18.12)   | 12.32<br>(8.90 to<br>17.03)   | 14.04<br>(9.86 to<br>20.22)   |
| <b>Ethiopia</b>                               |                                       |                                       |                                       |                                       |                              |                               |                               |                               |
| Cause                                         | YLLs (in 1000s)                       |                                       |                                       |                                       | Deaths (in 1000s)            |                               |                               |                               |
|                                               | 2016                                  | 2040 Forecast                         | 2040 Better Scenario                  | 2040 Worse Scenario                   | 2016                         | 2040 Forecast                 | 2040 Better Scenario          | 2040 Worse Scenario           |
| Cyclist road injuries                         | 4.30<br>(3.27 to<br>5.54)             | 8.15<br>(5.55 to<br>11.91)            | 7.76<br>(5.33 to<br>11.18)            | 9.05<br>(6.05 to<br>13.55)            | 0.09<br>(0.07 to<br>0.12)    | 0.19<br>(0.13 to<br>0.27)     | 0.18<br>(0.13 to<br>0.25)     | 0.20<br>(0.14 to<br>0.29)     |
| Motorcyclist road injuries                    | 14.06<br>(9.96 to<br>19.29)           | 29.80<br>(18.51 to<br>47.21)          | 28.33<br>(18.08 to<br>44.25)          | 32.64<br>(20.33 to<br>51.85)          | 0.28<br>(0.20 to<br>0.37)    | 0.62<br>(0.40 to<br>0.93)     | 0.59<br>(0.39 to<br>0.87)     | 0.65<br>(0.42 to<br>1.01)     |
| Motor vehicle road injuries                   | 295.44<br>(226.53 to<br>374.70)       | 573.81<br>(394.97 to<br>813.17)       | 544.07<br>(381.80 to<br>763.97)       | 641.14<br>(439.66 to<br>920.49)       | 6.28<br>(4.92 to<br>7.91)    | 13.22<br>(9.35 to<br>18.43)   | 12.69<br>(9.19 to<br>17.29)   | 13.95<br>(9.76 to<br>19.55)   |
| Other road injuries                           | 4.09<br>(3.01 to<br>5.60)             | 7.45<br>(4.90 to<br>11.37)            | 7.10<br>(4.67 to<br>10.72)            | 8.36<br>(5.38 to<br>12.97)            | 0.09<br>(0.06 to<br>0.11)    | 0.17<br>(0.12 to<br>0.25)     | 0.17<br>(0.11 to<br>0.24)     | 0.18<br>(0.12 to<br>0.27)     |
| Other transport injuries                      | 31.82<br>(21.29 to<br>49.80)          | 55.37<br>(32.63 to<br>93.99)          | 52.82<br>(31.27 to<br>89.79)          | 73.55<br>(44.52 to<br>124.84)         | 0.58<br>(0.39 to<br>0.91)    | 1.09<br>(0.64 to<br>1.87)     | 1.04<br>(0.62 to<br>1.76)     | 1.41<br>(0.85 to<br>2.41)     |

|                                                 |                                            |                                          |                                            |                                              |                                     |                                     |                                     |                                     |
|-------------------------------------------------|--------------------------------------------|------------------------------------------|--------------------------------------------|----------------------------------------------|-------------------------------------|-------------------------------------|-------------------------------------|-------------------------------------|
| <b>Unintentional injuries</b>                   | <b>1,156.14</b><br>(966.61 to<br>1,340.40) | <b>995.96</b><br>(790.76 to<br>1,256.11) | <b>1,000.65</b><br>(788.72 to<br>1,282.82) | <b>1,413.65</b><br>(1,107.50 to<br>1,830.47) | <b>26.24</b><br>(22.52 to<br>30.16) | <b>31.14</b><br>(26.67 to<br>36.46) | <b>32.40</b><br>(27.45 to<br>38.50) | <b>37.19</b><br>(31.50 to<br>44.27) |
| Falls                                           | 216.81<br>(181.84 to<br>252.43)            | 284.38<br>(231.71 to<br>341.76)          | 293.53<br>(237.88 to<br>355.07)            | 330.50<br>(269.45 to<br>396.69)              | 7.81<br>(6.60 to<br>9.07)           | 13.62<br>(11.69 to<br>15.93)        | 14.66<br>(12.55 to<br>17.11)        | 13.52<br>(11.46 to<br>15.82)        |
| Drowning                                        | 225.97<br>(184.54 to<br>277.08)            | 168.99<br>(121.93 to<br>232.21)          | 165.94<br>(119.93 to<br>228.71)            | 253.12<br>(180.69 to<br>358.01)              | 4.06<br>(3.40 to<br>4.86)           | 3.70<br>(2.81 to<br>4.84)           | 3.68<br>(2.80 to<br>4.82)           | 5.00<br>(3.74 to<br>6.65)           |
| Fire, heat, and hot substances                  | 140.92<br>(107.74 to<br>184.73)            | 95.11<br>(69.98 to<br>127.97)            | 93.75<br>(68.75 to<br>129.36)              | 148.22<br>(104.95 to<br>209.33)              | 3.17<br>(2.58 to<br>3.85)           | 2.84<br>(2.19 to<br>3.63)           | 2.87<br>(2.22 to<br>3.62)           | 3.81<br>(2.90 to<br>4.93)           |
| Poisonings                                      | 69.93<br>(46.08 to<br>113.33)              | 29.98<br>(20.34 to<br>45.08)             | 29.24<br>(19.54 to<br>43.16)               | 55.78<br>(35.50 to<br>93.08)                 | 1.36<br>(0.99 to<br>1.91)           | 0.75<br>(0.55 to<br>1.02)           | 0.74<br>(0.53 to<br>1.01)           | 1.22<br>(0.85 to<br>1.74)           |
| Exposure to mechanical forces                   | 126.07<br>(95.70 to<br>154.21)             | 102.51<br>(76.10 to<br>134.86)           | 102.46<br>(75.36 to<br>137.27)             | 151.17<br>(109.00 to<br>204.74)              | 2.48<br>(2.00 to<br>2.97)           | 2.46<br>(1.93 to<br>3.09)           | 2.51<br>(1.95 to<br>3.21)           | 3.28<br>(2.53 to<br>4.21)           |
| Unintentional firearm injuries                  | 30.48<br>(19.92 to<br>41.67)               | 18.24<br>(11.42 to<br>26.23)             | 18.17<br>(11.43 to<br>26.34)               | 26.28<br>(16.50 to<br>38.33)                 | 0.61<br>(0.41 to<br>0.81)           | 0.42<br>(0.29 to<br>0.57)           | 0.43<br>(0.29 to<br>0.58)           | 0.57<br>(0.38 to<br>0.77)           |
| Unintentional suffocation                       | 15.73<br>(10.66 to<br>24.67)               | 10.11<br>(6.82 to<br>14.65)              | 10.08<br>(6.77 to<br>14.82)                | 17.89<br>(11.74 to<br>28.20)                 | 0.25<br>(0.19 to<br>0.36)           | 0.21<br>(0.15 to<br>0.28)           | 0.21<br>(0.15 to<br>0.29)           | 0.32<br>(0.22 to<br>0.45)           |
| Other exposure to mechanical forces             | 79.86<br>(62.49 to<br>99.59)               | 74.17<br>(53.40 to<br>98.03)             | 74.21<br>(53.61 to<br>98.43)               | 107.01<br>(75.57 to<br>143.95)               | 1.62<br>(1.30 to<br>1.97)           | 1.83<br>(1.42 to<br>2.31)           | 1.87<br>(1.44 to<br>2.38)           | 2.40<br>(1.82 to<br>3.09)           |
| Adverse effects of medical treatment            | 89.75<br>(72.06 to<br>119.19)              | 76.22<br>(57.68 to<br>101.91)            | 76.55<br>(57.70 to<br>103.52)              | 111.07<br>(83.89 to<br>150.32)               | 1.82<br>(1.51 to<br>2.29)           | 2.04<br>(1.59 to<br>2.60)           | 2.10<br>(1.61 to<br>2.70)           | 2.58<br>(2.03 to<br>3.34)           |
| Animal contact                                  | 97.28<br>(74.17 to<br>124.92)              | 90.86<br>(67.14 to<br>122.28)            | 90.92<br>(65.73 to<br>123.81)              | 149.54<br>(105.05 to<br>206.21)              | 2.25<br>(1.74 to<br>2.83)           | 2.52<br>(1.96 to<br>3.24)           | 2.57<br>(1.96 to<br>3.33)           | 3.68<br>(2.77 to<br>4.85)           |
| Venomous animal contact                         | 68.70<br>(48.68 to<br>90.67)               | 62.32<br>(42.98 to<br>85.67)             | 62.45<br>(42.00 to<br>86.75)               | 102.86<br>(67.12 to<br>145.54)               | 1.71<br>(1.26 to<br>2.19)           | 1.85<br>(1.36 to<br>2.45)           | 1.89<br>(1.36 to<br>2.52)           | 2.70<br>(1.94 to<br>3.67)           |
| Non-venomous animal contact                     | 28.57<br>(17.49 to<br>43.85)               | 28.54<br>(17.94 to<br>43.22)             | 28.47<br>(17.75 to<br>43.73)               | 46.68<br>(28.68 to<br>70.81)                 | 0.54<br>(0.34 to<br>0.81)           | 0.67<br>(0.42 to<br>0.99)           | 0.68<br>(0.43 to<br>1.02)           | 0.98<br>(0.61 to<br>1.45)           |
| Foreign body                                    | 106.76<br>(71.95 to<br>154.51)             | 86.37<br>(50.57 to<br>130.71)            | 86.77<br>(50.66 to<br>130.35)              | 120.93<br>(69.99 to<br>185.35)               | 1.66<br>(1.11 to<br>2.35)           | 1.79<br>(1.04 to<br>2.66)           | 1.83<br>(1.06 to<br>2.74)           | 2.13<br>(1.27 to<br>3.21)           |
| Pulmonary aspiration and foreign body in airway | 96.69<br>(67.01 to<br>141.12)              | 77.32<br>(46.24 to<br>112.96)            | 77.72<br>(46.77 to<br>114.15)              | 108.16<br>(63.79 to<br>164.40)               | 1.49<br>(1.02 to<br>2.12)           | 1.60<br>(0.96 to<br>2.31)           | 1.64<br>(0.98 to<br>2.37)           | 1.89<br>(1.14 to<br>2.74)           |
| Foreign body in other body part                 | 10.07<br>(2.84 to<br>23.25)                | 9.05<br>(2.18 to<br>22.39)               | 9.05<br>(2.18 to<br>22.44)                 | 12.78<br>(3.26 to<br>30.52)                  | 0.17<br>(0.05 to<br>0.41)           | 0.19<br>(0.04 to<br>0.45)           | 0.19<br>(0.04 to<br>0.46)           | 0.24<br>(0.06 to<br>0.57)           |
| Environmental heat and cold exposure            | 21.62<br>(16.42 to<br>28.87)               | 15.47<br>(10.96 to<br>22.07)             | 15.43<br>(10.72 to<br>22.66)               | 27.22<br>(18.99 to<br>39.24)                 | 0.49<br>(0.37 to<br>0.63)           | 0.41<br>(0.30 to<br>0.56)           | 0.42<br>(0.30 to<br>0.60)           | 0.64<br>(0.46 to<br>0.89)           |
| Other unintentional injuries                    | 61.03<br>(48.81 to<br>75.54)               | 46.08<br>(33.20 to<br>63.04)             | 46.05<br>(32.98 to<br>63.56)               | 66.08<br>(47.72 to<br>90.88)                 | 1.14<br>(0.92 to<br>1.37)           | 1.00<br>(0.75 to<br>1.29)           | 1.01<br>(0.76 to<br>1.32)           | 1.32<br>(0.99 to<br>1.74)           |
| Self-harm and interpersonal violence            | 797.34<br>(581.96 to<br>1,130.84)          | 1,113.03<br>(745.66 to<br>1,641.16)      | 1,072.89<br>(729.47 to<br>1,561.67)        | 1,267.79<br>(838.63 to<br>1,891.12)          | 16.67<br>(12.59 to<br>22.73)        | 25.84<br>(18.18 to<br>36.76)        | 25.13<br>(18.05 to<br>35.29)        | 28.34<br>(19.61 to<br>41.15)        |

**Ethiopia**

| Cause     | YLLs (in 1000s)                 |                                 |                                 |                                 | Deaths (in 1000s)         |                             |                             |                              |
|-----------|---------------------------------|---------------------------------|---------------------------------|---------------------------------|---------------------------|-----------------------------|-----------------------------|------------------------------|
|           | 2016                            | 2040 Forecast                   | 2040 Better Scenario            | 2040 Worse Scenario             | 2016                      | 2040 Forecast               | 2040 Better Scenario        | 2040 Worse Scenario          |
| Self-harm | 278.68<br>(218.53 to<br>344.14) | 503.72<br>(338.85 to<br>749.62) | 479.71<br>(332.29 to<br>691.26) | 574.98<br>(378.38 to<br>868.52) | 6.98<br>(5.54 to<br>8.62) | 13.52<br>(9.52 to<br>19.18) | 13.09<br>(9.47 to<br>18.13) | 14.73<br>(10.05 to<br>21.62) |

|                                                                              |                                          |                                          |                                        |                                          |                                 |                                 |                                 |                                 |
|------------------------------------------------------------------------------|------------------------------------------|------------------------------------------|----------------------------------------|------------------------------------------|---------------------------------|---------------------------------|---------------------------------|---------------------------------|
| Self-harm by firearm                                                         | 29.28<br>(18.07 to<br>48.38)             | 37.23<br>(20.31 to<br>65.37)             | 35.16<br>(19.48 to<br>60.40)           | 44.92<br>(24.01 to<br>79.30)             | 0.65<br>(0.41 to<br>1.03)       | 0.88<br>(0.50 to<br>1.59)       | 0.84<br>(0.49 to<br>1.50)       | 1.02<br>(0.57 to<br>1.80)       |
| Self-harm by other specified means                                           | 249.40<br>(193.88 to<br>307.48)          | 466.49<br>(314.77 to<br>687.59)          | 444.55<br>(305.22 to<br>641.66)        | 530.06<br>(350.57 to<br>793.94)          | 6.34<br>(4.96 to<br>7.76)       | 12.65<br>(8.91 to<br>18.17)     | 12.25<br>(8.86 to<br>17.08)     | 13.71<br>(9.33 to<br>20.00)     |
| Interpersonal violence                                                       | 518.66<br>(347.74 to<br>828.42)          | 609.31<br>(369.36 to<br>1,051.57)        | 593.17<br>(367.05 to<br>1,012.79)      | 692.81<br>(412.20 to<br>1,204.10)        | 9.68<br>(6.63 to<br>15.22)      | 12.31<br>(7.79 to<br>20.76)     | 12.04<br>(7.73 to<br>20.13)     | 13.61<br>(8.44 to<br>23.17)     |
| Physical violence by firearm                                                 | 109.07<br>(66.83 to<br>211.05)           | 135.30<br>(81.06 to<br>272.15)           | 135.57<br>(81.43 to<br>272.02)         | 145.05<br>(85.90 to<br>294.29)           | 2.02<br>(1.26 to<br>3.80)       | 2.64<br>(1.64 to<br>5.15)       | 2.65<br>(1.64 to<br>5.17)       | 2.78<br>(1.71 to<br>5.52)       |
| Physical violence by sharp object                                            | 62.25<br>(41.23 to<br>107.87)            | 90.16<br>(58.07 to<br>156.18)            | 90.82<br>(58.65 to<br>156.83)          | 91.38<br>(58.19 to<br>159.63)            | 1.28<br>(0.88 to<br>2.13)       | 2.00<br>(1.36 to<br>3.29)       | 2.03<br>(1.38 to<br>3.52)       | 1.97<br>(1.32 to<br>3.28)       |
| Physical violence by other means                                             | 347.34<br>(233.61 to<br>576.83)          | 383.84<br>(216.62 to<br>701.61)          | 366.78<br>(210.82 to<br>668.29)        | 456.37<br>(254.66 to<br>836.58)          | 6.39<br>(4.36 to<br>10.37)      | 7.67<br>(4.48 to<br>13.73)      | 7.36<br>(4.33 to<br>12.96)      | 8.86<br>(5.10 to<br>16.05)      |
| Forces of nature, conflict and terrorism, and executions and police conflict | 57.65<br>(31.93 to<br>82.73)             | 9.65<br>(0.00 to<br>49.07)               | 9.70<br>(0.00 to<br>49.26)             | 11.23<br>(0.00 to<br>57.84)              | 0.93<br>(0.52 to<br>1.33)       | 0.17<br>(0.00 to<br>0.93)       | 0.18<br>(0.00 to<br>0.94)       | 0.19<br>(0.00 to<br>1.01)       |
| Exposure to forces of nature                                                 | 0.00<br>(0.00 to<br>0.00)                | 1.47<br>(0.00 to<br>15.05)               | 1.48<br>(0.00 to<br>15.13)             | 1.80<br>(0.00 to<br>18.09)               | 0.00<br>(0.00 to<br>0.00)       | 0.03<br>(0.00 to<br>0.29)       | 0.03<br>(0.00 to<br>0.30)       | 0.03<br>(0.00 to<br>0.32)       |
| Conflict and terrorism                                                       | 53.60<br>(27.67 to<br>79.46)             | 6.63<br>(0.00 to<br>49.07)               | 6.65<br>(0.00 to<br>49.26)             | 7.76<br>(0.00 to<br>57.84)               | 0.86<br>(0.44 to<br>1.28)       | 0.12<br>(0.00 to<br>0.83)       | 0.12<br>(0.00 to<br>0.84)       | 0.13<br>(0.00 to<br>0.94)       |
| Executions and police conflict                                               | 4.05<br>(2.10 to<br>7.28)                | 1.55<br>(0.00 to<br>7.84)                | 1.56<br>(0.00 to<br>7.88)              | 1.67<br>(0.00 to<br>8.44)                | 0.07<br>(0.03 to<br>0.12)       | 0.03<br>(0.00 to<br>0.15)       | 0.03<br>(0.00 to<br>0.15)       | 0.03<br>(0.00 to<br>0.16)       |
| <b>Kenya</b>                                                                 |                                          |                                          |                                        |                                          |                                 |                                 |                                 |                                 |
| Cause                                                                        | YLLs (in 1000s)                          |                                          |                                        |                                          | Deaths (in 1000s)               |                                 |                                 |                                 |
|                                                                              | 2016                                     | 2040 Forecast                            | 2040 Better Scenario                   | 2040 Worse Scenario                      | 2016                            | 2040 Forecast                   | 2040 Better Scenario            | 2040 Worse Scenario             |
| All causes                                                                   | 12,491.85<br>(12,148.89 to<br>12,850.21) | 13,510.84<br>(10,073.80 to<br>19,694.51) | 9,449.73<br>(7,243.55 to<br>13,292.28) | 25,205.60<br>(19,144.14 to<br>32,818.78) | 269.67<br>(261.82 to<br>277.57) | 392.17<br>(311.82 to<br>534.74) | 297.92<br>(243.14 to<br>389.64) | 623.50<br>(495.35 to<br>791.45) |
| Communicable, maternal, neonatal, and nutritional diseases                   | 9,564.60<br>(9,110.99 to<br>10,067.55)   | 7,894.69<br>(5,174.48 to<br>12,668.73)   | 4,777.73<br>(3,217.32 to<br>7,405.34)  | 18,669.99<br>(13,484.09 to<br>25,288.31) | 175.35<br>(162.92 to<br>190.53) | 180.45<br>(111.82 to<br>310.75) | 113.88<br>(73.20 to<br>191.54)  | 385.73<br>(266.88 to<br>541.93) |
| HIV/AIDS and tuberculosis                                                    | 2,650.34<br>(2,493.28 to<br>2,820.45)    | 1,690.01<br>(1,109.36 to<br>2,214.46)    | 1,109.84<br>(701.13 to<br>1,608.84)    | 9,044.40<br>(6,437.93 to<br>12,483.59)   | 51.90<br>(48.68 to<br>55.18)    | 33.36<br>(22.96 to<br>44.23)    | 21.64<br>(14.05 to<br>30.16)    | 177.84<br>(123.68 to<br>244.09) |
| Tuberculosis                                                                 | 382.40<br>(301.81 to<br>467.88)          | 247.05<br>(144.57 to<br>420.15)          | 133.23<br>(79.49 to<br>218.36)         | 362.01<br>(210.94 to<br>630.46)          | 9.95<br>(7.76 to<br>12.43)      | 7.05<br>(4.21 to<br>11.26)      | 3.94<br>(2.43 to<br>6.10)       | 10.09<br>(5.99 to<br>16.38)     |
| HIV/AIDS                                                                     | 2,267.93<br>(2,122.46 to<br>2,417.83)    | 1,442.97<br>(908.14 to<br>1,972.86)      | 976.61<br>(589.58 to<br>1,489.38)      | 8,682.39<br>(6,089.00 to<br>12,121.79)   | 41.95<br>(39.42 to<br>44.52)    | 26.32<br>(16.62 to<br>37.07)    | 17.71<br>(10.35 to<br>26.09)    | 167.76<br>(114.33 to<br>233.88) |
| Diarrhea, lower respiratory, and other common infectious diseases            | 4,220.02<br>(3,667.01 to<br>4,807.87)    | 3,888.36<br>(1,683.85 to<br>8,258.59)    | 2,192.10<br>(1,005.02 to<br>4,667.44)  | 6,280.26<br>(2,962.41 to<br>12,020.29)   | 87.15<br>(71.37 to<br>105.41)   | 113.21<br>(49.74 to<br>241.35)  | 69.00<br>(32.03 to<br>146.10)   | 161.40<br>(73.85 to<br>306.09)  |
| Diarrheal diseases                                                           | 1,972.74<br>(1,339.11 to<br>2,744.01)    | 2,214.88<br>(453.43 to<br>6,306.91)      | 1,175.66<br>(243.78 to<br>3,460.63)    | 3,272.17<br>(806.16 to<br>8,280.17)      | 49.89<br>(32.34 to<br>73.46)    | 72.20<br>(15.26 to<br>196.42)   | 41.12<br>(8.70 to<br>117.04)    | 100.81<br>(23.14 to<br>242.68)  |
| Intestinal infectious diseases                                               | 83.96<br>(44.53 to<br>138.78)            | 80.88<br>(39.46 to<br>148.54)            | 63.22<br>(31.37 to<br>115.58)          | 99.86<br>(48.08 to<br>182.17)            | 1.16<br>(0.61 to<br>1.91)       | 1.16<br>(0.57 to<br>2.12)       | 0.92<br>(0.47 to<br>1.69)       | 1.41<br>(0.68 to<br>2.59)       |
| Typhoid fever                                                                | 77.84<br>(39.43 to<br>131.22)            | 75.73<br>(36.13 to<br>140.19)            | 59.57<br>(29.10 to<br>108.52)          | 93.02<br>(43.69 to<br>171.90)            | 1.08<br>(0.55 to<br>1.80)       | 1.08<br>(0.52 to<br>2.01)       | 0.87<br>(0.43 to<br>1.59)       | 1.31<br>(0.61 to<br>2.44)       |
| Paratyphoid fever                                                            | 2.71<br>(1.16 to<br>5.44)                | 3.28<br>(1.39 to<br>6.77)                | 2.49<br>(1.09 to<br>5.14)              | 4.12<br>(1.71 to<br>8.70)                | 0.04<br>(0.02 to<br>0.08)       | 0.05<br>(0.02 to<br>0.10)       | 0.04<br>(0.02 to<br>0.08)       | 0.06<br>(0.02 to<br>0.12)       |



|                                                       |                                                      |                                                      |                                                     |                                                      |                                                |                                                |                                                |                                                |
|-------------------------------------------------------|------------------------------------------------------|------------------------------------------------------|-----------------------------------------------------|------------------------------------------------------|------------------------------------------------|------------------------------------------------|------------------------------------------------|------------------------------------------------|
| Schistosomiasis                                       | 11.64<br>(9.38 to<br>14.19)                          | 11.70<br>(8.65 to<br>17.17)                          | 10.04<br>(7.36 to<br>14.49)                         | 12.65<br>(9.27 to<br>18.76)                          | 0.32<br>(0.26 to<br>0.39)                      | 0.37<br>(0.29 to<br>0.50)                      | 0.32<br>(0.26 to<br>0.43)                      | 0.38<br>(0.30 to<br>0.52)                      |
| Cysticercosis                                         | 0.14<br>(0.11 to<br>0.18)                            | 0.09<br>(0.06 to<br>0.13)                            | 0.08<br>(0.05 to<br>0.12)                           | 0.09<br>(0.06 to<br>0.14)                            | 0.00<br>(0.00 to<br>0.00)                      | 0.00<br>(0.00 to<br>0.00)                      | 0.00<br>(0.00 to<br>0.00)                      | 0.00<br>(0.00 to<br>0.00)                      |
| Cystic echinococcosis                                 | 0.27<br>(0.19 to<br>0.37)                            | 0.17<br>(0.11 to<br>0.28)                            | 0.10<br>(0.06 to<br>0.16)                           | 0.24<br>(0.15 to<br>0.39)                            | 0.01<br>(0.00 to<br>0.01)                      | 0.00<br>(0.00 to<br>0.01)                      | 0.00<br>(0.00 to<br>0.00)                      | 0.01<br>(0.00 to<br>0.01)                      |
| Dengue                                                | 0.44<br>(0.06 to<br>1.45)                            | 2.01<br>(0.29 to<br>6.44)                            | 1.73<br>(0.25 to<br>5.45)                           | 2.36<br>(0.33 to<br>7.65)                            | 0.01<br>(0.00 to<br>0.02)                      | 0.04<br>(0.01 to<br>0.12)                      | 0.03<br>(0.01 to<br>0.11)                      | 0.04<br>(0.01 to<br>0.13)                      |
| Yellow fever                                          | 2.61<br>(0.53 to<br>7.49)                            | 1.36<br>(0.26 to<br>4.16)                            | 0.94<br>(0.18 to<br>2.94)                           | 1.77<br>(0.33 to<br>5.53)                            | 0.04<br>(0.01 to<br>0.12)                      | 0.02<br>(0.00 to<br>0.07)                      | 0.02<br>(0.00 to<br>0.05)                      | 0.03<br>(0.01 to<br>0.09)                      |
| Rabies                                                | 6.19<br>(3.09 to<br>11.73)                           | 3.64<br>(1.62 to<br>7.11)                            | 1.79<br>(0.86 to<br>3.43)                           | 5.91<br>(2.81 to<br>11.35)                           | 0.09<br>(0.05 to<br>0.17)                      | 0.06<br>(0.03 to<br>0.12)                      | 0.03<br>(0.01 to<br>0.06)                      | 0.09<br>(0.05 to<br>0.18)                      |
| Intestinal nematode infections                        | 1.88<br>(1.39 to<br>2.43)                            | 3.04<br>(2.18 to<br>4.20)                            | 2.58<br>(1.85 to<br>3.58)                           | 3.63<br>(2.57 to<br>5.01)                            | 0.02<br>(0.02 to<br>0.03)                      | 0.04<br>(0.03 to<br>0.05)                      | 0.04<br>(0.03 to<br>0.05)                      | 0.05<br>(0.03 to<br>0.06)                      |
| Other neglected tropical diseases                     | 16.24<br>(11.37 to<br>23.92)                         | 15.37<br>(10.30 to<br>23.90)                         | 10.06<br>(6.60 to<br>15.20)                         | 21.81<br>(14.50 to<br>32.63)                         | 0.22<br>(0.15 to<br>0.32)                      | 0.23<br>(0.16 to<br>0.36)                      | 0.16<br>(0.11 to<br>0.25)                      | 0.32<br>(0.22 to<br>0.47)                      |
| <b>Maternal disorders</b>                             | <b>194.06</b><br><b>(146.94 to</b><br><b>253.38)</b> | <b>185.81</b><br><b>(122.83 to</b><br><b>293.76)</b> | <b>110.57</b><br><b>(74.51 to</b><br><b>173.03)</b> | <b>269.02</b><br><b>(179.54 to</b><br><b>434.62)</b> | <b>3.59</b><br><b>(2.72 to</b><br><b>4.68)</b> | <b>3.57</b><br><b>(2.35 to</b><br><b>5.70)</b> | <b>2.12</b><br><b>(1.42 to</b><br><b>3.35)</b> | <b>5.15</b><br><b>(3.41 to</b><br><b>8.30)</b> |
| Maternal hemorrhage                                   | 34.53<br>(22.63 to<br>51.99)                         | 26.62<br>(15.63 to<br>47.41)                         | 16.61<br>(9.61 to<br>28.08)                         | 35.42<br>(20.16 to<br>60.92)                         | 0.65<br>(0.43 to<br>0.97)                      | 0.51<br>(0.30 to<br>0.91)                      | 0.32<br>(0.19 to<br>0.55)                      | 0.68<br>(0.38 to<br>1.16)                      |
| Maternal sepsis and other maternal infections         | 6.61<br>(3.39 to<br>11.27)                           | 4.69<br>(2.24 to<br>8.48)                            | 2.90<br>(1.40 to<br>5.21)                           | 6.30<br>(2.98 to<br>11.61)                           | 0.12<br>(0.06 to<br>0.21)                      | 0.09<br>(0.04 to<br>0.16)                      | 0.06<br>(0.03 to<br>0.10)                      | 0.12<br>(0.06 to<br>0.22)                      |
| Maternal hypertensive disorders                       | 29.79<br>(20.11 to<br>43.41)                         | 23.19<br>(14.25 to<br>37.58)                         | 14.34<br>(8.90 to<br>23.22)                         | 31.22<br>(19.01 to<br>52.55)                         | 0.54<br>(0.36 to<br>0.79)                      | 0.45<br>(0.27 to<br>0.70)                      | 0.27<br>(0.17 to<br>0.44)                      | 0.58<br>(0.35 to<br>0.97)                      |
| Maternal obstructed labor and uterine rupture         | 8.22<br>(4.47 to<br>13.85)                           | 6.78<br>(3.28 to<br>12.03)                           | 4.07<br>(2.07 to<br>7.24)                           | 9.28<br>(4.39 to<br>17.02)                           | 0.15<br>(0.08 to<br>0.25)                      | 0.13<br>(0.06 to<br>0.23)                      | 0.08<br>(0.04 to<br>0.14)                      | 0.18<br>(0.08 to<br>0.33)                      |
| Maternal abortion, miscarriage, and ectopic pregnancy | 11.09<br>(6.64 to<br>17.22)                          | 10.49<br>(5.11 to<br>20.26)                          | 6.32<br>(3.20 to<br>11.77)                          | 13.96<br>(6.83 to<br>26.13)                          | 0.21<br>(0.12 to<br>0.32)                      | 0.20<br>(0.10 to<br>0.39)                      | 0.12<br>(0.06 to<br>0.22)                      | 0.27<br>(0.13 to<br>0.51)                      |
| Indirect maternal deaths                              | 58.77<br>(39.88 to<br>83.34)                         | 53.19<br>(31.29 to<br>86.98)                         | 32.92<br>(20.19 to<br>53.54)                        | 72.53<br>(41.84 to<br>119.72)                        | 1.08<br>(0.73 to<br>1.54)                      | 1.00<br>(0.59 to<br>1.63)                      | 0.62<br>(0.38 to<br>1.01)                      | 1.35<br>(0.77 to<br>2.24)                      |
| Late maternal deaths                                  | 5.59<br>(2.80 to<br>9.71)                            | 3.53<br>(1.74 to<br>6.60)                            | 2.17<br>(1.06 to<br>4.03)                           | 4.81<br>(2.32 to<br>9.13)                            | 0.10<br>(0.05 to<br>0.18)                      | 0.07<br>(0.03 to<br>0.15)                      | 0.04<br>(0.02 to<br>0.08)                      | 0.09<br>(0.04 to<br>0.17)                      |
| Maternal deaths aggravated by HIV/AIDS                | 5.27<br>(3.06 to<br>7.72)                            | 28.77<br>(6.95 to<br>58.35)                          | 13.05<br>(1.20 to<br>31.93)                         | 57.36<br>(32.35 to<br>102.60)                        | 0.10<br>(0.06 to<br>0.15)                      | 0.59<br>(0.15 to<br>1.18)                      | 0.27<br>(0.02 to<br>0.64)                      | 1.16<br>(0.66 to<br>2.09)                      |
| Other maternal disorders                              | 34.19<br>(21.96 to<br>51.48)                         | 28.56<br>(16.73 to<br>47.34)                         | 18.18<br>(10.65 to<br>30.11)                        | 38.13<br>(21.95 to<br>64.89)                         | 0.63<br>(0.41 to<br>0.95)                      | 0.54<br>(0.32 to<br>0.90)                      | 0.35<br>(0.20 to<br>0.58)                      | 0.72<br>(0.41 to<br>1.24)                      |
| <b>Kenya</b>                                          |                                                      |                                                      |                                                     |                                                      |                                                |                                                |                                                |                                                |
| Cause                                                 | YLLs (in 1000s)                                      |                                                      |                                                     |                                                      | Deaths (in 1000s)                              |                                                |                                                |                                                |
|                                                       | 2016                                                 | 2040 Forecast                                        | 2040 Better Scenario                                | 2040 Worse Scenario                                  | 2016                                           | 2040 Forecast                                  | 2040 Better Scenario                           | 2040 Worse Scenario                            |
| Neonatal disorders                                    | 1,633.45<br>(1,522.41 to<br>1,749.44)                | 1,578.01<br>(1,003.26 to<br>2,485.69)                | 942.23<br>(601.54 to<br>1,507.80)                   | 2,371.89<br>(1,525.80 to<br>3,777.74)                | 18.87<br>(17.59 to<br>20.21)                   | 18.23<br>(11.59 to<br>28.71)                   | 10.89<br>(6.95 to<br>17.42)                    | 27.40<br>(17.63 to<br>43.64)                   |
| Neonatal preterm birth                                | 482.01<br>(368.81 to<br>582.58)                      | 484.01<br>(295.62 to<br>742.13)                      | 248.39<br>(149.74 to<br>382.53)                     | 711.17<br>(432.11 to<br>1,081.57)                    | 5.57<br>(4.26 to<br>6.73)                      | 5.59<br>(3.42 to<br>8.57)                      | 2.87<br>(1.73 to<br>4.42)                      | 8.22<br>(4.99 to<br>12.49)                     |





| Kenya                                |                              |                                  |                                  |                                  |                           |                           |                           |                           |
|--------------------------------------|------------------------------|----------------------------------|----------------------------------|----------------------------------|---------------------------|---------------------------|---------------------------|---------------------------|
| Cause                                | YLLs (in 1000s)              |                                  |                                  |                                  | Deaths (in 1000s)         |                           |                           |                           |
|                                      | 2016                         | 2040 Forecast                    | 2040 Better Scenario             | 2040 Worse Scenario              | 2016                      | 2040 Forecast             | 2040 Better Scenario      | 2040 Worse Scenario       |
| Neoplasms                            | 484.80<br>(402.26 to 564.74) | 1,195.78<br>(933.81 to 1,615.06) | 1,148.33<br>(898.50 to 1,559.52) | 1,229.98<br>(947.81 to 1,674.53) | 15.82<br>(13.15 to 18.30) | 42.31<br>(34.06 to 53.25) | 41.88<br>(34.22 to 52.78) | 42.48<br>(33.65 to 53.98) |
| Lip and oral cavity cancer           | 7.87<br>(6.59 to 9.17)       | 23.38<br>(15.60 to 34.54)        | 17.72<br>(12.45 to 24.94)        | 28.84<br>(18.42 to 44.14)        | 0.29<br>(0.24 to 0.33)    | 0.87<br>(0.60 to 1.22)    | 0.69<br>(0.51 to 0.94)    | 1.03<br>(0.68 to 1.54)    |
| Nasopharynx cancer                   | 7.98<br>(6.49 to 9.33)       | 25.59<br>(16.38 to 39.69)        | 18.48<br>(12.18 to 27.93)        | 31.71<br>(19.99 to 49.46)        | 0.23<br>(0.19 to 0.27)    | 0.78<br>(0.50 to 1.19)    | 0.57<br>(0.38 to 0.85)    | 0.95<br>(0.59 to 1.48)    |
| Other pharynx cancer                 | 4.26<br>(3.35 to 5.15)       | 10.17<br>(6.29 to 15.92)         | 8.15<br>(5.26 to 12.41)          | 11.48<br>(6.88 to 18.18)         | 0.15<br>(0.12 to 0.18)    | 0.36<br>(0.23 to 0.55)    | 0.30<br>(0.19 to 0.44)    | 0.41<br>(0.25 to 0.63)    |
| Esophageal cancer                    | 21.89<br>(18.49 to 25.72)    | 62.27<br>(37.27 to 103.28)       | 49.80<br>(31.34 to 80.89)        | 73.38<br>(41.89 to 124.73)       | 0.87<br>(0.74 to 1.02)    | 2.47<br>(1.53 to 3.92)    | 2.06<br>(1.34 to 3.21)    | 2.82<br>(1.68 to 4.61)    |
| Stomach cancer                       | 44.98<br>(36.71 to 55.24)    | 81.15<br>(61.73 to 110.16)       | 76.64<br>(57.94 to 104.96)       | 82.89<br>(63.52 to 113.77)       | 1.79<br>(1.47 to 2.19)    | 3.35<br>(2.66 to 4.36)    | 3.24<br>(2.56 to 4.23)    | 3.37<br>(2.64 to 4.44)    |
| Colon and rectum cancer              | 24.80<br>(19.60 to 30.30)    | 78.23<br>(52.25 to 112.64)       | 79.43<br>(54.04 to 114.83)       | 77.54<br>(51.11 to 112.23)       | 1.05<br>(0.82 to 1.28)    | 3.51<br>(2.40 to 4.88)    | 3.76<br>(2.64 to 5.13)    | 3.37<br>(2.26 to 4.71)    |
| Liver cancer                         | 27.12<br>(21.63 to 32.24)    | 73.13<br>(51.47 to 106.90)       | 69.70<br>(50.06 to 101.44)       | 77.97<br>(52.47 to 117.13)       | 0.92<br>(0.73 to 1.09)    | 2.62<br>(1.89 to 3.67)    | 2.56<br>(1.90 to 3.55)    | 2.73<br>(1.93 to 3.93)    |
| Liver cancer due to hepatitis B      | 8.19<br>(5.94 to 10.62)      | 21.34<br>(13.89 to 33.63)        | 20.64<br>(13.54 to 31.37)        | 22.53<br>(14.06 to 36.29)        | 0.25<br>(0.18 to 0.33)    | 0.70<br>(0.46 to 1.05)    | 0.69<br>(0.45 to 1.02)    | 0.73<br>(0.47 to 1.13)    |
| Liver cancer due to hepatitis C      | 8.94<br>(6.72 to 11.10)      | 24.93<br>(17.14 to 36.55)        | 24.37<br>(17.07 to 35.74)        | 25.82<br>(17.13 to 38.77)        | 0.34<br>(0.25 to 0.43)    | 0.99<br>(0.70 to 1.40)    | 1.00<br>(0.72 to 1.38)    | 1.01<br>(0.68 to 1.45)    |
| Liver cancer due to alcohol use      | 3.02<br>(2.27 to 3.84)       | 8.45<br>(5.79 to 12.53)          | 7.09<br>(4.94 to 10.25)          | 9.94<br>(6.56 to 14.96)          | 0.11<br>(0.08 to 0.14)    | 0.31<br>(0.22 to 0.45)    | 0.27<br>(0.19 to 0.38)    | 0.36<br>(0.24 to 0.54)    |
| Liver cancer due to other causes     | 6.96<br>(5.51 to 8.57)       | 18.41<br>(12.48 to 27.81)        | 17.60<br>(12.20 to 26.42)        | 19.68<br>(12.80 to 30.91)        | 0.21<br>(0.17 to 0.26)    | 0.61<br>(0.43 to 0.89)    | 0.60<br>(0.42 to 0.87)    | 0.64<br>(0.43 to 0.95)    |
| Gallbladder and biliary tract cancer | 4.77<br>(3.62 to 6.05)       | 8.53<br>(6.52 to 11.43)          | 8.96<br>(6.85 to 11.92)          | 8.02<br>(6.09 to 10.83)          | 0.19<br>(0.15 to 0.25)    | 0.36<br>(0.28 to 0.47)    | 0.39<br>(0.31 to 0.50)    | 0.33<br>(0.26 to 0.43)    |
| Pancreatic cancer                    | 16.22<br>(12.56 to 19.58)    | 52.02<br>(39.37 to 68.91)        | 55.33<br>(42.48 to 72.88)        | 48.86<br>(36.28 to 64.01)        | 0.68<br>(0.53 to 0.82)    | 2.23<br>(1.71 to 2.81)    | 2.43<br>(1.91 to 3.06)    | 2.06<br>(1.56 to 2.61)    |
| Larynx cancer                        | 9.03<br>(7.17 to 10.78)      | 22.63<br>(14.73 to 33.89)        | 17.43<br>(11.85 to 25.29)        | 27.46<br>(16.99 to 43.56)        | 0.33<br>(0.26 to 0.39)    | 0.82<br>(0.55 to 1.21)    | 0.65<br>(0.46 to 0.92)    | 0.98<br>(0.61 to 1.51)    |
| Tracheal, bronchus, and lung cancer  | 19.34<br>(16.23 to 23.02)    | 52.78<br>(36.21 to 75.35)        | 40.24<br>(28.94 to 55.65)        | 63.33<br>(41.22 to 94.27)        | 0.77<br>(0.64 to 0.89)    | 2.19<br>(1.54 to 3.00)    | 1.74<br>(1.30 to 2.30)    | 2.51<br>(1.68 to 3.59)    |
| Malignant skin melanoma              | 2.83<br>(2.11 to 3.86)       | 7.19<br>(5.28 to 10.35)          | 7.99<br>(5.86 to 11.38)          | 6.51<br>(4.75 to 9.23)           | 0.10<br>(0.07 to 0.15)    | 0.27<br>(0.20 to 0.39)    | 0.31<br>(0.23 to 0.46)    | 0.24<br>(0.18 to 0.35)    |
| Non-melanoma skin cancer             | 3.42<br>(2.62 to 4.27)       | 9.68<br>(7.20 to 13.22)          | 9.40<br>(7.00 to 12.85)          | 9.56<br>(7.06 to 13.07)          | 0.14<br>(0.11 to 0.18)    | 0.45<br>(0.34 to 0.57)    | 0.46<br>(0.36 to 0.58)    | 0.43<br>(0.33 to 0.54)    |
| Breast cancer                        | 27.89<br>(19.82 to 40.53)    | 75.79<br>(50.29 to 114.02)       | 73.97<br>(50.63 to 109.29)       | 77.49<br>(49.68 to 117.28)       | 0.91<br>(0.64 to 1.28)    | 2.67<br>(1.83 to 3.85)    | 2.67<br>(1.88 to 3.78)    | 2.69<br>(1.76 to 3.94)    |
| Cervical cancer                      | 46.84<br>(27.55 to 68.95)    | 93.09<br>(50.20 to 140.83)       | 85.41<br>(45.54 to 128.21)       | 95.91<br>(51.20 to 145.43)       | 1.57<br>(0.91 to 2.31)    | 3.19<br>(1.77 to 4.70)    | 2.96<br>(1.63 to 4.31)    | 3.27<br>(1.78 to 4.90)    |

|                                 |                                                      |                                                          |                                                        |                                                            |                                                   |                                                   |                                                   |                                                    |
|---------------------------------|------------------------------------------------------|----------------------------------------------------------|--------------------------------------------------------|------------------------------------------------------------|---------------------------------------------------|---------------------------------------------------|---------------------------------------------------|----------------------------------------------------|
| Uterine cancer                  | 2.84<br>(1.97 to<br>3.92)                            | 7.28<br>(5.14 to<br>10.48)                               | 6.63<br>(4.76 to<br>9.57)                              | 7.52<br>(5.24 to<br>10.83)                                 | 0.12<br>(0.08 to<br>0.16)                         | 0.32<br>(0.23 to<br>0.44)                         | 0.30<br>(0.22 to<br>0.41)                         | 0.32<br>(0.22 to<br>0.45)                          |
| Ovarian cancer                  | 10.95<br>(7.00 to<br>14.89)                          | 30.06<br>(18.42 to<br>44.27)                             | 32.36<br>(20.15 to<br>47.27)                           | 28.11<br>(16.91 to<br>41.60)                               | 0.38<br>(0.24 to<br>0.51)                         | 1.08<br>(0.68 to<br>1.54)                         | 1.19<br>(0.76 to<br>1.67)                         | 1.01<br>(0.62 to<br>1.44)                          |
| Prostate cancer                 | 15.66<br>(8.76 to<br>20.18)                          | 56.52<br>(32.10 to<br>76.27)                             | 62.17<br>(35.72 to<br>84.82)                           | 51.63<br>(28.97 to<br>69.50)                               | 0.82<br>(0.47 to<br>1.05)                         | 3.01<br>(1.80 to<br>3.84)                         | 3.41<br>(2.05 to<br>4.39)                         | 2.70<br>(1.56 to<br>3.48)                          |
| Testicular cancer               | 2.44<br>(1.83 to<br>3.00)                            | 3.34<br>(2.16 to<br>5.24)                                | 3.16<br>(2.04 to<br>4.92)                              | 3.40<br>(2.19 to<br>5.37)                                  | 0.06<br>(0.04 to<br>0.07)                         | 0.08<br>(0.06 to<br>0.11)                         | 0.08<br>(0.06 to<br>0.11)                         | 0.08<br>(0.06 to<br>0.12)                          |
| <b>Kenya</b>                    |                                                      |                                                          |                                                        |                                                            |                                                   |                                                   |                                                   |                                                    |
| Cause                           | YLLs (in 1000s)                                      |                                                          |                                                        |                                                            | Deaths (in 1000s)                                 |                                                   |                                                   |                                                    |
|                                 | 2016                                                 | 2040 Forecast                                            | 2040 Better Scenario                                   | 2040 Worse Scenario                                        | 2016                                              | 2040 Forecast                                     | 2040 Better Scenario                              | 2040 Worse Scenario                                |
| Kidney cancer                   | 3.93<br>(2.71 to<br>5.08)                            | 10.16<br>(7.09 to<br>13.91)                              | 10.97<br>(7.75 to<br>15.08)                            | 9.69<br>(6.69 to<br>13.31)                                 | 0.11<br>(0.08 to<br>0.14)                         | 0.35<br>(0.25 to<br>0.45)                         | 0.39<br>(0.29 to<br>0.51)                         | 0.31<br>(0.23 to<br>0.40)                          |
| Bladder cancer                  | 4.93<br>(3.79 to<br>6.08)                            | 12.77<br>(9.49 to<br>17.17)                              | 12.67<br>(9.50 to<br>16.95)                            | 12.57<br>(9.24 to<br>16.89)                                | 0.21<br>(0.17 to<br>0.26)                         | 0.57<br>(0.43 to<br>0.74)                         | 0.59<br>(0.45 to<br>0.75)                         | 0.55<br>(0.42 to<br>0.71)                          |
| Brain and nervous system cancer | 18.43<br>(12.00 to<br>24.53)                         | 45.22<br>(28.33 to<br>68.11)                             | 45.67<br>(29.00 to<br>69.11)                           | 44.94<br>(27.65 to<br>67.98)                               | 0.41<br>(0.29 to<br>0.54)                         | 1.18<br>(0.81 to<br>1.65)                         | 1.23<br>(0.86 to<br>1.75)                         | 1.12<br>(0.76 to<br>1.58)                          |
| Thyroid cancer                  | 2.26<br>(1.69 to<br>2.79)                            | 5.25<br>(3.62 to<br>7.22)                                | 4.84<br>(3.44 to<br>6.69)                              | 5.51<br>(3.79 to<br>7.77)                                  | 0.08<br>(0.06 to<br>0.10)                         | 0.19<br>(0.13 to<br>0.25)                         | 0.18<br>(0.13 to<br>0.24)                         | 0.20<br>(0.13 to<br>0.27)                          |
| Mesothelioma                    | 1.25<br>(0.95 to<br>1.59)                            | 3.27<br>(2.32 to<br>4.67)                                | 3.30<br>(2.32 to<br>4.76)                              | 3.15<br>(2.22 to<br>4.49)                                  | 0.04<br>(0.03 to<br>0.05)                         | 0.12<br>(0.08 to<br>0.16)                         | 0.12<br>(0.09 to<br>0.17)                         | 0.11<br>(0.08 to<br>0.15)                          |
| Hodgkin lymphoma                | 6.98<br>(2.80 to<br>8.25)                            | 8.10<br>(3.53 to<br>13.22)                               | 6.63<br>(2.88 to<br>10.81)                             | 6.63<br>(3.92 to<br>15.37)                                 | 0.13<br>(0.06 to<br>0.17)                         | 0.19<br>(0.09 to<br>0.29)                         | 0.16<br>(0.08 to<br>0.25)                         | 0.21<br>(0.10 to<br>0.33)                          |
| Non-Hodgkin lymphoma            | 27.86<br>(19.94 to<br>34.11)                         | 59.95<br>(39.67 to<br>87.26)                             | 60.47<br>(40.48 to<br>87.64)                           | 60.10<br>(39.24 to<br>86.80)                               | 0.64<br>(0.45 to<br>0.78)                         | 1.62<br>(1.09 to<br>2.24)                         | 1.69<br>(1.15 to<br>2.35)                         | 1.56<br>(1.05 to<br>2.16)                          |
| Multiple myeloma                | 7.10<br>(4.85 to<br>9.24)                            | 21.72<br>(13.63 to<br>31.33)                             | 23.26<br>(14.87 to<br>33.73)                           | 20.41<br>(12.62 to<br>29.68)                               | 0.26<br>(0.17 to<br>0.34)                         | 0.82<br>(0.52 to<br>1.15)                         | 0.89<br>(0.58 to<br>1.25)                         | 0.76<br>(0.48 to<br>1.08)                          |
| Leukemia                        | 29.42<br>(21.43 to<br>37.03)                         | 58.63<br>(39.73 to<br>84.78)                             | 57.65<br>(39.51 to<br>83.73)                           | 60.11<br>(40.44 to<br>87.01)                               | 0.66<br>(0.51 to<br>0.81)                         | 1.61<br>(1.20 to<br>2.15)                         | 1.65<br>(1.22 to<br>2.21)                         | 1.59<br>(1.17 to<br>2.11)                          |
| Acute lymphoid leukemia         | 10.71<br>(6.94 to<br>13.54)                          | 19.35<br>(11.99 to<br>28.79)                             | 18.89<br>(11.76 to<br>28.42)                           | 20.14<br>(12.17 to<br>30.13)                               | 0.20<br>(0.14 to<br>0.25)                         | 0.43<br>(0.29 to<br>0.60)                         | 0.43<br>(0.29 to<br>0.62)                         | 0.43<br>(0.29 to<br>0.61)                          |
| Chronic lymphoid leukemia       | 1.12<br>(0.78 to<br>1.45)                            | 2.82<br>(1.81 to<br>3.87)                                | 2.87<br>(1.83 to<br>3.97)                              | 2.75<br>(1.75 to<br>3.78)                                  | 0.05<br>(0.03 to<br>0.06)                         | 0.12<br>(0.08 to<br>0.16)                         | 0.13<br>(0.09 to<br>0.17)                         | 0.12<br>(0.08 to<br>0.16)                          |
| Acute myeloid leukemia          | 8.57<br>(6.18 to<br>10.85)                           | 21.77<br>(14.59 to<br>31.61)                             | 22.50<br>(15.36 to<br>32.91)                           | 21.49<br>(14.54 to<br>31.34)                               | 0.19<br>(0.14 to<br>0.24)                         | 0.58<br>(0.42 to<br>0.81)                         | 0.62<br>(0.45 to<br>0.87)                         | 0.55<br>(0.39 to<br>0.76)                          |
| Chronic myeloid leukemia        | 3.17<br>(2.06 to<br>4.53)                            | 4.55<br>(2.59 to<br>7.36)                                | 4.38<br>(2.47 to<br>7.17)                              | 4.61<br>(2.62 to<br>7.62)                                  | 0.08<br>(0.05 to<br>0.11)                         | 0.12<br>(0.08 to<br>0.19)                         | 0.12<br>(0.07 to<br>0.19)                         | 0.12<br>(0.07 to<br>0.20)                          |
| Other leukemia                  | 5.85<br>(3.94 to<br>8.13)                            | 10.14<br>(6.80 to<br>14.65)                              | 9.00<br>(6.03 to<br>12.88)                             | 11.11<br>(7.31 to<br>16.25)                                | 0.15<br>(0.11 to<br>0.20)                         | 0.36<br>(0.25 to<br>0.46)                         | 0.34<br>(0.24 to<br>0.44)                         | 0.37<br>(0.26 to<br>0.49)                          |
| Other neoplasms                 | 82.41<br>(66.38 to<br>101.24)                        | 197.87<br>(141.74 to<br>289.91)                          | 199.90<br>(141.19 to<br>293.57)                        | 192.65<br>(138.01 to<br>283.78)                            | 1.92<br>(1.55 to<br>2.36)                         | 5.04<br>(3.78 to<br>7.01)                         | 5.23<br>(3.90 to<br>7.29)                         | 4.79<br>(3.59 to<br>6.71)                          |
| <b>Cardiovascular diseases</b>  | <b>666.67</b><br><b>(562.78 to</b><br><b>788.13)</b> | <b>1,237.09</b><br><b>(914.81 to</b><br><b>1,640.23)</b> | <b>804.11</b><br><b>(616.52 to</b><br><b>1,038.81)</b> | <b>1,750.16</b><br><b>(1,240.42 to</b><br><b>2,417.77)</b> | <b>30.71</b><br><b>(25.84 to</b><br><b>35.77)</b> | <b>63.38</b><br><b>(49.13 to</b><br><b>80.07)</b> | <b>45.00</b><br><b>(36.13 to</b><br><b>55.43)</b> | <b>83.51</b><br><b>(62.03 to</b><br><b>110.63)</b> |

|                                               |                                         |                                          |                                         |                                          |                                    |                                     |                                    |                                     |
|-----------------------------------------------|-----------------------------------------|------------------------------------------|-----------------------------------------|------------------------------------------|------------------------------------|-------------------------------------|------------------------------------|-------------------------------------|
| Rheumatic heart disease                       | 9.86<br>(7.53 to<br>12.71)              | 10.00<br>(7.02 to<br>14.83)              | 8.05<br>(5.60 to<br>12.28)              | 11.42<br>(7.97 to<br>17.41)              | 0.33<br>(0.25 to<br>0.43)          | 0.39<br>(0.28 to<br>0.55)           | 0.32<br>(0.23 to<br>0.47)          | 0.43<br>(0.30 to<br>0.62)           |
| Ischemic heart disease                        | 216.40<br>(177.06 to<br>269.13)         | 340.74<br>(208.02 to<br>569.91)          | 180.09<br>(112.26 to<br>300.63)         | 538.04<br>(320.83 to<br>859.74)          | 10.77<br>(8.83 to<br>13.31)        | 18.91<br>(12.04 to<br>30.73)        | 11.26<br>(7.30 to<br>18.06)        | 27.22<br>(16.85 to<br>43.97)        |
| Stroke                                        | 232.26<br>(186.75 to<br>287.39)         | 379.95<br>(236.06 to<br>600.25)          | 182.19<br>(118.92 to<br>284.61)         | 621.69<br>(364.96 to<br>1,029.78)        | 10.57<br>(8.57 to<br>13.03)        | 18.81<br>(12.64 to<br>27.92)        | 10.28<br>(7.11 to<br>14.96)        | 28.26<br>(18.21 to<br>43.00)        |
| Ischemic stroke                               | 59.70<br>(47.02 to<br>73.07)            | 96.29<br>(58.14 to<br>160.09)            | 55.02<br>(35.39 to<br>88.85)            | 136.22<br>(79.27 to<br>225.27)           | 3.62<br>(2.92 to<br>4.38)          | 6.34<br>(3.94 to<br>10.67)          | 4.08<br>(2.68 to<br>6.47)          | 8.28<br>(4.92 to<br>13.91)          |
| Intracerebral hemorrhage                      | 172.56<br>(138.88 to<br>217.29)         | 283.67<br>(161.98 to<br>485.15)          | 127.17<br>(74.42 to<br>211.72)          | 485.47<br>(265.34 to<br>840.21)          | 6.95<br>(5.60 to<br>8.77)          | 12.48<br>(7.79 to<br>19.83)         | 6.20<br>(4.02 to<br>9.45)          | 19.98<br>(11.88 to<br>32.48)        |
| Hypertensive heart disease                    | 50.09<br>(36.05 to<br>62.54)            | 116.60<br>(74.25 to<br>185.47)           | 88.37<br>(57.30 to<br>133.85)           | 152.42<br>(89.03 to<br>269.29)           | 2.57<br>(1.81 to<br>3.29)          | 6.61<br>(4.16 to<br>10.55)          | 5.37<br>(3.56 to<br>8.10)          | 8.26<br>(4.81 to<br>14.74)          |
| Cardiomyopathy and myocarditis                | 25.64<br>(15.85 to<br>39.33)            | 57.70<br>(30.30 to<br>102.20)            | 56.92<br>(29.82 to<br>100.99)           | 58.58<br>(30.88 to<br>103.62)            | 0.73<br>(0.46 to<br>1.14)          | 1.93<br>(1.08 to<br>3.27)           | 2.00<br>(1.13 to<br>3.38)          | 1.88<br>(1.05 to<br>3.17)           |
| Myocarditis                                   | 3.11<br>(1.57 to<br>6.21)               | 5.35<br>(2.18 to<br>10.88)               | 4.96<br>(1.98 to<br>10.04)              | 5.62<br>(2.33 to<br>11.24)               | 0.07<br>(0.03 to<br>0.13)          | 0.14<br>(0.06 to<br>0.28)           | 0.14<br>(0.05 to<br>0.28)          | 0.14<br>(0.06 to<br>0.27)           |
| <b>Kenya</b>                                  |                                         |                                          |                                         |                                          |                                    |                                     |                                    |                                     |
| Cause                                         | YLLs (in 1000s)                         |                                          |                                         |                                          | Deaths (in 1000s)                  |                                     |                                    |                                     |
|                                               | 2016                                    | 2040 Forecast                            | 2040 Better Scenario                    | 2040 Worse Scenario                      | 2016                               | 2040 Forecast                       | 2040 Better Scenario               | 2040 Worse Scenario                 |
| Alcoholic cardiomyopathy                      | 2.12<br>(1.13 to<br>3.72)               | 5.18<br>(2.49 to<br>9.75)                | 5.00<br>(2.41 to<br>9.27)               | 5.18<br>(2.49 to<br>9.76)                | 0.06<br>(0.04 to<br>0.11)          | 0.17<br>(0.08 to<br>0.31)           | 0.16<br>(0.08 to<br>0.30)          | 0.16<br>(0.08 to<br>0.31)           |
| Other cardiomyopathy                          | 20.41<br>(12.93 to<br>31.41)            | 47.17<br>(24.70 to<br>85.48)             | 46.97<br>(24.56 to<br>85.46)            | 47.78<br>(25.28 to<br>87.02)             | 0.60<br>(0.38 to<br>0.96)          | 1.62<br>(0.90 to<br>2.82)           | 1.30<br>(0.94 to<br>2.94)          | 1.57<br>(0.88 to<br>2.75)           |
| Atrial fibrillation and flutter               | 4.12<br>(3.10 to<br>5.33)               | 12.39<br>(8.96 to<br>16.34)              | 12.95<br>(9.65 to<br>17.18)             | 12.10<br>(8.64 to<br>16.21)              | 0.37<br>(0.27 to<br>0.47)          | 1.15<br>(0.77 to<br>1.59)           | 1.28<br>(0.91 to<br>1.75)          | 1.06<br>(0.69 to<br>1.51)           |
| Aortic aneurysm                               | 7.02<br>(5.46 to<br>8.57)               | 17.14<br>(12.24 to<br>23.71)             | 16.90<br>(12.05 to<br>23.50)            | 17.27<br>(12.29 to<br>24.25)             | 0.31<br>(0.24 to<br>0.38)          | 0.82<br>(0.62 to<br>1.08)           | 0.86<br>(0.66 to<br>1.12)          | 0.79<br>(0.59 to<br>1.05)           |
| Peripheral artery disease                     | 0.68<br>(0.33 to<br>0.92)               | 2.98<br>(1.40 to<br>4.19)                | 3.27<br>(1.55 to<br>4.54)               | 2.77<br>(1.26 to<br>3.90)                | 0.05<br>(0.02 to<br>0.06)          | 0.22<br>(0.10 to<br>0.32)           | 0.27<br>(0.13 to<br>0.38)          | 0.20<br>(0.09 to<br>0.29)           |
| Endocarditis                                  | 13.81<br>(10.28 to<br>17.52)            | 33.33<br>(21.10 to<br>49.38)             | 31.52<br>(19.53 to<br>46.40)            | 34.96<br>(22.03 to<br>52.09)             | 0.42<br>(0.30 to<br>0.53)          | 1.17<br>(0.77 to<br>1.62)           | 1.17<br>(0.76 to<br>1.62)          | 1.17<br>(0.77 to<br>1.62)           |
| Other cardiovascular and circulatory diseases | 106.79<br>(77.09 to<br>149.01)          | 266.27<br>(185.10 to<br>379.79)          | 223.84<br>(157.66 to<br>314.50)         | 300.91<br>(205.22 to<br>439.93)          | 4.61<br>(3.29 to<br>6.47)          | 13.38<br>(9.49 to<br>18.86)         | 12.17<br>(8.78 to<br>16.75)        | 14.25<br>(9.78 to<br>20.36)         |
| <b>Chronic respiratory diseases</b>           | <b>110.23<br/>(86.67 to<br/>142.76)</b> | <b>163.20<br/>(115.49 to<br/>244.80)</b> | <b>117.44<br/>(87.29 to<br/>167.66)</b> | <b>207.21<br/>(141.05 to<br/>318.42)</b> | <b>4.78<br/>(3.76 to<br/>6.25)</b> | <b>7.90<br/>(5.61 to<br/>11.50)</b> | <b>5.92<br/>(4.46 to<br/>7.97)</b> | <b>9.59<br/>(6.51 to<br/>14.54)</b> |
| Chronic obstructive pulmonary disease         | 65.12<br>(51.71 to<br>80.84)            | 112.27<br>(75.12 to<br>176.79)           | 73.74<br>(54.47 to<br>104.63)           | 149.68<br>(93.97 to<br>240.92)           | 3.32<br>(2.64 to<br>4.15)          | 6.00<br>(4.05 to<br>9.14)           | 4.18<br>(3.11 to<br>5.71)          | 7.54<br>(4.84 to<br>11.97)          |
| Pneumoconiosis                                | 0.47<br>(0.32 to<br>0.67)               | 0.77<br>(0.50 to<br>1.11)                | 0.76<br>(0.49 to<br>1.11)               | 0.80<br>(0.53 to<br>1.16)                | 0.02<br>(0.01 to<br>0.03)          | 0.04<br>(0.03 to<br>0.05)           | 0.04<br>(0.03 to<br>0.06)          | 0.04<br>(0.03 to<br>0.06)           |
| Silicosis                                     | 0.10<br>(0.05 to<br>0.15)               | 0.10<br>(0.06 to<br>0.17)                | 0.10<br>(0.05 to<br>0.17)               | 0.10<br>(0.06 to<br>0.17)                | 0.00<br>(0.00 to<br>0.01)          | 0.01<br>(0.00 to<br>0.01)           | 0.01<br>(0.00 to<br>0.01)          | 0.01<br>(0.00 to<br>0.01)           |
| Asbestosis                                    | 0.13<br>(0.06 to<br>0.21)               | 0.31<br>(0.15 to<br>0.53)                | 0.33<br>(0.16 to<br>0.56)               | 0.29<br>(0.14 to<br>0.49)                | 0.01<br>(0.00 to<br>0.01)          | 0.01<br>(0.00 to<br>0.02)           | 0.02<br>(0.01 to<br>0.03)          | 0.01<br>(0.01 to<br>0.02)           |

|                                                                |                                        |                                        |                                        |                                        |                                  |                                     |                                     |                                     |
|----------------------------------------------------------------|----------------------------------------|----------------------------------------|----------------------------------------|----------------------------------------|----------------------------------|-------------------------------------|-------------------------------------|-------------------------------------|
| Coal workers pneumoconiosis                                    | 0.03<br>(0.02 to<br>0.05)              | 0.04<br>(0.02 to<br>0.08)              | 0.03<br>(0.02 to<br>0.06)              | 0.05<br>(0.03 to<br>0.09)              | 0.00<br>(0.00 to<br>0.00)        | 0.00<br>(0.00 to<br>0.00)           | 0.00<br>(0.00 to<br>0.00)           | 0.00<br>(0.00 to<br>0.00)           |
| Other pneumoconiosis                                           | 0.21<br>(0.13 to<br>0.34)              | 0.31<br>(0.18 to<br>0.53)              | 0.30<br>(0.16 to<br>0.53)              | 0.36<br>(0.21 to<br>0.57)              | 0.01<br>(0.01 to<br>0.02)        | 0.01<br>(0.01 to<br>0.03)           | 0.02<br>(0.01 to<br>0.03)           | 0.02<br>(0.01 to<br>0.03)           |
| Asthma                                                         | 36.40<br>(26.84 to<br>60.53)           | 32.94<br>(19.97 to<br>57.17)           | 25.77<br>(16.32 to<br>44.99)           | 39.39<br>(23.30 to<br>69.19)           | 1.21<br>(0.85 to<br>2.17)        | 1.28<br>(0.80 to<br>2.30)           | 1.07<br>(0.69 to<br>1.95)           | 1.46<br>(0.87 to<br>2.69)           |
| Interstitial lung disease and pulmonary sarcoidosis            | 2.44<br>(1.62 to<br>3.65)              | 6.88<br>(4.38 to<br>10.83)             | 7.83<br>(4.98 to<br>12.17)             | 6.17<br>(3.90 to<br>9.74)              | 0.10<br>(0.06 to<br>0.15)        | 0.30<br>(0.19 to<br>0.49)           | 0.36<br>(0.22 to<br>0.57)           | 0.26<br>(0.16 to<br>0.42)           |
| Other chronic respiratory diseases                             | 5.80<br>(3.44 to<br>8.39)              | 10.33<br>(5.79 to<br>16.62)            | 9.34<br>(5.35 to<br>14.80)             | 11.17<br>(6.27 to<br>18.02)            | 0.13<br>(0.08 to<br>0.20)        | 0.28<br>(0.16 to<br>0.44)           | 0.27<br>(0.16 to<br>0.42)           | 0.29<br>(0.17 to<br>0.45)           |
| <b>Cirrhosis and other chronic liver diseases</b>              | <b>119.90</b><br>(88.12 to<br>155.84)  | <b>277.29</b><br>(187.37 to<br>402.65) | <b>246.49</b><br>(168.81 to<br>355.38) | <b>293.96</b><br>(197.72 to<br>428.64) | <b>3.75</b><br>(2.77 to<br>4.82) | <b>9.44</b><br>(6.69 to<br>12.76)   | <b>8.65</b><br>(6.16 to<br>11.66)   | <b>9.80</b><br>(6.96 to<br>13.17)   |
| Cirrhosis and other chronic liver diseases due to hepatitis B  | 36.43<br>(25.93 to<br>48.87)           | 88.86<br>(59.28 to<br>131.89)          | 84.68<br>(56.36 to<br>126.28)          | 88.73<br>(58.81 to<br>131.50)          | 1.19<br>(0.85 to<br>1.58)        | 3.09<br>(2.15 to<br>4.28)           | 3.02<br>(2.11 to<br>4.22)           | 3.03<br>(2.09 to<br>4.26)           |
| Cirrhosis and other chronic liver diseases due to hepatitis C  | 9.96<br>(7.17 to<br>13.46)             | 24.49<br>(16.50 to<br>35.63)           | 23.19<br>(15.58 to<br>33.87)           | 24.56<br>(16.41 to<br>36.02)           | 0.32<br>(0.23 to<br>0.43)        | 0.84<br>(0.59 to<br>1.18)           | 0.82<br>(0.57 to<br>1.13)           | 0.83<br>(0.58 to<br>1.16)           |
| Cirrhosis and other chronic liver diseases due to alcohol use  | 43.14<br>(30.55 to<br>56.75)           | 104.62<br>(69.36 to<br>151.51)         | 84.25<br>(55.60 to<br>122.76)          | 118.63<br>(79.60 to<br>171.79)         | 1.45<br>(1.05 to<br>1.89)        | 3.72<br>(2.62 to<br>5.09)           | 3.12<br>(2.18 to<br>4.25)           | 4.14<br>(2.92 to<br>5.64)           |
| Cirrhosis and other chronic liver diseases due to other causes | 30.37<br>(22.90 to<br>38.95)           | 59.31<br>(40.61 to<br>87.50)           | 54.37<br>(37.62 to<br>79.14)           | 62.04<br>(42.93 to<br>91.23)           | 0.79<br>(0.60 to<br>1.02)        | 1.78<br>(1.29 to<br>2.43)           | 1.70<br>(1.23 to<br>2.31)           | 1.80<br>(1.31 to<br>2.46)           |
| <b>Digestive diseases</b>                                      | <b>202.14</b><br>(165.40 to<br>258.32) | <b>352.37</b><br>(271.90 to<br>481.16) | <b>317.77</b><br>(244.38 to<br>441.43) | <b>372.83</b><br>(286.80 to<br>507.53) | <b>6.49</b><br>(5.25 to<br>8.38) | <b>13.65</b><br>(11.24 to<br>17.85) | <b>13.08</b><br>(10.77 to<br>17.19) | <b>13.76</b><br>(11.20 to<br>18.09) |
| Peptic ulcer disease                                           | 24.74<br>(19.08 to<br>33.11)           | 27.84<br>(20.00 to<br>39.19)           | 22.18<br>(15.67 to<br>31.20)           | 31.68<br>(22.73 to<br>44.61)           | 0.98<br>(0.75 to<br>1.32)        | 1.31<br>(0.98 to<br>1.81)           | 1.11<br>(0.82 to<br>1.51)           | 1.43<br>(1.04 to<br>1.98)           |
| <b>Kenya</b>                                                   |                                        |                                        |                                        |                                        |                                  |                                     |                                     |                                     |
| Cause                                                          | YLLs (in 1000s)                        |                                        |                                        |                                        | Deaths (in 1000s)                |                                     |                                     |                                     |
|                                                                | 2016                                   | 2040 Forecast                          | 2040 Better Scenario                   | 2040 Worse Scenario                    | 2016                             | 2040 Forecast                       | 2040 Better Scenario                | 2040 Worse Scenario                 |
| Gastritis and duodenitis                                       | 9.76<br>(6.06 to<br>15.55)             | 20.73<br>(12.50 to<br>34.80)           | 19.26<br>(11.54 to<br>32.46)           | 21.17<br>(12.83 to<br>35.67)           | 0.35<br>(0.21 to<br>0.60)        | 0.89<br>(0.56 to<br>1.56)           | 0.88<br>(0.55 to<br>1.51)           | 0.88<br>(0.55 to<br>1.51)           |
| Appendicitis                                                   | 12.34<br>(9.37 to<br>16.77)            | 15.71<br>(10.84 to<br>22.90)           | 12.96<br>(9.00 to<br>18.92)            | 17.79<br>(12.27 to<br>26.11)           | 0.28<br>(0.21 to<br>0.37)        | 0.46<br>(0.34 to<br>0.63)           | 0.40<br>(0.30 to<br>0.55)           | 0.49<br>(0.36 to<br>0.67)           |
| Paralytic ileus and intestinal obstruction                     | 94.94<br>(76.87 to<br>118.95)          | 177.78<br>(132.89 to<br>240.22)        | 167.19<br>(124.02 to<br>227.44)        | 182.93<br>(136.14 to<br>246.31)        | 2.80<br>(2.22 to<br>3.52)        | 6.47<br>(5.05 to<br>8.21)           | 6.50<br>(5.11 to<br>8.20)           | 6.31<br>(4.87 to<br>7.98)           |
| Inguinal, femoral, and abdominal hernia                        | 12.13<br>(8.33 to<br>16.53)            | 16.67<br>(10.80 to<br>25.43)           | 14.76<br>(9.58 to<br>22.95)            | 17.68<br>(11.37 to<br>27.11)           | 0.38<br>(0.27 to<br>0.52)        | 0.59<br>(0.41 to<br>0.87)           | 0.55<br>(0.38 to<br>0.83)           | 0.60<br>(0.42 to<br>0.88)           |
| Inflammatory bowel disease                                     | 8.73<br>(5.05 to<br>12.64)             | 16.24<br>(9.53 to<br>24.64)            | 16.10<br>(9.35 to<br>24.50)            | 16.06<br>(9.38 to<br>24.34)            | 0.26<br>(0.16 to<br>0.38)        | 0.60<br>(0.38 to<br>0.88)           | 0.63<br>(0.40 to<br>0.93)           | 0.56<br>(0.36 to<br>0.83)           |
| Vascular intestinal disorders                                  | 3.33<br>(2.26 to<br>4.90)              | 8.50<br>(5.75 to<br>12.75)             | 8.32<br>(5.62 to<br>12.61)             | 8.37<br>(5.65 to<br>12.51)             | 0.16<br>(0.11 to<br>0.24)        | 0.46<br>(0.31 to<br>0.69)           | 0.48<br>(0.33 to<br>0.70)           | 0.44<br>(0.29 to<br>0.66)           |
| Gallbladder and biliary diseases                               | 10.02<br>(7.56 to<br>13.41)            | 18.42<br>(11.50 to<br>29.10)           | 14.64<br>(9.40 to<br>22.93)            | 21.75<br>(13.06 to<br>36.16)           | 0.43<br>(0.31 to<br>0.58)        | 0.90<br>(0.57 to<br>1.42)           | 0.77<br>(0.51 to<br>1.17)           | 1.00<br>(0.62 to<br>1.66)           |
| Pancreatitis                                                   | 9.17<br>(6.59 to<br>13.26)             | 20.59<br>(11.64 to<br>34.79)           | 16.00<br>(9.35 to<br>26.17)            | 23.54<br>(13.17 to<br>40.52)           | 0.26<br>(0.18 to<br>0.37)        | 0.65<br>(0.38 to<br>1.09)           | 0.53<br>(0.32 to<br>0.86)           | 0.72<br>(0.41 to<br>1.22)           |

|                                                            |                                                      |                                                      |                                                      |                                                      |                                                |                                                   |                                                   |                                                   |
|------------------------------------------------------------|------------------------------------------------------|------------------------------------------------------|------------------------------------------------------|------------------------------------------------------|------------------------------------------------|---------------------------------------------------|---------------------------------------------------|---------------------------------------------------|
| Other digestive diseases                                   | 16.97<br>(13.07 to<br>22.82)                         | 29.89<br>(21.01 to<br>42.66)                         | 26.36<br>(18.61 to<br>37.47)                         | 31.85<br>(22.52 to<br>45.70)                         | 0.60<br>(0.44 to<br>0.82)                      | 1.31<br>(0.94 to<br>1.84)                         | 1.24<br>(0.90 to<br>1.74)                         | 1.32<br>(0.90 to<br>1.88)                         |
| <b>Neurological disorders</b>                              | <b>76.82</b><br><b>(63.70 to</b><br><b>89.96)</b>    | <b>184.04</b><br><b>(150.13 to</b><br><b>226.18)</b> | <b>183.92</b><br><b>(151.74 to</b><br><b>223.65)</b> | <b>186.19</b><br><b>(148.65 to</b><br><b>231.38)</b> | <b>4.18</b><br><b>(3.31 to</b><br><b>5.12)</b> | <b>12.25</b><br><b>(8.68 to</b><br><b>15.85)</b>  | <b>13.87</b><br><b>(10.43 to</b><br><b>17.27)</b> | <b>11.18</b><br><b>(7.74 to</b><br><b>14.99)</b>  |
| Alzheimer's disease and other dementias                    | 33.99<br>(26.08 to<br>43.76)                         | 101.26<br>(71.07 to<br>134.11)                       | 110.91<br>(84.00 to<br>144.14)                       | 94.37<br>(62.49 to<br>129.50)                        | 3.21<br>(2.45 to<br>4.09)                      | 9.89<br>(6.35 to<br>13.56)                        | 11.45<br>(8.04 to<br>14.94)                       | 8.82<br>(5.27 to<br>12.68)                        |
| Parkinson's disease                                        | 2.93<br>(2.16 to<br>3.93)                            | 10.43<br>(7.69 to<br>13.75)                          | 12.91<br>(9.70 to<br>16.82)                          | 8.79<br>(6.37 to<br>11.72)                           | 0.23<br>(0.17 to<br>0.31)                      | 0.85<br>(0.59 to<br>1.17)                         | 1.10<br>(0.81 to<br>1.46)                         | 0.69<br>(0.47 to<br>0.97)                         |
| Epilepsy                                                   | 30.21<br>(23.65 to<br>37.15)                         | 52.61<br>(34.61 to<br>82.72)                         | 40.26<br>(26.93 to<br>63.60)                         | 62.95<br>(41.60 to<br>98.88)                         | 0.55<br>(0.43 to<br>0.68)                      | 1.07<br>(0.75 to<br>1.59)                         | 0.84<br>(0.59 to<br>1.26)                         | 1.24<br>(0.86 to<br>1.88)                         |
| Multiple sclerosis                                         | 0.55<br>(0.39 to<br>0.85)                            | 1.27<br>(0.83 to<br>2.08)                            | 1.32<br>(0.87 to<br>2.17)                            | 1.20<br>(0.79 to<br>1.96)                            | 0.01<br>(0.01 to<br>0.02)                      | 0.04<br>(0.02 to<br>0.06)                         | 0.04<br>(0.03 to<br>0.06)                         | 0.05<br>(0.02 to<br>0.05)                         |
| Motor neuron disease                                       | 0.62<br>(0.49 to<br>0.82)                            | 1.45<br>(1.03 to<br>2.30)                            | 1.54<br>(1.08 to<br>2.38)                            | 1.39<br>(0.99 to<br>2.04)                            | 0.02<br>(0.01 to<br>0.02)                      | 0.04<br>(0.03 to<br>0.07)                         | 0.05<br>(0.03 to<br>0.08)                         | 0.04<br>(0.03 to<br>0.06)                         |
| Other neurological disorders                               | 8.51<br>(7.05 to<br>10.04)                           | 17.01<br>(12.72 to<br>23.25)                         | 16.98<br>(12.66 to<br>23.54)                         | 17.49<br>(13.05 to<br>23.83)                         | 0.15<br>(0.13 to<br>0.18)                      | 0.36<br>(0.28 to<br>0.48)                         | 0.38<br>(0.30 to<br>0.51)                         | 0.35<br>(0.28 to<br>0.47)                         |
| <b>Mental disorders</b>                                    | <b>12.60</b><br><b>(9.60 to</b><br><b>15.97)</b>     | <b>26.73</b><br><b>(19.57 to</b><br><b>38.51)</b>    | <b>26.65</b><br><b>(18.79 to</b><br><b>37.03)</b>    | <b>26.65</b><br><b>(19.51 to</b><br><b>38.11)</b>    | <b>0.37</b><br><b>(0.28 to</b><br><b>0.46)</b> | <b>0.86</b><br><b>(0.66 to</b><br><b>1.14)</b>    | <b>0.85</b><br><b>(0.66 to</b><br><b>1.14)</b>    | <b>0.84</b><br><b>(0.65 to</b><br><b>1.11)</b>    |
| Alcohol use disorders                                      | 9.84<br>(7.28 to<br>12.85)                           | 18.96<br>(13.37 to<br>27.29)                         | 17.92<br>(12.61 to<br>25.95)                         | 19.11<br>(13.66 to<br>27.47)                         | 0.30<br>(0.23 to<br>0.39)                      | 0.65<br>(0.50 to<br>0.87)                         | 0.64<br>(0.48 to<br>0.86)                         | 0.65<br>(0.49 to<br>0.86)                         |
| Drug use disorders                                         | 2.67<br>(1.96 to<br>3.95)                            | 7.57<br>(5.21 to<br>11.45)                           | 7.64<br>(5.25 to<br>11.52)                           | 7.34<br>(5.04 to<br>11.19)                           | 0.06<br>(0.05 to<br>0.09)                      | 0.20<br>(0.15 to<br>0.28)                         | 0.21<br>(0.16 to<br>0.29)                         | 0.19<br>(0.14 to<br>0.26)                         |
| Opioid use disorders                                       | 2.13<br>(1.57 to<br>3.05)                            | 5.73<br>(3.84 to<br>8.93)                            | 5.74<br>(3.86 to<br>8.95)                            | 5.59<br>(3.77 to<br>8.71)                            | 0.05<br>(0.04 to<br>0.06)                      | 0.14<br>(0.10 to<br>0.21)                         | 0.15<br>(0.11 to<br>0.21)                         | 0.13<br>(0.10 to<br>0.20)                         |
| Cocaine use disorders                                      | 0.08<br>(0.04 to<br>0.14)                            | 0.25<br>(0.12 to<br>0.45)                            | 0.24<br>(0.12 to<br>0.43)                            | 0.25<br>(0.12 to<br>0.45)                            | 0.00<br>(0.00 to<br>0.00)                      | 0.01<br>(0.00 to<br>0.01)                         | 0.01<br>(0.00 to<br>0.01)                         | 0.01<br>(0.00 to<br>0.01)                         |
| Amphetamine use disorders                                  | 0.05<br>(0.03 to<br>0.12)                            | 0.22<br>(0.12 to<br>0.52)                            | 0.22<br>(0.12 to<br>0.52)                            | 0.22<br>(0.12 to<br>0.50)                            | 0.00<br>(0.00 to<br>0.00)                      | 0.01<br>(0.00 to<br>0.01)                         | 0.01<br>(0.00 to<br>0.01)                         | 0.01<br>(0.00 to<br>0.01)                         |
| Other drug use disorders                                   | 0.41<br>(0.29 to<br>0.73)                            | 1.36<br>(0.90 to<br>2.15)                            | 1.44<br>(0.95 to<br>2.26)                            | 1.28<br>(0.85 to<br>2.03)                            | 0.01<br>(0.01 to<br>0.02)                      | 0.05<br>(0.04 to<br>0.07)                         | 0.06<br>(0.04 to<br>0.07)                         | 0.04<br>(0.03 to<br>0.06)                         |
| Eating disorders                                           | 0.09<br>(0.06 to<br>0.15)                            | 0.20<br>(0.11 to<br>0.33)                            | 0.20<br>(0.11 to<br>0.33)                            | 0.20<br>(0.11 to<br>0.33)                            | 0.00<br>(0.00 to<br>0.00)                      | 0.00<br>(0.00 to<br>0.01)                         | 0.00<br>(0.00 to<br>0.01)                         | 0.00<br>(0.00 to<br>0.01)                         |
| <b>Kenya</b>                                               |                                                      |                                                      |                                                      |                                                      |                                                |                                                   |                                                   |                                                   |
| Cause                                                      | YLLs (in 1000s)                                      |                                                      |                                                      |                                                      | Deaths (in 1000s)                              |                                                   |                                                   |                                                   |
|                                                            | 2016                                                 | 2040 Forecast                                        | 2040 Better Scenario                                 | 2040 Worse Scenario                                  | 2016                                           | 2040 Forecast                                     | 2040 Better Scenario                              | 2040 Worse Scenario                               |
| <b>Diabetes, urogenital, blood, and endocrine diseases</b> | <b>219.92</b><br><b>(188.57 to</b><br><b>254.93)</b> | <b>477.76</b><br><b>(361.45 to</b><br><b>638.11)</b> | <b>378.84</b><br><b>(285.30 to</b><br><b>510.66)</b> | <b>554.32</b><br><b>(418.13 to</b><br><b>735.53)</b> | <b>6.97</b><br><b>(5.96 to</b><br><b>8.06)</b> | <b>19.42</b><br><b>(15.13 to</b><br><b>24.81)</b> | <b>16.05</b><br><b>(12.63 to</b><br><b>20.29)</b> | <b>21.62</b><br><b>(16.90 to</b><br><b>27.90)</b> |
| Diabetes mellitus                                          | 80.67<br>(68.17 to<br>96.62)                         | 220.77<br>(140.70 to<br>335.72)                      | 169.09<br>(109.76 to<br>256.48)                      | 265.15<br>(165.50 to<br>409.80)                      | 3.41<br>(2.91 to<br>4.06)                      | 10.44<br>(7.34 to<br>14.83)                       | 8.50<br>(6.06 to<br>11.73)                        | 11.98<br>(8.23 to<br>17.30)                       |
| Acute glomerulonephritis                                   | 0.46<br>(0.37 to<br>0.58)                            | 0.79<br>(0.57 to<br>1.14)                            | 0.65<br>(0.47 to<br>0.94)                            | 0.92<br>(0.67 to<br>1.32)                            | 0.01<br>(0.01 to<br>0.01)                      | 0.01<br>(0.01 to<br>0.02)                         | 0.01<br>(0.01 to<br>0.02)                         | 0.02<br>(0.01 to<br>0.02)                         |
| Chronic kidney disease                                     | 41.12<br>(34.89 to<br>50.11)                         | 96.40<br>(62.21 to<br>157.36)                        | 69.15<br>(46.91 to<br>107.02)                        | 112.03<br>(72.41 to<br>182.08)                       | 1.36<br>(1.14 to<br>1.65)                      | 4.25<br>(2.50 to<br>8.10)                         | 3.10<br>(1.93 to<br>5.80)                         | 4.77<br>(2.75 to<br>8.79)                         |

|                                                            |                              |                               |                              |                               |                           |                           |                           |                           |
|------------------------------------------------------------|------------------------------|-------------------------------|------------------------------|-------------------------------|---------------------------|---------------------------|---------------------------|---------------------------|
| Chronic kidney disease due to diabetes mellitus            | 9.57<br>(7.50 to<br>12.02)   | 29.05<br>(17.26 to<br>49.71)  | 20.80<br>(13.17 to<br>34.70) | 33.05<br>(19.73 to<br>56.38)  | 0.37<br>(0.30 to<br>0.47) | 1.38<br>(0.76 to<br>2.72) | 1.00<br>(0.58 to<br>1.95) | 1.53<br>(0.83 to<br>3.03) |
| Chronic kidney disease due to hypertension                 | 5.30<br>(4.17 to<br>6.73)    | 16.31<br>(9.41 to<br>29.87)   | 11.65<br>(7.16 to<br>20.73)  | 18.48<br>(10.41 to<br>32.95)  | 0.28<br>(0.22 to<br>0.35) | 1.02<br>(0.55 to<br>2.09) | 0.76<br>(0.44 to<br>1.47) | 1.12<br>(0.59 to<br>2.25) |
| Chronic kidney disease due to glomerulonephritis           | 12.34<br>(10.12 to<br>15.36) | 23.04<br>(15.26 to<br>35.05)  | 16.59<br>(11.23 to<br>25.15) | 27.44<br>(18.28 to<br>41.65)  | 0.32<br>(0.26 to<br>0.39) | 0.78<br>(0.48 to<br>1.36) | 0.57<br>(0.36 to<br>0.95) | 0.90<br>(0.55 to<br>1.54) |
| Chronic kidney disease due to other and unspecified causes | 13.91<br>(11.40 to<br>17.40) | 28.01<br>(18.33 to<br>43.66)  | 20.11<br>(13.41 to<br>31.24) | 33.06<br>(21.59 to<br>51.77)  | 0.39<br>(0.32 to<br>0.49) | 1.07<br>(0.64 to<br>2.00) | 0.78<br>(0.50 to<br>1.41) | 1.22<br>(0.73 to<br>2.20) |
| Urinary diseases and male infertility                      | 27.95<br>(23.37 to<br>32.13) | 62.19<br>(48.35 to<br>83.21)  | 58.11<br>(45.17 to<br>78.35) | 64.19<br>(50.25 to<br>86.48)  | 0.85<br>(0.70 to<br>0.97) | 2.16<br>(1.82 to<br>2.61) | 2.14<br>(1.80 to<br>2.61) | 2.13<br>(1.79 to<br>2.59) |
| Urinary tract infections                                   | 15.81<br>(12.09 to<br>19.99) | 42.07<br>(31.27 to<br>58.39)  | 40.70<br>(30.46 to<br>56.70) | 42.40<br>(31.70 to<br>59.57)  | 0.48<br>(0.36 to<br>0.61) | 1.48<br>(1.18 to<br>1.88) | 1.52<br>(1.22 to<br>1.94) | 1.43<br>(1.12 to<br>1.82) |
| Urolithiasis                                               | 1.00<br>(0.61 to<br>1.62)    | 2.38<br>(1.27 to<br>4.19)     | 2.17<br>(1.15 to<br>3.87)    | 2.52<br>(1.35 to<br>4.41)     | 0.02<br>(0.01 to<br>0.04) | 0.06<br>(0.03 to<br>0.11) | 0.06<br>(0.03 to<br>0.11) | 0.06<br>(0.03 to<br>0.11) |
| Other urinary diseases                                     | 11.14<br>(7.73 to<br>14.56)  | 17.74<br>(10.79 to<br>27.31)  | 15.24<br>(9.03 to<br>23.90)  | 19.27<br>(11.76 to<br>30.18)  | 0.35<br>(0.23 to<br>0.45) | 0.62<br>(0.37 to<br>0.88) | 0.56<br>(0.34 to<br>0.81) | 0.65<br>(0.39 to<br>0.91) |
| Gynecological diseases                                     | 3.06<br>(2.15 to<br>4.40)    | 5.19<br>(3.30 to<br>8.25)     | 4.25<br>(2.74 to<br>6.69)    | 5.72<br>(3.73 to<br>9.12)     | 0.07<br>(0.05 to<br>0.11) | 0.11<br>(0.09 to<br>0.20) | 0.11<br>(0.07 to<br>0.17) | 0.14<br>(0.09 to<br>0.22) |
| Uterine fibroids                                           | 0.99<br>(0.56 to<br>1.82)    | 1.53<br>(0.74 to<br>3.00)     | 1.21<br>(0.58 to<br>2.40)    | 1.71<br>(0.85 to<br>3.33)     | 0.03<br>(0.02 to<br>0.05) | 0.04<br>(0.02 to<br>0.08) | 0.03<br>(0.02 to<br>0.07) | 0.05<br>(0.02 to<br>0.09) |
| Polycystic ovarian syndrome                                | 0.26<br>(0.07 to<br>0.58)    | 0.28<br>(0.07 to<br>0.70)     | 0.19<br>(0.05 to<br>0.49)    | 0.33<br>(0.08 to<br>0.83)     | 0.01<br>(0.00 to<br>0.01) | 0.01<br>(0.00 to<br>0.02) | 0.00<br>(0.00 to<br>0.01) | 0.01<br>(0.00 to<br>0.02) |
| Endometriosis                                              | 0.01<br>(0.01 to<br>0.03)    | 0.03<br>(0.01 to<br>0.08)     | 0.02<br>(0.01 to<br>0.06)    | 0.03<br>(0.01 to<br>0.08)     | 0.00<br>(0.00 to<br>0.00) | 0.00<br>(0.00 to<br>0.00) | 0.00<br>(0.00 to<br>0.00) | 0.00<br>(0.00 to<br>0.00) |
| Genital prolapse                                           | 0.08<br>(0.03 to<br>0.15)    | 0.10<br>(0.04 to<br>0.22)     | 0.08<br>(0.04 to<br>0.17)    | 0.12<br>(0.05 to<br>0.26)     | 0.00<br>(0.00 to<br>0.01) | 0.00<br>(0.00 to<br>0.01) | 0.00<br>(0.00 to<br>0.01) | 0.00<br>(0.00 to<br>0.01) |
| Other gynecological diseases                               | 1.72<br>(1.12 to<br>2.68)    | 3.25<br>(1.95 to<br>5.47)     | 2.74<br>(1.68 to<br>4.53)    | 3.52<br>(2.13 to<br>5.85)     | 0.04<br>(0.02 to<br>0.06) | 0.08<br>(0.05 to<br>0.13) | 0.07<br>(0.04 to<br>0.11) | 0.08<br>(0.05 to<br>0.14) |
| Hemoglobinopathies and hemolytic anemias                   | 57.04<br>(47.38 to<br>73.57) | 75.11<br>(56.11 to<br>104.46) | 62.27<br>(45.99 to<br>87.38) | 87.21<br>(65.31 to<br>121.10) | 1.01<br>(0.83 to<br>1.27) | 1.83<br>(1.42 to<br>2.40) | 1.61<br>(1.25 to<br>2.11) | 1.99<br>(1.55 to<br>2.59) |
| Thalassemias                                               | 0.06<br>(0.04 to<br>0.10)    | 0.05<br>(0.03 to<br>0.09)     | 0.05<br>(0.03 to<br>0.08)    | 0.06<br>(0.03 to<br>0.10)     | 0.00<br>(0.00 to<br>0.00) | 0.00<br>(0.00 to<br>0.00) | 0.00<br>(0.00 to<br>0.00) | 0.00<br>(0.00 to<br>0.00) |
| Sickle cell disorders                                      | 50.11<br>(41.31 to<br>65.85) | 56.68<br>(40.82 to<br>81.14)  | 46.17<br>(33.19 to<br>65.85) | 67.58<br>(48.46 to<br>96.46)  | 0.70<br>(0.58 to<br>0.89) | 0.92<br>(0.66 to<br>1.32) | 0.77<br>(0.55 to<br>1.12) | 1.06<br>(0.77 to<br>1.51) |
| G6PD deficiency                                            | 4.11<br>(3.17 to<br>5.13)    | 13.24<br>(9.77 to<br>18.27)   | 11.28<br>(8.24 to<br>15.82)  | 14.35<br>(10.40 to<br>19.58)  | 0.13<br>(0.10 to<br>0.16) | 0.52<br>(0.38 to<br>0.67) | 0.45<br>(0.34 to<br>0.60) | 0.55<br>(0.40 to<br>0.71) |
| Other hemoglobinopathies and hemolytic anemias             | 2.76<br>(2.11 to<br>3.49)    | 5.14<br>(3.95 to<br>6.50)     | 4.77<br>(3.72 to<br>6.02)    | 5.23<br>(4.00 to<br>6.66)     | 0.19<br>(0.14 to<br>0.24) | 0.40<br>(0.29 to<br>0.51) | 0.39<br>(0.29 to<br>0.48) | 0.39<br>(0.27 to<br>0.51) |
| Endocrine, metabolic, blood, and immune disorders          | 9.62<br>(7.43 to<br>12.98)   | 17.30<br>(12.53 to<br>23.61)  | 15.32<br>(11.23 to<br>20.76) | 19.10<br>(13.76 to<br>26.19)  | 0.26<br>(0.19 to<br>0.34) | 0.59<br>(0.44 to<br>0.78) | 0.58<br>(0.44 to<br>0.76) | 0.59<br>(0.44 to<br>0.79) |

**Kenya**

| Cause | YLLs (in 1000s) |               |                      |                     | Deaths (in 1000s) |               |                      |                     |
|-------|-----------------|---------------|----------------------|---------------------|-------------------|---------------|----------------------|---------------------|
|       | 2016            | 2040 Forecast | 2040 Better Scenario | 2040 Worse Scenario | 2016              | 2040 Forecast | 2040 Better Scenario | 2040 Worse Scenario |

|                                               |                                            |                                                |                                              |                                                |                                       |                                       |                                       |                                       |
|-----------------------------------------------|--------------------------------------------|------------------------------------------------|----------------------------------------------|------------------------------------------------|---------------------------------------|---------------------------------------|---------------------------------------|---------------------------------------|
|                                               | 7.96<br>(6.09 to<br>10.11)                 | 19.65<br>(14.39 to<br>28.11)                   | 20.28<br>(14.90 to<br>28.96)                 | 19.02<br>(13.72 to<br>27.26)                   | 0.21<br>(0.15 to<br>0.26)             | 0.61<br>(0.46 to<br>0.81)             | 0.65<br>(0.49 to<br>0.87)             | 0.58<br>(0.43 to<br>0.76)             |
| <b>Musculoskeletal disorders</b>              |                                            |                                                |                                              |                                                |                                       |                                       |                                       |                                       |
| Rheumatoid arthritis                          | 1.21<br>(0.82 to<br>1.69)                  | 3.61<br>(2.34 to<br>5.33)                      | 3.20<br>(2.07 to<br>4.79)                    | 3.82<br>(2.46 to<br>5.57)                      | 0.05<br>(0.03 to<br>0.07)             | 0.18<br>(0.11 to<br>0.27)             | 0.16<br>(0.11 to<br>0.25)             | 0.18<br>(0.12 to<br>0.27)             |
| Other musculoskeletal disorders               | 6.75<br>(5.22 to<br>8.64)                  | 16.05<br>(11.50 to<br>23.39)                   | 17.08<br>(12.36 to<br>24.89)                 | 15.20<br>(10.86 to<br>22.31)                   | 0.16<br>(0.12 to<br>0.20)             | 0.44<br>(0.33 to<br>0.59)             | 0.48<br>(0.36 to<br>0.65)             | 0.40<br>(0.29 to<br>0.54)             |
| <b>Other non-communicable diseases</b>        | <b>141.53<br/>(120.74 to<br/>170.97)</b>   | <b>245.67<br/>(184.87 to<br/>324.66)</b>       | <b>201.68<br/>(152.56 to<br/>267.09)</b>     | <b>298.71<br/>(224.68 to<br/>398.13)</b>       | <b>2.16<br/>(1.79 to<br/>2.72)</b>    | <b>5.34<br/>(3.89 to<br/>7.45)</b>    | <b>4.96<br/>(3.53 to<br/>6.99)</b>    | <b>5.80<br/>(4.28 to<br/>7.82)</b>    |
| Congenital birth defects                      | 85.00<br>(70.90 to<br>105.84)              | 108.19<br>(75.84 to<br>154.14)                 | 78.97<br>(55.75 to<br>112.48)                | 144.59<br>(102.29 to<br>203.53)                | 1.02<br>(0.86 to<br>1.26)             | 1.34<br>(0.95 to<br>1.89)             | 0.99<br>(0.71 to<br>1.39)             | 1.77<br>(1.26 to<br>2.48)             |
| Neural tube defects                           | 12.08<br>(8.03 to<br>19.46)                | 5.85<br>(3.04 to<br>11.37)                     | 3.68<br>(1.90 to<br>7.17)                    | 8.61<br>(4.52 to<br>16.23)                     | 0.14<br>(0.09 to<br>0.23)             | 0.07<br>(0.04 to<br>0.15)             | 0.04<br>(0.02 to<br>0.09)             | 0.10<br>(0.05 to<br>0.19)             |
| Congenital heart anomalies                    | 27.24<br>(20.58 to<br>40.18)               | 36.66<br>(23.88 to<br>58.20)                   | 27.33<br>(18.12 to<br>42.89)                 | 48.00<br>(31.29 to<br>77.02)                   | 0.33<br>(0.25 to<br>0.49)             | 0.47<br>(0.31 to<br>0.73)             | 0.36<br>(0.24 to<br>0.55)             | 0.60<br>(0.40 to<br>0.95)             |
| Orofacial clefts                              | 0.62<br>(0.16 to<br>1.34)                  | 0.63<br>(0.15 to<br>1.55)                      | 0.38<br>(0.09 to<br>0.89)                    | 0.95<br>(0.23 to<br>2.32)                      | 0.01<br>(0.00 to<br>0.02)             | 0.01<br>(0.00 to<br>0.02)             | 0.00<br>(0.00 to<br>0.01)             | 0.01<br>(0.00 to<br>0.03)             |
| Down syndrome                                 | 1.66<br>(1.19 to<br>3.20)                  | 2.59<br>(1.59 to<br>4.91)                      | 1.92<br>(1.20 to<br>3.62)                    | 3.38<br>(2.05 to<br>6.64)                      | 0.02<br>(0.02 to<br>0.04)             | 0.04<br>(0.02 to<br>0.07)             | 0.03<br>(0.02 to<br>0.05)             | 0.05<br>(0.03 to<br>0.09)             |
| Other chromosomal abnormalities               | 4.41<br>(2.33 to<br>6.30)                  | 8.99<br>(4.21 to<br>15.30)                     | 6.25<br>(2.90 to<br>10.72)                   | 12.44<br>(5.87 to<br>21.28)                    | 0.05<br>(0.03 to<br>0.07)             | 0.11<br>(0.05 to<br>0.18)             | 0.07<br>(0.03 to<br>0.13)             | 0.15<br>(0.07 to<br>0.25)             |
| Congenital musculoskeletal and limb anomalies | 1.15<br>(0.80 to<br>2.07)                  | 1.71<br>(1.06 to<br>3.15)                      | 1.29<br>(0.81 to<br>2.36)                    | 2.24<br>(1.38 to<br>4.15)                      | 0.01<br>(0.01 to<br>0.04)             | 0.02<br>(0.01 to<br>0.04)             | 0.02<br>(0.01 to<br>0.03)             | 0.03<br>(0.02 to<br>0.05)             |
| Urogenital congenital anomalies               | 2.07<br>(1.48 to<br>3.25)                  | 2.66<br>(1.76 to<br>4.23)                      | 2.05<br>(1.35 to<br>3.23)                    | 3.42<br>(2.28 to<br>5.42)                      | 0.03<br>(0.02 to<br>0.04)             | 0.04<br>(0.02 to<br>0.06)             | 0.03<br>(0.02 to<br>0.04)             | 0.04<br>(0.03 to<br>0.07)             |
| Digestive congenital anomalies                | 7.51<br>(4.98 to<br>11.07)                 | 10.27<br>(5.64 to<br>17.43)                    | 7.20<br>(4.00 to<br>12.10)                   | 14.14<br>(7.78 to<br>23.82)                    | 0.09<br>(0.06 to<br>0.13)             | 0.12<br>(0.07 to<br>0.20)             | 0.08<br>(0.05 to<br>0.14)             | 0.17<br>(0.09 to<br>0.28)             |
| Other congenital birth defects                | 28.26<br>(20.07 to<br>37.48)               | 38.83<br>(24.54 to<br>58.69)                   | 28.86<br>(18.65 to<br>43.52)                 | 51.41<br>(32.19 to<br>78.18)                   | 0.34<br>(0.24 to<br>0.45)             | 0.47<br>(0.31 to<br>0.71)             | 0.36<br>(0.23 to<br>0.53)             | 0.62<br>(0.39 to<br>0.93)             |
| Skin and subcutaneous diseases                | 31.78<br>(20.40 to<br>51.17)               | 110.96<br>(70.98 to<br>173.72)                 | 103.56<br>(66.19 to<br>156.31)               | 118.05<br>(74.70 to<br>183.63)                 | 0.85<br>(0.52 to<br>1.33)             | 3.69<br>(2.30 to<br>5.54)             | 3.75<br>(2.35 to<br>5.53)             | 3.62<br>(2.24 to<br>5.47)             |
| Cellulitis                                    | 4.14<br>(1.85 to<br>6.71)                  | 19.53<br>(8.76 to<br>32.05)                    | 20.48<br>(9.07 to<br>33.09)                  | 18.88<br>(8.42 to<br>31.30)                    | 0.11<br>(0.05 to<br>0.18)             | 0.61<br>(0.27 to<br>0.94)             | 0.67<br>(0.30 to<br>1.02)             | 0.56<br>(0.25 to<br>0.87)             |
| Pyoderma                                      | 23.97<br>(15.75 to<br>40.72)               | 80.48<br>(51.58 to<br>131.49)                  | 72.00<br>(46.28 to<br>118.60)                | 88.26<br>(55.96 to<br>143.57)                  | 0.60<br>(0.37 to<br>1.00)             | 2.59<br>(1.62 to<br>4.14)             | 2.53<br>(1.60 to<br>4.00)             | 2.61<br>(1.64 to<br>4.24)             |
| Decubitus ulcer                               | 2.46<br>(1.33 to<br>4.01)                  | 7.61<br>(4.12 to<br>12.55)                     | 7.81<br>(4.19 to<br>12.68)                   | 7.45<br>(4.03 to<br>12.31)                     | 0.11<br>(0.06 to<br>0.18)             | 0.41<br>(0.21 to<br>0.65)             | 0.45<br>(0.23 to<br>0.72)             | 0.37<br>(0.19 to<br>0.60)             |
| Other skin and subcutaneous diseases          | 1.22<br>(0.73 to<br>2.03)                  | 3.34<br>(1.92 to<br>5.36)                      | 3.27<br>(1.88 to<br>5.24)                    | 3.46<br>(2.00 to<br>5.58)                      | 0.03<br>(0.02 to<br>0.04)             | 0.08<br>(0.05 to<br>0.13)             | 0.09<br>(0.05 to<br>0.13)             | 0.08<br>(0.05 to<br>0.13)             |
| Sudden infant death syndrome                  | 24.75<br>(15.53 to<br>37.98)               | 26.52<br>(12.56 to<br>49.35)                   | 19.16<br>(9.09 to<br>35.20)                  | 36.07<br>(17.06 to<br>66.61)                   | 0.29<br>(0.18 to<br>0.44)             | 0.31<br>(0.15 to<br>0.57)             | 0.22<br>(0.11 to<br>0.41)             | 0.42<br>(0.20 to<br>0.77)             |
| <b>Injuries</b>                               | <b>884.70<br/>(732.91 to<br/>1,034.83)</b> | <b>1,436.57<br/>(1,065.12 to<br/>2,018.60)</b> | <b>1,227.36<br/>(909.12 to<br/>1,742.87)</b> | <b>1,596.59<br/>(1,185.05 to<br/>2,236.41)</b> | <b>18.88<br/>(15.61 to<br/>22.03)</b> | <b>36.58<br/>(29.23 to<br/>47.29)</b> | <b>33.13<br/>(26.75 to<br/>42.54)</b> | <b>38.60<br/>(30.80 to<br/>50.41)</b> |
| <b>Transport injuries</b>                     | <b>201.50<br/>(164.56 to<br/>244.45)</b>   | <b>397.62<br/>(279.38 to<br/>591.12)</b>       | <b>312.01<br/>(218.28 to<br/>461.25)</b>     | <b>459.22<br/>(321.03 to<br/>688.81)</b>       | <b>4.24<br/>(3.47 to<br/>5.11)</b>    | <b>9.35<br/>(6.89 to<br/>13.06)</b>   | <b>7.71<br/>(5.71 to<br/>10.72)</b>   | <b>10.35<br/>(7.56 to<br/>14.77)</b>  |



|                                      |                                                      |                                                      |                                                      |                                                      |                                                |                                                   |                                                   |                                                   |
|--------------------------------------|------------------------------------------------------|------------------------------------------------------|------------------------------------------------------|------------------------------------------------------|------------------------------------------------|---------------------------------------------------|---------------------------------------------------|---------------------------------------------------|
| Road injuries                        | 186.82<br>(152.71 to<br>224.13)                      | 365.16<br>(256.47 to<br>538.40)                      | 284.84<br>(199.16 to<br>416.99)                      | 422.82<br>(297.26 to<br>628.39)                      | 3.98<br>4.77                                   | 8.71<br>(6.45 to<br>12.14)                        | 7.17<br>(5.32 to<br>9.87)                         | 9.65<br>(7.10 to<br>13.54)                        |
| Pedestrian road injuries             | 76.89<br>(60.34 to<br>97.17)                         | 130.27<br>(87.11 to<br>200.85)                       | 103.78<br>(69.76 to<br>158.77)                       | 148.34<br>(98.78 to<br>229.57)                       | 1.68<br>2.10                                   | 3.30<br>(1.31 to<br>4.76)                         | 2.76<br>(1.96 to<br>3.91)                         | 3.62<br>(2.53 to<br>5.24)                         |
| <b>Kenya</b>                         |                                                      |                                                      |                                                      |                                                      |                                                |                                                   |                                                   |                                                   |
| Cause                                | YLLs (in 1000s)                                      |                                                      |                                                      |                                                      | Deaths (in 1000s)                              |                                                   |                                                   |                                                   |
|                                      | 2016                                                 | 2040 Forecast                                        | 2040 Better Scenario                                 | 2040 Worse Scenario                                  | 2016                                           | 2040 Forecast                                     | 2040 Better Scenario                              | 2040 Worse Scenario                               |
| Cyclist road injuries                | 11.02<br>(7.04 to<br>17.35)                          | 22.15<br>(12.82 to<br>38.23)                         | 17.52<br>(10.09 to<br>30.56)                         | 25.43<br>(14.88 to<br>44.46)                         | 0.24<br>(0.15 to<br>0.37)                      | 0.52<br>(0.32 to<br>0.87)                         | 0.44<br>(0.27 to<br>0.73)                         | 0.57<br>(0.35 to<br>0.94)                         |
| Motorcyclist road injuries           | 13.29<br>(9.70 to<br>18.37)                          | 29.90<br>(18.68 to<br>47.32)                         | 24.80<br>(15.46 to<br>39.81)                         | 33.56<br>(21.08 to<br>53.25)                         | 0.27<br>(0.20 to<br>0.37)                      | 0.66<br>(0.43 to<br>1.00)                         | 0.57<br>(0.38 to<br>0.87)                         | 0.71<br>(0.46 to<br>1.10)                         |
| Motor vehicle road injuries          | 84.76<br>(63.15 to<br>115.10)                        | 181.06<br>(118.75 to<br>277.70)                      | 137.56<br>(90.13 to<br>209.88)                       | 213.42<br>(139.61 to<br>326.92)                      | 1.78<br>(1.32 to<br>2.40)                      | 4.19<br>(2.87 to<br>6.12)                         | 3.37<br>(2.31 to<br>4.87)                         | 4.71<br>(3.19 to<br>6.94)                         |
| Other road injuries                  | 0.86<br>(0.57 to<br>1.55)                            | 1.77<br>(1.08 to<br>3.25)                            | 1.38<br>(0.84 to<br>2.53)                            | 2.07<br>(1.26 to<br>3.78)                            | 0.02<br>(0.01 to<br>0.03)                      | 0.04<br>(0.03 to<br>0.07)                         | 0.03<br>(0.02 to<br>0.06)                         | 0.04<br>(0.03 to<br>0.08)                         |
| Other transport injuries             | 14.69<br>(10.34 to<br>21.39)                         | 32.46<br>(19.64 to<br>53.75)                         | 27.18<br>(16.55 to<br>44.51)                         | 36.40<br>(22.18 to<br>59.57)                         | 0.27<br>(0.18 to<br>0.39)                      | 0.63<br>(0.39 to<br>1.06)                         | 0.54<br>(0.33 to<br>0.89)                         | 0.70<br>(0.42 to<br>1.16)                         |
| <b>Unintentional injuries</b>        | <b>401.69</b><br><b>(347.74 to</b><br><b>459.82)</b> | <b>536.27</b><br><b>(409.07 to</b><br><b>719.89)</b> | <b>454.20</b><br><b>(350.24 to</b><br><b>617.52)</b> | <b>610.75</b><br><b>(471.29 to</b><br><b>823.22)</b> | <b>8.74</b><br><b>(7.45 to</b><br><b>9.96)</b> | <b>15.40</b><br><b>(12.88 to</b><br><b>18.47)</b> | <b>14.33</b><br><b>(12.15 to</b><br><b>17.32)</b> | <b>16.11</b><br><b>(13.52 to</b><br><b>19.58)</b> |
| Falls                                | 62.71<br>(52.18 to<br>75.81)                         | 116.99<br>(95.49 to<br>148.78)                       | 111.39<br>(91.06 to<br>142.37)                       | 120.65<br>(98.16 to<br>155.01)                       | 2.22<br>(1.84 to<br>2.61)                      | 5.56<br>(4.68 to<br>6.49)                         | 5.80<br>(5.03 to<br>6.61)                         | 5.29<br>(4.33 to<br>6.28)                         |
| Drowning                             | 72.83<br>(59.42 to<br>99.24)                         | 80.03<br>(56.60 to<br>113.88)                        | 66.06<br>(46.92 to<br>95.05)                         | 92.78<br>(65.30 to<br>133.10)                        | 1.30<br>(1.06 to<br>1.72)                      | 1.73<br>(1.30 to<br>2.35)                         | 1.51<br>(2.04)                                    | 1.91<br>(1.44 to<br>2.59)                         |
| Fire, heat, and hot substances       | 51.30<br>(41.48 to<br>70.42)                         | 56.02<br>(40.66 to<br>80.07)                         | 45.11<br>(33.13 to<br>64.33)                         | 65.83<br>(47.96 to<br>94.93)                         | 1.13<br>(0.92 to<br>1.46)                      | 1.60<br>(1.26 to<br>2.13)                         | 1.40<br>(1.10 to<br>1.84)                         | 1.75<br>(1.37 to<br>2.33)                         |
| Poisonings                           | 26.04<br>(17.27 to<br>41.20)                         | 20.22<br>(12.06 to<br>35.46)                         | 14.65<br>(8.88 to<br>25.15)                          | 25.66<br>(15.14 to<br>44.73)                         | 0.47<br>(0.33 to<br>0.73)                      | 0.45<br>(0.30 to<br>0.74)                         | 0.35<br>(0.23 to<br>0.58)                         | 0.54<br>(0.35 to<br>0.89)                         |
| Exposure to mechanical forces        | 45.00<br>(36.66 to<br>57.22)                         | 55.55<br>(38.49 to<br>83.36)                         | 45.56<br>(31.10 to<br>69.12)                         | 63.87<br>(44.56 to<br>94.52)                         | 0.86<br>(0.70 to<br>1.08)                      | 1.26<br>(0.94 to<br>1.78)                         | 1.09<br>(0.81 to<br>1.55)                         | 1.37<br>(1.02 to<br>1.91)                         |
| Unintentional firearm injuries       | 16.36<br>(10.24 to<br>29.56)                         | 17.82<br>(8.96 to<br>37.42)                          | 14.64<br>(7.10 to<br>30.55)                          | 20.09<br>(10.16 to<br>40.87)                         | 0.31<br>(0.19 to<br>0.55)                      | 0.37<br>(0.20 to<br>0.74)                         | 0.31<br>(0.17 to<br>0.62)                         | 0.41<br>(0.22 to<br>0.79)                         |
| Unintentional suffocation            | 5.83<br>(4.53 to<br>8.34)                            | 6.73<br>(4.53 to<br>10.13)                           | 5.12<br>(3.43 to<br>7.77)                            | 8.51<br>(5.76 to<br>12.85)                           | 0.09<br>(0.07 to<br>0.13)                      | 0.13<br>(0.10 to<br>0.19)                         | 0.11<br>(0.08 to<br>0.16)                         | 0.15<br>(0.11 to<br>0.22)                         |
| Other exposure to mechanical forces  | 22.81<br>(18.68 to<br>28.37)                         | 31.00<br>(22.01 to<br>44.64)                         | 25.79<br>(18.33 to<br>37.28)                         | 35.27<br>(25.13 to<br>50.41)                         | 0.46<br>(0.38 to<br>0.57)                      | 0.76<br>(0.58 to<br>1.02)                         | 0.67<br>(0.52 to<br>0.91)                         | 0.81<br>(0.62 to<br>1.09)                         |
| Adverse effects of medical treatment | 27.89<br>(21.44 to<br>39.22)                         | 37.32<br>(26.76 to<br>52.46)                         | 30.93<br>(22.50 to<br>43.21)                         | 43.45<br>(30.98 to<br>62.35)                         | 0.54<br>(0.45 to<br>0.72)                      | 0.89<br>(0.70 to<br>1.19)                         | 0.80<br>(0.63 to<br>1.05)                         | 0.96<br>(0.76 to<br>1.30)                         |
| Animal contact                       | 45.38<br>(31.80 to<br>59.44)                         | 76.86<br>(50.12 to<br>115.11)                        | 60.88<br>(39.29 to<br>92.63)                         | 90.48<br>(59.14 to<br>136.66)                        | 1.04<br>(0.72 to<br>1.36)                      | 2.11<br>(1.40 to<br>3.02)                         | 1.78<br>(1.17 to<br>2.52)                         | 2.34<br>(1.57 to<br>3.36)                         |
| Venomous animal contact              | 35.15<br>(24.12 to<br>46.33)                         | 58.62<br>(37.96 to<br>88.95)                         | 46.50<br>(29.64 to<br>70.82)                         | 68.83<br>(44.64 to<br>103.30)                        | 0.85<br>(0.60 to<br>1.12)                      | 1.72<br>(1.15 to<br>2.46)                         | 1.45<br>(0.97 to<br>2.08)                         | 1.90<br>(1.28 to<br>2.72)                         |
| Non-venomous animal contact          | 10.24<br>(5.39 to<br>15.30)                          | 18.24<br>(8.92 to<br>30.37)                          | 14.38<br>(6.94 to<br>24.28)                          | 21.65<br>(10.60 to<br>36.15)                         | 0.19<br>(0.11 to<br>0.28)                      | 0.39<br>(0.20 to<br>0.64)                         | 0.33<br>(0.17 to<br>0.53)                         | 0.44<br>(0.23 to<br>0.72)                         |

|                                                 |                                        |                                        |                                        |                                        |                                  |                                    |                                    |                                    |
|-------------------------------------------------|----------------------------------------|----------------------------------------|----------------------------------------|----------------------------------------|----------------------------------|------------------------------------|------------------------------------|------------------------------------|
| Foreign body                                    | 42.02<br>(28.81 to<br>52.99)           | 60.52<br>(39.24 to<br>84.26)           | 52.55<br>(34.57 to<br>72.52)           | 70.44<br>(45.16 to<br>99.02)           | 0.63<br>(0.44 to<br>0.75)        | 1.04<br>(0.71 to<br>1.37)          | 0.97<br>(0.68 to<br>1.29)          | 1.13<br>(0.77 to<br>1.50)          |
| Pulmonary aspiration and foreign body in airway | 39.16<br>(27.49 to<br>50.49)           | 56.66<br>(37.58 to<br>79.15)           | 49.29<br>(33.20 to<br>68.38)           | 66.02<br>(43.31 to<br>94.20)           | 0.58<br>(0.42 to<br>0.71)        | 0.97<br>(0.68 to<br>1.27)          | 0.91<br>(0.65 to<br>1.19)          | 1.05<br>(0.73 to<br>1.41)          |
| Foreign body in other body part                 | 2.85<br>(1.01 to<br>5.23)              | 3.86<br>(1.21 to<br>7.69)              | 3.25<br>(1.00 to<br>6.63)              | 4.42<br>(1.41 to<br>8.65)              | 0.05<br>(0.02 to<br>0.09)        | 0.07<br>(0.02 to<br>0.15)          | 0.07<br>(0.02 to<br>0.13)          | 0.08<br>(0.03 to<br>0.16)          |
| Environmental heat and cold exposure            | 5.47<br>(3.36 to<br>11.15)             | 7.06<br>(3.89 to<br>14.32)             | 5.25<br>(2.98 to<br>10.58)             | 8.69<br>(4.88 to<br>17.80)             | 0.11<br>(0.07 to<br>0.22)        | 0.18<br>(0.11 to<br>0.33)          | 0.14<br>(0.09 to<br>0.26)          | 0.20<br>(0.13 to<br>0.39)          |
| Other unintentional injuries                    | 23.05<br>(17.81 to<br>32.26)           | 25.71<br>(17.24 to<br>40.26)           | 21.82<br>(14.42 to<br>34.32)           | 28.89<br>(19.31 to<br>44.51)           | 0.44<br>(0.34 to<br>0.61)        | 0.57<br>(0.40 to<br>0.84)          | 0.51<br>(0.35 to<br>0.75)          | 0.62<br>(0.43 to<br>0.93)          |
| <b>Self-harm and interpersonal violence</b>     | <b>275.01</b><br>(211.89 to<br>347.17) | <b>491.35</b><br>(340.48 to<br>727.76) | <b>450.29</b><br>(313.90 to<br>667.75) | <b>514.80</b><br>(355.25 to<br>768.96) | <b>5.79</b><br>(4.51 to<br>7.21) | <b>11.63</b><br>(8.40 to<br>16.38) | <b>10.89</b><br>(7.94 to<br>15.37) | <b>11.94</b><br>(8.52 to<br>16.98) |

**Kenya**

| Cause                                                                               | YLLs (in 1000s)                  |                                     |                                     |                                     | Deaths (in 1000s)                |                                  |                                  |                                  |
|-------------------------------------------------------------------------------------|----------------------------------|-------------------------------------|-------------------------------------|-------------------------------------|----------------------------------|----------------------------------|----------------------------------|----------------------------------|
|                                                                                     | 2016                             | 2040 Forecast                       | 2040 Better Scenario                | 2040 Worse Scenario                 | 2016                             | 2040 Forecast                    | 2040 Better Scenario             | 2040 Worse Scenario              |
| Self-harm                                                                           | 83.73<br>(64.98 to<br>107.03)    | 195.09<br>(130.93 to<br>290.02)     | 175.39<br>(118.98 to<br>261.14)     | 205.54<br>(134.89 to<br>313.62)     | 2.11<br>(1.66 to<br>2.65)        | 5.42<br>(3.85 to<br>7.65)        | 5.03<br>(3.67 to<br>7.01)        | 5.57<br>(3.87 to<br>7.94)        |
| Self-harm by firearm                                                                | 7.42<br>(4.54 to<br>13.95)       | 11.85<br>(6.04 to<br>24.13)         | 10.33<br>(5.31 to<br>20.80)         | 12.73<br>(6.34 to<br>26.53)         | 0.17<br>(0.10 to<br>0.32)        | 0.31<br>(0.16 to<br>0.65)        | 0.28<br>(0.15 to<br>0.57)        | 0.33<br>(0.17 to<br>0.69)        |
| Self-harm by other specified means                                                  | 76.31<br>(59.80 to<br>96.70)     | 183.24<br>(124.05 to<br>274.73)     | 165.06<br>(112.75 to<br>244.37)     | 192.81<br>(127.77 to<br>294.12)     | 1.94<br>(1.54 to<br>2.41)        | 5.11<br>(3.65 to<br>7.18)        | 4.76<br>(3.49 to<br>6.60)        | 5.24<br>(3.63 to<br>7.55)        |
| Interpersonal violence                                                              | 191.29<br>(146.13 to<br>262.11)  | 296.26<br>(196.45 to<br>460.81)     | 274.90<br>(183.93 to<br>425.49)     | 309.26<br>(204.01 to<br>486.44)     | 3.68<br>(2.83 to<br>4.81)        | 6.21<br>(4.20 to<br>9.42)        | 5.86<br>(3.98 to<br>8.83)        | 6.37<br>(4.31 to<br>9.72)        |
| Physical violence by firearm                                                        | 31.82<br>(19.62 to<br>61.06)     | 49.56<br>(28.04 to<br>93.38)        | 48.39<br>(27.43 to<br>90.84)        | 49.85<br>(28.33 to<br>94.40)        | 0.61<br>(0.37 to<br>1.14)        | 1.01<br>(0.59 to<br>1.85)        | 0.99<br>(0.58 to<br>1.80)        | 1.00<br>(0.58 to<br>1.85)        |
| Physical violence by sharp object                                                   | 18.54<br>(12.55 to<br>25.68)     | 33.58<br>(20.15 to<br>52.28)        | 34.06<br>(20.13 to<br>53.47)        | 32.91<br>(19.91 to<br>51.77)        | 0.40<br>(0.26 to<br>0.54)        | 0.80<br>(0.48 to<br>1.19)        | 0.83<br>(0.48 to<br>1.24)        | 0.77<br>(0.46 to<br>1.15)        |
| Physical violence by other means                                                    | 140.93<br>(106.20 to<br>189.93)  | 213.13<br>(136.48 to<br>338.89)     | 192.46<br>(123.90 to<br>304.88)     | 226.50<br>(145.09 to<br>364.31)     | 2.67<br>(2.00 to<br>3.48)        | 4.40<br>(2.84 to<br>6.85)        | 4.04<br>(2.60 to<br>6.29)        | 4.60<br>(2.98 to<br>7.26)        |
| <b>Forces of nature, conflict and terrorism, and executions and police conflict</b> | <b>6.49</b><br>(4.19 to<br>8.95) | <b>11.32</b><br>(0.00 to<br>105.11) | <b>10.85</b><br>(0.00 to<br>100.69) | <b>11.82</b><br>(0.00 to<br>109.78) | <b>0.11</b><br>(0.07 to<br>0.15) | <b>0.20</b><br>(0.00 to<br>1.85) | <b>0.20</b><br>(0.00 to<br>1.80) | <b>0.21</b><br>(0.00 to<br>1.88) |
| Exposure to forces of nature                                                        | 4.50<br>(2.66 to<br>6.34)        | 1.40<br>(0.00 to<br>9.59)           | 1.32<br>(0.00 to<br>9.06)           | 1.48<br>(0.00 to<br>10.13)          | 0.07<br>(0.04 to<br>0.11)        | 0.03<br>(0.00 to<br>0.18)        | 0.03<br>(0.00 to<br>0.18)        | 0.03<br>(0.00 to<br>0.18)        |
| Conflict and terrorism                                                              | 0.00<br>(0.00 to<br>0.00)        | 8.76<br>(0.00 to<br>105.11)         | 8.39<br>(0.00 to<br>100.69)         | 9.15<br>(0.00 to<br>109.78)         | 0.00<br>(0.00 to<br>0.00)        | 0.15<br>(0.00 to<br>1.85)        | 0.15<br>(0.00 to<br>1.80)        | 0.16<br>(0.00 to<br>1.88)        |
| Executions and police conflict                                                      | 1.99<br>(0.62 to<br>3.66)        | 1.17<br>(0.00 to<br>14.25)          | 1.14<br>(0.00 to<br>13.96)          | 1.19<br>(0.00 to<br>14.46)          | 0.03<br>(0.01 to<br>0.06)        | 0.02<br>(0.00 to<br>0.26)        | 0.02<br>(0.00 to<br>0.26)        | 0.02<br>(0.00 to<br>0.26)        |

**Madagascar**

| Cause             | YLLs (in 1000s)                                |                                                |                                              |                                                 | Deaths (in 1000s)                      |                                        |                                        |                                        |
|-------------------|------------------------------------------------|------------------------------------------------|----------------------------------------------|-------------------------------------------------|----------------------------------------|----------------------------------------|----------------------------------------|----------------------------------------|
|                   | 2016                                           | 2040 Forecast                                  | 2040 Better Scenario                         | 2040 Worse Scenario                             | 2016                                   | 2040 Forecast                          | 2040 Better Scenario                   | 2040 Worse Scenario                    |
| <b>All causes</b> | <b>10,264.58</b><br>(8,748.83 to<br>11,989.48) | <b>11,917.13</b><br>(9,716.46 to<br>14,596.77) | <b>6,682.52</b><br>(5,494.08 to<br>8,125.60) | <b>15,289.45</b><br>(12,353.88 to<br>18,761.33) | <b>197.47</b><br>(171.30 to<br>225.51) | <b>288.10</b><br>(248.80 to<br>332.49) | <b>188.10</b><br>(163.38 to<br>213.85) | <b>350.90</b><br>(301.75 to<br>403.75) |



|                                                |                                            |                                            |                                            |                                            |                                      |                                      |                                      |                                      |
|------------------------------------------------|--------------------------------------------|--------------------------------------------|--------------------------------------------|--------------------------------------------|--------------------------------------|--------------------------------------|--------------------------------------|--------------------------------------|
| Measles                                        | 121.53<br>(41.02 to 284.12)                | 13.00<br>(0.93 to 55.68)                   | 3.48<br>(0.39 to 18.08)                    | 23.63<br>(3.13 to 83.42)                   | 1.45<br>(0.49 to 3.39)               | 0.16<br>(0.01 to 0.66)               | 0.04<br>(0.01 to 0.21)               | 0.28<br>(0.04 to 1.00)               |
| <b>Madagascar</b>                              |                                            |                                            |                                            |                                            |                                      |                                      |                                      |                                      |
| Cause                                          | YLLs (in 1000s)                            |                                            |                                            |                                            | Deaths (in 1000s)                    |                                      |                                      |                                      |
|                                                | 2016                                       | 2040 Forecast                              | 2040 Better Scenario                       | 2040 Worse Scenario                        | 2016                                 | 2040 Forecast                        | 2040 Better Scenario                 | 2040 Worse Scenario                  |
| Varicella and herpes zoster                    | 5.69<br>(3.13 to 9.61)                     | 5.36<br>(2.82 to 9.34)                     | 2.36<br>(1.34 to 3.95)                     | 7.05<br>(3.63 to 12.45)                    | 0.09<br>(0.06 to 0.14)               | 0.09<br>(0.06 to 0.15)               | 0.05<br>(0.03 to 0.08)               | 0.11<br>(0.07 to 0.19)               |
| <b>Neglected tropical diseases and malaria</b> | <b>433.99</b><br><b>(298.94 to 620.52)</b> | <b>281.39</b><br><b>(197.15 to 402.88)</b> | <b>198.57</b><br><b>(143.33 to 276.69)</b> | <b>317.25</b><br><b>(218.50 to 460.35)</b> | <b>6.43</b><br><b>(4.67 to 8.89)</b> | <b>4.84</b><br><b>(3.54 to 6.61)</b> | <b>3.82</b><br><b>(2.82 to 5.13)</b> | <b>5.26</b><br><b>(3.83 to 7.18)</b> |
| Malaria                                        | 378.64<br>(247.36 to 558.95)               | 217.82<br>(142.91 to 322.05)               | 159.76<br>(108.83 to 229.13)               | 241.39<br>(155.31 to 364.67)               | 5.54<br>(3.87 to 7.84)               | 3.84<br>(2.66 to 5.42)               | 3.17<br>(2.24 to 4.40)               | 4.09<br>(2.80 to 5.80)               |
| Chagas disease                                 | 0.00<br>(0.00 to 0.00)                     | 0.00<br>(0.00 to 0.00)                     | 0.00<br>(0.00 to 0.00)                     | 0.00<br>(0.00 to 0.00)                     | 0.00<br>(0.00 to 0.00)               | 0.00<br>(0.00 to 0.00)               | 0.00<br>(0.00 to 0.00)               | 0.00<br>(0.00 to 0.00)               |
| Leishmaniasis                                  | 0.00<br>(0.00 to 0.00)                     | 0.00<br>(0.00 to 0.00)                     | 0.00<br>(0.00 to 0.00)                     | 0.00<br>(0.00 to 0.00)                     | 0.00<br>(0.00 to 0.00)               | 0.00<br>(0.00 to 0.00)               | 0.00<br>(0.00 to 0.00)               | 0.00<br>(0.00 to 0.00)               |
| African trypanosomiasis                        | 0.00<br>(0.00 to 0.00)                     | 0.00<br>(0.00 to 0.00)                     | 0.00<br>(0.00 to 0.00)                     | 0.00<br>(0.00 to 0.00)                     | 0.00<br>(0.00 to 0.00)               | 0.00<br>(0.00 to 0.00)               | 0.00<br>(0.00 to 0.00)               | 0.00<br>(0.00 to 0.00)               |
| Schistosomiasis                                | 10.98<br>(7.51 to 15.24)                   | 9.28<br>(6.26 to 13.19)                    | 6.96<br>(4.69 to 10.01)                    | 10.15<br>(6.90 to 14.64)                   | 0.28<br>(0.20 to 0.40)               | 0.26<br>(0.18 to 0.37)               | 0.21<br>(0.14 to 0.29)               | 0.28<br>(0.19 to 0.39)               |
| Cysticercosis                                  | 2.37<br>(1.79 to 3.10)                     | 1.26<br>(0.93 to 1.70)                     | 1.03<br>(0.76 to 1.38)                     | 1.34<br>(1.00 to 1.81)                     | 0.05<br>(0.03 to 0.06)               | 0.03<br>(0.02 to 0.05)               | 0.02<br>(0.02 to 0.03)               | 0.03<br>(0.02 to 0.04)               |
| Cystic echinococcosis                          | 0.69<br>(0.46 to 0.97)                     | 0.41<br>(0.26 to 0.62)                     | 0.17<br>(0.11 to 0.25)                     | 0.56<br>(0.36 to 0.83)                     | 0.01<br>(0.01 to 0.02)               | 0.01<br>(0.01 to 0.02)               | 0.00<br>(0.00 to 0.01)               | 0.01<br>(0.01 to 0.02)               |
| Dengue                                         | 0.38<br>(0.02 to 1.49)                     | 1.76<br>(0.10 to 6.84)                     | 1.23<br>(0.08 to 4.41)                     | 1.99<br>(0.11 to 8.03)                     | 0.01<br>(0.00 to 0.02)               | 0.03<br>(0.00 to 0.10)               | 0.02<br>(0.00 to 0.07)               | 0.03<br>(0.00 to 0.12)               |
| Yellow fever                                   | 0.00<br>(0.00 to 0.00)                     | 0.00<br>(0.00 to 0.00)                     | 0.00<br>(0.00 to 0.00)                     | 0.00<br>(0.00 to 0.00)                     | 0.00<br>(0.00 to 0.00)               | 0.00<br>(0.00 to 0.00)               | 0.00<br>(0.00 to 0.00)               | 0.00<br>(0.00 to 0.00)               |
| Rabies                                         | 11.06<br>(4.57 to 23.00)                   | 7.92<br>(3.02 to 16.13)                    | 2.52<br>(0.96 to 5.55)                     | 11.65<br>(4.51 to 24.40)                   | 0.17<br>(0.07 to 0.33)               | 0.12<br>(0.05 to 0.24)               | 0.04<br>(0.02 to 0.08)               | 0.18<br>(0.08 to 0.35)               |
| Intestinal nematode infections                 | 15.61<br>(9.07 to 25.56)                   | 28.44<br>(15.57 to 48.89)                  | 19.89<br>(11.18 to 33.59)                  | 31.68<br>(17.13 to 55.31)                  | 0.19<br>(0.11 to 0.31)               | 0.36<br>(0.20 to 0.60)               | 0.26<br>(0.15 to 0.42)               | 0.40<br>(0.22 to 0.68)               |
| Other neglected tropical diseases              | 14.27<br>(7.53 to 26.86)                   | 14.30<br>(7.72 to 25.92)                   | 7.00<br>(3.74 to 12.46)                    | 18.48<br>(10.05 to 32.81)                  | 0.18<br>(0.10 to 0.33)               | 0.20<br>(0.11 to 0.35)               | 0.10<br>(0.06 to 0.17)               | 0.25<br>(0.14 to 0.42)               |
| <b>Maternal disorders</b>                      | <b>179.31</b><br><b>(123.80 to 249.10)</b> | <b>157.98</b><br><b>(99.16 to 236.69)</b>  | <b>74.36</b><br><b>(46.18 to 114.07)</b>   | <b>206.79</b><br><b>(132.01 to 312.72)</b> | <b>3.23</b><br><b>(2.21 to 4.51)</b> | <b>2.87</b><br><b>(1.80 to 4.35)</b> | <b>1.36</b><br><b>(0.85 to 2.08)</b> | <b>3.75</b><br><b>(2.37 to 5.64)</b> |
| Maternal hemorrhage                            | 42.77<br>(26.41 to 67.63)                  | 36.69<br>(20.69 to 62.30)                  | 17.64<br>(9.92 to 30.48)                   | 47.10<br>(26.85 to 79.36)                  | 0.79<br>(0.49 to 1.27)               | 0.69<br>(0.39 to 1.16)               | 0.33<br>(0.18 to 0.57)               | 0.88<br>(0.50 to 1.50)               |
| Maternal sepsis and other maternal infections  | 15.95<br>(6.67 to 29.83)                   | 12.17<br>(4.93 to 23.41)                   | 5.74<br>(2.33 to 11.18)                    | 15.84<br>(6.38 to 30.46)                   | 0.29<br>(0.12 to 0.54)               | 0.22<br>(0.09 to 0.43)               | 0.10<br>(0.04 to 0.20)               | 0.29<br>(0.12 to 0.55)               |
| Maternal hypertensive disorders                | 25.50<br>(15.16 to 38.90)                  | 22.97<br>(12.87 to 37.18)                  | 10.86<br>(5.98 to 18.24)                   | 29.69<br>(16.47 to 47.90)                  | 0.45<br>(0.27 to 0.69)               | 0.41<br>(0.23 to 0.66)               | 0.19<br>(0.11 to 0.32)               | 0.53<br>(0.29 to 0.85)               |
| Maternal obstructed labor and uterine rupture  | 14.28<br>(6.80 to 25.41)                   | 13.01<br>(5.80 to 24.51)                   | 5.91<br>(2.66 to 11.20)                    | 17.06<br>(7.61 to 32.13)                   | 0.26<br>(0.12 to 0.47)               | 0.24<br>(0.11 to 0.46)               | 0.11<br>(0.05 to 0.21)               | 0.31<br>(0.14 to 0.58)               |

|                                                                         |                                              |                                              |                                          |                                              |                                     |                                     |                                   |                                     |
|-------------------------------------------------------------------------|----------------------------------------------|----------------------------------------------|------------------------------------------|----------------------------------------------|-------------------------------------|-------------------------------------|-----------------------------------|-------------------------------------|
| Maternal abortion, miscarriage, and ectopic pregnancy                   | 8.15<br>(3.49 to<br>15.19)                   | 7.96<br>(3.05 to<br>16.54)                   | 3.78<br>(1.45 to<br>7.97)                | 10.51<br>(4.02 to<br>22.17)                  | 0.14<br>(0.07 to<br>0.26)           | 0.14<br>(0.06 to<br>0.29)           | 0.07<br>(0.03 to<br>0.14)         | 0.19<br>(0.07 to<br>0.39)           |
| Indirect maternal deaths                                                | 48.03<br>(26.61 to<br>77.70)                 | 43.66<br>(22.05 to<br>74.65)                 | 20.16<br>(9.95 to<br>33.79)              | 58.32<br>(28.81 to<br>98.30)                 | 0.86<br>(0.47 to<br>1.38)           | 0.78<br>(0.40 to<br>1.33)           | 0.36<br>(0.18 to<br>0.61)         | 1.04<br>(0.53 to<br>1.73)           |
| Late maternal deaths                                                    | 3.73<br>(1.51 to<br>7.39)                    | 2.74<br>(1.09 to<br>5.62)                    | 1.26<br>(0.48 to<br>2.66)                | 3.63<br>(1.41 to<br>7.61)                    | 0.07<br>(0.03 to<br>0.13)           | 0.05<br>(0.02 to<br>0.10)           | 0.02<br>(0.01 to<br>0.05)         | 0.07<br>(0.03 to<br>0.13)           |
| Maternal deaths aggravated by HIV/AIDS                                  | 0.13<br>(0.04 to<br>0.34)                    | 0.57<br>(0.10 to<br>1.78)                    | 0.22<br>(0.00 to<br>0.85)                | 0.80<br>(0.18 to<br>2.36)                    | 0.00<br>(0.00 to<br>0.01)           | 0.01<br>(0.00 to<br>0.03)           | 0.00<br>(0.00 to<br>0.02)         | 0.02<br>(0.00 to<br>0.05)           |
| Other maternal disorders                                                | 20.75<br>(10.08 to<br>36.12)                 | 18.20<br>(7.98 to<br>33.65)                  | 8.79<br>(4.02 to<br>16.42)               | 23.85<br>(10.87 to<br>43.81)                 | 0.37<br>(0.18 to<br>0.65)           | 0.33<br>(0.15 to<br>0.61)           | 0.16<br>(0.07 to<br>0.30)         | 0.43<br>(0.20 to<br>0.79)           |
| <b>Madagascar</b>                                                       |                                              |                                              |                                          |                                              |                                     |                                     |                                   |                                     |
| Cause                                                                   | YLLs (in 1000s)                              |                                              |                                          |                                              | Deaths (in 1000s)                   |                                     |                                   |                                     |
|                                                                         | 2016                                         | 2040 Forecast                                | 2040 Better Scenario                     | 2040 Worse Scenario                          | 2016                                | 2040 Forecast                       | 2040 Better Scenario              | 2040 Worse Scenario                 |
| <b>Neonatal disorders</b>                                               | <b>1,651.99</b><br>(1,273.10 to<br>2,119.47) | <b>1,937.18</b><br>(1,216.79 to<br>2,888.49) | <b>832.41</b><br>(520.55 to<br>1,257.47) | <b>2,595.93</b><br>(1,637.37 to<br>3,914.79) | <b>19.10</b><br>(14.72 to<br>24.50) | <b>22.40</b><br>(14.07 to<br>33.39) | <b>9.63</b><br>(6.02 to<br>14.54) | <b>30.01</b><br>(18.93 to<br>45.25) |
| Neonatal preterm birth                                                  | 661.42<br>(451.82 to<br>895.59)              | 741.59<br>(447.82 to<br>1,171.81)            | 292.86<br>(173.78 to<br>464.97)          | 989.11<br>(599.94 to<br>1,539.75)            | 7.64<br>(5.22 to<br>10.35)          | 8.57<br>(5.18 to<br>13.54)          | 3.39<br>(2.01 to<br>5.37)         | 11.43<br>(6.93 to<br>17.80)         |
| Neonatal encephalopathy due to birth asphyxia and trauma                | 334.38<br>(208.83 to<br>499.07)              | 341.71<br>(157.98 to<br>633.53)              | 162.36<br>(74.35 to<br>301.15)           | 452.80<br>(210.66 to<br>837.03)              | 3.86<br>(2.41 to<br>5.77)           | 3.95<br>(1.83 to<br>7.32)           | 1.88<br>(0.86 to<br>3.48)         | 5.23<br>(2.44 to<br>9.68)           |
| Neonatal sepsis and other neonatal infections                           | 333.32<br>(193.67 to<br>522.28)              | 481.63<br>(275.42 to<br>791.36)              | 222.21<br>(126.37 to<br>365.77)          | 639.81<br>(357.62 to<br>1,057.80)            | 3.85<br>(2.24 to<br>6.04)           | 5.57<br>(3.19 to<br>9.15)           | 2.57<br>(1.46 to<br>4.23)         | 7.40<br>(4.13 to<br>12.23)          |
| Hemolytic disease and other neonatal jaundice                           | 41.69<br>(27.63 to<br>79.93)                 | 29.59<br>(13.91 to<br>57.03)                 | 12.31<br>(5.77 to<br>23.90)              | 40.94<br>(19.36 to<br>78.65)                 | 0.55<br>(0.32 to<br>0.92)           | 0.34<br>(0.16 to<br>0.66)           | 0.14<br>(0.07 to<br>0.28)         | 0.47<br>(0.22 to<br>0.91)           |
| Other neonatal disorders                                                | 275.27<br>(145.87 to<br>432.15)              | 342.67<br>(149.20 to<br>643.09)              | 142.66<br>(61.47 to<br>272.75)           | 473.28<br>(209.64 to<br>889.63)              | 3.18<br>(1.69 to<br>5.00)           | 3.96<br>(1.73 to<br>7.43)           | 1.65<br>(0.71 to<br>3.15)         | 5.47<br>(2.42 to<br>10.29)          |
| <b>Nutritional deficiencies</b>                                         | <b>875.09</b><br>(573.40 to<br>1,246.15)     | <b>500.28</b><br>(327.54 to<br>747.04)       | <b>251.90</b><br>(167.44 to<br>363.23)   | <b>681.47</b><br>(436.35 to<br>1,029.56)     | <b>12.75</b><br>(8.78 to<br>17.47)  | <b>8.81</b><br>(6.12 to<br>12.29)   | <b>5.43</b><br>(3.87 to<br>7.29)  | <b>11.03</b><br>(7.47 to<br>15.63)  |
| Protein-energy malnutrition                                             | 832.42<br>(544.55 to<br>1,187.29)            | 436.25<br>(271.80 to<br>674.33)              | 209.09<br>(133.50 to<br>311.92)          | 607.31<br>(372.84 to<br>951.47)              | 11.71<br>(7.89 to<br>16.21)         | 7.17<br>(4.72 to<br>10.32)          | 4.18<br>(2.80 to<br>5.78)         | 9.24<br>(6.01 to<br>13.58)          |
| Iodine deficiency                                                       | 3.12<br>(0.16 to<br>11.53)                   | 12.73<br>(0.26 to<br>65.30)                  | 6.45<br>(0.15 to<br>28.55)               | 16.67<br>(0.29 to<br>97.46)                  | 0.06<br>(0.00 to<br>0.19)           | 0.26<br>(0.01 to<br>0.96)           | 0.16<br>(0.01 to<br>0.55)         | 0.32<br>(0.01 to<br>1.24)           |
| Dietary iron deficiency                                                 | 2.18<br>(1.37 to<br>3.34)                    | 2.58<br>(1.50 to<br>4.12)                    | 1.99<br>(1.16 to<br>3.17)                | 2.81<br>(1.66 to<br>4.46)                    | 0.04<br>(0.02 to<br>0.06)           | 0.05<br>(0.03 to<br>0.07)           | 0.04<br>(0.02 to<br>0.06)         | 0.05<br>(0.03 to<br>0.08)           |
| Other nutritional deficiencies                                          | 37.37<br>(22.72 to<br>54.36)                 | 48.72<br>(29.02 to<br>72.22)                 | 34.37<br>(20.75 to<br>50.15)             | 54.68<br>(32.15 to<br>82.65)                 | 0.94<br>(0.59 to<br>1.35)           | 1.33<br>(0.82 to<br>1.87)           | 1.05<br>(0.65 to<br>1.46)         | 1.42<br>(0.88 to<br>2.02)           |
| <b>Other communicable, maternal, neonatal, and nutritional diseases</b> | <b>579.06</b><br>(319.74 to<br>961.07)       | <b>409.75</b><br>(237.38 to<br>713.24)       | <b>219.30</b><br>(133.55 to<br>367.97)   | <b>504.53</b><br>(286.42 to<br>878.73)       | <b>7.51</b><br>(4.36 to<br>12.11)   | <b>6.10</b><br>(3.84 to<br>9.85)    | <b>3.59</b><br>(2.38 to<br>5.55)  | <b>7.30</b><br>(4.50 to<br>12.00)   |
| Sexually transmitted infections excluding HIV                           | 321.04<br>(143.33 to<br>582.96)              | 120.46<br>(41.26 to<br>253.86)               | 61.94<br>(23.08 to<br>127.66)            | 149.22<br>(51.38 to<br>318.67)               | 3.82<br>(1.74 to<br>6.87)           | 1.46<br>(0.53 to<br>3.04)           | 0.77<br>(0.31 to<br>1.55)         | 1.80<br>(0.64 to<br>3.79)           |
| Syphilis                                                                | 317.72<br>(140.19 to<br>579.68)              | 117.35<br>(38.36 to<br>249.75)               | 59.46<br>(20.63 to<br>125.21)            | 145.87<br>(48.39 to<br>314.71)               | 3.75<br>(1.68 to<br>6.81)           | 1.39<br>(0.46 to<br>2.96)           | 0.71<br>(0.26 to<br>1.49)         | 1.73<br>(0.58 to<br>3.70)           |
| Chlamydial infection                                                    | 0.63<br>(0.42 to<br>0.93)                    | 0.61<br>(0.37 to<br>1.00)                    | 0.49<br>(0.30 to<br>0.78)                | 0.66<br>(0.40 to<br>1.08)                    | 0.01<br>(0.01 to<br>0.02)           | 0.01<br>(0.01 to<br>0.02)           | 0.01<br>(0.01 to<br>0.02)         | 0.01<br>(0.01 to<br>0.02)           |

|                                       |                                              |                                              |                                              |                                              |                                     |                                        |                                        |                                        |
|---------------------------------------|----------------------------------------------|----------------------------------------------|----------------------------------------------|----------------------------------------------|-------------------------------------|----------------------------------------|----------------------------------------|----------------------------------------|
|                                       | 1.71<br>(1.18 to<br>2.48)                    | 1.58<br>(1.00 to<br>2.46)                    | 1.27<br>(0.82 to<br>2.01)                    | 1.69<br>(1.07 to<br>2.64)                    | 0.04<br>(0.05)                      | 0.03<br>(0.02 to<br>0.05)              | 0.03<br>(0.02 to<br>0.04)              | 0.04<br>(0.02 to<br>0.06)              |
| Gonococcal infection                  |                                              |                                              |                                              |                                              |                                     |                                        |                                        |                                        |
| Other sexually transmitted infections | 0.98<br>(0.67 to<br>1.46)                    | 0.91<br>(0.55 to<br>1.45)                    | 0.72<br>(0.45 to<br>1.14)                    | 0.99<br>(0.60 to<br>1.57)                    | 0.02<br>(0.01 to<br>0.03)           | 0.02<br>(0.01 to<br>0.03)              | 0.02<br>(0.01 to<br>0.02)              | 0.02<br>(0.01 to<br>0.03)              |
| Acute hepatitis                       | 20.36<br>(15.90 to<br>25.48)                 | 20.44<br>(15.24 to<br>26.62)                 | 14.96<br>(11.31 to<br>19.49)                 | 22.62<br>(17.23 to<br>29.57)                 | 0.45<br>(0.36 to<br>0.57)           | 0.51<br>(0.38 to<br>0.65)              | 0.39<br>(0.30 to<br>0.50)              | 0.56<br>(0.42 to<br>0.70)              |
| Acute hepatitis A                     | 0.43<br>(0.10 to<br>0.96)                    | 0.41<br>(0.13 to<br>0.87)                    | 0.26<br>(0.09 to<br>0.55)                    | 0.48<br>(0.14 to<br>1.00)                    | 0.01<br>(0.00 to<br>0.01)           | 0.01<br>(0.00 to<br>0.02)              | 0.01<br>(0.01 to<br>0.01)              | 0.01<br>(0.00 to<br>0.02)              |
| Acute hepatitis B                     | 16.22<br>(12.46 to<br>20.74)                 | 16.61<br>(12.31 to<br>22.11)                 | 12.20<br>(9.14 to<br>16.25)                  | 18.35<br>(13.63 to<br>24.24)                 | 0.38<br>(0.29 to<br>0.48)           | 0.43<br>(0.32 to<br>0.55)              | 0.32<br>(0.24 to<br>0.42)              | 0.47<br>(0.35 to<br>0.61)              |
| Acute hepatitis C                     | 0.35<br>(0.25 to<br>0.49)                    | 0.45<br>(0.31 to<br>0.66)                    | 0.39<br>(0.26 to<br>0.56)                    | 0.47<br>(0.33 to<br>0.68)                    | 0.01<br>(0.01 to<br>0.01)           | 0.01<br>(0.01 to<br>0.02)              | 0.01<br>(0.01 to<br>0.02)              | 0.01<br>(0.01 to<br>0.02)              |
| Acute hepatitis E                     | 3.35<br>(2.40 to<br>4.67)                    | 2.97<br>(1.95 to<br>4.39)                    | 2.11<br>(1.38 to<br>3.12)                    | 3.32<br>(2.20 to<br>4.91)                    | 0.06<br>(0.04 to<br>0.08)           | 0.06<br>(0.04 to<br>0.09)              | 0.05<br>(0.03 to<br>0.07)              | 0.07<br>(0.04 to<br>0.09)              |
| Other unspecified infectious diseases | 237.66<br>(92.87 to<br>581.47)               | 268.86<br>(138.61 to<br>516.43)              | 142.40<br>(79.03 to<br>258.34)               | 332.69<br>(168.34 to<br>638.92)              | 3.23<br>(1.43 to<br>7.37)           | 4.13<br>(2.36 to<br>7.32)              | 2.44<br>(1.51 to<br>4.13)              | 4.95<br>(2.77 to<br>8.90)              |
| <b>Non-communicable diseases</b>      | <b>2,561.88</b><br>(2,134.19 to<br>3,019.56) | <b>4,426.52</b><br>(3,599.72 to<br>5,303.74) | <b>3,008.24</b><br>(2,489.04 to<br>3,585.65) | <b>5,409.18</b><br>(4,359.60 to<br>6,640.10) | <b>82.18</b><br>(67.91 to<br>96.68) | <b>158.55</b><br>(135.72 to<br>184.60) | <b>116.37</b><br>(101.58 to<br>132.17) | <b>188.21</b><br>(159.26 to<br>222.46) |

| Madagascar                      |                                 |                                   |                                 |                                   |                              |                              |                              |                              |
|---------------------------------|---------------------------------|-----------------------------------|---------------------------------|-----------------------------------|------------------------------|------------------------------|------------------------------|------------------------------|
| Cause                           | YLLs (in 1000s)                 |                                   |                                 |                                   | Deaths (in 1000s)            |                              |                              |                              |
|                                 | 2016                            | 2040 Forecast                     | 2040 Better Scenario            | 2040 Worse Scenario               | 2016                         | 2040 Forecast                | 2040 Better Scenario         | 2040 Worse Scenario          |
| Neoplasms                       | 428.48<br>(338.54 to<br>523.32) | 848.37<br>(668.80 to<br>1,046.47) | 816.51<br>(649.31 to<br>998.40) | 869.64<br>(683.69 to<br>1,080.65) | 13.12<br>(10.25 to<br>16.11) | 27.86<br>(22.29 to<br>33.63) | 28.45<br>(23.12 to<br>34.15) | 27.78<br>(22.08 to<br>33.98) |
| Lip and oral cavity cancer      | 5.61<br>(4.31 to<br>6.99)       | 12.64<br>(7.91 to<br>20.14)       | 9.39<br>(6.41 to<br>13.76)      | 14.59<br>(8.83 to<br>24.34)       | 0.19<br>(0.15 to<br>0.24)    | 0.44<br>(0.29 to<br>0.69)    | 0.35<br>(0.25 to<br>0.50)    | 0.49<br>(0.31 to<br>0.80)    |
| Nasopharynx cancer              | 4.88<br>(3.51 to<br>6.77)       | 11.57<br>(6.81 to<br>20.06)       | 7.93<br>(4.96 to<br>13.00)      | 13.92<br>(7.70 to<br>24.90)       | 0.14<br>(0.10 to<br>0.19)    | 0.34<br>(0.20 to<br>0.57)    | 0.24<br>(0.16 to<br>0.38)    | 0.40<br>(0.23 to<br>0.69)    |
| Other pharynx cancer            | 3.44<br>(2.55 to<br>4.49)       | 6.54<br>(3.76 to<br>10.67)        | 5.10<br>(3.18 to<br>7.70)       | 7.06<br>(3.95 to<br>11.66)        | 0.11<br>(0.08 to<br>0.14)    | 0.22<br>(0.13 to<br>0.35)    | 0.18<br>(0.11 to<br>0.26)    | 0.23<br>(0.13 to<br>0.38)    |
| Esophageal cancer               | 18.07<br>(13.77 to<br>23.22)    | 39.78<br>(22.73 to<br>67.17)      | 31.03<br>(19.30 to<br>51.38)    | 44.87<br>(25.49 to<br>79.22)      | 0.69<br>(0.54 to<br>0.85)    | 1.54<br>(0.92 to<br>2.47)    | 1.27<br>(0.81 to<br>2.01)    | 1.67<br>(0.97 to<br>2.87)    |
| Stomach cancer                  | 17.58<br>(13.41 to<br>21.75)    | 25.04<br>(19.45 to<br>31.46)      | 22.97<br>(17.64 to<br>29.44)    | 26.11<br>(20.14 to<br>33.87)      | 0.65<br>(0.50 to<br>0.80)    | 0.98<br>(0.79 to<br>1.21)    | 0.94<br>(0.75 to<br>1.18)    | 1.00<br>(0.79 to<br>1.25)    |
| Colon and rectum cancer         | 25.19<br>(18.43 to<br>33.23)    | 58.63<br>(39.14 to<br>86.18)      | 61.25<br>(41.39 to<br>89.72)    | 57.85<br>(38.32 to<br>84.77)      | 0.95<br>(0.71 to<br>1.23)    | 2.37<br>(1.62 to<br>3.45)    | 2.64<br>(1.83 to<br>3.85)    | 2.27<br>(1.52 to<br>3.31)    |
| Liver cancer                    | 23.33<br>(16.59 to<br>31.91)    | 46.54<br>(32.57 to<br>65.89)      | 44.74<br>(31.33 to<br>63.07)    | 49.52<br>(33.72 to<br>72.51)      | 0.74<br>(0.53 to<br>0.98)    | 1.56<br>(1.12 to<br>2.14)    | 1.58<br>(1.14 to<br>2.13)    | 1.62<br>(1.14 to<br>2.28)    |
| Liver cancer due to hepatitis B | 8.71<br>(6.02 to<br>12.21)      | 16.82<br>(11.13 to<br>24.90)      | 16.32<br>(10.83 to<br>23.82)    | 17.90<br>(11.56 to<br>27.20)      | 0.25<br>(0.17 to<br>0.35)    | 0.51<br>(0.34 to<br>0.74)    | 0.52<br>(0.35 to<br>0.74)    | 0.53<br>(0.35 to<br>0.79)    |
| Liver cancer due to hepatitis C | 5.59<br>(3.47 to<br>8.53)       | 11.45<br>(7.12 to<br>17.75)       | 11.50<br>(7.29 to<br>17.46)     | 11.90<br>(7.22 to<br>18.87)       | 0.21<br>(0.14 to<br>0.31)    | 0.46<br>(0.30 to<br>0.67)    | 0.48<br>(0.32 to<br>0.70)    | 0.46<br>(0.29 to<br>0.71)    |
| Liver cancer due to alcohol use | 2.37<br>(1.53 to<br>3.33)       | 5.16<br>(3.30 to<br>7.41)         | 4.54<br>(2.95 to<br>6.43)       | 5.72<br>(3.60 to<br>8.50)         | 0.08<br>(0.06 to<br>0.12)    | 0.19<br>(0.13 to<br>0.26)    | 0.17<br>(0.12 to<br>0.24)    | 0.20<br>(0.13 to<br>0.29)    |

|                                      |                              |                               |                               |                               |                           |                           |                           |                           |
|--------------------------------------|------------------------------|-------------------------------|-------------------------------|-------------------------------|---------------------------|---------------------------|---------------------------|---------------------------|
| Liver cancer due to other causes     | 6.66<br>(4.44 to<br>9.25)    | 13.11<br>(8.54 to<br>18.94)   | 12.38<br>(8.16 to<br>17.54)   | 14.00<br>(8.96 to<br>20.86)   | 0.19<br>(0.13 to<br>0.26) | 0.40<br>(0.27 to<br>0.58) | 0.40<br>(0.27 to<br>0.57) | 0.42<br>(0.28 to<br>0.62) |
| Gallbladder and biliary tract cancer | 2.60<br>(1.95 to<br>3.41)    | 3.61<br>(2.86 to<br>4.56)     | 3.91<br>(3.07 to<br>4.99)     | 3.45<br>(2.74 to<br>4.34)     | 0.10<br>(0.08 to<br>0.13) | 0.15<br>(0.12 to<br>0.18) | 0.17<br>(0.14 to<br>0.21) | 0.14<br>(0.11 to<br>0.17) |
| Pancreatic cancer                    | 9.45<br>(7.39 to<br>11.69)   | 23.17<br>(18.51 to<br>28.95)  | 25.50<br>(20.42 to<br>31.68)  | 22.47<br>(17.93 to<br>27.99)  | 0.35<br>(0.28 to<br>0.43) | 0.90<br>(0.74 to<br>1.11) | 1.04<br>(0.85 to<br>1.27) | 0.85<br>(0.69 to<br>1.06) |
| Larynx cancer                        | 3.39<br>(2.30 to<br>4.57)    | 6.64<br>(3.94 to<br>11.06)    | 4.97<br>(3.16 to<br>7.44)     | 8.23<br>(4.62 to<br>14.74)    | 0.12<br>(0.09 to<br>0.16) | 0.24<br>(0.15 to<br>0.38) | 0.19<br>(0.13 to<br>0.28) | 0.29<br>(0.17 to<br>0.49) |
| Tracheal, bronchus, and lung cancer  | 11.77<br>(9.23 to<br>14.75)  | 25.77<br>(16.88 to<br>40.66)  | 18.26<br>(13.05 to<br>25.92)  | 30.41<br>(19.24 to<br>50.90)  | 0.45<br>(0.36 to<br>0.56) | 1.02<br>(0.69 to<br>1.54) | 0.77<br>(0.57 to<br>1.06) | 1.15<br>(0.76 to<br>1.87) |
| Malignant skin melanoma              | 3.77<br>(2.73 to<br>5.56)    | 7.77<br>(5.76 to<br>10.75)    | 9.28<br>(6.97 to<br>12.75)    | 7.21<br>(5.39 to<br>10.03)    | 0.14<br>(0.10 to<br>0.20) | 0.30<br>(0.23 to<br>0.41) | 0.37<br>(0.29 to<br>0.51) | 0.27<br>(0.21 to<br>0.37) |
| Non-melanoma skin cancer             | 2.40<br>(1.77 to<br>3.15)    | 5.48<br>(4.31 to<br>6.81)     | 5.17<br>(4.06 to<br>6.43)     | 5.50<br>(4.32 to<br>6.83)     | 0.09<br>(0.07 to<br>0.12) | 0.23<br>(0.18 to<br>0.29) | 0.23<br>(0.19 to<br>0.29) | 0.22<br>(0.18 to<br>0.28) |
| Breast cancer                        | 31.35<br>(20.19 to<br>44.12) | 64.04<br>(41.83 to<br>92.21)  | 61.61<br>(40.15 to<br>87.30)  | 66.12<br>(42.83 to<br>94.12)  | 0.95<br>(0.61 to<br>1.32) | 2.07<br>(1.39 to<br>2.91) | 2.07<br>(1.38 to<br>2.86) | 2.10<br>(1.39 to<br>2.94) |
| Cervical cancer                      | 54.87<br>(32.13 to<br>81.56) | 83.98<br>(49.68 to<br>123.61) | 73.35<br>(43.07 to<br>108.64) | 87.47<br>(51.50 to<br>128.73) | 1.71<br>(0.99 to<br>2.50) | 2.70<br>(1.64 to<br>3.81) | 2.43<br>(1.47 to<br>3.46) | 2.76<br>(1.70 to<br>3.94) |
| Uterine cancer                       | 6.11<br>(3.71 to<br>8.63)    | 12.15<br>(7.79 to<br>16.70)   | 10.39<br>(6.63 to<br>14.59)   | 12.66<br>(8.13 to<br>17.45)   | 0.21<br>(0.13 to<br>0.29) | 0.45<br>(0.30 to<br>0.60) | 0.40<br>(0.27 to<br>0.53) | 0.46<br>(0.31 to<br>0.61) |
| Ovarian cancer                       | 11.07<br>(7.03 to<br>15.22)  | 23.26<br>(14.89 to<br>32.30)  | 26.69<br>(17.18 to<br>36.71)  | 22.37<br>(14.30 to<br>31.17)  | 0.35<br>(0.22 to<br>0.48) | 0.78<br>(0.51 to<br>1.04) | 0.93<br>(0.62 to<br>1.25) | 0.74<br>(0.48 to<br>1.00) |
| Prostate cancer                      | 25.50<br>(8.97 to<br>39.39)  | 69.47<br>(26.24 to<br>99.39)  | 80.31<br>(31.60 to<br>114.03) | 64.46<br>(23.59 to<br>92.84)  | 1.31<br>(0.47 to<br>1.97) | 3.69<br>(1.41 to<br>5.16) | 4.46<br>(1.79 to<br>6.10) | 3.35<br>(1.24 to<br>4.73) |
| Testicular cancer                    | 1.13<br>(0.73 to<br>1.64)    | 1.78<br>(1.16 to<br>2.64)     | 1.61<br>(1.04 to<br>2.39)     | 1.83<br>(1.19 to<br>2.70)     | 0.02<br>(0.02 to<br>0.04) | 0.04<br>(0.03 to<br>0.06) | 0.04<br>(0.02 to<br>0.06) | 0.04<br>(0.03 to<br>0.06) |

**Madagascar**

| Cause                           | YLLs (in 1000s)              |                               |                               |                               | Deaths (in 1000s)         |                           |                           |                           |
|---------------------------------|------------------------------|-------------------------------|-------------------------------|-------------------------------|---------------------------|---------------------------|---------------------------|---------------------------|
|                                 | 2016                         | 2040 Forecast                 | 2040 Better Scenario          | 2040 Worse Scenario           | 2016                      | 2040 Forecast             | 2040 Better Scenario      | 2040 Worse Scenario       |
| Kidney cancer                   | 3.87<br>(3.01 to<br>4.97)    | 7.61<br>(5.88 to<br>9.76)     | 7.89<br>(6.11 to<br>9.89)     | 7.54<br>(5.74 to<br>9.72)     | 0.09<br>(0.07 to<br>0.11) | 0.20<br>(0.16 to<br>0.24) | 0.23<br>(0.18 to<br>0.29) | 0.19<br>(0.15 to<br>0.23) |
| Bladder cancer                  | 4.85<br>(3.70 to<br>6.09)    | 9.82<br>(7.57 to<br>12.53)    | 9.89<br>(7.64 to<br>12.64)    | 9.81<br>(7.49 to<br>12.71)    | 0.21<br>(0.16 to<br>0.26) | 0.44<br>(0.35 to<br>0.56) | 0.48<br>(0.37 to<br>0.59) | 0.43<br>(0.33 to<br>0.54) |
| Brain and nervous system cancer | 12.75<br>(10.32 to<br>15.72) | 27.30<br>(21.87 to<br>33.91)  | 27.03<br>(21.48 to<br>33.64)  | 27.22<br>(21.99 to<br>33.84)  | 0.29<br>(0.23 to<br>0.35) | 0.67<br>(0.55 to<br>0.81) | 0.71<br>(0.58 to<br>0.87) | 0.64<br>(0.53 to<br>0.78) |
| Thyroid cancer                  | 5.72<br>(2.92 to<br>7.78)    | 9.54<br>(4.80 to<br>13.20)    | 8.46<br>(4.34 to<br>11.51)    | 10.18<br>(5.25 to<br>14.44)   | 0.18<br>(0.09 to<br>0.24) | 0.31<br>(0.16 to<br>0.42) | 0.29<br>(0.15 to<br>0.38) | 0.33<br>(0.17 to<br>0.45) |
| Mesothelioma                    | 0.66<br>(0.46 to<br>0.90)    | 1.35<br>(0.95 to<br>1.80)     | 1.33<br>(0.94 to<br>1.80)     | 1.34<br>(0.96 to<br>1.78)     | 0.02<br>(0.01 to<br>0.03) | 0.05<br>(0.03 to<br>0.06) | 0.05<br>(0.03 to<br>0.06) | 0.04<br>(0.03 to<br>0.06) |
| Hodgkin lymphoma                | 6.66<br>(3.24 to<br>9.52)    | 8.48<br>(3.99 to<br>12.38)    | 6.11<br>(2.90 to<br>8.81)     | 9.45<br>(4.44 to<br>13.91)    | 0.14<br>(0.07 to<br>0.20) | 0.19<br>(0.09 to<br>0.27) | 0.14<br>(0.07 to<br>0.20) | 0.21<br>(0.10 to<br>0.29) |
| Non-Hodgkin lymphoma            | 44.67<br>(30.31 to<br>57.85) | 83.09<br>(55.00 to<br>112.10) | 79.99<br>(53.11 to<br>105.40) | 84.33<br>(55.38 to<br>113.15) | 0.88<br>(0.60 to<br>1.12) | 1.75<br>(1.18 to<br>2.26) | 1.82<br>(1.24 to<br>2.32) | 1.73<br>(1.15 to<br>2.22) |

|                                 |                                            |                                              |                                            |                                              |                                     |                                      |                                     |                                       |
|---------------------------------|--------------------------------------------|----------------------------------------------|--------------------------------------------|----------------------------------------------|-------------------------------------|--------------------------------------|-------------------------------------|---------------------------------------|
| Multiple myeloma                | 5.41<br>(3.43 to<br>7.19)                  | 12.35<br>(7.87 to<br>16.12)                  | 13.95<br>(9.00 to<br>18.07)                | 11.92<br>(7.50 to<br>15.69)                  | 0.18<br>(0.12 to<br>0.24)           | 0.44<br>(0.28 to<br>0.56)            | 0.51<br>(0.33 to<br>0.65)           | 0.42<br>(0.27 to<br>0.54)             |
| Leukemia                        | 16.48<br>(13.04 to<br>20.42)               | 27.25<br>(20.78 to<br>34.60)                 | 25.84<br>(19.99 to<br>33.27)               | 28.22<br>(21.53 to<br>35.72)                 | 0.36<br>(0.28 to<br>0.44)           | 0.66<br>(0.52 to<br>0.81)            | 0.67<br>(0.53 to<br>0.83)           | 0.66<br>(0.52 to<br>0.82)             |
| Acute lymphoid leukemia         | 5.17<br>(4.01 to<br>6.64)                  | 8.56<br>(6.33 to<br>11.33)                   | 8.16<br>(6.08 to<br>10.70)                 | 8.81<br>(6.51 to<br>11.60)                   | 0.09<br>(0.07 to<br>0.12)           | 0.17<br>(0.13 to<br>0.21)            | 0.17<br>(0.13 to<br>0.22)           | 0.17<br>(0.13 to<br>0.22)             |
| Chronic lymphoid leukemia       | 0.50<br>(0.37 to<br>0.66)                  | 0.98<br>(0.73 to<br>1.28)                    | 1.04<br>(0.78 to<br>1.37)                  | 0.97<br>(0.72 to<br>1.27)                    | 0.02<br>(0.01 to<br>0.03)           | 0.09<br>(0.03 to<br>0.05)            | 0.05<br>(0.04 to<br>0.06)           | 0.04<br>(0.03 to<br>0.05)             |
| Acute myeloid leukemia          | 3.41<br>(2.66 to<br>4.51)                  | 7.30<br>(5.55 to<br>9.72)                    | 7.68<br>(5.92 to<br>10.21)                 | 7.29<br>(5.54 to<br>9.68)                    | 0.07<br>(0.06 to<br>0.09)           | 0.17<br>(0.13 to<br>0.22)            | 0.19<br>(0.15 to<br>0.25)           | 0.16<br>(0.13 to<br>0.22)             |
| Chronic myeloid leukemia        | 1.92<br>(1.32 to<br>2.75)                  | 2.24<br>(1.55 to<br>3.24)                    | 2.19<br>(1.50 to<br>3.18)                  | 2.32<br>(1.59 to<br>3.34)                    | 0.05<br>(0.03 to<br>0.06)           | 0.06<br>(0.04 to<br>0.08)            | 0.06<br>(0.04 to<br>0.08)           | 0.06<br>(0.04 to<br>0.08)             |
| Other leukemia                  | 5.48<br>(4.07 to<br>7.04)                  | 8.17<br>(5.81 to<br>10.70)                   | 6.77<br>(4.84 to<br>8.94)                  | 8.84<br>(6.31 to<br>11.51)                   | 0.13<br>(0.09 to<br>0.16)           | 0.22<br>(0.17 to<br>0.28)            | 0.20<br>(0.15 to<br>0.25)           | 0.23<br>(0.17 to<br>0.29)             |
| Other neoplasms                 | 65.91<br>(50.52 to<br>83.39)               | 133.74<br>(104.28 to<br>168.99)              | 132.58<br>(103.85 to<br>166.71)            | 133.53<br>(104.33 to<br>167.96)              | 1.49<br>(1.14 to<br>1.88)           | 3.15<br>(2.51 to<br>3.87)            | 3.24<br>(2.60 to<br>4.00)           | 3.10<br>(2.44 to<br>3.81)             |
| <b>Cardiovascular diseases</b>  | <b>1,090.09</b><br>(887.06 to<br>1,306.10) | <b>2,001.39</b><br>(1,482.53 to<br>2,681.92) | <b>1,058.28</b><br>(812.88 to<br>1,376.50) | <b>2,742.04</b><br>(1,945.94 to<br>3,777.63) | <b>41.98</b><br>(34.34 to<br>49.63) | <b>82.52</b><br>(65.21 to<br>104.04) | <b>48.75</b><br>(39.98 to<br>59.69) | <b>107.96</b><br>(83.02 to<br>141.57) |
| Rheumatic heart disease         | 31.22<br>(23.04 to<br>42.51)               | 26.28<br>(18.78 to<br>37.79)                 | 18.19<br>(12.94 to<br>25.73)               | 29.98<br>(21.19 to<br>42.99)                 | 0.88<br>(0.64 to<br>1.24)           | 0.82<br>(0.60 to<br>1.16)            | 0.60<br>(0.44 to<br>0.85)           | 0.91<br>(0.66 to<br>1.32)             |
| Ischemic heart disease          | 274.40<br>(211.62 to<br>342.33)            | 562.94<br>(322.74 to<br>921.31)              | 231.10<br>(139.80 to<br>384.81)            | 836.09<br>(479.15 to<br>1,345.46)            | 11.97<br>(9.57 to<br>14.42)         | 25.30<br>(16.02 to<br>38.72)         | 12.33<br>(8.12 to<br>19.05)         | 35.28<br>(22.26 to<br>53.58)          |
| Stroke                          | 437.12<br>(338.97 to<br>548.31)            | 733.87<br>(430.40 to<br>1,168.11)            | 285.93<br>(176.49 to<br>455.61)            | 1,094.87<br>(645.22 to<br>1,764.13)          | 16.86<br>(13.15 to<br>20.83)        | 29.65<br>(19.51 to<br>43.89)         | 13.25<br>(9.03 to<br>19.48)         | 42.21<br>(27.13 to<br>64.40)          |
| Ischemic stroke                 | 100.56<br>(77.71 to<br>124.99)             | 154.91<br>(98.14 to<br>241.97)               | 78.72<br>(50.41 to<br>119.14)              | 211.15<br>(132.80 to<br>326.24)              | 5.23<br>(4.10 to<br>6.39)           | 8.53<br>(5.69 to<br>12.76)           | 4.90<br>(3.31 to<br>7.25)           | 11.01<br>(7.17 to<br>16.51)           |
| Intracerebral hemorrhage        | 336.56<br>(261.52 to<br>427.51)            | 578.96<br>(312.82 to<br>996.56)              | 207.21<br>(119.23 to<br>349.75)            | 883.72<br>(468.80 to<br>1,504.77)            | 11.63<br>(8.98 to<br>14.71)         | 21.12<br>(12.51 to<br>34.19)         | 8.35<br>(5.27 to<br>13.42)          | 31.19<br>(17.63 to<br>50.57)          |
| Hypertensive heart disease      | 86.79<br>(51.98 to<br>127.01)              | 167.81<br>(92.66 to<br>273.22)               | 112.12<br>(64.72 to<br>176.08)             | 211.38<br>(108.52 to<br>391.02)              | 3.64<br>(2.16 to<br>5.29)           | 7.77<br>(4.32 to<br>12.79)           | 5.65<br>(3.26 to<br>8.71)           | 9.34<br>(4.79 to<br>17.56)            |
| Cardiomyopathy and myocarditis  | 39.78<br>(26.31 to<br>57.28)               | 67.93<br>(42.90 to<br>102.96)                | 64.09<br>(40.03 to<br>97.37)               | 70.71<br>(44.23 to<br>107.55)                | 0.97<br>(0.65 to<br>1.38)           | 1.83<br>(1.17 to<br>2.66)            | 1.86<br>(1.19 to<br>2.71)           | 1.85<br>(1.17 to<br>2.73)             |
| Myocarditis                     | 3.96<br>(3.35 to<br>10.50)                 | 8.62<br>(4.22 to<br>15.88)                   | 7.28<br>(3.37 to<br>13.76)                 | 9.14<br>(4.59 to<br>16.79)                   | 0.12<br>(0.06 to<br>0.21)           | 0.19<br>(0.09 to<br>0.35)            | 0.17<br>(0.07 to<br>0.33)           | 0.19<br>(0.09 to<br>0.36)             |
| <b>Madagascar</b>               |                                            |                                              |                                            |                                              |                                     |                                      |                                     |                                       |
| Cause                           | YLLs (in 1000s)                            |                                              |                                            |                                              | Deaths (in 1000s)                   |                                      |                                     |                                       |
|                                 | 2016                                       | 2040 Forecast                                | 2040 Better Scenario                       | 2040 Worse Scenario                          | 2016                                | 2040 Forecast                        | 2040 Better Scenario                | 2040 Worse Scenario                   |
| Alcoholic cardiomyopathy        | 2.21<br>(1.19 to<br>3.99)                  | 3.94<br>(2.09 to<br>7.10)                    | 3.97<br>(2.11 to<br>7.18)                  | 3.95<br>(2.13 to<br>7.08)                    | 0.06<br>(0.03 to<br>0.11)           | 0.11<br>(0.06 to<br>0.20)            | 0.12<br>(0.06 to<br>0.21)           | 0.11<br>(0.06 to<br>0.20)             |
| Other cardiomyopathy            | 31.61<br>(20.82 to<br>46.09)               | 55.36<br>(33.21 to<br>86.79)                 | 52.84<br>(31.80 to<br>84.39)               | 57.61<br>(34.18 to<br>90.55)                 | 0.79<br>(0.53 to<br>1.15)           | 1.57<br>(0.94 to<br>2.34)            | 1.57<br>(0.98 to<br>2.39)           | 1.55<br>(0.94 to<br>2.38)             |
| Atrial fibrillation and flutter | 4.13<br>(3.05 to<br>5.32)                  | 9.46<br>(7.31 to<br>12.00)                   | 10.31<br>(7.94 to<br>13.12)                | 9.28<br>(7.05 to<br>11.76)                   | 0.32<br>(0.24 to<br>0.41)           | 0.75<br>(0.56 to<br>0.98)            | 0.90<br>(0.68 to<br>1.18)           | 0.70<br>(0.52 to<br>0.91)             |



|                                                                |                                          |                                          |                                          |                                          |                                    |                                      |                                    |                                      |
|----------------------------------------------------------------|------------------------------------------|------------------------------------------|------------------------------------------|------------------------------------------|------------------------------------|--------------------------------------|------------------------------------|--------------------------------------|
| Aortic aneurysm                                                | 11.90<br>(8.70 to<br>16.67)              | 22.36<br>(15.71 to<br>31.34)             | 21.62<br>(15.27 to<br>30.70)             | 23.53<br>(16.33 to<br>33.34)             | 0.43<br>(0.32 to<br>0.58)          | 0.86<br>(0.64 to<br>1.15)            | 0.90<br>(0.67 to<br>1.21)          | 0.87<br>(0.64 to<br>1.17)            |
| Peripheral artery disease                                      | 0.50<br>(0.16 to<br>0.95)                | 1.57<br>(0.51 to<br>3.00)                | 1.81<br>(0.60 to<br>3.45)                | 1.55<br>(0.49 to<br>3.00)                | 0.03<br>(0.01 to<br>0.05)          | 0.10<br>(0.03 to<br>0.18)            | 0.12<br>(0.04 to<br>0.25)          | 0.09<br>(0.03 to<br>0.17)            |
| Endocarditis                                                   | 23.77<br>(16.81 to<br>31.41)             | 46.94<br>(30.41 to<br>67.88)             | 41.58<br>(26.98 to<br>59.68)             | 49.91<br>(31.97 to<br>73.66)             | 0.61<br>(0.42 to<br>0.81)          | 1.29<br>(0.83 to<br>1.84)            | 1.23<br>(0.78 to<br>1.75)          | 1.33<br>(0.84 to<br>1.94)            |
| Other cardiovascular and circulatory diseases                  | 180.48<br>(127.93 to<br>241.55)          | 362.24<br>(258.84 to<br>496.97)          | 271.55<br>(197.75 to<br>371.74)          | 414.74<br>(290.81 to<br>577.68)          | 6.28<br>(4.30 to<br>8.44)          | 14.16<br>(10.02 to<br>18.83)         | 11.90<br>(8.93 to<br>15.53)        | 15.39<br>(10.79 to<br>20.91)         |
| <b>Chronic respiratory diseases</b>                            | <b>243.08<br/>(191.71 to<br/>306.10)</b> | <b>274.33<br/>(195.34 to<br/>395.15)</b> | <b>170.71<br/>(130.10 to<br/>225.08)</b> | <b>332.41<br/>(232.08 to<br/>486.81)</b> | <b>7.95<br/>(6.48 to<br/>9.86)</b> | <b>10.52<br/>(7.44 to<br/>16.08)</b> | <b>6.89<br/>(5.36 to<br/>9.22)</b> | <b>12.14<br/>(8.38 to<br/>18.34)</b> |
| Chronic obstructive pulmonary disease                          | 111.03<br>(81.99 to<br>145.38)           | 169.46<br>(105.13 to<br>282.43)          | 90.94<br>(60.17 to<br>132.87)            | 210.70<br>(128.32 to<br>349.81)          | 4.73<br>(3.56 to<br>6.03)          | 7.68<br>(4.85 to<br>13.06)           | 4.51<br>(3.06 to<br>6.63)          | 8.95<br>(5.54 to<br>15.13)           |
| Pneumoconiosis                                                 | 0.67<br>(0.44 to<br>0.99)                | 0.90<br>(0.62 to<br>1.28)                | 0.81<br>(0.55 to<br>1.18)                | 0.95<br>(0.64 to<br>1.36)                | 0.03<br>(0.02 to<br>0.04)          | 0.04<br>(0.03 to<br>0.06)            | 0.04<br>(0.03 to<br>0.06)          | 0.04<br>(0.03 to<br>0.06)            |
| Silicosis                                                      | 0.12<br>(0.06 to<br>0.21)                | 0.12<br>(0.05 to<br>0.20)                | 0.11<br>(0.05 to<br>0.19)                | 0.12<br>(0.05 to<br>0.20)                | 0.01<br>(0.00 to<br>0.01)          | 0.01<br>(0.00 to<br>0.01)            | 0.01<br>(0.00 to<br>0.01)          | 0.01<br>(0.00 to<br>0.01)            |
| Asbestosis                                                     | 0.18<br>(0.11 to<br>0.29)                | 0.29<br>(0.17 to<br>0.47)                | 0.30<br>(0.17 to<br>0.48)                | 0.29<br>(0.16 to<br>0.46)                | 0.01<br>(0.00 to<br>0.01)          | 0.01<br>(0.01 to<br>0.02)            | 0.01<br>(0.01 to<br>0.02)          | 0.01<br>(0.01 to<br>0.02)            |
| Coal workers pneumoconiosis                                    | 0.05<br>(0.03 to<br>0.11)                | 0.07<br>(0.03 to<br>0.14)                | 0.05<br>(0.02 to<br>0.09)                | 0.08<br>(0.04 to<br>0.16)                | 0.00<br>(0.00 to<br>0.00)          | 0.00<br>(0.00 to<br>0.01)            | 0.00<br>(0.00 to<br>0.00)          | 0.00<br>(0.00 to<br>0.01)            |
| Other pneumoconiosis                                           | 0.32<br>(0.18 to<br>0.50)                | 0.42<br>(0.24 to<br>0.64)                | 0.35<br>(0.20 to<br>0.57)                | 0.47<br>(0.27 to<br>0.71)                | 0.01<br>(0.01 to<br>0.02)          | 0.02<br>(0.01 to<br>0.03)            | 0.02<br>(0.01 to<br>0.03)          | 0.02<br>(0.01 to<br>0.03)            |
| Asthma                                                         | 116.93<br>(86.57 to<br>161.86)           | 79.56<br>(54.39 to<br>120.52)            | 57.33<br>(40.53 to<br>83.92)             | 95.07<br>(63.10 to<br>148.85)            | 2.89<br>(2.14 to<br>4.19)          | 2.21<br>(1.55 to<br>3.59)            | 1.73<br>(1.25 to<br>2.64)          | 2.56<br>(1.74 to<br>4.18)            |
| Interstitial lung disease and pulmonary sarcoidosis            | 2.84<br>(1.21 to<br>5.23)                | 6.04<br>(2.54 to<br>10.61)               | 7.06<br>(3.03 to<br>12.21)               | 5.65<br>(2.33 to<br>9.94)                | 0.09<br>(0.04 to<br>0.17)          | 0.22<br>(0.09 to<br>0.38)            | 0.28<br>(0.12 to<br>0.47)          | 0.20<br>(0.08 to<br>0.34)            |
| Other chronic respiratory diseases                             | 11.61<br>(5.64 to<br>21.35)              | 18.37<br>(10.05 to<br>32.92)             | 14.57<br>(8.45 to<br>24.36)              | 20.04<br>(10.64 to<br>36.05)             | 0.22<br>(0.12 to<br>0.36)          | 0.38<br>(0.22 to<br>0.60)            | 0.33<br>(0.20 to<br>0.50)          | 0.40<br>(0.23 to<br>0.63)            |
| <b>Cirrhosis and other chronic liver diseases</b>              | <b>96.93<br/>(68.91 to<br/>130.82)</b>   | <b>190.67<br/>(134.09 to<br/>255.24)</b> | <b>164.78<br/>(115.83 to<br/>220.39)</b> | <b>199.34<br/>(140.84 to<br/>267.87)</b> | <b>2.86<br/>(2.05 to<br/>3.83)</b> | <b>5.95<br/>(4.34 to<br/>7.77)</b>   | <b>5.38<br/>(3.89 to<br/>6.98)</b> | <b>6.09<br/>(4.42 to<br/>8.03)</b>   |
| Cirrhosis and other chronic liver diseases due to hepatitis B  | 29.47<br>(19.41 to<br>41.68)             | 59.51<br>(38.55 to<br>85.71)             | 54.43<br>(35.56 to<br>77.39)             | 60.75<br>(39.29 to<br>86.90)             | 0.91<br>(0.61 to<br>1.27)          | 1.91<br>(1.28 to<br>2.67)            | 1.81<br>(1.23 to<br>2.54)          | 1.91<br>(1.28 to<br>2.66)            |
| Cirrhosis and other chronic liver diseases due to hepatitis C  | 20.77<br>(11.61 to<br>32.79)             | 41.96<br>(23.84 to<br>65.52)             | 38.19<br>(21.85 to<br>59.66)             | 42.89<br>(24.49 to<br>66.69)             | 0.66<br>(0.38 to<br>1.02)          | 1.38<br>(0.80 to<br>2.13)            | 1.30<br>(0.76 to<br>2.01)          | 1.38<br>(0.81 to<br>2.13)            |
| Cirrhosis and other chronic liver diseases due to alcohol use  | 23.24<br>(15.61 to<br>33.27)             | 48.57<br>(32.55 to<br>68.20)             | 37.96<br>(25.44 to<br>53.18)             | 52.85<br>(35.65 to<br>74.36)             | 0.75<br>(0.51 to<br>1.05)          | 1.64<br>(1.15 to<br>2.24)            | 1.35<br>(0.95 to<br>1.84)          | 1.75<br>(1.22 to<br>2.39)            |
| Cirrhosis and other chronic liver diseases due to other causes | 23.44<br>(17.59 to<br>30.46)             | 40.62<br>(29.47 to<br>54.20)             | 34.20<br>(24.62 to<br>45.47)             | 42.85<br>(31.34 to<br>56.80)             | 0.54<br>(0.40 to<br>0.71)          | 1.02<br>(0.76 to<br>1.33)            | 0.92<br>(0.68 to<br>1.21)          | 1.05<br>(0.78 to<br>1.37)            |
| <b>Digestive diseases</b>                                      | <b>160.68<br/>(123.41 to<br/>203.56)</b> | <b>218.44<br/>(171.76 to<br/>273.17)</b> | <b>179.21<br/>(141.09 to<br/>222.25)</b> | <b>234.06<br/>(183.50 to<br/>292.28)</b> | <b>4.49<br/>(3.54 to<br/>5.50)</b> | <b>7.01<br/>(5.81 to<br/>8.33)</b>   | <b>6.31<br/>(5.25 to<br/>7.44)</b> | <b>7.21<br/>(5.93 to<br/>8.64)</b>   |
| Peptic ulcer disease                                           | 26.48<br>(18.60 to<br>35.59)             | 24.75<br>(17.11 to<br>33.96)             | 17.14<br>(11.76 to<br>23.40)             | 28.12<br>(19.64 to<br>38.71)             | 0.90<br>(0.63 to<br>1.21)          | 0.96<br>(0.67 to<br>1.29)            | 0.73<br>(0.50 to<br>0.99)          | 1.05<br>(0.72 to<br>1.42)            |
| <b>Madagascar</b>                                              |                                          |                                          |                                          |                                          |                                    |                                      |                                    |                                      |
| <b>YLLs (in 1000s)</b>                                         |                                          |                                          |                                          |                                          | <b>Deaths (in 1000s)</b>           |                                      |                                    |                                      |

| Cause                                      | 2016                                              | 2040 Forecast                                       | 2040 Better Scenario                                | 2040 Worse Scenario                                 | 2016                                           | 2040 Forecast                                  | 2040 Better Scenario                           | 2040 Worse Scenario                            |
|--------------------------------------------|---------------------------------------------------|-----------------------------------------------------|-----------------------------------------------------|-----------------------------------------------------|------------------------------------------------|------------------------------------------------|------------------------------------------------|------------------------------------------------|
| Gastritis and duodenitis                   | 7.45<br>(4.82 to<br>10.52)                        | 12.20<br>(7.98 to<br>17.25)                         | 10.55<br>(6.90 to<br>14.93)                         | 12.68<br>(8.33 to<br>17.94)                         | 0.24<br>(0.15 to<br>0.35)                      | 0.44<br>(0.30 to<br>0.65)                      | 0.42<br>(0.28 to<br>0.61)                      | 0.44<br>(0.30 to<br>0.64)                      |
| Appendicitis                               | 12.95<br>(8.96 to<br>18.86)                       | 14.99<br>(10.41 to<br>20.82)                        | 10.58<br>(7.38 to<br>14.21)                         | 16.82<br>(11.63 to<br>23.77)                        | 0.26<br>(0.19 to<br>0.35)                      | 0.35<br>(0.25 to<br>0.46)                      | 0.27<br>(0.20 to<br>0.35)                      | 0.38<br>(0.28 to<br>0.51)                      |
| Paralytic ileus and intestinal obstruction | 70.06<br>(51.29 to<br>96.66)                      | 103.00<br>(76.91 to<br>138.33)                      | 89.01<br>(66.47 to<br>117.84)                       | 107.70<br>(79.56 to<br>145.58)                      | 1.77<br>(1.33 to<br>2.36)                      | 3.06<br>(2.38 to<br>3.98)                      | 2.94<br>(2.28 to<br>3.84)                      | 3.05<br>(2.38 to<br>3.96)                      |
| Inguinal, femoral, and abdominal hernia    | 7.02<br>(2.54 to<br>11.61)                        | 8.07<br>(2.98 to<br>12.95)                          | 6.38<br>(2.43 to<br>10.17)                          | 8.67<br>(3.18 to<br>14.01)                          | 0.19<br>(0.07 to<br>0.30)                      | 0.24<br>(0.10 to<br>0.37)                      | 0.20<br>(0.08 to<br>0.31)                      | 0.25<br>(0.10 to<br>0.39)                      |
| Inflammatory bowel disease                 | 6.27<br>(3.29 to<br>9.69)                         | 9.44<br>(5.96 to<br>13.37)                          | 9.01<br>(4.88 to<br>12.24)                          | 9.52<br>(5.08 to<br>13.61)                          | 0.17<br>(0.09 to<br>0.23)                      | 0.29<br>(0.17 to<br>0.39)                      | 0.30<br>(0.18 to<br>0.40)                      | 0.28<br>(0.16 to<br>0.37)                      |
| Vascular intestinal disorders              | 2.16<br>(1.44 to<br>3.13)                         | 4.16<br>(2.84 to<br>5.91)                           | 3.95<br>(2.69 to<br>5.58)                           | 4.16<br>(2.84 to<br>5.89)                           | 0.09<br>(0.06 to<br>0.13)                      | 0.20<br>(0.13 to<br>0.28)                      | 0.20<br>(0.14 to<br>0.29)                      | 0.19<br>(0.13 to<br>0.27)                      |
| Gallbladder and biliary diseases           | 7.31<br>(5.11 to<br>10.04)                        | 9.94<br>(6.74 to<br>14.49)                          | 7.76<br>(5.31 to<br>11.31)                          | 11.92<br>(7.70 to<br>18.45)                         | 0.27<br>(0.19 to<br>0.39)                      | 0.42<br>(0.28 to<br>0.63)                      | 0.36<br>(0.25 to<br>0.54)                      | 0.49<br>(0.31 to<br>0.78)                      |
| Pancreatitis                               | 5.90<br>(3.65 to<br>9.23)                         | 11.04<br>(6.23 to<br>20.30)                         | 8.45<br>(5.06 to<br>14.62)                          | 12.05<br>(6.66 to<br>23.11)                         | 0.16<br>(0.10 to<br>0.25)                      | 0.32<br>(0.18 to<br>0.58)                      | 0.25<br>(0.16 to<br>0.43)                      | 0.34<br>(0.19 to<br>0.62)                      |
| Other digestive diseases                   | 15.08<br>(10.25 to<br>22.14)                      | 20.84<br>(14.82 to<br>29.45)                        | 16.36<br>(11.71 to<br>22.94)                        | 22.43<br>(16.02 to<br>31.92)                        | 0.44<br>(0.31 to<br>0.60)                      | 0.72<br>(0.53 to<br>0.96)                      | 0.63<br>(0.46 to<br>0.84)                      | 0.74<br>(0.54 to<br>0.99)                      |
| <b>Neurological disorders</b>              | <b>56.18</b><br><b>(45.01 to</b><br><b>68.68)</b> | <b>108.95</b><br><b>(88.83 to</b><br><b>133.45)</b> | <b>100.55</b><br><b>(83.77 to</b><br><b>120.27)</b> | <b>114.21</b><br><b>(91.30 to</b><br><b>142.41)</b> | <b>2.26</b><br><b>(1.81 to</b><br><b>2.72)</b> | <b>4.96</b><br><b>(3.98 to</b><br><b>6.14)</b> | <b>5.83</b><br><b>(4.74 to</b><br><b>7.05)</b> | <b>4.74</b><br><b>(3.70 to</b><br><b>6.02)</b> |
| Alzheimer's disease and other dementias    | 17.26<br>(13.03 to<br>21.89)                      | 39.22<br>(29.81 to<br>51.39)                        | 47.15<br>(36.92 to<br>59.73)                        | 57.27<br>(26.80 to<br>50.63)                        | 1.49<br>(1.15 to<br>1.88)                      | 3.42<br>(2.49 to<br>4.53)                      | 4.44<br>(3.39 to<br>5.63)                      | 3.13<br>(2.16 to<br>4.35)                      |
| Parkinson's disease                        | 1.31<br>(0.94 to<br>1.73)                         | 3.59<br>(2.68 to<br>4.69)                           | 4.99<br>(3.72 to<br>6.45)                           | 3.08<br>(2.28 to<br>4.09)                           | 0.10<br>(0.07 to<br>0.13)                      | 0.27<br>(0.20 to<br>0.37)                      | 0.41<br>(0.31 to<br>0.53)                      | 0.23<br>(0.16 to<br>0.31)                      |
| Epilepsy                                   | 31.47<br>(23.87 to<br>40.55)                      | 54.50<br>(38.12 to<br>76.31)                        | 37.23<br>(26.55 to<br>50.63)                        | 62.06<br>(43.68 to<br>88.44)                        | 0.56<br>(0.43 to<br>0.71)                      | 1.03<br>(0.74 to<br>1.43)                      | 0.73<br>(0.54 to<br>0.97)                      | 1.15<br>(0.82 to<br>1.61)                      |
| Multiple sclerosis                         | 0.52<br>(0.31 to<br>0.81)                         | 1.02<br>(0.61 to<br>1.61)                           | 1.09<br>(0.65 to<br>1.70)                           | 1.01<br>(0.60 to<br>1.58)                           | 0.01<br>(0.01 to<br>0.02)                      | 0.03<br>(0.02 to<br>0.04)                      | 0.03<br>(0.02 to<br>0.05)                      | 0.03<br>(0.02 to<br>0.04)                      |
| Motor neuron disease                       | 0.35<br>(0.24 to<br>0.54)                         | 0.64<br>(0.43 to<br>1.08)                           | 0.67<br>(0.44 to<br>1.14)                           | 0.63<br>(0.42 to<br>1.04)                           | 0.01<br>(0.01 to<br>0.01)                      | 0.02<br>(0.01 to<br>0.05)                      | 0.02<br>(0.01 to<br>0.04)                      | 0.02<br>(0.01 to<br>0.05)                      |
| Other neurological disorders               | 5.27<br>(3.82 to<br>7.01)                         | 9.97<br>(7.65 to<br>12.99)                          | 9.43<br>(7.29 to<br>12.33)                          | 10.15<br>(7.70 to<br>13.47)                         | 0.09<br>(0.07 to<br>0.11)                      | 0.19<br>(0.14 to<br>0.25)                      | 0.19<br>(0.14 to<br>0.25)                      | 0.19<br>(0.15 to<br>0.24)                      |
| <b>Mental disorders</b>                    | <b>9.82</b><br><b>(6.88 to</b><br><b>16.59)</b>   | <b>18.05</b><br><b>(13.06 to</b><br><b>29.21)</b>   | <b>17.30</b><br><b>(12.42 to</b><br><b>28.52)</b>   | <b>18.22</b><br><b>(13.21 to</b><br><b>29.63)</b>   | <b>0.27</b><br><b>(0.20 to</b><br><b>0.46)</b> | <b>0.52</b><br><b>(0.40 to</b><br><b>0.84)</b> | <b>0.52</b><br><b>(0.40 to</b><br><b>0.84)</b> | <b>0.52</b><br><b>(0.39 to</b><br><b>0.83)</b> |
| Alcohol use disorders                      | 7.37<br>(4.93 to<br>14.29)                        | 11.83<br>(7.99 to<br>23.39)                         | 11.13<br>(7.46 to<br>22.31)                         | 12.00<br>(8.22 to<br>23.54)                         | 0.22<br>(0.15 to<br>0.41)                      | 0.38<br>(0.27 to<br>0.72)                      | 0.37<br>(0.27 to<br>0.69)                      | 0.38<br>(0.27 to<br>0.71)                      |
| Drug use disorders                         | 2.40<br>(1.58 to<br>3.36)                         | 6.11<br>(4.22 to<br>8.29)                           | 6.06<br>(4.23 to<br>8.27)                           | 6.10<br>(4.21 to<br>8.28)                           | 0.05<br>(0.04 to<br>0.07)                      | 0.14<br>(0.10 to<br>0.19)                      | 0.15<br>(0.11 to<br>0.19)                      | 0.14<br>(0.10 to<br>0.18)                      |
| Opioid use disorders                       | 1.83<br>(1.10 to<br>2.70)                         | 4.41<br>(2.77 to<br>6.38)                           | 4.37<br>(2.76 to<br>6.27)                           | 4.42<br>(2.74 to<br>6.37)                           | 0.04<br>(0.02 to<br>0.06)                      | 0.10<br>(0.06 to<br>0.14)                      | 0.10<br>(0.07 to<br>0.14)                      | 0.10<br>(0.06 to<br>0.14)                      |
| Cocaine use disorders                      | 0.13<br>(0.03 to<br>0.28)                         | 0.36<br>(0.10 to<br>0.75)                           | 0.33<br>(0.10 to<br>0.68)                           | 0.37<br>(0.11 to<br>0.77)                           | 0.00<br>(0.00 to<br>0.01)                      | 0.01<br>(0.00 to<br>0.02)                      | 0.01<br>(0.00 to<br>0.02)                      | 0.01<br>(0.00 to<br>0.02)                      |

|                                                            |                                 |                                 |                                 |                                 |                           |                              |                            |                              |
|------------------------------------------------------------|---------------------------------|---------------------------------|---------------------------------|---------------------------------|---------------------------|------------------------------|----------------------------|------------------------------|
| Amphetamine use disorders                                  | 0.07<br>(0.02 to<br>0.16)       | 0.29<br>(0.10 to<br>0.63)       | 0.25<br>(0.08 to<br>0.54)       | 0.31<br>(0.10 to<br>0.66)       | 0.00<br>(0.00 to<br>0.00) | 0.01<br>(0.00 to<br>0.01)    | 0.01<br>(0.00 to<br>0.01)  | 0.01<br>(0.00 to<br>0.01)    |
| Other drug use disorders                                   | 0.37<br>(0.23 to<br>0.55)       | 1.04<br>(0.69 to<br>1.58)       | 1.12<br>(0.73 to<br>1.67)       | 1.01<br>(0.67 to<br>1.53)       | 0.01<br>(0.01 to<br>0.01) | 0.03<br>(0.02 to<br>0.04)    | 0.03<br>(0.02 to<br>0.04)  | 0.03<br>(0.02 to<br>0.04)    |
| Eating disorders                                           | 0.05<br>(0.02 to<br>0.09)       | 0.11<br>(0.06 to<br>0.20)       | 0.11<br>(0.06 to<br>0.20)       | 0.11<br>(0.05 to<br>0.20)       | 0.00<br>(0.00 to<br>0.00) | 0.00<br>(0.00 to<br>0.00)    | 0.00<br>(0.00 to<br>0.00)  | 0.00<br>(0.00 to<br>0.00)    |
| <b>Madagascar</b>                                          |                                 |                                 |                                 |                                 |                           |                              |                            |                              |
| Cause                                                      | YLLs (in 1000s)                 |                                 |                                 |                                 | Deaths (in 1000s)         |                              |                            |                              |
|                                                            | 2016                            | 2040 Forecast                   | 2040 Better Scenario            | 2040 Worse Scenario             | 2016                      | 2040 Forecast                | 2040 Better Scenario       | 2040 Worse Scenario          |
| Diabetes, urogenital, blood, and endocrine diseases        | 187.45<br>(153.88 to<br>224.18) | 364.69<br>(277.28 to<br>477.19) | 256.32<br>(194.27 to<br>338.50) | 425.07<br>(323.88 to<br>559.56) | 5.49<br>(4.54 to<br>6.51) | 13.18<br>(10.82 to<br>17.20) | 9.98<br>(7.68 to<br>12.91) | 14.94<br>(11.24 to<br>20.00) |
| Diabetes mellitus                                          | 74.84<br>(59.01 to<br>92.36)    | 192.13<br>(120.55 to<br>295.22) | 131.98<br>(83.43 to<br>202.25)  | 228.02<br>(142.24 to<br>347.62) | 2.96<br>(2.36 to<br>3.59) | 8.21<br>(5.60 to<br>11.90)   | 6.08<br>(4.21 to<br>8.85)  | 9.38<br>(6.30 to<br>13.70)   |
| Acute glomerulonephritis                                   | 0.32<br>(0.21 to<br>0.55)       | 0.65<br>(0.42 to<br>1.14)       | 0.47<br>(0.31 to<br>0.81)       | 0.72<br>(0.46 to<br>1.27)       | 0.01<br>(0.00 to<br>0.01) | 0.01<br>(0.01 to<br>0.02)    | 0.01<br>(0.01 to<br>0.01)  | 0.01<br>(0.01 to<br>0.02)    |
| Chronic kidney disease                                     | 34.10<br>(26.68 to<br>42.95)    | 70.58<br>(48.69 to<br>106.88)   | 48.25<br>(33.57 to<br>75.00)    | 84.57<br>(57.57 to<br>130.52)   | 1.01<br>(0.80 to<br>1.26) | 2.51<br>(1.64 to<br>5.11)    | 1.85<br>(3.72)             | 2.97<br>(1.87 to<br>6.10)    |
| Chronic kidney disease due to diabetes mellitus            | 7.64<br>(5.63 to<br>10.19)      | 18.71<br>(12.04 to<br>30.83)    | 13.38<br>(8.76 to<br>21.97)     | 22.45<br>(14.15 to<br>37.82)    | 0.28<br>(0.21 to<br>0.37) | 0.78<br>(0.48 to<br>1.57)    | 0.58<br>(0.36 to<br>1.17)  | 0.92<br>(0.54 to<br>1.96)    |
| Chronic kidney disease due to hypertension                 | 4.03<br>(3.03 to<br>5.32)       | 9.93<br>(6.14 to<br>19.75)      | 7.26<br>(4.61 to<br>14.16)      | 11.86<br>(7.05 to<br>24.48)     | 0.19<br>(0.15 to<br>0.25) | 0.54<br>(0.32 to<br>1.27)    | 0.42<br>(0.26 to<br>0.95)  | 0.63<br>(0.35 to<br>1.51)    |
| Chronic kidney disease due to glomerulonephritis           | 10.65<br>(7.91 to<br>13.90)     | 19.70<br>(13.87 to<br>28.33)    | 12.89<br>(8.96 to<br>18.77)     | 23.61<br>(16.58 to<br>33.86)    | 0.25<br>(0.18 to<br>0.32) | 0.53<br>(0.35 to<br>0.93)    | 0.37<br>(0.25 to<br>0.65)  | 0.63<br>(0.41 to<br>1.13)    |
| Chronic kidney disease due to other and unspecified causes | 11.78<br>(8.79 to<br>15.36)     | 22.24<br>(15.44 to<br>32.56)    | 14.72<br>(10.24 to<br>21.85)    | 26.65<br>(18.00 to<br>39.25)    | 0.30<br>(0.22 to<br>0.38) | 0.67<br>(0.43 to<br>1.24)    | 0.48<br>(0.32 to<br>0.89)  | 0.79<br>(0.50 to<br>1.47)    |
| Urinary diseases and male infertility                      | 16.43<br>(12.43 to<br>21.71)    | 29.38<br>(22.88 to<br>38.78)    | 24.96<br>(19.45 to<br>32.70)    | 30.92<br>(23.96 to<br>40.72)    | 0.45<br>(0.35 to<br>0.59) | 0.88<br>(0.72 to<br>1.14)    | 0.82<br>(0.67 to<br>1.04)  | 0.90<br>(0.72 to<br>1.15)    |
| Urinary tract infections                                   | 6.47<br>(4.27 to<br>9.42)       | 15.03<br>(10.35 to<br>20.92)    | 13.88<br>(9.68 to<br>19.12)     | 15.34<br>(10.51 to<br>21.38)    | 0.18<br>(0.11 to<br>0.26) | 0.47<br>(0.32 to<br>0.65)    | 0.47<br>(0.33 to<br>0.64)  | 0.46<br>(0.31 to<br>0.64)    |
| Urolithiasis                                               | 0.46<br>(0.26 to<br>0.75)       | 1.04<br>(0.61 to<br>1.76)       | 0.89<br>(0.52 to<br>1.52)       | 1.09<br>(0.64 to<br>1.81)       | 0.01<br>(0.01 to<br>0.02) | 0.02<br>(0.01 to<br>0.04)    | 0.02<br>(0.01 to<br>0.04)  | 0.02<br>(0.01 to<br>0.04)    |
| Other urinary diseases                                     | 9.50<br>(6.38 to<br>14.23)      | 13.31<br>(8.38 to<br>21.24)     | 10.19<br>(6.22 to<br>16.41)     | 14.48<br>(9.03 to<br>23.07)     | 0.26<br>(0.17 to<br>0.38) | 0.39<br>(0.24 to<br>0.61)    | 0.32<br>(0.19 to<br>0.52)  | 0.41<br>(0.26 to<br>0.65)    |
| Gynecological diseases                                     | 2.61<br>(1.66 to<br>3.77)       | 3.82<br>(2.27 to<br>5.82)       | 2.76<br>(1.65 to<br>4.23)       | 4.27<br>(2.53 to<br>6.58)       | 0.06<br>(0.04 to<br>0.09) | 0.09<br>(0.05 to<br>0.14)    | 0.06<br>(0.04 to<br>0.10)  | 0.10<br>(0.06 to<br>0.15)    |
| Uterine fibroids                                           | 0.90<br>(0.35 to<br>1.88)       | 1.15<br>(0.39 to<br>2.55)       | 0.80<br>(0.26 to<br>1.83)       | 1.30<br>(0.45 to<br>2.88)       | 0.02<br>(0.01 to<br>0.05) | 0.03<br>(0.01 to<br>0.06)    | 0.02<br>(0.01 to<br>0.05)  | 0.03<br>(0.01 to<br>0.07)    |
| Polycystic ovarian syndrome                                | 0.27<br>(0.04 to<br>0.67)       | 0.27<br>(0.03 to<br>0.71)       | 0.16<br>(0.02 to<br>0.44)       | 0.32<br>(0.04 to<br>0.88)       | 0.01<br>(0.00 to<br>0.02) | 0.01<br>(0.00 to<br>0.02)    | 0.00<br>(0.00 to<br>0.01)  | 0.01<br>(0.00 to<br>0.02)    |
| Endometriosis                                              | 0.01<br>(0.00 to<br>0.03)       | 0.02<br>(0.01 to<br>0.08)       | 0.02<br>(0.00 to<br>0.06)       | 0.02<br>(0.01 to<br>0.09)       | 0.00<br>(0.00 to<br>0.00) | 0.00<br>(0.00 to<br>0.00)    | 0.00<br>(0.00 to<br>0.00)  | 0.00<br>(0.00 to<br>0.00)    |
| Genital prolapse                                           | 0.08<br>(0.02 to<br>0.19)       | 0.09<br>(0.02 to<br>0.25)       | 0.06<br>(0.02 to<br>0.18)       | 0.11<br>(0.03 to<br>0.29)       | 0.00<br>(0.00 to<br>0.01) | 0.00<br>(0.00 to<br>0.01)    | 0.00<br>(0.00 to<br>0.01)  | 0.00<br>(0.00 to<br>0.01)    |

|                                                   |                                 |                                 |                                 |                                 |                           |                           |                           |                           |
|---------------------------------------------------|---------------------------------|---------------------------------|---------------------------------|---------------------------------|---------------------------|---------------------------|---------------------------|---------------------------|
| Other gynecological diseases                      | 1.35<br>(0.57 to<br>2.29)       | 2.28<br>(0.96 to<br>3.82)       | 1.72<br>(0.75 to<br>2.88)       | 2.51<br>(1.05 to<br>4.20)       | 0.03<br>(0.01 to<br>0.05) | 0.05<br>(0.02 to<br>0.08) | 0.04<br>(0.02 to<br>0.07) | 0.05<br>(0.02 to<br>0.09) |
| Hemoglobinopathies and hemolytic anemias          | 51.74<br>(39.06 to<br>70.65)    | 55.87<br>(41.87 to<br>75.18)    | 38.39<br>(29.10 to<br>50.86)    | 63.25<br>(47.31 to<br>84.87)    | 0.83<br>(0.65 to<br>1.09) | 1.15<br>(0.91 to<br>1.48) | 0.87<br>(0.69 to<br>1.13) | 1.25<br>(0.98 to<br>1.62) |
| Thalassemias                                      | 0.28<br>(0.09 to<br>0.77)       | 0.23<br>(0.07 to<br>0.65)       | 0.19<br>(0.06 to<br>0.54)       | 0.24<br>(0.07 to<br>0.66)       | 0.00<br>(0.00 to<br>0.01) | 0.00<br>(0.00 to<br>0.01) | 0.00<br>(0.00 to<br>0.01) | 0.00<br>(0.00 to<br>0.01) |
| Sickle cell disorders                             | 43.64<br>(32.05 to<br>60.58)    | 40.02<br>(28.80 to<br>55.71)    | 26.34<br>(19.20 to<br>35.89)    | 46.00<br>(33.18 to<br>64.42)    | 0.57<br>(0.43 to<br>0.79) | 0.58<br>(0.42 to<br>0.78) | 0.40<br>(0.30 to<br>0.53) | 0.65<br>(0.48 to<br>0.88) |
| G6PD deficiency                                   | 5.16<br>(3.83 to<br>7.02)       | 12.54<br>(9.18 to<br>17.24)     | 9.22<br>(6.72 to<br>12.99)      | 13.83<br>(10.17 to<br>18.86)    | 0.12<br>(0.09 to<br>0.17) | 0.38<br>(0.28 to<br>0.51) | 0.29<br>(0.22 to<br>0.40) | 0.40<br>(0.31 to<br>0.55) |
| Other hemoglobinopathies and hemolytic anemias    | 2.66<br>(2.07 to<br>3.42)       | 3.09<br>(2.38 to<br>4.11)       | 2.64<br>(2.07 to<br>3.50)       | 3.18<br>(2.42 to<br>4.25)       | 0.13<br>(0.10 to<br>0.17) | 0.19<br>(0.15 to<br>0.25) | 0.18<br>(0.14 to<br>0.23) | 0.19<br>(0.14 to<br>0.25) |
| Endocrine, metabolic, blood, and immune disorders | 7.41<br>(5.52 to<br>10.41)      | 12.25<br>(9.06 to<br>16.66)     | 9.51<br>(7.25 to<br>12.71)      | 13.31<br>(9.91 to<br>18.22)     | 0.17<br>(0.13 to<br>0.22) | 0.32<br>(0.25 to<br>0.42) | 0.29<br>(0.23 to<br>0.38) | 0.33<br>(0.26 to<br>0.43) |
| <b>Madagascar</b>                                 |                                 |                                 |                                 |                                 |                           |                           |                           |                           |
| Cause                                             | YLLs (in 1000s)                 |                                 |                                 |                                 | Deaths (in 1000s)         |                           |                           |                           |
|                                                   | 2016                            | 2040 Forecast                   | 2040 Better Scenario            | 2040 Worse Scenario             | 2016                      | 2040 Forecast             | 2040 Better Scenario      | 2040 Worse Scenario       |
| Musculoskeletal disorders                         | 5.10<br>(3.65 to<br>6.69)       | 11.05<br>(7.80 to<br>14.53)     | 11.24<br>(7.95 to<br>14.94)     | 10.96<br>(7.79 to<br>14.36)     | 0.12<br>(0.09 to<br>0.17) | 0.30<br>(0.21 to<br>0.40) | 0.31<br>(0.22 to<br>0.42) | 0.29<br>(0.20 to<br>0.39) |
| Rheumatoid arthritis                              | 1.03<br>(0.67 to<br>1.57)       | 2.33<br>(1.53 to<br>3.44)       | 1.90<br>(1.23 to<br>2.87)       | 2.47<br>(1.63 to<br>3.63)       | 0.04<br>(0.02 to<br>0.05) | 0.10<br>(0.06 to<br>0.14) | 0.08<br>(0.05 to<br>0.13) | 0.10<br>(0.06 to<br>0.15) |
| Other musculoskeletal disorders                   | 4.08<br>(2.88 to<br>5.43)       | 8.72<br>(6.05 to<br>11.55)      | 9.33<br>(6.46 to<br>12.37)      | 8.49<br>(5.88 to<br>11.20)      | 0.09<br>(0.06 to<br>0.12) | 0.20<br>(0.14 to<br>0.27) | 0.23<br>(0.16 to<br>0.31) | 0.19<br>(0.13 to<br>0.26) |
| Other non-communicable diseases                   | 284.07<br>(196.17 to<br>402.39) | 390.57<br>(269.20 to<br>565.46) | 233.35<br>(162.01 to<br>333.59) | 463.24<br>(315.35 to<br>670.35) | 3.64<br>(2.59 to<br>5.10) | 5.73<br>(4.09 to<br>8.04) | 3.96<br>(2.89 to<br>5.51) | 6.53<br>(4.64 to<br>9.15) |
| Congenital birth defects                          | 237.03<br>(156.49 to<br>352.71) | 300.56<br>(188.78 to<br>467.59) | 165.00<br>(102.60 to<br>260.18) | 364.11<br>(229.50 to<br>568.23) | 2.80<br>(1.85 to<br>4.21) | 3.61<br>(2.26 to<br>5.59) | 2.01<br>(1.25 to<br>3.18) | 4.35<br>(2.74 to<br>6.83) |
| Neural tube defects                               | 52.75<br>(23.02 to<br>113.37)   | 28.19<br>(10.01 to<br>68.93)    | 12.61<br>(4.52 to<br>32.31)     | 36.49<br>(13.27 to<br>90.50)    | 0.62<br>(0.27 to<br>1.32) | 0.33<br>(0.12 to<br>0.81) | 0.15<br>(0.05 to<br>0.38) | 0.43<br>(0.16 to<br>1.06) |
| Congenital heart anomalies                        | 69.27<br>(37.41 to<br>119.52)   | 96.72<br>(51.07 to<br>170.36)   | 55.77<br>(29.90 to<br>99.13)    | 115.23<br>(60.46 to<br>204.01)  | 0.83<br>(0.45 to<br>1.43) | 1.19<br>(0.64 to<br>2.08) | 0.70<br>(0.39 to<br>1.26) | 1.40<br>(0.75 to<br>2.48) |
| Orofacial clefts                                  | 2.56<br>(0.40 to<br>8.68)       | 3.03<br>(0.45 to<br>10.10)      | 1.27<br>(0.19 to<br>4.32)       | 3.99<br>(0.60 to<br>13.23)      | 0.03<br>(0.00 to<br>0.10) | 0.04<br>(0.01 to<br>0.12) | 0.01<br>(0.00 to<br>0.05) | 0.05<br>(0.01 to<br>0.15) |
| Down syndrome                                     | 3.36<br>(1.61 to<br>6.40)       | 5.40<br>(2.45 to<br>10.68)      | 3.07<br>(1.43 to<br>6.09)       | 6.51<br>(2.94 to<br>12.91)      | 0.04<br>(0.02 to<br>0.08) | 0.07<br>(0.03 to<br>0.14) | 0.04<br>(0.02 to<br>0.08) | 0.08<br>(0.04 to<br>0.16) |
| Other chromosomal abnormalities                   | 9.37<br>(2.49 to<br>20.95)      | 21.44<br>(5.26 to<br>51.74)     | 11.04<br>(2.66 to<br>26.51)     | 26.44<br>(6.59 to<br>62.88)     | 0.11<br>(0.03 to<br>0.24) | 0.25<br>(0.06 to<br>0.60) | 0.13<br>(0.03 to<br>0.31) | 0.31<br>(0.08 to<br>0.73) |
| Congenital musculoskeletal and limb anomalies     | 2.73<br>(1.25 to<br>7.04)       | 4.38<br>(1.92 to<br>11.35)      | 2.55<br>(1.14 to<br>6.56)       | 5.17<br>(2.26 to<br>13.38)      | 0.03<br>(0.01 to<br>0.08) | 0.05<br>(0.02 to<br>0.13) | 0.03<br>(0.01 to<br>0.08) | 0.06<br>(0.03 to<br>0.16) |
| Urogenital congenital anomalies                   | 4.69<br>(2.54 to<br>8.81)       | 6.57<br>(3.27 to<br>13.02)      | 3.85<br>(1.87 to<br>7.79)       | 7.82<br>(3.89 to<br>15.37)      | 0.06<br>(0.03 to<br>0.11) | 0.08<br>(0.04 to<br>0.16) | 0.05<br>(0.02 to<br>0.10) | 0.10<br>(0.05 to<br>0.19) |
| Digestive congenital anomalies                    | 18.94<br>(8.69 to<br>36.29)     | 29.51<br>(12.75 to<br>60.68)    | 15.65<br>(6.40 to<br>31.84)     | 35.97<br>(15.41 to<br>72.94)    | 0.22<br>(0.10 to<br>0.42) | 0.34<br>(0.15 to<br>0.71) | 0.18<br>(0.08 to<br>0.37) | 0.42<br>(0.18 to<br>0.85) |

|                                      |                                                      |                                                        |                                                      |                                                        |                                                  |                                                   |                                                   |                                                   |
|--------------------------------------|------------------------------------------------------|--------------------------------------------------------|------------------------------------------------------|--------------------------------------------------------|--------------------------------------------------|---------------------------------------------------|---------------------------------------------------|---------------------------------------------------|
| Other congenital birth defects       | 73.35<br>(38.14 to<br>125.91)                        | 105.32<br>(55.69 to<br>189.56)                         | 59.19<br>(32.04 to<br>107.37)                        | 126.48<br>(66.58 to<br>229.66)                         | 0.87<br>(0.45 to<br>1.49)                        | 1.25<br>(0.67 to<br>2.28)                         | 0.71<br>(0.39 to<br>1.28)                         | 1.50<br>(0.79 to<br>2.72)                         |
| Skin and subcutaneous diseases       | 22.71<br>(14.90 to<br>40.14)                         | 64.69<br>(44.27 to<br>112.10)                          | 54.15<br>(37.97 to<br>92.66)                         | 68.68<br>(46.47 to<br>119.47)                          | 0.55<br>(0.37 to<br>0.96)                        | 1.83<br>(1.26 to<br>3.10)                         | 1.78<br>(1.24 to<br>3.01)                         | 1.82<br>(1.26 to<br>3.11)                         |
| Cellulitis                           | 1.71<br>(0.78 to<br>3.05)                            | 6.34<br>(2.89 to<br>10.94)                             | 6.41<br>(3.05 to<br>10.99)                           | 6.31<br>(2.83 to<br>10.95)                             | 0.05<br>(0.02 to<br>0.08)                        | 0.19<br>(0.09 to<br>0.33)                         | 0.21<br>(0.10 to<br>0.37)                         | 0.18<br>(0.08 to<br>0.31)                         |
| Pyoderma                             | 18.36<br>(11.97 to<br>32.52)                         | 51.70<br>(34.76 to<br>89.31)                           | 41.21<br>(28.30 to<br>70.58)                         | 55.75<br>(37.57 to<br>97.33)                           | 0.42<br>(0.27 to<br>0.73)                        | 1.40<br>(0.95 to<br>2.36)                         | 1.29<br>(0.89 to<br>2.21)                         | 1.42<br>(0.97 to<br>2.43)                         |
| Decubitus ulcer                      | 1.67<br>(0.97 to<br>3.25)                            | 4.33<br>(2.52 to<br>8.61)                              | 4.41<br>(2.62 to<br>8.65)                            | 4.24<br>(2.48 to<br>8.46)                              | 0.07<br>(0.04 to<br>0.13)                        | 0.19<br>(0.11 to<br>0.38)                         | 0.22<br>(0.13 to<br>0.44)                         | 0.18<br>(0.10 to<br>0.36)                         |
| Other skin and subcutaneous diseases | 0.96<br>(0.55 to<br>1.81)                            | 2.32<br>(1.35 to<br>4.39)                              | 2.12<br>(1.31 to<br>3.89)                            | 2.38<br>(1.36 to<br>4.56)                              | 0.02<br>(0.01 to<br>0.03)                        | 0.05<br>(0.03 to<br>0.09)                         | 0.05<br>(0.03 to<br>0.09)                         | 0.05<br>(0.03 to<br>0.09)                         |
| Sudden infant death syndrome         | 24.34<br>(11.48 to<br>44.83)                         | 25.33<br>(10.26 to<br>49.74)                           | 14.19<br>(5.81 to<br>27.95)                          | 30.45<br>(12.33 to<br>60.06)                           | 0.28<br>(0.13 to<br>0.52)                        | 0.29<br>(0.12 to<br>0.58)                         | 0.16<br>(0.07 to<br>0.32)                         | 0.35<br>(0.14 to<br>0.70)                         |
| <b>Injuries</b>                      | <b>576.87</b><br><b>(472.72 to</b><br><b>692.20)</b> | <b>848.63</b><br><b>(674.94 to</b><br><b>1,035.05)</b> | <b>669.35</b><br><b>(534.96 to</b><br><b>811.80)</b> | <b>931.31</b><br><b>(741.06 to</b><br><b>1,144.84)</b> | <b>11.39</b><br><b>(9.41 to</b><br><b>13.47)</b> | <b>18.91</b><br><b>(15.74 to</b><br><b>22.28)</b> | <b>16.34</b><br><b>(13.75 to</b><br><b>19.11)</b> | <b>19.97</b><br><b>(16.55 to</b><br><b>23.50)</b> |
| <b>Transport injuries</b>            | <b>152.37</b><br><b>(119.57 to</b><br><b>187.49)</b> | <b>287.09</b><br><b>(219.22 to</b><br><b>374.21)</b>   | <b>235.59</b><br><b>(180.65 to</b><br><b>301.00)</b> | <b>317.09</b><br><b>(240.79 to</b><br><b>409.34)</b>   | <b>2.98</b><br><b>(2.36 to</b><br><b>3.66)</b>   | <b>5.93</b><br><b>(4.64 to</b><br><b>7.57)</b>    | <b>5.16</b><br><b>(4.08 to</b><br><b>6.43)</b>    | <b>6.38</b><br><b>(4.94 to</b><br><b>8.12)</b>    |
| Road injuries                        | 143.65<br>(112.70 to<br>177.91)                      | 268.15<br>(203.37 to<br>348.84)                        | 221.14<br>(169.19 to<br>281.46)                      | 296.30<br>(223.33 to<br>381.55)                        | 2.83<br>(2.24 to<br>3.46)                        | 5.58<br>(4.35 to<br>7.13)                         | 4.89<br>(3.86 to<br>6.09)                         | 6.00<br>(4.62 to<br>7.66)                         |
| Pedestrian road injuries             | 64.50<br>(48.64 to<br>81.54)                         | 102.22<br>(73.65 to<br>136.00)                         | 83.69<br>(60.90 to<br>110.92)                        | 112.17<br>(80.35 to<br>150.34)                         | 1.28<br>(0.98 to<br>1.60)                        | 2.23<br>(1.64 to<br>2.91)                         | 1.93<br>(1.46 to<br>2.50)                         | 2.38<br>(1.76 to<br>3.09)                         |
| <b>Madagascar</b>                    |                                                      |                                                        |                                                      |                                                        |                                                  |                                                   |                                                   |                                                   |
| <b>Cause</b>                         | <b>YLLs (in 1000s)</b>                               |                                                        |                                                      |                                                        | <b>Deaths (in 1000s)</b>                         |                                                   |                                                   |                                                   |
|                                      | <b>2016</b>                                          | <b>2040 Forecast</b>                                   | <b>2040 Better Scenario</b>                          | <b>2040 Worse Scenario</b>                             | <b>2016</b>                                      | <b>2040 Forecast</b>                              | <b>2040 Better Scenario</b>                       | <b>2040 Worse Scenario</b>                        |
| Cyclist road injuries                | 5.41<br>(3.95 to<br>7.48)                            | 11.34<br>(7.88 to<br>15.81)                            | 9.50<br>(6.70 to<br>13.29)                           | 12.50<br>(8.80 to<br>17.67)                            | 0.11<br>(0.08 to<br>0.15)                        | 0.23<br>(0.17 to<br>0.31)                         | 0.21<br>(0.15 to<br>0.28)                         | 0.25<br>(0.18 to<br>0.34)                         |
| Motorcyclist road injuries           | 11.12<br>(8.13 to<br>15.22)                          | 23.91<br>(16.58 to<br>34.45)                           | 20.32<br>(14.24 to<br>28.89)                         | 26.04<br>(17.89 to<br>37.44)                           | 0.21<br>(0.16 to<br>0.28)                        | 0.46<br>(0.33 to<br>0.66)                         | 0.42<br>(0.30 to<br>0.57)                         | 0.49<br>(0.35 to<br>0.69)                         |
| Motor vehicle road injuries          | 61.87<br>(46.65 to<br>82.20)                         | 129.16<br>(95.45 to<br>174.69)                         | 106.37<br>(78.68 to<br>142.03)                       | 143.91<br>(105.82 to<br>194.49)                        | 1.22<br>(0.93 to<br>1.61)                        | 2.63<br>(1.98 to<br>3.52)                         | 2.30<br>(1.75 to<br>3.04)                         | 2.85<br>(2.13 to<br>3.83)                         |
| Other road injuries                  | 0.75<br>(0.54 to<br>1.03)                            | 1.52<br>(1.04 to<br>2.15)                              | 1.26<br>(0.87 to<br>1.78)                            | 1.68<br>(1.15 to<br>2.40)                              | 0.01<br>(0.01 to<br>0.02)                        | 0.03<br>(0.02 to<br>0.04)                         | 0.03<br>(0.02 to<br>0.04)                         | 0.03<br>(0.02 to<br>0.04)                         |
| Other transport injuries             | 8.72<br>(5.94 to<br>12.71)                           | 18.94<br>(12.43 to<br>28.86)                           | 14.45<br>(9.41 to<br>22.11)                          | 20.79<br>(13.54 to<br>31.12)                           | 0.15<br>(0.11 to<br>0.22)                        | 0.35<br>(0.23 to<br>0.53)                         | 0.27<br>(0.18 to<br>0.41)                         | 0.38<br>(0.25 to<br>0.57)                         |
| <b>Unintentional injuries</b>        | <b>328.46</b><br><b>(257.93 to</b><br><b>411.09)</b> | <b>401.54</b><br><b>(311.19 to</b><br><b>501.09)</b>   | <b>292.26</b><br><b>(229.44 to</b><br><b>360.43)</b> | <b>447.43</b><br><b>(345.68 to</b><br><b>562.49)</b>   | <b>6.35</b><br><b>(5.22 to</b><br><b>7.59)</b>   | <b>9.24</b><br><b>(7.80 to</b><br><b>10.87)</b>   | <b>7.74</b><br><b>(6.51 to</b><br><b>9.01)</b>    | <b>9.76</b><br><b>(8.10 to</b><br><b>11.62)</b>   |
| Falls                                | 47.80<br>(37.49 to<br>61.27)                         | 74.32<br>(59.41 to<br>92.05)                           | 64.67<br>(52.26 to<br>78.01)                         | 77.41<br>(61.71 to<br>96.75)                           | 1.40<br>(1.14 to<br>1.72)                        | 2.71<br>(2.30 to<br>3.18)                         | 2.75<br>(2.36 to<br>3.18)                         | 2.63<br>(2.20 to<br>3.15)                         |
| Drowning                             | 67.56<br>(52.65 to<br>86.57)                         | 70.86<br>(52.80 to<br>94.62)                           | 50.54<br>(37.76 to<br>67.01)                         | 79.31<br>(58.67 to<br>106.29)                          | 1.10<br>(0.87 to<br>1.38)                        | 1.30<br>(1.01 to<br>1.66)                         | 1.00<br>(0.79 to<br>1.28)                         | 1.41<br>(1.09 to<br>1.82)                         |
| Fire, heat, and hot substances       | 47.55<br>(36.39 to<br>60.28)                         | 46.70<br>(35.10 to<br>60.97)                           | 31.79<br>(24.32 to<br>40.98)                         | 53.14<br>(39.69 to<br>70.19)                           | 0.92<br>(0.73 to<br>1.12)                        | 1.08<br>(0.87 to<br>1.35)                         | 0.84<br>(0.67 to<br>1.03)                         | 1.17<br>(0.93 to<br>1.48)                         |

|                                                 |                                                    |                                                      |                                                     |                                                      |                                                |                                                |                                                |                                                |
|-------------------------------------------------|----------------------------------------------------|------------------------------------------------------|-----------------------------------------------------|------------------------------------------------------|------------------------------------------------|------------------------------------------------|------------------------------------------------|------------------------------------------------|
| Poisonings                                      | 23.96<br>(13.19 to<br>51.29)                       | 19.53<br>(10.92 to<br>40.44)                         | 11.11<br>(6.50 to<br>21.21)                         | 23.63<br>(12.97 to<br>50.25)                         | 0.40<br>(0.25 to<br>0.73)                      | 0.36<br>(0.23 to<br>0.61)                      | 0.23<br>(0.15 to<br>0.35)                      | 0.42<br>(0.26 to<br>0.72)                      |
| Exposure to mechanical forces                   | 33.76<br>(25.92 to<br>42.02)                       | 40.74<br>(30.44 to<br>53.23)                         | 28.97<br>(21.45 to<br>38.24)                        | 45.75<br>(34.13 to<br>59.88)                         | 0.61<br>(0.47 to<br>0.76)                      | 0.61<br>(0.62 to<br>1.04)                      | 0.63<br>(0.49 to<br>0.81)                      | 0.89<br>(0.68 to<br>1.13)                      |
| Unintentional firearm injuries                  | 6.70<br>(4.38 to<br>10.22)                         | 6.95<br>(4.43 to<br>10.77)                           | 5.08<br>(3.21 to<br>7.92)                           | 7.72<br>(4.96 to<br>11.83)                           | 0.13<br>(0.08 to<br>0.19)                      | 0.14<br>(0.09 to<br>0.21)                      | 0.11<br>(0.07 to<br>0.16)                      | 0.15<br>(0.10 to<br>0.22)                      |
| Unintentional suffocation                       | 4.61<br>(2.84 to<br>7.60)                          | 5.40<br>(3.36 to<br>8.83)                            | 3.28<br>(2.16 to<br>5.00)                           | 6.40<br>(3.89 to<br>10.60)                           | 0.07<br>(0.04 to<br>0.10)                      | 0.08<br>(0.06 to<br>0.12)                      | 0.06<br>(0.04 to<br>0.08)                      | 0.10<br>(0.06 to<br>0.15)                      |
| Other exposure to mechanical forces             | 22.44<br>(17.03 to<br>29.08)                       | 28.39<br>(20.82 to<br>37.82)                         | 20.61<br>(15.15 to<br>27.53)                        | 31.63<br>(23.11 to<br>42.50)                         | 0.42<br>(0.32 to<br>0.54)                      | 0.59<br>(0.45 to<br>0.76)                      | 0.47<br>(0.35 to<br>0.60)                      | 0.64<br>(0.49 to<br>0.83)                      |
| Adverse effects of medical treatment            | 25.91<br>(15.53 to<br>41.28)                       | 52.49<br>(21.09 to<br>50.40)                         | 22.85<br>(16.06 to<br>33.28)                        | 36.64<br>(23.02 to<br>56.46)                         | 0.46<br>(0.32 to<br>0.65)                      | 0.66<br>(0.51 to<br>0.89)                      | 0.52<br>(0.42 to<br>0.68)                      | 0.71<br>(0.54 to<br>0.97)                      |
| Animal contact                                  | 30.37<br>(20.86 to<br>44.50)                       | 52.75<br>(35.96 to<br>78.79)                         | 35.04<br>(24.25 to<br>51.99)                        | 60.50<br>(41.10 to<br>88.85)                         | 0.64<br>(0.45 to<br>0.93)                      | 0.64<br>(0.85 to<br>1.78)                      | 0.89<br>(0.63 to<br>1.32)                      | 1.34<br>(0.94 to<br>1.93)                      |
| Venomous animal contact                         | 21.25<br>(13.99 to<br>31.03)                       | 35.74<br>(23.11 to<br>51.37)                         | 23.48<br>(14.78 to<br>33.59)                        | 41.12<br>(26.34 to<br>59.93)                         | 0.47<br>(0.33 to<br>0.66)                      | 0.89<br>(0.60 to<br>1.25)                      | 0.66<br>(0.44 to<br>0.92)                      | 0.98<br>(0.66 to<br>1.38)                      |
| Non-venomous animal contact                     | 9.12<br>(3.51 to<br>17.29)                         | 17.01<br>(6.61 to<br>31.33)                          | 11.55<br>(4.50 to<br>21.18)                         | 19.38<br>(7.68 to<br>35.60)                          | 0.16<br>(0.07 to<br>0.31)                      | 0.33<br>(0.14 to<br>0.58)                      | 0.24<br>(0.10 to<br>0.42)                      | 0.37<br>(0.15 to<br>0.65)                      |
| Foreign body                                    | 28.54<br>(17.06 to<br>49.01)                       | 39.08<br>(23.69 to<br>64.81)                         | 29.46<br>(18.98 to<br>44.95)                        | 42.86<br>(25.36 to<br>72.95)                         | 0.41<br>(0.27 to<br>0.65)                      | 0.61<br>(0.41 to<br>0.90)                      | 0.51<br>(0.37 to<br>0.69)                      | 0.65<br>(0.43 to<br>0.98)                      |
| Pulmonary aspiration and foreign body in airway | 26.28<br>(15.26 to<br>46.87)                       | 35.97<br>(21.24 to<br>62.15)                         | 27.15<br>(17.00 to<br>43.21)                        | 39.42<br>(22.58 to<br>69.82)                         | 0.38<br>(0.24 to<br>0.60)                      | 0.56<br>(0.37 to<br>0.85)                      | 0.47<br>(0.30 to<br>0.65)                      | 0.59<br>(0.38 to<br>0.93)                      |
| Foreign body in other body part                 | 2.26<br>(0.75 to<br>4.28)                          | 3.11<br>(1.03 to<br>6.16)                            | 2.31<br>(0.74 to<br>4.67)                           | 3.44<br>(1.17 to<br>6.74)                            | 0.04<br>(0.01 to<br>0.07)                      | 0.05<br>(0.02 to<br>0.11)                      | 0.04<br>(0.01 to<br>0.09)                      | 0.06<br>(0.02 to<br>0.12)                      |
| Environmental heat and cold exposure            | 3.77<br>(4.23 to<br>7.82)                          | 6.94<br>(4.78 to<br>9.94)                            | 4.29<br>(2.93 to<br>6.16)                           | 8.17<br>(5.55 to<br>11.62)                           | 0.11<br>(0.08 to<br>0.15)                      | 0.15<br>(0.11 to<br>0.21)                      | 0.10<br>(0.07 to<br>0.14)                      | 0.17<br>(0.12 to<br>0.23)                      |
| Other unintentional injuries                    | 17.24<br>(13.07 to<br>21.69)                       | 18.13<br>(13.57 to<br>24.20)                         | 13.54<br>(10.12 to<br>18.47)                        | 20.03<br>(15.00 to<br>26.63)                         | 0.30<br>(0.23 to<br>0.38)                      | 0.34<br>(0.26 to<br>0.44)                      | 0.27<br>(0.21 to<br>0.36)                      | 0.37<br>(0.28 to<br>0.48)                      |
| <b>Self-harm and interpersonal violence</b>     | <b>89.23</b><br><b>(64.09 to</b><br><b>115.39)</b> | <b>155.06</b><br><b>(110.15 to</b><br><b>210.12)</b> | <b>137.06</b><br><b>(99.61 to</b><br><b>181.14)</b> | <b>161.70</b><br><b>(114.38 to</b><br><b>217.93)</b> | <b>1.94</b><br><b>(1.45 to</b><br><b>2.45)</b> | <b>3.65</b><br><b>(2.69 to</b><br><b>4.79)</b> | <b>3.36</b><br><b>(2.55 to</b><br><b>4.27)</b> | <b>3.74</b><br><b>(2.74 to</b><br><b>4.94)</b> |

**Madagascar**

| Cause                              | YLLs (in 1000s)              |                                |                                |                                | Deaths (in 1000s)         |                           |                           |                           |
|------------------------------------|------------------------------|--------------------------------|--------------------------------|--------------------------------|---------------------------|---------------------------|---------------------------|---------------------------|
|                                    | 2016                         | 2040 Forecast                  | 2040 Better Scenario           | 2040 Worse Scenario            | 2016                      | 2040 Forecast             | 2040 Better Scenario      | 2040 Worse Scenario       |
| Self-harm                          | 59.32<br>(45.00 to<br>75.99) | 115.07<br>(81.92 to<br>156.58) | 101.73<br>(74.20 to<br>135.84) | 119.91<br>(84.51 to<br>163.78) | 1.43<br>(1.11 to<br>1.80) | 2.95<br>(2.18 to<br>3.95) | 2.73<br>(2.08 to<br>3.50) | 3.01<br>(2.20 to<br>4.04) |
| Self-harm by firearm               | 7.12<br>(4.13 to<br>10.79)   | 9.91<br>(5.48 to<br>16.28)     | 8.36<br>(4.75 to<br>13.20)     | 10.51<br>(5.88 to<br>17.52)    | 0.16<br>(0.10 to<br>0.23) | 0.23<br>(0.13 to<br>0.37) | 0.20<br>(0.12 to<br>0.31) | 0.24<br>(0.14 to<br>0.40) |
| Self-harm by other specified means | 52.19<br>(39.65 to<br>67.28) | 105.16<br>(74.94 to<br>143.14) | 93.37<br>(68.07 to<br>124.26)  | 109.40<br>(76.87 to<br>148.83) | 1.28<br>(0.99 to<br>1.62) | 2.72<br>(2.00 to<br>3.64) | 2.52<br>(1.93 to<br>3.25) | 2.77<br>(2.01 to<br>3.73) |
| Interpersonal violence             | 29.92<br>(11.76 to<br>44.10) | 39.99<br>(14.85 to<br>60.30)   | 35.33<br>(13.06 to<br>52.88)   | 41.79<br>(15.47 to<br>63.37)   | 0.51<br>(0.21 to<br>0.75) | 0.70<br>(0.27 to<br>1.05) | 0.63<br>(0.25 to<br>0.93) | 0.73<br>(0.28 to<br>1.10) |
| Physical violence by firearm       | 5.48<br>(1.81 to<br>9.27)    | 7.46<br>(2.38 to<br>12.68)     | 7.03<br>(2.29 to<br>11.92)     | 7.61<br>(2.40 to<br>12.99)     | 0.10<br>(0.03 to<br>0.16) | 0.13<br>(0.04 to<br>0.22) | 0.13<br>(0.04 to<br>0.21) | 0.13<br>(0.04 to<br>0.22) |

|                                                                                     |                                                                        |                                                                         |                                                                        |                                                                           |                                                                  |                                                                  |                                                                  |                                                                  |
|-------------------------------------------------------------------------------------|------------------------------------------------------------------------|-------------------------------------------------------------------------|------------------------------------------------------------------------|---------------------------------------------------------------------------|------------------------------------------------------------------|------------------------------------------------------------------|------------------------------------------------------------------|------------------------------------------------------------------|
| Physical violence by sharp object                                                   | 3.05<br>(1.05 to<br>4.95)                                              | 4.61<br>(1.60 to<br>7.64)                                               | 4.55<br>(1.57 to<br>7.50)                                              | 4.63<br>(1.59 to<br>7.63)                                                 | 0.05<br>(0.02 to<br>0.09)                                        | 0.08<br>(0.03 to<br>0.13)                                        | 0.09<br>(0.03 to<br>0.13)                                        | 0.08<br>(0.03 to<br>0.13)                                        |
| Physical violence by other means                                                    | 21.38<br>(8.22 to<br>31.61)                                            | 27.92<br>(9.96 to<br>43.81)                                             | 23.75<br>(8.58 to<br>36.83)                                            | 29.54<br>(10.62 to<br>46.12)                                              | 0.36<br>(0.14 to<br>0.53)                                        | 0.49<br>(0.18 to<br>0.76)                                        | 0.42<br>(0.16 to<br>0.64)                                        | 0.51<br>(0.19 to<br>0.79)                                        |
| <b>Forces of nature, conflict and terrorism, and executions and police conflict</b> | <b>6.81</b><br><b>(3.75 to</b><br><b>9.85)</b>                         | <b>4.93</b><br><b>(0.00 to</b><br><b>27.44)</b>                         | <b>4.45</b><br><b>(0.00 to</b><br><b>24.63)</b>                        | <b>5.08</b><br><b>(0.00 to</b><br><b>28.35)</b>                           | <b>0.11</b><br><b>(0.06 to</b><br><b>0.16)</b>                   | <b>0.09</b><br><b>(0.00 to</b><br><b>0.47)</b>                   | <b>0.08</b><br><b>(0.00 to</b><br><b>0.45)</b>                   | <b>0.09</b><br><b>(0.00 to</b><br><b>0.48)</b>                   |
| Exposure to forces of nature                                                        | 0.00<br>(0.00 to<br>0.00)                                              | 4.32<br>(0.00 to<br>27.44)                                              | 3.87<br>(0.00 to<br>24.63)                                             | 4.46<br>(0.00 to<br>28.35)                                                | 0.00<br>(0.00 to<br>0.00)                                        | 0.08<br>(0.00 to<br>0.47)                                        | 0.07<br>(0.00 to<br>0.45)                                        | 0.08<br>(0.00 to<br>0.48)                                        |
| Conflict and terrorism                                                              | 6.19<br>(3.18 to<br>9.19)                                              | 0.17<br>(0.00 to<br>1.73)                                               | 0.15<br>(0.00 to<br>1.57)                                              | 0.18<br>(0.00 to<br>1.78)                                                 | 0.10<br>(0.05 to<br>0.15)                                        | 0.00<br>(0.00 to<br>0.05)                                        | 0.00<br>(0.00 to<br>0.03)                                        | 0.00<br>(0.00 to<br>0.03)                                        |
| Executions and police conflict                                                      | 0.63<br>(0.32 to<br>1.21)                                              | 0.44<br>(0.00 to<br>3.44)                                               | 0.42<br>(0.00 to<br>3.29)                                              | 0.45<br>(0.00 to<br>3.47)                                                 | 0.01<br>(0.00 to<br>0.02)                                        | 0.01<br>(0.00 to<br>0.06)                                        | 0.01<br>(0.00 to<br>0.06)                                        | 0.01<br>(0.00 to<br>0.06)                                        |
| <b>Malawi</b>                                                                       |                                                                        |                                                                         |                                                                        |                                                                           |                                                                  |                                                                  |                                                                  |                                                                  |
| Cause                                                                               | YLLs (actual counts)                                                   |                                                                         |                                                                        |                                                                           | Deaths (actual counts)                                           |                                                                  |                                                                  |                                                                  |
|                                                                                     | 2016                                                                   | 2040 Forecast                                                           | 2040 Better Scenario                                                   | 2040 Worse Scenario                                                       | 2016                                                             | 2040 Forecast                                                    | 2040 Better Scenario                                             | 2040 Worse Scenario                                              |
| <b>All causes</b>                                                                   | <b>8,358,034.81</b><br><b>(7,305,227.13 to</b><br><b>9,582,769.74)</b> | <b>7,471,824.61</b><br><b>(5,713,990.18 to</b><br><b>10,051,781.68)</b> | <b>5,303,705.47</b><br><b>(3,988,433.54 to</b><br><b>7,262,683.83)</b> | <b>13,518,391.75</b><br><b>(10,737,520.08 to</b><br><b>16,986,732.36)</b> | <b>158,890.06</b><br><b>(140,734.44 to</b><br><b>178,620.50)</b> | <b>182,437.11</b><br><b>(146,868.29 to</b><br><b>236,048.55)</b> | <b>136,580.44</b><br><b>(108,624.81 to</b><br><b>177,456.45)</b> | <b>290,366.70</b><br><b>(236,314.71 to</b><br><b>356,684.05)</b> |
| <b>Communicable, maternal, neonatal, and nutritional diseases</b>                   | <b>6,403,866.66</b><br><b>(5,504,913.76 to</b><br><b>7,539,248.56)</b> | <b>4,265,700.86</b><br><b>(3,073,379.10 to</b><br><b>5,841,199.26)</b>  | <b>2,719,783.08</b><br><b>(1,856,737.20 to</b><br><b>3,948,668.55)</b> | <b>9,709,226.04</b><br><b>(7,479,315.39 to</b><br><b>12,332,678.66)</b>   | <b>101,676.74</b><br><b>(89,737.16 to</b><br><b>116,687.04)</b>  | <b>81,113.48</b><br><b>(58,226.02 to</b><br><b>112,400.91)</b>   | <b>52,612.18</b><br><b>(35,635.60 to</b><br><b>74,872.51)</b>    | <b>173,595.16</b><br><b>(131,858.86 to</b><br><b>220,712.13)</b> |
| <b>HIV/AIDS and tuberculosis</b>                                                    | <b>1,961,285.60</b><br><b>(1,578,376.44 to</b><br><b>2,497,319.67)</b> | <b>1,665,846.60</b><br><b>(923,125.06 to</b><br><b>2,814,958.06)</b>    | <b>1,131,573.55</b><br><b>(538,172.60 to</b><br><b>2,236,814.13)</b>   | <b>5,376,617.98</b><br><b>(3,755,295.13 to</b><br><b>7,491,300.05)</b>    | <b>36,884.87</b><br><b>(31,097.49 to</b><br><b>45,721.62)</b>    | <b>32,286.98</b><br><b>(19,326.68 to</b><br><b>51,000.55)</b>    | <b>21,783.35</b><br><b>(11,006.38 to</b><br><b>40,210.88)</b>    | <b>101,858.86</b><br><b>(71,016.38 to</b><br><b>141,554.56)</b>  |
| Tuberculosis                                                                        | 255,633.69<br>(182,267.03 to<br>337,818.71)                            | 194,318.37<br>(80,438.53 to<br>417,615.09)                              | 92,755.20<br>(40,095.93 to<br>206,869.05)                              | 301,350.37<br>(123,516.67 to<br>658,482.42)                               | 6,446.68<br>(4,596.73 to<br>8,657.59)                            | 4,953.52<br>(2,243.11 to<br>10,160.36)                           | 2,448.67<br>(1,148.18 to<br>5,039.67)                            | 7,445.89<br>(3,175.43 to<br>15,527.88)                           |
| HIV/AIDS                                                                            | 1,705,651.91<br>(1,305,728.01 to<br>2,255,996.86)                      | 1,471,528.23<br>(745,366.42 to<br>2,621,469.33)                         | 1,038,818.35<br>(451,640.64 to<br>2,176,959.00)                        | 5,075,267.61<br>(3,480,913.81 to<br>7,191,448.43)                         | 30,438.19<br>(24,356.62 to<br>46,333.74)                         | 27,333.46<br>(14,899.57 to<br>46,333.74)                         | 19,334.68<br>(8,461.39 to<br>38,112.46)                          | 94,412.97<br>(64,360.94 to<br>133,635.08)                        |
| <b>Diarrhea, lower respiratory, and other common infectious diseases</b>            | <b>1,753,747.27</b><br><b>(1,401,631.66 to</b><br><b>2,197,609.53)</b> | <b>1,223,954.97</b><br><b>(603,282.85 to</b><br><b>2,119,790.24)</b>    | <b>685,848.93</b><br><b>(338,725.20 to</b><br><b>1,218,651.73)</b>     | <b>2,099,772.56</b><br><b>(1,168,619.35 to</b><br><b>3,489,011.90)</b>    | <b>30,189.67</b><br><b>(24,645.57 to</b><br><b>36,843.75)</b>    | <b>28,998.17</b><br><b>(14,733.02 to</b><br><b>50,239.48)</b>    | <b>17,109.85</b><br><b>(8,928.59 to</b><br><b>30,285.95)</b>     | <b>41,539.25</b><br><b>(22,678.15 to</b><br><b>67,663.89)</b>    |
| Diarrheal diseases                                                                  | 564,924.05<br>(401,426.90 to<br>777,055.71)                            | 468,856.31<br>(95,953.47 to<br>1,112,469.77)                            | 241,447.48<br>(46,234.50 to<br>638,735.95)                             | 675,116.10<br>(189,558.08 to<br>1,442,043.64)                             | 11,232.84<br>(7,721.75 to<br>16,382.78)                          | 12,103.33<br>(2,423.61 to<br>30,037.40)                          | 6,555.81<br>(1,316.86 to<br>17,751.68)                           | 15,818.73<br>(3,969.63 to<br>35,784.75)                          |
| Intestinal infectious diseases                                                      | 18,721.75<br>(9,052.17 to<br>34,133.52)                                | 17,392.46<br>(7,601.85 to<br>33,961.89)                                 | 13,589.19<br>(5,979.04 to<br>26,155.85)                                | 22,447.02<br>(10,056.11 to<br>43,892.55)                                  | 255.53<br>(126.67 to<br>471.53)                                  | 250.30<br>(112.19 to<br>484.31)                                  | 198.77<br>(89.42 to<br>378.51)                                   | 315.36<br>(143.24 to<br>611.13)                                  |
| Typhoid fever                                                                       | 16,373.94<br>(7,549.81 to<br>32,205.29)                                | 15,817.22<br>(6,810.22 to<br>31,593.70)                                 | 12,504.60<br>(5,423.09 to<br>24,729.91)                                | 20,209.86<br>(8,597.77 to<br>40,217.77)                                   | 227.19<br>(105.24 to<br>440.14)                                  | 227.29<br>(98.03 to<br>451.81)                                   | 182.47<br>(79.71 to<br>355.91)                                   | 283.96<br>(123.52 to<br>557.30)                                  |
| Paratyphoid fever                                                                   | 834.18<br>(309.78 to<br>2,021.27)                                      | 999.57<br>(378.61 to<br>2,241.21)                                       | 759.02<br>(283.12 to<br>1,673.93)                                      | 1,294.63<br>(483.32 to<br>2,951.75)                                       | 11.53<br>(4.37 to<br>27.44)                                      | 14.52<br>(5.45 to<br>31.78)                                      | 11.16<br>(4.23 to<br>24.69)                                      | 18.41<br>(7.01 to<br>41.55)                                      |
| Other intestinal infectious diseases                                                | 1,313.63<br>(309.19 to<br>3,989.27)                                    | 575.67<br>(119.20 to<br>1,779.81)                                       | 325.56<br>(66.58 to<br>1,045.22)                                       | 942.53<br>(185.66 to<br>3,028.35)                                         | 16.81<br>(4.41 to<br>49.08)                                      | 8.49<br>(2.16 to<br>23.30)                                       | 5.14<br>(1.34 to<br>14.13)                                       | 12.99<br>(3.21 to<br>38.49)                                      |
| Lower respiratory infections                                                        | 790,930.43<br>(597,704.25 to<br>1,051,422.05)                          | 522,622.68<br>(275,899.16 to<br>927,709.62)                             | 271,474.85<br>(148,916.08 to<br>480,974.83)                            | 999,744.20<br>(478,427.62 to<br>1,970,981.78)                             | 13,322.00<br>(10,675.97 to<br>16,514.54)                         | 13,019.16<br>(8,017.33 to<br>21,042.99)                          | 7,395.13<br>(4,819.74 to<br>11,389.20)                           | 19,604.78<br>(11,300.13 to<br>32,691.28)                         |
| Upper respiratory infections                                                        | 1,929.99<br>(555.51 to<br>4,986.34)                                    | 1,353.97<br>(463.41 to<br>3,331.68)                                     | 725.48<br>(245.14 to<br>1,731.62)                                      | 2,165.67<br>(675.28 to<br>5,511.51)                                       | 27.18<br>(9.91 to<br>62.73)                                      | 24.31<br>(9.75 to<br>51.68)                                      | 13.90<br>(5.42 to<br>27.81)                                      | 35.76<br>(13.51 to<br>79.76)                                     |
| Otitis media                                                                        | 708.20<br>(212.47 to<br>2,226.41)                                      | 143.75<br>(53.31 to<br>410.56)                                          | 136.13<br>(50.86 to<br>385.74)                                         | 172.82<br>(60.84 to<br>510.36)                                            | 10.60<br>(3.93 to<br>30.74)                                      | 3.30<br>(1.45 to<br>8.17)                                        | 3.56<br>(1.56 to<br>8.57)                                        | 3.43<br>(1.47 to<br>8.47)                                        |

|                                |                                             |                                             |                                            |                                             |                                       |                                       |                                       |                                       |
|--------------------------------|---------------------------------------------|---------------------------------------------|--------------------------------------------|---------------------------------------------|---------------------------------------|---------------------------------------|---------------------------------------|---------------------------------------|
| Meningitis                     | 261,305.82<br>(184,950.23 to<br>384,607.40) | 173,389.44<br>(110,530.78 to<br>264,519.12) | 140,245.88<br>(86,272.75 to<br>216,414.08) | 280,914.45<br>(172,914.89 to<br>449,967.59) | 3,927.58<br>(2,881.96 to<br>5,469.19) | 3,070.65<br>(2,021.52 to<br>4,594.31) | 2,679.99<br>(1,740.84 to<br>4,054.32) | 4,303.46<br>(2,767.58 to<br>6,485.85) |
| Pneumococcal meningitis        | 14,955.32<br>(10,291.09 to<br>22,171.31)    | 10,533.34<br>(6,271.96 to<br>17,270.71)     | 9,783.59<br>(5,795.92 to<br>15,854.71)     | 14,183.36<br>(8,309.64 to<br>24,166.08)     | 259.41<br>(182.22 to<br>364.88)       | 218.21<br>(137.93 to<br>340.22)       | 218.07<br>(135.87 to<br>337.57)       | 259.45<br>(163.25 to<br>416.80)       |
| H influenzae type B meningitis | 26,190.22<br>(17,453.53 to<br>39,819.19)    | 34,078.80<br>(12,753.43 to<br>74,220.80)    | 23,312.33<br>(10,227.49 to<br>47,439.23)   | 107,354.44<br>(30,640.24 to<br>255,006.51)  | 367.66<br>(255.42 to<br>536.41)       | 461.67<br>(201.59 to<br>946.30)       | 341.95<br>(175.01 to<br>632.47)       | 1,314.23<br>(417.44 to<br>3,041.29)   |
| Meningococcal meningitis       | 113,509.85<br>(79,776.49 to<br>167,149.65)  | 60,586.83<br>(37,348.41 to<br>93,811.48)    | 50,011.31<br>(30,721.73 to<br>80,174.30)   | 75,525.77<br>(45,321.80 to<br>117,221.35)   | 1,665.31<br>(1,207.34 to<br>2,324.84) | 1,088.60<br>(701.58 to<br>1,676.53)   | 954.81<br>(607.90 to<br>1,488.41)     | 1,257.51<br>(795.54 to<br>1,912.25)   |
| Other meningitis               | 106,650.42<br>(75,016.66 to<br>157,780.71)  | 68,190.47<br>(43,370.90 to<br>107,183.21)   | 57,138.66<br>(35,563.88 to<br>91,449.00)   | 83,850.88<br>(51,004.83 to<br>132,697.55)   | 1,635.20<br>(1,188.13 to<br>2,341.53) | 1,302.17<br>(858.62 to<br>1,835.43)   | 1,165.17<br>(759.52 to<br>1,835.43)   | 1,472.26<br>(952.88 to<br>2,249.09)   |
| Encephalitis                   | 15,611.40<br>(9,689.00 to<br>24,317.13)     | 12,682.22<br>(7,578.03 to<br>19,950.32)     | 9,023.29<br>(5,333.99 to<br>14,711.51)     | 18,342.12<br>(10,842.86 to<br>28,430.44)    | 194.88<br>(123.07 to<br>293.03)       | 172.90<br>(107.08 to<br>260.34)       | 127.12<br>(78.48 to<br>196.49)        | 240.46<br>(146.00 to<br>364.63)       |
| Diphtheria                     | 172.98<br>(74.14 to<br>339.19)              | 42.36<br>(14.68 to<br>111.28)               | 22.26<br>(9.91 to<br>46.71)                | 221.52<br>(44.81 to<br>727.47)              | 2.14<br>(0.98 to<br>4.10)             | 0.58<br>(0.22 to<br>1.42)             | 0.34<br>(0.16 to<br>0.66)             | 2.68<br>(0.58 to<br>8.65)             |
| Whooping cough                 | 44,675.73<br>(3,630.67 to<br>160,290.24)    | 21,954.07<br>(1,352.33 to<br>81,038.73)     | 6,075.84<br>(379.00 to<br>23,666.42)       | 85,978.85<br>(6,194.74 to<br>282,770.02)    | 526.74<br>(42.76 to<br>1,890.40)      | 260.60<br>(16.08 to<br>963.10)        | 73.76<br>(4.68 to<br>288.25)          | 1,013.64<br>(73.03 to<br>3,331.03)    |
| Tetanus                        | 10,917.14<br>(4,954.32 to<br>26,075.11)     | 1,801.94<br>(642.74 to<br>4,137.46)         | 1,167.84<br>(430.17 to<br>2,796.43)        | 5,990.39<br>(1,989.58 to<br>16,087.01)      | 153.94<br>(71.93 to<br>354.92)        | 28.97<br>(10.77 to<br>66.81)          | 21.99<br>(8.19 to<br>55.96)           | 77.06<br>(26.94 to<br>201.92)         |
| Measles                        | 39,658.64<br>(13,342.49 to<br>94,329.41)    | 1,229.76<br>(145.61 to<br>6,321.03)         | 517.02<br>(90.07 to<br>2,224.43)           | 4,721.88<br>(312.54 to<br>28,221.53)        | 471.69<br>(158.99 to<br>1,120.95)     | 14.77<br>(1.87 to<br>74.84)           | 6.33<br>(1.14 to<br>26.56)            | 56.07<br>(3.80 to<br>335.08)          |

**Malawi**

| Cause                                          | YLLs (actual counts)                                         |                                                            |                                                            |                                                            | Deaths (actual counts)                                 |                                                      |                                                      |                                                      |
|------------------------------------------------|--------------------------------------------------------------|------------------------------------------------------------|------------------------------------------------------------|------------------------------------------------------------|--------------------------------------------------------|------------------------------------------------------|------------------------------------------------------|------------------------------------------------------|
|                                                | 2016                                                         | 2040 Forecast                                              | 2040 Better Scenario                                       | 2040 Worse Scenario                                        | 2016                                                   | 2040 Forecast                                        | 2040 Better Scenario                                 | 2040 Worse Scenario                                  |
| Varicella and herpes zoster                    | 4,191.15<br>(2,105.79 to<br>7,299.29)                        | 2,486.01<br>(1,310.63 to<br>4,343.49)                      | 1,423.65<br>(759.80 to<br>2,469.28)                        | 3,957.54<br>(2,002.59 to<br>7,013.87)                      | 64.54<br>(39.66 to<br>99.66)                           | 49.31<br>(30.86 to<br>74.70)                         | 33.16<br>(21.10 to<br>50.21)                         | 67.81<br>(41.13 to<br>108.14)                        |
| <b>Neglected tropical diseases and malaria</b> | <b>794,380.04</b><br>(546,744.37 to<br><b>1,093,264.06</b> ) | <b>274,393.51</b><br>(186,978.54 to<br><b>382,730.17</b> ) | <b>224,568.90</b><br>(154,261.73 to<br><b>313,558.16</b> ) | <b>362,931.34</b><br>(244,065.08 to<br><b>509,537.18</b> ) | <b>10,493.08</b><br>(7,491.58 to<br><b>14,084.02</b> ) | <b>4,494.33</b><br>(3,204.06 to<br><b>6,216.50</b> ) | <b>3,902.52</b><br>(2,792.96 to<br><b>5,365.41</b> ) | <b>5,501.42</b><br>(3,881.68 to<br><b>7,479.38</b> ) |
| Malaria                                        | 764,572.88<br>(519,992.43 to<br>1,064,023.10)                | 254,567.41<br>(171,923.91 to<br>358,948.10)                | 210,713.80<br>(143,894.61 to<br>296,675.91)                | 335,091.08<br>(220,466.84 to<br>481,457.93)                | 9,991.96<br>(7,044.07 to<br>13,681.36)                 | 4,121.04<br>(2,882.29 to<br>5,725.32)                | 3,623.74<br>(2,534.80 to<br>5,028.28)                | 5,022.26<br>(3,491.78 to<br>6,881.42)                |
| Chagas disease                                 | 0.00<br>(0.00 to<br>0.00)                                    | 0.00<br>(0.00 to<br>0.00)                                  | 0.00<br>(0.00 to<br>0.00)                                  | 0.00<br>(0.00 to<br>0.00)                                  | 0.00<br>(0.00 to<br>0.00)                              | 0.00<br>(0.00 to<br>0.00)                            | 0.00<br>(0.00 to<br>0.00)                            | 0.00<br>(0.00 to<br>0.00)                            |
| Leishmaniasis                                  | 60.82<br>(30.69 to<br>100.31)                                | 47.08<br>(22.73 to<br>81.98)                               | 26.92<br>(13.42 to<br>47.05)                               | 69.24<br>(30.98 to<br>120.68)                              | 1.42<br>(0.78 to<br>2.18)                              | 1.07<br>(0.55 to<br>1.81)                            | 0.66<br>(0.35 to<br>1.11)                            | 1.44<br>(0.75 to<br>2.32)                            |
| African trypanosomiasis                        | 3,538.03<br>(141.39 to<br>21,629.32)                         | 509.52<br>(13.87 to<br>3,306.11)                           | 492.17<br>(13.64 to<br>3,258.05)                           | 530.45<br>(14.45 to<br>3,415.10)                           | 62.38<br>(2.62 to<br>370.68)                           | 9.45<br>(0.26 to<br>59.75)                           | 9.27<br>(0.26 to<br>60.46)                           | 9.60<br>(0.27 to<br>59.43)                           |
| Schistosomiasis                                | 6,376.37<br>(4,382.55 to<br>8,972.64)                        | 5,846.28<br>(3,341.06 to<br>9,576.67)                      | 4,694.86<br>(2,617.83 to<br>7,741.37)                      | 6,468.48<br>(3,663.56 to<br>10,526.72)                     | 173.87<br>(120.44 to<br>245.61)                        | 164.66<br>(101.75 to<br>247.55)                      | 137.26<br>(85.88 to<br>210.19)                       | 175.98<br>(109.05 to<br>261.74)                      |
| Cysticercosis                                  | 439.16<br>(336.24 to<br>549.95)                              | 234.59<br>(146.97 to<br>367.83)                            | 209.46<br>(129.88 to<br>337.24)                            | 252.33<br>(161.30 to<br>390.30)                            | 8.29<br>(6.39 to<br>10.35)                             | 5.08<br>(3.27 to<br>7.76)                            | 4.63<br>(2.98 to<br>7.26)                            | 5.29<br>(3.52 to<br>7.90)                            |
| Cystic echinococcosis                          | 643.84<br>(440.26 to<br>916.17)                              | 338.64<br>(197.55 to<br>562.06)                            | 165.35<br>(95.08 to<br>270.03)                             | 513.17<br>(308.53 to<br>812.14)                            | 12.12<br>(8.37 to<br>16.82)                            | 8.01<br>(4.97 to<br>12.80)                           | 4.09<br>(2.48 to<br>6.44)                            | 11.47<br>(7.07 to<br>17.78)                          |
| Dengue                                         | 263.65<br>(18.29 to<br>1,115.93)                             | 846.67<br>(65.15 to<br>3,367.64)                           | 717.61<br>(55.20 to<br>2,787.39)                           | 1,080.75<br>(78.49 to<br>4,441.86)                         | 3.74<br>(0.27 to<br>14.99)                             | 15.08<br>(1.16 to<br>55.30)                          | 13.74<br>(1.05 to<br>49.50)                          | 17.56<br>(1.40 to<br>69.63)                          |



|                                                       |                                                 |                                                 |                                                |                                                 |                                            |                                            |                                          |                                            |                        |
|-------------------------------------------------------|-------------------------------------------------|-------------------------------------------------|------------------------------------------------|-------------------------------------------------|--------------------------------------------|--------------------------------------------|------------------------------------------|--------------------------------------------|------------------------|
| Yellow fever                                          | 0.00<br>(0.00 to 0.00)                          | 0.00<br>(0.00 to 0.00)                          | 0.00<br>(0.00 to 0.00)                         | 0.00<br>(0.00 to 0.00)                          | 0.00<br>(0.00 to 0.00)                     | 0.00<br>(0.00 to 0.00)                     | 0.00<br>(0.00 to 0.00)                   | 0.00<br>(0.00 to 0.00)                     | 0.00<br>(0.00 to 0.00) |
| Rabies                                                | 4,059.03<br>(822.32 to 9,897.61)                | 2,081.25<br>(415.23 to 5,310.80)                | 849.34<br>(160.03 to 2,151.53)                 | 3,690.34<br>(770.94 to 9,001.20)                | 58.05<br>(12.35 to 133.60)                 | 33.76<br>(7.14 to 81.63)                   | 14.01<br>(2.74 to 34.35)                 | 57.81<br>(12.53 to 136.89)                 |                        |
| Intestinal nematode infections                        | 1,694.08<br>(918.77 to 2,747.09)                | 1,698.46<br>(907.79 to 2,813.76)                | 1,458.91<br>(793.18 to 2,437.87)               | 2,278.66<br>(1,200.70 to 3,810.58)              | 20.79<br>(11.39 to 33.30)                  | 21.69<br>(12.24 to 34.80)                  | 18.96<br>(10.86 to 30.55)                | 28.52<br>(15.67 to 46.85)                  |                        |
| Other neglected tropical diseases                     | 12,732.18<br>(6,221.93 to 23,982.01)            | 8,223.62<br>(3,897.14 to 15,004.94)             | 5,240.49<br>(2,527.61 to 9,482.32)             | 12,956.82<br>(6,237.54 to 22,760.65)            | 160.48<br>(80.83 to 294.14)                | 114.50<br>(57.91 to 200.73)                | 76.17<br>(38.53 to 133.86)               | 171.49<br>(86.72 to 294.20)                |                        |
| <b>Maternal disorders</b>                             | <b>102,298.36<br/>(67,647.25 to 143,020.11)</b> | <b>113,667.69<br/>(63,028.46 to 186,220.16)</b> | <b>59,985.41<br/>(30,958.66 to 104,216.41)</b> | <b>170,865.73<br/>(94,268.28 to 278,154.63)</b> | <b>1,862.51<br/>(1,221.50 to 2,611.86)</b> | <b>2,193.09<br/>(1,185.13 to 3,618.49)</b> | <b>1,160.31<br/>(596.03 to 2,031.19)</b> | <b>3,279.98<br/>(1,791.39 to 5,376.53)</b> |                        |
| Maternal hemorrhage                                   | 25,179.51<br>(15,198.05 to 37,340.06)           | 22,252.99<br>(11,187.14 to 38,968.64)           | 12,041.55<br>(5,829.58 to 22,683.64)           | 30,590.40<br>(15,441.11 to 53,886.27)           | 469.56<br>(280.53 to 711.29)               | 433.02<br>(215.59 to 757.92)               | 234.73<br>(113.67 to 433.64)             | 592.08<br>(299.95 to 1,073.94)             |                        |
| Maternal sepsis and other maternal infections         | 17,284.82<br>(10,526.09 to 26,072.47)           | 13,398.62<br>(6,545.04 to 24,216.42)            | 7,206.12<br>(3,303.47 to 13,139.02)            | 18,858.64<br>(9,053.81 to 35,135.97)            | 310.36<br>(190.82 to 473.90)               | 251.12<br>(123.49 to 439.90)               | 135.37<br>(62.46 to 248.33)              | 351.18<br>(168.65 to 644.45)               |                        |
| Maternal hypertensive disorders                       | 11,226.70<br>(6,570.19 to 17,848.49)            | 9,826.82<br>(4,892.06 to 17,588.76)             | 5,258.96<br>(2,489.95 to 9,520.56)             | 13,722.68<br>(6,633.23 to 24,399.17)            | 198.85<br>(116.85 to 315.70)               | 181.72<br>(90.22 to 327.93)                | 97.42<br>(46.55 to 175.97)               | 252.12<br>(122.16 to 453.51)               |                        |
| Maternal obstructed labor and uterine rupture         | 4,404.28<br>(2,270.28 to 7,587.32)              | 4,195.93<br>(1,884.86 to 7,888.39)              | 2,168.02<br>(895.78 to 4,374.99)               | 5,962.60<br>(2,505.93 to 11,636.03)             | 81.03<br>(41.93 to 135.92)                 | 80.91<br>(36.68 to 151.01)                 | 41.90<br>(17.32 to 82.45)                | 114.31<br>(48.50 to 223.18)                |                        |
| Maternal abortion, miscarriage, and ectopic pregnancy | 3,725.02<br>(1,753.85 to 6,365.34)              | 4,025.57<br>(1,518.00 to 8,559.40)              | 2,145.95<br>(834.66 to 4,907.77)               | 5,658.60<br>(2,282.80 to 12,599.26)             | 66.72<br>(32.33 to 114.83)                 | 75.21<br>(28.63 to 157.28)                 | 40.17<br>(15.55 to 87.98)                | 104.94<br>(42.26 to 228.70)                |                        |
| Indirect maternal deaths                              | 27,368.41<br>(15,711.93 to 42,947.72)           | 26,678.58<br>(12,851.20 to 48,470.12)           | 14,594.50<br>(6,733.75 to 27,825.62)           | 39,036.98<br>(18,200.05 to 68,914.03)           | 493.36<br>(283.99 to 761.86)               | 496.71<br>(240.46 to 910.66)               | 272.64<br>(125.89 to 516.92)             | 720.40<br>(346.99 to 1,268.01)             |                        |
| Late maternal deaths                                  | 1,816.83<br>(791.30 to 3,462.73)                | 1,351.84<br>(532.49 to 2,721.44)                | 728.64<br>(270.98 to 1,546.88)                 | 1,956.69<br>(764.28 to 4,042.94)                | 32.87<br>(14.30 to 61.18)                  | 25.77<br>(10.05 to 52.14)                  | 13.94<br>(5.09 to 29.89)                 | 36.92<br>(14.27 to 75.56)                  |                        |
| Maternal deaths aggravated by HIV/AIDS                | 4,550.95<br>(2,548.29 to 6,682.96)              | 25,845.03<br>(8,700.46 to 49,068.28)            | 12,403.58<br>(2,015.46 to 27,800.33)           | 46,421.17<br>(22,687.47 to 79,603.47)           | 87.17<br>(49.02 to 129.87)                 | 532.11<br>(179.04 to 1,023.32)             | 258.16<br>(42.61 to 586.01)              | 944.16<br>(463.77 to 1,584.84)             |                        |
| Other maternal disorders                              | 6,741.84<br>(3,392.50 to 11,140.54)             | 6,092.31<br>(2,746.79 to 11,326.60)             | 3,438.10<br>(1,451.38 to 6,647.21)             | 8,657.97<br>(3,862.78 to 15,936.38)             | 122.59<br>(62.43 to 203.09)                | 116.50<br>(50.84 to 217.58)                | 65.99<br>(27.86 to 127.15)               | 163.84<br>(71.32 to 300.27)                |                        |

| Malawi                                                   |                                                        |                                                    |                                                  |                                                      |                                               |                                             |                                            |                                               |
|----------------------------------------------------------|--------------------------------------------------------|----------------------------------------------------|--------------------------------------------------|------------------------------------------------------|-----------------------------------------------|---------------------------------------------|--------------------------------------------|-----------------------------------------------|
| Cause                                                    | YLLs (actual counts)                                   |                                                    |                                                  |                                                      | Deaths (actual counts)                        |                                             |                                            |                                               |
|                                                          | 2016                                                   | 2040 Forecast                                      | 2040 Better Scenario                             | 2040 Worse Scenario                                  | 2016                                          | 2040 Forecast                               | 2040 Better Scenario                       | 2040 Worse Scenario                           |
| <b>Neonatal disorders</b>                                | <b>1,305,162.45<br/>(1,036,210.65 to 1,667,203.22)</b> | <b>777,185.02<br/>(507,165.67 to 1,119,008.09)</b> | <b>472,127.18<br/>(305,143.64 to 676,219.46)</b> | <b>1,390,495.45<br/>(911,483.44 to 1,989,305.70)</b> | <b>15,079.78<br/>(11,970.65 to 19,264.55)</b> | <b>8,981.73<br/>(5,862.22 to 12,936.92)</b> | <b>5,456.45<br/>(3,526.90 to 7,813.63)</b> | <b>16,068.69<br/>(10,535.72 to 22,985.15)</b> |
| Neonatal preterm birth                                   | 374,941.35<br>(245,923.03 to 518,647.83)               | 194,198.97<br>(117,683.79 to 290,029.15)           | 114,555.67<br>(68,216.17 to 171,342.39)          | 385,862.98<br>(235,324.67 to 569,750.00)             | 4,331.77<br>(2,841.27 to 5,991.01)            | 2,244.27<br>(1,360.62 to 3,350.97)          | 1,323.94<br>(788.42 to 1,979.54)           | 4,458.61<br>(2,719.23 to 6,581.17)            |
| Neonatal encephalopathy due to birth asphyxia and trauma | 507,297.42<br>(350,114.27 to 696,913.13)               | 275,273.14<br>(147,278.53 to 456,701.42)           | 174,070.84<br>(93,525.57 to 287,887.72)          | 466,879.67<br>(248,094.52 to 761,331.58)             | 5,860.51<br>(4,045.89 to 8,050.15)            | 3,180.92<br>(1,703.21 to 5,277.67)          | 2,011.52<br>(1,080.59 to 3,325.52)         | 5,394.85<br>(2,867.63 to 8,797.54)            |
| Neonatal sepsis and other neonatal infections            | 231,308.99<br>(145,648.41 to 361,954.54)               | 186,818.09<br>(110,997.35 to 295,259.66)           | 115,597.89<br>(69,243.34 to 186,758.30)          | 319,670.27<br>(189,049.23 to 514,263.28)             | 2,673.14<br>(1,481.95 to 4,181.95)            | 2,159.28<br>(1,282.69 to 3,411.68)          | 1,336.13<br>(800.15 to 2,158.31)           | 3,694.72<br>(2,185.15 to 5,943.91)            |
| Hemolytic disease and other neonatal jaundice            | 28,052.84<br>(13,168.64 to 50,340.84)                  | 11,289.25<br>(4,837.77 to 22,388.81)               | 6,368.77<br>(2,707.90 to 12,513.70)              | 20,311.29<br>(8,693.77 to 40,449.29)                 | 324.13<br>(152.13 to 581.51)                  | 130.45<br>(55.91 to 258.65)                 | 73.59<br>(31.29 to 144.55)                 | 234.70<br>(100.44 to 467.34)                  |
| Other neonatal disorders                                 | 163,561.84<br>(101,534.97 to 247,632.55)               | 109,605.57<br>(56,687.62 to 186,884.60)            | 61,534.02<br>(31,834.50 to 107,204.63)           | 197,771.24<br>(101,060.87 to 336,982.66)             | 1,890.23<br>(1,173.08 to 2,861.56)            | 1,266.86<br>(655.42 to 2,159.09)            | 711.25<br>(368.05 to 1,238.91)             | 2,285.81<br>(1,168.83 to 3,894.48)            |

|                                                                         |                                                          |                                                          |                                                          |                                                          |                                                 |                                                  |                                                 |                                                   |
|-------------------------------------------------------------------------|----------------------------------------------------------|----------------------------------------------------------|----------------------------------------------------------|----------------------------------------------------------|-------------------------------------------------|--------------------------------------------------|-------------------------------------------------|---------------------------------------------------|
|                                                                         | 320,049.41<br>(206,799.77 to<br>477,941.06)              | 138,136.38<br>(92,491.90 to<br>200,482.27)               | 93,812.71<br>(62,571.26 to<br>137,865.45)                | 206,828.28<br>(133,517.34 to<br>311,999.03)              | 4,880.75<br>(3,484.37 to<br>6,768.48)           | 2,853.71<br>(2,198.69 to<br>3,687.89)            | 2,200.22<br>(1,723.07 to<br>2,789.21)           | 3,680.52<br>(2,747.79 to<br>4,918.78)             |
| <b>Nutritional deficiencies</b>                                         |                                                          |                                                          |                                                          |                                                          |                                                 |                                                  |                                                 |                                                   |
| Protein-energy malnutrition                                             | 304,732.21<br>(195,948.31 to<br>462,400.73)              | 114,220.74<br>(71,435.05 to<br>178,901.39)               | 75,848.52<br>(46,556.41 to<br>116,618.23)                | 177,202.44<br>(106,310.98 to<br>281,700.84)              | 4,473.27<br>(3,136.73 to<br>6,316.88)           | 2,165.02<br>(1,564.43 to<br>2,949.70)            | 1,627.55<br>(1,206.28 to<br>2,175.58)           | 2,917.60<br>(2,026.53 to<br>4,160.06)             |
| Iodine deficiency                                                       | 1,435.89<br>(78.06 to<br>7,381.40)                       | 4,360.39<br>(79.65 to<br>25,632.89)                      | 2,787.32<br>(49.84 to<br>14,633.83)                      | 6,573.75<br>(115.15 to<br>44,532.92)                     | 27.04<br>(1.87 to<br>106.46)                    | 99.59<br>(2.83 to<br>350.59)                     | 71.45<br>(1.95 to<br>240.39)                    | 129.17<br>(3.49 to<br>573.30)                     |
| Dietary iron deficiency                                                 | 628.63<br>(436.13 to<br>884.23)                          | 830.10<br>(471.49 to<br>1,491.60)                        | 690.37<br>(377.90 to<br>1,273.48)                        | 928.65<br>(534.76 to<br>1,616.70)                        | 11.23<br>(7.83 to<br>15.95)                     | 15.50<br>(8.92 to<br>27.14)                      | 13.06<br>(7.30 to<br>23.44)                     | 16.99<br>(10.01 to<br>29.11)                      |
| Other nutritional deficiencies                                          | 13,252.68<br>(8,082.63 to<br>19,928.09)                  | 18,725.16<br>(11,360.11 to<br>29,091.29)                 | 14,486.51<br>(8,505.98 to<br>23,014.34)                  | 22,123.43<br>(13,049.31 to<br>34,120.16)                 | 369.21<br>(242.56 to<br>526.10)                 | 573.61<br>(395.27 to<br>805.47)                  | 488.15<br>(333.81 to<br>684.58)                 | 616.76<br>(420.86 to<br>856.08)                   |
| <b>Other communicable, maternal, neonatal, and nutritional diseases</b> | <b>166,943.54</b><br>(83,957.59 to<br>287,395.92)        | <b>72,516.69</b><br>(43,317.05 to<br>115,131.37)         | <b>51,866.39</b><br>(31,856.40 to<br>80,164.21)          | <b>101,714.70</b><br>(57,054.82 to<br>168,895.19)        | <b>2,286.08</b><br>(1,303.96 to<br>3,718.67)    | <b>1,905.47</b><br>(889.56 to<br>1,865.20)       | <b>999.48</b><br>(690.75 to<br>1,427.82)        | <b>1,666.45</b><br>(1,088.67 to<br>2,506.53)      |
| Sexually transmitted infections excluding HIV                           | 116,842.78<br>(42,289.59 to<br>232,547.62)               | 27,745.03<br>(8,878.10 to<br>60,516.10)                  | 19,002.47<br>(6,511.31 to<br>40,344.82)                  | 42,923.34<br>(13,022.34 to<br>97,387.41)                 | 4,392.81<br>(823.60 to<br>2,743.81)             | 352.30<br>(126.98 to<br>740.33)                  | 247.18<br>(94.12 to<br>507.60)                  | 530.59<br>(175.24 to<br>1,153.69)                 |
| Syphilis                                                                | 115,258.04<br>(41,395.77 to<br>230,682.25)               | 26,047.78<br>(7,561.31 to<br>58,770.12)                  | 17,576.68<br>(5,278.93 to<br>39,217.12)                  | 41,063.04<br>(11,634.42 to<br>96,346.80)                 | 1,359.20<br>(493.24 to<br>2,715.55)             | 314.90<br>(97.38 to<br>697.15)                   | 214.71<br>(69.83 to<br>467.94)                  | 490.73<br>(144.10 to<br>1,130.39)                 |
| Chlamydial infection                                                    | 313.25<br>(149.53 to<br>553.45)                          | 337.38<br>(151.48 to<br>616.27)                          | 281.25<br>(129.55 to<br>512.27)                          | 371.71<br>(167.03 to<br>672.88)                          | 6.51<br>(3.18 to<br>11.21)                      | 7.36<br>(3.55 to<br>12.93)                       | 6.36<br>(3.13 to<br>11.13)                      | 7.88<br>(3.77 to<br>13.69)                        |
| Gonococcal infection                                                    | 807.02<br>(400.24 to<br>1,396.23)                        | 867.80<br>(400.06 to<br>1,614.76)                        | 732.95<br>(336.99 to<br>1,360.02)                        | 946.07<br>(435.59 to<br>1,729.69)                        | 17.71<br>(8.86 to<br>30.55)                     | 19.68<br>(9.42 to<br>34.20)                      | 17.23<br>(8.42 to<br>30.11)                     | 20.82<br>(10.02 to<br>36.40)                      |
| Other sexually transmitted infections                                   | 464.46<br>(232.43 to<br>822.95)                          | 492.07<br>(221.32 to<br>922.19)                          | 411.59<br>(186.61 to<br>756.58)                          | 542.52<br>(241.92 to<br>1,025.06)                        | 9.38<br>(4.74 to<br>16.06)                      | 10.36<br>(4.84 to<br>18.75)                      | 8.88<br>(4.23 to<br>15.77)                      | 11.16<br>(5.22 to<br>20.44)                       |
| Acute hepatitis                                                         | 23,734.96<br>(18,385.50 to<br>29,369.72)                 | 26,419.79<br>(17,273.64 to<br>40,795.20)                 | 20,983.55<br>(13,306.61 to<br>33,461.64)                 | 29,916.22<br>(19,743.65 to<br>45,856.16)                 | 551.69<br>(433.78 to<br>695.10)                 | 672.44<br>(464.04 to<br>976.93)                  | 555.29<br>(376.49 to<br>828.38)                 | 730.48<br>(511.92 to<br>1,055.88)                 |
| Acute hepatitis A                                                       | 1,179.47<br>(127.91 to<br>2,688.94)                      | 667.87<br>(166.94 to<br>1,465.20)                        | 471.08<br>(126.16 to<br>975.08)                          | 957.11<br>(202.20 to<br>2,065.20)                        | 15.38<br>(2.57 to<br>32.94)                     | 11.49<br>(3.74 to<br>22.09)                      | 8.74<br>(2.94 to<br>16.73)                      | 14.99<br>(4.53 to<br>30.98)                       |
| Acute hepatitis B                                                       | 18,271.45<br>(13,416.45 to<br>23,640.13)                 | 21,741.54<br>(13,725.11 to<br>34,667.23)                 | 17,196.10<br>(10,375.02 to<br>28,340.67)                 | 24,215.19<br>(15,426.55 to<br>37,828.27)                 | 450.75<br>(339.44 to<br>572.88)                 | 562.30<br>(374.14 to<br>839.97)                  | 457.13<br>(295.87 to<br>700.78)                 | 609.41<br>(410.90 to<br>901.58)                   |
| Acute hepatitis C                                                       | 504.95<br>(350.55 to<br>707.80)                          | 769.00<br>(461.60 to<br>1,240.35)                        | 699.44<br>(411.36 to<br>1,153.32)                        | 796.11<br>(481.22 to<br>1,256.17)                        | 14.44<br>(10.02 to<br>20.91)                    | 22.79<br>(14.30 to<br>35.85)                     | 21.40<br>(13.30 to<br>33.73)                    | 22.85<br>(14.50 to<br>35.60)                      |
| Acute hepatitis E                                                       | 3,779.09<br>(2,661.29 to<br>5,377.29)                    | 3,241.38<br>(2,062.47 to<br>5,107.42)                    | 2,616.93<br>(1,644.53 to<br>4,154.24)                    | 3,947.81<br>(2,570.97 to<br>6,042.32)                    | 71.12<br>(51.26 to<br>99.25)                    | 75.86<br>(51.01 to<br>108.97)                    | 68.03<br>(44.46 to<br>98.91)                    | 83.22<br>(57.19 to<br>118.86)                     |
| Other unspecified infectious diseases                                   | 26,365.80<br>(10,410.53 to<br>75,831.11)                 | 18,351.87<br>(9,022.36 to<br>38,172.21)                  | 11,880.37<br>(5,837.78 to<br>24,460.92)                  | 28,875.14<br>(13,369.41 to<br>61,866.81)                 | 341.58<br>(152.54 to<br>932.04)                 | 280.73<br>(159.76 to<br>532.36)                  | 197.00<br>(116.80 to<br>353.72)                 | 405.38<br>(216.13 to<br>791.33)                   |
| <b>Non-communicable diseases</b>                                        | <b>1,504,693.29</b><br>(1,213,540.78 to<br>1,772,819.33) | <b>2,588,520.28</b><br>(1,824,778.82 to<br>3,689,067.94) | <b>2,061,152.44</b><br>(1,451,982.29 to<br>2,948,336.77) | <b>3,099,253.17</b><br>(2,184,149.49 to<br>4,357,316.48) | <b>48,239.68</b><br>(38,989.90 to<br>57,312.55) | <b>87,164.05</b><br>(67,597.42 to<br>112,793.15) | <b>71,226.93</b><br>(55,888.62 to<br>91,869.63) | <b>101,520.29</b><br>(77,123.77 to<br>131,702.95) |
| <b>Malawi</b>                                                           |                                                          |                                                          |                                                          |                                                          |                                                 |                                                  |                                                 |                                                   |
| Cause                                                                   | YLLs (actual counts)                                     |                                                          |                                                          |                                                          | Deaths (actual counts)                          |                                                  |                                                 |                                                   |
|                                                                         | 2016                                                     | 2040 Forecast                                            | 2040 Better Scenario                                     | 2040 Worse Scenario                                      | 2016                                            | 2040 Forecast                                    | 2040 Better Scenario                            | 2040 Worse Scenario                               |
| Neoplasms                                                               | 559,260.19<br>(376,454.35 to<br>691,136.12)              | 1,021,248.13<br>(624,730.34 to<br>1,521,733.23)          | 967,117.96<br>(610,108.77 to<br>1,440,598.52)            | 1,071,018.15<br>(651,561.01 to<br>1,594,009.88)          | 14,546.88<br>(10,967.45 to<br>17,788.41)        | 27,472.55<br>(18,896.62 to<br>38,331.39)         | 26,710.50<br>(18,625.09 to<br>37,458.49)        | 28,114.69<br>(19,081.72 to<br>39,675.99)          |
| Lip and oral cavity cancer                                              | 4,150.17<br>(3,100.58 to<br>5,192.43)                    | 9,371.56<br>(4,693.09 to<br>18,893.59)                   | 7,033.65<br>(3,805.78 to<br>13,356.90)                   | 11,708.35<br>(5,577.08 to<br>24,187.77)                  | 132.10<br>(100.18 to<br>165.87)                 | 282.25<br>(150.33 to<br>531.86)                  | 220.37<br>(127.84 to<br>383.67)                 | 344.15<br>(174.39 to<br>692.20)                   |

|                                      |                                       |                                         |                                        |                                         |                                    |                                    |                                    |                                    |
|--------------------------------------|---------------------------------------|-----------------------------------------|----------------------------------------|-----------------------------------------|------------------------------------|------------------------------------|------------------------------------|------------------------------------|
| Nasopharynx cancer                   | 703.88<br>(526.12 to 891.82)          | 2,087.40<br>(968.17 to 4,430.49)        | 1,460.67<br>(697.18 to 3,032.45)       | 2,702.59<br>(1,190.83 to 5,836.60)      | 18.80<br>(14.21 to 23.70)          | 55.56<br>(26.84 to 114.34)         | 39.86<br>(19.85 to 78.80)          | 70.90<br>(32.89 to 148.03)         |
| Other pharynx cancer                 | 1,264.25<br>(885.95 to 1,832.92)      | 2,560.29<br>(1,356.22 to 4,649.30)      | 2,076.04<br>(1,142.38 to 3,636.33)     | 2,850.48<br>(1,497.04 to 5,200.09)      | 44.50<br>(31.48 to 62.88)          | 85.78<br>(48.76 to 145.24)         | 71.91<br>(42.72 to 117.85)         | 93.37<br>(51.41 to 164.18)         |
| Esophageal cancer                    | 59,290.83<br>(45,777.46 to 73,478.41) | 129,932.81<br>(60,359.79 to 249,869.29) | 97,689.23<br>(49,060.90 to 184,715.73) | 155,025.10<br>(70,894.92 to 299,135.00) | 2,149.82<br>(1,700.07 to 2,622.77) | 4,257.01<br>(2,204.33 to 7,578.19) | 3,341.55<br>(1,842.15 to 5,855.16) | 4,952.49<br>(2,455.14 to 8,731.66) |
| Stomach cancer                       | 8,014.68<br>(6,178.23 to 9,799.66)    | 11,284.17<br>(7,838.59 to 15,966.55)    | 10,457.13<br>(7,145.50 to 15,251.23)   | 11,696.47<br>(8,105.81 to 17,017.95)    | 320.37<br>(251.23 to 388.21)       | 434.23<br>(335.98 to 570.99)       | 425.56<br>(326.10 to 570.80)       | 435.17<br>(331.85 to 581.43)       |
| Colon and rectum cancer              | 11,439.12<br>(8,614.33 to 14,410.79)  | 27,642.91<br>(16,450.15 to 43,125.68)   | 28,761.79<br>(17,274.15 to 46,055.73)  | 26,753.12<br>(15,974.62 to 42,244.08)   | 436.11<br>(333.18 to 540.31)       | 1,015.24<br>(660.68 to 1,469.09)   | 1,114.11<br>(735.75 to 1,627.05)   | 949.61<br>(613.15 to 1,379.96)     |
| Liver cancer                         | 19,728.86<br>(15,077.46 to 24,571.01) | 43,263.48<br>(26,690.97 to 67,609.46)   | 41,573.25<br>(25,699.17 to 65,833.33)  | 47,608.11<br>(28,513.13 to 71,449.06)   | 571.03<br>(438.08 to 711.14)       | 1,259.91<br>(829.08 to 1,835.29)   | 1,231.01<br>(819.20 to 1,851.24)   | 1,330.37<br>(853.21 to 2,058.62)   |
| Liver cancer due to hepatitis B      | 7,182.78<br>(5,087.55 to 9,725.07)    | 15,955.70<br>(9,159.74 to 26,586.23)    | 15,485.79<br>(8,877.19 to 26,140.14)   | 17,385.62<br>(9,669.56 to 30,013.54)    | 190.47<br>(136.30 to 262.67)       | 425.09<br>(253.56 to 682.57)       | 422.89<br>(251.73 to 685.07)       | 454.17<br>(260.04 to 755.02)       |
| Liver cancer due to hepatitis C      | 4,438.50<br>(2,958.31 to 6,048.41)    | 10,140.99<br>(5,758.88 to 16,258.97)    | 10,075.30<br>(5,740.72 to 16,156.13)   | 10,770.52<br>(5,898.38 to 17,751.40)    | 164.64<br>(111.69 to 223.97)       | 352.88<br>(216.54 to 529.43)       | 363.49<br>(225.81 to 545.27)       | 364.28<br>(215.90 to 563.56)       |
| Liver cancer due to alcohol use      | 1,570.64<br>(1,120.37 to 2,128.35)    | 3,784.43<br>(2,209.50 to 6,343.76)      | 3,326.12<br>(1,952.57 to 5,460.59)     | 4,593.63<br>(2,565.88 to 7,984.12)      | 54.79<br>(39.88 to 73.89)          | 120.20<br>(76.65 to 187.12)        | 109.95<br>(70.68 to 166.94)        | 141.18<br>(86.32 to 227.04)        |
| Liver cancer due to other causes     | 6,536.94<br>(4,749.92 to 8,413.60)    | 13,382.36<br>(7,816.67 to 21,575.02)    | 12,686.04<br>(7,488.98 to 20,411.98)   | 14,858.34<br>(8,525.86 to 24,472.04)    | 161.14<br>(119.05 to 206.65)       | 342.03<br>(218.03 to 528.28)       | 334.68<br>(211.82 to 515.85)       | 370.74<br>(229.08 to 593.79)       |
| Gallbladder and biliary tract cancer | 1,743.96<br>(1,271.60 to 2,344.30)    | 2,806.75<br>(1,918.27 to 3,886.68)      | 2,992.13<br>(2,025.15 to 4,253.24)     | 2,618.41<br>(1,807.19 to 3,598.41)      | 72.36<br>(53.51 to 93.37)          | 108.49<br>(80.94 to 141.52)        | 120.86<br>(88.66 to 159.49)        | 98.50<br>(73.91 to 127.83)         |
| Pancreatic cancer                    | 5,462.15<br>(4,220.92 to 6,740.34)    | 14,292.08<br>(10,149.10 to 19,860.19)   | 15,525.03<br>(10,933.40 to 21,844.26)  | 13,439.78<br>(9,613.79 to 18,459.73)    | 239.90<br>(187.32 to 293.66)       | 569.14<br>(439.44 to 723.67)       | 645.96<br>(501.65 to 839.48)       | 521.23<br>(401.94 to 666.27)       |
| Larynx cancer                        | 1,515.78<br>(1,155.62 to 1,935.75)    | 3,132.82<br>(1,667.74 to 6,220.12)      | 2,306.20<br>(1,309.96 to 4,188.39)     | 4,188.62<br>(2,111.13 to 8,488.58)      | 54.79<br>(42.88 to 69.39)          | 103.75<br>(60.86 to 187.52)        | 80.31<br>(50.57 to 137.42)         | 136.94<br>(73.74 to 268.06)        |
| Tracheal, bronchus, and lung cancer  | 8,851.59<br>(6,951.83 to 10,868.77)   | 20,179.08<br>(11,637.67 to 33,623.26)   | 13,253.79<br>(8,427.63 to 20,559.52)   | 24,420.59<br>(13,660.88 to 43,077.53)   | 387.55<br>(308.69 to 473.55)       | 802.10<br>(500.22 to 1,284.34)     | 557.89<br>(379.38 to 825.02)       | 953.34<br>(570.26 to 1,553.62)     |
| Malignant skin melanoma              | 5,300.89<br>(3,296.22 to 7,247.00)    | 11,362.00<br>(6,343.53 to 16,844.90)    | 12,899.56<br>(7,658.72 to 19,434.13)   | 10,263.72<br>(5,748.67 to 15,136.27)    | 186.88<br>(129.25 to 249.56)       | 381.21<br>(254.77 to 524.45)       | 448.22<br>(306.26 to 606.68)       | 337.21<br>(220.59 to 467.83)       |
| Non-melanoma skin cancer             | 1,666.33<br>(1,236.07 to 2,147.67)    | 3,979.51<br>(2,777.59 to 5,626.94)      | 3,812.72<br>(2,618.76 to 5,458.77)     | 3,912.60<br>(2,748.56 to 5,462.52)      | 72.82<br>(53.76 to 94.62)          | 165.49<br>(124.59 to 210.52)       | 169.83<br>(125.50 to 219.72)       | 156.08<br>(118.77 to 194.06)       |
| Breast cancer                        | 16,673.84<br>(10,575.27 to 23,725.17) | 37,543.68<br>(22,446.50 to 57,270.39)   | 36,992.84<br>(22,106.57 to 56,087.70)  | 38,044.66<br>(22,437.06 to 59,012.86)   | 540.84<br>(343.21 to 753.95)       | 1,189.27<br>(757.60 to 1,737.11)   | 1,206.31<br>(765.80 to 1,758.31)   | 1,183.28<br>(742.54 to 1,750.53)   |
| Cervical cancer                      | 39,872.12<br>(19,177.09 to 57,762.51) | 63,156.67<br>(27,729.53 to 97,616.60)   | 55,239.64<br>(24,789.73 to 86,890.91)  | 66,230.44<br>(28,896.95 to 104,536.58)  | 1,284.28<br>(663.52 to 1,827.54)   | 1,920.33<br>(914.73 to 2,898.68)   | 1,712.95<br>(847.58 to 2,595.66)   | 1,988.09<br>(951.41 to 3,041.12)   |
| Uterine cancer                       | 2,137.47<br>(1,402.32 to 2,954.56)    | 4,854.03<br>(2,999.44 to 7,140.26)      | 4,166.85<br>(2,562.65 to 6,299.36)     | 5,132.14<br>(3,225.69 to 7,413.99)      | 79.59<br>(52.87 to 109.37)         | 170.68<br>(115.48 to 238.04)       | 151.02<br>(100.30 to 214.06)       | 176.89<br>(119.19 to 243.39)       |
| Ovarian cancer                       | 5,005.60<br>(3,226.85 to 6,941.44)    | 10,589.62<br>(6,451.07 to 15,708.92)    | 11,725.92<br>(7,182.91 to 17,121.08)   | 9,992.45<br>(6,066.79 to 14,933.82)     | 157.17<br>(104.25 to 218.12)       | 331.39<br>(218.46 to 472.67)       | 377.54<br>(248.63 to 534.79)       | 307.39<br>(203.44 to 439.11)       |
| Prostate cancer                      | 12,334.57<br>(7,653.47 to 16,767.79)  | 29,013.82<br>(17,040.72 to 40,613.11)   | 33,059.85<br>(19,192.93 to 47,526.57)  | 25,946.28<br>(15,018.03 to 35,373.40)   | 641.64<br>(418.34 to 851.51)       | 1,420.15<br>(913.25 to 1,806.69)   | 1,698.17<br>(1,098.49 to 2,207.98) | 1,236.27<br>(793.26 to 1,557.57)   |
| Testicular cancer                    | 841.06<br>(573.92 to 1,157.68)        | 1,390.04<br>(818.18 to 2,298.83)        | 1,304.34<br>(765.86 to 2,203.08)       | 1,426.04<br>(835.78 to 2,404.34)        | 22.99<br>(16.47 to 31.07)          | 38.86<br>(27.30 to 55.26)          | 39.54<br>(27.78 to 56.58)          | 37.66<br>(26.38 to 54.22)          |

| Malawi                          |                                                      |                                                        |                                                      |                                                        |                                                   |                                                   |                                                   |                                                   |
|---------------------------------|------------------------------------------------------|--------------------------------------------------------|------------------------------------------------------|--------------------------------------------------------|---------------------------------------------------|---------------------------------------------------|---------------------------------------------------|---------------------------------------------------|
| Cause                           | YLLs (actual counts)                                 |                                                        |                                                      |                                                        | Deaths (actual counts)                            |                                                   |                                                   |                                                   |
|                                 | 2016                                                 | 2040 Forecast                                          | 2040 Better Scenario                                 | 2040 Worse Scenario                                    | 2016                                              | 2040 Forecast                                     | 2040 Better Scenario                              | 2040 Worse Scenario                               |
| Kidney cancer                   | 7,040.63<br>(4,303.87 to<br>11,093.71)               | 9,422.39<br>(6,169.52 to<br>14,137.28)                 | 9,671.30<br>(6,456.17 to<br>13,929.56)               | 10,584.92<br>(6,512.61 to<br>16,428.66)                | 116.51<br>(82.12 to<br>161.88)                    | 197.35<br>(146.13 to<br>261.80)                   | 219.34<br>(164.72 to<br>290.19)                   | 200.73<br>(143.47 to<br>278.09)                   |
| Bladder cancer                  | 19,007.11<br>(14,641.96 to<br>23,600.08)             | 35,734.84<br>(23,781.61 to<br>52,182.75)               | 34,655.51<br>(22,883.08 to<br>51,412.73)             | 36,096.57<br>(23,991.65 to<br>52,514.88)               | 731.64<br>(572.50 to<br>897.68)                   | 1,271.33<br>(918.67 to<br>1,765.62)               | 1,294.68<br>(944.64 to<br>1,794.54)               | 1,247.08<br>(896.53 to<br>1,710.02)               |
| Brain and nervous system cancer | 7,263.65<br>(5,824.71 to<br>9,022.42)                | 15,444.07<br>(10,823.23 to<br>21,975.72)               | 15,929.94<br>(10,961.32 to<br>22,983.33)             | 15,606.58<br>(11,075.69 to<br>21,881.31)               | 166.92<br>(132.16 to<br>206.95)                   | 393.60<br>(289.31 to<br>532.52)                   | 426.10<br>(306.37 to<br>582.22)                   | 375.02<br>(279.31 to<br>497.43)                   |
| Thyroid cancer                  | 2,487.49<br>(1,643.35 to<br>3,335.35)                | 4,893.01<br>(2,946.02 to<br>7,571.42)                  | 4,290.97<br>(2,624.38 to<br>6,625.29)                | 5,568.66<br>(3,165.65 to<br>8,463.08)                  | 85.49<br>(56.73 to<br>114.55)                     | 161.29<br>(100.32 to<br>239.59)                   | 144.11<br>(91.53 to<br>214.38)                    | 174.49<br>(105.98 to<br>267.60)                   |
| Mesothelioma                    | 405.18<br>(267.05 to<br>572.20)                      | 974.12<br>(598.85 to<br>1,546.02)                      | 979.76<br>(593.62 to<br>1,602.30)                    | 938.87<br>(586.92 to<br>1,464.92)                      | 14.30<br>(9.16 to<br>20.16)                       | 32.32<br>(20.22 to<br>47.57)                      | 33.78<br>(20.68 to<br>51.57)                      | 30.39<br>(19.27 to<br>44.14)                      |
| Hodgkin lymphoma                | 2,388.14<br>(1,159.71 to<br>3,336.08)                | 2,806.78<br>(1,245.65 to<br>4,601.05)                  | 2,165.82<br>(955.64 to<br>3,623.54)                  | 3,293.70<br>(1,414.78 to<br>5,318.67)                  | 46.55<br>(24.13 to<br>62.86)                      | 59.92<br>(28.50 to<br>93.99)                      | 47.50<br>(22.91 to<br>76.79)                      | 67.80<br>(31.30 to<br>107.41)                     |
| Non-Hodgkin lymphoma            | 73,386.25<br>(35,846.85 to<br>100,229.61)            | 89,607.84<br>(47,072.87 to<br>131,632.81)              | 88,259.05<br>(49,091.69 to<br>130,549.66)            | 99,379.93<br>(50,037.90 to<br>145,106.30)              | 1,197.26<br>(690.60 to<br>1,567.88)               | 1,685.87<br>(1,036.43 to<br>2,410.85)             | 1,735.88<br>(1,103.64 to<br>2,488.31)             | 1,768.07<br>(1,027.47 to<br>2,521.98)             |
| Multiple myeloma                | 2,373.74<br>(1,735.00 to<br>3,243.12)                | 6,031.37<br>(3,897.72 to<br>8,826.82)                  | 6,625.24<br>(4,193.21 to<br>9,964.64)                | 5,718.60<br>(3,724.53 to<br>8,489.54)                  | 81.46<br>(58.08 to<br>120.56)                     | 198.37<br>(135.60 to<br>295.92)                   | 223.85<br>(150.34 to<br>337.88)                   | 184.68<br>(126.65 to<br>273.31)                   |
| Leukemia                        | 10,722.80<br>(8,233.93 to<br>13,561.03)              | 17,355.23<br>(11,551.18 to<br>25,614.69)               | 17,214.03<br>(11,449.92 to<br>26,098.59)             | 18,429.04<br>(12,241.43 to<br>27,000.08)               | 237.03<br>(182.62 to<br>293.67)                   | 433.81<br>(309.42 to<br>600.53)                   | 449.64<br>(318.99 to<br>627.71)                   | 439.61<br>(311.26 to<br>609.94)                   |
| Acute lymphoid leukemia         | 3,367.43<br>(2,474.46 to<br>4,344.03)                | 5,160.49<br>(3,406.39 to<br>7,512.44)                  | 5,261.68<br>(3,458.67 to<br>7,851.46)                | 5,480.65<br>(3,601.83 to<br>7,831.62)                  | 61.92<br>(46.67 to<br>77.74)                      | 111.88<br>(75.91 to<br>159.63)                    | 117.98<br>(79.32 to<br>169.37)                    | 113.67<br>(77.21 to<br>159.54)                    |
| Chronic lymphoid leukemia       | 378.63<br>(272.62 to<br>489.43)                      | 677.99<br>(443.08 to<br>938.05)                        | 709.51<br>(459.94 to<br>998.16)                      | 667.81<br>(436.95 to<br>918.18)                        | 16.77<br>(12.14 to<br>21.73)                      | 28.33<br>(19.81 to<br>37.71)                      | 30.69<br>(20.95 to<br>41.91)                      | 27.17<br>(18.81 to<br>35.75)                      |
| Acute myeloid leukemia          | 2,199.70<br>(1,699.97 to<br>2,792.69)                | 4,809.24<br>(3,209.40 to<br>7,113.73)                  | 5,240.50<br>(3,442.46 to<br>7,787.17)                | 4,814.01<br>(3,246.31 to<br>6,987.71)                  | 47.93<br>(37.34 to<br>59.38)                      | 119.07<br>(82.82 to<br>170.16)                    | 136.33<br>(95.26 to<br>194.00)                    | 113.87<br>(79.21 to<br>158.42)                    |
| Chronic myeloid leukemia        | 1,084.43<br>(738.79 to<br>1,476.66)                  | 1,583.12<br>(914.18 to<br>2,629.00)                    | 1,555.62<br>(893.93 to<br>2,651.69)                  | 1,619.76<br>(916.09 to<br>2,709.21)                    | 26.88<br>(19.12 to<br>35.91)                      | 39.74<br>(24.00 to<br>62.57)                      | 39.90<br>(24.04 to<br>63.05)                      | 40.00<br>(23.74 to<br>62.36)                      |
| Other leukemia                  | 3,692.62<br>(2,629.43 to<br>4,996.03)                | 5,124.39<br>(3,306.44 to<br>7,743.95)                  | 4,446.71<br>(2,854.80 to<br>6,806.62)                | 5,846.82<br>(3,717.61 to<br>8,861.74)                  | 83.53<br>(61.76 to<br>108.03)                     | 134.79<br>(94.91 to<br>186.59)                    | 124.74<br>(88.49 to<br>173.74)                    | 144.90<br>(100.95 to<br>202.28)                   |
| Other neoplasms                 | 228,188.07<br>(115,633.42 to<br>389,294.55)          | 410,534.86<br>(201,379.61 to<br>656,780.43)            | 404,995.71<br>(205,278.57 to<br>653,907.18)          | 411,641.33<br>(192,410.39 to<br>648,996.40)            | 4,456.19<br>(2,640.97 to<br>5,637.08)             | 8,467.85<br>(4,618.14 to<br>12,213.12)            | 8,482.65<br>(4,834.42 to<br>13,314.99)            | 8,317.89<br>(4,379.87 to<br>12,875.51)            |
| <b>Cardiovascular diseases</b>  | <b>370,319.15<br/>(294,423.87 to<br/>446,077.37)</b> | <b>675,024.17<br/>(419,887.13 to<br/>1,056,137.13)</b> | <b>370,945.41<br/>(242,362.53 to<br/>562,888.03)</b> | <b>971,379.72<br/>(580,519.62 to<br/>1,557,745.83)</b> | <b>17,124.28<br/>(13,714.43 to<br/>20,442.93)</b> | <b>29,914.03<br/>(20,802.95 to<br/>43,601.40)</b> | <b>18,347.74<br/>(13,650.81 to<br/>25,922.21)</b> | <b>40,714.14<br/>(27,602.83 to<br/>61,116.59)</b> |
| Rheumatic heart disease         | 7,218.40<br>(5,314.64 to<br>9,739.82)                | 6,471.92<br>(4,191.54 to<br>10,113.86)                 | 4,778.95<br>(3,059.17 to<br>7,561.77)                | 7,642.05<br>(4,954.26 to<br>12,034.75)                 | 239.89<br>(169.66 to<br>336.98)                   | 219.83<br>(150.21 to<br>333.76)                   | 169.95<br>(114.43 to<br>259.95)                   | 249.35<br>(171.57 to<br>375.80)                   |
| Ischemic heart disease          | 145,261.53<br>(113,197.03 to<br>180,047.95)          | 284,555.11<br>(154,570.28 to<br>549,273.66)            | 128,169.05<br>(69,715.06 to<br>248,900.49)           | 435,242.95<br>(232,781.32 to<br>833,056.61)            | 7,145.79<br>(5,638.14 to<br>8,774.93)             | 12,934.05<br>(7,696.14 to<br>23,224.68)           | 6,687.76<br>(3,969.35 to<br>11,746.86)            | 18,685.58<br>(10,790.62 to<br>34,084.30)          |
| Stroke                          | 108,437.64<br>(84,170.21 to<br>134,700.38)           | 179,502.96<br>(94,973.11 to<br>338,026.35)             | 73,330.03<br>(41,445.66 to<br>140,171.93)            | 286,073.58<br>(150,433.92 to<br>520,520.08)            | 5,080.37<br>(3,968.89 to<br>6,256.28)             | 7,862.89<br>(4,696.06 to<br>14,210.49)            | 3,723.33<br>(2,349.24 to<br>6,617.14)             | 11,849.32<br>(6,854.30 to<br>20,826.38)           |
| Ischemic stroke                 | 35,613.67<br>(26,864.89 to<br>45,929.06)             | 50,520.21<br>(26,457.01 to<br>106,444.08)              | 25,507.57<br>(13,659.24 to<br>54,114.30)             | 72,588.17<br>(36,211.84 to<br>157,176.22)              | 2,087.31<br>(1,595.78 to<br>2,642.86)             | 2,919.18<br>(1,620.93 to<br>6,444.23)             | 1,695.85<br>(959.90 to<br>3,957.10)               | 3,934.52<br>(2,109.74 to<br>9,223.59)             |

|                                                     |                                                               |                                                                |                                                               |                                                                |                                                            |                                                            |                                                            |                                                            |
|-----------------------------------------------------|---------------------------------------------------------------|----------------------------------------------------------------|---------------------------------------------------------------|----------------------------------------------------------------|------------------------------------------------------------|------------------------------------------------------------|------------------------------------------------------------|------------------------------------------------------------|
| Intracerebral hemorrhage                            | 72,823.97<br>(56,056.42 to<br>91,230.22)                      | 128,982.75<br>(61,893.81 to<br>254,107.31)                     | 47,822.46<br>(24,645.18 to<br>89,863.03)                      | 213,485.40<br>(101,408.85 to<br>418,475.61)                    | 2,993.06<br>(2,305.45 to<br>3,767.30)                      | 4,943.72<br>(2,710.40 to<br>9,303.65)                      | 2,027.49<br>(1,196.96 to<br>3,535.91)                      | 7,914.79<br>(4,145.17 to<br>14,944.44)                     |
| Hypertensive heart disease                          | 27,380.41<br>(17,087.08 to<br>38,721.80)                      | 50,464.29<br>(26,714.22 to<br>88,537.93)                       | 36,004.27<br>(19,838.02 to<br>61,562.93)                      | 67,558.41<br>(33,290.25 to<br>133,447.54)                      | 1,425.32<br>(865.28 to<br>1,993.18)                        | 2,524.54<br>(1,422.78 to<br>4,218.20)                      | 1,961.93<br>(1,169.95 to<br>3,121.08)                      | 3,184.07<br>(1,634.35 to<br>5,591.06)                      |
| Cardiomyopathy and myocarditis                      | 11,792.59<br>(8,730.64 to<br>16,320.24)                       | 20,728.90<br>(12,328.90 to<br>34,570.74)                       | 20,331.21<br>(11,899.63 to<br>34,216.41)                      | 21,675.18<br>(13,018.54 to<br>36,277.17)                       | 306.31<br>(228.70 to<br>409.58)                            | 602.11<br>(390.39 to<br>936.11)                            | 625.03<br>(398.99 to<br>992.36)                            | 595.54<br>(388.63 to<br>924.20)                            |
| Myocarditis                                         | 1,828.83<br>(1,065.79 to<br>3,231.59)                         | 2,419.11<br>(1,033.93 to<br>4,904.07)                          | 2,184.54<br>(877.32 to<br>4,555.39)                           | 2,640.64<br>(1,184.02 to<br>5,136.48)                          | 35.46<br>(18.56 to<br>66.91)                               | 57.38<br>(22.53 to<br>125.18)                              | 54.80<br>(20.23 to<br>122.07)                              | 58.76<br>(24.69 to<br>124.08)                              |
| <b>Malawi</b>                                       |                                                               |                                                                |                                                               |                                                                |                                                            |                                                            |                                                            |                                                            |
| Cause                                               | YLLs (actual counts)                                          |                                                                |                                                               |                                                                | Deaths (actual counts)                                     |                                                            |                                                            |                                                            |
|                                                     | 2016                                                          | 2040 Forecast                                                  | 2040 Better Scenario                                          | 2040 Worse Scenario                                            | 2016                                                       | 2040 Forecast                                              | 2040 Better Scenario                                       | 2040 Worse Scenario                                        |
| Alcoholic cardiomyopathy                            | 550.89<br>(260.14 to<br>1,029.28)                             | 1,322.61<br>(534.44 to<br>2,706.49)                            | 1,353.19<br>(544.00 to<br>2,786.81)                           | 1,334.40<br>(551.71 to<br>2,666.65)                            | 17.67<br>(8.45 to<br>32.35)                                | 39.95<br>(17.46 to<br>77.33)                               | 41.98<br>(18.11 to<br>84.36)                               | 39.52<br>(17.46 to<br>74.39)                               |
| Other cardiomyopathy                                | 9,412.87<br>(6,679.53 to<br>13,064.83)                        | 16,987.18<br>(9,526.47 to<br>30,292.24)                        | 16,793.48<br>(9,346.53 to<br>29,760.97)                       | 17,700.15<br>(10,039.94 to<br>30,845.30)                       | 253.18<br>(182.23 to<br>350.88)                            | 504.78<br>(301.28 to<br>832.94)                            | 528.25<br>(320.06 to<br>872.56)                            | 497.26<br>(294.78 to<br>817.74)                            |
| Atrial fibrillation and flutter                     | 2,006.21<br>(1,460.91 to<br>2,644.29)                         | 3,784.62<br>(2,813.16 to<br>4,876.80)                          | 4,044.77<br>(3,031.77 to<br>5,243.29)                         | 3,645.38<br>(2,627.45 to<br>4,778.80)                          | 168.91<br>(124.70 to<br>225.70)                            | 334.10<br>(232.48 to<br>452.24)                            | 391.33<br>(283.95 to<br>522.21)                            | 299.24<br>(199.16 to<br>408.27)                            |
| Aortic aneurysm                                     | 3,630.81<br>(2,551.87 to<br>5,159.63)                         | 7,514.61<br>(4,507.57 to<br>12,110.77)                         | 7,230.49<br>(4,341.88 to<br>11,530.32)                        | 7,681.12<br>(4,550.92 to<br>12,531.48)                         | 158.84<br>(113.34 to<br>221.08)                            | 305.55<br>(204.87 to<br>453.42)                            | 316.16<br>(212.90 to<br>477.97)                            | 298.58<br>(199.05 to<br>454.64)                            |
| Peripheral artery disease                           | 259.43<br>(101.12 to<br>429.74)                               | 743.58<br>(276.24 to<br>1,264.13)                              | 806.48<br>(315.04 to<br>1,366.81)                             | 717.73<br>(265.72 to<br>1,234.34)                              | 16.89<br>(6.57 to<br>27.50)                                | 48.60<br>(18.03 to<br>79.44)                               | 59.48<br>(22.90 to<br>96.78)                               | 43.70<br>(15.81 to<br>73.20)                               |
| Endocarditis                                        | 6,192.28<br>(4,307.93 to<br>7,968.46)                         | 13,030.09<br>(7,019.61 to<br>21,894.93)                        | 12,824.79<br>(6,435.74 to<br>19,930.80)                       | 13,991.75<br>(7,632.89 to<br>23,733.84)                        | 182.01<br>(120.60 to<br>243.40)                            | 394.07<br>(229.75 to<br>599.79)                            | 389.85<br>(225.13 to<br>579.52)                            | 398.99<br>(231.58 to<br>618.90)                            |
| Other cardiovascular and circulatory diseases       | 58,139.86<br>(41,887.22 to<br>76,985.65)                      | 108,228.08<br>(70,783.34 to<br>160,765.27)                     | 84,225.36<br>(54,955.37 to<br>124,489.43)                     | 127,151.58<br>(81,645.69 to<br>189,673.41)                     | 2,399.95<br>(1,655.84 to<br>3,210.18)                      | 4,688.30<br>(3,257.52 to<br>6,386.02)                      | 4,022.92<br>(2,852.15 to<br>5,423.72)                      | 5,109.78<br>(3,480.67 to<br>7,119.64)                      |
| <b>Chronic respiratory diseases</b>                 | <b>62,887.91</b><br><b>(49,232.46 to</b><br><b>77,716.53)</b> | <b>72,574.40</b><br><b>(47,011.74 to</b><br><b>117,035.83)</b> | <b>45,389.28</b><br><b>(31,818.19 to</b><br><b>67,109.86)</b> | <b>93,361.55</b><br><b>(60,319.94 to</b><br><b>155,333.50)</b> | <b>2,591.37</b><br><b>(2,059.41 to</b><br><b>3,118.53)</b> | <b>3,074.89</b><br><b>(2,134.70 to</b><br><b>4,831.27)</b> | <b>2,004.40</b><br><b>(1,485.19 to</b><br><b>2,759.92)</b> | <b>3,735.89</b><br><b>(2,533.51 to</b><br><b>5,941.54)</b> |
| Chronic obstructive pulmonary disease               | 33,570.20<br>(24,590.51 to<br>42,483.45)                      | 48,423.34<br>(28,158.59 to<br>86,857.67)                       | 25,801.47<br>(16,354.27 to<br>41,468.46)                      | 63,589.60<br>(36,297.83 to<br>117,542.75)                      | 1,698.28<br>(1,265.31 to<br>2,098.85)                      | 2,292.45<br>(1,431.49 to<br>3,903.74)                      | 1,328.44<br>(901.86 to<br>1,967.39)                        | 2,827.82<br>(1,738.09 to<br>4,769.87)                      |
| Pneumoconiosis                                      | 212.60<br>(130.30 to<br>326.92)                               | 286.31<br>(179.68 to<br>439.28)                                | 263.93<br>(159.28 to<br>416.36)                               | 286.63<br>(183.36 to<br>434.96)                                | 10.04<br>(6.17 to<br>15.10)                                | 13.30<br>(8.86 to<br>19.23)                                | 12.84<br>(8.35 to<br>19.13)                                | 12.87<br>(8.66 to<br>18.27)                                |
| Silicosis                                           | 51.08<br>(20.38 to<br>87.57)                                  | 44.81<br>(17.19 to<br>80.32)                                   | 42.99<br>(15.36 to<br>78.44)                                  | 44.07<br>(17.27 to<br>80.51)                                   | 2.63<br>(1.07 to<br>4.53)                                  | 2.26<br>(0.93 to<br>3.91)                                  | 2.29<br>(0.87 to<br>4.06)                                  | 2.15<br>(0.88 to<br>3.78)                                  |
| Asbestosis                                          | 45.54<br>(23.88 to<br>78.62)                                  | 85.14<br>(43.60 to<br>147.49)                                  | 90.36<br>(44.99 to<br>158.82)                                 | 79.64<br>(41.61 to<br>136.75)                                  | 1.83<br>(0.79 to<br>3.45)                                  | 3.44<br>(1.59 to<br>6.01)                                  | 3.89<br>(1.80 to<br>6.76)                                  | 3.09<br>(1.48 to<br>5.40)                                  |
| Coal workers pneumoconiosis                         | 18.22<br>(7.52 to<br>41.44)                                   | 23.81<br>(9.77 to<br>53.14)                                    | 16.45<br>(6.37 to<br>38.16)                                   | 27.78<br>(11.63 to<br>58.96)                                   | 0.88<br>(0.37 to<br>2.03)                                  | 1.08<br>(0.47 to<br>2.36)                                  | 0.78<br>(0.32 to<br>1.76)                                  | 1.23<br>(0.55 to<br>2.60)                                  |
| Other pneumoconiosis                                | 97.78<br>(49.37 to<br>169.14)                                 | 132.54<br>(70.92 to<br>219.51)                                 | 114.13<br>(57.30 to<br>206.27)                                | 135.14<br>(74.04 to<br>215.98)                                 | 4.71<br>(2.38 to<br>8.05)                                  | 6.51<br>(3.67 to<br>10.26)                                 | 5.88<br>(3.11 to<br>10.08)                                 | 6.39<br>(3.58 to<br>9.88)                                  |
| Asthma                                              | 25,549.33<br>(18,495.60 to<br>37,402.97)                      | 18,022.94<br>(10,931.31 to<br>30,804.19)                       | 13,672.54<br>(8,439.94 to<br>22,214.69)                       | 23,321.92<br>(13,860.33 to<br>41,041.01)                       | 793.56<br>(560.12 to<br>1,249.68)                          | 597.19<br>(374.52 to<br>1,035.13)                          | 480.38<br>(304.37 to<br>801.05)                            | 728.43<br>(447.09 to<br>1,302.58)                          |
| Interstitial lung disease and pulmonary sarcoidosis | 791.92<br>(296.53 to<br>1,466.00)                             | 1,827.01<br>(650.69 to<br>3,288.21)                            | 2,142.43<br>(771.69 to<br>3,912.04)                           | 1,633.24<br>(573.39 to<br>3,029.05)                            | 31.97<br>(10.95 to<br>57.21)                               | 72.84<br>(24.32 to<br>128.67)                              | 90.41<br>(30.99 to<br>153.93)                              | 62.19<br>(20.56 to<br>109.03)                              |

|                                                                |                                                                 |                                                                  |                                                                  |                                                                  |                                                            |                                                            |                                                            |                                                            |
|----------------------------------------------------------------|-----------------------------------------------------------------|------------------------------------------------------------------|------------------------------------------------------------------|------------------------------------------------------------------|------------------------------------------------------------|------------------------------------------------------------|------------------------------------------------------------|------------------------------------------------------------|
| Other chronic respiratory diseases                             | 2,733.85<br>(1,313.01 to<br>5,049.65)                           | 4,014.80<br>(2,151.66 to<br>6,899.15)                            | 3,508.91<br>(1,919.79 to<br>6,000.29)                            | 4,530.16<br>(2,383.72 to<br>7,793.85)                            | 57.50<br>(31.68 to<br>91.22)                               | 99.11<br>(55.67 to<br>159.23)                              | 92.32<br>(53.47 to<br>150.68)                              | 104.59<br>(58.79 to<br>170.33)                             |
| <b>Cirrhosis and other chronic liver diseases</b>              | <b>62,689.13</b><br><b>(32,063.82 to</b><br><b>97,104.57)</b>   | <b>144,310.84</b><br><b>(63,961.92 to</b><br><b>251,526.28)</b>  | <b>128,145.62</b><br><b>(57,024.48 to</b><br><b>223,045.29)</b>  | <b>152,145.63</b><br><b>(68,124.68 to</b><br><b>262,766.19)</b>  | <b>1,987.88</b><br><b>(1,061.73 to</b><br><b>3,066.54)</b> | <b>4,439.48</b><br><b>(2,137.66 to</b><br><b>7,193.33)</b> | <b>4,080.08</b><br><b>(1,991.47 to</b><br><b>6,668.24)</b> | <b>4,555.48</b><br><b>(2,196.72 to</b><br><b>7,336.13)</b> |
| Cirrhosis and other chronic liver diseases due to hepatitis B  | 18,583.00<br>(8,748.21 to<br>30,965.65)                         | 46,386.47<br>(18,973.19 to<br>85,000.42)                         | 43,020.99<br>(17,641.71 to<br>78,593.86)                         | 46,493.09<br>(19,323.14 to<br>83,586.80)                         | 620.69<br>(301.10 to<br>1,003.78)                          | 1,445.00<br>(658.86 to<br>2,468.93)                        | 1,379.86<br>(620.97 to<br>2,367.66)                        | 1,421.35<br>(645.43 to<br>2,398.64)                        |
| Cirrhosis and other chronic liver diseases due to hepatitis C  | 13,881.64<br>(6,019.80 to<br>25,001.54)                         | 34,543.76<br>(13,539.58 to<br>67,542.45)                         | 31,866.14<br>(12,250.46 to<br>62,868.41)                         | 34,747.74<br>(13,576.28 to<br>66,322.29)                         | 477.79<br>(214.79 to<br>839.70)                            | 1,107.55<br>(471.76 to<br>2,017.08)                        | 1,051.15<br>(445.15 to<br>1,924.35)                        | 1,094.01<br>(456.40 to<br>2,008.53)                        |
| Cirrhosis and other chronic liver diseases due to alcohol use  | 14,541.07<br>(6,973.18 to<br>23,552.14)                         | 36,121.48<br>(15,315.42 to<br>64,785.34)                         | 29,318.22<br>(12,567.29 to<br>52,663.75)                         | 41,236.12<br>(16,867.36 to<br>73,281.32)                         | 518.18<br>(260.28 to<br>812.84)                            | 1,445.00<br>(558.11 to<br>1,968.87)                        | 1,009.39<br>(476.36 to<br>1,676.26)                        | 1,318.95<br>(593.41 to<br>2,171.79)                        |
| Cirrhosis and other chronic liver diseases due to other causes | 15,683.43<br>(9,042.01 to<br>23,189.26)                         | 27,259.13<br>(13,565.80 to<br>46,737.66)                         | 23,940.27<br>(11,752.01 to<br>41,693.86)                         | 29,668.67<br>(14,875.21 to<br>50,062.30)                         | 571.22<br>(207.00 to<br>546.88)                            | 695.64<br>(367.56 to<br>1,115.34)                          | 639.68<br>(338.89 to<br>1,022.32)                          | 711.18<br>(378.85 to<br>1,151.59)                          |
| <b>Digestive diseases</b>                                      | <b>113,150.34</b><br><b>(86,912.52 to</b><br><b>142,002.91)</b> | <b>166,513.81</b><br><b>(116,519.22 to</b><br><b>250,748.23)</b> | <b>143,230.91</b><br><b>(100,096.16 to</b><br><b>218,415.99)</b> | <b>183,269.44</b><br><b>(128,353.08 to</b><br><b>275,186.95)</b> | <b>3,371.34</b><br><b>(2,709.30 to</b><br><b>4,063.25)</b> | <b>5,392.98</b><br><b>(4,238.20 to</b><br><b>7,226.36)</b> | <b>4,956.31</b><br><b>(3,896.91 to</b><br><b>6,656.42)</b> | <b>5,590.50</b><br><b>(4,404.85 to</b><br><b>7,456.85)</b> |
| Peptic ulcer disease                                           | 16,641.21<br>(11,846.84 to<br>23,175.48)                        | 17,187.75<br>(10,774.69 to<br>26,269.59)                         | 12,421.12<br>(7,623.10 to<br>19,494.19)                          | 20,213.60<br>(12,903.39 to<br>30,499.38)                         | 638.11<br>(436.82 to<br>893.05)                            | 677.58<br>(432.95 to<br>977.40)                            | 521.38<br>(329.86 to<br>772.98)                            | 759.20<br>(493.15 to<br>1,089.57)                          |

**Malawi**

| Cause                                      | YLLs (actual counts)                                          |                                                                |                                                                |                                                                | Deaths (actual counts)                                     |                                                            |                                                            |                                                            |
|--------------------------------------------|---------------------------------------------------------------|----------------------------------------------------------------|----------------------------------------------------------------|----------------------------------------------------------------|------------------------------------------------------------|------------------------------------------------------------|------------------------------------------------------------|------------------------------------------------------------|
|                                            | 2016                                                          | 2040 Forecast                                                  | 2040 Better Scenario                                           | 2040 Worse Scenario                                            | 2016                                                       | 2040 Forecast                                              | 2040 Better Scenario                                       | 2040 Worse Scenario                                        |
| Gastritis and duodenitis                   | 5,363.75<br>(3,453.91 to<br>7,998.27)                         | 10,561.98<br>(6,003.97 to<br>17,947.00)                        | 9,437.20<br>(5,276.67 to<br>15,990.59)                         | 10,921.30<br>(6,378.53 to<br>18,183.14)                        | 189.32<br>(118.99 to<br>291.13)                            | 380.72<br>(238.85 to<br>607.70)                            | 362.97<br>(224.86 to<br>582.95)                            | 375.30<br>(235.71 to<br>598.85)                            |
| Appendicitis                               | 9,034.42<br>(6,258.80 to<br>13,560.51)                        | 10,086.70<br>(6,664.37 to<br>15,213.12)                        | 7,750.58<br>(5,013.09 to<br>12,006.61)                         | 12,033.98<br>(7,940.67 to<br>18,301.59)                        | 186.88<br>(132.14 to<br>251.54)                            | 347.63<br>(175.27 to<br>345.57)                            | 201.87<br>(140.88 to<br>283.02)                            | 276.82<br>(195.66 to<br>382.15)                            |
| Paralytic ileus and intestinal obstruction | 51,955.37<br>(37,949.15 to<br>69,696.82)                      | 79,473.74<br>(55,526.17 to<br>118,066.48)                      | 72,418.93<br>(49,981.00 to<br>110,187.28)                      | 84,704.58<br>(59,669.07 to<br>124,330.60)                      | 1,367.01<br>(1,070.46 to<br>1,745.35)                      | 2,414.23<br>(1,817.90 to<br>3,254.65)                      | 2,364.75<br>(1,769.48 to<br>3,305.48)                      | 2,396.92<br>(1,819.28 to<br>3,282.87)                      |
| Inguinal, femoral, and abdominal hernia    | 5,037.58<br>(1,681.73 to<br>8,403.01)                         | 6,567.33<br>(2,095.38 to<br>12,449.17)                         | 5,431.94<br>(1,728.59 to<br>10,304.70)                         | 7,191.87<br>(2,293.97 to<br>13,392.90)                         | 147.42<br>(55.79 to<br>236.75)                             | 191.95<br>(70.43 to<br>334.62)                             | 167.52<br>(62.50 to<br>290.32)                             | 200.69<br>(71.95 to<br>342.98)                             |
| Inflammatory bowel disease                 | 4,621.30<br>(2,256.30 to<br>7,264.68)                         | 7,256.05<br>(3,518.54 to<br>11,165.01)                         | 7,083.81<br>(3,505.33 to<br>10,934.99)                         | 7,343.05<br>(3,545.56 to<br>11,452.16)                         | 131.25<br>(70.71 to<br>177.21)                             | 228.89<br>(123.81 to<br>315.49)                            | 239.97<br>(131.60 to<br>333.88)                            | 217.29<br>(115.52 to<br>298.64)                            |
| Vascular intestinal disorders              | 1,612.08<br>(1,061.00 to<br>2,373.84)                         | 3,122.06<br>(1,939.60 to<br>4,753.32)                          | 2,986.41<br>(1,871.84 to<br>4,565.22)                          | 3,095.86<br>(1,949.01 to<br>4,610.72)                          | 74.47<br>(48.75 to<br>112.31)                              | 144.64<br>(98.55 to<br>210.22)                             | 147.87<br>(99.15 to<br>217.15)                             | 136.53<br>(94.00 to<br>195.90)                             |
| Gallbladder and biliary diseases           | 5,420.17<br>(3,903.17 to<br>7,096.98)                         | 7,962.02<br>(4,757.06 to<br>12,401.91)                         | 6,321.73<br>(3,791.74 to<br>9,858.95)                          | 10,053.40<br>(5,637.79 to<br>16,521.04)                        | 231.97<br>(168.26 to<br>314.85)                            | 336.55<br>(217.01 to<br>505.60)                            | 287.89<br>(189.17 to<br>422.51)                            | 400.65<br>(238.88 to<br>642.14)                            |
| Pancreatitis                               | 4,165.98<br>(2,683.38 to<br>6,122.61)                         | 10,964.96<br>(3,995.41 to<br>28,401.11)                        | 8,328.81<br>(3,345.56 to<br>21,236.99)                         | 12,946.91<br>(4,450.35 to<br>35,133.79)                        | 116.94<br>(75.83 to<br>172.42)                             | 298.96<br>(129.95 to<br>729.77)                            | 277.76<br>(113.37 to<br>548.78)                            | 341.98<br>(137.96 to<br>889.91)                            |
| Other digestive diseases                   | 9,298.49<br>(6,077.85 to<br>14,492.28)                        | 13,331.22<br>(8,011.37 to<br>20,964.75)                        | 11,050.39<br>(6,698.20 to<br>17,793.32)                        | 14,764.90<br>(9,111.92 to<br>23,379.37)                        | 287.96<br>(191.29 to<br>411.59)                            | 471.83<br>(304.75 to<br>696.92)                            | 424.35<br>(272.07 to<br>633.37)                            | 485.13<br>(317.17 to<br>722.12)                            |
| <b>Neurological disorders</b>              | <b>47,264.47</b><br><b>(37,043.63 to</b><br><b>57,665.91)</b> | <b>81,251.93</b><br><b>(60,648.35 to</b><br><b>117,338.83)</b> | <b>76,776.20</b><br><b>(58,882.76 to</b><br><b>105,941.88)</b> | <b>88,920.07</b><br><b>(64,669.60 to</b><br><b>132,610.45)</b> | <b>2,124.18</b><br><b>(1,669.42 to</b><br><b>2,652.31)</b> | <b>4,081.65</b><br><b>(3,086.30 to</b><br><b>5,057.26)</b> | <b>4,727.13</b><br><b>(3,741.96 to</b><br><b>5,762.02)</b> | <b>3,836.83</b><br><b>(2,777.78 to</b><br><b>4,876.45)</b> |
| Alzheimer's disease and other dementias    | 17,269.11<br>(12,852.45 to<br>22,495.14)                      | 30,642.78<br>(23,144.98 to<br>39,363.25)                       | 35,526.89<br>(27,804.04 to<br>45,293.39)                       | 28,514.99<br>(20,642.66 to<br>38,539.82)                       | 2,927.35<br>(1,142.98 to<br>1,969.93)                      | 5,097.47<br>(1,945.55 to<br>3,906.12)                      | 3,651.55<br>(2,664.88 to<br>4,717.59)                      | 2,574.75<br>(1,585.97 to<br>3,681.38)                      |
| Parkinson's disease                        | 1,248.45<br>(886.52 to<br>1,675.71)                           | 2,749.46<br>(2,048.17 to<br>3,531.83)                          | 3,673.84<br>(2,758.71 to<br>4,711.92)                          | 2,231.07<br>(1,639.90 to<br>2,939.32)                          | 97.07<br>(68.56 to<br>129.63)                              | 219.26<br>(153.63 to<br>296.22)                            | 311.20<br>(229.47 to<br>411.19)                            | 170.80<br>(114.48 to<br>237.23)                            |

|                              |                                                |                                                  |                                                  |                                                  |                                          |                                          |                                          |                                          |
|------------------------------|------------------------------------------------|--------------------------------------------------|--------------------------------------------------|--------------------------------------------------|------------------------------------------|------------------------------------------|------------------------------------------|------------------------------------------|
| Epilepsy                     | 23,897.85<br>(17,466.86 to<br>31,020.93)       | 39,645.52<br>(21,076.87 to<br>74,202.67)         | 29,111.62<br>(15,980.28 to<br>55,278.49)         | 49,531.45<br>(26,612.70 to<br>92,564.58)         | 431.21<br>(322.43 to<br>550.72)          | 761.50<br>(438.29 to<br>1,358.86)        | 576.94<br>(337.26 to<br>1,019.85)        | 920.07<br>(521.47 to<br>1,657.05)        |
| Multiple sclerosis           | 258.29<br>(152.68 to<br>413.25)                | 650.77<br>(351.98 to<br>1,106.01)                | 681.15<br>(372.44 to<br>1,179.83)                | 616.30<br>(333.62 to<br>1,037.34)                | 7.24<br>(4.09 to<br>11.40)               | 17.96<br>(9.73 to<br>29.73)              | 19.12<br>(10.30 to<br>32.56)             | 16.83<br>(9.16 to<br>27.43)              |
| Motor neuron disease         | 293.97<br>(193.42 to<br>479.03)                | 509.23<br>(303.06 to<br>926.86)                  | 547.54<br>(320.56 to<br>1,012.48)                | 502.92<br>(308.74 to<br>898.40)                  | 6.46<br>(4.23 to<br>11.25)               | 14.55<br>(8.52 to<br>28.51)              | 16.29<br>(9.43 to<br>31.61)              | 13.54<br>(8.22 to<br>26.12)              |
| Other neurological disorders | 4,296.79<br>(3,352.59 to<br>5,416.18)          | 7,054.18<br>(4,804.24 to<br>10,360.60)           | 7,235.17<br>(4,834.76 to<br>10,873.52)           | 7,523.35<br>(5,254.29 to<br>10,655.01)           | 72.73<br>(56.90 to<br>89.21)             | 141.03<br>(91.02 to<br>201.79)           | 152.02<br>(95.62 to<br>222.01)           | 140.83<br>(93.88 to<br>197.67)           |
| <b>Mental disorders</b>      | <b>7,551.96<br/>(5,196.45 to<br/>9,798.96)</b> | <b>16,594.33<br/>(9,532.00 to<br/>26,847.19)</b> | <b>16,072.61<br/>(9,097.83 to<br/>25,994.62)</b> | <b>16,513.04<br/>(9,633.21 to<br/>26,447.06)</b> | <b>216.81<br/>(155.85 to<br/>280.26)</b> | <b>461.20<br/>(297.02 to<br/>678.81)</b> | <b>459.50<br/>(295.59 to<br/>677.50)</b> | <b>449.83<br/>(289.86 to<br/>658.96)</b> |
| Alcohol use disorders        | 5,657.08<br>(3,879.79 to<br>7,540.26)          | 11,024.81<br>(6,200.05 to<br>17,457.69)          | 10,477.63<br>(5,963.26 to<br>16,949.75)          | 11,106.89<br>(6,285.83 to<br>17,507.52)          | 175.01<br>(124.05 to<br>228.82)          | 355.61<br>(207.42 to<br>507.28)          | 329.53<br>(202.77 to<br>502.73)          | 330.49<br>(206.77 to<br>491.99)          |
| Drug use disorders           | 1,862.04<br>(1,226.01 to<br>2,572.59)          | 5,494.63<br>(3,008.45 to<br>9,447.84)            | 5,520.77<br>(3,010.13 to<br>9,597.66)            | 5,330.80<br>(2,939.71 to<br>9,079.11)            | 41.23<br>(27.43 to<br>56.02)             | 124.23<br>(73.94 to<br>201.21)           | 128.62<br>(77.53 to<br>209.00)           | 117.99<br>(69.67 to<br>189.78)           |
| Opioid use disorders         | 1,455.78<br>(932.40 to<br>2,015.43)            | 4,088.12<br>(2,206.63 to<br>7,165.92)            | 4,091.87<br>(2,210.31 to<br>7,198.40)            | 3,975.99<br>(2,182.40 to<br>6,904.09)            | 30.97<br>(19.55 to<br>42.54)             | 88.99<br>(50.47 to<br>148.13)            | 91.00<br>(52.49 to<br>151.67)            | 85.08<br>(48.04 to<br>140.67)            |
| Cocaine use disorders        | 77.61<br>(22.68 to<br>160.44)                  | 263.05<br>(74.77 to<br>585.78)                   | 242.57<br>(70.90 to<br>543.84)                   | 265.14<br>(75.65 to<br>603.66)                   | 1.73<br>(0.52 to<br>3.49)                | 5.94<br>(1.76 to<br>12.59)               | 5.57<br>(1.69 to<br>11.97)               | 5.92<br>(1.74 to<br>12.90)               |
| Amphetamine use disorders    | 44.21<br>(13.80 to<br>93.82)                   | 210.57<br>(60.08 to<br>497.24)                   | 183.94<br>(53.08 to<br>435.48)                   | 219.40<br>(61.15 to<br>516.71)                   | 0.94<br>(0.30 to<br>1.94)                | 4.54<br>(1.35 to<br>10.67)               | 4.01<br>(1.21 to<br>9.20)                | 4.68<br>(1.40 to<br>10.74)               |
| Other drug use disorders     | 284.44<br>(173.75 to<br>428.42)                | 932.89<br>(478.17 to<br>1,227.67)                | 1,002.39<br>(519.00 to<br>1,872.82)              | 870.27<br>(454.40 to<br>1,573.96)                | 7.59<br>(4.93 to<br>11.07)               | 24.76<br>(14.91 to<br>39.97)             | 28.05<br>(17.21 to<br>45.10)             | 22.31<br>(13.53 to<br>36.05)             |
| Eating disorders             | 32.84<br>(18.91 to<br>61.18)                   | 74.89<br>(37.56 to<br>147.63)                    | 74.20<br>(37.71 to<br>146.34)                    | 75.35<br>(37.66 to<br>145.59)                    | 0.57<br>(0.33 to<br>1.06)                | 1.36<br>(0.67 to<br>2.65)                | 1.35<br>(0.68 to<br>2.60)                | 1.35<br>(0.68 to<br>2.61)                |

**Malawi**

| Cause                                                      | YLLs (actual counts)                                 |                                                      |                                                      |                                                      | Deaths (actual counts)                         |                                                 |                                                 |                                                  |
|------------------------------------------------------------|------------------------------------------------------|------------------------------------------------------|------------------------------------------------------|------------------------------------------------------|------------------------------------------------|-------------------------------------------------|-------------------------------------------------|--------------------------------------------------|
|                                                            | 2016                                                 | 2040 Forecast                                        | 2040 Better Scenario                                 | 2040 Worse Scenario                                  | 2016                                           | 2040 Forecast                                   | 2040 Better Scenario                            | 2040 Worse Scenario                              |
| <b>Diabetes, urogenital, blood, and endocrine diseases</b> | <b>141,223.21<br/>(115,260.45 to<br/>167,585.84)</b> | <b>259,946.69<br/>(176,410.83 to<br/>398,234.68)</b> | <b>192,842.71<br/>(128,848.21 to<br/>297,716.67)</b> | <b>316,918.09<br/>(220,544.23 to<br/>478,643.33)</b> | <b>4,319.98<br/>(3,542.87 to<br/>5,105.56)</b> | <b>9,539.02<br/>(6,853.52 to<br/>14,310.67)</b> | <b>7,448.53<br/>(5,321.21 to<br/>11,574.80)</b> | <b>11,163.82<br/>(8,041.31 to<br/>16,994.78)</b> |
| Diabetes mellitus                                          | 47,030.46<br>(36,949.11 to<br>57,686.36)             | 119,179.94<br>(72,898.63 to<br>201,683.47)           | 85,163.93<br>(52,381.88 to<br>143,389.30)            | 143,658.77<br>(87,956.00 to<br>239,737.21)           | 2,068.90<br>(1,639.03 to<br>2,518.64)          | 5,067.68<br>(3,476.52 to<br>7,697.46)           | 3,863.37<br>(2,673.99 to<br>5,627.67)           | 5,833.75<br>(3,920.25 to<br>8,769.14)            |
| Acute glomerulonephritis                                   | 226.91<br>(153.63 to<br>384.41)                      | 353.35<br>(218.13 to<br>582.59)                      | 284.45<br>(173.26 to<br>467.55)                      | 431.11<br>(264.12 to<br>721.37)                      | 3.75<br>(2.66 to<br>5.91)                      | 6.15<br>(4.08 to<br>9.53)                       | 5.16<br>(3.42 to<br>7.91)                       | 7.15<br>(4.66 to<br>11.18)                       |
| Chronic kidney disease                                     | 28,731.81<br>(22,869.65 to<br>35,636.81)             | 67,914.35<br>(33,258.92 to<br>161,610.98)            | 47,620.37<br>(23,946.84 to<br>115,695.45)            | 87,403.06<br>(42,219.60 to<br>206,222.90)            | 926.94<br>(739.00 to<br>1,146.63)              | 2,611.07<br>(986.98 to<br>7,594.21)             | 1,933.41<br>(747.90 to<br>5,842.93)             | 3,322.25<br>(1,231.34 to<br>9,449.23)            |
| Chronic kidney disease due to diabetes mellitus            | 5,894.29<br>(4,421.64 to<br>7,604.22)                | 19,545.57<br>(8,095.71 to<br>54,680.83)              | 13,782.32<br>(5,874.17 to<br>37,025.10)              | 24,831.93<br>(9,870.01 to<br>68,243.47)              | 241.80<br>(181.15 to<br>312.75)                | 830.56<br>(275.73 to<br>2,543.94)               | 612.08<br>(212.00 to<br>1,911.52)               | 1,051.30<br>(326.75 to<br>3,167.18)              |
| Chronic kidney disease due to hypertension                 | 3,644.36<br>(2,713.13 to<br>4,729.63)                | 10,636.90<br>(3,734.14 to<br>33,935.64)              | 7,666.02<br>(2,777.75 to<br>24,107.37)               | 13,709.98<br>(4,594.02 to<br>42,315.14)              | 194.84<br>(145.79 to<br>250.40)                | 593.36<br>(166.86 to<br>1,823.29)               | 460.83<br>(136.46 to<br>1,499.97)               | 746.21<br>(197.49 to<br>2,277.18)                |
| Chronic kidney disease due to glomerulonephritis           | 9,095.16<br>(6,973.09 to<br>11,634.25)               | 17,469.87<br>(9,630.38 to<br>34,808.85)              | 12,100.59<br>(6,656.31 to<br>24,031.87)              | 22,643.09<br>(12,590.06 to<br>46,890.58)             | 221.11<br>(170.12 to<br>282.16)                | 516.06<br>(224.44 to<br>1,293.54)               | 371.22<br>(167.20 to<br>987.00)                 | 666.45<br>(294.25 to<br>1,691.44)                |
| Chronic kidney disease due to other and unspecified causes | 10,098.00<br>(8,003.24 to<br>12,788.59)              | 20,262.01<br>(10,791.03 to<br>41,939.65)             | 14,071.44<br>(7,558.39 to<br>31,131.20)              | 26,218.07<br>(13,923.12 to<br>52,289.56)             | 269.19<br>(209.88 to<br>341.90)                | 671.09<br>(282.20 to<br>1,770.79)               | 489.27<br>(210.73 to<br>1,385.59)               | 858.29<br>(357.37 to<br>2,316.43)                |

|                                                   |                                             |                                             |                                            |                                             |                                       |                                       |                                       |                                       |
|---------------------------------------------------|---------------------------------------------|---------------------------------------------|--------------------------------------------|---------------------------------------------|---------------------------------------|---------------------------------------|---------------------------------------|---------------------------------------|
| Urinary diseases and male infertility             | 14,906.38<br>(11,317.96 to<br>18,717.89)    | 25,513.37<br>(16,573.20 to<br>38,772.21)    | 22,575.20<br>(14,784.57 to<br>34,650.02)   | 27,265.25<br>(18,073.88 to<br>40,827.82)    | 428.01<br>(331.66 to<br>530.01)       | 764.55<br>(567.18 to<br>1,015.30)     | 723.47<br>(536.14 to<br>976.49)       | 771.60<br>(575.99 to<br>1,021.53)     |
| Urinary tract infections                          | 7,014.23<br>(4,073.86 to<br>10,040.72)      | 13,973.27<br>(8,408.95 to<br>21,340.39)     | 13,176.63<br>(7,983.57 to<br>20,093.17)    | 14,451.64<br>(8,541.42 to<br>21,872.43)     | 200.09<br>(115.34 to<br>294.59)       | 432.44<br>(261.65 to<br>624.88)       | 436.77<br>(270.57 to<br>626.16)       | 420.59<br>(254.95 to<br>608.89)       |
| Urolithiasis                                      | 446.71<br>(225.89 to<br>716.90)             | 936.29<br>(457.36 to<br>1,737.41)           | 825.90<br>(417.58 to<br>1,522.72)          | 1,015.26<br>(491.26 to<br>1,862.67)         | 9.87<br>(4.99 to<br>17.08)            | 21.10<br>(10.84 to<br>38.37)          | 19.46<br>(9.99 to<br>37.24)           | 21.95<br>(10.98 to<br>39.43)          |
| Other urinary diseases                            | 7,445.44<br>(4,548.26 to<br>11,547.71)      | 10,603.81<br>(5,341.71 to<br>19,164.68)     | 8,572.67<br>(4,303.10 to<br>16,020.16)     | 11,798.34<br>(6,173.06 to<br>20,670.09)     | 218.05<br>(133.22 to<br>331.33)       | 311.01<br>(170.72 to<br>529.29)       | 267.24<br>(139.91 to<br>468.89)       | 329.06<br>(179.37 to<br>547.04)       |
| Gynecological diseases                            | 1,182.22<br>(730.82 to<br>1,857.66)         | 2,129.28<br>(1,201.30 to<br>3,612.39)       | 1,598.74<br>(885.23 to<br>2,725.39)        | 2,425.45<br>(1,370.24 to<br>4,049.89)       | 28.17<br>(17.34 to<br>44.57)          | 51.43<br>(29.67 to<br>86.81)          | 39.02<br>(22.05 to<br>64.73)          | 58.12<br>(33.51 to<br>96.04)          |
| Uterine fibroids                                  | 396.21<br>(194.05 to<br>732.61)             | 693.91<br>(267.83 to<br>1,423.84)           | 501.91<br>(192.75 to<br>1,025.42)          | 802.13<br>(314.22 to<br>1,613.10)           | 10.58<br>(5.15 to<br>19.40)           | 18.50<br>(7.39 to<br>37.65)           | 13.47<br>(5.48 to<br>27.57)           | 21.30<br>(8.75 to<br>42.32)           |
| Polycystic ovarian syndrome                       | 102.93<br>(18.00 to<br>294.36)              | 134.47<br>(19.66 to<br>391.21)              | 84.13<br>(11.90 to<br>266.20)              | 167.99<br>(27.06 to<br>497.91)              | 2.28<br>(0.41 to<br>6.32)             | 3.14<br>(0.48 to<br>8.92)             | 1.96<br>(0.29 to<br>6.16)             | 3.92<br>(0.64 to<br>11.58)            |
| Endometriosis                                     | 5.10<br>(1.26 to<br>18.78)                  | 13.63<br>(2.76 to<br>49.01)                 | 10.15<br>(2.09 to<br>37.87)                | 15.65<br>(3.22 to<br>57.27)                 | 0.10<br>(0.03 to<br>0.37)             | 0.29<br>(0.06 to<br>1.06)             | 0.21<br>(0.04 to<br>0.77)             | 0.33<br>(0.07 to<br>1.22)             |
| Genital prolapse                                  | 28.65<br>(8.87 to<br>90.82)                 | 36.57<br>(9.59 to<br>120.47)                | 25.74<br>(6.70 to<br>87.55)                | 43.11<br>(11.01 to<br>143.52)               | 1.11<br>(0.37 to<br>3.28)             | 1.28<br>(0.39 to<br>4.09)             | 0.95<br>(0.28 to<br>3.02)             | 1.46<br>(0.43 to<br>4.66)             |
| Other gynecological diseases                      | 649.33<br>(327.02 to<br>1,105.61)           | 1,250.70<br>(603.38 to<br>2,227.31)         | 976.82<br>(465.54 to<br>1,758.83)          | 1,396.57<br>(650.83 to<br>2,480.30)         | 14.10<br>(6.90 to<br>23.92)           | 28.22<br>(13.79 to<br>49.35)          | 22.42<br>(11.06 to<br>39.60)          | 31.11<br>(14.61 to<br>54.68)          |
| Hemoglobinopathies and hemolytic anemias          | 41,563.68<br>(31,313.88 to<br>54,633.83)    | 35,421.58<br>(26,050.86 to<br>49,812.71)    | 27,469.71<br>(20,112.46 to<br>38,824.35)   | 44,749.77<br>(33,017.90 to<br>61,745.76)    | 677.17<br>(534.03 to<br>855.55)       | 761.48<br>(577.86 to<br>1,023.35)     | 622.88<br>(468.92 to<br>845.38)       | 883.78<br>(675.12 to<br>1,186.39)     |
| Thalassemias                                      | 846.96<br>(219.67 to<br>2,337.12)           | 426.33<br>(104.25 to<br>1,171.87)           | 430.51<br>(110.77 to<br>1,175.61)          | 537.41<br>(129.67 to<br>1,531.95)           | 9.93<br>(2.57 to<br>27.38)            | 5.02<br>(1.22 to<br>13.85)            | 5.07<br>(1.31 to<br>13.81)            | 6.32<br>(1.52 to<br>18.04)            |
| Sickle cell disorders                             | 29,449.05<br>(21,183.16 to<br>40,282.08)    | 18,459.85<br>(13,050.14 to<br>26,441.93)    | 14,066.63<br>(9,859.10 to<br>20,046.41)    | 25,213.43<br>(17,574.42 to<br>36,247.54)    | 364.30<br>(264.45 to<br>491.46)       | 248.06<br>(177.33 to<br>352.75)       | 191.75<br>(135.81 to<br>274.76)       | 330.39<br>(234.48 to<br>465.34)       |
| G6PD deficiency                                   | 8,286.24<br>(6,080.28 to<br>10,845.98)      | 13,763.23<br>(9,021.15 to<br>21,716.68)     | 10,594.35<br>(6,889.45 to<br>16,784.13)    | 16,060.38<br>(10,798.96 to<br>24,434.66)    | 163.70<br>(121.00 to<br>208.63)       | 349.57<br>(235.16 to<br>517.12)       | 277.95<br>(183.11 to<br>416.86)       | 389.94<br>(264.84 to<br>573.22)       |
| Other hemoglobinopathies and hemolytic anemias    | 2,981.43<br>(2,288.68 to<br>3,799.16)       | 2,772.16<br>(2,067.78 to<br>3,738.96)       | 2,378.21<br>(1,785.69 to<br>3,247.04)      | 2,938.55<br>(2,222.19 to<br>3,900.86)       | 139.25<br>(105.95 to<br>175.61)       | 158.84<br>(120.93 to<br>202.34)       | 148.12<br>(115.22 to<br>186.29)       | 157.13<br>(118.61 to<br>203.84)       |
| Endocrine, metabolic, blood, and immune disorders | 7,581.74<br>(5,658.17 to<br>10,409.57)      | 9,434.82<br>(6,780.44 to<br>13,266.66)      | 8,130.32<br>(5,833.92 to<br>11,498.58)     | 10,984.67<br>(7,974.16 to<br>15,454.05)     | 187.04<br>(140.44 to<br>239.28)       | 276.65<br>(214.00 to<br>358.27)       | 261.23<br>(198.35 to<br>341.70)       | 287.18<br>(223.16 to<br>372.36)       |
| <b>Malawi</b>                                     |                                             |                                             |                                            |                                             |                                       |                                       |                                       |                                       |
| Cause                                             | YLLs (actual counts)                        |                                             |                                            |                                             | Deaths (actual counts)                |                                       |                                       |                                       |
|                                                   | 2016                                        | 2040 Forecast                               | 2040 Better Scenario                       | 2040 Worse Scenario                         | 2016                                  | 2040 Forecast                         | 2040 Better Scenario                  | 2040 Worse Scenario                   |
| Musculoskeletal disorders                         | 3,534.72<br>(2,426.44 to<br>4,803.04)       | 7,666.95<br>(4,786.90 to<br>11,084.09)      | 7,888.21<br>(4,926.30 to<br>11,533.31)     | 7,561.36<br>(4,706.41 to<br>10,922.47)      | 92.74<br>(62.62 to<br>124.68)         | 217.03<br>(143.89 to<br>304.96)       | 217.81<br>(151.03 to<br>323.64)       | 208.15<br>(139.56 to<br>288.02)       |
| Rheumatoid arthritis                              | 772.44<br>(473.91 to<br>1,171.41)           | 1,655.38<br>(987.80 to<br>2,551.48)         | 1,394.84<br>(820.27 to<br>2,185.44)        | 1,784.80<br>(1,097.82 to<br>2,732.21)       | 32.03<br>(19.63 to<br>48.39)          | 72.88<br>(44.66 to<br>107.12)         | 65.19<br>(39.03 to<br>98.61)          | 74.99<br>(46.55 to<br>109.32)         |
| Other musculoskeletal disorders                   | 2,762.28<br>(1,906.75 to<br>3,776.54)       | 6,011.58<br>(3,616.68 to<br>9,073.08)       | 6,493.37<br>(3,870.76 to<br>9,728.80)      | 5,776.56<br>(3,524.46 to<br>8,607.74)       | 60.71<br>(41.05 to<br>83.56)          | 144.15<br>(91.65 to<br>213.06)        | 162.62<br>(104.48 to<br>239.79)       | 133.16<br>(85.02 to<br>194.78)        |
| Other non-communicable diseases                   | 136,842.21<br>(100,229.63 to<br>185,958.76) | 143,389.02<br>(104,961.57 to<br>198,003.28) | 112,743.52<br>(82,204.16 to<br>156,305.52) | 198,166.10<br>(144,420.83 to<br>273,379.59) | 1,864.21<br>(1,412.83 to<br>2,518.43) | 2,571.20<br>(1,951.24 to<br>3,581.39) | 2,264.94<br>(1,686.77 to<br>3,228.36) | 3,150.96<br>(2,384.01 to<br>4,320.72) |



|                                               |                                                    |                                                    |                                                    |                                                      |                                               |                                                 |                                                |                                                 |
|-----------------------------------------------|----------------------------------------------------|----------------------------------------------------|----------------------------------------------------|------------------------------------------------------|-----------------------------------------------|-------------------------------------------------|------------------------------------------------|-------------------------------------------------|
| Congenital birth defects                      | 100,683.68<br>(71,747.21 to<br>147,211.49)         | 86,772.24<br>(59,986.08 to<br>126,731.43)          | 62,567.21<br>(42,621.63 to<br>93,520.64)           | 130,749.87<br>(89,149.48 to<br>193,536.09)           | 1,187.99<br>(847.15 to<br>1,738.54)           | 1,054.80<br>(733.11 to<br>1,553.65)             | 767.62<br>(526.13 to<br>1,149.05)              | 1,569.06<br>(1,077.19 to<br>2,301.11)           |
| Neural tube defects                           | 16,375.23<br>(6,994.85 to<br>33,100.26)            | 6,513.81<br>(2,356.19 to<br>15,370.21)             | 3,952.42<br>(1,399.20 to<br>9,393.16)              | 10,874.29<br>(4,071.58 to<br>25,240.17)              | 190.84<br>(81.58 to<br>387.69)                | 76.99<br>(28.14 to<br>182.81)                   | 46.89<br>(16.73 to<br>111.61)                  | 127.82<br>(48.30 to<br>296.38)                  |
| Congenital heart anomalies                    | 30,909.60<br>(18,272.29 to<br>51,773.87)           | 28,502.30<br>(16,994.85 to<br>48,251.70)           | 21,067.75<br>(12,529.44 to<br>36,274.88)           | 41,667.14<br>(24,771.61 to<br>69,259.67)             | 369.09<br>(220.80 to<br>615.07)               | 355.96<br>(214.94 to<br>604.12)                 | 266.27<br>(160.85 to<br>459.90)                | 510.82<br>(306.61 to<br>858.40)                 |
| Orofacial clefts                              | 1,145.47<br>(187.87 to<br>3,354.54)                | 803.34<br>(124.46 to<br>2,418.77)                  | 463.04<br>(70.57 to<br>1,419.98)                   | 1,389.73<br>(214.43 to<br>4,150.22)                  | 13.27<br>(2.18 to<br>38.88)                   | 9.31<br>(1.44 to<br>28.04)                      | 5.36<br>(0.82 to<br>16.45)                     | 16.10<br>(2.49 to<br>48.04)                     |
| Down syndrome                                 | 1,727.79<br>(921.86 to<br>3,392.29)                | 1,761.13<br>(938.05 to<br>3,447.16)                | 1,263.60<br>(682.15 to<br>2,562.63)                | 2,557.75<br>(1,343.20 to<br>4,957.10)                | 21.35<br>(11.84 to<br>41.21)                  | 24.32<br>(13.73 to<br>47.29)                    | 17.89<br>(10.06 to<br>35.25)                   | 33.89<br>(18.82 to<br>67.10)                    |
| Other chromosomal abnormalities               | 4,458.24<br>(1,159.14 to<br>9,512.05)              | 5,926.84<br>(1,517.37 to<br>13,267.23)             | 4,075.27<br>(1,012.49 to<br>8,882.92)              | 9,269.26<br>(2,433.94 to<br>20,558.93)               | 52.00<br>(13.53 to<br>111.00)                 | 69.67<br>(17.96 to<br>154.90)                   | 48.04<br>(12.01 to<br>104.90)                  | 108.54<br>(28.48 to<br>240.16)                  |
| Congenital musculoskeletal and limb anomalies | 1,262.44<br>(551.05 to<br>3,140.35)                | 1,327.88<br>(595.27 to<br>3,172.13)                | 1,010.65<br>(455.67 to<br>2,393.76)                | 1,954.65<br>(877.63 to<br>4,624.61)                  | 14.80<br>(6.56 to<br>36.77)                   | 15.80<br>(7.20 to<br>37.36)                     | 12.08<br>(5.57 to<br>28.26)                    | 23.09<br>(10.45 to<br>54.39)                    |
| Urogenital congenital anomalies               | 2,125.90<br>(1,194.60 to<br>3,649.38)              | 1,911.01<br>(1,094.89 to<br>3,290.29)              | 1,455.61<br>(833.24 to<br>2,607.28)                | 2,789.24<br>(1,598.46 to<br>4,798.52)                | 25.64<br>(14.64 to<br>44.01)                  | 24.79<br>(14.84 to<br>42.54)                    | 19.34<br>(11.54 to<br>34.45)                   | 35.02<br>(20.32 to<br>60.05)                    |
| Digestive congenital anomalies                | 8,903.15<br>(4,359.57 to<br>16,632.40)             | 8,579.11<br>(4,031.64 to<br>16,514.16)             | 6,017.69<br>(2,792.55 to<br>11,758.49)             | 13,294.01<br>(6,277.03 to<br>25,521.31)              | 103.59<br>(50.78 to<br>193.37)                | 100.31<br>(47.34 to<br>193.11)                  | 70.48<br>(32.84 to<br>137.33)                  | 155.07<br>(73.37 to<br>296.82)                  |
| Other congenital birth defects                | 33,775.87<br>(17,090.35 to<br>55,520.21)           | 31,446.81<br>(16,980.33 to<br>52,510.81)           | 23,261.17<br>(12,723.94 to<br>38,525.47)           | 46,953.80<br>(24,704.59 to<br>79,973.33)             | 397.40<br>(202.30 to<br>650.69)               | 377.66<br>(207.13 to<br>624.88)                 | 281.26<br>(154.93 to<br>461.78)                | 558.71<br>(298.41 to<br>947.82)                 |
| Skin and subcutaneous diseases                | 19,546.08<br>(12,640.42 to<br>32,469.08)           | 45,817.29<br>(28,936.81 to<br>74,921.65)           | 42,199.16<br>(26,592.85 to<br>69,382.57)           | 51,036.27<br>(32,135.57 to<br>85,369.13)             | 483.42<br>(308.41 to<br>822.41)               | 1,391.10<br>(910.58 to<br>2,272.10)             | 1,404.77<br>(919.54 to<br>2,285.86)            | 1,391.86<br>(909.74 to<br>2,280.41)             |
| Cellulitis                                    | 1,612.70<br>(684.06 to<br>3,038.97)                | 5,497.01<br>(2,408.17 to<br>9,366.95)              | 5,840.46<br>(2,593.68 to<br>9,843.67)              | 5,523.27<br>(2,286.60 to<br>9,699.22)                | 42.38<br>(17.47 to<br>73.81)                  | 165.82<br>(68.43 to<br>274.05)                  | 187.70<br>(80.78 to<br>307.59)                 | 154.46<br>(62.49 to<br>254.47)                  |
| Pyoderma                                      | 15,337.87<br>(9,668.27 to<br>25,655.79)            | 35,201.13<br>(21,680.42 to<br>59,463.81)           | 31,136.81<br>(19,464.12 to<br>53,152.03)           | 40,273.86<br>(24,939.00 to<br>67,666.60)             | 356.22<br>(225.65 to<br>587.48)               | 1,029.05<br>(658.66 to<br>1,727.57)             | 996.00<br>(638.01 to<br>1,659.12)              | 1,056.62<br>(679.77 to<br>1,761.83)             |
| Decubitus ulcer                               | 1,531.54<br>(816.34 to<br>2,837.35)                | 3,412.41<br>(1,858.94 to<br>6,107.26)              | 3,528.15<br>(1,942.92 to<br>6,265.62)              | 3,382.78<br>(1,819.79 to<br>6,137.11)                | 67.54<br>(35.49 to<br>123.31)                 | 158.34<br>(84.75 to<br>280.24)                  | 180.87<br>(96.72 to<br>321.32)                 | 142.81<br>(76.09 to<br>259.51)                  |
| Other skin and subcutaneous diseases          | 863.97<br>(454.80 to<br>1,571.34)                  | 1,706.74<br>(936.41 to<br>3,011.20)                | 1,693.73<br>(933.57 to<br>3,068.86)                | 1,856.36<br>(985.25 to<br>3,415.11)                  | 17.28<br>(9.32 to<br>30.07)                   | 37.89<br>(21.10 to<br>65.56)                    | 40.21<br>(22.83 to<br>69.86)                   | 37.97<br>(20.86 to<br>65.13)                    |
| Sudden infant death syndrome                  | 16,612.44<br>(8,592.89 to<br>29,320.65)            | 10,799.49<br>(4,934.18 to<br>20,597.33)            | 7,977.16<br>(3,673.69 to<br>15,099.15)             | 16,379.97<br>(7,391.20 to<br>31,246.31)              | 192.81<br>(99.73 to<br>340.25)                | 125.30<br>(57.23 to<br>239.01)                  | 92.56<br>(42.61 to<br>175.19)                  | 190.04<br>(85.75 to<br>362.65)                  |
| Injuries                                      | <b>449,474.86</b><br>(368,659.47 to<br>537,813.86) | <b>617,603.48</b><br>(414,082.86 to<br>960,937.13) | <b>522,769.95</b><br>(350,069.48 to<br>821,356.16) | <b>709,912.54</b><br>(487,235.66 to<br>1,087,096.15) | <b>8,973.65</b><br>(7,370.64 to<br>10,761.71) | <b>14,159.58</b><br>(10,218.18 to<br>20,892.01) | <b>12,741.33</b><br>(9,258.19 to<br>18,858.04) | <b>15,251.26</b><br>(10,969.82 to<br>22,416.41) |
| Transport injuries                            | 121,985.22<br>(96,421.71 to<br>150,424.39)         | 226,549.36<br>(139,189.29 to<br>377,602.31)        | 191,615.07<br>(117,691.21 to<br>315,505.82)        | 254,977.44<br>(158,085.45 to<br>420,201.81)          | 2,396.44<br>(1,905.33 to<br>2,911.80)         | 4,739.63<br>(3,048.28 to<br>7,239.01)           | 4,167.09<br>(2,690.31 to<br>6,665.15)          | 5,125.93<br>(3,288.92 to<br>8,272.65)           |
| Road injuries                                 | 113,661.76<br>(90,093.47 to<br>139,190.82)         | 210,311.76<br>(129,026.11 to<br>352,042.29)        | 178,330.53<br>(109,565.46 to<br>295,838.03)        | 236,201.55<br>(146,828.90 to<br>390,055.25)          | 2,254.84<br>(1,794.79 to<br>2,748.13)         | 4,438.22<br>(2,863.00 to<br>7,201.24)           | 3,916.98<br>(2,533.39 to<br>6,265.26)          | 4,784.88<br>(3,075.09 to<br>7,773.41)           |
| Pedestrian road injuries                      | 48,419.51<br>(36,677.81 to<br>60,832.37)           | 78,083.09<br>(46,568.34 to<br>129,764.10)          | 66,071.37<br>(39,345.20 to<br>109,508.48)          | 87,518.44<br>(52,460.60 to<br>144,477.40)            | 973.69<br>(748.54 to<br>1,210.39)             | 1,714.74<br>(1,072.97 to<br>2,716.15)           | 1,508.70<br>(958.20 to<br>2,380.33)            | 1,846.42<br>(1,158.45 to<br>2,938.10)           |

**Malawi**

| Cause | YLLs (actual counts) |               |                      |                     | Deaths (actual counts) |               |                      |                     |
|-------|----------------------|---------------|----------------------|---------------------|------------------------|---------------|----------------------|---------------------|
|       | 2016                 | 2040 Forecast | 2040 Better Scenario | 2040 Worse Scenario | 2016                   | 2040 Forecast | 2040 Better Scenario | 2040 Worse Scenario |



|                                                                              |                                                                |                                                                 |                                                                 |                                                                 |                                                            |                                                            |                                                            |                                                            |
|------------------------------------------------------------------------------|----------------------------------------------------------------|-----------------------------------------------------------------|-----------------------------------------------------------------|-----------------------------------------------------------------|------------------------------------------------------------|------------------------------------------------------------|------------------------------------------------------------|------------------------------------------------------------|
| Other unintentional injuries                                                 | 12,125.66<br>(8,868.27 to<br>15,846.36)                        | 12,237.79<br>(7,584.61 to<br>19,321.09)                         | 9,971.94<br>(6,147.61 to<br>16,064.61)                          | 14,386.89<br>(9,220.97 to<br>22,194.71)                         | 209.26<br>(158.04 to<br>271.75)                            | 240.36<br>(156.81 to<br>373.22)                            | 203.33<br>(131.26 to<br>319.07)                            | 268.93<br>(178.97 to<br>410.01)                            |
| <b>Self-harm and interpersonal violence</b>                                  | <b>67,383.89</b><br><b>(46,157.03 to</b><br><b>114,272.33)</b> | <b>128,283.83</b><br><b>(70,627.16 to</b><br><b>234,503.72)</b> | <b>116,062.08</b><br><b>(64,473.71 to</b><br><b>209,059.33)</b> | <b>137,708.40</b><br><b>(75,000.41 to</b><br><b>253,210.86)</b> | <b>1,494.92</b><br><b>(1,067.98 to</b><br><b>2,382.47)</b> | <b>2,965.49</b><br><b>(1,753.81 to</b><br><b>5,098.94)</b> | <b>2,758.79</b><br><b>(1,659.33 to</b><br><b>4,677.55)</b> | <b>3,101.46</b><br><b>(1,787.78 to</b><br><b>5,398.70)</b> |
| <b>Malawi</b>                                                                |                                                                |                                                                 |                                                                 |                                                                 |                                                            |                                                            |                                                            |                                                            |
| <b>Cause</b>                                                                 | <b>YLLs (actual counts)</b>                                    |                                                                 |                                                                 |                                                                 | <b>Deaths (actual counts)</b>                              |                                                            |                                                            |                                                            |
|                                                                              | <b>2016</b>                                                    | <b>2040 Forecast</b>                                            | <b>2040 Better Scenario</b>                                     | <b>2040 Worse Scenario</b>                                      | <b>2016</b>                                                | <b>2040 Forecast</b>                                       | <b>2040 Better Scenario</b>                                | <b>2040 Worse Scenario</b>                                 |
| Self-harm                                                                    | 42,718.17<br>(31,616.17 to<br>55,221.56)                       | 91,401.13<br>(51,195.85 to<br>160,888.62)                       | 82,066.36<br>(46,893.87 to<br>143,485.77)                       | 98,090.18<br>(53,689.28 to<br>174,855.42)                       | 1,074.63<br>(821.37 to<br>1,370.86)                        | 2,291.49<br>(1,401.16 to<br>3,816.59)                      | 2,130.30<br>(1,321.47 to<br>3,501.58)                      | 2,390.39<br>(1,456.00 to<br>4,053.06)                      |
| Self-harm by firearm                                                         | 5,206.42<br>(2,625.48 to<br>9,093.32)                          | 8,559.25<br>(3,469.05 to<br>19,207.56)                          | 7,349.74<br>(3,077.81 to<br>16,263.23)                          | 9,417.14<br>(3,784.38 to<br>21,132.65)                          | 119.56<br>(63.85 to<br>209.95)                             | 202.82<br>(87.93 to<br>424.00)                             | 179.58<br>(79.16 to<br>369.24)                             | 217.78<br>(92.25 to<br>468.63)                             |
| Self-harm by other specified means                                           | 37,511.75<br>(27,227.63 to<br>50,035.54)                       | 82,841.88<br>(46,232.24 to<br>144,068.67)                       | 74,716.62<br>(42,428.07 to<br>128,432.95)                       | 88,673.04<br>(48,185.43 to<br>156,530.37)                       | 955.07<br>(719.09 to<br>1,241.18)                          | 2,088.67<br>(1,270.96 to<br>3,431.79)                      | 1,950.72<br>(1,215.72 to<br>3,153.08)                      | 2,172.61<br>(1,306.42 to<br>3,681.88)                      |
| Interpersonal violence                                                       | 24,665.72<br>(12,446.21 to<br>66,881.27)                       | 36,882.70<br>(15,323.92 to<br>109,202.48)                       | 33,995.72<br>(14,137.40 to<br>101,690.81)                       | 39,618.21<br>(16,369.08 to<br>116,344.61)                       | 420.28<br>(281.57 to<br>1,168.68)                          | 674.00<br>(211.23 to<br>2,008.84)                          | 628.49<br>(262.95 to<br>1,880.48)                          | 711.07<br>(294.33 to<br>2,121.00)                          |
| Physical violence by firearm                                                 | 4,850.34<br>(2,125.66 to<br>15,961.67)                         | 7,707.92<br>(2,932.09 to<br>26,014.23)                          | 7,451.95<br>(2,829.77 to<br>25,024.91)                          | 7,885.78<br>(2,994.37 to<br>27,095.14)                          | 83.69<br>(36.65 to<br>283.72)                              | 140.50<br>(53.04 to<br>487.74)                             | 136.87<br>(51.84 to<br>468.80)                             | 141.81<br>(53.98 to<br>500.55)                             |
| Physical violence by sharp object                                            | 2,453.13<br>(1,181.21 to<br>6,413.02)                          | 4,225.29<br>(1,840.67 to<br>12,020.74)                          | 4,257.66<br>(1,861.43 to<br>11,999.38)                          | 4,236.53<br>(1,847.72 to<br>11,993.34)                          | 45.34<br>(21.86 to<br>121.72)                              | 82.53<br>(37.21 to<br>237.35)                              | 84.32<br>(37.21 to<br>243.48)                              | 81.16<br>(36.09 to<br>232.17)                              |
| Physical violence by other means                                             | 17,362.24<br>(8,442.79 to<br>46,797.14)                        | 24,949.49<br>(9,699.21 to<br>76,037.69)                         | 22,286.11<br>(8,675.58 to<br>66,050.66)                         | 27,495.90<br>(10,586.91 to<br>82,828.97)                        | 291.25<br>(141.18 to<br>813.90)                            | 450.97<br>(176.52 to<br>1,397.55)                          | 407.29<br>(157.64 to<br>1,251.84)                          | 488.10<br>(186.91 to<br>1,499.01)                          |
| Forces of nature, conflict and terrorism, and executions and police conflict | 448.41<br>(225.18 to<br>921.45)                                | 900.01<br>(0.00 to<br>14,015.46)                                | 866.10<br>(0.00 to<br>13,496.98)                                | 977.45<br>(0.00 to<br>15,307.09)                                | 8.54<br>(4.55 to<br>16.24)                                 | 161.3<br>(0.00 to<br>250.06)                               | 15.96<br>(0.00 to<br>247.60)                               | 16.81<br>(0.00 to<br>261.35)                               |
| Exposure to forces of nature                                                 | 0.00<br>(0.00 to<br>0.00)                                      | 880.31<br>(0.00 to<br>13,969.37)                                | 846.72<br>(0.00 to<br>13,452.31)                                | 957.06<br>(0.00 to<br>15,257.65)                                | 0.00<br>(0.00 to<br>0.00)                                  | 15.79<br>(0.00 to<br>249.28)                               | 15.62<br>(0.00 to<br>246.83)                               | 16.46<br>(0.00 to<br>260.54)                               |
| Conflict and terrorism                                                       | 0.00<br>(0.00 to<br>0.00)                                      | 5.20<br>(0.00 to<br>49.47)                                      | 5.04<br>(0.00 to<br>47.71)                                      | 5.57<br>(0.00 to<br>53.01)                                      | 0.00<br>(0.00 to<br>0.00)                                  | 0.09<br>(0.00 to<br>0.83)                                  | 0.09<br>(0.00 to<br>0.81)                                  | 0.09<br>(0.00 to<br>0.87)                                  |
| Executions and police conflict                                               | 448.41<br>(225.18 to<br>921.45)                                | 14.50<br>(0.00 to<br>138.29)                                    | 14.34<br>(0.00 to<br>136.24)                                    | 14.83<br>(0.00 to<br>141.56)                                    | 8.54<br>(4.55 to<br>16.24)                                 | 0.26<br>(0.00 to<br>2.45)                                  | 0.26<br>(0.00 to<br>2.44)                                  | 0.26<br>(0.00 to<br>2.47)                                  |
| <b>Mozambique</b>                                                            |                                                                |                                                                 |                                                                 |                                                                 |                                                            |                                                            |                                                            |                                                            |
| <b>Cause</b>                                                                 | <b>YLLs (in 1000s)</b>                                         |                                                                 |                                                                 |                                                                 | <b>Deaths (in 1000s)</b>                                   |                                                            |                                                            |                                                            |
|                                                                              | <b>2016</b>                                                    | <b>2040 Forecast</b>                                            | <b>2040 Better Scenario</b>                                     | <b>2040 Worse Scenario</b>                                      | <b>2016</b>                                                | <b>2040 Forecast</b>                                       | <b>2040 Better Scenario</b>                                | <b>2040 Worse Scenario</b>                                 |
| All causes                                                                   | 14,019.47<br>(12,515.18 to<br>15,765.36)                       | 9,705.26<br>(7,470.51 to<br>12,285.67)                          | 7,903.16<br>(5,995.80 to<br>10,165.86)                          | 20,410.92<br>(16,627.69 to<br>24,455.49)                        | 262.14<br>(236.62 to<br>291.07)                            | 268.47<br>(219.88 to<br>324.21)                            | 224.70<br>(182.65 to<br>273.46)                            | 456.57<br>(381.93 to<br>535.73)                            |
| Communicable, maternal, neonatal, and nutritional diseases                   | 11,063.99<br>(9,800.54 to<br>12,628.08)                        | 5,376.78<br>(3,753.49 to<br>7,488.99)                           | 4,146.04<br>(2,769.59 to<br>6,054.57)                           | 14,731.47<br>(11,650.11 to<br>17,954.19)                        | 172.34<br>(154.78 to<br>192.48)                            | 110.39<br>(78.99 to<br>151.38)                             | 84.72<br>(56.88 to<br>121.02)                              | 262.84<br>(203.65 to<br>322.51)                            |
| HIV/AIDS and tuberculosis                                                    | 4,306.79<br>(3,665.06 to<br>5,151.39)                          | 2,689.10<br>(1,331.01 to<br>4,502.93)                           | 2,068.05<br>(949.03 to<br>3,970.33)                             | 8,798.17<br>(6,394.79 to<br>11,383.27)                          | 78.11<br>(67.95 to<br>92.16)                               | 54.48<br>(29.74 to<br>85.76)                               | 41.25<br>(19.33 to<br>71.85)                               | 161.90<br>(116.14 to<br>210.56)                            |
| Tuberculosis                                                                 | 667.18<br>(513.98 to<br>857.20)                                | 364.39<br>(165.69 to<br>754.31)                                 | 242.09<br>(112.94 to<br>479.49)                                 | 720.80<br>(338.87 to<br>1,420.90)                               | 16.90<br>(13.09 to<br>21.81)                               | 9.76<br>(4.73 to<br>19.41)                                 | 6.60<br>(3.36 to<br>12.62)                                 | 18.46<br>(8.93 to<br>35.54)                                |
| HIV/AIDS                                                                     | 3,639.60<br>(2,992.42 to<br>4,478.30)                          | 2,324.71<br>(1,020.82 to<br>4,190.93)                           | 1,825.97<br>(704.60 to<br>3,700.49)                             | 8,077.37<br>(5,740.16 to<br>10,566.72)                          | 61.21<br>(50.95 to<br>74.68)                               | 44.72<br>(20.75 to<br>77.03)                               | 34.65<br>(13.19 to<br>65.96)                               | 143.44<br>(99.93 to<br>189.30)                             |

|                                                                          |                                           |                                         |                                       |                                           |                                  |                                  |                                  |                                  |
|--------------------------------------------------------------------------|-------------------------------------------|-----------------------------------------|---------------------------------------|-------------------------------------------|----------------------------------|----------------------------------|----------------------------------|----------------------------------|
| <b>Diarrhea, lower respiratory, and other common infectious diseases</b> | <b>2,406.32</b><br>(1,903.72 to 2,971.13) | <b>1,135.77</b><br>(725.67 to 2,056.79) | <b>798.66</b><br>(451.08 to 1,382.80) | <b>2,694.55</b><br>(1,647.62 to 4,134.92) | <b>38.29</b><br>(31.18 to 46.69) | <b>32.19</b><br>(18.12 to 55.67) | <b>21.94</b><br>(12.42 to 39.12) | <b>55.31</b><br>(32.44 to 88.87) |
| Diarrheal diseases                                                       | 554.43<br>(368.61 to 771.00)              | 316.06<br>(65.50 to 943.64)             | 211.62<br>(41.21 to 657.74)           | 645.83<br>(194.52 to 1,549.51)            | 10.12<br>(6.17 to 14.71)         | 8.87<br>(1.52 to 29.77)          | 6.09<br>(1.03 to 21.28)          | 15.87<br>(3.58 to 42.62)         |
| Intestinal infectious diseases                                           | 71.48<br>(35.15 to 127.53)                | 49.00<br>(22.70 to 89.41)               | 44.74<br>(20.81 to 82.15)             | 76.10<br>(35.49 to 142.63)                | 0.97<br>(0.50 to 1.70)           | 0.74<br>(0.35 to 1.35)           | 0.68<br>(0.32 to 1.24)           | 1.09<br>(0.52 to 2.03)           |
| Typhoid fever                                                            | 57.22<br>(25.93 to 109.52)                | 43.82<br>(18.96 to 83.70)               | 40.34<br>(17.71 to 76.76)             | 65.94<br>(28.85 to 125.52)                | 0.79<br>(0.37 to 1.49)           | 0.66<br>(0.29 to 1.25)           | 0.61<br>(0.27 to 1.14)           | 0.95<br>(0.41 to 1.82)           |
| Paratyphoid fever                                                        | 2.89<br>(1.06 to 6.74)                    | 2.65<br>(0.99 to 5.83)                  | 2.42<br>(0.88 to 5.33)                | 4.11<br>(1.48 to 8.88)                    | 0.04<br>(0.02 to 0.09)           | 0.04<br>(0.02 to 0.08)           | 0.04<br>(0.01 to 0.08)           | 0.06<br>(0.02 to 0.13)           |
| Other intestinal infectious diseases                                     | 11.37<br>(2.73 to 35.41)                  | 2.53<br>(0.61 to 7.64)                  | 1.98<br>(0.48 to 5.86)                | 6.04<br>(1.30 to 19.35)                   | 0.14<br>(0.01 to 0.44)           | 0.04<br>(0.01 to 0.11)           | 0.04<br>(0.01 to 0.09)           | 0.09<br>(0.02 to 0.26)           |
| Lower respiratory infections                                             | 1,114.89<br>(844.71 to 1,444.01)          | 587.48<br>(331.62 to 1,000.26)          | 350.51<br>(207.01 to 573.13)          | 1,360.36<br>(678.45 to 2,426.27)          | 18.22<br>(14.62 to 22.40)        | 17.69<br>(10.82 to 28.12)        | 11.31<br>(7.34 to 17.30)         | 29.59<br>(17.14 to 49.82)        |
| Upper respiratory infections                                             | 3.50<br>(0.95 to 8.55)                    | 1.62<br>(0.58 to 3.99)                  | 1.26<br>(0.45 to 2.86)                | 3.81<br>(1.20 to 10.85)                   | 0.05<br>(0.02 to 0.11)           | 0.03<br>(0.01 to 0.07)           | 0.03<br>(0.01 to 0.05)           | 0.07<br>(0.03 to 0.15)           |
| Otitis media                                                             | 0.79<br>(0.29 to 1.96)                    | 0.15<br>(0.06 to 0.35)                  | 0.16<br>(0.06 to 0.35)                | 0.19<br>(0.07 to 0.46)                    | 0.01<br>(0.01 to 0.03)           | 0.01<br>(0.00 to 0.01)           | 0.01<br>(0.01 to 0.01)           | 0.00<br>(0.00 to 0.01)           |
| Meningitis                                                               | 311.26<br>(217.69 to 466.97)              | 162.89<br>(105.43 to 242.43)            | 145.31<br>(94.16 to 218.21)           | 296.78<br>(180.38 to 471.60)              | 4.63<br>(3.41 to 6.64)           | 3.31<br>(2.08 to 4.82)           | 3.14<br>(1.95 to 4.60)           | 4.85<br>(3.21 to 7.37)           |
| Pneumococcal meningitis                                                  | 17.71<br>(12.12 to 26.29)                 | 10.86<br>(6.64 to 17.68)                | 10.30<br>(6.22 to 16.09)              | 16.16<br>(9.64 to 27.43)                  | 0.30<br>(0.22 to 0.42)           | 0.26<br>(0.16 to 0.40)           | 0.26<br>(0.16 to 0.39)           | 0.32<br>(0.20 to 0.50)           |
| H influenzae type B meningitis                                           | 32.00<br>(20.52 to 50.21)                 | 26.41<br>(9.90 to 62.10)                | 17.07<br>(8.01 to 35.33)              | 109.45<br>(25.52 to 252.42)               | 0.44<br>(0.30 to 0.67)           | 0.40<br>(0.19 to 0.82)           | 0.30<br>(0.17 to 0.52)           | 1.25<br>(0.37 to 3.03)           |
| Meningococcal meningitis                                                 | 134.49<br>(91.92 to 196.64)               | 58.82<br>(36.80 to 87.73)               | 55.03<br>(34.30 to 82.02)             | 85.58<br>(55.37 to 131.28)                | 1.96<br>(1.40 to 2.76)           | 1.20<br>(0.75 to 1.76)           | 1.17<br>(0.71 to 1.72)           | 1.51<br>(0.99 to 2.21)           |
| Other meningitis                                                         | 127.06<br>(88.11 to 194.53)               | 66.80<br>(41.65 to 101.10)              | 62.90<br>(39.06 to 96.30)             | 94.60<br>(60.87 to 145.81)                | 1.93<br>(1.40 to 2.81)           | 1.45<br>(0.88 to 2.15)           | 1.42<br>(0.86 to 2.10)           | 1.76<br>(1.15 to 2.65)           |
| Encephalitis                                                             | 30.55<br>(14.19 to 53.25)                 | 16.70<br>(7.89 to 30.49)                | 14.55<br>(7.01 to 27.10)              | 31.89<br>(14.75 to 59.00)                 | 0.38<br>(0.18 to 0.67)           | 0.25<br>(0.12 to 0.45)           | 0.22<br>(0.11 to 0.41)           | 0.43<br>(0.21 to 0.79)           |
| Diphtheria                                                               | 0.64<br>(0.26 to 1.23)                    | 0.12<br>(0.05 to 0.27)                  | 0.07<br>(0.04 to 0.13)                | 0.49<br>(0.12 to 1.55)                    | 0.01<br>(0.00 to 0.01)           | 0.00<br>(0.00 to 0.00)           | 0.00<br>(0.00 to 0.00)           | 0.01<br>(0.00 to 0.02)           |
| Whooping cough                                                           | 199.58<br>(17.79 to 627.33)               | 91.05<br>(8.97 to 259.33)               | 22.33<br>(1.80 to 77.04)              | 239.21<br>(21.73 to 686.71)               | 2.35<br>(0.21 to 7.39)           | 1.08<br>(0.11 to 3.10)           | 0.27<br>(0.02 to 0.94)           | 2.83<br>(0.26 to 8.13)           |
| Tetanus                                                                  | 27.77<br>(13.53 to 48.30)                 | 4.86<br>(1.71 to 9.02)                  | 4.15<br>(1.24 to 7.61)                | 8.18<br>(3.24 to 17.13)                   | 0.43<br>(0.20 to 0.70)           | 0.39<br>(0.03 to 0.16)           | 0.08<br>(0.03 to 0.15)           | 0.13<br>(0.05 to 0.23)           |
| Measles                                                                  | 81.96<br>(27.66 to 195.06)                | 2.59<br>(0.33 to 12.72)                 | 1.37<br>(0.25 to 5.43)                | 24.38<br>(1.72 to 104.64)                 | 0.98<br>(0.33 to 2.32)           | 0.29<br>(0.00 to 0.15)           | 0.02<br>(0.00 to 0.07)           | 0.29<br>(0.02 to 1.24)           |

**Mozambique**

| Cause                       | YLLs (in 1000s)         |                        |                        |                         | Deaths (in 1000s)      |                        |                        |                        |
|-----------------------------|-------------------------|------------------------|------------------------|-------------------------|------------------------|------------------------|------------------------|------------------------|
|                             | 2016                    | 2040 Forecast          | 2040 Better Scenario   | 2040 Worse Scenario     | 2016                   | 2040 Forecast          | 2040 Better Scenario   | 2040 Worse Scenario    |
| Varicella and herpes zoster | 9.49<br>(5.11 to 15.27) | 3.24<br>(1.89 to 5.40) | 2.59<br>(1.49 to 4.24) | 7.32<br>(3.83 to 12.93) | 0.15<br>(0.09 to 0.22) | 0.08<br>(0.05 to 0.13) | 0.07<br>(0.05 to 0.12) | 0.14<br>(0.08 to 0.22) |

|                                                       |                                                      |                                                     |                                                     |                                                      |                                                |                                                |                                                |                                                 |
|-------------------------------------------------------|------------------------------------------------------|-----------------------------------------------------|-----------------------------------------------------|------------------------------------------------------|------------------------------------------------|------------------------------------------------|------------------------------------------------|-------------------------------------------------|
|                                                       | 1,493.82<br>(1,099.44 to<br>1,936.54)                | 445.49<br>(321.57 to<br>603.42)                     | 429.78<br>(310.46 to<br>583.90)                     | 692.87<br>(503.38 to<br>937.72)                      | 19.90<br>(14.93 to<br>25.40)                   | 8.50<br>(6.12 to<br>11.55)                     | 8.40<br>(5.99 to<br>11.50)                     | 11.37<br>(5.99 to<br>15.07)                     |
| Neglected tropical diseases and malaria               |                                                      |                                                     |                                                     |                                                      |                                                |                                                |                                                |                                                 |
| Malaria                                               | 1,423.38<br>(1,027.97 to<br>1,873.90)                | 403.30<br>(287.13 to<br>555.24)                     | 391.42<br>(276.89 to<br>540.02)                     | 617.68<br>(437.39 to<br>848.70)                      | 18.77<br>(13.85 to<br>24.36)                   | 7.64<br>(5.41 to<br>10.63)                     | 7.61<br>(5.35 to<br>10.60)                     | 10.04<br>(7.14 to<br>13.67)                     |
| Chagas disease                                        | 0.00<br>(0.00 to<br>0.00)                            | 0.00<br>(0.00 to<br>0.00)                           | 0.00<br>(0.00 to<br>0.00)                           | 0.00<br>(0.00 to<br>0.00)                            | 0.00<br>(0.00 to<br>0.00)                      | 0.00<br>(0.00 to<br>0.00)                      | 0.00<br>(0.00 to<br>0.00)                      | 0.00<br>(0.00 to<br>0.00)                       |
| Leishmaniasis                                         | 0.00<br>(0.00 to<br>0.00)                            | 0.00<br>(0.00 to<br>0.00)                           | 0.00<br>(0.00 to<br>0.00)                           | 0.00<br>(0.00 to<br>0.00)                            | 0.00<br>(0.00 to<br>0.00)                      | 0.00<br>(0.00 to<br>0.00)                      | 0.00<br>(0.00 to<br>0.00)                      | 0.00<br>(0.00 to<br>0.00)                       |
| African trypanosomiasis                               | 0.00<br>(0.00 to<br>0.00)                            | 0.00<br>(0.00 to<br>0.00)                           | 0.00<br>(0.00 to<br>0.00)                           | 0.00<br>(0.00 to<br>0.00)                            | 0.00<br>(0.00 to<br>0.00)                      | 0.00<br>(0.00 to<br>0.00)                      | 0.00<br>(0.00 to<br>0.00)                      | 0.00<br>(0.00 to<br>0.00)                       |
| Schistosomiasis                                       | 13.33<br>(9.24 to<br>18.33)                          | 12.40<br>(7.51 to<br>20.01)                         | 11.51<br>(7.01 to<br>18.63)                         | 15.36<br>(9.50 to<br>24.05)                          | 0.35<br>(0.25 to<br>0.49)                      | 0.36<br>(0.24 to<br>0.55)                      | 0.34<br>(0.22 to<br>0.52)                      | 0.43<br>(0.29 to<br>0.64)                       |
| Cysticercosis                                         | 1.20<br>(0.89 to<br>1.63)                            | 0.70<br>(0.43 to<br>1.12)                           | 0.68<br>(0.41 to<br>1.10)                           | 0.80<br>(0.51 to<br>1.25)                            | 0.02<br>(0.02 to<br>0.03)                      | 0.02<br>(0.01 to<br>0.02)                      | 0.02<br>(0.01 to<br>0.02)                      | 0.02<br>(0.01 to<br>0.03)                       |
| Cystic echinococcosis                                 | 1.54<br>(1.07 to<br>2.15)                            | 0.59<br>(0.36 to<br>0.90)                           | 0.45<br>(0.27 to<br>0.68)                           | 1.30<br>(0.82 to<br>1.99)                            | 0.03<br>(0.02 to<br>0.04)                      | 0.01<br>(0.01 to<br>0.02)                      | 0.01<br>(0.01 to<br>0.02)                      | 0.03<br>(0.02 to<br>0.05)                       |
| Dengue                                                | 0.64<br>(0.03 to<br>2.61)                            | 1.77<br>(0.11 to<br>6.57)                           | 1.73<br>(0.10 to<br>6.46)                           | 2.59<br>(0.15 to<br>10.03)                           | 0.01<br>(0.00 to<br>0.04)                      | 0.01<br>(0.00 to<br>0.14)                      | 0.04<br>(0.00 to<br>0.14)                      | 0.05<br>(0.00 to<br>0.18)                       |
| Yellow fever                                          | 0.00<br>(0.00 to<br>0.00)                            | 0.00<br>(0.00 to<br>0.00)                           | 0.00<br>(0.00 to<br>0.00)                           | 0.00<br>(0.00 to<br>0.00)                            | 0.00<br>(0.00 to<br>0.00)                      | 0.00<br>(0.00 to<br>0.00)                      | 0.00<br>(0.00 to<br>0.00)                      | 0.00<br>(0.00 to<br>0.00)                       |
| Rabies                                                | 6.94<br>(3.37 to<br>16.36)                           | 2.57<br>(1.15 to<br>6.48)                           | 1.77<br>(0.79 to<br>4.70)                           | 7.35<br>(3.32 to<br>16.14)                           | 0.11<br>(0.06 to<br>0.25)                      | 0.05<br>(0.02 to<br>0.12)                      | 0.04<br>(0.02 to<br>0.08)                      | 0.14<br>(0.06 to<br>0.28)                       |
| Intestinal nematode infections                        | 12.09<br>(7.06 to<br>18.60)                          | 9.64<br>(5.65 to<br>14.56)                          | 9.50<br>(5.66 to<br>14.19)                          | 16.21<br>(9.32 to<br>25.12)                          | 0.15<br>(0.09 to<br>0.22)                      | 0.15<br>(0.08 to<br>0.19)                      | 0.13<br>(0.08 to<br>0.19)                      | 0.21<br>(0.12 to<br>0.31)                       |
| Other neglected tropical diseases                     | 34.69<br>(14.56 to<br>68.82)                         | 14.52<br>(6.19 to<br>26.15)                         | 12.71<br>(5.45 to<br>22.80)                         | 31.58<br>(13.72 to<br>59.14)                         | 0.45<br>(0.19 to<br>0.88)                      | 0.25<br>(0.10 to<br>0.44)                      | 0.22<br>(0.09 to<br>0.40)                      | 0.46<br>(0.20 to<br>0.84)                       |
| <b>Maternal disorders</b>                             | <b>179.87</b><br><b>(128.75 to</b><br><b>228.48)</b> | <b>152.83</b><br><b>(69.92 to</b><br><b>309.94)</b> | <b>117.97</b><br><b>(52.53 to</b><br><b>248.65)</b> | <b>296.20</b><br><b>(137.44 to</b><br><b>598.55)</b> | <b>3.20</b><br><b>(2.30 to</b><br><b>4.09)</b> | <b>2.82</b><br><b>(1.32 to</b><br><b>5.64)</b> | <b>2.18</b><br><b>(0.98 to</b><br><b>4.51)</b> | <b>5.43</b><br><b>(2.53 to</b><br><b>11.01)</b> |
| Maternal hemorrhage                                   | 35.81<br>(23.61 to<br>51.25)                         | 26.58<br>(11.87 to<br>53.18)                        | 20.98<br>(8.84 to<br>43.77)                         | 47.71<br>(21.29 to<br>95.65)                         | 0.66<br>(0.44 to<br>0.95)                      | 0.50<br>(0.23 to<br>1.00)                      | 0.40<br>(0.17 to<br>0.81)                      | 0.90<br>(0.41 to<br>1.81)                       |
| Maternal sepsis and other maternal infections         | 20.23<br>(12.85 to<br>29.41)                         | 11.69<br>(4.86 to<br>23.14)                         | 9.21<br>(3.78 to<br>18.79)                          | 21.62<br>(9.06 to<br>43.38)                          | 0.36<br>(0.23 to<br>0.51)                      | 0.21<br>(0.09 to<br>0.42)                      | 0.17<br>(0.07 to<br>0.35)                      | 0.39<br>(0.17 to<br>0.77)                       |
| Maternal hypertensive disorders                       | 22.84<br>(14.77 to<br>32.71)                         | 16.47<br>(7.04 to<br>33.04)                         | 12.97<br>(5.50 to<br>27.68)                         | 30.27<br>(13.61 to<br>61.08)                         | 0.40<br>(0.26 to<br>0.57)                      | 0.30<br>(0.13 to<br>0.59)                      | 0.23<br>(0.10 to<br>0.49)                      | 0.54<br>(0.25 to<br>1.10)                       |
| Maternal obstructed labor and uterine rupture         | 14.56<br>(9.17 to<br>20.88)                          | 10.19<br>(4.15 to<br>22.11)                         | 7.90<br>(3.21 to<br>17.58)                          | 19.33<br>(8.28 to<br>39.97)                          | 0.26<br>(0.17 to<br>0.38)                      | 0.19<br>(0.08 to<br>0.41)                      | 0.15<br>(0.06 to<br>0.32)                      | 0.36<br>(0.15 to<br>0.74)                       |
| Maternal abortion, miscarriage, and ectopic pregnancy | 32.50<br>(20.88 to<br>46.22)                         | 26.16<br>(9.93 to<br>56.98)                         | 20.80<br>(7.62 to<br>48.60)                         | 49.70<br>(19.08 to<br>110.58)                        | 0.56<br>(0.37 to<br>0.79)                      | 0.47<br>(0.18 to<br>1.02)                      | 0.37<br>(0.14 to<br>0.84)                      | 0.88<br>(0.35 to<br>1.91)                       |
| Indirect maternal deaths                              | 36.04<br>(22.98 to<br>51.99)                         | 28.91<br>(11.55 to<br>61.01)                        | 23.02<br>(8.98 to<br>49.43)                         | 55.97<br>(22.63 to<br>117.80)                        | 0.64<br>(0.41 to<br>0.91)                      | 0.52<br>(0.21 to<br>1.10)                      | 0.42<br>(0.16 to<br>0.88)                      | 1.00<br>(0.41 to<br>2.10)                       |
| Late maternal deaths                                  | 1.62<br>(0.72 to<br>3.05)                            | 0.88<br>(0.31 to<br>2.13)                           | 0.69<br>(0.23 to<br>1.69)                           | 1.69<br>(0.59 to<br>4.00)                            | 0.03<br>(0.01 to<br>0.05)                      | 0.02<br>(0.01 to<br>0.04)                      | 0.01<br>(0.00 to<br>0.03)                      | 0.03<br>(0.01 to<br>0.07)                       |
| Maternal deaths aggravated by HIV/AIDS                | 7.15<br>(4.05 to<br>10.27)                           | 24.90<br>(6.59 to<br>52.23)                         | 16.73<br>(1.95 to<br>39.18)                         | 56.86<br>(23.74 to<br>116.79)                        | 0.13<br>(0.08 to<br>0.19)                      | 0.49<br>(0.15 to<br>1.03)                      | 0.33<br>(0.05 to<br>0.74)                      | 1.09<br>(0.46 to<br>2.21)                       |

|                                                                         |                                              |                                        |                                        |                                              |                                     |                                   |                                  |                                     |
|-------------------------------------------------------------------------|----------------------------------------------|----------------------------------------|----------------------------------------|----------------------------------------------|-------------------------------------|-----------------------------------|----------------------------------|-------------------------------------|
|                                                                         | 9.31<br>(4.76 to<br>15.52)                   | 7.05<br>(2.57 to<br>16.67)             | 5.68<br>(2.01 to<br>13.76)             | 13.04<br>(4.73 to<br>29.74)                  | 0.17<br>(0.09 to<br>0.28)           | 0.13<br>(0.05 to<br>0.31)         | 0.10<br>(0.04 to<br>0.26)        | 0.24<br>(0.09 to<br>0.55)           |
| Other maternal disorders                                                |                                              |                                        |                                        |                                              |                                     |                                   |                                  |                                     |
| <b>Mozambique</b>                                                       |                                              |                                        |                                        |                                              |                                     |                                   |                                  |                                     |
| Cause                                                                   | YLLs (in 1000s)                              |                                        |                                        |                                              | Deaths (in 1000s)                   |                                   |                                  |                                     |
|                                                                         | 2016                                         | 2040 Forecast                          | 2040 Better Scenario                   | 2040 Worse Scenario                          | 2016                                | 2040 Forecast                     | 2040 Better Scenario             | 2040 Worse Scenario                 |
| <b>Neonatal disorders</b>                                               | <b>2,001.22</b><br>(1,645.45 to<br>2,393.94) | <b>655.42</b><br>(415.70 to<br>930.45) | <b>552.81</b><br>(340.73 to<br>777.43) | <b>1,876.78</b><br>(1,145.24 to<br>2,654.77) | <b>23.12</b><br>(19.01 to<br>27.65) | <b>7.57</b><br>(4.80 to<br>10.75) | <b>6.39</b><br>(3.94 to<br>8.98) | <b>21.68</b><br>(13.23 to<br>30.67) |
| Neonatal preterm birth                                                  | 514.50<br>(352.12 to<br>705.04)              | 145.21<br>(87.53 to<br>219.64)         | 116.72<br>(70.70 to<br>177.71)         | 452.67<br>(275.59 to<br>700.05)              | 5.94<br>(4.07 to<br>8.14)           | 1.68<br>(1.01 to<br>2.54)         | 1.35<br>(0.82 to<br>2.05)        | 5.23<br>(3.18 to<br>8.09)           |
| Neonatal encephalopathy due to birth asphyxia and trauma                | 693.94<br>(481.70 to<br>936.14)              | 215.73<br>(107.39 to<br>355.35)        | 187.14<br>(94.08 to<br>303.56)         | 578.94<br>(284.96 to<br>969.37)              | 8.02<br>(5.56 to<br>10.81)          | 2.49<br>(1.24 to<br>4.10)         | 2.16<br>(1.09 to<br>3.51)        | 6.69<br>(3.29 to<br>11.20)          |
| Neonatal sepsis and other neonatal infections                           | 403.00<br>(271.16 to<br>641.66)              | 168.50<br>(97.58 to<br>284.97)         | 144.94<br>(84.40 to<br>240.84)         | 462.50<br>(260.86 to<br>803.82)              | 4.66<br>(3.13 to<br>7.41)           | 1.95<br>(1.13 to<br>3.29)         | 1.67<br>(0.98 to<br>2.78)        | 5.34<br>(3.01 to<br>9.29)           |
| Hemolytic disease and other neonatal jaundice                           | 56.00<br>(28.66 to<br>99.71)                 | 11.49<br>(4.66 to<br>24.02)            | 9.52<br>(3.92 to<br>19.32)             | 34.70<br>(13.68 to<br>70.83)                 | 0.65<br>(0.33 to<br>1.15)           | 0.13<br>(0.05 to<br>0.28)         | 0.11<br>(0.05 to<br>0.22)        | 0.40<br>(0.16 to<br>0.82)           |
| Other neonatal disorders                                                | 333.78<br>(202.67 to<br>498.64)              | 114.49<br>(52.50 to<br>203.58)         | 94.49<br>(42.70 to<br>167.25)          | 347.96<br>(160.41 to<br>630.31)              | 3.86<br>(2.34 to<br>5.76)           | 1.32<br>(0.61 to<br>2.35)         | 1.09<br>(0.49 to<br>1.93)        | 4.02<br>(1.85 to<br>7.28)           |
| <b>Nutritional deficiencies</b>                                         | <b>266.00</b><br>(177.71 to<br>392.52)       | <b>99.23</b><br>(70.60 to<br>137.18)   | <b>88.58</b><br>(63.00 to<br>120.92)   | <b>180.56</b><br>(122.47 to<br>263.66)       | <b>4.42</b><br>(3.28 to<br>5.95)    | <b>2.96</b><br>(2.34 to<br>3.73)  | <b>2.82</b><br>(2.22 to<br>3.57) | <b>4.09</b><br>(3.15 to<br>5.34)    |
| Protein-energy malnutrition                                             | 243.48<br>(159.48 to<br>366.83)              | 72.48<br>(49.72 to<br>102.68)          | 64.05<br>(44.01 to<br>91.58)           | 142.08<br>(91.89 to<br>212.57)               | 3.83<br>(2.77 to<br>5.28)           | 2.04<br>(1.50 to<br>2.69)         | 1.94<br>(1.41 to<br>2.57)        | 2.98<br>(2.18 to<br>4.02)           |
| Iodine deficiency                                                       | 1.89<br>(0.10 to<br>8.76)                    | 3.56<br>(0.12 to<br>12.99)             | 3.10<br>(0.10 to<br>10.80)             | 6.64<br>(0.20 to<br>31.90)                   | 0.04<br>(0.00 to<br>0.12)           | 0.11<br>(0.00 to<br>0.36)         | 0.10<br>(0.00 to<br>0.34)        | 0.16<br>(0.01 to<br>0.49)           |
| Dietary iron deficiency                                                 | 0.80<br>(0.56 to<br>1.10)                    | 0.99<br>(0.53 to<br>1.67)              | 0.93<br>(0.50 to<br>1.59)              | 1.21<br>(0.68 to<br>2.00)                    | 0.01<br>(0.01 to<br>0.02)           | 0.02<br>(0.01 to<br>0.03)         | 0.02<br>(0.01 to<br>0.03)        | 0.02<br>(0.01 to<br>0.04)           |
| Other nutritional deficiencies                                          | 19.84<br>(12.00 to<br>31.23)                 | 22.20<br>(13.79 to<br>33.51)           | 20.50<br>(12.76 to<br>30.88)           | 30.63<br>(18.65 to<br>47.17)                 | 0.54<br>(0.34 to<br>0.76)           | 0.78<br>(0.50 to<br>1.10)         | 0.76<br>(0.49 to<br>1.08)        | 0.93<br>(0.60 to<br>1.30)           |
| <b>Other communicable, maternal, neonatal, and nutritional diseases</b> | <b>409.96</b><br>(216.60 to<br>707.37)       | <b>98.95</b><br>(61.44 to<br>153.94)   | <b>90.20</b><br>(56.27 to<br>144.39)   | <b>192.35</b><br>(109.89 to<br>327.97)       | <b>5.29</b><br>(2.98 to<br>8.72)    | <b>1.87</b><br>(1.33 to<br>2.66)  | <b>1.75</b><br>(1.23 to<br>2.51) | <b>3.05</b><br>(1.99 to<br>4.67)    |
| Sexually transmitted infections excluding HIV                           | 321.42<br>(141.88 to<br>606.82)              | 48.25<br>(20.55 to<br>98.10)           | 43.98<br>(18.99 to<br>88.12)           | 107.31<br>(42.37 to<br>224.26)               | 3.82<br>(1.71 to<br>7.15)           | 0.63<br>(0.30 to<br>1.21)         | 0.58<br>(0.28 to<br>1.11)        | 1.33<br>(0.57 to<br>2.69)           |
| Syphilis                                                                | 318.40<br>(138.52 to<br>603.47)              | 44.67<br>(17.77 to<br>93.99)           | 40.56<br>(16.32 to<br>83.37)           | 103.18<br>(39.43 to<br>219.57)               | 3.75<br>(1.65 to<br>7.08)           | 0.55<br>(0.23 to<br>1.12)         | 0.50<br>(0.21 to<br>1.02)        | 1.24<br>(0.48 to<br>2.60)           |
| Chlamydial infection                                                    | 0.58<br>(0.39 to<br>0.81)                    | 0.70<br>(0.34 to<br>1.38)              | 0.67<br>(0.32 to<br>1.32)              | 0.82<br>(0.41 to<br>1.58)                    | 0.01<br>(0.01 to<br>0.02)           | 0.02<br>(0.01 to<br>0.03)         | 0.02<br>(0.01 to<br>0.03)        | 0.02<br>(0.01 to<br>0.03)           |
| Gonococcal infection                                                    | 1.55<br>(1.11 to<br>2.12)                    | 1.85<br>(0.98 to<br>3.34)              | 1.77<br>(0.93 to<br>3.22)              | 2.12<br>(1.14 to<br>3.80)                    | 0.03<br>(0.02 to<br>0.05)           | 0.04<br>(0.03 to<br>0.07)         | 0.04<br>(0.02 to<br>0.07)        | 0.05<br>(0.03 to<br>0.08)           |
| Other sexually transmitted infections                                   | 0.89<br>(0.62 to<br>1.26)                    | 1.03<br>(0.55 to<br>1.89)              | 0.98<br>(0.51 to<br>1.84)              | 1.20<br>(0.62 to<br>2.21)                    | 0.02<br>(0.01 to<br>0.02)           | 0.02<br>(0.01 to<br>0.04)         | 0.02<br>(0.01 to<br>0.04)        | 0.03<br>(0.01 to<br>0.04)           |
| Acute hepatitis                                                         | 31.72<br>(25.14 to<br>39.57)                 | 30.08<br>(19.80 to<br>45.27)           | 27.92<br>(18.10 to<br>42.50)           | 38.49<br>(26.89 to<br>56.09)                 | 0.74<br>(0.59 to<br>0.92)           | 0.83<br>(0.60 to<br>1.17)         | 0.79<br>(0.56 to<br>1.12)        | 1.00<br>(0.73 to<br>1.40)           |
| Acute hepatitis A                                                       | 1.59<br>(0.19 to<br>4.01)                    | 0.53<br>(0.16 to<br>1.13)              | 0.48<br>(0.14 to<br>1.04)              | 0.97<br>(0.23 to<br>2.30)                    | 0.02<br>(0.00 to<br>0.05)           | 0.01<br>(0.00 to<br>0.02)         | 0.01<br>(0.00 to<br>0.02)        | 0.02<br>(0.01 to<br>0.03)           |

|                                       |                                                            |                                                            |                                                            |                                                            |                                                   |                                                      |                                                     |                                                      |
|---------------------------------------|------------------------------------------------------------|------------------------------------------------------------|------------------------------------------------------------|------------------------------------------------------------|---------------------------------------------------|------------------------------------------------------|-----------------------------------------------------|------------------------------------------------------|
| Acute hepatitis B                     | 23.83<br>(18.11 to<br>30.19)                               | 24.83<br>(15.90 to<br>37.38)                               | 22.92<br>(14.35 to<br>35.18)                               | 31.29<br>(20.91 to<br>46.44)                               | 0.59<br>(0.46 to<br>0.75)                         | 0.68<br>(0.48 to<br>0.98)                            | 0.64<br>(0.44 to<br>0.93)                           | 0.83<br>(0.59 to<br>1.16)                            |
| Acute hepatitis C                     | 0.75<br>(0.51 to<br>1.04)                                  | 1.00<br>(0.62 to<br>1.60)                                  | 0.98<br>(0.61 to<br>1.59)                                  | 1.11<br>(0.70 to<br>1.76)                                  | 0.02<br>(0.01 to<br>0.03)                         | 0.03<br>(0.02 to<br>0.05)                            | 0.03<br>(0.02 to<br>0.05)                           | 0.03<br>(0.02 to<br>0.05)                            |
| Acute hepatitis E                     | 5.55<br>(3.97 to<br>7.62)                                  | 3.72<br>(2.44 to<br>5.61)                                  | 3.53<br>(2.28 to<br>5.33)                                  | 5.12<br>(3.44 to<br>7.69)                                  | 0.11<br>(0.08 to<br>0.14)                         | 0.11<br>(0.07 to<br>0.16)                            | 0.11<br>(0.07 to<br>0.16)                           | 0.13<br>(0.08 to<br>0.18)                            |
| Other unspecified infectious diseases | 56.81<br>(20.77 to<br>199.45)                              | 20.61<br>(10.86 to<br>49.48)                               | 18.29<br>(9.66 to<br>44.67)                                | 46.54<br>(22.75 to<br>119.92)                              | 0.73<br>(0.31 to<br>2.39)                         | 0.41<br>(0.27 to<br>0.75)                            | 0.38<br>(0.24 to<br>0.70)                           | 0.73<br>(0.42 to<br>1.59)                            |
| <b>Non-communicable diseases</b>      | <b>2,073.38</b><br><b>(1,781.28 to</b><br><b>2,433.56)</b> | <b>3,214.36</b><br><b>(2,407.48 to</b><br><b>4,227.30)</b> | <b>2,715.11</b><br><b>(2,073.18 to</b><br><b>3,528.72)</b> | <b>4,318.03</b><br><b>(3,227.10 to</b><br><b>5,694.67)</b> | <b>72.68</b><br><b>(62.34 to</b><br><b>85.22)</b> | <b>131.81</b><br><b>(108.16 to</b><br><b>162.18)</b> | <b>114.74</b><br><b>(94.88 to</b><br><b>139.18)</b> | <b>164.18</b><br><b>(132.45 to</b><br><b>204.34)</b> |
| <b>Mozambique</b>                     |                                                            |                                                            |                                                            |                                                            |                                                   |                                                      |                                                     |                                                      |
| Cause                                 | YLLs (in 1000s)                                            |                                                            |                                                            |                                                            | Deaths (in 1000s)                                 |                                                      |                                                     |                                                      |
|                                       | 2016                                                       | 2040 Forecast                                              | 2040 Better Scenario                                       | 2040 Worse Scenario                                        | 2016                                              | 2040 Forecast                                        | 2040 Better Scenario                                | 2040 Worse Scenario                                  |
| <b>Neoplasms</b>                      | <b>458.02</b><br><b>(374.68 to</b><br><b>554.25)</b>       | <b>974.11</b><br><b>(706.94 to</b><br><b>1,300.85)</b>     | <b>926.97</b><br><b>(679.82 to</b><br><b>1,227.84)</b>     | <b>990.02</b><br><b>(727.71 to</b><br><b>1,318.36)</b>     | <b>15.76</b><br><b>(12.85 to</b><br><b>19.03)</b> | <b>35.54</b><br><b>(27.74 to</b><br><b>45.11)</b>    | <b>34.77</b><br><b>(27.38 to</b><br><b>43.80)</b>   | <b>34.20</b><br><b>(26.83 to</b><br><b>43.31)</b>    |
| Lip and oral cavity cancer            | 5.93<br>(4.84 to<br>7.34)                                  | 14.54<br>(8.44 to<br>24.50)                                | 11.02<br>(6.98 to<br>17.46)                                | 17.23<br>(9.40 to<br>30.11)                                | 0.23<br>(0.20 to<br>0.29)                         | 0.56<br>(0.37 to<br>0.89)                            | 0.46<br>(0.32 to<br>0.68)                           | 0.62<br>(0.38 to<br>1.04)                            |
| Nasopharynx cancer                    | 0.78<br>(0.62 to<br>0.96)                                  | 2.06<br>(1.08 to<br>3.79)                                  | 1.41<br>(0.83 to<br>2.36)                                  | 2.63<br>(1.36 to<br>5.03)                                  | 0.02<br>(0.02 to<br>0.03)                         | 0.06<br>(0.03 to<br>0.11)                            | 0.04<br>(0.03 to<br>0.07)                           | 0.08<br>(0.04 to<br>0.13)                            |
| Other pharynx cancer                  | 3.34<br>(2.38 to<br>4.78)                                  | 6.61<br>(3.57 to<br>12.31)                                 | 5.59<br>(3.17 to<br>9.81)                                  | 7.61<br>(3.98 to<br>14.47)                                 | 0.12<br>(0.08 to<br>0.16)                         | 0.23<br>(0.13 to<br>0.41)                            | 0.20<br>(0.12 to<br>0.33)                           | 0.25<br>(0.14 to<br>0.46)                            |
| Esophageal cancer                     | 16.80<br>(13.59 to<br>20.72)                               | 39.98<br>(20.74 to<br>72.67)                               | 30.36<br>(17.09 to<br>51.41)                               | 46.81<br>(23.27 to<br>87.57)                               | 0.69<br>(0.57 to<br>0.84)                         | 1.52<br>(0.84 to<br>2.60)                            | 1.23<br>(0.74 to<br>2.00)                           | 1.71<br>(0.90 to<br>3.00)                            |
| Stomach cancer                        | 28.25<br>(23.11 to<br>34.14)                               | 39.23<br>(29.37 to<br>52.89)                               | 38.22<br>(28.47 to<br>52.10)                               | 41.70<br>(31.37 to<br>56.87)                               | 1.22<br>(1.02 to<br>1.46)                         | 1.72<br>(1.37 to<br>2.22)                            | 1.73<br>(1.37 to<br>2.24)                           | 1.75<br>(1.38 to<br>2.28)                            |
| Colon and rectum cancer               | 23.34<br>(19.04 to<br>28.62)                               | 66.23<br>(46.25 to<br>94.44)                               | 66.76<br>(47.10 to<br>92.99)                               | 60.08<br>(41.41 to<br>84.75)                               | 1.04<br>(0.87 to<br>1.26)                         | 3.16<br>(2.33 to<br>4.29)                            | 3.34<br>(2.49 to<br>4.49)                           | 2.68<br>(1.94 to<br>3.66)                            |
| Liver cancer                          | 65.63<br>(52.10 to<br>81.26)                               | 158.04<br>(109.24 to<br>229.82)                            | 146.26<br>(104.00 to<br>202.67)                            | 160.65<br>(109.80 to<br>239.37)                            | 2.63<br>(2.11 to<br>3.27)                         | 6.35<br>(4.62 to<br>8.67)                            | 6.08<br>(4.54 to<br>8.02)                           | 6.20<br>(4.45 to<br>8.53)                            |
| Liver cancer due to hepatitis B       | 33.32<br>(25.40 to<br>42.62)                               | 80.89<br>(54.59 to<br>122.56)                              | 75.72<br>(52.22 to<br>109.27)                              | 81.30<br>(54.46 to<br>124.22)                              | 1.26<br>(0.96 to<br>1.61)                         | 3.05<br>(2.12 to<br>4.35)                            | 2.94<br>(2.08 to<br>4.07)                           | 2.96<br>(2.03 to<br>4.27)                            |
| Liver cancer due to hepatitis C       | 6.87<br>(4.75 to<br>9.69)                                  | 16.38<br>(10.32 to<br>25.21)                               | 15.77<br>(10.26 to<br>23.74)                               | 16.04<br>(10.05 to<br>24.82)                               | 0.33<br>(0.22 to<br>0.46)                         | 0.80<br>(0.52 to<br>1.16)                            | 0.80<br>(0.53 to<br>1.14)                           | 0.75<br>(0.48 to<br>1.11)                            |
| Liver cancer due to alcohol use       | 8.41<br>(6.41 to<br>10.80)                                 | 20.47<br>(13.64 to<br>29.32)                               | 17.62<br>(12.07 to<br>24.54)                               | 22.19<br>(14.78 to<br>32.40)                               | 0.37<br>(0.28 to<br>0.47)                         | 0.87<br>(0.61 to<br>1.22)                            | 0.78<br>(0.56 to<br>1.07)                           | 0.91<br>(0.63 to<br>1.27)                            |
| Liver cancer due to other causes      | 17.03<br>(13.46 to<br>21.34)                               | 40.29<br>(27.54 to<br>58.31)                               | 37.15<br>(25.97 to<br>51.93)                               | 41.13<br>(27.81 to<br>60.48)                               | 0.67<br>(0.52 to<br>0.84)                         | 1.63<br>(1.14 to<br>2.26)                            | 1.55<br>(1.12 to<br>2.09)                           | 1.59<br>(1.10 to<br>2.23)                            |
| Gallbladder and biliary tract cancer  | 3.22<br>(2.36 to<br>4.23)                                  | 5.09<br>(3.53 to<br>7.09)                                  | 5.39<br>(3.67 to<br>7.57)                                  | 4.59<br>(3.24 to<br>6.24)                                  | 0.13<br>(0.10 to<br>0.17)                         | 0.21<br>(0.16 to<br>0.28)                            | 0.23<br>(0.17 to<br>0.31)                           | 0.19<br>(0.14 to<br>0.24)                            |
| Pancreatic cancer                     | 10.61<br>(8.72 to<br>13.05)                                | 29.77<br>(22.13 to<br>39.34)                               | 30.29<br>(22.42 to<br>40.03)                               | 26.12<br>(19.61 to<br>33.83)                               | 0.46<br>(0.38 to<br>0.57)                         | 1.29<br>(1.00 to<br>1.64)                            | 1.35<br>(1.06 to<br>1.73)                           | 1.09<br>(0.86 to<br>1.37)                            |
| Larynx cancer                         | 4.69<br>(3.24 to<br>6.40)                                  | 11.12<br>(5.74 to<br>21.21)                                | 6.99<br>(4.13 to<br>11.70)                                 | 13.32<br>(6.53 to<br>26.14)                                | 0.18<br>(0.13 to<br>0.24)                         | 0.40<br>(0.22 to<br>0.72)                            | 0.27<br>(0.17 to<br>0.42)                           | 0.46<br>(0.24 to<br>0.86)                            |

|                                     |                               |                               |                               |                                |                           |                           |                           |                           |
|-------------------------------------|-------------------------------|-------------------------------|-------------------------------|--------------------------------|---------------------------|---------------------------|---------------------------|---------------------------|
| Tracheal, bronchus, and lung cancer | 17.82<br>(14.52 to<br>21.80)  | 47.56<br>(26.39 to<br>79.12)  | 27.07<br>(17.25 to<br>41.35)  | 52.49<br>(29.00 to<br>88.37)   | 0.75<br>(0.61 to<br>0.92) | 1.93<br>(1.18 to<br>2.97) | 1.17<br>(0.79 to<br>1.66) | 2.04<br>(1.24 to<br>3.18) |
| Malignant skin melanoma             | 4.60<br>(3.12 to<br>6.29)     | 11.59<br>(7.60 to<br>16.16)   | 12.69<br>(8.35 to<br>17.86)   | 9.59<br>(6.36 to<br>13.17)     | 0.18<br>(0.12 to<br>0.24) | 0.47<br>(0.32 to<br>0.62) | 0.52<br>(0.37 to<br>0.71) | 0.37<br>(0.26 to<br>0.49) |
| Non-melanoma skin cancer            | 3.06<br>(2.24 to<br>4.06)     | 6.84<br>(4.85 to<br>8.96)     | 6.91<br>(4.82 to<br>9.15)     | 7.02<br>(5.05 to<br>9.03)      | 0.13<br>(0.09 to<br>0.18) | 0.30<br>(0.22 to<br>0.38) | 0.32<br>(0.23 to<br>0.41) | 0.29<br>(0.21 to<br>0.37) |
| Breast cancer                       | 24.25<br>(18.08 to<br>32.37)  | 63.37<br>(37.30 to<br>102.47) | 60.06<br>(35.60 to<br>96.37)  | 62.16<br>(37.11 to<br>97.46)   | 0.81<br>(0.61 to<br>1.07) | 2.20<br>(1.39 to<br>3.38) | 2.13<br>(1.36 to<br>3.29) | 2.09<br>(1.34 to<br>3.17) |
| Cervical cancer                     | 64.18<br>(34.65 to<br>104.08) | 99.10<br>(46.89 to<br>180.17) | 95.65<br>(45.64 to<br>173.35) | 107.42<br>(51.88 to<br>193.53) | 2.13<br>(1.15 to<br>3.45) | 3.28<br>(1.63 to<br>5.70) | 3.22<br>(1.59 to<br>5.61) | 3.47<br>(1.74 to<br>6.01) |
| Uterine cancer                      | 6.87<br>(4.06 to<br>10.56)    | 12.54<br>(7.06 to<br>20.32)   | 12.11<br>(6.77 to<br>20.22)   | 13.94<br>(7.97 to<br>22.47)    | 0.26<br>(0.18 to<br>0.39) | 0.49<br>(0.31 to<br>0.76) | 0.48<br>(0.29 to<br>0.76) | 0.53<br>(0.34 to<br>0.81) |
| Ovarian cancer                      | 14.14<br>(7.74 to<br>20.39)   | 40.19<br>(18.48 to<br>65.98)  | 42.16<br>(19.41 to<br>69.37)  | 34.31<br>(15.71 to<br>56.38)   | 0.48<br>(0.27 to<br>0.70) | 1.42<br>(0.69 to<br>2.24) | 1.51<br>(0.74 to<br>2.41) | 1.18<br>(0.58 to<br>1.80) |
| Prostate cancer                     | 8.87<br>(6.67 to<br>11.76)    | 23.84<br>(18.33 to<br>30.11)  | 26.31<br>(20.01 to<br>32.93)  | 20.00<br>(15.51 to<br>25.69)   | 0.52<br>(0.36 to<br>0.66) | 1.48<br>(1.03 to<br>1.80) | 1.69<br>(1.18 to<br>2.03) | 1.18<br>(0.85 to<br>1.47) |
| Testicular cancer                   | 0.40<br>(0.28 to<br>0.55)     | 0.74<br>(0.49 to<br>1.08)     | 0.73<br>(0.48 to<br>1.06)     | 0.79<br>(0.53 to<br>1.15)      | 0.01<br>(0.01 to<br>0.01) | 0.02<br>(0.01 to<br>0.02) | 0.02<br>(0.01 to<br>0.02) | 0.02<br>(0.01 to<br>0.02) |

**Mozambique**

| Cause                           | YLLs (in 1000s)              |                              |                              |                              | Deaths (in 1000s)         |                           |                           |                           |
|---------------------------------|------------------------------|------------------------------|------------------------------|------------------------------|---------------------------|---------------------------|---------------------------|---------------------------|
|                                 | 2016                         | 2040 Forecast                | 2040 Better Scenario         | 2040 Worse Scenario          | 2016                      | 2040 Forecast             | 2040 Better Scenario      | 2040 Worse Scenario       |
| Kidney cancer                   | 5.92<br>(4.49 to<br>7.64)    | 10.51<br>(8.25 to<br>13.12)  | 11.05<br>(8.74 to<br>13.82)  | 10.28<br>(7.92 to<br>12.89)  | 0.15<br>(0.12 to<br>0.18) | 0.36<br>(0.29 to<br>0.43) | 0.39<br>(0.32 to<br>0.47) | 0.31<br>(0.25 to<br>0.36) |
| Bladder cancer                  | 6.47<br>(4.73 to<br>8.60)    | 13.72<br>(9.12 to<br>19.31)  | 13.25<br>(8.90 to<br>18.52)  | 13.21<br>(8.78 to<br>18.51)  | 0.30<br>(0.23 to<br>0.39) | 0.65<br>(0.47 to<br>0.88) | 0.65<br>(0.48 to<br>0.86) | 0.59<br>(0.43 to<br>0.80) |
| Brain and nervous system cancer | 28.69<br>(22.53 to<br>36.04) | 47.93<br>(34.51 to<br>69.33) | 49.69<br>(35.62 to<br>72.09) | 53.36<br>(40.88 to<br>69.92) | 0.56<br>(0.44 to<br>0.74) | 1.21<br>(0.85 to<br>1.85) | 1.28<br>(0.88 to<br>1.98) | 1.19<br>(0.88 to<br>1.72) |
| Thyroid cancer                  | 6.29<br>(3.12 to<br>9.28)    | 11.43<br>(5.47 to<br>18.64)  | 10.79<br>(5.18 to<br>17.47)  | 12.59<br>(5.90 to<br>20.76)  | 0.21<br>(0.10 to<br>0.30) | 0.38<br>(0.19 to<br>0.61) | 0.37<br>(0.18 to<br>0.57) | 0.41<br>(0.20 to<br>0.65) |
| Mesothelioma                    | 0.74<br>(0.47 to<br>1.05)    | 1.69<br>(1.01 to<br>2.51)    | 1.73<br>(1.03 to<br>2.59)    | 1.65<br>(0.99 to<br>2.41)    | 0.03<br>(0.02 to<br>0.04) | 0.06<br>(0.03 to<br>0.08) | 0.06<br>(0.04 to<br>0.09) | 0.05<br>(0.03 to<br>0.08) |
| Hodgkin lymphoma                | 8.66<br>(3.96 to<br>12.66)   | 8.38<br>(3.52 to<br>12.87)   | 7.73<br>(3.18 to<br>11.98)   | 11.25<br>(4.76 to<br>17.26)  | 0.18<br>(0.08 to<br>0.26) | 0.20<br>(0.09 to<br>0.30) | 0.19<br>(0.08 to<br>0.28) | 0.25<br>(0.11 to<br>0.37) |
| Non-Hodgkin lymphoma            | 16.76<br>(11.98 to<br>28.92) | 33.45<br>(23.68 to<br>50.81) | 34.91<br>(24.58 to<br>52.76) | 32.89<br>(23.48 to<br>52.40) | 0.46<br>(0.36 to<br>0.61) | 1.14<br>(0.90 to<br>1.45) | 1.23<br>(0.96 to<br>1.56) | 1.01<br>(0.81 to<br>1.29) |
| Multiple myeloma                | 6.35<br>(3.62 to<br>8.98)    | 18.01<br>(9.42 to<br>27.21)  | 18.84<br>(10.04 to<br>28.23) | 15.84<br>(8.27 to<br>23.90)  | 0.23<br>(0.13 to<br>0.32) | 0.64<br>(0.35 to<br>0.95) | 0.68<br>(0.37 to<br>1.00) | 0.55<br>(0.30 to<br>0.82) |
| Leukemia                        | 19.61<br>(15.53 to<br>27.44) | 31.67<br>(23.02 to<br>46.48) | 31.19<br>(22.87 to<br>45.49) | 33.50<br>(24.67 to<br>48.83) | 0.44<br>(0.36 to<br>0.61) | 0.87<br>(0.67 to<br>1.23) | 0.87<br>(0.67 to<br>1.23) | 0.85<br>(0.66 to<br>1.22) |
| Acute lymphoid leukemia         | 6.38<br>(4.70 to<br>9.28)    | 9.51<br>(6.62 to<br>14.08)   | 9.50<br>(6.59 to<br>14.08)   | 10.20<br>(7.18 to<br>15.11)  | 0.12<br>(0.09 to<br>0.17) | 0.22<br>(0.16 to<br>0.32) | 0.22<br>(0.16 to<br>0.32) | 0.22<br>(0.16 to<br>0.32) |
| Chronic lymphoid leukemia       | 0.72<br>(0.54 to<br>0.98)    | 1.41<br>(0.99 to<br>2.02)    | 1.42<br>(1.00 to<br>1.98)    | 1.34<br>(0.96 to<br>1.91)    | 0.03<br>(0.02 to<br>0.04) | 0.06<br>(0.05 to<br>0.09) | 0.06<br>(0.05 to<br>0.09) | 0.06<br>(0.04 to<br>0.08) |



|                                               |                                                      |                                                          |                                                      |                                                            |                                                   |                                                   |                                                   |                                                    |
|-----------------------------------------------|------------------------------------------------------|----------------------------------------------------------|------------------------------------------------------|------------------------------------------------------------|---------------------------------------------------|---------------------------------------------------|---------------------------------------------------|----------------------------------------------------|
| Acute myeloid leukemia                        | 4.02<br>(3.04 to<br>5.76)                            | 9.15<br>(6.46 to<br>13.56)                               | 9.33<br>(6.62 to<br>13.80)                           | 8.76<br>(6.27 to<br>13.04)                                 | 0.09<br>(0.07 to<br>0.12)                         | 0.24<br>(0.18 to<br>0.35)                         | 0.25<br>(0.19 to<br>0.36)                         | 0.21<br>(0.16 to<br>0.32)                          |
| Chronic myeloid leukemia                      | 2.20<br>(1.55 to<br>3.17)                            | 3.21<br>(2.02 to<br>4.99)                                | 3.08<br>(1.94 to<br>4.76)                            | 3.20<br>(2.00 to<br>5.00)                                  | 0.06<br>(0.04 to<br>0.08)                         | 0.08<br>(0.05 to<br>0.12)                         | 0.08<br>(0.05 to<br>0.12)                         | 0.08<br>(0.05 to<br>0.12)                          |
| Other leukemia                                | 6.29<br>(4.76 to<br>9.23)                            | 8.38<br>(5.88 to<br>12.58)                               | 7.86<br>(5.48 to<br>11.81)                           | 10.01<br>(7.19 to<br>14.91)                                | 0.15<br>(0.12 to<br>0.22)                         | 0.26<br>(0.20 to<br>0.38)                         | 0.26<br>(0.19 to<br>0.37)                         | 0.29<br>(0.22 to<br>0.41)                          |
| Other neoplasms                               | 51.76<br>(38.92 to<br>65.16)                         | 118.88<br>(82.17 to<br>162.38)                           | 121.80<br>(83.41 to<br>166.75)                       | 116.98<br>(81.68 to<br>156.83)                             | 1.21<br>(0.89 to<br>1.53)                         | 2.95<br>(2.10 to<br>3.90)                         | 3.06<br>(2.19 to<br>4.07)                         | 2.79<br>(2.01 to<br>3.65)                          |
| <b>Cardiovascular diseases</b>                | <b>688.21</b><br><b>(575.25 to</b><br><b>818.74)</b> | <b>1,037.20</b><br><b>(686.29 to</b><br><b>1,523.57)</b> | <b>695.66</b><br><b>(478.95 to</b><br><b>992.12)</b> | <b>1,759.55</b><br><b>(1,133.77 to</b><br><b>2,705.73)</b> | <b>31.49</b><br><b>(26.72 to</b><br><b>37.24)</b> | <b>49.98</b><br><b>(36.81 to</b><br><b>68.66)</b> | <b>36.42</b><br><b>(27.91 to</b><br><b>48.80)</b> | <b>77.63</b><br><b>(55.66 to</b><br><b>111.21)</b> |
| Rheumatic heart disease                       | 13.62<br>(10.66 to<br>16.97)                         | 9.58<br>(6.48 to<br>14.19)                               | 8.63<br>(5.76 to<br>12.88)                           | 13.07<br>(8.96 to<br>19.42)                                | 0.46<br>(0.35 to<br>0.58)                         | 0.35<br>(0.25 to<br>0.51)                         | 0.32<br>(0.22 to<br>0.47)                         | 0.45<br>(0.32 to<br>0.64)                          |
| Ischemic heart disease                        | 211.20<br>(171.28 to<br>258.60)                      | 316.17<br>(178.24 to<br>552.39)                          | 175.31<br>(104.55 to<br>299.17)                      | 606.61<br>(347.50 to<br>1,077.04)                          | 10.42<br>(8.60 to<br>12.61)                       | 16.10<br>(9.88 to<br>26.02)                       | 10.08<br>(6.46 to<br>15.73)                       | 27.86<br>(17.25 to<br>45.50)                       |
| Stroke                                        | 264.70<br>(217.73 to<br>323.53)                      | 340.03<br>(186.93 to<br>600.78)                          | 190.73<br>(104.24 to<br>333.17)                      | 680.48<br>(363.36 to<br>1,215.14)                          | 12.07<br>(10.02 to<br>14.57)                      | 15.69<br>(9.58 to<br>25.50)                       | 9.69<br>(6.08 to<br>15.44)                        | 28.90<br>(17.12 to<br>48.28)                       |
| Ischemic stroke                               | 82.50<br>(65.29 to<br>104.56)                        | 100.92<br>(56.51 to<br>174.76)                           | 64.27<br>(36.52 to<br>107.06)                        | 169.17<br>(90.74 to<br>291.58)                             | 4.64<br>(3.70 to<br>5.76)                         | 5.99<br>(3.64 to<br>9.92)                         | 4.15<br>(2.58 to<br>6.81)                         | 9.30<br>(5.45 to<br>15.67)                         |
| Intracerebral hemorrhage                      | 182.20<br>(148.39 to<br>223.69)                      | 239.11<br>(116.25 to<br>445.27)                          | 126.46<br>(62.99 to<br>239.36)                       | 511.30<br>(249.47 to<br>985.92)                            | 7.43<br>(6.02 to<br>9.19)                         | 9.70<br>(5.33 to<br>16.78)                        | 5.54<br>(3.16 to<br>9.66)                         | 19.61<br>(10.40 to<br>35.81)                       |
| Hypertensive heart disease                    | 49.35<br>(31.37 to<br>70.29)                         | 89.68<br>(48.43 to<br>159.76)                            | 67.94<br>(38.27 to<br>116.12)                        | 126.26<br>(62.14 to<br>250.13)                             | 2.48<br>(1.57 to<br>3.50)                         | 4.75<br>(2.65 to<br>8.05)                         | 3.85<br>(2.22 to<br>6.40)                         | 6.25<br>(3.15 to<br>12.17)                         |
| Cardiomyopathy and myocarditis                | 19.79<br>(15.48 to<br>25.25)                         | 34.96<br>(22.12 to<br>54.05)                             | 34.96<br>(22.32 to<br>53.78)                         | 36.63<br>(23.61 to<br>56.62)                               | 0.53<br>(0.42 to<br>0.67)                         | 1.11<br>(0.76 to<br>1.61)                         | 1.14<br>(0.77 to<br>1.66)                         | 1.08<br>(0.73 to<br>1.57)                          |
| Myocarditis                                   | 2.94<br>(1.53 to<br>5.32)                            | 3.81<br>(1.46 to<br>9.02)                                | 3.77<br>(1.41 to<br>9.03)                            | 4.39<br>(1.81 to<br>9.66)                                  | 0.06<br>(0.03 to<br>0.13)                         | 0.10<br>(0.04 to<br>0.26)                         | 0.10<br>(0.04 to<br>0.27)                         | 0.11<br>(0.04 to<br>0.27)                          |
| <b>Mozambique</b>                             |                                                      |                                                          |                                                      |                                                            |                                                   |                                                   |                                                   |                                                    |
| Cause                                         | YLLs (in 1000s)                                      |                                                          |                                                      |                                                            | Deaths (in 1000s)                                 |                                                   |                                                   |                                                    |
|                                               | 2016                                                 | 2040 Forecast                                            | 2040 Better Scenario                                 | 2040 Worse Scenario                                        | 2016                                              | 2040 Forecast                                     | 2040 Better Scenario                              | 2040 Worse Scenario                                |
| Alcoholic cardiomyopathy                      | 1.02<br>(0.46 to<br>1.86)                            | 2.45<br>(1.03 to<br>4.63)                                | 2.39<br>(0.99 to<br>4.55)                            | 2.28<br>(0.99 to<br>4.21)                                  | 0.03<br>(0.02 to<br>0.06)                         | 0.08<br>(0.03 to<br>0.14)                         | 0.08<br>(0.03 to<br>0.14)                         | 0.07<br>(0.03 to<br>0.13)                          |
| Other cardiomyopathy                          | 15.83<br>(11.29 to<br>20.55)                         | 28.70<br>(16.74 to<br>47.52)                             | 28.80<br>(16.95 to<br>47.56)                         | 29.96<br>(17.67 to<br>49.39)                               | 0.44<br>(0.32 to<br>0.58)                         | 0.93<br>(0.58 to<br>1.43)                         | 0.96<br>(0.60 to<br>1.46)                         | 0.90<br>(0.56 to<br>1.39)                          |
| Atrial fibrillation and flutter               | 3.48<br>(2.60 to<br>4.59)                            | 8.88<br>(6.50 to<br>11.73)                               | 9.00<br>(6.52 to<br>12.18)                           | 8.09<br>(5.87 to<br>10.65)                                 | 0.29<br>(0.21 to<br>0.38)                         | 0.80<br>(0.58 to<br>1.08)                         | 0.86<br>(0.62 to<br>1.17)                         | 0.68<br>(0.48 to<br>0.91)                          |
| Aortic aneurysm                               | 6.91<br>(4.70 to<br>9.49)                            | 16.08<br>(10.27 to<br>24.05)                             | 14.68<br>(9.51 to<br>21.84)                          | 15.57<br>(9.89 to<br>23.67)                                | 0.30<br>(0.20 to<br>0.40)                         | 0.68<br>(0.45 to<br>0.98)                         | 0.66<br>(0.44 to<br>0.96)                         | 0.62<br>(0.41 to<br>0.89)                          |
| Peripheral artery disease                     | 0.46<br>(0.17 to<br>0.80)                            | 1.70<br>(0.62 to<br>3.04)                                | 1.60<br>(0.59 to<br>2.83)                            | 1.39<br>(0.49 to<br>2.52)                                  | 0.03<br>(0.01 to<br>0.05)                         | 0.12<br>(0.04 to<br>0.21)                         | 0.12<br>(0.04 to<br>0.21)                         | 0.09<br>(0.03 to<br>0.16)                          |
| Endocarditis                                  | 10.81<br>(7.38 to<br>14.42)                          | 22.69<br>(13.13 to<br>36.06)                             | 22.12<br>(12.84 to<br>34.52)                         | 25.11<br>(14.52 to<br>40.05)                               | 0.33<br>(0.22 to<br>0.45)                         | 0.77<br>(0.44 to<br>1.15)                         | 0.78<br>(0.45 to<br>1.15)                         | 0.79<br>(0.45 to<br>1.22)                          |
| Other cardiovascular and circulatory diseases | 107.88<br>(82.79 to<br>137.52)                       | 197.43<br>(140.29 to<br>274.32)                          | 170.69<br>(121.04 to<br>237.81)                      | 246.34<br>(173.91 to<br>346.92)                            | 4.58<br>(3.42 to<br>5.84)                         | 9.62<br>(7.12 to<br>12.58)                        | 8.91<br>(6.61 to<br>11.52)                        | 10.91<br>(7.94 to<br>14.72)                        |

|                                                                |                                        |                                        |                                        |                                        |                                  |                                  |                                  |                                  |
|----------------------------------------------------------------|----------------------------------------|----------------------------------------|----------------------------------------|----------------------------------------|----------------------------------|----------------------------------|----------------------------------|----------------------------------|
| <b>Chronic respiratory diseases</b>                            | 96.55<br>(79.64 to<br>117.15)          | 102.69<br>(69.65 to<br>155.34)         | 68.07<br>(49.66 to<br>94.65)           | 143.07<br>(94.40 to<br>220.60)         | 3.74<br>(3.12 to<br>4.58)        | 4.58<br>(3.25 to<br>6.93)        | 3.12<br>(2.39 to<br>4.21)        | 5.92<br>(4.00 to<br>9.27)        |
| Chronic obstructive pulmonary disease                          | 48.86<br>(32.24 to<br>63.04)           | 67.49<br>(38.59 to<br>114.85)          | 38.06<br>(23.07 to<br>59.49)           | 97.47<br>(54.27 to<br>172.11)          | 2.38<br>(1.59 to<br>3.05)        | 3.36<br>(2.05 to<br>5.68)        | 2.04<br>(1.31 to<br>3.07)        | 4.49<br>(2.63 to<br>7.75)        |
| Pneumoconiosis                                                 | 0.30<br>(0.18 to<br>0.46)              | 0.40<br>(0.27 to<br>0.61)              | 0.38<br>(0.24 to<br>0.59)              | 0.41<br>(0.27 to<br>0.60)              | 0.01<br>(0.01 to<br>0.02)        | 0.02<br>(0.01 to<br>0.03)        | 0.02<br>(0.01 to<br>0.03)        | 0.02<br>(0.01 to<br>0.03)        |
| Silicosis                                                      | 0.07<br>(0.02 to<br>0.12)              | 0.05<br>(0.02 to<br>0.10)              | 0.05<br>(0.02 to<br>0.10)              | 0.06<br>(0.02 to<br>0.10)              | 0.00<br>(0.00 to<br>0.01)        | 0.00<br>(0.00 to<br>0.01)        | 0.00<br>(0.00 to<br>0.01)        | 0.00<br>(0.00 to<br>0.01)        |
| Asbestosis                                                     | 0.06<br>(0.03 to<br>0.12)              | 0.12<br>(0.06 to<br>0.22)              | 0.13<br>(0.06 to<br>0.23)              | 0.11<br>(0.06 to<br>0.21)              | 0.00<br>(0.00 to<br>0.01)        | 0.01<br>(0.00 to<br>0.01)        | 0.01<br>(0.00 to<br>0.01)        | 0.00<br>(0.00 to<br>0.01)        |
| Coal workers pneumoconiosis                                    | 0.03<br>(0.01 to<br>0.06)              | 0.03<br>(0.01 to<br>0.07)              | 0.02<br>(0.01 to<br>0.06)              | 0.04<br>(0.02 to<br>0.09)              | 0.00<br>(0.00 to<br>0.00)        | 0.00<br>(0.00 to<br>0.00)        | 0.00<br>(0.00 to<br>0.00)        | 0.00<br>(0.00 to<br>0.00)        |
| Other pneumoconiosis                                           | 0.14<br>(0.07 to<br>0.24)              | 0.20<br>(0.10 to<br>0.34)              | 0.17<br>(0.09 to<br>0.31)              | 0.20<br>(0.10 to<br>0.32)              | 0.01<br>(0.00 to<br>0.01)        | 0.01<br>(0.01 to<br>0.02)        | 0.01<br>(0.00 to<br>0.02)        | 0.01<br>(0.00 to<br>0.02)        |
| Asthma                                                         | 42.28<br>(31.70 to<br>59.75)           | 26.83<br>(17.20 to<br>44.33)           | 21.73<br>(14.25 to<br>34.05)           | 36.53<br>(23.31 to<br>60.37)           | 1.22<br>(0.89 to<br>1.88)        | 0.95<br>(0.61 to<br>1.63)        | 0.79<br>(0.53 to<br>1.29)        | 1.17<br>(0.74 to<br>2.03)        |
| Interstitial lung disease and pulmonary sarcoidosis            | 1.10<br>(0.37 to<br>2.18)              | 2.80<br>(0.90 to<br>5.25)              | 3.06<br>(1.02 to<br>5.68)              | 2.35<br>(0.76 to<br>4.47)              | 0.04<br>(0.01 to<br>0.08)        | 0.12<br>(0.04 to<br>0.21)        | 0.13<br>(0.04 to<br>0.24)        | 0.09<br>(0.03 to<br>0.17)        |
| Other chronic respiratory diseases                             | 4.01<br>(1.96 to<br>7.30)              | 5.16<br>(2.88 to<br>7.87)              | 4.84<br>(2.77 to<br>7.38)              | 6.32<br>(3.38 to<br>9.96)              | 0.08<br>(0.05 to<br>0.13)        | 0.14<br>(0.08 to<br>0.20)        | 0.13<br>(0.08 to<br>0.19)        | 0.15<br>(0.08 to<br>0.22)        |
| <b>Cirrhosis and other chronic liver diseases</b>              | <b>61.72</b><br>(32.92 to<br>91.05)    | <b>125.40</b><br>(59.41 to<br>197.50)  | <b>120.57</b><br>(57.45 to<br>192.73)  | <b>139.16</b><br>(67.29 to<br>218.03)  | <b>1.90</b><br>(1.02 to<br>2.79) | <b>4.04</b><br>(2.11 to<br>6.07) | <b>3.98</b><br>(2.07 to<br>6.03) | <b>4.26</b><br>(2.24 to<br>6.40) |
| Cirrhosis and other chronic liver diseases due to hepatitis B  | 20.98<br>(10.66 to<br>32.90)           | 47.76<br>(22.34 to<br>79.81)           | 47.24<br>(21.58 to<br>78.89)           | 50.21<br>(23.23 to<br>82.63)           | 0.70<br>(0.37 to<br>1.10)        | 1.57<br>(0.79 to<br>2.48)        | 1.59<br>(0.79 to<br>2.52)        | 1.59<br>(0.80 to<br>2.49)        |
| Cirrhosis and other chronic liver diseases due to hepatitis C  | 11.51<br>(5.15 to<br>19.76)            | 26.12<br>(10.85 to<br>46.95)           | 25.78<br>(10.68 to<br>46.32)           | 27.55<br>(11.38 to<br>49.95)           | 0.39<br>(0.18 to<br>0.67)        | 0.88<br>(0.39 to<br>1.53)        | 0.89<br>(0.40 to<br>1.55)        | 0.90<br>(0.40 to<br>1.55)        |
| Cirrhosis and other chronic liver diseases due to alcohol use  | 11.65<br>(5.87 to<br>18.19)            | 26.63<br>(12.47 to<br>43.49)           | 23.45<br>(10.98 to<br>38.48)           | 31.39<br>(14.94 to<br>51.67)           | 0.42<br>(0.22 to<br>0.64)        | 0.94<br>(0.48 to<br>1.47)        | 0.86<br>(0.44 to<br>1.34)        | 1.07<br>(0.54 to<br>1.64)        |
| Cirrhosis and other chronic liver diseases due to other causes | 17.58<br>(10.34 to<br>25.15)           | 24.89<br>(12.53 to<br>39.62)           | 24.09<br>(11.99 to<br>38.10)           | 30.01<br>(15.37 to<br>46.31)           | 0.38<br>(0.22 to<br>0.54)        | 0.64<br>(0.34 to<br>0.95)        | 0.64<br>(0.34 to<br>0.95)        | 0.71<br>(0.38 to<br>1.04)        |
| <b>Digestive diseases</b>                                      | <b>175.92</b><br>(139.57 to<br>225.22) | <b>224.22</b><br>(167.85 to<br>287.50) | <b>214.29</b><br>(159.30 to<br>276.76) | <b>266.45</b><br>(201.56 to<br>341.53) | <b>4.91</b><br>(4.11 to<br>5.94) | <b>7.59</b><br>(6.24 to<br>9.15) | <b>7.50</b><br>(6.08 to<br>9.13) | <b>8.23</b><br>(6.82 to<br>9.88) |
| Peptic ulcer disease                                           | 26.60<br>(18.43 to<br>36.75)           | 21.83<br>(13.12 to<br>33.50)           | 18.67<br>(11.22 to<br>28.96)           | 29.22<br>(18.11 to<br>43.48)           | 0.96<br>(0.63 to<br>1.34)        | 0.90<br>(0.54 to<br>1.35)        | 0.80<br>(0.48 to<br>1.20)        | 1.12<br>(0.69 to<br>1.63)        |
| <b>Mozambique</b>                                              |                                        |                                        |                                        |                                        |                                  |                                  |                                  |                                  |
| <b>Cause</b>                                                   | <b>YLLs (in 1000s)</b>                 |                                        |                                        |                                        | <b>Deaths (in 1000s)</b>         |                                  |                                  |                                  |
|                                                                | <b>2016</b>                            | <b>2040 Forecast</b>                   | <b>2040 Better Scenario</b>            | <b>2040 Worse Scenario</b>             | <b>2016</b>                      | <b>2040 Forecast</b>             | <b>2040 Better Scenario</b>      | <b>2040 Worse Scenario</b>       |
| Gastritis and duodenitis                                       | 7.85<br>(5.12 to<br>11.55)             | 13.98<br>(8.33 to<br>20.94)            | 13.68<br>(7.97 to<br>20.56)            | 15.57<br>(9.41 to<br>22.97)            | 0.26<br>(0.17 to<br>0.40)        | 0.52<br>(0.33 to<br>0.77)        | 0.53<br>(0.33 to<br>0.79)        | 0.54<br>(0.35 to<br>0.80)        |
| Appendicitis                                                   | 13.89<br>(9.33 to<br>20.20)            | 11.95<br>(7.87 to<br>17.10)            | 11.02<br>(7.20 to<br>15.87)            | 16.58<br>(10.95 to<br>24.18)           | 0.28<br>(0.20 to<br>0.37)        | 0.30<br>(0.22 to<br>0.42)        | 0.29<br>(0.20 to<br>0.40)        | 0.38<br>(0.27 to<br>0.53)        |
| Paralytic ileus and intestinal obstruction                     | 87.81<br>(65.45 to<br>123.18)          | 116.70<br>(85.00 to<br>157.60)         | 115.43<br>(83.34 to<br>157.19)         | 134.14<br>(98.53 to<br>182.39)         | 2.16<br>(1.72 to<br>2.78)        | 3.70<br>(2.87 to<br>4.73)        | 3.79<br>(2.91 to<br>4.95)        | 3.81<br>(3.00 to<br>4.85)        |

|                                         |                                                   |                                                      |                                                      |                                                      |                                                |                                                 |                                                 |                                                 |
|-----------------------------------------|---------------------------------------------------|------------------------------------------------------|------------------------------------------------------|------------------------------------------------------|------------------------------------------------|-------------------------------------------------|-------------------------------------------------|-------------------------------------------------|
| Inguinal, femoral, and abdominal hernia | 4.06<br>(1.16 to<br>6.78)                         | 4.61<br>(1.26 to<br>7.66)                            | 4.35<br>(1.21 to<br>7.23)                            | 5.67<br>(1.53 to<br>9.63)                            | 0.11<br>(0.03 to<br>0.18)                      | 0.13<br>(0.04 to<br>0.21)                       | 0.13<br>(0.04 to<br>0.21)                       | 0.15<br>(0.05 to<br>0.25)                       |
| Inflammatory bowel disease              | 6.77<br>(3.43 to<br>10.55)                        | 10.73<br>(5.71 to<br>15.60)                          | 10.93<br>(5.77 to<br>15.91)                          | 11.06<br>(5.84 to<br>16.24)                          | 0.18<br>(0.10 to<br>0.25)                      | 0.36<br>(0.21 to<br>0.50)                       | 0.38<br>(0.22 to<br>0.53)                       | 0.34<br>(0.19 to<br>0.47)                       |
| Vascular intestinal disorders           | 2.01<br>(1.25 to<br>3.12)                         | 3.91<br>(2.48 to<br>6.04)                            | 3.96<br>(2.51 to<br>6.15)                            | 4.02<br>(2.56 to<br>6.20)                            | 0.09<br>(0.06 to<br>0.14)                      | 0.19<br>(0.13 to<br>0.30)                       | 0.20<br>(0.13 to<br>0.31)                       | 0.19<br>(0.12 to<br>0.28)                       |
| Gallbladder and biliary diseases        | 7.00<br>(5.13 to<br>9.51)                         | 10.17<br>(6.15 to<br>16.47)                          | 8.40<br>(5.28 to<br>13.10)                           | 13.23<br>(7.88 to<br>21.54)                          | 0.29<br>(0.21 to<br>0.41)                      | 0.46<br>(0.29 to<br>0.73)                       | 0.40<br>(0.26 to<br>0.61)                       | 0.56<br>(0.35 to<br>0.90)                       |
| Pancreatitis                            | 5.92<br>(3.75 to<br>8.97)                         | 12.75<br>(6.58 to<br>26.25)                          | 11.12<br>(5.93 to<br>20.93)                          | 15.18<br>(7.75 to<br>32.64)                          | 0.16<br>(0.10 to<br>0.24)                      | 0.35<br>(0.20 to<br>0.68)                       | 0.32<br>(0.18 to<br>0.57)                       | 0.41<br>(0.22 to<br>0.82)                       |
| Other digestive diseases                | 14.04<br>(9.29 to<br>20.81)                       | 17.59<br>(10.98 to<br>26.35)                         | 16.73<br>(10.32 to<br>25.05)                         | 21.79<br>(13.55 to<br>31.65)                         | 0.41<br>(0.27 to<br>0.59)                      | 0.66<br>(0.43 to<br>0.96)                       | 0.66<br>(0.42 to<br>0.97)                       | 0.74<br>(0.48 to<br>1.05)                       |
| <b>Neurological disorders</b>           | <b>68.39</b><br><b>(56.15 to</b><br><b>82.46)</b> | <b>135.36</b><br><b>(108.20 to</b><br><b>166.75)</b> | <b>134.30</b><br><b>(108.65 to</b><br><b>163.37)</b> | <b>138.14</b><br><b>(109.98 to</b><br><b>170.61)</b> | <b>3.36</b><br><b>(2.74 to</b><br><b>4.16)</b> | <b>9.16</b><br><b>(7.17 to</b><br><b>11.85)</b> | <b>9.75</b><br><b>(7.93 to</b><br><b>12.11)</b> | <b>7.69</b><br><b>(5.84 to</b><br><b>10.07)</b> |
| Alzheimer's disease and other dementias | 29.14<br>(22.68 to<br>37.33)                      | 77.82<br>(59.54 to<br>102.79)                        | 80.16<br>(63.29 to<br>102.29)                        | 66.01<br>(48.65 to<br>89.22)                         | 2.55<br>(2.00 to<br>3.30)                      | 7.54<br>(5.62 to<br>10.13)                      | 8.09<br>(6.24 to<br>10.37)                      | 5.99<br>(4.17 to<br>8.23)                       |
| Parkinson's disease                     | 2.02<br>(1.45 to<br>2.74)                         | 6.46<br>(4.86 to<br>8.32)                            | 7.61<br>(5.72 to<br>9.91)                            | 4.71<br>(3.48 to<br>6.08)                            | 0.16<br>(0.11 to<br>0.21)                      | 0.54<br>(0.40 to<br>0.72)                       | 0.66<br>(0.50 to<br>0.87)                       | 0.37<br>(0.27 to<br>0.50)                       |
| Epilepsy                                | 29.18<br>(22.02 to<br>37.99)                      | 37.65<br>(22.92 to<br>56.96)                         | 32.52<br>(20.27 to<br>49.46)                         | 53.26<br>(32.91 to<br>79.82)                         | 0.51<br>(0.39 to<br>0.69)                      | 0.77<br>(0.49 to<br>1.21)                       | 0.68<br>(0.44 to<br>1.05)                       | 1.03<br>(0.66 to<br>1.57)                       |
| Multiple sclerosis                      | 0.54<br>(0.26 to<br>0.89)                         | 1.46<br>(0.67 to<br>2.50)                            | 1.48<br>(0.68 to<br>2.57)                            | 1.31<br>(0.60 to<br>2.19)                            | 0.01<br>(0.01 to<br>0.02)                      | 0.04<br>(0.02 to<br>0.07)                       | 0.04<br>(0.02 to<br>0.07)                       | 0.04<br>(0.02 to<br>0.06)                       |
| Motor neuron disease                    | 0.44<br>(0.29 to<br>0.74)                         | 0.76<br>(0.47 to<br>1.59)                            | 0.81<br>(0.50 to<br>1.69)                            | 0.74<br>(0.46 to<br>1.49)                            | 0.01<br>(0.01 to<br>0.02)                      | 0.02<br>(0.01 to<br>0.05)                       | 0.02<br>(0.02 to<br>0.05)                       | 0.02<br>(0.01 to<br>0.04)                       |
| Other neurological disorders            | 7.07<br>(5.59 to<br>8.74)                         | 11.21<br>(7.04 to<br>15.45)                          | 11.72<br>(7.35 to<br>16.14)                          | 12.12<br>(8.35 to<br>16.20)                          | 0.12<br>(0.09 to<br>0.15)                      | 0.24<br>(0.14 to<br>0.34)                       | 0.26<br>(0.15 to<br>0.37)                       | 0.24<br>(0.15 to<br>0.33)                       |
| <b>Mental disorders</b>                 | <b>12.23</b><br><b>(8.81 to</b><br><b>18.18)</b>  | <b>26.11</b><br><b>(18.05 to</b><br><b>38.81)</b>    | <b>25.89</b><br><b>(17.78 to</b><br><b>38.40)</b>    | <b>26.13</b><br><b>(18.26 to</b><br><b>38.84)</b>    | <b>0.35</b><br><b>(0.26 to</b><br><b>0.51)</b> | <b>0.75</b><br><b>(0.56 to</b><br><b>1.10)</b>  | <b>0.76</b><br><b>(0.56 to</b><br><b>1.11)</b>  | <b>0.74</b><br><b>(0.55 to</b><br><b>1.07)</b>  |
| Alcohol use disorders                   | 9.61<br>(6.71 to<br>15.34)                        | 17.88<br>(11.86 to<br>30.13)                         | 17.51<br>(11.49 to<br>29.62)                         | 18.09<br>(12.16 to<br>30.13)                         | 0.30<br>(0.22 to<br>0.45)                      | 0.57<br>(0.41 to<br>0.89)                       | 0.57<br>(0.41 to<br>0.89)                       | 0.56<br>(0.41 to<br>0.88)                       |
| Drug use disorders                      | 2.58<br>(1.77 to<br>3.72)                         | 8.13<br>(5.22 to<br>12.05)                           | 8.28<br>(5.30 to<br>12.33)                           | 7.93<br>(5.13 to<br>11.61)                           | 0.06<br>(0.04 to<br>0.08)                      | 0.19<br>(0.13 to<br>0.27)                       | 0.19<br>(0.13 to<br>0.28)                       | 0.18<br>(0.12 to<br>0.25)                       |
| Opioid use disorders                    | 1.93<br>(1.32 to<br>2.63)                         | 5.69<br>(3.46 to<br>8.27)                            | 5.79<br>(3.53 to<br>8.47)                            | 5.54<br>(3.39 to<br>7.94)                            | 0.04<br>(0.03 to<br>0.05)                      | 0.13<br>(0.08 to<br>0.18)                       | 0.13<br>(0.08 to<br>0.19)                       | 0.12<br>(0.08 to<br>0.17)                       |
| Cocaine use disorders                   | 0.16<br>(0.03 to<br>0.38)                         | 0.57<br>(0.11 to<br>1.37)                            | 0.56<br>(0.11 to<br>1.36)                            | 0.60<br>(0.11 to<br>1.42)                            | 0.00<br>(0.00 to<br>0.01)                      | 0.01<br>(0.00 to<br>0.03)                       | 0.01<br>(0.00 to<br>0.03)                       | 0.01<br>(0.00 to<br>0.03)                       |
| Amphetamine use disorders               | 0.09<br>(0.02 to<br>0.22)                         | 0.43<br>(0.10 to<br>1.06)                            | 0.41<br>(0.09 to<br>1.02)                            | 0.48<br>(0.11 to<br>1.19)                            | 0.00<br>(0.00 to<br>0.00)                      | 0.01<br>(0.00 to<br>0.02)                       | 0.01<br>(0.00 to<br>0.02)                       | 0.01<br>(0.00 to<br>0.02)                       |
| Other drug use disorders                | 0.40<br>(0.26 to<br>0.62)                         | 1.45<br>(0.87 to<br>2.30)                            | 1.51<br>(0.90 to<br>2.43)                            | 1.32<br>(0.81 to<br>2.08)                            | 0.01<br>(0.01 to<br>0.01)                      | 0.04<br>(0.03 to<br>0.06)                       | 0.04<br>(0.03 to<br>0.06)                       | 0.03<br>(0.02 to<br>0.05)                       |
| Eating disorders                        | 0.05<br>(0.03 to<br>0.09)                         | 0.10<br>(0.06 to<br>0.21)                            | 0.11<br>(0.06 to<br>0.21)                            | 0.10<br>(0.06 to<br>0.20)                            | 0.00<br>(0.00 to<br>0.00)                      | 0.00<br>(0.00 to<br>0.00)                       | 0.00<br>(0.00 to<br>0.00)                       | 0.00<br>(0.00 to<br>0.00)                       |
| <b>Mozambique</b>                       |                                                   |                                                      |                                                      |                                                      |                                                |                                                 |                                                 |                                                 |
| <b>YLLs (in 1000s)</b>                  |                                                   |                                                      |                                                      |                                                      | <b>Deaths (in 1000s)</b>                       |                                                 |                                                 |                                                 |

| Cause                                                      | 2016                                | 2040 Forecast                       | 2040 Better Scenario                | 2040 Worse Scenario                 | 2016                          | 2040 Forecast                    | 2040 Better Scenario             | 2040 Worse Scenario              |
|------------------------------------------------------------|-------------------------------------|-------------------------------------|-------------------------------------|-------------------------------------|-------------------------------|----------------------------------|----------------------------------|----------------------------------|
| <b>Diabetes, urogenital, blood, and endocrine diseases</b> | <b>261.89</b><br>(219.85 to 310.33) | <b>397.11</b><br>(286.61 to 557.95) | <b>342.80</b><br>(246.03 to 480.80) | <b>543.49</b><br>(392.53 to 742.93) | <b>7.64</b><br>(6.49 to 9.14) | <b>15.63</b><br>(11.65 to 21.21) | <b>13.84</b><br>(10.30 to 19.00) | <b>19.75</b><br>(14.71 to 26.96) |
| Diabetes mellitus                                          | 89.64<br>(73.84 to 108.90)          | 207.68<br>(126.47 to 330.64)        | 173.08<br>(106.49 to 273.39)        | 282.27<br>(170.59 to 443.20)        | 3.74<br>(3.11 to 4.52)        | 9.27<br>(6.17 to 13.65)          | 8.10<br>(5.49 to 12.07)          | 11.88<br>(7.81 to 17.23)         |
| Acute glomerulonephritis                                   | 0.44<br>(0.30 to 0.74)              | 0.56<br>(0.37 to 0.90)              | 0.53<br>(0.35 to 0.84)              | 0.79<br>(0.51 to 1.34)              | 0.01<br>(0.01 to 0.01)        | 0.01<br>(0.01 to 0.02)           | 0.01<br>(0.01 to 0.02)           | 0.01<br>(0.01 to 0.02)           |
| Chronic kidney disease                                     | 49.01<br>(38.93 to 70.13)           | 83.15<br>(52.70 to 141.76)          | 68.77<br>(44.69 to 117.41)          | 115.94<br>(75.71 to 197.41)         | 1.51<br>(1.22 to 2.18)        | 3.35<br>(2.02 to 7.36)           | 2.78<br>(1.74 to 5.80)           | 4.31<br>(2.63 to 8.86)           |
| Chronic kidney disease due to diabetes mellitus            | 10.62<br>(8.03 to 15.99)            | 23.75<br>(14.32 to 43.34)           | 19.40<br>(12.09 to 35.13)           | 31.37<br>(18.84 to 57.68)           | 0.42<br>(0.32 to 0.63)        | 1.06<br>(0.60 to 2.27)           | 0.87<br>(0.51 to 1.85)           | 1.33<br>(0.75 to 2.89)           |
| Chronic kidney disease due to hypertension                 | 5.75<br>(4.39 to 8.55)              | 12.84<br>(7.16 to 28.24)            | 10.48<br>(6.16 to 21.95)            | 16.62<br>(9.42 to 35.76)            | 0.30<br>(0.23 to 0.44)        | 0.78<br>(0.44 to 1.89)           | 0.66<br>(0.39 to 1.59)           | 0.95<br>(0.52 to 2.31)           |
| Chronic kidney disease due to glomerulonephritis           | 15.46<br>(11.85 to 22.68)           | 21.74<br>(13.93 to 35.78)           | 18.19<br>(11.73 to 30.34)           | 31.95<br>(20.74 to 51.16)           | 0.36<br>(0.28 to 0.52)        | 0.66<br>(0.40 to 1.32)           | 0.54<br>(0.34 to 1.03)           | 0.89<br>(0.55 to 1.69)           |
| Chronic kidney disease due to other and unspecified causes | 17.18<br>(13.19 to 25.01)           | 24.81<br>(15.72 to 39.79)           | 20.69<br>(13.25 to 33.83)           | 36.01<br>(23.30 to 57.37)           | 0.44<br>(0.34 to 0.65)        | 0.85<br>(0.52 to 1.73)           | 0.71<br>(0.44 to 1.37)           | 1.13<br>(0.70 to 2.17)           |
| Urinary diseases and male infertility                      | 25.42<br>(18.98 to 32.22)           | 36.15<br>(26.39 to 47.55)           | 35.20<br>(25.47 to 46.49)           | 42.07<br>(30.88 to 54.18)           | 0.71<br>(0.54 to 0.90)        | 1.16<br>(0.90 to 1.43)           | 1.18<br>(0.91 to 1.46)           | 1.24<br>(0.95 to 1.52)           |
| Urinary tract infections                                   | 10.29<br>(6.52 to 14.65)            | 19.02<br>(12.05 to 26.98)           | 19.13<br>(12.16 to 26.91)           | 20.56<br>(12.89 to 29.23)           | 0.28<br>(0.17 to 0.41)        | 0.64<br>(0.43 to 0.88)           | 0.67<br>(0.44 to 0.92)           | 0.63<br>(0.41 to 0.87)           |
| Urolithiasis                                               | 0.66<br>(0.35 to 1.03)              | 1.21<br>(0.66 to 1.90)              | 1.18<br>(0.64 to 1.85)              | 1.41<br>(0.75 to 2.22)              | 0.01<br>(0.01 to 0.02)        | 0.03<br>(0.02 to 0.05)           | 0.03<br>(0.02 to 0.05)           | 0.03<br>(0.02 to 0.05)           |
| Other urinary diseases                                     | 14.47<br>(9.23 to 21.22)            | 15.92<br>(8.89 to 25.54)            | 14.90<br>(8.26 to 24.22)            | 20.10<br>(11.77 to 31.63)           | 0.42<br>(0.27 to 0.59)        | 0.49<br>(0.28 to 0.78)           | 0.48<br>(0.27 to 0.76)           | 0.58<br>(0.34 to 0.88)           |
| Gynecological diseases                                     | 3.68<br>(2.61 to 5.07)              | 5.21<br>(2.87 to 9.08)              | 4.72<br>(2.56 to 8.35)              | 6.69<br>(3.65 to 11.34)             | 0.09<br>(0.06 to 0.12)        | 0.12<br>(0.07 to 0.21)           | 0.11<br>(0.06 to 0.20)           | 0.16<br>(0.09 to 0.26)           |
| Uterine fibroids                                           | 1.37<br>(0.65 to 2.28)              | 1.61<br>(0.62 to 3.49)              | 1.43<br>(0.54 to 3.21)              | 2.13<br>(0.84 to 4.53)              | 0.04<br>(0.02 to 0.06)        | 0.04<br>(0.02 to 0.09)           | 0.04<br>(0.01 to 0.08)           | 0.06<br>(0.01 to 0.12)           |
| Polycystic ovarian syndrome                                | 0.39<br>(0.05 to 0.87)              | 0.34<br>(0.04 to 0.91)              | 0.28<br>(0.03 to 0.75)              | 0.52<br>(0.06 to 1.38)              | 0.01<br>(0.00 to 0.02)        | 0.01<br>(0.00 to 0.02)           | 0.01<br>(0.00 to 0.02)           | 0.01<br>(0.00 to 0.03)           |
| Endometriosis                                              | 0.01<br>(0.00 to 0.05)              | 0.03<br>(0.01 to 0.12)              | 0.03<br>(0.01 to 0.11)              | 0.04<br>(0.01 to 0.15)              | 0.00<br>(0.00 to 0.00)        | 0.00<br>(0.00 to 0.00)           | 0.00<br>(0.00 to 0.00)           | 0.00<br>(0.00 to 0.00)           |
| Genital prolapse                                           | 0.12<br>(0.04 to 0.29)              | 0.12<br>(0.03 to 0.32)              | 0.11<br>(0.03 to 0.29)              | 0.17<br>(0.05 to 0.46)              | 0.00<br>(0.00 to 0.01)        | 0.00<br>(0.00 to 0.01)           | 0.00<br>(0.00 to 0.01)           | 0.01<br>(0.00 to 0.01)           |
| Other gynecological diseases                               | 1.78<br>(0.76 to 2.83)              | 3.11<br>(1.23 to 5.69)              | 2.87<br>(1.12 to 5.39)              | 3.83<br>(1.45 to 7.05)              | 0.04<br>(0.02 to 0.06)        | 0.07<br>(0.03 to 0.12)           | 0.06<br>(0.03 to 0.12)           | 0.08<br>(0.03 to 0.15)           |
| Hemoglobinopathies and hemolytic anemias                   | 77.83<br>(57.90 to 107.55)          | 47.63<br>(34.58 to 62.86)           | 44.16<br>(31.57 to 58.79)           | 73.71<br>(53.05 to 99.45)           | 1.24<br>(0.97 to 1.60)        | 1.15<br>(0.86 to 1.47)           | 1.10<br>(0.82 to 1.41)           | 1.54<br>(1.17 to 1.97)           |
| Thalassemias                                               | 2.52<br>(0.79 to 7.41)              | 0.95<br>(0.28 to 2.64)              | 1.02<br>(0.30 to 2.79)              | 1.46<br>(0.41 to 4.23)              | 0.03<br>(0.01 to 0.09)        | 0.01<br>(0.00 to 0.03)           | 0.01<br>(0.00 to 0.03)           | 0.02<br>(0.00 to 0.05)           |
| Sickle cell disorders                                      | 39.05<br>(26.38 to 58.27)           | 13.00<br>(8.52 to 19.88)            | 12.10<br>(8.07 to 18.46)            | 24.99<br>(16.33 to 39.40)           | 0.47<br>(0.32 to 0.70)        | 0.17<br>(0.11 to 0.26)           | 0.16<br>(0.11 to 0.24)           | 0.31<br>(0.21 to 0.49)           |

|                                                   |                                 |                                 |                                 |                                 |                           |                           |                           |                           |
|---------------------------------------------------|---------------------------------|---------------------------------|---------------------------------|---------------------------------|---------------------------|---------------------------|---------------------------|---------------------------|
| G6PD deficiency                                   | 29.77<br>(22.18 to<br>39.31)    | 28.71<br>(19.37 to<br>40.12)    | 26.22<br>(17.26 to<br>36.98)    | 41.34<br>(28.09 to<br>56.98)    | 0.50<br>(0.38 to<br>0.62) | 0.67<br>(0.46 to<br>0.90) | 0.62<br>(0.42 to<br>0.85) | 0.89<br>(0.62 to<br>1.20) |
| Other hemoglobinopathies and hemolytic anemias    | 6.48<br>(5.17 to<br>7.85)       | 4.97<br>(3.76 to<br>6.38)       | 4.82<br>(3.63 to<br>6.34)       | 5.92<br>(4.53 to<br>7.61)       | 0.24<br>(0.20 to<br>0.30) | 0.30<br>(0.24 to<br>0.38) | 0.31<br>(0.24 to<br>0.39) | 0.32<br>(0.26 to<br>0.41) |
| Endocrine, metabolic, blood, and immune disorders | 15.87<br>(11.24 to<br>26.64)    | 16.73<br>(11.70 to<br>28.05)    | 16.34<br>(11.27 to<br>27.87)    | 22.00<br>(15.67 to<br>36.52)    | 0.35<br>(0.26 to<br>0.58) | 0.56<br>(0.41 to<br>0.91) | 0.57<br>(0.41 to<br>0.94) | 0.61<br>(0.46 to<br>0.99) |
| <b>Mozambique</b>                                 |                                 |                                 |                                 |                                 |                           |                           |                           |                           |
| Cause                                             | YLLs (in 1000s)                 |                                 |                                 |                                 | Deaths (in 1000s)         |                           |                           |                           |
|                                                   | 2016                            | 2040 Forecast                   | 2040 Better Scenario            | 2040 Worse Scenario             | 2016                      | 2040 Forecast             | 2040 Better Scenario      | 2040 Worse Scenario       |
| Musculoskeletal disorders                         | 6.10<br>(4.10 to<br>8.45)       | 14.08<br>(8.57 to<br>20.95)     | 14.54<br>(8.77 to<br>21.88)     | 13.80<br>(8.45 to<br>20.34)     | 0.16<br>(0.10 to<br>0.23) | 0.40<br>(0.25 to<br>0.61) | 0.42<br>(0.25 to<br>0.64) | 0.39<br>(0.24 to<br>0.57) |
| Rheumatoid arthritis                              | 1.51<br>(0.96 to<br>2.20)       | 3.13<br>(1.78 to<br>4.90)       | 2.95<br>(1.66 to<br>4.68)       | 3.66<br>(2.14 to<br>5.61)       | 0.06<br>(0.03 to<br>0.09) | 0.14<br>(0.08 to<br>0.22) | 0.14<br>(0.07 to<br>0.21) | 0.15<br>(0.09 to<br>0.23) |
| Other musculoskeletal disorders                   | 4.58<br>(3.07 to<br>6.52)       | 10.95<br>(6.42 to<br>16.72)     | 11.59<br>(6.83 to<br>17.59)     | 10.13<br>(6.04 to<br>15.30)     | 0.10<br>(0.06 to<br>0.15) | 0.26<br>(0.15 to<br>0.42) | 0.29<br>(0.17 to<br>0.45) | 0.23<br>(0.14 to<br>0.36) |
| Other non-communicable diseases                   | 244.34<br>(181.99 to<br>320.69) | 178.08<br>(135.69 to<br>238.48) | 172.02<br>(131.09 to<br>231.40) | 298.22<br>(226.55 to<br>395.16) | 3.37<br>(2.59 to<br>4.36) | 4.12<br>(3.04 to<br>6.14) | 4.17<br>(3.07 to<br>6.27) | 5.39<br>(4.11 to<br>7.43) |
| Congenital birth defects                          | 161.81<br>(116.60 to<br>213.82) | 71.31<br>(50.00 to<br>101.34)   | 66.10<br>(46.43 to<br>93.38)    | 153.48<br>(104.68 to<br>220.45) | 1.91<br>(1.39 to<br>2.54) | 0.90<br>(0.64 to<br>1.26) | 0.83<br>(0.59 to<br>1.18) | 1.86<br>(1.28 to<br>2.65) |
| Neural tube defects                               | 31.72<br>(14.81 to<br>66.11)    | 5.35<br>(2.11 to<br>13.72)      | 4.63<br>(1.78 to<br>12.32)      | 14.18<br>(5.62 to<br>34.36)     | 0.37<br>(0.17 to<br>0.77) | 0.06<br>(0.05 to<br>0.16) | 0.06<br>(0.02 to<br>0.15) | 0.17<br>(0.07 to<br>0.40) |
| Congenital heart anomalies                        | 30.09<br>(30.21 to<br>77.81)    | 25.00<br>(15.64 to<br>40.92)    | 23.35<br>(14.59 to<br>38.13)    | 30.24<br>(29.77 to<br>81.74)    | 0.60<br>(0.36 to<br>0.93) | 0.33<br>(0.21 to<br>0.55) | 0.31<br>(0.19 to<br>0.49) | 0.62<br>(0.38 to<br>1.03) |
| Orofacial clefts                                  | 1.78<br>(0.30 to<br>5.48)       | 0.53<br>(0.09 to<br>1.68)       | 0.45<br>(0.07 to<br>1.43)       | 1.54<br>(0.23 to<br>4.94)       | 0.02<br>(0.00 to<br>0.06) | 0.01<br>(0.00 to<br>0.02) | 0.01<br>(0.00 to<br>0.02) | 0.02<br>(0.00 to<br>0.06) |
| Down syndrome                                     | 2.96<br>(1.44 to<br>6.32)       | 1.87<br>(1.04 to<br>3.77)       | 1.72<br>(0.96 to<br>3.42)       | 3.60<br>(1.85 to<br>7.50)       | 0.04<br>(0.02 to<br>0.08) | 0.03<br>(0.02 to<br>0.06) | 0.03<br>(0.01 to<br>0.05) | 0.05<br>(0.03 to<br>0.10) |
| Other chromosomal abnormalities                   | 6.88<br>(1.66 to<br>14.81)      | 4.61<br>(1.09 to<br>10.27)      | 4.21<br>(0.98 to<br>9.20)       | 10.77<br>(2.51 to<br>24.33)     | 0.08<br>(0.02 to<br>0.17) | 0.06<br>(0.01 to<br>0.12) | 0.05<br>(0.01 to<br>0.11) | 0.13<br>(0.03 to<br>0.28) |
| Congenital musculoskeletal and limb anomalies     | 1.79<br>(0.78 to<br>4.54)       | 1.01<br>(0.46 to<br>2.56)       | 0.96<br>(0.44 to<br>2.45)       | 2.11<br>(0.90 to<br>5.33)       | 0.02<br>(0.01 to<br>0.05) | 0.01<br>(0.01 to<br>0.05) | 0.01<br>(0.01 to<br>0.03) | 0.03<br>(0.01 to<br>0.06) |
| Urogenital congenital anomalies                   | 2.99<br>(1.68 to<br>5.09)       | 1.53<br>(0.90 to<br>2.69)       | 1.45<br>(0.86 to<br>2.56)       | 3.03<br>(1.72 to<br>5.35)       | 0.04<br>(0.02 to<br>0.06) | 0.02<br>(0.01 to<br>0.04) | 0.02<br>(0.01 to<br>0.04) | 0.04<br>(0.02 to<br>0.07) |
| Digestive congenital anomalies                    | 13.62<br>(6.44 to<br>25.18)     | 6.32<br>(2.91 to<br>12.38)      | 5.81<br>(2.67 to<br>11.51)      | 14.71<br>(6.79 to<br>29.02)     | 0.16<br>(0.08 to<br>0.29) | 0.07<br>(0.03 to<br>0.14) | 0.07<br>(0.03 to<br>0.13) | 0.17<br>(0.08 to<br>0.34) |
| Other congenital birth defects                    | 49.98<br>(22.85 to<br>87.34)    | 25.09<br>(12.47 to<br>42.89)    | 23.52<br>(11.83 to<br>40.34)    | 53.30<br>(25.40 to<br>95.00)    | 0.59<br>(0.27 to<br>1.03) | 0.31<br>(0.16 to<br>0.53) | 0.29<br>(0.15 to<br>0.49) | 0.64<br>(0.31 to<br>1.13) |
| Skin and subcutaneous diseases                    | 46.37<br>(25.59 to<br>73.15)    | 93.96<br>(60.63 to<br>145.45)   | 93.90<br>(60.91 to<br>147.15)   | 115.96<br>(72.46 to<br>173.83)  | 1.04<br>(0.63 to<br>1.64) | 3.08<br>(2.07 to<br>4.99) | 3.20<br>(2.15 to<br>5.22) | 3.19<br>(2.12 to<br>5.13) |
| Cellulitis                                        | 2.56<br>(1.05 to<br>5.02)       | 8.20<br>(3.76 to<br>12.80)      | 8.69<br>(4.01 to<br>13.76)      | 8.42<br>(3.59 to<br>14.19)      | 0.06<br>(0.02 to<br>0.10) | 0.25<br>(0.11 to<br>0.41) | 0.28<br>(0.12 to<br>0.45) | 0.23<br>(0.10 to<br>0.35) |
| Pyoderma                                          | 38.51<br>(21.21 to<br>60.53)    | 74.48<br>(48.88 to<br>115.80)   | 73.41<br>(47.80 to<br>114.02)   | 95.69<br>(59.06 to<br>146.54)   | 0.81<br>(0.47 to<br>1.27) | 2.36<br>(1.55 to<br>3.91) | 2.42<br>(1.59 to<br>3.96) | 2.55<br>(1.65 to<br>4.09) |

|                                      |                                                        |                                                          |                                                          |                                                          |                                                   |                                                   |                                                   |                                                   |
|--------------------------------------|--------------------------------------------------------|----------------------------------------------------------|----------------------------------------------------------|----------------------------------------------------------|---------------------------------------------------|---------------------------------------------------|---------------------------------------------------|---------------------------------------------------|
|                                      | 3.33<br>(1.83 to<br>6.32)                              | 7.79<br>(4.54 to<br>15.04)                               | 8.18<br>(4.76 to<br>15.71)                               | 7.79<br>(4.49 to<br>14.95)                               | 0.13<br>(0.08 to<br>0.26)                         | 0.38<br>(0.24 to<br>0.76)                         | 0.42<br>(0.26 to<br>0.83)                         | 0.34<br>(0.20 to<br>0.67)                         |
| Decubitus ulcer                      |                                                        |                                                          |                                                          |                                                          |                                                   |                                                   |                                                   |                                                   |
|                                      | 1.98<br>(0.98 to<br>3.67)                              | 3.50<br>(2.03 to<br>5.83)                                | 3.62<br>(2.09 to<br>6.03)                                | 4.06<br>(2.24 to<br>6.92)                                | 0.04<br>(0.02 to<br>0.06)                         | 0.08<br>(0.05 to<br>0.14)                         | 0.09<br>(0.05 to<br>0.14)                         | 0.08<br>(0.05 to<br>0.14)                         |
| Other skin and subcutaneous diseases |                                                        |                                                          |                                                          |                                                          |                                                   |                                                   |                                                   |                                                   |
|                                      | 36.16<br>(16.34 to<br>64.88)                           | 12.81<br>(5.62 to<br>24.51)                              | 12.02<br>(5.34 to<br>22.73)                              | 28.78<br>(12.04 to<br>57.04)                             | 0.42<br>(0.19 to<br>0.75)                         | 0.15<br>(0.07 to<br>0.28)                         | 0.14<br>(0.06 to<br>0.26)                         | 0.33<br>(0.14 to<br>0.66)                         |
| Sudden infant death syndrome         |                                                        |                                                          |                                                          |                                                          |                                                   |                                                   |                                                   |                                                   |
| <b>Injuries</b>                      | <b>882.11</b><br><b>(733.67 to</b><br><b>1,050.65)</b> | <b>1,114.12</b><br><b>(800.40 to</b><br><b>1,495.77)</b> | <b>1,042.00</b><br><b>(748.91 to</b><br><b>1,390.41)</b> | <b>1,361.43</b><br><b>(997.73 to</b><br><b>1,798.01)</b> | <b>17.12</b><br><b>(14.19 to</b><br><b>20.50)</b> | <b>26.27</b><br><b>(19.86 to</b><br><b>33.93)</b> | <b>25.24</b><br><b>(19.13 to</b><br><b>32.46)</b> | <b>29.55</b><br><b>(22.48 to</b><br><b>38.28)</b> |
| <b>Transport injuries</b>            | <b>230.64</b><br><b>(183.98 to</b><br><b>286.06)</b>   | <b>423.52</b><br><b>(276.41 to</b><br><b>615.75)</b>     | <b>386.00</b><br><b>(254.57 to</b><br><b>552.43)</b>     | <b>501.56</b><br><b>(337.50 to</b><br><b>726.89)</b>     | <b>4.51</b><br><b>(3.64 to</b><br><b>5.52)</b>    | <b>9.13</b><br><b>(6.17 to</b><br><b>12.91)</b>   | <b>8.46</b><br><b>(5.82 to</b><br><b>11.78)</b>   | <b>10.26</b><br><b>(7.01 to</b><br><b>14.64)</b>  |
| Road injuries                        | 215.20<br>(170.75 to<br>268.17)                        | 392.76<br>(258.37 to<br>566.41)                          | 358.00<br>(237.50 to<br>508.73)                          | 463.62<br>(307.83 to<br>663.97)                          | 4.25<br>(3.40 to<br>5.22)                         | 8.56<br>(5.78 to<br>11.96)                        | 7.94<br>(5.51 to<br>10.97)                        | 9.57<br>(6.49 to<br>13.59)                        |
| Pedestrian road injuries             | 121.70<br>(96.13 to<br>152.98)                         | 200.06<br>(127.82 to<br>295.30)                          | 182.36<br>(117.98 to<br>264.66)                          | 235.68<br>(152.66 to<br>348.65)                          | 2.46<br>(1.97 to<br>3.05)                         | 4.52<br>(3.00 to<br>6.46)                         | 4.20<br>(2.83 to<br>5.91)                         | 5.06<br>(3.33 to<br>7.30)                         |
| <b>Mozambique</b>                    |                                                        |                                                          |                                                          |                                                          |                                                   |                                                   |                                                   |                                                   |
| Cause                                | YLLs (in 1000s)                                        |                                                          |                                                          |                                                          | Deaths (in 1000s)                                 |                                                   |                                                   |                                                   |
|                                      | 2016                                                   | 2040 Forecast                                            | 2040 Better Scenario                                     | 2040 Worse Scenario                                      | 2016                                              | 2040 Forecast                                     | 2040 Better Scenario                              | 2040 Worse Scenario                               |
| Cyclist road injuries                | 8.28<br>(6.03 to<br>11.57)                             | 16.57<br>(10.18 to<br>25.97)                             | 15.15<br>(9.48 to<br>23.53)                              | 19.60<br>(12.18 to<br>30.71)                             | 0.16<br>(0.11 to<br>0.22)                         | 0.34<br>(0.22 to<br>0.53)                         | 0.32<br>(0.21 to<br>0.48)                         | 0.38<br>(0.24 to<br>0.59)                         |
| Motorcyclist road injuries           | 16.98<br>(12.29 to<br>22.80)                           | 36.62<br>(22.12 to<br>58.03)                             | 34.05<br>(20.84 to<br>53.18)                             | 42.06<br>(25.63 to<br>66.65)                             | 0.31<br>(0.23 to<br>0.41)                         | 0.72<br>(0.44 to<br>1.12)                         | 0.68<br>(0.43 to<br>1.03)                         | 0.79<br>(0.49 to<br>1.21)                         |
| Motor vehicle road injuries          | 67.19<br>(50.35 to<br>93.64)                           | 137.53<br>(87.45 to<br>207.47)                           | 124.62<br>(79.94 to<br>187.77)                           | 163.90<br>(105.70 to<br>246.79)                          | 1.31<br>(1.00 to<br>1.76)                         | 2.94<br>(1.93 to<br>4.37)                         | 2.71<br>(1.84 to<br>3.90)                         | 3.30<br>(2.19 to<br>4.93)                         |
| Other road injuries                  | 1.05<br>(0.72 to<br>1.46)                              | 1.99<br>(1.18 to<br>3.28)                                | 1.81<br>(1.09 to<br>2.96)                                | 2.39<br>(1.47 to<br>3.85)                                | 0.02<br>(0.01 to<br>0.03)                         | 0.04<br>(0.03 to<br>0.07)                         | 0.04<br>(0.02 to<br>0.06)                         | 0.05<br>(0.03 to<br>0.07)                         |
| Other transport injuries             | 15.44<br>(8.13 to<br>23.52)                            | 30.75<br>(14.67 to<br>52.84)                             | 28.00<br>(13.56 to<br>47.79)                             | 37.94<br>(18.25 to<br>64.58)                             | 0.26<br>(0.14 to<br>0.39)                         | 0.57<br>(0.28 to<br>0.98)                         | 0.52<br>(0.26 to<br>0.88)                         | 0.68<br>(0.34 to<br>1.16)                         |
| <b>Unintentional injuries</b>        | <b>455.84</b><br><b>(377.02 to</b><br><b>550.53)</b>   | <b>359.69</b><br><b>(272.53 to</b><br><b>460.93)</b>     | <b>340.17</b><br><b>(255.26 to</b><br><b>443.45)</b>     | <b>500.22</b><br><b>(383.73 to</b><br><b>641.32)</b>     | <b>8.69</b><br><b>(7.29 to</b><br><b>10.29)</b>   | <b>9.88</b><br><b>(7.69 to</b><br><b>12.17)</b>   | <b>9.77</b><br><b>(7.44 to</b><br><b>12.10)</b>   | <b>11.67</b><br><b>(9.20 to</b><br><b>14.41)</b>  |
| Falls                                | 58.81<br>(37.25 to<br>77.65)                           | 76.18<br>(46.06 to<br>98.58)                             | 76.52<br>(46.46 to<br>99.74)                             | 85.92<br>(51.72 to<br>112.50)                            | 1.85<br>(1.13 to<br>2.33)                         | 3.47<br>(2.15 to<br>4.34)                         | 3.67<br>(2.28 to<br>4.61)                         | 3.38<br>(2.08 to<br>4.32)                         |
| Drowning                             | 93.17<br>(74.53 to<br>116.55)                          | 66.15<br>(48.11 to<br>90.20)                             | 61.12<br>(44.42 to<br>82.28)                             | 94.60<br>(69.98 to<br>127.14)                            | 1.50<br>(1.22 to<br>1.84)                         | 1.34<br>(1.00 to<br>1.79)                         | 1.26<br>(0.95 to<br>1.67)                         | 1.73<br>(1.31 to<br>2.30)                         |
| Fire, heat, and hot substances       | 66.60<br>(52.03 to<br>85.99)                           | 39.30<br>(28.85 to<br>52.98)                             | 35.90<br>(26.38 to<br>48.17)                             | 58.95<br>(43.62 to<br>79.77)                             | 1.25<br>(1.02 to<br>1.54)                         | 1.07<br>(0.82 to<br>1.40)                         | 1.01<br>(0.77 to<br>1.32)                         | 1.36<br>(1.06 to<br>1.76)                         |
| Poisonings                           | 32.33<br>(17.36 to<br>68.35)                           | 13.14<br>(8.02 to<br>24.04)                              | 11.45<br>(7.13 to<br>20.26)                              | 23.73<br>(13.39 to<br>49.27)                             | 0.53<br>(0.34 to<br>0.95)                         | 0.29<br>(0.20 to<br>0.45)                         | 0.26<br>(0.17 to<br>0.41)                         | 0.45<br>(0.29 to<br>0.76)                         |
| Exposure to mechanical forces        | 54.18<br>(41.87 to<br>68.10)                           | 43.70<br>(28.66 to<br>61.08)                             | 40.56<br>(26.54 to<br>56.89)                             | 59.77<br>(40.46 to<br>82.75)                             | 0.97<br>(0.74 to<br>1.21)                         | 0.98<br>(0.68 to<br>1.32)                         | 0.93<br>(0.65 to<br>1.26)                         | 1.22<br>(0.86 to<br>1.63)                         |
| Unintentional firearm injuries       | 11.39<br>(3.31 to<br>18.63)                            | 10.70<br>(2.61 to<br>19.52)                              | 9.78<br>(2.39 to<br>17.92)                               | 13.99<br>(3.55 to<br>25.24)                              | 0.21<br>(0.06 to<br>0.33)                         | 0.21<br>(0.06 to<br>0.37)                         | 0.20<br>(0.06 to<br>0.35)                         | 0.27<br>(0.08 to<br>0.47)                         |
| Unintentional suffocation            | 5.70<br>(3.79 to<br>8.75)                              | 3.54<br>(2.48 to<br>4.95)                                | 3.29<br>(2.28 to<br>4.65)                                | 5.86<br>(3.94 to<br>8.43)                                | 0.09<br>(0.06 to<br>0.12)                         | 0.07<br>(0.05 to<br>0.10)                         | 0.07<br>(0.05 to<br>0.10)                         | 0.10<br>(0.07 to<br>0.14)                         |

|                                                                              |                                 |                                 |                                 |                                 |                           |                            |                           |                            |
|------------------------------------------------------------------------------|---------------------------------|---------------------------------|---------------------------------|---------------------------------|---------------------------|----------------------------|---------------------------|----------------------------|
| Other exposure to mechanical forces                                          | 37.10<br>(29.99 to<br>45.64)    | 29.46<br>(20.96 to<br>39.70)    | 27.50<br>(19.51 to<br>37.21)    | 39.92<br>(29.05 to<br>53.15)    | 0.67<br>(0.55 to<br>0.82) | 0.69<br>(0.52 to<br>0.90)  | 0.66<br>(0.49 to<br>0.86) | 0.85<br>(0.64 to<br>1.09)  |
| Adverse effects of medical treatment                                         | 35.95<br>(22.40 to<br>53.51)    | 28.60<br>(20.45 to<br>39.43)    | 27.02<br>(19.16 to<br>36.82)    | 41.44<br>(28.15 to<br>59.56)    | 0.62<br>(0.47 to<br>0.84) | 0.69<br>(0.53 to<br>0.89)  | 0.67<br>(0.51 to<br>0.88) | 0.86<br>(0.67 to<br>1.13)  |
| Animal contact                                                               | 41.08<br>(30.18 to<br>55.01)    | 37.31<br>(26.95 to<br>50.79)    | 33.89<br>(24.23 to<br>46.66)    | 56.80<br>(40.90 to<br>78.00)    | 0.83<br>(0.64 to<br>1.06) | 0.95<br>(0.72 to<br>1.27)  | 0.89<br>(0.66 to<br>1.19) | 1.28<br>(0.97 to<br>1.71)  |
| Venomous animal contact                                                      | 29.92<br>(20.47 to<br>41.67)    | 26.29<br>(18.65 to<br>36.21)    | 23.86<br>(16.73 to<br>32.81)    | 40.05<br>(27.40 to<br>56.00)    | 0.64<br>(0.48 to<br>0.84) | 0.72<br>(0.53 to<br>0.98)  | 0.68<br>(0.49 to<br>0.93) | 0.97<br>(0.71 to<br>1.31)  |
| Non-venomous animal contact                                                  | 11.15<br>(6.71 to<br>16.73)     | 11.03<br>(6.59 to<br>16.51)     | 10.03<br>(5.95 to<br>15.00)     | 16.75<br>(9.97 to<br>25.72)     | 0.19<br>(0.12 to<br>0.27) | 0.23<br>(0.14 to<br>0.34)  | 0.22<br>(0.13 to<br>0.32) | 0.32<br>(0.19 to<br>0.47)  |
| Foreign body                                                                 | 47.37<br>(28.85 to<br>77.19)    | 34.16<br>(22.94 to<br>49.24)    | 34.04<br>(22.94 to<br>48.64)    | 49.71<br>(31.05 to<br>74.86)    | 0.66<br>(0.43 to<br>0.99) | 0.63<br>(0.43 to<br>0.95)  | 0.65<br>(0.44 to<br>0.94) | 0.80<br>(0.54 to<br>1.14)  |
| Pulmonary aspiration and foreign body in airway                              | 43.79<br>(25.78 to<br>73.97)    | 30.61<br>(20.92 to<br>43.74)    | 30.66<br>(21.12 to<br>43.90)    | 44.95<br>(28.15 to<br>69.67)    | 0.60<br>(0.39 to<br>0.93) | 0.57<br>(0.40 to<br>0.80)  | 0.58<br>(0.41 to<br>0.82) | 0.71<br>(0.49 to<br>1.02)  |
| Foreign body in other body part                                              | 3.58<br>(1.03 to<br>7.88)       | 3.55<br>(0.92 to<br>9.00)       | 3.38<br>(0.86 to<br>8.74)       | 4.76<br>(1.31 to<br>11.44)      | 0.06<br>(0.02 to<br>0.13) | 0.07<br>(0.02 to<br>0.18)  | 0.07<br>(0.02 to<br>0.18) | 0.09<br>(0.02 to<br>0.21)  |
| Environmental heat and cold exposure                                         | 5.74<br>(3.72 to<br>7.60)       | 4.45<br>(2.62 to<br>6.34)       | 3.92<br>(2.30 to<br>5.65)       | 7.18<br>(4.37 to<br>10.12)      | 0.11<br>(0.07 to<br>0.14) | 0.11<br>(0.07 to<br>0.14)  | 0.10<br>(0.06 to<br>0.13) | 0.15<br>(0.10 to<br>0.21)  |
| Other unintentional injuries                                                 | 20.62<br>(16.63 to<br>25.58)    | 16.70<br>(11.86 to<br>22.23)    | 15.74<br>(11.07 to<br>21.28)    | 22.12<br>(16.14 to<br>29.41)    | 0.36<br>(0.29 to<br>0.44) | 0.35<br>(0.26 to<br>0.45)  | 0.33<br>(0.24 to<br>0.44) | 0.43<br>(0.32 to<br>0.55)  |
| Self-harm and interpersonal violence                                         | 190.13<br>(136.30 to<br>244.29) | 319.93<br>(196.23 to<br>468.99) | 304.79<br>(191.02 to<br>440.47) | 347.17<br>(212.87 to<br>516.31) | 3.83<br>(2.82 to<br>4.90) | 7.06<br>(4.63 to<br>10.16) | 6.81<br>(4.57 to<br>9.42) | 7.42<br>(4.85 to<br>10.88) |
| <b>Mozambique</b>                                                            |                                 |                                 |                                 |                                 |                           |                            |                           |                            |
| Cause                                                                        | YLLs (in 1000s)                 |                                 |                                 |                                 | Deaths (in 1000s)         |                            |                           |                            |
|                                                                              | 2016                            | 2040 Forecast                   | 2040 Better Scenario            | 2040 Worse Scenario             | 2016                      | 2040 Forecast              | 2040 Better Scenario      | 2040 Worse Scenario        |
| Self-harm                                                                    | 75.79<br>(56.57 to<br>95.95)    | 161.24<br>(102.28 to<br>243.30) | 151.69<br>(99.47 to<br>219.86)  | 173.75<br>(108.24 to<br>266.46) | 1.87<br>(1.43 to<br>2.34) | 4.12<br>(2.81 to<br>6.02)  | 3.96<br>(2.76 to<br>5.53) | 4.27<br>(2.84 to<br>6.35)  |
| Self-harm by firearm                                                         | 9.02<br>(5.14 to<br>14.25)      | 14.37<br>(7.22 to<br>26.21)     | 13.25<br>(6.75 to<br>23.68)     | 16.11<br>(7.94 to<br>29.74)     | 0.20<br>(0.12 to<br>0.31) | 0.34<br>(0.18 to<br>0.61)  | 0.31<br>(0.18 to<br>0.55) | 0.37<br>(0.19 to<br>0.67)  |
| Self-harm by other specified means                                           | 66.77<br>(49.73 to<br>85.49)    | 146.87<br>(92.48 to<br>220.62)  | 138.44<br>(89.96 to<br>200.74)  | 157.64<br>(96.93 to<br>241.20)  | 1.67<br>(1.27 to<br>2.10) | 3.78<br>(2.55 to<br>5.49)  | 3.64<br>(2.51 to<br>5.06) | 3.90<br>(2.57 to<br>5.73)  |
| Interpersonal violence                                                       | 114.35<br>(69.89 to<br>155.64)  | 158.68<br>(83.73 to<br>246.46)  | 153.10<br>(81.94 to<br>233.57)  | 173.42<br>(91.22 to<br>267.88)  | 1.96<br>(1.22 to<br>2.66) | 2.95<br>(1.61 to<br>4.49)  | 2.85<br>(1.58 to<br>4.29) | 3.15<br>(1.72 to<br>4.84)  |
| Physical violence by firearm                                                 | 22.83<br>(9.39 to<br>36.32)     | 33.32<br>(13.40 to<br>58.29)    | 33.42<br>(13.66 to<br>58.68)    | 34.62<br>(13.80 to<br>60.49)    | 0.39<br>(0.17 to<br>0.62) | 0.60<br>(0.25 to<br>1.05)  | 0.60<br>(0.26 to<br>1.05) | 0.61<br>(0.26 to<br>1.06)  |
| Physical violence by sharp object                                            | 13.09<br>(5.66 to<br>19.53)     | 21.90<br>(8.40 to<br>35.01)     | 22.42<br>(8.74 to<br>35.80)     | 21.67<br>(8.22 to<br>34.68)     | 0.23<br>(0.11 to<br>0.34) | 0.42<br>(0.18 to<br>0.64)  | 0.43<br>(0.19 to<br>0.66) | 0.40<br>(0.17 to<br>0.62)  |
| Physical violence by other means                                             | 78.43<br>(48.24 to<br>106.72)   | 103.46<br>(55.01 to<br>166.87)  | 97.26<br>(51.33 to<br>155.32)   | 117.14<br>(62.39 to<br>189.12)  | 1.34<br>(0.82 to<br>1.81) | 1.93<br>(1.04 to<br>3.10)  | 1.82<br>(0.99 to<br>2.88) | 2.13<br>(1.15 to<br>3.45)  |
| Forces of nature, conflict and terrorism, and executions and police conflict | 5.50<br>(3.40 to<br>8.02)       | 10.98<br>(0.00 to<br>95.73)     | 11.04<br>(0.00 to<br>96.22)     | 12.48<br>(0.00 to<br>107.67)    | 0.09<br>(0.06 to<br>0.13) | 0.19<br>(0.00 to<br>1.64)  | 0.20<br>(0.00 to<br>1.66) | 0.21<br>(0.00 to<br>1.78)  |
| Exposure to forces of nature                                                 | 0.00<br>(0.00 to<br>0.00)       | 3.00<br>(0.00 to<br>43.06)      | 3.01<br>(0.00 to<br>43.32)      | 3.49<br>(0.00 to<br>50.14)      | 0.00<br>(0.00 to<br>0.00) | 0.06<br>(0.00 to<br>0.79)  | 0.06<br>(0.00 to<br>0.81) | 0.06<br>(0.00 to<br>0.87)  |

|                                                                          | 3.97<br>(2.04 to<br>5.90)                                | 7.97<br>(0.00 to<br>94.86)                               | 8.01<br>(0.00 to<br>95.32)                               | 8.98<br>(0.00 to<br>106.66)                              | 0.06<br>(0.03 to<br>0.09)                       | 0.14<br>(0.00 to<br>1.65)                        | 0.14<br>(0.00 to<br>1.65)                        | 0.15<br>(0.00 to<br>1.77)                         |
|--------------------------------------------------------------------------|----------------------------------------------------------|----------------------------------------------------------|----------------------------------------------------------|----------------------------------------------------------|-------------------------------------------------|--------------------------------------------------|--------------------------------------------------|---------------------------------------------------|
| Conflict and terrorism                                                   |                                                          |                                                          |                                                          |                                                          |                                                 |                                                  |                                                  |                                                   |
|                                                                          | 1.52<br>(0.72 to<br>3.46)                                | 0.02<br>(0.00 to<br>0.22)                                | 0.02<br>(0.00 to<br>0.22)                                | 0.02<br>(0.00 to<br>0.23)                                | 0.03<br>(0.01 to<br>0.06)                       | 0.00<br>(0.00 to<br>0.00)                        | 0.00<br>(0.00 to<br>0.00)                        | 0.00<br>(0.00 to<br>0.00)                         |
| Executions and police conflict                                           |                                                          |                                                          |                                                          |                                                          |                                                 |                                                  |                                                  |                                                   |
| <b>Rwanda</b>                                                            |                                                          |                                                          |                                                          |                                                          |                                                 |                                                  |                                                  |                                                   |
| Cause                                                                    | YLLs (actual counts)                                     |                                                          |                                                          |                                                          | Deaths (actual counts)                          |                                                  |                                                  |                                                   |
|                                                                          | 2016                                                     | 2040 Forecast                                            | 2040 Better Scenario                                     | 2040 Worse Scenario                                      | 2016                                            | 2040 Forecast                                    | 2040 Better Scenario                             | 2040 Worse Scenario                               |
| <b>All causes</b>                                                        | <b>3,282,064.83</b><br>(2,871,916.06 to<br>3,794,329.44) | <b>3,158,557.00</b><br>(1,967,071.22 to<br>6,027,778.26) | <b>2,511,541.00</b><br>(1,539,137.83 to<br>4,669,849.28) | <b>4,844,247.53</b><br>(3,107,939.72 to<br>8,642,517.76) | <b>68,085.38</b><br>(61,129.17 to<br>75,775.57) | <b>94,980.54</b><br>(63,886.73 to<br>165,559.68) | <b>79,495.35</b><br>(53,336.36 to<br>143,535.59) | <b>129,094.00</b><br>(87,101.97 to<br>213,045.12) |
| <b>Communicable, maternal, neonatal, and nutritional diseases</b>        | <b>2,222,456.28</b><br>(1,886,130.07 to<br>2,628,245.56) | <b>1,391,590.13</b><br>(871,382.11 to<br>2,359,188.29)   | <b>988,102.16</b><br>(641,652.22 to<br>1,652,073.56)     | <b>2,568,383.59</b><br>(1,630,631.25 to<br>4,188,518.74) | <b>35,876.18</b><br>(31,361.81 to<br>41,052.79) | <b>29,747.80</b><br>(17,230.69 to<br>53,260.53)  | <b>21,714.45</b><br>(13,114.20 to<br>38,533.88)  | <b>49,023.46</b><br>(29,287.26 to<br>86,260.63)   |
| <b>HIV/AIDS and tuberculosis</b>                                         | <b>360,736.52</b><br>(311,099.89 to<br>424,709.93)       | <b>285,698.99</b><br>(139,134.11 to<br>599,484.37)       | <b>227,558.70</b><br>(111,283.07 to<br>443,728.82)       | <b>535,196.00</b><br>(247,749.89 to<br>1,170,259.09)     | <b>7,939.90</b><br>(6,875.77 to<br>9,182.13)    | <b>6,772.48</b><br>(3,136.39 to<br>14,630.88)    | <b>5,353.70</b><br>(2,443.78 to<br>10,988.19)    | <b>12,561.29</b><br>(5,292.14 to<br>28,122.94)    |
| <b>Tuberculosis</b>                                                      | <b>194,909.45</b><br>(159,400.92 to<br>241,445.52)       | <b>146,511.78</b><br>(38,762.08 to<br>446,970.17)        | <b>100,625.19</b><br>(26,658.81 to<br>307,159.92)        | <b>306,601.83</b><br>(79,215.79 to<br>943,728.77)        | <b>4,741.46</b><br>(3,883.14 to<br>5,828.27)    | <b>4,119.52</b><br>(1,212.76 to<br>11,778.45)    | <b>2,893.76</b><br>(851.39 to<br>8,417.50)       | <b>8,317.19</b><br>(2,262.87 to<br>23,506.05)     |
| <b>HIV/AIDS</b>                                                          | <b>165,827.07</b><br>(133,522.82 to<br>206,930.60)       | <b>139,187.21</b><br>(61,073.14 to<br>223,657.82)        | <b>126,933.51</b><br>(55,254.63 to<br>213,195.21)        | <b>228,594.17</b><br>(100,398.27 to<br>404,912.94)       | <b>3,198.44</b><br>(2,607.01 to<br>3,924.11)    | <b>2,652.96</b><br>(1,072.28 to<br>4,574.65)     | <b>2,459.94</b><br>(966.73 to<br>4,374.84)       | <b>4,244.10</b><br>(1,639.58 to<br>7,838.14)      |
| <b>Diarrhea, lower respiratory, and other common infectious diseases</b> | <b>831,095.49</b><br>(666,837.52 to<br>1,021,741.52)     | <b>562,076.30</b><br>(254,075.57 to<br>1,127,129.65)     | <b>352,752.82</b><br>(155,851.38 to<br>736,979.49)       | <b>1,083,145.57</b><br>(512,699.40 to<br>2,044,199.78)   | <b>14,346.88</b><br>(11,808.30 to<br>17,373.53) | <b>14,791.14</b><br>(6,688.11 to<br>29,817.53)   | <b>9,866.05</b><br>(4,525.33 to<br>19,670.86)    | <b>23,271.85</b><br>(10,892.78 to<br>44,092.23)   |
| <b>Diarrheal diseases</b>                                                | <b>233,154.48</b><br>(158,891.83 to<br>346,355.78)       | <b>150,975.46</b><br>(21,860.97 to<br>465,136.37)        | <b>96,895.51</b><br>(13,418.86 to<br>303,544.37)         | <b>4,475.28</b><br>(50,090.05 to<br>698,827.80)          | <b>4,222.61</b><br>(2,736.13 to<br>7,169.39)    | <b>4,222.61</b><br>(589.51 to<br>13,913.86)      | <b>2,873.54</b><br>(389.88 to<br>9,702.27)       | <b>6,797.18</b><br>(1,132.77 to<br>19,605.51)     |
| <b>Intestinal infectious diseases</b>                                    | <b>15,878.42</b><br>(7,549.77 to<br>28,860.04)           | <b>11,355.97</b><br>(4,302.94 to<br>24,689.80)           | <b>9,513.91</b><br>(3,492.41 to<br>21,074.11)            | <b>15,684.93</b><br>(6,034.62 to<br>34,079.22)           | <b>217.07</b><br>(105.10 to<br>393.14)          | <b>163.68</b><br>(63.53 to<br>355.74)            | <b>139.34</b><br>(52.79 to<br>307.68)            | <b>220.12</b><br>(85.40 to<br>467.80)             |
| <b>Typhoid fever</b>                                                     | <b>14,033.94</b><br>(6,388.69 to<br>26,377.44)           | <b>10,345.69</b><br>(3,782.77 to<br>23,265.07)           | <b>8,716.65</b><br>(3,152.74 to<br>19,561.09)            | <b>14,085.65</b><br>(5,119.65 to<br>31,766.16)           | <b>192.50</b><br>(89.09 to<br>361.78)           | <b>148.48</b><br>(54.63 to<br>328.24)            | <b>126.98</b><br>(47.01 to<br>285.26)            | <b>197.27</b><br>(73.35 to<br>435.78)             |
| <b>Paratyphoid fever</b>                                                 | <b>717.03</b><br>(269.65 to<br>1,661.71)                 | <b>630.05</b><br>(203.74 to<br>1,524.99)                 | <b>522.63</b><br>(167.58 to<br>1,274.54)                 | <b>878.44</b><br>(281.53 to<br>2,069.00)                 | <b>9.92</b><br>(3.80 to<br>22.74)               | <b>9.12</b><br>(3.00 to<br>21.84)                | <b>7.67</b><br>(2.54 to<br>18.52)                | <b>12.42</b><br>(4.08 to<br>29.08)                |
| <b>Other intestinal infectious diseases</b>                              | <b>1,127.44</b><br>(264.47 to<br>3,161.38)               | <b>380.23</b><br>(70.62 to<br>1,214.65)                  | <b>274.64</b><br>(50.54 to<br>888.67)                    | <b>720.85</b><br>(130.19 to<br>2,315.50)                 | <b>14.65</b><br>(3.79 to<br>38.99)              | <b>6.08</b><br>(1.44 to<br>17.79)                | <b>4.69</b><br>(1.09 to<br>13.63)                | <b>10.43</b><br>(2.43 to<br>30.50)                |
| <b>Lower respiratory infections</b>                                      | <b>414,008.00</b><br>(305,269.96 to<br>534,881.73)       | <b>307,208.92</b><br>(142,397.43 to<br>626,157.13)       | <b>170,432.69</b><br>(81,802.27 to<br>337,355.73)        | <b>595,437.38</b><br>(260,839.99 to<br>1,248,283.70)     | <b>7,194.34</b><br>(5,632.47 to<br>8,783.40)    | <b>8,732.25</b><br>(4,447.61 to<br>16,357.64)    | <b>5,371.87</b><br>(2,823.16 to<br>9,683.62)     | <b>13,273.48</b><br>(6,676.40 to<br>24,818.03)    |
| <b>Upper respiratory infections</b>                                      | <b>815.07</b><br>(240.31 to<br>1,970.08)                 | <b>454.58</b><br>(145.12 to<br>1,195.31)                 | <b>324.44</b><br>(105.18 to<br>826.06)                   | <b>861.12</b><br>(258.97 to<br>2,408.85)                 | <b>11.66</b><br>(4.56 to<br>25.92)              | <b>8.81</b><br>(3.24 to<br>19.48)                | <b>6.67</b><br>(2.34 to<br>14.71)                | <b>14.97</b><br>(5.44 to<br>36.34)                |
| <b>Otitis media</b>                                                      | <b>313.90</b><br>(96.91 to<br>841.70)                    | <b>84.35</b><br>(30.80 to<br>200.24)                     | <b>80.09</b><br>(29.43 to<br>185.20)                     | <b>96.46</b><br>(34.15 to<br>232.82)                     | <b>5.21</b><br>(2.16 to<br>12.23)               | <b>2.67</b><br>(1.12 to<br>5.66)                 | <b>2.82</b><br>(1.18 to<br>5.90)                 | <b>2.58</b><br>(1.07 to<br>5.66)                  |
| <b>Meningitis</b>                                                        | <b>126,202.14</b><br>(89,038.05 to<br>189,856.23)        | <b>75,693.12</b><br>(40,141.63 to<br>133,832.85)         | <b>65,035.59</b><br>(34,811.74 to<br>118,097.50)         | <b>123,795.19</b><br>(66,559.63 to<br>215,962.20)        | <b>1,914.93</b><br>(1,402.76 to<br>2,741.31)    | <b>1,428.37</b><br>(790.48 to<br>2,590.62)       | <b>1,309.05</b><br>(702.26 to<br>2,358.02)       | <b>1,991.92</b><br>(1,122.49 to<br>3,368.78)      |
| <b>Pneumococcal meningitis</b>                                           | <b>7,287.67</b><br>(5,004.49 to<br>11,066.66)            | <b>5,003.73</b><br>(2,570.59 to<br>9,244.23)             | <b>4,671.14</b><br>(2,343.20 to<br>8,989.20)             | <b>6,505.65</b><br>(3,279.66 to<br>12,154.71)            | <b>127.25</b><br>(91.72 to<br>182.21)           | <b>112.61</b><br>(60.63 to<br>203.08)            | <b>111.90</b><br>(59.41 to<br>207.98)            | <b>127.85</b><br>(69.67 to<br>222.07)             |
| <b>H influenzae type B meningitis</b>                                    | <b>12,555.96</b><br>(8,287.97 to<br>19,490.39)           | <b>15,901.02</b><br>(6,444.68 to<br>34,064.12)           | <b>12,524.50</b><br>(5,266.72 to<br>26,262.86)           | <b>44,778.15</b><br>(14,692.42 to<br>103,748.84)         | <b>177.65</b><br>(125.54 to<br>259.73)          | <b>221.07</b><br>(98.49 to<br>437.53)            | <b>183.69</b><br>(86.93 to<br>355.04)            | <b>556.32</b><br>(201.21 to<br>1,268.34)          |
| <b>Meningococcal meningitis</b>                                          | <b>54,647.64</b><br>(37,991.69 to<br>81,979.47)          | <b>25,704.78</b><br>(13,229.83 to<br>47,521.77)          | <b>22,319.39</b><br>(11,406.66 to<br>41,597.44)          | <b>34,284.50</b><br>(17,560.20 to<br>61,184.33)          | <b>808.44</b><br>(580.24 to<br>1,153.01)        | <b>493.22</b><br>(264.97 to<br>915.86)           | <b>453.04</b><br>(240.10 to<br>862.24)           | <b>597.24</b><br>(326.31 to<br>1,044.52)          |



|                                                |                                                        |                                                      |                                                      |                                                       |                                                  |                                                |                                                |                                                |
|------------------------------------------------|--------------------------------------------------------|------------------------------------------------------|------------------------------------------------------|-------------------------------------------------------|--------------------------------------------------|------------------------------------------------|------------------------------------------------|------------------------------------------------|
| Other meningitis                               | 51,710.88<br>(36,248.37 to 78,022.50)                  | 29,083.59<br>(15,279.93 to 53,504.82)                | 25,520.56<br>(13,642.02 to 47,981.66)                | 38,226.89<br>(19,962.78 to 70,238.26)                 | 801.60<br>(592.68 to 1,156.72)                   | 601.48<br>(335.14 to 1,068.82)                 | 560.43<br>(305.95 to 1,048.40)                 | 710.51<br>(399.98 to 1,242.73)                 |
| Encephalitis                                   | 9,591.75<br>(4,956.13 to 15,991.54)                    | 6,504.23<br>(3,007.84 to 11,504.30)                  | 5,153.48<br>(2,397.94 to 9,095.22)                   | 10,313.31<br>(4,700.63 to 18,016.58)                  | 120.37<br>(64.67 to 195.72)                      | 90.18<br>(44.27 to 156.07)                     | 73.68<br>(36.72 to 128.45)                     | 136.22<br>(64.92 to 236.32)                    |
| Diphtheria                                     | 74.02<br>(31.59 to 148.07)                             | 16.84<br>(5.15 to 47.71)                             | 11.07<br>(3.94 to 27.37)                             | 104.39<br>(18.15 to 372.07)                           | 0.93<br>(0.42 to 1.78)                           | 0.23<br>(0.08 to 0.60)                         | 0.16<br>(0.06 to 0.37)                         | 1.26<br>(0.24 to 4.40)                         |
| Whooping cough                                 | 13,204.00<br>(951.24 to 44,147.20)                     | 5,289.90<br>(275.81 to 20,375.44)                    | 2,108.59<br>(105.84 to 7,918.76)                     | 50,206.22<br>(3,244.29 to 165,211.34)                 | 155.91<br>(11.23 to 520.87)                      | 62.97<br>(3.27 to 242.00)                      | 25.48<br>(1.30 to 95.47)                       | 591.67<br>(38.21 to 1,952.30)                  |
| Tetanus                                        | 10,209.94<br>(5,389.72 to 19,326.74)                   | 1,716.40<br>(620.75 to 3,855.35)                     | 1,347.43<br>(461.47 to 3,019.19)                     | 7,395.57<br>(2,245.08 to 20,508.51)                   | 149.85<br>(83.77 to 257.27)                      | 31.08<br>(11.72 to 66.32)                      | 27.14<br>(9.38 to 59.20)                       | 96.39<br>(32.68 to 248.25)                     |
| Measles                                        | 4,753.72<br>(1,414.98 to 11,909.42)                    | 1,301.70<br>(132.82 to 6,499.00)                     | 781.50<br>(101.41 to 3,604.18)                       | 8,120.33<br>(450.09 to 44,366.80)                     | 56.60<br>(16.87 to 141.79)                       | 15.67<br>(1.69 to 77.62)                       | 9.50<br>(42.95)                                | 96.33<br>(5.47 to 525.21)                      |
| <b>Rwanda</b>                                  |                                                        |                                                      |                                                      |                                                       |                                                  |                                                |                                                |                                                |
| Cause                                          | YLLs (actual counts)                                   |                                                      |                                                      |                                                       | Deaths (actual counts)                           |                                                |                                                |                                                |
|                                                | 2016                                                   | 2040 Forecast                                        | 2040 Better Scenario                                 | 2040 Worse Scenario                                   | 2016                                             | 2040 Forecast                                  | 2040 Better Scenario                           | 2040 Worse Scenario                            |
| Varicella and herpes zoster                    | 2,890.05<br>(1,399.07 to 5,011.82)                     | 1,474.83<br>(657.36 to 2,894.92)                     | 1,068.52<br>(480.04 to 2,113.30)                     | 2,712.70<br>(1,119.68 to 5,381.89)                    | 44.74<br>(26.56 to 69.94)                        | 32.61<br>(18.15 to 53.92)                      | 26.78<br>(15.00 to 44.46)                      | 49.74<br>(25.90 to 87.49)                      |
| <b>Neglected tropical diseases and malaria</b> | <b>191,599.98</b><br><b>(112,851.42 to 316,202.00)</b> | <b>75,475.28</b><br><b>(36,515.58 to 138,031.76)</b> | <b>65,584.48</b><br><b>(31,057.03 to 122,448.83)</b> | <b>101,203.32</b><br><b>(49,075.68 to 183,435.82)</b> | <b>2,748.49</b><br><b>(1,643.18 to 4,391.36)</b> | <b>1,419.75</b><br><b>(675.78 to 2,708.54)</b> | <b>1,301.28</b><br><b>(610.55 to 2,533.29)</b> | <b>1,736.13</b><br><b>(852.79 to 3,123.49)</b> |
| Malaria                                        | 173,950.15<br>(96,630.79 to 301,259.60)                | 65,886.50<br>(28,969.22 to 124,691.65)               | 57,954.59<br>(25,452.54 to 109,851.22)               | 86,153.91<br>(37,894.31 to 166,248.98)                | 2,466.68<br>(1,372.50 to 4,104.79)               | 1,240.31<br>(541.40 to 2,470.78)               | 1,150.32<br>(504.05 to 2,373.46)               | 1,479.45<br>(651.39 to 2,791.36)               |
| Chagas disease                                 | 0.00<br>(0.00 to 0.00)                                 | 0.00<br>(0.00 to 0.00)                               | 0.00<br>(0.00 to 0.00)                               | 0.00<br>(0.00 to 0.00)                                | 0.00<br>(0.00 to 0.00)                           | 0.00<br>(0.00 to 0.00)                         | 0.00<br>(0.00 to 0.00)                         | 0.00<br>(0.00 to 0.00)                         |
| Leishmaniasis                                  | 0.00<br>(0.00 to 0.00)                                 | 0.00<br>(0.00 to 0.00)                               | 0.00<br>(0.00 to 0.00)                               | 0.00<br>(0.00 to 0.00)                                | 0.00<br>(0.00 to 0.00)                           | 0.00<br>(0.00 to 0.00)                         | 0.00<br>(0.00 to 0.00)                         | 0.00<br>(0.00 to 0.00)                         |
| African trypanosomiasis                        | 0.00<br>(0.00 to 0.00)                                 | 0.00<br>(0.00 to 0.00)                               | 0.00<br>(0.00 to 0.00)                               | 0.00<br>(0.00 to 0.00)                                | 0.00<br>(0.00 to 0.00)                           | 0.00<br>(0.00 to 0.00)                         | 0.00<br>(0.00 to 0.00)                         | 0.00<br>(0.00 to 0.00)                         |
| Schistosomiasis                                | 3,106.99<br>(2,042.33 to 4,357.08)                     | 2,158.90<br>(1,023.48 to 4,255.61)                   | 1,951.35<br>(905.57 to 3,883.78)                     | 2,581.33<br>(1,232.96 to 4,928.64)                    | 82.82<br>(56.19 to 114.21)                       | 68.51<br>(35.76 to 126.22)                     | 63.91<br>(32.08 to 117.55)                     | 77.90<br>(40.16 to 136.64)                     |
| Cysticercosis                                  | 247.22<br>(191.81 to 307.90)                           | 101.26<br>(49.32 to 193.71)                          | 94.48<br>(44.43 to 184.97)                           | 115.87<br>(58.12 to 212.60)                           | 4.74<br>(3.72 to 5.92)                           | 2.34<br>(1.18 to 4.40)                         | 2.23<br>(1.12 to 4.33)                         | 2.57<br>(1.33 to 4.75)                         |
| Cystic echinococcosis                          | 802.37<br>(544.05 to 1,105.82)                         | 267.96<br>(129.33 to 511.10)                         | 187.58<br>(92.62 to 363.26)                          | 492.60<br>(254.98 to 902.14)                          | 15.31<br>(10.49 to 20.83)                        | 6.98<br>(3.70 to 12.59)                        | 5.10<br>(2.68 to 9.32)                         | 11.95<br>(6.56 to 21.07)                       |
| Dengue                                         | 69.62<br>(5.90 to 252.21)                              | 210.95<br>(18.69 to 722.28)                          | 186.18<br>(15.94 to 612.41)                          | 278.53<br>(24.16 to 969.64)                           | 1.01<br>(0.09 to 3.42)                           | 4.13<br>(0.35 to 13.41)                        | 3.90<br>(0.33 to 12.53)                        | 4.87<br>(0.44 to 16.22)                        |
| Yellow fever                                   | 1,235.64<br>(249.05 to 3,701.10)                       | 407.79<br>(68.10 to 1,367.76)                        | 315.98<br>(51.16 to 1,054.15)                        | 634.46<br>(109.56 to 2,073.88)                        | 18.86<br>(3.84 to 56.20)                         | 6.60<br>(1.09 to 22.86)                        | 5.20<br>(0.85 to 17.62)                        | 9.98<br>(1.67 to 33.78)                        |
| Rabies                                         | 3,460.62<br>(578.98 to 9,709.01)                       | 1,038.26<br>(171.09 to 3,047.90)                     | 647.67<br>(104.66 to 2,004.66)                       | 2,286.11<br>(395.50 to 6,166.85)                      | 49.54<br>(9.68 to 130.42)                        | 16.54<br>(2.95 to 50.44)                       | 10.49<br>(1.89 to 32.54)                       | 33.38<br>(6.54 to 98.47)                       |
| Intestinal nematode infections                 | 1,656.00<br>(932.76 to 2,754.73)                       | 1,621.20<br>(719.06 to 3,109.00)                     | 1,377.46<br>(595.93 to 2,641.11)                     | 2,221.27<br>(1,019.66 to 4,298.70)                    | 20.39<br>(11.69 to 33.65)                        | 20.97<br>(9.71 to 39.46)                       | 18.15<br>(8.36 to 34.00)                       | 28.01<br>(13.22 to 52.58)                      |
| Other neglected tropical diseases              | 7,071.37<br>(2,361.08 to 15,009.10)                    | 3,782.47<br>(1,356.99 to 7,840.72)                   | 2,869.21<br>(1,030.42 to 5,879.58)                   | 6,439.25<br>(2,393.58 to 12,975.43)                   | 89.15<br>(30.78 to 182.84)                       | 53.37<br>(19.06 to 105.53)                     | 41.98<br>(15.43 to 84.10)                      | 86.02<br>(32.54 to 166.27)                     |

|                                                          |                                             |                                             |                                             |                                             |                                       |                                       |                                       |                                       |
|----------------------------------------------------------|---------------------------------------------|---------------------------------------------|---------------------------------------------|---------------------------------------------|---------------------------------------|---------------------------------------|---------------------------------------|---------------------------------------|
|                                                          | 49,757.56<br>(35,035.68 to<br>67,390.80)    | 32,353.62<br>(13,422.72 to<br>74,505.92)    | 23,967.56<br>(9,516.28 to<br>57,400.87)     | 54,864.10<br>(23,003.16 to<br>132,618.45)   | 932.07<br>(656.79 to<br>1,266.96)     | 633.26<br>(259.89 to<br>1,459.94)     | 470.31<br>(182.24 to<br>1,111.83)     | 1,070.22<br>(438.82 to<br>2,593.84)   |
| <b>Maternal disorders</b>                                |                                             |                                             |                                             |                                             |                                       |                                       |                                       |                                       |
| Maternal hemorrhage                                      | 17,269.93<br>(11,207.10 to<br>25,579.18)    | 9,575.07<br>(3,873.55 to<br>23,265.83)      | 7,156.58<br>(2,784.70 to<br>17,954.03)      | 15,667.50<br>(6,173.01 to<br>38,343.39)     | 328.96<br>(212.52 to<br>490.37)       | 189.50<br>(75.60 to<br>469.16)        | 141.81<br>(53.86 to<br>361.42)        | 309.24<br>(118.41 to<br>767.26)       |
| Maternal sepsis and other maternal infections            | 2,357.51<br>(1,168.44 to<br>3,975.59)       | 1,317.59<br>(474.51 to<br>3,056.14)         | 978.53<br>(336.48 to<br>2,262.17)           | 2,192.57<br>(776.02 to<br>5,039.18)         | 43.84<br>(22.46 to<br>73.86)          | 25.53<br>(9.08 to<br>59.60)           | 19.00<br>(6.40 to<br>45.01)           | 42.33<br>(15.00 to<br>99.43)          |
| Maternal hypertensive disorders                          | 6,235.57<br>(3,743.53 to<br>9,573.33)       | 3,609.45<br>(1,402.14 to<br>8,661.86)       | 2,684.51<br>(1,022.47 to<br>6,574.43)       | 5,975.44<br>(2,297.68 to<br>14,335.62)      | 113.89<br>(70.26 to<br>175.70)        | 68.47<br>(26.58 to<br>163.64)         | 51.01<br>(18.58 to<br>125.82)         | 112.96<br>(41.62 to<br>274.19)        |
| Maternal obstructed labor and uterine rupture            | 5,379.64<br>(2,835.38 to<br>9,255.19)       | 3,086.48<br>(1,077.21 to<br>7,442.17)       | 2,255.85<br>(755.30 to<br>5,517.79)         | 5,244.05<br>(1,776.92 to<br>13,341.69)      | 101.35<br>(52.73 to<br>171.90)        | 60.54<br>(20.86 to<br>148.31)         | 44.32<br>(14.64 to<br>110.70)         | 102.55<br>(34.41 to<br>259.18)        |
| Maternal abortion, miscarriage, and ectopic pregnancy    | 4,111.03<br>(2,066.39 to<br>6,986.10)       | 2,782.22<br>(904.18 to<br>7,339.39)         | 2,043.37<br>(654.68 to<br>5,622.35)         | 4,670.50<br>(1,534.86 to<br>12,537.27)      | 75.32<br>(39.05 to<br>126.12)         | 52.94<br>(17.74 to<br>137.87)         | 38.96<br>(12.75 to<br>106.88)         | 88.55<br>(29.31 to<br>244.94)         |
| Indirect maternal deaths                                 | 8,484.12<br>(5,086.45 to<br>13,233.85)      | 5,280.14<br>(2,074.77 to<br>12,602.32)      | 3,891.27<br>(1,502.88 to<br>10,003.71)      | 8,996.18<br>(3,561.02 to<br>21,881.06)      | 156.90<br>(95.36 to<br>242.24)        | 100.70<br>(39.25 to<br>242.67)        | 74.49<br>(27.86 to<br>188.70)         | 170.69<br>(67.36 to<br>417.30)        |
| Late maternal deaths                                     | 1,088.46<br>(453.92 to<br>2,141.51)         | 581.16<br>(182.78 to<br>1,539.09)           | 429.00<br>(132.72 to<br>1,155.00)           | 983.19<br>(310.28 to<br>2,588.87)           | 20.25<br>(8.36 to<br>39.56)           | 11.31<br>(3.49 to<br>29.80)           | 8.38<br>(2.47 to<br>22.66)            | 19.03<br>(5.94 to<br>49.93)           |
| Maternal deaths aggravated by HIV/AIDS                   | 814.27<br>(432.41 to<br>1,258.72)           | 3,494.66<br>(469.90 to<br>9,834.80)         | 2,556.76<br>(261.50 to<br>7,689.63)         | 6,816.18<br>(1,562.30 to<br>17,712.75)      | 16.43<br>(8.69 to<br>25.51)           | 73.06<br>(8.10 to<br>206.27)          | 53.75<br>(3.99 to<br>162.31)          | 141.16<br>(28.27 to<br>367.37)        |
| Other maternal disorders                                 | 4,017.04<br>(2,173.19 to<br>6,664.78)       | 2,626.86<br>(975.01 to<br>6,611.65)         | 1,971.68<br>(676.65 to<br>5,066.17)         | 4,318.48<br>(1,501.73 to<br>10,453.37)      | 75.14<br>(39.60 to<br>125.63)         | 51.21<br>(18.38 to<br>128.62)         | 38.58<br>(13.13 to<br>98.46)          | 83.71<br>(28.28 to<br>205.64)         |
| <b>Rwanda</b>                                            |                                             |                                             |                                             |                                             |                                       |                                       |                                       |                                       |
| Cause                                                    | YLLs (actual counts)                        |                                             |                                             |                                             | Deaths (actual counts)                |                                       |                                       |                                       |
|                                                          | 2016                                        | 2040 Forecast                               | 2040 Better Scenario                        | 2040 Worse Scenario                         | 2016                                  | 2040 Forecast                         | 2040 Better Scenario                  | 2040 Worse Scenario                   |
| <b>Neonatal disorders</b>                                | 543,335.09<br>(428,798.71 to<br>683,449.34) | 323,649.63<br>(224,657.27 to<br>455,259.03) | 229,667.82<br>(167,512.12 to<br>317,971.95) | 613,846.31<br>(427,280.65 to<br>862,545.04) | 6,278.31<br>(4,955.39 to<br>7,898.15) | 3,740.53<br>(2,596.02 to<br>5,260.72) | 2,654.43<br>(1,936.60 to<br>3,675.51) | 7,094.12<br>(4,937.39 to<br>9,971.62) |
| Neonatal preterm birth                                   | 143,581.89<br>(92,156.05 to<br>205,064.89)  | 72,495.38<br>(43,849.67 to<br>106,793.12)   | 50,900.18<br>(31,901.93 to<br>73,673.03)    | 154,672.41<br>(96,690.48 to<br>229,312.56)  | 1,658.96<br>(1,065.17 to<br>2,369.26) | 837.84<br>(506.71 to<br>1,234.05)     | 588.29<br>(368.58 to<br>851.28)       | 1,787.33<br>(1,117.64 to<br>2,649.77) |
| Neonatal encephalopathy due to birth asphyxia and trauma | 188,508.46<br>(123,969.82 to<br>268,061.41) | 102,023.56<br>(57,223.00 to<br>166,879.17)  | 73,682.57<br>(41,482.78 to<br>118,905.27)   | 181,409.84<br>(103,553.80 to<br>300,408.54) | 2,177.86<br>(1,432.12 to<br>3,096.34) | 1,178.95<br>(661.32 to<br>1,928.07)   | 851.47<br>(479.82 to<br>1,373.72)     | 2,096.27<br>(1,196.76 to<br>3,470.87) |
| Neonatal sepsis and other neonatal infections            | 113,398.43<br>(68,318.74 to<br>187,391.03)  | 91,926.11<br>(52,516.56 to<br>154,012.01)   | 65,868.62<br>(38,272.82 to<br>106,915.90)   | 166,441.47<br>(94,638.23 to<br>280,132.91)  | 1,310.60<br>(789.58 to<br>2,165.24)   | 1,062.51<br>(606.99 to<br>1,779.86)   | 761.35<br>(442.45 to<br>1,235.33)     | 1,923.76<br>(1,093.84 to<br>3,238.09) |
| Hemolytic disease and other neonatal jaundice            | 11,328.74<br>(5,633.88 to<br>21,121.90)     | 4,728.86<br>(2,129.98 to<br>9,193.93)       | 3,240.78<br>(1,425.13 to<br>6,463.68)       | 9,213.54<br>(4,006.19 to<br>18,100.14)      | 130.90<br>(65.10 to<br>243.97)        | 54.64<br>(24.62 to<br>106.19)         | 37.45<br>(16.47 to<br>74.71)          | 106.47<br>(46.30 to<br>209.12)        |
| Other neonatal disorders                                 | 86,517.56<br>(50,082.09 to<br>136,424.38)   | 52,475.72<br>(26,488.59 to<br>89,965.93)    | 35,975.68<br>(17,942.14 to<br>62,906.67)    | 102,109.05<br>(51,766.51 to<br>178,147.41)  | 999.98<br>(578.93 to<br>1,577.55)     | 606.59<br>(306.34 to<br>1,039.76)     | 415.87<br>(207.39 to<br>727.25)       | 1,180.29<br>(598.32 to<br>2,059.32)   |
| <b>Nutritional deficiencies</b>                          | 173,066.13<br>(112,847.43 to<br>262,688.78) | 71,481.36<br>(41,688.07 to<br>117,011.43)   | 55,823.65<br>(32,614.33 to<br>90,923.30)    | 116,374.08<br>(67,546.51 to<br>195,525.46)  | 2,597.72<br>(1,894.50 to<br>3,682.94) | 1,636.64<br>(1,143.43 to<br>2,351.01) | 1,425.59<br>(982.73 to<br>2,052.59)   | 2,234.55<br>(1,528.53 to<br>3,277.51) |
| Protein-energy malnutrition                              | 165,931.82<br>(106,173.63 to<br>252,347.88) | 62,118.98<br>(35,337.23 to<br>107,040.83)   | 47,747.37<br>(27,481.37 to<br>79,834.78)    | 103,844.37<br>(58,831.40 to<br>181,508.67)  | 2,396.88<br>(1,696.13 to<br>3,407.01) | 1,317.98<br>(901.42 to<br>1,886.96)   | 1,129.36<br>(771.44 to<br>1,637.02)   | 1,859.95<br>(1,228.86 to<br>2,836.86) |
| Iodine deficiency                                        | 574.09<br>(28.12 to<br>2,465.74)            | 1,714.84<br>(30.00 to<br>9,581.67)          | 1,325.10<br>(24.78 to<br>6,857.16)          | 2,836.56<br>(46.52 to<br>17,798.58)         | 11.07<br>(0.78 to<br>38.51)           | 47.05<br>(1.09 to<br>161.75)          | 40.17<br>(0.84 to<br>138.52)          | 65.03<br>(1.61 to<br>251.81)          |
| Dietary iron deficiency                                  | 458.38<br>(325.12 to<br>636.31)             | 376.13<br>(171.02 to<br>777.86)             | 339.02<br>(148.36 to<br>722.05)             | 452.58<br>(211.40 to<br>906.74)             | 8.26<br>(5.75 to<br>11.47)            | 7.26<br>(3.29 to<br>15.20)            | 6.64<br>(2.96 to<br>14.07)            | 8.53<br>(4.02 to<br>17.08)            |

|                                                                         |                                                      |                                                          |                                                          |                                                            |                                                   |                                                   |                                                   |                                                    |
|-------------------------------------------------------------------------|------------------------------------------------------|----------------------------------------------------------|----------------------------------------------------------|------------------------------------------------------------|---------------------------------------------------|---------------------------------------------------|---------------------------------------------------|----------------------------------------------------|
| Other nutritional deficiencies                                          | 6,341.84<br>(4,182.20 to<br>9,871.92)                | 7,271.41<br>(3,611.18 to<br>14,678.63)                   | 6,412.16<br>(3,076.78 to<br>13,252.58)                   | 9,240.58<br>(4,545.46 to<br>17,993.44)                     | 181.51<br>(120.00 to<br>272.83)                   | 264.35<br>(144.89 to<br>463.32)                   | 249.42<br>(135.13 to<br>439.52)                   | 301.04<br>(168.39 to<br>524.04)                    |
| <b>Other communicable, maternal, neonatal, and nutritional diseases</b> | <b>72,625.51<br/>(37,939.36 to<br/>155,472.56)</b>   | <b>40,854.96<br/>(20,783.54 to<br/>84,729.52)</b>        | <b>32,747.12<br/>(16,978.70 to<br/>64,551.62)</b>        | <b>63,754.22<br/>(30,879.93 to<br/>139,012.59)</b>         | <b>1,032.82<br/>(612.21 to<br/>2,013.29)</b>      | <b>754.00<br/>(430.98 to<br/>1,388.70)</b>        | <b>643.10<br/>(371.48 to<br/>1,137.72)</b>        | <b>1,055.30<br/>(581.60 to<br/>1,972.42)</b>       |
| Sexually transmitted infections excluding HIV                           | 30,275.24<br>(10,311.48 to<br>64,482.85)             | 10,298.94<br>(3,247.09 to<br>23,683.80)                  | 8,071.44<br>(2,770.24 to<br>18,174.10)                   | 16,714.99<br>(4,829.87 to<br>38,897.33)                    | 369.45<br>(135.95 to<br>765.65)                   | 136.11<br>(50.67 to<br>291.90)                    | 109.46<br>(43.39 to<br>228.62)                    | 212.39<br>(72.37 to<br>481.01)                     |
| Syphilis                                                                | 29,288.28<br>(9,306.40 to<br>63,805.62)              | 9,441.67<br>(2,424.41 to<br>22,701.33)                   | 7,283.02<br>(2,068.69 to<br>17,550.04)                   | 15,721.67<br>(4,035.41 to<br>38,229.06)                    | 348.40<br>(113.12 to<br>751.46)                   | 115.36<br>(34.32 to<br>271.34)                    | 89.86<br>(28.61 to<br>210.61)                     | 189.25<br>(51.19 to<br>451.11)                     |
| Chlamydial infection                                                    | 195.46<br>(102.34 to<br>312.18)                      | 169.63<br>(65.38 to<br>380.38)                           | 155.54<br>(58.72 to<br>355.14)                           | 197.46<br>(77.42 to<br>437.09)                             | 4.12<br>(2.21 to<br>6.40)                         | 4.08<br>(1.70 to<br>8.87)                         | 3.85<br>(1.59 to<br>8.29)                         | 4.56<br>(1.91 to<br>9.66)                          |
| Gonococcal infection                                                    | 505.44<br>(271.50 to<br>796.98)                      | 443.12<br>(166.83 to<br>992.72)                          | 408.92<br>(150.27 to<br>926.22)                          | 510.48<br>(196.86 to<br>1,127.76)                          | 11.06<br>(6.05 to<br>16.99)                       | 11.12<br>(4.72 to<br>23.66)                       | 10.56<br>(4.42 to<br>23.03)                       | 12.29<br>(5.22 to<br>25.39)                        |
| Other sexually transmitted infections                                   | 286.07<br>(151.23 to<br>450.42)                      | 244.53<br>(93.30 to<br>547.39)                           | 223.97<br>(84.19 to<br>503.02)                           | 285.39<br>(108.58 to<br>636.73)                            | 5.88<br>(3.21 to<br>9.25)                         | 5.56<br>(2.26 to<br>12.16)                        | 5.19<br>(2.07 to<br>11.55)                        | 6.30<br>(2.58 to<br>13.64)                         |
| Acute hepatitis                                                         | 12,559.41<br>(10,074.94 to<br>15,328.51)             | 12,560.03<br>(6,079.85 to<br>24,153.43)                  | 11,180.98<br>(5,301.95 to<br>21,834.28)                  | 15,456.70<br>(7,710.08 to<br>28,527.07)                    | 287.90<br>(233.53 to<br>351.65)                   | 346.97<br>(183.75 to<br>626.41)                   | 317.89<br>(167.41 to<br>588.03)                   | 407.37<br>(222.98 to<br>705.79)                    |
| Acute hepatitis A                                                       | 569.08<br>(71.64 to<br>1,343.99)                     | 287.87<br>(64.43 to<br>709.44)                           | 230.91<br>(52.01 to<br>543.16)                           | 448.62<br>(86.36 to<br>1,152.09)                           | 7.38<br>(1.53 to<br>16.39)                        | 5.03<br>(1.41 to<br>11.15)                        | 4.28<br>(1.23 to<br>9.22)                         | 7.08<br>(1.78 to<br>16.57)                         |
| Acute hepatitis B                                                       | 9,763.52<br>(7,674.74 to<br>12,193.21)               | 10,292.91<br>(4,779.82 to<br>20,364.37)                  | 9,179.63<br>(4,277.24 to<br>18,670.08)                   | 12,554.75<br>(6,019.81 to<br>23,601.39)                    | 235.98<br>(145.39 to<br>291.87)                   | 286.67<br>(145.39 to<br>540.70)                   | 260.75<br>(130.84 to<br>496.67)                   | 338.72<br>(178.48 to<br>610.56)                    |
| Acute hepatitis C                                                       | 271.98<br>(192.55 to<br>376.52)                      | 383.07<br>(173.61 to<br>776.75)                          | 364.96<br>(162.46 to<br>755.52)                          | 418.67<br>(193.47 to<br>811.18)                            | 7.61<br>(5.33 to<br>10.62)                        | 12.32<br>(6.07 to<br>23.00)                       | 12.02<br>(5.72 to<br>23.66)                       | 12.98<br>(6.55 to<br>23.90)                        |
| Acute hepatitis E                                                       | 1,554.83<br>(1,377.54 to<br>2,674.04)                | 1,596.17<br>(807.56 to<br>2,784.96)                      | 1,405.49<br>(705.78 to<br>2,572.31)                      | 2,034.66<br>(1,075.20 to<br>3,471.40)                      | 36.93<br>(26.78 to<br>49.63)                      | 42.95<br>(24.15 to<br>70.81)                      | 40.84<br>(22.89 to<br>69.04)                      | 48.59<br>(28.34 to<br>79.69)                       |
| Other unspecified infectious diseases                                   | 29,790.86<br>(9,088.10 to<br>107,317.23)             | 17,995.99<br>(6,489.73 to<br>55,603.41)                  | 13,494.69<br>(5,012.44 to<br>43,955.40)                  | 31,582.53<br>(11,053.00 to<br>101,677.91)                  | 375.46<br>(130.56 to<br>1,284.09)                 | 270.92<br>(121.83 to<br>711.41)                   | 215.75<br>(100.26 to<br>578.91)                   | 435.54<br>(184.04 to<br>1,275.20)                  |
| <b>Non-communicable diseases</b>                                        | <b>754,626.59<br/>(659,916.84 to<br/>855,536.67)</b> | <b>1,279,604.38<br/>(774,665.07 to<br/>2,144,720.60)</b> | <b>1,077,904.61<br/>(655,694.79 to<br/>1,795,583.35)</b> | <b>1,684,123.56<br/>(1,007,947.04 to<br/>2,804,778.54)</b> | <b>26,118.50<br/>(22,991.74 to<br/>29,612.76)</b> | <b>53,852.89<br/>(37,366.83 to<br/>81,410.19)</b> | <b>46,959.33<br/>(32,990.58 to<br/>70,036.17)</b> | <b>67,024.09<br/>(45,607.82 to<br/>101,154.47)</b> |

**Rwanda**

| Cause                      | YLLs (actual counts)                        |                                             |                                             |                                             | Deaths (actual counts)                |                                         |                                         |                                         |
|----------------------------|---------------------------------------------|---------------------------------------------|---------------------------------------------|---------------------------------------------|---------------------------------------|-----------------------------------------|-----------------------------------------|-----------------------------------------|
|                            | 2016                                        | 2040 Forecast                               | 2040 Better Scenario                        | 2040 Worse Scenario                         | 2016                                  | 2040 Forecast                           | 2040 Better Scenario                    | 2040 Worse Scenario                     |
| Neoplasms                  | 203,790.64<br>(165,796.92 to<br>241,645.48) | 392,930.94<br>(226,992.18 to<br>689,235.17) | 374,360.71<br>(209,145.75 to<br>657,991.13) | 424,370.92<br>(239,133.27 to<br>731,020.93) | 6,444.46<br>(5,277.08 to<br>7,634.83) | 14,129.08<br>(8,720.77 to<br>22,659.40) | 13,899.65<br>(8,677.25 to<br>22,269.30) | 14,612.47<br>(9,028.61 to<br>22,894.33) |
| Lip and oral cavity cancer | 2,701.01<br>(2,200.24 to<br>3,287.19)       | 5,489.35<br>(1,851.64 to<br>13,737.36)      | 4,378.78<br>(1,560.75 to<br>10,691.60)      | 8,301.62<br>(2,540.87 to<br>21,018.99)      | 97.69<br>(81.53 to<br>115.81)         | 203.48<br>(83.83 to<br>449.14)          | 171.46<br>(74.13 to<br>377.85)          | 294.70<br>(109.38 to<br>682.23)         |
| Nasopharynx cancer         | 2,064.91<br>(1,481.76 to<br>2,948.79)       | 4,410.32<br>(1,315.81 to<br>12,101.63)      | 3,345.74<br>(1,028.39 to<br>9,076.25)       | 6,896.00<br>(1,965.16 to<br>18,262.23)      | 60.23<br>(44.28 to<br>83.54)          | 134.54<br>(45.91 to<br>347.14)          | 106.25<br>(37.79 to<br>266.76)          | 205.47<br>(65.36 to<br>523.82)          |
| Other pharynx cancer       | 1,792.44<br>(1,319.86 to<br>2,430.39)       | 3,027.86<br>(993.26 to<br>7,783.15)         | 2,762.25<br>(911.18 to<br>7,058.47)         | 4,411.96<br>(1,408.44 to<br>11,390.49)      | 58.62<br>(43.10 to<br>78.60)          | 104.97<br>(37.23 to<br>254.06)          | 97.46<br>(35.53 to<br>234.63)           | 148.95<br>(50.56 to<br>361.01)          |
| Esophageal cancer          | 7,986.16<br>(6,502.51 to<br>9,661.18)       | 16,317.61<br>(6,782.78 to<br>35,302.47)     | 13,742.16<br>(5,824.92 to<br>29,303.22)     | 22,774.80<br>(9,259.01 to<br>48,774.15)     | 327.43<br>(272.02 to<br>390.60)       | 677.47<br>(333.34 to<br>1,328.91)       | 597.73<br>(298.32 to<br>1,150.03)       | 908.86<br>(419.44 to<br>1,767.58)       |
| Stomach cancer             | 6,993.07<br>(5,718.15 to<br>8,573.73)       | 11,170.19<br>(6,396.43 to<br>19,486.83)     | 10,616.01<br>(5,943.07 to<br>18,552.86)     | 12,074.89<br>(6,922.48 to<br>20,336.76)     | 278.67<br>(231.55 to<br>336.30)       | 467.91<br>(305.19 to<br>731.21)         | 458.60<br>(290.05 to<br>724.56)         | 489.53<br>(315.43 to<br>761.76)         |

|                                      |                                          |                                          |                                          |                                          |                                   |                                     |                                     |                                     |
|--------------------------------------|------------------------------------------|------------------------------------------|------------------------------------------|------------------------------------------|-----------------------------------|-------------------------------------|-------------------------------------|-------------------------------------|
| Colon and rectum cancer              | 9,820.09<br>(7,480.04 to<br>12,276.48)   | 25,084.45<br>(11,717.79 to<br>47,945.14) | 25,262.08<br>(11,993.52 to<br>47,896.25) | 26,334.08<br>(12,055.94 to<br>50,586.90) | 404.28<br>(313.59 to<br>497.49)   | 1,130.13<br>(647.56 to<br>1,860.21) | 1,180.46<br>(678.61 to<br>1,945.84) | 1,122.27<br>(630.41 to<br>1,878.83) |
| Liver cancer                         | 13,742.68<br>(10,738.51 to<br>17,197.54) | 26,679.07<br>(13,943.89 to<br>49,165.34) | 24,697.52<br>(12,776.60 to<br>45,509.87) | 30,568.14<br>(16,005.09 to<br>56,713.11) | 447.88<br>(356.69 to<br>551.06)   | 950.18<br>(564.13 to<br>1,572.49)   | 912.02<br>(543.69 to<br>1,514.78)   | 1,051.10<br>(613.60 to<br>1,756.90) |
| Liver cancer due to hepatitis B      | 4,397.64<br>(3,136.61 to<br>5,985.33)    | 8,338.66<br>(4,215.73 to<br>15,960.19)   | 7,719.72<br>(3,896.22 to<br>14,875.87)   | 8,886.23<br>(4,501.03 to<br>17,002.18)   | 125.96<br>(90.88 to<br>168.26)    | 259.87<br>(140.35 to<br>466.57)     | 248.30<br>(133.57 to<br>445.62)     | 270.07<br>(144.74 to<br>491.28)     |
| Liver cancer due to hepatitis C      | 3,984.36<br>(2,680.71 to<br>5,556.59)    | 8,479.15<br>(4,238.55 to<br>16,098.80)   | 8,113.83<br>(4,036.85 to<br>15,611.09)   | 8,890.79<br>(4,481.84 to<br>16,893.36)   | 152.30<br>(105.95 to<br>205.84)   | 349.55<br>(200.42 to<br>599.00)     | 346.56<br>(201.34 to<br>578.71)     | 352.67<br>(200.61 to<br>601.66)     |
| Liver cancer due to alcohol use      | 2,416.26<br>(1,756.11 to<br>3,206.22)    | 4,480.06<br>(2,262.71 to<br>8,380.57)    | 3,925.29<br>(1,999.45 to<br>7,289.87)    | 6,983.72<br>(3,497.62 to<br>13,109.10)   | 85.77<br>(63.46 to<br>111.92)     | 166.90<br>(94.10 to<br>289.13)      | 151.85<br>(86.18 to<br>263.34)      | 247.33<br>(138.09 to<br>456.39)     |
| Liver cancer due to other causes     | 2,944.42<br>(2,192.83 to<br>3,839.57)    | 5,381.20<br>(2,826.28 to<br>10,220.80)   | 4,938.68<br>(2,604.52 to<br>9,514.43)    | 5,807.40<br>(3,049.29 to<br>10,670.79)   | 83.85<br>(64.41 to<br>108.12)     | 173.86<br>(100.45 to<br>298.61)     | 165.30<br>(96.26 to<br>288.05)      | 181.03<br>(103.42 to<br>308.08)     |
| Gallbladder and biliary tract cancer | 1,191.79<br>(893.42 to<br>1,540.34)      | 1,881.84<br>(1,041.24 to<br>3,102.54)    | 1,955.11<br>(1,070.31 to<br>3,326.20)    | 1,779.97<br>(1,011.87 to<br>2,874.96)    | 48.17<br>(36.76 to<br>62.21)      | 82.16<br>(52.65 to<br>124.14)       | 87.66<br>(55.35 to<br>135.36)       | 74.95<br>(49.09 to<br>109.63)       |
| Pancreatic cancer                    | 4,719.50<br>(3,863.12 to<br>5,768.04)    | 11,827.86<br>(6,894.48 to<br>20,279.24)  | 11,920.04<br>(6,897.17 to<br>20,878.67)  | 11,082.72<br>(6,495.61 to<br>18,671.15)  | 186.07<br>(154.15 to<br>224.25)   | 496.20<br>(325.40 to<br>764.74)     | 515.89<br>(330.62 to<br>799.53)     | 450.09<br>(300.80 to<br>675.68)     |
| Larynx cancer                        | 1,515.85<br>(1,180.26 to<br>1,972.48)    | 3,312.48<br>(1,194.10 to<br>8,063.47)    | 2,308.98<br>(865.07 to<br>5,007.21)      | 4,728.98<br>(1,620.82 to<br>11,297.99)   | 57.10<br>(45.08 to<br>73.11)      | 125.64<br>(53.99 to<br>278.52)      | 89.87<br>(42.61 to<br>179.52)       | 173.91<br>(68.40 to<br>391.88)      |
| Tracheal, bronchus, and lung cancer  | 6,408.54<br>(5,219.30 to<br>7,815.41)    | 16,557.22<br>(8,106.60 to<br>31,861.98)  | 9,432.14<br>(5,035.20 to<br>16,095.24)   | 18,788.20<br>(9,046.78 to<br>35,595.72)  | 263.46<br>(389.21 to<br>318.41)   | 705.50<br>(389.21 to<br>1,223.60)   | 429.58<br>(255.73 to<br>681.31)     | 775.17<br>(423.64 to<br>1,362.45)   |
| Malignant skin melanoma              | 1,949.74<br>(1,324.28 to<br>2,585.50)    | 4,290.33<br>(2,355.56 to<br>7,523.39)    | 4,623.79<br>(2,533.51 to<br>8,208.96)    | 3,820.76<br>(2,123.74 to<br>6,582.51)    | 74.33<br>(52.46 to<br>97.70)      | 177.73<br>(112.51 to<br>273.91)     | 196.86<br>(125.11 to<br>312.50)     | 152.46<br>(96.60 to<br>232.91)      |
| Non-melanoma skin cancer             | 930.15<br>(713.39 to<br>1,192.05)        | 2,091.79<br>(1,247.50 to<br>3,283.80)    | 2,066.14<br>(1,229.95 to<br>3,296.07)    | 2,161.86<br>(1,308.43 to<br>3,328.02)    | 40.41<br>(30.48 to<br>52.68)      | 100.78<br>(69.21 to<br>139.40)      | 103.53<br>(70.61 to<br>144.31)      | 98.88<br>(68.73 to<br>135.96)       |
| Breast cancer                        | 15,997.80<br>(10,239.71 to<br>22,208.43) | 34,369.80<br>(14,115.79 to<br>79,564.40) | 33,190.42<br>(13,712.58 to<br>77,552.80) | 38,559.72<br>(15,964.46 to<br>88,889.79) | 496.90<br>(325.62 to<br>696.56)   | 1,197.72<br>(556.51 to<br>2,460.76) | 1,183.84<br>(553.94 to<br>2,429.25) | 1,300.21<br>(605.77 to<br>2,698.72) |
| Cervical cancer                      | 23,594.00<br>(15,081.83 to<br>33,438.94) | 40,756.40<br>(17,947.50 to<br>88,475.62) | 38,292.12<br>(16,950.45 to<br>82,315.84) | 44,762.82<br>(20,147.80 to<br>96,193.64) | 774.90<br>(495.51 to<br>1,096.76) | 1,394.93<br>(690.99 to<br>2,741.48) | 1,335.93<br>(662.80 to<br>2,656.17) | 1,493.74<br>(740.77 to<br>2,905.99) |
| Uterine cancer                       | 2,699.69<br>(1,858.56 to<br>3,670.94)    | 5,682.67<br>(2,790.88 to<br>11,152.42)   | 5,343.20<br>(2,610.29 to<br>10,411.03)   | 6,300.01<br>(3,073.15 to<br>11,900.13)   | 99.19<br>(68.58 to<br>133.22)     | 223.61<br>(125.81 to<br>400.70)     | 214.91<br>(119.24 to<br>390.27)     | 240.31<br>(137.96 to<br>415.41)     |
| Ovarian cancer                       | 7,019.97<br>(4,648.59 to<br>9,972.03)    | 15,517.09<br>(7,183.57 to<br>31,870.91)  | 16,213.59<br>(7,595.34 to<br>33,761.30)  | 14,402.56<br>(6,728.19 to<br>28,780.90)  | 233.80<br>(155.30 to<br>328.63)   | 567.45<br>(293.30 to<br>1,046.92)   | 605.09<br>(308.75 to<br>1,136.49)   | 511.49<br>(267.55 to<br>915.86)     |
| Prostate cancer                      | 11,699.46<br>(4,387.77 to<br>17,158.05)  | 30,446.41<br>(10,617.59 to<br>53,226.72) | 32,302.68<br>(11,376.24 to<br>57,360.99) | 27,569.83<br>(9,373.11 to<br>46,467.80)  | 637.47<br>(244.67 to<br>930.64)   | 1,748.82<br>(651.29 to<br>2,884.67) | 1,917.31<br>(733.46 to<br>3,018.76) | 1,531.74<br>(564.98 to<br>2,295.41) |
| Testicular cancer                    | 341.12<br>(193.23 to<br>489.77)          | 559.94<br>(246.87 to<br>1,148.51)        | 538.99<br>(235.71 to<br>1,106.14)        | 598.41<br>(264.43 to<br>1,202.82)        | 7.61<br>(4.44 to<br>10.79)        | 13.28<br>(6.28 to<br>25.27)         | 12.95<br>(6.09 to<br>24.74)         | 13.92<br>(6.65 to<br>26.02)         |

| Rwanda         |                                       |                                       |                                       |                                       |                                |                                 |                                 |                                 |
|----------------|---------------------------------------|---------------------------------------|---------------------------------------|---------------------------------------|--------------------------------|---------------------------------|---------------------------------|---------------------------------|
| Cause          | YLLs (actual counts)                  |                                       |                                       |                                       | Deaths (actual counts)         |                                 |                                 |                                 |
|                | 2016                                  | 2040 Forecast                         | 2040 Better Scenario                  | 2040 Worse Scenario                   | 2016                           | 2040 Forecast                   | 2040 Better Scenario            | 2040 Worse Scenario             |
| Kidney cancer  | 2,297.40<br>(1,467.39 to<br>3,338.88) | 3,636.46<br>(2,138.73 to<br>5,824.89) | 3,598.38<br>(2,125.88 to<br>5,821.32) | 3,694.28<br>(2,201.69 to<br>5,860.69) | 49.59<br>(36.39 to<br>65.47)   | 105.86<br>(70.39 to<br>158.21)  | 111.37<br>(73.03 to<br>168.98)  | 97.23<br>(65.37 to<br>143.02)   |
| Bladder cancer | 2,344.16<br>(1,736.02 to<br>3,067.34) | 4,933.57<br>(2,786.75 to<br>8,221.25) | 4,751.58<br>(2,687.32 to<br>7,862.05) | 4,933.79<br>(2,797.62 to<br>8,172.12) | 108.30<br>(83.00 to<br>136.76) | 244.35<br>(161.69 to<br>354.19) | 245.02<br>(161.65 to<br>356.94) | 233.67<br>(155.46 to<br>338.61) |



| Rwanda                                                        |                                                     |                                                      |                                                      |                                                      |                                                  |                                                  |                                                  |                                                  |
|---------------------------------------------------------------|-----------------------------------------------------|------------------------------------------------------|------------------------------------------------------|------------------------------------------------------|--------------------------------------------------|--------------------------------------------------|--------------------------------------------------|--------------------------------------------------|
| Cause                                                         | YLLs (actual counts)                                |                                                      |                                                      |                                                      | Deaths (actual counts)                           |                                                  |                                                  |                                                  |
|                                                               | 2016                                                | 2040 Forecast                                        | 2040 Better Scenario                                 | 2040 Worse Scenario                                  | 2016                                             | 2040 Forecast                                    | 2040 Better Scenario                             | 2040 Worse Scenario                              |
| Alcoholic cardiomyopathy                                      | 578.45<br>(276.96 to 1,232.39)                      | 1,074.27<br>(404.51 to 2,532.92)                     | 1,055.24<br>(386.57 to 2,479.09)                     | 1,522.73<br>(590.64 to 3,410.32)                     | 18.02<br>(8.82 to 37.53)                         | 34.77<br>(14.27 to 80.78)                        | 34.66<br>(14.35 to 80.07)                        | 48.13<br>(19.66 to 104.42)                       |
| Other cardiomyopathy                                          | 6,361.50<br>(4,352.54 to 9,505.44)                  | 11,450.85<br>(5,670.86 to 21,320.47)                 | 11,132.98<br>(5,424.63 to 21,218.01)                 | 12,003.52<br>(6,219.26 to 21,951.66)                 | 177.95<br>(124.56 to 269.23)                     | 395.66<br>(226.55 to 680.86)                     | 400.60<br>(227.18 to 707.46)                     | 388.19<br>(221.54 to 667.49)                     |
| Atrial fibrillation and flutter                               | 1,319.22<br>(955.59 to 1,817.67)                    | 3,419.95<br>(2,264.50 to 4,963.75)                   | 3,556.92<br>(2,322.25 to 5,311.55)                   | 3,455.16<br>(2,202.21 to 5,127.87)                   | 121.15<br>(87.62 to 166.25)                      | 325.73<br>(217.03 to 449.89)                     | 355.11<br>(235.67 to 496.58)                     | 307.02<br>(199.14 to 431.42)                     |
| Aortic aneurysm                                               | 1,762.11<br>(1,171.21 to 2,451.09)                  | 3,886.74<br>(2,004.03 to 6,925.24)                   | 3,750.54<br>(1,966.96 to 6,785.54)                   | 3,884.33<br>(1,982.89 to 6,839.51)                   | 77.92<br>(52.50 to 106.79)                       | 188.44<br>(114.01 to 291.11)                     | 192.49<br>(118.66 to 302.68)                     | 177.69<br>(106.33 to 276.02)                     |
| Peripheral artery disease                                     | 150.77<br>(60.12 to 220.18)                         | 594.93<br>(220.14 to 953.13)                         | 614.36<br>(230.24 to 1,004.60)                       | 515.52<br>(188.69 to 814.45)                         | 10.50<br>(4.01 to 15.47)                         | 45.48<br>(17.36 to 68.69)                        | 50.41<br>(19.37 to 77.35)                        | 36.67<br>(13.44 to 56.40)                        |
| Endocarditis                                                  | 4,451.24<br>(3,163.39 to 6,047.13)                  | 8,091.00<br>(4,413.76 to 13,908.54)                  | 7,633.57<br>(4,144.51 to 13,157.07)                  | 8,878.99<br>(4,879.61 to 14,996.74)                  | 129.40<br>(92.02 to 173.77)                      | 286.31<br>(172.50 to 453.80)                     | 283.41<br>(166.86 to 446.32)                     | 291.87<br>(176.79 to 458.25)                     |
| Other cardiovascular and circulatory diseases                 | 38,844.47<br>(25,631.80 to 56,395.58)               | 79,827.80<br>(43,516.66 to 138,101.58)               | 70,134.73<br>(38,136.05 to 119,997.74)               | 96,279.07<br>(52,066.50 to 168,695.49)               | 1,617.93<br>(1,013.14 to 2,384.80)               | 4,035.37<br>(2,384.02 to 6,360.51)               | 3,784.73<br>(2,241.19 to 5,883.80)               | 4,479.48<br>(2,596.29 to 7,358.82)               |
| <b>Chronic respiratory diseases</b>                           | <b>44,408.16</b><br><b>(35,591.30 to 57,018.60)</b> | <b>60,350.81</b><br><b>(34,305.78 to 109,630.00)</b> | <b>38,192.81</b><br><b>(22,898.70 to 64,246.62)</b>  | <b>81,661.59</b><br><b>(45,603.33 to 144,288.07)</b> | <b>1,778.38</b><br><b>(1,454.06 to 2,217.59)</b> | <b>2,868.92</b><br><b>(1,810.17 to 4,780.96)</b> | <b>1,870.21</b><br><b>(1,250.69 to 2,894.44)</b> | <b>3,660.92</b><br><b>(2,237.39 to 6,036.93)</b> |
| Chronic obstructive pulmonary disease                         | 24,080.77<br>(17,867.88 to 31,680.90)               | 42,628.70<br>(22,130.66 to 81,987.91)                | 23,075.20<br>(12,771.16 to 40,896.77)                | 59,235.03<br>(30,218.40 to 114,335.47)               | 1,192.24<br>(911.24 to 1,510.52)                 | 2,231.93<br>(1,329.18 to 3,916.46)               | 1,299.57<br>(816.13 to 2,085.40)                 | 2,914.28<br>(1,688.60 to 5,127.71)               |
| Pneumoconiosis                                                | 135.48<br>(73.87 to 221.29)                         | 227.32<br>(112.45 to 395.80)                         | 209.13<br>(99.41 to 375.84)                          | 241.31<br>(124.13 to 412.85)                         | 6.26<br>(3.43 to 10.39)                          | 11.97<br>(6.54 to 19.73)                         | 11.29<br>(6.00 to 19.57)                         | 12.18<br>(6.84 to 19.72)                         |
| Silicosis                                                     | 31.85<br>(11.17 to 55.54)                           | 37.10<br>(14.12 to 73.77)                            | 36.58<br>(12.30 to 74.80)                            | 38.63<br>(15.27 to 75.74)                            | 1.60<br>(0.61 to 2.72)                           | 2.08<br>(0.78 to 3.81)                           | 2.11<br>(0.76 to 3.93)                           | 2.08<br>(0.82 to 3.75)                           |
| Asbestosis                                                    | 32.23<br>(17.03 to 58.14)                           | 65.74<br>(28.28 to 136.30)                           | 67.24<br>(29.14 to 135.24)                           | 63.24<br>(27.79 to 130.18)                           | 1.29<br>(0.54 to 2.52)                           | 3.08<br>(1.19 to 6.55)                           | 3.27<br>(1.28 to 6.76)                           | 2.81<br>(1.11 to 5.84)                           |
| Coal workers pneumoconiosis                                   | 9.75<br>(3.77 to 19.98)                             | 14.58<br>(4.98 to 32.82)                             | 11.21<br>(3.69 to 26.04)                             | 18.81<br>(6.58 to 41.32)                             | 0.46<br>(0.18 to 0.95)                           | 0.74<br>(0.27 to 1.62)                           | 0.58<br>(0.21 to 1.32)                           | 0.92<br>(0.35 to 1.92)                           |
| Other pneumoconiosis                                          | 61.65<br>(28.66 to 116.53)                          | 109.89<br>(45.60 to 209.86)                          | 94.11<br>(36.55 to 192.65)                           | 120.63<br>(52.63 to 221.11)                          | 2.91<br>(1.34 to 5.57)                           | 6.06<br>(2.74 to 11.24)                          | 5.32<br>(2.27 to 10.34)                          | 6.37<br>(3.04 to 11.08)                          |
| Asthma                                                        | 17,423.57<br>(13,020.68 to 27,151.04)               | 13,312.18<br>(7,272.64 to 25,926.36)                 | 10,950.36<br>(6,047.14 to 20,786.02)                 | 17,664.04<br>(9,353.95 to 34,241.03)                 | 514.21<br>(377.62 to 856.07)                     | 490.57<br>(285.56 to 959.92)                     | 422.65<br>(252.51 to 776.62)                     | 603.89<br>(344.12 to 1,157.51)                   |
| Interstitial lung disease and pulmonary sarcoidosis           | 570.18<br>(256.48 to 1,110.25)                      | 1,365.48<br>(523.14 to 2,801.80)                     | 1,461.55<br>(565.04 to 3,060.21)                     | 1,220.06<br>(469.13 to 2,499.60)                     | 21.64<br>(9.20 to 42.60)                         | 60.68<br>(23.49 to 118.63)                       | 67.44<br>(26.86 to 133.18)                       | 51.16<br>(19.92 to 99.98)                        |
| Other chronic respiratory diseases                            | 2,198.18<br>(1,207.56 to 4,105.09)                  | 2,817.13<br>(1,471.53 to 4,971.09)                   | 2,496.57<br>(1,347.53 to 4,429.46)                   | 3,301.15<br>(1,721.76 to 6,155.67)                   | 44.03<br>(26.84 to 73.78)                        | 73.77<br>(41.36 to 127.14)                       | 69.26<br>(39.87 to 121.34)                       | 79.40<br>(44.62 to 135.18)                       |
| <b>Cirrhosis and other chronic liver diseases</b>             | <b>43,354.70</b><br><b>(29,672.72 to 57,697.18)</b> | <b>78,177.82</b><br><b>(40,156.18 to 136,776.70)</b> | <b>73,829.01</b><br><b>(37,192.31 to 129,488.96)</b> | <b>92,512.54</b><br><b>(47,985.18 to 157,397.36)</b> | <b>1,330.94</b><br><b>(919.34 to 1,777.53)</b>   | <b>2,662.14</b><br><b>(1,494.95 to 4,411.79)</b> | <b>2,575.84</b><br><b>(1,427.02 to 4,347.17)</b> | <b>3,047.99</b><br><b>(1,744.00 to 4,866.71)</b> |
| Cirrhosis and other chronic liver diseases due to hepatitis B | 8,347.25<br>(5,337.61 to 12,165.59)                 | 16,532.73<br>(8,001.80 to 29,645.18)                 | 15,986.55<br>(7,570.38 to 29,187.40)                 | 17,482.40<br>(8,571.23 to 30,837.95)                 | 267.91<br>(174.46 to 379.06)                     | 569.81<br>(304.86 to 956.91)                     | 562.93<br>(298.02 to 947.79)                     | 585.20<br>(317.52 to 965.52)                     |
| Cirrhosis and other chronic liver diseases due to hepatitis C | 17,562.85<br>(11,715.99 to 23,952.69)               | 34,169.40<br>(16,902.14 to 61,174.56)                | 32,946.87<br>(16,266.13 to 59,467.07)                | 36,294.71<br>(18,283.92 to 63,615.75)                | 560.13<br>(377.79 to 758.67)                     | 1,176.19<br>(643.61 to 1,982.31)                 | 1,158.11<br>(630.88 to 2,006.03)                 | 1,213.83<br>(669.07 to 1,978.66)                 |

|                                                                |                                                   |                                                    |                                                    |                                                     |                                                |                                                |                                                |                                                |
|----------------------------------------------------------------|---------------------------------------------------|----------------------------------------------------|----------------------------------------------------|-----------------------------------------------------|------------------------------------------------|------------------------------------------------|------------------------------------------------|------------------------------------------------|
|                                                                | 8,734.05<br>(5,908.23 to<br>11,925.26)            | 14,778.03<br>(7,473.08 to<br>26,374.60)            | 13,070.71<br>(6,333.36 to<br>23,745.85)            | 24,325.71<br>(12,276.04 to<br>42,628.78)            | 298.81<br>(204.84 to<br>401.52)                | 548.53<br>(306.70 to<br>907.14)                | 498.81<br>(275.50 to<br>834.44)                | 856.46<br>(482.56 to<br>1,409.95)              |
| Cirrhosis and other chronic liver diseases due to alcohol use  |                                                   |                                                    |                                                    |                                                     |                                                |                                                |                                                |                                                |
|                                                                | 8,710.55<br>(6,288.89 to<br>11,402.42)            | 12,697.65<br>(7,049.60 to<br>21,694.91)            | 11,824.89<br>(6,460.50 to<br>20,127.19)            | 14,409.72<br>(8,111.74 to<br>24,369.35)             | 204.09<br>(145.00 to<br>267.93)                | 367.61<br>(215.09 to<br>584.60)                | 355.99<br>(205.23 to<br>572.78)                | 392.50<br>(231.52 to<br>615.00)                |
| Cirrhosis and other chronic liver diseases due to other causes |                                                   |                                                    |                                                    |                                                     |                                                |                                                |                                                |                                                |
| <b>Digestive diseases</b>                                      | <b>64,561.57<br/>(49,836.15 to<br/>87,255.55)</b> | <b>89,953.08<br/>(51,251.89 to<br/>156,904.68)</b> | <b>82,786.77<br/>(46,627.57 to<br/>145,798.64)</b> | <b>106,305.60<br/>(60,697.13 to<br/>185,535.01)</b> | <b>1,909.94<br/>(1,529.27 to<br/>2,438.83)</b> | <b>3,407.61<br/>(2,292.07 to<br/>5,122.06)</b> | <b>3,284.23<br/>(2,209.49 to<br/>4,947.46)</b> | <b>3,736.64<br/>(2,537.89 to<br/>5,622.06)</b> |
| Peptic ulcer disease                                           | 10,092.96<br>(7,405.34 to<br>13,287.12)           | 12,177.09<br>(6,858.12 to<br>21,474.92)            | 10,378.91<br>(5,645.75 to<br>18,455.43)            | 15,416.71<br>(8,671.90 to<br>26,328.66)             | 383.72<br>(280.44 to<br>503.68)                | 558.60<br>(356.33 to<br>843.08)                | 497.79<br>(305.48 to<br>758.56)                | 665.59<br>(427.96 to<br>992.24)                |
| <b>Rwanda</b>                                                  |                                                   |                                                    |                                                    |                                                     |                                                |                                                |                                                |                                                |
| Cause                                                          | YLLs (actual counts)                              |                                                    |                                                    |                                                     | Deaths (actual counts)                         |                                                |                                                |                                                |
|                                                                | 2016                                              | 2040 Forecast                                      | 2040 Better Scenario                               | 2040 Worse Scenario                                 | 2016                                           | 2040 Forecast                                  | 2040 Better Scenario                           | 2040 Worse Scenario                            |
| Gastritis and duodenitis                                       | 3,146.03<br>(1,788.78 to<br>5,383.28)             | 6,028.29<br>(2,676.70 to<br>11,980.13)             | 5,711.46<br>(2,486.94 to<br>11,134.61)             | 6,655.51<br>(3,019.36 to<br>12,924.14)              | 108.76<br>(61.64 to<br>193.19)                 | 252.79<br>(129.52 to<br>463.55)                | 249.94<br>(125.49 to<br>463.41)                | 262.72<br>(134.22 to<br>486.11)                |
| Appendicitis                                                   | 4,630.47<br>(3,053.82 to<br>7,194.19)             | 4,869.09<br>(2,684.64 to<br>8,751.08)              | 4,225.12<br>(2,223.89 to<br>7,593.30)              | 6,270.60<br>(3,427.86 to<br>11,120.22)              | 95.61<br>(61.92 to<br>144.49)                  | 136.66<br>(78.67 to<br>243.10)                 | 124.68<br>(70.84 to<br>219.32)                 | 162.58<br>(93.33 to<br>278.95)                 |
| Paralytic ileus and intestinal obstruction                     | 29,169.58<br>(20,692.02 to<br>41,614.09)          | 38,608.94<br>(22,405.95 to<br>65,692.81)           | 36,670.18<br>(21,214.51 to<br>63,402.16)           | 43,266.24<br>(25,637.12 to<br>71,790.55)            | 759.92<br>(570.87 to<br>990.64)                | 1,326.45<br>(891.93 to<br>2,012.55)            | 1,330.24<br>(896.62 to<br>2,051.02)            | 1,356.69<br>(914.53 to<br>2,027.54)            |
| Inguinal, femoral, and abdominal hernia                        | 2,619.39<br>(930.76 to<br>4,107.82)               | 3,395.90<br>(1,043.08 to<br>6,524.49)              | 3,099.50<br>(956.66 to<br>6,099.86)                | 3,994.38<br>(1,218.17 to<br>7,740.77)               | 72.64<br>(26.81 to<br>110.34)                  | 111.62<br>(38.35 to<br>197.91)                 | 105.77<br>(37.01 to<br>194.11)                 | 124.13<br>(43.24 to<br>214.78)                 |
| Inflammatory bowel disease                                     | 2,881.82<br>(1,269.25 to<br>4,526.27)             | 4,113.25<br>(1,764.46 to<br>7,444.78)              | 4,048.24<br>(1,745.74 to<br>7,409.16)              | 4,294.04<br>(1,846.90 to<br>7,696.06)               | 77.37<br>(37.71 to<br>105.15)                  | 147.09<br>(71.46 to<br>236.31)                 | 152.33<br>(74.78 to<br>245.33)                 | 141.80<br>(69.45 to<br>222.83)                 |
| Vascular intestinal disorders                                  | 830.87<br>(477.83 to<br>1,698.03)                 | 1,908.75<br>(931.51 to<br>4,206.07)                | 1,888.89<br>(902.99 to<br>4,218.50)                | 1,964.25<br>(989.90 to<br>4,235.89)                 | 37.50<br>(21.79 to<br>79.28)                   | 102.18<br>(56.32 to<br>222.32)                 | 105.15<br>(56.32 to<br>228.85)                 | 99.34<br>(55.13 to<br>210.42)                  |
| Gallbladder and biliary diseases                               | 3,110.51<br>(2,123.88 to<br>5,168.88)             | 5,040.83<br>(2,483.34 to<br>10,886.28)             | 4,289.78<br>(2,150.06 to<br>9,185.48)              | 6,565.56<br>(3,132.71 to<br>14,308.73)              | 127.38<br>(86.11 to<br>211.90)                 | 248.30<br>(136.66 to<br>496.03)                | 221.77<br>(126.11 to<br>432.03)                | 301.95<br>(159.09 to<br>601.28)                |
| Pancreatitis                                                   | 2,519.60<br>(1,517.45 to<br>4,229.11)             | 5,408.04<br>(1,205.77 to<br>20,366.35)             | 4,766.69<br>(1,086.67 to<br>17,529.64)             | 8,019.69<br>(1,602.68 to<br>30,780.48)              | 69.67<br>(42.69 to<br>113.95)                  | 164.95<br>(46.74 to<br>570.51)                 | 149.30<br>(43.39 to<br>504.83)                 | 234.25<br>(57.15 to<br>838.87)                 |
| Other digestive diseases                                       | 5,560.35<br>(3,245.11 to<br>9,687.55)             | 8,402.90<br>(4,188.49 to<br>16,161.86)             | 7,708.02<br>(3,777.73 to<br>15,158.01)             | 9,858.62<br>(4,976.46 to<br>18,552.70)              | 177.37<br>(108.25 to<br>310.48)                | 358.99<br>(201.61 to<br>656.16)                | 347.26<br>(191.73 to<br>637.24)                | 387.58<br>(220.65 to<br>709.16)                |
| <b>Neurological disorders</b>                                  | <b>27,424.68<br/>(23,583.97 to<br/>32,076.35)</b> | <b>50,343.01<br/>(36,767.02 to<br/>73,751.10)</b>  | <b>49,775.79<br/>(36,324.55 to<br/>72,433.71)</b>  | <b>55,683.30<br/>(39,327.83 to<br/>85,524.04)</b>   | <b>1,359.39<br/>(1,138.00 to<br/>1,637.40)</b> | <b>3,394.54<br/>(2,615.24 to<br/>4,315.10)</b> | <b>3,667.68<br/>(2,860.79 to<br/>4,578.57)</b> | <b>3,114.75<br/>(2,309.74 to<br/>4,110.01)</b> |
| Alzheimer's disease and other dementias                        | 10,458.95<br>(8,291.06 to<br>13,205.38)           | 27,745.96<br>(20,034.73 to<br>37,211.84)           | 29,352.41<br>(21,757.79 to<br>38,814.82)           | 25,203.64<br>(18,132.51 to<br>34,704.59)            | 1,003.96<br>(799.05 to<br>1,259.49)            | 2,764.66<br>(1,981.19 to<br>3,706.72)          | 3,038.27<br>(2,297.15 to<br>3,908.41)          | 2,385.40<br>(1,588.80 to<br>3,377.76)          |
| Parkinson's disease                                            | 740.27<br>(534.53 to<br>983.86)                   | 2,345.58<br>(1,669.88 to<br>3,137.20)              | 2,734.03<br>(1,914.75 to<br>3,703.06)              | 1,863.54<br>(1,370.71 to<br>2,476.09)               | 60.99<br>(43.97 to<br>81.00)                   | 202.91<br>(150.95 to<br>271.55)                | 243.46<br>(179.88 to<br>321.43)                | 154.86<br>(111.49 to<br>210.72)                |
| Epilepsy                                                       | 13,473.85<br>(10,825.41 to<br>16,578.75)          | 16,233.16<br>(7,382.92 to<br>33,597.06)            | 13,751.39<br>(6,344.33 to<br>28,456.79)            | 24,311.09<br>(10,833.17 to<br>50,148.61)            | 245.57<br>(201.45 to<br>300.61)                | 337.10<br>(170.50 to<br>658.42)                | 293.99<br>(149.25 to<br>578.05)                | 485.36<br>(231.49 to<br>967.58)                |
| Multiple sclerosis                                             | 154.60<br>(97.84 to<br>240.80)                    | 318.51<br>(153.23 to<br>625.78)                    | 323.36<br>(156.21 to<br>646.24)                    | 304.44<br>(149.37 to<br>581.17)                     | 4.13<br>(2.50 to<br>6.51)                      | 9.18<br>(4.51 to<br>17.62)                     | 9.45<br>(4.56 to<br>18.29)                     | 8.61<br>(4.25 to<br>15.89)                     |
| Motor neuron disease                                           | 150.26<br>(80.76 to<br>363.17)                    | 263.55<br>(110.41 to<br>716.08)                    | 268.90<br>(109.19 to<br>742.88)                    | 263.28<br>(115.11 to<br>710.22)                     | 3.32<br>(1.79 to<br>7.68)                      | 7.96<br>(3.25 to<br>22.08)                     | 8.38<br>(3.37 to<br>23.30)                     | 7.45<br>(3.19 to<br>20.32)                     |
| Other neurological disorders                                   | 2,446.75<br>(1,912.37 to<br>3,064.37)             | 3,436.25<br>(2,221.70 to<br>5,260.56)              | 3,345.70<br>(2,096.44 to<br>5,209.40)              | 3,737.30<br>(2,515.00 to<br>5,541.52)               | 41.42<br>(33.95 to<br>49.78)                   | 72.74<br>(45.23 to<br>111.10)                  | 74.12<br>(45.35 to<br>116.19)                  | 73.06<br>(48.17 to<br>107.85)                  |

|                                                            |                                                 |                                                   |                                                   |                                                    |                                              |                                               |                                              |                                               |
|------------------------------------------------------------|-------------------------------------------------|---------------------------------------------------|---------------------------------------------------|----------------------------------------------------|----------------------------------------------|-----------------------------------------------|----------------------------------------------|-----------------------------------------------|
| <b>Mental disorders</b>                                    | 4,948.92<br>(3,621.48 to<br>6,898.81)           | 8,784.81<br>(4,767.27 to<br>15,740.97)            | 8,609.11<br>(4,644.33 to<br>15,809.08)            | 9,812.46<br>(5,406.14 to<br>17,321.80)             | 139.54<br>(103.91 to<br>192.68)              | 280.02<br>(168.39 to<br>457.65)               | 280.27<br>(167.81 to<br>461.00)              | 305.72<br>(186.20 to<br>494.83)               |
| Alcohol use disorders                                      | 3,742.25<br>(2,590.98 to<br>5,797.83)           | 6,021.87<br>(3,075.54 to<br>11,590.34)            | 5,853.31<br>(2,966.03 to<br>11,327.11)            | 7,018.75<br>(3,652.66 to<br>12,942.97)             | 112.96<br>(80.44 to<br>168.06)               | 211.93<br>(124.09 to<br>351.71)               | 210.75<br>(123.06 to<br>357.36)              | 238.95<br>(142.24 to<br>395.82)               |
| Drug use disorders                                         | 1,185.21<br>(796.70 to<br>1,592.68)             | 2,724.33<br>(1,417.93 to<br>5,090.55)             | 2,717.50<br>(1,405.04 to<br>5,100.14)             | 2,754.31<br>(1,431.47 to<br>5,057.95)              | 26.20<br>(17.54 to<br>34.35)                 | 67.39<br>(39.36 to<br>115.43)                 | 68.82<br>(40.26 to<br>116.28)                | 66.06<br>(38.12 to<br>112.82)                 |
| Opioid use disorders                                       | 907.60<br>(576.74 to<br>1,258.09)               | 1,963.27<br>(994.25 to<br>3,701.80)               | 1,953.44<br>(977.56 to<br>3,710.46)               | 1,989.80<br>(1,004.84 to<br>3,722.42)              | 19.34<br>(12.17 to<br>26.49)                 | 45.93<br>(24.93 to<br>82.70)                  | 46.48<br>(25.07 to<br>83.89)                 | 45.49<br>(24.54 to<br>80.05)                  |
| Cocaine use disorders                                      | 56.90<br>(16.12 to<br>116.43)                   | 148.58<br>(39.00 to<br>362.63)                    | 143.28<br>(37.18 to<br>346.24)                    | 158.34<br>(41.93 to<br>383.60)                     | 1.24<br>(0.35 to<br>2.46)                    | 3.48<br>(0.96 to<br>8.05)                     | 3.39<br>(0.92 to<br>7.79)                    | 3.65<br>(1.00 to<br>8.43)                     |
| Amphetamine use disorders                                  | 30.76<br>(9.47 to<br>62.69)                     | 106.97<br>(31.30 to<br>264.87)                    | 100.78<br>(29.00 to<br>253.85)                    | 118.85<br>(35.19 to<br>295.09)                     | 0.65<br>(0.21 to<br>1.29)                    | 2.37<br>(0.72 to<br>5.71)                     | 2.25<br>(0.68 to<br>5.49)                    | 2.60<br>(0.80 to<br>6.24)                     |
| Other drug use disorders                                   | 189.95<br>(127.48 to<br>269.46)                 | 505.51<br>(270.56 to<br>951.48)                   | 520.00<br>(278.95 to<br>995.22)                   | 487.33<br>(262.17 to<br>913.30)                    | 4.96<br>(3.44 to<br>6.69)                    | 15.62<br>(9.95 to<br>25.17)                   | 16.70<br>(10.80 to<br>27.02)                 | 14.31<br>(9.15 to<br>22.86)                   |
| Eating disorders                                           | 21.47<br>(13.10 to<br>48.72)                    | 38.61<br>(19.20 to<br>87.89)                      | 38.30<br>(18.99 to<br>90.04)                      | 39.40<br>(20.23 to<br>87.64)                       | 0.38<br>(0.23 to<br>0.86)                    | 0.70<br>(0.35 to<br>1.60)                     | 0.70<br>(0.35 to<br>1.60)                    | 0.71<br>(0.36 to<br>1.57)                     |
| <b>Rwanda</b>                                              |                                                 |                                                   |                                                   |                                                    |                                              |                                               |                                              |                                               |
| Cause                                                      | YLLs (actual counts)                            |                                                   |                                                   |                                                    | Deaths (actual counts)                       |                                               |                                              |                                               |
|                                                            | 2016                                            | 2040 Forecast                                     | 2040 Better Scenario                              | 2040 Worse Scenario                                | 2016                                         | 2040 Forecast                                 | 2040 Better Scenario                         | 2040 Worse Scenario                           |
| <b>Diabetes, urogenital, blood, and endocrine diseases</b> | <b>81,305.68</b><br>(67,823.22 to<br>95,285.52) | <b>146,891.23</b><br>(87,782.35 to<br>263,332.84) | <b>121,835.95</b><br>(71,094.75 to<br>217,381.32) | <b>195,808.66</b><br>(116,500.72 to<br>339,307.60) | <b>2,600.46</b><br>(2,147.51 to<br>3,086.41) | <b>6,271.15</b><br>(4,039.69 to<br>10,599.01) | <b>5,402.95</b><br>(3,455.62 to<br>9,106.07) | <b>7,916.63</b><br>(5,125.40 to<br>13,005.55) |
| Diabetes mellitus                                          | 33,497.29<br>(24,743.87 to<br>42,199.48)        | 81,440.15<br>(44,819.10 to<br>139,918.12)         | 66,536.06<br>(34,771.82 to<br>115,920.95)         | 107,814.52<br>(57,210.58 to<br>191,234.56)         | 1,455.17<br>(1,077.85 to<br>1,816.71)        | 3,896.32<br>(2,538.04 to<br>5,831.06)         | 3,345.33<br>(2,126.81 to<br>5,101.99)        | 4,866.07<br>(3,106.98 to<br>7,511.15)         |
| Acute glomerulonephritis                                   | 162.20<br>(111.21 to<br>268.78)                 | 195.67<br>(112.10 to<br>343.66)                   | 168.37<br>(96.92 to<br>291.29)                    | 255.99<br>(146.87 to<br>447.47)                    | 2.61<br>(1.88 to<br>4.05)                    | 3.46<br>(2.12 to<br>5.75)                     | 3.09<br>(1.88 to<br>5.03)                    | 4.27<br>(2.62 to<br>6.96)                     |
| Chronic kidney disease                                     | 13,793.65<br>(9,936.21 to<br>18,762.58)         | 31,548.25<br>(11,276.24 to<br>102,884.18)         | 25,025.15<br>(8,911.77 to<br>75,420.81)           | 45,346.24<br>(15,883.42 to<br>137,851.53)          | 455.08<br>(332.71 to<br>623.36)              | 1,397.90<br>(359.45 to<br>5,270.72)           | 1,127.99<br>(293.70 to<br>4,312.68)          | 1,949.27<br>(494.11 to<br>6,560.43)           |
| Chronic kidney disease due to diabetes mellitus            | 2,951.73<br>(2,086.68 to<br>4,129.06)           | 9,375.49<br>(2,753.60 to<br>34,490.35)            | 7,407.31<br>(2,202.67 to<br>25,441.10)            | 13,409.05<br>(3,773.27 to<br>47,691.95)            | 119.50<br>(85.08 to<br>169.02)               | 438.15<br>(101.52 to<br>1,637.08)             | 351.77<br>(1,327.40)                         | 611.78<br>(136.91 to<br>2,143.24)             |
| Chronic kidney disease due to hypertension                 | 1,802.80<br>(1,260.18 to<br>2,539.42)           | 5,781.14<br>(1,390.20 to<br>22,852.39)            | 4,579.98<br>(1,137.17 to<br>17,921.15)            | 8,240.64<br>(1,936.28 to<br>29,542.23)             | 97.53<br>(69.14 to<br>139.56)                | 351.25<br>(72.55 to<br>1,404.34)              | 287.70<br>(60.91 to<br>1,185.89)             | 478.25<br>(98.21 to<br>1,712.89)              |
| Chronic kidney disease due to glomerulonephritis           | 4,275.36<br>(3,058.59 to<br>6,000.78)           | 7,442.71<br>(3,321.91 to<br>19,210.04)            | 5,930.17<br>(2,572.13 to<br>14,535.26)            | 10,759.10<br>(4,730.69 to<br>27,022.88)            | 106.68<br>(76.65 to<br>149.09)               | 259.36<br>(82.67 to<br>868.26)                | 207.73<br>(724.49)                           | 368.26<br>(117.50 to<br>1,163.57)             |
| Chronic kidney disease due to other and unspecified causes | 4,763.57<br>(3,452.58 to<br>6,537.48)           | 8,948.91<br>(3,604.89 to<br>26,425.87)            | 7,107.68<br>(2,818.59 to<br>20,024.54)            | 12,937.46<br>(5,142.58 to<br>35,367.36)            | 131.38<br>(95.23 to<br>182.97)               | 349.13<br>(101.40 to<br>1,224.91)             | 280.79<br>(83.81 to<br>1,050.55)             | 490.97<br>(144.51 to<br>1,612.48)             |
| Urinary diseases and male infertility                      | 7,203.59<br>(5,992.77 to<br>8,596.70)           | 11,347.33<br>(6,955.87 to<br>17,985.93)           | 10,705.36<br>(6,532.54 to<br>17,289.23)           | 12,743.17<br>(8,037.50 to<br>19,448.00)            | 207.83<br>(176.40 to<br>242.78)              | 385.58<br>(268.99 to<br>551.44)               | 381.10<br>(266.05 to<br>553.91)              | 403.51<br>(286.30 to<br>562.23)               |
| Urinary tract infections                                   | 3,744.26<br>(2,329.96 to<br>5,036.43)           | 6,590.55<br>(3,701.37 to<br>10,813.18)            | 6,411.50<br>(3,528.36 to<br>10,576.39)            | 7,038.83<br>(4,063.69 to<br>11,153.13)             | 107.54<br>(67.77 to<br>146.47)               | 232.49<br>(143.49 to<br>343.30)               | 237.42<br>(145.69 to<br>353.43)              | 230.12<br>(140.85 to<br>328.55)               |
| Urolithiasis                                               | 187.00<br>(112.74 to<br>272.36)                 | 290.61<br>(152.88 to<br>580.59)                   | 312.18<br>(141.03 to<br>553.92)                   | 354.80<br>(173.17 to<br>638.03)                    | 3.85<br>(2.34 to<br>6.04)                    | 7.22<br>(3.58 to<br>14.25)                    | 6.95<br>(3.45 to<br>14.17)                   | 7.82<br>(3.94 to<br>14.65)                    |
| Other urinary diseases                                     | 3,272.32<br>(2,192.46 to<br>4,628.56)           | 4,444.60<br>(2,201.15 to<br>8,087.09)             | 4,003.24<br>(1,956.05 to<br>7,421.32)             | 5,349.54<br>(2,720.92 to<br>9,330.55)              | 96.44<br>(65.60 to<br>133.89)                | 145.87<br>(80.50 to<br>245.65)                | 136.74<br>(74.51 to<br>237.27)               | 165.57<br>(93.42 to<br>269.77)                |



|                                                   |                                          |                                          |                                         |                                          |                                 |                                 |                                 |                                 |
|---------------------------------------------------|------------------------------------------|------------------------------------------|-----------------------------------------|------------------------------------------|---------------------------------|---------------------------------|---------------------------------|---------------------------------|
| Gynecological diseases                            | 942.68<br>(634.85 to<br>1,426.34)        | 1,255.37<br>(589.34 to<br>3,056.30)      | 1,090.66<br>(492.01 to<br>2,631.94)     | 1,585.29<br>(728.90 to<br>3,811.69)      | 22.44<br>(14.94 to<br>33.96)    | 31.09<br>(14.88 to<br>72.84)    | 27.24<br>(12.60 to<br>64.23)    | 38.85<br>(18.44 to<br>93.29)    |
| Uterine fibroids                                  | 345.39<br>(174.28 to<br>584.84)          | 434.79<br>(140.38 to<br>1,092.71)        | 372.15<br>(120.60 to<br>952.10)         | 560.59<br>(184.98 to<br>1,400.83)        | 9.10<br>(4.70 to<br>15.14)      | 11.73<br>(3.86 to<br>29.55)     | 10.09<br>(3.40 to<br>25.62)     | 15.02<br>(5.03 to<br>38.23)     |
| Polycystic ovarian syndrome                       | 89.76<br>(17.76 to<br>236.68)            | 76.90<br>(11.22 to<br>282.08)            | 61.56<br>(8.64 to<br>236.02)            | 111.32<br>(16.71 to<br>391.48)           | 2.04<br>(0.40 to<br>5.37)       | 1.83<br>(0.26 to<br>6.71)       | 1.47<br>(0.20 to<br>5.60)       | 2.64<br>(0.40 to<br>9.40)       |
| Endometriosis                                     | 4.47<br>(1.16 to<br>15.47)               | 8.11<br>(1.62 to<br>30.79)               | 7.04<br>(1.42 to<br>25.74)              | 10.30<br>(2.05 to<br>38.97)              | 0.09<br>(0.02 to<br>0.33)       | 0.18<br>(0.03 to<br>0.68)       | 0.15<br>(0.03 to<br>0.59)       | 0.22<br>(0.04 to<br>0.86)       |
| Genital prolapse                                  | 20.42<br>(5.48 to<br>67.62)              | 23.48<br>(4.92 to<br>85.14)              | 20.00<br>(4.15 to<br>73.12)             | 30.69<br>(6.45 to<br>114.74)             | 0.74<br>(0.22 to<br>2.22)       | 0.87<br>(0.21 to<br>2.94)       | 0.76<br>(0.19 to<br>2.51)       | 1.09<br>(0.26 to<br>3.76)       |
| Other gynecological diseases                      | 482.64<br>(246.28 to<br>802.06)          | 712.10<br>(295.30 to<br>1,709.54)        | 629.92<br>(260.37 to<br>1,551.84)       | 872.39<br>(349.28 to<br>2,097.78)        | 10.47<br>(5.24 to<br>17.42)     | 16.49<br>(6.90 to<br>38.40)     | 14.77<br>(6.07 to<br>34.90)     | 19.88<br>(7.86 to<br>47.03)     |
| Hemoglobinopathies and hemolytic anemias          | 20,975.99<br>(15,615.39 to<br>30,203.48) | 15,314.35<br>(10,054.21 to<br>23,602.18) | 13,002.01<br>(8,517.65 to<br>20,316.13) | 21,060.69<br>(13,933.85 to<br>32,579.09) | 341.18<br>(268.56 to<br>451.04) | 359.34<br>(254.34 to<br>520.32) | 323.91<br>(222.86 to<br>480.10) | 445.03<br>(316.41 to<br>637.71) |
| Thalassemias                                      | 298.31<br>(164.51 to<br>510.18)          | 159.27<br>(76.66 to<br>298.35)           | 147.77<br>(71.86 to<br>275.16)          | 194.93<br>(94.31 to<br>361.27)           | 3.50<br>(1.93 to<br>5.97)       | 1.87<br>(0.90 to<br>3.51)       | 1.74<br>(0.84 to<br>3.23)       | 2.29<br>(1.11 to<br>4.25)       |
| Sickle cell disorders                             | 13,047.49<br>(8,936.01 to<br>20,107.55)  | 7,015.94<br>(4,318.29 to<br>11,349.66)   | 5,734.18<br>(3,596.33 to<br>9,246.06)   | 10,379.27<br>(6,331.56 to<br>16,896.90)  | 161.00<br>(112.83 to<br>243.70) | 92.88<br>(57.64 to<br>150.10)   | 76.89<br>(48.27 to<br>123.74)   | 134.13<br>(83.92 to<br>214.36)  |
| G6PD deficiency                                   | 5,432.34<br>(3,934.55 to<br>7,503.19)    | 6,210.70<br>(3,582.30 to<br>10,496.51)   | 5,327.01<br>(3,006.92 to<br>9,139.87)   | 8,256.61<br>(4,865.84 to<br>13,673.40)   | 93.51<br>(70.46 to<br>121.63)   | 149.01<br>(88.19 to<br>242.02)  | 132.05<br>(74.19 to<br>221.63)  | 185.91<br>(109.90 to<br>296.84) |
| Other hemoglobinopathies and hemolytic anemias    | 2,197.84<br>(1,722.07 to<br>2,791.55)    | 1,928.43<br>(1,309.48 to<br>2,866.60)    | 1,793.05<br>(1,167.51 to<br>2,737.63)   | 2,229.87<br>(1,539.79 to<br>3,183.23)    | 83.18<br>(66.74 to<br>106.28)   | 115.58<br>(85.52 to<br>153.30)  | 113.23<br>(83.52 to<br>153.09)  | 122.70<br>(94.27 to<br>161.99)  |
| Endocrine, metabolic, blood, and immune disorders | 4,730.29<br>(3,346.98 to<br>6,768.36)    | 5,790.11<br>(3,714.06 to<br>9,182.79)    | 5,308.35<br>(3,380.15 to<br>8,458.76)   | 7,002.77<br>(4,481.11 to<br>11,201.08)   | 116.15<br>(87.76 to<br>152.04)  | 197.46<br>(136.51 to<br>285.25) | 194.29<br>(132.90 to<br>287.80) | 209.62<br>(147.94 to<br>299.22) |

**Rwanda**

| Cause                                  | YLLs (actual counts)                      |                                           |                                           |                                            | Deaths (actual counts)                |                                       |                                       |                                       |
|----------------------------------------|-------------------------------------------|-------------------------------------------|-------------------------------------------|--------------------------------------------|---------------------------------------|---------------------------------------|---------------------------------------|---------------------------------------|
|                                        | 2016                                      | 2040 Forecast                             | 2040 Better Scenario                      | 2040 Worse Scenario                        | 2016                                  | 2040 Forecast                         | 2040 Better Scenario                  | 2040 Worse Scenario                   |
|                                        | <b>Musculoskeletal disorders</b>          | 2,342.87<br>(1,700.74 to<br>3,011.88)     | 4,794.32<br>(2,709.51 to<br>8,440.05)     | 4,815.73<br>(2,695.15 to<br>8,565.69)      | 4,801.98<br>(2,763.56 to<br>8,310.01) | 59.62<br>(42.33 to<br>78.65)          | 149.17<br>(88.79 to<br>245.79)        | 153.35<br>(90.79 to<br>254.96)        |
| Rheumatoid arthritis                   | 508.78<br>(319.14 to<br>736.58)           | 1,062.46<br>(553.02 to<br>1,928.04)       | 981.80<br>(496.74 to<br>1,814.70)         | 1,205.68<br>(640.15 to<br>2,155.39)        | 19.63<br>(11.56 to<br>28.78)          | 51.32<br>(26.94 to<br>85.39)          | 49.32<br>(24.67 to<br>84.58)          | 55.06<br>(29.75 to<br>90.24)          |
| Other musculoskeletal disorders        | 1,834.09<br>(1,346.99 to<br>2,348.78)     | 3,731.86<br>(2,024.18 to<br>6,691.75)     | 3,833.93<br>(2,097.61 to<br>6,948.11)     | 3,596.30<br>(1,983.50 to<br>6,425.84)      | 39.99<br>(29.16 to<br>53.33)          | 97.85<br>(55.17 to<br>163.85)         | 104.04<br>(58.46 to<br>174.34)        | 89.83<br>(51.03 to<br>149.32)         |
| <b>Other non-communicable diseases</b> | 78,502.34<br>(57,234.47 to<br>108,819.17) | 81,060.43<br>(56,910.93 to<br>119,202.56) | 69,630.76<br>(47,990.67 to<br>101,480.80) | 115,793.20<br>(80,548.45 to<br>167,078.89) | 1,094.84<br>(813.05 to<br>1,487.00)   | 1,657.04<br>(1,148.33 to<br>2,507.73) | 1,545.28<br>(1,050.54 to<br>2,405.37) | 2,031.71<br>(1,457.56 to<br>2,991.77) |
| Congenital birth defects               | 53,515.60<br>(36,599.57 to<br>77,065.36)  | 42,540.95<br>(27,274.28 to<br>66,324.52)  | 33,793.73<br>(21,862.99 to<br>51,874.70)  | 67,900.31<br>(43,204.97 to<br>105,960.70)  | 634.33<br>(436.01 to<br>919.03)       | 518.31<br>(332.49 to<br>808.17)       | 414.79<br>(270.09 to<br>640.47)       | 816.50<br>(522.80 to<br>1,271.92)     |
| Neural tube defects                    | 7,769.84<br>(3,398.74 to<br>15,494.86)    | 2,986.33<br>(1,169.53 to<br>7,160.17)     | 2,183.24<br>(848.03 to<br>5,320.49)       | 5,470.97<br>(2,136.21 to<br>12,796.37)     | 90.69<br>(39.84 to<br>181.25)         | 35.35<br>(13.99 to<br>84.04)          | 25.92<br>(10.31 to<br>62.82)          | 64.40<br>(25.20 to<br>151.67)         |
| Congenital heart anomalies             | 17,395.43<br>(10,420.39 to<br>28,931.94)  | 14,122.29<br>(8,006.42 to<br>23,943.56)   | 11,379.38<br>(6,503.26 to<br>19,004.52)   | 21,861.35<br>(12,275.15 to<br>37,124.92)   | 208.84<br>(126.65 to<br>348.70)       | 176.26<br>(100.51 to<br>298.31)       | 143.42<br>(82.40 to<br>242.49)        | 268.00<br>(150.02 to<br>451.85)       |
| Orofacial clefts                       | 668.47<br>(99.13 to<br>1,962.40)          | 404.26<br>(55.21 to<br>1,313.84)          | 287.45<br>(40.31 to<br>909.59)            | 778.73<br>(108.33 to<br>2,529.16)          | 7.75<br>(1.15 to<br>22.76)            | 4.69<br>(0.64 to<br>15.22)            | 3.33<br>(0.47 to<br>10.53)            | 9.03<br>(1.26 to<br>29.30)            |



|                                                 |                                                                  |                                                                 |                                                                 |                                                                  |                                                            |                                                            |                                                            |                                                            |
|-------------------------------------------------|------------------------------------------------------------------|-----------------------------------------------------------------|-----------------------------------------------------------------|------------------------------------------------------------------|------------------------------------------------------------|------------------------------------------------------------|------------------------------------------------------------|------------------------------------------------------------|
| Other transport injuries                        | 4,320.37<br>(2,295.50 to<br>7,962.55)                            | 8,106.64<br>(2,772.78 to<br>21,180.25)                          | 7,281.35<br>(2,420.79 to<br>18,971.44)                          | 10,534.83<br>(3,594.78 to<br>27,081.70)                          | 75.79<br>(40.51 to<br>141.52)                              | 157.75<br>(52.76 to<br>414.42)                             | 143.71<br>(47.37 to<br>379.71)                             | 201.19<br>(66.78 to<br>521.84)                             |
| <b>Unintentional injuries</b>                   | <b>150,788.62</b><br><b>(127,857.51 to</b><br><b>181,173.69)</b> | <b>140,342.98</b><br><b>(90,780.48 to</b><br><b>218,195.02)</b> | <b>124,370.59</b><br><b>(78,928.51 to</b><br><b>196,815.89)</b> | <b>179,630.18</b><br><b>(116,502.91 to</b><br><b>267,302.46)</b> | <b>2,977.92</b><br><b>(2,590.34 to</b><br><b>3,464.88)</b> | <b>3,988.35</b><br><b>(2,883.90 to</b><br><b>5,609.28)</b> | <b>3,818.00</b><br><b>(2,739.51 to</b><br><b>5,474.80)</b> | <b>4,513.21</b><br><b>(3,262.86 to</b><br><b>6,323.76)</b> |
| Falls                                           | 22,980.02<br>(18,407.39 to<br>29,332.92)                         | 32,054.34<br>(22,121.48 to<br>47,494.03)                        | 30,838.61<br>(20,813.03 to<br>46,680.17)                        | 35,245.11<br>(24,425.58 to<br>50,912.68)                         | 746.89<br>(629.59 to<br>906.50)                            | 1,530.38<br>(1,198.73 to<br>1,900.76)                      | 1,582.03<br>(1,238.30 to<br>1,982.09)                      | 1,497.23<br>(1,163.39 to<br>1,855.82)                      |
| Drowning                                        | 30,437.93<br>(24,008.85 to<br>39,831.32)                         | 24,497.86<br>(14,653.29 to<br>41,380.69)                        | 21,227.20<br>(12,359.07 to<br>37,035.46)                        | 32,494.75<br>(19,517.87 to<br>53,701.02)                         | 498.23<br>(403.15 to<br>636.42)                            | 502.97<br>(302.02 to<br>834.46)                            | 455.66<br>(272.81 to<br>764.95)                            | 626.29<br>(382.51 to<br>1,036.49)                          |
| Fire, heat, and hot substances                  | 23,013.08<br>(16,289.94 to<br>34,824.32)                         | 17,241.54<br>(9,634.96 to<br>29,861.36)                         | 14,767.35<br>(8,057.65 to<br>25,473.70)                         | 23,631.69<br>(13,186.31 to<br>40,326.45)                         | 448.00<br>(331.63 to<br>640.41)                            | 473.59<br>(284.16 to<br>792.48)                            | 433.25<br>(253.59 to<br>731.88)                            | 585.90<br>(353.76 to<br>967.54)                            |
| Poisonings                                      | 11,628.71<br>(5,558.11 to<br>25,175.18)                          | 6,409.48<br>(2,940.97 to<br>14,235.06)                          | 5,101.82<br>(2,396.49 to<br>11,363.96)                          | 9,973.56<br>(4,523.38 to<br>22,076.85)                           | 188.56<br>(105.82 to<br>363.94)                            | 131.59<br>(69.31 to<br>264.75)                             | 110.43<br>(58.00 to<br>223.40)                             | 188.22<br>(97.38 to<br>387.79)                             |
| Exposure to mechanical forces                   | 13,082.69<br>(10,338.19 to<br>16,342.76)                         | 12,782.96<br>(7,560.86 to<br>21,493.89)                         | 11,167.30<br>(6,575.64 to<br>19,097.05)                         | 16,444.39<br>(9,973.68 to<br>26,635.30)                          | 237.05<br>(186.20 to<br>285.88)                            | 294.32<br>(187.76 to<br>478.65)                            | 270.15<br>(172.53 to<br>443.60)                            | 349.02<br>(223.75 to<br>552.25)                            |
| Unintentional firearm injuries                  | 2,240.89<br>(1,486.07 to<br>3,186.23)                            | 2,038.71<br>(944.13 to<br>3,980.81)                             | 1,796.87<br>(827.47 to<br>3,600.92)                             | 2,526.78<br>(1,208.57 to<br>4,944.52)                            | 43.18<br>(28.89 to<br>59.76)                               | 44.86<br>(23.91 to<br>81.12)                               | 40.70<br>(21.63 to<br>75.53)                               | 53.33<br>(28.41 to<br>98.02)                               |
| Unintentional suffocation                       | 2,209.17<br>(1,330.55 to<br>3,692.43)                            | 1,711.98<br>(980.72 to<br>2,865.16)                             | 1,419.58<br>(821.43 to<br>2,393.07)                             | 2,492.71<br>(1,405.07 to<br>4,360.52)                            | 32.45<br>(21.25 to<br>49.80)                               | 30.67<br>(18.94 to<br>49.41)                               | 26.94<br>(16.36 to<br>43.22)                               | 40.57<br>(24.69 to<br>66.22)                               |
| Other exposure to mechanical forces             | 8,632.62<br>(6,411.74 to<br>11,095.96)                           | 9,032.28<br>(5,266.71 to<br>15,474.74)                          | 7,950.84<br>(4,553.45 to<br>13,998.68)                          | 11,424.90<br>(6,692.02 to<br>18,413.87)                          | 161.41<br>(118.61 to<br>204.64)                            | 218.80<br>(136.35 to<br>354.82)                            | 202.51<br>(124.89 to<br>333.34)                            | 255.11<br>(159.20 to<br>406.84)                            |
| Adverse effects of medical treatment            | 11,619.03<br>(7,579.94 to<br>17,384.32)                          | 10,250.60<br>(6,340.00 to<br>16,689.73)                         | 8,934.32<br>(5,525.08 to<br>14,635.46)                          | 13,426.51<br>(7,995.82 to<br>21,811.27)                          | 204.97<br>(155.81 to<br>283.16)                            | 246.28<br>(168.37 to<br>365.87)                            | 229.02<br>(153.55 to<br>346.35)                            | 288.92<br>(199.04 to<br>425.54)                            |
| Animal contact                                  | 12,503.00<br>(6,961.82 to<br>17,508.87)                          | 14,310.70<br>(6,528.37 to<br>24,414.67)                         | 12,079.40<br>(5,473.39 to<br>21,177.33)                         | 19,428.81<br>(9,015.73 to<br>32,254.46)                          | 254.34<br>(141.69 to<br>341.00)                            | 371.57<br>(180.11 to<br>613.60)                            | 330.20<br>(157.28 to<br>556.05)                            | 462.40<br>(230.18 to<br>741.83)                            |
| Venomous animal contact                         | 9,148.20<br>(4,417.39 to<br>13,072.79)                           | 10,402.39<br>(4,497.44 to<br>17,855.59)                         | 8,774.05<br>(3,729.51 to<br>15,473.58)                          | 14,154.94<br>(6,105.84 to<br>23,485.93)                          | 195.77<br>(101.56 to<br>267.82)                            | 287.38<br>(132.43 to<br>482.66)                            | 255.83<br>(115.59 to<br>432.19)                            | 356.60<br>(167.74 to<br>583.27)                            |
| Non-venomous animal contact                     | 3,354.80<br>(1,782.87 to<br>5,894.18)                            | 3,908.31<br>(1,708.96 to<br>7,606.93)                           | 3,305.35<br>(1,406.53 to<br>6,466.94)                           | 5,273.87<br>(2,251.08 to<br>10,329.42)                           | 58.57<br>(30.73 to<br>102.71)                              | 84.18<br>(36.57 to<br>165.65)                              | 74.37<br>(31.70 to<br>149.50)                              | 105.80<br>(47.06 to<br>205.18)                             |
| Foreign body                                    | 15,771.76<br>(10,521.34 to<br>22,705.02)                         | 14,093.71<br>(8,649.31 to<br>21,824.20)                         | 12,662.03<br>(7,801.88 to<br>19,841.93)                         | 17,836.55<br>(10,923.46 to<br>27,437.89)                         | 226.20<br>(156.01 to<br>312.90)                            | 246.87<br>(153.23 to<br>385.11)                            | 234.41<br>(142.75 to<br>372.70)                            | 285.48<br>(182.64 to<br>430.34)                            |
| Pulmonary aspiration and foreign body in airway | 14,589.40<br>(9,724.43 to<br>20,938.07)                          | 13,005.87<br>(8,211.71 to<br>20,165.30)                         | 11,703.14<br>(7,335.81 to<br>18,241.22)                         | 16,456.47<br>(10,285.12 to<br>26,163.87)                         | 207.32<br>(145.76 to<br>287.01)                            | 226.38<br>(144.68 to<br>341.67)                            | 215.65<br>(134.85 to<br>331.26)                            | 261.09<br>(170.70 to<br>397.06)                            |
| Foreign body in other body part                 | 1,182.36<br>(411.71 to<br>2,309.04)                              | 1,087.84<br>(292.36 to<br>2,491.09)                             | 958.90<br>(250.88 to<br>2,230.50)                               | 1,380.08<br>(400.70 to<br>2,994.51)                              | 18.89<br>(6.42 to<br>37.26)                                | 20.49<br>(5.18 to<br>47.71)                                | 18.76<br>(4.75 to<br>43.90)                                | 24.39<br>(6.49 to<br>54.56)                                |
| Environmental heat and cold exposure            | 1,411.69<br>(829.92 to<br>2,436.00)                              | 1,437.97<br>(707.94 to<br>2,690.87)                             | 1,179.94<br>(573.42 to<br>2,205.65)                             | 2,049.74<br>(1,007.73 to<br>3,775.73)                            | 27.79<br>(16.30 to<br>45.93)                               | 37.02<br>(19.18 to<br>64.54)                               | 32.19<br>(16.20 to<br>57.00)                               | 47.99<br>(24.75 to<br>82.98)                               |
| Other unintentional injuries                    | 8,340.71<br>(6,098.75 to<br>12,205.72)                           | 7,263.81<br>(4,109.85 to<br>12,594.61)                          | 6,412.62<br>(3,560.25 to<br>11,327.79)                          | 9,099.07<br>(5,281.18 to<br>15,480.36)                           | 145.89<br>(108.16 to<br>210.03)                            | 153.77<br>(89.80 to<br>260.75)                             | 140.65<br>(80.04 to<br>245.56)                             | 181.76<br>(109.32 to<br>302.33)                            |
| Self-harm and interpersonal violence            | 57,513.44<br>(43,672.69 to<br>72,639.77)                         | 86,433.28<br>(40,089.84 to<br>186,437.71)                       | 81,703.11<br>(37,876.09 to<br>176,517.41)                       | 104,153.79<br>(47,296.63 to<br>226,677.57)                       | 1,194.09<br>(947.46 to<br>1,478.27)                        | 2,093.63<br>(1,049.75 to<br>4,217.83)                      | 2,020.28<br>(1,019.96 to<br>4,038.03)                      | 2,458.68<br>(1,169.79 to<br>5,026.92)                      |

**Rwanda**

| Cause | YLLs (actual counts) |               |                      |                     | Deaths (actual counts) |               |                      |                     |
|-------|----------------------|---------------|----------------------|---------------------|------------------------|---------------|----------------------|---------------------|
|       | 2016                 | 2040 Forecast | 2040 Better Scenario | 2040 Worse Scenario | 2016                   | 2040 Forecast | 2040 Better Scenario | 2040 Worse Scenario |

|                                                                              |                                                   |                                                   |                                                   |                                                    |                                            |                                             |                                           |                                             |
|------------------------------------------------------------------------------|---------------------------------------------------|---------------------------------------------------|---------------------------------------------------|----------------------------------------------------|--------------------------------------------|---------------------------------------------|-------------------------------------------|---------------------------------------------|
| Self-harm                                                                    | 28,135.34<br>(21,570.00 to<br>36,923.91)          | 55,025.64<br>(24,991.14 to<br>121,387.39)         | 51,942.57<br>(22,872.38 to<br>114,175.97)         | 67,579.98<br>(28,101.27 to<br>155,145.43)          | 697.92<br>(542.78 to<br>901.00)            | 1,528.94<br>(747.16 to<br>3,204.46)         | 1,480.44<br>(728.12 to<br>3,111.46)       | 1,810.55<br>(833.99 to<br>3,879.72)         |
| Self-harm by firearm                                                         | 2,902.41<br>(1,429.27 to<br>6,700.62)             | 4,177.18<br>(1,274.05 to<br>11,638.39)            | 3,876.12<br>(1,173.37 to<br>10,542.85)            | 5,300.43<br>(1,504.19 to<br>14,928.23)             | 65.84<br>(34.03 to<br>151.88)              | 105.89<br>(34.94 to<br>297.26)              | 100.49<br>(33.67 to<br>280.08)            | 130.07<br>(40.91 to<br>369.13)              |
| Self-harm by other specified means                                           | 25,232.93<br>(19,504.35 to<br>34,199.57)          | 50,848.46<br>(22,540.01 to<br>111,552.64)         | 48,066.44<br>(21,404.85 to<br>105,202.39)         | 62,279.55<br>(25,904.72 to<br>141,650.86)          | 632.09<br>(498.64 to<br>832.37)            | 1,423.05<br>(701.33 to<br>2,935.02)         | 1,379.95<br>(683.23 to<br>2,837.57)       | 1,680.48<br>(770.50 to<br>3,559.76)         |
| Interpersonal violence                                                       | 29,378.11<br>(17,580.09 to<br>39,630.72)          | 31,407.64<br>(13,321.69 to<br>66,643.49)          | 29,760.54<br>(12,615.02 to<br>63,363.45)          | 36,573.81<br>(15,324.24 to<br>75,648.87)           | 496.16<br>(313.17 to<br>653.04)            | 564.69<br>(247.32 to<br>1,170.06)           | 539.84<br>(233.59 to<br>1,134.14)         | 648.13<br>(285.84 to<br>1,332.96)           |
| Physical violence by firearm                                                 | 5,000.43<br>(2,383.60 to<br>8,583.49)             | 5,626.44<br>(2,386.86 to<br>11,738.56)            | 5,462.64<br>(2,338.02 to<br>11,502.06)            | 5,959.58<br>(2,497.21 to<br>12,059.15)             | 85.89<br>(42.75 to<br>148.32)              | 101.24<br>(45.20 to<br>210.13)              | 98.96<br>(44.42 to<br>205.14)             | 105.85<br>(46.66 to<br>216.43)              |
| Physical violence by sharp object                                            | 3,564.67<br>(1,635.67 to<br>5,103.91)             | 4,377.32<br>(1,703.80 to<br>8,512.26)             | 4,348.32<br>(1,690.89 to<br>8,464.90)             | 4,462.20<br>(1,773.96 to<br>8,641.02)              | 59.60<br>(31.65 to<br>88.05)               | 82.94<br>(37.43 to<br>158.57)               | 83.12<br>(37.96 to<br>161.68)             | 85.26<br>(37.49 to<br>159.03)               |
| Physical violence by other means                                             | 21,013.01<br>(12,487.74 to<br>28,940.63)          | 21,403.88<br>(8,509.92 to<br>47,350.80)           | 19,949.58<br>(7,832.14 to<br>44,991.02)           | 26,152.04<br>(10,299.88 to<br>58,171.23)           | 350.66<br>(216.99 to<br>470.36)            | 380.52<br>(153.57 to<br>848.11)             | 357.76<br>(141.84 to<br>802.56)           | 459.02<br>(183.29 to<br>1,016.08)           |
| Forces of nature, conflict and terrorism, and executions and police conflict | 3,299.20<br>(1,822.01 to<br>4,881.23)             | 108,693.94<br>(0.00 to<br>67,865.38)              | 103,047.88<br>(0.00 to<br>64,973.00)              | 120,793.71<br>(0.00 to<br>73,928.05)               | 55.39<br>(30.58 to<br>80.85)               | 1,810.68<br>(0.00 to<br>1,166.81)           | 1,745.90<br>(0.00 to<br>1,134.64)         | 1,951.63<br>(0.00 to<br>1,237.72)           |
| Exposure to forces of nature                                                 | 3,036.97<br>(1,559.27 to<br>4,511.16)             | 327.33<br>(0.00 to<br>3,279.81)                   | 311.71<br>(0.00 to<br>3,117.94)                   | 360.89<br>(0.00 to<br>3,620.97)                    | 50.54<br>(25.95 to<br>75.07)               | 6.13<br>(0.00 to<br>61.10)                  | 6.00<br>(0.00 to<br>59.55)                | 6.46<br>(0.00 to<br>64.90)                  |
| Conflict and terrorism                                                       | 0.00<br>(0.00 to<br>0.00)                         | 107,973.49<br>(0.00 to<br>45,338.59)              | 102,353.09<br>(0.00 to<br>42,718.16)              | 120,019.25<br>(0.00 to<br>50,244.58)               | 0.00<br>(0.00 to<br>0.00)                  | 1,797.49<br>(0.00 to<br>755.62)             | 1,732.95<br>(0.00 to<br>729.83)           | 1,937.87<br>(0.00 to<br>812.18)             |
| Executions and police conflict                                               | 262.22<br>(147.71 to<br>542.51)                   | 393.11<br>(0.00 to<br>1,206.23)                   | 383.07<br>(0.00 to<br>1,179.73)                   | 413.57<br>(0.00 to<br>1,264.87)                    | 4.85<br>(2.96 to<br>9.05)                  | 7.06<br>(0.00 to<br>21.88)                  | 6.95<br>(0.00 to<br>21.61)                | 7.29<br>(0.00 to<br>22.55)                  |
| <b>Somalia</b>                                                               |                                                   |                                                   |                                                   |                                                    |                                            |                                             |                                           |                                             |
| Cause                                                                        | YLLs (actual counts)                              |                                                   |                                                   |                                                    | Deaths (actual counts)                     |                                             |                                           |                                             |
|                                                                              | 2016                                              | 2040 Forecast                                     | 2040 Better Scenario                              | 2040 Worse Scenario                                | 2016                                       | 2040 Forecast                               | 2040 Better Scenario                      | 2040 Worse Scenario                         |
| All causes                                                                   | 5,041,416.71<br>(4,294,156.08 to<br>5,901,796.68) | 6,240,595.31<br>(4,919,287.41 to<br>7,721,911.29) | 4,203,397.81<br>(3,368,585.32 to<br>5,187,958.32) | 9,340,239.05<br>(7,320,576.08 to<br>11,607,931.14) | 101,491.49<br>(89,273.69 to<br>115,400.25) | 138,402.33<br>(117,954.72 to<br>162,098.02) | 97,444.30<br>(84,061.69 to<br>113,245.79) | 188,450.90<br>(158,412.36 to<br>222,743.38) |
| Communicable, maternal, neonatal, and nutritional diseases                   | 3,504,850.77<br>(2,849,267.17 to<br>4,231,900.64) | 3,687,799.98<br>(2,626,887.77 to<br>4,945,754.19) | 2,259,199.16<br>(1,604,473.43 to<br>3,013,577.60) | 6,129,536.13<br>(4,420,102.07 to<br>7,991,273.15)  | 57,578.51<br>(48,672.48 to<br>68,032.08)   | 60,896.07<br>(44,110.14 to<br>81,438.17)    | 37,393.39<br>(27,465.24 to<br>49,520.11)  | 95,286.49<br>(70,650.21 to<br>125,388.84)   |
| HIV/AIDS and tuberculosis                                                    | 521,715.39<br>(413,546.81 to<br>667,934.21)       | 433,559.78<br>(254,785.99 to<br>692,890.09)       | 233,196.26<br>(120,863.68 to<br>433,593.15)       | 754,217.07<br>(489,198.00 to<br>1,084,459.26)      | 12,455.91<br>(9,862.11 to<br>15,860.32)    | 9,894.77<br>(5,972.15 to<br>15,259.37)      | 5,325.93<br>(2,933.32 to<br>9,419.91)     | 16,293.56<br>(10,798.41 to<br>23,550.24)    |
| Tuberculosis                                                                 | 406,249.36<br>(312,052.53 to<br>530,183.73)       | 319,558.70<br>(193,455.52 to<br>506,994.70)       | 151,849.84<br>(89,203.73 to<br>240,508.86)        | 480,982.09<br>(286,041.41 to<br>773,850.56)        | 10,161.21<br>(7,816.67 to<br>11,697.76)    | 7,629.44<br>(4,375.61 to<br>11,697.76)      | 3,740.64<br>(2,295.01 to<br>5,815.13)     | 11,051.31<br>(6,697.73 to<br>17,268.03)     |
| HIV/AIDS                                                                     | 115,466.04<br>(60,691.74 to<br>213,346.43)        | 114,001.08<br>(6,742.74 to<br>329,831.99)         | 81,346.41<br>(1,463.94 to<br>277,584.59)          | 273,234.98<br>(95,834.72 to<br>541,921.83)         | 2,294.70<br>(1,227.77 to<br>4,158.58)      | 2,265.34<br>(6,424.96)                      | 1,585.29<br>(124.29 to<br>5,464.50)       | 5,242.25<br>(1,782.62 to<br>10,188.53)      |
| Diarrhea, lower respiratory, and other common infectious diseases            | 1,554,441.86<br>(1,165,702.27 to<br>2,018,462.70) | 1,831,357.01<br>(1,091,561.98 to<br>2,637,236.07) | 1,073,779.42<br>(667,097.01 to<br>1,574,645.65)   | 2,956,661.67<br>(1,816,073.90 to<br>4,203,511.56)  | 25,425.56<br>(19,808.75 to<br>32,596.46)   | 30,905.70<br>(19,449.33 to<br>46,882.64)    | 18,441.06<br>(11,850.83 to<br>28,056.56)  | 46,561.22<br>(29,334.18 to<br>68,421.57)    |
| Diarrheal diseases                                                           | 348,151.15<br>(217,252.78 to<br>571,405.50)       | 319,867.67<br>(98,932.92 to<br>898,029.17)        | 182,376.69<br>(54,004.26 to<br>472,928.33)        | 517,636.27<br>(173,170.95 to<br>1,249,629.23)      | 6,474.73<br>(4,239.08 to<br>12,336.22)     | 7,289.58<br>(1,163.38 to<br>21,482.80)      | 4,089.45<br>(998.72 to<br>11,993.37)      | 11,081.23<br>(2,958.94 to<br>27,626.08)     |
| Intestinal infectious diseases                                               | 26,972.44<br>(12,927.89 to<br>47,430.63)          | 33,744.54<br>(14,857.01 to<br>63,898.69)          | 27,831.90<br>(12,023.40 to<br>52,976.73)          | 45,161.15<br>(20,130.73 to<br>84,042.94)           | 370.99<br>(179.81 to<br>644.16)            | 473.70<br>(215.76 to<br>877.35)             | 391.36<br>(172.05 to<br>724.23)           | 619.83<br>(280.10 to<br>1,140.86)           |
| Typhoid fever                                                                | 21,309.99<br>(9,616.57 to<br>41,027.05)           | 28,567.92<br>(12,194.42 to<br>53,849.00)          | 24,200.14<br>(10,254.52 to<br>46,954.13)          | 36,999.72<br>(15,871.27 to<br>71,786.25)           | 295.48<br>(138.21 to<br>560.46)            | 401.08<br>(176.17 to<br>748.13)             | 339.86<br>(146.99 to<br>647.81)           | 510.19<br>(219.85 to<br>971.15)             |



|                                                       |                                                       |                                                       |                                                      |                                                        |                                                  |                                                  |                                                |                                                |                                                  |
|-------------------------------------------------------|-------------------------------------------------------|-------------------------------------------------------|------------------------------------------------------|--------------------------------------------------------|--------------------------------------------------|--------------------------------------------------|------------------------------------------------|------------------------------------------------|--------------------------------------------------|
| African trypanosomiasis                               | 0.00<br>(0.00 to 0.00)                                | 0.00<br>(0.00 to 0.00)                                | 0.00<br>(0.00 to 0.00)                               | 0.00<br>(0.00 to 0.00)                                 | 0.00<br>(0.00 to 0.00)                           | 0.00<br>(0.00 to 0.00)                           | 0.00<br>(0.00 to 0.00)                         | 0.00<br>(0.00 to 0.00)                         | 0.00<br>(0.00 to 0.00)                           |
| Schistosomiasis                                       | 6,405.73<br>(4,492.50 to 8,582.32)                    | 5,441.01<br>(3,376.46 to 8,163.36)                    | 4,198.82<br>(2,661.87 to 6,356.94)                   | 6,378.13<br>(3,960.02 to 9,455.62)                     | 167.96<br>(116.79 to 226.07)                     | 136.62<br>(87.21 to 202.06)                      | 110.34<br>(70.73 to 164.31)                    | 110.34<br>(70.73 to 164.31)                    | 152.72<br>(95.50 to 224.78)                      |
| Cysticercosis                                         | 159.59<br>(58.05 to 349.26)                           | 90.15<br>(29.95 to 210.68)                            | 78.49<br>(26.27 to 185.09)                           | 104.24<br>(33.98 to 244.84)                            | 3.09<br>(1.13 to 6.68)                           | 1.80<br>(0.61 to 4.19)                           | 1.60<br>(0.54 to 3.76)                         | 1.60<br>(0.54 to 3.76)                         | 2.00<br>(0.66 to 4.65)                           |
| Cystic echinococcosis                                 | 0.00<br>(0.00 to 0.00)                                | 0.00<br>(0.00 to 0.00)                                | 0.00<br>(0.00 to 0.00)                               | 0.00<br>(0.00 to 0.00)                                 | 0.00<br>(0.00 to 0.00)                           | 0.00<br>(0.00 to 0.00)                           | 0.00<br>(0.00 to 0.00)                         | 0.00<br>(0.00 to 0.00)                         | 0.00<br>(0.00 to 0.00)                           |
| Dengue                                                | 221.82<br>(6.38 to 900.56)                            | 1,064.84<br>(32.74 to 4,079.50)                       | 938.67<br>(29.85 to 3,576.03)                        | 1,465.11<br>(43.97 to 5,804.84)                        | 3.31<br>(0.10 to 12.47)                          | 16.84<br>(0.54 to 62.98)                         | 15.40<br>(0.49 to 56.60)                       | 15.40<br>(0.49 to 56.60)                       | 21.53<br>(0.68 to 81.77)                         |
| Yellow fever                                          | 1,746.05<br>(340.71 to 5,229.24)                      | 1,097.89<br>(202.18 to 3,457.75)                      | 656.28<br>(122.02 to 2,144.56)                       | 1,610.73<br>(295.99 to 5,128.13)                       | 26.90<br>(5.29 to 81.67)                         | 17.00<br>(3.11 to 54.78)                         | 10.25<br>(1.89 to 33.22)                       | 10.25<br>(1.89 to 33.22)                       | 24.31<br>(4.49 to 77.66)                         |
| Rabies                                                | 15,533.23<br>(4,345.85 to 46,104.66)                  | 13,609.59<br>(3,937.12 to 39,282.10)                  | 5,041.40<br>(1,185.31 to 16,406.46)                  | 26,020.91<br>(7,535.14 to 68,672.45)                   | 232.96<br>(70.38 to 654.59)                      | 212.94<br>(61.37 to 581.22)                      | 78.38<br>(19.49 to 236.41)                     | 78.38<br>(19.49 to 236.41)                     | 395.51<br>(117.00 to 995.13)                     |
| Intestinal nematode infections                        | 2,403.19<br>(1,299.16 to 4,098.22)                    | 4,591.93<br>(2,354.58 to 8,291.86)                    | 4,566.54<br>(2,279.67 to 8,340.66)                   | 6,267.53<br>(3,135.65 to 11,218.29)                    | 29.85<br>(16.87 to 50.27)                        | 57.19<br>(30.18 to 100.72)                       | 57.11<br>(30.02 to 102.13)                     | 57.11<br>(30.02 to 102.13)                     | 77.19<br>(39.48 to 137.23)                       |
| Other neglected tropical diseases                     | 7,714.99<br>(3,290.82 to 16,023.76)                   | 8,921.45<br>(3,838.92 to 18,015.27)                   | 6,119.01<br>(2,555.28 to 12,737.80)                  | 14,887.56<br>(6,466.45 to 30,420.45)                   | 99.68<br>(44.27 to 199.30)                       | 117.68<br>(52.82 to 233.63)                      | 81.74<br>(36.41 to 164.27)                     | 81.74<br>(36.41 to 164.27)                     | 189.62<br>(84.89 to 379.18)                      |
| <b>Maternal disorders</b>                             | <b>137,063.17</b><br><b>(97,903.84 to 186,023.14)</b> | <b>182,867.25</b><br><b>(95,286.42 to 314,761.43)</b> | <b>87,556.31</b><br><b>(45,057.74 to 155,832.83)</b> | <b>274,696.12</b><br><b>(147,997.59 to 479,894.54)</b> | <b>2,519.26</b><br><b>(1,788.03 to 3,451.62)</b> | <b>3,424.62</b><br><b>(1,774.95 to 5,910.14)</b> | <b>1,641.49</b><br><b>(844.87 to 2,942.95)</b> | <b>1,641.49</b><br><b>(844.87 to 2,942.95)</b> | <b>5,123.80</b><br><b>(2,727.51 to 9,015.46)</b> |
| Maternal hemorrhage                                   | 33,999.27<br>(20,720.67 to 51,606.75)                 | 45,191.73<br>(21,406.76 to 83,060.07)                 | 21,540.92<br>(9,740.44 to 41,173.10)                 | 65,202.50<br>(29,630.86 to 123,989.41)                 | 639.59<br>(393.30 to 975.98)                     | 864.97<br>(408.76 to 1,599.48)                   | 412.70<br>(183.95 to 781.91)                   | 412.70<br>(183.95 to 781.91)                   | 1,245.19<br>(566.73 to 2,408.54)                 |
| Maternal sepsis and other maternal infections         | 11,853.68<br>(4,949.17 to 21,616.90)                  | 14,042.12<br>(5,150.83 to 30,408.47)                  | 6,662.36<br>(2,367.57 to 14,532.78)                  | 20,756.92<br>(7,538.05 to 45,788.78)                   | 217.43<br>(93.97 to 396.96)                      | 262.61<br>(96.61 to 562.50)                      | 124.74<br>(45.26 to 269.76)                    | 124.74<br>(45.26 to 269.76)                    | 386.94<br>(142.17 to 839.04)                     |
| Maternal hypertensive disorders                       | 19,295.64<br>(11,623.19 to 28,965.96)                 | 25,878.83<br>(12,639.94 to 48,088.50)                 | 12,215.48<br>(5,895.64 to 22,898.63)                 | 37,673.19<br>(18,503.93 to 69,719.52)                  | 346.11<br>(205.92 to 523.80)                     | 473.95<br>(229.45 to 868.63)                     | 233.93<br>(107.68 to 425.24)                   | 233.93<br>(107.68 to 425.24)                   | 687.88<br>(331.71 to 1,276.25)                   |
| Maternal obstructed labor and uterine rupture         | 11,167.53<br>(5,623.93 to 19,980.40)                  | 15,589.01<br>(6,101.27 to 31,596.94)                  | 7,018.19<br>(2,697.67 to 14,691.13)                  | 23,169.13<br>(9,209.05 to 49,521.00)                   | 208.04<br>(103.82 to 373.52)                     | 295.35<br>(112.27 to 610.77)                     | 133.12<br>(50.42 to 277.40)                    | 133.12<br>(50.42 to 277.40)                    | 457.84<br>(173.30 to 939.58)                     |
| Maternal abortion, miscarriage, and ectopic pregnancy | 6,415.80<br>(2,659.04 to 11,506.26)                   | 9,590.72<br>(3,268.94 to 20,464.42)                   | 4,585.47<br>(1,549.66 to 9,852.30)                   | 14,457.75<br>(4,887.62 to 31,577.50)                   | 115.99<br>(50.28 to 209.75)                      | 176.88<br>(60.93 to 372.77)                      | 84.63<br>(28.75 to 179.65)                     | 84.63<br>(28.75 to 179.65)                     | 265.68<br>(91.21 to 570.32)                      |
| Indirect maternal deaths                              | 35,673.04<br>(19,511.38 to 55,892.23)                 | 47,132.78<br>(20,560.57 to 87,818.06)                 | 22,872.00<br>(9,763.97 to 44,164.35)                 | 74,151.41<br>(33,015.85 to 137,886.50)                 | 649.45<br>(358.60 to 1,021.64)                   | 871.54<br>(386.17 to 1,636.27)                   | 423.52<br>(181.07 to 824.43)                   | 423.52<br>(181.07 to 824.43)                   | 1,364.25<br>(601.23 to 2,563.02)                 |
| Late maternal deaths                                  | 2,988.07<br>(1,314.46 to 5,469.77)                    | 3,138.68<br>(1,175.87 to 6,749.36)                    | 1,496.54<br>(537.02 to 3,251.06)                     | 4,829.48<br>(1,750.32 to 10,295.58)                    | 54.58<br>(23.65 to 100.77)                       | 58.54<br>(22.16 to 124.03)                       | 27.95<br>(10.11 to 59.93)                      | 27.95<br>(10.11 to 59.93)                      | 89.57<br>(31.80 to 186.52)                       |
| Maternal deaths aggravated by HIV/AIDS                | 95.04<br>(45.85 to 154.85)                            | 236.28<br>(83.95 to 676.31)                           | 1,100.23<br>(323.2 to 3,424.97)                      | 4,123.52<br>(1,086.65 to 11,037.99)                    | 4.72<br>(1.83 to 10.19)                          | 46.30<br>(5.09 to 126.49)                        | 21.61<br>(0.06 to 66.35)                       | 21.61<br>(0.06 to 66.35)                       | 79.99<br>(21.52 to 212.47)                       |
| Other maternal disorders                              | 15,421.70<br>(6,843.98 to 27,566.46)                  | 19,939.08<br>(7,259.05 to 44,642.32)                  | 10,065.11<br>(3,445.52 to 22,804.52)                 | 30,332.21<br>(10,818.37 to 66,442.82)                  | 283.35<br>(127.66 to 507.25)                     | 374.47<br>(135.54 to 831.76)                     | 189.29<br>(65.34 to 420.77)                    | 189.29<br>(65.34 to 420.77)                    | 566.45<br>(204.03 to 1,214.39)                   |

**Somalia**

| Cause              | YLLs (actual counts)                     |                                            |                                          |                                              | Deaths (actual counts)             |                                     |                                    |                                      |
|--------------------|------------------------------------------|--------------------------------------------|------------------------------------------|----------------------------------------------|------------------------------------|-------------------------------------|------------------------------------|--------------------------------------|
|                    | 2016                                     | 2040 Forecast                              | 2040 Better Scenario                     | 2040 Worse Scenario                          | 2016                               | 2040 Forecast                       | 2040 Better Scenario               | 2040 Worse Scenario                  |
| Neonatal disorders | 528,256.96<br>(363,202.39 to 712,738.20) | 691,686.83<br>(440,144.23 to 1,015,481.46) | 472,556.82<br>(297,538.46 to 701,143.89) | 1,295,492.28<br>(824,153.75 to 1,904,574.34) | 6,104.12<br>(4,196.16 to 8,235.26) | 7,994.73<br>(5,088.32 to 11,740.36) | 5,462.18<br>(3,440.23 to 8,104.08) | 14,972.71<br>(9,527.84 to 22,018.14) |

|                                                                         |                                                            |                                                            |                                                           |                                                            |                                                      |                                                      |                                                      |                                                      |
|-------------------------------------------------------------------------|------------------------------------------------------------|------------------------------------------------------------|-----------------------------------------------------------|------------------------------------------------------------|------------------------------------------------------|------------------------------------------------------|------------------------------------------------------|------------------------------------------------------|
| Neonatal preterm birth                                                  | 143,281.34<br>(86,713.58 to<br>218,568.74)                 | 175,621.46<br>(102,430.62 to<br>275,298.06)                | 110,406.80<br>(63,095.09 to<br>173,625.88)                | 333,753.60<br>(193,962.20 to<br>526,817.43)                | 1,655.54<br>(1,001.97 to<br>2,522.64)                | 2,029.73<br>(1,184.05 to<br>3,181.26)                | 1,276.20<br>(729.38 to<br>2,006.98)                  | 3,856.97<br>(2,241.98 to<br>6,086.59)                |
| Neonatal encephalopathy due to birth asphyxia and trauma                | 167,364.78<br>(104,038.19 to<br>245,313.11)                | 184,527.95<br>(96,594.49 to<br>331,719.89)                 | 135,941.83<br>(71,350.43 to<br>245,168.02)                | 336,636.91<br>(175,477.22 to<br>610,780.26)                | 1,933.57<br>(1,202.16 to<br>2,833.87)                | 2,132.60<br>(1,117.05 to<br>3,833.06)                | 1,571.11<br>(824.65 to<br>2,832.16)                  | 3,890.27<br>(2,028.31 to<br>7,057.17)                |
| Neonatal sepsis and other neonatal infections                           | 109,152.53<br>(65,065.91 to<br>177,043.93)                 | 187,355.39<br>(105,826.88 to<br>310,238.23)                | 133,934.20<br>(77,128.27 to<br>214,374.97)                | 344,384.35<br>(199,381.26 to<br>564,384.04)                | 1,261.49<br>(751.91 to<br>2,046.14)                  | 2,165.64<br>(1,223.59 to<br>3,584.69)                | 1,548.16<br>(892.01 to<br>2,476.92)                  | 3,980.58<br>(2,304.87 to<br>6,523.62)                |
| Hemolytic disease and other neonatal jaundice                           | 17,334.02<br>(8,888.72 to<br>31,610.04)                    | 13,306.14<br>(6,224.77 to<br>27,728.97)                    | 8,537.94<br>(3,942.09 to<br>17,935.09)                    | 25,919.14<br>(12,130.28 to<br>53,200.82)                   | 200.31<br>(102.72 to<br>365.37)                      | 153.78<br>(71.96 to<br>320.55)                       | 98.67<br>(45.56 to<br>207.19)                        | 299.53<br>(140.18 to<br>614.95)                      |
| Other neonatal disorders                                                | 91,124.29<br>(47,708.26 to<br>155,087.08)                  | 130,875.89<br>(57,971.49 to<br>240,296.31)                 | 83,736.06<br>(36,977.62 to<br>155,047.37)                 | 254,798.28<br>(112,460.42 to<br>464,145.73)                | 1,053.22<br>(551.22 to<br>1,792.45)                  | 1,512.98<br>(670.06 to<br>2,778.15)                  | 968.04<br>(427.36 to<br>1,792.69)                    | 2,945.35<br>(1,300.47 to<br>5,365.58)                |
| <b>Nutritional deficiencies</b>                                         | <b>303,958.31</b><br>(189,755.47 to<br><b>468,715.31</b> ) | <b>218,635.08</b><br>(129,185.59 to<br><b>348,957.82</b> ) | <b>142,433.08</b><br>(87,508.29 to<br><b>229,477.62</b> ) | <b>337,353.80</b><br>(189,475.34 to<br><b>551,900.53</b> ) | <b>4,674.84</b><br>(3,229.02 to<br><b>6,732.78</b> ) | <b>3,819.64</b><br>(2,578.68 to<br><b>5,638.46</b> ) | <b>2,749.01</b><br>(1,916.59 to<br><b>3,959.02</b> ) | <b>5,263.41</b><br>(3,328.85 to<br><b>8,112.45</b> ) |
| Protein-energy malnutrition                                             | 290,509.66<br>(179,001.73 to<br>454,206.22)                | 192,997.49<br>(109,483.39 to<br>319,570.50)                | 123,885.37<br>(71,397.18 to<br>209,282.32)                | 304,676.43<br>(163,402.79 to<br>523,790.98)                | 4,305.99<br>(2,885.33 to<br>6,366.71)                | 3,177.60<br>(1,996.33 to<br>4,888.26)                | 2,243.01<br>(1,443.51 to<br>3,387.87)                | 4,521.10<br>(2,673.91 to<br>7,173.23)                |
| Iodine deficiency                                                       | 1,193.41<br>(68.86 to<br>4,347.10)                         | 5,807.80<br>(88.75 to<br>32,338.59)                        | 3,600.55<br>(46.99 to<br>19,120.20)                       | 8,914.44<br>(134.98 to<br>58,120.91)                       | 25.39<br>(1.59 to<br>77.93)                          | 118.57<br>(2.82 to<br>438.62)                        | 80.35<br>(1.56 to<br>272.70)                         | 160.42<br>(3.44 to<br>700.39)                        |
| Dietary iron deficiency                                                 | 362.93<br>(214.32 to<br>662.61)                            | 625.73<br>(333.78 to<br>1,162.65)                          | 511.69<br>(269.17 to<br>955.54)                           | 711.38<br>(383.60 to<br>1,308.67)                          | 6.91<br>(4.01 to<br>14.28)                           | 11.85<br>(6.30 to<br>23.55)                          | 9.84<br>(5.15 to<br>19.71)                           | 13.20<br>(7.16 to<br>25.46)                          |
| Other nutritional deficiencies                                          | 11,892.32<br>(6,926.65 to<br>17,863.84)                    | 19,204.06<br>(10,993.29 to<br>31,139.81)                   | 14,435.47<br>(8,238.70 to<br>23,810.11)                   | 23,051.55<br>(13,276.99 to<br>36,821.14)                   | 336.55<br>(183.07 to<br>521.22)                      | 511.62<br>(288.13 to<br>820.30)                      | 415.81<br>(230.44 to<br>680.81)                      | 568.70<br>(326.01 to<br>903.07)                      |
| <b>Other communicable, maternal, neonatal, and nutritional diseases</b> | <b>229,928.80</b><br>(122,743.59 to<br><b>428,548.37</b> ) | <b>174,131.70</b><br>(90,008.25 to<br><b>339,901.77</b> )  | <b>125,974.81</b><br>(65,968.29 to<br><b>240,147.23</b> ) | <b>282,991.64</b><br>(139,545.56 to<br><b>571,173.27</b> ) | <b>2,974.06</b><br>(1,698.01 to<br><b>5,260.62</b> ) | <b>2,421.32</b><br>(1,404.85 to<br><b>4,334.97</b> ) | <b>1,793.40</b><br>(1,072.24 to<br><b>3,202.02</b> ) | <b>3,719.22</b><br>(2,011.87 to<br><b>7,069.17</b> ) |
| Sexually transmitted infections excluding HIV                           | 135,574.94<br>(65,327.93 to<br>241,077.49)                 | 62,160.07<br>(23,316.31 to<br>130,778.07)                  | 47,664.58<br>(18,331.65 to<br>95,991.43)                  | 189,875.65<br>(55,984.41 to<br>216,728.78)                 | 1,640.68<br>(814.97 to<br>2,910.83)                  | 779.83<br>(313.95 to<br>1,570.89)                    | 603.00<br>(249.63 to<br>1,183.00)                    | 1,235.37<br>(467.91 to<br>2,590.81)                  |
| Syphilis                                                                | 132,877.30<br>(62,970.60 to<br>238,557.97)                 | 58,752.94<br>(20,367.74 to<br>125,928.47)                  | 44,876.79<br>(15,823.70 to<br>93,673.32)                  | 97,070.79<br>(32,788.34 to<br>211,280.30)                  | 1,584.50<br>(765.71 to<br>2,834.56)                  | 710.73<br>(257.66 to<br>1,487.03)                    | 545.12<br>(202.69 to<br>1,117.96)                    | 1,159.74<br>(405.87 to<br>2,500.80)                  |
| Chlamydial infection                                                    | 504.56<br>(232.59 to<br>918.11)                            | 650.53<br>(287.04 to<br>1,345.91)                          | 524.82<br>(229.39 to<br>1,089.88)                         | 731.43<br>(320.52 to<br>1,533.81)                          | 10.31<br>(4.86 to<br>18.69)                          | 13.00<br>(5.94 to<br>26.41)                          | 10.76<br>(4.96 to<br>21.60)                          | 14.32<br>(6.42 to<br>29.35)                          |
| Gonococcal infection                                                    | 1,394.61<br>(677.31 to<br>2,435.33)                        | 1,749.03<br>(775.79 to<br>3,596.04)                        | 1,440.30<br>(634.98 to<br>2,888.17)                       | 1,943.73<br>(843.64 to<br>3,933.73)                        | 29.59<br>(14.53 to<br>51.99)                         | 36.08<br>(16.44 to<br>72.66)                         | 30.48<br>(14.36 to<br>59.45)                         | 39.24<br>(17.49 to<br>78.83)                         |
| Other sexually transmitted infections                                   | 798.47<br>(386.60 to<br>1,409.79)                          | 1,007.57<br>(449.63 to<br>2,112.72)                        | 822.68<br>(372.46 to<br>1,716.93)                         | 1,129.69<br>(499.89 to<br>2,387.67)                        | 16.28<br>(7.99 to<br>28.16)                          | 20.02<br>(9.22 to<br>41.19)                          | 16.64<br>(7.58 to<br>33.31)                          | 22.06<br>(9.99 to<br>45.28)                          |
| Acute hepatitis                                                         | 15,786.30<br>(12,309.42 to<br>19,581.22)                   | 18,582.60<br>(12,999.78 to<br>25,982.21)                   | 14,050.55<br>(9,791.99 to<br>19,555.60)                   | 22,187.34<br>(15,315.07 to<br>31,159.35)                   | 354.25<br>(280.59 to<br>438.29)                      | 433.39<br>(312.01 to<br>578.81)                      | 338.73<br>(247.49 to<br>454.99)                      | 494.51<br>(359.31 to<br>674.81)                      |
| Acute hepatitis A                                                       | 548.92<br>(92.55 to<br>1,305.83)                           | 526.66<br>(149.21 to<br>1,279.20)                          | 389.79<br>(117.44 to<br>924.93)                           | 786.20<br>(182.20 to<br>2,041.16)                          | 7.40<br>(1.79 to<br>15.99)                           | 8.43<br>(3.06 to<br>17.92)                           | 6.47<br>(2.49 to<br>13.50)                           | 11.61<br>(3.59 to<br>27.49)                          |
| Acute hepatitis B                                                       | 12,161.88<br>(9,280.14 to<br>15,484.76)                    | 14,888.38<br>(10,163.54 to<br>21,286.53)                   | 11,079.07<br>(7,554.97 to<br>15,866.79)                   | 17,437.14<br>(11,970.29 to<br>24,900.67)                   | 290.78<br>(226.14 to<br>364.22)                      | 361.34<br>(257.48 to<br>494.58)                      | 276.82<br>(198.10 to<br>378.94)                      | 409.76<br>(294.17 to<br>566.94)                      |
| Acute hepatitis C                                                       | 290.75<br>(201.83 to<br>404.58)                            | 386.69<br>(251.51 to<br>564.65)                            | 343.17<br>(227.13 to<br>504.09)                           | 415.36<br>(269.57 to<br>606.64)                            | 7.96<br>(5.44 to<br>11.22)                           | 10.81<br>(7.08 to<br>15.85)                          | 9.96<br>(6.61 to<br>14.49)                           | 11.13<br>(7.39 to<br>16.15)                          |
| Acute hepatitis E                                                       | 2,784.76<br>(1,932.83 to<br>3,882.53)                      | 2,780.87<br>(1,730.42 to<br>4,175.32)                      | 2,238.52<br>(1,410.74 to<br>3,392.06)                     | 3,548.65<br>(2,153.91 to<br>5,532.89)                      | 48.10<br>(34.26 to<br>65.22)                         | 52.82<br>(34.92 to<br>76.41)                         | 45.47<br>(30.32 to<br>65.64)                         | 62.01<br>(40.41 to<br>92.02)                         |
| Other unspecified infectious diseases                                   | 78,567.56<br>(15,180.48 to<br>268,499.73)                  | 93,389.04<br>(29,568.55 to<br>260,324.76)                  | 64,259.68<br>(20,631.65 to<br>178,610.48)                 | 159,928.65<br>(51,021.65 to<br>443,485.29)                 | 979.13<br>(232.22 to<br>3,219.08)                    | 1,208.11<br>(441.70 to<br>3,163.42)                  | 851.68<br>(331.84 to<br>2,218.76)                    | 1,989.34<br>(704.14 to<br>5,311.76)                  |





|                                 |                                          |                                           |                                          |                                           |                                     |                                       |                                       |                                       |
|---------------------------------|------------------------------------------|-------------------------------------------|------------------------------------------|-------------------------------------------|-------------------------------------|---------------------------------------|---------------------------------------|---------------------------------------|
| Cervical cancer                 | 38,758.14<br>(20,582.91 to<br>58,952.68) | 64,919.54<br>(34,690.74 to<br>108,804.48) | 56,499.26<br>(31,099.47 to<br>95,754.75) | 68,785.60<br>(35,945.79 to<br>117,028.78) | 1,221.85<br>(652.90 to<br>1,875.24) | 1,913.72<br>(1,049.03 to<br>3,005.13) | 1,715.77<br>(956.77 to<br>2,783.69)   | 1,982.57<br>(1,073.10 to<br>3,132.59) |
| Uterine cancer                  | 3,984.57<br>(2,322.01 to<br>5,439.44)    | 7,933.31<br>(4,694.81 to<br>11,058.69)    | 6,765.03<br>(3,994.87 to<br>9,486.91)    | 8,380.29<br>(4,943.37 to<br>11,805.13)    | 140.12<br>(84.16 to<br>188.22)      | 264.94<br>(162.21 to<br>355.30)       | 234.87<br>(144.06 to<br>314.91)       | 272.08<br>(164.70 to<br>367.15)       |
| Ovarian cancer                  | 5,443.77<br>(3,891.14 to<br>7,402.11)    | 11,740.33<br>(7,955.06 to<br>16,062.92)   | 13,588.77<br>(9,339.19 to<br>18,553.53)  | 10,975.64<br>(7,326.96 to<br>15,181.61)   | 179.41<br>(128.79 to<br>239.41)     | 364.21<br>(248.83 to<br>493.44)       | 438.00<br>(306.41 to<br>588.58)       | 331.46<br>(224.12 to<br>454.28)       |
| Prostate cancer                 | 11,788.31<br>(4,437.18 to<br>17,614.72)  | 26,414.27<br>(10,299.82 to<br>37,014.87)  | 31,043.78<br>(12,790.40 to<br>42,809.99) | 23,568.23<br>(8,923.39 to<br>33,249.15)   | 608.08<br>(230.74 to<br>896.97)     | 1,358.52<br>(533.35 to<br>1,917.26)   | 1,686.03<br>(702.37 to<br>2,294.20)   | 1,171.01<br>(437.40 to<br>1,677.67)   |
| Testicular cancer               | 607.65<br>(418.24 to<br>1,029.35)        | 1,198.37<br>(780.01 to<br>2,106.38)       | 1,092.97<br>(709.20 to<br>1,916.95)      | 1,256.83<br>(816.13 to<br>2,213.61)       | 13.50<br>(9.19 to<br>23.39)         | 26.17<br>(17.36 to<br>46.86)          | 24.28<br>(16.15 to<br>42.91)          | 27.02<br>(17.86 to<br>48.39)          |
| <b>Somalia</b>                  |                                          |                                           |                                          |                                           |                                     |                                       |                                       |                                       |
| Cause                           | YLLs (actual counts)                     |                                           |                                          |                                           | Deaths (actual counts)              |                                       |                                       |                                       |
|                                 | 2016                                     | 2040 Forecast                             | 2040 Better Scenario                     | 2040 Worse Scenario                       | 2016                                | 2040 Forecast                         | 2040 Better Scenario                  | 2040 Worse Scenario                   |
| Kidney cancer                   | 1,783.48<br>(1,363.13 to<br>2,344.01)    | 3,703.92<br>(2,841.71 to<br>4,843.69)     | 4,318.04<br>(3,380.44 to<br>5,591.96)    | 3,917.26<br>(2,902.52 to<br>5,276.69)     | 40.86<br>(33.02 to<br>49.20)        | 87.97<br>(72.76 to<br>105.72)         | 107.57<br>(90.08 to<br>128.59)        | 84.76<br>(68.08 to<br>104.10)         |
| Bladder cancer                  | 2,434.31<br>(1,875.79 to<br>3,169.37)    | 4,558.70<br>(3,435.94 to<br>5,981.71)     | 4,557.48<br>(3,453.06 to<br>5,991.26)    | 4,525.19<br>(3,393.39 to<br>5,934.33)     | 105.50<br>(83.29 to<br>134.92)      | 185.98<br>(141.67 to<br>239.64)       | 200.09<br>(154.04 to<br>254.58)       | 175.34<br>(131.46 to<br>227.75)       |
| Brain and nervous system cancer | 5,525.18<br>(4,344.22 to<br>6,757.80)    | 13,111.02<br>(9,864.93 to<br>16,493.16)   | 14,088.92<br>(10,614.08 to<br>17,909.60) | 13,579.19<br>(10,181.10 to<br>17,183.26)  | 125.10<br>(99.56 to<br>152.94)      | 296.58<br>(231.59 to<br>360.02)       | 329.46<br>(258.13 to<br>404.02)       | 289.90<br>(224.94 to<br>353.92)       |
| Thyroid cancer                  | 3,078.87<br>(1,726.00 to<br>4,087.94)    | 5,625.10<br>(3,055.61 to<br>7,885.14)     | 4,911.80<br>(2,714.04 to<br>6,835.57)    | 6,271.63<br>(3,380.48 to<br>8,943.77)     | 96.04<br>(54.35 to<br>127.20)       | 167.60<br>(90.37 to<br>236.22)        | 151.90<br>(84.74 to<br>203.96)        | 181.93<br>(99.50 to<br>254.34)        |
| Mesothelioma                    | 337.50<br>(230.33 to<br>502.20)          | 741.99<br>(505.42 to<br>1,107.17)         | 721.81<br>(487.55 to<br>1,080.05)        | 743.34<br>(504.36 to<br>1,114.32)         | 11.19<br>(7.46 to<br>16.42)         | 22.97<br>(15.62 to<br>33.25)          | 23.36<br>(15.76 to<br>33.28)          | 22.31<br>(14.91 to<br>32.11)          |
| Hodgkin lymphoma                | 4,507.92<br>(2,144.30 to<br>6,636.69)    | 6,511.82<br>(2,951.30 to<br>10,179.52)    | 4,931.40<br>(2,228.14 to<br>7,665.66)    | 7,859.53<br>(3,468.72 to<br>12,372.93)    | 93.79<br>(44.87 to<br>132.25)       | 136.51<br>(63.09 to<br>202.85)        | 105.89<br>(49.96 to<br>157.28)        | 158.44<br>(71.98 to<br>237.16)        |
| Non-Hodgkin lymphoma            | 19,783.04<br>(12,475.47 to<br>26,454.57) | 39,551.35<br>(23,845.51 to<br>53,912.37)  | 42,717.44<br>(25,975.82 to<br>58,229.23) | 42,596.35<br>(25,319.61 to<br>57,924.43)  | 380.25<br>(245.19 to<br>491.93)     | 781.33<br>(485.27 to<br>1,028.12)     | 868.68<br>(553.84 to<br>1,137.99)     | 799.78<br>(491.15 to<br>1,058.76)     |
| Multiple myeloma                | 2,428.63<br>(1,597.93 to<br>3,205.60)    | 5,633.03<br>(3,579.80 to<br>7,507.03)     | 6,408.86<br>(4,131.79 to<br>8,535.47)    | 5,355.75<br>(3,346.06 to<br>7,279.95)     | 84.23<br>(55.80 to<br>109.67)       | 184.41<br>(118.62 to<br>238.63)       | 216.49<br>(144.06 to<br>280.31)       | 171.12<br>(107.19 to<br>227.29)       |
| Leukemia                        | 8,633.45<br>(6,907.13 to<br>10,609.28)   | 15,131.73<br>(11,422.15 to<br>19,605.81)  | 15,130.41<br>(11,446.75 to<br>19,615.45) | 16,735.83<br>(12,608.36 to<br>21,901.28)  | 187.04<br>(150.28 to<br>230.27)     | 338.05<br>(266.30 to<br>423.28)       | 348.33<br>(276.72 to<br>434.87)       | 355.55<br>(275.56 to<br>450.60)       |
| Acute lymphoid leukemia         | 2,477.64<br>(1,834.98 to<br>3,262.94)    | 4,336.32<br>(3,071.77 to<br>5,817.53)     | 4,622.66<br>(3,303.80 to<br>6,160.16)    | 4,778.22<br>(3,352.33 to<br>6,463.10)     | 44.14<br>(33.26 to<br>57.13)        | 80.95<br>(60.06 to<br>108.44)         | 87.65<br>(65.24 to<br>116.36)         | 85.61<br>(62.62 to<br>114.80)         |
| Chronic lymphoid leukemia       | 283.68<br>(203.46 to<br>384.42)          | 479.52<br>(350.51 to<br>640.95)           | 504.80<br>(376.86 to<br>681.45)          | 475.02<br>(340.71 to<br>647.12)           | 11.76<br>(8.49 to<br>15.87)         | 18.75<br>(13.88 to<br>24.94)          | 20.76<br>(15.64 to<br>27.56)          | 17.83<br>(12.92 to<br>23.94)          |
| Acute myeloid leukemia          | 1,437.11<br>(1,094.72 to<br>1,854.96)    | 3,290.85<br>(2,404.00 to<br>4,449.99)     | 3,732.92<br>(2,767.27 to<br>4,981.19)    | 3,415.67<br>(2,487.07 to<br>4,676.64)     | 29.25<br>(22.70 to<br>37.80)        | 70.16<br>(52.87 to<br>91.37)          | 82.34<br>(62.41 to<br>106.81)         | 69.46<br>(52.11 to<br>92.71)          |
| Chronic myeloid leukemia        | 1,045.03<br>(748.91 to<br>1,411.13)      | 1,381.36<br>(930.28 to<br>1,976.98)       | 1,350.12<br>(919.26 to<br>1,914.71)      | 1,453.53<br>(975.03 to<br>2,103.53)       | 25.42<br>(18.13 to<br>34.29)        | 32.92<br>(22.91 to<br>45.51)          | 32.92<br>(23.18 to<br>45.12)          | 34.00<br>(23.30 to<br>47.92)          |
| Other leukemia                  | 3,389.98<br>(2,496.90 to<br>4,741.60)    | 5,643.68<br>(3,910.41 to<br>7,900.08)     | 4,919.91<br>(3,409.77 to<br>7,055.61)    | 6,613.37<br>(4,512.05 to<br>9,410.83)     | 76.46<br>(56.91 to<br>102.34)       | 135.27<br>(99.94 to<br>184.06)        | 124.66<br>(90.49 to<br>168.41)        | 148.65<br>(105.88 to<br>203.83)       |
| Other neoplasms                 | 28,942.94<br>(23,113.51 to<br>35,455.23) | 73,813.65<br>(55,435.44 to<br>95,377.87)  | 75,207.42<br>(56,121.57 to<br>97,765.83) | 74,394.79<br>(56,227.54 to<br>96,123.46)  | 663.24<br>(531.05 to<br>813.38)     | 1,642.29<br>(1,278.10 to<br>2,058.42) | 1,713.83<br>(1,334.41 to<br>2,156.27) | 1,611.99<br>(1,255.65 to<br>2,022.74) |

|                                               |                                                 |                                                   |                                                 |                                                     |                                              |                                              |                                              |                                              |
|-----------------------------------------------|-------------------------------------------------|---------------------------------------------------|-------------------------------------------------|-----------------------------------------------------|----------------------------------------------|----------------------------------------------|----------------------------------------------|----------------------------------------------|
| <b>Cardiovascular diseases</b>                | <b>373,680.84</b><br>(311,164.91 to 450,173.59) | <b>785,140.65</b><br>(552,109.54 to 1,102,473.21) | <b>390,347.71</b><br>(284,219.67 to 544,922.61) | <b>1,176,185.54</b><br>(809,835.18 to 1,688,686.48) | <b>15,590.19</b><br>(13,027.10 to 18,410.73) | <b>30,421.78</b><br>(22,871.25 to 40,711.24) | <b>16,729.30</b><br>(12,992.96 to 21,744.57) | <b>42,535.14</b><br>(30,978.96 to 57,840.08) |
| Rheumatic heart disease                       | 9,890.44<br>(7,481.56 to 13,222.69)             | 9,059.15<br>(6,322.34 to 13,486.53)               | 6,350.28<br>(4,336.78 to 9,407.16)              | 11,111.58<br>(7,614.35 to 16,583.18)                | 289.90<br>(219.86 to 392.62)                 | 256.64<br>(189.34 to 365.64)                 | 189.30<br>(136.79 to 268.54)                 | 298.44<br>(215.02 to 429.65)                 |
| Ischemic heart disease                        | 157,312.60<br>(130,881.97 to 191,784.51)        | 352,684.27<br>(203,570.45 to 571,335.99)          | 147,715.32<br>(85,760.94 to 245,720.55)         | 564,453.26<br>(324,623.46 to 909,745.52)            | 6,894.42<br>(5,801.28 to 8,291.70)           | 14,297.39<br>(9,007.39 to 22,443.32)         | 6,835.79<br>(4,311.29 to 10,855.71)          | 21,185.46<br>(13,049.11 to 33,227.02)        |
| Stroke                                        | 126,240.65<br>(102,202.82 to 157,200.37)        | 257,006.44<br>(152,929.81 to 432,387.26)          | 104,350.88<br>(63,138.59 to 178,980.60)         | 401,644.29<br>(233,340.99 to 676,732.99)            | 5,247.42<br>(4,258.23 to 6,506.75)           | 9,837.50<br>(6,325.03 to 15,563.49)          | 4,499.47<br>(2,967.15 to 7,176.25)           | 14,392.55<br>(9,056.96 to 22,892.60)         |
| Ischemic stroke                               | 33,922.47<br>(27,210.85 to 42,023.97)           | 54,087.85<br>(31,642.47 to 91,744.42)             | 27,929.71<br>(17,193.54 to 47,338.46)           | 74,041.37<br>(42,259.62 to 124,424.56)              | 1,832.25<br>(1,480.55 to 2,254.45)           | 2,824.20<br>(1,694.95 to 5,087.69)           | 1,640.48<br>(1,040.87 to 2,890.07)           | 3,596.93<br>(2,145.27 to 6,316.10)           |
| Intracerebral hemorrhage                      | 92,318.18<br>(73,990.54 to 116,207.66)          | 202,918.59<br>(109,207.68 to 360,817.29)          | 76,421.17<br>(42,158.15 to 139,148.37)          | 327,602.92<br>(174,334.02 to 587,869.48)            | 3,415.17<br>(2,728.30 to 4,286.53)           | 7,013.30<br>(4,086.76 to 11,918.22)          | 2,858.99<br>(1,719.10 to 4,805.61)           | 10,795.62<br>(6,189.62 to 18,661.31)         |
| Hypertensive heart disease                    | 24,317.48<br>(13,168.21 to 34,783.88)           | 46,719.62<br>(24,596.79 to 81,358.80)             | 32,851.64<br>(18,292.94 to 54,165.40)           | 58,282.06<br>(28,871.53 to 112,692.25)              | 1,094.70<br>(640.80 to 1,556.89)             | 1,969.81<br>(1,068.38 to 3,286.22)           | 1,511.69<br>(887.02 to 2,364.38)             | 2,296.49<br>(1,151.84 to 4,364.29)           |
| Cardiomyopathy and myocarditis                | 7,520.31<br>(5,496.66 to 10,427.77)             | 14,651.02<br>(9,764.49 to 21,659.10)              | 14,555.77<br>(9,863.56 to 21,457.83)            | 16,039.32<br>(10,772.01 to 23,888.11)               | 185.55<br>(133.33 to 251.42)                 | 367.69<br>(246.53 to 523.86)                 | 384.27<br>(261.93 to 548.21)                 | 374.97<br>(249.30 to 543.33)                 |
| Myocarditis                                   | 1,299.55<br>(756.79 to 2,296.75)                | 2,211.68<br>(1,167.61 to 4,166.82)                | 2,006.18<br>(1,032.18 to 3,912.32)              | 2,572.98<br>(1,394.52 to 4,800.08)                  | 24.60<br>(13.98 to 45.26)                    | 45.06<br>(23.07 to 92.13)                    | 42.43<br>(20.66 to 89.41)                    | 49.13<br>(26.09 to 96.37)                    |
| <b>Somalia</b>                                |                                                 |                                                   |                                                 |                                                     |                                              |                                              |                                              |                                              |
| <b>Cause</b>                                  | <b>YLLs (actual counts)</b>                     |                                                   |                                                 |                                                     | <b>Deaths (actual counts)</b>                |                                              |                                              |                                              |
|                                               | <b>2016</b>                                     | <b>2040 Forecast</b>                              | <b>2040 Better Scenario</b>                     | <b>2040 Worse Scenario</b>                          | <b>2016</b>                                  | <b>2040 Forecast</b>                         | <b>2040 Better Scenario</b>                  | <b>2040 Worse Scenario</b>                   |
| Alcoholic cardiomyopathy                      | 380.45<br>(206.88 to 690.70)                    | 774.05<br>(405.14 to 1,448.98)                    | 852.10<br>(453.51 to 1,640.69)                  | 740.34<br>(387.66 to 1,374.54)                      | 11.77<br>(6.39 to 21.29)                     | 22.06<br>(11.89 to 40.41)                    | 24.99<br>(13.61 to 46.86)                    | 20.63<br>(11.00 to 37.69)                    |
| Other cardiomyopathy                          | 5,840.31<br>(4,137.28 to 8,045.99)              | 11,665.29<br>(7,347.84 to 17,831.49)              | 11,697.49<br>(7,555.59 to 17,843.39)            | 12,726.00<br>(7,962.43 to 19,701.30)                | 149.18<br>(105.61 to 205.41)                 | 300.56<br>(196.74 to 448.05)                 | 316.85<br>(209.24 to 461.72)                 | 305.21<br>(197.87 to 460.71)                 |
| Atrial fibrillation and flutter               | 917.20<br>(678.20 to 1,224.30)                  | 1,655.40<br>(1,227.48 to 2,173.57)                | 1,937.14<br>(1,431.21 to 2,542.70)              | 1,505.65<br>(1,087.83 to 1,991.44)                  | 72.40<br>(52.77 to 96.65)                    | 127.20<br>(87.00 to 177.66)                  | 166.08<br>(117.92 to 228.97)                 | 106.54<br>(70.49 to 149.34)                  |
| Aortic aneurysm                               | 2,266.79<br>(1,523.50 to 3,505.72)              | 4,757.39<br>(3,063.71 to 7,614.51)                | 4,683.96<br>(3,062.62 to 7,513.87)              | 4,922.66<br>(3,073.67 to 7,908.63)                  | 89.63<br>(64.37 to 135.13)                   | 172.24<br>(120.76 to 255.63)                 | 184.98<br>(132.60 to 274.25)                 | 168.19<br>(115.14 to 250.66)                 |
| Peripheral artery disease                     | 114.69<br>(40.15 to 208.58)                     | 296.63<br>(97.42 to 567.24)                       | 350.07<br>(124.36 to 679.60)                    | 274.73<br>(87.50 to 533.54)                         | 6.89<br>(2.45 to 12.49)                      | 17.71<br>(5.84 to 33.49)                     | 23.58<br>(8.27 to 46.01)                     | 15.19<br>(4.90 to 28.21)                     |
| Endocarditis                                  | 4,134.56<br>(3,059.04 to 5,206.73)              | 9,741.75<br>(6,290.11 to 14,118.98)               | 8,974.07<br>(5,863.04 to 12,946.81)             | 10,800.25<br>(6,933.84 to 15,880.61)                | 111.30<br>(79.95 to 142.46)                  | 245.61<br>(162.42 to 336.46)                 | 241.56<br>(160.90 to 328.82)                 | 254.73<br>(167.73 to 355.93)                 |
| Other cardiovascular and circulatory diseases | 40,966.12<br>(30,852.03 to 60,160.76)           | 88,568.97<br>(64,343.78 to 130,344.60)            | 88,578.58<br>(49,706.34 to 100,712.97)          | 107,151.76<br>(75,763.67 to 159,446.53)             | 1,507.96<br>(1,127.75 to 2,147.83)           | 3,130.01<br>(2,344.47 to 4,414.36)           | 2,692.57<br>(2,045.41 to 3,736.64)           | 3,442.59<br>(2,489.19 to 4,953.12)           |
| <b>Chronic respiratory diseases</b>           | <b>53,719.72</b><br>(42,433.30 to 66,474.38)    | <b>64,739.65</b><br>(44,623.46 to 97,648.79)      | <b>40,990.18</b><br>(30,295.48 to 55,979.73)    | <b>85,487.01</b><br>(56,866.72 to 131,756.51)       | <b>1,954.73</b><br>(1,553.95 to 2,385.99)    | <b>2,332.43</b><br>(1,598.43 to 3,550.85)    | <b>1,536.27</b><br>(1,158.35 to 2,065.24)    | <b>2,863.20</b><br>(1,908.81 to 4,435.68)    |
| Chronic obstructive pulmonary disease         | 26,369.84<br>(18,311.68 to 33,427.84)           | 39,686.58<br>(23,086.67 to 69,303.34)             | 21,105.19<br>(13,612.70 to 32,009.59)           | 53,134.30<br>(30,061.95 to 95,225.60)               | 1,187.05<br>(833.21 to 1,496.64)             | 1,654.39<br>(1,001.45 to 2,828.45)           | 965.86<br>(631.78 to 1,489.41)               | 2,039.98<br>(1,172.29 to 3,563.55)           |
| Pneumoconiosis                                | 155.14<br>(99.93 to 244.95)                     | 219.44<br>(143.99 to 331.67)                      | 187.11<br>(120.22 to 295.86)                    | 223.85<br>(144.43 to 333.78)                        | 6.57<br>(4.20 to 10.46)                      | 9.03<br>(5.94 to 13.42)                      | 8.27<br>(5.30 to 12.66)                      | 8.71<br>(5.71 to 12.96)                      |
| Silicosis                                     | 32.31<br>(11.18 to 62.28)                       | 28.82<br>(9.45 to 54.36)                          | 26.23<br>(8.43 to 53.04)                        | 29.46<br>(54.82)                                    | 1.51<br>(0.50 to 2.92)                       | 1.34<br>(0.44 to 2.56)                       | 1.32<br>(0.43 to 2.67)                       | 1.30<br>(0.43 to 2.45)                       |

|                                                                |                                           |                                            |                                            |                                             |                                       |                                       |                                       |                                       |
|----------------------------------------------------------------|-------------------------------------------|--------------------------------------------|--------------------------------------------|---------------------------------------------|---------------------------------------|---------------------------------------|---------------------------------------|---------------------------------------|
|                                                                | 30.62<br>(12.71 to<br>59.96)              | 56.32<br>(24.04 to<br>105.84)              | 57.78<br>(25.12 to<br>108.39)              | 54.94<br>(23.48 to<br>99.72)                | 1.10<br>(0.37 to<br>2.36)             | 2.01<br>(0.72 to<br>4.15)             | 2.24<br>(0.80 to<br>4.54)             | 1.85<br>(0.68 to<br>3.70)             |
| Asbestosis                                                     | 18.32<br>(5.15 to<br>42.70)               | 25.49<br>(7.24 to<br>55.19)                | 15.92<br>(4.22 to<br>36.83)                | 28.84<br>(8.43 to<br>62.94)                 | 0.80<br>(0.23 to<br>1.83)             | 1.08<br>(0.32 to<br>2.31)             | 0.71<br>(0.19 to<br>1.61)             | 1.16<br>(0.36 to<br>2.51)             |
| Coal workers pneumoconiosis                                    | 73.90<br>(39.64 to<br>126.34)             | 108.81<br>(60.77 to<br>172.59)             | 87.18<br>(47.70 to<br>147.72)              | 110.61<br>(60.04 to<br>174.27)              | 3.16<br>(1.70 to<br>5.38)             | 4.60<br>(2.49 to<br>7.29)             | 3.99<br>(2.15 to<br>6.78)             | 4.40<br>(2.34 to<br>6.92)             |
| Other pneumoconiosis                                           | 25,023.77<br>(18,880.15 to<br>32,296.88)  | 20,421.87<br>(13,059.07 to<br>29,799.28)   | 15,426.43<br>(10,245.78 to<br>22,076.99)   | 27,203.54<br>(17,315.58 to<br>40,857.80)    | 708.25<br>(512.22 to<br>907.76)       | 560.02<br>(367.07 to<br>798.45)       | 447.04<br>(304.94 to<br>624.14)       | 703.57<br>(443.36 to<br>1,042.70)     |
| Asthma                                                         | 489.43<br>(151.00 to<br>1,193.05)         | 1,091.88<br>(328.29 to<br>2,561.87)        | 1,327.64<br>(412.11 to<br>3,038.49)        | 996.44<br>(302.83 to<br>2,402.65)           | 17.97<br>(5.32 to<br>40.92)           | 38.14<br>(11.08 to<br>84.62)          | 49.63<br>(14.98 to<br>108.04)         | 32.58<br>(9.58 to<br>73.71)           |
| Interstitial lung disease and pulmonary sarcoidosis            | 1,681.54<br>(678.58 to<br>3,228.88)       | 3,319.88<br>(1,490.48 to<br>5,749.64)      | 2,943.81<br>(1,378.59 to<br>5,083.41)      | 3,928.88<br>(1,666.02 to<br>7,280.55)       | 34.88<br>(16.48 to<br>56.37)          | 70.86<br>(34.33 to<br>108.15)         | 65.47<br>(33.47 to<br>99.62)          | 78.35<br>(36.40 to<br>125.49)         |
| Other chronic respiratory diseases                             | 59,653.86<br>(46,243.48 to<br>77,121.48)  | 120,394.85<br>(89,656.34 to<br>162,229.38) | 107,898.91<br>(79,717.32 to<br>145,099.95) | 127,459.19<br>(94,362.40 to<br>172,314.70)  | 1,798.19<br>(1,407.21 to<br>2,307.79) | 3,451.54<br>(2,686.40 to<br>4,493.61) | 3,193.87<br>(2,504.68 to<br>4,189.15) | 3,529.77<br>(2,721.51 to<br>4,594.69) |
| Cirrhosis and other chronic liver diseases                     | 21,688.58<br>(16,042.67 to<br>29,512.98)  | 45,493.81<br>(32,366.60 to<br>63,294.04)   | 41,453.11<br>(29,533.63 to<br>58,361.70)   | 46,948.41<br>(33,339.62 to<br>66,060.50)    | 693.44<br>(525.28 to<br>937.48)       | 1,359.54<br>(1,019.17 to<br>1,842.98) | 1,287.63<br>(970.02 to<br>1,744.54)   | 1,363.72<br>(1,011.89 to<br>1,837.85) |
| Cirrhosis and other chronic liver diseases due to hepatitis B  | 6,118.57<br>(3,900.29 to<br>9,399.48)     | 12,992.54<br>(7,860.15 to<br>20,984.45)    | 11,772.24<br>(7,203.70 to<br>18,905.57)    | 13,442.28<br>(8,177.33 to<br>21,893.00)     | 194.26<br>(124.36 to<br>292.98)       | 386.73<br>(247.58 to<br>596.79)       | 362.75<br>(233.18 to<br>556.34)       | 389.92<br>(246.57 to<br>601.38)       |
| Cirrhosis and other chronic liver diseases due to hepatitis C  | 15,520.66<br>(11,545.39 to<br>20,773.42)  | 32,022.65<br>(22,835.42 to<br>44,008.66)   | 27,600.90<br>(19,613.75 to<br>38,490.64)   | 34,123.70<br>(24,429.19 to<br>47,012.76)    | 517.19<br>(394.16 to<br>681.48)       | 998.38<br>(744.32 to<br>1,331.41)     | 896.77<br>(667.24 to<br>1,209.61)     | 1,033.45<br>(762.33 to<br>1,391.14)   |
| Cirrhosis and other chronic liver diseases due to alcohol use  | 16,326.06<br>(12,844.17 to<br>20,276.87)  | 29,885.86<br>(22,126.44 to<br>39,975.69)   | 26,262.66<br>(19,401.18 to<br>34,994.49)   | 32,944.80<br>(24,371.14 to<br>43,994.62)    | 393.30<br>(311.66 to<br>489.74)       | 706.89<br>(545.25 to<br>905.49)       | 646.72<br>(499.88 to<br>831.76)       | 742.68<br>(570.48 to<br>946.28)       |
| Cirrhosis and other chronic liver diseases due to other causes | 85,476.97<br>(66,801.87 to<br>107,464.93) | 128,462.18<br>(98,274.73 to<br>166,243.61) | 108,307.83<br>(82,466.21 to<br>140,086.34) | 147,884.08<br>(110,909.79 to<br>192,670.55) | 2,456.10<br>(1,956.44 to<br>3,004.83) | 3,660.34<br>(2,880.47 to<br>4,453.80) | 3,293.40<br>(2,627.71 to<br>4,000.84) | 3,916.66<br>(3,048.60 to<br>4,813.87) |
| Digestive diseases                                             | 17,905.56<br>(12,264.21 to<br>24,349.96)  | 17,615.80<br>(11,536.11 to<br>25,452.34)   | 12,178.42<br>(7,872.77 to<br>17,673.67)    | 21,357.62<br>(13,863.65 to<br>30,973.23)    | 613.34<br>(417.55 to<br>829.32)       | 585.54<br>(392.17 to<br>816.42)       | 437.16<br>(286.92 to<br>612.35)       | 665.92<br>(443.39 to<br>924.71)       |
| Peptic ulcer disease                                           |                                           |                                            |                                            |                                             |                                       |                                       |                                       |                                       |

**Somalia**

| Cause                                      | YLLs (actual counts)                     |                                          |                                          |                                          | Deaths (actual counts)                 |                                       |                                       |                                       |
|--------------------------------------------|------------------------------------------|------------------------------------------|------------------------------------------|------------------------------------------|----------------------------------------|---------------------------------------|---------------------------------------|---------------------------------------|
|                                            | 2016                                     | 2040 Forecast                            | 2040 Better Scenario                     | 2040 Worse Scenario                      | 2016                                   | 2040 Forecast                         | 2040 Better Scenario                  | 2040 Worse Scenario                   |
|                                            | Gastritis and duodenitis                 | 3,691.16<br>(2,452.03 to<br>5,337.25)    | 6,707.40<br>(4,332.42 to<br>9,979.28)    | 5,817.20<br>(3,711.73 to<br>8,639.76)    | 7,228.05<br>(4,758.62 to<br>10,665.79) | 120.73<br>(82.76 to<br>181.31)        | 214.52<br>(144.71 to<br>324.79)       | 201.24<br>(136.04 to<br>310.62)       |
| Appendicitis                               | 7,624.04<br>(4,977.42 to<br>10,664.61)   | 10,304.06<br>(6,354.71 to<br>15,570.13)  | 7,711.85<br>(4,849.74 to<br>11,446.73)   | 12,709.28<br>(7,724.34 to<br>19,108.67)  | 155.79<br>(102.69 to<br>215.43)        | 222.89<br>(140.74 to<br>320.29)       | 174.27<br>(110.16 to<br>252.30)       | 259.13<br>(163.76 to<br>375.93)       |
| Paralytic ileus and intestinal obstruction | 30,908.93<br>(22,514.13 to<br>43,584.67) | 51,134.81<br>(37,641.52 to<br>68,834.86) | 46,953.93<br>(34,734.36 to<br>63,750.87) | 57,630.83<br>(41,377.75 to<br>82,166.29) | 788.73<br>(606.59 to<br>1,027.12)      | 1,348.73<br>(1,052.07 to<br>1,720.41) | 1,322.88<br>(1,034.04 to<br>1,721.75) | 1,390.22<br>(1,072.87 to<br>1,797.87) |
| Inguinal, femoral, and abdominal hernia    | 4,181.57<br>(1,549.13 to<br>6,653.25)    | 5,372.81<br>(1,932.90 to<br>8,887.41)    | 4,310.14<br>(1,578.64 to<br>7,107.03)    | 6,150.66<br>(2,137.54 to<br>10,267.35)   | 116.59<br>(45.17 to<br>184.07)         | 143.72<br>(53.16 to<br>228.25)        | 121.32<br>(45.60 to<br>192.07)        | 155.88<br>(56.87 to<br>250.48)        |
| Inflammatory bowel disease                 | 3,005.19<br>(1,278.49 to<br>6,062.81)    | 5,228.53<br>(2,251.66 to<br>10,074.15)   | 5,158.88<br>(2,270.60 to<br>9,869.60)    | 5,451.79<br>(2,274.24 to<br>10,869.27)   | 80.48<br>(37.69 to<br>147.29)          | 139.49<br>(66.23 to<br>245.14)        | 147.32<br>(71.58 to<br>252.88)        | 135.66<br>(62.45 to<br>248.30)        |
| Vascular intestinal disorders              | 1,859.93<br>(853.93 to<br>3,002.76)      | 3,663.65<br>(1,688.47 to<br>5,901.28)    | 3,477.35<br>(1,612.47 to<br>5,508.88)    | 3,685.64<br>(1,702.46 to<br>5,910.22)    | 78.67<br>(35.65 to<br>124.42)          | 149.84<br>(70.98 to<br>231.59)        | 154.72<br>(73.97 to<br>239.02)        | 140.83<br>(66.60 to<br>224.07)        |
| Gallbladder and biliary diseases           | 4,183.26<br>(2,937.83 to<br>5,574.19)    | 5,973.06<br>(3,630.95 to<br>9,335.76)    | 4,520.04<br>(2,836.40 to<br>6,965.23)    | 7,966.59<br>(4,539.96 to<br>12,981.39)   | 156.49<br>(112.37 to<br>224.68)        | 214.12<br>(130.92 to<br>337.89)       | 177.49<br>(112.97 to<br>280.52)       | 266.81<br>(153.16 to<br>433.06)       |

|                                                     |                                                   |                                                   |                                                   |                                                   |                                              |                                                |                                                |                                                |
|-----------------------------------------------------|---------------------------------------------------|---------------------------------------------------|---------------------------------------------------|---------------------------------------------------|----------------------------------------------|------------------------------------------------|------------------------------------------------|------------------------------------------------|
| Pancreatitis                                        | 2,802.31<br>(1,862.56 to<br>4,262.02)             | 6,275.30<br>(3,471.93 to<br>12,012.18)            | 5,051.99<br>(2,879.72 to<br>9,015.69)             | 7,076.69<br>(3,776.54 to<br>14,662.86)            | 76.13<br>(50.74 to<br>117.38)                | 164.13<br>(93.93 to<br>308.54)                 | 137.60<br>(81.87 to<br>247.34)                 | 179.64<br>(99.52 to<br>372.34)                 |
| Other digestive diseases                            | 9,315.04<br>(5,644.54 to<br>15,332.71)            | 16,186.76<br>(9,653.52 to<br>26,327.31)           | 13,128.03<br>(7,693.69 to<br>21,454.26)           | 18,626.92<br>(10,702.78 to<br>30,457.17)          | 477.34<br>(171.84 to<br>437.65)              | 477.34<br>(301.22 to<br>746.75)                | 419.39<br>(260.31 to<br>652.81)                | 505.90<br>(312.83 to<br>786.22)                |
| <b>Neurological disorders</b>                       | <b>28,242.06<br/>(22,258.14 to<br/>34,514.16)</b> | <b>54,964.97<br/>(42,751.32 to<br/>68,379.25)</b> | <b>51,474.68<br/>(40,915.62 to<br/>63,374.12)</b> | <b>61,038.06<br/>(46,025.45 to<br/>77,572.97)</b> | <b>1,072.98<br/>(881.24 to<br/>1,308.48)</b> | <b>1,921.75<br/>(1,495.42 to<br/>2,360.94)</b> | <b>2,269.13<br/>(1,798.03 to<br/>2,764.85)</b> | <b>1,825.80<br/>(1,391.14 to<br/>2,279.67)</b> |
| Alzheimer's disease and other dementias             | 8,210.61<br>(6,460.07 to<br>10,515.77)            | 13,412.96<br>(9,639.74 to<br>17,839.91)           | 16,895.95<br>(12,745.12 to<br>21,822.48)          | 11,938.77<br>(7,942.19 to<br>16,955.77)           | 680.16<br>(535.56 to<br>863.62)              | 1,097.10<br>(711.90 to<br>1,515.58)            | 1,517.66<br>(1,088.45 to<br>1,999.75)          | 911.63<br>(545.62 to<br>1,326.70)              |
| Parkinson's disease                                 | 569.19<br>(415.51 to<br>764.81)                   | 1,171.75<br>(834.26 to<br>1,575.35)               | 1,710.11<br>(1,270.37 to<br>2,259.37)             | 916.29<br>(633.34 to<br>1,258.24)                 | 42.40<br>(31.03 to<br>57.25)                 | 85.16<br>(56.34 to<br>118.67)                  | 134.38<br>(95.59 to<br>180.99)                 | 63.06<br>(40.22 to<br>88.83)                   |
| Epilepsy                                            | 16,968.24<br>(12,162.78 to<br>21,604.77)          | 34,966.18<br>(24,002.79 to<br>48,055.86)          | 26,933.60<br>(18,210.36 to<br>37,565.59)          | 42,325.50<br>(29,019.50 to<br>57,815.24)          | 304.33<br>(223.67 to<br>384.08)              | 635.13<br>(448.85 to<br>860.11)                | 499.60<br>(350.99 to<br>678.28)                | 745.07<br>(523.77 to<br>999.45)                |
| Multiple sclerosis                                  | 169.62<br>(105.67 to<br>308.35)                   | 418.00<br>(254.09 to<br>766.89)                   | 448.38<br>(267.78 to<br>817.48)                   | 402.72<br>(245.34 to<br>730.41)                   | 4.54<br>(2.75 to<br>7.93)                    | 10.64<br>(6.35 to<br>18.40)                    | 11.66<br>(6.96 to<br>20.30)                    | 10.11<br>(6.06 to<br>17.71)                    |
| Motor neuron disease                                | 137.25<br>(88.25 to<br>248.87)                    | 286.34<br>(185.39 to<br>529.72)                   | 323.13<br>(211.26 to<br>587.16)                   | 293.58<br>(189.06 to<br>542.01)                   | 3.23<br>(2.07 to<br>6.35)                    | 7.52<br>(4.96 to<br>14.98)                     | 8.74<br>(5.79 to<br>17.27)                     | 7.16<br>(4.63 to<br>13.84)                     |
| Other neurological disorders                        | 2,187.15<br>(1,671.83 to<br>2,822.56)             | 4,709.74<br>(3,619.16 to<br>6,031.58)             | 5,163.51<br>(3,960.68 to<br>6,624.16)             | 5,161.20<br>(3,857.14 to<br>6,778.28)             | 86.19<br>(30.94 to<br>46.17)                 | 86.19<br>(67.28 to<br>107.23)                  | 97.10<br>(75.23 to<br>121.21)                  | 88.77<br>(70.69 to<br>109.71)                  |
| <b>Mental disorders</b>                             | <b>3,884.10<br/>(2,470.42 to<br/>5,887.40)</b>    | <b>8,638.67<br/>(5,377.83 to<br/>13,173.83)</b>   | <b>8,468.97<br/>(5,308.95 to<br/>12,800.78)</b>   | <b>8,670.40<br/>(5,353.39 to<br/>13,351.51)</b>   | <b>112.22<br/>(73.99 to<br/>167.03)</b>      | <b>229.50<br/>(149.72 to<br/>340.25)</b>       | <b>234.02<br/>(152.96 to<br/>341.07)</b>       | <b>223.49<br/>(144.41 to<br/>336.73)</b>       |
| Alcohol use disorders                               | 2,934.88<br>(1,677.91 to<br>4,742.02)             | 5,482.75<br>(2,939.56 to<br>9,275.75)             | 5,310.42<br>(2,836.54 to<br>8,910.72)             | 5,503.67<br>(2,941.52 to<br>9,332.70)             | 91.48<br>(56.14 to<br>142.92)                | 161.28<br>(92.29 to<br>259.20)                 | 163.85<br>(95.05 to<br>257.99)                 | 156.35<br>(88.64 to<br>253.86)                 |
| Drug use disorders                                  | 930.08<br>(630.02 to<br>1,392.09)                 | 3,104.11<br>(1,978.72 to<br>4,638.14)             | 3,105.29<br>(1,983.46 to<br>4,634.25)             | 3,114.13<br>(1,982.51 to<br>4,653.72)             | 20.41<br>(13.80 to<br>30.10)                 | 67.28<br>(43.74 to<br>97.99)                   | 69.21<br>(45.76 to<br>100.14)                  | 66.20<br>(42.82 to<br>97.46)                   |
| Opioid use disorders                                | 703.59<br>(421.14 to<br>1,147.43)                 | 2,216.96<br>(1,223.00 to<br>3,610.59)             | 2,221.64<br>(1,249.80 to<br>3,580.44)             | 2,222.57<br>(1,225.17 to<br>3,606.98)             | 14.91<br>(8.65 to<br>24.08)                  | 46.76<br>(26.15 to<br>74.97)                   | 47.79<br>(27.33 to<br>75.63)                   | 46.16<br>(25.58 to<br>74.49)                   |
| Cocaine use disorders                               | 51.89<br>(12.54 to<br>115.87)                     | 211.61<br>(53.02 to<br>472.17)                    | 193.22<br>(48.58 to<br>427.30)                    | 220.58<br>(55.15 to<br>492.76)                    | 1.16<br>(0.28 to<br>2.52)                    | 4.63<br>(1.21 to<br>10.13)                     | 4.28<br>(1.14 to<br>9.45)                      | 4.77<br>(1.23 to<br>10.40)                     |
| Amphetamine use disorders                           | 29.87<br>(9.59 to<br>70.84)                       | 173.30<br>(58.30 to<br>396.82)                    | 147.33<br>(49.78 to<br>341.17)                    | 187.70<br>(62.05 to<br>431.57)                    | 0.64<br>(0.21 to<br>1.48)                    | 3.65<br>(1.24 to<br>8.24)                      | 3.13<br>(1.07 to<br>7.00)                      | 3.92<br>(1.30 to<br>8.87)                      |
| Other drug use disorders                            | 144.74<br>(91.21 to<br>222.06)                    | 502.24<br>(299.01 to<br>788.19)                   | 543.11<br>(323.01 to<br>846.90)                   | 483.28<br>(287.36 to<br>762.63)                   | 3.70<br>(2.42 to<br>5.58)                    | 12.25<br>(7.83 to<br>18.31)                    | 14.02<br>(9.08 to<br>20.64)                    | 11.35<br>(7.16 to<br>17.22)                    |
| Eating disorders                                    | 19.14<br>(9.91 to<br>40.97)                       | 51.81<br>(25.97 to<br>101.74)                     | 53.26<br>(26.11 to<br>106.78)                     | 52.60<br>(26.28 to<br>101.88)                     | 0.34<br>(0.18 to<br>0.72)                    | 0.94<br>(0.47 to<br>1.85)                      | 0.97<br>(0.47 to<br>1.94)                      | 0.94<br>(0.48 to<br>1.83)                      |
| <b>Somalia</b>                                      |                                                   |                                                   |                                                   |                                                   |                                              |                                                |                                                |                                                |
| Cause                                               | YLLs (actual counts)                              |                                                   |                                                   |                                                   | Deaths (actual counts)                       |                                                |                                                |                                                |
|                                                     | 2016                                              | 2040 Forecast                                     | 2040 Better Scenario                              | 2040 Worse Scenario                               | 2016                                         | 2040 Forecast                                  | 2040 Better Scenario                           | 2040 Worse Scenario                            |
| Diabetes, urogenital, blood, and endocrine diseases | 112,335.63<br>(94,096.08 to<br>133,129.32)        | 259,703.41<br>(196,038.87 to<br>347,418.95)       | 184,665.91<br>(138,184.43 to<br>243,302.84)       | 318,522.07<br>(239,868.87 to<br>421,689.92)       | 3,402.80<br>(2,897.44 to<br>4,014.23)        | 8,553.12<br>(6,515.48 to<br>12,006.34)         | 6,322.13<br>(4,784.06 to<br>8,732.47)          | 9,851.84<br>(7,530.94 to<br>13,616.29)         |
| Diabetes mellitus                                   | 45,652.79<br>(37,234.85 to<br>54,982.13)          | 130,712.17<br>(83,238.21 to<br>196,242.60)        | 88,684.69<br>(57,161.64 to<br>134,715.33)         | 159,581.47<br>(99,732.38 to<br>244,341.98)        | 1,821.27<br>(1,503.50 to<br>2,179.95)        | 4,890.04<br>(3,253.49 to<br>7,023.34)          | 3,571.98<br>(2,438.23 to<br>5,068.55)          | 5,672.33<br>(3,748.74 to<br>8,250.35)          |
| Acute glomerulonephritis                            | 159.31<br>(102.88 to<br>266.49)                   | 365.34<br>(225.73 to<br>627.16)                   | 305.56<br>(186.98 to<br>526.21)                   | 458.01<br>(275.36 to<br>786.84)                   | 2.90<br>(1.95 to<br>4.37)                    | 6.26<br>(4.08 to<br>9.85)                      | 5.39<br>(3.51 to<br>8.54)                      | 7.43<br>(4.76 to<br>11.88)                     |

|                                                            |                                          |                                           |                                          |                                           |                                 |                                       |                                     |                                       |
|------------------------------------------------------------|------------------------------------------|-------------------------------------------|------------------------------------------|-------------------------------------------|---------------------------------|---------------------------------------|-------------------------------------|---------------------------------------|
| Chronic kidney disease                                     | 22,057.69<br>(17,509.84 to<br>27,802.50) | 62,396.71<br>(36,422.74 to<br>129,012.40) | 40,972.10<br>(24,325.58 to<br>85,343.13) | 75,839.81<br>(45,471.67 to<br>144,794.11) | 679.21<br>(540.19 to<br>854.54) | 2,199.92<br>(1,000.48 to<br>5,724.26) | 1,489.99<br>(691.62 to<br>4,023.55) | 2,502.76<br>(1,163.72 to<br>6,273.73) |
| Chronic kidney disease due to diabetes mellitus            | 5,068.57<br>(3,817.36 to<br>6,593.07)    | 16,738.04<br>(8,333.83 to<br>39,097.31)   | 10,956.60<br>(5,681.84 to<br>25,639.89)  | 19,519.83<br>(9,927.44 to<br>44,650.04)   | 190.94<br>(144.91 to<br>249.47) | 682.51<br>(268.66 to<br>1,943.03)     | 461.11<br>(194.57 to<br>1,307.55)   | 762.40<br>(307.41 to<br>2,100.67)     |
| Chronic kidney disease due to hypertension                 | 2,789.93<br>(2,107.03 to<br>3,674.58)    | 9,037.30<br>(3,813.29 to<br>26,191.65)    | 5,975.39<br>(2,590.81 to<br>17,446.70)   | 10,302.07<br>(4,365.13 to<br>27,392.79)   | 132.15<br>(99.00 to<br>175.36)  | 462.88<br>(155.56 to<br>1,470.40)     | 325.66<br>(116.90 to<br>1,066.17)   | 499.02<br>(170.45 to<br>1,542.96)     |
| Chronic kidney disease due to glomerulonephritis           | 6,757.70<br>(5,217.84 to<br>8,551.08)    | 17,271.88<br>(11,195.76 to<br>28,572.41)  | 11,327.30<br>(7,245.31 to<br>18,545.97)  | 21,816.73<br>(14,300.01 to<br>34,424.66)  | 162.64<br>(124.47 to<br>210.62) | 470.92<br>(252.35 to<br>1,018.15)     | 312.14<br>(166.65 to<br>688.64)     | 560.37<br>(310.86 to<br>1,170.60)     |
| Chronic kidney disease due to other and unspecified causes | 7,441.49<br>(5,815.68 to<br>9,495.86)    | 19,349.48<br>(11,730.23 to<br>34,589.42)  | 12,712.81<br>(7,886.23 to<br>22,335.92)  | 24,201.18<br>(15,316.57 to<br>41,392.29)  | 193.48<br>(148.48 to<br>248.44) | 583.61<br>(290.02 to<br>1,428.79)     | 391.08<br>(197.99 to<br>1,001.94)   | 680.96<br>(351.13 to<br>1,578.19)     |
| Urinary diseases and male infertility                      | 9,820.93<br>(7,850.22 to<br>11,922.26)   | 18,348.75<br>(14,086.09 to<br>23,092.55)  | 15,707.62<br>(12,194.04 to<br>19,757.17) | 20,592.47<br>(15,565.57 to<br>25,791.68)  | 270.19<br>(218.53 to<br>326.57) | 483.87<br>(385.52 to<br>579.54)       | 439.84<br>(355.93 to<br>528.37)     | 510.90<br>(398.44 to<br>616.24)       |
| Urinary tract infections                                   | 3,338.70<br>(1,900.39 to<br>5,014.64)    | 7,998.41<br>(4,913.28 to<br>11,354.34)    | 7,621.16<br>(4,799.88 to<br>10,663.02)   | 8,530.06<br>(5,123.32 to<br>12,290.80)    | 91.69<br>(53.62 to<br>135.91)   | 217.30<br>(134.41 to<br>300.47)       | 220.29<br>(142.12 to<br>296.06)     | 216.38<br>(131.59 to<br>304.27)       |
| Urolithiasis                                               | 214.08<br>(106.81 to<br>345.40)          | 554.65<br>(300.21 to<br>913.51)           | 490.44<br>(273.65 to<br>794.25)          | 609.54<br>(322.26 to<br>988.46)           | 4.82<br>(2.38 to<br>8.64)       | 11.87<br>(6.49 to<br>20.57)           | 10.90<br>(6.34 to<br>18.44)         | 12.57<br>(6.87 to<br>21.64)           |
| Other urinary diseases                                     | 6,268.14<br>(4,125.98 to<br>8,229.20)    | 9,795.69<br>(5,655.44 to<br>14,122.71)    | 7,596.03<br>(4,351.67 to<br>11,055.22)   | 11,452.87<br>(6,680.00 to<br>16,178.19)   | 173.68<br>(114.81 to<br>224.28) | 254.91<br>(149.83 to<br>352.62)       | 208.66<br>(121.01 to<br>296.79)     | 281.95<br>(167.70 to<br>386.03)       |
| Gynecological diseases                                     | 1,963.20<br>(1,175.18 to<br>2,805.95)    | 3,749.76<br>(2,061.81 to<br>6,006.65)     | 2,666.07<br>(1,455.16 to<br>4,328.69)    | 4,427.06<br>(2,446.18 to<br>7,200.70)     | 46.20<br>(27.74 to<br>65.28)    | 84.51<br>(46.82 to<br>133.80)         | 60.26<br>(33.24 to<br>96.74)        | 99.37<br>(55.87 to<br>158.23)         |
| Uterine fibroids                                           | 861.72<br>(297.52 to<br>1,392.69)        | 1,375.15<br>(404.75 to<br>2,579.34)       | 947.16<br>(270.41 to<br>1,850.06)        | 1,638.67<br>(477.39 to<br>3,073.72)       | 21.94<br>(7.89 to<br>34.86)     | 33.96<br>(10.36 to<br>62.66)          | 23.48<br>(7.16 to<br>44.35)         | 40.31<br>(12.43 to<br>73.94)          |
| Polycystic ovarian syndrome                                | 207.49<br>(16.93 to<br>605.01)           | 293.60<br>(952.03)                        | 169.69<br>(10.67 to<br>573.99)           | 381.51<br>(26.49 to<br>1,228.39)          | 4.61<br>(0.38 to<br>13.52)      | 6.50<br>(0.45 to<br>20.74)            | 3.76<br>(0.24 to<br>12.75)          | 8.43<br>(0.60 to<br>26.70)            |
| Endometriosis                                              | 6.52<br>(1.17 to<br>24.11)               | 21.51<br>(3.13 to<br>88.86)               | 15.38<br>(2.25 to<br>63.45)              | 25.33<br>(3.64 to<br>101.36)              | 0.14<br>(0.02 to<br>0.49)       | 0.45<br>(0.07 to<br>1.70)             | 0.32<br>(0.05 to<br>1.22)           | 0.52<br>(0.08 to<br>1.94)             |
| Genital prolapse                                           | 67.25<br>(9.08 to<br>147.53)             | 93.59<br>(11.81 to<br>234.43)             | 62.17<br>(7.71 to<br>159.75)             | 113.27<br>(14.31 to<br>288.77)            | 2.19<br>(0.33 to<br>4.47)       | 2.58<br>(0.35 to<br>6.08)             | 1.77<br>(0.22 to<br>4.12)           | 3.06<br>(0.42 to<br>7.46)             |
| Other gynecological diseases                               | 820.22<br>(217.19 to<br>1,528.90)        | 1,965.90<br>(529.88 to<br>3,704.24)       | 1,471.68<br>(416.38 to<br>2,806.63)      | 2,268.28<br>(578.29 to<br>4,330.99)       | 17.32<br>(4.23 to<br>33.30)     | 41.02<br>(10.63 to<br>78.41)          | 30.93<br>(8.35 to<br>57.63)         | 47.05<br>(11.49 to<br>90.62)          |
| Hemoglobinopathies and hemolytic anemias                   | 28,307.18<br>(20,359.89 to<br>41,216.76) | 35,960.85<br>(25,670.10 to<br>50,753.49)  | 29,045.24<br>(20,364.22 to<br>41,527.84) | 47,648.02<br>(33,174.12 to<br>70,048.37)  | 471.55<br>(364.26 to<br>629.85) | 688.00<br>(524.85 to<br>900.02)       | 563.55<br>(429.92 to<br>743.74)     | 842.28<br>(630.83 to<br>1,131.72)     |
| Thalassemias                                               | 451.48<br>(100.79 to<br>1,338.20)        | 739.56<br>(78.38 to<br>1,184.24)          | 478.58<br>(102.25 to<br>1,397.28)        | 489.79<br>(99.42 to<br>1,507.95)          | 5.30<br>(1.18 to<br>15.71)      | 4.48<br>(0.93 to<br>13.88)            | 5.64<br>(1.20 to<br>16.47)          | 5.77<br>(1.17 to<br>17.75)            |
| Sickle cell disorders                                      | 20,120.76<br>(13,558.60 to<br>31,564.26) | 21,411.38<br>(13,815.01 to<br>32,594.71)  | 17,839.67<br>(11,415.60 to<br>27,409.48) | 30,015.82<br>(18,724.79 to<br>47,943.52)  | 255.74<br>(174.97 to<br>389.75) | 292.24<br>(194.52 to<br>433.47)       | 244.24<br>(161.07 to<br>365.41)     | 399.04<br>(254.09 to<br>608.70)       |
| G6PD deficiency                                            | 5,724.71<br>(4,187.65 to<br>7,835.63)    | 12,204.68<br>(8,546.07 to<br>17,110.14)   | 9,074.55<br>(6,364.45 to<br>12,757.03)   | 15,026.65<br>(10,587.88 to<br>20,988.52)  | 120.47<br>(90.56 to<br>158.49)  | 294.16<br>(216.67 to<br>398.79)       | 224.29<br>(164.07 to<br>307.97)     | 342.74<br>(252.86 to<br>463.30)       |
| Other hemoglobinopathies and hemolytic anemias             | 2,010.22<br>(1,557.66 to<br>2,583.75)    | 1,965.24<br>(1,478.50 to<br>2,613.66)     | 1,652.45<br>(1,257.22 to<br>2,208.18)    | 2,115.76<br>(1,561.05 to<br>2,828.51)     | 90.04<br>(70.22 to<br>118.88)   | 96.13<br>(71.54 to<br>128.10)         | 89.39<br>(69.41 to<br>118.92)       | 94.74<br>(70.47 to<br>128.70)         |
| Endocrine, metabolic, blood, and immune disorders          | 4,374.53<br>(3,318.25 to<br>5,713.52)    | 8,169.82<br>(6,070.32 to<br>10,770.63)    | 7,284.63<br>(5,421.78 to<br>9,591.08)    | 9,975.23<br>(7,217.89 to<br>13,367.49)    | 111.48<br>(85.49 to<br>140.73)  | 200.52<br>(152.53 to<br>256.01)       | 191.11<br>(146.44 to<br>244.18)     | 216.77<br>(162.74 to<br>277.75)       |
| <b>Somalia</b>                                             |                                          |                                           |                                          |                                           |                                 |                                       |                                     |                                       |
| <b>YLLs (actual counts)</b>                                |                                          |                                           |                                          |                                           | <b>Deaths (actual counts)</b>   |                                       |                                     |                                       |

| Cause                                         | 2016                                            | 2040 Forecast                                   | 2040 Better Scenario                            | 2040 Worse Scenario                             | 2016                                       | 2040 Forecast                               | 2040 Better Scenario                        | 2040 Worse Scenario                          |
|-----------------------------------------------|-------------------------------------------------|-------------------------------------------------|-------------------------------------------------|-------------------------------------------------|--------------------------------------------|---------------------------------------------|---------------------------------------------|----------------------------------------------|
| <b>Musculoskeletal disorders</b>              | <b>2,749.85</b><br>(1,796.53 to 4,265.62)       | <b>6,715.65</b><br>(4,125.15 to 11,104.37)      | <b>7,045.63</b><br>(4,363.45 to 11,563.11)      | <b>6,746.50</b><br>(4,183.78 to 11,116.12)      | <b>67.13</b><br>(44.70 to 101.18)          | <b>162.68</b><br>(107.52 to 249.71)         | <b>172.32</b><br>(114.07 to 262.79)         | <b>158.82</b><br>(103.86 to 246.14)          |
| Rheumatoid arthritis                          | 733.17<br>(471.66 to 1,092.80)                  | 1,570.84<br>(1,013.48 to 2,425.62)              | 1,298.54<br>(834.34 to 2,065.36)                | 1,729.22<br>(1,118.08 to 2,661.54)              | 25.63<br>(17.21 to 36.94)                  | 55.62<br>(37.45 to 81.51)                   | 49.31<br>(32.82 to 73.50)                   | 57.53<br>(38.92 to 84.11)                    |
| Other musculoskeletal disorders               | 2,016.68<br>(1,292.79 to 3,275.62)              | 5,144.82<br>(3,063.37 to 8,924.57)              | 5,747.09<br>(3,469.67 to 10,046.66)             | 5,017.28<br>(2,960.73 to 8,763.61)              | 41.50<br>(27.03 to 67.02)                  | 107.06<br>(65.25 to 180.85)                 | 123.00<br>(77.30 to 207.23)                 | 101.29<br>(61.95 to 172.58)                  |
| <b>Other non-communicable diseases</b>        | <b>49,703.32</b><br>(21,527.71 to 83,450.17)    | <b>91,306.06</b><br>(45,780.49 to 150,016.90)   | <b>78,898.14</b><br>(40,830.66 to 128,096.01)   | <b>134,228.50</b><br>(63,172.84 to 226,501.16)  | <b>715.39</b><br>(376.31 to 1,122.74)      | <b>1,484.66</b><br>(868.90 to 2,290.61)     | <b>1,369.91</b><br>(844.94 to 2,108.92)     | <b>1,956.66</b><br>(1,061.32 to 3,072.18)    |
| <b>Congenital birth defects</b>               | <b>28,686.80</b><br>(7,382.21 to 57,780.64)     | <b>48,823.76</b><br>(13,043.20 to 100,346.34)   | <b>39,878.43</b><br>(10,646.69 to 81,853.41)    | <b>77,721.60</b><br>(21,266.52 to 156,192.14)   | <b>342.63</b><br>(89.43 to 685.58)         | <b>596.37</b><br>(161.13 to 1,203.82)       | <b>488.00</b><br>(130.34 to 991.93)         | <b>953.34</b><br>(256.09 to 1,866.22)        |
| Neural tube defects                           | 8,101.45<br>(1,681.73 to 20,180.46)             | 6,402.11<br>(1,264.81 to 18,342.98)             | 4,388.11<br>(877.57 to 13,018.38)               | 11,284.51<br>(2,258.64 to 31,940.46)            | 95.07<br>(19.73 to 237.70)                 | 76.42<br>(15.09 to 215.07)                  | 52.40<br>(9.39 to 154.99)                   | 133.55<br>(26.59 to 376.70)                  |
| Congenital heart anomalies                    | 7,891.76<br>(2,118.79 to 18,590.66)             | 15,282.74<br>(4,115.67 to 35,868.90)            | 12,909.80<br>(3,383.19 to 30,459.48)            | 23,256.40<br>(6,355.52 to 54,337.14)            | 96.12<br>(26.00 to 224.53)                 | 191.94<br>(51.98 to 441.87)                 | 162.35<br>(42.93 to 378.01)                 | 286.06<br>(79.05 to 655.41)                  |
| Orofacial clefts                              | 327.47<br>(24.65 to 1,342.54)                   | 527.23<br>(35.04 to 2,184.80)                   | 350.16<br>(22.48 to 1,430.14)                   | 972.14<br>(67.08 to 3,966.90)                   | 3.80<br>(0.29 to 15.57)                    | 6.11<br>(0.41 to 25.32)                     | 4.06<br>(0.26 to 16.59)                     | 11.27<br>(0.78 to 45.96)                     |
| Down syndrome                                 | 494.59<br>(86.71 to 1,541.55)                   | 1,268.93<br>(233.69 to 4,021.50)                | 991.20<br>(182.46 to 3,089.37)                  | 1,986.79<br>(362.75 to 6,645.39)                | 6.33<br>(1.16 to 18.73)                    | 16.77<br>(3.23 to 51.78)                    | 13.18<br>(2.54 to 38.11)                    | 25.35<br>(4.75 to 80.21)                     |
| Other chromosomal abnormalities               | 1,003.67<br>(116.71 to 2,608.38)                | 3,260.46<br>(377.26 to 9,216.82)                | 2,600.99<br>(276.35 to 7,498.80)                | 5,395.51<br>(606.58 to 15,193.54)               | 11.77<br>(1.36 to 31.29)                   | 38.36<br>(4.46 to 108.77)                   | 30.61<br>(3.23 to 88.05)                    | 63.20<br>(7.14 to 173.56)                    |
| Congenital musculoskeletal and limb anomalies | 355.88<br>(71.94 to 629.68)                     | 532.39<br>(150.80 to 1,293.91)                  | 475.78<br>(133.21 to 1,184.04)                  | 817.78<br>(233.28 to 1,967.46)                  | 3.04<br>(0.86 to 7.39)                     | 6.40<br>(1.84 to 15.65)                     | 5.32<br>(1.61 to 14.01)                     | 9.72<br>(2.80 to 23.25)                      |
| Urogenital congenital anomalies               | 518.46<br>(122.30 to 1,195.31)                  | 990.36<br>(234.55 to 2,370.85)                  | 855.89<br>(200.45 to 2,156.89)                  | 1,521.25<br>(378.37 to 3,643.86)                | 6.52<br>(1.55 to 14.67)                    | 12.90<br>(3.08 to 29.98)                    | 11.18<br>(2.65 to 27.11)                    | 19.14<br>(4.75 to 44.72)                     |
| Digestive congenital anomalies                | 1,984.40<br>(608.75 to 4,669.36)                | 4,078.64<br>(1,203.15 to 9,331.54)              | 3,351.45<br>(942.10 to 7,594.62)                | 6,682.58<br>(1,988.15 to 15,450.65)             | 23.17<br>(7.09 to 54.47)                   | 47.78<br>(14.07 to 108.62)                  | 39.27<br>(10.99 to 88.81)                   | 78.03<br>(23.21 to 179.65)                   |
| Other congenital birth defects                | 8,109.13<br>(1,679.62 to 22,060.94)             | 16,480.90<br>(3,860.06 to 42,654.13)            | 13,955.05<br>(3,258.95 to 35,717.22)            | 25,804.64<br>(6,063.21 to 66,095.02)            | 96.82<br>(20.12 to 262.44)                 | 199.71<br>(46.19 to 515.62)                 | 169.23<br>(39.65 to 432.10)                 | 309.01<br>(72.99 to 786.70)                  |
| Skin and subcutaneous diseases                | 9,177.07<br>(5,835.64 to 15,963.21)             | 27,858.80<br>(17,807.66 to 46,702.53)           | 26,343.39<br>(17,154.46 to 44,352.88)           | 32,859.19<br>(20,538.20 to 55,643.56)           | 235.37<br>(148.08 to 400.14)               | 718.61<br>(474.23 to 1,202.01)              | 734.84<br>(490.87 to 1,229.51)              | 746.94<br>(485.42 to 1,253.60)               |
| Cellulitis                                    | 515.31<br>(230.56 to 863.06)                    | 1,979.26<br>(896.10 to 3,304.79)                | 2,178.57<br>(1,013.82 to 3,523.36)              | 2,053.54<br>(889.28 to 3,639.28)                | 13.58<br>(5.67 to 21.59)                   | 52.08<br>(21.56 to 82.03)                   | 60.41<br>(25.90 to 95.19)                   | 49.57<br>(20.31 to 80.77)                    |
| Pyoderma                                      | 7,204.70<br>(4,576.22 to 12,564.09)             | 22,290.22<br>(14,492.83 to 38,379.19)           | 20,342.35<br>(13,210.36 to 34,296.02)           | 27,106.80<br>(16,995.87 to 46,368.89)           | 169.24<br>(109.21 to 292.92)               | 546.67<br>(363.76 to 931.86)                | 534.70<br>(357.13 to 902.69)                | 587.22<br>(383.46 to 1,016.50)               |
| Decubitus ulcer                               | 1,004.48<br>(534.49 to 2,167.53)                | 2,390.79<br>(1,264.91 to 5,191.43)              | 2,552.30<br>(1,398.65 to 5,315.19)              | 2,364.69<br>(1,223.20 to 5,178.60)              | 43.05<br>(22.93 to 92.04)                  | 95.44<br>(51.25 to 208.09)                  | 112.71<br>(60.91 to 245.48)                 | 85.15<br>(44.83 to 186.56)                   |
| Other skin and subcutaneous diseases          | 452.58<br>(249.53 to 846.27)                    | 1,198.52<br>(659.10 to 2,163.60)                | 1,270.17<br>(711.57 to 2,266.30)                | 1,334.15<br>(711.71 to 2,446.64)                | 9.50<br>(5.43 to 16.90)                    | 34.42<br>(13.97 to 42.99)                   | 27.01<br>(15.93 to 46.87)                   | 25.01<br>(13.93 to 45.05)                    |
| Sudden infant death syndrome                  | 11,839.46<br>(4,182.72 to 22,952.10)            | 14,623.50<br>(4,727.33 to 31,818.77)            | 12,676.32<br>(4,155.39 to 26,993.33)            | 23,647.71<br>(7,494.68 to 51,658.94)            | 137.40<br>(48.55 to 266.27)                | 169.67<br>(54.86 to 369.24)                 | 147.08<br>(48.22 to 313.23)                 | 274.37<br>(86.93 to 599.49)                  |
| <b>Injuries</b>                               | <b>544,007.54</b><br>(445,012.67 to 649,339.98) | <b>575,903.40</b><br>(447,452.66 to 743,661.74) | <b>515,649.46</b><br>(397,673.02 to 671,706.69) | <b>670,912.18</b><br>(519,552.86 to 867,734.34) | <b>9,872.96</b><br>(8,223.33 to 11,653.84) | <b>11,689.73</b><br>(9,448.28 to 14,341.55) | <b>10,861.08</b><br>(8,763.46 to 13,513.18) | <b>12,799.54</b><br>(10,316.16 to 15,877.71) |

|                                      |                                             |                                             |                                             |                                             |                                       |                                       |                                       |                                       |
|--------------------------------------|---------------------------------------------|---------------------------------------------|---------------------------------------------|---------------------------------------------|---------------------------------------|---------------------------------------|---------------------------------------|---------------------------------------|
| Transport injuries                   | 89,154.52<br>(66,710.25 to<br>117,763.76)   | 193,651.85<br>(138,723.39 to<br>263,052.22) | 182,106.73<br>(130,697.75 to<br>247,279.10) | 214,419.12<br>(154,034.30 to<br>291,337.08) | 1,757.17<br>(1,319.09 to<br>2,310.46) | 3,811.39<br>(2,799.99 to<br>5,094.17) | 3,682.04<br>(2,741.31 to<br>4,890.07) | 4,042.16<br>(2,957.45 to<br>5,425.51) |
| Road injuries                        | 86,154.62<br>(64,188.06 to<br>114,627.76)   | 185,567.77<br>(132,485.85 to<br>253,384.88) | 175,335.29<br>(126,094.62 to<br>238,813.13) | 205,079.44<br>(146,971.02 to<br>280,166.78) | 1,705.27<br>(1,277.05 to<br>2,254.95) | 3,666.06<br>(2,691.17 to<br>4,921.20) | 3,559.30<br>(2,651.97 to<br>4,749.56) | 3,877.94<br>(2,828.22 to<br>5,229.87) |
| Pedestrian road injuries             | 40,959.85<br>(30,600.40 to<br>60,151.63)    | 73,708.93<br>(51,567.54 to<br>107,129.80)   | 67,800.56<br>(47,697.42 to<br>98,719.83)    | 81,786.46<br>(57,189.11 to<br>119,103.45)   | 817.74<br>(613.72 to<br>1,184.38)     | 1,512.56<br>(1,100.58 to<br>2,177.07) | 1,432.30<br>(1,058.78 to<br>2,064.57) | 1,606.24<br>(1,169.40 to<br>2,309.31) |
| <b>Somalia</b>                       |                                             |                                             |                                             |                                             |                                       |                                       |                                       |                                       |
| Cause                                | YLLs (actual counts)                        |                                             |                                             |                                             | Deaths (actual counts)                |                                       |                                       |                                       |
|                                      | 2016                                        | 2040 Forecast                               | 2040 Better Scenario                        | 2040 Worse Scenario                         | 2016                                  | 2040 Forecast                         | 2040 Better Scenario                  | 2040 Worse Scenario                   |
| Cyclist road injuries                | 4,943.78<br>(2,289.63 to<br>12,275.22)      | 11,881.23<br>(5,601.90 to<br>30,004.68)     | 11,455.73<br>(5,492.24 to<br>28,722.52)     | 13,049.26<br>(6,139.59 to<br>32,787.81)     | 98.53<br>(45.43 to<br>245.45)         | 230.72<br>(109.15 to<br>580.20)       | 229.04<br>(109.59 to<br>567.82)       | 242.44<br>(115.61 to<br>616.12)       |
| Motorcyclist road injuries           | 6,643.17<br>(4,660.08 to<br>8,894.32)       | 16,790.72<br>(11,376.25 to<br>23,402.87)    | 16,298.60<br>(11,063.79 to<br>22,693.37)    | 18,432.08<br>(12,401.59 to<br>25,823.20)    | 125.86<br>(90.29 to<br>166.72)        | 313.11<br>(219.04 to<br>435.17)       | 310.99<br>(219.38 to<br>430.25)       | 330.33<br>(227.61 to<br>460.51)       |
| Motor vehicle road injuries          | 32,983.42<br>(22,874.28 to<br>46,467.08)    | 81,676.84<br>(54,939.87 to<br>118,451.65)   | 78,316.71<br>(53,451.06 to<br>113,114.39)   | 90,143.17<br>(61,221.25 to<br>130,176.48)   | 651.40<br>(453.00 to<br>914.65)       | 1,581.75<br>(1,082.90 to<br>2,244.46) | 1,559.19<br>(1,092.15 to<br>2,215.92) | 1,669.32<br>(1,150.03 to<br>2,373.90) |
| Other road injuries                  | 624.41<br>(273.34 to<br>1,589.89)           | 1,510.05<br>(645.41 to<br>4,017.54)         | 1,463.69<br>(628.54 to<br>3,889.09)         | 1,668.48<br>(715.45 to<br>4,394.77)         | 11.73<br>(5.32 to<br>28.91)           | 27.93<br>(12.50 to<br>72.41)          | 29.60<br>(12.70 to<br>71.51)          | 29.60<br>(13.16 to<br>76.10)          |
| Other transport injuries             | 2,999.91<br>(1,740.19 to<br>4,855.01)       | 8,084.08<br>(4,276.97 to<br>14,181.66)      | 6,771.44<br>(3,570.50 to<br>11,938.54)      | 9,339.68<br>(4,999.76 to<br>16,280.84)      | 51.90<br>(30.48 to<br>84.75)          | 145.34<br>(78.45 to<br>252.63)        | 122.74<br>(65.72 to<br>219.03)        | 164.22<br>(89.15 to<br>285.96)        |
| Unintentional injuries               | 185,577.75<br>(150,091.03 to<br>230,611.21) | 247,051.43<br>(189,119.50 to<br>315,245.16) | 203,906.45<br>(155,113.61 to<br>261,899.78) | 312,961.39<br>(236,941.87 to<br>405,887.46) | 3,596.30<br>(2,993.61 to<br>4,279.46) | 5,170.74<br>(4,212.53 to<br>6,238.26) | 4,540.59<br>(3,695.57 to<br>5,487.40) | 5,958.11<br>(4,730.79 to<br>7,316.97) |
| Falls                                | 24,156.94<br>(18,221.10 to<br>33,130.03)    | 38,273.19<br>(29,094.50 to<br>51,823.95)    | 35,898.84<br>(27,357.17 to<br>48,588.44)    | 42,834.70<br>(32,045.59 to<br>59,452.32)    | 717.08<br>(571.08 to<br>950.04)       | 1,202.61<br>(941.68 to<br>1,565.97)   | 1,255.36<br>(1,004.72 to<br>1,617.98) | 1,183.37<br>(918.46 to<br>1,561.89)   |
| Drowning                             | 38,050.75<br>(29,292.53 to<br>47,787.01)    | 43,942.07<br>(32,032.96 to<br>59,436.60)    | 36,577.78<br>(26,364.04 to<br>49,824.78)    | 55,372.99<br>(39,757.74 to<br>76,308.93)    | 610.10<br>(480.28 to<br>751.99)       | 759.59<br>(577.45 to<br>994.56)       | 648.86<br>(488.16 to<br>855.34)       | 906.51<br>(680.03 to<br>1,189.43)     |
| Fire, heat, and hot substances       | 28,849.27<br>(22,452.76 to<br>37,591.39)    | 30,989.15<br>(22,694.69 to<br>41,633.92)    | 24,551.75<br>(17,718.32 to<br>33,101.84)    | 40,531.20<br>(28,647.22 to<br>55,977.21)    | 563.28<br>(458.10 to<br>695.82)       | 653.78<br>(511.78 to<br>830.93)       | 546.34<br>(427.39 to<br>691.13)       | 774.63<br>(593.50 to<br>1,008.52)     |
| Poisonings                           | 16,312.77<br>(8,790.28 to<br>35,892.03)     | 15,231.69<br>(8,037.25 to<br>34,706.94)     | 10,866.22<br>(5,715.14 to<br>25,578.00)     | 22,425.52<br>(11,184.16 to<br>54,085.01)    | 275.82<br>(168.72 to<br>513.17)       | 267.64<br>(160.32 to<br>518.46)       | 194.93<br>(117.51 to<br>372.13)       | 362.91<br>(209.29 to<br>754.28)       |
| Exposure to mechanical forces        | 19,347.45<br>(15,303.62 to<br>24,699.58)    | 27,450.99<br>(20,032.09 to<br>38,167.52)    | 21,608.91<br>(15,482.24 to<br>30,419.40)    | 34,294.76<br>(24,810.46 to<br>47,197.20)    | 350.91<br>(282.46 to<br>447.28)       | 526.62<br>(395.56 to<br>713.84)       | 427.36<br>(319.63 to<br>587.03)       | 621.20<br>(463.44 to<br>847.98)       |
| Unintentional firearm injuries       | 4,267.34<br>(3,011.39 to<br>5,797.12)       | 5,463.73<br>(3,495.61 to<br>8,252.66)       | 4,108.09<br>(2,560.18 to<br>6,210.79)       | 6,474.59<br>(4,123.59 to<br>9,678.09)       | 80.96<br>(58.22 to<br>107.59)         | 106.16<br>(69.70 to<br>156.22)        | 81.85<br>(53.88 to<br>121.45)         | 122.47<br>(80.85 to<br>177.70)        |
| Unintentional suffocation            | 2,402.06<br>(1,515.46 to<br>3,955.98)       | 3,388.17<br>(2,084.23 to<br>5,364.01)       | 2,646.76<br>(1,608.60 to<br>4,221.39)       | 4,936.02<br>(2,951.68 to<br>7,982.42)       | 35.37<br>(24.60 to<br>53.35)          | 52.57<br>(35.09 to<br>77.76)          | 42.23<br>(27.75 to<br>63.28)          | 71.35<br>(45.83 to<br>108.52)         |
| Other exposure to mechanical forces  | 12,678.05<br>(9,653.57 to<br>18,054.90)     | 18,599.08<br>(13,272.66 to<br>27,653.07)    | 14,854.06<br>(10,430.85 to<br>22,274.66)    | 22,884.15<br>(16,196.88 to<br>34,061.53)    | 234.58<br>(180.36 to<br>327.40)       | 367.88<br>(268.58 to<br>535.62)       | 303.28<br>(222.81 to<br>447.05)       | 427.38<br>(315.48 to<br>630.15)       |
| Adverse effects of medical treatment | 13,345.61<br>(8,732.86 to<br>19,546.60)     | 19,462.92<br>(12,980.42 to<br>28,695.07)    | 16,101.60<br>(10,803.31 to<br>23,766.57)    | 25,055.67<br>(15,733.02 to<br>38,136.39)    | 243.11<br>(186.59 to<br>319.93)       | 377.43<br>(290.08 to<br>498.64)       | 326.07<br>(251.46 to<br>432.83)       | 445.63<br>(326.75 to<br>620.40)       |
| Animal contact                       | 19,835.08<br>(10,837.22 to<br>31,501.44)    | 35,830.08<br>(18,824.56 to<br>57,444.73)    | 26,498.66<br>(13,944.07 to<br>42,890.10)    | 46,810.91<br>(24,433.97 to<br>74,912.48)    | 415.77<br>(232.27 to<br>652.41)       | 769.23<br>(424.51 to<br>1,200.67)     | 592.58<br>(329.71 to<br>945.33)       | 928.10<br>(517.75 to<br>1,448.30)     |
| Venomous animal contact              | 15,364.38<br>(8,312.16 to<br>24,876.56)     | 26,681.74<br>(13,776.90 to<br>43,509.01)    | 19,644.85<br>(10,092.25 to<br>32,307.55)    | 34,916.84<br>(18,127.74 to<br>57,387.34)    | 337.95<br>(193.79 to<br>542.06)       | 600.88<br>(327.53 to<br>951.30)       | 463.34<br>(250.00 to<br>736.09)       | 720.98<br>(393.37 to<br>1,116.71)     |

|                                                 |                                          |                                            |                                            |                                            |                                     |                                       |                                       |                                       |
|-------------------------------------------------|------------------------------------------|--------------------------------------------|--------------------------------------------|--------------------------------------------|-------------------------------------|---------------------------------------|---------------------------------------|---------------------------------------|
|                                                 | 4,470.70<br>(1,554.94 to<br>8,716.34)    | 9,148.34<br>(3,255.33 to<br>17,631.20)     | 6,853.81<br>(2,479.22 to<br>13,171.13)     | 11,894.07<br>(4,166.30 to<br>22,920.24)    | 77.82<br>(29.64 to<br>146.18)       | 168.35<br>(64.72 to<br>308.81)        | 129.24<br>(49.55 to<br>235.66)        | 207.11<br>(78.24 to<br>373.93)        |
| Non-venomous animal contact                     |                                          |                                            |                                            |                                            |                                     |                                       |                                       |                                       |
|                                                 | 11,489.32<br>(6,756.47 to<br>18,676.61)  | 17,938.43<br>(11,083.25 to<br>28,530.21)   | 17,844.07<br>(11,096.31 to<br>28,045.24)   | 23,077.13<br>(13,663.14 to<br>38,860.98)   | 169.73<br>(108.52 to<br>247.58)     | 279.73<br>(187.72 to<br>396.90)       | 284.53<br>(192.46 to<br>397.21)       | 335.72<br>(217.21 to<br>513.00)       |
| Foreign body                                    |                                          |                                            |                                            |                                            |                                     |                                       |                                       |                                       |
|                                                 | 10,257.18<br>(6,011.10 to<br>17,436.36)  | 15,913.59<br>(9,737.15 to<br>26,541.51)    | 16,101.01<br>(9,920.74 to<br>26,310.77)    | 20,565.05<br>(11,971.36 to<br>35,672.97)   | 149.74<br>(97.08 to<br>227.55)      | 244.39<br>(168.40 to<br>360.03)       | 254.02<br>(175.68 to<br>364.95)       | 294.75<br>(189.38 to<br>467.14)       |
| Pulmonary aspiration and foreign body in airway |                                          |                                            |                                            |                                            |                                     |                                       |                                       |                                       |
|                                                 | 1,232.15<br>(347.14 to<br>2,424.02)      | 2,024.84<br>(559.48 to<br>4,177.58)        | 1,743.06<br>(470.36 to<br>3,701.83)        | 2,512.09<br>(520.99 to<br>5,209.96)        | 19.99<br>(5.69 to<br>39.84)         | 34.78<br>(9.28 to<br>73.19)           | 30.50<br>(7.80 to<br>65.31)           | 40.98<br>(11.46 to<br>84.45)          |
| Foreign body in other body part                 |                                          |                                            |                                            |                                            |                                     |                                       |                                       |                                       |
|                                                 | 2,980.22<br>(1,927.34 to<br>4,443.13)    | 4,587.04<br>(2,752.34 to<br>7,013.88)      | 3,089.48<br>(1,790.66 to<br>4,740.07)      | 6,176.63<br>(3,556.49 to<br>9,377.71)      | 58.84<br>(38.93 to<br>85.23)        | 93.02<br>(58.08 to<br>138.78)         | 65.66<br>(40.08 to<br>98.01)          | 116.67<br>(70.20 to<br>172.47)        |
| Environmental heat and cold exposure            |                                          |                                            |                                            |                                            |                                     |                                       |                                       |                                       |
|                                                 | 11,210.32<br>(8,869.91 to<br>14,552.52)  | 13,345.88<br>(9,775.55 to<br>17,941.47)    | 10,869.13<br>(7,887.71 to<br>15,097.66)    | 16,391.88<br>(12,094.56 to<br>22,229.05)   | 191.65<br>(152.42 to<br>243.14)     | 241.66<br>(182.47 to<br>319.93)       | 200.89<br>(149.76 to<br>272.02)       | 238.37<br>(214.17 to<br>379.69)       |
| Other unintentional injuries                    |                                          |                                            |                                            |                                            |                                     |                                       |                                       |                                       |
|                                                 | 67,966.87<br>(41,307.63 to<br>88,590.15) | 120,618.70<br>(68,232.35 to<br>170,106.53) | 114,879.53<br>(64,865.73 to<br>161,341.80) | 127,296.77<br>(72,493.03 to<br>179,801.50) | 1,367.79<br>(827.60 to<br>1,786.33) | 2,479.95<br>(1,459.75 to<br>3,395.94) | 2,406.39<br>(1,417.05 to<br>3,253.67) | 2,552.43<br>(1,495.99 to<br>3,525.97) |
| Self-harm and interpersonal violence            |                                          |                                            |                                            |                                            |                                     |                                       |                                       |                                       |

**Somalia**

| Cause                                                                        | YLLs (actual counts)                        |                                           |                                           |                                          | Deaths (actual counts)                |                                     |                                     |                                     |
|------------------------------------------------------------------------------|---------------------------------------------|-------------------------------------------|-------------------------------------------|------------------------------------------|---------------------------------------|-------------------------------------|-------------------------------------|-------------------------------------|
|                                                                              | 2016                                        | 2020 Forecast                             | 2040 Better Scenario                      | 2040 Worse Scenario                      | 2016                                  | 2020 Forecast                       | 2040 Better Scenario                | 2040 Worse Scenario                 |
| Self-harm                                                                    | 20,839.90<br>(13,776.14 to<br>31,575.52)    | 43,892.18<br>(27,459.43 to<br>69,947.50)  | 41,505.93<br>(26,080.26 to<br>66,110.73)  | 45,615.57<br>(28,218.05 to<br>72,930.88) | 511.81<br>(338.25 to<br>774.50)       | 1,052.51<br>(671.48 to<br>1,631.75) | 1,028.74<br>(662.12 to<br>1,602.37) | 1,062.78<br>(674.61 to<br>1,668.60) |
| Self-harm by firearm                                                         | 3,590.54<br>(1,595.32 to<br>7,549.22)       | 6,070.97<br>(2,598.68 to<br>12,717.23)    | 5,493.99<br>(2,307.55 to<br>11,457.37)    | 6,437.11<br>(2,710.03 to<br>13,594.89)   | 81.33<br>(37.68 to<br>157.58)         | 136.61<br>(60.40 to<br>273.64)      | 127.06<br>(55.70 to<br>255.18)      | 141.58<br>(62.96 to<br>287.58)      |
| Self-harm by other specified means                                           | 17,249.35<br>(11,190.64 to<br>26,203.59)    | 37,821.21<br>(23,286.80 to<br>60,618.00)  | 36,011.94<br>(22,578.20 to<br>57,220.97)  | 39,178.47<br>(23,995.21 to<br>62,868.83) | 430.48<br>(278.66 to<br>651.83)       | 915.89<br>(577.71 to<br>1,429.82)   | 901.68<br>(572.87 to<br>1,408.78)   | 921.20<br>(575.68 to<br>1,439.72)   |
| Interpersonal violence                                                       | 47,126.97<br>(23,349.99 to<br>64,476.47)    | 76,726.52<br>(33,693.48 to<br>114,587.74) | 73,373.59<br>(32,538.84 to<br>109,434.48) | 16,047.49<br>(6,426.34 to<br>28,617.43)  | 81.81<br>(36.38 to<br>121.83)         | 1,427.45<br>(629.15 to<br>2,137.34) | 1,377.65<br>(612.27 to<br>2,044.99) | 1,489.65<br>(661.93 to<br>2,230.50) |
| Physical violence by firearm                                                 | 9,620.06<br>(3,983.63 to<br>15,477.63)      | 16,267.29<br>(6,359.40 to<br>27,790.81)   | 16,047.49<br>(6,377.10 to<br>27,472.90)   | 16,777.40<br>(6,426.34 to<br>28,617.43)  | 175.32<br>(71.82 to<br>274.72)        | 301.14<br>(117.24 to<br>504.92)     | 298.61<br>(118.44 to<br>505.07)     | 306.73<br>(118.73 to<br>514.66)     |
| Physical violence by sharp object                                            | 4,643.75<br>(2,079.69 to<br>6,760.73)       | 8,475.94<br>(3,484.71 to<br>13,206.56)    | 8,711.53<br>(3,528.53 to<br>13,484.27)    | 8,568.85<br>(3,551.95 to<br>13,363.68)   | 92.65<br>(40.86 to<br>133.50)         | 169.70<br>(70.60 to<br>257.21)      | 176.86<br>(73.30 to<br>265.20)      | 167.87<br>(70.13 to<br>255.11)      |
| Physical violence by other means                                             | 32,863.16<br>(16,051.05 to<br>45,558.01)    | 51,983.29<br>(22,412.42 to<br>80,796.03)  | 48,614.58<br>(20,948.32 to<br>74,561.39)  | 56,334.94<br>(24,588.49 to<br>86,359.74) | 588.02<br>(281.52 to<br>819.49)       | 956.61<br>(409.94 to<br>1,457.93)   | 902.17<br>(384.32 to<br>1,368.13)   | 1,015.06<br>(437.29 to<br>1,552.65) |
| Forces of nature, conflict and terrorism, and executions and police conflict | 201,308.40<br>(124,951.18 to<br>278,715.50) | 14,881.42<br>(0.00 to<br>138,909.38)      | 14,756.75<br>(0.00 to<br>140,906.28)      | 16,234.91<br>(0.00 to<br>153,690.66)     | 3,151.70<br>(1,961.50 to<br>4,363.08) | 227.64<br>(0.00 to<br>2,163.40)     | 232.06<br>(0.00 to<br>2,206.67)     | 246.85<br>(0.00 to<br>2,336.99)     |
| Exposure to forces of nature                                                 | 0.00<br>(0.00 to<br>0.00)                   | 5,387.76<br>(0.00 to<br>51,259.11)        | 5,458.93<br>(0.00 to<br>52,038.76)        | 6,084.37<br>(0.00 to<br>57,503.59)       | 0.00<br>(0.00 to<br>0.00)             | 84.31<br>(0.00 to<br>835.69)        | 86.36<br>(0.00 to<br>855.61)        | 92.27<br>(0.00 to<br>902.02)        |
| Conflict and terrorism                                                       | 200,839.99<br>(123,329.96 to<br>278,166.00) | 8,967.58<br>(0.00 to<br>116,804.61)       | 9,069.25<br>(0.00 to<br>117,613.34)       | 9,915.12<br>(0.00 to<br>130,947.18)      | 3,142.59<br>(1,929.77 to<br>4,352.52) | 139.52<br>(0.00 to<br>1,775.53)     | 141.84<br>(0.00 to<br>1,797.22)     | 150.67<br>(0.00 to<br>1,944.28)     |
| Executions and police conflict                                               | 468.41<br>(219.73 to<br>927.14)             | 226.08<br>(0.00 to<br>1,567.35)           | 228.58<br>(0.00 to<br>1,583.53)           | 235.43<br>(0.00 to<br>1,632.89)          | 9.12<br>(4.77 to<br>16.38)            | 3.81<br>(0.00 to<br>26.42)          | 3.86<br>(0.00 to<br>26.74)          | 3.91<br>(0.00 to<br>27.15)          |

**South Sudan**

| Cause | YLLs (actual counts) |               |                      |                     | Deaths (actual counts) |               |                      |                     |
|-------|----------------------|---------------|----------------------|---------------------|------------------------|---------------|----------------------|---------------------|
|       | 2016                 | 2020 Forecast | 2040 Better Scenario | 2040 Worse Scenario | 2016                   | 2020 Forecast | 2040 Better Scenario | 2040 Worse Scenario |



|                                                                   |                                                   |                                                    |                                                   |                                                     |                                             |                                             |                                             |                                             |
|-------------------------------------------------------------------|---------------------------------------------------|----------------------------------------------------|---------------------------------------------------|-----------------------------------------------------|---------------------------------------------|---------------------------------------------|---------------------------------------------|---------------------------------------------|
| All causes                                                        | 8,056,884.55<br>(6,725,140.41 to<br>9,716,779.83) | 7,767,534.38<br>(5,631,800.47 to<br>10,830,432.08) | 5,888,987.31<br>(4,350,825.84 to<br>8,001,776.13) | 12,498,602.29<br>(9,514,598.40 to<br>16,377,367.38) | 140,720.32<br>(120,603.32 to<br>162,680.40) | 167,741.98<br>(130,837.66 to<br>217,312.79) | 131,095.39<br>(103,843.84 to<br>168,427.15) | 244,065.70<br>(198,249.68 to<br>305,925.70) |
| Communicable, maternal, neonatal, and nutritional diseases        | 6,624,998.36<br>(5,417,649.48 to<br>8,150,624.58) | 5,335,794.40<br>(3,623,405.70 to<br>7,750,837.59)  | 3,825,646.72<br>(2,541,293.22 to<br>5,527,915.27) | 9,390,340.48<br>(6,950,044.92 to<br>12,639,679.24)  | 99,118.32<br>(83,399.40 to<br>117,656.11)   | 88,612.98<br>(61,223.56 to<br>127,246.92)   | 63,297.53<br>(42,713.38 to<br>91,932.76)    | 146,858.84<br>(107,971.77 to<br>195,431.84) |
| HIV/AIDS and tuberculosis                                         | 853,654.67<br>(602,872.20 to<br>1,235,902.83)     | 733,727.43<br>(490,946.26 to<br>1,577,854.60)      | 525,910.64<br>(307,939.55 to<br>1,397,453.74)     | 1,741,666.09<br>(1,076,529.55 to<br>2,655,092.18)   | 18,145.96<br>(13,152.26 to<br>25,264.12)    | 15,603.48<br>(10,426.06 to<br>31,976.60)    | 11,144.00<br>(7,714.31 to<br>28,461.03)     | 34,376.18<br>(21,879.19 to<br>51,854.80)    |
| Tuberculosis                                                      | 309,165.66<br>(231,874.05 to<br>421,307.40)       | 180,481.12<br>(86,856.05 to<br>345,663.86)         | 123,918.03<br>(69,877.91 to<br>218,461.07)        | 311,824.53<br>(176,872.82 to<br>536,260.19)         | 7,651.03<br>(5,687.33 to<br>10,418.01)      | 4,520.61<br>(2,244.06 to<br>8,216.54)       | 3,178.16<br>(1,855.62 to<br>5,399.22)       | 7,492.03<br>(4,271.66 to<br>12,635.69)      |
| HIV/AIDS                                                          | 544,489.01<br>(302,832.40 to<br>937,987.20)       | 553,246.31<br>(319,907.22 to<br>1,397,925.22)      | 401,992.61<br>(248,061.54 to<br>1,285,910.25)     | 1,429,841.56<br>(833,376.00 to<br>2,330,209.20)     | 10,494.93<br>(7,833.76 to<br>17,754.88)     | 11,082.87<br>(8,288.59 to<br>28,023.35)     | 7,965.84<br>(5,502.77 to<br>25,502.77)      | 26,884.15<br>(14,597.03 to<br>44,371.33)    |
| Diarrhea, lower respiratory, and other common infectious diseases | 2,511,769.46<br>(1,925,318.74 to<br>3,252,563.98) | 2,406,387.40<br>(1,437,476.44 to<br>3,713,129.14)  | 1,525,540.08<br>(911,435.62 to<br>2,417,120.12)   | 3,865,014.99<br>(2,573,499.30 to<br>5,511,663.37)   | 38,371.45<br>(30,406.38 to<br>48,228.63)    | 43,704.57<br>(26,449.60 to<br>67,551.24)    | 28,192.22<br>(16,835.65 to<br>45,377.95)    | 63,575.38<br>(41,397.79 to<br>92,110.51)    |
| Diarrheal diseases                                                | 532,658.52<br>(347,256.74 to<br>812,561.47)       | 612,836.22<br>(203,233.43 to<br>1,323,869.18)      | 413,544.70<br>(153,653.64 to<br>916,894.60)       | 866,927.31<br>(315,159.30 to<br>1,779,994.12)       | 10,666.29<br>(6,904.46 to<br>16,705.88)     | 15,026.29<br>(4,231.22 to<br>32,573.60)     | 9,886.94<br>(3,111.52 to<br>23,719.74)      | 19,319.82<br>(8,552.44 to<br>39,987.26)     |
| Intestinal infectious diseases                                    | 19,269.59<br>(9,186.32 to<br>34,206.18)           | 24,344.54<br>(10,201.43 to<br>46,941.77)           | 21,946.98<br>(9,352.04 to<br>41,511.43)           | 33,046.21<br>(14,223.73 to<br>61,771.16)            | 260.57<br>(126.87 to<br>454.47)             | 337.08<br>(143.81 to<br>644.34)             | 305.00<br>(130.82 to<br>575.24)             | 448.49<br>(196.79 to<br>834.74)             |
| Typhoid fever                                                     | 14,315.15<br>(6,541.95 to<br>27,676.36)           | 20,903.93<br>(8,449.32 to<br>42,460.56)            | 19,126.50<br>(7,781.15 to<br>37,963.15)           | 27,329.78<br>(10,888.05 to<br>54,544.26)            | 197.73<br>(91.19 to<br>368.35)              | 290.47<br>(118.41 to<br>585.67)             | 266.32<br>(111.78 to<br>526.49)             | 337.74<br>(153.33 to<br>748.08)             |
| Paratyphoid fever                                                 | 721.66<br>(262.67 to<br>1,671.73)                 | 1,249.59<br>(433.35 to<br>2,952.19)                | 1,111.94<br>(396.08 to<br>2,622.31)               | 1,682.39<br>(596.22 to<br>3,899.13)                 | 10.06<br>(3.70 to<br>22.89)                 | 17.53<br>(6.25 to<br>41.38)                 | 15.63<br>(5.76 to<br>35.99)                 | 23.26<br>(8.35 to<br>55.07)                 |
| Other intestinal infectious diseases                              | 4,232.78<br>(953.70 to<br>15,423.85)              | 2,191.02<br>(365.17 to<br>7,980.13)                | 1,708.54<br>(308.89 to<br>5,761.22)               | 4,034.04<br>(735.93 to<br>13,976.42)                | 52.77<br>(12.71 to<br>160.62)               | 29.08<br>(5.81 to<br>99.07)                 | 23.05<br>(4.68 to<br>71.59)                 | 51.50<br>(10.45 to<br>171.91)               |
| Lower respiratory infections                                      | 1,020,186.66<br>(695,588.17 to<br>1,453,845.14)   | 1,135,350.51<br>(494,970.52 to<br>1,900,898.18)    | 611,992.20<br>(250,239.31 to<br>1,177,555.22)     | 2,008,759.03<br>(1,126,290.85 to<br>3,018,854.00)   | 15,163.32<br>(10,976.36 to<br>20,819.36)    | 19,730.10<br>(10,713.38 to<br>29,936.99)    | 11,216.15<br>(6,058.33 to<br>18,310.84)     | 31,398.01<br>(19,572.30 to<br>44,267.04)    |
| Upper respiratory infections                                      | 1,125.64<br>(271.65 to<br>2,963.71)               | 1,027.23<br>(204.00 to<br>3,051.24)                | 744.02<br>(172.66 to<br>2,017.83)                 | 1,981.27<br>(409.65 to<br>5,902.25)                 | 15.15<br>(4.95 to<br>36.82)                 | 15.77<br>(3.90 to<br>42.09)                 | 11.62<br>(3.34 to<br>29.26)                 | 28.52<br>(7.42 to<br>76.49)                 |
| Otitis media                                                      | 1,350.77<br>(363.30 to<br>3,917.94)               | 307.93<br>(97.80 to<br>885.43)                     | 290.70<br>(96.85 to<br>853.11)                    | 378.08<br>(112.07 to<br>1,167.77)                   | 19.77<br>(6.92 to<br>51.71)                 | 6.02<br>(2.50 to<br>14.45)                  | 6.16<br>(2.61 to<br>14.88)                  | 6.56<br>(2.53 to<br>16.17)                  |
| Meningitis                                                        | 325,279.59<br>(208,020.95 to<br>524,842.38)       | 326,165.93<br>(170,781.71 to<br>615,682.67)        | 224,738.75<br>(126,678.49 to<br>384,987.82)       | 532,576.14<br>(259,186.91 to<br>1,045,508.55)       | 4,604.61<br>(3,087.99 to<br>7,247.92)       | 4,825.41<br>(2,766.65 to<br>8,588.77)       | 3,639.05<br>(2,209.32 to<br>6,028.70)       | 7,259.47<br>(3,873.38 to<br>13,281.92)      |
| Pneumococcal meningitis                                           | 18,026.60<br>(11,215.44 to<br>29,697.02)          | 13,694.91<br>(7,522.45 to<br>25,642.88)            | 9,545.11<br>(5,546.91 to<br>17,353.75)            | 20,848.99<br>(10,607.53 to<br>41,497.53)            | 289.76<br>(191.15 to<br>462.98)             | 253.80<br>(151.22 to<br>463.80)             | 195.59<br>(120.18 to<br>339.57)             | 342.17<br>(195.27 to<br>635.65)             |
| H influenzae type B meningitis                                    | 34,538.18<br>(20,192.10 to<br>56,752.37)          | 125,356.68<br>(25,127.97 to<br>347,436.72)         | 43,478.63<br>(11,226.78 to<br>127,475.43)         | 256,442.13<br>(50,831.50 to<br>686,941.99)          | 460.52<br>(284.83 to<br>722.64)             | 1,526.61<br>(345.21 to<br>4,131.87)         | 572.22<br>(185.08 to<br>1,553.13)           | 3,056.73<br>(640.66 to<br>8,137.41)         |
| Meningococcal meningitis                                          | 141,753.18<br>(88,517.26 to<br>226,824.92)        | 89,921.65<br>(50,318.92 to<br>155,841.10)          | 82,262.05<br>(47,497.74 to<br>140,893.09)         | 123,206.34<br>(68,876.66 to<br>212,556.42)          | 1,968.96<br>(1,282.63 to<br>3,119.72)       | 1,435.88<br>(845.08 to<br>2,474.46)         | 1,347.12<br>(821.09 to<br>2,248.71)         | 1,836.85<br>(1,063.97 to<br>3,065.47)       |
| Other meningitis                                                  | 130,961.64<br>(81,545.15 to<br>214,924.89)        | 97,192.70<br>(54,026.52 to<br>168,755.27)          | 89,452.96<br>(52,288.47 to<br>153,564.41)         | 132,078.68<br>(71,665.98 to<br>231,654.03)          | 1,885.38<br>(1,256.22 to<br>2,994.09)       | 1,609.11<br>(974.39 to<br>2,711.81)         | 1,524.12<br>(947.64 to<br>2,581.36)         | 2,023.73<br>(1,192.47 to<br>3,387.38)       |
| Encephalitis                                                      | 13,145.74<br>(8,540.72 to<br>19,502.02)           | 16,460.48<br>(9,366.58 to<br>26,580.56)            | 14,607.76<br>(8,388.83 to<br>23,422.23)           | 25,426.08<br>(15,251.31 to<br>38,873.10)            | 162.35<br>(108.17 to<br>236.27)             | 212.30<br>(123.33 to<br>335.59)             | 189.53<br>(113.33 to<br>296.07)             | 319.67<br>(195.69 to<br>483.35)             |
| Diphtheria                                                        | 7,192.72<br>(2,732.50 to<br>14,650.54)            | 4,932.79<br>(1,577.25 to<br>12,568.67)             | 1,810.30<br>(738.13 to<br>4,117.92)               | 6,420.50<br>(1,949.42 to<br>16,563.29)              | 88.23<br>(35.73 to<br>176.75)               | 61.04<br>(20.88 to<br>149.88)               | 24.23<br>(10.60 to<br>51.48)                | 78.56<br>(25.61 to<br>197.96)               |
| Whooping cough                                                    | 114,619.78<br>(9,330.73 to<br>322,475.99)         | 189,383.71<br>(16,466.31 to<br>503,622.84)         | 175,773.12<br>(16,547.61 to<br>432,273.87)        | 257,608.41<br>(20,714.68 to<br>697,114.29)          | 1,350.11<br>(110.01 to<br>3,799.39)         | 2,238.43<br>(194.03 to<br>5,930.32)         | 2,078.36<br>(194.77 to<br>5,119.66)         | 3,041.43<br>(245.98 to<br>8,216.39)         |

|                                               |                                             |                                             |                                             |                                             |                                        |                                       |                                       |                                       |
|-----------------------------------------------|---------------------------------------------|---------------------------------------------|---------------------------------------------|---------------------------------------------|----------------------------------------|---------------------------------------|---------------------------------------|---------------------------------------|
| Tetanus                                       | 178,857.29<br>(68,383.98 to<br>409,646.25)  | 63,880.17<br>(19,228.91 to<br>170,515.19)   | 48,156.02<br>(14,442.24 to<br>127,919.06)   | 86,205.52<br>(24,227.02 to<br>226,610.89)   | 2,484.91<br>(976.92 to<br>5,837.31)    | 851.91<br>(258.56 to<br>2,290.45)     | 672.41<br>(205.95 to<br>1,909.36)     | 1,107.47<br>(326.28 to<br>2,918.26)   |
| Measles                                       | 292,206.42<br>(103,943.56 to<br>632,041.69) | 27,290.28<br>(4,252.34 to<br>98,372.74)     | 8,359.84<br>(942.14 to<br>37,404.94)        | 37,333.98<br>(5,766.51 to<br>132,848.03)    | 3,468.92<br>(1,234.06 to<br>7,490.90)  | 324.63<br>(51.45 to<br>1,174.42)      | 100.51<br>(11.84 to<br>453.93)        | 443.47<br>(69.06 to<br>1,573.77)      |
| <b>South Sudan</b>                            |                                             |                                             |                                             |                                             |                                        |                                       |                                       |                                       |
| Cause                                         | YLLs (actual counts)                        |                                             |                                             |                                             | Deaths (actual counts)                 |                                       |                                       |                                       |
|                                               | 2016                                        | 2040 Forecast                               | 2040 Better Scenario                        | 2040 Worse Scenario                         | 2016                                   | 2040 Forecast                         | 2040 Better Scenario                  | 2040 Worse Scenario                   |
| Varicella and herpes zoster                   | 5,876.74<br>(2,950.23 to<br>10,574.80)      | 4,607.62<br>(1,894.93 to<br>9,047.64)       | 3,575.69<br>(1,584.13 to<br>6,838.62)       | 8,352.46<br>(3,690.34 to<br>16,228.23)      | 87.21<br>(50.71 to<br>144.99)          | 75.61<br>(37.50 to<br>135.63)         | 62.25<br>(33.25 to<br>106.13)         | 123.91<br>(62.83 to<br>223.27)        |
| Neglected tropical diseases and malaria       | 445,099.22<br>(298,872.32 to<br>656,713.00) | 217,608.20<br>(130,669.57 to<br>367,457.23) | 188,200.29<br>(113,150.75 to<br>324,617.87) | 338,451.50<br>(200,448.78 to<br>574,835.58) | 7,469.58<br>(5,194.61 to<br>10,715.57) | 3,360.83<br>(2,062.39 to<br>6,446.84) | 2,930.44<br>(1,766.61 to<br>5,646.63) | 5,008.58<br>(3,018.73 to<br>9,414.19) |
| Malaria                                       | 253,678.79<br>(138,497.74 to<br>445,475.32) | 102,120.41<br>(45,870.98 to<br>196,333.92)  | 97,090.99<br>(45,494.14 to<br>184,538.04)   | 136,412.59<br>(58,236.24 to<br>270,938.60)  | 3,459.04<br>(2,051.30 to<br>5,731.79)  | 1,465.56<br>(693.14 to<br>2,643.34)   | 1,413.91<br>(690.04 to<br>2,527.58)   | 1,869.49<br>(835.44 to<br>3,522.23)   |
| Chagas disease                                | 0.00<br>(0.00 to<br>0.00)                   | 0.00<br>(0.00 to<br>0.00)                   | 0.00<br>(0.00 to<br>0.00)                   | 0.00<br>(0.00 to<br>0.00)                   | 0.00<br>(0.00 to<br>0.00)              | 0.00<br>(0.00 to<br>0.00)             | 0.00<br>(0.00 to<br>0.00)             | 0.00<br>(0.00 to<br>0.00)             |
| Leishmaniasis                                 | 133,977.04<br>(72,907.88 to<br>230,592.89)  | 77,011.71<br>(44,473.36 to<br>155,101.98)   | 58,757.32<br>(32,393.72 to<br>116,371.25)   | 138,235.64<br>(80,233.44 to<br>246,584.44)  | 3,126.81<br>(1,700.59 to<br>5,256.10)  | 1,345.78<br>(778.46 to<br>3,186.30)   | 1,054.82<br>(568.41 to<br>2,570.84)   | 2,248.10<br>(1,294.14 to<br>4,749.95) |
| African trypanosomiasis                       | 1,937.02<br>(946.26 to<br>3,374.69)         | 162.97<br>(60.18 to<br>375.91)              | 164.54<br>(61.53 to<br>377.54)              | 172.78<br>(62.78 to<br>399.54)              | 34.80<br>(17.18 to<br>60.50)           | 2.77<br>(1.03 to<br>6.54)             | 2.81<br>(1.07 to<br>6.73)             | 2.86<br>(1.06 to<br>6.52)             |
| Schistosomiasis                               | 5,263.32<br>(3,596.60 to<br>7,449.23)       | 2,610.75<br>(1,293.59 to<br>5,225.34)       | 2,330.04<br>(1,175.20 to<br>4,953.18)       | 3,255.51<br>(1,601.74 to<br>6,516.55)       | 140.35<br>(95.27 to<br>196.55)         | 65.04<br>(31.02 to<br>147.41)         | 59.55<br>(28.65 to<br>139.50)         | 77.51<br>(36.98 to<br>171.52)         |
| Cysticercosis                                 | 310.00<br>(147.95 to<br>594.42)             | 108.98<br>(42.90 to<br>250.04)              | 102.95<br>(41.05 to<br>238.19)              | 129.73<br>(50.10 to<br>288.50)              | 5.81<br>(2.75 to<br>10.98)             | 2.06<br>(0.77 to<br>4.92)             | 1.97<br>(0.77 to<br>4.80)             | 2.35<br>(0.89 to<br>5.48)             |
| Cystic echinococcosis                         | 1,535.86<br>(1,034.99 to<br>2,149.33)       | 528.22<br>(271.39 to<br>937.55)             | 363.13<br>(182.64 to<br>696.21)             | 1,086.48<br>(548.95 to<br>1,938.23)         | 26.51<br>(18.28 to<br>36.64)           | 9.49<br>(4.80 to<br>18.32)            | 6.64<br>(3.23 to<br>13.68)            | 18.48<br>(9.23 to<br>34.41)           |
| Dengue                                        | 334.61<br>(7.14 to<br>1,398.28)             | 1,031.46<br>(21.28 to<br>4,457.83)          | 974.15<br>(21.12 to<br>4,025.94)            | 1,419.06<br>(27.77 to<br>6,201.61)          | 4.60<br>(0.11 to<br>18.43)             | 14.63<br>(0.36 to<br>58.46)           | 14.02<br>(0.34 to<br>54.36)           | 19.20<br>(0.43 to<br>81.37)           |
| Yellow fever                                  | 13,447.76<br>(2,646.81 to<br>43,916.40)     | 6,365.78<br>(910.02 to<br>23,928.79)        | 5,074.74<br>(740.78 to<br>19,218.46)        | 9,971.31<br>(1,534.08 to<br>37,425.40)      | 209.96<br>(41.23 to<br>665.62)         | 96.21<br>(13.97 to<br>354.39)         | 76.94<br>(10.94 to<br>288.94)         | 147.67<br>(21.91 to<br>545.23)        |
| Rabies                                        | 15,279.67<br>(5,221.37 to<br>39,392.21)     | 7,981.34<br>(2,015.50 to<br>27,784.74)      | 5,055.31<br>(1,197.64 to<br>16,714.93)      | 18,961.29<br>(4,754.39 to<br>58,373.71)     | 223.18<br>(81.57 to<br>543.96)         | 116.10<br>(30.88 to<br>409.40)        | 73.50<br>(18.42 to<br>245.30)         | 270.55<br>(69.04 to<br>844.46)        |
| Intestinal nematode infections                | 7,557.89<br>(4,095.95 to<br>13,034.41)      | 11,086.71<br>(4,961.05 to<br>20,535.50)     | 11,074.71<br>(5,149.24 to<br>20,518.95)     | 14,106.73<br>(6,008.51 to<br>26,924.33)     | 91.88<br>(51.09 to<br>156.39)          | 135.16<br>(62.43 to<br>246.97)        | 135.18<br>(64.14 to<br>246.86)        | 171.13<br>(73.42 to<br>324.10)        |
| Other neglected tropical diseases             | 11,777.27<br>(5,778.91 to<br>21,360.01)     | 8,599.97<br>(3,746.52 to<br>16,553.71)      | 7,212.43<br>(3,152.51 to<br>14,068.60)      | 14,700.38<br>(6,234.05 to<br>28,292.96)     | 146.63<br>(74.34 to<br>261.98)         | 108.05<br>(48.06 to<br>213.28)        | 91.10<br>(40.03 to<br>182.14)         | 181.23<br>(77.91 to<br>356.22)        |
| Maternal disorders                            | 138,244.17<br>(102,501.70 to<br>181,245.29) | 149,740.86<br>(71,771.15 to<br>267,953.92)  | 103,471.44<br>(59,992.51 to<br>171,358.11)  | 257,127.51<br>(148,574.83 to<br>428,186.58) | 2,528.68<br>(1,876.76 to<br>3,331.22)  | 2,751.86<br>(1,308.75 to<br>4,980.73) | 1,901.89<br>(1,093.38 to<br>3,152.79) | 4,705.80<br>(2,683.10 to<br>7,914.06) |
| Maternal hemorrhage                           | 27,401.14<br>(17,028.57 to<br>41,290.35)    | 27,013.56<br>(12,344.81 to<br>51,844.45)    | 18,993.86<br>(9,495.55 to<br>34,723.29)     | 44,537.62<br>(22,686.97 to<br>82,332.05)    | 515.10<br>(320.63 to<br>775.54)        | 508.73<br>(231.65 to<br>990.85)       | 357.70<br>(180.29 to<br>660.13)       | 836.20<br>(425.92 to<br>1,541.30)     |
| Maternal sepsis and other maternal infections | 12,004.81<br>(5,371.58 to<br>21,131.59)     | 11,209.62<br>(3,861.74 to<br>23,827.47)     | 7,825.79<br>(2,842.63 to<br>15,945.39)      | 18,830.14<br>(7,008.89 to<br>39,020.78)     | 219.22<br>(99.11 to<br>379.40)         | 205.26<br>(71.08 to<br>432.34)        | 143.35<br>(53.17 to<br>285.72)        | 343.61<br>(130.17 to<br>685.92)       |
| Maternal hypertensive disorders               | 15,671.79<br>(9,527.89 to<br>23,653.73)     | 16,493.40<br>(7,272.99 to<br>32,566.88)     | 11,538.13<br>(5,630.91 to<br>21,548.65)     | 27,505.83<br>(13,812.32 to<br>50,875.70)    | 280.03<br>(171.29 to<br>421.00)        | 295.31<br>(129.08 to<br>594.74)       | 206.61<br>(100.67 to<br>388.35)       | 491.02<br>(246.33 to<br>915.59)       |

|                                                                         |                                                        |                                                        |                                                      |                                                          |                                                |                                                |                                                |                                                 |
|-------------------------------------------------------------------------|--------------------------------------------------------|--------------------------------------------------------|------------------------------------------------------|----------------------------------------------------------|------------------------------------------------|------------------------------------------------|------------------------------------------------|-------------------------------------------------|
| Maternal obstructed labor and uterine rupture                           | 9,010.84<br>(4,590.40 to<br>15,834.96)                 | 9,463.05<br>(3,867.21 to<br>20,761.05)                 | 6,477.14<br>(2,837.54 to<br>12,926.23)               | 16,189.76<br>(7,136.38 to<br>33,089.01)                  | 167.83<br>(84.65 to<br>301.45)                 | 176.53<br>(70.21 to<br>399.90)                 | 120.83<br>(51.46 to<br>244.52)                 | 301.09<br>(133.50 to<br>609.11)                 |
| Maternal abortion, miscarriage, and ectopic pregnancy                   | 18,541.07<br>(10,686.12 to<br>28,749.98)               | 16,247.76<br>(6,015.79 to<br>33,925.30)                | 11,128.48<br>(4,641.44 to<br>22,989.41)              | 27,418.75<br>(10,837.97 to<br>54,802.48)                 | 331.89<br>(198.32 to<br>506.76)                | 292.25<br>(109.98 to<br>606.01)                | 200.13<br>(84.43 to<br>407.23)                 | 491.35<br>(199.89 to<br>963.09)                 |
| Indirect maternal deaths                                                | 36,090.05<br>(21,133.79 to<br>55,562.87)               | 40,643.39<br>(17,858.46 to<br>81,550.87)               | 28,292.62<br>(13,770.77 to<br>51,477.44)             | 71,026.19<br>(34,378.99 to<br>133,931.50)                | 656.05<br>(384.10 to<br>1,002.33)              | 735.41<br>(328.15 to<br>1,470.35)              | 512.62<br>(250.79 to<br>931.00)                | 1,278.22<br>(608.56 to<br>2,406.81)             |
| Late maternal deaths                                                    | 2,587.36<br>(1,129.36 to<br>4,913.22)                  | 2,261.40<br>(782.79 to<br>5,149.43)                    | 1,573.80<br>(609.92 to<br>3,430.44)                  | 3,917.94<br>(1,510.71 to<br>8,465.44)                    | 47.21<br>(19.99 to<br>85.91)                   | 41.35<br>(14.44 to<br>93.50)                   | 28.80<br>(11.01 to<br>63.20)                   | 71.19<br>(27.52 to<br>149.71)                   |
| Maternal deaths aggravated by HIV/AIDS                                  | 1,484.69<br>(608.41 to<br>2,971.67)                    | 9,574.58<br>(316.27 to<br>24,687.57)                   | 5,645.41<br>(911 to<br>16,561.18)                    | 19,303.86<br>(6,868.92 to<br>42,016.04)                  | 28.16<br>(11.55 to<br>56.00)                   | 187.48<br>(4.80 to<br>473.24)                  | 110.99<br>(0.19 to<br>320.43)                  | 374.21<br>(135.05 to<br>805.62)                 |
| Other maternal disorders                                                | 15,452.42<br>(7,645.18 to<br>26,900.09)                | 16,834.11<br>(6,361.52 to<br>35,972.22)                | 11,996.20<br>(4,948.61 to<br>23,926.86)              | 28,397.42<br>(11,686.25 to<br>57,608.80)                 | 283.19<br>(138.93 to<br>492.74)                | 309.54<br>(115.80 to<br>660.87)                | 220.86<br>(91.75 to<br>432.20)                 | 518.92<br>(213.97 to<br>1,046.41)               |
| <b>South Sudan</b>                                                      |                                                        |                                                        |                                                      |                                                          |                                                |                                                |                                                |                                                 |
| Cause                                                                   | YLLs (actual counts)                                   |                                                        |                                                      |                                                          | Deaths (actual counts)                         |                                                |                                                |                                                 |
|                                                                         | 2016                                                   | 2040 Forecast                                          | 2040 Better Scenario                                 | 2040 Worse Scenario                                      | 2016                                           | 2040 Forecast                                  | 2040 Better Scenario                           | 2040 Worse Scenario                             |
| <b>Neonatal disorders</b>                                               | <b>1,209,060.75</b><br>(839,368.05 to<br>1,670,273.88) | <b>1,182,948.49</b><br>(651,001.07 to<br>1,873,154.86) | <b>926,918.29</b><br>(527,258.41 to<br>1,458,223.34) | <b>2,100,515.92</b><br>(1,194,795.63 to<br>3,280,856.29) | <b>13,969.62</b><br>(9,699.05 to<br>19,296.68) | <b>13,671.04</b><br>(7,523.36 to<br>21,648.87) | <b>10,712.74</b><br>(6,093.87 to<br>16,850.65) | <b>24,274.28</b><br>(13,809.07 to<br>37,921.27) |
| Neonatal preterm birth                                                  | 357,409.91<br>(217,108.16 to<br>559,941.65)            | 364,971.69<br>(181,860.80 to<br>620,390.92)            | 240,703.47<br>(124,663.84 to<br>403,770.68)          | 607,234.52<br>(309,957.96 to<br>1,001,961.41)            | 4,129.27<br>(2,508.58 to<br>6,470.21)          | 4,217.28<br>(2,101.84 to<br>7,167.33)          | 2,781.79<br>(1,441.06 to<br>4,664.76)          | 7,016.51<br>(3,582.81 to<br>11,576.17)          |
| Neonatal encephalopathy due to birth asphyxia and trauma                | 407,739.43<br>(244,881.17 to<br>641,608.76)            | 326,671.44<br>(145,552.58 to<br>614,475.42)            | 279,996.97<br>(127,773.45 to<br>527,448.54)          | 577,620.66<br>(264,779.57 to<br>1,060,800.02)            | 4,710.25<br>(2,828.76 to<br>7,412.02)          | 3,774.94<br>(1,682.63 to<br>7,099.13)          | 3,235.61<br>(1,477.34 to<br>6,094.85)          | 6,674.52<br>(3,060.11 to<br>12,544.65)          |
| Neonatal sepsis and other neonatal infections                           | 214,580.09<br>(122,258.30 to<br>374,434.79)            | 269,337.69<br>(135,476.80 to<br>476,371.69)            | 228,173.61<br>(116,913.13 to<br>394,257.21)          | 484,197.48<br>(251,082.66 to<br>839,630.55)              | 2,479.85<br>(1,413.11 to<br>4,326.87)          | 2,479.85<br>(1,565.65 to<br>5,504.69)          | 3,113.19<br>(1,251.47 to<br>4,555.94)          | 5,596.46<br>(2,902.72 to<br>9,702.24)           |
| Hemolytic disease and other neonatal jaundice                           | 39,007.41<br>(20,079.63 to<br>70,387.64)               | 21,121.69<br>(8,796.61 to<br>43,613.96)                | 17,005.91<br>(7,051.20 to<br>35,320.17)              | 41,178.41<br>(17,409.95 to<br>84,886.37)                 | 450.72<br>(232.02 to<br>813.24)                | 244.08<br>(101.67 to<br>504.21)                | 196.52<br>(81.48 to<br>408.15)                 | 475.84<br>(201.17 to<br>980.69)                 |
| Other neonatal disorders                                                | 190,323.91<br>(104,291.96 to<br>317,392.13)            | 200,845.98<br>(86,730.60 to<br>391,176.32)             | 161,038.34<br>(74,249.66 to<br>312,944.85)           | 390,284.85<br>(178,606.90 to<br>742,825.09)              | 2,199.53<br>(1,205.36 to<br>3,667.69)          | 2,321.55<br>(1,003.01 to<br>4,521.66)          | 1,861.43<br>(837.52 to<br>3,616.54)            | 4,510.95<br>(2,064.62 to<br>8,586.03)           |
| <b>Nutritional deficiencies</b>                                         | <b>520,305.40</b><br>(286,893.73 to<br>807,610.25)     | <b>247,673.28</b><br>(124,140.05 to<br>425,359.77)     | <b>209,519.90</b><br>(109,424.06 to<br>351,551.57)   | <b>451,978.76</b><br>(230,450.23 to<br>758,848.08)       | <b>7,300.28</b><br>(4,277.14 to<br>10,879.68)  | <b>4,463.65</b><br>(2,456.99 to<br>7,027.43)   | <b>3,982.58</b><br>(2,289.56 to<br>6,166.09)   | <b>7,028.03</b><br>(3,880.00 to<br>11,268.86)   |
| Protein-energy malnutrition                                             | 506,665.23<br>(277,663.25 to<br>796,792.06)            | 221,683.75<br>(107,090.55 to<br>392,551.19)            | 186,938.06<br>(95,260.98 to<br>316,161.24)           | 416,529.53<br>(199,092.44 to<br>728,201.57)              | 6,923.18<br>(3,974.36 to<br>10,478.46)         | 3,759.66<br>(2,013.45 to<br>6,091.33)          | 3,331.69<br>(1,824.69 to<br>5,205.95)          | 6,168.23<br>(3,276.11 to<br>10,164.90)          |
| Iodine deficiency                                                       | 863.96<br>(44.26 to<br>3,505.00)                       | 5,510.91<br>(67.41 to<br>36,603.16)                    | 4,442.49<br>(55.62 to<br>30,435.98)                  | 9,661.08<br>(116.23 to<br>72,054.57)                     | 17.69<br>(1.15 to<br>63.27)                    | 117.26<br>(2.20 to<br>520.29)                  | 100.27<br>(1.84 to<br>431.91)                  | 176.10<br>(3.38 to<br>946.64)                   |
| Dietary iron deficiency                                                 | 486.07<br>(251.51 to<br>903.73)                        | 867.71<br>(373.74 to<br>1,830.86)                      | 792.82<br>(347.24 to<br>1,634.13)                    | 1,015.68<br>(448.92 to<br>2,074.00)                      | 9.02<br>(4.71 to<br>16.85)                     | 15.96<br>(6.97 to<br>33.23)                    | 14.68<br>(6.56 to<br>29.75)                    | 18.42<br>(8.21 to<br>37.09)                     |
| Other nutritional deficiencies                                          | 12,290.13<br>(6,390.74 to<br>20,797.21)                | 19,610.91<br>(9,124.45 to<br>38,693.52)                | 17,346.53<br>(8,258.48 to<br>32,808.70)              | 24,772.47<br>(11,897.35 to<br>48,260.23)                 | 350.38<br>(179.55 to<br>609.89)                | 570.77<br>(268.93 to<br>1,056.96)              | 535.94<br>(256.38 to<br>934.13)                | 665.29<br>(322.24 to<br>1,180.10)               |
| <b>Other communicable, maternal, neonatal, and nutritional diseases</b> | <b>946,864.69</b><br>(481,795.14 to<br>1,623,578.25)   | <b>397,708.64</b><br>(178,039.14 to<br>764,891.71)     | <b>346,086.07</b><br>(163,959.21 to<br>640,047.78)   | <b>635,585.71</b><br>(291,011.64 to<br>1,210,298.72)     | <b>11,332.75</b><br>(5,888.31 to<br>19,200.26) | <b>5,057.54</b><br>(2,433.41 to<br>9,343.78)   | <b>4,433.66</b><br>(2,261.99 to<br>7,877.11)   | <b>7,890.59</b><br>(3,808.12 to<br>14,627.89)   |
| Sexually transmitted infections excluding HIV                           | 853,737.14<br>(405,156.43 to<br>1,529,710.95)          | 305,010.46<br>(110,778.28 to<br>644,875.62)            | 267,449.56<br>(103,305.46 to<br>554,310.13)          | 487,086.13<br>(178,914.46 to<br>1,016,388.52)            | 10,032.23<br>(4,786.91 to<br>17,964.60)        | 3,630.64<br>(1,347.85 to<br>7,599.20)          | 3,187.86<br>(1,249.05 to<br>6,536.08)          | 5,766.31<br>(2,154.94 to<br>12,001.49)          |
| Syphilis                                                                | 851,469.32<br>(405,401.13 to<br>1,527,161.73)          | 301,977.61<br>(108,125.30 to<br>641,464.10)            | 264,667.44<br>(101,663.58 to<br>549,616.31)          | 483,597.29<br>(175,727.68 to<br>1,012,177.00)            | 9,983.74<br>(4,749.44 to<br>17,908.94)         | 3,566.76<br>(1,297.58 to<br>7,528.59)          | 3,128.05<br>(1,212.56 to<br>6,448.13)          | 5,694.57<br>(2,092.64 to<br>11,910.46)          |



|                                      |                                       |                                        |                                        |                                        |                                  |                                    |                                    |                                    |
|--------------------------------------|---------------------------------------|----------------------------------------|----------------------------------------|----------------------------------------|----------------------------------|------------------------------------|------------------------------------|------------------------------------|
| Liver cancer due to alcohol use      | 1,207.77<br>(784.72 to 1,745.65)      | 2,872.92<br>(1,722.18 to 4,616.73)     | 2,713.72<br>(1,667.53 to 4,345.16)     | 3,356.96<br>(1,929.29 to 5,508.97)     | 45.02<br>(30.18 to 63.00)        | 102.91<br>(66.54 to 158.30)        | 100.97<br>(65.82 to 151.95)        | 116.26<br>(70.98 to 186.93)        |
| Liver cancer due to other causes     | 3,450.08<br>(2,341.23 to 5,024.20)    | 8,367.96<br>(4,956.59 to 13,511.88)    | 7,906.83<br>(4,811.68 to 12,632.59)    | 9,616.55<br>(5,597.33 to 16,042.11)    | 106.33<br>(72.73 to 150.10)      | 254.16<br>(161.13 to 392.58)       | 248.69<br>(160.32 to 379.31)       | 283.97<br>(169.74 to 456.22)       |
| Gallbladder and biliary tract cancer | 1,429.64<br>(998.81 to 2,076.42)      | 2,107.73<br>(1,468.78 to 3,112.57)     | 2,234.85<br>(1,523.93 to 3,367.65)     | 1,975.10<br>(1,405.52 to 2,874.34)     | 58.31<br>(41.78 to 83.73)        | 85.41<br>(64.28 to 123.95)         | 93.64<br>(69.09 to 137.75)         | 77.39<br>(58.91 to 108.89)         |
| Pancreatic cancer                    | 4,320.84<br>(3,156.85 to 5,579.98)    | 11,745.34<br>(8,610.27 to 15,803.43)   | 12,194.62<br>(8,893.19 to 16,293.09)   | 10,904.61<br>(7,897.40 to 15,010.63)   | 172.59<br>(127.91 to 221.47)     | 454.80<br>(348.83 to 591.40)       | 489.75<br>(380.46 to 636.72)       | 409.23<br>(309.21 to 539.92)       |
| Larynx cancer                        | 1,701.70<br>(1,165.12 to 2,291.35)    | 3,733.42<br>(2,124.06 to 6,312.24)     | 2,851.10<br>(1,752.62 to 4,368.56)     | 4,296.68<br>(2,317.96 to 7,539.41)     | 63.57<br>(44.97 to 84.96)        | 132.84<br>(81.13 to 211.73)        | 107.72<br>(70.49 to 156.41)        | 148.34<br>(88.15 to 244.65)        |
| Tracheal, bronchus, and lung cancer  | 6,162.22<br>(4,560.80 to 7,989.23)    | 16,203.16<br>(9,132.55 to 28,053.34)   | 9,694.32<br>(5,841.61 to 15,270.05)    | 17,385.72<br>(9,509.95 to 31,705.93)   | 250.04<br>(187.32 to 315.66)     | 630.37<br>(370.39 to 1,039.08)     | 402.47<br>(255.76 to 608.39)       | 652.50<br>(373.56 to 1,117.76)     |
| Malignant skin melanoma              | 1,669.35<br>(1,105.08 to 2,353.13)    | 3,925.56<br>(2,549.35 to 5,649.60)     | 4,348.34<br>(2,788.30 to 6,333.73)     | 3,428.58<br>(2,223.25 to 4,818.53)     | 64.48<br>(43.00 to 89.75)        | 150.73<br>(102.00 to 213.26)       | 172.51<br>(117.66 to 242.77)       | 127.31<br>(86.42 to 174.82)        |
| Non-melanoma skin cancer             | 1,110.14<br>(783.93 to 1,465.06)      | 2,649.94<br>(1,885.69 to 3,660.17)     | 2,628.68<br>(1,919.09 to 3,571.78)     | 2,763.72<br>(1,950.81 to 3,810.78)     | 46.43<br>(32.34 to 61.68)        | 111.46<br>(82.27 to 145.13)        | 116.30<br>(87.01 to 151.76)        | 110.77<br>(80.58 to 144.78)        |
| Breast cancer                        | 11,977.18<br>(7,031.21 to 17,668.52)  | 27,475.88<br>(14,931.43 to 43,766.01)  | 27,361.94<br>(15,148.11 to 43,000.51)  | 27,900.70<br>(14,907.05 to 44,777.11)  | 390.57<br>(228.31 to 568.68)     | 905.87<br>(508.54 to 1,376.16)     | 925.16<br>(528.90 to 1,404.78)     | 895.87<br>(493.65 to 1,374.35)     |
| Cervical cancer                      | 34,704.57<br>(19,789.27 to 69,195.38) | 58,593.72<br>(30,576.89 to 122,774.61) | 55,098.01<br>(29,834.84 to 109,899.77) | 64,241.48<br>(33,422.49 to 136,345.77) | 1,140.57<br>(653.80 to 2,337.48) | 1,886.57<br>(1,032.40 to 4,057.72) | 1,815.15<br>(1,012.20 to 3,764.34) | 2,022.67<br>(1,090.89 to 4,517.19) |
| Uterine cancer                       | 3,289.62<br>(2,079.84 to 4,658.44)    | 6,450.90<br>(4,023.29 to 10,190.59)    | 6,059.44<br>(3,797.29 to 9,294.76)     | 7,152.99<br>(4,556.88 to 11,074.69)    | 122.02<br>(78.41 to 172.15)      | 238.74<br>(154.76 to 355.30)       | 230.41<br>(153.08 to 340.85)       | 257.67<br>(170.57 to 381.47)       |
| Ovarian cancer                       | 4,873.94<br>(3,084.63 to 6,816.37)    | 11,966.38<br>(7,395.00 to 17,818.98)   | 12,786.98<br>(8,062.86 to 18,998.72)   | 11,053.22<br>(6,631.90 to 16,552.52)   | 167.43<br>(106.33 to 232.92)     | 408.99<br>(256.33 to 581.46)       | 447.48<br>(290.58 to 636.01)       | 367.74<br>(225.60 to 534.81)       |
| Prostate cancer                      | 13,265.84<br>(4,739.20 to 19,811.42)  | 35,051.04<br>(13,214.37 to 50,060.04)  | 38,400.89<br>(15,141.73 to 55,117.23)  | 31,567.36<br>(11,464.76 to 46,273.96)  | 699.37<br>(251.85 to 1,034.34)   | 1,863.14<br>(705.95 to 2,629.83)   | 2,111.85<br>(840.83 to 2,959.18)   | 1,625.58<br>(595.95 to 2,331.41)   |
| Testicular cancer                    | 433.43<br>(277.97 to 642.23)          | 843.24<br>(491.96 to 1,442.75)         | 812.23<br>(477.04 to 1,366.37)         | 902.93<br>(530.79 to 1,521.61)         | 9.92<br>(6.46 to 14.94)          | 19.14<br>(11.54 to 31.92)          | 18.69<br>(11.29 to 30.21)          | 20.19<br>(12.39 to 33.11)          |

**South Sudan**

| Cause                           | YLLs (actual counts)               |                                      |                                      |                                      | Deaths (actual counts)      |                              |                              |                              |
|---------------------------------|------------------------------------|--------------------------------------|--------------------------------------|--------------------------------------|-----------------------------|------------------------------|------------------------------|------------------------------|
|                                 | 2016                               | 2040 Forecast                        | 2040 Better Scenario                 | 2040 Worse Scenario                  | 2016                        | 2040 Forecast                | 2040 Better Scenario         | 2040 Worse Scenario          |
| Kidney cancer                   | 2,193.53<br>(1,392.22 to 3,187.28) | 4,476.67<br>(2,881.53 to 6,341.79)   | 4,785.30<br>(3,125.20 to 6,745.16)   | 4,478.39<br>(2,796.75 to 6,490.27)   | 47.42<br>(32.37 to 64.23)   | 111.59<br>(77.29 to 148.70)  | 123.18<br>(85.18 to 161.57)  | 102.51<br>(69.87 to 139.33)  |
| Bladder cancer                  | 2,383.81<br>(1,747.47 to 3,116.61) | 4,975.87<br>(3,652.75 to 6,823.38)   | 4,952.80<br>(3,660.40 to 6,702.04)   | 4,945.80<br>(3,581.26 to 6,827.42)   | 108.39<br>(81.18 to 138.72) | 223.33<br>(173.74 to 290.47) | 233.49<br>(183.28 to 299.21) | 212.61<br>(161.28 to 279.71) |
| Brain and nervous system cancer | 5,301.31<br>(2,853.94 to 7,462.06) | 13,577.44<br>(6,872.32 to 20,567.56) | 14,128.49<br>(7,187.53 to 21,557.50) | 13,760.09<br>(6,877.66 to 20,710.00) | 121.40<br>(65.34 to 174.25) | 324.93<br>(167.82 to 468.03) | 345.54<br>(177.75 to 511.92) | 312.54<br>(160.98 to 454.60) |
| Thyroid cancer                  | 2,660.08<br>(1,452.30 to 3,652.82) | 4,992.64<br>(2,654.34 to 7,880.69)   | 4,698.19<br>(2,569.54 to 7,174.77)   | 5,907.50<br>(3,128.05 to 9,220.76)   | 86.83<br>(48.03 to 118.05)  | 161.72<br>(86.84 to 240.60)  | 156.09<br>(89.09 to 227.40)  | 186.55<br>(99.60 to 276.68)  |
| Mesothelioma                    | 289.33<br>(161.08 to 437.79)       | 674.83<br>(370.53 to 1,078.71)       | 680.36<br>(373.87 to 1,089.28)       | 679.55<br>(373.55 to 1,070.46)       | 9.91<br>(5.32 to 14.75)     | 22.45<br>(12.18 to 34.81)    | 23.31<br>(12.67 to 36.49)    | 21.94<br>(11.91 to 33.67)    |
| Hodgkin lymphoma                | 3,611.18<br>(1,666.64 to 5,346.04) | 4,912.77<br>(1,976.78 to 8,929.37)   | 4,328.77<br>(1,838.62 to 7,514.05)   | 6,220.69<br>(2,529.23 to 10,926.65)  | 76.84<br>(35.73 to 110.74)  | 106.41<br>(44.97 to 179.58)  | 95.50<br>(43.43 to 157.90)   | 129.94<br>(54.82 to 216.82)  |

|                                |                                                                  |                                                                  |                                                                  |                                                                    |                                                               |                                                               |                                                               |                                                               |
|--------------------------------|------------------------------------------------------------------|------------------------------------------------------------------|------------------------------------------------------------------|--------------------------------------------------------------------|---------------------------------------------------------------|---------------------------------------------------------------|---------------------------------------------------------------|---------------------------------------------------------------|
| Non-Hodgkin lymphoma           | 20,797.93<br>(12,195.72 to<br>29,021.42)                         | 44,993.11<br>(25,151.56 to<br>67,826.41)                         | 46,698.17<br>(26,780.70 to<br>70,799.18)                         | 47,337.48<br>(26,012.01 to<br>71,595.71)                           | 411.40<br>(242.84 to<br>568.77)                               | 935.99<br>(547.11 to<br>1,350.03)                             | 990.66<br>(595.92 to<br>1,430.89)                             | 941.15<br>(535.57 to<br>1,368.37)                             |
| Multiple myeloma               | 2,337.82<br>(1,281.07 to<br>3,331.41)                            | 6,085.93<br>(3,304.35 to<br>9,114.50)                            | 6,473.12<br>(3,694.88 to<br>9,684.79)                            | 5,845.91<br>(3,052.41 to<br>8,993.74)                              | 83.69<br>(46.31 to<br>117.79)                                 | 214.69<br>(119.20 to<br>309.76)                               | 232.78<br>(135.34 to<br>338.12)                               | 201.92<br>(107.10 to<br>304.06)                               |
| Leukemia                       | 8,420.01<br>(5,714.46 to<br>11,582.37)                           | 16,091.54<br>(10,154.96 to<br>23,489.36)                         | 15,939.67<br>(10,124.05 to<br>23,372.59)                         | 17,657.57<br>(11,111.88 to<br>25,958.88)                           | 185.70<br>(127.49 to<br>254.48)                               | 382.69<br>(255.82 to<br>536.75)                               | 387.54<br>(264.33 to<br>544.80)                               | 404.15<br>(267.08 to<br>577.41)                               |
| Acute lymphoid leukemia        | 2,507.46<br>(1,657.43 to<br>3,484.96)                            | 4,781.34<br>(2,918.28 to<br>7,387.03)                            | 4,880.52<br>(3,006.94 to<br>7,574.95)                            | 5,097.58<br>(3,122.61 to<br>7,840.62)                              | 44.96<br>(30.10 to<br>61.57)                                  | 92.87<br>(58.85 to<br>137.22)                                 | 95.72<br>(60.88 to<br>141.67)                                 | 95.93<br>(59.92 to<br>141.84)                                 |
| Chronic lymphoid leukemia      | 295.00<br>(184.00 to<br>451.20)                                  | 588.79<br>(373.15 to<br>902.49)                                  | 602.55<br>(385.38 to<br>919.74)                                  | 599.95<br>(370.88 to<br>932.26)                                    | 12.68<br>(7.99 to<br>19.31)                                   | 24.70<br>(15.82 to<br>36.38)                                  | 26.02<br>(16.86 to<br>38.60)                                  | 24.43<br>(15.11 to<br>36.22)                                  |
| Acute myeloid leukemia         | 1,383.26<br>(899.48 to<br>2,076.39)                              | 3,542.45<br>(2,146.39 to<br>5,749.82)                            | 3,706.57<br>(2,240.15 to<br>6,018.17)                            | 3,549.94<br>(2,170.57 to<br>5,747.68)                              | 29.08<br>(18.86 to<br>44.49)                                  | 80.13<br>(49.77 to<br>128.64)                                 | 85.67<br>(54.19 to<br>136.84)                                 | 77.16<br>(47.76 to<br>125.37)                                 |
| Chronic myeloid leukemia       | 878.39<br>(547.55 to<br>1,322.80)                                | 1,235.94<br>(719.47 to<br>2,111.96)                              | 1,198.87<br>(705.07 to<br>1,994.97)                              | 1,304.99<br>(754.26 to<br>2,195.12)                                | 21.89<br>(14.11 to<br>32.84)                                  | 30.64<br>(19.05 to<br>49.19)                                  | 30.25<br>(19.01 to<br>48.19)                                  | 31.95<br>(19.53 to<br>52.06)                                  |
| Other leukemia                 | 3,355.88<br>(2,010.12 to<br>5,396.55)                            | 5,943.03<br>(3,187.88 to<br>10,176.85)                           | 5,551.16<br>(3,016.20 to<br>9,458.29)                            | 7,105.10<br>(3,778.79 to<br>12,275.14)                             | 77.08<br>(46.78 to<br>120.17)                                 | 154.34<br>(91.41 to<br>248.69)                                | 149.88<br>(90.55 to<br>237.69)                                | 174.67<br>(101.95 to<br>282.58)                               |
| Other neoplasms                | 29,631.63<br>(17,693.26 to<br>40,956.45)                         | 77,325.54<br>(44,391.97 to<br>118,789.82)                        | 78,364.93<br>(45,606.73 to<br>120,354.59)                        | 77,762.64<br>(44,247.06 to<br>119,677.64)                          | 694.72<br>(418.08 to<br>959.57)                               | 1,808.05<br>(1,072.51 to<br>2,628.47)                         | 1,864.72<br>(1,119.37 to<br>2,737.37)                         | 1,771.75<br>(1,040.15 to<br>2,592.23)                         |
| <b>Cardiovascular diseases</b> | <b>322,253.98</b><br><b>(249,263.95 to</b><br><b>402,437.52)</b> | <b>635,435.22</b><br><b>(418,894.69 to</b><br><b>927,411.73)</b> | <b>391,478.07</b><br><b>(272,524.76 to</b><br><b>560,842.50)</b> | <b>989,488.95</b><br><b>(657,253.80 to</b><br><b>1,492,939.31)</b> | <b>13,947.37</b><br><b>(10,745.64 to</b><br><b>17,155.18)</b> | <b>27,818.18</b><br><b>(19,913.00 to</b><br><b>37,713.93)</b> | <b>18,569.73</b><br><b>(13,999.44 to</b><br><b>24,581.88)</b> | <b>40,576.86</b><br><b>(29,249.38 to</b><br><b>56,264.92)</b> |
| Rheumatic heart disease        | 7,669.91<br>(5,332.76 to<br>10,269.14)                           | 6,715.07<br>(3,950.75 to<br>10,916.85)                           | 8,841.43<br>(3,582.33 to<br>8,934.35)                            | 8,841.43<br>(5,410.08 to<br>13,794.76)                             | 233.44<br>(161.45 to<br>314.47)                               | 211.61<br>(134.66 to<br>317.95)                               | 187.27<br>(122.88 to<br>270.11)                               | 265.48<br>(171.85 to<br>388.98)                               |
| Ischemic heart disease         | 121,849.16<br>(91,331.98 to<br>156,506.34)                       | 256,300.26<br>(140,983.76 to<br>424,801.27)                      | 133,436.12<br>(77,536.95 to<br>227,469.06)                       | 424,252.39<br>(239,539.61 to<br>702,013.15)                        | 5,717.68<br>(4,402.13 to<br>7,183.31)                         | 5,717.68<br>(4,402.13 to<br>7,183.31)                         | 6,906.84<br>(4,327.15 to<br>10,883.18)                        | 18,187.54<br>(11,239.79 to<br>28,745.01)                      |
| Stroke                         | 108,976.29<br>(81,682.43 to<br>140,551.61)                       | 200,776.32<br>(114,215.59 to<br>347,178.37)                      | 102,359.41<br>(61,947.23 to<br>172,147.75)                       | 344,932.81<br>(197,742.66 to<br>569,527.12)                        | 4,774.19<br>(3,579.64 to<br>6,099.08)                         | 8,700.61<br>(5,358.92 to<br>13,730.52)                        | 4,920.96<br>(3,220.13 to<br>7,525.28)                         | 13,980.79<br>(8,920.56 to<br>22,276.49)                       |
| Ischemic stroke                | 29,527.33<br>(21,552.72 to<br>38,689.78)                         | 47,917.78<br>(27,438.86 to<br>81,692.28)                         | 28,374.04<br>(16,685.65 to<br>46,168.25)                         | 71,412.11<br>(41,246.97 to<br>115,941.03)                          | 1,683.26<br>(1,241.81 to<br>2,161.88)                         | 2,789.45<br>(1,683.26 to<br>4,535.33)                         | 1,831.58<br>(1,150.09 to<br>2,872.96)                         | 3,880.95<br>(2,315.06 to<br>6,347.95)                         |
| Intracerebral hemorrhage       | 79,448.97<br>(58,318.00 to<br>103,530.67)                        | 152,858.55<br>(79,014.10 to<br>277,457.91)                       | 73,985.38<br>(41,596.33 to<br>131,678.89)                        | 273,520.70<br>(142,638.04 to<br>482,284.19)                        | 3,090.93<br>(2,267.20 to<br>4,008.03)                         | 5,911.16<br>(3,324.23 to<br>9,987.74)                         | 3,089.38<br>(1,904.01 to<br>4,902.01)                         | 10,099.83<br>(5,775.14 to<br>17,252.60)                       |
| Hypertensive heart disease     | 21,395.50<br>(13,152.99 to<br>34,246.63)                         | 43,609.60<br>(23,380.48 to<br>77,581.17)                         | 33,927.54<br>(19,530.42 to<br>57,920.06)                         | 56,815.44<br>(28,438.84 to<br>112,181.09)                          | 1,027.51<br>(636.55 to<br>1,613.53)                           | 2,153.05<br>(1,221.45 to<br>3,625.66)                         | 1,767.70<br>(1,057.49 to<br>2,856.17)                         | 2,629.72<br>(1,380.91 to<br>5,048.60)                         |
| Cardiomyopathy and myocarditis | 9,818.96<br>(6,689.72 to<br>14,690.77)                           | 17,316.50<br>(10,811.83 to<br>27,224.82)                         | 17,175.65<br>(10,691.59 to<br>27,110.96)                         | 18,821.59<br>(11,565.84 to<br>29,637.22)                           | 228.67<br>(158.24 to<br>329.96)                               | 467.08<br>(306.26 to<br>707.88)                               | 479.08<br>(314.23 to<br>734.58)                               | 472.15<br>(304.59 to<br>719.79)                               |
| Myocarditis                    | 1,937.41<br>(802.87 to<br>4,264.98)                              | 3,008.88<br>(861.71 to<br>8,288.32)                              | 2,898.60<br>(828.58 to<br>8,199.16)                              | 3,487.54<br>(1,113.00 to<br>9,073.39)                              | 36.10<br>(13.08 to<br>95.75)                                  | 67.13<br>(17.24 to<br>210.58)                                 | 66.75<br>(16.81 to<br>211.72)                                 | 72.73<br>(20.04 to<br>216.25)                                 |
| <b>South Sudan</b>             |                                                                  |                                                                  |                                                                  |                                                                    |                                                               |                                                               |                                                               |                                                               |
| Cause                          | YLLs (actual counts)                                             |                                                                  |                                                                  |                                                                    | Deaths (actual counts)                                        |                                                               |                                                               |                                                               |
|                                | 2016                                                             | 2040 Forecast                                                    | 2040 Better Scenario                                             | 2040 Worse Scenario                                                | 2016                                                          | 2040 Forecast                                                 | 2040 Better Scenario                                          | 2040 Worse Scenario                                           |
| Alcoholic cardiomyopathy       | 378.27<br>(110.48 to<br>817.49)                                  | 851.41<br>(236.49 to<br>1,857.51)                                | 897.84<br>(242.93 to<br>1,996.70)                                | 795.51<br>(229.56 to<br>1,702.06)                                  | 12.12<br>(3.45 to<br>25.62)                                   | 26.35<br>(7.57 to<br>58.16)                                   | 28.35<br>(7.96 to<br>64.41)                                   | 24.16<br>(6.92 to<br>52.04)                                   |
| Other cardiomyopathy           | 7,503.28<br>(5,016.82 to<br>10,856.20)                           | 13,456.21<br>(8,247.10 to<br>20,610.27)                          | 13,379.21<br>(8,234.29 to<br>20,523.16)                          | 14,538.54<br>(8,919.23 to<br>22,150.63)                            | 180.44<br>(123.55 to<br>257.98)                               | 373.60<br>(239.88 to<br>568.59)                               | 383.97<br>(251.02 to<br>584.79)                               | 375.26<br>(239.24 to<br>575.24)                               |



| South Sudan                                |                                          |                                          |                                          |                                           |                                       |                                       |                                       |                                       |
|--------------------------------------------|------------------------------------------|------------------------------------------|------------------------------------------|-------------------------------------------|---------------------------------------|---------------------------------------|---------------------------------------|---------------------------------------|
| Cause                                      | YLLs (actual counts)                     |                                          |                                          |                                           | Deaths (actual counts)                |                                       |                                       |                                       |
|                                            | 2016                                     | 2040 Forecast                            | 2040 Better Scenario                     | 2040 Worse Scenario                       | 2016                                  | 2040 Forecast                         | 2040 Better Scenario                  | 2040 Worse Scenario                   |
| Gastritis and duodenitis                   | 3,653.24<br>(2,399.11 to<br>6,145.26)    | 6,243.48<br>(3,967.31 to<br>10,635.22)   | 5,947.04<br>(3,808.90 to<br>9,980.15)    | 6,976.97<br>(4,483.16 to<br>11,951.87)    | 122.72<br>(78.69 to<br>213.20)        | 223.88<br>(145.35 to<br>374.78)       | 224.89<br>(145.99 to<br>379.48)       | 235.14<br>(154.74 to<br>398.48)       |
| Appendicitis                               | 7,351.74<br>(4,434.59 to<br>12,451.77)   | 8,336.66<br>(4,428.42 to<br>14,744.83)   | 7,325.15<br>(4,165.00 to<br>12,426.20)   | 10,858.93<br>(5,826.91 to<br>18,699.66)   | 146.23<br>(92.58 to<br>216.99)        | 188.07<br>(108.63 to<br>305.29)       | 171.16<br>(103.51 to<br>266.26)       | 230.23<br>(132.86 to<br>377.46)       |
| Paralytic ileus and intestinal obstruction | 41,369.94<br>(28,775.55 to<br>62,584.83) | 60,362.16<br>(40,469.92 to<br>91,466.08) | 58,478.14<br>(39,801.44 to<br>87,392.06) | 69,210.74<br>(46,497.39 to<br>106,120.67) | 1,000.47<br>(725.67 to<br>1,386.70)   | 1,698.53<br>(1,258.63 to<br>2,347.47) | 1,722.27<br>(1,276.50 to<br>2,366.48) | 1,787.02<br>(1,307.24 to<br>2,469.26) |
| Inguinal, femoral, and abdominal hernia    | 4,514.47<br>(1,450.48 to<br>7,334.35)    | 5,034.05<br>(1,602.14 to<br>9,440.36)    | 4,582.43<br>(1,556.47 to<br>8,384.58)    | 6,038.11<br>(1,891.45 to<br>11,294.53)    | 128.09<br>(45.61 to<br>201.28)        | 143.55<br>(51.06 to<br>238.21)        | 135.67<br>(50.80 to<br>221.83)        | 163.35<br>(56.99 to<br>273.23)        |
| Inflammatory bowel disease                 | 3,210.74<br>(1,366.81 to<br>6,160.28)    | 5,400.80<br>(2,364.63 to<br>8,643.02)    | 5,429.16<br>(2,414.90 to<br>8,671.05)    | 5,659.16<br>(2,378.57 to<br>9,353.31)     | 89.14<br>(42.17 to<br>133.29)         | 161.04<br>(82.83 to<br>225.93)        | 169.81<br>(88.24 to<br>238.16)        | 157.16<br>(78.29 to<br>226.86)        |
| Vascular intestinal disorders              | 1,211.63<br>(738.21 to<br>1,756.23)      | 2,194.56<br>(1,322.42 to<br>3,287.66)    | 2,193.11<br>(1,356.52 to<br>3,290.85)    | 2,292.38<br>(1,376.22 to<br>3,446.44)     | 52.28<br>(32.25 to<br>76.44)          | 101.18<br>(64.42 to<br>144.99)        | 106.62<br>(68.24 to<br>152.83)        | 99.24<br>(62.68 to<br>144.31)         |
| Gallbladder and biliary diseases           | 3,786.11<br>(2,428.21 to<br>6,397.16)    | 5,491.67<br>(2,994.54 to<br>10,069.96)   | 4,734.77<br>(2,677.84 to<br>8,287.59)    | 8,258.17<br>(4,304.91 to<br>15,357.63)    | 152.62<br>(95.99 to<br>272.75)        | 232.79<br>(130.96 to<br>414.20)       | 213.05<br>(123.20 to<br>387.87)       | 327.64<br>(176.70 to<br>598.42)       |
| Pancreatitis                               | 2,883.11<br>(1,500.84 to<br>5,266.62)    | 6,058.12<br>(2,456.55 to<br>13,854.25)   | 5,336.66<br>(2,302.98 to<br>11,057.27)   | 7,247.31<br>(2,837.20 to<br>17,693.18)    | 80.45<br>(41.43 to<br>145.43)         | 169.95<br>(73.91 to<br>372.80)        | 154.56<br>(72.30 to<br>313.38)        | 197.15<br>(82.77 to<br>459.99)        |
| Other digestive diseases                   | 9,933.12<br>(5,743.69 to<br>18,674.86)   | 16,276.00<br>(8,320.39 to<br>32,764.03)  | 14,949.97<br>(8,081.89 to<br>28,881.54)  | 19,568.28<br>(10,454.49 to<br>39,089.10)  | 285.67<br>(166.06 to<br>565.46)       | 535.21<br>(293.41 to<br>1,008.50)     | 519.61<br>(291.87 to<br>1,006.67)     | 595.08<br>(330.37 to<br>1,164.94)     |
| Neurological disorders                     | 30,476.96<br>(24,331.32 to<br>37,714.72) | 62,058.76<br>(47,419.27 to<br>83,846.53) | 61,469.57<br>(47,568.25 to<br>81,337.42) | 69,624.65<br>(52,235.67 to<br>95,872.23)  | 1,277.22<br>(1,001.55 to<br>1,597.99) | 2,855.75<br>(2,278.61 to<br>3,645.86) | 3,206.66<br>(2,545.75 to<br>4,029.05) | 2,745.88<br>(2,088.67 to<br>3,593.96) |
| Alzheimer's disease and other dementias    | 10,481.46<br>(7,923.66 to<br>13,510.70)  | 22,808.85<br>(16,754.04 to<br>31,406.02) | 25,429.75<br>(19,090.75 to<br>33,458.75) | 21,821.87<br>(15,211.07 to<br>31,026.36)  | 881.23<br>(676.63 to<br>1,137.72)     | 2,015.14<br>(1,390.28 to<br>2,825.00) | 2,376.39<br>(1,731.78 to<br>3,180.91) | 1,804.13<br>(1,166.47 to<br>2,647.71) |
| Parkinson's disease                        | 684.38<br>(489.24 to<br>931.82)          | 1,804.21<br>(1,300.33 to<br>2,422.49)    | 2,212.51<br>(1,638.24 to<br>2,924.21)    | 1,409.56<br>(1,005.67 to<br>1,871.09)     | 140.50<br>(36.70 to<br>70.73)         | 140.50<br>(96.17 to<br>195.36)        | 179.98<br>(129.94 to<br>242.12)       | 104.72<br>(69.79 to<br>146.05)        |
| Epilepsy                                   | 16,699.38<br>(12,716.89 to<br>21,507.15) | 32,096.12<br>(19,389.79 to<br>54,039.64) | 28,223.78<br>(17,384.07 to<br>46,244.17) | 40,797.37<br>(25,418.93 to<br>66,225.39)  | 297.96<br>(223.83 to<br>386.47)       | 593.49<br>(375.91 to<br>963.18)       | 530.40<br>(341.06 to<br>827.74)       | 732.01<br>(474.95 to<br>1,155.95)     |
| Multiple sclerosis                         | 157.88<br>(70.65 to<br>272.55)           | 394.50<br>(171.60 to<br>680.51)          | 406.04<br>(174.89 to<br>723.85)          | 375.46<br>(161.93 to<br>640.53)           | 4.34<br>(1.83 to<br>7.48)             | 10.75<br>(4.49 to<br>18.67)           | 11.23<br>(4.64 to<br>20.15)           | 10.07<br>(4.20 to<br>16.95)           |
| Motor neuron disease                       | 169.62<br>(101.41 to<br>303.32)          | 311.12<br>(178.82 to<br>633.65)          | 330.59<br>(189.38 to<br>674.86)          | 314.18<br>(179.18 to<br>622.89)           | 3.56<br>(2.05 to<br>7.27)             | 8.47<br>(4.67 to<br>19.04)            | 9.19<br>(5.11 to<br>20.80)            | 7.97<br>(4.43 to<br>17.54)            |
| Other neurological disorders               | 2,284.25<br>(1,759.34 to<br>2,947.20)    | 4,643.96<br>(3,152.63 to<br>6,414.71)    | 4,866.90<br>(3,327.00 to<br>6,918.60)    | 4,906.21<br>(3,495.13 to<br>6,720.05)     | 38.31<br>(27.64 to<br>50.02)          | 87.41<br>(53.53 to<br>124.27)         | 93.47<br>(57.60 to<br>134.83)         | 86.98<br>(56.09 to<br>120.08)         |
| Mental disorders                           | 3,656.61<br>(2,278.20 to<br>5,718.27)    | 8,224.34<br>(4,802.00 to<br>13,425.30)   | 8,210.49<br>(4,805.85 to<br>13,394.77)   | 8,350.18<br>(4,919.58 to<br>13,659.50)    | 108.89<br>(69.18 to<br>166.62)        | 236.32<br>(150.62 to<br>364.39)       | 242.77<br>(156.61 to<br>372.53)       | 233.41<br>(147.06 to<br>365.18)       |
| Alcohol use disorders                      | 2,810.15<br>(1,533.92 to<br>4,676.03)    | 5,351.07<br>(2,668.19 to<br>9,431.21)    | 5,321.48<br>(2,662.74 to<br>9,316.51)    | 5,460.95<br>(2,750.32 to<br>9,636.85)     | 89.50<br>(52.08 to<br>143.71)         | 170.38<br>(96.00 to<br>278.70)        | 174.83<br>(98.52 to<br>287.45)        | 168.72<br>(94.98 to<br>277.26)        |
| Drug use disorders                         | 833.21<br>(449.59 to<br>1,339.04)        | 2,834.36<br>(1,479.42 to<br>5,008.12)    | 2,849.42<br>(1,493.66 to<br>5,020.64)    | 2,850.31<br>(1,478.37 to<br>5,044.77)     | 19.15<br>(10.59 to<br>29.85)          | 65.24<br>(36.89 to<br>107.27)         | 67.23<br>(38.38 to<br>109.49)         | 64.00<br>(35.44 to<br>105.61)         |
| Opioid use disorders                       | 606.18<br>(257.09 to<br>1,083.05)        | 1,968.62<br>(811.56 to<br>3,923.65)      | 1,980.42<br>(819.58 to<br>3,896.03)      | 1,974.79<br>(792.71 to<br>3,959.11)       | 13.40<br>(5.77 to<br>23.32)           | 43.58<br>(18.94 to<br>82.14)          | 44.63<br>(19.98 to<br>83.68)          | 42.90<br>(17.98 to<br>82.25)          |



|                                                            |                                            |                                             |                                             |                                             |                                       |                                        |                                        |                                         |
|------------------------------------------------------------|--------------------------------------------|---------------------------------------------|---------------------------------------------|---------------------------------------------|---------------------------------------|----------------------------------------|----------------------------------------|-----------------------------------------|
|                                                            | 61.72<br>(12.37 to<br>142.64)              | 219.16<br>(41.71 to<br>532.99)              | 211.27<br>(41.41 to<br>511.98)              | 232.72<br>(44.67 to<br>559.67)              | 1.39<br>(0.29 to<br>3.10)             | 4.90<br>(1.00 to<br>11.37)             | 4.78<br>(1.01 to<br>10.97)             | 5.15<br>(1.05 to<br>11.79)              |
| Cocaine use disorders                                      |                                            |                                             |                                             |                                             |                                       |                                        |                                        |                                         |
|                                                            | 35.35<br>(8.78 to<br>84.55)                | 175.83<br>(40.22 to<br>451.31)              | 163.28<br>(37.80 to<br>425.22)              | 197.34<br>(46.27 to<br>496.73)              | 0.76<br>(0.20 to<br>1.81)             | 3.74<br>(0.91 to<br>9.33)              | 3.50<br>(0.89 to<br>8.81)              | 4.17<br>(1.01 to<br>10.18)              |
| Amphetamine use disorders                                  |                                            |                                             |                                             |                                             |                                       |                                        |                                        |                                         |
|                                                            | 129.96<br>(70.00 to<br>209.28)             | 470.75<br>(239.38 to<br>827.76)             | 494.44<br>(252.50 to<br>882.07)             | 445.46<br>(218.99 to<br>792.90)             | 3.61<br>(2.12 to<br>5.43)             | 13.02<br>(7.74 to<br>20.09)            | 14.32<br>(8.65 to<br>22.01)            | 11.79<br>(6.86 to<br>18.58)             |
| Other drug use disorders                                   |                                            |                                             |                                             |                                             |                                       |                                        |                                        |                                         |
|                                                            | 13.25<br>(6.05 to<br>36.05)                | 38.91<br>(16.96 to<br>102.46)               | 39.58<br>(17.14 to<br>104.77)               | 38.93<br>(17.23 to<br>99.49)                | 0.24<br>(0.10 to<br>0.64)             | 0.70<br>(0.30 to<br>1.81)              | 0.71<br>(0.30 to<br>1.85)              | 0.69<br>(0.30 to<br>1.75)               |
| Eating disorders                                           |                                            |                                             |                                             |                                             |                                       |                                        |                                        |                                         |
| <b>South Sudan</b>                                         |                                            |                                             |                                             |                                             |                                       |                                        |                                        |                                         |
| Cause                                                      | YLLs (actual counts)                       |                                             |                                             |                                             | Deaths (actual counts)                |                                        |                                        |                                         |
|                                                            | 2016                                       | 2040 Forecast                               | 2040 Better Scenario                        | 2040 Worse Scenario                         | 2016                                  | 2040 Forecast                          | 2040 Better Scenario                   | 2040 Worse Scenario                     |
| Diabetes, urogenital, blood, and endocrine diseases        | 123,225.17<br>(98,303.59 to<br>158,620.44) | 237,531.12<br>(161,237.19 to<br>343,486.48) | 198,455.41<br>(139,023.06 to<br>283,150.94) | 310,735.56<br>(216,735.69 to<br>437,251.92) | 3,559.24<br>(2,860.11 to<br>4,352.68) | 8,628.56<br>(6,653.12 to<br>12,630.50) | 7,403.19<br>(5,369.72 to<br>10,729.16) | 10,662.01<br>(7,697.44 to<br>14,929.37) |
| Diabetes mellitus                                          | 44,226.05<br>(33,537.10 to<br>56,893.20)   | 121,683.87<br>(73,321.41 to<br>193,750.78)  | 98,208.17<br>(61,814.38 to<br>154,692.51)   | 159,259.92<br>(96,945.94 to<br>250,930.05)  | 1,869.89<br>(1,450.74 to<br>2,362.00) | 5,216.84<br>(3,415.03 to<br>7,681.84)  | 4,445.41<br>(3,025.10 to<br>6,403.86)  | 6,491.76<br>(4,298.29 to<br>9,461.43)   |
| Acute glomerulonephritis                                   | 160.13<br>(105.85 to<br>252.45)            | 351.07<br>(205.65 to<br>630.86)             | 323.69<br>(191.55 to<br>572.57)             | 445.35<br>(260.85 to<br>785.70)             | 2.77<br>(1.94 to<br>4.00)             | 5.97<br>(3.82 to<br>9.85)              | 5.61<br>(3.66 to<br>8.95)              | 7.24<br>(4.59 to<br>11.82)              |
| Chronic kidney disease                                     | 20,457.57<br>(15,674.18 to<br>26,849.08)   | 49,961.56<br>(27,445.92 to<br>108,298.55)   | 39,484.60<br>(22,801.06 to<br>84,125.76)    | 66,249.25<br>(38,085.89 to<br>135,246.79)   | 636.54<br>(485.50 to<br>818.67)       | 1,927.49<br>(914.29 to<br>5,761.16)    | 1,540.34<br>(780.10 to<br>4,580.18)    | 2,410.21<br>(1,191.55 to<br>6,716.87)   |
| Chronic kidney disease due to diabetes mellitus            | 4,568.87<br>(3,281.71 to<br>6,116.00)      | 13,506.87<br>(6,774.83 to<br>32,238.30)     | 10,511.52<br>(5,593.64 to<br>25,863.21)     | 17,255.66<br>(8,977.72 to<br>41,802.18)     | 179.99<br>(129.26 to<br>237.91)       | 607.06<br>(274.13 to<br>1,940.90)      | 480.64<br>(228.51 to<br>1,521.08)      | 746.26<br>(346.31 to<br>2,382.40)       |
| Chronic kidney disease due to hypertension                 | 2,485.76<br>(1,794.02 to<br>3,360.36)      | 7,514.49<br>(3,367.17 to<br>22,543.07)      | 5,894.28<br>(2,862.23 to<br>18,324.76)      | 9,450.27<br>(4,332.13 to<br>27,332.77)      | 125.65<br>(91.16 to<br>169.55)        | 433.77<br>(177.03 to<br>1,595.13)      | 352.75<br>(155.14 to<br>1,301.16)      | 519.37<br>(217.87 to<br>1,772.75)       |
| Chronic kidney disease due to glomerulonephritis           | 6,325.07<br>(4,824.36 to<br>8,423.09)      | 13,543.74<br>(7,696.06 to<br>23,984.66)     | 10,812.64<br>(6,444.66 to<br>19,172.14)     | 18,593.67<br>(11,152.35 to<br>31,853.62)    | 149.46<br>(111.67 to<br>201.20)       | 390.12<br>(197.99 to<br>977.15)        | 310.41<br>(165.81 to<br>800.15)        | 508.85<br>(274.20 to<br>1,223.01)       |
| Chronic kidney disease due to other and unspecified causes | 7,077.87<br>(5,417.63 to<br>9,345.54)      | 15,396.46<br>(8,620.97 to<br>28,583.78)     | 12,266.16<br>(7,280.65 to<br>22,547.06)     | 20,949.66<br>(12,547.83 to<br>37,232.78)    | 181.44<br>(136.77 to<br>237.01)       | 496.54<br>(241.80 to<br>1,348.38)      | 396.55<br>(207.55 to<br>1,057.49)      | 657.72<br>(327.16 to<br>1,591.76)       |
| Urinary diseases and male infertility                      | 10,058.30<br>(7,473.28 to<br>12,854.28)    | 17,147.56<br>(11,159.81 to<br>25,866.85)    | 16,107.75<br>(10,973.62 to<br>23,615.72)    | 19,932.66<br>(13,013.95 to<br>29,457.33)    | 275.01<br>(204.07 to<br>348.76)       | 498.74<br>(352.96 to<br>675.53)        | 490.53<br>(359.66 to<br>653.51)        | 543.04<br>(379.38 to<br>735.20)         |
| Urinary tract infections                                   | 3,116.14<br>(1,462.70 to<br>5,198.79)      | 7,481.96<br>(3,694.56 to<br>12,081.92)      | 7,395.86<br>(3,696.32 to<br>11,829.04)      | 8,134.33<br>(3,954.26 to<br>13,224.62)      | 85.15<br>(40.33 to<br>139.79)         | 226.58<br>(114.60 to<br>348.76)        | 234.64<br>(119.13 to<br>361.22)        | 228.88<br>(112.98 to<br>358.63)         |
| Urolithiasis                                               | 189.68<br>(74.03 to<br>346.64)             | 552.20<br>(220.39 to<br>1,095.08)           | 522.63<br>(220.44 to<br>1,015.15)           | 622.45<br>(244.95 to<br>1,247.57)           | 4.35<br>(1.69 to<br>8.22)             | 12.05<br>(5.02 to<br>22.22)            | 11.74<br>(5.06 to<br>21.93)            | 13.08<br>(5.35 to<br>24.19)             |
| Other urinary diseases                                     | 6,752.48<br>(4,269.74 to<br>9,269.22)      | 9,113.40<br>(4,588.75 to<br>15,672.40)      | 8,189.27<br>(4,267.08 to<br>14,027.82)      | 11,175.87<br>(5,771.97 to<br>18,400.16)     | 185.52<br>(117.06 to<br>251.32)       | 260.11<br>(137.75 to<br>420.32)        | 244.16<br>(133.08 to<br>391.49)        | 301.08<br>(165.13 to<br>470.44)         |
| Gynecological diseases                                     | 1,359.05<br>(873.44 to<br>2,208.01)        | 2,306.11<br>(1,165.92 to<br>4,361.84)       | 1,962.33<br>(1,041.01 to<br>3,560.62)       | 2,900.83<br>(1,541.15 to<br>5,345.16)       | 32.57<br>(20.58 to<br>53.25)          | 53.54<br>(27.65 to<br>100.07)          | 45.82<br>(24.49 to<br>83.28)           | 67.03<br>(35.58 to<br>123.52)           |
| Uterine fibroids                                           | 537.22<br>(164.14 to<br>1,099.07)          | 774.26<br>(183.14 to<br>1,996.60)           | 649.51<br>(162.33 to<br>1,725.76)           | 989.60<br>(244.41 to<br>2,449.59)           | 13.88<br>(4.24 to<br>28.02)           | 19.70<br>(5.00 to<br>49.92)            | 16.60<br>(4.31 to<br>41.86)            | 25.08<br>(6.55 to<br>58.39)             |
| Polycystic ovarian syndrome                                | 168.82<br>(12.57 to<br>398.32)             | 197.28<br>(11.89 to<br>571.74)              | 151.38<br>(9.23 to<br>406.78)               | 284.53<br>(17.14 to<br>803.82)              | 3.84<br>(0.26 to<br>9.14)             | 4.46<br>(0.26 to<br>12.65)             | 3.42<br>(0.28 to<br>9.28)              | 6.43<br>(0.39 to<br>17.84)              |
| Endometriosis                                              | 4.24<br>(0.73 to<br>15.12)                 | 12.09<br>(1.90 to<br>49.16)                 | 10.31<br>(1.70 to<br>42.24)                 | 15.19<br>(2.48 to<br>62.14)                 | 0.09<br>(0.02 to<br>0.33)             | 0.26<br>(0.04 to<br>1.02)              | 0.22<br>(0.04 to<br>0.88)              | 0.32<br>(0.05 to<br>1.28)               |





|                                                 |                                                               |                                                                 |                                                                 |                                                                 |                                                          |                                                            |                                                            |                                                            |
|-------------------------------------------------|---------------------------------------------------------------|-----------------------------------------------------------------|-----------------------------------------------------------------|-----------------------------------------------------------------|----------------------------------------------------------|------------------------------------------------------------|------------------------------------------------------------|------------------------------------------------------------|
|                                                 | 39,955.48<br>(22,503.43 to<br>66,856.73)                      | 36,869.71<br>(19,897.73 to<br>68,639.48)                        | 33,042.01<br>(18,056.36 to<br>60,274.58)                        | 50,379.96<br>(26,994.51 to<br>93,346.90)                        | 720.21<br>(439.40 to<br>1,214.26)                        | 781.49<br>(464.84 to<br>1,451.75)                          | 726.84<br>(440.51 to<br>1,335.14)                          | 973.57<br>(581.41 to<br>1,779.95)                          |
| Fire, heat, and hot substances                  | 24,780.56<br>(10,742.44 to<br>57,373.95)                      | 17,540.91<br>(6,940.56 to<br>41,646.60)                         | 14,923.73<br>(6,183.61 to<br>34,351.00)                         | 26,803.00<br>(10,626.70 to<br>65,584.10)                        | 383.67<br>(195.76 to<br>776.87)                          | 298.61<br>(137.00 to<br>609.36)                            | 257.71<br>(127.15 to<br>514.50)                            | 427.66<br>(200.56 to<br>906.98)                            |
| Poisonings                                      | 27,802.89<br>(19,458.73 to<br>42,936.09)                      | 34,976.37<br>(19,173.06 to<br>63,458.30)                        | 31,275.77<br>(18,324.11 to<br>57,033.08)                        | 45,420.98<br>(26,593.16 to<br>79,189.54)                        | 484.88<br>(346.35 to<br>743.36)                          | 671.09<br>(393.75 to<br>1,173.38)                          | 614.09<br>(377.10 to<br>1,068.86)                          | 825.20<br>(506.76 to<br>1,402.96)                          |
| Exposure to mechanical forces                   | 6,214.46<br>(3,115.66 to<br>12,330.74)                        | 8,069.65<br>(3,232.15 to<br>18,841.28)                          | 7,072.64<br>(2,849.37 to<br>16,755.92)                          | 10,067.53<br>(4,166.18 to<br>22,696.33)                         | 118.31<br>(59.12 to<br>228.56)                           | 159.59<br>(69.15 to<br>350.44)                             | 142.94<br>(62.31 to<br>315.09)                             | 193.23<br>(83.89 to<br>420.05)                             |
| Unintentional firearm injuries                  | 4,010.82<br>(2,027.50 to<br>7,849.22)                         | 4,216.72<br>(2,015.57 to<br>8,574.84)                           | 3,735.89<br>(1,850.07 to<br>7,331.57)                           | 6,258.07<br>(2,990.40 to<br>12,444.93)                          | 54.84<br>(29.74 to<br>103.06)                            | 63.54<br>(32.67 to<br>122.04)                              | 57.45<br>(30.49 to<br>109.16)                              | 88.73<br>(45.98 to<br>170.80)                              |
| Unintentional suffocation                       | 17,577.61<br>(12,115.02 to<br>28,182.92)                      | 22,689.99<br>(12,814.94 to<br>41,775.14)                        | 20,467.24<br>(11,796.38 to<br>36,960.96)                        | 29,095.38<br>(17,011.34 to<br>52,785.54)                        | 311.73<br>(214.81 to<br>487.93)                          | 447.97<br>(267.04 to<br>791.96)                            | 413.69<br>(254.90 to<br>718.74)                            | 543.24<br>(335.05 to<br>956.68)                            |
| Other exposure to mechanical forces             | 18,867.43<br>(10,420.32 to<br>31,630.89)                      | 22,066.15<br>(12,537.75 to<br>38,449.29)                        | 20,226.83<br>(11,967.19 to<br>33,611.44)                        | 29,429.99<br>(16,311.78 to<br>51,254.25)                        | 313.21<br>(213.30 to<br>466.94)                          | 421.20<br>(281.58 to<br>629.59)                            | 398.59<br>(275.95 to<br>581.28)                            | 517.17<br>(347.88 to<br>795.86)                            |
| Adverse effects of medical treatment            | 24,479.33<br>(11,314.47 to<br>42,680.61)                      | 40,441.99<br>(17,831.13 to<br>77,732.36)                        | 35,342.50<br>(15,773.86 to<br>65,758.41)                        | 55,408.71<br>(25,166.00 to<br>101,506.63)                       | 503.87<br>(241.64 to<br>871.53)                          | 893.46<br>(411.72 to<br>1,644.37)                          | 803.96<br>(376.91 to<br>1,468.96)                          | 1,137.99<br>(542.28 to<br>2,060.94)                        |
| Animal contact                                  | 19,012.25<br>(8,851.77 to<br>33,780.99)                       | 30,187.52<br>(13,335.65 to<br>58,832.76)                        | 26,355.89<br>(11,716.37 to<br>50,209.10)                        | 41,400.98<br>(18,865.35 to<br>78,364.22)                        | 411.77<br>(199.62 to<br>730.50)                          | 703.25<br>(319.87 to<br>1,319.41)                          | 633.89<br>(292.58 to<br>1,160.42)                          | 891.94<br>(417.96 to<br>1,626.45)                          |
| Venomous animal contact                         | 5,467.08<br>(1,343.52 to<br>11,957.09)                        | 10,254.48<br>(2,757.88 to<br>22,293.69)                         | 8,986.62<br>(2,429.95 to<br>19,696.74)                          | 14,007.73<br>(3,742.75 to<br>30,606.94)                         | 92.10<br>(25.79 to<br>194.55)                            | 190.21<br>(54.27 to<br>397.09)                             | 170.07<br>(50.38 to<br>347.16)                             | 246.05<br>(70.75 to<br>515.61)                             |
| Non-venomous animal contact                     | 22,075.38<br>(11,931.22 to<br>39,158.59)                      | 29,131.01<br>(16,296.08 to<br>50,952.82)                        | 29,066.30<br>(16,300.42 to<br>50,422.80)                        | 36,183.51<br>(19,894.10 to<br>65,598.25)                        | 307.42<br>(176.84 to<br>530.17)                          | 447.38<br>(271.50 to<br>700.24)                            | 453.71<br>(276.51 to<br>795.44)                            | 524.66<br>(308.28 to<br>911.94)                            |
| Foreign body                                    | 19,996.00<br>(10,296.12 to<br>36,108.22)                      | 25,988.37<br>(14,011.95 to<br>45,193.58)                        | 26,126.09<br>(14,215.11 to<br>45,445.05)                        | 32,272.59<br>(16,766.07 to<br>57,361.82)                        | 274.48<br>(153.65 to<br>460.10)                          | 392.78<br>(236.69 to<br>656.32)                            | 401.85<br>(244.50 to<br>668.81)                            | 459.90<br>(265.31 to<br>777.88)                            |
| Pulmonary aspiration and foreign body in airway | 2,079.38<br>(477.57 to<br>6,156.78)                           | 3,142.64<br>(696.27 to<br>10,186.63)                            | 2,940.21<br>(643.18 to<br>9,500.69)                             | 3,910.91<br>(915.84 to<br>11,915.10)                            | 32.94<br>(7.49 to<br>101.69)                             | 54.60<br>(12.29 to<br>182.36)                              | 51.85<br>(11.47 to<br>172.76)                              | 64.76<br>(14.80 to<br>206.79)                              |
| Foreign body in other body part                 | 3,402.44<br>(2,431.53 to<br>5,109.98)                         | 3,930.67<br>(2,135.52 to<br>6,918.30)                           | 3,270.13<br>(1,891.86 to<br>5,450.63)                           | 5,678.95<br>(3,312.94 to<br>9,618.63)                           | 64.86<br>(46.52 to<br>96.15)                             | 81.58<br>(48.94 to<br>137.00)                              | 70.34<br>(44.48 to<br>112.44)                              | 109.89<br>(69.24 to<br>178.58)                             |
| Environmental heat and cold exposure            | 12,107.69<br>(8,101.07 to<br>18,363.64)                       | 12,592.73<br>(7,429.95 to<br>22,360.23)                         | 11,480.34<br>(6,932.54 to<br>19,716.65)                         | 15,891.98<br>(9,570.11 to<br>27,141.60)                         | 198.92<br>(137.49 to<br>299.74)                          | 225.89<br>(139.65 to<br>380.58)                            | 209.13<br>(130.05 to<br>342.68)                            | 273.38<br>(170.91 to<br>450.30)                            |
| Other unintentional injuries                    | <b>60,903.08</b><br><b>(34,668.47 to</b><br><b>86,687.00)</b> | <b>109,997.39</b><br><b>(57,653.24 to</b><br><b>184,995.41)</b> | <b>107,037.02</b><br><b>(56,248.88 to</b><br><b>180,010.03)</b> | <b>117,881.99</b><br><b>(61,272.74 to</b><br><b>197,004.43)</b> | <b>1,233.63</b><br><b>(725.07 to</b><br><b>1,756.49)</b> | <b>2,295.16</b><br><b>(1,249.51 to</b><br><b>3,699.06)</b> | <b>2,264.80</b><br><b>(1,239.00 to</b><br><b>3,615.27)</b> | <b>2,402.37</b><br><b>(1,296.80 to</b><br><b>3,878.35)</b> |

**South Sudan**

| Cause                              | YLLs (actual counts)                     |                                           |                                           |                                           | Deaths (actual counts)            |                                     |                                     |                                     |
|------------------------------------|------------------------------------------|-------------------------------------------|-------------------------------------------|-------------------------------------------|-----------------------------------|-------------------------------------|-------------------------------------|-------------------------------------|
|                                    | 2016                                     | 2040 Forecast                             | 2040 Better Scenario                      | 2040 Worse Scenario                       | 2016                              | 2040 Forecast                       | 2040 Better Scenario                | 2040 Worse Scenario                 |
| Self-harm                          | 17,694.43<br>(10,117.70 to<br>30,363.72) | 37,900.32<br>(20,565.65 to<br>68,983.10)  | 36,795.88<br>(19,930.60 to<br>66,958.38)  | 40,176.77<br>(21,860.84 to<br>74,696.89)  | 454.94<br>(263.94 to<br>766.34)   | 959.69<br>(548.17 to<br>1,699.89)   | 955.15<br>(549.78 to<br>1,675.97)   | 989.16<br>(553.57 to<br>1,770.83)   |
| Self-harm by firearm               | 3,645.87<br>(1,751.32 to<br>7,611.71)    | 6,096.36<br>(2,654.90 to<br>13,884.44)    | 5,796.71<br>(2,531.49 to<br>13,227.18)    | 6,631.76<br>(2,899.55 to<br>14,960.19)    | 85.93<br>(41.07 to<br>176.86)     | 144.03<br>(64.09 to<br>314.12)      | 139.95<br>(62.90 to<br>304.52)      | 153.07<br>(68.70 to<br>335.92)      |
| Self-harm by other specified means | 14,048.56<br>(7,867.37 to<br>25,513.26)  | 31,803.96<br>(16,711.01 to<br>59,670.74)  | 30,999.16<br>(16,429.16 to<br>57,507.54)  | 33,545.01<br>(17,444.52 to<br>62,751.11)  | 369.00<br>(211.26 to<br>654.38)   | 815.66<br>(448.99 to<br>1,461.82)   | 815.20<br>(453.79 to<br>1,443.98)   | 836.09<br>(453.08 to<br>1,502.54)   |
| Interpersonal violence             | 43,208.65<br>(19,972.56 to<br>63,872.92) | 72,097.07<br>(28,775.38 to<br>126,944.10) | 70,241.14<br>(28,020.12 to<br>123,395.14) | 77,705.22<br>(31,075.08 to<br>137,172.43) | 778.69<br>(349.98 to<br>1,158.83) | 1,335.47<br>(527.71 to<br>2,315.07) | 1,309.65<br>(515.75 to<br>2,227.28) | 1,413.21<br>(556.11 to<br>2,434.76) |

|                                                                                     |                                                               |                                                          |                                                          |                                                          |                                                        |                                                      |                                                      |                                                      |
|-------------------------------------------------------------------------------------|---------------------------------------------------------------|----------------------------------------------------------|----------------------------------------------------------|----------------------------------------------------------|--------------------------------------------------------|------------------------------------------------------|------------------------------------------------------|------------------------------------------------------|
| Physical violence by firearm                                                        | 6,451.12<br>(2,336.67 to<br>11,782.29)                        | 11,502.54<br>(3,886.87 to<br>23,533.21)                  | 11,429.72<br>(3,896.58 to<br>23,485.38)                  | 11,927.66<br>(3,992.63 to<br>24,357.74)                  | 118.47<br>(42.29 to<br>213.55)                         | 213.25<br>(70.97 to<br>417.76)                       | 212.74<br>(71.40 to<br>417.99)                       | 218.49<br>(71.71 to<br>429.15)                       |
| Physical violence by sharp object                                                   | 3,864.31<br>(1,472.93 to<br>6,877.09)                         | 7,718.67<br>(2,686.13 to<br>15,368.27)                   | 7,858.39<br>(2,727.53 to<br>15,749.76)                   | 7,713.29<br>(2,704.72 to<br>15,329.25)                   | 77.27<br>(29.37 to<br>132.90)                          | 154.79<br>(54.52 to<br>290.07)                       | 159.13<br>(55.95 to<br>297.25)                       | 152.05<br>(54.18 to<br>284.03)                       |
| Physical violence by other means                                                    | 32,893.22<br>(14,868.36 to<br>48,463.80)                      | 52,875.86<br>(20,232.69 to<br>93,763.22)                 | 50,953.03<br>(19,992.90 to<br>89,393.26)                 | 58,064.27<br>(22,081.78 to<br>101,980.51)                | 582.95<br>(255.90 to<br>855.06)                        | 967.43<br>(364.91 to<br>1,676.96)                    | 937.78<br>(363.43 to<br>1,627.72)                    | 1,042.67<br>(389.63 to<br>1,805.08)                  |
| <b>Forces of nature, conflict and terrorism, and executions and police conflict</b> | <b>53,569.27</b><br><b>(22,533.23 to</b><br><b>85,128.05)</b> | <b>10,102.24</b><br><b>(0.00 to</b><br><b>78,004.36)</b> | <b>10,175.19</b><br><b>(0.00 to</b><br><b>78,785.16)</b> | <b>10,826.07</b><br><b>(0.00 to</b><br><b>84,133.98)</b> | <b>859.35</b><br><b>(361.39 to</b><br><b>1,364.51)</b> | <b>164.76</b><br><b>(0.00 to</b><br><b>1,271.91)</b> | <b>166.95</b><br><b>(0.00 to</b><br><b>1,294.23)</b> | <b>172.41</b><br><b>(0.00 to</b><br><b>1,331.78)</b> |
| Exposure to forces of nature                                                        | 0.00<br>(0.00 to<br>0.00)                                     | 318.27<br>(0.00 to<br>4,662.53)                          | 321.18<br>(0.00 to<br>4,738.72)                          | 345.15<br>(0.00 to<br>5,045.97)                          | 0.00<br>(0.00 to<br>0.00)                              | 5.39<br>(0.00 to<br>79.32)                           | 5.49<br>(0.00 to<br>80.97)                           | 5.65<br>(0.00 to<br>83.65)                           |
| Conflict and terrorism                                                              | 53,185.07<br>(22,153.07 to<br>84,662.27)                      | 9,290.15<br>(0.00 to<br>78,004.36)                       | 9,356.81<br>(0.00 to<br>78,785.16)                       | 9,973.39<br>(0.00 to<br>84,133.98)                       | 851.73<br>(354.77 to<br>1,355.81)                      | 150.94<br>(0.00 to<br>1,271.91)                      | 152.95<br>(0.00 to<br>1,294.23)                      | 158.21<br>(0.00 to<br>1,331.78)                      |
| Executions and police conflict                                                      | 384.20<br>(166.06 to<br>950.76)                               | 493.82<br>(0.00 to<br>7,460.47)                          | 497.20<br>(0.00 to<br>7,515.30)                          | 507.54<br>(0.00 to<br>7,703.77)                          | 7.62<br>(3.54 to<br>16.52)                             | 8.43<br>(0.00 to<br>125.62)                          | 8.51<br>(0.00 to<br>127.32)                          | 8.55<br>(0.00 to<br>128.11)                          |
| <b>Tanzania</b>                                                                     |                                                               |                                                          |                                                          |                                                          |                                                        |                                                      |                                                      |                                                      |
| Cause                                                                               | YLLs (in 1000s)                                               |                                                          |                                                          |                                                          | Deaths (in 1000s)                                      |                                                      |                                                      |                                                      |
|                                                                                     | 2016                                                          | 2040 Forecast                                            | 2040 Better Scenario                                     | 2040 Worse Scenario                                      | 2016                                                   | 2040 Forecast                                        | 2040 Better Scenario                                 | 2040 Worse Scenario                                  |
| All causes                                                                          | 18,932.89<br>(16,941.81 to<br>21,201.46)                      | 16,989.86<br>(14,012.69 to<br>20,644.51)                 | 12,507.45<br>(10,312.65 to<br>15,054.98)                 | 26,846.34<br>(21,699.52 to<br>32,875.17)                 | 388.91<br>(352.85 to<br>427.05)                        | 465.41<br>(402.25 to<br>539.54)                      | 371.59<br>(322.67 to<br>426.32)                      | 659.79<br>(560.88 to<br>779.27)                      |
| Communicable, maternal, neonatal, and nutritional diseases                          | 13,330.38<br>(11,678.67 to<br>15,145.55)                      | 8,341.90<br>(6,242.63 to<br>10,950.88)                   | 5,285.54<br>(3,911.98 to<br>6,949.16)                    | 15,695.02<br>(11,824.74 to<br>20,077.22)                 | 217.97<br>(195.98 to<br>243.73)                        | 164.27<br>(122.28 to<br>222.30)                      | 109.52<br>(80.61 to<br>147.21)                       | 288.02<br>(210.92 to<br>376.42)                      |
| HIV/AIDS and tuberculosis                                                           | 2,871.83<br>(2,473.33 to<br>3,500.16)                         | 1,974.89<br>(1,148.35 to<br>3,244.84)                    | 1,472.58<br>(772.72 to<br>2,668.90)                      | 4,956.62<br>(3,087.16 to<br>7,701.22)                    | 58.23<br>(50.96 to<br>68.56)                           | 38.57<br>(22.49 to<br>60.70)                         | 28.98<br>(15.15 to<br>50.19)                         | 94.60<br>(57.33 to<br>149.96)                        |
| Tuberculosis                                                                        | 621.02<br>(499.02 to<br>777.62)                               | 299.43<br>(149.00 to<br>544.17)                          | 184.77<br>(90.85 to<br>351.43)                           | 641.11<br>(306.48 to<br>1,228.68)                        | 15.73<br>(12.68 to<br>19.85)                           | 7.93<br>(4.06 to<br>14.30)                           | 5.03<br>(2.53 to<br>9.35)                            | 16.53<br>(7.92 to<br>31.28)                          |
| HIV/AIDS                                                                            | 2,250.81<br>(1,878.33 to<br>2,853.19)                         | 1,675.46<br>(888.77 to<br>2,892.93)                      | 1,287.81<br>(616.23 to<br>2,451.39)                      | 4,315.51<br>(2,431.96 to<br>7,031.82)                    | 42.50<br>(36.15 to<br>52.07)                           | 30.64<br>(15.53 to<br>52.12)                         | 23.95<br>(10.66 to<br>45.55)                         | 78.08<br>(42.18 to<br>131.45)                        |
| Diarrhea, lower respiratory, and other common infectious diseases                   | 4,348.28<br>(3,603.20 to<br>5,283.02)                         | 3,062.26<br>(1,736.31 to<br>5,064.22)                    | 1,669.40<br>(999.05 to<br>2,791.90)                      | 5,385.93<br>(3,124.41 to<br>8,544.08)                    | 79.51<br>(66.71 to<br>94.57)                           | 77.55<br>(46.32 to<br>129.35)                        | 46.99<br>(28.71 to<br>79.17)                         | 119.62<br>(70.02 to<br>192.28)                       |
| Diarrheal diseases                                                                  | 1,203.41<br>(848.71 to<br>1,669.45)                           | 913.44<br>(202.58 to<br>2,413.86)                        | 496.96<br>(107.32 to<br>1,366.91)                        | 1,603.10<br>(444.50 to<br>3,824.11)                      | 26.79<br>(16.95 to<br>40.27)                           | 26.21<br>(5.17 to<br>72.82)                          | 15.32<br>(3.11 to<br>43.81)                          | 43.01<br>(9.48 to<br>108.33)                         |
| Intestinal infectious diseases                                                      | 102.38<br>(51.91 to<br>181.57)                                | 87.31<br>(43.12 to<br>153.15)                            | 67.78<br>(35.13 to<br>116.59)                            | 116.48<br>(57.02 to<br>207.93)                           | 1.38<br>(0.73 to<br>2.44)                              | 1.24<br>(0.63 to<br>2.18)                            | 0.99<br>(0.52 to<br>1.70)                            | 1.62<br>(0.80 to<br>2.85)                            |
| Typhoid fever                                                                       | 82.11<br>(39.41 to<br>149.94)                                 | 76.32<br>(36.28 to<br>138.56)                            | 60.05<br>(30.14 to<br>106.20)                            | 99.72<br>(47.28 to<br>181.64)                            | 1.11<br>(0.54 to<br>2.01)                              | 1.08<br>(0.52 to<br>1.96)                            | 0.87<br>(0.44 to<br>1.55)                            | 1.38<br>(0.66 to<br>2.54)                            |
| Paratyphoid fever                                                                   | 5.61<br>(2.23 to<br>11.81)                                    | 6.18<br>(2.61 to<br>12.50)                               | 4.77<br>(2.03 to<br>9.74)                                | 8.27<br>(3.45 to<br>17.03)                               | 0.08<br>(0.03 to<br>0.16)                              | 0.09<br>(0.04 to<br>0.18)                            | 0.07<br>(0.03 to<br>0.14)                            | 0.12<br>(0.05 to<br>0.24)                            |
| Other intestinal infectious diseases                                                | 14.66<br>(3.58 to<br>46.00)                                   | 4.81<br>(1.09 to<br>15.27)                               | 2.95<br>(0.70 to<br>9.47)                                | 8.50<br>(1.84 to<br>26.97)                               | 0.19<br>(0.05 to<br>0.55)                              | 0.07<br>(0.02 to<br>0.21)                            | 0.05<br>(0.01 to<br>0.14)                            | 0.12<br>(0.03 to<br>0.35)                            |
| Lower respiratory infections                                                        | 2,187.45<br>(1,671.89 to<br>2,748.75)                         | 1,588.70<br>(883.82 to<br>2,738.78)                      | 770.64<br>(480.36 to<br>1,230.79)                        | 2,885.85<br>(1,457.72 to<br>5,223.71)                    | 38.83<br>(31.38 to<br>46.78)                           | 41.67<br>(27.01 to<br>62.03)                         | 23.90<br>(16.93 to<br>33.63)                         | 62.95<br>(38.49 to<br>100.08)                        |
| Upper respiratory infections                                                        | 3.85<br>(1.15 to<br>10.35)                                    | 2.47<br>(0.95 to<br>5.97)                                | 1.49<br>(0.60 to<br>3.46)                                | 4.51<br>(1.54 to<br>11.86)                               | 0.05<br>(0.02 to<br>0.13)                              | 0.04<br>(0.02 to<br>0.09)                            | 0.03<br>(0.01 to<br>0.06)                            | 0.08<br>(0.03 to<br>0.16)                            |

|                                |                                 |                                 |                                 |                                 |                            |                           |                           |                            |
|--------------------------------|---------------------------------|---------------------------------|---------------------------------|---------------------------------|----------------------------|---------------------------|---------------------------|----------------------------|
| Otitis media                   | 1.87<br>(0.54 to<br>6.71)       | 0.38<br>(0.13 to<br>1.36)       | 0.34<br>(0.12 to<br>1.19)       | 0.43<br>(0.14 to<br>1.58)       | 0.03<br>(0.01 to<br>0.09)  | 0.01<br>(0.00 to<br>0.03) | 0.01<br>(0.00 to<br>0.03) | 0.01<br>(0.00 to<br>0.03)  |
| Meningitis                     | 550.33<br>(383.01 to<br>859.87) | 348.61<br>(233.44 to<br>532.16) | 281.80<br>(191.77 to<br>411.66) | 466.53<br>(302.18 to<br>737.23) | 8.67<br>(6.41 to<br>12.58) | 6.77<br>(4.68 to<br>9.66) | 5.98<br>(4.22 to<br>8.32) | 8.13<br>(5.54 to<br>12.08) |
| Pneumococcal meningitis        | 32.45<br>(22.67 to<br>49.35)    | 22.65<br>(14.33 to<br>36.20)    | 20.33<br>(13.30 to<br>30.83)    | 26.67<br>(16.57 to<br>44.82)    | 0.60<br>(0.43 to<br>0.86)  | 0.51<br>(0.34 to<br>0.76) | 0.50<br>(0.34 to<br>0.72) | 0.54<br>(0.36 to<br>0.83)  |
| H influenzae type B meningitis | 53.98<br>(35.58 to<br>89.72)    | 50.12<br>(20.16 to<br>120.58)   | 31.95<br>(15.77 to<br>62.55)    | 96.68<br>(31.45 to<br>262.17)   | 0.79<br>(0.55 to<br>1.21)  | 0.75<br>(0.37 to<br>1.57) | 0.55<br>(0.33 to<br>0.92) | 1.28<br>(0.48 to<br>3.23)  |
| Meningococcal meningitis       | 235.99<br>(161.47 to<br>368.59) | 127.63<br>(84.02 to<br>194.18)  | 105.30<br>(70.43 to<br>156.99)  | 160.24<br>(103.37 to<br>254.83) | 3.62<br>(2.64 to<br>5.25)  | 2.47<br>(1.68 to<br>3.56) | 2.19<br>(1.52 to<br>3.11) | 2.86<br>(1.95 to<br>4.22)  |
| Other meningitis               | 227.92<br>(153.73 to<br>372.91) | 148.21<br>(100.38 to<br>227.90) | 124.23<br>(85.58 to<br>183.36)  | 182.93<br>(122.04 to<br>302.28) | 3.66<br>(2.68 to<br>5.54)  | 3.03<br>(2.12 to<br>4.45) | 2.74<br>(1.92 to<br>3.90) | 3.44<br>(2.42 to<br>5.19)  |
| Encephalitis                   | 53.23<br>(30.31 to<br>84.28)    | 41.85<br>(24.14 to<br>65.84)    | 29.30<br>(17.04 to<br>46.61)    | 62.37<br>(34.72 to<br>101.12)   | 0.66<br>(0.39 to<br>1.03)  | 0.57<br>(0.34 to<br>0.85) | 0.42<br>(0.25 to<br>0.63) | 0.82<br>(0.48 to<br>1.29)  |
| Diphtheria                     | 0.59<br>(0.26 to<br>1.12)       | 0.15<br>(0.05 to<br>0.37)       | 0.07<br>(0.03 to<br>0.12)       | 0.39<br>(0.10 to<br>1.15)       | 0.01<br>(0.00 to<br>0.01)  | 0.00<br>(0.00 to<br>0.00) | 0.00<br>(0.00 to<br>0.00) | 0.00<br>(0.00 to<br>0.01)  |
| Whooping cough                 | 131.96<br>(10.61 to<br>434.47)  | 59.51<br>(4.52 to<br>210.66)    | 10.40<br>(0.72 to<br>37.85)     | 201.51<br>(17.09 to<br>649.49)  | 1.56<br>(0.13 to<br>5.13)  | 0.71<br>(0.05 to<br>2.49) | 0.13<br>(0.01 to<br>0.47) | 2.38<br>(0.20 to<br>7.69)  |
| Tetanus                        | 64.88<br>(32.90 to<br>128.60)   | 8.97<br>(3.66 to<br>20.82)      | 5.36<br>(2.23 to<br>12.39)      | 20.13<br>(6.50 to<br>49.12)     | 0.92<br>(0.50 to<br>1.74)  | 0.14<br>(0.06 to<br>0.30) | 0.10<br>(0.04 to<br>0.23) | 0.27<br>(0.10 to<br>0.61)  |
| Measles                        | 35.78<br>(11.38 to<br>83.65)    | 4.89<br>(0.38 to<br>28.06)      | 1.59<br>(0.23 to<br>7.37)       | 14.09<br>(0.71 to<br>84.72)     | 0.43<br>(0.14 to<br>0.99)  | 0.06<br>(0.00 to<br>0.33) | 0.02<br>(0.00 to<br>0.09) | 0.17<br>(0.01 to<br>1.01)  |

| Tanzania                                       |                                                          |                                                      |                                                      |                                                      |                                                   |                                                 |                                                 |                                                  |
|------------------------------------------------|----------------------------------------------------------|------------------------------------------------------|------------------------------------------------------|------------------------------------------------------|---------------------------------------------------|-------------------------------------------------|-------------------------------------------------|--------------------------------------------------|
| Cause                                          | YLLs (in 1000s)                                          |                                                      |                                                      |                                                      | Deaths (in 1000s)                                 |                                                 |                                                 |                                                  |
|                                                | 2016                                                     | 2040 Forecast                                        | 2040 Better Scenario                                 | 2040 Worse Scenario                                  | 2016                                              | 2040 Forecast                                   | 2040 Better Scenario                            | 2040 Worse Scenario                              |
| Varicella and herpes zoster                    | 12.56<br>(6.49 to<br>22.11)                              | 5.99<br>(3.23 to<br>10.43)                           | 3.68<br>(2.00 to<br>6.28)                            | 10.53<br>(5.31 to<br>18.84)                          | 0.19<br>(0.11 to<br>0.30)                         | 0.12<br>(0.08 to<br>0.17)                       | 0.08<br>(0.05 to<br>0.12)                       | 0.18<br>(0.11 to<br>0.28)                        |
| <b>Neglected tropical diseases and malaria</b> | <b>1,306.97</b><br><b>(870.55 to</b><br><b>1,839.44)</b> | <b>543.95</b><br><b>(385.53 to</b><br><b>734.22)</b> | <b>437.84</b><br><b>(318.11 to</b><br><b>588.37)</b> | <b>698.03</b><br><b>(484.23 to</b><br><b>969.63)</b> | <b>17.97</b><br><b>(12.77 to</b><br><b>24.58)</b> | <b>9.40</b><br><b>(7.05 to</b><br><b>12.25)</b> | <b>8.12</b><br><b>(6.24 to</b><br><b>10.59)</b> | <b>11.25</b><br><b>(8.29 to</b><br><b>14.95)</b> |
| Malaria                                        | 1,185.42<br>(744.17 to<br>1,725.10)                      | 460.33<br>(309.43 to<br>649.75)                      | 377.31<br>(262.38 to<br>526.01)                      | 574.30<br>(368.02 to<br>843.77)                      | 16.04<br>(10.82 to<br>22.61)                      | 7.93<br>(5.71 to<br>10.80)                      | 6.99<br>(5.15 to<br>9.52)                       | 9.20<br>(6.45 to<br>12.85)                       |
| Chagas disease                                 | 0.00<br>(0.00 to<br>0.00)                                | 0.00<br>(0.00 to<br>0.00)                            | 0.00<br>(0.00 to<br>0.00)                            | 0.00<br>(0.00 to<br>0.00)                            | 0.00<br>(0.00 to<br>0.00)                         | 0.00<br>(0.00 to<br>0.00)                       | 0.00<br>(0.00 to<br>0.00)                       | 0.00<br>(0.00 to<br>0.00)                        |
| Leishmaniasis                                  | 0.00<br>(0.00 to<br>0.00)                                | 0.00<br>(0.00 to<br>0.00)                            | 0.00<br>(0.00 to<br>0.00)                            | 0.00<br>(0.00 to<br>0.00)                            | 0.00<br>(0.00 to<br>0.00)                         | 0.00<br>(0.00 to<br>0.00)                       | 0.00<br>(0.00 to<br>0.00)                       | 0.00<br>(0.00 to<br>0.00)                        |
| African trypanosomiasis                        | 0.26<br>(0.01 to<br>1.32)                                | 0.03<br>(0.00 to<br>0.14)                            | 0.03<br>(0.00 to<br>0.14)                            | 0.03<br>(0.00 to<br>0.14)                            | 0.00<br>(0.00 to<br>0.02)                         | 0.00<br>(0.00 to<br>0.00)                       | 0.00<br>(0.00 to<br>0.00)                       | 0.00<br>(0.00 to<br>0.00)                        |
| Schistosomiasis                                | 18.70<br>(13.12 to<br>25.34)                             | 15.71<br>(10.37 to<br>22.93)                         | 13.51<br>(8.81 to<br>19.51)                          | 18.42<br>(12.09 to<br>26.82)                         | 0.51<br>(0.35 to<br>0.69)                         | 0.46<br>(0.31 to<br>0.64)                       | 0.41<br>(0.27 to<br>0.58)                       | 0.52<br>(0.35 to<br>0.72)                        |
| Cysticercosis                                  | 1.48<br>(1.07 to<br>1.99)                                | 0.77<br>(0.53 to<br>1.11)                            | 0.71<br>(0.48 to<br>1.01)                            | 0.85<br>(0.58 to<br>1.21)                            | 0.03<br>(0.02 to<br>0.04)                         | 0.02<br>(0.01 to<br>0.02)                       | 0.02<br>(0.01 to<br>0.02)                       | 0.02<br>(0.01 to<br>0.03)                        |
| Cystic echinococcosis                          | 0.94<br>(0.66 to<br>1.27)                                | 0.41<br>(0.27 to<br>0.58)                            | 0.25<br>(0.16 to<br>0.36)                            | 0.72<br>(0.47 to<br>1.04)                            | 0.02<br>(0.01 to<br>0.02)                         | 0.01<br>(0.01 to<br>0.01)                       | 0.01<br>(0.01 to<br>0.01)                       | 0.02<br>(0.01 to<br>0.02)                        |

|                                                          |                                                |                                                |                                                |                                                |                                          |                                          |                                          |                                           |
|----------------------------------------------------------|------------------------------------------------|------------------------------------------------|------------------------------------------------|------------------------------------------------|------------------------------------------|------------------------------------------|------------------------------------------|-------------------------------------------|
| Dengue                                                   | 0.62<br>(0.05 to<br>2.16)                      | 2.05<br>(0.19 to<br>6.53)                      | 1.69<br>(0.16 to<br>5.30)                      | 2.56<br>(0.23 to<br>8.31)                      | 0.01<br>(0.00 to<br>0.03)                | 0.04<br>(0.00 to<br>0.11)                | 0.03<br>(0.00 to<br>0.10)                | 0.04<br>(0.00 to<br>0.13)                 |
| Yellow fever                                             | 5.08<br>(1.05 to<br>15.22)                     | 2.14<br>(0.43 to<br>6.25)                      | 1.52<br>(0.30 to<br>4.46)                      | 3.15<br>(0.63 to<br>9.22)                      | 0.08<br>(0.02 to<br>0.23)                | 0.03<br>(0.01 to<br>0.10)                | 0.02<br>(0.00 to<br>0.07)                | 0.05<br>(0.01 to<br>0.15)                 |
| Rabies                                                   | 32.89<br>(9.96 to<br>86.69)                    | 13.81<br>(4.34 to<br>34.45)                    | 7.33<br>(2.14 to<br>18.56)                     | 28.24<br>(9.34 to<br>68.04)                    | 0.50<br>(0.16 to<br>1.23)                | 0.23<br>(0.08 to<br>0.55)                | 0.12<br>(0.04 to<br>0.31)                | 0.46<br>(0.16 to<br>1.03)                 |
| Intestinal nematode infections                           | 15.63<br>(9.27 to<br>25.04)                    | 19.51<br>(11.44 to<br>30.59)                   | 15.74<br>(9.45 to<br>24.68)                    | 24.29<br>(13.94 to<br>38.46)                   | 0.19<br>(0.12 to<br>0.30)                | 0.25<br>(0.15 to<br>0.38)                | 0.20<br>(0.13 to<br>0.31)                | 0.30<br>(0.18 to<br>0.47)                 |
| Other neglected tropical diseases                        | 45.96<br>(19.44 to<br>91.66)                   | 29.19<br>(12.83 to<br>55.14)                   | 19.76<br>(8.44 to<br>37.00)                    | 45.47<br>(19.34 to<br>84.41)                   | 0.59<br>(0.25 to<br>1.16)                | 0.43<br>(0.18 to<br>0.78)                | 0.31<br>(0.13 to<br>0.56)                | 0.63<br>(0.27 to<br>1.13)                 |
| <b>Maternal disorders</b>                                | <b>387.76</b><br>(293.32 to<br><b>483.82</b> ) | <b>284.29</b><br>(197.66 to<br><b>396.76</b> ) | <b>180.45</b><br>(122.73 to<br><b>253.89</b> ) | <b>488.38</b><br>(339.23 to<br><b>680.24</b> ) | <b>7.09</b><br>(5.35 to<br><b>8.92</b> ) | <b>5.53</b><br>(3.66 to<br><b>7.52</b> ) | <b>3.39</b><br>(2.31 to<br><b>4.84</b> ) | <b>9.13</b><br>(6.28 to<br><b>12.87</b> ) |
| Maternal hemorrhage                                      | 95.50<br>(66.32 to<br>129.32)                  | 61.82<br>(39.10 to<br>93.94)                   | 40.59<br>(24.79 to<br>62.81)                   | 101.30<br>(63.53 to<br>156.20)                 | 1.80<br>(1.25 to<br>2.45)                | 1.18<br>(0.74 to<br>1.78)                | 0.78<br>(0.47 to<br>1.21)                | 1.93<br>(1.20 to<br>3.01)                 |
| Maternal sepsis and other maternal infections            | 54.50<br>(36.94 to<br>75.92)                   | 30.15<br>(18.47 to<br>45.12)                   | 19.49<br>(11.82 to<br>29.89)                   | 50.18<br>(30.62 to<br>76.68)                   | 0.98<br>(0.67 to<br>1.35)                | 0.55<br>(0.33 to<br>0.83)                | 0.36<br>(0.22 to<br>0.55)                | 0.91<br>(0.56 to<br>1.42)                 |
| Maternal hypertensive disorders                          | 57.28<br>(38.45 to<br>77.92)                   | 36.27<br>(22.60 to<br>53.54)                   | 23.55<br>(14.41 to<br>36.02)                   | 60.18<br>(36.52 to<br>90.77)                   | 1.02<br>(0.69 to<br>1.39)                | 0.65<br>(0.41 to<br>0.96)                | 0.43<br>(0.27 to<br>0.65)                | 1.08<br>(0.66 to<br>1.61)                 |
| Maternal obstructed labor and uterine rupture            | 43.77<br>(28.84 to<br>62.66)                   | 25.82<br>(15.01 to<br>40.59)                   | 16.40<br>(9.52 to<br>26.00)                    | 44.01<br>(25.61 to<br>69.30)                   | 0.81<br>(0.53 to<br>1.16)                | 0.49<br>(0.28 to<br>0.77)                | 0.31<br>(0.18 to<br>0.49)                | 0.83<br>(0.48 to<br>1.32)                 |
| Maternal abortion, miscarriage, and ectopic pregnancy    | 31.56<br>(19.73 to<br>47.13)                   | 23.59<br>(12.55 to<br>43.89)                   | 15.41<br>(7.98 to<br>27.19)                    | 40.27<br>(21.07 to<br>71.79)                   | 0.56<br>(0.36 to<br>0.83)                | 0.43<br>(0.23 to<br>0.77)                | 0.28<br>(0.15 to<br>0.48)                | 0.73<br>(0.38 to<br>1.27)                 |
| Indirect maternal deaths                                 | 50.34<br>(34.94 to<br>70.81)                   | 34.73<br>(21.18 to<br>52.29)                   | 21.87<br>(13.15 to<br>33.70)                   | 58.85<br>(36.41 to<br>92.34)                   | 0.91<br>(0.63 to<br>1.27)                | 0.63<br>(0.39 to<br>0.96)                | 0.40<br>(0.24 to<br>0.61)                | 1.07<br>(0.66 to<br>1.69)                 |
| Late maternal deaths                                     | 4.11<br>(1.84 to<br>7.46)                      | 2.26<br>(1.00 to<br>4.19)                      | 1.43<br>(0.61 to<br>2.72)                      | 3.82<br>(1.69 to<br>7.21)                      | 0.07<br>(0.03 to<br>0.13)                | 0.04<br>(0.02 to<br>0.08)                | 0.03<br>(0.01 to<br>0.05)                | 0.07<br>(0.03 to<br>0.13)                 |
| Maternal deaths aggravated by HIV/AIDS                   | 9.99<br>(5.83 to<br>14.55)                     | 39.58<br>(11.05 to<br>75.15)                   | 22.16<br>(4.19 to<br>47.78)                    | 80.53<br>(41.79 to<br>132.29)                  | 0.19<br>(0.11 to<br>0.28)                | 0.79<br>(0.22 to<br>1.50)                | 0.45<br>(0.08 to<br>0.95)                | 1.60<br>(0.83 to<br>2.60)                 |
| Other maternal disorders                                 | 40.72<br>(23.91 to<br>61.90)                   | 30.08<br>(16.48 to<br>48.94)                   | 19.54<br>(10.67 to<br>31.50)                   | 49.26<br>(26.51 to<br>80.25)                   | 0.74<br>(0.43 to<br>1.15)                | 0.56<br>(0.31 to<br>0.93)                | 0.37<br>(0.20 to<br>0.60)                | 0.92<br>(0.49 to<br>1.52)                 |
| <b>Tanzania</b>                                          |                                                |                                                |                                                |                                                |                                          |                                          |                                          |                                           |
| Cause                                                    | YLLs (in 1000s)                                |                                                |                                                |                                                | Deaths (in 1000s)                        |                                          |                                          |                                           |
|                                                          | 2016                                           | 2040 Forecast                                  | 2040 Better Scenario                           | 2040 Worse Scenario                            | 2016                                     | 2040 Forecast                            | 2040 Better Scenario                     | 2040 Worse Scenario                       |
| Neonatal disorders                                       | 2,988.51<br>(2,370.02 to<br>3,673.04)          | 1,896.36<br>(1,285.53 to<br>2,721.37)          | 1,118.89<br>(749.81 to<br>1,620.39)            | 3,287.47<br>(2,231.41 to<br>4,740.57)          | 34.53<br>(27.39 to<br>42.44)             | 21.92<br>(14.86 to<br>31.45)             | 12.93<br>(8.67 to<br>18.73)              | 37.99<br>(25.79 to<br>54.77)              |
| Neonatal preterm birth                                   | 769.47<br>(522.56 to<br>1,097.19)              | 463.36<br>(290.09 to<br>695.90)                | 239.70<br>(148.92 to<br>361.92)                | 795.04<br>(496.31 to<br>1,189.74)              | 8.89<br>(6.04 to<br>12.67)               | 5.35<br>(3.35 to<br>8.04)                | 2.77<br>(1.72 to<br>4.18)                | 9.19<br>(5.74 to<br>13.74)                |
| Neonatal encephalopathy due to birth asphyxia and trauma | 1,158.89<br>(840.92 to<br>1,574.26)            | 662.11<br>(378.34 to<br>1,088.67)              | 414.89<br>(234.64 to<br>693.90)                | 1,122.43<br>(645.19 to<br>1,881.93)            | 13.39<br>(9.71 to<br>18.19)              | 7.65<br>(4.37 to<br>12.58)               | 4.79<br>(2.71 to<br>8.02)                | 12.97<br>(7.46 to<br>21.74)               |
| Neonatal sepsis and other neonatal infections            | 555.37<br>(333.87 to<br>886.28)                | 461.75<br>(260.60 to<br>779.31)                | 285.13<br>(163.42 to<br>470.86)                | 794.85<br>(458.07 to<br>1,345.77)              | 6.42<br>(3.86 to<br>10.24)               | 5.34<br>(3.01 to<br>9.01)                | 3.30<br>(1.89 to<br>5.44)                | 9.19<br>(5.29 to<br>15.55)                |
| Hemolytic disease and other neonatal jaundice            | 63.93<br>(33.87 to<br>109.18)                  | 24.48<br>(10.82 to<br>45.72)                   | 14.22<br>(6.21 to<br>27.75)                    | 45.50<br>(20.07 to<br>87.27)                   | 0.74<br>(0.39 to<br>1.26)                | 0.28<br>(0.13 to<br>0.53)                | 0.16<br>(0.07 to<br>0.32)                | 0.53<br>(0.23 to<br>1.01)                 |

|                                                                         |                                                            |                                                            |                                                            |                                                             |                                                      |                                                      |                                                      |                                                      |
|-------------------------------------------------------------------------|------------------------------------------------------------|------------------------------------------------------------|------------------------------------------------------------|-------------------------------------------------------------|------------------------------------------------------|------------------------------------------------------|------------------------------------------------------|------------------------------------------------------|
| Other neonatal disorders                                                | 440.85<br>(263.35 to<br>693.99)                            | 284.65<br>(146.53 to<br>513.65)                            | 164.94<br>(84.67 to<br>300.03)                             | 529.65<br>(271.69 to<br>970.00)                             | 5.10<br>(3.04 to<br>8.02)                            | 3.29<br>(1.69 to<br>5.94)                            | 1.91<br>(0.98 to<br>3.47)                            | 6.12<br>(3.14 to<br>11.21)                           |
| <b>Nutritional deficiencies</b>                                         | <b>837.29</b><br><b>(552.68 to</b><br><b>1,231.27)</b>     | <b>347.84</b><br><b>(239.16 to</b><br><b>507.65)</b>       | <b>241.42</b><br><b>(167.92 to</b><br><b>342.30)</b>       | <b>535.14</b><br><b>(355.28 to</b><br><b>785.14)</b>        | <b>12.78</b><br><b>(9.23 to</b><br><b>17.45)</b>     | <b>7.54</b><br><b>(5.74 to</b><br><b>9.92)</b>       | <b>6.04</b><br><b>(4.65 to</b><br><b>7.90)</b>       | <b>10.02</b><br><b>(7.46 to</b><br><b>13.61)</b>     |
| Protein-energy malnutrition                                             | 796.42<br>(519.77 to<br>1,182.92)                          | 290.34<br>(185.58 to<br>442.03)                            | 195.96<br>(129.09 to<br>289.64)                            | 458.86<br>(288.13 to<br>708.98)                             | 11.73<br>(8.36 to<br>16.24)                          | 5.82<br>(4.19 to<br>8.03)                            | 4.55<br>(3.25 to<br>6.19)                            | 7.99<br>(5.67 to<br>11.37)                           |
| Iodine deficiency                                                       | 3.66<br>(0.12 to<br>22.70)                                 | 10.36<br>(0.24 to<br>56.46)                                | 7.05<br>(0.15 to<br>31.45)                                 | 16.39<br>(0.40 to<br>98.47)                                 | 0.07<br>(0.00 to<br>0.31)                            | 0.25<br>(0.01 to<br>0.91)                            | 0.19<br>(0.00 to<br>0.67)                            | 0.34<br>(0.01 to<br>1.34)                            |
| Dietary iron deficiency                                                 | 1.76<br>(1.12 to<br>2.62)                                  | 2.25<br>(1.30 to<br>3.73)                                  | 1.94<br>(1.09 to<br>3.25)                                  | 2.65<br>(1.55 to<br>4.30)                                   | 0.03<br>(0.02 to<br>0.05)                            | 0.04<br>(0.02 to<br>0.07)                            | 0.04<br>(0.02 to<br>0.06)                            | 0.05<br>(0.03 to<br>0.08)                            |
| Other nutritional deficiencies                                          | 35.45<br>(21.63 to<br>57.61)                               | 44.89<br>(28.14 to<br>66.75)                               | 36.47<br>(23.10 to<br>53.02)                               | 57.24<br>(35.12 to<br>88.41)                                | 0.95<br>(0.61 to<br>1.38)                            | 1.43<br>(0.92 to<br>1.99)                            | 1.27<br>(0.81 to<br>1.75)                            | 1.64<br>(1.05 to<br>2.28)                            |
| <b>Other communicable, maternal, neonatal, and nutritional diseases</b> | <b>589.73</b><br><b>(313.95 to</b><br><b>1,041.83)</b>     | <b>232.30</b><br><b>(140.60 to</b><br><b>396.52)</b>       | <b>164.97</b><br><b>(104.60 to</b><br><b>268.50)</b>       | <b>343.45</b><br><b>(197.65 to</b><br><b>597.59)</b>        | <b>7.85</b><br><b>(4.55 to</b><br><b>13.16)</b>      | <b>3.97</b><br><b>(2.80 to</b><br><b>6.06)</b>       | <b>3.07</b><br><b>(2.23 to</b><br><b>4.45)</b>       | <b>5.41</b><br><b>(3.66 to</b><br><b>8.46)</b>       |
| Sexually transmitted infections excluding HIV                           | 384.19<br>(142.68 to<br>766.03)                            | 92.98<br>(29.41 to<br>207.53)                              | 63.25<br>(21.79 to<br>141.00)                              | 141.94<br>(43.90 to<br>320.21)                              | 4.59<br>(1.76 to<br>9.06)                            | 1.18<br>(0.43 to<br>2.52)                            | 0.82<br>(0.34 to<br>1.73)                            | 1.76<br>(0.61 to<br>3.85)                            |
| Syphilis                                                                | 378.12<br>(137.36 to<br>758.96)                            | 87.24<br>(24.18 to<br>202.28)                              | 58.19<br>(17.18 to<br>135.65)                              | 135.33<br>(36.98 to<br>314.66)                              | 4.46<br>(1.65 to<br>8.91)                            | 1.05<br>(0.31 to<br>2.40)                            | 0.71<br>(0.23 to<br>1.61)                            | 1.62<br>(0.47 to<br>3.72)                            |
| Chlamydia infection                                                     | 1.19<br>(0.78 to<br>1.85)                                  | 1.14<br>(0.75 to<br>1.70)                                  | 1.00<br>(0.65 to<br>1.51)                                  | 1.31<br>(0.85 to<br>1.98)                                   | 0.02<br>(0.02 to<br>0.04)                            | 0.02<br>(0.02 to<br>0.03)                            | 0.02<br>(0.02 to<br>0.03)                            | 0.03<br>(0.02 to<br>0.04)                            |
| Gonococcal infection                                                    | 3.10<br>(2.11 to<br>4.64)                                  | 2.94<br>(1.97 to<br>4.35)                                  | 2.60<br>(1.76 to<br>3.79)                                  | 3.37<br>(2.22 to<br>5.05)                                   | 0.07<br>(0.05 to<br>0.10)                            | 0.07<br>(0.05 to<br>0.09)                            | 0.06<br>(0.04 to<br>0.08)                            | 0.07<br>(0.05 to<br>0.11)                            |
| Other sexually transmitted infections                                   | 1.78<br>(1.19 to<br>2.69)                                  | 1.66<br>(1.06 to<br>2.59)                                  | 1.46<br>(0.95 to<br>2.24)                                  | 1.93<br>(1.22 to<br>3.02)                                   | 0.04<br>(0.02 to<br>0.05)                            | 0.03<br>(0.02 to<br>0.05)                            | 0.03<br>(0.02 to<br>0.04)                            | 0.04<br>(0.03 to<br>0.06)                            |
| Acute hepatitis                                                         | 62.45<br>(51.12 to<br>75.26)                               | 58.22<br>(44.72 to<br>76.58)                               | 48.90<br>(36.75 to<br>63.90)                               | 70.85<br>(54.58 to<br>90.16)                                | 1.47<br>(1.19 to<br>1.78)                            | 1.57<br>(1.24 to<br>1.99)                            | 1.38<br>(1.08 to<br>1.72)                            | 1.83<br>(1.45 to<br>2.32)                            |
| Acute hepatitis A                                                       | 3.62<br>(0.51 to<br>9.14)                                  | 1.82<br>(0.60 to<br>3.93)                                  | 1.33<br>(0.48 to<br>2.73)                                  | 2.62<br>(0.82 to<br>5.98)                                   | 0.05<br>(0.01 to<br>0.11)                            | 0.05<br>(0.01 to<br>0.06)                            | 0.03<br>(0.01 to<br>0.05)                            | 0.04<br>(0.02 to<br>0.09)                            |
| Acute hepatitis B                                                       | 49.16<br>(39.01 to<br>61.45)                               | 48.56<br>(36.50 to<br>64.94)                               | 40.96<br>(30.49 to<br>55.05)                               | 58.64<br>(44.80 to<br>76.19)                                | 1.22<br>(0.98 to<br>1.51)                            | 1.33<br>(1.04 to<br>1.71)                            | 1.15<br>(0.89 to<br>1.47)                            | 1.55<br>(1.22 to<br>1.99)                            |
| Acute hepatitis C                                                       | 1.20<br>(0.88 to<br>1.63)                                  | 1.54<br>(1.08 to<br>2.16)                                  | 1.43<br>(0.99 to<br>2.00)                                  | 1.67<br>(1.18 to<br>2.31)                                   | 0.03<br>(0.03 to<br>0.05)                            | 0.05<br>(0.03 to<br>0.07)                            | 0.05<br>(0.03 to<br>0.07)                            | 0.05<br>(0.04 to<br>0.07)                            |
| Acute hepatitis E                                                       | 8.46<br>(6.12 to<br>11.31)                                 | 6.30<br>(4.41 to<br>8.61)                                  | 5.18<br>(3.62 to<br>7.05)                                  | 7.92<br>(5.47 to<br>11.00)                                  | 0.16<br>(0.12 to<br>0.21)                            | 0.16<br>(0.11 to<br>0.22)                            | 0.15<br>(0.10 to<br>0.21)                            | 0.18<br>(0.13 to<br>0.24)                            |
| Other unspecified infectious diseases                                   | 143.09<br>(44.78 to<br>421.67)                             | 81.10<br>(37.16 to<br>187.81)                              | 52.82<br>(25.49 to<br>118.76)                              | 130.66<br>(58.92 to<br>305.36)                              | 1.80<br>(0.63 to<br>5.08)                            | 1.22<br>(0.66 to<br>2.51)                            | 0.87<br>(0.49 to<br>1.71)                            | 1.82<br>(0.93 to<br>3.94)                            |
| <b>Non-communicable diseases</b>                                        | <b>4,056.18</b><br><b>(3,479.53 to</b><br><b>4,625.34)</b> | <b>6,622.45</b><br><b>(5,391.64 to</b><br><b>8,024.52)</b> | <b>5,438.32</b><br><b>(4,470.71 to</b><br><b>6,531.54)</b> | <b>8,701.68</b><br><b>(6,901.03 to</b><br><b>10,708.92)</b> | <b>140.55</b><br><b>(120.81 to</b><br><b>159.78)</b> | <b>254.72</b><br><b>(221.48 to</b><br><b>292.88)</b> | <b>218.96</b><br><b>(192.40 to</b><br><b>248.75)</b> | <b>318.56</b><br><b>(269.71 to</b><br><b>373.77)</b> |
| <b>Tanzania</b>                                                         |                                                            |                                                            |                                                            |                                                             |                                                      |                                                      |                                                      |                                                      |
| Cause                                                                   | YLLs (in 1000s)                                            |                                                            |                                                            |                                                             | Deaths (in 1000s)                                    |                                                      |                                                      |                                                      |
|                                                                         | 2016                                                       | 2040 Forecast                                              | 2040 Better Scenario                                       | 2040 Worse Scenario                                         | 2016                                                 | 2040 Forecast                                        | 2040 Better Scenario                                 | 2040 Worse Scenario                                  |
| Neoplasms                                                               | 996.59<br>(811.40 to<br>1,176.44)                          | 2,072.31<br>(1,623.41 to<br>2,568.57)                      | 1,999.56<br>(1,579.54 to<br>2,441.93)                      | 2,226.06<br>(1,724.46 to<br>2,797.33)                       | 32.18<br>(26.20 to<br>37.90)                         | 71.51<br>(57.85 to<br>85.35)                         | 71.70<br>(58.61 to<br>84.46)                         | 73.66<br>(58.83 to<br>89.62)                         |



|                                      |                                |                                 |                                |                                 |                           |                             |                             |                            |
|--------------------------------------|--------------------------------|---------------------------------|--------------------------------|---------------------------------|---------------------------|-----------------------------|-----------------------------|----------------------------|
| Lip and oral cavity cancer           | 10.47<br>(8.69 to<br>12.52)    | 19.15<br>(10.40 to<br>31.20)    | 16.10<br>(9.10 to<br>25.64)    | 31.79<br>(15.55 to<br>54.23)    | 0.42<br>(0.35 to<br>0.49) | 0.76<br>(0.45 to<br>1.19)   | 0.68<br>(0.40 to<br>1.05)   | 1.16<br>(0.61 to<br>1.92)  |
| Nasopharynx cancer                   | 11.17<br>(8.40 to<br>14.71)    | 23.36<br>(11.75 to<br>41.51)    | 18.31<br>(9.55 to<br>32.11)    | 41.38<br>(19.08 to<br>77.44)    | 0.33<br>(0.25 to<br>0.43) | 0.70<br>(0.37 to<br>1.23)   | 0.57<br>(0.31 to<br>0.95)   | 1.20<br>(0.57 to<br>2.22)  |
| Other pharynx cancer                 | 9.83<br>(7.13 to<br>12.44)     | 15.39<br>(8.47 to<br>26.52)     | 14.42<br>(7.98 to<br>24.70)    | 22.68<br>(11.45 to<br>41.54)    | 0.33<br>(0.24 to<br>0.41) | 0.52<br>(0.29 to<br>0.88)   | 0.50<br>(0.28 to<br>0.85)   | 0.75<br>(0.38 to<br>1.33)  |
| Esophageal cancer                    | 27.84<br>(22.90 to<br>34.02)   | 53.28<br>(32.37 to<br>88.39)    | 44.40<br>(27.69 to<br>70.69)   | 81.06<br>(45.17 to<br>145.04)   | 1.16<br>(0.96 to<br>1.39) | 2.13<br>(1.36 to<br>3.34)   | 1.86<br>(1.23 to<br>2.79)   | 3.05<br>(1.80 to<br>5.13)  |
| Stomach cancer                       | 42.26<br>(33.42 to<br>52.74)   | 64.33<br>(48.65 to<br>85.09)    | 60.35<br>(44.86 to<br>79.12)   | 70.09<br>(52.28 to<br>95.52)    | 1.69<br>(1.35 to<br>2.09) | 2.59<br>(1.99 to<br>3.35)   | 2.51<br>(1.91 to<br>3.21)   | 2.72<br>(2.09 to<br>3.59)  |
| Colon and rectum cancer              | 47.00<br>(37.15 to<br>57.12)   | 119.55<br>(80.77 to<br>167.78)  | 125.23<br>(85.53 to<br>177.36) | 124.16<br>(83.15 to<br>178.65)  | 2.12<br>(1.69 to<br>2.53) | 5.70<br>(3.97 to<br>7.89)   | 6.29<br>(4.48 to<br>8.59)   | 5.51<br>(3.80 to<br>7.33)  |
| Liver cancer                         | 61.40<br>(46.11 to<br>81.94)   | 139.33<br>(94.97 to<br>209.23)  | 129.06<br>(89.47 to<br>189.41) | 164.96<br>(107.29 to<br>254.51) | 2.08<br>(1.60 to<br>2.70) | 4.79<br>(3.41 to<br>6.76)   | 4.58<br>(3.34 to<br>6.41)   | 5.46<br>(3.73 to<br>8.00)  |
| Liver cancer due to hepatitis B      | 21.03<br>(14.43 to<br>29.43)   | 48.64<br>(30.46 to<br>77.99)    | 45.19<br>(28.68 to<br>71.27)   | 54.13<br>(33.27 to<br>90.73)    | 0.63<br>(0.44 to<br>0.88) | 1.49<br>(0.97 to<br>2.28)   | 1.42<br>(0.95 to<br>2.13)   | 1.61<br>(1.01 to<br>2.57)  |
| Liver cancer due to hepatitis C      | 15.09<br>(9.86 to<br>21.91)    | 35.49<br>(21.91 to<br>54.92)    | 33.62<br>(21.10 to<br>51.28)   | 38.34<br>(22.75 to<br>61.22)    | 0.61<br>(0.41 to<br>0.86) | 1.44<br>(0.93 to<br>2.13)   | 1.42<br>(0.94 to<br>2.06)   | 1.49<br>(0.94 to<br>2.28)  |
| Liver cancer due to alcohol use      | 10.65<br>(7.56 to<br>14.58)    | 22.16<br>(14.32 to<br>33.56)    | 19.94<br>(13.12 to<br>30.16)   | 35.44<br>(21.91 to<br>55.81)    | 0.39<br>(0.28 to<br>0.53) | 0.81<br>(0.54 to<br>1.18)   | 0.75<br>(0.51 to<br>1.09)   | 1.22<br>(0.79 to<br>1.84)  |
| Liver cancer due to other causes     | 14.63<br>(10.55 to<br>20.95)   | 33.04<br>(21.32 to<br>53.31)    | 30.31<br>(20.06 to<br>47.46)   | 37.05<br>(23.14 to<br>61.29)    | 0.45<br>(0.33 to<br>0.61) | 1.05<br>(0.70 to<br>1.58)   | 0.99<br>(0.68 to<br>1.47)   | 1.13<br>(0.73 to<br>1.75)  |
| Gallbladder and biliary tract cancer | 6.29<br>(4.64 to<br>8.07)      | 9.89<br>(7.41 to<br>12.79)      | 10.39<br>(7.74 to<br>13.59)    | 9.28<br>(6.97 to<br>11.86)      | 0.26<br>(0.20 to<br>0.33) | 0.41<br>(0.32 to<br>0.52)   | 0.45<br>(0.35 to<br>0.56)   | 0.37<br>(0.29 to<br>0.46)  |
| Pancreatic cancer                    | 25.63<br>(21.05 to<br>30.10)   | 71.04<br>(55.61 to<br>89.33)    | 73.20<br>(57.32 to<br>92.37)   | 67.42<br>(52.78 to<br>85.10)    | 1.02<br>(0.85 to<br>1.19) | 2.82<br>(2.26 to<br>3.46)   | 2.99<br>(2.42 to<br>3.66)   | 2.58<br>(2.09 to<br>3.18)  |
| Larynx cancer                        | 9.15<br>(7.21 to<br>11.95)     | 17.54<br>(9.85 to<br>31.74)     | 12.40<br>(7.54 to<br>20.10)    | 29.39<br>(14.50 to<br>56.20)    | 0.34<br>(0.28 to<br>0.44) | 0.65<br>(0.38 to<br>1.14)   | 0.48<br>(0.31 to<br>0.75)   | 1.03<br>(0.54 to<br>1.91)  |
| Tracheal, bronchus, and lung cancer  | 37.88<br>(30.97 to<br>45.33)   | 91.39<br>(56.20 to<br>144.64)   | 55.13<br>(38.12 to<br>79.63)   | 119.05<br>(68.30 to<br>198.84)  | 1.58<br>(1.30 to<br>1.87) | 3.75<br>(2.41 to<br>5.61)   | 2.38<br>(1.70 to<br>3.28)   | 4.67<br>(2.85 to<br>7.27)  |
| Malignant skin melanoma              | 9.81<br>(7.11 to<br>12.69)     | 23.50<br>(17.35 to<br>30.30)    | 26.15<br>(19.44 to<br>33.85)   | 20.62<br>(15.00 to<br>26.46)    | 0.38<br>(0.28 to<br>0.48) | 0.93<br>(0.71 to<br>1.15)   | 1.07<br>(0.83 to<br>1.33)   | 0.79<br>(0.59 to<br>0.99)  |
| Non-melanoma skin cancer             | 5.52<br>(4.34 to<br>6.90)      | 12.88<br>(10.34 to<br>15.75)    | 12.48<br>(10.03 to<br>15.40)   | 13.30<br>(10.59 to<br>16.27)    | 0.24<br>(0.18 to<br>0.30) | 0.57<br>(0.46 to<br>0.69)   | 0.57<br>(0.47 to<br>0.70)   | 0.55<br>(0.44 to<br>0.69)  |
| Breast cancer                        | 48.42<br>(31.57 to<br>69.62)   | 105.66<br>(64.31 to<br>168.34)  | 104.47<br>(64.15 to<br>164.12) | 115.61<br>(68.34 to<br>194.43)  | 1.60<br>(1.05 to<br>2.21) | 3.67<br>(2.36 to<br>5.67)   | 3.74<br>(2.43 to<br>5.66)   | 3.89<br>(2.38 to<br>6.31)  |
| Cervical cancer                      | 107.54<br>(69.39 to<br>147.05) | 176.14<br>(108.41 to<br>250.73) | 162.08<br>(99.49 to<br>233.08) | 192.32<br>(118.13 to<br>277.25) | 3.60<br>(2.31 to<br>4.81) | 5.90<br>(3.66 to<br>8.18)   | 5.54<br>(3.49 to<br>7.66)   | 6.30<br>(3.91 to<br>8.72)  |
| Uterine cancer                       | 13.32<br>(9.29 to<br>17.57)    | 26.84<br>(18.64 to<br>36.62)    | 24.51<br>(16.85 to<br>33.84)   | 29.65<br>(20.47 to<br>40.46)    | 0.50<br>(0.35 to<br>0.65) | 1.03<br>(0.75 to<br>1.37)   | 0.96<br>(0.69 to<br>1.28)   | 1.11<br>(0.80 to<br>1.47)  |
| Ovarian cancer                       | 29.04<br>(19.80 to<br>38.32)   | 70.65<br>(47.02 to<br>99.28)    | 75.33<br>(50.70 to<br>104.35)  | 65.00<br>(43.13 to<br>91.59)    | 0.99<br>(0.67 to<br>1.28) | 2.50<br>(1.69 to<br>3.39)   | 2.73<br>(1.88 to<br>3.69)   | 2.23<br>(1.49 to<br>3.07)  |
| Prostate cancer                      | 68.45<br>(25.41 to<br>100.19)  | 197.24<br>(78.28 to<br>275.25)  | 214.14<br>(89.26 to<br>298.49) | 178.20<br>(66.12 to<br>251.77)  | 3.73<br>(1.40 to<br>5.39) | 10.67<br>(4.27 to<br>14.66) | 11.96<br>(5.00 to<br>16.27) | 9.32<br>(3.54 to<br>13.00) |

|                                 |                                                            |                                                            |                                                          |                                                            |                                                   |                                                    |                                                   |                                                      |
|---------------------------------|------------------------------------------------------------|------------------------------------------------------------|----------------------------------------------------------|------------------------------------------------------------|---------------------------------------------------|----------------------------------------------------|---------------------------------------------------|------------------------------------------------------|
| Testicular cancer               | 1.01<br>(0.75 to<br>1.33)                                  | 1.80<br>(1.22 to<br>2.51)                                  | 1.70<br>(1.13 to<br>2.40)                                | 1.91<br>(1.29 to<br>2.67)                                  | 0.02<br>(0.02 to<br>0.03)                         | 0.04<br>(0.03 to<br>0.05)                          | 0.04<br>(0.03 to<br>0.05)                         | 0.04<br>(0.03 to<br>0.06)                            |
| <b>Tanzania</b>                 |                                                            |                                                            |                                                          |                                                            |                                                   |                                                    |                                                   |                                                      |
| Cause                           | YLLs (in 1000s)                                            |                                                            |                                                          |                                                            | Deaths (in 1000s)                                 |                                                    |                                                   |                                                      |
|                                 | 2016                                                       | 2040 Forecast                                              | 2040 Better Scenario                                     | 2040 Worse Scenario                                        | 2016                                              | 2040 Forecast                                      | 2040 Better Scenario                              | 2040 Worse Scenario                                  |
| Kidney cancer                   | 13.15<br>(9.32 to<br>17.80)                                | 24.75<br>(18.89 to<br>31.81)                               | 24.90<br>(19.21 to<br>31.06)                             | 24.55<br>(18.15 to<br>32.75)                               | 0.29<br>(0.23 to<br>0.35)                         | 0.69<br>(0.55 to<br>0.84)                          | 0.74<br>(0.60 to<br>0.91)                         | 0.63<br>(0.49 to<br>0.77)                            |
| Bladder cancer                  | 12.62<br>(9.67 to<br>15.57)                                | 27.10<br>(19.81 to<br>35.28)                               | 26.26<br>(19.40 to<br>33.62)                             | 27.59<br>(20.13 to<br>36.48)                               | 0.59<br>(0.46 to<br>0.71)                         | 1.27<br>(0.96 to<br>1.62)                          | 1.28<br>(0.97 to<br>1.61)                         | 1.23<br>(0.92 to<br>1.59)                            |
| Brain and nervous system cancer | 34.61<br>(28.62 to<br>44.08)                               | 71.85<br>(57.24 to<br>93.19)                               | 71.57<br>(56.82 to<br>94.59)                             | 71.96<br>(57.56 to<br>91.17)                               | 0.77<br>(0.64 to<br>1.01)                         | 1.85<br>(1.49 to<br>2.47)                          | 1.93<br>(1.56 to<br>2.63)                         | 1.76<br>(1.42 to<br>2.29)                            |
| Thyroid cancer                  | 11.45<br>(6.45 to<br>15.33)                                | 21.64<br>(12.25 to<br>30.82)                               | 19.61<br>(11.32 to<br>30.82)                             | 24.44<br>(13.46 to<br>35.93)                               | 0.37<br>(0.21 to<br>0.49)                         | 0.73<br>(0.42 to<br>1.00)                          | 0.68<br>(0.39 to<br>0.91)                         | 0.80<br>(0.45 to<br>1.13)                            |
| Mesothelioma                    | 1.60<br>(1.19 to<br>2.09)                                  | 3.59<br>(2.61 to<br>4.72)                                  | 3.59<br>(2.59 to<br>4.76)                                | 3.57<br>(2.60 to<br>4.72)                                  | 0.05<br>(0.04 to<br>0.07)                         | 0.12<br>(0.09 to<br>0.16)                          | 0.13<br>(0.09 to<br>0.17)                         | 0.12<br>(0.09 to<br>0.16)                            |
| Hodgkin lymphoma                | 13.17<br>(6.40 to<br>18.36)                                | 14.59<br>(6.75 to<br>20.89)                                | 12.06<br>(5.61 to<br>17.39)                              | 18.15<br>(8.37 to<br>25.96)                                | 0.28<br>(0.14 to<br>0.38)                         | 0.15<br>(0.16 to<br>0.48)                          | 0.29<br>(0.14 to<br>0.41)                         | 0.41<br>(0.20 to<br>0.58)                            |
| Non-Hodgkin lymphoma            | 127.86<br>(87.31 to<br>164.78)                             | 215.44<br>(143.13 to<br>279.99)                            | 209.30<br>(140.29 to<br>271.28)                          | 222.55<br>(145.74 to<br>290.58)                            | 2.48<br>(1.74 to<br>3.08)                         | 4.90<br>(3.39 to<br>6.15)                          | 5.00<br>(3.48 to<br>6.23)                         | 4.80<br>(3.26 to<br>6.09)                            |
| Multiple myeloma                | 13.80<br>(9.19 to<br>17.78)                                | 37.06<br>(24.50 to<br>49.93)                               | 39.09<br>(26.46 to<br>52.21)                             | 34.74<br>(22.60 to<br>47.56)                               | 0.49<br>(0.33 to<br>0.63)                         | 1.33<br>(0.91 to<br>1.77)                          | 1.43<br>(0.99 to<br>1.87)                         | 1.22<br>(0.81 to<br>1.64)                            |
| Leukemia                        | 39.49<br>(30.75 to<br>50.32)                               | 66.07<br>(50.24 to<br>88.27)                               | 63.80<br>(48.20 to<br>84.31)                             | 70.14<br>(52.90 to<br>92.15)                               | 0.85<br>(0.69 to<br>1.10)                         | 1.70<br>(1.35 to<br>2.26)                          | 1.69<br>(1.33 to<br>2.27)                         | 1.72<br>(1.34 to<br>2.27)                            |
| Acute lymphoid leukemia         | 13.31<br>(9.48 to<br>17.47)                                | 20.77<br>(15.13 to<br>27.99)                               | 19.78<br>(14.68 to<br>26.71)                             | 21.94<br>(15.77 to<br>29.23)                               | 0.24<br>(0.18 to<br>0.31)                         | 0.44<br>(0.34 to<br>0.60)                          | 0.44<br>(0.34 to<br>0.60)                         | 0.45<br>(0.34 to<br>0.60)                            |
| Chronic lymphoid leukemia       | 1.19<br>(0.89 to<br>1.61)                                  | 2.57<br>(1.85 to<br>3.57)                                  | 2.59<br>(1.86 to<br>3.59)                                | 2.55<br>(1.82 to<br>3.56)                                  | 0.05<br>(0.04 to<br>0.07)                         | 0.11<br>(0.08 to<br>0.15)                          | 0.12<br>(0.08 to<br>0.16)                         | 0.11<br>(0.08 to<br>0.15)                            |
| Acute myeloid leukemia          | 9.15<br>(7.18 to<br>12.01)                                 | 20.23<br>(15.53 to<br>28.08)                               | 20.45<br>(15.62 to<br>28.84)                             | 20.00<br>(15.29 to<br>27.78)                               | 0.19<br>(0.15 to<br>0.26)                         | 0.50<br>(0.39 to<br>0.71)                          | 0.53<br>(0.41 to<br>0.76)                         | 0.48<br>(0.37 to<br>0.66)                            |
| Chronic myeloid leukemia        | 3.93<br>(2.85 to<br>5.50)                                  | 5.51<br>(3.73 to<br>8.23)                                  | 5.28<br>(3.58 to<br>7.86)                                | 5.79<br>(3.88 to<br>8.62)                                  | 0.10<br>(0.07 to<br>0.13)                         | 0.14<br>(0.10 to<br>0.21)                          | 0.14<br>(0.10 to<br>0.20)                         | 0.15<br>(0.10 to<br>0.21)                            |
| Other leukemia                  | 11.91<br>(8.47 to<br>16.29)                                | 16.99<br>(11.97 to<br>23.25)                               | 14.91<br>(10.51 to<br>20.42)                             | 19.86<br>(13.86 to<br>27.23)                               | 0.28<br>(0.21 to<br>0.37)                         | 0.50<br>(0.37 to<br>0.67)                          | 0.46<br>(0.35 to<br>0.63)                         | 0.54<br>(0.40 to<br>0.72)                            |
| Other neoplasms                 | 156.81<br>(130.22 to<br>187.89)                            | 351.24<br>(270.60 to<br>443.70)                            | 350.33<br>(267.14 to<br>442.87)                          | 350.50<br>(270.79 to<br>442.00)                            | 3.61<br>(2.99 to<br>4.32)                         | 8.46<br>(6.72 to<br>10.37)                         | 8.64<br>(6.86 to<br>10.63)                        | 8.23<br>(6.55 to<br>10.05)                           |
| <b>Cardiovascular diseases</b>  | <b>1,252.85</b><br><b>(1,055.65 to</b><br><b>1,447.23)</b> | <b>1,881.87</b><br><b>(1,368.84 to</b><br><b>2,571.38)</b> | <b>1,210.23</b><br><b>(917.16 to</b><br><b>1,611.76)</b> | <b>3,103.21</b><br><b>(2,132.89 to</b><br><b>4,405.47)</b> | <b>57.11</b><br><b>(48.20 to</b><br><b>64.94)</b> | <b>89.37</b><br><b>(69.67 to</b><br><b>115.45)</b> | <b>62.80</b><br><b>(50.37 to</b><br><b>78.48)</b> | <b>136.13</b><br><b>(101.83 to</b><br><b>182.80)</b> |
| Rheumatic heart disease         | 19.63<br>(15.13 to<br>25.88)                               | 16.11<br>(11.50 to<br>22.59)                               | 13.14<br>(9.20 to<br>18.81)                              | 20.67<br>(14.58 to<br>29.74)                               | 0.64<br>(0.48 to<br>0.86)                         | 0.58<br>(0.42 to<br>0.82)                          | 0.49<br>(0.35 to<br>0.71)                         | 0.71<br>(0.51 to<br>1.04)                            |
| Ischemic heart disease          | 526.40<br>(440.38 to<br>633.82)                            | 780.54<br>(461.68 to<br>1,270.33)                          | 407.10<br>(246.97 to<br>668.25)                          | 1,398.00<br>(808.50 to<br>2,254.20)                        | 26.38<br>(22.04 to<br>31.03)                      | 38.58<br>(24.32 to<br>60.60)                       | 22.78<br>(14.87 to<br>35.21)                      | 63.38<br>(39.09 to<br>98.31)                         |
| Stroke                          | 330.35<br>(271.71 to<br>391.35)                            | 387.34<br>(235.22 to<br>610.25)                            | 193.17<br>(122.51 to<br>293.90)                          | 804.13<br>(465.11 to<br>1,318.99)                          | 14.65<br>(11.98 to<br>17.35)                      | 17.89<br>(12.03 to<br>26.74)                       | 10.05<br>(6.91 to<br>14.63)                       | 33.77<br>(20.91 to<br>53.13)                         |

|                                               |                                                      |                                                      |                                                      |                                                      |                                                |                                                 |                                                |                                                  |
|-----------------------------------------------|------------------------------------------------------|------------------------------------------------------|------------------------------------------------------|------------------------------------------------------|------------------------------------------------|-------------------------------------------------|------------------------------------------------|--------------------------------------------------|
| Ischemic stroke                               | 99.18<br>(78.53 to<br>120.89)                        | 119.33<br>(73.31 to<br>187.55)                       | 68.59<br>(44.11 to<br>104.75)                        | 199.42<br>(117.51 to<br>318.91)                      | 5.64<br>(4.55 to<br>6.78)                      | 7.07<br>(4.54 to<br>11.52)                      | 4.54<br>(3.02 to<br>6.82)                      | 10.84<br>(6.71 to<br>17.58)                      |
| Intracerebral hemorrhage                      | 231.16<br>(187.36 to<br>278.49)                      | 268.01<br>(147.56 to<br>461.83)                      | 124.58<br>(71.15 to<br>203.98)                       | 604.71<br>(316.24 to<br>1,085.11)                    | 9.01<br>(7.26 to<br>10.88)                     | 10.82<br>(6.45 to<br>17.62)                     | 5.51<br>(3.45 to<br>8.69)                      | 22.93<br>(12.67 to<br>39.25)                     |
| Hypertensive heart disease                    | 88.09<br>(58.60 to<br>119.51)                        | 155.04<br>(87.48 to<br>265.88)                       | 121.81<br>(71.04 to<br>198.05)                       | 241.67<br>(118.43 to<br>473.09)                      | 4.50<br>(2.98 to<br>6.11)                      | 8.36<br>(4.87 to<br>13.77)                      | 6.97<br>(4.18 to<br>11.07)                     | 12.09<br>(6.35 to<br>22.86)                      |
| Cardiomyopathy and myocarditis                | 44.55<br>(29.36 to<br>63.69)                         | 81.49<br>(46.03 to<br>126.65)                        | 78.67<br>(44.58 to<br>122.95)                        | 86.42<br>(49.58 to<br>134.79)                        | 1.19<br>(0.80 to<br>1.69)                      | 2.53<br>(1.51 to<br>3.77)                       | 1.19<br>(0.80 to<br>1.69)                      | 2.57<br>(1.52 to<br>3.80)                        |
| Myocarditis                                   | 6.11<br>(3.29 to<br>11.29)                           | 8.30<br>(3.59 to<br>15.86)                           | 7.56<br>(3.17 to<br>14.53)                           | 9.26<br>(4.26 to<br>17.35)                           | 0.12<br>(0.06 to<br>0.22)                      | 0.21<br>(0.08 to<br>0.41)                       | 0.20<br>(0.08 to<br>0.39)                      | 0.22<br>(0.09 to<br>0.41)                        |
| <b>Tanzania</b>                               |                                                      |                                                      |                                                      |                                                      |                                                |                                                 |                                                |                                                  |
| Cause                                         | YLLs (in 1000s)                                      |                                                      |                                                      |                                                      | Deaths (in 1000s)                              |                                                 |                                                |                                                  |
|                                               | 2016                                                 | 2040 Forecast                                        | 2040 Better Scenario                                 | 2040 Worse Scenario                                  | 2016                                           | 2040 Forecast                                   | 2040 Better Scenario                           | 2040 Worse Scenario                              |
| Alcoholic cardiomyopathy                      | 2.99<br>(1.59 to<br>5.25)                            | 5.68<br>(2.90 to<br>10.80)                           | 5.96<br>(3.04 to<br>11.45)                           | 7.42<br>(3.79 to<br>13.60)                           | 0.09<br>(0.05 to<br>0.17)                      | 0.18<br>(0.09 to<br>0.34)                       | 0.19<br>(0.10 to<br>0.37)                      | 0.23<br>(0.12 to<br>0.41)                        |
| Other cardiomyopathy                          | 35.45<br>(23.42 to<br>50.86)                         | 67.52<br>(38.01 to<br>108.23)                        | 65.15<br>(36.63 to<br>104.04)                        | 69.74<br>(38.86 to<br>111.45)                        | 0.98<br>(0.65 to<br>1.43)                      | 2.14<br>(1.25 to<br>3.29)                       | 2.18<br>(1.29 to<br>3.36)                      | 2.09<br>(1.22 to<br>3.26)                        |
| Atrial fibrillation and flutter               | 6.10<br>(4.63 to<br>7.88)                            | 13.65<br>(9.98 to<br>18.27)                          | 14.42<br>(10.53 to<br>19.31)                         | 14.10<br>(10.04 to<br>19.36)                         | 0.52<br>(0.39 to<br>0.69)                      | 1.22<br>(0.87 to<br>1.67)                       | 1.37<br>(0.99 to<br>1.86)                      | 1.16<br>(0.79 to<br>1.62)                        |
| Aortic aneurysm                               | 12.81<br>(9.16 to<br>16.84)                          | 27.25<br>(18.70 to<br>39.48)                         | 26.36<br>(18.29 to<br>38.01)                         | 27.95<br>(19.08 to<br>41.58)                         | 0.57<br>(0.41 to<br>0.74)                      | 1.23<br>(0.87 to<br>1.69)                       | 1.26<br>(0.90 to<br>1.72)                      | 1.19<br>(0.82 to<br>1.66)                        |
| Peripheral artery disease                     | 9.03<br>(0.37 to<br>1.64)                            | 3.60<br>(1.37 to<br>5.76)                            | 3.74<br>(1.47 to<br>5.74)                            | 3.25<br>(1.18 to<br>5.28)                            | 0.07<br>(0.02 to<br>0.11)                      | 0.25<br>(0.09 to<br>0.38)                       | 0.28<br>(0.11 to<br>0.43)                      | 0.21<br>(0.08 to<br>0.33)                        |
| Endocarditis                                  | 22.27<br>(16.19 to<br>29.10)                         | 47.44<br>(30.10 to<br>70.80)                         | 43.89<br>(27.84 to<br>64.63)                         | 51.59<br>(32.28 to<br>79.49)                         | 0.66<br>(0.48 to<br>0.86)                      | 1.52<br>(0.98 to<br>2.09)                       | 1.49<br>(0.95 to<br>2.04)                      | 1.55<br>(0.99 to<br>2.21)                        |
| Other cardiovascular and circulatory diseases | 191.62<br>(137.59 to<br>264.59)                      | 369.40<br>(264.72 to<br>528.16)                      | 307.92<br>(218.08 to<br>428.62)                      | 455.45<br>(311.82 to<br>661.08)                      | 7.93<br>(5.49 to<br>11.05)                     | 17.22<br>(11.90 to<br>23.90)                    | 15.52<br>(11.00 to<br>21.41)                   | 19.53<br>(13.14 to<br>27.87)                     |
| <b>Chronic respiratory diseases</b>           | <b>190.84</b><br><b>(155.21 to</b><br><b>247.48)</b> | <b>226.04</b><br><b>(159.79 to</b><br><b>326.92)</b> | <b>142.15</b><br><b>(108.72 to</b><br><b>189.70)</b> | <b>321.57</b><br><b>(217.53 to</b><br><b>487.53)</b> | <b>7.55</b><br><b>(6.19 to</b><br><b>9.13)</b> | <b>9.83</b><br><b>(7.03 to</b><br><b>14.46)</b> | <b>6.38</b><br><b>(5.01 to</b><br><b>8.28)</b> | <b>13.19</b><br><b>(8.96 to</b><br><b>20.62)</b> |
| Chronic obstructive pulmonary disease         | 101.03<br>(79.63 to<br>127.68)                       | 149.94<br>(93.99 to<br>245.22)                       | 80.35<br>(55.63 to<br>120.17)                        | 224.93<br>(133.72 to<br>381.83)                      | 4.96<br>(3.94 to<br>6.07)                      | 7.31<br>(4.68 to<br>11.92)                      | 4.22<br>(3.00 to<br>6.06)                      | 10.19<br>(6.25 to<br>17.15)                      |
| Pneumoconiosis                                | 0.62<br>(0.43 to<br>0.90)                            | 0.88<br>(0.63 to<br>1.24)                            | 0.82<br>(0.57 to<br>1.18)                            | 0.93<br>(0.67 to<br>1.31)                            | 0.03<br>(0.02 to<br>0.04)                      | 0.04<br>(0.03 to<br>0.06)                       | 0.04<br>(0.03 to<br>0.06)                      | 0.04<br>(0.03 to<br>0.06)                        |
| Silicosis                                     | 0.13<br>(0.06 to<br>0.20)                            | 0.12<br>(0.06 to<br>0.19)                            | 0.11<br>(0.05 to<br>0.19)                            | 0.12<br>(0.06 to<br>0.20)                            | 0.01<br>(0.00 to<br>0.01)                      | 0.01<br>(0.00 to<br>0.01)                       | 0.01<br>(0.00 to<br>0.01)                      | 0.01<br>(0.00 to<br>0.01)                        |
| Asbestosis                                    | 0.16<br>(0.09 to<br>0.26)                            | 0.31<br>(0.17 to<br>0.49)                            | 0.32<br>(0.18 to<br>0.50)                            | 0.29<br>(0.17 to<br>0.48)                            | 0.01<br>(0.00 to<br>0.01)                      | 0.01<br>(0.01 to<br>0.02)                       | 0.01<br>(0.01 to<br>0.02)                      | 0.01<br>(0.01 to<br>0.02)                        |
| Coal workers pneumoconiosis                   | 0.05<br>(0.02 to<br>0.09)                            | 0.06<br>(0.03 to<br>0.10)                            | 0.04<br>(0.02 to<br>0.08)                            | 0.07<br>(0.04 to<br>0.13)                            | 0.00<br>(0.00 to<br>0.00)                      | 0.00<br>(0.00 to<br>0.00)                       | 0.00<br>(0.00 to<br>0.00)                      | 0.00<br>(0.00 to<br>0.01)                        |
| Other pneumoconiosis                          | 0.29<br>(0.18 to<br>0.45)                            | 0.40<br>(0.24 to<br>0.62)                            | 0.35<br>(0.20 to<br>0.59)                            | 0.44<br>(0.27 to<br>0.67)                            | 0.01<br>(0.01 to<br>0.02)                      | 0.02<br>(0.01 to<br>0.03)                       | 0.02<br>(0.01 to<br>0.03)                      | 0.02<br>(0.01 to<br>0.03)                        |
| Asthma                                        | 76.79<br>(55.60 to<br>122.81)                        | 54.66<br>(34.67 to<br>95.17)                         | 41.45<br>(27.18 to<br>68.12)                         | 73.75<br>(44.89 to<br>133.24)                        | 2.25<br>(1.62 to<br>3.63)                      | 1.85<br>(1.19 to<br>3.18)                       | 1.48<br>(1.00 to<br>2.41)                      | 2.35<br>(1.46 to<br>4.17)                        |

|                                                                |                                                      |                                                      |                                                      |                                                      |                                                 |                                                   |                                                   |                                                   |
|----------------------------------------------------------------|------------------------------------------------------|------------------------------------------------------|------------------------------------------------------|------------------------------------------------------|-------------------------------------------------|---------------------------------------------------|---------------------------------------------------|---------------------------------------------------|
|                                                                | 2.94<br>(1.43 to<br>4.91)                            | 7.14<br>(3.42 to<br>11.40)                           | 7.89<br>(3.89 to<br>12.35)                           | 6.28<br>(2.99 to<br>10.20)                           | 0.11<br>(0.05 to<br>0.18)                       | 0.29<br>(0.14 to<br>0.47)                         | 0.34<br>(0.16 to<br>0.53)                         | 0.24<br>(0.11 to<br>0.39)                         |
| Interstitial lung disease and pulmonary sarcoidosis            |                                                      |                                                      |                                                      |                                                      |                                                 |                                                   |                                                   |                                                   |
|                                                                | 9.45<br>(5.00 to<br>17.52)                           | 13.41<br>(7.82 to<br>21.24)                          | 11.64<br>(7.07 to<br>17.68)                          | 15.68<br>(8.72 to<br>25.65)                          | 0.19<br>(0.11 to<br>0.31)                       | 0.33<br>(0.20 to<br>0.49)                         | 0.30<br>(0.19 to<br>0.44)                         | 0.36<br>(0.21 to<br>0.54)                         |
| Other chronic respiratory diseases                             |                                                      |                                                      |                                                      |                                                      |                                                 |                                                   |                                                   |                                                   |
| <b>Cirrhosis and other chronic liver diseases</b>              | <b>214.83</b><br><b>(137.27 to</b><br><b>305.62)</b> | <b>418.13</b><br><b>(259.56 to</b><br><b>606.50)</b> | <b>386.84</b><br><b>(237.14 to</b><br><b>559.50)</b> | <b>505.18</b><br><b>(314.58 to</b><br><b>731.34)</b> | <b>6.68</b><br><b>(4.40 to</b><br><b>9.45)</b>  | <b>13.42</b><br><b>(8.72 to</b><br><b>19.11)</b>  | <b>12.77</b><br><b>(8.24 to</b><br><b>18.10)</b>  | <b>15.77</b><br><b>(10.36 to</b><br><b>22.19)</b> |
| Cirrhosis and other chronic liver diseases due to hepatitis B  | 59.02<br>(35.12 to<br>89.49)                         | 129.88<br>(73.74 to<br>203.49)                       | 123.31<br>(69.97 to<br>189.61)                       | 136.85<br>(77.82 to<br>210.44)                       | 1.92<br>(1.16 to<br>2.85)                       | 4.21<br>(2.51 to<br>6.41)                         | 4.09<br>(2.44 to<br>6.22)                         | 4.33<br>(2.56 to<br>6.59)                         |
| Cirrhosis and other chronic liver diseases due to hepatitis C  | 41.61<br>(20.90 to<br>74.06)                         | 91.73<br>(45.74 to<br>160.90)                        | 86.81<br>(43.42 to<br>154.27)                        | 97.23<br>(47.91 to<br>172.54)                        | 1.38<br>(0.71 to<br>2.35)                       | 3.05<br>(1.61 to<br>5.17)                         | 2.95<br>(1.57 to<br>5.03)                         | 3.15<br>(1.64 to<br>5.40)                         |
| Cirrhosis and other chronic liver diseases due to alcohol use  | 60.31<br>(36.31 to<br>90.95)                         | 107.06<br>(62.57 to<br>165.32)                       | 95.73<br>(56.58 to<br>147.38)                        | 171.12<br>(102.39 to<br>259.14)                      | 2.07<br>(1.31 to<br>3.06)                       | 3.73<br>(2.29 to<br>5.51)                         | 3.43<br>(2.09 to<br>5.03)                         | 5.71<br>(3.56 to<br>8.27)                         |
| Cirrhosis and other chronic liver diseases due to other causes | 53.89<br>(37.26 to<br>74.78)                         | 89.46<br>(58.12 to<br>129.12)                        | 80.98<br>(52.34 to<br>116.54)                        | 99.98<br>(64.44 to<br>143.91)                        | 1.31<br>(0.90 to<br>1.78)                       | 2.43<br>(1.63 to<br>3.42)                         | 2.30<br>(1.53 to<br>3.23)                         | 2.58<br>(1.74 to<br>3.60)                         |
| <b>Digestive diseases</b>                                      | <b>305.42</b><br><b>(247.38 to</b><br><b>401.53)</b> | <b>413.37</b><br><b>(329.14 to</b><br><b>514.91)</b> | <b>368.44</b><br><b>(294.27 to</b><br><b>461.81)</b> | <b>482.10</b><br><b>(378.52 to</b><br><b>615.56)</b> | <b>9.05</b><br><b>(7.62 to</b><br><b>10.56)</b> | <b>14.37</b><br><b>(12.07 to</b><br><b>16.80)</b> | <b>13.62</b><br><b>(11.52 to</b><br><b>16.09)</b> | <b>15.58</b><br><b>(12.99 to</b><br><b>18.44)</b> |
| Peptic ulcer disease                                           | 40.97<br>(31.18 to<br>55.05)                         | 37.99<br>(27.62 to<br>53.36)                         | 30.27<br>(21.82 to<br>42.93)                         | 48.55<br>(35.62 to<br>67.23)                         | 1.62<br>(1.20 to<br>2.14)                       | 1.66<br>(1.20 to<br>2.22)                         | 1.39<br>(0.99 to<br>1.89)                         | 1.99<br>(1.45 to<br>2.69)                         |
| <b>Tanzania</b>                                                |                                                      |                                                      |                                                      |                                                      |                                                 |                                                   |                                                   |                                                   |
| Cause                                                          | YLLs (in 1000s)                                      |                                                      |                                                      |                                                      | Deaths (in 1000s)                               |                                                   |                                                   |                                                   |
|                                                                | 2016                                                 | 2040 Forecast                                        | 2040 Better Scenario                                 | 2040 Worse Scenario                                  | 2016                                            | 2040 Forecast                                     | 2040 Better Scenario                              | 2040 Worse Scenario                               |
| Gastritis and duodenitis                                       | 12.69<br>(8.44 to<br>18.14)                          | 23.13<br>(14.81 to<br>33.66)                         | 21.35<br>(13.71 to<br>31.62)                         | 25.31<br>(16.52 to<br>36.38)                         | 0.46<br>(0.30 to<br>0.67)                       | 0.92<br>(0.60 to<br>1.32)                         | 0.89<br>(0.59 to<br>1.30)                         | 0.94<br>(0.63 to<br>1.36)                         |
| Appendicitis                                                   | 20.05<br>(14.03 to<br>31.33)                         | 20.56<br>(14.62 to<br>28.28)                         | 16.77<br>(12.17 to<br>22.71)                         | 26.08<br>(18.55 to<br>37.63)                         | 0.42<br>(0.31 to<br>0.58)                       | 0.53<br>(0.40 to<br>0.68)                         | 0.46<br>(0.34 to<br>0.59)                         | 0.63<br>(0.47 to<br>0.83)                         |
| Paralytic ileus and intestinal obstruction                     | 155.81<br>(116.46 to<br>230.69)                      | 218.46<br>(172.59 to<br>277.29)                      | 200.32<br>(158.40 to<br>256.28)                      | 242.45<br>(189.73 to<br>313.15)                      | 3.97<br>(3.23 to<br>4.99)                       | 6.93<br>(5.64 to<br>8.63)                         | 6.83<br>(5.54 to<br>8.57)                         | 7.07<br>(5.82 to<br>8.90)                         |
| Inguinal, femoral, and abdominal hernia                        | 10.44<br>(3.80 to<br>16.54)                          | 11.88<br>(4.44 to<br>18.81)                          | 10.36<br>(3.94 to<br>16.49)                          | 13.90<br>(5.13 to<br>22.21)                          | 0.31<br>(0.12 to<br>0.47)                       | 0.38<br>(0.15 to<br>0.57)                         | 0.34<br>(0.14 to<br>0.53)                         | 0.42<br>(0.16 to<br>0.64)                         |
| Inflammatory bowel disease                                     | 11.81<br>(5.83 to<br>17.91)                          | 18.27<br>(9.53 to<br>24.88)                          | 17.82<br>(9.56 to<br>24.10)                          | 18.78<br>(9.63 to<br>26.11)                          | 0.33<br>(0.18 to<br>0.44)                       | 0.62<br>(0.35 to<br>0.80)                         | 0.64<br>(0.36 to<br>0.84)                         | 0.59<br>(0.33 to<br>0.76)                         |
| Vascular intestinal disorders                                  | 5.08<br>(3.63 to<br>6.61)                            | 9.43<br>(6.77 to<br>12.18)                           | 9.19<br>(6.60 to<br>11.97)                           | 9.66<br>(7.03 to<br>12.49)                           | 0.24<br>(0.17 to<br>0.31)                       | 0.49<br>(0.35 to<br>0.62)                         | 0.50<br>(0.36 to<br>0.63)                         | 0.47<br>(0.33 to<br>0.60)                         |
| Gallbladder and biliary diseases                               | 13.17<br>(9.91 to<br>16.94)                          | 20.64<br>(12.98 to<br>32.55)                         | 16.01<br>(10.54 to<br>24.38)                         | 27.48<br>(16.46 to<br>44.69)                         | 0.56<br>(0.42 to<br>0.74)                       | 0.94<br>(0.60 to<br>1.48)                         | 0.78<br>(0.52 to<br>1.16)                         | 1.17<br>(0.72 to<br>1.86)                         |
| Pancreatitis                                                   | 10.21<br>(7.18 to<br>14.87)                          | 18.81<br>(6.98 to<br>43.39)                          | 16.37<br>(6.22 to<br>37.49)                          | 29.96<br>(9.26 to<br>72.96)                          | 0.29<br>(0.21 to<br>0.43)                       | 0.56<br>(0.23 to<br>1.22)                         | 0.51<br>(0.22 to<br>1.10)                         | 0.86<br>(0.29 to<br>2.06)                         |
| Other digestive diseases                                       | 25.19<br>(17.77 to<br>37.05)                         | 34.20<br>(24.78 to<br>45.57)                         | 29.96<br>(21.56 to<br>39.76)                         | 39.92<br>(28.54 to<br>53.76)                         | 0.83<br>(0.60 to<br>1.13)                       | 1.35<br>(0.99 to<br>1.76)                         | 1.27<br>(0.93 to<br>1.66)                         | 1.46<br>(1.07 to<br>1.90)                         |
| <b>Neurological disorders</b>                                  | <b>140.84</b><br><b>(120.05 to</b><br><b>163.91)</b> | <b>259.24</b><br><b>(213.51 to</b><br><b>318.46)</b> | <b>252.76</b><br><b>(210.40 to</b><br><b>306.67)</b> | <b>288.53</b><br><b>(229.98 to</b><br><b>367.29)</b> | <b>6.57</b><br><b>(5.54 to</b><br><b>7.81)</b>  | <b>15.17</b><br><b>(12.06 to</b><br><b>19.14)</b> | <b>16.71</b><br><b>(13.68 to</b><br><b>20.55)</b> | <b>13.92</b><br><b>(10.67 to</b><br><b>18.14)</b> |
| Alzheimer's disease and other dementias                        | 52.83<br>(41.73 to<br>66.54)                         | 124.09<br>(94.64 to<br>164.98)                       | 132.83<br>(104.03 to<br>169.45)                      | 112.73<br>(81.47 to<br>155.53)                       | 4.73<br>(3.81 to<br>5.91)                       | 11.73<br>(8.63 to<br>15.71)                       | 13.26<br>(10.27 to<br>17.06)                      | 9.99<br>(6.84 to<br>14.16)                        |

|                                                            |                                        |                                          |                                        |                                            |                                     |                                     |                                     |                                     |
|------------------------------------------------------------|----------------------------------------|------------------------------------------|----------------------------------------|--------------------------------------------|-------------------------------------|-------------------------------------|-------------------------------------|-------------------------------------|
| Parkinson's disease                                        | 4.42<br>(3.35 to<br>5.75)              | 12.37<br>(9.49 to<br>15.76)              | 15.11<br>(11.65 to<br>19.04)           | 9.72<br>(7.31 to<br>12.55)                 | 0.35<br>(0.27 to<br>0.46)           | 1.00<br>(0.74 to<br>1.30)           | 1.27<br>(0.97 to<br>1.63)           | 0.75<br>(0.54 to<br>1.01)           |
| Epilepsy                                                   | 64.98<br>(53.78 to<br>78.34)           | 91.31<br>(60.88 to<br>129.29)            | 74.15<br>(48.63 to<br>107.10)          | 133.60<br>(86.54 to<br>199.84)             | 1.16<br>(0.97 to<br>1.39)           | 1.77<br>(1.20 to<br>2.48)           | 1.49<br>(1.01 to<br>2.10)           | 2.53<br>(1.65 to<br>3.69)           |
| Multiple sclerosis                                         | 0.87<br>(0.59 to<br>1.27)              | 1.98<br>(1.36 to<br>2.99)                | 2.04<br>(1.36 to<br>3.10)              | 1.89<br>(1.26 to<br>2.84)                  | 0.02<br>(0.02 to<br>0.03)           | 0.06<br>(0.04 to<br>0.08)           | 0.06<br>(0.04 to<br>0.09)           | 0.05<br>(0.03 to<br>0.08)           |
| Motor neuron disease                                       | 1.06<br>(0.75 to<br>1.65)              | 1.87<br>(1.33 to<br>3.19)                | 1.92<br>(1.35 to<br>3.30)              | 1.83<br>(1.29 to<br>3.14)                  | 0.02<br>(0.02 to<br>0.04)           | 0.05<br>(0.04 to<br>0.10)           | 0.06<br>(0.04 to<br>0.11)           | 0.05<br>(0.04 to<br>0.09)           |
| Other neurological disorders                               | 16.68<br>(12.96 to<br>21.31)           | 27.62<br>(21.36 to<br>34.80)             | 26.71<br>(20.24 to<br>34.26)           | 28.76<br>(22.48 to<br>36.06)               | 0.28<br>(0.23 to<br>0.34)           | 0.55<br>(0.41 to<br>0.69)           | 0.57<br>(0.40 to<br>0.72)           | 0.54<br>(0.41 to<br>0.67)           |
| <b>Mental disorders</b>                                    | <b>23.83</b><br>(17.69 to<br>30.73)    | <b>44.26</b><br>(32.24 to<br>58.01)      | <b>43.49</b><br>(31.60 to<br>57.35)    | <b>48.94</b><br>(35.44 to<br>64.14)        | <b>0.70</b><br>(0.54 to<br>0.89)    | <b>1.30</b><br>(1.00 to<br>1.66)    | <b>1.31</b><br>(1.02 to<br>1.68)    | <b>1.42</b><br>(1.09 to<br>1.79)    |
| Alcohol use disorders                                      | 19.46<br>(14.14 to<br>25.37)           | 31.48<br>(21.99 to<br>42.37)             | 30.72<br>(21.41 to<br>41.60)           | 36.20<br>(25.67 to<br>47.96)               | 0.61<br>(0.46 to<br>0.77)           | 1.02<br>(0.77 to<br>1.33)           | 1.02<br>(0.77 to<br>1.34)           | 1.14<br>(0.86 to<br>1.46)           |
| Drug use disorders                                         | 4.24<br>(2.78 to<br>6.13)              | 12.51<br>(7.97 to<br>18.42)              | 12.51<br>(7.99 to<br>18.35)            | 12.47<br>(7.96 to<br>18.33)                | 0.09<br>(0.06 to<br>0.13)           | 0.28<br>(0.19 to<br>0.39)           | 0.28<br>(0.19 to<br>0.40)           | 0.27<br>(0.18 to<br>0.39)           |
| Opioid use disorders                                       | 3.29<br>(2.20 to<br>4.61)              | 9.22<br>(5.97 to<br>13.20)               | 9.19<br>(5.92 to<br>13.26)             | 9.21<br>(5.96 to<br>13.14)                 | 0.07<br>(0.05 to<br>0.10)           | 0.20<br>(0.13 to<br>0.28)           | 0.20<br>(0.13 to<br>0.28)           | 0.19<br>(0.13 to<br>0.28)           |
| Cocaine use disorders                                      | 0.19<br>(0.05 to<br>0.40)              | 0.61<br>(0.17 to<br>1.28)                | 0.57<br>(0.16 to<br>1.22)              | 0.65<br>(0.18 to<br>1.37)                  | 0.00<br>(0.00 to<br>0.01)           | 0.01<br>(0.00 to<br>0.03)           | 0.01<br>(0.00 to<br>0.03)           | 0.01<br>(0.00 to<br>0.03)           |
| Amphetamine use disorders                                  | 0.11<br>(0.03 to<br>0.23)              | 0.47<br>(0.14 to<br>1.02)                | 0.42<br>(0.13 to<br>0.93)              | 0.53<br>(0.16 to<br>1.15)                  | 0.00<br>(0.00 to<br>0.00)           | 0.01<br>(0.00 to<br>0.02)           | 0.01<br>(0.00 to<br>0.02)           | 0.01<br>(0.00 to<br>0.02)           |
| Other drug use disorders                                   | 0.65<br>(0.38 to<br>1.08)              | 2.21<br>(1.23 to<br>3.72)                | 2.32<br>(1.27 to<br>3.94)              | 2.08<br>(1.14 to<br>3.52)                  | 0.02<br>(0.01 to<br>0.03)           | 0.06<br>(0.04 to<br>0.09)           | 0.06<br>(0.04 to<br>0.10)           | 0.05<br>(0.03 to<br>0.08)           |
| Eating disorders                                           | 0.12<br>(0.08 to<br>0.23)              | 0.27<br>(0.16 to<br>0.47)                | 0.26<br>(0.16 to<br>0.48)              | 0.27<br>(0.16 to<br>0.46)                  | 0.00<br>(0.00 to<br>0.00)           | 0.00<br>(0.00 to<br>0.01)           | 0.00<br>(0.00 to<br>0.01)           | 0.00<br>(0.00 to<br>0.01)           |
| <b>Tanzania</b>                                            |                                        |                                          |                                        |                                            |                                     |                                     |                                     |                                     |
| Cause                                                      | YLLs (in 1000s)                        |                                          |                                        |                                            | Deaths (in 1000s)                   |                                     |                                     |                                     |
|                                                            | 2016                                   | 2040 Forecast                            | 2040 Better Scenario                   | 2040 Worse Scenario                        | 2016                                | 2040 Forecast                       | 2040 Better Scenario                | 2040 Worse Scenario                 |
| <b>Diabetes, urogenital, blood, and endocrine diseases</b> | <b>464.62</b><br>(390.04 to<br>556.34) | <b>773.33</b><br>(586.08 to<br>1,005.39) | <b>616.53</b><br>(472.49 to<br>799.31) | <b>1,011.47</b><br>(768.13 to<br>1,323.48) | <b>14.19</b><br>(12.12 to<br>16.32) | <b>29.64</b><br>(23.21 to<br>39.12) | <b>24.73</b><br>(19.25 to<br>32.19) | <b>36.87</b><br>(28.67 to<br>49.72) |
| Diabetes mellitus                                          | 167.36<br>(139.53 to<br>197.10)        | 367.03<br>(236.82 to<br>547.57)          | 284.41<br>(184.40 to<br>417.95)        | 502.91<br>(314.69 to<br>761.33)            | 7.24<br>(6.05 to<br>8.47)           | 16.70<br>(11.63 to<br>23.56)        | 13.69<br>(9.59 to<br>19.12)         | 21.56<br>(14.40 to<br>31.37)        |
| Acute glomerulonephritis                                   | 0.82<br>(0.58 to<br>1.35)              | 1.23<br>(0.86 to<br>1.94)                | 1.01<br>(0.71 to<br>1.54)              | 1.54<br>(1.07 to<br>2.44)                  | 0.01<br>(0.01 to<br>0.02)           | 0.02<br>(0.01 to<br>0.03)           | 0.02<br>(0.01 to<br>0.03)           | 0.03<br>(0.02 to<br>0.04)           |
| Chronic kidney disease                                     | 85.59<br>(71.33 to<br>101.90)          | 161.28<br>(107.53 to<br>307.37)          | 122.50<br>(82.61 to<br>223.00)         | 213.10<br>(140.38 to<br>392.09)            | 2.73<br>(2.26 to<br>3.27)           | 6.45<br>(3.90 to<br>16.03)          | 5.05<br>(3.16 to<br>11.93)          | 8.10<br>(4.84 to<br>19.27)          |
| Chronic kidney disease due to diabetes mellitus            | 19.20<br>(15.09 to<br>24.07)           | 47.23<br>(28.65 to<br>99.86)             | 36.27<br>(22.89 to<br>73.10)           | 60.79<br>(36.09 to<br>122.68)              | 0.76<br>(0.60 to<br>0.96)           | 2.11<br>(1.19 to<br>5.52)           | 1.66<br>(0.98 to<br>4.15)           | 2.63<br>(1.43 to<br>6.49)           |
| Chronic kidney disease due to hypertension                 | 10.50<br>(8.25 to<br>13.24)            | 24.92<br>(14.07 to<br>61.57)             | 19.26<br>(11.33 to<br>46.85)           | 31.68<br>(17.60 to<br>74.31)               | 0.55<br>(0.44 to<br>0.69)           | 1.48<br>(0.80 to<br>4.11)           | 1.19<br>(0.67 to<br>3.13)           | 1.79<br>(0.92 to<br>4.92)           |
| Chronic kidney disease due to glomerulonephritis           | 26.44<br>(21.57 to<br>32.71)           | 41.27<br>(28.35 to<br>63.77)             | 30.98<br>(21.21 to<br>47.30)           | 56.11<br>(38.14 to<br>86.93)               | 0.64<br>(0.52 to<br>0.78)           | 1.24<br>(0.78 to<br>2.65)           | 0.95<br>(0.61 to<br>2.07)           | 1.62<br>(1.00 to<br>3.37)           |

|                                                            |                             |                             |                            |                              |                        |                        |                        |                        |
|------------------------------------------------------------|-----------------------------|-----------------------------|----------------------------|------------------------------|------------------------|------------------------|------------------------|------------------------|
| Chronic kidney disease due to other and unspecified causes | 29.45<br>(23.80 to 36.05)   | 47.86<br>(32.29 to 81.42)   | 35.99<br>(24.17 to 57.55)  | 64.51<br>(43.22 to 104.72)   | 0.78<br>(0.62 to 0.97) | 1.62<br>(0.99 to 3.61) | 1.26<br>(0.79 to 2.71) | 2.07<br>(1.27 to 4.50) |
| Urinary diseases and male infertility                      | 45.15<br>(37.41 to 54.22)   | 83.98<br>(66.88 to 102.60)  | 77.13<br>(61.79 to 95.17)  | 93.04<br>(74.61 to 113.64)   | 1.30<br>(1.09 to 1.55) | 2.68<br>(2.28 to 3.11) | 2.61<br>(2.22 to 3.04) | 3.80<br>(2.36 to 3.23) |
| Urinary tract infections                                   | 22.83<br>(16.16 to 30.02)   | 50.68<br>(36.89 to 66.02)   | 48.36<br>(35.09 to 62.84)  | 53.56<br>(38.68 to 69.91)    | 0.65<br>(0.46 to 0.87) | 1.65<br>(1.24 to 2.11) | 1.67<br>(1.26 to 2.14) | 1.64<br>(1.21 to 2.11) |
| Urolithiasis                                               | 1.35<br>(0.82 to 1.98)      | 3.16<br>(1.89 to 4.86)      | 2.87<br>(1.72 to 4.48)     | 3.54<br>(2.11 to 5.53)       | 0.03<br>(0.02 to 0.05) | 0.07<br>(0.04 to 0.12) | 0.07<br>(0.04 to 0.12) | 0.08<br>(0.05 to 0.13) |
| Other urinary diseases                                     | 20.97<br>(14.42 to 28.70)   | 30.14<br>(18.09 to 45.04)   | 25.90<br>(15.16 to 39.17)  | 35.94<br>(21.68 to 52.89)    | 0.62<br>(0.42 to 0.85) | 0.96<br>(0.59 to 1.39) | 0.87<br>(0.52 to 1.28) | 1.08<br>(0.67 to 1.55) |
| Gynecological diseases                                     | 4.97<br>(3.33 to 7.05)      | 7.24<br>(4.52 to 11.09)     | 6.01<br>(3.79 to 9.22)     | 9.00<br>(5.60 to 14.00)      | 0.12<br>(0.08 to 0.17) | 0.17<br>(0.11 to 0.26) | 0.14<br>(0.09 to 0.22) | 0.21<br>(0.13 to 0.33) |
| Uterine fibroids                                           | 1.65<br>(0.77 to 2.98)      | 2.14<br>(0.80 to 4.22)      | 1.73<br>(0.63 to 3.52)     | 2.74<br>(1.03 to 5.50)       | 0.04<br>(0.02 to 0.08) | 0.06<br>(0.02 to 0.11) | 0.05<br>(0.02 to 0.09) | 0.07<br>(0.03 to 0.14) |
| Polycystic ovarian syndrome                                | 0.45<br>(0.10 to 0.93)      | 0.40<br>(0.07 to 0.87)      | 0.29<br>(0.05 to 0.65)     | 0.58<br>(0.10 to 1.27)       | 0.01<br>(0.00 to 0.02) | 0.01<br>(0.00 to 0.02) | 0.01<br>(0.00 to 0.02) | 0.01<br>(0.00 to 0.03) |
| Endometriosis                                              | 0.02<br>(0.01 to 0.06)      | 0.04<br>(0.01 to 0.14)      | 0.04<br>(0.01 to 0.12)     | 0.06<br>(0.01 to 0.19)       | 0.00<br>(0.00 to 0.00) | 0.00<br>(0.00 to 0.00) | 0.00<br>(0.00 to 0.00) | 0.00<br>(0.00 to 0.00) |
| Genital prolapse                                           | 0.12<br>(0.04 to 0.30)      | 0.13<br>(0.04 to 0.34)      | 0.10<br>(0.03 to 0.27)     | 0.17<br>(0.05 to 0.45)       | 0.00<br>(0.00 to 0.01) | 0.00<br>(0.00 to 0.01) | 0.00<br>(0.00 to 0.01) | 0.01<br>(0.00 to 0.01) |
| Other gynecological diseases                               | 2.73<br>(1.52 to 4.28)      | 4.53<br>(2.15 to 7.57)      | 3.85<br>(1.86 to 6.20)     | 5.46<br>(2.49 to 9.03)       | 0.06<br>(0.03 to 0.09) | 0.10<br>(0.05 to 0.17) | 0.09<br>(0.04 to 0.14) | 0.12<br>(0.05 to 0.20) |
| Hemoglobinopathies and hemolytic anemias                   | 132.92<br>(92.43 to 208.65) | 116.53<br>(83.75 to 168.32) | 94.39<br>(68.96 to 129.95) | 148.76<br>(107.05 to 222.30) | 2.15<br>(1.59 to 3.02) | 2.53<br>(1.93 to 3.19) | 2.18<br>(1.68 to 2.72) | 3.01<br>(2.28 to 3.95) |
| Thalassemias                                               | 0.32<br>(0.09 to 0.98)      | 0.20<br>(0.06 to 0.59)      | 0.18<br>(0.05 to 0.53)     | 0.22<br>(0.06 to 0.68)       | 0.00<br>(0.00 to 0.01) | 0.00<br>(0.00 to 0.01) | 0.00<br>(0.00 to 0.01) | 0.00<br>(0.00 to 0.01) |
| Sickle cell disorders                                      | 118.22<br>(80.47 to 190.51) | 90.92<br>(63.54 to 140.39)  | 72.05<br>(51.61 to 106.16) | 118.77<br>(81.33 to 191.26)  | 1.54<br>(1.08 to 2.40) | 1.39<br>(0.98 to 2.02) | 1.14<br>(0.80 to 1.57) | 1.75<br>(1.24 to 2.62) |
| G6PD deficiency                                            | 8.52<br>(6.28 to 10.87)     | 17.93<br>(13.07 to 23.01)   | 15.25<br>(11.13 to 19.80)  | 21.60<br>(15.87 to 27.77)    | 0.24<br>(0.18 to 0.30) | 0.62<br>(0.47 to 0.79) | 0.54<br>(0.41 to 0.69) | 0.73<br>(0.54 to 0.92) |
| Other hemoglobinopathies and hemolytic anemias             | 5.86<br>(4.46 to 7.08)      | 7.48<br>(5.82 to 9.23)      | 6.92<br>(5.40 to 8.57)     | 8.17<br>(6.26 to 10.08)      | 0.36<br>(0.27 to 0.43) | 0.51<br>(0.39 to 0.64) | 0.50<br>(0.39 to 0.61) | 0.53<br>(0.40 to 0.67) |
| Endocrine, metabolic, blood, and immune disorders          | 27.82<br>(19.91 to 40.35)   | 36.04<br>(26.63 to 48.14)   | 31.08<br>(23.04 to 40.81)  | 43.11<br>(31.66 to 58.36)    | 0.64<br>(0.49 to 0.81) | 1.09<br>(0.84 to 1.36) | 1.04<br>(0.81 to 1.31) | 1.16<br>(0.90 to 1.45) |

**Tanzania**

| Cause                           | YLLs (in 1000s)          |                           |                           |                           | Deaths (in 1000s)      |                        |                        |                        |
|---------------------------------|--------------------------|---------------------------|---------------------------|---------------------------|------------------------|------------------------|------------------------|------------------------|
|                                 | 2016                     | 2040 Forecast             | 2040 Better Scenario      | 2040 Worse Scenario       | 2016                   | 2040 Forecast          | 2040 Better Scenario   | 2040 Worse Scenario    |
| Musculoskeletal disorders       | 12.60<br>(9.07 to 15.85) | 28.44<br>(20.43 to 36.43) | 28.88<br>(20.76 to 37.21) | 27.91<br>(20.01 to 35.66) | 0.32<br>(0.23 to 0.41) | 0.81<br>(0.60 to 1.05) | 0.85<br>(0.62 to 1.09) | 0.78<br>(0.57 to 1.01) |
| Rheumatoid arthritis            | 2.36<br>(1.58 to 3.25)   | 5.25<br>(3.60 to 7.29)    | 4.66<br>(3.21 to 6.63)    | 5.98<br>(4.14 to 8.34)    | 0.10<br>(0.06 to 0.13) | 0.24<br>(0.16 to 0.34) | 0.22<br>(0.15 to 0.32) | 0.26<br>(0.17 to 0.36) |
| Other musculoskeletal disorders | 10.24<br>(7.39 to 13.06) | 23.18<br>(16.36 to 30.17) | 24.22<br>(17.17 to 31.43) | 21.94<br>(15.23 to 28.53) | 0.23<br>(0.16 to 0.29) | 0.57<br>(0.40 to 0.75) | 0.62<br>(0.44 to 0.81) | 0.52<br>(0.37 to 0.67) |

|                                               |                                              |                                              |                                              |                                              |                                     |                                     |                                     |                                     |
|-----------------------------------------------|----------------------------------------------|----------------------------------------------|----------------------------------------------|----------------------------------------------|-------------------------------------|-------------------------------------|-------------------------------------|-------------------------------------|
|                                               | 453.76<br>(342.69 to<br>594.99)              | 505.45<br>(383.39 to<br>682.15)              | 389.45<br>(294.40 to<br>532.07)              | 686.71<br>(515.86 to<br>926.35)              | 6.19<br>(4.82 to<br>8.18)           | 9.30<br>(7.10 to<br>12.94)          | 8.10<br>(6.13 to<br>11.59)          | 11.25<br>(8.58 to<br>15.33)         |
| <b>Other non-communicable diseases</b>        |                                              |                                              |                                              |                                              |                                     |                                     |                                     |                                     |
| Congenital birth defects                      | 314.93<br>(229.02 to<br>430.97)              | 284.74<br>(199.80 to<br>406.57)              | 198.29<br>(140.85 to<br>282.37)              | 422.09<br>(299.77 to<br>609.52)              | 3.72<br>(2.71 to<br>5.07)           | 3.45<br>(2.44 to<br>4.91)           | 2.43<br>(1.75 to<br>3.48)           | 5.06<br>(3.59 to<br>7.30)           |
| Neural tube defects                           | 49.94<br>(23.41 to<br>100.80)                | 18.68<br>(7.94 to<br>43.75)                  | 11.43<br>(4.81 to<br>27.36)                  | 31.99<br>(13.70 to<br>73.87)                 | 0.58<br>(0.27 to<br>1.17)           | 0.22<br>(0.10 to<br>0.52)           | 0.14<br>(0.06 to<br>0.32)           | 0.38<br>(0.16 to<br>0.86)           |
| Congenital heart anomalies                    | 98.93<br>(61.09 to<br>155.19)                | 94.75<br>(58.09 to<br>149.44)                | 67.55<br>(42.23 to<br>108.59)                | 136.87<br>(82.81 to<br>215.00)               | 1.18<br>(0.74 to<br>1.86)           | 1.18<br>(0.74 to<br>1.86)           | 0.85<br>(0.55 to<br>1.37)           | 1.68<br>(1.03 to<br>2.64)           |
| Orofacial clefts                              | 3.06<br>(0.55 to<br>9.63)                    | 2.10<br>(0.35 to<br>6.73)                    | 1.24<br>(0.21 to<br>3.80)                    | 3.76<br>(0.62 to<br>11.73)                   | 0.04<br>(0.01 to<br>0.11)           | 0.02<br>(0.00 to<br>0.08)           | 0.01<br>(0.00 to<br>0.04)           | 0.04<br>(0.01 to<br>0.10)           |
| Down syndrome                                 | 4.86<br>(2.80 to<br>8.58)                    | 5.22<br>(2.97 to<br>9.55)                    | 3.71<br>(2.15 to<br>6.87)                    | 7.64<br>(4.32 to<br>13.92)                   | 0.06<br>(0.04 to<br>0.11)           | 0.07<br>(0.04 to<br>0.15)           | 0.05<br>(0.03 to<br>0.09)           | 0.10<br>(0.06 to<br>0.18)           |
| Other chromosomal abnormalities               | 13.97<br>(4.58 to<br>27.90)                  | 19.60<br>(6.20 to<br>41.31)                  | 13.04<br>(4.02 to<br>27.18)                  | 30.36<br>(9.45 to<br>64.95)                  | 0.16<br>(0.05 to<br>0.32)           | 0.23<br>(0.07 to<br>0.48)           | 0.15<br>(0.05 to<br>0.32)           | 0.36<br>(0.11 to<br>0.76)           |
| Congenital musculoskeletal and limb anomalies | 4.07<br>(2.19 to<br>8.61)                    | 4.55<br>(2.32 to<br>9.21)                    | 3.26<br>(1.67 to<br>6.55)                    | 6.47<br>(3.29 to<br>13.24)                   | 0.05<br>(0.03 to<br>0.10)           | 0.05<br>(0.03 to<br>0.11)           | 0.04<br>(0.02 to<br>0.08)           | 0.08<br>(0.04 to<br>0.16)           |
| Urogenital congenital anomalies               | 7.04<br>(4.17 to<br>11.59)                   | 6.57<br>(3.76 to<br>11.41)                   | 4.80<br>(2.80 to<br>8.41)                    | 9.32<br>(5.29 to<br>15.70)                   | 0.08<br>(0.05 to<br>0.14)           | 0.08<br>(0.05 to<br>0.14)           | 0.06<br>(0.04 to<br>0.11)           | 0.12<br>(0.07 to<br>0.19)           |
| Digestive congenital anomalies                | 27.67<br>(14.03 to<br>48.38)                 | 28.42<br>(13.75 to<br>52.54)                 | 19.17<br>(9.24 to<br>35.08)                  | 43.27<br>(20.76 to<br>79.38)                 | 0.32<br>(0.16 to<br>0.56)           | 0.33<br>(0.16 to<br>0.61)           | 0.22<br>(0.11 to<br>0.41)           | 0.50<br>(0.24 to<br>0.92)           |
| Other congenital birth defects                | 105.40<br>(63.23 to<br>156.90)               | 104.84<br>(65.18 to<br>159.92)               | 74.10<br>(46.41 to<br>113.45)                | 152.41<br>(92.76 to<br>236.27)               | 1.24<br>(0.75 to<br>1.84)           | 1.26<br>(0.79 to<br>1.91)           | 0.89<br>(0.57 to<br>1.36)           | 1.81<br>(1.12 to<br>2.78)           |
| Skin and subcutaneous diseases                | 74.20<br>(47.18 to<br>125.01)                | 178.26<br>(120.97 to<br>287.40)              | 161.58<br>(110.51 to<br>259.48)              | 202.17<br>(133.77 to<br>330.25)              | 1.72<br>(1.17 to<br>2.89)           | 5.36<br>(3.74 to<br>8.83)           | 5.33<br>(3.74 to<br>8.76)           | 5.46<br>(3.74 to<br>9.01)           |
| Cellulitis                                    | 5.90<br>(2.67 to<br>10.71)                   | 21.65<br>(10.28 to<br>35.75)                 | 22.01<br>(10.90 to<br>36.57)                 | 21.44<br>(10.10 to<br>37.05)                 | 0.14<br>(0.07 to<br>0.24)           | 0.64<br>(0.31 to<br>1.04)           | 0.69<br>(0.33 to<br>1.14)           | 0.59<br>(0.28 to<br>0.97)           |
| Pyoderma                                      | 60.04<br>(37.42 to<br>105.08)                | 136.90<br>(90.34 to<br>230.37)               | 120.04<br>(80.40 to<br>200.79)               | 160.73<br>(103.74 to<br>272.36)              | 1.29<br>(0.86 to<br>2.21)           | 3.95<br>(2.71 to<br>6.73)           | 3.80<br>(2.60 to<br>6.37)           | 4.17<br>(2.83 to<br>7.02)           |
| Decubitus ulcer                               | 5.32<br>(3.11 to<br>9.73)                    | 13.25<br>(8.12 to<br>24.38)                  | 13.38<br>(8.24 to<br>24.61)                  | 13.16<br>(7.90 to<br>24.23)                  | 0.23<br>(0.14 to<br>0.43)           | 0.63<br>(0.37 to<br>1.18)           | 0.69<br>(0.42 to<br>1.30)           | 0.57<br>(0.33 to<br>1.06)           |
| Other skin and subcutaneous diseases          | 2.93<br>(1.66 to<br>5.22)                    | 6.46<br>(3.81 to<br>11.16)                   | 6.15<br>(3.74 to<br>10.72)                   | 6.85<br>(3.91 to<br>11.99)                   | 0.06<br>(0.03 to<br>0.10)           | 0.14<br>(0.09 to<br>0.24)           | 0.15<br>(0.09 to<br>0.25)           | 0.14<br>(0.08 to<br>0.24)           |
| Sudden infant death syndrome                  | 64.63<br>(32.01 to<br>116.92)                | 42.45<br>(17.88 to<br>81.08)                 | 29.59<br>(12.67 to<br>55.36)                 | 62.45<br>(25.84 to<br>120.17)                | 0.75<br>(0.37 to<br>1.36)           | 0.49<br>(0.21 to<br>0.94)           | 0.34<br>(0.15 to<br>0.64)           | 0.72<br>(0.30 to<br>1.39)           |
| <b>Injuries</b>                               | <b>1,546.33</b><br>(1,323.99 to<br>1,808.79) | <b>2,025.52</b><br>(1,564.64 to<br>2,581.05) | <b>1,783.59</b><br>(1,360.07 to<br>2,296.64) | <b>2,449.64</b><br>(1,866.99 to<br>3,162.37) | <b>30.40</b><br>(26.38 to<br>34.98) | <b>46.42</b><br>(37.48 to<br>57.15) | <b>43.10</b><br>(34.78 to<br>53.34) | <b>53.20</b><br>(41.92 to<br>66.96) |
| <b>Transport injuries</b>                     | <b>352.85</b><br>(294.35 to<br>420.07)       | <b>639.91</b><br>(450.13 to<br>890.14)       | <b>563.00</b><br>(394.27 to<br>781.92)       | <b>764.82</b><br>(527.24 to<br>1,122.74)     | <b>7.09</b><br>(5.94 to<br>8.35)    | <b>13.80</b><br>(10.00 to<br>19.02) | <b>12.63</b><br>(9.18 to<br>17.29)  | <b>15.98</b><br>(11.20 to<br>23.47) |
| Road injuries                                 | 332.56<br>(277.25 to<br>395.91)              | 601.86<br>(420.66 to<br>830.39)              | 530.04<br>(372.40 to<br>734.13)              | 715.95<br>(491.67 to<br>1,041.89)            | 6.74<br>(5.68 to<br>7.96)           | 13.09<br>(9.46 to<br>17.92)         | 12.01<br>(8.72 to<br>16.42)         | 15.09<br>(10.63 to<br>21.84)        |
| Pedestrian road injuries                      | 149.70<br>(117.97 to<br>184.61)              | 232.23<br>(154.34 to<br>335.94)              | 205.59<br>(135.44 to<br>298.60)              | 278.57<br>(179.87 to<br>421.00)              | 3.10<br>(2.46 to<br>3.79)           | 5.31<br>(3.66 to<br>7.53)           | 4.88<br>(3.36 to<br>6.92)           | 6.17<br>(4.13 to<br>9.15)           |
| <b>Tanzania</b>                               |                                              |                                              |                                              |                                              |                                     |                                     |                                     |                                     |
|                                               | <b>YLLs (in 1000s)</b>                       |                                              |                                              |                                              | <b>Deaths (in 1000s)</b>            |                                     |                                     |                                     |

| Cause                                           | 2016                                     | 2040 Forecast                            | 2040 Better Scenario                     | 2040 Worse Scenario                        | 2016                                  | 2040 Forecast                         | 2040 Better Scenario                  | 2040 Worse Scenario                   |
|-------------------------------------------------|------------------------------------------|------------------------------------------|------------------------------------------|--------------------------------------------|---------------------------------------|---------------------------------------|---------------------------------------|---------------------------------------|
| Cyclist road injuries                           | 15.30<br>(11.39 to<br>20.30)             | 30.22<br>(19.88 to<br>44.38)             | 26.88<br>(17.66 to<br>39.43)             | 35.38<br>(22.76 to<br>54.53)               | 0.32<br>(0.24 to<br>0.42)             | 0.66<br>(0.43 to<br>0.95)             | 0.61<br>(0.41 to<br>0.87)             | 0.74<br>(0.48 to<br>1.12)             |
| Motorcyclist road injuries                      | 24.60<br>(19.14 to<br>32.42)             | 52.38<br>(33.78 to<br>80.95)             | 47.47<br>(29.95 to<br>72.83)             | 61.18<br>(38.10 to<br>97.51)               | 0.48<br>(0.38 to<br>0.62)             | 1.07<br>(0.70 to<br>1.61)             | 1.00<br>(0.66 to<br>1.49)             | 1.22<br>(0.77 to<br>1.92)             |
| Motor vehicle road injuries                     | 141.25<br>(112.21 to<br>179.15)          | 283.80<br>(195.07 to<br>408.46)          | 247.28<br>(168.02 to<br>356.18)          | 337.01<br>(224.66 to<br>500.14)            | 2.81<br>(2.27 to<br>3.56)             | 5.99<br>(4.18 to<br>8.41)             | 5.45<br>(3.80 to<br>7.59)             | 6.88<br>(4.62 to<br>10.19)            |
| Other road injuries                             | 1.70<br>(1.12 to<br>2.86)                | 3.23<br>(1.93 to<br>5.12)                | 2.83<br>(1.70 to<br>4.51)                | 3.82<br>(2.25 to<br>6.16)                  | 0.03<br>(0.02 to<br>0.05)             | 0.07<br>(0.04 to<br>0.10)             | 0.06<br>(0.04 to<br>0.10)             | 0.08<br>(0.05 to<br>0.12)             |
| Other transport injuries                        | 20.28<br>(14.65 to<br>26.95)             | 38.05<br>(23.71 to<br>60.62)             | 32.96<br>(20.26 to<br>53.95)             | 48.87<br>(29.89 to<br>80.91)               | 0.35<br>(0.25 to<br>0.47)             | 0.71<br>(0.44 to<br>1.15)             | 0.62<br>(0.38 to<br>1.00)             | 0.89<br>(0.54 to<br>1.48)             |
| <b>Unintentional injuries</b>                   | <b>812.76<br/>(685.09 to<br/>990.23)</b> | <b>796.52<br/>(652.09 to<br/>977.04)</b> | <b>665.56<br/>(542.00 to<br/>805.75)</b> | <b>994.38<br/>(805.13 to<br/>1,217.29)</b> | <b>15.78<br/>(13.65 to<br/>18.31)</b> | <b>20.09<br/>(17.39 to<br/>23.06)</b> | <b>18.43<br/>(15.84 to<br/>21.23)</b> | <b>22.75<br/>(19.56 to<br/>26.38)</b> |
| Falls                                           | 130.36<br>(102.08 to<br>171.09)          | 176.81<br>(143.90 to<br>214.05)          | 163.58<br>(133.52 to<br>197.27)          | 194.42<br>(156.83 to<br>237.58)            | 3.94<br>(3.24 to<br>4.71)             | 7.02<br>(5.81 to<br>8.20)             | 7.14<br>(5.95 to<br>8.30)             | 6.91<br>(5.70 to<br>8.15)             |
| Drowning                                        | 148.99<br>(118.58 to<br>192.16)          | 127.96<br>(95.06 to<br>168.84)           | 105.62<br>(77.17 to<br>140.11)           | 163.74<br>(119.41 to<br>222.40)            | 2.49<br>(2.04 to<br>3.06)             | 2.21<br>(1.96 to<br>3.26)             | 2.21<br>(1.70 to<br>2.83)             | 3.09<br>(2.36 to<br>4.07)             |
| Fire, heat, and hot substances                  | 117.40<br>(88.00 to<br>167.15)           | 86.56<br>(63.55 to<br>116.66)            | 69.29<br>(51.46 to<br>91.66)             | 115.44<br>(84.38 to<br>160.19)             | 2.26<br>(1.82 to<br>2.87)             | 2.16<br>(1.72 to<br>2.72)             | 1.88<br>(1.48 to<br>2.36)             | 2.65<br>(2.08 to<br>3.39)             |
| Poisonings                                      | 62.21<br>(30.19 to<br>147.95)            | 33.62<br>(18.51 to<br>77.64)             | 23.96<br>(13.54 to<br>52.97)             | 50.46<br>(25.60 to<br>121.39)              | 1.00<br>(0.59 to<br>1.99)             | 0.64<br>(0.42 to<br>1.17)             | 0.49<br>(0.33 to<br>0.84)             | 0.91<br>(0.55 to<br>1.25)             |
| Exposure to mechanical forces                   | 76.69<br>(61.48 to<br>98.64)             | 80.49<br>(61.25 to<br>103.65)            | 66.15<br>(49.88 to<br>85.63)             | 101.09<br>(76.60 to<br>130.54)             | 1.39<br>(1.14 to<br>1.71)             | 1.39<br>(1.41 to<br>2.17)             | 1.53<br>(1.22 to<br>1.89)             | 2.07<br>(1.66 to<br>2.60)             |
| Unintentional firearm injuries                  | 7.55<br>(5.38 to<br>10.41)               | 8.13<br>(5.44 to<br>11.97)               | 6.73<br>(4.48 to<br>9.80)                | 10.10<br>(6.74 to<br>14.73)                | 0.14<br>(0.11 to<br>0.19)             | 0.17<br>(0.12 to<br>0.24)             | 0.15<br>(0.10 to<br>0.20)             | 0.20<br>(0.15 to<br>0.28)             |
| Unintentional suffocation                       | 11.37<br>(7.29 to<br>19.18)              | 9.26<br>(6.34 to<br>14.29)               | 7.03<br>(4.88 to<br>10.49)               | 12.75<br>(8.53 to<br>20.56)                | 0.17<br>(0.12 to<br>0.26)             | 0.17<br>(0.13 to<br>0.24)             | 0.14<br>(0.10 to<br>0.19)             | 0.21<br>(0.16 to<br>0.31)             |
| Other exposure to mechanical forces             | 57.78<br>(45.46 to<br>74.89)             | 63.10<br>(47.63 to<br>82.69)             | 52.39<br>(39.11 to<br>68.58)             | 78.24<br>(58.80 to<br>102.83)              | 1.08<br>(0.87 to<br>1.33)             | 1.41<br>(1.12 to<br>1.78)             | 1.24<br>(0.98 to<br>1.55)             | 1.65<br>(1.30 to<br>2.09)             |
| Adverse effects of medical treatment            | 64.57<br>(38.94 to<br>97.77)             | 63.14<br>(43.44 to<br>90.44)             | 51.42<br>(36.26 to<br>72.32)             | 80.27<br>(52.53 to<br>118.21)              | 1.12<br>(0.79 to<br>1.57)             | 1.37<br>(1.10 to<br>1.81)             | 1.21<br>(0.98 to<br>1.57)             | 1.60<br>(1.23 to<br>2.17)             |
| Animal contact                                  | 73.84<br>(49.34 to<br>104.57)            | 89.14<br>(62.75 to<br>121.25)            | 69.06<br>(48.81 to<br>93.90)             | 119.78<br>(82.11 to<br>164.80)             | 1.45<br>(1.04 to<br>1.94)             | 2.12<br>(1.59 to<br>2.85)             | 1.76<br>(1.28 to<br>2.38)             | 2.65<br>(1.95 to<br>3.58)             |
| Venomous animal contact                         | 51.57<br>(31.00 to<br>79.42)             | 57.97<br>(37.11 to<br>86.31)             | 44.48<br>(29.11 to<br>65.28)             | 78.91<br>(49.29 to<br>118.54)              | 1.07<br>(0.74 to<br>1.51)             | 1.50<br>(1.07 to<br>2.09)             | 1.25<br>(0.88 to<br>1.71)             | 1.87<br>(1.33 to<br>2.65)             |
| Non-venomous animal contact                     | 22.27<br>(12.32 to<br>34.98)             | 31.16<br>(17.05 to<br>48.11)             | 24.59<br>(13.68 to<br>37.58)             | 40.87<br>(22.52 to<br>62.61)               | 0.38<br>(0.22 to<br>0.57)             | 0.62<br>(0.36 to<br>0.96)             | 0.51<br>(0.29 to<br>0.78)             | 0.78<br>(0.45 to<br>1.19)             |
| Foreign body                                    | 91.40<br>(56.72 to<br>139.50)            | 94.79<br>(63.51 to<br>131.32)            | 80.34<br>(54.80 to<br>108.92)            | 113.68<br>(73.94 to<br>165.37)             | 1.29<br>(0.86 to<br>1.85)             | 1.58<br>(1.13 to<br>2.07)             | 1.44<br>(1.02 to<br>1.91)             | 1.78<br>(1.23 to<br>2.39)             |
| Pulmonary aspiration and foreign body in airway | 85.33<br>(52.65 to<br>134.10)            | 87.80<br>(59.13 to<br>124.57)            | 74.46<br>(51.61 to<br>101.13)            | 105.16<br>(68.57 to<br>158.18)             | 1.20<br>(0.79 to<br>1.77)             | 1.45<br>(1.04 to<br>1.91)             | 1.33<br>(0.97 to<br>1.72)             | 1.63<br>(1.16 to<br>2.19)             |
| Foreign body in other body part                 | 6.07<br>(2.05 to<br>12.38)               | 7.00<br>(2.16 to<br>15.47)               | 5.88<br>(1.75 to<br>13.28)               | 8.52<br>(2.69 to<br>18.47)                 | 0.10<br>(0.03 to<br>0.20)             | 0.13<br>(0.04 to<br>0.29)             | 0.11<br>(0.03 to<br>0.26)             | 0.15<br>(0.05 to<br>0.33)             |



|                                                                                     |                                                      |                                                      |                                                      |                                                      |                                                |                                                  |                                                  |                                                  |
|-------------------------------------------------------------------------------------|------------------------------------------------------|------------------------------------------------------|------------------------------------------------------|------------------------------------------------------|------------------------------------------------|--------------------------------------------------|--------------------------------------------------|--------------------------------------------------|
| Environmental heat and cold exposure                                                | 10.05<br>(6.77 to<br>14.13)                          | 10.07<br>(6.49 to<br>13.94)                          | 7.50<br>(4.81 to<br>10.40)                           | 14.17<br>(9.23 to<br>19.99)                          | 0.19<br>(0.14 to<br>0.25)                      | 0.23<br>(0.16 to<br>0.30)                        | 0.18<br>(0.12 to<br>0.24)                        | 0.30<br>(0.21 to<br>0.40)                        |
| Other unintentional injuries                                                        | 37.25<br>(29.79 to<br>46.59)                         | 33.96<br>(25.60 to<br>44.80)                         | 28.63<br>(21.36 to<br>38.07)                         | 41.32<br>(31.08 to<br>54.14)                         | 0.66<br>(0.54 to<br>0.80)                      | 0.68<br>(0.54 to<br>0.88)                        | 0.60<br>(0.47 to<br>0.77)                        | 0.80<br>(0.63 to<br>1.02)                        |
| <b>Self-harm and interpersonal violence</b>                                         | <b>377.87</b><br><b>(298.14 to</b><br><b>478.28)</b> | <b>587.94</b><br><b>(403.71 to</b><br><b>829.89)</b> | <b>553.94</b><br><b>(378.40 to</b><br><b>778.56)</b> | <b>689.20</b><br><b>(460.59 to</b><br><b>997.04)</b> | <b>7.48</b><br><b>(6.07 to</b><br><b>9.41)</b> | <b>12.50</b><br><b>(8.78 to</b><br><b>17.43)</b> | <b>12.02</b><br><b>(8.46 to</b><br><b>16.74)</b> | <b>14.45</b><br><b>(9.81 to</b><br><b>20.89)</b> |
| <b>Tanzania</b>                                                                     |                                                      |                                                      |                                                      |                                                      |                                                |                                                  |                                                  |                                                  |
| <b>Cause</b>                                                                        | <b>YLLs (in 1000s)</b>                               |                                                      |                                                      |                                                      | <b>Deaths (in 1000s)</b>                       |                                                  |                                                  |                                                  |
|                                                                                     | <b>2016</b>                                          | <b>2040 Forecast</b>                                 | <b>2040 Better Scenario</b>                          | <b>2040 Worse Scenario</b>                           | <b>2016</b>                                    | <b>2040 Forecast</b>                             | <b>2040 Better Scenario</b>                      | <b>2040 Worse Scenario</b>                       |
| Self-harm                                                                           | 123.54<br>(99.10 to<br>156.31)                       | 235.83<br>(150.63 to<br>349.55)                      | 222.62<br>(143.93 to<br>327.63)                      | 288.59<br>(173.08 to<br>457.41)                      | 3.12<br>(2.55 to<br>3.90)                      | 6.15<br>(4.15 to<br>8.85)                        | 5.97<br>(4.09 to<br>8.52)                        | 7.29<br>(4.57 to<br>11.18)                       |
| Self-harm by firearm                                                                | 12.27<br>(8.30 to<br>18.49)                          | 17.22<br>(9.51 to<br>30.05)                          | 15.84<br>(8.76 to<br>27.40)                          | 21.83<br>(11.37 to<br>39.61)                         | 0.28<br>(0.19 to<br>0.42)                      | 0.42<br>(0.24 to<br>0.70)                        | 0.39<br>(0.23 to<br>0.67)                        | 0.51<br>(0.28 to<br>0.91)                        |
| Self-harm by other specified means                                                  | 111.27<br>(89.85 to<br>141.73)                       | 218.61<br>(141.18 to<br>322.17)                      | 206.79<br>(134.56 to<br>302.26)                      | 266.76<br>(160.03 to<br>419.12)                      | 2.84<br>(2.32 to<br>3.55)                      | 5.73<br>(3.91 to<br>8.19)                        | 5.58<br>(3.84 to<br>7.88)                        | 6.78<br>(4.28 to<br>10.33)                       |
| Interpersonal violence                                                              | 254.33<br>(187.30 to<br>334.87)                      | 352.11<br>(231.86 to<br>523.59)                      | 331.32<br>(218.38 to<br>490.90)                      | 400.61<br>(255.12 to<br>608.76)                      | 4.36<br>(3.28 to<br>5.81)                      | 6.36<br>(4.22 to<br>9.50)                        | 6.05<br>(4.03 to<br>8.99)                        | 7.16<br>(4.72 to<br>10.90)                       |
| Physical violence by firearm                                                        | 41.23<br>(24.50 to<br>65.13)                         | 61.78<br>(36.33 to<br>103.60)                        | 59.63<br>(35.32 to<br>100.04)                        | 64.16<br>(37.33 to<br>108.66)                        | 0.72<br>(0.44 to<br>1.15)                      | 1.12<br>(0.68 to<br>1.85)                        | 1.09<br>(0.67 to<br>1.80)                        | 1.15<br>(0.70 to<br>1.92)                        |
| Physical violence by sharp object                                                   | 23.82<br>(15.88 to<br>34.75)                         | 40.22<br>(25.27 to<br>62.13)                         | 39.93<br>(25.02 to<br>61.19)                         | 40.46<br>(25.38 to<br>62.94)                         | 0.43<br>(0.29 to<br>0.64)                      | 0.77<br>(0.50 to<br>1.20)                        | 0.77<br>(0.50 to<br>1.20)                        | 0.76<br>(0.50 to<br>1.19)                        |
| Physical violence by other means                                                    | 189.28<br>(139.67 to<br>255.07)                      | 250.12<br>(154.18 to<br>389.21)                      | 231.76<br>(141.69 to<br>361.59)                      | 295.98<br>(179.66 to<br>476.66)                      | 3.21<br>(2.39 to<br>4.31)                      | 4.47<br>(2.82 to<br>6.99)                        | 4.19<br>(2.62 to<br>6.56)                        | 5.25<br>(3.24 to<br>8.46)                        |
| <b>Forces of nature, conflict and terrorism, and executions and police conflict</b> | <b>2.85</b><br><b>(1.26 to</b><br><b>6.02)</b>       | <b>1.16</b><br><b>(0.00 to</b><br><b>6.62)</b>       | <b>1.09</b><br><b>(0.00 to</b><br><b>6.21)</b>       | <b>1.24</b><br><b>(0.00 to</b><br><b>7.07)</b>       | <b>0.05</b><br><b>(0.02 to</b><br><b>0.09)</b> | <b>0.02</b><br><b>(0.00 to</b><br><b>0.13)</b>   | <b>0.02</b><br><b>(0.00 to</b><br><b>0.12)</b>   | <b>0.02</b><br><b>(0.00 to</b><br><b>0.13)</b>   |
| Exposure to forces of nature                                                        | 0.00<br>(0.00 to<br>0.00)                            | 1.00<br>(0.00 to<br>6.62)                            | 0.93<br>(0.00 to<br>6.21)                            | 1.07<br>(0.00 to<br>7.07)                            | 0.00<br>(0.00 to<br>0.00)                      | 0.02<br>(0.00 to<br>0.13)                        | 0.02<br>(0.00 to<br>0.12)                        | 0.02<br>(0.00 to<br>0.13)                        |
| Conflict and terrorism                                                              | 0.00<br>(0.00 to<br>0.00)                            | 0.08<br>(0.00 to<br>0.98)                            | 0.08<br>(0.00 to<br>0.93)                            | 0.09<br>(0.00 to<br>1.04)                            | 0.00<br>(0.00 to<br>0.00)                      | 0.00<br>(0.00 to<br>0.02)                        | 0.00<br>(0.00 to<br>0.02)                        | 0.00<br>(0.00 to<br>0.02)                        |
| Executions and police conflict                                                      | 2.85<br>(1.26 to<br>6.02)                            | 0.08<br>(0.00 to<br>0.75)                            | 0.07<br>(0.00 to<br>0.73)                            | 0.08<br>(0.00 to<br>0.77)                            | 0.05<br>(0.02 to<br>0.09)                      | 0.00<br>(0.00 to<br>0.01)                        | 0.00<br>(0.00 to<br>0.01)                        | 0.00<br>(0.00 to<br>0.01)                        |
| <b>Uganda</b>                                                                       |                                                      |                                                      |                                                      |                                                      |                                                |                                                  |                                                  |                                                  |
| <b>Cause</b>                                                                        | <b>YLLs (in 1000s)</b>                               |                                                      |                                                      |                                                      | <b>Deaths (in 1000s)</b>                       |                                                  |                                                  |                                                  |
|                                                                                     | <b>2016</b>                                          | <b>2040 Forecast</b>                                 | <b>2040 Better Scenario</b>                          | <b>2040 Worse Scenario</b>                           | <b>2016</b>                                    | <b>2040 Forecast</b>                             | <b>2040 Better Scenario</b>                      | <b>2040 Worse Scenario</b>                       |
| All causes                                                                          | 16,240.14<br>(14,937.38 to<br>17,782.53)             | 15,137.52<br>(11,708.01 to<br>19,120.49)             | 12,028.80<br>(9,193.83 to<br>15,193.96)              | 27,667.15<br>(21,021.41 to<br>34,992.84)             | 299.67<br>(277.23 to<br>326.60)                | 373.29<br>(300.29 to<br>456.16)                  | 307.45<br>(248.15 to<br>375.94)                  | 597.73<br>(468.54 to<br>743.97)                  |
| Communicable, maternal, neonatal, and nutritional diseases                          | 12,344.04<br>(11,178.33 to<br>13,681.72)             | 8,062.88<br>(5,805.29 to<br>10,740.45)               | 5,801.29<br>(4,168.04 to<br>7,796.55)                | 18,343.09<br>(13,105.19 to<br>24,901.88)             | 188.62<br>(172.87 to<br>206.91)                | 151.50<br>(109.45 to<br>203.17)                  | 108.98<br>(77.58 to<br>146.65)                   | 320.29<br>(224.18 to<br>441.44)                  |
| HIV/AIDS and tuberculosis                                                           | 2,836.39<br>(2,346.57 to<br>3,458.70)                | 2,657.63<br>(1,442.73 to<br>4,243.63)                | 1,925.59<br>(999.66 to<br>3,399.19)                  | 8,194.55<br>(4,292.67 to<br>13,630.98)               | 57.23<br>(48.33 to<br>67.94)                   | 52.98<br>(29.70 to<br>82.15)                     | 38.33<br>(20.72 to<br>62.64)                     | 159.26<br>(83.20 to<br>261.15)                   |
| Tuberculosis                                                                        | 990.35<br>(784.13 to<br>1,212.84)                    | 556.56<br>(207.22 to<br>1,217.48)                    | 389.62<br>(145.44 to<br>864.26)                      | 1,267.61<br>(463.16 to<br>2,679.13)                  | 24.02<br>(18.88 to<br>29.56)                   | 13.71<br>(5.39 to<br>29.94)                      | 9.69<br>(3.83 to<br>20.89)                       | 30.41<br>(11.60 to<br>63.25)                     |

|                                                                          |                                                            |                                                            |                                                          |                                                            |                                                   |                                                   |                                                   |                                                    |
|--------------------------------------------------------------------------|------------------------------------------------------------|------------------------------------------------------------|----------------------------------------------------------|------------------------------------------------------------|---------------------------------------------------|---------------------------------------------------|---------------------------------------------------|----------------------------------------------------|
| HIV/AIDS                                                                 | 1,846.03<br>(1,403.01 to<br>2,488.84)                      | 2,101.07<br>(962.67 to<br>3,612.28)                        | 1,535.97<br>(657.07 to<br>2,981.74)                      | 6,926.94<br>(3,049.39 to<br>12,330.24)                     | 33.21<br>(26.38 to<br>43.71)                      | 39.27<br>(17.74 to<br>65.89)                      | 28.63<br>(12.16 to<br>53.07)                      | 128.85<br>(55.50 to<br>229.60)                     |
| <b>Diarrhea, lower respiratory, and other common infectious diseases</b> | <b>3,301.34</b><br><b>(2,737.72 to</b><br><b>3,906.90)</b> | <b>2,517.18</b><br><b>(1,457.59 to</b><br><b>4,093.96)</b> | <b>1,534.82</b><br><b>(886.11 to</b><br><b>2,528.34)</b> | <b>4,728.33</b><br><b>(2,736.72 to</b><br><b>7,400.84)</b> | <b>53.23</b><br><b>(44.89 to</b><br><b>62.07)</b> | <b>57.17</b><br><b>(33.15 to</b><br><b>92.62)</b> | <b>36.08</b><br><b>(21.15 to</b><br><b>58.86)</b> | <b>89.01</b><br><b>(52.86 to</b><br><b>139.74)</b> |
| Diarrheal diseases                                                       | 945.35<br>(676.76 to<br>1,271.29)                          | 710.18<br>(195.78 to<br>1,778.01)                          | 423.99<br>(103.07 to<br>1,063.34)                        | 1,140.92<br>(369.99 to<br>2,562.12)                        | 16.41<br>(11.37 to<br>23.24)                      | 17.32<br>(3.81 to<br>45.20)                       | 10.48<br>(2.25 to<br>28.26)                       | 24.89<br>(6.36 to<br>59.54)                        |
| Intestinal infectious diseases                                           | 50.39<br>(24.44 to<br>93.69)                               | 52.20<br>(25.09 to<br>99.92)                               | 46.41<br>(22.34 to<br>88.33)                             | 73.14<br>(35.45 to<br>140.10)                              | 0.68<br>(0.34 to<br>1.26)                         | 0.76<br>(0.36 to<br>1.44)                         | 0.68<br>(0.32 to<br>1.29)                         | 1.03<br>(0.50 to<br>1.92)                          |
| Typhoid fever                                                            | 43.83<br>(20.21 to<br>82.01)                               | 47.55<br>(21.92 to<br>92.06)                               | 42.58<br>(19.60 to<br>81.91)                             | 65.36<br>(30.15 to<br>129.37)                              | 0.60<br>(0.28 to<br>1.13)                         | 0.69<br>(0.31 to<br>1.35)                         | 0.62<br>(0.28 to<br>1.19)                         | 0.92<br>(0.43 to<br>1.78)                          |
| Paratyphoid fever                                                        | 2.22<br>(0.82 to<br>5.11)                                  | 2.85<br>(1.10 to<br>6.24)                                  | 2.50<br>(0.96 to<br>5.56)                                | 4.05<br>(1.58 to<br>9.09)                                  | 0.03<br>(0.01 to<br>0.07)                         | 0.04<br>(0.02 to<br>0.09)                         | 0.04<br>(0.01 to<br>0.08)                         | 0.06<br>(0.02 to<br>0.13)                          |
| Other intestinal infectious diseases                                     | 4.34<br>(1.06 to<br>13.21)                                 | 1.81<br>(0.41 to<br>5.53)                                  | 1.33<br>(0.30 to<br>4.01)                                | 3.73<br>(0.79 to<br>11.98)                                 | 0.06<br>(0.01 to<br>0.16)                         | 0.03<br>(0.01 to<br>0.08)                         | 0.02<br>(0.01 to<br>0.06)                         | 0.05<br>(0.01 to<br>0.15)                          |
| Lower respiratory infections                                             | 1,332.13<br>(1,031.68 to<br>1,655.55)                      | 1,163.68<br>(607.07 to<br>2,129.65)                        | 645.51<br>(349.45 to<br>1,143.39)                        | 2,349.94<br>(1,122.34 to<br>4,411.74)                      | 23.05<br>(18.49 to<br>28.01)                      | 29.80<br>(17.74 to<br>48.16)                      | 17.61<br>(10.80 to<br>27.82)                      | 47.12<br>(25.81 to<br>80.20)                       |
| Upper respiratory infections                                             | 3.16<br>(0.92 to<br>7.91)                                  | 2.23<br>(0.75 to<br>5.34)                                  | 1.60<br>(0.56 to<br>3.82)                                | 4.61<br>(1.46 to<br>11.96)                                 | 0.04<br>(0.02 to<br>0.10)                         | 0.04<br>(0.02 to<br>0.08)                         | 0.03<br>(0.01 to<br>0.06)                         | 0.07<br>(0.03 to<br>0.18)                          |
| Otitis media                                                             | 1.59<br>(0.61 to<br>3.95)                                  | 0.40<br>(0.16 to<br>0.85)                                  | 0.40<br>(0.16 to<br>0.85)                                | 0.46<br>(0.18 to<br>1.03)                                  | 0.02<br>(0.01 to<br>0.05)                         | 0.01<br>(0.00 to<br>0.02)                         | 0.01<br>(0.01 to<br>0.02)                         | 0.01<br>(0.00 to<br>0.02)                          |
| Meningitis                                                               | 621.99<br>(437.84 to<br>920.91)                            | 423.91<br>(272.60 to<br>624.47)                            | 355.35<br>(234.11 to<br>508.30)                          | 774.04<br>(449.04 to<br>1,276.92)                          | 8.75<br>(6.41 to<br>12.43)                        | 7.16<br>(4.81 to<br>10.26)                        | 6.40<br>(4.33 to<br>9.22)                         | 11.19<br>(6.93 to<br>17.66)                        |
| Pneumococcal meningitis                                                  | 34.65<br>(23.71 to<br>51.45)                               | 23.63<br>(13.92 to<br>37.05)                               | 21.98<br>(13.13 to<br>33.04)                             | 34.31<br>(19.26 to<br>60.40)                               | 0.55<br>(0.39 to<br>0.76)                         | 0.48<br>(0.30 to<br>0.71)                         | 0.47<br>(0.29 to<br>0.70)                         | 0.59<br>(0.36 to<br>0.93)                          |
| H influenzae type B meningitis                                           | 65.38<br>(43.05 to<br>102.06)                              | 92.36<br>(28.60 to<br>229.30)                              | 54.46<br>(21.82 to<br>119.92)                            | 316.09<br>(821.83)                                         | 0.87<br>(0.59 to<br>1.29)                         | 1.22<br>(0.45 to<br>2.83)                         | 0.79<br>(0.38 to<br>1.58)                         | 3.82<br>(0.97 to<br>9.79)                          |
| Meningococcal meningitis                                                 | 271.49<br>(190.14 to<br>412.47)                            | 144.97<br>(93.06 to<br>215.17)                             | 130.43<br>(83.53 to<br>191.70)                           | 202.53<br>(124.47 to<br>318.09)                            | 3.75<br>(2.70 to<br>5.45)                         | 2.50<br>(1.63 to<br>3.67)                         | 2.34<br>(1.53 to<br>3.38)                         | 3.16<br>(2.03 to<br>4.67)                          |
| Other meningitis                                                         | 250.46<br>(173.66 to<br>383.60)                            | 162.96<br>(107.06 to<br>251.48)                            | 148.48<br>(96.98 to<br>224.01)                           | 221.11<br>(137.18 to<br>348.66)                            | 3.59<br>(2.59 to<br>5.15)                         | 2.97<br>(2.00 to<br>4.41)                         | 2.81<br>(1.88 to<br>4.20)                         | 3.62<br>(2.39 to<br>5.51)                          |
| Encephalitis                                                             | 35.23<br>(21.20 to<br>53.16)                               | 27.93<br>(16.70 to<br>42.99)                               | 23.15<br>(13.85 to<br>35.44)                             | 46.95<br>(27.38 to<br>73.49)                               | 0.44<br>(0.27 to<br>0.65)                         | 0.38<br>(0.24 to<br>0.58)                         | 0.32<br>(0.20 to<br>0.49)                         | 0.61<br>(0.37 to<br>0.94)                          |
| Diphtheria                                                               | 0.64<br>(0.27 to<br>1.28)                                  | 0.19<br>(0.07 to<br>0.47)                                  | 0.10<br>(0.05 to<br>0.19)                                | 0.71<br>(0.17 to<br>2.31)                                  | 0.01<br>(0.00 to<br>0.02)                         | 0.00<br>(0.00 to<br>0.01)                         | 0.00<br>(0.00 to<br>0.00)                         | 0.01<br>(0.00 to<br>0.03)                          |
| Whooping cough                                                           | 147.50<br>(13.86 to<br>475.22)                             | 111.74<br>(11.89 to<br>337.98)                             | 24.63<br>(2.48 to<br>82.49)                              | 267.50<br>(26.95 to<br>807.22)                             | 1.74<br>(0.16 to<br>5.60)                         | 1.33<br>(0.14 to<br>4.01)                         | 0.30<br>(0.03 to<br>0.99)                         | 3.16<br>(0.32 to<br>9.52)                          |
| Tetanus                                                                  | 54.54<br>(30.74 to<br>100.95)                              | 9.68<br>(4.36 to<br>19.51)                                 | 6.57<br>(3.08 to<br>12.32)                               | 20.10<br>(8.11 to<br>48.90)                                | 0.75<br>(0.45 to<br>1.31)                         | 0.16<br>(0.08 to<br>0.28)                         | 0.12<br>(0.06 to<br>0.22)                         | 0.27<br>(0.12 to<br>0.60)                          |
| Measles                                                                  | 94.91<br>(32.77 to<br>213.20)                              | 8.66<br>(0.65 to<br>47.71)                                 | 2.44<br>(0.38 to<br>10.42)                               | 36.92<br>(2.01 to<br>178.46)                               | 1.13<br>(0.39 to<br>2.54)                         | 0.10<br>(0.01 to<br>0.57)                         | 0.03<br>(0.01 to<br>0.13)                         | 0.44<br>(0.02 to<br>2.12)                          |

**Uganda**

| Cause | YLLs (in 1000s) |               |                      |                     | Deaths (in 1000s) |               |                      |                     |
|-------|-----------------|---------------|----------------------|---------------------|-------------------|---------------|----------------------|---------------------|
|       | 2016            | 2040 Forecast | 2040 Better Scenario | 2040 Worse Scenario | 2016              | 2040 Forecast | 2040 Better Scenario | 2040 Worse Scenario |

|                                                       |                                                            |                                                        |                                                        |                                                          |                                                   |                                                   |                                                  |                                                   |
|-------------------------------------------------------|------------------------------------------------------------|--------------------------------------------------------|--------------------------------------------------------|----------------------------------------------------------|---------------------------------------------------|---------------------------------------------------|--------------------------------------------------|---------------------------------------------------|
| Varicella and herpes zoster                           | 13.91<br>(7.44 to<br>24.00)                                | 6.37<br>(3.36 to<br>11.52)                             | 4.67<br>(2.47 to<br>8.24)                              | 13.03<br>(6.47 to<br>25.35)                              | 0.20<br>(0.13 to<br>0.32)                         | 0.12<br>(0.07 to<br>0.19)                         | 0.09<br>(0.06 to<br>0.15)                        | 0.20<br>(0.12 to<br>0.36)                         |
| <b>Neglected tropical diseases and malaria</b>        | <b>1,980.44</b><br><b>(1,366.09 to</b><br><b>2,643.35)</b> | <b>848.11</b><br><b>(588.40 to</b><br><b>1,151.55)</b> | <b>783.79</b><br><b>(555.95 to</b><br><b>1,059.32)</b> | <b>1,219.67</b><br><b>(821.46 to</b><br><b>1,719.37)</b> | <b>26.02</b><br><b>(18.79 to</b><br><b>33.76)</b> | <b>13.94</b><br><b>(10.20 to</b><br><b>18.36)</b> | <b>13.28</b><br><b>(9.77 to</b><br><b>17.47)</b> | <b>18.19</b><br><b>(12.74 to</b><br><b>24.58)</b> |
| Malaria                                               | 1,797.30<br>(1,168.35 to<br>2,455.82)                      | 727.52<br>(487.71 to<br>1,025.16)                      | 685.48<br>(467.93 to<br>951.48)                        | 1,001.47<br>(631.93 to<br>1,486.51)                      | 23.46<br>(16.04 to<br>31.03)                      | 12.01<br>(8.43 to<br>16.44)                       | 11.66<br>(8.27 to<br>15.96)                      | 14.99<br>(10.16 to<br>21.40)                      |
| Chagas disease                                        | 0.00<br>(0.00 to<br>0.00)                                  | 0.00<br>(0.00 to<br>0.00)                              | 0.00<br>(0.00 to<br>0.00)                              | 0.00<br>(0.00 to<br>0.00)                                | 0.00<br>(0.00 to<br>0.00)                         | 0.00<br>(0.00 to<br>0.00)                         | 0.00<br>(0.00 to<br>0.00)                        | 0.00<br>(0.00 to<br>0.00)                         |
| Leishmaniasis                                         | 0.98<br>(0.53 to<br>1.60)                                  | 0.77<br>(0.42 to<br>1.24)                              | 0.59<br>(0.32 to<br>0.97)                              | 1.37<br>(0.70 to<br>2.25)                                | 0.02<br>(0.01 to<br>0.04)                         | 0.02<br>(0.01 to<br>0.05)                         | 0.01<br>(0.01 to<br>0.02)                        | 0.03<br>(0.02 to<br>0.05)                         |
| African trypanosomiasis                               | 7.76<br>(2.94 to<br>16.04)                                 | 1.15<br>(0.37 to<br>2.93)                              | 1.19<br>(0.39 to<br>3.05)                              | 1.12<br>(0.36 to<br>2.84)                                | 0.13<br>(0.05 to<br>0.28)                         | 0.02<br>(0.01 to<br>0.05)                         | 0.02<br>(0.01 to<br>0.05)                        | 0.02<br>(0.01 to<br>0.05)                         |
| Schistosomiasis                                       | 9.73<br>(6.90 to<br>13.17)                                 | 11.05<br>(6.63 to<br>17.84)                            | 10.09<br>(5.97 to<br>16.49)                            | 12.89<br>(8.12 to<br>20.31)                              | 0.25<br>(0.17 to<br>0.34)                         | 0.29<br>(0.19 to<br>0.45)                         | 0.27<br>(0.17 to<br>0.42)                        | 0.33<br>(0.22 to<br>0.50)                         |
| Cysticercosis                                         | 1.47<br>(1.20 to<br>1.79)                                  | 1.04<br>(0.67 to<br>1.54)                              | 1.02<br>(0.65 to<br>1.50)                              | 1.11<br>(0.76 to<br>1.59)                                | 0.03<br>(0.02 to<br>0.03)                         | 0.02<br>(0.01 to<br>0.03)                         | 0.02<br>(0.01 to<br>0.03)                        | 0.02<br>(0.02 to<br>0.03)                         |
| Cystic echinococcosis                                 | 2.04<br>(1.46 to<br>2.79)                                  | 1.09<br>(0.69 to<br>1.68)                              | 0.76<br>(0.47 to<br>1.18)                              | 2.13<br>(1.34 to<br>3.18)                                | 0.04<br>(0.03 to<br>0.05)                         | 0.02<br>(0.02 to<br>0.04)                         | 0.02<br>(0.01 to<br>0.03)                        | 0.05<br>(0.03 to<br>0.07)                         |
| Dengue                                                | 0.98<br>(0.06 to<br>3.96)                                  | 3.76<br>(0.26 to<br>14.30)                             | 3.60<br>(0.26 to<br>13.58)                             | 4.96<br>(0.33 to<br>20.22)                               | 0.01<br>(0.00 to<br>0.05)                         | 0.07<br>(0.00 to<br>0.24)                         | 0.07<br>(0.00 to<br>0.23)                        | 0.08<br>(0.01 to<br>0.30)                         |
| Yellow fever                                          | 8.72<br>(1.60 to<br>25.84)                                 | 4.60<br>(0.84 to<br>14.75)                             | 3.70<br>(0.66 to<br>11.94)                             | 7.20<br>(1.33 to<br>22.22)                               | 0.13<br>(0.02 to<br>0.40)                         | 0.07<br>(0.01 to<br>0.24)                         | 0.06<br>(0.01 to<br>0.20)                        | 0.11<br>(0.02 to<br>0.36)                         |
| Rabies                                                | 11.98<br>(4.19 to<br>26.26)                                | 5.36<br>(1.94 to<br>10.65)                             | 3.36<br>(1.17 to<br>6.73)                              | 13.30<br>(4.93 to<br>26.72)                              | 0.17<br>(0.07 to<br>0.36)                         | 0.09<br>(0.05 to<br>0.17)                         | 0.06<br>(0.02 to<br>0.11)                        | 0.21<br>(0.08 to<br>0.40)                         |
| Intestinal nematode infections                        | 9.00<br>(5.60 to<br>13.69)                                 | 11.63<br>(7.22 to<br>18.37)                            | 11.38<br>(7.11 to<br>17.66)                            | 15.87<br>(9.82 to<br>25.62)                              | 0.11<br>(0.07 to<br>0.17)                         | 0.15<br>(0.10 to<br>0.23)                         | 0.15<br>(0.09 to<br>0.22)                        | 0.20<br>(0.12 to<br>0.31)                         |
| Other neglected tropical diseases                     | 130.50<br>(31.41 to<br>277.94)                             | 80.13<br>(20.58 to<br>160.21)                          | 62.62<br>(15.76 to<br>128.70)                          | 158.25<br>(40.92 to<br>312.50)                           | 1.67<br>(0.40 to<br>3.50)                         | 1.18<br>(0.30 to<br>2.33)                         | 0.94<br>(0.24 to<br>1.90)                        | 2.15<br>(0.55 to<br>4.17)                         |
| <b>Maternal disorders</b>                             | <b>212.62</b><br><b>(156.28 to</b><br><b>288.56)</b>       | <b>210.87</b><br><b>(121.45 to</b><br><b>340.89)</b>   | <b>151.62</b><br><b>(85.59 to</b><br><b>255.05)</b>    | <b>386.67</b><br><b>(229.23 to</b><br><b>627.28)</b>     | <b>3.81</b><br><b>(2.78 to</b><br><b>5.21)</b>    | <b>3.93</b><br><b>(2.27 to</b><br><b>6.42)</b>    | <b>2.83</b><br><b>(1.60 to</b><br><b>4.78)</b>   | <b>7.16</b><br><b>(4.21 to</b><br><b>11.64)</b>   |
| Maternal hemorrhage                                   | 38.62<br>(23.38 to<br>59.24)                               | 32.43<br>(15.85 to<br>58.72)                           | 23.74<br>(11.76 to<br>43.99)                           | 55.05<br>(27.57 to<br>99.37)                             | 0.71<br>(0.43 to<br>1.10)                         | 0.61<br>(0.30 to<br>1.11)                         | 0.45<br>(0.22 to<br>0.84)                        | 1.03<br>(0.51 to<br>1.87)                         |
| Maternal sepsis and other maternal infections         | 6.95<br>(3.20 to<br>12.43)                                 | 5.14<br>(2.12 to<br>10.47)                             | 3.74<br>(1.53 to<br>7.79)                              | 8.98<br>(5.74 to<br>18.14)                               | 0.13<br>(0.06 to<br>0.22)                         | 0.10<br>(0.04 to<br>0.19)                         | 0.07<br>(0.03 to<br>0.14)                        | 0.17<br>(0.07 to<br>0.33)                         |
| Maternal hypertensive disorders                       | 26.04<br>(16.00 to<br>39.78)                               | 21.93<br>(10.83 to<br>39.41)                           | 15.97<br>(7.79 to<br>28.73)                            | 37.88<br>(18.54 to<br>68.01)                             | 0.46<br>(0.28 to<br>0.69)                         | 0.40<br>(0.19 to<br>0.71)                         | 0.29<br>(0.14 to<br>0.52)                        | 0.68<br>(0.33 to<br>1.22)                         |
| Maternal obstructed labor and uterine rupture         | 8.87<br>(4.38 to<br>15.22)                                 | 7.57<br>(3.16 to<br>14.82)                             | 5.40<br>(2.27 to<br>10.96)                             | 13.52<br>(5.64 to<br>26.09)                              | 0.16<br>(0.08 to<br>0.28)                         | 0.14<br>(0.06 to<br>0.28)                         | 0.10<br>(0.04 to<br>0.21)                        | 0.25<br>(0.11 to<br>0.49)                         |
| Maternal abortion, miscarriage, and ectopic pregnancy | 26.08<br>(13.69 to<br>43.71)                               | 24.77<br>(10.28 to<br>48.77)                           | 18.23<br>(7.64 to<br>36.76)                            | 44.52<br>(18.42 to<br>88.22)                             | 0.46<br>(0.25 to<br>0.76)                         | 0.45<br>(0.19 to<br>0.90)                         | 0.33<br>(0.14 to<br>0.65)                        | 0.80<br>(0.33 to<br>1.54)                         |
| Indirect maternal deaths                              | 66.32<br>(38.54 to<br>103.78)                              | 55.75<br>(27.06 to<br>99.69)                           | 40.82<br>(19.24 to<br>74.37)                           | 102.54<br>(49.76 to<br>182.37)                           | 1.18<br>(0.69 to<br>1.81)                         | 1.02<br>(0.50 to<br>1.82)                         | 0.74<br>(0.35 to<br>1.36)                        | 1.85<br>(0.91 to<br>3.30)                         |
| Late maternal deaths                                  | 5.04<br>(2.26 to<br>9.45)                                  | 3.25<br>(1.26 to<br>6.78)                              | 2.36<br>(0.93 to<br>4.98)                              | 5.89<br>(2.33 to<br>12.29)                               | 0.09<br>(0.04 to<br>0.17)                         | 0.06<br>(0.02 to<br>0.12)                         | 0.04<br>(0.02 to<br>0.09)                        | 0.11<br>(0.04 to<br>0.22)                         |

|                                                                         |                                              |                                            |                                            |                                              |                                     |                                    |                                    |                                     |
|-------------------------------------------------------------------------|----------------------------------------------|--------------------------------------------|--------------------------------------------|----------------------------------------------|-------------------------------------|------------------------------------|------------------------------------|-------------------------------------|
|                                                                         | 7.15<br>(4.34 to<br>10.75)                   | 36.75<br>(13.73 to<br>71.14)               | 24.00<br>(5.89 to<br>49.99)                | 77.32<br>(40.05 to<br>139.96)                | 0.13<br>(0.08 to<br>0.20)           | 0.73<br>(0.28 to<br>1.38)          | 0.48<br>(0.12 to<br>0.97)          | 1.51<br>(0.78 to<br>2.75)           |
| Maternal deaths aggravated by HIV/AIDS                                  |                                              |                                            |                                            |                                              |                                     |                                    |                                    |                                     |
|                                                                         | 27.55<br>(14.70 to<br>46.08)                 | 23.28<br>(10.46 to<br>45.24)               | 17.36<br>(7.41 to<br>33.64)                | 40.97<br>(18.62 to<br>78.99)                 | 0.49<br>(0.26 to<br>0.84)           | 0.43<br>(0.19 to<br>0.82)          | 0.32<br>(0.14 to<br>0.63)          | 0.75<br>(0.34 to<br>1.46)           |
| Other maternal disorders                                                |                                              |                                            |                                            |                                              |                                     |                                    |                                    |                                     |
| <b>Uganda</b>                                                           |                                              |                                            |                                            |                                              |                                     |                                    |                                    |                                     |
| Cause                                                                   | YLLs (in 1000s)                              |                                            |                                            |                                              | Deaths (in 1000s)                   |                                    |                                    |                                     |
|                                                                         | 2016                                         | 2040 Forecast                              | 2040 Better Scenario                       | 2040 Worse Scenario                          | 2016                                | 2040 Forecast                      | 2040 Better Scenario               | 2040 Worse Scenario                 |
| <b>Neonatal disorders</b>                                               | <b>2,835.67</b><br>(2,450.85 to<br>3,304.54) | <b>1,434.93</b><br>(741.21 to<br>2,167.86) | <b>1,076.62</b><br>(555.69 to<br>1,637.51) | <b>3,116.47</b><br>(1,631.82 to<br>4,700.81) | <b>32.76</b><br>(28.32 to<br>38.19) | <b>16.58</b><br>(8.57 to<br>25.06) | <b>12.44</b><br>(6.42 to<br>18.92) | <b>36.02</b><br>(18.86 to<br>54.32) |
| Neonatal preterm birth                                                  | 844.94<br>(580.70 to<br>1,138.93)            | 370.58<br>(194.49 to<br>595.17)            | 263.15<br>(139.75 to<br>422.97)            | 858.30<br>(448.35 to<br>1,355.55)            | 9.76<br>(6.71 to<br>13.16)          | 4.28<br>(2.25 to<br>6.88)          | 3.04<br>(1.62 to<br>4.89)          | 9.92<br>(5.19 to<br>15.66)          |
| Neonatal encephalopathy due to birth asphyxia and trauma                | 1,041.85<br>(744.10 to<br>1,398.95)          | 485.70<br>(193.51 to<br>876.38)            | 377.06<br>(148.61 to<br>685.23)            | 998.68<br>(399.10 to<br>1,833.14)            | 12.04<br>(8.60 to<br>16.16)         | 5.61<br>(2.24 to<br>10.13)         | 4.36<br>(1.72 to<br>7.92)          | 11.54<br>(4.61 to<br>21.18)         |
| Neonatal sepsis and other neonatal infections                           | 497.92<br>(313.55 to<br>815.97)              | 345.82<br>(189.89 to<br>607.02)            | 266.72<br>(147.47 to<br>469.10)            | 724.22<br>(400.39 to<br>1,284.70)            | 5.75<br>(3.62 to<br>9.44)           | 4.00<br>(2.20 to<br>7.02)          | 3.08<br>(1.70 to<br>5.42)          | 8.37<br>(4.63 to<br>14.84)          |
| Hemolytic disease and other neonatal jaundice                           | 62.03<br>(32.94 to<br>101.22)                | 18.53<br>(7.44 to<br>35.98)                | 13.54<br>(5.51 to<br>27.26)                | 42.46<br>(16.93 to<br>84.23)                 | 0.72<br>(0.38 to<br>1.17)           | 0.21<br>(0.09 to<br>0.42)          | 0.16<br>(0.06 to<br>0.31)          | 0.49<br>(0.20 to<br>0.97)           |
| Other neonatal disorders                                                | 388.92<br>(227.89 to<br>579.73)              | 214.30<br>(86.03 to<br>405.21)             | 156.16<br>(63.65 to<br>298.52)             | 492.81<br>(199.90 to<br>933.59)              | 4.50<br>(2.63 to<br>6.70)           | 2.48<br>(0.99 to<br>4.68)          | 1.81<br>(0.74 to<br>3.45)          | 5.70<br>(2.31 to<br>10.79)          |
| <b>Nutritional deficiencies</b>                                         | <b>548.89</b><br>(366.15 to<br>861.30)       | <b>197.90</b><br>(132.37 to<br>299.56)     | <b>164.20</b><br>(109.47 to<br>245.89)     | <b>356.82</b><br>(235.25 to<br>555.90)       | <b>7.68</b><br>(5.45 to<br>11.34)   | <b>3.80</b><br>(2.86 to<br>5.16)   | <b>3.35</b><br>(2.51 to<br>4.53)   | <b>5.79</b><br>(4.15 to<br>8.39)    |
| Protein-energy malnutrition                                             | 526.38<br>(347.58 to<br>832.98)              | 162.99<br>(103.15 to<br>250.14)            | 133.67<br>(84.42 to<br>208.76)             | 308.19<br>(189.69 to<br>494.92)              | 7.14<br>(4.96 to<br>10.69)          | 3.88<br>(2.08 to<br>4.03)          | 2.50<br>(1.83 to<br>3.46)          | 4.67<br>(3.18 to<br>6.83)           |
| Iodine deficiency                                                       | 1.61<br>(0.06 to<br>7.32)                    | 5.51<br>(0.06 to<br>29.53)                 | 4.38<br>(0.05 to<br>22.45)                 | 10.25<br>(0.10 to<br>66.78)                  | 0.03<br>(0.00 to<br>0.10)           | 0.12<br>(0.00 to<br>0.41)          | 0.10<br>(0.00 to<br>0.33)          | 0.18<br>(0.00 to<br>0.84)           |
| Dietary iron deficiency                                                 | 0.92<br>(0.70 to<br>1.21)                    | 1.26<br>(0.75 to<br>1.95)                  | 1.17<br>(0.68 to<br>1.82)                  | 1.48<br>(0.91 to<br>2.26)                    | 0.02<br>(0.01 to<br>0.02)           | 0.02<br>(0.01 to<br>0.04)          | 0.02<br>(0.01 to<br>0.03)          | 0.03<br>(0.02 to<br>0.04)           |
| Other nutritional deficiencies                                          | 19.99<br>(12.38 to<br>29.24)                 | 28.14<br>(16.62 to<br>42.60)               | 24.98<br>(14.69 to<br>38.16)               | 36.91<br>(21.61 to<br>55.42)                 | 0.50<br>(0.33 to<br>0.68)           | 0.78<br>(0.49 to<br>1.12)          | 0.72<br>(0.46 to<br>1.06)          | 0.91<br>(0.59 to<br>1.33)           |
| <b>Other communicable, maternal, neonatal, and nutritional diseases</b> | <b>628.69</b><br>(308.95 to<br>1,151.36)     | <b>196.26</b><br>(110.51 to<br>355.88)     | <b>164.65</b><br>(94.85 to<br>288.48)      | <b>340.58</b><br>(177.62 to<br>657.61)       | <b>7.88</b><br>(4.14 to<br>13.92)   | <b>3.10</b><br>(1.97 to<br>4.94)   | <b>2.68</b><br>(1.72 to<br>4.18)   | <b>4.87</b><br>(2.89 to<br>8.52)    |
| Sexually transmitted infections excluding HIV                           | 470.89<br>(192.90 to<br>919.61)              | 89.07<br>(50.80 to<br>193.95)              | 74.15<br>(26.38 to<br>159.72)              | 164.81<br>(51.19 to<br>379.18)               | 5.57<br>(2.31 to<br>10.80)          | 1.11<br>(0.43 to<br>2.33)          | 0.93<br>(0.38 to<br>1.95)          | 2.00<br>(0.68 to<br>4.51)           |
| Syphilis                                                                | 467.28<br>(190.16 to<br>917.10)              | 84.70<br>(26.63 to<br>189.88)              | 70.05<br>(22.36 to<br>155.91)              | 159.89<br>(46.73 to<br>373.55)               | 5.49<br>(2.25 to<br>10.75)          | 1.02<br>(0.34 to<br>2.25)          | 0.85<br>(0.28 to<br>1.85)          | 1.90<br>(0.57 to<br>4.38)           |
| Chlamydial infection                                                    | 0.70<br>(0.37 to<br>1.12)                    | 0.85<br>(0.42 to<br>1.42)                  | 0.80<br>(0.40 to<br>1.34)                  | 0.97<br>(0.47 to<br>1.63)                    | 0.01<br>(0.01 to<br>0.02)           | 0.02<br>(0.01 to<br>0.03)          | 0.02<br>(0.01 to<br>0.03)          | 0.02<br>(0.01 to<br>0.03)           |
| Gonococcal infection                                                    | 1.85<br>(1.06 to<br>2.83)                    | 2.24<br>(1.13 to<br>3.75)                  | 2.12<br>(1.09 to<br>3.53)                  | 2.51<br>(1.27 to<br>4.20)                    | 0.04<br>(0.02 to<br>0.06)           | 0.05<br>(0.03 to<br>0.08)          | 0.05<br>(0.03 to<br>0.07)          | 0.05<br>(0.03 to<br>0.09)           |
| Other sexually transmitted infections                                   | 1.07<br>(0.60 to<br>1.68)                    | 1.27<br>(0.65 to<br>2.15)                  | 1.19<br>(0.61 to<br>2.03)                  | 1.44<br>(0.72 to<br>2.45)                    | 0.02<br>(0.01 to<br>0.03)           | 0.03<br>(0.01 to<br>0.04)          | 0.02<br>(0.01 to<br>0.04)          | 0.03<br>(0.01 to<br>0.05)           |
| Acute hepatitis                                                         | 39.47<br>(31.97 to<br>48.69)                 | 43.61<br>(28.09 to<br>66.27)               | 39.35<br>(25.05 to<br>60.40)               | 52.94<br>(35.42 to<br>78.06)                 | 0.84<br>(0.68 to<br>1.02)           | 1.05<br>(0.72 to<br>1.53)          | 0.97<br>(0.65 to<br>1.40)          | 1.23<br>(0.86 to<br>1.73)           |

|                                       |                                                            |                                                            |                                                            |                                                            |                                                   |                                                      |                                                      |                                                      |
|---------------------------------------|------------------------------------------------------------|------------------------------------------------------------|------------------------------------------------------------|------------------------------------------------------------|---------------------------------------------------|------------------------------------------------------|------------------------------------------------------|------------------------------------------------------|
| Acute hepatitis A                     | 1.94<br>(0.24 to<br>4.64)                                  | 1.04<br>(0.31 to<br>2.26)                                  | 0.89<br>(0.28 to<br>1.96)                                  | 1.62<br>(0.45 to<br>3.67)                                  | 0.02<br>(0.00 to<br>0.06)                         | 0.02<br>(0.01 to<br>0.04)                            | 0.02<br>(0.01 to<br>0.04)                            | 0.03<br>(0.01 to<br>0.05)                            |
| Acute hepatitis B                     | 28.85<br>(22.50 to<br>36.60)                               | 35.60<br>(22.07 to<br>55.39)                               | 32.02<br>(19.43 to<br>50.22)                               | 42.56<br>(27.52 to<br>64.95)                               | 0.66<br>(0.52 to<br>0.82)                         | 0.87<br>(0.58 to<br>1.29)                            | 0.80<br>(0.52 to<br>1.18)                            | 1.02<br>(0.70 to<br>1.49)                            |
| Acute hepatitis C                     | 0.77<br>(0.55 to<br>1.05)                                  | 1.23<br>(0.75 to<br>1.95)                                  | 1.20<br>(0.73 to<br>1.91)                                  | 1.31<br>(0.82 to<br>2.01)                                  | 0.02<br>(0.01 to<br>0.03)                         | 0.03<br>(0.02 to<br>0.05)                            | 0.03<br>(0.02 to<br>0.05)                            | 0.04<br>(0.02 to<br>0.05)                            |
| Acute hepatitis E                     | 7.91<br>(5.59 to<br>10.97)                                 | 5.73<br>(3.64 to<br>8.91)                                  | 5.24<br>(3.25 to<br>8.23)                                  | 7.45<br>(4.74 to<br>11.47)                                 | 0.13<br>(0.10 to<br>0.18)                         | 0.12<br>(0.08 to<br>0.19)                            | 0.12<br>(0.08 to<br>0.18)                            | 0.15<br>(0.10 to<br>0.22)                            |
| Other unspecified infectious diseases | 118.33<br>(40.43 to<br>417.95)                             | 63.59<br>(29.34 to<br>160.74)                              | 51.14<br>(24.05 to<br>129.07)                              | 122.83<br>(52.83 to<br>325.83)                             | 1.47<br>(0.57 to<br>4.96)                         | 0.93<br>(0.51 to<br>2.11)                            | 0.78<br>(0.43 to<br>1.71)                            | 1.65<br>(0.81 to<br>3.97)                            |
| <b>Non-communicable diseases</b>      | <b>2,897.71</b><br><b>(2,380.20 to</b><br><b>3,037.11)</b> | <b>5,204.32</b><br><b>(3,977.15 to</b><br><b>6,590.06)</b> | <b>4,464.27</b><br><b>(3,414.28 to</b><br><b>5,650.33)</b> | <b>6,952.67</b><br><b>(5,231.74 to</b><br><b>8,993.52)</b> | <b>88.03</b><br><b>(77.01 to</b><br><b>98.69)</b> | <b>180.56</b><br><b>(146.94 to</b><br><b>215.22)</b> | <b>158.55</b><br><b>(130.51 to</b><br><b>187.42)</b> | <b>228.35</b><br><b>(184.21 to</b><br><b>277.11)</b> |
| <b>Uganda</b>                         |                                                            |                                                            |                                                            |                                                            |                                                   |                                                      |                                                      |                                                      |
| <b>Cause</b>                          | <b>YLLs (in 1000s)</b>                                     |                                                            |                                                            |                                                            | <b>Deaths (in 1000s)</b>                          |                                                      |                                                      |                                                      |
|                                       | <b>2016</b>                                                | <b>2040 Forecast</b>                                       | <b>2040 Better Scenario</b>                                | <b>2040 Worse Scenario</b>                                 | <b>2016</b>                                       | <b>2040 Forecast</b>                                 | <b>2040 Better Scenario</b>                          | <b>2040 Worse Scenario</b>                           |
| <b>Neoplasms</b>                      | <b>718.11</b><br><b>(616.48 to</b><br><b>829.20)</b>       | <b>1,856.16</b><br><b>(1,375.90 to</b><br><b>2,400.71)</b> | <b>1,789.27</b><br><b>(1,341.10 to</b><br><b>2,307.95)</b> | <b>1,991.00</b><br><b>(1,470.77 to</b><br><b>2,610.55)</b> | <b>23.02</b><br><b>(19.83 to</b><br><b>26.63)</b> | <b>60.26</b><br><b>(47.60 to</b><br><b>73.91)</b>    | <b>59.73</b><br><b>(47.97 to</b><br><b>72.92)</b>    | <b>61.78</b><br><b>(48.39 to</b><br><b>76.74)</b>    |
| Lip and oral cavity cancer            | 9.82<br>(8.19 to<br>11.84)                                 | 24.07<br>(10.56 to<br>46.64)                               | 19.17<br>(8.97 to<br>35.48)                                | 38.21<br>(15.13 to<br>77.63)                               | 0.33<br>(0.28 to<br>0.39)                         | 0.75<br>(0.37 to<br>1.36)                            | 0.63<br>(0.33 to<br>1.11)                            | 1.15<br>(0.50 to<br>2.15)                            |
| Nasopharynx cancer                    | 8.34<br>(6.83 to<br>10.18)                                 | 22.26<br>(9.55 to<br>43.84)                                | 17.29<br>(7.99 to<br>32.16)                                | 36.41<br>(14.26 to<br>73.82)                               | 0.24<br>(0.20 to<br>0.29)                         | 0.63<br>(0.30 to<br>1.21)                            | 0.51<br>(0.25 to<br>0.91)                            | 1.00<br>(0.43 to<br>1.92)                            |
| Other pharynx cancer                  | 5.98<br>(4.92 to<br>7.31)                                  | 13.25<br>(6.27 to<br>24.49)                                | 12.83<br>(6.07 to<br>23.72)                                | 18.98<br>(8.36 to<br>35.11)                                | 0.19<br>(0.16 to<br>0.23)                         | 0.41<br>(0.21 to<br>0.73)                            | 0.41<br>(0.21 to<br>0.72)                            | 0.58<br>(0.27 to<br>1.04)                            |
| Esophageal cancer                     | 56.38<br>(47.54 to<br>66.57)                               | 132.78<br>(71.42 to<br>234.18)                             | 108.36<br>(60.91 to<br>174.67)                             | 184.80<br>(93.83 to<br>325.94)                             | 2.24<br>(1.92 to<br>2.61)                         | 4.83<br>(2.81 to<br>7.96)                            | 4.13<br>(2.49 to<br>6.29)                            | 6.49<br>(3.50 to<br>10.89)                           |
| Stomach cancer                        | 21.34<br>(18.28 to<br>24.91)                               | 41.38<br>(31.23 to<br>54.37)                               | 39.13<br>(29.16 to<br>51.31)                               | 44.46<br>(33.81 to<br>59.54)                               | 0.83<br>(0.71 to<br>0.96)                         | 1.52<br>(1.22 to<br>1.93)                            | 1.48<br>(1.18 to<br>1.88)                            | 1.58<br>(1.27 to<br>2.06)                            |
| Colon and rectum cancer               | 39.73<br>(32.54 to<br>47.49)                               | 126.09<br>(78.09 to<br>190.63)                             | 126.86<br>(78.65 to<br>189.88)                             | 127.90<br>(76.69 to<br>197.37)                             | 1.45<br>(1.20 to<br>1.72)                         | 4.48<br>(2.96 to<br>6.52)                            | 4.62<br>(3.10 to<br>6.64)                            | 4.36<br>(2.82 to<br>6.46)                            |
| Liver cancer                          | 46.99<br>(38.97 to<br>56.08)                               | 130.59<br>(90.23 to<br>184.21)                             | 122.80<br>(86.46 to<br>171.39)                             | 148.52<br>(99.91 to<br>221.83)                             | 1.49<br>(1.25 to<br>1.77)                         | 4.01<br>(2.97 to<br>5.53)                            | 3.89<br>(2.92 to<br>5.18)                            | 4.42<br>(3.18 to<br>6.29)                            |
| Liver cancer due to hepatitis B       | 16.96<br>(12.78 to<br>21.75)                               | 49.11<br>(30.62 to<br>74.26)                               | 46.12<br>(28.88 to<br>67.92)                               | 51.89<br>(32.45 to<br>83.92)                               | 0.47<br>(0.36 to<br>0.61)                         | 1.35<br>(0.89 to<br>2.02)                            | 1.30<br>(0.87 to<br>1.88)                            | 1.40<br>(0.89 to<br>2.16)                            |
| Liver cancer due to hepatitis C       | 10.59<br>(7.20 to<br>14.14)                                | 30.11<br>(18.89 to<br>44.96)                               | 28.98<br>(18.60 to<br>42.61)                               | 31.20<br>(19.09 to<br>47.93)                               | 0.41<br>(0.29 to<br>0.54)                         | 1.12<br>(0.76 to<br>1.57)                            | 1.12<br>(0.77 to<br>1.58)                            | 1.11<br>(0.74 to<br>1.63)                            |
| Liver cancer due to alcohol use       | 8.54<br>(6.53 to<br>10.91)                                 | 22.06<br>(14.59 to<br>32.73)                               | 20.35<br>(13.71 to<br>29.45)                               | 33.73<br>(21.82 to<br>51.23)                               | 0.30<br>(0.24 to<br>0.38)                         | 0.73<br>(0.52 to<br>1.02)                            | 0.70<br>(0.50 to<br>0.97)                            | 1.07<br>(0.73 to<br>1.54)                            |
| Liver cancer due to other causes      | 10.90<br>(8.76 to<br>13.54)                                | 29.30<br>(18.98 to<br>42.77)                               | 27.35<br>(17.76 to<br>39.59)                               | 31.69<br>(20.56 to<br>46.56)                               | 0.30<br>(0.24 to<br>0.37)                         | 0.81<br>(0.56 to<br>1.15)                            | 0.78<br>(0.54 to<br>1.09)                            | 0.85<br>(0.57 to<br>1.25)                            |
| Gallbladder and biliary tract cancer  | 3.04<br>(2.47 to<br>3.70)                                  | 6.20<br>(4.81 to<br>7.91)                                  | 6.52<br>(5.04 to<br>8.37)                                  | 5.66<br>(4.47 to<br>6.98)                                  | 0.12<br>(0.10 to<br>0.15)                         | 0.24<br>(0.20 to<br>0.30)                            | 0.26<br>(0.21 to<br>0.32)                            | 0.21<br>(0.18 to<br>0.26)                            |
| Pancreatic cancer                     | 12.76<br>(10.72 to<br>15.06)                               | 45.67<br>(34.48 to<br>58.54)                               | 46.19<br>(34.87 to<br>59.08)                               | 41.67<br>(31.78 to<br>53.07)                               | 0.49<br>(0.41 to<br>0.57)                         | 1.65<br>(1.32 to<br>2.05)                            | 1.72<br>(1.38 to<br>2.12)                            | 1.46<br>(1.16 to<br>1.79)                            |

|                                     |                           |                              |                              |                              |                        |                         |                          |                         |
|-------------------------------------|---------------------------|------------------------------|------------------------------|------------------------------|------------------------|-------------------------|--------------------------|-------------------------|
| Larynx cancer                       | 5.72<br>(4.76 to 6.95)    | 14.57<br>(7.27 to 27.87)     | 9.67<br>(5.32 to 16.57)      | 21.33<br>(9.79 to 40.90)     | 0.21<br>(0.17 to 0.25) | 0.49<br>(0.27 to 0.94)  | 0.35<br>(0.21 to 0.58)   | 0.70<br>(0.34 to 1.29)  |
| Tracheal, bronchus, and lung cancer | 22.08<br>(18.66 to 26.11) | 78.95<br>(46.26 to 130.95)   | 42.21<br>(27.74 to 63.31)    | 86.32<br>(50.52 to 144.24)   | 0.88<br>(0.75 to 1.03) | 2.85<br>(1.82 to 4.47)  | 1.63<br>(1.13 to 2.28)   | 3.06<br>(1.89 to 4.87)  |
| Malignant skin melanoma             | 5.65<br>(4.45 to 7.26)    | 18.16<br>(14.01 to 23.79)    | 20.09<br>(15.37 to 26.69)    | 15.21<br>(11.92 to 19.78)    | 0.22<br>(0.17 to 0.28) | 0.69<br>(0.55 to 0.86)  | 0.78<br>(0.62 to 0.99)   | 0.55<br>(0.45 to 0.70)  |
| Non-melanoma skin cancer            | 3.10<br>(2.55 to 3.73)    | 8.68<br>(6.58 to 11.19)      | 8.54<br>(6.35 to 11.19)      | 8.91<br>(6.93 to 11.34)      | 0.13<br>(0.10 to 0.16) | 0.34<br>(0.27 to 0.41)  | 0.35<br>(0.27 to 0.42)   | 0.33<br>(0.27 to 0.40)  |
| Breast cancer                       | 69.01<br>(50.95 to 90.52) | 182.99<br>(120.48 to 269.11) | 182.81<br>(120.23 to 267.54) | 204.86<br>(131.42 to 310.94) | 2.17<br>(1.61 to 2.79) | 5.74<br>(3.99 to 8.12)  | 5.84<br>(4.10 to 8.27)   | 6.24<br>(4.18 to 9.10)  |
| Cervical cancer                     | 72.42<br>(51.49 to 94.69) | 138.64<br>(93.19 to 195.48)  | 129.15<br>(86.05 to 179.74)  | 152.91<br>(103.62 to 214.59) | 2.44<br>(1.74 to 3.12) | 4.44<br>(3.07 to 5.91)  | 4.22<br>(2.94 to 5.62)   | 4.77<br>(3.32 to 6.38)  |
| Uterine cancer                      | 9.01<br>(6.63 to 11.53)   | 20.68<br>(14.86 to 27.19)    | 19.30<br>(13.74 to 25.34)    | 23.18<br>(16.59 to 30.27)    | 0.33<br>(0.25 to 0.42) | 0.75<br>(0.57 to 0.94)  | 0.71<br>(0.54 to 0.89)   | 0.81<br>(0.61 to 1.01)  |
| Ovarian cancer                      | 15.25<br>(11.27 to 19.72) | 48.28<br>(34.76 to 65.73)    | 51.76<br>(37.13 to 70.16)    | 42.96<br>(30.72 to 58.54)    | 0.52<br>(0.39 to 0.66) | 1.62<br>(1.22 to 2.12)  | 1.77<br>(1.34 to 2.30)   | 1.40<br>(1.05 to 1.85)  |
| Prostate cancer                     | 58.50<br>(44.16 to 74.81) | 192.95<br>(146.67 to 239.36) | 209.34<br>(158.59 to 260.49) | 166.51<br>(125.71 to 204.79) | 3.16<br>(2.40 to 3.99) | 9.89<br>(7.76 to 11.86) | 11.01<br>(8.62 to 13.34) | 8.26<br>(6.22 to 10.16) |
| Testicular cancer                   | 1.62<br>(1.26 to 2.07)    | 3.62<br>(2.23 to 5.27)       | 3.49<br>(2.15 to 5.08)       | 3.86<br>(2.41 to 5.58)       | 0.03<br>(0.03 to 0.04) | 0.08<br>(0.05 to 0.11)  | 0.08<br>(0.05 to 0.11)   | 0.08<br>(0.06 to 0.12)  |

**Uganda**

| Cause                           | YLLs (in 1000s)            |                              |                              |                              | Deaths (in 1000s)      |                        |                        |                        |
|---------------------------------|----------------------------|------------------------------|------------------------------|------------------------------|------------------------|------------------------|------------------------|------------------------|
|                                 | 2016                       | 2040 Forecast                | 2040 Better Scenario         | 2040 Worse Scenario          | 2016                   | 2040 Forecast          | 2040 Better Scenario   | 2040 Worse Scenario    |
| Kidney cancer                   | 7.97<br>(6.18 to 10.54)    | 17.54<br>(13.44 to 21.92)    | 18.22<br>(13.94 to 22.88)    | 17.33<br>(13.33 to 22.22)    | 0.16<br>(0.14 to 0.20) | 0.46<br>(0.37 to 0.56) | 0.50<br>(0.40 to 0.60) | 0.41<br>(0.33 to 0.50) |
| Bladder cancer                  | 6.55<br>(5.42 to 7.70)     | 17.04<br>(12.53 to 22.15)    | 16.45<br>(12.20 to 21.31)    | 16.87<br>(12.61 to 21.94)    | 0.31<br>(0.26 to 0.36) | 0.75<br>(0.59 to 0.95) | 0.76<br>(0.60 to 0.95) | 0.70<br>(0.55 to 0.90) |
| Brain and nervous system cancer | 21.72<br>(17.45 to 26.59)  | 52.70<br>(37.49 to 69.37)    | 54.33<br>(38.19 to 72.06)    | 52.76<br>(38.59 to 68.22)    | 0.47<br>(0.36 to 0.59) | 1.31<br>(0.93 to 1.72) | 1.38<br>(0.97 to 1.83) | 1.23<br>(0.89 to 1.58) |
| Thyroid cancer                  | 7.85<br>(6.39 to 9.54)     | 17.38<br>(12.75 to 23.45)    | 16.40<br>(12.00 to 22.05)    | 19.39<br>(14.09 to 26.71)    | 0.25<br>(0.20 to 0.30) | 0.54<br>(0.42 to 0.70) | 0.52<br>(0.40 to 0.67) | 0.59<br>(0.44 to 0.77) |
| Mesothelioma                    | 0.87<br>(0.63 to 1.17)     | 2.54<br>(1.66 to 3.75)       | 2.57<br>(1.65 to 3.86)       | 2.48<br>(1.66 to 3.59)       | 0.03<br>(0.02 to 0.04) | 0.08<br>(0.05 to 0.12) | 0.08<br>(0.06 to 0.12) | 0.08<br>(0.05 to 0.11) |
| Hodgkin lymphoma                | 14.98<br>(10.21 to 19.35)  | 16.70<br>(10.33 to 23.84)    | 14.67<br>(9.01 to 20.86)     | 21.75<br>(13.32 to 30.89)    | 0.31<br>(0.21 to 0.38) | 0.38<br>(0.24 to 0.51) | 0.34<br>(0.21 to 0.46) | 0.47<br>(0.29 to 0.63) |
| Non-Hodgkin lymphoma            | 91.77<br>(75.15 to 110.36) | 192.47<br>(143.24 to 246.06) | 196.79<br>(145.91 to 254.11) | 200.48<br>(150.79 to 256.13) | 1.72<br>(1.44 to 2.02) | 4.16<br>(3.24 to 5.20) | 4.35<br>(3.36 to 5.50) | 4.05<br>(3.17 to 5.05) |
| Multiple myeloma                | 8.68<br>(7.06 to 10.70)    | 28.85<br>(21.43 to 37.75)    | 30.72<br>(22.55 to 40.05)    | 25.86<br>(19.50 to 33.74)    | 0.30<br>(0.24 to 0.37) | 0.98<br>(0.76 to 1.23) | 1.05<br>(0.82 to 1.34) | 0.86<br>(0.67 to 1.09) |
| Leukemia                        | 32.13<br>(25.18 to 39.00)  | 59.17<br>(42.36 to 80.75)    | 58.09<br>(41.64 to 79.84)    | 62.58<br>(44.73 to 83.90)    | 0.66<br>(0.53 to 0.78) | 1.40<br>(1.06 to 1.79) | 1.40<br>(1.06 to 1.80) | 1.40<br>(1.06 to 1.79) |
| Acute lymphoid leukemia         | 10.79<br>(7.77 to 13.64)   | 18.21<br>(12.26 to 25.33)    | 18.20<br>(12.24 to 25.55)    | 19.16<br>(13.09 to 26.49)    | 0.18<br>(0.14 to 0.22) | 0.36<br>(0.26 to 0.49) | 0.37<br>(0.26 to 0.50) | 0.36<br>(0.26 to 0.48) |

|                                 |                                        |                                            |                                          |                                              |                                     |                                     |                                     |                                      |
|---------------------------------|----------------------------------------|--------------------------------------------|------------------------------------------|----------------------------------------------|-------------------------------------|-------------------------------------|-------------------------------------|--------------------------------------|
| Chronic lymphoid leukemia       | 0.73<br>(0.55 to<br>0.91)              | 1.78<br>(1.30 to<br>2.37)                  | 1.80<br>(1.32 to<br>2.41)                | 1.71<br>(1.26 to<br>2.28)                    | 0.03<br>(0.02 to<br>0.04)           | 0.07<br>(0.05 to<br>0.09)           | 0.07<br>(0.06 to<br>0.10)           | 0.07<br>(0.06 to<br>0.09)            |
| Acute myeloid leukemia          | 6.14<br>(4.94 to<br>7.51)              | 16.74<br>(12.12 to<br>22.62)               | 17.26<br>(12.47 to<br>23.37)             | 16.08<br>(11.71 to<br>21.40)                 | 0.12<br>(0.10 to<br>0.15)           | 0.39<br>(0.29 to<br>0.51)           | 0.41<br>(0.31 to<br>0.54)           | 0.35<br>(0.27 to<br>0.46)            |
| Chronic myeloid leukemia        | 3.06<br>(2.29 to<br>3.94)              | 5.04<br>(3.20 to<br>7.48)                  | 4.87<br>(3.12 to<br>7.24)                | 5.11<br>(3.24 to<br>7.55)                    | 0.07<br>(0.05 to<br>0.09)           | 0.12<br>(0.08 to<br>0.17)           | 0.12<br>(0.08 to<br>0.17)           | 0.12<br>(0.08 to<br>0.17)            |
| Other leukemia                  | 11.41<br>(8.45 to<br>14.65)            | 17.41<br>(11.67 to<br>24.67)               | 15.95<br>(10.55 to<br>22.64)             | 20.53<br>(13.81 to<br>28.80)                 | 0.25<br>(0.19 to<br>0.31)           | 0.45<br>(0.32 to<br>0.58)           | 0.43<br>(0.31 to<br>0.55)           | 0.49<br>(0.35 to<br>0.64)            |
| Other neoplasms                 | 58.84<br>(49.07 to<br>76.45)           | 201.96<br>(138.28 to<br>275.48)            | 205.53<br>(139.43 to<br>282.67)          | 198.83<br>(138.64 to<br>266.89)              | 1.36<br>(1.14 to<br>1.70)           | 4.80<br>(3.56 to<br>6.27)           | 4.96<br>(3.64 to<br>6.55)           | 4.57<br>(3.43 to<br>5.87)            |
| <b>Cardiovascular diseases</b>  | <b>705.49</b><br>(611.79 to<br>813.69) | <b>1,230.06</b><br>(840.22 to<br>1,783.93) | <b>813.44</b><br>(581.44 to<br>1,141.97) | <b>2,152.22</b><br>(1,392.24 to<br>3,277.29) | <b>30.71</b><br>(26.69 to<br>35.10) | <b>52.34</b><br>(39.21 to<br>72.37) | <b>57.07</b><br>(28.74 to<br>48.98) | <b>84.63</b><br>(59.94 to<br>120.76) |
| Rheumatic heart disease         | 14.66<br>(11.17 to<br>18.29)           | 13.28<br>(8.76 to<br>19.41)                | 11.29<br>(7.29 to<br>16.61)              | 18.06<br>(11.89 to<br>26.28)                 | 0.44<br>(0.33 to<br>0.55)           | 0.42<br>(0.29 to<br>0.58)           | 0.37<br>(0.25 to<br>0.52)           | 0.54<br>(0.38 to<br>0.75)            |
| Ischemic heart disease          | 231.99<br>(192.20 to<br>282.28)        | 404.08<br>(224.78 to<br>710.11)            | 215.16<br>(125.16 to<br>386.62)          | 787.52<br>(424.54 to<br>1,375.66)            | 11.09<br>(9.28 to<br>13.38)         | 18.25<br>(11.21 to<br>30.93)        | 10.85<br>(6.73 to<br>18.31)         | 32.49<br>(19.11 to<br>54.86)         |
| Stroke                          | 236.72<br>(195.26 to<br>282.24)        | 359.54<br>(203.47 to<br>596.57)            | 187.67<br>(115.44 to<br>302.23)          | 751.11<br>(409.35 to<br>1,287.95)            | 10.41<br>(8.57 to<br>12.32)         | 15.29<br>(9.76 to<br>24.25)         | 8.85<br>(5.94 to<br>13.20)          | 29.15<br>(17.40 to<br>47.02)         |
| Ischemic stroke                 | 64.44<br>(49.97 to<br>78.58)           | 96.87<br>(57.14 to<br>164.16)              | 57.91<br>(35.00 to<br>96.35)             | 160.80<br>(90.03 to<br>281.62)               | 3.78<br>(2.99 to<br>4.57)           | 5.54<br>(3.43 to<br>9.69)           | 3.68<br>(2.35 to<br>6.34)           | 8.40<br>(5.00 to<br>14.79)           |
| Intracerebral hemorrhage        | 172.28<br>(141.33 to<br>205.90)        | 262.68<br>(135.23 to<br>468.47)            | 129.75<br>(71.09 to<br>226.96)           | 590.31<br>(287.81 to<br>1,083.90)            | 6.63<br>(5.41 to<br>7.91)           | 9.75<br>(5.61 to<br>16.30)          | 5.17<br>(3.14 to<br>8.40)           | 20.76<br>(11.25 to<br>36.45)         |
| Hypertensive heart disease      | 52.72<br>(35.25 to<br>71.71)           | 91.88<br>(51.70 to<br>159.44)              | 76.04<br>(43.88 to<br>126.67)            | 153.61<br>(77.32 to<br>302.95)               | 2.62<br>(1.73 to<br>3.54)           | 4.39<br>(2.55 to<br>7.49)           | 3.84<br>(2.30 to<br>6.13)           | 6.82<br>(3.63 to<br>13.36)           |
| Cardiomyopathy and myocarditis  | 28.11<br>(19.47 to<br>40.17)           | 58.93<br>(34.36 to<br>96.45)               | 59.42<br>(34.33 to<br>97.42)             | 64.97<br>(38.50 to<br>105.88)                | 0.69<br>(0.48 to<br>0.96)           | 1.63<br>(1.00 to<br>2.55)           | 1.70<br>(1.03 to<br>2.64)           | 1.69<br>(1.02 to<br>2.67)            |
| Myocarditis                     | 4.36<br>(2.40 to<br>8.26)              | 7.08<br>(2.95 to<br>13.95)                 | 6.74<br>(2.76 to<br>13.32)               | 8.20<br>(3.60 to<br>15.88)                   | 0.08<br>(0.04 to<br>0.15)           | 0.16<br>(0.06 to<br>0.32)           | 0.16<br>(0.06 to<br>0.31)           | 0.17<br>(0.07 to<br>0.33)            |
| <b>Uganda</b>                   |                                        |                                            |                                          |                                              |                                     |                                     |                                     |                                      |
| <b>Cause</b>                    | <b>YLLs (in 1000s)</b>                 |                                            |                                          |                                              | <b>Deaths (in 1000s)</b>            |                                     |                                     |                                      |
|                                 | <b>2016</b>                            | <b>2040 Forecast</b>                       | <b>2040 Better Scenario</b>              | <b>2040 Worse Scenario</b>                   | <b>2016</b>                         | <b>2040 Forecast</b>                | <b>2040 Better Scenario</b>         | <b>2040 Worse Scenario</b>           |
| Alcoholic cardiomyopathy        | 2.12<br>(1.10 to<br>3.88)              | 5.21<br>(2.41 to<br>10.98)                 | 5.47<br>(2.52 to<br>11.77)               | 6.78<br>(3.23 to<br>13.28)                   | 0.06<br>(0.03 to<br>0.11)           | 0.15<br>(0.07 to<br>0.31)           | 0.16<br>(0.08 to<br>0.32)           | 0.19<br>(0.09 to<br>0.36)            |
| Other cardiomyopathy            | 21.63<br>(15.19 to<br>30.02)           | 46.64<br>(26.54 to<br>77.19)               | 47.21<br>(26.85 to<br>77.16)             | 49.99<br>(28.67 to<br>82.15)                 | 0.55<br>(0.38 to<br>0.76)           | 1.32<br>(0.80 to<br>2.12)           | 1.38<br>(0.83 to<br>2.19)           | 1.33<br>(0.79 to<br>2.14)            |
| Atrial fibrillation and flutter | 3.19<br>(2.39 to<br>4.17)              | 7.43<br>(5.28 to<br>9.87)                  | 7.73<br>(5.45 to<br>10.32)               | 7.36<br>(5.14 to<br>10.08)                   | 0.28<br>(0.21 to<br>0.37)           | 0.64<br>(0.44 to<br>0.87)           | 0.72<br>(0.50 to<br>0.96)           | 0.57<br>(0.39 to<br>0.79)            |
| Aortic aneurysm                 | 6.16<br>(4.86 to<br>7.97)              | 15.97<br>(10.68 to<br>22.97)               | 15.28<br>(10.34 to<br>21.69)             | 16.15<br>(10.75 to<br>23.85)                 | 0.26<br>(0.21 to<br>0.33)           | 0.63<br>(0.47 to<br>0.85)           | 0.64<br>(0.48 to<br>0.85)           | 0.60<br>(0.44 to<br>0.83)            |
| Peripheral artery disease       | 0.43<br>(0.17 to<br>0.66)              | 1.72<br>(0.70 to<br>2.83)                  | 1.77<br>(0.71 to<br>2.93)                | 1.54<br>(0.62 to<br>2.58)                    | 0.03<br>(0.01 to<br>0.04)           | 0.11<br>(0.04 to<br>0.18)           | 0.13<br>(0.05 to<br>0.21)           | 0.09<br>(0.03 to<br>0.15)            |
| Endocarditis                    | 13.76<br>(10.15 to<br>17.31)           | 32.04<br>(19.93 to<br>46.32)               | 31.17<br>(19.22 to<br>45.70)             | 36.50<br>(22.48 to<br>53.14)                 | 0.37<br>(0.27 to<br>0.47)           | 0.92<br>(0.59 to<br>1.29)           | 0.93<br>(0.60 to<br>1.30)           | 0.97<br>(0.62 to<br>1.37)            |

|                                                                |                                                      |                                                      |                                                      |                                                      |                                                |                                                  |                                                  |                                                  |
|----------------------------------------------------------------|------------------------------------------------------|------------------------------------------------------|------------------------------------------------------|------------------------------------------------------|------------------------------------------------|--------------------------------------------------|--------------------------------------------------|--------------------------------------------------|
| Other cardiovascular and circulatory diseases                  | 117.74<br>(86.12 to<br>156.54)                       | 245.19<br>(163.18 to<br>350.72)                      | 207.92<br>(140.94 to<br>290.91)                      | 315.39<br>(201.66 to<br>456.33)                      | 4.52<br>(3.10 to<br>6.11)                      | 10.05<br>(6.73 to<br>13.96)                      | 9.05<br>(6.17 to<br>12.29)                       | 11.69<br>(7.64 to<br>16.51)                      |
| <b>Chronic respiratory diseases</b>                            | <b>140.59</b><br><b>(117.63 to</b><br><b>171.80)</b> | <b>203.40</b><br><b>(135.87 to</b><br><b>316.34)</b> | <b>127.14</b><br><b>(91.35 to</b><br><b>176.52)</b>  | <b>279.59</b><br><b>(183.75 to</b><br><b>435.47)</b> | <b>5.41</b><br><b>(4.53 to</b><br><b>6.39)</b> | <b>8.11</b><br><b>(5.57 to</b><br><b>12.59)</b>  | <b>5.17</b><br><b>(3.91 to</b><br><b>7.11)</b>   | <b>10.48</b><br><b>(6.97 to</b><br><b>16.31)</b> |
| Chronic obstructive pulmonary disease                          | 74.50<br>(59.57 to<br>90.56)                         | 138.94<br>(80.42 to<br>244.94)                       | 71.62<br>(46.22 to<br>112.13)                        | 196.38<br>(111.72 to<br>344.57)                      | 3.58<br>(2.88 to<br>4.30)                      | 6.14<br>(3.74 to<br>10.59)                       | 3.42<br>(2.30 to<br>5.22)                        | 8.12<br>(4.80 to<br>14.06)                       |
| Pneumoconiosis                                                 | 0.44<br>(0.32 to<br>0.63)                            | 0.82<br>(0.57 to<br>1.16)                            | 0.76<br>(0.52 to<br>1.12)                            | 0.82<br>(0.58 to<br>1.14)                            | 0.02<br>(0.01 to<br>0.03)                      | 0.04<br>(0.03 to<br>0.05)                        | 0.03<br>(0.02 to<br>0.05)                        | 0.03<br>(0.02 to<br>0.05)                        |
| Silicosis                                                      | 0.09<br>(0.05 to<br>0.16)                            | 0.11<br>(0.05 to<br>0.20)                            | 0.11<br>(0.05 to<br>0.20)                            | 0.11<br>(0.06 to<br>0.20)                            | 0.00<br>(0.00 to<br>0.01)                      | 0.01<br>(0.00 to<br>0.01)                        | 0.01<br>(0.00 to<br>0.01)                        | 0.01<br>(0.00 to<br>0.01)                        |
| Asbestosis                                                     | 0.10<br>(0.06 to<br>0.16)                            | 0.26<br>(0.14 to<br>0.41)                            | 0.27<br>(0.14 to<br>0.42)                            | 0.24<br>(0.13 to<br>0.38)                            | 0.00<br>(0.00 to<br>0.01)                      | 0.01<br>(0.00 to<br>0.02)                        | 0.01<br>(0.00 to<br>0.02)                        | 0.01<br>(0.00 to<br>0.01)                        |
| Coal workers pneumoconiosis                                    | 0.03<br>(0.02 to<br>0.07)                            | 0.06<br>(0.02 to<br>0.11)                            | 0.04<br>(0.02 to<br>0.09)                            | 0.07<br>(0.03 to<br>0.14)                            | 0.00<br>(0.00 to<br>0.00)                      | 0.00<br>(0.00 to<br>0.00)                        | 0.00<br>(0.00 to<br>0.00)                        | 0.00<br>(0.00 to<br>0.01)                        |
| Other pneumoconiosis                                           | 0.21<br>(0.14 to<br>0.34)                            | 0.40<br>(0.24 to<br>0.62)                            | 0.35<br>(0.20 to<br>0.56)                            | 0.40<br>(0.24 to<br>0.60)                            | 0.01<br>(0.01 to<br>0.02)                      | 0.02<br>(0.01 to<br>0.03)                        | 0.02<br>(0.01 to<br>0.03)                        | 0.02<br>(0.01 to<br>0.03)                        |
| Asthma                                                         | 56.98<br>(44.44 to<br>77.86)                         | 46.07<br>(30.95 to<br>69.90)                         | 37.77<br>(25.89 to<br>55.31)                         | 63.45<br>(42.23 to<br>97.57)                         | 1.61<br>(1.24 to<br>2.32)                      | 1.44<br>(0.98 to<br>2.17)                        | 1.22<br>(0.86 to<br>1.77)                        | 1.85<br>(1.23 to<br>2.88)                        |
| Interstitial lung disease and pulmonary sarcoidosis            | 1.78<br>(0.73 to<br>3.10)                            | 5.59<br>(2.27 to<br>9.91)                            | 6.13<br>(2.55 to<br>10.61)                           | 4.74<br>(1.93 to<br>8.48)                            | 0.07<br>(0.03 to<br>0.11)                      | 0.21<br>(0.08 to<br>0.37)                        | 0.24<br>(0.10 to<br>0.41)                        | 0.17<br>(0.07 to<br>0.29)                        |
| Other chronic respiratory diseases                             | 6.88<br>(3.10 to<br>12.71)                           | 11.98<br>(5.99 to<br>18.62)                          | 10.85<br>(5.60 to<br>16.81)                          | 14.21<br>(6.89 to<br>22.75)                          | 0.14<br>(0.07 to<br>0.21)                      | 0.28<br>(0.15 to<br>0.42)                        | 0.26<br>(0.15 to<br>0.39)                        | 0.31<br>(0.16 to<br>0.47)                        |
| <b>Cirrhosis and other chronic liver diseases</b>              | <b>148.14</b><br><b>(85.17 to</b><br><b>206.57)</b>  | <b>362.05</b><br><b>(179.95 to</b><br><b>562.64)</b> | <b>344.49</b><br><b>(171.68 to</b><br><b>537.21)</b> | <b>432.91</b><br><b>(223.05 to</b><br><b>661.17)</b> | <b>4.35</b><br><b>(2.59 to</b><br><b>6.03)</b> | <b>10.59</b><br><b>(5.69 to</b><br><b>15.71)</b> | <b>10.25</b><br><b>(5.45 to</b><br><b>15.31)</b> | <b>12.33</b><br><b>(6.84 to</b><br><b>18.12)</b> |
| Cirrhosis and other chronic liver diseases due to hepatitis B  | 45.50<br>(23.06 to<br>66.85)                         | 127.70<br>(54.74 to<br>214.27)                       | 123.35<br>(52.96 to<br>205.81)                       | 133.95<br>(59.51 to<br>219.34)                       | 1.40<br>(0.76 to<br>2.04)                      | 3.76<br>(1.83 to<br>5.88)                        | 3.69<br>(1.80 to<br>5.80)                        | 3.86<br>(1.89 to<br>6.00)                        |
| Cirrhosis and other chronic liver diseases due to hepatitis C  | 28.30<br>(13.37 to<br>48.92)                         | 79.16<br>(34.95 to<br>146.64)                        | 76.24<br>(33.27 to<br>142.72)                        | 83.65<br>(36.75 to<br>156.81)                        | 0.89<br>(0.44 to<br>1.48)                      | 2.41<br>(1.14 to<br>4.21)                        | 2.35<br>(1.12 to<br>4.13)                        | 2.49<br>(1.16 to<br>4.39)                        |
| Cirrhosis and other chronic liver diseases due to alcohol use  | 38.05<br>(20.40 to<br>54.77)                         | 83.25<br>(39.63 to<br>133.89)                        | 77.26<br>(36.68 to<br>125.38)                        | 132.94<br>(66.64 to<br>209.87)                       | 1.24<br>(0.70 to<br>1.76)                      | 2.65<br>(1.36 to<br>4.06)                        | 2.50<br>(1.28 to<br>3.84)                        | 4.06<br>(2.19 to<br>6.08)                        |
| Cirrhosis and other chronic liver diseases due to other causes | 36.29<br>(23.51 to<br>49.03)                         | 71.94<br>(40.07 to<br>111.58)                        | 67.64<br>(37.46 to<br>104.54)                        | 82.37<br>(46.41 to<br>125.45)                        | 0.82<br>(0.52 to<br>1.10)                      | 1.77<br>(1.04 to<br>2.59)                        | 1.70<br>(1.00 to<br>2.52)                        | 1.92<br>(1.14 to<br>2.81)                        |
| <b>Digestive diseases</b>                                      | <b>242.88</b><br><b>(192.29 to</b><br><b>318.49)</b> | <b>358.64</b><br><b>(257.32 to</b><br><b>496.58)</b> | <b>330.63</b><br><b>(235.15 to</b><br><b>462.69)</b> | <b>435.88</b><br><b>(314.10 to</b><br><b>609.41)</b> | <b>6.73</b><br><b>(5.47 to</b><br><b>8.23)</b> | <b>11.04</b><br><b>(8.59 to</b><br><b>14.47)</b> | <b>10.54</b><br><b>(8.22 to</b><br><b>13.83)</b> | <b>12.43</b><br><b>(9.68 to</b><br><b>16.53)</b> |
| Peptic ulcer disease                                           | 41.17<br>(31.46 to<br>52.99)                         | 41.26<br>(27.96 to<br>57.50)                         | 33.87<br>(22.59 to<br>48.13)                         | 55.43<br>(37.74 to<br>77.30)                         | 1.46<br>(1.12 to<br>1.84)                      | 1.53<br>(1.12 to<br>2.04)                        | 1.30<br>(0.93 to<br>1.74)                        | 1.94<br>(1.41 to<br>2.57)                        |

**Uganda**

| Cause                    | YLLs (in 1000s)              |                              |                              |                              | Deaths (in 1000s)         |                           |                           |                           |
|--------------------------|------------------------------|------------------------------|------------------------------|------------------------------|---------------------------|---------------------------|---------------------------|---------------------------|
|                          | 2016                         | 2040 Forecast                | 2040 Better Scenario         | 2040 Worse Scenario          | 2016                      | 2040 Forecast             | 2040 Better Scenario      | 2040 Worse Scenario       |
| Gastritis and duodenitis | 10.92<br>(7.19 to<br>16.67)  | 23.10<br>(13.91 to<br>37.94) | 21.81<br>(12.95 to<br>36.01) | 25.68<br>(15.73 to<br>41.62) | 0.36<br>(0.23 to<br>0.55) | 0.78<br>(0.49 to<br>1.24) | 0.77<br>(0.47 to<br>1.22) | 0.82<br>(0.52 to<br>1.28) |
| Appendicitis             | 19.04<br>(13.11 to<br>28.13) | 20.36<br>(12.86 to<br>31.40) | 17.81<br>(11.23 to<br>27.38) | 27.09<br>(17.05 to<br>42.30) | 0.38<br>(0.26 to<br>0.54) | 0.48<br>(0.32 to<br>0.73) | 0.43<br>(0.29 to<br>0.67) | 0.59<br>(0.40 to<br>0.91) |





| Uganda                                                     |                              |                              |                              |                                |                         |                           |                           |                           |
|------------------------------------------------------------|------------------------------|------------------------------|------------------------------|--------------------------------|-------------------------|---------------------------|---------------------------|---------------------------|
| Cause                                                      | YLLs (in 1000s)              |                              |                              |                                | Deaths (in 1000s)       |                           |                           |                           |
|                                                            | 2016                         | 2040 Forecast                | 2040 Better Scenario         | 2040 Worse Scenario            | 2016                    | 2040 Forecast             | 2040 Better Scenario      | 2040 Worse Scenario       |
|                                                            | 322.72<br>(279.45 to 369.42) | 630.51<br>(439.27 to 861.75) | 533.21<br>(373.33 to 725.47) | 877.63<br>(614.44 to 1,201.24) | 9.35<br>(8.06 to 10.62) | 22.23<br>(16.34 to 31.45) | 19.28<br>(13.95 to 27.09) | 29.22<br>(21.25 to 41.01) |
| Diabetes, urogenital, blood, and endocrine diseases        |                              |                              |                              |                                |                         |                           |                           |                           |
| Diabetes mellitus                                          | 116.05<br>(92.64 to 137.55)  | 314.96<br>(191.10 to 490.93) | 260.01<br>(160.48 to 398.28) | 452.42<br>(270.35 to 716.97)   | 4.83<br>(3.87 to 5.72)  | 12.74<br>(8.47 to 18.66)  | 10.96<br>(7.33 to 15.75)  | 17.19<br>(11.21 to 25.60) |
| Acute glomerulonephritis                                   | 0.53<br>(0.37 to 0.90)       | 0.87<br>(0.56 to 1.46)       | 0.78<br>(0.50 to 1.28)       | 1.18<br>(0.76 to 2.00)         | 0.01<br>(0.01 to 0.01)  | 0.02<br>(0.02 to 0.02)    | 0.01<br>(0.01 to 0.02)    | 0.02<br>(0.01 to 0.03)    |
| Chronic kidney disease                                     | 60.57<br>(51.35 to 71.65)    | 136.35<br>(78.87 to 272.06)  | 109.65<br>(63.45 to 215.18)  | 193.31<br>(112.82 to 373.09)   | 1.82<br>(1.54 to 2.12)  | 5.24<br>(2.39 to 14.69)   | 4.30<br>(1.99 to 12.10)   | 7.02<br>(3.21 to 17.97)   |
| Chronic kidney disease due to diabetes mellitus            | 12.19<br>(9.83 to 15.25)     | 36.95<br>(18.94 to 81.87)    | 29.65<br>(15.26 to 66.16)    | 50.61<br>(25.87 to 115.82)     | 0.47<br>(0.38 to 0.57)  | 1.60<br>(0.67 to 4.73)    | 1.31<br>(0.55 to 3.83)    | 2.12<br>(0.89 to 6.01)    |
| Chronic kidney disease due to hypertension                 | 6.95<br>(5.54 to 8.55)       | 20.98<br>(9.20 to 62.38)     | 16.96<br>(7.49 to 50.90)     | 28.47<br>(12.16 to 78.55)      | 0.36<br>(0.29 to 0.44)  | 1.21<br>(0.43 to 4.07)    | 1.01<br>(0.37 to 3.39)    | 1.55<br>(0.56 to 4.81)    |
| Chronic kidney disease due to glomerulonephritis           | 19.69<br>(16.21 to 23.94)    | 36.60<br>(22.48 to 60.09)    | 29.42<br>(18.17 to 48.07)    | 53.54<br>(33.56 to 88.93)      | 0.45<br>(0.37 to 0.54)  | 1.06<br>(0.55 to 2.54)    | 0.86<br>(0.44 to 2.01)    | 1.49<br>(0.77 to 3.40)    |
| Chronic kidney disease due to other and unspecified causes | 21.74<br>(17.87 to 26.30)    | 41.83<br>(24.81 to 73.41)    | 33.62<br>(20.10 to 59.53)    | 60.69<br>(36.62 to 104.83)     | 0.54<br>(0.44 to 0.65)  | 1.36<br>(0.66 to 3.44)    | 1.11<br>(0.55 to 2.82)    | 1.87<br>(0.93 to 4.38)    |
| Urinary diseases and male infertility                      | 30.09<br>(24.83 to 35.73)    | 59.32<br>(42.81 to 79.30)    | 55.82<br>(39.81 to 74.47)    | 68.26<br>(49.19 to 90.83)      | 0.80<br>(0.65 to 0.95)  | 1.68<br>(1.32 to 2.09)    | 1.64<br>(1.26 to 2.04)    | 1.80<br>(1.41 to 2.27)    |
| Urinary tract infections                                   | 13.19<br>(8.61 to 17.64)     | 33.50<br>(22.05 to 46.64)    | 32.68<br>(21.57 to 45.83)    | 36.32<br>(23.96 to 51.21)      | 0.34<br>(0.23 to 0.47)  | 0.97<br>(0.68 to 1.28)    | 0.99<br>(0.70 to 1.28)    | 0.98<br>(0.68 to 1.30)    |
| Urolithiasis                                               | 0.87<br>(0.51 to 1.31)       | 2.07<br>(1.13 to 3.31)       | 1.94<br>(1.07 to 3.13)       | 2.39<br>(1.31 to 3.88)         | 0.02<br>(0.01 to 0.03)  | 0.04<br>(0.02 to 0.07)    | 0.04<br>(0.02 to 0.07)    | 0.05<br>(0.03 to 0.08)    |
| Other urinary diseases                                     | 16.03<br>(11.12 to 21.51)    | 23.75<br>(13.35 to 38.56)    | 21.20<br>(11.79 to 34.91)    | 29.55<br>(17.14 to 46.27)      | 0.43<br>(0.30 to 0.58)  | 0.66<br>(0.39 to 1.03)    | 0.61<br>(0.36 to 0.95)    | 0.77<br>(0.47 to 1.17)    |
| Gynecological diseases                                     | 2.87<br>(1.93 to 4.25)       | 5.04<br>(3.02 to 7.85)       | 4.35<br>(2.60 to 6.83)       | 6.50<br>(3.91 to 10.33)        | 0.07<br>(0.04 to 0.10)  | 0.12<br>(0.07 to 0.18)    | 0.10<br>(0.06 to 0.16)    | 0.15<br>(0.09 to 0.24)    |
| Uterine fibroids                                           | 0.98<br>(0.43 to 1.80)       | 1.50<br>(0.58 to 3.14)       | 1.26<br>(0.48 to 2.66)       | 2.00<br>(0.78 to 4.05)         | 0.03<br>(0.01 to 0.05)  | 0.04<br>(0.02 to 0.08)    | 0.03<br>(0.01 to 0.07)    | 0.05<br>(0.02 to 0.10)    |
| Polycystic ovarian syndrome                                | 0.30<br>(0.05 to 0.73)       | 0.33<br>(0.04 to 0.89)       | 0.25<br>(0.03 to 0.70)       | 0.50<br>(0.07 to 1.33)         | 0.01<br>(0.00 to 0.02)  | 0.01<br>(0.00 to 0.02)    | 0.01<br>(0.00 to 0.02)    | 0.01<br>(0.00 to 0.03)    |
| Endometriosis                                              | 0.01<br>(0.00 to 0.04)       | 0.03<br>(0.01 to 0.11)       | 0.03<br>(0.01 to 0.09)       | 0.04<br>(0.01 to 0.14)         | 0.00<br>(0.00 to 0.00)  | 0.00<br>(0.00 to 0.00)    | 0.00<br>(0.00 to 0.00)    | 0.00<br>(0.00 to 0.00)    |
| Genital prolapse                                           | 0.07<br>(0.03 to 0.15)       | 0.09<br>(0.03 to 0.22)       | 0.08<br>(0.03 to 0.18)       | 0.12<br>(0.04 to 0.30)         | 0.00<br>(0.00 to 0.01)  | 0.00<br>(0.00 to 0.01)    | 0.00<br>(0.00 to 0.01)    | 0.00<br>(0.00 to 0.01)    |
| Other gynecological diseases                               | 1.51<br>(0.71 to 2.47)       | 3.09<br>(1.56 to 5.32)       | 2.73<br>(1.38 to 4.72)       | 3.84<br>(1.86 to 6.82)         | 0.03<br>(0.01 to 0.05)  | 0.07<br>(0.03 to 0.12)    | 0.06<br>(0.03 to 0.10)    | 0.08<br>(0.04 to 0.15)    |
| Hemoglobinopathies and hemolytic anemias                   | 96.10<br>(74.21 to 131.51)   | 90.25<br>(64.44 to 122.52)   | 80.56<br>(56.69 to 109.67)   | 125.47<br>(89.26 to 172.42)    | 1.47<br>(1.19 to 1.92)  | 1.81<br>(1.36 to 2.34)    | 1.65<br>(1.23 to 2.15)    | 2.32<br>(1.74 to 3.04)    |
| Thalassemias                                               | 0.29<br>(0.06 to 0.99)       | 0.18<br>(0.04 to 0.66)       | 0.19<br>(0.04 to 0.70)       | 0.23<br>(0.05 to 0.83)         | 0.00<br>(0.00 to 0.01)  | 0.00<br>(0.00 to 0.01)    | 0.00<br>(0.00 to 0.01)    | 0.00<br>(0.00 to 0.01)    |

|                                                   |                                        |                                        |                                        |                                        |                                  |                                  |                                  |                                   |
|---------------------------------------------------|----------------------------------------|----------------------------------------|----------------------------------------|----------------------------------------|----------------------------------|----------------------------------|----------------------------------|-----------------------------------|
| Sickle cell disorders                             | 86.28<br>(64.74 to<br>119.84)          | 70.78<br>(49.10 to<br>99.49)           | 63.05<br>(43.44 to<br>88.87)           | 101.72<br>(70.95 to<br>148.03)         | 1.11<br>(0.86 to<br>1.52)        | 1.07<br>(0.75 to<br>1.47)        | 0.96<br>(0.67 to<br>1.32)        | 1.46<br>(1.02 to<br>2.08)         |
| G6PD deficiency                                   | 6.45<br>(4.99 to<br>8.01)              | 15.27<br>(10.58 to<br>21.06)           | 13.52<br>(9.20 to<br>18.60)            | 19.06<br>(13.25 to<br>25.90)           | 0.18<br>(0.14 to<br>0.22)        | 0.49<br>(0.36 to<br>0.65)        | 0.44<br>(0.32 to<br>0.59)        | 0.59<br>(0.43 to<br>0.79)         |
| Other hemoglobinopathies and hemolytic anemias    | 3.08<br>(2.45 to<br>3.80)              | 4.01<br>(3.14 to<br>5.13)              | 3.80<br>(2.93 to<br>4.85)              | 4.47<br>(3.47 to<br>5.74)              | 0.19<br>(0.15 to<br>0.23)        | 0.25<br>(0.20 to<br>0.32)        | 0.25<br>(0.20 to<br>0.32)        | 0.26<br>(0.20 to<br>0.34)         |
| Endocrine, metabolic, blood, and immune disorders | 16.51<br>(12.93 to<br>21.86)           | 23.72<br>(17.85 to<br>31.28)           | 22.04<br>(16.59 to<br>29.01)           | 30.50<br>(23.01 to<br>41.43)           | 0.35<br>(0.29 to<br>0.45)        | 0.63<br>(0.49 to<br>0.80)        | 0.62<br>(0.48 to<br>0.79)        | 0.71<br>(0.56 to<br>0.89)         |
| <b>Uganda</b>                                     |                                        |                                        |                                        |                                        |                                  |                                  |                                  |                                   |
| Cause                                             | YLLs (in 1000s)                        |                                        |                                        |                                        | Deaths (in 1000s)                |                                  |                                  |                                   |
|                                                   | 2016                                   | 2040 Forecast                          | 2040 Better Scenario                   | 2040 Worse Scenario                    | 2016                             | 2040 Forecast                    | 2040 Better Scenario             | 2040 Worse Scenario               |
| <b>Musculoskeletal disorders</b>                  | <b>8.06</b><br>(5.84 to<br>10.24)      | <b>22.26</b><br>(14.89 to<br>30.59)    | <b>23.00</b><br>(15.22 to<br>31.71)    | <b>21.59</b><br>(14.60 to<br>29.42)    | <b>0.19</b><br>(0.14 to<br>0.24) | <b>0.58</b><br>(0.40 to<br>0.75) | <b>0.60</b><br>(0.41 to<br>0.79) | <b>0.54</b><br>(0.38 to<br>0.71)  |
| Rheumatoid arthritis                              | 1.44<br>(0.94 to<br>2.14)              | 3.53<br>(2.21 to<br>5.25)              | 3.21<br>(1.97 to<br>4.83)              | 4.12<br>(2.62 to<br>6.09)              | 0.06<br>(0.03 to<br>0.08)        | 0.15<br>(0.09 to<br>0.21)        | 0.14<br>(0.09 to<br>0.21)        | 0.16<br>(0.10 to<br>0.23)         |
| Other musculoskeletal disorders                   | 6.62<br>(4.76 to<br>8.41)              | 18.73<br>(12.09 to<br>25.64)           | 19.79<br>(12.74 to<br>27.37)           | 17.47<br>(11.40 to<br>24.02)           | 0.14<br>(0.10 to<br>0.17)        | 0.43<br>(0.29 to<br>0.56)        | 0.46<br>(0.31 to<br>0.61)        | 0.38<br>(0.26 to<br>0.50)         |
| <b>Other non-communicable diseases</b>            | <b>299.94</b><br>(232.25 to<br>383.81) | <b>319.86</b><br>(226.61 to<br>437.50) | <b>285.14</b><br>(203.78 to<br>387.82) | <b>501.11</b><br>(355.79 to<br>692.11) | <b>3.96</b><br>(3.12 to<br>5.01) | <b>5.70</b><br>(4.28 to<br>7.85) | <b>5.38</b><br>(4.04 to<br>7.45) | <b>7.70</b><br>(5.72 to<br>10.52) |
| Congenital birth defects                          | 209.70<br>(157.60 to<br>286.90)        | 171.27<br>(113.13 to<br>262.39)        | 145.70<br>(97.25 to<br>223.17)         | 302.05<br>(195.66 to<br>468.10)        | 2.48<br>(1.87 to<br>3.29)        | 2.10<br>(1.39 to<br>3.22)        | 1.80<br>(1.21 to<br>2.73)        | 3.64<br>(2.39 to<br>5.59)         |
| Neural tube defects                               | 40.86<br>(19.06 to<br>74.46)           | 12.19<br>(4.79 to<br>26.92)            | 9.40<br>(3.66 to<br>20.42)             | 25.75<br>(10.25 to<br>55.29)           | 0.48<br>(0.22 to<br>0.87)        | 0.15<br>(0.06 to<br>0.32)        | 0.11<br>(0.04 to<br>0.24)        | 0.30<br>(0.12 to<br>0.65)         |
| Congenital heart anomalies                        | 66.28<br>(43.03 to<br>107.48)          | 61.97<br>(36.09 to<br>105.46)          | 53.25<br>(31.42 to<br>90.55)           | 105.15<br>(60.28 to<br>177.69)         | 0.79<br>(0.52 to<br>1.28)        | 0.78<br>(0.47 to<br>1.32)        | 0.68<br>(0.40 to<br>1.15)        | 1.29<br>(0.75 to<br>2.18)         |
| Orofacial clefts                                  | 2.45<br>(0.43 to<br>6.63)              | 1.47<br>(0.23 to<br>4.38)              | 1.10<br>(0.17 to<br>3.38)              | 3.31<br>(0.52 to<br>9.55)              | 0.03<br>(0.00 to<br>0.08)        | 0.02<br>(0.00 to<br>0.05)        | 0.01<br>(0.00 to<br>0.04)        | 0.04<br>(0.01 to<br>0.11)         |
| Down syndrome                                     | 2.74<br>(1.64 to<br>5.03)              | 3.00<br>(1.63 to<br>5.43)              | 2.53<br>(1.41 to<br>4.62)              | 5.12<br>(2.71 to<br>9.40)              | 0.03<br>(0.02 to<br>0.06)        | 0.04<br>(0.02 to<br>0.07)        | 0.04<br>(0.02 to<br>0.06)        | 0.07<br>(0.04 to<br>0.12)         |
| Other chromosomal abnormalities                   | 7.05<br>(1.93 to<br>13.88)             | 9.47<br>(2.37 to<br>21.46)             | 7.83<br>(1.96 to<br>17.77)             | 17.77<br>(4.32 to<br>40.38)            | 0.08<br>(0.02 to<br>0.16)        | 0.11<br>(0.03 to<br>0.25)        | 0.09<br>(0.02 to<br>0.21)        | 0.21<br>(0.05 to<br>0.47)         |
| Congenital musculoskeletal and limb anomalies     | 2.61<br>(1.33 to<br>5.81)              | 2.66<br>(1.29 to<br>6.03)              | 2.35<br>(1.13 to<br>5.31)              | 4.46<br>(2.13 to<br>10.29)             | 0.03<br>(0.02 to<br>0.07)        | 0.03<br>(0.02 to<br>0.07)        | 0.03<br>(0.01 to<br>0.06)        | 0.05<br>(0.03 to<br>0.12)         |
| Urogenital congenital anomalies                   | 4.39<br>(2.53 to<br>7.63)              | 3.81<br>(2.13 to<br>6.80)              | 3.37<br>(1.87 to<br>6.10)              | 6.29<br>(3.49 to<br>11.25)             | 0.05<br>(0.03 to<br>0.09)        | 0.05<br>(0.03 to<br>0.09)        | 0.04<br>(0.03 to<br>0.08)        | 0.08<br>(0.05 to<br>0.14)         |
| Digestive congenital anomalies                    | 17.71<br>(9.65 to<br>29.19)            | 15.64<br>(7.17 to<br>28.95)            | 13.07<br>(5.94 to<br>24.19)            | 28.97<br>(13.14 to<br>53.58)           | 0.21<br>(0.11 to<br>0.34)        | 0.18<br>(0.08 to<br>0.34)        | 0.15<br>(0.07 to<br>0.28)        | 0.34<br>(0.15 to<br>0.62)         |
| Other congenital birth defects                    | 65.62<br>(38.92 to<br>101.97)          | 61.07<br>(36.86 to<br>102.23)          | 52.82<br>(32.05 to<br>87.68)           | 105.22<br>(61.23 to<br>178.52)         | 0.77<br>(0.46 to<br>1.20)        | 0.74<br>(0.45 to<br>1.23)        | 0.64<br>(0.39 to<br>1.05)        | 1.26<br>(0.74 to<br>2.11)         |
| Skin and subcutaneous diseases                    | 42.63<br>(27.99 to<br>70.35)           | 115.49<br>(76.77 to<br>184.92)         | 111.19<br>(74.84 to<br>177.73)         | 139.64<br>(90.92 to<br>224.43)         | 0.93<br>(0.62 to<br>1.51)        | 3.21<br>(2.20 to<br>5.12)        | 3.26<br>(2.22 to<br>5.21)        | 3.37<br>(2.26 to<br>5.41)         |
| Cellulitis                                        | 3.56<br>(1.55 to<br>6.56)              | 15.30<br>(7.06 to<br>26.24)            | 16.08<br>(7.41 to<br>27.13)            | 15.26<br>(6.84 to<br>27.04)            | 0.08<br>(0.04 to<br>0.14)        | 0.43<br>(0.20 to<br>0.71)        | 0.47<br>(0.22 to<br>0.76)        | 0.39<br>(0.17 to<br>0.65)         |

|                                      |                                                            |                                                            |                                                            |                                                            |                                                   |                                                   |                                                   |                                                   |
|--------------------------------------|------------------------------------------------------------|------------------------------------------------------------|------------------------------------------------------------|------------------------------------------------------------|---------------------------------------------------|---------------------------------------------------|---------------------------------------------------|---------------------------------------------------|
| Pyoderma                             | 34.11<br>(21.77 to<br>58.41)                               | 86.95<br>(56.68 to<br>143.57)                              | 81.59<br>(53.36 to<br>136.77)                              | 110.54<br>(70.11 to<br>185.15)                             | 0.69<br>(0.45 to<br>1.15)                         | 2.31<br>(1.56 to<br>3.79)                         | 2.28<br>(1.54 to<br>3.75)                         | 2.55<br>(1.71 to<br>4.21)                         |
| Decubitus ulcer                      | 3.08<br>(1.70 to<br>5.82)                                  | 8.57<br>(4.79 to<br>15.01)                                 | 8.81<br>(4.86 to<br>15.43)                                 | 8.63<br>(4.78 to<br>15.49)                                 | 0.13<br>(0.07 to<br>0.23)                         | 0.37<br>(0.20 to<br>0.67)                         | 0.41<br>(0.22 to<br>0.73)                         | 0.33<br>(0.18 to<br>0.60)                         |
| Other skin and subcutaneous diseases | 1.88<br>(1.02 to<br>3.59)                                  | 4.68<br>(2.69 to<br>7.98)                                  | 4.71<br>(2.74 to<br>8.04)                                  | 5.21<br>(2.86 to<br>9.28)                                  | 0.03<br>(0.02 to<br>0.06)                         | 0.10<br>(0.06 to<br>0.16)                         | 0.10<br>(0.06 to<br>0.17)                         | 0.10<br>(0.06 to<br>0.17)                         |
| Sudden infant death syndrome         | 47.62<br>(22.31 to<br>87.39)                               | 33.10<br>(13.64 to<br>66.71)                               | 28.25<br>(11.63 to<br>56.37)                               | 59.43<br>(23.14 to<br>124.01)                              | 0.55<br>(0.26 to<br>1.01)                         | 0.38<br>(0.16 to<br>0.77)                         | 0.33<br>(0.13 to<br>0.65)                         | 0.69<br>(0.27 to<br>1.44)                         |
| <b>Injuries</b>                      | <b>1,198.40</b><br><b>(1,043.86 to</b><br><b>1,362.55)</b> | <b>1,870.32</b><br><b>(1,280.07 to</b><br><b>2,645.65)</b> | <b>1,763.24</b><br><b>(1,194.71 to</b><br><b>2,524.49)</b> | <b>2,371.39</b><br><b>(1,624.33 to</b><br><b>3,364.34)</b> | <b>23.02</b><br><b>(20.10 to</b><br><b>26.03)</b> | <b>41.23</b><br><b>(29.67 to</b><br><b>56.07)</b> | <b>39.92</b><br><b>(28.68 to</b><br><b>54.60)</b> | <b>49.09</b><br><b>(34.77 to</b><br><b>67.97)</b> |
| <b>Transport injuries</b>            | <b>320.16</b><br><b>(267.81 to</b><br><b>391.75)</b>       | <b>669.81</b><br><b>(418.54 to</b><br><b>1,028.80)</b>     | <b>634.94</b><br><b>(391.37 to</b><br><b>981.85)</b>       | <b>853.40</b><br><b>(521.08 to</b><br><b>1,358.13)</b>     | <b>6.13</b><br><b>(5.15 to</b><br><b>7.47)</b>    | <b>13.76</b><br><b>(8.70 to</b><br><b>20.86)</b>  | <b>13.30</b><br><b>(8.42 to</b><br><b>20.21)</b>  | <b>16.80</b><br><b>(10.37 to</b><br><b>26.81)</b> |
| Road injuries                        | 299.74<br>(248.50 to<br>366.20)                            | 625.16<br>(387.98 to<br>954.97)                            | 593.90<br>(366.40 to<br>911.43)                            | 794.52<br>(486.82 to<br>1,251.04)                          | 5.78<br>(4.85 to<br>7.00)                         | 12.93<br>(8.27 to<br>19.51)                       | 12.53<br>(7.99 to<br>18.83)                       | 15.73<br>(9.81 to<br>24.88)                       |
| Pedestrian road injuries             | 97.48<br>(75.29 to<br>123.84)                              | 176.80<br>(105.29 to<br>278.46)                            | 167.42<br>(98.86 to<br>266.36)                             | 223.50<br>(132.16 to<br>363.53)                            | 1.91<br>(1.52 to<br>2.39)                         | 3.81<br>(2.40 to<br>5.80)                         | 3.67<br>(2.29 to<br>5.62)                         | 4.63<br>(2.86 to<br>7.34)                         |
| <b>Uganda</b>                        |                                                            |                                                            |                                                            |                                                            |                                                   |                                                   |                                                   |                                                   |
| Cause                                | YLLs (in 1000s)                                            |                                                            |                                                            |                                                            | Deaths (in 1000s)                                 |                                                   |                                                   |                                                   |
|                                      | 2016                                                       | 2040 Forecast                                              | 2040 Better Scenario                                       | 2040 Worse Scenario                                        | 2016                                              | 2040 Forecast                                     | 2040 Better Scenario                              | 2040 Worse Scenario                               |
| Cyclist road injuries                | 31.38<br>(23.83 to<br>41.41)                               | 67.26<br>(40.85 to<br>108.61)                              | 64.44<br>(38.73 to<br>103.06)                              | 83.90<br>(50.62 to<br>137.33)                              | 0.62<br>(0.48 to<br>0.82)                         | 1.40<br>(0.87 to<br>2.25)                         | 1.37<br>(0.85 to<br>2.18)                         | 1.67<br>(1.02 to<br>2.76)                         |
| Motorcyclist road injuries           | 20.27<br>(15.09 to<br>28.25)                               | 50.34<br>(28.91 to<br>83.32)                               | 48.74<br>(27.85 to<br>81.38)                               | 61.75<br>(35.28 to<br>103.97)                              | 0.39<br>(0.30 to<br>0.52)                         | 1.02<br>(0.60 to<br>1.65)                         | 1.01<br>(0.59 to<br>1.63)                         | 1.20<br>(0.70 to<br>2.01)                         |
| Motor vehicle road injuries          | 149.45<br>(118.73 to<br>190.26)                            | 328.40<br>(204.33 to<br>499.33)                            | 311.06<br>(191.53 to<br>476.59)                            | 422.31<br>(260.31 to<br>661.09)                            | 2.84<br>(2.27 to<br>3.57)                         | 6.65<br>(4.22 to<br>10.18)                        | 6.43<br>(4.08 to<br>9.81)                         | 8.17<br>(5.07 to<br>12.91)                        |
| Other road injuries                  | 1.16<br>(0.60 to<br>2.69)                                  | 2.36<br>(1.10 to<br>5.83)                                  | 2.24<br>(1.04 to<br>5.46)                                  | 3.05<br>(1.41 to<br>7.59)                                  | 0.02<br>(0.01 to<br>0.05)                         | 0.05<br>(0.02 to<br>0.11)                         | 0.04<br>(0.02 to<br>0.11)                         | 0.06<br>(0.03 to<br>0.14)                         |
| Other transport injuries             | 20.41<br>(14.10 to<br>28.84)                               | 44.65<br>(22.85 to<br>78.79)                               | 41.04<br>(20.79 to<br>73.07)                               | 58.88<br>(30.31 to<br>104.99)                              | 0.35<br>(0.24 to<br>0.50)                         | 0.83<br>(0.42 to<br>1.48)                         | 0.77<br>(0.39 to<br>1.38)                         | 1.07<br>(0.54 to<br>1.95)                         |
| <b>Unintentional injuries</b>        | <b>587.73</b><br><b>(506.57 to</b><br><b>681.63)</b>       | <b>620.34</b><br><b>(469.64 to</b><br><b>802.89)</b>       | <b>562.83</b><br><b>(424.09 to</b><br><b>736.13)</b>       | <b>831.93</b><br><b>(629.36 to</b><br><b>1,075.82)</b>     | <b>10.88</b><br><b>(9.54 to</b><br><b>12.34)</b>  | <b>14.70</b><br><b>(11.85 to</b><br><b>18.02)</b> | <b>14.01</b><br><b>(11.29 to</b><br><b>17.22)</b> | <b>17.50</b><br><b>(13.85 to</b><br><b>21.53)</b> |
| Falls                                | 82.37<br>(66.05 to<br>103.93)                              | 124.90<br>(96.61 to<br>157.00)                             | 121.33<br>(93.90 to<br>152.12)                             | 141.63<br>(108.77 to<br>181.65)                            | 2.39<br>(2.01 to<br>2.82)                         | 4.60<br>(3.78 to<br>5.39)                         | 4.76<br>(3.91 to<br>5.58)                         | 4.54<br>(3.73 to<br>5.36)                         |
| Drowning                             | 125.17<br>(102.11 to<br>153.81)                            | 118.48<br>(79.96 to<br>169.82)                             | 106.74<br>(71.28 to<br>152.28)                             | 161.25<br>(110.01 to<br>228.52)                            | 2.01<br>(1.67 to<br>2.42)                         | 2.28<br>(1.59 to<br>3.20)                         | 2.10<br>(1.46 to<br>2.94)                         | 2.92<br>(2.04 to<br>4.16)                         |
| Fire, heat, and hot substances       | 86.35<br>(67.16 to<br>110.39)                              | 67.93<br>(47.08 to<br>94.44)                               | 59.77<br>(41.28 to<br>83.80)                               | 98.25<br>(67.31 to<br>138.24)                              | 1.60<br>(1.28 to<br>1.95)                         | 1.62<br>(1.19 to<br>2.18)                         | 1.48<br>(1.08 to<br>2.00)                         | 2.10<br>(1.52 to<br>2.88)                         |
| Poisonings                           | 46.33<br>(22.11 to<br>107.06)                              | 26.66<br>(13.79 to<br>61.66)                               | 21.77<br>(11.23 to<br>49.39)                               | 45.88<br>(22.03 to<br>112.43)                              | 0.72<br>(0.42 to<br>1.44)                         | 0.50<br>(0.29 to<br>0.96)                         | 0.42<br>(0.25 to<br>0.80)                         | 0.78<br>(0.44 to<br>1.58)                         |
| Exposure to mechanical forces        | 56.06<br>(45.67 to<br>67.78)                               | 64.57<br>(43.18 to<br>91.94)                               | 57.06<br>(37.94 to<br>81.30)                               | 86.23<br>(59.80 to<br>120.32)                              | 0.97<br>(0.79 to<br>1.18)                         | 1.33<br>(0.92 to<br>1.82)                         | 1.20<br>(0.83 to<br>1.66)                         | 1.65<br>(1.14 to<br>2.23)                         |
| Unintentional firearm injuries       | 10.16<br>(6.35 to<br>15.37)                                | 12.38<br>(6.42 to<br>21.55)                                | 10.84<br>(5.57 to<br>18.31)                                | 15.83<br>(8.34 to<br>26.74)                                | 0.19<br>(0.12 to<br>0.28)                         | 0.25<br>(0.13 to<br>0.40)                         | 0.22<br>(0.12 to<br>0.36)                         | 0.30<br>(0.17 to<br>0.49)                         |

|                                                 |                                 |                                 |                                 |                                   |                           |                             |                             |                             |
|-------------------------------------------------|---------------------------------|---------------------------------|---------------------------------|-----------------------------------|---------------------------|-----------------------------|-----------------------------|-----------------------------|
| Unintentional suffocation                       | 8.81<br>(5.67 to<br>14.45)      | 7.59<br>(4.82 to<br>11.76)      | 6.54<br>(4.17 to<br>10.09)      | 11.81<br>(7.26 to<br>18.89)       | 0.12<br>(0.09 to<br>0.19) | 0.13<br>(0.09 to<br>0.19)   | 0.11<br>(0.08 to<br>0.17)   | 0.18<br>(0.12 to<br>0.27)   |
| Other exposure to mechanical forces             | 37.10<br>(28.23 to<br>46.23)    | 44.59<br>(29.03 to<br>64.15)    | 39.68<br>(25.48 to<br>57.60)    | 58.58<br>(39.42 to<br>83.06)      | 0.66<br>(0.50 to<br>0.82) | 0.95<br>(0.63 to<br>1.32)   | 0.87<br>(0.58 to<br>1.21)   | 1.16<br>(0.79 to<br>1.60)   |
| Adverse effects of medical treatment            | 44.88<br>(30.38 to<br>66.75)    | 47.06<br>(31.83 to<br>66.58)    | 42.08<br>(28.85 to<br>60.65)    | 65.40<br>(43.40 to<br>96.02)      | 0.75<br>(0.58 to<br>1.02) | 0.98<br>(0.74 to<br>1.26)   | 0.91<br>(0.69 to<br>1.18)   | 1.22<br>(0.91 to<br>1.63)   |
| Animal contact                                  | 46.41<br>(30.41 to<br>59.57)    | 61.00<br>(38.49 to<br>83.54)    | 52.20<br>(32.83 to<br>71.93)    | 87.40<br>(54.55 to<br>120.59)     | 0.90<br>(0.59 to<br>1.13) | 1.45<br>(0.94 to<br>1.93)   | 1.28<br>(0.83 to<br>1.72)   | 1.90<br>(1.22 to<br>2.52)   |
| Venomous animal contact                         | 35.45<br>(21.56 to<br>47.76)    | 44.59<br>(26.56 to<br>62.76)    | 38.12<br>(22.56 to<br>53.73)    | 64.12<br>(37.95 to<br>91.95)      | 0.72<br>(0.46 to<br>0.92) | 1.12<br>(0.71 to<br>1.51)   | 0.99<br>(0.62 to<br>1.35)   | 1.46<br>(0.92 to<br>1.96)   |
| Non-venomous animal contact                     | 10.96<br>(6.42 to<br>17.21)     | 16.41<br>(9.08 to<br>25.53)     | 14.08<br>(7.75 to<br>21.81)     | 23.28<br>(12.87 to<br>36.06)      | 0.18<br>(0.11 to<br>0.27) | 0.33<br>(0.18 to<br>0.51)   | 0.29<br>(0.16 to<br>0.44)   | 0.43<br>(0.24 to<br>0.66)   |
| Foreign body                                    | 59.47<br>(37.20 to<br>90.43)    | 69.77<br>(44.64 to<br>101.26)   | 66.47<br>(43.00 to<br>95.31)    | 92.65<br>(57.76 to<br>143.95)     | 0.83<br>(0.54 to<br>1.16) | 1.15<br>(0.78 to<br>1.59)   | 1.13<br>(0.76 to<br>1.56)   | 1.39<br>(0.91 to<br>1.97)   |
| Pulmonary aspiration and foreign body in airway | 54.96<br>(34.58 to<br>86.22)    | 64.05<br>(41.30 to<br>95.09)    | 61.26<br>(39.76 to<br>88.79)    | 85.22<br>(53.06 to<br>135.13)     | 0.76<br>(0.50 to<br>1.11) | 1.05<br>(0.72 to<br>1.44)   | 1.03<br>(0.72 to<br>1.42)   | 1.27<br>(0.84 to<br>1.83)   |
| Foreign body in other body part                 | 4.52<br>(1.42 to<br>8.70)       | 5.71<br>(1.68 to<br>12.43)      | 5.21<br>(1.51 to<br>11.43)      | 7.43<br>(2.28 to<br>15.53)        | 0.07<br>(0.02 to<br>0.14) | 0.10<br>(0.03 to<br>0.23)   | 0.10<br>(0.03 to<br>0.22)   | 0.13<br>(0.04 to<br>0.27)   |
| Environmental heat and cold exposure            | 9.48<br>(6.61 to<br>13.11)      | 9.15<br>(5.67 to<br>13.55)      | 7.52<br>(4.68 to<br>11.27)      | 13.89<br>(8.60 to<br>20.65)       | 0.18<br>(0.12 to<br>0.23) | 0.20<br>(0.13 to<br>0.28)   | 0.17<br>(0.11 to<br>0.24)   | 0.28<br>(0.18 to<br>0.40)   |
| Other unintentional injuries                    | 31.19<br>(24.54 to<br>39.82)    | 30.84<br>(20.51 to<br>44.95)    | 27.88<br>(18.57 to<br>41.04)    | 39.37<br>(26.81 to<br>56.96)      | 0.53<br>(0.42 to<br>0.66) | 0.60<br>(0.42 to<br>0.86)   | 0.56<br>(0.38 to<br>0.80)   | 0.73<br>(0.52 to<br>1.02)   |
| Self-harm and interpersonal violence            | 289.32<br>(197.07 to<br>360.80) | 571.47<br>(340.37 to<br>901.16) | 556.89<br>(331.72 to<br>884.23) | 676.49<br>(388.28 to<br>1,102.22) | 5.99<br>(4.37 to<br>7.25) | 12.62<br>(7.87 to<br>19.39) | 12.47<br>(7.73 to<br>19.08) | 14.63<br>(8.70 to<br>23.47) |

**Uganda**

| Cause                                                                        | YLLs (in 1000s)                 |                                 |                                 |                                 | Deaths (in 1000s)         |                            |                            |                            |
|------------------------------------------------------------------------------|---------------------------------|---------------------------------|---------------------------------|---------------------------------|---------------------------|----------------------------|----------------------------|----------------------------|
|                                                                              | 2016                            | 2040 Forecast                   | 2040 Better Scenario            | 2040 Worse Scenario             | 2016                      | 2040 Forecast              | 2040 Better Scenario       | 2040 Worse Scenario        |
| Self-harm                                                                    | 129.91<br>(105.42 to<br>159.30) | 299.55<br>(176.17 to<br>482.35) | 291.27<br>(172.95 to<br>471.90) | 365.15<br>(202.35 to<br>630.63) | 3.32<br>(2.68 to<br>4.03) | 7.82<br>(4.93 to<br>12.23) | 7.76<br>(4.95 to<br>12.04) | 9.21<br>(5.32 to<br>15.33) |
| Self-harm by firearm                                                         | 7.17<br>(4.10 to<br>12.27)      | 11.16<br>(4.45 to<br>23.30)     | 10.62<br>(4.25 to<br>22.29)     | 14.14<br>(5.45 to<br>30.36)     | 0.17<br>(0.08 to<br>0.30) | 0.28<br>(0.10 to<br>0.56)  | 0.27<br>(0.09 to<br>0.56)  | 0.34<br>(0.12 to<br>0.71)  |
| Self-harm by other specified means                                           | 122.74<br>(98.41 to<br>150.34)  | 288.39<br>(171.14 to<br>465.66) | 280.65<br>(168.15 to<br>451.48) | 351.01<br>(195.74 to<br>604.21) | 3.16<br>(2.53 to<br>3.84) | 7.54<br>(4.78 to<br>11.76) | 7.48<br>(4.76 to<br>11.58) | 8.87<br>(5.09 to<br>14.77) |
| Interpersonal violence                                                       | 159.41<br>(75.48 to<br>221.22)  | 271.92<br>(116.38 to<br>455.82) | 265.62<br>(114.69 to<br>447.46) | 311.34<br>(130.91 to<br>527.55) | 2.66<br>(1.31 to<br>3.62) | 4.80<br>(2.21 to<br>7.97)  | 4.71<br>(2.17 to<br>7.78)  | 5.42<br>(2.45 to<br>9.13)  |
| Physical violence by firearm                                                 | 29.31<br>(11.01 to<br>46.08)    | 54.16<br>(18.98 to<br>95.03)    | 53.69<br>(18.89 to<br>94.56)    | 56.21<br>(19.14 to<br>98.60)    | 0.50<br>(0.19 to<br>0.76) | 0.96<br>(0.36 to<br>1.67)  | 0.95<br>(0.36 to<br>1.68)  | 0.98<br>(0.35 to<br>1.71)  |
| Physical violence by sharp object                                            | 16.68<br>(6.20 to<br>25.32)     | 35.51<br>(12.11 to<br>61.66)    | 36.14<br>(12.35 to<br>62.87)    | 35.19<br>(11.86 to<br>60.60)    | 0.29<br>(0.12 to<br>0.43) | 0.64<br>(0.24 to<br>1.09)  | 0.66<br>(0.25 to<br>1.11)  | 0.63<br>(0.23 to<br>1.06)  |
| Physical violence by other means                                             | 113.41<br>(52.98 to<br>159.87)  | 182.26<br>(75.31 to<br>325.92)  | 175.79<br>(73.49 to<br>315.29)  | 219.94<br>(89.51 to<br>395.77)  | 1.88<br>(0.91 to<br>2.64) | 3.20<br>(1.38 to<br>5.69)  | 3.10<br>(1.36 to<br>5.50)  | 3.81<br>(1.60 to<br>6.94)  |
| Forces of nature, conflict and terrorism, and executions and police conflict | 1.19<br>(0.62 to<br>2.40)       | 8.69<br>(0.00 to<br>72.58)      | 8.58<br>(0.00 to<br>71.51)      | 9.57<br>(0.00 to<br>79.77)      | 0.02<br>(0.01 to<br>0.04) | 0.15<br>(0.00 to<br>1.21)  | 0.15<br>(0.00 to<br>1.21)  | 0.16<br>(0.00 to<br>1.29)  |

|                                                                   |                                                   |                                                    |                                                   |                                                     |                                             |                                             |                                            |                                             |
|-------------------------------------------------------------------|---------------------------------------------------|----------------------------------------------------|---------------------------------------------------|-----------------------------------------------------|---------------------------------------------|---------------------------------------------|--------------------------------------------|---------------------------------------------|
| Exposure to forces of nature                                      | 0.00<br>(0.00 to<br>0.00)                         | 0.85<br>(0.00 to<br>16.24)                         | 0.83<br>(0.00 to<br>15.98)                        | 0.96<br>(0.00 to<br>18.29)                          | 0.00<br>(0.00 to<br>0.00)                   | 0.01<br>(0.00 to<br>0.29)                   | 0.01<br>(0.00 to<br>0.29)                  | 0.02<br>(0.00 to<br>0.31)                   |
| Conflict and terrorism                                            | 0.00<br>(0.00 to<br>0.00)                         | 7.40<br>(0.00 to<br>72.58)                         | 7.30<br>(0.00 to<br>71.51)                        | 8.15<br>(0.00 to<br>79.77)                          | 0.00<br>(0.00 to<br>0.00)                   | 0.12<br>(0.00 to<br>1.21)                   | 0.12<br>(0.00 to<br>1.21)                  | 0.13<br>(0.00 to<br>1.29)                   |
| Executions and police conflict                                    | 1.19<br>(0.62 to<br>2.40)                         | 0.45<br>(0.00 to<br>5.01)                          | 0.45<br>(0.00 to<br>4.99)                         | 0.47<br>(0.00 to<br>5.22)                           | 0.02<br>(0.01 to<br>0.04)                   | 0.01<br>(0.00 to<br>0.09)                   | 0.01<br>(0.00 to<br>0.09)                  | 0.01<br>(0.00 to<br>0.09)                   |
| <b>Zambia</b>                                                     |                                                   |                                                    |                                                   |                                                     |                                             |                                             |                                            |                                             |
| Cause                                                             | YLLs (actual counts)                              |                                                    |                                                   |                                                     | Deaths (actual counts)                      |                                             |                                            |                                             |
|                                                                   | 2016                                              | 2040 Forecast                                      | 2040 Better Scenario                              | 2040 Worse Scenario                                 | 2016                                        | 2040 Forecast                               | 2040 Better Scenario                       | 2040 Worse Scenario                         |
| All causes                                                        | 7,453,658.63<br>(6,494,905.13 to<br>8,601,850.89) | 6,879,885.88<br>(4,617,515.26 to<br>10,306,823.20) | 4,924,859.22<br>(3,246,294.05 to<br>7,449,737.68) | 15,275,813.45<br>(9,512,426.54 to<br>17,442,418.99) | 150,477.16<br>(130,257.48 to<br>172,524.80) | 168,413.14<br>(116,148.84 to<br>241,682.15) | 128,413.08<br>(87,205.98 to<br>182,715.31) | 287,093.91<br>(208,839.94 to<br>367,040.08) |
| Communicable, maternal, neonatal, and nutritional diseases        | 5,460,452.57<br>(4,726,411.40 to<br>6,367,359.55) | 3,875,234.35<br>(2,655,357.58 to<br>5,802,872.32)  | 2,472,575.15<br>(1,653,978.44 to<br>3,697,453.54) | 9,703,581.56<br>(7,014,895.03 to<br>12,910,300.16)  | 91,166.34<br>(79,612.64 to<br>104,299.60)   | 74,426.41<br>(49,923.14 to<br>116,835.42)   | 48,737.09<br>(32,114.42 to<br>74,238.10)   | 178,746.72<br>(125,129.04 to<br>239,803.27) |
| HIV/AIDS and tuberculosis                                         | 1,896,785.78<br>(1,539,273.90 to<br>2,407,974.69) | 1,526,658.66<br>(882,114.17 to<br>2,489,890.08)    | 1,123,126.72<br>(595,652.58 to<br>1,982,168.82)   | 5,992,903.12<br>(4,007,311.01 to<br>8,555,595.20)   | 37,298.77<br>(30,731.33 to<br>45,988.74)    | 29,875.13<br>(17,301.99 to<br>46,390.51)    | 21,805.90<br>(11,729.90 to<br>36,353.96)   | 114,947.21<br>(75,839.17 to<br>163,343.19)  |
| Tuberculosis                                                      | 494,532.21<br>(343,006.02 to<br>642,466.33)       | 287,099.39<br>(83,661.86 to<br>716,411.55)         | 154,438.60<br>(45,680.96 to<br>372,685.31)        | 474,183.39<br>(139,588.24 to<br>1,148,147.15)       | 12,110.43<br>(8,257.73 to<br>15,693.40)     | 7,142.51<br>(2,182.79 to<br>16,710.33)      | 3,937.89<br>(1,300.25 to<br>9,072.27)      | 11,487.97<br>(3,626.09 to<br>26,750.31)     |
| HIV/AIDS                                                          | 1,402,253.57<br>(1,097,525.99 to<br>1,879,483.46) | 1,239,559.27<br>(655,666.58 to<br>2,093,626.49)    | 968,688.13<br>(470,013.93 to<br>1,801,659.31)     | 5,518,719.72<br>(3,636,939.40 to<br>8,130,812.15)   | 25,188.33<br>(20,138.59 to<br>32,729.08)    | 22,732.61<br>(12,080.89 to<br>36,710.26)    | 17,868.01<br>(8,879.79 to<br>30,836.29)    | 103,459.24<br>(67,205.12 to<br>151,634.44)  |
| Diarrhea, lower respiratory, and other common infectious diseases | 1,636,576.67<br>(1,329,418.23 to<br>1,983,468.42) | 1,287,334.89<br>(602,357.02 to<br>2,557,485.08)    | 657,220.22<br>(294,154.19 to<br>1,344,029.56)     | 2,035,363.19<br>(1,044,545.13 to<br>3,778,630.85)   | 28,671.68<br>(23,380.97 to<br>34,280.99)    | 28,458.69<br>(13,779.71 to<br>59,965.11)    | 16,426.07<br>(7,672.48 to<br>33,154.02)    | 41,315.84<br>(20,205.82 to<br>78,809.61)    |
| Diarrheal diseases                                                | 488,006.06<br>(353,839.33 to<br>662,803.73)       | 428,792.21<br>(87,676.54 to<br>1,374,705.35)       | 209,389.21<br>(35,597.61 to<br>696,450.32)        | 649,163.71<br>(162,416.65 to<br>1,853,824.35)       | 9,531.07<br>(6,309.70 to<br>13,782.10)      | 10,595.18<br>(1,803.56 to<br>35,566.68)     | 5,496.70<br>(877.46 to<br>18,568.99)       | 15,105.38<br>(2,952.91 to<br>46,062.69)     |
| Intestinal infectious diseases                                    | 30,781.33<br>(15,433.44 to<br>54,892.70)          | 25,072.02<br>(11,176.17 to<br>48,193.70)           | 19,321.66<br>(8,659.26 to<br>37,681.31)           | 32,666.35<br>(14,738.33 to<br>61,847.07)            | 419.40<br>(213.36 to<br>746.49)             | 358.84<br>(158.55 to<br>691.22)             | 282.34<br>(122.30 to<br>557.74)            | 456.38<br>(206.67 to<br>865.82)             |
| Typhoid fever                                                     | 25,825.32<br>(12,006.83 to<br>48,744.70)          | 22,380.89<br>(9,557.22 to<br>43,920.65)            | 17,487.02<br>(7,444.03 to<br>33,840.99)           | 28,718.08<br>(12,551.02 to<br>56,535.89)            | 353.48<br>(167.26 to<br>661.57)             | 318.81<br>(136.06 to<br>633.80)             | 253.84<br>(110.71 to<br>503.07)            | 400.40<br>(173.89 to<br>782.61)             |
| Paratyphoid fever                                                 | 1,311.74<br>(492.22 to<br>3,014.28)               | 1,365.12<br>(486.03 to<br>3,153.32)                | 1,042.92<br>(376.04 to<br>2,530.77)               | 1,783.67<br>(643.11 to<br>4,261.62)                 | 18.11<br>(6.80 to<br>41.08)                 | 19.63<br>(7.12 to<br>45.92)                 | 15.26<br>(5.52 to<br>36.58)                | 25.12<br>(9.17 to<br>59.88)                 |
| Other intestinal infectious diseases                              | 3,644.27<br>(911.33 to<br>10,173.11)              | 1,326.01<br>(330.96 to<br>3,930.12)                | 791.72<br>(194.06 to<br>2,308.44)                 | 2,164.60<br>(515.59 to<br>6,537.44)                 | 47.82<br>(13.01 to<br>127.72)               | 20.39<br>(5.84 to<br>55.55)                 | 13.23<br>(3.70 to<br>34.20)                | 30.85<br>(8.60 to<br>86.90)                 |
| Lower respiratory infections                                      | 754,952.30<br>(586,525.34 to<br>965,754.75)       | 625,384.89<br>(303,758.23 to<br>1,193,841.80)      | 276,068.79<br>(138,534.62 to<br>493,394.62)       | 1,030,219.50<br>(694,309.17 to<br>2,012,765.45)     | 13,271.63<br>(10,758.23 to<br>16,302.61)    | 14,867.85<br>(8,344.80 to<br>25,145.34)     | 7,669.29<br>(4,254.74 to<br>12,241.05)     | 30,804.69<br>(11,538.87 to<br>36,443.76)    |
| Upper respiratory infections                                      | 1,014.32<br>(339.47 to<br>2,479.80)               | 737.80<br>(257.18 to<br>1,794.29)                  | 431.91<br>(147.46 to<br>1,024.50)                 | 1,196.98<br>(404.34 to<br>3,072.93)                 | 14.82<br>(6.24 to<br>32.06)                 | 13.54<br>(5.43 to<br>28.04)                 | 8.52<br>(3.15 to<br>18.93)                 | 20.22<br>(7.81 to<br>44.40)                 |
| Otitis media                                                      | 568.22<br>(230.05 to<br>1,329.21)                 | 90.81<br>(37.36 to<br>209.92)                      | 83.46<br>(33.71 to<br>186.10)                     | 106.80<br>(43.09 to<br>256.66)                      | 8.80<br>(4.13 to<br>18.39)                  | 2.21<br>(1.09 to<br>4.36)                   | 2.42<br>(1.19 to<br>4.91)                  | 2.19<br>(1.07 to<br>4.40)                   |
| Meningitis                                                        | 259,935.06<br>(187,326.78 to<br>363,081.73)       | 173,457.01<br>(100,998.00 to<br>280,808.63)        | 138,183.33<br>(78,088.93 to<br>241,969.94)        | 241,100.85<br>(146,746.05 to<br>374,066.46)         | 4,070.76<br>(2,987.22 to<br>5,515.42)       | 3,166.03<br>(1,807.69 to<br>5,256.01)       | 2,750.44<br>(1,501.83 to<br>4,802.35)      | 3,917.09<br>(2,379.08 to<br>6,126.60)       |
| Pneumococcal meningitis                                           | 15,506.04<br>(10,902.88 to<br>21,618.06)          | 10,390.38<br>(5,560.25 to<br>18,191.28)            | 9,439.54<br>(4,778.54 to<br>17,555.23)            | 12,430.09<br>(6,779.79 to<br>21,351.90)             | 281.01<br>(198.02 to<br>379.98)             | 218.40<br>(119.27 to<br>387.63)             | 218.40<br>(112.95 to<br>392.65)            | 240.58<br>(133.73 to<br>404.27)             |
| H influenzae type B meningitis                                    | 25,223.69<br>(17,473.65 to<br>37,431.17)          | 30,151.84<br>(11,942.91 to<br>66,207.62)           | 17,442.25<br>(8,534.56 to<br>33,375.54)           | 69,801.73<br>(21,811.39 to<br>168,414.39)           | 368.18<br>(263.44 to<br>524.23)             | 421.74<br>(188.97 to<br>849.34)             | 278.60<br>(146.54 to<br>485.30)            | 879.06<br>(311.14 to<br>2,035.36)           |

|                                         |                                                                  |                                                                  |                                                                 |                                                                  |                                                            |                                                            |                                                            |                                                            |
|-----------------------------------------|------------------------------------------------------------------|------------------------------------------------------------------|-----------------------------------------------------------------|------------------------------------------------------------------|------------------------------------------------------------|------------------------------------------------------------|------------------------------------------------------------|------------------------------------------------------------|
| Meningococcal meningitis                | 113,240.66<br>(81,232.56 to<br>157,177.79)                       | 60,780.94<br>(34,424.61 to<br>103,582.85)                        | 50,280.35<br>(27,048.93 to<br>90,015.34)                        | 73,687.25<br>(43,275.78 to<br>121,427.76)                        | 1,725.92<br>(1,268.39 to<br>2,364.44)                      | 1,110.89<br>(622.55 to<br>1,906.82)                        | 979.64<br>(532.30 to<br>1,737.39)                          | 1,253.22<br>(734.96 to<br>2,097.54)                        |
| Other meningitis                        | 105,964.66<br>(75,554.88 to<br>148,456.70)                       | 72,133.86<br>(39,740.15 to<br>122,890.43)                        | 61,021.19<br>(32,464.80 to<br>109,532.17)                       | 85,181.69<br>(48,918.28 to<br>138,136.14)                        | 1,695.65<br>(1,223.10 to<br>2,304.82)                      | 1,410.53<br>(773.17 to<br>2,367.61)                        | 1,273.80<br>(674.62 to<br>2,246.56)                        | 1,544.23<br>(885.84 to<br>2,507.84)                        |
| Encephalitis                            | 10,018.48<br>(5,583.37 to<br>15,902.88)                          | 7,701.19<br>(4,297.71 to<br>12,749.61)                           | 5,240.60<br>(2,916.97 to<br>8,606.86)                           | 11,403.35<br>(6,211.26 to<br>19,066.97)                          | 124.78<br>(71.98 to<br>193.77)                             | 103.52<br>(60.09 to<br>165.33)                             | 73.49<br>(42.52 to<br>116.95)                              | 147.53<br>(83.72 to<br>241.42)                             |
| Diphtheria                              | 216.01<br>(95.91 to<br>404.29)                                   | 55.23<br>(19.31 to<br>141.68)                                    | 26.08<br>(11.45 to<br>49.31)                                    | 163.70<br>(39.98 to<br>521.26)                                   | 2.73<br>(1.30 to<br>4.96)                                  | 0.78<br>(0.30 to<br>1.84)                                  | 0.44<br>(0.19 to<br>0.85)                                  | 2.05<br>(0.56 to<br>6.26)                                  |
| Whooping cough                          | 29,890.22<br>(2,184.62 to<br>103,274.63)                         | 15,382.37<br>(1,144.83 to<br>54,890.73)                          | 2,541.65<br>(189.55 to<br>9,149.86)                             | 40,025.76<br>(2,985.21 to<br>134,067.61)                         | 352.65<br>(25.76 to<br>1,216.86)                           | 182.88<br>(13.64 to<br>652.94)                             | 31.50<br>(2.34 to<br>113.16)                               | 473.22<br>(35.32 to<br>1,587.85)                           |
| Tetanus                                 | 27,053.56<br>(15,752.41 to<br>48,780.78)                         | 4,629.89<br>(1,847.23 to<br>11,175.54)                           | 2,985.72<br>(1,847.19 to<br>6,439.41)                           | 9,567.75<br>(3,545.74 to<br>23,939.28)                           | 399.98<br>(252.36 to<br>650.94)                            | 76.62<br>(30.20 to<br>161.98)                              | 58.54<br>(21.13 to<br>124.29)                              | 131.88<br>(53.32 to<br>306.14)                             |
| Measles                                 | 27,468.59<br>(8,728.17 to<br>67,252.08)                          | 2,717.22<br>(226.94 to<br>16,242.50)                             | 1,001.19<br>(134.81 to<br>5,086.94)                             | 14,259.20<br>(742.74 to<br>72,086.39)                            | 327.00<br>(104.11 to<br>801.38)                            | 37.00<br>(2.85 to<br>191.65)                               | 12.25<br>(1.72 to<br>60.07)                                | 169.07<br>(9.27 to<br>850.69)                              |
| <b>Zambia</b>                           |                                                                  |                                                                  |                                                                 |                                                                  |                                                            |                                                            |                                                            |                                                            |
| Cause                                   | YLLs (actual counts)                                             |                                                                  |                                                                 |                                                                  | Deaths (actual counts)                                     |                                                            |                                                            |                                                            |
|                                         | 2016                                                             | 2040 Forecast                                                    | 2040 Better Scenario                                            | 2040 Worse Scenario                                              | 2016                                                       | 2040 Forecast                                              | 2040 Better Scenario                                       | 2040 Worse Scenario                                        |
| Varicella and herpes zoster             | 6,672.50<br>(3,478.61 to<br>11,626.71)                           | 3,314.25<br>(1,747.79 to<br>5,991.93)                            | 1,946.59<br>(1,025.84 to<br>3,389.90)                           | 5,489.23<br>(2,811.66 to<br>10,156.14)                           | 98.04<br>(59.13 to<br>157.62)                              | 58.71<br>(35.82 to<br>92.69)                               | 40.14<br>(25.04 to<br>62.04)                               | 86.14<br>(49.88 to<br>146.87)                              |
| Neglected tropical diseases and malaria | <b>415,138.31</b><br><b>(281,962.43 to</b><br><b>597,554.83)</b> | <b>162,262.99</b><br><b>(106,448.59 to</b><br><b>236,967.04)</b> | <b>131,586.78</b><br><b>(85,897.64 to</b><br><b>193,508.43)</b> | <b>205,528.45</b><br><b>(135,808.06 to</b><br><b>301,722.32)</b> | <b>5,706.06</b><br><b>(4,082.63 to</b><br><b>7,923.83)</b> | <b>2,774.26</b><br><b>(1,836.19 to</b><br><b>4,009.99)</b> | <b>2,417.93</b><br><b>(1,572.55 to</b><br><b>3,575.34)</b> | <b>3,248.55</b><br><b>(2,193.08 to</b><br><b>4,643.17)</b> |
| Malaria                                 | 385,747.64<br>(253,287.24 to<br>562,104.61)                      | 141,096.71<br>(89,954.40 to<br>209,472.57)                       | 115,810.43<br>(73,622.03 to<br>171,661.44)                      | 176,972.24<br>(111,295.37 to<br>265,932.85)                      | 5,207.54<br>(3,602.26 to<br>7,346.76)                      | 5,207.54<br>(1,560.89 to<br>3,510.81)                      | 2,383.09<br>(1,362.38 to<br>3,143.89)                      | 2,761.20<br>(1,809.39 to<br>4,021.46)                      |
| Chagas disease                          | 0.00<br>(0.00 to<br>0.00)                                        | 0.00<br>(0.00 to<br>0.00)                                        | 0.00<br>(0.00 to<br>0.00)                                       | 0.00<br>(0.00 to<br>0.00)                                        | 0.00<br>(0.00 to<br>0.00)                                  | 0.00<br>(0.00 to<br>0.00)                                  | 0.00<br>(0.00 to<br>0.00)                                  | 0.00<br>(0.00 to<br>0.00)                                  |
| Leishmaniasis                           | 1.74<br>(0.85 to<br>2.97)                                        | 1.20<br>(0.54 to<br>2.09)                                        | 0.75<br>(0.34 to<br>1.37)                                       | 1.81<br>(0.80 to<br>3.12)                                        | 0.04<br>(0.02 to<br>0.06)                                  | 0.03<br>(0.01 to<br>0.04)                                  | 0.02<br>(0.01 to<br>0.03)                                  | 0.04<br>(0.02 to<br>0.06)                                  |
| African trypanosomiasis                 | 1,087.25<br>(51.25 to<br>5,257.34)                               | 125.21<br>(4.42 to<br>641.08)                                    | 121.78<br>(4.25 to<br>624.17)                                   | 127.46<br>(4.54 to<br>659.13)                                    | 18.84<br>(0.92 to<br>92.77)                                | 2.27<br>(0.08 to<br>10.67)                                 | 2.25<br>(0.08 to<br>10.71)                                 | 2.25<br>(0.08 to<br>10.84)                                 |
| Schistosomiasis                         | 7,818.87<br>(5,271.68 to<br>10,963.34)                           | 6,841.53<br>(3,008.46 to<br>12,700.17)                           | 5,805.84<br>(2,522.69 to<br>10,947.04)                          | 7,468.61<br>(3,484.05 to<br>13,522.47)                           | 204.69<br>(138.57 to<br>287.41)                            | 184.88<br>(89.40 to<br>317.74)                             | 162.17<br>(77.72 to<br>290.50)                             | 195.57<br>(99.29 to<br>326.92)                             |
| Cysticercosis                           | 981.89<br>(714.68 to<br>1,322.58)                                | 534.66<br>(269.98 to<br>970.44)                                  | 488.49<br>(237.74 to<br>916.16)                                 | 560.87<br>(300.15 to<br>965.12)                                  | 18.95<br>(13.60 to<br>25.78)                               | 11.51<br>(5.75 to<br>20.40)                                | 10.74<br>(5.23 to<br>19.53)                                | 11.72<br>(6.05 to<br>19.98)                                |
| Cystic echinococcosis                   | 351.27<br>(252.41 to<br>476.21)                                  | 179.40<br>(90.83 to<br>311.46)                                   | 101.45<br>(48.50 to<br>188.87)                                  | 280.33<br>(149.75 to<br>474.33)                                  | 6.70<br>(4.77 to<br>9.00)                                  | 4.09<br>(2.10 to<br>6.84)                                  | 2.41<br>(1.21 to<br>4.28)                                  | 6.07<br>(3.33 to<br>10.07)                                 |
| Dengue                                  | 123.94<br>(11.23 to<br>414.25)                                   | 417.03<br>(43.78 to<br>1,256.55)                                 | 353.38<br>(36.59 to<br>1,064.46)                                | 508.52<br>(52.46 to<br>1,588.55)                                 | 1.77<br>(0.18 to<br>5.68)                                  | 7.42<br>(0.80 to<br>20.88)                                 | 6.77<br>(0.72 to<br>19.45)                                 | 8.33<br>(0.90 to<br>24.03)                                 |
| Yellow fever                            | 1,281.02<br>(252.99 to<br>3,920.69)                              | 566.29<br>(102.04 to<br>1,771.85)                                | 383.42<br>(70.17 to<br>1,227.72)                                | 793.80<br>(149.49 to<br>2,424.45)                                | 19.43<br>(3.85 to<br>59.84)                                | 9.06<br>(1.63 to<br>28.59)                                 | 6.26<br>(1.12 to<br>20.39)                                 | 12.35<br>(2.32 to<br>38.28)                                |
| Rabies                                  | 2,569.64<br>(1,033.89 to<br>5,866.12)                            | 1,234.94<br>(446.25 to<br>2,766.76)                              | 583.37<br>(197.98 to<br>1,329.15)                               | 2,313.76<br>(884.85 to<br>5,060.03)                              | 37.58<br>(15.93 to<br>81.04)                               | 20.19<br>(7.06 to<br>44.70)                                | 9.76<br>(3.25 to<br>23.02)                                 | 36.42<br>(13.68 to<br>82.31)                               |
| Intestinal nematode infections          | 3,111.62<br>(1,831.06 to<br>4,968.97)                            | 3,538.07<br>(2,084.98 to<br>5,737.59)                            | 2,872.96<br>(1,654.87 to<br>4,620.13)                           | 4,558.49<br>(2,690.60 to<br>7,489.79)                            | 38.53<br>(23.15 to<br>60.77)                               | 45.56<br>(26.84 to<br>72.28)                               | 37.86<br>(22.52 to<br>60.53)                               | 57.45<br>(34.42 to<br>92.18)                               |

|                                                          |                                                                    |                                                                  |                                                                  |                                                                      |                                                              |                                                             |                                                            |                                                              |
|----------------------------------------------------------|--------------------------------------------------------------------|------------------------------------------------------------------|------------------------------------------------------------------|----------------------------------------------------------------------|--------------------------------------------------------------|-------------------------------------------------------------|------------------------------------------------------------|--------------------------------------------------------------|
| Other neglected tropical diseases                        | 12,063.33<br>(5,245.50 to<br>23,537.13)                            | 7,727.95<br>(3,482.31 to<br>14,286.80)                           | 5,064.91<br>(2,263.67 to<br>9,454.45)                            | 11,942.46<br>(5,293.06 to<br>22,121.12)                              | 151.98<br>(69.63 to<br>288.75)                               | 106.25<br>(51.01 to<br>187.84)                              | 72.84<br>(35.10 to<br>130.96)                              | 157.15<br>(73.46 to<br>281.71)                               |
| <b>Maternal disorders</b>                                | <b>65,253.43</b><br><b>(36,655.03 to</b><br><b>105,435.22)</b>     | <b>68,465.61</b><br><b>(28,331.79 to</b><br><b>130,838.61)</b>   | <b>40,517.85</b><br><b>(16,657.35 to</b><br><b>79,392.68)</b>    | <b>106,863.68</b><br><b>(44,180.94 to</b><br><b>204,074.17)</b>      | <b>1,174.23</b><br><b>(650.54 to</b><br><b>1,908.54)</b>     | <b>1,279.65</b><br><b>(516.58 to</b><br><b>2,463.86)</b>    | <b>759.55</b><br><b>(312.90 to</b><br><b>1,505.94)</b>     | <b>1,987.74</b><br><b>(824.95 to</b><br><b>3,833.71)</b>     |
| Maternal hemorrhage                                      | 13,285.68<br>(6,709.55 to<br>23,414.44)                            | 10,653.64<br>(3,885.02 to<br>21,555.26)                          | 6,526.06<br>(2,348.94 to<br>13,140.48)                           | 15,205.42<br>(5,636.83 to<br>30,594.95)                              | 245.29<br>(125.92 to<br>432.48)                              | 201.47<br>(72.18 to<br>408.40)                              | 123.66<br>(44.43 to<br>251.43)                             | 285.68<br>(104.48 to<br>585.42)                              |
| Maternal sepsis and other maternal infections            | 4,433.28<br>(1,589.17 to<br>9,237.26)                              | 3,313.82<br>(1,015.49 to<br>7,893.36)                            | 2,007.44<br>(617.23 to<br>4,882.07)                              | 4,821.99<br>(1,491.12 to<br>11,650.01)                               | 79.68<br>(29.30 to<br>165.78)                                | 61.05<br>(18.70 to<br>147.24)                               | 37.08<br>(11.11 to<br>91.07)                               | 88.21<br>(27.05 to<br>213.23)                                |
| Maternal hypertensive disorders                          | 7,724.25<br>(3,903.00 to<br>13,425.99)                             | 6,329.63<br>(2,422.83 to<br>13,031.81)                           | 3,838.52<br>(1,505.74 to<br>7,716.52)                            | 9,204.72<br>(3,545.71 to<br>19,052.04)                               | 136.07<br>(68.42 to<br>240.04)                               | 114.32<br>(45.76 to<br>233.62)                              | 69.48<br>(27.04 to<br>140.18)                              | 165.10<br>(63.51 to<br>342.81)                               |
| Maternal obstructed labor and uterine rupture            | 4,290.08<br>(1,813.20 to<br>8,700.78)                              | 3,606.43<br>(1,316.34 to<br>7,907.86)                            | 2,126.01<br>(770.75 to<br>4,822.10)                              | 5,327.33<br>(1,850.37 to<br>11,816.30)                               | 78.18<br>(32.59 to<br>160.52)                                | 67.46<br>(23.71 to<br>149.55)                               | 39.85<br>(13.77 to<br>91.10)                               | 98.96<br>(34.02 to<br>219.88)                                |
| Maternal abortion, miscarriage, and ectopic pregnancy    | 12,419.95<br>(6,121.11 to<br>21,277.46)                            | 11,556.96<br>(3,978.39 to<br>24,453.09)                          | 6,907.65<br>(2,303.76 to<br>14,460.66)                           | 17,038.37<br>(5,788.96 to<br>36,893.20)                              | 218.63<br>(106.09 to<br>372.03)                              | 208.67<br>(70.53 to<br>447.26)                              | 125.01<br>(41.57 to<br>270.47)                             | 305.55<br>(103.86 to<br>680.49)                              |
| Indirect maternal deaths                                 | 13,382.65<br>(6,008.59 to<br>25,148.44)                            | 11,622.14<br>(4,174.81 to<br>24,528.55)                          | 6,984.90<br>(2,490.38 to<br>15,368.37)                           | 17,466.79<br>(6,215.01 to<br>37,419.33)                              | 239.30<br>(107.38 to<br>439.89)                              | 211.71<br>(76.21 to<br>441.99)                              | 127.75<br>(45.56 to<br>277.52)                             | 315.66<br>(112.89 to<br>687.60)                              |
| Late maternal deaths                                     | 939.06<br>(341.31 to<br>1,957.95)                                  | 661.37<br>(200.38 to<br>1,495.88)                                | 395.84<br>(123.81 to<br>899.39)                                  | 985.38<br>(315.85 to<br>2,241.79)                                    | 16.80<br>(6.29 to<br>35.34)                                  | 12.18<br>(3.65 to<br>27.28)                                 | 7.32<br>(2.34 to<br>16.86)                                 | 17.98<br>(5.62 to<br>40.70)                                  |
| Maternal deaths aggravated by HIV/AIDS                   | 3,156.37<br>(1,577.05 to<br>5,665.14)                              | 15,858.39<br>(4,906.15 to<br>34,113.18)                          | 8,718.41<br>(1,825.38 to<br>21,393.51)                           | 29,708.64<br>(11,273.88 to<br>61,369.51)                             | 59.00<br>(29.60 to<br>105.75)                                | 312.66<br>(94.43 to<br>677.92)                              | 173.32<br>(34.03 to<br>420.04)                             | 580.09<br>(220.62 to<br>1,171.06)                            |
| Other maternal disorders                                 | 5,622.11<br>(2,573.25 to<br>11,530.45)                             | 4,863.23<br>(1,621.07 to<br>10,989.60)                           | 3,013.02<br>(1,012.38 to<br>6,833.45)                            | 7,105.04<br>(2,564.87 to<br>16,237.43)                               | 101.28<br>(41.83 to<br>207.97)                               | 90.14<br>(30.64 to<br>197.92)                               | 56.10<br>(17.95 to<br>127.25)                              | 130.50<br>(43.10 to<br>293.49)                               |
| <b>Zambia</b>                                            |                                                                    |                                                                  |                                                                  |                                                                      |                                                              |                                                             |                                                            |                                                              |
| Cause                                                    | YLLs (actual counts)                                               |                                                                  |                                                                  |                                                                      | Deaths (actual counts)                                       |                                                             |                                                            |                                                              |
|                                                          | 2016                                                               | 2040 Forecast                                                    | 2040 Better Scenario                                             | 2040 Worse Scenario                                                  | 2016                                                         | 2040 Forecast                                               | 2040 Better Scenario                                       | 2040 Worse Scenario                                          |
| <b>Neonatal disorders</b>                                | <b>987,702.76</b><br><b>(760,438.11 to</b><br><b>1,275,300.35)</b> | <b>633,899.63</b><br><b>(394,502.88 to</b><br><b>999,294.12)</b> | <b>384,668.20</b><br><b>(231,886.32 to</b><br><b>594,873.21)</b> | <b>1,080,687.46</b><br><b>(672,495.38 to</b><br><b>1,643,821.60)</b> | <b>11,412.30</b><br><b>(8,786.76 to</b><br><b>14,733.57)</b> | <b>7,325.63</b><br><b>(4,559.42 to</b><br><b>11,547.21)</b> | <b>4,445.51</b><br><b>(2,680.37 to</b><br><b>6,872.86)</b> | <b>12,488.46</b><br><b>(7,772.59 to</b><br><b>18,993.48)</b> |
| Neonatal preterm birth                                   | 267,852.39<br>(176,648.16 to<br>379,907.71)                        | 150,224.23<br>(87,510.51 to<br>240,429.61)                       | 88,875.61<br>(51,717.36 to<br>141,509.09)                        | 282,362.30<br>(167,153.34 to<br>446,899.62)                          | 3,094.65<br>(2,041.98 to<br>4,388.52)                        | 1,735.98<br>(1,011.09 to<br>2,777.91)                       | 1,027.10<br>(597.81 to<br>1,635.20)                        | 3,262.64<br>(1,931.91 to<br>5,163.08)                        |
| Neonatal encephalopathy due to birth asphyxia and trauma | 371,853.46<br>(254,144.22 to<br>521,714.30)                        | 220,948.28<br>(108,000.20 to<br>396,381.58)                      | 138,593.76<br>(67,983.58 to<br>244,917.51)                       | 357,057.06<br>(171,593.10 to<br>632,625.11)                          | 4,295.89<br>(2,936.10 to<br>6,026.79)                        | 2,553.11<br>(1,249.09 to<br>4,579.06)                       | 1,601.51<br>(785.65 to<br>2,829.17)                        | 4,125.81<br>(1,983.19 to<br>7,309.27)                        |
| Neonatal sepsis and other neonatal infections            | 197,199.36<br>(121,496.85 to<br>315,679.67)                        | 163,184.88<br>(92,521.85 to<br>278,962.37)                       | 100,424.96<br>(56,547.66 to<br>171,757.93)                       | 267,539.95<br>(149,692.06 to<br>456,280.24)                          | 2,279.02<br>(1,403.98 to<br>3,647.48)                        | 1,886.04<br>(1,069.68 to<br>3,224.25)                       | 1,160.70<br>(653.74 to<br>1,984.60)                        | 3,092.12<br>(1,730.33 to<br>5,272.96)                        |
| Hemolytic disease and other neonatal jaundice            | 18,628.29<br>(9,814.77 to<br>30,370.98)                            | 7,129.02<br>(3,056.80 to<br>13,598.52)                           | 4,096.46<br>(1,754.36 to<br>7,841.25)                            | 12,385.23<br>(5,282.59 to<br>23,410.81)                              | 215.25<br>(113.39 to<br>350.85)                              | 82.38<br>(35.33 to<br>157.14)                               | 47.34<br>(20.28 to<br>90.58)                               | 143.12<br>(61.06 to<br>270.46)                               |
| Other neonatal disorders                                 | 132,169.26<br>(76,979.49 to<br>207,896.61)                         | 92,413.23<br>(41,966.54 to<br>171,552.31)                        | 52,677.41<br>(24,284.29 to<br>97,646.44)                         | 161,342.91<br>(73,516.71 to<br>309,167.67)                           | 1,527.49<br>(889.50 to<br>2,402.16)                          | 1,068.11<br>(485.22 to<br>1,983.27)                         | 608.86<br>(281.04 to<br>1,128.58)                          | 1,864.77<br>(850.00 to<br>3,572.43)                          |
| <b>Nutritional deficiencies</b>                          | <b>335,687.34</b><br><b>(235,123.52 to</b><br><b>474,860.83)</b>   | <b>129,780.85</b><br><b>(83,324.12 to</b><br><b>188,683.20)</b>  | <b>86,673.32</b><br><b>(56,525.04 to</b><br><b>123,739.06)</b>   | <b>190,022.74</b><br><b>(121,018.28 to</b><br><b>281,295.99)</b>     | <b>5,082.95</b><br><b>(3,848.60 to</b><br><b>6,767.67)</b>   | <b>2,506.14</b><br><b>(1,797.27 to</b><br><b>3,315.38)</b>  | <b>1,927.32</b><br><b>(1,394.88 to</b><br><b>2,596.83)</b> | <b>3,239.19</b><br><b>(2,296.58 to</b><br><b>4,404.95)</b>   |
| Protein-energy malnutrition                              | 321,064.21<br>(221,187.57 to<br>459,750.76)                        | 109,949.22<br>(68,617.61 to<br>166,143.55)                       | 70,969.01<br>(45,212.76 to<br>104,902.59)                        | 166,108.05<br>(102,431.24 to<br>253,873.40)                          | 4,691.27<br>(3,471.21 to<br>6,342.94)                        | 1,953.28<br>(1,370.14 to<br>2,660.52)                       | 1,448.55<br>(1,042.85 to<br>1,935.43)                      | 2,630.36<br>(1,803.70 to<br>3,699.44)                        |
| Iodine deficiency                                        | 1,149.37<br>(53.09 to<br>4,301.50)                                 | 3,366.49<br>(84.71 to<br>20,352.45)                              | 2,261.14<br>(55.82 to<br>12,068.89)                              | 4,852.06<br>(114.37 to<br>34,834.37)                                 | 23.28<br>(1.36 to<br>72.66)                                  | 78.72<br>(2.45 to<br>299.85)                                | 59.96<br>(1.62 to<br>194.94)                               | 99.69<br>(3.00 to<br>450.66)                                 |





|                                      |                                          |                                           |                                           |                                           |                                     |                                       |                                       |                                       |
|--------------------------------------|------------------------------------------|-------------------------------------------|-------------------------------------------|-------------------------------------------|-------------------------------------|---------------------------------------|---------------------------------------|---------------------------------------|
| Stomach cancer                       | 14,010.29<br>(10,547.16 to<br>18,166.16) | 19,532.69<br>(9,538.43 to<br>30,934.48)   | 18,547.04<br>(8,865.85 to<br>30,234.64)   | 19,960.35<br>(10,242.71 to<br>30,813.52)  | 541.51<br>(416.85 to<br>682.48)     | 709.94<br>(417.79 to<br>1,036.43)     | 700.51<br>(401.73 to<br>1,061.78)     | 709.26<br>(424.72 to<br>1,017.85)     |
| Colon and rectum cancer              | 17,254.70<br>(12,995.31 to<br>22,131.84) | 39,649.99<br>(19,737.95 to<br>67,142.14)  | 41,934.12<br>(21,183.41 to<br>71,016.48)  | 38,409.37<br>(18,937.99 to<br>66,933.08)  | 733.50<br>(562.10 to<br>916.73)     | 1,609.36<br>(1,026.17 to<br>2,436.93) | 1,820.00<br>(1,161.79 to<br>2,726.92) | 1,488.38<br>(933.89 to<br>2,286.97)   |
| Liver cancer                         | 19,571.98<br>(14,128.19 to<br>27,832.25) | 42,789.26<br>(21,223.15 to<br>73,997.79)  | 40,441.50<br>(19,875.38 to<br>69,992.35)  | 45,027.91<br>(22,171.34 to<br>78,611.12)  | 636.00<br>(464.52 to<br>890.00)     | 1,347.91<br>(743.00 to<br>2,173.39)   | 1,325.74<br>(729.95 to<br>2,133.21)   | 1,376.50<br>(776.66 to<br>2,270.97)   |
| Liver cancer due to hepatitis B      | 7,021.55<br>(4,736.71 to<br>10,375.66)   | 15,475.61<br>(6,990.43 to<br>27,345.73)   | 14,703.90<br>(6,680.65 to<br>25,922.28)   | 15,994.22<br>(7,195.66 to<br>29,038.12)   | 202.72<br>(138.58 to<br>296.63)     | 442.32<br>(219.63 to<br>741.14)       | 433.49<br>(215.61 to<br>722.69)       | 446.36<br>(220.77 to<br>757.22)       |
| Liver cancer due to hepatitis C      | 5,235.94<br>(3,321.90 to<br>7,789.00)    | 11,682.16<br>(5,660.75 to<br>20,470.68)   | 11,403.37<br>(5,448.23 to<br>19,969.81)   | 11,769.11<br>(5,684.21 to<br>20,933.57)   | 205.28<br>(134.07 to<br>296.21)     | 429.22<br>(241.13 to<br>706.58)       | 438.13<br>(247.54 to<br>719.51)       | 419.22<br>(234.77 to<br>709.55)       |
| Liver cancer due to alcohol use      | 2,152.24<br>(1,462.52 to<br>3,199.17)    | 4,839.57<br>(2,271.99 to<br>8,753.74)     | 4,242.12<br>(1,977.18 to<br>7,658.78)     | 5,918.39<br>(2,739.01 to<br>10,867.05)    | 78.09<br>(53.75 to<br>112.68)       | 163.26<br>(87.84 to<br>276.55)        | 149.66<br>(80.95 to<br>252.74)        | 192.10<br>(101.22 to<br>337.19)       |
| Liver cancer due to other causes     | 5,162.25<br>(3,667.90 to<br>7,539.59)    | 10,791.93<br>(5,097.70 to<br>19,322.49)   | 10,092.11<br>(4,747.65 to<br>17,991.64)   | 11,346.18<br>(5,278.93 to<br>21,223.46)   | 149.92<br>(107.47 to<br>216.67)     | 313.32<br>(160.94 to<br>543.61)       | 304.46<br>(155.77 to<br>521.96)       | 318.83<br>(166.23 to<br>573.39)       |
| Gallbladder and biliary tract cancer | 1,825.24<br>(1,233.31 to<br>2,675.50)    | 2,835.90<br>(1,554.51 to<br>4,477.60)     | 3,045.22<br>(1,620.61 to<br>4,983.26)     | 2,566.67<br>(1,444.16 to<br>3,984.66)     | 74.20<br>(51.28 to<br>106.25)       | 108.09<br>(69.15 to<br>158.76)        | 120.38<br>(75.49 to<br>180.00)        | 95.66<br>(62.08 to<br>137.37)         |
| Pancreatic cancer                    | 7,622.51<br>(5,633.37 to<br>10,089.03)   | 19,882.49<br>(10,065.17 to<br>31,301.86)  | 21,098.51<br>(10,631.26 to<br>33,281.89)  | 18,289.02<br>(9,502.82 to<br>28,294.17)   | 302.84<br>(225.94 to<br>394.35)     | 733.80<br>(444.96 to<br>1,049.25)     | 808.48<br>(482.11 to<br>1,168.92)     | 658.50<br>(406.93 to<br>933.32)       |
| Larynx cancer                        | 3,497.75<br>(2,172.69 to<br>4,934.54)    | 7,254.33<br>(2,164.24 to<br>15,840.17)    | 4,974.73<br>(1,581.22 to<br>10,363.74)    | 10,343.08<br>(2,923.60 to<br>23,898.42)   | 127.02<br>(81.86 to<br>173.95)      | 244.90<br>(88.45 to<br>505.95)        | 175.61<br>(68.99 to<br>344.97)        | 338.26<br>(110.46 to<br>747.99)       |
| Tracheal, bronchus, and lung cancer  | 9,892.89<br>(7,396.33 to<br>12,795.73)   | 22,815.01<br>(9,366.98 to<br>43,960.99)   | 14,381.77<br>(6,436.70 to<br>25,520.16)   | 27,697.23<br>(11,017.43 to<br>54,660.59)  | 406.10<br>(309.57 to<br>511.15)     | 855.26<br>(428.39 to<br>1,477.34)     | 658.48<br>(302.63 to<br>923.84)       | 998.60<br>(463.54 to<br>1,784.85)     |
| Malignant skin melanoma              | 2,958.43<br>(1,971.21 to<br>4,247.86)    | 6,442.54<br>(3,220.23 to<br>10,442.07)    | 7,451.75<br>(3,640.42 to<br>12,423.22)    | 5,485.41<br>(2,862.16 to<br>8,837.94)     | 112.20<br>(75.64 to<br>157.50)      | 234.85<br>(136.02 to<br>350.23)       | 282.06<br>(160.47 to<br>427.16)       | 195.30<br>(117.27 to<br>287.49)       |
| Non-melanoma skin cancer             | 1,880.38<br>(1,296.93 to<br>2,608.82)    | 3,738.23<br>(1,932.24 to<br>6,283.93)     | 3,691.10<br>(1,858.26 to<br>6,188.67)     | 3,609.06<br>(1,912.81 to<br>5,811.81)     | 76.31<br>(56.52 to<br>98.38)        | 142.88<br>(94.44 to<br>200.12)        | 149.79<br>(97.56 to<br>210.66)        | 133.06<br>(90.67 to<br>183.84)        |
| Breast cancer                        | 16,046.68<br>(9,003.75 to<br>24,050.51)  | 39,105.02<br>(17,012.19 to<br>71,174.90)  | 39,009.42<br>(16,903.17 to<br>70,739.52)  | 39,548.71<br>(17,400.58 to<br>70,698.80)  | 507.59<br>(288.51 to<br>740.07)     | 1,228.32<br>(625.67 to<br>2,043.74)   | 1,261.38<br>(634.04 to<br>2,099.68)   | 1,220.01<br>(631.56 to<br>2,015.71)   |
| Cervical cancer                      | 38,366.36<br>(19,911.15 to<br>60,626.19) | 71,725.84<br>(30,310.45 to<br>126,525.97) | 65,615.69<br>(27,386.52 to<br>116,400.63) | 73,636.51<br>(31,691.27 to<br>131,093.82) | 1,235.75<br>(657.45 to<br>1,932.70) | 2,220.10<br>(1,037.76 to<br>3,738.30) | 2,075.11<br>(973.91 to<br>3,469.59)   | 2,248.88<br>(1,077.98 to<br>3,783.48) |
| Uterine cancer                       | 4,679.97<br>(2,574.80 to<br>7,189.92)    | 10,445.46<br>(5,312.97 to<br>16,735.21)   | 9,450.84<br>(4,702.40 to<br>15,210.33)    | 10,880.20<br>(5,646.80 to<br>17,188.69)   | 171.51<br>(98.55 to<br>254.92)      | 368.44<br>(210.04 to<br>551.58)       | 342.53<br>(192.23 to<br>514.30)       | 672.92<br>(219.77 to<br>557.13)       |
| Ovarian cancer                       | 8,601.40<br>(4,360.14 to<br>14,272.69)   | 21,401.33<br>(9,273.09 to<br>37,535.87)   | 23,491.88<br>(10,346.86 to<br>40,912.27)  | 19,408.87<br>(8,561.58 to<br>34,049.57)   | 286.49<br>(147.35 to<br>465.34)     | 696.49<br>(345.74 to<br>1,147.96)     | 786.26<br>(390.69 to<br>1,302.53)     | 622.11<br>(318.80 to<br>1,031.71)     |
| Prostate cancer                      | 18,629.81<br>(6,194.56 to<br>29,227.00)  | 42,270.58<br>(12,292.44 to<br>69,213.19)  | 48,696.97<br>(14,388.50 to<br>82,011.84)  | 36,481.67<br>(10,806.22 to<br>57,998.42)  | 1,000.66<br>(340.39 to<br>1,538.41) | 2,094.58<br>(695.17 to<br>3,146.38)   | 2,513.55<br>(839.56 to<br>3,891.90)   | 1,768.66<br>(593.27 to<br>2,634.61)   |
| Testicular cancer                    | 855.07<br>(555.11 to<br>1,258.80)        | 1,275.12<br>(479.71 to<br>2,433.97)       | 1,221.60<br>(446.36 to<br>2,414.73)       | 1,252.50<br>(482.09 to<br>2,340.97)       | 19.37<br>(12.54 to<br>28.99)        | 29.57<br>(11.34 to<br>56.69)          | 28.89<br>(10.96 to<br>56.50)          | 28.53<br>(11.30 to<br>53.39)          |

**Zambia**

| Cause | YLLs (actual counts) |                                       |                                        |                                        | Deaths (actual counts)                 |                               |                                 |                                 |
|-------|----------------------|---------------------------------------|----------------------------------------|----------------------------------------|----------------------------------------|-------------------------------|---------------------------------|---------------------------------|
|       | 2016                 | 2040 Forecast                         | 2040 Better Scenario                   | 2040 Worse Scenario                    | 2016                                   | 2040 Forecast                 | 2040 Better Scenario            | 2040 Worse Scenario             |
|       | Kidney cancer        | 4,394.22<br>(3,204.14 to<br>5,873.63) | 7,818.39<br>(4,567.01 to<br>12,562.86) | 8,212.03<br>(4,667.63 to<br>13,752.18) | 7,689.36<br>(4,698.83 to<br>11,692.58) | 97.07<br>(69.46 to<br>136.19) | 204.17<br>(117.75 to<br>340.85) | 230.01<br>(128.72 to<br>401.33) |



|                                                               |                                                     |                                                     |                                                     |                                                      |                                                |                                                |                                                |                                                |
|---------------------------------------------------------------|-----------------------------------------------------|-----------------------------------------------------|-----------------------------------------------------|------------------------------------------------------|------------------------------------------------|------------------------------------------------|------------------------------------------------|------------------------------------------------|
| Mycocarditis                                                  | 2,300.19<br>(1,169.14 to<br>4,876.23)               | 2,921.49<br>(1,137.98 to<br>6,742.92)               | 2,684.36<br>(1,055.63 to<br>6,272.92)               | 3,093.88<br>(1,285.99 to<br>7,047.65)                | 45.67<br>(23.70 to<br>92.95)                   | 66.71<br>(28.29 to<br>150.87)                  | 64.27<br>(27.00 to<br>143.24)                  | 67.03<br>(29.08 to<br>148.49)                  |
| <b>Zambia</b>                                                 |                                                     |                                                     |                                                     |                                                      |                                                |                                                |                                                |                                                |
| Cause                                                         | YLLs (actual counts)                                |                                                     |                                                     |                                                      | Deaths (actual counts)                         |                                                |                                                |                                                |
|                                                               | 2016                                                | 2040 Forecast                                       | 2040 Better Scenario                                | 2040 Worse Scenario                                  | 2016                                           | 2040 Forecast                                  | 2040 Better Scenario                           | 2040 Worse Scenario                            |
| Alcoholic cardiomyopathy                                      | 1,185.88<br>(510.04 to<br>2,483.29)                 | 2,236.93<br>(690.12 to<br>5,525.14)                 | 2,260.05<br>(677.20 to<br>5,620.51)                 | 2,344.73<br>(754.16 to<br>5,653.20)                  | 35.19<br>(15.86 to<br>71.57)                   | 64.87<br>(22.81 to<br>150.48)                  | 67.26<br>(23.74 to<br>155.98)                  | 66.69<br>(23.79 to<br>152.86)                  |
| Other cardiomyopathy                                          | 11,857.57<br>(7,435.20 to<br>18,611.45)             | 19,473.34<br>(8,401.41 to<br>38,465.25)             | 19,394.63<br>(8,288.73 to<br>38,047.52)             | 19,400.92<br>(8,712.55 to<br>36,818.78)              | 319.83<br>(195.17 to<br>517.38)                | 563.25<br>(270.72 to<br>1,068.85)              | 591.58<br>(280.64 to<br>1,110.55)              | 535.35<br>(259.41 to<br>1,017.51)              |
| Atrial fibrillation and flutter                               | 1,528.07<br>(1,082.83 to<br>2,054.09)               | 2,702.67<br>(1,922.91 to<br>3,635.10)               | 2,848.83<br>(2,013.85 to<br>3,810.02)               | 2,562.36<br>(1,790.44 to<br>3,488.62)                | 126.84<br>(89.62 to<br>168.22)                 | 223.50<br>(155.32 to<br>308.70)                | 258.94<br>(188.56 to<br>354.82)                | 196.63<br>(132.79 to<br>277.93)                |
| Aortic aneurysm                                               | 4,170.03<br>(2,872.36 to<br>5,642.81)               | 8,040.39<br>(3,967.90 to<br>13,478.02)              | 7,519.75<br>(3,777.87 to<br>12,927.35)              | 7,760.59<br>(3,818.38 to<br>12,996.16)               | 172.79<br>(126.10 to<br>225.95)                | 306.85<br>(190.48 to<br>456.31)                | 309.16<br>(192.04 to<br>451.81)                | 285.17<br>(177.59 to<br>429.64)                |
| Peripheral artery disease                                     | 298.44<br>(115.37 to<br>474.71)                     | 868.04<br>(302.82 to<br>1,501.26)                   | 908.72<br>(329.76 to<br>1,542.75)                   | 777.52<br>(277.07 to<br>1,363.69)                    | 19.00<br>(7.69 to<br>28.46)                    | 53.41<br>(21.55 to<br>82.55)                   | 63.25<br>(26.43 to<br>96.43)                   | 44.77<br>(18.01 to<br>70.30)                   |
| Endocarditis                                                  | 6,698.45<br>(4,558.23 to<br>8,753.27)               | 12,190.59<br>(6,157.88 to<br>20,316.44)             | 11,486.35<br>(5,610.28 to<br>20,174.25)             | 12,825.23<br>(6,658.06 to<br>20,709.58)              | 188.54<br>(128.46 to<br>248.47)                | 353.60<br>(202.31 to<br>536.57)                | 356.49<br>(198.17 to<br>555.68)                | 351.46<br>(204.62 to<br>536.17)                |
| Other cardiovascular and circulatory diseases                 | 66,026.61<br>(46,151.68 to<br>95,247.37)            | 115,927.61<br>(64,480.84 to<br>187,676.38)          | 92,180.70<br>(51,814.98 to<br>148,570.11)           | 132,172.04<br>(73,774.10 to<br>215,846.98)           | 2,626.17<br>(1,798.51 to<br>3,829.87)          | 4,691.72<br>(3,063.55 to<br>6,859.41)          | 4,087.28<br>(2,725.50 to<br>5,953.15)          | 5,012.99<br>(3,229.48 to<br>7,535.98)          |
| <b>Chronic respiratory diseases</b>                           | <b>72,867.72<br/>(56,789.35 to<br/>92,507.46)</b>   | <b>86,673.59<br/>(46,518.68 to<br/>145,806.16)</b>  | <b>53,908.30<br/>(30,398.60 to<br/>87,738.36)</b>   | <b>113,285.85<br/>(60,231.88 to<br/>196,049.74)</b>  | <b>2,837.54<br/>(2,221.81 to<br/>3,551.38)</b> | <b>3,357.95<br/>(2,075.17 to<br/>5,245.86)</b> | <b>2,158.05<br/>(1,423.23 to<br/>3,134.17)</b> | <b>4,171.53<br/>(2,469.38 to<br/>6,760.16)</b> |
| Chronic obstructive pulmonary disease                         | 39,865.73<br>(30,273.54 to<br>50,908.27)            | 59,075.57<br>(28,827.56 to<br>109,325.04)           | 51,526.19<br>(16,870.21 to<br>82,208.79)            | 80,996.35<br>(38,108.44 to<br>153,178.75)            | 1,878.51<br>(1,454.75 to<br>2,342.10)          | 2,521.86<br>(1,430.57 to<br>4,304.48)          | 1,442.46<br>(900.36 to<br>2,151.15)            | 3,246.27<br>(1,828.08 to<br>5,655.47)          |
| Pneumoconiosis                                                | 282.96<br>(194.65 to<br>395.57)                     | 334.01<br>(178.99 to<br>515.53)                     | 308.58<br>(153.99 to<br>489.56)                     | 324.19<br>(182.48 to<br>488.14)                      | 12.27<br>(8.52 to<br>17.09)                    | 13.94<br>(8.97 to<br>19.52)                    | 13.42<br>(8.31 to<br>19.18)                    | 13.14<br>(8.71 to<br>18.43)                    |
| Silicosis                                                     | 58.06<br>(34.47 to<br>89.46)                        | 40.60<br>(19.49 to<br>70.31)                        | 39.94<br>(18.25 to<br>69.98)                        | 39.58<br>(20.22 to<br>66.71)                         | 2.79<br>(1.67 to<br>4.19)                      | 1.87<br>(1.06 to<br>2.94)                      | 1.94<br>(1.05 to<br>3.09)                      | 1.78<br>(1.04 to<br>2.78)                      |
| Asbestosis                                                    | 62.61<br>(33.00 to<br>101.82)                       | 103.89<br>(44.89 to<br>191.32)                      | 109.61<br>(46.15 to<br>204.19)                      | 95.24<br>(43.45 to<br>167.56)                        | 2.35<br>(1.04 to<br>4.14)                      | 3.83<br>(1.69 to<br>6.49)                      | 4.27<br>(1.85 to<br>7.31)                      | 3.38<br>(1.53 to<br>5.65)                      |
| Coal workers pneumoconiosis                                   | 22.64<br>(11.13 to<br>40.01)                        | 26.14<br>(11.31 to<br>51.20)                        | 18.35<br>(7.69 to<br>37.50)                         | 29.19<br>(13.08 to<br>55.55)                         | 1.02<br>(0.53 to<br>1.84)                      | 1.11<br>(0.56 to<br>2.07)                      | 0.81<br>(0.39 to<br>1.58)                      | 1.21<br>(0.61 to<br>2.21)                      |
| Other pneumoconiosis                                          | 139.66<br>(89.90 to<br>210.28)                      | 163.38<br>(86.02 to<br>363.06)                      | 140.68<br>(70.84 to<br>239.19)                      | 160.19<br>(85.54 to<br>251.97)                       | 6.11<br>(3.90 to<br>9.30)                      | 7.12<br>(4.36 to<br>10.85)                     | 6.40<br>(3.68 to<br>10.04)                     | 6.77<br>(4.23 to<br>9.97)                      |
| Asthma                                                        | 28,266.47<br>(20,657.62 to<br>37,946.61)            | 20,282.27<br>(10,639.83 to<br>34,160.11)            | 15,259.40<br>(8,140.88 to<br>25,153.57)             | 24,784.57<br>(13,230.19 to<br>41,656.73)             | 836.13<br>(601.92 to<br>1,161.31)              | 626.99<br>(368.46 to<br>998.74)                | 494.75<br>(292.80 to<br>773.61)                | 727.06<br>(429.46 to<br>1,167.41)              |
| Interstitial lung disease and pulmonary sarcoidosis           | 1,113.06<br>(559.50 to<br>1,844.79)                 | 2,442.04<br>(1,060.20 to<br>4,456.86)               | 2,817.73<br>(1,214.08 to<br>5,112.21)               | 2,099.00<br>(930.25 to<br>3,883.04)                  | 41.90<br>(21.65 to<br>65.82)                   | 89.97<br>(43.92 to<br>150.64)                  | 109.31<br>(53.79 to<br>183.95)                 | 74.23<br>(36.57 to<br>124.26)                  |
| Other chronic respiratory diseases                            | 3,339.49<br>(1,495.96 to<br>5,660.30)               | 4,539.70<br>(1,929.66 to<br>8,325.99)               | 3,996.41<br>(1,733.77 to<br>7,288.51)               | 5,081.73<br>(2,108.64 to<br>9,306.45)                | 68.73<br>(34.27 to<br>107.32)                  | 105.20<br>(47.71 to<br>185.90)                 | 98.10<br>(46.01 to<br>172.16)                  | 110.83<br>(49.76 to<br>197.32)                 |
| <b>Cirrhosis and other chronic liver diseases</b>             | <b>103,883.67<br/>(78,860.04 to<br/>136,042.91)</b> | <b>188,640.01<br/>(92,910.93 to<br/>305,956.01)</b> | <b>174,045.28<br/>(83,259.25 to<br/>296,811.39)</b> | <b>199,115.39<br/>(100,543.16 to<br/>320,164.88)</b> | <b>3,084.94<br/>(2,347.72 to<br/>3,991.52)</b> | <b>5,637.79<br/>(3,097.30 to<br/>8,446.87)</b> | <b>5,366.59<br/>(2,948.39 to<br/>8,355.35)</b> | <b>5,813.38<br/>(3,278.10 to<br/>8,551.07)</b> |
| Cirrhosis and other chronic liver diseases due to hepatitis B | 31,089.50<br>(21,559.93 to<br>42,937.07)            | 60,361.70<br>(28,391.66 to<br>98,819.77)            | 58,083.81<br>(26,317.51 to<br>96,830.21)            | 59,021.68<br>(28,837.26 to<br>94,839.11)             | 957.93<br>(679.88 to<br>1,284.36)              | 1,826.52<br>(999.82 to<br>2,846.81)            | 1,806.13<br>(961.46 to<br>2,874.67)            | 1,755.38<br>(980.56 to<br>2,673.71)            |

|                                                                |                                                      |                                                     |                                                     |                                                      |                                                |                                                |                                                |                                                |
|----------------------------------------------------------------|------------------------------------------------------|-----------------------------------------------------|-----------------------------------------------------|------------------------------------------------------|------------------------------------------------|------------------------------------------------|------------------------------------------------|------------------------------------------------|
| Cirrhosis and other chronic liver diseases due to hepatitis C  | 22,167.23<br>(13,116.55 to<br>34,652.01)             | 45,246.10<br>(18,788.19 to<br>83,320.76)            | 43,367.83<br>(17,582.99 to<br>81,252.40)            | 44,432.91<br>(18,722.99 to<br>80,444.21)             | 701.11<br>(418.69 to<br>1,078.61)              | 1,398.95<br>(657.10 to<br>2,396.04)            | 1,375.35<br>(638.60 to<br>2,400.66)            | 1,351.91<br>(644.52 to<br>2,271.72)            |
| Cirrhosis and other chronic liver diseases due to alcohol use  | 27,176.20<br>(19,496.12 to<br>36,388.90)             | 47,827.79<br>(21,882.28 to<br>79,437.29)            | 40,505.47<br>(18,271.47 to<br>68,771.61)            | 58,231.14<br>(27,177.31 to<br>94,510.32)             | 884.24<br>(645.61 to<br>1,165.49)              | 1,525.39<br>(822.72 to<br>2,348.89)            | 1,341.86<br>(723.58 to<br>2,126.96)            | 1,803.18<br>(986.63 to<br>2,748.79)            |
| Cirrhosis and other chronic liver diseases due to other causes | 23,450.74<br>(18,149.05 to<br>30,270.84)             | 35,204.41<br>(19,141.12 to<br>57,296.00)            | 32,088.17<br>(16,998.29 to<br>53,114.13)            | 37,429.65<br>(20,656.25 to<br>58,684.99)             | 541.66<br>(412.27 to<br>696.38)                | 886.92<br>(514.71 to<br>1,340.44)              | 843.24<br>(479.35 to<br>1,303.31)              | 902.90<br>(536.83 to<br>1,324.24)              |
| <b>Digestive diseases</b>                                      | <b>138,121.16<br/>(103,664.02 to<br/>176,708.08)</b> | <b>184,210.52<br/>(97,720.09 to<br/>294,825.08)</b> | <b>164,549.27<br/>(85,142.25 to<br/>272,990.40)</b> | <b>198,387.60<br/>(108,173.61 to<br/>313,687.59)</b> | <b>4,005.05<br/>(3,123.94 to<br/>5,034.07)</b> | <b>5,645.25<br/>(3,551.50 to<br/>8,199.17)</b> | <b>5,336.00<br/>(3,308.90 to<br/>7,901.66)</b> | <b>5,777.68<br/>(3,668.85 to<br/>8,320.34)</b> |
| Peptic ulcer disease                                           | 20,899.48<br>(14,407.35 to<br>28,833.01)             | 18,749.89<br>(9,671.17 to<br>30,871.71)             | 14,183.75<br>(7,196.29 to<br>23,785.81)             | 21,736.28<br>(11,440.12 to<br>35,863.56)             | 750.91<br>(538.46 to<br>1,013.24)              | 688.48<br>(437.28 to<br>1,053.37)              | 546.20<br>(341.10 to<br>826.34)                | 767.55<br>(505.12 to<br>1,138.15)              |
| <b>Zambia</b>                                                  |                                                      |                                                     |                                                     |                                                      |                                                |                                                |                                                |                                                |
| Cause                                                          | YLLs (actual counts)                                 |                                                     |                                                     |                                                      | Deaths (actual counts)                         |                                                |                                                |                                                |
|                                                                | 2016                                                 | 2040 Forecast                                       | 2040 Better Scenario                                | 2040 Worse Scenario                                  | 2016                                           | 2040 Forecast                                  | 2040 Better Scenario                           | 2040 Worse Scenario                            |
| Gastritis and duodenitis                                       | 5,197.01<br>(3,573.70 to<br>7,427.07)                | 8,605.99<br>(4,246.55 to<br>14,700.99)              | 7,987.23<br>(3,822.28 to<br>13,991.02)              | 8,776.49<br>(4,519.46 to<br>14,573.18)               | 171.37<br>(124.09 to<br>238.14)                | 289.08<br>(179.80 to<br>436.52)                | 284.41<br>(175.21 to<br>443.34)                | 282.58<br>(180.66 to<br>415.34)                |
| Appendicitis                                                   | 10,565.17<br>(7,292.82 to<br>14,701.87)              | 10,897.93<br>(5,706.21 to<br>17,314.56)             | 8,887.84<br>(4,582.25 to<br>14,563.61)              | 12,800.80<br>(6,855.27 to<br>20,060.85)              | 222.11<br>(158.56 to<br>295.38)                | 260.44<br>(150.67 to<br>391.42)                | 223.73<br>(128.98 to<br>341.39)                | 289.90<br>(170.80 to<br>425.17)                |
| Paralytic ileus and intestinal obstruction                     | 64,206.06<br>(46,625.83 to<br>84,585.79)             | 93,180.92<br>(49,666.26 to<br>146,944.37)           | 87,782.31<br>(45,852.22 to<br>141,274.83)           | 95,873.21<br>(54,095.15 to<br>149,239.61)            | 1,694.64<br>(1,276.95 to<br>2,185.29)          | 2,719.45<br>(1,680.49 to<br>3,991.05)          | 2,724.78<br>(1,655.44 to<br>4,031.79)          | 2,642.17<br>(1,676.53 to<br>3,787.51)          |
| Inguinal, femoral, and abdominal hernia                        | 6,260.75<br>(2,108.06 to<br>10,881.26)               | 6,224.82<br>(1,650.85 to<br>12,038.20)              | 5,414.50<br>(1,453.10 to<br>10,729.73)              | 6,760.10<br>(1,843.94 to<br>12,705.14)               | 174.94<br>(62.64 to<br>286.99)                 | 172.51<br>(54.15 to<br>308.14)                 | 157.07<br>(47.96 to<br>288.52)                 | 179.64<br>(55.02 to<br>312.99)                 |
| Inflammatory bowel disease                                     | 4,948.25<br>(2,478.75 to<br>7,939.64)                | 7,304.22<br>(3,081.68 to<br>12,045.13)              | 7,239.03<br>(3,056.63 to<br>12,259.95)              | 7,199.57<br>(3,093.70 to<br>11,981.57)               | 134.19<br>(73.64 to<br>190.45)                 | 214.90<br>(106.17 to<br>328.56)                | 227.06<br>(111.33 to<br>345.87)                | 200.11<br>(98.45 to<br>301.50)                 |
| Vascular intestinal disorders                                  | 2,112.09<br>(1,447.54 to<br>2,798.61)                | 3,608.53<br>(2,020.36 to<br>5,401.73)               | 3,558.74<br>(1,947.82 to<br>5,437.36)               | 3,521.02<br>(2,027.96 to<br>5,183.22)                | 91.52<br>(62.87 to<br>120.83)                  | 154.27<br>(105.44 to<br>205.42)                | 161.70<br>(107.25 to<br>224.84)                | 144.00<br>(99.97 to<br>189.95)                 |
| Gallbladder and biliary diseases                               | 6,660.67<br>(4,613.64 to<br>9,060.71)                | 9,315.33<br>(4,786.13 to<br>15,952.96)              | 7,323.76<br>(3,792.32 to<br>12,308.00)              | 11,190.36<br>(5,496.25 to<br>19,774.54)              | 260.87<br>(187.48 to<br>345.43)                | 350.31<br>(210.19 to<br>546.08)                | 295.81<br>(184.73 to<br>448.66)                | 399.57<br>(233.41 to<br>650.34)                |
| Pancreatitis                                                   | 5,857.02<br>(4,010.51 to<br>9,057.59)                | 11,647.09<br>(3,071.23 to<br>34,907.91)             | 9,346.97<br>(2,636.16 to<br>27,472.12)              | 14,507.98<br>(5,338.91 to<br>44,365.67)              | 155.93<br>(110.27 to<br>236.98)                | 308.85<br>(99.80 to<br>883.47)                 | 257.29<br>(68.31 to<br>688.31)                 | 373.59<br>(109.24 to<br>1,069.82)              |
| Other digestive diseases                                       | 11,414.67<br>(8,054.47 to<br>16,294.94)              | 14,675.79<br>(8,119.00 to<br>22,884.75)             | 12,825.15<br>(6,919.72 to<br>20,726.50)             | 16,021.79<br>(9,243.12 to<br>24,938.02)              | 348.56<br>(255.96 to<br>462.99)                | 486.94<br>(326.20 to<br>685.18)                | 457.95<br>(298.14 to<br>669.70)                | 498.57<br>(338.99 to<br>695.82)                |
| <b>Neurological disorders</b>                                  | <b>47,171.41<br/>(35,820.56 to<br/>61,227.04)</b>    | <b>71,168.84<br/>(47,608.19 to<br/>108,536.07)</b>  | <b>67,336.90<br/>(45,795.18 to<br/>98,745.89)</b>   | <b>78,062.40<br/>(50,363.16 to<br/>123,103.13)</b>   | <b>1,868.48<br/>(1,454.54 to<br/>2,359.99)</b> | <b>3,186.88<br/>(2,499.36 to<br/>4,004.02)</b> | <b>3,601.46<br/>(2,922.49 to<br/>4,403.33)</b> | <b>2,938.97<br/>(2,186.35 to<br/>3,847.25)</b> |
| Alzheimer's disease and other dementias                        | 14,209.62<br>(10,334.81 to<br>18,835.80)             | 24,103.44<br>(18,586.01 to<br>31,197.17)            | 27,272.89<br>(21,796.57 to<br>34,831.60)            | 21,247.24<br>(15,726.51 to<br>28,844.10)             | 1,222.14<br>(907.42 to<br>1,609.40)            | 2,158.21<br>(1,524.50 to<br>2,925.48)          | 2,625.50<br>(1,977.20 to<br>3,389.32)          | 1,795.76<br>(1,170.00 to<br>2,572.22)          |
| Parkinson's disease                                            | 1,145.75<br>(821.13 to<br>1,558.89)                  | 2,298.28<br>(1,730.49 to<br>2,980.18)               | 3,025.91<br>(2,249.50 to<br>3,974.81)               | 1,795.18<br>(1,340.79 to<br>2,335.03)                | 87.85<br>(62.60 to<br>119.34)                  | 173.04<br>(124.65 to<br>229.12)                | 241.65<br>(179.46 to<br>315.17)                | 129.47<br>(87.57 to<br>182.48)                 |
| Epilepsy                                                       | 25,942.15<br>(17,933.42 to<br>35,554.12)             | 35,363.45<br>(15,833.36 to<br>69,345.11)            | 27,572.68<br>(12,540.57 to<br>53,169.15)            | 45,428.84<br>(20,401.32 to<br>87,434.60)             | 454.56<br>(315.64 to<br>620.71)                | 661.57<br>(312.26 to<br>1,285.29)              | 529.25<br>(254.05 to<br>984.70)                | 827.77<br>(386.21 to<br>1,591.09)              |
| Multiple sclerosis                                             | 362.50<br>(232.08 to<br>594.81)                      | 816.72<br>(390.26 to<br>1,512.72)                   | 847.84<br>(396.82 to<br>1,602.25)                   | 738.36<br>(361.82 to<br>1,362.69)                    | 9.52<br>(6.26 to<br>15.24)                     | 21.60<br>(11.04 to<br>38.62)                   | 22.69<br>(11.36 to<br>41.74)                   | 19.33<br>(10.18 to<br>33.97)                   |
| Motor neuron disease                                           | 430.75<br>(285.61 to<br>632.92)                      | 725.63<br>(387.46 to<br>1,158.32)                   | 776.40<br>(396.72 to<br>1,265.57)                   | 681.04<br>(388.41 to<br>1,066.97)                    | 9.59<br>(6.91 to<br>13.63)                     | 20.07<br>(11.69 to<br>31.14)                   | 22.37<br>(11.69 to<br>35.61)                   | 17.87<br>(10.38 to<br>27.13)                   |

|                              |                                                             |                                                              |                                                              |                                                              |                                                      |                                                      |                                                      |                                                      |
|------------------------------|-------------------------------------------------------------|--------------------------------------------------------------|--------------------------------------------------------------|--------------------------------------------------------------|------------------------------------------------------|------------------------------------------------------|------------------------------------------------------|------------------------------------------------------|
| Other neurological disorders | 5,080.64<br>(3,434.54 to<br>7,796.41)                       | 7,861.32<br>(4,836.31 to<br>11,779.82)                       | 7,841.17<br>(4,728.46 to<br>12,004.49)                       | 8,171.75<br>(5,057.88 to<br>12,223.35)                       | 84.82<br>(61.70 to<br>118.94)                        | 152.39<br>(95.88 to<br>223.77)                       | 140.00<br>(100.25 to<br>236.89)                      | 148.78<br>(96.90 to<br>214.59)                       |
| <b>Mental disorders</b>      | <b>9,455.39</b><br><b>(6,489.60 to</b><br><b>13,210.54)</b> | <b>16,994.93</b><br><b>(7,524.00 to</b><br><b>29,444.28)</b> | <b>16,649.21</b><br><b>(7,255.58 to</b><br><b>29,208.63)</b> | <b>16,867.34</b><br><b>(7,735.61 to</b><br><b>28,412.54)</b> | <b>264.17</b><br><b>(184.43 to</b><br><b>359.32)</b> | <b>463.48</b><br><b>(229.38 to</b><br><b>752.57)</b> | <b>465.35</b><br><b>(227.99 to</b><br><b>771.62)</b> | <b>452.15</b><br><b>(230.04 to</b><br><b>718.46)</b> |
| Alcohol use disorders        | 7,731.46<br>(5,133.39 to<br>10,888.94)                      | 12,435.18<br>(5,406.46 to<br>21,713.80)                      | 12,034.38<br>(5,200.69 to<br>21,448.14)                      | 12,546.57<br>(5,583.52 to<br>21,240.76)                      | 228.32<br>(156.03 to<br>313.57)                      | 366.70<br>(183.18 to<br>594.64)                      | 365.44<br>(180.51 to<br>608.58)                      | 362.13<br>(186.71 to<br>578.00)                      |
| Drug use disorders           | 1,666.24<br>(1,121.70 to<br>2,413.51)                       | 4,430.82<br>(1,872.39 to<br>8,213.21)                        | 4,483.69<br>(1,862.09 to<br>8,514.99)                        | 4,196.82<br>(1,801.23 to<br>7,529.75)                        | 34.81<br>(23.49 to<br>49.77)                         | 94.39<br>(41.38 to<br>171.36)                        | 97.47<br>(42.46 to<br>180.84)                        | 87.75<br>(39.42 to<br>156.43)                        |
| Opioid use disorders         | 1,316.01<br>(882.04 to<br>1,903.53)                         | 3,346.80<br>(1,432.91 to<br>6,304.19)                        | 3,373.39<br>(1,410.43 to<br>6,470.24)                        | 3,179.77<br>(1,384.71 to<br>5,849.17)                        | 26.81<br>(17.95 to<br>38.61)                         | 69.75<br>(30.96 to<br>130.19)                        | 71.40<br>(30.86 to<br>136.51)                        | 65.18<br>(29.79 to<br>118.43)                        |
| Cocaine use disorders        | 67.25<br>(16.21 to<br>155.88)                               | 189.74<br>(41.20 to<br>474.90)                               | 180.03<br>(39.12 to<br>452.79)                               | 187.47<br>(41.65 to<br>464.57)                               | 1.44<br>(0.36 to<br>3.25)                            | 4.11<br>(0.93 to<br>10.11)                           | 3.95<br>(0.90 to<br>9.84)                            | 4.02<br>(0.92 to<br>9.77)                            |
| Amphetamine use disorders    | 38.77<br>(10.14 to<br>89.68)                                | 155.37<br>(35.86 to<br>399.53)                               | 143.17<br>(32.65 to<br>369.55)                               | 158.47<br>(36.30 to<br>410.35)                               | 0.80<br>(0.21 to<br>1.84)                            | 3.22<br>(0.78 to<br>8.16)                            | 2.98<br>(0.72 to<br>7.78)                            | 3.25<br>(0.79 to<br>8.36)                            |
| Other drug use disorders     | 244.22<br>(142.95 to<br>393.28)                             | 738.91<br>(305.90 to<br>1,499.46)                            | 787.10<br>(318.08 to<br>1,603.40)                            | 671.12<br>(285.80 to<br>1,344.42)                            | 5.77<br>(3.53 to<br>9.09)                            | 17.31<br>(8.31 to<br>32.51)                          | 19.15<br>(9.25 to<br>36.42)                          | 15.30<br>(7.57 to<br>28.54)                          |
| Eating disorders             | 57.69<br>(27.03 to<br>107.53)                               | 128.93<br>(45.09 to<br>263.28)                               | 131.14<br>(45.31 to<br>273.28)                               | 123.95<br>(44.51 to<br>249.16)                               | 1.04<br>(0.48 to<br>1.90)                            | 2.39<br>(0.81 to<br>4.99)                            | 2.44<br>(0.82 to<br>5.19)                            | 2.27<br>(0.79 to<br>4.60)                            |

**Zambia**

| Cause                                                      | YLLs (actual counts)                                             |                                                                  |                                                                  |                                                                  | Deaths (actual counts)                                     |                                                             |                                                             |                                                              |
|------------------------------------------------------------|------------------------------------------------------------------|------------------------------------------------------------------|------------------------------------------------------------------|------------------------------------------------------------------|------------------------------------------------------------|-------------------------------------------------------------|-------------------------------------------------------------|--------------------------------------------------------------|
|                                                            | 2016                                                             | 2040 Forecast                                                    | 2040 Better Scenario                                             | 2040 Worse Scenario                                              | 2016                                                       | 2040 Forecast                                               | 2040 Better Scenario                                        | 2040 Worse Scenario                                          |
| <b>Diabetes, urogenital, blood, and endocrine diseases</b> | <b>164,398.61</b><br><b>(134,751.16 to</b><br><b>197,168.01)</b> | <b>266,028.44</b><br><b>(145,617.56 to</b><br><b>429,300.91)</b> | <b>208,177.39</b><br><b>(111,621.16 to</b><br><b>342,154.85)</b> | <b>315,781.70</b><br><b>(179,666.02 to</b><br><b>491,776.71)</b> | <b>4,860.13</b><br><b>(3,943.19 to</b><br><b>5,921.40)</b> | <b>9,883.00</b><br><b>(5,551.82 to</b><br><b>13,832.13)</b> | <b>7,409.21</b><br><b>(4,513.29 to</b><br><b>11,322.20)</b> | <b>10,371.17</b><br><b>(6,461.35 to</b><br><b>15,571.60)</b> |
| Diabetes mellitus                                          | 57,255.80<br>(44,166.08 to<br>72,477.29)                         | 110,355.25<br>(52,759.53 to<br>191,684.45)                       | 84,439.68<br>(38,406.73 to<br>151,326.00)                        | 134,740.47<br>(63,949.01 to<br>236,306.43)                       | 2,328.88<br>(1,822.46 to<br>2,926.49)                      | 4,351.31<br>(2,586.83 to<br>6,809.94)                       | 3,526.06<br>(2,033.50 to<br>5,609.90)                       | 5,102.67<br>(3,022.03 to<br>8,104.20)                        |
| Acute glomerulonephritis                                   | 249.47<br>(171.11 to<br>421.17)                                  | 361.99<br>(212.74 to<br>599.29)                                  | 300.28<br>(172.20 to<br>500.89)                                  | 436.06<br>(263.96 to<br>721.17)                                  | 4.24<br>(3.09 to<br>6.56)                                  | 6.43<br>(3.90 to<br>10.20)                                  | 5.59<br>(3.30 to<br>8.77)                                   | 7.34<br>(4.57 to<br>11.55)                                   |
| Chronic kidney disease                                     | 33,638.73<br>(26,911.28 to<br>41,849.56)                         | 72,282.94<br>(31,174.48 to<br>167,149.98)                        | 51,302.67<br>(23,014.82 to<br>114,029.19)                        | 86,476.98<br>(38,867.83 to<br>193,565.29)                        | 1,017.72<br>(811.60 to<br>1,261.17)                        | 2,660.25<br>(1,039.16 to<br>6,773.07)                       | 1,960.46<br>(791.36 to<br>5,114.45)                         | 3,083.60<br>(1,227.09 to<br>7,700.12)                        |
| Chronic kidney disease due to diabetes mellitus            | 7,343.73<br>(5,517.80 to<br>9,650.12)                            | 22,769.87<br>(7,899.39 to<br>56,988.48)                          | 15,974.17<br>(6,084.48 to<br>40,481.01)                          | 26,327.58<br>(9,468.80 to<br>66,247.74)                          | 275.58<br>(208.11 to<br>355.72)                            | 913.09<br>(299.13 to<br>2,416.40)                           | 662.61<br>(238.68 to<br>1,871.51)                           | 1,039.53<br>(351.01 to<br>2,656.04)                          |
| Chronic kidney disease due to hypertension                 | 3,986.37<br>(2,939.10 to<br>5,182.23)                            | 11,294.29<br>(3,852.94 to<br>31,531.54)                          | 8,088.89<br>(2,946.49 to<br>21,496.61)                           | 13,118.83<br>(4,735.01 to<br>34,773.54)                          | 195.88<br>(143.58 to<br>252.21)                            | 569.98<br>(193.90 to<br>1,633.21)                           | 437.06<br>(163.81 to<br>1,375.40)                           | 644.71<br>(223.16 to<br>1,798.43)                            |
| Chronic kidney disease due to glomerulonephritis           | 10,590.87<br>(8,260.10 to<br>13,493.18)                          | 17,400.35<br>(8,538.75 to<br>35,943.10)                          | 12,453.95<br>(6,034.05 to<br>23,553.27)                          | 21,563.59<br>(11,048.82 to<br>43,511.99)                         | 247.95<br>(194.15 to<br>313.88)                            | 506.58<br>(224.55 to<br>1,196.95)                           | 370.07<br>(162.70 to<br>887.52)                             | 608.67<br>(278.93 to<br>1,391.02)                            |
| Chronic kidney disease due to other and unspecified causes | 11,717.55<br>(9,127.77 to<br>14,846.90)                          | 20,818.44<br>(9,728.58 to<br>42,977.98)                          | 14,785.65<br>(6,872.64 to<br>29,870.45)                          | 25,466.98<br>(11,977.52 to<br>50,519.41)                         | 298.31<br>(231.01 to<br>375.93)                            | 670.59<br>(278.48 to<br>1,572.48)                           | 490.71<br>(207.62 to<br>1,229.08)                           | 790.68<br>(339.01 to<br>1,797.12)                            |
| Urinary diseases and male infertility                      | 19,502.75<br>(14,987.20 to<br>24,591.68)                         | 29,280.28<br>(15,249.18 to<br>45,730.78)                         | 27,149.04<br>(13,690.63 to<br>43,545.25)                         | 30,523.72<br>(16,402.98 to<br>46,152.69)                         | 544.66<br>(416.42 to<br>678.78)                            | 845.64<br>(503.35 to<br>1,187.95)                           | 831.29<br>(486.12 to<br>1,213.20)                           | 836.62<br>(509.23 to<br>1,162.08)                            |
| Urinary tract infections                                   | 9,240.33<br>(6,599.93 to<br>12,662.68)                           | 17,681.90<br>(9,649.00 to<br>27,362.63)                          | 17,186.99<br>(9,104.08 to<br>27,493.18)                          | 17,736.51<br>(10,088.53 to<br>26,959.93)                         | 258.35<br>(186.16 to<br>346.60)                            | 525.81<br>(316.88 to<br>757.40)                             | 542.17<br>(324.89 to<br>791.77)                             | 499.66<br>(309.95 to<br>712.12)                              |
| Urolithiasis                                               | 522.28<br>(350.24 to<br>794.78)                                  | 972.49<br>(457.51 to<br>1,749.04)                                | 895.62<br>(417.69 to<br>1,643.41)                                | 1,029.66<br>(495.14 to<br>1,805.99)                              | 11.82<br>(7.60 to<br>19.22)                                | 22.45<br>(11.20 to<br>40.92)                                | 21.56<br>(10.57 to<br>41.31)                                | 22.76<br>(11.69 to<br>40.38)                                 |

|                                                   |                                            |                                            |                                            |                                             |                                       |                                       |                                       |                                       |
|---------------------------------------------------|--------------------------------------------|--------------------------------------------|--------------------------------------------|---------------------------------------------|---------------------------------------|---------------------------------------|---------------------------------------|---------------------------------------|
| Other urinary diseases                            | 9,740.14<br>(6,405.60 to<br>13,737.34)     | 10,625.89<br>(4,515.76 to<br>18,492.45)    | 9,066.43<br>(3,715.73 to<br>16,229.62)     | 11,757.55<br>(5,113.51 to<br>20,184.76)     | 274.48<br>(180.70 to<br>378.83)       | 297.38<br>(148.28 to<br>472.11)       | 267.57<br>(131.96 to<br>438.43)       | 314.20<br>(161.28 to<br>493.74)       |
| Gynecological diseases                            | 2,155.20<br>(1,132.78 to<br>3,440.45)      | 3,465.47<br>(1,363.67 to<br>6,366.57)      | 2,810.01<br>(1,087.96 to<br>5,321.49)      | 3,910.81<br>(1,543.83 to<br>7,208.40)       | 49.32<br>(26.40 to<br>77.79)          | 80.45<br>(33.07 to<br>144.55)         | 65.67<br>(26.79 to<br>119.26)         | 90.24<br>(56.49 to<br>161.87)         |
| Uterine fibroids                                  | 719.88<br>(284.64 to<br>1,328.14)          | 1,037.86<br>(326.75 to<br>2,227.97)        | 815.70<br>(247.16 to<br>1,738.58)          | 1,194.86<br>(372.61 to<br>2,463.88)         | 18.28<br>(7.37 to<br>32.05)           | 26.71<br>(8.72 to<br>55.03)           | 21.10<br>(6.82 to<br>44.39)           | 30.64<br>(10.04 to<br>62.13)          |
| Polycystic ovarian syndrome                       | 204.55<br>(30.69 to<br>632.05)             | 221.64<br>(28.98 to<br>742.61)             | 155.19<br>(19.15 to<br>527.15)             | 280.60<br>(37.06 to<br>920.96)              | 4.50<br>(0.70 to<br>13.66)            | 5.05<br>(0.66 to<br>16.19)            | 3.54<br>(0.44 to<br>11.98)            | 6.38<br>(0.86 to<br>20.24)            |
| Endometriosis                                     | 7.97<br>(2.01 to<br>26.58)                 | 19.19<br>(3.61 to<br>66.72)                | 15.54<br>(2.84 to<br>54.64)                | 21.85<br>(4.13 to<br>78.80)                 | 0.17<br>(0.04 to<br>0.52)             | 0.41<br>(0.08 to<br>1.45)             | 0.33<br>(0.06 to<br>1.15)             | 0.46<br>(0.09 to<br>1.51)             |
| Genital prolapse                                  | 37.08<br>(13.58 to<br>81.41)               | 45.71<br>(14.86 to<br>109.73)              | 35.55<br>(0.82 to<br>86.41)                | 54.30<br>(17.34 to<br>137.10)               | 1.33<br>(0.54 to<br>2.70)             | 1.49<br>(0.59 to<br>3.29)             | 1.20<br>(0.47 to<br>2.71)             | 1.72<br>(0.64 to<br>3.85)             |
| Other gynecological diseases                      | 1,185.72<br>(524.89 to<br>2,049.28)        | 2,141.06<br>(734.97 to<br>4,350.87)        | 1,788.23<br>(613.73 to<br>3,676.21)        | 2,359.20<br>(840.60 to<br>4,729.53)         | 25.05<br>(10.79 to<br>43.02)          | 46.80<br>(16.66 to<br>93.73)          | 39.50<br>(14.08 to<br>79.17)          | 51.05<br>(18.99 to<br>101.83)         |
| Hemoglobinopathies and hemolytic anemias          | 43,599.25<br>(34,073.47 to<br>56,999.51)   | 40,188.54<br>(25,385.51 to<br>59,554.40)   | 33,251.42<br>(20,338.76 to<br>51,241.82)   | 48,240.47<br>(31,446.97 to<br>69,403.83)    | 725.20<br>(572.22 to<br>905.77)       | 850.80<br>(547.54 to<br>1,228.52)     | 740.43<br>(463.90 to<br>1,105.19)     | 956.25<br>(634.05 to<br>1,346.39)     |
| Thalassemias                                      | 66.04<br>(16.35 to<br>216.87)              | 35.45<br>(8.69 to<br>124.01)               | 33.59<br>(8.29 to<br>116.87)               | 41.47<br>(10.06 to<br>145.87)               | 0.77<br>(0.19 to<br>2.55)             | 0.42<br>(0.10 to<br>1.46)             | 0.40<br>(0.10 to<br>1.38)             | 0.49<br>(0.12 to<br>1.71)             |
| Sickle cell disorders                             | 37,851.02<br>(29,126.94 to<br>50,894.50)   | 29,818.18<br>(19,121.71 to<br>43,971.31)   | 24,212.65<br>(15,101.53 to<br>36,923.89)   | 37,128.14<br>(24,419.68 to<br>53,625.92)    | 502.77<br>(393.29 to<br>665.40)       | 455.55<br>(279.49 to<br>696.72)       | 378.56<br>(226.02 to<br>604.64)       | 547.17<br>(351.24 to<br>813.45)       |
| G6PD deficiency                                   | 3,901.72<br>(2,694.89 to<br>5,234.69)      | 8,464.32<br>(4,010.02 to<br>14,086.36)     | 7,256.77<br>(3,305.91 to<br>12,591.38)     | 9,151.42<br>(4,521.33 to<br>14,733.77)      | 113.73<br>(78.11 to<br>150.75)        | 277.64<br>(143.34 to<br>428.30)       | 244.51<br>(123.56 to<br>392.57)       | 294.09<br>(157.90 to<br>439.42)       |
| Other hemoglobinopathies and hemolytic anemias    | 1,780.46<br>(1,241.44 to<br>2,346.51)      | 1,870.60<br>(1,265.34 to<br>2,445.84)      | 1,748.40<br>(1,158.25 to<br>2,345.65)      | 1,919.44<br>(1,290.14 to<br>2,491.85)       | 107.92<br>(76.07 to<br>140.40)        | 117.19<br>(87.96 to<br>144.32)        | 116.97<br>(87.32 to<br>143.95)        | 114.50<br>(86.58 to<br>142.67)        |
| Endocrine, metabolic, blood, and immune disorders | 7,997.42<br>(5,956.38 to<br>10,494.81)     | 10,093.97<br>(6,386.95 to<br>14,386.04)    | 8,924.29<br>(5,531.12 to<br>13,022.97)     | 11,453.21<br>(7,555.23 to<br>16,031.15)     | 190.11<br>(137.92 to<br>243.33)       | 288.12<br>(202.20 to<br>383.04)       | 279.72<br>(191.50 to<br>376.92)       | 294.45<br>(207.47 to<br>384.27)       |
| <b>Zambia</b>                                     |                                            |                                            |                                            |                                             |                                       |                                       |                                       |                                       |
| Cause                                             | YLLs (actual counts)                       |                                            |                                            |                                             | Deaths (actual counts)                |                                       |                                       |                                       |
|                                                   | 2016                                       | 2040 Forecast                              | 2040 Better Scenario                       | 2040 Worse Scenario                         | 2016                                  | 2040 Forecast                         | 2040 Better Scenario                  | 2040 Worse Scenario                   |
| Musculoskeletal disorders                         | 4,922.48<br>(3,191.33 to<br>7,164.89)      | 10,300.67<br>(5,365.78 to<br>16,502.98)    | 10,777.28<br>(5,536.17 to<br>17,495.13)    | 9,712.60<br>(5,212.64 to<br>15,600.96)      | 120.90<br>(81.26 to<br>170.20)        | 270.46<br>(158.76 to<br>402.15)       | 289.54<br>(166.28 to<br>433.02)       | 249.08<br>(148.83 to<br>367.53)       |
| Rheumatoid arthritis                              | 701.92<br>(414.09 to<br>1,181.40)          | 1,408.60<br>(733.51 to<br>2,457.98)        | 1,237.66<br>(637.34 to<br>2,178.76)        | 1,496.38<br>(807.62 to<br>2,527.80)         | 28.28<br>(17.65 to<br>44.79)          | 60.32<br>(37.86 to<br>92.01)          | 55.84<br>(33.52 to<br>87.66)          | 61.37<br>(39.45 to<br>87.66)          |
| Other musculoskeletal disorders                   | 4,220.56<br>(2,726.99 to<br>6,199.68)      | 8,892.07<br>(4,615.09 to<br>14,577.06)     | 9,539.62<br>(4,892.51 to<br>15,708.39)     | 8,216.22<br>(4,232.59 to<br>13,438.65)      | 92.62<br>(61.68 to<br>133.37)         | 210.13<br>(116.39 to<br>322.64)       | 233.70<br>(128.35 to<br>361.41)       | 187.71<br>(105.56 to<br>291.89)       |
| Other non-communicable diseases                   | 105,107.52<br>(76,727.55 to<br>139,987.46) | 124,924.83<br>(81,018.53 to<br>173,825.72) | 105,879.31<br>(67,391.64 to<br>150,656.57) | 154,681.36<br>(104,587.24 to<br>212,191.12) | 1,569.91<br>(1,148.46 to<br>2,046.54) | 2,581.50<br>(1,683.73 to<br>3,639.07) | 2,447.34<br>(1,553.03 to<br>3,565.38) | 2,833.83<br>(1,904.30 to<br>3,877.14) |
| Congenital birth defects                          | 59,629.23<br>(41,295.09 to<br>85,443.21)   | 45,960.41<br>(29,612.65 to<br>68,376.79)   | 33,596.56<br>(21,859.77 to<br>50,419.18)   | 66,004.49<br>(42,804.61 to<br>99,387.41)    | 710.24<br>(495.22 to<br>1,012.85)     | 571.10<br>(372.37 to<br>850.74)       | 423.62<br>(281.21 to<br>623.85)       | 806.60<br>(529.88 to<br>1,198.17)     |
| Neural tube defects                               | 9,251.56<br>(4,134.95 to<br>17,930.44)     | 2,925.64<br>(1,126.81 to<br>6,304.86)      | 1,840.00<br>(702.16 to<br>3,943.51)        | 4,761.47<br>(1,860.69 to<br>10,181.63)      | 108.30<br>(48.59 to<br>209.22)        | 35.12<br>(13.71 to<br>75.23)          | 22.26<br>(8.66 to<br>47.15)           | 56.67<br>(22.41 to<br>121.17)         |
| Congenital heart anomalies                        | 19,119.46<br>(12,598.59 to<br>29,923.66)   | 15,885.57<br>(9,653.75 to<br>26,501.10)    | 11,888.96<br>(7,205.83 to<br>19,505.08)    | 22,157.92<br>(13,352.86 to<br>36,886.46)    | 231.46<br>(154.95 to<br>359.88)       | 203.79<br>(124.06 to<br>329.47)       | 155.34<br>(95.04 to<br>247.44)        | 278.02<br>(169.86 to<br>457.67)       |

|                                               |                                             |                                               |                                               |                                               |                                         |                                         |                                         |                                          |  |
|-----------------------------------------------|---------------------------------------------|-----------------------------------------------|-----------------------------------------------|-----------------------------------------------|-----------------------------------------|-----------------------------------------|-----------------------------------------|------------------------------------------|--|
|                                               | 530.58<br>(84.66 to<br>1,572.70)            | 311.59<br>(47.17 to<br>895.04)                | 186.08<br>(28.10 to<br>551.54)                | 533.95<br>(83.86 to<br>1,583.62)              | 6.15<br>(0.98 to<br>18.23)              | 3.61<br>(0.55 to<br>10.38)              | 2.16<br>(0.33 to<br>6.41)               | 6.19<br>(0.97 to<br>18.34)               |  |
| Orofacial clefts                              | 1,044.68<br>(625.88 to<br>1,660.54)         | 1,026.37<br>(586.06 to<br>1,747.31)           | 766.15<br>(435.97 to<br>1,285.59)             | 1,412.84<br>(784.85 to<br>2,386.87)           | 13.28<br>(8.30 to<br>20.54)             | 14.96<br>(8.56 to<br>24.96)             | 11.57<br>(6.53 to<br>19.17)             | 19.66<br>(11.22 to<br>33.68)             |  |
| Down syndrome                                 | 2,659.98<br>(793.33 to<br>5,480.01)         | 3,139.87<br>(912.92 to<br>7,058.90)           | 2,187.27<br>(628.86 to<br>4,915.90)           | 4,717.36<br>(1,335.04 to<br>10,596.81)        | 31.15<br>(9.31 to<br>64.10)             | 37.28<br>(10.79 to<br>82.52)            | 26.12<br>(7.43 to<br>58.70)             | 55.69<br>(15.81 to<br>124.31)            |  |
| Other chromosomal abnormalities               | 719.82<br>(339.46 to<br>1,426.56)           | 671.19<br>(302.36 to<br>1,351.07)             | 507.11<br>(229.86 to<br>994.62)               | 941.03<br>(420.17 to<br>1,889.69)             | 8.51<br>(4.03 to<br>16.80)              | 8.12<br>(3.70 to<br>16.15)              | 6.20<br>(2.83 to<br>12.09)              | 11.27<br>(5.08 to<br>22.64)              |  |
| Congenital musculoskeletal and limb anomalies | 1,200.89<br>(714.32 to<br>1,912.50)         | 1,000.90<br>(562.45 to<br>1,660.84)           | 773.05<br>(436.29 to<br>1,286.42)             | 1,374.92<br>(773.44 to<br>2,268.44)           | 14.69<br>(8.90 to<br>23.05)             | 13.37<br>(7.62 to<br>21.84)             | 10.64<br>(6.03 to<br>17.23)             | 17.72<br>(10.38 to<br>28.90)             |  |
| Urogenital congenital anomalies               | 5,559.99<br>(2,734.55 to<br>9,616.73)       | 4,530.87<br>(2,087.41 to<br>8,409.98)         | 3,173.21<br>(1,443.20 to<br>5,978.54)         | 6,784.82<br>(3,120.13 to<br>12,465.56)        | 64.83<br>(31.91 to<br>112.04)           | 53.27<br>(24.57 to<br>98.43)            | 37.44<br>(17.06 to<br>70.41)            | 79.49<br>(36.57 to<br>147.06)            |  |
| Digestive congenital anomalies                | 19,542.27<br>(12,163.10 to<br>29,347.60)    | 16,468.40<br>(9,643.85 to<br>25,567.62)       | 12,274.72<br>(7,103.75 to<br>18,943.96)       | 23,320.18<br>(13,624.21 to<br>35,942.75)      | 231.88<br>(145.03 to<br>346.93)         | 201.56<br>(118.51 to<br>310.38)         | 151.90<br>(88.92 to<br>234.13)          | 281.89<br>(166.11 to<br>428.59)          |  |
| Other congenital birth defects                | 28,957.86<br>(18,356.27 to<br>46,134.70)    | 68,956.60<br>(37,992.09 to<br>108,287.09)     | 65,092.94<br>(34,561.53 to<br>104,777.77)     | 73,939.62<br>(42,310.14 to<br>114,537.21)     | 667.92<br>(429.12 to<br>1,033.51)       | 1,894.29<br>(1,113.06 to<br>2,869.53)   | 1,940.30<br>(1,110.81 to<br>2,990.39)   | 1,856.24<br>(1,099.15 to<br>2,796.28)    |  |
| Skin and subcutaneous diseases                | 3,429.23<br>(1,333.82 to<br>6,343.78)       | 12,997.94<br>(4,496.17 to<br>24,477.14)       | 13,928.91<br>(4,616.32 to<br>26,357.47)       | 12,210.39<br>(4,226.58 to<br>23,055.97)       | 87.94<br>(34.23 to<br>151.55)           | 367.78<br>(129.69 to<br>668.31)         | 413.46<br>(147.26 to<br>754.92)         | 327.67<br>(116.87 to<br>589.36)          |  |
| Cellulitis                                    | 21,965.66<br>(14,196.64 to<br>36,166.16)    | 48,262.34<br>(27,196.67 to<br>77,300.09)      | 43,335.76<br>(23,552.66 to<br>69,732.66)      | 54,055.43<br>(31,551.77 to<br>84,102.98)      | 461.12<br>(297.14 to<br>749.49)         | 1,262.80<br>(741.36 to<br>2,003.05)     | 1,232.49<br>(714.29 to<br>1,943.07)     | 1,288.80<br>(764.92 to<br>1,996.61)      |  |
| Pyoderma                                      | 2,297.50<br>(1,222.61 to<br>3,744.75)       | 5,069.76<br>(2,512.05 to<br>8,314.22)         | 5,238.80<br>(2,574.03 to<br>8,701.54)         | 4,936.69<br>(2,437.45 to<br>8,224.82)         | 94.08<br>(54.66 to<br>156.10)           | 207.70<br>(117.43 to<br>349.40)         | 235.77<br>(132.86 to<br>395.14)         | 185.23<br>(104.26 to<br>305.96)          |  |
| Decubitus ulcer                               | 1,265.47<br>(672.70 to<br>2,194.19)         | 2,636.57<br>(1,265.15 to<br>4,540.08)         | 2,589.47<br>(1,258.76 to<br>4,540.01)         | 2,737.11<br>(1,301.19 to<br>4,784.06)         | 24.79<br>(13.62 to<br>41.19)            | 56.00<br>(28.07 to<br>95.14)            | 58.58<br>(29.67 to<br>98.60)            | 54.53<br>(27.39 to<br>93.70)             |  |
| Other skin and subcutaneous diseases          | 16,520.42<br>(8,666.67 to<br>28,310.76)     | 10,007.81<br>(4,639.72 to<br>18,064.40)       | 7,189.81<br>(3,300.57 to<br>12,950.37)        | 14,737.25<br>(6,851.15 to<br>26,932.06)       | 191.74<br>(100.54 to<br>328.63)         | 116.12<br>(53.82 to<br>209.63)          | 83.42<br>(38.28 to<br>150.28)           | 170.99<br>(79.46 to<br>312.50)           |  |
| Sudden infant death syndrome                  | 585,713.70<br>(478,569.15 to<br>706,191.30) | 749,736.99<br>(406,058.62 to<br>1,239,713.15) | 637,533.76<br>(335,943.13 to<br>1,084,941.57) | 848,205.13<br>(485,307.59 to<br>1,378,603.47) | 11,675.52<br>(9,555.51 to<br>14,239.32) | 16,472.70<br>(9,256.12 to<br>26,287.52) | 14,798.26<br>(8,354.65 to<br>23,873.93) | 17,688.73<br>(10,354.14 to<br>28,064.44) |  |
| Injuries                                      | 145,024.99<br>(115,029.90 to<br>179,320.05) | 239,623.55<br>(121,056.58 to<br>435,518.62)   | 188,693.50<br>(92,281.39 to<br>350,359.98)    | 269,652.50<br>(140,089.88 to<br>486,609.01)   | 2,879.04<br>(2,279.25 to<br>3,568.67)   | 4,988.92<br>(2,484.75 to<br>8,890.12)   | 4,103.38<br>(2,040.93 to<br>7,251.07)   | 5,412.63<br>(2,792.77 to<br>9,545.51)    |  |
| Transport injuries                            | 131,560.16<br>(103,555.75 to<br>162,501.33) | 214,650.54<br>(109,793.15 to<br>390,077.57)   | 167,507.25<br>(83,048.02 to<br>307,838.12)    | 240,719.09<br>(126,312.48 to<br>429,650.42)   | 2,641.72<br>(2,082.16 to<br>3,284.08)   | 4,523.23<br>(2,302.44 to<br>7,946.59)   | 3,702.62<br>(1,873.92 to<br>6,498.54)   | 4,883.06<br>(2,561.61 to<br>8,596.54)    |  |
| Road injuries                                 | 61,189.58<br>(47,168.75 to<br>77,883.91)    | 87,369.99<br>(43,177.14 to<br>156,852.40)     | 69,689.63<br>(33,995.85 to<br>127,919.76)     | 97,961.97<br>(48,802.81 to<br>174,003.90)     | 1,246.08<br>(965.63 to<br>1,573.21)     | 1,907.11<br>(957.11 to<br>3,310.02)     | 1,584.92<br>(794.87 to<br>2,770.77)     | 2,062.91<br>(1,034.23 to<br>3,602.56)    |  |
| Pedestrian road injuries                      | <b>Zambia</b>                               |                                               |                                               |                                               |                                         |                                         |                                         |                                          |  |
| Cause                                         | YLLs (actual counts)                        |                                               |                                               |                                               | Deaths (actual counts)                  |                                         |                                         |                                          |  |
|                                               | 2016                                        | 2040 Forecast                                 | 2040 Better Scenario                          | 2040 Worse Scenario                           | 2016                                    | 2040 Forecast                           | 2040 Better Scenario                    | 2040 Worse Scenario                      |  |
| Cyclist road injuries                         | 12,815.66<br>(9,404.62 to<br>16,980.42)     | 22,842.25<br>(11,376.58 to<br>41,561.31)      | 17,982.45<br>(8,613.71 to<br>32,645.75)       | 25,315.89<br>(13,168.73 to<br>45,945.23)      | 260.88<br>(195.70 to<br>340.86)         | 479.69<br>(236.99 to<br>839.83)         | 398.82<br>(195.51 to<br>696.64)         | 511.39<br>(256.17 to<br>914.81)          |  |
| Motorcyclist road injuries                    | 5,785.93<br>(4,242.29 to<br>7,836.30)       | 11,024.84<br>(5,136.27 to<br>21,019.72)       | 9,141.71<br>(4,118.24 to<br>17,830.54)        | 12,161.13<br>(5,914.30 to<br>23,285.35)       | 114.77<br>(85.47 to<br>152.65)          | 224.68<br>(107.05 to<br>412.77)         | 195.67<br>(89.80 to<br>358.11)          | 238.58<br>(117.02 to<br>450.76)          |  |
| Motor vehicle road injuries                   | 51,076.56<br>(38,718.51 to<br>66,531.03)    | 92,147.93<br>(46,957.82 to<br>167,444.14)     | 69,714.40<br>(34,323.85 to<br>131,364.22)     | 103,864.49<br>(53,401.50 to<br>185,154.57)    | 1,007.11<br>(775.75 to<br>1,293.80)     | 1,887.19<br>(947.78 to<br>3,368.19)     | 1,503.25<br>(750.14 to<br>2,680.50)     | 2,043.71<br>(1,060.65 to<br>3,676.26)    |  |



|                                                 |                                                                  |                                                                  |                                                                  |                                                                  |                                                            |                                                            |                                                            |                                                             |
|-------------------------------------------------|------------------------------------------------------------------|------------------------------------------------------------------|------------------------------------------------------------------|------------------------------------------------------------------|------------------------------------------------------------|------------------------------------------------------------|------------------------------------------------------------|-------------------------------------------------------------|
|                                                 | 692.43<br>(444.23 to<br>1,006.77)                                | 1,265.53<br>(609.39 to<br>2,256.49)                              | 979.07<br>(466.60 to<br>1,734.04)                                | 1,415.60<br>(693.71 to<br>2,502.44)                              | 12.88<br>(8.24 to<br>18.40)                                | 24.56<br>(12.08 to<br>43.40)                               | 19.98<br>(9.75 to<br>35.17)                                | 26.48<br>(13.09 to<br>46.53)                                |
| Other road injuries                             | 13,464.83<br>(8,744.40 to<br>18,560.07)                          | 24,973.01<br>(10,413.47 to<br>47,069.15)                         | 21,186.25<br>(8,431.66 to<br>40,645.78)                          | 28,933.41<br>(12,146.43 to<br>54,308.05)                         | 237.32<br>(155.90 to<br>321.92)                            | 465.70<br>(187.45 to<br>883.63)                            | 400.75<br>(159.89 to<br>781.28)                            | 529.56<br>(218.86 to<br>1,005.96)                           |
| Other transport injuries                        | <b>295,661.54</b><br><b>(244,751.10 to</b><br><b>352,712.95)</b> | <b>287,461.75</b><br><b>(183,293.36 to</b><br><b>430,008.52)</b> | <b>242,289.49</b><br><b>(149,954.57 to</b><br><b>369,734.38)</b> | <b>339,210.40</b><br><b>(226,381.09 to</b><br><b>493,990.65)</b> | <b>5,891.16</b><br><b>(4,912.32 to</b><br><b>7,019.68)</b> | <b>6,803.35</b><br><b>(4,670.96 to</b><br><b>9,432.56)</b> | <b>6,266.50</b><br><b>(4,228.04 to</b><br><b>8,902.71)</b> | <b>7,344.64</b><br><b>(5,200.21 to</b><br><b>10,118.55)</b> |
| Unintentional injuries                          | 49,420.95<br>(38,793.26 to<br>62,869.16)                         | 62,519.45<br>(40,757.21 to<br>87,469.15)                         | 59,042.65<br>(37,638.91 to<br>85,341.50)                         | 65,704.86<br>(44,709.63 to<br>90,236.60)                         | 1,512.43<br>(1,222.11 to<br>1,839.37)                      | 2,217.98<br>(1,760.34 to<br>2,724.45)                      | 2,319.94<br>(1,809.97 to<br>2,895.99)                      | 2,114.03<br>(1,710.95 to<br>2,576.13)                       |
| Falls                                           | 58,258.56<br>(46,155.42 to<br>74,789.81)                         | 49,521.99<br>(29,954.13 to<br>77,147.58)                         | 40,602.78<br>(23,733.89 to<br>64,928.71)                         | 60,247.47<br>(38,529.48 to<br>91,957.21)                         | 968.56<br>(775.96 to<br>1,201.87)                          | 927.47<br>(555.66 to<br>1,446.10)                          | 798.37<br>(469.06 to<br>1,257.70)                          | 1,070.25<br>(667.01 to<br>1,651.70)                         |
| Drowning                                        | 40,796.26<br>(31,254.20 to<br>52,066.62)                         | 31,281.80<br>(19,111.50 to<br>47,377.07)                         | 25,055.24<br>(14,995.25 to<br>38,355.80)                         | 38,724.53<br>(24,331.92 to<br>57,265.47)                         | 805.32<br>(636.39 to<br>992.99)                            | 729.74<br>(466.06 to<br>1,061.73)                          | 631.09<br>(394.69 to<br>924.64)                            | 832.86<br>(541.30 to<br>1,205.66)                           |
| Fire, heat, and hot substances                  | 20,121.52<br>(11,439.67 to<br>37,933.38)                         | 11,848.37<br>(5,950.42 to<br>22,453.43)                          | 8,552.06<br>(4,263.82 to<br>16,581.88)                           | 16,131.60<br>(8,185.31 to<br>32,121.52)                          | 341.94<br>(223.72 to<br>565.29)                            | 235.36<br>(125.77 to<br>405.64)                            | 180.65<br>(94.49 to<br>315.17)                             | 298.01<br>(160.32 to<br>535.80)                             |
| Poisonings                                      | 32,630.48<br>(25,851.77 to<br>41,450.82)                         | 34,048.29<br>(18,372.42 to<br>55,892.55)                         | 28,175.03<br>(14,773.70 to<br>48,889.09)                         | 39,576.09<br>(22,208.27 to<br>63,479.10)                         | 604.49<br>(477.18 to<br>767.68)                            | 712.66<br>(390.05 to<br>1,139.94)                          | 616.93<br>(333.53 to<br>1,028.51)                          | 787.03<br>(446.06 to<br>1,222.36)                           |
| Exposure to mechanical forces                   | 7,525.42<br>(5,077.70 to<br>10,761.02)                           | 7,557.93<br>(3,367.19 to<br>14,496.61)                           | 6,182.12<br>(2,672.25 to<br>12,472.18)                           | 8,696.27<br>(4,006.98 to<br>16,280.56)                           | 145.04<br>(93.96 to<br>196.67)                             | 137.74<br>(67.58 to<br>270.72)                             | 121.02<br>(55.93 to<br>232.24)                             | 163.26<br>(76.97 to<br>300.99)                              |
| Unintentional firearm injuries                  | 3,539.96<br>(2,375.85 to<br>5,176.36)                            | 3,077.98<br>(1,827.76 to<br>4,723.81)                            | 2,401.95<br>(1,439.47 to<br>3,746.20)                            | 3,982.27<br>(2,436.69 to<br>6,164.86)                            | 55.04<br>(40.27 to<br>76.38)                               | 56.28<br>(35.59 to<br>83.86)                               | 47.30<br>(29.54 to<br>72.21)                               | 67.10<br>(42.44 to<br>98.15)                                |
| Unintentional suffocation                       | 21,565.10<br>(16,917.44 to<br>27,660.92)                         | 23,412.39<br>(12,978.80 to<br>37,933.32)                         | 19,590.96<br>(10,249.87 to<br>32,460.83)                         | 26,897.55<br>(15,680.79 to<br>41,821.52)                         | 411.72<br>(320.21 to<br>528.54)                            | 511.34<br>(281.76 to<br>813.50)                            | 448.60<br>(243.50 to<br>719.31)                            | 556.67<br>(315.85 to<br>861.70)                             |
| Other exposure to mechanical forces             | 21,490.57<br>(13,988.69 to<br>32,899.75)                         | 20,894.02<br>(12,418.54 to<br>32,895.33)                         | 17,200.53<br>(9,969.81 to<br>26,879.09)                          | 25,224.43<br>(15,020.02 to<br>40,249.74)                         | 378.88<br>(273.45 to<br>547.98)                            | 433.87<br>(278.78 to<br>639.29)                            | 383.58<br>(238.40 to<br>570.42)                            | 483.96<br>(311.60 to<br>724.04)                             |
| Adverse effects of medical treatment            | 25,657.76<br>(19,173.04 to<br>33,997.71)                         | 31,857.43<br>(18,722.60 to<br>48,686.41)                         | 24,967.58<br>(14,241.16 to<br>39,091.58)                         | 39,168.97<br>(23,837.23 to<br>57,696.54)                         | 540.77<br>(411.32 to<br>712.52)                            | 752.74<br>(446.51 to<br>1,100.90)                          | 626.07<br>(356.62 to<br>949.36)                            | 864.24<br>(531.05 to<br>1,257.62)                           |
| Animal contact                                  | 19,619.06<br>(14,004.05 to<br>26,442.86)                         | 24,070.13<br>(13,746.73 to<br>37,010.87)                         | 18,922.62<br>(10,443.64 to<br>30,215.43)                         | 29,412.94<br>(17,176.34 to<br>43,972.71)                         | 440.35<br>(323.10 to<br>589.91)                            | 602.83<br>(359.19 to<br>904.29)                            | 503.68<br>(284.63 to<br>775.50)                            | 687.17<br>(425.82 to<br>1,005.84)                           |
| Venomous animal contact                         | 6,038.70<br>(3,395.85 to<br>9,613.15)                            | 7,787.30<br>(3,882.80 to<br>13,270.54)                           | 6,044.97<br>(2,903.95 to<br>10,138.70)                           | 9,756.03<br>(4,893.40 to<br>16,433.87)                           | 100.42<br>(59.63 to<br>151.76)                             | 149.91<br>(75.35 to<br>246.46)                             | 122.38<br>(61.18 to<br>203.54)                             | 177.07<br>(90.90 to<br>291.66)                              |
| Non-venomous animal contact                     | 28,902.22<br>(16,385.77 to<br>50,758.98)                         | 28,770.11<br>(16,149.62 to<br>47,960.33)                         | 24,970.82<br>(14,069.15 to<br>40,622.85)                         | 34,622.97<br>(19,034.27 to<br>59,495.98)                         | 405.51<br>(240.94 to<br>667.07)                            | 458.34<br>(264.38 to<br>718.66)                            | 423.64<br>(246.10 to<br>659.79)                            | 515.66<br>(296.06 to<br>828.84)                             |
| Foreign body                                    | 26,967.04<br>(15,211.14 to<br>48,546.66)                         | 26,701.55<br>(14,736.59 to<br>45,502.66)                         | 23,254.55<br>(13,031.99 to<br>38,055.70)                         | 32,178.46<br>(17,727.23 to<br>56,458.43)                         | 375.08<br>(225.11 to<br>631.69)                            | 422.00<br>(248.64 to<br>673.68)                            | 391.80<br>(233.49 to<br>612.22)                            | 474.93<br>(272.84 to<br>779.25)                             |
| Pulmonary aspiration and foreign body in airway | 1,935.18<br>(594.69 to<br>3,631.76)                              | 2,068.56<br>(566.13 to<br>4,244.62)                              | 1,736.27<br>(464.23 to<br>3,620.19)                              | 2,444.52<br>(687.31 to<br>4,914.17)                              | 30.43<br>(9.15 to<br>56.21)                                | 36.34<br>(10.04 to<br>77.15)                               | 31.84<br>(8.41 to<br>68.55)                                | 40.75<br>(11.60 to<br>82.15)                                |
| Foreign body in other body part                 | 4,270.32<br>(3,026.04 to<br>5,696.12)                            | 4,013.94<br>(2,086.20 to<br>6,468.65)                            | 2,967.83<br>(1,545.98 to<br>4,921.84)                            | 5,188.48<br>(2,830.76 to<br>8,135.67)                            | 83.19<br>(58.37 to<br>108.78)                              | 85.24<br>(47.45 to<br>130.57)                              | 66.92<br>(36.28 to<br>104.56)                              | 103.38<br>(58.36 to<br>156.24)                              |
| Environmental heat and cold exposure            | 14,112.90<br>(10,999.91 to<br>17,844.41)                         | 12,706.34<br>(6,989.71 to<br>20,669.83)                          | 10,754.96<br>(5,785.43 to<br>17,796.95)                          | 14,620.99<br>(8,471.21 to<br>22,993.03)                          | 250.07<br>(195.91 to<br>314.34)                            | 249.94<br>(137.27 to<br>396.61)                            | 219.31<br>(119.10 to<br>353.95)                            | 275.22<br>(159.19 to<br>426.07)                             |
| Other unintentional injuries                    | <b>143,792.79</b><br><b>(97,609.65 to</b><br><b>188,308.75)</b>  | <b>222,440.26</b><br><b>(93,115.37 to</b><br><b>419,563.85)</b>  | <b>206,345.57</b><br><b>(86,570.13 to</b><br><b>390,706.72)</b>  | <b>239,124.22</b><br><b>(99,820.00 to</b><br><b>450,290.04)</b>  | <b>2,883.87</b><br><b>(2,053.31 to</b><br><b>3,754.25)</b> | <b>4,676.72</b><br><b>(2,014.42 to</b><br><b>8,596.77)</b> | <b>4,424.72</b><br><b>(1,920.08 to</b><br><b>8,100.50)</b> | <b>4,927.74</b><br><b>(2,121.22 to</b><br><b>9,052.55)</b>  |
| Self-harm and interpersonal violence            | <b>Zambia</b>                                                    |                                                                  |                                                                  |                                                                  |                                                            |                                                            |                                                            |                                                             |
|                                                 | <b>YLLs (actual counts)</b>                                      |                                                                  |                                                                  |                                                                  | <b>Deaths (actual counts)</b>                              |                                                            |                                                            |                                                             |

| Cause                                                                        | 2016                                       | 2040 Forecast                              | 2040 Better Scenario                       | 2040 Worse Scenario                        | 2016                                       | 2040 Forecast                         | 2040 Better Scenario                  | 2040 Worse Scenario                   |
|------------------------------------------------------------------------------|--------------------------------------------|--------------------------------------------|--------------------------------------------|--------------------------------------------|--------------------------------------------|---------------------------------------|---------------------------------------|---------------------------------------|
|                                                                              | Self-harm                                  | 56,179.66<br>(42,480.38 to<br>73,624.07)   | 102,379.62<br>(41,146.34 to<br>196,735.38) | 94,290.82<br>(38,512.85 to<br>181,453.95)  | 110,869.67<br>(44,033.57 to<br>214,899.24) | 1,384.00<br>(1,049.48 to<br>1,798.59) | 2,514.13<br>(1,081.76 to<br>4,542.96) | 2,387.10<br>(1,053.97 to<br>4,261.65) |
| Self-harm by firearm                                                         | 5,948.20<br>(2,996.82 to<br>9,684.85)      | 8,155.42<br>(2,459.18 to<br>17,647.12)     | 7,248.44<br>(2,263.09 to<br>15,818.21)     | 9,120.49<br>(2,700.21 to<br>20,429.24)     | 130.31<br>(68.42 to<br>206.52)             | 184.83<br>(62.41 to<br>387.83)        | 168.60<br>(57.47 to<br>359.19)        | 201.84<br>(65.22 to<br>444.90)        |
| Self-harm by other specified means                                           | 50,231.46<br>(37,767.19 to<br>66,569.50)   | 94,224.20<br>(38,231.19 to<br>179,499.90)  | 87,042.39<br>(35,426.31 to<br>166,779.57)  | 101,749.18<br>(40,668.28 to<br>196,113.60) | 1,253.69<br>(937.15 to<br>1,638.10)        | 2,329.30<br>(1,017.81 to<br>4,159.40) | 2,218.50<br>(982.55 to<br>3,910.49)   | 2,449.60<br>(1,063.00 to<br>4,495.75) |
| Interpersonal violence                                                       | 87,613.12<br>(45,486.39 to<br>119,634.20)  | 120,060.64<br>(45,236.01 to<br>225,925.75) | 112,054.75<br>(42,197.26 to<br>213,509.64) | 128,254.55<br>(48,480.19 to<br>239,796.75) | 1,499.87<br>(802.06 to<br>2,050.55)        | 2,162.58<br>(817.48 to<br>4,103.46)   | 2,037.62<br>(773.09 to<br>3,896.13)   | 2,276.30<br>(861.61 to<br>4,265.58)   |
| Physical violence by firearm                                                 | 14,097.75<br>(6,800.46 to<br>22,362.10)    | 20,344.40<br>(7,361.52 to<br>39,207.85)    | 19,839.27<br>(7,181.02 to<br>38,819.85)    | 20,381.98<br>(7,496.41 to<br>39,164.70)    | 244.19<br>(120.83 to<br>384.55)            | 367.00<br>(138.62 to<br>710.49)       | 360.74<br>(133.30 to<br>709.39)       | 362.57<br>(137.57 to<br>694.32)       |
| Physical violence by sharp object                                            | 8,028.82<br>(3,866.44 to<br>11,926.20)     | 12,906.58<br>(4,783.67 to<br>23,817.50)    | 13,006.25<br>(4,792.52 to<br>24,204.96)    | 12,630.62<br>(4,716.07 to<br>23,028.99)    | 144.06<br>(73.93 to<br>213.60)             | 242.06<br>(96.64 to<br>446.59)        | 246.65<br>(97.45 to<br>452.58)        | 233.09<br>(93.09 to<br>416.53)        |
| Physical violence by other means                                             | 65,486.56<br>(32,753.85 to<br>90,622.30)   | 86,809.66<br>(31,464.70 to<br>170,123.76)  | 79,209.23<br>(28,592.68 to<br>156,333.89)  | 95,241.95<br>(34,925.96 to<br>184,619.07)  | 1,111.62<br>(565.20 to<br>1,549.01)        | 1,553.52<br>(568.09 to<br>3,097.95)   | 1,430.23<br>(519.17 to<br>2,843.56)   | 1,680.63<br>(622.62 to<br>3,231.28)   |
| Forces of nature, conflict and terrorism, and executions and police conflict | <b>1,234.39</b><br>(564.50 to<br>2,590.52) | <b>211.43</b><br>(0.00 to<br>1,321.18)     | <b>205.19</b><br>(0.00 to<br>1,265.64)     | <b>218.01</b><br>(0.00 to<br>1,392.59)     | <b>21.46</b><br>(10.35 to<br>41.25)        | <b>3.71</b><br>(0.00 to<br>23.28)     | <b>3.67</b><br>(0.00 to<br>22.70)     | <b>3.73</b><br>(0.00 to<br>23.36)     |
| Exposure to forces of nature                                                 | 0.00<br>(0.00 to<br>0.00)                  | 52.53<br>(0.00 to<br>474.82)               | 49.96<br>(0.00 to<br>449.90)               | 55.95<br>(0.00 to<br>504.64)               | 0.00<br>(0.00 to<br>0.00)                  | 0.93<br>(0.00 to<br>8.33)             | 0.91<br>(0.00 to<br>8.13)             | 0.95<br>(0.00 to<br>8.57)             |
| Conflict and terrorism                                                       | 0.00<br>(0.00 to<br>0.00)                  | 48.84<br>(0.00 to<br>725.82)               | 46.89<br>(0.00 to<br>697.51)               | 51.32<br>(0.00 to<br>763.39)               | 0.00<br>(0.00 to<br>0.00)                  | 0.82<br>(0.00 to<br>12.21)            | 0.80<br>(0.00 to<br>11.97)            | 0.84<br>(0.00 to<br>12.54)            |
| Executions and police conflict                                               | 1,234.39<br>(564.50 to<br>2,590.52)        | 110.05<br>(0.00 to<br>1,117.07)            | 108.34<br>(0.00 to<br>1,098.42)            | 110.74<br>(0.00 to<br>1,140.17)            | 21.46<br>(10.35 to<br>41.25)               | 1.96<br>(0.00 to<br>20.16)            | 1.96<br>(0.00 to<br>20.09)            | 1.94<br>(0.00 to<br>19.94)            |
| <b>Southern Sub-Saharan Africa</b>                                           |                                            |                                            |                                            |                                            |                                            |                                       |                                       |                                       |
| Cause                                                                        | YLLs (in 1000s)                            |                                            |                                            |                                            | Deaths (in 1000s)                          |                                       |                                       |                                       |
|                                                                              | 2016                                       | 2040 Forecast                              | 2040 Better Scenario                       | 2040 Worse Scenario                        | 2016                                       | 2040 Forecast                         | 2040 Better Scenario                  | 2040 Worse Scenario                   |
| All causes                                                                   | 31,600.59<br>(29,981.41 to<br>33,414.84)   | 31,605.41<br>(20,567.58 to<br>55,808.25)   | 21,727.79<br>(14,292.40 to<br>38,641.89)   | 58,028.09<br>(43,824.70 to<br>85,515.29)   | 758.64<br>(726.70 to<br>790.00)            | 962.58<br>(686.98 to<br>1,473.64)     | 711.49<br>(513.00 to<br>1,079.34)     | 1,521.09<br>(1,197.39 to<br>2,067.59) |
| Communicable, maternal, neonatal, and nutritional diseases                   | 19,885.66<br>(18,311.15 to<br>21,642.21)   | 11,744.86<br>(7,116.71 to<br>21,417.53)    | 7,357.79<br>(4,527.13 to<br>12,979.70)     | 36,009.69<br>(27,242.45 to<br>49,681.93)   | 379.04<br>(351.29 to<br>410.14)            | 245.08<br>(158.89 to<br>426.39)       | 161.94<br>(105.71 to<br>272.98)       | 736.08<br>(559.39 to<br>968.15)       |
| HIV/AIDS and tuberculosis                                                    | 12,670.88<br>(11,429.07 to<br>14,195.34)   | 4,942.00<br>(3,339.40 to<br>7,986.97)      | 3,342.84<br>(2,212.53 to<br>5,064.07)      | 26,988.52<br>(20,798.17 to<br>33,506.58)   | 255.42<br>(232.25 to<br>284.21)            | 102.74<br>(70.84 to<br>165.46)        | 66.68<br>(44.96 to<br>101.63)         | 553.84<br>(428.37 to<br>682.26)       |
| Tuberculosis                                                                 | 1,493.48<br>(1,349.31 to<br>1,629.07)      | 1,631.79<br>(620.34 to<br>4,505.93)        | 703.25<br>(261.17 to<br>1,970.37)          | 2,071.77<br>(795.27 to<br>5,728.40)        | 37.93<br>(34.18 to<br>41.18)               | 42.30<br>(18.69 to<br>105.34)         | 18.83<br>(8.22 to<br>48.00)           | 53.10<br>(23.77 to<br>132.98)         |
| HIV/AIDS                                                                     | 11,177.40<br>(9,877.10 to<br>12,708.52)    | 3,310.21<br>(2,279.17 to<br>4,906.20)      | 2,639.59<br>(1,651.90 to<br>4,051.77)      | 24,916.74<br>(18,964.85 to<br>31,023.90)   | 217.49<br>(193.38 to<br>246.49)            | 60.44<br>(40.80 to<br>89.52)          | 47.85<br>(29.92 to<br>73.40)          | 500.74<br>(377.24 to<br>615.97)       |
| Diarrhea, lower respiratory, and other common infectious diseases            | 3,840.71<br>(3,429.76 to<br>4,324.19)      | 4,277.64<br>(1,498.99 to<br>12,000.01)     | 2,504.05<br>(950.18 to<br>6,679.64)        | 6,046.61<br>(2,130.30 to<br>16,250.39)     | 79.47<br>(70.31 to<br>90.45)               | 106.00<br>(49.43 to<br>237.25)        | 72.20<br>(36.40 to<br>156.56)         | 140.48<br>(64.70 to<br>330.76)        |
| Diarrheal diseases                                                           | 1,381.23<br>(1,099.20 to<br>1,692.08)      | 1,435.18<br>(188.69 to<br>4,685.08)        | 792.14<br>(112.63 to<br>2,832.12)          | 1,919.49<br>(285.65 to<br>6,292.09)        | 24.95<br>(18.13 to<br>33.77)               | 31.23<br>(5.57 to<br>102.18)          | 20.65<br>(4.24 to<br>69.64)           | 41.15<br>(7.21 to<br>136.47)          |
| Intestinal infectious diseases                                               | 3.25<br>(1.77 to<br>5.77)                  | 3.73<br>(0.91 to<br>10.37)                 | 2.71<br>(0.64 to<br>7.76)                  | 3.91<br>(0.95 to<br>10.34)                 | 0.05<br>(0.03 to<br>0.08)                  | 0.06<br>(0.02 to<br>0.15)             | 0.04<br>(0.01 to<br>0.12)             | 0.06<br>(0.02 to<br>0.15)             |



|                                                       |                                            |                                              |                                           |                                              |                                      |                                       |                                       |                                       |
|-------------------------------------------------------|--------------------------------------------|----------------------------------------------|-------------------------------------------|----------------------------------------------|--------------------------------------|---------------------------------------|---------------------------------------|---------------------------------------|
| Leishmaniasis                                         | 0.00<br>(0.00 to 0.00)                     | 0.00<br>(0.00 to 0.00)                       | 0.00<br>(0.00 to 0.00)                    | 0.00<br>(0.00 to 0.00)                       | 0.00<br>(0.00 to 0.00)               | 0.00<br>(0.00 to 0.00)                | 0.00<br>(0.00 to 0.00)                | 0.00<br>(0.00 to 0.00)                |
| African trypanosomiasis                               | 0.54<br>(0.02 to 2.95)                     | 0.08<br>(0.00 to 0.50)                       | 0.08<br>(0.00 to 0.49)                    | 0.08<br>(0.00 to 0.50)                       | 0.01<br>(0.00 to 0.05)               | 0.00<br>(0.00 to 0.01)                | 0.00<br>(0.00 to 0.01)                | 0.00<br>(0.00 to 0.01)                |
| Schistosomiasis                                       | 8.94<br>(6.35 to 12.51)                    | 12.17<br>(5.22 to 28.12)                     | 9.38<br>(4.01 to 23.14)                   | 12.08<br>(5.46 to 27.08)                     | 0.24<br>(0.18 to 0.33)               | 0.32<br>(0.16 to 0.66)                | 0.26<br>(0.13 to 0.57)                | 0.31<br>(0.16 to 0.63)                |
| Cysticercosis                                         | 2.17<br>(1.84 to 2.55)                     | 1.57<br>(0.71 to 3.63)                       | 1.39<br>(0.62 to 3.21)                    | 1.51<br>(0.68 to 3.47)                       | 0.04<br>(0.04 to 0.05)               | 0.03<br>(0.02 to 0.07)                | 0.03<br>(0.02 to 0.06)                | 0.03<br>(0.02 to 0.07)                |
| Cystic echinococcosis                                 | 0.75<br>(0.57 to 0.96)                     | 0.85<br>(0.38 to 1.88)                       | 0.41<br>(0.19 to 0.95)                    | 0.93<br>(0.41 to 2.00)                       | 0.02<br>(0.01 to 0.02)               | 0.02<br>(0.01 to 0.04)                | 0.01<br>(0.01 to 0.02)                | 0.02<br>(0.01 to 0.04)                |
| Dengue                                                | 0.02<br>(0.00 to 0.09)                     | 0.15<br>(0.01 to 0.91)                       | 0.13<br>(0.01 to 0.78)                    | 0.15<br>(0.01 to 0.88)                       | 0.00<br>(0.00 to 0.00)               | 0.00<br>(0.00 to 0.02)                | 0.00<br>(0.00 to 0.02)                | 0.00<br>(0.00 to 0.02)                |
| Yellow fever                                          | 0.00<br>(0.00 to 0.00)                     | 0.00<br>(0.00 to 0.00)                       | 0.00<br>(0.00 to 0.00)                    | 0.00<br>(0.00 to 0.00)                       | 0.00<br>(0.00 to 0.00)               | 0.00<br>(0.00 to 0.00)                | 0.00<br>(0.00 to 0.00)                | 0.00<br>(0.00 to 0.00)                |
| Rabies                                                | 3.15<br>(1.35 to 5.63)                     | 4.75<br>(1.09 to 12.29)                      | 2.07<br>(0.40 to 5.73)                    | 5.72<br>(1.30 to 14.72)                      | 0.05<br>(0.02 to 0.08)               | 0.07<br>(0.02 to 0.18)                | 0.03<br>(0.01 to 0.08)                | 0.08<br>(0.02 to 0.21)                |
| Intestinal nematode infections                        | 1.26<br>(0.86 to 1.74)                     | 3.61<br>(0.90 to 9.22)                       | 2.87<br>(0.71 to 7.40)                    | 3.67<br>(0.99 to 8.94)                       | 0.02<br>(0.01 to 0.02)               | 0.05<br>(0.01 to 0.12)                | 0.04<br>(0.01 to 0.09)                | 0.05<br>(0.01 to 0.11)                |
| Other neglected tropical diseases                     | 3.43<br>(2.11 to 5.19)                     | 6.05<br>(1.84 to 14.80)                      | 3.73<br>(1.20 to 8.75)                    | 6.58<br>(1.99 to 15.59)                      | 0.05<br>(0.03 to 0.08)               | 0.10<br>(0.04 to 0.21)                | 0.07<br>(0.03 to 0.13)                | 0.10<br>(0.04 to 0.22)                |
| <b>Maternal disorders</b>                             | <b>266.04</b><br><b>(215.14 to 327.51)</b> | <b>374.48</b><br><b>(109.66 to 1,299.80)</b> | <b>200.49</b><br><b>(56.30 to 777.48)</b> | <b>459.57</b><br><b>(136.59 to 1,652.12)</b> | <b>4.73</b><br><b>(3.81 to 5.81)</b> | <b>6.83</b><br><b>(2.08 to 23.39)</b> | <b>3.65</b><br><b>(1.08 to 13.59)</b> | <b>8.37</b><br><b>(2.57 to 29.05)</b> |
| Maternal hemorrhage                                   | 33.82<br>(23.20 to 47.45)                  | 40.07<br>(10.98 to 141.49)                   | 21.67<br>(5.88 to 83.08)                  | 43.00<br>(12.12 to 148.63)                   | 0.61<br>(0.42 to 0.85)               | 0.74<br>(0.20 to 2.55)                | 0.40<br>(0.11 to 1.43)                | 0.79<br>(0.23 to 2.62)                |
| Maternal sepsis and other maternal infections         | 15.61<br>(10.69 to 21.73)                  | 17.34<br>(4.42 to 70.41)                     | 9.97<br>(2.39 to 44.19)                   | 18.74<br>(4.84 to 73.30)                     | 0.28<br>(0.19 to 0.39)               | 0.31<br>(0.08 to 1.23)                | 0.18<br>(0.04 to 0.75)                | 0.33<br>(0.09 to 1.29)                |
| Maternal hypertensive disorders                       | 55.38<br>(41.10 to 73.67)                  | 66.94<br>(18.46 to 244.16)                   | 35.77<br>(9.62 to 153.57)                 | 72.56<br>(20.55 to 248.63)                   | 0.97<br>(0.71 to 1.28)               | 1.18<br>(0.34 to 4.25)                | 0.63<br>(0.17 to 2.62)                | 1.27<br>(0.37 to 4.24)                |
| Maternal obstructed labor and uterine rupture         | 5.24<br>(2.87 to 8.53)                     | 6.94<br>(1.72 to 25.68)                      | 3.51<br>(0.83 to 14.42)                   | 7.51<br>(1.94 to 27.88)                      | 0.09<br>(0.05 to 0.15)               | 0.13<br>(0.03 to 0.46)                | 0.06<br>(0.02 to 0.26)                | 0.14<br>(0.02 to 0.51)                |
| Maternal abortion, miscarriage, and ectopic pregnancy | 18.87<br>(13.69 to 25.56)                  | 22.73<br>(4.55 to 102.53)                    | 14.17<br>(2.64 to 63.99)                  | 24.47<br>(5.09 to 106.49)                    | 0.34<br>(0.25 to 0.46)               | 0.41<br>(0.09 to 1.75)                | 0.25<br>(0.05 to 1.14)                | 0.44<br>(0.10 to 1.85)                |
| Indirect maternal deaths                              | 77.66<br>(58.56 to 101.91)                 | 100.26<br>(27.04 to 377.71)                  | 55.28<br>(14.62 to 229.87)                | 108.68<br>(30.08 to 418.10)                  | 1.39<br>(1.05 to 1.83)               | 1.81<br>(0.50 to 6.64)                | 1.00<br>(0.27 to 4.14)                | 1.95<br>(0.55 to 7.42)                |
| Late maternal deaths                                  | 2.36<br>(0.85 to 4.57)                     | 2.55<br>(0.57 to 8.65)                       | 1.21<br>(0.26 to 4.16)                    | 2.78<br>(0.61 to 8.84)                       | 0.04<br>(0.02 to 0.08)               | 0.05<br>(0.01 to 0.15)                | 0.02<br>(0.00 to 0.08)                | 0.05<br>(0.01 to 0.15)                |
| Maternal deaths aggravated by HIV/AIDS                | 14.51<br>(10.05 to 19.15)                  | 67.53<br>(19.51 to 210.05)                   | 30.33<br>(7.00 to 95.98)                  | 127.68<br>(39.18 to 441.61)                  | 0.27<br>(0.18 to 0.35)               | 1.31<br>(0.38 to 3.89)                | 0.59<br>(0.14 to 1.73)                | 2.42<br>(0.77 to 8.07)                |
| Other maternal disorders                              | 42.60<br>(30.40 to 57.43)                  | 50.12<br>(13.37 to 177.01)                   | 28.58<br>(7.08 to 113.60)                 | 54.14<br>(14.93 to 182.97)                   | 0.75<br>(0.53 to 1.01)               | 0.90<br>(0.25 to 3.10)                | 0.51<br>(0.13 to 1.94)                | 0.97<br>(0.27 to 3.21)                |
| <b>Southern Sub-Saharan Africa</b>                    |                                            |                                              |                                           |                                              |                                      |                                       |                                       |                                       |
| Cause                                                 | YLLs (in 1000s)                            |                                              |                                           |                                              | Deaths (in 1000s)                    |                                       |                                       |                                       |
|                                                       | 2016                                       | 2040 Forecast                                | 2040 Better Scenario                      | 2040 Worse Scenario                          | 2016                                 | 2040 Forecast                         | 2040 Better Scenario                  | 2040 Worse Scenario                   |

|                                                                         |                                                      |                                                      |                                                     |                                                      |                                                |                                                |                                                |                                                |
|-------------------------------------------------------------------------|------------------------------------------------------|------------------------------------------------------|-----------------------------------------------------|------------------------------------------------------|------------------------------------------------|------------------------------------------------|------------------------------------------------|------------------------------------------------|
|                                                                         | 2,421.15<br>(2,047.04 to<br>2,869.34)                | 1,563.17<br>(958.54 to<br>2,335.15)                  | 889.60<br>(553.80 to<br>1,335.61)                   | 1,901.47<br>(1,194.08 to<br>2,796.35)                | 27.97<br>(23.65 to<br>33.15)                   | 18.06<br>(11.08 to<br>27.01)                   | 10.28<br>(6.40 to<br>15.43)                    | 21.97<br>(13.80 to<br>32.30)                   |
| <b>Neonatal disorders</b>                                               |                                                      |                                                      |                                                     |                                                      |                                                |                                                |                                                |                                                |
| Neonatal preterm birth                                                  | 854.45<br>(672.26 to<br>1,052.30)                    | 445.17<br>(283.07 to<br>656.38)                      | 246.74<br>(157.54 to<br>359.57)                     | 633.89<br>(403.29 to<br>910.94)                      | 9.87<br>(7.76 to<br>12.16)                     | 5.14<br>(3.27 to<br>7.58)                      | 2.85<br>(1.82 to<br>4.16)                      | 7.32<br>(4.66 to<br>10.52)                     |
| Neonatal encephalopathy due to birth asphyxia and trauma                | 723.02<br>(549.06 to<br>880.23)                      | 428.37<br>(222.48 to<br>738.56)                      | 232.63<br>(122.49 to<br>399.76)                     | 479.12<br>(251.68 to<br>813.17)                      | 8.35<br>(6.34 to<br>10.17)                     | 4.95<br>(2.57 to<br>8.54)                      | 2.69<br>(1.41 to<br>4.62)                      | 5.54<br>(2.91 to<br>9.40)                      |
| Neonatal sepsis and other neonatal infections                           | 338.60<br>(250.06 to<br>488.56)                      | 343.61<br>(195.68 to<br>572.15)                      | 184.93<br>(106.51 to<br>297.29)                     | 382.86<br>(221.13 to<br>618.04)                      | 3.91<br>(2.89 to<br>5.64)                      | 3.97<br>(2.26 to<br>6.61)                      | 2.14<br>(1.23 to<br>3.44)                      | 4.42<br>(2.55 to<br>7.15)                      |
| Hemolytic disease and other neonatal jaundice                           | 19.52<br>(15.18 to<br>25.12)                         | 8.21<br>(4.58 to<br>13.70)                           | 4.54<br>(2.51 to<br>7.60)                           | 9.48<br>(5.32 to<br>16.05)                           | 0.23<br>(0.18 to<br>0.29)                      | 0.09<br>(0.05 to<br>0.16)                      | 0.05<br>(0.03 to<br>0.09)                      | 0.11<br>(0.06 to<br>0.19)                      |
| Other neonatal disorders                                                | 485.56<br>(381.86 to<br>615.04)                      | 337.81<br>(190.55 to<br>544.31)                      | 220.76<br>(123.05 to<br>355.61)                     | 396.12<br>(225.92 to<br>650.69)                      | 5.61<br>(4.41 to<br>7.10)                      | 3.90<br>(2.20 to<br>6.29)                      | 2.55<br>(1.42 to<br>4.11)                      | 4.58<br>(2.61 to<br>7.52)                      |
| <b>Nutritional deficiencies</b>                                         | <b>342.83</b><br><b>(272.66 to</b><br><b>435.47)</b> | <b>248.02</b><br><b>(104.29 to</b><br><b>532.16)</b> | <b>160.00</b><br><b>(74.41 to</b><br><b>339.12)</b> | <b>266.19</b><br><b>(114.83 to</b><br><b>570.64)</b> | <b>5.61</b><br><b>(4.73 to</b><br><b>6.79)</b> | <b>4.83</b><br><b>(2.83 to</b><br><b>8.59)</b> | <b>3.66</b><br><b>(2.34 to</b><br><b>6.23)</b> | <b>4.89</b><br><b>(2.85 to</b><br><b>8.72)</b> |
| Protein-energy malnutrition                                             | 325.26<br>(256.73 to<br>415.49)                      | 218.88<br>(87.36 to<br>486.19)                       | 139.36<br>(62.29 to<br>301.18)                      | 236.84<br>(98.93 to<br>528.38)                       | 5.10<br>(4.24 to<br>6.24)                      | 3.99<br>(2.23 to<br>7.35)                      | 2.99<br>(1.85 to<br>5.21)                      | 4.09<br>(2.27 to<br>7.66)                      |
| Iodine deficiency                                                       | 1.09<br>(0.39 to<br>3.01)                            | 5.75<br>(0.59 to<br>33.33)                           | 3.18<br>(0.41 to<br>15.17)                          | 6.19<br>(0.60 to<br>32.61)                           | 0.02<br>(0.01 to<br>0.05)                      | 0.09<br>(0.02 to<br>0.45)                      | 0.09<br>(0.01 to<br>0.26)                      | 0.13<br>(0.02 to<br>0.47)                      |
| Dietary iron deficiency                                                 | 0.51<br>(0.44 to<br>0.58)                            | 0.74<br>(0.29 to<br>1.74)                            | 0.62<br>(0.24 to<br>1.47)                           | 0.75<br>(0.29 to<br>1.77)                            | 0.01<br>(0.01 to<br>0.01)                      | 0.01<br>(0.01 to<br>0.03)                      | 0.01<br>(0.01 to<br>0.03)                      | 0.01<br>(0.01 to<br>0.03)                      |
| Other nutritional deficiencies                                          | 15.98<br>(12.99 to<br>21.11)                         | 22.65<br>(11.70 to<br>46.94)                         | 16.83<br>(8.98 to<br>34.75)                         | 22.41<br>(11.59 to<br>45.15)                         | 0.47<br>(0.40 to<br>0.56)                      | 0.70<br>(0.48 to<br>1.12)                      | 0.58<br>(0.40 to<br>0.93)                      | 0.66<br>(0.45 to<br>1.06)                      |
| <b>Other communicable, maternal, neonatal, and nutritional diseases</b> | <b>200.16</b><br><b>(146.22 to</b><br><b>257.84)</b> | <b>192.65</b><br><b>(95.10 to</b><br><b>390.13)</b>  | <b>158.74</b><br><b>(74.26 to</b><br><b>312.45)</b> | <b>197.12</b><br><b>(97.42 to</b><br><b>385.60)</b>  | <b>3.58</b><br><b>(2.62 to</b><br><b>4.31)</b> | <b>4.44</b><br><b>(2.33 to</b><br><b>7.46)</b> | <b>3.48</b><br><b>(1.99 to</b><br><b>6.35)</b> | <b>4.05</b><br><b>(2.29 to</b><br><b>7.15)</b> |
| Sexually transmitted infections excluding HIV                           | 67.01<br>(38.02 to<br>110.64)                        | 34.23<br>(13.97 to<br>79.49)                         | 23.36<br>(9.71 to<br>57.39)                         | 35.39<br>(14.68 to<br>80.51)                         | 0.94<br>(0.60 to<br>1.46)                      | 0.57<br>(0.28 to<br>1.26)                      | 0.43<br>(0.22 to<br>0.93)                      | 0.58<br>(0.29 to<br>1.25)                      |
| Syphilis                                                                | 60.14<br>(31.56 to<br>103.74)                        | 25.34<br>(9.34 to<br>58.59)                          | 15.78<br>(6.04 to<br>37.38)                         | 26.84<br>(10.01 to<br>61.60)                         | 0.76<br>(0.42 to<br>1.27)                      | 0.35<br>(0.15 to<br>0.76)                      | 0.23<br>(0.10 to<br>0.50)                      | 0.36<br>(0.15 to<br>0.80)                      |
| Chlamydial infection                                                    | 1.33<br>(1.03 to<br>2.53)                            | 1.78<br>(0.67 to<br>5.18)                            | 1.51<br>(0.56 to<br>4.45)                           | 1.73<br>(0.65 to<br>4.88)                            | 0.03<br>(0.03 to<br>0.06)                      | 0.04<br>(0.02 to<br>0.11)                      | 0.04<br>(0.02 to<br>0.10)                      | 0.04<br>(0.02 to<br>0.10)                      |
| Gonococcal infection                                                    | 3.65<br>(2.83 to<br>6.75)                            | 4.68<br>(1.82 to<br>13.78)                           | 4.01<br>(1.59 to<br>11.89)                          | 4.49<br>(1.78 to<br>12.87)                           | 0.10<br>(0.08 to<br>0.16)                      | 0.12<br>(0.06 to<br>0.31)                      | 0.11<br>(0.06 to<br>0.26)                      | 0.12<br>(0.06 to<br>0.28)                      |
| Other sexually transmitted infections                                   | 1.90<br>(1.46 to<br>3.62)                            | 2.43<br>(0.93 to<br>6.97)                            | 2.05<br>(0.79 to<br>5.96)                           | 2.34<br>(0.90 to<br>6.52)                            | 0.05<br>(0.04 to<br>0.08)                      | 0.06<br>(0.03 to<br>0.15)                      | 0.05<br>(0.02 to<br>0.13)                      | 0.05<br>(0.03 to<br>0.14)                      |
| Acute hepatitis                                                         | 15.66<br>(14.11 to<br>17.34)                         | 18.65<br>(9.95 to<br>39.32)                          | 13.43<br>(6.96 to<br>28.97)                         | 18.04<br>(9.63 to<br>37.66)                          | 0.36<br>(0.33 to<br>0.39)                      | 0.48<br>(0.30 to<br>0.87)                      | 0.36<br>(0.22 to<br>0.66)                      | 0.45<br>(0.28 to<br>0.81)                      |
| Acute hepatitis A                                                       | 0.28<br>(0.14 to<br>0.56)                            | 0.25<br>(0.08 to<br>0.74)                            | 0.17<br>(0.06 to<br>0.49)                           | 0.26<br>(0.09 to<br>0.75)                            | 0.00<br>(0.00 to<br>0.01)                      | 0.00<br>(0.00 to<br>0.01)                      | 0.00<br>(0.00 to<br>0.01)                      | 0.00<br>(0.00 to<br>0.01)                      |
| Acute hepatitis B                                                       | 12.25<br>(10.96 to<br>13.67)                         | 14.85<br>(8.17 to<br>33.07)                          | 10.80<br>(5.79 to<br>24.47)                         | 14.19<br>(7.93 to<br>31.10)                          | 0.30<br>(0.27 to<br>0.33)                      | 0.40<br>(0.25 to<br>0.75)                      | 0.30<br>(0.18 to<br>0.57)                      | 0.37<br>(0.24 to<br>0.69)                      |
| Acute hepatitis C                                                       | 0.25<br>(0.19 to<br>0.33)                            | 0.39<br>(0.20 to<br>0.75)                            | 0.32<br>(0.16 to<br>0.64)                           | 0.36<br>(0.19 to<br>0.69)                            | 0.01<br>(0.01 to<br>0.01)                      | 0.01<br>(0.01 to<br>0.02)                      | 0.01<br>(0.01 to<br>0.02)                      | 0.01<br>(0.01 to<br>0.02)                      |
| Acute hepatitis E                                                       | 2.88<br>(2.29 to<br>3.53)                            | 3.16<br>(1.07 to<br>6.87)                            | 2.14<br>(0.77 to<br>4.64)                           | 3.24<br>(1.10 to<br>7.15)                            | 0.05<br>(0.04 to<br>0.06)                      | 0.06<br>(0.03 to<br>0.12)                      | 0.05<br>(0.03 to<br>0.09)                      | 0.06<br>(0.03 to<br>0.12)                      |

|                                       |                                       |                                         |                                         |                                          |                                 |                                 |                                 |                                 |
|---------------------------------------|---------------------------------------|-----------------------------------------|-----------------------------------------|------------------------------------------|---------------------------------|---------------------------------|---------------------------------|---------------------------------|
|                                       | 117.50<br>(72.17 to<br>145.47)        | 139.77<br>(61.73 to<br>283.29)          | 113.96<br>(50.61 to<br>239.15)          | 143.68<br>(64.38 to<br>286.74)           | 2.28<br>(1.37 to<br>2.69)       | 3.09<br>(1.53 to<br>5.51)       | 2.70<br>(1.36 to<br>4.78)       | 3.03<br>(1.52 to<br>5.28)       |
| Other unspecified infectious diseases |                                       |                                         |                                         |                                          |                                 |                                 |                                 |                                 |
| Non-communicable diseases             | 7,742.83<br>(7,259.96 to<br>8,215.19) | 14,502.89<br>(8,939.85 to<br>25,136.35) | 10,958.21<br>(6,750.00 to<br>19,138.02) | 16,364.19<br>(10,104.19 to<br>27,542.08) | 302.66<br>(286.45 to<br>318.22) | 603.30<br>(415.14 to<br>885.84) | 473.56<br>(327.17 to<br>713.14) | 667.49<br>(467.25 to<br>957.60) |
| <b>Southern Sub-Saharan Africa</b>    |                                       |                                         |                                         |                                          |                                 |                                 |                                 |                                 |
| Cause                                 | YLLs (in 1000s)                       |                                         |                                         |                                          | Deaths (in 1000s)               |                                 |                                 |                                 |
|                                       | 2016                                  | 2040 Forecast                           | 2040 Better Scenario                    | 2040 Worse Scenario                      | 2016                            | 2040 Forecast                   | 2040 Better Scenario            | 2040 Worse Scenario             |
| Neoplasms                             | 1,763.81<br>(1,629.52 to<br>1,894.80) | 3,629.77<br>(2,282.23 to<br>6,133.33)   | 3,294.38<br>(2,056.81 to<br>5,724.28)   | 3,959.75<br>(2,532.67 to<br>6,343.95)    | 66.03<br>(61.42 to<br>70.61)    | 139.16<br>(97.16 to<br>198.49)  | 131.00<br>(90.07 to<br>193.18)  | 149.32<br>(104.64 to<br>207.54) |
| Lip and oral cavity cancer            | 33.39<br>(30.61 to<br>36.45)          | 65.97<br>(35.96 to<br>118.93)           | 46.77<br>(24.98 to<br>85.66)            | 102.32<br>(54.14 to<br>181.32)           | 1.24<br>(1.15 to<br>1.35)       | 2.42<br>(1.39 to<br>3.94)       | 1.78<br>(1.06 to<br>2.97)       | 3.67<br>(2.08 to<br>6.13)       |
| Nasopharynx cancer                    | 7.53<br>(6.95 to<br>8.16)             | 16.73<br>(9.01 to<br>31.43)             | 10.93<br>(5.95 to<br>20.94)             | 24.99<br>(13.45 to<br>47.12)             | 0.25<br>(0.23 to<br>0.27)       | 0.54<br>(0.31 to<br>0.91)       | 0.36<br>(0.21 to<br>0.63)       | 0.81<br>(0.44 to<br>1.38)       |
| Other pharynx cancer                  | 8.63<br>(7.81 to<br>9.48)             | 16.98<br>(9.26 to<br>30.61)             | 15.25<br>(8.45 to<br>27.64)             | 18.29<br>(9.85 to<br>32.55)              | 0.31<br>(0.28 to<br>0.34)       | 0.61<br>(0.35 to<br>1.03)       | 0.56<br>(0.33 to<br>0.96)       | 0.65<br>(0.37 to<br>1.10)       |
| Esophageal cancer                     | 141.60<br>(130.16 to<br>154.63)       | 287.75<br>(135.65 to<br>566.13)         | 227.16<br>(110.41 to<br>446.02)         | 402.77<br>(180.07 to<br>821.37)          | 5.87<br>(5.45 to<br>6.36)       | 11.42<br>(5.98 to<br>21.12)     | 9.43<br>(5.05 to<br>17.62)      | 15.47<br>(7.52 to<br>29.17)     |
| Stomach cancer                        | 71.64<br>(65.17 to<br>78.13)          | 113.96<br>(70.74 to<br>193.34)          | 95.85<br>(59.19 to<br>166.35)           | 113.29<br>(70.88 to<br>186.67)           | 3.03<br>(2.77 to<br>3.28)       | 4.76<br>(3.29 to<br>7.29)       | 4.14<br>(2.78 to<br>6.46)       | 4.64<br>(3.21 to<br>6.93)       |
| Colon and rectum cancer               | 104.69<br>(96.26 to<br>113.80)        | 250.69<br>(146.80 to<br>419.89)         | 228.81<br>(131.30 to<br>396.46)         | 251.58<br>(147.46 to<br>413.53)          | 4.44<br>(4.11 to<br>4.82)       | 11.20<br>(7.29 to<br>17.00)     | 10.47<br>(6.67 to<br>15.98)     | 10.98<br>(7.11 to<br>16.60)     |
| Liver cancer                          | 111.94<br>(99.54 to<br>125.21)        | 267.30<br>(151.17 to<br>493.48)         | 252.18<br>(141.69 to<br>467.84)         | 307.28<br>(170.61 to<br>556.79)          | 3.95<br>(3.56 to<br>4.37)       | 9.41<br>(5.95 to<br>15.21)      | 9.21<br>(5.74 to<br>15.17)      | 10.54<br>(6.46 to<br>17.48)     |
| Liver cancer due to hepatitis B       | 51.99<br>(43.97 to<br>60.83)          | 123.51<br>(65.32 to<br>235.71)          | 119.56<br>(63.60 to<br>234.59)          | 136.86<br>(71.05 to<br>268.50)           | 1.70<br>(1.42 to<br>1.99)       | 4.02<br>(2.41 to<br>7.01)       | 4.02<br>(2.38 to<br>7.10)       | 4.36<br>(2.54 to<br>7.75)       |
| Liver cancer due to hepatitis C       | 15.66<br>(13.04 to<br>18.42)          | 37.82<br>(22.04 to<br>64.19)            | 37.43<br>(21.50 to<br>65.54)            | 40.84<br>(22.89 to<br>69.15)             | 0.69<br>(0.58 to<br>0.81)       | 1.64<br>(1.03 to<br>2.50)       | 1.69<br>(1.08 to<br>2.63)       | 1.71<br>(1.05 to<br>2.66)       |
| Liver cancer due to alcohol use       | 19.17<br>(16.46 to<br>22.37)          | 47.16<br>(26.52 to<br>85.17)            | 39.50<br>(22.22 to<br>72.16)            | 64.15<br>(35.13 to<br>118.28)            | 0.74<br>(0.64 to<br>0.86)       | 1.79<br>(1.09 to<br>2.93)       | 1.57<br>(0.96 to<br>2.58)       | 2.34<br>(1.37 to<br>3.96)       |
| Liver cancer due to other causes      | 24.92<br>(21.42 to<br>28.78)          | 58.81<br>(31.98 to<br>109.23)           | 55.70<br>(30.21 to<br>104.46)           | 65.43<br>(34.82 to<br>120.68)            | 0.82<br>(0.72 to<br>0.94)       | 1.96<br>(1.17 to<br>3.19)       | 1.92<br>(1.13 to<br>3.16)       | 2.13<br>(1.24 to<br>3.58)       |
| Gallbladder and biliary tract cancer  | 12.39<br>(11.00 to<br>14.03)          | 17.66<br>(12.06 to<br>26.62)            | 18.56<br>(12.22 to<br>26.62)            | 15.42<br>(10.86 to<br>22.53)             | 0.58<br>(0.52 to<br>0.64)       | 0.84<br>(0.63 to<br>1.13)       | 0.91<br>(0.66 to<br>1.28)       | 0.73<br>(0.56 to<br>0.94)       |
| Pancreatic cancer                     | 60.52<br>(56.68 to<br>64.40)          | 146.17<br>(93.15 to<br>226.01)          | 152.00<br>(95.20 to<br>244.27)          | 144.15<br>(93.07 to<br>218.05)           | 2.71<br>(2.54 to<br>2.87)       | 6.53<br>(4.48 to<br>9.48)       | 6.99<br>(4.68 to<br>10.36)      | 6.32<br>(4.38 to<br>8.98)       |
| Larynx cancer                         | 22.87<br>(21.13 to<br>24.96)          | 39.43<br>(19.27 to<br>72.91)            | 26.27<br>(13.43 to<br>50.20)            | 64.97<br>(30.73 to<br>123.76)            | 0.90<br>(0.84 to<br>0.98)       | 1.47<br>(0.80 to<br>2.65)       | 1.02<br>(0.56 to<br>1.82)       | 2.40<br>(1.24 to<br>4.37)       |
| Tracheal, bronchus, and lung cancer   | 202.89<br>(186.37 to<br>218.76)       | 346.33<br>(201.63 to<br>558.17)         | 266.52<br>(152.15 to<br>442.94)         | 580.68<br>(337.38 to<br>911.33)          | 8.40<br>(7.71 to<br>9.01)       | 14.22<br>(8.63 to<br>21.59)     | 11.36<br>(6.73 to<br>17.63)     | 23.83<br>(14.43 to<br>35.87)    |
| Malignant skin melanoma               | 15.92<br>(13.46 to<br>18.19)          | 34.13<br>(21.86 to<br>54.30)            | 42.14<br>(26.44 to<br>69.34)            | 29.13<br>(19.08 to<br>44.79)             | 0.62<br>(0.50 to<br>0.70)       | 1.38<br>(0.97 to<br>1.89)       | 1.76<br>(1.20 to<br>2.51)       | 1.15<br>(0.83 to<br>1.52)       |
| Non-melanoma skin cancer              | 26.65<br>(24.57 to<br>28.75)          | 66.88<br>(47.30 to<br>93.07)            | 59.82<br>(40.20 to<br>88.69)            | 58.47<br>(42.58 to<br>78.28)             | 1.22<br>(1.14 to<br>1.30)       | 3.13<br>(2.44 to<br>3.89)       | 2.88<br>(2.14 to<br>3.83)       | 2.67<br>(2.17 to<br>3.18)       |

|                   |                                 |                                 |                                 |                                 |                           |                             |                              |                             |
|-------------------|---------------------------------|---------------------------------|---------------------------------|---------------------------------|---------------------------|-----------------------------|------------------------------|-----------------------------|
| Breast cancer     | 149.39<br>(131.74 to<br>167.55) | 326.48<br>(168.30 to<br>693.13) | 290.24<br>(150.65 to<br>611.28) | 321.10<br>(163.90 to<br>667.15) | 5.22<br>(4.66 to<br>5.79) | 12.13<br>(7.12 to<br>21.08) | 11.03<br>(6.41 to<br>19.21)  | 11.84<br>(6.89 to<br>20.43) |
| Cervical cancer   | 192.31<br>(149.53 to<br>223.79) | 314.78<br>(160.98 to<br>669.59) | 262.18<br>(130.67 to<br>583.68) | 301.37<br>(155.90 to<br>630.39) | 6.52<br>(5.13 to<br>7.55) | 10.85<br>(6.38 to<br>19.54) | 9.26<br>(5.16 to<br>17.05)   | 10.34<br>(6.00 to<br>18.11) |
| Uterine cancer    | 16.26<br>(14.04 to<br>18.50)    | 35.89<br>(22.68 to<br>58.25)    | 31.39<br>(19.11 to<br>52.35)    | 33.80<br>(21.98 to<br>51.99)    | 0.75<br>(0.65 to<br>0.85) | 1.66<br>(1.15 to<br>2.39)   | 1.50<br>(1.01 to<br>2.30)    | 1.54<br>(1.11 to<br>2.16)   |
| Ovarian cancer    | 35.14<br>(30.88 to<br>39.52)    | 80.89<br>(43.68 to<br>156.28)   | 82.30<br>(43.62 to<br>163.33)   | 74.60<br>(41.07 to<br>141.83)   | 1.28<br>(1.14 to<br>1.41) | 3.02<br>(1.81 to<br>5.12)   | 3.11<br>(1.84 to<br>5.35)    | 2.78<br>(1.69 to<br>4.70)   |
| Prostate cancer   | 92.05<br>(64.96 to<br>106.14)   | 229.66<br>(145.54 to<br>301.68) | 245.42<br>(149.83 to<br>348.64) | 196.57<br>(124.81 to<br>248.74) | 5.74<br>(4.03 to<br>6.58) | 14.24<br>(9.84 to<br>16.87) | 15.66<br>(10.55 to<br>19.64) | 11.87<br>(8.24 to<br>14.12) |
| Testicular cancer | 3.04<br>(2.70 to<br>3.42)       | 4.91<br>(3.12 to<br>9.26)       | 4.44<br>(2.74 to<br>8.73)       | 4.49<br>(2.88 to<br>8.56)       | 0.08<br>(0.08 to<br>0.09) | 0.15<br>(0.11 to<br>0.24)   | 0.14<br>(0.10 to<br>0.22)    | 0.13<br>(0.10 to<br>0.21)   |

**Southern Sub-Saharan Africa**

| Cause                           | YLLs (in 1000s)              |                                |                                |                                | Deaths (in 1000s)         |                           |                           |                           |
|---------------------------------|------------------------------|--------------------------------|--------------------------------|--------------------------------|---------------------------|---------------------------|---------------------------|---------------------------|
|                                 | 2016                         | 2040 Forecast                  | 2040 Better Scenario           | 2040 Worse Scenario            | 2016                      | 2040 Forecast             | 2040 Better Scenario      | 2040 Worse Scenario       |
| Kidney cancer                   | 18.97<br>(17.30 to<br>20.58) | 41.16<br>(26.24 to<br>64.55)   | 43.84<br>(27.61 to<br>70.05)   | 39.49<br>(25.11 to<br>59.32)   | 0.60<br>(0.55 to<br>0.65) | 1.40<br>(0.97 to<br>1.92) | 1.57<br>(1.06 to<br>2.22) | 1.31<br>(0.92 to<br>1.76) |
| Bladder cancer                  | 28.75<br>(25.90 to<br>31.88) | 60.03<br>(38.21 to<br>96.80)   | 56.16<br>(35.17 to<br>91.96)   | 62.43<br>(39.28 to<br>98.19)   | 1.41<br>(1.28 to<br>1.54) | 2.83<br>(1.99 to<br>4.04) | 2.78<br>(1.92 to<br>4.05) | 2.88<br>(1.99 to<br>4.09) |
| Brain and nervous system cancer | 49.93<br>(40.65 to<br>55.44) | 126.26<br>(67.91 to<br>226.17) | 120.29<br>(64.74 to<br>220.73) | 117.54<br>(63.05 to<br>208.43) | 1.18<br>(0.98 to<br>1.32) | 3.10<br>(1.99 to<br>4.89) | 3.12<br>(2.00 to<br>5.10) | 2.77<br>(1.78 to<br>4.29) |
| Thyroid cancer                  | 5.90<br>(5.90 to<br>8.25)    | 16.13<br>(9.18 to<br>28.49)    | 13.91<br>(7.83 to<br>25.57)    | 16.26<br>(9.33 to<br>28.61)    | 0.27<br>(0.23 to<br>0.32) | 0.61<br>(0.38 to<br>0.97) | 0.54<br>(0.34 to<br>0.90) | 0.61<br>(0.38 to<br>0.95) |
| Mesothelioma                    | 8.53<br>(7.72 to<br>9.60)    | 19.02<br>(12.68 to<br>27.32)   | 20.21<br>(13.11 to<br>30.02)   | 16.21<br>(11.31 to<br>22.45)   | 0.34<br>(0.31 to<br>0.38) | 0.80<br>(0.57 to<br>1.05) | 0.87<br>(0.60 to<br>1.20) | 0.67<br>(0.49 to<br>0.85) |
| Hodgkin lymphoma                | 8.86<br>(6.08 to<br>10.46)   | 13.62<br>(6.97 to<br>28.13)    | 10.12<br>(5.15 to<br>21.41)    | 13.22<br>(6.93 to<br>26.72)    | 0.21<br>(0.15 to<br>0.24) | 0.34<br>(0.19 to<br>0.62) | 0.26<br>(0.15 to<br>0.48) | 0.32<br>(0.19 to<br>0.58) |
| Non-Hodgkin lymphoma            | 54.75<br>(37.73 to<br>64.81) | 129.28<br>(66.11 to<br>247.85) | 130.81<br>(63.96 to<br>261.52) | 121.31<br>(60.85 to<br>228.86) | 1.60<br>(1.22 to<br>1.84) | 4.02<br>(2.41 to<br>6.63) | 4.16<br>(2.42 to<br>7.22) | 3.66<br>(2.22 to<br>6.13) |
| Multiple myeloma                | 21.65<br>(17.36 to<br>24.46) | 57.71<br>(33.46 to<br>97.41)   | 60.89<br>(35.25 to<br>107.57)  | 52.27<br>(30.85 to<br>86.22)   | 0.87<br>(0.70 to<br>0.98) | 2.31<br>(1.46 to<br>3.52) | 2.48<br>(1.57 to<br>3.87) | 2.06<br>(1.33 to<br>3.05) |
| Leukemia                        | 88.78<br>(76.00 to<br>97.41) | 173.41<br>(95.28 to<br>301.45) | 155.38<br>(86.23 to<br>275.63) | 174.36<br>(96.55 to<br>298.74) | 2.39<br>(2.06 to<br>2.62) | 5.22<br>(3.48 to<br>7.81) | 4.87<br>(3.22 to<br>7.36) | 5.13<br>(3.46 to<br>7.59) |
| Acute lymphoid leukemia         | 18.34<br>(14.25 to<br>25.61) | 34.14<br>(14.28 to<br>69.14)   | 29.89<br>(12.64 to<br>60.24)   | 34.26<br>(14.38 to<br>68.84)   | 0.32<br>(0.26 to<br>0.43) | 0.64<br>(0.33 to<br>1.16) | 0.58<br>(0.30 to<br>1.05) | 0.64<br>(0.33 to<br>1.14) |
| Chronic lymphoid leukemia       | 1.86<br>(1.36 to<br>2.29)    | 3.74<br>(2.09 to<br>6.27)      | 3.70<br>(2.05 to<br>6.34)      | 3.69<br>(2.07 to<br>6.09)      | 0.09<br>(0.06 to<br>0.11) | 0.18<br>(0.10 to<br>0.28) | 0.18<br>(0.11 to<br>0.29) | 0.17<br>(0.10 to<br>0.26) |
| Acute myeloid leukemia          | 24.79<br>(18.10 to<br>32.95) | 58.29<br>(29.15 to<br>110.61)  | 58.67<br>(29.83 to<br>115.46)  | 57.33<br>(28.79 to<br>105.72)  | 0.62<br>(0.45 to<br>0.80) | 1.58<br>(0.91 to<br>2.67) | 1.66<br>(0.96 to<br>2.78) | 1.53<br>(0.88 to<br>2.53) |
| Chronic myeloid leukemia        | 6.08<br>(4.78 to<br>7.37)    | 8.05<br>(4.46 to<br>15.91)     | 6.78<br>(3.68 to<br>13.88)     | 8.12<br>(4.48 to<br>15.51)     | 0.18<br>(0.14 to<br>0.23) | 0.26<br>(0.16 to<br>0.44) | 0.22<br>(0.13 to<br>0.38) | 0.25<br>(0.16 to<br>0.43) |
| Other leukemia                  | 37.71<br>(27.22 to<br>44.89) | 69.18<br>(35.96 to<br>122.07)  | 56.35<br>(29.26 to<br>98.90)   | 70.96<br>(37.02 to<br>123.70)  | 1.19<br>(0.90 to<br>1.37) | 2.56<br>(1.59 to<br>3.65) | 2.23<br>(1.39 to<br>3.22) | 2.54<br>(1.61 to<br>3.62) |

|                                               |                                                  |                                                  |                                                  |                                                   |                                           |                                            |                                           |                                            |
|-----------------------------------------------|--------------------------------------------------|--------------------------------------------------|--------------------------------------------------|---------------------------------------------------|-------------------------------------------|--------------------------------------------|-------------------------------------------|--------------------------------------------|
| Other neoplasms                               | 167.94<br>(152.72 to 184.83)                     | 330.56<br>(180.79 to 693.16)                     | 324.53<br>(178.85 to 694.89)                     | 301.38<br>(167.35 to 626.24)                      | 4.03<br>(3.69 to 4.38)                    | 8.54<br>(5.57 to 15.71)                    | 8.77<br>(5.62 to 16.36)                   | 7.54<br>(4.98 to 13.38)                    |
| <b>Cardiovascular diseases</b>                | <b>2,223.22</b><br><b>(2,090.51 to 2,351.25)</b> | <b>3,864.37</b><br><b>(1,954.77 to 7,766.64)</b> | <b>2,167.82</b><br><b>(1,144.04 to 4,211.83)</b> | <b>5,068.72</b><br><b>(2,488.70 to 10,040.42)</b> | <b>105.33</b><br><b>(99.92 to 110.83)</b> | <b>192.34</b><br><b>(113.01 to 336.93)</b> | <b>117.91</b><br><b>(72.19 to 212.24)</b> | <b>237.82</b><br><b>(137.25 to 419.86)</b> |
| Rheumatic heart disease                       | 76.86<br>(68.96 to 87.03)                        | 80.33<br>(40.97 to 165.92)                       | 56.74<br>(28.59 to 117.11)                       | 79.79<br>(40.85 to 163.54)                        | 2.12<br>(1.92 to 2.36)                    | 2.42<br>(1.55 to 4.15)                     | 1.83<br>(1.15 to 3.16)                    | 2.31<br>(1.47 to 3.99)                     |
| Ischemic heart disease                        | 858.60<br>(804.43 to 916.40)                     | 1,440.34<br>(593.13 to 3,297.90)                 | 670.44<br>(283.51 to 1,574.75)                   | 2,104.80<br>(856.96 to 4,741.47)                  | 44.85<br>(42.40 to 47.61)                 | 75.96<br>(37.58 to 164.50)                 | 40.00<br>(20.24 to 86.77)                 | 102.07<br>(49.45 to 218.98)                |
| Stroke                                        | 717.17<br>(667.36 to 764.97)                     | 1,103.45<br>(489.72 to 2,478.05)                 | 503.02<br>(230.87 to 1,174.66)                   | 1,545.90<br>(681.62 to 3,237.39)                  | 33.54<br>(31.36 to 35.58)                 | 54.40<br>(28.13 to 122.76)                 | 28.33<br>(15.29 to 66.81)                 | 71.47<br>(36.22 to 148.85)                 |
| Ischemic stroke                               | 210.04<br>(96.44 to 223.94)                      | 306.02<br>(129.57 to 926.62)                     | 170.37<br>(74.82 to 506.50)                      | 384.94<br>(163.64 to 1,121.01)                    | 13.81<br>(12.91 to 14.69)                 | 21.38<br>(10.15 to 68.44)                  | 13.16<br>(6.28 to 39.16)                  | 25.12<br>(11.96 to 80.03)                  |
| Intracerebral hemorrhage                      | 507.13<br>(469.61 to 543.79)                     | 797.43<br>(329.65 to 1,819.30)                   | 332.65<br>(143.38 to 748.82)                     | 1,160.96<br>(477.98 to 2,604.64)                  | 19.73<br>(18.45 to 20.98)                 | 33.02<br>(15.77 to 70.56)                  | 15.17<br>(7.68 to 30.37)                  | 46.35<br>(21.34 to 98.08)                  |
| Hypertensive heart disease                    | 234.00<br>(206.70 to 273.13)                     | 521.87<br>(255.17 to 1,209.30)                   | 358.97<br>(186.37 to 775.24)                     | 630.64<br>(291.21 to 1,509.45)                    | 11.99<br>(10.48 to 14.04)                 | 29.13<br>(17.27 to 59.06)                  | 21.22<br>(13.26 to 37.70)                 | 33.38<br>(18.97 to 68.30)                  |
| Cardiomyopathy and myocarditis                | 129.14<br>(113.96 to 146.60)                     | 250.87<br>(151.24 to 450.07)                     | 207.83<br>(122.08 to 372.64)                     | 235.15<br>(141.28 to 408.79)                      | 4.70<br>(4.21 to 5.39)                    | 10.53<br>(7.18 to 15.88)                   | 9.12<br>(6.03 to 13.90)                   | 9.47<br>(6.45 to 14.20)                    |
| Myocarditis                                   | 17.70<br>(12.77 to 22.63)                        | 27.52<br>(12.29 to 64.39)                        | 24.49<br>(10.71 to 58.53)                        | 26.76<br>(61.74 to 0.45)                          | 0.36<br>(0.27 to 0.45)                    | 0.62<br>(0.34 to 1.27)                     | 0.58<br>(0.31 to 1.22)                    | 0.58<br>(0.31 to 1.18)                     |
| <b>Southern Sub-Saharan Africa</b>            |                                                  |                                                  |                                                  |                                                   |                                           |                                            |                                           |                                            |
| Cause                                         | YLLs (in 1000s)                                  |                                                  |                                                  |                                                   | Deaths (in 1000s)                         |                                            |                                           |                                            |
|                                               | 2016                                             | 2040 Forecast                                    | 2040 Better Scenario                             | 2040 Worse Scenario                               | 2016                                      | 2040 Forecast                              | 2040 Better Scenario                      | 2040 Worse Scenario                        |
| Alcoholic cardiomyopathy                      | 8.87<br>(7.42 to 11.38)                          | 15.88<br>(10.10 to 25.62)                        | 14.43<br>(8.92 to 24.46)                         | 17.39<br>(11.58 to 27.49)                         | 0.42<br>(0.35 to 0.53)                    | 0.79<br>(0.59 to 1.10)                     | 0.75<br>(0.53 to 1.07)                    | 0.84<br>(0.64 to 1.15)                     |
| Other cardiomyopathy                          | 102.56<br>(92.08 to 118.13)                      | 207.48<br>(123.25 to 365.66)                     | 168.91<br>(98.72 to 303.36)                      | 191.01<br>(113.85 to 334.51)                      | 3.92<br>(3.54 to 4.55)                    | 9.12<br>(6.05 to 14.00)                    | 7.80<br>(5.01 to 11.96)                   | 8.05<br>(5.26 to 12.28)                    |
| Atrial fibrillation and flutter               | 12.17<br>(9.69 to 14.86)                         | 27.48<br>(18.42 to 39.56)                        | 26.72<br>(17.74 to 38.09)                        | 26.58<br>(18.15 to 38.02)                         | 1.14<br>(0.89 to 1.41)                    | 2.60<br>(1.89 to 3.48)                     | 2.66<br>(1.90 to 3.56)                    | 2.40<br>(1.72 to 3.25)                     |
| Aortic aneurysm                               | 24.93<br>(23.06 to 26.93)                        | 48.86<br>(29.23 to 84.74)                        | 46.03<br>(27.10 to 80.50)                        | 47.25<br>(27.87 to 82.14)                         | 1.17<br>(1.09 to 1.26)                    | 2.45<br>(1.72 to 3.63)                     | 2.43<br>(1.68 to 3.63)                    | 2.25<br>(1.56 to 3.33)                     |
| Peripheral artery disease                     | 14.52<br>(10.75 to 17.04)                        | 41.18<br>(22.79 to 69.22)                        | 40.13<br>(21.70 to 67.31)                        | 40.44<br>(22.09 to 66.62)                         | 0.77<br>(0.58 to 0.91)                    | 2.43<br>(1.61 to 3.49)                     | 2.52<br>(1.65 to 3.67)                    | 2.26<br>(1.47 to 3.23)                     |
| Endocarditis                                  | 25.96<br>(22.34 to 32.56)                        | 53.32<br>(26.38 to 120.57)                       | 48.03<br>(23.96 to 110.85)                       | 50.97<br>(25.25 to 114.84)                        | 0.66<br>(0.57 to 0.82)                    | 1.47<br>(0.86 to 2.86)                     | 1.39<br>(0.81 to 2.67)                    | 1.36<br>(0.80 to 2.62)                     |
| Other cardiovascular and circulatory diseases | 129.86<br>(103.20 to 160.73)                     | 296.66<br>(158.05 to 587.30)                     | 209.90<br>(112.49 to 413.15)                     | 307.19<br>(167.89 to 592.05)                      | 4.38<br>(3.72 to 5.80)                    | 10.95<br>(7.17 to 18.17)                   | 8.41<br>(5.40 to 13.74)                   | 10.85<br>(6.99 to 17.65)                   |
| <b>Chronic respiratory diseases</b>           | <b>540.67</b><br><b>(499.72 to 585.02)</b>       | <b>708.16</b><br><b>(459.68 to 1,169.90)</b>     | <b>531.15</b><br><b>(344.02 to 865.92)</b>       | <b>975.15</b><br><b>(631.77 to 1,566.16)</b>      | <b>24.68</b><br><b>(23.04 to 26.60)</b>   | <b>33.86</b><br><b>(25.29 to 46.33)</b>    | <b>27.48</b><br><b>(20.58 to 37.56)</b>   | <b>46.01</b><br><b>(33.43 to 63.95)</b>    |
| Chronic obstructive pulmonary disease         | 308.58<br>(287.45 to 335.41)                     | 431.79<br>(278.32 to 663.75)                     | 300.62<br>(191.51 to 452.07)                     | 683.96<br>(433.99 to 1,072.46)                    | 16.69<br>(15.66 to 18.17)                 | 23.30<br>(16.82 to 32.71)                  | 17.86<br>(12.98 to 24.42)                 | 35.33<br>(24.66 to 51.51)                  |
| Pneumoconiosis                                | 5.69<br>(5.24 to 6.41)                           | 9.23<br>(6.56 to 12.74)                          | 9.95<br>(6.77 to 14.15)                          | 8.05<br>(5.94 to 10.83)                           | 0.26<br>(0.24 to 0.29)                    | 0.48<br>(0.38 to 0.58)                     | 0.54<br>(0.41 to 0.69)                    | 0.41<br>(0.34 to 0.49)                     |



|                                                                |                                                      |                                                        |                                                      |                                                        |                                                   |                                                   |                                                   |                                                   |
|----------------------------------------------------------------|------------------------------------------------------|--------------------------------------------------------|------------------------------------------------------|--------------------------------------------------------|---------------------------------------------------|---------------------------------------------------|---------------------------------------------------|---------------------------------------------------|
| Silicosis                                                      | 1.21<br>(0.95 to<br>1.46)                            | 1.13<br>(0.75 to<br>1.68)                              | 0.85<br>(0.54 to<br>1.37)                            | 1.00<br>(0.68 to<br>1.46)                              | 0.05<br>(0.04 to<br>0.06)                         | 0.05<br>(0.04 to<br>0.07)                         | 0.04<br>(0.03 to<br>0.06)                         | 0.05<br>(0.03 to<br>0.06)                         |
| Asbestosis                                                     | 2.74<br>(2.19 to<br>3.23)                            | 5.83<br>(3.90 to<br>7.95)                              | 7.09<br>(4.55 to<br>10.14)                           | 4.85<br>(3.43 to<br>6.34)                              | 0.13<br>(0.11 to<br>0.15)                         | 0.31<br>(0.23 to<br>0.39)                         | 0.39<br>(0.28 to<br>0.51)                         | 0.25<br>(0.20 to<br>0.31)                         |
| Coal workers pneumoconiosis                                    | 0.29<br>(0.20 to<br>0.36)                            | 0.39<br>(0.23 to<br>0.69)                              | 0.30<br>(0.17 to<br>0.59)                            | 0.40<br>(0.24 to<br>0.68)                              | 0.01<br>(0.01 to<br>0.01)                         | 0.02<br>(0.01 to<br>0.03)                         | 0.02<br>(0.01 to<br>0.02)                         | 0.02<br>(0.01 to<br>0.03)                         |
| Other pneumoconiosis                                           | 1.46<br>(1.24 to<br>1.94)                            | 1.88<br>(1.30 to<br>2.85)                              | 1.71<br>(1.12 to<br>2.67)                            | 1.81<br>(1.28 to<br>2.67)                              | 0.06<br>(0.05 to<br>0.09)                         | 0.10<br>(0.07 to<br>0.13)                         | 0.09<br>(0.07 to<br>0.13)                         | 0.09<br>(0.07 to<br>0.12)                         |
| Asthma                                                         | 180.62<br>(157.86 to<br>199.70)                      | 179.23<br>(93.43 to<br>379.84)                         | 116.25<br>(59.77 to<br>246.14)                       | 204.68<br>(106.39 to<br>429.74)                        | 6.18<br>(5.35 to<br>6.81)                         | 6.64<br>(4.02 to<br>11.27)                        | 4.52<br>(2.71 to<br>7.67)                         | 7.37<br>(4.38 to<br>12.78)                        |
| Interstitial lung disease and pulmonary sarcoidosis            | 26.69<br>(22.14 to<br>39.67)                         | 57.62<br>(38.53 to<br>88.79)                           | 77.76<br>(50.47 to<br>122.21)                        | 47.87<br>(33.16 to<br>73.99)                           | 1.21<br>(1.01 to<br>1.79)                         | 2.86<br>(2.12 to<br>4.10)                         | 4.02<br>(2.85 to<br>5.77)                         | 2.33<br>(1.76 to<br>3.34)                         |
| Other chronic respiratory diseases                             | 19.09<br>(13.94 to<br>23.98)                         | 30.28<br>(12.36 to<br>65.32)                           | 26.57<br>(10.83 to<br>58.48)                         | 30.58<br>(12.79 to<br>64.52)                           | 0.34<br>(0.24 to<br>0.43)                         | 0.57<br>(0.29 to<br>1.14)                         | 0.53<br>(0.27 to<br>1.05)                         | 0.57<br>(0.29 to<br>1.10)                         |
| <b>Cirrhosis and other chronic liver diseases</b>              | <b>209.90</b><br><b>(186.92 to</b><br><b>258.02)</b> | <b>465.92</b><br><b>(291.17 to</b><br><b>815.52)</b>   | <b>390.60</b><br><b>(236.79 to</b><br><b>722.93)</b> | <b>461.15</b><br><b>(296.46 to</b><br><b>783.84)</b>   | <b>6.43</b><br><b>(5.77 to</b><br><b>7.93)</b>    | <b>14.75</b><br><b>(10.03 to</b><br><b>23.80)</b> | <b>12.68</b><br><b>(8.36 to</b><br><b>20.62)</b>  | <b>14.40</b><br><b>(10.01 to</b><br><b>22.37)</b> |
| Cirrhosis and other chronic liver diseases due to hepatitis B  | 61.41<br>(52.98 to<br>76.84)                         | 145.68<br>(89.40 to<br>255.31)                         | 131.41<br>(77.89 to<br>243.14)                       | 130.69<br>(82.22 to<br>229.42)                         | 1.95<br>(1.71 to<br>2.46)                         | 4.67<br>(3.10 to<br>7.41)                         | 4.30<br>(2.75 to<br>7.01)                         | 4.14<br>(2.81 to<br>6.35)                         |
| Cirrhosis and other chronic liver diseases due to hepatitis C  | 26.30<br>(22.51 to<br>32.79)                         | 63.50<br>(39.20 to<br>112.07)                          | 56.84<br>(33.85 to<br>103.31)                        | 57.17<br>(35.83 to<br>98.98)                           | 0.82<br>(0.72 to<br>1.03)                         | 2.01<br>(1.33 to<br>3.28)                         | 1.83<br>(1.17 to<br>3.11)                         | 1.79<br>(1.20 to<br>2.85)                         |
| Cirrhosis and other chronic liver diseases due to alcohol use  | 73.42<br>(63.88 to<br>93.21)                         | 164.50<br>(103.64 to<br>278.79)                        | 123.87<br>(76.18 to<br>214.49)                       | 186.56<br>(118.22 to<br>312.05)                        | 2.42<br>(2.14 to<br>3.07)                         | 5.50<br>(3.74 to<br>8.35)                         | 4.27<br>(2.83 to<br>6.85)                         | 6.11<br>(4.21 to<br>9.23)                         |
| Cirrhosis and other chronic liver diseases due to other causes | 48.77<br>(42.65 to<br>57.47)                         | 92.25<br>(53.18 to<br>182.63)                          | 78.49<br>(45.52 to<br>157.99)                        | 86.73<br>(50.90 to<br>169.26)                          | 1.24<br>(1.09 to<br>1.45)                         | 2.57<br>(1.70 to<br>4.39)                         | 2.28<br>(1.48 to<br>3.96)                         | 2.36<br>(1.58 to<br>3.92)                         |
| <b>Digestive diseases</b>                                      | <b>360.66</b><br><b>(322.44 to</b><br><b>404.96)</b> | <b>584.05</b><br><b>(354.00 to</b><br><b>1,039.51)</b> | <b>491.21</b><br><b>(296.98 to</b><br><b>912.19)</b> | <b>569.28</b><br><b>(347.32 to</b><br><b>1,003.92)</b> | <b>11.74</b><br><b>(10.69 to</b><br><b>12.94)</b> | <b>20.53</b><br><b>(14.58 to</b><br><b>30.35)</b> | <b>18.36</b><br><b>(13.01 to</b><br><b>27.92)</b> | <b>19.37</b><br><b>(13.79 to</b><br><b>28.58)</b> |
| Peptic ulcer disease                                           | 44.90<br>(39.75 to<br>49.87)                         | 49.01<br>(31.48 to<br>81.85)                           | 34.34<br>(21.53 to<br>58.44)                         | 49.48<br>(32.03 to<br>82.07)                           | 1.87<br>(1.68 to<br>2.09)                         | 2.24<br>(1.65 to<br>3.07)                         | 1.64<br>(1.19 to<br>2.33)                         | 2.21<br>(1.64 to<br>3.02)                         |

**Southern Sub-Saharan Africa**

| Cause                                      | YLLs (in 1000s)                |                                 |                                 |                                 | Deaths (in 1000s)         |                           |                           |                           |
|--------------------------------------------|--------------------------------|---------------------------------|---------------------------------|---------------------------------|---------------------------|---------------------------|---------------------------|---------------------------|
|                                            | 2016                           | 2040 Forecast                   | 2040 Better Scenario            | 2040 Worse Scenario             | 2016                      | 2040 Forecast             | 2040 Better Scenario      | 2040 Worse Scenario       |
| Gastritis and duodenitis                   | 34.06<br>(29.96 to<br>38.94)   | 61.99<br>(37.26 to<br>119.20)   | 50.51<br>(29.76 to<br>99.54)    | 57.17<br>(35.13 to<br>105.96)   | 0.98<br>(0.87 to<br>1.11) | 2.00<br>(1.40 to<br>3.11) | 1.70<br>(1.18 to<br>3.11) | 1.80<br>(1.28 to<br>2.77) |
| Appendicitis                               | 23.24<br>(19.23 to<br>27.26)   | 29.53<br>(15.30 to<br>57.74)    | 20.96<br>(10.82 to<br>41.67)    | 29.23<br>(15.15 to<br>55.01)    | 0.51<br>(0.43 to<br>0.60) | 0.76<br>(0.48 to<br>1.24) | 0.58<br>(0.37 to<br>0.94) | 0.72<br>(0.45 to<br>1.16) |
| Paralytic ileus and intestinal obstruction | 116.14<br>(95.34 to<br>142.82) | 196.37<br>(115.04 to<br>359.29) | 180.48<br>(104.58 to<br>337.03) | 185.09<br>(109.13 to<br>325.24) | 3.47<br>(2.92 to<br>4.21) | 6.25<br>(4.33 to<br>9.71) | 6.27<br>(4.28 to<br>9.95) | 5.65<br>(3.97 to<br>8.66) |
| Inguinal, femoral, and abdominal hernia    | 9.15<br>(7.08 to<br>12.66)     | 12.32<br>(7.35 to<br>22.26)     | 10.62<br>(6.25 to<br>19.95)     | 11.39<br>(7.00 to<br>19.82)     | 0.35<br>(0.26 to<br>0.47) | 0.47<br>(0.33 to<br>0.72) | 0.44<br>(0.28 to<br>0.68) | 0.42<br>(0.30 to<br>0.64) |
| Inflammatory bowel disease                 | 38.53<br>(29.10 to<br>47.14)   | 58.40<br>(33.55 to<br>103.81)   | 57.04<br>(32.69 to<br>104.60)   | 53.13<br>(30.80 to<br>92.27)    | 1.17<br>(0.89 to<br>1.36) | 2.10<br>(1.39 to<br>3.10) | 2.20<br>(1.44 to<br>3.28) | 1.83<br>(1.24 to<br>2.62) |
| Vascular intestinal disorders              | 9.32<br>(7.55 to<br>10.41)     | 17.01<br>(11.22 to<br>26.48)    | 15.87<br>(10.13 to<br>25.54)    | 15.19<br>(10.23 to<br>22.77)    | 0.40<br>(0.32 to<br>0.45) | 0.80<br>(0.60 to<br>1.06) | 0.79<br>(0.56 to<br>1.06) | 0.70<br>(0.53 to<br>0.90) |

|                                                            |                                                            |                                                            |                                                            |                                                            |                                                   |                                                     |                                                     |                                                     |
|------------------------------------------------------------|------------------------------------------------------------|------------------------------------------------------------|------------------------------------------------------------|------------------------------------------------------------|---------------------------------------------------|-----------------------------------------------------|-----------------------------------------------------|-----------------------------------------------------|
|                                                            | 33.74<br>(27.74 to<br>38.87)                               | 58.93<br>(28.37 to<br>124.50)                              | 40.89<br>(20.07 to<br>85.63)                               | 66.65<br>(31.80 to<br>140.76)                              | 1.27<br>(1.09 to<br>1.46)                         | 2.37<br>(1.29 to<br>4.45)                           | 1.72<br>(0.95 to<br>3.22)                           | 2.40<br>(1.40 to<br>4.99)                           |
| Gallbladder and biliary diseases                           |                                                            |                                                            |                                                            |                                                            |                                                   |                                                     |                                                     |                                                     |
|                                                            | 17.06<br>(13.85 to<br>20.69)                               | 40.67<br>(16.05 to<br>101.76)                              | 28.92<br>(11.80 to<br>72.04)                               | 46.26<br>(17.56 to<br>119.44)                              | 0.51<br>(0.42 to<br>0.61)                         | 1.22<br>(0.57 to<br>2.67)                           | 0.90<br>(0.44 to<br>1.95)                           | 1.35<br>(0.61 to<br>3.06)                           |
| Pancreatitis                                               |                                                            |                                                            |                                                            |                                                            |                                                   |                                                     |                                                     |                                                     |
|                                                            | 34.52<br>(29.95 to<br>39.50)                               | 59.81<br>(36.75 to<br>109.09)                              | 51.58<br>(30.99 to<br>98.10)                               | 55.69<br>(34.74 to<br>99.05)                               | 1.21<br>(1.07 to<br>1.37)                         | 2.30<br>(1.67 to<br>3.43)                           | 2.11<br>(1.52 to<br>3.21)                           | 2.08<br>(1.54 to<br>3.02)                           |
| Other digestive diseases                                   |                                                            |                                                            |                                                            |                                                            |                                                   |                                                     |                                                     |                                                     |
| <b>Neurological disorders</b>                              | <b>410.37</b><br><b>(377.08 to</b><br><b>448.10)</b>       | <b>855.61</b><br><b>(545.58 to</b><br><b>1,512.00)</b>     | <b>763.77</b><br><b>(490.87 to</b><br><b>1,282.69)</b>     | <b>861.72</b><br><b>(546.78 to</b><br><b>1,495.96)</b>     | <b>18.23</b><br><b>(16.23 to</b><br><b>20.66)</b> | <b>42.33</b><br><b>(31.09 to</b><br><b>60.11)</b>   | <b>42.63</b><br><b>(31.72 to</b><br><b>57.36)</b>   | <b>40.11</b><br><b>(29.18 to</b><br><b>57.56)</b>   |
|                                                            | 112.44<br>(93.46 to<br>137.91)                             | 265.29<br>(174.37 to<br>404.93)                            | 273.07<br>(184.15 to<br>401.70)                            | 252.01<br>(160.48 to<br>394.03)                            | 10.89<br>(9.03 to<br>13.27)                       | 26.19<br>(17.72 to<br>39.18)                        | 28.16<br>(19.88 to<br>39.91)                        | 24.10<br>(15.33 to<br>37.29)                        |
| Alzheimer's disease and other dementias                    |                                                            |                                                            |                                                            |                                                            |                                                   |                                                     |                                                     |                                                     |
|                                                            | 9.31<br>(7.10 to<br>11.93)                                 | 23.88<br>(17.28 to<br>31.80)                               | 29.38<br>(20.49 to<br>40.38)                               | 19.51<br>(14.34 to<br>25.61)                               | 0.76<br>(0.58 to<br>0.99)                         | 1.94<br>(1.48 to<br>2.56)                           | 2.46<br>(1.86 to<br>3.26)                           | 1.56<br>(1.17 to<br>2.04)                           |
| Parkinson's disease                                        |                                                            |                                                            |                                                            |                                                            |                                                   |                                                     |                                                     |                                                     |
|                                                            | 255.09<br>(232.76 to<br>281.13)                            | 494.40<br>(249.97 to<br>1,086.28)                          | 384.77<br>(192.66 to<br>854.20)                            | 526.11<br>(259.76 to<br>1,143.40)                          | 5.69<br>(5.22 to<br>6.25)                         | 12.15<br>(7.02 to<br>22.66)                         | 9.74<br>(5.57 to<br>18.56)                          | 12.67<br>(7.17 to<br>24.65)                         |
| Epilepsy                                                   |                                                            |                                                            |                                                            |                                                            |                                                   |                                                     |                                                     |                                                     |
|                                                            | 2.39<br>(2.08 to<br>2.78)                                  | 4.70<br>(2.82 to<br>9.57)                                  | 5.10<br>(2.99 to<br>10.86)                                 | 4.22<br>(2.59 to<br>8.06)                                  | 0.07<br>(0.06 to<br>0.08)                         | 0.14<br>(0.09 to<br>0.26)                           | 0.16<br>(0.10 to<br>0.29)                           | 0.13<br>(0.08 to<br>0.22)                           |
| Multiple sclerosis                                         |                                                            |                                                            |                                                            |                                                            |                                                   |                                                     |                                                     |                                                     |
|                                                            | 2.38<br>(2.18 to<br>2.59)                                  | 6.34<br>(4.16 to<br>10.36)                                 | 6.89<br>(4.39 to<br>11.99)                                 | 5.46<br>(3.66 to<br>8.70)                                  | 0.07<br>(0.07 to<br>0.08)                         | 0.22<br>(0.14 to<br>0.30)                           | 0.22<br>(0.15 to<br>0.35)                           | 0.17<br>(0.12 to<br>0.25)                           |
| Motor neuron disease                                       |                                                            |                                                            |                                                            |                                                            |                                                   |                                                     |                                                     |                                                     |
|                                                            | 28.75<br>(25.72 to<br>31.63)                               | 61.00<br>(36.49 to<br>111.25)                              | 64.56<br>(38.50 to<br>121.21)                              | 54.41<br>(32.83 to<br>97.80)                               | 0.74<br>(0.67 to<br>0.81)                         | 1.71<br>(1.17 to<br>2.73)                           | 1.89<br>(1.26 to<br>3.15)                           | 1.48<br>(1.03 to<br>2.30)                           |
| Other neurological disorders                               |                                                            |                                                            |                                                            |                                                            |                                                   |                                                     |                                                     |                                                     |
| <b>Mental disorders</b>                                    | <b>109.19</b><br><b>(87.55 to</b><br><b>194.06)</b>        | <b>264.94</b><br><b>(143.91 to</b><br><b>581.31)</b>       | <b>282.63</b><br><b>(151.01 to</b><br><b>643.40)</b>       | <b>244.40</b><br><b>(135.89 to</b><br><b>519.69)</b>       | <b>2.59</b><br><b>(2.13 to</b><br><b>4.28)</b>    | <b>6.50</b><br><b>(3.89 to</b><br><b>12.79)</b>     | <b>7.06</b><br><b>(4.18 to</b><br><b>14.27)</b>     | <b>5.95</b><br><b>(3.63 to</b><br><b>11.57)</b>     |
|                                                            | 35.89<br>(30.03 to<br>54.80)                               | 74.12<br>(44.43 to<br>133.13)                              | 74.74<br>(43.12 to<br>142.65)                              | 70.76<br>(42.93 to<br>122.12)                              | 1.06<br>(0.89 to<br>1.59)                         | 2.25<br>(1.38 to<br>3.81)                           | 2.30<br>(1.38 to<br>4.04)                           | 2.13<br>(1.34 to<br>3.53)                           |
| Alcohol use disorders                                      |                                                            |                                                            |                                                            |                                                            |                                                   |                                                     |                                                     |                                                     |
|                                                            | 72.88<br>(55.39 to<br>146.16)                              | 190.04<br>(95.91 to<br>474.05)                             | 207.06<br>(102.94 to<br>541.19)                            | 172.93<br>(87.38 to<br>414.33)                             | 1.52<br>(1.19 to<br>2.88)                         | 4.24<br>(2.33 to<br>9.63)                           | 4.74<br>(2.60 to<br>11.15)                          | 3.80<br>(2.13 to<br>8.38)                           |
| Drug use disorders                                         |                                                            |                                                            |                                                            |                                                            |                                                   |                                                     |                                                     |                                                     |
|                                                            | 56.54<br>(40.16 to<br>126.63)                              | 142.71<br>(66.11 to<br>348.90)                             | 149.03<br>(67.50 to<br>377.44)                             | 130.63<br>(61.53 to<br>318.99)                             | 1.12<br>(0.80 to<br>2.43)                         | 2.97<br>(1.48 to<br>7.01)                           | 3.13<br>(1.53 to<br>7.67)                           | 2.69<br>(1.36 to<br>6.45)                           |
| Opioid use disorders                                       |                                                            |                                                            |                                                            |                                                            |                                                   |                                                     |                                                     |                                                     |
|                                                            | 1.88<br>(0.81 to<br>2.55)                                  | 5.79<br>(1.98 to<br>13.97)                                 | 6.76<br>(2.29 to<br>16.84)                                 | 5.09<br>(1.70 to<br>12.10)                                 | 0.05<br>(0.02 to<br>0.06)                         | 0.16<br>(0.06 to<br>0.33)                           | 0.20<br>(0.07 to<br>0.40)                           | 0.14<br>(0.05 to<br>0.28)                           |
| Cocaine use disorders                                      |                                                            |                                                            |                                                            |                                                            |                                                   |                                                     |                                                     |                                                     |
|                                                            | 0.99<br>(0.46 to<br>1.35)                                  | 4.11<br>(1.40 to<br>10.85)                                 | 5.36<br>(1.79 to<br>14.69)                                 | 3.63<br>(1.26 to<br>9.31)                                  | 0.02<br>(0.01 to<br>0.03)                         | 0.10<br>(0.04 to<br>0.25)                           | 0.13<br>(0.05 to<br>0.32)                           | 0.09<br>(0.04 to<br>0.20)                           |
| Amphetamine use disorders                                  |                                                            |                                                            |                                                            |                                                            |                                                   |                                                     |                                                     |                                                     |
|                                                            | 13.46<br>(8.53 to<br>17.07)                                | 37.43<br>(18.27 to<br>93.17)                               | 45.90<br>(22.41 to<br>113.69)                              | 33.58<br>(16.25 to<br>83.12)                               | 0.33<br>(0.22 to<br>0.41)                         | 1.01<br>(0.58 to<br>2.08)                           | 1.28<br>(0.74 to<br>2.58)                           | 0.88<br>(0.50 to<br>1.80)                           |
| Other drug use disorders                                   |                                                            |                                                            |                                                            |                                                            |                                                   |                                                     |                                                     |                                                     |
|                                                            | 0.42<br>(0.18 to<br>0.64)                                  | 0.78<br>(0.21 to<br>2.30)                                  | 0.83<br>(0.22 to<br>2.57)                                  | 0.71<br>(0.19 to<br>2.03)                                  | 0.01<br>(0.00 to<br>0.01)                         | 0.01<br>(0.00 to<br>0.04)                           | 0.02<br>(0.00 to<br>0.05)                           | 0.01<br>(0.00 to<br>0.04)                           |
| Eating disorders                                           |                                                            |                                                            |                                                            |                                                            |                                                   |                                                     |                                                     |                                                     |
| <b>Southern Sub-Saharan Africa</b>                         |                                                            |                                                            |                                                            |                                                            |                                                   |                                                     |                                                     |                                                     |
| Cause                                                      | YLLs (in 1000s)                                            |                                                            |                                                            |                                                            | Deaths (in 1000s)                                 |                                                     |                                                     |                                                     |
|                                                            | 2016                                                       | 2040 Forecast                                              | 2040 Better Scenario                                       | 2040 Worse Scenario                                        | 2016                                              | 2040 Forecast                                       | 2040 Better Scenario                                | 2040 Worse Scenario                                 |
| <b>Diabetes, urogenital, blood, and endocrine diseases</b> | <b>1,617.38</b><br><b>(1,499.87 to</b><br><b>1,724.15)</b> | <b>3,329.50</b><br><b>(1,837.52 to</b><br><b>6,664.49)</b> | <b>2,451.59</b><br><b>(1,310.57 to</b><br><b>5,114.81)</b> | <b>3,421.48</b><br><b>(1,896.61 to</b><br><b>6,588.36)</b> | <b>59.44</b><br><b>(55.92 to</b><br><b>62.83)</b> | <b>136.83</b><br><b>(80.63 to</b><br><b>240.49)</b> | <b>102.10</b><br><b>(58.97 to</b><br><b>189.89)</b> | <b>138.52</b><br><b>(82.49 to</b><br><b>233.39)</b> |
| Diabetes mellitus                                          | 872.02<br>(814.09 to<br>927.23)                            | 1,633.06<br>(869.10 to<br>3,266.17)                        | 1,148.90<br>(614.45 to<br>2,241.50)                        | 1,748.75<br>(916.12 to<br>3,586.85)                        | 36.79<br>(34.61 to<br>38.87)                      | 72.44<br>(45.22 to<br>119.30)                       | 53.22<br>(32.84 to<br>87.41)                        | 75.37<br>(47.20 to<br>123.68)                       |



| Southern Sub-Saharan Africa                   |                                     |                                       |                                     |                                       |                               |                                 |                                 |                                 |
|-----------------------------------------------|-------------------------------------|---------------------------------------|-------------------------------------|---------------------------------------|-------------------------------|---------------------------------|---------------------------------|---------------------------------|
| Cause                                         | YLLs (in 1000s)                     |                                       |                                     |                                       | Deaths (in 1000s)             |                                 |                                 |                                 |
|                                               | 2016                                | 2040 Forecast                         | 2040 Better Scenario                | 2040 Worse Scenario                   | 2016                          | 2040 Forecast                   | 2040 Better Scenario            | 2040 Worse Scenario             |
| <b>Musculoskeletal disorders</b>              | <b>36.05</b><br>(31.18 to 44.52)    | <b>82.92</b><br>(48.49 to 181.48)     | <b>75.97</b><br>(43.51 to 170.85)   | <b>74.22</b><br>(44.34 to 158.87)     | <b>1.07</b><br>(0.93 to 1.33) | <b>2.82</b><br>(1.97 to 4.87)   | <b>2.61</b><br>(1.76 to 4.61)   | <b>2.48</b><br>(1.76 to 4.17)   |
| Rheumatoid arthritis                          | 8.63<br>(6.96 to 11.06)             | 23.77<br>(15.44 to 38.04)             | 17.51<br>(11.05 to 28.64)           | 22.46<br>(14.85 to 35.11)             | 0.35<br>(0.28 to 0.45)        | 1.07<br>(0.76 to 1.49)          | 0.81<br>(0.56 to 1.17)          | 0.99<br>(0.72 to 1.36)          |
| Other musculoskeletal disorders               | 27.42<br>(23.31 to 34.91)           | 59.15<br>(31.03 to 144.23)            | 58.46<br>(30.70 to 143.49)          | 51.75<br>(27.53 to 122.06)            | 0.72<br>(0.61 to 0.92)        | 1.75<br>(1.14 to 3.47)          | 1.79<br>(1.15 to 3.57)          | 1.49<br>(0.99 to 2.90)          |
| <b>Other non-communicable diseases</b>        | <b>471.58</b><br>(398.88 to 555.43) | <b>717.63</b><br>(432.94 to 1,203.35) | <b>509.08</b><br>(308.74 to 862.41) | <b>728.31</b><br>(440.90 to 1,215.70) | <b>7.13</b><br>(6.15 to 8.57) | <b>14.17</b><br>(9.51 to 21.25) | <b>11.74</b><br>(8.10 to 17.84) | <b>13.51</b><br>(9.04 to 20.21) |
| Congenital birth defects                      | 408.66<br>(339.39 to 492.22)        | 542.10<br>(299.16 to 934.89)          | 348.72<br>(192.72 to 626.50)        | 566.48<br>(319.99 to 978.49)          | 5.08<br>(4.24 to 6.10)        | 7.23<br>(4.02 to 12.59)         | 4.79<br>(2.66 to 8.39)          | 7.46<br>(4.25 to 12.46)         |
| Neural tube defects                           | 21.47<br>(16.42 to 28.76)           | 10.43<br>(5.98 to 17.85)              | 5.50<br>(3.18 to 9.57)              | 11.28<br>(6.54 to 18.71)              | 0.26<br>(0.20 to 0.35)        | 0.14<br>(0.09 to 0.25)          | 0.08<br>(0.05 to 0.15)          | 0.15<br>(0.09 to 0.25)          |
| Congenital heart anomalies                    | 127.28<br>(107.09 to 154.13)        | 182.23<br>(91.33 to 330.99)           | 114.27<br>(57.37 to 215.00)         | 188.60<br>(96.94 to 336.08)           | 1.63<br>(1.38 to 1.97)        | 2.50<br>(1.27 to 4.68)          | 1.60<br>(0.81 to 3.07)          | 2.56<br>(1.32 to 4.57)          |
| Orofacial clefts                              | 3.26<br>(1.88 to 5.77)              | 3.54<br>(1.40 to 10.45)               | 1.71<br>(0.67 to 5.10)              | 3.86<br>(1.56 to 11.43)               | 0.04<br>(0.02 to 0.07)        | 0.04<br>(0.02 to 0.12)          | 0.02<br>(0.01 to 0.06)          | 0.04<br>(0.02 to 0.13)          |
| Down syndrome                                 | 19.95<br>(13.59 to 25.80)           | 31.31<br>(15.14 to 57.17)             | 23.12<br>(11.15 to 42.31)           | 32.73<br>(15.67 to 58.71)             | 0.26<br>(0.18 to 0.33)        | 0.44<br>(0.23 to 0.79)          | 0.34<br>(0.18 to 0.63)          | 0.46<br>(0.23 to 0.79)          |
| Other chromosomal abnormalities               | 28.50<br>(18.48 to 39.23)           | 63.81<br>(27.06 to 132.66)            | 42.26<br>(17.80 to 85.96)           | 67.13<br>(29.31 to 138.36)            | 0.35<br>(0.23 to 0.47)        | 0.83<br>(0.35 to 1.64)          | 0.57<br>(0.23 to 1.11)          | 0.87<br>(0.37 to 1.73)          |
| Congenital musculoskeletal and limb anomalies | 13.05<br>(7.12 to 17.06)            | 12.70<br>(6.02 to 19.63)              | 8.43<br>(3.97 to 13.10)             | 13.35<br>(6.30 to 20.41)              | 0.16<br>(0.09 to 0.20)        | 0.16<br>(0.08 to 0.24)          | 0.11<br>(0.05 to 0.16)          | 0.17<br>(0.08 to 0.25)          |
| Urogenital congenital anomalies               | 13.97<br>(9.51 to 17.89)            | 23.43<br>(11.54 to 41.04)             | 17.17<br>(8.57 to 31.68)            | 23.71<br>(11.71 to 40.91)             | 0.20<br>(0.14 to 0.25)        | 0.39<br>(0.21 to 0.66)          | 0.31<br>(0.16 to 0.55)          | 0.38<br>(0.21 to 0.64)          |
| Digestive congenital anomalies                | 56.16<br>(42.22 to 74.33)           | 77.51<br>(37.05 to 144.39)            | 46.90<br>(22.22 to 89.38)           | 81.69<br>(40.08 to 152.19)            | 0.67<br>(0.51 to 0.89)        | 0.97<br>(0.47 to 1.79)          | 0.60<br>(0.29 to 1.15)          | 1.02<br>(0.50 to 1.86)          |
| Other congenital birth defects                | 125.02<br>(97.65 to 160.75)         | 137.14<br>(80.24 to 227.50)           | 89.36<br>(51.69 to 148.15)          | 144.11<br>(84.85 to 235.26)           | 1.50<br>(1.18 to 1.92)        | 1.74<br>(1.02 to 2.86)          | 1.16<br>(0.69 to 1.91)          | 1.81<br>(1.08 to 2.95)          |
| Skin and subcutaneous diseases                | 46.26<br>(31.89 to 78.19)           | 157.36<br>(95.05 to 275.42)           | 148.33<br>(87.75 to 259.19)         | 142.51<br>(86.13 to 249.04)           | 1.86<br>(1.28 to 3.19)        | 6.73<br>(4.46 to 11.36)         | 6.81<br>(4.52 to 11.24)         | 5.83<br>(3.89 to 9.92)          |
| Cellulitis                                    | 13.13<br>(8.80 to 25.40)            | 50.88<br>(29.27 to 100.25)            | 53.28<br>(31.05 to 104.00)          | 44.16<br>(25.27 to 86.83)             | 0.56<br>(0.37 to 1.09)        | 2.32<br>(1.51 to 4.62)          | 2.55<br>(1.65 to 4.77)          | 1.95<br>(1.26 to 3.69)          |
| Pyoderma                                      | 20.06<br>(12.52 to 33.63)           | 72.12<br>(38.67 to 127.37)            | 63.89<br>(33.89 to 114.78)          | 67.81<br>(37.04 to 118.99)            | 0.69<br>(0.44 to 1.18)        | 2.66<br>(1.58 to 4.37)          | 2.58<br>(1.51 to 4.25)          | 2.38<br>(1.42 to 3.91)          |
| Decubitus ulcer                               | 10.53<br>(6.64 to 19.82)            | 27.68<br>(15.64 to 55.47)             | 24.99<br>(13.81 to 50.88)           | 24.39<br>(13.95 to 48.13)             | 0.52<br>(0.32 to 0.99)        | 1.54<br>(0.91 to 2.85)          | 1.46<br>(0.87 to 2.74)          | 1.31<br>(0.79 to 2.49)          |
| Other skin and subcutaneous diseases          | 2.55<br>(1.48 to 4.31)              | 6.69<br>(3.16 to 14.13)               | 6.17<br>(2.93 to 13.12)             | 6.15<br>(2.84 to 12.62)               | 0.09<br>(0.05 to 0.15)        | 0.22<br>(0.12 to 0.39)          | 0.22<br>(0.12 to 0.39)          | 0.19<br>(0.10 to 0.35)          |
| Sudden infant death syndrome                  | 16.66<br>(11.93 to 21.80)           | 18.17<br>(6.79 to 40.44)              | 12.03<br>(4.54 to 26.60)            | 19.33<br>(7.53 to 42.53)              | 0.19<br>(0.14 to 0.25)        | 0.21<br>(0.08 to 0.47)          | 0.14<br>(0.05 to 0.31)          | 0.22<br>(0.09 to 0.49)          |

|                                      |                                       |                                        |                                       |                                        |                              |                                |                               |                                |
|--------------------------------------|---------------------------------------|----------------------------------------|---------------------------------------|----------------------------------------|------------------------------|--------------------------------|-------------------------------|--------------------------------|
| Injuries                             | 3 972.10<br>(3,636.88 to<br>4,311.52) | 5 357.67<br>(2,834.17 to<br>11,051.16) | 3 411.79<br>(1,830.87 to<br>7,087.38) | 5 654.22<br>(2,992.97 to<br>11,644.06) | 76.95<br>(70.58 to<br>83.62) | 114.21<br>(66.17 to<br>220.82) | 76.00<br>(46.02 to<br>143.57) | 117.52<br>(68.12 to<br>229.08) |
| Transport injuries                   | 1 428.12<br>(1,304.24 to<br>1,557.03) | 2 105.21<br>(1,022.20 to<br>4 918.20)  | 739.96<br>(359.14 to<br>1 798.15)     | 2 435.45<br>(1,175.58 to<br>5,693.20)  | 27.46<br>(25.13 to<br>29.83) | 43.83<br>(23.16 to<br>98.29)   | 16.62<br>(8.92 to<br>36.09)   | 49.42<br>(25.58 to<br>109.94)  |
| Road injuries                        | 1 366.49<br>(1,247.95 to<br>1,491.58) | 1 966.88<br>(952.14 to<br>4 582.25)    | 636.14<br>(314.86 to<br>1 522.50)     | 2 292.31<br>(1,105.65 to<br>5 416.15)  | 26.19<br>(23.94 to<br>28.51) | 40.81<br>(21.50 to<br>90.04)   | 14.29<br>(7.68 to<br>31.15)   | 46.35<br>(23.94 to<br>103.67)  |
| Pedestrian road injuries             | 422.28<br>(370.68 to<br>471.42)       | 467.70<br>(241.16 to<br>905.97)        | 159.36<br>(82.76 to<br>328.30)        | 516.48<br>(266.05 to<br>988.93)        | 8.27<br>(7.33 to<br>9.22)    | 11.06<br>(6.48 to<br>19.72)    | 4.08<br>(2.38 to<br>7.48)     | 11.87<br>(6.81 to<br>21.16)    |
| <b>Southern Sub-Saharan Africa</b>   |                                       |                                        |                                       |                                        |                              |                                |                               |                                |
| Cause                                | YLLs (in 1000s)                       |                                        |                                       |                                        | Deaths (in 1000s)            |                                |                               |                                |
|                                      | 2016                                  | 2040 Forecast                          | 2040 Better Scenario                  | 2040 Worse Scenario                    | 2016                         | 2040 Forecast                  | 2040 Better Scenario          | 2040 Worse Scenario            |
| Cyclist road injuries                | 17.13<br>(13.88 to<br>20.36)          | 35.12<br>(16.12 to<br>75.65)           | 16.44<br>(7.08 to<br>39.65)           | 40.73<br>(18.43 to<br>88.96)           | 0.35<br>(0.29 to<br>0.42)    | 0.76<br>(0.37 to<br>1.62)      | 0.40<br>(0.18 to<br>0.92)     | 0.85<br>(0.40 to<br>1.83)      |
| Motorcyclist road injuries           | 52.69<br>(40.12 to<br>69.12)          | 96.10<br>(39.81 to<br>246.87)          | 56.54<br>(21.92 to<br>159.83)         | 109.44<br>(44.25 to<br>283.18)         | 0.92<br>(0.70 to<br>1.19)    | 1.73<br>(0.73 to<br>4.27)      | 1.05<br>(0.42 to<br>2.88)     | 1.94<br>(0.80 to<br>4.90)      |
| Motor vehicle road injuries          | 860.66<br>(768.07 to<br>973.55)       | 1 339.65<br>(608.67 to<br>3 357.99)    | 391.03<br>(185.59 to<br>967.54)       | 1 592.10<br>(720.72 to<br>4 063.92)    | 16.37<br>(14.69 to<br>18.26) | 26.67<br>(12.96 to<br>63.68)   | 8.46<br>(4.34 to<br>19.40)    | 31.00<br>(14.71 to<br>73.96)   |
| Other road injuries                  | 13.72<br>(10.38 to<br>17.19)          | 28.30<br>(11.90 to<br>69.97)           | 12.78<br>(5.12 to<br>33.82)           | 33.56<br>(14.04 to<br>83.58)           | 0.28<br>(0.22 to<br>0.35)    | 0.59<br>(0.28 to<br>1.43)      | 0.29<br>(0.13 to<br>0.72)     | 0.69<br>(0.32 to<br>1.72)      |
| Other transport injuries             | 61.63<br>(47.08 to<br>73.15)          | 138.33<br>(61.29 to<br>333.15)         | 103.81<br>(44.11 to<br>252.14)        | 143.14<br>(63.39 to<br>343.32)         | 1.27<br>(0.98 to<br>1.49)    | 3.02<br>(1.50 to<br>6.79)      | 2.33<br>(1.13 to<br>5.35)     | 3.07<br>(1.51 to<br>6.98)      |
| Unintentional injuries               | 801.87<br>(739.53 to<br>899.26)       | 969.45<br>(558.80 to<br>1 800.76)      | 754.12<br>(429.72 to<br>1 436.27)     | 959.82<br>(554.39 to<br>1 762.23)      | 15.94<br>(14.73 to<br>17.72) | 22.52<br>(15.11 to<br>37.58)   | 18.59<br>(12.37 to<br>31.69)  | 21.46<br>(14.44 to<br>35.61)   |
| Falls                                | 44.86<br>(39.41 to<br>50.96)          | 80.84<br>(56.29 to<br>121.89)          | 74.96<br>(50.50 to<br>118.57)         | 73.41<br>(51.52 to<br>108.28)          | 1.71<br>(1.52 to<br>1.99)    | 3.53<br>(2.87 to<br>4.50)      | 3.47<br>(2.75 to<br>4.55)     | 3.07<br>(2.51 to<br>3.90)      |
| Drowning                             | 165.41<br>(149.66 to<br>206.28)       | 174.21<br>(88.06 to<br>337.83)         | 135.66<br>(69.27 to<br>268.21)        | 175.55<br>(88.54 to<br>343.20)         | 2.89<br>(2.62 to<br>3.54)    | 3.49<br>(2.01 to<br>6.34)      | 2.81<br>(1.64 to<br>5.24)     | 3.44<br>(1.94 to<br>6.24)      |
| Fire, heat, and hot substances       | 147.33<br>(128.15 to<br>173.78)       | 163.06<br>(89.89 to<br>337.89)         | 118.87<br>(64.30 to<br>254.80)        | 163.41<br>(89.34 to<br>334.45)         | 3.19<br>(2.75 to<br>3.67)    | 4.09<br>(2.60 to<br>7.40)      | 3.14<br>(2.02 to<br>5.80)     | 3.97<br>(2.52 to<br>7.19)      |
| Poisonings                           | 54.22<br>(43.44 to<br>82.44)          | 50.66<br>(22.30 to<br>127.50)          | 32.64<br>(14.40 to<br>83.29)          | 53.20<br>(23.46 to<br>135.37)          | 0.93<br>(0.77 to<br>1.41)    | 0.96<br>(0.47 to<br>2.26)      | 0.64<br>(0.32 to<br>1.49)     | 0.99<br>(0.48 to<br>2.31)      |
| Exposure to mechanical forces        | 149.51<br>(131.46 to<br>164.15)       | 176.67<br>(94.58 to<br>326.99)         | 133.50<br>(70.08 to<br>257.86)        | 175.92<br>(94.62 to<br>318.38)         | 2.64<br>(2.31 to<br>2.89)    | 3.43<br>(2.08 to<br>6.05)      | 2.68<br>(1.60 to<br>4.91)     | 3.32<br>(2.03 to<br>5.74)      |
| Unintentional firearm injuries       | 18.53<br>(14.59 to<br>21.76)          | 18.88<br>(10.65 to<br>37.80)           | 14.61<br>(8.00 to<br>30.23)           | 18.48<br>(10.67 to<br>36.35)           | 0.39<br>(0.31 to<br>0.46)    | 0.44<br>(0.27 to<br>0.79)      | 0.35<br>(0.21 to<br>0.65)     | 0.42<br>(0.26 to<br>0.76)      |
| Unintentional suffocation            | 55.11<br>(44.34 to<br>65.00)          | 66.08<br>(32.55 to<br>118.69)          | 49.39<br>(24.25 to<br>90.30)          | 67.35<br>(33.14 to<br>120.48)          | 0.84<br>(0.68 to<br>0.98)    | 1.05<br>(0.56 to<br>1.89)      | 0.80<br>(0.43 to<br>1.48)     | 1.05<br>(0.56 to<br>1.86)      |
| Other exposure to mechanical forces  | 75.86<br>(63.04 to<br>83.85)          | 91.71<br>(47.94 to<br>176.27)          | 69.50<br>(35.97 to<br>140.42)         | 90.09<br>(48.02 to<br>167.07)          | 1.41<br>(1.18 to<br>1.56)    | 1.94<br>(1.16 to<br>3.54)      | 1.53<br>(0.90 to<br>2.86)     | 1.85<br>(1.11 to<br>3.27)      |
| Adverse effects of medical treatment | 47.62<br>(40.77 to<br>63.43)          | 70.08<br>(40.46 to<br>133.73)          | 58.22<br>(33.23 to<br>119.76)         | 67.78<br>(39.70 to<br>131.15)          | 1.12<br>(0.98 to<br>1.44)    | 1.86<br>(1.25 to<br>3.20)      | 1.65<br>(1.10 to<br>2.87)     | 1.73<br>(1.18 to<br>2.90)      |
| Animal contact                       | 46.42<br>(40.10 to<br>59.94)          | 76.77<br>(43.74 to<br>147.80)          | 56.92<br>(31.71 to<br>113.11)         | 77.47<br>(44.34 to<br>143.16)          | 0.87<br>(0.76 to<br>1.07)    | 1.59<br>(1.01 to<br>2.87)      | 1.23<br>(0.76 to<br>2.31)     | 1.56<br>(0.99 to<br>2.71)      |

|                                                                              |                                       |                                       |                                     |                                       |                              |                              |                              |                              |
|------------------------------------------------------------------------------|---------------------------------------|---------------------------------------|-------------------------------------|---------------------------------------|------------------------------|------------------------------|------------------------------|------------------------------|
| Venomous animal contact                                                      | 15.56<br>(12.67 to<br>21.92)          | 25.84<br>(13.68 to<br>51.47)          | 19.14<br>(10.15 to<br>38.70)        | 26.16<br>(13.92 to<br>51.53)          | 0.30<br>(0.25 to<br>0.42)    | 0.55<br>(0.34 to<br>1.01)    | 0.44<br>(0.27 to<br>0.79)    | 0.54<br>(0.33 to<br>0.98)    |
| Non-venomous animal contact                                                  | 30.86<br>(26.17 to<br>37.67)          | 50.93<br>(28.99 to<br>98.06)          | 37.78<br>(20.80 to<br>76.80)        | 51.30<br>(29.16 to<br>96.31)          | 0.57<br>(0.48 to<br>0.68)    | 1.03<br>(0.64 to<br>1.89)    | 0.79<br>(0.47 to<br>1.51)    | 1.01<br>(0.63 to<br>1.80)    |
| Foreign body                                                                 | 89.50<br>(74.76 to<br>106.84)         | 105.03<br>(55.41 to<br>180.48)        | 92.78<br>(49.09 to<br>159.78)       | 102.63<br>(54.89 to<br>172.08)        | 1.40<br>(1.20 to<br>1.66)    | 1.86<br>(1.13 to<br>2.98)    | 1.73<br>(1.06 to<br>2.80)    | 1.75<br>(1.06 to<br>2.80)    |
| Pulmonary aspiration and foreign body in airway                              | 75.30<br>(61.53 to<br>94.49)          | 89.47<br>(48.14 to<br>153.91)         | 78.82<br>(42.28 to<br>135.03)       | 86.87<br>(47.02 to<br>146.51)         | 1.18<br>(1.00 to<br>1.48)    | 1.62<br>(1.00 to<br>2.59)    | 1.50<br>(0.94 to<br>2.39)    | 1.51<br>(0.93 to<br>2.39)    |
| Foreign body in other body part                                              | 14.19<br>(9.04 to<br>17.32)           | 15.56<br>(6.20 to<br>30.94)           | 13.95<br>(5.71 to<br>28.05)         | 15.75<br>(6.38 to<br>30.68)           | 0.21<br>(0.14 to<br>0.26)    | 0.24<br>(0.11 to<br>0.48)    | 0.22<br>(0.10 to<br>0.43)    | 0.24<br>(0.11 to<br>0.47)    |
| Environmental heat and cold exposure                                         | 29.80<br>(21.47 to<br>37.14)          | 41.09<br>(23.80 to<br>76.11)          | 28.79<br>(16.45 to<br>54.84)        | 40.06<br>(23.52 to<br>71.39)          | 0.67<br>(0.48 to<br>0.83)    | 1.01<br>(0.63 to<br>1.73)    | 0.73<br>(0.44 to<br>1.27)    | 0.97<br>(0.60 to<br>1.60)    |
| Other unintentional injuries                                                 | 27.20<br>(24.24 to<br>33.09)          | 31.03<br>(17.64 to<br>57.91)          | 21.78<br>(12.02 to<br>44.61)        | 30.39<br>(17.55 to<br>56.31)          | 0.53<br>(0.48 to<br>0.62)    | 0.69<br>(0.44 to<br>1.19)    | 0.51<br>(0.32 to<br>0.98)    | 0.66<br>(0.43 to<br>1.12)    |
| Self-harm and interpersonal violence                                         | 1,738.34<br>(1,493.98 to<br>1,942.09) | 2,252.45<br>(1,195.97 to<br>4,780.85) | 1,888.17<br>(997.94 to<br>4,044.50) | 2,229.32<br>(1,165.52 to<br>4,736.17) | 33.49<br>(28.95 to<br>37.42) | 47.30<br>(26.54 to<br>91.90) | 40.23<br>(22.72 to<br>80.58) | 46.11<br>(25.65 to<br>90.76) |
| <b>Southern Sub-Saharan Africa</b>                                           |                                       |                                       |                                     |                                       |                              |                              |                              |                              |
| Cause                                                                        | YLLs (in 1000s)                       |                                       |                                     |                                       | Deaths (in 1000s)            |                              |                              |                              |
|                                                                              | 2016                                  | 2040 Forecast                         | 2040 Better Scenario                | 2040 Worse Scenario                   | 2016                         | 2040 Forecast                | 2040 Better Scenario         | 2040 Worse Scenario          |
| Self-harm                                                                    | 510.11<br>(442.05 to<br>627.60)       | 910.33<br>(441.73 to<br>2,085.90)     | 756.67<br>(370.10 to<br>1,700.61)   | 953.61<br>(445.36 to<br>2,185.41)     | 10.92<br>(9.57 to<br>13.18)  | 20.81<br>(10.86 to<br>43.76) | 17.71<br>(9.37 to<br>36.15)  | 21.36<br>(10.72 to<br>46.05) |
| Self-harm by firearm                                                         | 38.98<br>(24.84 to<br>77.09)          | 62.00<br>(23.84 to<br>172.12)         | 49.26<br>(19.37 to<br>135.52)       | 65.52<br>(24.23 to<br>184.94)         | 0.83<br>(0.55 to<br>1.53)    | 1.45<br>(0.61 to<br>3.56)    | 1.18<br>(0.51 to<br>2.81)    | 1.50<br>(0.63 to<br>3.72)    |
| Self-harm by other specified means                                           | 471.13<br>(401.27 to<br>559.26)       | 848.34<br>(408.79 to<br>1,965.81)     | 707.41<br>(348.74 to<br>1,587.12)   | 888.10<br>(413.80 to<br>2,013.41)     | 10.08<br>(8.65 to<br>11.92)  | 19.37<br>(10.09 to<br>40.75) | 16.53<br>(8.82 to<br>33.90)  | 19.87<br>(9.93 to<br>42.38)  |
| Interpersonal violence                                                       | 1,228.23<br>(957.84 to<br>1,395.29)   | 1,342.11<br>(703.70 to<br>2,760.01)   | 1,131.50<br>(571.77 to<br>2,398.73) | 1,275.71<br>(651.11 to<br>2,643.46)   | 22.57<br>(17.60 to<br>25.65) | 26.48<br>(14.60 to<br>52.88) | 22.52<br>(12.27 to<br>46.24) | 24.75<br>(13.73 to<br>49.46) |
| Physical violence by firearm                                                 | 190.54<br>(107.45 to<br>258.48)       | 195.66<br>(93.59 to<br>414.56)        | 159.58<br>(75.68 to<br>357.44)      | 182.80<br>(88.39 to<br>384.24)        | 3.54<br>(2.07 to<br>4.93)    | 3.95<br>(2.01 to<br>7.98)    | 3.26<br>(1.64 to<br>6.94)    | 3.63<br>(1.81 to<br>7.30)    |
| Physical violence by sharp object                                            | 588.03<br>(437.96 to<br>694.93)       | 641.08<br>(334.94 to<br>1,405.64)     | 550.38<br>(278.11 to<br>1,222.78)   | 588.74<br>(303.84 to<br>1,268.44)     | 10.85<br>(8.10 to<br>12.84)  | 12.66<br>(6.84 to<br>25.49)  | 10.91<br>(5.75 to<br>22.75)  | 11.44<br>(6.16 to<br>23.92)  |
| Physical violence by other means                                             | 449.66<br>(323.94 to<br>527.78)       | 505.38<br>(228.89 to<br>1,060.69)     | 421.54<br>(195.10 to<br>909.62)     | 504.17<br>(227.69 to<br>1,055.87)     | 8.18<br>(5.76 to<br>9.59)    | 9.87<br>(4.74 to<br>19.98)   | 8.35<br>(4.10 to<br>16.91)   | 9.68<br>(4.63 to<br>19.68)   |
| Forces of nature, conflict and terrorism, and executions and police conflict | 3.77<br>(2.00 to<br>5.58)             | 30.56<br>(0.00 to<br>314.33)          | 29.54<br>(0.00 to<br>304.88)        | 29.62<br>(0.00 to<br>302.91)          | 0.07<br>(0.03 to<br>0.10)    | 0.56<br>(0.00 to<br>5.48)    | 0.55<br>(0.00 to<br>5.27)    | 0.53<br>(0.00 to<br>5.44)    |
| Exposure to forces of nature                                                 | 0.00<br>(0.00 to<br>0.00)             | 1.04<br>(0.00 to<br>6.68)             | 1.01<br>(0.00 to<br>6.29)           | 0.99<br>(0.00 to<br>6.66)             | 0.00<br>(0.00 to<br>0.00)    | 0.02<br>(0.00 to<br>0.13)    | 0.02<br>(0.00 to<br>0.12)    | 0.02<br>(0.00 to<br>0.12)    |
| Conflict and terrorism                                                       | 3.25<br>(1.48 to<br>5.06)             | 19.00<br>(0.00 to<br>154.52)          | 17.99<br>(0.00 to<br>145.19)        | 18.81<br>(0.00 to<br>152.44)          | 0.06<br>(0.03 to<br>0.09)    | 0.33<br>(0.00 to<br>2.61)    | 0.32<br>(0.00 to<br>2.52)    | 0.32<br>(0.00 to<br>2.58)    |
| Executions and police conflict                                               | 0.53<br>(0.46 to<br>0.78)             | 10.52<br>(0.00 to<br>93.66)           | 10.54<br>(0.00 to<br>93.77)         | 9.82<br>(0.00 to<br>87.80)            | 0.01<br>(0.01 to<br>0.01)    | 0.21<br>(0.00 to<br>1.88)    | 0.21<br>(0.00 to<br>1.90)    | 0.19<br>(0.00 to<br>1.74)    |
| <b>Botswana</b>                                                              |                                       |                                       |                                     |                                       |                              |                              |                              |                              |
|                                                                              | YLLs (actual counts)                  |                                       |                                     |                                       | Deaths (actual counts)       |                              |                              |                              |

| Cause                                                             | 2016                                        | 2040 Forecast                                 | 2040 Better Scenario                          | 2040 Worse Scenario                             | 2016                                     | 2040 Forecast                            | 2040 Better Scenario                     | 2040 Worse Scenario                      |
|-------------------------------------------------------------------|---------------------------------------------|-----------------------------------------------|-----------------------------------------------|-------------------------------------------------|------------------------------------------|------------------------------------------|------------------------------------------|------------------------------------------|
| All causes                                                        | 642,782.05<br>(461,575.67 to<br>787,360.78) | 742,185.32<br>(400,127.54 to<br>1,364,767.35) | 581,826.64<br>(320,441.17 to<br>1,074,017.30) | 1,162,161.26<br>(693,585.78 to<br>1,973,031.23) | 17,056.49<br>(11,745.83 to<br>21,390.53) | 26,087.13<br>(16,454.77 to<br>42,152.92) | 21,014.31<br>(13,388.05 to<br>33,869.56) | 36,101.44<br>(23,978.95 to<br>56,245.84) |
| Communicable, maternal, neonatal, and nutritional diseases        | 367,974.17<br>(301,767.80 to<br>446,502.19) | 228,581.31<br>(121,504.09 to<br>401,603.81)   | 185,035.66<br>(91,087.95 to<br>324,533.00)    | 507,420.97<br>(305,282.60 to<br>844,827.09)     | 7,902.05<br>(6,557.01 to<br>9,347.33)    | 5,948.94<br>(3,498.27 to<br>9,741.94)    | 4,957.83<br>(2,716.36 to<br>8,387.28)    | 11,574.82<br>(7,104.83 to<br>18,439.82)  |
| HIV/AIDS and tuberculosis                                         | 258,752.03<br>(199,495.38 to<br>329,663.22) | 132,913.27<br>(55,449.37 to<br>246,672.33)    | 109,386.60<br>(37,543.24 to<br>220,954.76)    | 354,983.73<br>(194,431.49 to<br>546,015.38)     | 5,719.69<br>(4,497.91 to<br>7,139.64)    | 3,179.05<br>(1,362.76 to<br>6,334.09)    | 2,640.47<br>(932.34 to<br>5,817.87)      | 7,476.43<br>(4,068.47 to<br>11,876.99)   |
| Tuberculosis                                                      | 31,466.47<br>(13,927.35 to<br>48,095.44)    | 24,492.04<br>(7,453.60 to<br>67,007.09)       | 13,949.07<br>(4,103.55 to<br>37,411.66)       | 42,841.86<br>(12,906.63 to<br>115,954.80)       | 843.54<br>(390.14 to<br>1,291.16)        | 735.76<br>(257.49 to<br>1,819.38)        | 428.30<br>(143.92 to<br>1,020.81)        | 1,252.17<br>(424.94 to<br>3,160.42)      |
| HIV/AIDS                                                          | 227,285.55<br>(162,795.76 to<br>300,924.66) | 108,421.23<br>(30,622.61 to<br>224,047.59)    | 95,437.53<br>(23,054.77 to<br>210,265.62)     | 312,141.87<br>(159,091.37 to<br>514,030.74)     | 4,876.15<br>(3,431.13 to<br>6,443.65)    | 2,443.29<br>(629.72 to<br>5,731.76)      | 2,212.17<br>(488.60 to<br>5,491.34)      | 6,224.26<br>(2,914.52 to<br>10,805.12)   |
| Diarrhea, lower respiratory, and other common infectious diseases | 67,117.89<br>(40,609.88 to<br>94,021.43)    | 72,387.97<br>(27,356.53 to<br>210,207.59)     | 56,684.77<br>(20,363.63 to<br>167,523.23)     | 120,926.87<br>(41,867.42 to<br>366,202.39)      | 1,612.18<br>(892.53 to<br>2,265.44)      | 2,361.83<br>(1,181.20 to<br>5,354.90)    | 1,961.99<br>(966.34 to<br>4,594.64)      | 3,580.44<br>(1,644.05 to<br>8,813.92)    |
| Diarrheal diseases                                                | 29,223.05<br>(17,610.55 to<br>45,189.60)    | 18,227.10<br>(2,315.03 to<br>71,354.54)       | 19,224.55<br>(2,753.83 to<br>76,909.16)       | 38,065.26<br>(5,351.53 to<br>152,823.92)        | 578.73<br>(310.65 to<br>944.33)          | 512.77<br>(79.96 to<br>1,924.29)         | 584.85<br>(101.64 to<br>2,124.95)        | 1,035.10<br>(159.44 to<br>3,926.77)      |
| Intestinal infectious diseases                                    | 35.64<br>(15.73 to<br>68.16)                | 22.81<br>(7.83 to<br>57.49)                   | 23.48<br>(8.15 to<br>59.96)                   | 26.65<br>(9.50 to<br>67.84)                     | 0.56<br>(0.25 to<br>1.06)                | 0.41<br>(0.16 to<br>0.99)                | 0.43<br>(0.17 to<br>1.02)                | 0.47<br>(0.19 to<br>1.16)                |
| Typhoid fever                                                     | 28.44<br>(11.75 to<br>57.97)                | 17.93<br>(5.73 to<br>46.54)                   | 19.31<br>(6.26 to<br>50.06)                   | 20.66<br>(6.79 to<br>53.64)                     | 0.41<br>(0.17 to<br>0.83)                | 0.29<br>(0.10 to<br>0.74)                | 0.31<br>(0.11 to<br>0.81)                | 0.32<br>(0.11 to<br>0.84)                |
| Paratyphoid fever                                                 | 0.97<br>(0.34 to<br>2.14)                   | 0.73<br>(0.23 to<br>1.82)                     | 0.56<br>(0.18 to<br>1.40)                     | 0.86<br>(0.28 to<br>2.10)                       | 0.01<br>(0.01 to<br>0.03)                | 0.01<br>(0.00 to<br>0.05)                | 0.01<br>(0.00 to<br>0.02)                | 0.01<br>(0.00 to<br>0.03)                |
| Other intestinal infectious diseases                              | 6.22<br>(2.13 to<br>14.01)                  | 4.16<br>(0.99 to<br>12.13)                    | 3.61<br>(0.80 to<br>10.59)                    | 5.13<br>(1.22 to<br>15.12)                      | 0.13<br>(0.04 to<br>0.29)                | 0.11<br>(0.03 to<br>0.28)                | 0.10<br>(0.03 to<br>0.26)                | 0.13<br>(0.04 to<br>0.33)                |
| Lower respiratory infections                                      | 32,068.49<br>(17,654.44 to<br>46,955.21)    | 49,497.83<br>(19,830.89 to<br>112,650.37)     | 33,689.16<br>(13,936.40 to<br>78,108.08)      | 77,025.73<br>(28,630.57 to<br>192,884.76)       | 924.62<br>(493.12 to<br>1,351.23)        | 1,737.68<br>(967.85 to<br>3,197.11)      | 1,283.23<br>(736.03 to<br>2,368.93)      | 2,422.67<br>(1,249.96 to<br>4,666.00)    |
| Upper respiratory infections                                      | 14.56<br>(5.68 to<br>29.02)                 | 21.89<br>(6.51 to<br>54.96)                   | 14.73<br>(4.50 to<br>36.86)                   | 28.27<br>(8.85 to<br>70.63)                     | 0.33<br>(0.14 to<br>0.65)                | 0.62<br>(0.22 to<br>1.37)                | 0.43<br>(0.15 to<br>0.96)                | 0.77<br>(0.27 to<br>1.75)                |
| Otitis media                                                      | 17.17<br>(6.57 to<br>34.98)                 | 6.73<br>(1.91 to<br>18.05)                    | 6.80<br>(1.88 to<br>18.97)                    | 6.43<br>(1.84 to<br>17.29)                      | 0.34<br>(0.13 to<br>0.71)                | 0.17<br>(0.06 to<br>0.45)                | 0.18<br>(0.06 to<br>0.46)                | 0.16<br>(0.05 to<br>0.43)                |
| Meningitis                                                        | 4,538.90<br>(2,128.80 to<br>8,691.87)       | 3,839.75<br>(1,505.57 to<br>9,222.13)         | 3,072.29<br>(1,140.31 to<br>7,276.65)         | 4,137.82<br>(1,575.54 to<br>10,754.40)          | 88.43<br>(40.70 to<br>168.37)            | 92.29<br>(41.98 to<br>200.68)            | 76.55<br>(34.00 to<br>169.52)            | 93.39<br>(42.39 to<br>205.42)            |
| Pneumococcal meningitis                                           | 300.35<br>(132.90 to<br>580.06)             | 271.45<br>(99.63 to<br>644.25)                | 272.82<br>(99.54 to<br>646.59)                | 275.02<br>(102.71 to<br>653.90)                 | 6.71<br>(3.04 to<br>12.89)               | 7.22<br>(3.21 to<br>15.70)               | 7.50<br>(3.28 to<br>16.13)               | 6.96<br>(3.11 to<br>14.84)               |
| H influenzae type B meningitis                                    | 330.34<br>(150.38 to<br>620.93)             | 306.23<br>(104.51 to<br>798.10)               | 289.88<br>(101.41 to<br>756.23)               | 431.63<br>(125.37 to<br>1,310.73)               | 6.18<br>(2.83 to<br>11.65)               | 6.28<br>(2.64 to<br>14.30)               | 6.26<br>(2.66 to<br>13.91)               | 7.47<br>(2.88 to<br>19.50)               |
| Meningococcal meningitis                                          | 1,770.32<br>(823.07 to<br>3,389.63)         | 1,356.41<br>(531.77 to<br>3,379.11)           | 1,051.93<br>(394.19 to<br>2,659.88)           | 1,442.93<br>(559.12 to<br>3,589.57)             | 33.20<br>(15.38 to<br>63.90)             | 31.65<br>(14.04 to<br>70.75)             | 25.43<br>(11.15 to<br>57.17)             | 32.09<br>(14.45 to<br>72.59)             |
| Other meningitis                                                  | 2,137.90<br>(958.56 to<br>4,033.43)         | 1,905.66<br>(722.70 to<br>4,602.60)           | 1,457.66<br>(523.97 to<br>3,531.99)           | 1,988.24<br>(752.60 to<br>4,956.65)             | 42.34<br>(19.41 to<br>80.68)             | 47.14<br>(21.58 to<br>102.14)            | 37.36<br>(16.33 to<br>81.85)             | 46.87<br>(21.21 to<br>99.45)             |
| Encephalitis                                                      | 413.05<br>(183.73 to<br>693.47)             | 525.22<br>(196.15 to<br>1,247.00)             | 489.90<br>(179.62 to<br>1,170.41)             | 579.77<br>(220.97 to<br>1,369.53)               | 7.80<br>(3.59 to<br>12.63)               | 12.38<br>(5.76 to<br>25.65)              | 11.98<br>(5.48 to<br>24.66)              | 13.02<br>(6.14 to<br>27.02)              |
| Diphtheria                                                        | 2.42<br>(1.18 to<br>4.14)                   | 0.99<br>(0.33 to<br>2.44)                     | 0.91<br>(0.30 to<br>2.31)                     | 2.38<br>(0.53 to<br>8.51)                       | 0.04<br>(0.02 to<br>0.07)                | 0.02<br>(0.01 to<br>0.05)                | 0.02<br>(0.01 to<br>0.05)                | 0.04<br>(0.01 to<br>0.11)                |

|                                                |                                                          |                                                           |                                                           |                                                           |                                                   |                                                   |                                                   |                                                     |
|------------------------------------------------|----------------------------------------------------------|-----------------------------------------------------------|-----------------------------------------------------------|-----------------------------------------------------------|---------------------------------------------------|---------------------------------------------------|---------------------------------------------------|-----------------------------------------------------|
| Whooping cough                                 | 74.05<br>(5.95 to<br>249.62)                             | 57.28<br>(2.03 to<br>320.58)                              | 30.90<br>(1.19 to<br>172.16)                              | 569.27<br>(20.13 to<br>3,306.68)                          | 0.88<br>(0.07 to<br>2.98)                         | 0.68<br>(0.03 to<br>3.79)                         | 0.37<br>(0.01 to<br>2.03)                         | 6.68<br>(0.24 to<br>38.55)                          |
| Tetanus                                        | 30.09<br>(16.41 to<br>50.54)                             | 5.43<br>(2.07 to<br>11.43)                                | 5.15<br>(1.99 to<br>11.03)                                | 10.67<br>(3.80 to<br>30.86)                               | 0.59<br>(0.29 to<br>1.00)                         | 0.13<br>(0.05 to<br>0.26)                         | 0.13<br>(0.05 to<br>0.28)                         | 0.18<br>(0.07 to<br>0.43)                           |
| Measles                                        | 515.61<br>(148.70 to<br>1,286.84)                        | 68.35<br>(4.11 to<br>357.81)                              | 36.47<br>(3.04 to<br>190.91)                              | 325.25<br>(10.18 to<br>1,896.27)                          | 6.21<br>(1.80 to<br>15.39)                        | 0.82<br>(0.05 to<br>4.21)                         | 0.44<br>(0.04 to<br>2.24)                         | 3.84<br>(0.13 to<br>22.50)                          |
| <b>Botswana</b>                                |                                                          |                                                           |                                                           |                                                           |                                                   |                                                   |                                                   |                                                     |
| Cause                                          | YLLs (actual counts)                                     |                                                           |                                                           |                                                           | Deaths (actual counts)                            |                                                   |                                                   |                                                     |
|                                                | 2016                                                     | 2040 Forecast                                             | 2040 Better Scenario                                      | 2040 Worse Scenario                                       | 2016                                              | 2040 Forecast                                     | 2040 Better Scenario                              | 2040 Worse Scenario                                 |
| Varicella and herpes zoster                    | 184.87<br>(95.80 to<br>318.12)                           | 114.57<br>(50.01 to<br>267.53)                            | 90.43<br>(40.45 to<br>211.71)                             | 149.38<br>(64.04 to<br>373.52)                            | 3.64<br>(2.12 to<br>5.53)                         | 3.86<br>(2.28 to<br>6.40)                         | 3.38<br>(2.00 to<br>5.59)                         | 4.32<br>(2.48 to<br>7.52)                           |
| <b>Neglected tropical diseases and malaria</b> | <b>1,853.73</b><br><b>(875.55 to</b><br><b>3,442.51)</b> | <b>1,318.68</b><br><b>(489.92 to</b><br><b>3,099.36)</b>  | <b>1,259.69</b><br><b>(458.10 to</b><br><b>2,868.43)</b>  | <b>1,397.91</b><br><b>(532.77 to</b><br><b>3,176.44)</b>  | <b>38.79</b><br><b>(17.44 to</b><br><b>73.07)</b> | <b>34.85</b><br><b>(14.31 to</b><br><b>72.80)</b> | <b>34.09</b><br><b>(13.84 to</b><br><b>71.36)</b> | <b>35.71</b><br><b>(15.08 to</b><br><b>71.60)</b>   |
| Malaria                                        | 1,269.69<br>(501.08 to<br>2,753.77)                      | 820.37<br>(226.99 to<br>2,255.90)                         | 788.65<br>(214.86 to<br>2,161.34)                         | 855.36<br>(246.33 to<br>2,329.88)                         | 23.41<br>(8.46 to<br>52.63)                       | 19.09<br>(5.46 to<br>51.76)                       | 18.83<br>(5.34 to<br>50.67)                       | 19.20<br>(5.69 to<br>52.03)                         |
| Chagas disease                                 | 0.00<br>(0.00 to<br>0.00)                                | 0.00<br>(0.00 to<br>0.00)                                 | 0.00<br>(0.00 to<br>0.00)                                 | 0.00<br>(0.00 to<br>0.00)                                 | 0.00<br>(0.00 to<br>0.00)                         | 0.00<br>(0.00 to<br>0.00)                         | 0.00<br>(0.00 to<br>0.00)                         | 0.00<br>(0.00 to<br>0.00)                           |
| Leishmaniasis                                  | 0.00<br>(0.00 to<br>0.00)                                | 0.00<br>(0.00 to<br>0.00)                                 | 0.00<br>(0.00 to<br>0.00)                                 | 0.00<br>(0.00 to<br>0.00)                                 | 0.00<br>(0.00 to<br>0.00)                         | 0.00<br>(0.00 to<br>0.00)                         | 0.00<br>(0.00 to<br>0.00)                         | 0.00<br>(0.00 to<br>0.00)                           |
| African trypanosomiasis                        | 0.00<br>(0.00 to<br>0.00)                                | 0.00<br>(0.00 to<br>0.00)                                 | 0.00<br>(0.00 to<br>0.00)                                 | 0.00<br>(0.00 to<br>0.00)                                 | 0.00<br>(0.00 to<br>0.00)                         | 0.00<br>(0.00 to<br>0.00)                         | 0.00<br>(0.00 to<br>0.00)                         | 0.00<br>(0.00 to<br>0.00)                           |
| Schistosomiasis                                | 447.09<br>(159.24 to<br>888.25)                          | 409.29<br>(140.94 to<br>904.61)                           | 388.39<br>(130.55 to<br>862.71)                           | 435.17<br>(156.82 to<br>931.01)                           | 12.70<br>(4.90 to<br>23.98)                       | 13.59<br>(5.15 to<br>26.43)                       | 13.19<br>(4.95 to<br>26.14)                       | 14.02<br>(5.49 to<br>27.24)                         |
| Cysticercosis                                  | 34.76<br>(24.54 to<br>88.38)                             | 29.50<br>(11.06 to<br>62.05)                              | 28.56<br>(10.60 to<br>60.32)                              | 30.30<br>(11.77 to<br>63.15)                              | 1.24<br>(0.54 to<br>1.96)                         | 0.78<br>(0.32 to<br>1.54)                         | 0.76<br>(0.30 to<br>1.53)                         | 0.78<br>(0.33 to<br>1.51)                           |
| Cystic echinococcosis                          | 8.54<br>(4.10 to<br>13.70)                               | 6.17<br>(2.47 to<br>12.27)                                | 4.81<br>(1.91 to<br>9.59)                                 | 8.68<br>(3.67 to<br>16.80)                                | 0.22<br>(0.10 to<br>0.35)                         | 0.19<br>(0.09 to<br>0.35)                         | 0.15<br>(0.07 to<br>0.27)                         | 0.26<br>(0.13 to<br>0.45)                           |
| Dengue                                         | 0.00<br>(0.00 to<br>0.00)                                | 0.00<br>(0.00 to<br>0.00)                                 | 0.00<br>(0.00 to<br>0.00)                                 | 0.00<br>(0.00 to<br>0.00)                                 | 0.00<br>(0.00 to<br>0.00)                         | 0.00<br>(0.00 to<br>0.00)                         | 0.00<br>(0.00 to<br>0.00)                         | 0.00<br>(0.00 to<br>0.00)                           |
| Yellow fever                                   | 0.00<br>(0.00 to<br>0.00)                                | 0.00<br>(0.00 to<br>0.00)                                 | 0.00<br>(0.00 to<br>0.00)                                 | 0.00<br>(0.00 to<br>0.00)                                 | 0.00<br>(0.00 to<br>0.00)                         | 0.00<br>(0.00 to<br>0.00)                         | 0.00<br>(0.00 to<br>0.00)                         | 0.00<br>(0.00 to<br>0.00)                           |
| Rabies                                         | 16.30<br>(5.56 to<br>45.61)                              | 7.04<br>(2.34 to<br>18.12)                                | 5.38<br>(1.78 to<br>14.14)                                | 11.79<br>(4.11 to<br>29.63)                               | 0.27<br>(0.10 to<br>0.71)                         | 0.14<br>(0.05 to<br>0.36)                         | 0.11<br>(0.04 to<br>0.30)                         | 0.23<br>(0.08 to<br>0.59)                           |
| Intestinal nematode infections                 | 8.59<br>(1.89 to<br>21.54)                               | 9.31<br>(2.62 to<br>21.98)                                | 8.90<br>(2.54 to<br>20.90)                                | 9.98<br>(2.61 to<br>23.72)                                | 0.13<br>(0.04 to<br>0.28)                         | 0.18<br>(0.07 to<br>0.38)                         | 0.18<br>(0.07 to<br>0.38)                         | 0.18<br>(0.07 to<br>0.38)                           |
| Other neglected tropical diseases              | 48.76<br>(24.64 to<br>95.30)                             | 37.02<br>(17.73 to<br>73.81)                              | 35.00<br>(16.78 to<br>69.07)                              | 46.63<br>(22.65 to<br>91.02)                              | 0.82<br>(0.46 to<br>1.39)                         | 0.88<br>(0.49 to<br>1.55)                         | 0.87<br>(0.49 to<br>1.52)                         | 1.02<br>(0.59 to<br>1.80)                           |
| <b>Maternal disorders</b>                      | <b>2,166.74</b><br><b>(455.73 to</b><br><b>4,499.76)</b> | <b>3,561.30</b><br><b>(542.75 to</b><br><b>13,988.51)</b> | <b>2,798.34</b><br><b>(440.23 to</b><br><b>10,735.85)</b> | <b>5,414.53</b><br><b>(864.12 to</b><br><b>22,256.07)</b> | <b>38.15</b><br><b>(7.89 to</b><br><b>80.23)</b>  | <b>65.78</b><br><b>(9.96 to</b><br><b>247.34)</b> | <b>51.76</b><br><b>(8.04 to</b><br><b>203.01)</b> | <b>100.32</b><br><b>(15.64 to</b><br><b>399.81)</b> |
| Maternal hemorrhage                            | 294.42<br>(56.06 to<br>670.62)                           | 365.56<br>(50.70 to<br>1,410.48)                          | 293.23<br>(39.70 to<br>1,189.29)                          | 501.01<br>(68.35 to<br>1,956.01)                          | 5.26<br>(1.02 to<br>12.04)                        | 6.76<br>(0.94 to<br>25.97)                        | 5.44<br>(0.73 to<br>22.29)                        | 9.22<br>(1.27 to<br>36.34)                          |
| Maternal sepsis and other maternal infections  | 71.11<br>(12.56 to<br>191.20)                            | 83.68<br>(9.73 to<br>349.88)                              | 66.51<br>(7.49 to<br>274.87)                              | 115.72<br>(13.60 to<br>457.59)                            | 1.26<br>(0.22 to<br>3.36)                         | 1.54<br>(0.18 to<br>6.50)                         | 1.23<br>(0.14 to<br>5.07)                         | 2.12<br>(0.25 to<br>8.42)                           |



|                                                                         |                                                 |                                                |                                               |                                                |                                        |                                       |                                       |                                       |
|-------------------------------------------------------------------------|-------------------------------------------------|------------------------------------------------|-----------------------------------------------|------------------------------------------------|----------------------------------------|---------------------------------------|---------------------------------------|---------------------------------------|
| Maternal hypertensive disorders                                         | 450.55<br>(99.18 to<br>1,024.98)                | 538.04<br>(77.89 to<br>1,952.96)               | 423.24<br>(62.77 to<br>1,527.00)              | 749.19<br>(113.86 to<br>2,783.31)              | 7.74<br>(1.71 to<br>17.63)             | 9.61<br>(1.34 to<br>34.90)            | 7.58<br>(1.09 to<br>27.73)            | 13.30<br>(1.95 to<br>50.50)           |
| Maternal obstructed labor and uterine rupture                           | 52.16<br>(9.61 to<br>141.37)                    | 76.52<br>(9.27 to<br>294.88)                   | 58.77<br>(6.87 to<br>236.64)                  | 107.75<br>(12.83 to<br>418.69)                 | 0.93<br>(0.17 to<br>2.55)              | 1.41<br>(0.16 to<br>5.60)             | 1.09<br>(0.13 to<br>4.54)             | 1.97<br>(0.23 to<br>7.94)             |
| Maternal abortion, miscarriage, and ectopic pregnancy                   | 73.67<br>(13.34 to<br>200.74)                   | 88.75<br>(10.95 to<br>353.76)                  | 70.23<br>(8.52 to<br>279.30)                  | 122.97<br>(14.88 to<br>484.22)                 | 1.30<br>(0.24 to<br>3.60)              | 1.63<br>(0.20 to<br>6.47)             | 1.29<br>(0.16 to<br>5.16)             | 2.24<br>(0.28 to<br>9.25)             |
| Indirect maternal deaths                                                | 702.46<br>(147.48 to<br>1,661.75)               | 909.06<br>(132.09 to<br>3,752.24)              | 719.06<br>(105.03 to<br>2,799.14)             | 1,253.43<br>(180.01 to<br>5,056.48)            | 12.40<br>(2.56 to<br>28.76)            | 16.55<br>(2.36 to<br>66.09)           | 13.14<br>(1.90 to<br>50.94)           | 22.69<br>(3.21 to<br>89.37)           |
| Late maternal deaths                                                    | 47.81<br>(8.61 to<br>131.74)                    | 54.58<br>(6.22 to<br>217.77)                   | 42.99<br>(4.83 to<br>176.90)                  | 75.69<br>(8.86 to<br>298.55)                   | 0.84<br>(0.15 to<br>2.26)              | 0.99<br>(0.11 to<br>4.01)             | 0.79<br>(0.09 to<br>3.09)             | 1.37<br>(0.16 to<br>5.57)             |
| Maternal deaths aggravated by HIV/AIDS                                  | 121.99<br>(24.29 to<br>272.15)                  | 990.45<br>(68.93 to<br>4,174.84)               | 751.86<br>(36.18 to<br>3,032.31)              | 1,872.20<br>(284.42 to<br>7,609.72)            | 2.25<br>(0.45 to<br>5.02)              | 19.06<br>(1.43 to<br>79.79)           | 14.44<br>(0.72 to<br>59.13)           | 36.31<br>(5.47 to<br>146.08)          |
| Other maternal disorders                                                | 352.57<br>(72.16 to<br>805.17)                  | 454.66<br>(69.93 to<br>1,920.34)               | 372.45<br>(56.62 to<br>1,557.60)              | 616.55<br>(96.72 to<br>2,549.06)               | 6.15<br>(1.23 to<br>13.85)             | 8.24<br>(1.25 to<br>34.60)            | 6.77<br>(0.99 to<br>29.09)            | 11.10<br>(1.70 to<br>46.13)           |
| <b>Botswana</b>                                                         |                                                 |                                                |                                               |                                                |                                        |                                       |                                       |                                       |
| Cause                                                                   | YLLs (actual counts)                            |                                                |                                               |                                                | Deaths (actual counts)                 |                                       |                                       |                                       |
|                                                                         | 2016                                            | 2040 Forecast                                  | 2040 Better Scenario                          | 2040 Worse Scenario                            | 2016                                   | 2040 Forecast                         | 2040 Better Scenario                  | 2040 Worse Scenario                   |
| <b>Neonatal disorders</b>                                               | <b>29,012.20</b><br>(16,230.69 to<br>48,995.09) | <b>12,325.31</b><br>(4,070.27 to<br>30,504.62) | <b>9,275.05</b><br>(3,012.25 to<br>22,639.12) | <b>17,531.15</b><br>(5,765.72 to<br>43,715.58) | <b>335.23</b><br>(187.48 to<br>566.13) | <b>142.50</b><br>(47.05 to<br>352.38) | <b>107.24</b><br>(34.83 to<br>261.62) | <b>202.68</b><br>(66.62 to<br>504.97) |
| Neonatal preterm birth                                                  | 9,447.98<br>(4,550.51 to<br>17,432.20)          | 3,092.38<br>(847.81 to<br>7,388.28)            | 2,173.43<br>(579.96 to<br>5,278.53)           | 4,967.17<br>(1,372.31 to<br>11,104.31)         | 109.17<br>(52.57 to<br>201.44)         | 35.76<br>(9.81 to<br>85.35)           | 25.13<br>(6.70 to<br>61.14)           | 57.42<br>(15.86 to<br>128.27)         |
| Neonatal encephalopathy due to birth asphyxia and trauma                | 6,852.53<br>(3,302.02 to<br>12,280.27)          | 2,842.73<br>(749.44 to<br>7,662.65)            | 1,991.28<br>(510.22 to<br>5,314.19)           | 3,737.90<br>(979.24 to<br>10,127.81)           | 79.18<br>(38.17 to<br>141.92)          | 32.86<br>(8.67 to<br>88.54)           | 23.02<br>(5.90 to<br>61.48)           | 43.21<br>(11.32 to<br>116.98)         |
| Neonatal sepsis and other neonatal infections                           | 3,213.50<br>(1,425.39 to<br>7,656.32)           | 1,933.52<br>(622.23 to<br>5,089.81)            | 1,437.62<br>(454.44 to<br>3,767.47)           | 2,573.91<br>(809.03 to<br>6,672.95)            | 37.13<br>(16.47 to<br>88.45)           | 23.35<br>(7.19 to<br>58.89)           | 16.62<br>(5.25 to<br>43.63)           | 29.75<br>(9.35 to<br>77.13)           |
| Hemolytic disease and other neonatal jaundice                           | 128.17<br>(57.46 to<br>254.38)                  | 49.18<br>(14.31 to<br>140.89)                  | 35.39<br>(10.53 to<br>98.89)                  | 68.74<br>(19.82 to<br>197.06)                  | 1.48<br>(0.66 to<br>2.94)              | 0.57<br>(0.17 to<br>1.63)             | 0.41<br>(0.12 to<br>1.14)             | 0.79<br>(0.23 to<br>2.28)             |
| Other neonatal disorders                                                | 9,370.01<br>(4,339.19 to<br>17,734.44)          | 4,407.50<br>(1,077.19 to<br>12,015.97)         | 3,637.34<br>(910.72 to<br>9,888.83)           | 6,183.44<br>(1,610.03 to<br>16,956.61)         | 108.28<br>(50.12 to<br>204.91)         | 50.97<br>(12.47 to<br>139.06)         | 42.06<br>(10.52 to<br>114.27)         | 71.50<br>(18.60 to<br>195.94)         |
| <b>Nutritional deficiencies</b>                                         | <b>3,827.39</b><br>(2,014.80 to<br>7,666.62)    | <b>2,420.40</b><br>(1,174.67 to<br>4,781.22)   | <b>2,355.94</b><br>(1,134.77 to<br>4,761.08)  | <b>2,898.59</b><br>(1,383.35 to<br>5,927.09)   | <b>71.67</b><br>(40.96 to<br>119.89)   | <b>73.53</b><br>(47.22 to<br>115.38)  | <b>76.27</b><br>(48.65 to<br>120.23)  | <b>79.09</b><br>(50.73 to<br>124.94)  |
| Protein-energy malnutrition                                             | 3,464.69<br>(1,783.90 to<br>7,046.85)           | 1,873.15<br>(874.45 to<br>4,028.34)            | 1,864.06<br>(882.55 to<br>3,898.02)           | 2,291.24<br>(1,025.77 to<br>4,913.80)          | 60.37<br>(34.70 to<br>104.20)          | 52.65<br>(33.28 to<br>84.04)          | 56.57<br>(35.44 to<br>90.05)          | 57.59<br>(35.56 to<br>96.13)          |
| Iodine deficiency                                                       | 15.82<br>(0.75 to<br>57.11)                     | 76.38<br>(1.50 to<br>297.72)                   | 69.60<br>(1.20 to<br>277.88)                  | 93.62<br>(1.96 to<br>385.01)                   | 0.38<br>(0.02 to<br>1.33)              | 2.52<br>(0.04 to<br>8.75)             | 2.43<br>(0.03 to<br>8.79)             | 2.81<br>(0.06 to<br>9.51)             |
| Dietary iron deficiency                                                 | 13.90<br>(6.61 to<br>23.62)                     | 13.08<br>(5.09 to<br>28.01)                    | 12.90<br>(4.91 to<br>28.62)                   | 14.54<br>(5.79 to<br>29.87)                    | 0.24<br>(0.11 to<br>0.41)              | 0.26<br>(0.11 to<br>0.53)             | 0.27<br>(0.10 to<br>0.57)             | 0.29<br>(0.12 to<br>0.60)             |
| Other nutritional deficiencies                                          | 332.98<br>(152.76 to<br>618.75)                 | 457.79<br>(206.22 to<br>898.53)                | 409.38<br>(180.68 to<br>798.41)               | 499.18<br>(229.15 to<br>979.31)                | 10.68<br>(5.15 to<br>16.63)            | 18.10<br>(11.20 to<br>28.13)          | 17.00<br>(10.13 to<br>26.83)          | 18.42<br>(11.52 to<br>28.03)          |
| <b>Other communicable, maternal, neonatal, and nutritional diseases</b> | <b>5,244.20</b><br>(2,668.51 to<br>9,681.01)    | <b>3,654.39</b><br>(1,684.95 to<br>7,495.01)   | <b>3,275.26</b><br>(1,460.62 to<br>6,619.44)  | <b>4,268.19</b><br>(1,967.45 to<br>8,729.16)   | <b>86.34</b><br>(46.11 to<br>145.97)   | <b>91.40</b><br>(47.48 to<br>159.75)  | <b>86.01</b><br>(43.81 to<br>155.26)  | <b>99.94</b><br>(53.45 to<br>177.57)  |
| Sexually transmitted infections excluding HIV                           | 2,096.74<br>(588.33 to<br>4,877.45)             | 746.14<br>(194.95 to<br>2,436.75)              | 612.26<br>(158.58 to<br>1,990.71)             | 889.92<br>(219.34 to<br>3,081.22)              | 28.02<br>(9.46 to<br>63.41)            | 12.91<br>(4.16 to<br>37.38)           | 11.07<br>(3.51 to<br>32.24)           | 14.61<br>(4.63 to<br>41.91)           |

|                                       |                                                                 |                                                                  |                                                                  |                                                                    |                                                             |                                                               |                                                              |                                                               |
|---------------------------------------|-----------------------------------------------------------------|------------------------------------------------------------------|------------------------------------------------------------------|--------------------------------------------------------------------|-------------------------------------------------------------|---------------------------------------------------------------|--------------------------------------------------------------|---------------------------------------------------------------|
| Syphilis                              | 1,925.66<br>(417.92 to<br>4,597.20)                             | 543.43<br>(107.03 to<br>2,054.67)                                | 421.48<br>(81.84 to<br>1,647.05)                                 | 677.34<br>(123.96 to<br>2,691.37)                                  | 24.02<br>(6.31 to<br>55.48)                                 | 7.69<br>(2.09 to<br>26.04)                                    | 6.07<br>(1.62 to<br>20.54)                                   | 9.27<br>(2.37 to<br>32.46)                                    |
| Chlamydial infection                  | 31.81<br>(6.11 to<br>94.60)                                     | 38.43<br>(6.48 to<br>134.27)                                     | 36.31<br>(6.04 to<br>128.60)                                     | 40.47<br>(6.98 to<br>142.43)                                       | 0.74<br>(0.16 to<br>2.03)                                   | 0.99<br>(0.24 to<br>3.12)                                     | 0.95<br>(0.23 to<br>3.08)                                    | 1.01<br>(0.25 to<br>3.22)                                     |
| Gonococcal infection                  | 90.27<br>(19.30 to<br>247.91)                                   | 107.41<br>(19.80 to<br>370.48)                                   | 101.28<br>(18.25 to<br>348.30)                                   | 112.27<br>(21.23 to<br>384.23)                                     | 2.16<br>(0.49 to<br>5.73)                                   | 2.84<br>(0.73 to<br>8.88)                                     | 2.73<br>(0.69 to<br>8.78)                                    | 2.89<br>(0.76 to<br>9.02)                                     |
| Other sexually transmitted infections | 49.00<br>(10.28 to<br>133.17)                                   | 56.87<br>(10.16 to<br>193.15)                                    | 53.19<br>(9.04 to<br>183.71)                                     | 59.83<br>(10.78 to<br>206.26)                                      | 1.11<br>(0.25 to<br>2.92)                                   | 1.39<br>(0.31 to<br>4.51)                                     | 1.32<br>(0.28 to<br>4.32)                                    | 1.44<br>(0.32 to<br>4.46)                                     |
| Acute hepatitis                       | 336.17<br>(152.59 to<br>539.93)                                 | 383.65<br>(162.56 to<br>763.54)                                  | 307.22<br>(125.19 to<br>625.22)                                  | 414.91<br>(179.16 to<br>809.85)                                    | 8.74<br>(4.12 to<br>13.41)                                  | 12.04<br>(6.05 to<br>20.99)                                   | 9.89<br>(4.85 to<br>17.91)                                   | 12.60<br>(6.53 to<br>21.66)                                   |
| Acute hepatitis A                     | 3.33<br>(0.94 to<br>8.86)                                       | 3.60<br>(0.90 to<br>9.33)                                        | 3.04<br>(0.74 to<br>7.93)                                        | 4.02<br>(1.00 to<br>10.53)                                         | 0.06<br>(0.02 to<br>0.14)                                   | 0.10<br>(0.03 to<br>0.25)                                     | 0.09<br>(0.02 to<br>0.23)                                    | 0.11<br>(0.03 to<br>0.25)                                     |
| Acute hepatitis B                     | 289.77<br>(123.18 to<br>463.83)                                 | 334.76<br>(136.35 to<br>670.12)                                  | 267.00<br>(101.12 to<br>556.71)                                  | 363.63<br>(148.12 to<br>709.57)                                    | 7.62<br>(3.39 to<br>11.82)                                  | 10.28<br>(4.82 to<br>18.36)                                   | 8.37<br>(3.81 to<br>15.70)                                   | 10.88<br>(5.19 to<br>18.90)                                   |
| Acute hepatitis C                     | 8.36<br>(3.71 to<br>14.52)                                      | 13.78<br>(5.46 to<br>28.39)                                      | 11.44<br>(4.46 to<br>24.42)                                      | 13.79<br>(5.70 to<br>27.32)                                        | 0.25<br>(0.11 to<br>0.43)                                   | 0.47<br>(0.21 to<br>0.91)                                     | 0.40<br>(0.18 to<br>0.79)                                    | 0.46<br>(0.22 to<br>0.85)                                     |
| Acute hepatitis E                     | 34.71<br>(19.70 to<br>53.68)                                    | 31.51<br>(15.92 to<br>55.39)                                     | 25.74<br>(13.08 to<br>46.21)                                     | 33.47<br>(17.43 to<br>57.74)                                       | 0.81<br>(0.44 to<br>1.24)                                   | 1.19<br>(0.67 to<br>1.87)                                     | 1.03<br>(0.57 to<br>1.68)                                    | 1.15<br>(0.67 to<br>1.83)                                     |
| Other unspecified infectious diseases | 2,811.29<br>(1,007.87 to<br>6,342.66)                           | 2,524.59<br>(1,023.66 to<br>5,302.08)                            | 2,355.78<br>(975.26 to<br>5,054.35)                              | 2,963.36<br>(1,225.96 to<br>6,169.50)                              | 49.58<br>(20.06 to<br>95.19)                                | 66.44<br>(28.00 to<br>117.62)                                 | 65.05<br>(27.84 to<br>116.47)                                | 72.73<br>(31.60 to<br>131.65)                                 |
| <b>Non-communicable diseases</b>      | <b>198,411.00</b><br><b>(96,134.16 to</b><br><b>290,657.37)</b> | <b>423,279.44</b><br><b>(181,557.85 to</b><br><b>850,288.75)</b> | <b>325,930.80</b><br><b>(141,447.17 to</b><br><b>657,454.72)</b> | <b>538,985.68</b><br><b>(226,856.30 to</b><br><b>1,084,958.68)</b> | <b>7,626.74</b><br><b>(3,856.41 to</b><br><b>10,916.92)</b> | <b>18,021.45</b><br><b>(10,272.56 to</b><br><b>30,744.73)</b> | <b>14,349.86</b><br><b>(8,241.92 to</b><br><b>24,463.44)</b> | <b>21,912.99</b><br><b>(12,430.65 to</b><br><b>37,102.40)</b> |

| Botswana                        |                                                               |                                                                 |                                                                |                                                                 |                                                          |                                                            |                                                            |                                                            |
|---------------------------------|---------------------------------------------------------------|-----------------------------------------------------------------|----------------------------------------------------------------|-----------------------------------------------------------------|----------------------------------------------------------|------------------------------------------------------------|------------------------------------------------------------|------------------------------------------------------------|
| Cause                           | YLLs (actual counts)                                          |                                                                 |                                                                |                                                                 | Deaths (actual counts)                                   |                                                            |                                                            |                                                            |
|                                 | 2016                                                          | 2040 Forecast                                                   | 2040 Better Scenario                                           | 2040 Worse Scenario                                             | 2016                                                     | 2040 Forecast                                              | 2040 Better Scenario                                       | 2040 Worse Scenario                                        |
| <b>Neoplasms</b>                | <b>44,819.88</b><br><b>(19,889.23 to</b><br><b>67,754.91)</b> | <b>118,770.61</b><br><b>(41,856.26 to</b><br><b>270,925.53)</b> | <b>96,891.25</b><br><b>(36,172.05 to</b><br><b>218,503.16)</b> | <b>130,896.99</b><br><b>(45,310.18 to</b><br><b>286,709.12)</b> | <b>1,573.61</b><br><b>(755.63 to</b><br><b>2,307.60)</b> | <b>4,527.70</b><br><b>(2,165.00 to</b><br><b>8,625.18)</b> | <b>3,831.24</b><br><b>(1,892.37 to</b><br><b>7,263.54)</b> | <b>4,790.23</b><br><b>(2,251.92 to</b><br><b>9,272.34)</b> |
| Lip and oral cavity cancer      | 1,173.48<br>(556.99 to<br>1,765.95)                           | 3,116.71<br>(681.19 to<br>8,352.15)                             | 1,862.09<br>(475.64 to<br>4,723.93)                            | 4,783.97<br>(1,005.66 to<br>12,305.51)                          | 41.17<br>(20.96 to<br>59.64)                             | 108.98<br>(31.22 to<br>259.68)                             | 67.91<br>(22.53 to<br>155.20)                              | 162.42<br>(44.41 to<br>391.70)                             |
| Nasopharynx cancer              | 245.42<br>(116.00 to<br>372.21)                               | 668.30<br>(156.85 to<br>1,755.30)                               | 377.59<br>(100.80 to<br>951.01)                                | 1,048.98<br>(240.05 to<br>2,845.43)                             | 7.88<br>(3.85 to<br>11.62)                               | 22.40<br>(6.36 to<br>54.12)                                | 12.96<br>(4.21 to<br>29.91)                                | 34.25<br>(9.22 to<br>82.82)                                |
| Other pharynx cancer            | 278.36<br>(129.29 to<br>431.06)                               | 579.99<br>(204.56 to<br>1,254.99)                               | 553.93<br>(197.25 to<br>1,221.00)                              | 743.03<br>(267.13 to<br>1,567.65)                               | 9.50<br>(4.71 to<br>14.28)                               | 20.75<br>(8.41 to<br>42.52)                                | 20.17<br>(8.27 to<br>41.56)                                | 26.01<br>(10.44 to<br>50.61)                               |
| Esophageal cancer               | 3,869.08<br>(1,758.57 to<br>5,944.56)                         | 10,047.17<br>(2,604.52 to<br>26,125.47)                         | 6,679.58<br>(1,972.52 to<br>16,864.84)                         | 14,192.58<br>(3,545.43 to<br>37,826.46)                         | 147.59<br>(72.65 to<br>219.11)                           | 378.49<br>(124.78 to<br>898.93)                            | 264.19<br>(99.19 to<br>595.65)                             | 516.59<br>(164.06 to<br>1,261.30)                          |
| Stomach cancer                  | 1,701.86<br>(821.65 to<br>2,539.40)                           | 3,336.00<br>(1,293.08 to<br>6,934.91)                           | 2,693.56<br>(1,057.51 to<br>5,510.64)                          | 3,429.03<br>(1,344.80 to<br>6,946.03)                           | 67.54<br>(34.97 to<br>96.95)                             | 139.03<br>(70.66 to<br>240.90)                             | 116.90<br>(61.53 to<br>202.47)                             | 137.19<br>(70.47 to<br>232.63)                             |
| Colon and rectum cancer         | 2,284.35<br>(1,020.18 to<br>3,520.66)                         | 6,843.40<br>(2,736.56 to<br>13,973.55)                          | 5,961.75<br>(2,487.86 to<br>12,518.10)                         | 7,223.36<br>(2,927.69 to<br>14,585.90)                          | 92.03<br>(44.68 to<br>137.66)                            | 301.37<br>(157.12 to<br>525.40)                            | 272.65<br>(142.59 to<br>480.51)                            | 302.52<br>(157.44 to<br>527.18)                            |
| Liver cancer                    | 2,868.51<br>(1,314.18 to<br>4,705.13)                         | 7,809.70<br>(2,448.26 to<br>18,372.25)                          | 6,348.25<br>(2,129.03 to<br>13,974.76)                         | 8,677.92<br>(2,694.94 to<br>20,656.22)                          | 92.92<br>(44.68 to<br>146.28)                            | 277.79<br>(113.65 to<br>582.26)                            | 235.81<br>(104.20 to<br>470.11)                            | 296.90<br>(120.64 to<br>633.51)                            |
| Liver cancer due to hepatitis B | 1,419.34<br>(622.33 to<br>2,338.72)                           | 3,768.26<br>(1,140.05 to<br>8,931.62)                           | 3,099.91<br>(996.96 to<br>7,007.90)                            | 3,936.65<br>(1,176.76 to<br>9,458.19)                           | 42.61<br>(19.79 to<br>68.36)                             | 125.10<br>(46.99 to<br>271.82)                             | 106.68<br>(43.00 to<br>216.89)                             | 126.50<br>(46.59 to<br>272.50)                             |

|                                      |                                       |                                         |                                        |                                         |                                 |                                   |                                 |                                   |
|--------------------------------------|---------------------------------------|-----------------------------------------|----------------------------------------|-----------------------------------------|---------------------------------|-----------------------------------|---------------------------------|-----------------------------------|
| Liver cancer due to hepatitis C      | 376.02<br>(161.52 to<br>621.60)       | 1,179.97<br>(393.40 to<br>2,617.46)     | 999.20<br>(354.20 to<br>2,179.07)      | 1,196.28<br>(406.91 to<br>2,634.30)     | 14.96<br>(6.91 to<br>23.88)     | 49.71<br>(22.17 to<br>96.33)      | 44.43<br>(20.88 to<br>80.77)    | 48.18<br>(21.62 to<br>90.78)      |
| Liver cancer due to alcohol use      | 470.28<br>(205.66 to<br>779.49)       | 1,283.59<br>(405.38 to<br>2,910.71)     | 963.90<br>(325.81 to<br>2,152.64)      | 1,875.73<br>(583.21 to<br>4,533.22)     | 16.67<br>(7.91 to<br>26.71)     | 47.57<br>(19.75 to<br>101.49)     | 37.78<br>(16.74 to<br>75.92)    | 65.75<br>(26.13 to<br>145.07)     |
| Liver cancer due to other causes     | 602.87<br>(285.96 to<br>1,009.63)     | 1,578.87<br>(508.30 to<br>3,603.65)     | 1,285.25<br>(454.99 to<br>2,843.49)    | 1,669.27<br>(532.61 to<br>3,857.15)     | 18.68<br>(9.17 to<br>30.02)     | 55.41<br>(23.49 to<br>116.17)     | 46.91<br>(21.07 to<br>93.66)    | 56.47<br>(23.58 to<br>120.45)     |
| Gallbladder and biliary tract cancer | 303.52<br>(120.37 to<br>469.23)       | 614.63<br>(255.08 to<br>1,184.54)       | 628.53<br>(254.95 to<br>1,243.08)      | 547.94<br>(237.99 to<br>988.22)         | 13.24<br>(5.43 to<br>20.20)     | 28.24<br>(14.83 to<br>45.55)      | 29.59<br>(15.12 to<br>49.10)    | 24.29<br>(13.40 to<br>37.25)      |
| Pancreatic cancer                    | 1,612.20<br>(729.94 to<br>2,424.95)   | 5,268.76<br>(1,916.43 to<br>10,901.97)  | 4,848.53<br>(1,835.88 to<br>10,165.44) | 5,020.04<br>(1,845.24 to<br>10,080.35)  | 64.85<br>(30.89 to<br>94.73)    | 218.31<br>(102.51 to<br>390.14)   | 208.98<br>(100.82 to<br>377.12) | 200.43<br>(94.53 to<br>350.25)    |
| Larynx cancer                        | 702.31<br>(355.25 to<br>1,021.43)     | 1,698.82<br>(327.81 to<br>4,236.03)     | 865.16<br>(200.23 to<br>2,220.11)      | 2,409.88<br>(480.54 to<br>6,032.82)     | 25.97<br>(13.96 to<br>36.87)    | 61.69<br>(15.60 to<br>149.22)     | 32.15<br>(9.67 to<br>75.91)     | 85.91<br>(21.65 to<br>200.64)     |
| Tracheal, bronchus, and lung cancer  | 5,830.84<br>(2,703.46 to<br>8,644.08) | 17,610.00<br>(4,084.46 to<br>45,592.30) | 9,643.95<br>(2,451.64 to<br>24,251.72) | 23,501.53<br>(5,444.93 to<br>59,625.18) | 217.77<br>(108.04 to<br>315.95) | 659.61<br>(184.94 to<br>1,545.03) | 370.53<br>(122.25 to<br>838.80) | 858.74<br>(241.21 to<br>1,998.09) |
| Malignant skin melanoma              | 439.22<br>(184.62 to<br>806.14)       | 1,109.20<br>(479.96 to<br>2,223.44)     | 1,287.50<br>(543.69 to<br>2,595.85)    | 953.09<br>(428.82 to<br>1,890.78)       | 15.08<br>(7.04 to<br>26.53)     | 42.77<br>(23.84 to<br>77.36)      | 51.11<br>(27.69 to<br>90.06)    | 35.34<br>(20.53 to<br>61.87)      |
| Non-melanoma skin cancer             | 734.49<br>(375.12 to<br>1,047.33)     | 1,971.03<br>(1,162.39 to<br>2,899.77)   | 1,796.86<br>(1,009.38 to<br>2,737.35)  | 1,887.89<br>(1,149.37 to<br>2,639.58)   | 30.24<br>(16.80 to<br>41.62)    | 89.28<br>(63.79 to<br>111.84)     | 84.06<br>(57.85 to<br>112.11)   | 82.05<br>(61.25 to<br>99.25)      |
| Breast cancer                        | 3,438.53<br>(786.46 to<br>6,317.34)   | 10,997.54<br>(2,403.69 to<br>34,335.86) | 9,665.07<br>(2,091.70 to<br>29,178.74) | 11,556.32<br>(2,560.66 to<br>36,406.39) | 116.20<br>(29.85 to<br>204.90)  | 397.71<br>(128.95 to<br>1,031.76) | 357.45<br>(114.22 to<br>936.68) | 403.63<br>(131.21 to<br>1,095.24) |
| Cervical cancer                      | 4,610.72<br>(1,062.57 to<br>8,360.08) | 11,145.76<br>(2,272.11 to<br>34,523.03) | 9,409.97<br>(1,855.95 to<br>29,113.70) | 11,585.46<br>(2,400.04 to<br>35,711.19) | 152.59<br>(38.94 to<br>271.54)  | 379.89<br>(99.69 to<br>1,052.35)  | 327.07<br>(85.16 to<br>902.17)  | 384.03<br>(103.70 to<br>1,044.72) |
| Uterine cancer                       | 321.10<br>(81.58 to<br>548.45)        | 962.07<br>(273.49 to<br>2,168.13)       | 899.09<br>(243.55 to<br>2,088.76)      | 949.13<br>(290.09 to<br>2,009.45)       | 14.46<br>(4.06 to<br>24.02)     | 44.38<br>(17.12 to<br>85.17)      | 42.24<br>(16.04 to<br>85.17)    | 43.52<br>(17.67 to<br>75.18)      |
| Ovarian cancer                       | 819.05<br>(191.79 to<br>1,490.52)     | 2,753.41<br>(598.19 to<br>7,838.88)     | 2,587.98<br>(556.63 to<br>7,357.34)    | 2,459.62<br>(562.63 to<br>6,728.80)     | 28.26<br>(7.14 to<br>49.65)     | 100.36<br>(28.61 to<br>241.73)    | 95.84<br>(26.92 to<br>235.58)   | 87.77<br>(26.39 to<br>203.17)     |
| Prostate cancer                      | 2,246.24<br>(1,079.80 to<br>3,302.66) | 7,234.06<br>(3,958.37 to<br>10,105.79)  | 7,153.74<br>(3,916.25 to<br>10,163.59) | 6,226.08<br>(3,450.05 to<br>8,439.53)   | 123.82<br>(63.96 to<br>175.38)  | 423.53<br>(254.37 to<br>531.52)   | 435.33<br>(266.41 to<br>552.90) | 348.78<br>(206.53 to<br>440.48)   |
| Testicular cancer                    | 88.93<br>(42.79 to<br>134.18)         | 140.57<br>(68.99 to<br>233.39)          | 129.10<br>(61.55 to<br>216.62)         | 137.54<br>(223.67)                      | 2.48<br>(1.30 to<br>3.59)       | 4.87<br>(3.16 to<br>6.80)         | 4.67<br>(2.98 to<br>6.68)       | 4.53<br>(3.00 to<br>6.29)         |
| <b>Botswana</b>                      |                                       |                                         |                                        |                                         |                                 |                                   |                                 |                                   |
| Cause                                | YLLs (actual counts)                  |                                         |                                        |                                         | Deaths (actual counts)          |                                   |                                 |                                   |
|                                      | 2016                                  | 2040 Forecast                           | 2040 Better Scenario                   | 2040 Worse Scenario                     | 2016                            | 2040 Forecast                     | 2040 Better Scenario            | 2040 Worse Scenario               |
| Kidney cancer                        | 463.39<br>(238.37 to<br>690.34)       | 1,230.80<br>(501.32 to<br>2,405.65)     | 1,163.01<br>(492.71 to<br>2,261.97)    | 1,124.07<br>(461.33 to<br>2,107.69)     | 14.59<br>(7.58 to<br>21.09)     | 45.00<br>(22.29 to<br>76.23)      | 44.23<br>(22.67 to<br>75.43)    | 39.47<br>(20.01 to<br>65.88)      |
| Bladder cancer                       | 555.23<br>(269.85 to<br>820.45)       | 1,481.43<br>(586.66 to<br>3,001.89)     | 1,231.16<br>(529.75 to<br>2,452.43)    | 1,493.57<br>(590.47 to<br>3,033.75)     | 24.41<br>(13.24 to<br>34.45)    | 68.63<br>(37.45 to<br>114.01)     | 60.42<br>(34.84 to<br>97.22)    | 65.58<br>(35.84 to<br>110.00)     |
| Brain and nervous system cancer      | 1,185.73<br>(611.16 to<br>1,843.96)   | 2,751.00<br>(1,126.66 to<br>5,636.80)   | 2,687.30<br>(1,067.45 to<br>5,721.87)  | 2,539.29<br>(1,082.88 to<br>5,096.72)   | 30.20<br>(14.90 to<br>49.40)    | 85.89<br>(39.88 to<br>162.09)     | 86.17<br>(39.21 to<br>171.11)   | 76.51<br>(37.06 to<br>139.37)     |
| Thyroid cancer                       | 134.21<br>(52.78 to<br>212.53)        | 353.26<br>(128.34 to<br>759.94)         | 298.28<br>(109.31 to<br>654.06)        | 356.37<br>(132.08 to<br>738.38)         | 4.90<br>(1.98 to<br>7.53)       | 14.00<br>(6.52 to<br>26.34)       | 12.15<br>(5.65 to<br>23.61)     | 13.65<br>(6.57 to<br>24.94)       |
| Mesothelioma                         | 223.00<br>(101.08 to<br>353.89)       | 587.42<br>(273.54 to<br>1,007.56)       | 622.25<br>(284.85 to<br>1,108.32)      | 541.85<br>(255.47 to<br>880.06)         | 8.24<br>(3.92 to<br>12.81)      | 23.01<br>(11.76 to<br>35.82)      | 24.95<br>(12.50 to<br>40.56)    | 20.60<br>(10.85 to<br>30.74)      |

|                                |                                                     |                                                       |                                                      |                                                       |                                                  |                                                   |                                                  |                                                   |
|--------------------------------|-----------------------------------------------------|-------------------------------------------------------|------------------------------------------------------|-------------------------------------------------------|--------------------------------------------------|---------------------------------------------------|--------------------------------------------------|---------------------------------------------------|
| Hodgkin lymphoma               | 196.56<br>(89.95 to 301.54)                         | 266.10<br>(107.00 to 538.88)                          | 222.19<br>(88.46 to 469.10)                          | 286.28<br>(119.83 to 569.08)                          | 4.95<br>(2.27 to 7.57)                           | 7.80<br>(3.53 to 14.30)                           | 6.66<br>(2.97 to 12.59)                          | 8.16<br>(3.85 to 14.41)                           |
| Non-Hodgkin lymphoma           | 1,011.73<br>(481.67 to 1,637.87)                    | 2,522.23<br>(1,073.40 to 4,958.09)                    | 2,338.01<br>(987.90 to 4,741.83)                     | 2,293.96<br>(996.42 to 4,364.64)                      | 31.15<br>(15.17 to 49.29)                        | 92.85<br>(50.52 to 157.84)                        | 88.81<br>(47.02 to 155.06)                       | 81.09<br>(45.00 to 135.97)                        |
| Multiple myeloma               | 516.98<br>(220.88 to 857.62)                        | 1,730.52<br>(686.56 to 3,437.08)                      | 1,656.14<br>(654.47 to 3,338.37)                     | 1,540.87<br>(627.77 to 2,899.96)                      | 19.60<br>(8.75 to 31.87)                         | 68.53<br>(33.82 to 120.16)                        | 67.20<br>(32.21 to 117.79)                       | 59.29<br>(30.34 to 99.90)                         |
| Leukemia                       | 2,025.75<br>(1,098.56 to 2,976.54)                  | 4,190.09<br>(1,756.77 to 8,333.79)                    | 3,553.42<br>(1,544.08 to 7,171.08)                   | 4,148.61<br>(1,791.46 to 8,007.65)                    | 55.50<br>(28.69 to 80.37)                        | 147.46<br>(78.18 to 250.79)                       | 129.20<br>(71.45 to 223.75)                      | 140.28<br>(74.16 to 231.67)                       |
| Acute lymphoid leukemia        | 382.86<br>(219.03 to 579.60)                        | 536.34<br>(217.46 to 1,113.85)                        | 449.16<br>(186.65 to 916.11)                         | 529.62<br>(218.27 to 1,071.94)                        | 7.18<br>(4.09 to 10.71)                          | 13.45<br>(5.75 to 26.77)                          | 11.40<br>(5.04 to 22.40)                         | 12.84<br>(5.61 to 24.56)                          |
| Chronic lymphoid leukemia      | 42.96<br>(18.56 to 69.87)                           | 113.78<br>(45.43 to 223.15)                           | 101.78<br>(42.13 to 204.66)                          | 107.63<br>(44.51 to 203.90)                           | 1.82<br>(0.84 to 2.95)                           | 5.21<br>(2.63 to 8.80)                            | 4.85<br>(2.50 to 8.39)                           | 4.73<br>(2.41 to 7.78)                            |
| Acute myeloid leukemia         | 621.26<br>(306.32 to 1,046.54)                      | 1,514.83<br>(617.76 to 3,317.96)                      | 1,362.86<br>(578.23 to 2,872.09)                     | 1,425.30<br>(589.64 to 3,026.22)                      | 15.40<br>(7.47 to 26.04)                         | 46.75<br>(21.48 to 93.34)                         | 43.19<br>(20.20 to 83.76)                        | 42.42<br>(19.52 to 83.10)                         |
| Chronic myeloid leukemia       | 150.20<br>(63.99 to 247.85)                         | 237.55<br>(85.31 to 507.86)                           | 173.93<br>(64.41 to 368.83)                          | 235.42<br>(85.33 to 502.91)                           | 4.23<br>(1.90 to 6.94)                           | 7.78<br>(3.35 to 14.80)                           | 5.87<br>(2.56 to 11.14)                          | 7.46<br>(3.26 to 14.23)                           |
| Other leukemia                 | 828.46<br>(335.92 to 1,424.19)                      | 1,787.58<br>(653.48 to 3,823.03)                      | 1,465.69<br>(543.26 to 3,075.17)                     | 1,850.65<br>(698.28 to 3,803.07)                      | 26.87<br>(11.46 to 41.83)                        | 74.27<br>(35.85 to 127.81)                        | 63.88<br>(30.97 to 109.85)                       | 72.82<br>(35.91 to 121.39)                        |
| Other neoplasms                | 4,939.09<br>(2,194.60 to 8,105.21)                  | 9,750.68<br>(3,607.85 to 22,847.41)                   | 9,727.25<br>(3,525.97 to 23,074.60)                  | 9,238.74<br>(3,502.77 to 20,795.76)                   | 116.49<br>(51.52 to 184.61)                      | 275.09<br>(125.04 to 561.12)                      | 281.86<br>(127.30 to 576.30)                     | 251.70<br>(116.39 to 493.05)                      |
| <b>Cardiovascular diseases</b> | <b>62,785.12</b><br><b>(30,035.33 to 91,185.35)</b> | <b>118,104.99</b><br><b>(47,444.79 to 263,586.55)</b> | <b>74,842.57</b><br><b>(31,850.86 to 168,391.25)</b> | <b>189,039.88</b><br><b>(74,103.52 to 425,591.65)</b> | <b>2,879.33</b><br><b>(1,457.58 to 4,037.92)</b> | <b>5,814.98</b><br><b>(3,157.95 to 11,095.21)</b> | <b>3,989.91</b><br><b>(2,288.50 to 7,579.55)</b> | <b>8,525.13</b><br><b>(4,453.64 to 16,189.87)</b> |
| Rheumatic heart disease        | 1,582.56<br>(728.85 to 2,410.84)                    | 1,746.56<br>(758.91 to 3,704.64)                      | 1,469.54<br>(635.81 to 3,210.94)                     | 1,930.18<br>(866.80 to 3,967.22)                      | 52.26<br>(26.28 to 76.98)                        | 68.75<br>(39.25 to 122.84)                        | 59.75<br>(33.67 to 109.82)                       | 72.74<br>(42.54 to 125.26)                        |
| Ischemic heart disease         | 26,943.84<br>(12,463.31 to 39,451.66)               | 47,856.70<br>(15,874.31 to 124,518.55)                | 25,959.51<br>(9,472.95 to 69,068.49)                 | 84,170.68<br>(26,804.86 to 213,038.56)                | 1,283.32<br>(632.00 to 1,808.37)                 | 2,404.49<br>(1,117.86 to 5,393.72)                | 1,454.32<br>(676.25 to 3,261.91)                 | 3,824.97<br>(1,715.45 to 8,748.92)                |
| Stroke                         | 19,224.34<br>(9,145.22 to 28,127.05)                | 29,181.34<br>(10,700.72 to 72,424.22)                 | 16,420.74<br>(6,407.47 to 40,980.38)                 | 55,837.39<br>(19,556.68 to 136,124.06)                | 910.43<br>(453.06 to 1,286.80)                   | 1,494.70<br>(727.51 to 3,436.59)                  | 937.36<br>(477.08 to 2,280.05)                   | 2,545.78<br>(1,170.37 to 5,345.54)                |
| Ischemic stroke                | 6,186.85<br>(3,070.78 to 8,908.54)                  | 9,513.62<br>(3,625.10 to 27,832.57)                   | 6,063.29<br>(2,402.82 to 18,082.85)                  | 14,884.96<br>(5,736.76 to 38,549.23)                  | 371.74<br>(189.62 to 521.34)                     | 623.44<br>(295.09 to 1,925.78)                    | 435.57<br>(207.13 to 1,367.49)                   | 878.97<br>(405.16 to 2,650.08)                    |
| Intracerebral hemorrhage       | 13,037.49<br>(6,085.64 to 19,344.74)                | 19,667.72<br>(6,328.77 to 50,124.62)                  | 10,357.45<br>(3,508.86 to 27,134.32)                 | 40,952.43<br>(12,168.17 to 109,274.25)                | 538.69<br>(264.14 to 776.92)                     | 871.27<br>(372.97 to 2,006.15)                    | 501.79<br>(226.25 to 1,121.47)                   | 1,666.80<br>(639.86 to 3,871.90)                  |
| Hypertensive heart disease     | 6,994.22<br>(2,818.85 to 11,361.50)                 | 18,793.11<br>(6,101.88 to 50,915.66)                  | 14,009.80<br>(5,015.04 to 35,297.34)                 | 26,180.94<br>(8,600.45 to 75,480.95)                  | 320.13<br>(141.25 to 512.50)                     | 918.75<br>(405.33 to 2,106.17)                    | 726.12<br>(335.03 to 1,541.11)                   | 1,193.27<br>(493.45 to 2,976.95)                  |
| Cardiomyopathy and myocarditis | 3,153.65<br>(1,541.47 to 4,971.91)                  | 7,754.49<br>(3,729.75 to 14,192.37)                   | 6,423.69<br>(3,069.77 to 12,320.43)                  | 7,479.88<br>(3,644.20 to 13,644.49)                   | 121.33<br>(62.36 to 186.48)                      | 347.57<br>(205.86 to 565.00)                      | 399.07<br>(178.75 to 495.87)                     | 317.79<br>(193.41 to 502.80)                      |
| Myocarditis                    | 264.37<br>(90.56 to 561.68)                         | 422.46<br>(141.39 to 1,086.69)                        | 409.70<br>(136.93 to 1,062.42)                       | 419.46<br>(142.20 to 1,053.85)                        | 6.41<br>(2.41 to 14.55)                          | 12.72<br>(5.69 to 30.58)                          | 12.85<br>(5.78 to 31.12)                         | 12.03<br>(5.44 to 28.63)                          |
| <b>Botswana</b>                |                                                     |                                                       |                                                      |                                                       |                                                  |                                                   |                                                  |                                                   |
| Cause                          | YLLs (actual counts)                                |                                                       |                                                      |                                                       | Deaths (actual counts)                           |                                                   |                                                  |                                                   |
|                                | 2016                                                | 2040 Forecast                                         | 2040 Better Scenario                                 | 2040 Worse Scenario                                   | 2016                                             | 2040 Forecast                                     | 2040 Better Scenario                             | 2040 Worse Scenario                               |
| Alcoholic cardiomyopathy       | 252.59<br>(106.08 to 450.93)                        | 539.10<br>(250.10 to 1,004.32)                        | 518.32<br>(239.36 to 969.47)                         | 666.48<br>(317.31 to 1,266.76)                        | 11.08<br>(5.10 to 19.49)                         | 25.70<br>(14.34 to 45.02)                         | 25.68<br>(14.08 to 44.44)                        | 29.75<br>(17.45 to 50.33)                         |

|                                                                |                                                              |                                                              |                                                              |                                                               |                                                      |                                                          |                                                        |                                                          |
|----------------------------------------------------------------|--------------------------------------------------------------|--------------------------------------------------------------|--------------------------------------------------------------|---------------------------------------------------------------|------------------------------------------------------|----------------------------------------------------------|--------------------------------------------------------|----------------------------------------------------------|
|                                                                | 2,636.68<br>(1,306.82 to<br>4,013.36)                        | 6,792.92<br>(3,259.79 to<br>12,565.53)                       | 5,495.66<br>(2,611.03 to<br>10,534.23)                       | 6,393.95<br>(3,069.83 to<br>11,827.94)                        | 103.85<br>(53.51 to<br>152.58)                       | 308.96<br>(180.49 to<br>507.42)                          | 260.54<br>(152.37 to<br>428.95)                        | 276.01<br>(163.48 to<br>442.19)                          |
| Other cardiomyopathy                                           |                                                              |                                                              |                                                              |                                                               |                                                      |                                                          |                                                        |                                                          |
| Atrial fibrillation and flutter                                | 252.92<br>(124.34 to<br>373.72)                              | 809.54<br>(514.94 to<br>1,250.82)                            | 782.25<br>(504.64 to<br>1,207.29)                            | 794.26<br>(503.97 to<br>1,261.37)                             | 20.48<br>(11.00 to<br>29.72)                         | 70.53<br>(49.14 to<br>98.07)                             | 71.95<br>(50.34 to<br>99.19)                           | 63.92<br>(42.34 to<br>92.44)                             |
| Aortic aneurysm                                                | 823.14<br>(415.10 to<br>1,207.23)                            | 2,008.56<br>(1,064.47 to<br>3,536.06)                        | 1,760.51<br>(934.86 to<br>3,093.93)                          | 1,919.41<br>(1,026.03 to<br>3,287.45)                         | 36.01<br>(20.20 to<br>51.38)                         | 96.93<br>(65.60 to<br>143.29)                            | 90.52<br>(61.48 to<br>136.88)                          | 87.43<br>(60.59 to<br>126.94)                            |
| Peripheral artery disease                                      | 283.93<br>(60.41 to<br>536.00)                               | 1,088.16<br>(215.57 to<br>2,289.55)                          | 983.51<br>(189.53 to<br>2,057.62)                            | 1,063.18<br>(415.55 to<br>2,297.86)                           | 13.75<br>(2.93 to<br>24.88)                          | 57.76<br>(12.33 to<br>104.82)                            | 55.79<br>(11.88 to<br>100.91)                          | 52.33<br>(11.29 to<br>97.42)                             |
| Endocarditis                                                   | 829.83<br>(367.77 to<br>1,322.92)                            | 1,713.03<br>(627.20 to<br>4,143.45)                          | 1,589.90<br>(585.55 to<br>3,815.95)                          | 1,750.37<br>(647.80 to<br>4,156.85)                           | 20.52<br>(9.36 to<br>31.90)                          | 50.06<br>(21.53 to<br>102.27)                            | 47.99<br>(21.32 to<br>98.70)                           | 49.14<br>(20.72 to<br>101.93)                            |
| Other cardiovascular and circulatory diseases                  | 2,696.69<br>(1,146.79 to<br>5,367.23)                        | 7,153.50<br>(2,935.24 to<br>15,618.38)                       | 5,443.12<br>(2,222.21 to<br>11,974.59)                       | 7,913.59<br>(3,252.75 to<br>17,317.39)                        | 99.11<br>(44.33 to<br>194.39)                        | 305.64<br>(166.12 to<br>591.61)                          | 247.04<br>(131.90 to<br>480.04)                        | 317.76<br>(176.08 to<br>599.59)                          |
| <b>Chronic respiratory diseases</b>                            | <b>13,906.64</b><br><b>(7,071.88 to</b><br><b>20,533.85)</b> | <b>23,872.06</b><br><b>(9,700.48 to</b><br><b>46,506.95)</b> | <b>15,553.80</b><br><b>(6,860.24 to</b><br><b>29,941.54)</b> | <b>31,743.02</b><br><b>(12,752.85 to</b><br><b>63,565.89)</b> | <b>621.36</b><br><b>(340.72 to</b><br><b>875.10)</b> | <b>1,131.01</b><br><b>(629.98 to</b><br><b>1,863.50)</b> | <b>782.89</b><br><b>(472.85 to</b><br><b>1,237.36)</b> | <b>1,437.92</b><br><b>(775.62 to</b><br><b>2,483.70)</b> |
| Chronic obstructive pulmonary disease                          | 8,361.59<br>(4,442.76 to<br>12,097.33)                       | 15,511.75<br>(6,091.72 to<br>31,284.13)                      | 8,907.93<br>(3,849.69 to<br>17,153.21)                       | 22,942.92<br>(8,471.28 to<br>47,210.25)                       | 427.59<br>(244.35 to<br>595.20)                      | 794.43<br>(422.04 to<br>1,310.36)                        | 497.47<br>(294.20 to<br>780.68)                        | 1,102.28<br>(549.41 to<br>1,942.93)                      |
| Pneumoconiosis                                                 | 187.70<br>(88.75 to<br>290.77)                               | 345.34<br>(186.12 to<br>552.81)                              | 358.81<br>(190.62 to<br>590.47)                              | 332.61<br>(185.64 to<br>521.24)                               | 8.01<br>(4.16 to<br>12.07)                           | 17.26<br>(11.28 to<br>24.52)                             | 18.78<br>(12.11 to<br>26.92)                           | 16.01<br>(10.87 to<br>21.95)                             |
| Silicosis                                                      | 44.04<br>(18.47 to<br>82.28)                                 | 53.63<br>(19.85 to<br>112.46)                                | 42.70<br>(14.36 to<br>96.67)                                 | 52.49<br>(20.94 to<br>107.31)                                 | 1.70<br>(0.72 to<br>3.12)                            | 2.42<br>(1.07 to<br>4.75)                                | 2.02<br>(0.81 to<br>4.28)                              | 2.29<br>(1.09 to<br>4.34)                                |
| Asbestosis                                                     | 67.15<br>(24.20 to<br>121.78)                                | 173.46<br>(73.37 to<br>305.49)                               | 204.89<br>(94.73 to<br>357.72)                               | 152.70<br>(64.18 to<br>262.77)                                | 3.25<br>(1.13 to<br>5.81)                            | 9.15<br>(4.16 to<br>14.59)                               | 11.12<br>(5.46 to<br>17.76)                            | 7.78<br>(3.46 to<br>12.27)                               |
| Coal workers pneumoconiosis                                    | 11.36<br>(3.77 to<br>20.56)                                  | 17.54<br>(5.56 to<br>37.61)                                  | 15.86<br>(4.78 to<br>35.47)                                  | 21.40<br>(7.07 to<br>43.17)                                   | 0.46<br>(0.17 to<br>0.84)                            | 0.85<br>(0.33 to<br>1.65)                                | 0.80<br>(0.31 to<br>1.64)                              | 0.98<br>(0.39 to<br>1.83)                                |
| Other pneumoconiosis                                           | 65.15<br>(26.83 to<br>123.61)                                | 100.71<br>(40.19 to<br>206.23)                               | 95.36<br>(35.27 to<br>201.84)                                | 106.02<br>(44.97 to<br>205.73)                                | 2.60<br>(1.12 to<br>4.90)                            | 4.86<br>(2.33 to<br>8.92)                                | 4.84<br>(2.15 to<br>9.19)                              | 4.96<br>(2.55 to<br>8.95)                                |
| Asthma                                                         | 4,267.85<br>(1,958.44 to<br>6,565.66)                        | 5,584.39<br>(2,062.33 to<br>12,735.95)                       | 3,413.59<br>(1,276.06 to<br>7,836.55)                        | 6,319.78<br>(2,429.73 to<br>14,003.80)                        | 149.23<br>(73.41 to<br>226.43)                       | 218.19<br>(107.91 to<br>417.21)                          | 140.24<br>(70.16 to<br>267.58)                         | 255.75<br>(116.86 to<br>440.25)                          |
| Interstitial lung disease and pulmonary sarcoidosis            | 706.70<br>(240.93 to<br>1,208.41)                            | 1,939.36<br>(669.54 to<br>3,601.17)                          | 2,420.75<br>(835.60 to<br>4,398.02)                          | 1,630.40<br>(556.34 to<br>2,892.75)                           | 29.51<br>(10.36 to<br>49.51)                         | 89.41<br>(34.31 to<br>148.28)                            | 115.21<br>(46.21 to<br>191.69)                         | 72.11<br>(27.28 to<br>115.33)                            |
| Other chronic respiratory diseases                             | 376.81<br>(207.67 to<br>630.91)                              | 491.21<br>(190.39 to<br>1,208.70)                            | 452.71<br>(179.76 to<br>1,110.07)                            | 517.32<br>(209.32 to<br>1,231.62)                             | 7.01<br>(3.79 to<br>11.19)                           | 11.73<br>(5.53 to<br>25.59)                              | 11.19<br>(5.38 to<br>23.96)                            | 11.77<br>(5.59 to<br>25.20)                              |
| <b>Cirrhosis and other chronic liver diseases</b>              | <b>6,494.18</b><br><b>(2,794.08 to</b><br><b>9,900.10)</b>   | <b>13,484.36</b><br><b>(5,171.54 to</b><br><b>26,032.79)</b> | <b>11,927.52</b><br><b>(4,400.22 to</b><br><b>23,853.15)</b> | <b>15,433.54</b><br><b>(6,091.02 to</b><br><b>29,294.63)</b>  | <b>198.13</b><br><b>(90.39 to</b><br><b>296.59)</b>  | <b>449.43</b><br><b>(209.16 to</b><br><b>800.98)</b>     | <b>405.29</b><br><b>(180.92 to</b><br><b>739.99)</b>   | <b>500.67</b><br><b>(238.98 to</b><br><b>854.36)</b>     |
| Cirrhosis and other chronic liver diseases due to hepatitis B  | 2,083.30<br>(897.05 to<br>3,290.61)                          | 4,608.92<br>(1,765.88 to<br>9,113.49)                        | 4,220.85<br>(1,619.81 to<br>8,390.63)                        | 4,544.46<br>(1,800.13 to<br>8,680.06)                         | 64.12<br>(29.88 to<br>97.20)                         | 153.21<br>(70.15 to<br>276.14)                           | 142.74<br>(65.83 to<br>262.08)                         | 147.76<br>(69.47 to<br>256.74)                           |
| Cirrhosis and other chronic liver diseases due to hepatitis C  | 980.13<br>(417.12 to<br>1,517.36)                            | 2,256.85<br>(841.51 to<br>4,570.85)                          | 2,049.55<br>(756.85 to<br>4,199.00)                          | 2,231.72<br>(865.43 to<br>4,347.54)                           | 30.04<br>(13.56 to<br>45.85)                         | 74.05<br>(32.48 to<br>138.69)                            | 68.25<br>(29.82 to<br>129.44)                          | 71.82<br>(32.77 to<br>128.12)                            |
| Cirrhosis and other chronic liver diseases due to alcohol use  | 2,300.42<br>(966.66 to<br>3,567.36)                          | 4,431.34<br>(1,703.03 to<br>8,562.10)                        | 3,679.06<br>(1,401.44 to<br>7,329.13)                        | 6,459.58<br>(2,502.12 to<br>12,185.58)                        | 73.05<br>(32.94 to<br>110.90)                        | 151.64<br>(70.24 to<br>269.35)                           | 129.07<br>(59.21 to<br>232.20)                         | 212.36<br>(99.15 to<br>365.97)                           |
| Cirrhosis and other chronic liver diseases due to other causes | 1,130.33<br>(510.43 to<br>1,729.99)                          | 2,187.26<br>(806.66 to<br>4,747.22)                          | 1,978.06<br>(729.06 to<br>4,362.35)                          | 2,197.77<br>(844.40 to<br>4,640.76)                           | 30.91<br>(13.45 to<br>47.79)                         | 70.54<br>(31.89 to<br>137.20)                            | 65.24<br>(28.25 to<br>129.49)                          | 68.74<br>(31.49 to<br>130.42)                            |
| <b>Digestive diseases</b>                                      | <b>7,993.37</b><br><b>(3,682.38 to</b><br><b>12,158.76)</b>  | <b>14,634.61</b><br><b>(6,359.89 to</b><br><b>27,963.56)</b> | <b>12,998.83</b><br><b>(5,540.75 to</b><br><b>25,315.68)</b> | <b>15,381.30</b><br><b>(6,780.02 to</b><br><b>28,726.60)</b>  | <b>257.45</b><br><b>(125.54 to</b><br><b>383.53)</b> | <b>566.17</b><br><b>(329.10 to</b><br><b>917.45)</b>     | <b>520.75</b><br><b>(298.50 to</b><br><b>851.61)</b>   | <b>565.34</b><br><b>(336.51 to</b><br><b>906.43)</b>     |

|                                            |                                                              |                                                               |                                                               |                                                               |                                                      |                                                          |                                                          |                                                          |
|--------------------------------------------|--------------------------------------------------------------|---------------------------------------------------------------|---------------------------------------------------------------|---------------------------------------------------------------|------------------------------------------------------|----------------------------------------------------------|----------------------------------------------------------|----------------------------------------------------------|
| Peptic ulcer disease                       | 1,116.27<br>(506.14 to<br>1,699.95)                          | 1,515.15<br>(709.59 to<br>2,713.57)                           | 1,162.28<br>(519.52 to<br>2,177.66)                           | 1,685.64<br>(805.75 to<br>2,892.83)                           | 45.60<br>(22.38 to<br>68.66)                         | 71.18<br>(43.70 to<br>106.57)                            | 56.82<br>(34.15 to<br>85.39)                             | 75.42<br>(47.86 to<br>110.71)                            |
| <b>Botswana</b>                            |                                                              |                                                               |                                                               |                                                               |                                                      |                                                          |                                                          |                                                          |
| Cause                                      | YLLs (actual counts)                                         |                                                               |                                                               |                                                               | Deaths (actual counts)                               |                                                          |                                                          |                                                          |
|                                            | 2016                                                         | 2040 Forecast                                                 | 2040 Better Scenario                                          | 2040 Worse Scenario                                           | 2016                                                 | 2040 Forecast                                            | 2040 Better Scenario                                     | 2040 Worse Scenario                                      |
| Gastritis and duodenitis                   | 945.15<br>(399.32 to<br>1,473.79)                            | 1,708.81<br>(669.68 to<br>3,653.02)                           | 1,482.85<br>(568.39 to<br>3,235.83)                           | 1,750.98<br>(707.96 to<br>3,633.12)                           | 25.64<br>(11.17 to<br>39.92)                         | 55.35<br>(27.34 to<br>100.27)                            | 49.38<br>(24.03 to<br>92.37)                             | 54.76<br>(28.22 to<br>94.61)                             |
| Appendicitis                               | 369.16<br>(170.97 to<br>603.55)                              | 533.52<br>(234.14 to<br>1,079.79)                             | 433.13<br>(184.49 to<br>904.12)                               | 571.81<br>(256.07 to<br>1,096.10)                             | 9.96<br>(4.87 to<br>14.74)                           | 18.51<br>(10.29 to<br>31.30)                             | 15.62<br>(8.33 to<br>27.16)                              | 18.87<br>(10.81 to<br>30.78)                             |
| Paralytic ileus and intestinal obstruction | 2,234.39<br>(1,015.21 to<br>4,122.80)                        | 4,099.97<br>(1,714.98 to<br>8,414.88)                         | 4,112.24<br>(1,692.79 to<br>8,448.49)                         | 4,024.86<br>(1,737.09 to<br>8,109.07)                         | 66.29<br>(30.25 to<br>122.42)                        | 152.02<br>(84.63 to<br>273.89)                           | 158.49<br>(87.68 to<br>286.22)                           | 141.25<br>(79.77 to<br>248.66)                           |
| Inguinal, femoral, and abdominal hernia    | 237.09<br>(103.08 to<br>381.09)                              | 351.25<br>(154.19 to<br>694.05)                               | 321.11<br>(134.48 to<br>671.90)                               | 350.11<br>(159.31 to<br>672.59)                               | 8.50<br>(3.91 to<br>13.44)                           | 14.50<br>(7.69 to<br>24.34)                              | 13.82<br>(6.97 to<br>23.70)                              | 13.70<br>(7.51 to<br>22.36)                              |
| Inflammatory bowel disease                 | 877.37<br>(388.32 to<br>1,501.89)                            | 1,560.83<br>(656.79 to<br>3,039.55)                           | 1,565.08<br>(644.79 to<br>3,133.48)                           | 1,482.64<br>(629.65 to<br>2,858.52)                           | 25.26<br>(11.90 to<br>38.29)                         | 59.12<br>(32.80 to<br>95.43)                             | 61.70<br>(33.28 to<br>103.47)                            | 53.08<br>(30.05 to<br>83.08)                             |
| Vascular intestinal disorders              | 227.58<br>(99.55 to<br>367.36)                               | 543.23<br>(226.94 to<br>979.09)                               | 525.59<br>(218.50 to<br>983.56)                               | 521.41<br>(231.38 to<br>901.78)                               | 9.36<br>(4.22 to<br>14.41)                           | 25.75<br>(14.22 to<br>38.75)                             | 25.86<br>(13.87 to<br>40.04)                             | 23.53<br>(13.27 to<br>34.20)                             |
| Gallbladder and biliary diseases           | 689.68<br>(280.49 to<br>1,094.47)                            | 1,792.89<br>(619.38 to<br>4,321.58)                           | 1,179.67<br>(421.47 to<br>2,791.34)                           | 2,021.19<br>(731.20 to<br>4,854.52)                           | 25.54<br>(11.56 to<br>38.85)                         | 74.77<br>(34.88 to<br>151.54)                            | 51.67<br>(24.44 to<br>101.07)                            | 80.32<br>(36.90 to<br>162.30)                            |
| Pancreatitis                               | 463.65<br>(194.86 to<br>777.38)                              | 995.95<br>(224.51 to<br>2,963.37)                             | 774.19<br>(184.69 to<br>2,284.42)                             | 1,391.83<br>(288.65 to<br>4,108.47)                           | 13.15<br>(5.82 to<br>21.47)                          | 31.96<br>(9.34 to<br>88.45)                              | 25.61<br>(8.07 to<br>67.96)                              | 42.78<br>(11.61 to<br>123.91)                            |
| Other digestive diseases                   | 833.05<br>(350.63 to<br>1,330.78)                            | 1,533.01<br>(671.18 to<br>2,916.70)                           | 1,442.68<br>(619.83 to<br>2,831.50)                           | 1,580.82<br>(716.73 to<br>2,907.95)                           | 28.15<br>(13.27 to<br>41.94)                         | 63.01<br>(38.55 to<br>98.25)                             | 61.78<br>(36.36 to<br>97.47)                             | 61.63<br>(38.75 to<br>94.82)                             |
| <b>Neurological disorders</b>              | <b>10,809.70</b><br><b>(4,853.11 to</b><br><b>16,602.92)</b> | <b>23,406.19</b><br><b>(11,682.27 to</b><br><b>42,450.07)</b> | <b>21,570.67</b><br><b>(10,865.67 to</b><br><b>39,781.33)</b> | <b>25,772.50</b><br><b>(12,539.30 to</b><br><b>49,145.63)</b> | <b>398.51</b><br><b>(197.34 to</b><br><b>574.02)</b> | <b>1,173.99</b><br><b>(795.01 to</b><br><b>1,737.40)</b> | <b>1,150.02</b><br><b>(795.01 to</b><br><b>1,634.96)</b> | <b>1,121.18</b><br><b>(751.81 to</b><br><b>1,688.90)</b> |
| Alzheimer's disease and other dementias    | 2,213.09<br>(1,032.16 to<br>3,222.55)                        | 7,754.76<br>(4,769.80 to<br>11,924.67)                        | 7,433.31<br>(4,754.14 to<br>11,134.41)                        | 6,814.21<br>(4,222.64 to<br>10,663.47)                        | 189.15<br>(93.63 to<br>267.42)                       | 711.01<br>(459.47 to<br>1,071.76)                        | 711.84<br>(492.86 to<br>1,022.90)                        | 593.13<br>(342.45 to<br>936.68)                          |
| Parkinson's disease                        | 209.56<br>(107.17 to<br>315.98)                              | 733.64<br>(500.53 to<br>978.85)                               | 844.41<br>(564.25 to<br>1,174.21)                             | 576.08<br>(411.47 to<br>757.63)                               | 15.13<br>(8.14 to<br>22.73)                          | 56.59<br>(40.99 to<br>74.25)                             | 66.94<br>(49.98 to<br>86.76)                             | 42.65<br>(29.45 to<br>56.70)                             |
| Epilepsy                                   | 7,482.87<br>(3,193.11 to<br>12,248.31)                       | 12,752.44<br>(4,328.13 to<br>29,952.74)                       | 11,057.55<br>(3,761.11 to<br>26,592.35)                       | 16,413.63<br>(5,598.64 to<br>37,650.55)                       | 170.73<br>(75.87 to<br>271.17)                       | 340.85<br>(136.75 to<br>741.00)                          | 302.06<br>(122.49 to<br>668.41)                          | 427.55<br>(168.04 to<br>927.75)                          |
| Multiple sclerosis                         | 62.54<br>(22.93 to<br>101.94)                                | 156.28<br>(69.04 to<br>357.49)                                | 159.93<br>(48.64 to<br>374.67)                                | 144.22<br>(47.05 to<br>323.95)                                | 1.76<br>(0.68 to<br>2.82)                            | 4.73<br>(1.79 to<br>9.88)                                | 4.90<br>(1.79 to<br>10.69)                               | 4.30<br>(1.70 to<br>8.67)                                |
| Motor neuron disease                       | 73.67<br>(30.91 to<br>112.32)                                | 239.48<br>(89.57 to<br>493.04)                                | 246.00<br>(90.88 to<br>524.33)                                | 214.57<br>(82.92 to<br>424.48)                                | 2.26<br>(0.99 to<br>3.40)                            | 7.78<br>(3.33 to<br>14.96)                               | 8.09<br>(3.39 to<br>15.95)                               | 6.86<br>(3.02 to<br>12.52)                               |
| Other neurological disorders               | 767.97<br>(373.69 to<br>1,188.18)                            | 1,769.59<br>(733.69 to<br>3,593.80)                           | 1,829.48<br>(742.18 to<br>3,748.29)                           | 1,609.80<br>(678.09 to<br>3,112.40)                           | 19.47<br>(9.31 to<br>29.79)                          | 53.03<br>(25.72 to<br>97.43)                             | 56.20<br>(26.94 to<br>106.23)                            | 46.70<br>(23.29 to<br>82.83)                             |
| <b>Mental disorders</b>                    | <b>4,534.42</b><br><b>(1,980.22 to</b><br><b>7,505.61)</b>   | <b>9,060.55</b><br><b>(3,447.46 to</b><br><b>18,565.73)</b>   | <b>9,575.83</b><br><b>(3,579.57 to</b><br><b>19,959.17)</b>   | <b>9,117.86</b><br><b>(3,552.19 to</b><br><b>18,190.81)</b>   | <b>101.81</b><br><b>(45.38 to</b><br><b>166.50)</b>  | <b>222.95</b><br><b>(94.64 to</b><br><b>441.09)</b>      | <b>239.33</b><br><b>(100.45 to</b><br><b>474.68)</b>     | <b>222.97</b><br><b>(96.62 to</b><br><b>426.20)</b>      |
| Alcohol use disorders                      | 1,357.89<br>(561.39 to<br>2,267.51)                          | 2,712.70<br>(972.91 to<br>5,601.65)                           | 2,817.22<br>(973.42 to<br>5,985.01)                           | 2,966.99<br>(1,090.80 to<br>5,963.20)                         | 39.11<br>(16.77 to<br>64.76)                         | 83.40<br>(33.22 to<br>163.68)                            | 87.51<br>(33.94 to<br>174.62)                            | 89.94<br>(36.43 to<br>171.79)                            |
| Drug use disorders                         | 3,167.09<br>(1,379.37 to<br>5,430.40)                        | 6,329.76<br>(2,240.68 to<br>14,201.89)                        | 6,739.52<br>(2,357.96 to<br>15,078.29)                        | 6,133.79<br>(2,202.36 to<br>13,499.57)                        | 62.51<br>(26.91 to<br>106.22)                        | 139.19<br>(54.78 to<br>295.00)                           | 151.44<br>(59.34 to<br>321.90)                           | 132.69<br>(52.58 to<br>278.48)                           |

|                                                            |                                          |                                           |                                           |                                            |                                     |                                       |                                       |                                       |
|------------------------------------------------------------|------------------------------------------|-------------------------------------------|-------------------------------------------|--------------------------------------------|-------------------------------------|---------------------------------------|---------------------------------------|---------------------------------------|
| Opioid use disorders                                       | 2,734.52<br>(1,166.45 to<br>4,759.51)    | 5,108.11<br>(1,770.27 to<br>11,405.38)    | 5,266.27<br>(1,801.01 to<br>11,946.76)    | 4,978.13<br>(1,764.55 to<br>10,875.81)     | 52.37<br>(22.44 to<br>91.86)        | 105.39<br>(37.58 to<br>234.47)        | 109.59<br>(37.87 to<br>246.15)        | 101.74<br>(37.02 to<br>219.12)        |
| Cocaine use disorders                                      | 39.43<br>(8.62 to<br>73.40)              | 141.53<br>(29.35 to<br>317.55)            | 163.02<br>(33.11 to<br>382.08)            | 137.47<br>(29.00 to<br>301.94)             | 1.04<br>(0.24 to<br>1.87)           | 4.20<br>(0.94 to<br>8.81)             | 4.92<br>(1.10 to<br>10.60)            | 4.00<br>(0.91 to<br>7.98)             |
| Amphetamine use disorders                                  | 20.18<br>(5.85 to<br>37.43)              | 96.02<br>(24.93 to<br>231.44)             | 119.62<br>(30.84 to<br>279.97)            | 93.16<br>(25.54 to<br>213.31)              | 0.48<br>(0.14 to<br>0.87)           | 2.53<br>(0.73 to<br>5.54)             | 3.19<br>(0.89 to<br>6.90)             | 2.43<br>(0.73 to<br>5.12)             |
| Other drug use disorders                                   | 372.96<br>(149.41 to<br>680.31)          | 984.11<br>(367.61 to<br>2,151.54)         | 1,190.61<br>(432.76 to<br>2,630.67)       | 925.04<br>(342.95 to<br>2,012.17)          | 8.63<br>(3.71 to<br>14.89)          | 27.07<br>(12.72 to<br>52.58)          | 33.73<br>(16.10 to<br>64.40)          | 24.51<br>(11.48 to<br>47.90)          |
| Eating disorders                                           | 9.44<br>(2.84 to<br>18.40)               | 18.09<br>(4.47 to<br>52.91)               | 19.09<br>(4.39 to<br>57.38)               | 17.09<br>(4.43 to<br>49.29)                | 0.18<br>(0.05 to<br>0.36)           | 0.36<br>(0.09 to<br>1.09)             | 0.39<br>(0.09 to<br>1.19)             | 0.34<br>(0.09 to<br>1.00)             |
| <b>Botswana</b>                                            |                                          |                                           |                                           |                                            |                                     |                                       |                                       |                                       |
| Cause                                                      | YLLs (actual counts)                     |                                           |                                           |                                            | Deaths (actual counts)              |                                       |                                       |                                       |
|                                                            | 2016                                     | 2040 Forecast                             | 2040 Better Scenario                      | 2040 Worse Scenario                        | 2016                                | 2040 Forecast                         | 2040 Better Scenario                  | 2040 Worse Scenario                   |
| Diabetes, urogenital, blood, and endocrine diseases        | 39,564.56<br>(17,943.23 to<br>59,148.92) | 90,087.50<br>(37,096.56 to<br>189,387.32) | 72,262.62<br>(29,136.52 to<br>161,653.81) | 109,451.66<br>(45,815.07 to<br>229,048.83) | 1,453.02<br>(704.57 to<br>2,130.33) | 3,769.73<br>(1,984.24 to<br>7,016.77) | 3,089.05<br>(1,573.76 to<br>5,950.41) | 4,408.12<br>(2,335.72 to<br>8,057.65) |
| Diabetes mellitus                                          | 24,839.06<br>(11,035.17 to<br>37,788.55) | 53,120.42<br>(21,190.98 to<br>114,900.43) | 40,969.04<br>(16,266.61 to<br>89,612.85)  | 65,850.72<br>(26,161.54 to<br>139,331.07)  | 1,008.58<br>(470.81 to<br>1,484.60) | 2,329.48<br>(1,231.53 to<br>4,211.45) | 1,861.29<br>(964.05 to<br>3,399.87)   | 2,742.27<br>(1,437.89 to<br>5,031.31) |
| Acute glomerulonephritis                                   | 22.48<br>(12.23 to<br>33.75)             | 37.58<br>(17.69 to<br>79.13)              | 33.24<br>(15.26 to<br>69.88)              | 39.30<br>(18.98 to<br>81.66)               | 0.56<br>(0.30 to<br>0.81)           | 1.14<br>(0.67 to<br>1.92)             | 1.06<br>(0.60 to<br>1.79)             | 1.12<br>(0.68 to<br>1.83)             |
| Chronic kidney disease                                     | 6,480.14<br>(3,022.40 to<br>9,921.69)    | 22,466.69<br>(5,260.14 to<br>81,883.07)   | 17,436.96<br>(3,865.19 to<br>64,701.31)   | 28,756.26<br>(6,835.13 to<br>96,494.88)    | 241.18<br>(121.06 to<br>352.55)     | 1,008.74<br>(226.08 to<br>3,515.79)   | 809.47<br>(183.55 to<br>2,929.95)     | 1,241.12<br>(282.82 to<br>3,938.25)   |
| Chronic kidney disease due to diabetes mellitus            | 2,054.34<br>(925.08 to<br>3,217.87)      | 8,731.33<br>(1,860.17 to<br>31,548.28)    | 6,764.21<br>(1,381.06 to<br>25,176.72)    | 11,149.99<br>(2,388.77 to<br>38,564.91)    | 78.83<br>(38.40 to<br>117.69)       | 378.34<br>(81.61 to<br>1,326.39)      | 301.41<br>(64.71 to<br>1,118.57)      | 466.87<br>(101.30 to<br>1,440.89)     |
| Chronic kidney disease due to hypertension                 | 1,045.12<br>(496.13 to<br>1,551.94)      | 4,377.35<br>(894.17 to<br>16,545.39)      | 3,522.50<br>(700.17 to<br>13,749.15)      | 5,514.56<br>(1,135.59 to<br>18,187.17)     | 51.64<br>(26.88 to<br>73.36)        | 239.06<br>(47.02 to<br>829.00)        | 200.73<br>(40.48 to<br>770.08)        | 285.58<br>(56.88 to<br>909.43)        |
| Chronic kidney disease due to glomerulonephritis           | 1,539.97<br>(703.24 to<br>2,412.65)      | 3,991.73<br>(1,005.55 to<br>14,313.79)    | 3,021.19<br>(745.97 to<br>10,831.68)      | 5,174.32<br>(1,305.92 to<br>17,399.59)     | 48.19<br>(22.68 to<br>73.33)        | 160.81<br>(37.62 to<br>575.43)        | 124.55<br>(29.33 to<br>457.49)        | 202.39<br>(47.97 to<br>649.02)        |
| Chronic kidney disease due to other and unspecified causes | 1,840.71<br>(823.88 to<br>2,857.22)      | 5,366.29<br>(1,301.98 to<br>19,393.57)    | 4,129.06<br>(985.79 to<br>15,379.39)      | 6,917.38<br>(1,697.68 to<br>23,691.54)     | 62.52<br>(29.80 to<br>94.60)        | 230.53<br>(53.46 to<br>802.74)        | 182.77<br>(42.67 to<br>646.73)        | 286.27<br>(66.53 to<br>912.45)        |
| Urinary diseases and male infertility                      | 1,278.25<br>(570.76 to<br>1,996.82)      | 2,638.14<br>(1,205.16 to<br>5,130.33)     | 2,345.28<br>(1,047.90 to<br>4,815.16)     | 2,577.04<br>(1,228.43 to<br>4,771.38)      | 44.08<br>(21.54 to<br>64.70)        | 106.79<br>(68.74 to<br>165.77)        | 98.76<br>(61.02 to<br>159.19)         | 98.87<br>(65.64 to<br>149.36)         |
| Urinary tract infections                                   | 591.97<br>(245.98 to<br>1,015.92)        | 1,649.63<br>(676.86 to<br>3,499.34)       | 1,510.55<br>(615.16 to<br>3,351.03)       | 1,548.73<br>(665.78 to<br>3,171.53)        | 19.16<br>(8.49 to<br>31.58)         | 66.02<br>(38.52 to<br>112.64)         | 62.81<br>(35.86 to<br>110.37)         | 58.70<br>(35.67 to<br>95.82)          |
| Urolithiasis                                               | 19.78<br>(9.38 to<br>32.99)              | 52.68<br>(23.26 to<br>106.51)             | 44.52<br>(19.46 to<br>90.72)              | 50.33<br>(23.14 to<br>97.67)               | 0.60<br>(0.31 to<br>0.93)           | 1.90<br>(1.04 to<br>3.28)             | 1.66<br>(0.89 to<br>2.91)             | 1.73<br>(0.98 to<br>2.84)             |
| Other urinary diseases                                     | 666.49<br>(303.90 to<br>1,028.88)        | 935.83<br>(453.60 to<br>1,640.00)         | 790.20<br>(384.24 to<br>1,417.84)         | 977.98<br>(491.92 to<br>1,645.41)          | 24.31<br>(12.41 to<br>35.53)        | 38.87<br>(25.43 to<br>55.55)          | 34.29<br>(22.18 to<br>50.48)          | 38.43<br>(25.60 to<br>53.75)          |
| Gynecological diseases                                     | 81.08<br>(17.05 to<br>148.81)            | 162.60<br>(26.72 to<br>503.06)            | 122.31<br>(19.98 to<br>392.64)            | 177.16<br>(31.39 to<br>543.00)             | 2.15<br>(0.49 to<br>3.79)           | 4.49<br>(1.10 to<br>12.88)            | 3.43<br>(0.82 to<br>10.00)            | 4.80<br>(1.20 to<br>13.49)            |
| Uterine fibroids                                           | 32.27<br>(6.06 to<br>67.72)              | 58.58<br>(9.30 to<br>198.66)              | 46.46<br>(7.15 to<br>159.18)              | 64.93<br>(10.65 to<br>204.01)              | 0.91<br>(0.19 to<br>1.84)           | 1.72<br>(0.37 to<br>5.20)             | 1.38<br>(0.28 to<br>4.24)             | 1.87<br>(0.41 to<br>5.35)             |
| Polycystic ovarian syndrome                                | 2.96<br>(0.30 to<br>11.90)               | 4.04<br>(0.28 to<br>18.42)                | 2.44<br>(0.15 to<br>11.22)                | 4.90<br>(0.36 to<br>22.29)                 | 0.07<br>(0.01 to<br>0.27)           | 0.10<br>(0.01 to<br>0.45)             | 0.06<br>(0.00 to<br>0.28)             | 0.12<br>(0.01 to<br>0.54)             |

|                                                   |                                        |                                        |                                        |                                         |                                |                                |                                |                                |
|---------------------------------------------------|----------------------------------------|----------------------------------------|----------------------------------------|-----------------------------------------|--------------------------------|--------------------------------|--------------------------------|--------------------------------|
| Endometriosis                                     | 1.15<br>(0.11 to<br>5.66)              | 3.24<br>(15.06)                        | 2.42<br>(0.14 to<br>11.95)             | 3.56<br>(0.21 to<br>16.81)              | 0.02<br>(0.11)                 | 0.07<br>(0.00 to<br>0.32)      | 0.05<br>(0.00 to<br>0.24)      | 0.07<br>(0.01 to<br>0.35)      |
| Genital prolapse                                  | 4.80<br>(0.43 to<br>11.09)             | 8.61<br>(0.63 to<br>29.41)             | 6.38<br>(0.48 to<br>22.41)             | 9.74<br>(0.72 to<br>32.45)              | 0.17<br>(0.02 to<br>0.34)      | 0.29<br>(0.03 to<br>0.77)      | 0.22<br>(0.02 to<br>0.60)      | 0.31<br>(0.03 to<br>0.82)      |
| Other gynecological diseases                      | 39.89<br>(8.21 to<br>78.11)            | 88.14<br>(14.17 to<br>282.86)          | 64.60<br>(9.94 to<br>215.68)           | 94.03<br>(15.69 to<br>298.45)           | 0.98<br>(0.22 to<br>1.87)      | 2.32<br>(0.52 to<br>6.79)      | 1.72<br>(0.38 to<br>5.19)      | 2.42<br>(0.54 to<br>7.00)      |
| Hemoglobinopathies and hemolytic anemias          | 854.83<br>(353.66 to<br>1,716.61)      | 1,683.96<br>(658.16 to<br>3,630.41)    | 1,405.48<br>(537.21 to<br>3,185.84)    | 1,788.14<br>(725.98 to<br>3,821.04)     | 26.22<br>(11.15 to<br>51.36)   | 65.54<br>(33.60 to<br>124.95)  | 56.79<br>(28.12 to<br>113.87)  | 66.39<br>(35.17 to<br>121.20)  |
| Thalassemias                                      | 3.97<br>(1.47 to<br>10.72)             | 1.93<br>(0.49 to<br>5.78)              | 1.82<br>(0.45 to<br>5.52)              | 1.92<br>(0.49 to<br>5.70)               | 0.05<br>(0.02 to<br>0.13)      | 0.02<br>(0.01 to<br>0.07)      | 0.02<br>(0.01 to<br>0.07)      | 0.02<br>(0.01 to<br>0.07)      |
| Sickle cell disorders                             | 65.52<br>(26.44 to<br>165.42)          | 54.96<br>(15.93 to<br>153.57)          | 44.15<br>(11.86 to<br>130.37)          | 61.14<br>(17.97 to<br>180.88)           | 0.92<br>(0.38 to<br>2.29)      | 0.88<br>(0.24 to<br>2.65)      | 0.72<br>(0.19 to<br>2.22)      | 0.97<br>(0.28 to<br>2.81)      |
| G6PD deficiency                                   | 552.60<br>(219.47 to<br>1,111.31)      | 1,215.24<br>(432.56 to<br>2,782.66)    | 993.30<br>(338.84 to<br>2,458.05)      | 1,314.20<br>(487.35 to<br>2,947.29)     | 13.54<br>(5.43 to<br>26.85)    | 38.94<br>(16.08 to<br>81.33)   | 32.41<br>(12.87 to<br>68.89)   | 41.00<br>(17.48 to<br>81.71)   |
| Other hemoglobinopathies and hemolytic anemias    | 232.74<br>(95.93 to<br>449.88)         | 411.83<br>(206.85 to<br>802.16)        | 366.21<br>(173.42 to<br>738.34)        | 410.88<br>(215.88 to<br>758.25)         | 11.71<br>(5.28 to<br>21.75)    | 25.69<br>(16.18 to<br>43.84)   | 23.64<br>(14.40 to<br>41.06)   | 24.40<br>(15.87 to<br>41.71)   |
| Endocrine, metabolic, blood, and immune disorders | 6,008.72<br>(2,179.91 to<br>10,908.45) | 9,978.08<br>(2,852.78 to<br>24,358.54) | 9,950.30<br>(2,836.13 to<br>24,236.30) | 10,263.03<br>(2,962.87 to<br>24,831.00) | 130.25<br>(45.87 to<br>230.92) | 253.54<br>(79.98 to<br>575.64) | 258.26<br>(82.37 to<br>588.34) | 253.54<br>(79.23 to<br>568.10) |

**Botswana**

| Cause                                         | YLLs (actual counts)                                  |                                                       |                                                       |                                                       | Deaths (actual counts)                        |                                                |                                                |                                                |
|-----------------------------------------------|-------------------------------------------------------|-------------------------------------------------------|-------------------------------------------------------|-------------------------------------------------------|-----------------------------------------------|------------------------------------------------|------------------------------------------------|------------------------------------------------|
|                                               | 2016                                                  | 2040 Forecast                                         | 2040 Better Scenario                                  | 2040 Worse Scenario                                   | 2016                                          | 2040 Forecast                                  | 2040 Better Scenario                           | 2040 Worse Scenario                            |
| <b>Musculoskeletal disorders</b>              | <b>882.68</b><br>(334.41 to<br><b>1,514.62</b> )      | <b>2,440.44</b><br>(908.27 to<br><b>5,716.85</b> )    | <b>2,227.03</b><br>(818.97 to<br><b>5,354.58</b> )    | <b>2,297.65</b><br>(886.16 to<br><b>5,128.15</b> )    | <b>26.21</b><br>(10.92 to<br><b>42.62</b> )   | <b>86.66</b><br>(40.89 to<br><b>162.76</b> )   | <b>79.97</b><br>(37.05 to<br><b>153.69</b> )   | <b>79.30</b><br>(38.89 to<br><b>143.64</b> )   |
| Rheumatoid arthritis                          | 247.96<br>(94.98 to<br>431.74)                        | 793.61<br>(340.54 to<br>1,526.63)                     | 622.97<br>(258.10 to<br>1,241.54)                     | 817.26<br>(364.78 to<br>1,508.89)                     | 9.63<br>(4.01 to<br>15.54)                    | 35.35<br>(17.97 to<br>56.37)                   | 28.59<br>(14.33 to<br>46.89)                   | 34.95<br>(18.29 to<br>54.94)                   |
| Other musculoskeletal disorders               | 634.72<br>(232.51 to<br>1,118.50)                     | 1,646.84<br>(545.59 to<br>4,215.25)                   | 1,604.06<br>(529.20 to<br>4,193.47)                   | 1,480.39<br>(504.21 to<br>3,747.96)                   | 16.58<br>(6.34 to<br>27.84)                   | 51.31<br>(21.71 to<br>109.14)                  | 51.37<br>(22.05 to<br>109.45)                  | 44.35<br>(19.27 to<br>92.41)                   |
| <b>Other non-communicable diseases</b>        | <b>6,626.45</b><br>(3,720.21 to<br><b>11,592.55</b> ) | <b>9,418.12</b><br>(4,562.12 to<br><b>18,280.33</b> ) | <b>8,080.68</b><br>(3,900.59 to<br><b>15,496.04</b> ) | <b>9,851.28</b><br>(4,781.37 to<br><b>19,768.70</b> ) | <b>117.32</b><br>(68.25 to<br><b>183.60</b> ) | <b>278.83</b><br>(169.06 to<br><b>453.93</b> ) | <b>261.42</b><br>(157.50 to<br><b>421.09</b> ) | <b>262.13</b><br>(160.91 to<br><b>418.34</b> ) |
| Congenital birth defects                      | 4,795.60<br>(2,365.80 to<br>9,532.51)                 | 4,397.19<br>(1,834.55 to<br>10,366.77)                | 3,332.96<br>(1,383.89 to<br>7,899.14)                 | 5,076.61<br>(2,137.96 to<br>11,793.15)                | 64.27<br>(33.92 to<br>120.24)                 | 72.97<br>(31.77 to<br>150.99)                  | 56.81<br>(24.05 to<br>120.08)                  | 81.27<br>(35.45 to<br>172.97)                  |
| Neural tube defects                           | 151.34<br>(62.15 to<br>363.27)                        | 82.70<br>(32.09 to<br>183.08)                         | 56.53<br>(20.83 to<br>127.79)                         | 101.26<br>(39.49 to<br>224.79)                        | 2.11<br>(0.95 to<br>4.59)                     | 1.57<br>(0.60 to<br>3.50)                      | 1.10<br>(0.39 to<br>2.56)                      | 1.86<br>(0.72 to<br>3.92)                      |
| Congenital heart anomalies                    | 1,562.83<br>(869.07 to<br>3,142.56)                   | 1,637.42<br>(707.80 to<br>3,650.70)                   | 1,144.07<br>(469.64 to<br>2,598.41)                   | 1,841.62<br>(793.77 to<br>4,169.23)                   | 22.03<br>(12.35 to<br>40.79)                  | 27.79<br>(11.86 to<br>57.55)                   | 19.78<br>(8.20 to<br>43.87)                    | 30.39<br>(13.26 to<br>63.59)                   |
| Orofacial clefts                              | 23.79<br>(4.83 to<br>81.05)                           | 11.88<br>(1.45 to<br>52.79)                           | 7.16<br>(0.83 to<br>32.76)                            | 16.58<br>(1.96 to<br>73.95)                           | 0.28<br>(0.06 to<br>0.95)                     | 0.14<br>(0.02 to<br>0.62)                      | 0.08<br>(0.01 to<br>0.38)                      | 0.19<br>(0.02 to<br>0.86)                      |
| Down syndrome                                 | 502.47<br>(214.77 to<br>1,115.94)                     | 494.68<br>(185.69 to<br>1,282.96)                     | 478.77<br>(183.74 to<br>1,239.34)                     | 576.32<br>(216.05 to<br>1,515.53)                     | 6.96<br>(3.18 to<br>14.48)                    | 9.15<br>(3.67 to<br>20.81)                     | 9.10<br>(3.58 to<br>20.55)                     | 10.24<br>(4.10 to<br>23.27)                    |
| Other chromosomal abnormalities               | 461.97<br>(176.66 to<br>1,069.12)                     | 452.38<br>(142.99 to<br>1,255.55)                     | 372.68<br>(120.44 to<br>1,025.21)                     | 550.36<br>(171.68 to<br>1,572.06)                     | 5.73<br>(2.38 to<br>12.76)                    | 6.38<br>(2.24 to<br>16.47)                     | 5.36<br>(1.89 to<br>13.92)                     | 7.56<br>(2.54 to<br>19.67)                     |
| Congenital musculoskeletal and limb anomalies | 176.66<br>(54.38 to<br>460.08)                        | 129.76<br>(40.50 to<br>363.22)                        | 94.75<br>(29.92 to<br>260.77)                         | 150.44<br>(45.98 to<br>419.73)                        | 2.18<br>(0.74 to<br>5.46)                     | 1.89<br>(0.68 to<br>4.54)                      | 1.41<br>(0.50 to<br>3.42)                      | 2.12<br>(0.75 to<br>5.29)                      |



|                                      |                                                                |                                                                |                                                                |                                                                 |                                                          |                                                          |                                                          |                                                            |
|--------------------------------------|----------------------------------------------------------------|----------------------------------------------------------------|----------------------------------------------------------------|-----------------------------------------------------------------|----------------------------------------------------------|----------------------------------------------------------|----------------------------------------------------------|------------------------------------------------------------|
| Urogenital congenital anomalies      | 147.54<br>(72.31 to<br>310.28)                                 | 221.37<br>(95.39 to<br>480.62)                                 | 181.52<br>(75.00 to<br>393.99)                                 | 229.72<br>(99.03 to<br>497.97)                                  | 2.73<br>(1.36 to<br>5.19)                                | 5.60<br>(2.42 to<br>11.31)                               | 4.70<br>(1.98 to<br>9.45)                                | 5.40<br>(2.45 to<br>11.20)                                 |
| Digestive congenital anomalies       | 340.97<br>(98.95 to<br>874.26)                                 | 291.40<br>(79.77 to<br>968.11)                                 | 204.24<br>(57.43 to<br>648.95)                                 | 352.07<br>(94.98 to<br>1,190.09)                                | 4.28<br>(1.41 to<br>10.55)                               | 4.27<br>(1.45 to<br>12.76)                               | 3.06<br>(1.05 to<br>8.73)                                | 5.00<br>(1.64 to<br>14.65)                                 |
| Other congenital birth defects       | 1,428.02<br>(544.70 to<br>3,227.41)                            | 1,075.59<br>(398.97 to<br>2,767.66)                            | 793.23<br>(300.03 to<br>1,987.35)                              | 1,258.23<br>(446.92 to<br>3,253.97)                             | 17.97<br>(7.54 to<br>38.86)                              | 16.19<br>(6.86 to<br>38.77)                              | 12.22<br>(4.98 to<br>28.94)                              | 18.30<br>(7.51 to<br>42.97)                                |
| Skin and subcutaneous diseases       | 1,446.97<br>(681.13 to<br>2,586.15)                            | 4,733.72<br>(2,230.78 to<br>9,005.60)                          | 4,528.96<br>(2,134.42 to<br>8,938.30)                          | 4,423.38<br>(2,138.65 to<br>8,382.92)                           | 48.60<br>(23.03 to<br>86.50)                             | 202.52<br>(121.79 to<br>323.99)                          | 202.07<br>(119.38 to<br>329.86)                          | 176.78<br>(106.93 to<br>283.98)                            |
| Cellulitis                           | 373.52<br>(152.71 to<br>774.91)                                | 1,607.58<br>(682.74 to<br>3,234.18)                            | 1,630.19<br>(699.35 to<br>3,302.27)                            | 1,423.03<br>(617.26 to<br>2,967.84)                             | 12.60<br>(5.45 to<br>24.18)                              | 66.85<br>(35.63 to<br>116.96)                            | 70.64<br>(37.55 to<br>124.54)                            | 56.03<br>(30.20 to<br>99.69)                               |
| Pyoderma                             | 661.02<br>(310.74 to<br>1,339.26)                              | 1,938.05<br>(828.24 to<br>4,108.76)                            | 1,806.61<br>(753.84 to<br>3,876.20)                            | 1,928.22<br>(832.97 to<br>4,055.65)                             | 17.66<br>(8.18 to<br>36.82)                              | 70.79<br>(35.27 to<br>141.66)                            | 69.45<br>(36.99 to<br>134.24)                            | 65.86<br>(36.60 to<br>128.72)                              |
| Decubitus ulcer                      | 361.16<br>(145.47 to<br>636.03)                                | 1,052.18<br>(445.40 to<br>1,933.82)                            | 965.31<br>(399.62 to<br>1,812.16)                              | 945.97<br>(409.32 to<br>1,683.61)                               | 16.81<br>(6.67 to<br>30.04)                              | 59.97<br>(26.64 to<br>100.64)                            | 57.15<br>(24.16 to<br>94.17)                             | 50.66<br>(22.21 to<br>84.86)                               |
| Other skin and subcutaneous diseases | 51.27<br>(22.57 to<br>104.13)                                  | 135.92<br>(53.84 to<br>315.21)                                 | 126.85<br>(49.89 to<br>295.74)                                 | 126.16<br>(50.08 to<br>290.58)                                  | 1.52<br>(0.66 to<br>3.03)                                | 4.91<br>(2.50 to<br>9.31)                                | 4.83<br>(2.14 to<br>9.08)                                | 4.24<br>(2.14 to<br>8.13)                                  |
| Sudden infant death syndrome         | 383.88<br>(62.65 to<br>961.52)                                 | 287.21<br>(13.04 to<br>1,730.69)                               | 218.76<br>(9.52 to<br>1,350.51)                                | 351.29<br>(15.86 to<br>2,078.71)                                | 4.45<br>(0.73 to<br>11.16)                               | 20.09<br>(0.15 to<br>20.09)                              | 2.54<br>(0.11 to<br>15.68)                               | 4.08<br>(0.18 to<br>24.13)                                 |
| <b>Injuries</b>                      | <b>76,396.88</b><br><b>(38,360.30 to</b><br><b>107,073.93)</b> | <b>90,324.57</b><br><b>(35,975.64 to</b><br><b>188,716.92)</b> | <b>70,860.19</b><br><b>(28,301.53 to</b><br><b>148,217.82)</b> | <b>115,754.61</b><br><b>(45,898.51 to</b><br><b>241,962.38)</b> | <b>1,527.70</b><br><b>(753.09 to</b><br><b>2,160.86)</b> | <b>2,116.74</b><br><b>(917.49 to</b><br><b>4,128.61)</b> | <b>1,706.62</b><br><b>(751.67 to</b><br><b>3,357.90)</b> | <b>2,613.63</b><br><b>(1,113.59 to</b><br><b>5,143.57)</b> |
| <b>Transport injuries</b>            | <b>22,394.86</b><br><b>(11,335.93 to</b><br><b>33,347.02)</b>  | <b>22,786.77</b><br><b>(8,574.56 to</b><br><b>54,418.61)</b>   | <b>13,804.63</b><br><b>(5,150.18 to</b><br><b>32,324.70)</b>   | <b>40,178.81</b><br><b>(15,028.45 to</b><br><b>96,457.88)</b>   | <b>439.79</b><br><b>(211.22 to</b><br><b>654.94)</b>     | <b>516.04</b><br><b>(204.29 to</b><br><b>1,195.29)</b>   | <b>321.77</b><br><b>(125.08 to</b><br><b>750.28)</b>     | <b>869.98</b><br><b>(350.08 to</b><br><b>2,044.38)</b>     |
| Road injuries                        | 21,681.15<br>(10,968.70 to<br>32,320.46)                       | 21,495.35<br>(8,027.95 to<br>51,596.17)                        | 12,808.26<br>(4,741.61 to<br>30,039.59)                        | 38,660.63<br>(14,424.80 to<br>93,122.54)                        | 425.30<br>(204.35 to<br>634.07)                          | 485.81<br>(190.64 to<br>1,129.80)                        | 298.07<br>(114.90 to<br>694.58)                          | 835.07<br>(334.44 to<br>1,964.68)                          |
| Pedestrian road injuries             | 4,810.41<br>(2,525.76 to<br>7,387.68)                          | 5,023.47<br>(1,975.35 to<br>10,715.49)                         | 2,893.83<br>(1,069.55 to<br>6,472.73)                          | 7,878.36<br>(3,150.66 to<br>16,816.13)                          | 111.43<br>(56.78 to<br>169.34)                           | 145.79<br>(58.92 to<br>297.66)                           | 87.20<br>(35.83 to<br>189.87)                            | 219.50<br>(89.94 to<br>442.38)                             |
| <b>Botswana</b>                      |                                                                |                                                                |                                                                |                                                                 |                                                          |                                                          |                                                          |                                                            |
| Cause                                | YLLs (actual counts)                                           |                                                                |                                                                |                                                                 | Deaths (actual counts)                                   |                                                          |                                                          |                                                            |
|                                      | 2016                                                           | 2040 Forecast                                                  | 2040 Better Scenario                                           | 2040 Worse Scenario                                             | 2016                                                     | 2040 Forecast                                            | 2040 Better Scenario                                     | 2040 Worse Scenario                                        |
| Cyclist road injuries                | 171.17<br>(80.93 to<br>337.69)                                 | 206.57<br>(75.03 to<br>463.03)                                 | 142.13<br>(50.09 to<br>314.41)                                 | 339.88<br>(124.13 to<br>765.77)                                 | 3.63<br>(1.68 to<br>6.99)                                | 5.20<br>(1.93 to<br>11.61)                               | 3.79<br>(1.40 to<br>8.45)                                | 8.03<br>(2.99 to<br>17.84)                                 |
| Motorcyclist road injuries           | 928.99<br>(423.78 to<br>2,019.01)                              | 1,060.80<br>(331.85 to<br>2,547.87)                            | 776.45<br>(251.03 to<br>1,883.15)                              | 1,609.35<br>(512.03 to<br>3,972.81)                             | 15.70<br>(7.03 to<br>33.88)                              | 19.04<br>(6.26 to<br>45.92)                              | 14.25<br>(4.71 to<br>34.81)                              | 28.26<br>(8.97 to<br>68.96)                                |
| Motor vehicle road injuries          | 15,599.25<br>(7,595.42 to<br>23,260.71)                        | 15,013.00<br>(5,467.41 to<br>38,545.91)                        | 8,873.11<br>(3,165.27 to<br>22,252.98)                         | 28,499.50<br>(10,567.98 to<br>72,355.26)                        | 290.98<br>(137.55 to<br>438.45)                          | 311.32<br>(114.46 to<br>770.11)                          | 189.86<br>(68.56 to<br>461.63)                           | 571.85<br>(212.90 to<br>1,408.21)                          |
| Other road injuries                  | 171.34<br>(71.24 to<br>321.54)                                 | 191.49<br>(57.34 to<br>533.44)                                 | 122.74<br>(35.64 to<br>349.74)                                 | 333.54<br>(102.71 to<br>892.45)                                 | 3.46<br>(1.43 to<br>6.36)                                | 4.46<br>(1.43 to<br>11.91)                               | 2.98<br>(0.95 to<br>8.07)                                | 7.43<br>(2.39 to<br>19.91)                                 |
| Other transport injuries             | 713.70<br>(350.22 to<br>1,183.32)                              | 1,291.42<br>(465.86 to<br>2,997.83)                            | 996.38<br>(355.29 to<br>2,343.71)                              | 1,518.18<br>(537.34 to<br>3,539.83)                             | 14.59<br>(7.07 to<br>23.89)                              | 30.23<br>(11.47 to<br>68.24)                             | 23.70<br>(8.96 to<br>54.01)                              | 34.91<br>(12.93 to<br>79.13)                               |
| <b>Unintentional injuries</b>        | <b>21,646.42</b><br><b>(12,312.64 to</b><br><b>30,093.72)</b>  | <b>24,772.79</b><br><b>(11,219.10 to</b><br><b>48,383.95)</b>  | <b>21,008.81</b><br><b>(9,333.12 to</b><br><b>41,995.80)</b>   | <b>27,214.12</b><br><b>(12,578.65 to</b><br><b>53,521.05)</b>   | <b>449.68</b><br><b>(245.63 to</b><br><b>633.48)</b>     | <b>650.99</b><br><b>(346.31 to</b><br><b>1,140.64)</b>   | <b>572.80</b><br><b>(302.19 to</b><br><b>1,021.38)</b>   | <b>682.40</b><br><b>(359.52 to</b><br><b>1,199.47)</b>     |
| Falls                                | 1,072.04<br>(533.78 to<br>1,888.80)                            | 2,201.30<br>(1,175.16 to<br>3,767.88)                          | 2,090.65<br>(1,089.48 to<br>3,614.81)                          | 2,095.38<br>(1,144.25 to<br>3,499.83)                           | 39.90<br>(21.59 to<br>68.72)                             | 102.48<br>(73.26 to<br>158.27)                           | 101.18<br>(70.80 to<br>156.55)                           | 92.30<br>(67.44 to<br>142.61)                              |

|                                                 |                                                 |                                                 |                                                 |                                                  |                                        |                                          |                                          |                                            |
|-------------------------------------------------|-------------------------------------------------|-------------------------------------------------|-------------------------------------------------|--------------------------------------------------|----------------------------------------|------------------------------------------|------------------------------------------|--------------------------------------------|
| Drowning                                        | 3,613.71<br>(1,967.33 to<br>5,680.19)           | 3,446.71<br>(1,425.78 to<br>7,761.97)           | 3,097.95<br>(1,216.20 to<br>6,589.48)           | 4,097.75<br>(1,617.41 to<br>8,654.06)            | 70.77<br>(36.50 to<br>108.58)          | 86.81<br>(35.15 to<br>166.63)            | 75.26<br>(30.54 to<br>150.27)            | 95.22<br>(38.91 to<br>186.14)              |
| Fire, heat, and hot substances                  | 3,715.64<br>(1,802.42 to<br>5,758.39)           | 3,976.78<br>(1,566.00 to<br>8,693.07)           | 3,211.77<br>(1,238.34 to<br>7,230.43)           | 4,526.03<br>(1,793.70 to<br>9,827.81)            | 83.00<br>(39.70 to<br>125.09)          | 110.70<br>(53.34 to<br>213.69)           | 92.29<br>(44.10 to<br>183.41)            | 130.95<br>(57.13 to<br>231.52)             |
| Poisonings                                      | 1,633.33<br>(729.64 to<br>2,970.30)             | 1,122.56<br>(373.78 to<br>2,986.78)             | 845.49<br>(278.05 to<br>2,200.89)               | 1,377.44<br>(463.43 to<br>3,626.97)              | 29.71<br>(13.27 to<br>52.13)           | 23.78<br>(8.58 to<br>56.73)              | 18.20<br>(6.46 to<br>44.96)              | 28.52<br>(10.48 to<br>69.42)               |
| Exposure to mechanical forces                   | 4,121.83<br>(2,175.50 to<br>6,724.08)           | 4,253.29<br>(1,735.21 to<br>8,396.62)           | 3,534.76<br>(1,443.51 to<br>7,216.95)           | 4,681.16<br>(1,939.45 to<br>8,972.37)            | 79.34<br>(40.07 to<br>127.49)          | 98.36<br>(44.33 to<br>180.88)            | 83.67<br>(37.89 to<br>156.31)            | 104.76<br>(47.95 to<br>190.01)             |
| Unintentional firearm injuries                  | 670.33<br>(284.63 to<br>1,184.24)               | 615.26<br>(220.04 to<br>1,330.84)               | 520.70<br>(185.39 to<br>1,144.64)               | 683.62<br>(241.76 to<br>1,475.50)                | 13.58<br>(5.63 to<br>23.37)            | 14.14<br>(5.41 to<br>29.75)              | 12.16<br>(4.70 to<br>25.45)              | 15.41<br>(5.89 to<br>31.43)                |
| Unintentional suffocation                       | 1,127.68<br>(568.78 to<br>1,952.83)             | 1,056.06<br>(460.95 to<br>2,214.59)             | 886.54<br>(376.50 to<br>1,869.60)               | 1,186.71<br>(522.20 to<br>2,444.60)              | 18.26<br>(9.14 to<br>30.80)            | 18.92<br>(8.12 to<br>39.67)              | 16.10<br>(6.87 to<br>33.10)              | 20.87<br>(8.88 to<br>43.77)                |
| Other exposure to mechanical forces             | 2,323.82<br>(1,062.40 to<br>4,127.35)           | 2,581.96<br>(991.48 to<br>5,400.73)             | 2,127.52<br>(777.46 to<br>4,458.75)             | 2,810.83<br>(1,078.04 to<br>5,822.12)            | 47.50<br>(21.79 to<br>82.68)           | 65.30<br>(28.51 to<br>125.86)            | 55.40<br>(24.11 to<br>109.41)            | 68.49<br>(29.84 to<br>130.98)              |
| Adverse effects of medical treatment            | 1,268.47<br>(537.66 to<br>2,288.26)             | 1,759.19<br>(662.55 to<br>3,696.78)             | 1,605.61<br>(594.07 to<br>3,441.25)             | 1,845.72<br>(720.98 to<br>3,911.16)              | 29.81<br>(13.08 to<br>49.70)           | 51.88<br>(26.83 to<br>94.73)             | 48.96<br>(25.34 to<br>90.84)             | 51.96<br>(27.19 to<br>93.84)               |
| Animal contact                                  | 2,490.69<br>(984.04 to<br>4,174.58)             | 3,561.29<br>(1,235.61 to<br>7,734.55)           | 2,978.43<br>(1,038.73 to<br>6,434.33)           | 4,035.38<br>(1,464.56 to<br>8,380.81)            | 47.06<br>(18.39 to<br>79.69)           | 80.17<br>(30.47 to<br>161.91)            | 68.80<br>(25.66 to<br>142.21)            | 88.21<br>(33.69 to<br>177.25)              |
| Venomous animal contact                         | 780.33<br>(217.51 to<br>1,817.42)               | 1,069.52<br>(265.12 to<br>2,697.11)             | 941.31<br>(232.78 to<br>2,355.63)               | 1,208.01<br>(319.37 to<br>2,960.74)              | 15.58<br>(4.57 to<br>35.45)            | 26.52<br>(7.41 to<br>60.73)              | 24.06<br>(6.87 to<br>55.37)              | 28.83<br>(8.20 to<br>66.36)                |
| Non-venomous animal contact                     | 1,710.35<br>(678.67 to<br>2,920.12)             | 2,491.77<br>(882.12 to<br>5,223.98)             | 2,037.12<br>(712.96 to<br>4,428.61)             | 2,827.38<br>(1,027.98 to<br>5,939.00)            | 31.48<br>(12.26 to<br>54.02)           | 53.65<br>(19.91 to<br>108.13)            | 44.74<br>(16.31 to<br>94.46)             | 59.38<br>(22.38 to<br>119.20)              |
| Foreign body                                    | 2,273.19<br>(1,092.35 to<br>3,682.16)           | 2,491.42<br>(1,013.57 to<br>6,086.41)           | 2,292.83<br>(949.21 to<br>5,487.98)             | 2,578.85<br>(1,051.99 to<br>6,087.41)            | 37.75<br>(19.74 to<br>58.16)           | 51.09<br>(24.11 to<br>103.69)            | 48.63<br>(22.58 to<br>98.02)             | 50.25<br>(23.64 to<br>103.23)              |
| Pulmonary aspiration and foreign body in airway | 1,941.96<br>(932.21 to<br>3,182.68)             | 2,230.73<br>(911.18 to<br>5,118.96)             | 2,039.29<br>(832.41 to<br>4,966.87)             | 2,288.05<br>(939.35 to<br>5,415.37)              | 32.62<br>(17.34 to<br>50.09)           | 46.51<br>(22.22 to<br>93.75)             | 44.09<br>(20.53 to<br>87.96)             | 45.32<br>(21.69 to<br>91.97)               |
| Foreign body in other body part                 | 331.23<br>(107.54 to<br>600.00)                 | 260.69<br>(72.98 to<br>616.97)                  | 253.54<br>(74.18 to<br>611.29)                  | 290.80<br>(80.03 to<br>691.79)                   | 5.13<br>(1.61 to<br>9.22)              | 4.57<br>(1.33 to<br>11.06)               | 4.54<br>(1.35 to<br>11.16)               | 4.97<br>(1.40 to<br>11.65)                 |
| Environmental heat and cold exposure            | 883.58<br>(386.72 to<br>1,402.88)               | 1,159.11<br>(437.37 to<br>2,363.12)             | 930.28<br>(333.87 to<br>1,939.67)               | 1,335.49<br>(504.32 to<br>2,607.63)              | 20.44<br>(8.75 to<br>32.51)            | 30.66<br>(12.42 to<br>58.69)             | 25.00<br>(9.99 to<br>49.12)              | 34.62<br>(14.03 to<br>64.55)               |
| Other unintentional injuries                    | 573.95<br>(311.11 to<br>954.64)                 | 601.14<br>(248.70 to<br>1,181.67)               | 421.04<br>(174.77 to<br>861.09)                 | 640.91<br>(269.30 to<br>1,233.57)                | 11.90<br>(6.16 to<br>19.72)            | 15.06<br>(6.98 to<br>27.99)              | 10.81<br>(5.06 to<br>20.89)              | 15.56<br>(7.39 to<br>28.37)                |
| Self-harm and interpersonal violence            | <b>32,339.80</b><br>(14,041.80 to<br>47,866.02) | <b>42,747.93</b><br>(15,039.67 to<br>91,440.98) | <b>36,029.90</b><br>(12,708.80 to<br>78,002.99) | <b>48,344.65</b><br>(16,736.22 to<br>103,814.40) | <b>637.94</b><br>(274.10 to<br>952.35) | <b>949.35</b><br>(346.02 to<br>1,984.62) | <b>811.67</b><br>(302.89 to<br>1,708.32) | <b>1,060.90</b><br>(379.99 to<br>2,182.97) |
| <b>Botswana</b>                                 |                                                 |                                                 |                                                 |                                                  |                                        |                                          |                                          |                                            |
| Cause                                           | YLLs (actual counts)                            |                                                 |                                                 |                                                  | Deaths (actual counts)                 |                                          |                                          |                                            |
|                                                 | 2016                                            | 2040 Forecast                                   | 2040 Better Scenario                            | 2040 Worse Scenario                              | 2016                                   | 2040 Forecast                            | 2040 Better Scenario                     | 2040 Worse Scenario                        |
| Self-harm                                       | 16,509.43<br>(7,046.94 to<br>27,099.21)         | 26,537.08<br>(9,015.16 to<br>58,631.69)         | 22,532.69<br>(7,588.54 to<br>49,834.64)         | 31,670.27<br>(10,484.07 to<br>69,419.32)         | 345.90<br>(151.71 to<br>562.58)        | 624.09<br>(229.28 to<br>1,318.04)        | 538.15<br>(199.87 to<br>1,128.58)        | 729.13<br>(258.75 to<br>1,526.54)          |
| Self-harm by firearm                            | 1,474.04<br>(455.30 to<br>3,390.20)             | 1,855.96<br>(467.61 to<br>4,819.40)             | 1,489.69<br>(376.53 to<br>3,796.06)             | 2,249.92<br>(559.06 to<br>5,928.76)              | 30.64<br>(9.95 to<br>66.49)            | 44.41<br>(13.09 to<br>109.87)            | 36.30<br>(11.11 to<br>87.01)             | 52.59<br>(14.98 to<br>132.20)              |
| Self-harm by other specified means              | 15,035.39<br>(6,531.60 to<br>24,544.88)         | 24,681.12<br>(8,528.21 to<br>54,611.62)         | 21,043.00<br>(7,118.60 to<br>46,299.76)         | 29,420.36<br>(9,698.66 to<br>64,267.54)          | 315.26<br>(134.95 to<br>510.74)        | 579.68<br>(208.07 to<br>1,220.31)        | 501.85<br>(181.45 to<br>1,060.29)        | 676.54<br>(238.90 to<br>1,410.11)          |

|                                                                                     |                                         |                                         |                                         |                                         |                                  |                                  |                                  |                                  |
|-------------------------------------------------------------------------------------|-----------------------------------------|-----------------------------------------|-----------------------------------------|-----------------------------------------|----------------------------------|----------------------------------|----------------------------------|----------------------------------|
| Interpersonal violence                                                              | 15,830.37<br>(3,899.10 to<br>25,551.39) | 16,210.85<br>(3,268.15 to<br>36,503.11) | 13,497.21<br>(2,682.67 to<br>31,460.09) | 16,674.37<br>(3,019.20 to<br>37,971.62) | 292.04<br>(72.17 to<br>477.68)   | 325.26<br>(66.14 to<br>728.03)   | 273.53<br>(66.14 to<br>622.18)   | 331.77<br>(63.24 to<br>740.23)   |
| Physical violence by firearm                                                        | 1,949.67<br>(262.24 to<br>3,854.72)     | 2,081.73<br>(264.64 to<br>5,377.49)     | 1,684.31<br>(222.22 to<br>4,364.22)     | 2,088.04<br>(249.11 to<br>5,314.62)     | 36.41<br>(5.02 to<br>71.57)      | 42.39<br>(6.01 to<br>109.60)     | 34.69<br>(5.09 to<br>89.32)      | 42.01<br>(5.63 to<br>104.98)     |
| Physical violence by sharp object                                                   | 8,838.13<br>(1,863.10 to<br>14,664.27)  | 9,173.74<br>(1,696.37 to<br>20,923.42)  | 7,509.68<br>(1,382.76 to<br>17,171.66)  | 8,992.10<br>(1,507.54 to<br>20,224.06)  | 160.48<br>(33.47 to<br>270.24)   | 178.78<br>(33.44 to<br>391.53)   | 147.56<br>(27.87 to<br>337.04)   | 173.67<br>(30.62 to<br>385.17)   |
| Physical violence by other means                                                    | 5,042.57<br>(1,462.70 to<br>8,795.03)   | 4,955.38<br>(1,014.19 to<br>12,505.09)  | 4,303.22<br>(915.27 to<br>10,899.44)    | 5,594.23<br>(1,045.81 to<br>14,177.66)  | 95.15<br>(26.98 to<br>166.44)    | 104.10<br>(22.43 to<br>258.34)   | 91.28<br>(19.79 to<br>228.18)    | 116.10<br>(22.77 to<br>275.89)   |
| <b>Forces of nature, conflict and terrorism, and executions and police conflict</b> | <b>15.80</b><br>(8.39 to<br>28.61)      | <b>17.09</b><br>(0.00 to<br>194.52)     | <b>16.84</b><br>(0.00 to<br>191.29)     | <b>17.03</b><br>(0.00 to<br>194.66)     | <b>0.29</b><br>(0.15 to<br>0.53) | <b>0.37</b><br>(0.00 to<br>4.25) | <b>0.37</b><br>(0.00 to<br>4.30) | <b>0.36</b><br>(0.00 to<br>4.10) |
| Exposure to forces of nature                                                        | 0.00<br>(0.00 to<br>0.00)               | 13.98<br>(0.00 to<br>188.75)            | 13.77<br>(0.00 to<br>185.64)            | 13.94<br>(0.00 to<br>188.86)            | 0.00<br>(0.00 to<br>0.00)        | 0.31<br>(0.00 to<br>4.14)        | 0.31<br>(0.00 to<br>4.19)        | 0.30<br>(0.00 to<br>3.99)        |
| Conflict and terrorism                                                              | 0.00<br>(0.00 to<br>0.00)               | 1.25<br>(0.00 to<br>18.07)              | 1.22<br>(0.00 to<br>17.72)              | 1.25<br>(0.00 to<br>18.06)              | 0.00<br>(0.00 to<br>0.00)        | 0.02<br>(0.00 to<br>0.35)        | 0.02<br>(0.00 to<br>0.36)        | 0.02<br>(0.00 to<br>0.35)        |
| Executions and police conflict                                                      | 15.80<br>(8.39 to<br>28.61)             | 1.86<br>(0.00 to<br>0.00)               | 1.85<br>(0.00 to<br>0.00)               | 1.85<br>(0.00 to<br>0.00)               | 0.29<br>(0.15 to<br>0.53)        | 0.04<br>(0.00 to<br>0.00)        | 0.04<br>(0.00 to<br>0.00)        | 0.04<br>(0.00 to<br>0.00)        |

**Lesotho**

| Cause                                                                    | YLLs (actual counts)                                     |                                                        |                                                      |                                                          | Deaths (actual counts)                          |                                                 |                                                 |                                                 |
|--------------------------------------------------------------------------|----------------------------------------------------------|--------------------------------------------------------|------------------------------------------------------|----------------------------------------------------------|-------------------------------------------------|-------------------------------------------------|-------------------------------------------------|-------------------------------------------------|
|                                                                          | 2016                                                     | 2040 Forecast                                          | 2040 Better Scenario                                 | 2040 Worse Scenario                                      | 2016                                            | 2040 Forecast                                   | 2040 Better Scenario                            | 2040 Worse Scenario                             |
| <b>All causes</b>                                                        | <b>1,433,355.44</b><br>(1,236,361.29 to<br>1,670,772.40) | <b>1,213,540.08</b><br>(818,970.92 to<br>1,813,367.65) | <b>897,846.89</b><br>(577,741.50 to<br>1,366,676.64) | <b>2,144,200.72</b><br>(1,635,958.32 to<br>2,774,248.89) | <b>32,545.63</b><br>(28,071.41 to<br>37,510.15) | <b>30,661.97</b><br>(22,282.27 to<br>42,657.01) | <b>23,590.75</b><br>(16,693.88 to<br>33,697.94) | <b>48,827.63</b><br>(38,625.61 to<br>60,844.36) |
| <b>Communicable, maternal, neonatal, and nutritional diseases</b>        | <b>1,019,237.94</b><br>(865,844.00 to<br>1,215,771.94)   | <b>636,390.64</b><br>(404,053.61 to<br>938,165.38)     | <b>427,391.68</b><br>(232,062.28 to<br>659,854.14)   | <b>1,533,165.35</b><br>(1,137,225.24 to<br>1,970,472.62) | <b>19,857.25</b><br>(16,549.25 to<br>23,794.43) | <b>13,170.81</b><br>(8,479.03 to<br>19,311.06)  | <b>9,029.22</b><br>(5,143.38 to<br>13,636.73)   | <b>30,479.01</b><br>(22,751.59 to<br>38,340.32) |
| <b>HIV/AIDS and tuberculosis</b>                                         | <b>664,495.47</b><br>(534,858.65 to<br>851,600.31)       | <b>423,720.32</b><br>(252,353.26 to<br>639,219.49)     | <b>293,509.71</b><br>(139,853.92 to<br>502,485.38)   | <b>1,248,779.22</b><br>(885,599.57 to<br>1,596,702.25)   | <b>13,332.66</b><br>(11,254.78 to<br>16,568.73) | <b>8,785.92</b><br>(5,360.40 to<br>12,824.50)   | <b>6,100.54</b><br>(3,069.40 to<br>9,993.98)    | <b>25,009.83</b><br>(17,752.23 to<br>32,048.64) |
| Tuberculosis                                                             | 129,705.86<br>(97,483.25 to<br>173,524.87)               | 74,097.82<br>(21,761.37 to<br>201,975.87)              | 41,930.88<br>(12,435.48 to<br>117,642.75)            | 101,210.54<br>(30,007.90 to<br>283,954.55)               | 3,294.18<br>(2,504.04 to<br>4,279.81)           | 1,867.33<br>(596.15 to<br>4,891.75)             | 1,080.95<br>(346.33 to<br>2,892.97)             | 2,504.04<br>(826.90 to<br>6,634.28)             |
| HIV/AIDS                                                                 | 534,789.60<br>(412,439.30 to<br>723,176.09)              | 349,622.50<br>(193,829.36 to<br>551,768.48)            | 251,578.83<br>(106,640.44 to<br>461,726.48)          | 1,147,568.69<br>(784,334.65 to<br>1,510,063.16)          | 10,038.47<br>(8,029.55 to<br>13,364.04)         | 6,918.59<br>(3,846.65 to<br>10,508.40)          | 5,019.60<br>(2,184.05 to<br>8,717.35)           | 22,505.78<br>(15,170.11 to<br>29,579.59)        |
| <b>Diarrhea, lower respiratory, and other common infectious diseases</b> | <b>213,560.92</b><br>(162,671.62 to<br>277,713.82)       | <b>150,640.66</b><br>(49,996.81 to<br>346,433.69)      | <b>91,724.81</b><br>(29,985.71 to<br>219,253.84)     | <b>202,254.91</b><br>(74,549.66 to<br>430,599.27)        | <b>3,950.88</b><br>(2,968.21 to<br>5,297.21)    | <b>3,504.94</b><br>(1,393.44 to<br>7,757.31)    | <b>2,313.71</b><br>(940.31 to<br>5,131.25)      | <b>4,348.40</b><br>(1,797.16 to<br>8,945.58)    |
| Diarrheal diseases                                                       | 114,666.97<br>(80,935.55 to<br>161,678.08)               | 76,274.99<br>(11,521.77 to<br>222,640.81)              | 44,739.01<br>(6,594.61 to<br>140,640.03)             | 99,504.59<br>(20,033.38 to<br>264,679.73)                | 1,990.39<br>(1,247.45 to<br>3,012.68)           | 1,639.25<br>(245.42 to<br>4,943.27)             | 1,025.52<br>(148.97 to<br>3,348.69)             | 2,037.28<br>(349.87 to<br>5,563.59)             |
| Intestinal infectious diseases                                           | 116.19<br>(58.75 to<br>207.58)                           | 75.95<br>(25.08 to<br>180.92)                          | 57.87<br>(18.77 to<br>141.28)                        | 85.34<br>(29.14 to<br>195.45)                            | 1.77<br>(0.91 to<br>3.09)                       | 1.26<br>(0.44 to<br>2.91)                       | 1.00<br>(0.36 to<br>2.39)                       | 1.37<br>(0.49 to<br>3.05)                       |
| Typhoid fever                                                            | 47.56<br>(23.46 to<br>87.40)                             | 39.14<br>(12.25 to<br>101.66)                          | 31.68<br>(10.15 to<br>80.04)                         | 43.13<br>(13.08 to<br>111.42)                            | 0.67<br>(0.33 to<br>1.24)                       | 0.58<br>(0.19 to<br>1.46)                       | 0.48<br>(0.16 to<br>1.22)                       | 0.62<br>(0.20 to<br>1.58)                       |
| Paratyphoid fever                                                        | 1.62<br>(0.66 to<br>3.33)                                | 1.57<br>(0.48 to<br>4.12)                              | 1.23<br>(0.38 to<br>3.24)                            | 1.76<br>(0.53 to<br>4.67)                                | 0.02<br>(0.01 to<br>0.05)                       | 0.02<br>(0.01 to<br>0.06)                       | 0.02<br>(0.01 to<br>0.05)                       | 0.03<br>(0.01 to<br>0.07)                       |
| Other intestinal infectious diseases                                     | 67.01<br>(23.61 to<br>155.38)                            | 35.24<br>(8.53 to<br>94.17)                            | 24.96<br>(5.82 to<br>64.94)                          | 40.44<br>(10.25 to<br>103.05)                            | 1.07<br>(0.40 to<br>2.36)                       | 0.66<br>(0.19 to<br>1.70)                       | 0.50<br>(0.14 to<br>1.29)                       | 0.72<br>(0.20 to<br>1.78)                       |
| Lower respiratory infections                                             | 80,437.37<br>(58,110.51 to<br>104,996.21)                | 64,793.07<br>(28,875.05 to<br>133,940.43)              | 40,378.25<br>(18,187.00 to<br>83,904.84)             | 92,032.13<br>(38,045.94 to<br>188,391.72)                | 1,684.23<br>(1,178.70 to<br>2,261.45)           | 1,697.08<br>(838.07 to<br>3,242.08)             | 1,152.78<br>(596.90 to<br>2,131.77)             | 2,136.47<br>(1,029.88 to<br>4,122.37)           |

|                                |                                        |                                        |                                        |                                        |                                |                                |                                |                                |
|--------------------------------|----------------------------------------|----------------------------------------|----------------------------------------|----------------------------------------|--------------------------------|--------------------------------|--------------------------------|--------------------------------|
| Upper respiratory infections   | 81.06<br>(37.01 to<br>152.71)          | 93.81<br>(30.92 to<br>230.66)          | 64.74<br>(19.86 to<br>165.29)          | 107.59<br>(34.50 to<br>267.09)         | 1.52<br>(0.82 to<br>2.52)      | 2.06<br>(0.70 to<br>5.01)      | 1.49<br>(0.50 to<br>3.79)      | 2.25<br>(0.82 to<br>5.27)      |
| Otitis media                   | 143.74<br>(56.11 to<br>346.33)         | 38.81<br>(10.29 to<br>103.46)          | 39.43<br>(10.25 to<br>103.26)          | 35.12<br>(9.64 to<br>92.75)            | 2.39<br>(1.02 to<br>5.08)      | 0.80<br>(0.22 to<br>2.02)      | 0.85<br>(0.23 to<br>2.13)      | 0.69<br>(0.19 to<br>1.74)      |
| Meningitis                     | 8,879.91<br>(5,774.96 to<br>14,702.98) | 6,140.81<br>(2,621.06 to<br>13,561.36) | 5,420.58<br>(2,265.06 to<br>12,343.21) | 6,193.71<br>(2,638.82 to<br>12,862.84) | 150.25<br>(98.34 to<br>256.99) | 118.13<br>(53.33 to<br>259.08) | 111.82<br>(49.52 to<br>249.47) | 112.10<br>(51.25 to<br>237.43) |
| Pneumococcal meningitis        | 508.39<br>(319.70 to<br>884.13)        | 358.79<br>(143.69 to<br>804.42)        | 345.72<br>(134.58 to<br>799.39)        | 334.80<br>(136.82 to<br>750.65)        | 10.02<br>(6.15 to<br>18.19)    | 7.82<br>(3.29 to<br>17.28)     | 8.01<br>(3.37 to<br>17.82)     | 6.91<br>(3.09 to<br>15.26)     |
| H influenzae type B meningitis | 719.87<br>(455.77 to<br>1,189.27)      | 695.15<br>(192.56 to<br>1,940.09)      | 429.01<br>(152.31 to<br>1,026.85)      | 869.54<br>(216.37 to<br>2,627.29)      | 11.44<br>(7.41 to<br>18.70)    | 10.58<br>(3.69 to<br>26.35)    | 7.78<br>(3.18 to<br>17.57)     | 12.17<br>(3.80 to<br>32.80)    |
| Meningococcal meningitis       | 3,514.07<br>(2,238.69 to<br>5,803.51)  | 2,074.19<br>(860.43 to<br>4,886.42)    | 1,861.97<br>(773.02 to<br>4,590.92)    | 2,066.41<br>(865.94 to<br>4,590.34)    | 57.72<br>(37.39 to<br>98.24)   | 39.90<br>(17.74 to<br>90.29)   | 37.76<br>(16.62 to<br>85.17)   | 37.82<br>(17.12 to<br>84.99)   |
| Other meningitis               | 4,137.58<br>(2,680.42 to<br>6,810.96)  | 3,012.68<br>(1,307.28 to<br>6,778.79)  | 2,783.88<br>(1,169.04 to<br>6,402.75)  | 2,922.96<br>(1,259.63 to<br>6,207.90)  | 71.06<br>(46.03 to<br>122.05)  | 59.83<br>(26.81 to<br>133.43)  | 58.27<br>(25.72 to<br>131.90)  | 55.20<br>(25.59 to<br>119.33)  |
| Encephalitis                   | 495.63<br>(356.59 to<br>706.88)        | 599.05<br>(259.76 to<br>1,240.41)      | 512.53<br>(215.94 to<br>1,058.07)      | 609.80<br>(263.30 to<br>1,223.66)      | 8.79<br>(6.24 to<br>13.05)     | 11.86<br>(5.55 to<br>24.12)    | 10.72<br>(4.98 to<br>21.81)    | 11.49<br>(5.50 to<br>22.96)    |
| Diphtheria                     | 15.90<br>(8.49 to<br>27.08)            | 6.06<br>(1.92 to<br>13.84)             | 4.04<br>(1.49 to<br>9.30)              | 7.26<br>(2.06 to<br>19.39)             | 0.23<br>(0.13 to<br>0.37)      | 0.08<br>(0.04 to<br>0.22)      | 0.08<br>(0.19 to<br>0.19)      | 0.11<br>(0.04 to<br>0.26)      |
| Whooping cough                 | 2,093.02<br>(149.76 to<br>6,782.49)    | 2,198.37<br>(127.77 to<br>9,063.29)    | 247.58<br>(15.44 to<br>1,006.25)       | 3,035.48<br>(179.80 to<br>12,528.83)   | 24.86<br>(1.78 to<br>81.01)    | 26.15<br>(1.51 to<br>106.92)   | 3.15<br>(12.61 to<br>12.61)    | 36.01<br>(2.11 to<br>146.31)   |
| Tetanus                        | 188.64<br>(47.47 to<br>370.15)         | 38.99<br>(6.70 to<br>103.78)           | 35.82<br>(4.29 to<br>100.59)           | 38.60<br>(7.69 to<br>100.35)           | 3.86<br>(0.91 to<br>7.10)      | 0.81<br>(0.14 to<br>2.14)      | 0.82<br>(0.11 to<br>2.27)      | 0.74<br>(0.14 to<br>1.84)      |
| Measles                        | 5,807.31<br>(1,899.06 to<br>13,679.42) | 92.33<br>(6.91 to<br>507.41)           | 32.00<br>(3.91 to<br>134.37)           | 251.73<br>(12.62 to<br>1,609.11)       | 69.81<br>(22.89 to<br>164.44)  | 1.12<br>(0.09 to<br>6.06)      | 0.40<br>(0.05 to<br>1.65)      | 3.01<br>(0.16 to<br>19.15)     |

**Lesotho**

| Cause                                          | YLLs (actual counts)                           |                                                |                                                |                                                | Deaths (actual counts)                   |                                           |                                          |                                           |
|------------------------------------------------|------------------------------------------------|------------------------------------------------|------------------------------------------------|------------------------------------------------|------------------------------------------|-------------------------------------------|------------------------------------------|-------------------------------------------|
|                                                | 2016                                           | 2040 Forecast                                  | 2040 Better Scenario                           | 2040 Worse Scenario                            | 2016                                     | 2040 Forecast                             | 2040 Better Scenario                     | 2040 Worse Scenario                       |
| Varicella and herpes zoster                    | 635.19<br>(391.35 to<br>1,036.10)              | 288.42<br>(112.23 to<br>626.93)                | 192.96<br>(78.20 to<br>404.49)                 | 353.55<br>(136.21 to<br>797.00)                | 12.80<br>(8.64 to<br>18.85)              | 6.30<br>(3.12 to<br>11.26)                | 5.06<br>(2.62 to<br>8.53)                | 6.89<br>(3.32 to<br>12.88)                |
| <b>Neglected tropical diseases and malaria</b> | <b>370.78</b><br>(257.98 to<br><b>538.16</b> ) | <b>322.49</b><br>(145.14 to<br><b>638.70</b> ) | <b>266.98</b><br>(119.67 to<br><b>545.79</b> ) | <b>354.04</b><br>(161.73 to<br><b>718.24</b> ) | <b>6.44</b><br>(4.70 to<br><b>9.05</b> ) | <b>5.82</b><br>(3.09 to<br><b>10.59</b> ) | <b>5.01</b><br>(2.62 to<br><b>9.37</b> ) | <b>6.08</b><br>(3.24 to<br><b>10.85</b> ) |
| Malaria                                        | 0.00<br>(0.00 to<br>0.00)                      | 0.00<br>(0.00 to<br>0.00)                      | 0.00<br>(0.00 to<br>0.00)                      | 0.00<br>(0.00 to<br>0.00)                      | 0.00<br>(0.00 to<br>0.00)                | 0.00<br>(0.00 to<br>0.00)                 | 0.00<br>(0.00 to<br>0.00)                | 0.00<br>(0.00 to<br>0.00)                 |
| Chagas disease                                 | 0.00<br>(0.00 to<br>0.00)                      | 0.00<br>(0.00 to<br>0.00)                      | 0.00<br>(0.00 to<br>0.00)                      | 0.00<br>(0.00 to<br>0.00)                      | 0.00<br>(0.00 to<br>0.00)                | 0.00<br>(0.00 to<br>0.00)                 | 0.00<br>(0.00 to<br>0.00)                | 0.00<br>(0.00 to<br>0.00)                 |
| Leishmaniasis                                  | 0.00<br>(0.00 to<br>0.00)                      | 0.00<br>(0.00 to<br>0.00)                      | 0.00<br>(0.00 to<br>0.00)                      | 0.00<br>(0.00 to<br>0.00)                      | 0.00<br>(0.00 to<br>0.00)                | 0.00<br>(0.00 to<br>0.00)                 | 0.00<br>(0.00 to<br>0.00)                | 0.00<br>(0.00 to<br>0.00)                 |
| African trypanosomiasis                        | 0.00<br>(0.00 to<br>0.00)                      | 0.00<br>(0.00 to<br>0.00)                      | 0.00<br>(0.00 to<br>0.00)                      | 0.00<br>(0.00 to<br>0.00)                      | 0.00<br>(0.00 to<br>0.00)                | 0.00<br>(0.00 to<br>0.00)                 | 0.00<br>(0.00 to<br>0.00)                | 0.00<br>(0.00 to<br>0.00)                 |
| Schistosomiasis                                | 0.00<br>(0.00 to<br>0.00)                      | 0.00<br>(0.00 to<br>0.00)                      | 0.00<br>(0.00 to<br>0.00)                      | 0.00<br>(0.00 to<br>0.00)                      | 0.00<br>(0.00 to<br>0.00)                | 0.00<br>(0.00 to<br>0.00)                 | 0.00<br>(0.00 to<br>0.00)                | 0.00<br>(0.00 to<br>0.00)                 |
| Cysticercosis                                  | 106.72<br>(77.46 to<br>144.24)                 | 73.08<br>(34.84 to<br>142.50)                  | 70.45<br>(32.23 to<br>140.41)                  | 66.24<br>(32.84 to<br>125.50)                  | 2.27<br>(1.64 to<br>3.11)                | 1.67<br>(0.85 to<br>3.10)                 | 1.64<br>(0.80 to<br>3.12)                | 1.49<br>(0.77 to<br>2.67)                 |

|                                                          |                                            |                                          |                                          |                                           |                                     |                                 |                                 |                                   |
|----------------------------------------------------------|--------------------------------------------|------------------------------------------|------------------------------------------|-------------------------------------------|-------------------------------------|---------------------------------|---------------------------------|-----------------------------------|
|                                                          | 28.12<br>(18.90 to<br>39.33)               | 21.24<br>(9.71 to<br>40.65)              | 13.39<br>(5.92 to<br>26.36)              | 24.96<br>(12.17 to<br>45.56)              | 0.64<br>(0.25 to<br>0.89)           | 0.51<br>(0.25 to<br>0.93)       | 0.33<br>(0.16 to<br>0.62)       | 0.59<br>(0.31 to<br>1.03)         |
| Cystic echinococcosis                                    | 0.00<br>(0.00 to<br>0.00)                  | 0.00<br>(0.00 to<br>0.00)                | 0.00<br>(0.00 to<br>0.00)                | 0.00<br>(0.00 to<br>0.00)                 | 0.00<br>(0.00 to<br>0.00)           | 0.00<br>(0.00 to<br>0.00)       | 0.00<br>(0.00 to<br>0.00)       | 0.00<br>(0.00 to<br>0.00)         |
| Dengue                                                   | 0.00<br>(0.00 to<br>0.00)                  | 0.00<br>(0.00 to<br>0.00)                | 0.00<br>(0.00 to<br>0.00)                | 0.00<br>(0.00 to<br>0.00)                 | 0.00<br>(0.00 to<br>0.00)           | 0.00<br>(0.00 to<br>0.00)       | 0.00<br>(0.00 to<br>0.00)       | 0.00<br>(0.00 to<br>0.00)         |
| Yellow fever                                             | 49.43<br>(18.88 to<br>119.20)              | 23.69<br>(6.86 to<br>66.02)              | 11.77<br>(3.26 to<br>33.35)              | 35.03<br>(10.76 to<br>90.45)              | 0.76<br>(0.33 to<br>1.79)           | 0.39<br>(0.13 to<br>1.02)       | 0.20<br>(0.06 to<br>0.54)       | 0.56<br>(0.19 to<br>1.42)         |
| Rabies                                                   | 81.80<br>(19.66 to<br>179.08)              | 121.29<br>(28.63 to<br>330.31)           | 111.43<br>(27.44 to<br>299.54)           | 127.03<br>(28.65 to<br>352.38)            | 1.13<br>(0.38 to<br>2.31)           | 1.78<br>(0.57 to<br>4.35)       | 1.70<br>(0.56 to<br>4.08)       | 1.79<br>(0.54 to<br>4.53)         |
| Intestinal nematode infections                           | 104.70<br>(55.53 to<br>200.16)             | 83.20<br>(33.57 to<br>182.49)            | 59.94<br>(24.08 to<br>128.25)            | 100.78<br>(39.18 to<br>225.76)            | 1.65<br>(0.97 to<br>2.89)           | 1.46<br>(0.72 to<br>2.80)       | 1.13<br>(0.56 to<br>2.11)       | 1.65<br>(0.79 to<br>3.20)         |
| Other neglected tropical diseases                        | 10,521.52<br>(4,881.19 to<br>19,070.39)    | 11,095.67<br>(3,204.69 to<br>28,603.50)  | 7,058.27<br>(1,929.01 to<br>18,608.50)   | 13,239.79<br>(3,829.62 to<br>34,379.65)   | 191.82<br>(89.33 to<br>344.52)      | 218.88<br>(63.53 to<br>557.39)  | 139.94<br>(38.44 to<br>367.45)  | 257.46<br>(74.07 to<br>668.04)    |
| Maternal disorders                                       | 1,527.75<br>(659.64 to<br>2,875.64)        | 1,212.80<br>(317.05 to<br>3,385.32)      | 789.44<br>(194.07 to<br>2,307.04)        | 1,371.46<br>(360.23 to<br>3,864.85)       | 28.33<br>(12.24 to<br>53.19)        | 23.99<br>(6.14 to<br>66.76)     | 15.67<br>(3.80 to<br>45.81)     | 26.77<br>(6.87 to<br>75.00)       |
| Maternal hemorrhage                                      | 528.35<br>(199.98 to<br>1,061.86)          | 357.67<br>(95.07 to<br>947.69)           | 231.10<br>(59.50 to<br>632.73)           | 410.16<br>(107.37 to<br>1,074.67)         | 9.70<br>(3.83 to<br>19.37)          | 7.06<br>(1.84 to<br>18.94)      | 4.59<br>(1.14 to<br>12.71)      | 7.97<br>(2.06 to<br>20.83)        |
| Maternal sepsis and other maternal infections            | 2,388.03<br>(1,062.14 to<br>4,392.37)      | 1,705.83<br>(471.26 to<br>4,462.64)      | 1,094.47<br>(288.45 to<br>2,917.01)      | 1,991.28<br>(525.80 to<br>5,285.99)       | 42.49<br>(19.06 to<br>77.93)        | 32.30<br>(8.79 to<br>85.11)     | 20.81<br>(5.47 to<br>53.86)     | 37.12<br>(9.89 to<br>97.50)       |
| Maternal hypertensive disorders                          | 242.42<br>(90.00 to<br>537.57)             | 206.69<br>(48.92 to<br>608.51)           | 129.80<br>(29.21 to<br>400.92)           | 239.50<br>(57.53 to<br>719.14)            | 4.50<br>(1.65 to<br>9.79)           | 4.12<br>(0.97 to<br>11.96)      | 2.60<br>(0.59 to<br>8.13)       | 4.70<br>(1.10 to<br>14.32)        |
| Maternal obstructed labor and uterine rupture            | 166.30<br>(53.06 to<br>392.25)             | 165.18<br>(32.88 to<br>509.23)           | 106.98<br>(21.06 to<br>341.26)           | 191.77<br>(38.04 to<br>596.79)            | 3.07<br>(0.98 to<br>7.15)           | 3.26<br>(0.67 to<br>10.14)      | 2.12<br>(0.43 to<br>6.65)       | 3.73<br>(0.76 to<br>11.40)        |
| Maternal abortion, miscarriage, and ectopic pregnancy    | 3,104.16<br>(1,382.32 to<br>5,795.39)      | 2,684.22<br>(722.27 to<br>7,186.22)      | 1,747.89<br>(465.23 to<br>4,846.56)      | 3,108.59<br>(834.27 to<br>8,389.28)       | 56.82<br>(25.66 to<br>103.91)       | 52.05<br>(14.08 to<br>139.05)   | 34.09<br>(9.12 to<br>93.47)     | 59.37<br>(16.22 to<br>159.07)     |
| Indirect maternal deaths                                 | 152.47<br>(39.28 to<br>353.99)             | 102.34<br>(18.10 to<br>306.90)           | 65.99<br>(11.74 to<br>204.75)            | 118.16<br>(21.84 to<br>352.66)            | 2.77<br>(0.71 to<br>6.45)           | 1.99<br>(0.37 to<br>6.02)       | 1.29<br>(0.24 to<br>4.11)       | 2.26<br>(0.43 to<br>6.66)         |
| Late maternal deaths                                     | 650.43<br>(284.79 to<br>1,171.06)          | 3,249.60<br>(769.33 to<br>8,613.53)      | 1,952.62<br>(313.29 to<br>5,774.47)      | 4,198.61<br>(1,094.69 to<br>11,086.49)    | 12.21<br>(5.42 to<br>21.84)         | 66.76<br>(15.99 to<br>174.82)   | 40.44<br>(6.22 to<br>118.16)    | 84.83<br>(22.00 to<br>228.33)     |
| Maternal deaths aggravated by HIV/AIDS                   | 1,761.61<br>(783.62 to<br>3,344.27)        | 1,411.35<br>(380.75 to<br>3,947.11)      | 939.98<br>(246.99 to<br>2,624.66)        | 1,610.24<br>(435.86 to<br>4,474.94)       | 31.93<br>(13.95 to<br>60.11)        | 27.35<br>(7.32 to<br>75.38)     | 18.32<br>(4.81 to<br>50.70)     | 30.70<br>(8.32 to<br>82.00)       |
| Other maternal disorders                                 | <b>Lesotho</b>                             |                                          |                                          |                                           |                                     |                                 |                                 |                                   |
| Cause                                                    | YLLs (actual counts)                       |                                          |                                          |                                           | Deaths (actual counts)              |                                 |                                 |                                   |
|                                                          | 2016                                       | 2040 Forecast                            | 2040 Better Scenario                     | 2040 Worse Scenario                       | 2016                                | 2040 Forecast                   | 2040 Better Scenario            | 2040 Worse Scenario               |
| Neonatal disorders                                       | 111,876.90<br>(80,852.96 to<br>151,262.64) | 41,508.97<br>(22,991.60 to<br>73,410.28) | 27,584.42<br>(15,416.29 to<br>47,928.99) | 58,404.61<br>(32,114.98 to<br>104,000.13) | 1,292.34<br>(933.93 to<br>1,747.37) | 479.67<br>(265.69 to<br>848.40) | 318.77<br>(178.18 to<br>553.74) | 674.87<br>(371.10 to<br>1,201.95) |
| Neonatal preterm birth                                   | 39,329.20<br>(23,395.46 to<br>59,155.87)   | 11,816.77<br>(6,172.13 to<br>20,343.54)  | 7,646.29<br>(4,024.02 to<br>12,962.23)   | 18,436.10<br>(9,715.20 to<br>31,569.53)   | 454.30<br>(270.28 to<br>683.25)     | 136.55<br>(71.36 to<br>235.03)  | 88.36<br>(46.49 to<br>149.82)   | 213.01<br>(112.24 to<br>365.51)   |
| Neonatal encephalopathy due to birth asphyxia and trauma | 25,081.17<br>(15,085.10 to<br>39,907.15)   | 8,461.28<br>(3,890.70 to<br>16,426.31)   | 5,975.05<br>(2,779.68 to<br>11,515.04)   | 11,044.27<br>(4,991.34 to<br>21,639.52)   | 289.71<br>(174.24 to<br>460.95)     | 97.78<br>(45.01 to<br>189.76)   | 69.05<br>(32.14 to<br>133.02)   | 127.63<br>(57.71 to<br>249.95)    |
| Neonatal sepsis and other neonatal infections            | 9,151.37<br>(5,248.27 to<br>17,100.93)     | 4,643.13<br>(2,105.10 to<br>9,756.47)    | 3,220.35<br>(1,476.09 to<br>6,630.01)    | 6,110.54<br>(2,726.40 to<br>12,925.11)    | 105.71<br>(60.62 to<br>197.53)      | 53.65<br>(24.32 to<br>112.75)   | 37.21<br>(17.06 to<br>76.59)    | 70.61<br>(31.50 to<br>149.40)     |

|                                                                         |                                                             |                                                            |                                                            |                                                             |                                                      |                                                    |                                                    |                                                     |
|-------------------------------------------------------------------------|-------------------------------------------------------------|------------------------------------------------------------|------------------------------------------------------------|-------------------------------------------------------------|------------------------------------------------------|----------------------------------------------------|----------------------------------------------------|-----------------------------------------------------|
| Hemolytic disease and other neonatal jaundice                           | 1,535.36<br>(882.48 to<br>2,552.94)                         | 365.78<br>(163.01 to<br>751.01)                            | 237.24<br>(107.61 to<br>496.44)                            | 502.73<br>(217.77 to<br>1,058.15)                           | 17.74<br>(10.20 to<br>29.48)                         | 4.23<br>(1.88 to<br>8.68)                          | 2.74<br>(1.24 to<br>5.74)                          | 5.81<br>(1.24 to<br>12.22)                          |
| Other neonatal disorders                                                | 36,779.80<br>(23,087.98 to<br>56,014.29)                    | 16,222.01<br>(7,590.36 to<br>32,499.88)                    | 10,505.49<br>(5,019.80 to<br>20,846.21)                    | 22,310.96<br>(10,189.24 to<br>44,856.32)                    | 424.89<br>(266.73 to<br>647.11)                      | 187.46<br>(87.75 to<br>375.46)                     | 121.40<br>(58.00 to<br>241.08)                     | 257.82<br>(117.75 to<br>518.21)                     |
| <b>Nutritional deficiencies</b>                                         | <b>9,766.83</b><br><b>(6,070.47 to</b><br><b>15,021.12)</b> | <b>3,904.50</b><br><b>(1,763.62 to</b><br><b>7,921.13)</b> | <b>3,057.09</b><br><b>(1,431.17 to</b><br><b>5,885.27)</b> | <b>4,514.93</b><br><b>(2,048.76 to</b><br><b>9,635.05)</b>  | <b>152.66</b><br><b>(105.88 to</b><br><b>219.05)</b> | <b>77.52</b><br><b>(46.26 to</b><br><b>132.44)</b> | <b>66.87</b><br><b>(41.31 to</b><br><b>108.98)</b> | <b>81.63</b><br><b>(47.18 to</b><br><b>144.52)</b>  |
| Protein-energy malnutrition                                             | 9,112.07<br>(5,450.55 to<br>14,192.72)                      | 3,186.55<br>(1,327.82 to<br>6,936.52)                      | 2,445.08<br>(1,041.78 to<br>5,146.20)                      | 3,786.75<br>(1,535.06 to<br>8,485.93)                       | 132.59<br>(88.02 to<br>196.65)                       | 57.68<br>(31.73 to<br>102.57)                      | 48.46<br>(27.98 to<br>83.99)                       | 62.79<br>(32.76 to<br>118.62)                       |
| Iodine deficiency                                                       | 32.16<br>(1.19 to<br>161.52)                                | 104.72<br>(1.27 to<br>506.58)                              | 77.92<br>(0.90 to<br>361.41)                               | 121.86<br>(1.56 to<br>616.92)                               | 0.61<br>(0.03 to<br>2.21)                            | 2.24<br>(0.04 to<br>8.45)                          | 1.83<br>(0.03 to<br>6.94)                          | 2.39<br>(0.04 to<br>10.04)                          |
| Dietary iron deficiency                                                 | 10.48<br>(7.08 to<br>14.84)                                 | 11.20<br>(5.32 to<br>22.42)                                | 9.62<br>(4.46 to<br>19.08)                                 | 11.59<br>(5.48 to<br>23.11)                                 | 0.18<br>(0.12 to<br>0.24)                            | 0.20<br>(0.10 to<br>0.40)                          | 0.18<br>(0.09 to<br>0.36)                          | 0.20<br>(0.10 to<br>0.40)                           |
| Other nutritional deficiencies                                          | 612.12<br>(397.10 to<br>906.54)                             | 602.02<br>(310.36 to<br>1,098.94)                          | 524.48<br>(264.46 to<br>969.53)                            | 594.73<br>(310.20 to<br>1,056.71)                           | 19.30<br>(12.69 to<br>27.06)                         | 17.39<br>(10.74 to<br>27.30)                       | 16.40<br>(10.07 to<br>26.68)                       | 16.24<br>(10.29 to<br>25.21)                        |
| <b>Other communicable, maternal, neonatal, and nutritional diseases</b> | <b>8,645.53</b><br><b>(4,417.60 to</b><br><b>18,363.89)</b> | <b>5,098.03</b><br><b>(2,410.63 to</b><br><b>9,628.56)</b> | <b>4,100.39</b><br><b>(1,943.89 to</b><br><b>7,831.61)</b> | <b>5,617.85</b><br><b>(2,671.28 to</b><br><b>11,335.31)</b> | <b>130.45</b><br><b>(74.42 to</b><br><b>240.54)</b>  | <b>98.88</b><br><b>(50.62 to</b><br><b>166.61)</b> | <b>84.39</b><br><b>(42.19 to</b><br><b>142.51)</b> | <b>100.75</b><br><b>(51.96 to</b><br><b>177.42)</b> |
| Sexually transmitted infections excluding HIV                           | 3,540.83<br>(1,574.17 to<br>6,866.38)                       | 1,132.84<br>(410.89 to<br>2,501.06)                        | 917.65<br>(349.15 to<br>1,933.73)                          | 1,270.88<br>(439.39 to<br>2,948.76)                         | 46.64<br>(22.72 to<br>84.99)                         | 17.96<br>(7.49 to<br>37.12)                        | 15.31<br>(6.35 to<br>31.41)                        | 19.03<br>(7.65 to<br>40.66)                         |
| Syphilis                                                                | 3,320.83<br>(1,397.36 to<br>6,657.23)                       | 907.49<br>(292.61 to<br>2,112.21)                          | 711.91<br>(238.91 to<br>1,632.13)                          | 1,062.51<br>(317.57 to<br>2,537.93)                         | 41.38<br>(18.14 to<br>80.70)                         | 12.62<br>(4.48 to<br>27.60)                        | 10.30<br>(3.85 to<br>22.13)                        | 14.18<br>(4.89 to<br>32.10)                         |
| Chlamydial infection                                                    | 40.17<br>(16.22 to<br>119.10)                               | 41.65<br>(11.94 to<br>121.49)                              | 37.55<br>(10.79 to<br>108.48)                              | 39.04<br>(11.34 to<br>117.46)                               | 0.95<br>(0.40 to<br>2.61)                            | 0.98<br>(0.35 to<br>2.74)                          | 0.91<br>(0.31 to<br>2.50)                          | 0.90<br>(0.30 to<br>2.60)                           |
| Gonococcal infection                                                    | 116.76<br>(52.36 to<br>305.24)                              | 119.13<br>(37.23 to<br>337.28)                             | 109.21<br>(33.91 to<br>299.31)                             | 109.76<br>(34.20 to<br>318.32)                              | 2.88<br>(1.33 to<br>7.24)                            | 2.88<br>(1.02 to<br>7.83)                          | 2.71<br>(0.97 to<br>7.22)                          | 2.61<br>(0.93 to<br>7.08)                           |
| Other sexually transmitted infections                                   | 63.07<br>(28.16 to<br>166.27)                               | 64.56<br>(19.88 to<br>170.24)                              | 58.99<br>(18.06 to<br>157.25)                              | 59.57<br>(18.07 to<br>161.60)                               | 1.44<br>(0.66 to<br>3.55)                            | 1.49<br>(0.50 to<br>3.91)                          | 1.38<br>(0.47 to<br>3.49)                          | 1.35<br>(0.46 to<br>3.57)                           |
| Acute hepatitis                                                         | 562.61<br>(407.28 to<br>745.89)                             | 578.13<br>(287.06 to<br>1,059.29)                          | 518.79<br>(251.16 to<br>982.49)                            | 540.77<br>(277.07 to<br>963.11)                             | 13.71<br>(10.22 to<br>18.00)                         | 14.70<br>(8.19 to<br>25.07)                        | 13.63<br>(7.36 to<br>23.82)                        | 14.44<br>(7.82 to<br>22.79)                         |
| Acute hepatitis A                                                       | 11.71<br>(2.32 to<br>27.03)                                 | 7.77<br>(1.84 to<br>21.38)                                 | 6.47<br>(1.54 to<br>17.75)                                 | 8.34<br>(1.96 to<br>22.64)                                  | 0.17<br>(0.05 to<br>0.35)                            | 0.15<br>(0.04 to<br>0.39)                          | 0.14<br>(0.04 to<br>0.35)                          | 0.15<br>(0.04 to<br>0.39)                           |
| Acute hepatitis B                                                       | 454.37<br>(318.30 to<br>614.69)                             | 497.55<br>(239.03 to<br>928.74)                            | 446.26<br>(208.09 to<br>861.08)                            | 460.17<br>(228.12 to<br>846.95)                             | 11.54<br>(8.40 to<br>15.17)                          | 12.78<br>(6.82 to<br>22.15)                        | 11.74<br>(6.10 to<br>21.16)                        | 11.65<br>(6.37 to<br>20.25)                         |
| Acute hepatitis C                                                       | 12.22<br>(7.99 to<br>17.72)                                 | 16.90<br>(7.72 to<br>30.18)                                | 16.93<br>(7.46 to<br>31.68)                                | 14.74<br>(7.09 to<br>25.74)                                 | 0.35<br>(0.23 to<br>0.50)                            | 0.48<br>(0.25 to<br>0.82)                          | 0.50<br>(0.26 to<br>0.88)                          | 0.42<br>(0.22 to<br>0.69)                           |
| Acute hepatitis E                                                       | 84.31<br>(58.48 to<br>118.87)                               | 55.91<br>(26.19 to<br>106.29)                              | 49.13<br>(22.45 to<br>93.53)                               | 57.53<br>(26.35 to<br>111.46)                               | 1.64<br>(1.15 to<br>2.25)                            | 1.29<br>(0.71 to<br>2.22)                          | 1.25<br>(0.70 to<br>2.09)                          | 1.22<br>(0.67 to<br>2.06)                           |
| Other unspecified infectious diseases                                   | 4,542.09<br>(1,349.13 to<br>12,781.23)                      | 3,387.06<br>(1,198.77 to<br>7,318.10)                      | 2,663.96<br>(914.50 to<br>5,563.37)                        | 3,806.20<br>(1,357.14 to<br>8,820.77)                       | 70.10<br>(23.17 to<br>173.05)                        | 65.41<br>(24.74 to<br>120.45)                      | 55.44<br>(20.05 to<br>100.96)                      | 68.28<br>(25.21 to<br>131.82)                       |
| Non-communicable diseases                                               | 262,726.64<br>(204,589.22 to<br>329,378.06)                 | 393,508.10<br>(229,901.59 to<br>635,494.69)                | 303,133.29<br>(174,716.27 to<br>503,169.13)                | 423,362.80<br>(257,066.01 to<br>660,216.94)                 | 10,588.63<br>(8,281.49 to<br>13,173.54)              | 13,668.25<br>(9,476.24 to<br>19,769.17)            | 10,989.87<br>(7,640.16 to<br>16,043.42)            | 14,544.11<br>(10,230.48 to<br>20,561.06)            |

**Lesotho**

| Cause | YLLs (actual counts) |               |                      |                     | Deaths (actual counts) |               |                      |                     |
|-------|----------------------|---------------|----------------------|---------------------|------------------------|---------------|----------------------|---------------------|
|       | 2016                 | 2040 Forecast | 2040 Better Scenario | 2040 Worse Scenario | 2016                   | 2040 Forecast | 2040 Better Scenario | 2040 Worse Scenario |

|                                      |                                                               |                                                                |                                                                |                                                                |                                                            |                                                            |                                                            |                                                            |
|--------------------------------------|---------------------------------------------------------------|----------------------------------------------------------------|----------------------------------------------------------------|----------------------------------------------------------------|------------------------------------------------------------|------------------------------------------------------------|------------------------------------------------------------|------------------------------------------------------------|
| <b>Neoplasms</b>                     | <b>43,742.98</b><br><b>(30,671.44 to</b><br><b>57,995.12)</b> | <b>93,373.87</b><br><b>(47,163.66 to</b><br><b>159,683.76)</b> | <b>82,878.54</b><br><b>(42,088.05 to</b><br><b>144,142.89)</b> | <b>86,724.98</b><br><b>(45,621.68 to</b><br><b>144,607.40)</b> | <b>1,646.90</b><br><b>(1,196.57 to</b><br><b>2,136.73)</b> | <b>3,044.43</b><br><b>(1,738.66 to</b><br><b>4,769.39)</b> | <b>2,800.91</b><br><b>(1,659.30 to</b><br><b>4,381.22)</b> | <b>2,798.75</b><br><b>(1,609.61 to</b><br><b>4,359.93)</b> |
| Lip and oral cavity cancer           | 892.28<br>(608.38 to<br>1,245.17)                             | 2,526.97<br>(740.88 to<br>5,638.77)                            | 1,746.35<br>(508.59 to<br>4,063.93)                            | 2,853.07<br>(926.54 to<br>5,719.00)                            | 33.51<br>(23.64 to<br>46.31)                               | 79.57<br>(26.03 to<br>171.23)                              | 55.55<br>(18.74 to<br>122.11)                              | 90.22<br>(32.42 to<br>180.62)                              |
| Nasopharynx cancer                   | 227.96<br>(138.76 to<br>341.54)                               | 624.67<br>(172.22 to<br>1,430.15)                              | 417.37<br>(112.06 to<br>971.79)                                | 733.44<br>(224.89 to<br>1,559.69)                              | 7.44<br>(4.48 to<br>11.14)                                 | 18.67<br>(5.54 to<br>42.34)                                | 12.46<br>(3.73 to<br>28.61)                                | 21.86<br>(7.11 to<br>45.36)                                |
| Other pharynx cancer                 | 192.75<br>(115.62 to<br>314.74)                               | 362.62<br>(120.14 to<br>778.70)                                | 353.84<br>(113.71 to<br>785.51)                                | 390.91<br>(136.43 to<br>807.65)                                | 6.92<br>(4.22 to<br>11.08)                                 | 11.54<br>(4.14 to<br>23.43)                                | 11.50<br>(3.97 to<br>24.05)                                | 12.41<br>(4.49 to<br>25.27)                                |
| Esophageal cancer                    | 3,692.76<br>(2,696.18 to<br>4,835.21)                         | 9,400.74<br>(2,910.98 to<br>21,634.80)                         | 6,637.70<br>(2,113.33 to<br>15,881.47)                         | 10,118.26<br>(3,216.88 to<br>23,396.01)                        | 152.02<br>(113.14 to<br>194.77)                            | 309.63<br>(108.51 to<br>674.51)                            | 221.98<br>(81.01 to<br>495.03)                             | 332.72<br>(118.04 to<br>718.33)                            |
| Stomach cancer                       | 2,575.16<br>(1,953.47 to<br>3,248.04)                         | 3,638.40<br>(1,986.78 to<br>6,164.16)                          | 3,558.74<br>(1,828.72 to<br>5,796.20)                          | 3,207.18<br>(1,773.47 to<br>5,267.97)                          | 107.47<br>(83.74 to<br>132.96)                             | 125.67<br>(80.43 to<br>193.77)                             | 121.65<br>(66.81 to<br>188.31)                             | 109.85<br>(71.24 to<br>168.66)                             |
| Colon and rectum cancer              | 2,331.53<br>(1,487.07 to<br>3,233.93)                         | 5,036.12<br>(2,280.69 to<br>9,104.60)                          | 5,152.17<br>(2,381.46 to<br>9,206.03)                          | 4,534.44<br>(2,124.73 to<br>8,266.71)                          | 101.90<br>(66.04 to<br>140.15)                             | 185.17<br>(97.05 to<br>303.60)                             | 199.69<br>(105.41 to<br>329.10)                            | 163.47<br>(86.84 to<br>272.66)                             |
| Liver cancer                         | 1,996.21<br>(1,414.06 to<br>2,837.75)                         | 4,803.54<br>(2,190.24 to<br>9,224.62)                          | 4,216.44<br>(2,020.57 to<br>8,134.72)                          | 4,764.42<br>(2,136.35 to<br>9,062.04)                          | 70.78<br>(50.37 to<br>101.22)                              | 147.95<br>(74.14 to<br>269.04)                             | 135.12<br>(72.48 to<br>240.12)                             | 145.01<br>(72.54 to<br>269.37)                             |
| Liver cancer due to hepatitis B      | 975.17<br>(660.40 to<br>1,402.82)                             | 2,413.76<br>(1,073.18 to<br>4,667.79)                          | 2,167.28<br>(994.13 to<br>4,259.36)                            | 2,244.86<br>(998.76 to<br>4,360.47)                            | 31.60<br>(21.63 to<br>45.47)                               | 70.16<br>(35.06 to<br>129.79)                              | 65.02<br>(34.38 to<br>120.84)                              | 64.59<br>(31.47 to<br>120.39)                              |
| Liver cancer due to hepatitis C      | 282.11<br>(183.94 to<br>438.17)                               | 641.03<br>(297.97 to<br>1,241.90)                              | 591.04<br>(287.66 to<br>1,152.39)                              | 597.26<br>(274.90 to<br>1,129.35)                              | 12.75<br>(8.43 to<br>19.90)                                | 23.80<br>(12.87 to<br>42.42)                               | 23.30<br>(13.35 to<br>41.05)                               | 21.81<br>(11.50 to<br>38.09)                               |
| Liver cancer due to alcohol use      | 297.83<br>(202.93 to<br>437.45)                               | 708.25<br>(319.72 to<br>1,412.79)                              | 554.10<br>(260.18 to<br>1,104.93)                              | 948.08<br>(410.99 to<br>1,930.91)                              | 11.76<br>(8.14 to<br>17.29)                                | 22.97<br>(11.40 to<br>44.23)                               | 18.91<br>(9.96 to<br>35.25)                                | 30.02<br>(14.52 to<br>57.55)                               |
| Liver cancer due to other causes     | 441.10<br>(309.92 to<br>626.02)                               | 1,040.50<br>(471.66 to<br>2,098.65)                            | 904.02<br>(429.02 to<br>1,828.05)                              | 974.23<br>(431.67 to<br>1,943.17)                              | 14.66<br>(10.53 to<br>20.96)                               | 31.02<br>(15.43 to<br>60.51)                               | 27.89<br>(14.62 to<br>52.28)                               | 28.59<br>(13.99 to<br>54.79)                               |
| Gallbladder and biliary tract cancer | 326.80<br>(187.68 to<br>531.80)                               | 398.39<br>(213.92 to<br>683.16)                                | 454.25<br>(237.14 to<br>806.89)                                | 327.46<br>(181.29 to<br>549.39)                                | 15.62<br>(9.11 to<br>25.39)                                | 16.23<br>(10.01 to<br>25.31)                               | 19.41<br>(11.62 to<br>31.13)                               | 13.14<br>(8.10 to<br>20.30)                                |
| Pancreatic cancer                    | 1,159.23<br>(821.74 to<br>1,568.98)                           | 3,114.08<br>(1,664.38 to<br>5,202.26)                          | 3,096.07<br>(1,678.94 to<br>5,148.39)                          | 2,561.26<br>(1,431.40 to<br>4,259.25)                          | 51.89<br>(37.21 to<br>70.18)                               | 112.71<br>(68.08 to<br>176.46)                             | 117.33<br>(72.73 to<br>180.01)                             | 92.02<br>(56.53 to<br>143.01)                              |
| Larynx cancer                        | 843.18<br>(548.87 to<br>1,116.30)                             | 2,084.23<br>(682.63 to<br>4,421.47)                            | 1,323.74<br>(413.84 to<br>3,018.75)                            | 2,199.08<br>(788.31 to<br>4,142.87)                            | 32.27<br>(21.36 to<br>41.73)                               | 67.41<br>(24.16 to<br>137.98)                              | 42.25<br>(14.46 to<br>91.67)                               | 71.67<br>(26.94 to<br>132.27)                              |
| Tracheal, bronchus, and lung cancer  | 6,429.43<br>(4,250.93 to<br>9,082.56)                         | 19,034.63<br>(6,383.57 to<br>35,761.26)                        | 12,691.68<br>(3,969.49 to<br>27,713.75)                        | 17,618.56<br>(6,832.24 to<br>31,117.07)                        | 249.23<br>(171.28 to<br>348.43)                            | 620.94<br>(230.38 to<br>1,138.29)                          | 407.63<br>(143.83 to<br>846.49)                            | 580.66<br>(243.66 to<br>980.37)                            |
| Malignant skin melanoma              | 286.47<br>(179.27 to<br>512.54)                               | 625.10<br>(332.97 to<br>1,196.81)                              | 757.15<br>(386.16 to<br>1,449.87)                              | 486.84<br>(268.54 to<br>894.30)                                | 10.83<br>(7.04 to<br>19.32)                                | 20.26<br>(12.32 to<br>35.53)                               | 25.74<br>(15.41 to<br>45.59)                               | 15.52<br>(9.71 to<br>26.46)                                |
| Non-melanoma skin cancer             | 768.11<br>(524.65 to<br>1,056.64)                             | 1,479.29<br>(872.65 to<br>2,263.81)                            | 1,576.95<br>(872.69 to<br>2,564.53)                            | 1,257.83<br>(773.22 to<br>1,876.61)                            | 33.88<br>(23.88 to<br>44.96)                               | 52.68<br>(35.32 to<br>71.96)                               | 59.48<br>(38.90 to<br>84.81)                               | 43.89<br>(30.46 to<br>58.59)                               |
| Breast cancer                        | 3,454.81<br>(1,678.60 to<br>5,868.34)                         | 7,633.74<br>(2,765.60 to<br>16,816.32)                         | 7,615.79<br>(2,753.73 to<br>16,806.84)                         | 7,115.35<br>(2,529.37 to<br>15,632.29)                         | 129.80<br>(65.39 to<br>214.21)                             | 256.70<br>(115.15 to<br>507.70)                            | 266.16<br>(120.62 to<br>515.59)                            | 236.41<br>(103.00 to<br>472.63)                            |
| Cervical cancer                      | 5,446.97<br>(2,362.94 to<br>9,382.08)                         | 8,665.31<br>(2,510.63 to<br>19,724.42)                         | 8,024.99<br>(2,342.28 to<br>18,416.26)                         | 7,947.38<br>(2,294.86 to<br>18,174.05)                         | 198.38<br>(88.37 to<br>335.21)                             | 276.00<br>(92.79 to<br>574.54)                             | 263.82<br>(91.48 to<br>540.49)                             | 252.05<br>(85.41 to<br>532.38)                             |
| Uterine cancer                       | 447.59<br>(232.18 to<br>704.84)                               | 664.67<br>(314.12 to<br>1,115.30)                              | 646.87<br>(300.75 to<br>1,128.69)                              | 607.19<br>(306.28 to<br>994.40)                                | 21.36<br>(11.41 to<br>32.60)                               | 28.80<br>(16.81 to<br>43.04)                               | 29.24<br>(16.46 to<br>45.33)                               | 25.91<br>(15.61 to<br>37.40)                               |
| Ovarian cancer                       | 563.04<br>(283.52 to<br>964.21)                               | 1,289.77<br>(528.87 to<br>2,674.75)                            | 1,420.34<br>(572.42 to<br>3,063.34)                            | 1,076.46<br>(458.58 to<br>2,195.74)                            | 21.45<br>(11.05 to<br>36.35)                               | 44.45<br>(21.46 to<br>83.62)                               | 50.22<br>(23.45 to<br>98.80)                               | 36.83<br>(18.71 to<br>67.64)                               |

| Prostate cancer                 | 1,868.32<br>(1,020.38 to<br>3,208.06)                          | 3,277.11<br>(1,847.21 to<br>5,947.32)                           | 3,986.13<br>(2,281.51 to<br>6,962.90)                          | 2,570.46<br>(1,445.10 to<br>4,718.89)                           | 115.70<br>(64.35 to<br>191.73)                             | 154.66<br>(90.23 to<br>264.08)                             | 203.71<br>(123.89 to<br>330.62)                            | 118.04<br>(65.75 to<br>210.04)                             |
|---------------------------------|----------------------------------------------------------------|-----------------------------------------------------------------|----------------------------------------------------------------|-----------------------------------------------------------------|------------------------------------------------------------|------------------------------------------------------------|------------------------------------------------------------|------------------------------------------------------------|
| Testicular cancer               | 155.93<br>(109.90 to<br>215.88)                                | 196.82<br>(105.42 to<br>327.05)                                 | 200.11<br>(104.50 to<br>341.28)                                | 174.08<br>(97.14 to<br>287.55)                                  | 4.06<br>(2.95 to<br>5.44)                                  | 4.92<br>(3.03 to<br>7.44)                                  | 5.28<br>(3.19 to<br>8.09)                                  | 4.22<br>(2.67 to<br>6.24)                                  |
| <b>Lesotho</b>                  |                                                                |                                                                 |                                                                |                                                                 |                                                            |                                                            |                                                            |                                                            |
| Cause                           | YLLs (actual counts)                                           |                                                                 |                                                                |                                                                 | Deaths (actual counts)                                     |                                                            |                                                            |                                                            |
|                                 | 2016                                                           | 2040 Forecast                                                   | 2040 Better Scenario                                           | 2040 Worse Scenario                                             | 2016                                                       | 2040 Forecast                                              | 2040 Better Scenario                                       | 2040 Worse Scenario                                        |
| Kidney cancer                   | 357.75<br>(270.43 to<br>457.35)                                | 837.86<br>(462.23 to<br>1,365.25)                               | 886.74<br>(482.86 to<br>1,472.74)                              | 681.18<br>(394.95 to<br>1,051.97)                               | 11.21<br>(8.39 to<br>14.43)                                | 25.05<br>(14.80 to<br>39.41)                               | 27.65<br>(16.52 to<br>43.85)                               | 19.75<br>(12.20 to<br>30.58)                               |
| Bladder cancer                  | 554.65<br>(382.22 to<br>765.17)                                | 1,100.27<br>(529.32 to<br>1,910.01)                             | 988.05<br>(494.80 to<br>1,701.47)                              | 944.11<br>(468.38 to<br>1,636.41)                               | 26.73<br>(18.71 to<br>36.52)                               | 41.48<br>(22.83 to<br>67.62)                               | 39.62<br>(22.67 to<br>61.86)                               | 35.02<br>(19.18 to<br>57.08)                               |
| Brain and nervous system cancer | 1,026.36<br>(742.28 to<br>1,472.25)                            | 2,027.75<br>(1,158.24 to<br>3,278.80)                           | 2,186.29<br>(1,218.43 to<br>3,665.74)                          | 1,759.70<br>(1,033.08 to<br>2,808.30)                           | 24.91<br>(17.17 to<br>37.30)                               | 52.13<br>(31.82 to<br>82.81)                               | 59.11<br>(35.33 to<br>95.40)                               | 43.36<br>(27.09 to<br>66.35)                               |
| Thyroid cancer                  | 144.43<br>(92.15 to<br>211.84)                                 | 248.32<br>(129.12 to<br>444.91)                                 | 237.92<br>(123.46 to<br>426.93)                                | 236.30<br>(122.03 to<br>421.89)                                 | 5.80<br>(3.74 to<br>8.32)                                  | 8.72<br>(5.19 to<br>14.21)                                 | 8.69<br>(5.18 to<br>14.14)                                 | 8.17<br>(4.83 to<br>13.23)                                 |
| Mesothelioma                    | 243.79<br>(150.75 to<br>383.56)                                | 550.01<br>(280.02 to<br>1,010.91)                               | 619.94<br>(295.17 to<br>1,221.05)                              | 447.70<br>(239.42 to<br>778.17)                                 | 9.79<br>(6.16 to<br>15.17)                                 | 18.20<br>(10.17 to<br>30.95)                               | 21.25<br>(11.20 to<br>38.38)                               | 14.69<br>(8.58 to<br>23.76)                                |
| Hodgkin lymphoma                | 326.51<br>(229.32 to<br>438.13)                                | 340.27<br>(186.14 to<br>570.32)                                 | 304.16<br>(159.95 to<br>527.84)                                | 325.19<br>(181.12 to<br>528.55)                                 | 7.84<br>(5.38 to<br>10.35)                                 | 8.43<br>(5.00 to<br>13.19)                                 | 7.82<br>(4.54 to<br>12.48)                                 | 7.84<br>(4.77 to<br>11.78)                                 |
| Non-Hodgkin lymphoma            | 741.82<br>(535.45 to<br>1,144.33)                              | 1,460.66<br>(874.22 to<br>2,416.02)                             | 1,627.57<br>(953.58 to<br>2,730.59)                            | 1,245.61<br>(754.96 to<br>2,022.46)                             | 23.71<br>(17.20 to<br>35.93)                               | 44.28<br>(29.89 to<br>69.93)                               | 52.06<br>(34.71 to<br>81.42)                               | 36.67<br>(24.83 to<br>56.03)                               |
| Multiple myeloma                | 402.04<br>(272.56 to<br>608.50)                                | 987.94<br>(565.61 to<br>1,606.32)                               | 987.94<br>(639.44 to<br>1,910.91)                              | 813.68<br>(474.13 to<br>1,319.48)                               | 16.40<br>(11.39 to<br>25.08)                               | 34.17<br>(21.44 to<br>52.29)                               | 40.96<br>(25.51 to<br>63.47)                               | 27.94<br>(17.77 to<br>43.24)                               |
| Leukemia                        | 2,260.60<br>(1,679.35 to<br>2,963.19)                          | 3,334.95<br>(1,879.62 to<br>5,427.56)                           | 3,181.31<br>(1,800.07 to<br>5,255.72)                          | 3,107.69<br>(1,824.48 to<br>4,999.85)                           | 61.08<br>(43.66 to<br>82.62)                               | 93.56<br>(57.23 to<br>142.11)                              | 93.19<br>(57.77 to<br>141.26)                              | 84.44<br>(52.68 to<br>126.60)                              |
| Acute lymphoid leukemia         | 420.84<br>(288.75 to<br>655.79)                                | 524.98<br>(259.51 to<br>999.88)                                 | 510.10<br>(243.62 to<br>966.00)                                | 500.89<br>(249.94 to<br>921.35)                                 | 7.20<br>(4.99 to<br>11.50)                                 | 10.51<br>(5.57 to<br>20.02)                                | 10.51<br>(5.49 to<br>19.78)                                | 9.63<br>(5.18 to<br>17.71)                                 |
| Chronic lymphoid leukemia       | 40.53<br>(26.08 to<br>69.22)                                   | 65.22<br>(37.21 to<br>116.25)                                   | 65.73<br>(37.67 to<br>116.48)                                  | 57.92<br>(33.42 to<br>102.57)                                   | 1.87<br>(1.23 to<br>3.15)                                  | 2.57<br>(1.64 to<br>4.33)                                  | 2.75<br>(1.81 to<br>4.41)                                  | 2.23<br>(1.43 to<br>3.87)                                  |
| Acute myeloid leukemia          | 481.26<br>(288.42 to<br>782.33)                                | 998.47<br>(469.57 to<br>1,877.89)                               | 1,025.99<br>(482.23 to<br>1,922.30)                            | 879.05<br>(417.50 to<br>1,663.71)                               | 11.09<br>(6.86 to<br>18.59)                                | 24.96<br>(12.85 to<br>45.63)                               | 26.56<br>(13.73 to<br>48.15)                               | 21.23<br>(11.04 to<br>39.68)                               |
| Chronic myeloid leukemia        | 217.90<br>(142.31 to<br>325.35)                                | 267.21<br>(125.24 to<br>502.30)                                 | 256.64<br>(120.13 to<br>489.77)                                | 234.49<br>(112.90 to<br>436.84)                                 | 5.96<br>(3.94 to<br>9.01)                                  | 7.21<br>(3.78 to<br>12.91)                                 | 7.12<br>(3.79 to<br>12.40)                                 | 6.23<br>(3.34 to<br>11.01)                                 |
| Other leukemia                  | 1,100.06<br>(616.18 to<br>1,545.64)                            | 1,479.07<br>(732.63 to<br>2,446.39)                             | 1,322.85<br>(631.92 to<br>2,207.52)                            | 1,435.34<br>(720.41 to<br>2,320.22)                             | 34.96<br>(19.84 to<br>50.81)                               | 48.31<br>(26.95 to<br>74.67)                               | 46.25<br>(25.32 to<br>70.86)                               | 45.12<br>(25.08 to<br>70.01)                               |
| Other neoplasms                 | 4,026.47<br>(2,885.57 to<br>5,427.52)                          | 7,630.23<br>(4,104.42 to<br>13,468.13)                          | 8,024.57<br>(4,154.39 to<br>14,591.31)                         | 6,620.16<br>(3,666.39 to<br>11,219.46)                          | 94.91<br>(68.76 to<br>125.86)                              | 184.44<br>(108.79 to<br>305.62)                            | 202.33<br>(119.14 to<br>340.23)                            | 154.95<br>(93.88 to<br>243.49)                             |
| <b>Cardiovascular diseases</b>  | <b>90,310.56</b><br><b>(67,605.46 to</b><br><b>115,385.15)</b> | <b>118,003.87</b><br><b>(58,778.54 to</b><br><b>231,646.76)</b> | <b>69,665.50</b><br><b>(36,313.63 to</b><br><b>139,193.44)</b> | <b>147,641.40</b><br><b>(73,840.82 to</b><br><b>279,594.34)</b> | <b>4,369.62</b><br><b>(3,329.03 to</b><br><b>5,478.08)</b> | <b>4,684.44</b><br><b>(2,836.52 to</b><br><b>7,935.60)</b> | <b>3,070.72</b><br><b>(1,929.21 to</b><br><b>5,136.25)</b> | <b>5,701.09</b><br><b>(3,408.01 to</b><br><b>9,370.66)</b> |
| Rheumatic heart disease         | 3,617.94<br>(2,533.85 to<br>4,835.91)                          | 2,365.03<br>(1,310.64 to<br>4,202.34)                           | 2,030.39<br>(1,090.37 to<br>3,676.26)                          | 2,341.91<br>(1,302.03 to<br>3,929.31)                           | 114.56<br>(82.68 to<br>150.79)                             | 71.89<br>(45.21 to<br>113.35)                              | 65.42<br>(40.49 to<br>105.27)                              | 68.94<br>(44.84 to<br>106.78)                              |
| Ischemic heart disease          | 31,126.89<br>(22,992.18 to<br>40,858.89)                       | 41,788.67<br>(16,547.60 to<br>100,611.60)                       | 20,156.04<br>(8,220.15 to<br>53,361.69)                        | 56,439.18<br>(23,225.29 to<br>125,797.40)                       | 1,573.56<br>(1,181.60 to<br>2,042.65)                      | 1,683.60<br>(820.79 to<br>3,706.60)                        | 939.81<br>(473.00 to<br>2,183.33)                          | 2,181.17<br>(1,064.47 to<br>4,453.45)                      |



|                                               |                                                               |                                                               |                                                               |                                                               |                                                            |                                                          |                                                        |                                                          |
|-----------------------------------------------|---------------------------------------------------------------|---------------------------------------------------------------|---------------------------------------------------------------|---------------------------------------------------------------|------------------------------------------------------------|----------------------------------------------------------|--------------------------------------------------------|----------------------------------------------------------|
| Stroke                                        | 35,029.97<br>(25,929.66 to<br>45,994.74)                      | 39,118.47<br>(16,112.94 to<br>80,881.10)                      | 19,780.40<br>(8,469.09 to<br>42,611.22)                       | 52,693.37<br>(24,005.74 to<br>102,733.73)                     | 1,752.05<br>(1,298.37 to<br>2,276.88)                      | 1,603.96<br>(809.79 to<br>2,951.68)                      | 925.89<br>(486.79 to<br>1,938.16)                      | 2,106.66<br>(1,097.94 to<br>3,748.53)                    |
| Ischemic stroke                               | 9,966.30<br>(7,293.89 to<br>13,233.78)                        | 7,779.07<br>(3,664.99 to<br>18,956.71)                        | 4,908.06<br>(2,335.33 to<br>13,005.00)                        | 9,530.72<br>(4,468.13 to<br>23,274.21)                        | 637.46<br>(467.79 to<br>824.39)                            | 449.30<br>(227.38 to<br>1,358.15)                        | 324.12<br>(168.25 to<br>960.49)                        | 521.83<br>(261.23 to<br>1,365.27)                        |
| Intracerebral hemorrhage                      | 25,063.66<br>(18,221.71 to<br>33,146.59)                      | 31,339.40<br>(11,476.01 to<br>70,529.08)                      | 14,872.34<br>(5,402.15 to<br>36,159.09)                       | 43,162.65<br>(17,983.17 to<br>91,328.15)                      | 1,114.58<br>(817.21 to<br>1,455.99)                        | 1,154.66<br>(511.36 to<br>2,397.28)                      | 601.77<br>(277.23 to<br>1,329.10)                      | 1,584.83<br>(738.24 to<br>3,139.77)                      |
| Hypertensive heart disease                    | 11,246.47<br>(5,916.97 to<br>16,629.81)                       | 18,639.01<br>(6,962.60 to<br>43,698.31)                       | 12,839.82<br>(5,052.51 to<br>28,661.01)                       | 21,435.46<br>(7,515.17 to<br>53,592.73)                       | 564.30<br>(296.55 to<br>826.45)                            | 763.18<br>(336.61 to<br>1,583.33)                        | 568.96<br>(268.39 to<br>1,085.60)                      | 849.82<br>(347.40 to<br>1,919.76)                        |
| Cardiomyopathy and myocarditis                | 3,543.87<br>(2,599.12 to<br>4,759.38)                         | 5,438.76<br>(3,179.00 to<br>9,149.68)                         | 5,675.63<br>(3,223.01 to<br>9,659.58)                         | 4,865.63<br>(2,929.83 to<br>8,037.29)                         | 133.74<br>(96.23 to<br>179.86)                             | 190.70<br>(125.26 to<br>291.06)                          | 213.73<br>(139.09 to<br>328.70)                        | 164.27<br>(108.49 to<br>251.03)                          |
| Myocarditis                                   | 374.79<br>(225.13 to<br>711.24)                               | 482.51<br>(211.84 to<br>1,147.11)                             | 475.32<br>(201.83 to<br>1,152.69)                             | 439.93<br>(199.14 to<br>1,034.05)                             | 8.38<br>(4.98 to<br>16.38)                                 | 11.44<br>(5.38 to<br>28.21)                              | 11.84<br>(5.53 to<br>29.89)                            | 10.02<br>(4.80 to<br>23.49)                              |
| <b>Lesotho</b>                                |                                                               |                                                               |                                                               |                                                               |                                                            |                                                          |                                                        |                                                          |
| Cause                                         | YLLs (actual counts)                                          |                                                               |                                                               |                                                               | Deaths (actual counts)                                     |                                                          |                                                        |                                                          |
|                                               | 2016                                                          | 2040 Forecast                                                 | 2040 Better Scenario                                          | 2040 Worse Scenario                                           | 2016                                                       | 2040 Forecast                                            | 2040 Better Scenario                                   | 2040 Worse Scenario                                      |
| Alcoholic cardiomyopathy                      | 273.42<br>(144.20 to<br>444.06)                               | 362.48<br>(164.96 to<br>652.07)                               | 380.93<br>(163.62 to<br>709.20)                               | 425.99<br>(210.19 to<br>738.75)                               | 13.25<br>(7.41 to<br>21.98)                                | 14.13<br>(7.39 to<br>23.77)                              | 15.70<br>(7.96 to<br>26.02)                            | 16.17<br>(8.98 to<br>27.28)                              |
| Other cardiomyopathy                          | 2,895.66<br>(2,127.73 to<br>3,842.30)                         | 4,593.77<br>(2,594.44 to<br>7,938.96)                         | 4,819.39<br>(2,682.93 to<br>8,370.21)                         | 3,999.70<br>(2,314.63 to<br>6,727.90)                         | 112.11<br>(81.03 to<br>148.21)                             | 165.14<br>(105.25 to<br>256.27)                          | 186.20<br>(119.50 to<br>284.80)                        | 138.08<br>(89.39 to<br>212.26)                           |
| Atrial fibrillation and flutter               | 288.76<br>(196.81 to<br>403.44)                               | 380.83<br>(263.27 to<br>546.86)                               | 428.07<br>(296.90 to<br>606.59)                               | 344.56<br>(234.24 to<br>502.26)                               | 25.63<br>(17.89 to<br>35.47)                               | 30.04<br>(18.41 to<br>43.74)                             | 37.78<br>(24.41 to<br>53.11)                           | 25.46<br>(14.22 to<br>39.15)                             |
| Aortic aneurysm                               | 763.95<br>(486.38 to<br>1,064.26)                             | 1,326.63<br>(660.21 to<br>2,462.30)                           | 1,263.21<br>(655.48 to<br>2,304.18)                           | 1,107.36<br>(555.26 to<br>2,054.35)                           | 35.60<br>(23.71 to<br>48.04)                               | 48.43<br>(28.81 to<br>81.47)                             | 50.91<br>(31.43 to<br>81.59)                           | 39.44<br>(23.23 to<br>66.33)                             |
| Peripheral artery disease                     | 202.41<br>(45.67 to<br>380.44)                                | 624.42<br>(128.75 to<br>1,461.09)                             | 582.85<br>(119.79 to<br>1,292.86)                             | 510.65<br>(105.02 to<br>1,257.75)                             | 10.81<br>(2.51 to<br>19.55)                                | 26.48<br>(6.01 to<br>56.38)                              | 28.06<br>(6.52 to<br>56.30)                            | 20.98<br>(4.81 to<br>44.45)                              |
| Endocarditis                                  | 779.51<br>(480.80 to<br>1,086.63)                             | 1,447.30<br>(638.72 to<br>2,862.39)                           | 1,366.19<br>(595.38 to<br>2,699.04)                           | 1,341.32<br>(609.22 to<br>2,648.29)                           | 19.39<br>(11.83 to<br>26.90)                               | 35.80<br>(16.87 to<br>65.58)                             | 35.40<br>(16.45 to<br>65.94)                           | 32.07<br>(15.48 to<br>58.74)                             |
| Other cardiovascular and circulatory diseases | 3,710.79<br>(2,354.63 to<br>6,731.87)                         | 6,874.75<br>(3,294.04 to<br>14,015.38)                        | 5,542.91<br>(2,741.10 to<br>11,230.21)                        | 6,561.98<br>(3,251.53 to<br>13,300.03)                        | 139.98<br>(88.25 to<br>258.52)                             | 230.35<br>(130.52 to<br>443.46)                          | 204.77<br>(120.58 to<br>396.02)                        | 212.28<br>(120.42 to<br>401.32)                          |
| <b>Chronic respiratory diseases</b>           | <b>28,509.48</b><br><b>(21,807.26 to</b><br><b>36,219.28)</b> | <b>29,284.05</b><br><b>(15,997.12 to</b><br><b>49,330.65)</b> | <b>18,377.38</b><br><b>(10,586.94 to</b><br><b>30,467.75)</b> | <b>34,111.84</b><br><b>(18,279.87 to</b><br><b>58,285.27)</b> | <b>1,307.06</b><br><b>(1,024.10 to</b><br><b>1,620.80)</b> | <b>1,116.52</b><br><b>(695.54 to</b><br><b>1,737.22)</b> | <b>730.01</b><br><b>(489.35 to</b><br><b>1,088.28)</b> | <b>1,287.04</b><br><b>(778.05 to</b><br><b>2,106.19)</b> |
| Chronic obstructive pulmonary disease         | 17,602.99<br>(13,263.97 to<br>22,782.49)                      | 20,515.81<br>(10,009.25 to<br>37,341.09)                      | 10,941.88<br>(5,590.87 to<br>19,610.77)                       | 25,151.10<br>(12,365.70 to<br>46,795.64)                      | 933.31<br>(717.59 to<br>1,173.65)                          | 841.51<br>(493.03 to<br>1,409.10)                        | 480.50<br>(303.06 to<br>753.58)                        | 1,014.51<br>(565.49 to<br>1,765.06)                      |
| Pneumoconiosis                                | 427.76<br>(224.47 to<br>779.55)                               | 415.55<br>(198.95 to<br>756.68)                               | 446.78<br>(204.20 to<br>830.51)                               | 358.98<br>(181.26 to<br>647.84)                               | 18.37<br>(9.78 to<br>32.29)                                | 16.19<br>(8.77 to<br>28.44)                              | 18.27<br>(9.42 to<br>31.68)                            | 13.80<br>(7.65 to<br>24.12)                              |
| Silicosis                                     | 157.04<br>(67.24 to<br>296.46)                                | 113.69<br>(37.75 to<br>235.54)                                | 117.08<br>(35.90 to<br>250.26)                                | 97.55<br>(33.63 to<br>198.74)                                 | 6.13<br>(2.59 to<br>11.43)                                 | 3.98<br>(1.41 to<br>8.05)                                | 4.26<br>(1.39 to<br>8.92)                              | 3.39<br>(1.25 to<br>6.75)                                |
| Asbestosis                                    | 102.69<br>(27.90 to<br>230.62)                                | 139.53<br>(38.16 to<br>315.53)                                | 165.18<br>(45.17 to<br>364.36)                                | 112.80<br>(31.78 to<br>258.80)                                | 5.38<br>(1.35 to<br>11.94)                                 | 6.07<br>(1.85 to<br>12.95)                               | 7.56<br>(2.27 to<br>15.74)                             | 4.82<br>(1.45 to<br>10.07)                               |
| Coal workers pneumoconiosis                   | 29.84<br>(10.94 to<br>55.10)                                  | 28.54<br>(9.27 to<br>58.97)                                   | 23.82<br>(7.40 to<br>50.87)                                   | 29.34<br>(10.11 to<br>58.07)                                  | 1.21<br>(0.46 to<br>2.24)                                  | 1.07<br>(0.38 to<br>2.06)                                | 0.92<br>(0.32 to<br>1.88)                              | 1.09<br>(0.40 to<br>2.09)                                |
| Other pneumoconiosis                          | 138.19<br>(55.61 to<br>339.41)                                | 133.79<br>(45.91 to<br>330.31)                                | 140.71<br>(43.37 to<br>357.28)                                | 119.29<br>(43.49 to<br>292.44)                                | 5.65<br>(2.21 to<br>14.64)                                 | 5.07<br>(1.94 to<br>12.34)                               | 5.53<br>(1.93 to<br>13.31)                             | 4.50<br>(1.79 to<br>11.07)                               |

|                                                                |                                                              |                                                              |                                                              |                                                              |                                                      |                                                      |                                                      |                                                      |
|----------------------------------------------------------------|--------------------------------------------------------------|--------------------------------------------------------------|--------------------------------------------------------------|--------------------------------------------------------------|------------------------------------------------------|------------------------------------------------------|------------------------------------------------------|------------------------------------------------------|
| Asthma                                                         | 9,317.29<br>(6,762.18 to<br>12,868.05)                       | 6,694.91<br>(3,426.71 to<br>11,927.20)                       | 5,199.96<br>(2,694.50 to<br>9,251.13)                        | 7,133.43<br>(3,622.16 to<br>12,855.82)                       | 322.26<br>(223.07 to<br>447.90)                      | 210.40<br>(118.17 to<br>346.68)                      | 173.20<br>(99.30 to<br>286.79)                       | 218.97<br>(119.83 to<br>369.29)                      |
| Interstitial lung disease and pulmonary sarcoidosis            | 495.27<br>(186.98 to<br>932.47)                              | 941.69<br>(324.97 to<br>1,874.13)                            | 1,152.78<br>(407.95 to<br>2,261.87)                          | 740.55<br>(258.75 to<br>1,430.98)                            | 22.00<br>(8.18 to<br>42.44)                          | 22.00<br>(13.17 to<br>67.20)                         | 35.27<br>(17.35 to<br>86.48)                         | 45.87<br>(10.10 to<br>50.92)                         |
| Other chronic respiratory diseases                             | 666.17<br>(371.65 to<br>1,106.99)                            | 716.09<br>(331.29 to<br>1,363.00)                            | 635.98<br>(292.21 to<br>1,229.80)                            | 727.77<br>(333.33 to<br>1,425.72)                            | 11.12<br>(6.59 to<br>17.87)                          | 13.15<br>(6.55 to<br>23.47)                          | 12.17<br>(6.09 to<br>21.98)                          | 12.72<br>(6.42 to<br>23.09)                          |
| <b>Cirrhosis and other chronic liver diseases</b>              | <b>6,419.84</b><br><b>(3,772.41 to</b><br><b>9,640.13)</b>   | <b>11,776.30</b><br><b>(5,669.47 to</b><br><b>20,430.75)</b> | <b>11,324.01</b><br><b>(5,231.56 to</b><br><b>19,978.97)</b> | <b>11,754.66</b><br><b>(5,990.01 to</b><br><b>19,435.29)</b> | <b>199.19</b><br><b>(121.06 to</b><br><b>293.41)</b> | <b>342.73</b><br><b>(182.04 to</b><br><b>557.16)</b> | <b>338.36</b><br><b>(174.77 to</b><br><b>566.58)</b> | <b>339.34</b><br><b>(185.52 to</b><br><b>536.86)</b> |
| Cirrhosis and other chronic liver diseases due to hepatitis B  | 2,005.49<br>(1,108.87 to<br>3,099.37)                        | 4,091.42<br>(1,905.13 to<br>7,012.75)                        | 4,178.33<br>(1,865.19 to<br>7,238.20)                        | 3,474.64<br>(1,651.04 to<br>5,965.97)                        | 63.78<br>(36.37 to<br>96.66)                         | 118.91<br>(60.93 to<br>193.55)                       | 124.32<br>(61.61 to<br>208.60)                       | 100.48<br>(51.39 to<br>163.78)                       |
| Cirrhosis and other chronic liver diseases due to hepatitis C  | 955.73<br>(544.39 to<br>1,454.82)                            | 2,047.70<br>(964.51 to<br>3,578.48)                          | 2,079.80<br>(934.11 to<br>3,682.48)                          | 1,745.24<br>(857.19 to<br>3,013.34)                          | 30.26<br>(17.70 to<br>45.27)                         | 59.69<br>(30.47 to<br>98.46)                         | 61.88<br>(30.59 to<br>104.24)                        | 50.67<br>(26.83 to<br>82.42)                         |
| Cirrhosis and other chronic liver diseases due to alcohol use  | 2,080.27<br>(1,180.33 to<br>3,196.13)                        | 3,667.38<br>(1,728.72 to<br>6,446.98)                        | 3,154.93<br>(1,446.23 to<br>5,634.53)                        | 4,734.04<br>(2,303.58 to<br>8,095.83)                        | 69.19<br>(40.71 to<br>104.64)                        | 110.17<br>(58.22 to<br>180.36)                       | 97.71<br>(50.77 to<br>163.73)                        | 140.26<br>(74.70 to<br>231.80)                       |
| Cirrhosis and other chronic liver diseases due to other causes | 1,378.35<br>(917.44 to<br>1,957.15)                          | 1,969.80<br>(1,051.75 to<br>3,224.43)                        | 1,910.94<br>(984.81 to<br>3,276.71)                          | 1,800.74<br>(988.27 to<br>2,885.62)                          | 35.96<br>(23.70 to<br>51.37)                         | 53.96<br>(31.29 to<br>85.11)                         | 54.45<br>(30.38 to<br>89.70)                         | 47.92<br>(28.36 to<br>72.93)                         |
| <b>Digestive diseases</b>                                      | <b>11,702.88</b><br><b>(8,199.18 to</b><br><b>15,837.28)</b> | <b>14,707.93</b><br><b>(7,924.65 to</b><br><b>24,930.69)</b> | <b>13,669.80</b><br><b>(7,059.48 to</b><br><b>23,968.38)</b> | <b>13,921.72</b><br><b>(7,679.17 to</b><br><b>23,142.32)</b> | <b>380.75</b><br><b>(261.70 to</b><br><b>509.72)</b> | <b>447.92</b><br><b>(280.97 to</b><br><b>678.38)</b> | <b>441.33</b><br><b>(275.47 to</b><br><b>693.15)</b> | <b>411.13</b><br><b>(259.05 to</b><br><b>615.36)</b> |
| Peptic ulcer disease                                           | 2,552.40<br>(1,769.90 to<br>3,483.24)                        | 2,054.22<br>(1,089.29 to<br>3,486.15)                        | 1,670.31<br>(869.50 to<br>2,921.92)                          | 1,930.90<br>(1,072.74 to<br>3,121.54)                        | 104.72<br>(73.08 to<br>141.54)                       | 74.38<br>(46.99 to<br>113.81)                        | 64.95<br>(40.83 to<br>101.43)                        | 68.69<br>(44.37 to<br>102.86)                        |

**Lesotho**

| Cause                                      | YLLs (actual counts)                                         |                                                               |                                                               |                                                               | Deaths (actual counts)                               |                                                      |                                                        |                                                      |
|--------------------------------------------|--------------------------------------------------------------|---------------------------------------------------------------|---------------------------------------------------------------|---------------------------------------------------------------|------------------------------------------------------|------------------------------------------------------|--------------------------------------------------------|------------------------------------------------------|
|                                            | 2016                                                         | 2040 Forecast                                                 | 2040 Better Scenario                                          | 2040 Worse Scenario                                           | 2016                                                 | 2040 Forecast                                        | 2040 Better Scenario                                   | 2040 Worse Scenario                                  |
| Gastritis and duodenitis                   | 1,479.57<br>(852.90 to<br>2,299.86)                          | 2,280.23<br>(1,025.72 to<br>4,268.80)                         | 2,177.65<br>(952.91 to<br>4,224.16)                           | 2,064.23<br>(973.13 to<br>3,781.69)                           | 39.54<br>(22.65 to<br>63.06)                         | 61.31<br>(30.57 to<br>110.27)                        | 60.88<br>(29.96 to<br>112.25)                          | 54.19<br>(27.21 to<br>95.42)                         |
| Appendicitis                               | 827.78<br>(534.14 to<br>1,256.00)                            | 727.32<br>(391.65 to<br>1,265.55)                             | 641.71<br>(335.11 to<br>1,135.56)                             | 717.10<br>(389.44 to<br>1,233.45)                             | 19.57<br>(12.44 to<br>27.94)                         | 18.92<br>(11.01 to<br>30.12)                         | 17.76<br>(10.22 to<br>28.70)                           | 17.79<br>(10.68 to<br>27.57)                         |
| Paralytic ileus and intestinal obstruction | 2,456.34<br>(1,612.75 to<br>4,041.43)                        | 3,493.31<br>(1,875.65 to<br>6,413.50)                         | 3,484.30<br>(1,848.89 to<br>6,464.33)                         | 3,145.57<br>(1,730.72 to<br>5,567.61)                         | 69.65<br>(45.46 to<br>114.61)                        | 100.79<br>(61.62 to<br>174.97)                       | 108.47<br>(65.21 to<br>187.77)                         | 86.46<br>(54.51 to<br>146.53)                        |
| Inguinal, femoral, and abdominal hernia    | 432.38<br>(260.38 to<br>621.50)                              | 410.69<br>(200.53 to<br>697.48)                               | 400.23<br>(187.85 to<br>708.05)                               | 369.32<br>(188.90 to<br>604.18)                               | 15.41<br>(8.94 to<br>22.62)                          | 13.16<br>(7.02 to<br>20.34)                          | 13.80<br>(7.18 to<br>21.91)                            | 11.40<br>(6.21 to<br>17.21)                          |
| Inflammatory bowel disease                 | 1,012.51<br>(611.37 to<br>1,607.28)                          | 1,394.52<br>(710.21 to<br>2,528.57)                           | 1,441.39<br>(713.79 to<br>2,674.12)                           | 1,238.71<br>(651.92 to<br>2,227.73)                           | 28.03<br>(17.07 to<br>41.99)                         | 40.55<br>(23.11 to<br>68.86)                         | 45.25<br>(25.66 to<br>76.60)                           | 34.19<br>(19.61 to<br>56.45)                         |
| Vascular intestinal disorders              | 233.63<br>(139.58 to<br>334.65)                              | 363.69<br>(193.49 to<br>615.20)                               | 375.74<br>(193.54 to<br>660.76)                               | 314.58<br>(174.01 to<br>517.19)                               | 9.74<br>(5.69 to<br>13.73)                           | 13.30<br>(7.78 to<br>19.77)                          | 14.63<br>(8.35 to<br>21.99)                            | 11.21<br>(6.53 to<br>16.48)                          |
| Gallbladder and biliary diseases           | 999.71<br>(617.53 to<br>1,444.08)                            | 1,368.88<br>(607.65 to<br>2,792.33)                           | 1,101.42<br>(508.21 to<br>2,164.26)                           | 1,501.85<br>(655.64 to<br>3,070.38)                           | 38.78<br>(22.71 to<br>56.91)                         | 47.24<br>(22.79 to<br>88.91)                         | 40.22<br>(20.10 to<br>74.49)                           | 50.84<br>(24.04 to<br>96.98)                         |
| Pancreatitis                               | 527.43<br>(312.60 to<br>875.24)                              | 981.76<br>(222.24 to<br>2,891.82)                             | 840.29<br>(192.55 to<br>2,491.11)                             | 1,150.48<br>(260.85 to<br>3,295.35)                           | 15.13<br>(8.90 to<br>24.62)                          | 26.61<br>(7.05 to<br>75.48)                          | 23.56<br>(6.35 to<br>65.85)                            | 30.63<br>(7.79 to<br>84.96)                          |
| Other digestive diseases                   | 1,181.13<br>(743.34 to<br>1,671.07)                          | 1,633.30<br>(788.40 to<br>2,803.58)                           | 1,536.74<br>(732.08 to<br>2,689.59)                           | 1,488.98<br>(754.35 to<br>2,473.09)                           | 40.20<br>(25.33 to<br>55.78)                         | 51.66<br>(29.29 to<br>78.45)                         | 51.81<br>(29.55 to<br>79.99)                           | 45.73<br>(26.73 to<br>68.16)                         |
| <b>Neurological disorders</b>              | <b>12,290.59</b><br><b>(9,239.67 to</b><br><b>15,791.79)</b> | <b>19,167.96</b><br><b>(10,525.15 to</b><br><b>34,912.50)</b> | <b>17,657.27</b><br><b>(10,050.67 to</b><br><b>31,178.21)</b> | <b>20,009.19</b><br><b>(10,681.97 to</b><br><b>37,218.20)</b> | <b>443.59</b><br><b>(340.60 to</b><br><b>552.74)</b> | <b>666.77</b><br><b>(453.12 to</b><br><b>996.54)</b> | <b>706.14</b><br><b>(511.33 to</b><br><b>1,004.68)</b> | <b>633.25</b><br><b>(416.47 to</b><br><b>988.82)</b> |

|                                         |                                                            |                                                             |                                                             |                                                             |                                                    |                                                     |                                                     |                                                     |
|-----------------------------------------|------------------------------------------------------------|-------------------------------------------------------------|-------------------------------------------------------------|-------------------------------------------------------------|----------------------------------------------------|-----------------------------------------------------|-----------------------------------------------------|-----------------------------------------------------|
| Alzheimer's disease and other dementias | 2,347.10<br>(1,668.55 to<br>3,119.32)                      | 3,126.79<br>(1,972.61 to<br>4,824.15)                       | 3,629.77<br>(2,557.66 to<br>5,153.34)                       | 2,681.91<br>(1,563.30 to<br>4,399.79)                       | 213.81<br>(156.81 to<br>278.15)                    | 274.47<br>(145.32 to<br>466.64)                     | 344.05<br>(209.75 to<br>521.89)                     | 224.15<br>(104.16 to<br>415.37)                     |
| Parkinson's disease                     | 177.75<br>(124.55 to<br>239.11)                            | 261.13<br>(196.29 to<br>340.72)                             | 364.59<br>(277.32 to<br>462.76)                             | 194.45<br>(139.87 to<br>263.06)                             | 14.15<br>(9.95 to<br>18.96)                        | 18.74<br>(11.92 to<br>26.29)                        | 27.97<br>(19.72 to<br>37.37)                        | 13.48<br>(7.64 to<br>20.21)                         |
| Epilepsy                                | 9,108.75<br>(6,695.59 to<br>11,943.58)                     | 14,417.56<br>(6,148.81 to<br>29,987.80)                     | 12,140.27<br>(5,173.34 to<br>24,860.72)                     | 16,001.77<br>(6,840.15 to<br>33,119.57)                     | 198.72<br>(142.54 to<br>260.85)                    | 337.93<br>(149.97 to<br>687.14)                     | 292.86<br>(127.81 to<br>591.70)                     | 366.85<br>(162.65 to<br>738.52)                     |
| Multiple sclerosis                      | 56.69<br>(36.74 to<br>85.67)                               | 135.98<br>(69.61 to<br>252.77)                              | 146.45<br>(73.04 to<br>278.18)                              | 108.86<br>(56.90 to<br>192.58)                              | 1.68<br>(1.09 to<br>2.55)                          | 3.78<br>(2.07 to<br>6.65)                           | 4.16<br>(2.24 to<br>7.51)                           | 3.02<br>(1.71 to<br>5.13)                           |
| Motor neuron disease                    | 57.39<br>(37.97 to<br>83.28)                               | 149.20<br>(79.43 to<br>250.01)                              | 172.31<br>(88.19 to<br>302.05)                              | 118.00<br>(65.12 to<br>192.67)                              | 1.79<br>(1.16 to<br>2.63)                          | 4.42<br>(2.50 to<br>7.01)                           | 5.19<br>(2.84 to<br>8.66)                           | 3.49<br>(2.06 to<br>5.45)                           |
| Other neurological disorders            | 542.92<br>(407.03 to<br>713.26)                            | 1,077.30<br>(621.79 to<br>1,730.18)                         | 1,203.88<br>(675.62 to<br>2,001.88)                         | 904.20<br>(539.00 to<br>1,408.02)                           | 13.44<br>(10.03 to<br>17.69)                       | 27.42<br>(17.21 to<br>41.59)                        | 31.91<br>(19.46 to<br>49.66)                        | 22.27<br>(14.70 to<br>33.20)                        |
| <b>Mental disorders</b>                 | <b>3,491.54</b><br><b>(2,225.75 to</b><br><b>5,609.76)</b> | <b>8,525.19</b><br><b>(3,831.49 to</b><br><b>16,381.55)</b> | <b>8,776.19</b><br><b>(3,860.46 to</b><br><b>16,900.85)</b> | <b>7,597.40</b><br><b>(3,508.59 to</b><br><b>14,182.89)</b> | <b>79.85</b><br><b>(50.85 to</b><br><b>126.23)</b> | <b>195.81</b><br><b>(92.68 to</b><br><b>361.29)</b> | <b>204.13</b><br><b>(94.85 to</b><br><b>385.03)</b> | <b>173.44</b><br><b>(85.28 to</b><br><b>314.65)</b> |
| Alcohol use disorders                   | 1,088.90<br>(571.44 to<br>2,591.69)                        | 2,557.29<br>(990.80 to<br>6,460.14)                         | 2,585.93<br>(952.32 to<br>6,622.37)                         | 2,407.71<br>(987.23 to<br>5,959.76)                         | 32.03<br>(17.04 to<br>72.46)                       | 71.82<br>(29.20 to<br>179.25)                       | 73.53<br>(28.99 to<br>183.61)                       | 67.44<br>(29.29 to<br>166.03)                       |
| Drug use disorders                      | 2,393.69<br>(1,523.13 to<br>4,072.99)                      | 5,950.06<br>(2,592.79 to<br>11,619.02)                      | 6,171.71<br>(2,644.50 to<br>12,176.88)                      | 5,174.38<br>(2,332.64 to<br>10,025.30)                      | 47.66<br>(30.61 to<br>80.42)                       | 123.64<br>(56.71 to<br>235.30)                      | 130.23<br>(58.58 to<br>251.46)                      | 105.71<br>(49.84 to<br>200.43)                      |
| Opioid use disorders                    | 2,045.93<br>(1,275.47 to<br>3,603.31)                      | 4,914.56<br>(2,073.82 to<br>10,018.75)                      | 5,062.17<br>(2,114.28 to<br>10,500.86)                      | 4,290.73<br>(1,821.17 to<br>8,722.45)                       | 39.10<br>(24.78 to<br>68.27)                       | 98.49<br>(42.55 to<br>198.24)                       | 102.36<br>(43.29 to<br>205.61)                      | 84.72<br>(37.80 to<br>168.57)                       |
| Cocaine use disorders                   | 36.88<br>(9.53 to<br>70.36)                                | 134.31<br>(30.50 to<br>298.08)                              | 138.54<br>(30.63 to<br>314.14)                              | 114.91<br>(26.68 to<br>251.50)                              | 0.99<br>(0.27 to<br>1.85)                          | 3.55<br>(0.89 to<br>7.49)                           | 3.76<br>(0.92 to<br>8.13)                           | 3.00<br>(0.78 to<br>6.25)                           |
| Amphetamine use disorders               | 17.60<br>(4.85 to<br>33.81)                                | 88.14<br>(21.21 to<br>194.19)                               | 90.45<br>(21.24 to<br>204.69)                               | 76.09<br>(18.87 to<br>168.87)                               | 0.43<br>(0.12 to<br>0.80)                          | 2.16<br>(0.55 to<br>4.60)                           | 2.26<br>(0.58 to<br>4.93)                           | 1.84<br>(0.48 to<br>3.92)                           |
| Other drug use disorders                | 293.28<br>(157.99 to<br>465.34)                            | 813.05<br>(355.70 to<br>1,523.73)                           | 880.55<br>(375.99 to<br>1,672.29)                           | 692.65<br>(307.76 to<br>1,272.25)                           | 7.14<br>(3.90 to<br>10.95)                         | 19.44<br>(9.44 to<br>34.06)                         | 21.85<br>(10.59 to<br>38.40)                        | 16.15<br>(7.94 to<br>28.02)                         |
| Eating disorders                        | 8.94<br>(2.53 to<br>16.67)                                 | 17.83<br>(3.94 to<br>38.79)                                 | 18.55<br>(4.05 to<br>41.18)                                 | 15.31<br>(3.43 to<br>32.17)                                 | 0.16<br>(0.05 to<br>0.30)                          | 0.35<br>(0.08 to<br>0.77)                           | 0.37<br>(0.08 to<br>0.83)                           | 0.30<br>(0.07 to<br>0.63)                           |

| Lesotho                                                    |                                                               |                                                                |                                                                |                                                                |                                                            |                                                            |                                                            |                                                            |
|------------------------------------------------------------|---------------------------------------------------------------|----------------------------------------------------------------|----------------------------------------------------------------|----------------------------------------------------------------|------------------------------------------------------------|------------------------------------------------------------|------------------------------------------------------------|------------------------------------------------------------|
| Cause                                                      | YLLs (actual counts)                                          |                                                                |                                                                |                                                                | Deaths (actual counts)                                     |                                                            |                                                            |                                                            |
|                                                            | 2016                                                          | 2040 Forecast                                                  | 2040 Better Scenario                                           | 2040 Worse Scenario                                            | 2016                                                       | 2040 Forecast                                              | 2040 Better Scenario                                       | 2040 Worse Scenario                                        |
| <b>Diabetes, urogenital, blood, and endocrine diseases</b> | <b>50,888.90</b><br><b>(38,191.96 to</b><br><b>65,139.74)</b> | <b>83,990.17</b><br><b>(41,571.54 to</b><br><b>156,996.35)</b> | <b>67,588.88</b><br><b>(33,473.43 to</b><br><b>126,928.24)</b> | <b>86,239.15</b><br><b>(43,860.06 to</b><br><b>156,311.93)</b> | <b>1,927.61</b><br><b>(1,466.45 to</b><br><b>2,456.59)</b> | <b>2,875.47</b><br><b>(1,629.56 to</b><br><b>5,076.61)</b> | <b>2,403.83</b><br><b>(1,376.60 to</b><br><b>4,276.26)</b> | <b>2,919.25</b><br><b>(1,638.82 to</b><br><b>5,048.53)</b> |
| Diabetes mellitus                                          | 31,419.69<br>(22,830.95 to<br>41,287.81)                      | 47,144.95<br>(23,310.92 to<br>86,552.90)                       | 37,847.85<br>(18,624.94 to<br>71,332.51)                       | 49,445.10<br>(24,669.55 to<br>92,359.45)                       | 1,347.24<br>(991.29 to<br>1,764.74)                        | 1,746.41<br>(1,026.24 to<br>2,880.80)                      | 1,477.88<br>(865.26 to<br>2,435.92)                        | 1,759.77<br>(1,059.19 to<br>2,954.85)                      |
| Acute glomerulonephritis                                   | 39.96<br>(26.71 to<br>62.22)                                  | 63.53<br>(34.20 to<br>112.27)                                  | 58.15<br>(30.58 to<br>101.83)                                  | 62.29<br>(33.97 to<br>111.86)                                  | 1.00<br>(0.71 to<br>1.40)                                  | 1.52<br>(0.95 to<br>2.40)                                  | 1.51<br>(0.93 to<br>2.39)                                  | 1.40<br>(0.90 to<br>2.24)                                  |
| Chronic kidney disease                                     | 8,391.95<br>(6,090.37 to<br>11,039.00)                        | 21,284.30<br>(5,208.37 to<br>75,671.31)                        | 14,963.49<br>(3,765.08 to<br>56,553.35)                        | 22,486.13<br>(5,621.26 to<br>73,295.14)                        | 319.08<br>(237.95 to<br>410.50)                            | 751.73<br>(161.20 to<br>2,738.43)                          | 552.99<br>(120.81 to<br>2,194.90)                          | 783.44<br>(162.40 to<br>2,616.61)                          |
| Chronic kidney disease due to diabetes mellitus            | 2,526.83<br>(1,760.74 to<br>3,392.02)                         | 8,227.65<br>(1,745.50 to<br>30,817.01)                         | 5,782.57<br>(1,285.34 to<br>22,792.77)                         | 8,612.66<br>(1,778.24 to<br>29,816.13)                         | 102.35<br>(73.54 to<br>134.89)                             | 287.95<br>(55.60 to<br>1,097.72)                           | 210.51<br>(41.90 to<br>858.56)                             | 299.12<br>(57.13 to<br>1,017.44)                           |
| Chronic kidney disease due to hypertension                 | 1,335.96<br>(957.12 to<br>1,792.10)                           | 3,362.11<br>(644.26 to<br>13,059.78)                           | 2,405.86<br>(472.96 to<br>10,201.41)                           | 3,542.25<br>(660.26 to<br>12,657.61)                           | 70.30<br>(50.88 to<br>92.43)                               | 147.92<br>(26.98 to<br>564.46)                             | 114.09<br>(20.84 to<br>464.08)                             | 152.00<br>(27.70 to<br>519.84)                             |

|                                                            |                                     |                                      |                                      |                                      |                             |                             |                             |                             |
|------------------------------------------------------------|-------------------------------------|--------------------------------------|--------------------------------------|--------------------------------------|-----------------------------|-----------------------------|-----------------------------|-----------------------------|
| Chronic kidney disease due to glomerulonephritis           | 2,083.34<br>(1,472.15 to 2,821.98)  | 4,341.64<br>(1,173.12 to 15,954.35)  | 3,036.70<br>(838.21 to 11,062.00)    | 4,634.14<br>(1,285.73 to 14,897.69)  | 64.00<br>(45.51 to 86.34)   | 137.13<br>(32.92 to 499.22) | 98.53<br>(23.91 to 390.65)  | 144.84<br>(35.25 to 490.55) |
| Chronic kidney disease due to other and unspecified causes | 2,445.82<br>(1,751.70 to 3,345.40)  | 5,352.90<br>(1,421.36 to 17,547.62)  | 3,738.36<br>(1,037.90 to 13,145.16)  | 5,697.07<br>(1,510.28 to 17,508.82)  | 82.43<br>(60.13 to 110.34)  | 178.73<br>(41.67 to 621.65) | 129.86<br>(30.97 to 493.08) | 187.49<br>(43.11 to 602.01) |
| Urinary diseases and male infertility                      | 1,678.18<br>(1,301.65 to 2,124.44)  | 2,020.15<br>(1,176.17 to 3,166.63)   | 1,983.80<br>(1,128.35 to 3,242.14)   | 1,807.72<br>(1,093.17 to 2,730.68)   | 57.19<br>(44.90 to 71.56)   | 61.18<br>(42.50 to 85.34)   | 64.25<br>(44.38 to 92.99)   | 52.93<br>(37.78 to 71.15)   |
| Urinary tract infections                                   | 461.35<br>(277.95 to 733.45)        | 909.62<br>(484.20 to 1,638.02)       | 950.46<br>(493.97 to 1,752.64)       | 786.11<br>(429.39 to 1,353.24)       | 13.85<br>(8.18 to 23.25)    | 27.47<br>(16.93 to 44.56)   | 30.78<br>(18.80 to 51.03)   | 22.86<br>(14.44 to 36.37)   |
| Urolithiasis                                               | 17.70<br>(12.35 to 24.57)           | 38.99<br>(20.90 to 63.82)            | 40.28<br>(20.94 to 68.20)            | 34.20<br>(54.54)                     | 0.57<br>(0.38 to 0.77)      | 1.14<br>(0.66 to 1.81)      | 1.25<br>(0.69 to 2.05)      | 0.97<br>(0.57 to 1.50)      |
| Other urinary diseases                                     | 1,199.13<br>(882.62 to 1,558.65)    | 1,071.53<br>(570.96 to 1,807.88)     | 993.07<br>(508.07 to 1,721.47)       | 987.41<br>(546.83 to 1,586.26)       | 42.78<br>(31.59 to 54.96)   | 32.56<br>(20.34 to 49.09)   | 32.23<br>(19.82 to 49.69)   | 29.10<br>(18.42 to 42.27)   |
| Gynecological diseases                                     | 122.31<br>(56.33 to 215.78)         | 195.29<br>(59.03 to 420.85)          | 167.71<br>(49.67 to 373.85)          | 183.33<br>(58.91 to 388.32)          | 3.42<br>(1.58 to 5.90)      | 4.97<br>(1.78 to 10.50)     | 4.34<br>(1.54 to 9.31)      | 4.63<br>(1.76 to 9.37)      |
| Uterine fibroids                                           | 53.82<br>(16.01 to 113.81)          | 75.25<br>(15.03 to 188.55)           | 63.37<br>(12.22 to 167.36)           | 71.30<br>(15.09 to 173.59)           | 1.59<br>(0.48 to 3.17)      | 2.01<br>(0.46 to 4.87)      | 1.72<br>(0.38 to 4.32)      | 1.90<br>(0.45 to 4.40)      |
| Polycystic ovarian syndrome                                | 5.26<br>(0.25 to 24.61)             | 6.78<br>(0.24 to 32.48)              | 5.13<br>(0.18 to 25.12)              | 6.78<br>(0.26 to 32.18)              | 0.12<br>(0.01 to 0.54)      | 0.16<br>(0.01 to 0.75)      | 0.12<br>(0.01 to 0.57)      | 0.16<br>(0.01 to 0.72)      |
| Endometriosis                                              | 1.61<br>(0.14 to 8.10)              | 3.55<br>(0.30 to 15.92)              | 3.02<br>(0.25 to 14.00)              | 3.42<br>(0.29 to 15.45)              | 0.03<br>(0.00 to 0.16)      | 0.07<br>(0.01 to 0.32)      | 0.06<br>(0.01 to 0.27)      | 0.07<br>(0.01 to 0.29)      |
| Genital prolapse                                           | 10.99<br>(1.36 to 32.93)            | 14.73<br>(1.51 to 49.59)             | 12.08<br>(1.29 to 41.05)             | 14.36<br>(1.47 to 47.42)             | 0.42<br>(0.08 to 1.09)      | 0.42<br>(0.06 to 1.28)      | 0.36<br>(0.05 to 1.11)      | 0.41<br>(0.05 to 1.19)      |
| Other gynecological diseases                               | 50.62<br>(18.95 to 99.92)           | 94.98<br>(24.02 to 233.26)           | 84.11<br>(21.03 to 208.83)           | 87.47<br>(22.72 to 212.97)           | 1.26<br>(0.44 to 2.51)      | 2.30<br>(0.64 to 5.50)      | 2.08<br>(0.57 to 4.95)      | 2.10<br>(0.58 to 4.93)      |
| Hemoglobinopathies and hemolytic anemias                   | 1,453.48<br>(908.17 to 2,590.75)    | 1,756.92<br>(852.27 to 3,404.39)     | 1,583.02<br>(749.70 to 3,175.36)     | 1,689.57<br>(842.07 to 3,190.45)     | 42.08<br>(26.41 to 73.95)   | 52.49<br>(29.89 to 95.44)   | 50.18<br>(28.05 to 93.67)   | 48.63<br>(28.55 to 86.67)   |
| Thalassemias                                               | 6.27<br>(1.53 to 17.84)             | 3.20<br>(0.61 to 9.37)               | 3.29<br>(0.62 to 10.03)              | 3.20<br>(0.61 to 9.68)               | 0.07<br>(0.02 to 0.21)      | 0.04<br>(0.01 to 0.11)      | 0.04<br>(0.01 to 0.12)      | 0.04<br>(0.01 to 0.12)      |
| Sickle cell disorders                                      | 332.59<br>(144.56 to 713.18)        | 210.51<br>(63.85 to 545.51)          | 176.30<br>(52.77 to 467.79)          | 230.94<br>(72.16 to 597.09)          | 4.41<br>(1.81 to 9.85)      | 3.06<br>(0.86 to 8.04)      | 2.60<br>(0.71 to 6.90)      | 3.30<br>(0.98 to 8.56)      |
| G6PD deficiency                                            | 743.57<br>(429.75 to 1,352.10)      | 1,247.87<br>(563.01 to 2,542.15)     | 1,112.81<br>(496.36 to 2,329.18)     | 1,185.23<br>(551.20 to 2,298.91)     | 17.96<br>(10.69 to 31.84)   | 33.87<br>(17.23 to 64.95)   | 31.16<br>(15.35 to 62.03)   | 31.57<br>(16.29 to 58.90)   |
| Other hemoglobinopathies and hemolytic anemias             | 371.05<br>(222.63 to 662.41)        | 295.35<br>(174.95 to 535.53)         | 290.63<br>(167.02 to 530.69)         | 270.20<br>(164.54 to 485.77)         | 19.63<br>(12.17 to 24.55)   | 15.52<br>(9.76 to 26.68)    | 16.39<br>(10.40 to 28.17)   | 13.72<br>(8.41 to 24.15)    |
| Endocrine, metabolic, blood, and immune disorders          | 7,783.33<br>(3,635.07 to 11,300.40) | 11,525.04<br>(4,331.44 to 21,276.79) | 10,984.85<br>(4,142.13 to 21,006.75) | 10,565.01<br>(4,054.81 to 18,712.70) | 157.60<br>(74.70 to 227.83) | 257.19<br>(98.16 to 458.37) | 252.67<br>(95.88 to 460.21) | 228.46<br>(88.86 to 396.68) |

| Lesotho                   |                                |                                    |                                    |                                  |                           |                           |                            |                           |
|---------------------------|--------------------------------|------------------------------------|------------------------------------|----------------------------------|---------------------------|---------------------------|----------------------------|---------------------------|
| Cause                     | YLLs (actual counts)           |                                    |                                    |                                  | Deaths (actual counts)    |                           |                            |                           |
|                           | 2016                           | 2040 Forecast                      | 2040 Better Scenario               | 2040 Worse Scenario              | 2016                      | 2040 Forecast             | 2040 Better Scenario       | 2040 Worse Scenario       |
| Musculoskeletal disorders | 943.87<br>(554.07 to 1,369.57) | 2,012.75<br>(1,015.80 to 3,576.72) | 2,122.14<br>(1,033.42 to 3,869.12) | 1,712.67<br>(892.15 to 2,939.34) | 29.45<br>(16.58 to 43.47) | 61.11<br>(31.92 to 98.13) | 66.66<br>(34.14 to 109.33) | 51.28<br>(26.98 to 77.24) |
| Rheumatoid arthritis      | 322.09<br>(160.91 to 505.87)   | 740.16<br>(361.84 to 1,256.10)     | 691.98<br>(328.29 to 1,211.92)     | 669.01<br>(337.35 to 1,108.28)   | 13.35<br>(6.60 to 20.73)  | 27.50<br>(14.23 to 41.77) | 27.19<br>(13.59 to 42.83)  | 24.42<br>(12.75 to 36.24) |

|                                               |                                                                  |                                                                 |                                                                 |                                                                 |                                                            |                                                            |                                                            |                                                            |
|-----------------------------------------------|------------------------------------------------------------------|-----------------------------------------------------------------|-----------------------------------------------------------------|-----------------------------------------------------------------|------------------------------------------------------------|------------------------------------------------------------|------------------------------------------------------------|------------------------------------------------------------|
| Other musculoskeletal disorders               | 621.79<br>(373.89 to<br>911.93)                                  | 1,272.59<br>(602.10 to<br>2,343.79)                             | 1,430.17<br>(672.09 to<br>2,784.10)                             | 1,043.66<br>(494.90 to<br>1,903.26)                             | 16.10<br>(9.10 to<br>24.74)                                | 33.60<br>(16.11 to<br>58.61)                               | 39.48<br>(18.80 to<br>68.85)                               | 26.86<br>(13.32 to<br>45.58)                               |
|                                               | <b>14,426.01</b><br><b>(10,452.06 to</b><br><b>20,366.52)</b>    | <b>12,666.02</b><br><b>(7,838.66 to</b><br><b>20,228.69)</b>    | <b>11,073.57</b><br><b>(6,823.69 to</b><br><b>17,052.67)</b>    | <b>13,649.79</b><br><b>(8,353.79 to</b><br><b>21,245.98)</b>    | <b>204.61</b><br><b>(153.20 to</b><br><b>280.71)</b>       | <b>233.06</b><br><b>(160.77 to</b><br><b>340.06)</b>       | <b>227.78</b><br><b>(155.87 to</b><br><b>328.67)</b>       | <b>229.54</b><br><b>(156.16 to</b><br><b>338.45)</b>       |
| Congenital birth defects                      | 12,496.44<br>(8,657.83 to<br>17,781.10)                          | 9,336.72<br>(5,362.41 to<br>15,385.04)                          | 7,676.74<br>(4,403.27 to<br>12,431.62)                          | 10,568.51<br>(5,971.42 to<br>17,415.32)                         | 154.70<br>(110.21 to<br>215.89)                            | 130.87<br>(76.51 to<br>209.68)                             | 110.88<br>(64.70 to<br>179.68)                             | 142.86<br>(82.42 to<br>229.12)                             |
| Neural tube defects                           | 1,203.31<br>(613.95 to<br>2,161.99)                              | 354.32<br>(161.20 to<br>658.71)                                 | 260.39<br>(114.50 to<br>479.70)                                 | 424.51<br>(188.30 to<br>801.68)                                 | 14.78<br>(7.77 to<br>25.94)                                | 5.34<br>(2.47 to<br>9.66)                                  | 4.07<br>(1.86 to<br>7.49)                                  | 6.09<br>(2.85 to<br>11.31)                                 |
| Congenital heart anomalies                    | 3,754.96<br>(2,528.89 to<br>5,831.00)                            | 3,239.24<br>(1,820.55 to<br>5,437.12)                           | 2,724.53<br>(1,524.36 to<br>4,596.95)                           | 3,544.92<br>(1,963.77 to<br>6,000.22)                           | 48.40<br>(33.01 to<br>74.16)                               | 48.18<br>(26.85 to<br>81.20)                               | 41.73<br>(22.88 to<br>71.70)                               | 50.70<br>(28.74 to<br>86.15)                               |
| Orofacial clefts                              | 109.47<br>(46.93 to<br>222.27)                                   | 52.01<br>(18.35 to<br>123.26)                                   | 35.05<br>(12.22 to<br>81.62)                                    | 68.47<br>(23.19 to<br>165.67)                                   | 1.27<br>(0.54 to<br>2.58)                                  | 0.60<br>(0.21 to<br>1.45)                                  | 0.41<br>(0.14 to<br>0.95)                                  | 0.79<br>(0.27 to<br>1.90)                                  |
| Down syndrome                                 | 581.24<br>(374.42 to<br>866.02)                                  | 551.40<br>(291.39 to<br>977.87)                                 | 441.24<br>(231.67 to<br>783.17)                                 | 630.62<br>(331.13 to<br>1,112.58)                               | 7.35<br>(4.86 to<br>10.84)                                 | 8.31<br>(4.60 to<br>13.83)                                 | 6.91<br>(3.74 to<br>11.67)                                 | 9.06<br>(5.01 to<br>15.13)                                 |
| Other chromosomal abnormalities               | 548.73<br>(279.16 to<br>1,001.58)                                | 600.63<br>(262.13 to<br>1,208.71)                               | 471.36<br>(210.32 to<br>928.84)                                 | 711.21<br>(309.17 to<br>1,439.78)                               | 6.53<br>(3.35 to<br>11.83)                                 | 7.59<br>(3.50 to<br>14.72)                                 | 6.05<br>(2.80 to<br>11.55)                                 | 8.81<br>(3.94 to<br>17.46)                                 |
| Congenital musculoskeletal and limb anomalies | 559.65<br>(224.92 to<br>989.61)                                  | 410.36<br>(145.92 to<br>780.92)                                 | 340.72<br>(121.76 to<br>649.42)                                 | 470.81<br>(164.60 to<br>913.12)                                 | 6.63<br>(2.68 to<br>11.74)                                 | 5.18<br>(1.87 to<br>9.77)                                  | 4.38<br>(1.60 to<br>8.22)                                  | 5.82<br>(2.02 to<br>11.05)                                 |
| Urogenital congenital anomalies               | 291.09<br>(179.03 to<br>568.14)                                  | 329.70<br>(170.11 to<br>643.59)                                 | 306.27<br>(154.56 to<br>596.59)                                 | 331.21<br>(169.17 to<br>649.95)                                 | 4.55<br>(2.84 to<br>8.67)                                  | 6.55<br>(3.39 to<br>12.30)                                 | 6.40<br>(3.19 to<br>12.09)                                 | 6.20<br>(3.31 to<br>11.63)                                 |
| Digestive congenital anomalies                | 1,224.98<br>(698.75 to<br>2,308.54)                              | 875.14<br>(392.84 to<br>1,737.61)                               | 689.40<br>(315.44 to<br>1,371.73)                               | 1,030.90<br>(456.67 to<br>2,038.31)                             | 14.65<br>(8.46 to<br>26.82)                                | 11.25<br>(5.16 to<br>21.62)                                | 9.04<br>(4.20 to<br>17.30)                                 | 12.94<br>(5.91 to<br>25.02)                                |
| Other congenital birth defects                | 4,223.02<br>(2,717.83 to<br>6,149.30)                            | 2,923.94<br>(1,534.18 to<br>4,864.52)                           | 2,407.99<br>(1,280.76 to<br>3,961.31)                           | 3,355.84<br>(1,701.74 to<br>5,747.94)                           | 50.55<br>(32.78 to<br>73.02)                               | 50.55<br>(20.69 to<br>61.78)                               | 31.89<br>(17.44 to<br>51.76)                               | 42.44<br>(22.46 to<br>71.80)                               |
| Skin and subcutaneous diseases                | 1,050.63<br>(638.03 to<br>1,745.25)                              | 2,789.70<br>(1,608.08 to<br>4,581.29)                           | 2,961.89<br>(1,683.66 to<br>5,012.82)                           | 2,443.97<br>(1,426.42 to<br>4,016.14)                           | 39.71<br>(23.34 to<br>65.42)                               | 95.93<br>(61.05 to<br>153.05)                              | 111.85<br>(71.25 to<br>178.60)                             | 79.29<br>(51.12 to<br>126.92)                              |
| Cellulitis                                    | 199.96<br>(99.67 to<br>383.77)                                   | 740.44<br>(365.79 to<br>1,399.96)                               | 841.15<br>(413.78 to<br>1,606.32)                               | 612.72<br>(299.82 to<br>1,163.29)                               | 8.32<br>(3.97 to<br>16.06)                                 | 26.98<br>(13.45 to<br>49.00)                               | 32.79<br>(16.61 to<br>60.74)                               | 21.61<br>(10.89 to<br>40.13)                               |
| Pyoderma                                      | 476.54<br>(276.32 to<br>841.87)                                  | 1,221.51<br>(647.82 to<br>2,109.37)                             | 1,199.35<br>(624.42 to<br>2,058.28)                             | 1,137.12<br>(616.10 to<br>1,959.95)                             | 13.32<br>(7.36 to<br>25.48)                                | 35.07<br>(20.03 to<br>63.26)                               | 37.81<br>(21.32 to<br>69.27)                               | 30.54<br>(17.76 to<br>55.03)                               |
| Decubitus ulcer                               | 330.99<br>(157.22 to<br>561.75)                                  | 730.55<br>(334.08 to<br>1,317.28)                               | 817.86<br>(368.57 to<br>1,508.41)                               | 607.72<br>(272.10 to<br>1,106.43)                               | 16.72<br>(7.02 to<br>28.74)                                | 31.15<br>(12.51 to<br>54.86)                               | 38.06<br>(15.32 to<br>66.54)                               | 24.86<br>(10.08 to<br>43.78)                               |
| Other skin and subcutaneous diseases          | 43.14<br>(22.82 to<br>75.67)                                     | 97.20<br>(47.14 to<br>185.03)                                   | 103.53<br>(51.10 to<br>200.35)                                  | 86.42<br>(42.49 to<br>164.86)                                   | 1.35<br>(0.74 to<br>2.39)                                  | 2.73<br>(1.44 to<br>4.97)                                  | 3.19<br>(1.74 to<br>5.83)                                  | 2.27<br>(1.20 to<br>4.12)                                  |
| Sudden infant death syndrome                  | 878.94<br>(395.74 to<br>1,653.30)                                | 539.59<br>(148.85 to<br>1,333.00)                               | 434.93<br>(120.42 to<br>1,035.55)                               | 637.31<br>(173.53 to<br>1,598.17)                               | 10.20<br>(4.59 to<br>19.18)                                | 6.26<br>(1.73 to<br>15.47)                                 | 5.05<br>(1.40 to<br>12.02)                                 | 7.39<br>(2.01 to<br>18.55)                                 |
| Injuries                                      | <b>151,390.86</b><br><b>(115,764.34 to</b><br><b>189,712.42)</b> | <b>183,741.34</b><br><b>(91,084.40 to</b><br><b>323,386.86)</b> | <b>167,411.91</b><br><b>(81,898.45 to</b><br><b>302,973.01)</b> | <b>187,672.57</b><br><b>(93,741.24 to</b><br><b>330,358.83)</b> | <b>2,899.76</b><br><b>(2,227.82 to</b><br><b>3,635.02)</b> | <b>3,822.91</b><br><b>(2,008.18 to</b><br><b>6,578.31)</b> | <b>3,571.65</b><br><b>(1,850.53 to</b><br><b>6,263.73)</b> | <b>3,804.51</b><br><b>(1,998.68 to</b><br><b>6,565.76)</b> |
| Transport injuries                            | 48,189.22<br>(35,819.05 to<br>62,255.48)                         | 64,739.97<br>(29,002.07 to<br>128,115.09)                       | 53,186.94<br>(23,504.74 to<br>107,730.62)                       | 70,783.21<br>(31,312.97 to<br>140,212.66)                       | 907.63<br>(675.51 to<br>1,171.92)                          | 1,319.46<br>(607.55 to<br>2,600.82)                        | 1,116.50<br>(515.36 to<br>2,217.64)                        | 1,402.81<br>(638.45 to<br>2,751.65)                        |
| Road injuries                                 | 46,865.07<br>(34,677.06 to<br>60,591.76)                         | 62,549.14<br>(28,017.02 to<br>124,065.74)                       | 51,213.61<br>(22,662.35 to<br>103,614.63)                       | 68,499.76<br>(30,229.66 to<br>135,879.63)                       | 880.78<br>(654.85 to<br>1,138.17)                          | 1,271.20<br>(587.91 to<br>2,503.87)                        | 1,072.03<br>(492.91 to<br>2,127.39)                        | 1,353.65<br>(615.11 to<br>2,653.82)                        |
| Pedestrian road injuries                      | 12,693.56<br>(9,511.82 to<br>17,234.94)                          | 13,295.52<br>(6,604.43 to<br>24,140.25)                         | 11,277.38<br>(5,459.54 to<br>20,720.16)                         | 14,028.72<br>(6,900.65 to<br>25,402.59)                         | 260.07<br>(193.86 to<br>346.87)                            | 316.38<br>(159.72 to<br>569.20)                            | 280.93<br>(141.18 to<br>517.75)                            | 323.06<br>(163.10 to<br>572.48)                            |

| Lesotho                                         |                                               |                                               |                                               |                                               |                                      |                                        |                                      |                                      |
|-------------------------------------------------|-----------------------------------------------|-----------------------------------------------|-----------------------------------------------|-----------------------------------------------|--------------------------------------|----------------------------------------|--------------------------------------|--------------------------------------|
| Cause                                           | YLLs (actual counts)                          |                                               |                                               |                                               | Deaths (actual counts)               |                                        |                                      |                                      |
|                                                 | 2016                                          | 2040 Forecast                                 | 2040 Better Scenario                          | 2040 Worse Scenario                           | 2016                                 | 2040 Forecast                          | 2040 Better Scenario                 | 2040 Worse Scenario                  |
| Cyclist road injuries                           | 337.64<br>(215.88 to 555.84)                  | 547.28<br>(226.86 to 1,247.47)                | 470.88<br>(188.49 to 1,079.86)                | 573.51<br>(238.83 to 1,248.51)                | 6.73<br>(4.33 to 11.02)              | 12.01<br>(4.95 to 27.27)               | 10.71<br>(4.25 to 24.56)             | 12.21<br>(5.05 to 26.53)             |
| Motorcyclist road injuries                      | 2,321.20<br>(1,327.96 to 4,341.59)            | 3,189.95<br>(1,072.69 to 7,668.60)            | 2,799.59<br>(942.46 to 6,624.15)              | 3,508.45<br>(1,143.12 to 8,731.75)            | 39.31<br>(22.81 to 74.05)            | 56.83<br>(19.63 to 134.23)             | 50.61<br>(17.23 to 117.79)           | 61.31<br>(20.53 to 150.12)           |
| Motor vehicle road injuries                     | 31,168.69<br>(22,579.51 to 41,909.55)         | 44,917.19<br>(19,450.74 to 93,384.51)         | 36,170.23<br>(15,213.11 to 75,715.27)         | 49,747.11<br>(21,110.47 to 105,525.76)        | 567.91<br>(410.85 to 763.00)         | 873.37<br>(377.91 to 1,795.89)         | 719.04<br>(306.77 to 1,493.54)       | 943.92<br>(406.82 to 1,981.62)       |
| Other road injuries                             | 343.98<br>(207.67 to 597.90)                  | 599.19<br>(234.06 to 1,320.91)                | 495.53<br>(190.02 to 1,108.17)                | 641.97<br>(247.77 to 1,447.26)                | 6.76<br>(4.16 to 11.60)              | 12.60<br>(5.03 to 27.87)               | 10.74<br>(4.17 to 23.65)             | 13.14<br>(5.20 to 29.73)             |
| Other transport injuries                        | 1,324.14<br>(868.88 to 1,948.85)              | 2,190.82<br>(893.52 to 4,660.76)              | 1,973.33<br>(793.14 to 4,141.96)              | 2,283.45<br>(930.30 to 4,854.62)              | 26.85<br>(17.53 to 39.63)            | 48.26<br>(20.37 to 97.26)              | 44.47<br>(18.78 to 91.98)            | 49.16<br>(20.33 to 103.58)           |
| <b>Unintentional injuries</b>                   | <b>34,217.47<br/>(26,720.20 to 42,249.44)</b> | <b>30,108.81<br/>(16,658.36 to 49,548.64)</b> | <b>26,644.81<br/>(14,666.75 to 44,827.34)</b> | <b>30,287.40<br/>(17,052.62 to 49,379.26)</b> | <b>654.01<br/>(510.93 to 817.42)</b> | <b>649.34<br/>(388.13 to 1,028.01)</b> | <b>603.71<br/>(361.43 to 974.69)</b> | <b>624.62<br/>(379.76 to 979.04)</b> |
| Falls                                           | 1,327.00<br>(879.23 to 2,151.94)              | 1,837.53<br>(1,038.88 to 3,148.70)            | 1,945.67<br>(1,071.21 to 3,361.10)            | 1,580.74<br>(938.99 to 2,735.89)              | 49.94<br>(33.50 to 80.55)            | 63.83<br>(42.50 to 102.93)             | 72.54<br>(48.26 to 116.08)           | 52.95<br>(34.88 to 87.13)            |
| Drowning                                        | 6,357.26<br>(4,834.08 to 8,493.37)            | 5,015.98<br>(2,500.35 to 8,991.39)            | 4,465.84<br>(2,194.34 to 8,247.40)            | 5,137.30<br>(2,595.08 to 9,409.77)            | 111.32<br>(83.79 to 150.08)          | 102.62<br>(52.11 to 186.11)            | 94.37<br>(46.79 to 174.17)           | 101.43<br>(52.55 to 184.21)          |
| Fire, heat, and hot substances                  | 6,485.53<br>(4,773.56 to 8,682.71)            | 5,069.32<br>(2,523.47 to 9,469.25)            | 4,432.50<br>(2,151.39 to 8,401.23)            | 5,186.28<br>(2,581.03 to 9,407.99)            | 134.83<br>(98.47 to 176.44)          | 116.68<br>(62.83 to 207.23)            | 106.66<br>(57.29 to 192.24)          | 114.99<br>(63.58 to 200.05)          |
| Poisonings                                      | 3,544.02<br>(1,922.40 to 5,911.69)            | 1,887.52<br>(813.69 to 3,879.47)              | 1,486.95<br>(622.68 to 3,064.58)              | 2,101.11<br>(889.89 to 4,375.66)              | 59.55<br>(33.38 to 96.30)            | 35.69<br>(15.91 to 72.24)              | 28.88<br>(12.67 to 58.67)            | 38.45<br>(16.88 to 78.68)            |
| Exposure to mechanical forces                   | 6,740.74<br>(4,865.89 to 9,041.07)            | 5,687.33<br>(3,087.63 to 9,590.02)            | 4,946.71<br>(2,626.08 to 8,532.67)            | 5,717.61<br>(3,108.74 to 9,608.45)            | 118.16<br>(85.80 to 156.17)          | 112.08<br>(62.07 to 185.60)            | 100.90<br>(54.67 to 169.86)          | 108.27<br>(60.98 to 177.49)          |
| Unintentional firearm injuries                  | 1,115.56<br>(622.65 to 1,729.57)              | 849.23<br>(365.00 to 1,616.08)                | 735.83<br>(309.74 to 1,428.83)                | 835.61<br>(363.02 to 1,555.36)                | 21.30<br>(11.89 to 33.00)            | 17.74<br>(7.76 to 32.83)               | 15.70<br>(6.73 to 29.77)             | 17.02<br>(7.68 to 30.80)             |
| Unintentional suffocation                       | 2,192.25<br>(1,442.12 to 3,207.41)            | 1,833.18<br>(909.71 to 3,283.44)              | 1,562.75<br>(743.37 to 2,855.47)              | 1,921.67<br>(963.23 to 3,448.36)              | 33.27<br>(21.87 to 48.37)            | 30.80<br>(15.60 to 55.08)              | 26.87<br>(12.97 to 49.70)            | 31.27<br>(15.68 to 56.72)            |
| Other exposure to mechanical forces             | 3,432.93<br>(2,102.61 to 5,031.01)            | 3,004.93<br>(1,484.05 to 5,284.90)            | 2,648.14<br>(1,265.66 to 4,702.16)            | 2,960.33<br>(1,479.31 to 5,123.44)            | 63.58<br>(38.81 to 91.68)            | 63.53<br>(32.26 to 108.07)             | 58.33<br>(28.79 to 100.80)           | 59.99<br>(31.41 to 102.25)           |
| Adverse effects of medical treatment            | 1,716.04<br>(1,176.79 to 2,490.04)            | 1,810.41<br>(983.30 to 3,086.64)              | 1,668.45<br>(886.93 to 2,943.90)              | 1,726.62<br>(950.61 to 2,892.86)              | 38.64<br>(27.21 to 55.47)            | 43.97<br>(26.89 to 70.14)              | 42.68<br>(25.87 to 69.51)            | 40.19<br>(25.07 to 62.69)            |
| Animal contact                                  | 3,256.89<br>(1,431.28 to 4,652.14)            | 4,169.25<br>(1,612.18 to 7,814.58)            | 3,488.76<br>(1,311.15 to 6,740.96)            | 4,282.29<br>(1,680.72 to 7,722.28)            | 58.10<br>(26.15 to 83.07)            | 82.70<br>(32.58 to 149.22)             | 71.52<br>(27.88 to 133.24)           | 81.86<br>(33.15 to 143.15)           |
| Venomous animal contact                         | 744.25<br>(343.11 to 1,384.59)                | 866.34<br>(336.30 to 1,814.34)                | 717.04<br>(283.06 to 1,510.28)                | 889.23<br>(347.94 to 1,891.23)                | 14.10<br>(6.78 to 25.12)             | 18.01<br>(7.33 to 36.02)               | 15.63<br>(6.48 to 30.85)             | 17.67<br>(7.21 to 35.27)             |
| Non-venomous animal contact                     | 2,512.64<br>(980.51 to 3,706.72)              | 3,302.91<br>(1,087.21 to 6,280.65)            | 2,771.72<br>(898.04 to 5,499.40)              | 3,393.06<br>(1,129.95 to 6,280.59)            | 44.00<br>(17.20 to 65.54)            | 64.69<br>(22.06 to 121.22)             | 55.90<br>(19.09 to 108.67)           | 64.19<br>(22.05 to 115.38)           |
| Foreign body                                    | 2,510.97<br>(1,544.99 to 3,569.41)            | 2,471.93<br>(1,229.90 to 4,213.65)            | 2,346.94<br>(1,182.13 to 3,991.04)            | 2,453.05<br>(1,204.64 to 4,190.87)            | 38.00<br>(23.56 to 51.68)            | 43.10<br>(22.22 to 70.59)              | 43.07<br>(21.90 to 72.69)            | 40.47<br>(21.09 to 65.47)            |
| Pulmonary aspiration and foreign body in airway | 2,045.36<br>(1,358.28 to 2,960.37)            | 2,083.77<br>(1,076.11 to 3,431.00)            | 2,013.21<br>(1,032.78 to 3,324.73)            | 2,046.52<br>(1,060.14 to 3,441.23)            | 31.23<br>(20.67 to 42.79)            | 36.87<br>(20.20 to 59.33)              | 37.55<br>(20.20 to 61.31)            | 34.19<br>(18.84 to 53.14)            |

|                                             |                                                     |                                                      |                                                      |                                                      |                                                |                                                |                                                |                                                |
|---------------------------------------------|-----------------------------------------------------|------------------------------------------------------|------------------------------------------------------|------------------------------------------------------|------------------------------------------------|------------------------------------------------|------------------------------------------------|------------------------------------------------|
| Foreign body in other body part             | 465.61<br>(137.22 to 842.67)                        | 388.16<br>(89.17 to 851.97)                          | 333.73<br>(72.27 to 738.12)                          | 406.53<br>(96.40 to 866.13)                          | 6.77<br>(2.00 to 12.10)                        | 6.24<br>(1.40 to 13.36)                        | 5.52<br>(1.21 to 12.17)                        | 6.28<br>(1.47 to 13.20)                        |
| Environmental heat and cold exposure        | 1,100.94<br>(530.83 to 1,669.21)                    | 1,278.18<br>(522.12 to 2,329.04)                     | 1,060.47<br>(412.94 to 1,939.74)                     | 1,251.21<br>(507.51 to 2,199.86)                     | 23.67<br>(11.13 to 35.68)                      | 29.99<br>(12.28 to 52.77)                      | 25.49<br>(10.49 to 46.28)                      | 28.67<br>(11.89 to 48.38)                      |
| Other unintentional injuries                | 1,178.09<br>(834.52 to 1,890.39)                    | 881.36<br>(470.09 to 1,517.66)                       | 802.53<br>(412.07 to 1,405.28)                       | 851.18<br>(458.61 to 1,461.84)                       | 21.82<br>(15.52 to 34.87)                      | 18.66<br>(10.24 to 31.24)                      | 17.60<br>(9.40 to 29.71)                       | 17.34<br>(9.86 to 28.61)                       |
| <b>Self-harm and interpersonal violence</b> | <b>68,966.89</b><br><b>(43,384.00 to 92,539.84)</b> | <b>88,836.24</b><br><b>(39,627.54 to 169,003.76)</b> | <b>87,524.43</b><br><b>(39,407.87 to 168,431.55)</b> | <b>86,548.65</b><br><b>(38,476.54 to 163,208.71)</b> | <b>1,337.79</b><br><b>(882.48 to 1,786.82)</b> | <b>1,853.04</b><br><b>(852.62 to 3,411.28)</b> | <b>1,850.35</b><br><b>(863.39 to 3,442.55)</b> | <b>1,776.11</b><br><b>(826.12 to 3,243.60)</b> |

**Lesotho**

| Cause                                                                               | YLLs (actual counts)                    |                                         |                                         |                                         | Deaths (actual counts)               |                                       |                                       |                                       |
|-------------------------------------------------------------------------------------|-----------------------------------------|-----------------------------------------|-----------------------------------------|-----------------------------------------|--------------------------------------|---------------------------------------|---------------------------------------|---------------------------------------|
|                                                                                     | 2016                                    | 2040 Forecast                           | 2040 Better Scenario                    | 2040 Worse Scenario                     | 2016                                 | 2040 Forecast                         | 2040 Better Scenario                  | 2040 Worse Scenario                   |
| Self-harm                                                                           | 25,332.46<br>(17,336.24 to 36,827.69)   | 37,415.98<br>(15,272.91 to 75,141.22)   | 35,187.30<br>(14,192.47 to 74,519.13)   | 38,986.74<br>(15,484.90 to 78,734.62)   | 565.81<br>(383.96 to 817.15)         | 867.16<br>(383.95 to 1,679.55)        | 835.92<br>(369.38 to 1,596.72)        | 881.49<br>(379.57 to 1,731.46)        |
| Self-harm by firearm                                                                | 1,579.15<br>(675.87 to 3,272.28)        | 1,898.55<br>(490.47 to 5,108.87)        | 1,730.27<br>(453.95 to 4,718.13)        | 2,006.40<br>(515.58 to 5,387.52)        | 32.44<br>(13.08 to 71.20)            | 42.38<br>(10.86 to 114.31)            | 39.56<br>(10.10 to 106.36)            | 43.76<br>(11.07 to 116.81)            |
| Self-harm by other specified means                                                  | 23,753.31<br>(16,268.84 to 34,195.80)   | 35,517.43<br>(14,398.25 to 71,626.02)   | 33,457.02<br>(13,433.51 to 67,741.19)   | 36,980.34<br>(14,854.14 to 75,543.35)   | 533.38<br>(361.96 to 754.36)         | 824.79<br>(360.47 to 1,607.77)        | 796.36<br>(349.74 to 1,513.45)        | 837.74<br>(357.63 to 1,656.36)        |
| Interpersonal violence                                                              | 43,634.43<br>(18,556.05 to 60,909.52)   | 51,420.25<br>(18,242.55 to 97,079.12)   | 52,337.14<br>(18,867.09 to 101,573.38)  | 47,561.91<br>(16,853.64 to 91,255.48)   | 771.97<br>(329.22 to 1,093.72)       | 985.88<br>(354.68 to 1,867.86)        | 1,014.43<br>(372.82 to 1,953.01)      | 894.61<br>(310.58 to 1,699.45)        |
| Physical violence by firearm                                                        | 6,546.11<br>(1,459.85 to 12,706.36)     | 7,806.98<br>(1,430.23 to 18,430.46)     | 7,931.61<br>(1,427.55 to 18,774.02)     | 7,057.86<br>(1,276.12 to 16,417.20)     | 117.92<br>(26.46 to 227.49)          | 151.13<br>(28.04 to 353.47)           | 155.35<br>(28.99 to 365.12)           | 133.94<br>(25.38 to 309.05)           |
| Physical violence by sharp object                                                   | 23,574.87<br>(8,853.11 to 36,342.07)    | 28,682.06<br>(9,452.84 to 53,355.76)    | 30,219.41<br>(10,203.69 to 56,340.32)   | 25,462.29<br>(8,064.29 to 47,066.15)    | 413.91<br>(157.39 to 637.15)         | 541.65<br>(178.98 to 989.72)          | 576.29<br>(191.76 to 1,084.20)        | 471.81<br>(149.84 to 857.63)          |
| Physical violence by other means                                                    | 13,513.45<br>(6,801.74 to 21,264.48)    | 14,931.22<br>(4,980.25 to 30,484.13)    | 14,186.11<br>(4,664.63 to 28,504.45)    | 15,041.76<br>(4,888.50 to 31,066.31)    | 240.15<br>(118.77 to 388.53)         | 293.10<br>(96.90 to 599.09)           | 282.79<br>(93.87 to 578.27)           | 288.86<br>(93.70 to 609.92)           |
| <b>Forces of nature, conflict and terrorism, and executions and police conflict</b> | <b>17.28</b><br><b>(10.13 to 45.67)</b> | <b>56.32</b><br><b>(0.00 to 586.01)</b> | <b>55.73</b><br><b>(0.00 to 578.36)</b> | <b>53.31</b><br><b>(0.00 to 550.47)</b> | <b>0.33</b><br><b>(0.17 to 0.79)</b> | <b>1.07</b><br><b>(0.00 to 11.40)</b> | <b>1.09</b><br><b>(0.00 to 11.63)</b> | <b>0.98</b><br><b>(0.00 to 10.40)</b> |
| Exposure to forces of nature                                                        | 0.00<br>(0.00 to 0.00)                  | 29.86<br>(0.00 to 551.98)               | 29.43<br>(0.00 to 545.12)               | 28.27<br>(0.00 to 525.76)               | 0.00<br>(0.00 to 0.00)               | 0.58<br>(0.00 to 10.83)               | 0.60<br>(0.00 to 11.02)               | 0.53<br>(0.00 to 9.88)                |
| Conflict and terrorism                                                              | 0.00<br>(0.00 to 0.00)                  | 11.15<br>(0.00 to 70.71)                | 10.98<br>(0.00 to 68.89)                | 10.69<br>(0.00 to 68.96)                | 0.00<br>(0.00 to 0.00)               | 0.20<br>(0.00 to 1.28)                | 0.20<br>(0.00 to 1.28)                | 0.19<br>(0.00 to 1.20)                |
| Executions and police conflict                                                      | 17.28<br>(10.13 to 45.67)               | 15.31<br>(0.00 to 87.73)                | 15.33<br>(0.00 to 88.11)                | 14.35<br>(0.00 to 81.66)                | 0.33<br>(0.17 to 0.79)               | 0.29<br>(0.00 to 1.66)                | 0.29<br>(0.00 to 1.69)                | 0.26<br>(0.00 to 1.50)                |

**Namibia**

| Cause                                                             | YLLs (actual counts)                                   |                                                        |                                                        |                                                              | Deaths (actual counts)                              |                                                     |                                                     |                                                     |
|-------------------------------------------------------------------|--------------------------------------------------------|--------------------------------------------------------|--------------------------------------------------------|--------------------------------------------------------------|-----------------------------------------------------|-----------------------------------------------------|-----------------------------------------------------|-----------------------------------------------------|
|                                                                   | 2016                                                   | 2040 Forecast                                          | 2040 Better Scenario                                   | 2040 Worse Scenario                                          | 2016                                                | 2040 Forecast                                       | 2040 Better Scenario                                | 2040 Worse Scenario                                 |
| <b>All causes</b>                                                 | <b>779,879.85</b><br><b>(652,535.29 to 933,125.79)</b> | <b>692,008.12</b><br><b>(484,157.16 to 994,308.34)</b> | <b>525,275.46</b><br><b>(367,022.98 to 736,268.96)</b> | <b>1,673,918.58</b><br><b>(1,276,965.12 to 2,157,126.53)</b> | <b>17,990.58</b><br><b>(14,819.74 to 21,051.33)</b> | <b>22,353.67</b><br><b>(17,219.67 to 29,307.86)</b> | <b>17,910.01</b><br><b>(13,931.58 to 23,161.95)</b> | <b>43,278.65</b><br><b>(34,411.21 to 53,747.90)</b> |
| <b>Communicable, maternal, neonatal, and nutritional diseases</b> | <b>509,421.08</b><br><b>(414,948.59 to 638,942.83)</b> | <b>302,687.70</b><br><b>(180,842.43 to 474,847.83)</b> | <b>222,345.91</b><br><b>(123,381.10 to 366,358.95)</b> | <b>1,221,382.78</b><br><b>(861,847.02 to 1,659,149.39)</b>   | <b>9,422.34</b><br><b>(8,022.50 to 11,455.28)</b>   | <b>6,838.10</b><br><b>(4,237.03 to 10,270.05)</b>   | <b>5,146.35</b><br><b>(3,021.34 to 8,028.19)</b>    | <b>25,598.04</b><br><b>(18,237.56 to 34,454.18)</b> |
| <b>HIV/AIDS and tuberculosis</b>                                  | <b>262,715.09</b><br><b>(204,238.27 to 345,964.31)</b> | <b>153,689.22</b><br><b>(60,870.68 to 295,543.27)</b>  | <b>123,556.32</b><br><b>(41,020.34 to 257,831.59)</b>  | <b>999,278.34</b><br><b>(652,062.84 to 1,454,580.54)</b>     | <b>5,560.35</b><br><b>(4,420.51 to 7,147.15)</b>    | <b>3,473.36</b><br><b>(1,470.20 to 6,317.37)</b>    | <b>2,761.69</b><br><b>(1,036.17 to 5,352.09)</b>    | <b>20,868.45</b><br><b>(13,755.14 to 29,673.04)</b> |

|                                                                          |                                                     |                                                    |                                                    |                                                     |                                                |                                                |                                                |                                                |
|--------------------------------------------------------------------------|-----------------------------------------------------|----------------------------------------------------|----------------------------------------------------|-----------------------------------------------------|------------------------------------------------|------------------------------------------------|------------------------------------------------|------------------------------------------------|
| Tuberculosis                                                             | 33,836.78<br>(22,787.77 to<br>55,312.27)            | 29,291.36<br>(9,546.71 to<br>76,393.00)            | 16,308.24<br>(5,433.29 to<br>41,513.21)            | 41,960.02<br>(13,808.80 to<br>112,758.93)           | 895.17<br>(592.40 to<br>1,513.96)              | 913.03<br>(319.17 to<br>2,275.83)              | 526.43<br>(186.14 to<br>1,292.66)              | 1,280.80<br>(434.49 to<br>3,178.82)            |
| HIV/AIDS                                                                 | 228,878.31<br>(169,127.40 to<br>316,912.23)         | 124,397.85<br>(38,070.47 to<br>259,747.43)         | 107,248.08<br>(28,434.25 to<br>236,643.03)         | 957,318.32<br>(604,046.98 to<br>1,418,610.80)       | 4,665.18<br>(3,531.80 to<br>6,252.53)          | 2,560.33<br>(765.68 to<br>5,201.72)            | 2,235.26<br>(539.96 to<br>4,769.80)            | 19,587.64<br>(12,387.31 to<br>28,705.96)       |
| <b>Diarrhea, lower respiratory, and other common infectious diseases</b> | <b>128,029.15<br/>(92,883.14 to<br/>171,770.96)</b> | <b>85,521.73<br/>(38,953.31 to<br/>175,212.28)</b> | <b>53,365.88<br/>(24,970.77 to<br/>108,982.82)</b> | <b>136,748.73<br/>(60,000.99 to<br/>302,590.11)</b> | <b>2,365.34<br/>(1,733.75 to<br/>3,041.45)</b> | <b>2,475.96<br/>(1,394.98 to<br/>4,301.96)</b> | <b>1,720.57<br/>(1,007.80 to<br/>2,956.87)</b> | <b>3,582.10<br/>(1,934.58 to<br/>6,509.89)</b> |
| Diarrheal diseases                                                       | 63,730.58<br>(41,221.86 to<br>92,931.92)            | 26,780.02<br>(5,533.01 to<br>65,925.96)            | 16,388.87<br>(2,957.30 to<br>44,225.89)            | 45,408.19<br>(11,640.69 to<br>109,514.35)           | 978.51<br>(631.43 to<br>1,391.17)              | 593.85<br>(134.19 to<br>1,602.90)              | 401.84<br>(87.20 to<br>1,139.24)               | 1,024.12<br>(252.83 to<br>2,894.56)            |
| Intestinal infectious diseases                                           | 76.39<br>(36.33 to<br>143.82)                       | 46.28<br>(18.68 to<br>91.12)                       | 36.32<br>(14.82 to<br>71.35)                       | 54.15<br>(21.88 to<br>106.82)                       | 1.11<br>(0.54 to<br>2.03)                      | 0.77<br>(0.35 to<br>1.49)                      | 0.63<br>(0.28 to<br>1.21)                      | 0.87<br>(0.40 to<br>1.71)                      |
| Typhoid fever                                                            | 41.88<br>(18.01 to<br>78.95)                        | 29.70<br>(11.18 to<br>61.57)                       | 24.49<br>(9.25 to<br>50.63)                        | 33.75<br>(12.76 to<br>70.16)                        | 0.58<br>(0.25 to<br>1.08)                      | 0.43<br>(0.17 to<br>0.89)                      | 0.36<br>(0.14 to<br>0.74)                      | 0.48<br>(0.19 to<br>1.00)                      |
| Paratyphoid fever                                                        | 1.41<br>(0.54 to<br>2.99)                           | 1.20<br>(0.41 to<br>2.66)                          | 0.92<br>(0.32 to<br>2.03)                          | 1.39<br>(0.48 to<br>3.05)                           | 0.02<br>(0.01 to<br>0.04)                      | 0.02<br>(0.01 to<br>0.04)                      | 0.01<br>(0.01 to<br>0.03)                      | 0.02<br>(0.01 to<br>0.04)                      |
| Other intestinal infectious diseases                                     | 33.10<br>(10.85 to<br>80.09)                        | 15.37<br>(3.96 to<br>39.86)                        | 10.92<br>(2.70 to<br>28.91)                        | 19.02<br>(4.85 to<br>49.27)                         | 0.50<br>(0.18 to<br>1.18)                      | 0.33<br>(0.10 to<br>0.77)                      | 0.25<br>(0.08 to<br>0.59)                      | 0.37<br>(0.11 to<br>0.86)                      |
| Lower respiratory infections                                             | 54,515.95<br>(39,307.02 to<br>72,627.18)            | 52,215.11<br>(26,359.01 to<br>99,781.62)           | 32,439.25<br>(17,483.96 to<br>58,692.52)           | 83,117.22<br>(37,865.59 to<br>186,827.27)           | 1,231.96<br>(887.44 to<br>1,584.14)            | 1,755.41<br>(1,077.60 to<br>2,835.42)          | 1,216.90<br>(792.85 to<br>1,874.15)            | 2,415.59<br>(1,419.17 to<br>4,217.77)          |
| Upper respiratory infections                                             | 29.17<br>(12.10 to<br>57.32)                        | 27.58<br>(10.53 to<br>57.64)                       | 18.68<br>(6.96 to<br>38.68)                        | 34.04<br>(12.96 to<br>72.74)                        | 0.53<br>(0.25 to<br>0.94)                      | 0.70<br>(0.29 to<br>1.33)                      | 0.50<br>(0.21 to<br>0.99)                      | 0.81<br>(0.35 to<br>1.53)                      |
| Otitis media                                                             | 18.31<br>(7.70 to<br>44.27)                         | 6.03<br>(2.11 to<br>14.98)                         | 5.93<br>(2.09 to<br>14.55)                         | 5.73<br>(2.05 to<br>14.50)                          | 0.34<br>(0.14 to<br>0.76)                      | 0.16<br>(0.06 to<br>0.40)                      | 0.17<br>(0.07 to<br>0.42)                      | 0.14<br>(0.06 to<br>0.35)                      |
| Meningitis                                                               | 6,914.04<br>(4,103.78 to<br>11,565.37)              | 4,432.38<br>(2,335.51 to<br>8,237.37)              | 3,660.17<br>(1,939.15 to<br>6,688.95)              | 5,239.00<br>(2,693.46 to<br>10,275.58)              | 115.76<br>(54.74 to<br>197.90)                 | 93.12<br>(54.74 to<br>169.76)                  | 83.36<br>(49.36 to<br>147.78)                  | 98.64<br>(57.11 to<br>178.98)                  |
| Pneumococcal meningitis                                                  | 398.80<br>(236.08 to<br>681.85)                     | 265.64<br>(134.89 to<br>498.83)                    | 243.34<br>(123.08 to<br>453.71)                    | 298.93<br>(150.93 to<br>581.07)                     | 7.79<br>(4.62 to<br>13.21)                     | 6.61<br>(3.60 to<br>11.96)                     | 6.48<br>(3.51 to<br>11.95)                     | 6.77<br>(3.72 to<br>12.37)                     |
| H influenzae type B meningitis                                           | 567.13<br>(319.79 to<br>1,000.09)                   | 576.62<br>(176.42 to<br>1,575.69)                  | 346.84<br>(148.11 to<br>820.72)                    | 1,175.22<br>(261.97 to<br>3,350.79)                 | 8.92<br>(5.33 to<br>15.48)                     | 9.11<br>(3.88 to<br>21.69)                     | 6.59<br>(3.45 to<br>13.09)                     | 15.79<br>(4.56 to<br>41.75)                    |
| Meningococcal meningitis                                                 | 2,739.17<br>(1,605.71 to<br>4,703.65)               | 1,495.22<br>(793.73 to<br>2,821.01)                | 1,265.97<br>(668.39 to<br>2,385.62)                | 1,586.29<br>(815.56 to<br>3,049.23)                 | 44.46<br>(26.90 to<br>74.56)                   | 30.97<br>(18.16 to<br>55.88)                   | 27.79<br>(16.04 to<br>51.19)                   | 30.86<br>(17.81 to<br>55.84)                   |
| Other meningitis                                                         | 3,208.95<br>(1,879.43 to<br>5,347.81)               | 2,094.90<br>(1,090.44 to<br>3,969.37)              | 1,804.01<br>(942.49 to<br>3,441.56)                | 2,178.56<br>(1,111.22 to<br>4,180.45)               | 54.59<br>(33.60 to<br>94.55)                   | 46.42<br>(27.29 to<br>89.10)                   | 42.40<br>(24.35 to<br>79.38)                   | 45.23<br>(26.07 to<br>86.98)                   |
| Encephalitis                                                             | 541.22<br>(319.59 to<br>844.79)                     | 546.74<br>(295.62 to<br>972.49)                    | 457.87<br>(246.20 to<br>804.35)                    | 591.23<br>(317.96 to<br>1,037.00)                   | 9.28<br>(5.66 to<br>13.96)                     | 11.83<br>(7.38 to<br>18.87)                    | 10.51<br>(6.51 to<br>16.44)                    | 12.05<br>(7.41 to<br>19.26)                    |
| Diphtheria                                                               | 11.81<br>(5.73 to<br>21.32)                         | 3.75<br>(1.29 to<br>9.83)                          | 1.94<br>(0.84 to<br>3.99)                          | 8.87<br>(1.97 to<br>27.83)                          | 0.16<br>(0.08 to<br>0.28)                      | 0.06<br>(0.02 to<br>0.13)                      | 0.03<br>(0.01 to<br>0.07)                      | 0.11<br>(0.03 to<br>0.34)                      |
| Whooping cough                                                           | 1,221.05<br>(67.18 to<br>4,322.67)                  | 1,195.60<br>(68.60 to<br>4,881.26)                 | 202.94<br>(11.33 to<br>803.50)                     | 1,671.30<br>(88.85 to<br>6,584.48)                  | 14.48<br>(0.80 to<br>51.37)                    | 14.16<br>(0.82 to<br>57.82)                    | 2.47<br>(0.14 to<br>9.74)                      | 19.77<br>(1.05 to<br>78.15)                    |
| Tetanus                                                                  | 46.34<br>(25.16 to<br>83.70)                        | 8.63<br>(4.04 to<br>17.14)                         | 6.78<br>(3.06 to<br>13.91)                         | 10.32<br>(4.77 to<br>21.05)                         | 0.85<br>(0.47 to<br>1.52)                      | 0.19<br>(0.09 to<br>0.36)                      | 0.17<br>(0.08 to<br>0.33)                      | 0.19<br>(0.09 to<br>0.37)                      |
| Measles                                                                  | 713.65<br>(220.75 to<br>1,659.35)                   | 104.95<br>(6.18 to<br>666.32)                      | 40.39<br>(3.75 to<br>206.54)                       | 413.53<br>(17.77 to<br>2,369.03)                    | 8.55<br>(2.65 to<br>19.80)                     | 1.25<br>(0.08 to<br>7.92)                      | 0.49<br>(0.05 to<br>2.46)                      | 4.90<br>(0.22 to<br>28.11)                     |
| <b>Namibia</b>                                                           |                                                     |                                                    |                                                    |                                                     |                                                |                                                |                                                |                                                |
| <b>YLLs (actual counts)</b>                                              |                                                     |                                                    |                                                    |                                                     | <b>Deaths (actual counts)</b>                  |                                                |                                                |                                                |



| Cause                                                 | 2016                                                        | 2040 Forecast                                              | 2040 Better Scenario                                       | 2040 Worse Scenario                                         | 2016                                                | 2040 Forecast                                      | 2040 Better Scenario                               | 2040 Worse Scenario                                 |
|-------------------------------------------------------|-------------------------------------------------------------|------------------------------------------------------------|------------------------------------------------------------|-------------------------------------------------------------|-----------------------------------------------------|----------------------------------------------------|----------------------------------------------------|-----------------------------------------------------|
| Varicella and herpes zoster                           | 210.64<br>(112.68 to<br>361.99)                             | 154.66<br>(72.90 to<br>292.68)                             | 106.74<br>(50.31 to<br>205.10)                             | 195.15<br>(90.22 to<br>373.51)                              | 3.80<br>(2.31 to<br>5.70)                           | 4.46<br>(2.60 to<br>7.12)                          | 3.58<br>(2.08 to<br>5.64)                          | 4.89<br>(2.80 to<br>8.04)                           |
| <b>Neglected tropical diseases and malaria</b>        | <b>7,081.12</b><br><b>(3,190.79 to</b><br><b>13,990.60)</b> | <b>3,081.15</b><br><b>(1,282.41 to</b><br><b>6,491.63)</b> | <b>2,730.01</b><br><b>(1,116.96 to</b><br><b>5,800.79)</b> | <b>3,265.19</b><br><b>(1,375.68 to</b><br><b>6,973.36)</b>  | <b>111.52</b><br><b>(50.51 to</b><br><b>225.13)</b> | <b>62.15</b><br><b>(25.74 to</b><br><b>135.73)</b> | <b>57.87</b><br><b>(23.27 to</b><br><b>125.98)</b> | <b>62.17</b><br><b>(26.29 to</b><br><b>134.18)</b>  |
| Malaria                                               | 6,773.24<br>(2,866.36 to<br>13,651.59)                      | 2,883.38<br>(1,128.49 to<br>6,271.37)                      | 2,568.36<br>(988.28 to<br>5,610.46)                        | 3,042.58<br>(1,203.02 to<br>6,750.75)                       | 105.00<br>(44.40 to<br>217.87)                      | 57.03<br>(21.50 to<br>129.96)                      | 53.39<br>(19.58 to<br>120.22)                      | 56.84<br>(21.35 to<br>128.13)                       |
| Chagas disease                                        | 0.00<br>(0.00 to<br>0.00)                                   | 0.00<br>(0.00 to<br>0.00)                                  | 0.00<br>(0.00 to<br>0.00)                                  | 0.00<br>(0.00 to<br>0.00)                                   | 0.00<br>(0.00 to<br>0.00)                           | 0.00<br>(0.00 to<br>0.00)                          | 0.00<br>(0.00 to<br>0.00)                          | 0.00<br>(0.00 to<br>0.00)                           |
| Leishmaniasis                                         | 0.00<br>(0.00 to<br>0.00)                                   | 0.00<br>(0.00 to<br>0.00)                                  | 0.00<br>(0.00 to<br>0.00)                                  | 0.00<br>(0.00 to<br>0.00)                                   | 0.00<br>(0.00 to<br>0.00)                           | 0.00<br>(0.00 to<br>0.00)                          | 0.00<br>(0.00 to<br>0.00)                          | 0.00<br>(0.00 to<br>0.00)                           |
| African trypanosomiasis                               | 0.00<br>(0.00 to<br>0.00)                                   | 0.00<br>(0.00 to<br>0.00)                                  | 0.00<br>(0.00 to<br>0.00)                                  | 0.00<br>(0.00 to<br>0.00)                                   | 0.00<br>(0.00 to<br>0.00)                           | 0.00<br>(0.00 to<br>0.00)                          | 0.00<br>(0.00 to<br>0.00)                          | 0.00<br>(0.00 to<br>0.00)                           |
| Schistosomiasis                                       | 109.55<br>(45.48 to<br>204.27)                              | 78.03<br>(29.88 to<br>153.04)                              | 70.19<br>(26.01 to<br>139.29)                              | 77.21<br>(30.45 to<br>145.40)                               | 3.14<br>(1.34 to<br>5.97)                           | 2.73<br>(1.04 to<br>5.38)                          | 2.55<br>(0.96 to<br>4.98)                          | 2.62<br>(1.03 to<br>5.17)                           |
| Cysticercosis                                         | 50.39<br>(33.11 to<br>70.22)                                | 20.38<br>(12.23 to<br>31.09)                               | 19.11<br>(11.28 to<br>29.95)                               | 19.79<br>(12.03 to<br>29.61)                                | 1.09<br>(0.70 to<br>1.52)                           | 0.52<br>(0.32 to<br>0.77)                          | 0.50<br>(0.31 to<br>0.76)                          | 0.49<br>(0.31 to<br>0.72)                           |
| Cystic echinococcosis                                 | 12.16<br>(7.98 to<br>17.11)                                 | 6.53<br>(3.93 to<br>9.87)                                  | 4.31<br>(2.68 to<br>6.54)                                  | 8.21<br>(5.06 to<br>12.41)                                  | 0.29<br>(0.19 to<br>0.41)                           | 0.21<br>(0.14 to<br>0.30)                          | 0.14<br>(0.09 to<br>0.21)                          | 0.25<br>(0.17 to<br>0.36)                           |
| Dengue                                                | 0.00<br>(0.00 to<br>0.00)                                   | 0.00<br>(0.00 to<br>0.00)                                  | 0.00<br>(0.00 to<br>0.00)                                  | 0.00<br>(0.00 to<br>0.00)                                   | 0.00<br>(0.00 to<br>0.00)                           | 0.00<br>(0.00 to<br>0.00)                          | 0.00<br>(0.00 to<br>0.00)                          | 0.00<br>(0.00 to<br>0.00)                           |
| Yellow fever                                          | 0.00<br>(0.00 to<br>0.00)                                   | 0.00<br>(0.00 to<br>0.00)                                  | 0.00<br>(0.00 to<br>0.00)                                  | 0.00<br>(0.00 to<br>0.00)                                   | 0.00<br>(0.00 to<br>0.00)                           | 0.00<br>(0.00 to<br>0.00)                          | 0.00<br>(0.00 to<br>0.00)                          | 0.00<br>(0.00 to<br>0.00)                           |
| Rabies                                                | 31.14<br>(12.13 to<br>83.49)                                | 13.70<br>(4.85 to<br>38.92)                                | 7.38<br>(2.65 to<br>21.06)                                 | 21.00<br>(7.24 to<br>58.37)                                 | 0.46<br>(0.20 to<br>1.20)                           | 0.22<br>(0.09 to<br>0.63)                          | 0.12<br>(0.05 to<br>0.33)                          | 0.33<br>(0.13 to<br>0.87)                           |
| Intestinal nematode infections                        | 12.06<br>(1.47 to<br>31.95)                                 | 13.81<br>(1.97 to<br>40.36)                                | 12.12<br>(1.92 to<br>35.41)                                | 15.07<br>(1.89 to<br>45.16)                                 | 0.16<br>(0.03 to<br>0.39)                           | 0.20<br>(0.05 to<br>0.52)                          | 0.18<br>(0.05 to<br>0.45)                          | 0.21<br>(0.04 to<br>0.57)                           |
| Other neglected tropical diseases                     | 92.59<br>(49.75 to<br>193.67)                               | 65.33<br>(33.28 to<br>129.69)                              | 48.53<br>(25.77 to<br>93.43)                               | 81.32<br>(40.52 to<br>162.42)                               | 1.37<br>(0.81 to<br>2.56)                           | 1.24<br>(0.74 to<br>2.07)                          | 0.99<br>(0.62 to<br>1.64)                          | 1.43<br>(0.85 to<br>2.47)                           |
| <b>Maternal disorders</b>                             | <b>4,789.98</b><br><b>(1,525.14 to</b><br><b>8,824.04)</b>  | <b>3,736.91</b><br><b>(936.63 to</b><br><b>9,734.18)</b>   | <b>2,546.99</b><br><b>(617.82 to</b><br><b>6,602.46)</b>   | <b>5,282.73</b><br><b>(1,354.55 to</b><br><b>13,293.16)</b> | <b>89.00</b><br><b>(28.30 to</b><br><b>162.15)</b>  | <b>73.31</b><br><b>(18.09 to</b><br><b>190.64)</b> | <b>50.13</b><br><b>(12.00 to</b><br><b>132.90)</b> | <b>103.52</b><br><b>(26.06 to</b><br><b>266.70)</b> |
| Maternal hemorrhage                                   | 672.25<br>(209.72 to<br>1,376.61)                           | 447.01<br>(105.03 to<br>1,204.94)                          | 305.65<br>(67.77 to<br>836.25)                             | 537.55<br>(125.38 to<br>1,444.70)                           | 12.74<br>(3.89 to<br>36.28)                         | 8.85<br>(1.97 to<br>24.49)                         | 6.07<br>(1.32 to<br>17.11)                         | 10.51<br>(2.35 to<br>29.02)                         |
| Maternal sepsis and other maternal infections         | 248.08<br>(68.38 to<br>500.44)                              | 143.50<br>(32.51 to<br>365.57)                             | 97.75<br>(21.64 to<br>260.65)                              | 174.79<br>(40.09 to<br>449.92)                              | 4.65<br>(1.28 to<br>9.39)                           | 2.84<br>(0.63 to<br>7.38)                          | 1.94<br>(0.43 to<br>5.28)                          | 3.40<br>(0.78 to<br>8.85)                           |
| Maternal hypertensive disorders                       | 1,057.71<br>(315.21 to<br>2,032.97)                         | 670.46<br>(164.25 to<br>1,646.28)                          | 451.85<br>(109.00 to<br>1,115.04)                          | 829.29<br>(199.73 to<br>1,961.81)                           | 18.94<br>(5.76 to<br>36.30)                         | 12.54<br>(3.01 to<br>31.04)                        | 8.49<br>(2.01 to<br>20.98)                         | 15.30<br>(3.64 to<br>36.54)                         |
| Maternal obstructed labor and uterine rupture         | 104.92<br>(28.67 to<br>244.57)                              | 75.12<br>(14.85 to<br>214.09)                              | 49.78<br>(10.06 to<br>142.87)                              | 92.33<br>(18.54 to<br>264.52)                               | 2.00<br>(0.55 to<br>4.70)                           | 1.50<br>(0.29 to<br>4.29)                          | 1.00<br>(0.19 to<br>2.92)                          | 1.82<br>(0.35 to<br>5.34)                           |
| Maternal abortion, miscarriage, and ectopic pregnancy | 171.37<br>(48.72 to<br>379.74)                              | 131.98<br>(26.54 to<br>363.11)                             | 90.19<br>(18.13 to<br>254.66)                              | 161.46<br>(31.45 to<br>437.70)                              | 3.28<br>(0.94 to<br>7.27)                           | 2.65<br>(0.52 to<br>7.56)                          | 1.82<br>(0.36 to<br>5.26)                          | 3.19<br>(0.65 to<br>8.73)                           |
| Indirect maternal deaths                              | 1,418.00<br>(449.12 to<br>2,707.97)                         | 994.72<br>(240.07 to<br>2,563.89)                          | 685.89<br>(164.49 to<br>1,743.75)                          | 1,224.01<br>(291.32 to<br>3,110.21)                         | 26.52<br>(8.45 to<br>50.27)                         | 19.37<br>(4.59 to<br>50.00)                        | 13.42<br>(3.19 to<br>34.73)                        | 23.48<br>(5.56 to<br>58.74)                         |

|                                                                  |                                           |                                          |                                          |                                           |                                   |                                 |                                 |                                   |
|------------------------------------------------------------------|-------------------------------------------|------------------------------------------|------------------------------------------|-------------------------------------------|-----------------------------------|---------------------------------|---------------------------------|-----------------------------------|
|                                                                  | 62.49<br>(13.59 to<br>153.35)             | 36.57<br>(6.22 to<br>111.86)             | 24.93<br>(4.03 to<br>81.54)              | 45.05<br>(7.70 to<br>133.11)              | 1.16<br>(0.25 to<br>2.76)         | 0.71<br>(0.12 to<br>2.16)       | 0.49<br>(0.07 to<br>1.59)       | 0.86<br>(0.14 to<br>2.64)         |
| Late maternal deaths                                             |                                           |                                          |                                          |                                           |                                   |                                 |                                 |                                   |
|                                                                  | 235.37<br>(73.47 to<br>469.50)            | 691.78<br>(44.72 to<br>2,401.95)         | 457.23<br>(18.93 to<br>1,582.21)         | 1,555.89<br>(362.23 to<br>4,291.47)       | 4.64<br>(1.45 to<br>9.12)         | 14.33<br>(0.80 to<br>50.51)     | 9.47<br>(0.32 to<br>33.53)      | 32.36<br>(7.54 to<br>87.42)       |
| Maternal deaths aggravated by HIV/AIDS                           |                                           |                                          |                                          |                                           |                                   |                                 |                                 |                                   |
|                                                                  | 819.79<br>(246.43 to<br>1,583.45)         | 545.77<br>(132.59 to<br>1,390.02)        | 383.73<br>(91.31 to<br>988.28)           | 662.37<br>(163.68 to<br>1,647.16)         | 15.08<br>(4.61 to<br>29.04)       | 10.52<br>(2.52 to<br>26.69)     | 7.44<br>(1.75 to<br>18.90)      | 12.58<br>(3.02 to<br>31.75)       |
| Other maternal disorders                                         |                                           |                                          |                                          |                                           |                                   |                                 |                                 |                                   |
| <b>Namibia</b>                                                   |                                           |                                          |                                          |                                           |                                   |                                 |                                 |                                   |
| Cause                                                            | YLLs (actual counts)                      |                                          |                                          |                                           | Deaths (actual counts)            |                                 |                                 |                                   |
|                                                                  | 2016                                      | 2040 Forecast                            | 2040 Better Scenario                     | 2040 Worse Scenario                       | 2016                              | 2040 Forecast                   | 2040 Better Scenario            | 2040 Worse Scenario               |
| Neonatal disorders                                               | 89,115.19<br>(54,781.14 to<br>133,133.83) | 47,323.46<br>(23,925.45 to<br>82,165.95) | 32,910.30<br>(16,998.03 to<br>57,150.26) | 65,629.82<br>(33,805.05 to<br>114,658.27) | 1,029.60<br>(632.79 to<br>949.20) | 546.91<br>(276.64 to<br>949.20) | 380.35<br>(196.33 to<br>660.34) | 758.43<br>(390.55 to<br>1,324.09) |
| Neonatal preterm birth                                           | 29,408.88<br>(16,822.79 to<br>47,280.01)  | 12,449.25<br>(6,111.46 to<br>21,162.66)  | 8,633.51<br>(4,122.24 to<br>15,036.58)   | 19,482.38<br>(9,493.43 to<br>33,091.63)   | 339.77<br>(194.31 to<br>546.32)   | 143.87<br>(70.62 to<br>244.51)  | 99.78<br>(47.64 to<br>173.72)   | 225.13<br>(109.72 to<br>382.28)   |
| Neonatal encephalopathy due to birth asphyxia and trauma         | 22,182.66<br>(12,416.27 to<br>37,429.86)  | 10,920.52<br>(4,525.24 to<br>22,111.64)  | 7,769.38<br>(3,120.92 to<br>15,610.44)   | 14,014.83<br>(5,845.76 to<br>28,324.79)   | 256.27<br>(143.43 to<br>432.44)   | 136.21<br>(52.28 to<br>255.50)  | 89.79<br>(36.07 to<br>180.39)   | 161.96<br>(67.54 to<br>327.34)    |
| Neonatal sepsis and other neonatal infections                    | 7,946.75<br>(4,071.97 to<br>14,831.85)    | 5,662.51<br>(2,554.36 to<br>11,512.83)   | 4,009.35<br>(1,824.57 to<br>7,965.74)    | 7,337.00<br>(3,334.77 to<br>15,069.86)    | 91.81<br>(47.04 to<br>171.32)     | 65.43<br>(29.53 to<br>133.01)   | 46.33<br>(21.09 to<br>92.01)    | 84.78<br>(38.54 to<br>174.15)     |
| Hemolytic disease and other neonatal jaundice                    | 802.23<br>(416.16 to<br>1,423.05)         | 281.31<br>(116.62 to<br>569.44)          | 189.15<br>(78.10 to<br>385.20)           | 379.03<br>(154.77 to<br>762.41)           | 9.27<br>(4.81 to<br>16.44)        | 3.25<br>(1.35 to<br>6.58)       | 2.19<br>(0.90 to<br>4.45)       | 4.38<br>(1.79 to<br>8.81)         |
| Other neonatal disorders                                         | 28,774.67<br>(15,297.89 to<br>47,597.50)  | 18,009.86<br>(8,123.44 to<br>34,452.49)  | 12,308.92<br>(5,568.85 to<br>23,720.55)  | 24,416.56<br>(10,971.52 to<br>47,150.85)  | 332.48<br>(176.79 to<br>551.08)   | 208.14<br>(93.89 to<br>398.20)  | 142.26<br>(64.37 to<br>274.16)  | 282.18<br>(126.76 to<br>545.06)   |
| Nutritional deficiencies                                         | 10,605.87<br>(5,791.86 to<br>18,985.00)   | 4,201.98<br>(2,193.18 to<br>7,855.42)    | 3,197.24<br>(1,725.54 to<br>5,694.98)    | 5,143.55<br>(2,631.01 to<br>9,941.36)     | 155.72<br>(96.16 to<br>256.94)    | 98.36<br>(67.62 to<br>145.50)   | 84.21<br>(59.37 to<br>122.41)   | 106.61<br>(71.10 to<br>167.95)    |
| Protein-energy malnutrition                                      | 10,173.87<br>(5,470.27 to<br>18,446.76)   | 3,634.59<br>(1,757.85 to<br>7,259.91)    | 2,720.50<br>(1,382.70 to<br>5,126.58)    | 4,537.13<br>(2,129.48 to<br>9,265.98)     | 142.72<br>(85.59 to<br>242.34)    | 75.90<br>(48.78 to<br>121.21)   | 63.82<br>(42.68 to<br>98.94)    | 84.59<br>(51.91 to<br>142.35)     |
| Iodine deficiency                                                | 28.45<br>(0.96 to<br>148.39)              | 102.17<br>(2.02 to<br>563.58)            | 76.55<br>(1.48 to<br>394.71)             | 124.83<br>(2.09 to<br>751.65)             | 0.53<br>(0.03 to<br>1.97)         | 2.80<br>(0.05 to<br>9.61)       | 2.32<br>(0.04 to<br>7.99)       | 3.04<br>(0.07 to<br>11.07)        |
| Dietary iron deficiency                                          | 16.39<br>(7.92 to<br>26.08)               | 13.83<br>(6.52 to<br>23.46)              | 11.75<br>(5.52 to<br>19.97)              | 15.10<br>(6.93 to<br>25.76)               | 0.28<br>(0.14 to<br>0.43)         | 0.25<br>(0.12 to<br>0.42)       | 0.22<br>(0.11 to<br>0.37)       | 0.27<br>(0.13 to<br>0.44)         |
| Other nutritional deficiencies                                   | 387.17<br>(217.25 to<br>664.96)           | 451.39<br>(261.63 to<br>725.81)          | 388.44<br>(222.68 to<br>637.41)          | 466.49<br>(272.72 to<br>779.06)           | 12.19<br>(7.31 to<br>18.84)       | 19.41<br>(12.36 to<br>28.30)    | 17.85<br>(11.35 to<br>26.73)    | 18.71<br>(12.06 to<br>27.50)      |
| Other communicable, maternal, neonatal, and nutritional diseases | 7,084.68<br>(3,367.41 to<br>17,126.21)    | 5,133.25<br>(2,464.23 to<br>10,885.46)   | 4,039.18<br>(1,987.44 to<br>8,376.47)    | 6,034.42<br>(2,826.56 to<br>13,651.36)    | 110.82<br>(58.90 to<br>231.66)    | 108.06<br>(66.25 to<br>181.77)  | 91.53<br>(51.38 to<br>149.85)   | 116.76<br>(63.49 to<br>204.05)    |
| Sexually transmitted infections excluding HIV                    | 1,553.02<br>(691.06 to<br>3,103.22)       | 611.73<br>(224.74 to<br>1,391.18)        | 485.30<br>(177.30 to<br>1,097.56)        | 713.68<br>(256.58 to<br>1,700.24)         | 21.07<br>(10.12 to<br>41.47)      | 10.03<br>(4.38 to<br>21.36)     | 8.38<br>(3.76 to<br>17.85)      | 11.06<br>(4.64 to<br>23.76)       |
| Syphilis                                                         | 1,421.84<br>(594.51 to<br>2,951.24)       | 506.11<br>(168.27 to<br>1,183.70)        | 389.97<br>(131.83 to<br>906.49)          | 609.98<br>(200.67 to<br>1,483.73)         | 17.85<br>(7.96 to<br>36.18)       | 6.88<br>(2.65 to<br>15.36)      | 5.45<br>(2.18 to<br>12.17)      | 8.05<br>(3.03 to<br>18.54)        |
| Chlamydial infection                                             | 24.95<br>(7.08 to<br>76.67)               | 20.13<br>(5.51 to<br>59.43)              | 18.10<br>(4.93 to<br>54.48)              | 19.89<br>(5.60 to<br>59.34)               | 0.60<br>(0.19 to<br>1.75)         | 0.60<br>(0.23 to<br>1.62)       | 0.56<br>(0.21 to<br>1.55)       | 0.57<br>(0.23 to<br>1.58)         |
| Gonococcal infection                                             | 68.98<br>(22.74 to<br>202.03)             | 56.46<br>(16.57 to<br>160.97)            | 51.16<br>(14.75 to<br>151.46)            | 55.24<br>(16.37 to<br>159.21)             | 1.75<br>(0.61 to<br>4.77)         | 1.76<br>(0.68 to<br>4.67)       | 1.65<br>(0.62 to<br>4.41)       | 1.68<br>(0.66 to<br>4.42)         |
| Other sexually transmitted infections                            | 37.25<br>(12.12 to<br>108.59)             | 29.04<br>(8.07 to<br>84.96)              | 26.07<br>(7.21 to<br>76.90)              | 28.58<br>(8.08 to<br>86.32)               | 0.87<br>(0.31 to<br>2.37)         | 0.79<br>(0.27 to<br>2.15)       | 0.73<br>(0.25 to<br>2.01)       | 0.76<br>(0.27 to<br>2.10)         |



|                                     |                                       |                                        |                                        |                                        |                                |                                 |                                 |                                 |
|-------------------------------------|---------------------------------------|----------------------------------------|----------------------------------------|----------------------------------------|--------------------------------|---------------------------------|---------------------------------|---------------------------------|
| Pancreatic cancer                   | 838.13<br>(532.29 to<br>1,122.59)     | 1,852.99<br>(1,166.65 to<br>2,722.86)  | 1,970.18<br>(1,228.55 to<br>2,927.80)  | 1,641.69<br>(1,037.22 to<br>2,385.29)  | 35.08<br>(22.77 to<br>45.91)   | 86.58<br>(59.74 to<br>117.59)   | 94.77<br>(64.92 to<br>131.80)   | 75.21<br>(52.20 to<br>102.64)   |
| Larynx cancer                       | 436.79<br>(313.56 to<br>568.05)       | 818.31<br>(400.69 to<br>1,557.84)      | 603.40<br>(321.20 to<br>1,029.60)      | 1,024.42<br>(467.95 to<br>2,050.50)    | 18.03<br>(13.27 to<br>23.12)   | 34.57<br>(18.88 to<br>61.65)    | 26.85<br>(16.08 to<br>43.70)    | 42.02<br>(21.05 to<br>81.13)    |
| Tracheal, bronchus, and lung cancer | 1,489.98<br>(985.24 to<br>1,971.08)   | 2,546.55<br>(1,390.57 to<br>4,384.99)  | 2,125.28<br>(1,186.77 to<br>3,512.08)  | 3,167.89<br>(1,611.00 to<br>5,730.84)  | 60.17<br>(41.20 to<br>78.56)   | 113.05<br>(65.41 to<br>178.68)  | 99.19<br>(60.03 to<br>152.30)   | 135.72<br>(75.26 to<br>224.04)  |
| Malignant skin melanoma             | 631.81<br>(381.70 to<br>874.74)       | 1,113.84<br>(692.40 to<br>1,660.47)    | 1,259.83<br>(768.87 to<br>1,908.30)    | 922.67<br>(577.93 to<br>1,350.58)      | 23.89<br>(14.77 to<br>32.68)   | 49.27<br>(33.52 to<br>67.43)    | 57.45<br>(39.16 to<br>79.01)    | 39.92<br>(27.21 to<br>52.87)    |
| Non-melanoma skin cancer            | 688.74<br>(512.96 to<br>861.09)       | 1,543.05<br>(1,205.73 to<br>1,910.45)  | 1,517.83<br>(1,163.96 to<br>1,929.20)  | 1,384.97<br>(1,095.45 to<br>1,684.94)  | 30.53<br>(23.54 to<br>37.76)   | 76.87<br>(63.98 to<br>90.35)    | 78.61<br>(64.66 to<br>93.56)    | 66.89<br>(55.61 to<br>78.35)    |
| Breast cancer                       | 5,319.21<br>(1,293.45 to<br>5,336.31) | 6,154.43<br>(2,199.71 to<br>13,392.40) | 5,837.24<br>(2,089.46 to<br>12,426.35) | 6,127.31<br>(2,210.01 to<br>13,346.84) | 113.36<br>(46.18 to<br>182.12) | 242.98<br>(108.49 to<br>463.01) | 237.14<br>(104.23 to<br>452.28) | 257.93<br>(104.89 to<br>454.59) |
| Cervical cancer                     | 1,732.62<br>(659.39 to<br>2,840.17)   | 2,480.88<br>(904.22 to<br>4,852.31)    | 2,279.08<br>(804.62 to<br>4,581.55)    | 2,367.20<br>(877.96 to<br>4,573.65)    | 62.42<br>(24.76 to<br>102.25)  | 98.82<br>(42.81 to<br>175.34)   | 92.67<br>(38.97 to<br>166.09)   | 93.23<br>(41.51 to<br>161.96)   |
| Uterine cancer                      | 243.75<br>(97.86 to<br>393.13)        | 445.64<br>(187.10 to<br>768.53)        | 411.66<br>(170.59 to<br>721.49)        | 432.64<br>(190.38 to<br>730.05)        | 10.71<br>(4.51 to<br>17.05)    | 22.31<br>(11.13 to<br>34.49)    | 21.06<br>(10.21 to<br>33.38)    | 21.28<br>(11.03 to<br>31.59)    |
| Ovarian cancer                      | 553.60<br>(214.04 to<br>909.96)       | 996.28<br>(372.22 to<br>1,858.70)      | 1,047.68<br>(385.07 to<br>1,967.57)    | 888.63<br>(342.08 to<br>1,627.82)      | 19.88<br>(8.10 to<br>31.48)    | 40.98<br>(18.44 to<br>69.69)    | 43.98<br>(19.38 to<br>76.02)    | 36.23<br>(16.62 to<br>60.43)    |
| Prostate cancer                     | 1,494.26<br>(815.34 to<br>2,058.07)   | 3,479.10<br>(1,953.05 to<br>4,611.23)  | 3,837.64<br>(2,180.31 to<br>5,101.37)  | 2,884.25<br>(1,589.52 to<br>3,829.73)  | 81.20<br>(47.54 to<br>107.24)  | 202.19<br>(119.90 to<br>255.78) | 231.44<br>(144.09 to<br>291.32) | 162.54<br>(94.33 to<br>209.25)  |
| Testicular cancer                   | 75.79<br>(51.60 to<br>99.87)          | 96.87<br>(64.59 to<br>138.68)          | 92.39<br>(61.05 to<br>135.48)          | 90.88<br>(60.11 to<br>130.35)          | 1.84<br>(1.29 to<br>2.39)      | 2.79<br>(2.06 to<br>3.72)       | 2.77<br>(1.99 to<br>3.72)       | 2.51<br>(1.83 to<br>3.28)       |

**Namibia**

| Cause                           | YLLs (actual counts)                |                                       |                                       |                                       | Deaths (actual counts)       |                               |                               |                              |
|---------------------------------|-------------------------------------|---------------------------------------|---------------------------------------|---------------------------------------|------------------------------|-------------------------------|-------------------------------|------------------------------|
|                                 | 2016                                | 2040 Forecast                         | 2040 Better Scenario                  | 2040 Worse Scenario                   | 2016                         | 2040 Forecast                 | 2040 Better Scenario          | 2040 Worse Scenario          |
| Kidney cancer                   | 276.70<br>(188.62 to<br>369.03)     | 540.66<br>(372.93 to<br>753.50)       | 592.39<br>(403.39 to<br>843.03)       | 461.55<br>(322.17 to<br>636.56)       | 9.65<br>(6.45 to<br>12.73)   | 22.18<br>(16.30 to<br>28.80)  | 25.32<br>(18.53 to<br>33.20)  | 18.25<br>(13.44 to<br>23.30) |
| Bladder cancer                  | 324.30<br>(216.01 to<br>430.86)     | 545.73<br>(366.42 to<br>774.05)       | 553.75<br>(373.18 to<br>787.79)       | 502.32<br>(335.99 to<br>710.38)       | 16.04<br>(11.00 to<br>20.79) | 30.68<br>(22.40 to<br>41.07)  | 32.44<br>(23.82 to<br>43.11)  | 27.29<br>(19.67 to<br>37.71) |
| Brain and nervous system cancer | 943.68<br>(655.64 to<br>1,223.89)   | 1,578.43<br>(1,042.88 to<br>2,333.78) | 1,582.69<br>(1,044.54 to<br>2,362.82) | 1,450.31<br>(963.12 to<br>2,065.52)   | 22.78<br>(15.35 to<br>29.71) | 46.31<br>(31.25 to<br>64.51)  | 48.48<br>(32.19 to<br>69.24)  | 40.67<br>(27.80 to<br>56.02) |
| Thyroid cancer                  | 133.50<br>(73.12 to<br>191.33)      | 215.07<br>(112.93 to<br>376.31)       | 192.71<br>(102.73 to<br>335.85)       | 211.36<br>(110.87 to<br>372.21)       | 4.64<br>(2.58 to<br>6.59)    | 8.50<br>(5.04 to<br>13.69)    | 7.86<br>(4.73 to<br>12.32)    | 8.18<br>(4.82 to<br>13.03)   |
| Mesothelioma                    | 204.00<br>(128.13 to<br>281.81)     | 413.97<br>(245.56 to<br>579.69)       | 435.20<br>(254.38 to<br>624.22)       | 357.07<br>(216.72 to<br>501.06)       | 7.90<br>(4.82 to<br>10.74)   | 17.57<br>(10.54 to<br>23.68)  | 19.02<br>(11.35 to<br>25.64)  | 14.85<br>(9.03 to<br>19.81)  |
| Hodgkin lymphoma                | 186.54<br>(83.37 to<br>280.78)      | 183.34<br>(84.78 to<br>293.86)        | 154.83<br>(70.74 to<br>249.69)        | 191.86<br>(86.13 to<br>304.37)        | 4.04<br>(2.05 to<br>5.77)    | 4.66<br>(2.54 to<br>7.04)     | 4.05<br>(2.27 to<br>6.11)     | 4.70<br>(2.49 to<br>6.98)    |
| Non-Hodgkin lymphoma            | 1,394.34<br>(784.83 to<br>1,973.50) | 2,299.64<br>(1,297.91 to<br>3,778.63) | 2,329.00<br>(1,325.54 to<br>3,865.94) | 2,045.47<br>(1,150.89 to<br>3,321.83) | 39.65<br>(23.57 to<br>55.04) | 76.37<br>(48.80 to<br>116.46) | 79.69<br>(50.80 to<br>121.41) | 66.26<br>(41.99 to<br>98.99) |
| Multiple myeloma                | 348.58<br>(221.95 to<br>464.80)     | 721.34<br>(441.73 to<br>1,079.38)     | 757.79<br>(462.67 to<br>1,137.30)     | 620.17<br>(382.84 to<br>921.31)       | 12.53<br>(8.17 to<br>16.78)  | 28.93<br>(19.40 to<br>41.12)  | 31.19<br>(20.73 to<br>44.92)  | 24.48<br>(16.84 to<br>34.04) |
| Leukemia                        | 1,345.66<br>(918.98 to<br>1,752.28) | 2,046.73<br>(1,327.68 to<br>2,980.86) | 1,997.43<br>(1,312.17 to<br>2,924.32) | 1,946.64<br>(1,270.30 to<br>2,822.01) | 33.79<br>(22.55 to<br>44.39) | 65.59<br>(46.25 to<br>91.04)  | 66.47<br>(47.01 to<br>92.71)  | 59.79<br>(41.66 to<br>82.92) |

|                                 |                                          |                                           |                                          |                                            |                                       |                                       |                                       |                                        |  |
|---------------------------------|------------------------------------------|-------------------------------------------|------------------------------------------|--------------------------------------------|---------------------------------------|---------------------------------------|---------------------------------------|----------------------------------------|--|
|                                 | 375.32<br>(254.12 to<br>521.38)          | 450.48<br>(276.95 to<br>680.37)           | 428.97<br>(264.40 to<br>653.56)          | 442.06<br>(270.99 to<br>668.09)            | 6.88<br>(4.59 to<br>9.49)             | 10.29<br>(6.50 to<br>15.05)           | 10.16<br>(6.50 to<br>15.05)           | 9.67<br>(6.11 to<br>13.95)             |  |
| Acute lymphoid leukemia         | 38.30<br>(21.66 to<br>57.64)             | 75.88<br>(43.01 to<br>121.35)             | 76.07<br>(43.23 to<br>121.70)            | 69.75<br>(39.23 to<br>110.79)              | 1.66<br>(0.95 to<br>2.55)             | 3.89<br>(2.33 to<br>6.02)             | 4.03<br>(2.45 to<br>6.18)             | 3.47<br>(2.09 to<br>5.36)              |  |
| Chronic lymphoid leukemia       | 528.47<br>(331.61 to<br>749.24)          | 948.15<br>(574.33 to<br>1,432.72)         | 971.82<br>(591.48 to<br>1,459.96)        | 871.09<br>(526.35 to<br>1,324.26)          | 12.73<br>(8.00 to<br>18.02)           | 28.46<br>(17.99 to<br>41.29)          | 30.42<br>(19.52 to<br>43.69)          | 24.99<br>(15.93 to<br>36.44)           |  |
| Acute myeloid leukemia          | 109.81<br>(65.08 to<br>157.77)           | 143.60<br>(81.84 to<br>225.46)            | 137.17<br>(78.96 to<br>220.42)           | 134.12<br>(76.58 to<br>209.90)             | 3.30<br>(2.03 to<br>4.93)             | 5.18<br>(3.13 to<br>8.14)             | 5.11<br>(3.10 to<br>8.07)             | 4.68<br>(2.85 to<br>7.35)              |  |
| Chronic myeloid leukemia        | 293.76<br>(135.70 to<br>461.50)          | 428.62<br>(208.37 to<br>767.42)           | 383.41<br>(195.77 to<br>682.32)          | 429.62<br>(209.70 to<br>758.72)            | 9.21<br>(4.79 to<br>14.24)            | 17.78<br>(10.56 to<br>28.35)          | 16.74<br>(10.37 to<br>26.42)          | 16.99<br>(10.05 to<br>26.71)           |  |
| Other leukemia                  | 7,516.17<br>(4,184.70 to<br>10,830.29)   | 10,130.74<br>(5,374.52 to<br>16,921.69)   | 10,114.11<br>(5,335.42 to<br>16,972.87)  | 9,178.93<br>(4,822.78 to<br>15,199.49)     | 172.65<br>(99.51 to<br>245.73)        | 262.04<br>(152.61 to<br>416.55)       | 267.91<br>(156.77 to<br>431.54)       | 231.70<br>(136.91 to<br>367.39)        |  |
| Other neoplasms                 | 57,888.43<br>(39,141.80 to<br>74,052.08) | 87,958.05<br>(51,264.54 to<br>155,234.18) | 57,784.64<br>(35,366.94 to<br>99,042.38) | 128,306.57<br>(71,870.75 to<br>232,401.89) | 2,823.42<br>(1,931.98 to<br>3,579.20) | 4,968.16<br>(3,372.41 to<br>7,225.46) | 3,538.76<br>(2,450.02 to<br>5,305.94) | 6,801.69<br>(4,432.75 to<br>10,754.50) |  |
| Cardiovascular diseases         | 1,620.02<br>(997.03 to<br>2,293.87)      | 1,456.30<br>(827.86 to<br>2,335.63)       | 1,220.17<br>(688.76 to<br>1,979.89)      | 1,508.66<br>(890.62 to<br>2,405.29)        | 53.88<br>(33.97 to<br>74.80)          | 62.35<br>(40.99 to<br>91.79)          | 54.81<br>(36.27 to<br>79.48)          | 61.79<br>(41.43 to<br>90.44)           |  |
| Rheumatic heart disease         | 23,812.98<br>(15,809.60 to<br>31,303.95) | 31,886.52<br>(15,803.44 to<br>62,317.24)  | 18,309.40<br>(9,424.76 to<br>35,209.02)  | 52,730.87<br>(25,625.65 to<br>101,920.63)  | 1,220.80<br>(833.85 to<br>1,584.36)   | 1,872.17<br>(1,076.67 to<br>3,230.60) | 1,195.18<br>(697.90 to<br>2,013.73)   | 2,853.05<br>(1,585.91 to<br>5,147.65)  |  |
| Ischemic heart disease          | 18,323.02<br>(11,993.11 to<br>24,195.63) | 25,025.41<br>(12,776.33 to<br>51,853.26)  | 14,481.73<br>(7,626.05 to<br>30,324.12)  | 41,056.65<br>(19,685.78 to<br>83,706.16)   | 936.55<br>(627.53 to<br>1,217.44)     | 1,451.95<br>(850.17 to<br>2,687.84)   | 941.69<br>(569.40 to<br>1,722.21)     | 2,191.59<br>(1,224.18 to<br>4,101.66)  |  |
| Stroke                          | 5,891.66<br>(3,922.84 to<br>7,746.60)    | 7,993.71<br>(4,126.67 to<br>17,536.24)    | 5,409.57<br>(2,766.26 to<br>12,055.78)   | 11,656.53<br>(5,721.06 to<br>26,202.04)    | 378.23<br>(253.91 to<br>495.43)       | 593.07<br>(332.59 to<br>1,256.87)     | 435.74<br>(245.82 to<br>900.49)       | 798.05<br>(433.25 to<br>1,916.13)      |  |
| Ischemic stroke                 | 12,431.36<br>(8,102.99 to<br>16,671.04)  | 17,031.70<br>(7,658.30 to<br>37,834.52)   | 9,072.16<br>(4,283.50 to<br>19,214.02)   | 29,400.12<br>(12,571.99 to<br>64,485.75)   | 558.32<br>(368.02 to<br>738.71)       | 858.88<br>(461.94 to<br>1,644.64)     | 505.95<br>(290.62 to<br>941.12)       | 1,393.54<br>(701.71 to<br>2,768.59)    |  |
| Intracerebral hemorrhage        | 6,147.93<br>(2,989.56 to<br>9,519.09)    | 14,539.33<br>(5,842.68 to<br>34,520.88)   | 10,137.41<br>(4,453.40 to<br>22,346.32)  | 18,273.71<br>(6,821.41 to<br>46,365.39)    | 300.74<br>(147.38 to<br>466.15)       | 821.30<br>(375.83 to<br>1,736.27)     | 611.89<br>(302.20 to<br>1,165.87)     | 989.60<br>(422.35 to<br>2,296.76)      |  |
| Hypertensive heart disease      | 3,158.97<br>(2,217.81 to<br>4,313.52)    | 5,601.25<br>(3,640.70 to<br>8,581.24)     | 5,393.39<br>(3,503.18 to<br>8,206.78)    | 5,208.94<br>(3,410.77 to<br>8,014.47)      | 116.93<br>(80.97 to<br>157.55)        | 271.74<br>(187.72 to<br>381.61)       | 276.36<br>(188.37 to<br>389.31)       | 240.15<br>(164.47 to<br>340.14)        |  |
| Cardiomyopathy and myocarditis  | 282.84<br>(124.31 to<br>516.20)          | 331.76<br>(142.47 to<br>653.44)           | 313.42<br>(134.72 to<br>616.69)          | 322.54<br>(138.45 to<br>622.40)            | 6.35<br>(3.01 to<br>11.48)            | 9.92<br>(4.96 to<br>18.35)            | 9.93<br>(5.00 to<br>18.71)            | 9.06<br>(4.57 to<br>16.71)             |  |
| Mycocarditis                    | <b>Namibia</b>                           |                                           |                                          |                                            |                                       |                                       |                                       |                                        |  |
| Cause                           | YLLs (actual counts)                     |                                           |                                          |                                            | Deaths (actual counts)                |                                       |                                       |                                        |  |
|                                 | 2016                                     | 2040 Forecast                             | 2040 Better Scenario                     | 2040 Worse Scenario                        | 2016                                  | 2040 Forecast                         | 2040 Better Scenario                  | 2040 Worse Scenario                    |  |
| Alcoholic cardiomyopathy        | 186.55<br>(110.09 to<br>281.77)          | 372.18<br>(218.83 to<br>581.39)           | 345.15<br>(199.43 to<br>529.70)          | 395.21<br>(242.88 to<br>620.47)            | 8.45<br>(5.11 to<br>12.78)            | 18.93<br>(11.92 to<br>27.49)          | 18.74<br>(11.53 to<br>27.30)          | 19.06<br>(12.41 to<br>28.14)           |  |
| Other cardiomyopathy            | 2,689.58<br>(1,898.54 to<br>3,636.17)    | 4,897.30<br>(3,129.95 to<br>7,566.39)     | 4,734.81<br>(3,072.35 to<br>7,290.21)    | 4,491.20<br>(2,877.37 to<br>6,962.68)      | 102.13<br>(69.96 to<br>138.40)        | 242.89<br>(164.14 to<br>346.52)       | 247.69<br>(166.11 to<br>354.98)       | 212.02<br>(142.26 to<br>308.38)        |  |
| Atrial fibrillation and flutter | 289.10<br>(175.77 to<br>403.10)          | 784.17<br>(531.34 to<br>1,110.82)         | 768.08<br>(526.96 to<br>1,092.32)        | 742.63<br>(497.74 to<br>1,062.19)          | 24.15<br>(15.21 to<br>33.98)          | 75.26<br>(51.96 to<br>105.36)         | 77.91<br>(54.12 to<br>108.21)         | 67.48<br>(44.54 to<br>95.61)           |  |
| Aortic aneurysm                 | 710.23<br>(505.20 to<br>916.34)          | 1,432.90<br>(945.17 to<br>2,159.99)       | 1,365.12<br>(911.01 to<br>2,033.68)      | 1,312.99<br>(857.01 to<br>1,967.93)        | 33.92<br>(24.81 to<br>43.27)          | 77.18<br>(55.16 to<br>104.65)         | 78.16<br>(56.51 to<br>104.74)         | 67.73<br>(48.63 to<br>91.98)           |  |
| Peripheral artery disease       | 222.53<br>(49.06 to<br>415.12)           | 609.80<br>(127.43 to<br>1,237.05)         | 615.19<br>(130.34 to<br>1,225.18)        | 602.47<br>(124.86 to<br>1,217.18)          | 11.06<br>(2.41 to<br>20.33)           | 36.13<br>(7.61 to<br>67.05)           | 39.13<br>(8.33 to<br>71.64)           | 33.62<br>(7.10 to<br>62.52)            |  |

|                                                                |                                                              |                                                               |                                                              |                                                               |                                                      |                                                        |                                                        |                                                          |
|----------------------------------------------------------------|--------------------------------------------------------------|---------------------------------------------------------------|--------------------------------------------------------------|---------------------------------------------------------------|------------------------------------------------------|--------------------------------------------------------|--------------------------------------------------------|----------------------------------------------------------|
| Endocarditis                                                   | 792.91<br>(478.73 to<br>1,137.53)                            | 1,217.56<br>(638.24 to<br>2,210.02)                           | 1,117.51<br>(597.01 to<br>2,026.87)                          | 1,197.97<br>(632.15 to<br>2,134.86)                           | 19.54<br>(11.66 to<br>27.29)                         | 36.92<br>(20.88 to<br>61.17)                           | 35.52<br>(20.71 to<br>58.03)                           | 34.67<br>(19.41 to<br>57.33)                             |
| Other cardiovascular and circulatory diseases                  | 2,810.74<br>(1,692.75 to<br>4,833.73)                        | 5,404.81<br>(3,054.28 to<br>9,661.73)                         | 4,376.65<br>(2,501.92 to<br>7,711.19)                        | 5,671.69<br>(3,252.55 to<br>10,041.11)                        | 105.86<br>(62.68 to<br>184.76)                       | 263.16<br>(165.19 to<br>455.50)                        | 228.12<br>(142.87 to<br>389.67)                        | 262.01<br>(163.01 to<br>449.76)                          |
| <b>Chronic respiratory diseases</b>                            | <b>14,035.83</b><br><b>(9,817.03 to</b><br><b>18,466.19)</b> | <b>18,166.11</b><br><b>(11,985.39 to</b><br><b>26,567.59)</b> | <b>14,227.44</b><br><b>(9,679.10 to</b><br><b>20,147.77)</b> | <b>21,414.50</b><br><b>(13,717.58 to</b><br><b>33,023.86)</b> | <b>644.80</b><br><b>(458.99 to</b><br><b>839.40)</b> | <b>980.21</b><br><b>(705.84 to</b><br><b>1,350.34)</b> | <b>812.05</b><br><b>(604.40 to</b><br><b>1,076.91)</b> | <b>1,103.99</b><br><b>(758.01 to</b><br><b>1,636.81)</b> |
| Chronic obstructive pulmonary disease                          | 8,076.36<br>(5,732.29 to<br>10,659.93)                       | 12,045.05<br>(7,697.03 to<br>18,276.50)                       | 9,009.96<br>(6,013.62 to<br>13,149.64)                       | 15,066.53<br>(9,173.62 to<br>24,264.86)                       | 434.53<br>(315.80 to<br>560.92)                      | 708.52<br>(491.34 to<br>1,026.61)                      | 567.30<br>(413.20 to<br>774.97)                        | 834.37<br>(543.87 to<br>1,304.60)                        |
| Pneumoconiosis                                                 | 152.29<br>(96.39 to<br>221.07)                               | 259.51<br>(170.89 to<br>369.60)                               | 264.63<br>(173.08 to<br>379.10)                              | 233.61<br>(156.92 to<br>328.23)                               | 7.16<br>(4.66 to<br>10.33)                           | 14.79<br>(10.37 to<br>20.30)                           | 15.49<br>(10.87 to<br>21.33)                           | 13.07<br>(9.23 to<br>17.99)                              |
| Silicosis                                                      | 27.95<br>(12.90 to<br>54.66)                                 | 34.06<br>(14.33 to<br>70.19)                                  | 32.13<br>(12.78 to<br>70.17)                                 | 31.61<br>(13.64 to<br>63.09)                                  | 1.30<br>(0.59 to<br>2.64)                            | 1.96<br>(0.85 to<br>3.98)                              | 1.91<br>(0.78 to<br>4.09)                              | 1.79<br>(0.79 to<br>3.52)                                |
| Asbestosis                                                     | 64.97<br>(30.49 to<br>108.56)                                | 135.51<br>(70.64 to<br>214.96)                                | 150.37<br>(80.86 to<br>233.15)                               | 114.52<br>(58.51 to<br>184.03)                                | 3.21<br>(1.44 to<br>5.34)                            | 7.65<br>(3.98 to<br>11.99)                             | 8.71<br>(4.81 to<br>13.31)                             | 6.33<br>(3.14 to<br>10.13)                               |
| Coal workers pneumoconiosis                                    | 12.39<br>(4.98 to<br>24.09)                                  | 17.74<br>(7.16 to<br>34.75)                                   | 14.08<br>(5.54 to<br>28.43)                                  | 18.85<br>(7.84 to<br>35.60)                                   | 0.54<br>(0.22 to<br>1.04)                            | 0.96<br>(0.41 to<br>1.84)                              | 0.78<br>(0.33 to<br>1.57)                              | 1.00<br>(0.43 to<br>1.94)                                |
| Other pneumoconiosis                                           | 46.98<br>(20.71 to<br>91.62)                                 | 72.20<br>(30.13 to<br>143.80)                                 | 68.05<br>(26.43 to<br>142.23)                                | 68.63<br>(30.09 to<br>130.55)                                 | 2.10<br>(0.91 to<br>4.18)                            | 4.22<br>(1.89 to<br>7.96)                              | 4.09<br>(1.72 to<br>8.09)                              | 3.95<br>(1.83 to<br>7.22)                                |
| Asthma                                                         | 4,649.06<br>(3,002.42 to<br>6,929.42)                        | 4,136.31<br>(2,322.69 to<br>7,258.69)                         | 3,096.20<br>(1,764.49 to<br>5,314.10)                        | 4,564.74<br>(2,571.64 to<br>8,085.63)                         | 169.49<br>(108.74 to<br>252.99)                      | 186.64<br>(116.23 to<br>304.67)                        | 147.09<br>(91.57 to<br>231.70)                         | 198.43<br>(122.56 to<br>318.56)                          |
| Interstitial lung disease and pulmonary sarcoidosis            | 568.28<br>(263.83 to<br>967.07)                              | 1,158.87<br>(548.99 to<br>1,876.40)                           | 1,351.70<br>(629.27 to<br>2,210.42)                          | 954.07<br>(452.89 to<br>1,549.98)                             | 23.90<br>(11.16 to<br>38.15)                         | 58.57<br>(28.83 to<br>88.90)                           | 71.03<br>(34.81 to<br>107.03)                          | 46.61<br>(22.98 to<br>70.67)                             |
| Other chronic respiratory diseases                             | 589.85<br>(351.03 to<br>1,008.37)                            | 566.37<br>(323.72 to<br>939.38)                               | 504.94<br>(292.92 to<br>833.38)                              | 595.55<br>(339.59 to<br>989.78)                               | 9.71<br>(6.18 to<br>16.02)                           | 11.69<br>(7.41 to<br>18.90)                            | 11.14<br>(7.05 to<br>17.78)                            | 11.52<br>(7.28 to<br>18.55)                              |
| <b>Cirrhosis and other chronic liver diseases</b>              | <b>5,231.49</b><br><b>(3,121.62 to</b><br><b>7,575.78)</b>   | <b>8,609.75</b><br><b>(4,930.53 to</b><br><b>13,365.57)</b>   | <b>7,499.54</b><br><b>(4,285.65 to</b><br><b>11,778.36)</b>  | <b>8,955.30</b><br><b>(5,257.35 to</b><br><b>13,892.01)</b>   | <b>162.14</b><br><b>(96.44 to</b><br><b>228.57)</b>  | <b>302.47</b><br><b>(181.01 to</b><br><b>439.29)</b>   | <b>272.36</b><br><b>(160.76 to</b><br><b>398.10)</b>   | <b>306.40</b><br><b>(185.80 to</b><br><b>445.88)</b>     |
| Cirrhosis and other chronic liver diseases due to hepatitis B  | 1,577.68<br>(890.07 to<br>2,353.17)                          | 2,671.79<br>(1,466.61 to<br>4,263.92)                         | 2,550.24<br>(1,415.46 to<br>4,086.40)                        | 2,450.93<br>(1,340.14 to<br>3,850.43)                         | 50.47<br>(29.23 to<br>72.90)                         | 95.15<br>(54.81 to<br>140.43)                          | 92.95<br>(53.17 to<br>140.04)                          | 85.96<br>(50.38 to<br>127.31)                            |
| Cirrhosis and other chronic liver diseases due to hepatitis C  | 777.56<br>(460.90 to<br>1,166.81)                            | 1,361.52<br>(769.28 to<br>2,231.24)                           | 1,291.52<br>(715.14 to<br>2,136.37)                          | 1,253.05<br>(701.57 to<br>2,020.48)                           | 24.68<br>(14.58 to<br>36.72)                         | 47.44<br>(27.74 to<br>72.07)                           | 45.92<br>(27.28 to<br>70.80)                           | 43.10<br>(25.80 to<br>65.08)                             |
| Cirrhosis and other chronic liver diseases due to alcohol use  | 1,775.95<br>(1,010.93 to<br>2,575.93)                        | 3,169.18<br>(1,755.76 to<br>5,034.05)                         | 2,364.77<br>(1,321.40 to<br>3,795.96)                        | 3,881.41<br>(2,174.01 to<br>6,120.68)                         | 58.80<br>(34.40 to<br>83.84)                         | 113.69<br>(67.51 to<br>169.83)                         | 89.37<br>(53.27 to<br>133.51)                          | 134.15<br>(79.68 to<br>199.86)                           |
| Cirrhosis and other chronic liver diseases due to other causes | 1,100.29<br>(704.74 to<br>1,571.75)                          | 1,407.25<br>(850.78 to<br>2,150.12)                           | 1,293.00<br>(766.59 to<br>2,012.76)                          | 1,369.92<br>(828.13 to<br>2,069.76)                           | 28.20<br>(17.35 to<br>39.63)                         | 46.18<br>(29.17 to<br>68.41)                           | 44.12<br>(27.79 to<br>65.67)                           | 43.19<br>(27.84 to<br>63.00)                             |
| <b>Digestive diseases</b>                                      | <b>8,673.10</b><br><b>(5,722.23 to</b><br><b>12,675.96)</b>  | <b>11,893.36</b><br><b>(7,266.96 to</b><br><b>18,899.40)</b>  | <b>10,625.78</b><br><b>(6,451.32 to</b><br><b>16,754.66)</b> | <b>11,795.87</b><br><b>(7,234.35 to</b><br><b>18,884.87)</b>  | <b>278.09</b><br><b>(182.03 to</b><br><b>397.07)</b> | <b>497.27</b><br><b>(330.51 to</b><br><b>715.21)</b>   | <b>466.94</b><br><b>(309.00 to</b><br><b>661.49)</b>   | <b>471.89</b><br><b>(319.96 to</b><br><b>669.20)</b>     |
| Peptic ulcer disease                                           | 1,158.05<br>(649.67 to<br>1,755.69)                          | 1,327.95<br>(710.66 to<br>2,104.59)                           | 1,063.33<br>(561.61 to<br>1,737.81)                          | 1,387.03<br>(732.28 to<br>2,190.71)                           | 51.26<br>(28.57 to<br>76.28)                         | 72.84<br>(39.68 to<br>111.45)                          | 60.48<br>(33.17 to<br>92.02)                           | 74.21<br>(40.73 to<br>112.71)                            |
| <b>Namibia</b>                                                 |                                                              |                                                               |                                                              |                                                               |                                                      |                                                        |                                                        |                                                          |
| Cause                                                          | YLLs (actual counts)                                         |                                                               |                                                              |                                                               | Deaths (actual counts)                               |                                                        |                                                        |                                                          |
|                                                                | 2016                                                         | 2040 Forecast                                                 | 2040 Better Scenario                                         | 2040 Worse Scenario                                           | 2016                                                 | 2040 Forecast                                          | 2040 Better Scenario                                   | 2040 Worse Scenario                                      |
| Gastritis and duodenitis                                       | 1,014.53<br>(607.92 to<br>1,605.57)                          | 1,371.52<br>(767.79 to<br>2,328.82)                           | 1,244.28<br>(696.61 to<br>2,109.46)                          | 1,324.77<br>(763.92 to<br>2,230.01)                           | 27.87<br>(16.81 to<br>41.07)                         | 47.48<br>(30.25 to<br>72.11)                           | 44.80<br>(28.41 to<br>68.95)                           | 44.21<br>(28.72 to<br>66.93)                             |



|                                                            |                                                 |                                                 |                                                 |                                                  |                                            |                                              |                                              |                                              |
|------------------------------------------------------------|-------------------------------------------------|-------------------------------------------------|-------------------------------------------------|--------------------------------------------------|--------------------------------------------|----------------------------------------------|----------------------------------------------|----------------------------------------------|
| Eating disorders                                           | 6.37<br>(2.62 to<br>10.65)                      | 9.71<br>(3.79 to<br>17.28)                      | 9.60<br>(3.67 to<br>17.73)                      | 9.03<br>(3.54 to<br>15.78)                       | 0.12<br>(0.05 to<br>0.20)                  | 0.19<br>(0.07 to<br>0.34)                    | 0.19<br>(0.07 to<br>0.35)                    | 0.17<br>(0.07 to<br>0.30)                    |
| <b>Namibia</b>                                             |                                                 |                                                 |                                                 |                                                  |                                            |                                              |                                              |                                              |
| Cause                                                      | YLLs (actual counts)                            |                                                 |                                                 |                                                  | Deaths (actual counts)                     |                                              |                                              |                                              |
|                                                            | 2016                                            | 2040 Forecast                                   | 2040 Better Scenario                            | 2040 Worse Scenario                              | 2016                                       | 2040 Forecast                                | 2040 Better Scenario                         | 2040 Worse Scenario                          |
| <b>Diabetes, urogenital, blood, and endocrine diseases</b> | <b>29,340.06</b><br>(19,700.76 to<br>37,927.27) | <b>56,775.85</b><br>(33,934.50 to<br>95,478.08) | <b>46,218.33</b><br>(27,404.88 to<br>77,762.73) | <b>63,495.66</b><br>(38,204.05 to<br>104,532.57) | <b>1,098.96</b><br>(737.14 to<br>1,413.30) | <b>2,683.03</b><br>(1,763.40 to<br>4,240.22) | <b>2,255.86</b><br>(1,462.01 to<br>3,695.73) | <b>2,941.77</b><br>(1,922.80 to<br>4,741.49) |
| Diabetes mellitus                                          | 17,112.96<br>(10,969.79 to<br>23,185.89)        | 34,076.03<br>(18,435.88 to<br>62,984.22)        | 26,699.16<br>(14,549.74 to<br>49,214.95)        | 38,010.95<br>(20,177.68 to<br>70,951.29)         | 728.49<br>(477.14 to<br>972.46)            | 1,673.38<br>(1,044.48 to<br>2,650.78)        | 1,366.09<br>(858.36 to<br>2,157.82)          | 1,806.55<br>(1,107.19 to<br>2,883.80)        |
| Acute glomerulonephritis                                   | 28.23<br>(19.44 to<br>41.65)                    | 58.89<br>(24.56 to<br>59.03)                    | 33.85<br>(21.18 to<br>51.73)                    | 40.42<br>(25.63 to<br>63.17)                     | 0.65<br>(0.43 to<br>0.87)                  | 1.09<br>(0.74 to<br>1.48)                    | 1.02<br>(0.68 to<br>1.41)                    | 1.04<br>(0.72 to<br>1.41)                    |
| Chronic kidney disease                                     | 5,384.12<br>(3,685.26 to<br>7,230.36)           | 13,090.11<br>(5,354.79 to<br>32,129.88)         | 10,721.47<br>(4,358.77 to<br>26,505.43)         | 16,018.09<br>(6,260.33 to<br>37,916.37)          | 209.64<br>(144.58 to<br>282.59)            | 714.88<br>(257.14 to<br>2,030.80)            | 607.96<br>(222.88 to<br>1,777.09)            | 859.21<br>(299.10 to<br>2,315.86)            |
| Chronic kidney disease due to diabetes mellitus            | 1,639.77<br>(1,062.51 to<br>2,294.79)           | 4,783.98<br>(1,861.64 to<br>11,848.32)          | 3,940.77<br>(1,521.91 to<br>10,296.94)          | 5,835.10<br>(2,158.99 to<br>14,488.08)           | 67.62<br>(44.80 to<br>93.08)               | 254.82<br>(87.45 to<br>763.23)               | 216.69<br>(75.41 to<br>665.17)               | 306.12<br>(101.53 to<br>820.56)              |
| Chronic kidney disease due to hypertension                 | 886.20<br>(589.07 to<br>1,228.39)               | 2,795.55<br>(971.65 to<br>7,804.79)             | 2,345.63<br>(808.35 to<br>6,989.33)             | 3,422.57<br>(1,123.42 to<br>9,570.78)            | 187.55<br>(31.67 to<br>64.00)              | 187.55<br>(63.12 to<br>560.16)               | 163.39<br>(55.42 to<br>503.71)               | 222.80<br>(72.13 to<br>643.11)               |
| Chronic kidney disease due to glomerulonephritis           | 1,296.73<br>(866.64 to<br>1,809.79)             | 2,339.35<br>(1,050.85 to<br>5,132.00)           | 1,869.93<br>(832.05 to<br>4,262.01)             | 2,877.80<br>(1,256.50 to<br>6,420.23)            | 40.83<br>(27.32 to<br>57.18)               | 110.16<br>(41.36 to<br>302.80)               | 91.29<br>(34.55 to<br>258.82)                | 134.45<br>(48.47 to<br>360.98)               |
| Chronic kidney disease due to other and unspecified causes | 1,561.42<br>(1,032.89 to<br>2,175.65)           | 3,171.23<br>(1,384.41 to<br>7,521.00)           | 2,565.14<br>(1,125.03 to<br>6,141.83)           | 3,882.62<br>(1,642.17 to<br>9,049.56)            | 54.06<br>(36.11 to<br>74.98)               | 162.36<br>(61.11 to<br>464.29)               | 136.59<br>(51.49 to<br>397.39)               | 195.84<br>(70.56 to<br>539.30)               |
| Urinary diseases and male infertility                      | 1,004.89<br>(672.86 to<br>1,405.83)             | 1,683.47<br>(1,104.71 to<br>2,565.52)           | 1,590.59<br>(1,026.94 to<br>2,475.32)           | 1,573.56<br>(1,050.78 to<br>2,342.65)            | 35.28<br>(24.21 to<br>50.15)               | 75.44<br>(56.26 to<br>105.23)                | 75.46<br>(55.94 to<br>108.20)                | 67.00<br>(50.10 to<br>91.75)                 |
| Urinary tract infections                                   | 435.33<br>(246.00 to<br>716.92)                 | 912.92<br>(514.57 to<br>1,533.93)               | 899.50<br>(503.85 to<br>1,561.34)               | 830.37<br>(482.60 to<br>1,392.11)                | 13.85<br>(7.67 to<br>23.08)                | 40.67<br>(26.04 to<br>65.66)                 | 42.53<br>(27.14 to<br>69.75)                 | 35.01<br>(22.27 to<br>55.55)                 |
| Urolithiasis                                               | 18.50<br>(10.10 to<br>30.02)                    | 35.88<br>(19.95 to<br>59.59)                    | 34.24<br>(18.91 to<br>57.54)                    | 33.36<br>(18.88 to<br>54.78)                     | 0.56<br>(0.33 to<br>0.86)                  | 1.37<br>(0.85 to<br>2.11)                    | 1.38<br>(0.86 to<br>2.15)                    | 1.20<br>(0.75 to<br>1.82)                    |
| Other urinary diseases                                     | 551.06<br>(376.24 to<br>771.43)                 | 734.67<br>(480.39 to<br>1,077.81)               | 656.86<br>(422.87 to<br>1,001.07)               | 709.84<br>(469.61 to<br>1,025.39)                | 20.87<br>(14.52 to<br>29.15)               | 33.41<br>(24.30 to<br>44.86)                 | 31.55<br>(22.46 to<br>43.23)                 | 30.79<br>(22.55 to<br>41.27)                 |
| Gynecological diseases                                     | 63.28<br>(21.14 to<br>117.41)                   | 76.58<br>(23.75 to<br>173.05)                   | 62.97<br>(18.96 to<br>144.84)                   | 77.19<br>(24.39 to<br>172.73)                    | 1.80<br>(0.64 to<br>3.19)                  | 2.47<br>(0.97 to<br>5.06)                    | 2.08<br>(0.81 to<br>4.26)                    | 2.45<br>(0.98 to<br>4.92)                    |
| Uterine fibroids                                           | 25.17<br>(6.98 to<br>58.04)                     | 28.23<br>(6.45 to<br>76.05)                     | 25.03<br>(5.20 to<br>61.97)                     | 28.75<br>(6.84 to<br>75.04)                      | 0.75<br>(0.21 to<br>1.73)                  | 0.96<br>(0.27 to<br>2.31)                    | 0.80<br>(0.22 to<br>1.95)                    | 0.97<br>(0.27 to<br>2.27)                    |
| Polycystic ovarian syndrome                                | 2.33<br>(0.38 to<br>8.39)                       | 1.90<br>(0.26 to<br>7.12)                       | 1.36<br>(0.17 to<br>5.41)                       | 2.05<br>(0.30 to<br>7.50)                        | 0.06<br>(0.01 to<br>0.19)                  | 0.05<br>(0.01 to<br>0.18)                    | 0.03<br>(0.00 to<br>0.13)                    | 0.05<br>(0.01 to<br>0.18)                    |
| Endometriosis                                              | 0.82<br>(0.09 to<br>4.14)                       | 1.49<br>(0.13 to<br>7.28)                       | 1.22<br>(0.10 to<br>6.31)                       | 1.51<br>(0.14 to<br>7.39)                        | 0.02<br>(0.00 to<br>0.08)                  | 0.03<br>(0.00 to<br>0.15)                    | 0.03<br>(0.00 to<br>0.12)                    | 0.03<br>(0.00 to<br>0.15)                    |
| Genital prolapse                                           | 4.71<br>(0.46 to<br>10.53)                      | 5.43<br>(0.55 to<br>13.45)                      | 4.34<br>(0.47 to<br>10.74)                      | 5.66<br>(0.54 to<br>13.80)                       | 0.19<br>(0.02 to<br>0.40)                  | 0.25<br>(0.03 to<br>0.53)                    | 0.21<br>(0.02 to<br>0.45)                    | 0.25<br>(0.03 to<br>0.53)                    |
| Other gynecological diseases                               | 30.25<br>(9.41 to<br>58.88)                     | 39.52<br>(11.25 to<br>97.06)                    | 33.02<br>(8.75 to<br>77.20)                     | 39.22<br>(11.24 to<br>95.59)                     | 0.78<br>(0.25 to<br>1.49)                  | 1.01<br>(0.41 to<br>2.59)                    | 1.01<br>(0.36 to<br>2.19)                    | 1.15<br>(0.41 to<br>2.54)                    |
| Hemoglobinopathies and hemolytic anemias                   | 976.34<br>(544.61 to<br>1,841.17)               | 1,395.80<br>(759.28 to<br>2,696.81)             | 1,215.58<br>(646.35 to<br>2,368.00)             | 1,403.52<br>(777.45 to<br>2,680.42)              | 27.91<br>(15.64 to<br>51.58)               | 58.24<br>(35.88 to<br>104.39)                | 53.11<br>(31.95 to<br>95.17)                 | 55.86<br>(34.62 to<br>100.84)                |



|                                                   |                                                |                                                |                                                |                                                |                                        |                                        |                                        |                                        |
|---------------------------------------------------|------------------------------------------------|------------------------------------------------|------------------------------------------------|------------------------------------------------|----------------------------------------|----------------------------------------|----------------------------------------|----------------------------------------|
| Thalassemias                                      | 8.51<br>(3.67 to<br>18.79)                     | 4.06<br>(1.47 to<br>9.99)                      | 3.95<br>(1.43 to<br>9.78)                      | 4.12<br>(1.51 to<br>10.25)                     | 0.10<br>(0.04 to<br>0.22)              | 0.05<br>(0.02 to<br>0.12)              | 0.05<br>(0.02 to<br>0.12)              | 0.05<br>(0.02 to<br>0.12)              |
| Sickle cell disorders                             | 254.49<br>(128.14 to<br>506.84)                | 190.22<br>(83.28 to<br>449.67)                 | 159.36<br>(67.37 to<br>373.88)                 | 206.38<br>(91.88 to<br>465.34)                 | 3.59<br>(1.80 to<br>7.29)              | 3.01<br>(1.30 to<br>6.94)              | 2.55<br>(1.04 to<br>5.99)              | 3.19<br>(1.41 to<br>7.35)              |
| G6PD deficiency                                   | 484.71<br>(269.45 to<br>917.54)                | 840.53<br>(435.45 to<br>1,644.93)              | 719.79<br>(361.41 to<br>1,402.19)              | 848.29<br>(449.02 to<br>1,651.98)              | 11.89<br>(6.56 to<br>22.32)            | 29.22<br>(16.45 to<br>55.20)           | 25.72<br>(13.90 to<br>47.99)           | 28.68<br>(16.25 to<br>54.15)           |
| Other hemoglobinopathies and hemolytic anemias    | 228.63<br>(120.52 to<br>423.41)                | 360.99<br>(211.12 to<br>644.94)                | 332.49<br>(191.39 to<br>599.57)                | 344.73<br>(205.56 to<br>608.56)                | 12.33<br>(6.66 to<br>22.56)            | 25.96<br>(16.83 to<br>45.35)           | 24.78<br>(15.88 to<br>42.94)           | 23.94<br>(15.32 to<br>41.61)           |
| Endocrine, metabolic, blood, and immune disorders | 4,770.25<br>(1,825.51 to<br>9,924.53)          | 6,414.96<br>(2,220.47 to<br>13,478.09)         | 5,894.70<br>(2,112.92 to<br>12,092.27)         | 6,371.91<br>(2,221.74 to<br>13,415.40)         | 95.20<br>(36.23 to<br>188.89)          | 157.53<br>(58.00 to<br>312.13)         | 150.13<br>(56.65 to<br>292.27)         | 149.66<br>(55.25 to<br>303.12)         |
| <b>Namibia</b>                                    |                                                |                                                |                                                |                                                |                                        |                                        |                                        |                                        |
| Cause                                             | YLLs (actual counts)                           |                                                |                                                |                                                | Deaths (actual counts)                 |                                        |                                        |                                        |
|                                                   | 2016                                           | 2040 Forecast                                  | 2040 Better Scenario                           | 2040 Worse Scenario                            | 2016                                   | 2040 Forecast                          | 2040 Better Scenario                   | 2040 Worse Scenario                    |
| <b>Musculoskeletal disorders</b>                  | <b>714.48</b><br>(386.38 to<br>1,222.06)       | <b>1,449.36</b><br>(789.67 to<br>2,502.40)     | <b>1,420.19</b><br>(770.86 to<br>2,501.19)     | <b>1,322.89</b><br>(732.43 to<br>2,270.78)     | <b>22.14</b><br>(12.07 to<br>36.60)    | <b>57.69</b><br>(33.74 to<br>90.72)    | <b>57.73</b><br>(32.93 to<br>92.32)    | <b>51.55</b><br>(30.02 to<br>80.69)    |
| Rheumatoid arthritis                              | 247.06<br>(117.89 to<br>440.78)                | 575.75<br>(313.17 to<br>976.60)                | 506.19<br>(263.53 to<br>844.71)                | 559.51<br>(306.36 to<br>956.09)                | 9.99<br>(4.98 to<br>16.74)             | 28.93<br>(16.10 to<br>44.82)           | 26.35<br>(13.96 to<br>40.59)           | 27.39<br>(15.22 to<br>42.86)           |
| Other musculoskeletal disorders                   | 467.41<br>(246.37 to<br>827.08)                | 873.61<br>(442.54 to<br>1,628.88)              | 914.01<br>(461.73 to<br>1,703.46)              | 763.38<br>(384.11 to<br>1,434.18)              | 12.15<br>(6.53 to<br>21.18)            | 28.75<br>(15.71 to<br>49.44)           | 31.38<br>(17.18 to<br>53.84)           | 24.16<br>(13.35 to<br>41.90)           |
| <b>Other non-communicable diseases</b>            | <b>13,240.14</b><br>(8,458.03 to<br>20,762.29) | <b>13,265.47</b><br>(8,356.83 to<br>20,735.29) | <b>11,274.49</b><br>(7,173.40 to<br>17,474.24) | <b>14,618.36</b><br>(9,123.72 to<br>23,612.27) | <b>195.16</b><br>(130.07 to<br>288.91) | <b>297.78</b><br>(209.39 to<br>425.39) | <b>284.35</b><br>(199.43 to<br>410.26) | <b>292.20</b><br>(203.33 to<br>424.24) |
| Congenital birth defects                          | 10,762.48<br>(6,431.60 to<br>17,876.13)        | 8,977.38<br>(5,004.86 to<br>15,389.90)         | 7,121.11<br>(4,029.61 to<br>12,389.73)         | 10,498.03<br>(5,922.30 to<br>17,985.56)        | 132.60<br>(81.55 to<br>216.07)         | 118.35<br>(70.20 to<br>197.59)         | 95.41<br>(57.47 to<br>161.63)          | 135.52<br>(77.88 to<br>227.79)         |
| Neural tube defects                               | 539.91<br>(245.00 to<br>1,071.19)              | 190.69<br>(86.23 to<br>369.85)                 | 135.48<br>(60.58 to<br>266.74)                 | 239.88<br>(105.01 to<br>480.78)                | 6.58<br>(3.06 to<br>12.86)             | 2.60<br>(1.29 to<br>4.78)              | 1.89<br>(0.92 to<br>3.58)              | 3.18<br>(1.51 to<br>6.13)              |
| Congenital heart anomalies                        | 3,361.16<br>(2,132.21 to<br>5,629.60)          | 2,898.56<br>(1,739.11 to<br>4,933.16)          | 2,294.31<br>(1,340.61 to<br>3,941.31)          | 3,319.87<br>(1,971.06 to<br>5,651.23)          | 42.81<br>(27.85 to<br>71.53)           | 40.13<br>(25.19 to<br>66.26)           | 32.33<br>(19.66 to<br>53.62)           | 44.89<br>(27.64 to<br>74.50)           |
| Orofacial clefts                                  | 80.01<br>(27.15 to<br>190.12)                  | 47.61<br>(13.20 to<br>130.04)                  | 32.57<br>(8.82 to<br>95.09)                    | 62.56<br>(17.75 to<br>172.12)                  | 0.93<br>(0.32 to<br>2.20)              | 0.55<br>(0.15 to<br>1.51)              | 0.38<br>(0.10 to<br>1.10)              | 0.73<br>(0.21 to<br>2.00)              |
| Down syndrome                                     | 754.12<br>(408.11 to<br>1,329.83)              | 697.15<br>(333.42 to<br>1,374.98)              | 562.31<br>(270.65 to<br>1,118.10)              | 828.45<br>(392.81 to<br>1,664.54)              | 9.47<br>(5.28 to<br>16.31)             | 9.56<br>(4.89 to<br>17.79)             | 7.86<br>(4.08 to<br>14.67)             | 11.05<br>(5.66 to<br>21.19)            |
| Other chromosomal abnormalities                   | 680.61<br>(279.33 to<br>1,346.09)              | 853.88<br>(330.04 to<br>1,726.07)              | 671.75<br>(259.03 to<br>1,384.78)              | 1,031.40<br>(396.53 to<br>2,121.23)            | 8.08<br>(3.38 to<br>15.76)             | 10.36<br>(4.13 to<br>20.71)            | 8.20<br>(3.26 to<br>16.61)             | 12.41<br>(4.91 to<br>25.18)            |
| Congenital musculoskeletal and limb anomalies     | 464.18<br>(208.30 to<br>824.95)                | 390.04<br>(160.81 to<br>738.49)                | 315.06<br>(126.78 to<br>608.31)                | 453.78<br>(186.63 to<br>853.53)                | 5.51<br>(2.52 to<br>9.67)              | 4.76<br>(2.03 to<br>8.86)              | 3.88<br>(1.62 to<br>7.38)              | 5.49<br>(2.32 to<br>10.18)             |
| Urogenital congenital anomalies                   | 260.28<br>(149.01 to<br>566.28)                | 268.80<br>(155.76 to<br>573.89)                | 232.57<br>(133.99 to<br>476.57)                | 286.86<br>(163.65 to<br>602.70)                | 4.02<br>(2.43 to<br>8.11)              | 5.24<br>(3.22 to<br>10.14)             | 4.73<br>(2.88 to<br>9.11)              | 5.28<br>(3.22 to<br>10.28)             |
| Digestive congenital anomalies                    | 939.20<br>(438.58 to<br>1,794.82)              | 760.22<br>(312.17 to<br>1,670.94)              | 586.81<br>(235.39 to<br>1,283.14)              | 911.05<br>(368.36 to<br>2,024.96)              | 11.21<br>(5.39 to<br>21.15)            | 9.40<br>(4.05 to<br>20.18)             | 7.32<br>(3.17 to<br>15.55)             | 11.14<br>(4.72 to<br>24.11)            |
| Other congenital birth defects                    | 3,683.00<br>(1,902.32 to<br>6,476.90)          | 2,870.42<br>(1,412.56 to<br>5,388.78)          | 2,290.26<br>(1,133.26 to<br>4,288.69)          | 3,364.17<br>(1,638.93 to<br>6,408.78)          | 43.99<br>(23.09 to<br>76.65)           | 35.74<br>(18.43 to<br>66.07)           | 28.82<br>(15.01 to<br>53.26)           | 41.35<br>(20.87 to<br>77.36)           |
| Skin and subcutaneous diseases                    | 1,508.00<br>(876.18 to<br>2,672.88)            | 3,630.51<br>(2,224.54 to<br>6,217.96)          | 3,621.14<br>(2,213.16 to<br>6,131.89)          | 3,344.31<br>(2,018.55 to<br>5,676.39)          | 51.30<br>(29.15 to<br>90.13)           | 171.81<br>(113.42 to<br>282.92)        | 182.77<br>(120.09 to<br>298.60)        | 147.68<br>(97.12 to<br>242.88)         |

|                                      |                                           |                                            |                                           |                                            |                                       |                                       |                                       |                                       |
|--------------------------------------|-------------------------------------------|--------------------------------------------|-------------------------------------------|--------------------------------------------|---------------------------------------|---------------------------------------|---------------------------------------|---------------------------------------|
| Cellulitis                           | 327.97<br>(155.35 to<br>694.49)           | 1,004.64<br>(500.72 to<br>1,902.51)        | 1,071.63<br>(541.35 to<br>1,977.46)       | 870.46<br>(439.47 to<br>1,700.98)          | 11.13<br>(5.31 to<br>22.18)           | 45.03<br>(23.31 to<br>81.54)          | 50.31<br>(26.51 to<br>89.80)          | 37.34<br>(19.52 to<br>68.10)          |
| Pyoderma                             | 750.76<br>(412.02 to<br>1,345.11)         | 1,637.82<br>(899.65 to<br>3,009.31)        | 1,532.50<br>(836.71 to<br>2,766.57)       | 1,602.18<br>(886.50 to<br>2,885.70)        | 19.57<br>(10.66 to<br>37.63)          | 62.41<br>(37.34 to<br>115.88)         | 62.79<br>(37.10 to<br>117.99)         | 56.45<br>(34.40 to<br>104.49)         |
| Decubitus ulcer                      | 368.76<br>(187.87 to<br>643.16)           | 873.65<br>(456.26 to<br>1,450.65)          | 902.71<br>(476.82 to<br>1,516.31)         | 764.88<br>(396.41 to<br>1,264.83)          | 18.84<br>(9.44 to<br>32.24)           | 59.98<br>(30.84 to<br>102.81)         | 64.92<br>(33.86 to<br>111.33)         | 50.12<br>(25.11 to<br>87.03)          |
| Other skin and subcutaneous diseases | 60.51<br>(32.61 to<br>114.18)             | 114.41<br>(61.10 to<br>221.58)             | 114.30<br>(62.37 to<br>217.18)            | 106.79<br>(57.27 to<br>200.31)             | 1.76<br>(0.89 to<br>3.60)             | 4.40<br>(2.48 to<br>8.38)             | 4.75<br>(2.70 to<br>8.92)             | 3.78<br>(2.12 to<br>7.28)             |
| Sudden infant death syndrome         | 969.67<br>(327.36 to<br>2,030.15)         | 657.58<br>(146.22 to<br>1,850.21)          | 532.24<br>(119.51 to<br>1,494.01)         | 776.03<br>(167.17 to<br>2,188.03)          | 11.25<br>(3.80 to<br>23.56)           | 7.63<br>(1.70 to<br>21.47)            | 6.18<br>(1.39 to<br>17.34)            | 9.00<br>(1.94 to<br>25.40)            |
| Injuries                             | 96,509.87<br>(72,090.09 to<br>116,111.49) | 112,479.23<br>(67,844.43 to<br>177,955.64) | 79,419.18<br>(48,697.48 to<br>122,647.89) | 125,457.80<br>(76,349.54 to<br>199,203.95) | 1,821.72<br>(1,335.08 to<br>2,208.12) | 2,439.67<br>(1,501.35 to<br>3,863.01) | 1,787.62<br>(1,127.08 to<br>2,715.36) | 2,624.55<br>(1,683.97 to<br>4,185.13) |
| Transport injuries                   | 34,695.86<br>(25,021.04 to<br>43,061.59)  | 41,507.46<br>(22,977.11 to<br>79,227.59)   | 16,920.77<br>(9,087.37 to<br>32,093.73)   | 52,281.58<br>(28,239.29 to<br>97,822.19)   | 658.59<br>(468.33 to<br>823.40)       | 905.43<br>(500.72 to<br>1,720.76)     | 403.03<br>(221.36 to<br>736.66)       | 1,092.64<br>(587.43 to<br>2,075.24)   |
| Road injuries                        | 33,725.18<br>(24,297.94 to<br>41,863.20)  | 39,767.57<br>(21,809.47 to<br>76,009.49)   | 15,486.81<br>(8,289.64 to<br>28,239.15)   | 50,431.78<br>(27,104.11 to<br>94,531.13)   | 638.86<br>(453.37 to<br>798.12)       | 865.34<br>(476.59 to<br>1,650.95)     | 369.31<br>(203.31 to<br>671.93)       | 1,051.12<br>(565.56 to<br>1,996.25)   |
| Pedestrian road injuries             | 9,562.82<br>(5,806.75 to<br>13,103.13)    | 9,522.08<br>(4,689.34 to<br>17,595.80)     | 4,468.13<br>(2,259.99 to<br>8,420.45)     | 11,304.81<br>(5,692.06 to<br>20,753.03)    | 195.45<br>(122.17 to<br>265.62)       | 258.56<br>(132.00 to<br>470.28)       | 132.09<br>(70.93 to<br>241.41)        | 291.88<br>(149.71 to<br>547.35)       |

**Namibia**

| Cause                          | YLLs (actual counts)                     |                                          |                                          |                                          | Deaths (actual counts)          |                                   |                                 |                                   |
|--------------------------------|------------------------------------------|------------------------------------------|------------------------------------------|------------------------------------------|---------------------------------|-----------------------------------|---------------------------------|-----------------------------------|
|                                | 2016                                     | 2040 Forecast                            | 2040 Better Scenario                     | 2040 Worse Scenario                      | 2016                            | 2040 Forecast                     | 2040 Better Scenario            | 2040 Worse Scenario               |
| Cyclist road injuries          | 279.63<br>(177.31 to<br>425.89)          | 391.50<br>(182.28 to<br>840.16)          | 178.49<br>(81.06 to<br>394.74)           | 469.11<br>(219.28 to<br>1,021.66)        | 5.72<br>(3.67 to<br>8.58)       | 9.09<br>(4.18 to<br>20.01)        | 4.65<br>(2.15 to<br>10.20)      | 10.35<br>(4.80 to<br>22.68)       |
| Motorcyclist road injuries     | 1,555.06<br>(780.34 to<br>2,873.94)      | 2,131.11<br>(823.27 to<br>5,049.26)      | 1,173.88<br>(439.29 to<br>2,794.81)      | 2,529.80<br>(974.72 to<br>6,002.99)      | 26.25<br>(13.22 to<br>49.27)    | 37.65<br>(14.44 to<br>89.80)      | 21.52<br>(8.28 to<br>50.98)     | 43.86<br>(16.82 to<br>104.21)     |
| Motor vehicle road injuries    | 22,085.18<br>(15,539.23 to<br>27,616.73) | 27,417.58<br>(14,379.54 to<br>52,656.75) | 9,549.45<br>(4,898.34 to<br>18,297.62)   | 35,744.29<br>(18,511.04 to<br>68,031.15) | 406.58<br>(284.68 to<br>511.49) | 553.16<br>(286.72 to<br>1,063.97) | 208.10<br>(108.38 to<br>396.05) | 696.79<br>(361.73 to<br>1,314.06) |
| Other road injuries            | 242.48<br>(128.52 to<br>421.94)          | 305.30<br>(129.88 to<br>682.68)          | 116.86<br>(49.10 to<br>259.35)           | 383.77<br>(161.75 to<br>851.32)          | 4.86<br>(2.58 to<br>8.43)       | 6.88<br>(2.96 to<br>14.98)        | 2.96<br>(1.32 to<br>6.27)       | 8.24<br>(3.53 to<br>18.45)        |
| Other transport injuries       | 970.68<br>(666.36 to<br>1,410.82)        | 1,739.90<br>(845.98 to<br>3,445.95)      | 1,433.95<br>(697.60 to<br>2,918.37)      | 1,849.80<br>(894.83 to<br>3,671.78)      | 19.73<br>(13.43 to<br>28.60)    | 40.09<br>(19.82 to<br>79.24)      | 33.72<br>(16.80 to<br>67.13)    | 41.52<br>(20.00 to<br>81.81)      |
| Unintentional injuries         | 25,355.55<br>(19,569.96 to<br>32,087.00) | 22,501.97<br>(14,824.31 to<br>32,041.06) | 19,060.48<br>(12,717.11 to<br>27,361.92) | 23,812.77<br>(16,047.54 to<br>33,739.43) | 478.95<br>(364.23 to<br>586.93) | 544.55<br>(394.13 to<br>749.29)   | 488.52<br>(345.34 to<br>672.79) | 542.37<br>(390.30 to<br>742.63)   |
| Falls                          | 1,092.17<br>(750.82 to<br>1,684.71)      | 1,732.49<br>(1,232.95 to<br>2,696.58)    | 1,714.42<br>(1,217.13 to<br>2,677.20)    | 1,573.75<br>(1,125.52 to<br>2,446.41)    | 40.62<br>(28.15 to<br>62.93)    | 87.00<br>(66.36 to<br>131.02)     | 90.51<br>(69.07 to<br>135.00)   | 75.26<br>(56.38 to<br>116.04)     |
| Drowning                       | 5,100.06<br>(3,725.97 to<br>7,297.41)    | 3,832.52<br>(2,267.79 to<br>6,167.56)    | 3,195.02<br>(1,876.92 to<br>5,138.14)    | 4,113.31<br>(2,443.74 to<br>6,729.53)    | 88.69<br>(65.21 to<br>126.46)   | 80.06<br>(49.05 to<br>130.17)     | 68.92<br>(41.68 to<br>111.49)   | 82.68<br>(50.89 to<br>136.74)     |
| Fire, heat, and hot substances | 4,086.38<br>(2,842.68 to<br>5,581.27)    | 3,426.69<br>(1,966.22 to<br>5,909.89)    | 2,809.89<br>(1,603.92 to<br>4,705.35)    | 3,668.40<br>(2,137.37 to<br>6,083.48)    | 84.43<br>(57.25 to<br>114.39)   | 92.79<br>(56.62 to<br>150.45)     | 80.05<br>(47.91 to<br>127.46)   | 94.38<br>(56.25 to<br>151.66)     |
| Poisonings                     | 1,889.05<br>(1,023.24 to<br>3,642.62)    | 1,098.02<br>(506.01 to<br>2,163.19)      | 819.12<br>(379.39 to<br>1,589.62)        | 1,282.77<br>(593.28 to<br>2,556.28)      | 31.00<br>(17.46 to<br>55.92)    | 20.92<br>(10.24 to<br>40.86)      | 16.06<br>(7.78 to<br>29.73)     | 23.59<br>(11.62 to<br>46.03)      |
| Exposure to mechanical forces  | 4,717.54<br>(3,197.70 to<br>7,444.19)    | 4,005.95<br>(2,458.29 to<br>6,336.41)    | 3,331.56<br>(2,065.55 to<br>5,199.44)    | 4,295.92<br>(2,681.50 to<br>6,866.34)    | 82.12<br>(55.90 to<br>127.48)   | 81.54<br>(52.29 to<br>125.74)     | 70.58<br>(44.15 to<br>106.55)   | 83.48<br>(55.01 to<br>129.72)     |

|                                                 |                                                   |                                                   |                                                   |                                                   |                                          |                                            |                                            |                                            |
|-------------------------------------------------|---------------------------------------------------|---------------------------------------------------|---------------------------------------------------|---------------------------------------------------|------------------------------------------|--------------------------------------------|--------------------------------------------|--------------------------------------------|
| Unintentional firearm injuries                  | 670.34<br>(390.99 to<br>1,053.67)                 | 501.68<br>(265.23 to<br>833.24)                   | 422.28<br>(216.65 to<br>708.01)                   | 526.62<br>(278.56 to<br>864.52)                   | 13.11<br>(7.51 to<br>20.33)              | 11.03<br>(5.83 to<br>17.63)                | 9.49<br>(4.96 to<br>15.51)                 | 11.25<br>(6.05 to<br>18.06)                |
| Unintentional suffocation                       | 1,624.47<br>(1,030.21 to<br>2,826.25)             | 1,397.86<br>(818.26 to<br>2,519.94)               | 1,148.80<br>(679.12 to<br>1,994.83)               | 1,547.26<br>(895.80 to<br>2,825.11)               | 24.12<br>(15.49 to<br>42.01)             | 22.45<br>(13.38 to<br>38.96)               | 18.85<br>(11.50 to<br>31.88)               | 24.22<br>(14.36 to<br>43.31)               |
| Other exposure to mechanical forces             | 2,422.73<br>(1,491.32 to<br>3,794.15)             | 2,106.41<br>(1,218.86 to<br>3,384.41)             | 1,760.48<br>(1,006.54 to<br>2,765.05)             | 2,222.04<br>(1,268.50 to<br>3,551.23)             | 44.89<br>(27.75 to<br>67.95)             | 48.05<br>(28.59 to<br>72.05)               | 42.24<br>(25.01 to<br>63.47)               | 48.00<br>(27.78 to<br>72.34)               |
| Adverse effects of medical treatment            | 1,363.67<br>(863.35 to<br>2,166.73)               | 1,429.42<br>(867.77 to<br>2,384.28)               | 1,273.18<br>(763.43 to<br>2,142.92)               | 1,448.71<br>(899.59 to<br>2,458.47)               | 30.16<br>(19.07 to<br>47.05)             | 42.07<br>(27.75 to<br>65.53)               | 39.44<br>(25.87 to<br>62.30)               | 40.22<br>(26.99 to<br>62.12)               |
| Animal contact                                  | 2,172.59<br>(1,406.62 to<br>3,033.45)             | 2,494.16<br>(1,446.16 to<br>3,832.69)             | 2,021.11<br>(1,131.81 to<br>3,152.83)             | 2,731.92<br>(1,620.69 to<br>4,133.49)             | 38.83<br>(24.72 to<br>53.72)             | 51.37<br>(30.21 to<br>77.42)               | 43.22<br>(25.12 to<br>65.51)               | 53.88<br>(32.32 to<br>80.12)               |
| Venomous animal contact                         | 646.12<br>(353.95 to<br>1,100.06)                 | 724.64<br>(377.81 to<br>1,293.24)                 | 587.66<br>(296.31 to<br>1,056.89)                 | 793.37<br>(411.29 to<br>1,451.33)                 | 12.12<br>(6.80 to<br>19.43)              | 16.41<br>(9.10 to<br>27.27)                | 14.02<br>(7.61 to<br>23.71)                | 16.99<br>(9.34 to<br>28.31)                |
| Non-venomous animal contact                     | 1,526.47<br>(913.00 to<br>2,131.32)               | 1,769.52<br>(968.27 to<br>2,667.88)               | 1,433.46<br>(758.55 to<br>2,224.74)               | 1,938.55<br>(1,070.09 to<br>2,917.06)             | 26.71<br>(15.71 to<br>36.88)             | 34.95<br>(19.24 to<br>52.43)               | 29.20<br>(15.74 to<br>45.05)               | 36.89<br>(20.80 to<br>54.78)               |
| Foreign body                                    | 3,314.08<br>(1,828.82 to<br>5,276.16)             | 2,923.02<br>(1,564.23 to<br>4,893.58)             | 2,622.20<br>(1,469.90 to<br>4,414.52)             | 3,063.48<br>(1,592.36 to<br>5,253.47)             | 49.58<br>(28.98 to<br>74.47)             | 50.37<br>(29.58 to<br>78.24)               | 47.41<br>(28.80 to<br>73.09)               | 50.03<br>(28.34 to<br>79.57)               |
| Pulmonary aspiration and foreign body in airway | 2,827.46<br>(1,578.04 to<br>4,530.01)             | 2,543.67<br>(1,396.67 to<br>4,323.36)             | 2,305.12<br>(1,308.28 to<br>3,846.25)             | 2,643.10<br>(1,405.39 to<br>4,585.73)             | 42.66<br>(25.82 to<br>64.39)             | 44.56<br>(27.30 to<br>68.58)               | 42.43<br>(26.68 to<br>64.78)               | 43.77<br>(25.95 to<br>69.68)               |
| Foreign body in other body part                 | 486.62<br>(148.63 to<br>967.63)                   | 379.35<br>(104.70 to<br>796.75)                   | 317.08<br>(89.42 to<br>658.48)                    | 420.38<br>(114.17 to<br>888.13)                   | 6.92<br>(2.13 to<br>13.49)               | 5.81<br>(1.64 to<br>11.78)                 | 4.98<br>(1.46 to<br>9.97)                  | 6.25<br>(1.77 to<br>12.83)                 |
| Environmental heat and cold exposure            | 945.26<br>(563.14 to<br>1,326.11)                 | 1,009.20<br>(540.97 to<br>1,626.68)               | 811.30<br>(433.81 to<br>1,332.63)                 | 1,066.31<br>(581.61 to<br>1,997.16)               | 20.96<br>(12.36 to<br>29.60)             | 25.68<br>(13.94 to<br>40.86)               | 21.18<br>(11.52 to<br>34.16)               | 26.32<br>(14.29 to<br>40.63)               |
| Other unintentional injuries                    | 674.75<br>(458.67 to<br>1,074.10)                 | 550.50<br>(340.84 to<br>881.14)                   | 462.68<br>(287.12 to<br>757.44)                   | 568.20<br>(359.09 to<br>910.75)                   | 12.57<br>(8.54 to<br>19.76)              | 12.75<br>(8.33 to<br>20.44)                | 11.16<br>(7.23 to<br>17.84)                | 12.53<br>(8.24 to<br>20.27)                |
| <b>Self-harm and interpersonal violence</b>     | <b>36,441.89<br/>(25,325.33 to<br/>47,009.53)</b> | <b>44,007.58<br/>(23,898.92 to<br/>74,918.45)</b> | <b>39,119.13<br/>(21,709.53 to<br/>65,550.83)</b> | <b>44,984.81<br/>(24,060.78 to<br/>76,578.35)</b> | <b>683.90<br/>(472.66 to<br/>882.01)</b> | <b>907.89<br/>(489.68 to<br/>1,563.63)</b> | <b>815.29<br/>(449.84 to<br/>1,384.11)</b> | <b>911.34<br/>(482.49 to<br/>1,572.56)</b> |

**Namibia**

| Cause                              | YLLs (actual counts)                     |                                          |                                          |                                          | Deaths (actual counts)          |                                 |                                 |                                 |
|------------------------------------|------------------------------------------|------------------------------------------|------------------------------------------|------------------------------------------|---------------------------------|---------------------------------|---------------------------------|---------------------------------|
|                                    | 2016                                     | 2040 Forecast                            | 2040 Better Scenario                     | 2040 Worse Scenario                      | 2016                            | 2040 Forecast                   | 2040 Better Scenario            | 2040 Worse Scenario             |
| Self-harm                          | 12,354.33<br>(8,360.42 to<br>17,783.00)  | 21,230.70<br>(9,199.67 to<br>41,084.33)  | 17,883.54<br>(7,975.79 to<br>34,266.40)  | 22,664.67<br>(9,723.48 to<br>44,311.60)  | 254.58<br>(174.21 to<br>360.28) | 476.46<br>(215.67 to<br>924.40) | 409.68<br>(191.81 to<br>771.22) | 495.29<br>(219.90 to<br>960.95) |
| Self-harm by firearm               | 1,152.80<br>(548.88 to<br>2,490.37)      | 1,640.82<br>(594.27 to<br>4,048.62)      | 1,349.61<br>(509.68 to<br>3,272.23)      | 1,767.14<br>(620.80 to<br>4,405.91)      | 24.06<br>(12.39 to<br>48.55)    | 38.61<br>(15.34 to<br>90.98)    | 32.57<br>(13.86 to<br>75.87)    | 40.35<br>(15.49 to<br>95.81)    |
| Self-harm by other specified means | 11,201.53<br>(7,655.64 to<br>15,670.43)  | 19,589.88<br>(8,576.32 to<br>38,573.74)  | 16,533.93<br>(7,396.62 to<br>31,730.63)  | 20,897.53<br>(8,897.55 to<br>40,909.88)  | 230.52<br>(158.84 to<br>320.16) | 437.85<br>(197.78 to<br>847.96) | 377.11<br>(177.24 to<br>716.78) | 454.96<br>(199.73 to<br>887.45) |
| Interpersonal violence             | 24,087.56<br>(14,259.70 to<br>33,323.82) | 22,776.88<br>(12,051.01 to<br>36,349.71) | 21,235.60<br>(11,562.73 to<br>33,011.42) | 22,320.13<br>(11,644.39 to<br>35,872.08) | 429.32<br>(255.20 to<br>597.39) | 431.44<br>(230.99 to<br>697.11) | 405.61<br>(224.20 to<br>639.97) | 416.05<br>(221.18 to<br>675.29) |
| Physical violence by firearm       | 2,578.94<br>(755.57 to<br>4,701.93)      | 2,485.02<br>(674.59 to<br>4,897.31)      | 2,315.04<br>(620.78 to<br>4,487.01)      | 2,411.75<br>(645.81 to<br>4,781.66)      | 47.03<br>(14.03 to<br>85.29)    | 48.27<br>(13.59 to<br>94.84)    | 45.49<br>(13.08 to<br>87.05)    | 46.00<br>(12.98 to<br>90.21)    |
| Physical violence by sharp object  | 13,751.96<br>(7,351.21 to<br>20,074.21)  | 13,273.39<br>(6,419.50 to<br>21,198.85)  | 12,841.86<br>(6,454.71 to<br>20,295.93)  | 12,576.93<br>(5,824.32 to<br>20,168.62)  | 243.27<br>(130.50 to<br>355.86) | 245.99<br>(124.95 to<br>399.03) | 239.68<br>(124.02 to<br>381.76) | 229.80<br>(110.38 to<br>371.31) |
| Physical violence by other means   | 7,756.66<br>(4,833.21 to<br>11,888.20)   | 7,018.46<br>(3,306.73 to<br>13,557.73)   | 6,078.70<br>(2,920.46 to<br>11,403.35)   | 7,331.45<br>(3,388.84 to<br>14,047.09)   | 139.02<br>(85.69 to<br>212.07)  | 137.17<br>(65.10 to<br>266.62)  | 120.45<br>(57.21 to<br>229.53)  | 140.24<br>(64.90 to<br>270.30)  |

|                                                                              |                                       |                                       |                                      |                                       |                              |                                |                              |                                  |
|------------------------------------------------------------------------------|---------------------------------------|---------------------------------------|--------------------------------------|---------------------------------------|------------------------------|--------------------------------|------------------------------|----------------------------------|
| Forces of nature, conflict and terrorism, and executions and police conflict | 16.57<br>(10.93 to 25.59)             | 4,463.22<br>(0.00 to 16,490.26)       | 4,318.80<br>(0.00 to 15,969.32)      | 4,378.65<br>(0.00 to 16,241.37)       | 0.28<br>(0.18 to 0.43)       | 81.79<br>(0.00 to 302.79)      | 80.78<br>(0.00 to 298.97)    | 78.20<br>(0.00 to 290.82)        |
| Exposure to forces of nature                                                 | 0.00<br>(0.00 to 0.00)                | 96.38<br>(0.00 to 2,132.57)           | 93.16<br>(0.00 to 2,051.41)          | 93.51<br>(0.00 to 2,104.65)           | 0.00<br>(0.00 to 0.00)       | 1.97<br>(0.00 to 43.91)        | 1.96<br>(0.00 to 43.41)      | 1.84<br>(0.00 to 41.46)          |
| Conflict and terrorism                                                       | 0.00<br>(0.00 to 0.00)                | 4,349.09<br>(0.00 to 16,490.26)       | 4,209.14<br>(0.00 to 15,969.32)      | 4,269.03<br>(0.00 to 16,241.37)       | 0.00<br>(0.00 to 0.00)       | 79.50<br>(0.00 to 302.79)      | 78.50<br>(0.00 to 298.97)    | 76.05<br>(0.00 to 290.82)        |
| Executions and police conflict                                               | 16.57<br>(10.93 to 25.59)             | 16.75<br>(0.00 to 219.73)             | 16.50<br>(0.00 to 216.46)            | 16.11<br>(0.00 to 211.95)             | 0.28<br>(0.18 to 0.43)       | 0.32<br>(0.00 to 4.17)         | 0.32<br>(0.00 to 4.15)       | 0.30<br>(0.00 to 3.96)           |
| <b>South Africa</b>                                                          |                                       |                                       |                                      |                                       |                              |                                |                              |                                  |
| Cause                                                                        | YLLs (in 1000s)                       |                                       |                                      |                                       | Deaths (in 1000s)            |                                |                              |                                  |
|                                                                              | 2016                                  | 2040 Forecast                         | 2040 Better Scenario                 | 2040 Worse Scenario                   | 2016                         | 2040 Forecast                  | 2040 Better Scenario         | 2040 Worse Scenario              |
| All causes                                                                   | 21,264.89<br>(19,909.97 to 22,818.57) | 18,222.85<br>(11,302.72 to 34,113.60) | 12,857.35<br>(8,080.53 to 23,758.34) | 37,864.87<br>(29,346.29 to 56,186.20) | 533.73<br>(507.95 to 560.35) | 635.00<br>(439.97 to 1,002.53) | 475.19<br>(327.69 to 745.63) | 1,062.34<br>(848.28 to 1,463.07) |
| Communicable, maternal, neonatal, and nutritional diseases                   | 12,790.86<br>(11,385.37 to 14,374.89) | 5,026.18<br>(2,695.62 to 10,883.63)   | 3,468.89<br>(1,889.97 to 7,286.94)   | 23,363.76<br>(18,062.42 to 30,914.07) | 253.74<br>(228.51 to 281.98) | 119.47<br>(71.39 to 233.27)    | 84.50<br>(50.95 to 163.50)   | 502.89<br>(393.53 to 648.25)     |
| HIV/AIDS and tuberculosis                                                    | 9,260.84<br>(8,081.60 to 10,709.37)   | 2,061.14<br>(1,129.45 to 3,967.44)    | 1,411.29<br>(772.45 to 2,806.54)     | 19,467.00<br>(15,365.57 to 23,003.85) | 186.61<br>(163.39 to 212.76) | 42.86<br>(22.36 to 81.96)      | 26.42<br>(14.00 to 54.55)    | 405.39<br>(319.73 to 475.33)     |
| Tuberculosis                                                                 | 875.63<br>(780.79 to 986.64)          | 835.12<br>(312.38 to 2,279.35)        | 362.36<br>(135.73 to 1,050.29)       | 1,065.74<br>(393.48 to 2,958.18)      | 22.33<br>(20.33 to 24.78)    | 22.53<br>(10.49 to 53.39)      | 9.98<br>(4.43 to 23.96)      | 28.34<br>(12.32 to 68.91)        |
| HIV/AIDS                                                                     | 8,385.20<br>(7,168.45 to 9,864.54)    | 1,226.02<br>(568.50 to 2,683.87)      | 1,048.93<br>(499.78 to 2,360.03)     | 18,401.26<br>(14,207.05 to 22,145.37) | 164.29<br>(140.55 to 191.23) | 20.33<br>(7.05 to 49.17)       | 16.43<br>(6.24 to 41.63)     | 377.05<br>(287.67 to 447.02)     |
| Diarrhea, lower respiratory, and other common infectious diseases            | 1,954.33<br>(1,663.48 to 2,276.15)    | 2,056.40<br>(751.66 to 6,067.73)      | 1,407.53<br>(526.34 to 4,228.79)     | 2,810.58<br>(1,012.01 to 8,176.42)    | 46.47<br>(39.65 to 53.55)    | 62.79<br>(31.50 to 141.39)     | 47.63<br>(24.82 to 108.29)   | 81.53<br>(39.49 to 188.90)       |
| Diarrheal diseases                                                           | 540.60<br>(380.69 to 735.63)          | 608.80<br>(71.82 to 2,714.85)         | 461.83<br>(62.53 to 1,876.32)        | 876.20<br>(98.17 to 3,894.87)         | 12.34<br>(8.00 to 18.85)     | 17.12<br>(2.97 to 64.61)       | 14.39<br>(2.91 to 51.72)     | 23.38<br>(3.74 to 87.96)         |
| Intestinal infectious diseases                                               | 1.04<br>(0.57 to 1.73)                | 1.42<br>(0.25 to 4.54)                | 1.38<br>(0.23 to 4.58)               | 1.46<br>(0.25 to 4.70)                | 0.02<br>(0.01 to 0.03)       | 0.02<br>(0.01 to 0.07)         | 0.02<br>(0.01 to 0.06)       | 0.02<br>(0.01 to 0.06)           |
| Typhoid fever                                                                | 0.70<br>(0.33 to 1.24)                | 1.14<br>(0.15 to 3.81)                | 1.18<br>(0.17 to 3.94)               | 1.18<br>(0.16 to 4.08)                | 0.01<br>(0.00 to 0.02)       | 0.02<br>(0.00 to 0.05)         | 0.02<br>(0.00 to 0.06)       | 0.02<br>(0.00 to 0.06)           |
| Paratyphoid fever                                                            | 0.02<br>(0.01 to 0.05)                | 0.05<br>(0.01 to 0.16)                | 0.03<br>(0.00 to 0.11)               | 0.05<br>(0.01 to 0.18)                | 0.00<br>(0.00 to 0.00)       | 0.00<br>(0.00 to 0.00)         | 0.00<br>(0.00 to 0.00)       | 0.00<br>(0.00 to 0.00)           |
| Other intestinal infectious diseases                                         | 0.32<br>(0.12 to 0.70)                | 0.22<br>(0.06 to 0.69)                | 0.17<br>(0.04 to 0.53)               | 0.23<br>(0.06 to 0.69)                | 0.01<br>(0.00 to 0.01)       | 0.01<br>(0.00 to 0.02)         | 0.00<br>(0.00 to 0.01)       | 0.01<br>(0.00 to 0.01)           |
| Lower respiratory infections                                                 | 1,231.29<br>(1,034.43 to 1,434.96)    | 1,284.23<br>(591.32 to 3,024.52)      | 833.19<br>(392.77 to 1,937.24)       | 1,766.51<br>(815.92 to 4,049.59)      | 30.73<br>(25.96 to 34.38)    | 42.45<br>(25.96 to 76.04)      | 30.85<br>(19.16 to 53.69)    | 55.02<br>(31.84 to 97.54)        |
| Upper respiratory infections                                                 | 0.51<br>(0.40 to 0.66)                | 0.52<br>(0.21 to 1.26)                | 0.27<br>(0.11 to 0.68)               | 0.54<br>(0.21 to 1.34)                | 0.01<br>(0.01 to 0.01)       | 0.01<br>(0.01 to 0.03)         | 0.01<br>(0.00 to 0.02)       | 0.01<br>(0.01 to 0.03)           |
| Otitis media                                                                 | 0.85<br>(0.63 to 1.08)                | 0.24<br>(0.07 to 0.68)                | 0.23<br>(0.07 to 0.64)               | 0.23<br>(0.06 to 0.67)                | 0.02<br>(0.01 to 0.02)       | 0.00<br>(0.00 to 0.01)         | 0.00<br>(0.00 to 0.01)       | 0.00<br>(0.00 to 0.01)           |
| Meningitis                                                                   | 139.51<br>(95.30 to 169.48)           | 126.76<br>(36.92 to 338.52)           | 88.14<br>(26.35 to 248.11)           | 127.96<br>(37.94 to 337.40)           | 2.63<br>(1.71 to 3.24)       | 2.54<br>(0.97 to 6.07)         | 1.87<br>(0.72 to 4.43)       | 2.43<br>(0.91 to 5.74)           |
| Pneumococcal meningitis                                                      | 8.90<br>(6.00 to 11.22)               | 7.49<br>(2.41 to 18.90)               | 6.88<br>(2.16 to 17.16)              | 7.76<br>(2.42 to 20.22)               | 0.19<br>(0.12 to 0.25)       | 0.17<br>(0.07 to 0.37)         | 0.16<br>(0.07 to 0.35)       | 0.17<br>(0.07 to 0.36)           |

|                                         |                              |                               |                               |                               |                           |                           |                           |                           |
|-----------------------------------------|------------------------------|-------------------------------|-------------------------------|-------------------------------|---------------------------|---------------------------|---------------------------|---------------------------|
| H influenzae type B meningitis          | 10.23<br>(7.21 to<br>12.72)  | 10.20<br>(3.26 to<br>24.07)   | 7.22<br>(2.59 to<br>17.34)    | 13.83<br>(4.24 to<br>31.47)   | 0.19<br>(0.12 to<br>0.23) | 0.17<br>(0.07 to<br>0.37) | 0.14<br>(0.06 to<br>0.32) | 0.21<br>(0.08 to<br>0.45) |
| Meningococcal meningitis                | 55.99<br>(38.43 to<br>67.95) | 48.59<br>(12.68 to<br>138.93) | 33.24<br>(8.81 to<br>98.30)   | 47.76<br>(12.38 to<br>133.88) | 1.01<br>(0.67 to<br>1.24) | 0.95<br>(0.33 to<br>2.38) | 0.68<br>(0.25 to<br>1.74) | 0.90<br>(0.31 to<br>2.25) |
| Other meningitis                        | 64.40<br>(43.42 to<br>79.28) | 60.47<br>(17.56 to<br>169.75) | 40.80<br>(12.14 to<br>114.36) | 58.61<br>(16.40 to<br>164.91) | 1.23<br>(0.80 to<br>1.50) | 1.25<br>(0.47 to<br>2.95) | 0.88<br>(0.35 to<br>2.13) | 1.16<br>(0.43 to<br>2.77) |
| Encephalitis                            | 10.70<br>(8.13 to<br>12.26)  | 18.63<br>(5.91 to<br>52.38)   | 16.10<br>(5.32 to<br>45.21)   | 18.48<br>(5.73 to<br>50.55)   | 0.20<br>(0.15 to<br>0.23) | 0.38<br>(0.17 to<br>0.93) | 0.34<br>(0.16 to<br>0.83) | 0.36<br>(0.16 to<br>0.88) |
| Diphtheria                              | 0.24<br>(0.19 to<br>0.31)    | 0.15<br>(0.03 to<br>0.50)     | 0.13<br>(0.03 to<br>0.46)     | 0.16<br>(0.03 to<br>0.48)     | 0.00<br>(0.00 to<br>0.00) | 0.00<br>(0.00 to<br>0.01) | 0.00<br>(0.00 to<br>0.01) | 0.00<br>(0.00 to<br>0.01) |
| Whooping cough                          | 15.28<br>(1.27 to<br>50.25)  | 11.48<br>(0.86 to<br>42.14)   | 3.46<br>(0.16 to<br>14.29)    | 11.75<br>(0.90 to<br>43.79)   | 0.18<br>(0.02 to<br>0.60) | 0.14<br>(0.01 to<br>0.52) | 0.04<br>(0.00 to<br>0.19) | 0.14<br>(0.01 to<br>0.53) |
| Tetanus                                 | 0.72<br>(0.53 to<br>0.92)    | 0.23<br>(0.06 to<br>0.67)     | 0.20<br>(0.05 to<br>0.62)     | 0.23<br>(0.07 to<br>0.63)     | 0.01<br>(0.01 to<br>0.02) | 0.00<br>(0.00 to<br>0.01) | 0.00<br>(0.00 to<br>0.01) | 0.00<br>(0.00 to<br>0.01) |
| Measles                                 | 20.70<br>(6.89 to<br>46.83)  | 0.92<br>(0.06 to<br>4.33)     | 0.57<br>(0.04 to<br>2.38)     | 3.84<br>(16.01)               | 0.25<br>(0.08 to<br>0.57) | 0.01<br>(0.00 to<br>0.05) | 0.01<br>(0.00 to<br>0.03) | 0.05<br>(0.00 to<br>0.19) |
| <b>South Africa</b>                     |                              |                               |                               |                               |                           |                           |                           |                           |
| Cause                                   | YLLs (in 1000s)              |                               |                               |                               | Deaths (in 1000s)         |                           |                           |                           |
|                                         | 2016                         | 2040 Forecast                 | 2040 Better Scenario          | 2040 Worse Scenario           | 2016                      | 2040 Forecast             | 2040 Better Scenario      | 2040 Worse Scenario       |
| Varicella and herpes zoster             | 2.87<br>(2.37 to<br>3.48)    | 3.04<br>(1.18 to<br>6.95)     | 2.02<br>(0.84 to<br>4.60)     | 3.22<br>(1.23 to<br>7.40)     | 0.08<br>(0.07 to<br>0.09) | 0.11<br>(0.07 to<br>0.15) | 0.08<br>(0.05 to<br>0.14) | 0.10<br>(0.06 to<br>0.18) |
| Neglected tropical diseases and malaria | 13.57<br>(9.80 to<br>16.52)  | 16.41<br>(4.97 to<br>44.73)   | 13.63<br>(4.42 to<br>37.77)   | 16.79<br>(4.88 to<br>44.06)   | 0.25<br>(0.19 to<br>0.30) | 0.26<br>(0.13 to<br>0.74) | 0.26<br>(0.11 to<br>0.64) | 0.29<br>(0.12 to<br>0.71) |
| Malaria                                 | 8.46<br>(5.43 to<br>11.45)   | 8.67<br>(2.79 to<br>24.71)    | 8.01<br>(2.62 to<br>23.52)    | 8.23<br>(2.65 to<br>24.25)    | 0.16<br>(0.10 to<br>0.21) | 0.16<br>(0.07 to<br>0.44) | 0.16<br>(0.06 to<br>0.42) | 0.15<br>(0.06 to<br>0.41) |
| Chagas disease                          | 0.00<br>(0.00 to<br>0.00)    | 0.00<br>(0.00 to<br>0.00)     | 0.00<br>(0.00 to<br>0.00)     | 0.00<br>(0.00 to<br>0.00)     | 0.00<br>(0.00 to<br>0.00) | 0.00<br>(0.00 to<br>0.00) | 0.00<br>(0.00 to<br>0.00) | 0.00<br>(0.00 to<br>0.00) |
| Leishmaniasis                           | 0.00<br>(0.00 to<br>0.00)    | 0.00<br>(0.00 to<br>0.00)     | 0.00<br>(0.00 to<br>0.00)     | 0.00<br>(0.00 to<br>0.00)     | 0.00<br>(0.00 to<br>0.00) | 0.00<br>(0.00 to<br>0.00) | 0.00<br>(0.00 to<br>0.00) | 0.00<br>(0.00 to<br>0.00) |
| African trypanosomiasis                 | 0.00<br>(0.00 to<br>0.00)    | 0.00<br>(0.00 to<br>0.00)     | 0.00<br>(0.00 to<br>0.00)     | 0.00<br>(0.00 to<br>0.00)     | 0.00<br>(0.00 to<br>0.00) | 0.00<br>(0.00 to<br>0.00) | 0.00<br>(0.00 to<br>0.00) | 0.00<br>(0.00 to<br>0.00) |
| Schistosomiasis                         | 0.32<br>(0.24 to<br>0.42)    | 0.31<br>(0.15 to<br>0.68)     | 0.27<br>(0.13 to<br>0.59)     | 0.30<br>(0.14 to<br>0.64)     | 0.01<br>(0.01 to<br>0.01) | 0.01<br>(0.01 to<br>0.02) | 0.01<br>(0.00 to<br>0.01) | 0.01<br>(0.00 to<br>0.01) |
| Cysticercosis                           | 1.23<br>(1.06 to<br>1.44)    | 0.82<br>(0.32 to<br>2.06)     | 0.74<br>(0.30 to<br>1.97)     | 0.78<br>(0.30 to<br>1.95)     | 0.03<br>(0.02 to<br>0.03) | 0.02<br>(0.01 to<br>0.04) | 0.02<br>(0.01 to<br>0.04) | 0.02<br>(0.01 to<br>0.04) |
| Cystic echinococcosis                   | 0.33<br>(0.25 to<br>0.41)    | 0.35<br>(0.15 to<br>0.80)     | 0.21<br>(0.09 to<br>0.48)     | 0.38<br>(0.16 to<br>0.87)     | 0.01<br>(0.01 to<br>0.01) | 0.01<br>(0.00 to<br>0.02) | 0.01<br>(0.00 to<br>0.01) | 0.01<br>(0.00 to<br>0.02) |
| Dengue                                  | 0.00<br>(0.00 to<br>0.00)    | 0.00<br>(0.00 to<br>0.00)     | 0.00<br>(0.00 to<br>0.00)     | 0.00<br>(0.00 to<br>0.00)     | 0.00<br>(0.00 to<br>0.00) | 0.00<br>(0.00 to<br>0.00) | 0.00<br>(0.00 to<br>0.00) | 0.00<br>(0.00 to<br>0.00) |
| Yellow fever                            | 0.00<br>(0.00 to<br>0.00)    | 0.00<br>(0.00 to<br>0.00)     | 0.00<br>(0.00 to<br>0.00)     | 0.00<br>(0.00 to<br>0.00)     | 0.00<br>(0.00 to<br>0.00) | 0.00<br>(0.00 to<br>0.00) | 0.00<br>(0.00 to<br>0.00) | 0.00<br>(0.00 to<br>0.00) |
| Rabies                                  | 1.29<br>(0.29 to<br>2.06)    | 2.60<br>(0.25 to<br>8.01)     | 1.46<br>(0.14 to<br>4.54)     | 3.21<br>(0.32 to<br>9.48)     | 0.02<br>(0.00 to<br>0.03) | 0.04<br>(0.00 to<br>0.11) | 0.02<br>(0.00 to<br>0.06) | 0.04<br>(0.01 to<br>0.13) |

|                                                       |                                                      |                                                     |                                                    |                                                       |                                                |                                                 |                                                |                                                 |
|-------------------------------------------------------|------------------------------------------------------|-----------------------------------------------------|----------------------------------------------------|-------------------------------------------------------|------------------------------------------------|-------------------------------------------------|------------------------------------------------|-------------------------------------------------|
| Intestinal nematode infections                        | 0.30<br>(0.18 to<br>0.45)                            | 0.83<br>(2.30)                                      | 0.76<br>(0.14 to<br>2.05)                          | 0.82<br>(0.15 to<br>2.23)                             | 0.00<br>(0.00 to<br>0.01)                      | 0.01<br>(0.00 to<br>0.03)                       | 0.01<br>(0.00 to<br>0.03)                      | 0.01<br>(0.00 to<br>0.03)                       |
| Other neglected tropical diseases                     | 1.64<br>(1.04 to<br>2.17)                            | 2.83<br>(0.77 to<br>7.27)                           | 2.19<br>(0.67 to<br>5.34)                          | 3.06<br>(0.81 to<br>7.60)                             | 0.03<br>(0.02 to<br>0.04)                      | 0.05<br>(0.02 to<br>0.11)                       | 0.04<br>(0.02 to<br>0.09)                      | 0.05<br>(0.02 to<br>0.11)                       |
| <b>Maternal disorders</b>                             | <b>127.70</b><br><b>(100.01 to</b><br><b>157.91)</b> | <b>140.67</b><br><b>(19.62 to</b><br><b>784.15)</b> | <b>94.65</b><br><b>(12.50 to</b><br><b>570.38)</b> | <b>192.92</b><br><b>(27.55 to</b><br><b>1,094.56)</b> | <b>2.26</b><br><b>(1.77 to</b><br><b>2.77)</b> | <b>2.46</b><br><b>(0.36 to</b><br><b>13.84)</b> | <b>1.66</b><br><b>(0.23 to</b><br><b>9.95)</b> | <b>3.39</b><br><b>(0.50 to</b><br><b>18.58)</b> |
| Maternal hemorrhage                                   | 13.19<br>(9.72 to<br>17.70)                          | 14.21<br>(2.00 to<br>77.86)                         | 9.80<br>(1.29 to<br>58.50)                         | 15.15<br>(2.13 to<br>85.47)                           | 0.23<br>(0.17 to<br>0.31)                      | 0.25<br>(0.04 to<br>1.39)                       | 0.17<br>(0.02 to<br>0.99)                      | 0.27<br>(0.04 to<br>1.47)                       |
| Maternal sepsis and other maternal infections         | 8.91<br>(6.30 to<br>12.24)                           | 9.49<br>(1.22 to<br>53.22)                          | 6.44<br>(0.77 to<br>38.35)                         | 10.26<br>(1.33 to<br>55.68)                           | 0.16<br>(0.11 to<br>0.21)                      | 0.17<br>(0.02 to<br>0.89)                       | 0.11<br>(0.01 to<br>0.64)                      | 0.18<br>(0.03 to<br>0.97)                       |
| Maternal hypertensive disorders                       | 22.21<br>(16.73 to<br>28.17)                         | 25.77<br>(3.28 to<br>149.17)                        | 17.30<br>(2.07 to<br>100.73)                       | 27.87<br>(5.52 to<br>154.23)                          | 0.39<br>(0.29 to<br>0.50)                      | 0.44<br>(0.06 to<br>2.48)                       | 0.30<br>(0.04 to<br>1.71)                      | 0.48<br>(0.06 to<br>2.66)                       |
| Maternal obstructed labor and uterine rupture         | 2.04<br>(1.25 to<br>3.02)                            | 2.39<br>(0.32 to<br>12.75)                          | 1.54<br>(0.19 to<br>8.06)                          | 2.57<br>(0.34 to<br>13.21)                            | 0.04<br>(0.02 to<br>0.05)                      | 0.04<br>(0.01 to<br>0.22)                       | 0.03<br>(0.00 to<br>0.14)                      | 0.05<br>(0.01 to<br>0.23)                       |
| Maternal abortion, miscarriage, and ectopic pregnancy | 15.35<br>(10.92 to<br>20.59)                         | 17.36<br>(2.28 to<br>88.38)                         | 11.71<br>(1.44 to<br>60.46)                        | 18.55<br>(2.44 to<br>95.72)                           | 0.28<br>(0.19 to<br>0.37)                      | 0.31<br>(0.04 to<br>1.52)                       | 0.21<br>(0.03 to<br>1.04)                      | 0.33<br>(0.05 to<br>1.67)                       |
| Indirect maternal deaths                              | 38.14<br>(28.33 to<br>48.77)                         | 42.66<br>(5.48 to<br>240.65)                        | 29.06<br>(3.58 to<br>164.85)                       | 45.88<br>(5.97 to<br>254.93)                          | 0.68<br>(0.50 to<br>0.86)                      | 0.75<br>(0.10 to<br>4.33)                       | 0.51<br>(0.06 to<br>2.94)                      | 0.80<br>(0.11 to<br>4.42)                       |
| Late maternal deaths                                  | 0.31<br>(0.15 to<br>0.58)                            | 0.29<br>(0.03 to<br>1.51)                           | 0.19<br>(0.02 to<br>1.02)                          | 0.31<br>(0.04 to<br>1.56)                             | 0.01<br>(0.00 to<br>0.01)                      | 0.01<br>(0.00 to<br>0.03)                       | 0.00<br>(0.00 to<br>0.02)                      | 0.01<br>(0.00 to<br>0.03)                       |
| Maternal deaths aggravated by HIV/AIDS                | 7.63<br>(5.25 to<br>10.02)                           | 8.46<br>(0.02 to<br>48.42)                          | 4.26<br>(0.01 to<br>27.23)                         | 50.80<br>(7.46 to<br>267.20)                          | 0.14<br>(0.10 to<br>0.18)                      | 0.15<br>(0.00 to<br>0.84)                       | 0.07<br>(0.00 to<br>0.47)                      | 0.91<br>(0.14 to<br>4.79)                       |
| Other maternal disorders                              | 19.92<br>(14.51 to<br>25.99)                         | 20.04<br>(2.62 to<br>107.84)                        | 14.35<br>(1.80 to<br>81.41)                        | 21.52<br>(2.88 to<br>114.20)                          | 0.35<br>(0.25 to<br>0.45)                      | 0.35<br>(0.05 to<br>1.93)                       | 0.25<br>(0.03 to<br>1.42)                      | 0.37<br>(0.05 to<br>1.98)                       |

#### South Africa

| Cause                                                    | YLLs (in 1000s)                                          |                                                      |                                                      |                                                        | Deaths (in 1000s)                                 |                                                |                                                |                                                 |
|----------------------------------------------------------|----------------------------------------------------------|------------------------------------------------------|------------------------------------------------------|--------------------------------------------------------|---------------------------------------------------|------------------------------------------------|------------------------------------------------|-------------------------------------------------|
|                                                          | 2016                                                     | 2040 Forecast                                        | 2040 Better Scenario                                 | 2040 Worse Scenario                                    | 2016                                              | 2040 Forecast                                  | 2040 Better Scenario                           | 2040 Worse Scenario                             |
| <b>Neonatal disorders</b>                                | <b>1,191.75</b><br><b>(890.68 to</b><br><b>1,595.63)</b> | <b>553.07</b><br><b>(318.92 to</b><br><b>847.86)</b> | <b>374.44</b><br><b>(215.29 to</b><br><b>582.14)</b> | <b>675.74</b><br><b>(391.40 to</b><br><b>1,042.44)</b> | <b>13.77</b><br><b>(10.29 to</b><br><b>18.43)</b> | <b>6.39</b><br><b>(3.68 to</b><br><b>9.79)</b> | <b>4.33</b><br><b>(2.49 to</b><br><b>6.72)</b> | <b>7.81</b><br><b>(4.52 to</b><br><b>12.04)</b> |
| Neonatal preterm birth                                   | 430.97<br>(318.59 to<br>579.57)                          | 146.05<br>(88.42 to<br>212.89)                       | 91.38<br>(54.74 to<br>131.71)                        | 211.88<br>(125.40 to<br>306.65)                        | 4.98<br>(3.68 to<br>6.69)                         | 1.69<br>(1.02 to<br>2.46)                      | 1.06<br>(0.63 to<br>1.52)                      | 2.45<br>(1.45 to<br>3.54)                       |
| Neonatal encephalopathy due to birth asphyxia and trauma | 273.79<br>(200.99 to<br>369.52)                          | 116.51<br>(60.03 to<br>193.11)                       | 72.25<br>(36.66 to<br>122.37)                        | 130.76<br>(67.18 to<br>218.99)                         | 3.16<br>(2.32 to<br>4.27)                         | 1.35<br>(0.69 to<br>2.23)                      | 0.83<br>(0.42 to<br>1.41)                      | 1.51<br>(0.78 to<br>2.53)                       |
| Neonatal sepsis and other neonatal infections            | 138.59<br>(93.72 to<br>204.53)                           | 86.56<br>(51.14 to<br>139.82)                        | 57.81<br>(33.55 to<br>92.47)                         | 97.40<br>(58.04 to<br>158.05)                          | 1.60<br>(1.08 to<br>2.36)                         | 1.00<br>(0.59 to<br>1.62)                      | 0.67<br>(0.39 to<br>1.07)                      | 1.13<br>(0.67 to<br>1.83)                       |
| Hemolytic disease and other neonatal jaundice            | 12.03<br>(8.66 to<br>16.92)                              | 3.98<br>(2.14 to<br>6.54)                            | 2.52<br>(1.37 to<br>4.13)                            | 4.57<br>(2.43 to<br>7.57)                              | 0.14<br>(0.10 to<br>0.20)                         | 0.05<br>(0.02 to<br>0.08)                      | 0.03<br>(0.02 to<br>0.05)                      | 0.05<br>(0.03 to<br>0.09)                       |
| Other neonatal disorders                                 | 336.38<br>(243.57 to<br>460.47)                          | 199.98<br>(103.51 to<br>334.38)                      | 150.48<br>(79.65 to<br>248.28)                       | 231.12<br>(120.34 to<br>384.98)                        | 3.89<br>(2.81 to<br>5.32)                         | 2.31<br>(1.20 to<br>3.86)                      | 1.74<br>(0.92 to<br>2.87)                      | 2.67<br>(1.39 to<br>4.45)                       |
| <b>Nutritional deficiencies</b>                          | <b>110.14</b><br><b>(88.00 to</b><br><b>138.14)</b>      | <b>60.32</b><br><b>(33.42 to</b><br><b>115.82)</b>   | <b>54.20</b><br><b>(29.73 to</b><br><b>105.64)</b>   | <b>61.48</b><br><b>(34.25 to</b><br><b>113.56)</b>     | <b>1.85</b><br><b>(1.58 to</b><br><b>2.19)</b>    | <b>1.59</b><br><b>(1.12 to</b><br><b>2.57)</b> | <b>1.53</b><br><b>(1.10 to</b><br><b>2.46)</b> | <b>1.51</b><br><b>(1.07 to</b><br><b>2.37)</b>  |
| Protein-energy malnutrition                              | 101.45<br>(79.57 to<br>129.19)                           | 47.70<br>(25.84 to<br>87.98)                         | 44.09<br>(24.00 to<br>82.37)                         | 49.34<br>(26.98 to<br>88.89)                           | 1.58<br>(1.32 to<br>1.92)                         | 1.13<br>(0.79 to<br>1.83)                      | 1.14<br>(0.81 to<br>1.81)                      | 1.09<br>(0.76 to<br>1.76)                       |

|                                                                         |                                                |                                                 |                                                 |                                                  |                                          |                                          |                                          |                                          |
|-------------------------------------------------------------------------|------------------------------------------------|-------------------------------------------------|-------------------------------------------------|--------------------------------------------------|------------------------------------------|------------------------------------------|------------------------------------------|------------------------------------------|
| Iodine deficiency                                                       | 0.54<br>(0.22 to<br>1.11)                      | 1.01<br>(0.06 to<br>3.97)                       | 0.78<br>(0.04 to<br>3.04)                       | 1.03<br>(0.06 to<br>4.24)                        | 0.01<br>(0.01 to<br>0.02)                | 0.04<br>(0.00 to<br>0.15)                | 0.04<br>(0.00 to<br>0.11)                | 0.04<br>(0.00 to<br>0.12)                |
| Dietary iron deficiency                                                 | 0.30<br>(0.26 to<br>0.34)                      | 0.43<br>(0.13 to<br>1.13)                       | 0.39<br>(0.13 to<br>1.04)                       | 0.43<br>(0.14 to<br>1.09)                        | 0.01<br>(0.00 to<br>0.01)                | 0.01<br>(0.00 to<br>0.02)                | 0.01<br>(0.00 to<br>0.02)                | 0.01<br>(0.00 to<br>0.02)                |
| Other nutritional deficiencies                                          | 7.85<br>(6.83 to<br>9.02)                      | 11.19<br>(5.96 to<br>26.13)                     | 8.93<br>(4.75 to<br>21.51)                      | 10.69<br>(5.73 to<br>25.08)                      | 0.25<br>(0.22 to<br>0.29)                | 0.40<br>(0.29 to<br>0.69)                | 0.34<br>(0.24 to<br>0.59)                | 0.37<br>(0.27 to<br>0.63)                |
| <b>Other communicable, maternal, neonatal, and nutritional diseases</b> | <b>132.54<br/>(95.74 to<br/>167.99)</b>        | <b>138.16<br/>(59.90 to<br/>292.32)</b>         | <b>113.15<br/>(49.61 to<br/>252.77)</b>         | <b>139.25<br/>(60.93 to<br/>300.95)</b>          | <b>2.53<br/>(1.80 to<br/>3.00)</b>       | <b>3.09<br/>(1.63 to<br/>5.88)</b>       | <b>2.68<br/>(1.44 to<br/>5.11)</b>       | <b>2.98<br/>(1.58 to<br/>5.64)</b>       |
| Sexually transmitted infections excluding HIV                           | 29.14<br>(15.98 to<br>50.87)                   | 12.80<br>(4.69 to<br>34.19)                     | 9.68<br>(3.52 to<br>26.20)                      | 12.84<br>(4.72 to<br>32.89)                      | 0.42<br>(0.26 to<br>0.69)                | 0.23<br>(0.10 to<br>0.57)                | 0.18<br>(0.08 to<br>0.49)                | 0.22<br>(0.10 to<br>0.55)                |
| Syphilis                                                                | 25.50<br>(11.98 to<br>47.60)                   | 8.20<br>(2.94 to<br>18.37)                      | 5.59<br>(1.94 to<br>12.84)                      | 8.54<br>(3.05 to<br>18.82)                       | 0.33<br>(0.18 to<br>0.60)                | 0.12<br>(0.05 to<br>0.28)                | 0.09<br>(0.04 to<br>0.20)                | 0.13<br>(0.05 to<br>0.28)                |
| Chlamydial infection                                                    | 0.70<br>(0.57 to<br>0.91)                      | 0.94<br>(0.26 to<br>3.33)                       | 0.83<br>(0.23 to<br>3.00)                       | 0.89<br>(0.25 to<br>3.09)                        | 0.02<br>(0.01 to<br>0.02)                | 0.02<br>(0.01 to<br>0.07)                | 0.02<br>(0.01 to<br>0.06)                | 0.02<br>(0.01 to<br>0.06)                |
| Gonococcal infection                                                    | 1.93<br>(1.57 to<br>2.53)                      | 2.41<br>(0.77 to<br>8.39)                       | 2.15<br>(0.66 to<br>8.12)                       | 2.25<br>(0.72 to<br>7.60)                        | 0.05<br>(0.04 to<br>0.06)                | 0.06<br>(0.03 to<br>0.17)                | 0.05<br>(0.02 to<br>0.16)                | 0.05<br>(0.02 to<br>0.15)                |
| Other sexually transmitted infections                                   | 1.02<br>(0.83 to<br>1.33)                      | 1.25<br>(0.39 to<br>4.28)                       | 1.11<br>(0.34 to<br>3.94)                       | 1.16<br>(0.37 to<br>3.82)                        | 0.02<br>(0.02 to<br>0.03)                | 0.02<br>(0.01 to<br>0.08)                | 0.02<br>(0.01 to<br>0.08)                | 0.03<br>(0.01 to<br>0.07)                |
| Acute hepatitis                                                         | 9.72<br>(8.73 to<br>10.74)                     | 11.45<br>(5.95 to<br>26.29)                     | 7.88<br>(3.94 to<br>19.19)                      | 10.87<br>(5.59 to<br>24.19)                      | 0.23<br>(0.21 to<br>0.26)                | 0.31<br>(0.20 to<br>0.59)                | 0.22<br>(0.14 to<br>0.42)                | 0.28<br>(0.18 to<br>0.53)                |
| Acute hepatitis A                                                       | 0.12<br>(0.07 to<br>0.19)                      | 0.09<br>(0.03 to<br>0.22)                       | 0.06<br>(0.02 to<br>0.15)                       | 0.09<br>(0.03 to<br>0.22)                        | 0.00<br>(0.00 to<br>0.00)                | 0.00<br>(0.00 to<br>0.00)                | 0.00<br>(0.00 to<br>0.00)                | 0.00<br>(0.00 to<br>0.00)                |
| Acute hepatitis B                                                       | 7.95<br>(7.05 to<br>8.94)                      | 9.13<br>(5.02 to<br>21.32)                      | 6.33<br>(3.40 to<br>15.41)                      | 8.53<br>(4.72 to<br>19.64)                       | 0.20<br>(0.18 to<br>0.22)                | 0.26<br>(0.16 to<br>0.50)                | 0.18<br>(0.11 to<br>0.35)                | 0.23<br>(0.15 to<br>0.45)                |
| Acute hepatitis C                                                       | 0.14<br>(0.11 to<br>0.17)                      | 0.21<br>(0.11 to<br>0.40)                       | 0.15<br>(0.08 to<br>0.30)                       | 0.19<br>(0.10 to<br>0.36)                        | 0.00<br>(0.00 to<br>0.01)                | 0.01<br>(0.00 to<br>0.01)                | 0.01<br>(0.00 to<br>0.01)                | 0.01<br>(0.00 to<br>0.01)                |
| Acute hepatitis E                                                       | 1.52<br>(1.27 to<br>1.77)                      | 2.02<br>(0.56 to<br>4.77)                       | 1.33<br>(0.39 to<br>3.26)                       | 2.05<br>(0.54 to<br>4.83)                        | 0.03<br>(0.02 to<br>0.03)                | 0.04<br>(0.02 to<br>0.08)                | 0.03<br>(0.02 to<br>0.06)                | 0.04<br>(0.02 to<br>0.08)                |
| Other unspecified infectious diseases                                   | 93.68<br>(59.39 to<br>115.02)                  | 113.90<br>(46.36 to<br>246.42)                  | 95.59<br>(39.86 to<br>213.47)                   | 115.55<br>(47.65 to<br>249.16)                   | 1.87<br>(1.16 to<br>2.21)                | 2.56<br>(1.24 to<br>4.74)                | 2.28<br>(1.14 to<br>4.28)                | 2.47<br>(1.22 to<br>4.61)                |
| <b>Non-communicable diseases</b>                                        | <b>5,447.02<br/>(5,096.24 to<br/>5,827.64)</b> | <b>9,564.57<br/>(5,716.16 to<br/>17,370.89)</b> | <b>7,304.30<br/>(4,313.25 to<br/>13,600.90)</b> | <b>10,740.91<br/>(6,417.72 to<br/>18,903.45)</b> | <b>221.84<br/>(210.76 to<br/>233.60)</b> | <b>437.41<br/>(296.17 to<br/>649.66)</b> | <b>343.79<br/>(233.11 to<br/>517.04)</b> | <b>480.72<br/>(330.22 to<br/>697.92)</b> |

**South Africa**

| Cause                      | YLLs (in 1000s)                                |                                                |                                                |                                                | Deaths (in 1000s)                     |                                        |                                        |                                         |
|----------------------------|------------------------------------------------|------------------------------------------------|------------------------------------------------|------------------------------------------------|---------------------------------------|----------------------------------------|----------------------------------------|-----------------------------------------|
|                            | 2016                                           | 2040 Forecast                                  | 2040 Better Scenario                           | 2040 Worse Scenario                            | 2016                                  | 2040 Forecast                          | 2040 Better Scenario                   | 2040 Worse Scenario                     |
| <b>Neoplasms</b>           | <b>1,254.47<br/>(1,166.32 to<br/>1,345.32)</b> | <b>2,349.30<br/>(1,445.10 to<br/>4,155.27)</b> | <b>2,100.44<br/>(1,274.33 to<br/>3,802.50)</b> | <b>2,587.05<br/>(1,615.17 to<br/>4,329.13)</b> | <b>47.29<br/>(44.10 to<br/>50.28)</b> | <b>96.53<br/>(64.46 to<br/>139.72)</b> | <b>89.38<br/>(58.61 to<br/>135.22)</b> | <b>104.55<br/>(70.98 to<br/>146.10)</b> |
| Lip and oral cavity cancer | 26.53<br>(24.00 to<br>29.31)                   | 45.20<br>(23.30 to<br>81.07)                   | 32.78<br>(16.66 to<br>59.56)                   | 73.53<br>(36.41 to<br>131.65)                  | 1.00<br>(0.91 to<br>1.10)             | 1.75<br>(0.98 to<br>2.82)              | 1.32<br>(0.75 to<br>2.09)              | 2.77<br>(1.48 to<br>4.75)               |
| Nasopharynx cancer         | 5.69<br>(5.16 to<br>6.24)                      | 10.85<br>(5.58 to<br>20.17)                    | 7.14<br>(3.64 to<br>13.24)                     | 16.65<br>(8.44 to<br>31.10)                    | 0.19<br>(0.17 to<br>0.21)             | 0.37<br>(0.20 to<br>0.63)              | 0.25<br>(0.13 to<br>0.43)              | 0.57<br>(0.30 to<br>0.99)               |
| Other pharynx cancer       | 6.63<br>(5.93 to<br>7.43)                      | 11.75<br>(6.20 to<br>21.32)                    | 10.51<br>(5.65 to<br>18.85)                    | 12.36<br>(6.57 to<br>21.53)                    | 0.23<br>(0.21 to<br>0.26)             | 0.44<br>(0.24 to<br>0.73)              | 0.40<br>(0.23 to<br>0.67)              | 0.45<br>(0.25 to<br>0.76)               |

|                                      |                                 |                                 |                                 |                                 |                           |                             |                             |                              |
|--------------------------------------|---------------------------------|---------------------------------|---------------------------------|---------------------------------|---------------------------|-----------------------------|-----------------------------|------------------------------|
| Esophageal cancer                    | 103.23<br>(94.68 to<br>113.25)  | 180.38<br>(85.91 to<br>338.65)  | 150.01<br>(72.27 to<br>281.61)  | 259.21<br>(116.11 to<br>494.58) | 4.22<br>(3.91 to<br>4.57) | 7.64<br>(3.94 to<br>13.42)  | 6.58<br>(3.48 to<br>11.53)  | 10.57<br>(5.18 to<br>19.01)  |
| Stomach cancer                       | 43.66<br>(40.61 to<br>47.13)    | 63.47<br>(38.42 to<br>107.39)   | 51.06<br>(30.35 to<br>87.14)    | 62.85<br>(38.53 to<br>102.85)   | 1.82<br>(1.71 to<br>1.93) | 2.87<br>(1.91 to<br>4.32)   | 2.38<br>(1.54 to<br>3.57)   | 2.79<br>(1.87 to<br>4.14)    |
| Colon and rectum cancer              | 76.33<br>(69.84 to<br>83.58)    | 170.79<br>(95.86 to<br>284.92)  | 145.88<br>(81.84 to<br>243.34)  | 169.97<br>(98.06 to<br>276.93)  | 3.33<br>(3.05 to<br>3.64) | 8.38<br>(5.25 to<br>12.92)  | 7.41<br>(4.60 to<br>11.28)  | 8.17<br>(5.18 to<br>12.51)   |
| Liver cancer                         | 64.98<br>(58.73 to<br>73.46)    | 133.72<br>(75.86 to<br>245.96)  | 127.04<br>(74.28 to<br>234.16)  | 154.48<br>(84.84 to<br>283.61)  | 2.30<br>(2.11 to<br>2.60) | 5.19<br>(3.19 to<br>8.19)   | 5.09<br>(3.12 to<br>8.12)   | 5.83<br>(3.45 to<br>9.40)    |
| Liver cancer due to hepatitis B      | 28.02<br>(23.23 to<br>33.74)    | 55.24<br>(30.16 to<br>107.92)   | 54.25<br>(29.51 to<br>107.08)   | 60.77<br>(32.04 to<br>122.34)   | 0.92<br>(0.75 to<br>1.12) | 1.98<br>(1.17 to<br>3.35)   | 2.00<br>(1.20 to<br>3.38)   | 2.13<br>(1.23 to<br>3.61)    |
| Liver cancer due to hepatitis C      | 9.40<br>(7.86 to<br>11.43)      | 20.43<br>(11.54 to<br>35.16)    | 20.43<br>(11.70 to<br>36.04)    | 21.89<br>(12.05 to<br>37.97)    | 0.40<br>(0.34 to<br>0.50) | 0.96<br>(0.60 to<br>1.48)   | 1.00<br>(0.62 to<br>1.55)   | 1.00<br>(0.61 to<br>1.57)    |
| Liver cancer due to alcohol use      | 12.87<br>(10.95 to<br>15.26)    | 28.41<br>(15.68 to<br>51.23)    | 23.68<br>(12.81 to<br>41.97)    | 38.80<br>(21.10 to<br>70.20)    | 0.49<br>(0.42 to<br>0.59) | 1.16<br>(0.68 to<br>1.88)   | 1.01<br>(0.60 to<br>1.67)   | 1.52<br>(0.88 to<br>2.47)    |
| Liver cancer due to other causes     | 14.68<br>(12.57 to<br>17.07)    | 29.64<br>(16.12 to<br>52.90)    | 28.68<br>(15.82 to<br>51.56)    | 33.03<br>(17.05 to<br>60.09)    | 0.48<br>(0.42 to<br>0.55) | 1.08<br>(0.61 to<br>1.74)   | 1.08<br>(0.62 to<br>1.76)   | 1.18<br>(0.63 to<br>1.95)    |
| Gallbladder and biliary tract cancer | 9.15<br>(8.05 to<br>10.25)      | 12.38<br>(8.13 to<br>18.72)     | 12.74<br>(8.08 to<br>20.11)     | 10.59<br>(7.22 to<br>15.36)     | 0.44<br>(0.38 to<br>0.48) | 0.64<br>(0.46 to<br>0.85)   | 0.68<br>(0.47 to<br>0.94)   | 0.54<br>(0.40 to<br>0.69)    |
| Pancreatic cancer                    | 46.43<br>(43.49 to<br>49.72)    | 102.65<br>(64.83 to<br>161.74)  | 106.03<br>(64.91 to<br>173.31)  | 101.79<br>(65.55 to<br>154.80)  | 2.07<br>(1.95 to<br>2.21) | 4.85<br>(3.20 to<br>7.18)   | 5.14<br>(3.34 to<br>7.77)   | 4.72<br>(3.15 to<br>6.74)    |
| Larynx cancer                        | 16.64<br>(15.29 to<br>18.26)    | 22.31<br>(11.02 to<br>38.82)    | 15.83<br>(7.93 to<br>27.33)     | 40.26<br>(18.31 to<br>73.73)    | 0.65<br>(0.60 to<br>0.71) | 0.89<br>(0.47 to<br>1.50)   | 0.65<br>(0.34 to<br>1.08)   | 1.57<br>(0.78 to<br>2.77)    |
| Tracheal, bronchus, and lung cancer  | 168.25<br>(152.71 to<br>184.31) | 249.45<br>(137.29 to<br>412.28) | 201.99<br>(110.96 to<br>344.28) | 447.39<br>(248.93 to<br>727.38) | 7.00<br>(6.34 to<br>7.63) | 10.82<br>(6.20 to<br>17.11) | 9.03<br>(5.17 to<br>14.40)  | 19.21<br>(11.04 to<br>30.05) |
| Malignant skin melanoma              | 10.79<br>(9.05 to<br>12.44)     | 21.16<br>(13.39 to<br>35.25)    | 26.30<br>(16.36 to<br>43.31)    | 17.40<br>(11.42 to<br>28.25)    | 0.42<br>(0.35 to<br>0.47) | 0.90<br>(0.63 to<br>1.27)   | 1.16<br>(0.78 to<br>1.64)   | 0.73<br>(0.53 to<br>0.99)    |
| Non-melanoma skin cancer             | 19.26<br>(17.53 to<br>21.15)    | 47.16<br>(31.69 to<br>65.14)    | 40.52<br>(26.01 to<br>58.38)    | 40.17<br>(28.22 to<br>52.90)    | 0.89<br>(0.81 to<br>0.97) | 2.36<br>(1.76 to<br>2.94)   | 2.09<br>(1.51 to<br>2.75)   | 1.98<br>(1.55 to<br>2.35)    |
| Breast cancer                        | 110.63<br>(96.88 to<br>124.67)  | 218.88<br>(104.19 to<br>513.80) | 184.82<br>(87.52 to<br>448.04)  | 212.05<br>(101.24 to<br>482.54) | 3.92<br>(3.45 to<br>4.36) | 8.61<br>(4.89 to<br>15.71)  | 7.48<br>(4.25 to<br>13.77)  | 8.33<br>(4.62 to<br>14.95)   |
| Cervical cancer                      | 133.60<br>(108.94 to<br>157.23) | 189.11<br>(95.90 to<br>469.33)  | 154.08<br>(75.90 to<br>387.46)  | 176.60<br>(91.66 to<br>421.51)  | 4.40<br>(3.66 to<br>5.20) | 6.71<br>(3.99 to<br>13.03)  | 5.58<br>(3.17 to<br>11.23)  | 6.26<br>(3.79 to<br>11.91)   |
| Uterine cancer                       | 9.50<br>(8.55 to<br>10.53)      | 19.02<br>(11.85 to<br>30.08)    | 16.72<br>(10.05 to<br>28.15)    | 17.43<br>(11.23 to<br>26.09)    | 0.45<br>(0.40 to<br>0.50) | 0.98<br>(0.66 to<br>1.37)   | 0.88<br>(0.57 to<br>1.29)   | 0.89<br>(0.63 to<br>1.19)    |
| Ovarian cancer                       | 24.67<br>(22.14 to<br>27.38)    | 51.70<br>(27.24 to<br>108.45)   | 49.48<br>(25.78 to<br>107.60)   | 46.62<br>(24.80 to<br>92.60)    | 0.92<br>(0.83 to<br>1.01) | 2.07<br>(1.20 to<br>3.57)   | 2.01<br>(1.15 to<br>3.53)   | 1.87<br>(1.11 to<br>3.15)    |
| Prostate cancer                      | 61.63<br>(48.98 to<br>78.89)    | 161.02<br>(104.36 to<br>220.71) | 162.16<br>(102.11 to<br>231.21) | 135.08<br>(91.23 to<br>179.53)  | 3.82<br>(3.01 to<br>4.84) | 10.66<br>(7.80 to<br>13.46) | 11.08<br>(7.75 to<br>14.28) | 8.75<br>(6.49 to<br>10.93)   |
| Testicular cancer                    | 1.90<br>(1.65 to<br>2.17)       | 2.63<br>(1.78 to<br>4.06)       | 2.32<br>(1.54 to<br>3.64)       | 2.29<br>(1.59 to<br>3.55)       | 0.06<br>(0.05 to<br>0.06) | 0.10<br>(0.08 to<br>0.13)   | 0.09<br>(0.07 to<br>0.12)   | 0.08<br>(0.07 to<br>0.11)    |

**South Africa**

| Cause | YLLs (in 1000s) |               |                      |                     | Deaths (in 1000s) |               |                      |                     |
|-------|-----------------|---------------|----------------------|---------------------|-------------------|---------------|----------------------|---------------------|
|       | 2016            | 2040 Forecast | 2040 Better Scenario | 2040 Worse Scenario | 2016              | 2040 Forecast | 2040 Better Scenario | 2040 Worse Scenario |





|                                                     |                                          |                                          |                                          |                                            |                                       |                                       |                                       |                                       |
|-----------------------------------------------------|------------------------------------------|------------------------------------------|------------------------------------------|--------------------------------------------|---------------------------------------|---------------------------------------|---------------------------------------|---------------------------------------|
| Cardiomyopathy and myocarditis                      | 87.04<br>(76.96 to<br>97.58)             | 168.43<br>(98.61 to<br>313.61)           | 130.12<br>(75.11 to<br>240.99)           | 154.20<br>(91.14 to<br>280.27)             | 3.45<br>(3.06 to<br>3.90)             | 7.93<br>(5.37 to<br>12.03)            | 6.46<br>(4.20 to<br>9.76)             | 7.00<br>(4.75 to<br>10.43)            |
| Myocarditis                                         | 5.55<br>(4.50 to<br>7.69)                | 8.01<br>(3.88 to<br>16.62)               | 7.46<br>(3.67 to<br>16.36)               | 7.46<br>(3.57 to<br>15.41)                 | 0.13<br>(0.11 to<br>0.17)             | 0.21<br>(0.13 to<br>0.39)             | 0.21<br>(0.13 to<br>0.39)             | 0.19<br>(0.12 to<br>0.34)             |
| <b>South Africa</b>                                 |                                          |                                          |                                          |                                            |                                       |                                       |                                       |                                       |
| Cause                                               | YLLs (in 1000s)                          |                                          |                                          |                                            | Deaths (in 1000s)                     |                                       |                                       |                                       |
|                                                     | 2016                                     | 2040 Forecast                            | 2040 Better Scenario                     | 2040 Worse Scenario                        | 2016                                  | 2040 Forecast                         | 2040 Better Scenario                  | 2040 Worse Scenario                   |
| Alcoholic cardiomyopathy                            | 7.03<br>(5.78 to<br>9.12)                | 12.06<br>(7.57 to<br>19.33)              | 10.55<br>(6.42 to<br>17.08)              | 13.13<br>(8.50 to<br>20.82)                | 0.34<br>(0.28 to<br>0.43)             | 0.65<br>(0.47 to<br>0.88)             | 0.59<br>(0.41 to<br>0.82)             | 0.68<br>(0.52 to<br>0.92)             |
| Other cardiomyopathy                                | 74.46<br>(65.48 to<br>82.84)             | 148.36<br>(85.66 to<br>274.20)           | 112.11<br>(62.52 to<br>204.82)           | 133.60<br>(76.89 to<br>245.37)             | 2.98<br>(2.61 to<br>3.33)             | 7.07<br>(4.63 to<br>10.83)            | 5.66<br>(3.61 to<br>8.85)             | 6.13<br>(4.03 to<br>9.28)             |
| Atrial fibrillation and flutter                     | 9.14<br>(7.24 to<br>11.18)               | 21.49<br>(14.20 to<br>31.36)             | 20.47<br>(13.33 to<br>29.73)             | 20.75<br>(13.99 to<br>30.11)               | 0.87<br>(0.68 to<br>1.09)             | 2.13<br>(1.51 to<br>2.90)             | 2.13<br>(1.50 to<br>2.87)             | 1.97<br>(1.38 to<br>2.71)             |
| Aortic aneurysm                                     | 19.08<br>(17.55 to<br>20.75)             | 34.65<br>(20.09 to<br>61.01)             | 32.56<br>(18.52 to<br>57.75)             | 33.52<br>(19.74 to<br>59.28)               | 0.92<br>(0.86 to<br>0.99)             | 1.90<br>(1.32 to<br>2.81)             | 1.87<br>(1.26 to<br>2.77)             | 1.74<br>(1.22 to<br>2.57)             |
| Peripheral artery disease                           | 13.60<br>(10.46 to<br>16.54)             | 38.21<br>(21.22 to<br>63.49)             | 37.23<br>(20.53 to<br>62.90)             | 37.62<br>(20.82 to<br>62.53)               | 0.72<br>(0.56 to<br>0.89)             | 2.28<br>(1.52 to<br>3.29)             | 2.36<br>(1.57 to<br>3.44)             | 2.12<br>(1.38 to<br>3.06)             |
| Endocarditis                                        | 19.90<br>(16.97 to<br>26.38)             | 39.53<br>(17.82 to<br>100.31)            | 35.66<br>(16.45 to<br>89.72)             | 37.17<br>(17.05 to<br>91.77)               | 0.53<br>(0.46 to<br>0.68)             | 1.16<br>(0.66 to<br>2.38)             | 1.09<br>(0.63 to<br>2.20)             | 1.05<br>(0.59 to<br>2.14)             |
| Other cardiovascular and circulatory diseases       | 67.85<br>(52.42 to<br>82.99)             | 142.49<br>(75.93 to<br>295.47)           | 104.05<br>(55.60 to<br>221.63)           | 146.80<br>(79.73 to<br>297.02)             | 2.77<br>(2.12 to<br>3.40)             | 6.75<br>(4.44 to<br>10.86)            | 5.22<br>(3.37 to<br>8.51)             | 6.59<br>(4.36 to<br>10.55)            |
| <b>Chronic respiratory diseases</b>                 | <b>389.16<br/>(361.88 to<br/>420.39)</b> | <b>494.88<br/>(312.02 to<br/>784.73)</b> | <b>395.91<br/>(245.88 to<br/>648.45)</b> | <b>690.86<br/>(432.53 to<br/>1,105.31)</b> | <b>18.26<br/>(17.12 to<br/>19.52)</b> | <b>25.74<br/>(18.98 to<br/>34.50)</b> | <b>22.01<br/>(16.11 to<br/>29.87)</b> | <b>35.43<br/>(25.57 to<br/>48.95)</b> |
| Chronic obstructive pulmonary disease               | 224.82<br>(208.53 to<br>244.70)          | 297.11<br>(185.93 to<br>452.99)          | 227.21<br>(140.03 to<br>351.97)          | 486.15<br>(302.36 to<br>761.76)            | 12.42<br>(11.62 to<br>13.46)          | 17.62<br>(12.72 to<br>24.37)          | 14.45<br>(10.31 to<br>19.83)          | 27.36<br>(18.83 to<br>39.54)          |
| Pneumoconiosis                                      | 4.51<br>(4.13 to<br>5.02)                | 7.68<br>(5.16 to<br>10.79)               | 8.41<br>(5.40 to<br>12.38)               | 8.41<br>(4.63 to<br>9.02)                  | 0.21<br>(0.19 to<br>0.23)             | 0.41<br>(0.31 to<br>0.51)             | 0.47<br>(0.34 to<br>0.60)             | 0.35<br>(0.28 to<br>0.42)             |
| Silicosis                                           | 0.90<br>(0.65 to<br>1.10)                | 0.86<br>(0.50 to<br>1.34)                | 0.59<br>(0.32 to<br>1.03)                | 0.75<br>(0.46 to<br>1.15)                  | 0.04<br>(0.03 to<br>0.05)             | 0.04<br>(0.03 to<br>0.06)             | 0.03<br>(0.02 to<br>0.04)             | 0.04<br>(0.02 to<br>0.05)             |
| Asbestosis                                          | 2.40<br>(1.99 to<br>2.90)                | 5.22<br>(3.44 to<br>7.19)                | 6.39<br>(4.04 to<br>9.27)                | 4.32<br>(2.98 to<br>5.74)                  | 0.12<br>(0.10 to<br>0.14)             | 0.28<br>(0.21 to<br>0.36)             | 0.35<br>(0.25 to<br>0.47)             | 0.23<br>(0.18 to<br>0.28)             |
| Coal workers pneumoconiosis                         | 0.20<br>(0.15 to<br>0.26)                | 0.28<br>(0.15 to<br>0.56)                | 0.22<br>(0.11 to<br>0.49)                | 0.28<br>(0.16 to<br>0.55)                  | 0.01<br>(0.01 to<br>0.01)             | 0.01<br>(0.01 to<br>0.02)             | 0.01<br>(0.01 to<br>0.02)             | 0.01<br>(0.01 to<br>0.02)             |
| Other pneumoconiosis                                | 1.01<br>(0.84 to<br>1.28)                | 1.33<br>(0.86 to<br>2.07)                | 1.21<br>(0.74 to<br>1.98)                | 1.27<br>(0.85 to<br>1.96)                  | 0.04<br>(0.04 to<br>0.06)             | 0.07<br>(0.05 to<br>0.10)             | 0.07<br>(0.05 to<br>0.10)             | 0.07<br>(0.05 to<br>0.09)             |
| Asthma                                              | 125.06<br>(108.45 to<br>138.62)          | 122.25<br>(60.21 to<br>288.87)           | 75.41<br>(35.43 to<br>180.65)            | 139.11<br>(67.73 to<br>326.55)             | 4.34<br>(3.65 to<br>4.79)             | 4.81<br>(2.78 to<br>8.72)             | 3.13<br>(1.75 to<br>5.68)             | 5.30<br>(3.08 to<br>9.74)             |
| Interstitial lung disease and pulmonary sarcoidosis | 23.68<br>(19.00 to<br>36.54)             | 50.40<br>(32.24 to<br>80.33)             | 68.82<br>(42.76 to<br>109.97)            | 41.66<br>(27.51 to<br>66.36)               | 1.09<br>(0.87 to<br>1.66)             | 2.56<br>(1.83 to<br>3.80)             | 3.63<br>(2.49 to<br>5.30)             | 2.08<br>(1.53 to<br>3.10)             |
| Other chronic respiratory diseases                  | 11.09<br>(7.96 to<br>14.16)              | 17.44<br>(5.86 to<br>41.83)              | 16.06<br>(5.59 to<br>38.71)              | 17.32<br>(6.02 to<br>40.41)                | 0.20<br>(0.15 to<br>0.27)             | 0.34<br>(0.16 to<br>0.72)             | 0.33<br>(0.17 to<br>0.68)             | 0.33<br>(0.16 to<br>0.68)             |
| <b>Cirrhosis and other chronic liver diseases</b>   | <b>151.80<br/>(136.47 to<br/>181.28)</b> | <b>295.19<br/>(185.99 to<br/>514.48)</b> | <b>239.82<br/>(147.15 to<br/>430.17)</b> | <b>285.34<br/>(182.62 to<br/>498.56)</b>   | <b>4.65<br/>(4.23 to<br/>5.53)</b>    | <b>9.70<br/>(6.54 to<br/>15.42)</b>   | <b>8.07<br/>(5.28 to<br/>12.87)</b>   | <b>9.26<br/>(6.50 to<br/>14.55)</b>   |

|                                                                |                                                      |                                                        |                                                        |                                                        |                                                   |                                                   |                                                   |                                                   |
|----------------------------------------------------------------|------------------------------------------------------|--------------------------------------------------------|--------------------------------------------------------|--------------------------------------------------------|---------------------------------------------------|---------------------------------------------------|---------------------------------------------------|---------------------------------------------------|
|                                                                | 43.26<br>(38.29 to<br>52.66)                         | 88.22<br>(54.03 to<br>158.89)                          | 77.08<br>(46.37 to<br>141.27)                          | 76.41<br>(48.76 to<br>132.56)                          | 1.37<br>(1.22 to<br>1.66)                         | 2.95<br>(1.93 to<br>4.61)                         | 2.63<br>(1.70 to<br>4.19)                         | 2.54<br>(1.71 to<br>3.86)                         |
| Cirrhosis and other chronic liver diseases due to hepatitis B  |                                                      |                                                        |                                                        |                                                        |                                                   |                                                   |                                                   |                                                   |
|                                                                | 17.96<br>(15.68 to<br>21.70)                         | 36.92<br>(23.01 to<br>63.90)                           | 31.89<br>(19.54 to<br>56.71)                           | 32.03<br>(20.26 to<br>54.73)                           | 0.56<br>(0.50 to<br>0.68)                         | 1.21<br>(0.79 to<br>1.88)                         | 1.06<br>(0.68 to<br>1.69)                         | 1.04<br>(0.71 to<br>1.59)                         |
| Cirrhosis and other chronic liver diseases due to hepatitis C  |                                                      |                                                        |                                                        |                                                        |                                                   |                                                   |                                                   |                                                   |
|                                                                | 55.38<br>(48.72 to<br>67.62)                         | 110.23<br>(69.70 to<br>193.95)                         | 80.61<br>(50.95 to<br>142.87)                          | 121.94<br>(78.67 to<br>211.42)                         | 1.82<br>(1.62 to<br>2.19)                         | 3.81<br>(2.60 to<br>5.87)                         | 2.87<br>(1.91 to<br>4.43)                         | 4.13<br>(2.88 to<br>6.22)                         |
| Cirrhosis and other chronic liver diseases due to alcohol use  |                                                      |                                                        |                                                        |                                                        |                                                   |                                                   |                                                   |                                                   |
|                                                                | 35.20<br>(30.47 to<br>40.93)                         | 59.82<br>(33.13 to<br>126.73)                          | 50.24<br>(27.71 to<br>104.32)                          | 54.95<br>(30.40 to<br>114.02)                          | 0.90<br>(0.79 to<br>1.05)                         | 1.73<br>(1.13 to<br>3.03)                         | 1.51<br>(0.97 to<br>2.68)                         | 1.55<br>(1.03 to<br>2.67)                         |
| Cirrhosis and other chronic liver diseases due to other causes |                                                      |                                                        |                                                        |                                                        |                                                   |                                                   |                                                   |                                                   |
| <b>Digestive diseases</b>                                      | <b>210.50</b><br><b>(186.63 to</b><br><b>229.84)</b> | <b>327.57</b><br><b>(196.26 to</b><br><b>613.05)</b>   | <b>275.48</b><br><b>(161.80 to</b><br><b>535.57)</b>   | <b>310.94</b><br><b>(185.08 to</b><br><b>569.90)</b>   | <b>7.22</b><br><b>(6.44 to</b><br><b>7.79)</b>    | <b>13.07</b><br><b>(9.12 to</b><br><b>19.69)</b>  | <b>11.55</b><br><b>(7.98 to</b><br><b>17.39)</b>  | <b>12.06</b><br><b>(8.39 to</b><br><b>18.03)</b>  |
| Peptic ulcer disease                                           | 32.10<br>(28.52 to<br>35.34)                         | 31.46<br>(19.58 to<br>54.35)                           | 21.89<br>(13.28 to<br>38.35)                           | 31.70<br>(19.70 to<br>53.00)                           | 1.36<br>(1.23 to<br>1.49)                         | 1.60<br>(1.18 to<br>2.19)                         | 1.15<br>(0.82 to<br>1.62)                         | 1.57<br>(1.16 to<br>2.17)                         |
| <b>South Africa</b>                                            |                                                      |                                                        |                                                        |                                                        |                                                   |                                                   |                                                   |                                                   |
| Cause                                                          | YLLs (in 1000s)                                      |                                                        |                                                        |                                                        | Deaths (in 1000s)                                 |                                                   |                                                   |                                                   |
|                                                                | 2016                                                 | 2040 Forecast                                          | 2040 Better Scenario                                   | 2040 Worse Scenario                                    | 2016                                              | 2040 Forecast                                     | 2040 Better Scenario                              | 2040 Worse Scenario                               |
| Gastritis and duodenitis                                       | 25.47<br>(22.32 to<br>29.15)                         | 45.50<br>(26.33 to<br>94.35)                           | 36.45<br>(20.28 to<br>75.78)                           | 41.16<br>(24.18 to<br>86.30)                           | 0.74<br>(0.65 to<br>0.83)                         | 1.54<br>(1.06 to<br>2.52)                         | 1.28<br>(0.84 to<br>2.17)                         | 1.35<br>(0.94 to<br>2.21)                         |
| Appendicitis                                                   | 14.92<br>(12.02 to<br>17.64)                         | 18.91<br>(8.81 to<br>38.95)                            | 12.99<br>(6.08 to<br>27.51)                            | 18.52<br>(8.41 to<br>37.78)                            | 0.33<br>(0.27 to<br>0.38)                         | 0.50<br>(0.31 to<br>0.86)                         | 0.37<br>(0.22 to<br>0.63)                         | 0.47<br>(0.28 to<br>0.79)                         |
| Paralytic ileus and intestinal obstruction                     | 46.26<br>(37.90 to<br>55.94)                         | 75.18<br>(44.63 to<br>134.23)                          | 73.90<br>(43.20 to<br>134.37)                          | 66.88<br>(40.52 to<br>118.70)                          | 1.54<br>(1.25 to<br>1.85)                         | 3.00<br>(2.07 to<br>4.33)                         | 3.11<br>(2.13 to<br>4.57)                         | 2.58<br>(1.80 to<br>3.72)                         |
| Inguinal, femoral, and abdominal hernia                        | 5.93<br>(4.00 to<br>7.26)                            | 7.15<br>(3.90 to<br>13.85)                             | 6.16<br>(3.25 to<br>12.33)                             | 6.40<br>(3.57 to<br>12.20)                             | 0.23<br>(0.15 to<br>0.28)                         | 0.31<br>(0.19 to<br>0.46)                         | 0.28<br>(0.17 to<br>0.43)                         | 0.27<br>(0.17 to<br>0.39)                         |
| Inflammatory bowel disease                                     | 25.11<br>(17.94 to<br>29.27)                         | 38.12<br>(20.38 to<br>72.97)                           | 37.83<br>(19.87 to<br>72.93)                           | 33.63<br>(18.32 to<br>63.59)                           | 0.81<br>(0.58 to<br>0.94)                         | 1.52<br>(0.96 to<br>2.33)                         | 1.59<br>(0.98 to<br>2.44)                         | 1.30<br>(0.83 to<br>1.94)                         |
| Vascular intestinal disorders                                  | 7.25<br>(6.03 to<br>8.16)                            | 13.03<br>(8.22 to<br>21.33)                            | 11.98<br>(7.38 to<br>20.46)                            | 11.48<br>(7.32 to<br>18.29)                            | 0.30<br>(0.25 to<br>0.33)                         | 0.62<br>(0.44 to<br>0.85)                         | 0.60<br>(0.42 to<br>0.84)                         | 0.54<br>(0.40 to<br>0.71)                         |
| Gallbladder and biliary diseases                               | 20.03<br>(15.62 to<br>22.61)                         | 36.69<br>(16.24 to<br>83.63)                           | 24.72<br>(11.42 to<br>56.06)                           | 40.52<br>(17.85 to<br>92.74)                           | 0.76<br>(0.61 to<br>0.86)                         | 1.61<br>(0.83 to<br>3.03)                         | 1.14<br>(0.60 to<br>2.13)                         | 1.73<br>(0.87 to<br>3.27)                         |
| Pancreatitis                                                   | 11.13<br>(8.31 to<br>13.06)                          | 23.02<br>(8.93 to<br>55.85)                            | 15.60<br>(6.21 to<br>36.57)                            | 25.65<br>(9.42 to<br>62.81)                            | 0.33<br>(0.25 to<br>0.38)                         | 0.75<br>(0.34 to<br>1.61)                         | 0.53<br>(0.25 to<br>1.09)                         | 0.81<br>(0.36 to<br>1.78)                         |
| Other digestive diseases                                       | 22.31<br>(19.69 to<br>25.26)                         | 38.52<br>(23.54 to<br>73.26)                           | 33.96<br>(20.30 to<br>65.98)                           | 35.01<br>(21.69 to<br>65.77)                           | 0.81<br>(0.72 to<br>0.90)                         | 1.62<br>(1.18 to<br>2.44)                         | 1.50<br>(1.05 to<br>2.28)                         | 1.44<br>(1.06 to<br>2.12)                         |
| <b>Neurological disorders</b>                                  | <b>313.40</b><br><b>(285.14 to</b><br><b>346.97)</b> | <b>657.91</b><br><b>(406.83 to</b><br><b>1,185.88)</b> | <b>589.18</b><br><b>(365.51 to</b><br><b>1,040.37)</b> | <b>653.60</b><br><b>(397.68 to</b><br><b>1,164.63)</b> | <b>14.25</b><br><b>(12.69 to</b><br><b>16.15)</b> | <b>34.65</b><br><b>(25.00 to</b><br><b>50.36)</b> | <b>34.60</b><br><b>(25.27 to</b><br><b>47.53)</b> | <b>32.60</b><br><b>(23.20 to</b><br><b>47.53)</b> |
| Alzheimer's disease and other dementias                        | 86.57<br>(72.26 to<br>105.58)                        | 218.71<br>(137.83 to<br>338.70)                        | 221.09<br>(143.99 to<br>329.12)                        | 207.81<br>(128.53 to<br>329.59)                        | 8.54<br>(7.12 to<br>10.39)                        | 22.19<br>(14.70 to<br>33.76)                      | 23.39<br>(16.34 to<br>33.63)                      | 20.47<br>(12.80 to<br>32.36)                      |
| Parkinson's disease                                            | 7.24<br>(5.50 to<br>9.36)                            | 19.57<br>(13.93 to<br>26.42)                           | 23.54<br>(16.26 to<br>33.19)                           | 15.89<br>(11.54 to<br>20.99)                           | 0.59<br>(0.45 to<br>0.79)                         | 1.64<br>(1.24 to<br>2.20)                         | 2.03<br>(1.51 to<br>2.71)                         | 1.31<br>(0.98 to<br>1.72)                         |
| Epilepsy                                                       | 194.77<br>(174.98 to<br>219.70)                      | 370.21<br>(178.18 to<br>842.22)                        | 292.35<br>(140.15 to<br>676.41)                        | 387.08<br>(182.02 to<br>866.60)                        | 4.43<br>(4.01 to<br>4.95)                         | 9.33<br>(5.20 to<br>18.13)                        | 7.55<br>(4.20 to<br>15.14)                        | 9.55<br>(5.16 to<br>18.95)                        |
| Multiple sclerosis                                             | 1.87<br>(1.60 to<br>2.23)                            | 3.34<br>(1.94 to<br>7.16)                              | 3.63<br>(2.07 to<br>8.10)                              | 2.96<br>(1.77 to<br>6.05)                              | 0.06<br>(0.05 to<br>0.07)                         | 0.10<br>(0.07 to<br>0.19)                         | 0.12<br>(0.07 to<br>0.22)                         | 0.09<br>(0.06 to<br>0.16)                         |

|                                                            |                                                            |                                                            |                                                          |                                                            |                                                   |                                                     |                                                    |                                                     |
|------------------------------------------------------------|------------------------------------------------------------|------------------------------------------------------------|----------------------------------------------------------|------------------------------------------------------------|---------------------------------------------------|-----------------------------------------------------|----------------------------------------------------|-----------------------------------------------------|
| Motor neuron disease                                       | 1.75<br>(1.60 to<br>1.93)                                  | 4.11<br>(2.71 to<br>6.90)                                  | 4.32<br>(2.80 to<br>7.42)                                | 3.41<br>(2.29 to<br>5.46)                                  | 0.05<br>(0.05 to<br>0.06)                         | 0.14<br>(0.09 to<br>0.21)                           | 0.14<br>(0.10 to<br>0.23)                          | 0.11<br>(0.08 to<br>0.16)                           |
| Other neurological disorders                               | 21.20<br>(19.36 to<br>23.17)                               | 41.98<br>(25.41 to<br>83.86)                               | 44.24<br>(26.90 to<br>88.33)                             | 36.45<br>(22.09 to<br>70.16)                               | 0.57<br>(0.53 to<br>0.61)                         | 1.26<br>(0.85 to<br>2.09)                           | 1.38<br>(0.91 to<br>2.32)                          | 1.06<br>(0.74 to<br>1.71)                           |
| <b>Mental disorders</b>                                    | <b>72.80</b><br><b>(53.35 to</b><br><b>152.80)</b>         | <b>164.77</b><br><b>(81.46 to</b><br><b>425.08)</b>        | <b>181.05</b><br><b>(88.14 to</b><br><b>479.46)</b>      | <b>147.39</b><br><b>(72.90 to</b><br><b>378.58)</b>        | <b>1.73</b><br><b>(1.32 to</b><br><b>3.33)</b>    | <b>4.17</b><br><b>(2.32 to</b><br><b>9.17)</b>      | <b>4.65</b><br><b>(2.58 to</b><br><b>10.42)</b>    | <b>3.70</b><br><b>(2.09 to</b><br><b>8.13)</b>      |
| Alcohol use disorders                                      | 22.85<br>(18.42 to<br>39.83)                               | 43.95<br>(25.67 to<br>83.83)                               | 45.22<br>(26.02 to<br>87.18)                             | 40.46<br>(24.49 to<br>75.51)                               | 0.68<br>(0.55 to<br>1.17)                         | 1.38<br>(0.84 to<br>2.55)                           | 1.44<br>(0.85 to<br>2.72)                          | 1.26<br>(0.78 to<br>2.27)                           |
| Drug use disorders                                         | 49.63<br>(33.42 to<br>120.04)                              | 120.29<br>(49.14 to<br>360.42)                             | 135.24<br>(55.48 to<br>414.83)                           | 106.46<br>(43.38 to<br>317.17)                             | 1.04<br>(0.73 to<br>2.37)                         | 2.78<br>(1.36 to<br>7.44)                           | 3.21<br>(1.57 to<br>8.37)                          | 2.42<br>(1.18 to<br>6.38)                           |
| Opioid use disorders                                       | 36.15<br>(21.26 to<br>103.40)                              | 86.59<br>(30.33 to<br>274.41)                              | 92.44<br>(31.55 to<br>307.32)                            | 76.94<br>(26.70 to<br>249.12)                              | 0.72<br>(0.44 to<br>2.00)                         | 1.84<br>(0.73 to<br>5.76)                           | 1.98<br>(0.77 to<br>6.24)                          | 1.62<br>(0.64 to<br>5.02)                           |
| Cocaine use disorders                                      | 1.63<br>(0.74 to<br>2.22)                                  | 4.84<br>(1.69 to<br>12.36)                                 | 5.78<br>(2.00 to<br>14.86)                               | 4.20<br>(1.48 to<br>10.59)                                 | 0.04<br>(0.02 to<br>0.06)                         | 0.14<br>(0.05 to<br>0.29)                           | 0.17<br>(0.07 to<br>0.37)                          | 0.12<br>(0.05 to<br>0.25)                           |
| Amphetamine use disorders                                  | 0.86<br>(0.40 to<br>1.15)                                  | 3.38<br>(1.14 to<br>9.65)                                  | 4.57<br>(1.48 to<br>13.52)                               | 2.95<br>(1.02 to<br>8.41)                                  | 0.02<br>(0.01 to<br>0.03)                         | 0.08<br>(0.03 to<br>0.20)                           | 0.11<br>(0.04 to<br>0.28)                          | 0.07<br>(0.03 to<br>0.18)                           |
| Other drug use disorders                                   | 10.99<br>(6.62 to<br>14.17)                                | 25.49<br>(11.24 to<br>71.53)                               | 32.45<br>(14.63 to<br>85.87)                             | 22.38<br>(10.01 to<br>59.94)                               | 0.26<br>(0.17 to<br>0.33)                         | 0.71<br>(0.41 to<br>1.60)                           | 0.94<br>(0.55 to<br>1.94)                          | 0.61<br>(0.35 to<br>1.36)                           |
| Eating disorders                                           | 0.32<br>(0.12 to<br>0.50)                                  | 0.53<br>(0.12 to<br>1.72)                                  | 0.58<br>(0.12 to<br>1.95)                                | 0.47<br>(0.10 to<br>1.50)                                  | 0.01<br>(0.00 to<br>0.01)                         | 0.01<br>(0.00 to<br>0.03)                           | 0.01<br>(0.00 to<br>0.04)                          | 0.01<br>(0.00 to<br>0.03)                           |
| <b>South Africa</b>                                        |                                                            |                                                            |                                                          |                                                            |                                                   |                                                     |                                                    |                                                     |
| Cause                                                      | YLLs (in 1000s)                                            |                                                            |                                                          |                                                            | Deaths (in 1000s)                                 |                                                     |                                                    |                                                     |
|                                                            | 2016                                                       | 2040 Forecast                                              | 2040 Better Scenario                                     | 2040 Worse Scenario                                        | 2016                                              | 2040 Forecast                                       | 2040 Better Scenario                               | 2040 Worse Scenario                                 |
| <b>Diabetes, urogenital, blood, and endocrine diseases</b> | <b>1,255.18</b><br><b>(1,154.45 to</b><br><b>1,354.17)</b> | <b>2,423.91</b><br><b>(1,273.10 to</b><br><b>5,113.74)</b> | <b>1,806.57</b><br><b>(933.54 to</b><br><b>3,866.48)</b> | <b>2,459.80</b><br><b>(1,309.03 to</b><br><b>5,079.03)</b> | <b>46.24</b><br><b>(43.37 to</b><br><b>49.18)</b> | <b>103.92</b><br><b>(59.61 to</b><br><b>191.14)</b> | <b>77.61</b><br><b>(43.39 to</b><br><b>148.27)</b> | <b>104.20</b><br><b>(60.07 to</b><br><b>183.01)</b> |
| Diabetes mellitus                                          | 673.84<br>(628.60 to<br>722.91)                            | 1,169.95<br>(622.38 to<br>2,378.66)                        | 818.82<br>(442.49 to<br>1,615.63)                        | 1,240.76<br>(654.52 to<br>2,479.08)                        | 28.64<br>(26.91 to<br>30.45)                      | 54.79<br>(34.81 to<br>89.97)                        | 39.97<br>(25.24 to<br>65.09)                       | 56.48<br>(35.94 to<br>93.46)                        |
| Acute glomerulonephritis                                   | 2.13<br>(1.79 to<br>2.55)                                  | 4.50<br>(1.59 to<br>10.58)                                 | 3.57<br>(1.28 to<br>8.60)                                | 4.41<br>(1.53 to<br>10.19)                                 | 0.04<br>(0.04 to<br>0.05)                         | 0.09<br>(0.04 to<br>0.19)                           | 0.07<br>(0.04 to<br>0.16)                          | 0.08<br>(0.04 to<br>0.17)                           |
| Chronic kidney disease                                     | 242.65<br>(218.27 to<br>266.20)                            | 692.40<br>(197.91 to<br>1,960.13)                          | 454.01<br>(131.79 to<br>1,462.20)                        | 708.03<br>(204.61 to<br>1,913.43)                          | 9.40<br>(8.64 to<br>10.17)                        | 34.09<br>(7.87 to<br>105.55)                        | 23.14<br>(5.43 to<br>81.12)                        | 34.35<br>(8.09 to<br>97.68)                         |
| Chronic kidney disease due to diabetes mellitus            | 73.18<br>(61.57 to<br>85.89)                               | 253.53<br>(66.43 to<br>745.74)                             | 165.87<br>(44.46 to<br>545.67)                           | 257.97<br>(67.29 to<br>734.52)                             | 2.98<br>(2.54 to<br>3.41)                         | 12.35<br>(2.88 to<br>37.57)                         | 8.35<br>(1.83 to<br>30.58)                         | 12.42<br>(2.69 to<br>35.94)                         |
| Chronic kidney disease due to hypertension                 | 37.67<br>(31.70 to<br>43.91)                               | 131.54<br>(28.70 to<br>429.31)                             | 89.29<br>(19.68 to<br>329.94)                            | 134.22<br>(29.82 to<br>408.14)                             | 2.05<br>(1.76 to<br>2.35)                         | 8.26<br>(1.67 to<br>27.33)                          | 5.89<br>(1.21 to<br>21.94)                         | 8.25<br>(1.73 to<br>25.02)                          |
| Chronic kidney disease due to glomerulonephritis           | 60.86<br>(51.85 to<br>71.08)                               | 133.74<br>(43.52 to<br>370.57)                             | 85.51<br>(27.36 to<br>254.15)                            | 137.80<br>(45.28 to<br>367.19)                             | 1.91<br>(1.61 to<br>2.24)                         | 5.55<br>(1.42 to<br>16.64)                          | 3.60<br>(0.92 to<br>12.10)                         | 5.67<br>(1.43 to<br>15.73)                          |
| Chronic kidney disease due to other and unspecified causes | 70.94<br>(60.57 to<br>82.49)                               | 173.59<br>(53.61 to<br>491.05)                             | 113.34<br>(35.54 to<br>345.03)                           | 178.05<br>(56.47 to<br>473.19)                             | 2.46<br>(2.10 to<br>2.86)                         | 7.93<br>(1.96 to<br>24.18)                          | 5.30<br>(1.34 to<br>17.50)                         | 8.02<br>(1.99 to<br>22.50)                          |
| Urinary diseases and male infertility                      | 42.39<br>(38.69 to<br>46.27)                               | 75.12<br>(45.21 to<br>156.10)                              | 62.74<br>(36.66 to<br>130.67)                            | 66.94<br>(40.77 to<br>132.47)                              | 1.49<br>(1.39 to<br>1.61)                         | 3.02<br>(2.30 to<br>4.51)                           | 2.65<br>(1.94 to<br>4.11)                          | 2.61<br>(2.00 to<br>3.79)                           |
| Urinary tract infections                                   | 19.65<br>(16.64 to<br>25.38)                               | 45.70<br>(25.91 to<br>100.52)                              | 40.30<br>(22.40 to<br>90.57)                             | 40.23<br>(23.02 to<br>86.92)                               | 0.64<br>(0.54 to<br>0.83)                         | 1.80<br>(1.29 to<br>2.86)                           | 1.67<br>(1.17 to<br>2.66)                          | 1.54<br>(1.11 to<br>2.41)                           |

|                                                   |                                 |                                   |                                   |                                 |                           |                             |                             |                            |
|---------------------------------------------------|---------------------------------|-----------------------------------|-----------------------------------|---------------------------------|---------------------------|-----------------------------|-----------------------------|----------------------------|
| Urolithiasis                                      | 0.75<br>(0.60 to<br>1.14)       | 1.91<br>(0.98 to<br>4.12)         | 1.53<br>(0.77 to<br>3.41)         | 1.70<br>(0.87 to<br>3.54)       | 0.02<br>(0.02 to<br>0.04) | 0.06<br>(0.04 to<br>0.11)   | 0.05<br>(0.03 to<br>0.09)   | 0.05<br>(0.03 to<br>0.09)  |
| Other urinary diseases                            | 21.98<br>(17.37 to<br>25.21)    | 27.51<br>(15.81 to<br>56.63)      | 20.91<br>(11.60 to<br>44.61)      | 25.01<br>(14.56 to<br>49.86)    | 0.83<br>(0.67 to<br>0.93) | 1.16<br>(0.80 to<br>1.72)   | 0.93<br>(0.61 to<br>1.41)   | 1.02<br>(0.72 to<br>1.51)  |
| Gynecological diseases                            | 2.77<br>(2.24 to<br>3.32)       | 4.33<br>(1.48 to<br>15.21)        | 2.87<br>(0.95 to<br>10.69)        | 4.00<br>(1.39 to<br>13.35)      | 0.07<br>(0.06 to<br>0.08) | 0.11<br>(0.05 to<br>0.34)   | 0.08<br>(0.03 to<br>0.23)   | 0.10<br>(0.05 to<br>0.30)  |
| Uterine fibroids                                  | 1.19<br>(0.90 to<br>1.51)       | 1.52<br>(0.57 to<br>5.09)         | 1.07<br>(0.39 to<br>3.62)         | 1.41<br>(0.54 to<br>4.53)       | 0.03<br>(0.03 to<br>0.04) | 0.04<br>(0.02 to<br>0.12)   | 0.03<br>(0.01 to<br>0.09)   | 0.04<br>(0.02 to<br>0.10)  |
| Polycystic ovarian syndrome                       | 0.07<br>(0.02 to<br>0.19)       | 0.08<br>(0.01 to<br>0.52)         | 0.04<br>(0.00 to<br>0.16)         | 0.07<br>(0.01 to<br>0.31)       | 0.00<br>(0.00 to<br>0.00) | 0.00<br>(0.00 to<br>0.01)   | 0.00<br>(0.00 to<br>0.00)   | 0.00<br>(0.00 to<br>0.01)  |
| Endometriosis                                     | 0.10<br>(0.02 to<br>0.17)       | 0.17<br>(0.01 to<br>0.91)         | 0.11<br>(0.01 to<br>0.58)         | 0.16<br>(0.01 to<br>0.80)       | 0.00<br>(0.00 to<br>0.00) | 0.00<br>(0.00 to<br>0.02)   | 0.00<br>(0.00 to<br>0.01)   | 0.00<br>(0.00 to<br>0.01)  |
| Genital prolapse                                  | 0.12<br>(0.08 to<br>0.15)       | 0.16<br>(0.08 to<br>0.46)         | 0.10<br>(0.04 to<br>0.30)         | 0.16<br>(0.07 to<br>0.44)       | 0.01<br>(0.00 to<br>0.01) | 0.01<br>(0.00 to<br>0.01)   | 0.00<br>(0.00 to<br>0.01)   | 0.01<br>(0.00 to<br>0.01)  |
| Other gynecological diseases                      | 1.30<br>(1.00 to<br>1.62)       | 2.41<br>(0.71 to<br>10.11)        | 1.55<br>(0.44 to<br>6.42)         | 2.21<br>(0.67 to<br>8.77)       | 0.03<br>(0.02 to<br>0.04) | 0.06<br>(0.02 to<br>0.20)   | 0.04<br>(0.01 to<br>0.13)   | 0.05<br>(0.02 to<br>0.18)  |
| Hemoglobinopathies and hemolytic anemias          | 20.35<br>(16.13 to<br>22.93)    | 34.47<br>(18.54 to<br>72.98)      | 25.47<br>(13.24 to<br>59.54)      | 32.53<br>(17.61 to<br>67.96)    | 0.60<br>(0.48 to<br>0.69) | 1.23<br>(0.81 to<br>2.10)   | 0.96<br>(0.61 to<br>1.64)   | 1.12<br>(0.75 to<br>1.85)  |
| Thalassemias                                      | 0.14<br>(0.11 to<br>0.18)       | 0.12<br>(0.03 to<br>0.27)         | 0.11<br>(0.03 to<br>0.26)         | 0.11<br>(0.03 to<br>0.26)       | 0.00<br>(0.00 to<br>0.00) | 0.00<br>(0.00 to<br>0.00)   | 0.00<br>(0.00 to<br>0.00)   | 0.00<br>(0.00 to<br>0.00)  |
| Sickle cell disorders                             | 1.55<br>(1.20 to<br>1.93)       | 1.16<br>(0.37 to<br>2.62)         | 0.82<br>(0.26 to<br>1.92)         | 1.19<br>(0.38 to<br>2.62)       | 0.02<br>(0.02 to<br>0.02) | 0.02<br>(0.01 to<br>0.04)   | 0.01<br>(0.00 to<br>0.03)   | 0.02<br>(0.01 to<br>0.04)  |
| G6PD deficiency                                   | 13.10<br>(10.37 to<br>15.03)    | 25.56<br>(12.80 to<br>57.60)      | 18.38<br>(8.77 to<br>43.98)       | 24.30<br>(12.21 to<br>53.85)    | 0.29<br>(0.23 to<br>0.34) | 0.70<br>(0.39 to<br>1.41)   | 0.52<br>(0.28 to<br>1.09)   | 0.65<br>(0.37 to<br>1.24)  |
| Other hemoglobinopathies and hemolytic anemias    | 3.55<br>(4.34 to<br>6.38)       | 7.64<br>(4.85 to<br>11.76)        | 6.16<br>(3.74 to<br>9.98)         | 6.93<br>(4.61 to<br>10.49)      | 0.28<br>(0.23 to<br>0.34) | 0.51<br>(0.39 to<br>0.66)   | 0.43<br>(0.31 to<br>0.58)   | 0.45<br>(0.34 to<br>0.57)  |
| Endocrine, metabolic, blood, and immune disorders | 271.05<br>(202.39 to<br>309.92) | 443.13<br>(203.65 to<br>1,119.37) | 439.08<br>(198.43 to<br>1,116.76) | 403.13<br>(188.16 to<br>997.53) | 6.00<br>(4.41 to<br>6.82) | 10.60<br>(5.62 to<br>23.39) | 10.74<br>(5.65 to<br>23.88) | 9.46<br>(5.04 to<br>20.93) |

**South Africa**

| Cause                                  | YLLs (in 1000s)                        |                                        |                                        |                                        | Deaths (in 1000s)                |                                   |                                   |                                   |
|----------------------------------------|----------------------------------------|----------------------------------------|----------------------------------------|----------------------------------------|----------------------------------|-----------------------------------|-----------------------------------|-----------------------------------|
|                                        | 2016                                   | 2040 Forecast                          | 2040 Better Scenario                   | 2040 Worse Scenario                    | 2016                             | 2040 Forecast                     | 2040 Better Scenario              | 2040 Worse Scenario               |
| <b>Musculoskeletal disorders</b>       | <b>30.47</b><br>(26.00 to<br>39.02)    | <b>68.75</b><br>(38.88 to<br>156.30)   | <b>61.93</b><br>(34.00 to<br>148.36)   | <b>61.00</b><br>(34.85 to<br>133.58)   | <b>0.91</b><br>(0.79 to<br>1.18) | <b>2.38</b><br>(1.62 to<br>4.34)  | <b>2.16</b><br>(1.44 to<br>4.01)  | <b>2.08</b><br>(1.45 to<br>3.65)  |
| Rheumatoid arthritis                   | 6.78<br>(5.46 to<br>9.05)              | 18.15<br>(11.26 to<br>30.32)           | 12.78<br>(7.74 to<br>21.30)            | 17.01<br>(10.75 to<br>26.88)           | 0.28<br>(0.22 to<br>0.37)        | 0.86<br>(0.58 to<br>1.20)         | 0.62<br>(0.41 to<br>0.92)         | 0.79<br>(0.55 to<br>1.10)         |
| Other musculoskeletal disorders        | 23.69<br>(19.74 to<br>30.51)           | 50.59<br>(25.41 to<br>129.80)          | 49.16<br>(24.73 to<br>128.42)          | 43.99<br>(22.30 to<br>109.09)          | 0.63<br>(0.53 to<br>0.82)        | 1.52<br>(0.97 to<br>3.09)         | 1.54<br>(0.98 to<br>3.22)         | 1.29<br>(0.84 to<br>2.64)         |
| <b>Other non-communicable diseases</b> | <b>222.80</b><br>(181.43 to<br>278.45) | <b>294.21</b><br>(171.04 to<br>498.96) | <b>220.13</b><br>(130.39 to<br>371.57) | <b>287.61</b><br>(166.71 to<br>472.85) | <b>3.80</b><br>(3.16 to<br>4.79) | <b>7.70</b><br>(5.24 to<br>12.13) | <b>6.74</b><br>(4.54 to<br>10.65) | <b>6.98</b><br>(4.73 to<br>10.65) |
| Congenital birth defects               | 183.79<br>(140.28 to<br>238.21)        | 192.96<br>(92.88 to<br>344.29)         | 125.25<br>(63.16 to<br>223.92)         | 198.63<br>(96.10 to<br>346.69)         | 2.34<br>(1.82 to<br>2.99)        | 2.76<br>(1.39 to<br>5.02)         | 1.83<br>(0.94 to<br>3.30)         | 2.79<br>(1.41 to<br>4.94)         |
| Neural tube defects                    | 9.54<br>(7.29 to<br>12.67)             | 4.49<br>(2.28 to<br>8.99)              | 2.56<br>(1.26 to<br>5.54)              | 4.74<br>(2.42 to<br>9.12)              | 0.12<br>(0.10 to<br>0.16)        | 0.07<br>(0.04 to<br>0.15)         | 0.04<br>(0.02 to<br>0.09)         | 0.07<br>(0.04 to<br>0.14)         |



|                                                 |                                                |                                              |                                              |                                              |                                       |                                       |                                       |                                       |
|-------------------------------------------------|------------------------------------------------|----------------------------------------------|----------------------------------------------|----------------------------------------------|---------------------------------------|---------------------------------------|---------------------------------------|---------------------------------------|
| Motor vehicle road injuries                     | 669.87<br>(586.25 to<br>769.53)                | 962.31<br>(393.69 to<br>2,666.10)            | 184.22<br>(75.37 to<br>538.29)               | 1,117.45<br>(448.31 to<br>3,142.81)          | 12.71<br>(11.15 to<br>14.45)          | 19.14<br>(8.45 to<br>51.26)           | 4.06<br>(1.88 to<br>10.99)            | 21.74<br>(9.56 to<br>58.60)           |
| Other road injuries                             | 6.11<br>(5.02 to<br>7.23)                      | 9.39<br>(3.96 to<br>24.43)                   | 2.27<br>(0.97 to<br>6.23)                    | 10.49<br>(4.39 to<br>26.54)                  | 0.12<br>(0.10 to<br>0.15)             | 0.20<br>(0.10 to<br>0.49)             | 0.06<br>(0.03 to<br>0.13)             | 0.22<br>(0.10 to<br>0.54)             |
| Other transport injuries                        | 32.26<br>(27.72 to<br>38.20)                   | 56.78<br>(26.02 to<br>133.14)                | 39.44<br>(18.26 to<br>95.17)                 | 56.93<br>(26.48 to<br>137.85)                | 0.65<br>(0.56 to<br>0.77)             | 1.30<br>(0.64 to<br>2.87)             | 0.92<br>(0.46 to<br>2.03)             | 1.27<br>(0.64 to<br>2.83)             |
| <b>Unintentional injuries</b>                   | <b>533.32<br/>(485.49 to<br/>579.85)</b>       | <b>590.01<br/>(319.34 to<br/>1,172.69)</b>   | <b>459.18<br/>(248.02 to<br/>926.61)</b>     | <b>572.36<br/>(302.57 to<br/>1,121.65)</b>   | <b>10.54<br/>(9.70 to<br/>11.40)</b>  | <b>14.25<br/>(9.33 to<br/>24.50)</b>  | <b>11.60<br/>(7.66 to<br/>20.25)</b>  | <b>13.27<br/>(8.69 to<br/>22.85)</b>  |
| Falls                                           | 25.43<br>(23.21 to<br>28.12)                   | 45.46<br>(32.40 to<br>65.43)                 | 41.16<br>(28.60 to<br>60.38)                 | 39.77<br>(28.76 to<br>56.78)                 | 0.97<br>(0.90 to<br>1.11)             | 2.24<br>(1.85 to<br>2.75)             | 2.13<br>(1.73 to<br>2.65)             | 1.90<br>(1.57 to<br>2.29)             |
| Drowning                                        | 121.17<br>(108.91 to<br>134.20)                | 112.98<br>(52.79 to<br>235.07)               | 87.63<br>(41.70 to<br>180.38)                | 111.99<br>(52.19 to<br>229.55)               | 2.08<br>(1.88 to<br>2.31)             | 2.26<br>(1.24 to<br>4.49)             | 1.79<br>(0.98 to<br>3.47)             | 2.18<br>(1.18 to<br>4.27)             |
| Fire, heat, and hot substances                  | 100.49<br>(77.94 to<br>113.24)                 | 106.98<br>(53.38 to<br>238.74)               | 77.16<br>(38.02 to<br>176.26)                | 105.07<br>(52.61 to<br>237.88)               | 2.18<br>(1.75 to<br>2.44)             | 2.80<br>(1.68 to<br>5.43)             | 2.10<br>(1.26 to<br>4.00)             | 2.66<br>(1.56 to<br>5.24)             |
| Poisonings                                      | 30.85<br>(24.46 to<br>36.79)                   | 23.21<br>(9.95 to<br>62.13)                  | 15.21<br>(6.32 to<br>43.90)                  | 23.75<br>(10.19 to<br>63.18)                 | 0.54<br>(0.45 to<br>0.65)             | 0.46<br>(0.22 to<br>1.17)             | 0.31<br>(0.15 to<br>0.80)             | 0.46<br>(0.22 to<br>1.17)             |
| Exposure to mechanical forces                   | 102.38<br>(89.43 to<br>113.97)                 | 114.70<br>(55.32 to<br>217.68)               | 86.73<br>(40.95 to<br>172.98)                | 112.66<br>(53.92 to<br>210.08)               | 1.82<br>(1.59 to<br>2.01)             | 2.26<br>(1.30 to<br>4.06)             | 1.75<br>(0.99 to<br>3.32)             | 2.15<br>(1.21 to<br>3.82)             |
| Unintentional firearm injuries                  | 11.74<br>(8.06 to<br>14.09)                    | 10.94<br>(5.53 to<br>23.26)                  | 8.49<br>(4.11 to<br>18.97)                   | 10.48<br>(5.28 to<br>21.76)                  | 0.24<br>(0.16 to<br>0.28)             | 0.25<br>(0.13 to<br>0.48)             | 0.19<br>(0.10 to<br>0.40)             | 0.23<br>(0.13 to<br>0.44)             |
| Unintentional suffocation                       | 37.97<br>(30.37 to<br>44.83)                   | 43.76<br>(18.42 to<br>85.75)                 | 33.57<br>(13.94 to<br>66.32)                 | 44.06<br>(18.38 to<br>84.43)                 | 0.59<br>(0.47 to<br>0.70)             | 0.71<br>(0.35 to<br>1.37)             | 0.55<br>(0.26 to<br>1.11)             | 0.70<br>(0.32 to<br>1.35)             |
| Other exposure to mechanical forces             | 52.67<br>(45.87 to<br>59.06)                   | 60.00<br>(30.19 to<br>118.96)                | 44.68<br>(22.07 to<br>91.87)                 | 58.12<br>(28.72 to<br>110.83)                | 0.99<br>(0.87 to<br>1.11)             | 1.30<br>(0.79 to<br>2.29)             | 1.00<br>(0.60 to<br>1.83)             | 1.21<br>(0.73 to<br>2.10)             |
| Adverse effects of medical treatment            | 26.35<br>(22.45 to<br>30.70)                   | 34.65<br>(19.90 to<br>69.88)                 | 29.63<br>(16.84 to<br>62.53)                 | 32.44<br>(18.45 to<br>62.82)                 | 0.66<br>(0.57 to<br>0.76)             | 1.05<br>(0.72 to<br>1.76)             | 0.94<br>(0.64 to<br>1.60)             | 0.95<br>(0.65 to<br>1.53)             |
| Animal contact                                  | 26.19<br>(22.62 to<br>31.94)                   | 39.86<br>(20.96 to<br>81.61)                 | 30.23<br>(15.76 to<br>63.58)                 | 39.26<br>(20.28 to<br>80.67)                 | 0.50<br>(0.44 to<br>0.61)             | 0.85<br>(0.51 to<br>1.59)             | 0.66<br>(0.41 to<br>1.23)             | 0.81<br>(0.49 to<br>1.52)             |
| Venomous animal contact                         | 8.00<br>(6.59 to<br>11.38)                     | 12.74<br>(6.20 to<br>27.73)                  | 10.15<br>(4.94 to<br>22.04)                  | 12.54<br>(6.06 to<br>27.68)                  | 0.16<br>(0.14 to<br>0.23)             | 0.29<br>(0.18 to<br>0.57)             | 0.24<br>(0.15 to<br>0.47)             | 0.28<br>(0.16 to<br>0.55)             |
| Non-venomous animal contact                     | 18.18<br>(15.33 to<br>22.13)                   | 27.12<br>(14.18 to<br>55.07)                 | 20.08<br>(10.36 to<br>42.34)                 | 26.72<br>(13.93 to<br>54.50)                 | 0.34<br>(0.29 to<br>0.41)             | 0.56<br>(0.33 to<br>1.05)             | 0.42<br>(0.24 to<br>0.81)             | 0.53<br>(0.31 to<br>1.00)             |
| Foreign body                                    | 64.49<br>(54.72 to<br>79.00)                   | 69.72<br>(34.41 to<br>124.95)                | 63.26<br>(31.02 to<br>116.94)                | 66.84<br>(32.66 to<br>119.11)                | 1.04<br>(0.90 to<br>1.28)             | 1.31<br>(0.76 to<br>2.19)             | 1.23<br>(0.71 to<br>2.07)             | 1.21<br>(0.70 to<br>2.01)             |
| Pulmonary aspiration and foreign body in airway | 54.01<br>(44.96 to<br>69.21)                   | 57.83<br>(29.85 to<br>102.70)                | 52.00<br>(26.73 to<br>94.59)                 | 54.94<br>(28.31 to<br>94.82)                 | 0.87<br>(0.75 to<br>1.11)             | 1.12<br>(0.69 to<br>1.89)             | 1.05<br>(0.64 to<br>1.74)             | 1.02<br>(0.61 to<br>1.68)             |
| Foreign body in other body part                 | 10.48<br>(7.47 to<br>13.52)                    | 11.89<br>(4.23 to<br>25.33)                  | 11.26<br>(4.06 to<br>24.65)                  | 11.90<br>(4.21 to<br>25.58)                  | 0.16<br>(0.11 to<br>0.20)             | 0.19<br>(0.08 to<br>0.39)             | 0.18<br>(0.07 to<br>0.38)             | 0.18<br>(0.07 to<br>0.39)             |
| Environmental heat and cold exposure            | 20.55<br>(15.20 to<br>25.56)                   | 28.00<br>(15.65 to<br>55.58)                 | 19.53<br>(10.75 to<br>38.86)                 | 26.75<br>(15.00 to<br>50.14)                 | 0.46<br>(0.34 to<br>0.58)             | 0.70<br>(0.42 to<br>1.26)             | 0.50<br>(0.29 to<br>0.91)             | 0.65<br>(0.40 to<br>1.13)             |
| Other unintentional injuries                    | 15.42<br>(13.29 to<br>17.32)                   | 14.44<br>(7.84 to<br>27.96)                  | 8.64<br>(4.58 to<br>16.95)                   | 13.82<br>(7.47 to<br>26.10)                  | 0.29<br>(0.26 to<br>0.32)             | 0.33<br>(0.21 to<br>0.58)             | 0.20<br>(0.12 to<br>0.36)             | 0.30<br>(0.19 to<br>0.53)             |
| <b>Self-harm and interpersonal violence</b>     | <b>1,390.92<br/>(1,155.88 to<br/>1,588.95)</b> | <b>1,590.18<br/>(789.68 to<br/>3,547.17)</b> | <b>1,276.15<br/>(629.89 to<br/>2,852.16)</b> | <b>1,544.40<br/>(762.72 to<br/>3,389.74)</b> | <b>26.55<br/>(22.21 to<br/>30.23)</b> | <b>33.48<br/>(17.80 to<br/>71.61)</b> | <b>27.23<br/>(14.95 to<br/>57.13)</b> | <b>31.97<br/>(17.00 to<br/>67.52)</b> |

| South Africa                                                                 |                                  |                                  |                                |                                |                           |                           |                          |                           |
|------------------------------------------------------------------------------|----------------------------------|----------------------------------|--------------------------------|--------------------------------|---------------------------|---------------------------|--------------------------|---------------------------|
| Cause                                                                        | YLLs (in 1000s)                  |                                  |                                |                                | Deaths (in 1000s)         |                           |                          |                           |
|                                                                              | 2016                             | 2040 Forecast                    | 2040 Better Scenario           | 2040 Worse Scenario            | 2016                      | 2040 Forecast             | 2040 Better Scenario     | 2040 Worse Scenario       |
| Self-harm                                                                    | 355.96<br>(290.55 to 409.51)     | 548.90<br>(248.20 to 1,315.22)   | 437.39<br>(205.77 to 1,009.70) | 564.93<br>(241.87 to 1,370.63) | 7.37<br>(6.13 to 8.38)    | 12.53<br>(6.25 to 27.76)  | 10.15<br>(5.27 to 21.75) | 12.61<br>(5.96 to 28.70)  |
| Self-harm by firearm                                                         | 20.93<br>(11.97 to 40.27)        | 28.09<br>(8.97 to 83.35)         | 20.74<br>(6.90 to 60.12)       | 28.85<br>(9.06 to 82.25)       | 0.45<br>(0.26 to 0.87)    | 0.68<br>(0.25 to 1.85)    | 0.51<br>(0.19 to 1.37)   | 0.68<br>(0.23 to 1.86)    |
| Self-harm by other specified means                                           | 335.03<br>(271.98 to 388.13)     | 520.81<br>(236.70 to 1,241.08)   | 416.65<br>(193.85 to 965.18)   | 536.08<br>(230.19 to 1,301.25) | 6.92<br>(5.74 to 7.92)    | 11.86<br>(5.90 to 25.98)  | 9.64<br>(4.94 to 20.63)  | 11.94<br>(5.71 to 26.84)  |
| Interpersonal violence                                                       | 1,034.96<br>(828.80 to 1,187.79) | 1,041.28<br>(518.28 to 2,233.95) | 838.76<br>(410.24 to 1,810.83) | 979.47<br>(490.87 to 2,096.14) | 19.18<br>(15.37 to 22.19) | 20.95<br>(11.10 to 42.95) | 17.07<br>(9.11 to 35.11) | 19.35<br>(10.08 to 39.82) |
| Physical violence by firearm                                                 | 163.45<br>(99.58 to 243.13)      | 152.12<br>(75.96 to 340.16)      | 117.49<br>(56.33 to 272.37)    | 140.77<br>(70.66 to 304.01)    | 3.05<br>(1.92 to 4.63)    | 3.14<br>(1.68 to 6.61)    | 2.46<br>(1.27 to 5.32)   | 2.85<br>(1.52 to 5.89)    |
| Physical violence by sharp object                                            | 486.22<br>(370.36 to 580.83)     | 481.17<br>(240.09 to 1,052.32)   | 386.55<br>(185.95 to 862.75)   | 436.15<br>(216.00 to 929.13)   | 9.07<br>(6.90 to 10.83)   | 9.74<br>(5.10 to 20.93)   | 7.89<br>(4.06 to 17.47)  | 8.68<br>(4.52 to 18.18)   |
| Physical violence by other means                                             | 385.29<br>(273.56 to 451.71)     | 407.99<br>(173.62 to 855.54)     | 334.72<br>(146.83 to 715.98)   | 402.55<br>(169.65 to 834.73)   | 7.06<br>(4.94 to 8.27)    | 8.07<br>(3.73 to 16.15)   | 6.72<br>(3.20 to 13.92)  | 7.82<br>(3.59 to 15.69)   |
| Forces of nature, conflict and terrorism, and executions and police conflict | 3.57<br>(1.79 to 5.38)           | 11.67<br>(0.00 to 97.07)         | 11.70<br>(0.00 to 97.16)       | 10.91<br>(0.00 to 91.02)       | 0.06<br>(0.00 to 0.09)    | 0.24<br>(0.00 to 1.96)    | 0.24<br>(0.00 to 1.98)   | 0.22<br>(0.00 to 1.81)    |
| Exposure to forces of nature                                                 | 0.00<br>(0.00)                   | 0.58<br>(0.00 to 3.33)           | 0.54<br>(0.00 to 3.31)         | 0.54<br>(0.00 to 3.17)         | 0.00<br>(0.00)            | 0.01<br>(0.00 to 0.07)    | 0.01<br>(0.00 to 0.07)   | 0.01<br>(0.00 to 0.07)    |
| Conflict and terrorism                                                       | 3.25<br>(1.48 to 5.06)           | 0.74<br>(0.00 to 5.81)           | 0.74<br>(0.00 to 5.79)         | 0.70<br>(0.00 to 5.53)         | 0.06<br>(0.03 to 0.09)    | 0.01<br>(0.00 to 0.11)    | 0.01<br>(0.00 to 0.11)   | 0.01<br>(0.00 to 0.10)    |
| Executions and police conflict                                               | 0.32<br>(0.28 to 0.46)           | 10.35<br>(0.00 to 93.66)         | 10.38<br>(0.00 to 93.77)       | 9.67<br>(0.00 to 87.80)        | 0.01<br>(0.00 to 0.01)    | 0.21<br>(0.00 to 1.88)    | 0.21<br>(0.00 to 1.90)   | 0.19<br>(0.00 to 1.74)    |

  

| Swaziland                                                         |                                          |                                          |                                          |                                              |                                       |                                       |                                      |                                       |
|-------------------------------------------------------------------|------------------------------------------|------------------------------------------|------------------------------------------|----------------------------------------------|---------------------------------------|---------------------------------------|--------------------------------------|---------------------------------------|
| Cause                                                             | YLLs (actual counts)                     |                                          |                                          |                                              | Deaths (actual counts)                |                                       |                                      |                                       |
|                                                                   | 2016                                     | 2040 Forecast                            | 2040 Better Scenario                     | 2040 Worse Scenario                          | 2016                                  | 2040 Forecast                         | 2040 Better Scenario                 | 2040 Worse Scenario                   |
| All causes                                                        | 630,474.45<br>(528,325.08 to 744,906.02) | 574,013.03<br>(355,199.00 to 905,371.99) | 436,602.66<br>(270,010.94 to 690,979.05) | 1,158,566.65<br>(810,631.01 to 1,587,248.09) | 13,504.16<br>(10,939.05 to 16,216.06) | 15,313.41<br>(10,534.20 to 22,923.48) | 12,250.46<br>(8,340.98 to 18,357.62) | 26,590.56<br>(19,320.23 to 35,657.59) |
| Communicable, maternal, neonatal, and nutritional diseases        | 439,570.58<br>(375,450.67 to 526,662.19) | 269,513.51<br>(158,908.72 to 422,741.81) | 199,536.18<br>(108,909.39 to 310,280.46) | 809,006.42<br>(527,376.03 to 1,126,647.88)   | 7,724.43<br>(6,696.86 to 9,057.94)    | 5,331.18<br>(3,190.57 to 8,947.71)    | 4,126.47<br>(2,417.39 to 6,202.42)   | 15,397.18<br>(10,061.42 to 21,333.44) |
| HIV/AIDS and tuberculosis                                         | 255,495.99<br>(207,991.73 to 328,942.33) | 166,747.10<br>(88,177.04 to 263,515.73)  | 134,631.59<br>(64,170.63 to 228,673.08)  | 644,633.50<br>(407,249.01 to 932,764.73)     | 5,035.55<br>(4,221.83 to 6,226.05)    | 3,405.19<br>(1,893.53 to 5,144.16)    | 2,758.32<br>(1,364.22 to 4,410.42)   | 12,484.11<br>(7,663.33 to 18,012.97)  |
| Tuberculosis                                                      | 34,554.06<br>(22,886.83 to 49,411.70)    | 24,481.99<br>(7,894.54 to 61,032.38)     | 13,738.25<br>(4,471.79 to 34,629.49)     | 34,070.17<br>(11,135.74 to 84,352.37)        | 836.80<br>(544.43 to 1,192.22)        | 636.36<br>(229.20 to 1,500.91)        | 368.13<br>(132.24 to 894.23)         | 869.81<br>(304.00 to 2,118.70)        |
| HIV/AIDS                                                          | 220,941.94<br>(171,450.69 to 295,573.49) | 142,265.11<br>(67,593.83 to 236,344.09)  | 120,893.34<br>(49,980.31 to 214,912.82)  | 610,563.34<br>(379,215.31 to 903,203.46)     | 4,198.75<br>(3,347.12 to 5,395.04)    | 2,768.84<br>(1,278.58 to 4,526.28)    | 2,390.19<br>(975.40 to 4,096.39)     | 11,614.31<br>(6,986.54 to 17,213.03)  |
| Diarrhea, lower respiratory, and other common infectious diseases | 115,737.59<br>(88,309.51 to 146,657.47)  | 65,863.54<br>(18,584.50 to 170,268.55)   | 42,290.38<br>(13,654.16 to 106,689.77)   | 117,366.55<br>(33,178.92 to 287,877.91)      | 1,854.17<br>(1,416.01 to 2,370.01)    | 1,433.57<br>(567.52 to 3,404.24)      | 1,055.07<br>(475.19 to 2,349.11)     | 2,304.06<br>(849.53 to 5,337.93)      |
| Diarrheal diseases                                                | 57,417.10<br>(39,917.02 to 78,512.43)    | 26,719.78<br>(2,301.58 to 93,069.28)     | 13,942.58<br>(1,325.30 to 52,690.81)     | 48,338.38<br>(14,669.39 to 146,669.39)       | 837.70<br>(591.11 to 1,137.32)        | 515.89<br>(60.77 to 1,755.91)         | 301.74<br>(38.36 to 1,119.45)        | 898.36<br>(111.75 to 2,858.59)        |



|                                      |                                          |                                          |                                          |                                           |                                   |                                   |                                   |                                     |
|--------------------------------------|------------------------------------------|------------------------------------------|------------------------------------------|-------------------------------------------|-----------------------------------|-----------------------------------|-----------------------------------|-------------------------------------|
| Intestinal infectious diseases       | 127.84<br>(61.49 to<br>251.90)           | 84.17<br>(23.43 to<br>210.46)            | 56.94<br>(16.35 to<br>139.31)            | 94.66<br>(27.18 to<br>238.31)             | 1.75<br>(0.88 to<br>3.36)         | 1.32<br>(0.42 to<br>3.19)         | 0.93<br>(0.30 to<br>2.19)         | 1.43<br>(0.46 to<br>3.43)           |
| Typhoid fever                        | 41.62<br>(19.88 to<br>80.17)             | 38.09<br>(10.91 to<br>109.49)            | 28.96<br>(8.46 to<br>83.42)              | 41.56<br>(11.96 to<br>112.70)             | 0.58<br>(0.27 to<br>1.11)         | 0.55<br>(0.16 to<br>1.57)         | 0.43<br>(0.13 to<br>1.21)         | 0.59<br>(0.17 to<br>1.56)           |
| Paratyphoid fever                    | 1.37<br>(0.55 to<br>2.84)                | 1.55<br>(0.42 to<br>4.37)                | 1.14<br>(0.31 to<br>3.19)                | 1.70<br>(0.47 to<br>4.54)                 | 0.02<br>(0.01 to<br>0.04)         | 0.02<br>(0.01 to<br>0.06)         | 0.02<br>(0.00 to<br>0.05)         | 0.02<br>(0.01 to<br>0.07)           |
| Other intestinal infectious diseases | 84.84<br>(27.92 to<br>205.09)            | 44.54<br>(9.36 to<br>133.90)             | 26.84<br>(5.73 to<br>79.76)              | 51.40<br>(10.82 to<br>147.32)             | 1.16<br>(0.41 to<br>2.70)         | 0.75<br>(0.20 to<br>2.08)         | 0.49<br>(0.13 to<br>1.32)         | 0.82<br>(0.22 to<br>2.16)           |
| Lower respiratory infections         | 50,364.57<br>(35,744.28 to<br>66,475.83) | 34,378.57<br>(13,256.98 to<br>78,818.69) | 24,560.24<br>(10,070.95 to<br>52,063.67) | 61,972.24<br>(22,147.68 to<br>155,846.73) | 899.80<br>(650.01 to<br>1,168.60) | 831.56<br>(428.01 to<br>1,595.01) | 679.52<br>(374.64 to<br>1,226.48) | 1,296.00<br>(616.27 to<br>2,663.31) |
| Upper respiratory infections         | 29.19<br>(9.88 to<br>72.33)              | 31.86<br>(8.56 to<br>82.28)              | 18.93<br>(5.21 to<br>48.44)              | 35.91<br>(9.78 to<br>97.98)               | 0.47<br>(0.19 to<br>0.98)         | 0.65<br>(0.21 to<br>1.55)         | 0.41<br>(0.14 to<br>0.96)         | 0.70<br>(0.23 to<br>1.70)           |
| Otitis media                         | 27.60<br>(11.04 to<br>61.34)             | 8.35<br>(2.10 to<br>23.15)               | 8.21<br>(2.05 to<br>22.90)               | 7.81<br>(2.03 to<br>21.31)                | 0.47<br>(0.20 to<br>0.96)         | 0.18<br>(0.05 to<br>0.46)         | 0.18<br>(0.05 to<br>0.47)         | 0.16<br>(0.05 to<br>0.40)           |
| Meningitis                           | 5,572.10<br>(3,487.00 to<br>8,684.17)    | 3,719.43<br>(1,424.26 to<br>7,769.00)    | 3,127.58<br>(1,249.39 to<br>6,656.42)    | 4,627.52<br>(1,725.43 to<br>9,659.59)     | 84.75<br>(54.69 to<br>133.43)     | 68.14<br>(30.53 to<br>139.13)     | 61.12<br>(27.54 to<br>125.16)     | 75.92<br>(32.99 to<br>155.41)       |
| Pneumococcal meningitis              | 296.59<br>(184.86 to<br>479.87)          | 216.97<br>(85.18 to<br>457.01)           | 203.24<br>(78.68 to<br>430.83)           | 262.26<br>(99.69 to<br>564.24)            | 5.17<br>(3.17 to<br>8.43)         | 4.47<br>(1.97 to<br>9.27)         | 4.47<br>(1.98 to<br>9.16)         | 4.88<br>(2.17 to<br>9.90)           |
| H influenzae type B meningitis       | 485.70<br>(295.68 to<br>792.78)          | 395.53<br>(108.38 to<br>1,026.59)        | 303.54<br>(94.94 to<br>751.85)           | 1,157.78<br>(222.55 to<br>3,287.18)       | 6.95<br>(4.41 to<br>11.04)        | 5.95<br>(2.04 to<br>13.79)        | 4.98<br>(1.94 to<br>10.80)        | 14.66<br>(3.36 to<br>40.42)         |
| Meningococcal meningitis             | 2,193.30<br>(1,379.74 to<br>3,403.79)    | 1,278.43<br>(483.79 to<br>2,784.83)      | 1,061.85<br>(409.81 to<br>2,323.27)      | 1,332.07<br>(503.32 to<br>2,774.68)       | 32.72<br>(20.87 to<br>51.76)      | 23.21<br>(9.93 to<br>49.60)       | 20.43<br>(9.00 to<br>42.19)       | 22.93<br>(9.72 to<br>47.97)         |
| Other meningitis                     | 2,596.51<br>(1,624.12 to<br>4,054.00)    | 1,828.49<br>(717.83 to<br>3,843.68)      | 1,558.95<br>(635.61 to<br>3,212.84)      | 1,875.42<br>(749.33 to<br>3,873.72)       | 39.91<br>(25.43 to<br>62.59)      | 34.51<br>(15.82 to<br>72.15)      | 31.23<br>(14.47 to<br>65.27)      | 33.45<br>(15.24 to<br>68.51)        |
| Encephalitis                         | 328.33<br>(231.79 to<br>458.55)          | 402.51<br>(160.38 to<br>890.58)          | 317.17<br>(124.71 to<br>713.53)          | 415.17<br>(170.70 to<br>908.35)           | 5.29<br>(3.67 to<br>7.29)         | 7.67<br>(3.50 to<br>15.79)        | 6.40<br>(2.99 to<br>12.76)        | 7.55<br>(3.43 to<br>15.68)          |
| Diphtheria                           | 5.55<br>(2.54 to<br>10.02)               | 2.10<br>(0.56 to<br>5.72)                | 1.37<br>(0.43 to<br>3.59)                | 11.97<br>(1.69 to<br>43.79)               | 0.07<br>(0.04 to<br>0.13)         | 0.03<br>(0.01 to<br>0.08)         | 0.02<br>(0.01 to<br>0.05)         | 0.15<br>(0.02 to<br>0.52)           |
| Whooping cough                       | 378.65<br>(30.95 to<br>1,173.75)         | 267.44<br>(13.61 to<br>1,165.12)         | 103.65<br>(5.40 to<br>415.19)            | 1,077.66<br>(58.76 to<br>4,332.61)        | 4.48<br>(0.37 to<br>13.89)        | 3.17<br>(0.16 to<br>13.76)        | 1.25<br>(0.07 to<br>4.98)         | 12.69<br>(0.70 to<br>50.79)         |
| Tetanus                              | 48.65<br>(18.01 to<br>91.53)             | 9.82<br>(2.44 to<br>23.25)               | 8.55<br>(1.91 to<br>20.93)               | 18.44<br>(5.40 to<br>45.66)               | 0.90<br>(0.29 to<br>1.69)         | 0.20<br>(0.04 to<br>0.44)         | 0.19<br>(0.04 to<br>0.43)         | 0.28<br>(0.08 to<br>0.65)           |
| Measles                              | 1,111.49<br>(347.40 to<br>2,763.73)      | 47.31<br>(4.05 to<br>201.04)             | 31.27<br>(2.99 to<br>123.98)             | 541.01<br>(31.94 to<br>2,706.83)          | 13.27<br>(4.13 to<br>32.95)       | 0.57<br>(0.05 to<br>2.37)         | 0.38<br>(0.04 to<br>1.48)         | 6.40<br>(0.39 to<br>31.83)          |

**Swaziland**

| Cause                                          | YLLs (actual counts)                                 |                                                        |                                                      |                                                        | Deaths (actual counts)                           |                                                  |                                                  |                                                  |
|------------------------------------------------|------------------------------------------------------|--------------------------------------------------------|------------------------------------------------------|--------------------------------------------------------|--------------------------------------------------|--------------------------------------------------|--------------------------------------------------|--------------------------------------------------|
|                                                | 2016                                                 | 2040 Forecast                                          | 2040 Better Scenario                                 | 2040 Worse Scenario                                    | 2016                                             | 2040 Forecast                                    | 2040 Better Scenario                             | 2040 Worse Scenario                              |
| Varicella and herpes zoster                    | 326.54<br>(175.38 to<br>556.94)                      | 192.19<br>(64.39 to<br>446.98)                         | 113.89<br>(40.98 to<br>259.00)                       | 225.78<br>(79.53 to<br>523.91)                         | 5.22<br>(3.14 to<br>8.03)                        | 4.19<br>(1.97 to<br>7.64)                        | 2.93<br>(1.43 to<br>5.15)                        | 4.41<br>(2.10 to<br>8.17)                        |
| <b>Neglected tropical diseases and malaria</b> | <b>598.86</b><br><b>(347.51 to</b><br><b>979.90)</b> | <b>564.97</b><br><b>(234.42 to</b><br><b>1,180.39)</b> | <b>455.11</b><br><b>(188.00 to</b><br><b>961.77)</b> | <b>561.25</b><br><b>(241.77 to</b><br><b>1,165.29)</b> | <b>13.83</b><br><b>(7.20 to</b><br><b>23.75)</b> | <b>13.75</b><br><b>(5.93 to</b><br><b>28.01)</b> | <b>11.57</b><br><b>(4.83 to</b><br><b>23.52)</b> | <b>13.09</b><br><b>(5.85 to</b><br><b>25.41)</b> |
| Malaria                                        | 14.29<br>(6.86 to<br>26.74)                          | 8.52<br>(2.69 to<br>21.27)                             | 7.56<br>(2.35 to<br>19.23)                           | 8.40<br>(2.78 to<br>20.62)                             | 0.23<br>(0.10 to<br>0.45)                        | 0.16<br>(0.05 to<br>0.41)                        | 0.15<br>(0.05 to<br>0.39)                        | 0.16<br>(0.05 to<br>0.38)                        |

|                                                       |                                                          |                                                           |                                                          |                                                           |                                                   |                                                   |                                                   |                                                    |
|-------------------------------------------------------|----------------------------------------------------------|-----------------------------------------------------------|----------------------------------------------------------|-----------------------------------------------------------|---------------------------------------------------|---------------------------------------------------|---------------------------------------------------|----------------------------------------------------|
| Chagas disease                                        | 0.00<br>(0.00 to<br>0.00)                                | 0.00<br>(0.00 to<br>0.00)                                 | 0.00<br>(0.00 to<br>0.00)                                | 0.00<br>(0.00 to<br>0.00)                                 | 0.00<br>(0.00 to<br>0.00)                         | 0.00<br>(0.00 to<br>0.00)                         | 0.00<br>(0.00 to<br>0.00)                         | 0.00<br>(0.00 to<br>0.00)                          |
| Leishmaniasis                                         | 0.00<br>(0.00 to<br>0.00)                                | 0.00<br>(0.00 to<br>0.00)                                 | 0.00<br>(0.00 to<br>0.00)                                | 0.00<br>(0.00 to<br>0.00)                                 | 0.00<br>(0.00 to<br>0.00)                         | 0.00<br>(0.00 to<br>0.00)                         | 0.00<br>(0.00 to<br>0.00)                         | 0.00<br>(0.00 to<br>0.00)                          |
| African trypanosomiasis                               | 0.00<br>(0.00 to<br>0.00)                                | 0.00<br>(0.00 to<br>0.00)                                 | 0.00<br>(0.00 to<br>0.00)                                | 0.00<br>(0.00 to<br>0.00)                                 | 0.00<br>(0.00 to<br>0.00)                         | 0.00<br>(0.00 to<br>0.00)                         | 0.00<br>(0.00 to<br>0.00)                         | 0.00<br>(0.00 to<br>0.00)                          |
| Schistosomiasis                                       | 390.49<br>(170.21 to<br>730.20)                          | 387.53<br>(129.71 to<br>908.15)                           | 322.23<br>(104.97 to<br>757.33)                          | 367.55<br>(125.92 to<br>828.61)                           | 10.60<br>(4.49 to<br>19.45)                       | 10.81<br>(3.96 to<br>23.07)                       | 10.02<br>(3.29 to<br>19.70)                       | 10.02<br>(3.82 to<br>20.85)                        |
| Cysticercosis                                         | 39.01<br>(25.34 to<br>59.07)                             | 23.36<br>(10.51 to<br>48.24)                              | 21.40<br>(9.47 to<br>44.12)                              | 21.66<br>(9.90 to<br>44.22)                               | 0.80<br>(0.50 to<br>1.25)                         | 0.53<br>(0.24 to<br>1.04)                         | 0.50<br>(0.22 to<br>1.00)                         | 0.48<br>(0.23 to<br>0.92)                          |
| Cystic echinococcosis                                 | 10.82<br>(7.13 to<br>15.45)                              | 8.54<br>(3.98 to<br>16.71)                                | 4.69<br>(2.14 to<br>9.21)                                | 9.42<br>(4.42 to<br>18.87)                                | 0.23<br>(0.15 to<br>0.34)                         | 0.21<br>(0.11 to<br>0.38)                         | 0.12<br>(0.06 to<br>0.22)                         | 0.22<br>(0.11 to<br>0.40)                          |
| Dengue                                                | 0.00<br>(0.00 to<br>0.00)                                | 0.00<br>(0.00 to<br>0.00)                                 | 0.00<br>(0.00 to<br>0.00)                                | 0.00<br>(0.00 to<br>0.00)                                 | 0.00<br>(0.00 to<br>0.00)                         | 0.00<br>(0.00 to<br>0.00)                         | 0.00<br>(0.00 to<br>0.00)                         | 0.00<br>(0.00 to<br>0.00)                          |
| Yellow fever                                          | 0.00<br>(0.00 to<br>0.00)                                | 0.00<br>(0.00 to<br>0.00)                                 | 0.00<br>(0.00 to<br>0.00)                                | 0.00<br>(0.00 to<br>0.00)                                 | 0.00<br>(0.00 to<br>0.00)                         | 0.00<br>(0.00 to<br>0.00)                         | 0.00<br>(0.00 to<br>0.00)                         | 0.00<br>(0.00 to<br>0.00)                          |
| Rabies                                                | 18.97<br>(7.33 to<br>46.71)                              | 11.90<br>(3.09 to<br>33.14)                               | 5.05<br>(1.31 to<br>14.55)                               | 15.62<br>(4.33 to<br>43.94)                               | 0.28<br>(0.11 to<br>0.67)                         | 0.19<br>(0.05 to<br>0.50)                         | 0.08<br>(0.02 to<br>0.23)                         | 0.24<br>(0.07 to<br>0.65)                          |
| Intestinal nematode infections                        | 59.00<br>(11.05 to<br>142.34)                            | 72.19<br>(13.89 to<br>209.20)                             | 60.42<br>(12.27 to<br>170.55)                            | 77.12<br>(14.09 to<br>220.03)                             | 0.77<br>(0.20 to<br>1.74)                         | 0.99<br>(0.25 to<br>2.62)                         | 0.86<br>(0.23 to<br>2.20)                         | 1.03<br>(0.25 to<br>2.76)                          |
| Other neglected tropical diseases                     | 66.27<br>(34.04 to<br>128.58)                            | 52.93<br>(19.97 to<br>121.96)                             | 33.77<br>(13.19 to<br>74.44)                             | 61.50<br>(23.31 to<br>137.59)                             | 0.93<br>(0.52 to<br>1.74)                         | 0.85<br>(0.40 to<br>1.69)                         | 0.59<br>(0.29 to<br>1.18)                         | 0.94<br>(0.43 to<br>1.93)                          |
| <b>Maternal disorders</b>                             | <b>2,610.45</b><br><b>(664.86 to</b><br><b>4,445.49)</b> | <b>2,907.63</b><br><b>(487.86 to</b><br><b>10,606.62)</b> | <b>1,698.10</b><br><b>(382.59 to</b><br><b>6,127.14)</b> | <b>3,498.95</b><br><b>(615.89 to</b><br><b>12,189.50)</b> | <b>35.82</b><br><b>(11.88 to</b><br><b>80.35)</b> | <b>54.38</b><br><b>(9.31 to</b><br><b>197.85)</b> | <b>31.76</b><br><b>(5.21 to</b><br><b>117.02)</b> | <b>65.14</b><br><b>(11.66 to</b><br><b>228.28)</b> |
| Maternal hemorrhage                                   | 274.68<br>(85.47 to<br>619.61)                           | 324.84<br>(51.55 to<br>1,245.98)                          | 191.36<br>(29.82 to<br>763.15)                           | 352.95<br>(58.05 to<br>1,315.85)                          | 4.97<br>(1.53 to<br>11.12)                        | 6.13<br>(0.96 to<br>24.28)                        | 3.62<br>(0.54 to<br>14.18)                        | 6.61<br>(1.07 to<br>24.83)                         |
| Maternal sepsis and other maternal infections         | 98.83<br>(29.13 to<br>244.65)                            | 97.96<br>(14.13 to<br>372.16)                             | 57.23<br>(8.20 to<br>222.98)                             | 107.95<br>(16.17 to<br>397.02)                            | 1.76<br>(0.51 to<br>4.34)                         | 1.82<br>(0.26 to<br>6.72)                         | 1.06<br>(0.15 to<br>4.16)                         | 1.98<br>(0.30 to<br>7.40)                          |
| Maternal hypertensive disorders                       | 439.53<br>(142.05 to<br>924.78)                          | 489.98<br>(82.37 to<br>1,729.50)                          | 285.26<br>(45.30 to<br>987.47)                           | 542.71<br>(90.68 to<br>1,809.83)                          | 7.70<br>(2.49 to<br>16.40)                        | 8.95<br>(1.51 to<br>31.24)                        | 5.23<br>(0.84 to<br>18.05)                        | 9.83<br>(1.66 to<br>32.74)                         |
| Maternal obstructed labor and uterine rupture         | 41.38<br>(9.31 to<br>108.27)                             | 52.91<br>(6.57 to<br>207.04)                              | 29.84<br>(3.75 to<br>119.00)                             | 58.32<br>(7.36 to<br>220.08)                              | 0.74<br>(0.17 to<br>1.92)                         | 0.99<br>(0.13 to<br>3.98)                         | 0.56<br>(0.07 to<br>2.18)                         | 1.09<br>(0.13 to<br>4.21)                          |
| Maternal abortion, miscarriage, and ectopic pregnancy | 66.31<br>(17.85 to<br>173.96)                            | 63.43<br>(8.41 to<br>238.02)                              | 37.21<br>(4.92 to<br>150.59)                             | 70.24<br>(9.53 to<br>257.76)                              | 1.19<br>(0.32 to<br>3.16)                         | 1.19<br>(0.16 to<br>4.62)                         | 0.70<br>(0.09 to<br>2.77)                         | 1.31<br>(0.17 to<br>4.92)                          |
| Indirect maternal deaths                              | 589.52<br>(180.10 to<br>1,383.74)                        | 724.44<br>(119.32 to<br>2,985.76)                         | 426.46<br>(68.83 to<br>1,761.53)                         | 807.86<br>(128.68 to<br>3,163.58)                         | 10.51<br>(3.22 to<br>24.54)                       | 13.39<br>(2.19 to<br>54.53)                       | 7.90<br>(1.26 to<br>32.63)                        | 14.80<br>(2.33 to<br>60.35)                        |
| Late maternal deaths                                  | 26.52<br>(5.81 to<br>69.17)                              | 25.86<br>(3.41 to<br>105.99)                              | 15.06<br>(2.01 to<br>63.70)                              | 28.71<br>(3.51 to<br>117.99)                              | 0.47<br>(0.10 to<br>1.25)                         | 0.48<br>(0.06 to<br>2.01)                         | 0.28<br>(0.04 to<br>1.20)                         | 0.53<br>(0.06 to<br>2.16)                          |
| Maternal deaths aggravated by HIV/AIDS                | 139.15<br>(42.62 to<br>309.73)                           | 741.73<br>(68.65 to<br>2,935.83)                          | 419.07<br>(22.04 to<br>1,837.61)                         | 1,103.26<br>(186.85 to<br>4,240.41)                       | 2.55<br>(0.79 to<br>5.61)                         | 14.30<br>(1.35 to<br>56.49)                       | 8.08<br>(0.38 to<br>34.79)                        | 21.19<br>(3.56 to<br>81.04)                        |
| Other maternal disorders                              | 334.55<br>(99.79 to<br>789.85)                           | 386.47<br>(63.87 to<br>1,254.06)                          | 233.62<br>(39.07 to<br>801.33)                           | 426.95<br>(69.26 to<br>1,426.09)                          | 5.92<br>(1.75 to<br>13.71)                        | 7.13<br>(1.13 to<br>23.29)                        | 4.32<br>(0.70 to<br>14.75)                        | 7.80<br>(1.24 to<br>25.80)                         |
| <b>Swaziland</b>                                      |                                                          |                                                           |                                                          |                                                           |                                                   |                                                   |                                                   |                                                    |
| <b>YLLs (actual counts)</b>                           |                                                          |                                                           |                                                          |                                                           | <b>Deaths (actual counts)</b>                     |                                                   |                                                   |                                                    |

| Cause                                                                   | 2016                                         | 2040 Forecast                                | 2040 Better Scenario                        | 2040 Worse Scenario                          | 2016                                | 2040 Forecast                       | 2040 Better Scenario                | 2040 Worse Scenario                 |
|-------------------------------------------------------------------------|----------------------------------------------|----------------------------------------------|---------------------------------------------|----------------------------------------------|-------------------------------------|-------------------------------------|-------------------------------------|-------------------------------------|
| <b>Neonatal disorders</b>                                               | <b>55,023.33</b><br>(41,978.76 to 69,972.38) | <b>27,693.07</b><br>(15,157.07 to 46,472.19) | <b>16,496.55</b><br>(9,166.52 to 27,881.79) | <b>36,482.78</b><br>(20,100.56 to 59,960.10) | <b>635.79</b><br>(484.96 to 808.72) | <b>320.12</b><br>(175.18 to 537.25) | <b>190.70</b><br>(105.96 to 322.67) | <b>421.69</b><br>(232.47 to 693.13) |
| Neonatal preterm birth                                                  | 18,922.01<br>(11,496.05 to 27,483.54)        | 6,969.32<br>(3,397.02 to 11,958.61)          | 4,344.11<br>(2,129.10 to 7,368.12)          | 10,621.06<br>(5,306.21 to 18,019.73)         | 218.64<br>(132.82 to 317.63)        | 80.57<br>(39.28 to 138.27)          | 50.22<br>(24.61 to 85.17)           | 122.76<br>(61.34 to 208.26)         |
| Neonatal encephalopathy due to birth asphyxia and trauma                | 12,536.77<br>(7,730.29 to 19,047.74)         | 5,761.98<br>(2,696.66 to 11,901.14)          | 3,579.24<br>(1,706.30 to 7,280.46)          | 7,055.94<br>(3,243.60 to 14,209.52)          | 144.84<br>(89.35 to 220.05)         | 66.60<br>(31.17 to 137.48)          | 41.37<br>(19.72 to 84.13)           | 81.56<br>(37.50 to 164.19)          |
| Neonatal sepsis and other neonatal infections                           | 5,034.33<br>(2,823.28 to 10,818.89)          | 3,587.26<br>(1,640.90 to 7,590.90)           | 2,178.93<br>(1,002.92 to 4,704.52)          | 4,408.88<br>(1,955.84 to 9,610.90)           | 58.17<br>(32.62 to 124.98)          | 41.46<br>(18.97 to 87.71)           | 25.18<br>(11.59 to 54.35)           | 50.95<br>(22.60 to 111.06)          |
| Hemolytic disease and other neonatal jaundice                           | 493.69<br>(270.53 to 823.82)                 | 168.71<br>(69.16 to 346.22)                  | 94.24<br>(40.51 to 196.52)                  | 213.40<br>(91.15 to 442.71)                  | 5.71<br>(3.13 to 9.52)              | 1.95<br>(0.80 to 4.00)              | 1.09<br>(0.47 to 2.27)              | 2.47<br>(1.05 to 5.12)              |
| Other neonatal disorders                                                | 18,036.54<br>(11,336.00 to 26,301.14)        | 11,205.80<br>(5,340.69 to 20,743.35)         | 6,300.02<br>(3,013.69 to 11,841.21)         | 14,183.50<br>(6,788.63 to 26,909.15)         | 208.43<br>(131.03 to 303.95)        | 129.53<br>(61.74 to 239.71)         | 72.83<br>(34.83 to 136.90)          | 163.95<br>(78.46 to 310.93)         |
| <b>Nutritional deficiencies</b>                                         | <b>7,030.16</b><br>(4,227.08 to 11,169.46)   | <b>2,872.48</b><br>(1,172.52 to 5,843.88)    | <b>1,924.95</b><br>(821.62 to 3,880.31)     | <b>3,312.81</b><br>(1,357.29 to 7,040.07)    | <b>94.74</b><br>(59.43 to 144.50)   | <b>50.73</b><br>(27.10 to 91.34)    | <b>37.77</b><br>(21.32 to 65.28)    | <b>54.09</b><br>(28.54 to 101.51)   |
| Protein-energy malnutrition                                             | 6,731.93<br>(3,987.84 to 10,780.07)          | 2,484.52<br>(935.79 to 5,228.91)             | 1,635.38<br>(630.68 to 3,418.36)            | 2,906.04<br>(1,070.53 to 6,317.51)           | 87.53<br>(54.17 to 135.84)          | 40.21<br>(19.54 to 75.47)           | 29.02<br>(15.07 to 52.94)           | 43.98<br>(20.40 to 86.38)           |
| Iodine deficiency                                                       | 23.49<br>(0.58 to 157.99)                    | 86.29<br>(1.20 to 599.21)                    | 53.85<br>(0.67 to 343.86)                   | 101.50<br>(1.23 to 743.36)                   | 0.37<br>(0.02 to 1.92)              | 1.61<br>(0.04 to 7.36)              | 1.13<br>(0.47 to 4.47)              | 1.74<br>(0.04 to 9.15)              |
| Dietary iron deficiency                                                 | 7.25<br>(3.95 to 11.38)                      | 7.76<br>(3.12 to 17.09)                      | 6.12<br>(2.49 to 13.65)                     | 8.12<br>(3.29 to 17.96)                      | 0.11<br>(0.06 to 0.18)              | 0.13<br>(0.06 to 0.29)              | 0.11<br>(0.05 to 0.22)              | 0.13<br>(0.06 to 0.29)              |
| Other nutritional deficiencies                                          | 267.50<br>(145.39 to 468.38)                 | 293.91<br>(138.09 to 584.90)                 | 229.60<br>(107.20 to 452.43)                | 297.15<br>(142.63 to 601.90)                 | 6.73<br>(3.88 to 10.61)             | 8.77<br>(5.18 to 14.48)             | 7.51<br>(4.47 to 12.16)             | 8.23<br>(5.00 to 13.35)             |
| <b>Other communicable, maternal, neonatal, and nutritional diseases</b> | <b>3,674.19</b><br>(1,750.91 to 8,597.68)    | <b>2,864.72</b><br>(1,209.81 to 6,269.93)    | <b>2,042.49</b><br>(871.18 to 4,365.16)     | <b>3,150.57</b><br>(1,311.61 to 7,288.54)    | <b>54.53</b><br>(28.50 to 115.20)   | <b>33.45</b><br>(25.62 to 100.73)   | <b>41.28</b><br>(19.64 to 77.64)    | <b>55.00</b><br>(25.76 to 108.11)   |
| Sexually transmitted infections excluding HIV                           | 888.53<br>(386.12 to 1,733.38)               | 428.62<br>(140.84 to 978.74)                 | 320.41<br>(107.81 to 738.88)                | 465.72<br>(152.31 to 1,109.67)               | 12.15<br>(5.69 to 22.61)            | 7.07<br>(2.63 to 15.75)             | 5.62<br>(2.10 to 13.24)             | 7.34<br>(2.74 to 15.84)             |
| Syphilis                                                                | 795.49<br>(308.95 to 1,627.32)               | 317.04<br>(96.38 to 791.04)                  | 223.93<br>(71.84 to 523.17)                 | 358.37<br>(108.38 to 876.55)                 | 10.05<br>(4.29 to 19.83)            | 4.42<br>(1.59 to 10.09)             | 3.27<br>(1.26 to 7.11)              | 4.84<br>(1.67 to 11.34)             |
| Chlamydial infection                                                    | 17.95<br>(5.58 to 55.25)                     | 21.61<br>(4.27 to 76.95)                     | 18.54<br>(3.68 to 67.61)                    | 20.99<br>(4.28 to 73.04)                     | 0.40<br>(0.13 to 1.12)              | 0.51<br>(0.14 to 1.64)              | 0.45<br>(0.12 to 1.41)              | 0.48<br>(0.13 to 1.54)              |
| Gonococcal infection                                                    | 48.72<br>(16.99 to 139.73)                   | 58.52<br>(12.29 to 205.28)                   | 50.83<br>(10.95 to 174.65)                  | 56.11<br>(11.99 to 187.81)                   | 1.13<br>(0.42 to 3.01)              | 1.43<br>(0.50 to 4.50)              | 1.27<br>(0.36 to 3.95)              | 1.34<br>(0.39 to 4.11)              |
| Other sexually transmitted infections                                   | 26.37<br>(8.96 to 75.01)                     | 31.45<br>(6.56 to 110.10)                    | 27.11<br>(5.47 to 94.55)                    | 30.25<br>(6.47 to 103.88)                    | 0.58<br>(0.21 to 1.52)              | 0.72<br>(0.18 to 2.40)              | 0.63<br>(0.16 to 2.03)              | 0.68<br>(0.18 to 2.22)              |
| Acute hepatitis                                                         | 258.86<br>(174.62 to 364.48)                 | 288.68<br>(137.57 to 546.51)                 | 238.35<br>(112.04 to 456.23)                | 272.55<br>(133.40 to 514.21)                 | 5.90<br>(3.83 to 8.30)              | 7.64<br>(4.10 to 13.07)             | 6.54<br>(3.42 to 11.07)             | 7.01<br>(3.84 to 12.08)             |
| Acute hepatitis A                                                       | 10.32<br>(1.07 to 25.61)                     | 5.42<br>(1.04 to 14.81)                      | 3.88<br>(0.79 to 10.23)                     | 5.94<br>(1.04 to 16.87)                      | 0.13<br>(0.02 to 0.31)              | 0.09<br>(0.02 to 0.23)              | 0.07<br>(0.02 to 0.18)              | 0.10<br>(0.02 to 0.23)              |
| Acute hepatitis B                                                       | 197.41<br>(125.38 to 288.69)                 | 243.36<br>(111.33 to 463.89)                 | 201.43<br>(91.70 to 383.23)                 | 226.54<br>(106.73 to 439.59)                 | 4.84<br>(2.99 to 7.01)              | 6.54<br>(3.39 to 11.32)             | 5.55<br>(2.74 to 9.72)              | 5.98<br>(3.17 to 10.41)             |
| Acute hepatitis C                                                       | 5.33<br>(3.08 to 8.14)                       | 8.43<br>(3.67 to 16.47)                      | 7.89<br>(3.32 to 15.47)                     | 7.59<br>(3.47 to 14.39)                      | 0.15<br>(0.08 to 0.25)              | 0.25<br>(0.12 to 0.45)              | 0.24<br>(0.12 to 0.44)              | 0.22<br>(0.11 to 0.38)              |

|                                       |                                                                 |                                                                  |                                                                 |                                                                  |                                                            |                                                             |                                                             |                                                             |
|---------------------------------------|-----------------------------------------------------------------|------------------------------------------------------------------|-----------------------------------------------------------------|------------------------------------------------------------------|------------------------------------------------------------|-------------------------------------------------------------|-------------------------------------------------------------|-------------------------------------------------------------|
| Acute hepatitis E                     | 45.81<br>(29.49 to<br>67.41)                                    | 31.47<br>(13.79 to<br>61.74)                                     | 25.15<br>(11.35 to<br>49.25)                                    | 32.47<br>(14.34 to<br>64.33)                                     | 0.78<br>(0.52 to<br>1.09)                                  | 0.75<br>(0.41 to<br>1.30)                                   | 0.67<br>(0.37 to<br>1.14)                                   | 0.71<br>(0.39 to<br>1.22)                                   |
| Other unspecified infectious diseases | 2,526.80<br>(796.01 to<br>7,428.34)                             | 2,147.42<br>(729.22 to<br>5,286.59)                              | 1,483.74<br>(497.78 to<br>3,554.14)                             | 2,412.30<br>(794.59 to<br>6,377.32)                              | 36.47<br>(11.98 to<br>94.29)                               | 38.73<br>(13.88 to<br>80.51)                                | 29.12<br>(10.20 to<br>57.86)                                | 40.64<br>(14.39 to<br>89.87)                                |
| <b>Non-communicable diseases</b>      | <b>124,229.12</b><br><b>(83,340.26 to</b><br><b>168,937.23)</b> | <b>220,711.77</b><br><b>(112,354.07 to</b><br><b>407,105.58)</b> | <b>174,248.87</b><br><b>(88,028.54 to</b><br><b>328,022.70)</b> | <b>254,773.88</b><br><b>(128,510.73 to</b><br><b>475,126.81)</b> | <b>4,577.04</b><br><b>(3,031.73 to</b><br><b>6,205.08)</b> | <b>8,276.09</b><br><b>(5,289.93 to</b><br><b>13,213.43)</b> | <b>6,801.90</b><br><b>(4,355.24 to</b><br><b>10,863.68)</b> | <b>9,321.62</b><br><b>(5,858.11 to</b><br><b>14,727.32)</b> |
| <b>Swaziland</b>                      |                                                                 |                                                                  |                                                                 |                                                                  |                                                            |                                                             |                                                             |                                                             |
| <b>Cause</b>                          | <b>YLLs (actual counts)</b>                                     |                                                                  |                                                                 |                                                                  | <b>Deaths (actual counts)</b>                              |                                                             |                                                             |                                                             |
|                                       | <b>2016</b>                                                     | <b>2040 Forecast</b>                                             | <b>2040 Better Scenario</b>                                     | <b>2040 Worse Scenario</b>                                       | <b>2016</b>                                                | <b>2040 Forecast</b>                                        | <b>2040 Better Scenario</b>                                 | <b>2040 Worse Scenario</b>                                  |
| <b>Neoplasms</b>                      | <b>22,093.09</b><br><b>(13,491.11 to</b><br><b>32,335.78)</b>   | <b>48,968.00</b><br><b>(20,951.65 to</b><br><b>98,710.40)</b>    | <b>45,017.85</b><br><b>(19,557.66 to</b><br><b>90,677.91)</b>   | <b>54,290.33</b><br><b>(22,236.12 to</b><br><b>114,361.84)</b>   | <b>791.44</b><br><b>(494.08 to</b><br><b>1,127.63)</b>     | <b>1,697.22</b><br><b>(893.83 to</b><br><b>3,061.33)</b>    | <b>1,635.38</b><br><b>(877.10 to</b><br><b>2,895.72)</b>    | <b>1,837.48</b><br><b>(929.49 to</b><br><b>3,431.89)</b>    |
| Lip and oral cavity cancer            | 507.55<br>(309.84 to<br>728.30)                                 | 1,212.39<br>(341.20 to<br>2,923.89)                              | 879.95<br>(258.86 to<br>2,114.57)                               | 1,916.47<br>(501.14 to<br>4,838.80)                              | 18.54<br>(11.50 to<br>25.71)                               | 39.62<br>(13.40 to<br>89.54)                                | 29.84<br>(10.90 to<br>65.02)                                | 61.50<br>(18.46 to<br>144.86)                               |
| Nasopharynx cancer                    | 120.93<br>(76.43 to<br>176.60)                                  | 275.53<br>(85.62 to<br>669.99)                                   | 196.86<br>(65.69 to<br>467.63)                                  | 434.71<br>(125.00 to<br>1,062.38)                                | 3.84<br>(2.40 to<br>5.58)                                  | 8.37<br>(2.80 to<br>19.63)                                  | 6.11<br>(2.17 to<br>14.08)                                  | 13.14<br>(4.07 to<br>31.74)                                 |
| Other pharynx cancer                  | 109.52<br>(66.39 to<br>156.15)                                  | 216.16<br>(86.71 to<br>439.88)                                   | 210.61<br>(84.73 to<br>438.64)                                  | 253.79<br>(100.13 to<br>510.53)                                  | 3.90<br>(2.43 to<br>5.49)                                  | 7.25<br>(3.25 to<br>13.96)                                  | 7.20<br>(3.25 to<br>13.90)                                  | 8.36<br>(3.70 to<br>16.04)                                  |
| Esophageal cancer                     | 2,016.16<br>(1,199.35 to<br>2,874.19)                           | 4,782.94<br>(1,367.21 to<br>12,650.59)                           | 3,478.66<br>(1,076.13 to<br>9,063.84)                           | 6,692.56<br>(1,819.99 to<br>17,865.19)                           | 80.97<br>(49.12 to<br>113.68)                              | 166.55<br>(59.21 to<br>398.59)                              | 126.09<br>(48.84 to<br>291.69)                              | 228.64<br>(72.56 to<br>559.14)                              |
| Stomach cancer                        | 910.75<br>(562.77 to<br>1,311.75)                               | 1,553.84<br>(695.36 to<br>2,909.66)                              | 1,399.85<br>(638.93 to<br>2,642.12)                             | 1,493.73<br>(676.37 to<br>2,772.15)                              | 38.12<br>(24.35 to<br>53.22)                               | 59.79<br>(34.15 to<br>99.82)                                | 56.44<br>(32.41 to<br>93.40)                                | 56.06<br>(31.71 to<br>90.84)                                |
| Colon and rectum cancer               | 1,174.71<br>(690.60 to<br>1,745.87)                             | 3,049.68<br>(1,328.29 to<br>6,203.19)                            | 3,138.97<br>(1,367.14 to<br>6,342.30)                           | 2,995.48<br>(1,305.49 to<br>6,047.75)                            | 49.27<br>(29.74 to<br>71.49)                               | 124.74<br>(67.24 to<br>225.95)                              | 134.43<br>(74.03 to<br>233.94)                              | 117.99<br>(62.62 to<br>212.03)                              |
| Liver cancer                          | 1,257.62<br>(755.95 to<br>1,878.82)                             | 3,151.76<br>(1,222.75 to<br>6,597.41)                            | 2,816.36<br>(1,127.78 to<br>5,945.60)                           | 3,658.04<br>(1,349.72 to<br>7,951.82)                            | 42.23<br>(26.28 to<br>61.20)                               | 101.73<br>(47.71 to<br>193.37)                              | 94.78<br>(46.30 to<br>179.55)                               | 115.47<br>(49.56 to<br>231.64)                              |
| Liver cancer due to hepatitis B       | 622.08<br>(371.26 to<br>941.23)                                 | 1,580.01<br>(576.23 to<br>3,484.55)                              | 1,424.33<br>(541.44 to<br>3,042.30)                             | 1,755.41<br>(622.35 to<br>3,992.42)                              | 19.30<br>(11.75 to<br>28.32)                               | 47.57<br>(20.94 to<br>94.75)                                | 44.35<br>(20.39 to<br>86.93)                                | 52.03<br>(21.68 to<br>110.40)                               |
| Liver cancer due to hepatitis C       | 175.64<br>(98.57 to<br>277.34)                                  | 434.79<br>(175.35 to<br>936.40)                                  | 404.62<br>(164.90 to<br>880.52)                                 | 482.71<br>(186.00 to<br>1,072.65)                                | 7.36<br>(4.32 to<br>11.22)                                 | 17.28<br>(8.78 to<br>32.40)                                 | 16.99<br>(8.81 to<br>31.51)                                 | 18.46<br>(8.93 to<br>35.39)                                 |
| Liver cancer due to alcohol use       | 166.58<br>(98.54 to<br>254.06)                                  | 432.58<br>(168.32 to<br>921.23)                                  | 371.59<br>(149.36 to<br>785.15)                                 | 630.14<br>(225.42 to<br>1,395.29)                                | 6.31<br>(3.81 to<br>9.33)                                  | 14.97<br>(7.05 to<br>29.00)                                 | 13.54<br>(6.72 to<br>25.87)                                 | 20.82<br>(9.02 to<br>42.14)                                 |
| Liver cancer due to other causes      | 293.32<br>(181.74 to<br>434.17)                                 | 704.39<br>(275.36 to<br>1,466.10)                                | 615.82<br>(252.95 to<br>1,254.17)                               | 789.79<br>(296.10 to<br>1,703.23)                                | 9.25<br>(5.81 to<br>13.42)                                 | 21.91<br>(10.04 to<br>42.67)                                | 19.91<br>(9.45 to<br>37.95)                                 | 24.15<br>(10.50 to<br>50.08)                                |
| Gallbladder and biliary tract cancer  | 143.26<br>(73.10 to<br>240.38)                                  | 226.03<br>(100.87 to<br>432.59)                                  | 246.88<br>(107.48 to<br>481.97)                                 | 193.53<br>(90.21 to<br>354.18)                                   | 6.50<br>(3.41 to<br>10.68)                                 | 10.04<br>(5.64 to<br>16.65)                                 | 11.39<br>(6.20 to<br>19.42)                                 | 8.40<br>(4.95 to<br>13.26)                                  |
| Pancreatic cancer                     | 644.18<br>(394.08 to<br>938.08)                                 | 1,807.35<br>(767.66 to<br>3,556.07)                              | 1,832.38<br>(792.08 to<br>3,630.58)                             | 1,728.99<br>(727.66 to<br>3,404.89)                              | 27.41<br>(17.27 to<br>38.90)                               | 70.86<br>(38.16 to<br>122.24)                               | 75.28<br>(40.59 to<br>128.79)                               | 66.19<br>(34.83 to<br>113.75)                               |
| Larynx cancer                         | 337.47<br>(196.69 to<br>483.74)                                 | 717.92<br>(189.44 to<br>1,851.05)                                | 485.55<br>(133.31 to<br>1,312.42)                               | 1,064.97<br>(282.33 to<br>2,599.38)                              | 13.05<br>(7.84 to<br>18.07)                                | 24.18<br>(7.60 to<br>58.67)                                 | 16.67<br>(5.60 to<br>42.26)                                 | 35.95<br>(11.22 to<br>85.28)                                |
| Tracheal, bronchus, and lung cancer   | 3,041.14<br>(1,782.57 to<br>4,534.86)                           | 6,853.83<br>(1,770.92 to<br>16,791.34)                           | 5,073.90<br>(1,400.45 to<br>12,424.19)                          | 10,278.40<br>(2,695.25 to<br>25,100.47)                          | 118.92<br>(71.73 to<br>173.12)                             | 235.27<br>(72.36 to<br>539.82)                              | 179.31<br>(58.64 to<br>412.59)                              | 355.50<br>(110.42 to<br>803.50)                             |
| Malignant skin melanoma               | 173.18<br>(97.36 to<br>308.15)                                  | 416.66<br>(207.21 to<br>805.06)                                  | 489.85<br>(237.29 to<br>965.80)                                 | 341.12<br>(176.06 to<br>631.69)                                  | 6.18<br>(3.55 to<br>10.97)                                 | 14.52<br>(8.48 to<br>25.77)                                 | 17.76<br>(10.21 to<br>31.35)                                | 11.62<br>(7.18 to<br>19.72)                                 |

|                          |                                     |                                        |                                        |                                        |                               |                                |                                |                                |
|--------------------------|-------------------------------------|----------------------------------------|----------------------------------------|----------------------------------------|-------------------------------|--------------------------------|--------------------------------|--------------------------------|
| Non-melanoma skin cancer | 367.75<br>(235.41 to<br>511.96)     | 883.27<br>(525.90 to<br>1,318.66)      | 874.66<br>(502.34 to<br>1,357.23)      | 754.06<br>(472.70 to<br>1,067.73)      | 15.86<br>(10.48 to<br>21.55)  | 35.61<br>(24.84 to<br>47.17)   | 36.91<br>(25.24 to<br>50.97)   | 29.53<br>(21.80 to<br>37.63)   |
| Breast cancer            | 1,451.91<br>(579.26 to<br>2,699.53) | 3,834.98<br>(1,005.55 to<br>10,561.57) | 3,905.88<br>(1,009.62 to<br>10,667.29) | 3,862.73<br>(1,008.69 to<br>10,694.20) | 52.11<br>(21.81 to<br>93.53)  | 136.71<br>(51.02 to<br>321.08) | 144.33<br>(54.16 to<br>340.16) | 134.53<br>(50.16 to<br>315.88) |
| Cervical cancer          | 2,325.13<br>(927.66 to<br>4,273.25) | 4,782.18<br>(1,030.20 to<br>14,368.46) | 4,288.88<br>(912.88 to<br>12,540.54)   | 4,750.00<br>(1,005.49 to<br>14,322.97) | 81.17<br>(33.80 to<br>145.44) | 158.46<br>(48.90 to<br>405.99) | 146.33<br>(44.95 to<br>369.11) | 154.38<br>(47.67 to<br>393.80) |
| Uterine cancer           | 176.14<br>(75.75 to<br>307.41)      | 382.99<br>(132.84 to<br>822.55)        | 352.43<br>(117.51 to<br>772.02)        | 356.92<br>(129.39 to<br>704.19)        | 8.12<br>(3.66 to<br>13.72)    | 17.63<br>(8.11 to<br>30.78)    | 16.76<br>(7.35 to<br>30.88)    | 16.07<br>(7.94 to<br>26.31)    |
| Ovarian cancer           | 339.01<br>(138.62 to<br>611.50)     | 815.30<br>(218.00 to<br>1,992.24)      | 917.13<br>(242.53 to<br>2,349.70)      | 757.65<br>(208.33 to<br>1,789.65)      | 12.11<br>(5.22 to<br>21.30)   | 28.81<br>(10.43 to<br>62.58)   | 33.30<br>(11.70 to<br>75.27)   | 26.48<br>(9.79 to<br>55.84)    |
| Prostate cancer          | 1,054.60<br>(559.86 to<br>1,528.59) | 2,368.39<br>(1,369.42 to<br>3,381.89)  | 2,744.74<br>(1,596.35 to<br>3,984.44)  | 1,944.95<br>(1,114.61 to<br>2,804.44)  | 60.53<br>(33.03 to<br>86.78)  | 127.51<br>(79.24 to<br>179.96) | 155.83<br>(99.28 to<br>216.56) | 100.60<br>(59.70 to<br>146.21) |
| Testicular cancer        | 50.83<br>(26.77 to<br>75.35)        | 83.11<br>(38.22 to<br>138.32)          | 80.31<br>(36.40 to<br>134.42)          | 73.67<br>(35.00 to<br>121.98)          | 1.37<br>(0.73 to<br>1.97)     | 2.35<br>(1.17 to<br>3.48)      | 2.39<br>(1.17 to<br>3.61)      | 1.99<br>(1.04 to<br>2.90)      |

**Swaziland**

| Cause                           | YLLs (actual counts)                |                                       |                                       |                                       | Deaths (actual counts)       |                              |                              |                              |
|---------------------------------|-------------------------------------|---------------------------------------|---------------------------------------|---------------------------------------|------------------------------|------------------------------|------------------------------|------------------------------|
|                                 | 2016                                | 2020 Forecast                         | 2040 Better Scenario                  | 2040 Worse Scenario                   | 2016                         | 2020 Forecast                | 2040 Better Scenario         | 2040 Worse Scenario          |
| Kidney cancer                   | 257.54<br>(166.74 to<br>357.89)     | 586.81<br>(287.33 to<br>1,042.28)     | 619.43<br>(309.08 to<br>1,124.92)     | 542.77<br>(265.88 to<br>952.02)       | 7.34<br>(4.88 to<br>10.07)   | 18.21<br>(10.42 to<br>29.80) | 20.34<br>(11.77 to<br>33.48) | 16.29<br>(9.40 to<br>26.38)  |
| Bladder cancer                  | 263.23<br>(165.14 to<br>380.86)     | 571.57<br>(249.68 to<br>1,158.70)     | 526.06<br>(235.77 to<br>1,045.10)     | 575.78<br>(248.81 to<br>1,190.55)     | 12.16<br>(7.90 to<br>17.10)  | 24.42<br>(13.61 to<br>41.25) | 23.98<br>(14.10 to<br>39.03) | 23.64<br>(12.87 to<br>40.43) |
| Brain and nervous system cancer | 618.08<br>(410.19 to<br>875.64)     | 1,294.26<br>(656.62 to<br>2,347.60)   | 1,324.16<br>(662.26 to<br>2,507.17)   | 1,175.88<br>(626.35 to<br>2,085.28)   | 13.86<br>(8.95 to<br>19.92)  | 32.88<br>(17.76 to<br>56.75) | 35.45<br>(18.77 to<br>62.13) | 26.58<br>(16.12 to<br>48.53) |
| Thyroid cancer                  | 67.83<br>(38.48 to<br>108.89)       | 144.51<br>(66.47 to<br>281.99)        | 134.70<br>(61.20 to<br>267.03)        | 145.90<br>(68.00 to<br>282.41)        | 2.54<br>(1.46 to<br>3.98)    | 3.36<br>(3.04 to<br>9.23)    | 5.17<br>(2.91 to<br>9.09)    | 3.29<br>(3.03 to<br>9.05)    |
| Mesothelioma                    | 98.32<br>(54.70 to<br>150.85)       | 250.09<br>(123.48 to<br>442.03)       | 265.06<br>(127.40 to<br>484.33)       | 209.02<br>(108.65 to<br>351.25)       | 3.83<br>(2.18 to<br>5.69)    | 8.88<br>(4.83 to<br>14.41)   | 9.70<br>(5.13 to<br>16.24)   | 7.30<br>(4.10 to<br>11.13)   |
| Hodgkin lymphoma                | 140.49<br>(83.67 to<br>214.22)      | 189.25<br>(85.56 to<br>351.22)        | 156.51<br>(69.74 to<br>293.88)        | 179.82<br>(82.92 to<br>329.29)        | 3.29<br>(1.93 to<br>4.84)    | 4.79<br>(2.42 to<br>8.25)    | 4.09<br>(2.01 to<br>7.15)    | 4.42<br>(2.29 to<br>7.45)    |
| Non-Hodgkin lymphoma            | 461.53<br>(299.27 to<br>699.62)     | 1,004.92<br>(528.17 to<br>1,804.60)   | 1,079.86<br>(557.56 to<br>1,994.25)   | 911.83<br>(492.63 to<br>1,601.20)     | 13.70<br>(8.73 to<br>20.84)  | 32.01<br>(19.35 to<br>52.95) | 36.12<br>(21.31 to<br>61.09) | 28.10<br>(17.62 to<br>45.94) |
| Multiple myeloma                | 224.06<br>(126.08 to<br>351.99)     | 635.26<br>(310.91 to<br>1,164.03)     | 716.45<br>(342.08 to<br>1,352.71)     | 563.52<br>(282.51 to<br>991.26)       | 8.89<br>(5.11 to<br>13.65)   | 23.37<br>(13.07 to<br>39.04) | 27.12<br>(14.93 to<br>46.42) | 20.41<br>(12.02 to<br>33.18) |
| Leukemia                        | 1,277.59<br>(846.14 to<br>1,779.78) | 2,096.09<br>(1,054.48 to<br>3,795.42) | 1,991.57<br>(1,009.01 to<br>3,631.18) | 2,121.53<br>(1,068.15 to<br>3,856.61) | 31.08<br>(20.14 to<br>43.24) | 60.31<br>(34.62 to<br>98.56) | 59.91<br>(34.08 to<br>98.58) | 59.21<br>(34.03 to<br>96.46) |
| Acute lymphoid leukemia         | 285.75<br>(197.34 to<br>408.75)     | 366.72<br>(180.61 to<br>733.02)       | 350.01<br>(174.08 to<br>715.52)       | 372.65<br>(183.60 to<br>729.27)       | 4.72<br>(3.20 to<br>6.72)    | 7.15<br>(3.68 to<br>13.52)   | 7.10<br>(3.60 to<br>13.43)   | 7.13<br>(3.71 to<br>13.11)   |
| Chronic lymphoid leukemia       | 22.47<br>(12.27 to<br>36.83)        | 44.13<br>(21.65 to<br>81.16)          | 44.95<br>(21.92 to<br>82.63)          | 43.56<br>(21.35 to<br>80.65)          | 0.97<br>(0.54 to<br>1.58)    | 1.91<br>(1.08 to<br>3.07)    | 2.04<br>(1.15 to<br>3.41)    | 1.82<br>(1.03 to<br>2.91)    |
| Acute myeloid leukemia          | 343.07<br>(197.51 to<br>541.65)     | 714.66<br>(303.63 to<br>1,403.00)     | 738.00<br>(322.41 to<br>1,424.39)     | 700.69<br>(296.19 to<br>1,329.63)     | 7.57<br>(4.28 to<br>11.66)   | 18.03<br>(8.55 to<br>33.41)  | 19.43<br>(9.32 to<br>36.07)  | 17.28<br>(8.03 to<br>32.16)  |
| Chronic myeloid leukemia        | 79.81<br>(47.19 to<br>124.93)       | 112.04<br>(48.28 to<br>215.47)        | 108.41<br>(47.22 to<br>206.03)        | 110.92<br>(47.81 to<br>214.36)        | 2.24<br>(1.33 to<br>3.50)    | 3.29<br>(1.65 to<br>6.00)    | 3.30<br>(1.64 to<br>5.93)    | 3.20<br>(1.59 to<br>5.78)    |

|                                               |                                                     |                                                      |                                                     |                                                      |                                                  |                                                  |                                                  |                                                  |
|-----------------------------------------------|-----------------------------------------------------|------------------------------------------------------|-----------------------------------------------------|------------------------------------------------------|--------------------------------------------------|--------------------------------------------------|--------------------------------------------------|--------------------------------------------------|
| Other leukemia                                | 546.49<br>(263.18 to 809.47)                        | 858.54<br>(368.86 to 1,596.53)                       | 750.20<br>(313.93 to 1,416.22)                      | 893.71<br>(383.36 to 1,660.27)                       | 15.58<br>(8.11 to 22.83)                         | 29.92<br>(15.78 to 48.53)                        | 28.04<br>(14.51 to 45.26)                        | 29.78<br>(15.58 to 47.97)                        |
| Other neoplasms                               | 2,482.59<br>(1,431.20 to 3,842.07)                  | 4,780.94<br>(2,149.13 to 9,431.81)                   | 4,790.22<br>(2,132.78 to 9,676.65)                  | 4,312.53<br>(1,977.65 to 8,385.17)                   | 54.53<br>(32.28 to 82.11)                        | 116.96<br>(61.48 to 216.07)                      | 122.33<br>(63.21 to 225.11)                      | 101.84<br>(54.08 to 182.90)                      |
| <b>Cardiovascular diseases</b>                | <b>35,725.14</b><br><b>(22,890.97 to 49,771.06)</b> | <b>56,627.77</b><br><b>(25,719.59 to 122,236.31)</b> | <b>35,893.30</b><br><b>(17,376.43 to 72,748.82)</b> | <b>77,127.99</b><br><b>(34,078.24 to 164,186.98)</b> | <b>1,651.11</b><br><b>(1,084.15 to 2,250.99)</b> | <b>2,619.02</b><br><b>(1,486.97 to 4,837.10)</b> | <b>1,798.78</b><br><b>(1,073.19 to 3,247.90)</b> | <b>3,335.82</b><br><b>(1,855.61 to 6,030.89)</b> |
| Rheumatic heart disease                       | 1,210.96<br>(772.19 to 1,774.15)                    | 1,102.98<br>(534.97 to 2,168.74)                     | 871.87<br>(421.77 to 1,719.04)                      | 1,072.44<br>(538.20 to 2,067.36)                     | 37.12<br>(23.21 to 54.16)                        | 36.62<br>(22.01 to 62.51)                        | 30.52<br>(18.01 to 53.02)                        | 34.21<br>(21.04 to 57.80)                        |
| Ischemic heart disease                        | 13,806.90<br>(8,732.22 to 19,801.93)                | 20,939.48<br>(7,661.97 to 55,441.18)                 | 11,041.03<br>(4,120.32 to 29,727.32)                | 31,267.53<br>(11,206.29 to 80,052.10)                | 679.10<br>(443.20 to 953.84)                     | 1,004.98<br>(460.30 to 2,254.92)                 | 596.56<br>(272.68 to 1,430.14)                   | 1,382.78<br>(637.09 to 3,005.89)                 |
| Stroke                                        | 11,998.78<br>(7,694.98 to 17,083.52)                | 15,886.21<br>(6,283.70 to 35,790.88)                 | 8,597.30<br>(3,557.26 to 20,921.49)                 | 24,888.54<br>(9,100.83 to 55,583.81)                 | 581.20<br>(379.50 to 819.16)                     | 771.84<br>(385.21 to 1,354.45)                   | 476.63<br>(251.51 to 1,116.94)                   | 1,098.95<br>(531.31 to 2,322.67)                 |
| Ischemic stroke                               | 3,954.09<br>(2,487.51 to 5,621.14)                  | 4,564.69<br>(1,911.18 to 13,843.38)                  | 2,956.30<br>(1,256.59 to 10,518.39)                 | 6,069.32<br>(2,478.62 to 17,833.04)                  | 239.09<br>(155.55 to 331.82)                     | 299.82<br>(140.70 to 1,066.01)                   | 216.45<br>(103.83 to 752.30)                     | 366.18<br>(166.17 to 1,248.23)                   |
| Intracerebral hemorrhage                      | 8,044.70<br>(5,148.90 to 11,673.40)                 | 11,321.52<br>(3,916.21 to 28,657.42)                 | 5,641.00<br>(2,064.05 to 14,173.36)                 | 18,819.22<br>(6,198.13 to 47,880.17)                 | 342.11<br>(221.32 to 490.63)                     | 472.03<br>(213.51 to 1,011.42)                   | 260.18<br>(126.03 to 538.04)                     | 732.76<br>(302.34 to 1,628.68)                   |
| Hypertensive heart disease                    | 4,083.33<br>(1,868.38 to 6,527.07)                  | 9,405.23<br>(3,231.01 to 23,025.27)                  | 6,741.15<br>(2,433.66 to 15,347.15)                 | 11,063.97<br>(3,580.60 to 28,406.84)                 | 193.45<br>(91.75 to 300.53)                      | 449.99<br>(191.18 to 948.42)                     | 337.32<br>(150.57 to 645.61)                     | 498.75<br>(198.74 to 1,107.09)                   |
| Cardiomyopathy and myocarditis                | 1,934.80<br>(1,290.91 to 2,759.91)                  | 3,537.17<br>(1,840.99 to 6,516.62)                   | 3,523.70<br>(1,830.91 to 6,467.91)                  | 3,220.70<br>(1,706.01 to 5,746.72)                   | 62.81<br>(41.04 to 91.19)                        | 131.67<br>(82.65 to 206.96)                      | 140.18<br>(87.25 to 222.72)                      | 114.01<br>(72.40 to 175.60)                      |
| Myocarditis                                   | 214.17<br>(94.86 to 401.20)                         | 303.69<br>(119.12 to 660.13)                         | 281.00<br>(109.69 to 610.74)                        | 284.38<br>(110.83 to 622.65)                         | 4.25<br>(1.96 to 8.03)                           | 7.17<br>(3.25 to 15.29)                          | 7.00<br>(3.13 to 15.27)                          | 6.40<br>(2.91 to 13.82)                          |
| <b>Swaziland</b>                              |                                                     |                                                      |                                                     |                                                      |                                                  |                                                  |                                                  |                                                  |
| Cause                                         | YLLs (actual counts)                                |                                                      |                                                     |                                                      | Deaths (actual counts)                           |                                                  |                                                  |                                                  |
|                                               | 2016                                                | 2040 Forecast                                        | 2040 Better Scenario                                | 2040 Worse Scenario                                  | 2016                                             | 2040 Forecast                                    | 2040 Better Scenario                             | 2040 Worse Scenario                              |
| Alcoholic cardiomyopathy                      | 112.34<br>(60.60 to 183.06)                         | 204.53<br>(104.03 to 360.02)                         | 227.66<br>(114.48 to 414.46)                        | 217.87<br>(113.20 to 387.14)                         | 5.08<br>(2.80 to 8.23)                           | 8.80<br>(5.33 to 14.23)                          | 10.19<br>(6.08 to 16.88)                         | 8.90<br>(5.48 to 14.31)                          |
| Other cardiomyopathy                          | 1,608.28<br>(1,079.37 to 2,255.99)                  | 3,028.95<br>(1,575.58 to 5,502.65)                   | 3,015.03<br>(1,551.04 to 5,657.09)                  | 2,718.45<br>(1,451.53 to 4,936.60)                   | 53.48<br>(35.15 to 76.09)                        | 115.70<br>(72.07 to 184.71)                      | 122.99<br>(75.80 to 197.33)                      | 98.71<br>(61.73 to 157.74)                       |
| Atrial fibrillation and flutter               | 120.99<br>(73.74 to 177.37)                         | 261.22<br>(176.76 to 381.33)                         | 286.69<br>(190.62 to 427.09)                        | 240.54<br>(161.70 to 353.46)                         | 9.62<br>(6.05 to 13.65)                          | 23.00<br>(15.02 to 32.67)                        | 26.86<br>(18.58 to 37.52)                        | 19.85<br>(12.23 to 29.20)                        |
| Aortic aneurysm                               | 375.00<br>(231.38 to 554.44)                        | 697.58<br>(384.32 to 1,180.09)                       | 719.25<br>(396.73 to 1,218.62)                      | 634.15<br>(351.57 to 1,076.62)                       | 16.92<br>(10.91 to 24.15)                        | 30.07<br>(20.59 to 45.45)                        | 33.04<br>(22.61 to 48.73)                        | 26.07<br>(17.70 to 38.36)                        |
| Peripheral artery disease                     | 135.49<br>(31.35 to 235.70)                         | 406.08<br>(83.05 to 847.46)                          | 428.45<br>(90.44 to 920.93)                         | 393.60<br>(83.57 to 827.54)                          | 6.75<br>(1.56 to 11.60)                          | 19.75<br>(4.65 to 36.67)                         | 22.73<br>(5.45 to 42.60)                         | 18.14<br>(4.21 to 32.73)                         |
| Endocarditis                                  | 455.35<br>(242.62 to 694.71)                        | 912.04<br>(351.67 to 1,951.37)                       | 818.61<br>(312.57 to 1,720.80)                      | 861.11<br>(332.69 to 1,825.68)                       | 10.22<br>(5.45 to 15.24)                         | 22.63<br>(9.55 to 45.71)                         | 21.21<br>(9.03 to 41.33)                         | 20.59<br>(8.61 to 41.74)                         |
| Other cardiovascular and circulatory diseases | 1,603.55<br>(951.81 to 2,933.05)                    | 3,479.78<br>(1,652.01 to 7,464.62)                   | 2,865.26<br>(1,327.29 to 6,321.60)                  | 3,485.42<br>(1,657.83 to 7,411.24)                   | 53.92<br>(30.94 to 100.90)                       | 128.46<br>(73.51 to 243.23)                      | 113.72<br>(65.91 to 219.70)                      | 122.46<br>(70.87 to 234.67)                      |
| <b>Chronic respiratory diseases</b>           | <b>9,596.09</b><br><b>(6,334.78 to 13,091.94)</b>   | <b>10,703.28</b><br><b>(4,957.02 to 20,112.90)</b>   | <b>7,866.17</b><br><b>(3,863.11 to 14,756.89)</b>   | <b>15,218.92</b><br><b>(6,782.18 to 29,544.97)</b>   | <b>424.35</b><br><b>(284.42 to 567.79)</b>       | <b>450.54</b><br><b>(270.72 to 718.93)</b>       | <b>349.94</b><br><b>(222.75 to 548.15)</b>       | <b>629.25</b><br><b>(356.37 to 1,081.81)</b>     |
| Chronic obstructive pulmonary disease         | 5,715.01<br>(3,778.27 to 7,865.77)                  | 6,763.07<br>(2,821.39 to 13,785.15)                  | 4,400.08<br>(1,969.04 to 8,522.23)                  | 10,873.48<br>(4,269.42 to 23,308.32)                 | 296.22<br>(198.95 to 394.43)                     | 313.86<br>(175.37 to 548.81)                     | 221.32<br>(134.15 to 358.75)                     | 484.32<br>(244.98 to 911.58)                     |

|                                                                |                                              |                                               |                                               |                                               |                                        |                                        |                                        |                                        |
|----------------------------------------------------------------|----------------------------------------------|-----------------------------------------------|-----------------------------------------------|-----------------------------------------------|----------------------------------------|----------------------------------------|----------------------------------------|----------------------------------------|
| Pneumoconiosis                                                 | 106.38<br>(64.17 to<br>163.52)               | 153.44<br>(87.19 to<br>251.26)                | 157.03<br>(88.10 to<br>264.19)                | 135.15<br>(79.83 to<br>214.81)                | 4.77<br>(2.99 to<br>6.90)              | 7.16<br>(4.96 to<br>10.66)             | 7.54<br>(5.13 to<br>10.83)             | 6.15<br>(4.29 to<br>8.47)              |
| Silicosis                                                      | 23.47<br>(11.29 to<br>44.73)                 | 24.61<br>(9.88 to<br>55.32)                   | 23.57<br>(8.56 to<br>56.86)                   | 21.36<br>(8.78 to<br>45.41)                   | 0.99<br>(0.47 to<br>1.92)              | 1.07<br>(0.49 to<br>2.18)              | 1.05<br>(0.45 to<br>2.28)              | 0.91<br>(0.45 to<br>1.78)              |
| Asbestosis                                                     | 37.34<br>(12.01 to<br>67.81)                 | 69.13<br>(24.77 to<br>124.91)                 | 77.20<br>(28.24 to<br>143.19)                 | 57.22<br>(20.36 to<br>101.44)                 | 1.87<br>(0.56 to<br>3.35)              | 3.39<br>(1.27 to<br>5.50)              | 3.90<br>(1.57 to<br>6.55)              | 2.74<br>(1.02 to<br>4.38)              |
| Coal workers pneumoconiosis                                    | 7.65<br>(2.61 to<br>14.16)                   | 10.68<br>(3.54 to<br>23.02)                   | 8.26<br>(2.60 to<br>18.23)                    | 10.99<br>(3.74 to<br>23.27)                   | 0.32<br>(0.12 to<br>0.61)              | 0.48<br>(0.18 to<br>0.94)              | 0.37<br>(0.14 to<br>0.80)              | 0.48<br>(0.19 to<br>0.94)              |
| Other pneumoconiosis                                           | 37.92<br>(19.84 to<br>70.72)                 | 49.02<br>(22.13 to<br>102.68)                 | 48.01<br>(20.26 to<br>102.40)                 | 45.59<br>(21.62 to<br>89.84)                  | 1.59<br>(0.80 to<br>2.93)              | 2.23<br>(1.15 to<br>4.19)              | 2.22<br>(1.09 to<br>4.43)              | 2.03<br>(1.07 to<br>3.68)              |
| Asthma                                                         | 3,153.79<br>(1,965.76 to<br>4,543.06)        | 2,786.64<br>(1,294.75 to<br>5,628.06)         | 2,242.30<br>(1,036.80 to<br>4,642.50)         | 3,307.58<br>(1,533.13 to<br>6,784.31)         | 105.94<br>(65.35 to<br>153.04)         | 96.91<br>(52.89 to<br>167.87)          | 82.54<br>(44.54 to<br>144.07)          | 111.44<br>(59.47 to<br>194.16)         |
| Interstitial lung disease and pulmonary sarcoidosis            | 295.03<br>(120.21 to<br>505.11)              | 625.28<br>(237.44 to<br>1,171.21)             | 748.92<br>(287.83 to<br>1,435.10)             | 513.71<br>(194.51 to<br>941.92)               | 12.24<br>(4.97 to<br>20.66)            | 25.71<br>(10.99 to<br>42.47)           | 32.37<br>(14.08 to<br>54.17)           | 20.44<br>(8.83 to<br>33.11)            |
| Other chronic respiratory diseases                             | 325.89<br>(197.20 to<br>538.30)              | 374.84<br>(160.01 to<br>818.01)               | 317.84<br>(133.82 to<br>709.82)               | 389.00<br>(167.19 to<br>838.69)               | 5.18<br>(3.15 to<br>8.06)              | 6.90<br>(3.31 to<br>13.58)             | 6.16<br>(3.02 to<br>12.21)             | 6.91<br>(3.32 to<br>13.55)             |
| <b>Cirrhosis and other chronic liver diseases</b>              | <b>3,564.00</b><br>(2,145.79 to<br>5,393.77) | <b>8,370.20</b><br>(4,088.49 to<br>15,115.07) | <b>7,783.10</b><br>(3,720.29 to<br>14,566.48) | <b>8,198.81</b><br>(4,066.18 to<br>14,542.65) | <b>109.05</b><br>(64.83 to<br>163.52)  | <b>252.82</b><br>(136.08 to<br>430.87) | <b>240.63</b><br>(127.64 to<br>420.65) | <b>244.13</b><br>(134.41 to<br>403.01) |
| Cirrhosis and other chronic liver diseases due to hepatitis B  | 1,088.78<br>(640.72 to<br>1,693.36)          | 2,862.77<br>(1,416.77 to<br>5,298.93)         | 2,752.64<br>(1,334.89 to<br>5,196.85)         | 2,478.52<br>(1,257.24 to<br>4,466.15)         | 34.68<br>(20.65 to<br>52.88)           | 86.72<br>(46.68 to<br>151.13)          | 85.05<br>(45.07 to<br>150.89)          | 74.48<br>(41.32 to<br>126.70)          |
| Cirrhosis and other chronic liver diseases due to hepatitis C  | 514.25<br>(301.89 to<br>797.81)              | 1,340.57<br>(629.06 to<br>2,433.81)           | 1,282.04<br>(590.18 to<br>2,564.68)           | 1,165.91<br>(553.27 to<br>2,080.54)           | 16.25<br>(9.63 to<br>24.52)            | 40.56<br>(20.84 to<br>69.33)           | 39.48<br>(19.87 to<br>68.98)           | 35.04<br>(18.66 to<br>58.70)           |
| Cirrhosis and other chronic liver diseases due to alcohol use  | 1,174.22<br>(676.02 to<br>1,813.70)          | 2,764.21<br>(1,335.17 to<br>5,008.66)         | 2,467.07<br>(1,174.41 to<br>4,611.32)         | 3,247.80<br>(1,572.08 to<br>5,806.09)         | 38.98<br>(22.87 to<br>58.88)           | 86.88<br>(46.53 to<br>146.67)          | 79.43<br>(42.11 to<br>138.55)          | 99.69<br>(54.37 to<br>164.88)          |
| Cirrhosis and other chronic liver diseases due to other causes | 786.75<br>(508.86 to<br>1,162.56)            | 1,402.65<br>(672.09 to<br>2,559.20)           | 1,281.35<br>(602.43 to<br>2,372.76)           | 1,306.58<br>(648.42 to<br>2,359.51)           | 19.13<br>(11.71 to<br>29.08)           | 38.66<br>(20.18 to<br>65.54)           | 36.67<br>(18.97 to<br>63.05)           | 34.92<br>(18.79 to<br>58.73)           |
| <b>Digestive diseases</b>                                      | <b>5,441.35</b><br>(3,497.99 to<br>7,827.26) | <b>8,087.80</b><br>(4,140.50 to<br>14,717.43) | <b>7,145.90</b><br>(3,606.72 to<br>13,267.70) | <b>7,897.61</b><br>(4,200.12 to<br>14,340.01) | <b>158.70</b><br>(103.16 to<br>229.05) | <b>262.83</b><br>(164.72 to<br>431.03) | <b>245.09</b><br>(152.82 to<br>402.66) | <b>247.13</b><br>(158.71 to<br>404.24) |
| Peptic ulcer disease                                           | 825.70<br>(490.81 to<br>1,265.03)            | 916.41<br>(463.56 to<br>1,656.61)             | 730.40<br>(365.69 to<br>1,370.76)             | 886.38<br>(468.48 to<br>1,579.40)             | 33.46<br>(20.60 to<br>49.64)           | 38.71<br>(24.74 to<br>59.00)           | 32.37<br>(20.21 to<br>51.07)           | 36.50<br>(23.62 to<br>55.45)           |
| <b>Swaziland</b>                                               |                                              |                                               |                                               |                                               |                                        |                                        |                                        |                                        |
| Cause                                                          | YLLs (actual counts)                         |                                               |                                               |                                               | Deaths (actual counts)                 |                                        |                                        |                                        |
|                                                                | 2016                                         | 2040 Forecast                                 | 2040 Better Scenario                          | 2040 Worse Scenario                           | 2016                                   | 2040 Forecast                          | 2040 Better Scenario                   | 2040 Worse Scenario                    |
| Gastritis and duodenitis                                       | 592.05<br>(348.90 to<br>920.53)              | 1,041.21<br>(482.84 to<br>2,094.18)           | 927.89<br>(418.20 to<br>1,884.46)             | 955.28<br>(453.34 to<br>1,877.19)             | 15.04<br>(8.66 to<br>23.37)            | 29.53<br>(15.61 to<br>53.86)           | 27.33<br>(14.02 to<br>50.50)           | 26.34<br>(14.02 to<br>46.75)           |
| Appendicitis                                                   | 352.06<br>(223.23 to<br>621.55)              | 397.71<br>(192.44 to<br>787.33)               | 323.09<br>(153.13 to<br>654.80)               | 389.71<br>(190.76 to<br>783.73)               | 7.76<br>(4.87 to<br>12.56)             | 10.75<br>(6.16 to<br>18.56)            | 9.29<br>(5.31 to<br>16.24)             | 9.99<br>(5.92 to<br>17.34)             |
| Paralytic ileus and intestinal obstruction                     | 1,526.62<br>(917.36 to<br>2,515.77)          | 2,247.74<br>(1,138.55 to<br>4,357.01)         | 2,078.44<br>(1,023.67 to<br>4,155.12)         | 2,077.78<br>(1,070.90 to<br>3,919.04)         | 37.28<br>(22.50 to<br>63.45)           | 66.65<br>(39.11 to<br>122.42)          | 66.44<br>(39.09 to<br>122.97)          | 58.29<br>(35.28 to<br>102.50)          |
| Inguinal, femoral, and abdominal hernia                        | 180.50<br>(106.15 to<br>281.16)              | 218.90<br>(102.88 to<br>423.85)               | 198.80<br>(91.07 to<br>401.60)                | 199.01<br>(95.24 to<br>374.90)                | 6.07<br>(3.53 to<br>9.47)              | 7.69<br>(4.38 to<br>12.90)             | 7.48<br>(4.08 to<br>12.97)             | 6.71<br>(3.96 to<br>10.86)             |
| Inflammatory bowel disease                                     | 631.12<br>(337.94 to<br>1,171.11)            | 844.63<br>(387.80 to<br>1,646.43)             | 818.46<br>(372.53 to<br>1,590.30)             | 773.76<br>(362.82 to<br>1,548.10)             | 14.90<br>(8.49 to<br>22.48)            | 25.52<br>(14.24 to<br>41.48)           | 26.70<br>(14.93 to<br>43.70)           | 22.08<br>(12.85 to<br>35.21)           |

|                                         |                                                            |                                                              |                                                              |                                                              |                                                      |                                                      |                                                      |                                                      |
|-----------------------------------------|------------------------------------------------------------|--------------------------------------------------------------|--------------------------------------------------------------|--------------------------------------------------------------|------------------------------------------------------|------------------------------------------------------|------------------------------------------------------|------------------------------------------------------|
|                                         | 125.70<br>(67.76 to<br>190.02)                             | 236.30<br>(115.24 to<br>410.37)                              | 228.68<br>(108.92 to<br>407.04)                              | 207.88<br>(104.24 to<br>354.93)                              | 4.93<br>(2.78 to<br>7.29)                            | 9.70<br>(5.66 to<br>14.41)                           | 9.89<br>(5.67 to<br>14.93)                           | 8.27<br>(4.96 to<br>12.06)                           |
| Vascular intestinal disorders           |                                                            |                                                              |                                                              |                                                              |                                                      |                                                      |                                                      |                                                      |
|                                         | 438.59<br>(263.91 to<br>688.80)                            | 795.21<br>(331.56 to<br>1,709.03)                            | 635.94<br>(266.40 to<br>1,369.71)                            | 954.18<br>(387.55 to<br>2,126.39)                            | 16.00<br>(9.54 to<br>24.71)                          | 29.45<br>(14.36 to<br>56.91)                         | 24.77<br>(12.15 to<br>47.31)                         | 34.44<br>(16.30 to<br>67.92)                         |
| Gallbladder and biliary diseases        |                                                            |                                                              |                                                              |                                                              |                                                      |                                                      |                                                      |                                                      |
|                                         | 267.96<br>(155.78 to<br>421.59)                            | 545.00<br>(137.58 to<br>1,496.99)                            | 468.14<br>(121.85 to<br>1,279.48)                            | 684.15<br>(152.92 to<br>1,955.45)                            | 7.47<br>(4.37 to<br>11.70)                           | 15.59<br>(5.27 to<br>39.50)                          | 13.84<br>(4.88 to<br>34.52)                          | 18.76<br>(5.49 to<br>50.35)                          |
| Pancreatitis                            |                                                            |                                                              |                                                              |                                                              |                                                      |                                                      |                                                      |                                                      |
|                                         | 501.25<br>(291.77 to<br>793.91)                            | 844.69<br>(397.98 to<br>1,595.20)                            | 736.07<br>(341.01 to<br>1,414.25)                            | 769.48<br>(376.72 to<br>1,412.88)                            | 15.79<br>(9.66 to<br>23.24)                          | 29.25<br>(17.67 to<br>46.43)                         | 26.98<br>(15.96 to<br>44.12)                         | 25.75<br>(16.30 to<br>40.78)                         |
| Other digestive diseases                |                                                            |                                                              |                                                              |                                                              |                                                      |                                                      |                                                      |                                                      |
|                                         | <b>6,372.76</b><br><b>(4,373.99 to</b><br><b>8,704.60)</b> | <b>11,685.33</b><br><b>(6,879.08 to</b><br><b>20,563.02)</b> | <b>10,555.15</b><br><b>(6,016.33 to</b><br><b>18,393.17)</b> | <b>12,370.08</b><br><b>(6,745.66 to</b><br><b>22,160.17)</b> | <b>203.53</b><br><b>(137.54 to</b><br><b>271.57)</b> | <b>448.60</b><br><b>(319.45 to</b><br><b>627.94)</b> | <b>465.11</b><br><b>(336.37 to</b><br><b>637.34)</b> | <b>441.22</b><br><b>(301.39 to</b><br><b>634.91)</b> |
| Neurological disorders                  |                                                            |                                                              |                                                              |                                                              |                                                      |                                                      |                                                      |                                                      |
|                                         | 1,040.69<br>(637.71 to<br>1,520.59)                        | 2,240.40<br>(1,476.63 to<br>3,396.51)                        | 2,523.28<br>(1,668.03 to<br>3,738.65)                        | 2,158.99<br>(1,332.66 to<br>3,446.54)                        | 86.09<br>(55.02 to<br>122.76)                        | 212.78<br>(131.01 to<br>322.89)                      | 252.07<br>(167.45 to<br>367.52)                      | 196.12<br>(103.76 to<br>324.75)                      |
| Alzheimer's disease and other dementias |                                                            |                                                              |                                                              |                                                              |                                                      |                                                      |                                                      |                                                      |
|                                         | 93.03<br>(56.34 to<br>135.95)                              | 212.63<br>(155.31 to<br>281.50)                              | 275.80<br>(196.26 to<br>366.64)                              | 166.23<br>(122.01 to<br>219.99)                              | 6.78<br>(4.23 to<br>9.89)                            | 16.41<br>(11.62 to<br>22.36)                         | 22.22<br>(16.48 to<br>29.58)                         | 12.44<br>(8.16 to<br>17.58)                          |
| Parkinson's disease                     |                                                            |                                                              |                                                              |                                                              |                                                      |                                                      |                                                      |                                                      |
|                                         | 4,796.76<br>(3,235.57 to<br>6,643.77)                      | 8,297.59<br>(3,819.23 to<br>16,826.67)                       | 6,753.42<br>(3,057.13 to<br>13,935.78)                       | 9,218.77<br>(4,229.80 to<br>18,495.06)                       | 100.37<br>(66.98 to<br>138.19)                       | 195.23<br>(94.55 to<br>375.00)                       | 163.81<br>(78.21 to<br>314.20)                       | 212.00<br>(102.02 to<br>400.29)                      |
| Epilepsy                                |                                                            |                                                              |                                                              |                                                              |                                                      |                                                      |                                                      |                                                      |
|                                         | 27.62<br>(15.40 to<br>45.09)                               | 67.37<br>(27.87 to<br>142.94)                                | 72.54<br>(29.33 to<br>157.43)                                | 58.36<br>(25.24 to<br>114.94)                                | 0.80<br>(0.45 to<br>1.26)                            | 1.92<br>(0.88 to<br>3.82)                            | 2.10<br>(0.94 to<br>4.24)                            | 1.66<br>(0.79 to<br>3.14)                            |
| Multiple sclerosis                      |                                                            |                                                              |                                                              |                                                              |                                                      |                                                      |                                                      |                                                      |
|                                         | 27.26<br>(16.30 to<br>41.48)                               | 80.47<br>(35.31 to<br>152.89)                                | 89.66<br>(38.40 to<br>175.07)                                | 67.49<br>(30.84 to<br>125.83)                                | 0.81<br>(0.48 to<br>1.25)                            | 2.41<br>(1.14 to<br>4.36)                            | 2.74<br>(1.28 to<br>5.10)                            | 2.01<br>(0.99 to<br>3.53)                            |
| Motor neuron disease                    |                                                            |                                                              |                                                              |                                                              |                                                      |                                                      |                                                      |                                                      |
|                                         | 387.41<br>(269.47 to<br>545.76)                            | 786.87<br>(419.47 to<br>1,438.46)                            | 840.45<br>(448.13 to<br>1,545.83)                            | 700.23<br>(369.61 to<br>1,233.74)                            | 8.68<br>(5.75 to<br>12.19)                           | 19.85<br>(11.05 to<br>33.65)                         | 22.16<br>(12.23 to<br>37.92)                         | 16.99<br>(10.01 to<br>27.88)                         |
| Other neurological disorders            |                                                            |                                                              |                                                              |                                                              |                                                      |                                                      |                                                      |                                                      |
|                                         | <b>1,897.83</b><br><b>(1,110.43 to</b><br><b>2,830.96)</b> | <b>4,838.86</b><br><b>(2,205.56 to</b><br><b>8,920.03)</b>   | <b>4,843.35</b><br><b>(2,203.61 to</b><br><b>8,919.31)</b>   | <b>4,385.06</b><br><b>(2,045.01 to</b><br><b>7,940.74)</b>   | <b>42.48</b><br><b>(24.95 to</b><br><b>62.94)</b>    | <b>111.42</b><br><b>(53.75 to</b><br><b>197.47)</b>  | <b>112.72</b><br><b>(53.69 to</b><br><b>203.58)</b>  | <b>100.18</b><br><b>(49.76 to</b><br><b>176.31)</b>  |
| Mental disorders                        |                                                            |                                                              |                                                              |                                                              |                                                      |                                                      |                                                      |                                                      |
|                                         | 598.81<br>(318.27 to<br>973.64)                            | 1,468.49<br>(617.74 to<br>2,929.31)                          | 1,453.63<br>(600.58 to<br>2,965.49)                          | 1,379.03<br>(594.21 to<br>2,688.81)                          | 17.45<br>(9.35 to<br>27.82)                          | 42.13<br>(18.55 to<br>81.12)                         | 42.12<br>(18.22 to<br>82.16)                         | 39.36<br>(17.92 to<br>74.77)                         |
| Alcohol use disorders                   |                                                            |                                                              |                                                              |                                                              |                                                      |                                                      |                                                      |                                                      |
|                                         | 1,294.92<br>(748.10 to<br>1,934.84)                        | 3,361.35<br>(1,459.37 to<br>6,547.50)                        | 3,380.64<br>(1,465.91 to<br>6,628.95)                        | 2,997.94<br>(1,362.09 to<br>5,752.47)                        | 24.95<br>(14.51 to<br>37.22)                         | 69.12<br>(31.51 to<br>129.80)                        | 70.42<br>(32.04 to<br>132.83)                        | 60.67<br>(28.58 to<br>114.16)                        |
| Drug use disorders                      |                                                            |                                                              |                                                              |                                                              |                                                      |                                                      |                                                      |                                                      |
|                                         | 1,109.21<br>(646.29 to<br>1,661.43)                        | 2,767.75<br>(1,208.64 to<br>5,485.36)                        | 2,765.02<br>(1,191.40 to<br>5,520.55)                        | 2,476.46<br>(1,115.36 to<br>4,853.96)                        | 20.65<br>(12.18 to<br>31.06)                         | 54.43<br>(24.66 to<br>106.73)                        | 54.76<br>(24.40 to<br>108.10)                        | 48.08<br>(22.30 to<br>92.85)                         |
| Opioid use disorders                    |                                                            |                                                              |                                                              |                                                              |                                                      |                                                      |                                                      |                                                      |
|                                         | 16.87<br>(3.98 to<br>30.70)                                | 65.57<br>(13.82 to<br>142.53)                                | 63.81<br>(12.94 to<br>141.21)                                | 57.62<br>(12.46 to<br>122.22)                                | 0.44<br>(0.11 to<br>0.79)                            | 1.78<br>(0.40 to<br>3.65)                            | 1.77<br>(0.38 to<br>3.76)                            | 1.54<br>(0.37 to<br>3.03)                            |
| Cocaine use disorders                   |                                                            |                                                              |                                                              |                                                              |                                                      |                                                      |                                                      |                                                      |
|                                         | 7.98<br>(2.31 to<br>13.89)                                 | 40.61<br>(10.20 to<br>81.48)                                 | 38.59<br>(9.71 to<br>80.79)                                  | 36.18<br>(9.26 to<br>70.72)                                  | 0.19<br>(0.06 to<br>0.33)                            | 1.01<br>(0.26 to<br>1.95)                            | 0.97<br>(0.25 to<br>1.96)                            | 0.89<br>(0.23 to<br>1.68)                            |
| Amphetamine use disorders               |                                                            |                                                              |                                                              |                                                              |                                                      |                                                      |                                                      |                                                      |
|                                         | 160.86<br>(82.00 to<br>266.45)                             | 487.42<br>(209.40 to<br>956.32)                              | 513.22<br>(221.57 to<br>1,024.08)                            | 427.68<br>(183.61 to<br>836.07)                              | 3.67<br>(1.91 to<br>5.77)                            | 11.90<br>(5.77 to<br>21.40)                          | 12.92<br>(6.24 to<br>23.12)                          | 10.16<br>(5.00 to<br>17.95)                          |
| Other drug use disorders                |                                                            |                                                              |                                                              |                                                              |                                                      |                                                      |                                                      |                                                      |
|                                         | 4.10<br>(1.39 to<br>7.71)                                  | 9.02<br>(2.62 to<br>21.48)                                   | 9.09<br>(2.57 to<br>22.19)                                   | 8.09<br>(2.39 to<br>18.81)                                   | 0.07<br>(0.02 to<br>0.14)                            | 0.17<br>(0.05 to<br>0.41)                            | 0.18<br>(0.05 to<br>0.43)                            | 0.15<br>(0.04 to<br>0.37)                            |
| Eating disorders                        |                                                            |                                                              |                                                              |                                                              |                                                      |                                                      |                                                      |                                                      |

**Swaziland**

| Cause                                               | YLLs (actual counts)                     |                                           |                                          |                                           | Deaths (actual counts)              |                                       |                                     |                                       |
|-----------------------------------------------------|------------------------------------------|-------------------------------------------|------------------------------------------|-------------------------------------------|-------------------------------------|---------------------------------------|-------------------------------------|---------------------------------------|
|                                                     | 2016                                     | 2040 Forecast                             | 2040 Better Scenario                     | 2040 Worse Scenario                       | 2016                                | 2040 Forecast                         | 2040 Better Scenario                | 2040 Worse Scenario                   |
| Diabetes, urogenital, blood, and endocrine diseases | 29,068.33<br>(18,191.26 to<br>41,698.16) | 59,852.51<br>(27,800.06 to<br>123,594.78) | 45,756.34<br>(21,252.68 to<br>96,512.81) | 62,980.69<br>(29,724.57 to<br>129,368.78) | 1,048.19<br>(658.37 to<br>1,480.72) | 2,215.17<br>(1,245.72 to<br>4,178.08) | 1,754.40<br>(967.65 to<br>3,311.81) | 2,272.49<br>(1,298.45 to<br>4,149.91) |



|                                                            |                                          |                                          |                                          |                                          |                                   |                                     |                                     |                                     |
|------------------------------------------------------------|------------------------------------------|------------------------------------------|------------------------------------------|------------------------------------------|-----------------------------------|-------------------------------------|-------------------------------------|-------------------------------------|
| Diabetes mellitus                                          | 18,031.58<br>(10,861.55 to<br>26,607.03) | 34,537.99<br>(15,687.29 to<br>70,276.41) | 25,914.63<br>(11,955.31 to<br>53,948.74) | 36,653.69<br>(16,943.69 to<br>75,216.35) | 752.95<br>(467.45 to<br>1,082.87) | 1,413.51<br>(838.76 to<br>2,467.07) | 1,110.05<br>(656.38 to<br>1,950.22) | 1,448.35<br>(866.46 to<br>2,522.05) |
| Acute glomerulonephritis                                   | 24.34<br>(14.11 to<br>39.83)             | 42.03<br>(18.89 to<br>88.06)             | 34.74<br>(15.87 to<br>75.52)             | 42.29<br>(19.10 to<br>88.84)             | 0.50<br>(0.31 to<br>0.77)         | 0.95<br>(0.52 to<br>1.75)           | 0.86<br>(0.46 to<br>1.56)           | 0.89<br>(0.49 to<br>1.69)           |
| Chronic kidney disease                                     | 4,308.02<br>(2,756.28 to<br>6,217.91)    | 13,857.53<br>(3,030.08 to<br>49,759.51)  | 9,738.80<br>(2,172.53 to<br>37,736.26)   | 15,477.56<br>(3,373.19 to<br>53,022.71)  | 154.81<br>(99.74 to<br>218.72)    | 523.71<br>(102.16 to<br>1,814.87)   | 387.15<br>(74.70 to<br>1,431.73)    | 571.70<br>(111.01 to<br>1,798.41)   |
| Chronic kidney disease due to diabetes mellitus            | 1,257.81<br>(761.54 to<br>1,830.76)      | 5,295.27<br>(957.69 to<br>19,746.30)     | 3,737.37<br>(693.83 to<br>14,896.40)     | 5,894.30<br>(1,071.39 to<br>21,324.83)   | 49.94<br>(31.39 to<br>71.32)      | 197.83<br>(34.94 to<br>715.41)      | 145.84<br>(25.84 to<br>578.36)      | 216.18<br>(38.39 to<br>698.34)      |
| Chronic kidney disease due to hypertension                 | 650.50<br>(395.89 to<br>974.87)          | 2,235.17<br>(378.60 to<br>8,452.78)      | 1,617.87<br>(276.35 to<br>6,360.64)      | 2,486.38<br>(428.93 to<br>8,557.69)      | 32.76<br>(21.05 to<br>47.14)      | 109.34<br>(18.06 to<br>379.47)      | 84.68<br>(13.81 to<br>329.71)       | 116.94<br>(20.20 to<br>360.66)      |
| Chronic kidney disease due to glomerulonephritis           | 1,105.40<br>(710.83 to<br>1,616.01)      | 2,796.09<br>(733.35 to<br>9,565.94)      | 1,934.83<br>(502.24 to<br>6,726.33)      | 3,145.74<br>(829.75 to<br>10,488.38)     | 31.64<br>(19.84 to<br>46.50)      | 92.04<br>(19.68 to<br>322.75)       | 66.10<br>(14.18 to<br>249.41)       | 102.10<br>(22.23 to<br>326.81)      |
| Chronic kidney disease due to other and unspecified causes | 1,294.31<br>(840.66 to<br>1,850.90)      | 3,531.00<br>(880.29 to<br>11,891.24)     | 2,448.73<br>(608.44 to<br>8,895.68)      | 3,951.14<br>(996.00 to<br>13,482.35)     | 40.48<br>(25.49 to<br>58.53)      | 124.49<br>(26.81 to<br>419.88)      | 90.54<br>(19.31 to<br>333.16)       | 136.48<br>(29.16 to<br>437.25)      |
| Urinary diseases and male infertility                      | 919.43<br>(607.18 to<br>1,276.08)        | 1,665.56<br>(901.21 to<br>2,798.30)      | 1,546.12<br>(821.75 to<br>2,706.29)      | 1,505.11<br>(839.58 to<br>2,442.85)      | 28.85<br>(19.00 to<br>39.23)      | 55.76<br>(38.30 to<br>81.91)        | 55.19<br>(37.13 to<br>82.39)        | 48.29<br>(33.93 to<br>68.51)        |
| Urinary tract infections                                   | 339.96<br>(202.19 to<br>521.65)          | 864.29<br>(425.63 to<br>1,531.43)        | 855.27<br>(416.46 to<br>1,562.80)        | 772.86<br>(395.88 to<br>1,354.72)        | 9.41<br>(5.55 to<br>14.70)        | 28.39<br>(17.39 to<br>45.64)        | 30.13<br>(18.17 to<br>49.48)        | 24.24<br>(15.14 to<br>38.16)        |
| Urolithiasis                                               | 11.46<br>(7.03 to<br>16.49)              | 29.18<br>(14.97 to<br>50.34)             | 28.35<br>(14.15 to<br>51.81)             | 26.39<br>(13.89 to<br>44.27)             | 0.34<br>(0.22 to<br>0.47)         | 0.89<br>(0.53 to<br>1.40)           | 0.91<br>(0.54 to<br>1.50)           | 0.77<br>(0.48 to<br>1.16)           |
| Other urinary diseases                                     | 568.01<br>(366.04 to<br>784.67)          | 772.09<br>(412.86 to<br>1,272.08)        | 662.50<br>(355.33 to<br>1,115.02)        | 705.85<br>(387.66 to<br>1,114.55)        | 19.10<br>(12.34 to<br>25.91)      | 26.48<br>(17.64 to<br>38.37)        | 24.14<br>(15.81 to<br>35.31)        | 23.28<br>(15.98 to<br>32.50)        |
| Gynecological diseases                                     | 46.11<br>(17.80 to<br>93.05)             | 88.54<br>(19.92 to<br>260.16)            | 71.11<br>(15.63 to<br>213.15)            | 85.99<br>(20.19 to<br>243.17)            | 1.23<br>(0.51 to<br>2.38)         | 2.35<br>(0.71 to<br>6.32)           | 1.90<br>(0.58 to<br>5.16)           | 2.24<br>(0.69 to<br>5.92)           |
| Uterine fibroids                                           | 19.20<br>(5.58 to<br>42.06)              | 33.72<br>(6.76 to<br>99.94)              | 26.37<br>(5.14 to<br>82.82)              | 33.11<br>(6.55 to<br>95.49)              | 0.55<br>(0.17 to<br>1.15)         | 0.94<br>(0.22 to<br>2.58)           | 0.75<br>(0.18 to<br>2.14)           | 0.92<br>(0.22 to<br>2.46)           |
| Polycystic ovarian syndrome                                | 1.77<br>(0.13 to<br>8.87)                | 2.72<br>(0.14 to<br>16.73)               | 1.87<br>(0.09 to<br>12.03)               | 2.78<br>(0.15 to<br>16.13)               | 0.04<br>(0.00 to<br>0.19)         | 0.06<br>(0.00 to<br>0.39)           | 0.04<br>(0.00 to<br>0.28)           | 0.07<br>(0.00 to<br>0.38)           |
| Endometriosis                                              | 0.60<br>(0.05 to<br>3.21)                | 1.68<br>(0.10 to<br>7.58)                | 1.35<br>(0.08 to<br>6.23)                | 1.63<br>(0.10 to<br>7.47)                | 0.01<br>(0.00 to<br>0.06)         | 0.03<br>(0.00 to<br>0.15)           | 0.03<br>(0.00 to<br>0.13)           | 0.03<br>(0.00 to<br>0.14)           |
| Genital prolapse                                           | 3.75<br>(0.44 to<br>9.15)                | 6.21<br>(0.57 to<br>20.43)               | 4.71<br>(0.45 to<br>15.88)               | 6.13<br>(0.56 to<br>20.01)               | 0.13<br>(0.02 to<br>0.30)         | 0.19<br>(0.03 to<br>0.54)           | 0.15<br>(0.02 to<br>0.43)           | 0.19<br>(0.03 to<br>0.53)           |
| Other gynecological diseases                               | 20.79<br>(6.68 to<br>45.90)              | 44.22<br>(8.77 to<br>142.95)             | 36.80<br>(7.22 to<br>118.72)             | 42.35<br>(8.53 to<br>130.73)             | 0.50<br>(0.17 to<br>1.09)         | 1.10<br>(0.28 to<br>3.34)           | 0.93<br>(0.23 to<br>2.80)           | 1.04<br>(0.26 to<br>3.02)           |
| Hemoglobinopathies and hemolytic anemias                   | 675.77<br>(385.75 to<br>1,240.83)        | 1,001.25<br>(471.11 to<br>2,088.97)      | 832.50<br>(381.46 to<br>1,772.93)        | 963.78<br>(466.70 to<br>2,010.36)        | 17.40<br>(9.75 to<br>31.56)       | 32.06<br>(17.68 to<br>61.60)        | 28.19<br>(15.07 to<br>54.38)        | 29.46<br>(16.72 to<br>56.37)        |
| Thalassemias                                               | 5.51<br>(1.54 to<br>14.43)               | 2.85<br>(0.59 to<br>8.47)                | 2.76<br>(0.56 to<br>8.34)                | 2.94<br>(0.62 to<br>8.61)                | 0.07<br>(0.02 to<br>0.17)         | 0.03<br>(0.01 to<br>0.10)           | 0.03<br>(0.01 to<br>0.10)           | 0.04<br>(0.01 to<br>0.10)           |
| Sickle cell disorders                                      | 184.63<br>(84.89 to<br>402.57)           | 131.62<br>(37.85 to<br>361.82)           | 101.47<br>(28.40 to<br>280.43)           | 142.98<br>(41.54 to<br>390.95)           | 2.36<br>(1.06 to<br>5.23)         | 1.83<br>(0.50 to<br>5.11)           | 1.44<br>(0.38 to<br>4.06)           | 1.97<br>(0.54 to<br>5.37)           |
| G6PD deficiency                                            | 340.89<br>(175.66 to<br>636.47)          | 683.91<br>(296.51 to<br>1,474.02)        | 563.39<br>(235.95 to<br>1,242.84)        | 651.61<br>(290.97 to<br>1,416.91)        | 7.86<br>(4.11 to<br>14.52)        | 19.30<br>(9.09 to<br>39.86)         | 16.38<br>(7.43 to<br>35.38)         | 17.94<br>(8.72 to<br>36.62)         |
| Other hemoglobinopathies and hemolytic anemias             | 144.74<br>(74.55 to<br>272.19)           | 182.86<br>(99.07 to<br>346.28)           | 164.68<br>(87.33 to<br>321.92)           | 166.25<br>(92.06 to<br>303.91)           | 7.11<br>(3.82 to<br>12.85)        | 10.90<br>(6.90 to<br>18.44)         | 10.34<br>(6.44 to<br>17.76)         | 9.52<br>(5.88 to<br>16.42)          |

|                                                   |                                                |                                                |                                               |                                                |                                       |                                        |                                        |                                        |
|---------------------------------------------------|------------------------------------------------|------------------------------------------------|-----------------------------------------------|------------------------------------------------|---------------------------------------|----------------------------------------|----------------------------------------|----------------------------------------|
| Endocrine, metabolic, blood, and immune disorders | 5,063.07<br>(2,044.19 to<br>8,205.75)          | 8,659.62<br>(2,730.27 to<br>18,022.56)         | 7,618.64<br>(2,432.64 to<br>16,282.77)        | 8,252.27<br>(2,677.51 to<br>17,043.19)         | 92.45<br>(35.53 to<br>150.85)         | 186.84<br>(58.94 to<br>376.94)         | 171.06<br>(55.25 to<br>362.00)         | 171.56<br>(55.54 to<br>347.73)         |
| <b>Swaziland</b>                                  |                                                |                                                |                                               |                                                |                                       |                                        |                                        |                                        |
| Cause                                             | YLLs (actual counts)                           |                                                |                                               |                                                | Deaths (actual counts)                |                                        |                                        |                                        |
|                                                   | 2016                                           | 2040 Forecast                                  | 2040 Better Scenario                          | 2040 Worse Scenario                            | 2016                                  | 2040 Forecast                          | 2040 Better Scenario                   | 2040 Worse Scenario                    |
| <b>Musculoskeletal disorders</b>                  | <b>467.29</b><br>(251.01 to<br>743.12)         | <b>1,174.28</b><br>(501.22 to<br>2,345.21)     | <b>1,205.23</b><br>(507.23 to<br>2,454.58)    | <b>1,039.53</b><br>(452.60 to<br>2,052.31)     | <b>13.66</b><br>(6.94 to<br>21.22)    | <b>37.31</b><br>(17.91 to<br>65.14)    | <b>39.13</b><br>(18.43 to<br>69.20)    | <b>32.37</b><br>(15.71 to<br>55.50)    |
| Rheumatoid arthritis                              | 146.96<br>(67.36 to<br>247.58)                 | 390.29<br>(170.92 to<br>700.69)                | 346.56<br>(152.37 to<br>639.34)               | 360.83<br>(163.72 to<br>633.38)                | 5.73<br>(2.63 to<br>9.34)             | 15.91<br>(7.92 to<br>24.38)            | 14.76<br>(7.26 to<br>23.67)            | 14.33<br>(7.23 to<br>21.58)            |
| Other musculoskeletal disorders                   | 320.32<br>(173.41 to<br>521.33)                | 783.98<br>(316.37 to<br>1,704.10)              | 858.67<br>(343.80 to<br>1,875.20)             | 678.71<br>(280.18 to<br>1,465.97)              | 7.93<br>(4.18 to<br>12.59)            | 21.40<br>(9.58 to<br>40.58)            | 24.37<br>(10.86 to<br>46.81)           | 18.03<br>(8.11 to<br>33.86)            |
| <b>Other non-communicable diseases</b>            | <b>10,803.24</b><br>(6,822.34 to<br>14,563.47) | <b>10,403.75</b><br>(5,816.59 to<br>18,437.12) | <b>8,182.46</b><br>(4,571.25 to<br>14,027.25) | <b>11,264.86</b><br>(6,186.73 to<br>20,033.60) | <b>134.54</b><br>(95.17 to<br>191.49) | <b>181.15</b><br>(113.92 to<br>284.93) | <b>160.74</b><br>(104.03 to<br>248.80) | <b>181.56</b><br>(114.28 to<br>293.49) |
| Congenital birth defects                          | 8,417.66<br>(5,485.58 to<br>12,966.73)         | 7,720.72<br>(3,931.09 to<br>14,688.47)         | 5,685.94<br>(2,939.22 to<br>10,696.23)        | 8,669.17<br>(4,369.07 to<br>16,251.41)         | 102.46<br>(67.25 to<br>156.27)        | 101.74<br>(54.63 to<br>185.99)         | 77.01<br>(41.05 to<br>138.58)          | 111.73<br>(59.77 to<br>205.01)         |
| Neural tube defects                               | 586.95<br>(308.30 to<br>1,000.80)              | 205.75<br>(96.56 to<br>398.20)                 | 132.15<br>(62.42 to<br>255.87)                | 240.11<br>(111.53 to<br>462.19)                | 7.09<br>(3.78 to<br>12.01)            | 2.88<br>(1.41 to<br>5.44)              | 1.92<br>(0.96 to<br>3.66)              | 3.26<br>(1.57 to<br>6.12)              |
| Congenital heart anomalies                        | 2,578.96<br>(1,635.51 to<br>4,048.75)          | 2,596.11<br>(1,311.61 to<br>4,828.85)          | 1,966.43<br>(984.04 to<br>3,643.72)           | 2,843.16<br>(1,435.87 to<br>5,313.51)          | 32.38<br>(20.85 to<br>50.55)          | 36.07<br>(18.71 to<br>65.99)           | 28.14<br>(14.40 to<br>53.26)           | 38.47<br>(19.93 to<br>69.28)           |
| Orofacial clefts                                  | 75.00<br>(27.57 to<br>155.94)                  | 48.73<br>(14.23 to<br>134.05)                  | 28.70<br>(8.39 to<br>77.72)                   | 60.32<br>(17.76 to<br>167.78)                  | 0.87<br>(0.32 to<br>1.81)             | 0.57<br>(0.16 to<br>1.56)              | 0.33<br>(0.10 to<br>0.90)              | 0.70<br>(0.21 to<br>1.95)              |
| Down syndrome                                     | 418.50<br>(230.73 to<br>670.50)                | 451.82<br>(186.71 to<br>937.33)                | 319.73<br>(138.18 to<br>650.53)               | 513.83<br>(214.51 to<br>1,081.97)              | 5.15<br>(2.89 to<br>8.15)             | 6.16<br>(2.77 to<br>12.44)             | 4.50<br>(2.05 to<br>8.92)              | 6.82<br>(3.05 to<br>13.89)             |
| Other chromosomal abnormalities                   | 359.10<br>(147.82 to<br>650.42)                | 521.21<br>(170.57 to<br>1,234.90)              | 363.79<br>(123.18 to<br>850.49)               | 603.60<br>(197.42 to<br>1,393.08)              | 4.25<br>(1.78 to<br>7.64)             | 6.35<br>(2.16 to<br>14.74)             | 4.49<br>(1.57 to<br>10.29)             | 7.28<br>(2.45 to<br>16.53)             |
| Congenital musculoskeletal and limb anomalies     | 349.77<br>(140.90 to<br>584.19)                | 307.65<br>(109.88 to<br>590.71)                | 231.57<br>(82.77 to<br>434.59)                | 346.96<br>(121.77 to<br>666.23)                | 4.13<br>(1.67 to<br>6.88)             | 3.80<br>(1.40 to<br>7.16)              | 2.91<br>(1.08 to<br>5.39)              | 4.23<br>(1.49 to<br>7.95)              |
| Urogenital congenital anomalies                   | 201.44<br>(112.35 to<br>411.64)                | 231.07<br>(115.64 to<br>477.69)                | 193.75<br>(97.35 to<br>409.81)                | 239.05<br>(120.69 to<br>489.72)                | 2.92<br>(1.73 to<br>5.82)             | 4.18<br>(2.23 to<br>8.22)              | 3.73<br>(1.89 to<br>7.43)              | 4.10<br>(2.21 to<br>8.08)              |
| Digestive congenital anomalies                    | 1,032.61<br>(555.01 to<br>1,832.42)            | 940.71<br>(341.90 to<br>2,158.55)              | 661.49<br>(248.87 to<br>1,453.80)             | 1,084.29<br>(389.16 to<br>2,432.52)            | 12.21<br>(6.67 to<br>21.61)           | 11.56<br>(4.43 to<br>25.79)            | 8.24<br>(3.27 to<br>17.38)             | 13.17<br>(5.01 to<br>29.19)            |
| Other congenital birth defects                    | 2,815.33<br>(1,580.58 to<br>4,627.52)          | 2,417.67<br>(1,125.68 to<br>4,866.68)          | 1,788.32<br>(869.49 to<br>3,512.36)           | 2,737.87<br>(1,264.34 to<br>5,505.10)          | 33.46<br>(19.14 to<br>54.38)          | 30.17<br>(14.52 to<br>59.61)           | 22.74<br>(11.30 to<br>43.95)           | 33.70<br>(15.94 to<br>66.83)           |
| Skin and subcutaneous diseases                    | 737.65<br>(425.56 to<br>1,232.41)              | 2,055.29<br>(1,044.93 to<br>3,599.89)          | 2,040.93<br>(1,034.70 to<br>3,583.00)         | 1,874.93<br>(954.77 to<br>3,231.00)            | 22.24<br>(12.63 to<br>37.56)          | 22.13<br>(43.28 to<br>117.37)          | 78.44<br>(47.07 to<br>125.20)          | 61.46<br>(37.52 to<br>100.05)          |
| Cellulitis                                        | 138.50<br>(66.95 to<br>268.30)                 | 544.81<br>(247.16 to<br>1,059.29)              | 605.57<br>(278.74 to<br>1,178.76)             | 467.43<br>(212.41 to<br>903.18)                | 4.69<br>(2.36 to<br>8.65)             | 19.99<br>(10.50 to<br>35.03)           | 23.50<br>(12.57 to<br>40.33)           | 16.46<br>(8.57 to<br>28.68)            |
| Pyoderma                                          | 400.35<br>(230.15 to<br>666.05)                | 1,021.20<br>(482.09 to<br>1,866.84)            | 919.27<br>(429.91 to<br>1,770.63)             | 980.58<br>(470.34 to<br>1,779.13)              | 9.00<br>(5.13 to<br>16.02)            | 28.58<br>(15.89 to<br>50.53)           | 28.19<br>(15.59 to<br>50.26)           | 25.52<br>(14.50 to<br>44.53)           |
| Decubitus ulcer                                   | 166.97<br>(73.44 to<br>298.44)                 | 418.95<br>(181.15 to<br>746.11)                | 445.52<br>(192.51 to<br>800.76)               | 360.73<br>(156.32 to<br>632.63)                | 7.75<br>(3.47 to<br>14.27)            | 21.62<br>(9.18 to<br>37.64)            | 24.62<br>(10.89 to<br>42.10)           | 17.79<br>(7.56 to<br>31.38)            |
| Other skin and subcutaneous diseases              | 31.82<br>(16.26 to<br>61.36)                   | 70.33<br>(29.38 to<br>148.31)                  | 70.57<br>(29.96 to<br>146.96)                 | 66.19<br>(27.34 to<br>139.37)                  | 0.80<br>(0.41 to<br>1.56)             | 1.93<br>(0.97 to<br>3.77)              | 2.13<br>(1.07 to<br>4.04)              | 1.69<br>(0.85 to<br>3.26)              |

|                                      |                                                               |                                                                |                                                                |                                                                |                                                          |                                                          |                                                          |                                                          |
|--------------------------------------|---------------------------------------------------------------|----------------------------------------------------------------|----------------------------------------------------------------|----------------------------------------------------------------|----------------------------------------------------------|----------------------------------------------------------|----------------------------------------------------------|----------------------------------------------------------|
| Sudden infant death syndrome         | 847.94<br>(391.84 to<br>1,605.32)                             | 627.74<br>(170.65 to<br>1,543.29)                              | 455.59<br>(121.13 to<br>1,136.93)                              | 720.76<br>(200.27 to<br>1,776.45)                              | 9.84<br>(4.55 to<br>18.64)                               | 7.28<br>(1.98 to<br>17.91)                               | 5.29<br>(1.41 to<br>13.20)                               | 8.36<br>(2.32 to<br>20.62)                               |
| <b>Injuries</b>                      | <b>66,674.74</b><br><b>(48,864.00 to</b><br><b>87,858.24)</b> | <b>83,787.74</b><br><b>(42,372.81 to</b><br><b>151,457.71)</b> | <b>62,817.61</b><br><b>(31,563.41 to</b><br><b>113,508.45)</b> | <b>94,786.35</b><br><b>(47,975.46 to</b><br><b>170,346.08)</b> | <b>1,202.69</b><br><b>(851.00 to</b><br><b>1,618.63)</b> | <b>1,706.14</b><br><b>(893.66 to</b><br><b>2,989.50)</b> | <b>1,322.09</b><br><b>(698.13 to</b><br><b>2,329.66)</b> | <b>1,871.76</b><br><b>(969.65 to</b><br><b>3,298.33)</b> |
| <b>Transport injuries</b>            | <b>24,087.29</b><br><b>(17,210.50 to</b><br><b>32,708.57)</b> | <b>30,291.66</b><br><b>(14,610.61 to</b><br><b>58,696.68)</b>  | <b>14,247.66</b><br><b>(6,791.54 to</b><br><b>28,150.73)</b>   | <b>40,689.96</b><br><b>(19,526.22 to</b><br><b>79,743.01)</b>  | <b>437.42</b><br><b>(300.49 to</b><br><b>604.72)</b>     | <b>615.87</b><br><b>(299.47 to</b><br><b>1,160.21)</b>   | <b>308.69</b><br><b>(150.17 to</b><br><b>585.23)</b>     | <b>798.21</b><br><b>(387.12 to</b><br><b>1,528.46)</b>   |
| Road injuries                        | 23,448.72<br>(16,811.42 to<br>31,815.88)                      | 28,944.35<br>(13,984.41 to<br>56,384.06)                       | 13,065.00<br>(6,195.44 to<br>25,824.08)                        | 39,295.89<br>(18,956.00 to<br>76,908.65)                       | 424.79<br>(292.24 to<br>585.47)                          | 586.53<br>(285.85 to<br>1,108.51)                        | 282.41<br>(138.23 to<br>537.63)                          | 768.49<br>(373.82 to<br>1,473.96)                        |
| Pedestrian road injuries             | 6,618.10<br>(4,491.48 to<br>8,978.60)                         | 6,855.75<br>(3,447.95 to<br>12,241.24)                         | 3,621.40<br>(1,807.45 to<br>6,641.05)                          | 8,535.49<br>(4,313.32 to<br>15,250.13)                         | 125.51<br>(85.98 to<br>172.36)                           | 162.50<br>(84.02 to<br>286.90)                           | 92.48<br>(47.91 to<br>164.39)                            | 194.19<br>(100.76 to<br>339.29)                          |
| <b>Swaziland</b>                     |                                                               |                                                                |                                                                |                                                                |                                                          |                                                          |                                                          |                                                          |
| Cause                                | YLLs (actual counts)                                          |                                                                |                                                                |                                                                | Deaths (actual counts)                                   |                                                          |                                                          |                                                          |
|                                      | 2016                                                          | 2040 Forecast                                                  | 2040 Better Scenario                                           | 2040 Worse Scenario                                            | 2016                                                     | 2040 Forecast                                            | 2040 Better Scenario                                     | 2040 Worse Scenario                                      |
| Cyclist road injuries                | 166.76<br>(108.77 to<br>291.28)                               | 274.59<br>(123.10 to<br>593.95)                                | 143.68<br>(62.22 to<br>310.33)                                 | 349.49<br>(157.54 to<br>745.78)                                | 3.29<br>(2.07 to<br>5.75)                                | 6.14<br>(2.72 to<br>13.18)                               | 3.51<br>(1.51 to<br>7.53)                                | 7.46<br>(3.32 to<br>15.90)                               |
| Motorcyclist road injuries           | 1,047.27<br>(608.07 to<br>1,853.61)                           | 1,573.17<br>(651.55 to<br>3,440.98)                            | 987.43<br>(397.50 to<br>2,148.65)                              | 1,941.81<br>(778.07 to<br>4,410.66)                            | 17.50<br>(10.15 to<br>31.12)                             | 27.85<br>(11.28 to<br>60.13)                             | 15.05<br>(7.32 to<br>38.17)                              | 33.67<br>(13.37 to<br>75.82)                             |
| Motor vehicle road injuries          | 15,447.66<br>(10,676.16 to<br>21,456.54)                      | 19,996.72<br>(9,204.49 to<br>40,479.66)                        | 8,204.57<br>(3,581.90 to<br>17,137.26)                         | 28,138.78<br>(13,153.00 to<br>58,362.97)                       | 275.26<br>(184.40 to<br>386.70)                          | 384.91<br>(176.73 to<br>762.34)                          | 165.93<br>(74.23 to<br>335.50)                           | 526.48<br>(241.96 to<br>1,071.52)                        |
| Other road injuries                  | 168.92<br>(96.66 to<br>322.08)                                | 244.12<br>(100.12 to<br>549.11)                                | 107.92<br>(44.19 to<br>246.83)                                 | 330.33<br>(136.35 to<br>734.61)                                | 3.23<br>(1.85 to<br>6.01)                                | 5.13<br>(2.17 to<br>11.41)                               | 2.45<br>(1.04 to<br>5.24)                                | 6.68<br>(2.74 to<br>14.66)                               |
| Other transport injuries             | 638.57<br>(411.69 to<br>956.84)                               | 1,347.31<br>(616.14 to<br>2,755.16)                            | 1,182.66<br>(532.80 to<br>2,421.62)                            | 1,394.07<br>(630.67 to<br>2,816.97)                            | 12.63<br>(7.83 to<br>19.34)                              | 29.34<br>(13.78 to<br>56.43)                             | 26.28<br>(12.18 to<br>52.14)                             | 29.72<br>(13.67 to<br>59.47)                             |
| <b>Unintentional injuries</b>        | <b>19,035.39</b><br><b>(14,326.30 to</b><br><b>24,869.90)</b> | <b>20,057.16</b><br><b>(10,629.79 to</b><br><b>34,721.56)</b>  | <b>16,403.34</b><br><b>(8,665.75 to</b><br><b>28,417.97)</b>   | <b>20,252.62</b><br><b>(10,664.09 to</b><br><b>35,116.90)</b>  | <b>333.65</b><br><b>(240.54 to</b><br><b>443.33)</b>     | <b>423.26</b><br><b>(245.91 to</b><br><b>692.04)</b>     | <b>365.12</b><br><b>(212.68 to</b><br><b>607.62)</b>     | <b>407.91</b><br><b>(238.29 to</b><br><b>662.04)</b>     |
| Falls                                | 630.36<br>(413.50 to<br>1,057.74)                             | 1,123.61<br>(662.93 to<br>1,854.83)                            | 1,106.71<br>(642.31 to<br>1,807.25)                            | 989.47<br>(596.50 to<br>1,647.42)                              | 21.52<br>(13.84 to<br>35.52)                             | 43.58<br>(31.17 to<br>67.97)                             | 45.57<br>(32.68 to<br>70.74)                             | 36.64<br>(26.14 to<br>57.31)                             |
| Drowning                             | 3,325.12<br>(2,422.70 to<br>4,579.19)                         | 3,216.90<br>(1,683.73 to<br>6,009.42)                          | 2,687.87<br>(1,399.09 to<br>4,991.02)                          | 3,289.14<br>(1,699.54 to<br>6,179.15)                          | 55.25<br>(39.56 to<br>77.36)                             | 64.12<br>(34.40 to<br>115.97)                            | 55.49<br>(29.34 to<br>103.83)                            | 63.44<br>(33.56 to<br>115.39)                            |
| Fire, heat, and hot substances       | 3,140.83<br>(2,123.44 to<br>4,324.83)                         | 2,969.05<br>(1,452.00 to<br>5,467.08)                          | 2,415.96<br>(1,161.17 to<br>4,563.21)                          | 3,035.05<br>(1,513.55 to<br>5,573.50)                          | 59.63<br>(39.37 to<br>84.11)                             | 67.99<br>(35.97 to<br>118.91)                            | 58.05<br>(30.65 to<br>103.59)                            | 66.76<br>(35.88 to<br>116.15)                            |
| Poisonings                           | 1,944.17<br>(1,019.47 to<br>3,793.95)                         | 1,219.74<br>(490.72 to<br>2,826.41)                            | 869.35<br>(360.11 to<br>1,989.58)                              | 1,344.36<br>(525.62 to<br>3,166.27)                            | 30.07<br>(16.58 to<br>53.71)                             | 21.63<br>(9.56 to<br>48.00)                              | 15.97<br>(7.17 to<br>35.52)                              | 23.11<br>(9.91 to<br>50.37)                              |
| Exposure to mechanical forces        | 3,694.96<br>(2,439.81 to<br>5,661.60)                         | 3,864.77<br>(1,831.21 to<br>7,751.52)                          | 3,091.87<br>(1,492.52 to<br>6,154.60)                          | 3,890.64<br>(1,924.95 to<br>7,799.85)                          | 61.39<br>(40.20 to<br>93.16)                             | 74.40<br>(38.30 to<br>139.14)                            | 61.79<br>(31.56 to<br>117.09)                            | 72.02<br>(37.24 to<br>134.49)                            |
| Unintentional firearm injuries       | 536.36<br>(262.34 to<br>928.61)                               | 557.62<br>(204.51 to<br>1,180.04)                              | 449.34<br>(165.54 to<br>962.43)                                | 543.49<br>(203.11 to<br>1,093.75)                              | 10.05<br>(4.87 to<br>17.29)                              | 11.55<br>(4.42 to<br>23.67)                              | 9.47<br>(3.68 to<br>20.03)                               | 10.99<br>(4.24 to<br>21.76)                              |
| Unintentional suffocation            | 1,255.52<br>(762.71 to<br>2,204.73)                           | 1,232.62<br>(575.18 to<br>2,476.78)                            | 966.14<br>(448.53 to<br>1,951.41)                              | 1,290.70<br>(596.19 to<br>2,654.67)                            | 18.18<br>(11.20 to<br>31.63)                             | 19.77<br>(9.42 to<br>39.05)                              | 15.91<br>(7.50 to<br>31.92)                              | 20.14<br>(9.41 to<br>40.39)                              |
| Other exposure to mechanical forces  | 1,903.07<br>(1,165.40 to<br>3,207.52)                         | 2,074.53<br>(965.95 to<br>4,166.43)                            | 1,676.39<br>(768.81 to<br>3,361.34)                            | 2,056.44<br>(988.37 to<br>4,234.33)                            | 33.16<br>(19.81 to<br>54.34)                             | 43.08<br>(21.48 to<br>81.23)                             | 36.42<br>(17.84 to<br>69.59)                             | 40.88<br>(20.44 to<br>78.28)                             |
| Adverse effects of medical treatment | 1,000.55<br>(616.12 to<br>1,671.18)                           | 1,213.43<br>(607.42 to<br>2,331.80)                            | 1,029.42<br>(514.32 to<br>1,987.82)                            | 1,183.48<br>(597.48 to<br>2,267.57)                            | 19.84<br>(12.27 to<br>31.97)                             | 29.28<br>(16.67 to<br>51.20)                             | 26.25<br>(15.03 to<br>45.87)                             | 27.22<br>(15.81 to<br>47.50)                             |

|                                                 |                                                 |                                                 |                                                 |                                                 |                                        |                                          |                                          |                                          |
|-------------------------------------------------|-------------------------------------------------|-------------------------------------------------|-------------------------------------------------|-------------------------------------------------|----------------------------------------|------------------------------------------|------------------------------------------|------------------------------------------|
| Animal contact                                  | 1,968.17<br>(874.70 to<br>2,986.13)             | 2,917.82<br>(1,102.42 to<br>5,696.08)           | 2,239.05<br>(844.72 to<br>4,366.94)             | 2,970.67<br>(1,134.69 to<br>5,843.34)           | 33.38<br>(14.71 to<br>51.27)           | 56.73<br>(21.91 to<br>107.28)            | 45.05<br>(17.37 to<br>86.07)             | 55.74<br>(21.68 to<br>104.31)            |
| Venomous animal contact                         | 652.50<br>(237.05 to<br>1,374.15)               | 920.12<br>(280.74 to<br>2,210.97)               | 699.23<br>(207.65 to<br>1,703.61)               | 930.46<br>(287.15 to<br>2,220.14)               | 11.44<br>(4.31 to<br>23.50)            | 18.91<br>(6.13 to<br>43.33)              | 15.06<br>(4.98 to<br>34.97)              | 18.31<br>(6.14 to<br>42.31)              |
| Non-venomous animal contact                     | 1,315.68<br>(595.56 to<br>2,077.24)             | 1,997.70<br>(735.45 to<br>3,898.13)             | 1,539.82<br>(554.16 to<br>3,041.11)             | 2,040.21<br>(775.53 to<br>3,993.59)             | 21.94<br>(9.58 to<br>35.09)            | 37.83<br>(14.68 to<br>73.16)             | 29.99<br>(11.37 to<br>58.08)             | 37.43<br>(14.68 to<br>70.83)             |
| Foreign body                                    | 2,159.92<br>(1,264.80 to<br>3,405.98)           | 2,208.65<br>(947.44 to<br>4,264.74)             | 1,924.22<br>(849.40 to<br>3,598.93)             | 2,262.95<br>(955.67 to<br>4,490.06)             | 30.37<br>(18.25 to<br>45.71)           | 36.02<br>(17.28 to<br>64.59)             | 33.15<br>(16.21 to<br>58.70)             | 35.21<br>(16.57 to<br>64.60)             |
| Pulmonary aspiration and foreign body in airway | 1,813.48<br>(1,097.35 to<br>2,905.71)           | 1,895.52<br>(850.78 to<br>3,661.35)             | 1,678.48<br>(773.73 to<br>3,160.81)             | 1,933.89<br>(869.44 to<br>3,743.24)             | 25.58<br>(16.23 to<br>38.92)           | 31.24<br>(15.95 to<br>55.11)             | 29.27<br>(15.14 to<br>50.60)             | 30.34<br>(15.37 to<br>54.35)             |
| Foreign body in other body part                 | 346.44<br>(108.18 to<br>635.89)                 | 313.13<br>(70.68 to<br>728.90)                  | 245.74<br>(55.12 to<br>571.02)                  | 329.05<br>(74.74 to<br>754.92)                  | 4.78<br>(1.49 to<br>8.64)              | 4.78<br>(1.09 to<br>11.17)               | 3.87<br>(0.88 to<br>8.83)                | 4.87<br>(1.13 to<br>11.03)               |
| Environmental heat and cold exposure            | 600.20<br>(331.71 to<br>880.04)                 | 797.69<br>(351.25 to<br>1,503.89)               | 598.45<br>(264.15 to<br>1,153.09)               | 770.73<br>(343.01 to<br>1,418.54)               | 12.38<br>(6.82 to<br>18.06)            | 18.66<br>(8.47 to<br>34.27)              | 14.37<br>(6.41 to<br>27.25)              | 17.56<br>(7.97 to<br>30.76)              |
| Other unintentional injuries                    | 571.09<br>(392.71 to<br>853.09)                 | 525.51<br>(271.87 to<br>978.60)                 | 440.43<br>(227.83 to<br>827.89)                 | 516.13<br>(262.89 to<br>937.60)                 | 9.82<br>(6.71 to<br>14.97)             | 10.84<br>(5.90 to<br>19.46)              | 9.44<br>(5.05 to<br>16.96)               | 10.22<br>(5.50 to<br>18.20)              |
| <b>Self-harm and interpersonal violence</b>     | <b>23,541.81</b><br>(16,007.13 to<br>33,249.56) | <b>33,394.02</b><br>(15,652.91 to<br>64,557.19) | <b>32,123.39</b><br>(15,017.73 to<br>61,550.61) | <b>33,800.42</b><br>(15,675.66 to<br>64,097.71) | <b>431.44</b><br>(286.20 to<br>613.36) | <b>666.15</b><br>(313.28 to<br>1,236.32) | <b>647.43</b><br>(304.36 to<br>1,205.89) | <b>664.83</b><br>(307.43 to<br>1,217.01) |

**Swaziland**

| Cause                                                                               | YLLs (actual counts)                    |                                         |                                         |                                         | Deaths (actual counts)           |                                  |                                  |                                  |
|-------------------------------------------------------------------------------------|-----------------------------------------|-----------------------------------------|-----------------------------------------|-----------------------------------------|----------------------------------|----------------------------------|----------------------------------|----------------------------------|
|                                                                                     | 2016                                    | 2040 Forecast                           | 2040 Better Scenario                    | 2040 Worse Scenario                     | 2016                             | 2040 Forecast                    | 2040 Better Scenario             | 2040 Worse Scenario              |
| Self-harm                                                                           | 9,251.75<br>(5,946.68 to<br>13,388.16)  | 15,765.71<br>(6,761.93 to<br>31,701.46) | 14,762.38<br>(6,365.69 to<br>29,764.00) | 16,963.52<br>(6,920.46 to<br>34,526.24) | 184.63<br>(116.97 to<br>270.58)  | 338.45<br>(151.65 to<br>662.22)  | 321.66<br>(143.92 to<br>618.63)  | 356.70<br>(148.67 to<br>698.87)  |
| Self-harm by firearm                                                                | 871.57<br>(462.24 to<br>1,721.16)       | 1,118.58<br>(413.67 to<br>2,512.75)     | 1,012.46<br>(371.73 to<br>2,225.16)     | 1,215.91<br>(425.89 to<br>2,711.45)     | 16.95<br>(9.19 to<br>32.15)      | 24.00<br>(9.37 to<br>52.11)      | 22.10<br>(8.80 to<br>46.85)      | 25.52<br>(9.51 to<br>54.97)      |
| Self-harm by other specified means                                                  | 8,380.18<br>(5,295.29 to<br>12,128.83)  | 14,647.13<br>(6,189.66 to<br>29,248.52) | 13,749.93<br>(5,903.84 to<br>27,553.04) | 15,747.61<br>(6,443.82 to<br>31,384.46) | 167.68<br>(104.99 to<br>242.93)  | 314.46<br>(141.14 to<br>614.69)  | 299.57<br>(134.60 to<br>576.72)  | 331.19<br>(136.86 to<br>653.37)  |
| Interpersonal violence                                                              | 14,290.06<br>(9,602.28 to<br>21,367.10) | 17,628.31<br>(8,530.37 to<br>33,295.77) | 17,361.01<br>(8,202.64 to<br>32,764.46) | 16,836.90<br>(8,250.03 to<br>32,125.17) | 246.81<br>(163.72 to<br>369.13)  | 327.70<br>(158.49 to<br>626.58)  | 325.77<br>(154.55 to<br>612.41)  | 308.12<br>(149.19 to<br>575.10)  |
| Physical violence by firearm                                                        | 1,821.79<br>(631.80 to<br>3,069.12)     | 2,311.66<br>(615.64 to<br>4,995.56)     | 2,260.12<br>(587.61 to<br>4,900.79)     | 2,153.77<br>(581.52 to<br>4,606.40)     | 32.11<br>(11.11 to<br>54.24)     | 43.37<br>(11.54 to<br>91.31)     | 42.81<br>(11.20 to<br>90.50)     | 39.75<br>(11.03 to<br>83.11)     |
| Physical violence by sharp object                                                   | 7,472.85<br>(4,499.90 to<br>11,776.86)  | 9,596.26<br>(4,529.96 to<br>18,816.09)  | 9,820.39<br>(4,703.06 to<br>19,145.16)  | 8,828.43<br>(4,188.32 to<br>17,010.61)  | 128.88<br>(77.20 to<br>203.57)   | 175.99<br>(84.43 to<br>337.87)   | 181.32<br>(87.01 to<br>352.76)   | 159.47<br>(76.72 to<br>305.12)   |
| Physical violence by other means                                                    | 4,995.43<br>(3,096.05 to<br>9,009.15)   | 5,720.39<br>(2,486.14 to<br>12,389.66)  | 5,280.50<br>(2,253.96 to<br>11,458.20)  | 5,854.70<br>(2,505.17 to<br>12,913.88)  | 85.83<br>(51.99 to<br>157.43)    | 108.34<br>(46.59 to<br>234.96)   | 101.64<br>(42.97 to<br>225.09)   | 108.90<br>(46.33 to<br>239.39)   |
| <b>Forces of nature, conflict and terrorism, and executions and police conflict</b> | <b>10.26</b><br>(6.48 to<br>19.11)      | <b>43.22</b><br>(0.00 to<br>285.73)     | <b>43.22</b><br>(0.00 to<br>274.53)     | <b>43.35</b><br>(0.00 to<br>275.34)     | <b>0.18</b><br>(0.11 to<br>0.32) | <b>0.86</b><br>(0.00 to<br>5.52) | <b>0.85</b><br>(0.00 to<br>5.54) | <b>0.81</b><br>(0.00 to<br>5.11) |
| Exposure to forces of nature                                                        | 0.00<br>(0.00 to<br>0.00)               | 32.74<br>(0.00 to<br>285.73)            | 31.29<br>(0.00 to<br>274.53)            | 31.82<br>(0.00 to<br>275.34)            | 0.00<br>(0.00 to<br>0.00)        | 0.63<br>(0.00 to<br>5.52)        | 0.63<br>(0.00 to<br>5.54)        | 0.60<br>(0.00 to<br>5.11)        |
| Conflict and terrorism                                                              | 0.00<br>(0.00 to<br>0.00)               | 1.59<br>(0.00 to<br>20.35)              | 1.52<br>(0.00 to<br>19.46)              | 1.53<br>(0.00 to<br>19.98)              | 0.00<br>(0.00 to<br>0.00)        | 0.03<br>(0.00 to<br>0.35)        | 0.03<br>(0.00 to<br>0.34)        | 0.03<br>(0.00 to<br>0.34)        |
| Executions and police conflict                                                      | 10.26<br>(6.48 to<br>19.11)             | 10.57<br>(0.00 to<br>149.80)            | 10.41<br>(0.00 to<br>147.13)            | 10.00<br>(0.00 to<br>139.60)            | 0.18<br>(0.11 to<br>0.32)        | 0.20<br>(0.00 to<br>2.81)        | 0.20<br>(0.00 to<br>2.80)        | 0.18<br>(0.00 to<br>2.58)        |

| Zimbabwe                                                          |                                                |                                                  |                                                 |                                                  |                                          |                                          |                                         |                                          |
|-------------------------------------------------------------------|------------------------------------------------|--------------------------------------------------|-------------------------------------------------|--------------------------------------------------|------------------------------------------|------------------------------------------|-----------------------------------------|------------------------------------------|
| Cause                                                             | YLLs (actual counts)                           |                                                  |                                                 |                                                  | Deaths (actual counts)                   |                                          |                                         |                                          |
|                                                                   | 2016                                           | 2040 Forecast                                    | 2040 Better Scenario                            | 2040 Worse Scenario                              | 2016                                     | 2040 Forecast                            | 2040 Better Scenario                    | 2040 Worse Scenario                      |
| All causes                                                        | 6,849,213.68<br>(6,116,563.93 to 7,643,386.08) | 10,160,811.86<br>(5,536,879.03 to 20,059,882.80) | 6,428,885.62<br>(3,413,573.09 to 12,986,184.59) | 14,024,379.19<br>(8,069,852.54 to 25,414,540.51) | 143,819.13<br>(128,524.91 to 160,343.27) | 233,166.22<br>(135,909.48 to 423,379.60) | 161,532.18<br>(96,386.65 to 302,447.56) | 303,952.93<br>(188,784.34 to 509,191.83) |
| Communicable, maternal, neonatal, and nutritional diseases        | 4,758,599.40<br>(4,199,657.73 to 5,433,802.43) | 5,281,606.87<br>(2,832,636.80 to 10,334,560.11)  | 2,854,676.47<br>(1,532,011.95 to 5,406,763.92)  | 8,574,954.45<br>(4,949,996.09 to 16,098,957.84)  | 81,186.64<br>(72,674.80 to 90,806.97)    | 94,321.60<br>(52,005.70 to 182,968.68)   | 54,178.20<br>(30,342.21 to 99,569.39)   | 150,140.55<br>(87,591.29 to 264,848.88)  |
| HIV/AIDS and tuberculosis                                         | 1,968,581.24<br>(1,625,810.35 to 2,445,733.16) | 2,003,788.49<br>(1,133,498.00 to 3,610,639.46)   | 1,270,464.07<br>(661,618.28 to 2,194,405.78)    | 4,273,842.29<br>(2,634,411.33 to 6,808,172.33)   | 39,160.04<br>(33,409.70 to 46,919.52)    | 41,045.04<br>(21,892.86 to 75,622.22)    | 25,998.20<br>(13,094.20 to 44,283.82)   | 82,608.52<br>(48,495.52 to 133,033.97)   |
| Tuberculosis                                                      | 388,284.03<br>(291,370.98 to 482,512.62)       | 644,310.51<br>(149,252.92 to 2,077,238.57)       | 254,965.47<br>(57,621.63 to 915,883.28)         | 785,947.34<br>(184,013.26 to 2,786,751.27)       | 9,738.48<br>(7,125.47 to 12,208.80)      | 15,624.02<br>(4,032.06 to 49,647.14)     | 6,443.72<br>(1,716.58 to 22,368.54)     | 18,851.68<br>(4,962.63 to 62,968.51)     |
| HIV/AIDS                                                          | 1,580,297.21<br>(1,241,499.14 to 2,054,357.21) | 1,359,477.99<br>(730,553.28 to 2,141,979.05)     | 1,015,498.60<br>(481,312.40 to 1,753,310.76)    | 3,487,894.96<br>(2,007,410.02 to 5,573,573.87)   | 29,421.55<br>(23,719.07 to 37,230.15)    | 25,421.02<br>(12,532.19 to 39,228.66)    | 19,554.49<br>(8,569.67 to 33,287.87)    | 63,756.84<br>(35,704.39 to 101,973.82)   |
| Diarrhea, lower respiratory, and other common infectious diseases | 1,361,936.20<br>(1,120,290.13 to 1,623,192.21) | 1,846,822.07<br>(451,208.73 to 5,502,619.82)     | 852,456.71<br>(231,219.49 to 2,606,870.17)      | 2,658,729.47<br>(636,372.76 to 8,785,827.25)     | 23,214.00<br>(19,028.61 to 27,750.89)    | 33,432.03<br>(11,417.80 to 85,639.65)    | 17,525.36<br>(6,441.80 to 46,269.74)    | 45,127.79<br>(14,644.28 to 122,275.74)   |
| Diarrheal diseases                                                | 575,598.34<br>(412,920.71 to 768,601.05)       | 678,381.88<br>(54,552.16 to 2,128,968.01)        | 236,015.11<br>(18,058.63 to 843,923.86)         | 811,982.01<br>(89,375.39 to 2,300,873.08)        | 8,222.38<br>(5,752.39 to 11,184.16)      | 10,849.68<br>(1,173.62 to 34,356.95)     | 3,947.12<br>(433.22 to 13,714.46)       | 12,774.33<br>(1,666.96 to 38,102.79)     |
| Intestinal infectious diseases                                    | 1,853.21<br>(974.71 to 3,528.88)               | 2,082.84<br>(501.00 to 5,483.06)                 | 1,163.71<br>(287.46 to 3,173.65)                | 2,186.19<br>(520.93 to 5,558.66)                 | 25.75<br>(14.05 to 46.91)                | 29.40<br>(7.84 to 75.86)                 | 17.23<br>(4.85 to 45.67)                | 30.60<br>(8.05 to 78.94)                 |
| Typhoid fever                                                     | 672.23<br>(329.02 to 1,199.34)                 | 889.66<br>(214.52 to 2,546.28)                   | 608.28<br>(148.13 to 1,835.46)                  | 920.05<br>(225.38 to 2,372.36)                   | 9.22<br>(4.61 to 16.46)                  | 12.40<br>(3.17 to 35.46)                 | 8.70<br>(2.20 to 26.20)                 | 12.78<br>(3.27 to 36.51)                 |
| Paratyphoid fever                                                 | 22.58<br>(9.59 to 47.05)                       | 33.79<br>(8.22 to 101.03)                        | 21.96<br>(5.27 to 63.60)                        | 35.12<br>(8.89 to 99.22)                         | 0.31<br>(0.13 to 0.65)                   | 0.48<br>(0.12 to 1.40)                   | 0.32<br>(0.08 to 0.92)                  | 0.50<br>(0.13 to 1.41)                   |
| Other intestinal infectious diseases                              | 1,158.41<br>(404.85 to 2,096.39)               | 1,159.39<br>(178.44 to 3,618.53)                 | 533.47<br>(79.69 to 1,769.78)                   | 1,231.02<br>(185.94 to 3,943.96)                 | 16.22<br>(5.88 to 36.46)                 | 16.51<br>(3.24 to 47.19)                 | 8.21<br>(1.70 to 24.28)                 | 17.32<br>(3.52 to 51.54)                 |
| Lower respiratory infections                                      | 583,821.23<br>(408,368.72 to 739,669.86)       | 919,494.38<br>(251,388.01 to 3,057,801.21)       | 468,624.67<br>(139,071.05 to 1,477,054.93)      | 1,495,058.54<br>(359,108.50 to 5,322,349.16)     | 11,913.59<br>(8,091.80 to 15,165.91)     | 18,728.82<br>(7,088.54 to 49,366.02)     | 10,962.85<br>(4,576.18 to 27,851.92)    | 27,327.90<br>(9,418.59 to 77,574.75)     |
| Upper respiratory infections                                      | 959.37<br>(340.29 to 2,086.56)                 | 1,998.74<br>(398.28 to 6,451.34)                 | 866.45<br>(183.74 to 2,671.61)                  | 2,120.03<br>(484.15 to 6,592.70)                 | 15.43<br>(7.00 to 29.20)                 | 34.56<br>(9.29 to 96.62)                 | 16.39<br>(4.50 to 46.94)                | 36.10<br>(10.22 to 97.86)                |
| Otitis media                                                      | 344.29<br>(129.23 to 903.09)                   | 159.17<br>(36.20 to 491.44)                      | 150.14<br>(33.06 to 474.55)                     | 157.97<br>(37.30 to 458.73)                      | 5.93<br>(2.57 to 14.12)                  | 3.48<br>(0.81 to 10.52)                  | 3.48<br>(0.77 to 11.29)                 | 3.40<br>(0.81 to 10.37)                  |
| Meningitis                                                        | 142,593.58<br>(100,944.93 to 203,400.70)       | 158,292.60<br>(53,404.27 to 406,674.36)          | 115,653.79<br>(37,688.48 to 297,447.43)         | 167,550.53<br>(57,241.58 to 416,202.65)          | 2,262.18<br>(1,613.16 to 3,114.22)       | 2,593.05<br>(981.99 to 6,280.28)         | 2,076.44<br>(756.39 to 5,190.25)        | 2,668.45<br>(1,022.49 to 5,190.25)       |
| Pneumococcal meningitis                                           | 7,786.38<br>(5,351.46 to 11,121.21)            | 8,073.94<br>(2,501.68 to 22,218.93)              | 6,897.62<br>(2,132.36 to 18,408.91)             | 8,439.51<br>(2,653.27 to 22,374.70)              | 142.24<br>(97.54 to 197.16)              | 144.78<br>(52.91 to 342.83)              | 136.38<br>(51.66 to 323.11)             | 146.89<br>(55.01 to 345.44)              |
| H influenzae type B meningitis                                    | 12,143.61<br>(8,368.42 to 17,713.28)           | 17,709.94<br>(3,626.12 to 60,441.39)             | 10,320.28<br>(2,594.49 to 32,200.25)            | 24,431.05<br>(4,609.95 to 88,518.75)             | 180.58<br>(126.24 to 249.28)             | 241.14<br>(64.28 to 754.59)              | 158.72<br>(48.56 to 428.99)             | 317.60<br>(75.47 to 1,080.66)            |
| Meningococcal meningitis                                          | 56,316.12<br>(39,682.11 to 79,659.22)          | 54,234.98<br>(16,794.22 to 141,645.06)           | 39,090.88<br>(12,285.56 to 99,417.65)           | 55,376.39<br>(18,543.49 to 133,046.13)           | 872.60<br>(617.42 to 1,192.43)           | 886.38<br>(335.68 to 2,065.67)           | 692.72<br>(255.33 to 1,682.63)          | 889.92<br>(346.84 to 2,007.28)           |
| Other meningitis                                                  | 66,347.47<br>(46,940.73 to 94,465.25)          | 78,273.74<br>(25,757.54 to 211,769.82)           | 59,345.01<br>(18,971.82 to 155,920.64)          | 79,303.59<br>(26,686.42 to 201,877.49)           | 1,066.76<br>(758.74 to 1,477.64)         | 1,320.75<br>(501.29 to 3,150.43)         | 1,088.62<br>(396.31 to 2,825.82)        | 1,314.04<br>(512.52 to 3,122.74)         |
| Encephalitis                                                      | 17,647.37<br>(4,887.23 to 31,567.09)           | 28,247.75<br>(3,801.66 to 88,831.06)             | 19,742.80<br>(2,495.15 to 64,700.16)            | 28,785.92<br>(3,943.58 to 89,149.39)             | 288.03<br>(78.65 to 509.22)              | 489.94<br>(68.59 to 1,514.78)            | 366.62<br>(48.48 to 1,180.58)           | 492.62<br>(69.73 to 1,446.83)            |

|                                                |                                                     |                                                     |                                                    |                                                     |                                                |                                                 |                                              |                                                 |
|------------------------------------------------|-----------------------------------------------------|-----------------------------------------------------|----------------------------------------------------|-----------------------------------------------------|------------------------------------------------|-------------------------------------------------|----------------------------------------------|-------------------------------------------------|
| Diphtheria                                     | 99.34<br>(47.78 to<br>174.17)                       | 90.05<br>(15.48 to<br>337.46)                       | 31.93<br>(7.48 to<br>92.71)                        | 164.08<br>(23.90 to<br>641.75)                      | 1.30<br>(0.67 to<br>2.23)                      | 1.18<br>(0.22 to<br>4.10)                       | 0.51<br>(0.13 to<br>1.44)                    | 2.05<br>(0.35 to<br>7.68)                       |
| Whooping cough                                 | 18,722.94<br>(1,287.94 to<br>68,553.23)             | 43,737.45<br>(1,608.01 to<br>224,827.57)            | 5,114.84<br>(199.88 to<br>24,128.64)               | 92,839.34<br>(3,701.82 to<br>471,167.62)            | 221.69<br>(15.25 to<br>810.97)                 | 516.07<br>(19.19 to<br>2,636.97)                | 62.15<br>(2.51 to<br>291.69)                 | 1,092.81<br>(43.72 to<br>5,542.13)              |
| Tetanus                                        | 301.84<br>(191.56 to<br>537.54)                     | 105.37<br>(34.06 to<br>267.90)                      | 89.23<br>(23.77 to<br>255.13)                      | 124.67<br>(41.79 to<br>310.19)                      | 5.91<br>(3.46 to<br>10.71)                     | 2.02<br>(0.65 to<br>5.02)                       | 1.92<br>(0.52 to<br>5.20)                    | 2.20<br>(0.77 to<br>5.44)                       |
| Measles                                        | 17,269.17<br>(6,110.19 to<br>42,410.90)             | 10,048.16<br>(336.17 to<br>61,070.92)               | 3,167.29<br>(168.78 to<br>17,762.81)               | 53,308.82<br>(1,380.00 to<br>309,688.31)            | 206.68<br>(72.89 to<br>506.16)                 | 119.63<br>(4.12 to<br>718.43)                   | 38.22<br>(2.21 to<br>211.17)                 | 630.64<br>(16.53 to<br>3,647.73)                |
| <b>Zimbabwe</b>                                |                                                     |                                                     |                                                    |                                                     |                                                |                                                 |                                              |                                                 |
| Cause                                          | YLLs (actual counts)                                |                                                     |                                                    |                                                     | Deaths (actual counts)                         |                                                 |                                              |                                                 |
|                                                | 2016                                                | 2040 Forecast                                       | 2040 Better Scenario                               | 2040 Worse Scenario                                 | 2016                                           | 2040 Forecast                                   | 2040 Better Scenario                         | 2040 Worse Scenario                             |
| Varicella and herpes zoster                    | 2,725.51<br>(1,575.49 to<br>4,525.42)               | 4,183.68<br>(1,024.05 to<br>12,589.05)              | 1,836.75<br>(494.60 to<br>6,007.77)                | 4,451.36<br>(1,178.40 to<br>12,778.98)              | 45.14<br>(30.02 to<br>65.95)                   | 64.20<br>(23.57 to<br>166.31)                   | 32.44<br>(13.39 to<br>84.89)                 | 66.68<br>(24.05 to<br>170.01)                   |
| <b>Neglected tropical diseases and malaria</b> | <b>120,417.74<br/>(69,510.93 to<br/>204,132.92)</b> | <b>125,187.55<br/>(43,780.87 to<br/>302,546.32)</b> | <b>91,723.89<br/>(31,627.39 to<br/>231,152.80)</b> | <b>127,850.33<br/>(44,542.37 to<br/>306,411.90)</b> | <b>1,835.94<br/>(1,109.34 to<br/>2,947.36)</b> | <b>2,066.01<br/>(822.67 to<br/>4,703.20)</b>    | <b>1,610.74<br/>(617.64 to<br/>3,845.29)</b> | <b>2,078.91<br/>(831.47 to<br/>4,656.27)</b>    |
| Malaria                                        | 107,121.40<br>(56,310.57 to<br>190,464.47)          | 105,269.02<br>(32,381.30 to<br>262,677.36)          | 78,636.27<br>(24,215.42 to<br>199,670.43)          | 107,359.00<br>(34,016.39 to<br>264,041.85)          | 1,541.17<br>(826.96 to<br>2,642.33)            | 1,644.89<br>(553.19 to<br>4,014.18)             | 1,308.52<br>(442.06 to<br>3,314.16)          | 1,655.82<br>(570.40 to<br>3,991.14)             |
| Chagas disease                                 | 0.00<br>(0.00 to<br>0.00)                           | 0.00<br>(0.00 to<br>0.00)                           | 0.00<br>(0.00 to<br>0.00)                          | 0.00<br>(0.00 to<br>0.00)                           | 0.00<br>(0.00 to<br>0.00)                      | 0.00<br>(0.00 to<br>0.00)                       | 0.00<br>(0.00 to<br>0.00)                    | 0.00<br>(0.00 to<br>0.00)                       |
| Leishmaniasis                                  | 0.00<br>(0.00 to<br>0.00)                           | 0.00<br>(0.00 to<br>0.00)                           | 0.00<br>(0.00 to<br>0.00)                          | 0.00<br>(0.00 to<br>0.00)                           | 0.00<br>(0.00 to<br>0.00)                      | 0.00<br>(0.00 to<br>0.00)                       | 0.00<br>(0.00 to<br>0.00)                    | 0.00<br>(0.00 to<br>0.00)                       |
| African trypanosomiasis                        | 535.80<br>(16.50 to<br>2,953.25)                    | 83.04<br>(1.72 to<br>500.56)                        | 77.96<br>(1.58 to<br>487.56)                       | 82.67<br>(1.76 to<br>503.17)                        | 9.30<br>(0.28 to<br>50.60)                     | 1.49<br>(0.05 to<br>9.22)                       | 1.45<br>(0.03 to<br>9.24)                    | 1.47<br>(0.03 to<br>9.00)                       |
| Schistosomiasis                                | 7,670.05<br>(5,135.01 to<br>11,230.50)              | 10,985.36<br>(4,273.38 to<br>26,420.69)             | 8,335.53<br>(3,152.98 to<br>21,842.97)             | 10,905.79<br>(4,547.84 to<br>25,378.06)             | 206.47<br>(143.78 to<br>295.08)                | 285.92<br>(129.88 to<br>619.34)                 | 226.84<br>(95.73 to<br>535.83)               | 279.76<br>(130.51 to<br>597.45)                 |
| Cysticercosis                                  | 688.87<br>(515.77 to<br>885.94)                     | 597.96<br>(226.07 to<br>1,471.59)                   | 509.29<br>(181.52 to<br>1,366.41)                  | 592.49<br>(234.95 to<br>1,420.50)                   | 13.67<br>(10.01 to<br>17.77)                   | 12.77<br>(5.23 to<br>30.15)                     | 11.25<br>(4.25 to<br>27.90)                  | 12.51<br>(5.31 to<br>28.61)                     |
| Cystic echinococcosis                          | 362.69<br>(257.19 to<br>498.71)                     | 459.99<br>(175.56 to<br>1,066.04)                   | 179.28<br>(65.41 to<br>467.22)                     | 495.96<br>(202.50 to<br>1,156.89)                   | 7.81<br>(5.52 to<br>10.66)                     | 10.51<br>(4.68 to<br>22.80)                     | 4.36<br>(1.83 to<br>10.63)                   | 11.12<br>(5.17 to<br>24.16)                     |
| Dengue                                         | 17.02<br>(0.88 to<br>89.10)                         | 153.01<br>(7.27 to<br>906.96)                       | 134.72<br>(6.57 to<br>784.16)                      | 148.81<br>(6.97 to<br>880.30)                       | 0.50<br>(0.04 to<br>1.73)                      | 4.00<br>(0.27 to<br>17.96)                      | 3.95<br>(0.28 to<br>16.39)                   | 3.78<br>(0.25 to<br>17.28)                      |
| Yellow fever                                   | 0.00<br>(0.00 to<br>0.00)                           | 0.00<br>(0.00 to<br>0.00)                           | 0.00<br>(0.00 to<br>0.00)                          | 0.00<br>(0.00 to<br>0.00)                           | 0.00<br>(0.00 to<br>0.00)                      | 0.00<br>(0.00 to<br>0.00)                       | 0.00<br>(0.00 to<br>0.00)                    | 0.00<br>(0.00 to<br>0.00)                       |
| Rabies                                         | 1,747.53<br>(684.49 to<br>4,034.89)                 | 2,093.92<br>(544.90 to<br>5,749.58)                 | 577.21<br>(149.63 to<br>1,726.48)                  | 2,418.18<br>(646.58 to<br>6,385.42)                 | 26.27<br>(11.15 to<br>57.89)                   | 33.10<br>(9.21 to<br>84.98)                     | 9.61<br>(2.65 to<br>25.81)                   | 37.69<br>(11.15 to<br>92.74)                    |
| Intestinal nematode infections                 | 791.98<br>(445.12 to<br>1,244.05)                   | 2,560.93<br>(570.07 to<br>7,595.05)                 | 1,916.07<br>(415.75 to<br>5,847.99)                | 2,621.56<br>(640.52 to<br>7,440.22)                 | 10.13<br>(5.99 to<br>15.44)                    | 32.41<br>(8.16 to<br>93.22)                     | 24.87<br>(6.25 to<br>75.55)                  | 33.04<br>(8.68 to<br>91.64)                     |
| Other neglected tropical diseases              | 1,482.40<br>(707.83 to<br>3,111.82)                 | 2,984.31<br>(759.54 to<br>8,681.11)                 | 1,357.56<br>(349.16 to<br>3,950.09)                | 3,225.89<br>(845.20 to<br>8,875.84)                 | 20.62<br>(10.85 to<br>39.89)                   | 40.92<br>(12.23 to<br>108.36)                   | 19.89<br>(6.55 to<br>52.84)                  | 43.73<br>(13.62 to<br>112.40)                   |
| <b>Maternal disorders</b>                      | <b>118,854.03<br/>(79,734.51 to<br/>171,540.57)</b> | <b>212,510.56<br/>(62,637.31 to<br/>626,318.62)</b> | <b>91,737.76<br/>(26,073.89 to<br/>283,119.75)</b> | <b>239,216.06<br/>(72,808.62 to<br/>696,990.15)</b> | <b>2,117.07<br/>(1,408.69 to<br/>3,072.93)</b> | <b>3,952.55<br/>(1,170.38 to<br/>11,191.38)</b> | <b>1,718.36<br/>(493.45 to<br/>5,343.77)</b> | <b>4,451.58<br/>(1,393.41 to<br/>12,659.02)</b> |
| Maternal hemorrhage                            | 17,860.77<br>(9,958.52 to<br>28,802.26)             | 23,508.39<br>(6,353.83 to<br>69,868.93)             | 10,294.17<br>(2,848.44 to<br>32,309.53)            | 25,087.40<br>(6,957.23 to<br>73,351.82)             | 323.81<br>(180.55 to<br>517.67)                | 439.11<br>(120.02 to<br>1,302.14)               | 193.18<br>(54.63 to<br>610.12)               | 467.34<br>(134.47 to<br>1,392.73)               |

|                                                       |                                          |                                           |                                         |                                           |                                 |                                     |                                   |                                     |
|-------------------------------------------------------|------------------------------------------|-------------------------------------------|-----------------------------------------|-------------------------------------------|---------------------------------|-------------------------------------|-----------------------------------|-------------------------------------|
|                                                       | 5,761.60<br>(2,948.19 to<br>9,682.02)    | 7,168.23<br>(1,742.17 to<br>21,275.35)    | 3,084.09<br>(770.28 to<br>9,692.80)     | 7,677.01<br>(2,043.12 to<br>23,755.41)    | 103.07<br>(52.83 to<br>172.20)  | 132.51<br>(33.03 to<br>371.81)      | 57.36<br>(14.90 to<br>173.07)     | 141.49<br>(37.87 to<br>421.45)      |
| Maternal sepsis and other maternal infections         | 28,833.97<br>(18,340.09 to<br>44,631.81) | 37,770.06<br>(10,664.18 to<br>111,305.15) | 16,212.51<br>(4,411.60 to<br>55,077.02) | 40,582.35<br>(11,691.44 to<br>122,661.11) | 501.68<br>(315.77 to<br>779.98) | 673.21<br>(198.35 to<br>1,961.88)   | 290.42<br>(80.11 to<br>962.58)    | 721.08<br>(214.49 to<br>2,318.51)   |
| Maternal hypertensive disorders                       | 2,755.53<br>(1,187.28 to<br>5,190.68)    | 4,136.82<br>(911.95 to<br>12,667.62)      | 1,697.30<br>(375.98 to<br>5,352.85)     | 4,442.58<br>(990.64 to<br>13,472.42)      | 49.91<br>(21.37 to<br>93.77)    | 77.62<br>(17.34 to<br>238.27)       | 32.00<br>(7.18 to<br>101.91)      | 83.07<br>(19.61 to<br>253.21)       |
| Maternal obstructed labor and uterine rupture         | 3,036.63<br>(1,281.09 to<br>5,758.33)    | 4,921.12<br>(1,082.50 to<br>16,403.06)    | 2,154.99<br>(474.75 to<br>7,475.09)     | 5,372.82<br>(1,206.17 to<br>17,988.55)    | 54.75<br>(23.26 to<br>101.56)   | 91.98<br>(21.21 to<br>290.32)       | 40.53<br>(8.91 to<br>138.55)      | 100.08<br>(23.05 to<br>321.81)      |
| Maternal abortion, miscarriage, and ectopic pregnancy | 33,708.04<br>(21,095.36 to<br>53,076.66) | 52,292.73<br>(14,571.10 to<br>153,870.00) | 22,644.22<br>(6,080.76 to<br>72,662.23) | 56,401.94<br>(15,837.08 to<br>171,746.84) | 602.51<br>(375.10 to<br>953.75) | 957.39<br>(270.45 to<br>2,800.16)   | 417.80<br>(115.27 to<br>1,339.10) | 1,029.32<br>(303.72 to<br>3,080.33) |
| Indirect maternal deaths                              | 1,755.51<br>(476.71 to<br>3,526.76)      | 2,040.29<br>(390.93 to<br>6,525.55)       | 867.39<br>(157.97 to<br>2,973.47)       | 2,198.64<br>(428.09 to<br>7,077.70)       | 31.18<br>(8.46 to<br>62.38)     | 37.24<br>(7.33 to<br>116.95)        | 15.95<br>(2.98 to<br>54.28)       | 40.00<br>(7.90 to<br>126.39)        |
| Late maternal deaths                                  | 5,736.69<br>(3,397.37 to<br>8,831.28)    | 53,398.35<br>(13,154.90 to<br>149,131.13) | 22,485.62<br>(3,699.69 to<br>70,095.49) | 68,145.86<br>(20,578.44 to<br>196,623.19) | 106.96<br>(62.75 to<br>165.59)  | 1,046.78<br>(245.68 to<br>2,980.35) | 445.33<br>(76.65 to<br>1,387.29)  | 1,337.34<br>(421.46 to<br>3,778.74) |
| Maternal deaths aggravated by HIV/AIDS                | 19,405.28<br>(10,811.75 to<br>30,926.15) | 27,274.57<br>(7,389.25 to<br>86,002.65)   | 12,297.47<br>(3,246.84 to<br>40,035.73) | 29,307.45<br>(8,375.37 to<br>88,145.34)   | 343.20<br>(192.73 to<br>550.82) | 496.71<br>(136.48 to<br>1,573.95)   | 225.79<br>(62.03 to<br>703.24)    | 531.86<br>(156.35 to<br>1,585.44)   |
| Other maternal disorders                              |                                          |                                           |                                         |                                           |                                 |                                     |                                   |                                     |

**Zimbabwe**

| Cause                                                                   | YLLs (actual counts)                                 |                                                      |                                                    |                                                        | Deaths (actual counts)                         |                                                |                                              |                                                |
|-------------------------------------------------------------------------|------------------------------------------------------|------------------------------------------------------|----------------------------------------------------|--------------------------------------------------------|------------------------------------------------|------------------------------------------------|----------------------------------------------|------------------------------------------------|
|                                                                         | 2016                                                 | 2040 Forecast                                        | 2040 Better Scenario                               | 2040 Worse Scenario                                    | 2016                                           | 2040 Forecast                                  | 2040 Better Scenario                         | 2040 Worse Scenario                            |
| <b>Neonatal disorders</b>                                               | <b>944,370.12</b><br>(762,187.03 to<br>1,162,730.37) | <b>881,252.46</b><br>(510,780.35 to<br>1,447,257.52) | <b>428,892.77</b><br>(251,731.87 to<br>699,008.18) | <b>1,047,679.30</b><br>(623,714.31 to<br>1,695,587.66) | <b>10,909.51</b><br>(8,804.29 to<br>13,432.15) | <b>10,184.87</b><br>(5,908.17 to<br>16,717.91) | <b>4,957.04</b><br>(2,908.86 to<br>8,078.81) | <b>12,107.45</b><br>(7,209.67 to<br>19,583.93) |
| Neonatal preterm birth                                                  | 526,377.95<br>(220,428.69 to<br>456,355.79)          | 264,795.29<br>(144,863.52 to<br>446,479.86)          | 132,567.77<br>(70,733.82 to<br>222,648.25)         | 368,500.25<br>(201,141.57 to<br>599,608.37)            | 3,770.19<br>(2,546.35 to<br>5,271.66)          | 3,060.00<br>(1,673.67 to<br>5,157.17)          | 1,523.04<br>(817.31 to<br>2,573.28)          | 4,257.84<br>(2,323.35 to<br>6,925.71)          |
| Neonatal encephalopathy due to birth asphyxia and trauma                | 382,575.20<br>(244,076.28 to<br>523,022.35)          | 283,871.80<br>(132,432.64 to<br>518,491.20)          | 141,066.59<br>(67,325.20 to<br>258,738.57)         | 312,498.81<br>(147,147.95 to<br>576,155.74)            | 4,419.35<br>(2,819.18 to<br>6,042.37)          | 3,280.74<br>(1,529.93 to<br>5,997.58)          | 1,630.40<br>(777.71 to<br>2,988.89)          | 3,611.49<br>(1,700.02 to<br>6,658.77)          |
| Neonatal sepsis and other neonatal infections                           | 174,668.32<br>(113,736.35 to<br>259,818.29)          | 241,228.15<br>(124,056.44 to<br>413,467.18)          | 116,267.91<br>(61,128.29 to<br>200,185.57)         | 265,028.61<br>(140,087.92 to<br>458,598.26)            | 2,018.02<br>(1,314.02 to<br>3,001.67)          | 2,788.12<br>(1,433.64 to<br>4,781.23)          | 1,343.88<br>(706.51 to<br>2,315.50)          | 3,063.13<br>(1,618.65 to<br>5,299.54)          |
| Hemolytic disease and other neonatal jaundice                           | 4,529.24<br>(2,872.70 to<br>7,222.44)                | 3,372.88<br>(1,483.99 to<br>6,473.18)                | 1,464.13<br>(648.13 to<br>2,943.90)                | 3,746.31<br>(1,685.44 to<br>7,311.64)                  | 52.34<br>(33.20 to<br>83.48)                   | 39.00<br>(17.15 to<br>74.82)                   | 16.93<br>(7.49 to<br>34.09)                  | 43.32<br>(19.48 to<br>84.65)                   |
| Other neonatal disorders                                                | 56,219.41<br>(33,981.15 to<br>91,446.90)             | 87,984.33<br>(39,378.08 to<br>171,684.73)            | 37,526.37<br>(16,821.26 to<br>73,384.46)           | 97,905.32<br>(45,029.58 to<br>194,999.61)              | 649.60<br>(392.64 to<br>1,056.68)              | 1,017.02<br>(455.20 to<br>1,984.02)            | 433.79<br>(194.33 to<br>847.64)              | 1,131.66<br>(520.55 to<br>2,254.31)            |
| <b>Nutritional deficiencies</b>                                         | <b>201,464.92</b><br>(139,000.96 to<br>287,329.55)   | <b>174,300.90</b><br>(55,955.31 to<br>448,739.64)    | <b>95,266.53</b><br>(32,607.86 to<br>242,652.99)   | <b>188,841.81</b><br>(64,071.36 to<br>477,178.99)      | <b>3,280.78</b><br>(2,503.08 to<br>4,339.34)   | <b>2,940.49</b><br>(1,375.76 to<br>6,322.37)   | <b>1,869.23</b><br>(3,885.45)                | <b>3,063.80</b><br>(1,472.77 to<br>6,584.24)   |
| Protein-energy malnutrition                                             | 194,326.06<br>(133,004.63 to<br>279,350.93)          | 160,007.37<br>(50,396.64 to<br>417,698.93)           | 86,611.29<br>(28,742.59 to<br>223,579.59)          | 173,973.96<br>(45,168.79 to<br>445,168.79)             | 3,095.43<br>(2,341.41 to<br>4,084.53)          | 2,627.89<br>(1,195.20 to<br>5,832.26)          | 1,649.44<br>(827.32 to<br>3,501.37)          | 2,750.78<br>(1,249.27 to<br>5,984.63)          |
| Iodine deficiency                                                       | 444.75<br>(13.72 to<br>2,461.62)                     | 4,368.27<br>(29.92 to<br>31,826.78)                  | 2,121.41<br>(15.43 to<br>13,124.29)                | 4,722.94<br>(31.89 to<br>31,298.50)                    | 7.54<br>(0.34 to<br>32.76)                     | 76.63<br>(0.94 to<br>387.52)                   | 43.13<br>(0.42 to<br>211.43)                 | 79.97<br>(0.89 to<br>411.78)                   |
| Dietary iron deficiency                                                 | 165.03<br>(123.30 to<br>221.82)                      | 268.91<br>(101.93 to<br>642.29)                      | 186.79<br>(67.59 to<br>471.15)                     | 276.79<br>(106.08 to<br>650.22)                        | 2.62<br>(1.98 to<br>3.44)                      | 4.39<br>(1.80 to<br>10.56)                     | 3.19<br>(1.24 to<br>7.94)                    | 4.46<br>(1.85 to<br>10.46)                     |
| Other nutritional deficiencies                                          | 6,529.08<br>(4,255.01 to<br>11,128.67)               | 9,656.35<br>(3,666.89 to<br>21,955.40)               | 6,347.04<br>(2,552.93 to<br>14,248.14)             | 9,868.12<br>(3,878.96 to<br>21,970.90)                 | 175.20<br>(122.86 to<br>253.97)                | 231.58<br>(122.47 to<br>432.92)                | 173.47<br>(90.23 to<br>329.52)               | 228.58<br>(122.27 to<br>432.52)                |
| <b>Other communicable, maternal, neonatal, and nutritional diseases</b> | <b>42,975.16</b><br>(24,463.23 to<br>74,140.31)      | <b>37,744.84</b><br>(16,004.54 to<br>79,889.38)      | <b>24,134.74</b><br>(10,422.09 to<br>51,136.57)    | <b>38,795.18</b><br>(17,228.48 to<br>80,590.67)        | <b>669.30</b><br>(450.16 to<br>1,036.42)       | <b>700.60</b><br>(361.16 to<br>1,352.05)       | <b>499.26</b><br>(254.38 to<br>999.44)       | <b>702.50</b><br>(361.40 to<br>1,328.17)       |

|                                               |                                                   |                                                   |                                                   |                                                   |                                          |                                            |                                           |                                            |
|-----------------------------------------------|---------------------------------------------------|---------------------------------------------------|---------------------------------------------------|---------------------------------------------------|------------------------------------------|--------------------------------------------|-------------------------------------------|--------------------------------------------|
| Sexually transmitted infections excluding HIV | 29,789.77<br>(13,078.54 to<br>60,027.79)          | 18,501.97<br>(6,112.30 to<br>47,060.70)           | 11,343.16<br>(3,969.36 to<br>28,749.58)           | 19,211.62<br>(6,265.34 to<br>49,220.14)           | 416.78<br>(215.15 to<br>774.92)          | 295.79<br>(128.33 to<br>641.72)            | 202.71<br>(94.42 to<br>427.87)            | 300.92<br>(128.77 to<br>677.46)            |
| Syphilis                                      | 27,170.85<br>(10,990.98 to<br>57,360.57)          | 14,857.48<br>(3,711.31 to<br>43,584.49)           | 8,440.86<br>(2,181.99 to<br>24,341.59)            | 15,588.21<br>(4,065.09 to<br>44,542.59)           | 334.61<br>(144.39 to<br>689.92)          | 193.69<br>(58.80 to<br>531.23)             | 115.22<br>(37.99 to<br>300.61)            | 201.58<br>(62.65 to<br>539.18)             |
| Chlamydia infection                           | 517.78<br>(296.37 to<br>1,297.58)                 | 718.81<br>(267.42 to<br>1,944.23)                 | 569.83<br>(219.97 to<br>1,478.58)                 | 716.23<br>(276.91 to<br>1,878.71)                 | 16.15<br>(10.18 to<br>29.54)             | 19.86<br>(9.88 to<br>44.90)                | 17.10<br>(8.87 to<br>36.13)               | 19.31<br>(9.78 to<br>42.86)                |
| Gonococcal infection                          | 1,398.72<br>(806.18 to<br>3,387.77)               | 1,927.64<br>(742.85 to<br>5,304.18)               | 1,548.84<br>(602.92 to<br>4,196.13)               | 1,911.57<br>(738.39 to<br>5,259.97)               | 46.48<br>(28.70 to<br>79.76)             | 56.34<br>(27.96 to<br>121.92)              | 48.88<br>(24.78 to<br>104.29)             | 54.62<br>(26.93 to<br>120.68)              |
| Other sexually transmitted infections         | 702.41<br>(391.42 to<br>1,830.67)                 | 998.04<br>(362.74 to<br>2,790.17)                 | 783.63<br>(287.57 to<br>2,142.37)                 | 995.61<br>(368.26 to<br>2,693.81)                 | 19.54<br>(11.83 to<br>40.10)             | 25.89<br>(11.84 to<br>60.72)               | 21.51<br>(9.97 to<br>49.22)               | 25.40<br>(11.52 to<br>58.51)               |
| Acute hepatitis                               | 4,400.49<br>(3,405.10 to<br>5,633.96)             | 5,622.66<br>(1,911.38 to<br>15,073.77)            | 4,200.58<br>(1,308.15 to<br>11,986.35)            | 5,613.77<br>(1,995.91 to<br>14,366.53)            | 87.23<br>(68.03 to<br>110.10)            | 123.67<br>(46.25 to<br>299.85)             | 96.86<br>(33.21 to<br>251.09)             | 121.51<br>(47.52 to<br>288.35)             |
| Acute hepatitis A                             | 122.91<br>(12.35 to<br>409.24)                    | 138.27<br>(14.09 to<br>567.51)                    | 85.42<br>(9.26 to<br>338.25)                      | 143.56<br>(14.40 to<br>560.84)                    | 1.59<br>(0.24 to<br>5.06)                | 2.09<br>(0.33 to<br>7.36)                  | 1.40<br>(0.23 to<br>5.04)                 | 2.13<br>(0.32 to<br>7.65)                  |
| Acute hepatitis B                             | 3,071.90<br>(2,319.14 to<br>3,975.74)             | 4,377.08<br>(1,444.04 to<br>12,161.46)            | 3,324.37<br>(983.81 to<br>9,653.56)               | 4,336.03<br>(1,450.09 to<br>11,640.04)            | 67.38<br>(51.35 to<br>86.11)             | 102.46<br>(35.66 to<br>261.68)             | 80.49<br>(26.06 to<br>212.20)             | 100.22<br>(35.65 to<br>246.23)             |
| Acute hepatitis C                             | 82.08<br>(53.25 to<br>122.90)                     | 131.15<br>(44.14 to<br>335.46)                    | 118.87<br>(37.20 to<br>323.03)                    | 127.53<br>(45.51 to<br>306.57)                    | 1.91<br>(1.27 to<br>2.90)                | 3.38<br>(1.22 to<br>7.89)                  | 3.20<br>(1.07 to<br>8.26)                 | 3.23<br>(1.25 to<br>7.18)                  |
| Acute hepatitis E                             | 1,123.60<br>(713.70 to<br>1,700.50)               | 976.16<br>(325.09 to<br>2,434.75)                 | 671.92<br>(224.15 to<br>1,659.67)                 | 1,006.65<br>(340.93 to<br>2,372.70)               | 16.35<br>(10.88 to<br>23.49)             | 15.75<br>(5.91 to<br>36.39)                | 11.78<br>(4.37 to<br>27.09)               | 15.93<br>(6.01 to<br>35.06)                |
| Other unspecified infectious diseases         | 8,784.90<br>(5,764.38 to<br>16,267.34)            | 13,620.21<br>(6,024.42 to<br>29,595.79)           | 8,591.00<br>(3,682.47 to<br>19,593.55)            | 13,969.79<br>(6,423.69 to<br>29,440.38)           | 165.29<br>(110.58 to<br>263.06)          | 281.14<br>(136.06 to<br>544.61)            | 199.68<br>(93.24 to<br>412.04)            | 280.07<br>(144.99 to<br>536.50)            |
| Non-communicable diseases                     | 1,536,492.31<br>(1,290,331.59 to<br>1,819,360.73) | 3,623,979.08<br>(1,766,195.33 to<br>7,310,641.78) | 2,627,082.82<br>(1,264,936.03 to<br>5,576,121.93) | 4,079,082.51<br>(1,953,162.87 to<br>8,024,529.92) | 51,281.89<br>(42,330.56 to<br>61,350.17) | 112,848.90<br>(63,669.85 to<br>202,660.09) | 86,647.96<br>(48,910.56 to<br>160,204.91) | 125,929.86<br>(71,575.96 to<br>223,299.43) |

**Zimbabwe**

| Cause                      | YLLs (actual counts)                     |                                             |                                               |                                               | Deaths (actual counts)                          |                                          |                                          |                                          |
|----------------------------|------------------------------------------|---------------------------------------------|-----------------------------------------------|-----------------------------------------------|-------------------------------------------------|------------------------------------------|------------------------------------------|------------------------------------------|
|                            | 2016                                     | 2040 Forecast                               | 2040 Better Scenario                          | 2040 Worse Scenario                           | 2016                                            | 2040 Forecast                            | 2040 Better Scenario                     | 2040 Worse Scenario                      |
|                            | <b>Neoplasms</b>                         | 368,412.17<br>(288,204.06 to<br>463,609.92) | 967,221.74<br>(462,223.57 to<br>2,053,407.26) | 918,955.70<br>(429,164.05 to<br>1,995,322.85) | 1,050,411.83<br>(494,016.87 to<br>2,186,445.07) | 13,714.11<br>(10,888.84 to<br>16,988.85) | 31,315.30<br>(17,291.47 to<br>58,389.86) | 31,322.43<br>(17,119.47 to<br>59,729.41) |
| Lip and oral cavity cancer | 3,076.76<br>(2,390.21 to<br>3,918.20)    | 11,223.95<br>(3,284.22 to<br>35,409.43)     | 7,488.88<br>(2,321.45 to<br>23,208.56)        | 16,051.06<br>(4,250.72 to<br>51,584.54)       | 106.30<br>(82.29 to<br>134.19)                  | 332.97<br>(113.58 to<br>960.14)          | 232.01<br>(87.33 to<br>645.36)           | 467.02<br>(145.84 to<br>1,378.13)        |
| Nasopharynx cancer         | 1,071.21<br>(824.28 to<br>1,403.58)      | 3,977.60<br>(1,240.74 to<br>12,193.26)      | 2,558.43<br>(823.39 to<br>7,798.99)           | 5,703.80<br>(1,643.53 to<br>17,395.85)        | 30.83<br>(23.35 to<br>40.14)                    | 107.31<br>(65.13 to<br>301.77)           | 70.83<br>(24.34 to<br>203.01)            | 153.35<br>(48.06 to<br>435.16)           |
| Other pharynx cancer       | 1,038.05<br>(791.32 to<br>1,374.09)      | 3,249.92<br>(1,052.94 to<br>9,103.14)       | 2,934.35<br>(920.99 to<br>8,853.11)           | 3,669.83<br>(1,219.71 to<br>9,814.83)         | 37.90<br>(29.21 to<br>49.26)                    | 106.28<br>(39.51 to<br>266.22)           | 99.04<br>(36.18 to<br>266.50)            | 118.46<br>(44.65 to<br>284.63)           |
| Esophageal cancer          | 28,249.33<br>(21,901.17 to<br>35,527.36) | 82,010.95<br>(24,983.95 to<br>234,906.02)   | 59,423.65<br>(18,080.44 to<br>175,448.37)     | 111,305.32<br>(31,788.75 to<br>322,186.29)    | 1,254.14<br>(982.46 to<br>1,532.70)             | 2,872.92<br>(1,061.04 to<br>7,250.70)    | 2,201.97<br>(832.38 to<br>5,798.95)      | 3,771.75<br>(1,297.88 to<br>9,805.62)    |
| Stomach cancer             | 21,984.62<br>(17,096.76 to<br>27,379.76) | 40,885.05<br>(18,864.15 to<br>84,824.24)    | 36,317.44<br>(16,344.02 to<br>77,992.20)      | 41,299.20<br>(19,472.79 to<br>82,821.33)      | 969.79<br>(763.52 to<br>1,197.47)               | 1,510.30<br>(832.17 to<br>2,692.43)      | 1,406.16<br>(775.77 to<br>2,596.22)      | 1,496.82<br>(847.08 to<br>2,654.83)      |
| Colon and rectum cancer    | 20,769.93<br>(16,103.60 to<br>26,325.86) | 61,149.24<br>(25,939.24 to<br>129,198.84)   | 64,982.99<br>(26,830.96 to<br>149,261.66)     | 63,155.59<br>(27,221.73 to<br>134,937.82)     | 800.09<br>(630.33 to<br>985.69)                 | 2,032.33<br>(1,047.44 to<br>3,777.23)    | 2,274.24<br>(1,147.91 to<br>4,536.23)    | 2,052.07<br>(1,064.01 to<br>3,785.01)    |
| Liver cancer               | 39,677.01<br>(31,157.33 to<br>49,764.00) | 116,033.49<br>(50,593.29 to<br>261,673.22)  | 110,146.75<br>(46,588.97 to<br>264,835.34)    | 133,896.74<br>(56,531.11 to<br>303,816.98)    | 1,411.24<br>(1,100.77 to<br>1,769.85)           | 3,625.32<br>(1,844.67 to<br>7,304.47)    | 3,589.35<br>(1,769.66 to<br>7,386.60)    | 4,086.40<br>(1,995.48 to<br>8,076.84)    |



|                                      |                                          |                                           |                                           |                                           |                                      |                                       |                                       |                                       |
|--------------------------------------|------------------------------------------|-------------------------------------------|-------------------------------------------|-------------------------------------------|--------------------------------------|---------------------------------------|---------------------------------------|---------------------------------------|
| Liver cancer due to hepatitis B      | 20,510.59<br>(15,524.04 to<br>25,864.99) | 59,712.50<br>(24,807.00 to<br>139,468.97) | 57,877.10<br>(23,255.69 to<br>141,596.25) | 67,394.91<br>(27,229.49 to<br>154,729.40) | 669.42<br>(516.61 to<br>849.01)      | 1,767.97<br>(860.68 to<br>3,681.66)   | 1,775.85<br>(832.88 to<br>3,850.18)   | 1,957.90<br>(914.87 to<br>4,022.74)   |
| Liver cancer due to hepatitis C      | 5,297.40<br>(3,867.18 to<br>7,130.26)    | 14,866.94<br>(6,849.06 to<br>31,355.95)   | 14,747.81<br>(6,501.39 to<br>32,052.94)   | 16,423.70<br>(7,625.86 to<br>32,809.99)   | 245.87<br>(177.11 to<br>332.07)      | 568.25<br>(305.07 to<br>1,010.35)     | 592.89<br>(309.36 to<br>1,093.47)     | 609.79<br>(323.70 to<br>1,070.11)     |
| Liver cancer due to alcohol use      | 5,168.76<br>(3,918.48 to<br>6,747.36)    | 15,966.66<br>(6,687.66 to<br>36,296.93)   | 13,645.84<br>(5,681.58 to<br>32,354.01)   | 21,458.82<br>(8,547.70 to<br>50,274.68)   | 208.04<br>(158.38 to<br>269.87)      | 532.94<br>(257.46 to<br>1,050.75)     | 483.14<br>(232.61 to<br>1,009.89)     | 684.86<br>(319.61 to<br>1,449.72)     |
| Liver cancer due to other causes     | 8,700.26<br>(6,809.25 to<br>11,172.80)   | 25,487.39<br>(10,656.93 to<br>59,041.94)  | 23,875.99<br>(9,628.76 to<br>58,765.05)   | 28,619.31<br>(11,785.77 to<br>64,497.55)  | 287.92<br>(226.33 to<br>367.92)      | 756.16<br>(364.43 to<br>1,523.83)     | 737.47<br>(345.34 to<br>1,620.66)     | 833.85<br>(394.36 to<br>1,668.56)     |
| Gallbladder and biliary tract cancer | 2,249.81<br>(1,650.47 to<br>2,999.14)    | 3,751.93<br>(1,929.62 to<br>6,997.88)     | 4,194.96<br>(2,015.86 to<br>8,661.33)     | 3,519.76<br>(1,881.49 to<br>6,333.01)     | 98.37<br>(73.40 to<br>131.12)        | 138.30<br>(83.88 to<br>228.68)        | 161.69<br>(93.32 to<br>292.50)        | 127.91<br>(79.64 to<br>205.79)        |
| Pancreatic cancer                    | 9,834.44<br>(7,698.83 to<br>12,231.98)   | 31,477.27<br>(15,585.90 to<br>61,169.76)  | 34,226.26<br>(16,180.55 to<br>70,578.68)  | 31,409.85<br>(15,833.88 to<br>59,220.73)  | 455.07<br>(358.98 to<br>556.65)      | 1,193.48<br>(697.90 to<br>2,051.67)   | 1,356.34<br>(755.02 to<br>2,454.01)   | 1,167.87<br>(683.74 to<br>1,924.23)   |
| Larynx cancer                        | 3,910.12<br>(2,938.08 to<br>5,042.32)    | 11,803.62<br>(3,179.45 to<br>34,228.57)   | 7,157.09<br>(2,010.48 to<br>20,951.45)    | 18,010.12<br>(4,733.26 to<br>52,333.00)   | 164.93<br>(125.64 to<br>208.18)      | 399.88<br>(131.91 to<br>1,037.76)     | 253.64<br>(89.61 to<br>674.58)        | 597.21<br>(188.31 to<br>1,172.26)     |
| Tracheal, bronchus, and lung cancer  | 17,849.00<br>(13,821.51 to<br>22,561.27) | 50,832.59<br>(19,294.36 to<br>125,765.13) | 35,000.56<br>(13,356.35 to<br>86,247.72)  | 78,727.71<br>(29,205.69 to<br>186,041.49) | 752.22<br>(587.73 to<br>940.79)      | 1,770.54<br>(777.37 to<br>4,071.12)   | 1,271.69<br>(572.80 to<br>2,834.88)   | 2,685.72<br>(1,161.46 to<br>5,882.26) |
| Malignant skin melanoma              | 3,597.23<br>(2,529.81 to<br>4,819.97)    | 9,709.97<br>(4,811.41 to<br>18,367.39)    | 12,042.90<br>(5,746.57 to<br>24,280.58)   | 9,026.39<br>(4,580.73 to<br>16,573.74)    | 150.35<br>(95.74 to<br>200.42)       | 346.09<br>(195.10 to<br>580.09)       | 451.46<br>(251.57 to<br>789.02)       | 316.37<br>(179.28 to<br>506.96)       |
| Non-melanoma skin cancer             | 4,826.23<br>(3,702.80 to<br>6,058.21)    | 13,843.23<br>(6,580.47 to<br>26,866.56)   | 13,534.04<br>(6,074.08 to<br>28,735.94)   | 13,014.79<br>(6,356.45 to<br>23,920.00)   | 222.51<br>(168.72 to<br>273.53)      | 513.86<br>(310.94 to<br>825.65)       | 532.10<br>(299.45 to<br>954.59)       | 474.24<br>(295.87 to<br>727.27)       |
| Breast cancer                        | 27,102.57<br>(17,605.71 to<br>38,976.08) | 78,977.80<br>(32,554.33 to<br>179,908.11) | 78,400.27<br>(32,028.02 to<br>181,069.69) | 80,391.08<br>(33,265.39 to<br>182,624.72) | 891.63<br>(590.61 to<br>1,261.44)    | 2,481.86<br>(1,190.80 to<br>5,149.38) | 2,540.88<br>(1,215.04 to<br>5,410.15) | 2,500.06<br>(1,171.15 to<br>5,120.44) |
| Cervical cancer                      | 44,594.01<br>(26,733.35 to<br>65,169.89) | 98,590.12<br>(39,095.88 to<br>219,590.41) | 84,105.37<br>(33,120.84 to<br>195,671.71) | 98,125.78<br>(40,444.32 to<br>215,043.77) | 98.125.78<br>(666.05 to<br>2,184.95) | 1,632.18<br>(964.65 to<br>2,300.12)   | 2,845.69<br>(1,438.78 to<br>6,537.00) | 3,191.62<br>(1,424.20 to<br>6,395.91) |
| Uterine cancer                       | 5,572.50<br>(3,619.45 to<br>7,761.82)    | 14,413.27<br>(6,988.41 to<br>27,395.13)   | 12,357.76<br>(5,864.78 to<br>24,742.74)   | 14,029.18<br>(7,031.00 to<br>25,866.67)   | 250.37<br>(168.16 to<br>339.08)      | 569.66<br>(322.87 to<br>959.45)       | 508.74<br>(285.61 to<br>919.12)       | 547.17<br>(320.01 to<br>890.56)       |
| Ovarian cancer                       | 8,194.91<br>(5,366.71 to<br>11,625.10)   | 23,326.80<br>(10,081.23 to<br>50,523.31)  | 26,852.08<br>(11,221.34 to<br>59,606.50)  | 22,796.04<br>(9,765.25 to<br>48,635.14)   | 273.62<br>(182.76 to<br>376.93)      | 743.91<br>(361.04 to<br>1,467.34)     | 877.72<br>(419.56 to<br>1,810.65)     | 721.90<br>(350.13 to<br>1,411.52)     |
| Prostate cancer                      | 23,752.28<br>(10,378.35 to<br>34,121.30) | 52,283.45<br>(21,001.80 to<br>88,806.98)  | 65,531.91<br>(25,553.28 to<br>123,115.15) | 47,862.15<br>(19,074.31 to<br>76,487.97)  | 1,532.54<br>(666.05 to<br>2,184.95)  | 2,671.10<br>(1,186.97 to<br>3,915.80) | 3,551.75<br>(1,570.68 to<br>5,550.45) | 2,397.10<br>(1,060.41 to<br>3,456.53) |
| Testicular cancer                    | 770.18<br>(543.56 to<br>1,036.88)        | 1,767.83<br>(552.51 to<br>5,432.95)       | 1,614.49<br>(488.60 to<br>5,126.21)       | 1,722.98<br>(548.40 to<br>4,922.77)       | 16.41<br>(11.77 to<br>21.48)         | 37.33<br>(13.91 to<br>105.42)         | 35.25<br>(12.59 to<br>102.60)         | 35.91<br>(13.74 to<br>98.53)          |
| <b>Zimbabwe</b>                      |                                          |                                           |                                           |                                           |                                      |                                       |                                       |                                       |
| Cause                                | YLLs (actual counts)                     |                                           |                                           |                                           | Deaths (actual counts)               |                                       |                                       |                                       |
|                                      | 2016                                     | 2040 Forecast                             | 2040 Better Scenario                      | 2040 Worse Scenario                       | 2016                                 | 2040 Forecast                         | 2040 Better Scenario                  | 2040 Worse Scenario                   |
| Kidney cancer                        | 2,845.42<br>(2,095.82 to<br>3,717.60)    | 7,570.33<br>(3,514.19 to<br>14,383.39)    | 8,078.40<br>(3,697.64 to<br>16,791.82)    | 7,578.88<br>(3,623.54 to<br>14,744.68)    | 66.76<br>(51.94 to<br>84.12)         | 180.86<br>(94.43 to<br>334.87)        | 211.56<br>(105.43 to<br>433.33)       | 178.30<br>(93.76 to<br>327.85)        |
| Bladder cancer                       | 9,422.82<br>(7,393.20 to<br>11,813.42)   | 24,607.33<br>(12,091.34 to<br>50,100.10)  | 23,232.38<br>(10,933.52 to<br>48,674.64)  | 25,538.56<br>(12,565.21 to<br>50,985.31)  | 453.71<br>(364.58 to<br>557.23)      | 945.53<br>(563.48 to<br>1,616.31)     | 951.49<br>(557.79 to<br>1,687.28)     | 957.10<br>(573.19 to<br>1,616.79)     |
| Brain and nervous system cancer      | 12,228.09<br>(9,679.46 to<br>15,370.82)  | 35,282.36<br>(17,215.00 to<br>71,395.15)  | 35,544.58<br>(16,577.82 to<br>75,512.46)  | 34,364.78<br>(17,074.13 to<br>68,825.27)  | 263.22<br>(205.53 to<br>332.77)      | 779.84<br>(415.30 to<br>1,474.00)     | 843.09<br>(421.68 to<br>1,672.69)     | 743.94<br>(404.45 to<br>1,400.37)     |
| Thyroid cancer                       | 3,212.53<br>(1,894.30 to<br>4,402.50)    | 8,463.88<br>(3,597.24 to<br>17,412.48)    | 7,420.27<br>(3,102.82 to<br>16,184.91)    | 8,851.89<br>(3,930.60 to<br>17,822.56)    | 126.80<br>(74.93 to<br>169.43)       | 296.30<br>(145.16 to<br>563.37)       | 267.92<br>(129.55 to<br>520.29)       | 305.87<br>(152.64 to<br>566.98)       |

|                                |                                             |                                               |                                               |                                                 |                                          |                                          |                                         |                                          |
|--------------------------------|---------------------------------------------|-----------------------------------------------|-----------------------------------------------|-------------------------------------------------|------------------------------------------|------------------------------------------|-----------------------------------------|------------------------------------------|
|                                | 504.23<br>(379.81 to<br>679.08)             | 1,511.78<br>(654.77 to<br>3,282.74)           | 1,559.51<br>(625.13 to<br>3,704.18)           | 1,432.50<br>(653.64 to<br>2,974.80)             | 17.37<br>(13.15 to<br>23.94)             | 46.52<br>(23.93 to<br>89.73)             | 49.73<br>(23.72 to<br>102.70)           | 43.50<br>(23.30 to<br>81.32)             |
| Mesothelioma                   |                                             |                                               |                                               |                                                 |                                          |                                          |                                         |                                          |
|                                | 2,727.08<br>(1,614.16 to<br>3,706.69)       | 5,450.29<br>(1,935.47 to<br>13,496.18)        | 3,954.15<br>(1,427.91 to<br>10,290.07)        | 5,470.21<br>(2,008.33 to<br>13,509.52)          | 115.25<br>(36.14 to<br>73.13)            | 55.46<br>(48.34 to<br>268.31)            | 87.55<br>(35.02 to<br>206.67)           | 113.86<br>(48.97 to<br>252.94)           |
| Hodgkin lymphoma               |                                             |                                               |                                               |                                                 |                                          |                                          |                                         |                                          |
|                                | 24,802.95<br>(10,003.62 to<br>34,381.66)    | 64,554.83<br>(18,890.53 to<br>156,118.15)     | 69,907.26<br>(20,377.48 to<br>174,974.36)     | 63,455.81<br>(18,562.81 to<br>152,634.75)       | 585.92<br>(302.13 to<br>796.44)          | 1,542.95<br>(578.05 to<br>3,501.87)      | 1,732.13<br>(660.32 to<br>4,157.17)     | 1,502.98<br>(552.05 to<br>3,345.77)      |
| Non-Hodgkin lymphoma           |                                             |                                               |                                               |                                                 |                                          |                                          |                                         |                                          |
|                                | 5,267.01<br>(3,405.66 to<br>7,046.15)       | 18,053.72<br>(9,160.67 to<br>36,863.16)       | 21,311.95<br>(9,160.67 to<br>45,945.14)       | 17,613.29<br>(7,935.02 to<br>34,681.47)         | 209.89<br>(140.13 to<br>276.57)          | 624.56<br>(319.98 to<br>1,130.31)        | 758.74<br>(383.80 to<br>1,420.48)       | 602.98<br>(309.54 to<br>1,086.49)        |
| Multiple myeloma               |                                             |                                               |                                               |                                                 |                                          |                                          |                                         |                                          |
|                                | 15,916.59<br>(12,709.06 to<br>20,519.65)    | 36,357.35<br>(17,042.40 to<br>73,116.00)      | 35,597.60<br>(15,950.93 to<br>76,568.59)      | 37,622.59<br>(17,885.22 to<br>76,649.64)        | 360.94<br>(283.69 to<br>519.89)          | 842.98<br>(443.77 to<br>1,583.43)        | 872.34<br>(432.88 to<br>1,741.02)       | 864.18<br>(457.92 to<br>1,604.91)        |
| Leukemia                       |                                             |                                               |                                               |                                                 |                                          |                                          |                                         |                                          |
|                                | 5,139.14<br>(3,887.54 to<br>6,802.84)       | 10,271.44<br>(4,621.02 to<br>21,631.84)       | 9,744.20<br>(4,123.34 to<br>21,500.95)        | 10,552.43<br>(4,810.01 to<br>21,969.22)         | 83.79<br>(64.56 to<br>111.03)            | 180.75<br>(84.77 to<br>365.98)           | 180.89<br>(80.16 to<br>380.42)          | 185.50<br>(88.27 to<br>379.89)           |
| Acute lymphoid leukemia        |                                             |                                               |                                               |                                                 |                                          |                                          |                                         |                                          |
|                                | 387.76<br>(282.07 to<br>529.20)             | 901.56<br>(457.41 to<br>1,722.93)             | 941.93<br>(454.22 to<br>1,885.20)             | 925.76<br>(478.29 to<br>1,760.58)               | 17.01<br>(12.61 to<br>22.83)             | 33.52<br>(20.47 to<br>56.43)             | 37.02<br>(22.21 to<br>65.93)            | 33.63<br>(20.68 to<br>56.05)             |
| Chronic lymphoid leukemia      |                                             |                                               |                                               |                                                 |                                          |                                          |                                         |                                          |
|                                | 5,076.50<br>(3,815.38 to<br>6,540.20)       | 14,474.72<br>(6,652.83 to<br>30,917.37)       | 15,713.85<br>(6,851.70 to<br>35,172.74)       | 14,846.96<br>(6,794.30 to<br>31,521.04)         | 108.44<br>(83.63 to<br>143.60)           | 323.91<br>(159.42 to<br>660.78)          | 372.84<br>(175.19 to<br>788.53)         | 329.76<br>(164.22 to<br>651.13)          |
| Acute myeloid leukemia         |                                             |                                               |                                               |                                                 |                                          |                                          |                                         |                                          |
|                                | 1,362.06<br>(935.81 to<br>1,840.56)         | 2,233.33<br>(875.44 to<br>5,652.01)           | 2,255.15<br>(846.03 to<br>5,952.31)           | 2,346.17<br>(919.27 to<br>5,814.11)             | 37.47<br>(27.35 to<br>49.46)             | 60.05<br>(27.96 to<br>133.85)            | 62.79<br>(28.53 to<br>146.28)           | 62.18<br>(28.97 to<br>135.44)            |
| Chronic myeloid leukemia       |                                             |                                               |                                               |                                                 |                                          |                                          |                                         |                                          |
|                                | 3,951.14<br>(2,666.88 to<br>7,424.95)       | 8,476.30<br>(3,885.03 to<br>18,203.26)        | 6,942.47<br>(3,028.17 to<br>15,646.42)        | 8,951.27<br>(4,114.67 to<br>19,489.56)          | 114.23<br>(76.70 to<br>245.97)           | 244.75<br>(129.77 to<br>525.08)          | 218.80<br>(113.75 to<br>503.54)         | 253.11<br>(132.24 to<br>531.44)          |
| Other leukemia                 |                                             |                                               |                                               |                                                 |                                          |                                          |                                         |                                          |
|                                | 23,365.26<br>(18,534.76 to<br>29,392.67)    | 56,061.80<br>(27,107.62 to<br>109,816.63)     | 53,479.43<br>(24,359.79 to<br>111,990.60)     | 54,765.92<br>(26,551.07 to<br>106,629.43)       | 523.52<br>(404.11 to<br>671.74)          | 1,252.15<br>(671.66 to<br>2,311.23)      | 1,287.35<br>(662.47 to<br>2,517.05)     | 1,198.60<br>(661.90 to<br>2,183.65)      |
| Other neoplasms                |                                             |                                               |                                               |                                                 |                                          |                                          |                                         |                                          |
|                                | 420,081.98<br>(358,424.76 to<br>513,413.85) | 995,608.67<br>(395,975.16 to<br>2,248,414.76) | 495,844.92<br>(208,341.51 to<br>1,113,624.02) | 1,269,290.37<br>(517,427.83 to<br>2,869,971.82) | 16,112.82<br>(13,166.60 to<br>19,322.02) | 34,703.43<br>(17,307.92 to<br>71,258.42) | 18,490.41<br>(9,755.25 to<br>36,062.79) | 43,293.60<br>(21,300.48 to<br>88,773.45) |
| Cardiovascular diseases        |                                             |                                               |                                               |                                                 |                                          |                                          |                                         |                                          |
|                                | 24,978.10<br>(18,915.15 to<br>32,569.50)    | 30,432.96<br>(11,120.69 to<br>72,972.37)      | 19,821.07<br>(7,235.33 to<br>48,968.07)       | 31,182.12<br>(11,797.64 to<br>74,634.12)        | 549.49<br>(412.49 to<br>717.22)          | 678.13<br>(293.40 to<br>1,471.41)        | 470.36<br>(205.31 to<br>1,056.81)       | 681.29<br>(308.41 to<br>1,466.13)        |
| Rheumatic heart disease        |                                             |                                               |                                               |                                                 |                                          |                                          |                                         |                                          |
|                                | 129,930.49<br>(102,334.39 to<br>161,815.33) | 380,351.04<br>(133,025.58 to<br>957,496.94)   | 147,253.49<br>(52,217.47 to<br>372,642.00)    | 536,816.34<br>(188,333.77 to<br>1,325,874.03)   | 6,827.36<br>(5,413.27 to<br>8,354.87)    | 15,797.76<br>(7,062.03 to<br>35,050.71)  | 6,941.07<br>(3,149.23 to<br>14,705.43)  | 21,168.00<br>(9,170.91 to<br>45,449.75)  |
| Ischemic heart disease         |                                             |                                               |                                               |                                                 |                                          |                                          |                                         |                                          |
|                                | 166,413.55<br>(138,725.01 to<br>197,973.45) | 311,818.22<br>(110,545.72 to<br>794,624.16)   | 126,221.41<br>(47,590.91 to<br>334,370.45)    | 408,654.02<br>(147,891.87 to<br>1,039,276.89)   | 5,458.86<br>(4,437.70 to<br>6,612.77)    | 10,253.09<br>(4,488.17 to<br>23,996.84)  | 4,583.11<br>(2,149.81 to<br>10,149.97)  | 13,283.75<br>(5,729.67 to<br>29,973.38)  |
| Stroke                         |                                             |                                               |                                               |                                                 |                                          |                                          |                                         |                                          |
|                                | 28,518.84<br>(22,023.26 to<br>35,034.41)    | 50,777.97<br>(20,929.13 to<br>117,466.41)     | 26,607.40<br>(11,770.35 to<br>65,750.47)      | 63,541.77<br>(26,281.63 to<br>146,141.81)       | 1,804.64<br>(1,404.15 to<br>2,213.03)    | 2,698.40<br>(1,361.29 to<br>5,651.68)    | 1,594.41<br>(835.65 to<br>3,210.44)     | 3,221.18<br>(1,607.33 to<br>6,610.53)    |
| Ischemic stroke                |                                             |                                               |                                               |                                                 |                                          |                                          |                                         |                                          |
|                                | 137,894.71<br>(114,588.08 to<br>164,977.74) | 261,040.25<br>(81,418.23 to<br>698,038.39)    | 99,614.01<br>(32,796.94 to<br>288,942.48)     | 345,112.25<br>(113,111.34 to<br>927,583.52)     | 3,654.22<br>(2,999.57 to<br>4,412.49)    | 7,554.69<br>(2,741.44 to<br>19,554.96)   | 2,988.70<br>(1,143.34 to<br>7,837.91)   | 10,062.57<br>(5,650.73 to<br>25,880.57)  |
| Intracerebral hemorrhage       |                                             |                                               |                                               |                                                 |                                          |                                          |                                         |                                          |
|                                | 18,711.51<br>(13,421.98 to<br>25,919.57)    | 60,379.39<br>(21,299.76 to<br>163,778.15)     | 38,126.39<br>(14,582.08 to<br>95,130.89)      | 74,343.28<br>(24,871.32 to<br>201,187.77)       | 862.84<br>(607.48 to<br>1,262.12)        | 2,290.50<br>(978.76 to<br>5,354.82)      | 1,570.31<br>(735.04 to<br>3,539.70)     | 2,761.24<br>(1,164.69 to<br>6,750.75)    |
| Hypertensive heart disease     |                                             |                                               |                                               |                                                 |                                          |                                          |                                         |                                          |
|                                | 30,307.66<br>(23,380.58 to<br>38,492.80)    | 60,107.40<br>(28,374.90 to<br>126,066.68)     | 56,696.93<br>(25,324.83 to<br>124,979.72)     | 60,178.17<br>(28,649.23 to<br>125,739.85)       | 813.12<br>(628.27 to<br>1,044.43)        | 1,661.14<br>(908.46 to<br>3,155.93)      | 1,731.52<br>(929.24 to<br>3,449.18)     | 1,627.00<br>(905.19 to<br>3,053.17)      |
| Cardiomyopathy and myocarditis |                                             |                                               |                                               |                                                 |                                          |                                          |                                         |                                          |
|                                | 11,019.11<br>(6,040.84 to<br>16,526.24)     | 17,966.96<br>(5,897.37 to<br>46,947.77)       | 15,554.29<br>(4,787.68 to<br>43,313.48)       | 17,833.76<br>(5,774.63 to<br>47,018.76)         | 208.56<br>(118.79 to<br>308.43)          | 359.38<br>(126.44 to<br>898.78)          | 329.52<br>(113.65 to<br>844.64)         | 350.46<br>(125.93 to<br>873.10)          |
| Myocarditis                    |                                             |                                               |                                               |                                                 |                                          |                                          |                                         |                                          |

Zimbabwe

| Cause | YLLs (actual counts) |               |                      |                     | Deaths (actual counts) |               |                      |                     |
|-------|----------------------|---------------|----------------------|---------------------|------------------------|---------------|----------------------|---------------------|
|       | 2016                 | 2040 Forecast | 2040 Better Scenario | 2040 Worse Scenario | 2016                   | 2040 Forecast | 2040 Better Scenario | 2040 Worse Scenario |



|                                            |                                                               |                                                                 |                                                                 |                                                                 |                                                            |                                                            |                                                            |                                                            |
|--------------------------------------------|---------------------------------------------------------------|-----------------------------------------------------------------|-----------------------------------------------------------------|-----------------------------------------------------------------|------------------------------------------------------------|------------------------------------------------------------|------------------------------------------------------------|------------------------------------------------------------|
| Digestive diseases                         | 116,341.14<br>(90,711.30 to<br>150,242.67)                    | 207,153.02<br>(83,250.92 to<br>446,364.45)                      | 171,296.05<br>(73,332.93 to<br>398,372.40)                      | 209,341.28<br>(94,996.42 to<br>453,859.06)                      | 3,450.82<br>(2,692.03 to<br>4,264.76)                      | 5,683.80<br>(3,069.69 to<br>11,026.63)                     | 5,128.72<br>(2,759.08 to<br>10,381.65)                     | 5,611.15<br>(3,091.42 to<br>10,602.72)                     |
| Peptic ulcer disease                       | 7,146.63<br>(4,837.08 to<br>9,375.67)                         | 11,740.00<br>(4,960.63 to<br>25,762.15)                         | 7,818.67<br>(3,250.67 to<br>18,648.29)                          | 11,892.49<br>(5,306.39 to<br>25,706.75)                         | 266.92<br>(179.56 to<br>354.76)                            | 384.97<br>(198.92 to<br>728.73)                            | 273.06<br>(137.89 to<br>548.38)                            | 383.22<br>(204.87 to<br>704.05)                            |
| <b>Zimbabwe</b>                            |                                                               |                                                                 |                                                                 |                                                                 |                                                            |                                                            |                                                            |                                                            |
| Cause                                      | YLLs (actual counts)                                          |                                                                 |                                                                 |                                                                 | Deaths (actual counts)                                     |                                                            |                                                            |                                                            |
|                                            | 2016                                                          | 2040 Forecast                                                   | 2040 Better Scenario                                            | 2040 Worse Scenario                                             | 2016                                                       | 2040 Forecast                                              | 2040 Better Scenario                                       | 2040 Worse Scenario                                        |
| Gastritis and duodenitis                   | 4,561.03<br>(3,018.63 to<br>6,973.82)                         | 10,086.90<br>(4,109.93 to<br>25,694.91)                         | 8,225.40<br>(3,214.21 to<br>20,467.03)                          | 9,910.47<br>(4,188.81 to<br>22,861.91)                          | 129.14<br>(89.75 to<br>184.28)                             | 274.18<br>(136.29 to<br>556.10)                            | 239.01<br>(114.11 to<br>511.91)                            | 263.70<br>(135.41 to<br>529.38)                            |
| Appendicitis                               | 6,292.99<br>(4,548.77 to<br>8,615.43)                         | 8,475.22<br>(3,359.44 to<br>19,677.52)                          | 6,163.46<br>(2,335.88 to<br>14,822.77)                          | 8,525.38<br>(3,535.66 to<br>19,163.40)                          | 136.14<br>(99.02 to<br>183.18)                             | 189.02<br>(86.93 to<br>395.33)                             | 149.38<br>(66.32 to<br>329.75)                             | 185.30<br>(85.31 to<br>372.43)                             |
| Paralytic ileus and intestinal obstruction | 61,060.88<br>(45,684.96 to<br>83,126.06)                      | 107,919.32<br>(49,280.90 to<br>222,452.58)                      | 93,603.28<br>(41,191.33 to<br>209,162.99)                       | 105,715.09<br>(48,300.62 to<br>212,292.57)                      | 1,685.33<br>(1,287.96 to<br>2,104.91)                      | 2,800.39<br>(1,550.24 to<br>5,294.99)                      | 2,496.59<br>(1,439.60 to<br>5,299.88)                      | 2,663.66<br>(1,504.02 to<br>4,850.90)                      |
| Inguinal, femoral, and abdominal hernia    | 2,131.90<br>(1,212.07 to<br>4,314.05)                         | 3,912.66<br>(1,415.79 to<br>10,096.98)                          | 3,285.92<br>(1,162.32 to<br>8,872.42)                           | 3,811.44<br>(1,432.84 to<br>10,135.31)                          | 76.90<br>(43.13 to<br>159.07)                              | 119.28<br>(51.96 to<br>276.97)                             | 109.25<br>(47.12 to<br>261.72)                             | 113.25<br>(51.75 to<br>263.00)                             |
| Inflammatory bowel disease                 | 9,780.61<br>(6,043.37 to<br>15,993.84)                        | 15,142.54<br>(6,351.45 to<br>31,170.79)                         | 14,073.28<br>(5,978.10 to<br>30,019.99)                         | 14,755.92<br>(6,375.98 to<br>30,431.79)                         | 258.97<br>(174.56 to<br>368.34)                            | 397.99<br>(208.76 to<br>715.39)                            | 414.33<br>(218.49 to<br>753.67)                            | 375.72<br>(197.31 to<br>672.93)                            |
| Vascular intestinal disorders              | 1,264.43<br>(874.99 to<br>1,694.63)                           | 2,416.71<br>(1,335.93 to<br>4,256.00)                           | 2,346.33<br>(1,226.86 to<br>4,440.86)                           | 2,279.65<br>(1,301.85 to<br>3,838.48)                           | 72.19<br>(41.36 to<br>98.86)                               | 110.67<br>(64.95 to<br>162.84)                             | 115.40<br>(65.48 to<br>181.43)                             | 102.01<br>(60.31 to<br>146.37)                             |
| Gallbladder and biliary diseases           | 10,955.44<br>(7,875.84 to<br>14,434.55)                       | 17,220.00<br>(7,012.91 to<br>39,714.83)                         | 12,446.53<br>(4,832.52 to<br>30,171.25)                         | 20,475.49<br>(8,417.23 to<br>47,293.34)                         | 403.49<br>(286.04 to<br>539.10)                            | 554.42<br>(267.88 to<br>1,119.43)                          | 426.07<br>(201.85 to<br>909.35)                            | 650.04<br>(308.66 to<br>1,342.17)                          |
| Pancreatitis                               | 4,283.54<br>(2,960.45 to<br>6,475.36)                         | 14,142.53<br>(2,716.33 to<br>59,632.89)                         | 10,500.14<br>(2,110.20 to<br>44,137.93)                         | 16,277.63<br>(2,945.10 to<br>67,000.11)                         | 131.03<br>(90.95 to<br>201.87)                             | 368.62<br>(96.89 to<br>1,360.12)                           | 288.66<br>(82.50 to<br>1,057.44)                           | 412.96<br>(102.29 to<br>1,510.15)                          |
| Other digestive diseases                   | 8,863.70<br>(6,240.28 to<br>12,287.72)                        | 16,097.14<br>(6,751.24 to<br>37,017.03)                         | 12,833.03<br>(5,176.00 to<br>32,411.37)                         | 15,697.74<br>(6,916.21 to<br>35,552.14)                         | 290.72<br>(212.75 to<br>378.86)                            | 484.28<br>(265.00 to<br>957.42)                            | 416.97<br>(221.33 to<br>879.88)                            | 461.29<br>(259.60 to<br>881.40)                            |
| <b>Neurological disorders</b>              | <b>56,720.51</b><br><b>(45,810.18 to</b><br><b>68,834.23)</b> | <b>122,993.57</b><br><b>(61,501.54 to</b><br><b>260,566.45)</b> | <b>106,575.99</b><br><b>(56,583.15 to</b><br><b>223,433.99)</b> | <b>128,961.21</b><br><b>(64,342.25 to</b><br><b>273,641.92)</b> | <b>2,512.22</b><br><b>(2,025.68 to</b><br><b>3,084.47)</b> | <b>4,297.04</b><br><b>(2,892.29 to</b><br><b>6,975.96)</b> | <b>4,606.05</b><br><b>(3,294.53 to</b><br><b>7,051.62)</b> | <b>4,289.11</b><br><b>(2,878.08 to</b><br><b>6,948.15)</b> |
| Alzheimer's disease and other dementias    | 17,675.49<br>(13,485.56 to<br>22,786.09)                      | 26,507.94<br>(18,741.48 to<br>37,590.50)                        | 31,243.41<br>(22,169.90 to<br>43,650.43)                        | 26,157.28<br>(17,861.42 to<br>39,046.70)                        | 1,633.53<br>(1,261.99 to<br>2,091.31)                      | 2,101.65<br>(1,405.95 to<br>3,007.73)                      | 2,711.83<br>(1,969.84 to<br>3,693.31)                      | 2,000.69<br>(1,274.43 to<br>2,978.90)                      |
| Parkinson's disease                        | 1,374.58<br>(990.84 to<br>1,820.91)                           | 2,461.57<br>(1,735.25 to<br>3,414.74)                           | 3,579.10<br>(2,424.35 to<br>5,137.75)                           | 2,178.15<br>(1,543.26 to<br>2,996.06)                           | 109.90<br>(77.86 to<br>145.70)                             | 162.80<br>(116.40 to<br>218.16)                            | 254.65<br>(185.42 to<br>333.70)                            | 140.52<br>(97.38 to<br>188.58)                             |
| Epilepsy                                   | 31,788.57<br>(25,568.41 to<br>39,020.74)                      | 77,298.53<br>(28,112.14 to<br>200,787.10)                       | 53,647.72<br>(18,598.10 to<br>145,263.34)                       | 84,554.90<br>(30,549.00 to<br>210,213.13)                       | 634.95<br>(509.48 to<br>779.74)                            | 1,645.99<br>(618.70 to<br>4,110.36)                        | 1,195.05<br>(452.93 to<br>3,052.56)                        | 1,782.89<br>(682.81 to<br>4,303.19)                        |
| Multiple sclerosis                         | 320.65<br>(192.01 to<br>462.84)                               | 908.03<br>(364.79 to<br>2,101.09)                               | 998.99<br>(389.68 to<br>2,339.25)                               | 867.81<br>(350.38 to<br>1,911.20)                               | 9.00<br>(5.56 to<br>12.87)                                 | 25.00<br>(10.93 to<br>53.07)                               | 28.02<br>(11.67 to<br>61.68)                               | 23.76<br>(10.44 to<br>48.93)                               |
| Motor neuron disease                       | 413.12<br>(323.14 to<br>538.11)                               | 1,642.93<br>(716.20 to<br>3,517.85)                             | 1,920.36<br>(766.93 to<br>4,660.56)                             | 1,540.31<br>(696.34 to<br>3,207.47)                             | 12.02<br>(9.22 to<br>15.28)                                | 47.32<br>(22.52 to<br>93.80)                               | 56.65<br>(25.27 to<br>124.20)                              | 44.02<br>(21.49 to<br>82.35)                               |
| Other neurological disorders               | 5,148.10<br>(2,973.68 to<br>7,559.21)                         | 14,174.56<br>(5,475.51 to<br>32,184.05)                         | 15,186.40<br>(5,816.64 to<br>35,613.90)                         | 13,662.75<br>(5,290.59 to<br>30,895.66)                         | 112.82<br>(70.70 to<br>160.67)                             | 314.30<br>(138.90 to<br>646.91)                            | 359.86<br>(157.19 to<br>782.03)                            | 297.23<br>(135.24 to<br>603.10)                            |
| <b>Mental disorders</b>                    | <b>22,685.75</b><br><b>(16,520.06 to</b><br><b>28,986.44)</b> | <b>71,598.36</b><br><b>(25,295.99 to</b><br><b>180,594.72)</b>  | <b>72,357.64</b><br><b>(24,358.35 to</b><br><b>193,167.11)</b>  | <b>70,125.52</b><br><b>(25,159.77 to</b><br><b>169,976.76)</b>  | <b>552.13</b><br><b>(384.23 to</b><br><b>713.23)</b>       | <b>1,656.35</b><br><b>(666.63 to</b><br><b>3,780.80)</b>   | <b>1,700.38</b><br><b>(646.89 to</b><br><b>4,118.04)</b>   | <b>1,613.23</b><br><b>(655.72 to</b><br><b>3,579.60)</b>   |
| Alcohol use disorders                      | 8,694.82<br>(4,893.90 to<br>12,303.29)                        | 21,513.51<br>(7,253.81 to<br>52,477.66)                         | 20,883.53<br>(6,556.89 to<br>53,890.68)                         | 21,690.71<br>(7,576.30 to<br>50,657.85)                         | 257.42<br>(148.22 to<br>366.33)                            | 613.45<br>(224.60 to<br>1,415.67)                          | 605.84<br>(209.63 to<br>1,455.22)                          | 613.35<br>(233.45 to<br>1,343.12)                          |

|                           |                                          |                                           |                                           |                                           |                                 |                                     |                                     |                                   |
|---------------------------|------------------------------------------|-------------------------------------------|-------------------------------------------|-------------------------------------------|---------------------------------|-------------------------------------|-------------------------------------|-----------------------------------|
| Drug use disorders        | 13,923.01<br>(10,247.46 to<br>18,467.99) | 49,890.24<br>(16,879.83 to<br>132,660.47) | 51,278.71<br>(16,726.71 to<br>141,228.49) | 48,245.57<br>(16,436.66 to<br>127,508.94) | 293.49<br>(218.79 to<br>383.69) | 1,039.30<br>(283.86 to<br>2,563.20) | 1,090.89<br>(387.98 to<br>2,761.27) | 996.40<br>(376.64 to<br>2,447.29) |
| Opioid use disorders      | 12,389.81<br>(9,046.97 to<br>16,529.76)  | 39,907.69<br>(12,935.50 to<br>109,750.00) | 40,093.31<br>(12,529.78 to<br>114,204.58) | 38,746.09<br>(12,609.52 to<br>104,331.03) | 248.59<br>(183.69 to<br>329.33) | 796.42<br>(289.80 to<br>2,093.65)   | 810.91<br>(282.02 to<br>2,190.61)   | 768.23<br>(283.13 to<br>1,950.35) |
| Cocaine use disorders     | 125.55<br>(28.09 to<br>249.56)           | 519.52<br>(96.15 to<br>1,359.32)          | 519.44<br>(92.87 to<br>1,434.00)          | 497.98<br>(93.70 to<br>1,286.41)          | 3.53<br>(0.77 to<br>6.59)       | 13.77<br>(2.71 to<br>34.24)         | 14.06<br>(2.68 to<br>36.11)         | 13.10<br>(2.63 to<br>31.51)       |
| Amphetamine use disorders | 72.68<br>(25.01 to<br>134.60)            | 449.25<br>(120.28 to<br>1,143.30)         | 489.33<br>(131.55 to<br>1,295.26)         | 429.23<br>(116.49 to<br>1,063.46)         | 2.05<br>(0.60 to<br>3.45)       | 11.76<br>(3.20 to<br>26.24)         | 13.11<br>(3.48 to<br>30.44)         | 11.14<br>(3.04 to<br>24.38)       |
| Other drug use disorders  | 1,334.97<br>(841.26 to<br>2,145.06)      | 9,013.78<br>(3,023.07 to<br>24,048.73)    | 10,176.64<br>(3,170.35 to<br>28,701.08)   | 8,572.27<br>(2,961.83 to<br>22,360.13)    | 39.32<br>(23.95 to<br>53.56)    | 217.35<br>(85.47 to<br>513.59)      | 252.81<br>(95.07 to<br>639.41)      | 203.92<br>(80.70 to<br>469.10)    |
| Eating disorders          | 67.92<br>(32.22 to<br>135.72)            | 194.62<br>(56.69 to<br>562.06)            | 195.40<br>(56.41 to<br>584.38)            | 189.24<br>(54.52 to<br>540.63)            | 1.22<br>(0.58 to<br>2.45)       | 3.60<br>(1.06 to<br>10.61)          | 3.66<br>(1.05 to<br>11.20)          | 3.48<br>(1.01 to<br>10.06)        |

**Zimbabwe**

| Cause                                                      | YLLs (actual counts)                               |                                                      |                                                    |                                                      | Deaths (actual counts)                       |                                                 |                                                |                                                 |
|------------------------------------------------------------|----------------------------------------------------|------------------------------------------------------|----------------------------------------------------|------------------------------------------------------|----------------------------------------------|-------------------------------------------------|------------------------------------------------|-------------------------------------------------|
|                                                            | 2016                                               | 2040 Forecast                                        | 2040 Better Scenario                               | 2040 Worse Scenario                                  | 2016                                         | 2040 Forecast                                   | 2040 Better Scenario                           | 2040 Worse Scenario                             |
| <b>Diabetes, urogenital, blood, and endocrine diseases</b> | <b>213,334.07</b><br>(173,897.61 to<br>259,390.44) | <b>614,889.55</b><br>(274,744.62 to<br>1,276,749.24) | <b>413,192.46</b><br>(177,069.71 to<br>939,223.32) | <b>639,513.80</b><br>(294,964.63 to<br>1,313,639.47) | <b>7,665.10</b><br>(6,180.01 to<br>9,336.22) | <b>21,363.39</b><br>(10,887.66 to<br>42,541.73) | <b>14,988.74</b><br>(7,362.92 to<br>32,298.13) | <b>21,775.97</b><br>(11,258.70 to<br>41,239.99) |
| Diabetes mellitus                                          | 106,772.76<br>(84,898.60 to<br>131,205.27)         | 294,226.16<br>(114,849.84 to<br>709,464.51)          | 198,646.71<br>(74,304.74 to<br>496,584.15)         | 318,036.30<br>(125,967.30 to<br>744,477.48)          | 4,313.68<br>(3,429.45 to<br>5,293.39)        | 10,487.25<br>(5,098.41 to<br>22,275.47)         | 7,438.75<br>(3,511.34 to<br>15,847.12)         | 11,092.49<br>(5,375.92 to<br>22,843.58)         |
| Acute glomerulonephritis                                   | 139.41<br>(118.51 to<br>163.53)                    | 357.38<br>(148.47 to<br>785.29)                      | 261.88<br>(105.57 to<br>619.72)                    | 364.82<br>(154.26 to<br>786.95)                      | 2.22<br>(1.88 to<br>2.62)                    | 5.74<br>(2.47 to<br>13.01)                      | 4.37<br>(1.82 to<br>10.43)                     | 5.80<br>(2.56 to<br>12.78)                      |
| Chronic kidney disease                                     | 52,891.58<br>(39,738.15 to<br>67,180.00)           | 207,597.68<br>(68,879.00 to<br>587,161.26)           | 126,041.45<br>(41,214.52 to<br>378,450.43)         | 209,080.60<br>(71,541.56 to<br>569,170.17)           | 1,977.30<br>(1,501.03 to<br>2,518.21)        | 8,047.33<br>(2,668.56 to<br>23,659.13)          | 5,125.56<br>(1,676.20 to<br>17,198.05)         | 7,947.50<br>(2,726.78 to<br>22,415.42)          |
| Chronic kidney disease due to diabetes mellitus            | 14,455.24<br>(10,405.29 to<br>19,051.84)           | 73,769.66<br>(21,711.44 to<br>219,851.32)            | 45,578.42<br>(13,054.33 to<br>140,305.75)          | 73,867.24<br>(22,736.03 to<br>208,310.48)            | 602.25<br>(435.86 to<br>785.57)              | 2,965.65<br>(894.01 to<br>9,325.21)             | 1,904.33<br>(567.05 to<br>6,412.29)            | 2,923.26<br>(921.49 to<br>8,684.20)             |
| Chronic kidney disease due to hypertension                 | 8,018.50<br>(5,825.75 to<br>10,531.83)             | 35,600.63<br>(10,217.99 to<br>110,353.72)            | 22,241.33<br>(6,294.46 to<br>77,780.85)            | 35,383.56<br>(10,482.85 to<br>104,146.13)            | 441.20<br>(325.40 to<br>571.87)              | 1,729.12<br>(544.65 to<br>5,567.91)             | 1,147.80<br>(359.36 to<br>4,030.02)            | 1,684.74<br>(547.63 to<br>5,247.17)             |
| Chronic kidney disease due to glomerulonephritis           | 14,106.44<br>(10,463.07 to<br>18,316.14)           | 43,554.81<br>(15,597.15 to<br>105,796.25)            | 25,687.99<br>(9,345.11 to<br>66,597.82)            | 44,416.59<br>(17,200.39 to<br>102,853.56)            | 408.41<br>(300.90 to<br>536.99)              | 1,423.45<br>(482.44 to<br>4,080.17)             | 871.41<br>(293.67 to<br>2,577.75)              | 1,424.35<br>(499.41 to<br>3,882.51)             |
| Chronic kidney disease due to other and unspecified causes | 16,311.39<br>(11,988.09 to<br>20,692.38)           | 54,672.58<br>(19,769.69 to<br>140,058.01)            | 32,533.71<br>(11,148.01 to<br>92,927.82)           | 55,413.22<br>(20,515.63 to<br>137,428.53)            | 525.44<br>(388.11 to<br>675.31)              | 1,929.11<br>(668.51 to<br>5,433.55)             | 1,202.02<br>(399.38 to<br>3,769.18)            | 1,915.15<br>(684.57 to<br>5,188.67)             |
| Urinary diseases and male infertility                      | 15,381.69<br>(12,754.40 to<br>18,287.07)           | 33,654.74<br>(15,798.95 to<br>70,640.08)             | 29,389.78<br>(13,273.08 to<br>65,657.54)           | 32,740.88<br>(15,661.02 to<br>67,156.02)             | 509.54<br>(418.80 to<br>603.93)              | 966.76<br>(579.90 to<br>1,741.63)               | 927.80<br>(547.69 to<br>1,741.83)              | 914.92<br>(560.46 to<br>1,620.59)               |
| Urinary tract infections                                   | 7,115.66<br>(5,191.12 to<br>9,496.20)              | 18,778.52<br>(8,838.35 to<br>39,164.94)              | 17,741.18<br>(8,077.20 to<br>39,111.20)            | 18,159.63<br>(8,741.89 to<br>37,310.55)              | 216.33<br>(150.31 to<br>301.94)              | 530.39<br>(302.70 to<br>957.92)                 | 556.80<br>(319.59 to<br>1,041.12)              | 498.41<br>(287.34 to<br>885.04)                 |
| Urolithiasis                                               | 372.72<br>(193.56 to<br>575.26)                    | 1,021.51<br>(332.91 to<br>2,794.45)                  | 868.87<br>(298.64 to<br>2,339.44)                  | 1,023.92<br>(336.88 to<br>2,797.14)                  | 7.72<br>(4.79 to<br>10.95)                   | 19.82<br>(8.46 to<br>46.29)                     | 18.16<br>(7.94 to<br>42.01)                    | 19.44<br>(8.18 to<br>46.27)                     |
| Other urinary diseases                                     | 7,893.30<br>(5,883.95 to<br>10,329.87)             | 13,854.71<br>(6,071.57 to<br>30,921.08)              | 10,779.73<br>(4,418.88 to<br>24,939.45)            | 13,557.34<br>(6,198.69 to<br>29,344.15)              | 285.48<br>(217.18 to<br>364.64)              | 416.55<br>(228.15 to<br>777.65)                 | 352.84<br>(185.70 to<br>689.82)                | 397.07<br>(221.57 to<br>733.15)                 |
| Gynecological diseases                                     | 189.75<br>(113.31 to<br>302.22)                    | 568.86<br>(196.95 to<br>1,538.52)                    | 394.37<br>(136.33 to<br>1,093.56)                  | 572.03<br>(201.18 to<br>1,537.50)                    | 4.18<br>(2.50 to<br>6.74)                    | 12.60<br>(4.88 to<br>31.84)                     | 9.04<br>(3.60 to<br>23.40)                     | 12.55<br>(4.96 to<br>32.54)                     |
| Uterine fibroids                                           | 5.41<br>(2.23 to<br>12.59)                         | 15.74<br>(4.14 to<br>57.29)                          | 10.90<br>(2.93 to<br>39.04)                        | 15.67<br>(4.18 to<br>55.70)                          | 0.19<br>(0.09 to<br>0.38)                    | 0.49<br>(0.18 to<br>1.43)                       | 0.38<br>(0.14 to<br>1.03)                      | 0.48<br>(0.18 to<br>1.40)                       |

|                                                   |                                          |                                           |                                          |                                           |                                 |                                     |                                     |                                     |
|---------------------------------------------------|------------------------------------------|-------------------------------------------|------------------------------------------|-------------------------------------------|---------------------------------|-------------------------------------|-------------------------------------|-------------------------------------|
| Polycystic ovarian syndrome                       | 35.59<br>(8.33 to<br>79.57)              | 72.33<br>(10.32 to<br>237.50)             | 40.34<br>(4.83 to<br>138.93)             | 74.21<br>(10.47 to<br>241.76)             | 0.73<br>(0.16 to<br>1.64)       | 1.56<br>(0.22 to<br>5.18)           | 0.87<br>(0.11 to<br>2.89)           | 1.40<br>(0.23 to<br>5.08)           |
| Endometriosis                                     | 92.98<br>(44.03 to<br>169.17)            | 321.34<br>(89.01 to<br>944.83)            | 223.86<br>(60.59 to<br>645.75)           | 323.06<br>(93.25 to<br>906.56)            | 1.81<br>(0.87 to<br>3.31)       | 6.51<br>(1.80 to<br>18.66)          | 4.55<br>(1.21 to<br>13.03)          | 6.53<br>(1.83 to<br>18.27)          |
| Genital prolapse                                  | 1.12<br>(0.49 to<br>2.38)                | 2.24<br>(0.65 to<br>6.79)                 | 1.45<br>(0.42 to<br>4.47)                | 2.27<br>(0.65 to<br>7.02)                 | 0.04<br>(0.02 to<br>0.09)       | 0.07<br>(0.02 to<br>0.16)           | 0.05<br>(0.02 to<br>0.12)           | 0.06<br>(0.02 to<br>0.16)           |
| Other gynecological diseases                      | 54.65<br>(25.21 to<br>117.15)            | 157.21<br>(49.89 to<br>449.74)            | 117.82<br>(37.55 to<br>349.35)           | 156.82<br>(49.74 to<br>452.62)            | 1.41<br>(0.76 to<br>2.88)       | 3.97<br>(1.61 to<br>10.83)          | 3.19<br>(1.35 to<br>8.40)           | 3.88<br>(1.59 to<br>10.47)          |
| Hemoglobinopathies and hemolytic anemias          | 28,883.05<br>(23,091.71 to<br>35,630.34) | 54,027.37<br>(26,889.63 to<br>106,577.15) | 40,326.00<br>(19,613.27 to<br>84,926.62) | 53,987.95<br>(27,858.83 to<br>106,090.59) | 710.02<br>(549.82 to<br>879.51) | 1,410.19<br>(827.54 to<br>2,481.98) | 1,129.66<br>(633.35 to<br>2,075.67) | 1,373.52<br>(838.61 to<br>2,356.36) |
| Thalassemias                                      | 196.29<br>(128.47 to<br>294.92)          | 196.44<br>(67.99 to<br>469.32)            | 186.51<br>(60.44 to<br>438.33)           | 195.78<br>(69.29 to<br>449.91)            | 2.31<br>(1.52 to<br>3.49)       | 2.32<br>(0.81 to<br>5.54)           | 2.21<br>(0.73 to<br>5.18)           | 2.32<br>(0.83 to<br>5.32)           |
| Sickle cell disorders                             | 15,847.10<br>(12,144.19 to<br>20,267.89) | 22,812.50<br>(9,416.86 to<br>52,200.99)   | 16,575.58<br>(6,591.47 to<br>40,090.06)  | 23,315.65<br>(9,762.63 to<br>52,228.65)   | 221.09<br>(167.97 to<br>280.96) | 345.20<br>(142.10 to<br>819.87)     | 258.46<br>(102.39 to<br>643.79)     | 350.53<br>(146.53 to<br>788.02)     |
| G6PD deficiency                                   | 8,203.36<br>(6,149.01 to<br>10,641.11)   | 24,649.14<br>(11,222.91 to<br>51,621.05)  | 18,218.78<br>(7,709.05 to<br>40,860.16)  | 24,388.16<br>(11,647.03 to<br>49,806.43)  | 207.13<br>(154.14 to<br>272.19) | 710.92<br>(358.12 to<br>1,335.23)   | 548.22<br>(261.01 to<br>1,147.59)   | 693.60<br>(360.99 to<br>1,262.91)   |
| Other hemoglobinopathies and hemolytic anemias    | 4,636.30<br>(3,401.49 to<br>5,999.46)    | 6,369.28<br>(3,939.07 to<br>10,221.46)    | 5,345.13<br>(3,173.72 to<br>8,842.81)    | 6,088.36<br>(3,881.19 to<br>9,368.73)     | 279.48<br>(202.84 to<br>356.67) | 351.74<br>(248.78 to<br>468.18)     | 320.78<br>(219.27 to<br>449.75)     | 327.08<br>(229.56 to<br>424.83)     |
| Endocrine, metabolic, blood, and immune disorders | 9,075.83<br>(6,135.68 to<br>14,711.93)   | 24,457.35<br>(9,266.40 to<br>59,192.04)   | 18,132.28<br>(6,780.31 to<br>48,522.44)  | 24,731.23<br>(9,630.54 to<br>58,222.74)   | 148.16<br>(102.13 to<br>266.27) | 433.54<br>(186.17 to<br>1,168.80)   | 353.56<br>(150.68 to<br>1,010.14)   | 429.20<br>(185.80 to<br>1,143.81)   |

**Zimbabwe**

| Cause                                  | YLLs (actual counts)                               |                                                    |                                                    |                                                    | Deaths (actual counts)                       |                                              |                                              |                                              |
|----------------------------------------|----------------------------------------------------|----------------------------------------------------|----------------------------------------------------|----------------------------------------------------|----------------------------------------------|----------------------------------------------|----------------------------------------------|----------------------------------------------|
|                                        | 2016                                               | 2040 Forecast                                      | 2040 Better Scenario                               | 2040 Worse Scenario                                | 2016                                         | 2040 Forecast                                | 2040 Better Scenario                         | 2040 Worse Scenario                          |
| <b>Musculoskeletal disorders</b>       | <b>2,567.02</b><br>(2,015.69 to<br>3,469.42)       | <b>7,093.58</b><br>(3,113.27 to<br>15,541.57)      | <b>7,062.04</b><br>(2,878.46 to<br>16,220.33)      | <b>6,848.40</b><br>(3,086.14 to<br>14,507.10)      | <b>70.13</b><br>(54.59 to<br>100.71)         | <b>200.36</b><br>(106.17 to<br>386.68)       | <b>203.79</b><br>(103.27 to<br>427.28)       | <b>190.55</b><br>(103.74 to<br>357.64)       |
| Rheumatoid arthritis                   | 884.53<br>(632.98 to<br>1,232.49)                  | 3,118.62<br>(1,463.69 to<br>6,330.66)              | 2,566.49<br>(1,156.26 to<br>5,563.09)              | 3,050.97<br>(1,506.97 to<br>5,981.13)              | 33.52<br>(24.35 to<br>48.67)                 | 108.02<br>(61.98 to<br>190.70)               | 93.95<br>(51.80 to<br>176.64)                | 103.89<br>(61.93 to<br>179.13)               |
| Other musculoskeletal disorders        | 1,682.48<br>(1,264.06 to<br>2,336.96)              | 3,974.97<br>(1,617.57 to<br>9,593.25)              | 4,495.55<br>(1,745.68 to<br>11,193.05)             | 3,797.43<br>(1,563.31 to<br>8,722.67)              | 36.61<br>(27.12 to<br>55.08)                 | 92.34<br>(41.87 to<br>201.25)                | 109.85<br>(49.03 to<br>245.59)               | 86.66<br>(38.90 to<br>184.23)                |
| <b>Other non-communicable diseases</b> | <b>204,485.80</b><br>(160,356.18 to<br>267,697.89) | <b>377,665.05</b><br>(193,461.70 to<br>711,659.89) | <b>250,329.60</b><br>(130,894.94 to<br>484,096.99) | <b>391,325.45</b><br>(206,261.73 to<br>744,405.66) | <b>2,676.70</b><br>(2,154.68 to<br>3,398.48) | <b>5,480.54</b><br>(3,059.11 to<br>9,762.51) | <b>4,064.18</b><br>(2,320.59 to<br>7,495.09) | <b>5,568.57</b><br>(3,177.90 to<br>9,984.88) |
| Congenital birth defects               | 188,403.12<br>(144,653.12 to<br>248,498.96)        | 318,713.93<br>(161,389.30 to<br>625,578.99)        | 199,646.85<br>(101,310.86 to<br>410,218.41)        | 333,034.22<br>(170,757.21 to<br>657,389.87)        | 2,276.61<br>(1,758.67 to<br>2,981.16)        | 4,045.91<br>(2,054.52 to<br>7,857.70)        | 2,618.35<br>(1,332.08 to<br>5,143.42)        | 4,204.17<br>(2,202.59 to<br>8,003.79)        |
| Neural tube defects                    | 9,445.97<br>(5,427.24 to<br>16,061.46)             | 5,108.96<br>(2,216.91 to<br>10,201.81)             | 2,354.35<br>(1,072.09 to<br>4,795.20)              | 5,538.28<br>(2,517.90 to<br>10,898.73)             | 109.95<br>(63.43 to<br>186.39)               | 60.41<br>(26.21 to<br>119.33)                | 28.11<br>(12.81 to<br>56.28)                 | 65.39<br>(29.72 to<br>127.66)                |
| Congenital heart anomalies             | 48,650.88<br>(35,156.76 to<br>67,183.62)           | 85,072.12<br>(39,199.12 to<br>177,311.35)          | 54,836.36<br>(25,535.08 to<br>118,605.94)          | 88,647.23<br>(42,051.14 to<br>181,652.12)          | 597.07<br>(433.83 to<br>819.48)              | 1,091.25<br>(518.97 to<br>2,254.47)          | 722.13<br>(336.88 to<br>1,537.09)            | 1,132.09<br>(547.15 to<br>2,311.59)          |
| Orofacial clefts                       | 2,022.06<br>(927.27 to<br>4,269.45)                | 2,966.00<br>(906.91 to<br>9,684.52)                | 1,402.51<br>(421.12 to<br>4,706.94)                | 3,190.57<br>(972.90 to<br>10,390.01)               | 23.48<br>(10.76 to<br>49.60)                 | 34.55<br>(10.52 to<br>114.39)                | 16.35<br>(4.88 to<br>55.57)                  | 37.16<br>(11.30 to<br>120.66)                |
| Down syndrome                          | 8,288.51<br>(5,070.69 to<br>12,222.26)             | 16,959.75<br>(6,615.92 to<br>37,583.52)            | 10,067.65<br>(3,749.85 to<br>22,328.62)            | 17,766.20<br>(7,085.40 to<br>38,529.00)            | 100.91<br>(62.67 to<br>146.92)               | 219.69<br>(92.29 to<br>470.96)               | 134.75<br>(54.96 to<br>290.05)               | 228.63<br>(95.06 to<br>482.96)               |
| Other chromosomal abnormalities        | 15,064.05<br>(8,399.54 to<br>23,458.35)            | 47,535.13<br>(16,557.86 to<br>109,959.39)          | 29,807.06<br>(10,149.07 to<br>70,891.30)           | 49,589.02<br>(17,856.56 to<br>115,340.61)          | 186.56<br>(103.53 to<br>284.51)              | 620.38<br>(207.94 to<br>1,405.32)            | 405.09<br>(128.06 to<br>906.06)              | 642.64<br>(219.80 to<br>1,456.66)            |

|                                               |                                          |                                              |                                            |                                              |                                      |                                       |                                      |                                       |  |
|-----------------------------------------------|------------------------------------------|----------------------------------------------|--------------------------------------------|----------------------------------------------|--------------------------------------|---------------------------------------|--------------------------------------|---------------------------------------|--|
|                                               | 2,127.98<br>(879.59 to 3,429.21)         | 4,314.84<br>(1,645.27 to 8,116.15)           | 2,751.42<br>(1,072.86 to 5,230.78)         | 4,518.81<br>(1,743.26 to 8,474.61)           | 24.81<br>(10.41 to 39.88)            | 50.54<br>(19.69 to 94.49)             | 32.39<br>(12.91 to 61.16)            | 52.89<br>(20.88 to 98.55)             |  |
| Congenital musculoskeletal and limb anomalies | 8,875.84<br>(5,535.47 to 12,311.15)      | 15,457.51<br>(6,699.38 to 30,211.45)         | 11,363.47<br>(5,011.01 to 21,975.09)       | 15,794.73<br>(7,015.88 to 30,474.34)         | 118.52<br>(76.72 to 159.65)          | 234.77<br>(110.74 to 450.72)          | 187.20<br>(85.53 to 378.28)          | 236.02<br>(115.68 to 447.22)          |  |
| Urogenital congenital anomalies               | 39,868.69<br>(26,967.03 to 56,815.94)    | 63,779.15<br>(27,090.02 to 129,767.90)       | 37,982.02<br>(15,997.95 to 78,746.87)      | 66,939.14<br>(28,853.16 to 133,985.32)       | 475.68<br>(323.64 to 675.53)         | 790.68<br>(337.33 to 1,558.66)        | 482.70<br>(201.83 to 977.03)         | 825.89<br>(357.94 to 1,630.59)        |  |
| Digestive congenital anomalies                | 54,059.15<br>(37,914.69 to 76,555.98)    | 77,520.47<br>(39,612.77 to 149,733.76)       | 49,082.00<br>(24,906.02 to 95,691.35)      | 81,050.25<br>(41,716.57 to 152,872.57)       | 639.63<br>(451.16 to 897.03)         | 943.64<br>(479.36 to 1,825.16)        | 609.64<br>(314.47 to 1,188.83)       | 983.45<br>(512.34 to 1,861.65)        |  |
| Other congenital birth defects                | 10,708.02<br>(6,449.48 to 17,225.68)     | 46,882.70<br>(21,347.96 to 96,122.01)        | 43,158.79<br>(19,488.60 to 93,258.34)      | 45,702.00<br>(21,060.18 to 91,043.91)        | 337.72<br>(205.86 to 541.72)         | 1,294.59<br>(708.62 to 2,342.38)      | 1,358.52<br>(733.50 to 2,542.12)     | 1,218.33<br>(669.93 to 2,152.99)      |  |
| Skin and subcutaneous diseases                | 1,933.81<br>(1,011.69 to 3,817.60)       | 9,483.39<br>(3,983.43 to 20,373.05)          | 10,557.35<br>(4,496.85 to 23,745.34)       | 8,996.31<br>(3,819.55 to 19,326.75)          | 8,996.31<br>(37.53 to 140.58)        | 309.79<br>(151.05 to 586.09)          | 380.25<br>(182.60 to 727.60)         | 285.21<br>(141.86 to 540.39)          |  |
| Cellulitis                                    | 7,315.28<br>(4,238.61 to 11,836.97)      | 32,586.52<br>(13,885.28 to 67,218.23)        | 27,719.84<br>(11,604.00 to 61,250.92)      | 32,073.79<br>(13,848.11 to 64,521.33)        | 206.07<br>(122.68 to 334.54)         | 832.38<br>(412.28 to 1,562.06)        | 801.60<br>(397.62 to 1,575.48)       | 792.43<br>(400.61 to 1,472.34)        |  |
| Pyoderma                                      | 934.63<br>(502.41 to 1,650.53)           | 3,099.53<br>(1,295.70 to 7,006.06)           | 3,251.13<br>(1,349.32 to 7,718.70)         | 2,946.53<br>(1,249.36 to 6,488.30)           | 42.05<br>(22.63 to 74.35)            | 112.09<br>(53.95 to 217.20)           | 132.11<br>(65.30 to 257.44)          | 102.53<br>(49.06 to 195.98)           |  |
| Decubitus ulcer                               | 524.31<br>(252.58 to 871.94)             | 1,713.25<br>(641.48 to 3,877.55)             | 1,630.48<br>(629.81 to 3,676.92)           | 1,685.38<br>(608.39 to 3,842.85)             | 15.77<br>(8.31 to 27.35)             | 40.33<br>(19.12 to 78.27)             | 44.56<br>(21.91 to 83.59)            | 38.16<br>(17.70 to 73.12)             |  |
| Other skin and subcutaneous diseases          | 5,374.66<br>(2,963.06 to 9,170.11)       | 12,068.42<br>(2,790.00 to 33,170.60)         | 7,523.95<br>(1,655.70 to 20,552.13)        | 12,589.22<br>(2,915.99 to 33,732.99)         | 62.37<br>(34.37 to 106.39)           | 140.04<br>(32.35 to 384.97)           | 87.31<br>(19.20 to 238.53)           | 146.08<br>(33.82 to 391.53)           |  |
| Sudden infant death syndrome                  | 554,121.97<br>(450,789.81 to 697,143.40) | 1,255,225.90<br>(470,231.71 to 3,217,432.58) | 947,126.33<br>(338,882.33 to 2,503,944.09) | 1,370,342.23<br>(516,729.93 to 3,543,797.58) | 11,350.61<br>(9,141.67 to 14,083.21) | 25,995.73<br>(10,403.99 to 62,545.66) | 20,706.02<br>(8,354.38 to 52,244.07) | 27,882.52<br>(11,187.24 to 68,460.14) |  |
| Injuries                                      | 199,555.96<br>(163,586.33 to 241,575.74) | 585,641.29<br>(182,241.33 to 1,386,507.43)   | 384,666.26<br>(104,125.86 to 870,098.48)   | 598,981.08<br>(216,147.00 to 1,644,092.40)   | 4,025.85<br>(3,277.34 to 4,885.91)   | 10,319.78<br>(4,090.48 to 27,374.95)  | 6,636.55<br>(2,509.76 to 17,871.02)  | 11,988.10<br>(4,559.26 to 31,483.14)  |  |
| Transport injuries                            | 173,831.35<br>(142,676.25 to 213,194.01) | 430,655.55<br>(157,354.44 to 1,183,798.33)   | 245,876.70<br>(83,983.47 to 716,695.37)    | 519,809.79<br>(191,470.74 to 1,426,550.80)   | 3,480.18<br>(2,831.07 to 4,295.71)   | 8,742.72<br>(3,328.46 to 22,744.07)   | 3,348.16<br>(2,033.60 to 14,529.22)  | 10,346.57<br>(3,952.45 to 27,009.90)  |  |
| Road injuries                                 | 37,602.15<br>(26,420.59 to 49,787.27)    | 75,280.59<br>(27,737.42 to 200,520.81)       | 46,660.59<br>(17,348.00 to 126,424.99)     | 86,904.25<br>(32,053.13 to 230,395.08)       | 802.87<br>(592.87 to 1,013.31)       | 1,702.67<br>(669.21 to 4,205.06)      | 1,124.60<br>(446.67 to 2,840.69)     | 1,932.90<br>(744.76 to 4,679.39)      |  |
| Pedestrian road injuries                      | <b>Zimbabwe</b>                          |                                              |                                            |                                              |                                      |                                       |                                      |                                       |  |
| Cause                                         | YLLs (actual counts)                     |                                              |                                            |                                              | Deaths (actual counts)               |                                       |                                      |                                       |  |
|                                               | 2016                                     | 2040 Forecast                                | 2040 Better Scenario                       | 2040 Worse Scenario                          | 2016                                 | 2040 Forecast                         | 2040 Better Scenario                 | 2040 Worse Scenario                   |  |
| Cyclist road injuries                         | 6,727.05<br>(4,078.21 to 9,422.91)       | 18,919.95<br>(6,227.95 to 53,456.88)         | 11,487.04<br>(3,498.44 to 33,654.43)       | 22,490.38<br>(7,438.29 to 64,423.36)         | 143.87<br>(89.23 to 194.21)          | 410.93<br>(140.98 to 1,086.92)        | 273.73<br>(90.48 to 761.13)          | 475.75<br>(162.60 to 1,265.05)        |  |
| Motorcyclist road injuries                    | 16,328.01<br>(8,126.89 to 24,674.02)     | 48,888.09<br>(10,057.73 to 182,736.52)       | 34,047.25<br>(6,579.67 to 127,562.77)      | 56,518.44<br>(11,525.49 to 216,758.65)       | 278.99<br>(141.16 to 419.11)         | 858.72<br>(181.90 to 3,120.69)        | 615.85<br>(131.22 to 2,272.16)       | 983.47<br>(206.56 to 3,664.56)        |  |
| Motor vehicle road injuries                   | 106,491.52<br>(80,748.49 to 139,005.40)  | 269,999.83<br>(97,395.42 to 756,586.51)      | 144,015.97<br>(48,978.78 to 421,858.31)    | 332,517.22<br>(121,440.94 to 931,979.52)     | 2,119.39<br>(1,615.73 to 2,740.05)   | 5,409.61<br>(2,054.27 to 15,069.62)   | 3,116.66<br>(1,162.54 to 8,756.03)   | 6,525.14<br>(2,431.55 to 18,444.02)   |  |
| Other road injuries                           | 6,682.62<br>(4,011.65 to 9,834.68)       | 17,567.10<br>(6,020.66 to 50,446.05)         | 9,665.85<br>(3,083.37 to 28,227.72)        | 21,379.50<br>(7,217.02 to 62,362.02)         | 135.06<br>(84.73 to 193.66)          | 360.79<br>(123.42 to 997.47)          | 217.32<br>(76.04 to 598.40)          | 429.31<br>(142.90 to 1,203.55)        |  |
| Other transport injuries                      | 25,724.60<br>(13,696.03 to 35,750.97)    | 74,985.74<br>(22,515.29 to 216,168.31)       | 58,789.56<br>(16,850.04 to 176,696.02)     | 79,171.30<br>(23,679.07 to 234,644.92)       | 545.66<br>(321.36 to 731.92)         | 1,577.06<br>(547.25 to 4,330.25)      | 1,288.39<br>(449.95 to 3,650.92)     | 1,641.53<br>(563.20 to 4,470.37)      |  |
| Unintentional injuries                        | 168,292.53<br>(130,255.48 to 243,809.15) | 281,999.68<br>(124,583.78 to 609,066.57)     | 211,825.09<br>(90,651.18 to 483,496.76)    | 285,893.71<br>(127,375.07 to 603,122.27)     | 3,481.30<br>(2,764.10 to 4,700.12)   | 6,000.12<br>(3,069.22 to 12,252.03)   | 4,954.98<br>(2,545.73 to 10,810.22)  | 5,929.85<br>(3,095.54 to 11,799.24)   |  |

|                                                 |                                             |                                               |                                               |                                               |                                       |                                        |                                        |                                        |
|-------------------------------------------------|---------------------------------------------|-----------------------------------------------|-----------------------------------------------|-----------------------------------------------|---------------------------------------|----------------------------------------|----------------------------------------|----------------------------------------|
|                                                 | 15,304.43<br>(11,033.07 to<br>20,021.92)    | 28,486.87<br>(14,089.16 to<br>55,427.39)      | 26,943.69<br>(12,584.35 to<br>57,025.16)      | 27,400.91<br>(13,788.34 to<br>51,495.57)      | 581.62<br>(431.04 to<br>752.15)       | 988.90<br>(623.82 to<br>1,606.71)      | 1,029.66<br>(646.41 to<br>1,772.88)    | 917.16<br>(587.95 to<br>1,464.29)      |
| Falls                                           | 25,845.86<br>(18,318.80 to<br>66,161.18)    | 45,516.54<br>(17,391.21 to<br>116,938.36)     | 34,590.55<br>(12,717.14 to<br>86,572.06)      | 46,916.92<br>(17,877.70 to<br>120,720.37)     | 480.56<br>(357.84 to<br>1,081.72)     | 902.48<br>(383.45 to<br>2,098.68)      | 732.66<br>(302.44 to<br>1,736.33)      | 914.73<br>(386.58 to<br>2,145.28)      |
| Drowning                                        | 29,406.14<br>(20,025.11 to<br>51,755.07)    | 40,640.67<br>(16,486.04 to<br>104,228.89)     | 28,843.16<br>(11,654.81 to<br>75,179.72)      | 41,922.43<br>(16,723.95 to<br>107,339.99)     | 648.12<br>(479.36 to<br>971.37)       | 905.54<br>(458.12 to<br>1,958.23)      | 708.24<br>(366.31 to<br>1,565.99)      | 911.21<br>(464.92 to<br>2,036.30)      |
| Fire, heat, and hot substances                  | 14,356.23<br>(6,433.07 to<br>37,357.91)     | 22,122.85<br>(6,027.78 to<br>71,250.53)       | 13,407.72<br>(3,537.17 to<br>45,090.23)       | 23,340.74<br>(6,319.22 to<br>78,100.47)       | 242.41<br>(123.92 to<br>612.58)       | 395.54<br>(127.48 to<br>1,258.71)      | 256.39<br>(84.10 to<br>812.73)         | 411.56<br>(128.31 to<br>1,337.62)      |
| Poisonings                                      | 27,854.68<br>(21,245.75 to<br>34,974.85)    | 44,157.60<br>(17,849.20 to<br>99,554.42)      | 31,861.91<br>(12,127.40 to<br>79,604.49)      | 44,677.50<br>(19,139.49 to<br>98,716.86)      | 479.39<br>(360.88 to<br>597.69)       | 808.58<br>(346.90 to<br>1,837.54)      | 614.97<br>(251.97 to<br>1,547.12)      | 805.89<br>(353.08 to<br>1,787.99)      |
| Exposure to mechanical forces                   | 3,802.60<br>(2,356.03 to<br>6,792.13)       | 5,417.98<br>(2,134.84 to<br>13,290.85)        | 3,991.82<br>(1,524.83 to<br>10,246.21)        | 5,419.44<br>(2,177.19 to<br>13,002.19)        | 98.79<br>(64.31 to<br>143.91)         | 139.01<br>(67.82 to<br>291.93)         | 111.55<br>(54.23 to<br>242.50)         | 135.56<br>(65.58 to<br>274.44)         |
| Unintentional firearm injuries                  | 10,935.76<br>(7,446.72 to<br>17,170.02)     | 16,806.62<br>(7,214.22 to<br>35,505.19)       | 11,257.57<br>(4,580.02 to<br>26,332.78)       | 17,339.37<br>(7,387.76 to<br>36,359.72)       | 147.96<br>(102.19 to<br>221.78)       | 245.74<br>(102.39 to<br>551.94)        | 171.05<br>(66.72 to<br>410.90)         | 251.58<br>(108.41 to<br>539.88)        |
| Unintentional suffocation                       | 13,116.33<br>(8,101.06 to<br>17,110.69)     | 21,933.00<br>(6,897.85 to<br>59,508.46)       | 16,612.52<br>(4,793.26 to<br>48,176.64)       | 21,918.70<br>(7,435.13 to<br>57,109.88)       | 232.63<br>(138.66 to<br>310.50)       | 423.82<br>(141.13 to<br>1,128.99)      | 332.37<br>(101.28 to<br>920.27)        | 418.75<br>(140.46 to<br>1,078.23)      |
| Other exposure to mechanical forces             | 15,922.37<br>(11,178.75 to<br>26,646.33)    | 29,218.78<br>(12,193.07 to<br>66,442.66)      | 23,013.68<br>(9,115.77 to<br>56,050.72)       | 29,144.04<br>(12,355.29 to<br>68,225.25)      | 339.99<br>(247.55 to<br>551.00)       | 640.55<br>(311.30 to<br>1,243.62)      | 548.87<br>(260.43 to<br>1,243.62)      | 623.56<br>(305.93 to<br>1,344.59)      |
| Adverse effects of medical treatment            | 10,343.14<br>(7,729.05 to<br>14,749.80)     | 23,765.94<br>(10,340.89 to<br>53,020.08)      | 15,967.29<br>(6,562.19 to<br>38,650.09)       | 24,186.64<br>(10,688.35 to<br>52,324.18)      | 190.07<br>(143.34 to<br>261.61)       | 467.99<br>(217.22 to<br>1,011.65)      | 335.27<br>(149.38 to<br>759.53)        | 467.58<br>(224.55 to<br>979.62)        |
| Animal contact                                  | 4,729.08<br>(3,237.13 to<br>7,816.79)       | 9,519.30<br>(4,124.47 to<br>20,780.74)        | 6,044.79<br>(2,550.52 to<br>14,223.72)        | 9,801.72<br>(4,336.70 to<br>20,788.27)        | 86.12<br>(60.60 to<br>135.40)         | 180.82<br>(85.84 to<br>389.56)         | 125.21<br>(58.79 to<br>283.46)         | 182.04<br>(89.84 to<br>375.11)         |
| Venomous animal contact                         | 5,614.06<br>(4,144.03 to<br>7,668.15)       | 14,246.63<br>(5,683.52 to<br>34,180.42)       | 9,922.50<br>(3,738.27 to<br>25,101.59)        | 14,284.92<br>(6,001.87 to<br>33,005.31)       | 103.95<br>(78.17 to<br>140.93)        | 287.17<br>(120.29 to<br>661.94)        | 210.07<br>(86.44 to<br>520.86)         | 285.54<br>(124.18 to<br>638.75)        |
| Non-venomous animal contact                     | 14,753.21<br>(9,727.15 to<br>20,756.72)     | 25,210.31<br>(10,236.02 to<br>52,597.15)      | 20,327.55<br>(8,329.68 to<br>43,498.03)       | 25,428.87<br>(10,586.90 to<br>52,780.96)      | 204.65<br>(142.00 to<br>281.14)       | 371.20<br>(169.39 to<br>754.63)        | 321.47<br>(149.45 to<br>662.12)        | 369.16<br>(169.43 to<br>728.89)        |
| Foreign body                                    | 12,667.73<br>(7,976.69 to<br>18,593.73)     | 22,886.75<br>(9,411.63 to<br>49,117.55)       | 18,785.10<br>(7,631.53 to<br>40,982.53)       | 23,023.75<br>(9,515.61 to<br>49,100.29)       | 177.91<br>(117.65 to<br>256.10)       | 340.52<br>(156.96 to<br>694.82)        | 300.61<br>(138.15 to<br>623.36)        | 337.51<br>(153.33 to<br>681.15)        |
| Pulmonary aspiration and foreign body in airway | 2,085.48<br>(800.71 to<br>3,346.91)         | 2,323.56<br>(696.76 to<br>5,449.35)           | 1,542.45<br>(478.83 to<br>3,464.21)           | 2,405.12<br>(724.95 to<br>5,420.51)           | 26.74<br>(11.31 to<br>41.91)          | 30.68<br>(10.01 to<br>68.23)           | 20.86<br>(7.07 to<br>47.52)            | 31.65<br>(10.37 to<br>67.84)           |
| Foreign body in other body part                 | 5,723.00<br>(3,821.70 to<br>8,238.14)       | 8,851.66<br>(3,160.54 to<br>20,290.52)        | 5,858.81<br>(1,933.56 to<br>14,617.85)        | 8,885.74<br>(3,402.23 to<br>19,821.22)        | 128.44<br>(81.08 to<br>182.97)        | 209.61<br>(79.09 to<br>460.62)         | 145.57<br>(51.65 to<br>349.79)         | 207.14<br>(82.67 to<br>440.90)         |
| Environmental heat and cold exposure            | 8,783.46<br>(6,759.46 to<br>13,931.89)      | 14,028.45<br>(6,023.75 to<br>30,458.24)       | 11,010.72<br>(4,440.28 to<br>26,639.99)       | 13,989.93<br>(6,155.32 to<br>30,632.70)       | 186.05<br>(147.18 to<br>255.23)       | 309.72<br>(154.28 to<br>634.14)        | 261.86<br>(124.84 to<br>592.63)        | 301.85<br>(152.43 to<br>615.65)        |
| Other unintentional injuries                    | 186,130.07<br>(141,548.27 to<br>260,952.48) | 453,282.57<br>(135,408.88 to<br>1,336,038.70) | 417,221.32<br>(123,530.35 to<br>1,273,982.66) | 471,242.08<br>(140,265.79 to<br>1,423,440.22) | 3,841.20<br>(1,402.65 to<br>5,265.98) | 9,435.72<br>(3,228.38 to<br>27,194.04) | 8,882.78<br>(3,053.70 to<br>25,961.15) | 9,727.50<br>(3,215.48 to<br>27,681.40) |
| Self-harm and interpersonal violence            |                                             |                                               |                                               |                                               |                                       |                                        |                                        |                                        |

**Zimbabwe**

| Cause                | YLLs (actual counts)                      |                                            |                                            |                                            | Deaths (actual counts)                |                                        |                                        |                                        |
|----------------------|-------------------------------------------|--------------------------------------------|--------------------------------------------|--------------------------------------------|---------------------------------------|----------------------------------------|----------------------------------------|----------------------------------------|
|                      | 2016                                      | 2040 Forecast                              | 2040 Better Scenario                       | 2040 Worse Scenario                        | 2016                                  | 2040 Forecast                          | 2040 Better Scenario                   | 2040 Worse Scenario                    |
| Self-harm            | 90,699.14<br>(64,547.96 to<br>171,637.69) | 260,483.43<br>(71,524.37 to<br>828,267.24) | 228,912.16<br>(63,623.64 to<br>730,794.26) | 278,400.20<br>(74,419.43 to<br>867,540.51) | 2,195.85<br>(1,625.28 to<br>3,566.50) | 5,974.17<br>(1,938.06 to<br>17,367.45) | 5,451.07<br>(1,833.93 to<br>16,011.35) | 6,284.42<br>(1,938.91 to<br>18,341.07) |
| Self-harm by firearm | 12,976.42<br>(7,137.36 to<br>39,692.52)   | 27,392.08<br>(5,997.85 to<br>98,448.58)    | 22,937.16<br>(5,179.83 to<br>79,441.14)    | 29,425.65<br>(6,268.10 to<br>107,428.00)   | 283.24<br>(169.93 to<br>734.11)       | 619.44<br>(171.65 to<br>1,995.00)      | 537.89<br>(156.87 to<br>1,730.20)      | 655.77<br>(173.45 to<br>2,197.38)      |



|                                                                              |                                             |                                             |                                            |                                             |                                       |                                        |                                        |                                        |
|------------------------------------------------------------------------------|---------------------------------------------|---------------------------------------------|--------------------------------------------|---------------------------------------------|---------------------------------------|----------------------------------------|----------------------------------------|----------------------------------------|
| Self-harm by other specified means                                           | 77,722.71<br>(55,932.45 to<br>134,587.60)   | 233,091.35<br>(63,631.34 to<br>718,112.68)  | 205,975.00<br>(57,712.03 to<br>654,822.74) | 248,974.54<br>(66,868.69 to<br>764,255.10)  | 1,912.60<br>(1,413.48 to<br>2,945.94) | 5,354.73<br>(1,755.65 to<br>15,415.98) | 4,913.18<br>(1,660.60 to<br>14,120.71) | 5,628.65<br>(1,755.68 to<br>16,203.84) |
| Interpersonal violence                                                       | 95,430.94<br>(65,784.50 to<br>127,342.61)   | 192,799.13<br>(58,852.21 to<br>584,215.23)  | 188,309.16<br>(55,581.89 to<br>571,539.49) | 192,841.89<br>(58,560.50 to<br>571,125.15)  | 1,645.35<br>(1,142.13 to<br>2,188.71) | 3,461.54<br>(1,077.81 to<br>10,195.36) | 3,431.71<br>(1,022.99 to<br>10,241.38) | 3,443.09<br>(1,076.32 to<br>10,167.65) |
| Physical violence by firearm                                                 | 14,196.82<br>(3,922.30 to<br>24,246.57)     | 28,859.31<br>(5,594.32 to<br>90,931.70)     | 27,899.93<br>(5,255.08 to<br>92,271.35)    | 28,313.75<br>(5,550.45 to<br>89,468.40)     | 250.19<br>(71.55 to<br>422.32)        | 524.98<br>(111.26 to<br>1,663.45)      | 514.95<br>(176.98 to<br>1,716.98)      | 512.18<br>(108.83 to<br>1,569.43)      |
| Physical violence by sharp object                                            | 48,166.01<br>(31,165.45 to<br>70,045.24)    | 99,176.05<br>(29,173.87 to<br>282,507.51)   | 103,436.92<br>(29,268.82 to<br>303,865.40) | 96,728.67<br>(29,075.34 to<br>270,233.20)   | 835.99<br>(540.18 to<br>1,219.44)     | 1,780.02<br>(544.82 to<br>4,969.75)    | 1,880.26<br>(565.22 to<br>5,421.59)    | 1,725.74<br>(531.04 to<br>4,855.58)    |
| Physical violence by other means                                             | 33,068.10<br>(21,959.37 to<br>48,557.40)    | 64,763.77<br>(17,994.54 to<br>204,228.69)   | 56,972.31<br>(15,354.35 to<br>179,567.89)  | 67,799.46<br>(19,172.11 to<br>210,833.10)   | 559.16<br>(371.12 to<br>835.37)       | 1,156.54<br>(318.36 to<br>3,607.41)    | 1,036.50<br>(272.92 to<br>3,276.75)    | 1,205.17<br>(335.14 to<br>3,753.17)    |
| Forces of nature, conflict and terrorism, and executions and police conflict | 143.41<br>(120.38 to<br>193.47)             | 14,302.57<br>(0.00 to<br>143,696.88)        | 13,413.67<br>(0.00 to<br>134,756.73)       | 14,225.35<br>(0.00 to<br>141,772.96)        | 2.26<br>(0.00 to<br>3.12)             | 240.11<br>(0.00 to<br>2,417.37)        | 231.72<br>(0.00 to<br>2,326.61)        | 257.07<br>(0.00 to<br>2,387.86)        |
| Exposure to forces of nature                                                 | 0.00<br>(0.00 to<br>0.00)                   | 288.35<br>(0.00 to<br>4,403.92)             | 267.42<br>(0.00 to<br>4,063.83)            | 286.95<br>(0.00 to<br>4,387.70)             | 0.00<br>(0.00 to<br>0.00)             | 5.15<br>(78.37 to<br>78.37)            | 5.00<br>(0.00 to<br>75.43)             | 5.06<br>(0.00 to<br>77.41)             |
| Conflict and terrorism                                                       | 0.00<br>(0.00 to<br>0.00)                   | 13,897.33<br>(0.00 to<br>143,696.88)        | 13,032.39<br>(0.00 to<br>134,756.73)       | 13,823.32<br>(0.00 to<br>141,772.96)        | 0.00<br>(0.00 to<br>0.00)             | 232.86<br>(0.00 to<br>2,417.37)        | 224.62<br>(0.00 to<br>2,326.61)        | 229.95<br>(0.00 to<br>2,387.86)        |
| Executions and police conflict                                               | 143.41<br>(120.38 to<br>193.47)             | 116.69<br>(0.00 to<br>1,214.31)             | 113.86<br>(0.00 to<br>1,182.18)            | 115.08<br>(0.00 to<br>1,200.24)             | 2.26<br>(1.87 to<br>3.12)             | 2.11<br>(0.00 to<br>22.10)             | 2.10<br>(0.00 to<br>21.91)             | 2.07<br>(0.00 to<br>21.68)             |
| <b>Western Sub-Saharan Africa</b>                                            |                                             |                                             |                                            |                                             |                                       |                                        |                                        |                                        |
| Cause                                                                        | YLLs (in 1000s)                             |                                             |                                            |                                             | Deaths (in 1000s)                     |                                        |                                        |                                        |
|                                                                              | 2016                                        | 2040 Forecast                               | 2040 Better Scenario                       | 2040 Worse Scenario                         | 2016                                  | 2040 Forecast                          | 2040 Better Scenario                   | 2040 Worse Scenario                    |
| All causes                                                                   | 183,296.79<br>(171,043.27 to<br>196,154.28) | 151,117.25<br>(123,142.40 to<br>181,089.72) | 100,684.72<br>(84,820.12 to<br>118,924.38) | 232,729.97<br>(188,919.24 to<br>277,120.00) | 3,094.61<br>(2,932.03 to<br>3,265.15) | 3,758.33<br>(3,315.09 to<br>4,279.46)  | 2,809.78<br>(2,512.85 to<br>3,157.17)  | 5,255.44<br>(4,575.77 to<br>5,983.00)  |
| Communicable, maternal, neonatal, and nutritional diseases                   | 140,077.14<br>(128,290.02 to<br>153,184.51) | 88,226.79<br>(65,084.15 to<br>112,593.98)   | 50,464.23<br>(38,644.22 to<br>63,948.59)   | 152,300.49<br>(116,024.81 to<br>189,920.35) | 2,008.90<br>(1,862.93 to<br>2,163.99) | 1,600.35<br>(1,228.35 to<br>2,009.47)  | 985.15<br>(777.80 to<br>1,233.96)      | 2,443.17<br>(2,040.50 to<br>3,263.67)  |
| HIV/AIDS and tuberculosis                                                    | 15,933.34<br>(14,486.72 to<br>18,057.21)    | 13,659.97<br>(10,331.98 to<br>17,939.28)    | 7,514.96<br>(4,571.21 to<br>11,686.56)     | 34,169.84<br>(23,962.67 to<br>46,166.38)    | 330.11<br>(304.68 to<br>365.91)       | 305.18<br>(236.68 to<br>383.75)        | 170.63<br>(114.98 to<br>239.81)        | 724.04<br>(505.18 to<br>963.51)        |
| Tuberculosis                                                                 | 3,498.37<br>(3,071.36 to<br>4,183.24)       | 2,433.06<br>(1,786.32 to<br>3,490.97)       | 1,410.17<br>(1,056.88 to<br>1,950.82)      | 4,450.58<br>(3,219.42 to<br>6,483.05)       | 91.59<br>(80.90 to<br>106.90)         | 79.00<br>(58.67 to<br>110.00)          | 48.07<br>(36.73 to<br>64.15)           | 136.72<br>(98.97 to<br>192.90)         |
| HIV/AIDS                                                                     | 12,434.97<br>(11,086.01 to<br>14,459.99)    | 11,226.91<br>(8,065.81 to<br>15,569.49)     | 6,104.80<br>(3,202.70 to<br>10,361.15)     | 29,719.26<br>(19,706.68 to<br>42,098.50)    | 238.51<br>(216.41 to<br>271.37)       | 226.18<br>(164.15 to<br>301.95)        | 122.56<br>(69.13 to<br>192.38)         | 587.33<br>(374.51 to<br>833.48)        |
| Diarrhea, lower respiratory, and other common infectious diseases            | 45,617.43<br>(39,466.94 to<br>52,342.84)    | 33,365.21<br>(20,107.47 to<br>49,104.02)    | 17,591.08<br>(11,036.41 to<br>26,282.64)   | 56,278.67<br>(35,055.04 to<br>79,646.46)    | 692.91<br>(604.57 to<br>787.11)       | 726.23<br>(471.39 to<br>1,060.35)      | 438.77<br>(288.59 to<br>650.64)        | 1,098.26<br>(718.24 to<br>1,562.33)    |
| Diarrheal diseases                                                           | 18,486.64<br>(15,055.19 to<br>22,518.95)    | 10,731.99<br>(5,300.29 to<br>19,251.37)     | 5,879.17<br>(2,612.30 to<br>11,116.19)     | 16,760.49<br>(9,029.91 to<br>28,123.10)     | 270.08<br>(213.65 to<br>339.54)       | 222.35<br>(86.74 to<br>488.71)         | 127.17<br>(45.87 to<br>299.15)         | 337.79<br>(141.32 to<br>669.81)        |
| Intestinal infectious diseases                                               | 883.96<br>(427.73 to<br>1,607.10)           | 974.73<br>(454.47 to<br>1,810.14)           | 751.83<br>(363.92 to<br>1,393.95)          | 1,251.94<br>(576.41 to<br>2,361.92)         | 12.31<br>(6.13 to<br>22.03)           | 14.11<br>(6.79 to<br>26.14)            | 11.12<br>(5.54 to<br>20.43)            | 17.79<br>(8.46 to<br>32.95)            |
| Typhoid fever                                                                | 701.21<br>(318.77 to<br>1,320.06)           | 754.79<br>(345.59 to<br>1,509.42)           | 591.10<br>(275.16 to<br>1,135.52)          | 969.66<br>(436.81 to<br>1,919.14)           | 9.78<br>(4.60 to<br>18.18)            | 10.92<br>(5.03 to<br>21.53)            | 8.73<br>(4.12 to<br>16.64)             | 13.75<br>(6.27 to<br>27.00)            |
| Paratyphoid fever                                                            | 164.62<br>(63.56 to<br>369.78)              | 212.91<br>(83.63 to<br>454.98)              | 157.23<br>(63.25 to<br>326.53)             | 271.45<br>(107.51 to<br>586.30)             | 2.31<br>(0.89 to<br>5.11)             | 3.10<br>(1.27 to<br>6.48)              | 2.34<br>(0.98 to<br>4.78)              | 3.89<br>(1.61 to<br>8.29)              |
| Other intestinal infectious diseases                                         | 18.14<br>(5.14 to<br>50.58)                 | 7.02<br>(1.58 to<br>21.66)                  | 3.50<br>(0.86 to<br>10.53)                 | 10.83<br>(2.59 to<br>32.23)                 | 0.22<br>(0.07 to<br>0.62)             | 0.10<br>(0.03 to<br>0.28)              | 0.05<br>(0.02 to<br>0.15)              | 0.15<br>(0.04 to<br>0.41)              |

|                                         |                                          |                                         |                                         |                                          |                                 |                                 |                                 |                                 |
|-----------------------------------------|------------------------------------------|-----------------------------------------|-----------------------------------------|------------------------------------------|---------------------------------|---------------------------------|---------------------------------|---------------------------------|
| Lower respiratory infections            | 16,028.48<br>(13,496.15 to<br>18,875.42) | 14,490.56<br>(7,797.43 to<br>23,169.31) | 7,144.31<br>(4,385.02 to<br>11,222.61)  | 26,580.70<br>(14,285.15 to<br>40,573.24) | 273.94<br>(236.31 to<br>315.22) | 383.47<br>(253.47 to<br>547.77) | 234.32<br>(166.64 to<br>322.17) | 582.74<br>(373.90 to<br>832.12) |
| Upper respiratory infections            | 27.81<br>(17.27 to<br>44.23)             | 19.46<br>(11.04 to<br>34.35)            | 11.17<br>(6.91 to<br>17.64)             | 36.63<br>(21.57 to<br>60.27)             | 0.38<br>(0.25 to<br>0.57)       | 0.33<br>(0.21 to<br>0.51)       | 0.20<br>(0.14 to<br>0.29)       | 0.57<br>(0.38 to<br>0.86)       |
| Otitis media                            | 0.78<br>(0.43 to<br>1.46)                | 0.17<br>(0.10 to<br>0.28)               | 0.17<br>(0.09 to<br>0.29)               | 0.21<br>(0.11 to<br>0.39)                | 0.01<br>(0.01 to<br>0.02)       | 0.01<br>(0.00 to<br>0.01)       | 0.01<br>(0.00 to<br>0.02)       | 0.01<br>(0.00 to<br>0.01)       |
| Meningitis                              | 6,436.67<br>(4,729.04 to<br>9,537.55)    | 4,644.95<br>(2,704.02 to<br>7,500.06)   | 2,871.24<br>(1,906.70 to<br>4,273.71)   | 7,954.88<br>(4,381.39 to<br>13,325.22)   | 90.00<br>(66.79 to<br>129.32)   | 74.14<br>(48.24 to<br>113.19)   | 52.85<br>(36.19 to<br>77.93)    | 113.35<br>(67.90 to<br>180.93)  |
| Pneumococcal meningitis                 | 482.73<br>(336.07 to<br>708.57)          | 298.35<br>(186.52 to<br>491.55)         | 220.04<br>(142.35 to<br>344.59)         | 446.34<br>(267.94 to<br>765.34)          | 7.62<br>(5.36 to<br>11.05)      | 6.04<br>(3.94 to<br>9.82)       | 5.05<br>(3.34 to<br>8.20)       | 7.93<br>(5.09 to<br>13.14)      |
| H influenzae type B meningitis          | 886.41<br>(625.58 to<br>1,283.90)        | 1,541.09<br>(381.22 to<br>4,068.71)     | 516.24<br>(200.93 to<br>1,173.48)       | 3,862.70<br>(896.55 to<br>9,488.04)      | 11.84<br>(8.48 to<br>17.22)     | 19.73<br>(5.87 to<br>49.52)     | 7.80<br>(3.75 to<br>15.68)      | 46.84<br>(11.92 to<br>113.02)   |
| Meningococcal meningitis                | 2,142.99<br>(1,543.29 to<br>3,076.55)    | 1,294.50<br>(829.40 to<br>1,952.81)     | 1,003.78<br>(652.69 to<br>1,492.09)     | 1,634.05<br>(1,041.54 to<br>2,522.90)    | 30.06<br>(21.97 to<br>42.12)    | 22.44<br>(14.55 to<br>34.76)    | 18.81<br>(12.17 to<br>29.17)    | 26.56<br>(17.41 to<br>41.10)    |
| Other meningitis                        | 2,924.55<br>(2,090.31 to<br>4,658.53)    | 1,511.01<br>(979.30 to<br>2,378.09)     | 1,131.18<br>(768.11 to<br>1,684.98)     | 2,011.80<br>(1,293.30 to<br>3,218.80)    | 40.49<br>(29.87 to<br>61.57)    | 25.93<br>(17.99 to<br>38.41)    | 21.19<br>(15.08 to<br>30.39)    | 32.02<br>(22.25 to<br>48.02)    |
| Encephalitis                            | 293.25<br>(195.61 to<br>421.08)          | 300.73<br>(183.04 to<br>462.49)         | 210.91<br>(132.47 to<br>308.72)         | 408.04<br>(251.30 to<br>614.41)          | 4.15<br>(2.87 to<br>5.67)       | 4.95<br>(3.30 to<br>6.95)       | 3.76<br>(2.59 to<br>5.06)       | 6.33<br>(4.18 to<br>8.84)       |
| Diphtheria                              | 45.10<br>(22.68 to<br>80.91)             | 20.76<br>(6.57 to<br>51.21)             | 4.32<br>(2.21 to<br>7.51)               | 29.83<br>(11.07 to<br>66.86)             | 0.55<br>(0.28 to<br>0.97)       | 0.26<br>(0.09 to<br>0.61)       | 0.06<br>(0.03 to<br>0.10)       | 0.36<br>(0.14 to<br>0.80)       |
| Whooping cough                          | 1,470.56<br>(534.91 to<br>3,046.47)      | 1,739.26<br>(543.62 to<br>3,824.30)     | 589.09<br>(173.62 to<br>1,336.76)       | 2,457.06<br>(899.53 to<br>5,299.25)      | 17.36<br>(6.31 to<br>35.96)     | 20.59<br>(6.44 to<br>45.38)     | 7.04<br>(2.07 to<br>15.93)      | 29.04<br>(10.65 to<br>62.47)    |
| Tetanus                                 | 354.82<br>(194.95 to<br>575.03)          | 91.62<br>(43.18 to<br>174.82)           | 43.11<br>(21.11 to<br>84.79)            | 132.23<br>(62.93 to<br>244.18)           | 4.90<br>(2.77 to<br>7.74)       | 3.33<br>(0.65 to<br>2.43)       | 0.35<br>(0.30 to<br>1.59)       | 1.77<br>(0.87 to<br>3.14)       |
| Measles                                 | 1,503.66<br>(523.28 to<br>3,334.44)      | 296.79<br>(21.60 to<br>1,166.19)        | 52.24<br>(8.59 to<br>212.66)            | 572.03<br>(58.54 to<br>1,832.38)         | 17.92<br>(6.24 to<br>39.78)     | 3.54<br>(0.27 to<br>13.83)      | 0.64<br>(0.11 to<br>2.54)       | 6.80<br>(0.70 to<br>21.73)      |
| <b>Western Sub-Saharan Africa</b>       |                                          |                                         |                                         |                                          |                                 |                                 |                                 |                                 |
| Cause                                   | YLLs (in 1000s)                          |                                         |                                         |                                          | Deaths (in 1000s)               |                                 |                                 |                                 |
|                                         | 2016                                     | 2040 Forecast                           | 2040 Better Scenario                    | 2040 Worse Scenario                      | 2016                            | 2040 Forecast                   | 2040 Better Scenario            | 2040 Worse Scenario             |
| Varicella and herpes zoster             | 85.71<br>(66.85 to<br>107.91)            | 54.19<br>(37.03 to<br>78.50)            | 33.52<br>(23.98 to<br>45.81)            | 94.64<br>(68.13 to<br>130.24)            | 1.30<br>(1.07 to<br>1.58)       | 1.16<br>(0.89 to<br>1.50)       | 0.84<br>(0.67 to<br>1.04)       | 1.72<br>(1.33 to<br>2.18)       |
| Neglected tropical diseases and malaria | 36,856.73<br>(30,037.27 to<br>44,922.64) | 14,429.23<br>(9,866.81 to<br>19,498.53) | 10,318.92<br>(7,593.53 to<br>13,519.36) | 19,031.33<br>(13,579.53 to<br>25,689.70) | 472.87<br>(391.21 to<br>568.24) | 223.20<br>(163.29 to<br>291.51) | 173.74<br>(133.19 to<br>220.47) | 278.26<br>(208.90 to<br>362.49) |
| Malaria                                 | 34,984.34<br>(28,196.39 to<br>43,208.34) | 12,980.16<br>(8,670.87 to<br>17,926.16) | 9,373.51<br>(6,722.74 to<br>12,419.05)  | 16,801.21<br>(11,705.19 to<br>23,280.41) | 446.20<br>(364.85 to<br>543.17) | 200.20<br>(144.06 to<br>266.52) | 157.75<br>(117.94 to<br>204.09) | 244.82<br>(178.59 to<br>327.39) |
| Chagas disease                          | 0.00<br>(0.00 to<br>0.00)                | 0.00<br>(0.00 to<br>0.00)               | 0.00<br>(0.00 to<br>0.00)               | 0.00<br>(0.00 to<br>0.00)                | 0.00<br>(0.00 to<br>0.00)       | 0.00<br>(0.00 to<br>0.00)       | 0.00<br>(0.00 to<br>0.00)       | 0.00<br>(0.00 to<br>0.00)       |
| Leishmaniasis                           | 0.45<br>(0.25 to<br>0.70)                | 0.35<br>(0.18 to<br>0.53)               | 0.26<br>(0.14 to<br>0.41)               | 0.54<br>(0.29 to<br>0.82)                | 0.01<br>(0.01 to<br>0.02)       | 0.01<br>(0.01 to<br>0.02)       | 0.01<br>(0.01 to<br>0.01)       | 0.02<br>(0.01 to<br>0.03)       |
| African trypanosomiasis                 | 13.77<br>(6.18 to<br>25.92)              | 1.80<br>(0.72 to<br>3.95)               | 1.77<br>(0.70 to<br>3.85)               | 1.98<br>(0.80 to<br>4.45)                | 0.25<br>(0.11 to<br>0.46)       | 0.03<br>(0.01 to<br>0.07)       | 0.03<br>(0.01 to<br>0.07)       | 0.04<br>(0.01 to<br>0.08)       |
| Schistosomiasis                         | 118.27<br>(100.62 to<br>139.31)          | 92.23<br>(76.02 to<br>113.77)           | 75.53<br>(62.56 to<br>92.78)            | 110.49<br>(91.55 to<br>134.83)           | 3.00<br>(2.60 to<br>3.47)       | 2.86<br>(2.38 to<br>3.48)       | 2.44<br>(2.03 to<br>2.96)       | 3.26<br>(2.76 to<br>3.96)       |

|                                                          |                                                            |                                                            |                                                          |                                                            |                                                   |                                                   |                                                   |                                                   |
|----------------------------------------------------------|------------------------------------------------------------|------------------------------------------------------------|----------------------------------------------------------|------------------------------------------------------------|---------------------------------------------------|---------------------------------------------------|---------------------------------------------------|---------------------------------------------------|
|                                                          | 7.98<br>(5.25 to<br>11.95)                                 | 3.60<br>(2.24 to<br>5.66)                                  | 3.10<br>(1.94 to<br>4.86)                                | 4.18<br>(2.56 to<br>6.64)                                  | 0.14<br>(0.10 to<br>0.21)                         | 0.08<br>(0.05 to<br>0.12)                         | 0.07<br>(0.04 to<br>0.10)                         | 0.09<br>(0.05 to<br>0.13)                         |
| Cysticercosis                                            | 11.94<br>(8.70 to<br>16.13)                                | 4.73<br>(3.35 to<br>6.59)                                  | 2.90<br>(2.06 to<br>4.08)                                | 10.08<br>(7.18 to<br>14.05)                                | 0.20<br>(0.15 to<br>0.27)                         | 0.11<br>(0.08 to<br>0.14)                         | 0.07<br>(0.05 to<br>0.09)                         | 0.20<br>(0.15 to<br>0.28)                         |
| Cystic echinococcosis                                    | 13.78<br>(1.00 to<br>56.59)                                | 46.28<br>(3.67 to<br>175.87)                               | 32.85<br>(2.69 to<br>114.46)                             | 56.12<br>(4.41 to<br>206.72)                               | 0.19<br>(0.01 to<br>0.73)                         | 0.80<br>(0.07 to<br>2.74)                         | 0.64<br>(0.05 to<br>2.18)                         | 0.91<br>(0.08 to<br>3.16)                         |
| Dengue                                                   | 121.09<br>(25.43 to<br>365.76)                             | 58.33<br>(11.58 to<br>173.17)                              | 38.64<br>(7.59 to<br>116.85)                             | 86.72<br>(17.58 to<br>262.50)                              | 1.88<br>(0.39 to<br>5.67)                         | 0.94<br>(0.19 to<br>2.82)                         | 0.64<br>(0.12 to<br>1.94)                         | 1.37<br>(0.28 to<br>4.10)                         |
| Yellow fever                                             | 208.90<br>(75.35 to<br>381.42)                             | 106.87<br>(35.47 to<br>210.75)                             | 51.18<br>(15.72 to<br>105.08)                            | 241.30<br>(85.14 to<br>473.42)                             | 3.11<br>(1.10 to<br>5.66)                         | 1.70<br>(0.55 to<br>3.37)                         | 0.84<br>(0.26 to<br>1.78)                         | 3.77<br>(1.27 to<br>7.49)                         |
| Rabies                                                   | 156.72<br>(111.96 to<br>223.34)                            | 205.44<br>(113.42 to<br>326.47)                            | 146.79<br>(86.36 to<br>217.07)                           | 251.73<br>(153.49 to<br>379.13)                            | 1.90<br>(1.37 to<br>2.69)                         | 2.55<br>(1.45 to<br>4.00)                         | 1.86<br>(1.12 to<br>2.71)                         | 3.10<br>(1.93 to<br>4.63)                         |
| Intestinal nematode infections                           | 1,219.31<br>(727.09 to<br>1,828.05)                        | 929.43<br>(557.17 to<br>1,423.94)                          | 592.38<br>(371.58 to<br>855.97)                          | 1,466.98<br>(941.33 to<br>2,170.48)                        | 15.99<br>(9.71 to<br>23.30)                       | 13.82<br>(8.61 to<br>20.00)                       | 9.40<br>(6.14 to<br>12.92)                        | 20.69<br>(13.47 to<br>29.44)                      |
| Other neglected tropical diseases                        | <b>2,682.29</b><br><b>(2,269.76 to</b><br><b>3,116.45)</b> | <b>2,123.55</b><br><b>(1,581.42 to</b><br><b>2,943.09)</b> | <b>1,315.44</b><br><b>(993.81 to</b><br><b>1,804.21)</b> | <b>3,469.23</b><br><b>(2,647.69 to</b><br><b>4,697.82)</b> | <b>48.82</b><br><b>(41.22 to</b><br><b>56.73)</b> | <b>39.41</b><br><b>(29.35 to</b><br><b>54.17)</b> | <b>24.42</b><br><b>(18.50 to</b><br><b>33.38)</b> | <b>64.04</b><br><b>(48.89 to</b><br><b>86.43)</b> |
| <b>Maternal disorders</b>                                |                                                            |                                                            |                                                          |                                                            |                                                   |                                                   |                                                   |                                                   |
| Maternal hemorrhage                                      | 757.05<br>(593.01 to<br>964.12)                            | 555.17<br>(389.51 to<br>804.71)                            | 363.17<br>(253.11 to<br>528.45)                          | 910.42<br>(636.48 to<br>1,315.26)                          | 14.00<br>(10.99 to<br>17.69)                      | 10.43<br>(7.28 to<br>15.02)                       | 6.82<br>(4.76 to<br>9.90)                         | 17.02<br>(12.00 to<br>24.32)                      |
| Maternal sepsis and other maternal infections            | 187.67<br>(117.56 to<br>269.79)                            | 126.08<br>(71.34 to<br>192.96)                             | 75.53<br>(43.71 to<br>116.48)                            | 192.43<br>(112.71 to<br>303.87)                            | 3.43<br>(2.17 to<br>4.86)                         | 2.33<br>(1.34 to<br>3.62)                         | 1.40<br>(0.82 to<br>2.16)                         | 3.55<br>(2.09 to<br>5.52)                         |
| Maternal hypertensive disorders                          | 557.59<br>(413.24 to<br>720.93)                            | 430.39<br>(290.44 to<br>623.23)                            | 269.00<br>(182.49 to<br>390.24)                          | 679.11<br>(460.01 to<br>964.95)                            | 9.95<br>(7.37 to<br>12.90)                        | 7.81<br>(5.30 to<br>11.25)                        | 4.89<br>(3.31 to<br>7.08)                         | 12.26<br>(8.39 to<br>17.26)                       |
| Maternal obstructed labor and uterine rupture            | 132.17<br>(83.14 to<br>193.03)                             | 105.41<br>(59.55 to<br>171.46)                             | 62.35<br>(35.37 to<br>99.83)                             | 165.90<br>(95.17 to<br>265.42)                             | 2.46<br>(1.55 to<br>3.63)                         | 1.99<br>(1.13 to<br>3.26)                         | 1.17<br>(0.67 to<br>1.90)                         | 3.11<br>(1.78 to<br>5.02)                         |
| Maternal abortion, miscarriage, and ectopic pregnancy    | 244.99<br>(163.57 to<br>347.42)                            | 147.04<br>(83.79 to<br>261.75)                             | 93.74<br>(52.39 to<br>168.38)                            | 243.09<br>(135.84 to<br>443.87)                            | 4.41<br>(2.96 to<br>6.17)                         | 2.70<br>(1.55 to<br>4.75)                         | 1.72<br>(0.98 to<br>3.05)                         | 4.45<br>(2.52 to<br>8.07)                         |
| Indirect maternal deaths                                 | 526.07<br>(379.48 to<br>712.26)                            | 418.46<br>(278.33 to<br>606.66)                            | 257.27<br>(169.70 to<br>368.71)                          | 698.02<br>(468.96 to<br>1,003.56)                          | 9.46<br>(6.92 to<br>12.73)                        | 7.59<br>(5.11 to<br>10.90)                        | 4.68<br>(3.15 to<br>6.64)                         | 12.58<br>(8.59 to<br>17.90)                       |
| Late maternal deaths                                     | 31.97<br>(16.18 to<br>56.19)                               | 19.86<br>(9.69 to<br>36.47)                                | 12.70<br>(6.19 to<br>23.49)                              | 34.26<br>(16.89 to<br>62.40)                               | 0.58<br>(0.29 to<br>1.00)                         | 0.37<br>(0.18 to<br>0.66)                         | 0.23<br>(0.11 to<br>0.42)                         | 0.63<br>(0.31 to<br>1.12)                         |
| Maternal deaths aggravated by HIV/AIDS                   | 33.85<br>(19.85 to<br>48.36)                               | 159.64<br>(84.94 to<br>258.26)                             | 77.23<br>(32.85 to<br>134.52)                            | 280.40<br>(162.07 to<br>430.85)                            | 0.65<br>(0.38 to<br>0.93)                         | 3.17<br>(1.70 to<br>5.04)                         | 1.54<br>(0.68 to<br>2.67)                         | 5.52<br>(3.20 to<br>8.49)                         |
| Other maternal disorders                                 | 210.93<br>(141.58 to<br>288.21)                            | 161.50<br>(102.70 to<br>242.71)                            | 104.45<br>(66.04 to<br>158.07)                           | 265.61<br>(169.35 to<br>394.59)                            | 3.88<br>(2.64 to<br>5.28)                         | 3.02<br>(1.90 to<br>4.51)                         | 1.96<br>(1.24 to<br>2.94)                         | 4.93<br>(3.16 to<br>7.31)                         |
| <b>Western Sub-Saharan Africa</b>                        |                                                            |                                                            |                                                          |                                                            |                                                   |                                                   |                                                   |                                                   |
| Cause                                                    | YLLs (in 1000s)                                            |                                                            |                                                          |                                                            | Deaths (in 1000s)                                 |                                                   |                                                   |                                                   |
|                                                          | 2016                                                       | 2040 Forecast                                              | 2040 Better Scenario                                     | 2040 Worse Scenario                                        | 2016                                              | 2040 Forecast                                     | 2040 Better Scenario                              | 2040 Worse Scenario                               |
| Neonatal disorders                                       | 30,920.17<br>(26,338.46 to<br>35,945.67)                   | 21,019.22<br>(10,538.27 to<br>32,744.66)                   | 11,343.15<br>(6,326.86 to<br>17,065.88)                  | 33,716.90<br>(18,740.37 to<br>50,588.15)                   | 357.17<br>(304.25 to<br>415.21)                   | 242.87<br>(121.82 to<br>378.30)                   | 131.07<br>(73.12 to<br>197.18)                    | 389.58<br>(216.57 to<br>584.42)                   |
| Neonatal preterm birth                                   | 9,514.48<br>(7,667.37 to<br>11,689.60)                     | 5,772.79<br>(2,993.90 to<br>8,771.20)                      | 2,878.82<br>(1,716.48 to<br>4,101.44)                    | 9,807.06<br>(5,785.52 to<br>13,866.13)                     | 109.90<br>(88.56 to<br>135.01)                    | 66.69<br>(34.59 to<br>101.32)                     | 33.26<br>(19.84 to<br>47.38)                      | 113.30<br>(66.85 to<br>160.16)                    |
| Neonatal encephalopathy due to birth asphyxia and trauma | 12,154.37<br>(9,627.88 to<br>14,976.33)                    | 7,495.29<br>(2,927.93 to<br>13,454.95)                     | 4,191.48<br>(1,855.01 to<br>7,328.65)                    | 11,441.90<br>(5,001.00 to<br>19,649.63)                    | 140.38<br>(111.20 to<br>172.98)                   | 86.59<br>(33.84 to<br>155.41)                     | 48.43<br>(21.43 to<br>84.65)                      | 132.19<br>(57.78 to<br>226.97)                    |

|                                                                         |                                                               |                                                               |                                                               |                                                               |                                                      |                                                            |                                                            |                                                            |
|-------------------------------------------------------------------------|---------------------------------------------------------------|---------------------------------------------------------------|---------------------------------------------------------------|---------------------------------------------------------------|------------------------------------------------------|------------------------------------------------------------|------------------------------------------------------------|------------------------------------------------------------|
| Neonatal sepsis and other neonatal infections                           | 6,176.59<br>(4,567.84 to<br>8,567.31)                         | 5,632.94<br>(3,020.59 to<br>9,041.53)                         | 3,143.23<br>(1,837.99 to<br>4,821.67)                         | 8,845.83<br>(4,997.78 to<br>13,659.84)                        | 71.37<br>(8.99)                                      | 65.10<br>(34.91 to<br>104.47)                              | 36.33<br>(21.25 to<br>55.71)                               | 102.23<br>(57.79 to<br>157.83)                             |
| Hemolytic disease and other neonatal jaundice                           | 867.62<br>(662.08 to<br>1,187.02)                             | 374.07<br>(193.47 to<br>641.58)                               | 197.77<br>(109.92 to<br>330.21)                               | 632.66<br>(356.20 to<br>1,037.20)                             | 10.03<br>(7.65 to<br>13.71)                          | 4.32<br>(2.24 to<br>7.41)                                  | 2.29<br>(1.27 to<br>3.82)                                  | 7.31<br>(4.12 to<br>11.99)                                 |
| Other neonatal disorders                                                | 2,207.09<br>(1,573.10 to<br>3,474.15)                         | 1,744.14<br>(833.24 to<br>3,385.13)                           | 931.84<br>(488.48 to<br>1,654.10)                             | 2,989.44<br>(1,571.48 to<br>5,347.05)                         | 25.50<br>(18.18 to<br>40.15)                         | 20.16<br>(9.63 to<br>39.11)                                | 10.77<br>(5.65 to<br>19.12)                                | 34.55<br>(18.17 to<br>61.79)                               |
| <b>Nutritional deficiencies</b>                                         | <b>5,149.88</b><br><b>(3,904.48 to</b><br><b>6,752.22)</b>    | <b>2,177.19</b><br><b>(1,443.46 to</b><br><b>3,143.59)</b>    | <b>1,338.48</b><br><b>(957.10 to</b><br><b>1,798.64)</b>      | <b>3,488.73</b><br><b>(2,447.79 to</b><br><b>4,776.27)</b>    | <b>68.06</b><br><b>(52.67 to</b><br><b>87.62)</b>    | <b>38.67</b><br><b>(29.46 to</b><br><b>50.46)</b>          | <b>27.61</b><br><b>(22.22 to</b><br><b>33.81)</b>          | <b>55.10</b><br><b>(41.72 to</b><br><b>71.08)</b>          |
| Protein-energy malnutrition                                             | 4,947.26<br>(3,739.32 to<br>6,522.19)                         | 1,967.34<br>(1,270.23 to<br>2,890.41)                         | 1,184.08<br>(828.27 to<br>1,617.01)                           | 3,176.43<br>(2,179.44 to<br>4,424.72)                         | 64.24<br>(49.37 to<br>82.70)                         | 33.79<br>(24.92 to<br>44.95)                               | 23.61<br>(18.77 to<br>29.31)                               | 48.72<br>(36.35 to<br>63.97)                               |
| Iodine deficiency                                                       | 21.11<br>(6.06 to<br>67.74)                                   | 58.35<br>(14.21 to<br>236.46)                                 | 36.29<br>(0.74 to<br>125.35)                                  | 101.26<br>(21.77 to<br>381.63)                                | 0.52<br>(0.12 to<br>0.87)                            | 1.13<br>(0.39 to<br>3.53)                                  | 0.80<br>(0.31 to<br>2.00)                                  | 1.71<br>(0.57 to<br>5.20)                                  |
| Dietary iron deficiency                                                 | 16.04<br>(11.21 to<br>29.08)                                  | 16.44<br>(11.96 to<br>26.54)                                  | 14.12<br>(10.33 to<br>22.85)                                  | 20.79<br>(14.85 to<br>35.49)                                  | 0.32<br>(0.23 to<br>0.55)                            | 0.41<br>(0.28 to<br>0.84)                                  | 0.37<br>(0.25 to<br>0.78)                                  | 0.48<br>(0.33 to<br>0.97)                                  |
| Other nutritional deficiencies                                          | 165.46<br>(97.29 to<br>266.63)                                | 135.07<br>(89.83 to<br>205.33)                                | 103.98<br>(72.07 to<br>140.84)                                | 190.25<br>(123.76 to<br>286.61)                               | 3.18<br>(2.24 to<br>4.42)                            | 3.34<br>(2.34 to<br>4.33)                                  | 2.82<br>(2.00 to<br>3.56)                                  | 4.20<br>(2.96 to<br>5.42)                                  |
| <b>Other communicable, maternal, neonatal, and nutritional diseases</b> | <b>2,917.31</b><br><b>(1,967.01 to</b><br><b>4,246.03)</b>    | <b>1,452.42</b><br><b>(1,003.57 to</b><br><b>2,151.86)</b>    | <b>1,042.20</b><br><b>(748.22 to</b><br><b>1,452.48)</b>      | <b>2,145.78</b><br><b>(1,447.28 to</b><br><b>3,111.96)</b>    | <b>38.96</b><br><b>(27.74 to</b><br><b>54.42)</b>    | <b>24.80</b><br><b>(19.08 to</b><br><b>33.44)</b>          | <b>18.91</b><br><b>(14.94 to</b><br><b>23.98)</b>          | <b>33.89</b><br><b>(25.62 to</b><br><b>45.46)</b>          |
| Sexually transmitted infections excluding HIV                           | 2,000.49<br>(1,100.54 to<br>3,172.73)                         | 615.82<br>(300.47 to<br>1,079.82)                             | 439.41<br>(224.22 to<br>757.42)                               | 988.51<br>(491.72 to<br>1,729.76)                             | 23.65<br>(13.12 to<br>37.38)                         | 7.52<br>(3.85 to<br>13.02)                                 | 5.42<br>(2.92 to<br>9.16)                                  | 11.92<br>(6.15 to<br>20.49)                                |
| Syphilis                                                                | 1,976.52<br>(1,079.64 to<br>3,147.59)                         | 588.29<br>(276.34 to<br>1,048.11)                             | 415.22<br>(201.11 to<br>731.06)                               | 956.58<br>(459.78 to<br>1,703.74)                             | 23.19<br>(12.69 to<br>36.90)                         | 6.96<br>(3.29 to<br>12.34)                                 | 4.93<br>(2.41 to<br>8.62)                                  | 11.28<br>(5.49 to<br>19.97)                                |
| Chlamydial infection                                                    | 4.91<br>(3.79 to<br>6.46)                                     | 5.66<br>(4.02 to<br>8.21)                                     | 4.96<br>(3.56 to<br>7.08)                                     | 6.58<br>(4.73 to<br>9.38)                                     | 0.09<br>(0.07 to<br>0.12)                            | 0.11<br>(0.08 to<br>0.16)                                  | 0.10<br>(0.07 to<br>0.14)                                  | 0.13<br>(0.09 to<br>0.18)                                  |
| Gonococcal infection                                                    | 12.29<br>(9.54 to<br>15.90)                                   | 14.15<br>(10.05 to<br>19.92)                                  | 12.47<br>(9.02 to<br>17.43)                                   | 16.35<br>(11.65 to<br>22.84)                                  | 0.24<br>(0.19 to<br>0.32)                            | 0.29<br>(0.21 to<br>0.40)                                  | 0.26<br>(0.19 to<br>0.36)                                  | 0.33<br>(0.24 to<br>0.46)                                  |
| Other sexually transmitted infections                                   | 6.77<br>(5.24 to<br>8.79)                                     | 7.72<br>(5.48 to<br>10.95)                                    | 6.76<br>(4.90 to<br>9.45)                                     | 9.00<br>(6.47 to<br>12.57)                                    | 0.13<br>(0.10 to<br>0.17)                            | 0.15<br>(0.11 to<br>0.21)                                  | 0.13<br>(0.10 to<br>0.19)                                  | 0.18<br>(0.13 to<br>0.24)                                  |
| Acute hepatitis                                                         | 472.14<br>(420.55 to<br>531.62)                               | 437.41<br>(353.30 to<br>552.34)                               | 348.27<br>(282.39 to<br>438.72)                               | 543.22<br>(441.25 to<br>673.81)                               | 9.20<br>(8.18 to<br>10.37)                           | 10.05<br>(8.33 to<br>12.45)                                | 8.24<br>(6.82 to<br>10.13)                                 | 12.04<br>(9.94 to<br>14.75)                                |
| Acute hepatitis A                                                       | 21.71<br>(8.74 to<br>39.16)                                   | 12.46<br>(5.40 to<br>27.24)                                   | 7.66<br>(4.09 to<br>13.77)                                    | 17.58<br>(8.46 to<br>34.75)                                   | 0.27<br>(0.12 to<br>0.47)                            | 0.19<br>(0.09 to<br>0.36)                                  | 0.12<br>(0.07 to<br>0.20)                                  | 0.25<br>(0.14 to<br>0.44)                                  |
| Acute hepatitis B                                                       | 318.70<br>(275.84 to<br>365.95)                               | 321.41<br>(256.15 to<br>409.03)                               | 259.32<br>(207.12 to<br>329.55)                               | 393.50<br>(314.73 to<br>497.82)                               | 6.92<br>(6.03 to<br>7.91)                            | 7.90<br>(6.44 to<br>9.79)                                  | 6.48<br>(5.26 to<br>8.03)                                  | 9.43<br>(7.70 to<br>11.65)                                 |
| Acute hepatitis C                                                       | 9.08<br>(6.77 to<br>12.03)                                    | 11.70<br>(8.18 to<br>16.46)                                   | 10.34<br>(7.25 to<br>14.56)                                   | 13.01<br>(9.14 to<br>18.30)                                   | 0.27<br>(0.16 to<br>0.29)                            | 0.32<br>(0.22 to<br>0.45)                                  | 0.29<br>(0.20 to<br>0.41)                                  | 0.34<br>(0.24 to<br>0.48)                                  |
| Acute hepatitis E                                                       | 122.65<br>(98.86 to<br>152.21)                                | 91.83<br>(64.04 to<br>125.94)                                 | 70.95<br>(50.74 to<br>96.16)                                  | 119.14<br>(85.01 to<br>159.02)                                | 1.79<br>(1.45 to<br>2.21)                            | 1.65<br>(1.21 to<br>2.21)                                  | 1.35<br>(0.99 to<br>1.81)                                  | 2.02<br>(1.50 to<br>2.66)                                  |
| Other unspecified infectious diseases                                   | 444.68<br>(260.09 to<br>1,023.08)                             | 399.19<br>(242.54 to<br>769.76)                               | 254.52<br>(168.47 to<br>427.47)                               | 614.05<br>(388.33 to<br>1,091.04)                             | 6.11<br>(3.91 to<br>12.80)                           | 7.23<br>(5.17 to<br>11.40)                                 | 5.24<br>(4.00 to<br>7.37)                                  | 9.93<br>(7.08 to<br>15.36)                                 |
| <b>Non-communicable diseases</b>                                        | <b>33,276.83</b><br><b>(27,543.15 to</b><br><b>38,053.32)</b> | <b>50,992.36</b><br><b>(43,410.90 to</b><br><b>59,257.46)</b> | <b>40,576.97</b><br><b>(35,091.65 to</b><br><b>46,319.75)</b> | <b>65,713.37</b><br><b>(55,431.00 to</b><br><b>77,523.02)</b> | <b>905.67</b><br><b>(819.40 to</b><br><b>989.30)</b> | <b>1,882.82</b><br><b>(1,682.35 to</b><br><b>2,114.58)</b> | <b>1,582.57</b><br><b>(1,433.95 to</b><br><b>1,755.11)</b> | <b>2,295.15</b><br><b>(2,023.87 to</b><br><b>2,625.23)</b> |
| <b>Western Sub-Saharan Africa</b>                                       |                                                               |                                                               |                                                               |                                                               |                                                      |                                                            |                                                            |                                                            |
| <b>YLLs (in 1000s)</b>                                                  |                                                               |                                                               |                                                               |                                                               | <b>Deaths (in 1000s)</b>                             |                                                            |                                                            |                                                            |

| Cause                                | 2016                                      | 2040 Forecast                                | 2040 Better Scenario                         | 2040 Worse Scenario                          | 2016                                | 2040 Forecast                       | 2040 Better Scenario                | 2040 Worse Scenario                 |
|--------------------------------------|-------------------------------------------|----------------------------------------------|----------------------------------------------|----------------------------------------------|-------------------------------------|-------------------------------------|-------------------------------------|-------------------------------------|
| <b>Neoplasms</b>                     | <b>5,888.12</b><br>(5,296.65 to 6,502.14) | <b>12,965.58</b><br>(11,002.92 to 15,107.65) | <b>12,280.23</b><br>(10,510.74 to 14,264.49) | <b>13,909.08</b><br>(11,741.17 to 16,511.49) | <b>188.44</b><br>(170.09 to 208.38) | <b>482.57</b><br>(421.94 to 550.68) | <b>477.19</b><br>(417.13 to 539.28) | <b>496.63</b><br>(431.25 to 570.16) |
| Lip and oral cavity cancer           | 51.52<br>(46.72 to 56.91)                 | 108.63<br>(81.01 to 145.52)                  | 86.60<br>(67.01 to 113.86)                   | 152.38<br>(107.88 to 215.91)                 | 1.82<br>(1.66 to 2.01)              | 4.12<br>(3.16 to 5.44)              | 3.47<br>(2.76 to 4.49)              | 5.52<br>(4.01 to 7.69)              |
| Nasopharynx cancer                   | 16.41<br>(14.23 to 19.13)                 | 33.69<br>(24.32 to 47.84)                    | 25.31<br>(18.86 to 34.64)                    | 51.70<br>(35.76 to 77.47)                    | 0.41<br>(0.36 to 0.47)              | 0.91<br>(0.67 to 1.27)              | 0.70<br>(0.53 to 0.94)              | 1.37<br>(0.96 to 1.99)              |
| Other pharynx cancer                 | 31.74<br>(28.66 to 35.04)                 | 50.90<br>(37.27 to 70.55)                    | 45.22<br>(33.63 to 60.91)                    | 66.31<br>(46.04 to 94.85)                    | 1.09<br>(0.99 to 1.20)              | 1.96<br>(1.44 to 2.75)              | 1.79<br>(1.34 to 2.45)              | 2.46<br>(1.70 to 3.58)              |
| Esophageal cancer                    | 143.50<br>(121.02 to 163.89)              | 278.11<br>(184.92 to 427.57)                 | 227.82<br>(156.43 to 340.92)                 | 375.68<br>(237.78 to 590.92)                 | 5.39<br>(4.60 to 6.13)              | 11.15<br>(7.55 to 16.75)            | 9.53<br>(6.65 to 14.12)             | 14.52<br>(9.32 to 22.11)            |
| Stomach cancer                       | 323.74<br>(299.65 to 350.24)              | 483.68<br>(414.04 to 601.43)                 | 454.16<br>(389.59 to 556.27)                 | 524.13<br>(442.51 to 658.80)                 | 12.41<br>(11.51 to 13.37)           | 20.67<br>(17.99 to 25.39)           | 20.13<br>(17.64 to 24.30)           | 21.43<br>(18.44 to 26.70)           |
| Colon and rectum cancer              | 277.95<br>(246.56 to 313.39)              | 718.90<br>(532.59 to 972.21)                 | 736.25<br>(544.73 to 985.63)                 | 731.45<br>(533.15 to 1,007.17)               | 10.32<br>(9.23 to 11.59)            | 31.21<br>(23.20 to 41.79)           | 33.14<br>(25.15 to 44.14)           | 30.42<br>(22.45 to 41.20)           |
| Liver cancer                         | 1,196.34<br>(970.47 to 1,435.16)          | 2,944.49<br>(2,108.06 to 4,070.64)           | 2,645.92<br>(1,940.90 to 3,511.29)           | 3,372.20<br>(2,307.23 to 4,864.26)           | 35.78<br>(29.46 to 42.36)           | 96.98<br>(70.65 to 129.81)          | 89.92<br>(67.59 to 116.92)          | 107.65<br>(74.70 to 149.54)         |
| Liver cancer due to hepatitis B      | 697.87<br>(564.40 to 858.98)              | 1,706.91<br>(1,198.75 to 2,401.58)           | 1,548.93<br>(1,132.22 to 2,103.12)           | 1,867.53<br>(1,261.73 to 2,741.49)           | 20.05<br>(16.44 to 24.33)           | 53.95<br>(39.16 to 73.57)           | 50.46<br>(38.04 to 67.11)           | 57.26<br>(39.75 to 81.12)           |
| Liver cancer due to hepatitis C      | 76.99<br>(56.94 to 101.39)                | 205.14<br>(157.22 to 292.22)                 | 189.82<br>(130.06 to 265.86)                 | 218.07<br>(142.12 to 320.31)                 | 2.87<br>(2.11 to 3.72)              | 8.52<br>(5.84 to 12.09)             | 8.19<br>(5.80 to 11.25)             | 8.71<br>(5.81 to 12.57)             |
| Liver cancer due to alcohol use      | 160.83<br>(120.83 to 204.98)              | 398.29<br>(264.81 to 569.76)                 | 341.98<br>(236.76 to 471.58)                 | 582.96<br>(363.91 to 873.24)                 | 5.44<br>(4.18 to 6.80)              | 14.46<br>(9.89 to 20.00)            | 12.86<br>(9.20 to 17.37)            | 20.12<br>(13.18 to 29.02)           |
| Liver cancer due to other causes     | 260.64<br>(210.78 to 318.68)              | 634.16<br>(447.61 to 886.58)                 | 565.19<br>(408.46 to 765.89)                 | 703.64<br>(480.38 to 1,017.64)               | 7.41<br>(6.00 to 8.86)              | 20.05<br>(14.27 to 27.92)           | 18.39<br>(13.54 to 24.68)           | 21.55<br>(14.94 to 30.91)           |
| Gallbladder and biliary tract cancer | 65.30<br>(52.17 to 82.40)                 | 110.81<br>(88.03 to 141.45)                  | 116.37<br>(91.66 to 149.50)                  | 104.38<br>(83.75 to 132.68)                  | 2.70<br>(2.16 to 3.41)              | 5.08<br>(4.09 to 6.42)              | 5.49<br>(4.39 to 6.96)              | 4.64<br>(3.74 to 5.85)              |
| Pancreatic cancer                    | 166.31<br>(151.71 to 183.98)              | 465.52<br>(395.83 to 561.80)                 | 482.49<br>(411.05 to 577.69)                 | 438.75<br>(371.99 to 526.80)                 | 6.87<br>(6.27 to 7.61)              | 20.84<br>(17.91 to 24.96)           | 22.25<br>(19.18 to 26.41)           | 19.05<br>(16.31 to 22.87)           |
| Larynx cancer                        | 44.63<br>(38.75 to 50.89)                 | 84.29<br>(58.23 to 123.03)                   | 61.29<br>(45.43 to 85.69)                    | 123.35<br>(81.44 to 187.28)                  | 1.65<br>(1.45 to 1.87)              | 3.25<br>(2.32 to 4.67)              | 2.46<br>(1.87 to 3.35)              | 4.61<br>(3.11 to 7.00)              |
| Tracheal, bronchus, and lung cancer  | 257.09<br>(233.96 to 285.13)              | 657.56<br>(477.57 to 907.11)                 | 427.24<br>(331.08 to 558.64)                 | 817.89<br>(580.40 to 1,154.28)               | 10.25<br>(9.37 to 11.41)            | 27.72<br>(20.56 to 37.92)           | 19.12<br>(14.93 to 24.60)           | 33.64<br>(24.16 to 46.65)           |
| Malignant skin melanoma              | 24.55<br>(21.17 to 31.45)                 | 63.80<br>(54.35 to 78.82)                    | 72.30<br>(60.89 to 89.37)                    | 56.09<br>(47.77 to 69.09)                    | 0.91<br>(0.77 to 1.09)              | 2.86<br>(2.25 to 3.33)              | 3.39<br>(2.61 to 3.95)              | 2.42<br>(1.94 to 2.80)              |
| Non-melanoma skin cancer             | 14.61<br>(12.71 to 16.87)                 | 35.64<br>(30.43 to 41.57)                    | 34.24<br>(29.24 to 40.00)                    | 36.84<br>(31.52 to 43.02)                    | 0.52<br>(0.45 to 0.59)              | 1.58<br>(1.39 to 1.79)              | 1.60<br>(1.42 to 1.80)              | 1.53<br>(1.34 to 1.75)              |
| Breast cancer                        | 644.40<br>(507.67 to 781.68)              | 1,384.72<br>(996.56 to 1,866.89)             | 1,363.63<br>(983.98 to 1,820.92)             | 1,486.42<br>(1,043.98 to 2,028.61)           | 19.69<br>(15.76 to 23.65)           | 46.66<br>(35.23 to 61.41)           | 46.72<br>(35.56 to 60.74)           | 49.15<br>(36.68 to 65.65)           |
| Cervical cancer                      | 486.50<br>(335.31 to 580.68)              | 777.18<br>(518.84 to 976.56)                 | 718.13<br>(482.47 to 905.75)                 | 848.36<br>(569.94 to 1,062.23)               | 15.43<br>(10.43 to 18.39)           | 25.82<br>(17.10 to 31.85)           | 24.20<br>(15.88 to 29.87)           | 27.62<br>(18.46 to 33.77)           |
| Uterine cancer                       | 67.84<br>(56.95 to 79.37)                 | 139.41<br>(114.38 to 168.63)                 | 126.91<br>(103.97 to 153.34)                 | 150.80<br>(124.16 to 181.71)                 | 2.60<br>(2.20 to 3.01)              | 5.82<br>(4.93 to 6.86)              | 5.42<br>(4.58 to 6.36)              | 6.13<br>(5.21 to 7.22)              |

|                                   |                                                            |                                                              |                                                             |                                                               |                                                      |                                                      |                                                      |                                                        |
|-----------------------------------|------------------------------------------------------------|--------------------------------------------------------------|-------------------------------------------------------------|---------------------------------------------------------------|------------------------------------------------------|------------------------------------------------------|------------------------------------------------------|--------------------------------------------------------|
| Ovarian cancer                    | 96.59<br>(79.49 to<br>115.25)                              | 232.73<br>(177.57 to<br>298.30)                              | 247.05<br>(190.47 to<br>313.93)                             | 216.05<br>(161.85 to<br>280.24)                               | 3.05<br>(2.53 to<br>3.63)                            | 7.92<br>(6.17 to<br>10.12)                           | 8.53<br>(6.73 to<br>10.67)                           | 7.26<br>(5.59 to<br>9.29)                              |
| Prostate cancer                   | 375.36<br>(193.10 to<br>509.44)                            | 1,291.80<br>(705.76 to<br>1,677.11)                          | 1,405.68<br>(795.75 to<br>1,818.67)                         | 1,183.44<br>(618.74 to<br>1,555.53)                           | 19.90<br>(10.57 to<br>26.47)                         | 77.98<br>(44.17 to<br>98.56)                         | 87.48<br>(52.00 to<br>109.28)                        | 69.26<br>(37.40 to<br>88.53)                           |
| Testicular cancer                 | 11.74<br>(10.09 to<br>13.64)                               | 19.66<br>(16.28 to<br>24.19)                                 | 18.69<br>(15.42 to<br>23.03)                                | 20.97<br>(17.40 to<br>25.75)                                  | 0.26<br>(0.23 to<br>0.30)                            | 0.48<br>(0.41 to<br>0.57)                            | 0.46<br>(0.39 to<br>0.56)                            | 0.50<br>(0.42 to<br>0.60)                              |
| <b>Western Sub-Saharan Africa</b> |                                                            |                                                              |                                                             |                                                               |                                                      |                                                      |                                                      |                                                        |
| Cause                             | YLLs (in 1000s)                                            |                                                              |                                                             |                                                               | Deaths (in 1000s)                                    |                                                      |                                                      |                                                        |
|                                   | 2016                                                       | 2040 Forecast                                                | 2040 Better Scenario                                        | 2040 Worse Scenario                                           | 2016                                                 | 2040 Forecast                                        | 2040 Better Scenario                                 | 2040 Worse Scenario                                    |
| Kidney cancer                     | 63.34<br>(57.70 to<br>69.35)                               | 141.71<br>(123.59 to<br>165.11)                              | 148.91<br>(130.16 to<br>174.16)                             | 135.41<br>(118.13 to<br>158.47)                               | 1.67<br>(1.52 to<br>1.83)                            | 4.65<br>(4.13 to<br>5.39)                            | 5.14<br>(4.55 to<br>5.99)                            | 4.19<br>(3.70 to<br>4.84)                              |
| Bladder cancer                    | 75.22<br>(68.09 to<br>82.53)                               | 178.60<br>(150.40 to<br>216.90)                              | 170.94<br>(145.56 to<br>205.06)                             | 183.49<br>(153.14 to<br>223.86)                               | 3.06<br>(2.79 to<br>3.36)                            | 8.08<br>(6.90 to<br>9.74)                            | 8.09<br>(7.00 to<br>9.63)                            | 7.91<br>(6.67 to<br>9.69)                              |
| Brain and nervous system cancer   | 243.74<br>(188.34 to<br>308.12)                            | 499.12<br>(386.00 to<br>634.67)                              | 491.91<br>(386.36 to<br>614.84)                             | 498.30<br>(384.56 to<br>631.41)                               | 5.24<br>(4.21 to<br>6.46)                            | 12.80<br>(10.41 to<br>15.90)                         | 13.25<br>(10.88 to<br>16.46)                         | 12.23<br>(9.92 to<br>15.05)                            |
| Thyroid cancer                    | 17.77<br>(16.05 to<br>19.56)                               | 36.07<br>(29.05 to<br>45.28)                                 | 32.72<br>(26.61 to<br>40.52)                                | 40.00<br>(31.82 to<br>51.63)                                  | 0.57<br>(0.52 to<br>0.63)                            | 1.28<br>(1.06 to<br>1.60)                            | 1.19<br>(0.99 to<br>1.45)                            | 1.37<br>(1.12 to<br>1.76)                              |
| Mesothelioma                      | 8.05<br>(6.96 to<br>9.69)                                  | 17.78<br>(14.80 to<br>22.01)                                 | 17.27<br>(14.34 to<br>21.50)                                | 18.31<br>(15.23 to<br>22.68)                                  | 0.25<br>(0.22 to<br>0.30)                            | 0.64<br>(0.54 to<br>0.78)                            | 0.64<br>(0.54 to<br>0.78)                            | 0.63<br>(0.54 to<br>0.77)                              |
| Hodgkin lymphoma                  | 65.07<br>(51.21 to<br>91.40)                               | 86.47<br>(64.28 to<br>118.94)                                | 67.10<br>(49.47 to<br>90.86)                                | 100.36<br>(75.30 to<br>135.91)                                | 1.35<br>(1.01 to<br>1.72)                            | 2.23<br>(1.48 to<br>2.78)                            | 1.81<br>(1.19 to<br>2.24)                            | 2.78<br>(1.66 to<br>3.07)                              |
| Non-Hodgkin lymphoma              | 303.26<br>(269.76 to<br>336.52)                            | 580.35<br>(486.40 to<br>694.19)                              | 569.02<br>(480.99 to<br>677.23)                             | 585.36<br>(486.94 to<br>704.19)                               | 6.41<br>(5.83 to<br>7.09)                            | 14.74<br>(12.75 to<br>17.19)                         | 15.16<br>(13.19 to<br>17.72)                         | 14.17<br>(12.21 to<br>16.63)                           |
| Multiple myeloma                  | 30.72<br>(43.06 to<br>60.47)                               | 142.48<br>(112.02 to<br>183.64)                              | 149.62<br>(118.61 to<br>188.74)                             | 133.14<br>(103.71 to<br>171.87)                               | 1.86<br>(1.56 to<br>2.21)                            | 5.64<br>(4.52 to<br>7.19)                            | 6.07<br>(4.86 to<br>7.64)                            | 5.13<br>(4.07 to<br>6.47)                              |
| Leukemia                          | 283.96<br>(250.33 to<br>329.22)                            | 501.23<br>(410.52 to<br>603.00)                              | 477.55<br>(392.42 to<br>575.40)                             | 525.42<br>(430.73 to<br>635.79)                               | 6.21<br>(5.46 to<br>7.00)                            | 13.43<br>(11.01 to<br>15.93)                         | 13.20<br>(10.86 to<br>15.53)                         | 13.56<br>(11.08 to<br>16.23)                           |
| Acute lymphoid leukemia           | 59.09<br>(50.63 to<br>77.86)                               | 98.29<br>(76.32 to<br>128.81)                                | 93.96<br>(73.05 to<br>121.55)                               | 103.11<br>(80.23 to<br>134.66)                                | 1.02<br>(0.87 to<br>1.28)                            | 1.97<br>(1.53 to<br>2.51)                            | 1.94<br>(1.49 to<br>2.46)                            | 2.00<br>(1.55 to<br>2.56)                              |
| Chronic lymphoid leukemia         | 12.79<br>(9.16 to<br>15.25)                                | 28.29<br>(19.37 to<br>35.44)                                 | 27.79<br>(18.99 to<br>34.70)                                | 28.19<br>(19.18 to<br>35.96)                                  | 0.57<br>(0.39 to<br>0.68)                            | 1.34<br>(0.91 to<br>1.68)                            | 1.34<br>(0.91 to<br>1.66)                            | 1.31<br>(0.88 to<br>1.66)                              |
| Acute myeloid leukemia            | 109.74<br>(93.40 to<br>129.34)                             | 218.33<br>(177.03 to<br>271.11)                              | 215.66<br>(173.30 to<br>272.27)                             | 220.14<br>(177.61 to<br>272.27)                               | 2.09<br>(1.77 to<br>2.45)                            | 5.11<br>(4.13 to<br>6.35)                            | 5.24<br>(4.21 to<br>6.57)                            | 4.96<br>(4.01 to<br>6.19)                              |
| Chronic myeloid leukemia          | 28.20<br>(23.40 to<br>33.06)                               | 37.08<br>(28.06 to<br>47.66)                                 | 35.30<br>(26.97 to<br>44.56)                                | 38.43<br>(28.92 to<br>50.06)                                  | 0.70<br>(0.59 to<br>0.83)                            | 1.06<br>(0.85 to<br>1.33)                            | 1.04<br>(0.83 to<br>1.30)                            | 1.07<br>(0.84 to<br>1.35)                              |
| Other leukemia                    | 74.13<br>(62.04 to<br>87.91)                               | 119.25<br>(93.77 to<br>150.23)                               | 104.84<br>(81.92 to<br>130.10)                              | 135.56<br>(106.98 to<br>170.33)                               | 1.84<br>(1.53 to<br>2.11)                            | 3.95<br>(3.03 to<br>4.75)                            | 3.64<br>(2.81 to<br>4.37)                            | 4.23<br>(3.27 to<br>5.17)                              |
| Other neoplasms                   | 480.89<br>(421.52 to<br>586.89)                            | 900.25<br>(766.16 to<br>1,109.99)                            | 859.88<br>(740.95 to<br>1,022.57)                           | 932.07<br>(795.90 to<br>1,152.95)                             | 10.75<br>(9.66 to<br>12.53)                          | 26.07<br>(23.35 to<br>30.27)                         | 26.84<br>(24.11 to<br>31.04)                         | 25.16<br>(22.55 to<br>29.19)                           |
| <b>Cardiovascular diseases</b>    | <b>7,705.35</b><br><b>(7,174.30 to</b><br><b>8,277.01)</b> | <b>12,561.65</b><br><b>(9,506.20 to</b><br><b>16,408.15)</b> | <b>7,902.67</b><br><b>(6,231.68 to</b><br><b>10,011.37)</b> | <b>19,880.95</b><br><b>(14,739.95 to</b><br><b>26,958.18)</b> | <b>312.02</b><br><b>(291.43 to</b><br><b>334.52)</b> | <b>625.97</b><br><b>(497.93 to</b><br><b>803.28)</b> | <b>425.30</b><br><b>(348.60 to</b><br><b>528.16)</b> | <b>909.02</b><br><b>(704.04 to</b><br><b>1,186.57)</b> |
| Rheumatic heart disease           | 225.67<br>(195.05 to<br>262.27)                            | 175.14<br>(140.41 to<br>221.92)                              | 141.82<br>(114.72 to<br>177.15)                             | 225.59<br>(181.30 to<br>287.48)                               | 6.37<br>(5.51 to<br>7.35)                            | 7.07<br>(5.87 to<br>8.78)                            | 6.08<br>(5.07 to<br>7.41)                            | 8.28<br>(6.87 to<br>10.40)                             |

|                                               |                                                            |                                                            |                                                            |                                                            |                                                   |                                                    |                                                   |                                                     |
|-----------------------------------------------|------------------------------------------------------------|------------------------------------------------------------|------------------------------------------------------------|------------------------------------------------------------|---------------------------------------------------|----------------------------------------------------|---------------------------------------------------|-----------------------------------------------------|
| Ischemic heart disease                        | 3,117.82<br>(2,862.74 to<br>3,448.22)                      | 5,559.66<br>(3,604.35 to<br>8,401.72)                      | 3,081.37<br>(2,072.53 to<br>4,707.09)                      | 9,278.28<br>(5,881.81 to<br>14,130.17)                     | 146.02<br>(134.55 to<br>160.68)                   | 304.80<br>(208.93 to<br>445.83)                    | 187.71<br>(131.93 to<br>275.57)                   | 462.65<br>(312.49 to<br>682.90)                     |
| Stroke                                        | 2,717.84<br>(2,459.13 to<br>2,947.22)                      | 3,639.39<br>(2,421.65 to<br>5,461.38)                      | 1,974.65<br>(1,362.23 to<br>2,855.84)                      | 6,537.46<br>(4,233.22 to<br>9,935.58)                      | 105.94<br>(96.17 to<br>114.43)                    | 176.71<br>(126.58 to<br>250.01)                    | 107.49<br>(80.03 to<br>148.39)                    | 284.65<br>(197.56 to<br>414.06)                     |
| Ischemic stroke                               | 773.46<br>(689.42 to<br>853.01)                            | 1,180.20<br>(764.45 to<br>1,840.62)                        | 731.17<br>(489.95 to<br>1,135.47)                          | 1,787.03<br>(1,122.46 to<br>2,795.66)                      | 41.49<br>(37.16 to<br>45.42)                      | 76.83<br>(51.45 to<br>126.25)                      | 52.56<br>(36.65 to<br>84.31)                      | 105.89<br>(68.97 to<br>172.89)                      |
| Intracerebral hemorrhage                      | 1,944.39<br>(1,762.96 to<br>2,119.97)                      | 2,459.19<br>(1,496.53 to<br>3,904.29)                      | 1,243.48<br>(820.27 to<br>1,877.44)                        | 4,750.42<br>(2,832.37 to<br>7,686.18)                      | 64.45<br>(58.75 to<br>70.02)                      | 99.88<br>(66.25 to<br>150.02)                      | 54.93<br>(38.56 to<br>78.12)                      | 178.76<br>(113.33 to<br>274.55)                     |
| Hypertensive heart disease                    | 301.27<br>(189.86 to<br>381.25)                            | 544.35<br>(310.04 to<br>911.30)                            | 400.94<br>(239.55 to<br>607.41)                            | 758.48<br>(401.44 to<br>1,422.10)                          | 12.60<br>(8.02 to<br>15.88)                       | 27.92<br>(16.75 to<br>45.95)                       | 21.34<br>(13.44 to<br>31.28)                      | 36.35<br>(20.16 to<br>65.34)                        |
| Cardiomyopathy and myocarditis                | 194.77<br>(165.56 to<br>248.81)                            | 366.29<br>(270.20 to<br>520.92)                            | 355.22<br>(262.43 to<br>502.13)                            | 384.48<br>(284.11 to<br>547.75)                            | 5.13<br>(4.31 to<br>6.64)                         | 12.72<br>(9.51 to<br>17.75)                        | 13.11<br>(9.87 to<br>18.15)                       | 12.47<br>(9.36 to<br>17.51)                         |
| Myocarditis                                   | 41.17<br>(32.34 to<br>58.46)                               | 58.91<br>(39.19 to<br>91.26)                               | 54.17<br>(35.79 to<br>84.39)                               | 64.78<br>(43.97 to<br>99.48)                               | 0.79<br>(0.59 to<br>1.15)                         | 1.47<br>(1.01 to<br>2.28)                          | 1.47<br>(1.00 to<br>2.27)                         | 1.49<br>(1.02 to<br>2.29)                           |
| <b>Western Sub-Saharan Africa</b>             |                                                            |                                                            |                                                            |                                                            |                                                   |                                                    |                                                   |                                                     |
| Cause                                         | YLLs (in 1000s)                                            |                                                            |                                                            |                                                            | Deaths (in 1000s)                                 |                                                    |                                                   |                                                     |
|                                               | 2016                                                       | 2040 Forecast                                              | 2040 Better Scenario                                       | 2040 Worse Scenario                                        | 2016                                              | 2040 Forecast                                      | 2040 Better Scenario                              | 2040 Worse Scenario                                 |
| Alcoholic cardiomyopathy                      | 15.25<br>(10.93 to<br>29.55)                               | 30.96<br>(21.14 to<br>62.79)                               | 31.61<br>(20.98 to<br>64.23)                               | 36.78<br>(25.10 to<br>73.64)                               | 0.47<br>(0.33 to<br>0.91)                         | 1.04<br>(0.71 to<br>2.14)                          | 1.09<br>(0.72 to<br>2.23)                         | 1.21<br>(0.82 to<br>2.46)                           |
| Other cardiomyopathy                          | 138.34<br>(119.08 to<br>169.91)                            | 276.42<br>(198.08 to<br>390.22)                            | 269.45<br>(194.95 to<br>377.22)                            | 282.92<br>(202.16 to<br>402.15)                            | 3.87<br>(3.31 to<br>4.73)                         | 10.20<br>(7.49 to<br>14.03)                        | 9.76<br>(7.84 to<br>14.54)                        | 9.76<br>(7.14 to<br>13.58)                          |
| Atrial fibrillation and flutter               | 29.52<br>(23.32 to<br>37.16)                               | 99.41<br>(76.91 to<br>128.43)                              | 104.49<br>(81.02 to<br>133.45)                             | 97.49<br>(73.24 to<br>128.13)                              | 2.32<br>(1.81 to<br>2.90)                         | 9.32<br>(7.02 to<br>12.06)                         | 10.34<br>(7.86 to<br>13.23)                       | 8.58<br>(6.39 to<br>11.19)                          |
| Aortic aneurysm                               | 39.54<br>(35.22 to<br>44.43)                               | 87.79<br>(71.19 to<br>114.46)                              | 87.13<br>(71.78 to<br>111.91)                              | 87.43<br>(69.58 to<br>116.42)                              | 1.64<br>(1.46 to<br>1.84)                         | 4.36<br>(3.64 to<br>5.49)                          | 4.57<br>(3.89 to<br>5.66)                         | 4.11<br>(3.37 to<br>5.27)                           |
| Peripheral artery disease                     | 2.42<br>(1.91 to<br>3.13)                                  | 11.35<br>(8.39 to<br>15.38)                                | 12.80<br>(9.27 to<br>17.22)                                | 9.89<br>(7.33 to<br>13.30)                                 | 0.15<br>(0.12 to<br>0.19)                         | 0.84<br>(0.62 to<br>1.12)                          | 1.01<br>(0.75 to<br>1.33)                         | 0.69<br>(0.51 to<br>0.92)                           |
| Endocarditis                                  | 154.82<br>(125.36 to<br>199.01)                            | 284.17<br>(209.28 to<br>380.97)                            | 256.53<br>(190.36 to<br>349.18)                            | 316.96<br>(233.70 to<br>430.42)                            | 3.80<br>(3.17 to<br>4.81)                         | 9.44<br>(7.00 to<br>12.74)                         | 9.13<br>(6.82 to<br>12.47)                        | 9.65<br>(7.09 to<br>13.12)                          |
| Other cardiovascular and circulatory diseases | 921.67<br>(777.06 to<br>1,256.66)                          | 1,794.10<br>(1,427.21 to<br>2,509.32)                      | 1,487.72<br>(1,206.46 to<br>2,033.24)                      | 2,184.90<br>(1,715.19 to<br>3,081.68)                      | 28.05<br>(23.71 to<br>39.26)                      | 72.80<br>(59.56 to<br>102.47)                      | 64.51<br>(53.68 to<br>89.14)                      | 81.59<br>(65.54 to<br>116.18)                       |
| <b>Chronic respiratory diseases</b>           | <b>1,313.81</b><br><b>(1,190.69 to</b><br><b>1,495.79)</b> | <b>1,876.06</b><br><b>(1,379.05 to</b><br><b>2,659.28)</b> | <b>1,287.55</b><br><b>(1,007.15 to</b><br><b>1,731.00)</b> | <b>2,520.40</b><br><b>(1,798.40 to</b><br><b>3,828.51)</b> | <b>47.65</b><br><b>(43.39 to</b><br><b>54.84)</b> | <b>82.43</b><br><b>(60.43 to</b><br><b>120.43)</b> | <b>58.88</b><br><b>(46.52 to</b><br><b>78.82)</b> | <b>105.26</b><br><b>(74.25 to</b><br><b>160.21)</b> |
| Chronic obstructive pulmonary disease         | 676.61<br>(593.12 to<br>788.35)                            | 1,137.59<br>(714.77 to<br>1,944.64)                        | 667.63<br>(465.29 to<br>1,077.18)                          | 1,646.04<br>(1,023.07 to<br>2,838.33)                      | 29.38<br>(25.69 to<br>34.45)                      | 56.39<br>(36.78 to<br>92.07)                       | 35.80<br>(25.24 to<br>54.15)                      | 76.26<br>(47.93 to<br>126.37)                       |
| Pneumoconiosis                                | 1.57<br>(1.30 to<br>1.90)                                  | 2.25<br>(1.85 to<br>2.80)                                  | 2.11<br>(1.71 to<br>2.67)                                  | 2.35<br>(1.94 to<br>2.91)                                  | 0.06<br>(0.05 to<br>0.07)                         | 0.11<br>(0.09 to<br>0.14)                          | 0.10<br>(0.09 to<br>0.13)                         | 0.11<br>(0.09 to<br>0.14)                           |
| Silicosis                                     | 0.14<br>(0.10 to<br>0.19)                                  | 0.14<br>(0.10 to<br>0.20)                                  | 0.14<br>(0.09 to<br>0.20)                                  | 0.15<br>(0.10 to<br>0.21)                                  | 0.01<br>(0.00 to<br>0.01)                         | 0.01<br>(0.00 to<br>0.01)                          | 0.01<br>(0.00 to<br>0.01)                         | 0.01<br>(0.00 to<br>0.01)                           |
| Asbestosis                                    | 0.41<br>(0.31 to<br>0.52)                                  | 0.66<br>(0.50 to<br>0.88)                                  | 0.68<br>(0.51 to<br>0.91)                                  | 0.64<br>(0.49 to<br>0.86)                                  | 0.01<br>(0.01 to<br>0.01)                         | 0.02<br>(0.02 to<br>0.03)                          | 0.02<br>(0.02 to<br>0.03)                         | 0.02<br>(0.01 to<br>0.03)                           |
| Coal workers pneumoconiosis                   | 0.08<br>(0.05 to<br>0.11)                                  | 0.10<br>(0.06 to<br>0.14)                                  | 0.07<br>(0.04 to<br>0.11)                                  | 0.12<br>(0.08 to<br>0.18)                                  | 0.00<br>(0.00 to<br>0.00)                         | 0.00<br>(0.00 to<br>0.01)                          | 0.00<br>(0.00 to<br>0.01)                         | 0.01<br>(0.00 to<br>0.01)                           |

|                                                                |                                                  |                                                  |                                                  |                                                  |                                         |                                           |                                           |                                            |
|----------------------------------------------------------------|--------------------------------------------------|--------------------------------------------------|--------------------------------------------------|--------------------------------------------------|-----------------------------------------|-------------------------------------------|-------------------------------------------|--------------------------------------------|
| Other pneumoconiosis                                           | 0.94<br>(0.79 to 1.14)                           | 1.36<br>(1.12 to 1.67)                           | 1.23<br>(1.00 to 1.53)                           | 1.44<br>(1.19 to 1.75)                           | 0.04<br>(0.03 to 0.05)                  | 0.08<br>(0.06 to 0.10)                    | 0.07<br>(0.06 to 0.09)                    | 0.08<br>(0.06 to 0.10)                     |
| Asthma                                                         | 435.05<br>(378.65 to 506.58)                     | 378.00<br>(271.09 to 528.68)                     | 290.93<br>(215.04 to 392.77)                     | 482.79<br>(339.17 to 690.58)                     | 13.06<br>(11.40 to 15.55)               | 14.28<br>(10.42 to 20.08)                 | 11.64<br>(8.82 to 15.65)                  | 17.01<br>(12.10 to 24.46)                  |
| Interstitial lung disease and pulmonary sarcoidosis            | 13.33<br>(10.35 to 17.86)                        | 34.80<br>(25.93 to 47.67)                        | 39.06<br>(28.85 to 54.00)                        | 30.81<br>(23.14 to 41.88)                        | 0.48<br>(0.36 to 0.66)                  | 1.50<br>(1.10 to 2.08)                    | 1.76<br>(1.29 to 2.47)                    | 1.28<br>(0.94 to 1.77)                     |
| Other chronic respiratory diseases                             | 187.25<br>(134.91 to 238.78)                     | 323.41<br>(239.82 to 419.25)                     | 287.82<br>(219.17 to 369.24)                     | 358.42<br>(261.33 to 465.80)                     | 4.66<br>(3.28 to 6.02)                  | 10.16<br>(7.27 to 13.55)                  | 9.57<br>(7.03 to 12.62)                   | 10.61<br>(7.45 to 14.24)                   |
| <b>Cirrhosis and other chronic liver diseases</b>              | <b>2,108.57</b><br><b>(1,705.06 to 2,633.25)</b> | <b>3,917.96</b><br><b>(3,058.75 to 4,920.16)</b> | <b>3,582.99</b><br><b>(2,795.45 to 4,522.68)</b> | <b>4,447.55</b><br><b>(3,442.19 to 5,558.91)</b> | <b>58.24</b><br><b>(47.21 to 72.50)</b> | <b>123.04</b><br><b>(98.75 to 150.58)</b> | <b>115.47</b><br><b>(93.23 to 142.19)</b> | <b>135.87</b><br><b>(108.92 to 165.82)</b> |
| Cirrhosis and other chronic liver diseases due to hepatitis B  | 890.08<br>(692.24 to 1,170.12)                   | 1,851.21<br>(1,409.58 to 2,360.63)               | 1,721.30<br>(1,327.64 to 2,236.96)               | 1,909.46<br>(1,465.38 to 2,484.49)               | 26.21<br>(20.66 to 33.73)               | 59.60<br>(46.70 to 75.54)                 | 57.18<br>(45.18 to 73.16)                 | 60.66<br>(47.48 to 77.00)                  |
| Cirrhosis and other chronic liver diseases due to hepatitis C  | 287.65<br>(187.78 to 420.73)                     | 592.90<br>(377.22 to 874.88)                     | 562.72<br>(356.95 to 826.67)                     | 626.02<br>(394.31 to 933.74)                     | 8.54<br>(5.59 to 12.31)                 | 18.74<br>(12.22 to 27.12)                 | 18.10<br>(11.77 to 26.24)                 | 19.37<br>(12.56 to 28.09)                  |
| Cirrhosis and other chronic liver diseases due to alcohol use  | 451.49<br>(346.41 to 609.09)                     | 806.84<br>(615.77 to 1,055.04)                   | 699.05<br>(534.00 to 907.32)                     | 1,141.44<br>(874.54 to 1,507.15)                 | 13.91<br>(10.67 to 18.33)               | 27.62<br>(21.76 to 35.25)                 | 24.50<br>(19.31 to 31.31)                 | 37.60<br>(29.33 to 48.49)                  |
| Cirrhosis and other chronic liver diseases due to other causes | 479.34<br>(387.01 to 593.47)                     | 687.00<br>(517.97 to 899.09)                     | 599.93<br>(454.85 to 779.09)                     | 770.62<br>(586.46 to 988.72)                     | 9.58<br>(7.84 to 11.80)                 | 17.08<br>(13.57 to 21.37)                 | 15.69<br>(12.44 to 19.81)                 | 18.25<br>(14.54 to 22.72)                  |
| <b>Digestive diseases</b>                                      | <b>1,934.83</b><br><b>(1,671.81 to 2,345.22)</b> | <b>2,588.38</b><br><b>(2,183.20 to 3,127.71)</b> | <b>2,239.58</b><br><b>(1,906.36 to 2,674.20)</b> | <b>3,078.17</b><br><b>(2,597.70 to 3,714.43)</b> | <b>48.16</b><br><b>(43.07 to 55.94)</b> | <b>88.25</b><br><b>(76.62 to 102.48)</b>  | <b>81.59</b><br><b>(71.39 to 95.05)</b>   | <b>97.11</b><br><b>(84.51 to 113.87)</b>   |
| Peptic ulcer disease                                           | 304.58<br>(257.65 to 358.20)                     | 281.55<br>(224.51 to 339.36)                     | 223.76<br>(179.24 to 267.58)                     | 364.19<br>(291.74 to 431.03)                     | 8.57<br>(7.21 to 9.91)                  | 10.36<br>(8.42 to 12.23)                  | 8.62<br>(6.97 to 10.09)                   | 12.52<br>(10.29 to 14.60)                  |
| <b>Western Sub-Saharan Africa</b>                              |                                                  |                                                  |                                                  |                                                  |                                         |                                           |                                           |                                            |
| Cause                                                          | YLLs (in 1000s)                                  |                                                  |                                                  |                                                  | Deaths (in 1000s)                       |                                           |                                           |                                            |
|                                                                | 2016                                             | 2040 Forecast                                    | 2040 Better Scenario                             | 2040 Worse Scenario                              | 2016                                    | 2040 Forecast                             | 2040 Better Scenario                      | 2040 Worse Scenario                        |
| Gastritis and duodenitis                                       | 80.10<br>(65.48 to 101.59)                       | 128.67<br>(97.24 to 162.74)                      | 115.43<br>(86.96 to 146.88)                      | 143.88<br>(111.34 to 181.19)                     | 1.84<br>(1.47 to 2.28)                  | 3.49<br>(2.60 to 4.49)                    | 3.23<br>(2.42 to 4.18)                    | 3.75<br>(2.83 to 4.77)                     |
| Appendicitis                                                   | 166.02<br>(107.55 to 281.44)                     | 170.11<br>(127.22 to 247.04)                     | 137.61<br>(106.81 to 182.95)                     | 210.62<br>(156.25 to 306.76)                     | 3.62<br>(2.79 to 5.17)                  | 5.58<br>(4.36 to 6.85)                    | 4.93<br>(3.82 to 5.91)                    | 6.27<br>(4.97 to 7.75)                     |
| Paralytic ileus and intestinal obstruction                     | 733.84<br>(592.48 to 963.67)                     | 1,014.80<br>(834.36 to 1,329.65)                 | 909.72<br>(765.31 to 1,164.38)                   | 1,144.88<br>(940.20 to 1,486.08)                 | 16.37<br>(13.90 to 20.76)               | 33.30<br>(28.71 to 42.05)                 | 32.58<br>(28.21 to 41.23)                 | 34.03<br>(29.43 to 43.17)                  |
| Inguinal, femoral, and abdominal hernia                        | 62.58<br>(45.79 to 83.90)                        | 76.70<br>(53.79 to 107.70)                       | 68.23<br>(47.77 to 96.71)                        | 87.12<br>(61.32 to 120.04)                       | 1.95<br>(1.40 to 2.70)                  | 3.12<br>(2.19 to 4.49)                    | 2.94<br>(2.07 to 4.19)                    | 3.29<br>(2.30 to 4.73)                     |
| Inflammatory bowel disease                                     | 50.77<br>(36.04 to 91.17)                        | 86.14<br>(66.99 to 128.88)                       | 83.18<br>(65.46 to 121.73)                       | 88.83<br>(68.59 to 137.82)                       | 1.27<br>(1.01 to 1.89)                  | 2.84<br>(2.33 to 4.13)                    | 2.90<br>(2.36 to 4.26)                    | 2.76<br>(2.27 to 4.01)                     |
| Vascular intestinal disorders                                  | 39.71<br>(29.10 to 61.44)                        | 64.72<br>(49.19 to 84.06)                        | 60.43<br>(45.98 to 75.98)                        | 68.37<br>(52.48 to 90.15)                        | 1.22<br>(0.97 to 1.55)                  | 3.05<br>(2.40 to 3.86)                    | 3.07<br>(2.38 to 3.86)                    | 2.97<br>(2.35 to 3.75)                     |
| Gallbladder and biliary diseases                               | 72.98<br>(60.71 to 84.51)                        | 115.23<br>(78.40 to 169.27)                      | 87.07<br>(61.46 to 124.15)                       | 146.39<br>(98.60 to 218.16)                      | 2.22<br>(1.89 to 2.71)                  | 4.69<br>(3.21 to 6.90)                    | 3.71<br>(2.67 to 5.36)                    | 5.61<br>(3.78 to 8.51)                     |
| Pancreatitis                                                   | 173.21<br>(130.53 to 217.38)                     | 311.90<br>(193.13 to 515.29)                     | 266.68<br>(166.84 to 433.09)                     | 428.64<br>(259.07 to 750.16)                     | 4.83<br>(3.65 to 6.03)                  | 9.84<br>(6.37 to 15.70)                   | 8.65<br>(5.74 to 13.33)                   | 12.95<br>(8.05 to 21.89)                   |
| Other digestive diseases                                       | 251.04<br>(189.16 to 345.12)                     | 338.57<br>(274.06 to 439.23)                     | 287.46<br>(231.40 to 366.41)                     | 395.24<br>(318.60 to 510.72)                     | 6.26<br>(5.22 to 7.94)                  | 11.98<br>(9.89 to 15.22)                  | 10.94<br>(8.97 to 13.90)                  | 12.93<br>(10.61 to 16.33)                  |



|                                                     |                                                      |                                                      |                                                      |                                                      |                                                |                                                  |                                                  |                                                  |
|-----------------------------------------------------|------------------------------------------------------|------------------------------------------------------|------------------------------------------------------|------------------------------------------------------|------------------------------------------------|--------------------------------------------------|--------------------------------------------------|--------------------------------------------------|
|                                                     | 862.52<br>(737.53 to<br>980.50)                      | 1,802.98<br>(1,503.14 to<br>2,185.35)                | 1,715.55<br>(1,468.32 to<br>2,038.43)                | 1,948.20<br>(1,607.45 to<br>2,387.25)                | 31.56<br>(27.28 to<br>36.55)                   | 106.58<br>(86.64 to<br>132.76)                   | 114.59<br>(95.83 to<br>138.81)                   | 98.80<br>(79.45 to<br>124.95)                    |
| <b>Neurological disorders</b>                       |                                                      |                                                      |                                                      |                                                      |                                                |                                                  |                                                  |                                                  |
| Alzheimer's disease and other dementias             | 235.99<br>(193.46 to<br>286.93)                      | 847.89<br>(653.27 to<br>1,140.88)                    | 887.97<br>(711.98 to<br>1,140.73)                    | 778.23<br>(571.92 to<br>1,058.81)                    | 19.29<br>(15.85 to<br>23.58)                   | 81.36<br>(62.41 to<br>107.87)                    | 89.76<br>(71.29 to<br>113.40)                    | 71.05<br>(52.53 to<br>97.34)                     |
| Parkinson's disease                                 | 22.10<br>(16.28 to<br>28.76)                         | 91.11<br>(67.83 to<br>118.80)                        | 111.10<br>(83.11 to<br>144.27)                       | 74.60<br>(54.59 to<br>98.70)                         | 1.58<br>(1.17 to<br>2.06)                      | 7.56<br>(5.63 to<br>10.08)                       | 9.57<br>(7.23 to<br>12.59)                       | 5.98<br>(4.37 to<br>8.15)                        |
| Epilepsy                                            | 492.08<br>(396.68 to<br>622.98)                      | 664.21<br>(473.10 to<br>983.55)                      | 525.79<br>(379.83 to<br>770.04)                      | 891.15<br>(641.36 to<br>1,301.59)                    | 8.73<br>(6.97 to<br>11.22)                     | 13.59<br>(9.55 to<br>20.12)                      | 11.15<br>(7.90 to<br>16.28)                      | 17.77<br>(12.52 to<br>26.57)                     |
| Multiple sclerosis                                  | 6.12<br>(4.01 to<br>8.91)                            | 13.66<br>(8.59 to<br>20.50)                          | 14.27<br>(8.92 to<br>21.35)                          | 12.96<br>(8.18 to<br>19.41)                          | 0.17<br>(0.11 to<br>0.24)                      | 0.40<br>(0.25 to<br>0.59)                        | 0.42<br>(0.26 to<br>0.63)                        | 0.37<br>(0.23 to<br>0.55)                        |
| Motor neuron disease                                | 12.50<br>(8.08 to<br>16.20)                          | 22.95<br>(18.84 to<br>27.94)                         | 23.47<br>(19.45 to<br>28.31)                         | 21.97<br>(17.77 to<br>26.97)                         | 0.27<br>(0.22 to<br>0.33)                      | 0.68<br>(0.57 to<br>0.80)                        | 0.73<br>(0.61 to<br>0.87)                        | 0.62<br>(0.52 to<br>0.74)                        |
| Other neurological disorders                        | 93.72<br>(52.88 to<br>150.14)                        | 163.15<br>(99.66 to<br>255.58)                       | 152.95<br>(98.73 to<br>226.37)                       | 169.28<br>(99.94 to<br>269.48)                       | 1.52<br>(0.94 to<br>2.27)                      | 3.00<br>(2.03 to<br>4.25)                        | 2.96<br>(2.09 to<br>4.03)                        | 3.00<br>(1.96 to<br>4.39)                        |
| <b>Mental disorders</b>                             | <b>249.90</b><br><b>(180.69 to</b><br><b>311.69)</b> | <b>525.34</b><br><b>(366.38 to</b><br><b>682.11)</b> | <b>518.13</b><br><b>(363.54 to</b><br><b>674.49)</b> | <b>543.90</b><br><b>(379.67 to</b><br><b>702.91)</b> | <b>5.89</b><br><b>(4.30 to</b><br><b>7.22)</b> | <b>13.33</b><br><b>(9.44 to</b><br><b>16.71)</b> | <b>13.43</b><br><b>(9.48 to</b><br><b>16.79)</b> | <b>13.56</b><br><b>(9.56 to</b><br><b>16.97)</b> |
| Alcohol use disorders                               | 100.09<br>(77.05 to<br>146.06)                       | 171.63<br>(126.54 to<br>263.34)                      | 166.07<br>(121.93 to<br>260.02)                      | 189.88<br>(141.38 to<br>285.38)                      | 2.73<br>(2.14 to<br>3.93)                      | 5.14<br>(3.93 to<br>7.73)                        | 5.08<br>(3.86 to<br>7.72)                        | 5.55<br>(4.25 to<br>8.22)                        |
| Drug use disorders                                  | 149.15<br>(79.50 to<br>206.80)                       | 352.31<br>(193.54 to<br>494.21)                      | 350.69<br>(193.69 to<br>489.90)                      | 352.62<br>(191.46 to<br>489.53)                      | 3.15<br>(1.68 to<br>4.30)                      | 8.16<br>(4.48 to<br>11.06)                       | 8.32<br>(4.57 to<br>11.25)                       | 7.98<br>(4.36 to<br>10.83)                       |
| Opioid use disorders                                | 138.99<br>(73.69 to<br>190.96)                       | 319.52<br>(176.00 to<br>446.61)                      | 316.73<br>(175.03 to<br>439.90)                      | 320.72<br>(173.77 to<br>445.18)                      | 2.82<br>(1.51 to<br>3.32)                      | 6.83<br>(3.77 to<br>9.23)                        | 6.83<br>(3.80 to<br>9.23)                        | 6.75<br>(3.70 to<br>9.13)                        |
| Cocaine use disorders                               | 1.95<br>(0.83 to<br>3.36)                            | 6.17<br>(2.77 to<br>10.44)                           | 5.86<br>(2.66 to<br>9.95)                            | 6.48<br>(2.83 to<br>11.09)                           | 0.05<br>(0.02 to<br>0.09)                      | 0.19<br>(0.08 to<br>0.30)                        | 0.18<br>(0.08 to<br>0.29)                        | 0.19<br>(0.08 to<br>0.31)                        |
| Amphetamine use disorders                           | 0.99<br>(0.45 to<br>1.71)                            | 4.24<br>(1.93 to<br>7.29)                            | 3.93<br>(1.81 to<br>6.71)                            | 4.61<br>(2.06 to<br>7.91)                            | 0.03<br>(0.01 to<br>0.05)                      | 0.13<br>(0.06 to<br>0.21)                        | 0.12<br>(0.06 to<br>0.19)                        | 0.14<br>(0.06 to<br>0.22)                        |
| Other drug use disorders                            | 7.21<br>(3.44 to<br>11.72)                           | 22.39<br>(11.13 to<br>34.94)                         | 24.17<br>(12.09 to<br>37.57)                         | 20.81<br>(10.31 to<br>32.59)                         | 0.25<br>(0.12 to<br>0.37)                      | 1.03<br>(0.51 to<br>1.48)                        | 1.18<br>(0.59 to<br>1.69)                        | 0.90<br>(0.44 to<br>1.31)                        |
| Eating disorders                                    | 0.66<br>(0.45 to<br>1.13)                            | 1.39<br>(0.93 to<br>2.24)                            | 1.37<br>(0.91 to<br>2.22)                            | 1.40<br>(0.93 to<br>2.24)                            | 0.01<br>(0.01 to<br>0.02)                      | 0.03<br>(0.02 to<br>0.04)                        | 0.02<br>(0.02 to<br>0.04)                        | 0.02<br>(0.02 to<br>0.04)                        |
| <b>Western Sub-Saharan Africa</b>                   |                                                      |                                                      |                                                      |                                                      |                                                |                                                  |                                                  |                                                  |
| Cause                                               | YLLs (in 1000s)                                      |                                                      |                                                      |                                                      | Deaths (in 1000s)                              |                                                  |                                                  |                                                  |
|                                                     | 2016                                                 | 2040 Forecast                                        | 2040 Better Scenario                                 | 2040 Worse Scenario                                  | 2016                                           | 2040 Forecast                                    | 2040 Better Scenario                             | 2040 Worse Scenario                              |
| Diabetes, urogenital, blood, and endocrine diseases | 4,662.16<br>(4,074.81 to<br>5,217.01)                | 7,228.36<br>(6,083.83 to<br>8,584.60)                | 5,819.29<br>(4,888.96 to<br>6,898.58)                | 9,062.84<br>(7,666.43 to<br>10,804.92)               | 108.20<br>(98.30 to<br>119.88)                 | 247.72<br>(212.77 to<br>297.53)                  | 208.88<br>(179.54 to<br>249.25)                  | 295.65<br>(253.15 to<br>357.51)                  |
| Diabetes mellitus                                   | 917.75<br>(839.37 to<br>1,009.00)                    | 2,095.99<br>(1,458.92 to<br>3,015.34)                | 1,646.84<br>(1,163.79 to<br>2,360.28)                | 2,778.19<br>(1,911.20 to<br>3,992.01)                | 37.53<br>(34.27 to<br>41.34)                   | 104.68<br>(77.16 to<br>142.70)                   | 86.23<br>(64.42 to<br>116.78)                    | 129.88<br>(94.76 to<br>176.13)                   |
| Acute glomerulonephritis                            | 2.74<br>(2.49 to<br>3.02)                            | 4.20<br>(3.43 to<br>5.15)                            | 3.42<br>(2.81 to<br>4.17)                            | 5.07<br>(4.17 to<br>6.18)                            | 0.04<br>(0.04 to<br>0.05)                      | 0.07<br>(0.06 to<br>0.09)                        | 0.06<br>(0.05 to<br>0.07)                        | 0.08<br>(0.07 to<br>0.10)                        |
| Chronic kidney disease                              | 875.87<br>(777.49 to<br>994.01)                      | 1,538.91<br>(1,091.05 to<br>2,359.39)                | 1,165.45<br>(838.93 to<br>1,762.06)                  | 2,062.57<br>(1,456.77 to<br>3,115.17)                | 22.94<br>(20.53 to<br>25.97)                   | 59.20<br>(37.57 to<br>103.45)                    | 45.79<br>(30.18 to<br>81.17)                     | 74.11<br>(46.17 to<br>126.92)                    |
| Chronic kidney disease due to diabetes mellitus     | 173.18<br>(144.22 to<br>205.62)                      | 420.86<br>(264.85 to<br>699.72)                      | 322.17<br>(212.05 to<br>528.49)                      | 540.65<br>(334.77 to<br>896.44)                      | 6.03<br>(5.02 to<br>7.11)                      | 18.67<br>(10.91 to<br>34.01)                     | 14.49<br>(8.98 to<br>26.44)                      | 22.97<br>(13.15 to<br>40.57)                     |

|                                                            |                                       |                                       |                                       |                                       |                              |                              |                              |                              |
|------------------------------------------------------------|---------------------------------------|---------------------------------------|---------------------------------------|---------------------------------------|------------------------------|------------------------------|------------------------------|------------------------------|
| Chronic kidney disease due to hypertension                 | 93.10<br>(78.60 to<br>111.10)         | 244.36<br>(147.16 to<br>461.26)       | 186.47<br>(117.90 to<br>342.09)       | 308.80<br>(179.37 to<br>567.13)       | 4.12<br>(3.47 to<br>4.86)    | 14.10<br>(8.02 to<br>27.32)  | 11.09<br>(6.74 to<br>21.34)  | 16.85<br>(6.74 to<br>32.46)  |
| Chronic kidney disease due to glomerulonephritis           | 289.89<br>(247.61 to<br>344.40)       | 405.34<br>(302.25 to<br>565.85)       | 304.67<br>(229.41 to<br>423.57)       | 565.42<br>(421.76 to<br>780.46)       | 5.87<br>(5.02 to<br>6.97)    | 11.51<br>(7.66 to<br>18.84)  | 8.76<br>(5.97 to<br>14.04)   | 15.08<br>(10.04 to<br>24.45) |
| Chronic kidney disease due to other and unspecified causes | 319.70<br>(272.78 to<br>375.29)       | 468.36<br>(340.24 to<br>665.58)       | 352.14<br>(258.97 to<br>491.57)       | 647.69<br>(469.54 to<br>917.78)       | 6.92<br>(5.93 to<br>8.19)    | 14.93<br>(9.84 to<br>25.42)  | 11.45<br>(7.87 to<br>19.30)  | 19.20<br>(12.62 to<br>32.09) |
| Urinary diseases and male infertility                      | 494.51<br>(439.06 to<br>554.59)       | 940.05<br>(816.21 to<br>1,091.14)     | 858.88<br>(750.78 to<br>987.62)       | 1,014.24<br>(884.50 to<br>1,174.32)   | 11.98<br>(10.88 to<br>13.17) | 33.85<br>(30.61 to<br>37.23) | 34.08<br>(30.82 to<br>37.72) | 33.36<br>(30.22 to<br>36.68) |
| Urinary tract infections                                   | 333.22<br>(281.60 to<br>393.76)       | 729.51<br>(615.39 to<br>854.74)       | 678.60<br>(583.05 to<br>789.51)       | 766.24<br>(645.41 to<br>906.09)       | 7.82<br>(6.82 to<br>9.02)    | 26.59<br>(23.55 to<br>30.10) | 27.44<br>(24.34 to<br>31.12) | 25.49<br>(22.45 to<br>29.02) |
| Urolithiasis                                               | 8.85<br>(6.63 to<br>10.98)            | 21.03<br>(14.99 to<br>27.97)          | 19.17<br>(13.67 to<br>25.42)          | 23.00<br>(16.45 to<br>30.57)          | 0.16<br>(0.12 to<br>0.21)    | 0.44<br>(0.31 to<br>0.59)    | 0.42<br>(0.29 to<br>0.56)    | 0.46<br>(0.32 to<br>0.62)    |
| Other urinary diseases                                     | 152.43<br>(120.27 to<br>181.75)       | 189.51<br>(142.13 to<br>233.84)       | 161.11<br>(120.77 to<br>200.96)       | 225.00<br>(170.62 to<br>272.81)       | 4.00<br>(3.24 to<br>4.65)    | 6.82<br>(4.97 to<br>8.72)    | 6.21<br>(4.45 to<br>7.95)    | 7.42<br>(5.51 to<br>9.27)    |
| Gynecological diseases                                     | 21.85<br>(18.64 to<br>25.33)          | 35.68<br>(28.12 to<br>44.28)          | 30.73<br>(24.14 to<br>38.01)          | 43.55<br>(34.90 to<br>53.62)          | 0.51<br>(0.44 to<br>0.59)    | 0.88<br>(0.71 to<br>1.07)    | 0.77<br>(0.61 to<br>0.93)    | 1.05<br>(0.85 to<br>1.27)    |
| Uterine fibroids                                           | 1.44<br>(0.96 to<br>2.15)             | 1.99<br>(1.29 to<br>3.26)             | 1.69<br>(1.08 to<br>2.75)             | 2.49<br>(1.60 to<br>4.02)             | 0.05<br>(0.03 to<br>0.07)    | 0.07<br>(0.05 to<br>0.11)    | 0.06<br>(0.04 to<br>0.10)    | 0.09<br>(0.05 to<br>0.13)    |
| Polycystic ovarian syndrome                                | 3.52<br>(0.78 to<br>6.30)             | 3.52<br>(0.65 to<br>6.81)             | 2.68<br>(0.48 to<br>5.40)             | 5.04<br>(0.96 to<br>9.93)             | 0.08<br>(0.02 to<br>0.14)    | 0.08<br>(0.02 to<br>0.15)    | 0.06<br>(0.01 to<br>0.12)    | 0.11<br>(0.02 to<br>0.22)    |
| Endometriosis                                              | 0.04<br>(0.02 to<br>0.10)             | 0.09<br>(0.04 to<br>0.21)             | 0.08<br>(0.03 to<br>0.18)             | 0.11<br>(0.05 to<br>0.26)             | 0.00<br>(0.00 to<br>0.00)    | 0.00<br>(0.00 to<br>0.00)    | 0.00<br>(0.00 to<br>0.00)    | 0.00<br>(0.00 to<br>0.01)    |
| Genital prolapse                                           | 0.74<br>(0.13 to<br>1.44)             | 1.04<br>(0.15 to<br>2.16)             | 0.85<br>(0.13 to<br>1.79)             | 1.38<br>(0.20 to<br>2.80)             | 0.02<br>(0.01 to<br>0.05)    | 0.02<br>(0.01 to<br>0.05)    | 0.02<br>(0.01 to<br>0.04)    | 0.03<br>(0.01 to<br>0.06)    |
| Other gynecological diseases                               | 16.11<br>(12.08 to<br>19.75)          | 29.05<br>(21.37 to<br>36.68)          | 25.43<br>(19.05 to<br>32.25)          | 34.53<br>(25.57 to<br>43.85)          | 0.37<br>(0.28 to<br>0.45)    | 0.70<br>(0.53 to<br>0.87)    | 0.62<br>(0.48 to<br>0.77)    | 0.82<br>(0.62 to<br>1.01)    |
| Hemoglobinopathies and hemolytic anemias                   | 2,082.51<br>(1,631.92 to<br>2,489.72) | 2,255.56<br>(1,719.04 to<br>2,860.64) | 1,816.90<br>(1,409.18 to<br>2,281.79) | 2,742.46<br>(2,096.70 to<br>3,444.49) | 30.02<br>(23.98 to<br>35.42) | 38.81<br>(30.41 to<br>48.37) | 32.37<br>(25.59 to<br>40.33) | 45.84<br>(35.78 to<br>57.30) |
| Thalassemias                                               | 13.29<br>(6.90 to<br>20.85)           | 8.86<br>(4.78 to<br>14.14)            | 8.90<br>(4.83 to<br>14.20)            | 10.78<br>(5.73 to<br>17.58)           | 0.16<br>(0.08 to<br>0.25)    | 0.11<br>(0.06 to<br>0.17)    | 0.11<br>(0.06 to<br>0.17)    | 0.13<br>(0.07 to<br>0.21)    |
| Sickle cell disorders                                      | 1,996.05<br>(1,565.46 to<br>2,389.20) | 2,098.26<br>(1,584.78 to<br>2,672.06) | 1,680.03<br>(1,292.52 to<br>2,135.10) | 2,557.77<br>(1,934.95 to<br>3,236.58) | 27.29<br>(21.78 to<br>32.29) | 32.03<br>(24.62 to<br>40.66) | 26.26<br>(20.25 to<br>33.36) | 38.39<br>(29.38 to<br>48.35) |
| G6PD deficiency                                            | 48.74<br>(38.36 to<br>64.68)          | 104.08<br>(77.07 to<br>148.66)        | 87.65<br>(65.62 to<br>123.95)         | 125.58<br>(93.78 to<br>174.53)        | 1.19<br>(0.89 to<br>1.65)    | 3.49<br>(2.51 to<br>5.19)    | 3.00<br>(2.16 to<br>4.49)    | 4.04<br>(2.93 to<br>5.90)    |
| Other hemoglobinopathies and hemolytic anemias             | 24.43<br>(17.94 to<br>34.78)          | 44.36<br>(32.88 to<br>65.97)          | 40.33<br>(30.05 to<br>60.13)          | 48.52<br>(35.94 to<br>72.22)          | 1.38<br>(1.03 to<br>2.05)    | 3.18<br>(2.37 to<br>4.88)    | 3.00<br>(2.27 to<br>4.59)    | 3.29<br>(2.40 to<br>5.07)    |
| Endocrine, metabolic, blood, and immune disorders          | 266.92<br>(198.88 to<br>379.08)       | 357.96<br>(276.80 to<br>504.77)       | 297.06<br>(240.04 to<br>408.88)       | 416.77<br>(321.27 to<br>586.04)       | 5.18<br>(4.22 to<br>7.28)    | 10.23<br>(8.64 to<br>14.67)  | 9.59<br>(8.22 to<br>13.61)   | 10.74<br>(9.04 to<br>15.33)  |

**Western Sub-Saharan Africa**

| Cause                     | YLLs (in 1000s)              |                                 |                                 |                                 | Deaths (in 1000s)         |                           |                           |                           |
|---------------------------|------------------------------|---------------------------------|---------------------------------|---------------------------------|---------------------------|---------------------------|---------------------------|---------------------------|
|                           | 2016                         | 2040 Forecast                   | 2040 Better Scenario            | 2040 Worse Scenario             | 2016                      | 2040 Forecast             | 2040 Better Scenario      | 2040 Worse Scenario       |
| Musculoskeletal disorders | 67.52<br>(52.18 to<br>85.16) | 158.20<br>(120.20 to<br>205.59) | 163.53<br>(125.04 to<br>211.79) | 151.95<br>(115.77 to<br>197.82) | 1.58<br>(1.26 to<br>2.00) | 4.69<br>(3.79 to<br>5.92) | 5.08<br>(4.10 to<br>6.37) | 4.32<br>(3.49 to<br>5.46) |

|                                               |                                                             |                                                              |                                                             |                                                               |                                                      |                                                      |                                                      |                                                      |
|-----------------------------------------------|-------------------------------------------------------------|--------------------------------------------------------------|-------------------------------------------------------------|---------------------------------------------------------------|------------------------------------------------------|------------------------------------------------------|------------------------------------------------------|------------------------------------------------------|
| Rheumatoid arthritis                          | 5.35<br>(3.57 to<br>8.19)                                   | 12.98<br>(8.80 to<br>18.52)                                  | 11.67<br>(7.88 to<br>16.87)                                 | 14.32<br>(9.79 to<br>20.40)                                   | 0.22<br>(0.15 to<br>0.30)                            | 0.70<br>(0.48 to<br>0.99)                            | 0.66<br>(0.45 to<br>0.94)                            | 0.73<br>(0.50 to<br>1.03)                            |
| Other musculoskeletal disorders               | 62.17<br>(47.70 to<br>79.02)                                | 145.23<br>(109.83 to<br>191.07)                              | 151.86<br>(115.32 to<br>199.29)                             | 137.64<br>(103.46 to<br>182.28)                               | 1.36<br>(1.09 to<br>1.74)                            | 3.99<br>(3.20 to<br>5.14)                            | 4.42<br>(3.60 to<br>5.63)                            | 3.59<br>(2.90 to<br>4.61)                            |
| <b>Other non-communicable diseases</b>        | <b>8,484.06</b><br><b>(3,996.10 to</b><br><b>12,503.22)</b> | <b>7,367.86</b><br><b>(3,742.63 to</b><br><b>11,589.76)</b>  | <b>5,067.46</b><br><b>(2,795.07 to</b><br><b>7,434.43)</b>  | <b>10,170.33</b><br><b>(5,145.53 to</b><br><b>15,798.28)</b>  | <b>103.92</b><br><b>(51.30 to</b><br><b>151.88)</b>  | <b>108.25</b><br><b>(63.86 to</b><br><b>160.13)</b>  | <b>82.15</b><br><b>(53.75 to</b><br><b>113.70)</b>   | <b>140.14</b><br><b>(79.13 to</b><br><b>206.06)</b>  |
| Congenital birth defects                      | 7,895.07<br>(3,472.75 to<br>11,913.89)                      | 6,349.52<br>(2,785.82 to<br>10,356.28)                       | 4,195.46<br>(1,980.44 to<br>6,533.68)                       | 8,959.61<br>(3,985.03 to<br>14,267.44)                        | 93.68<br>(41.87 to<br>141.00)                        | 77.98<br>(35.77 to<br>125.56)                        | 52.54<br>(26.19 to<br>80.34)                         | 108.82<br>(50.33 to<br>172.13)                       |
| Neural tube defects                           | 1,643.62<br>(863.09 to<br>3,034.30)                         | 524.23<br>(226.92 to<br>1,127.39)                            | 312.52<br>(141.29 to<br>671.12)                             | 852.88<br>(397.68 to<br>1,737.52)                             | 19.19<br>(10.09 to<br>35.45)                         | 6.22<br>(2.71 to<br>13.26)                           | 3.73<br>(1.70 to<br>8.04)                            | 10.08<br>(4.69 to<br>20.48)                          |
| Congenital heart anomalies                    | 1,917.56<br>(884.72 to<br>3,511.83)                         | 1,776.27<br>(858.40 to<br>3,124.91)                          | 1,229.78<br>(647.21 to<br>2,033.20)                         | 2,445.06<br>(1,190.31 to<br>4,268.80)                         | 23.12<br>(10.95 to<br>39.49)                         | 22.30<br>(11.36 to<br>38.29)                         | 15.76<br>(8.65 to<br>25.61)                          | 30.30<br>(15.32 to<br>51.83)                         |
| Orofacial clefts                              | 60.65<br>(13.43 to<br>147.12)                               | 39.59<br>(7.72 to<br>101.45)                                 | 23.60<br>(4.64 to<br>59.17)                                 | 69.49<br>(14.03 to<br>177.57)                                 | 0.70<br>(0.16 to<br>1.71)                            | 0.46<br>(0.09 to<br>1.18)                            | 0.27<br>(0.05 to<br>0.69)                            | 0.81<br>(0.16 to<br>2.06)                            |
| Down syndrome                                 | 83.95<br>(33.29 to<br>229.13)                               | 91.16<br>(37.07 to<br>243.50)                                | 60.58<br>(28.38 to<br>142.30)                               | 123.08<br>(50.85 to<br>320.22)                                | 1.06<br>(0.45 to<br>2.77)                            | 1.28<br>(0.59 to<br>3.08)                            | 0.90<br>(0.46 to<br>1.91)                            | 1.67<br>(0.78 to<br>4.02)                            |
| Other chromosomal abnormalities               | 335.65<br>(94.25 to<br>650.32)                              | 447.72<br>(124.44 to<br>894.41)                              | 268.78<br>(76.93 to<br>515.65)                              | 621.52<br>(172.46 to<br>1,197.44)                             | 3.92<br>(1.10 to<br>7.56)                            | 5.28<br>(1.46 to<br>10.52)                           | 3.19<br>(0.91 to<br>6.05)                            | 7.31<br>(2.02 to<br>14.04)                           |
| Congenital musculoskeletal and limb anomalies | 56.83<br>(16.74 to<br>162.25)                               | 60.65<br>(17.07 to<br>173.18)                                | 40.97<br>(12.52 to<br>121.27)                               | 83.48<br>(23.98 to<br>246.62)                                 | 0.66<br>(0.20 to<br>1.89)                            | 0.72<br>(0.21 to<br>2.04)                            | 0.49<br>(0.15 to<br>1.43)                            | 0.98<br>(0.29 to<br>2.91)                            |
| Urogenital congenital anomalies               | 68.70<br>(29.75 to<br>130.07)                               | 71.05<br>(33.21 to<br>142.52)                                | 53.55<br>(26.41 to<br>100.69)                               | 91.69<br>(42.13 to<br>176.75)                                 | 0.88<br>(0.43 to<br>1.62)                            | 1.06<br>(0.57 to<br>1.95)                            | 0.84<br>(0.48 to<br>1.44)                            | 1.30<br>(0.69 to<br>2.34)                            |
| Digestive congenital anomalies                | 389.90<br>(182.59 to<br>822.82)                             | 344.89<br>(159.20 to<br>751.47)                              | 226.42<br>(109.44 to<br>484.89)                             | 502.83<br>(234.12 to<br>1,064.12)                             | 4.56<br>(2.14 to<br>9.62)                            | 4.08<br>(1.91 to<br>8.82)                            | 2.70<br>(1.33 to<br>5.70)                            | 5.93<br>(2.77 to<br>12.46)                           |
| Other congenital birth defects                | 3,338.22<br>(855.11 to<br>6,993.88)                         | 2,993.96<br>(848.07 to<br>6,203.66)                          | 1,979.45<br>(616.55 to<br>3,894.90)                         | 4,169.58<br>(1,158.03 to<br>8,469.97)                         | 39.58<br>(10.43 to<br>82.61)                         | 36.59<br>(11.21 to<br>74.87)                         | 24.65<br>(8.32 to<br>47.78)                          | 50.44<br>(14.83 to<br>101.61)                        |
| Skin and subcutaneous diseases                | 236.59<br>(153.38 to<br>385.47)                             | 744.31<br>(505.82 to<br>1,190.77)                            | 691.12<br>(468.56 to<br>1,081.62)                           | 817.45<br>(548.93 to<br>1,290.82)                             | 6.15<br>(4.01 to<br>10.01)                           | 27.09<br>(18.30 to<br>43.20)                         | 27.51<br>(18.61 to<br>43.63)                         | 26.75<br>(18.05 to<br>43.20)                         |
| Cellulitis                                    | 19.44<br>(10.01 to<br>35.10)                                | 86.06<br>(46.02 to<br>150.67)                                | 90.84<br>(49.25 to<br>156.45)                               | 81.91<br>(43.01 to<br>145.02)                                 | 0.59<br>(0.30 to<br>1.05)                            | 3.44<br>(1.80 to<br>5.85)                            | 3.84<br>(2.01 to<br>6.44)                            | 3.08<br>(1.57 to<br>5.38)                            |
| Pyoderma                                      | 197.16<br>(127.84 to<br>320.69)                             | 603.03<br>(407.70 to<br>955.66)                              | 544.12<br>(362.87 to<br>855.14)                             | 680.74<br>(461.83 to<br>1,082.84)                             | 4.83<br>(3.16 to<br>8.00)                            | 20.69<br>(13.97 to<br>33.28)                         | 20.31<br>(13.76 to<br>31.95)                         | 21.08<br>(14.14 to<br>33.72)                         |
| Decubitus ulcer                               | 12.05<br>(6.31 to<br>18.71)                                 | 36.60<br>(19.96 to<br>56.22)                                 | 38.22<br>(20.87 to<br>58.44)                                | 35.21<br>(18.95 to<br>54.57)                                  | 0.57<br>(0.31 to<br>0.90)                            | 2.49<br>(1.38 to<br>4.02)                            | 2.86<br>(1.57 to<br>4.56)                            | 2.14<br>(1.17 to<br>3.51)                            |
| Other skin and subcutaneous diseases          | 7.95<br>(4.08 to<br>12.64)                                  | 18.62<br>(10.17 to<br>30.27)                                 | 17.95<br>(10.04 to<br>28.07)                                | 19.59<br>(10.37 to<br>32.21)                                  | 0.16<br>(0.08 to<br>0.26)                            | 0.47<br>(0.25 to<br>0.75)                            | 0.50<br>(0.26 to<br>0.79)                            | 0.44<br>(0.23 to<br>0.72)                            |
| Sudden infant death syndrome                  | 352.40<br>(239.73 to<br>532.69)                             | 274.03<br>(144.56 to<br>468.55)                              | 180.87<br>(103.30 to<br>291.00)                             | 393.27<br>(226.98 to<br>633.70)                               | 4.09<br>(2.78 to<br>6.18)                            | 3.18<br>(1.68 to<br>5.44)                            | 2.10<br>(1.20 to<br>3.38)                            | 4.56<br>(2.63 to<br>7.35)                            |
| <b>Injuries</b>                               | <b>9,936.82</b><br><b>(8,985.43 to</b><br><b>11,012.53)</b> | <b>11,898.10</b><br><b>(9,985.51 to</b><br><b>14,119.13)</b> | <b>9,643.52</b><br><b>(8,193.36 to</b><br><b>11,326.50)</b> | <b>14,716.11</b><br><b>(12,356.59 to</b><br><b>17,422.09)</b> | <b>180.04</b><br><b>(165.08 to</b><br><b>195.30)</b> | <b>275.16</b><br><b>(240.66 to</b><br><b>316.45)</b> | <b>242.07</b><br><b>(213.63 to</b><br><b>276.23)</b> | <b>317.12</b><br><b>(277.18 to</b><br><b>367.41)</b> |
| <b>Transport injuries</b>                     | <b>2,664.00</b><br><b>(2,359.35 to</b><br><b>3,012.43)</b>  | <b>4,176.23</b><br><b>(3,359.09 to</b><br><b>5,229.10)</b>   | <b>3,136.81</b><br><b>(2,539.41 to</b><br><b>3,920.31)</b>  | <b>5,372.17</b><br><b>(4,306.18 to</b><br><b>6,801.44)</b>    | <b>48.68</b><br><b>(43.63 to</b><br><b>54.24)</b>    | <b>87.35</b><br><b>(72.37 to</b><br><b>108.61)</b>   | <b>70.08</b><br><b>(58.63 to</b><br><b>85.96)</b>    | <b>107.41</b><br><b>(88.05 to</b><br><b>136.08)</b>  |
| Road injuries                                 | 2,510.50<br>(2,218.41 to<br>2,844.17)                       | 3,928.02<br>(3,150.00 to<br>4,910.93)                        | 2,935.18<br>(2,370.75 to<br>3,650.37)                       | 5,068.74<br>(4,035.66 to<br>6,421.28)                         | 46.14<br>(41.13 to<br>51.61)                         | 82.67<br>(68.26 to<br>102.37)                        | 66.11<br>(54.98 to<br>81.30)                         | 101.80<br>(82.43 to<br>129.09)                       |

|                                      |                                                            |                                                            |                                                            |                                                            |                                                     |                                                      |                                                      |                                                      |
|--------------------------------------|------------------------------------------------------------|------------------------------------------------------------|------------------------------------------------------------|------------------------------------------------------------|-----------------------------------------------------|------------------------------------------------------|------------------------------------------------------|------------------------------------------------------|
| Pedestrian road injuries             | 795.54<br>(623.52 to<br>937.43)                            | 1,001.40<br>(736.84 to<br>1,294.12)                        | 767.86<br>(570.01 to<br>986.87)                            | 1,264.15<br>(921.74 to<br>1,661.58)                        | 14.79<br>(11.94 to<br>17.13)                        | 22.80<br>(17.48 to<br>28.81)                         | 18.56<br>(14.29 to<br>23.45)                         | 27.74<br>(21.02 to<br>36.12)                         |
| <b>Western Sub-Saharan Africa</b>    |                                                            |                                                            |                                                            |                                                            |                                                     |                                                      |                                                      |                                                      |
| Cause                                | YLLs (in 1000s)                                            |                                                            |                                                            |                                                            | Deaths (in 1000s)                                   |                                                      |                                                      |                                                      |
|                                      | 2016                                                       | 2040 Forecast                                              | 2040 Better Scenario                                       | 2040 Worse Scenario                                        | 2016                                                | 2040 Forecast                                        | 2040 Better Scenario                                 | 2040 Worse Scenario                                  |
| Cyclist road injuries                | 79.07<br>(56.56 to<br>102.21)                              | 133.26<br>(92.94 to<br>181.82)                             | 97.69<br>(70.03 to<br>130.62)                              | 175.41<br>(119.52 to<br>247.69)                            | 1.51<br>(1.14 to<br>1.92)                           | 2.93<br>(2.15 to<br>3.98)                            | 2.36<br>(1.79 to<br>3.12)                            | 3.63<br>(2.60 to<br>5.09)                            |
| Motorcyclist road injuries           | 316.43<br>(260.36 to<br>394.35)                            | 569.80<br>(424.92 to<br>757.16)                            | 444.79<br>(336.43 to<br>589.19)                            | 721.57<br>(533.05 to<br>959.35)                            | 5.42<br>(4.50 to<br>6.70)                           | 10.68<br>(8.10 to<br>14.04)                          | 8.86<br>(6.81 to<br>11.75)                           | 12.95<br>(9.68 to<br>17.46)                          |
| Motor vehicle road injuries          | 1,275.13<br>(1,104.18 to<br>1,520.11)                      | 2,147.88<br>(1,690.71 to<br>2,702.53)                      | 1,568.33<br>(1,249.75 to<br>1,976.62)                      | 2,809.10<br>(2,193.98 to<br>3,560.33)                      | 23.60<br>(20.71 to<br>27.88)                        | 44.62<br>(36.20 to<br>55.93)                         | 55.00<br>(44.27 to<br>70.58)                         | 55.47<br>(44.27 to<br>70.58)                         |
| Other road injuries                  | 44.32<br>(31.51 to<br>64.94)                               | 75.69<br>(52.38 to<br>107.57)                              | 56.51<br>(39.66 to<br>79.83)                               | 98.52<br>(67.03 to<br>145.37)                              | 0.83<br>(0.62 to<br>1.19)                           | 1.64<br>(1.18 to<br>2.30)                            | 1.32<br>(0.96 to<br>1.85)                            | 2.01<br>(1.41 to<br>2.95)                            |
| Other transport injuries             | 153.50<br>(117.30 to<br>202.58)                            | 248.21<br>(175.12 to<br>352.71)                            | 201.64<br>(143.25 to<br>281.65)                            | 303.43<br>(213.22 to<br>425.77)                            | 2.54<br>(1.96 to<br>3.27)                           | 4.68<br>(3.37 to<br>6.80)                            | 3.97<br>(2.88 to<br>5.76)                            | 5.61<br>(3.99 to<br>8.13)                            |
| <b>Unintentional injuries</b>        | <b>5,790.95</b><br><b>(5,011.56 to</b><br><b>6,696.26)</b> | <b>5,672.39</b><br><b>(4,600.17 to</b><br><b>6,900.33)</b> | <b>4,582.13</b><br><b>(3,814.95 to</b><br><b>5,362.42)</b> | <b>7,037.85</b><br><b>(5,759.47 to</b><br><b>8,519.03)</b> | <b>100.73</b><br><b>(89.63 to</b><br><b>112.45)</b> | <b>138.06</b><br><b>(118.77 to</b><br><b>155.73)</b> | <b>124.19</b><br><b>(107.47 to</b><br><b>137.82)</b> | <b>154.89</b><br><b>(133.02 to</b><br><b>175.92)</b> |
| Falls                                | 796.29<br>(679.76 to<br>977.09)                            | 1,144.51<br>(969.50 to<br>1,355.21)                        | 1,030.13<br>(888.95 to<br>1,190.34)                        | 1,252.39<br>(1,062.59 to<br>1,485.04)                      | 20.41<br>(18.05 to<br>22.83)                        | 47.77<br>(42.07 to<br>53.56)                         | 47.85<br>(42.20 to<br>53.04)                         | 46.83<br>(41.01 to<br>52.83)                         |
| Drowning                             | 1,152.66<br>(961.89 to<br>1,450.56)                        | 940.67<br>(709.24 to<br>1,276.07)                          | 742.67<br>(584.12 to<br>965.95)                            | 1,191.86<br>(914.26 to<br>1,574.26)                        | 17.52<br>(14.95 to<br>22.21)                        | 17.44<br>(13.94 to<br>23.12)                         | 14.64<br>(11.89 to<br>18.58)                         | 21.03<br>(16.72 to<br>27.43)                         |
| Fire, heat, and hot substances       | 622.91<br>(465.26 to<br>755.80)                            | 483.16<br>(354.02 to<br>613.43)                            | 376.79<br>(282.66 to<br>460.64)                            | 636.83<br>(474.50 to<br>815.68)                            | 10.99<br>(8.61 to<br>12.78)                         | 11.53<br>(8.68 to<br>13.79)                          | 9.85<br>(7.49 to<br>11.56)                           | 13.91<br>(10.53 to<br>16.85)                         |
| Poisonings                           | 329.91<br>(188.27 to<br>525.83)                            | 207.03<br>(120.66 to<br>327.92)                            | 147.76<br>(90.53 to<br>214.16)                             | 303.68<br>(171.16 to<br>466.43)                            | 5.24<br>(3.30 to<br>7.57)                           | 3.84<br>(2.47 to<br>5.31)                            | 2.93<br>(1.89 to<br>3.90)                            | 3.29<br>(3.37 to<br>7.34)                            |
| Exposure to mechanical forces        | 843.48<br>(669.38 to<br>1,037.91)                          | 721.57<br>(555.22 to<br>942.42)                            | 547.37<br>(427.33 to<br>672.16)                            | 938.02<br>(735.14 to<br>1,211.42)                          | 12.96<br>(10.67 to<br>15.35)                        | 13.47<br>(10.24 to<br>16.50)                         | 10.99<br>(8.36 to<br>13.13)                          | 16.46<br>(12.97 to<br>20.02)                         |
| Unintentional firearm injuries       | 210.97<br>(125.36 to<br>263.17)                            | 173.62<br>(94.80 to<br>241.82)                             | 136.46<br>(76.58 to<br>187.83)                             | 222.64<br>(125.42 to<br>297.74)                            | 3.56<br>(2.10 to<br>4.52)                           | 3.46<br>(1.95 to<br>4.85)                            | 2.85<br>(1.61 to<br>3.97)                            | 4.21<br>(2.42 to<br>5.69)                            |
| Unintentional suffocation            | 228.86<br>(142.56 to<br>355.44)                            | 172.39<br>(104.83 to<br>287.13)                            | 117.02<br>(77.51 to<br>176.35)                             | 239.23<br>(151.46 to<br>381.22)                            | 2.84<br>(1.82 to<br>4.31)                           | 2.24<br>(1.43 to<br>3.61)                            | 1.56<br>(1.07 to<br>2.27)                            | 3.06<br>(2.01 to<br>4.79)                            |
| Other exposure to mechanical forces  | 403.65<br>(320.66 to<br>496.50)                            | 375.57<br>(280.59 to<br>478.02)                            | 293.89<br>(224.97 to<br>360.46)                            | 476.15<br>(363.66 to<br>604.73)                            | 6.56<br>(5.30 to<br>7.76)                           | 7.78<br>(5.89 to<br>9.32)                            | 6.59<br>(4.96 to<br>7.88)                            | 9.19<br>(7.04 to<br>11.07)                           |
| Adverse effects of medical treatment | 675.69<br>(412.26 to<br>917.97)                            | 695.03<br>(435.48 to<br>967.26)                            | 552.33<br>(359.06 to<br>734.22)                            | 864.24<br>(529.39 to<br>1,202.99)                          | 10.92<br>(7.27 to<br>13.91)                         | 13.93<br>(9.82 to<br>17.69)                          | 11.97<br>(8.67 to<br>14.66)                          | 16.18<br>(11.22 to<br>20.76)                         |
| Animal contact                       | 344.76<br>(260.61 to<br>405.09)                            | 428.26<br>(302.71 to<br>531.74)                            | 331.90<br>(239.28 to<br>399.26)                            | 578.91<br>(421.97 to<br>713.46)                            | 6.59<br>(5.01 to<br>7.53)                           | 10.05<br>(6.99 to<br>12.11)                          | 8.33<br>(5.86 to<br>9.85)                            | 12.47<br>(8.79 to<br>14.69)                          |
| Venomous animal contact              | 276.26<br>(194.42 to<br>338.21)                            | 341.46<br>(227.21 to<br>445.63)                            | 265.27<br>(179.11 to<br>332.76)                            | 458.87<br>(310.78 to<br>584.55)                            | 5.51<br>(3.97 to<br>6.53)                           | 8.36<br>(5.60 to<br>10.29)                           | 6.93<br>(4.74 to<br>8.38)                            | 10.31<br>(7.00 to<br>12.62)                          |
| Non-venomous animal contact          | 68.49<br>(40.26 to<br>115.16)                              | 86.80<br>(51.26 to<br>140.64)                              | 66.63<br>(40.73 to<br>102.94)                              | 120.04<br>(70.70 to<br>196.36)                             | 1.08<br>(0.68 to<br>1.71)                           | 1.69<br>(1.16 to<br>2.53)                            | 1.40<br>(2.01 to<br>2.01)                            | 2.16<br>(1.41 to<br>3.22)                            |
| Foreign body                         | 513.77<br>(347.04 to<br>840.88)                            | 629.73<br>(425.44 to<br>1,010.46)                          | 523.57<br>(376.31 to<br>743.34)                            | 725.20<br>(492.18 to<br>1,162.71)                          | 7.71<br>(5.64 to<br>11.35)                          | 11.68<br>(9.00 to<br>15.72)                          | 10.76<br>(8.61 to<br>13.29)                          | 12.47<br>(9.43 to<br>17.26)                          |

|                                                                                     |                                                            |                                                            |                                                            |                                                            |                                                   |                                                   |                                                   |                                                   |
|-------------------------------------------------------------------------------------|------------------------------------------------------------|------------------------------------------------------------|------------------------------------------------------------|------------------------------------------------------------|---------------------------------------------------|---------------------------------------------------|---------------------------------------------------|---------------------------------------------------|
| Pulmonary aspiration and foreign body in airway                                     | 471.24<br>(320.73 to<br>796.25)                            | 579.09<br>(390.59 to<br>954.01)                            | 482.03<br>(351.82 to<br>709.25)                            | 663.44<br>(439.72 to<br>1,096.86)                          | 7.04<br>(5.16 to<br>10.80)                        | 10.76<br>(8.38 to<br>15.03)                       | 9.96<br>(8.09 to<br>12.75)                        | 11.41<br>(8.66 to<br>16.47)                       |
| Foreign body in other body part                                                     | 42.53<br>(13.29 to<br>75.82)                               | 50.64<br>(14.98 to<br>103.80)                              | 41.54<br>(12.46 to<br>90.26)                               | 61.76<br>(18.54 to<br>122.90)                              | 0.67<br>(0.22 to<br>1.27)                         | 0.92<br>(0.29 to<br>2.02)                         | 0.80<br>(0.24 to<br>1.83)                         | 1.07<br>(0.34 to<br>2.25)                         |
| Environmental heat and cold exposure                                                | 184.10<br>(86.67 to<br>234.17)                             | 168.11<br>(77.35 to<br>225.74)                             | 123.85<br>(58.32 to<br>163.57)                             | 231.25<br>(108.12 to<br>306.85)                            | 3.20<br>(1.51 to<br>3.96)                         | 3.47<br>(1.63 to<br>4.51)                         | 2.69<br>(1.29 to<br>3.47)                         | 4.51<br>(2.13 to<br>5.79)                         |
| Other unintentional injuries                                                        | 327.38<br>(255.18 to<br>390.35)                            | 254.32<br>(202.79 to<br>315.04)                            | 205.76<br>(167.67 to<br>250.22)                            | 315.47<br>(254.06 to<br>389.06)                            | 5.20<br>(4.33 to<br>5.99)                         | 4.88<br>(4.04 to<br>5.80)                         | 4.17<br>(3.50 to<br>4.89)                         | 5.73<br>(4.79 to<br>6.78)                         |
| <b>Self-harm and interpersonal violence</b>                                         | <b>1,190.03</b><br><b>(1,004.46 to</b><br><b>1,484.86)</b> | <b>1,968.22</b><br><b>(1,533.47 to</b><br><b>2,606.92)</b> | <b>1,849.50</b><br><b>(1,448.81 to</b><br><b>2,425.15)</b> | <b>2,221.72</b><br><b>(1,694.76 to</b><br><b>2,992.09)</b> | <b>25.99</b><br><b>(21.97 to</b><br><b>32.31)</b> | <b>48.36</b><br><b>(37.87 to</b><br><b>63.37)</b> | <b>46.48</b><br><b>(36.64 to</b><br><b>60.29)</b> | <b>53.40</b><br><b>(40.88 to</b><br><b>71.52)</b> |
| <b>Western Sub-Saharan Africa</b>                                                   |                                                            |                                                            |                                                            |                                                            |                                                   |                                                   |                                                   |                                                   |
| Cause                                                                               | YLLs (in 1000s)                                            |                                                            |                                                            |                                                            | Deaths (in 1000s)                                 |                                                   |                                                   |                                                   |
|                                                                                     | 2016                                                       | 2040 Forecast                                              | 2040 Better Scenario                                       | 2040 Worse Scenario                                        | 2016                                              | 2040 Forecast                                     | 2040 Better Scenario                              | 2040 Worse Scenario                               |
| Self-harm                                                                           | 783.31<br>(643.83 to<br>1,020.05)                          | 1,439.00<br>(1,061.67 to<br>2,001.57)                      | 1,342.16<br>(1,000.32 to<br>1,859.17)                      | 1,654.03<br>(1,193.19 to<br>2,330.53)                      | 19.14<br>(15.76 to<br>24.85)                      | 38.83<br>(29.21 to<br>53.27)                      | 37.23<br>(28.17 to<br>50.80)                      | 43.37<br>(31.44 to<br>60.70)                      |
| Self-harm by firearm                                                                | 83.13<br>(48.21 to<br>137.32)                              | 121.08<br>(63.97 to<br>202.40)                             | 111.71<br>(59.27 to<br>186.74)                             | 141.68<br>(73.17 to<br>239.46)                             | 2.04<br>(1.18 to<br>3.13)                         | 3.33<br>(1.81 to<br>5.36)                         | 3.17<br>(1.73 to<br>5.04)                         | 3.77<br>(2.00 to<br>6.09)                         |
| Self-harm by other specified means                                                  | 700.18<br>(569.17 to<br>909.43)                            | 1,317.92<br>(966.56 to<br>1,819.19)                        | 1,230.45<br>(913.93 to<br>1,694.30)                        | 1,512.34<br>(1,085.43 to<br>2,151.39)                      | 17.11<br>(13.90 to<br>22.19)                      | 35.50<br>(26.70 to<br>48.59)                      | 34.07<br>(26.02 to<br>46.35)                      | 39.60<br>(28.84 to<br>55.76)                      |
| Interpersonal violence                                                              | 406.73<br>(339.76 to<br>609.49)                            | 529.22<br>(414.72 to<br>799.05)                            | 507.34<br>(399.96 to<br>757.96)                            | 567.69<br>(445.43 to<br>869.40)                            | 6.85<br>(5.73 to<br>10.43)                        | 9.52<br>(7.55 to<br>14.78)                        | 9.25<br>(7.35 to<br>14.16)                        | 10.03<br>(7.92 to<br>15.76)                       |
| Physical violence by firearm                                                        | 300.91<br>(152.55 to<br>329.78)                            | 368.68<br>(191.82 to<br>438.60)                            | 290.67<br>(186.57 to<br>423.30)                            | 281.13<br>(201.84 to<br>468.49)                            | 3.45<br>(2.64 to<br>5.74)                         | 4.77<br>(3.46 to<br>7.88)                         | 4.66<br>(3.36 to<br>7.64)                         | 4.94<br>(3.57 to<br>8.28)                         |
| Physical violence by sharp object                                                   | 106.46<br>(75.37 to<br>162.90)                             | 156.04<br>(104.96 to<br>239.45)                            | 153.99<br>(102.81 to<br>235.69)                            | 159.97<br>(109.29 to<br>244.92)                            | 1.84<br>(1.33 to<br>2.86)                         | 2.89<br>(1.98 to<br>4.49)                         | 2.89<br>(1.97 to<br>4.48)                         | 2.91<br>(2.02 to<br>4.51)                         |
| Physical violence by other means                                                    | 99.36<br>(75.45 to<br>161.80)                              | 104.50<br>(74.20 to<br>187.51)                             | 92.68<br>(66.30 to<br>165.87)                              | 126.59<br>(90.17 to<br>224.58)                             | 1.56<br>(1.20 to<br>2.68)                         | 1.86<br>(1.33 to<br>3.39)                         | 1.70<br>(1.22 to<br>3.13)                         | 2.18<br>(1.55 to<br>4.00)                         |
| <b>Forces of nature, conflict and terrorism, and executions and police conflict</b> | <b>291.84</b><br><b>(93.54 to</b><br><b>516.75)</b>        | <b>81.26</b><br><b>(0.00 to</b><br><b>623.81)</b>          | <b>75.07</b><br><b>(0.00 to</b><br><b>550.99)</b>          | <b>84.38</b><br><b>(0.00 to</b><br><b>627.21)</b>          | <b>4.63</b><br><b>(1.49 to</b><br><b>8.20)</b>    | <b>1.39</b><br><b>(0.00 to</b><br><b>10.43)</b>   | <b>1.32</b><br><b>(0.00 to</b><br><b>9.59)</b>    | <b>1.42</b><br><b>(0.00 to</b><br><b>10.40)</b>   |
| Exposure to forces of nature                                                        | 0.00<br>(0.00 to<br>0.00)                                  | 6.22<br>(0.00 to<br>29.91)                                 | 5.95<br>(0.00 to<br>27.80)                                 | 6.80<br>(0.00 to<br>31.87)                                 | 0.00<br>(0.00 to<br>0.00)                         | 0.11<br>(0.00 to<br>0.54)                         | 0.11<br>(0.00 to<br>0.51)                         | 0.12<br>(0.00 to<br>0.55)                         |
| Conflict and terrorism                                                              | 287.77<br>(88.72 to<br>512.62)                             | 64.41<br>(0.00 to<br>623.81)                               | 59.06<br>(0.00 to<br>550.99)                               | 66.97<br>(0.00 to<br>627.21)                               | 4.56<br>(1.40 to<br>8.12)                         | 1.08<br>(0.00 to<br>10.43)                        | 1.02<br>(0.00 to<br>9.59)                         | 1.11<br>(0.00 to<br>10.40)                        |
| Executions and police conflict                                                      | 4.07<br>(2.91 to<br>6.53)                                  | 10.63<br>(0.00 to<br>78.67)                                | 10.05<br>(0.00 to<br>74.29)                                | 10.61<br>(0.00 to<br>78.04)                                | 0.08<br>(0.05 to<br>0.11)                         | 0.19<br>(0.00 to<br>1.44)                         | 0.19<br>(0.00 to<br>1.39)                         | 0.19<br>(0.00 to<br>1.42)                         |
| <b>Benin</b>                                                                        |                                                            |                                                            |                                                            |                                                            |                                                   |                                                   |                                                   |                                                   |
| Cause                                                                               | YLLs (actual counts)                                       |                                                            |                                                            |                                                            | Deaths (actual counts)                            |                                                   |                                                   |                                                   |
|                                                                                     | 2016                                                       | 2040 Forecast                                              | 2040 Better Scenario                                       | 2040 Worse Scenario                                        | 2016                                              | 2040 Forecast                                     | 2040 Better Scenario                              | 2040 Worse Scenario                               |
| All causes                                                                          | 4,409,873.33<br>(3,905,934.26 to<br>4,985,880.22)          | 3,512,659.85<br>(2,850,978.28 to<br>4,326,185.38)          | 2,770,685.39<br>(2,279,495.11 to<br>3,359,236.96)          | 5,843,705.81<br>(4,711,050.36 to<br>7,135,471.38)          | 81,307.66<br>(74,426.46 to<br>88,689.80)          | 101,978.72<br>(87,626.42 to<br>118,837.04)        | 83,512.18<br>(72,579.73 to<br>96,158.60)          | 145,511.91<br>(123,926.86 to<br>169,585.69)       |
| Communicable, maternal, neonatal, and nutritional diseases                          | 3,068,543.00<br>(2,629,399.27 to<br>3,547,522.23)          | 1,569,883.26<br>(1,157,349.75 to<br>2,073,773.95)          | 1,126,233.95<br>(822,786.28 to<br>1,491,460.81)            | 3,127,004.76<br>(2,302,511.96 to<br>4,061,120.31)          | 45,515.41<br>(40,290.65 to<br>51,446.88)          | 33,377.16<br>(24,722.92 to<br>44,887.58)          | 24,111.70<br>(18,067.45 to<br>32,502.06)          | 56,700.50<br>(42,466.22 to<br>73,498.38)          |

|                                                                   |                                                   |                                               |                                             |                                                 |                                          |                                          |                                         |                                          |
|-------------------------------------------------------------------|---------------------------------------------------|-----------------------------------------------|---------------------------------------------|-------------------------------------------------|------------------------------------------|------------------------------------------|-----------------------------------------|------------------------------------------|
|                                                                   | 208,729.02<br>(173,078.51 to<br>250,349.99)       | 192,309.77<br>(129,383.72 to<br>272,085.75)   | 127,674.25<br>(77,876.24 to<br>202,566.78)  | 416,081.85<br>(298,494.09 to<br>574,887.91)     | 4,653.56<br>(3,929.01 to<br>5,522.72)    | 4,330.21<br>(3,049.72 to<br>5,869.08)    | 2,937.85<br>(1,955.28 to<br>4,308.31)   | 8,973.16<br>(6,515.42 to<br>12,222.36)   |
| HIV/AIDS and tuberculosis                                         |                                                   |                                               |                                             |                                                 |                                          |                                          |                                         |                                          |
| Tuberculosis                                                      | 95,710.14<br>(73,049.37 to<br>121,155.26)         | 54,984.48<br>(33,124.84 to<br>89,091.32)      | 37,979.53<br>(23,987.18 to<br>58,027.47)    | 113,648.55<br>(67,132.50 to<br>183,575.38)      | 2,585.74<br>(1,994.37 to<br>3,256.31)    | 1,728.82<br>(1,090.80 to<br>2,658.30)    | 1,240.47<br>(827.92 to<br>1,801.11)     | 3,366.39<br>(2,082.54 to<br>5,261.23)    |
| HIV/AIDS                                                          | 113,018.88<br>(88,486.93 to<br>149,487.49)        | 137,325.29<br>(82,706.24 to<br>209,746.16)    | 89,694.71<br>(42,974.96 to<br>160,861.04)   | 302,433.29<br>(199,244.31 to<br>454,874.29)     | 2,067.82<br>(1,657.25 to<br>2,660.69)    | 2,601.39<br>(1,573.83 to<br>3,898.37)    | 1,697.39<br>(836.28 to<br>2,916.31)     | 5,606.77<br>(3,648.62 to<br>8,466.92)    |
| Diarrhea, lower respiratory, and other common infectious diseases | 1,253,213.52<br>(1,029,482.74 to<br>1,520,844.12) | 735,209.24<br>(457,204.71 to<br>1,095,964.52) | 466,345.46<br>(284,405.72 to<br>731,660.44) | 1,419,490.87<br>(890,929.30 to<br>2,139,789.69) | 19,939.68<br>(16,718.79 to<br>23,728.90) | 18,976.70<br>(11,991.82 to<br>29,105.67) | 12,512.41<br>(7,909.80 to<br>19,972.72) | 29,561.13<br>(18,609.87 to<br>43,337.33) |
| Diarrheal diseases                                                | 584,123.39<br>(417,130.06 to<br>771,670.47)       | 268,178.76<br>(110,461.67 to<br>529,405.13)   | 172,757.25<br>(57,495.96 to<br>353,227.52)  | 489,188.95<br>(230,862.62 to<br>872,519.36)     | 8,679.28<br>(6,300.82 to<br>11,863.59)   | 6,473.39<br>(2,074.82 to<br>14,858.86)   | 4,092.09<br>(1,185.32 to<br>10,371.60)  | 10,265.38<br>(3,848.62 to<br>21,614.15)  |
| Intestinal infectious diseases                                    | 18,503.85<br>(8,395.69 to<br>35,143.39)           | 19,663.41<br>(8,673.00 to<br>39,184.54)       | 17,448.64<br>(7,827.72 to<br>33,892.31)     | 28,702.41<br>(12,317.73 to<br>57,175.44)        | 263.88<br>(122.27 to<br>492.63)          | 295.11<br>(134.07 to<br>587.12)          | 264.27<br>(120.88 to<br>506.72)         | 416.36<br>(384.16 to<br>812.42)          |
| Typhoid fever                                                     | 17,447.46<br>(7,658.54 to<br>33,521.40)           | 18,375.32<br>(7,640.08 to<br>37,118.80)       | 16,325.83<br>(6,865.10 to<br>32,368.56)     | 26,714.76<br>(10,924.30 to<br>53,958.24)        | 248.94<br>(110.21 to<br>462.95)          | 275.62<br>(120.51 to<br>553.01)          | 247.13<br>(108.15 to<br>481.67)         | 387.30<br>(164.03 to<br>764.74)          |
| Paratyphoid fever                                                 | 881.38<br>(317.61 to<br>2,048.13)                 | 1,228.62<br>(442.80 to<br>2,738.15)           | 1,078.14<br>(396.10 to<br>2,445.52)         | 1,850.90<br>(674.07 to<br>4,217.13)             | 12.66<br>(4.72 to<br>29.00)              | 18.51<br>(6.99 to<br>40.92)              | 16.36<br>(6.22 to<br>36.06)             | 27.05<br>(10.19 to<br>59.15)             |
| Other intestinal infectious diseases                              | 175.01<br>(54.17 to<br>475.47)                    | 59.47<br>(15.06 to<br>174.36)                 | 44.66<br>(11.44 to<br>137.16)               | 136.74<br>(33.23 to<br>407.33)                  | 2.28<br>(0.74 to<br>5.91)                | 0.98<br>(0.29 to<br>2.68)                | 0.78<br>(0.23 to<br>2.14)               | 2.00<br>(0.55 to<br>5.42)                |
| Lower respiratory infections                                      | 425,069.22<br>(329,283.14 to<br>547,251.05)       | 318,223.87<br>(180,779.49 to<br>535,372.81)   | 186,797.22<br>(113,260.81 to<br>304,972.68) | 667,664.16<br>(332,651.07 to<br>1,200,836.02)   | 7,776.69<br>(6,417.91 to<br>9,324.82)    | 9,967.54<br>(6,570.61 to<br>14,575.66)   | 6,390.43<br>(4,448.83 to<br>8,990.48)   | 15,370.32<br>(9,298.35 to<br>23,774.99)  |
| Upper respiratory infections                                      | 777.80<br>(250.22 to<br>1,862.56)                 | 458.93<br>(157.65 to<br>1,088.16)             | 337.23<br>(117.97 to<br>772.22)             | 1,072.07<br>(344.59 to<br>2,794.03)             | 11.33<br>(4.81 to<br>24.11)              | 9.03<br>(3.68 to<br>19.15)               | 6.96<br>(2.87 to<br>14.20)              | 18.42<br>(7.14 to<br>42.63)              |
| Otitis media                                                      | 13.96<br>(7.04 to<br>28.34)                       | 4.06<br>(2.10 to<br>7.40)                     | 4.16<br>(2.12 to<br>7.57)                   | 4.27<br>(2.25 to<br>7.82)                       | 0.33<br>(0.19 to<br>0.54)                | 0.22<br>(0.09 to<br>0.41)                | 0.25<br>(0.10 to<br>0.46)               | 0.19<br>(0.08 to<br>0.34)                |
| Meningitis                                                        | 147,328.84<br>(100,932.69 to<br>237,572.25)       | 92,637.92<br>(59,557.80 to<br>149,204.17)     | 76,952.61<br>(51,032.94 to<br>121,757.90)   | 154,228.90<br>(91,292.23 to<br>264,360.42)      | 2,236.74<br>(1,590.65 to<br>3,474.71)    | 1,737.70<br>(1,172.15 to<br>2,764.75)    | 1,550.48<br>(1,057.08 to<br>2,470.33)   | 2,483.00<br>(1,601.49 to<br>3,980.28)    |
| Pneumococcal meningitis                                           | 11,686.17<br>(7,959.64 to<br>18,880.03)           | 7,647.11<br>(4,845.79 to<br>13,661.33)        | 6,902.07<br>(4,412.07 to<br>11,915.21)      | 10,239.93<br>(6,126.80 to<br>18,992.52)         | 207.09<br>(146.47 to<br>338.38)          | 176.25<br>(114.19 to<br>310.46)          | 167.68<br>(109.26 to<br>294.72)         | 205.34<br>(131.96 to<br>372.50)          |
| H influenzae type B meningitis                                    | 19,142.82<br>(12,405.24 to<br>30,501.99)          | 19,748.09<br>(7,260.99 to<br>47,298.09)       | 11,294.32<br>(5,546.68 to<br>23,998.24)     | 49,858.34<br>(13,704.43 to<br>130,456.70)       | 275.59<br>(186.42 to<br>436.53)          | 288.97<br>(132.38 to<br>630.57)          | 192.09<br>(111.04 to<br>360.27)         | 638.01<br>(206.90 to<br>1,584.03)        |
| Meningococcal meningitis                                          | 58,004.84<br>(38,792.83 to<br>91,015.75)          | 36,230.25<br>(23,023.36 to<br>61,263.31)      | 32,993.79<br>(21,186.83 to<br>54,853.43)    | 50,499.16<br>(30,995.14 to<br>84,763.76)        | 871.02<br>(602.83 to<br>1,345.60)        | 695.17<br>(443.80 to<br>1,207.35)        | 654.13<br>(418.43 to<br>1,096.70)       | 876.40<br>(558.15 to<br>1,490.22)        |
| Other meningitis                                                  | 58,495.01<br>(38,850.20 to<br>102,326.21)         | 29,012.47<br>(18,429.06 to<br>47,422.78)      | 25,762.43<br>(16,852.97 to<br>40,540.64)    | 43,631.48<br>(26,356.47 to<br>72,329.84)        | 883.04<br>(628.03 to<br>1,425.63)        | 577.31<br>(390.55 to<br>892.92)          | 536.59<br>(309.24 to<br>830.84)         | 763.24<br>(502.25 to<br>1,206.23)        |
| Encephalitis                                                      | 7,476.37<br>(4,967.29 to<br>10,638.49)            | 7,192.37<br>(4,395.98 to<br>10,637.23)        | 6,147.64<br>(3,784.36 to<br>9,050.83)       | 11,810.29<br>(7,281.40 to<br>17,744.42)         | 113.08<br>(76.01 to<br>153.16)           | 129.65<br>(82.01 to<br>185.33)           | 115.10<br>(73.23 to<br>161.57)          | 191.14<br>(121.54 to<br>274.66)          |
| Diphtheria                                                        | 204.61<br>(88.16 to<br>403.31)                    | 47.08<br>(17.78 to<br>111.42)                 | 22.60<br>(11.56 to<br>41.13)                | 129.75<br>(34.19 to<br>390.26)                  | 2.60<br>(1.21 to<br>4.96)                | 0.67<br>(0.30 to<br>1.43)                | 0.38<br>(0.20 to<br>0.68)               | 1.65<br>(0.50 to<br>4.70)                |
| Whooping cough                                                    | 31,674.18<br>(2,403.91 to<br>110,871.84)          | 23,786.81<br>(1,967.50 to<br>78,485.50)       | 3,445.39<br>(259.12 to<br>12,832.04)        | 49,727.28<br>(4,246.04 to<br>172,588.78)        | 374.18<br>(28.36 to<br>1,311.39)         | 282.48<br>(23.12 to<br>933.97)           | 42.80<br>(3.22 to<br>160.77)            | 588.04<br>(50.22 to<br>2,041.54)         |
| Tetanus                                                           | 4,552.95<br>(2,384.39 to<br>9,596.37)             | 741.31<br>(372.38 to<br>1,422.85)             | 518.65<br>(233.64 to<br>1,007.05)           | 1,294.09<br>(604.85 to<br>2,973.08)             | 71.20<br>(41.46 to<br>133.56)            | 13.63<br>(6.93 to<br>24.66)              | 11.09<br>(5.17 to<br>21.16)             | 19.92<br>(10.16 to<br>40.26)             |
| Measles                                                           | 30,572.98<br>(9,918.06 to<br>75,581.33)           | 2,841.08<br>(219.87 to<br>15,679.91)          | 819.98<br>(120.87 to<br>3,485.94)           | 12,484.51<br>(784.86 to<br>48,642.81)           | 364.66<br>(118.76 to<br>878.17)          | 34.13<br>(2.80 to<br>187.28)             | 10.17<br>(1.56 to<br>42.04)             | 148.27<br>(9.66 to<br>575.51)            |

| Benin                                                 |                                                      |                                                      |                                                      |                                                      |                                                 |                                                |                                                |                                                |
|-------------------------------------------------------|------------------------------------------------------|------------------------------------------------------|------------------------------------------------------|------------------------------------------------------|-------------------------------------------------|------------------------------------------------|------------------------------------------------|------------------------------------------------|
| Cause                                                 | YLLs (actual counts)                                 |                                                      |                                                      |                                                      | Deaths (actual counts)                          |                                                |                                                |                                                |
|                                                       | 2016                                                 | 2040 Forecast                                        | 2040 Better Scenario                                 | 2040 Worse Scenario                                  | 2016                                            | 2040 Forecast                                  | 2040 Better Scenario                           | 2040 Worse Scenario                            |
| Varicella and herpes zoster                           | 2,915.37<br>(1,643.68 to<br>4,935.79)                | 1,433.63<br>(797.05 to<br>2,443.04)                  | 1,094.09<br>(628.02 to<br>1,811.74)                  | 3,184.19<br>(1,674.91 to<br>5,728.21)                | 45.71<br>(30.06 to<br>69.67)                    | 33.16<br>(20.68 to<br>51.36)                   | 28.41<br>(17.94 to<br>43.14)                   | 58.47<br>(35.68 to<br>91.28)                   |
| <b>Neglected tropical diseases and malaria</b>        | <b>650,084.23<br/>(481,491.91 to<br/>843,276.26)</b> | <b>239,613.68<br/>(178,063.06 to<br/>307,772.05)</b> | <b>215,852.85<br/>(162,023.42 to<br/>276,455.54)</b> | <b>375,091.27<br/>(271,181.80 to<br/>494,198.20)</b> | <b>8,908.36<br/>(6,913.45 to<br/>11,245.69)</b> | <b>4,456.26<br/>(3,445.24 to<br/>5,341.79)</b> | <b>4,167.99<br/>(3,250.18 to<br/>5,341.79)</b> | <b>6,142.26<br/>(4,707.27 to<br/>7,879.24)</b> |
| Malaria                                               | 603,413.91<br>(438,477.79 to<br>795,643.98)          | 209,760.38<br>(151,740.55 to<br>274,788.24)          | 190,866.66<br>(140,537.65 to<br>248,494.69)          | 319,322.81<br>(224,614.53 to<br>434,658.98)          | 8,190.56<br>(6,171.26 to<br>10,510.01)          | 3,905.10<br>(2,939.44 to<br>5,174.03)          | 3,692.71<br>(2,804.15 to<br>4,873.46)          | 5,220.74<br>(3,836.72 to<br>6,901.30)          |
| Chagas disease                                        | 0.00<br>(0.00 to<br>0.00)                            | 0.00<br>(0.00 to<br>0.00)                            | 0.00<br>(0.00 to<br>0.00)                            | 0.00<br>(0.00 to<br>0.00)                            | 0.00<br>(0.00 to<br>0.00)                       | 0.00<br>(0.00 to<br>0.00)                      | 0.00<br>(0.00 to<br>0.00)                      | 0.00<br>(0.00 to<br>0.00)                      |
| Leishmaniasis                                         | 0.00<br>(0.00 to<br>0.00)                            | 0.00<br>(0.00 to<br>0.00)                            | 0.00<br>(0.00 to<br>0.00)                            | 0.00<br>(0.00 to<br>0.00)                            | 0.00<br>(0.00 to<br>0.00)                       | 0.00<br>(0.00 to<br>0.00)                      | 0.00<br>(0.00 to<br>0.00)                      | 0.00<br>(0.00 to<br>0.00)                      |
| African trypanosomiasis                               | 0.00<br>(0.00 to<br>0.00)                            | 0.00<br>(0.00 to<br>0.00)                            | 0.00<br>(0.00 to<br>0.00)                            | 0.00<br>(0.00 to<br>0.00)                            | 0.00<br>(0.00 to<br>0.00)                       | 0.00<br>(0.00 to<br>0.00)                      | 0.00<br>(0.00 to<br>0.00)                      | 0.00<br>(0.00 to<br>0.00)                      |
| Schistosomiasis                                       | 4,584.33<br>(3,283.88 to<br>6,138.79)                | 3,630.43<br>(2,442.13 to<br>5,229.97)                | 3,233.43<br>(2,185.25 to<br>4,660.04)                | 4,781.33<br>(3,272.61 to<br>6,827.36)                | 112.95<br>(86.58 to<br>166.64)                  | 112.95<br>(77.24 to<br>157.00)                 | 102.72<br>(69.49 to<br>144.25)                 | 140.83<br>(99.65 to<br>195.72)                 |
| Cysticercosis                                         | 303.83<br>(228.13 to<br>400.93)                      | 149.61<br>(103.89 to<br>210.01)                      | 138.69<br>(96.45 to<br>196.77)                       | 183.29<br>(127.66 to<br>254.55)                      | 5.99<br>(4.54 to<br>7.92)                       | 3.45<br>(2.46 to<br>4.74)                      | 3.24<br>(2.30 to<br>4.46)                      | 4.05<br>(2.88 to<br>5.51)                      |
| Cystic echinococcosis                                 | 399.89<br>(287.44 to<br>536.30)                      | 148.85<br>(104.10 to<br>213.05)                      | 107.01<br>(72.36 to<br>155.45)                       | 345.99<br>(236.61 to<br>488.70)                      | 7.63<br>(5.56 to<br>10.11)                      | 3.78<br>(2.66 to<br>5.33)                      | 2.79<br>(1.91 to<br>3.95)                      | 8.10<br>(5.52 to<br>11.45)                     |
| Dengue                                                | 306.08<br>(18.52 to<br>1,287.84)                     | 979.00<br>(72.38 to<br>3,824.87)                     | 897.95<br>(67.66 to<br>3,424.21)                     | 1,453.07<br>(98.79 to<br>5,925.21)                   | 4.48<br>(0.31 to<br>17.86)                      | 19.88<br>(1.49 to<br>72.87)                    | 19.01<br>(1.42 to<br>67.53)                    | 25.65<br>(1.87 to<br>97.81)                    |
| Yellow fever                                          | 3,651.38<br>(744.24 to<br>10,712.43)                 | 1,436.20<br>(283.89 to<br>4,408.23)                  | 1,155.11<br>(220.17 to<br>3,569.36)                  | 2,564.19<br>(501.69 to<br>7,857.77)                  | 58.33<br>(11.82 to<br>173.04)                   | 24.24<br>(4.69 to<br>74.48)                    | 19.63<br>(3.74 to<br>60.16)                    | 41.85<br>(8.16 to<br>126.02)                   |
| Rabies                                                | 3,130.34<br>(669.22 to<br>9,190.74)                  | 1,162.70<br>(238.91 to<br>3,442.32)                  | 764.27<br>(155.60 to<br>2,326.01)                    | 3,415.47<br>(742.27 to<br>9,936.73)                  | 21.16<br>(11.31 to<br>45.40)                    | 21.16<br>(4.41 to<br>62.88)                    | 13.98<br>(2.83 to<br>42.78)                    | 59.52<br>(13.06 to<br>182.34)                  |
| Intestinal nematode infections                        | 2,359.03<br>(1,355.29 to<br>3,685.15)                | 2,607.15<br>(1,489.80 to<br>4,183.69)                | 2,401.49<br>(1,357.95 to<br>3,817.48)                | 4,077.95<br>(2,301.08 to<br>6,611.30)                | 29.16<br>(17.08 to<br>44.76)                    | 33.96<br>(20.42 to<br>52.69)                   | 31.61<br>(18.73 to<br>48.80)                   | 51.42<br>(29.90 to<br>81.40)                   |
| Other neglected tropical diseases                     | 31,935.43<br>(18,523.84 to<br>53,616.80)             | 19,739.36<br>(12,352.17 to<br>31,607.51)             | 16,288.24<br>(10,086.40 to<br>25,793.74)             | 38,947.17<br>(23,918.25 to<br>61,957.22)             | 438.77<br>(272.40 to<br>703.10)                 | 332.34<br>(223.27 to<br>480.46)                | 282.31<br>(192.25 to<br>405.72)                | 590.10<br>(389.10 to<br>881.59)                |
| <b>Maternal disorders</b>                             | <b>60,787.09 to<br/>92,122.14)</b>                   | <b>29,942.14 to<br/>85,293.62)</b>                   | <b>22,854.53 to<br/>62,184.55)</b>                   | <b>61,692.31 to<br/>164,001.90)</b>                  | <b>(11,136.68 to<br/>1,707.07)</b>              | <b>(572.74 to<br/>1,615.77)</b>                | <b>(435.98 to<br/>1,170.35)</b>                | <b>(1,174.46 to<br/>3,107.30)</b>              |
| Maternal hemorrhage                                   | 24,492.75<br>(17,441.78 to<br>32,970.87)             | 17,223.00<br>(9,337.27 to<br>30,276.73)              | 12,965.74<br>(6,986.64 to<br>21,635.78)              | 32,746.58<br>(18,395.71 to<br>54,924.61)             | 461.46<br>(326.27 to<br>621.94)                 | 330.04<br>(178.43 to<br>571.71)                | 248.53<br>(134.77 to<br>412.36)                | 625.81<br>(350.79 to<br>1,047.49)              |
| Maternal sepsis and other maternal infections         | 2,996.80<br>(1,305.70 to<br>5,200.68)                | 1,996.79<br>(700.94 to<br>3,836.21)                  | 1,497.98<br>(539.30 to<br>2,890.65)                  | 3,892.66<br>(1,435.84 to<br>7,452.65)                | 56.08<br>(25.59 to<br>97.09)                    | 38.01<br>(13.62 to<br>72.73)                   | 28.52<br>(10.34 to<br>54.88)                   | 73.80<br>(27.21 to<br>141.36)                  |
| Maternal hypertensive disorders                       | 13,182.86<br>(9,257.54 to<br>18,001.72)              | 9,609.76<br>(5,056.53 to<br>17,045.42)               | 7,201.22<br>(3,872.00 to<br>12,743.86)               | 18,514.13<br>(9,908.39 to<br>31,531.32)              | 240.02<br>(167.23 to<br>330.76)                 | 178.44<br>(94.15 to<br>313.13)                 | 133.77<br>(73.32 to<br>229.80)                 | 342.57<br>(185.35 to<br>579.79)                |
| Maternal obstructed labor and uterine rupture         | 2,948.61<br>(1,641.76 to<br>4,978.25)                | 2,167.18<br>(978.97 to<br>4,282.05)                  | 1,598.94<br>(737.12 to<br>3,041.24)                  | 4,330.16<br>(2,015.28 to<br>8,395.71)                | 55.51<br>(30.92 to<br>92.66)                    | 41.45<br>(18.76 to<br>79.45)                   | 30.59<br>(13.93 to<br>58.05)                   | 82.60<br>(37.98 to<br>157.18)                  |
| Maternal abortion, miscarriage, and ectopic pregnancy | 15,100.04<br>(9,324.46 to<br>22,108.56)              | 6,309.34<br>(2,876.66 to<br>12,434.49)               | 4,670.81<br>(2,185.79 to<br>8,966.22)                | 12,242.06<br>(5,656.48 to<br>23,734.39)              | 277.59<br>(170.76 to<br>403.92)                 | 119.04<br>(55.86 to<br>232.60)                 | 88.17<br>(41.99 to<br>169.14)                  | 229.94<br>(107.93 to<br>441.11)                |

|                                                                         |                                                                  |                                                                  |                                                                  |                                                                    |                                                             |                                                            |                                                            |                                                             |
|-------------------------------------------------------------------------|------------------------------------------------------------------|------------------------------------------------------------------|------------------------------------------------------------------|--------------------------------------------------------------------|-------------------------------------------------------------|------------------------------------------------------------|------------------------------------------------------------|-------------------------------------------------------------|
| Indirect maternal deaths                                                | 10,765.16<br>(7,541.57 to<br>14,841.68)                          | 8,106.21<br>(4,096.41 to<br>14,547.25)                           | 6,082.05<br>(3,122.75 to<br>10,630.31)                           | 16,740.10<br>(8,798.48 to<br>28,623.19)                            | 197.23<br>(138.68 to<br>270.07)                             | 150.67<br>(76.22 to<br>267.63)                             | 113.17<br>(58.39 to<br>196.81)                             | 308.82<br>(166.37 to<br>525.70)                             |
| Late maternal deaths                                                    | 766.08<br>(371.18 to<br>1,372.48)                                | 450.95<br>(190.34 to<br>902.01)                                  | 337.16<br>(148.63 to<br>660.56)                                  | 913.82<br>(393.81 to<br>1,790.09)                                  | 14.18<br>(6.66 to<br>25.39)                                 | 8.54<br>(3.52 to<br>16.74)                                 | 6.39<br>(2.78 to<br>12.48)                                 | 17.19<br>(7.43 to<br>33.03)                                 |
| Maternal deaths aggravated by HIV/AIDS                                  | 561.54<br>(307.25 to<br>831.27)                                  | 2,270.55<br>(1,002.49 to<br>4,112.61)                            | 1,510.38<br>(478.84 to<br>3,027.57)                              | 4,782.90<br>(2,189.52 to<br>8,454.37)                              | 11.05<br>(6.01 to<br>16.43)                                 | 45.80<br>(20.03 to<br>83.11)                               | 30.72<br>(9.71 to<br>60.68)                                | 95.42<br>(44.81 to<br>169.04)                               |
| Other maternal disorders                                                | 5,135.66<br>(3,304.24 to<br>7,424.63)                            | 3,844.01<br>(1,911.84 to<br>6,977.06)                            | 2,932.34<br>(1,465.56 to<br>5,181.79)                            | 7,530.70<br>(3,928.47 to<br>13,024.65)                             | 96.67<br>(61.69 to<br>141.01)                               | 73.92<br>(36.82 to<br>133.40)                              | 56.44<br>(28.90 to<br>99.92)                               | 143.65<br>(75.03 to<br>245.37)                              |
| <b>Benin</b>                                                            |                                                                  |                                                                  |                                                                  |                                                                    |                                                             |                                                            |                                                            |                                                             |
| Cause                                                                   | YLLs (actual counts)                                             |                                                                  |                                                                  |                                                                    | Deaths (actual counts)                                      |                                                            |                                                            |                                                             |
|                                                                         | 2016                                                             | 2040 Forecast                                                    | 2040 Better Scenario                                             | 2040 Worse Scenario                                                | 2016                                                        | 2040 Forecast                                              | 2040 Better Scenario                                       | 2040 Worse Scenario                                         |
| <b>Neonatal disorders</b>                                               | <b>747,919.77</b><br><b>(616,085.96 to</b><br><b>891,907.59)</b> | <b>291,464.03</b><br><b>(141,173.42 to</b><br><b>432,162.17)</b> | <b>227,458.96</b><br><b>(111,380.92 to</b><br><b>339,791.69)</b> | <b>703,918.01</b><br><b>(349,728.45 to</b><br><b>1,034,013.67)</b> | <b>8,639.96</b><br><b>(7,116.56 to</b><br><b>10,302.72)</b> | <b>3,368.61</b><br><b>(1,633.24 to</b><br><b>4,996.12)</b> | <b>2,628.97</b><br><b>(1,287.84 to</b><br><b>3,926.77)</b> | <b>8,134.94</b><br><b>(4,044.73 to</b><br><b>11,949.99)</b> |
| Neonatal preterm birth                                                  | 271,708.08<br>(180,689.78 to<br>377,186.67)                      | 88,974.61<br>(42,162.15 to<br>144,949.87)                        | 65,413.95<br>(30,878.95 to<br>107,547.65)                        | 229,266.57<br>(108,844.21 to<br>367,805.36)                        | 3,138.46<br>(2,087.32 to<br>4,356.75)                       | 1,028.16<br>(487.25 to<br>1,675.20)                        | 755.96<br>(356.99 to<br>1,242.70)                          | 2,649.04<br>(1,257.73 to<br>4,250.48)                       |
| Neonatal encephalopathy due to birth asphyxia and trauma                | 283,662.66<br>(193,176.90 to<br>387,293.35)                      | 103,713.76<br>(38,110.43 to<br>184,157.71)                       | 83,770.51<br>(30,603.89 to<br>148,213.90)                        | 237,413.69<br>(86,327.42 to<br>417,659.15)                         | 3,276.48<br>(2,231.16 to<br>4,473.21)                       | 1,198.50<br>(440.45 to<br>2,127.71)                        | 968.06<br>(354.24 to<br>1,712.11)                          | 2,743.38<br>(999.37 to<br>4,824.17)                         |
| Neonatal sepsis and other neonatal infections                           | 125,554.64<br>(79,440.78 to<br>184,622.11)                       | 71,767.61<br>(38,889.99 to<br>114,053.82)                        | 57,489.41<br>(31,973.72 to<br>91,623.79)                         | 167,808.11<br>(91,757.83 to<br>265,465.25)                         | 1,450.79<br>(917.94 to<br>2,132.78)                         | 829.67<br>(449.94 to<br>1,317.92)                          | 664.62<br>(369.77 to<br>1,059.28)                          | 1,939.82<br>(1,061.31 to<br>3,067.65)                       |
| Hemolytic disease and other neonatal jaundice                           | 16,520.73<br>(9,764.38 to<br>26,382.38)                          | 4,213.13<br>(1,554.21 to<br>7,761.30)                            | 3,257.74<br>(1,207.03 to<br>6,018.96)                            | 10,766.22<br>(3,923.87 to<br>19,533.62)                            | 190.91<br>(112.82 to<br>304.76)                             | 48.71<br>(18.02 to<br>89.67)                               | 37.66<br>(13.96 to<br>69.58)                               | 124.46<br>(45.42 to<br>225.76)                              |
| Other neonatal disorders                                                | 50,473.64<br>(30,407.03 to<br>75,515.64)                         | 22,794.91<br>(9,911.31 to<br>42,281.27)                          | 17,527.34<br>(7,648.15 to<br>32,973.69)                          | 58,663.43<br>(25,274.89 to<br>107,754.51)                          | 583.31<br>(351.68 to<br>872.45)                             | 263.56<br>(114.64 to<br>488.59)                            | 202.66<br>(88.47 to<br>381.04)                             | 678.24<br>(292.69 to<br>1,245.97)                           |
| <b>Nutritional deficiencies</b>                                         | <b>98,507.59</b><br><b>(63,387.16 to</b><br><b>153,855.18)</b>   | <b>36,996.62</b><br><b>(24,202.19 to</b><br><b>55,400.02)</b>    | <b>30,742.94</b><br><b>(20,554.02 to</b><br><b>45,348.80)</b>    | <b>75,281.98</b><br><b>(46,703.03 to</b><br><b>118,690.21)</b>     | <b>1,409.28</b><br><b>(980.75 to</b><br><b>2,070.06)</b>    | <b>781.67</b><br><b>(589.81 to</b><br><b>1,029.46)</b>     | <b>701.17</b><br><b>(542.29 to</b><br><b>902.55)</b>       | <b>1,288.15</b><br><b>(918.99 to</b><br><b>1,826.70)</b>    |
| Protein-energy malnutrition                                             | 93,759.57<br>(59,772.39 to<br>147,671.36)                        | 32,133.61<br>(20,502.44 to<br>50,439.57)                         | 26,558.19<br>(17,272.45 to<br>40,829.21)                         | 67,504.86<br>(40,345.58 to<br>109,570.02)                          | 651.92<br>(889.79 to<br>1,943.66)                           | 1,304.77<br>(484.57 to<br>874.99)                          | 582.91<br>(444.20 to<br>766.64)                            | 1,109.35<br>(766.41 to<br>1,615.88)                         |
| Iodine deficiency                                                       | 459.89<br>(16.46 to<br>2,306.52)                                 | 1,071.39<br>(22.16 to<br>5,823.26)                               | 862.99<br>(17.35 to<br>4,519.85)                                 | 2,253.20<br>(41.40 to<br>14,133.36)                                | 7.86<br>(0.42 to<br>32.43)                                  | 24.90<br>(0.65 to<br>90.08)                                | 21.58<br>(0.54 to<br>75.21)                                | 42.34<br>(1.32 to<br>187.30)                                |
| Dietary iron deficiency                                                 | 226.13<br>(165.90 to<br>368.06)                                  | 276.49<br>(162.31 to<br>506.63)                                  | 249.02<br>(148.10 to<br>451.69)                                  | 364.11<br>(219.71 to<br>656.62)                                    | 4.09<br>(2.87 to<br>9.55)                                   | 5.56<br>(3.11 to<br>15.12)                                 | 5.09<br>(2.87 to<br>14.42)                                 | 7.01<br>(4.05 to<br>18.33)                                  |
| Other nutritional deficiencies                                          | 4,061.99<br>(2,688.04 to<br>6,788.82)                            | 3,515.14<br>(2,192.56 to<br>5,291.05)                            | 3,072.75<br>(1,915.73 to<br>4,570.88)                            | 5,159.80<br>(3,261.42 to<br>7,991.48)                              | 92.55<br>(65.73 to<br>127.57)                               | 99.29<br>(65.62 to<br>139.33)                              | 91.60<br>(60.16 to<br>126.34)                              | 129.44<br>(85.97 to<br>181.83)                              |
| <b>Other communicable, maternal, neonatal, and nutritional diseases</b> | <b>34,139.35</b><br><b>(24,627.96 to</b><br><b>56,572.51)</b>    | <b>22,312.13</b><br><b>(15,425.42 to</b><br><b>34,575.31)</b>    | <b>19,362.88</b><br><b>(13,760.19 to</b><br><b>30,002.89)</b>    | <b>35,447.68</b><br><b>(23,940.38 to</b><br><b>58,015.40)</b>      | <b>554.77</b><br><b>(432.29 to</b><br><b>819.33)</b>        | <b>477.80</b><br><b>(359.55 to</b><br><b>665.27)</b>       | <b>427.00</b><br><b>(325.96 to</b><br><b>579.85)</b>       | <b>681.07</b><br><b>(500.59 to</b><br><b>983.28)</b>        |
| Sexually transmitted infections excluding HIV                           | 9,705.86<br>(4,421.37 to<br>17,711.80)                           | 2,946.86<br>(1,385.62 to<br>5,725.31)                            | 2,526.17<br>(1,215.38 to<br>4,766.88)                            | 5,434.06<br>(2,344.32 to<br>11,185.08)                             | 119.90<br>(58.23 to<br>214.25)                              | 41.99<br>(22.26 to<br>75.73)                               | 36.52<br>(19.76 to<br>63.63)                               | 72.60<br>(35.10 to<br>140.28)                               |
| Syphilis                                                                | 9,077.02<br>(3,871.25 to<br>17,048.78)                           | 2,243.47<br>(794.56 to<br>4,943.35)                              | 1,886.19<br>(677.14 to<br>4,088.29)                              | 4,563.57<br>(1,592.88 to<br>10,359.53)                             | 107.62<br>(46.56 to<br>201.01)                              | 27.87<br>(10.91 to<br>59.26)                               | 23.54<br>(9.18 to<br>49.38)                                | 55.40<br>(20.40 to<br>123.36)                               |
| Chlamydia infection                                                     | 130.04<br>(83.98 to<br>176.17)                                   | 144.65<br>(80.36 to<br>233.78)                                   | 131.49<br>(72.79 to<br>214.03)                                   | 179.47<br>(100.78 to<br>292.68)                                    | 2.49<br>(1.61 to<br>3.31)                                   | 2.86<br>(1.67 to<br>4.44)                                  | 2.63<br>(1.53 to<br>4.14)                                  | 3.49<br>(2.03 to<br>5.44)                                   |
| Gonococcal infection                                                    | 321.98<br>(207.63 to<br>431.70)                                  | 362.19<br>(206.30 to<br>589.84)                                  | 330.07<br>(186.63 to<br>530.20)                                  | 446.22<br>(250.83 to<br>720.92)                                    | 6.39<br>(4.15 to<br>8.46)                                   | 7.40<br>(4.37 to<br>11.49)                                 | 6.82<br>(4.05 to<br>10.48)                                 | 8.95<br>(5.24 to<br>13.78)                                  |



|                                       |                                              |                                                |                                                |                                                |                                       |                                       |                                       |                                       |
|---------------------------------------|----------------------------------------------|------------------------------------------------|------------------------------------------------|------------------------------------------------|---------------------------------------|---------------------------------------|---------------------------------------|---------------------------------------|
| Other sexually transmitted infections | 176.82<br>(113.88 to 237.88)                 | 196.55<br>(107.28 to 315.86)                   | 178.42<br>(97.98 to 288.45)                    | 244.81<br>(135.52 to 385.84)                   | 3.40<br>(2.19 to 4.53)                | 3.87<br>(2.21 to 6.04)                | 3.54<br>(5.51)                        | 4.76<br>(2.75 to 7.25)                |
| Acute hepatitis                       | 14,438.13<br>(12,007.14 to 17,326.21)        | 12,871.89<br>(9,163.26 to 17,963.01)           | 11,387.55<br>(8,141.42 to 15,951.78)           | 17,457.65<br>(12,586.79 to 24,125.59)          | 288.32<br>(240.84 to 343.85)          | 293.14<br>(216.47 to 395.82)          | 262.63<br>(195.11 to 353.88)          | 383.20<br>(285.11 to 513.45)          |
| Acute hepatitis A                     | 404.66<br>(58.30 to 887.44)                  | 230.38<br>(66.72 to 530.19)                    | 197.17<br>(58.85 to 449.90)                    | 403.56<br>(96.16 to 953.01)                    | 5.29<br>(1.08 to 11.04)               | 3.99<br>(1.38 to 8.59)                | 3.50<br>(1.24 to 7.38)                | 6.30<br>(1.92 to 14.26)               |
| Acute hepatitis B                     | 10,582.44<br>(8,557.46 to 12,850.33)         | 9,979.66<br>(7,000.23 to 13,979.56)            | 8,795.47<br>(6,219.61 to 12,273.03)            | 13,338.46<br>(9,478.59 to 18,569.30)           | 228.09<br>(186.55 to 273.94)          | 237.49<br>(173.27 to 325.23)          | 211.54<br>(155.63 to 284.88)          | 309.78<br>(228.51 to 415.33)          |
| Acute hepatitis C                     | 270.05<br>(193.63 to 372.75)                 | 339.02<br>(222.20 to 506.06)                   | 317.59<br>(208.19 to 472.14)                   | 395.74<br>(257.43 to 585.93)                   | 6.40<br>(4.59 to 9.11)                | 9.09<br>(6.06 to 13.57)               | 8.62<br>(5.69 to 12.84)               | 10.27<br>(6.74 to 15.30)              |
| Acute hepatitis E                     | 3,180.99<br>(2,261.60 to 4,311.54)           | 2,322.83<br>(1,420.39 to 3,545.51)             | 2,077.31<br>(1,272.70 to 3,196.79)             | 3,319.89<br>(2,087.65 to 5,054.10)             | 48.54<br>(35.50 to 65.86)             | 42.57<br>(27.12 to 63.23)             | 58.97<br>(38.15)                      | 56.84<br>(36.85 to 83.71)             |
| Other unspecified infectious diseases | 9,995.36<br>(4,357.20 to 30,822.79)          | 6,493.38<br>(3,397.25 to 15,396.18)            | 5,449.16<br>(2,950.87 to 12,532.32)            | 12,555.97<br>(5,972.74 to 31,886.34)           | 146.56<br>(78.32 to 388.18)           | 142.67<br>(95.00 to 247.89)           | 127.85<br>(87.65 to 213.98)           | 225.26<br>(137.16 to 454.78)          |
| Non-communicable diseases             | 1,047,575.71<br>(929,436.23 to 1,188,692.96) | 1,621,522.87<br>(1,330,436.88 to 1,934,567.72) | 1,365,008.77<br>(1,137,037.43 to 1,607,815.78) | 2,246,314.25<br>(1,836,447.30 to 2,706,500.70) | 30,011.70<br>(27,275.33 to 32,772.52) | 60,573.89<br>(52,195.99 to 69,412.98) | 52,078.83<br>(45,703.34 to 58,562.62) | 78,276.14<br>(66,776.16 to 91,453.24) |

**Benin**

| Cause                            | YLLs (actual counts)                            |                                                 |                                                 |                                                 | Deaths (actual counts)                    |                                              |                                              |                                              |
|----------------------------------|-------------------------------------------------|-------------------------------------------------|-------------------------------------------------|-------------------------------------------------|-------------------------------------------|----------------------------------------------|----------------------------------------------|----------------------------------------------|
|                                  | 2016                                            | 2040 Forecast                                   | 2040 Better Scenario                            | 2040 Worse Scenario                             | 2016                                      | 2040 Forecast                                | 2040 Better Scenario                         | 2040 Worse Scenario                          |
| <b>Neoplasms</b>                 | <b>187,873.55</b><br>(169,317.71 to 208,109.12) | <b>428,943.38</b><br>(352,633.35 to 520,558.79) | <b>390,208.47</b><br>(325,367.21 to 463,100.41) | <b>462,988.39</b><br>(379,419.01 to 566,263.58) | <b>6,080.57</b><br>(5,492.15 to 6,717.84) | <b>15,599.02</b><br>(13,549.08 to 18,275.34) | <b>14,643.33</b><br>(12,696.47 to 16,829.93) | <b>16,104.54</b><br>(13,695.00 to 19,107.84) |
| Lip and oral cavity cancer       | 1,963.83<br>(1,662.32 to 2,299.11)              | 4,654.94<br>(2,923.32 to 7,266.20)              | 3,468.25<br>(2,369.65 to 5,055.18)              | 6,453.97<br>(3,766.27 to 10,572.07)             | 68.56<br>(58.85 to 79.71)                 | 172.37<br>(114.21 to 259.15)                 | 135.12<br>(96.98 to 190.58)                  | 228.51<br>(140.04 to 369.70)                 |
| Nasopharynx cancer               | 537.18<br>(426.08 to 676.79)                    | 1,224.73<br>(730.18 to 1,990.07)                | 889.18<br>(584.27 to 1,345.64)                  | 1,809.58<br>(1,000.83 to 3,057.87)              | 14.08<br>(11.24 to 17.59)                 | 34.11<br>(20.68 to 54.36)                    | 24.98<br>(16.67 to 37.39)                    | 49.78<br>(27.96 to 82.82)                    |
| Other pharynx cancer             | 1,039.61<br>(871.58 to 1,235.96)                | 1,857.53<br>(1,155.08 to 2,995.96)              | 1,605.41<br>(1,068.23 to 2,442.40)              | 2,284.22<br>(1,318.43 to 3,877.84)              | 35.98<br>(30.49 to 42.79)                 | 69.67<br>(44.80 to 110.73)                   | 62.16<br>(42.60 to 92.37)                    | 82.62<br>(49.35 to 138.44)                   |
| Esophageal cancer                | 6,767.82<br>(5,666.99 to 8,093.66)              | 12,741.85<br>(7,688.03 to 20,955.29)            | 10,181.94<br>(6,352.08 to 15,857.66)            | 17,619.21<br>(9,809.66 to 30,368.60)            | 245.60<br>(207.51 to 290.78)              | 484.81<br>(300.56 to 764.33)                 | 403.25<br>(260.06 to 609.38)                 | 645.34<br>(369.44 to 1,085.87)               |
| Stomach cancer                   | 15,897.15<br>(14,071.66 to 17,933.53)           | 23,304.68<br>(18,752.54 to 29,082.22)           | 22,269.24<br>(18,016.68 to 27,409.48)           | 26,018.84<br>(20,622.24 to 33,054.02)           | 604.53<br>(536.26 to 680.51)              | 986.25<br>(812.44 to 1,205.86)               | 977.00<br>(814.15 to 1,180.36)               | 1,053.26<br>(857.14 to 1,314.24)             |
| Colon and rectum cancer          | 9,215.42<br>(7,935.32 to 10,848.07)             | 26,268.32<br>(18,735.17 to 36,440.32)           | 26,179.51<br>(18,956.53 to 35,932.45)           | 24,774.40<br>(17,631.29 to 34,594.36)           | 343.40<br>(296.67 to 401.14)              | 1,097.14<br>(795.64 to 1,476.95)             | 1,132.02<br>(828.36 to 1,530.20)             | 989.47<br>(708.81 to 1,362.99)               |
| Liver cancer                     | 34,274.73<br>(27,736.22 to 41,983.73)           | 95,942.02<br>(62,991.57 to 147,662.35)          | 79,958.01<br>(56,492.92 to 114,826.52)          | 105,234.03<br>(66,941.38 to 167,575.12)         | 1,027.09<br>(850.88 to 1,242.02)          | 3,125.02<br>(2,125.95 to 4,660.45)           | 2,675.18<br>(1,954.55 to 3,760.71)           | 3,320.51<br>(2,190.57 to 5,081.09)           |
| Liver cancer due to hepatitis B  | 19,742.85<br>(15,799.75 to 24,679.90)           | 54,394.74<br>(35,123.36 to 85,541.29)           | 45,770.03<br>(31,667.05 to 67,083.53)           | 58,819.69<br>(36,759.03 to 94,805.91)           | 572.97<br>(466.32 to 702.82)              | 1,709.51<br>(1,132.58 to 2,604.11)           | 1,475.23<br>(1,053.05 to 2,078.39)           | 1,794.23<br>(1,149.89 to 2,782.54)           |
| Liver cancer due to hepatitis C  | 2,238.59<br>(1,538.90 to 3,105.78)              | 6,671.50<br>(3,984.77 to 10,531.82)             | 5,701.00<br>(3,562.53 to 8,588.53)              | 7,055.39<br>(4,161.70 to 11,546.53)             | 84.26<br>(57.68 to 116.68)                | 272.98<br>(166.15 to 417.25)                 | 243.41<br>(157.19 to 362.08)                 | 276.67<br>(163.46 to 428.02)                 |
| Liver cancer due to alcohol use  | 3,501.41<br>(2,687.28 to 4,507.72)              | 10,940.70<br>(6,868.55 to 17,635.78)            | 8,507.01<br>(5,669.60 to 12,797.78)             | 12,897.41<br>(7,782.03 to 21,099.35)            | 119.07<br>(92.73 to 149.45)               | 388.97<br>(256.68 to 602.50)                 | 313.54<br>(219.86 to 459.69)                 | 442.78<br>(279.77 to 701.48)                 |
| Liver cancer due to other causes | 8,791.88<br>(6,815.68 to 11,114.36)             | 23,935.07<br>(15,410.80 to 37,981.68)           | 19,979.98<br>(13,685.99 to 29,702.96)           | 26,461.53<br>(16,505.61 to 42,450.88)           | 250.79<br>(197.16 to 310.62)              | 753.56<br>(497.58 to 1,165.92)               | 643.00<br>(453.30 to 926.34)                 | 806.83<br>(513.89 to 1,282.18)               |

|                                      |                                          |                                          |                                          |                                          |                                 |                                     |                                       |                                       |  |
|--------------------------------------|------------------------------------------|------------------------------------------|------------------------------------------|------------------------------------------|---------------------------------|-------------------------------------|---------------------------------------|---------------------------------------|--|
|                                      | 2,219.08<br>(1,572.43 to<br>2,978.36)    | 3,977.55<br>(2,851.53 to<br>5,420.33)    | 4,172.43<br>(2,960.92 to<br>5,712.76)    | 3,705.04<br>(2,655.31 to<br>5,012.42)    | 91.21<br>(64.67 to<br>121.16)   | 175.52<br>(127.82 to<br>232.87)     | 189.10<br>(137.16 to<br>254.38)       | 157.93<br>(115.14 to<br>207.99)       |  |
| Gallbladder and biliary tract cancer | 6,435.88<br>(5,602.69 to<br>7,304.62)    | 19,118.18<br>(15,687.35 to<br>23,195.87) | 19,284.13<br>(15,860.41 to<br>23,175.21) | 17,991.25<br>(14,655.35 to<br>21,763.46) | 261.49<br>(228.01 to<br>296.96) | 828.97<br>(691.01 to<br>999.03)     | 860.69<br>(723.77 to<br>1,020.23)     | 752.42<br>(623.00 to<br>913.87)       |  |
| Pancreatic cancer                    | 1,647.05<br>(1,232.49 to<br>1,974.36)    | 3,448.27<br>(1,967.60 to<br>5,932.45)    | 2,241.36<br>(1,412.19 to<br>3,448.67)    | 5,098.97<br>(2,760.04 to<br>8,691.65)    | 60.79<br>(46.28 to<br>72.02)    | 132.85<br>(79.03 to<br>218.82)      | 90.37<br>(60.02 to<br>134.33)         | 191.03<br>(107.49 to<br>319.70)       |  |
| Larynx cancer                        | 11,813.13<br>(10,222.86 to<br>13,518.41) | 31,283.96<br>(19,907.76 to<br>46,614.14) | 17,019.69<br>(11,921.24 to<br>23,940.66) | 41,436.32<br>(26,052.83 to<br>63,530.97) | 462.64<br>(403.82 to<br>525.07) | 1,287.60<br>(842.98 to<br>1,875.40) | 732.24<br>(527.70 to<br>1,002.54)     | 1,653.84<br>(1,067.37 to<br>2,470.13) |  |
| Tracheal, bronchus, and lung cancer  | 611.43<br>(502.29 to<br>845.85)          | 1,705.82<br>(1,386.22 to<br>2,353.01)    | 1,854.09<br>(1,505.44 to<br>2,559.07)    | 1,457.18<br>(1,192.81 to<br>2,010.94)    | 21.34<br>(17.71 to<br>29.03)    | 66.96<br>(56.19 to<br>88.18)        | 75.43<br>(63.31 to<br>99.52)          | 54.60<br>(45.83 to<br>72.67)          |  |
| Malignant skin melanoma              | 526.65<br>(447.35 to<br>616.44)          | 1,281.40<br>(1,005.17 to<br>1,569.50)    | 1,272.34<br>(1,060.46 to<br>1,563.61)    | 1,366.65<br>(1,145.36 to<br>1,662.95)    | 18.09<br>(15.69 to<br>20.66)    | 52.62<br>(45.62 to<br>60.38)        | 54.79<br>(47.56 to<br>63.12)          | 52.56<br>(45.41 to<br>60.36)          |  |
| Non-melanoma skin cancer             | 13,880.36<br>(11,300.17 to<br>17,120.09) | 33,427.86<br>(23,003.75 to<br>47,423.26) | 31,245.56<br>(21,763.80 to<br>43,505.19) | 35,413.16<br>(24,045.97 to<br>50,231.39) | 439.87<br>(355.85 to<br>542.38) | 1,150.09<br>(812.41 to<br>1,607.70) | 1,098.26<br>(793.60 to<br>1,504.63)   | 1,184.21<br>(815.05 to<br>1,667.20)   |  |
| Breast cancer                        | 18,441.40<br>(11,856.38 to<br>23,114.19) | 28,567.05<br>(17,464.44 to<br>39,469.91) | 26,903.51<br>(16,696.40 to<br>36,670.64) | 32,314.36<br>(19,974.83 to<br>44,509.02) | 581.15<br>(373.96 to<br>728.63) | 942.42<br>(586.04 to<br>1,266.31)   | 903.93<br>(569.24 to<br>1,194.02)     | 1,042.62<br>(644.70 to<br>1,404.05)   |  |
| Cervical cancer                      | 2,287.91<br>(1,732.55 to<br>2,877.42)    | 4,488.44<br>(3,185.74 to<br>5,885.35)    | 4,331.75<br>(3,069.83 to<br>5,675.07)    | 5,086.17<br>(3,587.69 to<br>6,580.90)    | 90.79<br>(68.62 to<br>114.10)   | 191.80<br>(144.61 to<br>246.99)     | 190.40<br>(141.86 to<br>244.54)       | 209.57<br>(157.47 to<br>265.46)       |  |
| Uterine cancer                       | 2,665.76<br>(2,182.84 to<br>3,219.51)    | 7,674.49<br>(5,524.58 to<br>10,152.83)   | 7,812.19<br>(5,679.99 to<br>10,165.61)   | 6,846.70<br>(4,941.95 to<br>9,147.91)    | 85.92<br>(69.59 to<br>105.01)   | 263.68<br>(191.77 to<br>349.35)     | 271.62<br>(201.72 to<br>354.14)       | 230.51<br>(168.95 to<br>305.64)       |  |
| Ovarian cancer                       | 7,685.88<br>(4,856.57 to<br>9,477.15)    | 24,495.37<br>(15,938.05 to<br>29,987.84) | 26,505.82<br>(17,326.26 to<br>32,389.45) | 21,494.94<br>(13,765.24 to<br>26,518.13) | 405.28<br>(255.77 to<br>499.21) | 1,425.75<br>(920.69 to<br>1,727.19) | 1,588.99<br>(1,030.90 to<br>1,908.95) | 1,203.39<br>(757.45 to<br>1,488.87)   |  |
| Prostate cancer                      | 460.41<br>(337.69 to<br>595.85)          | 794.96<br>(552.74 to<br>1,110.54)        | 773.26<br>(539.09 to<br>1,076.21)        | 866.84<br>(608.71 to<br>1,217.62)        | 10.22<br>(7.49 to<br>13.18)     | 19.15<br>(13.55 to<br>25.77)        | 18.90<br>(13.34 to<br>25.39)          | 30.37<br>(14.47 to<br>27.53)          |  |
| Testicular cancer                    | <b>Benin</b>                             |                                          |                                          |                                          |                                 |                                     |                                       |                                       |  |

| Cause                           | YLLs (actual counts)                   |                                          |                                          |                                          | Deaths (actual counts)                |                                 |                                 |                                 |
|---------------------------------|----------------------------------------|------------------------------------------|------------------------------------------|------------------------------------------|---------------------------------------|---------------------------------|---------------------------------|---------------------------------|
|                                 | 2016                                   | 2040 Forecast                            | 2040 Better Scenario                     | 2040 Worse Scenario                      | 2016                                  | 2040 Forecast                   | 2040 Better Scenario            | 2040 Worse Scenario             |
|                                 | Kidney cancer                          | 2,298.77<br>(1,959.28 to<br>2,700.01)    | 5,489.15<br>(4,493.45 to<br>6,697.32)    | 5,699.86<br>(4,614.33 to<br>6,947.89)    | 5,185.78<br>(4,201.96 to<br>6,342.53) | 62.81<br>(53.96 to<br>72.82)    | 186.23<br>(154.87 to<br>225.04) | 198.73<br>(165.02 to<br>237.82) |
| Bladder cancer                  | 2,946.85<br>(2,540.29 to<br>3,395.12)  | 7,520.55<br>(5,937.51 to<br>9,598.82)    | 7,122.71<br>(5,746.94 to<br>8,923.75)    | 8,016.77<br>(6,187.48 to<br>10,562.64)   | 116.43<br>(101.72 to<br>132.27)       | 327.08<br>(266.89 to<br>404.02) | 323.08<br>(268.66 to<br>390.53) | 331.61<br>(263.22 to<br>421.19) |
| Brain and nervous system cancer | 6,981.14<br>(5,342.62 to<br>8,215.64)  | 15,408.89<br>(11,430.11 to<br>19,056.67) | 15,836.14<br>(11,781.59 to<br>19,853.69) | 15,429.39<br>(11,469.93 to<br>19,050.65) | 158.02<br>(123.55 to<br>183.11)       | 414.11<br>(324.27 to<br>496.07) | 434.61<br>(341.20 to<br>523.31) | 391.27<br>(305.63 to<br>468.29) |
| Thyroid cancer                  | 644.10<br>(539.50 to<br>762.44)        | 1,467.92<br>(1,070.87 to<br>2,054.45)    | 1,291.44<br>(972.74 to<br>1,730.64)      | 1,637.00<br>(1,194.81 to<br>2,282.20)    | 20.90<br>(17.40 to<br>24.79)          | 51.39<br>(38.21 to<br>69.68)    | 46.32<br>(35.42 to<br>61.00)    | 55.64<br>(41.44 to<br>75.15)    |
| Mesothelioma                    | 274.07<br>(224.25 to<br>352.85)        | 593.89<br>(458.24 to<br>776.29)          | 590.96<br>(455.38 to<br>770.21)          | 623.29<br>(486.30 to<br>821.08)          | 8.65<br>(7.00 to<br>11.18)            | 20.77<br>(16.34 to<br>26.60)    | 21.34<br>(16.67 to<br>27.40)    | 20.86<br>(16.52 to<br>26.94)    |
| Hodgkin lymphoma                | 1,166.11<br>(898.17 to<br>1,463.14)    | 1,325.49<br>(930.71 to<br>1,790.60)      | 1,201.95<br>(855.51 to<br>1,636.99)      | 1,757.34<br>(1,263.31 to<br>2,368.70)    | 24.77<br>(19.02 to<br>30.23)          | 31.18<br>(22.07 to<br>40.60)    | 28.76<br>(20.53 to<br>37.18)    | 39.64<br>(28.70 to<br>50.90)    |
| Non-Hodgkin lymphoma            | 9,104.21<br>(7,744.98 to<br>10,653.31) | 18,956.96<br>(15,253.40 to<br>23,673.91) | 18,878.77<br>(15,168.12 to<br>23,451.80) | 19,031.08<br>(15,235.37 to<br>23,874.84) | 199.75<br>(172.68 to<br>227.98)       | 508.57<br>(420.77 to<br>618.18) | 516.87<br>(429.68 to<br>618.61) | 478.17<br>(396.67 to<br>581.27) |
| Multiple myeloma                | 1,737.29<br>(1,429.77 to<br>2,269.69)  | 5,577.20<br>(4,232.70 to<br>7,804.02)    | 5,584.65<br>(4,320.15 to<br>7,648.96)    | 5,044.99<br>(3,819.20 to<br>7,010.22)    | 61.72<br>(50.99 to<br>79.51)          | 212.67<br>(164.35 to<br>291.75) | 217.48<br>(170.61 to<br>291.30) | 187.19<br>(144.79 to<br>256.47) |

|                                 |                                                      |                                                      |                                                      |                                                        |                                                  |                                                   |                                                   |                                                   |
|---------------------------------|------------------------------------------------------|------------------------------------------------------|------------------------------------------------------|--------------------------------------------------------|--------------------------------------------------|---------------------------------------------------|---------------------------------------------------|---------------------------------------------------|
| Leukemia                        | 10,097.87<br>(8,031.61 to<br>11,742.45)              | 18,236.18<br>(14,056.89 to<br>22,863.83)             | 17,489.24<br>(13,483.34 to<br>21,714.43)             | 19,298.17<br>(14,818.63 to<br>24,208.28)               | 221.20<br>(177.20 to<br>252.94)                  | 486.04<br>(384.33 to<br>600.84)                   | 469.73<br>(372.87 to<br>570.08)                   | 491.12<br>(386.92 to<br>605.70)                   |
| Acute lymphoid leukemia         | 2,069.49<br>(1,515.31 to<br>2,616.51)                | 3,497.72<br>(2,440.62 to<br>4,757.98)                | 3,417.09<br>(2,382.04 to<br>4,647.02)                | 3,715.17<br>(2,551.12 to<br>5,053.65)                  | 35.86<br>(26.66 to<br>44.16)                     | 72.66<br>(51.06 to<br>96.38)                      | 71.02<br>(49.97 to<br>93.43)                      | 73.60<br>(50.97 to<br>98.35)                      |
| Chronic lymphoid leukemia       | 437.19<br>(321.78 to<br>538.88)                      | 1,045.41<br>(730.73 to<br>1,381.50)                  | 997.71<br>(704.61 to<br>1,297.85)                    | 1,034.47<br>(725.22 to<br>1,382.86)                    | 19.14<br>(13.92 to<br>23.65)                     | 47.99<br>(33.45 to<br>63.31)                      | 46.65<br>(32.73 to<br>60.48)                      | 46.26<br>(32.21 to<br>61.49)                      |
| Acute myeloid leukemia          | 3,645.63<br>(2,650.63 to<br>4,598.83)                | 7,918.04<br>(5,855.56 to<br>10,251.82)               | 7,813.24<br>(5,754.14 to<br>10,063.23)               | 7,944.68<br>(5,758.88 to<br>10,383.14)                 | 70.96<br>(54.06 to<br>86.43)                     | 190.67<br>(145.06 to<br>246.09)                   | 189.11<br>(144.04 to<br>240.20)                   | 181.21<br>(135.98 to<br>235.17)                   |
| Chronic myeloid leukemia        | 1,187.46<br>(900.69 to<br>1,516.30)                  | 1,618.02<br>(1,139.61 to<br>2,294.16)                | 1,508.42<br>(1,068.74 to<br>2,114.21)                | 1,669.37<br>(1,180.47 to<br>2,388.70)                  | 28.73<br>(22.56 to<br>35.89)                     | 44.80<br>(33.79 to<br>61.16)                      | 42.70<br>(32.54 to<br>57.55)                      | 44.88<br>(33.61 to<br>61.16)                      |
| Other leukemia                  | 2,758.10<br>(1,975.35 to<br>3,583.79)                | 4,156.98<br>(2,797.53 to<br>5,846.77)                | 3,752.78<br>(2,535.35 to<br>5,262.14)                | 4,934.48<br>(3,333.37 to<br>6,927.48)                  | 66.51<br>(49.20 to<br>84.19)                     | 129.92<br>(90.43 to<br>176.33)                    | 120.25<br>(84.57 to<br>160.02)                    | 145.18<br>(101.24 to<br>197.16)                   |
| Other neoplasms                 | 14,252.47<br>(12,229.81 to<br>16,839.05)             | 28,109.74<br>(23,436.14 to<br>34,018.72)             | 28,545.07<br>(23,608.01 to<br>34,596.60)             | 29,692.74<br>(24,539.11 to<br>35,910.34)               | 338.26<br>(295.22 to<br>391.40)                  | 854.20<br>(737.52 to<br>995.49)                   | 901.97<br>(774.72 to<br>1,047.17)                 | 822.07<br>(709.35 to<br>958.22)                   |
| <b>Cardiovascular diseases</b>  | <b>267,701.12<br/>(239,278.10 to<br/>296,165.05)</b> | <b>414,315.80<br/>(296,569.12 to<br/>571,838.69)</b> | <b>279,669.11<br/>(210,727.15 to<br/>368,151.68)</b> | <b>723,506.42<br/>(502,366.11 to<br/>1,029,375.34)</b> | <b>10,695.12<br/>(9,546.64 to<br/>11,814.25)</b> | <b>19,661.94<br/>(15,660.31 to<br/>26,020.77)</b> | <b>14,230.67<br/>(11,372.38 to<br/>17,920.00)</b> | <b>31,352.70<br/>(23,265.57 to<br/>41,783.36)</b> |
| Rheumatic heart disease         | 7,879.36<br>(6,491.43 to<br>9,277.81)                | 5,677.78<br>(4,159.64 to<br>7,561.40)                | 5,091.02<br>(3,790.70 to<br>6,704.08)                | 7,857.89<br>(5,774.92 to<br>10,575.52)                 | 238.26<br>(194.78 to<br>280.29)                  | 229.58<br>(178.29 to<br>294.49)                   | 216.51<br>(169.85 to<br>272.36)                   | 291.50<br>(224.06 to<br>374.05)                   |
| Ischemic heart disease          | 99,260.31<br>(84,870.83 to<br>114,801.35)            | 171,527.70<br>(106,770.28 to<br>275,406.03)          | 101,443.62<br>(64,666.74 to<br>160,716.94)           | 317,167.54<br>(194,163.60 to<br>509,171.25)            | 4,504.33<br>(3,878.34 to<br>5,167.90)            | 8,862.19<br>(5,846.65 to<br>13,416.95)            | 5,788.57<br>(3,891.97 to<br>8,624.82)             | 14,829.24<br>(9,760.01 to<br>22,421.45)           |
| Stroke                          | 103,936.10<br>(88,908.05 to<br>118,877.36)           | 131,010.52<br>(75,394.13 to<br>201,430.80)           | 77,623.31<br>(47,463.51 to<br>120,011.31)            | 263,225.53<br>(151,279.40 to<br>424,970.33)            | 4,061.79<br>(3,492.59 to<br>4,629.05)            | 6,128.12<br>(4,048.26 to<br>9,106.50)             | 4,015.58<br>(2,733.42 to<br>5,776.75)             | 11,015.53<br>(6,954.37 to<br>16,862.20)           |
| Ischemic stroke                 | 29,230.66<br>(23,825.45 to<br>34,493.88)             | 42,288.59<br>(25,334.13 to<br>69,827.38)             | 27,952.45<br>(17,189.77 to<br>44,273.90)             | 70,343.44<br>(41,370.07 to<br>115,453.18)              | 1,533.51<br>(1,267.29 to<br>1,791.40)            | 2,592.15<br>(1,642.07 to<br>4,151.97)             | 1,881.37<br>(1,230.06 to<br>2,842.53)             | 3,899.94<br>(2,414.85 to<br>6,434.54)             |
| Intracerebral hemorrhage        | 74,605.44<br>(63,786.54 to<br>86,222.25)             | 88,721.93<br>(48,119.31 to<br>151,209.10)            | 49,670.86<br>(28,147.46 to<br>82,988.39)             | 192,882.09<br>(103,187.30 to<br>331,170.15)            | 2,528.28<br>(2,170.17 to<br>2,914.68)            | 3,353.97<br>(2,111.72 to<br>5,670.91)             | 2,134.20<br>(1,327.22 to<br>3,335.40)             | 7,115.59<br>(4,104.54 to<br>11,652.57)            |
| Hypertensive heart disease      | 11,557.66<br>(6,791.27 to<br>15,659.35)              | 18,926.30<br>(9,776.79 to<br>33,286.84)              | 14,680.68<br>(8,147.62 to<br>23,295.90)              | 27,853.97<br>(13,409.67 to<br>54,189.39)               | 478.69<br>(284.99 to<br>651.53)                  | 907.01<br>(483.17 to<br>1,563.48)                 | 735.96<br>(419.18 to<br>1,146.41)                 | 1,257.95<br>(621.89 to<br>2,460.49)               |
| Cardiomyopathy and myocarditis  | 5,687.71<br>(4,408.56 to<br>8,089.41)                | 11,786.86<br>(8,035.96 to<br>18,624.19)              | 11,669.11<br>(8,000.54 to<br>18,202.85)              | 12,197.68<br>(8,396.86 to<br>19,215.80)                | 152.72<br>(117.95 to<br>218.24)                  | 397.18<br>(277.59 to<br>600.80)                   | 410.18<br>(289.78 to<br>616.90)                   | 381.20<br>(267.65 to<br>579.44)                   |
| Myocarditis                     | 1,309.29<br>(846.80 to<br>2,088.54)                  | 2,008.74<br>(1,116.98 to<br>3,397.49)                | 1,952.08<br>(1,082.35 to<br>3,302.99)                | 2,282.87<br>(1,304.37 to<br>3,927.60)                  | 25.89<br>(16.57 to<br>40.38)                     | 48.44<br>(27.70 to<br>79.85)                      | 49.69<br>(28.52 to<br>80.41)                      | 50.88<br>(29.27 to<br>85.08)                      |
| <b>Benin</b>                    |                                                      |                                                      |                                                      |                                                        |                                                  |                                                   |                                                   |                                                   |
| Cause                           | YLLs (actual counts)                                 |                                                      |                                                      |                                                        | Deaths (actual counts)                           |                                                   |                                                   |                                                   |
|                                 | 2016                                                 | 2040 Forecast                                        | 2040 Better Scenario                                 | 2040 Worse Scenario                                    | 2016                                             | 2040 Forecast                                     | 2040 Better Scenario                              | 2040 Worse Scenario                               |
| Alcoholic cardiomyopathy        | 406.98<br>(236.47 to<br>684.77)                      | 986.89<br>(529.73 to<br>1,698.24)                    | 1,008.12<br>(530.84 to<br>1,734.21)                  | 919.81<br>(513.53 to<br>1,571.83)                      | 12.30<br>(7.14 to<br>20.92)                      | 32.00<br>(17.23 to<br>55.57)                      | 33.21<br>(17.46 to<br>57.81)                      | 29.25<br>(16.33 to<br>49.95)                      |
| Other cardiomyopathy            | 3,971.44<br>(3,123.79 to<br>5,542.86)                | 8,791.23<br>(5,973.92 to<br>14,043.39)               | 8,708.91<br>(5,967.62 to<br>13,511.00)               | 8,994.99<br>(6,078.15 to<br>14,497.01)                 | 114.53<br>(90.78 to<br>157.55)                   | 316.74<br>(220.55 to<br>481.51)                   | 327.27<br>(228.99 to<br>501.08)                   | 301.07<br>(210.63 to<br>471.46)                   |
| Atrial fibrillation and flutter | 969.91<br>(746.03 to<br>1,247.60)                    | 3,168.29<br>(2,409.95 to<br>4,120.48)                | 3,356.49<br>(2,575.20 to<br>4,321.06)                | 2,978.32<br>(2,232.12 to<br>3,945.77)                  | 74.87<br>(57.07 to<br>96.09)                     | 278.76<br>(203.98 to<br>375.07)                   | 312.46<br>(229.96 to<br>409.79)                   | 242.98<br>(174.33 to<br>327.16)                   |
| Aortic aneurysm                 | 1,477.58<br>(1,158.13 to<br>1,862.32)                | 3,304.05<br>(2,432.19 to<br>4,515.40)                | 3,285.79<br>(2,465.81 to<br>4,445.93)                | 3,337.81<br>(2,409.93 to<br>4,667.47)                  | 58.99<br>(46.88 to<br>72.06)                     | 152.20<br>(117.71 to<br>200.93)                   | 158.86<br>(124.35 to<br>206.84)                   | 144.54<br>(110.60 to<br>195.79)                   |

|                                                                |                                               |                                                 |                                                 |                                                 |                                            |                                            |                                            |                                            |
|----------------------------------------------------------------|-----------------------------------------------|-------------------------------------------------|-------------------------------------------------|-------------------------------------------------|--------------------------------------------|--------------------------------------------|--------------------------------------------|--------------------------------------------|
| Peripheral artery disease                                      | 75.61<br>(49.56 to 136.51)                    | 373.66<br>(225.91 to 689.24)                    | 392.57<br>(239.83 to 740.12)                    | 302.91<br>(186.29 to 550.41)                    | 4.52<br>(2.97 to 7.97)                     | 25.27<br>(15.27 to 45.94)                  | 28.39<br>(17.31 to 51.28)                  | 19.09<br>(11.90 to 34.36)                  |
| Endocarditis                                                   | 4,899.43<br>(3,888.21 to 6,325.73)            | 8,935.14<br>(6,414.79 to 12,574.46)             | 8,555.39<br>(6,200.39 to 11,791.22)             | 10,381.30<br>(7,396.66 to 14,588.21)            | 123.74<br>(100.68 to 154.38)               | 301.06<br>(216.12 to 401.63)               | 301.68<br>(215.93 to 401.44)               | 314.92<br>(227.34 to 427.10)               |
| Other cardiovascular and circulatory diseases                  | 31,957.46<br>(26,000.92 to 45,264.17)         | 59,605.51<br>(44,363.85 to 82,655.38)           | 53,571.13<br>(40,520.99 to 72,332.11)           | 78,203.47<br>(57,573.08 to 111,396.82)          | 997.21<br>(806.26 to 1,469.63)             | 2,380.55<br>(1,821.12 to 3,314.44)         | 2,262.50<br>(1,761.88 to 3,084.51)         | 2,855.75<br>(2,158.95 to 3,999.01)         |
| <b>Chronic respiratory diseases</b>                            | <b>50,544.91<br/>(44,149.10 to 58,871.25)</b> | <b>75,126.53<br/>(50,005.80 to 118,055.86)</b>  | <b>48,458.30<br/>(35,461.94 to 67,335.32)</b>   | <b>110,826.58<br/>(70,819.14 to 179,874.95)</b> | <b>1,874.04<br/>(1,636.47 to 2,207.86)</b> | <b>3,217.29<br/>(2,148.80 to 5,095.62)</b> | <b>2,110.97<br/>(1,565.66 to 2,901.68)</b> | <b>4,521.63<br/>(2,878.17 to 7,413.49)</b> |
| Chronic obstructive pulmonary disease                          | 27,635.08<br>(23,360.10 to 33,039.65)         | 47,139.27<br>(26,762.44 to 86,715.41)           | 24,942.86<br>(15,641.73 to 42,099.17)           | 76,160.33<br>(41,496.91 to 144,259.30)          | 1,187.79<br>(1,002.94 to 1,428.41)         | 2,229.29<br>(1,315.55 to 4,091.36)         | 1,252.79<br>(823.43 to 1,986.80)           | 3,370.96<br>(1,911.99 to 6,220.93)         |
| Pneumoconiosis                                                 | 66.03<br>(49.11 to 88.09)                     | 88.81<br>(65.60 to 120.17)                      | 84.87<br>(61.64 to 116.49)                      | 95.13<br>(70.17 to 128.38)                      | 2.28<br>(1.74 to 2.96)                     | 3.90<br>(2.91 to 5.12)                     | 3.79<br>(2.81 to 5.00)                     | 4.09<br>(3.06 to 5.49)                     |
| Silicosis                                                      | 6.27<br>(3.51 to 10.00)                       | 5.87<br>(3.21 to 9.90)                          | 5.82<br>(3.14 to 9.80)                          | 6.30<br>(3.48 to 10.51)                         | 0.21<br>(0.13 to 0.33)                     | 0.25<br>(0.14 to 0.39)                     | 0.25<br>(0.14 to 0.41)                     | 0.25<br>(0.14 to 0.41)                     |
| Asbestosis                                                     | 16.08<br>(11.22 to 22.32)                     | 26.09<br>(17.50 to 38.20)                       | 26.80<br>(17.57 to 39.40)                       | 25.29<br>(17.10 to 37.06)                       | 0.40<br>(0.28 to 0.55)                     | 0.76<br>(0.52 to 1.08)                     | 0.80<br>(0.54 to 1.15)                     | 0.72<br>(0.49 to 1.02)                     |
| Coal workers pneumoconiosis                                    | 3.80<br>(1.80 to 6.64)                        | 4.03<br>(1.99 to 7.03)                          | 3.27<br>(1.62 to 5.72)                          | 5.63<br>(2.78 to 9.58)                          | 0.14<br>(0.07 to 0.23)                     | 0.18<br>(0.09 to 0.32)                     | 0.15<br>(0.07 to 0.26)                     | 0.24<br>(0.12 to 0.44)                     |
| Other pneumoconiosis                                           | 39.87<br>(29.59 to 54.03)                     | 52.83<br>(38.62 to 71.28)                       | 48.99<br>(35.08 to 66.78)                       | 57.90<br>(42.76 to 79.71)                       | 1.53<br>(1.16 to 2.01)                     | 2.71<br>(1.99 to 3.67)                     | 2.59<br>(1.89 to 3.49)                     | 2.88<br>(2.09 to 3.99)                     |
| Asthma                                                         | 16,410.83<br>(13,472.62 to 20,564.43)         | 16,058.51<br>(10,484.23 to 24,592.60)           | 12,101.78<br>(8,218.18 to 17,606.74)            | 21,046.74<br>(13,501.77 to 32,702.11)           | 513.43<br>(419.65 to 652.31)               | 599.18<br>(399.81 to 916.27)               | 472.49<br>(332.85 to 684.08)               | 735.92<br>(480.60 to 1,148.18)             |
| Interstitial lung disease and pulmonary sarcoidosis            | 393.64<br>(245.11 to 610.53)                  | 1,138.49<br>(686.72 to 1,781.23)                | 1,243.81<br>(747.13 to 1,940.03)                | 966.29<br>(584.77 to 1,512.34)                  | 14.20<br>(8.56 to 22.04)                   | 46.98<br>(27.37 to 72.99)                  | 52.95<br>(31.04 to 82.06)                  | 37.97<br>(22.25 to 59.34)                  |
| Other chronic respiratory diseases                             | 6,039.33<br>(3,990.03 to 8,116.55)            | 10,701.46<br>(7,038.39 to 14,825.12)            | 10,084.97<br>(6,900.20 to 13,750.47)            | 12,558.09<br>(8,122.33 to 17,788.55)            | 156.35<br>(100.46 to 212.34)               | 337.94<br>(218.15 to 470.53)               | 328.96<br>(219.50 to 443.28)               | 372.69<br>(237.95 to 522.19)               |
| <b>Cirrhosis and other chronic liver diseases</b>              | <b>63,705.00<br/>(47,076.80 to 87,107.85)</b> | <b>124,308.63<br/>(86,303.96 to 176,679.80)</b> | <b>118,766.73<br/>(82,324.29 to 168,643.14)</b> | <b>141,014.85<br/>(98,284.44 to 200,833.58)</b> | <b>1,804.08<br/>(1,354.98 to 2,437.49)</b> | <b>3,894.73<br/>(2,802.98 to 5,387.35)</b> | <b>3,795.41<br/>(2,721.83 to 5,224.86)</b> | <b>4,284.14<br/>(3,078.51 to 5,945.61)</b> |
| Cirrhosis and other chronic liver diseases due to hepatitis B  | 26,651.97<br>(19,233.03 to 37,522.95)         | 54,969.06<br>(37,634.09 to 79,667.17)           | 53,708.58<br>(36,924.79 to 77,590.21)           | 59,732.76<br>(40,894.36 to 87,598.23)           | 789.07<br>(583.25 to 1,095.97)             | 1,758.70<br>(1,248.07 to 2,503.20)         | 1,754.49<br>(1,250.48 to 2,487.24)         | 1,858.64<br>(1,316.99 to 2,655.96)         |
| Cirrhosis and other chronic liver diseases due to hepatitis C  | 11,103.92<br>(6,772.57 to 17,712.56)          | 23,392.05<br>(13,465.57 to 37,283.79)           | 22,804.34<br>(13,185.28 to 35,987.14)           | 25,497.58<br>(14,693.13 to 41,098.67)           | 331.14<br>(203.60 to 513.54)               | 743.23<br>(445.48 to 1,155.37)             | 737.12<br>(445.55 to 1,144.09)             | 791.57<br>(470.49 to 1,245.71)             |
| Cirrhosis and other chronic liver diseases due to alcohol use  | 13,195.40<br>(9,445.80 to 18,693.50)          | 26,702.64<br>(18,187.06 to 38,903.06)           | 23,838.43<br>(16,234.11 to 34,736.48)           | 32,894.50<br>(22,716.30 to 47,589.20)           | 407.36<br>(294.07 to 568.57)               | 888.28<br>(618.74 to 1,260.54)             | 808.21<br>(561.91 to 1,142.85)             | 1,069.01<br>(752.41 to 1,507.05)           |
| Cirrhosis and other chronic liver diseases due to other causes | 12,753.71<br>(9,669.32 to 16,825.49)          | 19,244.87<br>(13,344.10 to 27,172.97)           | 18,415.39<br>(12,801.95 to 25,847.48)           | 22,890.00<br>(16,020.89 to 32,328.44)           | 276.51<br>(211.41 to 357.92)               | 504.52<br>(359.51 to 682.13)               | 495.59<br>(351.73 to 665.79)               | 564.92<br>(408.88 to 758.03)               |
| <b>Digestive diseases</b>                                      | <b>65,125.38<br/>(54,055.31 to 79,608.45)</b> | <b>88,804.04<br/>(71,548.78 to 112,908.99)</b>  | <b>82,978.37<br/>(67,203.70 to 105,059.28)</b>  | <b>108,390.70<br/>(87,180.89 to 137,965.90)</b> | <b>1,741.62<br/>(1,494.75 to 2,054.83)</b> | <b>3,073.91<br/>(2,572.85 to 3,715.77)</b> | <b>2,988.90<br/>(2,511.36 to 3,637.24)</b> | <b>3,475.41<br/>(2,915.05 to 4,222.51)</b> |
| Peptic ulcer disease                                           | 11,692.18<br>(9,429.00 to 14,306.58)          | 9,992.60<br>(7,295.60 to 13,396.12)             | 8,817.69<br>(6,384.74 to 11,763.24)             | 13,936.01<br>(10,185.01 to 18,334.77)           | 347.83<br>(277.70 to 424.27)               | 369.83<br>(274.92 to 476.71)               | 339.27<br>(252.32 to 431.25)               | 484.73<br>(362.39 to 609.64)               |
| <b>Benin</b>                                                   |                                               |                                                 |                                                 |                                                 |                                            |                                            |                                            |                                            |
| Cause                                                          | YLLs (actual counts)                          |                                                 |                                                 |                                                 | Deaths (actual counts)                     |                                            |                                            |                                            |
|                                                                | 2016                                          | 2040 Forecast                                   | 2040 Better Scenario                            | 2040 Worse Scenario                             | 2016                                       | 2040 Forecast                              | 2040 Better Scenario                       | 2040 Worse Scenario                        |



|                                                            |                                                    |                                                    |                                                    |                                                    |                                              |                                               |                                               |                                                |  |
|------------------------------------------------------------|----------------------------------------------------|----------------------------------------------------|----------------------------------------------------|----------------------------------------------------|----------------------------------------------|-----------------------------------------------|-----------------------------------------------|------------------------------------------------|--|
|                                                            | 219.87<br>(114.47 to<br>354.90)                    | 670.58<br>(359.29 to<br>1,096.13)                  | 715.67<br>(386.23 to<br>1,144.66)                  | 609.07<br>(325.67 to<br>1,002.95)                  | 7.41<br>(3.79 to<br>10.48)                   | 28.26<br>(15.47 to<br>38.94)                  | 31.92<br>(17.58 to<br>44.13)                  | 23.76<br>(12.92 to<br>33.36)                   |  |
| Other drug use disorders                                   | 17.44<br>(10.69 to<br>33.52)                       | 37.10<br>(21.75 to<br>65.87)                       | 37.32<br>(21.99 to<br>67.00)                       | 38.04<br>(22.32 to<br>65.93)                       | 0.31<br>(0.19 to<br>0.58)                    | 0.68<br>(0.40 to<br>1.20)                     | 0.69<br>(0.39 to<br>1.22)                     | 0.69<br>(0.41 to<br>1.18)                      |  |
| Eating disorders                                           | <b>Benin</b>                                       |                                                    |                                                    |                                                    |                                              |                                               |                                               |                                                |  |
| Cause                                                      | YLLs (actual counts)                               |                                                    |                                                    |                                                    | Deaths (actual counts)                       |                                               |                                               |                                                |  |
|                                                            | 2016                                               | 2040 Forecast                                      | 2040 Better Scenario                               | 2040 Worse Scenario                                | 2016                                         | 2040 Forecast                                 | 2040 Better Scenario                          | 2040 Worse Scenario                            |  |
| <b>Diabetes, urogenital, blood, and endocrine diseases</b> | <b>162,094.96</b><br>(142,111.25 to<br>184,306.32) | <b>256,888.58</b><br>(200,522.20 to<br>329,746.36) | <b>229,390.32</b><br>(180,366.84 to<br>291,640.07) | <b>348,191.28</b><br>(274,582.40 to<br>438,646.41) | <b>3,909.38</b><br>(3,495.13 to<br>4,384.69) | <b>8,744.89</b><br>(6,830.35 to<br>12,000.21) | <b>7,925.62</b><br>(6,302.72 to<br>10,373.07) | <b>11,204.14</b><br>(8,901.40 to<br>14,921.21) |  |
| Diabetes mellitus                                          | 30,460.26<br>(26,414.14 to<br>35,123.06)           | 66,149.02<br>(43,631.00 to<br>98,330.33)           | 57,727.36<br>(38,101.75 to<br>85,471.05)           | 96,983.00<br>(62,786.59 to<br>145,424.38)          | 1,230.60<br>(1,060.76 to<br>1,428.42)        | 3,151.91<br>(2,193.56 to<br>4,453.90)         | 2,873.00<br>(2,021.76 to<br>4,002.81)         | 4,326.32<br>(2,932.56 to<br>6,207.71)          |  |
| Acute glomerulonephritis                                   | 80.13<br>(70.71 to<br>89.92)                       | 114.90<br>(88.31 to<br>145.01)                     | 106.71<br>(82.55 to<br>134.50)                     | 151.86<br>(117.75 to<br>189.39)                    | 1.30<br>(1.15 to<br>1.45)                    | 2.04<br>(1.61 to<br>2.55)                     | 1.92<br>(1.52 to<br>2.40)                     | 2.58<br>(2.05 to<br>3.19)                      |  |
| Chronic kidney disease                                     | 37,956.29<br>(31,554.30 to<br>46,523.32)           | 67,343.02<br>(41,925.60 to<br>123,961.75)          | 54,910.83<br>(35,478.13 to<br>93,217.25)           | 95,365.65<br>(60,846.03 to<br>165,680.52)          | 1,031.77<br>(864.94 to<br>1,247.58)          | 2,714.09<br>(1,512.21 to<br>5,948.04)         | 2,214.25<br>(1,307.35 to<br>4,647.80)         | 3,555.98<br>(2,019.42 to<br>7,464.96)          |  |
| Chronic kidney disease due to diabetes mellitus            | 7,637.30<br>(5,930.23 to<br>9,774.69)              | 18,666.90<br>(11,125.34 to<br>36,244.17)           | 15,155.58<br>(9,491.94 to<br>28,768.56)            | 25,359.75<br>(14,904.62 to<br>47,597.88)           | 261.95<br>(210.52 to<br>330.51)              | 826.42<br>(446.96 to<br>1,899.83)             | 674.20<br>(394.13 to<br>1,426.39)             | 1,067.46<br>(578.53 to<br>2,352.20)            |  |
| Chronic kidney disease due to hypertension                 | 4,582.53<br>(3,610.30 to<br>5,925.65)              | 11,785.43<br>(6,246.87 to<br>27,371.58)            | 9,464.95<br>(5,377.45 to<br>19,954.20)             | 15,591.39<br>(8,369.16 to<br>34,127.32)            | 196.10<br>(156.41 to<br>254.58)              | 673.01<br>(330.66 to<br>1,753.37)             | 551.88<br>(292.63 to<br>1,367.08)             | 837.51<br>(411.76 to<br>2,079.58)              |  |
| Chronic kidney disease due to glomerulonephritis           | 12,213.38<br>(9,675.89 to<br>15,229.71)            | 17,056.75<br>(10,780.00 to<br>27,678.22)           | 14,008.81<br>(9,251.21 to<br>22,229.47)            | 25,280.87<br>(16,340.43 to<br>39,339.07)           | 262.41<br>(209.44 to<br>329.39)              | 529.10<br>(300.27 to<br>1,121.06)             | 428.78<br>(258.56 to<br>893.18)               | 726.24<br>(427.61 to<br>1,461.39)              |  |
| Chronic kidney disease due to other and unspecified causes | 13,523.07<br>(10,784.77 to<br>16,924.91)           | 19,833.94<br>(12,613.33 to<br>33,224.69)           | 16,281.49<br>(10,693.89 to<br>26,475.78)           | 29,133.63<br>(18,611.88 to<br>46,089.55)           | 311.30<br>(253.33 to<br>391.61)              | 685.55<br>(388.52 to<br>1,452.28)             | 559.39<br>(333.43 to<br>1,159.73)             | 924.76<br>(538.76 to<br>1,846.02)              |  |
| Urinary diseases and male infertility                      | 15,372.88<br>(13,151.76 to<br>18,119.55)           | 29,655.85<br>(24,314.11 to<br>35,600.59)           | 29,400.94<br>(24,081.86 to<br>35,528.21)           | 33,393.14<br>(27,437.15 to<br>40,289.01)           | 410.84<br>(353.89 to<br>469.66)              | 1,080.77<br>(917.69 to<br>1,255.05)           | 1,128.11<br>(954.60 to<br>1,310.00)           | 1,095.85<br>(933.83 to<br>1,263.13)            |  |
| Urinary tract infections                                   | 9,142.84<br>(7,443.54 to<br>11,345.15)             | 21,678.12<br>(17,416.18 to<br>26,555.78)           | 21,931.46<br>(17,524.52 to<br>26,926.38)           | 23,448.57<br>(18,893.87 to<br>28,795.23)           | 237.88<br>(193.32 to<br>288.95)              | 805.89<br>(665.02 to<br>967.39)               | 858.30<br>(708.24 to<br>1,027.76)             | 779.47<br>(641.99 to<br>936.84)                |  |
| Urolithiasis                                               | 305.98<br>(215.58 to<br>414.44)                    | 707.15<br>(456.63 to<br>1,048.60)                  | 685.14<br>(445.45 to<br>1,014.48)                  | 812.78<br>(516.31 to<br>1,218.84)                  | 5.69<br>(3.99 to<br>7.76)                    | 14.88<br>(9.64 to<br>21.51)                   | 14.85<br>(9.78 to<br>21.60)                   | 16.18<br>(10.53 to<br>23.54)                   |  |
| Other urinary diseases                                     | 5,924.06<br>(4,519.19 to<br>7,224.24)              | 7,270.59<br>(4,914.45 to<br>9,786.11)              | 6,784.34<br>(4,561.43 to<br>9,113.57)              | 9,131.79<br>(6,489.74 to<br>12,110.95)             | 167.27<br>(129.01 to<br>202.37)              | 260.01<br>(179.70 to<br>346.04)               | 254.96<br>(174.31 to<br>343.18)               | 300.20<br>(214.35 to<br>392.82)                |  |
| Gynecological diseases                                     | 718.01<br>(516.22 to<br>940.17)                    | 1,149.44<br>(719.49 to<br>1,743.07)                | 1,040.76<br>(653.33 to<br>1,560.60)                | 1,490.11<br>(938.60 to<br>2,259.91)                | 16.82<br>(12.29 to<br>22.11)                 | 27.65<br>(18.02 to<br>40.50)                  | 25.42<br>(16.43 to<br>37.16)                  | 35.17<br>(22.70 to<br>52.19)                   |  |
| Uterine fibroids                                           | 58.16<br>(25.04 to<br>112.40)                      | 75.85<br>(29.56 to<br>158.68)                      | 68.15<br>(26.46 to<br>142.28)                      | 101.37<br>(39.74 to<br>208.37)                     | 1.94<br>(0.85 to<br>3.48)                    | 2.57<br>(1.06 to<br>5.03)                     | 2.38<br>(0.99 to<br>4.66)                     | 3.30<br>(1.35 to<br>6.34)                      |  |
| Polycystic ovarian syndrome                                | 121.21<br>(21.00 to<br>285.40)                     | 115.32<br>(16.74 to<br>313.00)                     | 95.81<br>(13.46 to<br>264.24)                      | 180.65<br>(27.43 to<br>470.35)                     | 2.66<br>(0.50 to<br>6.12)                    | 2.58<br>(0.37 to<br>6.78)                     | 2.14<br>(0.30 to<br>5.78)                     | 4.03<br>(0.59 to<br>10.27)                     |  |
| Endometriosis                                              | 1.47<br>(0.54 to<br>4.19)                          | 3.08<br>(0.98 to<br>9.78)                          | 2.76<br>(0.87 to<br>8.79)                          | 4.06<br>(1.34 to<br>12.69)                         | 0.03<br>(0.01 to<br>0.09)                    | 0.07<br>(0.02 to<br>0.22)                     | 0.06<br>(0.02 to<br>0.20)                     | 0.09<br>(0.03 to<br>0.28)                      |  |
| Genital prolapse                                           | 21.82<br>(3.61 to<br>59.63)                        | 28.18<br>(3.47 to<br>89.06)                        | 24.54<br>(3.04 to<br>78.96)                        | 39.74<br>(5.05 to<br>123.60)                       | 0.50<br>(0.11 to<br>1.31)                    | 0.62<br>(0.12 to<br>1.83)                     | 0.55<br>(0.11 to<br>1.61)                     | 0.86<br>(0.16 to<br>2.48)                      |  |
| Other gynecological diseases                               | 515.35<br>(345.67 to<br>739.14)                    | 927.00<br>(551.22 to<br>1,465.13)                  | 849.50<br>(510.65 to<br>1,310.23)                  | 1,164.29<br>(690.06 to<br>1,858.73)                | 11.68<br>(7.81 to<br>16.50)                  | 21.82<br>(13.53 to<br>33.92)                  | 20.28<br>(12.71 to<br>31.24)                  | 26.90<br>(16.42 to<br>42.25)                   |  |

|                                                   |                                                    |                                                   |                                                   |                                                    |                                              |                                              |                                              |                                              |
|---------------------------------------------------|----------------------------------------------------|---------------------------------------------------|---------------------------------------------------|----------------------------------------------------|----------------------------------------------|----------------------------------------------|----------------------------------------------|----------------------------------------------|
| Hemoglobinopathies and hemolytic anemias          | 70,195.96<br>(57,483.94 to<br>83,628.03)           | 82,698.57<br>(60,347.48 to<br>110,469.69)         | 76,695.16<br>(55,778.43 to<br>103,419.69)         | 108,418.80<br>(79,741.11 to<br>144,329.97)         | 1,061.17<br>(871.59 to<br>1,254.87)          | 1,458.31<br>(1,090.79 to<br>1,943.22)        | 1,367.77<br>(1,023.75 to<br>1,824.22)        | 1,848.36<br>(1,391.28 to<br>2,424.55)        |
| Thalassemias                                      | 70.10<br>(9.98 to<br>220.63)                       | 49.67<br>(6.84 to<br>164.13)                      | 51.66<br>(7.22 to<br>170.72)                      | 57.60<br>(7.84 to<br>189.46)                       | 0.87<br>(0.12 to<br>2.73)                    | 0.64<br>(0.09 to<br>2.15)                    | 0.67<br>(0.09 to<br>2.25)                    | 0.73<br>(0.10 to<br>2.45)                    |
| Sickle cell disorders                             | 68,544.61<br>(55,793.16 to<br>82,021.82)           | 79,138.22<br>(57,316.88 to<br>106,523.61)         | 73,405.53<br>(52,866.06 to<br>99,595.12)          | 104,175.47<br>(76,038.99 to<br>139,597.23)         | 990.04<br>(804.52 to<br>1,172.68)            | 1,286.73<br>(933.76 to<br>1,744.39)          | 1,198.71<br>(876.70 to<br>1,627.68)          | 1,650.26<br>(1,215.63 to<br>2,212.72)        |
| G6PD deficiency                                   | 837.40<br>(661.78 to<br>1,126.91)                  | 2,102.57<br>(1,444.95 to<br>3,101.99)             | 1,940.14<br>(1,327.93 to<br>2,837.54)             | 2,674.09<br>(1,875.62 to<br>3,866.10)              | 24.83<br>(18.57 to<br>35.22)                 | 78.95<br>(51.68 to<br>120.36)                | 74.36<br>(48.58 to<br>113.29)                | 96.85<br>(64.13 to<br>145.07)                |
| Other hemoglobinopathies and hemolytic anemias    | 743.85<br>(522.09 to<br>1,064.70)                  | 1,318.10<br>(881.84 to<br>1,933.70)               | 1,297.83<br>(873.07 to<br>1,876.97)               | 1,511.63<br>(1,006.66 to<br>2,233.88)              | 45.43<br>(31.52 to<br>66.56)                 | 91.98<br>(62.13 to<br>138.08)                | 94.02<br>(65.26 to<br>141.66)                | 100.53<br>(67.88 to<br>151.98)               |
| Endocrine, metabolic, blood, and immune disorders | 7,311.43<br>(5,600.23 to<br>10,319.05)             | 9,867.78<br>(7,504.66 to<br>13,702.11)            | 9,508.57<br>(7,292.53 to<br>13,025.21)            | 12,388.72<br>(9,270.86 to<br>17,457.15)            | 156.89<br>(125.45 to<br>221.64)              | 310.13<br>(246.99 to<br>436.78)              | 315.15<br>(250.82 to<br>443.42)              | 339.88<br>(269.33 to<br>476.91)              |
| <b>Benin</b>                                      |                                                    |                                                   |                                                   |                                                    |                                              |                                              |                                              |                                              |
| Cause                                             | YLLs (actual counts)                               |                                                   |                                                   |                                                    | Deaths (actual counts)                       |                                              |                                              |                                              |
|                                                   | 2016                                               | 2040 Forecast                                     | 2040 Better Scenario                              | 2040 Worse Scenario                                | 2016                                         | 2040 Forecast                                | 2040 Better Scenario                         | 2040 Worse Scenario                          |
| <b>Musculoskeletal disorders</b>                  | <b>2,119.82</b><br>(1,591.06 to<br>2,937.49)       | <b>5,122.03</b><br>(3,690.46 to<br>7,208.02)      | <b>5,365.78</b><br>(3,863.05 to<br>7,526.27)      | <b>4,874.64</b><br>(3,509.15 to<br>6,816.50)       | <b>51.70</b><br>(40.04 to<br>69.88)          | <b>152.03</b><br>(116.67 to<br>205.01)       | <b>164.45</b><br>(125.30 to<br>222.87)       | <b>138.10</b><br>(105.72 to<br>185.96)       |
| Rheumatoid arthritis                              | 197.65<br>(119.79 to<br>292.01)                    | 463.94<br>(273.53 to<br>701.66)                   | 450.51<br>(260.33 to<br>688.98)                   | 536.07<br>(328.17 to<br>791.24)                    | 8.34<br>(5.10 to<br>12.63)                   | 24.63<br>(14.81 to<br>37.90)                 | 24.78<br>(14.64 to<br>39.29)                 | 26.82<br>(16.32 to<br>40.88)                 |
| Other musculoskeletal disorders                   | 1,922.17<br>(1,443.43 to<br>2,727.90)              | 4,658.09<br>(3,340.94 to<br>6,685.91)             | 4,915.28<br>(3,500.91 to<br>7,088.78)             | 4,338.57<br>(3,086.60 to<br>6,277.00)              | 43.36<br>(33.72 to<br>60.53)                 | 127.40<br>(96.66 to<br>178.50)               | 139.67<br>(104.75 to<br>195.75)              | 111.28<br>(83.93 to<br>157.01)               |
| <b>Other non-communicable diseases</b>            | <b>214,080.23</b><br>(119,490.25 to<br>315,961.75) | <b>152,673.38</b><br>(95,140.93 to<br>223,270.21) | <b>136,847.05</b><br>(87,590.05 to<br>196,698.37) | <b>267,400.76</b><br>(157,390.00 to<br>399,848.18) | <b>2,659.43</b><br>(1,547.49 to<br>3,870.61) | <b>2,453.56</b><br>(1,707.31 to<br>3,400.98) | <b>2,300.46</b><br>(1,640.58 to<br>3,154.63) | <b>3,787.23</b><br>(2,424.96 to<br>5,406.04) |
| Congenital birth defects                          | 199,689.09<br>(107,085.87 to<br>298,359.97)        | 127,953.87<br>(71,385.67 to<br>195,776.11)        | 112,770.92<br>(63,951.06 to<br>171,739.10)        | 235,665.10<br>(124,899.53 to<br>366,234.65)        | 2,392.47<br>(1,307.54 to<br>3,542.35)        | 1,657.10<br>(965.46 to<br>2,487.56)          | 1,473.37<br>(877.71 to<br>2,208.09)          | 2,935.99<br>(1,620.07 to<br>4,522.93)        |
| Neural tube defects                               | 36,564.96<br>(16,581.61 to<br>69,409.58)           | 8,144.39<br>(2,992.47 to<br>18,278.29)            | 6,636.43<br>(2,449.97 to<br>15,183.88)            | 18,411.17<br>(6,758.65 to<br>39,787.03)            | 427.68<br>(194.67 to<br>816.08)              | 80.94<br>(36.53 to<br>221.98)                | 80.94<br>(30.18 to<br>185.53)                | 219.90<br>(82.50 to<br>476.88)               |
| Congenital heart anomalies                        | 53,155.84<br>(27,413.91 to<br>90,421.19)           | 40,825.47<br>(23,609.70 to<br>68,071.04)          | 36,487.68<br>(21,489.39 to<br>59,616.29)          | 70,358.04<br>(39,385.43 to<br>121,924.21)          | 650.27<br>(345.02 to<br>1,086.34)            | 543.81<br>(320.88 to<br>886.37)              | 489.59<br>(289.66 to<br>785.84)              | 900.24<br>(522.74 to<br>1,522.00)            |
| Orofacial clefts                                  | 2,234.22<br>(389.83 to<br>6,769.87)                | 990.28<br>(163.21 to<br>3,124.34)                 | 788.38<br>(128.65 to<br>2,443.85)                 | 2,415.41<br>(406.56 to<br>7,738.46)                | 25.89<br>(4.52 to<br>78.34)                  | 11.48<br>(1.89 to<br>36.18)                  | 9.14<br>(1.49 to<br>28.35)                   | 28.00<br>(4.72 to<br>89.78)                  |
| Down syndrome                                     | 1,585.69<br>(651.71 to<br>3,213.12)                | 1,623.60<br>(753.94 to<br>3,125.26)               | 1,448.21<br>(688.35 to<br>2,768.73)               | 2,710.61<br>(1,190.99 to<br>5,510.88)              | 21.09<br>(9.26 to<br>41.37)                  | 26.25<br>(13.61 to<br>46.56)                 | 23.75<br>(12.34 to<br>41.76)                 | 40.34<br>(19.54 to<br>75.19)                 |
| Other chromosomal abnormalities                   | 6,565.21<br>(1,603.65 to<br>13,670.71)             | 6,460.42<br>(1,531.28 to<br>13,958.07)            | 5,553.15<br>(1,346.74 to<br>11,881.30)            | 13,014.64<br>(3,163.71 to<br>28,774.15)            | 76.88<br>(18.73 to<br>159.75)                | 77.35<br>(18.51 to<br>165.27)                | 66.68<br>(16.21 to<br>140.15)                | 153.91<br>(37.47 to<br>338.40)               |
| Congenital musculoskeletal and limb anomalies     | 1,584.31<br>(484.81 to<br>4,307.67)                | 1,245.01<br>(401.17 to<br>3,283.96)               | 1,107.05<br>(362.85 to<br>2,898.53)               | 2,905.63<br>(718.58 to<br>6,238.99)                | 18.55<br>(5.71 to<br>50.41)                  | 14.89<br>(5.00 to<br>38.79)                  | 13.28<br>(4.53 to<br>34.30)                  | 27.25<br>(8.61 to<br>73.19)                  |
| Urogenital congenital anomalies                   | 1,772.40<br>(798.11 to<br>3,216.96)                | 1,644.40<br>(870.92 to<br>2,866.92)               | 1,535.31<br>(825.64 to<br>2,684.11)               | 2,543.85<br>(1,282.90 to<br>4,640.03)              | 24.03<br>(11.87 to<br>41.73)                 | 28.97<br>(17.31 to<br>45.29)                 | 27.68<br>(16.62 to<br>42.19)                 | 39.88<br>(22.70 to<br>66.77)                 |
| Digestive congenital anomalies                    | 10,919.40<br>(5,356.88 to<br>19,912.77)            | 7,509.50<br>(3,700.16 to<br>13,630.61)            | 6,545.47<br>(3,254.31 to<br>11,742.84)            | 14,658.20<br>(7,101.73 to<br>27,187.50)            | 127.92<br>(63.21 to<br>232.56)               | 90.02<br>(45.10 to<br>161.62)                | 78.69<br>(40.17 to<br>138.87)                | 173.61<br>(85.05 to<br>319.22)               |
| Other congenital birth defects                    | 85,307.06<br>(28,098.62 to<br>161,756.75)          | 59,510.80<br>(22,696.96 to<br>112,661.07)         | 52,669.23<br>(21,050.92 to<br>98,074.88)          | 109,247.55<br>(38,547.59 to<br>208,387.36)         | 1,020.17<br>(346.69 to<br>1,921.36)          | 765.35<br>(318.08 to<br>1,425.20)            | 683.61<br>(294.13 to<br>1,257.27)            | 1,352.86<br>(514.74 to<br>2,562.61)          |

|                                      |                                             |                                             |                                             |                                             |                                       |                                       |                                       |                                         |
|--------------------------------------|---------------------------------------------|---------------------------------------------|---------------------------------------------|---------------------------------------------|---------------------------------------|---------------------------------------|---------------------------------------|-----------------------------------------|
| Skin and subcutaneous diseases       | 6,465.68<br>(4,095.37 to<br>10,527.82)      | 20,411.98<br>(12,874.29 to<br>30,594.49)    | 20,278.68<br>(12,881.09 to<br>30,195.77)    | 23,336.03<br>(14,963.78 to<br>35,754.51)    | 174.96<br>(109.86 to<br>279.46)       | 746.47<br>(471.41 to<br>1,146.63)     | 783.02<br>(496.54 to<br>1,204.49)     | 753.76<br>(478.18 to<br>1,159.89)       |
| Cellulitis                           | 410.11<br>(182.59 to<br>710.00)             | 1,957.38<br>(858.08 to<br>3,153.55)         | 2,084.54<br>(913.44 to<br>3,372.31)         | 1,835.41<br>(780.70 to<br>3,035.96)         | 12.93<br>(5.66 to<br>22.56)           | 77.55<br>(32.52 to<br>131.29)         | 85.83<br>(35.89 to<br>145.54)         | 67.46<br>(28.61 to<br>117.62)           |
| Pyoderma                             | 5,512.18<br>(3,560.17 to<br>8,886.91)       | 16,921.66<br>(10,930.74 to<br>26,011.83)    | 16,562.88<br>(10,657.65 to<br>25,559.90)    | 19,985.78<br>(13,018.42 to<br>31,523.79)    | 140.40<br>(91.57 to<br>230.47)        | 586.70<br>(380.44 to<br>913.72)       | 602.77<br>(391.81 to<br>941.22)       | 616.24<br>(399.09 to<br>966.27)         |
| Decubitus ulcer                      | 352.17<br>(171.95 to<br>574.87)             | 1,061.51<br>(530.96 to<br>1,723.54)         | 1,150.76<br>(574.27 to<br>1,877.54)         | 1,010.07<br>(504.23 to<br>1,689.51)         | 17.82<br>(8.36 to<br>29.97)           | 70.73<br>(32.35 to<br>119.12)         | 82.15<br>(37.81 to<br>137.16)         | 58.96<br>(27.03 to<br>101.27)           |
| Other skin and subcutaneous diseases | 191.22<br>(95.02 to<br>320.19)              | 471.41<br>(237.04 to<br>743.38)             | 480.50<br>(244.60 to<br>767.25)             | 504.77<br>(249.82 to<br>820.78)             | 3.82<br>(1.92 to<br>6.49)             | 11.49<br>(5.92 to<br>19.11)           | 12.27<br>(6.33 to<br>20.39)           | 11.10<br>(5.59 to<br>18.61)             |
| Sudden infant death syndrome         | 7,925.46<br>(4,143.84 to<br>14,812.06)      | 4,307.53<br>(1,937.79 to<br>8,664.18)       | 3,797.45<br>(1,752.29 to<br>7,714.14)       | 8,399.63<br>(3,676.94 to<br>17,072.55)      | 92.00<br>(48.08 to<br>171.97)         | 49.99<br>(22.49 to<br>100.55)         | 44.07<br>(20.10 to<br>89.54)          | 97.48<br>(42.67 to<br>198.13)           |
| Injuries                             | 293,754.62<br>(255,309.07 to<br>334,533.52) | 321,253.72<br>(257,269.96 to<br>403,097.02) | 279,442.67<br>(224,213.97 to<br>348,170.88) | 470,386.80<br>(375,167.73 to<br>586,362.44) | 5,780.55<br>(5,108.29 to<br>6,526.17) | 8,027.67<br>(6,756.49 to<br>9,622.99) | 7,321.65<br>(6,174.12 to<br>8,693.54) | 10,535.26<br>(8,791.89 to<br>12,650.62) |
| Transport injuries                   | 87,700.11<br>(69,749.53 to<br>119,834.83)   | 85,834.71<br>(61,601.13 to<br>122,847.49)   | 58,104.74<br>(41,568.02 to<br>83,675.35)    | 172,822.68<br>(125,990.04 to<br>238,285.31) | 1,724.49<br>(1,395.59 to<br>2,345.74) | 2,035.01<br>(1,522.73 to<br>2,797.63) | 1,455.27<br>(1,085.25 to<br>2,026.52) | 3,668.14<br>(2,748.75 to<br>5,003.09)   |
| Road injuries                        | 84,834.28<br>(67,646.53 to<br>115,723.69)   | 80,569.10<br>(57,948.76 to<br>114,620.98)   | 53,259.02<br>(38,132.45 to<br>77,256.10)    | 166,207.32<br>(121,864.94 to<br>238,620.94) | 1,673.24<br>(1,359.48 to<br>2,282.08) | 1,928.01<br>(1,440.48 to<br>2,659.52) | 1,355.49<br>(1,012.88 to<br>1,912.38) | 3,539.02<br>(2,664.87 to<br>4,791.29)   |
| Pedestrian road injuries             | 26,614.51<br>(19,851.74 to<br>39,614.50)    | 22,807.11<br>(15,517.84 to<br>34,729.90)    | 15,981.37<br>(10,917.38 to<br>24,337.11)    | 41,985.16<br>(28,419.02 to<br>63,760.89)    | 534.95<br>(405.85 to<br>783.51)       | 571.69<br>(402.42 to<br>842.87)       | 421.27<br>(297.13 to<br>615.20)       | 958.76<br>(673.24 to<br>1,417.19)       |

**Benin**

| Cause                          | YLLs (actual counts)                        |                                             |                                             |                                             | Deaths (actual counts)                |                                       |                                       |                                       |
|--------------------------------|---------------------------------------------|---------------------------------------------|---------------------------------------------|---------------------------------------------|---------------------------------------|---------------------------------------|---------------------------------------|---------------------------------------|
|                                | 2016                                        | 2040 Forecast                               | 2040 Better Scenario                        | 2040 Worse Scenario                         | 2016                                  | 2040 Forecast                         | 2040 Better Scenario                  | 2040 Worse Scenario                   |
| Cyclist road injuries          | 4,534.14<br>(1,732.71 to<br>12,904.22)      | 4,998.24<br>(1,917.96 to<br>13,936.60)      | 3,334.35<br>(1,273.86 to<br>9,502.87)       | 10,246.66<br>(3,971.87 to<br>27,545.55)     | 94.13<br>(35.33 to<br>282.53)         | 133.52<br>(51.26 to<br>376.51)        | 97.65<br>(37.91 to<br>278.89)         | 233.33<br>(90.16 to<br>630.69)        |
| Motorcyclist road injuries     | 11,316.76<br>(7,966.21 to<br>15,845.80)     | 13,349.34<br>(8,574.05 to<br>20,497.69)     | 9,719.78<br>(6,143.31 to<br>15,191.01)      | 24,524.08<br>(16,320.47 to<br>36,382.02)    | 208.73<br>(146.75 to<br>288.03)       | 281.44<br>(183.92 to<br>425.69)       | 214.68<br>(136.79 to<br>336.45)       | 469.15<br>(317.77 to<br>689.73)       |
| Motor vehicle road injuries    | 40,350.79<br>(31,425.73 to<br>54,387.65)    | 37,344.94<br>(26,998.91 to<br>53,205.87)    | 22,877.09<br>(16,263.77 to<br>32,726.16)    | 85,107.86<br>(62,359.98 to<br>118,762.30)   | 797.79<br>(613.59 to<br>1,066.53)     | 888.60<br>(656.89 to<br>1,215.30)     | 584.54<br>(429.05 to<br>812.70)       | 1,782.21<br>(1,336.29 to<br>2,411.57) |
| Other road injuries            | 2,018.07<br>(896.09 to<br>7,355.33)         | 2,069.48<br>(872.86 to<br>7,472.12)         | 1,346.43<br>(560.09 to<br>4,815.75)         | 4,343.56<br>(1,879.88 to<br>15,318.72)      | 40.64<br>(18.41 to<br>144.87)         | 52.76<br>(22.59 to<br>179.40)         | 37.35<br>(15.59 to<br>122.11)         | 95.56<br>(42.11 to<br>327.01)         |
| Other transport injuries       | 2,865.83<br>(1,619.76 to<br>5,539.99)       | 5,265.60<br>(2,802.19 to<br>10,320.44)      | 4,845.72<br>(2,624.56 to<br>9,321.66)       | 6,615.36<br>(3,517.84 to<br>13,026.99)      | 51.25<br>(28.26 to<br>100.54)         | 107.00<br>(57.32 to<br>211.85)        | 99.78<br>(54.35 to<br>195.72)         | 129.12<br>(68.76 to<br>251.32)        |
| Unintentional injuries         | 151,595.14<br>(128,700.81 to<br>176,962.74) | 142,925.21<br>(111,026.35 to<br>180,619.02) | 132,710.26<br>(104,959.15 to<br>167,547.52) | 196,699.14<br>(151,376.39 to<br>253,163.47) | 2,880.20<br>(2,467.99 to<br>3,277.68) | 3,788.33<br>(3,150.21 to<br>4,544.74) | 3,723.33<br>(3,114.24 to<br>4,466.54) | 4,528.78<br>(3,674.88 to<br>5,496.75) |
| Falls                          | 20,547.84<br>(16,888.80 to<br>25,356.28)    | 30,541.96<br>(25,262.06 to<br>36,653.42)    | 30,334.15<br>(25,144.20 to<br>36,285.44)    | 35,056.14<br>(28,307.79 to<br>42,935.40)    | 592.95<br>(509.57 to<br>684.20)       | 1,314.73<br>(1,129.85 to<br>1,507.88) | 1,391.11<br>(1,207.54 to<br>1,596.81) | 1,322.11<br>(1,109.97 to<br>1,534.83) |
| Drowning                       | 28,022.73<br>(22,522.27 to<br>35,689.98)    | 23,090.79<br>(17,084.68 to<br>31,086.99)    | 21,051.65<br>(15,797.61 to<br>28,154.96)    | 32,689.95<br>(23,469.80 to<br>44,691.79)    | 459.94<br>(381.19 to<br>572.30)       | 472.00<br>(365.15 to<br>605.46)       | 442.72<br>(345.44 to<br>566.35)       | 610.06<br>(459.49 to<br>800.70)       |
| Fire, heat, and hot substances | 16,571.71<br>(13,073.52 to<br>20,459.03)    | 12,438.06<br>(9,028.08 to<br>16,206.12)     | 11,192.11<br>(8,215.81 to<br>14,393.40)     | 18,196.70<br>(12,998.95 to<br>24,173.43)    | 323.45<br>(253.07 to<br>381.21)       | 332.05<br>(243.64 to<br>412.25)       | 312.65<br>(232.20 to<br>386.07)       | 425.98<br>(313.99 to<br>537.43)       |
| Poisonings                     | 9,585.43<br>(5,859.22 to<br>16,801.90)      | 5,184.60<br>(3,103.46 to<br>8,531.67)       | 4,419.04<br>(2,726.79 to<br>7,091.34)       | 8,770.16<br>(4,999.94 to<br>16,355.03)      | 165.02<br>(108.90 to<br>255.79)       | 109.10<br>(71.77 to<br>159.29)        | 95.75<br>(63.08 to<br>135.37)         | 165.74<br>(103.39 to<br>264.45)       |



|                                                 |                                                 |                                                  |                                                  |                                                   |                                            |                                              |                                              |                                              |
|-------------------------------------------------|-------------------------------------------------|--------------------------------------------------|--------------------------------------------------|---------------------------------------------------|--------------------------------------------|----------------------------------------------|----------------------------------------------|----------------------------------------------|
| Exposure to mechanical forces                   | 21,699.50<br>(16,549.60 to<br>28,115.99)        | 17,287.47<br>(11,650.58 to<br>24,853.44)         | 15,522.20<br>(10,450.39 to<br>22,034.92)         | 25,770.10<br>(17,427.29 to<br>37,687.08)          | 358.89<br>(272.32 to<br>458.52)            | 354.60<br>(240.36 to<br>502.29)              | 329.16<br>(224.01 to<br>465.79)              | 478.82<br>(325.95 to<br>682.59)              |
| Unintentional firearm injuries                  | 6,121.74<br>(3,698.70 to<br>8,954.25)           | 4,529.36<br>(2,409.44 to<br>7,704.12)            | 4,042.92<br>(2,165.91 to<br>6,815.84)            | 6,486.41<br>(3,533.07 to<br>10,868.75)            | 108.33<br>(66.76 to<br>159.46)             | 94.38<br>(53.41 to<br>155.39)                | 86.42<br>(49.51 to<br>140.93)                | 126.25<br>(71.27 to<br>205.12)               |
| Unintentional suffocation                       | 5,411.38<br>(3,518.72 to<br>8,739.71)           | 3,291.39<br>(2,043.89 to<br>5,134.68)            | 2,869.88<br>(1,802.16 to<br>4,352.23)            | 5,857.31<br>(3,518.60 to<br>9,776.75)             | 68.65<br>(45.89 to<br>107.89)              | 45.49<br>(29.12 to<br>67.63)                 | 39.98<br>(25.70 to<br>58.01)                 | 77.54<br>(47.79 to<br>124.22)                |
| Other exposure to mechanical forces             | 10,166.38<br>(7,599.30 to<br>13,309.71)         | 9,466.73<br>(6,242.17 to<br>14,027.99)           | 8,609.40<br>(5,734.76 to<br>12,735.11)           | 13,426.37<br>(8,987.15 to<br>19,848.03)           | 181.91<br>(134.65 to<br>234.59)            | 214.73<br>(142.43 to<br>308.07)              | 202.77<br>(133.78 to<br>289.76)              | 275.03<br>(182.52 to<br>393.74)              |
| Adverse effects of medical treatment            | 17,693.83<br>(12,430.49 to<br>22,895.70)        | 18,057.49<br>(11,822.00 to<br>24,584.76)         | 16,723.30<br>(10,898.59 to<br>22,821.41)         | 24,702.33<br>(16,297.44 to<br>33,396.92)          | 313.65<br>(226.61 to<br>384.89)            | 402.90<br>(274.24 to<br>532.06)              | 386.08<br>(265.69 to<br>507.76)              | 499.08<br>(342.59 to<br>651.64)              |
| Animal contact                                  | 8,787.12<br>(6,126.25 to<br>11,691.87)          | 9,434.27<br>(6,997.98 to<br>13,522.91)           | 8,333.67<br>(5,492.76 to<br>11,787.57)           | 14,547.25<br>(9,305.59 to<br>21,231.08)           | 176.53<br>(125.65 to<br>231.00)            | 239.03<br>(159.00 to<br>326.31)              | 219.83<br>(148.06 to<br>301.59)              | 326.95<br>(215.42 to<br>454.77)              |
| Venomous animal contact                         | 7,280.41<br>(4,847.18 to<br>10,208.76)          | 7,880.49<br>(4,986.45 to<br>11,711.62)           | 6,961.94<br>(4,525.85 to<br>10,266.01)           | 12,066.87<br>(7,516.49 to<br>18,165.70)           | 151.87<br>(104.98 to<br>207.32)            | 205.70<br>(137.08 to<br>290.70)              | 188.90<br>(126.81 to<br>265.43)              | 280.32<br>(183.04 to<br>401.37)              |
| Non-venomous animal contact                     | 1,506.71<br>(870.82 to<br>2,386.22)             | 1,553.78<br>(909.00 to<br>2,448.85)              | 1,371.73<br>(813.39 to<br>2,139.47)              | 2,480.38<br>(1,388.66 to<br>4,035.43)             | 24.65<br>(15.20 to<br>36.83)               | 33.33<br>(19.97 to<br>49.61)                 | 30.93<br>(18.58 to<br>44.92)                 | 46.62<br>(28.38 to<br>71.75)                 |
| Foreign body                                    | 11,742.47<br>(8,686.54 to<br>15,754.86)         | 13,327.71<br>(9,926.56 to<br>17,514.97)          | 12,943.49<br>(9,774.17 to<br>17,038.62)          | 17,586.58<br>(12,578.87 to<br>23,918.73)          | 186.66<br>(144.97 to<br>239.98)            | 275.29<br>(216.76 to<br>354.39)              | 280.75<br>(224.23 to<br>359.94)              | 316.13<br>(243.20 to<br>406.17)              |
| Pulmonary aspiration and foreign body in airway | 10,539.43<br>(7,538.14 to<br>14,680.21)         | 11,976.94<br>(8,783.24 to<br>16,194.00)          | 11,684.79<br>(8,651.98 to<br>15,811.92)          | 15,777.94<br>(11,091.85 to<br>21,846.98)          | 166.41<br>(125.80 to<br>224.74)            | 248.97<br>(195.34 to<br>324.14)              | 255.15<br>(200.78 to<br>329.96)              | 282.95<br>(215.59 to<br>375.27)              |
| Foreign body in other body part                 | 1,203.03<br>(382.25 to<br>2,519.21)             | 1,350.77<br>(373.88 to<br>3,186.92)              | 1,258.70<br>(346.57 to<br>2,977.84)              | 1,808.63<br>(533.32 to<br>4,091.23)               | 20.25<br>(6.32 to<br>43.63)                | 26.82<br>(7.17 to<br>63.79)                  | 25.60<br>(6.69 to<br>61.15)                  | 33.19<br>(9.27 to<br>76.21)                  |
| Environmental heat and cold exposure            | 6,091.37<br>(2,953.20 to<br>8,306.84)           | 5,235.55<br>(2,292.39 to<br>8,286.38)            | 4,516.74<br>(1,959.99 to<br>7,091.37)            | 8,086.13<br>(3,571.85 to<br>12,803.24)            | 115.12<br>(56.10 to<br>156.26)             | 115.74<br>(52.55 to<br>177.51)               | 102.40<br>(45.72 to<br>155.09)               | 167.00<br>(75.99 to<br>253.27)               |
| Other unintentional injuries                    | 10,853.15<br>(8,270.22 to<br>14,065.40)         | 8,327.31<br>(5,833.39 to<br>11,583.98)           | 7,673.92<br>(5,393.28 to<br>10,654.09)           | 11,293.81<br>(7,895.60 to<br>15,664.23)           | 187.99<br>(147.26 to<br>236.47)            | 172.38<br>(126.08 to<br>232.86)              | 162.88<br>(119.56 to<br>220.69)              | 216.91<br>(157.73 to<br>295.06)              |
| <b>Self-harm and interpersonal violence</b>     | <b>54,361.51</b><br>(44,467.09 to<br>64,017.16) | <b>92,295.95</b><br>(68,816.42 to<br>122,427.49) | <b>88,431.78</b><br>(66,538.76 to<br>115,579.68) | <b>100,639.92</b><br>(73,127.64 to<br>135,202.69) | <b>1,173.86</b><br>(965.89 to<br>1,376.33) | <b>2,200.69</b><br>(1,672.25 to<br>2,832.61) | <b>2,139.38</b><br>(1,655.78 to<br>2,712.57) | <b>2,334.42</b><br>(1,731.29 to<br>3,049.27) |

**Benin**

| Cause                              | YLLs (actual counts)                     |                                          |                                          |                                           | Deaths (actual counts)            |                                       |                                       |                                       |
|------------------------------------|------------------------------------------|------------------------------------------|------------------------------------------|-------------------------------------------|-----------------------------------|---------------------------------------|---------------------------------------|---------------------------------------|
|                                    | 2016                                     | 2040 Forecast                            | 2040 Better Scenario                     | 2040 Worse Scenario                       | 2016                              | 2040 Forecast                         | 2040 Better Scenario                  | 2040 Worse Scenario                   |
| Self-harm                          | 35,534.11<br>(27,991.29 to<br>43,684.10) | 67,759.46<br>(48,011.31 to<br>92,610.42) | 64,221.14<br>(46,401.39 to<br>85,881.23) | 74,163.99<br>(51,475.22 to<br>103,006.40) | 846.83<br>(671.96 to<br>1,020.82) | 1,744.75<br>(1,279.23 to<br>2,285.82) | 1,686.71<br>(1,255.49 to<br>2,174.98) | 1,853.47<br>(1,311.51 to<br>2,496.18) |
| Self-harm by firearm               | 3,549.96<br>(2,128.42 to<br>5,389.16)    | 5,160.86<br>(2,847.27 to<br>8,608.70)    | 4,827.62<br>(2,709.52 to<br>7,912.93)    | 5,826.51<br>(3,195.70 to<br>9,647.56)     | 85.66<br>(54.52 to<br>125.68)     | 139.49<br>(81.32 to<br>218.44)        | 133.65<br>(79.56 to<br>210.12)        | 152.14<br>(88.99 to<br>241.71)        |
| Self-harm by other specified means | 31,984.15<br>(24,826.95 to<br>39,336.23) | 62,598.60<br>(44,041.07 to<br>84,750.46) | 59,393.52<br>(42,819.25 to<br>79,577.17) | 68,337.48<br>(47,493.42 to<br>95,008.73)  | 761.18<br>(591.80 to<br>919.03)   | 1,605.26<br>(1,162.48 to<br>2,099.08) | 1,553.06<br>(1,137.98 to<br>1,989.23) | 1,701.33<br>(1,195.73 to<br>2,276.98) |
| Interpersonal violence             | 18,827.41<br>(14,309.81 to<br>23,857.11) | 24,536.49<br>(17,423.00 to<br>34,372.84) | 24,210.64<br>(17,227.08 to<br>33,945.20) | 26,475.93<br>(18,618.05 to<br>36,784.77)  | 327.03<br>(251.19 to<br>416.55)   | 455.93<br>(329.14 to<br>630.25)       | 452.67<br>(327.53 to<br>629.53)       | 480.95<br>(343.93 to<br>657.62)       |
| Physical violence by firearm       | 10,448.90<br>(7,084.25 to<br>14,511.52)  | 13,977.43<br>(8,966.77 to<br>21,180.74)  | 13,839.74<br>(8,922.69 to<br>20,810.16)  | 14,760.00<br>(9,474.52 to<br>22,292.32)   | 183.52<br>(125.24 to<br>256.45)   | 253.33<br>(162.28 to<br>374.37)       | 251.63<br>(163.14 to<br>369.29)       | 264.33<br>(168.98 to<br>392.84)       |
| Physical violence by sharp object  | 4,652.64<br>(2,725.93 to<br>6,859.77)    | 6,849.80<br>(3,871.44 to<br>10,662.61)   | 6,887.84<br>(3,979.37 to<br>10,649.47)   | 7,070.84<br>(3,901.16 to<br>11,052.18)    | 82.61<br>(48.68 to<br>121.14)     | 130.66<br>(76.92 to<br>196.69)        | 132.43<br>(78.10 to<br>198.70)        | 131.81<br>(76.29 to<br>198.63)        |

|                                                                              |                                        |                                       |                                       |                                          |                                 |                                 |                                 |                                 |
|------------------------------------------------------------------------------|----------------------------------------|---------------------------------------|---------------------------------------|------------------------------------------|---------------------------------|---------------------------------|---------------------------------|---------------------------------|
| Physical violence by other means                                             | 3,725.87<br>(2,655.39 to<br>5,529.67)  | 3,709.25<br>(2,404.77 to<br>5,886.96) | 3,483.06<br>(2,265.54 to<br>5,608.55) | 4,645.09<br>(3,016.84 to<br>7,242.59)    | 60.90<br>(44.57 to<br>91.12)    | 71.94<br>(47.82 to<br>115.02)   | 68.60<br>(46.03 to<br>111.65)   | 84.80<br>(56.14 to<br>132.32)   |
| Forces of nature, conflict and terrorism, and executions and police conflict | 97.85<br>(77.30 to<br>136.74)          | 197.86<br>(0.00 to<br>2,144.20)       | 195.88<br>(0.00 to<br>2,123.22)       | 225.06<br>(0.00 to<br>2,447.37)          | 1.99<br>(1.31 to<br>3.10)       | 3.65<br>(0.00 to<br>39.46)      | 3.67<br>(0.00 to<br>39.68)      | 3.93<br>(0.00 to<br>42.63)      |
| Exposure to forces of nature                                                 | 0.00<br>(0.00 to<br>0.00)              | 191.30<br>(0.00 to<br>2,144.20)       | 189.34<br>(0.00 to<br>2,123.22)       | 218.08<br>(0.00 to<br>2,447.37)          | 0.00<br>(0.00 to<br>0.00)       | 3.53<br>(0.00 to<br>39.46)      | 3.55<br>(0.00 to<br>39.68)      | 3.81<br>(0.00 to<br>42.63)      |
| Conflict and terrorism                                                       | 0.00<br>(0.00 to<br>0.00)              | 1.10<br>(0.00 to<br>17.78)            | 1.09<br>(0.00 to<br>17.57)            | 1.23<br>(0.00 to<br>19.87)               | 0.00<br>(0.00 to<br>0.00)       | 0.02<br>(0.00 to<br>0.30)       | 0.02<br>(0.00 to<br>0.30)       | 0.02<br>(0.00 to<br>0.33)       |
| Executions and police conflict                                               | 97.85<br>(77.30 to<br>136.74)          | 5.46<br>(0.00 to<br>65.34)            | 5.45<br>(0.00 to<br>65.22)            | 5.75<br>(0.00 to<br>68.89)               | 1.99<br>(1.31 to<br>3.10)       | 0.10<br>(0.00 to<br>1.17)       | 0.10<br>(0.00 to<br>1.17)       | 0.10<br>(0.00 to<br>1.21)       |
| <b>Burkina Faso</b>                                                          |                                        |                                       |                                       |                                          |                                 |                                 |                                 |                                 |
| Cause                                                                        | YLLs (in 1000s)                        |                                       |                                       |                                          | Deaths (in 1000s)               |                                 |                                 |                                 |
|                                                                              | 2016                                   | 2040 Forecast                         | 2040 Better Scenario                  | 2040 Worse Scenario                      | 2016                            | 2040 Forecast                   | 2040 Better Scenario            | 2040 Worse Scenario             |
| All causes                                                                   | 9,779.71<br>(7,747.98 to<br>11,748.66) | 7,369.70<br>(5,602.36 to<br>9,406.87) | 6,350.24<br>(4,881.18 to<br>8,004.67) | 14,149.43<br>(10,588.62 to<br>18,059.96) | 160.42<br>(136.38 to<br>184.14) | 175.57<br>(145.44 to<br>206.46) | 153.30<br>(129.52 to<br>179.88) | 285.72<br>(233.77 to<br>342.09) |
| Communicable, maternal, neonatal, and nutritional diseases                   | 7,277.61<br>(5,552.84 to<br>8,969.02)  | 3,954.78<br>(2,681.74 to<br>5,330.53) | 3,243.24<br>(2,221.33 to<br>4,514.11) | 8,934.57<br>(6,051.51 to<br>12,179.56)   | 102.16<br>(81.44 to<br>122.52)  | 69.92<br>(49.85 to<br>95.62)    | 56.57<br>(40.41 to<br>76.94)    | 139.71<br>(98.00 to<br>186.04)  |
| HIV/AIDS and tuberculosis                                                    | 406.63<br>(360.08 to<br>469.39)        | 287.22<br>(158.96 to<br>462.64)       | 196.51<br>(103.67 to<br>325.60)       | 758.70<br>(440.06 to<br>1,259.72)        | 9.04<br>(8.12 to<br>10.15)      | 6.53<br>(3.83 to<br>10.02)      | 4.71<br>(2.67 to<br>7.35)       | 16.74<br>(10.04 to<br>27.00)    |
| Tuberculosis                                                                 | 249.29<br>(215.44 to<br>286.91)        | 105.50<br>(59.91 to<br>170.78)        | 89.63<br>(52.62 to<br>142.71)         | 312.40<br>(172.94 to<br>505.26)          | 6.15<br>(5.44 to<br>6.85)       | 3.01<br>(1.79 to<br>4.97)       | 2.62<br>(1.59 to<br>4.08)       | 8.37<br>(4.77 to<br>13.56)      |
| HIV/AIDS                                                                     | 157.34<br>(122.28 to<br>211.27)        | 181.72<br>(66.97 to<br>342.98)        | 106.88<br>(26.73 to<br>221.36)        | 446.29<br>(187.68 to<br>995.67)          | 2.89<br>(2.29 to<br>3.80)       | 3.51<br>(1.33 to<br>6.82)       | 2.09<br>(0.57 to<br>4.13)       | 8.37<br>(3.52 to<br>18.59)      |
| Diarrhea, lower respiratory, and other common infectious diseases            | 2,284.34<br>(1,722.11 to<br>2,921.62)  | 1,603.69<br>(929.18 to<br>2,538.11)   | 1,172.64<br>(670.43 to<br>1,884.64)   | 3,793.46<br>(2,158.77 to<br>5,777.21)    | 35.02<br>(28.00 to<br>42.73)    | 33.89<br>(19.98 to<br>53.06)    | 24.53<br>(14.39 to<br>39.57)    | 65.11<br>(39.74 to<br>97.55)    |
| Diarrheal diseases                                                           | 610.84<br>(424.65 to<br>836.98)        | 467.72<br>(186.47 to<br>943.84)       | 345.91<br>(125.71 to<br>721.81)       | 911.32<br>(412.16 to<br>1,662.92)        | 10.54<br>(7.36 to<br>14.48)     | 11.08<br>(3.51 to<br>25.67)     | 7.87<br>(2.38 to<br>19.38)      | 18.89<br>(6.94 to<br>38.10)     |
| Intestinal infectious diseases                                               | 91.83<br>(46.45 to<br>163.34)          | 112.06<br>(52.97 to<br>197.28)        | 107.06<br>(51.99 to<br>186.92)        | 181.93<br>(86.52 to<br>331.81)           | 1.26<br>(0.65 to<br>2.21)       | 1.60<br>(0.77 to<br>2.78)       | 1.53<br>(0.75 to<br>2.69)       | 2.51<br>(1.20 to<br>4.58)       |
| Typhoid fever                                                                | 73.42<br>(36.41 to<br>134.43)          | 88.27<br>(39.51 to<br>162.14)         | 84.35<br>(39.28 to<br>151.39)         | 142.36<br>(61.98 to<br>260.86)           | 1.01<br>(0.51 to<br>1.83)       | 1.25<br>(0.57 to<br>2.26)       | 1.20<br>(0.57 to<br>2.15)       | 1.95<br>(0.87 to<br>3.55)       |
| Paratyphoid fever                                                            | 17.89<br>(7.35 to<br>37.11)            | 23.62<br>(10.22 to<br>47.71)          | 22.55<br>(9.81 to<br>45.39)           | 39.07<br>(16.96 to<br>81.10)             | 0.25<br>(0.10 to<br>0.51)       | 0.34<br>(0.15 to<br>0.69)       | 0.33<br>(0.14 to<br>0.66)       | 0.55<br>(0.24 to<br>1.13)       |
| Other intestinal infectious diseases                                         | 0.52<br>(0.14 to<br>1.48)              | 0.18<br>(0.04 to<br>0.58)             | 0.16<br>(0.03 to<br>0.52)             | 0.50<br>(0.10 to<br>1.60)                | 0.01<br>(0.00 to<br>0.02)       | 0.00<br>(0.00 to<br>0.01)       | 0.00<br>(0.00 to<br>0.01)       | 0.01<br>(0.00 to<br>0.02)       |
| Lower respiratory infections                                                 | 1,077.59<br>(760.17 to<br>1,448.92)    | 743.62<br>(368.94 to<br>1,324.63)     | 486.27<br>(238.83 to<br>878.35)       | 2,028.67<br>(875.07 to<br>3,430.12)      | 16.35<br>(12.52 to<br>20.75)    | 16.74<br>(9.93 to<br>26.72)     | 11.20<br>(6.78 to<br>17.57)     | 34.57<br>(18.46 to<br>54.53)    |
| Upper respiratory infections                                                 | 2.42<br>(0.64 to<br>6.32)              | 1.30<br>(0.33 to<br>3.40)             | 1.13<br>(0.32 to<br>2.92)             | 3.80<br>(0.92 to<br>10.55)               | 0.03<br>(0.01 to<br>0.08)       | 0.02<br>(0.01 to<br>0.05)       | 0.02<br>(0.01 to<br>0.04)       | 0.06<br>(0.02 to<br>0.14)       |
| Otitis media                                                                 | 0.24<br>(0.06 to<br>0.69)              | 0.04<br>(0.01 to<br>0.11)             | 0.04<br>(0.01 to<br>0.11)             | 0.06<br>(0.01 to<br>0.17)                | 0.00<br>(0.00 to<br>0.01)       | 0.00<br>(0.00 to<br>0.00)       | 0.00<br>(0.00 to<br>0.00)       | 0.00<br>(0.00 to<br>0.00)       |
| Meningitis                                                                   | 405.50<br>(268.33 to<br>607.47)        | 237.71<br>(150.04 to<br>371.07)       | 211.59<br>(135.74 to<br>328.57)       | 508.14<br>(283.95 to<br>866.64)          | 5.63<br>(3.91 to<br>8.11)       | 3.90<br>(2.59 to<br>5.93)       | 3.61<br>(2.44 to<br>5.29)       | 7.13<br>(4.33 to<br>11.56)      |

|                                                |                                                           |                                                         |                                                        |                                                            |                                                   |                                                   |                                                   |                                                   |
|------------------------------------------------|-----------------------------------------------------------|---------------------------------------------------------|--------------------------------------------------------|------------------------------------------------------------|---------------------------------------------------|---------------------------------------------------|---------------------------------------------------|---------------------------------------------------|
| Pneumococcal meningitis                        | 30.58<br>(19.53 to<br>46.65)                              | 18.33<br>(10.85 to<br>29.56)                            | 17.18<br>(10.36 to<br>27.34)                           | 29.60<br>(16.65 to<br>51.31)                               | 0.47<br>(0.31 to<br>0.70)                         | 0.35<br>(0.23 to<br>0.55)                         | 0.34<br>(0.22 to<br>0.53)                         | 0.48<br>(0.29 to<br>0.78)                         |
| H influenzae type B meningitis                 | 57.17<br>(34.64 to<br>87.45)                              | 55.78<br>(19.53 to<br>130.12)                           | 39.77<br>(16.21 to<br>86.72)                           | 203.02<br>(51.02 to<br>515.71)                             | 0.75<br>(0.47 to<br>1.13)                         | 0.75<br>(0.32 to<br>1.61)                         | 0.56<br>(0.27 to<br>1.12)                         | 2.47<br>(0.68 to<br>6.14)                         |
| Meningococcal meningitis                       | 90.34<br>(58.24 to<br>137.22)                             | 55.46<br>(32.83 to<br>89.02)                            | 52.63<br>(31.53 to<br>84.11)                           | 90.18<br>(51.47 to<br>146.72)                              | 1.23<br>(0.81 to<br>1.84)                         | 0.92<br>(0.57 to<br>1.48)                         | 0.89<br>(0.56 to<br>1.41)                         | 1.35<br>(0.81 to<br>2.13)                         |
| Other meningitis                               | 227.41<br>(149.93 to<br>353.20)                           | 108.15<br>(68.19 to<br>169.07)                          | 102.01<br>(65.26 to<br>155.57)                         | 185.34<br>(107.98 to<br>308.86)                            | 3.18<br>(2.26 to<br>4.69)                         | 1.88<br>(1.24 to<br>2.76)                         | 1.81<br>(1.21 to<br>2.64)                         | 2.83<br>(1.80 to<br>4.35)                         |
| Encephalitis                                   | 10.42<br>(4.22 to<br>21.23)                               | 9.03<br>(3.69 to<br>19.17)                              | 8.29<br>(3.48 to<br>17.56)                             | 19.20<br>(6.95 to<br>43.08)                                | 0.13<br>(0.06 to<br>0.26)                         | 0.13<br>(0.06 to<br>0.24)                         | 0.12<br>(0.06 to<br>0.23)                         | 0.25<br>(0.11 to<br>0.53)                         |
| Diphtheria                                     | 0.37<br>(0.14 to<br>0.77)                                 | 0.09<br>(0.03 to<br>0.23)                               | 0.05<br>(0.02 to<br>0.10)                              | 0.47<br>(0.09 to<br>1.44)                                  | 0.00<br>(0.00 to<br>0.01)                         | 0.00<br>(0.00 to<br>0.00)                         | 0.00<br>(0.00 to<br>0.00)                         | 0.01<br>(0.00 to<br>0.02)                         |
| Whooping cough                                 | 49.13<br>(4.19 to<br>167.36)                              | 24.65<br>(1.66 to<br>91.73)                             | 6.83<br>(0.49 to<br>24.51)                             | 112.20<br>(8.41 to<br>394.01)                              | 0.58<br>(0.05 to<br>1.97)                         | 0.29<br>(0.02 to<br>1.09)                         | 0.08<br>(0.01 to<br>0.30)                         | 1.32<br>(0.10 to<br>4.65)                         |
| Tetanus                                        | 17.69<br>(9.02 to<br>34.59)                               | 2.68<br>(1.18 to<br>5.47)                               | 1.82<br>(0.85 to<br>3.26)                              | 9.00<br>(2.95 to<br>23.41)                                 | 0.25<br>(0.14 to<br>0.45)                         | 0.04<br>(0.02 to<br>0.08)                         | 0.03<br>(0.02 to<br>0.06)                         | 0.12<br>(0.04 to<br>0.28)                         |
| Measles                                        | 12.41<br>(3.91 to<br>31.05)                               | 1.78<br>(0.16 to<br>10.56)                              | 0.95<br>(0.13 to<br>4.57)                              | 10.69<br>(0.81 to<br>46.26)                                | 0.15<br>(0.05 to<br>0.37)                         | 0.02<br>(0.00 to<br>0.13)                         | 0.01<br>(0.00 to<br>0.05)                         | 0.13<br>(0.01 to<br>0.55)                         |
| <b>Burkina Faso</b>                            |                                                           |                                                         |                                                        |                                                            |                                                   |                                                   |                                                   |                                                   |
| Cause                                          | YLLs (in 1000s)                                           |                                                         |                                                        |                                                            | Deaths (in 1000s)                                 |                                                   |                                                   |                                                   |
|                                                | 2016                                                      | 2040 Forecast                                           | 2040 Better Scenario                                   | 2040 Worse Scenario                                        | 2016                                              | 2040 Forecast                                     | 2040 Better Scenario                              | 2040 Worse Scenario                               |
| Varicella and herpes zoster                    | 5.90<br>(3.05 to<br>9.96)                                 | 3.00<br>(1.40 to<br>5.67)                               | 2.70<br>(1.31 to<br>4.89)                              | 8.80<br>(3.63 to<br>15.48)                                 | 0.09<br>(0.05 to<br>0.14)                         | 0.06<br>(0.03 to<br>0.09)                         | 0.05<br>(0.03 to<br>0.09)                         | 0.12<br>(0.07 to<br>0.22)                         |
| <b>Neglected tropical diseases and malaria</b> | <b>2720.69</b><br><b>(1,949.93 to</b><br><b>3,529.96)</b> | <b>1033.15</b><br><b>(718.45 to</b><br><b>1,428.22)</b> | <b>977.58</b><br><b>(682.41 to</b><br><b>1,331.54)</b> | <b>1,840.55</b><br><b>(1,261.49 to</b><br><b>2,558.08)</b> | <b>34.55</b><br><b>(25.45 to</b><br><b>44.04)</b> | <b>15.58</b><br><b>(11.58 to</b><br><b>20.37)</b> | <b>14.99</b><br><b>(11.14 to</b><br><b>19.50)</b> | <b>25.34</b><br><b>(18.19 to</b><br><b>33.92)</b> |
| Malaria                                        | 2,610.07<br>(1,876.78 to<br>3,422.07)                     | 957.35<br>(658.72 to<br>1,327.78)                       | 907.60<br>(629.90 to<br>1,256.87)                      | 1,668.16<br>(1,126.38 to<br>2,358.39)                      | 33.01<br>(24.19 to<br>42.54)                      | 14.42<br>(10.57 to<br>19.02)                      | 13.91<br>(10.20 to<br>18.34)                      | 22.90<br>(16.17 to<br>31.02)                      |
| Chagas disease                                 | 0.00<br>(0.00 to<br>0.00)                                 | 0.00<br>(0.00 to<br>0.00)                               | 0.00<br>(0.00 to<br>0.00)                              | 0.00<br>(0.00 to<br>0.00)                                  | 0.00<br>(0.00 to<br>0.00)                         | 0.00<br>(0.00 to<br>0.00)                         | 0.00<br>(0.00 to<br>0.00)                         | 0.00<br>(0.00 to<br>0.00)                         |
| Leishmaniasis                                  | 0.02<br>(0.01 to<br>0.04)                                 | 0.02<br>(0.01 to<br>0.03)                               | 0.01<br>(0.01 to<br>0.02)                              | 0.03<br>(0.02 to<br>0.05)                                  | 0.00<br>(0.00 to<br>0.00)                         | 0.00<br>(0.00 to<br>0.00)                         | 0.00<br>(0.00 to<br>0.00)                         | 0.00<br>(0.00 to<br>0.00)                         |
| African trypanosomiasis                        | 0.48<br>(0.12 to<br>1.27)                                 | 0.06<br>(0.01 to<br>0.16)                               | 0.06<br>(0.01 to<br>0.16)                              | 0.06<br>(0.02 to<br>0.18)                                  | 0.01<br>(0.00 to<br>0.02)                         | 0.00<br>(0.00 to<br>0.00)                         | 0.00<br>(0.00 to<br>0.00)                         | 0.00<br>(0.00 to<br>0.00)                         |
| Schistosomiasis                                | 4.07<br>(2.92 to<br>5.50)                                 | 3.18<br>(2.12 to<br>4.51)                               | 3.06<br>(2.02 to<br>4.39)                              | 4.56<br>(3.09 to<br>6.50)                                  | 0.10<br>(0.07 to<br>0.14)                         | 0.09<br>(0.06 to<br>0.13)                         | 0.09<br>(0.06 to<br>0.13)                         | 0.12<br>(0.08 to<br>0.17)                         |
| Cysticercosis                                  | 0.40<br>(0.22 to<br>0.69)                                 | 0.20<br>(0.10 to<br>0.35)                               | 0.19<br>(0.10 to<br>0.34)                              | 0.26<br>(0.14 to<br>0.47)                                  | 0.01<br>(0.00 to<br>0.01)                         | 0.00<br>(0.00 to<br>0.01)                         | 0.00<br>(0.00 to<br>0.01)                         | 0.01<br>(0.00 to<br>0.01)                         |
| Cystic echinococcosis                          | 1.35<br>(0.93 to<br>1.92)                                 | 0.42<br>(0.28 to<br>0.60)                               | 0.37<br>(0.24 to<br>0.55)                              | 1.27<br>(0.84 to<br>1.88)                                  | 0.02<br>(0.02 to<br>0.03)                         | 0.01<br>(0.01 to<br>0.01)                         | 0.01<br>(0.01 to<br>0.01)                         | 0.02<br>(0.01 to<br>0.04)                         |
| Dengue                                         | 0.43<br>(0.02 to<br>2.00)                                 | 1.52<br>(0.07 to<br>6.47)                               | 1.45<br>(0.07 to<br>6.03)                              | 2.52<br>(0.11 to<br>11.20)                                 | 0.01<br>(0.00 to<br>0.03)                         | 0.03<br>(0.00 to<br>0.10)                         | 0.03<br>(0.00 to<br>0.10)                         | 0.04<br>(0.00 to<br>0.16)                         |
| Yellow fever                                   | 9.14<br>(1.79 to<br>28.82)                                | 3.86<br>(0.75 to<br>11.87)                              | 3.57<br>(0.68 to<br>11.14)                             | 7.84<br>(1.52 to<br>24.24)                                 | 0.14<br>(0.03 to<br>0.45)                         | 0.06<br>(0.01 to<br>0.19)                         | 0.06<br>(0.01 to<br>0.18)                         | 0.12<br>(0.02 to<br>0.38)                         |

|                                                          |                                            |                                          |                                          |                                              |                                    |                                   |                                   |                                     |
|----------------------------------------------------------|--------------------------------------------|------------------------------------------|------------------------------------------|----------------------------------------------|------------------------------------|-----------------------------------|-----------------------------------|-------------------------------------|
| Rabies                                                   | 9.07<br>(2.52 to<br>24.61)                 | 3.33<br>(0.78 to<br>10.92)               | 2.88<br>(0.62 to<br>9.32)                | 13.32<br>(3.07 to<br>43.09)                  | 0.14<br>(0.04 to<br>0.42)          | 0.06<br>(0.01 to<br>0.19)         | 0.05<br>(0.01 to<br>0.17)         | 0.22<br>(0.05 to<br>0.72)           |
| Intestinal nematode infections                           | 5.89<br>(3.22 to<br>10.01)                 | 8.52<br>(4.57 to<br>15.26)               | 8.13<br>(4.34 to<br>14.79)               | 13.96<br>(7.49 to<br>24.43)                  | 0.07<br>(0.04 to<br>0.12)          | 0.11<br>(0.06 to<br>0.19)         | 0.10<br>(0.05 to<br>0.18)         | 0.17<br>(0.09 to<br>0.30)           |
| Other neglected tropical diseases                        | 79.76<br>(40.20 to<br>146.74)              | 54.72<br>(29.25 to<br>96.99)             | 50.27<br>(27.74 to<br>91.08)             | 128.55<br>(65.87 to<br>229.65)               | 1.04<br>(0.55 to<br>1.84)          | 0.80<br>(0.47 to<br>1.31)         | 0.74<br>(0.44 to<br>1.23)         | 1.74<br>(0.96 to<br>2.97)           |
| <b>Maternal disorders</b>                                | <b>131.72</b><br>(103.40 to<br>160.52)     | <b>88.30</b><br>(48.10 to<br>140.39)     | <b>78.55</b><br>(45.17 to<br>118.74)     | <b>203.00</b><br>(122.65 to<br>302.64)       | <b>2.37</b><br>(1.88 to<br>2.87)   | <b>1.62</b><br>(0.90 to<br>2.59)  | <b>1.44</b><br>(0.83 to<br>2.17)  | <b>3.71</b><br>(2.24 to<br>5.50)    |
| Maternal hemorrhage                                      | 45.28<br>(32.45 to<br>60.20)               | 28.53<br>(14.71 to<br>48.20)             | 25.68<br>(13.93 to<br>40.78)             | 63.37<br>(35.98 to<br>100.29)                | 0.83<br>(0.60 to<br>1.10)          | 0.53<br>(0.27 to<br>0.89)         | 0.48<br>(0.26 to<br>0.77)         | 1.17<br>(0.67 to<br>1.85)           |
| Maternal sepsis and other maternal infections            | 6.27<br>(2.76 to<br>11.10)                 | 3.68<br>(1.29 to<br>7.71)                | 3.29<br>(1.15 to<br>6.62)                | 8.39<br>(3.12 to<br>17.06)                   | 0.11<br>(0.05 to<br>0.20)          | 0.07<br>(0.02 to<br>0.14)         | 0.06<br>(0.02 to<br>0.12)         | 0.15<br>(0.06 to<br>0.31)           |
| Maternal hypertensive disorders                          | 25.56<br>(17.64 to<br>35.58)               | 16.69<br>(8.29 to<br>28.56)              | 14.99<br>(7.88 to<br>24.83)              | 37.65<br>(20.09 to<br>60.49)                 | 0.45<br>(0.31 to<br>0.62)          | 0.30<br>(0.15 to<br>0.51)         | 0.27<br>(0.14 to<br>0.44)         | 0.67<br>(0.36 to<br>1.09)           |
| Maternal obstructed labor and uterine rupture            | 5.50<br>(3.04 to<br>9.16)                  | 3.61<br>(1.61 to<br>7.27)                | 3.23<br>(1.48 to<br>6.36)                | 8.51<br>(4.09 to<br>16.06)                   | 0.10<br>(0.06 to<br>0.17)          | 0.07<br>(0.03 to<br>0.13)         | 0.06<br>(0.03 to<br>0.12)         | 0.16<br>(0.07 to<br>0.30)           |
| Maternal abortion, miscarriage, and ectopic pregnancy    | 13.14<br>(7.15 to<br>22.00)                | 7.88<br>(2.89 to<br>16.99)               | 7.05<br>(2.84 to<br>15.13)               | 17.84<br>(7.07 to<br>37.93)                  | 0.23<br>(0.13 to<br>0.37)          | 0.14<br>(0.05 to<br>0.30)         | 0.13<br>(0.05 to<br>0.27)         | 0.32<br>(0.13 to<br>0.66)           |
| Indirect maternal deaths                                 | 23.10<br>(15.95 to<br>32.66)               | 15.32<br>(7.71 to<br>26.01)              | 13.71<br>(7.20 to<br>22.46)              | 37.35<br>(20.37 to<br>59.61)                 | 0.41<br>(0.28 to<br>0.57)          | 0.28<br>(0.14 to<br>0.46)         | 0.25<br>(0.13 to<br>0.40)         | 0.67<br>(0.36 to<br>1.07)           |
| Late maternal deaths                                     | 1.37<br>(0.65 to<br>2.57)                  | 0.73<br>(0.28 to<br>1.44)                | 0.65<br>(0.26 to<br>1.32)                | 1.74<br>(0.71 to<br>3.43)                    | 0.02<br>(0.01 to<br>0.05)          | 0.01<br>(0.01 to<br>0.05)         | 0.01<br>(0.00 to<br>0.02)         | 0.03<br>(0.01 to<br>0.06)           |
| Maternal deaths aggravated by HIV/AIDS                   | 0.72<br>(0.37 to<br>1.12)                  | 4.23<br>(1.64 to<br>9.12)                | 3.54<br>(0.67 to<br>7.59)                | 11.80<br>(5.21 to<br>21.17)                  | 0.01<br>(0.01 to<br>0.02)          | 0.09<br>(0.05 to<br>0.18)         | 0.07<br>(0.01 to<br>0.15)         | 0.23<br>(0.10 to<br>0.41)           |
| Other maternal disorders                                 | 10.78<br>(6.81 to<br>15.65)                | 7.13<br>(3.44 to<br>12.52)               | 6.42<br>(3.19 to<br>10.86)               | 16.35<br>(8.35 to<br>27.42)                  | 0.19<br>(0.12 to<br>0.28)          | 0.13<br>(0.06 to<br>0.23)         | 0.12<br>(0.06 to<br>0.20)         | 0.30<br>(0.15 to<br>0.50)           |
| <b>Burkina Faso</b>                                      |                                            |                                          |                                          |                                              |                                    |                                   |                                   |                                     |
| Cause                                                    | YLLs (in 1000s)                            |                                          |                                          |                                              | Deaths (in 1000s)                  |                                   |                                   |                                     |
|                                                          | 2016                                       | 2040 Forecast                            | 2040 Better Scenario                     | 2040 Worse Scenario                          | 2016                               | 2040 Forecast                     | 2040 Better Scenario              | 2040 Worse Scenario                 |
| <b>Neonatal disorders</b>                                | <b>1,244.13</b><br>(837.46 to<br>1,664.59) | <b>752.26</b><br>(408.70 to<br>1,222.90) | <b>641.17</b><br>(353.41 to<br>1,022.79) | <b>1,918.86</b><br>(1,077.90 to<br>3,021.61) | <b>14.37</b><br>(9.67 to<br>19.25) | <b>8.69</b><br>(4.73 to<br>14.13) | <b>7.41</b><br>(4.09 to<br>11.82) | <b>22.18</b><br>(12.46 to<br>34.91) |
| Neonatal preterm birth                                   | 435.31<br>(266.91 to<br>646.01)            | 225.49<br>(116.11 to<br>365.08)          | 166.73<br>(85.51 to<br>273.66)           | 571.53<br>(300.89 to<br>918.81)              | 5.03<br>(3.08 to<br>7.46)          | 2.61<br>(1.34 to<br>4.22)         | 1.93<br>(0.99 to<br>3.16)         | 6.60<br>(3.48 to<br>10.61)          |
| Neonatal encephalopathy due to birth asphyxia and trauma | 350.69<br>(205.40 to<br>548.79)            | 199.07<br>(87.46 to<br>410.99)           | 180.30<br>(78.66 to<br>358.81)           | 488.12<br>(217.63 to<br>984.60)              | 4.05<br>(2.37 to<br>6.34)          | 2.30<br>(1.01 to<br>4.75)         | 2.08<br>(0.91 to<br>4.14)         | 5.64<br>(2.51 to<br>11.37)          |
| Neonatal sepsis and other neonatal infections            | 295.14<br>(172.58 to<br>462.98)            | 234.31<br>(119.31 to<br>396.37)          | 211.22<br>(105.64 to<br>351.62)          | 593.53<br>(306.00 to<br>972.74)              | 3.41<br>(1.99 to<br>5.35)          | 2.71<br>(1.38 to<br>4.58)         | 2.44<br>(1.22 to<br>4.06)         | 6.86<br>(3.54 to<br>11.25)          |
| Hemolytic disease and other neonatal jaundice            | 46.03<br>(24.57 to<br>80.26)               | 16.50<br>(7.30 to<br>33.28)              | 14.71<br>(6.42 to<br>28.95)              | 46.65<br>(21.52 to<br>90.54)                 | 0.53<br>(0.28 to<br>0.93)          | 0.19<br>(0.08 to<br>0.38)         | 0.17<br>(0.07 to<br>0.33)         | 0.54<br>(0.25 to<br>1.05)           |
| Other neonatal disorders                                 | 116.97<br>(64.84 to<br>189.05)             | 76.88<br>(33.39 to<br>145.69)            | 68.20<br>(29.78 to<br>129.70)            | 219.02<br>(96.75 to<br>410.30)               | 1.35<br>(0.75 to<br>2.19)          | 0.89<br>(0.39 to<br>1.68)         | 0.79<br>(0.34 to<br>1.50)         | 2.53<br>(1.12 to<br>4.74)           |
| <b>Nutritional deficiencies</b>                          | <b>346.33</b><br>(213.28 to<br>539.96)     | <b>111.81</b><br>(66.65 to<br>185.00)    | <b>103.85</b><br>(63.22 to<br>169.00)    | <b>257.58</b><br>(149.52 to<br>433.48)       | <b>4.86</b><br>(3.27 to<br>7.20)   | <b>2.29</b><br>(1.61 to<br>3.25)  | <b>2.22</b><br>(1.60 to<br>3.11)  | <b>4.23</b><br>(2.84 to<br>6.38)    |

|                                                                         |                                                  |                                                  |                                                  |                                                  |                                         |                                          |                                         |                                            |
|-------------------------------------------------------------------------|--------------------------------------------------|--------------------------------------------------|--------------------------------------------------|--------------------------------------------------|-----------------------------------------|------------------------------------------|-----------------------------------------|--------------------------------------------|
| Protein-energy malnutrition                                             | 318.18<br>(189.75 to 506.43)                     | 88.25<br>(49.55 to 152.99)                       | 81.60<br>(46.84 to 141.85)                       | 215.11<br>(115.42 to 370.53)                     | 4.29<br>(2.78 to 6.51)                  | 1.70<br>(1.15 to 2.54)                   | 1.65<br>(1.16 to 2.43)                  | 3.33<br>(2.10 to 5.25)                     |
| Iodine deficiency                                                       | 3.15<br>(0.10 to 18.15)                          | 4.43<br>(0.14 to 20.94)                          | 4.06<br>(0.13 to 18.63)                          | 10.85<br>(0.27 to 57.69)                         | 0.05<br>(0.00 to 0.23)                  | 0.10<br>(0.00 to 0.32)                   | 0.09<br>(0.00 to 0.30)                  | 0.19<br>(0.01 to 0.78)                     |
| Dietary iron deficiency                                                 | 0.85<br>(0.58 to 1.77)                           | 1.05<br>(0.60 to 2.21)                           | 1.01<br>(0.58 to 2.17)                           | 1.45<br>(0.84 to 3.10)                           | 0.02<br>(0.01 to 0.05)                  | 0.02<br>(0.01 to 0.07)                   | 0.02<br>(0.01 to 0.07)                  | 0.03<br>(0.02 to 0.08)                     |
| Other nutritional deficiencies                                          | 24.15<br>(12.62 to 46.21)                        | 18.09<br>(10.50 to 30.38)                        | 17.19<br>(10.17 to 28.20)                        | 30.17<br>(16.51 to 56.26)                        | 0.51<br>(0.32 to 0.77)                  | 0.47<br>(0.30 to 0.68)                   | 0.46<br>(0.29 to 0.66)                  | 0.67<br>(0.42 to 1.03)                     |
| <b>Other communicable, maternal, neonatal, and nutritional diseases</b> | <b>143.77</b><br><b>(71.68 to 283.01)</b>        | <b>78.34</b><br><b>(38.97 to 168.13)</b>         | <b>72.94</b><br><b>(37.70 to 151.71)</b>         | <b>162.42</b><br><b>(74.60 to 369.37)</b>        | <b>1.96</b><br><b>(1.12 to 3.58)</b>    | <b>1.32</b><br><b>(0.79 to 2.41)</b>     | <b>1.26</b><br><b>(0.78 to 2.20)</b>    | <b>2.41</b><br><b>(1.33 to 4.85)</b>       |
| Sexually transmitted infections excluding HIV                           | 66.07<br>(27.38 to 125.72)                       | 21.93<br>(8.37 to 50.84)                         | 20.43<br>(7.98 to 46.93)                         | 46.13<br>(15.74 to 110.46)                       | 0.80<br>(0.35 to 1.50)                  | 0.29<br>(0.12 to 0.63)                   | 0.27<br>(0.12 to 0.58)                  | 0.58<br>(0.22 to 1.33)                     |
| Syphilis                                                                | 63.66<br>(25.45 to 123.02)                       | 19.30<br>(5.93 to 47.97)                         | 17.88<br>(5.62 to 43.43)                         | 42.75<br>(12.59 to 106.92)                       | 0.75<br>(0.31 to 1.44)                  | 0.23<br>(0.08 to 0.57)                   | 0.22<br>(0.07 to 0.52)                  | 0.51<br>(0.16 to 1.26)                     |
| Chlamydial infection                                                    | 0.48<br>(0.34 to 0.72)                           | 0.53<br>(0.29 to 0.85)                           | 0.52<br>(0.29 to 0.81)                           | 0.69<br>(0.40 to 1.11)                           | 0.01<br>(0.01 to 0.01)                  | 0.01<br>(0.01 to 0.02)                   | 0.01<br>(0.01 to 0.02)                  | 0.01<br>(0.01 to 0.02)                     |
| Gonococcal infection                                                    | 1.24<br>(0.89 to 1.80)                           | 1.35<br>(0.77 to 2.11)                           | 1.31<br>(0.76 to 2.01)                           | 1.72<br>(1.02 to 2.71)                           | 0.02<br>(0.02 to 0.04)                  | 0.02<br>(0.02 to 0.04)                   | 0.03<br>(0.02 to 0.04)                  | 0.03<br>(0.02 to 0.05)                     |
| Other sexually transmitted infections                                   | 0.69<br>(0.49 to 1.01)                           | 0.75<br>(0.41 to 1.20)                           | 0.72<br>(0.40 to 1.16)                           | 0.97<br>(0.54 to 1.53)                           | 0.01<br>(0.01 to 0.02)                  | 0.01<br>(0.01 to 0.02)                   | 0.01<br>(0.01 to 0.02)                  | 0.02<br>(0.01 to 0.03)                     |
| Acute hepatitis                                                         | 25.50<br>(21.00 to 31.22)                        | 22.08<br>(15.70 to 29.56)                        | 21.19<br>(15.29 to 27.89)                        | 32.88<br>(23.69 to 42.79)                        | 0.52<br>(0.44 to 0.61)                  | 0.55<br>(0.42 to 0.71)                   | 0.54<br>(0.41 to 0.69)                  | 0.76<br>(0.58 to 0.95)                     |
| Acute hepatitis A                                                       | 1.61<br>(0.13 to 4.15)                           | 0.71<br>(0.14 to 1.85)                           | 0.66<br>(0.13 to 1.66)                           | 1.55<br>(0.21 to 4.23)                           | 0.02<br>(0.00 to 0.05)                  | 0.01<br>(0.00 to 0.02)                   | 0.01<br>(0.00 to 0.02)                  | 0.02<br>(0.00 to 0.05)                     |
| Acute hepatitis B                                                       | 16.85<br>(13.63 to 21.14)                        | 16.28<br>(11.48 to 21.97)                        | 15.64<br>(11.32 to 20.83)                        | 23.35<br>(16.85 to 31.10)                        | 0.38<br>(0.32 to 0.46)                  | 0.43<br>(0.32 to 0.56)                   | 0.42<br>(0.32 to 0.55)                  | 0.59<br>(0.45 to 0.76)                     |
| Acute hepatitis C                                                       | 0.48<br>(0.35 to 0.67)                           | 0.67<br>(0.42 to 1.00)                           | 0.66<br>(0.42 to 0.98)                           | 0.80<br>(0.51 to 1.19)                           | 0.01<br>(0.01 to 0.02)                  | 0.01<br>(0.01 to 0.03)                   | 0.02<br>(0.01 to 0.03)                  | 0.02<br>(0.01 to 0.03)                     |
| Acute hepatitis E                                                       | 6.56<br>(4.60 to 9.27)                           | 4.42<br>(2.77 to 6.85)                           | 4.24<br>(2.69 to 6.42)                           | 7.18<br>(4.49 to 11.34)                          | 0.10<br>(0.07 to 0.14)                  | 0.09<br>(0.06 to 0.13)                   | 0.09<br>(0.06 to 0.13)                  | 0.13<br>(0.08 to 0.18)                     |
| Other unspecified infectious diseases                                   | 52.20<br>(9.18 to 190.10)                        | 34.33<br>(8.83 to 112.06)                        | 31.32<br>(8.49 to 97.53)                         | 83.41<br>(19.99 to 279.30)                       | 0.64<br>(0.14 to 2.28)                  | 0.48<br>(0.18 to 1.40)                   | 0.45<br>(0.18 to 1.22)                  | 1.07<br>(0.34 to 3.36)                     |
| <b>Non-communicable diseases</b>                                        | <b>1,918.53</b><br><b>(1,559.68 to 2,283.32)</b> | <b>2,775.35</b><br><b>(2,277.07 to 3,316.56)</b> | <b>2,500.10</b><br><b>(2,069.28 to 2,963.62)</b> | <b>4,184.10</b><br><b>(3,403.65 to 5,094.01)</b> | <b>47.78</b><br><b>(43.08 to 52.88)</b> | <b>91.16</b><br><b>(79.16 to 104.62)</b> | <b>82.54</b><br><b>(72.76 to 93.15)</b> | <b>125.35</b><br><b>(107.70 to 147.07)</b> |

**Burkina Faso**

| Cause                      | YLLs (in 1000s)              |                              |                              |                              | Deaths (in 1000s)      |                           |                           |                           |
|----------------------------|------------------------------|------------------------------|------------------------------|------------------------------|------------------------|---------------------------|---------------------------|---------------------------|
|                            | 2016                         | 2040 Forecast                | 2040 Better Scenario         | 2040 Worse Scenario          | 2016                   | 2040 Forecast             | 2040 Better Scenario      | 2040 Worse Scenario       |
| Neoplasms                  | 288.25<br>(263.48 to 315.48) | 653.65<br>(553.95 to 770.52) | 631.14<br>(537.38 to 737.08) | 721.02<br>(605.53 to 864.06) | 8.90<br>(8.08 to 9.68) | 22.47<br>(19.67 to 25.83) | 22.19<br>(19.46 to 25.36) | 23.33<br>(20.09 to 27.20) |
| Lip and oral cavity cancer | 2.44<br>(2.05 to 2.84)       | 4.95<br>(2.71 to 8.37)       | 4.48<br>(2.57 to 7.49)       | 8.33<br>(4.13 to 14.80)      | 0.08<br>(0.07 to 0.10) | 0.19<br>(0.11 to 0.33)    | 0.18<br>(0.11 to 0.30)    | 0.30<br>(0.15 to 0.54)    |
| Nasopharynx cancer         | 0.87<br>(0.71 to 1.04)       | 1.69<br>(0.90 to 2.85)       | 1.48<br>(0.82 to 2.47)       | 3.12<br>(1.54 to 5.42)       | 0.02<br>(0.02 to 0.03) | 0.04<br>(0.02 to 0.08)    | 0.04<br>(0.02 to 0.07)    | 0.08<br>(0.04 to 0.14)    |

|                                      |                              |                                 |                                |                                 |                           |                           |                           |                           |
|--------------------------------------|------------------------------|---------------------------------|--------------------------------|---------------------------------|---------------------------|---------------------------|---------------------------|---------------------------|
| Other pharynx cancer                 | 1.98<br>(1.65 to<br>2.40)    | 3.00<br>(1.57 to<br>5.53)       | 2.89<br>(1.55 to<br>5.16)      | 4.75<br>(2.24 to<br>8.76)       | 0.07<br>(0.05 to<br>0.08) | 0.11<br>(0.06 to<br>0.19) | 0.10<br>(0.06 to<br>0.18) | 0.16<br>(0.08 to<br>0.29) |
| Esophageal cancer                    | 9.54<br>(8.45 to<br>10.74)   | 19.62<br>(11.04 to<br>31.74)    | 17.92<br>(10.39 to<br>28.72)   | 29.03<br>(15.67 to<br>49.27)    | 0.36<br>(0.32 to<br>0.41) | 0.78<br>(0.45 to<br>1.25) | 0.74<br>(0.42 to<br>1.15) | 1.09<br>(0.59 to<br>1.79) |
| Stomach cancer                       | 25.67<br>(22.82 to<br>28.49) | 39.27<br>(32.19 to<br>49.00)    | 39.12<br>(32.16 to<br>47.88)   | 44.55<br>(36.43 to<br>55.90)    | 0.95<br>(0.84 to<br>1.05) | 1.57<br>(1.29 to<br>1.93) | 1.60<br>(1.33 to<br>1.94) | 1.68<br>(1.38 to<br>2.10) |
| Colon and rectum cancer              | 15.37<br>(13.21 to<br>17.54) | 44.23<br>(31.35 to<br>61.27)    | 44.47<br>(31.61 to<br>61.65)   | 44.02<br>(30.90 to<br>61.92)    | 0.61<br>(0.53 to<br>0.69) | 2.01<br>(1.45 to<br>2.75) | 2.09<br>(1.53 to<br>2.85) | 1.84<br>(1.30 to<br>2.61) |
| Liver cancer                         | 54.28<br>(44.45 to<br>71.12) | 144.69<br>(103.16 to<br>206.39) | 133.04<br>(98.14 to<br>187.21) | 166.32<br>(114.71 to<br>243.52) | 1.55<br>(1.26 to<br>2.00) | 4.44<br>(3.25 to<br>6.24) | 4.16<br>(3.14 to<br>5.70) | 4.91<br>(3.47 to<br>7.09) |
| Liver cancer due to hepatitis B      | 30.77<br>(24.46 to<br>40.72) | 82.21<br>(57.10 to<br>118.23)   | 75.92<br>(55.24 to<br>106.39)  | 88.77<br>(58.67 to<br>133.69)   | 0.84<br>(0.66 to<br>1.09) | 2.41<br>(1.71 to<br>3.48) | 2.26<br>(1.67 to<br>3.15) | 2.50<br>(1.72 to<br>3.68) |
| Liver cancer due to hepatitis C      | 4.17<br>(2.89 to<br>5.75)    | 12.17<br>(7.80 to<br>18.44)     | 11.36<br>(7.40 to<br>16.69)    | 12.59<br>(7.89 to<br>19.18)     | 0.15<br>(0.10 to<br>0.21) | 0.47<br>(0.31 to<br>0.70) | 0.45<br>(0.30 to<br>0.66) | 0.46<br>(0.29 to<br>0.70) |
| Liver cancer due to alcohol use      | 7.58<br>(5.87 to<br>10.35)   | 19.74<br>(13.51 to<br>29.62)    | 17.58<br>(12.45 to<br>25.63)   | 31.07<br>(20.58 to<br>48.24)    | 0.25<br>(0.19 to<br>0.33) | 0.67<br>(0.46 to<br>0.98) | 0.61<br>(0.44 to<br>0.88) | 1.00<br>(0.67 to<br>1.50) |
| Liver cancer due to other causes     | 11.75<br>(9.25 to<br>16.18)  | 30.57<br>(21.12 to<br>45.95)    | 28.18<br>(20.17 to<br>41.23)   | 33.90<br>(22.78 to<br>52.11)    | 0.31<br>(0.25 to<br>0.43) | 0.89<br>(0.62 to<br>1.33) | 0.83<br>(0.60 to<br>1.23) | 0.95<br>(0.64 to<br>1.42) |
| Gallbladder and biliary tract cancer | 3.70<br>(2.66 to<br>4.91)    | 6.97<br>(4.98 to<br>9.36)       | 7.22<br>(5.11 to<br>9.72)      | 6.42<br>(4.59 to<br>8.66)       | 0.15<br>(0.11 to<br>0.20) | 0.29<br>(0.21 to<br>0.39) | 0.31<br>(0.22 to<br>0.41) | 0.26<br>(0.19 to<br>0.34) |
| Pancreatic cancer                    | 8.46<br>(7.60 to<br>9.41)    | 26.50<br>(22.56 to<br>31.83)    | 26.88<br>(22.80 to<br>32.06)   | 23.98<br>(20.38 to<br>28.85)    | 0.33<br>(0.30 to<br>0.37) | 1.10<br>(0.94 to<br>1.31) | 1.14<br>(0.97 to<br>1.35) | 0.95<br>(0.81 to<br>1.14) |
| Larynx cancer                        | 2.07<br>(1.79 to<br>2.36)    | 3.91<br>(2.43 to<br>6.33)       | 3.22<br>(2.11 to<br>4.97)      | 6.70<br>(3.70 to<br>11.50)      | 0.07<br>(0.06 to<br>0.09) | 0.15<br>(0.09 to<br>0.24) | 0.12<br>(0.08 to<br>0.19) | 0.24<br>(0.13 to<br>0.42) |
| Tracheal, bronchus, and lung cancer  | 10.00<br>(8.72 to<br>11.21)  | 28.22<br>(18.30 to<br>41.98)    | 18.46<br>(12.77 to<br>26.01)   | 34.50<br>(21.83 to<br>52.60)    | 0.39<br>(0.34 to<br>0.43) | 1.14<br>(0.75 to<br>1.69) | 0.77<br>(0.54 to<br>1.08) | 1.33<br>(0.83 to<br>2.03) |
| Malignant skin melanoma              | 0.94<br>(0.75 to<br>1.25)    | 2.77<br>(2.17 to<br>3.72)       | 2.89<br>(2.27 to<br>3.90)      | 2.30<br>(1.80 to<br>3.06)       | 0.03<br>(0.03 to<br>0.04) | 0.10<br>(0.08 to<br>0.13) | 0.11<br>(0.09 to<br>0.14) | 0.08<br>(0.06 to<br>0.10) |
| Non-melanoma skin cancer             | 0.78<br>(0.66 to<br>0.93)    | 1.95<br>(1.60 to<br>2.35)       | 1.99<br>(1.62 to<br>2.38)      | 2.15<br>(1.75 to<br>2.59)       | 0.03<br>(0.02 to<br>0.03) | 0.07<br>(0.06 to<br>0.09) | 0.08<br>(0.07 to<br>0.09) | 0.07<br>(0.06 to<br>0.09) |
| Breast cancer                        | 20.23<br>(15.73 to<br>27.37) | 46.92<br>(32.12 to<br>69.23)    | 46.34<br>(31.89 to<br>68.47)   | 52.35<br>(35.40 to<br>79.23)    | 0.62<br>(0.48 to<br>0.83) | 1.55<br>(1.09 to<br>2.21) | 1.55<br>(1.11 to<br>2.20) | 1.66<br>(1.15 to<br>2.48) |
| Cervical cancer                      | 37.30<br>(21.93 to<br>46.71) | 59.95<br>(35.96 to<br>81.44)    | 59.44<br>(35.70 to<br>80.22)   | 69.77<br>(40.76 to<br>95.03)    | 1.13<br>(0.66 to<br>1.40) | 1.86<br>(1.09 to<br>2.46) | 1.86<br>(1.09 to<br>2.45) | 2.11<br>(1.21 to<br>2.80) |
| Uterine cancer                       | 3.95<br>(2.97 to<br>4.89)    | 7.84<br>(5.53 to<br>10.27)      | 7.86<br>(5.61 to<br>10.31)     | 9.20<br>(6.59 to<br>11.92)      | 0.15<br>(0.11 to<br>0.18) | 0.31<br>(0.23 to<br>0.40) | 0.32<br>(0.23 to<br>0.41) | 0.35<br>(0.26 to<br>0.45) |
| Ovarian cancer                       | 4.46<br>(3.66 to<br>5.22)    | 13.18<br>(9.80 to<br>17.16)     | 13.10<br>(9.72 to<br>16.78)    | 11.32<br>(8.37 to<br>14.59)     | 0.14<br>(0.11 to<br>0.16) | 0.43<br>(0.32 to<br>0.55) | 0.43<br>(0.32 to<br>0.54) | 0.36<br>(0.27 to<br>0.46) |
| Prostate cancer                      | 9.10<br>(5.65 to<br>11.43)   | 32.05<br>(20.27 to<br>40.63)    | 34.22<br>(21.77 to<br>42.78)   | 27.36<br>(17.10 to<br>35.40)    | 0.49<br>(0.30 to<br>0.61) | 1.81<br>(1.13 to<br>2.31) | 1.98<br>(1.28 to<br>2.49) | 1.47<br>(0.91 to<br>1.92) |
| Testicular cancer                    | 0.91<br>(0.61 to<br>1.81)    | 1.57<br>(1.02 to<br>3.10)       | 1.57<br>(1.02 to<br>3.10)      | 1.76<br>(1.14 to<br>3.47)       | 0.02<br>(0.01 to<br>0.04) | 0.04<br>(0.02 to<br>0.07) | 0.04<br>(0.02 to<br>0.07) | 0.04<br>(0.03 to<br>0.07) |
| <b>Burkina Faso</b>                  |                              |                                 |                                |                                 |                           |                           |                           |                           |
| <b>YLLs (in 1000s)</b>               |                              |                                 |                                |                                 | <b>Deaths (in 1000s)</b>  |                           |                           |                           |

| Cause                           | 2016                                       | 2040 Forecast                              | 2040 Better Scenario                       | 2040 Worse Scenario                            | 2016                                    | 2040 Forecast                           | 2040 Better Scenario                    | 2040 Worse Scenario                     |
|---------------------------------|--------------------------------------------|--------------------------------------------|--------------------------------------------|------------------------------------------------|-----------------------------------------|-----------------------------------------|-----------------------------------------|-----------------------------------------|
| Kidney cancer                   | 3.25<br>(2.66 to 4.01)                     | 7.63<br>(6.32 to 9.17)                     | 7.80<br>(6.46 to 9.39)                     | 7.30<br>(5.93 to 9.04)                         | 0.08<br>(0.07 to 0.09)                  | 0.23<br>(0.19 to 0.27)                  | 0.24<br>(0.20 to 0.28)                  | 0.20<br>(0.17 to 0.23)                  |
| Bladder cancer                  | 3.85<br>(3.40 to 4.46)                     | 10.38<br>(8.58 to 12.96)                   | 10.28<br>(8.58 to 12.74)                   | 10.80<br>(8.74 to 13.62)                       | 0.15<br>(0.13 to 0.17)                  | 0.43<br>(0.36 to 0.53)                  | 0.44<br>(0.37 to 0.54)                  | 0.42<br>(0.34 to 0.52)                  |
| Brain and nervous system cancer | 11.32<br>(8.34 to 13.69)                   | 25.82<br>(18.77 to 31.73)                  | 26.22<br>(19.10 to 32.22)                  | 26.47<br>(18.88 to 32.73)                      | 0.24<br>(0.18 to 0.28)                  | 0.63<br>(0.48 to 0.75)                  | 0.65<br>(0.50 to 0.77)                  | 0.60<br>(0.45 to 0.72)                  |
| Thyroid cancer                  | 1.05<br>(0.86 to 1.25)                     | 2.33<br>(1.70 to 3.11)                     | 2.18<br>(1.63 to 2.83)                     | 2.67<br>(1.93 to 3.57)                         | 0.03<br>(0.03 to 0.04)                  | 0.08<br>(0.06 to 0.10)                  | 0.07<br>(0.06 to 0.09)                  | 0.08<br>(0.06 to 0.11)                  |
| Mesothelioma                    | 0.44<br>(0.34 to 0.60)                     | 1.02<br>(0.73 to 1.47)                     | 1.03<br>(0.73 to 1.48)                     | 1.12<br>(0.79 to 1.64)                         | 0.01<br>(0.01 to 0.02)                  | 0.03<br>(0.02 to 0.05)                  | 0.03<br>(0.02 to 0.05)                  | 0.03<br>(0.02 to 0.05)                  |
| Hodgkin lymphoma                | 2.21<br>(1.66 to 2.78)                     | 2.80<br>(1.76 to 3.35)                     | 2.43<br>(1.70 to 3.20)                     | 3.61<br>(2.56 to 4.74)                         | 0.04<br>(0.03 to 0.05)                  | 0.05<br>(0.04 to 0.07)                  | 0.05<br>(0.04 to 0.07)                  | 0.08<br>(0.05 to 0.10)                  |
| Non-Hodgkin lymphoma            | 14.91<br>(12.61 to 17.68)                  | 32.38<br>(26.22 to 40.14)                  | 32.32<br>(26.35 to 39.98)                  | 32.75<br>(26.27 to 40.66)                      | 0.31<br>(0.26 to 0.36)                  | 0.80<br>(0.67 to 0.96)                  | 0.80<br>(0.67 to 0.97)                  | 0.75<br>(0.62 to 0.90)                  |
| Multiple myeloma                | 2.44<br>(2.05 to 3.04)                     | 8.06<br>(6.20 to 10.67)                    | 8.00<br>(6.25 to 10.36)                    | 7.07<br>(5.42 to 9.37)                         | 0.08<br>(0.07 to 0.11)                  | 0.29<br>(0.23 to 0.38)                  | 0.29<br>(0.23 to 0.38)                  | 0.25<br>(0.19 to 0.33)                  |
| Leukemia                        | 11.98<br>(10.24 to 15.06)                  | 23.10<br>(18.92 to 29.27)                  | 22.56<br>(18.60 to 28.47)                  | 24.72<br>(20.09 to 31.59)                      | 0.25<br>(0.22 to 0.30)                  | 0.58<br>(0.48 to 0.71)                  | 0.57<br>(0.48 to 0.69)                  | 0.59<br>(0.49 to 0.71)                  |
| Acute lymphoid leukemia         | 2.38<br>(1.85 to 3.65)                     | 4.55<br>(3.36 to 6.65)                     | 4.49<br>(3.30 to 6.60)                     | 4.83<br>(3.60 to 7.09)                         | 0.04<br>(0.03 to 0.06)                  | 0.09<br>(0.07 to 0.12)                  | 0.09<br>(0.07 to 0.12)                  | 0.09<br>(0.07 to 0.13)                  |
| Chronic lymphoid leukemia       | 0.48<br>(0.37 to 0.58)                     | 1.18<br>(0.90 to 1.51)                     | 1.16<br>(0.89 to 1.44)                     | 1.14<br>(0.86 to 1.46)                         | 0.02<br>(0.02 to 0.02)                  | 0.05<br>(0.04 to 0.07)                  | 0.05<br>(0.04 to 0.07)                  | 0.05<br>(0.04 to 0.06)                  |
| Acute myeloid leukemia          | 4.04<br>(2.88 to 5.54)                     | 9.56<br>(6.80 to 12.73)                    | 9.44<br>(6.74 to 12.52)                    | 9.53<br>(6.73 to 12.89)                        | 0.08<br>(0.06 to 0.10)                  | 0.22<br>(0.15 to 0.28)                  | 0.21<br>(0.15 to 0.28)                  | 0.20<br>(0.14 to 0.26)                  |
| Chronic myeloid leukemia        | 1.53<br>(1.20 to 1.97)                     | 2.19<br>(1.55 to 3.01)                     | 2.09<br>(1.50 to 2.85)                     | 2.25<br>(1.59 to 3.13)                         | 0.04<br>(0.03 to 0.05)                  | 0.06<br>(0.04 to 0.08)                  | 0.06<br>(0.04 to 0.07)                  | 0.06<br>(0.04 to 0.08)                  |
| Other leukemia                  | 3.56<br>(2.52 to 4.75)                     | 5.61<br>(3.83 to 7.74)                     | 5.39<br>(3.69 to 7.33)                     | 6.96<br>(4.77 to 9.62)                         | 0.08<br>(0.06 to 0.10)                  | 0.17<br>(0.12 to 0.22)                  | 0.16<br>(0.12 to 0.21)                  | 0.19<br>(0.13 to 0.25)                  |
| Other neoplasms                 | 24.77<br>(21.16 to 29.88)                  | 51.13<br>(42.36 to 62.21)                  | 51.74<br>(42.76 to 62.93)                  | 56.59<br>(46.41 to 69.71)                      | 0.53<br>(0.47 to 0.61)                  | 1.36<br>(1.18 to 1.57)                  | 1.42<br>(1.22 to 1.65)                  | 1.35<br>(1.16 to 1.57)                  |
| <b>Cardiovascular diseases</b>  | <b>420.17</b><br><b>(383.74 to 452.52)</b> | <b>686.20</b><br><b>(498.51 to 937.64)</b> | <b>504.65</b><br><b>(379.96 to 658.30)</b> | <b>1,254.15</b><br><b>(903.51 to 1,734.56)</b> | <b>16.48</b><br><b>(14.96 to 17.79)</b> | <b>30.28</b><br><b>(22.81 to 39.92)</b> | <b>23.37</b><br><b>(18.42 to 29.74)</b> | <b>51.05</b><br><b>(38.21 to 68.24)</b> |
| Rheumatic heart disease         | 20.33<br>(15.54 to 25.13)                  | 14.17<br>(9.73 to 19.66)                   | 13.75<br>(9.55 to 18.69)                   | 21.73<br>(15.38 to 29.60)                      | 0.60<br>(0.45 to 0.74)                  | 0.53<br>(0.37 to 0.71)                  | 0.53<br>(0.37 to 0.70)                  | 0.73<br>(0.52 to 0.96)                  |
| Ischemic heart disease          | 161.63<br>(140.02 to 181.96)               | 293.08<br>(177.64 to 474.89)               | 184.13<br>(113.37 to 293.00)               | 581.38<br>(351.24 to 921.95)                   | 7.27<br>(6.25 to 8.19)                  | 14.14<br>(8.89 to 21.91)                | 9.67<br>(6.27 to 14.66)                 | 25.61<br>(16.21 to 40.24)               |
| Stroke                          | 111.64<br>(92.78 to 130.99)                | 148.62<br>(85.16 to 237.84)                | 95.41<br>(56.32 to 153.61)                 | 332.49<br>(191.05 to 524.79)                   | 4.31<br>(3.61 to 5.01)                  | 6.47<br>(3.98 to 10.21)                 | 4.45<br>(2.87 to 6.79)                  | 13.17<br>(8.00 to 20.27)                |
| Ischemic stroke                 | 28.17<br>(21.45 to 34.85)                  | 42.06<br>(22.20 to 72.58)                  | 29.04<br>(16.39 to 47.52)                  | 72.36<br>(38.76 to 124.47)                     | 1.46<br>(1.13 to 1.81)                  | 2.41<br>(1.38 to 4.14)                  | 1.79<br>(1.06 to 2.95)                  | 3.80<br>(2.15 to 6.59)                  |
| Intracerebral hemorrhage        | 83.47<br>(70.44 to 98.11)                  | 106.56<br>(53.95 to 188.47)                | 66.36<br>(35.15 to 117.22)                 | 260.13<br>(133.59 to 438.29)                   | 2.85<br>(2.41 to 3.33)                  | 4.06<br>(2.18 to 6.94)                  | 2.66<br>(1.50 to 4.56)                  | 9.38<br>(4.96 to 15.72)                 |





|                                                                |                              |                              |                              |                              |                        |                        |                        |                        |
|----------------------------------------------------------------|------------------------------|------------------------------|------------------------------|------------------------------|------------------------|------------------------|------------------------|------------------------|
| Cirrhosis and other chronic liver diseases                     | 71.93<br>(37.46 to 106.19)   | 143.85<br>(66.43 to 229.51)  | 142.71<br>(66.03 to 225.55)  | 182.24<br>(85.67 to 287.07)  | 2.01<br>(1.03 to 2.95) | 4.43<br>(2.09 to 6.88) | 4.47<br>(2.14 to 6.89) | 5.38<br>(2.56 to 8.27) |
| Cirrhosis and other chronic liver diseases due to hepatitis B  | 27.57<br>(13.39 to 42.91)    | 62.24<br>(28.11 to 101.71)   | 62.42<br>(28.61 to 100.49)   | 69.33<br>(31.36 to 112.32)   | 0.83<br>(0.41 to 1.26) | 1.99<br>(0.94 to 3.16) | 2.03<br>(0.96 to 3.19) | 2.14<br>(1.01 to 3.37) |
| Cirrhosis and other chronic liver diseases due to hepatitis C  | 12.20<br>(5.15 to 21.54)     | 27.56<br>(10.76 to 50.61)    | 27.61<br>(10.91 to 50.47)    | 30.78<br>(12.09 to 57.08)    | 0.37<br>(0.16 to 0.64) | 0.88<br>(0.36 to 1.57) | 0.89<br>(0.37 to 1.59) | 0.95<br>(0.39 to 1.72) |
| Cirrhosis and other chronic liver diseases due to alcohol use  | 14.32<br>(6.78 to 22.22)     | 26.55<br>(11.73 to 44.00)    | 25.49<br>(11.29 to 41.73)    | 47.12<br>(21.26 to 76.98)    | 0.45<br>(0.22 to 0.69) | 0.89<br>(0.41 to 1.44) | 0.87<br>(0.41 to 1.39) | 1.51<br>(0.70 to 2.42) |
| Cirrhosis and other chronic liver diseases due to other causes | 17.83<br>(10.15 to 25.49)    | 27.50<br>(13.42 to 43.06)    | 27.20<br>(13.28 to 42.64)    | 35.02<br>(17.66 to 54.54)    | 0.36<br>(0.20 to 0.51) | 0.67<br>(0.33 to 1.02) | 0.68<br>(0.33 to 1.03) | 0.79<br>(0.39 to 1.20) |
| Digestive diseases                                             | 136.36<br>(111.72 to 174.43) | 175.01<br>(135.88 to 221.83) | 171.78<br>(135.03 to 216.28) | 237.46<br>(179.93 to 315.21) | 3.27<br>(2.86 to 3.83) | 5.44<br>(4.50 to 6.50) | 5.51<br>(4.57 to 6.51) | 6.60<br>(5.37 to 8.05) |
| Peptic ulcer disease                                           | 23.43<br>(18.91 to 28.94)    | 19.50<br>(13.70 to 26.52)    | 18.41<br>(12.98 to 24.34)    | 30.29<br>(22.02 to 40.41)    | 0.65<br>(0.51 to 0.78) | 0.66<br>(0.47 to 0.88) | 0.64<br>(0.46 to 0.85) | 0.95<br>(0.69 to 1.25) |
| <b>Burkina Faso</b>                                            |                              |                              |                              |                              |                        |                        |                        |                        |
| Cause                                                          | YLLs (in 1000s)              |                              |                              |                              | Deaths (in 1000s)      |                        |                        |                        |
|                                                                | 2016                         | 2040 Forecast                | 2040 Better Scenario         | 2040 Worse Scenario          | 2016                   | 2040 Forecast          | 2040 Better Scenario   | 2040 Worse Scenario    |
| Gastritis and duodenitis                                       | 5.22<br>(3.87 to 7.08)       | 8.22<br>(5.68 to 11.31)      | 8.15<br>(5.64 to 11.22)      | 10.19<br>(7.11 to 13.92)     | 0.12<br>(0.09 to 0.15) | 0.21<br>(0.15 to 0.29) | 0.21<br>(0.15 to 0.29) | 0.25<br>(0.18 to 0.33) |
| Appendicitis                                                   | 9.80<br>(6.19 to 16.75)      | 9.52<br>(6.57 to 14.37)      | 9.32<br>(6.51 to 13.66)      | 14.14<br>(9.51 to 23.11)     | 0.22<br>(0.16 to 0.31) | 0.29<br>(0.21 to 0.38) | 0.29<br>(0.21 to 0.38) | 0.37<br>(0.27 to 0.50) |
| Paralytic ileus and intestinal obstruction                     | 63.58<br>(45.62 to 95.08)    | 86.34<br>(66.69 to 112.58)   | 86.39<br>(67.31 to 112.89)   | 110.40<br>(81.33 to 155.36)  | 1.38<br>(1.12 to 1.77) | 2.59<br>(2.14 to 3.18) | 2.69<br>(2.22 to 3.30) | 2.86<br>(2.33 to 3.60) |
| Inguinal, femoral, and abdominal hernia                        | 3.81<br>(2.64 to 5.69)       | 4.38<br>(3.00 to 6.30)       | 4.38<br>(3.04 to 6.25)       | 5.68<br>(3.89 to 8.17)       | 0.11<br>(0.08 to 0.15) | 0.16<br>(0.11 to 0.23) | 0.17<br>(0.11 to 0.24) | 0.19<br>(0.13 to 0.26) |
| Inflammatory bowel disease                                     | 2.45<br>(1.55 to 5.15)       | 4.63<br>(3.22 to 7.80)       | 4.69<br>(3.25 to 7.86)       | 5.06<br>(3.36 to 9.34)       | 0.06<br>(0.04 to 0.10) | 0.14<br>(0.10 to 0.21) | 0.15<br>(0.11 to 0.22) | 0.14<br>(0.10 to 0.22) |
| Vascular intestinal disorders                                  | 1.92<br>(1.21 to 3.40)       | 3.02<br>(2.10 to 4.48)       | 3.08<br>(2.15 to 4.45)       | 3.56<br>(2.41 to 5.85)       | 0.06<br>(0.04 to 0.07) | 0.12<br>(0.09 to 0.16) | 0.13<br>(0.09 to 0.17) | 0.13<br>(0.09 to 0.17) |
| Gallbladder and biliary diseases                               | 3.85<br>(3.06 to 4.65)       | 5.94<br>(3.67 to 9.08)       | 4.89<br>(3.20 to 6.98)       | 8.12<br>(5.08 to 12.45)      | 0.11<br>(0.09 to 0.14) | 0.23<br>(0.14 to 0.35) | 0.19<br>(0.13 to 0.28) | 0.28<br>(0.18 to 0.45) |
| Pancreatitis                                                   | 9.69<br>(6.49 to 12.93)      | 16.15<br>(6.31 to 39.40)     | 15.32<br>(6.29 to 37.11)     | 26.64<br>(8.96 to 88.85)     | 0.26<br>(0.18 to 0.35) | 0.48<br>(0.21 to 1.08) | 0.46<br>(0.21 to 1.03) | 0.75<br>(0.27 to 1.88) |
| Other digestive diseases                                       | 12.62<br>(8.76 to 17.85)     | 17.32<br>(10.73 to 24.26)    | 17.15<br>(10.69 to 23.71)    | 23.38<br>(15.06 to 33.00)    | 0.31<br>(0.22 to 0.40) | 0.57<br>(0.37 to 0.75) | 0.58<br>(0.38 to 0.77) | 0.68<br>(0.45 to 0.91) |
| Neurological disorders                                         | 40.93<br>(35.06 to 46.68)    | 81.11<br>(66.48 to 100.45)   | 79.37<br>(66.00 to 96.25)    | 95.56<br>(75.23 to 120.89)   | 1.42<br>(1.23 to 1.65) | 4.29<br>(3.26 to 5.51) | 4.38<br>(3.49 to 5.43) | 3.78<br>(2.88 to 4.91) |
| Alzheimer's disease and other dementias                        | 10.97<br>(8.91 to 13.54)     | 38.57<br>(28.05 to 53.27)    | 37.80<br>(29.19 to 49.56)    | 32.06<br>(22.60 to 45.33)    | 0.88<br>(0.72 to 1.10) | 3.31<br>(2.34 to 4.53) | 3.38<br>(2.47 to 4.38) | 2.54<br>(1.69 to 3.59) |
| Parkinson's disease                                            | 0.84<br>(0.63 to 1.08)       | 3.59<br>(2.66 to 4.71)       | 4.01<br>(2.99 to 5.21)       | 2.55<br>(1.87 to 3.40)       | 0.06<br>(0.04 to 0.08) | 0.27<br>(0.19 to 0.37) | 0.31<br>(0.23 to 0.42) | 0.18<br>(0.13 to 0.25) |
| Epilepsy                                                       | 24.71<br>(20.08 to 31.04)    | 30.23<br>(20.02 to 44.75)    | 28.76<br>(19.44 to 42.13)    | 51.66<br>(34.21 to 76.72)    | 0.40<br>(0.33 to 0.48) | 0.53<br>(0.35 to 0.79) | 0.51<br>(0.34 to 0.74) | 0.88<br>(0.58 to 1.31) |

|                                                            |                                          |                                          |                                          |                                          |                                    |                                       |                                       |                                       |
|------------------------------------------------------------|------------------------------------------|------------------------------------------|------------------------------------------|------------------------------------------|------------------------------------|---------------------------------------|---------------------------------------|---------------------------------------|
| Multiple sclerosis                                         | 0.34<br>(0.19 to<br>0.48)                | 0.88<br>(0.47 to<br>1.31)                | 0.88<br>(0.47 to<br>1.31)                | 0.81<br>(0.44 to<br>1.21)                | 0.01<br>(0.00 to<br>0.01)          | 0.02<br>(0.01 to<br>0.04)             | 0.02<br>(0.01 to<br>0.04)             | 0.02<br>(0.01 to<br>0.03)             |
| Motor neuron disease                                       | 0.51<br>(0.38 to<br>0.69)                | 1.06<br>(0.84 to<br>1.36)                | 1.09<br>(0.85 to<br>1.42)                | 1.03<br>(0.81 to<br>1.33)                | 0.01<br>(0.01 to<br>0.01)          | 0.03<br>(0.02 to<br>0.04)             | 0.03<br>(0.02 to<br>0.04)             | 0.03<br>(0.02 to<br>0.04)             |
| Other neurological disorders                               | 3.56<br>(2.02 to<br>5.54)                | 6.79<br>(4.34 to<br>9.83)                | 6.84<br>(4.40 to<br>9.84)                | 7.46<br>(4.42 to<br>11.44)               | 0.06<br>(0.04 to<br>0.08)          | 0.13<br>(0.09 to<br>0.17)             | 0.13<br>(0.09 to<br>0.17)             | 0.13<br>(0.08 to<br>0.18)             |
| <b>Mental disorders</b>                                    | <b>7.54<br/>(6.01 to<br/>9.42)</b>       | <b>14.78<br/>(11.27 to<br/>18.94)</b>    | <b>14.82<br/>(11.33 to<br/>19.11)</b>    | <b>16.76<br/>(12.91 to<br/>21.19)</b>    | <b>0.20<br/>(0.16 to<br/>0.25)</b> | <b>0.41<br/>(0.32 to<br/>0.52)</b>    | <b>0.42<br/>(0.33 to<br/>0.53)</b>    | <b>0.45<br/>(0.36 to<br/>0.57)</b>    |
| Alcohol use disorders                                      | 6.06<br>(4.79 to<br>7.98)                | 10.41<br>(7.59 to<br>14.29)              | 10.41<br>(7.60 to<br>14.40)              | 12.32<br>(9.14 to<br>16.64)              | 0.17<br>(0.14 to<br>0.22)          | 0.31<br>(0.24 to<br>0.42)             | 0.32<br>(0.24 to<br>0.43)             | 0.36<br>(0.27 to<br>0.47)             |
| Drug use disorders                                         | 1.46<br>(1.04 to<br>1.92)                | 4.31<br>(3.05 to<br>5.87)                | 4.34<br>(3.04 to<br>5.91)                | 4.38<br>(3.07 to<br>5.99)                | 0.03<br>(0.02 to<br>0.04)          | 0.09<br>(0.07 to<br>0.12)             | 0.10<br>(0.07 to<br>0.13)             | 0.09<br>(0.07 to<br>0.12)             |
| Opioid use disorders                                       | 1.32<br>(0.92 to<br>1.70)                | 3.72<br>(2.57 to<br>5.10)                | 3.75<br>(2.60 to<br>5.11)                | 3.77<br>(2.53 to<br>5.16)                | 0.03<br>(0.02 to<br>0.03)          | 0.08<br>(0.05 to<br>0.10)             | 0.08<br>(0.05 to<br>0.10)             | 0.08<br>(0.05 to<br>0.10)             |
| Cocaine use disorders                                      | 0.04<br>(0.01 to<br>0.12)                | 0.19<br>(0.04 to<br>0.49)                | 0.19<br>(0.04 to<br>0.50)                | 0.21<br>(0.04 to<br>0.54)                | 0.00<br>(0.00 to<br>0.00)          | 0.00<br>(0.00 to<br>0.01)             | 0.00<br>(0.00 to<br>0.01)             | 0.00<br>(0.00 to<br>0.01)             |
| Amphetamine use disorders                                  | 0.02<br>(0.00 to<br>0.06)                | 0.12<br>(0.02 to<br>0.35)                | 0.12<br>(0.02 to<br>0.33)                | 0.15<br>(0.03 to<br>0.40)                | 0.00<br>(0.00 to<br>0.00)          | 0.00<br>(0.00 to<br>0.01)             | 0.00<br>(0.00 to<br>0.01)             | 0.00<br>(0.00 to<br>0.01)             |
| Other drug use disorders                                   | 0.07<br>(0.04 to<br>0.13)                | 0.27<br>(0.15 to<br>0.47)                | 0.29<br>(0.16 to<br>0.49)                | 0.25<br>(0.14 to<br>0.44)                | 0.00<br>(0.00 to<br>0.00)          | 0.01<br>(0.01 to<br>0.02)             | 0.01<br>(0.01 to<br>0.02)             | 0.01<br>(0.01 to<br>0.01)             |
| Eating disorders                                           | 0.03<br>(0.02 to<br>0.06)                | 0.06<br>(0.04 to<br>0.13)                | 0.06<br>(0.04 to<br>0.13)                | 0.06<br>(0.04 to<br>0.14)                | 0.00<br>(0.00 to<br>0.00)          | 0.00<br>(0.00 to<br>0.00)             | 0.00<br>(0.00 to<br>0.00)             | 0.00<br>(0.00 to<br>0.00)             |
| <b>Burkina Faso</b>                                        |                                          |                                          |                                          |                                          |                                    |                                       |                                       |                                       |
| Cause                                                      | YLLs (in 1000s)                          |                                          |                                          |                                          | Deaths (in 1000s)                  |                                       |                                       |                                       |
|                                                            | 2016                                     | 2040 Forecast                            | 2040 Better Scenario                     | 2040 Worse Scenario                      | 2016                               | 2040 Forecast                         | 2040 Better Scenario                  | 2040 Worse Scenario                   |
| <b>Diabetes, urogenital, blood, and endocrine diseases</b> | <b>317.59<br/>(273.61 to<br/>377.31)</b> | <b>490.58<br/>(379.49 to<br/>618.39)</b> | <b>462.56<br/>(362.54 to<br/>571.56)</b> | <b>712.55<br/>(565.03 to<br/>888.02)</b> | <b>6.43<br/>(5.73 to<br/>7.23)</b> | <b>13.93<br/>(10.76 to<br/>19.53)</b> | <b>13.11<br/>(10.36 to<br/>17.63)</b> | <b>19.04<br/>(15.12 to<br/>25.68)</b> |
| Diabetes mellitus                                          | 45.78<br>(40.81 to<br>50.74)             | 121.70<br>(75.95 to<br>188.59)           | 110.98<br>(71.58 to<br>169.52)           | 190.16<br>(120.12 to<br>293.85)          | 1.72<br>(1.53 to<br>1.90)          | 5.12<br>(3.41 to<br>7.38)             | 4.85<br>(3.34 to<br>6.89)             | 7.49<br>(4.91 to<br>10.96)            |
| Acute glomerulonephritis                                   | 0.14<br>(0.13 to<br>0.16)                | 0.23<br>(0.18 to<br>0.28)                | 0.22<br>(0.17 to<br>0.27)                | 0.32<br>(0.26 to<br>0.40)                | 0.00<br>(0.00 to<br>0.00)          | 0.00<br>(0.00 to<br>0.00)             | 0.00<br>(0.00 to<br>0.00)             | 0.01<br>(0.00 to<br>0.01)             |
| Chronic kidney disease                                     | 37.46<br>(33.01 to<br>44.21)             | 77.66<br>(44.77 to<br>174.87)            | 66.42<br>(41.47 to<br>144.33)            | 116.34<br>(71.02 to<br>237.62)           | 0.99<br>(0.89 to<br>1.12)          | 3.23<br>(1.39 to<br>9.83)             | 2.69<br>(1.27 to<br>7.88)             | 4.35<br>(1.98 to<br>12.27)            |
| Chronic kidney disease due to diabetes mellitus            | 7.32<br>(6.15 to<br>8.68)                | 21.27<br>(10.83 to<br>54.20)             | 17.77<br>(9.81 to<br>43.32)              | 29.67<br>(15.60 to<br>70.95)             | 0.25<br>(0.21 to<br>0.30)          | 1.00<br>(0.39 to<br>3.25)             | 0.82<br>(0.36 to<br>2.60)             | 1.30<br>(0.54 to<br>4.01)             |
| Chronic kidney disease due to hypertension                 | 4.12<br>(3.41 to<br>4.93)                | 13.68<br>(5.69 to<br>42.09)              | 11.24<br>(5.22 to<br>32.29)              | 18.56<br>(8.09 to<br>54.05)              | 0.18<br>(0.15 to<br>0.21)          | 0.80<br>(0.27 to<br>2.69)             | 0.66<br>(0.24 to<br>2.21)             | 1.01<br>(0.35 to<br>3.32)             |
| Chronic kidney disease due to glomerulonephritis           | 12.42<br>(10.35 to<br>15.54)             | 19.83<br>(12.47 to<br>35.29)             | 17.45<br>(11.51 to<br>28.66)             | 31.89<br>(21.16 to<br>53.40)             | 0.26<br>(0.22 to<br>0.31)          | 0.63<br>(0.31 to<br>1.72)             | 0.53<br>(0.28 to<br>1.32)             | 0.90<br>(0.48 to<br>2.19)             |
| Chronic kidney disease due to other and unspecified causes | 13.61<br>(11.46 to<br>16.95)             | 22.87<br>(13.90 to<br>44.92)             | 19.96<br>(12.82 to<br>36.31)             | 36.22<br>(23.18 to<br>64.77)             | 0.30<br>(0.26 to<br>0.36)          | 0.80<br>(0.37 to<br>2.20)             | 0.68<br>(0.35 to<br>1.73)             | 1.13<br>(0.57 to<br>2.81)             |
| Urinary diseases and male infertility                      | 25.57<br>(22.38 to<br>29.26)             | 45.05<br>(37.94 to<br>52.94)             | 45.28<br>(38.18 to<br>53.11)             | 53.84<br>(45.40 to<br>63.39)             | 0.63<br>(0.57 to<br>0.70)          | 1.38<br>(1.22 to<br>1.57)             | 1.43<br>(1.26 to<br>1.62)             | 1.48<br>(1.29 to<br>1.70)             |

|                                                   |                                 |                                 |                                 |                                 |                           |                           |                           |                           |
|---------------------------------------------------|---------------------------------|---------------------------------|---------------------------------|---------------------------------|---------------------------|---------------------------|---------------------------|---------------------------|
| Urinary tract infections                          | 14.14<br>(11.60 to<br>17.59)    | 32.00<br>(26.31 to<br>38.59)    | 32.43<br>(26.65 to<br>39.16)    | 36.06<br>(29.37 to<br>44.15)    | 0.35<br>(0.29 to<br>0.42) | 1.02<br>(0.87 to<br>1.19) | 1.06<br>(0.91 to<br>1.24) | 1.02<br>(0.86 to<br>1.21) |
| Urolithiasis                                      | 0.54<br>(0.39 to<br>0.73)       | 1.22<br>(0.84 to<br>1.72)       | 1.21<br>(0.84 to<br>1.71)       | 1.46<br>(0.98 to<br>2.09)       | 0.01<br>(0.01 to<br>0.01) | 0.02<br>(0.02 to<br>0.03) | 0.02<br>(0.02 to<br>0.03) | 0.03<br>(0.02 to<br>0.04) |
| Other urinary diseases                            | 10.88<br>(8.59 to<br>13.19)     | 11.82<br>(8.26 to<br>15.56)     | 11.63<br>(8.21 to<br>15.28)     | 16.32<br>(11.74 to<br>21.09)    | 0.28<br>(0.22 to<br>0.33) | 0.35<br>(0.24 to<br>0.45) | 0.35<br>(0.24 to<br>0.46) | 0.44<br>(0.31 to<br>0.57) |
| Gynecological diseases                            | 2.25<br>(1.66 to<br>2.90)       | 3.65<br>(2.19 to<br>5.43)       | 3.53<br>(2.11 to<br>5.21)       | 5.15<br>(3.16 to<br>7.42)       | 0.05<br>(0.04 to<br>0.06) | 0.08<br>(0.05 to<br>0.12) | 0.08<br>(0.05 to<br>0.12) | 0.11<br>(0.07 to<br>0.16) |
| Uterine fibroids                                  | 0.16<br>(0.07 to<br>0.29)       | 0.20<br>(0.08 to<br>0.41)       | 0.19<br>(0.08 to<br>0.40)       | 0.30<br>(0.12 to<br>0.60)       | 0.00<br>(0.00 to<br>0.01) | 0.01<br>(0.00 to<br>0.01) | 0.01<br>(0.00 to<br>0.01) | 0.01<br>(0.00 to<br>0.01) |
| Polycystic ovarian syndrome                       | 0.48<br>(0.10 to<br>1.02)       | 0.43<br>(0.06 to<br>1.14)       | 0.41<br>(0.06 to<br>1.04)       | 0.76<br>(0.12 to<br>1.85)       | 0.01<br>(0.00 to<br>0.02) | 0.01<br>(0.00 to<br>0.03) | 0.01<br>(0.00 to<br>0.02) | 0.02<br>(0.00 to<br>0.04) |
| Endometriosis                                     | 0.01<br>(0.00 to<br>0.02)       | 0.01<br>(0.00 to<br>0.04)       | 0.01<br>(0.00 to<br>0.04)       | 0.02<br>(0.00 to<br>0.06)       | 0.00<br>(0.00 to<br>0.00) | 0.00<br>(0.00 to<br>0.00) | 0.00<br>(0.00 to<br>0.00) | 0.00<br>(0.00 to<br>0.00) |
| Genital prolapse                                  | 0.09<br>(0.01 to<br>0.25)       | 0.13<br>(0.01 to<br>0.39)       | 0.12<br>(0.01 to<br>0.37)       | 0.20<br>(0.01 to<br>0.57)       | 0.00<br>(0.00 to<br>0.00) | 0.00<br>(0.00 to<br>0.01) | 0.00<br>(0.00 to<br>0.01) | 0.00<br>(0.00 to<br>0.01) |
| Other gynecological diseases                      | 1.52<br>(0.85 to<br>2.20)       | 2.88<br>(1.60 to<br>4.47)       | 2.80<br>(1.58 to<br>4.35)       | 3.87<br>(2.13 to<br>5.93)       | 0.03<br>(0.02 to<br>0.05) | 0.06<br>(0.04 to<br>0.10) | 0.06<br>(0.04 to<br>0.10) | 0.08<br>(0.05 to<br>0.13) |
| Hemoglobinopathies and hemolytic anemias          | 194.50<br>(156.09 to<br>243.77) | 228.13<br>(163.18 to<br>298.89) | 222.11<br>(160.86 to<br>287.30) | 326.33<br>(239.07 to<br>424.61) | 2.80<br>(2.25 to<br>3.43) | 3.71<br>(2.69 to<br>4.80) | 3.63<br>(2.66 to<br>4.64) | 5.13<br>(3.76 to<br>6.55) |
| Thalassemias                                      | 0.10<br>(0.06 to<br>0.15)       | 0.08<br>(0.05 to<br>0.13)       | 0.08<br>(0.05 to<br>0.13)       | 0.09<br>(0.06 to<br>0.16)       | 0.00<br>(0.00 to<br>0.00) | 0.00<br>(0.00 to<br>0.00) | 0.00<br>(0.00 to<br>0.00) | 0.00<br>(0.00 to<br>0.00) |
| Sickle cell disorders                             | 190.40<br>(151.96 to<br>239.07) | 219.69<br>(156.71 to<br>289.02) | 213.73<br>(154.44 to<br>277.85) | 314.90<br>(231.51 to<br>410.57) | 2.66<br>(2.13 to<br>3.26) | 3.37<br>(2.39 to<br>4.41) | 3.28<br>(2.35 to<br>4.26) | 4.70<br>(3.42 to<br>6.12) |
| G6PD deficiency                                   | 2.96<br>(2.36 to<br>3.73)       | 6.65<br>(4.64 to<br>9.55)       | 6.53<br>(4.66 to<br>9.13)       | 9.28<br>(6.60 to<br>12.79)      | 0.08<br>(0.06 to<br>0.10) | 0.22<br>(0.15 to<br>0.33) | 0.22<br>(0.15 to<br>0.33) | 0.30<br>(0.20 to<br>0.42) |
| Other hemoglobinopathies and hemolytic anemias    | 1.04<br>(0.70 to<br>1.46)       | 1.71<br>(1.12 to<br>2.54)       | 1.78<br>(1.17 to<br>2.61)       | 2.06<br>(1.33 to<br>3.04)       | 0.06<br>(0.04 to<br>0.09) | 0.11<br>(0.08 to<br>0.17) | 0.12<br>(0.08 to<br>0.18) | 0.13<br>(0.08 to<br>0.19) |
| Endocrine, metabolic, blood, and immune disorders | 11.90<br>(8.54 to<br>15.89)     | 14.17<br>(10.58 to<br>19.08)    | 14.03<br>(10.55 to<br>18.84)    | 20.41<br>(14.52 to<br>28.33)    | 0.24<br>(0.18 to<br>0.29) | 0.40<br>(0.30 to<br>0.50) | 0.42<br>(0.31 to<br>0.51) | 0.48<br>(0.36 to<br>0.60) |

**Burkina Faso**

| Cause                           | YLLs (in 1000s)                 |                                 |                                 |                                   | Deaths (in 1000s)          |                            |                           |                             |
|---------------------------------|---------------------------------|---------------------------------|---------------------------------|-----------------------------------|----------------------------|----------------------------|---------------------------|-----------------------------|
|                                 | 2016                            | 2040 Forecast                   | 2040 Better Scenario            | 2040 Worse Scenario               | 2016                       | 2040 Forecast              | 2040 Better Scenario      | 2040 Worse Scenario         |
| Musculoskeletal disorders       | 3.53<br>(2.47 to<br>4.96)       | 9.50<br>(6.51 to<br>13.67)      | 9.72<br>(6.65 to<br>14.04)      | 9.01<br>(6.16 to<br>13.01)        | 0.08<br>(0.06 to<br>0.11)  | 0.25<br>(0.18 to<br>0.34)  | 0.26<br>(0.19 to<br>0.35) | 0.23<br>(0.16 to<br>0.31)   |
| Rheumatoid arthritis            | 0.35<br>(0.20 to<br>0.52)       | 0.79<br>(0.43 to<br>1.25)       | 0.79<br>(0.44 to<br>1.26)       | 0.96<br>(0.56 to<br>1.47)         | 0.01<br>(0.01 to<br>0.02)  | 0.04<br>(0.02 to<br>0.06)  | 0.04<br>(0.02 to<br>0.06) | 0.04<br>(0.02 to<br>0.07)   |
| Other musculoskeletal disorders | 3.19<br>(2.25 to<br>4.58)       | 8.72<br>(5.97 to<br>12.97)      | 8.93<br>(6.14 to<br>13.23)      | 8.05<br>(5.49 to<br>12.08)        | 0.07<br>(0.05 to<br>0.10)  | 0.21<br>(0.15 to<br>0.30)  | 0.22<br>(0.16 to<br>0.32) | 0.18<br>(0.13 to<br>0.27)   |
| Other non-communicable diseases | 573.02<br>(227.49 to<br>905.11) | 445.92<br>(203.33 to<br>724.98) | 426.38<br>(197.93 to<br>689.07) | 842.47<br>(354.16 to<br>1,405.20) | 7.06<br>(2.97 to<br>10.94) | 6.77<br>(3.71 to<br>10.36) | 6.62<br>(3.74 to<br>9.87) | 11.40<br>(5.47 to<br>18.10) |
| Congenital birth defects        | 524.81<br>(184.55 to<br>845.26) | 356.41<br>(124.92 to<br>626.72) | 337.71<br>(120.20 to<br>589.78) | 713.95<br>(240.52 to<br>1,264.65) | 6.23<br>(2.23 to<br>9.99)  | 4.42<br>(1.62 to<br>7.65)  | 4.20<br>(1.58 to<br>7.21) | 8.64<br>(3.06 to<br>15.10)  |

|                                               |                                                      |                                                      |                                                      |                                                          |                                                  |                                                   |                                                   |                                                   |
|-----------------------------------------------|------------------------------------------------------|------------------------------------------------------|------------------------------------------------------|----------------------------------------------------------|--------------------------------------------------|---------------------------------------------------|---------------------------------------------------|---------------------------------------------------|
| Neural tube defects                           | 129.32<br>(51.37 to<br>255.46)                       | 31.94<br>(10.15 to<br>80.81)                         | 29.47<br>(9.60 to<br>74.89)                          | 78.92<br>(26.57 to<br>195.08)                            | 1.51<br>(0.60 to<br>2.99)                        | 0.38<br>(0.12 to<br>0.96)                         | 0.35<br>(0.12 to<br>0.90)                         | 0.93<br>(0.31 to<br>2.28)                         |
| Congenital heart anomalies                    | 129.89<br>(48.57 to<br>259.41)                       | 106.37<br>(44.12 to<br>224.21)                       | 101.38<br>(42.83 to<br>208.36)                       | 200.05<br>(77.20 to<br>427.71)                           | 1.57<br>(0.61 to<br>3.09)                        | 1.35<br>(0.60 to<br>2.74)                         | 1.29<br>(0.58 to<br>2.60)                         | 2.47<br>(1.00 to<br>5.15)                         |
| Orofacial clefts                              | 5.08<br>(0.86 to<br>17.24)                           | 2.75<br>(0.40 to<br>9.92)                            | 2.52<br>(0.36 to<br>8.74)                            | 7.31<br>(1.09 to<br>25.89)                               | 0.06<br>(0.01 to<br>0.20)                        | 0.03<br>(0.00 to<br>0.11)                         | 0.03<br>(0.00 to<br>0.10)                         | 0.08<br>(0.01 to<br>0.30)                         |
| Down syndrome                                 | 4.30<br>(1.07 to<br>11.97)                           | 4.67<br>(1.39 to<br>13.06)                           | 4.44<br>(1.36 to<br>12.06)                           | 8.87<br>(2.41 to<br>25.95)                               | 0.05<br>(0.02 to<br>0.15)                        | 0.07<br>(0.02 to<br>0.17)                         | 0.06<br>(0.02 to<br>0.16)                         | 0.12<br>(0.04 to<br>0.33)                         |
| Other chromosomal abnormalities               | 14.83<br>(2.42 to<br>38.70)                          | 18.50<br>(2.86 to<br>47.68)                          | 17.40<br>(2.73 to<br>44.76)                          | 39.63<br>(6.33 to<br>102.24)                             | 0.17<br>(0.03 to<br>0.45)                        | 0.22<br>(0.03 to<br>0.56)                         | 0.21<br>(0.03 to<br>0.53)                         | 0.47<br>(0.07 to<br>1.20)                         |
| Congenital musculoskeletal and limb anomalies | 3.67<br>(0.74 to<br>12.94)                           | 3.49<br>(0.75 to<br>11.99)                           | 3.33<br>(0.73 to<br>11.57)                           | 6.71<br>(1.41 to<br>23.33)                               | 0.04<br>(0.01 to<br>0.15)                        | 0.04<br>(0.01 to<br>0.14)                         | 0.04<br>(0.01 to<br>0.14)                         | 0.08<br>(0.02 to<br>0.27)                         |
| Urogenital congenital anomalies               | 3.92<br>(1.26 to<br>8.25)                            | 3.86<br>(1.36 to<br>8.08)                            | 3.73<br>(1.34 to<br>7.83)                            | 6.54<br>(2.09 to<br>13.70)                               | 0.05<br>(0.02 to<br>0.10)                        | 0.06<br>(0.02 to<br>0.11)                         | 0.06<br>(0.02 to<br>0.10)                         | 0.09<br>(0.03 to<br>0.18)                         |
| Digestive congenital anomalies                | 26.97<br>(7.88 to<br>64.94)                          | 20.72<br>(5.82 to<br>50.39)                          | 19.56<br>(5.57 to<br>47.44)                          | 43.05<br>(11.90 to<br>102.69)                            | 0.32<br>(0.09 to<br>0.76)                        | 0.25<br>(0.07 to<br>0.59)                         | 0.23<br>(0.07 to<br>0.56)                         | 0.51<br>(0.14 to<br>1.21)                         |
| Other congenital birth defects                | 206.84<br>(37.00 to<br>430.68)                       | 164.09<br>(33.46 to<br>344.59)                       | 155.87<br>(32.47 to<br>323.88)                       | 322.87<br>(62.80 to<br>682.47)                           | 2.46<br>(0.45 to<br>5.08)                        | 2.46<br>(0.45 to<br>4.19)                         | 2.03<br>(0.44 to<br>3.96)                         | 3.90<br>(0.79 to<br>8.15)                         |
| Skin and subcutaneous diseases                | 26.53<br>(12.96 to<br>40.81)                         | 74.39<br>(41.43 to<br>107.61)                        | 74.38<br>(41.86 to<br>107.11)                        | 97.15<br>(50.72 to<br>146.17)                            | 0.58<br>(0.32 to<br>0.83)                        | 2.17<br>(1.37 to<br>3.22)                         | 2.26<br>(1.43 to<br>3.34)                         | 2.39<br>(1.43 to<br>3.43)                         |
| Cellulitis                                    | 1.43<br>(0.53 to<br>2.45)                            | 5.98<br>(2.50 to<br>9.73)                            | 6.14<br>(2.57 to<br>9.91)                            | 6.09<br>(2.32 to<br>10.40)                               | 0.04<br>(0.01 to<br>0.06)                        | 0.20<br>(0.08 to<br>0.34)                         | 0.21<br>(0.09 to<br>0.36)                         | 0.18<br>(0.07 to<br>0.30)                         |
| Pyoderma                                      | 22.88<br>(11.31 to<br>35.88)                         | 62.59<br>(35.93 to<br>91.91)                         | 62.23<br>(36.17 to<br>90.67)                         | 84.65<br>(44.50 to<br>130.97)                            | 0.47<br>(0.27 to<br>0.69)                        | 0.75<br>(1.12 to<br>2.63)                         | 1.80<br>(1.16 to<br>2.73)                         | 2.01<br>(1.19 to<br>2.93)                         |
| Decubitus ulcer                               | 1.29<br>(0.58 to<br>2.06)                            | 3.59<br>(1.86 to<br>5.63)                            | 3.77<br>(1.94 to<br>5.95)                            | 3.79<br>(1.76 to<br>6.14)                                | 0.05<br>(0.03 to<br>0.08)                        | 0.18<br>(0.10 to<br>0.31)                         | 0.20<br>(0.11 to<br>0.35)                         | 0.15<br>(0.08 to<br>0.26)                         |
| Other skin and subcutaneous diseases          | 0.93<br>(0.34 to<br>1.64)                            | 2.22<br>(0.97 to<br>3.63)                            | 2.23<br>(0.98 to<br>3.62)                            | 2.62<br>(1.02 to<br>4.59)                                | 0.02<br>(0.01 to<br>0.03)                        | 0.02<br>(0.02 to<br>0.07)                         | 0.05<br>(0.02 to<br>0.07)                         | 0.05<br>(0.02 to<br>0.07)                         |
| Sudden infant death syndrome                  | 21.68<br>(10.56 to<br>42.04)                         | 15.13<br>(6.17 to<br>31.93)                          | 14.30<br>(5.81 to<br>30.17)                          | 31.37<br>(12.61 to<br>65.68)                             | 0.25<br>(0.12 to<br>0.49)                        | 0.18<br>(0.07 to<br>0.37)                         | 0.17<br>(0.07 to<br>0.35)                         | 0.36<br>(0.15 to<br>0.76)                         |
| <b>Injuries</b>                               | <b>583.57</b><br><b>(497.97 to</b><br><b>688.23)</b> | <b>639.58</b><br><b>(491.43 to</b><br><b>809.64)</b> | <b>606.90</b><br><b>(470.78 to</b><br><b>762.86)</b> | <b>1,030.76</b><br><b>(786.16 to</b><br><b>1,333.38)</b> | <b>10.48</b><br><b>(9.33 to</b><br><b>11.74)</b> | <b>14.50</b><br><b>(11.79 to</b><br><b>17.61)</b> | <b>14.19</b><br><b>(11.62 to</b><br><b>17.12)</b> | <b>20.66</b><br><b>(16.47 to</b><br><b>25.53)</b> |
| <b>Transport injuries</b>                     | <b>160.42</b><br><b>(136.21 to</b><br><b>191.33)</b> | <b>191.75</b><br><b>(144.73 to</b><br><b>255.11)</b> | <b>168.96</b><br><b>(127.31 to</b><br><b>224.31)</b> | <b>375.85</b><br><b>(279.92 to</b><br><b>510.00)</b>     | <b>2.90</b><br><b>(2.55 to</b><br><b>3.34)</b>   | <b>3.99</b><br><b>(3.04 to</b><br><b>5.39)</b>    | <b>3.60</b><br><b>(2.76 to</b><br><b>4.57)</b>    | <b>7.11</b><br><b>(5.31 to</b><br><b>9.82)</b>    |
| Road injuries                                 | 156.00<br>(132.58 to<br>186.52)                      | 183.97<br>(138.15 to<br>245.73)                      | 161.43<br>(120.86 to<br>214.82)                      | 364.43<br>(271.37 to<br>495.65)                          | 2.83<br>(2.48 to<br>3.27)                        | 3.85<br>(2.92 to<br>5.22)                         | 3.46<br>(2.62 to<br>4.67)                         | 6.91<br>(5.11 to<br>9.55)                         |
| Pedestrian road injuries                      | 50.15<br>(39.78 to<br>61.94)                         | 52.39<br>(37.76 to<br>72.43)                         | 47.39<br>(34.28 to<br>65.20)                         | 91.60<br>(63.93 to<br>128.85)                            | 0.93<br>(0.76 to<br>1.11)                        | 1.14<br>(0.85 to<br>1.55)                         | 1.05<br>(0.79 to<br>1.42)                         | 1.88<br>(1.35 to<br>2.63)                         |

**Burkina Faso**

| Cause                 | YLLs (in 1000s)            |                            |                            |                             | Deaths (in 1000s)         |                           |                           |                           |
|-----------------------|----------------------------|----------------------------|----------------------------|-----------------------------|---------------------------|---------------------------|---------------------------|---------------------------|
|                       | 2016                       | 2040 Forecast              | 2040 Better Scenario       | 2040 Worse Scenario         | 2016                      | 2040 Forecast             | 2040 Better Scenario      | 2040 Worse Scenario       |
| Cyclist road injuries | 5.48<br>(2.47 to<br>15.81) | 7.23<br>(3.11 to<br>20.91) | 6.31<br>(2.72 to<br>18.28) | 14.67<br>(6.17 to<br>41.98) | 0.10<br>(0.05 to<br>0.29) | 0.16<br>(0.07 to<br>0.45) | 0.14<br>(0.06 to<br>0.41) | 0.28<br>(0.12 to<br>0.82) |

|                                                 |                                                      |                                                      |                                                      |                                                      |                                                |                                                |                                                |                                                  |
|-------------------------------------------------|------------------------------------------------------|------------------------------------------------------|------------------------------------------------------|------------------------------------------------------|------------------------------------------------|------------------------------------------------|------------------------------------------------|--------------------------------------------------|
| Motorcyclist road injuries                      | 17.17<br>(12.44 to<br>22.58)                         | 23.58<br>(15.63 to<br>35.55)                         | 20.96<br>(13.72 to<br>31.30)                         | 45.57<br>(29.03 to<br>68.96)                         | 0.28<br>(0.21 to<br>0.37)                      | 0.44<br>(0.29 to<br>0.66)                      | 0.40<br>(0.26 to<br>0.59)                      | 0.78<br>(0.51 to<br>1.18)                        |
| Motor vehicle road injuries                     | 80.52<br>(66.03 to<br>99.79)                         | 97.19<br>(71.00 to<br>132.63)                        | 83.64<br>(61.02 to<br>114.99)                        | 205.34<br>(148.21 to<br>284.97)                      | 1.47<br>(1.23 to<br>1.74)                      | 2.02<br>(1.49 to<br>2.73)                      | 1.79<br>(1.31 to<br>2.42)                      | 3.83<br>(2.79 to<br>5.28)                        |
| Other road injuries                             | 2.70<br>(1.23 to<br>9.07)                            | 3.58<br>(1.52 to<br>11.94)                           | 3.13<br>(1.32 to<br>10.57)                           | 7.25<br>(3.03 to<br>23.79)                           | 0.05<br>(0.02 to<br>0.16)                      | 0.08<br>(0.03 to<br>0.25)                      | 0.07<br>(0.03 to<br>0.23)                      | 0.14<br>(0.06 to<br>0.46)                        |
| Other transport injuries                        | 4.41<br>(2.53 to<br>8.05)                            | 7.78<br>(3.97 to<br>14.52)                           | 7.53<br>(3.97 to<br>13.79)                           | 11.42<br>(5.79 to<br>21.48)                          | 0.07<br>(0.04 to<br>0.13)                      | 0.14<br>(0.08 to<br>0.27)                      | 0.14<br>(0.07 to<br>0.26)                      | 0.20<br>(0.10 to<br>0.39)                        |
| <b>Unintentional injuries</b>                   | <b>356.32</b><br><b>(289.77 to</b><br><b>435.77)</b> | <b>339.08</b><br><b>(253.56 to</b><br><b>435.79)</b> | <b>331.07</b><br><b>(251.60 to</b><br><b>420.72)</b> | <b>518.58</b><br><b>(374.57 to</b><br><b>687.75)</b> | <b>6.14</b><br><b>(5.28 to</b><br><b>7.07)</b> | <b>7.87</b><br><b>(6.45 to</b><br><b>9.37)</b> | <b>7.97</b><br><b>(6.62 to</b><br><b>9.37)</b> | <b>10.34</b><br><b>(8.30 to</b><br><b>12.65)</b> |
| Falls                                           | 54.53<br>(42.42 to<br>74.65)                         | 74.16<br>(59.03 to<br>91.47)                         | 74.73<br>(59.92 to<br>91.12)                         | 93.81<br>(72.26 to<br>122.39)                        | 1.34<br>(1.15 to<br>1.58)                      | 2.68<br>(2.27 to<br>3.14)                      | 2.84<br>(2.43 to<br>3.31)                      | 2.83<br>(2.33 to<br>3.40)                        |
| Drowning                                        | 73.69<br>(55.54 to<br>99.06)                         | 54.81<br>(38.07 to<br>76.52)                         | 53.08<br>(37.95 to<br>73.44)                         | 85.87<br>(58.84 to<br>120.46)                        | 1.11<br>(0.88 to<br>1.41)                      | 1.00<br>(0.75 to<br>1.35)                      | 0.99<br>(0.75 to<br>1.31)                      | 1.45<br>(1.06 to<br>2.00)                        |
| Fire, heat, and hot substances                  | 48.18<br>(35.14 to<br>63.61)                         | 34.50<br>(24.01 to<br>46.97)                         | 33.28<br>(23.55 to<br>44.71)                         | 57.88<br>(39.41 to<br>80.36)                         | 0.82<br>(0.64 to<br>1.00)                      | 0.77<br>(0.58 to<br>0.99)                      | 0.76<br>(0.58 to<br>0.97)                      | 1.14<br>(0.84 to<br>1.49)                        |
| Poisonings                                      | 23.88<br>(12.10 to<br>49.29)                         | 13.09<br>(6.63 to<br>28.25)                          | 12.33<br>(6.51 to<br>26.01)                          | 26.54<br>(12.42 to<br>58.71)                         | 0.37<br>(0.22 to<br>0.67)                      | 0.24<br>(0.14 to<br>0.42)                      | 0.23<br>(0.14 to<br>0.39)                      | 0.43<br>(0.25 to<br>0.83)                        |
| Exposure to mechanical forces                   | 38.72<br>(26.38 to<br>75.33)                         | 36.14<br>(23.67 to<br>63.57)                         | 34.83<br>(23.25 to<br>59.89)                         | 58.66<br>(36.86 to<br>113.64)                        | 0.61<br>(0.45 to<br>1.03)                      | 0.69<br>(0.50 to<br>1.02)                      | 0.68<br>(0.51 to<br>0.97)                      | 1.00<br>(0.71 to<br>1.66)                        |
| Unintentional firearm injuries                  | 3.58<br>(2.53 to<br>4.69)                            | 3.51<br>(1.99 to<br>5.27)                            | 3.39<br>(1.97 to<br>4.96)                            | 5.18<br>(3.09 to<br>7.49)                            | 0.06<br>(0.05 to<br>0.08)                      | 0.07<br>(0.04 to<br>0.10)                      | 0.07<br>(0.04 to<br>0.10)                      | 0.10<br>(0.06 to<br>0.14)                        |
| Unintentional suffocation                       | 11.18<br>(3.14 to<br>43.36)                          | 9.68<br>(3.07 to<br>35.96)                           | 9.19<br>(2.99 to<br>33.76)                           | 18.15<br>(5.39 to<br>69.99)                          | 0.15<br>(0.05 to<br>0.54)                      | 0.14<br>(0.05 to<br>0.46)                      | 0.13<br>(0.05 to<br>0.44)                      | 0.25<br>(0.09 to<br>0.88)                        |
| Other exposure to mechanical forces             | 23.95<br>(19.05 to<br>31.19)                         | 22.95<br>(16.18 to<br>31.60)                         | 22.25<br>(15.94 to<br>29.89)                         | 35.33<br>(24.57 to<br>49.15)                         | 0.40<br>(0.33 to<br>0.49)                      | 0.48<br>(0.35 to<br>0.62)                      | 0.47<br>(0.35 to<br>0.60)                      | 0.66<br>(0.48 to<br>0.87)                        |
| Adverse effects of medical treatment            | 40.94<br>(22.28 to<br>62.24)                         | 41.82<br>(22.39 to<br>63.36)                         | 40.58<br>(22.04 to<br>60.32)                         | 64.54<br>(33.35 to<br>103.11)                        | 0.65<br>(0.38 to<br>0.91)                      | 0.80<br>(0.48 to<br>1.11)                      | 0.79<br>(0.48 to<br>1.08)                      | 1.11<br>(0.64 to<br>1.63)                        |
| Animal contact                                  | 28.89<br>(19.53 to<br>39.17)                         | 34.12<br>(22.43 to<br>47.86)                         | 32.75<br>(21.85 to<br>45.36)                         | 58.46<br>(37.01 to<br>84.51)                         | 0.53<br>(0.38 to<br>0.67)                      | 0.76<br>(0.54 to<br>1.00)                      | 0.75<br>(0.54 to<br>0.97)                      | 1.16<br>(0.81 to<br>1.53)                        |
| Venomous animal contact                         | 21.01<br>(12.28 to<br>32.44)                         | 23.61<br>(13.37 to<br>39.01)                         | 22.65<br>(12.89 to<br>37.39)                         | 41.33<br>(22.85 to<br>67.94)                         | 0.40<br>(0.25 to<br>0.56)                      | 0.56<br>(0.37 to<br>0.81)                      | 0.55<br>(0.36 to<br>0.79)                      | 0.86<br>(0.54 to<br>1.28)                        |
| Non-venomous animal contact                     | 7.88<br>(3.14 to<br>13.52)                           | 10.52<br>(3.36 to<br>18.81)                          | 10.10<br>(3.80 to<br>17.58)                          | 17.13<br>(6.46 to<br>31.27)                          | 0.13<br>(0.05 to<br>0.22)                      | 0.20<br>(0.08 to<br>0.34)                      | 0.20<br>(0.08 to<br>0.33)                      | 0.30<br>(0.12 to<br>0.52)                        |
| Foreign body                                    | 25.47<br>(16.22 to<br>40.69)                         | 32.81<br>(22.25 to<br>48.29)                         | 33.43<br>(22.25 to<br>46.97)                         | 45.51<br>(28.19 to<br>73.00)                         | 0.38<br>(0.26 to<br>0.54)                      | 0.59<br>(0.44 to<br>0.78)                      | 0.59<br>(0.45 to<br>0.78)                      | 0.72<br>(0.50 to<br>1.03)                        |
| Pulmonary aspiration and foreign body in airway | 22.65<br>(13.89 to<br>38.38)                         | 29.31<br>(19.47 to<br>44.79)                         | 29.01<br>(19.53 to<br>43.69)                         | 40.25<br>(24.63 to<br>67.49)                         | 0.33<br>(0.23 to<br>0.51)                      | 0.52<br>(0.40 to<br>0.70)                      | 0.53<br>(0.40 to<br>0.71)                      | 0.63<br>(0.44 to<br>0.95)                        |
| Foreign body in other body part                 | 2.82<br>(0.74 to<br>6.25)                            | 3.50<br>(0.88 to<br>8.85)                            | 3.42<br>(0.86 to<br>8.72)                            | 5.07<br>(1.31 to<br>12.10)                           | 0.04<br>(0.01 to<br>0.10)                      | 0.06<br>(0.02 to<br>0.17)                      | 0.06<br>(0.02 to<br>0.17)                      | 0.08<br>(0.02 to<br>0.21)                        |
| Environmental heat and cold exposure            | 4.48<br>(3.08 to<br>6.18)                            | 3.95<br>(2.52 to<br>5.98)                            | 3.74<br>(2.45 to<br>5.45)                            | 7.36<br>(4.65 to<br>11.06)                           | 0.07<br>(0.05 to<br>0.10)                      | 0.08<br>(0.05 to<br>0.11)                      | 0.08<br>(0.05 to<br>0.11)                      | 0.13<br>(0.09 to<br>0.19)                        |
| Other unintentional injuries                    | 17.53<br>(13.84 to<br>23.36)                         | 13.68<br>(10.09 to<br>18.30)                         | 13.31<br>(9.84 to<br>17.76)                          | 20.14<br>(14.85 to<br>27.24)                         | 0.28<br>(0.23 to<br>0.36)                      | 0.26<br>(0.20 to<br>0.34)                      | 0.26<br>(0.20 to<br>0.33)                      | 0.36<br>(0.27 to<br>0.46)                        |

|                                      |                              |                                |                                |                                |                           |                           |                           |                           |
|--------------------------------------|------------------------------|--------------------------------|--------------------------------|--------------------------------|---------------------------|---------------------------|---------------------------|---------------------------|
| Self-harm and interpersonal violence | 60.43<br>(50.73 to<br>82.21) | 108.54<br>(76.66 to<br>160.47) | 106.66<br>(76.13 to<br>154.35) | 136.10<br>(89.71 to<br>209.87) | 1.34<br>(1.14 to<br>1.71) | 2.63<br>(1.88 to<br>3.77) | 2.62<br>(1.89 to<br>3.69) | 3.20<br>(2.12 to<br>4.86) |
|--------------------------------------|------------------------------|--------------------------------|--------------------------------|--------------------------------|---------------------------|---------------------------|---------------------------|---------------------------|

**Burkina Faso**

| Cause                                                                        | YLLs (in 1000s)              |                               |                               |                                | Deaths (in 1000s)         |                           |                           |                           |
|------------------------------------------------------------------------------|------------------------------|-------------------------------|-------------------------------|--------------------------------|---------------------------|---------------------------|---------------------------|---------------------------|
|                                                                              | 2016                         | 2040 Forecast                 | 2040 Better Scenario          | 2040 Worse Scenario            | 2016                      | 2040 Forecast             | 2040 Better Scenario      | 2040 Worse Scenario       |
| Self-harm                                                                    | 50.17<br>(42.19 to<br>62.90) | 94.59<br>(66.34 to<br>139.00) | 92.86<br>(65.23 to<br>133.83) | 119.32<br>(76.78 to<br>186.69) | 1.17<br>(1.00 to<br>1.42) | 2.38<br>(1.68 to<br>3.45) | 2.37<br>(1.70 to<br>3.37) | 2.91<br>(1.90 to<br>4.46) |
| Self-harm by firearm                                                         | 7.20<br>(3.56 to<br>14.20)   | 10.71<br>(4.55 to<br>22.41)   | 10.45<br>(4.49 to<br>21.31)   | 14.11<br>(5.72 to<br>29.82)    | 0.16<br>(0.08 to<br>0.30) | 0.26<br>(0.12 to<br>0.51) | 0.26<br>(0.12 to<br>0.50) | 0.34<br>(0.14 to<br>0.67) |
| Self-harm by other specified means                                           | 42.97<br>(35.47 to<br>52.79) | 83.88<br>(58.17 to<br>122.45) | 82.41<br>(57.35 to<br>118.49) | 105.21<br>(67.20 to<br>164.04) | 1.00<br>(0.84 to<br>1.21) | 2.11<br>(1.49 to<br>3.04) | 2.11<br>(1.51 to<br>2.97) | 2.57<br>(1.67 to<br>4.00) |
| Interpersonal violence                                                       | 10.26<br>(6.78 to<br>21.66)  | 13.95<br>(8.50 to<br>30.10)   | 13.80<br>(8.42 to<br>29.63)   | 16.78<br>(10.08 to<br>36.20)   | 0.17<br>(0.12 to<br>0.36) | 0.25<br>(0.15 to<br>0.54) | 0.25<br>(0.15 to<br>0.53) | 0.29<br>(0.18 to<br>0.64) |
| Physical violence by firearm                                                 | 2.61<br>(1.27 to<br>8.14)    | 3.95<br>(1.90 to<br>12.09)    | 3.94<br>(1.91 to<br>11.98)    | 4.30<br>(2.06 to<br>13.33)     | 0.04<br>(0.02 to<br>0.14) | 0.07<br>(0.03 to<br>0.21) | 0.07<br>(0.03 to<br>0.21) | 0.07<br>(0.04 to<br>0.23) |
| Physical violence by sharp object                                            | 1.03<br>(0.63 to<br>2.30)    | 1.77<br>(1.06 to<br>3.88)     | 1.77<br>(1.07 to<br>3.87)     | 1.84<br>(1.09 to<br>4.12)      | 0.02<br>(0.01 to<br>0.04) | 0.02<br>(0.02 to<br>0.07) | 0.03<br>(0.02 to<br>0.07) | 0.03<br>(0.02 to<br>0.07) |
| Physical violence by other means                                             | 6.62<br>(4.56 to<br>12.36)   | 8.24<br>(5.14 to<br>15.94)    | 8.08<br>(5.08 to<br>15.55)    | 10.64<br>(6.46 to<br>20.84)    | 0.11<br>(0.08 to<br>0.20) | 0.15<br>(0.09 to<br>0.28) | 0.14<br>(0.09 to<br>0.28) | 0.18<br>(0.11 to<br>0.36) |
| Forces of nature, conflict and terrorism, and executions and police conflict | 6.41<br>(1.90 to<br>11.39)   | 0.21<br>(0.00 to<br>1.68)     | 0.21<br>(0.00 to<br>1.68)     | 0.24<br>(0.00 to<br>1.88)      | 0.10<br>(0.03 to<br>0.18) | 0.00<br>(0.00 to<br>0.03) | 0.00<br>(0.00 to<br>0.03) | 0.00<br>(0.00 to<br>0.03) |
| Exposure to forces of nature                                                 | 0.00<br>(0.00 to<br>0.00)    | 0.14<br>(0.00 to<br>1.60)     | 0.14<br>(0.00 to<br>1.60)     | 0.16<br>(0.00 to<br>1.83)      | 0.00<br>(0.00 to<br>0.00) | 0.00<br>(0.00 to<br>0.03) | 0.00<br>(0.00 to<br>0.03) | 0.00<br>(0.00 to<br>0.03) |
| Conflict and terrorism                                                       | 5.37<br>(0.85 to<br>10.29)   | 0.01<br>(0.00 to<br>0.06)     | 0.01<br>(0.00 to<br>0.06)     | 0.01<br>(0.00 to<br>0.07)      | 0.08<br>(0.01 to<br>0.16) | 0.00<br>(0.00 to<br>0.00) | 0.00<br>(0.00 to<br>0.00) | 0.00<br>(0.00 to<br>0.00) |
| Executions and police conflict                                               | 1.04<br>(0.27 to<br>3.02)    | 0.06<br>(0.00 to<br>1.19)     | 0.06<br>(0.00 to<br>1.19)     | 0.06<br>(0.00 to<br>1.25)      | 0.02<br>(0.00 to<br>0.04) | 0.00<br>(0.00 to<br>0.02) | 0.00<br>(0.00 to<br>0.02) | 0.00<br>(0.00 to<br>0.02) |

**Cameroon**

| Cause                                                             | YLLs (in 1000s)                          |                                        |                                       |                                          | Deaths (in 1000s)               |                                 |                                 |                                 |
|-------------------------------------------------------------------|------------------------------------------|----------------------------------------|---------------------------------------|------------------------------------------|---------------------------------|---------------------------------|---------------------------------|---------------------------------|
|                                                                   | 2016                                     | 2040 Forecast                          | 2040 Better Scenario                  | 2040 Worse Scenario                      | 2016                            | 2040 Forecast                   | 2040 Better Scenario            | 2040 Worse Scenario             |
| All causes                                                        | 11,691.44<br>(10,179.18 to<br>13,547.60) | 9,133.45<br>(7,101.31 to<br>11,747.77) | 6,883.95<br>(5,216.27 to<br>8,986.85) | 15,556.57<br>(11,993.83 to<br>20,307.92) | 218.65<br>(193.84 to<br>245.53) | 240.15<br>(201.18 to<br>287.21) | 190.09<br>(158.83 to<br>228.55) | 358.43<br>(306.28 to<br>430.85) |
| Communicable, maternal, neonatal, and nutritional diseases        | 8,295.61<br>(7,032.97 to<br>9,867.74)    | 4,586.06<br>(3,153.92 to<br>6,291.28)  | 2,989.28<br>(1,966.83 to<br>4,362.62) | 9,581.89<br>(6,882.17 to<br>12,953.04)   | 128.42<br>(112.12 to<br>146.78) | 92.77<br>(68.16 to<br>121.99)   | 60.37<br>(43.09 to<br>82.20)    | 176.34<br>(132.40 to<br>225.58) |
| HIV/AIDS and tuberculosis                                         | 1,629.53<br>(1,230.79 to<br>2,152.21)    | 1,528.66<br>(760.25 to<br>2,449.99)    | 711.05<br>(214.94 to<br>1,618.07)     | 3,711.55<br>(2,561.66 to<br>4,924.93)    | 33.57<br>(26.49 to<br>42.51)    | 33.15<br>(18.29 to<br>50.03)    | 15.72<br>(5.54 to<br>31.95)     | 78.04<br>(55.07 to<br>100.52)   |
| Tuberculosis                                                      | 205.51<br>(119.30 to<br>283.38)          | 98.04<br>(49.36 to<br>177.15)          | 65.53<br>(31.85 to<br>114.56)         | 206.66<br>(98.34 to<br>379.77)           | 5.59<br>(3.38 to<br>7.75)       | 2.97<br>(1.58 to<br>4.96)       | 2.06<br>(1.09 to<br>3.36)       | 5.98<br>(3.10 to<br>10.23)      |
| HIV/AIDS                                                          | 1,424.02<br>(1,016.85 to<br>1,947.01)    | 1,430.63<br>(657.04 to<br>2,360.90)    | 645.52<br>(152.09 to<br>1,542.64)     | 3,504.89<br>(2,376.08 to<br>4,719.73)    | 27.98<br>(20.68 to<br>37.20)    | 30.18<br>(15.20 to<br>47.42)    | 13.67<br>(3.60 to<br>30.25)     | 72.06<br>(49.99 to<br>95.39)    |
| Diarrhea, lower respiratory, and other common infectious diseases | 2,268.54<br>(1,784.25 to<br>2,855.00)    | 1,321.38<br>(676.33 to<br>2,368.92)    | 854.25<br>(446.41 to<br>1,538.09)     | 2,706.96<br>(1,294.44 to<br>5,080.65)    | 38.17<br>(31.37 to<br>46.19)    | 33.32<br>(19.81 to<br>54.24)    | 22.82<br>(13.92 to<br>36.77)    | 54.99<br>(31.25 to<br>91.18)    |

|                                         |                                       |                                   |                                   |                                     |                              |                              |                             |                              |
|-----------------------------------------|---------------------------------------|-----------------------------------|-----------------------------------|-------------------------------------|------------------------------|------------------------------|-----------------------------|------------------------------|
|                                         | 605.47<br>(417.02 to<br>853.10)       | 349.72<br>(86.69 to<br>815.71)    | 211.42<br>(45.71 to<br>531.32)    | 642.69<br>(214.27 to<br>1,338.15)   | 10.46<br>(7.37 to<br>15.02)  | 8.60<br>(2.02 to<br>22.49)   | 5.29<br>(1.19 to<br>14.89)  | 14.20<br>(4.09 to<br>31.64)  |
| Diarrheal diseases                      |                                       |                                   |                                   |                                     |                              |                              |                             |                              |
|                                         | 55.07<br>(25.42 to<br>102.65)         | 47.54<br>(19.23 to<br>97.93)      | 41.38<br>(17.03 to<br>85.19)      | 67.78<br>(27.43 to<br>142.30)       | 0.77<br>(0.36 to<br>1.42)    | 0.71<br>(0.29 to<br>1.45)    | 0.63<br>(0.26 to<br>1.25)   | 0.98<br>(0.41 to<br>1.99)    |
| Intestinal infectious diseases          |                                       |                                   |                                   |                                     |                              |                              |                             |                              |
|                                         | 45.18<br>(19.07 to<br>86.30)          | 38.66<br>(14.67 to<br>84.33)      | 33.79<br>(13.01 to<br>72.59)      | 54.63<br>(20.71 to<br>121.40)       | 0.64<br>(0.28 to<br>1.19)    | 0.58<br>(0.23 to<br>1.24)    | 0.51<br>(0.20 to<br>1.08)   | 0.79<br>(0.31 to<br>1.70)    |
| Typhoid fever                           |                                       |                                   |                                   |                                     |                              |                              |                             |                              |
|                                         | 8.76<br>(3.01 to<br>21.14)            | 8.57<br>(2.99 to<br>19.19)        | 7.36<br>(2.60 to<br>16.73)        | 12.51<br>(4.27 to<br>28.29)         | 0.12<br>(0.04 to<br>0.29)    | 0.13<br>(0.05 to<br>0.28)    | 0.11<br>(0.04 to<br>0.24)   | 0.18<br>(0.07 to<br>0.40)    |
| Paratyphoid fever                       |                                       |                                   |                                   |                                     |                              |                              |                             |                              |
|                                         | 1.13<br>(0.31 to<br>3.32)             | 0.30<br>(0.06 to<br>0.98)         | 0.23<br>(0.05 to<br>0.73)         | 0.63<br>(0.12 to<br>2.02)           | 0.01<br>(0.00 to<br>0.04)    | 0.00<br>(0.00 to<br>0.01)    | 0.00<br>(0.00 to<br>0.01)   | 0.01<br>(0.00 to<br>0.03)    |
| Other intestinal infectious diseases    |                                       |                                   |                                   |                                     |                              |                              |                             |                              |
|                                         | 1,136.24<br>(842.66 to<br>1,509.62)   | 692.23<br>(338.39 to<br>1,281.10) | 430.08<br>(228.53 to<br>811.31)   | 1,509.25<br>(630.06 to<br>3,472.23) | 20.30<br>(15.94 to<br>25.56) | 20.04<br>(12.35 to<br>32.12) | 13.65<br>(8.72 to<br>20.42) | 32.80<br>(18.28 to<br>59.15) |
| Lower respiratory infections            |                                       |                                   |                                   |                                     |                              |                              |                             |                              |
|                                         | 2.10<br>(0.59 to<br>5.42)             | 0.95<br>(0.32 to<br>2.38)         | 0.68<br>(0.23 to<br>1.70)         | 1.99<br>(0.60 to<br>5.25)           | 0.03<br>(0.01 to<br>0.07)    | 0.02<br>(0.01 to<br>0.04)    | 0.01<br>(0.01 to<br>0.03)   | 0.03<br>(0.01 to<br>0.07)    |
| Upper respiratory infections            |                                       |                                   |                                   |                                     |                              |                              |                             |                              |
|                                         | 0.03<br>(0.01 to<br>0.08)             | 0.01<br>(0.00 to<br>0.01)         | 0.01<br>(0.00 to<br>0.01)         | 0.01<br>(0.00 to<br>0.01)           | 0.00<br>(0.00 to<br>0.00)    | 0.00<br>(0.00 to<br>0.00)    | 0.00<br>(0.00 to<br>0.00)   | 0.00<br>(0.00 to<br>0.00)    |
| Otitis media                            |                                       |                                   |                                   |                                     |                              |                              |                             |                              |
|                                         | 336.51<br>(236.84 to<br>473.14)       | 167.22<br>(101.26 to<br>273.09)   | 141.97<br>(87.19 to<br>222.10)    | 324.13<br>(171.25 to<br>583.07)     | 4.93<br>(3.59 to<br>6.70)    | 2.78<br>(1.99 to<br>4.52)    | 2.78<br>(1.82 to<br>4.08)   | 4.93<br>(2.94 to<br>7.99)    |
| Meningitis                              |                                       |                                   |                                   |                                     |                              |                              |                             |                              |
|                                         | 25.56<br>(17.35 to<br>36.86)          | 14.78<br>(8.86 to<br>24.22)       | 13.58<br>(8.29 to<br>22.14)       | 23.74<br>(13.13 to<br>42.27)        | 0.43<br>(0.30 to<br>0.60)    | 0.32<br>(0.21 to<br>0.49)    | 0.31<br>(0.20 to<br>0.47)   | 0.43<br>(0.27 to<br>0.69)    |
| Pneumococcal meningitis                 |                                       |                                   |                                   |                                     |                              |                              |                             |                              |
|                                         | 45.00<br>(30.03 to<br>67.33)          | 32.26<br>(11.10 to<br>82.54)      | 21.31<br>(9.00 to<br>47.01)       | 128.70<br>(29.65 to<br>344.35)      | 0.62<br>(0.43 to<br>0.89)    | 0.47<br>(0.21 to<br>1.07)    | 0.35<br>(0.18 to<br>0.66)   | 1.60<br>(0.42 to<br>4.11)    |
| H influenzae type B meningitis          |                                       |                                   |                                   |                                     |                              |                              |                             |                              |
|                                         | 135.46<br>(94.09 to<br>194.54)        | 65.16<br>(38.85 to<br>102.84)     | 58.51<br>(34.66 to<br>94.57)      | 91.12<br>(53.66 to<br>148.52)       | 1.96<br>(1.39 to<br>2.73)    | 1.21<br>(0.76 to<br>1.84)    | 1.13<br>(0.71 to<br>1.75)   | 1.52<br>(0.96 to<br>2.36)    |
| Meningococcal meningitis                |                                       |                                   |                                   |                                     |                              |                              |                             |                              |
|                                         | 130.49<br>(91.48 to<br>191.28)        | 55.02<br>(33.82 to<br>85.43)      | 48.58<br>(29.46 to<br>75.61)      | 80.57<br>(48.79 to<br>131.68)       | 1.92<br>(1.40 to<br>2.69)    | 1.07<br>(0.70 to<br>1.55)    | 0.99<br>(0.64 to<br>1.42)   | 1.38<br>(0.91 to<br>2.05)    |
| Other meningitis                        |                                       |                                   |                                   |                                     |                              |                              |                             |                              |
|                                         | 20.57<br>(12.34 to<br>33.09)          | 15.76<br>(7.72 to<br>27.37)       | 13.37<br>(6.47 to<br>23.35)       | 24.47<br>(11.97 to<br>43.22)        | 0.30<br>(0.18 to<br>0.46)    | 0.28<br>(0.15 to<br>0.44)    | 0.24<br>(0.13 to<br>0.38)   | 0.39<br>(0.21 to<br>0.63)    |
| Encephalitis                            |                                       |                                   |                                   |                                     |                              |                              |                             |                              |
|                                         | 0.54<br>(0.21 to<br>1.09)             | 0.12<br>(0.04 to<br>0.32)         | 0.06<br>(0.02 to<br>0.13)         | 0.66<br>(0.11 to<br>2.16)           | 0.01<br>(0.00 to<br>0.01)    | 0.00<br>(0.00 to<br>0.00)    | 0.00<br>(0.00 to<br>0.00)   | 0.01<br>(0.00 to<br>0.03)    |
| Diphtheria                              |                                       |                                   |                                   |                                     |                              |                              |                             |                              |
|                                         | 65.63<br>(4.71 to<br>231.40)          | 40.91<br>(2.82 to<br>150.84)      | 11.09<br>(0.69 to<br>42.58)       | 105.93<br>(7.68 to<br>400.27)       | 0.77<br>(0.06 to<br>2.73)    | 0.49<br>(0.03 to<br>1.78)    | 0.13<br>(0.01 to<br>0.51)   | 1.25<br>(0.09 to<br>4.70)    |
| Whooping cough                          |                                       |                                   |                                   |                                     |                              |                              |                             |                              |
|                                         | 9.95<br>(3.91 to<br>22.50)            | 1.32<br>(0.44 to<br>3.04)         | 0.84<br>(0.30 to<br>1.82)         | 3.13<br>(0.97 to<br>8.33)           | 0.14<br>(0.06 to<br>0.29)    | 0.02<br>(0.01 to<br>0.05)    | 0.02<br>(0.01 to<br>0.04)   | 0.04<br>(0.01 to<br>0.10)    |
| Tetanus                                 |                                       |                                   |                                   |                                     |                              |                              |                             |                              |
|                                         | 29.57<br>(9.64 to<br>69.04)           | 2.72<br>(0.23 to<br>15.65)        | 1.19<br>(0.16 to<br>5.13)         | 21.15<br>(1.13 to<br>90.52)         | 0.35<br>(0.11 to<br>0.82)    | 0.03<br>(0.00 to<br>0.18)    | 0.01<br>(0.00 to<br>0.06)   | 0.25<br>(0.01 to<br>1.08)    |
| Measles                                 |                                       |                                   |                                   |                                     |                              |                              |                             |                              |
| <b>Cameroon</b>                         |                                       |                                   |                                   |                                     |                              |                              |                             |                              |
| Cause                                   | YLLs (in 1000s)                       |                                   |                                   |                                     | Deaths (in 1000s)            |                              |                             |                              |
|                                         | 2016                                  | 2040 Forecast                     | 2040 Better Scenario              | 2040 Worse Scenario                 | 2016                         | 2040 Forecast                | 2040 Better Scenario        | 2040 Worse Scenario          |
| Varicella and herpes zoster             | 6.85<br>(3.67 to<br>11.83)            | 2.89<br>(1.39 to<br>5.85)         | 2.15<br>(1.09 to<br>4.19)         | 5.77<br>(2.66 to<br>12.22)          | 0.11<br>(0.07 to<br>0.17)    | 0.06<br>(0.04 to<br>0.10)    | 0.05<br>(0.03 to<br>0.08)   | 0.10<br>(0.06 to<br>0.18)    |
| Neglected tropical diseases and malaria | 2,108.32<br>(1,532.07 to<br>2,802.38) | 735.32<br>(457.63 to<br>1,134.33) | 652.36<br>(409.70 to<br>1,007.63) | 1,124.68<br>(684.65 to<br>1,806.23) | 27.95<br>(21.08 to<br>36.41) | 12.25<br>(8.24 to<br>17.77)  | 11.26<br>(7.62 to<br>16.16) | 16.93<br>(11.15 to<br>25.27) |





| Cameroon                                                                |                                           |                                       |                                     |                                         |                                  |                                |                               |                                 |
|-------------------------------------------------------------------------|-------------------------------------------|---------------------------------------|-------------------------------------|-----------------------------------------|----------------------------------|--------------------------------|-------------------------------|---------------------------------|
| Cause                                                                   | YLLs (in 1000s)                           |                                       |                                     |                                         | Deaths (in 1000s)                |                                |                               |                                 |
|                                                                         | 2016                                      | 2040 Forecast                         | 2040 Better Scenario                | 2040 Worse Scenario                     | 2016                             | 2040 Forecast                  | 2040 Better Scenario          | 2040 Worse Scenario             |
| <b>Neonatal disorders</b>                                               | <b>1,548.48</b><br>(1,191.14 to 1,984.58) | <b>699.84</b><br>(388.48 to 1,109.27) | <b>538.98</b><br>(298.85 to 853.67) | <b>1,508.67</b><br>(840.97 to 2,361.97) | <b>17.89</b><br>(13.76 to 22.92) | <b>8.09</b><br>(4.49 to 12.82) | <b>6.23</b><br>(3.45 to 9.86) | <b>17.43</b><br>(9.72 to 27.29) |
| Neonatal preterm birth                                                  | 574.30<br>(389.12 to 810.11)              | 231.48<br>(126.18 to 380.26)          | 162.21<br>(87.76 to 267.07)         | 519.61<br>(282.60 to 866.82)            | 6.63<br>(4.50 to 9.36)           | 2.67<br>(1.46 to 4.39)         | 1.87<br>(1.01 to 3.09)        | 6.00<br>(3.26 to 10.01)         |
| Neonatal encephalopathy due to birth asphyxia and trauma                | 524.82<br>(345.44 to 751.92)              | 223.48<br>(98.50 to 415.37)           | 182.14<br>(80.07 to 335.17)         | 461.76<br>(203.28 to 851.76)            | 6.06<br>(3.99 to 8.69)           | 2.58<br>(1.14 to 4.80)         | 2.10<br>(0.93 to 3.87)        | 5.34<br>(2.35 to 9.84)          |
| Neonatal sepsis and other neonatal infections                           | 305.49<br>(203.40 to 456.20)              | 179.19<br>(97.73 to 298.78)           | 144.16<br>(79.25 to 237.03)         | 377.38<br>(206.98 to 626.29)            | 3.53<br>(2.35 to 5.27)           | 2.07<br>(1.13 to 3.45)         | 1.67<br>(0.92 to 2.74)        | 4.36<br>(2.39 to 7.24)          |
| Hemolytic disease and other neonatal jaundice                           | 37.49<br>(23.49 to 57.14)                 | 9.52<br>(4.65 to 17.07)               | 7.34<br>(3.62 to 13.03)             | 21.65<br>(10.38 to 38.68)               | 0.43<br>(0.27 to 0.66)           | 0.11<br>(0.05 to 0.20)         | 0.08<br>(0.04 to 0.15)        | 0.25<br>(0.12 to 0.45)          |
| Other neonatal disorders                                                | 106.38<br>(61.50 to 178.55)               | 56.18<br>(25.18 to 110.30)            | 43.13<br>(19.47 to 84.10)           | 128.26<br>(58.12 to 251.72)             | 1.23<br>(0.71 to 2.06)           | 0.65<br>(0.29 to 1.27)         | 0.50<br>(0.23 to 0.97)        | 1.48<br>(0.67 to 2.91)          |
| <b>Nutritional deficiencies</b>                                         | <b>249.51</b><br>(143.28 to 407.33)       | <b>72.42</b><br>(38.24 to 134.04)     | <b>58.27</b><br>(31.27 to 107.29)   | <b>138.00</b><br>(69.87 to 258.62)      | <b>3.43</b><br>(2.15 to 5.32)    | <b>1.41</b><br>(0.95 to 2.19)  | <b>1.22</b><br>(0.84 to 1.85) | <b>2.23</b><br>(1.38 to 3.70)   |
| Protein-energy malnutrition                                             | 236.00<br>(133.55 to 388.28)              | 62.49<br>(31.66 to 120.22)            | 50.01<br>(25.50 to 95.06)           | 121.93<br>(59.73 to 238.54)             | 3.18<br>(1.95 to 5.00)           | 1.17<br>(0.77 to 1.89)         | 1.01<br>(0.67 to 1.59)        | 1.91<br>(1.13 to 3.34)          |
| Iodine deficiency                                                       | 1.84<br>(0.04 to 12.55)                   | 2.34<br>(0.04 to 13.53)               | 1.83<br>(0.03 to 10.47)             | 4.59<br>(0.06 to 30.56)                 | 0.03<br>(0.00 to 0.15)           | 0.05<br>(0.00 to 0.19)         | 0.04<br>(0.00 to 0.16)        | 0.08<br>(0.00 to 0.38)          |
| Dietary iron deficiency                                                 | 0.48<br>(0.32 to 0.83)                    | 0.51<br>(0.29 to 0.94)                | 0.46<br>(0.25 to 0.81)              | 0.67<br>(0.37 to 1.23)                  | 0.01<br>(0.01 to 0.02)           | 0.01<br>(0.01 to 0.02)         | 0.01<br>(0.00 to 0.02)        | 0.01<br>(0.01 to 0.03)          |
| Other nutritional deficiencies                                          | 11.20<br>(4.97 to 25.94)                  | 7.08<br>(3.72 to 13.75)               | 5.98<br>(3.22 to 11.38)             | 10.80<br>(5.14 to 23.58)                | 0.22<br>(0.13 to 0.40)           | 0.18<br>(0.11 to 0.27)         | 0.16<br>(0.10 to 0.24)        | 0.23<br>(0.14 to 0.40)          |
| <b>Other communicable, maternal, neonatal, and nutritional diseases</b> | <b>278.68</b><br>(139.09 to 492.06)       | <b>92.08</b><br>(50.61 to 163.10)     | <b>77.83</b><br>(42.72 to 135.38)   | <b>154.32</b><br>(77.49 to 284.61)      | <b>3.60</b><br>(1.96 to 6.09)    | <b>1.52</b><br>(0.97 to 2.38)  | <b>1.31</b><br>(0.85 to 2.02) | <b>2.32</b><br>(1.37 to 3.88)   |
| Sexually transmitted infections excluding HIV                           | 221.83<br>(87.94 to 422.22)               | 47.68<br>(15.65 to 110.81)            | 39.71<br>(13.13 to 91.98)           | 88.99<br>(27.66 to 209.50)              | 2.61<br>(1.05 to 4.96)           | 0.58<br>(0.20 to 1.31)         | 0.48<br>(0.17 to 1.10)        | 1.06<br>(0.35 to 2.48)          |
| Syphilis                                                                | 219.99<br>(86.10 to 419.72)               | 45.76<br>(13.60 to 108.90)            | 37.96<br>(11.45 to 90.03)           | 86.73<br>(24.81 to 206.82)              | 2.58<br>(1.01 to 4.92)           | 0.54<br>(0.17 to 1.28)         | 0.45<br>(0.16 to 1.06)        | 1.02<br>(0.30 to 2.43)          |
| Chlamydial infection                                                    | 0.38<br>(0.23 to 0.55)                    | 0.39<br>(0.21 to 0.66)                | 0.36<br>(0.19 to 0.60)              | 0.47<br>(0.25 to 0.78)                  | 0.01<br>(0.00 to 0.01)           | 0.01<br>(0.01 to 0.01)         | 0.01<br>(0.00 to 0.01)        | 0.01<br>(0.01 to 0.01)          |
| Gonococcal infection                                                    | 0.94<br>(0.58 to 1.36)                    | 0.99<br>(0.56 to 1.62)                | 0.91<br>(0.51 to 1.47)              | 1.17<br>(0.66 to 1.91)                  | 0.02<br>(0.01 to 0.03)           | 0.02<br>(0.01 to 0.03)         | 0.02<br>(0.01 to 0.03)        | 0.02<br>(0.01 to 0.04)          |
| Other sexually transmitted infections                                   | 0.52<br>(0.32 to 0.75)                    | 0.53<br>(0.29 to 0.88)                | 0.49<br>(0.26 to 0.80)              | 0.63<br>(0.35 to 1.04)                  | 0.01<br>(0.01 to 0.01)           | 0.01<br>(0.01 to 0.02)         | 0.01<br>(0.01 to 0.02)        | 0.01<br>(0.01 to 0.02)          |
| Acute hepatitis                                                         | 35.38<br>(26.95 to 47.32)                 | 30.67<br>(20.66 to 48.07)             | 26.90<br>(17.73 to 41.84)           | 40.02<br>(26.92 to 62.12)               | 0.68<br>(0.51 to 0.89)           | 0.67<br>(0.46 to 1.00)         | 0.60<br>(0.41 to 0.90)        | 0.84<br>(0.59 to 1.27)          |
| Acute hepatitis A                                                       | 1.27<br>(0.13 to 3.25)                    | 0.60<br>(0.14 to 1.54)                | 0.50<br>(0.12 to 1.30)              | 1.02<br>(0.20 to 2.77)                  | 0.02<br>(0.00 to 0.04)           | 0.01<br>(0.00 to 0.02)         | 0.01<br>(0.00 to 0.02)        | 0.01<br>(0.00 to 0.04)          |
| Acute hepatitis B                                                       | 24.45<br>(18.30 to 32.90)                 | 23.13<br>(14.74 to 36.31)             | 20.28<br>(12.93 to 31.95)           | 29.40<br>(19.12 to 47.11)               | 0.51<br>(0.39 to 0.69)           | 0.53<br>(0.36 to 0.81)         | 0.47<br>(0.32 to 0.71)        | 0.66<br>(0.45 to 1.01)          |

|                                       |                                                            |                                                            |                                                            |                                                            |                                                   |                                                      |                                                     |                                                      |
|---------------------------------------|------------------------------------------------------------|------------------------------------------------------------|------------------------------------------------------------|------------------------------------------------------------|---------------------------------------------------|------------------------------------------------------|-----------------------------------------------------|------------------------------------------------------|
| Acute hepatitis C                     | 0.70<br>(0.46 to<br>1.02)                                  | 0.90<br>(0.54 to<br>1.46)                                  | 0.84<br>(0.50 to<br>1.37)                                  | 1.03<br>(0.63 to<br>1.70)                                  | 0.02<br>(0.01 to<br>0.02)                         | 0.02<br>(0.01 to<br>0.04)                            | 0.02<br>(0.01 to<br>0.03)                           | 0.03<br>(0.02 to<br>0.04)                            |
| Acute hepatitis E                     | 8.95<br>(6.20 to<br>13.18)                                 | 6.05<br>(3.49 to<br>10.60)                                 | 5.29<br>(3.04 to<br>9.06)                                  | 8.57<br>(4.86 to<br>14.62)                                 | 0.13<br>(0.09 to<br>0.19)                         | 0.10<br>(0.07 to<br>0.17)                            | 0.09<br>(0.06 to<br>0.16)                           | 0.14<br>(0.09 to<br>0.23)                            |
| Other unspecified infectious diseases | 21.47<br>(7.52 to<br>74.64)                                | 13.72<br>(5.91 to<br>33.78)                                | 11.22<br>(4.87 to<br>27.72)                                | 25.30<br>(9.67 to<br>65.46)                                | 0.31<br>(0.14 to<br>0.91)                         | 0.27<br>(0.15 to<br>0.52)                            | 0.23<br>(0.14 to<br>0.45)                           | 0.42<br>(0.21 to<br>0.90)                            |
| <b>Non-communicable diseases</b>      | <b>2,607.47</b><br><b>(2,100.03 to</b><br><b>3,119.28)</b> | <b>3,590.55</b><br><b>(2,777.11 to</b><br><b>4,553.89)</b> | <b>3,044.90</b><br><b>(2,367.63 to</b><br><b>3,905.12)</b> | <b>4,799.59</b><br><b>(3,650.84 to</b><br><b>6,212.44)</b> | <b>75.14</b><br><b>(62.81 to</b><br><b>88.03)</b> | <b>125.97</b><br><b>(104.91 to</b><br><b>151.76)</b> | <b>109.35</b><br><b>(91.78 to</b><br><b>128.97)</b> | <b>157.09</b><br><b>(128.92 to</b><br><b>189.35)</b> |
| <b>Cameroon</b>                       |                                                            |                                                            |                                                            |                                                            |                                                   |                                                      |                                                     |                                                      |
| Cause                                 | YLLs (in 1000s)                                            |                                                            |                                                            |                                                            | Deaths (in 1000s)                                 |                                                      |                                                     |                                                      |
|                                       | 2016                                                       | 2040 Forecast                                              | 2040 Better Scenario                                       | 2040 Worse Scenario                                        | 2016                                              | 2040 Forecast                                        | 2040 Better Scenario                                | 2040 Worse Scenario                                  |
| <b>Neoplasms</b>                      | <b>459.88</b><br><b>(368.12 to</b><br><b>565.74)</b>       | <b>1,014.44</b><br><b>(748.54 to</b><br><b>1,396.87)</b>   | <b>920.73</b><br><b>(697.28 to</b><br><b>1,224.44)</b>     | <b>1,113.35</b><br><b>(809.95 to</b><br><b>1,556.50)</b>   | <b>15.34</b><br><b>(12.40 to</b><br><b>18.62)</b> | <b>35.34</b><br><b>(27.84 to</b><br><b>45.60)</b>    | <b>33.07</b><br><b>(26.64 to</b><br><b>41.67)</b>   | <b>37.18</b><br><b>(28.30 to</b><br><b>49.15)</b>    |
| Lip and oral cavity cancer            | 4.62<br>(3.46 to<br>6.19)                                  | 10.37<br>(5.45 to<br>18.47)                                | 7.02<br>(4.02 to<br>11.47)                                 | 16.10<br>(8.10 to<br>30.05)                                | 0.17<br>(0.13 to<br>0.23)                         | 0.37<br>(0.21 to<br>0.62)                            | 0.26<br>(0.16 to<br>0.41)                           | 0.56<br>(0.30 to<br>0.98)                            |
| Nasopharynx cancer                    | 1.12<br>(0.74 to<br>1.53)                                  | 2.67<br>(1.25 to<br>5.06)                                  | 1.69<br>(0.90 to<br>2.92)                                  | 4.15<br>(1.89 to<br>8.12)                                  | 0.03<br>(0.02 to<br>0.04)                         | 0.07<br>(0.03 to<br>0.14)                            | 0.05<br>(0.03 to<br>0.08)                           | 0.11<br>(0.05 to<br>0.22)                            |
| Other pharynx cancer                  | 2.73<br>(1.84 to<br>3.65)                                  | 4.35<br>(2.48 to<br>7.13)                                  | 3.93<br>(2.28 to<br>6.34)                                  | 6.10<br>(3.29 to<br>10.35)                                 | 0.10<br>(0.07 to<br>0.13)                         | 0.16<br>(0.09 to<br>0.25)                            | 0.15<br>(0.09 to<br>0.23)                           | 0.21<br>(0.12 to<br>0.35)                            |
| Esophageal cancer                     | 15.99<br>(12.10 to<br>20.37)                               | 31.63<br>(16.68 to<br>55.53)                               | 21.87<br>(12.97 to<br>34.64)                               | 42.85<br>(21.53 to<br>78.27)                               | 0.62<br>(0.48 to<br>0.78)                         | 1.16<br>(0.67 to<br>1.92)                            | 0.85<br>(0.54 to<br>1.29)                           | 1.54<br>(0.84 to<br>2.67)                            |
| Stomach cancer                        | 31.19<br>(26.54 to<br>42.96)                               | 47.55<br>(33.73 to<br>65.47)                               | 44.52<br>(31.91 to<br>60.05)                               | 51.16<br>(35.80 to<br>71.29)                               | 1.39<br>(1.10 to<br>1.74)                         | 1.95<br>(1.49 to<br>2.54)                            | 1.90<br>(1.47 to<br>2.43)                           | 2.02<br>(1.53 to<br>2.68)                            |
| Colon and rectum cancer               | 23.63<br>(18.30 to<br>29.88)                               | 61.67<br>(41.88 to<br>90.51)                               | 62.49<br>(42.84 to<br>89.35)                               | 62.45<br>(40.83 to<br>92.57)                               | 0.94<br>(0.75 to<br>1.17)                         | 2.50<br>(1.79 to<br>3.46)                            | 2.63<br>(1.90 to<br>3.57)                           | 2.43<br>(1.68 to<br>3.44)                            |
| Liver cancer                          | 91.20<br>(67.66 to<br>123.84)                              | 240.99<br>(142.53 to<br>400.94)                            | 205.68<br>(130.06 to<br>317.90)                            | 283.30<br>(157.59 to<br>496.56)                            | 2.83<br>(2.13 to<br>3.75)                         | 7.56<br>(4.75 to<br>11.94)                           | 6.65<br>(4.42 to<br>9.95)                           | 8.68<br>(5.11 to<br>14.13)                           |
| Liver cancer due to hepatitis B       | 50.19<br>(36.54 to<br>68.43)                               | 131.96<br>(78.28 to<br>219.33)                             | 114.39<br>(71.93 to<br>175.26)                             | 147.69<br>(82.42 to<br>254.84)                             | 1.48<br>(1.08 to<br>1.94)                         | 3.97<br>(2.43 to<br>6.24)                            | 3.53<br>(2.33 to<br>5.21)                           | 4.34<br>(2.51 to<br>7.10)                            |
| Liver cancer due to hepatitis C       | 6.51<br>(4.15 to<br>9.69)                                  | 17.88<br>(9.64 to<br>31.23)                                | 15.85<br>(9.01 to<br>26.41)                                | 19.69<br>(10.24 to<br>35.71)                               | 0.26<br>(0.16 to<br>0.38)                         | 0.70<br>(0.39 to<br>1.16)                            | 0.65<br>(0.38 to<br>1.02)                           | 0.74<br>(0.40 to<br>1.27)                            |
| Liver cancer due to alcohol use       | 14.73<br>(10.49 to<br>20.10)                               | 40.49<br>(22.79 to<br>71.59)                               | 32.07<br>(19.43 to<br>53.28)                               | 58.28<br>(31.82 to<br>106.09)                              | 0.52<br>(0.38 to<br>0.70)                         | 1.36<br>(0.80 to<br>2.27)                            | 1.12<br>(0.70 to<br>1.73)                           | 1.90<br>(1.07 to<br>3.29)                            |
| Liver cancer due to other causes      | 19.77<br>(14.19 to<br>28.25)                               | 50.66<br>(28.63 to<br>86.56)                               | 43.37<br>(25.78 to<br>70.64)                               | 57.66<br>(31.37 to<br>102.72)                              | 0.58<br>(0.42 to<br>0.80)                         | 1.53<br>(0.89 to<br>2.50)                            | 1.34<br>(0.85 to<br>2.11)                           | 1.69<br>(0.94 to<br>2.86)                            |
| Gallbladder and biliary tract cancer  | 4.93<br>(3.23 to<br>6.84)                                  | 8.31<br>(5.64 to<br>11.37)                                 | 8.78<br>(5.88 to<br>12.07)                                 | 7.70<br>(5.24 to<br>10.48)                                 | 0.21<br>(0.14 to<br>0.29)                         | 0.36<br>(0.26 to<br>0.48)                            | 0.39<br>(0.28 to<br>0.52)                           | 0.32<br>(0.23 to<br>0.42)                            |
| Pancreatic cancer                     | 15.65<br>(11.94 to<br>20.30)                               | 44.80<br>(32.11 to<br>61.59)                               | 44.41<br>(31.87 to<br>59.61)                               | 41.94<br>(29.79 to<br>58.09)                               | 0.68<br>(0.52 to<br>0.88)                         | 1.90<br>(1.41 to<br>2.49)                            | 1.94<br>(1.47 to<br>2.55)                           | 1.72<br>(1.27 to<br>2.32)                            |
| Larynx cancer                         | 4.21<br>(3.20 to<br>5.30)                                  | 8.85<br>(4.51 to<br>16.62)                                 | 4.90<br>(2.89 to<br>8.30)                                  | 12.54<br>(6.18 to<br>23.29)                                | 0.16<br>(0.13 to<br>0.20)                         | 0.33<br>(0.18 to<br>0.60)                            | 0.19<br>(0.12 to<br>0.31)                           | 0.46<br>(0.24 to<br>0.82)                            |
| Tracheal, bronchus, and lung cancer   | 28.20<br>(21.60 to<br>35.93)                               | 80.52<br>(42.16 to<br>143.65)                              | 41.73<br>(24.87 to<br>67.94)                               | 96.06<br>(48.84 to<br>171.43)                              | 1.18<br>(0.92 to<br>1.47)                         | 3.20<br>(1.82 to<br>5.38)                            | 1.74<br>(1.10 to<br>2.70)                           | 3.75<br>(2.07 to<br>6.42)                            |

|                          |                           |                            |                            |                            |                        |                        |                        |                        |
|--------------------------|---------------------------|----------------------------|----------------------------|----------------------------|------------------------|------------------------|------------------------|------------------------|
| Malignant skin melanoma  | 1.56<br>(1.16 to 2.18)    | 4.14<br>(3.09 to 5.74)     | 4.57<br>(3.40 to 6.37)     | 3.57<br>(2.68 to 4.96)     | 0.06<br>(0.04 to 0.08) | 0.16<br>(0.13 to 0.21) | 0.18<br>(0.14 to 0.24) | 0.13<br>(0.10 to 0.17) |
| Non-melanoma skin cancer | 1.23<br>(0.98 to 1.53)    | 2.65<br>(2.10 to 3.40)     | 2.64<br>(2.08 to 3.41)     | 2.77<br>(2.21 to 3.57)     | 0.05<br>(0.04 to 0.06) | 0.11<br>(0.09 to 0.12) | 0.11<br>(0.10 to 0.13) | 0.10<br>(0.09 to 0.12) |
| Breast cancer            | 33.86<br>(22.72 to 48.08) | 80.87<br>(46.98 to 134.79) | 79.56<br>(46.74 to 130.40) | 86.86<br>(48.06 to 155.78) | 1.09<br>(0.73 to 1.53) | 2.69<br>(1.65 to 4.40) | 2.69<br>(1.66 to 4.33) | 2.82<br>(1.63 to 4.93) |
| Cervical cancer          | 36.23<br>(20.18 to 54.09) | 58.11<br>(30.22 to 93.56)  | 54.91<br>(28.74 to 88.36)  | 64.23<br>(32.92 to 103.76) | 1.16<br>(0.66 to 1.72) | 1.86<br>(1.03 to 2.89) | 1.79<br>(1.00 to 2.77) | 2.02<br>(1.09 to 3.16) |
| Uterine cancer           | 5.11<br>(3.16 to 7.43)    | 9.72<br>(6.19 to 14.01)    | 9.29<br>(5.81 to 13.53)    | 10.59<br>(6.65 to 15.07)   | 0.21<br>(0.13 to 0.30) | 0.40<br>(0.27 to 0.56) | 0.39<br>(0.26 to 0.55) | 0.42<br>(0.29 to 0.58) |
| Ovarian cancer           | 6.11<br>(3.94 to 9.28)    | 17.48<br>(10.33 to 27.42)  | 18.31<br>(10.76 to 28.70)  | 16.00<br>(9.37 to 25.12)   | 0.20<br>(0.13 to 0.30) | 0.58<br>(0.35 to 0.88) | 0.61<br>(0.37 to 0.94) | 0.52<br>(0.32 to 0.81) |
| Prostate cancer          | 19.34<br>(11.68 to 24.45) | 48.68<br>(29.97 to 66.53)  | 53.43<br>(33.57 to 66.51)  | 42.77<br>(25.75 to 53.69)  | 1.12<br>(0.68 to 1.41) | 2.82<br>(1.75 to 3.49) | 3.20<br>(2.03 to 3.90) | 2.38<br>(1.46 to 3.00) |
| Testicular cancer        | 0.95<br>(0.47 to 1.37)    | 1.49<br>(0.71 to 2.35)     | 1.46<br>(0.69 to 2.28)     | 1.60<br>(0.75 to 2.51)     | 0.02<br>(0.01 to 0.03) | 0.04<br>(0.02 to 0.05) | 0.04<br>(0.02 to 0.05) | 0.04<br>(0.02 to 0.06) |

**Cameroon**

| Cause                           | YLLs (in 1000s)           |                           |                           |                           | Deaths (in 1000s)      |                        |                        |                        |
|---------------------------------|---------------------------|---------------------------|---------------------------|---------------------------|------------------------|------------------------|------------------------|------------------------|
|                                 | 2016                      | 2040 Forecast             | 2040 Better Scenario      | 2040 Worse Scenario       | 2016                   | 2040 Forecast          | 2040 Better Scenario   | 2040 Worse Scenario    |
| Kidney cancer                   | 6.70<br>(4.87 to 9.24)    | 15.38<br>(10.76 to 23.32) | 15.68<br>(10.94 to 23.03) | 14.70<br>(10.19 to 22.38) | 0.18<br>(0.13 to 0.23) | 0.49<br>(0.36 to 0.71) | 0.52<br>(0.38 to 0.73) | 0.44<br>(0.32 to 0.63) |
| Bladder cancer                  | 7.01<br>(5.52 to 8.97)    | 17.49<br>(11.89 to 25.74) | 15.61<br>(11.09 to 21.33) | 17.79<br>(11.88 to 26.62) | 0.30<br>(0.24 to 0.38) | 0.72<br>(0.54 to 1.00) | 0.69<br>(0.53 to 0.90) | 0.72<br>(0.51 to 1.00) |
| Brain and nervous system cancer | 19.78<br>(11.87 to 32.35) | 42.29<br>(25.02 to 71.21) | 43.54<br>(25.84 to 72.12) | 43.12<br>(25.18 to 72.78) | 0.43<br>(0.26 to 0.70) | 1.08<br>(0.66 to 1.75) | 1.14<br>(0.71 to 1.85) | 1.03<br>(0.64 to 1.69) |
| Thyroid cancer                  | 1.38<br>(1.03 to 1.81)    | 2.88<br>(1.90 to 4.20)    | 2.68<br>(1.78 to 3.90)    | 3.30<br>(2.11 to 4.90)    | 0.05<br>(0.03 to 0.06) | 0.10<br>(0.07 to 0.14) | 0.09<br>(0.06 to 0.13) | 0.11<br>(0.07 to 0.15) |
| Mesothelioma                    | 0.68<br>(0.49 to 0.91)    | 1.52<br>(1.07 to 2.11)    | 1.52<br>(1.07 to 2.11)    | 1.56<br>(1.09 to 2.17)    | 0.02<br>(0.02 to 0.03) | 0.05<br>(0.04 to 0.07) | 0.05<br>(0.04 to 0.07) | 0.05<br>(0.04 to 0.07) |
| Hodgkin lymphoma                | 2.64<br>(1.83 to 3.56)    | 2.69<br>(1.75 to 3.87)    | 2.40<br>(1.55 to 3.49)    | 3.45<br>(2.22 to 4.97)    | 0.05<br>(0.04 to 0.07) | 0.06<br>(0.04 to 0.08) | 0.06<br>(0.04 to 0.08) | 0.08<br>(0.05 to 0.10) |
| Non-Hodgkin lymphoma            | 24.08<br>(18.64 to 31.69) | 46.50<br>(33.37 to 66.34) | 47.29<br>(33.96 to 67.59) | 48.33<br>(34.82 to 68.87) | 0.52<br>(0.40 to 0.69) | 1.19<br>(0.89 to 1.61) | 1.24<br>(0.93 to 1.71) | 1.16<br>(0.87 to 1.59) |
| Multiple myeloma                | 4.39<br>(2.96 to 6.46)    | 13.01<br>(8.37 to 19.22)  | 13.63<br>(8.80 to 20.11)  | 12.20<br>(7.73 to 18.44)  | 0.16<br>(0.11 to 0.23) | 0.48<br>(0.32 to 0.70) | 0.52<br>(0.34 to 0.75) | 0.44<br>(0.29 to 0.65) |
| Leukemia                        | 25.80<br>(20.36 to 33.45) | 42.55<br>(30.25 to 60.06) | 41.18<br>(29.33 to 57.67) | 45.98<br>(32.60 to 65.50) | 0.55<br>(0.44 to 0.71) | 1.08<br>(0.80 to 1.48) | 1.06<br>(0.79 to 1.43) | 1.11<br>(0.81 to 1.52) |
| Acute lymphoid leukemia         | 5.14<br>(3.85 to 7.00)    | 7.92<br>(5.36 to 12.13)   | 7.76<br>(5.25 to 11.92)   | 8.70<br>(5.89 to 13.40)   | 0.09<br>(0.07 to 0.12) | 0.16<br>(0.11 to 0.23) | 0.16<br>(0.11 to 0.23) | 0.17<br>(0.11 to 0.24) |
| Chronic lymphoid leukemia       | 0.98<br>(0.71 to 1.31)    | 1.99<br>(1.42 to 2.78)    | 1.96<br>(1.41 to 2.68)    | 2.02<br>(1.42 to 2.84)    | 0.04<br>(0.03 to 0.06) | 0.09<br>(0.07 to 0.12) | 0.09<br>(0.07 to 0.12) | 0.09<br>(0.06 to 0.13) |
| Acute myeloid leukemia          | 10.13<br>(7.81 to 12.86)  | 19.92<br>(13.96 to 28.46) | 19.81<br>(14.12 to 28.41) | 20.68<br>(14.44 to 29.96) | 0.19<br>(0.15 to 0.24) | 0.46<br>(0.33 to 0.65) | 0.47<br>(0.34 to 0.64) | 0.46<br>(0.32 to 0.64) |

|                                               |                                          |                                            |                                          |                                              |                                       |                                       |                                       |                                       |
|-----------------------------------------------|------------------------------------------|--------------------------------------------|------------------------------------------|----------------------------------------------|---------------------------------------|---------------------------------------|---------------------------------------|---------------------------------------|
| Chronic myeloid leukemia                      | 2.80<br>(1.98 to<br>3.92)                | 3.64<br>(2.29 to<br>5.49)                  | 3.46<br>(2.21 to<br>5.16)                | 3.82<br>(2.37 to<br>5.87)                    | 0.07<br>(0.05 to<br>0.09)             | 0.10<br>(0.07 to<br>0.14)             | 0.10<br>(0.07 to<br>0.14)             | 0.10<br>(0.07 to<br>0.15)             |
| Other leukemia                                | 6.75<br>(4.57 to<br>9.73)                | 9.08<br>(5.80 to<br>13.74)                 | 8.19<br>(5.29 to<br>12.28)               | 10.76<br>(6.88 to<br>16.50)                  | 0.16<br>(0.11 to<br>0.22)             | 0.27<br>(0.19 to<br>0.38)             | 0.25<br>(0.17 to<br>0.35)             | 0.30<br>(0.21 to<br>0.43)             |
| Other neoplasms                               | 36.58<br>(27.65 to<br>52.30)             | 65.26<br>(47.33 to<br>95.13)               | 66.02<br>(47.57 to<br>96.18)             | 70.18<br>(50.48 to<br>104.70)                | 0.85<br>(0.65 to<br>1.19)             | 1.85<br>(1.44 to<br>2.52)             | 1.96<br>(1.51 to<br>2.67)             | 1.80<br>(1.40 to<br>2.48)             |
| <b>Cardiovascular diseases</b>                | <b>598.10<br/>(473.60 to<br/>734.49)</b> | <b>754.41<br/>(513.20 to<br/>1,083.33)</b> | <b>515.86<br/>(362.64 to<br/>716.27)</b> | <b>1,235.84<br/>(798.73 to<br/>1,827.65)</b> | <b>24.82<br/>(19.99 to<br/>30.37)</b> | <b>34.17<br/>(25.01 to<br/>49.08)</b> | <b>24.98<br/>(19.09 to<br/>34.85)</b> | <b>51.51<br/>(36.24 to<br/>72.53)</b> |
| Rheumatic heart disease                       | 17.23<br>(12.54 to<br>22.47)             | 10.58<br>(7.20 to<br>15.34)                | 9.32<br>(6.25 to<br>13.69)               | 14.10<br>(9.39 to<br>20.59)                  | 0.50<br>(0.37 to<br>0.65)             | 0.40<br>(0.30 to<br>0.55)             | 0.37<br>(0.27 to<br>0.49)             | 0.48<br>(0.36 to<br>0.65)             |
| Ischemic heart disease                        | 217.84<br>(165.73 to<br>280.94)          | 287.57<br>(153.57 to<br>516.31)            | 167.49<br>(93.64 to<br>295.01)           | 482.88<br>(261.67 to<br>852.28)              | 10.42<br>(8.13 to<br>13.07)           | 14.19<br>(8.31 to<br>24.62)           | 9.15<br>(5.56 to<br>15.74)            | 21.93<br>(12.64 to<br>38.10)          |
| Stroke                                        | 223.97<br>(165.02 to<br>290.47)          | 222.94<br>(127.53 to<br>383.26)            | 130.70<br>(77.12 to<br>222.73)           | 447.77<br>(248.38 to<br>775.97)              | 9.09<br>(6.85 to<br>11.64)            | 10.27<br>(6.43 to<br>18.27)           | 6.68<br>(4.18 to<br>11.94)            | 18.35<br>(11.11 to<br>31.27)          |
| Ischemic stroke                               | 62.36<br>(44.08 to<br>81.27)             | 69.65<br>(37.83 to<br>152.46)              | 45.56<br>(26.16 to<br>98.26)             | 112.98<br>(60.14 to<br>234.12)               | 3.56<br>(2.64 to<br>4.57)             | 4.32<br>(2.46 to<br>10.48)            | 3.13<br>(1.85 to<br>7.22)             | 6.30<br>(3.52 to<br>15.15)            |
| Intracerebral hemorrhage                      | 161.60<br>(118.61 to<br>209.40)          | 153.29<br>(83.99 to<br>272.75)             | 85.14<br>(48.00 to<br>146.27)            | 334.79<br>(170.76 to<br>617.47)              | 5.53<br>(4.13 to<br>7.16)             | 5.95<br>(3.44 to<br>10.30)            | 3.54<br>(2.13 to<br>5.67)             | 12.04<br>(6.66 to<br>21.38)           |
| Hypertensive heart disease                    | 27.36<br>(14.25 to<br>41.48)             | 42.46<br>(20.25 to<br>79.41)               | 33.46<br>(16.84 to<br>57.94)             | 63.84<br>(27.46 to<br>133.65)                | 1.22<br>(0.66 to<br>1.84)             | 2.01<br>(1.01 to<br>3.54)             | 1.66<br>(0.89 to<br>2.68)             | 2.85<br>(1.29 to<br>5.58)             |
| Cardiomyopathy and myocarditis                | 16.16<br>(12.15 to<br>22.54)             | 29.75<br>(19.50 to<br>45.95)               | 29.87<br>(19.59 to<br>46.18)             | 31.53<br>(20.73 to<br>49.17)                 | 0.44<br>(0.33 to<br>0.61)             | 0.95<br>(0.67 to<br>1.40)             | 1.00<br>(0.70 to<br>1.44)             | 0.93<br>(0.66 to<br>1.40)             |
| Myocarditis                                   | 2.63<br>(2.42 to<br>5.61)                | 4.78<br>(2.90 to<br>7.75)                  | 4.63<br>(2.81 to<br>7.48)                | 5.39<br>(3.28 to<br>8.75)                    | 0.07<br>(0.05 to<br>0.11)             | 0.11<br>(0.08 to<br>0.17)             | 0.12<br>(0.08 to<br>0.17)             | 0.12<br>(0.08 to<br>0.18)             |
| <b>Cameroon</b>                               |                                          |                                            |                                          |                                              |                                       |                                       |                                       |                                       |
| Cause                                         | YLLs (in 1000s)                          |                                            |                                          |                                              | Deaths (in 1000s)                     |                                       |                                       |                                       |
|                                               | 2016                                     | 2040 Forecast                              | 2040 Better Scenario                     | 2040 Worse Scenario                          | 2016                                  | 2040 Forecast                         | 2040 Better Scenario                  | 2040 Worse Scenario                   |
| Alcoholic cardiomyopathy                      | 1.38<br>(0.91 to<br>2.41)                | 3.11<br>(1.88 to<br>5.57)                  | 3.18<br>(1.92 to<br>5.69)                | 3.46<br>(2.14 to<br>5.99)                    | 0.04<br>(0.03 to<br>0.08)             | 0.10<br>(0.06 to<br>0.17)             | 0.10<br>(0.07 to<br>0.18)             | 0.11<br>(0.07 to<br>0.19)             |
| Other cardiomyopathy                          | 11.14<br>(8.37 to<br>15.52)              | 21.86<br>(13.76 to<br>35.61)               | 22.06<br>(14.03 to<br>35.18)             | 22.68<br>(14.39 to<br>37.37)                 | 0.32<br>(0.25 to<br>0.44)             | 0.74<br>(0.51 to<br>1.10)             | 0.78<br>(0.54 to<br>1.13)             | 0.71<br>(0.49 to<br>1.10)             |
| Atrial fibrillation and flutter               | 2.56<br>(1.92 to<br>3.43)                | 5.85<br>(4.23 to<br>7.90)                  | 6.18<br>(4.57 to<br>8.23)                | 5.79<br>(4.11 to<br>8.08)                    | 0.22<br>(0.17 to<br>0.30)             | 0.53<br>(0.36 to<br>0.75)             | 0.59<br>(0.42 to<br>0.75)             | 0.48<br>(0.32 to<br>0.69)             |
| Aortic aneurysm                               | 3.31<br>(2.31 to<br>4.68)                | 6.80<br>(4.54 to<br>10.07)                 | 6.69<br>(4.53 to<br>9.58)                | 6.67<br>(4.36 to<br>10.11)                   | 0.14<br>(0.11 to<br>0.20)             | 0.31<br>(0.22 to<br>0.43)             | 0.32<br>(0.23 to<br>0.44)             | 0.28<br>(0.20 to<br>0.41)             |
| Peripheral artery disease                     | 0.29<br>(0.18 to<br>0.48)                | 1.17<br>(0.70 to<br>1.97)                  | 1.28<br>(0.74 to<br>2.20)                | 0.97<br>(0.57 to<br>1.64)                    | 0.02<br>(0.01 to<br>0.03)             | 0.08<br>(0.05 to<br>0.13)             | 0.09<br>(0.05 to<br>0.15)             | 0.06<br>(0.04 to<br>0.10)             |
| Endocarditis                                  | 12.80<br>(8.67 to<br>18.47)              | 20.54<br>(13.04 to<br>31.63)               | 19.76<br>(12.64 to<br>30.05)             | 24.22<br>(15.52 to<br>38.46)                 | 0.32<br>(0.23 to<br>0.43)             | 0.63<br>(0.44 to<br>0.89)             | 0.64<br>(0.44 to<br>0.89)             | 0.67<br>(0.45 to<br>0.96)             |
| Other cardiovascular and circulatory diseases | 76.58<br>(56.45 to<br>113.24)            | 126.73<br>(88.63 to<br>185.79)             | 111.11<br>(78.35 to<br>158.06)           | 158.07<br>(108.84 to<br>233.86)              | 2.45<br>(1.78 to<br>3.65)             | 4.80<br>(3.57 to<br>7.01)             | 4.48<br>(3.38 to<br>6.32)             | 5.48<br>(3.99 to<br>8.07)             |
| <b>Chronic respiratory diseases</b>           | <b>114.94<br/>(92.69 to<br/>143.17)</b>  | <b>152.59<br/>(94.83 to<br/>242.78)</b>    | <b>100.27<br/>(68.13 to<br/>148.33)</b>  | <b>214.97<br/>(127.89 to<br/>361.27)</b>     | <b>4.49<br/>(3.64 to<br/>5.58)</b>    | <b>6.23<br/>(4.07 to<br/>9.72)</b>    | <b>4.16<br/>(3.02 to<br/>5.85)</b>    | <b>8.48<br/>(5.28 to<br/>14.14)</b>   |

|                                                                |                                                      |                                                      |                                                      |                                                      |                                                |                                                  |                                                 |                                                  |
|----------------------------------------------------------------|------------------------------------------------------|------------------------------------------------------|------------------------------------------------------|------------------------------------------------------|------------------------------------------------|--------------------------------------------------|-------------------------------------------------|--------------------------------------------------|
| Chronic obstructive pulmonary disease                          | 64.81<br>(51.53 to<br>82.46)                         | 96.46<br>(50.99 to<br>180.91)                        | 51.15<br>(30.29 to<br>87.83)                         | 145.72<br>(73.53 to<br>278.44)                       | 2.99<br>(2.39 to<br>3.77)                      | 4.38<br>(2.59 to<br>7.57)                        | 2.47<br>(1.59 to<br>3.93)                       | 6.33<br>(3.46 to<br>11.59)                       |
| Pneumoconiosis                                                 | 0.18<br>(0.13 to<br>0.26)                            | 0.22<br>(0.15 to<br>0.31)                            | 0.21<br>(0.14 to<br>0.30)                            | 0.23<br>(0.16 to<br>0.32)                            | 0.01<br>(0.00 to<br>0.01)                      | 0.01<br>(0.01 to<br>0.01)                        | 0.01<br>(0.01 to<br>0.01)                       | 0.01<br>(0.01 to<br>0.01)                        |
| Silicosis                                                      | 0.02<br>(0.01 to<br>0.03)                            | 0.02<br>(0.01 to<br>0.03)                            | 0.02<br>(0.01 to<br>0.03)                            | 0.02<br>(0.01 to<br>0.03)                            | 0.00<br>(0.00 to<br>0.00)                      | 0.00<br>(0.00 to<br>0.00)                        | 0.00<br>(0.00 to<br>0.00)                       | 0.00<br>(0.00 to<br>0.00)                        |
| Asbestosis                                                     | 0.04<br>(0.03 to<br>0.07)                            | 0.07<br>(0.04 to<br>0.11)                            | 0.07<br>(0.04 to<br>0.11)                            | 0.06<br>(0.04 to<br>0.10)                            | 0.00<br>(0.00 to<br>0.00)                      | 0.00<br>(0.00 to<br>0.00)                        | 0.00<br>(0.00 to<br>0.00)                       | 0.00<br>(0.00 to<br>0.00)                        |
| Coal workers pneumoconiosis                                    | 0.01<br>(0.00 to<br>0.01)                            | 0.01<br>(0.00 to<br>0.01)                            | 0.01<br>(0.00 to<br>0.01)                            | 0.01<br>(0.01 to<br>0.02)                            | 0.00<br>(0.00 to<br>0.00)                      | 0.00<br>(0.00 to<br>0.00)                        | 0.00<br>(0.00 to<br>0.00)                       | 0.00<br>(0.00 to<br>0.00)                        |
| Other pneumoconiosis                                           | 0.11<br>(0.07 to<br>0.16)                            | 0.12<br>(0.09 to<br>0.18)                            | 0.12<br>(0.08 to<br>0.17)                            | 0.13<br>(0.09 to<br>0.19)                            | 0.00<br>(0.00 to<br>0.01)                      | 0.01<br>(0.00 to<br>0.01)                        | 0.01<br>(0.00 to<br>0.01)                       | 0.01<br>(0.00 to<br>0.01)                        |
| Asthma                                                         | 32.55<br>(23.71 to<br>43.16)                         | 26.03<br>(15.29 to<br>40.71)                         | 21.10<br>(12.55 to<br>32.66)                         | 36.04<br>(20.45 to<br>57.79)                         | 1.02<br>(0.74 to<br>1.33)                      | 0.92<br>(0.56 to<br>1.42)                        | 0.78<br>(0.49 to<br>1.17)                       | 1.19<br>(0.70 to<br>1.89)                        |
| Interstitial lung disease and pulmonary sarcoidosis            | 1.13<br>(0.75 to<br>1.63)                            | 3.06<br>(2.03 to<br>4.25)                            | 3.40<br>(2.27 to<br>4.80)                            | 2.63<br>(1.76 to<br>3.67)                            | 0.04<br>(0.03 to<br>0.06)                      | 0.12<br>(0.08 to<br>0.17)                        | 0.14<br>(0.10 to<br>0.19)                       | 0.10<br>(0.07 to<br>0.14)                        |
| Other chronic respiratory diseases                             | 16.27<br>(10.33 to<br>23.13)                         | 26.83<br>(17.49 to<br>40.15)                         | 24.41<br>(16.45 to<br>35.25)                         | 30.36<br>(19.40 to<br>46.02)                         | 0.43<br>(0.27 to<br>0.59)                      | 0.80<br>(0.51 to<br>1.16)                        | 0.76<br>(0.51 to<br>1.05)                       | 0.85<br>(0.53 to<br>1.24)                        |
| <b>Cirrhosis and other chronic liver diseases</b>              | <b>183.63</b><br><b>(109.17 to</b><br><b>271.50)</b> | <b>334.08</b><br><b>(190.38 to</b><br><b>505.85)</b> | <b>317.77</b><br><b>(177.52 to</b><br><b>479.83)</b> | <b>390.15</b><br><b>(220.21 to</b><br><b>584.98)</b> | <b>5.20</b><br><b>(3.07 to</b><br><b>7.66)</b> | <b>10.10</b><br><b>(5.97 to</b><br><b>14.85)</b> | <b>9.79</b><br><b>(5.76 to</b><br><b>14.37)</b> | <b>11.50</b><br><b>(6.74 to</b><br><b>16.96)</b> |
| Cirrhosis and other chronic liver diseases due to hepatitis B  | 69.62<br>(39.79 to<br>107.02)                        | 140.38<br>(77.43 to<br>214.26)                       | 137.04<br>(74.82 to<br>208.71)                       | 148.32<br>(81.34 to<br>229.11)                       | 2.10<br>(1.21 to<br>3.14)                      | 4.37<br>(2.52 to<br>6.57)                        | 4.34<br>(2.49 to<br>6.49)                       | 4.51<br>(2.59 to<br>6.80)                        |
| Cirrhosis and other chronic liver diseases due to hepatitis C  | 27.43<br>(13.76 to<br>47.17)                         | 58.16<br>(27.33 to<br>105.34)                        | 56.71<br>(26.87 to<br>102.58)                        | 61.58<br>(28.72 to<br>111.95)                        | 0.82<br>(0.42 to<br>1.38)                      | 1.78<br>(0.89 to<br>3.09)                        | 1.77<br>(0.88 to<br>3.01)                       | 1.85<br>(0.91 to<br>3.24)                        |
| Cirrhosis and other chronic liver diseases due to alcohol use  | 44.05<br>(24.84 to<br>66.88)                         | 78.15<br>(42.60 to<br>122.05)                        | 69.75<br>(37.54 to<br>108.43)                        | 112.95<br>(61.75 to<br>174.42)                       | 1.38<br>(0.80 to<br>2.07)                      | 2.51<br>(1.44 to<br>3.79)                        | 2.28<br>(1.31 to<br>3.46)                       | 3.55<br>(2.07 to<br>5.34)                        |
| Cirrhosis and other chronic liver diseases due to other causes | 42.53<br>(25.87 to<br>61.43)                         | 57.39<br>(31.09 to<br>88.79)                         | 54.26<br>(29.52 to<br>84.42)                         | 67.30<br>(37.03 to<br>104.57)                        | 0.89<br>(0.53 to<br>1.28)                      | 1.44<br>(0.80 to<br>2.14)                        | 1.40<br>(0.78 to<br>2.10)                       | 1.59<br>(0.89 to<br>2.36)                        |
| <b>Digestive diseases</b>                                      | <b>148.33</b><br><b>(103.41 to</b><br><b>197.48)</b> | <b>183.23</b><br><b>(130.92 to</b><br><b>251.83)</b> | <b>168.08</b><br><b>(121.04 to</b><br><b>229.16)</b> | <b>232.29</b><br><b>(159.53 to</b><br><b>334.32)</b> | <b>3.96</b><br><b>(2.94 to</b><br><b>5.01)</b> | <b>5.99</b><br><b>(4.64 to</b><br><b>7.66)</b>   | <b>5.75</b><br><b>(4.48 to</b><br><b>7.30)</b>  | <b>6.97</b><br><b>(5.27 to</b><br><b>9.28)</b>   |
| Peptic ulcer disease                                           | 26.07<br>(18.36 to<br>35.80)                         | 21.00<br>(14.41 to<br>31.13)                         | 17.95<br>(12.27 to<br>26.33)                         | 27.68<br>(18.93 to<br>40.98)                         | 0.79<br>(0.57 to<br>1.08)                      | 0.75<br>(0.55 to<br>1.05)                        | 0.66<br>(0.48 to<br>0.93)                       | 0.92<br>(0.67 to<br>1.29)                        |
| <b>Cameroon</b>                                                |                                                      |                                                      |                                                      |                                                      |                                                |                                                  |                                                 |                                                  |
| Cause                                                          | YLLs (in 1000s)                                      |                                                      |                                                      |                                                      | Deaths (in 1000s)                              |                                                  |                                                 |                                                  |
|                                                                | 2016                                                 | 2040 Forecast                                        | 2040 Better Scenario                                 | 2040 Worse Scenario                                  | 2016                                           | 2040 Forecast                                    | 2040 Better Scenario                            | 2040 Worse Scenario                              |
| Gastritis and duodenitis                                       | 6.84<br>(4.14 to<br>10.91)                           | 10.26<br>(6.27 to<br>15.83)                          | 9.72<br>(5.99 to<br>14.91)                           | 11.68<br>(6.95 to<br>18.69)                          | 0.16<br>(0.11 to<br>0.24)                      | 0.27<br>(0.18 to<br>0.39)                        | 0.26<br>(0.18 to<br>0.38)                       | 0.29<br>(0.19 to<br>0.44)                        |
| Appendicitis                                                   | 12.59<br>(6.87 to<br>25.01)                          | 11.28<br>(7.21 to<br>17.07)                          | 10.17<br>(6.51 to<br>15.20)                          | 14.70<br>(8.78 to<br>23.85)                          | 0.30<br>(0.19 to<br>0.46)                      | 0.36<br>(0.25 to<br>0.48)                        | 0.35<br>(0.24 to<br>0.46)                       | 0.42<br>(0.29 to<br>0.58)                        |
| Paralytic ileus and intestinal obstruction                     | 48.99<br>(31.03 to<br>77.25)                         | 62.26<br>(43.83 to<br>90.87)                         | 60.33<br>(42.80 to<br>87.10)                         | 73.85<br>(49.79 to<br>112.82)                        | 1.13<br>(0.81 to<br>1.58)                      | 1.97<br>(1.51 to<br>2.65)                        | 2.02<br>(1.55 to<br>2.70)                       | 2.06<br>(1.53 to<br>2.81)                        |
| Inguinal, femoral, and abdominal hernia                        | 5.36<br>(3.46 to<br>8.12)                            | 5.69<br>(3.60 to<br>8.99)                            | 5.39<br>(3.45 to<br>8.65)                            | 6.62<br>(4.19 to<br>10.58)                           | 0.18<br>(0.12 to<br>0.28)                      | 0.22<br>(0.14 to<br>0.35)                        | 0.22<br>(0.14 to<br>0.35)                       | 0.23<br>(0.15 to<br>0.37)                        |

|                                         |                                  |                                    |                                    |                                    |                               |                               |                               |                               |
|-----------------------------------------|----------------------------------|------------------------------------|------------------------------------|------------------------------------|-------------------------------|-------------------------------|-------------------------------|-------------------------------|
| Inflammatory bowel disease              | 3.39<br>(1.73 to 7.62)           | 5.85<br>(3.51 to 10.28)            | 5.88<br>(3.56 to 10.19)            | 6.15<br>(3.54 to 11.69)            | 0.09<br>(0.05 to 0.16)        | 0.18<br>(0.12 to 0.29)        | 0.19<br>(0.13 to 0.30)        | 0.18<br>(0.12 to 0.29)        |
| Vascular intestinal disorders           | 2.90<br>(1.78 to 4.70)           | 4.32<br>(2.90 to 6.26)             | 4.29<br>(2.88 to 6.23)             | 4.71<br>(3.07 to 7.09)             | 0.10<br>(0.07 to 0.14)        | 0.19<br>(0.13 to 0.26)        | 0.20<br>(0.14 to 0.28)        | 0.18<br>(0.13 to 0.26)        |
| Gallbladder and biliary diseases        | 6.67<br>(4.42 to 8.95)           | 8.99<br>(5.23 to 14.65)            | 7.35<br>(4.33 to 11.63)            | 12.62<br>(6.98 to 20.59)           | 0.22<br>(0.15 to 0.30)        | 0.34<br>(0.21 to 0.55)        | 0.29<br>(0.18 to 0.45)        | 0.45<br>(0.26 to 0.74)        |
| Pancreatitis                            | 16.48<br>(11.36 to 22.41)        | 29.63<br>(13.10 to 66.25)          | 24.80<br>(11.76 to 51.59)          | 45.24<br>(18.85 to 105.98)         | 0.46<br>(0.33 to 0.63)        | 0.87<br>(0.43 to 1.81)        | 0.75<br>(0.37 to 1.49)        | 1.30<br>(0.58 to 2.85)        |
| Other digestive diseases                | 19.04<br>(11.18 to 28.89)        | 23.94<br>(15.50 to 34.10)          | 22.18<br>(14.47 to 31.72)          | 29.03<br>(18.19 to 42.84)          | 0.53<br>(0.35 to 0.72)        | 0.83<br>(0.61 to 1.08)        | 0.81<br>(0.59 to 1.05)        | 0.92<br>(0.65 to 1.22)        |
| <b>Neurological disorders</b>           | <b>67.96</b><br>(50.11 to 89.40) | <b>116.21</b><br>(88.17 to 151.65) | <b>114.50</b><br>(88.65 to 147.83) | <b>130.72</b><br>(93.82 to 177.74) | <b>2.78</b><br>(2.24 to 3.43) | <b>6.37</b><br>(4.93 to 8.21) | <b>6.88</b><br>(5.59 to 8.68) | <b>5.96</b><br>(4.47 to 8.40) |
| Alzheimer's disease and other dementias | 20.44<br>(15.42 to 26.52)        | 51.45<br>(37.56 to 72.92)          | 54.04<br>(40.64 to 72.94)          | 47.75<br>(33.09 to 70.38)          | 1.81<br>(1.40 to 2.33)        | 4.70<br>(3.31 to 6.61)        | 5.19<br>(3.88 to 7.04)        | 4.08<br>(2.69 to 6.09)        |
| Parkinson's disease                     | 1.91<br>(1.34 to 2.54)           | 5.87<br>(4.39 to 7.52)             | 7.03<br>(5.23 to 8.92)             | 4.53<br>(3.35 to 5.90)             | 0.15<br>(0.10 to 0.20)        | 0.46<br>(0.34 to 0.61)        | 0.57<br>(0.43 to 0.74)        | 0.34<br>(0.24 to 0.46)        |
| Epilepsy                                | 36.69<br>(25.07 to 50.86)        | 43.04<br>(25.78 to 68.39)          | 37.31<br>(22.68 to 59.17)          | 61.51<br>(36.43 to 100.66)         | 0.66<br>(0.47 to 0.90)        | 0.89<br>(0.56 to 1.35)        | 0.78<br>(0.50 to 1.20)        | 1.22<br>(0.74 to 1.93)        |
| Multiple sclerosis                      | 0.43<br>(0.29 to 0.66)           | 1.06<br>(0.66 to 1.65)             | 1.10<br>(0.68 to 1.72)             | 0.98<br>(0.61 to 1.53)             | 0.01<br>(0.01 to 0.02)        | 0.03<br>(0.02 to 0.05)        | 0.03<br>(0.02 to 0.05)        | 0.03<br>(0.02 to 0.04)        |
| Motor neuron disease                    | 0.95<br>(0.55 to 1.36)           | 1.98<br>(1.40 to 2.67)             | 2.11<br>(1.50 to 2.82)             | 1.88<br>(1.29 to 2.55)             | 0.02<br>(0.02 to 0.03)        | 0.06<br>(0.04 to 0.08)        | 0.06<br>(0.05 to 0.08)        | 0.05<br>(0.04 to 0.07)        |
| Other neurological disorders            | 7.55<br>(3.43 to 13.32)          | 12.81<br>(6.40 to 22.00)           | 12.91<br>(6.61 to 21.85)           | 14.08<br>(6.57 to 25.08)           | 0.12<br>(0.06 to 0.21)        | 0.24<br>(0.13 to 0.39)        | 0.25<br>(0.14 to 0.40)        | 0.25<br>(0.13 to 0.42)        |
| <b>Mental disorders</b>                 | <b>24.29</b><br>(16.75 to 35.15) | <b>50.02</b><br>(31.52 to 76.26)   | <b>49.99</b><br>(31.82 to 75.70)   | <b>51.91</b><br>(32.62 to 80.30)   | <b>0.59</b><br>(0.42 to 0.87) | <b>1.24</b><br>(0.83 to 1.86) | <b>1.26</b><br>(0.85 to 1.88) | <b>1.26</b><br>(0.85 to 1.91) |
| Alcohol use disorders                   | 11.26<br>(6.41 to 22.49)         | 18.94<br>(9.52 to 40.49)           | 18.58<br>(9.27 to 39.75)           | 20.84<br>(10.57 to 43.13)          | 0.31<br>(0.18 to 0.61)        | 0.54<br>(0.28 to 1.13)        | 0.54<br>(0.28 to 1.13)        | 0.58<br>(0.31 to 1.19)        |
| Drug use disorders                      | 12.97<br>(6.95 to 19.30)         | 30.94<br>(16.50 to 49.06)          | 31.27<br>(16.67 to 49.31)          | 30.93<br>(16.33 to 49.20)          | 0.28<br>(0.15 to 0.40)        | 0.70<br>(0.37 to 1.04)        | 0.72<br>(0.39 to 1.06)        | 0.68<br>(0.36 to 1.02)        |
| Opioid use disorders                    | 12.05<br>(6.26 to 17.81)         | 28.30<br>(14.72 to 44.42)          | 28.51<br>(14.92 to 44.54)          | 28.39<br>(14.64 to 44.58)          | 0.25<br>(0.13 to 0.36)        | 0.60<br>(0.31 to 0.90)        | 0.61<br>(0.32 to 0.92)        | 0.59<br>(0.31 to 0.90)        |
| Cocaine use disorders                   | 0.16<br>(0.08 to 0.28)           | 0.46<br>(0.22 to 0.84)             | 0.46<br>(0.22 to 0.83)             | 0.49<br>(0.23 to 0.90)             | 0.00<br>(0.00 to 0.01)        | 0.01<br>(0.01 to 0.02)        | 0.01<br>(0.01 to 0.02)        | 0.01<br>(0.01 to 0.02)        |
| Amphetamine use disorders               | 0.08<br>(0.04 to 0.14)           | 0.33<br>(0.15 to 0.59)             | 0.33<br>(0.15 to 0.58)             | 0.36<br>(0.16 to 0.66)             | 0.00<br>(0.00 to 0.00)        | 0.01<br>(0.00 to 0.02)        | 0.01<br>(0.00 to 0.02)        | 0.01<br>(0.00 to 0.02)        |
| Other drug use disorders                | 0.67<br>(0.33 to 1.15)           | 1.84<br>(0.90 to 3.31)             | 1.97<br>(0.98 to 3.53)             | 1.69<br>(0.83 to 3.06)             | 0.03<br>(0.01 to 0.04)        | 0.07<br>(0.04 to 0.11)        | 0.08<br>(0.04 to 0.13)        | 0.06<br>(0.03 to 0.10)        |
| Eating disorders                        | 0.07<br>(0.04 to 0.12)           | 0.14<br>(0.07 to 0.25)             | 0.14<br>(0.07 to 0.26)             | 0.14<br>(0.07 to 0.25)             | 0.00<br>(0.00 to 0.00)        | 0.00<br>(0.00 to 0.00)        | 0.00<br>(0.00 to 0.00)        | 0.00<br>(0.00 to 0.00)        |

**Cameroon**

| Cause | YLLs (in 1000s) |               |                      |                     | Deaths (in 1000s) |               |                      |                     |
|-------|-----------------|---------------|----------------------|---------------------|-------------------|---------------|----------------------|---------------------|
|       | 2016            | 2040 Forecast | 2040 Better Scenario | 2040 Worse Scenario | 2016              | 2040 Forecast | 2040 Better Scenario | 2040 Worse Scenario |

|                                                            |                                               |                                               |                                               |                                                 |                                           |                                            |                                            |                                            |
|------------------------------------------------------------|-----------------------------------------------|-----------------------------------------------|-----------------------------------------------|-------------------------------------------------|-------------------------------------------|--------------------------------------------|--------------------------------------------|--------------------------------------------|
|                                                            | <b>382.24</b><br>(303.93 to<br><b>462.88)</b> | <b>558.84</b><br>(400.69 to<br><b>812.27)</b> | <b>478.16</b><br>(345.10 to<br><b>669.80)</b> | <b>734.47</b><br>(521.47 to<br><b>1,063.60)</b> | <b>10.16</b><br>(8.23 to<br><b>12.16)</b> | <b>19.92</b><br>(14.39 to<br><b>31.87)</b> | <b>17.30</b><br>(12.66 to<br><b>26.71)</b> | <b>24.55</b><br>(17.58 to<br><b>38.73)</b> |
| <b>Diabetes, urogenital, blood, and endocrine diseases</b> |                                               |                                               |                                               |                                                 |                                           |                                            |                                            |                                            |
| Diabetes mellitus                                          | 92.19<br>(72.49 to<br>114.13)                 | 159.90<br>(110.43 to<br>234.98)               | 133.62<br>(92.33 to<br>194.98)                | 222.04<br>(147.22 to<br>336.29)                 | 4.00<br>(3.16 to<br>4.94)                 | 7.38<br>(5.43 to<br>10.10)                 | 6.47<br>(4.76 to<br>8.84)                  | 9.61<br>(6.77 to<br>13.58)                 |
| Acute glomerulonephritis                                   | 0.19<br>(0.16 to<br>0.23)                     | 0.27<br>(0.20 to<br>0.38)                     | 0.25<br>(0.18 to<br>0.35)                     | 0.36<br>(0.26 to<br>0.51)                       | 0.00<br>(0.00 to<br>0.00)                 | 0.00<br>(0.00 to<br>0.01)                  | 0.00<br>(0.00 to<br>0.01)                  | 0.01<br>(0.00 to<br>0.01)                  |
| Chronic kidney disease                                     | 92.94<br>(68.01 to<br>124.74)                 | 167.07<br>(72.56 to<br>407.52)                | 125.54<br>(57.26 to<br>288.68)                | 226.95<br>(99.14 to<br>538.10)                  | 2.52<br>(1.85 to<br>3.37)                 | 6.70<br>(2.20 to<br>19.45)                 | 5.01<br>(1.79 to<br>14.70)                 | 8.52<br>(2.85 to<br>23.61)                 |
| Chronic kidney disease due to diabetes mellitus            | 19.07<br>(13.49 to<br>26.55)                  | 52.46<br>(18.49 to<br>137.74)                 | 38.65<br>(14.69 to<br>104.05)                 | 68.25<br>(23.24 to<br>173.99)                   | 0.68<br>(0.49 to<br>0.93)                 | 2.29<br>(0.65 to<br>6.85)                  | 1.70<br>(0.53 to<br>5.48)                  | 2.87<br>(0.82 to<br>8.25)                  |
| Chronic kidney disease due to hypertension                 | 9.81<br>(6.74 to<br>13.64)                    | 29.19<br>(8.66 to<br>88.90)                   | 21.28<br>(6.95 to<br>63.91)                   | 37.58<br>(11.07 to<br>107.42)                   | 0.46<br>(0.32 to<br>0.64)                 | 1.60<br>(0.40 to<br>5.34)                  | 1.21<br>(0.33 to<br>4.16)                  | 1.96<br>(0.48 to<br>6.13)                  |
| Chronic kidney disease due to glomerulonephritis           | 30.44<br>(21.95 to<br>41.01)                  | 38.89<br>(20.45 to<br>80.04)                  | 29.99<br>(15.87 to<br>59.97)                  | 55.46<br>(28.81 to<br>109.70)                   | 0.63<br>(0.46 to<br>0.84)                 | 1.20<br>(0.48 to<br>3.16)                  | 0.91<br>(0.38 to<br>2.35)                  | 1.60<br>(0.65 to<br>4.05)                  |
| Chronic kidney disease due to other and unspecified causes | 33.63<br>(23.76 to<br>46.00)                  | 46.53<br>(22.87 to<br>102.35)                 | 35.62<br>(18.12 to<br>72.43)                  | 65.65<br>(32.80 to<br>134.18)                   | 0.75<br>(0.54 to<br>1.01)                 | 1.60<br>(0.58 to<br>4.36)                  | 1.21<br>(0.46 to<br>3.23)                  | 2.09<br>(0.77 to<br>5.59)                  |
| Urinary diseases and male infertility                      | 48.04<br>(38.61 to<br>59.34)                  | 83.66<br>(63.51 to<br>109.73)                 | 82.82<br>(62.54 to<br>108.91)                 | 93.16<br>(70.52 to<br>122.11)                   | 1.26<br>(1.04 to<br>1.55)                 | 2.98<br>(2.33 to<br>3.51)                  | 2.98<br>(2.44 to<br>3.66)                  | 2.83<br>(2.32 to<br>3.44)                  |
| Urinary tract infections                                   | 32.95<br>(24.93 to<br>42.25)                  | 66.75<br>(49.22 to<br>88.34)                  | 67.19<br>(49.73 to<br>88.88)                  | 72.54<br>(53.11 to<br>98.31)                    | 0.84<br>(0.64 to<br>1.06)                 | 2.31<br>(1.81 to<br>2.90)                  | 2.46<br>(1.93 to<br>3.10)                  | 2.23<br>(1.75 to<br>2.77)                  |
| Urolithiasis                                               | 0.77<br>(0.53 to<br>1.09)                     | 1.63<br>(1.01 to<br>2.67)                     | 1.57<br>(0.96 to<br>2.56)                     | 1.84<br>(1.13 to<br>3.01)                       | 0.01<br>(0.01 to<br>0.02)                 | 0.03<br>(0.02 to<br>0.05)                  | 0.03<br>(0.02 to<br>0.05)                  | 0.04<br>(0.02 to<br>0.05)                  |
| Other urinary diseases                                     | 14.32<br>(10.08 to<br>18.73)                  | 15.29<br>(9.90 to<br>21.36)                   | 14.06<br>(8.98 to<br>19.72)                   | 18.79<br>(12.10 to<br>26.34)                    | 0.41<br>(0.30 to<br>0.52)                 | 0.50<br>(0.34 to<br>0.66)                  | 0.49<br>(0.33 to<br>0.65)                  | 0.57<br>(0.39 to<br>0.74)                  |
| Gynecological diseases                                     | 1.48<br>(0.91 to<br>2.10)                     | 2.43<br>(1.38 to<br>3.77)                     | 2.19<br>(1.21 to<br>3.45)                     | 2.95<br>(1.67 to<br>4.55)                       | 0.03<br>(0.02 to<br>0.05)                 | 0.06<br>(0.03 to<br>0.09)                  | 0.05<br>(0.03 to<br>0.08)                  | 0.07<br>(0.04 to<br>0.10)                  |
| Uterine fibroids                                           | 0.09<br>(0.04 to<br>0.18)                     | 0.12<br>(0.05 to<br>0.24)                     | 0.11<br>(0.05 to<br>0.21)                     | 0.15<br>(0.06 to<br>0.29)                       | 0.00<br>(0.00 to<br>0.01)                 | 0.00<br>(0.00 to<br>0.01)                  | 0.00<br>(0.00 to<br>0.01)                  | 0.00<br>(0.00 to<br>0.01)                  |
| Polycystic ovarian syndrome                                | 0.22<br>(0.04 to<br>0.52)                     | 0.22<br>(0.04 to<br>0.60)                     | 0.18<br>(0.03 to<br>0.50)                     | 0.32<br>(0.06 to<br>0.83)                       | 0.00<br>(0.00 to<br>0.01)                 | 0.00<br>(0.00 to<br>0.01)                  | 0.00<br>(0.01 to<br>0.01)                  | 0.01<br>(0.00 to<br>0.02)                  |
| Endometriosis                                              | 0.00<br>(0.00 to<br>0.01)                     | 0.01<br>(0.00 to<br>0.02)                     | 0.01<br>(0.00 to<br>0.02)                     | 0.01<br>(0.00 to<br>0.02)                       | 0.00<br>(0.00 to<br>0.00)                 | 0.00<br>(0.00 to<br>0.00)                  | 0.00<br>(0.00 to<br>0.00)                  | 0.00<br>(0.00 to<br>0.00)                  |
| Genital prolapse                                           | 0.04<br>(0.11 to<br>0.11)                     | 0.05<br>(0.01 to<br>0.16)                     | 0.05<br>(0.01 to<br>0.13)                     | 0.07<br>(0.01 to<br>0.20)                       | 0.00<br>(0.00 to<br>0.00)                 | 0.00<br>(0.00 to<br>0.00)                  | 0.00<br>(0.00 to<br>0.00)                  | 0.00<br>(0.00 to<br>0.00)                  |
| Other gynecological diseases                               | 1.12<br>(0.67 to<br>1.69)                     | 2.03<br>(1.12 to<br>3.18)                     | 1.85<br>(1.01 to<br>2.93)                     | 2.41<br>(1.33 to<br>3.85)                       | 0.03<br>(0.02 to<br>0.04)                 | 0.05<br>(0.03 to<br>0.07)                  | 0.04<br>(0.03 to<br>0.07)                  | 0.05<br>(0.03 to<br>0.08)                  |
| Hemoglobinopathies and hemolytic anemias                   | 123.96<br>(79.93 to<br>162.78)                | 117.40<br>(75.76 to<br>170.61)                | 107.11<br>(68.92 to<br>155.16)                | 153.77<br>(97.04 to<br>223.74)                  | 1.85<br>(1.24 to<br>2.38)                 | 2.12<br>(1.42 to<br>2.97)                  | 1.96<br>(1.31 to<br>2.76)                  | 2.64<br>(1.73 to<br>3.71)                  |
| Thalassemias                                               | 1.44<br>(0.17 to<br>4.52)                     | 0.89<br>(0.11 to<br>2.87)                     | 0.92<br>(0.11 to<br>2.99)                     | 1.15<br>(0.13 to<br>3.76)                       | 0.02<br>(0.00 to<br>0.05)                 | 0.01<br>(0.00 to<br>0.03)                  | 0.01<br>(0.00 to<br>0.04)                  | 0.01<br>(0.00 to<br>0.04)                  |
| Sickle cell disorders                                      | 117.79<br>(75.48 to<br>155.37)                | 108.93<br>(69.74 to<br>160.25)                | 99.20<br>(63.08 to<br>145.10)                 | 143.59<br>(89.25 to<br>211.93)                  | 1.64<br>(1.08 to<br>2.15)                 | 1.76<br>(1.14 to<br>2.53)                  | 1.62<br>(1.03 to<br>2.35)                  | 2.23<br>(1.43 to<br>3.25)                  |
| G6PD deficiency                                            | 2.52<br>(1.72 to<br>3.36)                     | 4.70<br>(3.11 to<br>6.88)                     | 4.23<br>(2.76 to<br>6.19)                     | 5.85<br>(3.81 to<br>8.47)                       | 0.07<br>(0.05 to<br>0.09)                 | 0.16<br>(0.11 to<br>0.23)                  | 0.15<br>(0.10 to<br>0.21)                  | 0.19<br>(0.12 to<br>0.27)                  |

| Other hemoglobinopathies and hemolytic anemias    | 2.20<br>(1.44 to<br>3.16)              | 2.88<br>(1.97 to<br>4.15)              | 2.77<br>(1.89 to<br>4.04)              | 3.18<br>(2.18 to<br>4.56)                | 0.13<br>(0.09 to<br>0.19)         | 0.19<br>(0.13 to<br>0.28)        | 0.19<br>(0.13 to<br>0.28)        | 0.20<br>(0.13 to<br>0.29)         |
|---------------------------------------------------|----------------------------------------|----------------------------------------|----------------------------------------|------------------------------------------|-----------------------------------|----------------------------------|----------------------------------|-----------------------------------|
| Endocrine, metabolic, blood, and immune disorders | 23.44<br>(14.79 to<br>34.76)           | 28.09<br>(18.32 to<br>41.32)           | 26.63<br>(17.36 to<br>39.41)           | 35.44<br>(22.32 to<br>53.64)             | 0.48<br>(0.33 to<br>0.71)         | 0.81<br>(0.57 to<br>1.20)        | 0.81<br>(0.57 to<br>1.18)        | 0.88<br>(0.61 to<br>1.30)         |
| <b>Cameroon</b>                                   |                                        |                                        |                                        |                                          |                                   |                                  |                                  |                                   |
| Cause                                             | YLLs (in 1000s)                        |                                        |                                        |                                          | Deaths (in 1000s)                 |                                  |                                  |                                   |
|                                                   | 2016                                   | 2040 Forecast                          | 2040 Better Scenario                   | 2040 Worse Scenario                      | 2016                              | 2040 Forecast                    | 2040 Better Scenario             | 2040 Worse Scenario               |
| <b>Musculoskeletal disorders</b>                  | <b>6.26</b><br>(3.67 to<br>9.35)       | <b>14.68</b><br>(8.71 to<br>22.83)     | <b>15.46</b><br>(9.18 to<br>23.93)     | <b>14.03</b><br>(8.22 to<br>21.59)       | <b>0.15</b><br>(0.10 to<br>0.22)  | <b>0.41</b><br>(0.27 to<br>0.59) | <b>0.45</b><br>(0.29 to<br>0.65) | <b>0.37</b><br>(0.24 to<br>0.54)  |
| Rheumatoid arthritis                              | 0.40<br>(0.20 to<br>0.64)              | 0.81<br>(0.43 to<br>1.29)              | 0.78<br>(0.40 to<br>1.26)              | 0.91<br>(0.48 to<br>1.46)                | 0.02<br>(0.01 to<br>0.03)         | 0.04<br>(0.02 to<br>0.07)        | 0.04<br>(0.02 to<br>0.07)        | 0.05<br>(0.03 to<br>0.07)         |
| Other musculoskeletal disorders                   | 5.86<br>(3.41 to<br>8.83)              | 13.86<br>(8.08 to<br>21.50)            | 14.68<br>(8.68 to<br>22.96)            | 13.12<br>(7.47 to<br>20.44)              | 0.13<br>(0.08 to<br>0.20)         | 0.37<br>(0.23 to<br>0.55)        | 0.40<br>(0.26 to<br>0.60)        | 0.33<br>(0.21 to<br>0.48)         |
| <b>Other non-communicable diseases</b>            | <b>621.84</b><br>(286.16 to<br>969.70) | <b>412.07</b><br>(214.60 to<br>666.13) | <b>364.09</b><br>(193.31 to<br>586.37) | <b>681.65</b><br>(319.63 to<br>1,156.03) | <b>7.65</b><br>(3.73 to<br>11.77) | <b>6.20</b><br>(3.76 to<br>9.37) | <b>5.71</b><br>(3.61 to<br>8.54) | <b>9.30</b><br>(5.06 to<br>14.85) |
| Congenital birth defects                          | 581.96<br>(250.58 to<br>923.42)        | 351.52<br>(156.00 to<br>595.28)        | 305.72<br>(139.98 to<br>516.34)        | 604.00<br>(255.95 to<br>1,049.22)        | 6.93<br>(3.06 to<br>10.91)        | 4.44<br>(2.09 to<br>7.36)        | 3.89<br>(1.85 to<br>6.46)        | 7.42<br>(3.25 to<br>12.69)        |
| Neural tube defects                               | 92.17<br>(42.75 to<br>177.13)          | 17.56<br>(6.89 to<br>37.28)            | 14.02<br>(5.46 to<br>29.74)            | 35.64<br>(13.94 to<br>73.37)             | 1.08<br>(0.50 to<br>2.07)         | 0.21<br>(0.08 to<br>0.45)        | 0.17<br>(0.07 to<br>0.37)        | 0.42<br>(0.17 to<br>0.87)         |
| Congenital heart anomalies                        | 157.13<br>(72.84 to<br>270.92)         | 110.54<br>(54.10 to<br>195.55)         | 97.11<br>(48.55 to<br>172.09)          | 181.70<br>(84.04 to<br>336.02)           | 1.90<br>(0.91 to<br>3.22)         | 1.43<br>(0.73 to<br>2.44)        | 1.26<br>(0.65 to<br>2.17)        | 2.28<br>(1.08 to<br>4.10)         |
| Orofacial clefts                                  | 4.19<br>(0.86 to<br>10.95)             | 1.78<br>(0.33 to<br>4.84)              | 1.39<br>(0.26 to<br>3.71)              | 3.84<br>(0.72 to<br>10.77)               | 0.05<br>(0.01 to<br>0.13)         | 0.02<br>(0.00 to<br>0.06)        | 0.02<br>(0.00 to<br>0.04)        | 0.04<br>(0.01 to<br>0.13)         |
| Down syndrome                                     | 4.51<br>(1.69 to<br>10.35)             | 4.12<br>(1.76 to<br>9.40)              | 3.61<br>(1.58 to<br>8.12)              | 6.59<br>(2.70 to<br>14.91)               | 0.06<br>(0.02 to<br>0.13)         | 0.06<br>(0.03 to<br>0.13)        | 0.06<br>(0.03 to<br>0.12)        | 0.09<br>(0.04 to<br>0.20)         |
| Other chromosomal abnormalities                   | 21.54<br>(7.16 to<br>44.44)            | 21.04<br>(6.71 to<br>46.97)            | 19.92<br>(5.61 to<br>39.65)            | 38.46<br>(12.10 to<br>86.60)             | 0.25<br>(0.08 to<br>0.52)         | 0.25<br>(0.08 to<br>0.55)        | 0.21<br>(0.07 to<br>0.47)        | 0.45<br>(0.14 to<br>1.02)         |
| Congenital musculoskeletal and limb anomalies     | 4.47<br>(1.30 to<br>12.33)             | 3.29<br>(0.91 to<br>9.33)              | 2.92<br>(0.82 to<br>8.10)              | 5.59<br>(1.50 to<br>16.00)               | 0.05<br>(0.02 to<br>0.14)         | 0.04<br>(0.01 to<br>0.11)        | 0.03<br>(0.01 to<br>0.10)        | 0.07<br>(0.02 to<br>0.19)         |
| Urogenital congenital anomalies                   | 5.06<br>(2.18 to<br>9.62)              | 4.26<br>(2.01 to<br>7.94)              | 3.95<br>(1.89 to<br>7.31)              | 6.36<br>(2.83 to<br>12.02)               | 0.07<br>(0.03 to<br>0.12)         | 0.07<br>(0.04 to<br>0.12)        | 0.07<br>(0.04 to<br>0.11)        | 0.09<br>(0.05 to<br>0.16)         |
| Digestive congenital anomalies                    | 35.27<br>(15.47 to<br>74.07)           | 22.08<br>(9.17 to<br>47.58)            | 19.01<br>(8.04 to<br>40.88)            | 39.57<br>(15.83 to<br>85.95)             | 0.41<br>(0.18 to<br>0.86)         | 0.26<br>(0.11 to<br>0.56)        | 0.23<br>(0.10 to<br>0.48)        | 0.47<br>(0.19 to<br>1.01)         |
| Other congenital birth defects                    | 257.62<br>(73.39 to<br>521.96)         | 166.86<br>(51.38 to<br>340.62)         | 145.77<br>(46.41 to<br>292.18)         | 286.25<br>(82.38 to<br>595.45)           | 3.06<br>(0.90 to<br>6.20)         | 2.10<br>(0.69 to<br>4.20)        | 1.84<br>(0.64 to<br>3.61)        | 3.50<br>(1.07 to<br>7.21)         |
| Skin and subcutaneous diseases                    | 15.82<br>(10.33 to<br>26.73)           | 46.82<br>(29.95 to<br>72.36)           | 46.36<br>(29.64 to<br>71.22)           | 53.23<br>(34.54 to<br>85.99)             | 0.44<br>(0.28 to<br>0.73)         | 1.60<br>(1.03 to<br>2.44)        | 1.69<br>(1.08 to<br>2.56)        | 1.60<br>(1.04 to<br>2.47)         |
| Cellulitis                                        | 1.42<br>(0.66 to<br>2.72)              | 6.41<br>(3.02 to<br>11.55)             | 6.88<br>(3.23 to<br>12.15)             | 6.09<br>(2.84 to<br>11.43)               | 0.05<br>(0.02 to<br>0.09)         | 0.24<br>(0.11 to<br>0.43)        | 0.26<br>(0.12 to<br>0.47)        | 0.21<br>(0.10 to<br>0.38)         |
| Pyoderma                                          | 12.96<br>(8.40 to<br>22.71)            | 37.06<br>(23.35 to<br>58.40)           | 35.92<br>(22.53 to<br>56.33)           | 43.76<br>(27.44 to<br>72.14)             | 0.33<br>(0.22 to<br>0.58)         | 1.19<br>(0.76 to<br>1.89)        | 1.22<br>(0.78 to<br>1.94)        | 1.24<br>(0.81 to<br>1.97)         |
| Decubitus ulcer                                   | 0.96<br>(0.48 to<br>1.51)              | 2.27<br>(1.13 to<br>3.60)              | 2.46<br>(1.22 to<br>3.82)              | 2.19<br>(1.07 to<br>3.49)                | 0.06<br>(0.03 to<br>0.09)         | 0.15<br>(0.07 to<br>0.23)        | 0.18<br>(0.08 to<br>0.27)        | 0.12<br>(0.06 to<br>0.19)         |



|                                      |                                        |                                          |                                          |                                            |                                     |                                     |                                     |                                     |
|--------------------------------------|----------------------------------------|------------------------------------------|------------------------------------------|--------------------------------------------|-------------------------------------|-------------------------------------|-------------------------------------|-------------------------------------|
| Other skin and subcutaneous diseases | 0.48<br>(0.23 to<br>0.84)              | 1.09<br>(0.52 to<br>1.94)                | 1.10<br>(0.53 to<br>1.93)                | 1.20<br>(0.57 to<br>2.13)                  | 0.01<br>(0.00 to<br>0.02)           | 0.02<br>(0.01 to<br>0.04)           | 0.03<br>(0.01 to<br>0.04)           | 0.02<br>(0.01 to<br>0.04)           |
| Sudden infant death syndrome         | 24.06<br>(12.77 to<br>41.37)           | 13.72<br>(5.25 to<br>29.52)              | 12.01<br>(4.73 to<br>25.68)              | 24.41<br>(9.80 to<br>52.33)                | 0.28<br>(0.15 to<br>0.48)           | 0.16<br>(0.06 to<br>0.34)           | 0.14<br>(0.05 to<br>0.30)           | 0.28<br>(0.11 to<br>0.61)           |
| <b>Injuries</b>                      | <b>788.35</b><br>(662.06 to<br>937.19) | <b>956.85</b><br>(700.01 to<br>1,306.84) | <b>849.77</b><br>(621.69 to<br>1,158.08) | <b>1,175.09</b><br>(856.65 to<br>1,612.45) | <b>15.09</b><br>(12.74 to<br>17.69) | <b>21.91</b><br>(17.17 to<br>28.26) | <b>20.37</b><br>(16.05 to<br>26.05) | <b>25.00</b><br>(19.40 to<br>32.62) |
| <b>Transport injuries</b>            | <b>207.86</b><br>(165.10 to<br>257.97) | <b>375.72</b><br>(265.71 to<br>540.65)   | <b>309.28</b><br>(220.06 to<br>447.40)   | <b>446.35</b><br>(310.77 to<br>639.19)     | <b>3.96</b><br>(3.16 to<br>4.85)    | <b>7.87</b><br>(5.76 to<br>10.95)   | <b>6.75</b><br>(4.95 to<br>9.33)    | <b>8.87</b><br>(6.38 to<br>12.63)   |
| Road injuries                        | 194.24<br>(153.85 to<br>240.92)        | 361.43<br>(255.79 to<br>521.92)          | 296.37<br>(210.99 to<br>429.45)          | 427.63<br>(298.00 to<br>614.65)            | 3.73<br>(2.95 to<br>4.57)           | 7.60<br>(5.58 to<br>10.52)          | 6.50<br>(4.77 to<br>8.96)           | 8.53<br>(6.12 to<br>12.08)          |
| Pedestrian road injuries             | 23.52<br>(17.16 to<br>30.33)           | 33.02<br>(21.89 to<br>48.20)             | 28.11<br>(18.71 to<br>41.11)             | 39.13<br>(25.96 to<br>57.66)               | 0.46<br>(0.35 to<br>0.58)           | 0.75<br>(0.53 to<br>1.04)           | 0.66<br>(0.47 to<br>0.91)           | 0.85<br>(0.59 to<br>1.21)           |
| <b>Cameroon</b>                      |                                        |                                          |                                          |                                            |                                     |                                     |                                     |                                     |
| Cause                                | YLLs (in 1000s)                        |                                          |                                          |                                            | Deaths (in 1000s)                   |                                     |                                     |                                     |
|                                      | 2016                                   | 2040 Forecast                            | 2040 Better Scenario                     | 2040 Worse Scenario                        | 2016                                | 2040 Forecast                       | 2040 Better Scenario                | 2040 Worse Scenario                 |
| Cyclist road injuries                | 4.48<br>(2.87 to<br>6.17)              | 9.13<br>(5.57 to<br>13.93)               | 7.54<br>(4.64 to<br>11.26)               | 10.76<br>(6.39 to<br>17.11)                | 0.09<br>(0.06 to<br>0.12)           | 0.20<br>(0.13 to<br>0.29)           | 0.17<br>(0.11 to<br>0.25)           | 0.22<br>(0.14 to<br>0.33)           |
| Motorcyclist road injuries           | 37.19<br>(28.00 to<br>48.67)           | 73.61<br>(47.96 to<br>111.33)            | 63.28<br>(41.66 to<br>94.79)             | 86.20<br>(56.12 to<br>131.15)              | 0.71<br>(0.53 to<br>0.91)           | 1.52<br>(1.03 to<br>2.22)           | 1.37<br>(0.92 to<br>2.01)           | 1.70<br>(1.13 to<br>2.52)           |
| Motor vehicle road injuries          | 126.37<br>(98.43 to<br>157.52)         | 240.58<br>(168.33 to<br>351.82)          | 193.30<br>(135.23 to<br>281.34)          | 285.37<br>(197.87 to<br>427.95)            | 2.42<br>(1.91 to<br>2.99)           | 5.02<br>(3.63 to<br>7.04)           | 4.21<br>(3.06 to<br>5.82)           | 5.64<br>(3.99 to<br>8.01)           |
| Other road injuries                  | 2.68<br>(1.82 to<br>3.72)              | 5.09<br>(3.15 to<br>7.91)                | 4.14<br>(2.58 to<br>6.33)                | 6.17<br>(3.73 to<br>10.00)                 | 0.05<br>(0.04 to<br>0.07)           | 0.11<br>(0.07 to<br>0.15)           | 0.09<br>(0.06 to<br>0.13)           | 0.12<br>(0.08 to<br>0.18)           |
| Other transport injuries             | 13.63<br>(10.74 to<br>17.41)           | 14.29<br>(8.63 to<br>23.08)              | 12.92<br>(7.77 to<br>20.83)              | 18.72<br>(11.44 to<br>29.86)               | 0.24<br>(0.19 to<br>0.29)           | 0.27<br>(0.17 to<br>0.43)           | 0.25<br>(0.15 to<br>0.39)           | 0.34<br>(0.21 to<br>0.54)           |
| <b>Unintentional injuries</b>        | <b>414.48</b><br>(331.77 to<br>512.78) | <b>354.55</b><br>(253.47 to<br>483.77)   | <b>324.53</b><br>(231.00 to<br>444.00)   | <b>470.27</b><br>(325.84 to<br>663.44)     | <b>7.69</b><br>(6.29 to<br>9.20)    | <b>8.82</b><br>(6.83 to<br>10.88)   | <b>8.57</b><br>(6.67 to<br>10.58)   | <b>10.28</b><br>(7.77 to<br>13.07)  |
| Falls                                | 60.03<br>(46.62 to<br>79.98)           | 78.20<br>(60.34 to<br>100.51)            | 76.56<br>(58.95 to<br>97.67)             | 89.23<br>(66.77 to<br>118.30)              | 1.74<br>(1.42 to<br>2.14)           | 3.09<br>(2.59 to<br>3.59)           | 3.24<br>(2.70 to<br>3.73)           | 3.08<br>(2.55 to<br>3.62)           |
| Drowning                             | 84.44<br>(64.03 to<br>108.12)          | 58.69<br>(38.86 to<br>87.22)             | 52.73<br>(34.94 to<br>77.51)             | 79.75<br>(52.54 to<br>121.75)              | 1.36<br>(1.05 to<br>1.70)           | 1.16<br>(0.83 to<br>1.61)           | 1.08<br>(0.76 to<br>1.49)           | 1.47<br>(1.02 to<br>2.09)           |
| Fire, heat, and hot substances       | 43.47<br>(29.61 to<br>57.38)           | 28.65<br>(18.14 to<br>41.54)             | 25.43<br>(15.96 to<br>36.73)             | 40.20<br>(24.61 to<br>61.09)               | 0.82<br>(0.56 to<br>1.04)           | 0.71<br>(0.48 to<br>0.96)           | 0.67<br>(0.45 to<br>0.89)           | 0.90<br>(0.59 to<br>1.24)           |
| Poisonings                           | 22.99<br>(10.52 to<br>49.79)           | 11.49<br>(5.31 to<br>23.47)              | 9.58<br>(4.40 to<br>19.35)               | 18.46<br>(7.85 to<br>40.73)                | 0.37<br>(0.19 to<br>0.70)           | 0.22<br>(0.11 to<br>0.40)           | 0.19<br>(0.10 to<br>0.34)           | 0.33<br>(0.16 to<br>0.64)           |
| Exposure to mechanical forces        | 58.51<br>(38.77 to<br>81.26)           | 41.84<br>(24.86 to<br>63.03)             | 36.83<br>(22.01 to<br>55.62)             | 59.42<br>(34.84 to<br>92.84)               | 0.93<br>(0.63 to<br>1.24)           | 0.82<br>(0.53 to<br>1.15)           | 0.75<br>(0.48 to<br>1.06)           | 1.06<br>(0.67 to<br>1.53)           |
| Unintentional firearm injuries       | 15.29<br>(7.75 to<br>23.70)            | 10.24<br>(4.71 to<br>17.46)              | 8.98<br>(4.19 to<br>15.37)               | 13.93<br>(6.20 to<br>23.85)                | 0.27<br>(0.14 to<br>0.40)           | 0.21<br>(0.10 to<br>0.33)           | 0.19<br>(0.09 to<br>0.30)           | 0.27<br>(0.13 to<br>0.43)           |
| Unintentional suffocation            | 15.29<br>(8.36 to<br>28.82)            | 8.65<br>(4.49 to<br>16.53)               | 7.36<br>(3.83 to<br>13.93)               | 14.27<br>(7.10 to<br>28.20)                | 0.19<br>(0.11 to<br>0.35)           | 0.12<br>(0.06 to<br>0.21)           | 0.10<br>(0.05 to<br>0.18)           | 0.18<br>(0.10 to<br>0.35)           |
| Other exposure to mechanical forces  | 27.94<br>(18.17 to<br>38.03)           | 22.94<br>(13.94 to<br>33.22)             | 20.49<br>(12.44 to<br>29.69)             | 31.21<br>(18.75 to<br>46.63)               | 0.48<br>(0.33 to<br>0.62)           | 0.50<br>(0.33 to<br>0.68)           | 0.46<br>(0.30 to<br>0.63)           | 0.61<br>(0.40 to<br>0.85)           |

|                                                                                     |                                                      |                                                      |                                                      |                                                      |                                                |                                                |                                                |                                                |
|-------------------------------------------------------------------------------------|------------------------------------------------------|------------------------------------------------------|------------------------------------------------------|------------------------------------------------------|------------------------------------------------|------------------------------------------------|------------------------------------------------|------------------------------------------------|
| Adverse effects of medical treatment                                                | 48.78<br>(28.38 to<br>70.12)                         | 44.92<br>(24.55 to<br>70.67)                         | 40.76<br>(22.56 to<br>63.28)                         | 60.39<br>(32.54 to<br>99.18)                         | 0.82<br>(0.50 to<br>1.11)                      | 0.92<br>(0.58 to<br>1.32)                      | 0.87<br>(0.55 to<br>1.23)                      | 1.13<br>(0.68 to<br>1.67)                      |
| Animal contact                                                                      | 22.53<br>(15.62 to<br>30.03)                         | 23.65<br>(14.80 to<br>33.18)                         | 20.49<br>(12.90 to<br>29.16)                         | 34.05<br>(20.71 to<br>49.51)                         | 0.44<br>(0.31 to<br>0.58)                      | 0.57<br>(0.37 to<br>0.75)                      | 0.51<br>(0.33 to<br>0.69)                      | 0.73<br>(0.47 to<br>0.99)                      |
| Venomous animal contact                                                             | 17.87<br>(11.81 to<br>24.77)                         | 18.91<br>(11.49 to<br>27.17)                         | 16.41<br>(10.03 to<br>23.92)                         | 26.86<br>(15.63 to<br>39.82)                         | 0.37<br>(0.25 to<br>0.49)                      | 0.47<br>(0.30 to<br>0.64)                      | 0.43<br>(0.27 to<br>0.58)                      | 0.61<br>(0.38 to<br>0.83)                      |
| Non-venomous animal contact                                                         | 4.67<br>(2.41 to<br>8.40)                            | 4.75<br>(2.58 to<br>8.73)                            | 4.08<br>(2.21 to<br>7.41)                            | 7.19<br>(3.70 to<br>13.78)                           | 0.08<br>(0.04 to<br>0.13)                      | 0.10<br>(0.06 to<br>0.16)                      | 0.09<br>(0.05 to<br>0.14)                      | 0.13<br>(0.07 to<br>0.23)                      |
| Foreign body                                                                        | 34.82<br>(22.37 to<br>58.44)                         | 38.47<br>(23.81 to<br>64.24)                         | 36.90<br>(23.23 to<br>59.43)                         | 49.73<br>(29.13 to<br>89.63)                         | 0.53<br>(0.38 to<br>0.82)                      | 0.72<br>(0.51 to<br>1.04)                      | 0.73<br>(0.52 to<br>1.01)                      | 0.83<br>(0.56 to<br>1.31)                      |
| Pulmonary aspiration and foreign body in airway                                     | 31.96<br>(19.90 to<br>54.85)                         | 35.51<br>(21.99 to<br>61.06)                         | 34.20<br>(21.53 to<br>56.66)                         | 45.83<br>(26.88 to<br>84.34)                         | 0.49<br>(0.34 to<br>0.76)                      | 0.67<br>(0.48 to<br>0.98)                      | 0.68<br>(0.49 to<br>0.96)                      | 0.77<br>(0.52 to<br>1.23)                      |
| Foreign body in other body part                                                     | 2.86<br>(0.89 to<br>5.30)                            | 2.96<br>(0.87 to<br>6.00)                            | 2.70<br>(0.79 to<br>5.46)                            | 3.90<br>(1.12 to<br>7.92)                            | 0.05<br>(0.02 to<br>0.08)                      | 0.05<br>(0.02 to<br>0.11)                      | 0.05<br>(0.02 to<br>0.10)                      | 0.07<br>(0.02 to<br>0.13)                      |
| Environmental heat and cold exposure                                                | 14.82<br>(6.00 to<br>21.22)                          | 11.98<br>(4.21 to<br>19.97)                          | 10.10<br>(3.51 to<br>17.24)                          | 17.46<br>(6.16 to<br>29.46)                          | 0.27<br>(0.10 to<br>0.38)                      | 0.26<br>(0.09 to<br>0.41)                      | 0.22<br>(0.08 to<br>0.36)                      | 0.35<br>(0.13 to<br>0.56)                      |
| Other unintentional injuries                                                        | 24.09<br>(16.16 to<br>32.99)                         | 16.66<br>(10.52 to<br>24.80)                         | 15.14<br>(9.62 to<br>22.76)                          | 21.58<br>(13.59 to<br>32.04)                         | 0.40<br>(0.28 to<br>0.53)                      | 0.34<br>(0.23 to<br>0.48)                      | 0.32<br>(0.21 to<br>0.45)                      | 0.41<br>(0.27 to<br>0.58)                      |
| <b>Self-harm and interpersonal violence</b>                                         | <b>141.90</b><br><b>(106.33 to</b><br><b>177.25)</b> | <b>224.66</b><br><b>(147.01 to</b><br><b>319.46)</b> | <b>214.05</b><br><b>(141.99 to</b><br><b>300.83)</b> | <b>256.36</b><br><b>(166.53 to</b><br><b>368.57)</b> | <b>3.05</b><br><b>(2.35 to</b><br><b>3.78)</b> | <b>5.19</b><br><b>(3.51 to</b><br><b>7.12)</b> | <b>5.02</b><br><b>(3.46 to</b><br><b>6.88)</b> | <b>5.82</b><br><b>(3.88 to</b><br><b>8.23)</b> |
| <b>Cameroon</b>                                                                     |                                                      |                                                      |                                                      |                                                      |                                                |                                                |                                                |                                                |
| Cause                                                                               | YLLs (in 1000s)                                      |                                                      |                                                      |                                                      | Deaths (in 1000s)                              |                                                |                                                |                                                |
|                                                                                     | 2016                                                 | 2040 Forecast                                        | 2040 Better Scenario                                 | 2040 Worse Scenario                                  | 2016                                           | 2040 Forecast                                  | 2040 Better Scenario                           | 2040 Worse Scenario                            |
| Self-harm                                                                           | 90.28<br>(66.21 to<br>117.00)                        | 158.28<br>(100.75 to<br>231.53)                      | 148.67<br>(96.67 to<br>214.68)                       | 185.28<br>(113.51 to<br>279.62)                      | 2.18<br>(1.64 to<br>2.80)                      | 4.00<br>(2.66 to<br>5.63)                      | 3.84<br>(2.61 to<br>5.29)                      | 4.57<br>(2.90 to<br>6.55)                      |
| Self-harm by firearm                                                                | 6.75<br>(3.70 to<br>10.66)                           | 9.13<br>(4.51 to<br>16.27)                           | 8.45<br>(4.18 to<br>14.50)                           | 11.00<br>(5.28 to<br>19.94)                          | 0.16<br>(0.09 to<br>0.25)                      | 0.24<br>(0.13 to<br>0.40)                      | 0.23<br>(0.12 to<br>0.37)                      | 0.28<br>(0.15 to<br>0.48)                      |
| Self-harm by other specified means                                                  | 83.53<br>(61.04 to<br>109.31)                        | 149.14<br>(94.80 to<br>217.99)                       | 140.23<br>(90.70 to<br>202.07)                       | 174.28<br>(106.99 to<br>260.90)                      | 2.02<br>(1.51 to<br>2.60)                      | 3.76<br>(2.50 to<br>5.27)                      | 3.61<br>(2.45 to<br>4.97)                      | 4.29<br>(2.74 to<br>6.17)                      |
| Interpersonal violence                                                              | 51.62<br>(29.78 to<br>71.75)                         | 66.38<br>(33.54 to<br>102.68)                        | 65.38<br>(33.21 to<br>101.66)                        | 71.08<br>(35.86 to<br>111.03)                        | 0.87<br>(0.50 to<br>1.19)                      | 1.19<br>(0.62 to<br>1.82)                      | 1.18<br>(0.62 to<br>1.80)                      | 1.25<br>(0.65 to<br>1.90)                      |
| Physical violence by firearm                                                        | 27.93<br>(13.15 to<br>42.02)                         | 36.12<br>(15.45 to<br>60.74)                         | 35.64<br>(15.42 to<br>60.00)                         | 37.82<br>(15.82 to<br>63.53)                         | 0.48<br>(0.23 to<br>0.71)                      | 0.64<br>(0.28 to<br>1.06)                      | 0.63<br>(0.28 to<br>1.06)                      | 0.66<br>(0.28 to<br>1.09)                      |
| Physical violence by sharp object                                                   | 14.03<br>(5.70 to<br>21.44)                          | 20.58<br>(7.82 to<br>33.50)                          | 20.69<br>(7.92 to<br>33.31)                          | 21.03<br>(7.99 to<br>34.48)                          | 0.24<br>(0.10 to<br>0.36)                      | 0.38<br>(0.15 to<br>0.60)                      | 0.38<br>(0.15 to<br>0.60)                      | 0.38<br>(0.15 to<br>0.60)                      |
| Physical violence by other means                                                    | 9.65<br>(6.20 to<br>13.86)                           | 9.69<br>(5.51 to<br>15.23)                           | 9.06<br>(5.17 to<br>14.12)                           | 12.22<br>(6.90 to<br>19.41)                          | 0.15<br>(0.10 to<br>0.21)                      | 0.17<br>(0.10 to<br>0.27)                      | 0.16<br>(0.10 to<br>0.25)                      | 0.21<br>(0.12 to<br>0.33)                      |
| <b>Forces of nature, conflict and terrorism, and executions and police conflict</b> | <b>24.12</b><br><b>(4.02 to</b><br><b>45.97)</b>     | <b>1.92</b><br><b>(0.00 to</b><br><b>8.12)</b>       | <b>1.90</b><br><b>(0.00 to</b><br><b>8.04)</b>       | <b>2.11</b><br><b>(0.00 to</b><br><b>8.72)</b>       | <b>0.39</b><br><b>(0.07 to</b><br><b>0.73)</b> | <b>0.04</b><br><b>(0.00 to</b><br><b>0.14)</b> | <b>0.04</b><br><b>(0.00 to</b><br><b>0.14)</b> | <b>0.04</b><br><b>(0.00 to</b><br><b>0.15)</b> |
| Exposure to forces of nature                                                        | 0.00<br>(0.00 to<br>0.00)                            | 1.46<br>(0.00 to<br>1.25)                            | 1.44<br>(0.00 to<br>1.24)                            | 1.62<br>(0.00 to<br>1.39)                            | 0.00<br>(0.00 to<br>0.00)                      | 0.03<br>(0.00 to<br>0.02)                      | 0.03<br>(0.00 to<br>0.02)                      | 0.03<br>(0.00 to<br>0.02)                      |
| Conflict and terrorism                                                              | 23.89<br>(3.79 to<br>45.79)                          | 0.33<br>(0.00 to<br>5.76)                            | 0.33<br>(0.00 to<br>5.72)                            | 0.36<br>(0.00 to<br>6.28)                            | 0.38<br>(0.06 to<br>0.73)                      | 0.01<br>(0.00 to<br>0.10)                      | 0.01<br>(0.00 to<br>0.10)                      | 0.01<br>(0.00 to<br>0.11)                      |

|                                                                          |                                          |                                            |                                           |                                             |                                       |                                       |                                       |                                       |
|--------------------------------------------------------------------------|------------------------------------------|--------------------------------------------|-------------------------------------------|---------------------------------------------|---------------------------------------|---------------------------------------|---------------------------------------|---------------------------------------|
|                                                                          | 0.23<br>(0.17 to<br>0.35)                | 0.13<br>(0.00 to<br>1.67)                  | 0.13<br>(0.00 to<br>1.67)                 | 0.13<br>(0.00 to<br>1.73)                   | 0.00<br>(0.00 to<br>0.01)             | 0.00<br>(0.00 to<br>0.03)             | 0.00<br>(0.00 to<br>0.03)             | 0.00<br>(0.00 to<br>0.03)             |
| Executions and police conflict                                           |                                          |                                            |                                           |                                             |                                       |                                       |                                       |                                       |
| <b>Cape Verde</b>                                                        |                                          |                                            |                                           |                                             |                                       |                                       |                                       |                                       |
| Cause                                                                    | YLLs (actual counts)                     |                                            |                                           |                                             | Deaths (actual counts)                |                                       |                                       |                                       |
|                                                                          | 2016                                     | 2040 Forecast                              | 2040 Better Scenario                      | 2040 Worse Scenario                         | 2016                                  | 2040 Forecast                         | 2040 Better Scenario                  | 2040 Worse Scenario                   |
| <b>All causes</b>                                                        | 87,532.43<br>(77,833.96 to<br>97,525.69) | 100,770.38<br>(75,167.06 to<br>125,285.32) | 84,877.62<br>(64,272.97 to<br>103,924.93) | 135,636.36<br>(101,840.30 to<br>169,454.50) | 2,843.46<br>(2,548.18 to<br>3,114.53) | 4,290.02<br>(3,385.61 to<br>5,160.70) | 3,727.79<br>(2,968.21 to<br>4,442.29) | 5,420.77<br>(4,271.20 to<br>6,550.67) |
| <b>Communicable, maternal, neonatal, and nutritional diseases</b>        | 29,594.69<br>(25,658.70 to<br>34,323.21) | 18,224.40<br>(12,453.71 to<br>25,465.32)   | 13,293.36<br>(8,988.90 to<br>18,764.13)   | 31,851.95<br>(23,801.15 to<br>41,796.95)    | 629.36<br>(550.50 to<br>715.15)       | 551.20<br>(404.27 to<br>721.19)       | 437.60<br>(320.04 to<br>580.55)       | 881.19<br>(676.21 to<br>1,133.90)     |
| <b>HIV/AIDS and tuberculosis</b>                                         | 7,269.88<br>(4,814.52 to<br>10,737.15)   | 6,160.64<br>(2,252.84 to<br>11,860.87)     | 3,580.85<br>(1,170.72 to<br>8,134.03)     | 13,810.52<br>(8,962.53 to<br>20,630.93)     | 160.14<br>(111.61 to<br>226.46)       | 146.64<br>(59.20 to<br>276.34)        | 86.87<br>(31.15 to<br>187.76)         | 317.91<br>(210.10 to<br>458.17)       |
| Tuberculosis                                                             | 1,061.02<br>(845.91 to<br>1,456.98)      | 755.23<br>(443.65 to<br>1,233.08)          | 535.20<br>(336.13 to<br>838.44)           | 1,306.59<br>(765.32 to<br>2,166.42)         | 36.87<br>(28.24 to<br>48.89)          | 31.11<br>(18.46 to<br>51.61)          | 22.76<br>(13.66 to<br>36.40)          | 51.43<br>(29.79 to<br>86.34)          |
| HIV/AIDS                                                                 | 6,208.86<br>(3,730.75 to<br>9,551.06)    | 5,405.40<br>(1,597.59 to<br>11,155.75)     | 3,045.65<br>(647.76 to<br>7,604.54)       | 12,503.92<br>(7,653.94 to<br>18,990.93)     | 123.27<br>(75.66 to<br>188.57)        | 115.52<br>(29.35 to<br>244.86)        | 64.10<br>(9.77 to<br>163.54)          | 266.48<br>(157.05 to<br>412.38)       |
| <b>Diarrhea, lower respiratory, and other common infectious diseases</b> | 10,075.44<br>(8,577.18 to<br>11,882.99)  | 7,517.25<br>(5,059.95 to<br>10,836.10)     | 6,208.39<br>(4,263.73 to<br>8,744.09)     | 11,946.95<br>(7,781.03 to<br>18,400.15)     | 314.48<br>(270.11 to<br>361.53)       | 335.30<br>(243.13 to<br>451.84)       | 294.79<br>(216.80 to<br>390.03)       | 474.96<br>(325.48 to<br>682.57)       |
| Diarrheal diseases                                                       | 1,440.13<br>(1,021.37 to<br>2,133.97)    | 497.70<br>(133.85 to<br>1,372.53)          | 385.11<br>(106.15 to<br>1,078.28)         | 1,164.21<br>(282.71 to<br>3,123.29)         | 34.49<br>(22.66 to<br>56.40)          | 20.48<br>(5.46 to<br>57.40)           | 16.82<br>(4.60 to<br>47.62)           | 44.00<br>(9.71 to<br>128.59)          |
| Intestinal infectious diseases                                           | 684.57<br>(329.47 to<br>1,214.79)        | 394.47<br>(177.87 to<br>740.92)            | 350.31<br>(160.36 to<br>648.40)           | 470.76<br>(209.74 to<br>890.77)             | 9.78<br>(4.79 to<br>17.20)            | 6.31<br>(2.95 to<br>11.64)            | 5.68<br>(2.70 to<br>10.44)            | 7.34<br>(3.35 to<br>14.00)            |
| Typhoid fever                                                            | 574.47<br>(258.82 to<br>1,061.66)        | 321.21<br>(131.63 to<br>619.34)            | 286.21<br>(120.50 to<br>553.74)           | 382.85<br>(156.20 to<br>749.59)             | 8.21<br>(3.87 to<br>15.00)            | 8.21<br>(2.37 to<br>9.76)             | 5.15<br>(2.11 to<br>8.92)             | 5.97<br>(2.58 to<br>11.51)            |
| Paratyphoid fever                                                        | 109.01<br>(40.25 to<br>247.55)           | 72.95<br>(24.58 to<br>166.09)              | 63.85<br>(21.95 to<br>140.91)             | 87.50<br>(28.96 to<br>202.38)               | 1.55<br>(0.59 to<br>3.50)             | 1.16<br>(0.41 to<br>2.53)             | 1.03<br>(0.37 to<br>2.19)             | 1.36<br>(0.47 to<br>3.05)             |
| Other intestinal infectious diseases                                     | 1.09<br>(0.34 to<br>2.80)                | 0.31<br>(0.09 to<br>0.84)                  | 0.25<br>(0.07 to<br>0.65)                 | 0.41<br>(0.11 to<br>1.06)                   | 0.02<br>(0.01 to<br>0.04)             | 0.01<br>(0.00 to<br>0.02)             | 0.01<br>(0.00 to<br>0.02)             | 0.01<br>(0.00 to<br>0.03)             |
| Lower respiratory infections                                             | 6,363.45<br>(5,345.09 to<br>7,527.50)    | 5,677.57<br>(3,788.74 to<br>8,398.71)      | 4,602.77<br>(3,128.36 to<br>6,593.68)     | 8,775.73<br>(5,474.61 to<br>13,928.57)      | 240.59<br>(196.39 to<br>277.42)       | 283.10<br>(203.45 to<br>388.49)       | 247.90<br>(179.58 to<br>335.82)       | 391.47<br>(264.91 to<br>582.96)       |
| Upper respiratory infections                                             | 6.26<br>(2.59 to<br>12.98)               | 4.91<br>(1.48 to<br>12.03)                 | 3.80<br>(1.21 to<br>9.10)                 | 6.53<br>(2.02 to<br>16.00)                  | 0.12<br>(0.06 to<br>0.22)             | 0.15<br>(0.05 to<br>0.37)             | 0.12<br>(0.04 to<br>0.28)             | 0.19<br>(0.06 to<br>0.45)             |
| Otitis media                                                             | 0.22<br>(0.10 to<br>0.39)                | 0.12<br>(0.03 to<br>0.23)                  | 0.13<br>(0.04 to<br>0.24)                 | 0.11<br>(0.03 to<br>0.21)                   | 0.01<br>(0.00 to<br>0.02)             | 0.01<br>(0.00 to<br>0.02)             | 0.01<br>(0.00 to<br>0.02)             | 0.01<br>(0.00 to<br>0.01)             |
| Meningitis                                                               | 1,017.72<br>(701.54 to<br>1,737.07)      | 644.76<br>(419.34 to<br>1,128.72)          | 613.25<br>(398.10 to<br>1,070.28)         | 781.48<br>(496.36 to<br>1,409.60)           | 20.67<br>(14.99 to<br>33.52)          | 18.32<br>(12.93 to<br>31.17)          | 18.01<br>(12.68 to<br>30.39)          | 19.65<br>(13.72 to<br>33.54)          |
| Pneumococcal meningitis                                                  | 89.28<br>(59.39 to<br>154.28)            | 59.18<br>(37.49 to<br>110.05)              | 59.55<br>(37.77 to<br>108.95)             | 66.58<br>(42.35 to<br>126.35)               | 2.20<br>(1.54 to<br>3.78)             | 1.95<br>(1.26 to<br>3.41)             | 2.01<br>(1.30 to<br>3.50)             | 2.07<br>(1.35 to<br>3.72)             |
| H influenzae type B meningitis                                           | 111.80<br>(73.19 to<br>190.30)           | 81.57<br>(49.87 to<br>145.78)              | 78.30<br>(49.14 to<br>139.45)             | 175.25<br>(78.99 to<br>364.47)              | 2.14<br>(1.49 to<br>3.60)             | 1.93<br>(1.30 to<br>3.36)             | 1.93<br>(1.31 to<br>3.34)             | 2.94<br>(1.66 to<br>5.49)             |
| Meningococcal meningitis                                                 | 557.94<br>(373.28 to<br>951.35)          | 351.69<br>(211.26 to<br>651.73)            | 333.35<br>(201.45 to<br>619.82)           | 373.95<br>(223.89 to<br>717.10)             | 11.03<br>(7.73 to<br>18.95)           | 9.55<br>(6.21 to<br>17.19)            | 9.32<br>(6.09 to<br>16.76)            | 9.65<br>(6.27 to<br>17.54)            |
| Other meningitis                                                         | 258.70<br>(173.52 to<br>497.83)          | 152.31<br>(102.61 to<br>256.28)            | 142.06<br>(97.18 to<br>234.73)            | 165.70<br>(109.05 to<br>291.72)             | 5.30<br>(3.94 to<br>8.42)             | 4.90<br>(3.54 to<br>7.29)             | 4.74<br>(3.44 to<br>7.04)             | 4.99<br>(3.61 to<br>7.62)             |

|                                                |                                                        |                                                      |                                                      |                                                      |                                                  |                                                 |                                                |                                                 |
|------------------------------------------------|--------------------------------------------------------|------------------------------------------------------|------------------------------------------------------|------------------------------------------------------|--------------------------------------------------|-------------------------------------------------|------------------------------------------------|-------------------------------------------------|
| Encephalitis                                   | 269.03<br>(170.88 to<br>432.95)                        | 218.91<br>(129.22 to<br>304.63)                      | 198.48<br>(119.78 to<br>277.21)                      | 249.94<br>(147.69 to<br>347.14)                      | 5.05<br>(3.18 to<br>6.58)                        | 5.65<br>(3.13 to<br>8.17)                       | 5.29<br>(2.91 to<br>7.63)                      | 6.06<br>(2.91 to<br>8.52)                       |
| Diphtheria                                     | 0.89<br>(0.43 to<br>1.61)                              | 0.18<br>(0.08 to<br>0.39)                            | 0.17<br>(0.08 to<br>0.37)                            | 1.42<br>(0.27 to<br>4.80)                            | 0.01<br>(0.01 to<br>0.02)                        | 0.00<br>(0.00 to<br>0.01)                       | 0.00<br>(0.00 to<br>0.01)                      | 0.02<br>(0.00 to<br>0.06)                       |
| Whooping cough                                 | 158.10<br>(14.01 to<br>541.51)                         | 40.81<br>(2.41 to<br>161.71)                         | 35.14<br>(2.06 to<br>140.97)                         | 376.42<br>(36.91 to<br>1,156.41)                     | 1.86<br>(0.17 to<br>6.38)                        | 0.49<br>(0.03 to<br>1.91)                       | 0.42<br>(0.02 to<br>1.69)                      | 4.45<br>(0.44 to<br>13.65)                      |
| Tetanus                                        | 5.95<br>(4.74 to<br>7.85)                              | 1.14<br>(0.71 to<br>1.73)                            | 1.12<br>(0.70 to<br>1.71)                            | 2.73<br>(1.44 to<br>5.09)                            | 0.11<br>(0.08 to<br>0.14)                        | 0.03<br>(0.02 to<br>0.04)                       | 0.03<br>(0.02 to<br>0.04)                      | 0.04<br>(0.03 to<br>0.07)                       |
| Measles                                        | 90.99<br>(26.47 to<br>222.20)                          | 23.07<br>(1.35 to<br>163.53)                         | 7.34<br>(0.81 to<br>35.89)                           | 98.61<br>(4.69 to<br>454.04)                         | 1.08<br>(0.31 to<br>2.64)                        | 0.28<br>(0.02 to<br>1.95)                       | 0.09<br>(0.01 to<br>0.43)                      | 1.17<br>(0.06 to<br>5.41)                       |
| <b>Cape Verde</b>                              |                                                        |                                                      |                                                      |                                                      |                                                  |                                                 |                                                |                                                 |
| Cause                                          | YLLs (actual counts)                                   |                                                      |                                                      |                                                      | Deaths (actual counts)                           |                                                 |                                                |                                                 |
|                                                | 2016                                                   | 2040 Forecast                                        | 2040 Better Scenario                                 | 2040 Worse Scenario                                  | 2016                                             | 2040 Forecast                                   | 2040 Better Scenario                           | 2040 Worse Scenario                             |
| Varicella and herpes zoster                    | 38.11<br>(19.41 to<br>68.85)                           | 13.60<br>(6.70 to<br>24.39)                          | 10.76<br>(5.55 to<br>18.40)                          | 19.00<br>(8.96 to<br>35.34)                          | 0.71<br>(0.46 to<br>1.09)                        | 0.48<br>(0.26 to<br>0.80)                       | 0.41<br>(0.23 to<br>0.68)                      | 0.56<br>(0.31 to<br>0.90)                       |
| <b>Neglected tropical diseases and malaria</b> | <b>667.99</b><br><b>(287.81 to</b><br><b>1,341.67)</b> | <b>319.97</b><br><b>(161.71 to</b><br><b>577.26)</b> | <b>267.38</b><br><b>(136.04 to</b><br><b>473.71)</b> | <b>407.57</b><br><b>(197.02 to</b><br><b>752.19)</b> | <b>10.10</b><br><b>(5.03 to</b><br><b>18.55)</b> | <b>6.95</b><br><b>(3.76 to</b><br><b>10.90)</b> | <b>3.15</b><br><b>(1.91 to</b><br><b>4.35)</b> | <b>8.32</b><br><b>(4.35 to</b><br><b>13.43)</b> |
| Malaria                                        | 15.59<br>(6.81 to<br>25.85)                            | 9.02<br>(4.10 to<br>13.03)                           | 8.67<br>(3.93 to<br>12.50)                           | 9.41<br>(4.23 to<br>13.61)                           | 0.31<br>(0.14 to<br>0.46)                        | 0.26<br>(0.10 to<br>0.35)                       | 0.25<br>(0.10 to<br>0.35)                      | 0.26<br>(0.11 to<br>0.35)                       |
| Chagas disease                                 | 0.00<br>(0.00 to<br>0.00)                              | 0.00<br>(0.00 to<br>0.00)                            | 0.00<br>(0.00 to<br>0.00)                            | 0.00<br>(0.00 to<br>0.00)                            | 0.00<br>(0.00 to<br>0.00)                        | 0.00<br>(0.00 to<br>0.00)                       | 0.00<br>(0.00 to<br>0.00)                      | 0.00<br>(0.00 to<br>0.00)                       |
| Leishmaniasis                                  | 0.00<br>(0.00 to<br>0.00)                              | 0.00<br>(0.00 to<br>0.00)                            | 0.00<br>(0.00 to<br>0.00)                            | 0.00<br>(0.00 to<br>0.00)                            | 0.00<br>(0.00 to<br>0.00)                        | 0.00<br>(0.00 to<br>0.00)                       | 0.00<br>(0.00 to<br>0.00)                      | 0.00<br>(0.00 to<br>0.00)                       |
| African trypanosomiasis                        | 0.00<br>(0.00 to<br>0.00)                              | 0.00<br>(0.00 to<br>0.00)                            | 0.00<br>(0.00 to<br>0.00)                            | 0.00<br>(0.00 to<br>0.00)                            | 0.00<br>(0.00 to<br>0.00)                        | 0.00<br>(0.00 to<br>0.00)                       | 0.00<br>(0.00 to<br>0.00)                      | 0.00<br>(0.00 to<br>0.00)                       |
| Schistosomiasis                                | 0.00<br>(0.00 to<br>0.00)                              | 0.00<br>(0.00 to<br>0.00)                            | 0.00<br>(0.00 to<br>0.00)                            | 0.00<br>(0.00 to<br>0.00)                            | 0.00<br>(0.00 to<br>0.00)                        | 0.00<br>(0.00 to<br>0.00)                       | 0.00<br>(0.00 to<br>0.00)                      | 0.00<br>(0.00 to<br>0.00)                       |
| Cysticercosis                                  | 6.10<br>(4.90 to<br>7.42)                              | 2.97<br>(2.22 to<br>3.83)                            | 2.85<br>(2.10 to<br>3.78)                            | 3.10<br>(2.36 to<br>3.91)                            | 0.14<br>(0.11 to<br>0.17)                        | 0.08<br>(0.06 to<br>0.11)                       | 0.08<br>(0.06 to<br>0.11)                      | 0.09<br>(0.07 to<br>0.11)                       |
| Cystic echinococcosis                          | 3.59<br>(2.68 to<br>4.60)                              | 2.24<br>(1.58 to<br>3.06)                            | 1.68<br>(1.13 to<br>2.43)                            | 3.17<br>(2.10 to<br>4.51)                            | 0.10<br>(0.08 to<br>0.13)                        | 0.08<br>(0.06 to<br>0.11)                       | 0.06<br>(0.04 to<br>0.09)                      | 0.11<br>(0.07 to<br>0.16)                       |
| Dengue                                         | 1.36<br>(0.23 to<br>3.95)                              | 4.06<br>(0.77 to<br>10.48)                           | 3.87<br>(0.74 to<br>9.83)                            | 4.29<br>(0.79 to<br>10.86)                           | 0.03<br>(0.00 to<br>0.07)                        | 0.12<br>(0.02 to<br>0.30)                       | 0.12<br>(0.02 to<br>0.30)                      | 0.12<br>(0.02 to<br>0.30)                       |
| Yellow fever                                   | 0.00<br>(0.00 to<br>0.00)                              | 0.00<br>(0.00 to<br>0.00)                            | 0.00<br>(0.00 to<br>0.00)                            | 0.00<br>(0.00 to<br>0.00)                            | 0.00<br>(0.00 to<br>0.00)                        | 0.00<br>(0.00 to<br>0.00)                       | 0.00<br>(0.00 to<br>0.00)                      | 0.00<br>(0.00 to<br>0.00)                       |
| Rabies                                         | 49.32<br>(13.70 to<br>145.18)                          | 21.02<br>(5.37 to<br>57.45)                          | 14.62<br>(3.55 to<br>41.37)                          | 33.31<br>(8.70 to<br>89.21)                          | 0.83<br>(0.26 to<br>2.28)                        | 0.43<br>(0.11 to<br>1.11)                       | 0.30<br>(0.08 to<br>0.79)                      | 0.67<br>(0.18 to<br>1.68)                       |
| Intestinal nematode infections                 | 0.37<br>(0.05 to<br>1.11)                              | 0.27<br>(0.06 to<br>0.76)                            | 0.26<br>(0.06 to<br>0.69)                            | 0.30<br>(0.06 to<br>0.81)                            | 0.01<br>(0.00 to<br>0.01)                        | 0.00<br>(0.00 to<br>0.01)                       | 0.00<br>(0.00 to<br>0.01)                      | 0.00<br>(0.00 to<br>0.01)                       |
| Other neglected tropical diseases              | 591.66<br>(220.84 to<br>1,281.41)                      | 280.39<br>(123.07 to<br>533.12)                      | 235.43<br>(104.73 to<br>438.72)                      | 353.99<br>(145.56 to<br>700.63)                      | 8.69<br>(3.60 to<br>17.15)                       | 5.97<br>(2.69 to<br>9.85)                       | 5.22<br>(2.34 to<br>8.44)                      | 7.06<br>(3.07 to<br>11.97)                      |
| <b>Maternal disorders</b>                      | <b>224.57</b><br><b>(163.77 to</b><br><b>304.24)</b>   | <b>130.32</b><br><b>(84.05 to</b><br><b>195.92)</b>  | <b>97.46</b><br><b>(63.04 to</b><br><b>142.42)</b>   | <b>185.92</b><br><b>(121.87 to</b><br><b>273.30)</b> | <b>3.95</b><br><b>(2.88 to</b><br><b>5.32)</b>   | <b>2.36</b><br><b>(1.53 to</b><br><b>3.57)</b>  | <b>1.77</b><br><b>(1.13 to</b><br><b>2.57)</b> | <b>3.37</b><br><b>(2.20 to</b><br><b>4.98)</b>  |

|                                                       |                              |                              |                              |                              |                           |                           |                           |                           |
|-------------------------------------------------------|------------------------------|------------------------------|------------------------------|------------------------------|---------------------------|---------------------------|---------------------------|---------------------------|
| Maternal hemorrhage                                   | 64.69<br>(41.91 to<br>95.09) | 32.38<br>(19.12 to<br>51.77) | 24.54<br>(14.88 to<br>36.98) | 45.46<br>(27.34 to<br>70.03) | 1.16<br>(0.75 to<br>1.73) | 0.60<br>(0.35 to<br>0.95) | 0.45<br>(0.28 to<br>0.69) | 0.84<br>(0.50 to<br>1.29) |
| Maternal sepsis and other maternal infections         | 3.07<br>(1.41 to<br>5.58)    | 1.53<br>(0.66 to<br>2.90)    | 1.15<br>(0.52 to<br>2.08)    | 2.15<br>(0.96 to<br>3.89)    | 0.05<br>(0.03 to<br>0.10) | 0.03<br>(0.01 to<br>0.05) | 0.02<br>(0.01 to<br>0.04) | 0.04<br>(0.02 to<br>0.07) |
| Maternal hypertensive disorders                       | 31.68<br>(20.05 to<br>47.00) | 16.79<br>(9.66 to<br>26.78)  | 12.65<br>(7.44 to<br>19.81)  | 23.72<br>(13.82 to<br>37.39) | 0.55<br>(0.35 to<br>0.81) | 0.30<br>(0.17 to<br>0.48) | 0.23<br>(0.13 to<br>0.35) | 0.42<br>(0.25 to<br>0.66) |
| Maternal obstructed labor and uterine rupture         | 4.16<br>(2.09 to<br>7.31)    | 2.36<br>(1.08 to<br>4.27)    | 1.75<br>(0.82 to<br>3.09)    | 3.39<br>(1.62 to<br>6.39)    | 0.07<br>(0.04 to<br>0.13) | 0.04<br>(0.02 to<br>0.08) | 0.03<br>(0.02 to<br>0.06) | 0.06<br>(0.03 to<br>0.11) |
| Maternal abortion, miscarriage, and ectopic pregnancy | 51.96<br>(33.56 to<br>78.49) | 32.87<br>(17.63 to<br>57.34) | 24.93<br>(13.80 to<br>41.83) | 47.20<br>(26.65 to<br>81.83) | 0.90<br>(0.59 to<br>1.35) | 0.59<br>(0.32 to<br>1.00) | 0.45<br>(0.25 to<br>0.75) | 0.85<br>(0.48 to<br>1.43) |
| Indirect maternal deaths                              | 35.80<br>(22.80 to<br>52.98) | 21.77<br>(12.33 to<br>34.96) | 16.49<br>(9.64 to<br>25.53)  | 30.48<br>(18.08 to<br>47.28) | 0.62<br>(0.40 to<br>0.92) | 0.39<br>(0.22 to<br>0.63) | 0.30<br>(0.17 to<br>0.46) | 0.54<br>(0.32 to<br>0.84) |
| Late maternal deaths                                  | 2.86<br>(1.27 to<br>5.65)    | 1.41<br>(0.59 to<br>2.89)    | 1.06<br>(0.45 to<br>2.10)    | 1.99<br>(0.83 to<br>3.98)    | 0.05<br>(0.02 to<br>0.10) | 0.03<br>(0.01 to<br>0.05) | 0.02<br>(0.01 to<br>0.04) | 0.04<br>(0.01 to<br>0.07) |
| Maternal deaths aggravated by HIV/AIDS                | 1.38<br>(0.64 to<br>2.43)    | 3.74<br>(0.12 to<br>9.81)    | 1.42<br>(0.03 to<br>6.33)    | 7.49<br>(3.18 to<br>14.50)   | 0.03<br>(0.01 to<br>0.04) | 0.07<br>(0.00 to<br>0.18) | 0.03<br>(0.00 to<br>0.12) | 0.14<br>(0.06 to<br>0.27) |
| Other maternal disorders                              | 28.97<br>(18.53 to<br>43.45) | 17.48<br>(10.13 to<br>27.36) | 13.45<br>(7.80 to<br>20.98)  | 24.04<br>(14.60 to<br>36.98) | 0.51<br>(0.33 to<br>0.76) | 0.25<br>(0.19 to<br>0.51) | 0.25<br>(0.15 to<br>0.39) | 0.44<br>(0.26 to<br>0.68) |

**Cape Verde**

| Cause                                                    | YLLs (actual counts)                           |                                              |                                              |                                              | Deaths (actual counts)                |                                     |                                     |                                     |
|----------------------------------------------------------|------------------------------------------------|----------------------------------------------|----------------------------------------------|----------------------------------------------|---------------------------------------|-------------------------------------|-------------------------------------|-------------------------------------|
|                                                          | 2016                                           | 2040 Forecast                                | 2040 Better Scenario                         | 2040 Worse Scenario                          | 2016                                  | 2040 Forecast                       | 2040 Better Scenario                | 2040 Worse Scenario                 |
| <b>Neonatal disorders</b>                                | <b>10,487.12</b><br>(8,538.31 to<br>12,972.57) | <b>3,576.59</b><br>(1,443.35 to<br>5,864.30) | <b>2,681.47</b><br>(1,078.09 to<br>4,303.59) | <b>4,899.07</b><br>(1,939.49 to<br>7,862.04) | <b>121.23</b><br>(98.66 to<br>150.00) | <b>41.36</b><br>(16.70 to<br>67.83) | <b>31.01</b><br>(12.48 to<br>49.77) | <b>56.65</b><br>(22.43 to<br>90.93) |
| Neonatal preterm birth                                   | 4,543.70<br>(3,295.73 to<br>6,039.23)          | 1,380.78<br>(512.28 to<br>2,346.19)          | 1,003.98<br>(388.02 to<br>1,675.35)          | 2,057.34<br>(772.92 to<br>3,460.56)          | 52.52<br>(38.08 to<br>69.77)          | 15.96<br>(5.93 to<br>27.12)         | 11.61<br>(4.49 to<br>19.37)         | 23.78<br>(8.95 to<br>40.01)         |
| Neonatal encephalopathy due to birth asphyxia and trauma | 3,591.84<br>(2,533.64 to<br>4,897.87)          | 1,148.67<br>(373.74 to<br>2,138.78)          | 883.69<br>(291.12 to<br>1,647.68)            | 1,473.32<br>(484.05 to<br>2,742.40)          | 41.52<br>(29.29 to<br>56.64)          | 13.28<br>(4.33 to<br>24.77)         | 10.22<br>(3.37 to<br>19.06)         | 17.04<br>(5.60 to<br>31.71)         |
| Neonatal sepsis and other neonatal infections            | 1,845.48<br>(1,186.48 to<br>2,623.37)          | 875.67<br>(416.50 to<br>1,504.49)            | 667.88<br>(329.05 to<br>1,132.76)            | 1,135.37<br>(543.70 to<br>1,917.73)          | 21.33<br>(13.71 to<br>30.35)          | 10.12<br>(4.82 to<br>17.39)         | 7.72<br>(3.81 to<br>13.09)          | 13.13<br>(6.29 to<br>22.16)         |
| Hemolytic disease and other neonatal jaundice            | 84.50<br>(54.16 to<br>128.99)                  | 21.21<br>(7.72 to<br>41.00)                  | 15.61<br>(5.80 to<br>29.77)                  | 28.68<br>(10.43 to<br>55.11)                 | 0.98<br>(0.63 to<br>1.49)             | 0.25<br>(0.09 to<br>0.47)           | 0.18<br>(0.07 to<br>0.34)           | 0.33<br>(0.12 to<br>0.64)           |
| Other neonatal disorders                                 | 421.60<br>(267.21 to<br>625.39)                | 150.26<br>(57.69 to<br>282.71)               | 110.32<br>(43.72 to<br>203.10)               | 204.37<br>(80.72 to<br>389.76)               | 4.88<br>(3.09 to<br>7.23)             | 1.74<br>(0.67 to<br>3.27)           | 1.28<br>(0.51 to<br>2.35)           | 2.36<br>(0.93 to<br>4.51)           |
| <b>Nutritional deficiencies</b>                          | <b>448.56</b><br>(334.75 to<br>620.51)         | <b>224.57</b><br>(157.92 to<br>319.27)       | <b>195.41</b><br>(139.87 to<br>266.73)       | <b>265.01</b><br>(190.10 to<br>368.04)       | <b>10.27</b><br>(8.67 to<br>12.46)    | <b>9.06</b><br>(7.02 to<br>11.78)   | <b>8.41</b><br>(6.58 to<br>10.66)   | <b>9.59</b><br>(7.57 to<br>12.15)   |
| Protein-energy malnutrition                              | 363.91<br>(257.43 to<br>520.90)                | 132.68<br>(89.77 to<br>195.47)               | 113.44<br>(79.07 to<br>161.48)               | 160.81<br>(109.97 to<br>234.01)              | 7.62<br>(6.16 to<br>9.66)             | 5.35<br>(4.08 to<br>6.92)           | 4.95<br>(3.82 to<br>6.32)           | 5.69<br>(4.35 to<br>7.22)           |
| Iodine deficiency                                        | 4.72<br>(0.23 to<br>23.24)                     | 9.44<br>(0.32 to<br>32.39)                   | 7.91<br>(0.25 to<br>26.34)                   | 11.51<br>(0.41 to<br>41.40)                  | 0.10<br>(0.01 to<br>0.35)             | 0.39<br>(0.01 to<br>1.37)           | 0.34<br>(0.01 to<br>1.27)           | 0.43<br>(0.01 to<br>1.49)           |
| Dietary iron deficiency                                  | 7.15<br>(5.59 to<br>9.08)                      | 5.25<br>(3.52 to<br>7.37)                    | 4.70<br>(3.25 to<br>6.45)                    | 6.02<br>(4.11 to<br>8.49)                    | 0.12<br>(0.09 to<br>0.15)             | 0.10<br>(0.07 to<br>0.15)           | 0.09<br>(0.06 to<br>0.12)           | 0.11<br>(0.08 to<br>0.15)           |
| Other nutritional deficiencies                           | 72.78<br>(55.50 to<br>97.92)                   | 77.20<br>(51.84 to<br>111.47)                | 69.37<br>(47.87 to<br>96.55)                 | 86.68<br>(60.11 to<br>122.35)                | 2.44<br>(1.93 to<br>2.94)             | 3.22<br>(2.27 to<br>4.43)           | 3.02<br>(2.16 to<br>4.16)           | 3.36<br>(2.41 to<br>4.52)           |

|                                                                         |                                              |                                              |                                              |                                               |                                           |                                           |                                           |                                           |
|-------------------------------------------------------------------------|----------------------------------------------|----------------------------------------------|----------------------------------------------|-----------------------------------------------|-------------------------------------------|-------------------------------------------|-------------------------------------------|-------------------------------------------|
| <b>Other communicable, maternal, neonatal, and nutritional diseases</b> | <b>421.13</b><br>(310.76 to 596.80)          | <b>295.05</b><br>(208.86 to 408.00)          | <b>262.40</b><br>(190.23 to 354.26)          | <b>336.90</b><br>(242.76 to 454.18)           | <b>9.19</b><br>(7.49 to 11.57)            | <b>9.54</b><br>(7.03 to 12.43)            | <b>8.72</b><br>(6.60 to 11.20)            | <b>10.40</b><br>(7.97 to 13.18)           |
| Sexually transmitted infections excluding HIV                           | 96.06<br>(26.38 to 216.44)                   | 20.63<br>(7.57 to 50.19)                     | 17.38<br>(6.79 to 41.12)                     | 25.09<br>(8.65 to 62.34)                      | 1.21<br>(0.39 to 2.61)                    | 0.33<br>(0.17 to 0.68)                    | 0.29<br>(0.16 to 0.58)                    | 0.39<br>(0.19 to 0.84)                    |
| Syphilis                                                                | 91.07<br>(22.31 to 210.59)                   | 16.67<br>(3.78 to 45.93)                     | 13.72<br>(3.18 to 37.17)                     | 20.73<br>(4.55 to 57.48)                      | 1.09<br>(0.28 to 2.50)                    | 0.22<br>(0.06 to 0.56)                    | 0.18<br>(0.06 to 0.46)                    | 0.27<br>(0.08 to 0.70)                    |
| Chlamydial infection                                                    | 1.00<br>(0.69 to 1.72)                       | 0.80<br>(0.54 to 1.35)                       | 0.73<br>(0.50 to 1.24)                       | 0.88<br>(0.60 to 1.51)                        | 0.02<br>(0.02 to 0.04)                    | 0.02<br>(0.02 to 0.05)                    | 0.02<br>(0.02 to 0.03)                    | 0.02<br>(0.02 to 0.04)                    |
| Gonococcal infection                                                    | 2.63<br>(1.89 to 4.43)                       | 2.11<br>(1.48 to 3.47)                       | 1.95<br>(1.37 to 3.15)                       | 2.31<br>(1.62 to 3.81)                        | 0.06<br>(0.05 to 0.10)                    | 0.06<br>(0.05 to 0.09)                    | 0.06<br>(0.04 to 0.09)                    | 0.07<br>(0.05 to 0.10)                    |
| Other sexually transmitted infections                                   | 1.37<br>(0.97 to 2.35)                       | 1.06<br>(0.71 to 1.80)                       | 0.97<br>(0.65 to 1.66)                       | 1.17<br>(0.79 to 1.99)                        | 0.03<br>(0.02 to 0.05)                    | 0.03<br>(0.02 to 0.04)                    | 0.03<br>(0.02 to 0.04)                    | 0.03<br>(0.02 to 0.05)                    |
| Acute hepatitis                                                         | 214.44<br>(174.04 to 261.46)                 | 184.41<br>(130.17 to 246.45)                 | 165.91<br>(118.68 to 218.97)                 | 208.37<br>(151.48 to 272.38)                  | 5.36<br>(4.42 to 6.44)                    | 5.62<br>(4.10 to 7.36)                    | 5.13<br>(3.79 to 6.58)                    | 6.19<br>(4.68 to 7.91)                    |
| Acute hepatitis A                                                       | 3.93<br>(0.75 to 8.45)                       | 1.95<br>(0.58 to 4.72)                       | 1.72<br>(0.51 to 4.10)                       | 2.25<br>(0.67 to 5.43)                        | 0.06<br>(0.02 to 0.11)                    | 0.05<br>(0.02 to 0.14)                    | 0.05<br>(0.01 to 0.12)                    | 0.06<br>(0.02 to 0.15)                    |
| Acute hepatitis B                                                       | 174.22<br>(139.35 to 215.23)                 | 154.38<br>(109.26 to 206.44)                 | 138.22<br>(98.95 to 182.36)                  | 175.37<br>(127.87 to 231.42)                  | 4.43<br>(3.55 to 5.40)                    | 4.63<br>(3.35 to 6.14)                    | 4.18<br>(3.04 to 5.48)                    | 5.15<br>(3.86 to 6.65)                    |
| Acute hepatitis C                                                       | 5.20<br>(3.59 to 7.35)                       | 6.52<br>(4.10 to 10.42)                      | 6.21<br>(3.92 to 9.88)                       | 6.87<br>(4.40 to 10.93)                       | 0.15<br>(0.11 to 0.21)                    | 0.22<br>(0.14 to 0.33)                    | 0.21<br>(0.14 to 0.32)                    | 0.22<br>(0.15 to 0.34)                    |
| Acute hepatitis E                                                       | 31.09<br>(22.23 to 43.60)                    | 21.55<br>(13.23 to 32.62)                    | 19.75<br>(12.21 to 29.88)                    | 23.88<br>(14.75 to 36.99)                     | 0.72<br>(0.52 to 0.98)                    | 0.73<br>(0.45 to 1.08)                    | 0.69<br>(0.43 to 1.04)                    | 0.75<br>(0.48 to 1.12)                    |
| Other unspecified infectious diseases                                   | 110.63<br>(72.89 to 208.01)                  | 90.02<br>(58.48 to 143.82)                   | 79.11<br>(52.67 to 127.21)                   | 103.44<br>(67.31 to 167.41)                   | 2.62<br>(2.00 to 3.91)                    | 3.58<br>(2.41 to 5.14)                    | 3.30<br>(2.26 to 4.69)                    | 3.83<br>(2.64 to 5.43)                    |
| <b>Non-communicable diseases</b>                                        | <b>42,541.32</b><br>(37,054.19 to 48,175.32) | <b>67,355.72</b><br>(48,848.70 to 86,191.11) | <b>57,639.73</b><br>(42,665.65 to 72,368.96) | <b>86,797.74</b><br>(61,844.02 to 112,376.10) | <b>1,893.37</b><br>(1,671.36 to 2,081.68) | <b>3,350.23</b><br>(2,590.28 to 4,121.63) | <b>2,927.03</b><br>(2,307.13 to 3,550.45) | <b>4,116.19</b><br>(3,163.05 to 5,070.85) |

**Cape Verde**

| Cause                      | YLLs (actual counts)               |                                             |                                              |                                              | Deaths (actual counts)                       |                                     |                                         |                                       |
|----------------------------|------------------------------------|---------------------------------------------|----------------------------------------------|----------------------------------------------|----------------------------------------------|-------------------------------------|-----------------------------------------|---------------------------------------|
|                            | 2016                               | 2040 Forecast                               | 2040 Better Scenario                         | 2040 Worse Scenario                          | 2016                                         | 2040 Forecast                       | 2040 Better Scenario                    | 2040 Worse Scenario                   |
|                            | <b>Neoplasms</b>                   | <b>11,591.04</b><br>(9,967.18 to 13,241.56) | <b>22,648.02</b><br>(16,777.63 to 28,824.57) | <b>21,022.69</b><br>(15,661.09 to 26,490.17) | <b>26,243.41</b><br>(19,069.58 to 34,191.64) | <b>488.61</b><br>(427.47 to 546.89) | <b>1,033.76</b><br>(806.87 to 1,249.72) | <b>982.46</b><br>(766.04 to 1,188.02) |
| Lip and oral cavity cancer | 293.09<br>(240.12 to 350.75)       | 556.99<br>(324.05 to 903.29)                | 436.45<br>(261.26 to 673.97)                 | 977.16<br>(519.29 to 1,668.23)               | 11.81<br>(9.90 to 13.80)                     | 23.21<br>(13.79 to 35.33)           | 18.59<br>(11.71 to 27.74)               | 39.26<br>(21.48 to 63.92)             |
| Nasopharynx cancer         | 42.19<br>(32.87 to 52.47)          | 74.91<br>(42.34 to 129.53)                  | 57.16<br>(33.71 to 94.10)                    | 133.50<br>(69.33 to 248.60)                  | 1.10<br>(0.87 to 1.35)                       | 2.15<br>(1.22 to 3.65)              | 1.63<br>(0.96 to 2.65)                  | 3.80<br>(2.00 to 6.98)                |
| Other pharynx cancer       | 82.47<br>(68.77 to 97.12)          | 157.59<br>(97.98 to 243.75)                 | 142.48<br>(91.53 to 214.81)                  | 210.13<br>(125.03 to 334.65)                 | 3.68<br>(3.11 to 4.22)                       | 7.58<br>(4.74 to 11.40)             | 7.00<br>(4.50 to 10.47)                 | 9.82<br>(5.74 to 15.35)               |
| Esophageal cancer          | 1,076.05<br>(872.78 to 1,321.55)   | 2,119.40<br>(1,112.93 to 3,675.11)          | 1,688.35<br>(928.73 to 2,831.61)             | 3,228.01<br>(1,568.35 to 6,010.62)           | 45.56<br>(37.91 to 54.21)                    | 86.86<br>(47.85 to 147.75)          | 69.70<br>(40.43 to 112.79)              | 129.58<br>(67.35 to 231.38)           |
| Stomach cancer             | 1,422.97<br>(1,199.63 to 1,658.60) | 2,294.53<br>(1,608.49 to 3,085.24)          | 2,183.21<br>(1,532.08 to 2,937.30)           | 2,456.17<br>(1,726.66 to 3,378.78)           | 73.78<br>(63.84 to 83.98)                    | 118.81<br>(88.20 to 155.20)         | 115.15<br>(85.26 to 148.44)             | 122.56<br>(90.80 to 162.13)           |
| Colon and rectum cancer    | 522.44<br>(441.85 to 602.50)       | 1,196.27<br>(848.97 to 1,651.16)            | 1,184.59<br>(836.58 to 1,608.65)             | 1,281.63<br>(899.57 to 1,812.49)             | 27.18<br>(23.36 to 30.77)                    | 65.04<br>(47.89 to 87.96)           | 65.81<br>(47.98 to 89.66)               | 66.86<br>(48.21 to 92.19)             |

|                                      |                                       |                                       |                                       |                                       |                              |                                |                                |                                |
|--------------------------------------|---------------------------------------|---------------------------------------|---------------------------------------|---------------------------------------|------------------------------|--------------------------------|--------------------------------|--------------------------------|
| Liver cancer                         | 1,224.36<br>(1,004.14 to<br>1,491.94) | 2,722.09<br>(1,776.05 to<br>4,075.97) | 2,330.89<br>(1,585.88 to<br>3,305.72) | 3,096.42<br>(1,963.38 to<br>4,864.09) | 44.08<br>(37.34 to<br>52.16) | 108.65<br>(73.70 to<br>155.40) | 94.73<br>(66.95 to<br>129.21)  | 119.34<br>(78.90 to<br>175.96) |
| Liver cancer due to hepatitis B      | 692.46<br>(547.20 to<br>858.31)       | 1,494.59<br>(958.64 to<br>2,264.53)   | 1,290.26<br>(868.05 to<br>1,861.15)   | 1,616.51<br>(1,000.23 to<br>2,530.38) | 23.53<br>(18.99 to<br>28.19) | 57.11<br>(38.67 to<br>83.39)   | 50.30<br>(35.48 to<br>69.74)   | 59.89<br>(39.65 to<br>90.06)   |
| Liver cancer due to hepatitis C      | 81.67<br>(56.32 to<br>111.11)         | 216.71<br>(127.82 to<br>344.91)       | 188.92<br>(114.17 to<br>285.99)       | 229.07<br>(130.26 to<br>371.14)       | 4.05<br>(2.77 to<br>5.65)    | 11.00<br>(6.51 to<br>17.19)    | 9.86<br>(6.07 to<br>14.84)     | 11.18<br>(6.58 to<br>17.72)    |
| Liver cancer due to alcohol use      | 190.40<br>(150.32 to<br>244.44)       | 470.87<br>(288.46 to<br>749.96)       | 380.76<br>(243.69 to<br>571.23)       | 644.84<br>(385.53 to<br>1,040.85)     | 7.60<br>(6.16 to<br>9.52)    | 19.36<br>(12.54 to<br>29.48)   | 16.09<br>(10.90 to<br>23.13)   | 25.61<br>(16.25 to<br>39.26)   |
| Liver cancer due to other causes     | 259.84<br>(203.30 to<br>331.74)       | 549.92<br>(338.99 to<br>861.87)       | 470.94<br>(303.54 to<br>694.90)       | 606.00<br>(360.80 to<br>958.25)       | 8.90<br>(7.21 to<br>10.95)   | 21.19<br>(13.61 to<br>31.41)   | 18.49<br>(12.25 to<br>26.40)   | 22.66<br>(14.31 to<br>34.05)   |
| Gallbladder and biliary tract cancer | 71.16<br>(56.42 to<br>86.15)          | 121.68<br>(93.27 to<br>151.18)        | 125.68<br>(94.89 to<br>157.04)        | 114.65<br>(88.76 to<br>141.19)        | 3.44<br>(2.77 to<br>4.10)    | 6.18<br>(4.89 to<br>7.56)      | 6.49<br>(5.06 to<br>8.00)      | 5.65<br>(4.56 to<br>6.83)      |
| Pancreatic cancer                    | 553.47<br>(466.03 to<br>629.77)       | 1,504.57<br>(1,141.75 to<br>1,918.99) | 1,515.34<br>(1,148.40 to<br>1,918.25) | 1,516.47<br>(1,139.69 to<br>1,942.38) | 26.27<br>(22.50 to<br>29.56) | 74.08<br>(57.77 to<br>92.93)   | 75.53<br>(58.82 to<br>95.36)   | 72.73<br>(55.76 to<br>92.54)   |
| Larynx cancer                        | 88.46<br>(71.76 to<br>106.81)         | 167.48<br>(86.92 to<br>287.87)        | 121.71<br>(67.24 to<br>203.53)        | 294.41<br>(139.11 to<br>545.09)       | 4.16<br>(3.43 to<br>4.91)    | 7.50<br>(3.99 to<br>13.02)     | 5.47<br>(3.11 to<br>9.10)      | 12.77<br>(6.26 to<br>22.77)    |
| Tracheal, bronchus, and lung cancer  | 978.84<br>(826.09 to<br>1,134.67)     | 2,034.51<br>(1,204.35 to<br>3,115.21) | 1,521.51<br>(925.42 to<br>2,280.63)   | 3,331.31<br>(1,859.77 to<br>5,370.94) | 48.47<br>(41.24 to<br>55.68) | 100.91<br>(61.85 to<br>148.31) | 76.62<br>(48.60 to<br>111.50)  | 159.85<br>(92.63 to<br>244.11) |
| Malignant skin melanoma              | 26.51<br>(21.77 to<br>33.14)          | 54.00<br>(42.97 to<br>68.64)          | 57.80<br>(45.78 to<br>74.28)          | 48.79<br>(39.64 to<br>61.63)          | 1.16<br>(0.95 to<br>1.38)    | 2.72<br>(2.17 to<br>3.28)      | 2.98<br>(2.37 to<br>3.63)      | 2.35<br>(1.91 to<br>2.79)      |
| Non-melanoma skin cancer             | 21.68<br>(17.55 to<br>26.34)          | 44.37<br>(32.59 to<br>56.17)          | 43.69<br>(32.18 to<br>55.60)          | 44.13<br>(33.37 to<br>54.39)          | 0.97<br>(0.82 to<br>1.13)    | 2.16<br>(1.74 to<br>2.56)      | 2.19<br>(1.75 to<br>2.64)      | 2.03<br>(1.70 to<br>2.36)      |
| Breast cancer                        | 583.66<br>(426.28 to<br>730.86)       | 1,218.22<br>(822.26 to<br>1,839.39)   | 1,302.55<br>(819.82 to<br>1,736.11)   | 1,336.46<br>(856.78 to<br>2,133.15)   | 20.75<br>(16.19 to<br>26.02) | 52.43<br>(36.45 to<br>75.18)   | 52.67<br>(36.78 to<br>74.69)   | 55.46<br>(36.93 to<br>84.40)   |
| Cervical cancer                      | 639.68<br>(484.44 to<br>859.95)       | 983.43<br>(676.66 to<br>1,369.94)     | 927.74<br>(641.67 to<br>1,288.21)     | 1,057.18<br>(729.85 to<br>1,478.03)   | 22.82<br>(17.43 to<br>30.06) | 39.94<br>(28.67 to<br>54.07)   | 38.22<br>(27.29 to<br>50.97)   | 41.83<br>(29.98 to<br>57.08)   |
| Uterine cancer                       | 90.89<br>(71.57 to<br>113.58)         | 227.74<br>(165.12 to<br>302.89)       | 218.38<br>(158.10 to<br>287.54)       | 233.46<br>(174.46 to<br>305.06)       | 5.62<br>(4.44 to<br>6.80)    | 15.22<br>(11.41 to<br>19.46)   | 14.94<br>(11.12 to<br>19.23)   | 14.96<br>(11.58 to<br>18.81)   |
| Ovarian cancer                       | 87.52<br>(66.13 to<br>112.60)         | 204.07<br>(139.57 to<br>276.97)       | 206.81<br>(143.43 to<br>276.16)       | 192.05<br>(132.54 to<br>258.64)       | 3.02<br>(2.27 to<br>3.85)    | 8.14<br>(5.59 to<br>11.01)     | 8.33<br>(5.72 to<br>11.16)     | 7.52<br>(5.16 to<br>10.13)     |
| Prostate cancer                      | 879.71<br>(479.53 to<br>1,142.12)     | 2,159.07<br>(1,163.63 to<br>2,883.80) | 2,294.99<br>(1,222.39 to<br>3,083.87) | 1,945.74<br>(1,077.01 to<br>2,567.16) | 63.17<br>(32.18 to<br>82.81) | 137.26<br>(73.42 to<br>178.47) | 149.10<br>(80.18 to<br>193.87) | 118.88<br>(63.47 to<br>152.64) |
| Testicular cancer                    | 14.26<br>(9.41 to<br>19.44)           | 18.43<br>(10.98 to<br>27.15)          | 17.91<br>(10.70 to<br>26.26)          | 18.89<br>(11.55 to<br>27.27)          | 0.34<br>(0.22 to<br>0.47)    | 0.52<br>(0.31 to<br>0.78)      | 0.51<br>(0.30 to<br>0.77)      | 0.52<br>(0.31 to<br>0.77)      |

**Cape Verde**

| Cause                           | YLLs (actual counts)            |                                   |                                   |                                   | Deaths (actual counts)      |                              |                              |                              |
|---------------------------------|---------------------------------|-----------------------------------|-----------------------------------|-----------------------------------|-----------------------------|------------------------------|------------------------------|------------------------------|
|                                 | 2016                            | 2040 Forecast                     | 2040 Better Scenario              | 2040 Worse Scenario               | 2016                        | 2040 Forecast                | 2040 Better Scenario         | 2040 Worse Scenario          |
| Kidney cancer                   | 236.67<br>(196.81 to<br>288.86) | 523.49<br>(366.45 to<br>696.07)   | 543.93<br>(375.24 to<br>719.27)   | 507.43<br>(352.85 to<br>678.72)   | 7.05<br>(5.72 to<br>8.49)   | 18.97<br>(13.49 to<br>25.02) | 19.99<br>(13.90 to<br>26.51) | 17.98<br>(12.65 to<br>23.93) |
| Bladder cancer                  | 187.37<br>(154.48 to<br>227.29) | 364.63<br>(253.12 to<br>502.09)   | 347.16<br>(242.11 to<br>474.06)   | 402.32<br>(275.07 to<br>562.93)   | 9.56<br>(8.09 to<br>11.24)  | 18.50<br>(13.81 to<br>24.31) | 17.94<br>(13.32 to<br>23.52) | 19.62<br>(14.33 to<br>26.69) |
| Brain and nervous system cancer | 483.34<br>(403.55 to<br>594.41) | 847.61<br>(635.85 to<br>1,225.93) | 865.49<br>(643.37 to<br>1,275.88) | 819.49<br>(619.43 to<br>1,173.46) | 11.34<br>(9.14 to<br>16.08) | 25.90<br>(19.09 to<br>41.87) | 26.92<br>(19.51 to<br>44.24) | 24.30<br>(18.19 to<br>39.05) |

|                                |                                          |                                          |                                          |                                          |                                 |                                     |                                   |                                       |
|--------------------------------|------------------------------------------|------------------------------------------|------------------------------------------|------------------------------------------|---------------------------------|-------------------------------------|-----------------------------------|---------------------------------------|
|                                | 18.74<br>(14.99 to<br>23.31)             | 38.23<br>(25.98 to<br>55.42)             | 34.00<br>(23.54 to<br>48.05)             | 39.34<br>(26.93 to<br>57.21)             | 0.68<br>(0.54 to<br>0.85)       | 1.52<br>(1.05 to<br>2.22)           | 1.38<br>(0.96 to<br>1.94)         | 1.53<br>(1.08 to<br>2.18)             |
| Thyroid cancer                 | 8.52<br>(7.05 to<br>10.20)               | 16.25<br>(12.19 to<br>20.61)             | 16.17<br>(12.04 to<br>20.59)             | 16.12<br>(12.27 to<br>20.11)             | 0.31<br>(0.26 to<br>0.36)       | 0.66<br>(0.52 to<br>0.81)           | 0.67<br>(0.52 to<br>0.83)         | 0.63<br>(0.50 to<br>0.77)             |
| Mesothelioma                   | 16.43<br>(12.59 to<br>24.33)             | 17.33<br>(11.05 to<br>26.40)             | 15.68<br>(10.08 to<br>23.38)             | 19.35<br>(12.47 to<br>28.83)             | 0.39<br>(0.29 to<br>0.55)       | 0.53<br>(0.32 to<br>0.75)           | 0.48<br>(0.30 to<br>0.69)         | 0.57<br>(0.36 to<br>0.81)             |
| Hodgkin lymphoma               | 461.93<br>(387.58 to<br>572.37)          | 729.01<br>(552.31 to<br>972.51)          | 721.02<br>(547.52 to<br>956.31)          | 702.90<br>(536.47 to<br>940.90)          | 11.50<br>(9.73 to<br>14.35)     | 24.59<br>(19.22 to<br>32.42)        | 21.84<br>(19.16 to<br>32.61)      | 22.79<br>(17.96 to<br>29.75)          |
| Non-Hodgkin lymphoma           | 97.13<br>(71.24 to<br>138.90)            | 272.55<br>(187.36 to<br>397.33)          | 271.20<br>(186.55 to<br>395.95)          | 254.20<br>(176.07 to<br>369.23)          | 3.81<br>(2.81 to<br>5.40)       | 11.43<br>(8.00 to<br>16.76)         | 11.56<br>(8.10 to<br>17.10)       | 10.39<br>(7.43 to<br>14.99)           |
| Multiple myeloma               | 678.86<br>(548.87 to<br>804.38)          | 888.17<br>(641.47 to<br>1,252.72)        | 838.99<br>(601.39 to<br>1,180.92)        | 912.21<br>(655.82 to<br>1,309.84)        | 15.47<br>(12.94 to<br>19.63)    | 27.59<br>(20.55 to<br>41.07)        | 26.27<br>(19.44 to<br>39.22)      | 27.64<br>(20.39 to<br>41.60)          |
| Leukemia                       | 125.15<br>(84.27 to<br>172.14)           | 135.78<br>(88.66 to<br>188.20)           | 130.32<br>(86.48 to<br>180.56)           | 138.02<br>(90.04 to<br>191.73)           | 2.14<br>(1.53 to<br>2.82)       | 3.05<br>(2.10 to<br>4.55)           | 2.95<br>(2.05 to<br>4.42)         | 3.04<br>(2.05 to<br>4.63)             |
| Acute lymphoid leukemia        | 21.40<br>(15.34 to<br>27.64)             | 47.16<br>(28.18 to<br>69.94)             | 44.13<br>(26.52 to<br>64.36)             | 47.24<br>(28.64 to<br>70.46)             | 1.05<br>(0.75 to<br>1.36)       | 2.44<br>(1.46 to<br>3.64)           | 2.31<br>(1.39 to<br>3.38)         | 2.41<br>(1.46 to<br>3.60)             |
| Chronic lymphoid leukemia      | 262.97<br>(195.64 to<br>329.59)          | 375.29<br>(278.08 to<br>520.39)          | 364.71<br>(270.32 to<br>496.54)          | 372.19<br>(273.62 to<br>521.91)          | 5.18<br>(4.15 to<br>6.35)       | 10.46<br>(7.67 to<br>15.25)         | 10.25<br>(7.50 to<br>14.70)       | 10.10<br>(7.34 to<br>14.89)           |
| Acute myeloid leukemia         | 56.12<br>(37.45 to<br>79.00)             | 53.83<br>(33.85 to<br>82.87)             | 50.26<br>(32.09 to<br>76.95)             | 54.84<br>(34.33 to<br>85.22)             | 1.55<br>(1.12 to<br>2.12)       | 1.75<br>(1.21 to<br>2.57)           | 1.67<br>(1.17 to<br>2.46)         | 1.72<br>(1.16 to<br>2.51)             |
| Chronic myeloid leukemia       | 213.23<br>(161.79 to<br>280.88)          | 276.10<br>(173.11 to<br>459.87)          | 249.57<br>(159.35 to<br>416.10)          | 299.93<br>(190.18 to<br>503.54)          | 5.55<br>(4.34 to<br>7.97)       | 9.89<br>(6.84 to<br>16.33)          | 9.09<br>(6.25 to<br>15.03)        | 10.36<br>(7.15 to<br>17.14)           |
| Other leukemia                 | 722.62<br>(611.22 to<br>927.35)          | 1,081.42<br>(853.30 to<br>1,348.71)      | 1,091.84<br>(850.63 to<br>1,361.47)      | 1,053.47<br>(843.21 to<br>1,303.22)      | 21.12<br>(18.29 to<br>24.48)    | 44.71<br>(36.36 to<br>53.16)        | 46.75<br>(37.41 to<br>56.39)      | 41.85<br>(34.21 to<br>48.42)          |
| Other neoplasms                | 14,237.17<br>(12,330.97 to<br>16,014.06) | 20,341.63<br>(12,967.06 to<br>29,422.43) | 14,809.54<br>(10,147.02 to<br>20,441.76) | 32,116.87<br>(20,091.93 to<br>48,671.01) | 820.12<br>(726.74 to<br>896.17) | 1,200.77<br>(852.46 to<br>1,622.63) | 927.35<br>(681.99 to<br>1,216.63) | 1,718.25<br>(1,180.09 to<br>2,424.78) |
| Cardiovascular diseases        | 195.72<br>(161.25 to<br>226.38)          | 174.26<br>(113.64 to<br>246.89)          | 155.15<br>(103.73 to<br>214.19)          | 196.50<br>(133.55 to<br>275.60)          | 8.43<br>(7.22 to<br>9.63)       | 9.21<br>(6.64 to<br>12.53)          | 8.45<br>(6.21 to<br>11.19)        | 9.84<br>(7.42 to<br>13.19)            |
| Rheumatic heart disease        | 7,066.38<br>(6,077.06 to<br>8,054.11)    | 9,674.93<br>(5,477.83 to<br>15,392.81)   | 6,351.08<br>(3,761.65 to<br>9,922.07)    | 16,579.98<br>(9,257.87 to<br>27,512.48)  | 460.31<br>(405.28 to<br>507.03) | 609.98<br>(393.77 to<br>926.82)     | 431.17<br>(282.00 to<br>646.41)   | 955.76<br>(587.07 to<br>1,457.11)     |
| Ischemic heart disease         | 4,051.69<br>(3,394.00 to<br>4,732.57)    | 4,750.76<br>(2,698.09 to<br>7,799.89)    | 3,140.55<br>(1,890.45 to<br>5,029.29)    | 8,700.59<br>(4,667.82 to<br>14,935.92)   | 215.92<br>(184.88 to<br>246.26) | 269.11<br>(171.91 to<br>410.87)     | 194.00<br>(131.17 to<br>293.86)   | 432.73<br>(260.95 to<br>699.42)       |
| Stroke                         | 1,293.15<br>(1,088.44 to<br>1,493.47)    | 1,609.40<br>(928.23 to<br>2,703.50)      | 1,164.81<br>(711.15 to<br>1,917.20)      | 2,455.33<br>(1,367.56 to<br>4,271.58)    | 94.70<br>(80.71 to<br>108.43)   | 117.78<br>(74.25 to<br>190.11)      | 91.47<br>(60.40 to<br>150.03)     | 161.53<br>(99.01 to<br>273.40)        |
| Ischemic stroke                | 2,758.54<br>(2,282.22 to<br>3,257.58)    | 3,141.36<br>(1,656.49 to<br>5,478.87)    | 1,975.74<br>(1,104.87 to<br>3,257.45)    | 6,245.26<br>(3,159.37 to<br>11,187.90)   | 121.22<br>(102.33 to<br>140.33) | 151.33<br>(89.28 to<br>247.14)      | 102.53<br>(63.69 to<br>159.15)    | 271.20<br>(150.62 to<br>464.05)       |
| Intracerebral hemorrhage       | 479.84<br>(392.40 to<br>575.68)          | 878.57<br>(522.34 to<br>1,510.51)        | 722.52<br>(448.37 to<br>1,122.75)        | 1,293.37<br>(709.86 to<br>2,450.67)      | 26.23<br>(21.42 to<br>32.48)    | 51.66<br>(32.04 to<br>89.58)        | 44.08<br>(28.85 to<br>69.08)      | 72.40<br>(42.88 to<br>137.17)         |
| Hypertensive heart disease     | 205.31<br>(160.83 to<br>260.36)          | 357.66<br>(231.49 to<br>534.87)          | 358.55<br>(230.74 to<br>522.45)          | 362.94<br>(237.18 to<br>554.01)          | 7.14<br>(5.68 to<br>8.83)       | 14.72<br>(10.27 to<br>20.14)        | 15.22<br>(10.41 to<br>20.83)      | 14.13<br>(9.89 to<br>19.79)           |
| Cardiomyopathy and myocarditis | 45.09<br>(32.17 to<br>60.72)             | 52.03<br>(32.24 to<br>76.66)             | 50.46<br>(31.33 to<br>74.31)             | 53.81<br>(33.62 to<br>78.61)             | 1.16<br>(0.82 to<br>1.52)       | 1.64<br>(1.08 to<br>2.27)           | 1.67<br>(1.09 to<br>2.30)         | 1.58<br>(1.04 to<br>2.16)             |
| Myocarditis                    | <b>Cape Verde</b>                        |                                          |                                          |                                          |                                 |                                     |                                   |                                       |
|                                | <b>YLLs (actual counts)</b>              |                                          |                                          |                                          | <b>Deaths (actual counts)</b>   |                                     |                                   |                                       |



| Cause                                                         | 2016                                                       | 2040 Forecast                                              | 2040 Better Scenario                                       | 2040 Worse Scenario                                        | 2016                                               | 2040 Forecast                                        | 2040 Better Scenario                                 | 2040 Worse Scenario                                  |
|---------------------------------------------------------------|------------------------------------------------------------|------------------------------------------------------------|------------------------------------------------------------|------------------------------------------------------------|----------------------------------------------------|------------------------------------------------------|------------------------------------------------------|------------------------------------------------------|
| Alcoholic cardiomyopathy                                      | 15.52<br>(10.42 to<br>22.81)                               | 30.99<br>(18.71 to<br>49.63)                               | 31.37<br>(18.33 to<br>49.99)                               | 34.15<br>(21.17 to<br>53.62)                               | 0.50<br>(0.34 to<br>0.73)                          | 1.05<br>(0.65 to<br>1.63)                            | 1.08<br>(0.66 to<br>1.68)                            | 1.13<br>(0.73 to<br>1.74)                            |
| Other cardiomyopathy                                          | 144.70<br>(113.74 to<br>184.17)                            | 274.64<br>(171.84 to<br>428.68)                            | 276.72<br>(171.96 to<br>423.65)                            | 274.98<br>(171.77 to<br>444.20)                            | 5.48<br>(4.39 to<br>6.80)                          | 12.03<br>(7.98 to<br>16.96)                          | 12.48<br>(8.25 to<br>17.52)                          | 11.42<br>(7.59 to<br>16.67)                          |
| Atrial fibrillation and flutter                               | 121.69<br>(92.64 to<br>156.30)                             | 299.37<br>(212.77 to<br>408.84)                            | 301.81<br>(215.15 to<br>415.11)                            | 303.40<br>(212.28 to<br>421.61)                            | 12.74<br>(9.59 to<br>16.45)                        | 28.94<br>(21.08 to<br>39.44)                         | 30.10<br>(21.77 to<br>40.64)                         | 27.73<br>(19.70 to<br>38.54)                         |
| Aortic aneurysm                                               | 93.78<br>(76.50 to<br>111.43)                              | 180.24<br>(125.29 to<br>249.73)                            | 176.01<br>(122.97 to<br>241.89)                            | 178.57<br>(124.36 to<br>249.62)                            | 5.06<br>(4.27 to<br>5.87)                          | 9.74<br>(7.46 to<br>12.89)                           | 9.91<br>(7.52 to<br>13.07)                           | 9.11<br>(6.98 to<br>12.21)                           |
| Peripheral artery disease                                     | 18.34<br>(9.67 to<br>26.03)                                | 89.80<br>(40.87 to<br>138.68)                              | 94.74<br>(43.05 to<br>146.14)                              | 81.34<br>(36.64 to<br>125.88)                              | 1.47<br>(0.83 to<br>2.02)                          | 6.82<br>(3.38 to<br>10.29)                           | 7.46<br>(3.70 to<br>11.07)                           | 5.85<br>(2.88 to<br>8.84)                            |
| Endocarditis                                                  | 250.14<br>(199.05 to<br>314.05)                            | 360.89<br>(236.76 to<br>537.43)                            | 347.73<br>(226.21 to<br>513.14)                            | 381.05<br>(250.88 to<br>567.41)                            | 7.59<br>(6.13 to<br>9.08)                          | 15.74<br>(10.39 to<br>22.41)                         | 15.73<br>(10.38 to<br>22.08)                         | 15.65<br>(10.49 to<br>22.37)                         |
| Other cardiovascular and circulatory diseases                 | 1,754.30<br>(1,417.61 to<br>2,587.71)                      | 3,575.14<br>(2,487.47 to<br>5,355.88)                      | 3,161.40<br>(2,271.34 to<br>4,602.48)                      | 4,039.12<br>(2,794.20 to<br>6,216.51)                      | 75.23<br>(61.17 to<br>107.12)                      | 184.84<br>(136.35 to<br>269.48)                      | 171.23<br>(127.40 to<br>245.25)                      | 195.06<br>(143.90 to<br>291.45)                      |
| <b>Chronic respiratory diseases</b>                           | <b>1,751.36</b><br><b>(1,478.48 to</b><br><b>2,055.98)</b> | <b>2,525.67</b><br><b>(1,651.86 to</b><br><b>3,668.76)</b> | <b>1,945.36</b><br><b>(1,304.09 to</b><br><b>2,771.33)</b> | <b>3,876.36</b><br><b>(2,444.03 to</b><br><b>6,170.87)</b> | <b>91.79</b><br><b>(78.55 to</b><br><b>108.05)</b> | <b>131.30</b><br><b>(93.12 to</b><br><b>188.73)</b>  | <b>101.80</b><br><b>(73.52 to</b><br><b>143.16)</b>  | <b>198.59</b><br><b>(132.40 to</b><br><b>309.59)</b> |
| Chronic obstructive pulmonary disease                         | 1,088.14<br>(906.86 to<br>1,296.33)                        | 1,578.90<br>(955.75 to<br>2,509.00)                        | 1,124.37<br>(710.48 to<br>1,770.16)                        | 2,831.65<br>(1,615.02 to<br>4,900.20)                      | 66.13<br>(56.11 to<br>79.28)                       | 91.44<br>(59.94 to<br>140.50)                        | 66.77<br>(45.09 to<br>101.84)                        | 156.40<br>(95.12 to<br>257.91)                       |
| Pneumoconiosis                                                | 6.00<br>(4.16 to<br>8.70)                                  | 7.08<br>(4.72 to<br>10.39)                                 | 6.72<br>(4.49 to<br>9.94)                                  | 7.27<br>(4.89 to<br>10.71)                                 | 0.20<br>(0.15 to<br>0.26)                          | 0.30<br>(0.21 to<br>0.45)                            | 0.29<br>(0.20 to<br>0.40)                            | 0.31<br>(0.22 to<br>0.44)                            |
| Silicosis                                                     | 0.55<br>(0.28 to<br>1.06)                                  | 0.54<br>(0.25 to<br>1.09)                                  | 0.52<br>(0.24 to<br>1.05)                                  | 0.56<br>(0.26 to<br>1.12)                                  | 0.02<br>(0.01 to<br>0.03)                          | 0.02<br>(0.01 to<br>0.03)                            | 0.02<br>(0.01 to<br>0.03)                            | 0.02<br>(0.01 to<br>0.03)                            |
| Asbestosis                                                    | 1.22<br>(0.80 to<br>1.96)                                  | 1.71<br>(1.09 to<br>2.72)                                  | 1.75<br>(1.11 to<br>2.79)                                  | 1.65<br>(1.06 to<br>2.55)                                  | 0.03<br>(0.02 to<br>0.05)                          | 0.05<br>(0.04 to<br>0.08)                            | 0.06<br>(0.04 to<br>0.08)                            | 0.05<br>(0.03 to<br>0.07)                            |
| Coal workers pneumoconiosis                                   | 0.38<br>(0.17 to<br>0.66)                                  | 0.51<br>(0.22 to<br>1.02)                                  | 0.41<br>(0.18 to<br>0.80)                                  | 0.60<br>(0.27 to<br>1.18)                                  | 0.01<br>(0.01 to<br>0.02)                          | 0.01<br>(0.01 to<br>0.04)                            | 0.02<br>(0.01 to<br>0.03)                            | 0.02<br>(0.01 to<br>0.05)                            |
| Other pneumoconiosis                                          | 3.85<br>(2.65 to<br>5.69)                                  | 4.32<br>(2.83 to<br>6.78)                                  | 4.04<br>(2.63 to<br>6.37)                                  | 4.47<br>(2.96 to<br>6.93)                                  | 0.14<br>(0.10 to<br>0.18)                          | 0.21<br>(0.14 to<br>0.31)                            | 0.19<br>(0.13 to<br>0.28)                            | 0.21<br>(0.15 to<br>0.32)                            |
| Asthma                                                        | 374.32<br>(301.19 to<br>464.70)                            | 402.58<br>(246.45 to<br>629.91)                            | 300.46<br>(196.46 to<br>447.52)                            | 459.85<br>(279.55 to<br>717.47)                            | 15.99<br>(12.94 to<br>19.94)                       | 19.65<br>(12.40 to<br>30.49)                         | 15.27<br>(10.20 to<br>22.63)                         | 21.23<br>(13.39 to<br>33.11)                         |
| Interstitial lung disease and pulmonary sarcoidosis           | 22.31<br>(17.10 to<br>31.41)                               | 56.32<br>(39.86 to<br>80.52)                               | 60.99<br>(43.07 to<br>80.52)                               | 30.33<br>(36.42 to<br>70.26)                               | 0.95<br>(0.71 to<br>1.42)                          | 2.57<br>(1.82 to<br>3.78)                            | 2.83<br>(2.01 to<br>4.20)                            | 2.22<br>(1.60 to<br>3.21)                            |
| Other chronic respiratory diseases                            | 260.59<br>(185.15 to<br>355.33)                            | 480.79<br>(295.64 to<br>710.31)                            | 452.82<br>(284.15 to<br>660.37)                            | 527.25<br>(321.43 to<br>812.96)                            | 8.52<br>(5.89 to<br>11.72)                         | 17.35<br>(11.03 to<br>25.62)                         | 16.64<br>(10.80 to<br>24.13)                         | 18.43<br>(11.67 to<br>27.60)                         |
| <b>Cirrhosis and other chronic liver diseases</b>             | <b>2,533.18</b><br><b>(2,041.27 to</b><br><b>3,111.95)</b> | <b>4,519.34</b><br><b>(3,038.51 to</b><br><b>6,206.50)</b> | <b>4,288.26</b><br><b>(2,873.39 to</b><br><b>5,872.61)</b> | <b>4,991.13</b><br><b>(3,408.29 to</b><br><b>6,721.12)</b> | <b>78.25</b><br><b>(63.71 to</b><br><b>93.87)</b>  | <b>157.41</b><br><b>(110.18 to</b><br><b>213.61)</b> | <b>151.29</b><br><b>(105.98 to</b><br><b>202.65)</b> | <b>170.25</b><br><b>(121.49 to</b><br><b>224.84)</b> |
| Cirrhosis and other chronic liver diseases due to hepatitis B | 1,106.44<br>(842.18 to<br>1,403.76)                        | 2,073.49<br>(1,335.28 to<br>2,933.97)                      | 2,008.73<br>(1,306.01 to<br>2,795.89)                      | 2,127.95<br>(1,405.49 to<br>2,973.67)                      | 34.99<br>(27.57 to<br>43.06)                       | 73.23<br>(49.39 to<br>100.84)                        | 71.79<br>(48.63 to<br>98.72)                         | 73.52<br>(50.72 to<br>99.94)                         |
| Cirrhosis and other chronic liver diseases due to hepatitis C | 385.90<br>(247.26 to<br>580.65)                            | 778.77<br>(433.93 to<br>1,244.79)                          | 752.60<br>(423.99 to<br>1,186.74)                          | 801.89<br>(453.89 to<br>1,280.60)                          | 11.99<br>(7.89 to<br>17.27)                        | 26.54<br>(15.29 to<br>41.25)                         | 25.90<br>(15.16 to<br>40.01)                         | 26.84<br>(15.43 to<br>41.45)                         |
| Cirrhosis and other chronic liver diseases due to alcohol use | 654.70<br>(503.54 to<br>848.31)                            | 1,135.49<br>(737.02 to<br>1,606.28)                        | 1,020.44<br>(663.35 to<br>1,444.28)                        | 1,502.59<br>(1,006.83 to<br>2,075.61)                      | 21.33<br>(16.77 to<br>26.57)                       | 40.24<br>(27.31 to<br>55.41)                         | 36.71<br>(24.92 to<br>50.02)                         | 52.20<br>(36.37 to<br>69.99)                         |



|                           |                                   |                                       |                                       |                                       |                              |                              |                              |                              |
|---------------------------|-----------------------------------|---------------------------------------|---------------------------------------|---------------------------------------|------------------------------|------------------------------|------------------------------|------------------------------|
| Alcohol use disorders     | 199.79<br>(95.68 to<br>534.50)    | 342.92<br>(148.26 to<br>1,060.57)     | 334.67<br>(144.67 to<br>1,041.75)     | 365.15<br>(162.56 to<br>1,115.81)     | 5.88<br>(3.04 to<br>15.01)   | 11.11<br>(5.24 to<br>32.39)  | 10.96<br>(5.14 to<br>31.78)  | 11.62<br>(5.55 to<br>33.67)  |
| Drug use disorders        | 808.98<br>(548.29 to<br>1,286.29) | 1,555.21<br>(1,054.79 to<br>2,369.41) | 1,560.17<br>(1,060.38 to<br>2,365.04) | 1,542.73<br>(1,041.89 to<br>2,365.88) | 18.11<br>(12.89 to<br>26.87) | 41.65<br>(29.88 to<br>57.83) | 42.58<br>(30.44 to<br>58.95) | 40.03<br>(28.77 to<br>55.81) |
| Opioid use disorders      | 715.30<br>(485.98 to<br>1,138.69) | 1,277.02<br>(870.40 to<br>1,889.17)   | 1,274.74<br>(871.71 to<br>1,870.85)   | 1,276.74<br>(864.46 to<br>1,907.66)   | 14.59<br>(10.31 to<br>22.17) | 30.15<br>(20.92 to<br>42.37) | 30.37<br>(20.97 to<br>42.28) | 29.66<br>(20.73 to<br>41.46) |
| Cocaine use disorders     | 12.54<br>(5.96 to<br>28.84)       | 42.05<br>(18.17 to<br>93.90)          | 40.80<br>(17.68 to<br>90.44)          | 43.05<br>(19.13 to<br>96.89)          | 0.37<br>(0.18 to<br>0.75)    | 1.37<br>(0.62 to<br>2.79)    | 1.35<br>(0.61 to<br>2.72)    | 1.37<br>(0.62 to<br>2.81)    |
| Amphetamine use disorders | 6.50<br>(3.25 to<br>14.46)        | 29.80<br>(13.66 to<br>61.92)          | 28.33<br>(13.31 to<br>58.32)          | 31.31<br>(14.50 to<br>65.99)          | 0.19<br>(0.10 to<br>0.38)    | 0.96<br>(0.45 to<br>1.87)    | 0.93<br>(0.44 to<br>1.76)    | 0.99<br>(0.46 to<br>1.92)    |
| Other drug use disorders  | 74.64<br>(38.63 to<br>149.57)     | 206.35<br>(111.39 to<br>378.76)       | 216.29<br>(117.94 to<br>398.14)       | 191.63<br>(103.00 to<br>356.40)       | 2.96<br>(1.87 to<br>4.78)    | 9.16<br>(5.97 to<br>14.15)   | 9.93<br>(6.53 to<br>15.45)   | 8.01<br>(5.17 to<br>12.53)   |
| Eating disorders          | 0.89<br>(0.59 to<br>1.34)         | 1.12<br>(0.73 to<br>1.76)             | 1.12<br>(0.73 to<br>1.77)             | 1.12<br>(0.74 to<br>1.73)             | 0.02<br>(0.01 to<br>0.02)    | 0.02<br>(0.01 to<br>0.03)    | 0.02<br>(0.01 to<br>0.03)    | 0.02<br>(0.01 to<br>0.03)    |

**Cape Verde**

| Cause                                                      | YLLs (actual counts)                         |                                              |                                              |                                               | Deaths (actual counts)                 |                                        |                                        |                                        |
|------------------------------------------------------------|----------------------------------------------|----------------------------------------------|----------------------------------------------|-----------------------------------------------|----------------------------------------|----------------------------------------|----------------------------------------|----------------------------------------|
|                                                            | 2016                                         | 2040 Forecast                                | 2040 Better Scenario                         | 2040 Worse Scenario                           | 2016                                   | 2040 Forecast                          | 2040 Better Scenario                   | 2040 Worse Scenario                    |
| <b>Diabetes, urogenital, blood, and endocrine diseases</b> | <b>4,244.71</b><br>(3,665.31 to<br>4,827.73) | <b>7,253.73</b><br>(5,153.32 to<br>9,840.02) | <b>6,163.74</b><br>(4,437.68 to<br>8,230.28) | <b>8,809.34</b><br>(6,419.97 to<br>11,819.24) | <b>184.79</b><br>(162.00 to<br>205.71) | <b>389.74</b><br>(294.94 to<br>515.82) | <b>338.71</b><br>(257.89 to<br>439.32) | <b>452.23</b><br>(347.16 to<br>587.45) |
| Diabetes mellitus                                          | 1,715.97<br>(1,472.90 to<br>1,950.93)        | 3,528.75<br>(2,307.17 to<br>5,234.48)        | 2,968.46<br>(1,978.29 to<br>4,416.08)        | 4,469.10<br>(2,965.95 to<br>6,707.82)         | 95.28<br>(81.95 to<br>107.29)          | 214.39<br>(148.80 to<br>302.12)        | 186.05<br>(130.93 to<br>263.27)        | 256.67<br>(180.07 to<br>367.64)        |
| Acute glomerulonephritis                                   | 4.88<br>(3.50 to<br>4.91)                    | 3.81<br>(2.74 to<br>5.08)                    | 3.47<br>(2.53 to<br>4.55)                    | 4.27<br>(3.09 to<br>5.69)                     | 0.07<br>(0.06 to<br>0.08)              | 0.07<br>(0.05 to<br>0.09)              | 0.07<br>(0.05 to<br>0.09)              | 0.08<br>(0.06 to<br>0.10)              |
| Chronic kidney disease                                     | 1,638.35<br>(1,316.28 to<br>1,938.92)        | 2,439.49<br>(1,443.23 to<br>3,832.40)        | 1,961.02<br>(1,211.76 to<br>2,956.03)        | 1,093.54<br>(716.53 to<br>4,763.06)           | 63.17<br>(51.59 to<br>72.50)           | 120.58<br>(71.65 to<br>189.53)         | 97.89<br>(61.79 to<br>147.72)          | 142.49<br>(85.76 to<br>228.21)         |
| Chronic kidney disease due to diabetes mellitus            | 460.46<br>(361.62 to<br>559.55)              | 888.49<br>(504.67 to<br>1,471.65)            | 714.93<br>(433.43 to<br>1,127.04)            | 1,093.54<br>(628.96 to<br>1,852.27)           | 20.22<br>(15.92 to<br>23.97)           | 44.30<br>(25.91 to<br>74.45)           | 36.04<br>(22.07 to<br>57.34)           | 52.44<br>(30.35 to<br>89.95)           |
| Chronic kidney disease due to hypertension                 | 239.80<br>(185.84 to<br>290.99)              | 474.92<br>(277.70 to<br>765.53)              | 381.85<br>(229.84 to<br>593.52)              | 574.54<br>(331.58 to<br>932.81)               | 14.64<br>(11.60 to<br>17.55)           | 30.65<br>(18.21 to<br>50.40)           | 25.07<br>(15.50 to<br>39.67)           | 35.37<br>(20.64 to<br>59.13)           |
| Chronic kidney disease due to glomerulonephritis           | 436.46<br>(344.07 to<br>527.50)              | 474.34<br>(281.14 to<br>734.09)              | 380.87<br>(235.43 to<br>575.32)              | 592.02<br>(357.58 to<br>934.96)               | 12.22<br>(9.81 to<br>14.73)            | 18.85<br>(11.19 to<br>31.69)           | 15.13<br>(9.33 to<br>23.89)            | 22.74<br>(13.39 to<br>38.02)           |
| Chronic kidney disease due to other and unspecified causes | 501.63<br>(392.13 to<br>607.77)              | 601.75<br>(353.71 to<br>925.74)              | 483.37<br>(289.56 to<br>720.49)              | 747.13<br>(455.33 to<br>1,167.48)             | 16.09<br>(12.69 to<br>19.43)           | 26.79<br>(16.12 to<br>42.80)           | 21.65<br>(13.42 to<br>33.61)           | 31.94<br>(19.28 to<br>50.63)           |
| Urinary diseases and male infertility                      | 329.31<br>(279.34 to<br>384.62)              | 625.74<br>(488.99 to<br>759.93)              | 619.46<br>(482.23 to<br>756.05)              | 621.67<br>(498.15 to<br>747.09)               | 14.02<br>(12.10 to<br>16.03)           | 32.36<br>(26.97 to<br>37.94)           | 32.26<br>(27.16 to<br>39.53)           | 30.09<br>(25.44 to<br>35.08)           |
| Urinary tract infections                                   | 204.01<br>(169.37 to<br>241.41)              | 467.18<br>(368.63 to<br>568.42)              | 470.94<br>(367.80 to<br>577.35)              | 454.04<br>(364.13 to<br>547.62)               | 7.99<br>(6.43 to<br>9.82)              | 24.08<br>(19.62 to<br>29.01)           | 25.19<br>(20.26 to<br>30.91)           | 21.94<br>(18.05 to<br>26.38)           |
| Urolithiasis                                               | 5.86<br>(4.40 to<br>7.75)                    | 9.52<br>(6.74 to<br>13.25)                   | 9.29<br>(6.59 to<br>12.86)                   | 9.84<br>(6.89 to<br>13.77)                    | 0.12<br>(0.09 to<br>0.15)              | 0.24<br>(0.18 to<br>0.31)              | 0.24<br>(0.18 to<br>0.32)              | 0.23<br>(0.17 to<br>0.31)              |
| Other urinary diseases                                     | 119.44<br>(92.88 to<br>149.07)               | 149.05<br>(100.06 to<br>209.59)              | 139.23<br>(93.44 to<br>191.56)               | 157.79<br>(110.60 to<br>216.55)               | 5.91<br>(4.51 to<br>7.25)              | 10.71<br>(5.38 to<br>10.71)            | 7.83<br>(5.16 to<br>10.54)             | 7.92<br>(5.52 to<br>10.40)             |
| Gynecological diseases                                     | 6.66<br>(4.95 to<br>8.54)                    | 14.34<br>(9.21 to<br>20.49)                  | 13.38<br>(8.42 to<br>19.04)                  | 15.16<br>(10.08 to<br>20.97)                  | 0.45<br>(0.20 to<br>0.59)              | 1.06<br>(0.32 to<br>1.53)              | 1.02<br>(0.29 to<br>1.46)              | 1.06<br>(0.36 to<br>1.50)              |

|                                                   |                                 |                                 |                                 |                                 |                           |                             |                             |                             |
|---------------------------------------------------|---------------------------------|---------------------------------|---------------------------------|---------------------------------|---------------------------|-----------------------------|-----------------------------|-----------------------------|
| Uterine fibroids                                  | 0.78<br>(0.36 to<br>1.17)       | 1.54<br>(0.64 to<br>2.61)       | 1.40<br>(0.58 to<br>2.36)       | 1.67<br>(0.70 to<br>2.86)       | 0.07<br>(0.02 to<br>0.11) | 0.13<br>(0.03 to<br>0.21)   | 0.12<br>(0.03 to<br>0.20)   | 0.13<br>(0.03 to<br>0.22)   |
| Polycystic ovarian syndrome                       | 0.28<br>(0.12 to<br>0.63)       | 0.23<br>(0.08 to<br>0.51)       | 0.19<br>(0.07 to<br>0.42)       | 0.29<br>(0.10 to<br>0.65)       | 0.01<br>(0.00 to<br>0.01) | 0.01<br>(0.00 to<br>0.01)   | 0.01<br>(0.00 to<br>0.01)   | 0.01<br>(0.00 to<br>0.02)   |
| Endometriosis                                     | 0.01<br>(0.01 to<br>0.03)       | 0.02<br>(0.01 to<br>0.05)       | 0.02<br>(0.01 to<br>0.04)       | 0.02<br>(0.01 to<br>0.06)       | 0.00<br>(0.00 to<br>0.00) | 0.00<br>(0.00 to<br>0.00)   | 0.00<br>(0.00 to<br>0.00)   | 0.00<br>(0.00 to<br>0.00)   |
| Genital prolapse                                  | 0.36<br>(0.07 to<br>1.16)       | 0.60<br>(0.11 to<br>2.09)       | 0.54<br>(0.09 to<br>1.85)       | 0.67<br>(0.12 to<br>2.32)       | 0.03<br>(0.00 to<br>0.10) | 0.05<br>(0.01 to<br>0.17)   | 0.04<br>(0.00 to<br>0.15)   | 0.05<br>(0.01 to<br>0.18)   |
| Other gynecological diseases                      | 5.22<br>(3.71 to<br>6.72)       | 11.95<br>(7.48 to<br>17.08)     | 11.23<br>(6.87 to<br>16.25)     | 12.51<br>(7.97 to<br>17.94)     | 0.34<br>(0.15 to<br>0.46) | 0.88<br>(0.28 to<br>1.29)   | 0.86<br>(0.25 to<br>1.24)   | 0.87<br>(0.29 to<br>1.25)   |
| Hemoglobinopathies and hemolytic anemias          | 405.14<br>(327.43 to<br>486.16) | 387.32<br>(249.24 to<br>530.04) | 354.35<br>(234.10 to<br>476.65) | 428.15<br>(288.46 to<br>585.65) | 8.08<br>(6.55 to<br>9.43) | 11.44<br>(7.92 to<br>15.20) | 10.65<br>(7.54 to<br>13.96) | 12.19<br>(8.69 to<br>16.01) |
| Thalassemias                                      | 3.46<br>(0.29 to<br>14.06)      | 1.38<br>(0.15 to<br>5.24)       | 1.36<br>(0.14 to<br>5.13)       | 1.39<br>(0.15 to<br>5.33)       | 0.04<br>(0.00 to<br>0.17) | 0.02<br>(0.00 to<br>0.06)   | 0.02<br>(0.00 to<br>0.06)   | 0.02<br>(0.00 to<br>0.07)   |
| Sickle cell disorders                             | 332.80<br>(265.99 to<br>404.13) | 262.46<br>(167.27 to<br>371.07) | 240.40<br>(153.63 to<br>335.53) | 291.72<br>(189.62 to<br>402.97) | 4.97<br>(3.95 to<br>6.04) | 4.88<br>(3.13 to<br>6.80)   | 4.51<br>(2.94 to<br>6.19)   | 5.36<br>(3.52 to<br>7.40)   |
| G6PD deficiency                                   | 39.05<br>(24.96 to<br>54.54)    | 70.50<br>(41.75 to<br>105.25)   | 63.05<br>(38.32 to<br>90.86)    | 79.61<br>(49.55 to<br>115.96)   | 0.96<br>(0.68 to<br>1.26) | 2.21<br>(1.53 to<br>3.54)   | 2.21<br>(1.43 to<br>3.12)   | 2.69<br>(1.76 to<br>3.79)   |
| Other hemoglobinopathies and hemolytic anemias    | 29.84<br>(23.61 to<br>36.88)    | 52.98<br>(37.63 to<br>72.10)    | 49.54<br>(35.36 to<br>67.46)    | 55.42<br>(40.78 to<br>73.86)    | 2.10<br>(1.69 to<br>2.66) | 4.10<br>(3.05 to<br>5.54)   | 3.92<br>(2.95 to<br>5.26)   | 4.12<br>(3.16 to<br>5.33)   |
| Endocrine, metabolic, blood, and immune disorders | 145.20<br>(97.02 to<br>317.71)  | 254.27<br>(143.86 to<br>642.82) | 243.60<br>(138.26 to<br>622.39) | 263.75<br>(151.32 to<br>672.17) | 3.72<br>(2.42 to<br>9.29) | 9.84<br>(5.63 to<br>27.69)  | 9.76<br>(5.62 to<br>27.27)  | 9.64<br>(5.59 to<br>26.93)  |

**Cape Verde**

| Cause                                  | YLLs (actual counts)                         |                                              |                                              |                                              | Deaths (actual counts)              |                                     |                                     |                                     |
|----------------------------------------|----------------------------------------------|----------------------------------------------|----------------------------------------------|----------------------------------------------|-------------------------------------|-------------------------------------|-------------------------------------|-------------------------------------|
|                                        | 2016                                         | 2040 Forecast                                | 2040 Better Scenario                         | 2040 Worse Scenario                          | 2016                                | 2040 Forecast                       | 2040 Better Scenario                | 2040 Worse Scenario                 |
| <b>Musculoskeletal disorders</b>       | <b>82.60</b><br>(67.10 to<br>114.48)         | <b>179.46</b><br>(136.60 to<br>230.09)       | <b>186.12</b><br>(140.68 to<br>238.59)       | <b>169.80</b><br>(130.71 to<br>217.57)       | <b>2.82</b><br>(2.21 to<br>3.48)    | <b>8.32</b><br>(5.84 to<br>10.15)   | <b>8.83</b><br>(6.20 to<br>10.88)   | <b>7.54</b><br>(5.40 to<br>9.25)    |
| Rheumatoid arthritis                   | 7.99<br>(5.71 to<br>11.08)                   | 24.01<br>(15.07 to<br>36.46)                 | 22.48<br>(14.26 to<br>34.43)                 | 25.25<br>(16.56 to<br>37.44)                 | 0.45<br>(0.31 to<br>0.62)           | 1.55<br>(0.96 to<br>2.43)           | 1.47<br>(0.91 to<br>2.33)           | 1.58<br>(0.99 to<br>2.44)           |
| Other musculoskeletal disorders        | 74.61<br>(60.24 to<br>104.87)                | 155.46<br>(118.35 to<br>200.23)              | 163.63<br>(123.95 to<br>210.78)              | 144.55<br>(111.19 to<br>189.57)              | 2.37<br>(1.88 to<br>2.91)           | 6.77<br>(4.63 to<br>8.28)           | 7.35<br>(5.00 to<br>9.05)           | 5.96<br>(4.11 to<br>7.23)           |
| <b>Other non-communicable diseases</b> | <b>4,185.64</b><br>(3,317.35 to<br>5,506.08) | <b>2,890.00</b><br>(1,898.81 to<br>4,201.83) | <b>2,601.60</b><br>(1,740.56 to<br>3,690.89) | <b>3,231.62</b><br>(2,095.63 to<br>4,685.35) | <b>57.80</b><br>(47.18 to<br>73.33) | <b>64.58</b><br>(44.06 to<br>85.73) | <b>61.94</b><br>(42.53 to<br>81.56) | <b>66.84</b><br>(46.12 to<br>89.31) |
| Congenital birth defects               | 3,602.45<br>(2,741.48 to<br>4,918.33)        | 1,983.13<br>(1,160.56 to<br>3,104.44)        | 1,716.59<br>(1,025.25 to<br>2,647.68)        | 2,311.24<br>(1,327.99 to<br>3,652.67)        | 44.36<br>(34.35 to<br>59.99)        | 28.81<br>(17.82 to<br>43.06)        | 25.47<br>(16.04 to<br>37.53)        | 32.88<br>(20.44 to<br>49.68)        |
| Neural tube defects                    | 332.83<br>(155.03 to<br>732.67)              | 72.15<br>(24.08 to<br>190.72)                | 56.52<br>(19.13 to<br>146.10)                | 93.31<br>(31.59 to<br>243.39)                | 3.93<br>(1.84 to<br>8.72)           | 0.93<br>(0.33 to<br>2.42)           | 0.74<br>(0.27 to<br>1.95)           | 1.19<br>(0.43 to<br>3.00)           |
| Congenital heart anomalies             | 1,266.58<br>(883.65 to<br>2,164.65)          | 753.70<br>(431.81 to<br>1,318.26)            | 657.25<br>(381.23 to<br>1,124.05)            | 873.44<br>(505.22 to<br>1,538.95)            | 15.90<br>(11.39 to<br>26.77)        | 10.85<br>(6.58 to<br>18.15)         | 9.60<br>(5.90 to<br>15.77)          | 12.40<br>(7.54 to<br>20.54)         |
| Orofacial clefts                       | 34.04<br>(5.45 to<br>95.77)                  | 12.05<br>(1.47 to<br>40.34)                  | 9.27<br>(1.12 to<br>30.47)                   | 15.84<br>(1.99 to<br>51.87)                  | 0.39<br>(0.06 to<br>1.11)           | 0.14<br>(0.02 to<br>0.47)           | 0.11<br>(0.01 to<br>0.35)           | 0.18<br>(0.02 to<br>0.60)           |
| Down syndrome                          | 36.83<br>(26.19 to<br>55.70)                 | 32.37<br>(19.25 to<br>53.75)                 | 28.59<br>(17.45 to<br>46.34)                 | 37.05<br>(22.50 to<br>60.67)                 | 0.52<br>(0.39 to<br>0.76)           | 0.65<br>(0.40 to<br>1.04)           | 0.58<br>(0.37 to<br>0.91)           | 0.73<br>(0.45 to<br>1.15)           |

|                                               |                                       |                                       |                                       |                                       |                              |                              |                              |                              |
|-----------------------------------------------|---------------------------------------|---------------------------------------|---------------------------------------|---------------------------------------|------------------------------|------------------------------|------------------------------|------------------------------|
| Other chromosomal abnormalities               | 213.88<br>(70.12 to 391.56)           | 143.97<br>(38.18 to 305.20)           | 119.20<br>(32.85 to 251.87)           | 174.52<br>(48.29 to 372.17)           | 2.52<br>(0.83 to 4.59)       | 1.78<br>(0.50 to 3.74)       | 1.48<br>(0.42 to 3.09)       | 2.14<br>(0.60 to 4.52)       |
| Congenital musculoskeletal and limb anomalies | 31.08<br>(20.18 to 44.83)             | 17.22<br>(7.50 to 30.96)              | 14.87<br>(6.56 to 26.08)              | 19.90<br>(8.59 to 35.49)              | 0.37<br>(0.24 to 0.53)       | 0.21<br>(0.10 to 0.38)       | 0.19<br>(0.09 to 0.32)       | 0.25<br>(0.11 to 0.43)       |
| Urogenital congenital anomalies               | 25.26<br>(16.58 to 43.53)             | 23.38<br>(14.83 to 34.95)             | 22.02<br>(14.10 to 32.61)             | 24.83<br>(15.74 to 37.18)             | 0.38<br>(0.27 to 0.60)       | 0.58<br>(0.35 to 0.84)       | 0.56<br>(0.33 to 0.81)       | 0.59<br>(0.37 to 0.85)       |
| Digestive congenital anomalies                | 264.67<br>(99.47 to 410.90)           | 125.73<br>(42.42 to 236.29)           | 105.79<br>(35.23 to 198.10)           | 149.89<br>(51.16 to 278.85)           | 3.11<br>(1.17 to 4.82)       | 1.55<br>(0.54 to 2.86)       | 1.31<br>(0.45 to 2.41)       | 1.84<br>(0.64 to 3.36)       |
| Other congenital birth defects                | 1,397.28<br>(1,002.14 to 2,188.85)    | 802.56<br>(435.03 to 1,321.66)        | 703.07<br>(391.54 to 1,127.09)        | 922.47<br>(486.24 to 1,524.34)        | 17.24<br>(12.61 to 26.34)    | 12.12<br>(7.31 to 18.42)     | 10.90<br>(6.62 to 16.16)     | 13.56<br>(8.10 to 20.92)     |
| Skin and subcutaneous diseases                | 281.17<br>(188.33 to 473.79)          | 807.31<br>(480.53 to 1,192.26)        | 800.16<br>(473.43 to 1,166.70)        | 804.45<br>(483.38 to 1,199.46)        | 9.93<br>(6.05 to 14.57)      | 34.62<br>(20.51 to 49.15)    | 55.48<br>(20.69 to 50.52)    | 32.62<br>(19.30 to 46.79)    |
| Cellulitis                                    | 25.23<br>(15.15 to 44.40)             | 117.37<br>(53.87 to 184.22)           | 124.27<br>(56.67 to 191.77)           | 107.85<br>(50.74 to 164.47)           | 0.84<br>(0.43 to 1.36)       | 4.65<br>(2.11 to 7.18)       | 4.99<br>(2.23 to 7.70)       | 4.17<br>(1.88 to 6.35)       |
| Pyoderma                                      | 206.40<br>(139.85 to 354.79)          | 578.62<br>(330.91 to 876.40)          | 559.11<br>(321.49 to 844.40)          | 595.52<br>(353.14 to 897.45)          | 5.47<br>(3.48 to 8.96)       | 20.88<br>(11.90 to 30.83)    | 20.64<br>(11.67 to 30.53)    | 20.70<br>(12.03 to 30.57)    |
| Decubitus ulcer                               | 40.31<br>(22.05 to 58.93)             | 97.30<br>(46.46 to 143.61)            | 102.82<br>(49.57 to 151.34)           | 87.01<br>(42.75 to 128.80)            | 3.46<br>(1.67 to 4.94)       | 8.75<br>(3.79 to 12.67)      | 9.51<br>(4.21 to 13.82)      | 7.42<br>(3.18 to 11.07)      |
| Other skin and subcutaneous diseases          | 9.22<br>(5.82 to 18.30)               | 14.02<br>(9.19 to 24.40)              | 13.96<br>(9.13 to 24.09)              | 14.07<br>(9.13 to 24.87)              | 0.17<br>(0.11 to 0.32)       | 0.34<br>(0.22 to 0.56)       | 0.35<br>(0.22 to 0.57)       | 0.32<br>(0.21 to 0.55)       |
| Sudden infant death syndrome                  | 302.03<br>(152.46 to 545.89)          | 99.56<br>(38.00 to 212.59)            | 84.84<br>(32.69 to 179.33)            | 115.93<br>(44.60 to 251.63)           | 3.51<br>(1.77 to 6.24)       | 1.16<br>(0.44 to 2.47)       | 0.98<br>(0.38 to 2.08)       | 1.35<br>(0.52 to 2.92)       |
| Injuries                                      | 15,396.42<br>(12,395.01 to 18,214.22) | 15,190.25<br>(11,039.16 to 19,870.95) | 13,944.54<br>(10,152.68 to 18,137.96) | 16,986.66<br>(12,378.51 to 22,291.67) | 320.73<br>(263.36 to 379.87) | 388.59<br>(294.63 to 490.21) | 363.16<br>(276.59 to 456.38) | 423.39<br>(321.94 to 536.31) |
| Transport injuries                            | 2,329.33<br>(1,876.78 to 2,880.82)    | 2,633.58<br>(1,854.68 to 3,506.39)    | 2,072.09<br>(1,458.06 to 2,737.81)    | 3,174.32<br>(2,187.45 to 4,301.12)    | 51.66<br>(42.38 to 61.96)    | 70.70<br>(52.86 to 91.40)    | 57.89<br>(43.29 to 74.51)    | 82.05<br>(60.34 to 110.24)   |
| Road injuries                                 | 2,091.89<br>(1,681.30 to 2,560.38)    | 2,350.12<br>(1,657.18 to 3,104.96)    | 1,813.32<br>(1,282.76 to 2,391.89)    | 2,847.37<br>(1,978.57 to 3,902.95)    | 47.08<br>(38.77 to 56.29)    | 64.27<br>(47.41 to 83.15)    | 51.95<br>(38.32 to 66.95)    | 74.77<br>(54.50 to 100.01)   |
| Pedestrian road injuries                      | 1,004.72<br>(782.69 to 1,285.45)      | 1,077.13<br>(751.48 to 1,462.33)      | 848.29<br>(593.97 to 1,148.31)        | 1,291.24<br>(890.91 to 1,807.90)      | 23.68<br>(19.18 to 29.13)    | 31.14<br>(22.85 to 41.19)    | 25.49<br>(18.62 to 33.18)    | 35.96<br>(25.83 to 48.95)    |

**Cape Verde**

| Cause                       | YLLs (actual counts)         |                                |                              |                                  | Deaths (actual counts)    |                           |                           |                           |
|-----------------------------|------------------------------|--------------------------------|------------------------------|----------------------------------|---------------------------|---------------------------|---------------------------|---------------------------|
|                             | 2016                         | 2040 Forecast                  | 2040 Better Scenario         | 2040 Worse Scenario              | 2016                      | 2040 Forecast             | 2040 Better Scenario      | 2040 Worse Scenario       |
| Cyclist road injuries       | 66.88<br>(52.13 to 87.07)    | 84.95<br>(59.17 to 118.45)     | 67.15<br>(46.28 to 93.03)    | 101.24<br>(69.16 to 146.01)      | 1.64<br>(1.28 to 2.07)    | 2.50<br>(1.77 to 3.41)    | 2.09<br>(1.48 to 2.85)    | 2.85<br>(1.97 to 4.00)    |
| Motorcyclist road injuries  | 247.40<br>(183.08 to 320.94) | 299.41<br>(191.94 to 435.67)   | 245.75<br>(158.22 to 355.60) | 352.53<br>(222.06 to 534.00)     | 4.70<br>(3.56 to 5.97)    | 6.54<br>(4.39 to 9.34)    | 5.52<br>(3.73 to 7.79)    | 7.53<br>(4.90 to 11.14)   |
| Motor vehicle road injuries | 740.23<br>(577.62 to 982.18) | 847.92<br>(597.81 to 1,181.41) | 621.34<br>(439.55 to 866.62) | 1,052.81<br>(726.92 to 1,492.43) | 16.28<br>(13.14 to 20.97) | 22.88<br>(16.96 to 30.75) | 17.86<br>(13.33 to 23.71) | 27.06<br>(19.48 to 37.62) |
| Other road injuries         | 32.65<br>(24.95 to 42.43)    | 40.70<br>(27.89 to 56.31)      | 30.78<br>(21.10 to 42.44)    | 49.55<br>(33.19 to 71.17)        | 0.78<br>(0.61 to 0.97)    | 1.20<br>(0.82 to 1.63)    | 0.98<br>(0.68 to 1.32)    | 1.38<br>(0.93 to 1.91)    |
| Other transport injuries    | 237.45<br>(146.52 to 367.66) | 283.46<br>(156.17 to 478.69)   | 258.78<br>(144.95 to 427.47) | 326.94<br>(182.45 to 546.79)     | 4.58<br>(2.80 to 7.11)    | 6.42<br>(3.57 to 10.87)   | 5.94<br>(3.34 to 9.91)    | 7.28<br>(4.04 to 12.17)   |

|                                                 |                                           |                                           |                                           |                                           |                                    |                                    |                                    |                                    |
|-------------------------------------------------|-------------------------------------------|-------------------------------------------|-------------------------------------------|-------------------------------------------|------------------------------------|------------------------------------|------------------------------------|------------------------------------|
| <b>Unintentional injuries</b>                   | <b>4,844.39</b><br>(3,815.26 to 5,703.52) | <b>3,719.78</b><br>(2,576.48 to 4,951.97) | <b>3,413.78</b><br>(2,366.07 to 4,512.23) | <b>4,121.36</b><br>(2,853.41 to 5,492.36) | <b>102.61</b><br>(85.53 to 120.38) | <b>108.01</b><br>(80.52 to 138.12) | <b>102.63</b><br>(78.25 to 129.23) | <b>113.54</b><br>(86.72 to 142.80) |
| Falls                                           | 261.62<br>(216.29 to 315.13)              | 401.15<br>(302.74 to 504.08)              | 395.24<br>(297.98 to 500.03)              | 399.85<br>(305.67 to 497.77)              | 11.00<br>(9.15 to 14.06)           | 30.60<br>(16.55 to 26.87)          | 20.83<br>(16.73 to 27.33)          | 19.51<br>(15.86 to 25.07)          |
| Drowning                                        | 1,946.33<br>(1,050.54 to 2,461.03)        | 1,248.00<br>(617.62 to 1,797.18)          | 1,141.12<br>(563.56 to 1,636.32)          | 1,407.05<br>(680.29 to 2,016.87)          | 35.48<br>(21.18 to 44.90)          | 28.37<br>(14.76 to 40.04)          | 26.40<br>(13.73 to 36.79)          | 31.23<br>(16.40 to 44.48)          |
| Fire, heat, and hot substances                  | 253.45<br>(205.20 to 355.30)              | 204.45<br>(143.63 to 272.69)              | 185.01<br>(131.66 to 241.88)              | 232.54<br>(164.89 to 311.51)              | 6.67<br>(5.60 to 8.21)             | 7.46<br>(5.46 to 10.07)            | 6.97<br>(5.04 to 9.36)             | 8.06<br>(6.02 to 10.85)            |
| Poisonings                                      | 176.55<br>(129.40 to 245.89)              | 94.16<br>(59.74 to 138.35)                | 80.43<br>(52.42 to 116.41)                | 114.74<br>(73.65 to 167.56)               | 3.58<br>(2.77 to 4.62)             | 2.48<br>(1.70 to 3.50)             | 2.18<br>(1.53 to 3.01)             | 2.90<br>(2.01 to 4.04)             |
| Exposure to mechanical forces                   | 652.15<br>(429.19 to 874.75)              | 455.98<br>(268.35 to 622.70)              | 387.39<br>(247.74 to 543.95)              | 496.91<br>(305.76 to 706.53)              | 12.19<br>(8.60 to 15.34)           | 10.76<br>(7.22 to 14.85)           | 9.88<br>(6.56 to 13.26)            | 11.73<br>(7.87 to 15.89)           |
| Unintentional firearm injuries                  | 202.39<br>(130.47 to 275.35)              | 132.90<br>(68.74 to 212.66)               | 118.34<br>(62.97 to 182.44)               | 151.24<br>(82.40 to 234.30)               | 4.29<br>(2.65 to 5.77)             | 3.49<br>(1.75 to 5.32)             | 3.18<br>(1.61 to 4.74)             | 3.83<br>(2.00 to 5.73)             |
| Unintentional suffocation                       | 202.36<br>(42.55 to 385.99)               | 94.61<br>(19.31 to 186.87)                | 79.60<br>(17.10 to 151.18)                | 114.05<br>(23.17 to 225.37)               | 2.58<br>(0.57 to 4.81)             | 1.32<br>(0.30 to 2.47)             | 1.12<br>(0.27 to 2.05)             | 1.57<br>(0.36 to 2.95)             |
| Other exposure to mechanical forces             | 247.40<br>(195.26 to 310.18)              | 208.47<br>(141.92 to 289.97)              | 189.45<br>(130.15 to 259.36)              | 231.62<br>(162.60 to 321.08)              | 5.32<br>(4.32 to 6.59)             | 5.96<br>(4.28 to 7.83)             | 5.58<br>(4.06 to 7.20)             | 6.32<br>(4.65 to 8.18)             |
| Adverse effects of medical treatment            | 383.06<br>(293.97 to 481.35)              | 312.14<br>(191.59 to 443.57)              | 289.00<br>(177.65 to 408.45)              | 338.41<br>(216.39 to 471.39)              | 8.48<br>(6.13 to 10.67)            | 9.50<br>(5.55 to 12.96)            | 9.10<br>(5.26 to 12.46)            | 9.77<br>(5.95 to 13.19)            |
| Animal contact                                  | 120.29<br>(95.85 to 155.60)               | 110.92<br>(76.03 to 152.65)               | 97.26<br>(68.81 to 131.00)                | 128.46<br>(91.14 to 174.58)               | 2.60<br>(2.14 to 3.18)             | 3.39<br>(2.45 to 4.42)             | 3.10<br>(2.28 to 3.90)             | 3.68<br>(2.75 to 4.74)             |
| Venomous animal contact                         | 79.61<br>(61.95 to 105.03)                | 76.52<br>(52.01 to 109.51)                | 67.20<br>(47.20 to 93.42)                 | 88.54<br>(62.00 to 121.95)                | 1.77<br>(1.43 to 2.22)             | 2.31<br>(1.68 to 3.10)             | 2.10<br>(1.54 to 2.82)             | 2.54<br>(1.89 to 3.34)             |
| Non-venomous animal contact                     | 40.67<br>(29.48 to 57.30)                 | 34.40<br>(22.33 to 50.12)                 | 30.06<br>(20.05 to 42.51)                 | 39.92<br>(26.27 to 58.34)                 | 0.83<br>(0.63 to 1.08)             | 1.08<br>(0.73 to 1.45)             | 1.00<br>(0.68 to 1.32)             | 1.15<br>(0.80 to 1.53)             |
| Foreign body                                    | 384.06<br>(288.32 to 518.25)              | 298.48<br>(221.98 to 389.14)              | 288.35<br>(215.17 to 370.87)              | 306.76<br>(228.70 to 402.77)              | 7.35<br>(6.05 to 8.93)             | 8.48<br>(6.41 to 10.25)            | 8.62<br>(6.48 to 10.51)            | 8.12<br>(6.22 to 9.77)             |
| Pulmonary aspiration and foreign body in airway | 352.46<br>(262.65 to 495.56)              | 273.30<br>(207.54 to 362.58)              | 265.11<br>(202.50 to 347.58)              | 279.27<br>(211.08 to 375.60)              | 6.76<br>(5.63 to 8.54)             | 7.89<br>(6.11 to 9.46)             | 8.06<br>(6.12 to 9.77)             | 7.50<br>(5.88 to 8.98)             |
| Foreign body in other body part                 | 31.60<br>(12.13 to 60.81)                 | 25.18<br>(8.02 to 51.62)                  | 23.24<br>(7.41 to 47.96)                  | 27.49<br>(9.01 to 55.63)                  | 0.58<br>(0.21 to 1.12)             | 0.59<br>(0.19 to 1.18)             | 0.56<br>(0.18 to 1.12)             | 0.62<br>(0.20 to 1.22)             |
| Environmental heat and cold exposure            | 335.71<br>(231.18 to 448.75)              | 329.02<br>(180.53 to 501.93)              | 283.70<br>(158.95 to 417.68)              | 388.72<br>(217.42 to 576.44)              | 7.47<br>(5.06 to 10.02)            | 8.76<br>(5.11 to 13.00)            | 7.70<br>(4.52 to 11.21)            | 10.03<br>(5.87 to 14.25)           |
| Other unintentional injuries                    | 331.17<br>(256.76 to 435.72)              | 285.49<br>(193.73 to 404.85)              | 266.27<br>(182.18 to 381.76)              | 307.91<br>(214.51 to 429.46)              | 7.79<br>(6.25 to 9.77)             | 8.21<br>(5.91 to 10.97)            | 7.85<br>(5.72 to 10.44)            | 8.50<br>(6.24 to 11.27)            |
| Self-harm and interpersonal violence            | 8,218.67<br>(6,060.63 to 10,035.85)       | 8,822.76<br>(6,066.24 to 12,040.38)       | 8,444.81<br>(5,825.15 to 11,388.72)       | 9,676.59<br>(6,542.06 to 13,447.49)       | 166.39<br>(128.70 to 202.30)       | 209.58<br>(148.45 to 279.30)       | 202.33<br>(145.58 to 268.73)       | 227.50<br>(159.51 to 310.87)       |

**Cape Verde**

| Cause     | YLLs (actual counts)               |                                    |                                    |                                    | Deaths (actual counts)     |                             |                             |                             |
|-----------|------------------------------------|------------------------------------|------------------------------------|------------------------------------|----------------------------|-----------------------------|-----------------------------|-----------------------------|
|           | 2016                               | 2040 Forecast                      | 2040 Better Scenario               | 2040 Worse Scenario                | 2016                       | 2040 Forecast               | 2040 Better Scenario        | 2040 Worse Scenario         |
| Self-harm | 3,758.48<br>(2,604.18 to 4,748.16) | 5,012.75<br>(3,206.16 to 7,288.92) | 4,685.37<br>(3,063.65 to 6,724.16) | 5,794.94<br>(3,629.18 to 8,653.21) | 86.92<br>(65.03 to 107.07) | 131.56<br>(90.77 to 182.38) | 124.71<br>(86.25 to 171.50) | 149.02<br>(99.04 to 212.60) |

|                                                                              |                                       |                                        |                                       |                                          |                                 |                                 |                                 |                                 |
|------------------------------------------------------------------------------|---------------------------------------|----------------------------------------|---------------------------------------|------------------------------------------|---------------------------------|---------------------------------|---------------------------------|---------------------------------|
| Self-harm by firearm                                                         | 297.26<br>(167.78 to<br>430.74)       | 321.86<br>(165.77 to<br>504.97)        | 296.29<br>(156.88 to<br>464.21)       | 377.71<br>(187.49 to<br>614.50)          | 7.01<br>(4.48 to<br>9.92)       | 8.88<br>(5.08 to<br>13.53)      | 8.32<br>(4.88 to<br>12.47)      | 10.14<br>(5.57 to<br>15.95)     |
| Self-harm by other specified means                                           | 3,461.22<br>(2,371.77 to<br>4,363.76) | 4,690.89<br>(3,031.38 to<br>6,766.36)  | 4,389.09<br>(2,884.14 to<br>6,324.22) | 5,417.23<br>(3,403.52 to<br>8,047.02)    | 79.92<br>(59.80 to<br>98.03)    | 122.69<br>(84.40 to<br>170.09)  | 116.39<br>(81.01 to<br>161.00)  | 138.88<br>(91.72 to<br>199.16)  |
| Interpersonal violence                                                       | 4,460.19<br>(3,017.48 to<br>5,659.57) | 3,810.01<br>(2,445.63 to<br>5,197.07)  | 3,759.43<br>(2,429.39 to<br>5,114.60) | 3,881.65<br>(2,447.34 to<br>5,328.80)    | 79.46<br>(54.86 to<br>100.69)   | 78.02<br>(51.05 to<br>104.89)   | 77.62<br>(51.34 to<br>104.12)   | 78.48<br>(50.48 to<br>105.67)   |
| Physical violence by firearm                                                 | 2,534.94<br>(1,303.11 to<br>3,405.48) | 2,108.62<br>(991.04 to<br>3,104.13)    | 2,072.09<br>(973.49 to<br>3,038.70)   | 2,157.62<br>(1,014.44 to<br>3,180.09)    | 44.51<br>(22.82 to<br>59.55)    | 40.88<br>(19.24 to<br>59.27)    | 40.40<br>(19.03 to<br>58.35)    | 41.45<br>(19.45 to<br>59.94)    |
| Physical violence by sharp object                                            | 1,648.11<br>(1,108.92 to<br>2,697.59) | 1,517.26<br>(995.78 to<br>2,406.56)    | 1,515.52<br>(994.16 to<br>2,394.66)   | 1,519.02<br>(990.98 to<br>2,429.25)      | 30.07<br>(20.43 to<br>48.31)    | 32.45<br>(21.91 to<br>50.36)    | 32.73<br>(22.04 to<br>50.54)    | 31.98<br>(21.51 to<br>49.68)    |
| Physical violence by other means                                             | 277.14<br>(185.51 to<br>406.27)       | 184.12<br>(113.23 to<br>262.94)        | 171.83<br>(107.21 to<br>241.18)       | 205.01<br>(125.81 to<br>300.27)          | 4.88<br>(3.34 to<br>6.69)       | 4.68<br>(2.76 to<br>6.80)       | 4.50<br>(2.68 to<br>6.52)       | 5.05<br>(2.94 to<br>7.39)       |
| Forces of nature, conflict and terrorism, and executions and police conflict | 4.03<br>(3.45 to<br>4.83)             | 14.13<br>(0.00 to<br>150.21)           | 13.86<br>(0.00 to<br>147.44)          | 14.39<br>(0.00 to<br>151.70)             | 0.07<br>(0.06 to<br>0.08)       | 0.30<br>(0.00 to<br>3.19)       | 0.30<br>(0.00 to<br>3.20)       | 0.30<br>(0.00 to<br>3.14)       |
| Exposure to forces of nature                                                 | 0.00<br>(0.00 to<br>0.00)             | 14.13<br>(0.00 to<br>150.21)           | 13.86<br>(0.00 to<br>147.44)          | 14.39<br>(0.00 to<br>151.70)             | 0.00<br>(0.00 to<br>0.00)       | 0.30<br>(0.00 to<br>3.19)       | 0.30<br>(0.00 to<br>3.20)       | 0.30<br>(0.00 to<br>3.14)       |
| Conflict and terrorism                                                       | 0.00<br>(0.00 to<br>0.00)             | 0.00<br>(0.00 to<br>0.00)              | 0.00<br>(0.00 to<br>0.00)             | 0.00<br>(0.00 to<br>0.00)                | 0.00<br>(0.00 to<br>0.00)       | 0.00<br>(0.00 to<br>0.00)       | 0.00<br>(0.00 to<br>0.00)       | 0.00<br>(0.00 to<br>0.00)       |
| Executions and police conflict                                               | 4.03<br>(3.45 to<br>4.83)             | 0.00<br>(0.00 to<br>0.00)              | 0.00<br>(0.00 to<br>0.00)             | 0.00<br>(0.00 to<br>0.00)                | 0.07<br>(0.06 to<br>0.08)       | 0.00<br>(0.00 to<br>0.00)       | 0.00<br>(0.00 to<br>0.00)       | 0.00<br>(0.00 to<br>0.00)       |
| <b>Chad</b>                                                                  |                                       |                                        |                                       |                                          |                                 |                                 |                                 |                                 |
| Cause                                                                        | YLLs (in 1000s)                       |                                        |                                       |                                          | Deaths (in 1000s)               |                                 |                                 |                                 |
|                                                                              | 2016                                  | 2040 Forecast                          | 2040 Better Scenario                  | 2040 Worse Scenario                      | 2016                            | 2040 Forecast                   | 2040 Better Scenario            | 2040 Worse Scenario             |
| All causes                                                                   | 8,532.28<br>(7,679.27 to<br>9,512.34) | 9,059.73<br>(7,021.60 to<br>11,537.84) | 6,588.77<br>(5,118.54 to<br>8,405.18) | 15,507.81<br>(12,147.64 to<br>19,397.68) | 136.64<br>(125.06 to<br>148.66) | 178.08<br>(147.77 to<br>214.37) | 132.90<br>(110.16 to<br>160.81) | 275.51<br>(228.80 to<br>332.10) |
| Communicable, maternal, neonatal, and nutritional diseases                   | 6,728.02<br>(5,983.78 to<br>7,699.90) | 6,084.61<br>(4,351.42 to<br>8,044.46)  | 4,093.17<br>(2,933.46 to<br>5,431.52) | 11,439.48<br>(8,430.82 to<br>14,592.30)  | 93.86<br>(84.63 to<br>105.45)   | 94.86<br>(69.47 to<br>123.33)   | 63.26<br>(45.97 to<br>82.53)    | 168.18<br>(127.46 to<br>212.41) |
| HIV/AIDS and tuberculosis                                                    | 710.16<br>(558.85 to<br>884.49)       | 772.32<br>(367.72 to<br>1,220.97)      | 476.57<br>(155.16 to<br>943.10)       | 1,693.16<br>(1,049.21 to<br>2,345.79)    | 14.09<br>(11.56 to<br>17.18)    | 15.94<br>(8.12 to<br>23.88)     | 9.79<br>(3.55 to<br>18.16)      | 33.77<br>(21.36 to<br>46.15)    |
| Tuberculosis                                                                 | 175.33<br>(134.85 to<br>227.10)       | 129.32<br>(81.77 to<br>202.34)         | 79.11<br>(50.52 to<br>121.60)         | 267.88<br>(167.55 to<br>427.00)          | 4.34<br>(3.35 to<br>5.52)       | 3.44<br>(2.24 to<br>5.16)       | 2.19<br>(1.47 to<br>3.18)       | 6.77<br>(4.30 to<br>10.24)      |
| HIV/AIDS                                                                     | 534.83<br>(388.11 to<br>710.01)       | 643.00<br>(239.78 to<br>1,090.04)      | 397.46<br>(69.00 to<br>863.36)        | 1,425.28<br>(804.87 to<br>2,089.78)      | 9.75<br>(7.17 to<br>12.74)      | 12.50<br>(4.76 to<br>20.48)     | 7.61<br>(1.19 to<br>16.04)      | 27.00<br>(15.26 to<br>39.34)    |
| Diarrhea, lower respiratory, and other common infectious diseases            | 3,253.10<br>(2,707.69 to<br>3,856.99) | 3,098.86<br>(1,878.14 to<br>4,513.41)  | 1,847.31<br>(1,128.04 to<br>2,697.05) | 5,508.87<br>(3,461.09 to<br>7,604.61)    | 45.02<br>(38.33 to<br>52.33)    | 50.21<br>(32.67 to<br>70.75)    | 30.41<br>(19.61 to<br>43.70)    | 80.91<br>(53.97 to<br>108.81)   |
| Diarrheal diseases                                                           | 1,306.85<br>(933.25 to<br>1,715.41)   | 1,019.45<br>(506.16 to<br>1,671.88)    | 771.28<br>(384.61 to<br>1,248.78)     | 1,687.54<br>(874.74 to<br>2,749.57)      | 18.04<br>(13.12 to<br>23.62)    | 17.15<br>(8.02 to<br>30.48)     | 12.33<br>(5.76 to<br>22.60)     | 26.14<br>(12.72 to<br>45.04)    |
| Intestinal infectious diseases                                               | 41.40<br>(19.57 to<br>77.84)          | 64.04<br>(28.12 to<br>127.68)          | 57.05<br>(25.16 to<br>109.07)         | 87.53<br>(38.66 to<br>176.58)            | 0.57<br>(0.27 to<br>1.04)       | 0.89<br>(0.40 to<br>1.77)       | 0.80<br>(0.35 to<br>1.52)       | 1.20<br>(0.53 to<br>2.40)       |
| Typhoid fever                                                                | 33.47<br>(14.28 to<br>65.00)          | 51.51<br>(19.73 to<br>107.91)          | 46.18<br>(18.11 to<br>92.92)          | 69.59<br>(26.16 to<br>148.73)            | 0.46<br>(0.20 to<br>0.89)       | 0.72<br>(0.28 to<br>1.50)       | 0.65<br>(0.26 to<br>1.30)       | 0.96<br>(0.37 to<br>2.01)       |
| Paratyphoid fever                                                            | 6.63<br>(2.29 to<br>15.81)            | 11.88<br>(4.04 to<br>29.65)            | 10.37<br>(3.52 to<br>25.24)           | 16.60<br>(5.65 to<br>40.70)              | 0.09<br>(0.03 to<br>0.21)       | 0.17<br>(0.06 to<br>0.41)       | 0.15<br>(0.05 to<br>0.35)       | 0.23<br>(0.08 to<br>0.56)       |

|                                      |                                  |                                  |                                |                                    |                           |                           |                          |                           |
|--------------------------------------|----------------------------------|----------------------------------|--------------------------------|------------------------------------|---------------------------|---------------------------|--------------------------|---------------------------|
| Other intestinal infectious diseases | 1.30<br>(0.35 to 3.64)           | 0.65<br>(0.14 to 2.15)           | 0.49<br>(0.10 to 1.58)         | 1.35<br>(0.29 to 4.24)             | 0.02<br>(0.00 to 0.04)    | 0.01<br>(0.00 to 0.03)    | 0.01<br>(0.00 to 0.02)   | 0.02<br>(0.00 to 0.05)    |
| Lower respiratory infections         | 1,128.05<br>(845.82 to 1,488.01) | 1,296.72<br>(543.99 to 2,122.87) | 564.16<br>(258.67 to 1,031.86) | 2,492.83<br>(1,130.85 to 3,644.46) | 16.53<br>(13.06 to 21.40) | 22.78<br>(12.72 to 34.00) | 11.02<br>(6.54 to 17.40) | 37.99<br>(20.65 to 53.40) |
| Upper respiratory infections         | 1.80<br>(0.41 to 5.01)           | 1.59<br>(0.41 to 4.90)           | 1.11<br>(0.28 to 3.30)         | 3.56<br>(0.83 to 10.91)            | 0.02<br>(0.01 to 0.06)    | 0.02<br>(0.01 to 0.06)    | 0.02<br>(0.01 to 0.04)   | 0.05<br>(0.01 to 0.13)    |
| Otitis media                         | 0.07<br>(0.03 to 0.16)           | 0.01<br>(0.01 to 0.03)           | 0.01<br>(0.01 to 0.03)         | 0.02<br>(0.01 to 0.04)             | 0.00<br>(0.00 to 0.00)    | 0.00<br>(0.00 to 0.00)    | 0.00<br>(0.00 to 0.00)   | 0.00<br>(0.00 to 0.00)    |
| Meningitis                           | 356.48<br>(240.87 to 504.52)     | 362.41<br>(185.43 to 676.74)     | 235.79<br>(141.64 to 391.24)   | 695.36<br>(325.41 to 1,361.07)     | 4.79<br>(3.36 to 6.67)    | 5.06<br>(2.92 to 9.02)    | 3.56<br>(2.29 to 5.66)   | 9.01<br>(4.58 to 17.00)   |
| Pneumococcal meningitis              | 26.33<br>(17.21 to 40.61)        | 17.37<br>(9.99 to 30.72)         | 12.47<br>(7.65 to 21.22)       | 29.44<br>(15.75 to 54.77)          | 0.39<br>(0.26 to 0.57)    | 0.30<br>(0.19 to 0.53)    | 0.24<br>(0.16 to 0.39)   | 0.45<br>(0.26 to 0.80)    |
| H influenzae type B meningitis       | 51.15<br>(32.72 to 78.97)        | 151.06<br>(28.74 to 450.30)      | 50.60<br>(13.51 to 147.42)     | 380.75<br>(69.27 to 1,090.76)      | 0.66<br>(0.43 to 1.00)    | 1.84<br>(0.40 to 5.37)    | 0.66<br>(0.23 to 1.81)   | 4.53<br>(0.88 to 12.83)   |
| Meningococcal meningitis             | 79.36<br>(51.16 to 118.81)       | 70.33<br>(43.12 to 114.13)       | 63.12<br>(38.96 to 100.76)     | 100.59<br>(60.37 to 164.00)        | 1.06<br>(0.70 to 1.54)    | 1.05<br>(0.67 to 1.71)    | 0.96<br>(0.62 to 1.55)   | 1.42<br>(0.88 to 2.27)    |
| Other meningitis                     | 199.64<br>(134.69 to 287.13)     | 123.64<br>(76.09 to 197.97)      | 109.59<br>(69.23 to 172.95)    | 184.57<br>(111.34 to 301.26)       | 2.69<br>(1.90 to 3.73)    | 1.87<br>(1.25 to 2.83)    | 1.70<br>(1.16 to 2.55)   | 2.61<br>(1.68 to 4.14)    |
| Encephalitis                         | 14.70<br>(8.17 to 26.01)         | 20.32<br>(10.34 to 36.76)        | 17.61<br>(9.07 to 32.27)       | 31.84<br>(16.19 to 59.79)          | 0.20<br>(0.12 to 0.34)    | 0.29<br>(0.16 to 0.51)    | 0.26<br>(0.14 to 0.44)   | 0.44<br>(0.24 to 0.78)    |
| Diphtheria                           | 6.13<br>(2.14 to 12.49)          | 4.24<br>(1.13 to 11.18)          | 1.22<br>(0.49 to 2.70)         | 6.42<br>(1.70 to 16.84)            | 0.07<br>(0.03 to 0.15)    | 0.05<br>(0.01 to 0.13)    | 0.02<br>(0.01 to 0.03)   | 0.08<br>(0.02 to 0.20)    |
| Whooping cough                       | 140.95<br>(11.05 to 450.51)      | 263.83<br>(23.58 to 786.48)      | 170.07<br>(14.42 to 508.95)    | 379.03<br>(30.69 to 1,132.37)      | 1.66<br>(0.13 to 5.32)    | 3.12<br>(0.27 to 9.34)    | 2.02<br>(0.17 to 6.06)   | 4.48<br>(0.36 to 13.43)   |
| Tetanus                              | 59.50<br>(22.65 to 138.38)       | 23.53<br>(7.17 to 64.55)         | 12.43<br>(3.89 to 34.43)       | 34.21<br>(9.63 to 98.91)           | 0.77<br>(0.31 to 1.71)    | 0.30<br>(0.10 to 0.77)    | 0.17<br>(0.06 to 0.44)   | 0.42<br>(0.13 to 1.17)    |
| Measles                              | 189.74<br>(62.04 to 445.69)      | 37.06<br>(1.96 to 161.14)        | 12.38<br>(1.09 to 55.14)       | 79.07<br>(7.63 to 296.46)          | 2.26<br>(0.74 to 5.31)    | 0.44<br>(0.02 to 1.92)    | 0.15<br>(0.01 to 0.66)   | 0.94<br>(0.09 to 3.53)    |

**Chad**

| Cause                                   | YLLs (in 1000s)              |                              |                              |                              | Deaths (in 1000s)       |                        |                        |                         |
|-----------------------------------------|------------------------------|------------------------------|------------------------------|------------------------------|-------------------------|------------------------|------------------------|-------------------------|
|                                         | 2016                         | 2040 Forecast                | 2040 Better Scenario         | 2040 Worse Scenario          | 2016                    | 2040 Forecast          | 2040 Better Scenario   | 2040 Worse Scenario     |
| Varicella and herpes zoster             | 7.44<br>(4.11 to 13.11)      | 5.66<br>(2.75 to 11.13)      | 4.20<br>(2.02 to 8.10)       | 11.46<br>(5.30 to 22.70)     | 0.11<br>(0.07 to 0.18)  | 0.09<br>(0.05 to 0.16) | 0.07<br>(0.04 to 0.12) | 0.17<br>(0.09 to 0.30)  |
| Neglected tropical diseases and malaria | 617.85<br>(363.77 to 967.34) | 391.06<br>(236.29 to 620.81) | 343.18<br>(210.31 to 541.90) | 624.57<br>(373.13 to 993.42) | 8.07<br>(5.01 to 12.23) | 5.57<br>(3.64 to 8.24) | 4.97<br>(3.23 to 7.28) | 8.48<br>(5.31 to 12.90) |
| Malaria                                 | 497.54<br>(242.74 to 859.86) | 275.04<br>(132.37 to 495.63) | 251.89<br>(127.25 to 445.33) | 404.89<br>(177.44 to 760.54) | 6.40<br>(3.40 to 10.56) | 3.94<br>(2.10 to 6.67) | 3.67<br>(2.05 to 6.02) | 5.49<br>(2.76 to 9.81)  |
| Chagas disease                          | 0.00<br>(0.00 to 0.00)       | 0.00<br>(0.00 to 0.00)       | 0.00<br>(0.00 to 0.00)       | 0.00<br>(0.00 to 0.00)       | 0.00<br>(0.00 to 0.00)  | 0.00<br>(0.00 to 0.00) | 0.00<br>(0.00 to 0.00) | 0.00<br>(0.00 to 0.00)  |
| Leishmaniasis                           | 0.01<br>(0.01 to 0.02)       | 0.01<br>(0.01 to 0.02)       | 0.01<br>(0.00 to 0.01)       | 0.02<br>(0.01 to 0.03)       | 0.00<br>(0.00 to 0.00)  | 0.00<br>(0.00 to 0.00) | 0.00<br>(0.00 to 0.00) | 0.00<br>(0.00 to 0.00)  |
| African trypanosomiasis                 | 5.48<br>(2.41 to 10.21)      | 0.86<br>(0.33 to 1.96)       | 0.85<br>(0.32 to 1.92)       | 0.94<br>(0.36 to 2.14)       | 0.10<br>(0.04 to 0.17)  | 0.01<br>(0.01 to 0.03) | 0.01<br>(0.01 to 0.03) | 0.02<br>(0.01 to 0.03)  |



|                                                       |                                        |                                        |                                       |                                        |                                  |                                  |                                  |                                  |
|-------------------------------------------------------|----------------------------------------|----------------------------------------|---------------------------------------|----------------------------------------|----------------------------------|----------------------------------|----------------------------------|----------------------------------|
| Schistosomiasis                                       | 4.62<br>(3.29 to<br>6.60)              | 4.14<br>(2.79 to<br>6.13)              | 3.55<br>(2.41 to<br>5.31)             | 5.49<br>(3.74 to<br>8.07)              | 0.11<br>(0.08 to<br>0.15)        | 0.11<br>(0.07 to<br>0.15)        | 0.09<br>(0.07 to<br>0.13)        | 0.13<br>(0.09 to<br>0.19)        |
| Cysticercosis                                         | 0.60<br>(0.32 to<br>1.03)              | 0.33<br>(0.16 to<br>0.61)              | 0.30<br>(0.15 to<br>0.55)             | 0.43<br>(0.21 to<br>0.77)              | 0.01<br>(0.01 to<br>0.02)        | 0.01<br>(0.00 to<br>0.01)        | 0.01<br>(0.00 to<br>0.01)        | 0.01<br>(0.00 to<br>0.01)        |
| Cystic echinococcosis                                 | 0.97<br>(0.66 to<br>1.37)              | 0.44<br>(0.28 to<br>0.67)              | 0.27<br>(0.17 to<br>0.41)             | 1.05<br>(0.65 to<br>1.62)              | 0.01<br>(0.01 to<br>0.02)        | 0.01<br>(0.01 to<br>0.01)        | 0.00<br>(0.00 to<br>0.01)        | 0.02<br>(0.01 to<br>0.03)        |
| Dengue                                                | 0.34<br>(0.01 to<br>1.48)              | 1.56<br>(0.06 to<br>6.55)              | 1.43<br>(0.05 to<br>5.84)             | 2.32<br>(0.09 to<br>9.99)              | 0.00<br>(0.00 to<br>0.02)        | 0.02<br>(0.00 to<br>0.09)        | 0.02<br>(0.00 to<br>0.08)        | 0.03<br>(0.00 to<br>0.13)        |
| Yellow fever                                          | 6.94<br>(1.44 to<br>21.84)             | 4.41<br>(0.80 to<br>13.79)             | 3.34<br>(0.63 to<br>10.39)            | 7.51<br>(1.44 to<br>22.59)             | 0.10<br>(0.02 to<br>0.32)        | 0.07<br>(0.01 to<br>0.21)        | 0.05<br>(0.01 to<br>0.16)        | 0.11<br>(0.02 to<br>0.33)        |
| Rabies                                                | 22.73<br>(7.40 to<br>50.82)            | 15.11<br>(4.33 to<br>37.48)            | 8.63<br>(2.24 to<br>22.31)            | 41.08<br>(12.36 to<br>92.96)           | 0.33<br>(0.11 to<br>0.70)        | 0.23<br>(0.06 to<br>0.55)        | 0.13<br>(0.03 to<br>0.33)        | 0.61<br>(0.19 to<br>1.32)        |
| Intestinal nematode infections                        | 6.12<br>(3.36 to<br>10.54)             | 12.67<br>(6.59 to<br>22.69)            | 12.34<br>(6.33 to<br>21.79)           | 17.48<br>(9.21 to<br>30.84)            | 0.07<br>(0.04 to<br>0.13)        | 0.15<br>(0.08 to<br>0.28)        | 0.15<br>(0.08 to<br>0.26)        | 0.21<br>(0.11 to<br>0.37)        |
| Other neglected tropical diseases                     | 72.51<br>(39.99 to<br>124.59)          | 76.49<br>(43.42 to<br>120.58)          | 60.56<br>(34.51 to<br>96.17)          | 143.38<br>(81.03 to<br>227.67)         | 0.93<br>(0.53 to<br>1.55)        | 1.03<br>(0.62 to<br>1.57)        | 0.82<br>(0.49 to<br>1.26)        | 1.86<br>(1.10 to<br>2.90)        |
| <b>Maternal disorders</b>                             | <b>193.69</b><br>(152.94 to<br>229.46) | <b>184.18</b><br>(103.45 to<br>308.26) | <b>122.48</b><br>(67.06 to<br>204.31) | <b>345.33</b><br>(196.31 to<br>561.56) | <b>3.43</b><br>(2.71 to<br>4.04) | <b>3.31</b><br>(1.89 to<br>5.49) | <b>2.20</b><br>(1.22 to<br>3.61) | <b>6.18</b><br>(3.52 to<br>9.93) |
| Maternal hemorrhage                                   | 60.81<br>(43.33 to<br>81.05)           | 54.21<br>(28.82 to<br>92.97)           | 36.44<br>(19.12 to<br>62.13)          | 97.64<br>(51.63 to<br>165.33)          | 1.10<br>(0.79 to<br>1.45)        | 0.99<br>(0.53 to<br>1.65)        | 0.66<br>(0.35 to<br>1.12)        | 1.77<br>(0.94 to<br>2.97)        |
| Maternal sepsis and other maternal infections         | 10.45<br>(4.78 to<br>18.39)            | 8.46<br>(3.12 to<br>18.21)             | 5.65<br>(2.06 to<br>11.99)            | 15.59<br>(5.76 to<br>33.99)            | 0.19<br>(0.09 to<br>0.32)        | 0.15<br>(0.06 to<br>0.32)        | 0.10<br>(0.04 to<br>0.21)        | 0.28<br>(0.10 to<br>0.59)        |
| Maternal hypertensive disorders                       | 35.79<br>(24.68 to<br>49.50)           | 33.18<br>(17.15 to<br>59.96)           | 22.22<br>(11.07 to<br>40.12)          | 60.57<br>(31.61 to<br>108.20)          | 0.62<br>(0.44 to<br>0.85)        | 0.58<br>(0.30 to<br>1.03)        | 0.39<br>(0.20 to<br>0.70)        | 1.06<br>(0.56 to<br>1.85)        |
| Maternal obstructed labor and uterine rupture         | 7.54<br>(3.82 to<br>12.52)             | 7.05<br>(3.03 to<br>13.78)             | 4.60<br>(1.92 to<br>8.97)             | 13.27<br>(5.74 to<br>26.61)            | 0.14<br>(0.07 to<br>0.23)        | 0.13<br>(0.06 to<br>0.25)        | 0.08<br>(0.04 to<br>0.16)        | 0.24<br>(0.11 to<br>0.48)        |
| Maternal abortion, miscarriage, and ectopic pregnancy | 16.14<br>(8.19 to<br>27.32)            | 11.92<br>(4.43 to<br>26.92)            | 8.00<br>(2.96 to<br>17.38)            | 22.20<br>(8.33 to<br>51.98)            | 0.28<br>(0.15 to<br>0.46)        | 0.21<br>(0.08 to<br>0.47)        | 0.14<br>(0.05 to<br>0.31)        | 0.39<br>(0.15 to<br>0.89)        |
| Indirect maternal deaths                              | 39.33<br>(27.43 to<br>52.60)           | 36.76<br>(18.67 to<br>64.66)           | 24.68<br>(12.44 to<br>44.64)          | 72.41<br>(36.39 to<br>125.10)          | 0.69<br>(0.48 to<br>0.91)        | 0.64<br>(0.34 to<br>1.11)        | 0.43<br>(0.22 to<br>0.76)        | 1.26<br>(0.65 to<br>2.14)        |
| Late maternal deaths                                  | 2.73<br>(1.26 to<br>5.14)              | 2.02<br>(0.79 to<br>4.09)              | 1.35<br>(0.53 to<br>2.80)             | 3.89<br>(1.58 to<br>7.97)              | 0.05<br>(0.02 to<br>0.09)        | 0.04<br>(0.01 to<br>0.07)        | 0.02<br>(0.01 to<br>0.05)        | 0.07<br>(0.03 to<br>0.14)        |
| Maternal deaths aggravated by HIV/AIDS                | 2.46<br>(1.29 to<br>3.76)              | 13.96<br>(5.38 to<br>27.20)            | 8.13<br>(1.25 to<br>18.31)            | 28.57<br>(12.41 to<br>54.87)           | 0.05<br>(0.02 to<br>0.07)        | 0.27<br>(0.10 to<br>0.52)        | 0.16<br>(0.02 to<br>0.35)        | 0.55<br>(0.24 to<br>1.03)        |
| Other maternal disorders                              | 18.44<br>(11.58 to<br>26.46)           | 16.63<br>(8.01 to<br>29.63)            | 11.42<br>(5.55 to<br>20.27)           | 31.18<br>(15.90 to<br>54.92)           | 0.33<br>(0.21 to<br>0.47)        | 0.30<br>(0.15 to<br>0.53)        | 0.21<br>(0.10 to<br>0.36)        | 0.56<br>(0.29 to<br>0.98)        |
| <b>Chad</b>                                           |                                        |                                        |                                       |                                        |                                  |                                  |                                  |                                  |
| Cause                                                 | YLLs (in 1000s)                        |                                        |                                       |                                        | Deaths (in 1000s)                |                                  |                                  |                                  |
|                                                       | 2016                                   | 2040 Forecast                          | 2040 Better Scenario                  | 2040 Worse Scenario                    | 2016                             | 2040 Forecast                    | 2040 Better Scenario             | 2040 Worse Scenario              |
| Neonatal disorders                                    | 1,239.40<br>(1,053.51 to<br>1,476.72)  | 1,276.32<br>(744.17 to<br>1,964.60)    | 1,008.67<br>(588.38 to<br>1,543.65)   | 2,613.65<br>(1,546.47 to<br>3,903.71)  | 14.32<br>(12.17 to<br>17.06)     | 14.75<br>(8.60 to<br>22.70)      | 11.66<br>(6.80 to<br>17.84)      | 30.20<br>(17.87 to<br>45.11)     |
| Neonatal preterm birth                                | 422.92<br>(280.22 to<br>598.09)        | 386.01<br>(209.96 to<br>627.59)        | 281.93<br>(153.39 to<br>458.85)       | 833.54<br>(462.69 to<br>1,333.77)      | 4.89<br>(3.24 to<br>6.91)        | 4.46<br>(2.43 to<br>7.25)        | 3.26<br>(1.77 to<br>5.30)        | 9.63<br>(5.35 to<br>15.41)       |

|                                                                         |                                                            |                                                            |                                                            |                                                            |                                                   |                                                   |                                                   |                                                    |
|-------------------------------------------------------------------------|------------------------------------------------------------|------------------------------------------------------------|------------------------------------------------------------|------------------------------------------------------------|---------------------------------------------------|---------------------------------------------------|---------------------------------------------------|----------------------------------------------------|
| Neonatal encephalopathy due to birth asphyxia and trauma                | 446.01<br>(307.65 to<br>604.05)                            | 431.79<br>(195.37 to<br>814.14)                            | 358.57<br>(161.72 to<br>684.56)                            | 842.41<br>(384.98 to<br>1,569.02)                          | 5.15<br>(3.55 to<br>6.98)                         | 4.99<br>(2.26 to<br>9.41)                         | 4.14<br>(1.87 to<br>7.91)                         | 9.73<br>(4.45 to<br>18.12)                         |
| Neonatal sepsis and other neonatal infections                           | 235.70<br>(146.34 to<br>343.72)                            | 319.85<br>(173.59 to<br>534.23)                            | 261.41<br>(140.16 to<br>438.38)                            | 636.70<br>(349.46 to<br>1,057.98)                          | 2.72<br>(1.69 to<br>3.97)                         | 3.70<br>(2.01 to<br>6.17)                         | 3.02<br>(1.62 to<br>5.07)                         | 7.36<br>(4.04 to<br>12.23)                         |
| Hemolytic disease and other neonatal jaundice                           | 40.16<br>(24.59 to<br>63.35)                               | 24.16<br>(11.78 to<br>45.32)                               | 18.65<br>(8.91 to<br>34.20)                                | 52.46<br>(25.49 to<br>98.00)                               | 0.46<br>(0.28 to<br>0.73)                         | 0.28<br>(0.14 to<br>0.52)                         | 0.22<br>(0.10 to<br>0.40)                         | 0.61<br>(0.29 to<br>1.13)                          |
| Other neonatal disorders                                                | 94.60<br>(56.83 to<br>148.06)                              | 114.50<br>(54.68 to<br>217.20)                             | 88.12<br>(41.77 to<br>169.76)                              | 248.55<br>(117.72 to<br>469.97)                            | 1.09<br>(0.66 to<br>1.71)                         | 1.32<br>(0.63 to<br>2.51)                         | 1.02<br>(0.48 to<br>1.96)                         | 2.87<br>(1.36 to<br>5.43)                          |
| <b>Nutritional deficiencies</b>                                         | <b>339.61</b><br><b>(194.99 to</b><br><b>534.93)</b>       | <b>173.14</b><br><b>(90.68 to</b><br><b>293.14)</b>        | <b>133.27</b><br><b>(70.58 to</b><br><b>224.32)</b>        | <b>333.43</b><br><b>(171.85 to</b><br><b>569.09)</b>       | <b>4.35</b><br><b>(2.60 to</b><br><b>6.70)</b>    | <b>2.52</b><br><b>(1.48 to</b><br><b>4.03)</b>    | <b>2.03</b><br><b>(1.23 to</b><br><b>3.17)</b>    | <b>4.49</b><br><b>(2.51 to</b><br><b>7.32)</b>     |
| Protein-energy malnutrition                                             | 332.36<br>(189.96 to<br>526.95)                            | 161.83<br>(82.44 to<br>284.78)                             | 124.20<br>(64.81 to<br>215.05)                             | 314.38<br>(157.30 to<br>546.05)                            | 4.21<br>(2.49 to<br>6.52)                         | 2.30<br>(1.31 to<br>3.81)                         | 1.85<br>(0.88 to<br>3.11)                         | 4.16<br>(2.24 to<br>7.00)                          |
| Iodine deficiency                                                       | 0.83<br>(0.02 to<br>4.50)                                  | 4.20<br>(0.04 to<br>33.68)                                 | 3.12<br>(0.02 to<br>25.22)                                 | 8.52<br>(0.06 to<br>68.41)                                 | 0.01<br>(0.00 to<br>0.06)                         | 0.06<br>(0.00 to<br>0.42)                         | 0.05<br>(0.00 to<br>0.31)                         | 0.12<br>(0.00 to<br>0.82)                          |
| Dietary iron deficiency                                                 | 0.27<br>(0.16 to<br>0.74)                                  | 0.47<br>(0.23 to<br>1.44)                                  | 0.42<br>(0.21 to<br>1.24)                                  | 0.60<br>(0.30 to<br>1.98)                                  | 0.01<br>(0.00 to<br>0.02)                         | 0.01<br>(0.00 to<br>0.04)                         | 0.01<br>(0.00 to<br>0.04)                         | 0.01<br>(0.01 to<br>0.05)                          |
| Other nutritional deficiencies                                          | 6.16<br>(3.35 to<br>12.21)                                 | 6.64<br>(3.52 to<br>12.76)                                 | 5.54<br>(2.96 to<br>10.52)                                 | 9.93<br>(4.93 to<br>21.63)                                 | 0.12<br>(0.08 to<br>0.21)                         | 0.14<br>(0.09 to<br>0.23)                         | 0.13<br>(0.08 to<br>0.20)                         | 0.19<br>(0.11 to<br>0.35)                          |
| <b>Other communicable, maternal, neonatal, and nutritional diseases</b> | <b>374.21</b><br><b>(196.25 to</b><br><b>660.30)</b>       | <b>188.74</b><br><b>(98.79 to</b><br><b>355.94)</b>        | <b>161.69</b><br><b>(85.69 to</b><br><b>299.99)</b>        | <b>320.48</b><br><b>(163.26 to</b><br><b>620.24)</b>       | <b>4.58</b><br><b>(2.52 to</b><br><b>7.94)</b>    | <b>2.55</b><br><b>(1.47 to</b><br><b>4.56)</b>    | <b>2.20</b><br><b>(1.29 to</b><br><b>3.86)</b>    | <b>4.15</b><br><b>(2.30 to</b><br><b>7.68)</b>     |
| Sexually transmitted infections excluding HIV                           | 327.36<br>(154.52 to<br>599.30)                            | 134.49<br>(51.91 to<br>275.86)                             | 116.18<br>(45.66 to<br>239.63)                             | 234.34<br>(90.92 to<br>481.33)                             | 3.85<br>(1.82 to<br>7.03)                         | 1.59<br>(0.63 to<br>3.26)                         | 1.38<br>(0.55 to<br>2.82)                         | 2.77<br>(1.09 to<br>5.66)                          |
| Syphilis                                                                | 326.31<br>(153.22 to<br>598.42)                            | 132.63<br>(50.41 to<br>274.18)                             | 114.52<br>(44.28 to<br>237.95)                             | 232.12<br>(88.69 to<br>477.15)                             | 3.83<br>(1.80 to<br>7.01)                         | 1.56<br>(0.60 to<br>3.25)                         | 1.35<br>(0.52 to<br>2.79)                         | 2.72<br>(1.05 to<br>5.59)                          |
| Chlamydial infection                                                    | 0.22<br>(0.12 to<br>0.34)                                  | 0.39<br>(0.17 to<br>0.77)                                  | 0.35<br>(0.16 to<br>0.69)                                  | 0.47<br>(0.21 to<br>0.92)                                  | 0.00<br>(0.00 to<br>0.01)                         | 0.01<br>(0.00 to<br>0.01)                         | 0.01<br>(0.00 to<br>0.01)                         | 0.01<br>(0.00 to<br>0.02)                          |
| Gonococcal infection                                                    | 0.53<br>(0.28 to<br>0.81)                                  | 0.94<br>(0.43 to<br>1.73)                                  | 0.84<br>(0.39 to<br>1.55)                                  | 1.11<br>(0.51 to<br>2.07)                                  | 0.01<br>(0.01 to<br>0.02)                         | 0.02<br>(0.01 to<br>0.03)                         | 0.02<br>(0.01 to<br>0.03)                         | 0.02<br>(0.01 to<br>0.04)                          |
| Other sexually transmitted infections                                   | 0.30<br>(0.16 to<br>0.46)                                  | 0.53<br>(0.23 to<br>0.99)                                  | 0.47<br>(0.21 to<br>0.89)                                  | 0.63<br>(0.28 to<br>1.18)                                  | 0.01<br>(0.00 to<br>0.01)                         | 0.01<br>(0.00 to<br>0.02)                         | 0.01<br>(0.00 to<br>0.02)                         | 0.01<br>(0.01 to<br>0.02)                          |
| Acute hepatitis                                                         | 23.30<br>(18.74 to<br>28.26)                               | 25.07<br>(17.63 to<br>35.47)                               | 21.55<br>(15.15 to<br>30.69)                               | 33.81<br>(23.99 to<br>47.34)                               | 0.41<br>(0.33 to<br>0.49)                         | 0.49<br>(0.36 to<br>0.67)                         | 0.42<br>(0.31 to<br>0.57)                         | 0.63<br>(0.46 to<br>0.86)                          |
| Acute hepatitis A                                                       | 0.97<br>(0.08 to<br>2.35)                                  | 0.73<br>(0.11 to<br>1.92)                                  | 0.61<br>(0.10 to<br>1.58)                                  | 1.26<br>(0.15 to<br>3.35)                                  | 0.01<br>(0.00 to<br>0.03)                         | 0.01<br>(0.00 to<br>0.02)                         | 0.01<br>(0.00 to<br>0.02)                         | 0.02<br>(0.00 to<br>0.04)                          |
| Acute hepatitis B                                                       | 13.86<br>(10.79 to<br>17.41)                               | 16.35<br>(11.18 to<br>23.73)                               | 13.87<br>(9.47 to<br>20.21)                                | 21.47<br>(14.78 to<br>31.00)                               | 0.28<br>(0.22 to<br>0.34)                         | 0.35<br>(0.25 to<br>0.49)                         | 0.30<br>(0.21 to<br>0.42)                         | 0.45<br>(0.32 to<br>0.63)                          |
| Acute hepatitis C                                                       | 0.37<br>(0.25 to<br>0.51)                                  | 0.56<br>(0.36 to<br>0.83)                                  | 0.52<br>(0.34 to<br>0.77)                                  | 0.65<br>(0.41 to<br>0.96)                                  | 0.01<br>(0.01 to<br>0.01)                         | 0.01<br>(0.01 to<br>0.02)                         | 0.01<br>(0.01 to<br>0.02)                         | 0.01<br>(0.01 to<br>0.02)                          |
| Acute hepatitis E                                                       | 8.10<br>(5.84 to<br>11.15)                                 | 7.43<br>(4.56 to<br>11.13)                                 | 6.55<br>(4.13 to<br>9.85)                                  | 10.44<br>(6.46 to<br>15.69)                                | 0.11<br>(0.08 to<br>0.15)                         | 0.11<br>(0.07 to<br>0.17)                         | 0.10<br>(0.06 to<br>0.15)                         | 0.15<br>(0.10 to<br>0.22)                          |
| Other unspecified infectious diseases                                   | 23.55<br>(10.27 to<br>70.13)                               | 29.17<br>(13.66 to<br>70.20)                               | 23.96<br>(11.53 to<br>56.27)                               | 52.33<br>(23.36 to<br>124.78)                              | 0.33<br>(0.17 to<br>0.86)                         | 0.46<br>(0.27 to<br>0.93)                         | 0.40<br>(0.23 to<br>0.77)                         | 0.75<br>(0.40 to<br>1.61)                          |
| <b>Non-communicable diseases</b>                                        | <b>1,317.09</b><br><b>(1,062.33 to</b><br><b>1,573.63)</b> | <b>2,248.77</b><br><b>(1,778.19 to</b><br><b>2,788.19)</b> | <b>1,823.73</b><br><b>(1,453.42 to</b><br><b>2,261.42)</b> | <b>3,138.01</b><br><b>(2,459.44 to</b><br><b>3,927.44)</b> | <b>34.59</b><br><b>(30.01 to</b><br><b>38.85)</b> | <b>69.62</b><br><b>(58.97 to</b><br><b>82.30)</b> | <b>56.73</b><br><b>(48.90 to</b><br><b>65.58)</b> | <b>91.01</b><br><b>(75.90 to</b><br><b>109.37)</b> |

| Chad                                 |                              |                              |                              |                              |                        |                           |                           |                           |
|--------------------------------------|------------------------------|------------------------------|------------------------------|------------------------------|------------------------|---------------------------|---------------------------|---------------------------|
| Cause                                | YLLs (in 1000s)              |                              |                              |                              | Deaths (in 1000s)      |                           |                           |                           |
|                                      | 2016                         | 2040 Forecast                | 2040 Better Scenario         | 2040 Worse Scenario          | 2016                   | 2040 Forecast             | 2040 Better Scenario      | 2040 Worse Scenario       |
| Neoplasms                            | 199.35<br>(175.85 to 224.43) | 465.70<br>(377.92 to 576.43) | 434.12<br>(355.82 to 532.45) | 501.15<br>(406.65 to 623.35) | 6.24<br>(5.49 to 6.99) | 14.85<br>(12.43 to 17.65) | 14.18<br>(12.07 to 16.62) | 15.26<br>(12.67 to 18.28) |
| Lip and oral cavity cancer           | 2.02<br>(1.73 to 2.34)       | 5.24<br>(3.29 to 8.77)       | 3.74<br>(2.56 to 5.57)       | 7.15<br>(4.27 to 12.54)      | 0.07<br>(0.06 to 0.08) | 0.18<br>(0.12 to 0.29)    | 0.14<br>(0.10 to 0.20)    | 0.24<br>(0.15 to 0.39)    |
| Nasopharynx cancer                   | 0.58<br>(0.48 to 0.71)       | 1.65<br>(0.96 to 2.93)       | 1.11<br>(0.72 to 1.74)       | 2.34<br>(1.33 to 4.25)       | 0.01<br>(0.01 to 0.02) | 0.04<br>(0.03 to 0.07)    | 0.03<br>(0.02 to 0.04)    | 0.06<br>(0.03 to 0.11)    |
| Other pharynx cancer                 | 1.04<br>(0.86 to 1.24)       | 1.92<br>(1.24 to 2.89)       | 1.69<br>(1.12 to 2.53)       | 2.43<br>(1.50 to 3.77)       | 0.04<br>(0.03 to 0.04) | 0.07<br>(0.04 to 0.10)    | 0.06<br>(0.04 to 0.09)    | 0.08<br>(0.05 to 0.12)    |
| Esophageal cancer                    | 6.14<br>(5.11 to 7.33)       | 13.55<br>(7.41 to 24.68)     | 9.86<br>(5.72 to 16.70)      | 17.23<br>(9.15 to 31.66)     | 0.23<br>(0.19 to 0.28) | 0.49<br>(0.28 to 0.85)    | 0.37<br>(0.23 to 0.62)    | 0.60<br>(0.33 to 1.07)    |
| Stomach cancer                       | 15.69<br>(13.52 to 18.18)    | 24.04<br>(19.02 to 31.05)    | 22.43<br>(17.72 to 28.58)    | 26.46<br>(20.54 to 34.70)    | 0.62<br>(0.53 to 0.71) | 0.95<br>(0.78 to 1.19)    | 0.93<br>(0.76 to 1.14)    | 1.01<br>(0.81 to 1.27)    |
| Colon and rectum cancer              | 7.65<br>(6.25 to 9.41)       | 21.44<br>(14.81 to 30.31)    | 21.89<br>(15.17 to 30.70)    | 21.28<br>(14.69 to 30.61)    | 0.29<br>(0.24 to 0.36) | 0.83<br>(0.59 to 1.17)    | 0.89<br>(0.64 to 1.24)    | 0.79<br>(0.55 to 1.12)    |
| Liver cancer                         | 35.98<br>(29.63 to 43.61)    | 96.43<br>(67.84 to 138.90)   | 87.52<br>(64.27 to 118.01)   | 106.72<br>(71.67 to 158.76)  | 1.06<br>(0.89 to 1.27) | 2.83<br>(2.06 to 3.87)    | 2.64<br>(1.99 to 3.41)    | 3.05<br>(2.14 to 4.34)    |
| Liver cancer due to hepatitis B      | 20.92<br>(16.97 to 25.62)    | 55.75<br>(39.53 to 82.17)    | 51.23<br>(37.34 to 71.72)    | 60.23<br>(40.77 to 91.35)    | 0.60<br>(0.48 to 0.72) | 1.58<br>(1.13 to 2.25)    | 1.49<br>(1.10 to 2.00)    | 1.67<br>(1.15 to 2.46)    |
| Liver cancer due to hepatitis C      | 2.22<br>(1.54 to 3.05)       | 5.91<br>(3.75 to 8.70)       | 5.54<br>(3.63 to 7.92)       | 6.27<br>(3.88 to 9.56)       | 0.08<br>(0.06 to 0.12) | 0.22<br>(0.15 to 0.33)    | 0.22<br>(0.15 to 0.31)    | 0.23<br>(0.15 to 0.34)    |
| Liver cancer due to alcohol use      | 3.96<br>(3.15 to 5.06)       | 11.13<br>(7.44 to 16.41)     | 9.22<br>(6.50 to 12.88)      | 14.16<br>(9.02 to 22.01)     | 0.14<br>(0.11 to 0.17) | 0.36<br>(0.25 to 0.51)    | 0.32<br>(0.23 to 0.42)    | 0.44<br>(0.29 to 0.66)    |
| Liver cancer due to other causes     | 8.88<br>(7.00 to 11.14)      | 23.65<br>(16.24 to 34.41)    | 21.52<br>(15.26 to 30.54)    | 26.07<br>(17.24 to 38.70)    | 0.25<br>(0.20 to 0.30) | 0.66<br>(0.46 to 0.92)    | 0.61<br>(0.45 to 0.83)    | 0.71<br>(0.48 to 1.01)    |
| Gallbladder and biliary tract cancer | 2.28<br>(1.65 to 3.03)       | 3.83<br>(2.79 to 5.20)       | 4.05<br>(2.90 to 5.49)       | 3.61<br>(2.64 to 4.88)       | 0.10<br>(0.07 to 0.13) | 0.16<br>(0.12 to 0.21)    | 0.18<br>(0.13 to 0.23)    | 0.15<br>(0.11 to 0.19)    |
| Pancreatic cancer                    | 5.88<br>(5.04 to 6.77)       | 16.73<br>(13.40 to 20.40)    | 17.09<br>(13.82 to 20.78)    | 15.62<br>(12.60 to 19.20)    | 0.25<br>(0.21 to 0.28) | 0.69<br>(0.57 to 0.85)    | 0.73<br>(0.61 to 0.86)    | 0.62<br>(0.51 to 0.76)    |
| Larynx cancer                        | 1.50<br>(1.20 to 1.81)       | 3.67<br>(2.05 to 6.20)       | 2.16<br>(1.39 to 3.30)       | 5.00<br>(2.69 to 8.69)       | 0.06<br>(0.05 to 0.07) | 0.14<br>(0.08 to 0.23)    | 0.08<br>(0.06 to 0.12)    | 0.18<br>(0.10 to 0.32)    |
| Tracheal, bronchus, and lung cancer  | 11.11<br>(9.39 to 12.92)     | 33.42<br>(19.26 to 55.10)    | 16.32<br>(10.59 to 24.68)    | 36.27<br>(21.12 to 60.03)    | 0.45<br>(0.39 to 0.53) | 1.33<br>(0.80 to 2.12)    | 0.68<br>(0.45 to 0.99)    | 1.40<br>(0.84 to 2.24)    |
| Malignant skin melanoma              | 0.59<br>(0.45 to 0.85)       | 1.64<br>(1.26 to 2.31)       | 1.83<br>(1.40 to 2.58)       | 1.42<br>(1.10 to 1.97)       | 0.02<br>(0.02 to 0.03) | 0.06<br>(0.05 to 0.08)    | 0.07<br>(0.05 to 0.09)    | 0.05<br>(0.04 to 0.07)    |
| Non-melanoma skin cancer             | 0.55<br>(0.45 to 0.66)       | 1.39<br>(1.07 to 1.78)       | 1.36<br>(1.04 to 1.75)       | 1.50<br>(1.15 to 1.93)       | 0.02<br>(0.02 to 0.02) | 0.05<br>(0.04 to 0.06)    | 0.05<br>(0.04 to 0.06)    | 0.05<br>(0.04 to 0.06)    |
| Breast cancer                        | 12.13<br>(9.20 to 16.20)     | 31.13<br>(22.25 to 44.27)    | 30.50<br>(21.80 to 43.22)    | 32.32<br>(22.90 to 46.65)    | 0.39<br>(0.30 to 0.52) | 1.01<br>(0.73 to 1.40)    | 1.01<br>(0.74 to 1.38)    | 1.02<br>(0.75 to 1.44)    |
| Cervical cancer                      | 19.53<br>(13.89 to 24.43)    | 34.46<br>(23.19 to 46.55)    | 31.86<br>(21.56 to 42.93)    | 38.80<br>(26.17 to 52.29)    | 0.62<br>(0.45 to 0.78) | 1.08<br>(0.75 to 1.41)    | 1.01<br>(0.71 to 1.33)    | 1.19<br>(0.83 to 1.56)    |

|                                 |                                            |                                            |                                            |                                                |                                         |                                         |                                         |                                         |
|---------------------------------|--------------------------------------------|--------------------------------------------|--------------------------------------------|------------------------------------------------|-----------------------------------------|-----------------------------------------|-----------------------------------------|-----------------------------------------|
| Uterine cancer                  | 2.25<br>(1.72 to 2.87)                     | 4.59<br>(3.42 to 5.96)                     | 4.26<br>(3.18 to 5.56)                     | 5.19<br>(3.89 to 6.68)                         | 0.09<br>(0.07 to 0.12)                  | 0.18<br>(0.14 to 0.23)                  | 0.18<br>(0.14 to 0.22)                  | 0.20<br>(0.16 to 0.25)                  |
| Ovarian cancer                  | 2.34<br>(1.79 to 2.93)                     | 6.64<br>(4.84 to 8.89)                     | 7.10<br>(5.22 to 9.48)                     | 6.00<br>(4.38 to 8.02)                         | 0.08<br>(0.06 to 0.10)                  | 0.21<br>(0.16 to 0.28)                  | 0.23<br>(0.18 to 0.31)                  | 0.19<br>(0.14 to 0.25)                  |
| Prostate cancer                 | 7.95<br>(4.96 to 10.18)                    | 20.42<br>(12.93 to 25.59)                  | 22.95<br>(14.98 to 28.67)                  | 18.03<br>(11.28 to 22.79)                      | 0.44<br>(0.28 to 0.57)                  | 1.15<br>(0.74 to 1.44)                  | 1.36<br>(0.89 to 1.67)                  | 0.98<br>(0.61 to 1.23)                  |
| Testicular cancer               | 0.54<br>(0.38 to 0.84)                     | 1.07<br>(0.71 to 1.72)                     | 1.02<br>(0.67 to 1.66)                     | 1.17<br>(0.77 to 1.89)                         | 0.01<br>(0.01 to 0.02)                  | 0.02<br>(0.02 to 0.04)                  | 0.02<br>(0.02 to 0.03)                  | 0.02<br>(0.02 to 0.04)                  |
| <b>Chad</b>                     |                                            |                                            |                                            |                                                |                                         |                                         |                                         |                                         |
| Cause                           | YLLs (in 1000s)                            |                                            |                                            |                                                | Deaths (in 1000s)                       |                                         |                                         |                                         |
|                                 | 2016                                       | 2040 Forecast                              | 2040 Better Scenario                       | 2040 Worse Scenario                            | 2016                                    | 2040 Forecast                           | 2040 Better Scenario                    | 2040 Worse Scenario                     |
| Kidney cancer                   | 2.85<br>(2.33 to 3.68)                     | 6.54<br>(5.19 to 8.31)                     | 7.00<br>(5.53 to 8.93)                     | 6.50<br>(5.10 to 8.45)                         | 0.07<br>(0.06 to 0.08)                  | 0.17<br>(0.14 to 0.21)                  | 0.19<br>(0.16 to 0.23)                  | 0.16<br>(0.13 to 0.19)                  |
| Bladder cancer                  | 2.73<br>(2.34 to 3.16)                     | 7.19<br>(5.50 to 9.53)                     | 6.67<br>(5.31 to 8.44)                     | 7.37<br>(5.57 to 10.02)                        | 0.11<br>(0.10 to 0.13)                  | 0.29<br>(0.23 to 0.38)                  | 0.29<br>(0.24 to 0.35)                  | 0.29<br>(0.23 to 0.38)                  |
| Brain and nervous system cancer | 7.99<br>(6.06 to 9.55)                     | 20.14<br>(14.14 to 26.72)                  | 20.96<br>(14.77 to 27.73)                  | 21.03<br>(14.81 to 27.80)                      | 0.16<br>(0.13 to 0.19)                  | 0.44<br>(0.32 to 0.56)                  | 0.46<br>(0.34 to 0.59)                  | 0.43<br>(0.32 to 0.55)                  |
| Thyroid cancer                  | 0.64<br>(0.54 to 0.76)                     | 1.44<br>(1.11 to 1.91)                     | 1.35<br>(1.04 to 1.77)                     | 1.62<br>(1.23 to 2.17)                         | 0.02<br>(0.02 to 0.02)                  | 0.05<br>(0.04 to 0.06)                  | 0.04<br>(0.04 to 0.06)                  | 0.05<br>(0.04 to 0.07)                  |
| Mesothelioma                    | 0.25<br>(0.20 to 0.34)                     | 0.66<br>(0.49 to 0.91)                     | 0.64<br>(0.48 to 0.90)                     | 0.69<br>(0.51 to 0.97)                         | 0.01<br>(0.01 to 0.01)                  | 0.02<br>(0.02 to 0.03)                  | 0.02<br>(0.02 to 0.03)                  | 0.02<br>(0.02 to 0.03)                  |
| Hodgkin lymphoma                | 1.71<br>(1.31 to 2.24)                     | 2.40<br>(1.65 to 3.55)                     | 2.08<br>(1.41 to 3.09)                     | 2.21<br>(2.19 to 4.73)                         | 0.03<br>(0.03 to 0.04)                  | 0.05<br>(0.05 to 0.07)                  | 0.04<br>(0.03 to 0.06)                  | 0.06<br>(0.04 to 0.09)                  |
| Non-Hodgkin lymphoma            | 12.00<br>(10.07 to 14.23)                  | 27.55<br>(21.01 to 36.84)                  | 28.79<br>(21.93 to 38.35)                  | 28.67<br>(21.70 to 38.60)                      | 0.24<br>(0.20 to 0.27)                  | 0.58<br>(0.47 to 0.73)                  | 0.62<br>(0.50 to 0.78)                  | 0.57<br>(0.46 to 0.72)                  |
| Multiple myeloma                | 1.63<br>(1.29 to 2.18)                     | 4.80<br>(3.64 to 6.58)                     | 5.14<br>(3.90 to 7.06)                     | 4.41<br>(3.37 to 6.09)                         | 0.06<br>(0.05 to 0.08)                  | 0.17<br>(0.13 to 0.23)                  | 0.19<br>(0.15 to 0.25)                  | 0.15<br>(0.12 to 0.21)                  |
| Leukemia                        | 14.29<br>(11.25 to 17.06)                  | 27.80<br>(20.45 to 37.17)                  | 28.03<br>(20.55 to 37.79)                  | 30.24<br>(22.12 to 40.26)                      | 0.28<br>(0.22 to 0.32)                  | 0.58<br>(0.44 to 0.73)                  | 0.59<br>(0.45 to 0.75)                  | 0.60<br>(0.45 to 0.77)                  |
| Acute lymphoid leukemia         | 3.19<br>(2.32 to 4.23)                     | 6.39<br>(4.19 to 9.57)                     | 6.57<br>(4.32 to 9.87)                     | 6.92<br>(4.51 to 10.31)                        | 0.05<br>(0.04 to 0.06)                  | 0.11<br>(0.07 to 0.15)                  | 0.11<br>(0.07 to 0.16)                  | 0.11<br>(0.08 to 0.16)                  |
| Chronic lymphoid leukemia       | 0.48<br>(0.35 to 0.63)                     | 0.93<br>(0.66 to 1.24)                     | 0.94<br>(0.67 to 1.23)                     | 0.93<br>(0.65 to 1.26)                         | 0.02<br>(0.01 to 0.03)                  | 0.04<br>(0.03 to 0.05)                  | 0.04<br>(0.03 to 0.05)                  | 0.04<br>(0.03 to 0.05)                  |
| Acute myeloid leukemia          | 5.08<br>(3.78 to 6.47)                     | 11.96<br>(8.17 to 16.70)                   | 12.61<br>(8.65 to 17.55)                   | 12.32<br>(8.38 to 17.34)                       | 0.09<br>(0.06 to 0.11)                  | 0.22<br>(0.16 to 0.30)                  | 0.24<br>(0.17 to 0.31)                  | 0.22<br>(0.16 to 0.29)                  |
| Chronic myeloid leukemia        | 1.20<br>(0.92 to 1.54)                     | 1.69<br>(1.15 to 2.47)                     | 1.64<br>(1.12 to 2.33)                     | 1.74<br>(1.17 to 2.54)                         | 0.03<br>(0.02 to 0.04)                  | 0.04<br>(0.03 to 0.06)                  | 0.04<br>(0.03 to 0.06)                  | 0.04<br>(0.03 to 0.06)                  |
| Other leukemia                  | 4.34<br>(3.14 to 5.52)                     | 6.83<br>(4.74 to 9.24)                     | 6.27<br>(4.34 to 8.44)                     | 8.32<br>(5.82 to 11.24)                        | 0.09<br>(0.07 to 0.11)                  | 0.17<br>(0.12 to 0.21)                  | 0.16<br>(0.11 to 0.20)                  | 0.19<br>(0.14 to 0.25)                  |
| Other neoplasms                 | 19.49<br>(16.04 to 23.98)                  | 43.93<br>(34.16 to 56.30)                  | 44.72<br>(34.79 to 57.74)                  | 48.88<br>(37.65 to 63.59)                      | 0.41<br>(0.35 to 0.48)                  | 1.02<br>(0.84 to 1.22)                  | 1.08<br>(0.89 to 1.30)                  | 1.04<br>(0.86 to 1.24)                  |
| <b>Cardiovascular diseases</b>  | <b>316.77</b><br><b>(273.69 to 369.25)</b> | <b>615.52</b><br><b>(433.80 to 866.49)</b> | <b>366.71</b><br><b>(273.28 to 493.34)</b> | <b>1,001.61</b><br><b>(691.06 to 1,445.28)</b> | <b>12.30</b><br><b>(10.67 to 14.27)</b> | <b>25.72</b><br><b>(19.12 to 34.33)</b> | <b>16.48</b><br><b>(12.84 to 21.17)</b> | <b>39.14</b><br><b>(28.62 to 53.22)</b> |

|                                               |                                       |                                        |                                       |                                         |                                    |                                    |                                    |                                    |
|-----------------------------------------------|---------------------------------------|----------------------------------------|---------------------------------------|-----------------------------------------|------------------------------------|------------------------------------|------------------------------------|------------------------------------|
| Rheumatic heart disease                       | 14.08<br>(10.42 to<br>18.40)          | 10.44<br>(6.80 to<br>15.51)            | 8.72<br>(5.72 to<br>13.06)            | 15.25<br>(9.83 to<br>23.11)             | 0.34<br>(0.25 to<br>0.44)          | 0.31<br>(0.21 to<br>0.43)          | 0.27<br>(0.19 to<br>0.38)          | 0.40<br>(0.28 to<br>0.57)          |
| Ischemic heart disease                        | 117.80<br>(97.04 to<br>146.25)        | 275.89<br>(164.51 to<br>450.05)        | 139.81<br>(86.89 to<br>227.93)        | 465.97<br>(273.87 to<br>759.84)         | 5.61<br>(4.69 to<br>6.87)          | 13.00<br>(8.33 to<br>19.60)        | 7.53<br>(5.04 to<br>11.45)         | 20.44<br>(12.83 to<br>31.03)       |
| Stroke                                        | 115.55<br>(95.15 to<br>137.65)        | 194.18<br>(113.62 to<br>310.96)        | 102.91<br>(61.01 to<br>159.92)        | 344.53<br>(198.96 to<br>543.32)         | 4.26<br>(3.54 to<br>5.00)          | 7.83<br>(5.05 to<br>11.60)         | 4.55<br>(3.01 to<br>6.48)          | 12.84<br>(8.02 to<br>19.59)        |
| Ischemic stroke                               | 29.05<br>(22.45 to<br>35.73)          | 51.43<br>(29.78 to<br>80.94)           | 30.90<br>(18.59 to<br>48.25)          | 76.97<br>(43.52 to<br>128.12)           | 1.58<br>(1.24 to<br>1.91)          | 2.94<br>(1.82 to<br>4.44)          | 1.96<br>(1.24 to<br>2.89)          | 4.09<br>(2.47 to<br>6.56)          |
| Intracerebral hemorrhage                      | 86.50<br>(71.59 to<br>103.96)         | 142.75<br>(76.44 to<br>238.03)         | 72.01<br>(39.46 to<br>119.37)         | 267.56<br>(139.90 to<br>446.32)         | 2.68<br>(2.22 to<br>3.19)          | 4.89<br>(2.75 to<br>7.81)          | 2.58<br>(1.51 to<br>4.10)          | 8.75<br>(4.81 to<br>14.26)         |
| Hypertensive heart disease                    | 10.60<br>(5.76 to<br>15.06)           | 19.05<br>(9.57 to<br>32.92)            | 13.63<br>(7.23 to<br>21.55)           | 26.94<br>(12.51 to<br>50.91)            | 0.45<br>(0.25 to<br>0.64)          | 0.85<br>(0.45 to<br>1.44)          | 0.64<br>(0.36 to<br>0.99)          | 1.13<br>(0.56 to<br>2.13)          |
| Cardiomyopathy and myocarditis                | 6.88<br>(4.87 to<br>9.67)             | 14.23<br>(8.91 to<br>22.28)            | 14.00<br>(8.83 to<br>21.98)           | 15.53<br>(9.88 to<br>24.29)             | 0.16<br>(0.11 to<br>0.23)          | 0.38<br>(0.24 to<br>0.57)          | 0.39<br>(0.25 to<br>0.59)          | 0.38<br>(0.24 to<br>0.57)          |
| Myocarditis                                   | 1.78<br>(1.07 to<br>2.84)             | 3.04<br>(1.52 to<br>5.63)              | 2.89<br>(1.42 to<br>5.35)             | 3.58<br>(1.83 to<br>6.41)               | 0.03<br>(0.02 to<br>0.05)          | 0.06<br>(0.03 to<br>0.11)          | 0.06<br>(0.03 to<br>0.11)          | 0.07<br>(0.03 to<br>0.12)          |
| <b>Chad</b>                                   |                                       |                                        |                                       |                                         |                                    |                                    |                                    |                                    |
| Cause                                         | YLLs (in 1000s)                       |                                        |                                       |                                         | Deaths (in 1000s)                  |                                    |                                    |                                    |
|                                               | 2016                                  | 2040 Forecast                          | 2040 Better Scenario                  | 2040 Worse Scenario                     | 2016                               | 2040 Forecast                      | 2040 Better Scenario               | 2040 Worse Scenario                |
| Alcoholic cardiomyopathy                      | 0.39<br>(0.22 to<br>0.75)             | 1.00<br>(0.50 to<br>2.05)              | 1.00<br>(0.50 to<br>2.09)             | 1.02<br>(0.53 to<br>2.02)               | 0.01<br>(0.01 to<br>0.02)          | 0.03<br>(0.02 to<br>0.06)          | 0.03<br>(0.02 to<br>0.06)          | 0.03<br>(0.02 to<br>0.06)          |
| Other cardiomyopathy                          | 4.71<br>(3.29 to<br>6.49)             | 10.19<br>(6.56 to<br>16.25)            | 10.11<br>(6.53 to<br>15.80)           | 10.93<br>(7.06 to<br>17.43)             | 0.12<br>(0.08 to<br>0.16)          | 0.29<br>(0.18 to<br>0.44)          | 0.30<br>(0.19 to<br>0.45)          | 0.29<br>(0.18 to<br>0.44)          |
| Atrial fibrillation and flutter               | 0.95<br>(0.71 to<br>1.24)             | 2.43<br>(1.81 to<br>3.27)              | 2.61<br>(1.96 to<br>3.44)             | 2.31<br>(1.71 to<br>3.09)               | 0.08<br>(0.06 to<br>0.11)          | 0.21<br>(0.15 to<br>0.29)          | 0.25<br>(0.18 to<br>0.33)          | 0.19<br>(0.13 to<br>0.25)          |
| Aortic aneurysm                               | 1.24<br>(0.98 to<br>1.57)             | 2.77<br>(1.99 to<br>3.84)              | 2.68<br>(1.96 to<br>3.67)             | 2.78<br>(1.96 to<br>3.94)               | 0.05<br>(0.04 to<br>0.07)          | 0.12<br>(0.09 to<br>0.15)          | 0.12<br>(0.09 to<br>0.16)          | 0.11<br>(0.08 to<br>0.15)          |
| Peripheral artery disease                     | 0.06<br>(0.04 to<br>0.10)             | 0.22<br>(0.14 to<br>0.40)              | 0.24<br>(0.15 to<br>0.44)             | 0.19<br>(0.12 to<br>0.33)               | 0.00<br>(0.00 to<br>0.01)          | 0.01<br>(0.01 to<br>0.03)          | 0.02<br>(0.01 to<br>0.03)          | 0.01<br>(0.01 to<br>0.02)          |
| Endocarditis                                  | 6.65<br>(4.83 to<br>9.64)             | 12.90<br>(8.67 to<br>18.99)            | 12.22<br>(8.32 to<br>18.01)           | 16.02<br>(10.55 to<br>24.13)            | 0.14<br>(0.11 to<br>0.19)          | 0.32<br>(0.23 to<br>0.45)          | 0.31<br>(0.23 to<br>0.43)          | 0.35<br>(0.25 to<br>0.48)          |
| Other cardiovascular and circulatory diseases | 42.97<br>(29.94 to<br>68.40)          | 83.41<br>(55.48 to<br>133.31)          | 69.89<br>(47.94 to<br>108.29)         | 112.11<br>(73.87 to<br>176.59)          | 1.21<br>(0.85 to<br>2.03)          | 2.69<br>(1.85 to<br>4.49)          | 2.40<br>(1.69 to<br>3.89)          | 3.28<br>(2.23 to<br>5.45)          |
| <b>Chronic respiratory diseases</b>           | <b>59.50<br/>(49.97 to<br/>71.29)</b> | <b>91.65<br/>(59.76 to<br/>148.62)</b> | <b>57.88<br/>(41.71 to<br/>81.50)</b> | <b>122.27<br/>(78.70 to<br/>201.36)</b> | <b>2.07<br/>(1.75 to<br/>2.48)</b> | <b>3.42<br/>(2.27 to<br/>5.65)</b> | <b>2.11<br/>(1.56 to<br/>3.02)</b> | <b>4.34<br/>(2.80 to<br/>7.35)</b> |
| Chronic obstructive pulmonary disease         | 28.34<br>(22.26 to<br>34.80)          | 55.63<br>(29.96 to<br>105.75)          | 26.29<br>(16.17 to<br>43.81)          | 77.12<br>(40.83 to<br>147.61)           | 1.23<br>(0.98 to<br>1.50)          | 2.40<br>(1.38 to<br>4.56)          | 1.19<br>(0.78 to<br>1.96)          | 3.14<br>(1.74 to<br>5.99)          |
| Pneumoconiosis                                | 0.07<br>(0.05 to<br>0.09)             | 0.09<br>(0.07 to<br>0.13)              | 0.09<br>(0.06 to<br>0.12)             | 0.10<br>(0.07 to<br>0.13)               | 0.00<br>(0.00 to<br>0.00)          | 0.00<br>(0.00 to<br>0.00)          | 0.00<br>(0.00 to<br>0.00)          | 0.00<br>(0.00 to<br>0.00)          |
| Silicosis                                     | 0.01<br>(0.00 to<br>0.01)             | 0.01<br>(0.00 to<br>0.01)              | 0.01<br>(0.00 to<br>0.01)             | 0.01<br>(0.00 to<br>0.01)               | 0.00<br>(0.00 to<br>0.00)          | 0.00<br>(0.00 to<br>0.00)          | 0.00<br>(0.00 to<br>0.00)          | 0.00<br>(0.00 to<br>0.00)          |
| Asbestosis                                    | 0.02<br>(0.01 to<br>0.02)             | 0.03<br>(0.02 to<br>0.04)              | 0.03<br>(0.02 to<br>0.04)             | 0.03<br>(0.02 to<br>0.04)               | 0.00<br>(0.00 to<br>0.00)          | 0.00<br>(0.00 to<br>0.00)          | 0.00<br>(0.00 to<br>0.00)          | 0.00<br>(0.00 to<br>0.00)          |

|                                                                |                                       |                                        |                                        |                                        |                                  |                                  |                                  |                                  |
|----------------------------------------------------------------|---------------------------------------|----------------------------------------|----------------------------------------|----------------------------------------|----------------------------------|----------------------------------|----------------------------------|----------------------------------|
| Coal workers pneumoconiosis                                    | 0.00<br>(0.00 to<br>0.01)             | 0.01<br>(0.00 to<br>0.01)              | 0.00<br>(0.00 to<br>0.01)              | 0.01<br>(0.00 to<br>0.01)              | 0.00<br>(0.00 to<br>0.00)        | 0.00<br>(0.00 to<br>0.00)        | 0.00<br>(0.00 to<br>0.00)        | 0.00<br>(0.00 to<br>0.00)        |
| Other pneumoconiosis                                           | 0.04<br>(0.03 to<br>0.06)             | 0.05<br>(0.04 to<br>0.07)              | 0.05<br>(0.03 to<br>0.07)              | 0.06<br>(0.04 to<br>0.08)              | 0.00<br>(0.00 to<br>0.00)        | 0.00<br>(0.00 to<br>0.00)        | 0.00<br>(0.00 to<br>0.00)        | 0.00<br>(0.00 to<br>0.00)        |
| Asthma                                                         | 22.76<br>(17.08 to<br>29.63)          | 18.91<br>(12.34 to<br>28.21)           | 15.53<br>(10.32 to<br>22.80)           | 25.51<br>(16.51 to<br>38.92)           | 0.64<br>(0.49 to<br>0.85)        | 0.58<br>(0.40 to<br>0.85)        | 0.49<br>(0.35 to<br>0.71)        | 0.73<br>(0.50 to<br>1.11)        |
| Interstitial lung disease and pulmonary sarcoidosis            | 0.38<br>(0.22 to<br>0.67)             | 1.04<br>(0.56 to<br>1.80)              | 1.16<br>(0.63 to<br>2.00)              | 0.92<br>(0.50 to<br>1.59)              | 0.01<br>(0.01 to<br>0.02)        | 0.04<br>(0.02 to<br>0.06)        | 0.02<br>(0.02 to<br>0.07)        | 0.03<br>(0.00 to<br>0.05)        |
| Other chronic respiratory diseases                             | 7.96<br>(5.11 to<br>11.20)            | 15.98<br>(10.35 to<br>22.97)           | 14.81<br>(9.93 to<br>20.85)            | 18.63<br>(11.82 to<br>26.91)           | 0.18<br>(0.12 to<br>0.25)        | 0.40<br>(0.26 to<br>0.54)        | 0.38<br>(0.26 to<br>0.50)        | 0.43<br>(0.28 to<br>0.60)        |
| <b>Cirrhosis and other chronic liver diseases</b>              | <b>79.10</b><br>(62.71 to<br>99.03)   | <b>161.66</b><br>(118.96 to<br>218.28) | <b>150.12</b><br>(110.44 to<br>203.03) | <b>188.39</b><br>(137.85 to<br>255.34) | <b>2.09</b><br>(1.67 to<br>2.64) | <b>4.43</b><br>(3.37 to<br>5.81) | <b>4.21</b><br>(3.23 to<br>5.55) | <b>5.00</b><br>(3.78 to<br>6.60) |
| Cirrhosis and other chronic liver diseases due to hepatitis B  | 30.57<br>(23.13 to<br>39.82)          | 66.85<br>(46.76 to<br>93.16)           | 63.84<br>(45.20 to<br>88.69)           | 72.61<br>(50.72 to<br>101.60)          | 0.88<br>(0.68 to<br>1.14)        | 1.94<br>(1.43 to<br>2.61)        | 1.89<br>(1.40 to<br>2.56)        | 2.06<br>(1.52 to<br>2.75)        |
| Cirrhosis and other chronic liver diseases due to hepatitis C  | 10.87<br>(6.94 to<br>16.36)           | 25.02<br>(15.22 to<br>39.87)           | 23.83<br>(14.62 to<br>37.30)           | 27.25<br>(16.52 to<br>43.57)           | 0.32<br>(0.21 to<br>0.47)        | 0.72<br>(0.45 to<br>1.10)        | 0.70<br>(0.44 to<br>1.06)        | 0.77<br>(0.48 to<br>1.18)        |
| Cirrhosis and other chronic liver diseases due to alcohol use  | 16.39<br>(12.37 to<br>21.55)          | 34.44<br>(24.30 to<br>47.72)           | 29.43<br>(20.61 to<br>41.17)           | 45.06<br>(31.52 to<br>62.83)           | 0.50<br>(0.38 to<br>0.65)        | 1.05<br>(0.78 to<br>1.42)        | 0.93<br>(0.69 to<br>1.25)        | 1.33<br>(0.98 to<br>1.81)        |
| Cirrhosis and other chronic liver diseases due to other causes | 21.26<br>(16.18 to<br>27.76)          | 35.35<br>(24.50 to<br>49.76)           | 33.02<br>(22.90 to<br>46.97)           | 43.47<br>(30.01 to<br>61.48)           | 0.39<br>(0.31 to<br>0.50)        | 0.72<br>(0.52 to<br>0.97)        | 0.68<br>(0.49 to<br>0.93)        | 0.83<br>(0.60 to<br>1.14)        |
| <b>Digestive diseases</b>                                      | <b>100.12</b><br>(76.91 to<br>146.76) | <b>137.11</b><br>(101.54 to<br>182.61) | <b>123.48</b><br>(91.75 to<br>162.35)  | <b>179.19</b><br>(129.28 to<br>246.30) | <b>2.30</b><br>(1.90 to<br>2.87) | <b>3.68</b><br>(2.92 to<br>4.62) | <b>3.47</b><br>(2.77 to<br>4.34) | <b>4.40</b><br>(3.45 to<br>5.56) |
| Peptic ulcer disease                                           | 18.04<br>(13.51 to<br>25.38)          | 16.42<br>(11.22 to<br>23.11)           | 13.30<br>(9.10 to<br>18.68)            | 23.44<br>(15.92 to<br>34.03)           | 0.47<br>(0.36 to<br>0.60)        | 0.49<br>(0.36 to<br>0.64)        | 0.41<br>(0.30 to<br>0.55)        | 0.65<br>(0.48 to<br>0.85)        |

**Chad**

| Cause                                      | YLLs (in 1000s)              |                              |                              |                               | Deaths (in 1000s)         |                           |                           |                           |
|--------------------------------------------|------------------------------|------------------------------|------------------------------|-------------------------------|---------------------------|---------------------------|---------------------------|---------------------------|
|                                            | 2016                         | 2040 Forecast                | 2040 Better Scenario         | 2040 Worse Scenario           | 2016                      | 2040 Forecast             | 2040 Better Scenario      | 2040 Worse Scenario       |
| Gastritis and duodenitis                   | 3.94<br>(2.62 to<br>5.97)    | 6.69<br>(4.36 to<br>10.14)   | 6.17<br>(4.02 to<br>9.35)    | 8.01<br>(5.18 to<br>12.26)    | 0.09<br>(0.06 to<br>0.12) | 0.16<br>(0.11 to<br>0.23) | 0.15<br>(0.10 to<br>0.22) | 0.18<br>(0.12 to<br>0.27) |
| Appendicitis                               | 9.95<br>(5.60 to<br>22.32)   | 10.27<br>(6.28 to<br>17.85)  | 8.90<br>(5.40 to<br>15.15)   | 14.57<br>(8.13 to<br>28.15)   | 0.20<br>(0.13 to<br>0.34) | 0.25<br>(0.18 to<br>0.36) | 0.23<br>(0.16 to<br>0.33) | 0.32<br>(0.22 to<br>0.50) |
| Paralytic ileus and intestinal obstruction | 35.48<br>(23.26 to<br>57.41) | 51.57<br>(35.82 to<br>76.05) | 49.35<br>(34.36 to<br>71.27) | 65.82<br>(43.30 to<br>105.06) | 0.72<br>(0.54 to<br>0.97) | 1.29<br>(1.01 to<br>1.70) | 1.30<br>(1.02 to<br>1.70) | 1.45<br>(1.10 to<br>1.97) |
| Inguinal, femoral, and abdominal hernia    | 3.71<br>(2.39 to<br>5.68)    | 4.22<br>(2.61 to<br>6.43)    | 3.86<br>(2.39 to<br>5.88)    | 5.25<br>(3.19 to<br>8.18)     | 0.11<br>(0.07 to<br>0.17) | 0.14<br>(0.09 to<br>0.21) | 0.13<br>(0.08 to<br>0.21) | 0.15<br>(0.10 to<br>0.24) |
| Inflammatory bowel disease                 | 2.17<br>(1.20 to<br>5.26)    | 3.89<br>(2.48 to<br>7.67)    | 3.88<br>(2.49 to<br>7.53)    | 4.33<br>(2.60 to<br>9.46)     | 0.05<br>(0.03 to<br>0.09) | 0.10<br>(0.08 to<br>0.16) | 0.11<br>(0.08 to<br>0.16) | 0.11<br>(0.08 to<br>0.17) |
| Vascular intestinal disorders              | 1.92<br>(1.10 to<br>4.02)    | 2.93<br>(1.89 to<br>5.25)    | 2.85<br>(1.86 to<br>5.00)    | 3.49<br>(2.12 to<br>6.92)     | 0.05<br>(0.04 to<br>0.08) | 0.10<br>(0.07 to<br>0.15) | 0.10<br>(0.08 to<br>0.13) | 0.11<br>(0.08 to<br>0.15) |
| Gallbladder and biliary diseases           | 3.26<br>(2.51 to<br>4.08)    | 4.53<br>(2.99 to<br>6.49)    | 3.79<br>(2.58 to<br>5.33)    | 6.16<br>(3.92 to<br>9.10)     | 0.09<br>(0.07 to<br>0.12) | 0.15<br>(0.10 to<br>0.22) | 0.13<br>(0.09 to<br>0.18) | 0.19<br>(0.12 to<br>0.28) |
| Pancreatitis                               | 7.30<br>(4.98 to<br>10.31)   | 15.54<br>(7.55 to<br>33.81)  | 12.54<br>(6.63 to<br>25.60)  | 20.72<br>(9.53 to<br>46.25)   | 0.20<br>(0.14 to<br>0.28) | 0.43<br>(0.23 to<br>0.87) | 0.36<br>(0.21 to<br>0.68) | 0.55<br>(0.28 to<br>1.17) |

|                                                     |                                                   |                                                   |                                                   |                                                    |                                                |                                                |                                                |                                                |
|-----------------------------------------------------|---------------------------------------------------|---------------------------------------------------|---------------------------------------------------|----------------------------------------------------|------------------------------------------------|------------------------------------------------|------------------------------------------------|------------------------------------------------|
| Other digestive diseases                            | 14.37<br>(9.39 to<br>23.55)                       | 21.05<br>(13.90 to<br>32.35)                      | 18.83<br>(12.45 to<br>28.63)                      | 27.40<br>(17.72 to<br>42.33)                       | 0.33<br>(0.23 to<br>0.47)                      | 0.58<br>(0.40 to<br>0.84)                      | 0.54<br>(0.37 to<br>0.80)                      | 0.69<br>(0.47 to<br>0.99)                      |
| <b>Neurological disorders</b>                       | <b>34.53</b><br><b>(26.84 to</b><br><b>42.88)</b> | <b>67.95</b><br><b>(52.15 to</b><br><b>87.95)</b> | <b>65.80</b><br><b>(51.16 to</b><br><b>84.25)</b> | <b>80.71</b><br><b>(59.96 to</b><br><b>107.47)</b> | <b>1.20</b><br><b>(1.00 to</b><br><b>1.41)</b> | <b>2.91</b><br><b>(2.39 to</b><br><b>3.60)</b> | <b>3.23</b><br><b>(2.69 to</b><br><b>3.92)</b> | <b>2.79</b><br><b>(2.27 to</b><br><b>3.50)</b> |
| Alzheimer's disease and other dementias             | 8.54<br>(6.88 to<br>10.61)                        | 21.87<br>(16.97 to<br>29.02)                      | 24.33<br>(19.27 to<br>31.01)                      | 19.59<br>(14.55 to<br>26.97)                       | 0.72<br>(0.59 to<br>0.90)                      | 1.95<br>(1.45 to<br>2.59)                      | 2.31<br>(1.79 to<br>2.95)                      | 1.64<br>(1.16 to<br>2.27)                      |
| Parkinson's disease                                 | 0.69<br>(0.52 to<br>0.90)                         | 2.19<br>(1.65 to<br>2.86)                         | 2.74<br>(2.08 to<br>3.51)                         | 1.68<br>(1.25 to<br>2.19)                          | 0.05<br>(0.04 to<br>0.07)                      | 0.17<br>(0.12 to<br>0.23)                      | 0.22<br>(0.17 to<br>0.29)                      | 0.12<br>(0.09 to<br>0.17)                      |
| Epilepsy                                            | 21.32<br>(15.45 to<br>27.33)                      | 34.41<br>(22.46 to<br>50.70)                      | 28.86<br>(18.97 to<br>42.13)                      | 49.34<br>(31.54 to<br>72.21)                       | 0.36<br>(0.27 to<br>0.44)                      | 0.62<br>(0.42 to<br>0.89)                      | 0.52<br>(0.36 to<br>0.75)                      | 0.86<br>(0.57 to<br>1.25)                      |
| Multiple sclerosis                                  | 0.21<br>(0.11 to<br>0.32)                         | 0.59<br>(0.31 to<br>0.92)                         | 0.61<br>(0.32 to<br>0.97)                         | 0.55<br>(0.29 to<br>0.87)                          | 0.01<br>(0.00 to<br>0.01)                      | 0.02<br>(0.01 to<br>0.02)                      | 0.02<br>(0.01 to<br>0.03)                      | 0.01<br>(0.01 to<br>0.02)                      |
| Motor neuron disease                                | 0.41<br>(0.23 to<br>0.61)                         | 0.83<br>(0.57 to<br>1.20)                         | 0.89<br>(0.62 to<br>1.29)                         | 0.84<br>(0.57 to<br>1.25)                          | 0.01<br>(0.01 to<br>0.01)                      | 0.02<br>(0.02 to<br>0.03)                      | 0.02<br>(0.02 to<br>0.03)                      | 0.01<br>(0.01 to<br>0.03)                      |
| Other neurological disorders                        | 3.37<br>(1.83 to<br>5.55)                         | 8.07<br>(4.47 to<br>13.85)                        | 8.38<br>(4.73 to<br>14.37)                        | 8.71<br>(4.60 to<br>15.11)                         | 0.05<br>(0.03 to<br>0.08)                      | 0.13<br>(0.08 to<br>0.21)                      | 0.14<br>(0.09 to<br>0.22)                      | 0.14<br>(0.08 to<br>0.22)                      |
| <b>Mental disorders</b>                             | <b>7.66</b><br><b>(4.61 to</b><br><b>10.28)</b>   | <b>20.02</b><br><b>(10.93 to</b><br><b>30.18)</b> | <b>19.82</b><br><b>(10.92 to</b><br><b>30.11)</b> | <b>20.67</b><br><b>(11.21 to</b><br><b>31.12)</b>  | <b>0.18</b><br><b>(0.11 to</b><br><b>0.23)</b> | <b>0.46</b><br><b>(0.26 to</b><br><b>0.65)</b> | <b>0.46</b><br><b>(0.26 to</b><br><b>0.65)</b> | <b>0.46</b><br><b>(0.26 to</b><br><b>0.66)</b> |
| Alcohol use disorders                               | 3.06<br>(1.61 to<br>4.46)                         | 6.16<br>(2.94 to<br>9.66)                         | 5.90<br>(2.81 to<br>9.24)                         | 6.67<br>(3.18 to<br>10.39)                         | 0.08<br>(0.05 to<br>0.12)                      | 0.17<br>(0.09 to<br>0.25)                      | 0.16<br>(0.09 to<br>0.24)                      | 0.18<br>(0.09 to<br>0.26)                      |
| Drug use disorders                                  | 4.59<br>(2.56 to<br>6.50)                         | 13.81<br>(7.23 to<br>21.89)                       | 13.87<br>(7.30 to<br>21.96)                       | 13.95<br>(7.20 to<br>22.15)                        | 0.10<br>(0.05 to<br>0.13)                      | 0.29<br>(0.15 to<br>0.44)                      | 0.30<br>(0.16 to<br>0.45)                      | 0.29<br>(0.15 to<br>0.44)                      |
| Opioid use disorders                                | 4.22<br>(2.21 to<br>6.20)                         | 12.53<br>(6.28 to<br>20.60)                       | 12.55<br>(6.34 to<br>20.64)                       | 12.66<br>(6.28 to<br>20.95)                        | 0.08<br>(0.04 to<br>0.12)                      | 0.25<br>(0.12 to<br>0.40)                      | 0.25<br>(0.13 to<br>0.41)                      | 0.25<br>(0.12 to<br>0.40)                      |
| Cocaine use disorders                               | 0.09<br>(0.03 to<br>0.19)                         | 0.32<br>(0.11 to<br>0.70)                         | 0.31<br>(0.10 to<br>0.66)                         | 0.35<br>(0.12 to<br>0.77)                          | 0.00<br>(0.00 to<br>0.00)                      | 0.01<br>(0.00 to<br>0.02)                      | 0.01<br>(0.00 to<br>0.02)                      | 0.01<br>(0.00 to<br>0.02)                      |
| Amphetamine use disorders                           | 0.05<br>(0.02 to<br>0.10)                         | 0.22<br>(0.07 to<br>0.48)                         | 0.20<br>(0.07 to<br>0.44)                         | 0.25<br>(0.08 to<br>0.56)                          | 0.00<br>(0.00 to<br>0.00)                      | 0.01<br>(0.00 to<br>0.01)                      | 0.01<br>(0.00 to<br>0.01)                      | 0.01<br>(0.00 to<br>0.01)                      |
| Other drug use disorders                            | 0.23<br>(0.13 to<br>0.38)                         | 0.74<br>(0.41 to<br>1.36)                         | 0.81<br>(0.44 to<br>1.46)                         | 0.68<br>(0.38 to<br>1.27)                          | 0.01<br>(0.00 to<br>0.01)                      | 0.03<br>(0.01 to<br>0.04)                      | 0.03<br>(0.02 to<br>0.04)                      | 0.02<br>(0.01 to<br>0.03)                      |
| Eating disorders                                    | 0.02<br>(0.01 to<br>0.03)                         | 0.05<br>(0.03 to<br>0.10)                         | 0.05<br>(0.03 to<br>0.10)                         | 0.05<br>(0.03 to<br>0.10)                          | 0.00<br>(0.00 to<br>0.00)                      | 0.00<br>(0.00 to<br>0.00)                      | 0.00<br>(0.00 to<br>0.00)                      | 0.00<br>(0.00 to<br>0.00)                      |
| <b>Chad</b>                                         |                                                   |                                                   |                                                   |                                                    |                                                |                                                |                                                |                                                |
| Cause                                               | YLLs (in 1000s)                                   |                                                   |                                                   |                                                    | Deaths (in 1000s)                              |                                                |                                                |                                                |
|                                                     | 2016                                              | 2040 Forecast                                     | 2040 Better Scenario                              | 2040 Worse Scenario                                | 2016                                           | 2040 Forecast                                  | 2040 Better Scenario                           | 2040 Worse Scenario                            |
| Diabetes, urogenital, blood, and endocrine diseases | 198.93<br>(156.28 to<br>239.28)                   | 334.47<br>(256.34 to<br>434.81)                   | 286.09<br>(220.03 to<br>377.55)                   | 467.35<br>(359.88 to<br>607.49)                    | 4.30<br>(3.62 to<br>4.99)                      | 9.35<br>(7.57 to<br>11.55)                     | 8.15<br>(6.59 to<br>10.07)                     | 12.22<br>(9.91 to<br>15.14)                    |
| Diabetes mellitus                                   | 31.65<br>(26.48 to<br>38.70)                      | 87.87<br>(55.83 to<br>133.30)                     | 69.81<br>(45.22 to<br>104.82)                     | 122.43<br>(79.34 to<br>184.04)                     | 1.26<br>(1.04 to<br>1.57)                      | 3.77<br>(2.49 to<br>5.42)                      | 3.18<br>(2.17 to<br>4.62)                      | 4.95<br>(3.26 to<br>7.29)                      |
| Acute glomerulonephritis                            | 0.11<br>(0.10 to<br>0.13)                         | 0.24<br>(0.18 to<br>0.34)                         | 0.22<br>(0.16 to<br>0.31)                         | 0.32<br>(0.24 to<br>0.45)                          | 0.00<br>(0.00 to<br>0.00)                      | 0.00<br>(0.00 to<br>0.01)                      | 0.00<br>(0.00 to<br>0.00)                      | 0.00<br>(0.00 to<br>0.01)                      |
| Chronic kidney disease                              | 54.71<br>(43.46 to<br>66.26)                      | 96.32<br>(67.06 to<br>137.99)                     | 77.22<br>(54.25 to<br>109.06)                     | 142.98<br>(100.23 to<br>203.26)                    | 1.27<br>(1.01 to<br>1.53)                      | 2.71<br>(1.88 to<br>3.83)                      | 2.22<br>(1.58 to<br>3.07)                      | 3.74<br>(2.57 to<br>5.31)                      |

|                                                            |                               |                               |                               |                                |                           |                           |                           |                           |
|------------------------------------------------------------|-------------------------------|-------------------------------|-------------------------------|--------------------------------|---------------------------|---------------------------|---------------------------|---------------------------|
| Chronic kidney disease due to diabetes mellitus            | 8.77<br>(6.72 to<br>11.04)    | 20.22<br>(13.40 to<br>29.86)  | 16.11<br>(10.66 to<br>23.51)  | 27.89<br>(18.12 to<br>42.78)   | 0.30<br>(0.23 to<br>0.37) | 0.74<br>(0.48 to<br>1.12) | 0.61<br>(0.41 to<br>0.88) | 0.99<br>(0.63 to<br>1.53) |
| Chronic kidney disease due to hypertension                 | 4.69<br>(3.62 to<br>5.87)     | 10.64<br>(6.98 to<br>15.67)   | 8.55<br>(5.77 to<br>12.21)    | 14.47<br>(9.27 to<br>21.29)    | 0.21<br>(0.16 to<br>0.26) | 0.52<br>(0.34 to<br>0.77) | 0.44<br>(0.30 to<br>0.62) | 0.67<br>(0.43 to<br>1.00) |
| Chronic kidney disease due to glomerulonephritis           | 19.68<br>(14.84 to<br>24.98)  | 31.15<br>(20.99 to<br>45.58)  | 24.97<br>(16.61 to<br>37.09)  | 47.93<br>(32.13 to<br>70.15)   | 0.36<br>(0.28 to<br>0.44) | 0.66<br>(0.45 to<br>0.93) | 0.53<br>(0.37 to<br>0.75) | 0.96<br>(0.66 to<br>1.35) |
| Chronic kidney disease due to other and unspecified causes | 21.57<br>(16.26 to<br>27.24)  | 34.31<br>(23.42 to<br>51.71)  | 27.59<br>(18.63 to<br>40.98)  | 52.69<br>(35.64 to<br>78.14)   | 0.41<br>(0.32 to<br>0.51) | 0.79<br>(0.54 to<br>1.12) | 0.64<br>(0.45 to<br>0.91) | 1.13<br>(0.78 to<br>1.63) |
| Urinary diseases and male infertility                      | 20.99<br>(17.40 to<br>25.63)  | 38.24<br>(30.10 to<br>49.78)  | 36.94<br>(28.79 to<br>48.05)  | 46.83<br>(36.31 to<br>61.38)   | 0.46<br>(0.40 to<br>0.54) | 1.02<br>(0.87 to<br>1.20) | 1.04<br>(0.90 to<br>1.23) | 1.10<br>(0.93 to<br>1.32) |
| Urinary tract infections                                   | 11.92<br>(9.23 to<br>15.87)   | 26.95<br>(20.56 to<br>36.02)  | 26.85<br>(20.43 to<br>35.76)  | 31.94<br>(23.72 to<br>43.94)   | 0.25<br>(0.20 to<br>0.31) | 0.71<br>(0.59 to<br>0.88) | 0.76<br>(0.62 to<br>0.93) | 0.74<br>(0.60 to<br>0.93) |
| Urolithiasis                                               | 0.36<br>(0.25 to<br>0.48)     | 1.06<br>(0.65 to<br>1.73)     | 1.01<br>(0.63 to<br>1.65)     | 1.21<br>(0.75 to<br>1.97)      | 0.01<br>(0.00 to<br>0.01) | 0.02<br>(0.01 to<br>0.03) | 0.02<br>(0.01 to<br>0.03) | 0.02<br>(0.01 to<br>0.03) |
| Other urinary diseases                                     | 8.71<br>(6.67 to<br>11.07)    | 10.23<br>(7.15 to<br>13.98)   | 9.07<br>(6.30 to<br>12.52)    | 13.68<br>(9.51 to<br>18.98)    | 0.21<br>(0.17 to<br>0.25) | 0.28<br>(0.20 to<br>0.37) | 0.27<br>(0.19 to<br>0.36) | 0.34<br>(0.25 to<br>0.44) |
| Gynecological diseases                                     | 0.78<br>(0.50 to<br>1.05)     | 1.70<br>(0.98 to<br>2.62)     | 1.45<br>(0.82 to<br>2.02)     | 2.17<br>(1.25 to<br>3.37)      | 0.02<br>(0.01 to<br>0.02) | 0.04<br>(0.02 to<br>0.06) | 0.03<br>(0.02 to<br>0.05) | 0.05<br>(0.03 to<br>0.07) |
| Uterine fibroids                                           | 0.06<br>(0.02 to<br>0.15)     | 0.10<br>(0.03 to<br>0.28)     | 0.09<br>(0.03 to<br>0.23)     | 0.14<br>(0.04 to<br>0.36)      | 0.00<br>(0.00 to<br>0.00) | 0.00<br>(0.00 to<br>0.01) | 0.00<br>(0.00 to<br>0.01) | 0.00<br>(0.00 to<br>0.01) |
| Polycystic ovarian syndrome                                | 0.15<br>(0.02 to<br>0.31)     | 0.19<br>(0.07 to<br>0.47)     | 0.15<br>(0.01 to<br>0.36)     | 0.29<br>(0.05 to<br>0.70)      | 0.00<br>(0.00 to<br>0.01) | 0.00<br>(0.00 to<br>0.01) | 0.00<br>(0.00 to<br>0.01) | 0.01<br>(0.00 to<br>0.01) |
| Endometriosis                                              | 0.00<br>(0.00 to<br>0.00)     | 0.00<br>(0.00 to<br>0.01)     | 0.00<br>(0.00 to<br>0.01)     | 0.00<br>(0.00 to<br>0.01)      | 0.00<br>(0.00 to<br>0.00) | 0.00<br>(0.00 to<br>0.00) | 0.00<br>(0.00 to<br>0.00) | 0.00<br>(0.00 to<br>0.00) |
| Genital prolapse                                           | 0.04<br>(0.01 to<br>0.11)     | 0.08<br>(0.01 to<br>0.23)     | 0.06<br>(0.01 to<br>0.19)     | 0.10<br>(0.01 to<br>0.31)      | 0.00<br>(0.00 to<br>0.00) | 0.00<br>(0.00 to<br>0.00) | 0.00<br>(0.00 to<br>0.00) | 0.00<br>(0.00 to<br>0.01) |
| Other gynecological diseases                               | 0.53<br>(0.27 to<br>0.80)     | 1.32<br>(0.67 to<br>2.14)     | 1.15<br>(0.59 to<br>1.85)     | 1.64<br>(0.80 to<br>2.65)      | 0.01<br>(0.01 to<br>0.02) | 0.03<br>(0.02 to<br>0.05) | 0.03<br>(0.01 to<br>0.04) | 0.04<br>(0.02 to<br>0.06) |
| Hemoglobinopathies and hemolytic anemias                   | 80.81<br>(47.10 to<br>111.17) | 95.18<br>(55.61 to<br>142.09) | 86.46<br>(50.87 to<br>128.82) | 132.31<br>(75.37 to<br>197.69) | 1.11<br>(0.68 to<br>1.48) | 1.49<br>(0.91 to<br>2.17) | 1.36<br>(0.85 to<br>1.97) | 1.99<br>(1.20 to<br>2.91) |
| Thalassemias                                               | 1.81<br>(0.81 to<br>2.80)     | 1.61<br>(0.70 to<br>2.80)     | 1.82<br>(0.80 to<br>3.16)     | 1.89<br>(0.80 to<br>3.27)      | 0.02<br>(0.01 to<br>0.03) | 0.02<br>(0.01 to<br>0.05) | 0.02<br>(0.01 to<br>0.04) | 0.02<br>(0.01 to<br>0.04) |
| Sickle cell disorders                                      | 73.16<br>(41.38 to<br>101.96) | 83.51<br>(47.34 to<br>126.01) | 75.90<br>(43.76 to<br>114.68) | 117.06<br>(65.16 to<br>177.33) | 0.94<br>(0.55 to<br>1.28) | 1.17<br>(0.70 to<br>1.76) | 1.07<br>(0.63 to<br>1.59) | 1.60<br>(0.92 to<br>2.39) |
| G6PD deficiency                                            | 4.42<br>(2.92 to<br>6.05)     | 8.21<br>(5.22 to<br>12.59)    | 7.04<br>(4.45 to<br>10.66)    | 11.15<br>(7.00 to<br>16.51)    | 0.08<br>(0.06 to<br>0.12) | 0.19<br>(0.12 to<br>0.29) | 0.17<br>(0.11 to<br>0.25) | 0.25<br>(0.16 to<br>0.36) |
| Other hemoglobinopathies and hemolytic anemias             | 1.43<br>(0.98 to<br>2.01)     | 1.85<br>(1.23 to<br>2.84)     | 1.70<br>(1.11 to<br>2.69)     | 2.22<br>(1.48 to<br>3.37)      | 0.06<br>(0.04 to<br>0.10) | 0.10<br>(0.07 to<br>0.16) | 0.10<br>(0.07 to<br>0.16) | 0.12<br>(0.08 to<br>0.18) |
| Endocrine, metabolic, blood, and immune disorders          | 9.88<br>(6.61 to<br>14.23)    | 14.92<br>(10.26 to<br>22.04)  | 13.99<br>(9.69 to<br>20.51)   | 20.31<br>(13.10 to<br>30.40)   | 0.18<br>(0.13 to<br>0.24) | 0.33<br>(0.24 to<br>0.45) | 0.32<br>(0.24 to<br>0.45) | 0.39<br>(0.29 to<br>0.56) |

**Chad**

| Cause | YLLs (in 1000s) |               |                      |                     | Deaths (in 1000s) |               |                      |                     |
|-------|-----------------|---------------|----------------------|---------------------|-------------------|---------------|----------------------|---------------------|
|       | 2016            | 2040 Forecast | 2040 Better Scenario | 2040 Worse Scenario | 2016              | 2040 Forecast | 2040 Better Scenario | 2040 Worse Scenario |





|                                      |                                                      |                                                      |                                                      |                                                      |                                                |                                                |                                                |                                                 |
|--------------------------------------|------------------------------------------------------|------------------------------------------------------|------------------------------------------------------|------------------------------------------------------|------------------------------------------------|------------------------------------------------|------------------------------------------------|-------------------------------------------------|
| Road injuries                        | 111.90<br>(91.12 to<br>138.07)                       | 256.20<br>(191.31 to<br>348.92)                      | 239.92<br>(179.14 to<br>326.41)                      | 304.46<br>(224.54 to<br>417.97)                      | 1.93<br>(1.61 to<br>2.29)                      | 4.57<br>(3.51 to<br>6.09)                      | 4.34<br>(3.37 to<br>5.74)                      | 5.20<br>(3.92 to<br>6.91)                       |
| Pedestrian road injuries             | 39.86<br>(29.13 to<br>54.57)                         | 66.18<br>(44.22 to<br>97.75)                         | 61.70<br>(41.21 to<br>91.24)                         | 79.33<br>(52.89 to<br>117.30)                        | 0.69<br>(0.52 to<br>0.89)                      | 1.25<br>(0.87 to<br>1.80)                      | 1.19<br>(0.84 to<br>1.69)                      | 1.44<br>(1.00 to<br>2.07)                       |
| <b>Chad</b>                          |                                                      |                                                      |                                                      |                                                      |                                                |                                                |                                                |                                                 |
| Cause                                | YLLs (in 1000s)                                      |                                                      |                                                      |                                                      | Deaths (in 1000s)                              |                                                |                                                |                                                 |
|                                      | 2016                                                 | 2040 Forecast                                        | 2040 Better Scenario                                 | 2040 Worse Scenario                                  | 2016                                           | 2040 Forecast                                  | 2040 Better Scenario                           | 2040 Worse Scenario                             |
| Cyclist road injuries                | 2.78<br>(1.81 to<br>3.94)                            | 7.44<br>(4.51 to<br>11.43)                           | 7.01<br>(4.29 to<br>10.77)                           | 8.78<br>(5.27 to<br>13.59)                           | 0.05<br>(0.03 to<br>0.07)                      | 0.13<br>(0.09 to<br>0.21)                      | 0.13<br>(0.08 to<br>0.20)                      | 0.15<br>(0.10 to<br>0.23)                       |
| Motorcyclist road injuries           | 15.56<br>(11.41 to<br>20.66)                         | 41.43<br>(27.73 to<br>61.19)                         | 39.14<br>(26.34 to<br>57.26)                         | 49.36<br>(32.79 to<br>73.89)                         | 0.25<br>(0.19 to<br>0.33)                      | 0.68<br>(0.46 to<br>0.98)                      | 0.65<br>(0.44 to<br>0.93)                      | 0.78<br>(0.53 to<br>1.13)                       |
| Motor vehicle road injuries          | 51.64<br>(40.65 to<br>66.23)                         | 135.82<br>(97.74 to<br>191.22)                       | 127.06<br>(91.32 to<br>177.77)                       | 160.64<br>(114.96 to<br>224.13)                      | 0.90<br>(0.72 to<br>1.13)                      | 2.41<br>(1.77 to<br>3.30)                      | 2.29<br>(1.70 to<br>3.13)                      | 2.72<br>(1.98 to<br>3.77)                       |
| Other road injuries                  | 2.06<br>(1.21 to<br>3.17)                            | 5.33<br>(2.93 to<br>8.66)                            | 5.02<br>(2.80 to<br>8.06)                            | 6.35<br>(3.48 to<br>10.37)                           | 0.04<br>(0.02 to<br>0.06)                      | 0.10<br>(0.06 to<br>0.15)                      | 0.09<br>(0.05 to<br>0.15)                      | 0.11<br>(0.06 to<br>0.17)                       |
| Other transport injuries             | 5.52<br>(3.32 to<br>9.28)                            | 12.25<br>(7.13 to<br>20.49)                          | 11.01<br>(6.32 to<br>18.51)                          | 15.97<br>(9.23 to<br>26.82)                          | 0.09<br>(0.05 to<br>0.14)                      | 0.21<br>(0.12 to<br>0.35)                      | 0.19<br>(0.11 to<br>0.32)                      | 0.27<br>(0.16 to<br>0.44)                       |
| <b>Unintentional injuries</b>        | <b>315.90</b><br><b>(255.54 to</b><br><b>385.71)</b> | <b>347.59</b><br><b>(255.84 to</b><br><b>465.68)</b> | <b>314.93</b><br><b>(231.68 to</b><br><b>423.76)</b> | <b>487.67</b><br><b>(352.33 to</b><br><b>669.13)</b> | <b>5.09</b><br><b>(4.32 to</b><br><b>5.97)</b> | <b>6.52</b><br><b>(5.22 to</b><br><b>8.20)</b> | <b>6.14</b><br><b>(4.88 to</b><br><b>7.68)</b> | <b>8.35</b><br><b>(6.56 to</b><br><b>10.73)</b> |
| Falls                                | 34.03<br>(26.17 to<br>46.76)                         | 51.37<br>(38.62 to<br>67.97)                         | 49.96<br>(37.63 to<br>65.63)                         | 62.74<br>(45.91 to<br>86.60)                         | 0.79<br>(0.65 to<br>0.98)                      | 1.51<br>(1.25 to<br>1.84)                      | 1.58<br>(1.31 to<br>1.91)                      | 1.61<br>(1.30 to<br>1.97)                       |
| Drowning                             | 62.21<br>(47.94 to<br>81.74)                         | 61.24<br>(41.83 to<br>87.16)                         | 55.43<br>(38.13 to<br>79.27)                         | 84.79<br>(57.53 to<br>122.80)                        | 0.90<br>(0.72 to<br>1.13)                      | 0.98<br>(0.71 to<br>1.35)                      | 0.90<br>(0.65 to<br>1.24)                      | 1.30<br>(0.93 to<br>1.81)                       |
| Fire, heat, and hot substances       | 34.87<br>(23.73 to<br>47.52)                         | 29.98<br>(19.36 to<br>43.75)                         | 26.33<br>(17.03 to<br>38.56)                         | 44.31<br>(28.30 to<br>65.44)                         | 0.56<br>(0.41 to<br>0.72)                      | 0.56<br>(0.39 to<br>0.77)                      | 0.51<br>(0.35 to<br>0.69)                      | 0.76<br>(0.53 to<br>1.05)                       |
| Poisonings                           | 22.08<br>(10.26 to<br>48.63)                         | 15.99<br>(7.43 to<br>35.96)                          | 13.20<br>(6.11 to<br>29.33)                          | 26.53<br>(11.76 to<br>63.27)                         | 0.33<br>(0.17 to<br>0.66)                      | 0.26<br>(0.13 to<br>0.51)                      | 0.21<br>(0.11 to<br>0.41)                      | 0.40<br>(0.20 to<br>0.84)                       |
| Exposure to mechanical forces        | 52.86<br>(40.63 to<br>70.30)                         | 51.80<br>(35.29 to<br>76.21)                         | 45.39<br>(30.67 to<br>66.56)                         | 76.16<br>(51.05 to<br>113.41)                        | 0.78<br>(0.61 to<br>1.00)                      | 0.85<br>(0.59 to<br>1.20)                      | 0.75<br>(0.52 to<br>1.07)                      | 1.17<br>(0.82 to<br>1.68)                       |
| Unintentional firearm injuries       | 16.44<br>(9.90 to<br>23.83)                          | 14.32<br>(7.41 to<br>23.51)                          | 12.28<br>(6.37 to<br>20.37)                          | 20.56<br>(10.81 to<br>33.96)                         | 0.26<br>(0.16 to<br>0.37)                      | 0.25<br>(0.13 to<br>0.40)                      | 0.22<br>(0.12 to<br>0.35)                      | 0.34<br>(0.18 to<br>0.54)                       |
| Unintentional suffocation            | 12.51<br>(6.45 to<br>22.14)                          | 11.97<br>(6.12 to<br>22.53)                          | 10.50<br>(5.40 to<br>19.88)                          | 19.23<br>(9.53 to<br>36.12)                          | 0.15<br>(0.08 to<br>0.27)                      | 0.15<br>(0.08 to<br>0.28)                      | 0.13<br>(0.07 to<br>0.25)                      | 0.24<br>(0.12 to<br>0.44)                       |
| Other exposure to mechanical forces  | 23.91<br>(17.61 to<br>31.71)                         | 25.51<br>(17.40 to<br>37.21)                         | 22.60<br>(15.14 to<br>32.91)                         | 36.58<br>(24.69 to<br>53.05)                         | 0.37<br>(0.28 to<br>0.48)                      | 0.45<br>(0.31 to<br>0.65)                      | 0.40<br>(0.28 to<br>0.59)                      | 0.59<br>(0.42 to<br>0.86)                       |
| Adverse effects of medical treatment | 32.77<br>(19.98 to<br>46.97)                         | 41.08<br>(24.59 to<br>62.55)                         | 37.31<br>(22.35 to<br>56.61)                         | 57.64<br>(33.57 to<br>88.27)                         | 0.50<br>(0.34 to<br>0.67)                      | 0.70<br>(0.47 to<br>0.99)                      | 0.65<br>(0.43 to<br>0.91)                      | 0.92<br>(0.60 to<br>1.32)                       |
| Animal contact                       | 22.60<br>(12.51 to<br>33.42)                         | 31.44<br>(16.40 to<br>48.51)                         | 26.77<br>(13.91 to<br>42.27)                         | 47.54<br>(24.76 to<br>75.65)                         | 0.40<br>(0.23 to<br>0.56)                      | 0.60<br>(0.33 to<br>0.88)                      | 0.52<br>(0.29 to<br>0.77)                      | 0.83<br>(0.46 to<br>1.25)                       |
| Venomous animal contact              | 17.67<br>(9.23 to<br>26.21)                          | 24.15<br>(11.65 to<br>38.40)                         | 20.53<br>(9.83 to<br>32.70)                          | 36.27<br>(17.35 to<br>58.38)                         | 0.32<br>(0.18 to<br>0.47)                      | 0.48<br>(0.25 to<br>0.72)                      | 0.42<br>(0.21 to<br>0.63)                      | 0.66<br>(0.34 to<br>1.01)                       |
| Non-venomous animal contact          | 4.94<br>(1.62 to<br>9.96)                            | 7.28<br>(2.48 to<br>14.32)                           | 6.24<br>(2.13 to<br>12.37)                           | 11.27<br>(3.66 to<br>22.71)                          | 0.07<br>(0.03 to<br>0.14)                      | 0.12<br>(0.05 to<br>0.21)                      | 0.10<br>(0.04 to<br>0.19)                      | 0.17<br>(0.06 to<br>0.33)                       |

|                                                                                     |                                             |                                            |                                           |                                              |                                     |                                     |                                     |                                     |
|-------------------------------------------------------------------------------------|---------------------------------------------|--------------------------------------------|-------------------------------------------|----------------------------------------------|-------------------------------------|-------------------------------------|-------------------------------------|-------------------------------------|
| Foreign body                                                                        | 22.08<br>(13.66 to 37.32)                   | 34.84<br>(20.91 to 58.17)                  | 34.76<br>(21.08 to 57.25)                 | 44.75<br>(25.75 to 76.83)                    | 0.32<br>(0.21 to 0.49)              | 0.54<br>(0.37 to 0.81)              | 0.56<br>(0.38 to 0.81)              | 0.65<br>(0.42 to 1.02)              |
| Pulmonary aspiration and foreign body in airway                                     | 19.86<br>(11.97 to 34.92)                   | 31.49<br>(18.54 to 53.62)                  | 31.66<br>(18.85 to 53.41)                 | 40.26<br>(22.72 to 71.42)                    | 0.28<br>(0.19 to 0.45)              | 0.49<br>(0.33 to 0.75)              | 0.50<br>(0.35 to 0.76)              | 0.58<br>(0.37 to 0.94)              |
| Foreign body in other body part                                                     | 2.23<br>(0.63 to 4.67)                      | 3.35<br>(0.90 to 8.02)                     | 3.10<br>(0.82 to 7.47)                    | 4.49<br>(1.24 to 10.29)                      | 0.03<br>(0.01 to 0.07)              | 0.05<br>(0.02 to 0.14)              | 0.05<br>(0.01 to 0.13)              | 0.07<br>(0.02 to 0.16)              |
| Environmental heat and cold exposure                                                | 12.43<br>(6.00 to 17.08)                    | 12.33<br>(5.51 to 19.34)                   | 10.03<br>(4.61 to 15.52)                  | 19.21<br>(8.76 to 30.33)                     | 0.21<br>(0.10 to 0.27)              | 0.22<br>(0.10 to 0.35)              | 0.18<br>(0.09 to 0.27)              | 0.33<br>(0.16 to 0.49)              |
| Other unintentional injuries                                                        | 19.98<br>(14.58 to 26.85)                   | 17.51<br>(12.18 to 25.66)                  | 15.77<br>(11.01 to 23.03)                 | 24.01<br>(16.54 to 35.13)                    | 0.30<br>(0.23 to 0.39)              | 0.29<br>(0.21 to 0.41)              | 0.27<br>(0.19 to 0.38)              | 0.38<br>(0.27 to 0.54)              |
| <b>Self-harm and interpersonal violence</b>                                         | <b>52.24</b><br>(41.21 to 65.73)            | <b>101.88</b><br>(70.22 to 151.27)         | <b>97.50</b><br>(68.18 to 142.07)         | <b>112.97</b><br>(77.54 to 168.85)           | <b>1.06</b><br>(0.83 to 1.36)       | <b>2.17</b><br>(1.51 to 3.16)       | <b>2.10</b><br>(1.47 to 3.00)       | <b>2.35</b><br>(1.63 to 3.42)       |
| <b>Chad</b>                                                                         |                                             |                                            |                                           |                                              |                                     |                                     |                                     |                                     |
| Cause                                                                               | YLLs (in 1000s)                             |                                            |                                           |                                              | Deaths (in 1000s)                   |                                     |                                     |                                     |
|                                                                                     | 2016                                        | 2040 Forecast                              | 2040 Better Scenario                      | 2040 Worse Scenario                          | 2016                                | 2040 Forecast                       | 2040 Better Scenario                | 2040 Worse Scenario                 |
| Self-harm                                                                           | 26.45<br>(18.61 to 38.37)                   | 59.88<br>(37.14 to 97.19)                  | 55.86<br>(35.03 to 88.41)                 | 67.15<br>(40.74 to 109.13)                   | 0.64<br>(0.45 to 0.93)              | 1.46<br>(0.92 to 2.24)              | 1.39<br>(0.89 to 2.13)              | 1.59<br>(0.98 to 2.47)              |
| Self-harm by firearm                                                                | 4.08<br>(1.75 to 7.46)                      | 6.98<br>(2.77 to 13.52)                    | 6.39<br>(2.56 to 12.43)                   | 8.06<br>(3.21 to 15.83)                      | 0.10<br>(0.04 to 0.17)              | 0.17<br>(0.07 to 0.32)              | 0.16<br>(0.07 to 0.30)              | 0.19<br>(0.08 to 0.37)              |
| Self-harm by other specified means                                                  | 22.37<br>(15.40 to 33.69)                   | 52.90<br>(32.93 to 85.75)                  | 49.47<br>(30.89 to 79.17)                 | 59.09<br>(36.50 to 96.05)                    | 0.54<br>(0.37 to 0.81)              | 1.28<br>(0.81 to 2.00)              | 1.23<br>(0.80 to 1.89)              | 1.40<br>(0.87 to 2.18)              |
| Interpersonal violence                                                              | 25.79<br>(19.73 to 32.96)                   | 42.00<br>(28.88 to 61.29)                  | 41.65<br>(28.68 to 60.73)                 | 45.82<br>(31.67 to 65.99)                    | 0.42<br>(0.33 to 0.53)              | 0.71<br>(0.50 to 1.03)              | 0.71<br>(0.49 to 1.02)              | 0.76<br>(0.53 to 1.09)              |
| Physical violence by firearm                                                        | 12.41<br>(8.21 to 17.45)                    | 20.72<br>(12.40 to 33.48)                  | 20.56<br>(12.31 to 33.12)                 | 21.80<br>(13.08 to 35.20)                    | 0.21<br>(0.14 to 0.29)              | 0.36<br>(0.22 to 0.56)              | 0.35<br>(0.22 to 0.56)              | 0.37<br>(0.23 to 0.58)              |
| Physical violence by sharp object                                                   | 6.85<br>(4.08 to 10.00)                     | 12.60<br>(6.82 to 19.99)                   | 12.82<br>(6.90 to 20.45)                  | 13.00<br>(7.05 to 20.47)                     | 0.12<br>(0.07 to 0.17)              | 0.22<br>(0.12 to 0.35)              | 0.23<br>(0.12 to 0.36)              | 0.22<br>(0.12 to 0.35)              |
| Physical violence by other means                                                    | 6.53<br>(4.62 to 9.88)                      | 8.68<br>(5.54 to 13.41)                    | 8.26<br>(5.34 to 12.74)                   | 11.02<br>(7.11 to 16.66)                     | 0.10<br>(0.07 to 0.15)              | 0.14<br>(0.09 to 0.22)              | 0.13<br>(0.09 to 0.21)              | 0.17<br>(0.11 to 0.26)              |
| <b>Forces of nature, conflict and terrorism, and executions and police conflict</b> | <b>1.61</b><br>(0.37 to 2.97)               | <b>8.42</b><br>(0.00 to 28.03)             | <b>8.50</b><br>(0.00 to 28.26)            | <b>9.26</b><br>(0.00 to 30.84)               | <b>0.03</b><br>(0.01 to 0.05)       | <b>0.13</b><br>(0.00 to 0.45)       | <b>0.14</b><br>(0.00 to 0.45)       | <b>0.14</b><br>(0.00 to 0.48)       |
| Exposure to forces of nature                                                        | 0.00<br>(0.00 to 0.00)                      | 0.63<br>(0.00 to 8.98)                     | 0.63<br>(0.00 to 9.08)                    | 0.70<br>(0.00 to 10.04)                      | 0.00<br>(0.00 to 0.00)              | 0.01<br>(0.00 to 0.15)              | 0.01<br>(0.00 to 0.15)              | 0.01<br>(0.00 to 0.16)              |
| Conflict and terrorism                                                              | 1.47<br>(0.23 to 2.82)                      | 7.78<br>(0.00 to 28.03)                    | 7.85<br>(0.00 to 28.26)                   | 8.54<br>(0.00 to 30.84)                      | 0.02<br>(0.00 to 0.04)              | 0.12<br>(0.00 to 0.45)              | 0.13<br>(0.00 to 0.45)              | 0.13<br>(0.00 to 0.48)              |
| Executions and police conflict                                                      | 0.13<br>(0.11 to 0.22)                      | 0.02<br>(0.00 to 0.25)                     | 0.02<br>(0.00 to 0.25)                    | 0.02<br>(0.00 to 0.26)                       | 0.00<br>(0.00 to 0.00)              | 0.00<br>(0.00 to 0.00)              | 0.00<br>(0.00 to 0.00)              | 0.00<br>(0.00 to 0.00)              |
| <b>Cote d'Ivoire</b>                                                                |                                             |                                            |                                           |                                              |                                     |                                     |                                     |                                     |
| Cause                                                                               | YLLs (in 1000s)                             |                                            |                                           |                                              | Deaths (in 1000s)                   |                                     |                                     |                                     |
|                                                                                     | 2016                                        | 2040 Forecast                              | 2040 Better Scenario                      | 2040 Worse Scenario                          | 2016                                | 2040 Forecast                       | 2040 Better Scenario                | 2040 Worse Scenario                 |
| <b>All causes</b>                                                                   | <b>10,968.96</b><br>(9,445.35 to 12,695.50) | <b>8,966.92</b><br>(7,252.42 to 11,125.23) | <b>6,351.15</b><br>(5,215.88 to 7,834.99) | <b>14,779.01</b><br>(11,798.66 to 18,433.29) | <b>208.06</b><br>(187.02 to 231.96) | <b>237.82</b><br>(206.19 to 275.38) | <b>184.46</b><br>(162.48 to 212.07) | <b>349.00</b><br>(297.20 to 407.46) |



|                                                | 25.89<br>(8.07 to<br>65.07)                                | 5.44<br>(0.39 to<br>35.83)                           | 1.70<br>(0.22 to<br>7.78)                            | 22.94<br>(1.54 to<br>91.81)                            | 0.31<br>(0.10 to<br>0.78)                         | 0.07<br>(0.01 to<br>0.42)                        | 0.02<br>(0.00 to<br>0.09)                        | 0.27<br>(0.02 to<br>1.09)                         |
|------------------------------------------------|------------------------------------------------------------|------------------------------------------------------|------------------------------------------------------|--------------------------------------------------------|---------------------------------------------------|--------------------------------------------------|--------------------------------------------------|---------------------------------------------------|
| Measles                                        |                                                            |                                                      |                                                      |                                                        |                                                   |                                                  |                                                  |                                                   |
| <b>Cote d'Ivoire</b>                           |                                                            |                                                      |                                                      |                                                        |                                                   |                                                  |                                                  |                                                   |
| Cause                                          | YLLs (in 1000s)                                            |                                                      |                                                      |                                                        | Deaths (in 1000s)                                 |                                                  |                                                  |                                                   |
|                                                | 2016                                                       | 2040 Forecast                                        | 2040 Better Scenario                                 | 2040 Worse Scenario                                    | 2016                                              | 2040 Forecast                                    | 2040 Better Scenario                             | 2040 Worse Scenario                               |
| Varicella and herpes zoster                    | 6.69<br>(3.75 to<br>11.12)                                 | 3.59<br>(1.97 to<br>6.10)                            | 2.19<br>(1.24 to<br>3.61)                            | 6.08<br>(3.20 to<br>11.03)                             | 0.10<br>(0.07 to<br>0.16)                         | 0.08<br>(0.05 to<br>0.12)                        | 0.06<br>(0.04 to<br>0.09)                        | 0.11<br>(0.07 to<br>0.18)                         |
| <b>Neglected tropical diseases and malaria</b> | <b>1,648.73</b><br><b>(1,194.04 to</b><br><b>2,193.09)</b> | <b>690.04</b><br><b>(487.87 to</b><br><b>964.80)</b> | <b>545.71</b><br><b>(391.52 to</b><br><b>743.79)</b> | <b>906.09</b><br><b>(627.19 to</b><br><b>1,285.78)</b> | <b>22.75</b><br><b>(16.92 to</b><br><b>29.49)</b> | <b>12.11</b><br><b>(9.00 to</b><br><b>16.20)</b> | <b>10.41</b><br><b>(7.83 to</b><br><b>13.59)</b> | <b>14.58</b><br><b>(10.77 to</b><br><b>19.71)</b> |
| Malaria                                        | 1,540.04<br>(1,086.50 to<br>2,087.89)                      | 607.03<br>(414.61 to<br>866.31)                      | 486.87<br>(343.45 to<br>677.44)                      | 782.99<br>(517.51 to<br>1,147.84)                      | 21.05<br>(15.42 to<br>27.62)                      | 10.66<br>(7.74 to<br>14.38)                      | 9.31<br>(6.87 to<br>12.40)                       | 12.58<br>(8.88 to<br>17.27)                       |
| Chagas disease                                 | 0.00<br>(0.00 to<br>0.00)                                  | 0.00<br>(0.00 to<br>0.00)                            | 0.00<br>(0.00 to<br>0.00)                            | 0.00<br>(0.00 to<br>0.00)                              | 0.00<br>(0.00 to<br>0.00)                         | 0.00<br>(0.00 to<br>0.00)                        | 0.00<br>(0.00 to<br>0.00)                        | 0.00<br>(0.00 to<br>0.00)                         |
| Leishmaniasis                                  | 0.00<br>(0.00 to<br>0.00)                                  | 0.00<br>(0.00 to<br>0.00)                            | 0.00<br>(0.00 to<br>0.00)                            | 0.00<br>(0.00 to<br>0.00)                              | 0.00<br>(0.00 to<br>0.00)                         | 0.00<br>(0.00 to<br>0.00)                        | 0.00<br>(0.00 to<br>0.00)                        | 0.00<br>(0.00 to<br>0.00)                         |
| African trypanosomiasis                        | 0.70<br>(0.26 to<br>1.43)                                  | 0.07<br>(0.02 to<br>0.15)                            | 0.07<br>(0.02 to<br>0.15)                            | 0.07<br>(0.03 to<br>0.16)                              | 0.01<br>(0.00 to<br>0.03)                         | 0.00<br>(0.00 to<br>0.00)                        | 0.00<br>(0.00 to<br>0.00)                        | 0.00<br>(0.00 to<br>0.00)                         |
| Schistosomiasis                                | 12.50<br>(9.00 to<br>16.60)                                | 9.45<br>(6.42 to<br>13.10)                           | 7.92<br>(5.44 to<br>11.04)                           | 11.13<br>(7.64 to<br>15.36)                            | 0.33<br>(0.23 to<br>0.44)                         | 0.28<br>(0.20 to<br>0.38)                        | 0.24<br>(0.17 to<br>0.33)                        | 0.31<br>(0.22 to<br>0.42)                         |
| Cysticercosis                                  | 0.74<br>(0.49 to<br>1.06)                                  | 0.36<br>(0.23 to<br>0.56)                            | 0.33<br>(0.21 to<br>0.50)                            | 0.41<br>(0.26 to<br>0.61)                              | 0.01<br>(0.01 to<br>0.02)                         | 0.01<br>(0.01 to<br>0.01)                        | 0.01<br>(0.00 to<br>0.01)                        | 0.01<br>(0.01 to<br>0.01)                         |
| Cystic echinococcosis                          | 0.70<br>(0.51 to<br>0.94)                                  | 0.29<br>(0.20 to<br>0.41)                            | 0.17<br>(0.12 to<br>0.24)                            | 0.52<br>(0.35 to<br>0.73)                              | 0.01<br>(0.01 to<br>0.02)                         | 0.01<br>(0.00 to<br>0.01)                        | 0.01<br>(0.01 to<br>0.01)                        | 0.01<br>(0.01 to<br>0.02)                         |
| Dengue                                         | 1.17<br>(0.07 to<br>4.91)                                  | 4.27<br>(0.31 to<br>16.98)                           | 3.51<br>(0.26 to<br>13.21)                           | 5.41<br>(0.37 to<br>22.22)                             | 0.02<br>(0.00 to<br>0.07)                         | 0.08<br>(0.01 to<br>0.30)                        | 0.07<br>(0.01 to<br>0.26)                        | 0.09<br>(0.01 to<br>0.35)                         |
| Yellow fever                                   | 3.56<br>(0.69 to<br>10.98)                                 | 1.44<br>(0.27 to<br>4.49)                            | 0.98<br>(0.18 to<br>3.06)                            | 2.12<br>(0.40 to<br>6.68)                              | 0.06<br>(0.01 to<br>0.17)                         | 0.02<br>(0.00 to<br>0.07)                        | 0.02<br>(0.00 to<br>0.05)                        | 0.03<br>(0.01 to<br>0.11)                         |
| Rabies                                         | 10.24<br>(2.95 to<br>23.16)                                | 4.47<br>(1.21 to<br>10.54)                           | 2.14<br>(0.55 to<br>5.16)                            | 9.51<br>(2.52 to<br>23.11)                             | 0.17<br>(0.05 to<br>0.36)                         | 0.08<br>(0.02 to<br>0.19)                        | 0.04<br>(0.01 to<br>0.09)                        | 0.16<br>(0.04 to<br>0.40)                         |
| Intestinal nematode infections                 | 9.33<br>(5.77 to<br>14.67)                                 | 12.13<br>(7.07 to<br>19.25)                          | 9.71<br>(5.66 to<br>15.46)                           | 15.51<br>(9.26 to<br>24.65)                            | 0.12<br>(0.07 to<br>0.18)                         | 0.16<br>(0.10 to<br>0.24)                        | 0.13<br>(0.08 to<br>0.20)                        | 0.20<br>(0.12 to<br>0.30)                         |
| Other neglected tropical diseases              | 69.74<br>(37.44 to<br>114.95)                              | 50.54<br>(28.79 to<br>79.22)                         | 34.02<br>(19.44 to<br>53.51)                         | 78.42<br>(43.97 to<br>122.09)                          | 0.97<br>(0.55 to<br>1.53)                         | 0.81<br>(0.50 to<br>1.18)                        | 0.59<br>(0.37 to<br>0.84)                        | 1.18<br>(0.72 to<br>1.73)                         |
| <b>Maternal disorders</b>                      | <b>200.89</b><br><b>(161.74 to</b><br><b>249.32)</b>       | <b>150.43</b><br><b>(96.46 to</b><br><b>242.87)</b>  | <b>91.29</b><br><b>(58.82 to</b><br><b>145.47)</b>   | <b>248.50</b><br><b>(160.47 to</b><br><b>383.53)</b>   | <b>3.70</b><br><b>(3.00 to</b><br><b>4.63)</b>    | <b>2.87</b><br><b>(1.84 to</b><br><b>4.66)</b>   | <b>1.75</b><br><b>(1.10 to</b><br><b>2.81)</b>   | <b>4.72</b><br><b>(3.01 to</b><br><b>7.31)</b>    |
| Maternal hemorrhage                            | 72.44<br>(53.36 to<br>97.34)                               | 47.73<br>(28.01 to<br>81.22)                         | 29.98<br>(16.86 to<br>50.33)                         | 75.87<br>(44.73 to<br>124.53)                          | 1.35<br>(1.00 to<br>1.81)                         | 0.92<br>(0.53 to<br>1.57)                        | 0.58<br>(0.32 to<br>0.97)                        | 1.45<br>(0.84 to<br>2.40)                         |
| Maternal sepsis and other maternal infections  | 10.67<br>(5.02 to<br>18.79)                                | 6.48<br>(2.60 to<br>13.27)                           | 4.03<br>(1.67 to<br>8.34)                            | 10.47<br>(4.25 to<br>20.44)                            | 0.20<br>(0.09 to<br>0.34)                         | 0.12<br>(0.05 to<br>0.25)                        | 0.08<br>(0.03 to<br>0.16)                        | 0.20<br>(0.08 to<br>0.39)                         |
| Maternal hypertensive disorders                | 40.30<br>(28.28 to<br>55.30)                               | 26.92<br>(15.81 to<br>45.23)                         | 16.75<br>(9.69 to<br>27.85)                          | 43.24<br>(25.39 to<br>69.24)                           | 0.72<br>(0.51 to<br>1.00)                         | 0.50<br>(0.29 to<br>0.84)                        | 0.31<br>(0.18 to<br>0.52)                        | 0.80<br>(0.47 to<br>1.30)                         |
| Maternal obstructed labor and uterine rupture  | 8.78<br>(4.80 to<br>14.57)                                 | 6.13<br>(2.87 to<br>11.86)                           | 3.71<br>(1.68 to<br>7.17)                            | 10.08<br>(4.71 to<br>19.09)                            | 0.16<br>(0.09 to<br>0.27)                         | 0.12<br>(0.05 to<br>0.22)                        | 0.07<br>(0.03 to<br>0.14)                        | 0.19<br>(0.09 to<br>0.35)                         |

|                                                                         |                                              |                                          |                                        |                                            |                                     |                                    |                                   |                                     |
|-------------------------------------------------------------------------|----------------------------------------------|------------------------------------------|----------------------------------------|--------------------------------------------|-------------------------------------|------------------------------------|-----------------------------------|-------------------------------------|
| Maternal abortion, miscarriage, and ectopic pregnancy                   | 4.38<br>(1.79 to<br>8.54)                    | 3.54<br>(1.26 to<br>8.00)                | 2.20<br>(0.76 to<br>4.92)              | 5.74<br>(2.05 to<br>12.66)                 | 0.08<br>(0.04 to<br>0.16)           | 0.07<br>(0.03 to<br>0.15)          | 0.04<br>(0.02 to<br>0.09)         | 0.11<br>(0.04 to<br>0.25)           |
| Indirect maternal deaths                                                | 39.12<br>(27.07 to<br>54.99)                 | 27.44<br>(16.10 to<br>47.24)             | 16.89<br>(9.44 to<br>28.65)            | 45.84<br>(26.97 to<br>77.66)               | 0.71<br>(0.49 to<br>1.00)           | 0.51<br>(0.30 to<br>0.89)          | 0.32<br>(0.18 to<br>0.53)         | 0.85<br>(0.49 to<br>1.43)           |
| Late maternal deaths                                                    | 2.42<br>(1.09 to<br>4.51)                    | 1.35<br>(0.54 to<br>2.67)                | 0.83<br>(0.33 to<br>1.70)              | 2.23<br>(0.91 to<br>4.32)                  | 0.04<br>(0.02 to<br>0.08)           | 0.03<br>(0.01 to<br>0.05)          | 0.02<br>(0.01 to<br>0.03)         | 0.04<br>(0.02 to<br>0.08)           |
| Maternal deaths aggravated by HIV/AIDS                                  | 4.13<br>(2.44 to<br>6.03)                    | 17.93<br>(6.28 to<br>34.20)              | 8.70<br>(1.15 to<br>19.96)             | 34.26<br>(17.47 to<br>59.93)               | 0.08<br>(0.05 to<br>0.12)           | 0.36<br>(0.12 to<br>0.69)          | 0.18<br>(0.02 to<br>0.39)         | 0.69<br>(0.36 to<br>1.21)           |
| Other maternal disorders                                                | 18.66<br>(11.85 to<br>27.37)                 | 12.91<br>(6.93 to<br>22.35)              | 8.20<br>(4.46 to<br>14.22)             | 20.79<br>(11.53 to<br>35.20)               | 0.35<br>(0.22 to<br>0.51)           | 0.25<br>(0.13 to<br>0.44)          | 0.16<br>(0.08 to<br>0.28)         | 0.40<br>(0.22 to<br>0.68)           |
| <b>Cote d'Ivoire</b>                                                    |                                              |                                          |                                        |                                            |                                     |                                    |                                   |                                     |
| Cause                                                                   | YLLs (in 1000s)                              |                                          |                                        |                                            | Deaths (in 1000s)                   |                                    |                                   |                                     |
|                                                                         | 2016                                         | 2040 Forecast                            | 2040 Better Scenario                   | 2040 Worse Scenario                        | 2016                                | 2040 Forecast                      | 2040 Better Scenario              | 2040 Worse Scenario                 |
| <b>Neonatal disorders</b>                                               | <b>1,693.83</b><br>(1,227.19 to<br>2,239.29) | <b>964.94</b><br>(529.62 to<br>1,651.84) | <b>557.03</b><br>(308.43 to<br>974.03) | <b>1,776.49</b><br>(991.93 to<br>3,030.97) | <b>19.57</b><br>(14.18 to<br>25.87) | <b>11.15</b><br>(6.12 to<br>19.09) | <b>6.44</b><br>(3.56 to<br>11.25) | <b>20.53</b><br>(11.46 to<br>35.01) |
| Neonatal preterm birth                                                  | 650.90<br>(404.82 to<br>910.87)              | 323.80<br>(176.83 to<br>550.08)          | 175.39<br>(96.08 to<br>297.25)         | 636.01<br>(349.98 to<br>1,068.16)          | 7.52<br>(4.68 to<br>10.52)          | 3.74<br>(2.04 to<br>6.35)          | 2.03<br>(1.11 to<br>3.44)         | 7.35<br>(4.04 to<br>12.34)          |
| Neonatal encephalopathy due to birth asphyxia and trauma                | 570.07<br>(360.87 to<br>845.10)              | 311.58<br>(132.19 to<br>636.30)          | 188.85<br>(80.89 to<br>387.86)         | 544.54<br>(231.31 to<br>1,114.14)          | 6.58<br>(4.17 to<br>9.76)           | 3.60<br>(1.53 to<br>7.35)          | 2.18<br>(0.93 to<br>4.48)         | 6.29<br>(2.67 to<br>12.87)          |
| Neonatal sepsis and other neonatal infections                           | 312.73<br>(183.08 to<br>475.43)              | 236.89<br>(121.47 to<br>432.13)          | 141.26<br>(74.07 to<br>256.30)         | 419.39<br>(216.02 to<br>755.07)            | 3.61<br>(2.12 to<br>5.49)           | 2.74<br>(1.40 to<br>4.99)          | 1.63<br>(0.86 to<br>2.96)         | 4.85<br>(2.50 to<br>8.72)           |
| Hemolytic disease and other neonatal jaundice                           | 45.15<br>(26.25 to<br>75.33)                 | 15.31<br>(6.43 to<br>30.76)              | 8.64<br>(3.70 to<br>17.92)             | 28.80<br>(12.93 to<br>56.98)               | 0.52<br>(0.30 to<br>0.87)           | 0.18<br>(0.07 to<br>0.36)          | 0.10<br>(0.04 to<br>0.21)         | 0.33<br>(0.15 to<br>0.66)           |
| Other neonatal disorders                                                | 114.98<br>(66.42 to<br>200.42)               | 77.35<br>(32.79 to<br>175.64)            | 42.90<br>(17.92 to<br>98.38)           | 147.75<br>(61.76 to<br>336.21)             | 1.33<br>(0.77 to<br>2.32)           | 0.89<br>(0.38 to<br>2.03)          | 0.50<br>(0.21 to<br>1.14)         | 1.71<br>(0.71 to<br>3.89)           |
| <b>Nutritional deficiencies</b>                                         | <b>205.07</b><br>(130.81 to<br>314.49)       | <b>76.44</b><br>(49.41 to<br>118.07)     | <b>52.05</b><br>(33.98 to<br>79.25)    | <b>121.92</b><br>(74.41 to<br>197.60)      | <b>2.98</b><br>(2.07 to<br>4.31)    | <b>1.61</b><br>(1.19 to<br>2.16)   | <b>1.26</b><br>(0.96 to<br>1.65)  | <b>2.17</b><br>(1.54 to<br>3.11)    |
| Protein-energy malnutrition                                             | 194.09<br>(121.86 to<br>301.13)              | 65.92<br>(40.96 to<br>106.78)            | 44.05<br>(28.06 to<br>69.18)           | 107.65<br>(62.75 to<br>181.29)             | 2.74<br>(1.86 to<br>4.05)           | 1.34<br>(0.98 to<br>1.87)          | 1.04<br>(0.78 to<br>1.39)         | 1.85<br>(1.26 to<br>2.75)           |
| Iodine deficiency                                                       | 1.02<br>(0.03 to<br>5.71)                    | 2.22<br>(0.03 to<br>12.36)               | 1.47<br>(0.02 to<br>7.22)              | 3.59<br>(0.05 to<br>21.76)                 | 0.02<br>(0.00 to<br>0.07)           | 0.05<br>(0.00 to<br>0.18)          | 0.04<br>(0.00 to<br>0.13)         | 0.07<br>(0.00 to<br>0.29)           |
| Dietary iron deficiency                                                 | 0.47<br>(0.32 to<br>0.80)                    | 0.54<br>(0.32 to<br>1.05)                | 0.45<br>(0.27 to<br>0.88)              | 0.65<br>(0.39 to<br>1.26)                  | 0.01<br>(0.01 to<br>0.02)           | 0.01<br>(0.01 to<br>0.05)          | 0.01<br>(0.01 to<br>0.03)         | 0.01<br>(0.01 to<br>0.03)           |
| Other nutritional deficiencies                                          | 9.49<br>(5.88 to<br>16.92)                   | 7.76<br>(4.92 to<br>11.96)               | 6.08<br>(3.89 to<br>9.11)              | 10.03<br>(6.27 to<br>16.08)                | 0.21<br>(0.14 to<br>0.30)           | 0.21<br>(0.14 to<br>0.29)          | 0.18<br>(0.12 to<br>0.25)         | 0.24<br>(0.16 to<br>0.35)           |
| <b>Other communicable, maternal, neonatal, and nutritional diseases</b> | <b>151.22</b><br>(85.27 to<br>267.81)        | <b>71.66</b><br>(45.07 to<br>117.34)     | <b>52.54</b><br>(34.67 to<br>82.72)    | <b>101.47</b><br>(61.79 to<br>174.08)      | <b>2.16</b><br>(1.36 to<br>3.53)    | <b>1.32</b><br>(0.94 to<br>1.91)   | <b>1.03</b><br>(0.76 to<br>1.42)  | <b>1.72</b><br>(1.20 to<br>2.65)    |
| Sexually transmitted infections excluding HIV                           | 97.04<br>(35.47 to<br>197.83)                | 26.97<br>(8.84 to<br>62.08)              | 17.92<br>(6.30 to<br>40.97)            | 42.37<br>(13.27 to<br>100.06)              | 1.15<br>(0.43 to<br>2.33)           | 0.34<br>(0.12 to<br>0.75)          | 0.23<br>(0.09 to<br>0.50)         | 0.52<br>(0.18 to<br>1.19)           |
| Syphilis                                                                | 95.18<br>(33.47 to<br>195.62)                | 25.01<br>(7.04 to<br>60.54)              | 16.24<br>(4.72 to<br>39.42)            | 40.11<br>(10.93 to<br>97.62)               | 1.12<br>(0.40 to<br>2.29)           | 0.30<br>(0.09 to<br>0.71)          | 0.19<br>(0.06 to<br>0.46)         | 0.47<br>(0.13 to<br>1.14)           |
| Chlamydial infection                                                    | 0.39<br>(0.23 to<br>0.59)                    | 0.40<br>(0.23 to<br>0.63)                | 0.35<br>(0.20 to<br>0.55)              | 0.47<br>(0.26 to<br>0.73)                  | 0.01<br>(0.00 to<br>0.01)           | 0.01<br>(0.00 to<br>0.01)          | 0.01<br>(0.00 to<br>0.01)         | 0.01<br>(0.01 to<br>0.01)           |

|                                       |                                              |                                              |                                              |                                              |                                     |                                        |                                       |                                        |
|---------------------------------------|----------------------------------------------|----------------------------------------------|----------------------------------------------|----------------------------------------------|-------------------------------------|----------------------------------------|---------------------------------------|----------------------------------------|
| Gonococcal infection                  | 0.95<br>(0.58 to<br>1.45)                    | 1.01<br>(0.56 to<br>1.63)                    | 0.87<br>(0.48 to<br>1.41)                    | 1.16<br>(0.64 to<br>1.87)                    | 0.02<br>(0.01 to<br>0.03)           | 0.02<br>(0.01 to<br>0.03)              | 0.02<br>(0.01 to<br>0.03)             | 0.02<br>(0.01 to<br>0.04)              |
| Other sexually transmitted infections | 0.52<br>(0.32 to<br>0.81)                    | 0.55<br>(0.31 to<br>0.90)                    | 0.47<br>(0.27 to<br>0.78)                    | 0.64<br>(0.36 to<br>1.04)                    | 0.01<br>(0.01 to<br>0.02)           | 0.01<br>(0.01 to<br>0.02)              | 0.01<br>(0.01 to<br>0.02)             | 0.01<br>(0.01 to<br>0.02)              |
| Acute hepatitis                       | 36.60<br>(29.61 to<br>44.93)                 | 30.80<br>(22.57 to<br>42.14)                 | 25.22<br>(18.49 to<br>33.98)                 | 37.53<br>(27.72 to<br>50.25)                 | 0.74<br>(0.60 to<br>0.90)           | 0.70<br>(0.53 to<br>0.92)              | 0.58<br>(0.44 to<br>0.77)             | 0.82<br>(0.63 to<br>1.08)              |
| Acute hepatitis A                     | 0.86<br>(0.12 to<br>2.05)                    | 0.49<br>(0.13 to<br>1.14)                    | 0.35<br>(0.10 to<br>0.80)                    | 0.73<br>(0.17 to<br>1.71)                    | 0.01<br>(0.00 to<br>0.03)           | 0.01<br>(0.00 to<br>0.02)              | 0.01<br>(0.00 to<br>0.01)             | 0.01<br>(0.00 to<br>0.02)              |
| Acute hepatitis B                     | 27.40<br>(21.57 to<br>34.52)                 | 24.19<br>(17.73 to<br>33.61)                 | 19.83<br>(14.33 to<br>27.70)                 | 29.28<br>(21.56 to<br>40.45)                 | 0.59<br>(0.47 to<br>0.74)           | 0.57<br>(0.43 to<br>0.77)              | 0.48<br>(0.35 to<br>0.64)             | 0.68<br>(0.51 to<br>0.90)              |
| Acute hepatitis C                     | 0.74<br>(0.53 to<br>1.04)                    | 0.85<br>(0.58 to<br>1.21)                    | 0.77<br>(0.52 to<br>1.09)                    | 0.93<br>(0.63 to<br>1.33)                    | 0.02<br>(0.01 to<br>0.02)           | 0.02<br>(0.01 to<br>0.03)              | 0.02<br>(0.01 to<br>0.03)             | 0.02<br>(0.02 to<br>0.03)              |
| Acute hepatitis E                     | 7.60<br>(5.31 to<br>10.27)                   | 5.28<br>(3.27 to<br>8.12)                    | 4.28<br>(2.68 to<br>6.49)                    | 6.60<br>(4.10 to<br>10.03)                   | 0.12<br>(0.08 to<br>0.16)           | 0.10<br>(0.06 to<br>0.14)              | 0.08<br>(0.05 to<br>0.12)             | 0.11<br>(0.08 to<br>0.17)              |
| Other unspecified infectious diseases | 17.57<br>(8.09 to<br>48.21)                  | 13.89<br>(7.15 to<br>30.90)                  | 9.40<br>(5.17 to<br>19.93)                   | 21.57<br>(10.57 to<br>51.46)                 | 0.27<br>(0.15 to<br>0.63)           | 0.28<br>(0.18 to<br>0.49)              | 0.22<br>(0.15 to<br>0.36)             | 0.38<br>(0.23 to<br>0.73)              |
| <b>Non-communicable diseases</b>      | <b>2,663.83</b><br>(2,258.64 to<br>3,099.96) | <b>3,783.15</b><br>(3,079.03 to<br>4,663.31) | <b>2,972.76</b><br>(2,430.80 to<br>3,620.09) | <b>5,171.22</b><br>(4,114.72 to<br>6,459.52) | <b>77.05</b><br>(69.08 to<br>86.33) | <b>134.22</b><br>(115.26 to<br>155.93) | <b>111.56</b><br>(97.39 to<br>127.27) | <b>172.28</b><br>(144.02 to<br>205.11) |

**Cote d'Ivoire**

| Cause                           | YLLs (in 1000s)                                |                                                |                                                |                                                | Deaths (in 1000s)                           |                                             |                                             |                                             |
|---------------------------------|------------------------------------------------|------------------------------------------------|------------------------------------------------|------------------------------------------------|---------------------------------------------|---------------------------------------------|---------------------------------------------|---------------------------------------------|
|                                 | 2016                                           | 2040 Forecast                                  | 2040 Better Scenario                           | 2040 Worse Scenario                            | 2016                                        | 2040 Forecast                               | 2040 Better Scenario                        | 2040 Worse Scenario                         |
| <b>Neoplasms</b>                | <b>355.66</b><br>(303.99 to<br><b>413.56</b> ) | <b>735.65</b><br>(602.67 to<br><b>905.11</b> ) | <b>726.29</b><br>(594.21 to<br><b>893.90</b> ) | <b>761.49</b><br>(618.30 to<br><b>933.32</b> ) | <b>12.43</b><br>(10.32 to<br><b>14.47</b> ) | <b>28.44</b><br>(23.31 to<br><b>33.22</b> ) | <b>29.33</b><br>(24.16 to<br><b>34.24</b> ) | <b>27.91</b><br>(22.80 to<br><b>32.92</b> ) |
| Lip and oral cavity cancer      | 4.93<br>(4.11 to<br>5.83)                      | 9.16<br>(5.57 to<br>15.52)                     | 8.17<br>(5.12 to<br>13.21)                     | 13.14<br>(6.93 to<br>23.30)                    | 0.22<br>(0.18 to<br>0.26)                   | 0.44<br>(0.28 to<br>0.71)                   | 0.42<br>(0.28 to<br>0.64)                   | 0.58<br>(0.33 to<br>1.01)                   |
| Nasopharynx cancer              | 1.22<br>(1.00 to<br>1.54)                      | 2.15<br>(1.21 to<br>3.71)                      | 1.79<br>(1.03 to<br>3.06)                      | 3.49<br>(1.80 to<br>6.30)                      | 0.03<br>(0.03 to<br>0.04)                   | 0.06<br>(0.04 to<br>0.11)                   | 0.05<br>(0.03 to<br>0.09)                   | 0.10<br>(0.05 to<br>0.18)                   |
| Other pharynx cancer            | 3.93<br>(3.23 to<br>4.83)                      | 6.04<br>(3.58 to<br>10.06)                     | 5.49<br>(3.34 to<br>8.87)                      | 8.18<br>(4.37 to<br>14.45)                     | 0.14<br>(0.11 to<br>0.16)                   | 0.22<br>(0.14 to<br>0.36)                   | 0.21<br>(0.13 to<br>0.33)                   | 0.29<br>(0.16 to<br>0.51)                   |
| Esophageal cancer               | 3.97<br>(3.24 to<br>4.79)                      | 6.31<br>(3.71 to<br>9.91)                      | 5.51<br>(3.41 to<br>8.50)                      | 8.92<br>(4.89 to<br>14.84)                     | 0.15<br>(0.12 to<br>0.18)                   | 0.25<br>(0.16 to<br>0.39)                   | 0.23<br>(0.15 to<br>0.34)                   | 0.34<br>(0.19 to<br>0.55)                   |
| Stomach cancer                  | 16.48<br>(14.28 to<br>19.33)                   | 21.93<br>(17.67 to<br>28.69)                   | 20.84<br>(16.88 to<br>26.80)                   | 22.87<br>(18.35 to<br>30.24)                   | 0.67<br>(0.58 to<br>0.78)                   | 0.97<br>(0.81 to<br>1.23)                   | 0.96<br>(0.79 to<br>1.20)                   | 0.97<br>(0.79 to<br>1.25)                   |
| Colon and rectum cancer         | 14.75<br>(12.39 to<br>17.53)                   | 34.13<br>(24.19 to<br>46.86)                   | 36.01<br>(25.84 to<br>49.56)                   | 34.38<br>(23.84 to<br>47.99)                   | 0.54<br>(0.46 to<br>0.62)                   | 1.37<br>(1.01 to<br>1.87)                   | 1.50<br>(1.11 to<br>2.02)                   | 1.31<br>(0.93 to<br>1.82)                   |
| Liver cancer                    | 40.21<br>(33.21 to<br>48.26)                   | 87.08<br>(61.87 to<br>121.19)                  | 81.56<br>(59.57 to<br>108.90)                  | 95.16<br>(64.67 to<br>135.54)                  | 1.43<br>(1.19 to<br>1.71)                   | 3.33<br>(2.48 to<br>4.40)                   | 3.25<br>(2.47 to<br>4.14)                   | 3.45<br>(2.46 to<br>4.71)                   |
| Liver cancer due to hepatitis B | 22.51<br>(18.11 to<br>27.66)                   | 48.95<br>(34.14 to<br>66.96)                   | 46.07<br>(33.39 to<br>61.16)                   | 51.75<br>(34.81 to<br>74.01)                   | 0.77<br>(0.62 to<br>0.95)                   | 1.80<br>(1.29 to<br>2.38)                   | 1.76<br>(1.29 to<br>2.30)                   | 1.81<br>(1.26 to<br>2.47)                   |
| Liver cancer due to hepatitis C | 3.34<br>(2.28 to<br>4.69)                      | 7.75<br>(4.94 to<br>11.60)                     | 7.49<br>(4.85 to<br>10.91)                     | 7.90<br>(4.93 to<br>12.09)                     | 0.14<br>(0.10 to<br>0.20)                   | 0.36<br>(0.23 to<br>0.54)                   | 0.36<br>(0.24 to<br>0.53)                   | 0.35<br>(0.22 to<br>0.53)                   |
| Liver cancer due to alcohol use | 4.93<br>(3.86 to<br>6.29)                      | 10.16<br>(6.89 to<br>14.50)                    | 9.28<br>(6.54 to<br>12.85)                     | 13.73<br>(8.86 to<br>20.27)                    | 0.19<br>(0.15 to<br>0.24)                   | 0.41<br>(0.29 to<br>0.57)                   | 0.39<br>(0.28 to<br>0.53)                   | 0.52<br>(0.35 to<br>0.75)                   |

|                                      |                              |                                |                                |                                |                           |                           |                           |                           |
|--------------------------------------|------------------------------|--------------------------------|--------------------------------|--------------------------------|---------------------------|---------------------------|---------------------------|---------------------------|
| Liver cancer due to other causes     | 9.43<br>(7.45 to<br>11.79)   | 20.22<br>(13.87 to<br>29.24)   | 18.72<br>(13.31 to<br>26.06)   | 21.78<br>(14.46 to<br>32.33)   | 0.33<br>(0.26 to<br>0.40) | 0.76<br>(0.53 to<br>1.07) | 0.73<br>(0.53 to<br>1.00) | 0.78<br>(0.52 to<br>1.14) |
| Gallbladder and biliary tract cancer | 5.44<br>(3.46 to<br>7.82)    | 8.76<br>(5.56 to<br>12.65)     | 9.27<br>(5.85 to<br>13.44)     | 8.10<br>(5.13 to<br>11.70)     | 0.22<br>(0.14 to<br>0.31) | 0.37<br>(0.24 to<br>0.52) | 0.40<br>(0.26 to<br>0.57) | 0.33<br>(0.22 to<br>0.46) |
| Pancreatic cancer                    | 11.17<br>(9.74 to<br>12.92)  | 27.90<br>(23.14 to<br>33.92)   | 29.77<br>(24.52 to<br>36.43)   | 25.80<br>(21.47 to<br>31.87)   | 0.45<br>(0.40 to<br>0.52) | 1.19<br>(1.00 to<br>1.45) | 1.31<br>(1.10 to<br>1.58) | 1.06<br>(0.89 to<br>1.29) |
| Larynx cancer                        | 4.90<br>(4.09 to<br>5.98)    | 6.87<br>(4.33 to<br>10.90)     | 5.44<br>(3.60 to<br>8.10)      | 10.72<br>(5.90 to<br>18.79)    | 0.19<br>(0.16 to<br>0.23) | 0.28<br>(0.18 to<br>0.42) | 0.23<br>(0.16 to<br>0.33) | 0.41<br>(0.24 to<br>0.70) |
| Tracheal, bronchus, and lung cancer  | 16.76<br>(14.13 to<br>20.01) | 33.03<br>(21.79 to<br>48.83)   | 23.30<br>(16.32 to<br>32.30)   | 44.38<br>(27.96 to<br>68.65)   | 0.67<br>(0.57 to<br>0.80) | 1.37<br>(0.93 to<br>1.99) | 1.00<br>(0.72 to<br>1.35) | 1.76<br>(1.12 to<br>2.71) |
| Malignant skin melanoma              | 2.96<br>(2.37 to<br>3.62)    | 7.41<br>(5.65 to<br>8.97)      | 8.55<br>(6.36 to<br>10.34)     | 6.24<br>(4.86 to<br>7.52)      | 0.13<br>(0.08 to<br>0.16) | 0.37<br>(0.21 to<br>0.46) | 0.44<br>(0.25 to<br>0.55) | 0.29<br>(0.18 to<br>0.37) |
| Non-melanoma skin cancer             | 1.42<br>(1.17 to<br>1.71)    | 2.90<br>(2.33 to<br>3.53)      | 2.79<br>(2.24 to<br>3.40)      | 2.95<br>(2.39 to<br>3.60)      | 0.05<br>(0.04 to<br>0.06) | 0.11<br>(0.09 to<br>0.13) | 0.11<br>(0.10 to<br>0.13) | 0.11<br>(0.09 to<br>0.12) |
| Breast cancer                        | 46.06<br>(33.95 to<br>59.57) | 107.76<br>(73.19 to<br>157.90) | 105.84<br>(72.66 to<br>154.11) | 113.53<br>(76.24 to<br>167.41) | 1.41<br>(1.04 to<br>1.82) | 3.50<br>(2.42 to<br>5.01) | 3.49<br>(2.45 to<br>4.92) | 3.62<br>(2.48 to<br>5.24) |
| Cervical cancer                      | 30.69<br>(20.47 to<br>40.04) | 52.40<br>(33.26 to<br>72.60)   | 48.57<br>(30.54 to<br>68.56)   | 55.77<br>(35.52 to<br>76.95)   | 1.06<br>(0.62 to<br>1.39) | 1.85<br>(1.04 to<br>2.52) | 1.75<br>(0.99 to<br>2.40) | 1.93<br>(1.09 to<br>2.62) |
| Uterine cancer                       | 4.01<br>(3.00 to<br>5.12)    | 8.71<br>(6.61 to<br>11.13)     | 8.07<br>(6.09 to<br>10.43)     | 9.21<br>(6.96 to<br>11.76)     | 0.17<br>(0.13 to<br>0.21) | 0.39<br>(0.31 to<br>0.49) | 0.37<br>(0.29 to<br>0.47) | 0.40<br>(0.31 to<br>0.51) |
| Ovarian cancer                       | 7.75<br>(5.99 to<br>9.84)    | 20.79<br>(14.92 to<br>29.06)   | 22.23<br>(16.06 to<br>30.59)   | 19.24<br>(13.77 to<br>26.81)   | 0.25<br>(0.19 to<br>0.31) | 0.69<br>(0.50 to<br>0.94) | 0.74<br>(0.55 to<br>1.00) | 0.63<br>(0.46 to<br>0.86) |
| Prostate cancer                      | 33.79<br>(16.85 to<br>45.75) | 87.49<br>(45.41 to<br>114.11)  | 98.69<br>(53.00 to<br>127.05)  | 74.39<br>(37.40 to<br>98.73)   | 1.91<br>(0.91 to<br>2.59) | 5.57<br>(2.78 to<br>7.37) | 6.48<br>(3.34 to<br>8.35) | 4.55<br>(2.17 to<br>6.24) |
| Testicular cancer                    | 1.15<br>(0.87 to<br>1.50)    | 1.58<br>(1.15 to<br>2.20)      | 1.49<br>(1.08 to<br>2.06)      | 1.66<br>(1.21 to<br>2.31)      | 0.03<br>(0.02 to<br>0.03) | 0.04<br>(0.03 to<br>0.05) | 0.04<br>(0.03 to<br>0.05) | 0.04<br>(0.03 to<br>0.05) |

**Cote d'Ivoire**

| Cause                           | YLLs (in 1000s)              |                              |                              |                              | Deaths (in 1000s)         |                           |                           |                           |
|---------------------------------|------------------------------|------------------------------|------------------------------|------------------------------|---------------------------|---------------------------|---------------------------|---------------------------|
|                                 | 2016                         | 2040 Forecast                | 2040 Better Scenario         | 2040 Worse Scenario          | 2016                      | 2040 Forecast             | 2040 Better Scenario      | 2040 Worse Scenario       |
| Kidney cancer                   | 3.45<br>(2.94 to<br>4.08)    | 8.15<br>(6.83 to<br>9.76)    | 9.00<br>(7.44 to<br>10.74)   | 7.34<br>(6.17 to<br>8.79)    | 0.12<br>(0.10 to<br>0.14) | 0.32<br>(0.26 to<br>0.38) | 0.37<br>(0.30 to<br>0.45) | 0.27<br>(0.22 to<br>0.31) |
| Bladder cancer                  | 5.96<br>(4.99 to<br>7.01)    | 11.51<br>(9.05 to<br>14.53)  | 11.51<br>(9.10 to<br>14.42)  | 11.44<br>(8.92 to<br>14.70)  | 0.26<br>(0.22 to<br>0.30) | 0.54<br>(0.44 to<br>0.68) | 0.57<br>(0.46 to<br>0.70) | 0.51<br>(0.40 to<br>0.65) |
| Brain and nervous system cancer | 11.20<br>(9.24 to<br>13.16)  | 24.25<br>(19.24 to<br>29.82) | 24.58<br>(19.60 to<br>30.33) | 23.86<br>(18.85 to<br>29.01) | 0.26<br>(0.21 to<br>0.32) | 0.64<br>(0.52 to<br>0.78) | 0.67<br>(0.54 to<br>0.83) | 0.60<br>(0.48 to<br>0.72) |
| Thyroid cancer                  | 2.89<br>(2.20 to<br>3.66)    | 5.19<br>(3.72 to<br>7.36)    | 4.63<br>(3.36 to<br>6.49)    | 5.75<br>(4.08 to<br>8.18)    | 0.10<br>(0.07 to<br>0.12) | 0.18<br>(0.13 to<br>0.25) | 0.17<br>(0.12 to<br>0.22) | 0.20<br>(0.14 to<br>0.27) |
| Mesothelioma                    | 0.77<br>(0.55 to<br>1.00)    | 1.62<br>(1.11 to<br>2.31)    | 1.56<br>(1.08 to<br>2.22)    | 1.66<br>(1.12 to<br>2.38)    | 0.02<br>(0.02 to<br>0.03) | 0.05<br>(0.04 to<br>0.07) | 0.05<br>(0.04 to<br>0.07) | 0.05<br>(0.04 to<br>0.07) |
| Hodgkin lymphoma                | 3.39<br>(1.82 to<br>4.42)    | 4.07<br>(1.94 to<br>6.09)    | 3.39<br>(1.58 to<br>5.08)    | 4.85<br>(2.34 to<br>7.09)    | 0.08<br>(0.04 to<br>0.10) | 0.07<br>(0.05 to<br>0.15) | 0.09<br>(0.04 to<br>0.13) | 0.12<br>(0.05 to<br>0.17) |
| Non-Hodgkin lymphoma            | 27.64<br>(22.73 to<br>32.75) | 52.79<br>(41.69 to<br>66.97) | 52.58<br>(41.59 to<br>66.72) | 52.96<br>(41.39 to<br>67.68) | 0.60<br>(0.51 to<br>0.69) | 1.29<br>(1.07 to<br>1.58) | 1.34<br>(1.11 to<br>1.63) | 1.23<br>(1.01 to<br>1.51) |



|                                 |                                        |                                            |                                        |                                              |                                     |                                     |                                     |                                      |  |
|---------------------------------|----------------------------------------|--------------------------------------------|----------------------------------------|----------------------------------------------|-------------------------------------|-------------------------------------|-------------------------------------|--------------------------------------|--|
|                                 | 5.30<br>(4.24 to<br>6.61)              | 14.51<br>(11.06 to<br>18.78)               | 15.79<br>(11.98 to<br>20.16)           | 13.05<br>(10.08 to<br>16.90)                 | 0.22<br>(0.16 to<br>0.27)           | 0.65<br>(0.42 to<br>0.85)           | 0.74<br>(0.48 to<br>0.96)           | 0.56<br>(0.37 to<br>0.72)            |  |
| Multiple myeloma                | 19.95<br>(16.58 to<br>24.45)           | 35.06<br>(27.60 to<br>45.04)               | 34.08<br>(26.89 to<br>43.59)           | 36.26<br>(28.50 to<br>47.00)                 | 0.49<br>(0.40 to<br>0.58)           | 1.00<br>(0.76 to<br>1.21)           | 1.00<br>(0.76 to<br>1.22)           | 0.99<br>(0.74 to<br>1.22)            |  |
| Leukemia                        | 4.11<br>(3.17 to<br>5.75)              | 6.69<br>(4.90 to<br>9.22)                  | 6.46<br>(4.74 to<br>8.81)              | 7.01<br>(5.09 to<br>9.73)                    | 0.08<br>(0.06 to<br>0.10)           | 0.14<br>(0.11 to<br>0.18)           | 0.14<br>(0.11 to<br>0.18)           | 0.14<br>(0.11 to<br>0.18)            |  |
| Acute lymphoid leukemia         | 1.18<br>(0.83 to<br>1.46)              | 2.29<br>(1.56 to<br>3.02)                  | 2.30<br>(1.58 to<br>2.97)              | 2.25<br>(1.52 to<br>2.97)                    | 0.05<br>(0.03 to<br>0.06)           | 0.11<br>(0.07 to<br>0.14)           | 0.11<br>(0.07 to<br>0.14)           | 0.10<br>(0.07 to<br>0.14)            |  |
| Chronic lymphoid leukemia       | 7.46<br>(5.93 to<br>9.52)              | 15.17<br>(11.79 to<br>20.23)               | 15.31<br>(11.89 to<br>20.18)           | 15.13<br>(11.68 to<br>20.59)                 | 0.15<br>(0.13 to<br>0.19)           | 0.36<br>(0.29 to<br>0.46)           | 0.38<br>(0.30 to<br>0.48)           | 0.34<br>(0.27 to<br>0.44)            |  |
| Acute myeloid leukemia          | 2.73<br>(2.15 to<br>3.43)              | 3.25<br>(2.37 to<br>4.41)                  | 3.13<br>(2.30 to<br>4.19)              | 3.37<br>(2.42 to<br>4.71)                    | 0.07<br>(0.06 to<br>0.09)           | 0.09<br>(0.07 to<br>0.12)           | 0.09<br>(0.07 to<br>0.12)           | 0.09<br>(0.07 to<br>0.12)            |  |
| Chronic myeloid leukemia        | 4.47<br>(3.55 to<br>5.55)              | 7.66<br>(5.21 to<br>9.91)                  | 6.88<br>(4.58 to<br>8.94)              | 8.51<br>(6.00 to<br>11.04)                   | 0.14<br>(0.09 to<br>0.18)           | 0.30<br>(0.17 to<br>0.38)           | 0.28<br>(0.15 to<br>0.36)           | 0.31<br>(0.18 to<br>0.40)            |  |
| Other leukemias                 | 23.51<br>(20.24 to<br>27.68)           | 46.07<br>(37.65 to<br>57.40)               | 45.79<br>(37.13 to<br>57.52)           | 46.20<br>(38.17 to<br>57.14)                 | 0.58<br>(0.49 to<br>0.68)           | 1.29<br>(1.08 to<br>1.53)           | 1.34<br>(1.11 to<br>1.61)           | 1.22<br>(1.03 to<br>1.44)            |  |
| Other neoplasms                 | <b>808.91</b><br>(706.58 to<br>940.56) | <b>1,108.99</b><br>(780.72 to<br>1,569.06) | <b>663.54</b><br>(487.38 to<br>909.63) | <b>1,931.16</b><br>(1,316.55 to<br>2,830.13) | <b>30.91</b><br>(27.25 to<br>35.40) | <b>48.01</b><br>(36.23 to<br>63.83) | <b>31.49</b><br>(24.66 to<br>40.46) | <b>76.97</b><br>(55.96 to<br>106.37) |  |
| <b>Cardiovascular diseases</b>  | 20.57<br>(16.76 to<br>25.20)           | 14.27<br>(10.26 to<br>19.60)               | 11.45<br>(8.26 to<br>15.52)            | 17.76<br>(12.93 to<br>24.57)                 | 0.60<br>(0.50 to<br>0.73)           | 0.52<br>(0.40 to<br>0.68)           | 0.45<br>(0.34 to<br>0.57)           | 0.60<br>(0.46 to<br>0.79)            |  |
| Rheumatic heart disease         | 350.55<br>(297.13 to<br>419.48)        | 507.30<br>(297.35 to<br>817.29)            | 271.36<br>(163.59 to<br>430.10)        | 950.83<br>(542.95 to<br>1,515.31)            | 15.00<br>(13.05 to<br>17.62)        | 23.92<br>(15.34 to<br>35.39)        | 14.40<br>(9.49 to<br>21.09)         | 40.66<br>(25.01 to<br>61.20)         |  |
| Ischemic heart disease          | 294.16<br>(249.92 to<br>345.40)        | 335.83<br>(201.51 to<br>543.96)            | 169.57<br>(108.31 to<br>266.58)        | 654.41<br>(379.92 to<br>1,085.95)            | 10.79<br>(9.21 to<br>12.43)         | 14.20<br>(9.45 to<br>21.30)         | 8.17<br>(5.75 to<br>12.02)          | 23.03<br>(15.81 to<br>38.95)         |  |
| Stroke                          | 75.99<br>(63.63 to<br>89.15)           | 95.73<br>(59.38 to<br>160.52)              | 57.22<br>(36.91 to<br>92.86)           | 154.85<br>(93.17 to<br>256.96)               | 3.74<br>(3.18 to<br>4.33)           | 5.49<br>(3.55 to<br>9.56)           | 3.68<br>(2.46 to<br>6.04)           | 8.03<br>(4.99 to<br>13.74)           |  |
| Ischemic stroke                 | 218.17<br>(182.21 to<br>259.56)        | 240.10<br>(132.24 to<br>420.08)            | 112.35<br>(66.37 to<br>189.19)         | 499.56<br>(266.58 to<br>869.56)              | 7.05<br>(5.94 to<br>8.24)           | 8.71<br>(5.29 to<br>14.23)          | 4.49<br>(2.91 to<br>7.07)           | 17.00<br>(9.88 to<br>29.10)          |  |
| Intracerebral hemorrhage        | 28.98<br>(15.53 to<br>40.89)           | 42.57<br>(19.95 to<br>80.03)               | 32.50<br>(16.39 to<br>55.12)           | 63.93<br>(28.20 to<br>131.61)                | 1.12<br>(0.61 to<br>1.58)           | 1.86<br>(0.92 to<br>3.35)           | 1.50<br>(0.79 to<br>2.47)           | 2.63<br>(1.19 to<br>5.16)            |  |
| Hypertensive heart disease      | 16.46<br>(12.67 to<br>21.81)           | 29.52<br>(20.59 to<br>44.00)               | 29.37<br>(20.27 to<br>43.14)           | 31.16<br>(21.70 to<br>47.38)                 | 0.43<br>(0.34 to<br>0.56)           | 0.90<br>(0.66 to<br>1.27)           | 0.95<br>(0.69 to<br>1.36)           | 0.89<br>(0.65 to<br>1.28)            |  |
| Cardiomyopathy and myocarditis  | 3.72<br>(2.66 to<br>5.11)              | 5.34<br>(3.53 to<br>7.96)                  | 4.92<br>(3.24 to<br>7.44)              | 5.83<br>(3.90 to<br>8.69)                    | 0.07<br>(0.05 to<br>0.10)           | 0.12<br>(0.08 to<br>0.17)           | 0.11<br>(0.08 to<br>0.16)           | 0.12<br>(0.08 to<br>0.17)            |  |
| Mycocarditis                    | <b>Cote d'Ivoire</b>                   |                                            |                                        |                                              |                                     |                                     |                                     |                                      |  |
| Cause                           | YLLs (in 1000s)                        |                                            |                                        |                                              | Deaths (in 1000s)                   |                                     |                                     |                                      |  |
|                                 | 2016                                   | 2040 Forecast                              | 2040 Better Scenario                   | 2040 Worse Scenario                          | 2016                                | 2040 Forecast                       | 2040 Better Scenario                | 2040 Worse Scenario                  |  |
| Alcoholic cardiomyopathy        | 1.33<br>(0.92 to<br>1.95)              | 2.37<br>(1.59 to<br>3.61)                  | 2.56<br>(1.71 to<br>3.91)              | 2.73<br>(1.88 to<br>4.06)                    | 0.04<br>(0.03 to<br>0.06)           | 0.07<br>(0.05 to<br>0.11)           | 0.08<br>(0.06 to<br>0.12)           | 0.08<br>(0.06 to<br>0.12)            |  |
| Other cardiomyopathy            | 11.41<br>(8.74 to<br>14.98)            | 21.82<br>(14.55 to<br>34.62)               | 21.89<br>(14.38 to<br>34.17)           | 22.60<br>(14.82 to<br>36.90)                 | 0.32<br>(0.25 to<br>0.42)           | 0.71<br>(0.50 to<br>1.05)           | 0.75<br>(0.54 to<br>1.10)           | 0.69<br>(0.48 to<br>1.03)            |  |
| Atrial fibrillation and flutter | 2.12<br>(1.65 to<br>2.72)              | 5.68<br>(4.20 to<br>7.41)                  | 6.08<br>(4.53 to<br>7.88)              | 5.35<br>(3.87 to<br>7.10)                    | 0.16<br>(0.12 to<br>0.20)           | 0.49<br>(0.35 to<br>0.65)           | 0.56<br>(0.41 to<br>0.74)           | 0.43<br>(0.30 to<br>0.57)            |  |

|                                                                |                                            |                                            |                                            |                                            |                                      |                                       |                                       |                                        |
|----------------------------------------------------------------|--------------------------------------------|--------------------------------------------|--------------------------------------------|--------------------------------------------|--------------------------------------|---------------------------------------|---------------------------------------|----------------------------------------|
| Aortic aneurysm                                                | 4.23<br>(3.38 to 5.24)                     | 8.22<br>(6.11 to 11.19)                    | 7.92<br>(5.99 to 10.60)                    | 8.09<br>(5.92 to 11.27)                    | 0.16<br>(0.13 to 0.20)               | 0.35<br>(0.27 to 0.46)                | 0.36<br>(0.29 to 0.47)                | 0.33<br>(0.25 to 0.44)                 |
| Peripheral artery disease                                      | 0.17<br>(0.13 to 0.25)                     | 0.70<br>(0.46 to 1.11)                     | 0.79<br>(0.52 to 1.26)                     | 0.61<br>(0.39 to 0.96)                     | 0.01<br>(0.01 to 0.01)               | 0.05<br>(0.03 to 0.07)                | 0.06<br>(0.04 to 0.08)                | 0.04<br>(0.02 to 0.06)                 |
| Endocarditis                                                   | 11.86<br>(9.10 to 15.34)                   | 20.10<br>(13.91 to 29.05)                  | 18.41<br>(12.74 to 26.81)                  | 22.94<br>(15.75 to 33.41)                  | 0.29<br>(0.23 to 0.38)               | 0.60<br>(0.43 to 0.84)                | 0.60<br>(0.43 to 0.84)                | 0.63<br>(0.44 to 0.88)                 |
| Other cardiovascular and circulatory diseases                  | 79.82<br>(61.63 to 112.34)                 | 144.79<br>(104.73 to 203.21)               | 116.08<br>(85.70 to 163.05)                | 176.08<br>(124.20 to 257.03)               | 2.35<br>(1.82 to 3.37)               | 5.12<br>(3.81 to 7.31)                | 4.44<br>(3.38 to 6.18)                | 5.74<br>(4.17 to 8.36)                 |
| <b>Chronic respiratory diseases</b>                            | <b>125.20</b><br><b>(107.19 to 147.30)</b> | <b>154.66</b><br><b>(111.13 to 231.24)</b> | <b>108.96</b><br><b>(82.25 to 149.39)</b>  | <b>215.28</b><br><b>(148.49 to 344.02)</b> | <b>4.48</b><br><b>(3.83 to 5.39)</b> | <b>6.16</b><br><b>(4.44 to 9.11)</b>  | <b>4.52</b><br><b>(3.50 to 6.16)</b>  | <b>8.09</b><br><b>(5.56 to 12.78)</b>  |
| Chronic obstructive pulmonary disease                          | 67.67<br>(56.07 to 82.13)                  | 92.08<br>(56.76 to 155.03)                 | 56.18<br>(37.86 to 86.46)                  | 141.25<br>(82.42 to 255.72)                | 2.80<br>(2.32 to 3.41)               | 4.11<br>(2.80 to 6.76)                | 2.70<br>(1.88 to 4.03)                | 5.82<br>(3.51 to 10.26)                |
| Pneumoconiosis                                                 | 0.19<br>(0.14 to 0.25)                     | 0.22<br>(0.16 to 0.30)                     | 0.21<br>(0.15 to 0.29)                     | 0.22<br>(0.17 to 0.30)                     | 0.01<br>(0.00 to 0.01)               | 0.01<br>(0.01 to 0.01)                | 0.01<br>(0.01 to 0.01)                | 0.01<br>(0.01 to 0.01)                 |
| Silicosis                                                      | 0.02<br>(0.01 to 0.03)                     | 0.01<br>(0.01 to 0.03)                     | 0.01<br>(0.01 to 0.03)                     | 0.01<br>(0.01 to 0.03)                     | 0.00<br>(0.00 to 0.00)               | 0.00<br>(0.00 to 0.00)                | 0.00<br>(0.00 to 0.00)                | 0.00<br>(0.00 to 0.00)                 |
| Asbestosis                                                     | 0.05<br>(0.03 to 0.06)                     | 0.07<br>(0.05 to 0.09)                     | 0.07<br>(0.05 to 0.10)                     | 0.06<br>(0.04 to 0.09)                     | 0.00<br>(0.00 to 0.00)               | 0.00<br>(0.00 to 0.00)                | 0.00<br>(0.00 to 0.00)                | 0.00<br>(0.00 to 0.00)                 |
| Coal workers pneumoconiosis                                    | 0.01<br>(0.01 to 0.02)                     | 0.01<br>(0.01 to 0.02)                     | 0.01<br>(0.01 to 0.01)                     | 0.01<br>(0.01 to 0.02)                     | 0.00<br>(0.00 to 0.00)               | 0.00<br>(0.00 to 0.00)                | 0.00<br>(0.00 to 0.00)                | 0.00<br>(0.00 to 0.00)                 |
| Other pneumoconiosis                                           | 0.12<br>(0.09 to 0.15)                     | 0.13<br>(0.09 to 0.17)                     | 0.12<br>(0.09 to 0.16)                     | 0.13<br>(0.10 to 0.18)                     | 0.00<br>(0.00 to 0.01)               | 0.01<br>(0.00 to 0.01)                | 0.01<br>(0.00 to 0.01)                | 0.01<br>(0.00 to 0.01)                 |
| Asthma                                                         | 39.91<br>(31.61 to 49.98)                  | 33.13<br>(21.82 to 50.84)                  | 25.27<br>(17.09 to 38.11)                  | 42.31<br>(26.91 to 66.56)                  | 1.20<br>(0.95 to 1.53)               | 1.13<br>(0.76 to 1.68)                | 0.92<br>(0.63 to 1.32)                | 1.35<br>(0.87 to 2.06)                 |
| Interstitial lung disease and pulmonary sarcoidosis            | 1.11<br>(0.74 to 1.72)                     | 2.75<br>(1.81 to 4.24)                     | 3.13<br>(2.09 to 4.79)                     | 2.37<br>(1.56 to 3.67)                     | 0.04<br>(0.03 to 0.06)               | 0.11<br>(0.08 to 0.17)                | 0.13<br>(0.09 to 0.20)                | 0.09<br>(0.06 to 0.14)                 |
| Other chronic respiratory diseases                             | 16.33<br>(10.09 to 21.89)                  | 26.48<br>(17.27 to 36.18)                  | 24.17<br>(16.15 to 32.45)                  | 29.13<br>(18.68 to 40.64)                  | 0.44<br>(0.26 to 0.60)               | 0.80<br>(0.51 to 1.07)                | 0.77<br>(0.50 to 1.03)                | 0.82<br>(0.52 to 1.13)                 |
| <b>Cirrhosis and other chronic liver diseases</b>              | <b>193.23</b><br><b>(147.70 to 250.93)</b> | <b>335.19</b><br><b>(247.86 to 450.71)</b> | <b>311.09</b><br><b>(230.05 to 415.77)</b> | <b>375.64</b><br><b>(276.11 to 507.79)</b> | <b>5.38</b><br><b>(4.14 to 6.99)</b> | <b>9.97</b><br><b>(7.62 to 12.92)</b> | <b>9.49</b><br><b>(7.23 to 12.33)</b> | <b>10.83</b><br><b>(8.17 to 13.92)</b> |
| Cirrhosis and other chronic liver diseases due to hepatitis B  | 81.47<br>(60.76 to 106.22)                 | 150.54<br>(109.09 to 202.82)               | 142.44<br>(103.54 to 190.03)               | 156.49<br>(113.22 to 212.06)               | 2.35<br>(1.78 to 3.08)               | 4.57<br>(3.43 to 5.99)                | 4.42<br>(3.28 to 5.74)                | 4.62<br>(3.44 to 6.02)                 |
| Cirrhosis and other chronic liver diseases due to hepatitis C  | 35.75<br>(22.93 to 53.72)                  | 67.01<br>(42.88 to 103.57)                 | 63.30<br>(40.16 to 103.57)                 | 69.77<br>(43.90 to 109.42)                 | 1.05<br>(0.68 to 1.57)               | 2.03<br>(1.32 to 3.07)                | 1.96<br>(1.28 to 2.93)                | 2.07<br>(1.33 to 3.16)                 |
| Cirrhosis and other chronic liver diseases due to alcohol use  | 40.10<br>(29.72 to 54.49)                  | 63.80<br>(44.86 to 86.93)                  | 57.10<br>(40.34 to 77.65)                  | 89.35<br>(62.95 to 121.61)                 | 1.21<br>(0.91 to 1.62)               | 2.04<br>(1.48 to 2.69)                | 1.87<br>(1.37 to 2.48)                | 2.74<br>(1.97 to 3.64)                 |
| Cirrhosis and other chronic liver diseases due to other causes | 35.91<br>(27.97 to 45.99)                  | 53.84<br>(38.69 to 74.00)                  | 48.26<br>(34.65 to 65.90)                  | 60.03<br>(43.13 to 82.36)                  | 0.77<br>(0.60 to 0.98)               | 1.33<br>(0.97 to 1.72)                | 1.24<br>(0.92 to 1.61)                | 1.41<br>(1.03 to 1.83)                 |
| <b>Digestive diseases</b>                                      | <b>160.82</b><br><b>(125.40 to 206.43)</b> | <b>201.50</b><br><b>(148.59 to 265.79)</b> | <b>175.89</b><br><b>(131.08 to 228.52)</b> | <b>240.65</b><br><b>(172.85 to 332.56)</b> | <b>4.28</b><br><b>(3.41 to 5.21)</b> | <b>6.52</b><br><b>(5.15 to 8.12)</b>  | <b>6.04</b><br><b>(4.78 to 7.47)</b>  | <b>7.19</b><br><b>(5.52 to 9.45)</b>   |
| Peptic ulcer disease                                           | 30.26<br>(24.19 to 37.01)                  | 25.67<br>(19.04 to 34.45)                  | 19.96<br>(14.73 to 26.69)                  | 32.17<br>(23.94 to 42.80)                  | 0.87<br>(0.70 to 1.06)               | 0.88<br>(0.68 to 1.12)                | 0.72<br>(0.55 to 0.92)                | 1.04<br>(0.80 to 1.32)                 |
| <b>Cote d'Ivoire</b>                                           |                                            |                                            |                                            |                                            |                                      |                                       |                                       |                                        |
| <b>YLLs (in 1000s)</b>                                         |                                            |                                            |                                            |                                            | <b>Deaths (in 1000s)</b>             |                                       |                                       |                                        |

| Cause                                      | 2016                                              | 2040 Forecast                                       | 2040 Better Scenario                                | 2040 Worse Scenario                                 | 2016                                           | 2040 Forecast                                  | 2040 Better Scenario                           | 2040 Worse Scenario                            |
|--------------------------------------------|---------------------------------------------------|-----------------------------------------------------|-----------------------------------------------------|-----------------------------------------------------|------------------------------------------------|------------------------------------------------|------------------------------------------------|------------------------------------------------|
| Gastritis and duodenitis                   | 7.61<br>(5.23 to<br>11.12)                        | 10.66<br>(7.18 to<br>15.49)                         | 9.63<br>(6.53 to<br>14.05)                          | 11.69<br>(7.81 to<br>17.35)                         | 0.18<br>(0.13 to<br>0.25)                      | 0.28<br>(0.20 to<br>0.39)                      | 0.26<br>(0.19 to<br>0.36)                      | 0.29<br>(0.21 to<br>0.41)                      |
| Appendicitis                               | 12.85<br>(8.79 to<br>19.30)                       | 13.64<br>(9.15 to<br>19.54)                         | 11.41<br>(7.90 to<br>16.07)                         | 16.29<br>(10.87 to<br>24.14)                        | 0.32<br>(0.22 to<br>0.43)                      | 0.44<br>(0.31 to<br>0.58)                      | 0.39<br>(0.28 to<br>0.52)                      | 0.48<br>(0.33 to<br>0.65)                      |
| Paralytic ileus and intestinal obstruction | 50.65<br>(35.49 to<br>74.82)                      | 68.34<br>(50.08 to<br>93.88)                        | 61.97<br>(46.13 to<br>84.68)                        | 76.49<br>(54.38 to<br>109.81)                       | 1.21<br>(0.90 to<br>1.63)                      | 2.16<br>(1.68 to<br>2.90)                      | 2.13<br>(1.67 to<br>2.86)                      | 2.17<br>(1.64 to<br>2.92)                      |
| Inguinal, femoral, and abdominal hernia    | 6.61<br>(4.50 to<br>9.33)                         | 7.00<br>(4.66 to<br>10.07)                          | 6.25<br>(4.18 to<br>8.94)                           | 7.72<br>(5.13 to<br>11.08)                          | 0.22<br>(0.15 to<br>0.32)                      | 0.27<br>(0.18 to<br>0.41)                      | 0.25<br>(0.17 to<br>0.38)                      | 0.28<br>(0.19 to<br>0.41)                      |
| Inflammatory bowel disease                 | 3.60<br>(2.12 to<br>6.55)                         | 6.35<br>(3.98 to<br>10.68)                          | 6.24<br>(3.94 to<br>10.09)                          | 6.40<br>(3.95 to<br>11.04)                          | 0.10<br>(0.06 to<br>0.16)                      | 0.20<br>(0.13 to<br>0.32)                      | 0.21<br>(0.14 to<br>0.33)                      | 0.19<br>(0.12 to<br>0.31)                      |
| Vascular intestinal disorders              | 3.22<br>(2.25 to<br>4.61)                         | 5.31<br>(3.84 to<br>7.29)                           | 5.09<br>(3.67 to<br>6.92)                           | 5.48<br>(3.92 to<br>7.67)                           | 0.11<br>(0.08 to<br>0.15)                      | 0.23<br>(0.17 to<br>0.31)                      | 0.24<br>(0.18 to<br>0.31)                      | 0.22<br>(0.16 to<br>0.29)                      |
| Gallbladder and biliary diseases           | 6.90<br>(4.94 to<br>8.80)                         | 9.44<br>(5.78 to<br>14.71)                          | 7.24<br>(4.71 to<br>10.99)                          | 12.07<br>(7.13 to<br>18.98)                         | 0.21<br>(0.16 to<br>0.28)                      | 0.35<br>(0.22 to<br>0.53)                      | 0.28<br>(0.19 to<br>0.43)                      | 0.42<br>(0.25 to<br>0.65)                      |
| Pancreatitis                               | 19.59<br>(14.44 to<br>25.61)                      | 30.14<br>(13.63 to<br>68.80)                        | 26.50<br>(12.21 to<br>58.18)                        | 43.76<br>(16.72 to<br>110.53)                       | 0.53<br>(0.40 to<br>0.69)                      | 0.88<br>(0.46 to<br>1.87)                      | 0.79<br>(0.43 to<br>1.60)                      | 1.21<br>(0.53 to<br>2.89)                      |
| Other digestive diseases                   | 19.54<br>(14.17 to<br>26.57)                      | 24.93<br>(17.77 to<br>34.09)                        | 21.60<br>(15.53 to<br>29.28)                        | 28.57<br>(20.14 to<br>39.62)                        | 0.53<br>(0.41 to<br>0.71)                      | 0.83<br>(0.62 to<br>1.09)                      | 0.77<br>(0.58 to<br>1.00)                      | 0.89<br>(0.65 to<br>1.17)                      |
| <b>Neurological disorders</b>              | <b>63.11</b><br><b>(50.30 to</b><br><b>76.81)</b> | <b>115.03</b><br><b>(89.40 to</b><br><b>145.82)</b> | <b>112.15</b><br><b>(89.01 to</b><br><b>140.04)</b> | <b>126.22</b><br><b>(93.05 to</b><br><b>168.94)</b> | <b>2.24</b><br><b>(1.87 to</b><br><b>2.66)</b> | <b>5.94</b><br><b>(4.67 to</b><br><b>7.42)</b> | <b>6.57</b><br><b>(5.31 to</b><br><b>8.04)</b> | <b>5.39</b><br><b>(4.08 to</b><br><b>6.90)</b> |
| Alzheimer's disease and other dementias    | 16.67<br>(13.31 to<br>20.62)                      | 48.15<br>(36.30 to<br>63.99)                        | 52.46<br>(40.79 to<br>67.72)                        | 42.20<br>(30.27 to<br>58.26)                        | 1.29<br>(1.03 to<br>1.60)                      | 4.26<br>(3.11 to<br>5.72)                      | 4.90<br>(3.76 to<br>6.33)                      | 3.50<br>(2.34 to<br>4.92)                      |
| Parkinson's disease                        | 1.60<br>(1.18 to<br>2.13)                         | 5.40<br>(4.01 to<br>6.97)                           | 6.71<br>(5.01 to<br>8.62)                           | 4.12<br>(3.02 to<br>5.40)                           | 0.11<br>(0.08 to<br>0.14)                      | 0.42<br>(0.31 to<br>0.56)                      | 0.54<br>(0.40 to<br>0.71)                      | 0.30<br>(0.21 to<br>0.41)                      |
| Epilepsy                                   | 36.72<br>(27.80 to<br>46.02)                      | 45.82<br>(28.11 to<br>71.39)                        | 37.47<br>(22.98 to<br>58.58)                        | 63.99<br>(37.66 to<br>102.58)                       | 0.69<br>(0.53 to<br>0.85)                      | 0.94<br>(0.57 to<br>1.46)                      | 0.79<br>(0.49 to<br>1.21)                      | 1.28<br>(0.73 to<br>2.05)                      |
| Multiple sclerosis                         | 0.49<br>(0.37 to<br>0.71)                         | 1.11<br>(0.79 to<br>1.69)                           | 1.16<br>(0.82 to<br>1.75)                           | 1.04<br>(0.74 to<br>1.58)                           | 0.01<br>(0.01 to<br>0.02)                      | 0.03<br>(0.02 to<br>0.05)                      | 0.03<br>(0.02 to<br>0.05)                      | 0.03<br>(0.02 to<br>0.04)                      |
| Motor neuron disease                       | 0.90<br>(0.63 to<br>1.16)                         | 2.04<br>(1.56 to<br>2.61)                           | 2.18<br>(1.70 to<br>2.78)                           | 1.90<br>(1.41 to<br>2.42)                           | 0.02<br>(0.02 to<br>0.03)                      | 0.06<br>(0.05 to<br>0.08)                      | 0.07<br>(0.05 to<br>0.08)                      | 0.05<br>(0.04 to<br>0.07)                      |
| Other neurological disorders               | 6.73<br>(3.61 to<br>10.66)                        | 12.50<br>(7.15 to<br>19.51)                         | 12.17<br>(7.12 to<br>18.69)                         | 12.97<br>(7.09 to<br>20.74)                         | 0.11<br>(0.07 to<br>0.17)                      | 0.24<br>(0.14 to<br>0.35)                      | 0.24<br>(0.15 to<br>0.35)                      | 0.24<br>(0.14 to<br>0.36)                      |
| <b>Mental disorders</b>                    | <b>20.29</b><br><b>(12.43 to</b><br><b>28.32)</b> | <b>39.43</b><br><b>(23.13 to</b><br><b>57.12)</b>   | <b>39.15</b><br><b>(23.18 to</b><br><b>56.50)</b>   | <b>40.56</b><br><b>(23.65 to</b><br><b>58.89)</b>   | <b>0.48</b><br><b>(0.30 to</b><br><b>0.66)</b> | <b>0.96</b><br><b>(0.58 to</b><br><b>1.32)</b> | <b>0.97</b><br><b>(0.60 to</b><br><b>1.35)</b> | <b>0.96</b><br><b>(0.58 to</b><br><b>1.35)</b> |
| Alcohol use disorders                      | 8.63<br>(5.43 to<br>12.69)                        | 13.14<br>(8.24 to<br>20.30)                         | 12.89<br>(8.17 to<br>19.74)                         | 14.40<br>(8.99 to<br>21.85)                         | 0.23<br>(0.15 to<br>0.34)                      | 0.37<br>(0.25 to<br>0.57)                      | 0.38<br>(0.25 to<br>0.57)                      | 0.40<br>(0.26 to<br>0.59)                      |
| Drug use disorders                         | 11.60<br>(6.13 to<br>17.12)                       | 26.17<br>(13.69 to<br>40.73)                        | 26.13<br>(13.82 to<br>40.55)                        | 26.04<br>(13.60 to<br>40.76)                        | 0.24<br>(0.13 to<br>0.35)                      | 0.58<br>(0.31 to<br>0.86)                      | 0.59<br>(0.32 to<br>0.88)                      | 0.56<br>(0.30 to<br>0.84)                      |
| Opioid use disorders                       | 10.72<br>(5.49 to<br>16.20)                       | 23.76<br>(11.84 to<br>37.87)                        | 23.66<br>(11.93 to<br>37.29)                        | 23.72<br>(11.68 to<br>38.21)                        | 0.22<br>(0.11 to<br>0.33)                      | 0.49<br>(0.25 to<br>0.77)                      | 0.50<br>(0.25 to<br>0.78)                      | 0.49<br>(0.24 to<br>0.76)                      |
| Cocaine use disorders                      | 0.20<br>(0.07 to<br>0.41)                         | 0.55<br>(0.21 to<br>1.14)                           | 0.52<br>(0.20 to<br>1.06)                           | 0.57<br>(0.22 to<br>1.19)                           | 0.01<br>(0.00 to<br>0.01)                      | 0.02<br>(0.01 to<br>0.03)                      | 0.02<br>(0.01 to<br>0.03)                      | 0.02<br>(0.01 to<br>0.03)                      |

|                                                            |                                 |                                 |                                 |                                 |                            |                              |                              |                              |
|------------------------------------------------------------|---------------------------------|---------------------------------|---------------------------------|---------------------------------|----------------------------|------------------------------|------------------------------|------------------------------|
| Amphetamine use disorders                                  | 0.10<br>(0.04 to<br>0.22)       | 0.38<br>(0.15 to<br>0.80)       | 0.35<br>(0.14 to<br>0.71)       | 0.41<br>(0.16 to<br>0.86)       | 0.00<br>(0.00 to<br>0.01)  | 0.01<br>(0.00 to<br>0.02)    | 0.01<br>(0.00 to<br>0.02)    | 0.01<br>(0.00 to<br>0.02)    |
| Other drug use disorders                                   | 0.57<br>(0.29 to<br>0.92)       | 1.47<br>(0.80 to<br>2.28)       | 1.60<br>(0.88 to<br>2.46)       | 1.34<br>(0.71 to<br>2.09)       | 0.02<br>(0.01 to<br>0.03)  | 0.06<br>(0.03 to<br>0.08)    | 0.07<br>(0.04 to<br>0.10)    | 0.05<br>(0.03 to<br>0.07)    |
| Eating disorders                                           | 0.06<br>(0.03 to<br>0.10)       | 0.12<br>(0.07 to<br>0.23)       | 0.12<br>(0.07 to<br>0.23)       | 0.12<br>(0.07 to<br>0.22)       | 0.00<br>(0.00 to<br>0.00)  | 0.00<br>(0.00 to<br>0.00)    | 0.00<br>(0.00 to<br>0.00)    | 0.00<br>(0.00 to<br>0.00)    |
| <b>Cote d'Ivoire</b>                                       |                                 |                                 |                                 |                                 |                            |                              |                              |                              |
| Cause                                                      | YLLs (in 1000s)                 |                                 |                                 |                                 | Deaths (in 1000s)          |                              |                              |                              |
|                                                            | 2016                            | 2040 Forecast                   | 2040 Better Scenario            | 2040 Worse Scenario             | 2016                       | 2040 Forecast                | 2040 Better Scenario         | 2040 Worse Scenario          |
| Diabetes, urogenital, blood, and endocrine diseases        | 354.98<br>(306.38 to<br>406.26) | 582.56<br>(458.18 to<br>758.98) | 466.06<br>(365.13 to<br>599.98) | 736.95<br>(577.89 to<br>950.40) | 9.59<br>(8.44 to<br>11.05) | 20.64<br>(16.36 to<br>27.80) | 17.16<br>(13.69 to<br>22.95) | 24.74<br>(19.59 to<br>32.52) |
| Diabetes mellitus                                          | 101.15<br>(87.43 to<br>117.31)  | 203.58<br>(137.45 to<br>299.97) | 155.20<br>(106.22 to<br>224.96) | 268.86<br>(175.46 to<br>407.66) | 3.98<br>(3.44 to<br>4.63)  | 9.15<br>(6.48 to<br>12.77)   | 7.38<br>(5.36 to<br>10.19)   | 11.30<br>(7.85 to<br>15.91)  |
| Acute glomerulonephritis                                   | 0.19<br>(0.17 to<br>0.21)       | 0.29<br>(0.22 to<br>0.39)       | 0.24<br>(0.18 to<br>0.32)       | 0.36<br>(0.27 to<br>0.47)       | 0.00<br>(0.00 to<br>0.00)  | 0.00<br>(0.00 to<br>0.01)    | 0.00<br>(0.00 to<br>0.01)    | 0.01<br>(0.00 to<br>0.01)    |
| Chronic kidney disease                                     | 98.45<br>(80.23 to<br>121.69)   | 166.72<br>(101.28 to<br>297.96) | 125.30<br>(78.26 to<br>219.78)  | 221.18<br>(134.53 to<br>390.37) | 2.64<br>(2.20 to<br>3.32)  | 6.21<br>(3.26 to<br>13.59)   | 4.81<br>(2.59 to<br>10.54)   | 7.82<br>(4.13 to<br>16.13)   |
| Chronic kidney disease due to diabetes mellitus            | 22.13<br>(17.44 to<br>28.52)    | 47.88<br>(27.48 to<br>92.40)    | 36.70<br>(21.37 to<br>68.75)    | 62.06<br>(34.79 to<br>117.34)   | 0.74<br>(0.60 to<br>0.95)  | 2.00<br>(1.01 to<br>4.46)    | 1.56<br>(0.83 to<br>3.49)    | 2.49<br>(1.25 to<br>5.37)    |
| Chronic kidney disease due to hypertension                 | 11.38<br>(8.74 to<br>15.40)     | 26.70<br>(13.53 to<br>58.46)    | 20.38<br>(10.72 to<br>44.05)    | 34.09<br>(16.98 to<br>74.19)    | 0.47<br>(0.37 to<br>0.64)  | 1.43<br>(0.64 to<br>3.59)    | 1.13<br>(0.53 to<br>2.88)    | 1.73<br>(0.76 to<br>4.25)    |
| Chronic kidney disease due to glomerulonephritis           | 30.85<br>(24.27 to<br>38.87)    | 42.86<br>(27.58 to<br>68.64)    | 31.65<br>(20.46 to<br>49.73)    | 58.31<br>(37.43 to<br>93.55)    | 0.65<br>(0.52 to<br>0.83)  | 1.23<br>(0.68 to<br>2.52)    | 0.92<br>(0.53 to<br>1.88)    | 1.59<br>(0.90 to<br>3.09)    |
| Chronic kidney disease due to other and unspecified causes | 34.09<br>(27.00 to<br>42.80)    | 49.28<br>(31.29 to<br>83.07)    | 36.57<br>(23.04 to<br>60.89)    | 66.72<br>(41.66 to<br>108.72)   | 0.77<br>(0.62 to<br>0.98)  | 1.56<br>(0.85 to<br>3.19)    | 1.19<br>(0.67 to<br>2.43)    | 2.00<br>(1.11 to<br>3.90)    |
| Urinary diseases and male infertility                      | 39.68<br>(33.87 to<br>46.87)    | 74.17<br>(61.70 to<br>92.13)    | 69.66<br>(57.60 to<br>86.28)    | 79.50<br>(65.10 to<br>97.92)    | 1.06<br>(0.91 to<br>1.23)  | 2.48<br>(2.15 to<br>2.83)    | 2.50<br>(2.17 to<br>2.89)    | 2.41<br>(2.07 to<br>2.77)    |
| Urinary tract infections                                   | 24.04<br>(19.73 to<br>29.86)    | 55.30<br>(44.78 to<br>68.46)    | 53.36<br>(43.26 to<br>66.18)    | 57.76<br>(46.53 to<br>72.52)    | 0.62<br>(0.51 to<br>0.75)  | 1.86<br>(1.58 to<br>2.19)    | 1.94<br>(1.65 to<br>2.28)    | 1.76<br>(1.48 to<br>2.06)    |
| Urolithiasis                                               | 0.75<br>(0.54 to<br>1.00)       | 1.55<br>(1.06 to<br>2.29)       | 1.43<br>(0.98 to<br>2.09)       | 1.70<br>(1.14 to<br>2.54)       | 0.01<br>(0.01 to<br>0.02)  | 0.03<br>(0.02 to<br>0.04)    | 0.03<br>(0.02 to<br>0.04)    | 0.03<br>(0.02 to<br>0.05)    |
| Other urinary diseases                                     | 14.89<br>(11.56 to<br>18.32)    | 17.32<br>(12.30 to<br>23.21)    | 14.87<br>(10.56 to<br>19.84)    | 20.04<br>(14.48 to<br>26.35)    | 0.43<br>(0.34 to<br>0.52)  | 0.59<br>(0.43 to<br>0.75)    | 0.54<br>(0.38 to<br>0.70)    | 0.62<br>(0.46 to<br>0.80)    |
| Gynecological diseases                                     | 1.87<br>(1.25 to<br>2.52)       | 3.19<br>(1.82 to<br>5.02)       | 2.65<br>(1.51 to<br>4.20)       | 3.82<br>(2.18 to<br>6.04)       | 0.04<br>(0.03 to<br>0.06)  | 0.07<br>(0.04 to<br>0.11)    | 0.06<br>(0.04 to<br>0.10)    | 0.09<br>(0.05 to<br>0.14)    |
| Uterine fibroids                                           | 0.13<br>(0.06 to<br>0.25)       | 0.18<br>(0.08 to<br>0.36)       | 0.15<br>(0.06 to<br>0.30)       | 0.22<br>(0.09 to<br>0.44)       | 0.00<br>(0.00 to<br>0.01)  | 0.01<br>(0.00 to<br>0.01)    | 0.00<br>(0.00 to<br>0.01)    | 0.01<br>(0.00 to<br>0.01)    |
| Polycystic ovarian syndrome                                | 0.31<br>(0.05 to<br>0.67)       | 0.32<br>(0.04 to<br>0.83)       | 0.23<br>(0.03 to<br>0.62)       | 0.44<br>(0.06 to<br>1.13)       | 0.01<br>(0.00 to<br>0.01)  | 0.01<br>(0.00 to<br>0.02)    | 0.01<br>(0.00 to<br>0.01)    | 0.01<br>(0.00 to<br>0.02)    |
| Endometriosis                                              | 0.00<br>(0.00 to<br>0.01)       | 0.01<br>(0.00 to<br>0.02)       | 0.01<br>(0.00 to<br>0.02)       | 0.01<br>(0.00 to<br>0.03)       | 0.00<br>(0.00 to<br>0.00)  | 0.00<br>(0.00 to<br>0.00)    | 0.00<br>(0.00 to<br>0.00)    | 0.00<br>(0.00 to<br>0.00)    |
| Genital prolapse                                           | 0.06<br>(0.01 to<br>0.15)       | 0.08<br>(0.01 to<br>0.23)       | 0.06<br>(0.01 to<br>0.18)       | 0.10<br>(0.01 to<br>0.28)       | 0.00<br>(0.00 to<br>0.00)  | 0.00<br>(0.00 to<br>0.00)    | 0.00<br>(0.00 to<br>0.00)    | 0.00<br>(0.00 to<br>0.01)    |

|                                                   |                            |                             |                            |                             |                        |                        |                        |                        |
|---------------------------------------------------|----------------------------|-----------------------------|----------------------------|-----------------------------|------------------------|------------------------|------------------------|------------------------|
| Other gynecological diseases                      | 1.37<br>(0.83 to 1.95)     | 2.40<br>(1.44 to 4.26)      | 2.21<br>(1.20 to 3.58)     | 3.05<br>(1.67 to 5.04)      | 0.03<br>(0.02 to 0.04) | 0.06<br>(0.03 to 0.10) | 0.05<br>(0.03 to 0.08) | 0.07<br>(0.04 to 0.11) |
| Hemoglobinopathies and hemolytic anemias          | 96.86<br>(67.55 to 121.98) | 109.87<br>(75.31 to 151.16) | 91.41<br>(63.24 to 125.87) | 134.20<br>(91.35 to 185.41) | 1.51<br>(1.07 to 1.86) | 2.04<br>(1.43 to 2.77) | 1.75<br>(1.23 to 2.36) | 2.40<br>(1.67 to 3.24) |
| Thalassemias                                      | 4.97<br>(2.77 to 7.39)     | 3.56<br>(1.87 to 5.89)      | 3.18<br>(1.74 to 5.23)     | 4.10<br>(2.09 to 6.87)      | 0.06<br>(0.03 to 0.09) | 0.04<br>(0.02 to 0.07) | 0.04<br>(0.02 to 0.06) | 0.05<br>(0.03 to 0.08) |
| Sickle cell disorders                             | 81.67<br>(56.34 to 103.85) | 90.26<br>(60.62 to 125.19)  | 74.59<br>(50.77 to 104.78) | 111.41<br>(74.30 to 157.63) | 1.16<br>(0.81 to 1.45) | 1.44<br>(0.96 to 2.00) | 1.22<br>(0.83 to 1.71) | 1.74<br>(1.16 to 2.44) |
| G6PD deficiency                                   | 7.75<br>(5.94 to 10.21)    | 12.37<br>(8.69 to 17.43)    | 10.33<br>(7.21 to 14.51)   | 14.72<br>(10.32 to 20.57)   | 0.18<br>(0.13 to 0.25) | 0.34<br>(0.24 to 0.50) | 0.29<br>(0.20 to 0.43) | 0.39<br>(0.27 to 0.57) |
| Other hemoglobinopathies and hemolytic anemias    | 2.46<br>(1.60 to 3.43)     | 3.67<br>(2.30 to 5.43)      | 3.30<br>(2.10 to 4.91)     | 3.97<br>(2.48 to 5.82)      | 0.12<br>(0.08 to 0.17) | 0.22<br>(0.14 to 0.32) | 0.20<br>(0.14 to 0.31) | 0.22<br>(0.14 to 0.33) |
| Endocrine, metabolic, blood, and immune disorders | 16.78<br>(11.90 to 23.34)  | 24.75<br>(17.70 to 35.05)   | 21.60<br>(15.57 to 30.62)  | 29.05<br>(20.10 to 41.85)   | 0.35<br>(0.26 to 0.50) | 0.69<br>(0.52 to 1.02) | 0.66<br>(0.49 to 0.97) | 0.72<br>(0.53 to 1.06) |

**Cote d'Ivoire**

| Cause                                         | YLLs (in 1000s)                     |                                     |                                     |                                       | Deaths (in 1000s)              |                                |                               |                                |
|-----------------------------------------------|-------------------------------------|-------------------------------------|-------------------------------------|---------------------------------------|--------------------------------|--------------------------------|-------------------------------|--------------------------------|
|                                               | 2016                                | 2040 Forecast                       | 2040 Better Scenario                | 2040 Worse Scenario                   | 2016                           | 2040 Forecast                  | 2040 Better Scenario          | 2040 Worse Scenario            |
| <b>Musculoskeletal disorders</b>              | <b>5.68</b><br>(3.90 to 7.70)       | <b>13.54</b><br>(9.06 to 19.26)     | <b>14.18</b><br>(9.57 to 20.15)     | <b>12.86</b><br>(8.60 to 18.27)       | <b>0.13</b><br>(0.09 to 0.17)  | <b>0.37</b><br>(0.27 to 0.50)  | <b>0.40</b><br>(0.29 to 0.55) | <b>0.33</b><br>(0.24 to 0.45)  |
| Rheumatoid arthritis                          | 0.40<br>(0.22 to 0.68)              | 0.91<br>(0.49 to 1.56)              | 0.82<br>(0.44 to 1.41)              | 0.98<br>(0.54 to 1.68)                | 0.02<br>(0.01 to 0.03)         | 0.05<br>(0.03 to 0.07)         | 0.04<br>(0.02 to 0.07)        | 0.05<br>(0.03 to 0.07)         |
| Other musculoskeletal disorders               | 5.28<br>(3.63 to 7.19)              | 12.63<br>(8.38 to 18.11)            | 13.35<br>(8.90 to 19.25)            | 11.88<br>(7.86 to 17.16)              | 0.12<br>(0.08 to 0.16)         | 0.32<br>(0.23 to 0.45)         | 0.36<br>(0.26 to 0.50)        | 0.29<br>(0.20 to 0.40)         |
| <b>Other non-communicable diseases</b>        | <b>575.96</b><br>(268.40 to 869.25) | <b>496.61</b><br>(251.21 to 793.99) | <b>355.46</b><br>(187.22 to 551.71) | <b>730.40</b><br>(348.77 to 1,197.39) | <b>7.12</b><br>(3.49 to 10.59) | <b>7.20</b><br>(4.15 to 10.84) | <b>5.59</b><br>(3.46 to 8.11) | <b>9.87</b><br>(5.22 to 15.47) |
| Congenital birth defects                      | 541.81<br>(235.83 to 826.06)        | 435.71<br>(190.16 to 717.18)        | 302.59<br>(138.33 to 486.76)        | 656.81<br>(278.07 to 1,092.85)        | 6.50<br>(2.89 to 9.87)         | 5.50<br>(2.52 to 8.92)         | 3.91<br>(1.88 to 6.17)        | 8.11<br>(3.56 to 13.33)        |
| Neural tube defects                           | 113.02<br>(47.39 to 226.95)         | 32.24<br>(11.03 to 77.24)           | 19.36<br>(6.80 to 46.97)            | 55.88<br>(20.03 to 132.61)            | 1.32<br>(0.56 to 2.64)         | 0.39<br>(0.13 to 0.91)         | 0.23<br>(0.08 to 0.56)        | 0.66<br>(0.24 to 1.55)         |
| Congenital heart anomalies                    | 135.63<br>(66.50 to 222.88)         | 129.40<br>(66.88 to 226.94)         | 93.00<br>(50.79 to 157.97)          | 187.65<br>(93.31 to 342.15)           | 1.67<br>(0.85 to 2.69)         | 1.68<br>(0.91 to 2.85)         | 1.24<br>(0.71 to 2.03)        | 2.38<br>(1.23 to 4.23)         |
| Orofacial clefts                              | 4.19<br>(0.83 to 11.84)             | 2.55<br>(0.47 to 7.46)              | 1.44<br>(0.26 to 4.14)              | 4.71<br>(0.85 to 14.19)               | 0.05<br>(0.01 to 0.14)         | 0.03<br>(0.01 to 0.09)         | 0.02<br>(0.00 to 0.05)        | 0.05<br>(0.01 to 0.16)         |
| Down syndrome                                 | 5.25<br>(1.77 to 13.16)             | 6.27<br>(2.31 to 15.24)             | 4.55<br>(1.80 to 10.28)             | 9.04<br>(3.12 to 23.11)               | 0.07<br>(0.03 to 0.17)         | 0.10<br>(0.04 to 0.21)         | 0.07<br>(0.03 to 0.16)        | 0.13<br>(0.05 to 0.31)         |
| Other chromosomal abnormalities               | 22.07<br>(6.04 to 49.12)            | 29.11<br>(7.93 to 64.76)            | 19.17<br>(5.19 to 42.38)            | 46.01<br>(12.37 to 102.42)            | 0.26<br>(0.07 to 0.57)         | 0.25<br>(0.09 to 0.76)         | 0.23<br>(0.06 to 0.50)        | 0.54<br>(0.15 to 1.20)         |
| Congenital musculoskeletal and limb anomalies | 4.16<br>(1.18 to 11.64)             | 4.34<br>(1.29 to 11.84)             | 3.04<br>(0.91 to 8.22)              | 6.44<br>(1.83 to 17.80)               | 0.05<br>(0.01 to 0.14)         | 0.05<br>(0.02 to 0.14)         | 0.04<br>(0.01 to 0.10)        | 0.08<br>(0.02 to 0.21)         |
| Urogenital congenital anomalies               | 4.83<br>(1.90 to 9.28)              | 5.44<br>(2.31 to 10.62)             | 4.23<br>(1.88 to 8.04)              | 7.34<br>(2.97 to 14.65)               | 0.07<br>(0.03 to 0.12)         | 0.09<br>(0.04 to 0.15)         | 0.07<br>(0.04 to 0.12)        | 0.11<br>(0.05 to 0.20)         |
| Digestive congenital anomalies                | 27.09<br>(11.33 to 53.66)           | 23.81<br>(9.51 to 50.69)            | 15.80<br>(6.39 to 32.61)            | 37.36<br>(14.17 to 78.99)             | 0.32<br>(0.13 to 0.63)         | 0.28<br>(0.11 to 0.60)         | 0.19<br>(0.08 to 0.38)        | 0.44<br>(0.17 to 0.93)         |

|                                      |                                                      |                                                        |                                                      |                                                          |                                                   |                                                   |                                                   |                                                   |
|--------------------------------------|------------------------------------------------------|--------------------------------------------------------|------------------------------------------------------|----------------------------------------------------------|---------------------------------------------------|---------------------------------------------------|---------------------------------------------------|---------------------------------------------------|
| Other congenital birth defects       | 225.57<br>(59.87 to<br>445.64)                       | 202.55<br>(57.89 to<br>411.61)                         | 142.00<br>(42.75 to<br>280.03)                       | 302.38<br>(81.95 to<br>629.79)                           | 2.71<br>(0.74 to<br>5.28)                         | 2.54<br>(0.79 to<br>5.06)                         | 1.83<br>(0.61 to<br>3.53)                         | 3.72<br>(1.08 to<br>7.66)                         |
| Skin and subcutaneous diseases       | 14.52<br>(9.37 to<br>22.89)                          | 45.54<br>(29.20 to<br>70.12)                           | 42.60<br>(27.68 to<br>64.64)                         | 49.55<br>(31.51 to<br>78.13)                             | 0.39<br>(0.25 to<br>0.62)                         | 1.52<br>(1.00 to<br>2.33)                         | 1.56<br>(1.02 to<br>2.35)                         | 1.48<br>(0.96 to<br>2.31)                         |
| Cellulitis                           | 1.16<br>(0.51 to<br>1.99)                            | 4.98<br>(2.32 to<br>8.44)                              | 5.33<br>(2.52 to<br>8.82)                            | 4.65<br>(2.09 to<br>7.89)                                | 0.04<br>(0.02 to<br>0.06)                         | 0.18<br>(0.08 to<br>0.31)                         | 0.20<br>(0.09 to<br>0.34)                         | 0.16<br>(0.07 to<br>0.28)                         |
| Pyoderma                             | 11.98<br>(7.83 to<br>19.64)                          | 36.90<br>(24.15 to<br>58.41)                           | 33.47<br>(21.98 to<br>52.76)                         | 41.38<br>(27.06 to<br>67.80)                             | 0.30<br>(0.19 to<br>0.48)                         | 1.16<br>(0.78 to<br>1.81)                         | 1.14<br>(0.76 to<br>1.80)                         | 1.16<br>(0.79 to<br>1.82)                         |
| Decubitus ulcer                      | 0.92<br>(0.46 to<br>1.46)                            | 2.49<br>(1.31 to<br>3.87)                              | 2.66<br>(1.41 to<br>4.09)                            | 2.30<br>(1.18 to<br>3.61)                                | 0.05<br>(0.02 to<br>0.07)                         | 0.16<br>(0.08 to<br>0.25)                         | 0.19<br>(0.10 to<br>0.30)                         | 0.13<br>(0.07 to<br>0.21)                         |
| Other skin and subcutaneous diseases | 0.47<br>(0.23 to<br>0.77)                            | 1.17<br>(0.58 to<br>1.89)                              | 1.13<br>(0.59 to<br>1.86)                            | 1.22<br>(0.59 to<br>1.99)                                | 0.01<br>(0.00 to<br>0.02)                         | 0.03<br>(0.01 to<br>0.05)                         | 0.03<br>(0.01 to<br>0.05)                         | 0.03<br>(0.01 to<br>0.04)                         |
| Sudden infant death syndrome         | 19.63<br>(10.12 to<br>35.56)                         | 15.36<br>(6.65 to<br>32.13)                            | 10.27<br>(4.40 to<br>21.61)                          | 24.05<br>(10.25 to<br>51.07)                             | 0.23<br>(0.12 to<br>0.41)                         | 0.18<br>(0.08 to<br>0.37)                         | 0.12<br>(0.05 to<br>0.25)                         | 0.28<br>(0.12 to<br>0.59)                         |
| <b>Injuries</b>                      | <b>742.29</b><br><b>(644.27 to</b><br><b>850.48)</b> | <b>929.95</b><br><b>(723.90 to</b><br><b>1,203.17)</b> | <b>749.21</b><br><b>(589.53 to</b><br><b>962.38)</b> | <b>1,117.82</b><br><b>(853.95 to</b><br><b>1,474.32)</b> | <b>14.83</b><br><b>(13.13 to</b><br><b>16.85)</b> | <b>21.80</b><br><b>(18.02 to</b><br><b>26.93)</b> | <b>18.93</b><br><b>(15.84 to</b><br><b>23.19)</b> | <b>24.48</b><br><b>(19.97 to</b><br><b>30.74)</b> |
| <b>Transport injuries</b>            | <b>205.32</b><br><b>(174.30 to</b><br><b>245.81)</b> | <b>349.82</b><br><b>(265.73 to</b><br><b>475.23)</b>   | <b>246.42</b><br><b>(186.12 to</b><br><b>339.65)</b> | <b>418.53</b><br><b>(309.64 to</b><br><b>584.64)</b>     | <b>4.11</b><br><b>(3.55 to</b><br><b>4.82)</b>    | <b>7.49</b><br><b>(5.90 to</b><br><b>9.98)</b>    | <b>5.63</b><br><b>(4.42 to</b><br><b>7.45)</b>    | <b>8.59</b><br><b>(6.48 to</b><br><b>11.87)</b>   |
| Road injuries                        | 193.88<br>(165.37 to<br>231.18)                      | 330.08<br>(252.10 to<br>448.38)                        | 229.38<br>(175.20 to<br>314.78)                      | 393.89<br>(293.85 to<br>545.95)                          | 3.90<br>(3.36 to<br>4.56)                         | 7.10<br>(5.60 to<br>9.38)                         | 5.28<br>(4.18 to<br>6.97)                         | 8.11<br>(6.18 to<br>11.12)                        |
| Pedestrian road injuries             | 65.52<br>(46.33 to<br>86.01)                         | 90.32<br>(58.16 to<br>129.79)                          | 66.49<br>(42.49 to<br>95.57)                         | 107.58<br>(68.12 to<br>158.83)                           | 1.36<br>(0.99 to<br>1.76)                         | 2.10<br>(1.44 to<br>2.91)                         | 1.63<br>(1.12 to<br>2.22)                         | 2.39<br>(1.61 to<br>3.34)                         |
| <b>Cote d'Ivoire</b>                 |                                                      |                                                        |                                                      |                                                          |                                                   |                                                   |                                                   |                                                   |
| <b>Cause</b>                         | <b>YLLs (in 1000s)</b>                               |                                                        |                                                      |                                                          | <b>Deaths (in 1000s)</b>                          |                                                   |                                                   |                                                   |
|                                      | <b>2016</b>                                          | <b>2040 Forecast</b>                                   | <b>2040 Better Scenario</b>                          | <b>2040 Worse Scenario</b>                               | <b>2016</b>                                       | <b>2040 Forecast</b>                              | <b>2040 Better Scenario</b>                       | <b>2040 Worse Scenario</b>                        |
| Cyclist road injuries                | 4.78<br>(3.24 to<br>6.44)                            | 9.42<br>(5.88 to<br>14.04)                             | 6.64<br>(4.18 to<br>9.90)                            | 11.08<br>(6.80 to<br>16.85)                              | 0.10<br>(0.07 to<br>0.14)                         | 0.21<br>(0.14 to<br>0.30)                         | 0.16<br>(0.11 to<br>0.23)                         | 0.24<br>(0.15 to<br>0.35)                         |
| Motorcyclist road injuries           | 25.54<br>(19.75 to<br>32.71)                         | 49.02<br>(33.70 to<br>70.48)                           | 36.49<br>(24.68 to<br>53.41)                         | 57.89<br>(38.45 to<br>85.25)                             | 0.47<br>(0.37 to<br>0.60)                         | 0.94<br>(0.66 to<br>1.34)                         | 0.74<br>(0.52 to<br>1.06)                         | 1.08<br>(0.73 to<br>1.56)                         |
| Motor vehicle road injuries          | 94.68<br>(78.13 to<br>115.86)                        | 175.09<br>(133.00 to<br>239.13)                        | 115.53<br>(87.53 to<br>159.23)                       | 209.86<br>(155.20 to<br>292.94)                          | 1.90<br>(1.58 to<br>2.33)                         | 3.71<br>(2.90 to<br>4.94)                         | 2.64<br>(2.05 to<br>3.51)                         | 4.25<br>(3.20 to<br>5.82)                         |
| Other road injuries                  | 3.36<br>(2.35 to<br>4.42)                            | 6.24<br>(3.93 to<br>9.45)                              | 4.23<br>(2.71 to<br>6.31)                            | 7.48<br>(4.70 to<br>11.57)                               | 0.07<br>(0.05 to<br>0.09)                         | 0.14<br>(0.09 to<br>0.20)                         | 0.10<br>(0.07 to<br>0.15)                         | 0.16<br>(0.10 to<br>0.23)                         |
| Other transport injuries             | 11.44<br>(7.92 to<br>16.64)                          | 19.73<br>(12.28 to<br>30.68)                           | 17.04<br>(10.65 to<br>26.71)                         | 24.63<br>(15.16 to<br>39.20)                             | 0.21<br>(0.15 to<br>0.30)                         | 0.39<br>(0.25 to<br>0.59)                         | 0.35<br>(0.23 to<br>0.53)                         | 0.47<br>(0.30 to<br>0.73)                         |
| <b>Unintentional injuries</b>        | <b>420.80</b><br><b>(355.67 to</b><br><b>497.64)</b> | <b>408.18</b><br><b>(310.02 to</b><br><b>534.82)</b>   | <b>341.04</b><br><b>(260.06 to</b><br><b>440.52)</b> | <b>501.43</b><br><b>(372.83 to</b><br><b>669.20)</b>     | <b>8.12</b><br><b>(6.98 to</b><br><b>9.35)</b>    | <b>10.14</b><br><b>(8.33 to</b><br><b>12.29)</b>  | <b>9.27</b><br><b>(7.66 to</b><br><b>11.12)</b>   | <b>11.23</b><br><b>(9.03 to</b><br><b>13.86)</b>  |
| Falls                                | 57.14<br>(45.62 to<br>71.61)                         | 81.83<br>(63.57 to<br>101.32)                          | 76.34<br>(59.52 to<br>92.86)                         | 87.84<br>(67.22 to<br>112.56)                            | 1.61<br>(1.31 to<br>1.90)                         | 3.21<br>(2.65 to<br>3.72)                         | 3.28<br>(2.72 to<br>3.78)                         | 3.06<br>(2.47 to<br>3.64)                         |
| Drowning                             | 79.43<br>(64.23 to<br>97.93)                         | 65.85<br>(47.00 to<br>92.54)                           | 54.31<br>(38.95 to<br>75.32)                         | 82.71<br>(58.26 to<br>115.25)                            | 1.35<br>(1.11 to<br>1.61)                         | 1.32<br>(1.00 to<br>1.75)                         | 1.15<br>(0.87 to<br>1.52)                         | 1.56<br>(1.17 to<br>2.10)                         |
| Fire, heat, and hot substances       | 54.76<br>(43.76 to<br>68.56)                         | 43.49<br>(31.91 to<br>59.40)                           | 35.13<br>(25.87 to<br>47.28)                         | 56.09<br>(40.13 to<br>78.26)                             | 1.10<br>(0.91 to<br>1.33)                         | 1.12<br>(0.86 to<br>1.43)                         | 0.98<br>(0.75 to<br>1.24)                         | 1.32<br>(1.01 to<br>1.72)                         |

|                                                 |                                                     |                                                      |                                                      |                                                      |                                                |                                                |                                                |                                                |
|-------------------------------------------------|-----------------------------------------------------|------------------------------------------------------|------------------------------------------------------|------------------------------------------------------|------------------------------------------------|------------------------------------------------|------------------------------------------------|------------------------------------------------|
| Poisonings                                      | 23.14<br>(12.56 to<br>42.24)                        | 13.48<br>(6.79 to<br>25.66)                          | 9.75<br>(5.20 to<br>17.20)                           | 19.50<br>(9.46 to<br>39.74)                          | 0.40<br>(0.24 to<br>0.65)                      | 0.27<br>(0.15 to<br>0.42)                      | 0.21<br>(0.12 to<br>0.31)                      | 0.36<br>(0.20 to<br>0.61)                      |
| Exposure to mechanical forces                   | 58.07<br>(43.02 to<br>74.03)                        | 48.02<br>(30.20 to<br>68.98)                         | 37.93<br>(23.83 to<br>53.55)                         | 61.90<br>(38.56 to<br>90.19)                         | 0.98<br>(0.74 to<br>1.23)                      | 0.95<br>(0.62 to<br>1.31)                      | 0.79<br>(0.52 to<br>1.07)                      | 1.14<br>(0.76 to<br>1.59)                      |
| Unintentional firearm injuries                  | 17.74<br>(10.06 to<br>24.85)                        | 13.04<br>(6.72 to<br>20.62)                          | 10.40<br>(5.32 to<br>16.28)                          | 16.50<br>(8.48 to<br>26.43)                          | 0.32<br>(0.18 to<br>0.43)                      | 0.26<br>(0.14 to<br>0.39)                      | 0.22<br>(0.12 to<br>0.32)                      | 0.32<br>(0.17 to<br>0.48)                      |
| Unintentional suffocation                       | 12.53<br>(7.52 to<br>20.47)                         | 8.96<br>(5.00 to<br>14.94)                           | 6.36<br>(3.68 to<br>10.12)                           | 13.00<br>(6.96 to<br>22.15)                          | 0.16<br>(0.10 to<br>0.25)                      | 0.12<br>(0.07 to<br>0.20)                      | 0.09<br>(0.05 to<br>0.14)                      | 0.17<br>(0.10 to<br>0.28)                      |
| Other exposure to mechanical forces             | 27.80<br>(20.63 to<br>35.38)                        | 26.02<br>(16.89 to<br>37.34)                         | 21.17<br>(13.65 to<br>29.72)                         | 32.40<br>(20.82 to<br>47.28)                         | 0.50<br>(0.37 to<br>0.63)                      | 0.56<br>(0.38 to<br>0.76)                      | 0.49<br>(0.32 to<br>0.66)                      | 0.65<br>(0.44 to<br>0.90)                      |
| Adverse effects of medical treatment            | 44.22<br>(28.20 to<br>60.92)                        | 47.46<br>(28.65 to<br>69.70)                         | 39.32<br>(23.66 to<br>57.33)                         | 58.34<br>(34.94 to<br>88.96)                         | 0.79<br>(0.52 to<br>1.04)                      | 0.99<br>(0.64 to<br>1.39)                      | 0.88<br>(0.57 to<br>1.20)                      | 1.14<br>(0.73 to<br>1.58)                      |
| Animal contact                                  | 32.33<br>(25.71 to<br>40.23)                        | 36.53<br>(26.71 to<br>49.99)                         | 28.20<br>(20.84 to<br>37.83)                         | 47.96<br>(34.62 to<br>66.64)                         | 0.65<br>(0.53 to<br>0.78)                      | 0.86<br>(0.68 to<br>1.10)                      | 0.71<br>(0.57 to<br>0.91)                      | 1.04<br>(0.81 to<br>1.36)                      |
| Venomous animal contact                         | 27.54<br>(21.45 to<br>34.49)                        | 31.16<br>(22.78 to<br>42.40)                         | 24.24<br>(17.63 to<br>32.46)                         | 40.51<br>(29.09 to<br>55.91)                         | 0.58<br>(0.47 to<br>0.69)                      | 0.76<br>(0.60 to<br>0.97)                      | 0.63<br>(0.50 to<br>0.81)                      | 0.91<br>(0.71 to<br>1.19)                      |
| Non-venomous animal contact                     | 4.79<br>(2.50 to<br>8.11)                           | 5.37<br>(2.65 to<br>9.19)                            | 3.96<br>(2.08 to<br>6.68)                            | 7.45<br>(3.50 to<br>13.44)                           | 0.07<br>(0.04 to<br>0.12)                      | 0.10<br>(0.06 to<br>0.16)                      | 0.08<br>(0.05 to<br>0.13)                      | 0.13<br>(0.07 to<br>0.21)                      |
| Foreign body                                    | 29.73<br>(19.70 to<br>48.25)                        | 37.75<br>(24.05 to<br>58.39)                         | 32.84<br>(21.85 to<br>48.47)                         | 44.64<br>(27.22 to<br>71.90)                         | 0.48<br>(0.34 to<br>0.72)                      | 0.72<br>(0.52 to<br>1.02)                      | 0.69<br>(0.51 to<br>0.94)                      | 0.78<br>(0.53 to<br>1.15)                      |
| Pulmonary aspiration and foreign body in airway | 27.00<br>(17.64 to<br>45.34)                        | 34.58<br>(21.71 to<br>55.37)                         | 30.17<br>(19.90 to<br>46.21)                         | 40.81<br>(24.44 to<br>68.52)                         | 0.43<br>(0.30 to<br>0.67)                      | 0.66<br>(0.47 to<br>0.97)                      | 0.63<br>(0.46 to<br>0.89)                      | 0.71<br>(0.48 to<br>1.08)                      |
| Foreign body in other body part                 | 2.73<br>(0.87 to<br>5.19)                           | 3.17<br>(0.93 to<br>6.64)                            | 2.66<br>(0.77 to<br>5.79)                            | 3.83<br>(1.14 to<br>7.75)                            | 0.05<br>(0.02 to<br>0.09)                      | 0.06<br>(0.02 to<br>0.13)                      | 0.05<br>(0.02 to<br>0.12)                      | 0.07<br>(0.02 to<br>0.14)                      |
| Environmental heat and cold exposure            | 15.99<br>(6.80 to<br>22.36)                         | 13.17<br>(4.98 to<br>21.76)                          | 9.92<br>(3.79 to<br>16.25)                           | 17.63<br>(6.78 to<br>28.81)                          | 0.30<br>(0.13 to<br>0.42)                      | 0.28<br>(0.11 to<br>0.45)                      | 0.22<br>(0.09 to<br>0.34)                      | 0.36<br>(0.14 to<br>0.56)                      |
| Other unintentional injuries                    | 25.99<br>(19.76 to<br>32.02)                        | 20.61<br>(14.57 to<br>28.21)                         | 17.30<br>(12.31 to<br>23.85)                         | 24.80<br>(17.39 to<br>33.98)                         | 0.46<br>(0.35 to<br>0.55)                      | 0.42<br>(0.31 to<br>0.54)                      | 0.36<br>(0.27 to<br>0.48)                      | 0.48<br>(0.35 to<br>0.62)                      |
| <b>Self-harm and interpersonal violence</b>     | <b>112.25</b><br><b>(84.73 to</b><br><b>203.75)</b> | <b>171.11</b><br><b>(115.27 to</b><br><b>305.07)</b> | <b>160.94</b><br><b>(110.11 to</b><br><b>280.79)</b> | <b>196.99</b><br><b>(126.63 to</b><br><b>354.08)</b> | <b>2.54</b><br><b>(2.00 to</b><br><b>4.18)</b> | <b>4.16</b><br><b>(2.97 to</b><br><b>6.69)</b> | <b>4.02</b><br><b>(2.92 to</b><br><b>6.30)</b> | <b>4.65</b><br><b>(3.15 to</b><br><b>7.69)</b> |
| <b>Cote d'Ivoire</b>                            |                                                     |                                                      |                                                      |                                                      |                                                |                                                |                                                |                                                |
| Cause                                           | YLLs (in 1000s)                                     |                                                      |                                                      |                                                      | Deaths (in 1000s)                              |                                                |                                                |                                                |
|                                                 | 2016                                                | 2040 Forecast                                        | 2040 Better Scenario                                 | 2040 Worse Scenario                                  | 2016                                           | 2040 Forecast                                  | 2040 Better Scenario                           | 2040 Worse Scenario                            |
| Self-harm                                       | 83.56<br>(68.32 to<br>104.59)                       | 131.61<br>(92.20 to<br>194.87)                       | 124.06<br>(87.29 to<br>178.39)                       | 154.04<br>(102.76 to<br>243.13)                      | 2.05<br>(1.69 to<br>2.51)                      | 3.43<br>(2.50 to<br>4.88)                      | 3.33<br>(2.45 to<br>4.56)                      | 3.87<br>(2.66 to<br>5.77)                      |
| Self-harm by firearm                            | 9.67<br>(4.51 to<br>15.46)                          | 11.70<br>(5.46 to<br>20.30)                          | 10.79<br>(5.10 to<br>18.70)                          | 14.01<br>(6.23 to<br>26.71)                          | 0.24<br>(0.12 to<br>0.36)                      | 0.32<br>(0.15 to<br>0.52)                      | 0.30<br>(0.15 to<br>0.50)                      | 0.37<br>(0.17 to<br>0.64)                      |
| Self-harm by other specified means              | 73.89<br>(59.49 to<br>92.88)                        | 119.90<br>(83.75 to<br>179.18)                       | 113.27<br>(79.07 to<br>165.94)                       | 140.02<br>(92.09 to<br>225.05)                       | 1.81<br>(1.46 to<br>2.23)                      | 3.11<br>(2.26 to<br>4.44)                      | 3.03<br>(2.20 to<br>4.21)                      | 3.51<br>(2.43 to<br>5.26)                      |
| Interpersonal violence                          | 28.69<br>(13.87 to<br>109.35)                       | 39.50<br>(17.67 to<br>152.39)                        | 36.88<br>(16.67 to<br>139.85)                        | 42.95<br>(18.92 to<br>168.12)                        | 0.50<br>(0.24 to<br>1.90)                      | 0.73<br>(0.33 to<br>2.78)                      | 0.69<br>(0.32 to<br>2.61)                      | 0.77<br>(0.35 to<br>3.04)                      |
| Physical violence by firearm                    | 13.80<br>(4.90 to<br>66.10)                         | 19.36<br>(6.65 to<br>89.62)                          | 18.28<br>(6.37 to<br>82.86)                          | 20.54<br>(6.79 to<br>97.58)                          | 0.24<br>(0.09 to<br>1.17)                      | 0.35<br>(0.12 to<br>1.61)                      | 0.33<br>(0.12 to<br>1.50)                      | 0.37<br>(0.12 to<br>1.75)                      |

|                                                                                     |                                                                  |                                                                  |                                                                  |                                                                    |                                                               |                                                               |                                                               |                                                               |
|-------------------------------------------------------------------------------------|------------------------------------------------------------------|------------------------------------------------------------------|------------------------------------------------------------------|--------------------------------------------------------------------|---------------------------------------------------------------|---------------------------------------------------------------|---------------------------------------------------------------|---------------------------------------------------------------|
| Physical violence by sharp object                                                   | 7.66<br>(3.80 to<br>28.30)                                       | 11.78<br>(5.79 to<br>44.06)                                      | 11.35<br>(5.60 to<br>42.74)                                      | 12.24<br>(5.89 to<br>46.19)                                        | 0.14<br>(0.07 to<br>0.50)                                     | 0.22<br>(0.11 to<br>0.81)                                     | 0.22<br>(0.11 to<br>0.79)                                     | 0.23<br>(0.11 to<br>0.84)                                     |
| Physical violence by other means                                                    | 7.23<br>(3.90 to<br>22.74)                                       | 8.36<br>(3.80 to<br>31.61)                                       | 7.26<br>(3.29 to<br>27.44)                                       | 10.17<br>(4.57 to<br>39.49)                                        | 0.12<br>(0.06 to<br>0.39)                                     | 0.15<br>(0.07 to<br>0.60)                                     | 0.14<br>(0.06 to<br>0.53)                                     | 0.18<br>(0.08 to<br>0.72)                                     |
| <b>Forces of nature, conflict and terrorism, and executions and police conflict</b> | <b>3.92</b><br><b>(0.87 to</b><br><b>7.31)</b>                   | <b>0.84</b><br><b>(0.00 to</b><br><b>7.81)</b>                   | <b>0.80</b><br><b>(0.00 to</b><br><b>7.49)</b>                   | <b>0.88</b><br><b>(0.00 to</b><br><b>8.23)</b>                     | <b>0.06</b><br><b>(0.01 to</b><br><b>0.12)</b>                | <b>0.01</b><br><b>(0.00 to</b><br><b>0.14)</b>                | <b>0.01</b><br><b>(0.00 to</b><br><b>0.13)</b>                | <b>0.02</b><br><b>(0.00 to</b><br><b>0.14)</b>                |
| Exposure to forces of nature                                                        | 0.00<br>(0.00 to<br>0.00)                                        | 0.10<br>(0.00 to<br>1.64)                                        | 0.09<br>(0.00 to<br>1.56)                                        | 0.11<br>(0.00 to<br>1.76)                                          | 0.00<br>(0.00 to<br>0.00)                                     | 0.00<br>(0.00 to<br>0.03)                                     | 0.00<br>(0.00 to<br>0.03)                                     | 0.00<br>(0.00 to<br>0.03)                                     |
| Conflict and terrorism                                                              | 3.71<br>(0.60 to<br>7.09)                                        | 0.51<br>(0.00 to<br>6.66)                                        | 0.49<br>(0.00 to<br>6.53)                                        | 0.54<br>(0.00 to<br>7.07)                                          | 0.06<br>(0.01 to<br>0.11)                                     | 0.01<br>(0.00 to<br>0.12)                                     | 0.01<br>(0.00 to<br>0.11)                                     | 0.01<br>(0.00 to<br>0.12)                                     |
| Executions and police conflict                                                      | 0.22<br>(0.17 to<br>0.29)                                        | 0.23<br>(0.00 to<br>2.18)                                        | 0.22<br>(0.00 to<br>2.14)                                        | 0.23<br>(0.00 to<br>2.24)                                          | 0.00<br>(0.00 to<br>0.01)                                     | 0.00<br>(0.00 to<br>0.04)                                     | 0.00<br>(0.00 to<br>0.04)                                     | 0.00<br>(0.00 to<br>0.04)                                     |
| <b>The Gambia</b>                                                                   |                                                                  |                                                                  |                                                                  |                                                                    |                                                               |                                                               |                                                               |                                                               |
| Cause                                                                               | YLLs (actual counts)                                             |                                                                  |                                                                  |                                                                    | Deaths (actual counts)                                        |                                                               |                                                               |                                                               |
|                                                                                     | 2016                                                             | 2040 Forecast                                                    | 2040 Better Scenario                                             | 2040 Worse Scenario                                                | 2016                                                          | 2040 Forecast                                                 | 2040 Better Scenario                                          | 2040 Worse Scenario                                           |
| <b>All causes</b>                                                                   | <b>591,621.25</b><br><b>(522,434.73 to</b><br><b>666,195.94)</b> | <b>562,367.45</b><br><b>(466,276.88 to</b><br><b>682,718.64)</b> | <b>401,344.14</b><br><b>(336,714.14 to</b><br><b>476,412.90)</b> | <b>857,331.91</b><br><b>(707,477.60 to</b><br><b>1,035,017.02)</b> | <b>11,138.66</b><br><b>(10,150.13 to</b><br><b>12,159.86)</b> | <b>16,438.13</b><br><b>(14,417.88 to</b><br><b>18,808.10)</b> | <b>12,522.89</b><br><b>(11,114.77 to</b><br><b>14,135.79)</b> | <b>22,335.68</b><br><b>(19,250.07 to</b><br><b>25,647.20)</b> |
| <b>Communicable, maternal, neonatal, and nutritional diseases</b>                   | <b>405,889.00</b><br><b>(347,603.26 to</b><br><b>471,781.66)</b> | <b>251,046.29</b><br><b>(185,025.30 to</b><br><b>331,409.44)</b> | <b>152,293.95</b><br><b>(112,253.18 to</b><br><b>202,426.30)</b> | <b>466,188.29</b><br><b>(349,187.01 to</b><br><b>606,489.16)</b>   | <b>6,224.66</b><br><b>(5,465.44 to</b><br><b>7,077.11)</b>    | <b>5,337.46</b><br><b>(4,096.67 to</b><br><b>6,901.95)</b>    | <b>3,391.13</b><br><b>(2,621.72 to</b><br><b>4,415.01)</b>    | <b>8,998.08</b><br><b>(6,921.36 to</b><br><b>11,437.25)</b>   |
| <b>HIV/AIDS and tuberculosis</b>                                                    | <b>60,738.26</b><br><b>(45,715.94 to</b><br><b>79,821.81)</b>    | <b>46,677.25</b><br><b>(20,968.30 to</b><br><b>88,524.91)</b>    | <b>29,919.54</b><br><b>(11,435.84 to</b><br><b>63,497.95)</b>    | <b>134,302.78</b><br><b>(73,156.95 to</b><br><b>202,588.24)</b>    | <b>1,336.11</b><br><b>(1,053.29 to</b><br><b>1,721.77)</b>    | <b>1,117.67</b><br><b>(883.09 to</b><br><b>1,923.15)</b>      | <b>714.36</b><br><b>(328.95 to</b><br><b>1,371.18)</b>        | <b>2,978.27</b><br><b>(1,721.84 to</b><br><b>4,332.15)</b>    |
| Tuberculosis                                                                        | 16,971.33<br>(12,491.09 to<br>24,132.23)                         | 13,304.95<br>(8,188.88 to<br>22,032.51)                          | 7,729.25<br>(4,777.67 to<br>12,553.69)                           | 22,324.35<br>(12,951.34 to<br>37,594.13)                           | 458.83<br>(338.06 to<br>672.00)                               | 439.33<br>(273.86 to<br>727.50)                               | 269.27<br>(167.65 to<br>451.93)                               | 699.67<br>(405.26 to<br>1,208.82)                             |
| HIV/AIDS                                                                            | 43,766.93<br>(29,563.74 to<br>60,802.20)                         | 33,372.30<br>(8,966.62 to<br>74,198.76)                          | 22,190.29<br>(4,242.18 to<br>54,580.70)                          | 111,978.43<br>(51,333.23 to<br>178,755.45)                         | 877.28<br>(621.67 to<br>1,190.50)                             | 678.34<br>(196.48 to<br>1,484.39)                             | 445.09<br>(93.70 to<br>1,081.20)                              | 2,278.60<br>(1,027.89 to<br>3,578.46)                         |
| <b>Diarrhea, lower respiratory, and other common infectious diseases</b>            | <b>150,208.54</b><br><b>(123,914.77 to</b><br><b>179,290.05)</b> | <b>107,980.90</b><br><b>(67,020.21 to</b><br><b>163,363.11)</b>  | <b>57,369.11</b><br><b>(36,872.27 to</b><br><b>86,823.88)</b>    | <b>169,562.56</b><br><b>(104,678.56 to</b><br><b>255,762.74)</b>   | <b>2,391.42</b><br><b>(2,017.09 to</b><br><b>2,837.04)</b>    | <b>2,790.32</b><br><b>(1,865.52 to</b><br><b>4,018.29)</b>    | <b>1,657.40</b><br><b>(1,134.23 to</b><br><b>2,423.44)</b>    | <b>3,781.30</b><br><b>(2,489.48 to</b><br><b>5,535.49)</b>    |
| Diarrheal diseases                                                                  | 45,746.16<br>(32,187.07 to<br>64,646.09)                         | 22,213.89<br>(9,596.26 to<br>51,375.62)                          | 11,505.86<br>(3,842.88 to<br>26,962.31)                          | 37,676.68<br>(16,718.77 to<br>81,620.78)                           | 694.42<br>(470.13 to<br>1,015.81)                             | 548.00<br>(181.28 to<br>1,515.97)                             | 297.11<br>(85.04 to<br>821.61)                                | 867.24<br>(301.19 to<br>2,239.04)                             |
| Intestinal infectious diseases                                                      | 3,018.08<br>(1,378.87 to<br>5,706.11)                            | 2,950.66<br>(1,389.45 to<br>5,528.88)                            | 2,360.67<br>(1,103.19 to<br>4,259.95)                            | 3,842.93<br>(1,765.67 to<br>7,308.57)                              | 41.56<br>(19.09 to<br>76.75)                                  | 43.37<br>(20.58 to<br>80.31)                                  | 35.29<br>(16.73 to<br>62.94)                                  | 55.09<br>(25.74 to<br>104.23)                                 |
| Typhoid fever                                                                       | 2,522.16<br>(1,084.06 to<br>4,822.69)                            | 2,395.80<br>(1,043.36 to<br>4,653.93)                            | 1,929.78<br>(846.78 to<br>3,713.47)                              | 3,105.99<br>(1,314.14 to<br>6,213.54)                              | 34.74<br>(15.58 to<br>65.39)                                  | 35.23<br>(15.68 to<br>67.46)                                  | 28.87<br>(54.02 to<br>88.05)                                  | 44.52<br>(19.36 to<br>88.05)                                  |
| Paratyphoid fever                                                                   | 487.54<br>(172.06 to<br>1,169.19)                                | 551.99<br>(206.38 to<br>1,258.83)                                | 429.09<br>(163.13 to<br>964.68)                                  | 732.14<br>(272.78 to<br>1,658.98)                                  | 6.71<br>(2.43 to<br>15.93)                                    | 8.09<br>(3.13 to<br>17.75)                                    | 6.38<br>(2.49 to<br>13.89)                                    | 10.49<br>(4.04 to<br>23.28)                                   |
| Other intestinal infectious diseases                                                | 8.38<br>(2.40 to<br>21.13)                                       | 2.87<br>(0.79 to<br>7.70)                                        | 1.80<br>(0.51 to<br>5.07)                                        | 4.80<br>(1.24 to<br>13.17)                                         | 0.11<br>(0.03 to<br>0.26)                                     | 0.05<br>(0.02 to<br>0.12)                                     | 0.03<br>(0.01 to<br>0.08)                                     | 0.08<br>(0.02 to<br>0.19)                                     |
| Lower respiratory infections                                                        | 58,669.86<br>(46,341.18 to<br>72,739.17)                         | 60,095.47<br>(32,868.63 to<br>100,937.71)                        | 28,121.23<br>(16,815.76 to<br>46,799.08)                         | 89,321.99<br>(46,369.83 to<br>149,875.00)                          | 1,063.16<br>(893.10 to<br>1,262.63)                           | 1,797.14<br>(1,163.00 to<br>2,681.89)                         | 1,011.90<br>(699.65 to<br>1,469.71)                           | 2,268.66<br>(1,408.23 to<br>3,479.89)                         |
| Upper respiratory infections                                                        | 117.42<br>(37.99 to<br>289.65)                                   | 78.09<br>(30.24 to<br>167.98)                                    | 46.66<br>(18.07 to<br>96.63)                                     | 127.90<br>(47.09 to<br>301.76)                                     | 1.68<br>(0.69 to<br>3.72)                                     | 1.63<br>(0.69 to<br>3.28)                                     | 1.04<br>(0.45 to<br>2.07)                                     | 2.41<br>(1.01 to<br>4.96)                                     |
| Otitis media                                                                        | 5.78<br>(0.83 to<br>31.60)                                       | 1.25<br>(0.30 to<br>6.13)                                        | 1.16<br>(0.31 to<br>4.98)                                        | 1.57<br>(0.31 to<br>8.54)                                          | 0.09<br>(0.02 to<br>0.40)                                     | 0.04<br>(0.01 to<br>0.12)                                     | 0.04<br>(0.02 to<br>0.13)                                     | 0.04<br>(0.01 to<br>0.14)                                     |



|                                                |                                                               |                                                              |                                                              |                                                               |                                                      |                                                      |                                                      |                                                      |
|------------------------------------------------|---------------------------------------------------------------|--------------------------------------------------------------|--------------------------------------------------------------|---------------------------------------------------------------|------------------------------------------------------|------------------------------------------------------|------------------------------------------------------|------------------------------------------------------|
| Meningitis                                     | 24,116.55<br>(15,444.44 to<br>41,190.03)                      | 16,845.55<br>(9,989.81 to<br>29,430.94)                      | 13,360.14<br>(8,113.17 to<br>23,034.66)                      | 25,718.50<br>(14,604.16 to<br>44,443.57)                      | 364.33<br>(236.84 to<br>602.22)                      | 320.78<br>(195.15 to<br>566.26)                      | 278.82<br>(172.13 to<br>478.11)                      | 424.33<br>(256.28 to<br>740.23)                      |
| Pneumococcal meningitis                        | 1,993.39<br>(1,202.87 to<br>3,403.34)                         | 1,357.22<br>(766.87 to<br>2,609.59)                          | 1,236.82<br>(716.70 to<br>2,256.97)                          | 1,691.22<br>(932.97 to<br>3,214.16)                           | 34.78<br>(20.61 to<br>60.40)                         | 31.64<br>(17.72 to<br>61.22)                         | 30.88<br>(17.68 to<br>57.28)                         | 35.41<br>(20.13 to<br>69.73)                         |
| H influenzae type B meningitis                 | 3,203.99<br>(1,949.50 to<br>5,389.68)                         | 3,987.02<br>(1,397.47 to<br>8,956.55)                        | 2,277.74<br>(1,043.07 to<br>4,681.89)                        | 9,849.34<br>(2,703.94 to<br>23,357.96)                        | 46.17<br>(28.49 to<br>76.07)                         | 56.71<br>(24.37 to<br>119.38)                        | 37.34<br>(20.36 to<br>68.85)                         | 124.87<br>(39.99 to<br>287.07)                       |
| Meningococcal meningitis                       | 5,645.46<br>(3,470.16 to<br>9,378.60)                         | 4,536.17<br>(2,377.97 to<br>8,641.19)                        | 3,920.38<br>(2,145.41 to<br>7,180.37)                        | 5,490.55<br>(2,948.46 to<br>10,461.68)                        | 84.26<br>(51.20 to<br>138.02)                        | 88.15<br>(46.65 to<br>167.46)                        | 79.98<br>(43.82 to<br>149.45)                        | 99.54<br>(52.86 to<br>189.99)                        |
| Other meningitis                               | 13,273.72<br>(8,566.18 to<br>23,675.05)                       | 6,965.14<br>(4,208.24 to<br>12,098.76)                       | 5,925.21<br>(3,648.26 to<br>9,979.51)                        | 8,687.39<br>(5,068.67 to<br>15,522.95)                        | 199.12<br>(133.20 to<br>342.18)                      | 144.29<br>(90.73 to<br>245.26)                       | 130.62<br>(83.28 to<br>217.42)                       | 164.51<br>(103.18 to<br>289.42)                      |
| Encephalitis                                   | 1,334.22<br>(815.41 to<br>1,943.65)                           | 1,217.72<br>(727.30 to<br>1,766.51)                          | 950.66<br>(573.86 to<br>1,385.95)                            | 1,658.56<br>(1,008.44 to<br>2,494.21)                         | 19.17<br>(12.07 to<br>27.04)                         | 22.27<br>(14.00 to<br>36.67)                         | 18.40<br>(11.58 to<br>24.95)                         | 17.43<br>(9.86 to<br>39.86)                          |
| Diphtheria                                     | 19.52<br>(8.13 to<br>39.25)                                   | 4.61<br>(1.75 to<br>11.91)                                   | 2.12<br>(1.11 to<br>4.05)                                    | 13.57<br>(3.23 to<br>42.06)                                   | 0.24<br>(0.11 to<br>0.48)                            | 0.06<br>(0.03 to<br>0.15)                            | 0.03<br>(0.02 to<br>0.06)                            | 0.17<br>(0.05 to<br>0.51)                            |
| Whooping cough                                 | 6,259.92<br>(460.43 to<br>20,948.05)                          | 3,396.09<br>(254.80 to<br>11,754.44)                         | 571.51<br>(39.00 to<br>2,121.78)                             | 7,758.98<br>(631.38 to<br>23,802.05)                          | 73.92<br>(54.3 to<br>247.55)                         | 40.41<br>(3.05 to<br>139.81)                         | 7.07<br>(0.49 to<br>25.99)                           | 91.89<br>(74.3 to<br>282.50)                         |
| Tetanus                                        | 1,007.35<br>(501.27 to<br>2,111.74)                           | 125.81<br>(53.03 to<br>300.52)                               | 66.52<br>(30.58 to<br>130.07)                                | 287.30<br>(105.54 to<br>740.16)                               | 13.74<br>(7.16 to<br>27.68)                          | 2.04<br>(0.96 to<br>4.36)                            | 1.38<br>(0.66 to<br>2.58)                            | 3.89<br>(1.64 to<br>9.49)                            |
| Measles                                        | 9,516.23<br>(3,356.04 to<br>20,639.83)                        | 843.44<br>(47.62 to<br>6,093.95)                             | 253.28<br>(26.64 to<br>1,606.30)                             | 2,807.45<br>(151.39 to<br>14,035.61)                          | 113.35<br>(40.04 to<br>245.80)                       | 10.04<br>(0.59 to<br>72.33)                          | 3.06<br>(0.34 to<br>19.09)                           | 33.29<br>(1.83 to<br>166.22)                         |
| <b>The Gambia</b>                              |                                                               |                                                              |                                                              |                                                               |                                                      |                                                      |                                                      |                                                      |
| Cause                                          | YLLs (actual counts)                                          |                                                              |                                                              |                                                               | Deaths (actual counts)                               |                                                      |                                                      |                                                      |
|                                                | 2016                                                          | 2040 Forecast                                                | 2040 Better Scenario                                         | 2040 Worse Scenario                                           | 2016                                                 | 2040 Forecast                                        | 2040 Better Scenario                                 | 2040 Worse Scenario                                  |
| Varicella and herpes zoster                    | 397.45<br>(208.61 to<br>704.42)                               | 208.33<br>(113.51 to<br>351.61)                              | 129.32<br>(73.91 to<br>216.66)                               | 347.14<br>(182.96 to<br>626.99)                               | 5.75<br>(3.43 to<br>9.52)                            | 4.52<br>(2.86 to<br>6.82)                            | 3.25<br>(2.11 to<br>4.82)                            | 6.38<br>(3.89 to<br>10.05)                           |
| <b>Neglected tropical diseases and malaria</b> | <b>27,188.01</b><br><b>(17,732.90 to</b><br><b>40,761.39)</b> | <b>12,637.72</b><br><b>(8,985.57 to</b><br><b>18,254.84)</b> | <b>10,505.91</b><br><b>(7,569.19 to</b><br><b>14,748.98)</b> | <b>16,563.41</b><br><b>(11,557.89 to</b><br><b>24,197.30)</b> | <b>389.65</b><br><b>(269.80 to</b><br><b>562.40)</b> | <b>259.08</b><br><b>(184.55 to</b><br><b>358.06)</b> | <b>231.74</b><br><b>(166.96 to</b><br><b>322.54)</b> | <b>306.33</b><br><b>(219.27 to</b><br><b>437.69)</b> |
| Malaria                                        | 20,020.29<br>(11,745.53 to<br>32,991.86)                      | 8,056.06<br>(5,123.22 to<br>12,357.97)                       | 7,187.93<br>(4,758.73 to<br>10,779.44)                       | 9,856.49<br>(5,914.09 to<br>15,872.16)                        | 286.42<br>(178.18 to<br>440.31)                      | 175.66<br>(113.70 to<br>271.02)                      | 167.83<br>(110.05 to<br>256.82)                      | 193.94<br>(123.71 to<br>300.50)                      |
| Chagas disease                                 | 0.00<br>(0.00 to<br>0.00)                                     | 0.00<br>(0.00 to<br>0.00)                                    | 0.00<br>(0.00 to<br>0.00)                                    | 0.00<br>(0.00 to<br>0.00)                                     | 0.00<br>(0.00 to<br>0.00)                            | 0.00<br>(0.00 to<br>0.00)                            | 0.00<br>(0.00 to<br>0.00)                            | 0.00<br>(0.00 to<br>0.00)                            |
| Leishmaniasis                                  | 1.18<br>(0.60 to<br>1.93)                                     | 1.13<br>(0.58 to<br>1.92)                                    | 0.77<br>(0.39 to<br>1.28)                                    | 1.49<br>(0.77 to<br>2.45)                                     | 0.04<br>(0.02 to<br>0.06)                            | 0.04<br>(0.02 to<br>0.06)                            | 0.03<br>(0.01 to<br>0.04)                            | 0.05<br>(0.02 to<br>0.08)                            |
| African trypanosomiasis                        | 0.00<br>(0.00 to<br>0.00)                                     | 0.00<br>(0.00 to<br>0.00)                                    | 0.00<br>(0.00 to<br>0.00)                                    | 0.00<br>(0.00 to<br>0.00)                                     | 0.00<br>(0.00 to<br>0.00)                            | 0.00<br>(0.00 to<br>0.00)                            | 0.00<br>(0.00 to<br>0.00)                            | 0.00<br>(0.00 to<br>0.00)                            |
| Schistosomiasis                                | 409.05<br>(203.83 to<br>672.98)                               | 409.43<br>(194.33 to<br>717.03)                              | 346.75<br>(162.30 to<br>601.12)                              | 461.32<br>(215.99 to<br>799.44)                               | 10.79<br>(5.29 to<br>17.73)                          | 12.89<br>(5.87 to<br>22.33)                          | 11.32<br>(5.08 to<br>19.76)                          | 13.98<br>(6.45 to<br>23.92)                          |
| Cysticercosis                                  | 6.78<br>(2.55 to<br>14.37)                                    | 3.68<br>(1.33 to<br>7.79)                                    | 3.35<br>(1.22 to<br>7.09)                                    | 4.03<br>(1.47 to<br>8.47)                                     | 0.13<br>(0.05 to<br>0.27)                            | 0.08<br>(0.03 to<br>0.18)                            | 0.08<br>(0.03 to<br>0.17)                            | 0.09<br>(0.03 to<br>0.19)                            |
| Cystic echinococcosis                          | 57.75<br>(40.22 to<br>78.89)                                  | 30.18<br>(20.65 to<br>42.09)                                 | 16.82<br>(11.58 to<br>23.65)                                 | 47.87<br>(32.81 to<br>68.26)                                  | 1.07<br>(0.77 to<br>1.44)                            | 0.79<br>(0.55 to<br>1.10)                            | 0.46<br>(0.32 to<br>0.63)                            | 1.18<br>(0.82 to<br>1.66)                            |
| Dengue                                         | 56.49<br>(3.30 to<br>261.29)                                  | 169.41<br>(13.67 to<br>674.01)                               | 150.41<br>(12.67 to<br>576.15)                               | 212.75<br>(16.15 to<br>851.30)                                | 0.80<br>(0.05 to<br>3.51)                            | 3.52<br>(0.30 to<br>13.11)                           | 3.35<br>(0.29 to<br>11.91)                           | 3.97<br>(0.33 to<br>15.30)                           |

|                                                       |                                                               |                                                              |                                                            |                                                               |                                                      |                                                      |                                                     |                                                      |
|-------------------------------------------------------|---------------------------------------------------------------|--------------------------------------------------------------|------------------------------------------------------------|---------------------------------------------------------------|------------------------------------------------------|------------------------------------------------------|-----------------------------------------------------|------------------------------------------------------|
| Yellow fever                                          | 781.11<br>(147.15 to<br>2,434.39)                             | 387.14<br>(63.19 to<br>1,241.71)                             | 267.72<br>(41.69 to<br>862.83)                             | 537.26<br>(93.94 to<br>1,740.95)                              | 11.86<br>(2.23 to<br>36.69)                          | 6.35<br>(1.05 to<br>19.87)                           | 4.45<br>(0.72 to<br>14.50)                          | 8.58<br>(1.51 to<br>26.73)                           |
| Rabies                                                | 486.77<br>(140.35 to<br>1,404.99)                             | 252.96<br>(64.88 to<br>705.95)                               | 118.60<br>(29.71 to<br>342.58)                             | 469.18<br>(131.15 to<br>1,270.20)                             | 7.41<br>(2.09 to<br>20.59)                           | 4.48<br>(1.14 to<br>12.59)                           | 2.13<br>(0.54 to<br>6.11)                           | 8.02<br>(2.15 to<br>21.58)                           |
| Intestinal nematode infections                        | 110.17<br>(14.54 to<br>280.26)                                | 104.65<br>(18.79 to<br>259.10)                               | 91.90<br>(18.31 to<br>225.41)                              | 140.95<br>(22.49 to<br>358.34)                                | 1.35<br>(0.21 to<br>3.38)                            | 1.37<br>(0.33 to<br>3.24)                            | 1.23<br>(0.33 to<br>2.86)                           | 1.80<br>(0.37 to<br>4.40)                            |
| Other neglected tropical diseases                     | 5,258.42<br>(2,476.15 to<br>9,853.40)                         | 3,223.08<br>(1,784.41 to<br>5,180.73)                        | 2,321.66<br>(1,245.85 to<br>3,717.18)                      | 4,832.07<br>(2,609.36 to<br>7,906.85)                         | 69.79<br>(35.11 to<br>125.25)                        | 53.91<br>(31.92 to<br>82.64)                         | 40.87<br>(23.50 to<br>61.21)                        | 74.73<br>(43.91 to<br>114.44)                        |
| <b>Maternal disorders</b>                             | <b>13,631.28</b><br><b>(11,026.46 to</b><br><b>16,392.29)</b> | <b>11,149.97</b><br><b>(7,914.81 to</b><br><b>15,806.81)</b> | <b>6,737.28</b><br><b>(4,696.69 to</b><br><b>9,713.39)</b> | <b>16,357.47</b><br><b>(11,446.80 to</b><br><b>23,312.97)</b> | <b>251.95</b><br><b>(202.10 to</b><br><b>301.85)</b> | <b>210.91</b><br><b>(148.41 to</b><br><b>303.54)</b> | <b>127.74</b><br><b>(88.55 to</b><br><b>185.99)</b> | <b>308.21</b><br><b>(215.01 to</b><br><b>437.81)</b> |
| Maternal hemorrhage                                   | 5,197.45<br>(3,835.51 to<br>6,748.43)                         | 3,988.51<br>(2,571.83 to<br>6,092.26)                        | 2,403.35<br>(1,545.38 to<br>3,700.86)                      | 5,733.01<br>(3,739.98 to<br>8,797.57)                         | 97.46<br>(72.12 to<br>126.21)                        | 76.39<br>(48.69 to<br>118.46)                        | 46.11<br>(29.14 to<br>70.99)                        | 109.50<br>(70.73 to<br>169.42)                       |
| Maternal sepsis and other maternal infections         | 709.20<br>(332.57 to<br>1,203.54)                             | 520.28<br>(224.63 to<br>966.17)                              | 312.58<br>(137.90 to<br>569.37)                            | 760.22<br>(333.35 to<br>1,397.98)                             | 13.20<br>(6.05 to<br>22.09)                          | 9.90<br>(4.35 to<br>17.89)                           | 5.96<br>(2.58 to<br>10.96)                          | 14.41<br>(6.33 to<br>26.26)                          |
| Maternal hypertensive disorders                       | 2,844.33<br>(2,029.03 to<br>3,928.62)                         | 2,269.35<br>(1,420.20 to<br>3,473.16)                        | 1,355.41<br>(863.98 to<br>2,050.66)                        | 3,294.72<br>(2,102.17 to<br>4,915.77)                         | 51.22<br>(36.73 to<br>69.95)                         | 41.90<br>(26.22 to<br>63.49)                         | 25.08<br>(15.94 to<br>38.01)                        | 69.62<br>(38.08 to<br>92.60)                         |
| Maternal obstructed labor and uterine rupture         | 629.44<br>(346.83 to<br>1,010.54)                             | 527.06<br>(260.74 to<br>968.27)                              | 305.16<br>(151.23 to<br>557.95)                            | 778.32<br>(389.58 to<br>1,417.53)                             | 11.80<br>(6.49 to<br>19.18)                          | 10.08<br>(4.81 to<br>18.82)                          | 5.84<br>(2.80 to<br>10.87)                          | 14.84<br>(7.28 to<br>27.18)                          |
| Maternal abortion, miscarriage, and ectopic pregnancy | 1,093.83<br>(554.21 to<br>1,809.00)                           | 1,061.64<br>(459.06 to<br>2,099.13)                          | 644.61<br>(278.55 to<br>1,253.99)                          | 1,550.17<br>(682.38 to<br>3,003.53)                           | 20.08<br>(10.39 to<br>32.93)                         | 20.03<br>(8.80 to<br>38.39)                          | 12.19<br>(5.32 to<br>23.49)                         | 29.12<br>(12.93 to<br>55.23)                         |
| Indirect maternal deaths                              | 1,822.57<br>(1,246.88 to<br>2,532.94)                         | 1,504.02<br>(914.77 to<br>2,425.85)                          | 920.26<br>(563.97 to<br>1,470.72)                          | 2,296.01<br>(1,434.09 to<br>3,578.67)                         | 33.20<br>(22.71 to<br>45.78)                         | 27.87<br>(17.06 to<br>44.20)                         | 17.11<br>(10.60 to<br>27.13)                        | 42.32<br>(26.25 to<br>66.99)                         |
| Late maternal deaths                                  | 188.22<br>(92.30 to<br>336.64)                                | 120.36<br>(53.82 to<br>222.55)                               | 72.61<br>(32.54 to<br>135.59)                              | 181.13<br>(85.13 to<br>335.51)                                | 3.46<br>(1.66 to<br>6.10)                            | 3.27<br>(1.03 to<br>4.16)                            | 1.37<br>(0.62 to<br>2.55)                           | 3.40<br>(1.58 to<br>6.27)                            |
| Maternal deaths aggravated by HIV/AIDS                | 95.56<br>(50.93 to<br>148.00)                                 | 297.56<br>(109.23 to<br>544.18)                              | 182.01<br>(31.95 to<br>351.37)                             | 491.70<br>(229.99 to<br>852.68)                               | 1.88<br>(1.00 to<br>2.91)                            | 3.96<br>(2.26 to<br>10.91)                           | 3.67<br>(0.65 to<br>6.97)                           | 9.76<br>(4.49 to<br>16.99)                           |
| Other maternal disorders                              | 1,050.68<br>(658.03 to<br>1,538.45)                           | 861.19<br>(491.71 to<br>1,364.01)                            | 541.29<br>(320.71 to<br>854.28)                            | 1,272.18<br>(737.90 to<br>2,029.02)                           | 19.65<br>(12.37 to<br>28.58)                         | 16.51<br>(9.35 to<br>26.23)                          | 10.41<br>(6.01 to<br>16.64)                         | 24.24<br>(14.13 to<br>38.39)                         |

**The Gambia**

| Cause                                                    | YLLs (actual counts)                                            |                                                               |                                                               |                                                                 | Deaths (actual counts)                                     |                                                        |                                                      |                                                          |
|----------------------------------------------------------|-----------------------------------------------------------------|---------------------------------------------------------------|---------------------------------------------------------------|-----------------------------------------------------------------|------------------------------------------------------------|--------------------------------------------------------|------------------------------------------------------|----------------------------------------------------------|
|                                                          | 2016                                                            | 2040 Forecast                                                 | 2040 Better Scenario                                          | 2040 Worse Scenario                                             | 2016                                                       | 2040 Forecast                                          | 2040 Better Scenario                                 | 2040 Worse Scenario                                      |
| <b>Neonatal disorders</b>                                | <b>124,896.52</b><br><b>(99,169.96 to</b><br><b>155,478.46)</b> | <b>60,467.98</b><br><b>(40,385.59 to</b><br><b>89,159.44)</b> | <b>39,254.45</b><br><b>(26,954.74 to</b><br><b>57,088.24)</b> | <b>111,578.78</b><br><b>(74,544.66 to</b><br><b>164,137.85)</b> | <b>1,443.10</b><br><b>(1,145.63 to</b><br><b>1,796.56)</b> | <b>698.92</b><br><b>(466.90 to</b><br><b>1,030.27)</b> | <b>453.75</b><br><b>(311.47 to</b><br><b>659.28)</b> | <b>1,289.59</b><br><b>(861.55 to</b><br><b>1,896.73)</b> |
| Neonatal preterm birth                                   | 47,735.22<br>(33,269.32 to<br>66,066.78)                        | 21,412.18<br>(13,126.77 to<br>33,054.69)                      | 12,495.95<br>(7,704.03 to<br>18,833.11)                       | 40,137.33<br>(24,755.22 to<br>61,902.45)                        | 551.43<br>(384.36 to<br>763.24)                            | 247.40<br>(151.64 to<br>381.89)                        | 144.40<br>(89.05 to<br>217.59)                       | 463.73<br>(286.01 to<br>715.10)                          |
| Neonatal encephalopathy due to birth asphyxia and trauma | 38,702.83<br>(24,813.01 to<br>55,694.53)                        | 16,713.87<br>(8,615.86 to<br>30,644.47)                       | 11,720.68<br>(6,384.51 to<br>20,533.45)                       | 30,108.54<br>(15,272.84 to<br>54,700.51)                        | 447.16<br>(286.69 to<br>643.57)                            | 193.19<br>(99.61 to<br>354.04)                         | 135.48<br>(73.80 to<br>237.26)                       | 347.99<br>(176.52 to<br>631.91)                          |
| Neonatal sepsis and other neonatal infections            | 25,724.61<br>(16,653.02 to<br>37,145.97)                        | 16,156.89<br>(9,598.14 to<br>25,330.39)                       | 11,099.88<br>(6,564.84 to<br>17,171.03)                       | 29,436.24<br>(16,954.40 to<br>46,528.16)                        | 297.32<br>(192.43 to<br>429.18)                            | 186.81<br>(110.98 to<br>292.91)                        | 128.34<br>(75.92 to<br>198.45)                       | 340.33<br>(196.02 to<br>538.08)                          |
| Hemolytic disease and other neonatal jaundice            | 2,806.16<br>(1,601.80 to<br>4,636.84)                           | 821.90<br>(396.61 to<br>1,501.26)                             | 524.97<br>(255.09 to<br>957.24)                               | 1,581.34<br>(757.14 to<br>2,913.74)                             | 32.43<br>(18.50 to<br>53.56)                               | 9.50<br>(4.58 to<br>17.35)                             | 6.07<br>(2.95 to<br>11.06)                           | 18.28<br>(8.75 to<br>33.67)                              |
| Other neonatal disorders                                 | 9,927.70<br>(6,066.45 to<br>15,111.27)                          | 5,363.14<br>(2,729.53 to<br>9,983.79)                         | 3,412.96<br>(1,721.91 to<br>6,267.60)                         | 10,315.33<br>(5,151.27 to<br>18,721.45)                         | 114.76<br>(70.14 to<br>174.72)                             | 62.01<br>(31.56 to<br>115.40)                          | 39.46<br>(19.91 to<br>72.44)                         | 119.26<br>(59.56 to<br>216.39)                           |

|                                                                         |                                             |                                             |                                             |                                             |                                       |                                        |                                       |                                          |
|-------------------------------------------------------------------------|---------------------------------------------|---------------------------------------------|---------------------------------------------|---------------------------------------------|---------------------------------------|----------------------------------------|---------------------------------------|------------------------------------------|
|                                                                         | 20,354.26<br>(12,340.10 to<br>35,403.43)    | 7,997.01<br>(5,036.48 to<br>13,676.53)      | 5,347.12<br>(3,583.85 to<br>8,676.83)       | 11,975.01<br>(7,218.98 to<br>21,286.72)     | 291.36<br>(192.89 to<br>465.88)       | 181.03<br>(135.86 to<br>260.34)        | 142.51<br>(110.78 to<br>195.15)       | 231.81<br>(164.95 to<br>354.44)          |
| <b>Nutritional deficiencies</b>                                         |                                             |                                             |                                             |                                             |                                       |                                        |                                       |                                          |
| Protein-energy malnutrition                                             | 19,478.66<br>(11,413.90 to<br>34,032.17)    | 7,131.66<br>(4,299.96 to<br>12,482.18)      | 4,723.90<br>(3,019.86 to<br>7,813.93)       | 10,796.48<br>(6,264.29 to<br>19,965.62)     | 275.18<br>(177.44 to<br>450.96)       | 159.02<br>(114.97 to<br>233.83)        | 124.60<br>(94.03 to<br>173.17)        | 205.13<br>(142.15 to<br>324.50)          |
| Iodine deficiency                                                       | 127.34<br>(32.0 to<br>851.44)               | 246.60<br>(5.81 to<br>1,402.63)             | 160.74<br>(3.82 to<br>795.40)               | 379.94<br>(7.53 to<br>2,276.42)             | 1.92<br>(0.10 to<br>10.37)            | 5.99<br>(0.21 to<br>21.84)             | 4.46<br>(0.14 to<br>15.54)            | 7.92<br>(0.32 to<br>33.32)               |
| Dietary iron deficiency                                                 | 43.29<br>(29.19 to<br>69.60)                | 56.08<br>(36.51 to<br>99.54)                | 46.40<br>(30.26 to<br>82.68)                | 67.53<br>(44.41 to<br>117.25)               | 0.72<br>(0.48 to<br>1.29)             | 1.06<br>(0.65 to<br>2.51)              | 0.90<br>(0.54 to<br>2.23)             | 1.23<br>(0.77 to<br>2.79)                |
| Other nutritional deficiencies                                          | 704.97<br>(382.09 to<br>1,544.86)           | 562.67<br>(363.49 to<br>906.06)             | 436.07<br>(281.53 to<br>696.68)             | 731.06<br>(439.79 to<br>1,277.59)           | 13.55<br>(8.59 to<br>23.55)           | 14.96<br>(10.34 to<br>21.55)           | 12.55<br>(8.67 to<br>17.80)           | 17.54<br>(11.76 to<br>26.15)             |
| <b>Other communicable, maternal, neonatal, and nutritional diseases</b> | 8,872.14<br>(4,852.68 to<br>16,100.43)      | 4,135.46<br>(2,639.82 to<br>6,652.97)       | 3,140.54<br>(2,087.29 to<br>4,884.55)       | 5,848.29<br>(3,564.27 to<br>10,052.86)      | 121.08<br>(73.94 to<br>208.82)        | 79.53<br>(58.71 to<br>109.05)          | 63.64<br>(48.41 to<br>84.80)          | 102.56<br>(71.74 to<br>152.54)           |
| Sexually transmitted infections excluding HIV                           | 5,545.89<br>(1,984.01 to<br>12,132.80)      | 1,306.62<br>(445.96 to<br>3,052.75)         | 958.77<br>(346.14 to<br>2,200.84)           | 2,072.32<br>(653.06 to<br>4,955.03)         | 65.92<br>(24.00 to<br>143.54)         | 16.64<br>(6.40 to<br>36.95)            | 12.40<br>(5.04 to<br>27.01)           | 25.74<br>(9.01 to<br>59.84)              |
| Syphilis                                                                | 5,451.78<br>(1,908.13 to<br>12,013.53)      | 1,191.44<br>(338.37 to<br>2,925.07)         | 859.54<br>(258.98 to<br>2,090.73)           | 1,943.47<br>(530.00 to<br>4,833.23)         | 64.09<br>(22.53 to<br>141.22)         | 14.29<br>(4.26 to<br>34.72)            | 10.34<br>(3.27 to<br>24.81)           | 23.14<br>(6.56 to<br>57.26)              |
| Chlamydial infection                                                    | 19.40<br>(13.34 to<br>27.27)                | 23.47<br>(15.24 to<br>35.53)                | 20.19<br>(13.13 to<br>30.42)                | 26.31<br>(17.06 to<br>39.67)                | 0.37<br>(0.25 to<br>0.52)             | 0.41<br>(0.31 to<br>0.71)              | 0.41<br>(0.28 to<br>0.61)             | 0.52<br>(0.35 to<br>0.78)                |
| Gonococcal infection                                                    | 48.11<br>(33.54 to<br>68.02)                | 59.56<br>(39.37 to<br>88.75)                | 51.46<br>(34.61 to<br>76.54)                | 66.42<br>(44.48 to<br>99.26)                | 0.95<br>(0.66 to<br>1.33)             | 1.24<br>(0.84 to<br>1.84)              | 1.09<br>(0.75 to<br>1.60)             | 1.36<br>(0.93 to<br>2.00)                |
| Other sexually transmitted infections                                   | 26.61<br>(18.52 to<br>37.95)                | 32.15<br>(21.05 to<br>47.94)                | 27.59<br>(18.20 to<br>40.49)                | 36.12<br>(23.22 to<br>53.05)                | 0.51<br>(0.36 to<br>0.72)             | 0.64<br>(0.43 to<br>0.96)              | 0.56<br>(0.38 to<br>0.84)             | 0.72<br>(0.48 to<br>1.06)                |
| Acute hepatitis                                                         | 1,592.23<br>(1,252.68 to<br>1,948.29)       | 1,676.70<br>(1,254.88 to<br>2,238.33)       | 1,358.48<br>(1,011.83 to<br>1,794.40)       | 1,988.88<br>(1,495.52 to<br>2,612.15)       | 31.40<br>(24.99 to<br>38.20)          | 39.20<br>(30.29 to<br>50.11)           | 32.45<br>(25.11 to<br>41.71)          | 45.13<br>(34.67 to<br>58.02)             |
| Acute hepatitis A                                                       | 43.08<br>(5.22 to<br>102.29)                | 23.63<br>(6.74 to<br>51.57)                 | 17.84<br>(5.24 to<br>38.30)                 | 34.00<br>(8.14 to<br>77.67)                 | 0.55<br>(0.09 to<br>1.25)             | 0.41<br>(0.14 to<br>0.84)              | 0.32<br>(0.11 to<br>0.67)             | 0.54<br>(0.16 to<br>1.13)                |
| Acute hepatitis B                                                       | 1,134.20<br>(867.92 to<br>1,393.00)         | 1,326.91<br>(981.98 to<br>1,757.80)         | 1,072.53<br>(794.70 to<br>1,426.97)         | 1,549.67<br>(1,135.47 to<br>2,053.68)       | 24.46<br>(19.08 to<br>30.10)          | 32.35<br>(24.64 to<br>41.51)           | 26.57<br>(20.22 to<br>34.52)          | 37.05<br>(28.33 to<br>47.71)             |
| Acute hepatitis C                                                       | 20.87<br>(14.61 to<br>29.12)                | 31.09<br>(20.88 to<br>44.80)                | 28.20<br>(19.22 to<br>41.15)                | 33.55<br>(22.78 to<br>48.03)                | 0.51<br>(0.36 to<br>0.71)             | 0.89<br>(0.60 to<br>1.28)              | 0.82<br>(0.56 to<br>1.18)             | 0.93<br>(0.63 to<br>1.34)                |
| Acute hepatitis E                                                       | 394.08<br>(275.86 to<br>553.48)             | 295.07<br>(190.16 to<br>444.53)             | 239.92<br>(153.37 to<br>361.93)             | 371.66<br>(239.89 to<br>565.38)             | 5.88<br>(4.16 to<br>8.15)             | 5.56<br>(3.72 to<br>8.20)              | 4.73<br>(3.18 to<br>7.00)             | 6.60<br>(4.45 to<br>9.62)                |
| Other unspecified infectious diseases                                   | 1,734.01<br>(633.47 to<br>5,780.92)         | 1,152.14<br>(584.30 to<br>2,864.42)         | 823.29<br>(443.57 to<br>1,912.49)           | 1,787.09<br>(846.37 to<br>4,727.34)         | 23.76<br>(10.80 to<br>71.03)          | 23.68<br>(15.32 to<br>43.57)           | 18.79<br>(12.66 to<br>31.72)          | 31.70<br>(19.13 to<br>65.72)             |
| Non-communicable diseases                                               | 147,815.17<br>(127,360.29 to<br>167,984.84) | 260,053.17<br>(212,927.68 to<br>310,241.67) | 204,968.48<br>(170,356.58 to<br>241,451.34) | 331,412.78<br>(267,246.53 to<br>404,075.37) | 4,188.49<br>(3,744.01 to<br>4,636.18) | 9,791.53<br>(8,373.38 to<br>11,343.32) | 7,928.33<br>(6,892.03 to<br>9,036.58) | 11,915.71<br>(10,034.79 to<br>14,160.00) |
| <b>The Gambia</b>                                                       |                                             |                                             |                                             |                                             |                                       |                                        |                                       |                                          |
| Cause                                                                   | YLLs (actual counts)                        |                                             |                                             |                                             | Deaths (actual counts)                |                                        |                                       |                                          |
|                                                                         | 2016                                        | 2040 Forecast                               | 2040 Better Scenario                        | 2040 Worse Scenario                         | 2016                                  | 2040 Forecast                          | 2040 Better Scenario                  | 2040 Worse Scenario                      |
| Neoplasms                                                               | 33,116.11<br>(28,496.82 to<br>37,894.43)    | 77,392.79<br>(61,663.70 to<br>96,017.92)    | 73,246.48<br>(59,426.39 to<br>89,158.13)    | 87,267.99<br>(68,096.10 to<br>113,183.02)   | 940.65<br>(818.32 to<br>1,068.01)     | 2,478.65<br>(2,068.98 to<br>2,986.30)  | 2,430.48<br>(2,045.70 to<br>2,855.27) | 2,687.54<br>(2,179.66 to<br>3,343.70)    |
| Lip and oral cavity cancer                                              | 258.71<br>(216.47 to<br>303.22)             | 601.36<br>(386.61 to<br>974.21)             | 520.77<br>(346.78 to<br>811.26)             | 854.82<br>(482.61 to<br>1,528.01)           | 8.64<br>(7.30 to<br>10.01)            | 21.47<br>(14.21 to<br>33.91)           | 19.34<br>(13.27 to<br>29.75)          | 29.25<br>(17.03 to<br>50.02)             |



| The Gambia                      |                                               |                                                |                                               |                                                 |                                            |                                            |                                            |                                            |
|---------------------------------|-----------------------------------------------|------------------------------------------------|-----------------------------------------------|-------------------------------------------------|--------------------------------------------|--------------------------------------------|--------------------------------------------|--------------------------------------------|
| Cause                           | YLLs (actual counts)                          |                                                |                                               |                                                 | Deaths (actual counts)                     |                                            |                                            |                                            |
|                                 | 2016                                          | 2040 Forecast                                  | 2040 Better Scenario                          | 2040 Worse Scenario                             | 2016                                       | 2040 Forecast                              | 2040 Better Scenario                       | 2040 Worse Scenario                        |
| Kidney cancer                   | 276.34<br>(218.18 to 347.70)                  | 618.24<br>(518.51 to 733.09)                   | 681.24<br>(573.82 to 802.89)                  | 601.89<br>(495.08 to 721.86)                    | 7.67<br>(6.52 to 8.92)                     | 23.21<br>(19.81 to 26.90)                  | 27.19<br>(22.79 to 31.62)                  | 21.03<br>(17.90 to 24.68)                  |
| Bladder cancer                  | 232.07<br>(197.13 to 275.78)                  | 598.83<br>(478.20 to 742.16)                   | 592.39<br>(476.51 to 735.61)                  | 619.85<br>(486.64 to 790.55)                    | 9.75<br>(8.36 to 11.45)                    | 9.75<br>(23.07 to 34.57)                   | 29.23<br>(24.17 to 35.73)                  | 29.23<br>(22.44 to 34.76)                  |
| Brain and nervous system cancer | 821.55<br>(683.86 to 977.78)                  | 1,845.86<br>(1,490.05 to 2,331.72)             | 1,886.30<br>(1,514.29 to 2,431.81)            | 1,874.70<br>(1,511.98 to 2,335.30)              | 18.05<br>(14.81 to 21.94)                  | 49.23<br>(39.75 to 62.74)                  | 52.06<br>(41.60 to 67.22)                  | 47.66<br>(38.63 to 60.39)                  |
| Thyroid cancer                  | 169.57<br>(123.31 to 212.41)                  | 355.39<br>(232.70 to 459.11)                   | 299.08<br>(211.18 to 404.03)                  | 382.85<br>(259.14 to 540.49)                    | 4.63<br>(3.54 to 5.70)                     | 9.98<br>(7.40 to 13.25)                    | 9.09<br>(6.81 to 11.97)                    | 11.19<br>(8.12 to 15.27)                   |
| Mesothelioma                    | 36.25<br>(28.51 to 48.08)                     | 90.05<br>(68.87 to 120.01)                     | 86.44<br>(65.50 to 115.16)                    | 92.11<br>(70.55 to 124.83)                      | 1.14<br>(0.87 to 1.52)                     | 1.14<br>(2.40 to 4.20)                     | 3.18<br>(2.39 to 4.19)                     | 3.14<br>(2.38 to 4.18)                     |
| Hodgkin lymphoma                | 234.14<br>(111.73 to 329.18)                  | 273.50<br>(132.59 to 402.38)                   | 217.81<br>(105.85 to 318.90)                  | 334.08<br>(158.08 to 497.26)                    | 4.19<br>(2.22 to 5.71)                     | 5.63<br>(3.08 to 7.87)                     | 4.61<br>(2.52 to 6.44)                     | 6.64<br>(3.55 to 9.30)                     |
| Non-Hodgkin lymphoma            | 1,751.10<br>(1,372.67 to 2,178.73)            | 3,073.16<br>(2,461.70 to 3,825.07)             | 3,084.28<br>(2,487.14 to 3,815.62)            | 3,279.32<br>(2,575.95 to 4,130.26)              | 33.26<br>(27.76 to 39.12)                  | 33.26<br>(61.57 to 87.63)                  | 73.79<br>(64.76 to 92.16)                  | 74.40<br>(61.97 to 88.83)                  |
| Multiple myeloma                | 434.27<br>(340.80 to 527.04)                  | 1,289.50<br>(980.40 to 1,638.20)               | 1,375.78<br>(1,045.12 to 1,747.74)            | 1,261.15<br>(941.82 to 1,637.33)                | 12.95<br>(10.26 to 17.04)                  | 41.87<br>(31.69 to 58.02)                  | 45.85<br>(34.87 to 64.67)                  | 40.05<br>(30.35 to 54.67)                  |
| Leukemia                        | 1,275.65<br>(1,020.42 to 1,580.60)            | 2,268.17<br>(1,767.50 to 2,816.77)             | 2,242.21<br>(1,756.29 to 2,785.24)            | 2,457.00<br>(1,911.76 to 3,079.94)              | 27.01<br>(21.96 to 32.66)                  | 59.68<br>(47.77 to 72.49)                  | 60.63<br>(48.84 to 73.62)                  | 62.29<br>(49.80 to 77.37)                  |
| Acute lymphoid leukemia         | 290.01<br>(207.04 to 383.85)                  | 464.89<br>(331.05 to 628.54)                   | 462.73<br>(326.66 to 624.51)                  | 505.88<br>(359.36 to 682.54)                    | 4.90<br>(3.59 to 6.31)                     | 9.40<br>(6.72 to 12.33)                    | 9.62<br>(6.89 to 12.84)                    | 9.89<br>(7.06 to 13.02)                    |
| Chronic lymphoid leukemia       | 51.92<br>(37.99 to 64.76)                     | 129.09<br>(93.33 to 168.53)                    | 130.72<br>(94.46 to 169.67)                   | 132.76<br>(95.47 to 176.86)                     | 2.25<br>(1.65 to 2.80)                     | 5.91<br>(4.31 to 7.67)                     | 6.12<br>(4.45 to 7.92)                     | 5.95<br>(4.26 to 7.91)                     |
| Acute myeloid leukemia          | 477.75<br>(332.57 to 635.36)                  | 951.83<br>(659.86 to 1,284.17)                 | 986.27<br>(684.13 to 1,322.17)                | 1,002.62<br>(691.35 to 1,363.96)                | 8.83<br>(6.27 to 11.45)                    | 22.30<br>(15.72 to 29.20)                  | 23.84<br>(16.88 to 31.40)                  | 22.59<br>(15.86 to 29.92)                  |
| Chronic myeloid leukemia        | 128.91<br>(96.00 to 169.21)                   | 198.21<br>(137.67 to 282.79)                   | 193.33<br>(134.56 to 275.33)                  | 211.49<br>(143.26 to 306.79)                    | 3.16<br>(2.42 to 4.08)                     | 5.42<br>(3.98 to 7.38)                     | 5.46<br>(4.03 to 7.36)                     | 5.62<br>(4.05 to 7.88)                     |
| Other leukemia                  | 327.06<br>(247.93 to 428.34)                  | 524.15<br>(380.41 to 705.93)                   | 469.16<br>(341.34 to 639.90)                  | 604.25<br>(434.45 to 827.28)                    | 7.87<br>(6.07 to 10.22)                    | 16.64<br>(12.52 to 21.49)                  | 15.59<br>(11.76 to 20.33)                  | 18.25<br>(13.65 to 23.96)                  |
| Other neoplasms                 | 2,526.34<br>(1,887.96 to 3,118.64)            | 4,619.41<br>(3,464.03 to 5,754.69)             | 4,563.25<br>(3,453.47 to 5,694.80)            | 4,887.08<br>(3,617.75 to 6,136.69)              | 54.37<br>(42.73 to 64.16)                  | 134.77<br>(108.32 to 158.16)               | 141.19<br>(114.54 to 166.87)               | 132.02<br>(105.21 to 156.03)               |
| <b>Cardiovascular diseases</b>  | <b>37,772.63<br/>(32,915.46 to 42,445.30)</b> | <b>76,674.51<br/>(64,588.43 to 105,127.75)</b> | <b>42,742.92<br/>(31,526.89 to 58,265.90)</b> | <b>112,919.00<br/>(78,501.10 to 159,315.91)</b> | <b>1,559.33<br/>(1,367.33 to 1,740.88)</b> | <b>3,743.08<br/>(2,854.34 to 4,895.20)</b> | <b>2,301.22<br/>(1,800.21 to 2,979.85)</b> | <b>5,184.54<br/>(3,870.84 to 7,056.69)</b> |
| Rheumatic heart disease         | 815.01<br>(628.49 to 997.16)                  | 719.98<br>(534.51 to 941.59)                   | 567.10<br>(413.43 to 749.12)                  | 870.59<br>(648.62 to 1,144.24)                  | 23.82<br>(18.95 to 28.95)                  | 30.22<br>(23.35 to 38.47)                  | 25.54<br>(19.48 to 32.46)                  | 34.04<br>(26.30 to 43.41)                  |
| Ischemic heart disease          | 17,685.04<br>(14,898.68 to 20,511.79)         | 40,083.91<br>(24,191.85 to 61,499.29)          | 19,107.49<br>(11,586.87 to 30,579.68)         | 61,187.07<br>(37,102.74 to 93,511.71)           | 834.69<br>(716.34 to 950.49)               | 2,109.63<br>(1,398.00 to 3,083.27)         | 1,153.28<br>(764.55 to 1,736.18)           | 3,017.79<br>(1,952.47 to 4,435.25)         |
| Stroke                          | 12,225.78<br>(10,373.21 to 14,191.52)         | 20,226.06<br>(12,319.16 to 32,055.82)          | 10,107.03<br>(6,321.25 to 15,986.25)          | 32,309.51<br>(19,364.52 to 52,733.66)           | 477.03<br>(406.46 to 550.35)               | 952.25<br>(640.84 to 1,414.99)             | 541.57<br>(367.52 to 777.12)               | 1,410.51<br>(916.04 to 2,141.69)           |
| Ischemic stroke                 | 3,341.86<br>(2,634.06 to 4,055.10)            | 6,148.38<br>(3,625.15 to 9,514.93)             | 3,627.98<br>(2,155.99 to 5,588.20)            | 8,667.80<br>(4,976.55 to 13,654.86)             | 179.18<br>(143.52 to 217.62)               | 387.53<br>(241.54 to 596.58)               | 254.37<br>(160.09 to 383.83)               | 509.97<br>(306.81 to 797.53)               |

|                                                     |                                                            |                                                              |                                                            |                                                              |                                                      |                                                      |                                                      |                                                      |
|-----------------------------------------------------|------------------------------------------------------------|--------------------------------------------------------------|------------------------------------------------------------|--------------------------------------------------------------|------------------------------------------------------|------------------------------------------------------|------------------------------------------------------|------------------------------------------------------|
| Intracerebral hemorrhage                            | 8,883.92<br>(7,515.13 to<br>10,328.26)                     | 14,077.68<br>(7,787.07 to<br>23,464.60)                      | 6,479.05<br>(3,656.10 to<br>10,947.62)                     | 23,641.71<br>(12,863.58 to<br>40,679.17)                     | 297.85<br>(251.03 to<br>348.17)                      | 564.72<br>(341.81 to<br>890.41)                      | 287.20<br>(181.38 to<br>443.91)                      | 900.54<br>(524.28 to<br>1,411.25)                    |
| Hypertensive heart disease                          | 1,107.57<br>(698.15 to<br>1,561.02)                        | 2,429.72<br>(1,308.66 to<br>4,172.77)                        | 1,746.92<br>(963.83 to<br>2,753.65)                        | 3,289.03<br>(1,681.48 to<br>6,126.05)                        | 45.43<br>(29.08 to<br>64.00)                         | 120.05<br>(66.44 to<br>201.24)                       | 91.22<br>(52.04 to<br>139.62)                        | 153.63<br>(80.40 to<br>287.53)                       |
| Cardiomyopathy and myocarditis                      | 689.76<br>(479.20 to<br>972.28)                            | 1,547.44<br>(931.07 to<br>2,586.69)                          | 1,515.51<br>(922.51 to<br>2,422.59)                        | 1,616.37<br>(972.79 to<br>2,727.36)                          | 17.97<br>(12.47 to<br>24.82)                         | 51.30<br>(32.49 to<br>78.36)                         | 53.60<br>(34.23 to<br>81.70)                         | 50.39<br>(31.63 to<br>78.34)                         |
| Myocarditis                                         | 157.93<br>(84.55 to<br>290.60)                             | 268.35<br>(126.38 to<br>507.99)                              | 247.69<br>(114.98 to<br>470.71)                            | 291.17<br>(138.42 to<br>554.13)                              | 3.04<br>(1.64 to<br>5.71)                            | 6.42<br>(3.20 to<br>12.21)                           | 6.37<br>(3.16 to<br>12.07)                           | 6.52<br>(3.27 to<br>12.39)                           |
| <b>The Gambia</b>                                   |                                                            |                                                              |                                                            |                                                              |                                                      |                                                      |                                                      |                                                      |
| Cause                                               | YLLs (actual counts)                                       |                                                              |                                                            |                                                              | Deaths (actual counts)                               |                                                      |                                                      |                                                      |
|                                                     | 2016                                                       | 2040 Forecast                                                | 2040 Better Scenario                                       | 2040 Worse Scenario                                          | 2016                                                 | 2040 Forecast                                        | 2040 Better Scenario                                 | 2040 Worse Scenario                                  |
| Alcoholic cardiomyopathy                            | 41.84<br>(19.46 to<br>77.90)                               | 102.16<br>(43.63 to<br>202.38)                               | 110.23<br>(47.45 to<br>219.25)                             | 106.97<br>(46.49 to<br>206.81)                               | 1.27<br>(0.58 to<br>2.42)                            | 3.33<br>(1.40 to<br>6.62)                            | 3.68<br>(1.56 to<br>7.42)                            | 3.41<br>(1.48 to<br>6.57)                            |
| Other cardiomyopathy                                | 489.99<br>(352.99 to<br>666.99)                            | 1,176.93<br>(699.23 to<br>2,004.23)                          | 1,157.59<br>(704.77 to<br>1,912.57)                        | 1,218.24<br>(710.96 to<br>2,112.61)                          | 13.66<br>(9.84 to<br>18.49)                          | 41.56<br>(26.37 to<br>65.61)                         | 43.54<br>(27.71 to<br>68.05)                         | 40.46<br>(25.04 to<br>64.72)                         |
| Atrial fibrillation and flutter                     | 130.64<br>(99.72 to<br>167.67)                             | 467.87<br>(349.01 to<br>623.11)                              | 501.29<br>(374.09 to<br>661.24)                            | 454.67<br>(338.43 to<br>610.73)                              | 10.58<br>(7.98 to<br>13.64)                          | 42.39<br>(31.52 to<br>56.45)                         | 48.38<br>(35.99 to<br>63.53)                         | 38.85<br>(28.43 to<br>52.35)                         |
| Aortic aneurysm                                     | 169.07<br>(127.82 to<br>221.32)                            | 417.60<br>(294.55 to<br>598.98)                              | 405.64<br>(288.54 to<br>564.99)                            | 424.52<br>(294.91 to<br>627.43)                              | 6.96<br>(5.32 to<br>8.97)                            | 19.77<br>(14.31 to<br>27.30)                         | 20.64<br>(14.99 to<br>27.99)                         | 19.04<br>(13.56 to<br>26.52)                         |
| Peripheral artery disease                           | 8.30<br>(5.61 to<br>12.55)                                 | 41.80<br>(25.49 to<br>69.24)                                 | 48.24<br>(28.97 to<br>81.52)                               | 37.57<br>(23.13 to<br>61.61)                                 | 0.52<br>(0.35 to<br>0.78)                            | 2.96<br>(1.81 to<br>4.86)                            | 3.67<br>(2.22 to<br>6.05)                            | 2.52<br>(1.57 to<br>4.04)                            |
| Endocarditis                                        | 668.10<br>(502.16 to<br>855.17)                            | 1,292.95<br>(849.14 to<br>1,892.26)                          | 1,183.57<br>(794.16 to<br>1,698.05)                        | 1,451.01<br>(945.37 to<br>2,148.28)                          | 15.46<br>(11.55 to<br>19.21)                         | 40.68<br>(27.41 to<br>56.32)                         | 39.73<br>(26.97 to<br>54.30)                         | 42.16<br>(28.25 to<br>58.67)                         |
| Other cardiovascular and circulatory diseases       | 4,273.36<br>(3,254.18 to<br>6,267.30)                      | 9,447.19<br>(6,735.67 to<br>14,475.36)                       | 7,560.14<br>(5,584.38 to<br>11,221.30)                     | 11,278.64<br>(7,810.32 to<br>17,390.23)                      | 126.87<br>(93.71 to<br>197.47)                       | 373.81<br>(273.27 to<br>594.39)                      | 323.60<br>(244.76 to<br>508.63)                      | 415.60<br>(293.62 to<br>676.74)                      |
| <b>Chronic respiratory diseases</b>                 | <b>6,266.07</b><br><b>(5,213.39 to</b><br><b>7,503.57)</b> | <b>10,163.22</b><br><b>(6,826.94 to</b><br><b>16,451.57)</b> | <b>6,681.19</b><br><b>(4,805.25 to</b><br><b>9,823.83)</b> | <b>13,307.34</b><br><b>(8,749.68 to</b><br><b>21,805.13)</b> | <b>237.72</b><br><b>(200.06 to</b><br><b>282.17)</b> | <b>464.45</b><br><b>(312.42 to</b><br><b>752.86)</b> | <b>314.80</b><br><b>(232.41 to</b><br><b>454.24)</b> | <b>573.93</b><br><b>(373.17 to</b><br><b>945.90)</b> |
| Chronic obstructive pulmonary disease               | 3,255.80<br>(2,568.35 to<br>4,074.45)                      | 6,432.25<br>(3,512.37 to<br>12,101.14)                       | 3,511.39<br>(2,082.95 to<br>6,031.78)                      | 8,762.21<br>(4,653.37 to<br>16,517.24)                       | 147.60<br>(117.78 to<br>182.40)                      | 328.33<br>(188.99 to<br>616.92)                      | 192.40<br>(121.68 to<br>322.12)                      | 416.59<br>(232.95 to<br>792.40)                      |
| Pneumoconiosis                                      | 7.60<br>(5.15 to<br>10.68)                                 | 12.39<br>(8.46 to<br>17.64)                                  | 11.71<br>(7.80 to<br>16.98)                                | 12.93<br>(8.99 to<br>18.29)                                  | 0.28<br>(0.20 to<br>0.37)                            | 0.57<br>(0.41 to<br>0.79)                            | 0.56<br>(0.40 to<br>0.77)                            | 0.59<br>(0.42 to<br>0.82)                            |
| Silicosis                                           | 0.82<br>(0.35 to<br>1.39)                                  | 0.96<br>(0.44 to<br>1.85)                                    | 0.91<br>(0.40 to<br>1.72)                                  | 0.99<br>(0.46 to<br>1.92)                                    | 0.03<br>(0.01 to<br>0.04)                            | 0.04<br>(0.02 to<br>0.06)                            | 0.04<br>(0.02 to<br>0.06)                            | 0.04<br>(0.02 to<br>0.06)                            |
| Asbestosis                                          | 1.98<br>(1.16 to<br>3.02)                                  | 3.62<br>(2.21 to<br>5.75)                                    | 3.73<br>(2.23 to<br>5.99)                                  | 3.53<br>(2.14 to<br>5.61)                                    | 0.05<br>(0.03 to<br>0.08)                            | 0.11<br>(0.07 to<br>0.16)                            | 0.11<br>(0.07 to<br>0.17)                            | 0.10<br>(0.06 to<br>0.15)                            |
| Coal workers pneumoconiosis                         | 0.38<br>(0.20 to<br>0.70)                                  | 0.55<br>(0.28 to<br>1.05)                                    | 0.40<br>(0.20 to<br>0.78)                                  | 0.66<br>(0.34 to<br>1.24)                                    | 0.02<br>(0.01 to<br>0.03)                            | 0.02<br>(0.01 to<br>0.05)                            | 0.02<br>(0.01 to<br>0.04)                            | 0.03<br>(0.02 to<br>0.06)                            |
| Other pneumoconiosis                                | 4.42<br>(3.05 to<br>6.13)                                  | 7.25<br>(5.08 to<br>10.11)                                   | 6.67<br>(4.58 to<br>9.47)                                  | 7.74<br>(5.44 to<br>10.96)                                   | 0.18<br>(0.13 to<br>0.25)                            | 0.40<br>(0.29 to<br>0.57)                            | 0.39<br>(0.28 to<br>0.55)                            | 0.42<br>(0.29 to<br>0.60)                            |
| Asthma                                              | 2,113.68<br>(1,633.34 to<br>2,768.02)                      | 2,058.90<br>(1,312.64 to<br>3,103.86)                        | 1,615.05<br>(1,060.40 to<br>2,354.76)                      | 2,713.17<br>(1,689.12 to<br>4,236.52)                        | 66.71<br>(50.82 to<br>87.79)                         | 80.83<br>(52.63 to<br>121.84)                        | 67.60<br>(45.23 to<br>97.75)                         | 100.71<br>(63.24 to<br>155.94)                       |
| Interstitial lung disease and pulmonary sarcoidosis | 52.84<br>(31.56 to<br>78.25)                               | 150.68<br>(87.48 to<br>230.64)                               | 172.17<br>(100.14 to<br>262.31)                            | 135.87<br>(79.18 to<br>205.40)                               | 1.93<br>(1.10 to<br>2.95)                            | 6.41<br>(3.53 to<br>9.91)                            | 7.65<br>(4.24 to<br>11.91)                           | 5.54<br>(3.10 to<br>8.56)                            |

|                                                                |                                                             |                                                               |                                                               |                                                               |                                                      |                                                      |                                                      |                                                      |
|----------------------------------------------------------------|-------------------------------------------------------------|---------------------------------------------------------------|---------------------------------------------------------------|---------------------------------------------------------------|------------------------------------------------------|------------------------------------------------------|------------------------------------------------------|------------------------------------------------------|
| Other chronic respiratory diseases                             | 836.15<br>(595.18 to<br>1,157.22)                           | 1,599.00<br>(1,051.64 to<br>2,122.10)                         | 1,370.86<br>(980.51 to<br>1,902.65)                           | 1,683.16<br>(1,142.92 to<br>2,376.75)                         | 21.21<br>(15.00 to<br>30.12)                         | 48.31<br>(33.22 to<br>69.18)                         | 46.58<br>(32.83 to<br>64.85)                         | 50.50<br>(33.94 to<br>72.34)                         |
| <b>Cirrhosis and other chronic liver diseases</b>              | <b>8,100.97</b><br><b>(5,961.04 to</b><br><b>10,662.81)</b> | <b>17,131.43</b><br><b>(12,413.27 to</b><br><b>22,744.95)</b> | <b>15,710.78</b><br><b>(11,390.21 to</b><br><b>20,890.71)</b> | <b>18,702.94</b><br><b>(13,579.91 to</b><br><b>24,733.51)</b> | <b>228.99</b><br><b>(171.21 to</b><br><b>299.00)</b> | <b>547.42</b><br><b>(407.64 to</b><br><b>716.35)</b> | <b>516.29</b><br><b>(382.04 to</b><br><b>672.80)</b> | <b>582.46</b><br><b>(432.84 to</b><br><b>762.13)</b> |
| Cirrhosis and other chronic liver diseases due to hepatitis B  | 3,291.60<br>(2,379.73 to<br>4,438.80)                       | 7,622.18<br>(5,329.34 to<br>10,458.64)                        | 7,120.87<br>(4,980.76 to<br>9,763.61)                         | 7,924.25<br>(5,560.04 to<br>10,863.05)                        | 98.94<br>(73.09 to<br>130.81)                        | 249.82<br>(182.63 to<br>335.88)                      | 239.59<br>(174.78 to<br>323.45)                      | 253.96<br>(185.13 to<br>342.85)                      |
| Cirrhosis and other chronic liver diseases due to hepatitis C  | 1,336.32<br>(806.03 to<br>2,090.54)                         | 3,184.33<br>(1,916.52 to<br>5,057.65)                         | 2,966.73<br>(1,778.70 to<br>4,683.63)                         | 3,314.68<br>(1,972.07 to<br>5,305.73)                         | 40.56<br>(24.91 to<br>61.29)                         | 103.31<br>(62.58 to<br>156.73)                       | 98.38<br>(60.13 to<br>149.37)                        | 105.56<br>(64.40 to<br>159.96)                       |
| Cirrhosis and other chronic liver diseases due to alcohol use  | 1,608.87<br>(1,167.83 to<br>2,155.84)                       | 3,431.06<br>(2,429.11 to<br>4,755.45)                         | 3,040.85<br>(2,123.49 to<br>4,188.42)                         | 4,229.94<br>(2,972.18 to<br>5,815.23)                         | 50.80<br>(36.98 to<br>67.55)                         | 117.77<br>(85.12 to<br>158.53)                       | 107.29<br>(77.80 to<br>143.77)                       | 141.54<br>(102.48 to<br>190.84)                      |
| Cirrhosis and other chronic liver diseases due to other causes | 1,864.17<br>(1,374.05 to<br>2,398.35)                       | 2,893.85<br>(2,078.44 to<br>3,968.16)                         | 2,582.32<br>(1,850.34 to<br>3,522.28)                         | 3,234.07<br>(2,322.45 to<br>4,373.85)                         | 38.68<br>(28.78 to<br>49.15)                         | 76.52<br>(55.18 to<br>100.69)                        | 71.02<br>(52.13 to<br>93.76)                         | 81.40<br>(60.11 to<br>106.81)                        |
| <b>Digestive diseases</b>                                      | <b>7,964.65</b><br><b>(6,320.95 to</b><br><b>10,863.59)</b> | <b>12,352.36</b><br><b>(9,741.74 to</b><br><b>16,016.43)</b>  | <b>10,866.40</b><br><b>(8,614.30 to</b><br><b>14,093.42)</b>  | <b>14,186.85</b><br><b>(10,949.62 to</b><br><b>18,931.87)</b> | <b>208.63</b><br><b>(173.48 to</b><br><b>266.83)</b> | <b>435.72</b><br><b>(361.82 to</b><br><b>546.23)</b> | <b>405.67</b><br><b>(338.90 to</b><br><b>502.98)</b> | <b>469.29</b><br><b>(385.43 to</b><br><b>597.93)</b> |
| Peptic ulcer disease                                           | 1,184.49<br>(888.18 to<br>1,543.48)                         | 1,319.14<br>(935.55 to<br>1,809.44)                           | 1,003.57<br>(708.41 to<br>1,374.20)                           | 1,604.30<br>(1,143.47 to<br>2,192.86)                         | 35.08<br>(26.45 to<br>45.06)                         | 50.81<br>(36.87 to<br>67.00)                         | 40.78<br>(29.53 to<br>53.98)                         | 58.71<br>(43.12 to<br>78.18)                         |

**The Gambia**

| Cause                                      | YLLs (actual counts)                                       |                                                             |                                                             |                                                             | Deaths (actual counts)                               |                                                      |                                                      |                                                      |
|--------------------------------------------|------------------------------------------------------------|-------------------------------------------------------------|-------------------------------------------------------------|-------------------------------------------------------------|------------------------------------------------------|------------------------------------------------------|------------------------------------------------------|------------------------------------------------------|
|                                            | 2016                                                       | 2040 Forecast                                               | 2040 Better Scenario                                        | 2040 Worse Scenario                                         | 2016                                                 | 2040 Forecast                                        | 2040 Better Scenario                                 | 2040 Worse Scenario                                  |
| Gastritis and duodenitis                   | 393.46<br>(237.50 to<br>713.07)                            | 726.14<br>(420.05 to<br>1,229.32)                           | 647.48<br>(372.94 to<br>1,192.27)                           | 788.14<br>(457.28 to<br>1,438.13)                           | 9.28<br>(5.72 to<br>16.22)                           | 19.74<br>(12.11 to<br>34.58)                         | 18.14<br>(11.08 to<br>31.88)                         | 20.77<br>(12.75 to<br>31.88)                         |
| Appendicitis                               | 626.23<br>(439.04 to<br>1,036.52)                          | 772.67<br>(565.16 to<br>1,075.96)                           | 636.03<br>(472.81 to<br>875.42)                             | 911.00<br>(666.47 to<br>1,292.15)                           | 15.19<br>(11.35 to<br>21.13)                         | 27.80<br>(20.93 to<br>36.60)                         | 24.58<br>(18.33 to<br>32.19)                         | 30.29<br>(23.04 to<br>40.07)                         |
| Paralytic ileus and intestinal obstruction | 3,178.26<br>(2,312.24 to<br>4,629.92)                      | 4,878.31<br>(3,807.67 to<br>6,497.45)                       | 3,033.68<br>(3,552.15 to<br>5,948.71)                       | 3,754.45<br>(4,113.74 to<br>7,274.62)                       | 74.18<br>(58.34 to<br>97.60)                         | 168.36<br>(135.08 to<br>216.00)                      | 167.04<br>(134.67 to<br>215.40)                      | 170.15<br>(134.64 to<br>218.60)                      |
| Inguinal, femoral, and abdominal hernia    | 248.64<br>(166.55 to<br>358.47)                            | 343.75<br>(224.68 to<br>497.34)                             | 303.68<br>(200.99 to<br>437.56)                             | 375.45<br>(246.90 to<br>540.75)                             | 8.33<br>(5.66 to<br>11.65)                           | 14.32<br>(9.52 to<br>20.56)                          | 13.45<br>(8.99 to<br>19.54)                          | 14.77<br>(9.72 to<br>21.25)                          |
| Inflammatory bowel disease                 | 218.21<br>(148.21 to<br>342.62)                            | 422.37<br>(302.74 to<br>631.50)                             | 415.42<br>(297.02 to<br>621.63)                             | 431.85<br>(310.87 to<br>646.38)                             | 5.72<br>(4.16 to<br>8.50)                            | 14.27<br>(10.41 to<br>21.44)                         | 14.70<br>(10.70 to<br>22.56)                         | 13.87<br>(10.16 to<br>20.92)                         |
| Vascular intestinal disorders              | 154.68<br>(105.71 to<br>240.43)                            | 307.94<br>(215.96 to<br>413.44)                             | 295.22<br>(203.88 to<br>399.86)                             | 317.98<br>(223.21 to<br>427.35)                             | 5.50<br>(3.93 to<br>7.51)                            | 15.22<br>(11.00 to<br>20.07)                         | 15.51<br>(11.02 to<br>20.47)                         | 14.75<br>(10.41 to<br>19.51)                         |
| Gallbladder and biliary diseases           | 316.48<br>(242.73 to<br>422.36)                            | 531.63<br>(346.60 to<br>835.36)                             | 418.02<br>(278.30 to<br>636.81)                             | 713.01<br>(442.28 to<br>1,154.11)                           | 10.00<br>(7.70 to<br>13.11)                          | 22.05<br>(14.39 to<br>34.47)                         | 18.36<br>(12.34 to<br>27.78)                         | 28.20<br>(17.57 to<br>46.03)                         |
| Pancreatitis                               | 758.86<br>(531.28 to<br>1,088.84)                          | 1,653.65<br>(923.39 to<br>3,119.61)                         | 1,429.51<br>(812.53 to<br>2,558.19)                         | 2,092.76<br>(1,063.01 to<br>4,426.15)                       | 21.41<br>(15.02 to<br>30.59)                         | 51.69<br>(30.68 to<br>94.41)                         | 46.19<br>(28.26 to<br>80.37)                         | 63.24<br>(33.56 to<br>128.96)                        |
| Other digestive diseases                   | 885.34<br>(588.16 to<br>1,321.16)                          | 1,396.74<br>(899.42 to<br>2,064.97)                         | 1,194.72<br>(775.25 to<br>1,748.89)                         | 1,579.41<br>(1,010.99 to<br>2,307.66)                       | 23.94<br>(15.76 to<br>34.45)                         | 51.46<br>(35.07 to<br>72.27)                         | 46.91<br>(31.94 to<br>65.87)                         | 54.53<br>(36.70 to<br>77.07)                         |
| <b>Neurological disorders</b>              | <b>3,878.86</b><br><b>(3,282.82 to</b><br><b>4,561.06)</b> | <b>8,768.48</b><br><b>(7,189.07 to</b><br><b>10,823.28)</b> | <b>8,717.96</b><br><b>(7,211.18 to</b><br><b>10,593.15)</b> | <b>9,486.76</b><br><b>(7,609.35 to</b><br><b>11,877.28)</b> | <b>152.91</b><br><b>(129.06 to</b><br><b>180.94)</b> | <b>514.73</b><br><b>(416.81 to</b><br><b>647.34)</b> | <b>578.09</b><br><b>(478.81 to</b><br><b>710.83)</b> | <b>492.72</b><br><b>(385.82 to</b><br><b>643.01)</b> |
| Alzheimer's disease and other dementias    | 1,193.09<br>(945.58 to<br>1,486.26)                        | 4,370.71<br>(3,336.49 to<br>5,852.90)                       | 4,781.60<br>(3,795.79 to<br>6,194.50)                       | 4,234.09<br>(3,073.99 to<br>6,035.59)                       | 99.06<br>(79.83 to<br>123.82)                        | 396.30<br>(295.14 to<br>526.35)                      | 458.75<br>(357.41 to<br>585.96)                      | 365.03<br>(260.15 to<br>515.58)                      |
| Parkinson's disease                        | 103.84<br>(77.65 to<br>134.87)                             | 441.77<br>(335.49 to<br>568.22)                             | 552.98<br>(419.67 to<br>706.97)                             | 366.68<br>(274.62 to<br>479.13)                             | 7.54<br>(5.66 to<br>9.91)                            | 35.27<br>(26.07 to<br>46.03)                         | 46.02<br>(34.67 to<br>59.13)                         | 28.29<br>(20.43 to<br>37.32)                         |

|                              |                                              |                                                |                                                |                                                |                                       |                                       |                                       |                                       |
|------------------------------|----------------------------------------------|------------------------------------------------|------------------------------------------------|------------------------------------------------|---------------------------------------|---------------------------------------|---------------------------------------|---------------------------------------|
| Epilepsy                     | 2,102.52<br>(1,666.80 to<br>2,682.34)        | 3,070.82<br>(2,078.74 to<br>4,478.92)          | 2,483.74<br>(1,706.27 to<br>3,580.69)          | 3,965.20<br>(2,630.60 to<br>5,908.67)          | 37.74<br>(47.49)                      | 63.84<br>(30.32 to<br>90.79)          | 52.99<br>(37.52 to<br>74.09)          | 80.24<br>(54.63 to<br>116.79)         |
| Multiple sclerosis           | 30.35<br>(16.99 to<br>45.73)                 | 79.46<br>(43.37 to<br>121.79)                  | 82.87<br>(45.59 to<br>127.17)                  | 76.37<br>(41.44 to<br>117.99)                  | 0.82<br>(0.45 to<br>1.25)             | 2.27<br>(1.23 to<br>3.49)             | 2.41<br>(1.31 to<br>3.70)             | 3.15<br>(1.15 to<br>3.28)             |
| Motor neuron disease         | 46.69<br>(36.64 to<br>60.59)                 | 111.04<br>(84.69 to<br>149.12)                 | 119.94<br>(89.86 to<br>163.42)                 | 106.59<br>(82.02 to<br>141.23)                 | 1.13<br>(0.89 to<br>1.45)             | 3.50<br>(2.68 to<br>4.78)             | 3.87<br>(2.92 to<br>5.33)             | 3.24<br>(2.49 to<br>4.40)             |
| Other neurological disorders | 402.37<br>(289.63 to<br>536.32)              | 694.69<br>(530.07 to<br>898.97)                | 696.83<br>(538.29 to<br>891.56)                | 737.83<br>(552.64 to<br>980.08)                | 6.62<br>(5.03 to<br>8.48)             | 13.55<br>(10.96 to<br>16.74)          | 14.04<br>(11.44 to<br>17.27)          | 13.77<br>(10.97 to<br>17.19)          |
| <b>Mental disorders</b>      | <b>1,037.08<br/>(618.02 to<br/>1,391.41)</b> | <b>2,675.55<br/>(1,637.16 to<br/>3,770.47)</b> | <b>2,647.17<br/>(1,618.36 to<br/>3,750.56)</b> | <b>2,719.88<br/>(1,666.77 to<br/>3,834.98)</b> | <b>23.98<br/>(14.55 to<br/>31.51)</b> | <b>64.67<br/>(40.80 to<br/>87.15)</b> | <b>65.61<br/>(41.12 to<br/>88.11)</b> | <b>64.50<br/>(40.77 to<br/>87.00)</b> |
| Alcohol use disorders        | 337.61<br>(190.97 to<br>540.62)              | 675.33<br>(357.70 to<br>1,150.95)              | 656.00<br>(344.01 to<br>1,111.44)              | 710.98<br>(378.29 to<br>1,207.11)              | 9.45<br>(5.64 to<br>14.49)            | 20.38<br>(11.80 to<br>33.46)          | 20.37<br>(11.79 to<br>33.17)          | 20.96<br>(12.20 to<br>33.88)          |
| Drug use disorders           | 696.65<br>(353.90 to<br>989.30)              | 1,993.50<br>(1,005.08 to<br>2,972.65)          | 1,984.47<br>(1,009.19 to<br>2,943.17)          | 2,002.05<br>(1,006.17 to<br>2,997.58)          | 14.47<br>(7.35 to<br>20.18)           | 44.17<br>(22.39 to<br>62.49)          | 45.12<br>(22.97 to<br>63.43)          | 43.42<br>(22.09 to<br>61.74)          |
| Opioid use disorders         | 645.81<br>(333.38 to<br>915.45)              | 1,815.34<br>(910.62 to<br>2,740.02)            | 1,800.42<br>(913.47 to<br>2,692.22)            | 1,828.18<br>(913.50 to<br>2,764.12)            | 12.81<br>(6.57 to<br>17.80)           | 37.31<br>(18.90 to<br>53.36)          | 37.47<br>(19.36 to<br>53.48)          | 37.12<br>(18.65 to<br>53.73)          |
| Cocaine use disorders        | 9.96<br>(3.51 to<br>17.98)                   | 34.98<br>(13.05 to<br>63.89)                   | 32.80<br>(12.43 to<br>59.53)                   | 36.38<br>(13.54 to<br>66.75)                   | 0.27<br>(0.10 to<br>0.48)             | 1.04<br>(0.39 to<br>1.82)             | 1.01<br>(0.38 to<br>1.75)             | 1.05<br>(0.39 to<br>1.85)             |
| Amphetamine use disorders    | 5.13<br>(2.00 to<br>9.49)                    | 24.69<br>(9.42 to<br>45.63)                    | 22.25<br>(8.61 to<br>40.72)                    | 26.50<br>(9.99 to<br>49.17)                    | 0.14<br>(0.05 to<br>0.26)             | 0.73<br>(0.28 to<br>1.29)             | 0.68<br>(0.26 to<br>1.21)             | 0.76<br>(0.30 to<br>1.36)             |
| Other drug use disorders     | 35.76<br>(15.84 to<br>62.91)                 | 118.49<br>(51.72 to<br>208.00)                 | 129.00<br>(56.90 to<br>223.40)                 | 110.98<br>(48.57 to<br>196.62)                 | 1.25<br>(0.55 to<br>1.94)             | 5.09<br>(2.52 to<br>7.55)             | 5.96<br>(2.80 to<br>8.74)             | 4.48<br>(2.08 to<br>6.67)             |
| Eating disorders             | 2.82<br>(1.68 to<br>5.15)                    | 6.72<br>(4.14 to<br>11.52)                     | 6.70<br>(4.08 to<br>11.86)                     | 6.86<br>(4.22 to<br>11.58)                     | 0.05<br>(0.03 to<br>0.09)             | 0.12<br>(0.07 to<br>0.21)             | 0.12<br>(0.07 to<br>0.22)             | 0.12<br>(0.08 to<br>0.21)             |

**The Gambia**

| Cause                                                      | YLLs (actual counts)                              |                                                   |                                                   |                                                   | Deaths (actual counts)                   |                                              |                                            |                                                |
|------------------------------------------------------------|---------------------------------------------------|---------------------------------------------------|---------------------------------------------------|---------------------------------------------------|------------------------------------------|----------------------------------------------|--------------------------------------------|------------------------------------------------|
|                                                            | 2016                                              | 2040 Forecast                                     | 2040 Better Scenario                              | 2040 Worse Scenario                               | 2016                                     | 2040 Forecast                                | 2040 Better Scenario                       | 2040 Worse Scenario                            |
| <b>Diabetes, urogenital, blood, and endocrine diseases</b> | <b>17,180.77<br/>(14,396.78 to<br/>21,678.20)</b> | <b>30,212.23<br/>(23,687.10 to<br/>38,249.35)</b> | <b>24,479.00<br/>(19,504.07 to<br/>31,207.90)</b> | <b>37,099.98<br/>(28,974.92 to<br/>46,654.13)</b> | <b>429.96<br/>(373.24 to<br/>502.71)</b> | <b>1,131.92<br/>(919.33 to<br/>1,387.91)</b> | <b>956.80<br/>(784.96 to<br/>1,188.56)</b> | <b>1,325.16<br/>(1,071.38 to<br/>1,645.17)</b> |
| Diabetes mellitus                                          | 3,341.76<br>(2,745.13 to<br>4,142.95)             | 8,929.19<br>(5,602.19 to<br>13,611.19)            | 6,747.63<br>(4,336.47 to<br>10,389.49)            | 11,273.24<br>(7,039.30 to<br>17,419.47)           | 137.51<br>(112.60 to<br>173.37)          | 447.76<br>(296.30 to<br>662.75)              | 357.97<br>(242.70 to<br>526.25)            | 537.41<br>(352.18 to<br>794.15)                |
| Acute glomerulonephritis                                   | 16.22<br>(13.69 to<br>18.66)                      | 23.68<br>(18.39 to<br>29.88)                      | 19.71<br>(15.47 to<br>24.70)                      | 29.15<br>(22.67 to<br>36.80)                      | 0.25<br>(0.21 to<br>0.28)                | 0.40<br>(0.32 to<br>0.49)                    | 0.34<br>(0.27 to<br>0.42)                  | 0.48<br>(0.38 to<br>0.59)                      |
| Chronic kidney disease                                     | 4,659.73<br>(3,734.04 to<br>5,740.36)             | 8,880.60<br>(6,215.36 to<br>12,339.38)            | 6,718.54<br>(4,751.79 to<br>9,305.60)             | 11,480.59<br>(7,891.88 to<br>16,366.64)           | 126.75<br>(102.96 to<br>153.52)          | 338.20<br>(236.98 to<br>488.53)              | 267.11<br>(190.07 to<br>379.66)            | 422.43<br>(286.10 to<br>621.85)                |
| Chronic kidney disease due to diabetes mellitus            | 973.65<br>(747.32 to<br>1,225.65)                 | 2,519.66<br>(1,654.61 to<br>3,679.98)             | 1,945.51<br>(1,322.57 to<br>2,846.85)             | 3,189.07<br>(2,031.95 to<br>4,877.85)             | 34.50<br>(26.80 to<br>42.61)             | 108.17<br>(71.28 to<br>162.86)               | 86.33<br>(58.33 to<br>128.09)              | 134.15<br>(84.47 to<br>208.40)                 |
| Chronic kidney disease due to hypertension                 | 518.53<br>(403.65 to<br>653.15)                   | 1,402.85<br>(945.35 to<br>2,074.17)               | 1,091.00<br>(750.98 to<br>1,579.14)               | 1,767.66<br>(1,136.10 to<br>2,658.76)             | 23.43<br>(18.29 to<br>29.00)             | 79.13<br>(53.19 to<br>115.30)                | 64.52<br>(44.69 to<br>93.74)               | 96.40<br>(61.87 to<br>145.81)                  |
| Chronic kidney disease due to glomerulonephritis           | 1,507.82<br>(1,176.20 to<br>1,899.00)             | 2,312.57<br>(1,578.43 to<br>3,239.26)             | 1,710.62<br>(1,175.50 to<br>2,395.57)             | 3,046.75<br>(2,073.68 to<br>4,360.26)             | 31.46<br>(24.80 to<br>39.06)             | 65.96<br>(45.29 to<br>95.34)                 | 50.33<br>(35.05 to<br>72.56)               | 84.32<br>(57.11 to<br>125.00)                  |
| Chronic kidney disease due to other and unspecified causes | 1,659.73<br>(1,277.79 to<br>2,151.46)             | 2,645.51<br>(1,811.17 to<br>3,748.22)             | 1,971.41<br>(1,356.23 to<br>2,784.50)             | 3,477.11<br>(2,398.80 to<br>4,993.40)             | 37.36<br>(29.32 to<br>46.99)             | 84.94<br>(57.98 to<br>121.37)                | 65.93<br>(45.95 to<br>93.50)               | 107.56<br>(72.55 to<br>156.54)                 |



|                                                   |                                        |                                       |                                       |                                        |                               |                                 |                                 |                                 |
|---------------------------------------------------|----------------------------------------|---------------------------------------|---------------------------------------|----------------------------------------|-------------------------------|---------------------------------|---------------------------------|---------------------------------|
| Urinary diseases and male infertility             | 1,867.85<br>(1,568.80 to<br>2,190.41)  | 4,366.38<br>(3,611.74 to<br>5,171.40) | 4,185.97<br>(3,471.40 to<br>4,963.15) | 4,615.70<br>(3,798.21 to<br>5,463.81)  | 51.00<br>(43.46 to<br>58.46)  | 169.79<br>(145.59 to<br>192.56) | 175.13<br>(150.17 to<br>199.53) | 165.74<br>(142.81 to<br>189.06) |
| Urinary tract infections                          | 1,236.83<br>(980.98 to<br>1,489.20)    | 3,341.08<br>(2,691.64 to<br>4,016.07) | 3,306.30<br>(2,652.72 to<br>3,997.24) | 3,462.50<br>(2,769.48 to<br>4,179.50)  | 32.77<br>(26.04 to<br>39.32)  | 132.23<br>(110.43 to<br>155.19) | 140.54<br>(117.75 to<br>164.19) | 126.26<br>(104.36 to<br>148.03) |
| Urolithiasis                                      | 43.66<br>(28.89 to<br>62.27)           | 108.70<br>(67.74 to<br>165.01)        | 98.63<br>(62.95 to<br>148.40)         | 120.22<br>(73.64 to<br>183.62)         | 0.79<br>(0.52 to<br>1.09)     | 2.24<br>(1.43 to<br>3.25)       | 2.13<br>(1.37 to<br>3.10)       | 2.37<br>(1.50 to<br>3.50)       |
| Other urinary diseases                            | 587.37<br>(429.87 to<br>759.64)        | 916.60<br>(604.93 to<br>1,272.73)     | 781.03<br>(519.00 to<br>1,092.74)     | 1,032.98<br>(689.53 to<br>1,428.32)    | 17.44<br>(12.56 to<br>22.69)  | 35.32<br>(22.97 to<br>49.19)    | 32.45<br>(20.54 to<br>46.05)    | 37.11<br>(24.35 to<br>51.19)    |
| Gynecological diseases                            | 87.38<br>(59.80 to<br>122.89)          | 171.33<br>(110.19 to<br>260.11)       | 139.90<br>(89.57 to<br>213.73)        | 197.73<br>(126.93 to<br>302.23)        | 2.02<br>(1.41 to<br>2.83)     | 4.21<br>(2.79 to<br>6.29)       | 3.50<br>(2.32 to<br>5.19)       | 4.78<br>(3.15 to<br>7.11)       |
| Uterine fibroids                                  | 5.09<br>(2.76 to<br>9.02)              | 8.83<br>(4.67 to<br>16.50)            | 6.99<br>(3.69 to<br>13.06)            | 10.36<br>(5.47 to<br>19.25)            | 0.17<br>(0.10 to<br>0.28)     | 0.32<br>(0.17 to<br>0.55)       | 0.26<br>(0.14 to<br>0.44)       | 0.36<br>(0.20 to<br>0.61)       |
| Polycystic ovarian syndrome                       | 12.64<br>(2.64 to<br>26.23)            | 15.57<br>(2.83 to<br>35.95)           | 10.75<br>(1.80 to<br>26.03)           | 20.17<br>(3.73 to<br>45.34)            | 0.28<br>(0.06 to<br>0.58)     | 0.35<br>(0.06 to<br>0.79)       | 0.24<br>(0.04 to<br>0.57)       | 0.45<br>(0.08 to<br>1.02)       |
| Endometriosis                                     | 0.20<br>(0.08 to<br>0.56)              | 0.50<br>(0.18 to<br>1.46)             | 0.40<br>(0.14 to<br>1.19)             | 0.58<br>(0.21 to<br>1.69)              | 0.00<br>(0.00 to<br>0.01)     | 0.01<br>(0.00 to<br>0.03)       | 0.01<br>(0.00 to<br>0.03)       | 0.01<br>(0.00 to<br>0.04)       |
| Genital prolapse                                  | 2.78<br>(0.42 to<br>8.17)              | 4.61<br>(0.59 to<br>15.82)            | 3.48<br>(0.45 to<br>12.07)            | 5.60<br>(0.72 to<br>19.06)             | 0.06<br>(0.01 to<br>0.18)     | 0.10<br>(0.02 to<br>0.33)       | 0.08<br>(0.02 to<br>0.26)       | 0.13<br>(0.02 to<br>0.39)       |
| Other gynecological diseases                      | 66.67<br>(44.17 to<br>94.41)           | 141.83<br>(87.32 to<br>214.88)        | 118.28<br>(72.94 to<br>181.46)        | 161.01<br>(99.55 to<br>247.34)         | 1.51<br>(1.00 to<br>2.10)     | 3.43<br>(2.21 to<br>5.13)       | 2.91<br>(1.89 to<br>4.33)       | 3.83<br>(2.46 to<br>5.73)       |
| Hemoglobinopathies and hemolytic anemias          | 6,154.71<br>(4,360.42 to<br>10,516.24) | 6,300.12<br>(4,375.83 to<br>8,777.38) | 5,282.72<br>(3,751.26 to<br>7,309.91) | 7,717.68<br>(5,374.16 to<br>11,088.14) | 91.12<br>(65.98 to<br>145.31) | 122.60<br>(88.05 to<br>168.70)  | 105.26<br>(76.67 to<br>145.53)  | 143.24<br>(102.67 to<br>200.91) |
| Thalassemias                                      | 110.20<br>(13.87 to<br>349.40)         | 52.21<br>(6.60 to<br>160.21)          | 53.33<br>(6.81 to<br>156.82)          | 65.55<br>(8.15 to<br>204.21)           | 1.31<br>(0.17 to<br>4.16)     | 0.63<br>(0.08 to<br>1.95)       | 0.63<br>(0.08 to<br>1.88)       | 0.79<br>(0.10 to<br>2.44)       |
| Sickle cell disorders                             | 5,677.20<br>(3,980.39 to<br>9,828.37)  | 5,516.27<br>(3,809.39 to<br>7,742.73) | 4,618.28<br>(3,238.93 to<br>6,457.64) | 6,818.33<br>(4,669.03 to<br>9,955.91)  | 77.77<br>(55.71 to<br>127.89) | 89.65<br>(62.37 to<br>123.73)   | 76.11<br>(53.76 to<br>104.21)   | 107.56<br>(75.39 to<br>151.74)  |
| G6PD deficiency                                   | 246.55<br>(178.84 to<br>377.48)        | 476.34<br>(328.61 to<br>674.97)       | 385.99<br>(267.64 to<br>550.32)       | 560.00<br>(392.84 to<br>803.12)        | 5.61<br>(4.07 to<br>7.97)     | 15.37<br>(10.53 to<br>22.18)    | 12.78<br>(8.72 to<br>18.69)     | 17.44<br>(11.90 to<br>25.02)    |
| Other hemoglobinopathies and hemolytic anemias    | 120.77<br>(82.19 to<br>169.14)         | 255.30<br>(170.23 to<br>370.54)       | 226.13<br>(151.34 to<br>327.98)       | 273.79<br>(181.21 to<br>394.67)        | 6.43<br>(4.29 to<br>9.35)     | 16.95<br>(11.51 to<br>25.03)    | 15.74<br>(10.74 to<br>23.42)    | 17.46<br>(11.55 to<br>25.93)    |
| Endocrine, metabolic, blood, and immune disorders | 1,053.10<br>(791.76 to<br>1,551.76)    | 1,540.93<br>(1,175.84 to<br>2,175.11) | 1,384.53<br>(1,061.06 to<br>1,938.11) | 1,785.90<br>(1,340.53 to<br>2,530.93)  | 21.29<br>(16.85 to<br>31.06)  | 48.96<br>(38.91 to<br>72.52)    | 47.49<br>(37.74 to<br>69.85)    | 51.07<br>(40.45 to<br>76.45)    |

**The Gambia**

| Cause                                  | YLLs (actual counts)                            |                                                 |                                                 |                                                 | Deaths (actual counts)                 |                                        |                                        |                                        |
|----------------------------------------|-------------------------------------------------|-------------------------------------------------|-------------------------------------------------|-------------------------------------------------|----------------------------------------|----------------------------------------|----------------------------------------|----------------------------------------|
|                                        | 2016                                            | 2040 Forecast                                   | 2040 Better Scenario                            | 2040 Worse Scenario                             | 2016                                   | 2040 Forecast                          | 2040 Better Scenario                   | 2040 Worse Scenario                    |
| <b>Musculoskeletal disorders</b>       | <b>302.00</b><br>(228.52 to<br>408.53)          | <b>735.00</b><br>(548.93 to<br>988.49)          | <b>774.85</b><br>(578.50 to<br>1,040.02)        | <b>720.67</b><br>(538.97 to<br>973.81)          | <b>7.10</b><br>(5.39 to<br>9.58)       | <b>22.43</b><br>(16.93 to<br>29.24)    | <b>24.58</b><br>(18.60 to<br>31.93)    | <b>21.07</b><br>(15.90 to<br>27.38)    |
| Rheumatoid arthritis                   | 28.76<br>(18.04 to<br>42.99)                    | 78.17<br>(48.87 to<br>119.63)                   | 69.45<br>(42.73 to<br>107.37)                   | 84.93<br>(53.46 to<br>129.93)                   | 1.11<br>(0.70 to<br>1.66)              | 4.15<br>(2.51 to<br>6.52)              | 3.87<br>(2.30 to<br>6.13)              | 4.29<br>(2.60 to<br>6.66)              |
| Other musculoskeletal disorders        | 273.24<br>(205.15 to<br>374.61)                 | 656.83<br>(484.95 to<br>902.85)                 | 705.39<br>(520.01 to<br>967.62)                 | 635.74<br>(461.93 to<br>880.15)                 | 5.98<br>(4.54 to<br>8.24)              | 18.28<br>(13.71 to<br>24.86)           | 20.71<br>(15.59 to<br>28.07)           | 16.78<br>(12.56 to<br>22.92)           |
| <b>Other non-communicable diseases</b> | <b>32,196.05</b><br>(17,733.40 to<br>46,899.96) | <b>23,947.60</b><br>(14,337.99 to<br>35,024.65) | <b>19,101.73</b><br>(11,912.31 to<br>27,160.99) | <b>35,001.37</b><br>(19,829.74 to<br>52,586.40) | <b>399.25</b><br>(227.80 to<br>573.76) | <b>388.45</b><br>(269.23 to<br>536.75) | <b>334.79</b><br>(238.98 to<br>451.96) | <b>514.52</b><br>(337.03 to<br>727.60) |

|                                               |                                          |                                          |                                          |                                          |                                 |                                       |                                       |                                       |
|-----------------------------------------------|------------------------------------------|------------------------------------------|------------------------------------------|------------------------------------------|---------------------------------|---------------------------------------|---------------------------------------|---------------------------------------|
| Congenital birth defects                      | 29,588.93<br>(15,354.34 to<br>44,481.59) | 19,581.27<br>(10,213.53 to<br>30,962.76) | 15,110.41<br>(8,303.60 to<br>23,082.46)  | 29,797.66<br>(15,252.95 to<br>47,560.54) | 353.93<br>(186.63 to<br>530.34) | 251.90<br>(138.27 to<br>391.34)       | 197.35<br>(112.08 to<br>298.11)       | 373.08<br>(197.81 to<br>588.89)       |
| Neural tube defects                           | 5,143.99<br>(2,369.45 to<br>9,709.95)    | 1,336.10<br>(522.78 to<br>3,194.61)      | 890.55<br>(348.03 to<br>2,103.71)        | 2,309.90<br>(908.48 to<br>5,380.75)      | 60.17<br>(27.71 to<br>113.24)   | 16.19<br>(6.42 to<br>38.78)           | 10.86<br>(4.29 to<br>26.02)           | 27.65<br>(11.01 to<br>63.47)          |
| Congenital heart anomalies                    | 8,014.76<br>(4,215.56 to<br>14,403.57)   | 6,159.47<br>(3,407.63 to<br>11,128.52)   | 4,858.72<br>(2,812.77 to<br>8,292.77)    | 8,953.36<br>(4,832.93 to<br>16,344.80)   | 97.59<br>(51.97 to<br>173.07)   | 81.43<br>(46.94 to<br>140.89)         | 65.11<br>(38.27 to<br>107.38)         | 115.07<br>(64.18 to<br>205.74)        |
| Orofacial clefts                              | 266.69<br>(33.38 to<br>847.70)           | 140.42<br>(16.54 to<br>455.59)           | 92.81<br>(10.86 to<br>305.39)            | 250.58<br>(29.61 to<br>813.28)           | 3.09<br>(0.39 to<br>9.84)       | 1.63<br>(0.19 to<br>5.27)             | 1.08<br>(0.13 to<br>3.54)             | 2.91<br>(0.34 to<br>9.42)             |
| Down syndrome                                 | 351.05<br>(144.92 to<br>732.45)          | 337.90<br>(155.28 to<br>697.49)          | 266.67<br>(124.49 to<br>545.32)          | 475.41<br>(210.05 to<br>999.60)          | 4.57<br>(2.01 to<br>9.36)       | 5.37<br>(2.68 to<br>10.61)            | 4.36<br>(2.19 to<br>8.64)             | 7.12<br>(3.41 to<br>14.36)            |
| Other chromosomal abnormalities               | 1,441.35<br>(351.15 to<br>3,116.64)      | 1,385.75<br>(375.34 to<br>2,949.06)      | 1,026.83<br>(276.59 to<br>2,140.88)      | 2,236.80<br>(598.43 to<br>4,816.40)      | 16.88<br>(4.11 to<br>36.40)     | 16.57<br>(4.48 to<br>34.93)           | 12.34<br>(3.32 to<br>25.53)           | 26.52<br>(7.10 to<br>56.81)           |
| Congenital musculoskeletal and limb anomalies | 218.68<br>(70.75 to<br>582.53)           | 180.70<br>(62.45 to<br>516.90)           | 143.91<br>(52.11 to<br>400.12)           | 277.53<br>(91.42 to<br>809.90)           | 2.56<br>(0.84 to<br>6.82)       | 2.16<br>(0.77 to<br>6.13)             | 1.73<br>(0.64 to<br>4.73)             | 3.29<br>(1.10 to<br>9.52)             |
| Urogenital congenital anomalies               | 269.56<br>(115.21 to<br>504.88)          | 239.38<br>(126.96 to<br>409.53)          | 204.95<br>(112.81 to<br>343.93)          | 326.84<br>(165.71 to<br>584.48)          | 3.55<br>(1.70 to<br>6.34)       | 4.08<br>(2.36 to<br>6.54)             | 3.63<br>(2.14 to<br>5.56)             | 5.12<br>(2.89 to<br>8.47)             |
| Digestive congenital anomalies                | 1,646.93<br>(771.11 to<br>2,970.86)      | 1,148.83<br>(515.61 to<br>2,027.56)      | 870.55<br>(404.56 to<br>1,500.30)        | 1,821.44<br>(817.64 to<br>3,262.17)      | 19.30<br>(9.08 to<br>34.76)     | 13.76<br>(6.30 to<br>24.14)           | 10.47<br>(4.92 to<br>18.05)           | 21.63<br>(9.73 to<br>38.51)           |
| Other congenital birth defects                | 12,235.91<br>(3,853.31 to<br>21,274.40)  | 8,652.71<br>(3,175.00 to<br>15,252.40)   | 6,755.42<br>(2,577.19 to<br>11,695.49)   | 13,145.79<br>(4,599.89 to<br>23,710.52)  | 146.23<br>(47.25 to<br>253.40)  | 110.71<br>(43.88 to<br>191.41)        | 87.78<br>(36.40 to<br>149.69)         | 163.78<br>(61.05 to<br>290.67)        |
| Skin and subcutaneous diseases                | 1,162.85<br>(751.25 to<br>1,911.61)      | 3,605.12<br>(2,325.75 to<br>5,496.35)    | 3,405.60<br>(2,207.58 to<br>5,201.75)    | 3,983.00<br>(2,596.90 to<br>6,203.61)    | 28.55<br>(18.12 to<br>46.27)    | 127.71<br>(81.21 to<br>195.26)        | 130.64<br>(84.38 to<br>198.36)        | 127.28<br>(81.77 to<br>196.80)        |
| Cellulitis                                    | 83.24<br>(42.11 to<br>143.76)            | 362.14<br>(178.50 to<br>606.85)          | 388.00<br>(192.72 to<br>638.96)          | 353.79<br>(172.54 to<br>599.57)          | 2.38<br>(1.11 to<br>4.15)       | 14.12<br>(6.65 to<br>24.36)           | 15.95<br>(7.45 to<br>26.89)           | 12.92<br>(6.06 to<br>22.91)           |
| Pyoderma                                      | 966.82<br>(610.10 to<br>1,657.28)        | 2,944.23<br>(1,900.54 to<br>4,590.83)    | 2,706.63<br>(1,770.23 to<br>4,177.08)    | 3,325.89<br>(2,130.67 to<br>5,389.37)    | 22.24<br>(14.23 to<br>36.75)    | 98.40<br>(62.75 to<br>153.49)         | 97.06<br>(62.90 to<br>148.34)         | 100.80<br>(64.92 to<br>158.16)        |
| Decubitus ulcer                               | 69.26<br>(38.11 to<br>111.51)            | 201.63<br>(109.18 to<br>326.34)          | 214.80<br>(117.28 to<br>348.42)          | 198.04<br>(106.28 to<br>321.07)          | 3.16<br>(1.65 to<br>5.04)       | 12.99<br>(6.42 to<br>21.96)           | 15.31<br>(7.59 to<br>25.78)           | 11.36<br>(5.67 to<br>19.42)           |
| Other skin and subcutaneous diseases          | 43.52<br>(24.32 to<br>75.37)             | 97.12<br>(56.67 to<br>164.36)            | 96.17<br>(56.72 to<br>161.93)            | 105.28<br>(60.22 to<br>180.40)           | 0.77<br>(0.44 to<br>1.33)       | 2.20<br>(1.29 to<br>3.69)             | 2.33<br>(1.37 to<br>3.91)             | 2.20<br>(1.26 to<br>3.78)             |
| Sudden infant death syndrome                  | 1,444.27<br>(542.36 to<br>2,869.91)      | 761.22<br>(268.48 to<br>1,538.94)        | 585.72<br>(207.82 to<br>1,158.31)        | 1,220.70<br>(417.52 to<br>2,474.17)      | 16.77<br>(6.30 to<br>33.32)     | 8.83<br>(3.12 to<br>17.86)            | 6.80<br>(2.41 to<br>13.44)            | 14.17<br>(4.85 to<br>28.71)           |
| Injuries                                      | 37,917.07<br>(32,412.22 to<br>43,810.55) | 51,267.98<br>(40,966.12 to<br>63,963.77) | 44,081.71<br>(35,394.40 to<br>54,461.06) | 59,730.84<br>(47,326.39 to<br>74,803.24) | 725.51<br>(630.40 to<br>829.98) | 1,309.14<br>(1,115.00 to<br>1,547.41) | 1,203.43<br>(1,023.01 to<br>1,423.70) | 1,421.90<br>(1,190.88 to<br>1,705.75) |
| Transport injuries                            | 9,890.01<br>(8,348.57 to<br>11,608.86)   | 18,846.69<br>(14,705.54 to<br>24,202.45) | 15,739.59<br>(12,316.03 to<br>20,446.40) | 21,328.26<br>(16,414.14 to<br>27,923.27) | 192.54<br>(165.14 to<br>223.02) | 428.40<br>(346.44 to<br>539.58)       | 376.04<br>(304.49 to<br>475.50)       | 465.38<br>(367.56 to<br>602.82)       |
| Road injuries                                 | 9,378.35<br>(7,893.55 to<br>11,031.99)   | 17,843.72<br>(13,890.26 to<br>22,922.17) | 14,873.14<br>(11,646.04 to<br>19,060.65) | 20,135.09<br>(15,421.58 to<br>26,177.46) | 183.55<br>(157.50 to<br>212.79) | 408.04<br>(328.88 to<br>511.87)       | 358.01<br>(289.44 to<br>448.66)       | 441.82<br>(346.83 to<br>571.10)       |
| Pedestrian road injuries                      | 2,881.09<br>(2,116.64 to<br>3,658.06)    | 4,420.50<br>(3,038.33 to<br>6,065.91)    | 3,741.22<br>(2,568.14 to<br>5,145.25)    | 5,003.20<br>(3,397.01 to<br>6,937.69)    | 58.30<br>(43.92 to<br>72.28)    | 111.24<br>(80.54 to<br>148.74)        | 98.94<br>(71.93 to<br>130.26)         | 120.55<br>(86.35 to<br>164.13)        |

**The Gambia**

| Cause | YLLs (actual counts) |               |                      |                     | Deaths (actual counts) |               |                      |                     |
|-------|----------------------|---------------|----------------------|---------------------|------------------------|---------------|----------------------|---------------------|
|       | 2016                 | 2040 Forecast | 2040 Better Scenario | 2040 Worse Scenario | 2016                   | 2040 Forecast | 2040 Better Scenario | 2040 Worse Scenario |



|                                      |                                       |                                        |                                        |                                        |                               |                                 |                                 |                                 |
|--------------------------------------|---------------------------------------|----------------------------------------|----------------------------------------|----------------------------------------|-------------------------------|---------------------------------|---------------------------------|---------------------------------|
|                                      | 1,187.96<br>(925.93 to<br>1,548.24)   | 981.83<br>(697.33 to<br>1,364.71)      | 824.62<br>(587.62 to<br>1,163.06)      | 1,176.15<br>(840.65 to<br>1,591.64)    | 19.91<br>(15.57 to<br>25.68)  | 20.57<br>(15.19 to<br>27.92)    | 18.00<br>(13.27 to<br>24.56)    | 23.33<br>(17.44 to<br>31.88)    |
| Other unintentional injuries         |                                       |                                        |                                        |                                        |                               |                                 |                                 |                                 |
| Self-harm and interpersonal violence | 4,406.43<br>(2,726.70 to<br>9,846.49) | 8,273.31<br>(4,865.73 to<br>17,559.71) | 7,776.80<br>(4,642.10 to<br>16,154.27) | 9,083.21<br>(5,150.94 to<br>19,493.96) | 94.37<br>(61.92 to<br>191.04) | 198.60<br>(124.16 to<br>369.02) | 191.35<br>(121.60 to<br>348.50) | 213.69<br>(129.35 to<br>403.91) |

### The Gambia

| Cause                                                                        | YLLs (actual counts)                  |                                        |                                       |                                        | Deaths (actual counts)        |                                 |                                 |                                 |
|------------------------------------------------------------------------------|---------------------------------------|----------------------------------------|---------------------------------------|----------------------------------------|-------------------------------|---------------------------------|---------------------------------|---------------------------------|
|                                                                              | 2016                                  | 2040 Forecast                          | 2040 Better Scenario                  | 2040 Worse Scenario                    | 2016                          | 2040 Forecast                   | 2040 Better Scenario            | 2040 Worse Scenario             |
| Self-harm                                                                    | 2,950.67<br>(2,067.39 to<br>4,729.89) | 5,973.77<br>(3,814.53 to<br>10,195.66) | 5,593.75<br>(3,614.38 to<br>9,504.61) | 6,619.54<br>(4,093.89 to<br>11,588.49) | 69.97<br>(50.36 to<br>109.14) | 156.85<br>(104.75 to<br>258.87) | 151.25<br>(102.46 to<br>248.48) | 169.65<br>(109.36 to<br>285.10) |
| Self-harm by firearm                                                         | 360.25<br>(120.95 to<br>740.80)       | 609.18<br>(184.97 to<br>1,247.42)      | 556.61<br>(171.48 to<br>1,140.87)     | 685.73<br>(211.15 to<br>1,441.33)      | 8.76<br>(2.83 to<br>17.23)    | 16.85<br>(5.10 to<br>33.68)     | 15.95<br>(4.83 to<br>30.87)     | 18.42<br>(5.57 to<br>37.29)     |
| Self-harm by other specified means                                           | 2,590.42<br>(1,808.72 to<br>4,207.84) | 5,364.59<br>(3,433.04 to<br>9,119.26)  | 5,037.14<br>(3,227.50 to<br>8,411.26) | 5,933.80<br>(3,678.08 to<br>10,247.39) | 61.21<br>(43.63 to<br>96.62)  | 140.00<br>(92.37 to<br>230.02)  | 135.29<br>(90.61 to<br>220.57)  | 151.23<br>(96.14 to<br>255.19)  |
| Interpersonal violence                                                       | 1,455.76<br>(557.21 to<br>6,569.68)   | 2,299.53<br>(830.59 to<br>10,869.84)   | 2,183.05<br>(806.72 to<br>10,022.17)  | 2,463.67<br>(876.86 to<br>11,789.50)   | 24.40<br>(9.44 to<br>110.63)  | 41.75<br>(15.48 to<br>194.55)   | 40.11<br>(15.20 to<br>182.19)   | 44.04<br>(16.04 to<br>209.44)   |
| Physical violence by firearm                                                 | 818.96<br>(274.65 to<br>4,005.76)     | 1,337.74<br>(430.45 to<br>6,691.67)    | 1,267.59<br>(417.79 to<br>6,192.78)   | 1,412.32<br>(439.98 to<br>7,232.75)    | 13.89<br>(4.64 to<br>69.05)   | 23.72<br>(7.65 to<br>120.11)    | 22.61<br>(7.52 to<br>111.39)    | 24.83<br>(7.83 to<br>128.47)    |
| Physical violence by sharp object                                            | 342.37<br>(130.33 to<br>1,669.19)     | 589.36<br>(212.47 to<br>2,829.63)      | 583.18<br>(212.47 to<br>2,778.63)     | 606.13<br>(217.73 to<br>2,922.26)      | 5.86<br>(2.27 to<br>28.38)    | 10.97<br>(4.14 to<br>52.31)     | 11.00<br>(5.123 to<br>53.58)    | 11.10<br>(4.17 to<br>53.58)     |
| Physical violence by other means                                             | 294.42<br>(99.00 to<br>1,405.22)      | 372.44<br>(110.93 to<br>2,070.04)      | 332.28<br>(100.65 to<br>1,795.64)     | 445.22<br>(131.54 to<br>2,493.21)      | 4.65<br>(1.59 to<br>22.99)    | 7.05<br>(2.18 to<br>38.60)      | 6.50<br>(2.06 to<br>35.37)      | 8.11<br>(2.47 to<br>44.94)      |
| Forces of nature, conflict and terrorism, and executions and police conflict | 18.17<br>(14.64 to<br>25.47)          | 177.71<br>(0.00 to<br>1,552.86)        | 171.70<br>(0.00 to<br>1,528.42)       | 191.75<br>(0.00 to<br>1,606.01)        | 0.32<br>(0.24 to<br>0.46)     | 3.14<br>(0.00 to<br>28.86)      | 3.09<br>(0.00 to<br>27.87)      | 3.29<br>(0.00 to<br>28.62)      |
| Exposure to forces of nature                                                 | 0.00<br>(0.00 to<br>0.00)             | 48.79<br>(0.00 to<br>392.96)           | 46.71<br>(0.00 to<br>377.83)          | 53.75<br>(0.00 to<br>432.30)           | 0.00<br>(0.00 to<br>0.00)     | 0.90<br>(0.00 to<br>7.29)       | 0.88<br>(0.00 to<br>7.20)       | 0.95<br>(0.00 to<br>7.67)       |
| Conflict and terrorism                                                       | 0.00<br>(0.00 to<br>0.00)             | 95.66<br>(0.00 to<br>83.01)            | 92.22<br>(0.00 to<br>80.15)           | 103.60<br>(0.00 to<br>89.75)           | 0.00<br>(0.00 to<br>0.00)     | 1.64<br>(0.00 to<br>1.42)       | 1.61<br>(0.00 to<br>1.40)       | 1.73<br>(0.00 to<br>1.50)       |
| Executions and police conflict                                               | 18.17<br>(14.64 to<br>25.47)          | 33.26<br>(0.00 to<br>455.27)           | 32.77<br>(0.00 to<br>450.30)          | 34.41<br>(0.00 to<br>469.01)           | 0.32<br>(0.24 to<br>0.46)     | 0.60<br>(0.24 to<br>8.35)       | 0.60<br>(0.00 to<br>8.32)       | 0.61<br>(0.00 to<br>8.47)       |

### Ghana

| Cause                                                      | YLLs (in 1000s)                       |                                       |                                       |                                         | Deaths (in 1000s)               |                                 |                                 |                                 |
|------------------------------------------------------------|---------------------------------------|---------------------------------------|---------------------------------------|-----------------------------------------|---------------------------------|---------------------------------|---------------------------------|---------------------------------|
|                                                            | 2016                                  | 2040 Forecast                         | 2040 Better Scenario                  | 2040 Worse Scenario                     | 2016                            | 2040 Forecast                   | 2040 Better Scenario            | 2040 Worse Scenario             |
| All causes                                                 | 8,783.94<br>(7,817.44 to<br>9,879.45) | 7,627.99<br>(6,412.47 to<br>9,021.11) | 5,974.77<br>(5,042.40 to<br>7,025.57) | 11,381.73<br>(9,401.77 to<br>13,663.43) | 189.15<br>(171.90 to<br>206.65) | 253.42<br>(223.19 to<br>287.50) | 207.56<br>(184.03 to<br>233.02) | 336.62<br>(292.97 to<br>384.59) |
| Communicable, maternal, neonatal, and nutritional diseases | 5,574.18<br>(4,761.33 to<br>6,498.09) | 3,045.81<br>(2,377.10 to<br>3,936.74) | 2,153.40<br>(1,682.14 to<br>2,809.93) | 5,650.56<br>(4,223.95 to<br>7,380.27)   | 92.29<br>(81.88 to<br>103.76)   | 74.97<br>(59.26 to<br>95.51)    | 53.98<br>(43.27 to<br>68.40)    | 124.75<br>(96.42 to<br>158.92)  |
| HIV/AIDS and tuberculosis                                  | 901.58<br>(732.09 to<br>1,121.75)     | 724.84<br>(377.42 to<br>1,179.23)     | 377.13<br>(159.63 to<br>740.03)       | 1,854.24<br>(978.12 to<br>2,976.42)     | 20.19<br>(17.07 to<br>24.20)    | 17.95<br>(10.07 to<br>27.10)    | 9.72<br>(4.88 to<br>16.78)      | 42.18<br>(23.13 to<br>65.21)    |
| Tuberculosis                                               | 196.98<br>(166.12 to<br>238.13)       | 169.54<br>(96.97 to<br>307.38)        | 100.14<br>(59.27 to<br>172.05)        | 290.58<br>(162.72 to<br>525.02)         | 6.19<br>(5.19 to<br>7.33)       | 6.36<br>(3.76 to<br>10.96)      | 3.92<br>(2.45 to<br>6.50)       | 10.40<br>(6.07 to<br>18.00)     |
| HIV/AIDS                                                   | 704.60<br>(539.59 to<br>927.99)       | 555.29<br>(210.15 to<br>993.45)       | 276.99<br>(61.73 to<br>637.58)        | 1,563.65<br>(700.30 to<br>2,657.52)     | 14.00<br>(11.11 to<br>17.87)    | 11.59<br>(4.40 to<br>19.91)     | 5.80<br>(1.23 to<br>12.27)      | 31.78<br>(13.60 to<br>53.34)    |

|                                                                          |                                           |                                         |                                       |                                           |                                  |                                  |                                  |                                  |
|--------------------------------------------------------------------------|-------------------------------------------|-----------------------------------------|---------------------------------------|-------------------------------------------|----------------------------------|----------------------------------|----------------------------------|----------------------------------|
| <b>Diarrhea, lower respiratory, and other common infectious diseases</b> | <b>1,297.56</b><br>(1,092.97 to 1,562.75) | <b>1,060.39</b><br>(719.80 to 1,563.17) | <b>731.13</b><br>(510.08 to 1,058.55) | <b>1,783.11</b><br>(1,191.92 to 2,726.12) | <b>27.68</b><br>(23.85 to 32.10) | <b>36.14</b><br>(25.48 to 50.62) | <b>26.01</b><br>(19.04 to 35.55) | <b>52.62</b><br>(36.24 to 75.51) |
| Diarrheal diseases                                                       | 218.20<br>(155.15 to 323.09)              | 160.78<br>(40.09 to 409.17)             | 97.76<br>(24.41 to 246.44)            | 270.14<br>(93.04 to 584.66)               | 4.29<br>(2.98 to 6.88)           | 4.90<br>(1.09 to 14.22)          | 3.03<br>(0.71 to 8.65)           | 7.62<br>(1.97 to 18.34)          |
| Intestinal infectious diseases                                           | 53.36<br>(27.34 to 91.85)                 | 43.45<br>(21.44 to 76.84)               | 37.25<br>(18.36 to 65.77)             | 57.96<br>(27.59 to 101.73)                | 0.76<br>(0.39 to 1.29)           | 0.67<br>(0.33 to 1.18)           | 0.58<br>(0.30 to 1.03)           | 0.87<br>(0.42 to 1.50)           |
| Typhoid fever                                                            | 47.40<br>(23.64 to 81.86)                 | 37.36<br>(17.56 to 67.77)               | 32.12<br>(15.50 to 58.40)             | 49.73<br>(22.89 to 90.18)                 | 0.67<br>(0.34 to 1.14)           | 0.58<br>(0.28 to 1.03)           | 0.50<br>(0.25 to 0.89)           | 0.74<br>(0.35 to 1.31)           |
| Paratyphoid fever                                                        | 5.77<br>(2.40 to 12.06)                   | 6.02<br>(2.63 to 12.48)                 | 5.08<br>(2.26 to 10.24)               | 8.12<br>(3.55 to 17.03)                   | 0.08<br>(0.04 to 0.17)           | 0.09<br>(0.04 to 0.19)           | 0.08<br>(0.04 to 0.16)           | 0.12<br>(0.06 to 0.26)           |
| Other intestinal infectious diseases                                     | 0.19<br>(0.06 to 0.49)                    | 0.06<br>(0.02 to 0.17)                  | 0.05<br>(0.02 to 0.12)                | 0.11<br>(0.03 to 0.29)                    | 0.00<br>(0.00 to 0.01)           | 0.00<br>(0.00 to 0.00)           | 0.00<br>(0.00 to 0.00)           | 0.00<br>(0.00 to 0.00)           |
| Lower respiratory infections                                             | 660.34<br>(531.68 to 810.21)              | 651.79<br>(424.13 to 1,027.42)          | 419.02<br>(283.42 to 627.29)          | 1,112.17<br>(675.00 to 1,863.79)          | 16.58<br>(14.01 to 19.65)        | 26.00<br>(18.04 to 38.03)        | 18.14<br>(13.02 to 25.41)        | 37.88<br>(25.25 to 58.01)        |
| Upper respiratory infections                                             | 0.90<br>(0.33 to 2.11)                    | 0.62<br>(0.27 to 1.24)                  | 0.45<br>(0.19 to 0.92)                | 1.02<br>(0.42 to 2.22)                    | 0.01<br>(0.01 to 0.03)           | 0.01<br>(0.01 to 0.03)           | 0.01<br>(0.01 to 0.02)           | 0.02<br>(0.01 to 0.04)           |
| Otitis media                                                             | 0.02<br>(0.01 to 0.03)                    | 0.01<br>(0.00 to 0.01)                  | 0.01<br>(0.00 to 0.01)                | 0.00<br>(0.00 to 0.01)                    | 0.00<br>(0.00 to 0.00)           | 0.00<br>(0.00 to 0.00)           | 0.00<br>(0.00 to 0.00)           | 0.00<br>(0.00 to 0.00)           |
| Meningitis                                                               | 272.69<br>(192.08 to 387.14)              | 170.50<br>(113.06 to 254.15)            | 153.71<br>(103.01 to 223.89)          | 254.94<br>(162.51 to 396.34)              | 4.82<br>(3.38 to 6.56)           | 3.96<br>(2.71 to 5.58)           | 3.78<br>(2.61 to 5.27)           | 4.98<br>(3.34 to 7.32)           |
| Pneumococcal meningitis                                                  | 23.86<br>(15.82 to 33.86)                 | 16.42<br>(10.64 to 25.20)               | 15.86<br>(10.36 to 24.27)             | 20.54<br>(13.14 to 32.93)                 | 0.50<br>(0.34 to 0.69)           | 0.45<br>(0.29 to 0.67)           | 0.45<br>(0.29 to 0.66)           | 0.50<br>(0.33 to 0.78)           |
| H influenzae type B meningitis                                           | 32.84<br>(21.68 to 48.07)                 | 26.93<br>(13.38 to 53.49)               | 21.76<br>(12.11 to 39.84)             | 81.67<br>(27.62 to 189.03)                | 0.54<br>(0.38 to 0.76)           | 0.48<br>(0.29 to 0.82)           | 0.43<br>(0.27 to 0.69)           | 1.11<br>(0.45 to 2.35)           |
| Meningococcal meningitis                                                 | 130.31<br>(88.06 to 186.07)               | 77.29<br>(49.61 to 118.17)              | 70.88<br>(45.78 to 106.02)            | 91.97<br>(58.16 to 140.84)                | 2.23<br>(1.54 to 3.11)           | 1.78<br>(1.16 to 2.66)           | 1.70<br>(1.12 to 2.52)           | 1.96<br>(1.27 to 2.97)           |
| Other meningitis                                                         | 85.68<br>(59.92 to 124.56)                | 49.87<br>(33.12 to 71.41)               | 45.21<br>(30.49 to 62.65)             | 60.76<br>(39.27 to 89.53)                 | 1.55<br>(1.13 to 2.10)           | 1.26<br>(0.87 to 1.69)           | 1.20<br>(0.85 to 1.58)           | 1.40<br>(0.96 to 1.91)           |
| Encephalitis                                                             | 21.50<br>(14.08 to 30.51)                 | 18.26<br>(11.64 to 27.91)               | 15.67<br>(9.96 to 24.36)              | 24.79<br>(15.27 to 38.25)                 | 0.33<br>(0.22 to 0.46)           | 0.37<br>(0.24 to 0.59)           | 0.33<br>(0.21 to 0.53)           | 0.46<br>(0.29 to 0.73)           |
| Diphtheria                                                               | 0.14<br>(0.07 to 0.27)                    | 0.03<br>(0.01 to 0.07)                  | 0.02<br>(0.01 to 0.04)                | 0.15<br>(0.03 to 0.50)                    | 0.00<br>(0.00 to 0.00)           | 0.00<br>(0.00 to 0.00)           | 0.00<br>(0.00 to 0.00)           | 0.00<br>(0.00 to 0.01)           |
| Whooping cough                                                           | 21.82<br>(11.90 to 71.52)                 | 7.67<br>(0.45 to 26.02)                 | 2.68<br>(0.17 to 9.19)                | 31.18<br>(2.25 to 98.66)                  | 0.26<br>(0.02 to 0.84)           | 0.09<br>(0.01 to 0.31)           | 0.03<br>(0.00 to 0.11)           | 0.37<br>(0.03 to 1.17)           |
| Tetanus                                                                  | 19.31<br>(7.59 to 39.19)                  | 2.25<br>(0.73 to 5.01)                  | 1.54<br>(0.50 to 2.97)                | 7.20<br>(2.29 to 18.55)                   | 0.27<br>(0.11 to 0.50)           | 0.04<br>(0.01 to 0.08)           | 0.03<br>(0.01 to 0.06)           | 0.10<br>(0.03 to 0.23)           |
| Measles                                                                  | 25.37<br>(7.84 to 62.87)                  | 3.09<br>(0.23 to 19.54)                 | 1.53<br>(0.17 to 8.82)                | 20.31<br>(0.97 to 102.54)                 | 0.30<br>(0.09 to 0.75)           | 0.24<br>(0.00 to 0.23)           | 0.02<br>(0.00 to 0.10)           | 0.24<br>(0.01 to 1.21)           |
| <b>Ghana</b>                                                             |                                           |                                         |                                       |                                           |                                  |                                  |                                  |                                  |
| Cause                                                                    | YLLs (in 1000s)                           |                                         |                                       |                                           | Deaths (in 1000s)                |                                  |                                  |                                  |
|                                                                          | 2016                                      | 2040 Forecast                           | 2040 Better Scenario                  | 2040 Worse Scenario                       | 2016                             | 2040 Forecast                    | 2040 Better Scenario             | 2040 Worse Scenario              |
| Varicella and herpes zoster                                              | 3.91<br>(2.19 to 6.57)                    | 1.95<br>(1.15 to 3.34)                  | 1.49<br>(0.89 to 2.49)                | 3.23<br>(1.83 to 5.82)                    | 0.07<br>(0.05 to 0.10)           | 0.06<br>(0.04 to 0.08)           | 0.05<br>(0.03 to 0.07)           | 0.08<br>(0.05 to 0.12)           |

|                                                       |                                                      |                                                |                                                |                                                |                                             |                                            |                                           |                                            |
|-------------------------------------------------------|------------------------------------------------------|------------------------------------------------|------------------------------------------------|------------------------------------------------|---------------------------------------------|--------------------------------------------|-------------------------------------------|--------------------------------------------|
| <b>Neglected tropical diseases and malaria</b>        | <b>1,459.74</b><br>(1,147.33 to<br><b>1,851.60</b> ) | <b>499.91</b><br>(359.31 to<br><b>672.80</b> ) | <b>449.62</b><br>(327.89 to<br><b>602.76</b> ) | <b>660.70</b><br>(469.50 to<br><b>918.97</b> ) | <b>20.95</b><br>(16.72 to<br><b>25.96</b> ) | <b>10.51</b><br>(7.88 to<br><b>13.99</b> ) | <b>9.93</b><br>(7.41 to<br><b>13.18</b> ) | <b>12.47</b><br>(9.14 to<br><b>16.70</b> ) |
| Malaria                                               | 1,384.50<br>(1,064.56 to<br>1,761.24)                | 453.05<br>(324.88 to<br>618.68)                | 411.10<br>(294.52 to<br>559.28)                | 591.35<br>(414.30 to<br>839.39)                | 19.67<br>(15.48 to<br>24.71)                | 9.49<br>(6.97 to<br>12.88)                 | 9.05<br>(6.71 to<br>12.30)                | 11.10<br>(7.91 to<br>15.15)                |
| Chagas disease                                        | 0.00<br>(0.00 to<br>0.00)                            | 0.00<br>(0.00 to<br>0.00)                      | 0.00<br>(0.00 to<br>0.00)                      | 0.00<br>(0.00 to<br>0.00)                      | 0.00<br>(0.00 to<br>0.00)                   | 0.00<br>(0.00 to<br>0.00)                  | 0.00<br>(0.00 to<br>0.00)                 | 0.00<br>(0.00 to<br>0.00)                  |
| Leishmaniasis                                         | 0.00<br>(0.00 to<br>0.00)                            | 0.00<br>(0.00 to<br>0.00)                      | 0.00<br>(0.00 to<br>0.00)                      | 0.00<br>(0.00 to<br>0.00)                      | 0.00<br>(0.00 to<br>0.00)                   | 0.00<br>(0.00 to<br>0.00)                  | 0.00<br>(0.00 to<br>0.00)                 | 0.00<br>(0.00 to<br>0.00)                  |
| African trypanosomiasis                               | 0.00<br>(0.00 to<br>0.00)                            | 0.00<br>(0.00 to<br>0.00)                      | 0.00<br>(0.00 to<br>0.00)                      | 0.00<br>(0.00 to<br>0.00)                      | 0.00<br>(0.00 to<br>0.00)                   | 0.00<br>(0.00 to<br>0.00)                  | 0.00<br>(0.00 to<br>0.00)                 | 0.00<br>(0.00 to<br>0.00)                  |
| Schistosomiasis                                       | 10.88<br>(7.66 to<br>14.86)                          | 8.50<br>(5.77 to<br>11.90)                     | 7.54<br>(5.08 to<br>10.58)                     | 10.03<br>(6.80 to<br>14.22)                    | 0.51<br>(0.22 to<br>0.42)                   | 0.29<br>(0.20 to<br>0.40)                  | 0.26<br>(0.18 to<br>0.37)                 | 0.52<br>(0.22 to<br>0.46)                  |
| Cysticercosis                                         | 0.57<br>(0.46 to<br>0.70)                            | 0.27<br>(0.20 to<br>0.35)                      | 0.25<br>(0.19 to<br>0.32)                      | 0.30<br>(0.23 to<br>0.39)                      | 0.01<br>(0.01 to<br>0.01)                   | 0.01<br>(0.01 to<br>0.01)                  | 0.01<br>(0.00 to<br>0.01)                 | 0.01<br>(0.01 to<br>0.01)                  |
| Cystic echinococcosis                                 | 0.36<br>(0.26 to<br>0.46)                            | 0.16<br>(0.12 to<br>0.22)                      | 0.11<br>(0.08 to<br>0.15)                      | 0.27<br>(0.20 to<br>0.37)                      | 0.01<br>(0.01 to<br>0.01)                   | 0.00<br>(0.00 to<br>0.01)                  | 0.00<br>(0.00 to<br>0.00)                 | 0.01<br>(0.01 to<br>0.01)                  |
| Dengue                                                | 0.49<br>(0.05 to<br>1.75)                            | 1.61<br>(0.21 to<br>5.13)                      | 1.49<br>(0.20 to<br>4.70)                      | 2.01<br>(0.25 to<br>6.52)                      | 0.01<br>(0.00 to<br>0.03)                   | 0.04<br>(0.01 to<br>0.12)                  | 0.04<br>(0.11 to<br>0.11)                 | 0.04<br>(0.01 to<br>0.13)                  |
| Yellow fever                                          | 3.90<br>(0.81 to<br>12.35)                           | 1.42<br>(0.29 to<br>4.53)                      | 1.10<br>(0.22 to<br>3.48)                      | 2.11<br>(0.42 to<br>6.81)                      | 0.06<br>(0.01 to<br>0.20)                   | 0.02<br>(0.01 to<br>0.08)                  | 0.02<br>(0.00 to<br>0.06)                 | 0.04<br>(0.01 to<br>0.12)                  |
| Rabies                                                | 5.83<br>(1.94 to<br>10.71)                           | 2.42<br>(0.76 to<br>4.25)                      | 1.47<br>(0.47 to<br>2.54)                      | 4.95<br>(1.59 to<br>8.90)                      | 0.11<br>(0.03 to<br>0.18)                   | 0.05<br>(0.01 to<br>0.09)                  | 0.03<br>(0.01 to<br>0.05)                 | 0.10<br>(0.03 to<br>0.18)                  |
| Intestinal nematode infections                        | 1.88<br>(1.14 to<br>2.86)                            | 1.64<br>(0.92 to<br>2.67)                      | 1.49<br>(0.84 to<br>2.42)                      | 2.26<br>(1.24 to<br>3.69)                      | 0.02<br>(0.02 to<br>0.04)                   | 0.02<br>(0.01 to<br>0.04)                  | 0.02<br>(0.01 to<br>0.03)                 | 0.03<br>(0.02 to<br>0.05)                  |
| Other neglected tropical diseases                     | 51.33<br>(22.91 to<br>93.00)                         | 30.84<br>(14.44 to<br>50.97)                   | 25.06<br>(11.50 to<br>41.44)                   | 47.41<br>(22.81 to<br>79.49)                   | 0.74<br>(0.34 to<br>1.25)                   | 0.58<br>(0.28 to<br>0.86)                  | 0.50<br>(0.24 to<br>0.71)                 | 0.81<br>(0.39 to<br>1.25)                  |
| <b>Maternal disorders</b>                             | <b>71.50</b><br>(53.37 to<br><b>90.64</b> )          | <b>43.38</b><br>(30.11 to<br><b>58.62</b> )    | <b>30.47</b><br>(20.77 to<br><b>41.81</b> )    | <b>69.00</b><br>(48.41 to<br><b>94.14</b> )    | <b>1.26</b><br>(0.95 to<br><b>1.60</b> )    | <b>0.78</b><br>(0.54 to<br><b>1.06</b> )   | <b>0.55</b><br>(0.38 to<br><b>0.76</b> )  | <b>1.24</b><br>(0.87 to<br><b>1.70</b> )   |
| Maternal hemorrhage                                   | 17.55<br>(11.97 to<br>24.23)                         | 9.46<br>(5.76 to<br>14.17)                     | 6.77<br>(4.03 to<br>10.26)                     | 14.75<br>(8.76 to<br>22.28)                    | 0.32<br>(0.21 to<br>0.44)                   | 0.17<br>(0.11 to<br>0.26)                  | 0.12<br>(0.08 to<br>0.19)                 | 0.27<br>(0.16 to<br>0.41)                  |
| Maternal sepsis and other maternal infections         | 5.96<br>(3.94 to<br>8.62)                            | 2.95<br>(1.84 to<br>4.56)                      | 2.11<br>(1.29 to<br>3.41)                      | 4.67<br>(2.86 to<br>7.43)                      | 0.11<br>(0.07 to<br>0.15)                   | 0.05<br>(0.03 to<br>0.08)                  | 0.04<br>(0.02 to<br>0.06)                 | 0.08<br>(0.05 to<br>0.13)                  |
| Maternal hypertensive disorders                       | 12.51<br>(8.42 to<br>17.74)                          | 6.95<br>(4.32 to<br>10.44)                     | 4.94<br>(3.06 to<br>7.60)                      | 10.96<br>(6.78 to<br>16.57)                    | 0.22<br>(0.15 to<br>0.31)                   | 0.12<br>(0.08 to<br>0.18)                  | 0.09<br>(0.05 to<br>0.13)                 | 0.19<br>(0.12 to<br>0.29)                  |
| Maternal obstructed labor and uterine rupture         | 3.14<br>(1.95 to<br>4.82)                            | 1.72<br>(1.02 to<br>2.65)                      | 1.21<br>(0.68 to<br>1.94)                      | 2.78<br>(1.58 to<br>4.38)                      | 0.06<br>(0.04 to<br>0.09)                   | 0.03<br>(0.02 to<br>0.05)                  | 0.02<br>(0.01 to<br>0.04)                 | 0.05<br>(0.03 to<br>0.08)                  |
| Maternal abortion, miscarriage, and ectopic pregnancy | 12.12<br>(8.12 to<br>16.92)                          | 7.46<br>(4.19 to<br>12.49)                     | 5.24<br>(2.91 to<br>8.75)                      | 11.75<br>(6.68 to<br>19.99)                    | 0.21<br>(0.14 to<br>0.29)                   | 0.13<br>(0.08 to<br>0.22)                  | 0.09<br>(0.05 to<br>0.15)                 | 0.21<br>(0.12 to<br>0.34)                  |
| Indirect maternal deaths                              | 13.36<br>(8.93 to<br>18.96)                          | 8.12<br>(5.01 to<br>12.30)                     | 5.85<br>(3.51 to<br>8.87)                      | 13.07<br>(8.05 to<br>19.71)                    | 0.23<br>(0.16 to<br>0.33)                   | 0.14<br>(0.09 to<br>0.21)                  | 0.10<br>(0.06 to<br>0.16)                 | 0.23<br>(0.14 to<br>0.34)                  |
| Late maternal deaths                                  | 0.47<br>(0.22 to<br>0.86)                            | 0.22<br>(0.10 to<br>0.42)                      | 0.16<br>(0.07 to<br>0.31)                      | 0.36<br>(0.16 to<br>0.69)                      | 0.01<br>(0.00 to<br>0.02)                   | 0.00<br>(0.00 to<br>0.01)                  | 0.00<br>(0.00 to<br>0.01)                 | 0.01<br>(0.00 to<br>0.01)                  |
| Maternal deaths aggravated by HIV/AIDS                | 0.66<br>(0.33 to<br>1.03)                            | 0.04<br>(0.15 to<br>5.57)                      | 1.67<br>(0.15 to<br>3.98)                      | 5.26<br>(2.45 to<br>9.28)                      | 0.01<br>(0.01 to<br>0.02)                   | 0.06<br>(0.02 to<br>0.11)                  | 0.03<br>(0.00 to<br>0.08)                 | 0.10<br>(0.05 to<br>0.17)                  |

|                                                                         |                                           |                                     |                                     |                                         |                                  |                                |                               |                                 |
|-------------------------------------------------------------------------|-------------------------------------------|-------------------------------------|-------------------------------------|-----------------------------------------|----------------------------------|--------------------------------|-------------------------------|---------------------------------|
| Other maternal disorders                                                | 5.74<br>(3.59 to 8.27)                    | 3.46<br>(2.03 to 5.28)              | 2.53<br>(1.48 to 3.89)              | 5.40<br>(3.21 to 8.30)                  | 0.10<br>(0.06 to 0.15)           | 0.06<br>(0.04 to 0.10)         | 0.05<br>(0.03 to 0.07)        | 0.10<br>(0.06 to 0.15)          |
| <b>Ghana</b>                                                            |                                           |                                     |                                     |                                         |                                  |                                |                               |                                 |
| Cause                                                                   | YLLs (in 1000s)                           |                                     |                                     |                                         | Deaths (in 1000s)                |                                |                               |                                 |
|                                                                         | 2016                                      | 2040 Forecast                       | 2040 Better Scenario                | 2040 Worse Scenario                     | 2016                             | 2040 Forecast                  | 2040 Better Scenario          | 2040 Worse Scenario             |
| <b>Neonatal disorders</b>                                               | <b>1,572.77</b><br>(1,249.52 to 1,939.15) | <b>613.11</b><br>(357.31 to 945.77) | <b>478.14</b><br>(281.30 to 751.76) | <b>1,125.40</b><br>(649.26 to 1,791.45) | <b>18.17</b><br>(14.43 to 22.40) | <b>7.08</b><br>(4.13 to 10.93) | <b>5.52</b><br>(3.25 to 8.69) | <b>13.00</b><br>(7.50 to 20.69) |
| Neonatal preterm birth                                                  | 319.02<br>(192.02 to 546.95)              | 113.26<br>(58.46 to 204.36)         | 86.14<br>(44.66 to 154.12)          | 236.64<br>(123.08 to 423.17)            | 3.68<br>(2.22 to 6.32)           | 1.31<br>(0.68 to 2.36)         | 1.00<br>(0.52 to 1.78)        | 2.73<br>(1.42 to 4.89)          |
| Neonatal encephalopathy due to birth asphyxia and trauma                | 695.67<br>(424.04 to 967.06)              | 246.30<br>(109.74 to 452.83)        | 195.63<br>(87.39 to 360.54)         | 429.86<br>(190.37 to 797.76)            | 8.03<br>(4.90 to 11.17)          | 2.85<br>(1.27 to 5.23)         | 2.26<br>(1.01 to 4.16)        | 4.97<br>(2.20 to 9.22)          |
| Neonatal sepsis and other neonatal infections                           | 362.98<br>(239.27 to 524.95)              | 177.24<br>(102.25 to 281.86)        | 139.28<br>(79.39 to 221.55)         | 313.92<br>(174.69 to 515.77)            | 4.19<br>(2.77 to 6.07)           | 2.05<br>(1.18 to 3.26)         | 1.61<br>(0.92 to 2.56)        | 3.63<br>(2.02 to 5.96)          |
| Hemolytic disease and other neonatal jaundice                           | 26.99<br>(16.71 to 40.99)                 | 6.96<br>(3.46 to 13.29)             | 5.25<br>(2.57 to 10.06)             | 13.11<br>(6.29 to 24.91)                | 0.31<br>(0.19 to 0.47)           | 0.08<br>(0.04 to 0.15)         | 0.06<br>(0.03 to 0.12)        | 0.15<br>(0.07 to 0.29)          |
| Other neonatal disorders                                                | 168.11<br>(105.46 to 251.28)              | 69.36<br>(32.64 to 130.96)          | 51.85<br>(23.81 to 95.53)           | 131.88<br>(61.25 to 248.27)             | 1.94<br>(1.22 to 2.90)           | 0.80<br>(0.38 to 1.51)         | 0.60<br>(0.28 to 1.10)        | 1.52<br>(0.71 to 2.87)          |
| <b>Nutritional deficiencies</b>                                         | <b>204.68</b><br>(126.27 to 325.80)       | <b>64.18</b><br>(40.53 to 102.58)   | <b>52.47</b><br>(33.46 to 82.22)    | <b>105.47</b><br>(61.77 to 176.21)      | <b>2.91</b><br>(1.99 to 4.34)    | <b>1.57</b><br>(1.21 to 2.10)  | <b>1.43</b><br>(1.12 to 1.88) | <b>2.10</b><br>(1.52 to 3.06)   |
| Protein-energy malnutrition                                             | 191.92<br>(116.28 to 313.11)              | 52.60<br>(30.50 to 90.07)           | 42.50<br>(24.78 to 71.96)           | 89.71<br>(49.27 to 138.69)              | 2.64<br>(1.72 to 4.09)           | 1.23<br>(0.89 to 1.76)         | 1.11<br>(0.83 to 1.54)        | 1.69<br>(1.15 to 2.60)          |
| Iodine deficiency                                                       | 0.84<br>(0.02 to -5.17)                   | 1.91<br>(0.02 to -11.05)            | 1.51<br>(0.02 to 8.66)              | 3.24<br>(0.03 to 20.90)                 | 0.01<br>(0.00 to 0.06)           | 0.05<br>(0.00 to 0.21)         | 0.04<br>(0.00 to 0.17)        | 0.07<br>(0.00 to 0.32)          |
| Dietary iron deficiency                                                 | 8.97<br>(4.17 to 20.75)                   | 7.61<br>(4.47 to 12.76)             | 6.67<br>(4.00 to 11.04)             | 9.82<br>(5.30 to 19.26)                 | 0.20<br>(0.11 to 0.35)           | 0.23<br>(0.14 to 0.36)         | 0.22<br>(0.13 to 0.34)        | 0.27<br>(0.16 to 0.43)          |
| Other nutritional deficiencies                                          | 2.96<br>(1.20 to 5.80)                    | 2.06<br>(0.85 to 3.34)              | 1.78<br>(0.74 to 2.83)              | 2.69<br>(1.11 to 4.66)                  | 0.06<br>(0.03 to 0.10)           | 0.06<br>(0.03 to 0.09)         | 0.06<br>(0.03 to 0.08)        | 0.07<br>(0.03 to 0.10)          |
| <b>Other communicable, maternal, neonatal, and nutritional diseases</b> | <b>66.35</b><br>(49.14 to 101.19)         | <b>40.00</b><br>(30.99 to 52.61)    | <b>34.44</b><br>(26.54 to 45.15)    | <b>52.66</b><br>(39.70 to 74.36)        | <b>1.12</b><br>(0.88 to 1.56)    | <b>0.93</b><br>(0.76 to 1.14)  | <b>0.82</b><br>(0.67 to 1.01) | <b>1.14</b><br>(0.92 to 1.42)   |
| Sexually transmitted infections excluding HIV                           | 24.80<br>(13.28 to 43.87)                 | 7.61<br>(4.43 to 12.85)             | 6.50<br>(3.88 to 10.83)             | 11.05<br>(5.88 to 19.82)                | 0.33<br>(0.19 to 0.55)           | 0.12<br>(0.08 to 0.18)         | 0.10<br>(0.07 to 0.15)        | 0.16<br>(0.10 to 0.27)          |
| Syphilis                                                                | 21.71<br>(10.17 to 40.82)                 | 5.33<br>(2.41 to 10.42)             | 4.45<br>(2.08 to 8.63)              | 8.39<br>(3.52 to 17.17)                 | 0.27<br>(0.13 to 0.49)           | 0.07<br>(0.04 to 0.11)         | 0.06<br>(0.03 to 0.11)        | 0.11<br>(0.05 to 0.21)          |
| Chlamydial infection                                                    | 0.61<br>(0.43 to 0.82)                    | 0.46<br>(0.31 to 0.65)              | 0.41<br>(0.27 to 0.58)              | 0.53<br>(0.35 to 0.76)                  | 0.01<br>(0.01 to 0.02)           | 0.01<br>(0.01 to 0.01)         | 0.01<br>(0.01 to 0.01)        | 0.01<br>(0.01 to 0.01)          |
| Gonococcal infection                                                    | 1.60<br>(1.16 to 2.14)                    | 1.18<br>(0.83 to 1.65)              | 1.06<br>(0.73 to 1.49)              | 1.37<br>(0.94 to 1.92)                  | 0.03<br>(0.02 to 0.04)           | 0.02<br>(0.02 to 0.03)         | 0.02<br>(0.02 to 0.03)        | 0.03<br>(0.02 to 0.04)          |
| Other sexually transmitted infections                                   | 0.88<br>(0.63 to 1.18)                    | 0.64<br>(0.45 to 0.92)              | 0.57<br>(0.39 to 0.82)              | 0.75<br>(0.51 to 1.09)                  | 0.02<br>(0.01 to 0.02)           | 0.01<br>(0.01 to 0.02)         | 0.01<br>(0.01 to 0.02)        | 0.01<br>(0.01 to 0.02)          |
| Acute hepatitis                                                         | 29.40<br>(24.42 to 35.23)                 | 24.77<br>(19.45 to 31.67)           | 21.57<br>(16.77 to 27.39)           | 30.22<br>(23.40 to 38.25)               | 0.61<br>(0.51 to 0.74)           | 0.61<br>(0.49 to 0.75)         | 0.54<br>(0.43 to 0.67)        | 0.72<br>(0.58 to 0.90)          |
| Acute hepatitis A                                                       | 0.67<br>(0.10 to 1.61)                    | 0.30<br>(0.10 to 0.64)              | 0.26<br>(0.08 to 0.53)              | 0.44<br>(0.13 to 0.98)                  | 0.01<br>(0.00 to 0.02)           | 0.01<br>(0.00 to 0.01)         | 0.00<br>(0.00 to 0.01)        | 0.01<br>(0.00 to 0.02)          |

|                                       |                                                            |                                                            |                                                            |                                                            |                                                   |                                                      |                                                      |                                                      |
|---------------------------------------|------------------------------------------------------------|------------------------------------------------------------|------------------------------------------------------------|------------------------------------------------------------|---------------------------------------------------|------------------------------------------------------|------------------------------------------------------|------------------------------------------------------|
| Acute hepatitis B                     | 23.46<br>(19.22 to<br>28.86)                               | 20.58<br>(15.75 to<br>26.42)                               | 17.87<br>(13.63 to<br>23.14)                               | 24.96<br>(18.99 to<br>32.05)                               | 0.52<br>(0.43 to<br>0.63)                         | 0.52<br>(0.41 to<br>0.65)                            | 0.45<br>(0.35 to<br>0.58)                            | 0.62<br>(0.48 to<br>0.79)                            |
| Acute hepatitis C                     | 0.64<br>(0.45 to<br>0.90)                                  | 0.75<br>(0.51 to<br>1.11)                                  | 0.69<br>(0.47 to<br>1.03)                                  | 0.83<br>(0.57 to<br>1.23)                                  | 0.02<br>(0.01 to<br>0.02)                         | 0.02<br>(0.01 to<br>0.03)                            | 0.02<br>(0.01 to<br>0.03)                            | 0.02<br>(0.02 to<br>0.03)                            |
| Acute hepatitis E                     | 4.63<br>(3.41 to<br>6.22)                                  | 3.14<br>(2.08 to<br>4.54)                                  | 2.74<br>(1.81 to<br>3.99)                                  | 4.00<br>(2.64 to<br>5.76)                                  | 0.07<br>(0.05 to<br>0.10)                         | 0.06<br>(0.04 to<br>0.09)                            | 0.06<br>(0.04 to<br>0.08)                            | 0.08<br>(0.05 to<br>0.11)                            |
| Other unspecified infectious diseases | 12.16<br>(5.19 to<br>38.54)                                | 7.61<br>(4.56 to<br>16.61)                                 | 6.38<br>(3.89 to<br>14.06)                                 | 11.38<br>(6.41 to<br>26.49)                                | 0.19<br>(0.10 to<br>0.49)                         | 0.20<br>(0.15 to<br>0.31)                            | 0.18<br>(0.13 to<br>0.28)                            | 0.26<br>(0.18 to<br>0.44)                            |
| <b>Non-communicable diseases</b>      | <b>2,585.85</b><br><b>(2,284.59 to</b><br><b>2,890.37)</b> | <b>3,822.71</b><br><b>(3,205.09 to</b><br><b>4,581.08)</b> | <b>3,156.92</b><br><b>(2,680.82 to</b><br><b>3,728.02)</b> | <b>4,827.31</b><br><b>(3,943.80 to</b><br><b>5,885.49)</b> | <b>83.31</b><br><b>(73.64 to</b><br><b>91.82)</b> | <b>157.20</b><br><b>(135.64 to</b><br><b>180.78)</b> | <b>133.98</b><br><b>(118.06 to</b><br><b>150.53)</b> | <b>188.31</b><br><b>(160.86 to</b><br><b>221.12)</b> |
| <b>Ghana</b>                          |                                                            |                                                            |                                                            |                                                            |                                                   |                                                      |                                                      |                                                      |
| Cause                                 | YLLs (in 1000s)                                            |                                                            |                                                            |                                                            | Deaths (in 1000s)                                 |                                                      |                                                      |                                                      |
|                                       | 2016                                                       | 2040 Forecast                                              | 2040 Better Scenario                                       | 2040 Worse Scenario                                        | 2016                                              | 2040 Forecast                                        | 2040 Better Scenario                                 | 2040 Worse Scenario                                  |
| <b>Neoplasms</b>                      | <b>476.97</b><br><b>(420.50 to</b><br><b>534.94)</b>       | <b>971.04</b><br><b>(806.20 to</b><br><b>1,158.92)</b>     | <b>917.45</b><br><b>(771.86 to</b><br><b>1,084.82)</b>     | <b>1,015.50</b><br><b>(841.45 to</b><br><b>1,216.14)</b>   | <b>15.41</b><br><b>(13.51 to</b><br><b>17.25)</b> | <b>37.15</b><br><b>(32.07 to</b><br><b>42.77)</b>    | <b>36.51</b><br><b>(31.83 to</b><br><b>41.56)</b>    | <b>37.21</b><br><b>(31.97 to</b><br><b>43.11)</b>    |
| Lip and oral cavity cancer            | 6.08<br>(5.14 to<br>7.19)                                  | 14.05<br>(7.94 to<br>22.68)                                | 9.60<br>(5.84 to<br>15.12)                                 | 17.50<br>(9.58 to<br>28.80)                                | 0.20<br>(0.17 to<br>0.24)                         | 0.52<br>(0.30 to<br>0.84)                            | 0.38<br>(0.23 to<br>0.59)                            | 0.63<br>(0.36 to<br>1.01)                            |
| Nasopharynx cancer                    | 1.02<br>(0.84 to<br>1.24)                                  | 2.76<br>(1.48 to<br>4.44)                                  | 1.85<br>(1.03 to<br>2.90)                                  | 3.83<br>(2.03 to<br>6.27)                                  | 0.03<br>(0.02 to<br>0.03)                         | 0.08<br>(0.04 to<br>0.13)                            | 0.06<br>(0.03 to<br>0.09)                            | 0.11<br>(0.06 to<br>0.18)                            |
| Other pharynx cancer                  | 3.44<br>(2.76 to<br>4.20)                                  | 6.42<br>(3.53 to<br>10.65)                                 | 4.58<br>(2.77 to<br>7.08)                                  | 7.46<br>(4.12 to<br>12.52)                                 | 0.12<br>(0.10 to<br>0.15)                         | 0.27<br>(0.15 to<br>0.45)                            | 0.20<br>(0.12 to<br>0.31)                            | 0.30<br>(0.17 to<br>0.49)                            |
| Esophageal cancer                     | 10.11<br>(8.72 to<br>11.67)                                | 20.85<br>(12.78 to<br>32.51)                               | 16.00<br>(10.43 to<br>23.66)                               | 26.23<br>(15.44 to<br>42.19)                               | 0.39<br>(0.34 to<br>0.44)                         | 0.85<br>(0.55 to<br>1.29)                            | 0.68<br>(0.47 to<br>0.97)                            | 1.03<br>(0.64 to<br>1.62)                            |
| Stomach cancer                        | 24.78<br>(20.56 to<br>29.35)                               | 36.12<br>(28.74 to<br>47.30)                               | 34.96<br>(28.01 to<br>45.23)                               | 37.87<br>(30.07 to<br>49.62)                               | 1.02<br>(0.86 to<br>1.21)                         | 1.70<br>(1.39 to<br>2.17)                            | 1.72<br>(1.41 to<br>2.15)                            | 1.71<br>(1.40 to<br>2.18)                            |
| Colon and rectum cancer               | 20.87<br>(17.86 to<br>24.14)                               | 53.57<br>(37.40 to<br>76.95)                               | 51.67<br>(36.74 to<br>71.90)                               | 52.52<br>(36.63 to<br>75.69)                               | 0.82<br>(0.70 to<br>0.93)                         | 2.46<br>(1.76 to<br>3.42)                            | 2.48<br>(1.83 to<br>3.38)                            | 2.30<br>(1.64 to<br>3.24)                            |
| Liver cancer                          | 85.68<br>(70.88 to<br>101.91)                              | 187.76<br>(136.48 to<br>260.70)                            | 165.52<br>(124.14 to<br>219.28)                            | 206.10<br>(146.24 to<br>295.84)                            | 2.62<br>(2.22 to<br>3.05)                         | 6.59<br>(4.93 to<br>8.90)                            | 5.99<br>(4.62 to<br>7.68)                            | 7.03<br>(5.08 to<br>9.84)                            |
| Liver cancer due to hepatitis B       | 50.39<br>(40.87 to<br>60.94)                               | 106.42<br>(75.15 to<br>149.64)                             | 97.04<br>(71.56 to<br>133.34)                              | 113.05<br>(77.74 to<br>165.06)                             | 1.47<br>(1.20 to<br>1.74)                         | 3.58<br>(2.55 to<br>4.87)                            | 3.37<br>(2.51 to<br>4.43)                            | 3.69<br>(2.56 to<br>5.18)                            |
| Liver cancer due to hepatitis C       | 5.68<br>(3.89 to<br>7.78)                                  | 14.30<br>(9.17 to<br>21.59)                                | 13.30<br>(8.61 to<br>19.62)                                | 14.79<br>(9.30 to<br>22.65)                                | 0.22<br>(0.16 to<br>0.30)                         | 0.63<br>(0.40 to<br>0.95)                            | 0.61<br>(0.40 to<br>0.91)                            | 0.63<br>(0.40 to<br>0.97)                            |
| Liver cancer due to alcohol use       | 10.02<br>(7.97 to<br>12.38)                                | 25.23<br>(17.50 to<br>35.55)                               | 17.59<br>(12.52 to<br>23.85)                               | 33.26<br>(22.27 to<br>48.59)                               | 0.36<br>(0.29 to<br>0.44)                         | 0.97<br>(0.68 to<br>1.34)                            | 0.70<br>(0.51 to<br>0.96)                            | 1.23<br>(0.84 to<br>1.74)                            |
| Liver cancer due to other causes      | 19.59<br>(15.57 to<br>24.21)                               | 41.81<br>(28.98 to<br>59.68)                               | 37.59<br>(26.73 to<br>52.06)                               | 45.00<br>(30.35 to<br>65.22)                               | 0.57<br>(0.45 to<br>0.68)                         | 1.42<br>(1.00 to<br>2.02)                            | 1.31<br>(0.96 to<br>1.79)                            | 1.48<br>(1.02 to<br>2.14)                            |
| Gallbladder and biliary tract cancer  | 5.87<br>(3.89 to<br>8.13)                                  | 9.39<br>(6.31 to<br>12.85)                                 | 9.90<br>(6.68 to<br>13.53)                                 | 8.85<br>(5.97 to<br>12.06)                                 | 0.24<br>(0.17 to<br>0.33)                         | 0.43<br>(0.30 to<br>0.57)                            | 0.46<br>(0.32 to<br>0.62)                            | 0.39<br>(0.27 to<br>0.53)                            |
| Pancreatic cancer                     | 25.29<br>(21.20 to<br>29.10)                               | 66.34<br>(53.18 to<br>83.30)                               | 68.61<br>(54.97 to<br>84.98)                               | 62.20<br>(49.92 to<br>77.51)                               | 1.05<br>(0.88 to<br>1.20)                         | 2.97<br>(2.42 to<br>3.72)                            | 3.16<br>(2.60 to<br>3.89)                            | 2.71<br>(2.21 to<br>3.36)                            |
| Larynx cancer                         | 4.07<br>(3.23 to<br>4.96)                                  | 7.62<br>(4.18 to<br>12.78)                                 | 5.21<br>(3.21 to<br>8.09)                                  | 10.89<br>(5.57 to<br>19.26)                                | 0.16<br>(0.12 to<br>0.19)                         | 0.30<br>(0.18 to<br>0.49)                            | 0.22<br>(0.14 to<br>0.32)                            | 0.42<br>(0.23 to<br>0.73)                            |



|                                     |                              |                               |                               |                               |                           |                           |                           |                           |
|-------------------------------------|------------------------------|-------------------------------|-------------------------------|-------------------------------|---------------------------|---------------------------|---------------------------|---------------------------|
| Tracheal, bronchus, and lung cancer | 20.26<br>(17.17 to<br>23.71) | 45.61<br>(30.65 to<br>66.27)  | 31.16<br>(22.62 to<br>41.86)  | 59.76<br>(38.51 to<br>91.35)  | 0.81<br>(0.69 to<br>0.94) | 1.93<br>(1.34 to<br>2.72) | 1.40<br>(1.04 to<br>1.84) | 2.46<br>(1.61 to<br>3.64) |
| Malignant skin melanoma             | 1.57<br>(1.26 to<br>1.95)    | 3.14<br>(2.55 to<br>3.93)     | 3.43<br>(2.77 to<br>4.26)     | 2.82<br>(2.30 to<br>3.51)     | 0.05<br>(0.04 to<br>0.07) | 0.12<br>(0.10 to<br>0.16) | 0.14<br>(0.12 to<br>0.18) | 0.11<br>(0.09 to<br>0.14) |
| Non-melanoma skin cancer            | 1.59<br>(1.35 to<br>1.86)    | 3.20<br>(2.71 to<br>3.78)     | 3.18<br>(2.68 to<br>3.76)     | 3.29<br>(2.79 to<br>3.88)     | 0.06<br>(0.05 to<br>0.07) | 0.14<br>(0.13 to<br>0.16) | 0.15<br>(0.13 to<br>0.17) | 0.14<br>(0.12 to<br>0.16) |
| Breast cancer                       | 35.84<br>(27.01 to<br>45.41) | 76.56<br>(49.40 to<br>122.68) | 69.58<br>(46.87 to<br>102.56) | 76.99<br>(49.03 to<br>125.45) | 1.10<br>(0.83 to<br>1.38) | 2.67<br>(1.78 to<br>4.16) | 2.48<br>(1.72 to<br>3.58) | 2.62<br>(1.71 to<br>4.17) |
| Cervical cancer                     | 48.02<br>(27.42 to<br>66.49) | 63.29<br>(35.51 to<br>89.66)  | 60.37<br>(33.86 to<br>85.45)  | 68.02<br>(38.30 to<br>95.38)  | 1.48<br>(0.86 to<br>2.04) | 2.13<br>(1.24 to<br>2.90) | 2.07<br>(1.19 to<br>2.87) | 2.24<br>(1.29 to<br>3.09) |
| Uterine cancer                      | 8.49<br>(6.50 to<br>10.65)   | 16.73<br>(12.89 to<br>21.09)  | 15.97<br>(12.19 to<br>20.34)  | 18.00<br>(13.96 to<br>22.58)  | 0.33<br>(0.26 to<br>0.41) | 0.72<br>(0.57 to<br>0.89) | 0.70<br>(0.55 to<br>0.87) | 0.76<br>(0.60 to<br>0.93) |
| Ovarian cancer                      | 8.87<br>(6.63 to<br>11.97)   | 19.93<br>(14.27 to<br>28.04)  | 20.44<br>(14.86 to<br>28.43)  | 18.46<br>(13.25 to<br>26.05)  | 0.28<br>(0.21 to<br>0.37) | 0.69<br>(0.51 to<br>0.98) | 0.72<br>(0.53 to<br>1.00) | 0.63<br>(0.46 to<br>0.89) |
| Prostate cancer                     | 19.50<br>(15.30 to<br>28.47) | 70.44<br>(56.99 to<br>98.67)  | 77.47<br>(63.20 to<br>106.95) | 62.95<br>(50.20 to<br>89.36)  | 1.10<br>(0.87 to<br>1.57) | 4.35<br>(3.48 to<br>5.99) | 4.95<br>(4.04 to<br>6.65) | 3.75<br>(2.95 to<br>5.28) |
| Testicular cancer                   | 0.60<br>(0.45 to<br>0.79)    | 0.89<br>(0.62 to<br>1.18)     | 0.86<br>(0.61 to<br>1.14)     | 0.93<br>(0.66 to<br>1.24)     | 0.01<br>(0.01 to<br>0.02) | 0.02<br>(0.02 to<br>0.03) | 0.02<br>(0.02 to<br>0.03) | 0.02<br>(0.02 to<br>0.03) |
| <b>Ghana</b>                        |                              |                               |                               |                               |                           |                           |                           |                           |
| Cause                               | YLLs (in 1000s)              |                               |                               |                               | Deaths (in 1000s)         |                           |                           |                           |
|                                     | 2016                         | 2040 Forecast                 | 2040 Better Scenario          | 2040 Worse Scenario           | 2016                      | 2040 Forecast             | 2040 Better Scenario      | 2040 Worse Scenario       |
| Kidney cancer                       | 6.76<br>(5.28 to<br>8.63)    | 12.34<br>(10.04 to<br>14.97)  | 12.93<br>(10.61 to<br>15.60)  | 12.13<br>(9.84 to<br>14.97)   | 0.16<br>(0.14 to<br>0.19) | 0.40<br>(0.34 to<br>0.47) | 0.44<br>(0.37 to<br>0.52) | 0.36<br>(0.31 to<br>0.43) |
| Bladder cancer                      | 7.14<br>(5.95 to<br>8.42)    | 16.46<br>(12.70 to<br>21.43)  | 15.87<br>(12.42 to<br>19.96)  | 16.68<br>(12.71 to<br>21.90)  | 0.28<br>(0.24 to<br>0.32) | 0.72<br>(0.58 to<br>0.92) | 0.73<br>(0.59 to<br>0.91) | 0.70<br>(0.55 to<br>0.89) |
| Brain and nervous system cancer     | 29.51<br>(23.43 to<br>35.09) | 55.93<br>(45.13 to<br>67.28)  | 57.12<br>(45.89 to<br>69.27)  | 56.04<br>(45.20 to<br>67.63)  | 0.65<br>(0.55 to<br>0.77) | 1.47<br>(1.22 to<br>1.84) | 1.54<br>(1.27 to<br>1.94) | 1.41<br>(1.17 to<br>1.74) |
| Thyroid cancer                      | 0.69<br>(0.50 to<br>0.84)    | 1.42<br>(0.83 to<br>1.93)     | 1.35<br>(0.77 to<br>1.80)     | 1.49<br>(0.88 to<br>2.09)     | 0.02<br>(0.01 to<br>0.03) | 0.06<br>(0.03 to<br>0.08) | 0.06<br>(0.03 to<br>0.08) | 0.06<br>(0.03 to<br>0.09) |
| Mesothelioma                        | 1.00<br>(0.83 to<br>1.21)    | 1.88<br>(1.53 to<br>2.30)     | 1.85<br>(1.51 to<br>2.28)     | 1.93<br>(1.57 to<br>2.37)     | 0.03<br>(0.02 to<br>0.04) | 0.07<br>(0.06 to<br>0.08) | 0.07<br>(0.06 to<br>0.08) | 0.06<br>(0.05 to<br>0.08) |
| Hodgkin lymphoma                    | 1.83<br>(1.25 to<br>3.13)    | 2.00<br>(1.33 to<br>3.62)     | 1.77<br>(1.18 to<br>3.19)     | 2.43<br>(1.62 to<br>4.35)     | 0.04<br>(0.03 to<br>0.07) | 0.06<br>(0.04 to<br>0.10) | 0.05<br>(0.04 to<br>0.09) | 0.07<br>(0.05 to<br>0.11) |
| Non-Hodgkin lymphoma                | 38.58<br>(31.24 to<br>51.38) | 74.55<br>(58.27 to<br>104.92) | 74.83<br>(58.79 to<br>105.11) | 75.26<br>(59.09 to<br>104.84) | 0.90<br>(0.74 to<br>1.24) | 2.12<br>(1.69 to<br>2.97) | 2.20<br>(1.76 to<br>3.06) | 2.02<br>(1.61 to<br>2.83) |
| Multiple myeloma                    | 5.60<br>(4.04 to<br>7.98)    | 15.01<br>(10.22 to<br>22.00)  | 15.37<br>(10.58 to<br>22.56)  | 13.96<br>(9.38 to<br>20.70)   | 0.20<br>(0.15 to<br>0.29) | 0.59<br>(0.41 to<br>0.88) | 0.62<br>(0.44 to<br>0.92) | 0.54<br>(0.37 to<br>0.80) |
| Leukemia                            | 22.38<br>(18.21 to<br>28.21) | 35.40<br>(27.45 to<br>47.76)  | 34.08<br>(26.48 to<br>45.55)  | 37.08<br>(28.67 to<br>50.01)  | 0.50<br>(0.42 to<br>0.65) | 0.98<br>(0.79 to<br>1.35) | 0.97<br>(0.78 to<br>1.33) | 0.99<br>(0.79 to<br>1.36) |
| Acute lymphoid leukemia             | 3.29<br>(2.51 to<br>4.83)    | 5.33<br>(3.87 to<br>8.09)     | 5.18<br>(3.77 to<br>7.86)     | 5.55<br>(4.05 to<br>8.36)     | 0.06<br>(0.05 to<br>0.09) | 0.12<br>(0.09 to<br>0.18) | 0.12<br>(0.09 to<br>0.18) | 0.12<br>(0.09 to<br>0.18) |
| Chronic lymphoid leukemia           | 0.95<br>(0.76 to<br>1.27)    | 2.03<br>(1.54 to<br>2.72)     | 1.99<br>(1.52 to<br>2.63)     | 1.99<br>(1.51 to<br>2.71)     | 0.04<br>(0.03 to<br>0.06) | 0.10<br>(0.07 to<br>0.13) | 0.10<br>(0.07 to<br>0.13) | 0.09<br>(0.07 to<br>0.13) |

|                                               |                                                      |                                                          |                                                      |                                                            |                                                   |                                                   |                                                   |                                                    |
|-----------------------------------------------|------------------------------------------------------|----------------------------------------------------------|------------------------------------------------------|------------------------------------------------------------|---------------------------------------------------|---------------------------------------------------|---------------------------------------------------|----------------------------------------------------|
| Acute myeloid leukemia                        | 9.02<br>(6.82 to<br>11.48)                           | 15.46<br>(11.72 to<br>20.43)                             | 15.38<br>(11.80 to<br>20.39)                         | 15.59<br>(11.70 to<br>20.48)                               | 0.18<br>(0.14 to<br>0.22)                         | 0.39<br>(0.30 to<br>0.55)                         | 0.39<br>(0.31 to<br>0.55)                         | 0.37<br>(0.29 to<br>0.52)                          |
| Chronic myeloid leukemia                      | 2.42<br>(1.83 to<br>3.27)                            | 2.74<br>(1.87 to<br>4.01)                                | 2.59<br>(1.78 to<br>3.76)                            | 2.80<br>(1.91 to<br>4.14)                                  | 0.06<br>(0.05 to<br>0.08)                         | 0.08<br>(0.06 to<br>0.11)                         | 0.08<br>(0.06 to<br>0.11)                         | 0.08<br>(0.06 to<br>0.11)                          |
| Other leukemia                                | 6.70<br>(5.29 to<br>8.90)                            | 9.85<br>(7.40 to<br>14.19)                               | 8.94<br>(6.70 to<br>12.64)                           | 11.15<br>(8.29 to<br>15.89)                                | 0.16<br>(0.13 to<br>0.22)                         | 0.30<br>(0.24 to<br>0.45)                         | 0.29<br>(0.22 to<br>0.43)                         | 0.32<br>(0.25 to<br>0.49)                          |
| Other neoplasms                               | 31.50<br>(25.75 to<br>38.36)                         | 51.39<br>(43.42 to<br>61.78)                             | 51.91<br>(43.87 to<br>62.43)                         | 53.82<br>(45.02 to<br>65.60)                               | 0.75<br>(0.65 to<br>0.85)                         | 1.72<br>(1.52 to<br>1.95)                         | 1.84<br>(1.63 to<br>2.09)                         | 1.63<br>(1.44 to<br>1.85)                          |
| <b>Cardiovascular diseases</b>                | <b>789.03</b><br><b>(683.07 to</b><br><b>889.30)</b> | <b>1,120.91</b><br><b>(809.82 to</b><br><b>1,553.96)</b> | <b>717.10</b><br><b>(549.90 to</b><br><b>945.63)</b> | <b>1,740.70</b><br><b>(1,213.50 to</b><br><b>2,490.67)</b> | <b>34.45</b><br><b>(29.70 to</b><br><b>38.30)</b> | <b>56.27</b><br><b>(43.73 to</b><br><b>73.65)</b> | <b>39.02</b><br><b>(31.43 to</b><br><b>49.22)</b> | <b>80.63</b><br><b>(60.50 to</b><br><b>107.16)</b> |
| Rheumatic heart disease                       | 11.09<br>(9.24 to<br>13.29)                          | 9.79<br>(7.69 to<br>13.08)                               | 8.67<br>(6.84 to<br>11.60)                           | 11.79<br>(9.24 to<br>15.89)                                | 0.40<br>(0.33 to<br>0.49)                         | 0.46<br>(0.38 to<br>0.61)                         | 0.43<br>(0.35 to<br>0.57)                         | 0.52<br>(0.42 to<br>0.69)                          |
| Ischemic heart disease                        | 305.42<br>(263.02 to<br>346.03)                      | 426.42<br>(255.88 to<br>695.18)                          | 246.99<br>(157.06 to<br>396.64)                      | 717.54<br>(415.55 to<br>1,149.68)                          | 14.63<br>(12.64 to<br>16.42)                      | 23.08<br>(14.91 to<br>35.37)                      | 14.85<br>(10.11 to<br>22.65)                      | 35.26<br>(22.40 to<br>53.60)                       |
| Stroke                                        | 316.97<br>(269.40 to<br>364.19)                      | 403.55<br>(258.69 to<br>626.67)                          | 211.09<br>(147.22 to<br>309.48)                      | 681.56<br>(422.41 to<br>1,100.20)                          | 13.92<br>(11.82 to<br>15.83)                      | 20.37<br>(14.08 to<br>29.40)                      | 12.21<br>(8.99 to<br>17.20)                       | 31.14<br>(21.33 to<br>46.59)                       |
| Ischemic stroke                               | 116.25<br>(96.83 to<br>134.34)                       | 151.75<br>(98.36 to<br>240.55)                           | 92.05<br>(63.42 to<br>139.06)                        | 221.10<br>(141.39 to<br>355.22)                            | 6.63<br>(5.61 to<br>7.60)                         | 9.71<br>(6.56 to<br>15.35)                        | 6.61<br>(4.69 to<br>9.87)                         | 13.01<br>(8.65 to<br>20.68)                        |
| Intracerebral hemorrhage                      | 200.71<br>(172.50 to<br>230.72)                      | 251.80<br>(146.93 to<br>426.72)                          | 119.04<br>(75.17 to<br>186.38)                       | 460.45<br>(262.18 to<br>799.11)                            | 7.29<br>(6.22 to<br>8.43)                         | 10.66<br>(6.70 to<br>16.94)                       | 5.59<br>(3.81 to<br>8.11)                         | 18.13<br>(11.02 to<br>29.65)                       |
| Hypertensive heart disease                    | 36.32<br>(19.59 to<br>52.59)                         | 63.03<br>(28.30 to<br>122.96)                            | 46.08<br>(22.44 to<br>78.38)                         | 86.68<br>(36.96 to<br>176.82)                              | 1.58<br>(0.90 to<br>2.25)                         | 3.16<br>(1.53 to<br>5.84)                         | 2.43<br>(1.27 to<br>3.92)                         | 4.15<br>(1.92 to<br>8.06)                          |
| Cardiomyopathy and myocarditis                | 32.69<br>(26.91 to<br>38.85)                         | 50.46<br>(37.72 to<br>66.80)                             | 49.42<br>(37.34 to<br>64.31)                         | 53.38<br>(39.55 to<br>71.36)                               | 0.97<br>(0.81 to<br>1.14)                         | 1.91<br>(1.46 to<br>2.42)                         | 1.98<br>(1.52 to<br>2.51)                         | 1.89<br>(1.44 to<br>2.41)                          |
| Myocarditis                                   | 4.42<br>(3.34 to<br>5.64)                            | 5.51<br>(4.02 to<br>7.46)                                | 5.33<br>(3.86 to<br>7.20)                            | 5.95<br>(4.30 to<br>8.13)                                  | 0.10<br>(0.08 to<br>0.13)                         | 0.17<br>(0.12 to<br>0.21)                         | 0.18<br>(0.13 to<br>0.23)                         | 0.16<br>(0.12 to<br>0.21)                          |
| <b>Ghana</b>                                  |                                                      |                                                          |                                                      |                                                            |                                                   |                                                   |                                                   |                                                    |
| Cause                                         | YLLs (in 1000s)                                      |                                                          |                                                      |                                                            | Deaths (in 1000s)                                 |                                                   |                                                   |                                                    |
|                                               | 2016                                                 | 2040 Forecast                                            | 2040 Better Scenario                                 | 2040 Worse Scenario                                        | 2016                                              | 2040 Forecast                                     | 2040 Better Scenario                              | 2040 Worse Scenario                                |
| Alcoholic cardiomyopathy                      | 2.87<br>(2.18 to<br>3.82)                            | 5.21<br>(3.80 to<br>7.16)                                | 4.20<br>(2.97 to<br>6.03)                            | 6.06<br>(4.47 to<br>8.16)                                  | 0.09<br>(0.07 to<br>0.12)                         | 0.18<br>(0.14 to<br>0.25)                         | 0.15<br>(0.11 to<br>0.21)                         | 0.21<br>(0.16 to<br>0.28)                          |
| Other cardiomyopathy                          | 25.40<br>(20.57 to<br>30.24)                         | 39.74<br>(28.50 to<br>55.68)                             | 39.89<br>(28.86 to<br>54.15)                         | 41.36<br>(29.12 to<br>58.59)                               | 0.78<br>(0.63 to<br>0.91)                         | 1.55<br>(1.13 to<br>2.05)                         | 1.65<br>(1.22 to<br>2.16)                         | 1.52<br>(1.08 to<br>2.02)                          |
| Atrial fibrillation and flutter               | 3.14<br>(2.41 to<br>3.99)                            | 9.49<br>(6.97 to<br>12.83)                               | 9.48<br>(7.13 to<br>12.53)                           | 9.09<br>(6.65 to<br>12.29)                                 | 0.27<br>(0.20 to<br>0.34)                         | 0.86<br>(0.63 to<br>1.17)                         | 0.91<br>(0.68 to<br>1.21)                         | 0.78<br>(0.57 to<br>1.06)                          |
| Aortic aneurysm                               | 5.22<br>(4.40 to<br>6.11)                            | 10.88<br>(8.42 to<br>14.73)                              | 11.05<br>(8.68 to<br>14.70)                          | 10.69<br>(8.20 to<br>14.45)                                | 0.22<br>(0.18 to<br>0.25)                         | 0.52<br>(0.42 to<br>0.68)                         | 0.56<br>(0.45 to<br>0.71)                         | 0.49<br>(0.39 to<br>0.64)                          |
| Peripheral artery disease                     | 0.20<br>(0.15 to<br>0.31)                            | 0.94<br>(0.63 to<br>1.50)                                | 1.00<br>(0.67 to<br>1.58)                            | 0.79<br>(0.53 to<br>1.26)                                  | 0.01<br>(0.01 to<br>0.02)                         | 0.07<br>(0.05 to<br>0.10)                         | 0.08<br>(0.05 to<br>0.12)                         | 0.05<br>(0.04 to<br>0.08)                          |
| Endocarditis                                  | 15.78<br>(12.64 to<br>19.40)                         | 24.40<br>(18.12 to<br>32.86)                             | 23.58<br>(17.73 to<br>31.56)                         | 27.33<br>(20.08 to<br>37.14)                               | 0.41<br>(0.34 to<br>0.52)                         | 0.86<br>(0.64 to<br>1.19)                         | 0.88<br>(0.65 to<br>1.21)                         | 0.89<br>(0.65 to<br>1.23)                          |
| Other cardiovascular and circulatory diseases | 62.20<br>(49.78 to<br>79.58)                         | 121.95<br>(93.22 to<br>165.18)                           | 109.75<br>(85.20 to<br>146.49)                       | 141.86<br>(106.70 to<br>192.20)                            | 2.04<br>(1.62 to<br>2.74)                         | 4.97<br>(3.87 to<br>6.83)                         | 4.70<br>(3.68 to<br>6.33)                         | 5.45<br>(4.21 to<br>7.51)                          |

|                                                                |                                     |                                     |                                     |                                     |                               |                                 |                                 |                                 |
|----------------------------------------------------------------|-------------------------------------|-------------------------------------|-------------------------------------|-------------------------------------|-------------------------------|---------------------------------|---------------------------------|---------------------------------|
| <b>Chronic respiratory diseases</b>                            | <b>102.18</b><br>(85.66 to 117.74)  | <b>129.72</b><br>(92.94 to 176.88)  | <b>97.03</b><br>(73.91 to 123.93)   | <b>174.42</b><br>(120.38 to 251.17) | <b>3.98</b><br>(3.35 to 4.54) | <b>5.82</b><br>(4.35 to 7.87)   | <b>4.61</b><br>(3.57 to 5.82)   | <b>7.47</b><br>(5.29 to 10.79)  |
| Chronic obstructive pulmonary disease                          | 53.18<br>(44.70 to 61.76)           | 74.27<br>(47.73 to 116.40)          | 48.92<br>(33.33 to 70.12)           | 111.77<br>(68.04 to 180.83)         | 2.39<br>(2.01 to 2.75)        | 3.64<br>(2.41 to 5.53)          | 2.63<br>(1.88 to 3.70)          | 5.15<br>(3.25 to 8.26)          |
| Pneumoconiosis                                                 | 0.09<br>(0.07 to 0.11)              | 0.13<br>(0.10 to 0.17)              | 0.13<br>(0.10 to 0.16)              | 0.14<br>(0.11 to 0.17)              | 0.00<br>(0.00 to 0.00)        | 0.01<br>(0.01 to 0.01)          | 0.01<br>(0.01 to 0.01)          | 0.01<br>(0.01 to 0.01)          |
| Silicosis                                                      | 0.00<br>(0.00 to 0.01)              | 0.01<br>(0.00 to 0.01)              | 0.01<br>(0.00 to 0.01)              | 0.01<br>(0.00 to 0.01)              | 0.00<br>(0.00 to 0.00)        | 0.00<br>(0.00 to 0.00)          | 0.00<br>(0.00 to 0.00)          | 0.00<br>(0.00 to 0.00)          |
| Asbestosis                                                     | 0.02<br>(0.02 to 0.03)              | 0.04<br>(0.03 to 0.05)              | 0.04<br>(0.03 to 0.05)              | 0.04<br>(0.03 to 0.05)              | 0.00<br>(0.00 to 0.00)        | 0.00<br>(0.00 to 0.00)          | 0.00<br>(0.00 to 0.00)          | 0.00<br>(0.00 to 0.00)          |
| Coal workers pneumoconiosis                                    | 0.00<br>(0.00 to 0.00)              | 0.00<br>(0.00 to 0.00)              | 0.00<br>(0.00 to 0.00)              | 0.00<br>(0.00 to 0.01)              | 0.00<br>(0.00 to 0.00)        | 0.00<br>(0.00 to 0.00)          | 0.00<br>(0.00 to 0.00)          | 0.00<br>(0.00 to 0.00)          |
| Other pneumoconiosis                                           | 0.06<br>(0.04 to 0.07)              | 0.08<br>(0.06 to 0.11)              | 0.08<br>(0.06 to 0.10)              | 0.09<br>(0.07 to 0.12)              | 0.00<br>(0.00 to 0.00)        | 0.01<br>(0.00 to 0.01)          | 0.01<br>(0.00 to 0.01)          | 0.01<br>(0.00 to 0.01)          |
| Asthma                                                         | 31.36<br>(25.41 to 37.58)           | 27.96<br>(18.29 to 42.29)           | 21.56<br>(14.61 to 31.02)           | 33.44<br>(21.29 to 50.96)           | 1.09<br>(0.85 to 1.28)        | 1.19<br>(0.78 to 1.77)          | 0.97<br>(0.67 to 1.37)          | 1.34<br>(0.88 to 2.02)          |
| Interstitial lung disease and pulmonary sarcoidosis            | 1.75<br>(1.28 to 2.54)              | 4.41<br>(3.18 to 6.48)              | 4.90<br>(3.50 to 7.18)              | 3.88<br>(2.81 to 5.71)              | 0.07<br>(0.05 to 0.10)        | 0.23<br>(0.15 to 0.29)          | 0.23<br>(0.17 to 0.34)          | 0.17<br>(0.12 to 0.25)          |
| Other chronic respiratory diseases                             | 15.81<br>(10.74 to 20.86)           | 22.95<br>(14.99 to 31.10)           | 21.53<br>(14.28 to 28.59)           | 25.19<br>(16.34 to 34.51)           | 0.43<br>(0.28 to 0.58)        | 0.79<br>(0.49 to 1.05)          | 0.78<br>(0.50 to 1.03)          | 0.81<br>(0.50 to 1.10)          |
| <b>Cirrhosis and other chronic liver diseases</b>              | <b>214.61</b><br>(107.37 to 294.82) | <b>367.09</b><br>(186.25 to 517.66) | <b>333.63</b><br>(170.34 to 473.81) | <b>412.31</b><br>(210.29 to 581.84) | <b>5.99</b><br>(3.26 to 8.15) | <b>11.71</b><br>(6.66 to 16.09) | <b>10.86</b><br>(6.08 to 14.86) | <b>12.83</b><br>(7.24 to 17.68) |
| Cirrhosis and other chronic liver diseases due to hepatitis B  | 96.24<br>(44.40 to 137.82)          | 169.39<br>(78.29 to 247.92)         | 164.00<br>(77.05 to 239.60)         | 177.70<br>(83.43 to 260.16)         | 2.76<br>(1.41 to 3.86)        | 5.46<br>(2.87 to 7.80)          | 5.41<br>(2.81 to 7.70)          | 5.59<br>(2.92 to 8.04)          |
| Cirrhosis and other chronic liver diseases due to hepatitis C  | 38.01<br>(18.97 to 62.46)           | 71.00<br>(35.41 to 117.53)          | 68.54<br>(34.18 to 112.72)          | 74.72<br>(37.42 to 125.23)          | 1.11<br>(0.59 to 1.77)        | 2.27<br>(1.19 to 3.68)          | 2.23<br>(1.17 to 3.59)          | 2.34<br>(1.23 to 3.84)          |
| Cirrhosis and other chronic liver diseases due to alcohol use  | 44.07<br>(20.84 to 63.02)           | 80.16<br>(43.96 to 115.14)          | 57.27<br>(28.59 to 83.61)           | 108.18<br>(55.45 to 155.83)         | 1.33<br>(0.69 to 1.87)        | 2.71<br>(1.56 to 3.74)          | 1.98<br>(1.09 to 2.77)          | 3.54<br>(1.97 to 4.94)          |
| Cirrhosis and other chronic liver diseases due to other causes | 36.30<br>(20.88 to 49.43)           | 46.54<br>(27.98 to 65.62)           | 43.82<br>(26.73 to 61.82)           | 51.70<br>(31.22 to 73.27)           | 0.79<br>(0.50 to 1.05)        | 1.27<br>(0.82 to 1.74)          | 1.24<br>(0.80 to 1.69)          | 1.35<br>(0.88 to 1.85)          |
| <b>Digestive diseases</b>                                      | <b>130.51</b><br>(102.35 to 169.31) | <b>181.61</b><br>(133.71 to 244.39) | <b>165.62</b><br>(122.59 to 222.50) | <b>206.03</b><br>(151.29 to 282.60) | <b>3.86</b><br>(3.08 to 4.86) | <b>7.00</b><br>(5.40 to 9.02)   | <b>6.71</b><br>(5.22 to 8.62)   | <b>7.45</b><br>(5.72 to 9.71)   |
| Peptic ulcer disease                                           | 24.26<br>(18.70 to 31.60)           | 20.76<br>(15.33 to 27.48)           | 17.96<br>(13.09 to 23.90)           | 25.54<br>(18.85 to 34.23)           | 0.77<br>(0.59 to 1.00)        | 0.81<br>(0.61 to 1.06)          | 0.73<br>(0.54 to 0.95)          | 0.96<br>(0.73 to 1.25)          |

**Ghana**

| Cause                                      | YLLs (in 1000s)           |                           |                           |                            | Deaths (in 1000s)      |                        |                        |                        |
|--------------------------------------------|---------------------------|---------------------------|---------------------------|----------------------------|------------------------|------------------------|------------------------|------------------------|
|                                            | 2016                      | 2040 Forecast             | 2040 Better Scenario      | 2040 Worse Scenario        | 2016                   | 2040 Forecast          | 2040 Better Scenario   | 2040 Worse Scenario    |
| Gastritis and duodenitis                   | 3.73<br>(2.56 to 5.36)    | 6.53<br>(4.35 to 9.44)    | 6.14<br>(4.03 to 9.01)    | 7.17<br>(4.78 to 10.47)    | 0.09<br>(0.06 to 0.12) | 0.18<br>(0.13 to 0.26) | 0.17<br>(0.12 to 0.24) | 0.19<br>(0.14 to 0.27) |
| Appendicitis                               | 6.04<br>(4.46 to 8.58)    | 8.13<br>(6.15 to 11.03)   | 7.44<br>(5.52 to 10.16)   | 9.42<br>(7.04 to 12.89)    | 0.19<br>(0.14 to 0.25) | 0.34<br>(0.26 to 0.45) | 0.33<br>(0.25 to 0.43) | 0.37<br>(0.28 to 0.48) |
| Paralytic ileus and intestinal obstruction | 49.37<br>(35.74 to 70.80) | 70.27<br>(52.52 to 94.35) | 68.78<br>(51.53 to 92.91) | 75.42<br>(55.90 to 101.99) | 1.34<br>(1.02 to 1.78) | 2.71<br>(2.10 to 3.58) | 2.80<br>(2.16 to 3.69) | 2.69<br>(2.07 to 3.59) |

|                                         |                              |                                |                                |                                |                           |                            |                            |                           |
|-----------------------------------------|------------------------------|--------------------------------|--------------------------------|--------------------------------|---------------------------|----------------------------|----------------------------|---------------------------|
|                                         | 2.82<br>(1.79 to<br>4.42)    | 4.18<br>(2.59 to<br>6.83)      | 3.98<br>(2.43 to<br>6.50)      | 4.56<br>(2.80 to<br>7.39)      | 0.11<br>(0.07 to<br>0.17) | 0.19<br>(0.12 to<br>0.31)  | 0.19<br>(0.12 to<br>0.31)  | 0.20<br>(0.12 to<br>0.32) |
| Inguinal, femoral, and abdominal hernia |                              |                                |                                |                                |                           |                            |                            |                           |
|                                         | 7.02<br>(4.87 to<br>10.30)   | 10.50<br>(7.33 to<br>14.59)    | 10.55<br>(7.27 to<br>14.79)    | 10.66<br>(7.47 to<br>14.66)    | 0.19<br>(0.14 to<br>0.26) | 0.36<br>(0.26 to<br>0.50)  | 0.38<br>(0.27 to<br>0.53)  | 0.35<br>(0.25 to<br>0.49) |
| Inflammatory bowel disease              |                              |                                |                                |                                |                           |                            |                            |                           |
|                                         | 2.04<br>(1.44 to<br>3.09)    | 4.18<br>(3.04 to<br>6.05)      | 4.18<br>(3.03 to<br>6.03)      | 4.28<br>(3.12 to<br>6.25)      | 0.08<br>(0.06 to<br>0.11) | 0.22<br>(0.16 to<br>0.31)  | 0.23<br>(0.17 to<br>0.32)  | 0.21<br>(0.15 to<br>0.30) |
| Vascular intestinal disorders           |                              |                                |                                |                                |                           |                            |                            |                           |
|                                         | 4.85<br>(3.60 to<br>6.49)    | 8.07<br>(5.05 to<br>12.59)     | 6.16<br>(3.95 to<br>9.47)      | 9.80<br>(6.10 to<br>15.76)     | 0.16<br>(0.12 to<br>0.20) | 0.33<br>(0.21 to<br>0.52)  | 0.26<br>(0.17 to<br>0.40)  | 0.39<br>(0.24 to<br>0.61) |
| Gallbladder and biliary diseases        |                              |                                |                                |                                |                           |                            |                            |                           |
|                                         | 11.71<br>(8.04 to<br>16.26)  | 24.72<br>(8.06 to<br>62.08)    | 17.79<br>(6.39 to<br>43.47)    | 31.95<br>(10.03 to<br>81.62)   | 0.34<br>(0.24 to<br>0.46) | 0.82<br>(0.29 to<br>1.97)  | 0.61<br>(0.25 to<br>1.44)  | 1.02<br>(0.34 to<br>2.54) |
| Pancreatitis                            |                              |                                |                                |                                |                           |                            |                            |                           |
|                                         | 18.66<br>(13.90 to<br>24.97) | 24.27<br>(18.03 to<br>32.57)   | 22.64<br>(16.69 to<br>30.45)   | 27.24<br>(20.26 to<br>36.95)   | 0.61<br>(0.47 to<br>0.78) | 1.02<br>(0.78 to<br>1.32)  | 1.01<br>(0.77 to<br>1.30)  | 1.08<br>(0.82 to<br>1.41) |
| Other digestive diseases                |                              |                                |                                |                                |                           |                            |                            |                           |
|                                         | 55.03<br>(47.61 to<br>62.84) | 120.05<br>(98.60 to<br>150.08) | 117.91<br>(98.96 to<br>143.07) | 118.78<br>(96.68 to<br>149.32) | 2.76<br>(2.33 to<br>3.22) | 8.26<br>(6.47 to<br>10.69) | 8.76<br>(7.12 to<br>10.93) | 7.30<br>(5.60 to<br>9.65) |
| Neurological disorders                  |                              |                                |                                |                                |                           |                            |                            |                           |
|                                         | 22.95<br>(18.38 to<br>28.11) | 72.18<br>(54.38 to<br>98.95)   | 73.31<br>(57.60 to<br>94.31)   | 65.07<br>(46.91 to<br>92.80)   | 1.99<br>(1.60 to<br>2.44) | 6.64<br>(4.84 to<br>9.04)  | 7.09<br>(5.43 to<br>9.14)  | 5.69<br>(4.02 to<br>7.99) |
| Alzheimer's disease and other dementias |                              |                                |                                |                                |                           |                            |                            |                           |
|                                         | 2.29<br>(1.71 to<br>3.01)    | 8.16<br>(6.04 to<br>10.52)     | 9.71<br>(7.18 to<br>12.44)     | 6.62<br>(4.81 to<br>8.62)      | 0.17<br>(0.13 to<br>0.22) | 0.65<br>(0.48 to<br>0.85)  | 0.80<br>(0.60 to<br>1.05)  | 0.51<br>(0.36 to<br>0.67) |
| Parkinson's disease                     |                              |                                |                                |                                |                           |                            |                            |                           |
|                                         | 20.31<br>(16.66 to<br>24.93) | 24.41<br>(15.74 to<br>39.61)   | 19.38<br>(12.71 to<br>31.04)   | 31.52<br>(19.99 to<br>51.05)   | 0.41<br>(0.34 to<br>0.49) | 0.60<br>(0.40 to<br>0.96)  | 0.49<br>(0.33 to<br>0.77)  | 0.75<br>(0.48 to<br>1.20) |
| Epilepsy                                |                              |                                |                                |                                |                           |                            |                            |                           |
|                                         | 0.60<br>(0.42 to<br>0.82)    | 1.13<br>(0.78 to<br>1.57)      | 1.08<br>(0.80 to<br>1.62)      | 1.08<br>(0.74 to<br>1.59)      | 0.02<br>(0.01 to<br>0.02) | 0.03<br>(0.02 to<br>0.05)  | 0.04<br>(0.02 to<br>0.05)  | 0.03<br>(0.02 to<br>0.04) |
| Multiple sclerosis                      |                              |                                |                                |                                |                           |                            |                            |                           |
|                                         | 1.12<br>(0.86 to<br>1.47)    | 2.50<br>(1.92 to<br>3.23)      | 2.67<br>(2.03 to<br>3.47)      | 2.33<br>(1.78 to<br>3.01)      | 0.03<br>(0.02 to<br>0.04) | 0.08<br>(0.06 to<br>0.11)  | 0.09<br>(0.07 to<br>0.11)  | 0.08<br>(0.06 to<br>0.10) |
| Motor neuron disease                    |                              |                                |                                |                                |                           |                            |                            |                           |
|                                         | 7.76<br>(4.37 to<br>11.87)   | 11.67<br>(6.97 to<br>17.09)    | 11.66<br>(7.20 to<br>16.89)    | 12.17<br>(6.99 to<br>18.29)    | 0.14<br>(0.08 to<br>0.21) | 0.25<br>(0.16 to<br>0.35)  | 0.26<br>(0.17 to<br>0.36)  | 0.25<br>(0.15 to<br>0.36) |
| Other neurological disorders            |                              |                                |                                |                                |                           |                            |                            |                           |
|                                         | 21.38<br>(14.86 to<br>27.69) | 38.24<br>(25.27 to<br>51.82)   | 36.97<br>(24.26 to<br>50.38)   | 39.63<br>(26.22 to<br>53.24)   | 0.52<br>(0.37 to<br>0.66) | 1.02<br>(0.70 to<br>1.31)  | 1.01<br>(0.68 to<br>1.30)  | 1.04<br>(0.72 to<br>1.32) |
| Mental disorders                        |                              |                                |                                |                                |                           |                            |                            |                           |
|                                         | 8.81<br>(6.68 to<br>12.27)   | 13.23<br>(9.49 to<br>19.18)    | 11.95<br>(8.50 to<br>17.64)    | 14.51<br>(10.43 to<br>20.86)   | 0.24<br>(0.19 to<br>0.33) | 0.41<br>(0.31 to<br>0.57)  | 0.38<br>(0.28 to<br>0.53)  | 0.44<br>(0.32 to<br>0.60) |
| Alcohol use disorders                   |                              |                                |                                |                                |                           |                            |                            |                           |
|                                         | 12.49<br>(6.34 to<br>18.06)  | 24.87<br>(12.65 to<br>36.83)   | 24.88<br>(12.76 to<br>36.92)   | 24.99<br>(12.44 to<br>37.39)   | 0.27<br>(0.14 to<br>0.39) | 0.61<br>(0.32 to<br>0.87)  | 0.63<br>(0.33 to<br>0.89)  | 0.60<br>(0.31 to<br>0.85) |
| Drug use disorders                      |                              |                                |                                |                                |                           |                            |                            |                           |
|                                         | 12.00<br>(5.98 to<br>17.47)  | 23.28<br>(11.59 to<br>35.15)   | 23.20<br>(11.75 to<br>35.02)   | 23.48<br>(11.49 to<br>35.40)   | 0.25<br>(0.13 to<br>0.36) | 0.53<br>(0.27 to<br>0.77)  | 0.54<br>(0.27 to<br>0.78)  | 0.53<br>(0.26 to<br>0.78) |
| Opioid use disorders                    |                              |                                |                                |                                |                           |                            |                            |                           |
|                                         | 0.10<br>(0.06 to<br>0.18)    | 0.28<br>(0.17 to<br>0.54)      | 0.28<br>(0.17 to<br>0.53)      | 0.29<br>(0.18 to<br>0.56)      | 0.00<br>(0.00 to<br>0.01) | 0.01<br>(0.01 to<br>0.02)  | 0.01<br>(0.01 to<br>0.02)  | 0.01<br>(0.01 to<br>0.02) |
| Cocaine use disorders                   |                              |                                |                                |                                |                           |                            |                            |                           |
|                                         | 0.05<br>(0.03 to<br>0.09)    | 0.22<br>(0.14 to<br>0.39)      | 0.22<br>(0.14 to<br>0.39)      | 0.23<br>(0.14 to<br>0.39)      | 0.00<br>(0.00 to<br>0.00) | 0.01<br>(0.01 to<br>0.01)  | 0.01<br>(0.01 to<br>0.01)  | 0.01<br>(0.01 to<br>0.01) |
| Amphetamine use disorders               |                              |                                |                                |                                |                           |                            |                            |                           |
|                                         | 0.34<br>(0.19 to<br>0.52)    | 1.09<br>(0.63 to<br>1.66)      | 1.18<br>(0.69 to<br>1.79)      | 0.99<br>(0.57 to<br>1.51)      | 0.02<br>(0.01 to<br>0.02) | 0.06<br>(0.03 to<br>0.09)  | 0.07<br>(0.04 to<br>0.11)  | 0.05<br>(0.03 to<br>0.08) |
| Other drug use disorders                |                              |                                |                                |                                |                           |                            |                            |                           |
|                                         | 0.08<br>(0.05 to<br>0.14)    | 0.14<br>(0.09 to<br>0.22)      | 0.14<br>(0.09 to<br>0.23)      | 0.14<br>(0.09 to<br>0.22)      | 0.00<br>(0.00 to<br>0.00) | 0.00<br>(0.00 to<br>0.00)  | 0.00<br>(0.00 to<br>0.00)  | 0.00<br>(0.00 to<br>0.00) |
| Eating disorders                        |                              |                                |                                |                                |                           |                            |                            |                           |
| <b>Ghana</b>                            |                              |                                |                                |                                |                           |                            |                            |                           |
| <b>YLLs (in 1000s)</b>                  |                              |                                |                                |                                | <b>Deaths (in 1000s)</b>  |                            |                            |                           |

| Cause                                                      | 2016                                | 2040 Forecast                       | 2040 Better Scenario                | 2040 Worse Scenario                 | 2016                            | 2040 Forecast                    | 2040 Better Scenario             | 2040 Worse Scenario              |
|------------------------------------------------------------|-------------------------------------|-------------------------------------|-------------------------------------|-------------------------------------|---------------------------------|----------------------------------|----------------------------------|----------------------------------|
| <b>Diabetes, urogenital, blood, and endocrine diseases</b> | <b>377.71</b><br>(331.45 to 433.45) | <b>592.18</b><br>(463.87 to 772.05) | <b>497.78</b><br>(391.89 to 634.38) | <b>707.03</b><br>(554.64 to 921.65) | <b>10.81</b><br>(9.56 to 12.11) | <b>23.85</b><br>(18.86 to 33.32) | <b>20.53</b><br>(16.49 to 27.75) | <b>27.12</b><br>(21.56 to 37.62) |
| Diabetes mellitus                                          | 109.61<br>(95.38 to 124.37)         | 209.93<br>(144.79 to 310.80)        | 168.97<br>(117.64 to 243.77)        | 261.04<br>(178.39 to 380.96)        | 4.68<br>(4.05 to 5.30)          | 10.53<br>(7.64 to 14.53)         | 8.97<br>(6.60 to 12.14)          | 12.47<br>(9.04 to 17.33)         |
| Acute glomerulonephritis                                   | 0.20<br>(0.18 to 0.23)              | 0.24<br>(0.19 to 0.28)              | 0.21<br>(0.18 to 0.26)              | 0.29<br>(0.23 to 0.35)              | 0.00<br>(0.00 to 0.00)          | 0.00<br>(0.00 to 0.01)           | 0.00<br>(0.00 to 0.00)           | 0.01<br>(0.00 to 0.01)           |
| Chronic kidney disease                                     | 83.45<br>(68.81 to 98.31)           | 152.27<br>(89.05 to 334.62)         | 112.91<br>(69.78 to 239.53)         | 184.42<br>(108.86 to 387.29)        | 2.38<br>(2.03 to 2.81)          | 6.59<br>(3.36 to 16.73)          | 4.89<br>(2.71 to 13.10)          | 7.56<br>(3.91 to 18.61)          |
| Chronic kidney disease due to diabetes mellitus            | 20.21<br>(15.99 to 25.04)           | 50.91<br>(27.35 to 120.70)          | 37.25<br>(21.60 to 83.82)           | 60.05<br>(32.37 to 137.61)          | 0.70<br>(0.56 to 0.84)          | 2.34<br>(1.14 to 6.61)           | 1.72<br>(0.92 to 4.74)           | 2.66<br>(1.29 to 7.14)           |
| Chronic kidney disease due to hypertension                 | 10.02<br>(8.13 to 12.50)            | 27.87<br>(13.89 to 75.05)           | 20.29<br>(10.93 to 55.93)           | 32.29<br>(16.12 to 84.87)           | 0.44<br>(0.36 to 0.55)          | 1.62<br>(0.76 to 4.79)           | 1.21<br>(0.63 to 3.56)           | 1.79<br>(0.83 to 5.17)           |
| Chronic kidney disease due to glomerulonephritis           | 25.15<br>(20.02 to 30.47)           | 32.86<br>(21.08 to 58.30)           | 24.88<br>(16.30 to 42.00)           | 41.46<br>(26.82 to 70.21)           | 0.56<br>(0.45 to 0.68)          | 1.10<br>(0.61 to 2.57)           | 0.82<br>(0.49 to 1.88)           | 1.31<br>(0.73 to 2.97)           |
| Chronic kidney disease due to other and unspecified causes | 28.07<br>(22.50 to 33.97)           | 40.63<br>(24.05 to 76.85)           | 30.52<br>(19.08 to 54.35)           | 50.62<br>(30.53 to 91.27)           | 0.68<br>(0.55 to 0.82)          | 1.53<br>(0.81 to 3.68)           | 1.14<br>(0.64 to 2.64)           | 1.79<br>(0.97 to 4.11)           |
| Urinary diseases and male infertility                      | 32.31<br>(27.70 to 37.64)           | 65.58<br>(55.30 to 76.96)           | 64.79<br>(54.22 to 76.07)           | 68.88<br>(58.10 to 80.47)           | 0.98<br>(0.84 to 1.11)          | 2.77<br>(2.40 to 3.16)           | 2.90<br>(2.52 to 3.29)           | 2.69<br>(2.33 to 3.06)           |
| Urinary tract infections                                   | 22.71<br>(18.38 to 28.65)           | 51.91<br>(42.84 to 61.96)           | 52.17<br>(43.27 to 62.43)           | 53.38<br>(43.64 to 64.28)           | 0.72<br>(0.59 to 0.86)          | 2.30<br>(1.95 to 2.70)           | 2.45<br>(2.09 to 2.85)           | 2.19<br>(1.85 to 2.57)           |
| Urolithiasis                                               | 0.91<br>(0.51 to 1.26)              | 1.95<br>(1.02 to 2.90)              | 1.89<br>(0.96 to 2.83)              | 2.09<br>(1.14 to 3.06)              | 0.02<br>(0.01 to 0.03)          | 0.05<br>(0.02 to 0.07)           | 0.05<br>(0.02 to 0.07)           | 0.05<br>(0.03 to 0.07)           |
| Other urinary diseases                                     | 8.70<br>(4.94 to 11.77)             | 11.71<br>(5.90 to 17.08)            | 10.73<br>(5.42 to 15.81)            | 13.40<br>(6.89 to 19.25)            | 0.24<br>(0.14 to 0.33)          | 0.42<br>(0.23 to 0.62)           | 0.40<br>(0.22 to 0.60)           | 0.45<br>(0.25 to 0.66)           |
| Gynecological diseases                                     | 3.87<br>(2.68 to 5.26)              | 5.29<br>(3.44 to 7.60)              | 4.73<br>(3.11 to 6.78)              | 6.23<br>(4.06 to 8.87)              | 0.10<br>(0.06 to 0.13)          | 0.14<br>(0.10 to 0.20)           | 0.13<br>(0.09 to 0.18)           | 0.16<br>(0.11 to 0.23)           |
| Uterine fibroids                                           | 0.21<br>(0.11 to 0.34)              | 0.26<br>(0.13 to 0.44)              | 0.23<br>(0.12 to 0.39)              | 0.30<br>(0.16 to 0.51)              | 0.01<br>(0.00 to 0.01)          | 0.01<br>(0.01 to 0.02)           | 0.01<br>(0.01 to 0.02)           | 0.01<br>(0.01 to 0.02)           |
| Polycystic ovarian syndrome                                | 0.38<br>(0.09 to 0.79)              | 0.30<br>(0.07 to 0.65)              | 0.24<br>(0.05 to 0.53)              | 0.40<br>(0.09 to 0.90)              | 0.01<br>(0.00 to 0.02)          | 0.01<br>(0.00 to 0.02)           | 0.01<br>(0.00 to 0.01)           | 0.01<br>(0.00 to 0.02)           |
| Endometriosis                                              | 0.01<br>(0.00 to 0.02)              | 0.01<br>(0.00 to 0.03)              | 0.01<br>(0.00 to 0.03)              | 0.01<br>(0.00 to 0.04)              | 0.00<br>(0.00 to 0.00)          | 0.00<br>(0.00 to 0.00)           | 0.00<br>(0.00 to 0.00)           | 0.00<br>(0.00 to 0.00)           |
| Genital prolapse                                           | 0.10<br>(0.01 to 0.26)              | 0.10<br>(0.01 to 0.31)              | 0.09<br>(0.01 to 0.25)              | 0.13<br>(0.02 to 0.39)              | 0.00<br>(0.00 to 0.01)          | 0.00<br>(0.00 to 0.01)           | 0.00<br>(0.00 to 0.00)           | 0.00<br>(0.00 to 0.01)           |
| Other gynecological diseases                               | 3.19<br>(2.14 to 4.50)              | 4.63<br>(2.92 to 6.73)              | 4.17<br>(2.63 to 6.13)              | 5.38<br>(3.39 to 7.84)              | 0.08<br>(0.05 to 0.11)          | 0.12<br>(0.08 to 0.17)           | 0.11<br>(0.07 to 0.16)           | 0.14<br>(0.09 to 0.20)           |
| Hemoglobinopathies and hemolytic anemias                   | 122.50<br>(100.00 to 155.72)        | 129.71<br>(101.16 to 165.93)        | 118.08<br>(91.48 to 151.83)         | 153.95<br>(121.10 to 197.98)        | 2.04<br>(1.68 to 2.57)          | 2.81<br>(2.24 to 3.70)           | 2.62<br>(2.07 to 3.44)           | 3.21<br>(2.56 to 4.19)           |
| Thalassemias                                               | 0.02<br>(0.02 to 0.04)              | 0.01<br>(0.01 to 0.02)              | 0.01<br>(0.01 to 0.02)              | 0.01<br>(0.01 to 0.02)              | 0.00<br>(0.00 to 0.00)          | 0.00<br>(0.00 to 0.00)           | 0.00<br>(0.00 to 0.00)           | 0.00<br>(0.00 to 0.00)           |
| Sickle cell disorders                                      | 114.71<br>(93.20 to 146.15)         | 112.50<br>(86.72 to 142.57)         | 102.12<br>(78.61 to 129.23)         | 134.56<br>(103.81 to 172.84)        | 1.71<br>(1.41 to 2.15)          | 1.98<br>(1.52 to 2.51)           | 1.81<br>(1.39 to 2.29)           | 2.31<br>(1.80 to 2.93)           |

|                                                   |                                 |                                 |                                 |                                 |                           |                           |                           |                           |
|---------------------------------------------------|---------------------------------|---------------------------------|---------------------------------|---------------------------------|---------------------------|---------------------------|---------------------------|---------------------------|
| G6PD deficiency                                   | 4.64<br>(3.54 to<br>6.60)       | 11.60<br>(8.41 to<br>17.58)     | 10.52<br>(7.48 to<br>16.03)     | 13.40<br>(9.72 to<br>20.18)     | 0.13<br>(0.10 to<br>0.20) | 0.43<br>(0.31 to<br>0.68) | 0.40<br>(0.28 to<br>0.62) | 0.49<br>(0.35 to<br>0.76) |
| Other hemoglobinopathies and hemolytic anemias    | 3.12<br>(2.37 to<br>4.54)       | 5.60<br>(4.18 to<br>8.18)       | 5.43<br>(4.04 to<br>8.00)       | 5.98<br>(4.41 to<br>8.76)       | 0.19<br>(0.15 to<br>0.29) | 0.40<br>(0.30 to<br>0.61) | 0.40<br>(0.30 to<br>0.61) | 0.41<br>(0.30 to<br>0.63) |
| Endocrine, metabolic, blood, and immune disorders | 25.76<br>(18.74 to<br>33.13)    | 29.16<br>(19.18 to<br>38.22)    | 28.08<br>(18.42 to<br>37.51)    | 32.22<br>(21.58 to<br>42.63)    | 0.64<br>(0.43 to<br>0.81) | 1.01<br>(0.66 to<br>1.29) | 1.03<br>(0.67 to<br>1.32) | 1.03<br>(0.67 to<br>1.31) |
| <b>Ghana</b>                                      |                                 |                                 |                                 |                                 |                           |                           |                           |                           |
| Cause                                             | YLLs (in 1000s)                 |                                 |                                 |                                 | Deaths (in 1000s)         |                           |                           |                           |
|                                                   | 2016                            | 2040 Forecast                   | 2040 Better Scenario            | 2040 Worse Scenario             | 2016                      | 2040 Forecast             | 2040 Better Scenario      | 2040 Worse Scenario       |
|                                                   | 6.68<br>(4.53 to<br>8.18)       | 12.57<br>(8.86 to<br>15.41)     | 13.15<br>(9.36 to<br>16.10)     | 12.07<br>(8.40 to<br>14.92)     | 0.16<br>(0.12 to<br>0.19) | 0.38<br>(0.30 to<br>0.45) | 0.42<br>(0.33 to<br>0.50) | 0.35<br>(0.27 to<br>0.41) |
| Musculoskeletal disorders                         | 0.42<br>(0.25 to<br>0.66)       | 0.86<br>(0.55 to<br>1.31)       | 0.83<br>(0.52 to<br>1.26)       | 0.94<br>(0.61 to<br>1.40)       | 0.02<br>(0.01 to<br>0.02) | 0.05<br>(0.03 to<br>0.08) | 0.05<br>(0.03 to<br>0.08) | 0.05<br>(0.03 to<br>0.08) |
| Rheumatoid arthritis                              | 6.26<br>(4.23 to<br>7.62)       | 11.71<br>(8.10 to<br>14.47)     | 12.32<br>(8.55 to<br>15.23)     | 11.13<br>(7.55 to<br>13.87)     | 0.14<br>(0.10 to<br>0.17) | 0.33<br>(0.26 to<br>0.40) | 0.37<br>(0.29 to<br>0.44) | 0.30<br>(0.23 to<br>0.36) |
| Other musculoskeletal disorders                   | 411.74<br>(299.84 to<br>546.32) | 289.30<br>(213.16 to<br>378.74) | 260.28<br>(193.16 to<br>338.73) | 400.83<br>(283.97 to<br>546.74) | 5.38<br>(3.97 to<br>6.97) | 5.73<br>(4.15 to<br>7.15) | 5.55<br>(4.04 to<br>6.93) | 6.91<br>(5.09 to<br>8.90) |
| Congenital birth defects                          | 374.77<br>(268.64 to<br>501.75) | 213.57<br>(149.39 to<br>300.13) | 185.72<br>(129.53 to<br>257.34) | 317.13<br>(211.01 to<br>455.31) | 4.53<br>(3.27 to<br>6.03) | 2.83<br>(2.02 to<br>3.89) | 2.49<br>(1.78 to<br>3.35) | 4.07<br>(2.79 to<br>5.71) |
| Neural tube defects                               | 54.91<br>(24.18 to<br>109.55)   | 11.57<br>(4.47 to<br>25.39)     | 9.13<br>(3.42 to<br>20.17)      | 20.08<br>(7.48 to<br>44.00)     | 0.64<br>(0.28 to<br>1.28) | 0.14<br>(0.06 to<br>0.31) | 0.11<br>(0.04 to<br>0.25) | 0.24<br>(0.09 to<br>0.52) |
| Congenital heart anomalies                        | 96.10<br>(64.56 to<br>141.26)   | 62.92<br>(43.36 to<br>91.89)    | 55.04<br>(37.91 to<br>79.77)    | 89.94<br>(59.53 to<br>137.46)   | 1.19<br>(0.82 to<br>1.72) | 0.86<br>(0.61 to<br>1.21) | 0.76<br>(0.54 to<br>1.07) | 1.19<br>(0.82 to<br>1.75) |
| Orofacial clefts                                  | 2.78<br>(0.52 to<br>7.89)       | 1.08<br>(0.18 to<br>3.34)       | 0.83<br>(0.14 to<br>2.57)       | 1.97<br>(0.33 to<br>5.87)       | 0.03<br>(0.01 to<br>0.09) | 0.01<br>(0.00 to<br>0.04) | 0.01<br>(0.00 to<br>0.03) | 0.02<br>(0.00 to<br>0.07) |
| Down syndrome                                     | 8.33<br>(3.31 to<br>17.00)      | 6.05<br>(2.75 to<br>11.79)      | 5.29<br>(2.35 to<br>10.43)      | 8.64<br>(3.83 to<br>17.62)      | 0.11<br>(0.04 to<br>0.21) | 0.09<br>(0.05 to<br>0.17) | 0.08<br>(0.04 to<br>0.15) | 0.13<br>(0.06 to<br>0.24) |
| Other chromosomal abnormalities                   | 24.66<br>(8.29 to<br>48.35)     | 20.51<br>(6.71 to<br>40.88)     | 17.37<br>(5.61 to<br>34.55)     | 32.46<br>(10.52 to<br>65.95)    | 0.29<br>(0.10 to<br>0.57) | 0.25<br>(0.08 to<br>0.49) | 0.21<br>(0.07 to<br>0.41) | 0.39<br>(0.13 to<br>0.78) |
| Congenital musculoskeletal and limb anomalies     | 2.98<br>(1.29 to<br>6.76)       | 1.93<br>(0.80 to<br>4.54)       | 1.71<br>(0.70 to<br>3.99)       | 2.90<br>(1.15 to<br>6.79)       | 0.03<br>(0.02 to<br>0.08) | 0.02<br>(0.01 to<br>0.05) | 0.02<br>(0.01 to<br>0.05) | 0.03<br>(0.01 to<br>0.08) |
| Urogenital congenital anomalies                   | 9.78<br>(4.56 to<br>17.94)      | 6.10<br>(3.07 to<br>10.76)      | 5.67<br>(2.87 to<br>9.90)       | 8.12<br>(3.84 to<br>14.83)      | 0.13<br>(0.06 to<br>0.22) | 0.10<br>(0.05 to<br>0.16) | 0.10<br>(0.05 to<br>0.15) | 0.13<br>(0.07 to<br>0.21) |
| Digestive congenital anomalies                    | 21.09<br>(9.62 to<br>40.14)     | 11.82<br>(4.93 to<br>24.17)     | 10.08<br>(4.20 to<br>20.14)     | 18.50<br>(7.50 to<br>38.74)     | 0.25<br>(0.11 to<br>0.47) | 0.14<br>(0.06 to<br>0.29) | 0.12<br>(0.05 to<br>0.25) | 0.22<br>(0.09 to<br>0.46) |
| Other congenital birth defects                    | 154.15<br>(82.47 to<br>236.70)  | 91.60<br>(50.56 to<br>144.99)   | 80.61<br>(45.07 to<br>127.33)   | 134.51<br>(71.83 to<br>224.59)  | 1.86<br>(1.01 to<br>2.83) | 1.21<br>(0.70 to<br>1.85) | 1.08<br>(0.63 to<br>1.66) | 1.72<br>(0.96 to<br>2.79) |
| Skin and subcutaneous diseases                    | 24.55<br>(14.20 to<br>36.18)    | 69.24<br>(41.51 to<br>95.88)    | 69.02<br>(41.46 to<br>94.61)    | 73.38<br>(43.85 to<br>103.18)   | 0.71<br>(0.41 to<br>1.00) | 2.82<br>(1.69 to<br>3.84) | 3.00<br>(1.78 to<br>4.06) | 2.72<br>(1.62 to<br>3.76) |
| Cellulitis                                        | 2.93<br>(1.29 to<br>4.93)       | 12.76<br>(6.14 to<br>21.07)     | 13.69<br>(6.64 to<br>22.40)     | 11.93<br>(5.68 to<br>19.84)     | 0.11<br>(0.05 to<br>0.18) | 0.57<br>(0.26 to<br>0.91) | 0.63<br>(0.29 to<br>1.01) | 0.50<br>(0.23 to<br>0.83) |
| Pyoderma                                          | 19.55<br>(11.48 to<br>29.10)    | 52.39<br>(30.76 to<br>75.59)    | 51.10<br>(30.07 to<br>71.48)    | 57.26<br>(34.19 to<br>82.39)    | 0.54<br>(0.31 to<br>0.80) | 2.07<br>(1.24 to<br>2.89) | 2.15<br>(1.27 to<br>2.99) | 2.06<br>(1.25 to<br>2.90) |

|                                      |                                                      |                                                      |                                                      |                                                        |                                                   |                                                   |                                                   |                                                   |
|--------------------------------------|------------------------------------------------------|------------------------------------------------------|------------------------------------------------------|--------------------------------------------------------|---------------------------------------------------|---------------------------------------------------|---------------------------------------------------|---------------------------------------------------|
| Decubitus ulcer                      | 0.91<br>(0.39 to<br>1.42)                            | 1.84<br>(0.86 to<br>2.84)                            | 1.89<br>(0.90 to<br>2.88)                            | 1.88<br>(0.84 to<br>2.99)                              | 0.03<br>(0.01 to<br>0.05)                         | 0.09<br>(0.04 to<br>0.15)                         | 0.10<br>(0.05 to<br>0.18)                         | 0.08<br>(0.04 to<br>0.13)                         |
| Other skin and subcutaneous diseases | 1.16<br>(0.43 to<br>1.86)                            | 2.26<br>(0.87 to<br>3.54)                            | 2.34<br>(0.92 to<br>3.66)                            | 2.31<br>(0.87 to<br>3.67)                              | 0.03<br>(0.01 to<br>0.05)                         | 0.10<br>(0.03 to<br>0.18)                         | 0.11<br>(0.04 to<br>0.21)                         | 0.08<br>(0.03 to<br>0.15)                         |
| Sudden infant death syndrome         | 12.41<br>(5.55 to<br>24.72)                          | 6.49<br>(2.39 to<br>14.36)                           | 5.54<br>(2.10 to<br>12.25)                           | 10.32<br>(3.79 to<br>23.55)                            | 0.14<br>(0.06 to<br>0.29)                         | 0.08<br>(0.03 to<br>0.17)                         | 0.06<br>(0.02 to<br>0.14)                         | 0.12<br>(0.04 to<br>0.27)                         |
| <b>Injuries</b>                      | <b>623.91</b><br><b>(542.53 to</b><br><b>725.01)</b> | <b>759.47</b><br><b>(593.19 to</b><br><b>987.20)</b> | <b>664.45</b><br><b>(523.44 to</b><br><b>849.15)</b> | <b>903.86</b><br><b>(698.22 to</b><br><b>1,186.58)</b> | <b>13.54</b><br><b>(12.02 to</b><br><b>15.36)</b> | <b>21.24</b><br><b>(17.32 to</b><br><b>26.66)</b> | <b>19.59</b><br><b>(16.02 to</b><br><b>24.05)</b> | <b>23.56</b><br><b>(19.03 to</b><br><b>29.81)</b> |
| <b>Transport injuries</b>            | <b>178.02</b><br><b>(152.10 to</b><br><b>208.03)</b> | <b>267.08</b><br><b>(190.15 to</b><br><b>394.93)</b> | <b>214.13</b><br><b>(155.43 to</b><br><b>304.53)</b> | <b>332.77</b><br><b>(232.94 to</b><br><b>501.87)</b>   | <b>3.82</b><br><b>(3.32 to</b><br><b>4.42)</b>    | <b>6.79</b><br><b>(4.86 to</b><br><b>10.07)</b>   | <b>5.64</b><br><b>(4.17 to</b><br><b>8.04)</b>    | <b>8.03</b><br><b>(5.61 to</b><br><b>12.28)</b>   |
| Road injuries                        | 168.35<br>(144.45 to<br>196.91)                      | 250.05<br>(178.09 to<br>370.83)                      | 199.39<br>(145.07 to<br>284.07)                      | 312.12<br>(219.07 to<br>468.70)                        | 3.63<br>(3.16 to<br>4.19)                         | 6.40<br>(4.60 to<br>9.49)                         | 5.29<br>(3.93 to<br>7.52)                         | 7.57<br>(5.27 to<br>11.57)                        |
| Pedestrian road injuries             | 68.24<br>(56.12 to<br>82.60)                         | 90.09<br>(61.49 to<br>136.67)                        | 72.94<br>(50.92 to<br>106.03)                        | 111.07<br>(74.82 to<br>173.18)                         | 1.49<br>(1.24 to<br>1.78)                         | 2.37<br>(1.62 to<br>3.55)                         | 1.98<br>(1.39 to<br>2.86)                         | 2.79<br>(1.89 to<br>4.31)                         |
| <b>Ghana</b>                         |                                                      |                                                      |                                                      |                                                        |                                                   |                                                   |                                                   |                                                   |
| Cause                                | YLLs (in 1000s)                                      |                                                      |                                                      |                                                        | Deaths (in 1000s)                                 |                                                   |                                                   |                                                   |
|                                      | 2016                                                 | 2040 Forecast                                        | 2040 Better Scenario                                 | 2040 Worse Scenario                                    | 2016                                              | 2040 Forecast                                     | 2040 Better Scenario                              | 2040 Worse Scenario                               |
| Cyclist road injuries                | 7.94<br>(6.34 to<br>10.06)                           | 12.43<br>(8.30 to<br>18.85)                          | 10.02<br>(6.82 to<br>14.66)                          | 15.35<br>(10.18 to<br>23.61)                           | 0.17<br>(0.14 to<br>0.22)                         | 0.32<br>(0.22 to<br>0.49)                         | 0.27<br>(0.19 to<br>0.40)                         | 0.37<br>(0.25 to<br>0.58)                         |
| Motorcyclist road injuries           | 9.78<br>(7.71 to<br>13.93)                           | 17.26<br>(10.97 to<br>28.22)                         | 14.45<br>(9.39 to<br>23.09)                          | 20.68<br>(13.05 to<br>34.47)                           | 0.20<br>(0.17 to<br>0.27)                         | 0.42<br>(0.27 to<br>0.67)                         | 0.36<br>(0.24 to<br>0.56)                         | 0.47<br>(0.30 to<br>0.78)                         |
| Motor vehicle road injuries          | 78.30<br>(63.16 to<br>95.28)                         | 123.69<br>(86.11 to<br>183.92)                       | 96.76<br>(68.80 to<br>139.10)                        | 156.75<br>(108.41 to<br>237.04)                        | 1.68<br>(1.38 to<br>1.99)                         | 3.12<br>(2.18 to<br>4.67)                         | 2.55<br>(1.84 to<br>3.67)                         | 3.73<br>(2.54 to<br>5.68)                         |
| Other road injuries                  | 4.09<br>(2.75 to<br>5.29)                            | 6.58<br>(3.84 to<br>10.23)                           | 5.22<br>(3.07 to<br>7.81)                            | 8.27<br>(4.84 to<br>13.03)                             | 0.09<br>(0.06 to<br>0.11)                         | 0.17<br>(0.10 to<br>0.26)                         | 0.14<br>(0.08 to<br>0.21)                         | 0.20<br>(0.12 to<br>0.31)                         |
| Other transport injuries             | 9.67<br>(7.20 to<br>12.57)                           | 17.03<br>(10.62 to<br>27.78)                         | 14.74<br>(9.39 to<br>23.21)                          | 20.65<br>(12.99 to<br>34.02)                           | 0.19<br>(0.14 to<br>0.24)                         | 0.39<br>(0.24 to<br>0.65)                         | 0.35<br>(0.22 to<br>0.56)                         | 0.46<br>(0.28 to<br>0.78)                         |
| <b>Unintentional injuries</b>        | <b>331.89</b><br><b>(281.11 to</b><br><b>387.16)</b> | <b>317.99</b><br><b>(257.34 to</b><br><b>382.88)</b> | <b>292.57</b><br><b>(236.99 to</b><br><b>352.65)</b> | <b>376.95</b><br><b>(302.64 to</b><br><b>458.48)</b>   | <b>7.30</b><br><b>(6.30 to</b><br><b>8.29)</b>    | <b>10.23</b><br><b>(8.61 to</b><br><b>11.97)</b>  | <b>10.08</b><br><b>(8.46 to</b><br><b>11.72)</b>  | <b>10.92</b><br><b>(9.20 to</b><br><b>12.78)</b>  |
| Falls                                | 57.41<br>(46.56 to<br>69.07)                         | 81.21<br>(65.11 to<br>96.09)                         | 80.53<br>(64.49 to<br>94.99)                         | 85.50<br>(68.51 to<br>101.31)                          | 2.04<br>(1.65 to<br>2.36)                         | 4.17<br>(3.32 to<br>4.96)                         | 4.41<br>(3.50 to<br>5.23)                         | 4.02<br>(3.17 to<br>4.78)                         |
| Drowning                             | 49.27<br>(40.32 to<br>60.77)                         | 39.33<br>(28.75 to<br>53.04)                         | 34.69<br>(25.57 to<br>46.47)                         | 48.09<br>(34.74 to<br>65.40)                           | 0.91<br>(0.76 to<br>1.09)                         | 0.95<br>(0.72 to<br>1.29)                         | 0.87<br>(0.66 to<br>1.16)                         | 1.10<br>(0.82 to<br>1.49)                         |
| Fire, heat, and hot substances       | 33.26<br>(26.78 to<br>42.05)                         | 25.83<br>(19.19 to<br>35.04)                         | 22.57<br>(16.85 to<br>30.16)                         | 32.06<br>(23.33 to<br>43.41)                           | 0.74<br>(0.62 to<br>0.88)                         | 0.82<br>(0.62 to<br>1.10)                         | 0.76<br>(0.56 to<br>1.01)                         | 0.94<br>(0.69 to<br>1.27)                         |
| Poisonings                           | 18.69<br>(10.44 to<br>31.65)                         | 10.35<br>(5.66 to<br>16.52)                          | 8.50<br>(4.66 to<br>13.55)                           | 14.17<br>(7.67 to<br>23.59)                            | 0.35<br>(0.20 to<br>0.54)                         | 0.25<br>(0.14 to<br>0.38)                         | 0.21<br>(0.12 to<br>0.32)                         | 0.32<br>(0.18 to<br>0.49)                         |
| Exposure to mechanical forces        | 38.97<br>(31.87 to<br>48.30)                         | 31.52<br>(24.83 to<br>39.68)                         | 27.93<br>(21.79 to<br>35.25)                         | 39.46<br>(30.71 to<br>50.99)                           | 0.71<br>(0.61 to<br>0.84)                         | 0.77<br>(0.64 to<br>0.92)                         | 0.71<br>(0.59 to<br>0.86)                         | 0.89<br>(0.73 to<br>1.08)                         |
| Unintentional firearm injuries       | 12.03<br>(8.22 to<br>16.03)                          | 8.63<br>(5.61 to<br>12.16)                           | 7.57<br>(4.92 to<br>10.71)                           | 10.73<br>(7.06 to<br>15.27)                            | 0.23<br>(0.16 to<br>0.29)                         | 0.21<br>(0.14 to<br>0.28)                         | 0.19<br>(0.13 to<br>0.25)                         | 0.24<br>(0.16 to<br>0.33)                         |
| Unintentional suffocation            | 6.55<br>(4.15 to<br>10.87)                           | 3.77<br>(2.47 to<br>6.05)                            | 3.18<br>(2.11 to<br>5.16)                            | 5.49<br>(3.40 to<br>8.99)                              | 0.08<br>(0.06 to<br>0.13)                         | 0.05<br>(0.04 to<br>0.08)                         | 0.05<br>(0.03 to<br>0.07)                         | 0.08<br>(0.05 to<br>0.12)                         |

|                                                 |                                |                                 |                                 |                                 |                           |                           |                           |                           |
|-------------------------------------------------|--------------------------------|---------------------------------|---------------------------------|---------------------------------|---------------------------|---------------------------|---------------------------|---------------------------|
| Other exposure to mechanical forces             | 20.39<br>(16.57 to<br>25.85)   | 19.12<br>(15.11 to<br>23.97)    | 17.18<br>(13.49 to<br>21.45)    | 22.25<br>(18.24 to<br>29.51)    | 0.40<br>(0.34 to<br>0.48) | 0.51<br>(0.42 to<br>0.60) | 0.48<br>(0.39 to<br>0.57) | 0.57<br>(0.47 to<br>0.68) |
| Adverse effects of medical treatment            | 50.09<br>(37.77 to<br>61.91)   | 46.89<br>(33.65 to<br>60.48)    | 42.79<br>(30.66 to<br>55.04)    | 56.25<br>(40.70 to<br>73.52)    | 0.95<br>(0.72 to<br>1.13) | 1.16<br>(0.86 to<br>1.43) | 1.10<br>(0.81 to<br>1.37) | 1.29<br>(0.96 to<br>1.59) |
| Animal contact                                  | 25.11<br>(18.29 to<br>32.28)   | 26.71<br>(19.14 to<br>34.44)    | 23.16<br>(16.54 to<br>29.89)    | 34.19<br>(24.16 to<br>45.27)    | 0.57<br>(0.42 to<br>0.70) | 0.78<br>(0.57 to<br>0.98) | 0.71<br>(0.52 to<br>0.90) | 0.92<br>(0.68 to<br>1.16) |
| Venomous animal contact                         | 21.13<br>(14.98 to<br>26.99)   | 22.63<br>(15.76 to<br>29.18)    | 19.62<br>(13.69 to<br>25.34)    | 28.78<br>(19.74 to<br>37.93)    | 0.50<br>(0.36 to<br>0.61) | 0.68<br>(0.49 to<br>0.85) | 0.61<br>(0.44 to<br>0.77) | 0.80<br>(0.57 to<br>1.01) |
| Non-venomous animal contact                     | 3.98<br>(2.45 to<br>6.22)      | 4.08<br>(2.58 to<br>6.06)       | 3.53<br>(2.25 to<br>5.23)       | 5.42<br>(3.38 to<br>8.26)       | 0.07<br>(0.04 to<br>0.11) | 0.11<br>(0.07 to<br>0.16) | 0.10<br>(0.06 to<br>0.15) | 0.12<br>(0.08 to<br>0.18) |
| Foreign body                                    | 36.57<br>(26.26 to<br>49.05)   | 35.83<br>(26.92 to<br>48.42)    | 34.69<br>(26.24 to<br>46.40)    | 41.72<br>(30.13 to<br>58.47)    | 0.62<br>(0.48 to<br>0.79) | 0.84<br>(0.68 to<br>1.05) | 0.87<br>(0.70 to<br>1.07) | 0.88<br>(0.69 to<br>1.13) |
| Pulmonary aspiration and foreign body in airway | 34.40<br>(24.54 to<br>46.45)   | 33.68<br>(25.60 to<br>45.64)    | 32.72<br>(25.18 to<br>43.60)    | 39.15<br>(28.19 to<br>55.07)    | 0.58<br>(0.45 to<br>0.74) | 0.80<br>(0.65 to<br>1.00) | 0.83<br>(0.68 to<br>1.02) | 0.83<br>(0.66 to<br>1.07) |
| Foreign body in other body part                 | 2.17<br>(0.81 to<br>3.92)      | 2.15<br>(0.70 to<br>4.40)       | 1.97<br>(0.64 to<br>4.04)       | 2.56<br>(0.86 to<br>5.06)       | 0.04<br>(0.01 to<br>0.07) | 0.05<br>(0.01 to<br>0.10) | 0.04<br>(0.01 to<br>0.09) | 0.05<br>(0.02 to<br>0.10) |
| Environmental heat and cold exposure            | 9.83<br>(6.35 to<br>13.32)     | 10.21<br>(6.22 to<br>14.40)     | 8.59<br>(5.09 to<br>12.33)      | 13.30<br>(8.17 to<br>18.89)     | 0.19<br>(0.13 to<br>0.26) | 0.25<br>(0.16 to<br>0.34) | 0.21<br>(0.17 to<br>0.29) | 0.31<br>(0.20 to<br>0.42) |
| Other unintentional injuries                    | 12.68<br>(10.18 to<br>15.50)   | 10.12<br>(7.91 to<br>12.74)     | 9.12<br>(7.03 to<br>11.47)      | 12.22<br>(9.54 to<br>15.43)     | 0.23<br>(0.19 to<br>0.27) | 0.23<br>(0.18 to<br>0.28) | 0.21<br>(0.17 to<br>0.26) | 0.26<br>(0.21 to<br>0.32) |
| Self-harm and interpersonal violence            | 113.75<br>(82.10 to<br>206.42) | 173.91<br>(110.21 to<br>304.82) | 157.28<br>(102.65 to<br>274.72) | 193.62<br>(120.12 to<br>342.64) | 2.40<br>(1.80 to<br>4.07) | 4.22<br>(2.74 to<br>6.84) | 3.86<br>(2.58 to<br>6.21) | 4.60<br>(2.91 to<br>7.54) |

| Ghana                                                                        |                               |                                |                               |                                |                           |                           |                           |                           |
|------------------------------------------------------------------------------|-------------------------------|--------------------------------|-------------------------------|--------------------------------|---------------------------|---------------------------|---------------------------|---------------------------|
| Cause                                                                        | YLLs (in 1000s)               |                                |                               |                                | Deaths (in 1000s)         |                           |                           |                           |
|                                                                              | 2016                          | 2040 Forecast                  | 2040 Better Scenario          | 2040 Worse Scenario            | 2016                      | 2040 Forecast             | 2040 Better Scenario      | 2040 Worse Scenario       |
| Self-harm                                                                    | 57.32<br>(46.41 to<br>71.10)  | 106.96<br>(64.87 to<br>163.59) | 93.17<br>(57.17 to<br>138.14) | 122.29<br>(70.53 to<br>193.48) | 1.40<br>(1.14 to<br>1.70) | 2.92<br>(1.76 to<br>4.37) | 2.61<br>(1.65 to<br>3.82) | 3.24<br>(1.92 to<br>5.01) |
| Self-harm by firearm                                                         | 3.74<br>(2.46 to<br>5.29)     | 5.45<br>(2.80 to<br>9.81)      | 4.64<br>(2.46 to<br>8.00)     | 6.35<br>(3.26 to<br>11.81)     | 0.09<br>(0.06 to<br>0.12) | 0.15<br>(0.07 to<br>0.25) | 0.13<br>(0.07 to<br>0.21) | 0.17<br>(0.08 to<br>0.29) |
| Self-harm by other specified means                                           | 53.58<br>(43.12 to<br>66.51)  | 101.51<br>(61.25 to<br>155.40) | 88.52<br>(54.67 to<br>132.89) | 115.94<br>(67.07 to<br>183.59) | 1.31<br>(1.06 to<br>1.59) | 2.77<br>(1.68 to<br>4.20) | 2.48<br>(1.56 to<br>3.61) | 3.07<br>(1.82 to<br>4.77) |
| Interpersonal violence                                                       | 56.43<br>(31.54 to<br>147.04) | 66.95<br>(36.52 to<br>183.23)  | 64.12<br>(35.65 to<br>172.81) | 71.33<br>(37.93 to<br>201.10)  | 1.01<br>(0.57 to<br>2.61) | 1.30<br>(0.71 to<br>3.63) | 1.26<br>(0.70 to<br>3.42) | 1.36<br>(0.73 to<br>3.88) |
| Physical violence by firearm                                                 | 29.04<br>(15.79 to<br>81.89)  | 35.17<br>(18.42 to<br>101.09)  | 34.16<br>(18.20 to<br>96.10)  | 36.75<br>(18.68 to<br>108.76)  | 0.52<br>(0.28 to<br>1.46) | 0.66<br>(0.34 to<br>1.91) | 0.64<br>(0.34 to<br>1.82) | 0.68<br>(0.35 to<br>2.04) |
| Physical violence by sharp object                                            | 13.04<br>(6.46 to<br>40.05)   | 17.65<br>(8.58 to<br>55.33)    | 17.47<br>(8.67 to<br>53.90)   | 18.03<br>(8.61 to<br>57.75)    | 0.24<br>(0.12 to<br>0.74) | 0.35<br>(0.17 to<br>1.10) | 0.35<br>(0.18 to<br>1.08) | 0.35<br>(0.17 to<br>1.13) |
| Physical violence by other means                                             | 14.35<br>(7.61 to<br>35.69)   | 14.13<br>(7.03 to<br>38.36)    | 12.49<br>(6.40 to<br>33.39)   | 16.54<br>(8.03 to<br>45.52)    | 0.25<br>(0.14 to<br>0.63) | 0.29<br>(0.15 to<br>0.81) | 0.26<br>(0.13 to<br>0.71) | 0.33<br>(0.16 to<br>0.93) |
| Forces of nature, conflict and terrorism, and executions and police conflict | 0.25<br>(0.20 to<br>0.38)     | 0.48<br>(0.00 to<br>5.91)      | 0.48<br>(0.00 to<br>5.84)     | 0.51<br>(0.00 to<br>6.12)      | 0.01<br>(0.00 to<br>0.01) | 0.01<br>(0.00 to<br>0.11) | 0.01<br>(0.00 to<br>0.11) | 0.01<br>(0.00 to<br>0.11) |
| Exposure to forces of nature                                                 | 0.00<br>(0.00 to<br>0.00)     | 0.23<br>(0.00 to<br>1.90)      | 0.23<br>(0.00 to<br>1.85)     | 0.25<br>(0.00 to<br>2.07)      | 0.00<br>(0.00 to<br>0.00) | 0.00<br>(0.00 to<br>0.04) | 0.00<br>(0.00 to<br>0.04) | 0.00<br>(0.00 to<br>0.04) |



|                                                                          |                                                          |                                                          |                                                          |                                                           |                                                    |                                                    |                                                   |                                                    |
|--------------------------------------------------------------------------|----------------------------------------------------------|----------------------------------------------------------|----------------------------------------------------------|-----------------------------------------------------------|----------------------------------------------------|----------------------------------------------------|---------------------------------------------------|----------------------------------------------------|
| Conflict and terrorism                                                   | 0.00<br>(0.00 to<br>0.00)                                | 0.04<br>(0.00 to<br>0.38)                                | 0.04<br>(0.00 to<br>0.37)                                | 0.05<br>(0.00 to<br>0.40)                                 | 0.00<br>(0.00 to<br>0.00)                          | 0.00<br>(0.00 to<br>0.01)                          | 0.00<br>(0.00 to<br>0.01)                         | 0.00<br>(0.00 to<br>0.01)                          |
| Executions and police conflict                                           | 0.25<br>(0.20 to<br>0.38)                                | 0.21<br>(0.00 to<br>3.23)                                | 0.21<br>(0.00 to<br>3.18)                                | 0.22<br>(0.00 to<br>3.35)                                 | 0.01<br>(0.00 to<br>0.01)                          | 0.00<br>(0.00 to<br>0.06)                          | 0.00<br>(0.00 to<br>0.06)                         | 0.00<br>(0.00 to<br>0.06)                          |
| <b>Guinea</b>                                                            |                                                          |                                                          |                                                          |                                                           |                                                    |                                                    |                                                   |                                                    |
| Cause                                                                    | YLLs (actual counts)                                     |                                                          |                                                          |                                                           | Deaths (actual counts)                             |                                                    |                                                   |                                                    |
|                                                                          | 2016                                                     | 2040 Forecast                                            | 2040 Better Scenario                                     | 2040 Worse Scenario                                       | 2016                                               | 2040 Forecast                                      | 2040 Better Scenario                              | 2040 Worse Scenario                                |
| <b>All causes</b>                                                        | <b>6,320,060.90</b><br>(5,598,024.04 to<br>7,238,336.93) | <b>4,658,713.01</b><br>(3,704,199.89 to<br>5,833,652.34) | <b>3,603,749.32</b><br>(2,833,478.56 to<br>4,511,803.44) | <b>8,205,682.26</b><br>(6,587,029.71 to<br>10,170,647.24) | <b>115,624.59</b><br>(104,766.21 to<br>127,761.48) | <b>128,584.48</b><br>(107,395.82 to<br>153,772.01) | <b>104,105.50</b><br>(87,326.09 to<br>124,054.60) | <b>189,378.63</b><br>(158,908.22 to<br>224,382.11) |
| <b>Communicable, maternal, neonatal, and nutritional diseases</b>        | <b>4,547,577.06</b><br>(3,909,350.87 to<br>5,332,688.23) | <b>2,177,539.95</b><br>(1,622,435.83 to<br>2,851,724.17) | <b>1,511,974.44</b><br>(1,110,537.92 to<br>1,994,967.16) | <b>4,773,153.65</b><br>(3,655,576.81 to<br>6,214,409.79)  | <b>68,049.11</b><br>(60,067.82 to<br>77,484.31)    | <b>44,029.63</b><br>(33,280.55 to<br>58,738.79)    | <b>31,097.26</b><br>(23,410.81 to<br>41,357.00)   | <b>81,978.97</b><br>(62,094.58 to<br>106,147.42)   |
| <b>HIV/AIDS and tuberculosis</b>                                         | <b>455,362.82</b><br>(368,443.67 to<br>558,191.06)       | <b>362,812.70</b><br>(171,704.74 to<br>589,763.42)       | <b>235,007.03</b><br>(105,680.08 to<br>424,326.68)       | <b>736,040.63</b><br>(474,659.83 to<br>998,969.50)        | <b>10,488.38</b><br>(8,698.11 to<br>12,547.38)     | <b>8,326.35</b><br>(4,513.89 to<br>12,729.94)      | <b>5,541.10</b><br>(2,927.01 to<br>9,227.55)      | <b>16,445.17</b><br>(10,840.02 to<br>21,805.22)    |
| <b>Tuberculosis</b>                                                      | <b>188,724.00</b><br>(141,200.03 to<br>231,071.26)       | <b>81,751.03</b><br>(48,634.49 to<br>127,481.95)         | <b>61,387.29</b><br>(36,960.85 to<br>91,531.52)          | <b>166,898.24</b><br>(102,457.73 to<br>257,032.28)        | <b>5,259.97</b><br>(3,942.81 to<br>6,436.53)       | <b>2,583.75</b><br>(1,650.58 to<br>3,786.31)       | <b>2,030.55</b><br>(1,318.53 to<br>2,847.95)      | <b>4,905.65</b><br>(3,234.07 to<br>7,027.73)       |
| <b>HIV/AIDS</b>                                                          | <b>266,638.81</b><br>(189,764.84 to<br>359,880.55)       | <b>281,061.67</b><br>(92,319.23 to<br>509,283.50)        | <b>173,619.75</b><br>(44,557.68 to<br>372,609.12)        | <b>569,142.40</b><br>(312,815.04 to<br>831,510.69)        | <b>5,228.42</b><br>(3,828.75 to<br>6,937.92)       | <b>5,742.60</b><br>(1,983.47 to<br>10,254.07)      | <b>3,510.54</b><br>(879.26 to<br>7,344.58)        | <b>11,539.52</b><br>(6,381.09 to<br>16,741.87)     |
| <b>Diarrhea, lower respiratory, and other common infectious diseases</b> | <b>1,515,979.13</b><br>(1,246,364.37 to<br>1,859,394.46) | <b>881,780.68</b><br>(537,942.57 to<br>1,414,090.57)     | <b>491,611.16</b><br>(296,404.55 to<br>803,246.48)       | <b>1,914,564.65</b><br>(1,125,476.77 to<br>3,011,323.14)  | <b>24,436.66</b><br>(20,732.73 to<br>29,120.82)    | <b>21,686.44</b><br>(13,853.91 to<br>33,298.49)    | <b>13,387.06</b><br>(8,454.41 to<br>20,895.26)    | <b>36,802.60</b><br>(22,922.90 to<br>56,137.39)    |
| <b>Diarrheal diseases</b>                                                | <b>334,120.55</b><br>(227,853.46 to<br>484,915.95)       | <b>174,131.43</b><br>(54,589.08 to<br>440,299.36)        | <b>113,112.90</b><br>(29,271.67 to<br>293,890.01)        | <b>378,539.39</b><br>(144,604.64 to<br>834,156.66)        | <b>5,840.22</b><br>(4,032.21 to<br>8,761.22)       | <b>4,593.71</b><br>(1,101.32 to<br>12,358.92)      | <b>3,116.32</b><br>(713.61 to<br>8,841.66)        | <b>8,847.84</b><br>(2,583.96 to<br>21,129.71)      |
| <b>Intestinal infectious diseases</b>                                    | <b>21,736.80</b><br>(9,907.02 to<br>39,990.07)           | <b>25,098.33</b><br>(11,033.72 to<br>48,284.09)          | <b>22,605.45</b><br>(10,109.68 to<br>44,345.86)          | <b>38,840.00</b><br>(17,137.92 to<br>75,625.79)           | <b>308.05</b><br>(147.76 to<br>559.90)             | <b>377.08</b><br>(164.77 to<br>730.14)             | <b>342.49</b><br>(152.36 to<br>671.70)            | <b>561.10</b><br>(252.20 to<br>1,082.64)           |
| <b>Typhoid fever</b>                                                     | <b>17,912.03</b><br>(7,550.81 to<br>34,404.27)           | <b>20,148.66</b><br>(8,104.13 to<br>41,692.41)           | <b>18,192.53</b><br>(7,387.41 to<br>37,101.08)           | <b>30,884.72</b><br>(12,554.87 to<br>63,038.87)           | <b>254.55</b><br>(112.96 to<br>477.40)             | <b>303.08</b><br>(124.14 to<br>617.21)             | <b>276.06</b><br>(115.44 to<br>559.53)            | <b>446.22</b><br>(184.11 to<br>899.16)             |
| <b>Paratyphoid fever</b>                                                 | <b>3,500.60</b><br>(1,197.81 to<br>8,326.57)             | <b>4,859.31</b><br>(1,694.85 to<br>10,600.38)            | <b>4,344.13</b><br>(1,528.83 to<br>9,309.25)             | <b>7,727.70</b><br>(2,747.59 to<br>17,029.75)             | <b>49.46</b><br>(17.39 to<br>117.71)               | <b>72.50</b><br>(26.38 to<br>156.65)               | <b>65.21</b><br>(23.58 to<br>139.19)              | <b>111.48</b><br>(40.86 to<br>242.83)              |
| <b>Other intestinal infectious diseases</b>                              | <b>314.17</b><br>(89.65 to<br>897.28)                    | <b>90.36</b><br>(22.03 to<br>263.65)                     | <b>68.79</b><br>(18.21 to<br>188.35)                     | <b>236.58</b><br>(56.07 to<br>703.16)                     | <b>4.04</b><br>(1.23 to<br>10.88)                  | <b>1.50</b><br>(0.45 to<br>3.96)                   | <b>1.21</b><br>(0.37 to<br>3.06)                  | <b>3.40</b><br>(0.97 to<br>9.25)                   |
| <b>Lower respiratory infections</b>                                      | <b>736,966.55</b><br>(561,407.82 to<br>946,770.33)       | <b>464,454.37</b><br>(254,916.57 to<br>796,845.99)       | <b>231,171.51</b><br>(134,081.65 to<br>384,927.08)       | <b>1,051,696.31</b><br>(507,795.82 to<br>1,822,598.61)    | <b>12,523.48</b><br>(10,199.20 to<br>15,416.60)    | <b>13,272.36</b><br>(8,374.53 to<br>20,186.63)     | <b>7,579.85</b><br>(5,157.10 to<br>11,063.83)     | <b>21,226.12</b><br>(12,508.87 to<br>32,898.61)    |
| <b>Upper respiratory infections</b>                                      | <b>1,373.33</b><br>(422.83 to<br>3,192.92)               | <b>637.57</b><br>(192.49 to<br>1,548.92)                 | <b>477.45</b><br>(151.14 to<br>1,081.76)                 | <b>1,651.12</b><br>(455.90 to<br>4,310.92)                | <b>19.77</b><br>(8.08 to<br>41.00)                 | <b>12.55</b><br>(4.36 to<br>28.16)                 | <b>9.90</b><br>(3.54 to<br>20.93)                 | <b>27.75</b><br>(9.01 to<br>62.85)                 |
| <b>Otitis media</b>                                                      | <b>28.69</b><br>(13.25 to<br>65.96)                      | <b>6.69</b><br>(3.32 to<br>12.40)                        | <b>6.97</b><br>(3.44 to<br>12.74)                        | <b>7.25</b><br>(3.65 to<br>14.46)                         | <b>0.67</b><br>(0.38 to<br>1.17)                   | <b>0.36</b><br>(0.16 to<br>0.71)                   | <b>0.42</b><br>(0.17 to<br>0.84)                  | <b>0.31</b><br>(0.14 to<br>0.59)                   |
| <b>Meningitis</b>                                                        | <b>222,566.22</b><br>(158,036.19 to<br>320,294.85)       | <b>124,104.49</b><br>(75,473.39 to<br>195,914.77)        | <b>96,155.12</b><br>(62,900.42 to<br>150,079.61)         | <b>253,751.43</b><br>(138,019.01 to<br>420,904.66)        | <b>3,291.82</b><br>(2,448.71 to<br>4,598.80)       | <b>2,237.35</b><br>(1,467.12 to<br>3,475.59)       | <b>1,915.22</b><br>(1,278.20 to<br>2,997.24)      | <b>3,791.30</b><br>(2,256.03 to<br>6,110.95)       |
| <b>Pneumococcal meningitis</b>                                           | <b>16,766.79</b><br>(11,529.73 to<br>24,922.14)          | <b>7,935.34</b><br>(4,946.69 to<br>13,850.82)            | <b>6,792.03</b><br>(4,281.81 to<br>11,856.57)            | <b>12,158.06</b><br>(7,256.78 to<br>21,530.02)            | <b>285.13</b><br>(206.09 to<br>417.24)             | <b>187.29</b><br>(121.29 to<br>321.87)             | <b>171.86</b><br>(110.87 to<br>292.29)            | <b>239.57</b><br>(154.15 to<br>409.61)             |
| <b>H influenzae type B meningitis</b>                                    | <b>29,467.34</b><br>(19,872.09 to<br>44,301.62)          | <b>33,494.97</b><br>(10,242.51 to<br>78,573.03)          | <b>14,624.04</b><br>(6,581.51 to<br>30,529.62)           | <b>111,253.03</b><br>(26,340.01 to<br>267,623.94)         | <b>409.52</b><br>(289.34 to<br>595.71)             | <b>460.45</b><br>(178.29 to<br>1,008.39)           | <b>242.95</b><br>(132.90 to<br>449.24)            | <b>1,366.01</b><br>(361.21 to<br>3,211.87)         |
| <b>Meningococcal meningitis</b>                                          | <b>100,550.15</b><br>(70,503.87 to<br>144,215.22)        | <b>48,959.55</b><br>(29,750.21 to<br>81,706.54)          | <b>44,574.43</b><br>(27,565.21 to<br>72,726.75)          | <b>75,220.02</b><br>(46,609.61 to<br>120,764.82)          | <b>1,457.58</b><br>(1,050.15 to<br>2,062.54)       | <b>922.26</b><br>(585.87 to<br>1,532.35)           | <b>873.14</b><br>(554.55 to<br>1,444.28)          | <b>1,249.77</b><br>(806.99 to<br>1,999.81)         |

|                                                |                                                                      |                                                                  |                                                                  |                                                                  |                                                               |                                                            |                                                            |                                                             |
|------------------------------------------------|----------------------------------------------------------------------|------------------------------------------------------------------|------------------------------------------------------------------|------------------------------------------------------------------|---------------------------------------------------------------|------------------------------------------------------------|------------------------------------------------------------|-------------------------------------------------------------|
| Other meningitis                               | 75,781.95<br>(53,343.87 to<br>114,885.83)                            | 33,714.64<br>(21,642.98 to<br>51,574.38)                         | 30,164.62<br>(20,116.90 to<br>44,298.01)                         | 55,120.31<br>(35,331.17 to<br>84,386.88)                         | 1,139.60<br>(849.26 to<br>1,631.26)                           | 667.35<br>(462.56 to<br>980.30)                            | 627.28<br>(438.31 to<br>908.17)                            | 935.95<br>(631.24 to<br>1,388.67)                           |
| Encephalitis                                   | 9,785.79<br>(6,021.87 to<br>15,807.88)                               | 8,117.53<br>(4,591.88 to<br>13,494.88)                           | 7,032.32<br>(3,940.88 to<br>11,302.44)                           | 14,462.24<br>(8,178.27 to<br>24,362.17)                          | 146.27<br>(92.15 to<br>223.44)                                | 146.78<br>(88.73 to<br>223.88)                             | 132.61<br>(79.43 to<br>203.58)                             | 229.92<br>(136.78 to<br>363.07)                             |
| Diphtheria                                     | 974.01<br>(409.87 to<br>1,925.29)                                    | 205.14<br>(75.01 to<br>527.38)                                   | 94.00<br>(47.62 to<br>173.92)                                    | 610.72<br>(157.86 to<br>1,802.75)                                | 12.16<br>(5.39 to<br>23.36)                                   | 2.88<br>(1.17 to<br>6.68)                                  | 1.56<br>(0.81 to<br>2.89)                                  | 7.68<br>(2.20 to<br>21.69)                                  |
| Whooping cough                                 | 93,901.97<br>(8,691.90 to<br>304,819.84)                             | 72,126.03<br>(7,545.97 to<br>213,843.95)                         | 16,545.93<br>(1,331.99 to<br>57,412.32)                          | 139,940.10<br>(12,961.37 to<br>446,089.00)                       | 1,109.64<br>(102.61 to<br>3,603.46)                           | 856.70<br>(89.74 to<br>2,548.38)                           | 201.71<br>(16.62 to<br>699.66)                             | 1,655.76<br>(152.28 to<br>5,284.59)                         |
| Tetanus                                        | 19,755.55<br>(9,925.44 to<br>39,583.11)                              | 3,620.89<br>(1,469.04 to<br>8,721.18)                            | 1,389.80<br>(562.24 to<br>3,101.11)                              | 6,375.92<br>(2,471.80 to<br>16,302.99)                           | 272.97<br>(142.28 to<br>503.89)                               | 52.21<br>(22.29 to<br>117.80)                              | 26.54<br>(11.56 to<br>57.96)                               | 83.78<br>(34.86 to<br>200.66)                               |
| Measles                                        | 69,897.71<br>(24,152.59 to<br>159,840.60)                            | 7,329.26<br>(489.51 to<br>36,081.66)                             | 1,488.95<br>(241.26 to<br>5,510.49)                              | 23,911.17<br>(1,767.23 to<br>90,985.94)                          | 834.10<br>(287.63 to<br>1,902.39)                             | 87.80<br>(6.32 to<br>430.05)                               | 18.67<br>(3.19 to<br>66.08)                                | 284.03<br>(22.13 to<br>1,075.02)                            |
| <b>Guinea</b>                                  |                                                                      |                                                                  |                                                                  |                                                                  |                                                               |                                                            |                                                            |                                                             |
| Cause                                          | YLLs (actual counts)                                                 |                                                                  |                                                                  |                                                                  | Deaths (actual counts)                                        |                                                            |                                                            |                                                             |
|                                                | 2016                                                                 | 2040 Forecast                                                    | 2040 Better Scenario                                             | 2040 Worse Scenario                                              | 2016                                                          | 2040 Forecast                                              | 2040 Better Scenario                                       | 2040 Worse Scenario                                         |
| Varicella and herpes zoster                    | 4,881.96<br>(2,809.73 to<br>7,969.56)                                | 1,948.94<br>(1,008.33 to<br>3,415.25)                            | 1,530.76<br>(853.95 to<br>2,597.99)                              | 4,769.99<br>(2,367.67 to<br>8,888.31)                            | 77.51<br>(51.10 to<br>115.10)                                 | 46.67<br>(27.82 to<br>73.53)                               | 41.76<br>(25.65 to<br>64.43)                               | 87.03<br>(50.86 to<br>141.20)                               |
| <b>Neglected tropical diseases and malaria</b> | <b>1,209,966.59</b><br><b>(953,646.85 to</b><br><b>1,514,893.31)</b> | <b>368,937.70</b><br><b>(282,726.51 to</b><br><b>477,087.09)</b> | <b>326,790.97</b><br><b>(253,671.49 to</b><br><b>420,526.37)</b> | <b>660,006.60</b><br><b>(494,083.86 to</b><br><b>848,753.05)</b> | <b>15,874.17</b><br><b>(12,717.67 to</b><br><b>19,476.20)</b> | <b>6,226.85</b><br><b>(4,954.23 to</b><br><b>8,011.73)</b> | <b>5,753.36</b><br><b>(4,534.79 to</b><br><b>7,406.80)</b> | <b>9,786.39</b><br><b>(7,661.33 to</b><br><b>12,327.34)</b> |
| Malaria                                        | 1,125,696.37<br>(863,527.77 to<br>1,423,100.87)                      | 321,286.58<br>(241,142.53 to<br>414,897.42)                      | 286,640.77<br>(218,733.81 to<br>369,516.52)                      | 561,668.01<br>(414,995.39 to<br>752,250.61)                      | 14,556.91<br>(11,482.38 to<br>18,104.19)                      | 5,393.17<br>(4,155.00 to<br>7,001.50)                      | 5,027.85<br>(3,885.99 to<br>6,511.47)                      | 8,251.51<br>(6,269.91 to<br>10,519.77)                      |
| Chagas disease                                 | 0.00<br>(0.00 to<br>0.00)                                            | 0.00<br>(0.00 to<br>0.00)                                        | 0.00<br>(0.00 to<br>0.00)                                        | 0.00<br>(0.00 to<br>0.00)                                        | 0.00<br>(0.00 to<br>0.00)                                     | 0.00<br>(0.00 to<br>0.00)                                  | 0.00<br>(0.00 to<br>0.00)                                  | 0.00<br>(0.00 to<br>0.00)                                   |
| Leishmaniasis                                  | 0.00<br>(0.00 to<br>0.00)                                            | 0.00<br>(0.00 to<br>0.00)                                        | 0.00<br>(0.00 to<br>0.00)                                        | 0.00<br>(0.00 to<br>0.00)                                        | 0.00<br>(0.00 to<br>0.00)                                     | 0.00<br>(0.00 to<br>0.00)                                  | 0.00<br>(0.00 to<br>0.00)                                  | 0.00<br>(0.00 to<br>0.00)                                   |
| African trypanosomiasis                        | 6,458.08<br>(2,492.37 to<br>13,905.57)                               | 757.43<br>(249.37 to<br>2,064.63)                                | 738.59<br>(240.09 to<br>2,000.39)                                | 840.57<br>(285.87 to<br>2,222.78)                                | 118.72<br>(46.80 to<br>247.37)                                | 14.68<br>(4.68 to<br>37.75)                                | 14.45<br>(4.61 to<br>37.58)                                | 15.68<br>(5.19 to<br>41.06)                                 |
| Schistosomiasis                                | 6,524.06<br>(4,576.35 to<br>9,006.40)                                | 4,853.26<br>(3,073.19 to<br>7,501.23)                            | 4,395.82<br>(2,803.82 to<br>6,765.26)                            | 6,560.82<br>(4,211.77 to<br>9,934.61)                            | 176.48<br>(123.20 to<br>246.96)                               | 148.19<br>(96.43 to<br>216.94)                             | 138.58<br>(90.65 to<br>209.17)                             | 188.20<br>(125.49 to<br>274.51)                             |
| Cysticercosis                                  | 184.18<br>(78.90 to<br>358.41)                                       | 86.57<br>(34.85 to<br>182.99)                                    | 80.72<br>(32.52 to<br>173.22)                                    | 110.46<br>(44.94 to<br>230.51)                                   | 3.54<br>(1.52 to<br>6.83)                                     | 1.95<br>(0.80 to<br>4.05)                                  | 1.84<br>(0.77 to<br>3.82)                                  | 2.34<br>(0.98 to<br>4.80)                                   |
| Cystic echinococcosis                          | 779.64<br>(546.82 to<br>1,098.53)                                    | 238.34<br>(156.97 to<br>359.95)                                  | 176.16<br>(113.11 to<br>264.69)                                  | 618.22<br>(408.87 to<br>913.88)                                  | 14.16<br>(10.13 to<br>19.66)                                  | 5.78<br>(3.89 to<br>8.46)                                  | 4.42<br>(2.93 to<br>6.49)                                  | 13.47<br>(9.04 to<br>19.48)                                 |
| Dengue                                         | 304.69<br>(13.95 to<br>1,276.03)                                     | 891.94<br>(50.85 to<br>3,372.88)                                 | 813.64<br>(45.71 to<br>3,023.24)                                 | 1,442.46<br>(78.87 to<br>5,933.02)                               | 4.41<br>(0.23 to<br>18.03)                                    | 17.92<br>(0.97 to<br>63.94)                                | 17.24<br>(0.93 to<br>59.49)                                | 24.51<br>(1.42 to<br>95.31)                                 |
| Yellow fever                                   | 7,166.82<br>(1,406.38 to<br>21,264.25)                               | 2,733.42<br>(487.34 to<br>9,015.47)                              | 2,246.39<br>(404.67 to<br>7,301.37)                              | 5,187.00<br>(934.44 to<br>15,931.04)                             | 113.40<br>(22.25 to<br>335.80)                                | 45.84<br>(8.43 to<br>148.41)                               | 37.93<br>(6.91 to<br>122.70)                               | 83.58<br>(15.50 to<br>257.90)                               |
| Rabies                                         | 7,602.99<br>(2,661.61 to<br>14,939.76)                               | 2,478.29<br>(730.00 to<br>5,338.94)                              | 1,679.77<br>(516.16 to<br>3,568.73)                              | 8,411.92<br>(2,730.08 to<br>16,919.57)                           | 121.22<br>(41.52 to<br>230.79)                                | 44.48<br>(12.50 to<br>95.38)                               | 30.36<br>(9.15 to<br>63.93)                                | 142.89<br>(43.65 to<br>289.39)                              |
| Intestinal nematode infections                 | 9,585.05<br>(5,654.49 to<br>15,834.81)                               | 9,757.81<br>(5,685.97 to<br>16,579.01)                           | 8,748.04<br>(5,183.48 to<br>15,003.52)                           | 17,081.87<br>(9,833.75 to<br>29,069.92)                          | 117.60<br>(70.96 to<br>191.49)                                | 125.41<br>(76.48 to<br>206.83)                             | 113.79<br>(70.06 to<br>190.84)                             | 212.55<br>(125.76 to<br>355.32)                             |
| Other neglected tropical diseases              | 47,535.14<br>(26,229.97 to<br>82,888.73)                             | 25,854.06<br>(15,654.98 to<br>40,488.75)                         | 21,271.07<br>(13,057.84 to<br>33,191.26)                         | 58,085.27<br>(34,163.18 to<br>94,196.38)                         | 644.73<br>(377.98 to<br>1,079.19)                             | 429.43<br>(272.60 to<br>630.87)                            | 366.88<br>(233.66 to<br>531.85)                            | 851.65<br>(534.45 to<br>1,294.12)                           |

|                                                          |                                               |                                             |                                             |                                                 |                                         |                                       |                                       |                                         |
|----------------------------------------------------------|-----------------------------------------------|---------------------------------------------|---------------------------------------------|-------------------------------------------------|-----------------------------------------|---------------------------------------|---------------------------------------|-----------------------------------------|
|                                                          | 134,374.07<br>(109,383.70 to<br>162,535.27)   | 86,654.67<br>(46,050.81 to<br>143,877.96)   | 66,370.07<br>(37,065.72 to<br>105,885.00)   | 177,448.96<br>(101,073.68 to<br>273,091.69)     | 2,440.94<br>(1,976.43 to<br>2,963.54)   | 1,622.70<br>(859.04 to<br>2,688.17)   | 1,243.23<br>(696.97 to<br>1,972.03)   | 3,300.09<br>(1,862.05 to<br>5,063.76)   |
| <b>Maternal disorders</b>                                |                                               |                                             |                                             |                                                 |                                         |                                       |                                       |                                         |
| Maternal hemorrhage                                      | 40,904.20<br>(29,295.26 to<br>54,745.41)      | 25,575.17<br>(13,107.87 to<br>44,309.24)    | 19,781.31<br>(10,336.95 to<br>33,662.53)    | 50,796.60<br>(26,979.12 to<br>84,091.82)        | 756.15<br>(540.70 to<br>1,011.71)       | 485.15<br>(246.67 to<br>833.75)       | 375.33<br>(193.93 to<br>636.31)       | 959.36<br>(503.95 to<br>1,580.83)       |
| Maternal sepsis and other maternal infections            | 5,995.61<br>(2,701.77 to<br>10,971.46)        | 3,491.27<br>(1,250.84 to<br>7,238.08)       | 2,693.74<br>(1,027.56 to<br>5,393.06)       | 7,103.75<br>(2,682.75 to<br>14,171.31)          | 109.96<br>(50.74 to<br>195.98)          | 65.72<br>(23.86 to<br>135.98)         | 50.73<br>(19.28 to<br>101.35)         | 132.93<br>(50.76 to<br>264.20)          |
| Maternal hypertensive disorders                          | 23,014.39<br>(16,178.20 to<br>31,470.91)      | 14,614.04<br>(7,229.14 to<br>25,469.82)     | 11,257.02<br>(5,822.88 to<br>19,152.90)     | 29,516.20<br>(15,852.88 to<br>48,220.73)        | 408.80<br>(289.66 to<br>556.94)         | 267.37<br>(132.71 to<br>460.82)       | 206.02<br>(106.96 to<br>350.13)       | 536.91<br>(291.57 to<br>872.11)         |
| Maternal obstructed labor and uterine rupture            | 5,028.32<br>(2,750.06 to<br>8,411.00)         | 3,245.69<br>(1,338.87 to<br>6,405.80)       | 2,460.97<br>(1,053.94 to<br>4,727.70)       | 6,781.25<br>(2,976.68 to<br>13,061.24)          | 93.05<br>(50.94 to<br>152.42)           | 61.56<br>(25.20 to<br>126.07)         | 46.69<br>(19.43 to<br>91.33)          | 128.07<br>(55.44 to<br>247.18)          |
| Maternal abortion, miscarriage, and ectopic pregnancy    | 23,918.69<br>(14,202.45 to<br>35,628.45)      | 14,254.29<br>(6,205.91 to<br>28,546.71)     | 10,919.10<br>(4,917.22 to<br>21,105.75)     | 29,118.85<br>(13,282.73 to<br>55,670.97)        | 429.63<br>(258.21 to<br>636.17)         | 264.53<br>(116.84 to<br>520.42)       | 202.68<br>(92.33 to<br>393.73)        | 536.85<br>(243.93 to<br>1,037.31)       |
| Indirect maternal deaths                                 | 22,160.98<br>(15,509.36 to<br>30,067.14)      | 14,388.24<br>(6,979.34 to<br>25,866.45)     | 11,100.80<br>(5,674.25 to<br>18,979.14)     | 30,868.45<br>(15,945.95 to<br>52,342.72)        | 397.40<br>(276.76 to<br>538.97)         | 264.73<br>(129.12 to<br>476.50)       | 204.39<br>(104.31 to<br>350.19)       | 562.42<br>(292.33 to<br>960.86)         |
| Late maternal deaths                                     | 1,635.88<br>(812.24 to<br>2,947.16)           | 824.02<br>(318.93 to<br>1,753.04)           | 633.51<br>(253.32 to<br>1,285.29)           | 1,741.09<br>(723.18 to<br>3,477.95)             | 29.64<br>(14.60 to<br>53.40)            | 15.41<br>(5.91 to<br>32.51)           | 11.85<br>(4.73 to<br>24.20)           | 32.25<br>(12.95 to<br>64.14)            |
| Maternal deaths aggravated by HIV/AIDS                   | 1,143.07<br>(590.95 to<br>1,752.64)           | 3,379.49<br>(1,200.94 to<br>6,743.85)       | 2,131.76<br>(330.87 to<br>4,939.15)         | 7,526.72<br>(3,393.46 to<br>13,890.98)          | 21.95<br>(11.41 to<br>33.28)            | 67.56<br>(24.40 to<br>133.18)         | 43.08<br>(7.22 to<br>95.59)           | 148.28<br>(67.98 to<br>269.82)          |
| Other maternal disorders                                 | 10,572.93<br>(6,902.71 to<br>15,214.96)       | 6,882.46<br>(3,144.36 to<br>12,645.56)      | 5,391.86<br>(2,529.13 to<br>9,536.14)       | 13,996.06<br>(6,874.72 to<br>24,222.85)         | 194.37<br>(126.04 to<br>278.56)         | 130.68<br>(60.02 to<br>238.08)        | 102.46<br>(47.13 to<br>179.04)        | 263.00<br>(127.12 to<br>452.98)         |
| <b>Guinea</b>                                            |                                               |                                             |                                             |                                                 |                                         |                                       |                                       |                                         |
| Cause                                                    | YLLs (actual counts)                          |                                             |                                             |                                                 | Deaths (actual counts)                  |                                       |                                       |                                         |
|                                                          | 2016                                          | 2040 Forecast                               | 2040 Better Scenario                        | 2040 Worse Scenario                             | 2016                                    | 2040 Forecast                         | 2040 Better Scenario                  | 2040 Worse Scenario                     |
| <b>Neonatal disorders</b>                                | 968,610.56<br>(779,257.49 to<br>1,205,500.94) | 394,026.67<br>(261,112.59 to<br>550,206.28) | 322,368.68<br>(212,482.64 to<br>445,469.69) | 1,109,516.83<br>(744,875.22 to<br>1,523,613.05) | 11,190.93<br>(9,002.34 to<br>13,927.46) | 4,554.05<br>(3,019.82 to<br>6,360.39) | 3,725.79<br>(2,457.41 to<br>5,150.35) | 12,822.45<br>(8,610.83 to<br>17,611.45) |
| Neonatal preterm birth                                   | 307,414.66<br>(206,925.34 to<br>431,332.65)   | 107,457.15<br>(66,265.47 to<br>161,408.66)  | 84,166.94<br>(52,180.72 to<br>126,766.77)   | 331,880.69<br>(210,439.86 to<br>487,596.87)     | 3,551.46<br>(2,390.20 to<br>4,983.06)   | 1,241.85<br>(765.56 to<br>1,864.65)   | 972.71<br>(602.91 to<br>1,464.60)     | 3,834.88<br>(2,431.59 to<br>5,634.60)   |
| Neonatal encephalopathy due to birth asphyxia and trauma | 389,475.83<br>(263,997.49 to<br>541,712.39)   | 149,277.02<br>(81,421.98 to<br>249,007.94)  | 125,525.41<br>(69,714.83 to<br>209,226.93)  | 394,844.33<br>(217,219.56 to<br>655,770.01)     | 4,498.88<br>(3,049.03 to<br>6,257.61)   | 1,724.86<br>(941.02 to<br>2,876.81)   | 1,450.39<br>(805.65 to<br>2,416.88)   | 4,562.13<br>(2,511.58 to<br>7,577.36)   |
| Neonatal sepsis and other neonatal infections            | 174,619.18<br>(110,860.66 to<br>255,867.88)   | 98,954.60<br>(58,762.52 to<br>148,310.94)   | 82,093.98<br>(49,498.43 to<br>124,171.59)   | 267,913.51<br>(162,164.68 to<br>403,679.21)     | 2,018.10<br>(1,281.07 to<br>2,956.90)   | 1,144.03<br>(679.49 to<br>1,714.46)   | 949.07<br>(572.32 to<br>1,435.51)     | 3,097.18<br>(1,875.31 to<br>4,664.44)   |
| Hemolytic disease and other neonatal jaundice            | 27,725.20<br>(16,910.72 to<br>45,489.68)      | 6,858.56<br>(3,653.68 to<br>12,203.91)      | 5,490.60<br>(2,938.91 to<br>8,842.53)       | 20,514.21<br>(10,991.42 to<br>35,517.59)        | 320.48<br>(195.46 to<br>525.90)         | 79.31<br>(42.27 to<br>141.06)         | 63.49<br>(33.97 to<br>113.76)         | 257.19<br>(127.14 to<br>410.55)         |
| Other neonatal disorders                                 | 69,375.70<br>(43,958.52 to<br>103,468.52)     | 31,479.35<br>(17,294.10 to<br>53,274.57)    | 25,091.75<br>(13,860.37 to<br>43,254.95)    | 94,364.09<br>(52,803.74 to<br>162,749.51)       | 802.01<br>(508.07 to<br>1,196.00)       | 364.00<br>(200.06 to<br>616.29)       | 290.13<br>(160.42 to<br>500.10)       | 1,091.06<br>(610.48 to<br>1,881.16)     |
| <b>Nutritional deficiencies</b>                          | 146,741.67<br>(92,514.10 to<br>225,252.28)    | 44,813.91<br>(28,067.53 to<br>70,592.12)    | 36,432.89<br>(23,675.61 to<br>57,082.52)    | 102,046.50<br>(62,043.15 to<br>168,224.94)      | 2,056.44<br>(1,415.74 to<br>2,980.43)   | 912.12<br>(676.44 to<br>1,268.59)     | 819.39<br>(622.06 to<br>1,099.75)     | 1,650.24<br>(1,130.66 to<br>2,465.57)   |
| Protein-energy malnutrition                              | 137,080.90<br>(85,374.95 to<br>213,633.28)    | 37,994.84<br>(22,805.56 to<br>63,099.18)    | 30,650.78<br>(18,953.83 to<br>49,829.08)    | 89,251.99<br>(52,127.17 to<br>151,479.34)       | 1,877.15<br>(1,272.30 to<br>2,780.69)   | 749.19<br>(542.07 to<br>1,065.88)     | 670.42<br>(499.57 to<br>923.70)       | 1,399.01<br>(931.65 to<br>2,165.01)     |
| Iodine deficiency                                        | 1,094.86<br>(29.87 to<br>7,119.69)            | 1,516.90<br>(31.67 to<br>7,969.12)          | 1,204.33<br>(25.68 to<br>6,132.31)          | 3,680.30<br>(60.79 to<br>22,906.80)             | 16.30<br>(0.91 to<br>90.00)             | 31.97<br>(1.27 to<br>121.03)          | 27.72<br>(1.10 to<br>101.05)          | 61.77<br>(2.08 to<br>289.36)            |
| Dietary iron deficiency                                  | 258.73<br>(179.00 to<br>472.03)               | 297.35<br>(170.41 to<br>579.75)             | 269.55<br>(155.05 to<br>522.88)             | 416.34<br>(242.85 to<br>800.41)                 | 4.55<br>(3.07 to<br>10.84)              | 5.79<br>(3.16 to<br>15.16)            | 5.36<br>(2.87 to<br>14.74)            | 7.64<br>(4.34 to<br>19.60)              |

|                                                                         |                                                            |                                                            |                                                            |                                                            |                                                   |                                                   |                                                   |                                                    |
|-------------------------------------------------------------------------|------------------------------------------------------------|------------------------------------------------------------|------------------------------------------------------------|------------------------------------------------------------|---------------------------------------------------|---------------------------------------------------|---------------------------------------------------|----------------------------------------------------|
| Other nutritional deficiencies                                          | 8,307.18<br>(3,900.01 to<br>18,707.20)                     | 5,004.82<br>(2,633.31 to<br>8,938.93)                      | 4,308.23<br>(2,296.39 to<br>7,270.42)                      | 8,697.87<br>(4,095.11 to<br>17,415.36)                     | 158.44<br>(96.00 to<br>279.38)                    | 125.17<br>(79.77 to<br>181.05)                    | 115.88<br>(74.63 to<br>165.73)                    | 181.81<br>(108.31 to<br>293.36)                    |
| <b>Other communicable, maternal, neonatal, and nutritional diseases</b> | <b>116,542.23<br/>(68,856.78 to<br/>197,787.88)</b>        | <b>38,513.63<br/>(24,180.98 to<br/>59,969.71)</b>          | <b>33,393.63<br/>(20,920.92 to<br/>50,928.55)</b>          | <b>73,529.47<br/>(43,579.99 to<br/>119,727.05)</b>         | <b>1,561.59<br/>(1,005.99 to<br/>2,500.04)</b>    | <b>701.11<br/>(483.35 to<br/>1,003.47)</b>        | <b>627.35<br/>(434.95 to<br/>871.25)</b>          | <b>1,172.04<br/>(781.19 to<br/>1,727.88)</b>       |
| Sexually transmitted infections excluding HIV                           | 86,545.53<br>(42,276.98 to<br>163,948.75)                  | 16,231.99<br>(6,994.72 to<br>31,939.64)                    | 13,793.29<br>(5,971.75 to<br>27,294.35)                    | 37,139.30<br>(15,109.90 to<br>74,020.73)                   | 1,022.50<br>(504.06 to<br>1,928.47)               | 202.11<br>(93.38 to<br>388.22)                    | 172.82<br>(80.44 to<br>328.22)                    | 449.06<br>(190.96 to<br>885.14)                    |
| Syphilis                                                                | 85,557.89<br>(41,460.39 to<br>162,851.26)                  | 15,095.31<br>(5,901.24 to<br>30,755.36)                    | 12,745.10<br>(5,075.42 to<br>25,988.06)                    | 35,719.05<br>(13,631.83 to<br>72,782.32)                   | 1,003.14<br>(487.51 to<br>1,907.04)               | 179.47<br>(70.80 to<br>362.40)                    | 151.74<br>(61.48 to<br>307.70)                    | 421.28<br>(164.75 to<br>854.02)                    |
| Chlamydial infection                                                    | 204.41<br>(125.15 to<br>290.37)                            | 232.59<br>(121.24 to<br>378.74)                            | 214.34<br>(112.89 to<br>341.45)                            | 291.68<br>(156.68 to<br>467.44)                            | 3.93<br>(2.47 to<br>5.53)                         | 4.56<br>(2.51 to<br>7.25)                         | 4.24<br>(2.33 to<br>6.66)                         | 5.61<br>(3.06 to<br>8.78)                          |
| Gonococcal infection                                                    | 505.33<br>(311.85 to<br>712.61)                            | 585.79<br>(304.74 to<br>956.83)                            | 540.87<br>(283.14 to<br>881.45)                            | 728.09<br>(380.26 to<br>1,173.70)                          | 10.07<br>(6.39 to<br>14.11)                       | 11.85<br>(6.44 to<br>18.70)                       | 11.06<br>(6.05 to<br>17.28)                       | 14.45<br>(7.84 to<br>22.61)                        |
| Other sexually transmitted infections                                   | 277.91<br>(170.59 to<br>394.46)                            | 318.31<br>(170.05 to<br>511.40)                            | 292.98<br>(156.47 to<br>474.76)                            | 400.47<br>(215.76 to<br>638.80)                            | 5.37<br>(3.36 to<br>7.51)                         | 6.23<br>(3.42 to<br>9.83)                         | 5.78<br>(3.17 to<br>9.15)                         | 7.72<br>(4.23 to<br>11.97)                         |
| Acute hepatitis                                                         | 18,612.87<br>(15,412.89 to<br>22,149.90)                   | 15,637.46<br>(10,419.27 to<br>23,109.72)                   | 13,981.73<br>(9,325.48 to<br>20,639.09)                    | 22,056.68<br>(15,035.60 to<br>31,490.61)                   | 369.70<br>(306.19 to<br>441.56)                   | 351.73<br>(241.93 to<br>499.76)                   | 319.45<br>(221.11 to<br>450.76)                   | 473.47<br>(333.59 to<br>651.95)                    |
| Acute hepatitis A                                                       | 521.87<br>(63.52 to<br>1,222.39)                           | 235.91<br>(59.57 to<br>558.09)                             | 200.67<br>(52.83 to<br>476.77)                             | 467.49<br>(94.57 to<br>1,164.72)                           | 6.65<br>(1.21 to<br>15.09)                        | 3.98<br>(1.18 to<br>8.77)                         | 3.49<br>(1.08 to<br>7.71)                         | 6.98<br>(1.83 to<br>15.98)                         |
| Acute hepatitis B                                                       | 13,177.24<br>(10,464.24 to<br>16,311.39)                   | 11,938.96<br>(7,617.82 to<br>18,135.11)                    | 10,646.05<br>(6,800.86 to<br>16,114.55)                    | 16,395.24<br>(10,730.53 to<br>24,289.23)                   | 286.52<br>(230.55 to<br>349.03)                   | 282.37<br>(191.42 to<br>407.83)                   | 255.13<br>(172.01 to<br>367.47)                   | 376.62<br>(258.75 to<br>525.38)                    |
| Acute hepatitis C                                                       | 342.23<br>(240.31 to<br>468.22)                            | 411.78<br>(246.56 to<br>642.28)                            | 389.37<br>(232.59 to<br>604.55)                            | 491.42<br>(297.39 to<br>749.89)                            | 8.22<br>(5.67 to<br>11.52)                        | 10.95<br>(6.80 to<br>16.79)                       | 10.51<br>(6.55 to<br>16.21)                       | 12.55<br>(7.89 to<br>19.18)                        |
| Acute hepatitis E                                                       | 4,571.54<br>(3,325.66 to<br>6,127.91)                      | 3,050.80<br>(1,824.80 to<br>5,016.91)                      | 2,745.65<br>(1,633.58 to<br>4,501.11)                      | 4,702.53<br>(2,896.23 to<br>7,504.84)                      | 68.31<br>(49.61 to<br>89.61)                      | 54.42<br>(33.31 to<br>85.72)                      | 50.32<br>(31.26 to<br>79.86)                      | 77.33<br>(48.11 to<br>119.56)                      |
| Other unspecified infectious diseases                                   | 11,383.82<br>(4,701.31 to<br>32,703.22)                    | 6,644.18<br>(3,546.98 to<br>14,338.22)                     | 5,618.61<br>(3,099.78 to<br>11,370.05)                     | 14,333.49<br>(7,033.81 to<br>32,576.76)                    | 169.38<br>(87.92 to<br>412.14)                    | 147.28<br>(97.09 to<br>239.66)                    | 135.08<br>(92.90 to<br>215.51)                    | 249.51<br>(151.51 to<br>464.06)                    |
| <b>Non-communicable diseases</b>                                        | <b>1,422,003.35<br/>(1,188,748.40 to<br/>1,651,781.59)</b> | <b>2,075,133.16<br/>(1,570,041.75 to<br/>2,672,637.19)</b> | <b>1,709,754.04<br/>(1,323,147.95 to<br/>2,166,287.70)</b> | <b>2,898,173.05<br/>(2,195,361.87 to<br/>3,732,210.89)</b> | <b>40,888.86<br/>(35,836.20 to<br/>46,290.48)</b> | <b>75,026.51<br/>(62,077.88 to<br/>90,354.35)</b> | <b>63,641.95<br/>(53,600.64 to<br/>75,057.45)</b> | <b>96,153.65<br/>(79,047.74 to<br/>116,409.44)</b> |

**Guinea**

| Cause                      | YLLs (actual counts)                                 |                                                      |                                                      |                                                      | Deaths (actual counts)                         |                                                   |                                                   |                                                   |
|----------------------------|------------------------------------------------------|------------------------------------------------------|------------------------------------------------------|------------------------------------------------------|------------------------------------------------|---------------------------------------------------|---------------------------------------------------|---------------------------------------------------|
|                            | 2016                                                 | 2040 Forecast                                        | 2040 Better Scenario                                 | 2040 Worse Scenario                                  | 2016                                           | 2040 Forecast                                     | 2040 Better Scenario                              | 2040 Worse Scenario                               |
| <b>Neoplasms</b>           | <b>262,551.15<br/>(227,593.78 to<br/>304,004.77)</b> | <b>574,417.50<br/>(427,085.47 to<br/>763,123.82)</b> | <b>526,372.85<br/>(396,856.96 to<br/>684,687.96)</b> | <b>622,511.62<br/>(459,802.05 to<br/>843,641.33)</b> | <b>8,112.75<br/>(7,021.87 to<br/>9,359.54)</b> | <b>18,907.48<br/>(15,015.53 to<br/>23,796.92)</b> | <b>18,031.89<br/>(14,470.16 to<br/>22,312.35)</b> | <b>19,493.10<br/>(15,276.67 to<br/>25,179.16)</b> |
| Lip and oral cavity cancer | 5,029.43<br>(4,150.26 to<br>6,177.88)                | 11,189.93<br>(7,031.49 to<br>17,633.22)              | 8,872.57<br>(5,898.40 to<br>13,062.17)               | 14,284.54<br>(8,667.92 to<br>23,212.16)              | 148.78<br>(123.45 to<br>182.00)                | 334.51<br>(221.78 to<br>498.64)                   | 275.11<br>(194.64 to<br>388.93)                   | 414.78<br>(266.05 to<br>637.08)                   |
| Nasopharynx cancer         | 606.97<br>(455.59 to<br>763.90)                      | 1,465.64<br>(789.91 to<br>2,594.20)                  | 1,088.44<br>(627.66 to<br>1,810.85)                  | 1,991.36<br>(1,044.54 to<br>3,666.20)                | 15.99<br>(11.96 to<br>20.05)                   | 38.87<br>(21.96 to<br>64.75)                      | 29.68<br>(18.15 to<br>47.36)                      | 51.87<br>(28.50 to<br>89.88)                      |
| Other pharynx cancer       | 2,421.74<br>(1,923.71 to<br>2,986.40)                | 4,015.81<br>(2,786.84 to<br>5,686.31)                | 3,761.91<br>(2,633.04 to<br>5,237.36)                | 4,601.63<br>(3,168.39 to<br>6,580.87)                | 74.31<br>(58.47 to<br>91.45)                   | 127.08<br>(91.25 to<br>174.90)                    | 121.43<br>(88.24 to<br>164.60)                    | 142.24<br>(101.10 to<br>199.02)                   |
| Esophageal cancer          | 3,307.99<br>(2,742.77 to<br>4,020.96)                | 6,804.32<br>(3,848.92 to<br>11,438.17)               | 5,157.26<br>(3,207.97 to<br>8,041.86)                | 8,575.70<br>(4,621.50 to<br>15,045.01)               | 114.70<br>(96.45 to<br>136.49)                 | 239.35<br>(148.81 to<br>372.67)                   | 194.52<br>(132.49 to<br>280.68)                   | 286.60<br>(169.62 to<br>466.97)                   |
| Stomach cancer             | 20,051.13<br>(16,849.14 to<br>23,885.12)             | 26,814.03<br>(18,937.92 to<br>38,110.07)             | 25,017.29<br>(17,755.40 to<br>34,538.19)             | 31,035.60<br>(21,793.86 to<br>45,001.85)             | 663.32<br>(559.56 to<br>772.92)                | 933.53<br>(704.26 to<br>1,245.41)                 | 911.52<br>(693.33 to<br>1,202.37)                 | 1,033.47<br>(773.37 to<br>1,407.71)               |

|                                      |                                          |                                             |                                            |                                             |                                       |                                       |                                       |                                       |
|--------------------------------------|------------------------------------------|---------------------------------------------|--------------------------------------------|---------------------------------------------|---------------------------------------|---------------------------------------|---------------------------------------|---------------------------------------|
| Colon and rectum cancer              | 8,929.15<br>(7,344.72 to<br>10,967.21)   | 23,976.69<br>(16,192.27 to<br>34,102.13)    | 23,932.96<br>(16,196.32 to<br>33,907.21)   | 22,203.70<br>(15,081.98 to<br>31,481.58)    | 329.70<br>(272.19 to<br>403.18)       | 954.95<br>(676.27 to<br>1,346.56)     | 992.85<br>(704.76 to<br>1,395.93)     | 842.31<br>(596.61 to<br>1,180.48)     |
| Liver cancer                         | 69,455.64<br>(56,897.94 to<br>85,457.01) | 167,656.70<br>(106,929.29 to<br>270,190.85) | 148,356.01<br>(99,392.13 to<br>221,947.58) | 192,316.66<br>(116,014.98 to<br>324,498.70) | 1,967.91<br>(1,628.24 to<br>2,391.22) | 4,868.21<br>(3,287.04 to<br>7,318.67) | 4,460.45<br>(3,162.00 to<br>6,340.75) | 5,414.38<br>(3,446.15 to<br>8,634.15) |
| Liver cancer due to hepatitis B      | 40,081.56<br>(32,116.50 to<br>49,730.51) | 96,098.46<br>(60,283.23 to<br>157,329.97)   | 85,288.94<br>(56,141.93 to<br>131,087.13)  | 109,287.90<br>(65,244.19 to<br>186,636.63)  | 1,107.17<br>(899.77 to<br>1,367.39)   | 2,718.14<br>(1,786.44 to<br>4,159.99) | 2,491.73<br>(1,720.37 to<br>3,596.98) | 3,005.51<br>(1,863.84 to<br>4,885.66) |
| Liver cancer due to hepatitis C      | 4,544.71<br>(3,036.38 to<br>6,598.63)    | 11,182.44<br>(6,475.09 to<br>18,929.28)     | 10,243.26<br>(6,180.83 to<br>16,852.34)    | 12,390.13<br>(6,757.24 to<br>21,799.08)     | 152.60<br>(104.10 to<br>215.70)       | 388.86<br>(240.65 to<br>616.20)       | 373.13<br>(237.07 to<br>563.80)       | 412.33<br>(245.72 to<br>672.94)       |
| Liver cancer due to alcohol use      | 6,523.28<br>(4,938.90 to<br>8,411.43)    | 16,794.84<br>(9,938.35 to<br>28,690.10)     | 14,563.85<br>(9,064.79 to<br>23,414.11)    | 19,900.83<br>(11,200.16 to<br>36,149.23)    | 201.46<br>(155.26 to<br>255.93)       | 513.88<br>(327.23 to<br>811.05)       | 463.74<br>(307.51 to<br>691.66)       | 588.81<br>(353.69 to<br>975.46)       |
| Liver cancer due to other causes     | 18,306.09<br>(14,479.51 to<br>22,993.50) | 43,580.96<br>(26,644.47 to<br>71,613.36)    | 38,259.95<br>(24,657.98 to<br>60,298.30)   | 50,737.80<br>(29,526.37 to<br>87,573.92)    | 506.67<br>(400.31 to<br>629.48)       | 1,247.33<br>(803.55 to<br>1,934.65)   | 1,131.84<br>(763.84 to<br>1,678.09)   | 1,407.73<br>(863.49 to<br>2,298.20)   |
| Gallbladder and biliary tract cancer | 2,950.01<br>(1,871.45 to<br>4,322.72)    | 4,793.19<br>(3,015.31 to<br>7,092.49)       | 5,086.39<br>(3,175.53 to<br>7,624.23)      | 4,426.97<br>(2,795.55 to<br>6,469.37)       | 122.52<br>(79.01 to<br>176.76)        | 208.41<br>(138.05 to<br>297.02)       | 227.96<br>(149.91 to<br>326.99)       | 185.23<br>(122.15 to<br>263.16)       |
| Pancreatic cancer                    | 6,369.44<br>(5,352.28 to<br>7,599.87)    | 18,242.61<br>(13,978.19 to<br>23,774.51)    | 18,402.52<br>(14,174.07 to<br>23,599.39)   | 17,044.79<br>(12,888.98 to<br>22,404.39)    | 259.92<br>(218.54 to<br>308.79)       | 775.56<br>(623.23 to<br>971.18)       | 818.65<br>(655.61 to<br>1,019.42)     | 689.75<br>(552.89 to<br>873.48)       |
| Larynx cancer                        | 2,035.48<br>(1,450.76 to<br>2,539.63)    | 3,845.77<br>(1,969.80 to<br>7,008.50)       | 2,601.15<br>(1,455.71 to<br>4,301.46)      | 5,484.58<br>(2,650.28 to<br>10,137.17)      | 143.07<br>(56.34 to<br>92.25)         | 143.07<br>(81.78 to<br>238.12)        | 195.20<br>(65.97 to<br>158.94)        | 105.06<br>(105.06 to<br>344.84)       |
| Tracheal, bronchus, and lung cancer  | 17,258.19<br>(13,866.71 to<br>21,274.91) | 47,475.69<br>(25,497.87 to<br>81,024.06)    | 23,521.10<br>(13,660.88 to<br>38,287.32)   | 55,232.29<br>(29,306.25 to<br>93,164.52)    | 580.39<br>(474.51 to<br>708.32)       | 1,627.83<br>(945.17 to<br>2,658.12)   | 848.38<br>(543.39 to<br>1,311.99)     | 1,847.25<br>(1,038.38 to<br>3,026.90) |
| Malignant skin melanoma              | 2,353.37<br>(1,689.05 to<br>3,047.71)    | 6,286.39<br>(4,319.02 to<br>8,535.94)       | 6,937.95<br>(4,698.78 to<br>9,534.84)      | 5,223.34<br>(3,671.38 to<br>7,061.98)       | 91.04<br>(59.13 to<br>117.72)         | 262.72<br>(164.53 to<br>343.84)       | 301.28<br>(186.35 to<br>395.15)       | 208.17<br>(133.71 to<br>270.46)       |
| Non-melanoma skin cancer             | 634.01<br>(516.80 to<br>768.18)          | 1,405.74<br>(1,054.55 to<br>1,855.03)       | 1,421.73<br>(1,069.13 to<br>1,876.55)      | 1,511.44<br>(1,143.13 to<br>1,989.79)       | 23.03<br>(19.15 to<br>27.02)          | 58.12<br>(48.09 to<br>68.90)          | 62.32<br>(51.09 to<br>74.94)          | 57.94<br>(47.83 to<br>68.65)          |
| Breast cancer                        | 16,438.50<br>(12,147.20 to<br>21,516.81) | 38,670.62<br>(25,179.23 to<br>54,524.94)    | 38,557.01<br>(25,043.29 to<br>54,423.47)   | 38,756.75<br>(25,057.97 to<br>54,532.13)    | 506.86<br>(372.79 to<br>653.29)       | 1,235.50<br>(836.38 to<br>1,688.85)   | 1,251.81<br>(856.43 to<br>1,718.21)   | 1,209.40<br>(811.02 to<br>1,664.77)   |
| Cervical cancer                      | 33,567.49<br>(22,630.71 to<br>44,711.92) | 53,840.83<br>(33,614.53 to<br>78,198.38)    | 51,867.58<br>(32,528.31 to<br>75,054.09)   | 61,386.33<br>(39,020.49 to<br>87,701.22)    | 1,013.94<br>(709.29 to<br>1,331.28)   | 1,636.21<br>(1,059.51 to<br>2,304.15) | 1,604.10<br>(1,041.17 to<br>2,260.09) | 1,825.10<br>(1,196.36 to<br>2,529.79) |
| Uterine cancer                       | 2,655.89<br>(2,004.14 to<br>3,441.67)    | 5,056.67<br>(3,594.85 to<br>6,878.50)       | 4,947.12<br>(3,523.43 to<br>6,737.75)      | 5,761.31<br>(4,187.87 to<br>7,745.65)       | 100.32<br>(76.08 to<br>129.11)        | 200.97<br>(151.05 to<br>265.37)       | 202.37<br>(150.82 to<br>267.19)       | 220.52<br>(168.36 to<br>288.62)       |
| Ovarian cancer                       | 3,789.91<br>(2,907.91 to<br>4,836.89)    | 10,410.80<br>(7,314.69 to<br>14,326.56)     | 10,770.64<br>(7,536.00 to<br>14,848.31)    | 9,224.01<br>(6,426.54 to<br>12,752.54)      | 115.82<br>(87.65 to<br>147.30)        | 327.28<br>(231.75 to<br>441.99)       | 342.87<br>(244.33 to<br>459.60)       | 284.06<br>(199.90 to<br>384.49)       |
| Prostate cancer                      | 7,391.61<br>(4,972.34 to<br>9,235.03)    | 22,076.94<br>(15,503.66 to<br>27,101.37)    | 24,273.83<br>(17,198.54 to<br>30,407.40)   | 19,330.74<br>(13,436.80 to<br>25,742.74)    | 381.78<br>(272.12 to<br>474.37)       | 1,246.78<br>(942.98 to<br>1,532.21)   | 1,422.64<br>(1,087.08 to<br>1,751.81) | 1,044.94<br>(765.63 to<br>1,265.80)   |
| Testicular cancer                    | 1,259.85<br>(876.95 to<br>1,717.32)      | 1,839.11<br>(1,107.56 to<br>2,857.92)       | 1,817.41<br>(1,110.00 to<br>2,818.88)      | 2,033.06<br>(1,235.60 to<br>3,178.65)       | 29.17<br>(21.04 to<br>38.84)          | 48.43<br>(33.06 to<br>68.42)          | 50.04<br>(34.21 to<br>70.66)          | 50.45<br>(34.37 to<br>71.26)          |

| Guinea         |                                       |                                         |                                         |                                         |                                 |                                 |                                 |                                 |
|----------------|---------------------------------------|-----------------------------------------|-----------------------------------------|-----------------------------------------|---------------------------------|---------------------------------|---------------------------------|---------------------------------|
| Cause          | YLLs (actual counts)                  |                                         |                                         |                                         | Deaths (actual counts)          |                                 |                                 |                                 |
|                | 2016                                  | 2040 Forecast                           | 2040 Better Scenario                    | 2040 Worse Scenario                     | 2016                            | 2040 Forecast                   | 2040 Better Scenario            | 2040 Worse Scenario             |
| Kidney cancer  | 2,841.13<br>(2,068.27 to<br>3,509.24) | 8,299.02<br>(4,666.85 to<br>12,250.48)  | 8,328.34<br>(4,830.42 to<br>11,962.82)  | 7,684.26<br>(4,492.15 to<br>11,565.18)  | 87.27<br>(62.08 to<br>111.08)   | 271.99<br>(166.33 to<br>389.92) | 282.36<br>(180.39 to<br>397.97) | 240.30<br>(143.77 to<br>352.56) |
| Bladder cancer | 5,122.22<br>(4,228.24 to<br>6,309.85) | 11,127.52<br>(8,123.69 to<br>15,764.74) | 10,508.47<br>(7,792.20 to<br>14,575.27) | 11,749.71<br>(8,368.79 to<br>16,970.20) | 213.10<br>(176.48 to<br>262.19) | 492.74<br>(380.48 to<br>661.23) | 494.55<br>(389.60 to<br>652.14) | 490.69<br>(369.39 to<br>673.90) |

|                                 |                                                                  |                                                                  |                                                                  |                                                                    |                                                               |                                                               |                                                               |                                                               |
|---------------------------------|------------------------------------------------------------------|------------------------------------------------------------------|------------------------------------------------------------------|--------------------------------------------------------------------|---------------------------------------------------------------|---------------------------------------------------------------|---------------------------------------------------------------|---------------------------------------------------------------|
| Brain and nervous system cancer | 7,100.57<br>(5,829.16 to<br>9,072.41)                            | 17,290.30<br>(13,255.27 to<br>22,807.69)                         | 18,111.61<br>(13,670.98 to<br>24,031.83)                         | 17,085.60<br>(13,333.45 to<br>22,327.07)                           | 193.13<br>(153.15 to<br>250.42)                               | 546.88<br>(391.44 to<br>742.70)                               | 591.58<br>(413.75 to<br>822.37)                               | 499.46<br>(371.23 to<br>662.61)                               |
| Thyroid cancer                  | 1,186.94<br>(844.42 to<br>1,493.38)                              | 2,158.02<br>(1,373.31 to<br>3,167.50)                            | 2,041.30<br>(1,298.88 to<br>2,976.71)                            | 2,506.89<br>(1,586.66 to<br>3,710.51)                              | 65.10<br>(25.79 to<br>42.73)                                  | 34.07<br>(45.29 to<br>91.62)                                  | 63.09<br>(44.36 to<br>87.41)                                  | 73.26<br>(50.45 to<br>103.88)                                 |
| Mesothelioma                    | 359.18<br>(270.57 to<br>515.34)                                  | 778.92<br>(531.39 to<br>1,160.42)                                | 780.90<br>(531.39 to<br>1,165.72)                                | 828.66<br>(562.49 to<br>1,243.19)                                  | 11.84<br>(9.07 to<br>17.18)                                   | 27.11<br>(19.90 to<br>38.63)                                  | 28.25<br>(20.53 to<br>40.09)                                  | 27.43<br>(20.04 to<br>39.52)                                  |
| Hodgkin lymphoma                | 1,805.77<br>(1,058.26 to<br>2,480.75)                            | 1,883.93<br>(1,029.33 to<br>2,852.80)                            | 1,727.52<br>(953.11 to<br>2,596.64)                              | 2,665.53<br>(1,428.94 to<br>4,051.38)                              | 35.74<br>(22.17 to<br>46.63)                                  | 40.86<br>(24.27 to<br>58.51)                                  | 38.00<br>(22.75 to<br>54.18)                                  | 54.97<br>(31.97 to<br>78.66)                                  |
| Non-Hodgkin lymphoma            | 7,572.63<br>(6,495.34 to<br>8,893.27)                            | 16,238.59<br>(12,553.13 to<br>21,260.84)                         | 16,816.88<br>(12,893.05 to<br>22,057.13)                         | 16,195.58<br>(12,669.45 to<br>21,081.00)                           | 183.73<br>(156.22 to<br>217.98)                               | 458.68<br>(359.85 to<br>578.29)                               | 491.81<br>(383.58 to<br>627.44)                               | 424.07<br>(335.95 to<br>528.79)                               |
| Multiple myeloma                | 2,149.56<br>(1,680.30 to<br>2,762.77)                            | 6,017.16<br>(4,335.20 to<br>8,457.68)                            | 6,296.86<br>(4,551.92 to<br>8,805.91)                            | 5,451.84<br>(3,974.73 to<br>7,694.24)                              | 75.38<br>(58.65 to<br>97.98)                                  | 218.22<br>(160.71 to<br>299.22)                               | 233.56<br>(173.22 to<br>319.38)                               | 192.10<br>(142.96 to<br>263.14)                               |
| Leukemia                        | 9,459.72<br>(7,823.51 to<br>11,410.73)                           | 17,434.80<br>(12,683.54 to<br>23,487.83)                         | 17,176.32<br>(12,593.19 to<br>22,872.31)                         | 18,642.40<br>(13,687.66 to<br>24,990.43)                           | 214.96<br>(178.10 to<br>254.30)                               | 456.30<br>(345.01 to<br>605.36)                               | 459.52<br>(344.71 to<br>597.56)                               | 459.53<br>(349.63 to<br>609.03)                               |
| Acute lymphoid leukemia         | 2,312.00<br>(1,780.80 to<br>3,004.82)                            | 3,918.29<br>(2,685.66 to<br>5,566.27)                            | 3,904.48<br>(2,669.43 to<br>5,553.22)                            | 4,283.33<br>(3,021.88 to<br>6,108.15)                              | 41.55<br>(32.52 to<br>52.33)                                  | 82.31<br>(56.71 to<br>110.79)                                 | 82.76<br>(56.27 to<br>111.71)                                 | 84.75<br>(59.52 to<br>114.31)                                 |
| Chronic lymphoid leukemia       | 561.24<br>(406.92 to<br>704.15)                                  | 1,114.91<br>(761.74 to<br>1,474.48)                              | 1,128.34<br>(762.67 to<br>1,503.20)                              | 1,099.89<br>(760.33 to<br>1,453.07)                                | 24.43<br>(17.55 to<br>30.53)                                  | 50.56<br>(35.35 to<br>64.82)                                  | 52.48<br>(36.31 to<br>67.56)                                  | 48.25<br>(33.85 to<br>62.32)                                  |
| Acute myeloid leukemia          | 3,814.81<br>(2,875.41 to<br>4,985.02)                            | 8,207.88<br>(5,642.59 to<br>11,485.83)                           | 8,225.80<br>(5,686.69 to<br>11,450.37)                           | 8,474.15<br>(5,862.47 to<br>11,726.64)                             | 75.81<br>(57.52 to<br>95.52)                                  | 196.81<br>(137.44 to<br>268.99)                               | 200.86<br>(139.72 to<br>273.11)                               | 189.35<br>(132.34 to<br>259.46)                               |
| Chronic myeloid leukemia        | 1,330.61<br>(1,010.63 to<br>1,698.04)                            | 1,724.75<br>(1,113.02 to<br>2,589.75)                            | 1,647.76<br>(1,074.00 to<br>2,442.62)                            | 1,812.67<br>(1,158.31 to<br>2,753.77)                              | 34.27<br>(26.88 to<br>42.45)                                  | 48.72<br>(34.43 to<br>68.13)                                  | 48.31<br>(34.40 to<br>66.13)                                  | 49.28<br>(34.40 to<br>70.58)                                  |
| Other leukemia                  | 1,441.05<br>(1,070.65 to<br>1,926.29)                            | 2,468.99<br>(1,535.02 to<br>3,939.70)                            | 2,269.94<br>(1,425.34 to<br>3,571.67)                            | 2,972.37<br>(1,879.50 to<br>4,674.01)                              | 2,972.37<br>(1,879.50 to<br>52.36)                            | 2,972.37<br>(1,879.50 to<br>118.84)                           | 75.10<br>(48.58 to<br>112.79)                                 | 87.90<br>(57.20 to<br>135.81)                                 |
| Other neoplasms                 | 18,447.65<br>(15,590.65 to<br>21,536.35)                         | 37,321.78<br>(28,217.81 to<br>49,327.27)                         | 38,194.00<br>(28,755.01 to<br>50,799.47)                         | 39,276.36<br>(30,412.36 to<br>50,577.80)                           | 448.72<br>(374.72 to<br>548.52)                               | 1,062.23<br>(845.15 to<br>1,338.88)                           | 1,127.45<br>(885.70 to<br>1,440.74)                           | 1,027.62<br>(828.61 to<br>1,280.97)                           |
| <b>Cardiovascular diseases</b>  | <b>383,835.35</b><br><b>(332,926.84 to</b><br><b>438,757.03)</b> | <b>598,791.83</b><br><b>(407,567.92 to</b><br><b>867,227.02)</b> | <b>362,000.23</b><br><b>(256,309.70 to</b><br><b>501,689.23)</b> | <b>978,265.55</b><br><b>(658,181.94 to</b><br><b>1,435,848.00)</b> | <b>15,492.82</b><br><b>(13,473.12 to</b><br><b>17,553.78)</b> | <b>27,412.99</b><br><b>(20,638.97 to</b><br><b>36,320.96)</b> | <b>18,419.75</b><br><b>(14,387.22 to</b><br><b>23,864.98)</b> | <b>41,142.87</b><br><b>(30,283.97 to</b><br><b>56,179.19)</b> |
| Rheumatic heart disease         | 11,835.46<br>(9,499.60 to<br>14,346.65)                          | 7,127.73<br>(4,913.44 to<br>10,114.35)                           | 6,519.12<br>(4,532.56 to<br>9,089.77)                            | 10,370.07<br>(7,132.58 to<br>14,584.52)                            | 343.95<br>(266.89 to<br>413.74)                               | 272.69<br>(203.25 to<br>359.77)                               | 264.90<br>(197.00 to<br>347.69)                               | 354.78<br>(263.49 to<br>464.14)                               |
| Ischemic heart disease          | 156,238.53<br>(132,124.13 to<br>181,347.84)                      | 280,436.90<br>(166,017.13 to<br>454,175.36)                      | 148,548.32<br>(87,959.51 to<br>248,155.95)                       | 469,799.84<br>(270,787.60 to<br>766,184.79)                        | 7,104.89<br>(6,087.13 to<br>8,189.85)                         | 13,685.18<br>(8,848.16 to<br>20,634.36)                       | 8,335.33<br>(5,520.15 to<br>12,534.82)                        | 21,186.27<br>(13,399.15 to<br>32,365.44)                      |
| Stroke                          | 147,327.23<br>(125,398.05 to<br>171,804.11)                      | 192,569.21<br>(116,246.24 to<br>309,654.46)                      | 100,176.01<br>(66,006.34 to<br>150,651.98)                       | 347,327.59<br>(208,305.53 to<br>561,496.81)                        | 5,774.31<br>(4,908.94 to<br>6,686.78)                         | 8,632.31<br>(5,901.67 to<br>12,643.32)                        | 5,201.83<br>(3,838.93 to<br>7,095.24)                         | 14,071.77<br>(9,375.94 to<br>21,261.15)                       |
| Ischemic stroke                 | 43,606.27<br>(36,199.47 to<br>51,705.30)                         | 61,476.31<br>(38,874.73 to<br>97,426.07)                         | 36,608.03<br>(24,507.32 to<br>55,617.44)                         | 93,635.68<br>(56,890.81 to<br>149,676.12)                          | 2,285.21<br>(1,900.56 to<br>2,675.29)                         | 3,641.03<br>(2,403.71 to<br>5,759.03)                         | 2,483.32<br>(1,756.23 to<br>3,768.45)                         | 5,077.33<br>(3,308.44 to<br>7,813.35)                         |
| Intracerebral hemorrhage        | 103,720.96<br>(87,723.65 to<br>121,949.26)                       | 131,092.89<br>(72,542.78 to<br>227,103.67)                       | 63,567.98<br>(39,280.58 to<br>103,418.60)                        | 253,691.90<br>(143,364.53 to<br>437,797.85)                        | 3,489.09<br>(2,941.99 to<br>4,101.84)                         | 4,991.28<br>(3,100.40 to<br>7,972.09)                         | 2,718.50<br>(1,870.88 to<br>4,029.75)                         | 8,994.44<br>(5,435.29 to<br>14,774.74)                        |
| Hypertensive heart disease      | 14,711.86<br>(7,443.06 to<br>21,127.65)                          | 23,726.84<br>(11,244.81 to<br>43,476.58)                         | 18,495.57<br>(9,263.00 to<br>31,403.50)                          | 31,803.99<br>(14,033.71 to<br>63,907.38)                           | 608.97<br>(315.06 to<br>868.31)                               | 1,114.17<br>(570.20 to<br>1,978.04)                           | 909.57<br>(495.82 to<br>1,469.02)                             | 1,393.45<br>(670.06 to<br>2,715.05)                           |
| Cardiomyopathy and myocarditis  | 6,457.42<br>(5,003.41 to<br>8,532.97)                            | 12,787.71<br>(8,298.85 to<br>20,384.39)                          | 12,618.88<br>(8,267.00 to<br>19,611.13)                          | 13,416.43<br>(8,742.85 to<br>21,358.78)                            | 169.70<br>(130.54 to<br>221.84)                               | 414.71<br>(279.35 to<br>609.85)                               | 432.00<br>(292.76 to<br>626.72)                               | 395.27<br>(269.53 to<br>584.74)                               |
| Myocarditis                     | 1,487.43<br>(1,019.98 to<br>2,160.06)                            | 2,157.87<br>(1,192.14 to<br>3,624.87)                            | 2,104.15<br>(1,158.17 to<br>3,508.82)                            | 2,539.75<br>(1,444.92 to<br>4,164.82)                              | 28.28<br>(18.90 to<br>40.55)                                  | 50.08<br>(28.57 to<br>81.97)                                  | 51.94<br>(29.35 to<br>84.05)                                  | 53.67<br>(31.24 to<br>86.20)                                  |

| Guinea                                                        |                                                |                                                  |                                                  |                                                  |                                            |                                            |                                            |                                            |
|---------------------------------------------------------------|------------------------------------------------|--------------------------------------------------|--------------------------------------------------|--------------------------------------------------|--------------------------------------------|--------------------------------------------|--------------------------------------------|--------------------------------------------|
| Cause                                                         | YLLs (actual counts)                           |                                                  |                                                  |                                                  | Deaths (actual counts)                     |                                            |                                            |                                            |
|                                                               | 2016                                           | 2040 Forecast                                    | 2040 Better Scenario                             | 2040 Worse Scenario                              | 2016                                       | 2040 Forecast                              | 2040 Better Scenario                       | 2040 Worse Scenario                        |
| Alcoholic cardiomyopathy                                      | 363.72<br>(218.29 to 556.34)                   | 864.86<br>(459.34 to 1,367.68)                   | 913.95<br>(483.52 to 1,448.80)                   | 772.47<br>(413.54 to 1,222.72)                   | 11.30<br>(6.78 to 17.56)                   | 28.00<br>(15.05 to 44.50)                  | 30.33<br>(16.40 to 47.90)                  | 24.33<br>(13.15 to 38.06)                  |
| Other cardiomyopathy                                          | 4,606.28<br>(3,526.74 to 6,086.41)             | 9,764.98<br>(6,172.12 to 15,921.23)              | 9,600.78<br>(6,180.08 to 15,506.91)              | 10,104.21<br>(6,384.35 to 16,681.31)             | 130.11<br>(102.31 to 169.06)               | 336.62<br>(222.56 to 507.12)               | 349.73<br>(232.06 to 519.37)               | 317.28<br>(210.69 to 481.30)               |
| Atrial fibrillation and flutter                               | 1,170.21<br>(892.21 to 1,513.03)               | 3,388.66<br>(2,608.97 to 4,416.74)               | 3,746.00<br>(2,882.36 to 4,833.34)               | 3,041.26<br>(2,308.84 to 4,058.34)               | 91.34<br>(70.51 to 117.44)                 | 299.31<br>(223.18 to 397.77)               | 351.55<br>(264.83 to 454.33)               | 248.23<br>(178.11 to 335.09)               |
| Aortic aneurysm                                               | 1,822.34<br>(1,354.53 to 2,511.11)             | 3,840.18<br>(2,641.88 to 5,741.59)               | 3,768.28<br>(2,608.22 to 5,615.66)               | 3,818.43<br>(2,605.36 to 5,797.17)               | 74.71<br>(56.98 to 101.36)                 | 175.66<br>(130.36 to 244.23)               | 184.20<br>(139.11 to 255.44)               | 163.16<br>(119.32 to 228.35)               |
| Peripheral artery disease                                     | 65.77<br>(41.61 to 114.72)                     | 296.95<br>(177.72 to 564.04)                     | 313.22<br>(187.64 to 578.76)                     | 230.33<br>(138.74 to 416.40)                     | 3.87<br>(2.48 to 6.39)                     | 19.80<br>(12.04 to 36.39)                  | 22.47<br>(13.71 to 40.95)                  | 14.26<br>(8.75 to 25.63)                   |
| Endocarditis                                                  | 5,938.59<br>(4,592.75 to 7,712.32)             | 10,449.46<br>(7,145.71 to 15,914.33)             | 9,985.90<br>(6,846.83 to 14,848.74)              | 12,514.24<br>(8,629.91 to 18,999.01)             | 147.19<br>(118.32 to 182.24)               | 335.43<br>(239.04 to 469.22)               | 338.19<br>(240.03 to 470.74)               | 352.14<br>(252.86 to 490.98)               |
| Other cardiovascular and circulatory diseases                 | 38,267.94<br>(29,392.42 to 53,440.83)          | 64,168.20<br>(43,941.54 to 93,445.62)            | 57,828.93<br>(40,463.80 to 82,474.88)            | 85,943.38<br>(58,597.90 to 125,179.92)           | 1,173.88<br>(899.98 to 1,672.62)           | 2,463.73<br>(1,824.68 to 3,466.82)         | 2,379.71<br>(1,797.94 to 3,301.39)         | 2,963.51<br>(2,163.89 to 4,155.36)         |
| <b>Chronic respiratory diseases</b>                           | <b>70,499.80<br/>(57,388.42 to 86,867.33)</b>  | <b>91,886.91<br/>(57,341.15 to 154,441.00)</b>   | <b>60,095.48<br/>(41,325.88 to 88,343.77)</b>    | <b>130,906.54<br/>(79,475.28 to 222,511.15)</b>  | <b>2,648.18<br/>(2,157.58 to 3,270.93)</b> | <b>3,883.26<br/>(2,509.04 to 6,351.48)</b> | <b>2,648.82<br/>(1,901.53 to 3,829.87)</b> | <b>5,111.38<br/>(3,239.61 to 8,571.33)</b> |
| Chronic obstructive pulmonary disease                         | 37,965.87<br>(28,748.79 to 47,234.21)          | 59,297.52<br>(30,980.00 to 114,555.08)           | 30,975.87<br>(18,157.16 to 53,835.58)            | 88,904.60<br>(45,356.82 to 172,758.87)           | 1,655.71<br>(1,269.91 to 2,042.41)         | 2,752.99<br>(1,529.47 to 5,138.01)         | 1,585.90<br>(981.01 to 2,591.32)           | 3,768.05<br>(2,039.80 to 7,009.75)         |
| Pneumoconiosis                                                | 90.07<br>(65.01 to 129.66)                     | 112.74<br>(75.16 to 161.96)                      | 107.72<br>(70.28 to 157.65)                      | 119.02<br>(79.71 to 168.52)                      | 3.23<br>(2.38 to 4.44)                     | 4.95<br>(3.61 to 6.78)                     | 4.91<br>(3.48 to 6.78)                     | 5.01<br>(3.62 to 6.95)                     |
| Silicosis                                                     | 11.96<br>(5.39 to 21.37)                       | 9.79<br>(4.30 to 18.74)                          | 9.77<br>(4.26 to 18.70)                          | 10.60<br>(4.82 to 19.86)                         | 0.39<br>(0.19 to 0.69)                     | 0.38<br>(0.19 to 0.67)                     | 0.40<br>(0.19 to 0.72)                     | 0.39<br>(0.20 to 0.67)                     |
| Asbestosis                                                    | 17.41<br>(11.29 to 27.74)                      | 28.41<br>(17.34 to 46.09)                        | 29.09<br>(17.35 to 47.03)                        | 27.79<br>(16.92 to 45.30)                        | 0.44<br>(0.29 to 0.69)                     | 0.83<br>(0.52 to 1.31)                     | 0.88<br>(0.53 to 1.39)                     | 0.78<br>(0.50 to 1.25)                     |
| Coal workers pneumoconiosis                                   | 5.24<br>(1.94 to 9.49)                         | 5.27<br>(1.88 to 10.72)                          | 4.32<br>(1.54 to 8.80)                           | 7.28<br>(2.72 to 14.34)                          | 0.21<br>(0.08 to 0.36)                     | 0.24<br>(0.09 to 0.46)                     | 0.21<br>(0.07 to 0.39)                     | 0.32<br>(0.12 to 0.62)                     |
| Other pneumoconiosis                                          | 55.47<br>(38.65 to 81.15)                      | 69.26<br>(45.64 to 98.75)                        | 64.54<br>(41.16 to 93.70)                        | 73.34<br>(48.32 to 104.30)                       | 2.19<br>(1.56 to 3.05)                     | 3.51<br>(2.45 to 4.87)                     | 3.44<br>(2.37 to 4.79)                     | 3.52<br>(2.43 to 4.97)                     |
| Asthma                                                        | 24,371.71<br>(18,846.32 to 31,506.32)          | 18,283.74<br>(11,608.82 to 27,834.56)            | 15,602.30<br>(10,199.65 to 22,891.78)            | 25,193.78<br>(15,843.60 to 38,261.47)            | 770.98<br>(593.13 to 1,010.28)             | 670.76<br>(457.14 to 905.06)               | 603.47<br>(418.63 to 864.27)               | 851.03<br>(569.60 to 1,295.18)             |
| Interstitial lung disease and pulmonary sarcoidosis           | 477.08<br>(267.49 to 810.39)                   | 1,355.68<br>(727.37 to 2,256.88)                 | 1,482.01<br>(794.14 to 2,530.38)                 | 1,142.61<br>(619.12 to 1,931.48)                 | 17.61<br>(9.62 to 30.12)                   | 55.48<br>(29.32 to 93.17)                  | 63.12<br>(33.44 to 106.06)                 | 44.03<br>(23.46 to 74.05)                  |
| Other chronic respiratory diseases                            | 7,595.08<br>(4,968.88 to 10,409.25)            | 12,837.23<br>(8,361.16 to 19,348.94)             | 11,927.57<br>(7,950.54 to 17,353.80)             | 15,546.53<br>(9,907.30 to 23,669.37)             | 200.66<br>(131.24 to 273.70)               | 399.07<br>(264.55 to 571.02)               | 391.41<br>(264.28 to 546.74)               | 443.27<br>(291.53 to 642.61)               |
| <b>Cirrhosis and other chronic liver diseases</b>             | <b>83,401.98<br/>(67,018.41 to 112,562.12)</b> | <b>153,711.26<br/>(104,030.60 to 228,163.74)</b> | <b>150,480.49<br/>(102,021.56 to 222,790.84)</b> | <b>173,386.64<br/>(119,594.49 to 254,263.81)</b> | <b>2,419.25<br/>(1,937.28 to 3,181.80)</b> | <b>4,800.89<br/>(3,458.44 to 6,939.79)</b> | <b>4,826.46<br/>(3,478.17 to 6,939.25)</b> | <b>5,202.36<br/>(3,772.95 to 7,435.65)</b> |
| Cirrhosis and other chronic liver diseases due to hepatitis B | 34,122.46<br>(25,808.80 to 46,837.18)          | 66,968.32<br>(44,296.23 to 102,303.33)           | 66,114.89<br>(44,045.06 to 100,472.86)           | 73,239.83<br>(48,880.42 to 110,498.50)           | 1,040.64<br>(798.24 to 1,431.57)           | 2,139.29<br>(1,517.41 to 3,123.96)         | 2,170.10<br>(1,541.54 to 3,176.17)         | 2,263.51<br>(1,615.08 to 3,321.90)         |
| Cirrhosis and other chronic liver diseases due to hepatitis C | 16,205.99<br>(10,797.02 to 25,436.66)          | 32,659.26<br>(19,509.29 to 54,470.56)            | 32,191.11<br>(19,240.75 to 53,533.43)            | 35,800.23<br>(21,373.20 to 59,205.30)            | 501.96<br>(330.60 to 763.61)               | 1,045.98<br>(663.83 to 1,665.78)           | 1,054.45<br>(670.61 to 1,671.57)           | 1,115.65<br>(706.82 to 1,782.02)           |

|                                                                |                                                    |                                                     |                                                    |                                                     |                                                |                                                |                                                |                                                |
|----------------------------------------------------------------|----------------------------------------------------|-----------------------------------------------------|----------------------------------------------------|-----------------------------------------------------|------------------------------------------------|------------------------------------------------|------------------------------------------------|------------------------------------------------|
|                                                                | 15,460.22<br>(11,504.53 to<br>21,601.38)           | 29,257.73<br>(19,255.23 to<br>44,784.29)            | 28,158.99<br>(18,526.66 to<br>42,393.47)           | 33,806.64<br>(22,606.21 to<br>50,638.12)            | 495.93<br>(372.92 to<br>687.10)                | 978.83<br>(682.63 to<br>1,429.20)              | 967.35<br>(680.26 to<br>1,404.73)              | 1,097.06<br>(778.32 to<br>1,598.38)            |
| Cirrhosis and other chronic liver diseases due to alcohol use  |                                                    |                                                     |                                                    |                                                     |                                                |                                                |                                                |                                                |
|                                                                | 17,613.31<br>(14,203.53 to<br>22,379.37)           | 24,825.96<br>(17,049.26 to<br>36,450.13)            | 24,015.49<br>(16,678.37 to<br>34,881.36)           | 30,539.93<br>(21,599.24 to<br>44,202.90)            | 380.71<br>(305.31 to<br>486.06)                | 636.78<br>(454.79 to<br>888.06)                | 634.56<br>(456.95 to<br>880.13)                | 726.15<br>(528.37 to<br>1,009.32)              |
| Cirrhosis and other chronic liver diseases due to other causes |                                                    |                                                     |                                                    |                                                     |                                                |                                                |                                                |                                                |
| <b>Digestive diseases</b>                                      | <b>84,823.97<br/>(68,344.43 to<br/>108,729.04)</b> | <b>101,095.38<br/>(75,047.12 to<br/>133,256.05)</b> | <b>96,639.53<br/>(72,282.54 to<br/>127,260.76)</b> | <b>128,770.90<br/>(96,455.03 to<br/>170,510.98)</b> | <b>2,266.76<br/>(1,891.01 to<br/>2,693.51)</b> | <b>3,439.46<br/>(2,746.64 to<br/>4,331.17)</b> | <b>3,453.96<br/>(2,758.54 to<br/>4,308.05)</b> | <b>3,961.37<br/>(3,175.14 to<br/>4,968.11)</b> |
| Peptic ulcer disease                                           | 16,811.24<br>(13,097.59 to<br>21,383.64)           | 12,685.37<br>(8,315.58 to<br>17,888.98)             | 11,290.70<br>(7,585.71 to<br>16,056.87)            | 18,349.66<br>(12,457.93 to<br>25,854.16)            | 495.66<br>(382.70 to<br>623.87)                | 455.91<br>(321.71 to<br>612.71)                | 426.34<br>(306.06 to<br>579.84)                | 608.29<br>(438.97 to<br>816.08)                |
| <b>Guinea</b>                                                  |                                                    |                                                     |                                                    |                                                     |                                                |                                                |                                                |                                                |
| <b>Cause</b>                                                   | <b>YLLs (actual counts)</b>                        |                                                     |                                                    |                                                     | <b>Deaths (actual counts)</b>                  |                                                |                                                |                                                |
|                                                                | <b>2016</b>                                        | <b>2040 Forecast</b>                                | <b>2040 Better Scenario</b>                        | <b>2040 Worse Scenario</b>                          | <b>2016</b>                                    | <b>2040 Forecast</b>                           | <b>2040 Better Scenario</b>                    | <b>2040 Worse Scenario</b>                     |
| Gastritis and duodenitis                                       | 3,746.13<br>(2,670.41 to<br>5,247.32)              | 5,436.41<br>(3,502.88 to<br>8,244.93)               | 5,239.15<br>(3,323.11 to<br>7,972.99)              | 6,507.92<br>(4,261.81 to<br>9,776.05)               | 89.45<br>(66.07 to<br>119.79)                  | 146.91<br>(99.97 to<br>208.93)                 | 146.09<br>(98.04 to<br>206.28)                 | 166.66<br>(115.80 to<br>233.88)                |
| Appendicitis                                                   | 7,581.56<br>(4,473.69 to<br>13,108.68)             | 6,891.70<br>(4,193.74 to<br>10,408.01)              | 6,459.61<br>(3,955.47 to<br>9,674.21)              | 9,591.46<br>(5,779.33 to<br>15,161.33)              | 185.25<br>(116.15 to<br>265.94)                | 230.77<br>(148.61 to<br>334.77)                | 229.59<br>(150.07 to<br>334.77)                | 283.87<br>(181.35 to<br>401.06)                |
| Paralytic ileus and intestinal obstruction                     | 28,033.77<br>(20,043.85 to<br>42,477.46)           | 35,714.42<br>(26,351.38 to<br>48,595.77)            | 35,463.04<br>(26,370.35 to<br>47,863.96)           | 44,142.26<br>(32,370.20 to<br>62,213.67)            | 661.49<br>(517.92 to<br>873.23)                | 1,202.02<br>(953.16 to<br>1,547.68)            | 1,260.92<br>(1,000.01 to<br>1,615.45)          | 1,281.42<br>(1,016.50 to<br>1,660.93)          |
| Inguinal, femoral, and abdominal hernia                        | 3,620.63<br>(2,357.31 to<br>5,486.39)              | 3,773.82<br>(2,275.46 to<br>6,474.32)               | 3,676.27<br>(2,235.94 to<br>6,329.15)              | 4,606.55<br>(2,796.44 to<br>7,664.89)               | 119.72<br>(77.48 to<br>192.74)                 | 150.99<br>(94.86 to<br>255.32)                 | 155.26<br>(97.17 to<br>263.50)                 | 168.56<br>(105.64 to<br>283.18)                |
| Inflammatory bowel disease                                     | 1,936.39<br>(1,143.89 to<br>3,861.03)              | 3,399.40<br>(2,153.17 to<br>5,533.30)               | 3,461.61<br>(2,196.58 to<br>5,685.14)              | 3,623.52<br>(2,250.29 to<br>6,360.69)               | 52.00<br>(34.46 to<br>84.42)                   | 111.53<br>(77.06 to<br>169.59)                 | 118.14<br>(81.03 to<br>179.28)                 | 109.70<br>(74.89 to<br>170.51)                 |
| Vascular intestinal disorders                                  | 1,592.09<br>(1,024.20 to<br>2,536.31)              | 2,477.06<br>(1,570.45 to<br>3,676.39)               | 2,530.33<br>(1,610.29 to<br>3,758.46)              | 2,734.49<br>(1,738.74 to<br>4,033.69)               | 55.40<br>(36.88 to<br>77.85)                   | 115.16<br>(75.33 to<br>163.90)                 | 124.44<br>(81.66 to<br>179.25)                 | 114.36<br>(73.97 to<br>162.68)                 |
| Gallbladder and biliary diseases                               | 3,345.80<br>(2,606.32 to<br>4,192.35)              | 4,346.22<br>(2,663.54 to<br>6,605.61)               | 3,741.48<br>(2,386.82 to<br>5,477.18)              | 6,092.38<br>(3,668.59 to<br>9,469.32)               | 109.02<br>(81.56 to<br>142.12)                 | 173.73<br>(108.03 to<br>258.64)                | 156.57<br>(99.35 to<br>226.19)                 | 225.52<br>(136.69 to<br>346.25)                |
| Pancreatitis                                                   | 7,965.29<br>(5,646.19 to<br>10,993.86)             | 14,037.35<br>(7,911.23 to<br>25,164.30)             | 12,997.32<br>(7,451.00 to<br>21,679.54)            | 17,220.70<br>(9,388.13 to<br>34,027.76)             | 225.40<br>(162.14 to<br>309.55)                | 425.03<br>(249.72 to<br>736.07)                | 406.15<br>(247.13 to<br>653.22)                | 504.35<br>(289.29 to<br>963.29)                |
| Other digestive diseases                                       | 10,191.07<br>(7,441.50 to<br>14,083.31)            | 12,333.63<br>(8,481.61 to<br>17,621.27)             | 11,780.01<br>(8,053.50 to<br>16,872.61)            | 15,901.96<br>(10,933.16 to<br>22,363.50)            | 273.36<br>(208.28 to<br>346.57)                | 427.40<br>(305.75 to<br>579.22)                | 430.45<br>(306.33 to<br>584.95)                | 498.64<br>(363.79 to<br>666.17)                |
| <b>Neurological disorders</b>                                  | <b>31,234.17<br/>(26,095.51 to<br/>36,705.40)</b>  | <b>61,187.49<br/>(50,085.38 to<br/>76,226.85)</b>   | <b>62,941.45<br/>(51,378.49 to<br/>78,031.29)</b>  | <b>65,641.60<br/>(52,549.00 to<br/>82,950.24)</b>   | <b>1,208.17<br/>(1,029.74 to<br/>1,423.27)</b> | <b>3,435.47<br/>(2,777.56 to<br/>4,304.63)</b> | <b>3,874.92<br/>(3,231.68 to<br/>4,705.35)</b> | <b>3,010.90<br/>(2,405.71 to<br/>3,852.41)</b> |
| Alzheimer's disease and other dementias                        | 9,574.17<br>(7,638.36 to<br>12,014.40)             | 29,066.73<br>(22,384.34 to<br>38,092.59)            | 31,813.16<br>(25,256.45 to<br>40,281.10)           | 25,209.90<br>(18,531.08 to<br>34,502.28)            | 765.19<br>(614.57 to<br>957.32)                | 2,579.31<br>(1,885.35 to<br>3,430.42)          | 2,978.87<br>(2,334.16 to<br>3,798.75)          | 2,084.70<br>(1,448.86 to<br>2,926.26)          |
| Parkinson's disease                                            | 821.24<br>(601.37 to<br>1,094.61)                  | 3,164.29<br>(2,325.19 to<br>4,121.64)               | 3,812.47<br>(2,875.57 to<br>4,936.37)              | 2,327.18<br>(1,694.91 to<br>3,053.04)               | 58.31<br>(43.07 to<br>78.35)                   | 247.86<br>(180.12 to<br>324.18)                | 310.82<br>(232.76 to<br>402.64)                | 172.75<br>(121.08 to<br>230.43)                |
| Epilepsy                                                       | 17,357.16<br>(13,818.41 to<br>20,990.30)           | 22,165.21<br>(14,375.81 to<br>32,753.26)            | 20,340.38<br>(13,394.49 to<br>29,791.52)           | 30,865.70<br>(20,943.90 to<br>44,246.38)            | 320.53<br>(263.80 to<br>381.68)                | 462.32<br>(317.90 to<br>657.81)                | 432.29<br>(297.16 to<br>607.97)                | 608.86<br>(424.80 to<br>854.56)                |
| Multiple sclerosis                                             | 230.93<br>(140.09 to<br>343.48)                    | 590.89<br>(347.93 to<br>910.13)                     | 607.30<br>(357.82 to<br>945.09)                    | 547.75<br>(321.92 to<br>842.14)                     | 6.42<br>(3.80 to<br>9.50)                      | 16.82<br>(9.73 to<br>25.32)                    | 17.59<br>(10.23 to<br>26.69)                   | 15.27<br>(8.87 to<br>23.21)                    |
| Motor neuron disease                                           | 352.87<br>(271.77 to<br>516.35)                    | 743.31<br>(561.71 to<br>1,084.57)                   | 787.53<br>(583.89 to<br>1,157.80)                  | 711.44<br>(552.85 to<br>1,024.91)                   | 8.69<br>(6.98 to<br>11.97)                     | 23.14<br>(17.56 to<br>34.45)                   | 25.02<br>(18.60 to<br>37.11)                   | 20.71<br>(16.05 to<br>30.21)                   |
| Other neurological disorders                                   | 2,897.80<br>(1,691.33 to<br>4,391.17)              | 5,457.07<br>(3,315.37 to<br>8,099.24)               | 5,580.61<br>(3,427.30 to<br>8,277.42)              | 5,979.62<br>(3,505.73 to<br>9,240.30)               | 49.04<br>(31.20 to<br>69.07)                   | 106.02<br>(70.58 to<br>149.72)                 | 110.33<br>(74.24 to<br>154.77)                 | 108.61<br>(69.72 to<br>157.35)                 |



|                                                            |                                             |                                             |                                             |                                             |                                       |                                        |                                        |                                         |
|------------------------------------------------------------|---------------------------------------------|---------------------------------------------|---------------------------------------------|---------------------------------------------|---------------------------------------|----------------------------------------|----------------------------------------|-----------------------------------------|
|                                                            | 7,733.80<br>(5,357.58 to<br>10,440.61)      | 17,823.28<br>(10,462.43 to<br>27,360.34)    | 17,961.44<br>(10,651.10 to<br>27,663.37)    | 18,170.61<br>(10,709.48 to<br>27,841.30)    | 185.37<br>(130.97 to<br>246.97)       | 437.06<br>(281.52 to<br>630.27)        | 451.63<br>(290.92 to<br>649.66)        | 432.38<br>(277.24 to<br>622.14)         |
| <b>Mental disorders</b>                                    |                                             |                                             |                                             |                                             |                                       |                                        |                                        |                                         |
| Alcohol use disorders                                      | 3,062.48<br>(1,871.69 to<br>4,627.09)       | 5,400.98<br>(2,878.57 to<br>9,205.95)       | 5,418.30<br>(2,873.91 to<br>9,307.28)       | 5,584.88<br>(3,035.74 to<br>9,418.03)       | 86.25<br>(54.14 to<br>127.13)         | 158.70<br>(91.45 to<br>256.22)         | 163.63<br>(94.46 to<br>265.60)         | 159.09<br>(92.04 to<br>255.26)          |
| Drug use disorders                                         | 4,652.12<br>(2,659.44 to<br>6,803.27)       | 12,377.60<br>(6,285.93 to<br>20,224.11)     | 12,497.88<br>(6,354.49 to<br>20,517.74)     | 12,540.20<br>(6,388.71 to<br>20,627.67)     | 98.78<br>(55.61 to<br>139.88)         | 277.55<br>(146.74 to<br>425.72)        | 287.18<br>(152.01 to<br>440.56)        | 272.47<br>(144.01 to<br>422.43)         |
| Opioid use disorders                                       | 4,268.35<br>(2,358.32 to<br>6,438.63)       | 11,147.49<br>(5,404.44 to<br>19,112.42)     | 11,215.32<br>(5,443.15 to<br>19,228.89)     | 11,330.00<br>(5,579.12 to<br>19,189.32)     | 86.23<br>(46.12 to<br>127.40)         | 231.63<br>(116.71 to<br>382.32)        | 235.87<br>(117.87 to<br>388.59)        | 231.27<br>(115.94 to<br>382.15)         |
| Cocaine use disorders                                      | 89.82<br>(28.49 to<br>184.31)               | 277.07<br>(87.18 to<br>599.55)              | 274.01<br>(86.34 to<br>595.78)              | 302.49<br>(93.34 to<br>659.78)              | 2.46<br>(0.79 to<br>4.77)             | 8.01<br>(2.62 to<br>15.35)             | 8.15<br>(2.67 to<br>15.59)             | 8.42<br>(2.71 to<br>16.49)              |
| Amphetamine use disorders                                  | 47.00<br>(16.46 to<br>97.47)                | 193.05<br>(65.56 to<br>427.69)              | 186.91<br>(65.05 to<br>413.87)              | 224.27<br>(78.07 to<br>505.89)              | 1.31<br>(0.45 to<br>2.54)             | 5.55<br>(2.06 to<br>11.16)             | 5.53<br>(2.06 to<br>11.16)             | 6.21<br>(2.31 to<br>12.60)              |
| Other drug use disorders                                   | 246.95<br>(133.01 to<br>413.10)             | 759.99<br>(398.64 to<br>1,294.00)           | 821.64<br>(432.97 to<br>1,371.74)           | 683.45<br>(357.96 to<br>1,168.80)           | 8.78<br>(4.60 to<br>12.55)            | 32.36<br>(17.62 to<br>45.47)           | 37.62<br>(20.50 to<br>52.59)           | 26.57<br>(14.86 to<br>38.08)            |
| Eating disorders                                           | 19.21<br>(11.26 to<br>39.89)                | 44.69<br>(23.80 to<br>88.16)                | 45.26<br>(23.91 to<br>89.52)                | 45.53<br>(24.84 to<br>88.73)                | 0.34<br>(0.20 to<br>0.71)             | 0.81<br>(0.42 to<br>1.61)              | 0.82<br>(0.43 to<br>1.64)              | 0.82<br>(0.44 to<br>1.59)               |
| <b>Guinea</b>                                              |                                             |                                             |                                             |                                             |                                       |                                        |                                        |                                         |
| Cause                                                      | YLLs (actual counts)                        |                                             |                                             |                                             | Deaths (actual counts)                |                                        |                                        |                                         |
|                                                            | 2016                                        | 2040 Forecast                               | 2040 Better Scenario                        | 2040 Worse Scenario                         | 2016                                  | 2040 Forecast                          | 2040 Better Scenario                   | 2040 Worse Scenario                     |
|                                                            | 185,896.84<br>(157,294.44 to<br>215,404.00) | 276,117.47<br>(202,797.68 to<br>358,833.67) | 249,639.91<br>(184,761.08 to<br>323,885.57) | 386,554.42<br>(292,361.14 to<br>493,180.07) | 4,685.42<br>(4,053.97 to<br>5,354.68) | 9,534.40<br>(7,483.81 to<br>12,022.87) | 8,888.40<br>(6,994.81 to<br>11,163.92) | 12,381.82<br>(9,886.22 to<br>15,377.80) |
| <b>Diabetes, urogenital, blood, and endocrine diseases</b> |                                             |                                             |                                             |                                             |                                       |                                        |                                        |                                         |
| Diabetes mellitus                                          | 45,288.79<br>(37,596.58 to<br>53,364.60)    | 96,624.30<br>(63,711.97 to<br>144,539.37)   | 83,641.92<br>(54,962.04 to<br>124,050.20)   | 137,644.39<br>(91,658.66 to<br>201,644.29)  | 1,866.73<br>(1,539.13 to<br>2,217.92) | 4,594.74<br>(3,249.42 to<br>6,442.51)  | 4,205.32<br>(2,975.38 to<br>5,901.00)  | 6,098.91<br>(4,291.01 to<br>8,598.39)   |
| Acute glomerulonephritis                                   | 92.74<br>(82.26 to<br>105.91)               | 132.71<br>(96.59 to<br>179.85)              | 124.80<br>(91.15 to<br>167.60)              | 184.02<br>(137.80 to<br>243.77)             | 1.50<br>(1.33 to<br>1.69)             | 2.33<br>(1.74 to<br>3.11)              | 2.22<br>(1.66 to<br>2.95)              | 3.07<br>(2.33 to<br>4.00)               |
| Chronic kidney disease                                     | 38,390.77<br>(31,083.83 to<br>47,747.62)    | 58,130.01<br>(36,713.27 to<br>92,206.00)    | 49,814.49<br>(32,329.02 to<br>76,762.10)    | 86,948.77<br>(55,884.39 to<br>134,980.85)   | 1,046.38<br>(850.20 to<br>1,302.14)   | 2,136.19<br>(1,366.24 to<br>3,756.34)  | 1,873.80<br>(1,229.83 to<br>3,350.37)  | 2,937.49<br>(1,878.84 to<br>5,148.91)   |
| Chronic kidney disease due to diabetes mellitus            | 7,987.96<br>(6,112.41 to<br>10,378.09)      | 16,045.58<br>(10,082.34 to<br>27,227.61)    | 13,738.34<br>(8,754.93 to<br>22,248.30)     | 22,513.01<br>(13,868.77 to<br>38,291.89)    | 282.71<br>(220.41 to<br>362.06)       | 670.98<br>(411.52 to<br>1,248.45)      | 588.46<br>(369.39 to<br>1,053.90)      | 898.59<br>(546.51 to<br>1,644.98)       |
| Chronic kidney disease due to hypertension                 | 4,411.50<br>(3,399.46 to<br>5,803.55)       | 9,104.15<br>(5,490.84 to<br>15,849.88)      | 7,837.37<br>(4,864.01 to<br>12,803.04)      | 12,529.83<br>(7,504.61 to<br>22,107.99)     | 194.29<br>(150.28 to<br>253.27)       | 489.98<br>(302.07 to<br>947.97)        | 438.56<br>(279.77 to<br>816.63)        | 633.89<br>(379.20 to<br>1,153.46)       |
| Chronic kidney disease due to glomerulonephritis           | 12,342.06<br>(9,623.41 to<br>16,014.72)     | 15,427.02<br>(9,810.13 to<br>23,975.25)     | 13,191.78<br>(8,399.55 to<br>20,078.47)     | 24,396.74<br>(15,763.87 to<br>36,222.45)    | 260.36<br>(205.06 to<br>322.84)       | 429.85<br>(273.69 to<br>716.21)        | 371.03<br>(239.95 to<br>603.08)        | 626.39<br>(403.50 to<br>999.70)         |
| Chronic kidney disease due to other and unspecified causes | 13,649.23<br>(10,750.07 to<br>17,524.15)    | 17,552.27<br>(10,883.38 to<br>27,517.53)    | 15,047.01<br>(9,510.47 to<br>23,287.71)     | 27,509.19<br>(17,449.35 to<br>41,307.86)    | 309.02<br>(244.46 to<br>394.18)       | 545.38<br>(343.06 to<br>937.60)        | 475.76<br>(305.54 to<br>814.09)        | 778.63<br>(490.13 to<br>1,305.86)       |
| Urinary diseases and male infertility                      | 15,565.98<br>(13,120.90 to<br>18,382.98)    | 28,343.25<br>(22,230.11 to<br>35,649.87)    | 28,531.46<br>(22,327.96 to<br>36,027.60)    | 32,952.44<br>(26,280.00 to<br>40,914.67)    | 415.70<br>(354.73 to<br>481.92)       | 1,011.64<br>(859.15 to<br>1,185.86)    | 1,081.40<br>(905.59 to<br>1,275.36)    | 1,031.55<br>(882.04 to<br>1,205.09)     |
| Urinary tract infections                                   | 9,149.24<br>(7,250.74 to<br>11,229.47)      | 20,975.02<br>(16,479.10 to<br>26,413.35)    | 21,507.44<br>(16,618.75 to<br>27,125.49)    | 23,354.02<br>(18,264.67 to<br>29,425.71)    | 233.75<br>(188.16 to<br>284.49)       | 755.19<br>(625.96 to<br>897.37)        | 821.05<br>(671.48 to<br>988.02)        | 731.54<br>(605.60 to<br>876.59)         |
| Urolithiasis                                               | 262.94<br>(187.87 to<br>355.43)             | 632.39<br>(399.79 to<br>974.63)             | 618.23<br>(391.24 to<br>948.61)             | 742.07<br>(464.48 to<br>1,171.85)           | 4.86<br>(3.53 to<br>6.55)             | 12.72<br>(8.40 to<br>18.43)            | 12.84<br>(8.53 to<br>18.48)            | 14.08<br>(9.15 to<br>20.48)             |
| Other urinary diseases                                     | 6,153.80<br>(4,801.99 to<br>7,638.02)       | 6,735.84<br>(4,382.14 to<br>9,653.87)       | 6,405.79<br>(4,206.95 to<br>9,108.05)       | 8,856.35<br>(5,979.27 to<br>12,353.19)      | 177.09<br>(136.55 to<br>215.96)       | 243.73<br>(169.03 to<br>322.22)        | 247.52<br>(168.54 to<br>327.45)        | 285.93<br>(201.49 to<br>369.86)         |

|                                                   |                                          |                                           |                                           |                                            |                                     |                                     |                                     |                                       |
|---------------------------------------------------|------------------------------------------|-------------------------------------------|-------------------------------------------|--------------------------------------------|-------------------------------------|-------------------------------------|-------------------------------------|---------------------------------------|
| Gynecological diseases                            | 1,018.12<br>(675.67 to<br>1,412.51)      | 1,700.10<br>(967.18 to<br>2,793.03)       | 1,556.83<br>(894.26 to<br>2,478.90)       | 2,243.48<br>(1,285.88 to<br>3,614.69)      | 23.92<br>(16.08 to<br>32.75)        | 40.08<br>(23.82 to<br>64.62)        | 37.27<br>(22.55 to<br>59.66)        | 51.88<br>(31.23 to<br>81.13)          |
| Uterine fibroids                                  | 86.69<br>(32.67 to<br>160.71)            | 108.91<br>(37.39 to<br>235.28)            | 99.57<br>(35.01 to<br>212.95)             | 148.08<br>(53.29 to<br>306.60)             | 2.90<br>(1.15 to<br>5.41)           | 2.90<br>(1.33 to<br>7.19)           | 3.33<br>(1.27 to<br>6.74)           | 4.59<br>(1.75 to<br>9.06)             |
| Polycystic ovarian syndrome                       | 187.99<br>(27.93 to<br>433.31)           | 183.47<br>(20.43 to<br>482.17)            | 155.52<br>(16.81 to<br>418.43)            | 295.29<br>(33.41 to<br>741.83)             | 4.11<br>(0.62 to<br>8.98)           | 4.09<br>(0.48 to<br>10.53)          | 3.47<br>(0.40 to<br>8.95)           | 6.57<br>(0.83 to<br>16.20)            |
| Endometriosis                                     | 1.58<br>(0.53 to<br>4.41)                | 3.64<br>(1.00 to<br>11.34)                | 3.31<br>(0.91 to<br>10.79)                | 4.85<br>(1.39 to<br>14.71)                 | 0.03<br>(0.01 to<br>0.10)           | 0.08<br>(0.02 to<br>0.27)           | 0.07<br>(0.02 to<br>0.25)           | 0.11<br>(0.03 to<br>0.35)             |
| Genital prolapse                                  | 43.21<br>(9.23 to<br>101.38)             | 58.52<br>(8.10 to<br>165.42)              | 51.61<br>(7.39 to<br>144.80)              | 84.43<br>(11.85 to<br>233.48)              | 1.01<br>(0.33 to<br>2.15)           | 1.25<br>(0.27 to<br>3.19)           | 1.12<br>(0.25 to<br>2.85)           | 1.76<br>(0.38 to<br>4.44)             |
| Other gynecological diseases                      | 698.66<br>(391.33 to<br>1,051.80)        | 1,345.56<br>(689.15 to<br>2,264.42)       | 1,246.82<br>(641.54 to<br>2,064.42)       | 1,710.84<br>(878.32 to<br>2,830.22)        | 15.86<br>(8.95 to<br>23.67)         | 31.14<br>(16.76 to<br>50.37)        | 29.27<br>(15.99 to<br>46.58)        | 38.85<br>(20.87 to<br>62.75)          |
| Hemoglobinopathies and hemolytic anemias          | 78,369.00<br>(58,585.56 to<br>95,977.47) | 81,767.85<br>(54,564.99 to<br>116,146.24) | 76,769.88<br>(52,173.80 to<br>109,115.25) | 113,965.88<br>(78,281.11 to<br>159,567.26) | 1,179.66<br>(902.26 to<br>1,449.85) | 1,461.92<br>(992.02 to<br>2,038.32) | 1,390.57<br>(945.77 to<br>1,955.46) | 1,934.86<br>(1,340.09 to<br>2,640.04) |
| Thalassemias                                      | 273.80<br>(31.31 to<br>910.44)           | 163.55<br>(19.02 to<br>548.46)            | 169.99<br>(20.23 to<br>565.60)            | 224.41<br>(25.16 to<br>763.68)             | 3.28<br>(0.38 to<br>10.94)          | 2.02<br>(0.24 to<br>6.76)           | 2.10<br>(0.26 to<br>7.06)           | 2.73<br>(0.31 to<br>9.40)             |
| Sickle cell disorders                             | 75,752.89<br>(56,314.42 to<br>93,037.83) | 77,544.63<br>(51,690.14 to<br>110,915.55) | 72,661.07<br>(49,078.22 to<br>103,396.80) | 108,703.87<br>(74,216.02 to<br>154,224.50) | 1,071.33<br>(818.74 to<br>1,309.10) | 1,260.07<br>(834.91 to<br>1,796.51) | 1,185.24<br>(788.13 to<br>1,685.92) | 1,700.90<br>(1,145.78 to<br>2,387.27) |
| G6PD deficiency                                   | 1,027.69<br>(731.19 to<br>1,449.55)      | 2,188.35<br>(1,340.60 to<br>3,409.38)     | 2,052.00<br>(1,237.98 to<br>3,258.41)     | 2,862.60<br>(1,751.36 to<br>4,453.78)      | 29.68<br>(20.17 to<br>44.11)        | 76.18<br>(45.99 to<br>119.63)       | 73.19<br>(43.81 to<br>117.99)       | 95.48<br>(58.72 to<br>150.43)         |
| Other hemoglobinopathies and hemolytic anemias    | 1,314.61<br>(879.26 to<br>1,945.75)      | 1,871.32<br>(1,244.38 to<br>2,754.31)     | 1,886.83<br>(1,245.16 to<br>2,817.42)     | 2,175.00<br>(1,446.74 to<br>3,214.57)      | 75.36<br>(49.78 to<br>113.78)       | 123.65<br>(85.11 to<br>186.08)      | 130.04<br>(89.74 to<br>195.11)      | 135.75<br>(92.46 to<br>205.37)        |
| Endocrine, metabolic, blood, and immune disorders | 7,171.45<br>(5,748.62 to<br>10,165.96)   | 9,419.25<br>(7,107.42 to<br>13,523.38)    | 9,200.53<br>(6,930.45 to<br>13,327.67)    | 12,615.43<br>(9,673.12 to<br>17,753.79)    | 151.53<br>(123.48 to<br>218.82)     | 287.50<br>(223.03 to<br>425.50)     | 297.81<br>(230.27 to<br>438.32)     | 324.06<br>(255.98 to<br>472.58)       |

**Guinea**

| Cause                                  | YLLs (actual counts)                        |                                             |                                            |                                             | Deaths (actual counts)                |                                       |                                       |                                       |
|----------------------------------------|---------------------------------------------|---------------------------------------------|--------------------------------------------|---------------------------------------------|---------------------------------------|---------------------------------------|---------------------------------------|---------------------------------------|
|                                        | 2016                                        | 2040 Forecast                               | 2040 Better Scenario                       | 2040 Worse Scenario                         | 2016                                  | 2040 Forecast                         | 2040 Better Scenario                  | 2040 Worse Scenario                   |
|                                        | <b>Musculoskeletal disorders</b>            | 2,432.79<br>(1,845.68 to<br>3,396.81)       | 6,124.59<br>(4,317.50 to<br>8,894.37)      | 6,439.56<br>(4,501.11 to<br>9,360.11)       | 5,858.80<br>(4,131.41 to<br>8,442.08) | 59.67<br>(45.92 to<br>80.08)          | 175.87<br>(133.38 to<br>243.77)       | 192.13<br>(143.89 to<br>265.05)       |
| Rheumatoid arthritis                   | 263.38<br>(169.30 to<br>408.89)             | 562.32<br>(338.18 to<br>916.22)             | 559.20<br>(330.34 to<br>920.36)            | 654.14<br>(408.47 to<br>1,051.21)           | 11.13<br>(7.17 to<br>17.10)           | 29.08<br>(17.47 to<br>46.50)          | 30.25<br>(17.98 to<br>48.63)          | 31.37<br>(19.84 to<br>49.17)          |
| Other musculoskeletal disorders        | 2,169.41<br>(1,606.54 to<br>3,087.99)       | 5,562.27<br>(3,877.85 to<br>8,243.93)       | 5,880.36<br>(4,054.00 to<br>8,683.27)      | 5,204.66<br>(3,598.81 to<br>7,704.61)       | 48.53<br>(37.12 to<br>68.20)          | 146.79<br>(107.67 to<br>211.08)       | 161.88<br>(118.10 to<br>229.33)       | 127.55<br>(92.69 to<br>182.31)        |
| <b>Other non-communicable diseases</b> | 309,593.49<br>(136,761.75 to<br>466,732.51) | 193,977.46<br>(100,606.12 to<br>294,419.95) | 177,183.11<br>(94,371.20 to<br>263,064.13) | 388,106.37<br>(182,950.06 to<br>589,505.57) | 3,810.46<br>(1,783.03 to<br>5,687.85) | 2,999.62<br>(1,838.18 to<br>4,297.67) | 2,853.98<br>(1,806.86 to<br>4,018.15) | 5,258.54<br>(2,817.71 to<br>7,795.36) |
| Congenital birth defects               | 289,435.37<br>(118,787.43 to<br>447,121.91) | 165,583.10<br>(73,208.29 to<br>264,282.71)  | 149,208.12<br>(67,618.99 to<br>230,755.41) | 348,038.79<br>(143,219.99 to<br>553,243.44) | 3,458.09<br>(1,450.77 to<br>5,305.37) | 2,118.47<br>(986.15 to<br>3,312.69)   | 1,921.15<br>(927.41 to<br>2,946.89)   | 4,276.93<br>(1,866.88 to<br>6,691.17) |
| Neural tube defects                    | 66,974.64<br>(31,771.14 to<br>122,219.33)   | 13,345.45<br>(5,613.52 to<br>28,786.53)     | 11,286.18<br>(4,770.65 to<br>24,423.46)    | 34,745.12<br>(15,095.04 to<br>72,162.98)    | 783.43<br>(373.33 to<br>1,429.71)     | 161.19<br>(68.83 to<br>346.77)        | 136.62<br>(59.31 to<br>297.89)        | 412.54<br>(181.42 to<br>853.56)       |
| Congenital heart anomalies             | 71,616.99<br>(29,896.05 to<br>132,905.52)   | 50,168.83<br>(25,156.08 to<br>90,283.97)    | 45,753.68<br>(23,614.68 to<br>79,916.12)   | 97,572.75<br>(46,441.64 to<br>183,582.90)   | 871.94<br>(379.11 to<br>1,596.25)     | 658.40<br>(340.32 to<br>1,146.55)     | 603.57<br>(318.51 to<br>1,028.81)     | 1,226.13<br>(602.67 to<br>2,262.32)   |
| Orofacial clefts                       | 2,867.05<br>(544.33 to<br>8,661.01)         | 1,166.61<br>(206.14 to<br>3,542.05)         | 966.41<br>(172.66 to<br>2,860.47)          | 3,336.92<br>(582.58 to<br>10,119.52)        | 33.23<br>(6.31 to<br>100.23)          | 13.53<br>(2.41 to<br>41.02)           | 11.20<br>(2.00 to<br>33.11)           | 38.68<br>(6.75 to<br>117.44)          |

|                                               |                                             |                                             |                                             |                                             |                                       |                                        |                                        |                                         |
|-----------------------------------------------|---------------------------------------------|---------------------------------------------|---------------------------------------------|---------------------------------------------|---------------------------------------|----------------------------------------|----------------------------------------|-----------------------------------------|
|                                               | 2,690.45<br>(752.65 to<br>2,269.84)         | 2,429.65<br>(864.31 to<br>5,957.57)         | 2,199.75<br>(790.31 to<br>5,178.49)         | 4,579.06<br>(1,489.33 to<br>12,294.21)      | 35.14<br>(11.09 to<br>90.78)          | 38.46<br>(15.43 to<br>84.36)           | 35.28<br>(14.22 to<br>75.88)           | 65.61<br>(24.13 to<br>163.08)           |
| Down syndrome                                 | 9,995.38<br>(2,723.28 to<br>22,904.22)      | 9,134.48<br>(2,448.56 to<br>19,621.26)      | 8,101.73<br>(2,156.69 to<br>17,027.29)      | 20,951.97<br>(5,397.81 to<br>46,022.70)     | 117.02<br>(31.88 to<br>268.45)        | 109.23<br>(29.27 to<br>233.13)         | 97.08<br>(25.86 to<br>202.71)          | 247.18<br>(64.35 to<br>537.92)          |
| Other chromosomal abnormalities               | 2,079.22<br>(482.81 to<br>6,949.46)         | 1,649.12<br>(427.02 to<br>5,448.18)         | 1,507.81<br>(401.85 to<br>4,969.36)         | 3,464.60<br>(858.72 to<br>11,674.71)        | 24.35<br>(5.74 to<br>81.30)           | 19.68<br>(5.30 to<br>64.71)            | 18.02<br>(4.98 to<br>59.10)            | 40.82<br>(10.27 to<br>137.19)           |
| Congenital musculoskeletal and limb anomalies | 2,306.45<br>(4,969.07 to<br>27,517.47)      | 1,999.95<br>(3,455.17 to<br>17,224.14)      | 1,896.27<br>(885.59 to<br>3,470.31)         | 3,480.74<br>(1,475.71 to<br>6,712.34)       | 31.27<br>(12.85 to<br>57.65)          | 33.96<br>(18.38 to<br>56.74)           | 32.83<br>(17.82 to<br>54.74)           | 51.83<br>(24.63 to<br>91.57)            |
| Urogenital congenital anomalies               | 13,449.41<br>(4,969.07 to<br>27,517.47)     | 8,214.71<br>(3,455.17 to<br>17,224.14)      | 7,348.31<br>(3,198.55 to<br>15,273.40)      | 18,356.09<br>(7,429.11 to<br>39,050.86)     | 157.57<br>(58.69 to<br>321.38)        | 98.31<br>(43.02 to<br>203.16)          | 88.15<br>(39.32 to<br>180.79)          | 216.80<br>(89.48 to<br>459.28)          |
| Digestive congenital anomalies                | 117,455.77<br>(24,235.32 to<br>243,551.81)  | 77,474.29<br>(20,634.98 to<br>151,752.86)   | 70,147.96<br>(19,295.28 to<br>134,235.47)   | 161,551.53<br>(38,889.17 to<br>319,864.20)  | 1,404.14<br>(302.75 to<br>2,898.71)   | 1,404.14<br>(293.00 to<br>1,900.76)    | 985.71<br>(276.72 to<br>1,709.70)      | 1,977.33<br>(510.46 to<br>3,871.63)     |
| Other congenital birth defects                | 7,237.18<br>(4,690.65 to<br>12,017.84)      | 22,137.47<br>(14,372.98 to<br>33,823.05)    | 22,331.08<br>(14,527.44 to<br>34,158.39)    | 25,987.63<br>(16,855.18 to<br>41,297.65)    | 202.40<br>(130.25 to<br>335.93)       | 808.55<br>(526.59 to<br>1,246.12)      | 867.35<br>(565.09 to<br>1,333.15)      | 818.25<br>(533.93 to<br>1,268.65)       |
| Skin and subcutaneous diseases                | 455.33<br>(204.08 to<br>763.24)             | 2,028.68<br>(902.24 to<br>3,444.18)         | 2,172.83<br>(955.40 to<br>3,579.85)         | 1,926.50<br>(858.11 to<br>3,388.43)         | 14.42<br>(6.05 to<br>24.72)           | 79.22<br>(33.52 to<br>136.72)          | 88.77<br>(37.34 to<br>153.81)          | 68.51<br>(28.85 to<br>117.89)           |
| Cellulitis                                    | 6,122.31<br>(4,024.00 to<br>10,488.29)      | 18,320.97<br>(11,903.91 to<br>28,917.74)    | 18,214.98<br>(11,857.10 to<br>28,737.72)    | 22,282.78<br>(14,596.39 to<br>36,536.49)    | 160.02<br>(104.31 to<br>274.67)       | 632.01<br>(421.70 to<br>1,002.16)      | 663.35<br>(443.64 to<br>1,061.43)      | 668.29<br>(443.35 to<br>1,054.39)       |
| Pyoderma                                      | 437.09<br>(214.44 to<br>706.50)             | 1,247.30<br>(613.24 to<br>2,007.95)         | 1,388.16<br>(670.36 to<br>2,234.72)         | 1,183.24<br>(580.02 to<br>1,905.64)         | 23.43<br>(11.15 to<br>38.70)          | 84.16<br>(40.02 to<br>139.79)          | 101.02<br>(47.81 to<br>166.78)         | 68.63<br>(32.34 to<br>115.42)           |
| Decubitus ulcer                               | 222.45<br>(113.98 to<br>371.82)             | 540.52<br>(294.35 to<br>889.88)             | 555.11<br>(301.98 to<br>917.08)             | 595.11<br>(308.56 to<br>993.62)             | 4.53<br>(2.45 to<br>7.70)             | 13.15<br>(7.35 to<br>22.00)            | 14.21<br>(7.80 to<br>24.08)            | 12.81<br>(6.91 to<br>21.28)             |
| Other skin and subcutaneous diseases          | 12,920.94<br>(6,319.94 to<br>23,402.93)     | 6,256.89<br>(2,661.05 to<br>12,113.89)      | 5,643.91<br>(2,477.64 to<br>10,810.35)      | 14,079.95<br>(5,877.55 to<br>27,576.15)     | 149.97<br>(73.36 to<br>271.65)        | 72.60<br>(30.87 to<br>140.58)          | 65.49<br>(28.75 to<br>125.46)          | 163.37<br>(68.20 to<br>320.01)          |
| Sudden infant death syndrome                  | 350,480.49<br>(303,605.38 to<br>404,989.16) | 406,039.89<br>(304,320.31 to<br>545,924.95) | 382,020.84<br>(283,959.05 to<br>511,380.79) | 534,355.56<br>(406,470.38 to<br>704,150.00) | 6,686.62<br>(5,760.97 to<br>7,614.73) | 9,528.33<br>(7,526.86 to<br>12,083.09) | 9,366.29<br>(7,346.99 to<br>11,870.50) | 11,246.01<br>(8,948.63 to<br>14,150.81) |
| Injuries                                      | 89,307.18<br>(73,689.04 to<br>108,315.40)   | 146,166.27<br>(106,863.20 to<br>201,553.48) | 133,325.65<br>(97,508.94 to<br>183,752.01)  | 184,655.12<br>(136,179.19 to<br>252,636.05) | 1,718.34<br>(1,434.38 to<br>2,028.02) | 3,172.27<br>(2,424.42 to<br>4,218.31)  | 2,988.72<br>(2,288.97 to<br>3,957.39)  | 3,701.87<br>(2,840.68 to<br>4,924.89)   |
| Transport injuries                            | 84,831.51<br>(70,187.68 to<br>102,707.75)   | 138,728.27<br>(101,988.66 to<br>189,801.51) | 126,327.38<br>(92,939.90 to<br>173,751.36)  | 174,913.37<br>(129,230.49 to<br>237,585.82) | 1,640.25<br>(1,372.75 to<br>1,943.79) | 3,025.10<br>(2,321.44 to<br>4,001.85)  | 2,847.98<br>(2,190.98 to<br>3,764.78)  | 3,519.20<br>(2,700.57 to<br>4,649.58)   |
| Road injuries                                 | 28,056.44<br>(20,402.53 to<br>37,364.12)    | 35,723.48<br>(23,421.99 to<br>53,781.69)    | 32,919.62<br>(21,569.66 to<br>49,622.04)    | 45,083.02<br>(29,880.59 to<br>66,990.18)    | 549.41<br>(406.11 to<br>720.04)       | 834.61<br>(576.28 to<br>1,199.77)      | 796.32<br>(547.76 to<br>1,145.57)      | 969.99<br>(672.45 to<br>1,399.82)       |
| Pedestrian road injuries                      | <b>Guinea</b>                               |                                             |                                             |                                             |                                       |                                        |                                        |                                         |
|                                               | <b>YLLs (actual counts)</b>                 |                                             |                                             |                                             | <b>Deaths (actual counts)</b>         |                                        |                                        |                                         |
| <b>Cause</b>                                  | <b>2016</b>                                 | <b>2040 Forecast</b>                        | <b>2040 Better Scenario</b>                 | <b>2040 Worse Scenario</b>                  | <b>2016</b>                           | <b>2040 Forecast</b>                   | <b>2040 Better Scenario</b>            | <b>2040 Worse Scenario</b>              |
| Cyclist road injuries                         | 2,033.49<br>(1,445.64 to<br>2,868.75)       | 3,794.49<br>(2,499.27 to<br>5,773.72)       | 3,471.75<br>(2,294.43 to<br>5,277.74)       | 4,752.96<br>(3,103.58 to<br>7,150.41)       | 40.72<br>(29.74 to<br>57.44)          | 86.46<br>(59.08 to<br>128.71)          | 82.49<br>(56.13 to<br>123.00)          | 98.45<br>(67.16 to<br>145.88)           |
| Motorcyclist road injuries                    | 11,341.74<br>(8,627.36 to<br>15,036.64)     | 20,815.85<br>(13,777.28 to<br>30,383.16)    | 19,194.20<br>(12,677.21 to<br>27,942.43)    | 26,028.12<br>(17,693.43 to<br>37,500.65)    | 200.72<br>(156.20 to<br>260.71)       | 401.67<br>(271.13 to<br>570.91)        | 379.10<br>(256.63 to<br>541.90)        | 469.65<br>(323.40 to<br>663.55)         |
| Motor vehicle road injuries                   | 41,782.20<br>(33,182.63 to<br>52,786.55)    | 75,457.21<br>(53,186.68 to<br>104,336.45)   | 68,067.95<br>(48,060.62 to<br>95,072.44)    | 95,344.61<br>(68,263.82 to<br>130,612.41)   | 817.14<br>(654.91 to<br>1,023.11)     | 1,635.79<br>(1,204.74 to<br>2,185.55)  | 1,526.90<br>(1,118.09 to<br>2,038.16)  | 1,904.81<br>(1,404.45 to<br>2,555.21)   |
| Other road injuries                           | 1,617.65<br>(1,063.17 to<br>2,302.99)       | 2,937.25<br>(1,801.64 to<br>4,616.35)       | 2,673.87<br>(1,631.82 to<br>4,189.27)       | 3,704.67<br>(2,271.71 to<br>5,631.96)       | 32.27<br>(21.45 to<br>45.65)          | 66.57<br>(41.50 to<br>103.30)          | 63.16<br>(39.37 to<br>97.88)           | 76.31<br>(48.06 to<br>116.60)           |

|                                                 |                                                                  |                                                                  |                                                                  |                                                                  |                                                            |                                                            |                                                            |                                                            |
|-------------------------------------------------|------------------------------------------------------------------|------------------------------------------------------------------|------------------------------------------------------------------|------------------------------------------------------------------|------------------------------------------------------------|------------------------------------------------------------|------------------------------------------------------------|------------------------------------------------------------|
| Other transport injuries                        | 4,475.67<br>(2,912.96 to<br>6,763.53)                            | 7,438.00<br>(4,128.76 to<br>12,633.56)                           | 6,998.27<br>(3,906.29 to<br>11,870.78)                           | 9,741.75<br>(5,613.88 to<br>16,387.84)                           | 78.09<br>(51.68 to<br>116.34)                              | 147.17<br>(84.12 to<br>248.75)                             | 140.74<br>(80.06 to<br>234.01)                             | 182.67<br>(106.63 to<br>306.94)                            |
| <b>Unintentional injuries</b>                   | <b>211,337.12</b><br><b>(179,544.62 to</b><br><b>250,893.14)</b> | <b>180,685.35</b><br><b>(130,274.44 to</b><br><b>244,862.49)</b> | <b>170,698.13</b><br><b>(124,628.03 to</b><br><b>229,507.45)</b> | <b>263,893.47</b><br><b>(193,924.87 to</b><br><b>350,276.91)</b> | <b>3,907.68</b><br><b>(3,309.45 to</b><br><b>4,476.56)</b> | <b>4,544.45</b><br><b>(3,536.00 to</b><br><b>5,712.91)</b> | <b>4,559.69</b><br><b>(3,548.39 to</b><br><b>5,706.32)</b> | <b>5,647.29</b><br><b>(4,389.34 to</b><br><b>7,090.10)</b> |
| Falls                                           | 26,497.64<br>(21,283.67 to<br>34,522.19)                         | 35,856.16<br>(27,502.77 to<br>45,960.13)                         | 36,169.85<br>(27,701.60 to<br>46,556.02)                         | 42,868.54<br>(33,057.33 to<br>55,148.42)                         | 755.60<br>(33,057.33 to<br>903.79)                         | 1,483.30<br>(620.72 to<br>1,777.82)                        | 1,611.56<br>(1,331.62 to<br>1,933.27)                      | 1,501.13<br>(1,240.63 to<br>1,802.28)                      |
| Drowning                                        | 41,416.38<br>(33,056.28 to<br>52,685.94)                         | 30,312.84<br>(21,175.97 to<br>42,925.14)                         | 28,292.57<br>(19,758.52 to<br>40,210.77)                         | 45,442.30<br>(32,380.67 to<br>63,161.00)                         | 656.70<br>(536.94 to<br>809.95)                            | 586.71<br>(427.79 to<br>799.11)                            | 564.15<br>(412.66 to<br>765.39)                            | 793.77<br>(592.45 to<br>1,061.69)                          |
| Fire, heat, and hot substances                  | 23,024.47<br>(17,521.04 to<br>29,213.47)                         | 15,473.54<br>(10,284.13 to<br>21,542.65)                         | 14,318.47<br>(9,576.92 to<br>19,796.04)                          | 23,992.17<br>(16,609.61 to<br>33,303.99)                         | 436.53<br>(335.96 to<br>522.77)                            | 391.47<br>(267.57 to<br>507.51)                            | 381.16<br>(261.13 to<br>489.41)                            | 518.88<br>(368.45 to<br>675.36)                            |
| Poisonings                                      | 14,504.69<br>(7,808.83 to<br>28,128.71)                          | 7,158.96<br>(3,800.16 to<br>13,145.83)                           | 6,288.19<br>(3,414.41 to<br>11,391.74)                           | 6,288.19<br>(3,414.41 to<br>11,391.74)                           | 243.39<br>(145.83 to<br>415.23)                            | 143.66<br>(83.90 to<br>226.44)                             | 130.14<br>(77.10 to<br>202.90)                             | 230.16<br>(128.27 to<br>409.51)                            |
| Exposure to mechanical forces                   | 31,780.60<br>(24,344.71 to<br>40,989.03)                         | 23,050.61<br>(14,060.18 to<br>34,384.73)                         | 21,092.64<br>(12,843.27 to<br>31,418.31)                         | 36,515.62<br>(23,205.33 to<br>52,237.77)                         | 512.99<br>(387.60 to<br>640.65)                            | 455.96<br>(278.10 to<br>669.20)                            | 431.07<br>(262.39 to<br>624.71)                            | 646.37<br>(409.58 to<br>906.70)                            |
| Unintentional firearm injuries                  | 9,420.83<br>(6,230.10 to<br>12,675.76)                           | 6,300.36<br>(3,287.28 to<br>10,574.90)                           | 5,716.50<br>(2,974.29 to<br>9,389.35)                            | 9,537.79<br>(5,124.67 to<br>15,279.91)                           | 162.35<br>(109.74 to<br>217.39)                            | 127.47<br>(69.83 to<br>200.23)                             | 118.92<br>(65.90 to<br>184.98)                             | 177.85<br>(100.45 to<br>274.35)                            |
| Unintentional suffocation                       | 7,768.87<br>(4,769.41 to<br>12,788.10)                           | 4,438.63<br>(2,644.52 to<br>7,200.63)                            | 3,980.03<br>(2,413.25 to<br>6,316.88)                            | 8,523.17<br>(4,960.98 to<br>14,145.73)                           | 97.72<br>(62.24 to<br>156.44)                              | 60.52<br>(36.95 to<br>95.56)                               | 54.55<br>(33.86 to<br>84.53)                               | 111.16<br>(66.89 to<br>179.01)                             |
| Other exposure to mechanical forces             | 14,590.90<br>(10,782.21 to<br>18,964.50)                         | 12,311.62<br>(7,366.51 to<br>19,076.72)                          | 11,396.11<br>(6,786.85 to<br>17,723.41)                          | 18,454.65<br>(11,527.01 to<br>27,083.20)                         | 252.92<br>(183.73 to<br>329.97)                            | 267.97<br>(160.49 to<br>418.86)                            | 257.60<br>(153.34 to<br>398.13)                            | 357.36<br>(222.30 to<br>536.99)                            |
| Adverse effects of medical treatment            | 23,687.27<br>(15,827.27 to<br>31,531.41)                         | 22,411.69<br>(13,776.67 to<br>32,703.07)                         | 21,051.40<br>(12,917.20 to<br>30,686.95)                         | 32,479.02<br>(20,694.37 to<br>46,461.02)                         | 412.24<br>(288.46 to<br>516.79)                            | 483.19<br>(311.33 to<br>682.67)                            | 470.45<br>(306.28 to<br>663.50)                            | 623.49<br>(418.16 to<br>852.35)                            |
| Animal contact                                  | 13,286.81<br>(8,708.16 to<br>17,851.44)                          | 13,314.57<br>(8,117.16 to<br>18,932.71)                          | 12,060.51<br>(7,441.83 to<br>16,913.83)                          | 21,518.47<br>(13,165.18 to<br>30,678.59)                         | 266.77<br>(178.67 to<br>349.85)                            | 326.19<br>(206.57 to<br>447.05)                            | 308.08<br>(197.52 to<br>420.28)                            | 461.20<br>(298.75 to<br>612.08)                            |
| Venomous animal contact                         | 10,737.99<br>(6,608.55 to<br>15,102.00)                          | 10,780.94<br>(6,288.06 to<br>16,117.00)                          | 9,770.58<br>(5,764.70 to<br>14,429.18)                           | 17,259.43<br>(9,909.50 to<br>25,448.07)                          | 225.18<br>(142.68 to<br>307.89)                            | 273.97<br>(170.63 to<br>393.01)                            | 258.64<br>(165.01 to<br>369.74)                            | 384.67<br>(235.27 to<br>543.45)                            |
| Non-venomous animal contact                     | 2,548.83<br>(1,185.71 to<br>4,453.13)                            | 2,533.63<br>(1,213.67 to<br>4,335.45)                            | 2,289.94<br>(1,120.24 to<br>3,839.83)                            | 4,259.04<br>(1,982.02 to<br>7,335.53)                            | 41.59<br>(21.41 to<br>68.40)                               | 52.22<br>(27.19 to<br>81.84)                               | 49.44<br>(26.32 to<br>76.77)                               | 76.53<br>(39.70 to<br>122.19)                              |
| Foreign body                                    | 14,623.83<br>(10,097.55 to<br>22,215.28)                         | 16,530.49<br>(11,433.28 to<br>23,523.81)                         | 16,315.18<br>(11,327.61 to<br>23,235.64)                         | 22,873.97<br>(15,507.88 to<br>33,922.93)                         | 231.24<br>(169.90 to<br>319.95)                            | 333.30<br>(251.17 to<br>445.04)                            | 344.28<br>(259.96 to<br>456.59)                            | 395.39<br>(288.43 to<br>548.01)                            |
| Pulmonary aspiration and foreign body in airway | 13,062.84<br>(8,872.08 to<br>20,891.92)                          | 14,804.17<br>(10,180.63 to<br>22,370.26)                         | 14,680.06<br>(10,145.55 to<br>21,859.08)                         | 20,458.62<br>(13,488.36 to<br>31,799.64)                         | 205.51<br>(147.91 to<br>302.03)                            | 299.80<br>(223.02 to<br>413.62)                            | 311.75<br>(231.75 to<br>426.97)                            | 352.61<br>(254.47 to<br>515.50)                            |
| Foreign body in other body part                 | 1,560.99<br>(452.20 to<br>3,210.34)                              | 1,726.32<br>(434.79 to<br>4,025.45)                              | 1,635.12<br>(409.97 to<br>3,868.65)                              | 2,415.35<br>(648.50 to<br>5,263.45)                              | 25.73<br>(7.71 to<br>53.65)                                | 33.49<br>(7.98 to<br>80.28)                                | 32.54<br>(7.21 to<br>78.21)                                | 42.79<br>(11.46 to<br>96.23)                               |
| Environmental heat and cold exposure            | 8,650.47<br>(4,083.15 to<br>12,121.51)                           | 6,809.20<br>(2,545.50 to<br>11,803.25)                           | 5,988.91<br>(2,251.03 to<br>10,323.77)                           | 11,157.36<br>(4,517.34 to<br>18,610.41)                          | 160.11<br>(76.37 to<br>224.85)                             | 146.26<br>(56.51 to<br>248.64)                             | 132.38<br>(51.75 to<br>221.06)                             | 220.54<br>(88.21 to<br>361.18)                             |
| Other unintentional injuries                    | 13,864.95<br>(10,825.24 to<br>17,569.15)                         | 9,767.30<br>(6,573.26 to<br>14,207.17)                           | 9,120.40<br>(6,137.65 to<br>13,189.28)                           | 14,073.01<br>(9,617.44 to<br>19,764.30)                          | 232.10<br>(183.94 to<br>285.35)                            | 194.42<br>(135.27 to<br>275.06)                            | 186.42<br>(129.09 to<br>261.72)                            | 256.35<br>(182.87 to<br>355.24)                            |
| Self-harm and interpersonal violence            | 49,720.58<br>(37,749.05 to<br>66,361.11)                         | 78,587.51<br>(52,805.39 to<br>118,449.94)                        | 77,396.60<br>(52,103.00 to<br>116,946.24)                        | 85,120.42<br>(57,709.57 to<br>127,616.02)                        | 1,058.01<br>(793.89 to<br>1,411.32)                        | 1,800.81<br>(1,234.76 to<br>2,621.91)                      | 1,806.97<br>(1,241.32 to<br>2,636.32)                      | 1,885.11<br>(1,297.65 to<br>2,741.21)                      |

**Guinea**

| Cause | YLLs (actual counts) |               |                      |                     | Deaths (actual counts) |               |                      |                     |
|-------|----------------------|---------------|----------------------|---------------------|------------------------|---------------|----------------------|---------------------|
|       | 2016                 | 2040 Forecast | 2040 Better Scenario | 2040 Worse Scenario | 2016                   | 2040 Forecast | 2040 Better Scenario | 2040 Worse Scenario |

|                                                                              |                                          |                                          |                                          |                                          |                                 |                                     |                                     |                                     |
|------------------------------------------------------------------------------|------------------------------------------|------------------------------------------|------------------------------------------|------------------------------------------|---------------------------------|-------------------------------------|-------------------------------------|-------------------------------------|
| Self-harm                                                                    | 27,111.81<br>(18,658.28 to<br>40,835.08) | 48,406.79<br>(30,414.91 to<br>81,097.33) | 47,393.24<br>(29,606.67 to<br>79,469.82) | 52,162.34<br>(32,960.31 to<br>87,252.25) | 670.54<br>(457.17 to<br>987.81) | 1,248.25<br>(816.76 to<br>2,010.05) | 1,253.93<br>(820.59 to<br>2,012.09) | 1,298.04<br>(846.18 to<br>2,079.42) |
| Self-harm by firearm                                                         | 4,220.43<br>(1,799.48 to<br>8,042.83)    | 6,059.82<br>(2,371.45 to<br>12,571.93)   | 5,873.43<br>(2,294.83 to<br>12,251.80)   | 6,713.61<br>(2,650.38 to<br>13,826.26)   | 105.69<br>(46.77 to<br>196.08)  | 163.00<br>(67.73 to<br>323.13)      | 162.77<br>(68.15 to<br>320.26)      | 173.68<br>(72.48 to<br>343.55)      |
| Self-harm by other specified means                                           | 22,891.37<br>(15,700.00 to<br>36,047.81) | 42,346.97<br>(26,018.13 to<br>72,002.10) | 41,519.81<br>(25,546.09 to<br>70,852.34) | 45,448.72<br>(27,878.69 to<br>77,253.21) | 564.85<br>(388.46 to<br>871.37) | 1,085.26<br>(700.50 to<br>1,782.88) | 1,091.16<br>(706.57 to<br>1,793.59) | 1,124.36<br>(723.90 to<br>1,840.12) |
| Interpersonal violence                                                       | 22,608.77<br>(17,560.34 to<br>29,272.03) | 30,180.72<br>(19,250.27 to<br>45,374.79) | 30,003.36<br>(19,166.91 to<br>45,188.74) | 32,958.09<br>(21,788.62 to<br>49,049.54) | 387.47<br>(300.49 to<br>506.60) | 552.56<br>(356.17 to<br>815.80)     | 553.05<br>(355.05 to<br>818.40)     | 587.07<br>(388.35 to<br>861.44)     |
| Physical violence by firearm                                                 | 12,221.56<br>(8,329.37 to<br>17,177.19)  | 16,874.57<br>(9,507.53 to<br>27,373.77)  | 16,790.45<br>(9,449.06 to<br>27,049.33)  | 17,909.19<br>(10,066.01 to<br>28,845.31) | 212.34<br>(142.99 to<br>296.98) | 302.82<br>(173.54 to<br>484.09)     | 302.26<br>(171.81 to<br>485.36)     | 316.97<br>(181.37 to<br>504.60)     |
| Physical violence by sharp object                                            | 5,571.29<br>(3,476.30 to<br>8,082.65)    | 8,517.65<br>(4,675.60 to<br>13,781.80)   | 8,587.88<br>(4,696.62 to<br>13,916.71)   | 8,895.74<br>(4,581.34 to<br>14,205.55)   | 97.76<br>(61.09 to<br>140.58)   | 159.89<br>(90.62 to<br>248.80)      | 162.57<br>(91.90 to<br>254.07)      | 162.52<br>(92.24 to<br>251.78)      |
| Physical violence by other means                                             | 4,815.93<br>(3,494.16 to<br>7,084.38)    | 4,788.51<br>(3,095.61 to<br>7,557.85)    | 4,625.02<br>(2,997.66 to<br>7,294.71)    | 6,153.16<br>(4,068.13 to<br>9,624.68)    | 77.36<br>(57.10 to<br>115.25)   | 89.86<br>(59.09 to<br>140.46)       | 88.22<br>(57.94 to<br>138.08)       | 107.58<br>(71.94 to<br>166.63)      |
| Forces of nature, conflict and terrorism, and executions and police conflict | 115.61<br>(89.61 to<br>174.46)           | 600.76<br>(0.00 to<br>8,140.73)          | 600.46<br>(0.00 to<br>8,177.26)          | 686.55<br>(0.00 to<br>9,071.70)          | 2.59<br>(1.50 to<br>4.29)       | 10.79<br>(0.00 to<br>143.05)        | 10.90<br>(0.00 to<br>144.86)        | 11.74<br>(0.00 to<br>153.16)        |
| Exposure to forces of nature                                                 | 0.00<br>(0.00 to<br>0.00)                | 343.07<br>(0.00 to<br>662.62)            | 342.51<br>(0.00 to<br>660.73)            | 403.37<br>(0.00 to<br>772.74)            | 0.00<br>(0.00 to<br>0.00)       | 6.31<br>(0.00 to<br>12.12)          | 6.31<br>(0.00 to<br>12.28)          | 6.90<br>(0.00 to<br>13.30)          |
| Conflict and terrorism                                                       | 0.00<br>(0.00 to<br>0.00)                | 104.86<br>(0.00 to<br>554.89)            | 104.67<br>(0.00 to<br>552.57)            | 120.50<br>(0.00 to<br>636.75)            | 0.00<br>(0.00 to<br>0.00)       | 1.79<br>(0.00 to<br>9.50)           | 1.81<br>(0.00 to<br>9.52)           | 1.97<br>(0.00 to<br>10.45)          |
| Executions and police conflict                                               | 115.61<br>(89.61 to<br>174.46)           | 152.83<br>(0.00 to<br>1,830.45)          | 153.29<br>(0.00 to<br>1,838.78)          | 162.68<br>(0.00 to<br>1,951.40)          | 2.59<br>(1.50 to<br>4.29)       | 2.78<br>(0.00 to<br>33.22)          | 2.78<br>(0.00 to<br>33.49)          | 2.87<br>(0.00 to<br>34.51)          |

**Guinea-Bissau**

| Cause                                                                    | YLLs (actual counts)                        |                                             |                                             |                                                 | Deaths (actual counts)                   |                                          |                                          |                                          |
|--------------------------------------------------------------------------|---------------------------------------------|---------------------------------------------|---------------------------------------------|-------------------------------------------------|------------------------------------------|------------------------------------------|------------------------------------------|------------------------------------------|
|                                                                          | 2016                                        | 2040 Forecast                               | 2040 Better Scenario                        | 2040 Worse Scenario                             | 2016                                     | 2040 Forecast                            | 2040 Better Scenario                     | 2040 Worse Scenario                      |
| <b>All causes</b>                                                        | 908,010.13<br>(832,284.89 to<br>987,021.81) | 712,423.84<br>(594,812.77 to<br>844,357.45) | 545,802.53<br>(460,673.45 to<br>645,653.44) | 1,183,217.91<br>(983,899.56 to<br>1,406,767.68) | 18,605.21<br>(17,156.35 to<br>20,077.96) | 20,210.63<br>(17,861.87 to<br>22,756.34) | 15,942.70<br>(14,254.30 to<br>17,783.23) | 28,889.15<br>(25,328.70 to<br>32,559.77) |
| <b>Communicable, maternal, neonatal, and nutritional diseases</b>        | 594,592.15<br>(538,044.72 to<br>658,952.28) | 302,544.23<br>(224,806.72 to<br>393,405.10) | 212,166.50<br>(156,438.88 to<br>281,915.11) | 623,596.47<br>(478,256.15 to<br>791,075.04)     | 9,765.77<br>(8,905.49 to<br>10,713.14)   | 6,623.44<br>(5,001.19 to<br>8,393.08)    | 4,627.69<br>(3,495.17 to<br>5,977.15)    | 11,624.92<br>(8,913.94 to<br>14,313.48)  |
| <b>HIV/AIDS and tuberculosis</b>                                         | 140,696.51<br>(115,565.36 to<br>169,342.83) | 97,268.31<br>(48,030.95 to<br>158,271.86)   | 62,280.06<br>(25,974.87 to<br>115,345.17)   | 203,689.77<br>(121,863.56 to<br>287,965.85)     | 3,029.56<br>(2,521.08 to<br>3,560.28)    | 2,120.55<br>(1,146.80 to<br>3,285.82)    | 1,377.44<br>(670.22 to<br>2,321.06)      | 4,304.46<br>(2,633.57 to<br>6,033.14)    |
| Tuberculosis                                                             | 44,113.77<br>(28,833.75 to<br>56,620.72)    | 19,469.22<br>(9,847.63 to<br>30,904.26)     | 13,099.82<br>(6,714.27 to<br>20,770.62)     | 39,356.94<br>(19,437.64 to<br>63,528.90)        | 1,185.16<br>(725.69 to<br>1,499.71)      | 565.31<br>(298.95 to<br>890.88)          | 397.33<br>(211.43 to<br>609.80)          | 1,081.11<br>(555.44 to<br>1,735.88)      |
| HIV/AIDS                                                                 | 96,582.74<br>(77,098.34 to<br>123,415.06)   | 77,799.09<br>(29,838.85 to<br>137,399.85)   | 49,180.24<br>(13,721.21 to<br>103,200.03)   | 164,332.83<br>(84,666.49 to<br>246,806.91)      | 1,844.40<br>(1,529.62 to<br>2,301.81)    | 1,555.24<br>(649.50 to<br>2,670.45)      | 980.11<br>(313.16 to<br>1,882.72)        | 3,223.35<br>(1,678.97 to<br>4,835.57)    |
| <b>Diarrhea, lower respiratory, and other common infectious diseases</b> | 197,959.81<br>(162,818.35 to<br>236,116.22) | 119,297.57<br>(76,431.26 to<br>171,564.82)  | 77,269.04<br>(49,146.14 to<br>112,710.71)   | 225,359.58<br>(146,388.54 to<br>338,800.82)     | 3,462.44<br>(2,836.46 to<br>4,163.78)    | 3,224.00<br>(2,101.48 to<br>4,597.97)    | 2,142.84<br>(1,398.82 to<br>3,118.93)    | 4,721.22<br>(3,107.79 to<br>6,760.10)    |
| Diarrheal diseases                                                       | 62,109.97<br>(42,193.94 to<br>88,673.03)    | 33,867.13<br>(11,043.23 to<br>68,970.74)    | 22,693.88<br>(6,527.55 to<br>47,897.55)     | 58,292.02<br>(24,306.41 to<br>107,886.72)       | 1,040.33<br>(723.72 to<br>1,565.08)      | 851.26<br>(227.25 to<br>1,964.84)        | 568.85<br>(138.78 to<br>1,393.68)        | 1,239.10<br>(425.89 to<br>2,548.02)      |
| Intestinal infectious diseases                                           | 869.91<br>(456.12 to<br>1,467.02)           | 709.51<br>(349.22 to<br>1,339.62)           | 644.29<br>(328.35 to<br>1,208.60)           | 1,118.62<br>(549.70 to<br>2,102.30)             | 11.98<br>(6.36 to<br>20.30)              | 10.42<br>(5.20 to<br>19.80)              | 9.53<br>(4.92 to<br>17.71)               | 15.71<br>(7.86 to<br>29.48)              |
| Typhoid fever                                                            | 630.40<br>(304.49 to<br>1,153.79)           | 528.10<br>(251.43 to<br>1,052.64)           | 483.71<br>(239.07 to<br>950.43)             | 821.31<br>(379.32 to<br>1,604.05)               | 8.69<br>(4.32 to<br>16.04)               | 7.70<br>(3.72 to<br>15.01)               | 7.10<br>(3.57 to<br>13.73)               | 11.47<br>(5.42 to<br>22.06)              |



|                                                       |                                                               |                                                             |                                                            |                                                              |                                                      |                                                     |                                                     |                                                      |                           |
|-------------------------------------------------------|---------------------------------------------------------------|-------------------------------------------------------------|------------------------------------------------------------|--------------------------------------------------------------|------------------------------------------------------|-----------------------------------------------------|-----------------------------------------------------|------------------------------------------------------|---------------------------|
|                                                       | 0.00<br>(0.00 to<br>0.00)                                     | 0.00<br>(0.00 to<br>0.00)                                   | 0.00<br>(0.00 to<br>0.00)                                  | 0.00<br>(0.00 to<br>0.00)                                    | 0.00<br>(0.00 to<br>0.00)                            | 0.00<br>(0.00 to<br>0.00)                           | 0.00<br>(0.00 to<br>0.00)                           | 0.00<br>(0.00 to<br>0.00)                            | 0.00<br>(0.00 to<br>0.00) |
| African trypanosomiasis                               | 1,014.29<br>(594.20 to<br>1,562.46)                           | 739.49<br>(398.87 to<br>1,236.01)                           | 677.24<br>(368.17 to<br>1,120.53)                          | 880.48<br>(474.43 to<br>1,432.64)                            | 27.22<br>(16.37 to<br>42.22)                         | 31.64<br>(12.20 to<br>35.99)                        | 20.48<br>(11.56 to<br>34.18)                        | 24.47<br>(14.01 to<br>39.11)                         | 0.00<br>(0.00 to<br>0.00) |
| Schistosomiasis                                       | 77.57<br>(50.27 to<br>114.01)                                 | 35.66<br>(22.13 to<br>54.78)                                | 34.34<br>(21.17 to<br>53.51)                               | 40.38<br>(25.36 to<br>59.99)                                 | 1.56<br>(1.02 to<br>2.29)                            | 0.81<br>(0.51 to<br>1.26)                           | 0.80<br>(0.49 to<br>1.24)                           | 0.88<br>(0.56 to<br>1.32)                            | 0.00<br>(0.00 to<br>0.00) |
| Cysticercosis                                         | 123.39<br>(88.73 to<br>169.87)                                | 42.76<br>(28.17 to<br>62.23)                                | 30.50<br>(19.47 to<br>46.45)                               | 85.33<br>(55.85 to<br>123.66)                                | 2.41<br>(1.76 to<br>3.31)                            | 1.06<br>(0.71 to<br>1.55)                           | 0.78<br>(0.50 to<br>1.20)                           | 1.95<br>(1.26 to<br>2.82)                            | 0.00<br>(0.00 to<br>0.00) |
| Cystic echinococcosis                                 | 68.97<br>(3.10 to<br>292.57)                                  | 190.12<br>(10.45 to<br>665.01)                              | 185.88<br>(10.38 to<br>646.97)                             | 274.24<br>(13.82 to<br>1,048.74)                             | 1.04<br>(0.05 to<br>4.22)                            | 3.95<br>(0.22 to<br>13.80)                          | 4.01<br>(0.23 to<br>13.72)                          | 4.86<br>(0.27 to<br>18.29)                           | 0.00<br>(0.00 to<br>0.00) |
| Dengue                                                | 877.19<br>(153.35 to<br>2,633.24)                             | 319.94<br>(49.70 to<br>1,037.87)                            | 260.68<br>(41.76 to<br>860.48)                             | 529.89<br>(82.94 to<br>1,727.68)                             | 13.82<br>(2.51 to<br>40.56)                          | 5.35<br>(0.88 to<br>17.05)                          | 4.38<br>(0.72 to<br>14.34)                          | 8.49<br>(1.37 to<br>26.66)                           | 0.00<br>(0.00 to<br>0.00) |
| Yellow fever                                          | 1,638.27<br>(477.35 to<br>3,605.74)                           | 587.60<br>(139.35 to<br>1,371.75)                           | 380.56<br>(83.93 to<br>970.83)                             | 1,464.55<br>(364.48 to<br>3,323.85)                          | 26.85<br>(7.80 to<br>57.73)                          | 10.91<br>(2.62 to<br>26.25)                         | 7.07<br>(1.55 to<br>18.31)                          | 25.67<br>(6.07 to<br>57.27)                          | 0.00<br>(0.00 to<br>0.00) |
| Rabies                                                | 809.14<br>(431.74 to<br>1,350.15)                             | 661.79<br>(348.02 to<br>1,125.99)                           | 662.94<br>(353.21 to<br>1,126.26)                          | 1,110.53<br>(567.71 to<br>1,971.20)                          | 10.05<br>(5.58 to<br>16.51)                          | 8.82<br>(4.91 to<br>14.34)                          | 8.92<br>(5.10 to<br>14.18)                          | 14.10<br>(7.45 to<br>24.29)                          | 0.00<br>(0.00 to<br>0.00) |
| Intestinal nematode infections                        | 6,966.48<br>(3,574.48 to<br>12,345.83)                        | 3,408.97<br>(1,854.85 to<br>5,145.93)                       | 2,948.45<br>(1,548.46 to<br>4,524.01)                      | 6,511.34<br>(3,549.14 to<br>10,394.21)                       | 96.46<br>(50.40 to<br>160.53)                        | 58.69<br>(31.42 to<br>84.23)                        | 52.11<br>(27.60 to<br>75.95)                        | 98.66<br>(54.97 to<br>149.04)                        | 0.00<br>(0.00 to<br>0.00) |
| Other neglected tropical diseases                     | <b>13,821.80</b><br><b>(10,249.82 to</b><br><b>18,306.32)</b> | <b>8,422.02</b><br><b>(5,026.75 to</b><br><b>13,352.11)</b> | <b>6,015.24</b><br><b>(3,624.88 to</b><br><b>9,183.10)</b> | <b>15,061.54</b><br><b>(9,590.60 to</b><br><b>22,263.29)</b> | <b>246.45</b><br><b>(182.20 to</b><br><b>327.10)</b> | <b>152.96</b><br><b>(88.20 to</b><br><b>245.60)</b> | <b>109.24</b><br><b>(65.30 to</b><br><b>168.10)</b> | <b>271.85</b><br><b>(170.39 to</b><br><b>405.65)</b> | 0.00<br>(0.00 to<br>0.00) |
| <b>Maternal disorders</b>                             | 5,968.79<br>(4,095.07 to<br>8,367.49)                         | 3,378.80<br>(1,882.50 to<br>5,614.14)                       | 2,430.91<br>(1,422.42 to<br>3,804.13)                      | 5,821.27<br>(3,427.11 to<br>9,226.72)                        | 107.86<br>(73.77 to<br>152.12)                       | 62.03<br>(33.91 to<br>104.03)                       | 44.63<br>(26.12 to<br>72.17)                        | 106.31<br>(62.63 to<br>167.14)                       | 0.00<br>(0.00 to<br>0.00) |
| Maternal hemorrhage                                   | 516.11<br>(298.37 to<br>819.07)                               | 259.49<br>(128.43 to<br>487.41)                             | 186.72<br>(95.37 to<br>335.40)                             | 460.86<br>(241.60 to<br>801.31)                              | 9.17<br>(5.31 to<br>14.56)                           | 4.68<br>(2.32 to<br>8.77)                           | 3.37<br>(1.74 to<br>6.05)                           | 8.26<br>(4.36 to<br>14.28)                           | 0.00<br>(0.00 to<br>0.00) |
| Maternal sepsis and other maternal infections         | 3,273.29<br>(2,148.42 to<br>4,595.78)                         | 1,960.48<br>(1,065.01 to<br>3,309.46)                       | 1,405.37<br>(793.61 to<br>2,270.24)                        | 3,440.86<br>(1,990.73 to<br>5,372.29)                        | 57.13<br>(37.61 to<br>80.24)                         | 34.79<br>(18.57 to<br>59.19)                        | 24.94<br>(14.05 to<br>40.40)                        | 60.68<br>(35.41 to<br>94.65)                         | 0.00<br>(0.00 to<br>0.00) |
| Maternal hypertensive disorders                       | 522.11<br>(288.93 to<br>869.96)                               | 316.39<br>(140.86 to<br>596.49)                             | 221.78<br>(102.94 to<br>403.73)                            | 568.70<br>(269.85 to<br>1,035.83)                            | 9.40<br>(5.17 to<br>15.67)                           | 5.78<br>(2.62 to<br>10.85)                          | 4.05<br>(1.86 to<br>7.43)                           | 10.34<br>(4.90 to<br>19.03)                          | 0.00<br>(0.00 to<br>0.00) |
| Maternal obstructed labor and uterine rupture         | 116.39<br>(39.23 to<br>246.98)                                | 87.54<br>(27.65 to<br>220.15)                               | 62.11<br>(20.30 to<br>149.29)                              | 154.87<br>(49.37 to<br>370.93)                               | 2.09<br>(0.73 to<br>4.36)                            | 1.60<br>(0.52 to<br>3.89)                           | 1.13<br>(0.37 to<br>2.68)                           | 2.81<br>(0.92 to<br>6.77)                            | 0.00<br>(0.00 to<br>0.00) |
| Maternal abortion, miscarriage, and ectopic pregnancy | 1,918.54<br>(1,253.79 to<br>2,840.92)                         | 1,140.19<br>(605.06 to<br>1,982.34)                         | 829.14<br>(458.15 to<br>1,360.82)                          | 2,161.27<br>(1,233.86 to<br>3,455.52)                        | 33.69<br>(22.19 to<br>49.46)                         | 20.25<br>(10.78 to<br>35.18)                        | 14.73<br>(8.22 to<br>24.15)                         | 38.12<br>(21.86 to<br>61.28)                         | 0.00<br>(0.00 to<br>0.00) |
| Indirect maternal deaths                              | 201.56<br>(89.56 to<br>389.86)                                | 91.55<br>(36.81 to<br>184.61)                               | 66.07<br>(27.20 to<br>133.65)                              | 170.19<br>(71.19 to<br>349.61)                               | 3.56<br>(1.56 to<br>6.86)                            | 1.64<br>(0.67 to<br>3.29)                           | 1.19<br>(0.49 to<br>2.42)                           | 3.03<br>(1.30 to<br>6.22)                            | 0.00<br>(0.00 to<br>0.00) |
| Late maternal deaths                                  | 247.59<br>(127.95 to<br>391.53)                               | 578.15<br>(221.67 to<br>1,154.04)                           | 362.19<br>(71.72 to<br>768.43)                             | 1,179.91<br>(555.37 to<br>2,212.38)                          | 4.63<br>(2.36 to<br>7.40)                            | 11.09<br>(4.57 to<br>21.67)                         | 6.99<br>(1.55 to<br>14.72)                          | 22.38<br>(10.76 to<br>41.88)                         | 0.00<br>(0.00 to<br>0.00) |
| Maternal deaths aggravated by HIV/AIDS                | 1,057.39<br>(601.31 to<br>1,596.19)                           | 609.44<br>(299.06 to<br>1,053.50)                           | 450.95<br>(217.52 to<br>753.21)                            | 1,103.61<br>(559.13 to<br>1,830.19)                          | 18.91<br>(10.93 to<br>28.67)                         | 11.09<br>(5.38 to<br>19.21)                         | 8.21<br>(4.09 to<br>13.74)                          | 19.91<br>(10.13 to<br>33.04)                         | 0.00<br>(0.00 to<br>0.00) |
| Other maternal disorders                              |                                                               |                                                             |                                                            |                                                              |                                                      |                                                     |                                                     |                                                      |                           |
| <b>Guinea-Bissau</b>                                  |                                                               |                                                             |                                                            |                                                              |                                                      |                                                     |                                                     |                                                      |                           |
| Cause                                                 | YLLs (actual counts)                                          |                                                             |                                                            |                                                              | Deaths (actual counts)                               |                                                     |                                                     |                                                      |                           |
|                                                       | 2016                                                          | 2040 Forecast                                               | 2040 Better Scenario                                       | 2040 Worse Scenario                                          | 2016                                                 | 2040 Forecast                                       | 2040 Better Scenario                                | 2040 Worse Scenario                                  |                           |
| Neonatal disorders                                    | 133,866.91<br>(112,075.13 to<br>158,922.78)                   | 45,284.34<br>(30,100.45 to<br>64,197.22)                    | 37,426.50<br>(25,308.46 to<br>52,396.48)                   | 121,814.11<br>(80,862.56 to<br>169,286.41)                   | 1,546.62<br>(1,294.93 to<br>1,836.04)                | 523.41<br>(347.99 to<br>741.69)                     | 432.61<br>(292.42 to<br>605.43)                     | 1,407.83<br>(934.14 to<br>1,957.05)                  |                           |

|                                                                  |                                          |                                         |                                         |                                          |                                 |                                 |                                |                                 |
|------------------------------------------------------------------|------------------------------------------|-----------------------------------------|-----------------------------------------|------------------------------------------|---------------------------------|---------------------------------|--------------------------------|---------------------------------|
|                                                                  | 47,575.29<br>(32,891.16 to<br>66,024.24) | 14,262.71<br>(8,720.59 to<br>21,667.87) | 10,975.22<br>(6,649.80 to<br>16,630.11) | 40,837.42<br>(24,475.18 to<br>60,728.85) | 549.59<br>(379.97 to<br>762.72) | 164.82<br>(100.76 to<br>250.36) | 126.84<br>(76.89 to<br>192.26) | 471.85<br>(282.93 to<br>701.49) |
| Neonatal preterm birth                                           | 47,575.29<br>(32,891.16 to<br>66,024.24) | 14,262.71<br>(8,720.59 to<br>21,667.87) | 10,975.22<br>(6,649.80 to<br>16,630.11) | 40,837.42<br>(24,475.18 to<br>60,728.85) | 549.59<br>(379.97 to<br>762.72) | 164.82<br>(100.76 to<br>250.36) | 126.84<br>(76.89 to<br>192.26) | 471.85<br>(282.93 to<br>701.49) |
|                                                                  | 47,919.47<br>(33,918.46 to<br>65,084.76) | 14,970.18<br>(7,788.99 to<br>25,268.37) | 12,939.46<br>(6,718.78 to<br>21,585.79) | 38,271.55<br>(19,825.97 to<br>64,483.77) | 553.56<br>(391.88 to<br>751.80) | 173.01<br>(90.07 to<br>291.96)  | 149.54<br>(77.66 to<br>249.36) | 442.26<br>(229.25 to<br>744.97) |
| Neonatal encephalopathy due to birth asphyxia and trauma         | 47,919.47<br>(33,918.46 to<br>65,084.76) | 14,970.18<br>(7,788.99 to<br>25,268.37) | 12,939.46<br>(6,718.78 to<br>21,585.79) | 38,271.55<br>(19,825.97 to<br>64,483.77) | 553.56<br>(391.88 to<br>751.80) | 173.01<br>(90.07 to<br>291.96)  | 149.54<br>(77.66 to<br>249.36) | 442.26<br>(229.25 to<br>744.97) |
|                                                                  | 24,911.66<br>(16,765.93 to<br>35,098.59) | 11,554.74<br>(6,997.94 to<br>17,194.86) | 9,858.75<br>(5,933.98 to<br>14,913.41)  | 30,027.52<br>(17,922.76 to<br>44,895.61) | 287.90<br>(193.70 to<br>405.72) | 133.60<br>(80.98 to<br>198.86)  | 113.99<br>(68.63 to<br>172.44) | 347.14<br>(207.26 to<br>519.17) |
| Neonatal sepsis and other neonatal infections                    | 24,911.66<br>(16,765.93 to<br>35,098.59) | 11,554.74<br>(6,997.94 to<br>17,194.86) | 9,858.75<br>(5,933.98 to<br>14,913.41)  | 30,027.52<br>(17,922.76 to<br>44,895.61) | 287.90<br>(193.70 to<br>405.72) | 133.60<br>(80.98 to<br>198.86)  | 113.99<br>(68.63 to<br>172.44) | 347.14<br>(207.26 to<br>519.17) |
|                                                                  | 3,512.79<br>(2,226.25 to<br>5,376.50)    | 761.58<br>(408.34 to<br>1,387.11)       | 621.70<br>(332.44 to<br>1,146.11)       | 2,144.55<br>(1,140.41 to<br>3,788.21)    | 40.59<br>(25.72 to<br>62.12)    | 8.80<br>(4.72 to<br>16.03)      | 7.19<br>(3.84 to<br>13.25)     | 24.79<br>(13.19 to<br>43.81)    |
| Hemolytic disease and other neonatal jaundice                    | 3,512.79<br>(2,226.25 to<br>5,376.50)    | 761.58<br>(408.34 to<br>1,387.11)       | 621.70<br>(332.44 to<br>1,146.11)       | 2,144.55<br>(1,140.41 to<br>3,788.21)    | 40.59<br>(25.72 to<br>62.12)    | 8.80<br>(4.72 to<br>16.03)      | 7.19<br>(3.84 to<br>13.25)     | 24.79<br>(13.19 to<br>43.81)    |
|                                                                  | 9,947.69<br>(6,344.47 to<br>14,931.25)   | 3,735.13<br>(1,925.34 to<br>6,349.17)   | 3,031.38<br>(1,563.41 to<br>5,087.02)   | 10,533.08<br>(5,330.97 to<br>17,633.38)  | 114.98<br>(73.37 to<br>172.50)  | 43.19<br>(22.26 to<br>73.46)    | 35.05<br>(18.07 to<br>58.88)   | 121.78<br>(61.67 to<br>203.83)  |
| Other neonatal disorders                                         | 9,947.69<br>(6,344.47 to<br>14,931.25)   | 3,735.13<br>(1,925.34 to<br>6,349.17)   | 3,031.38<br>(1,563.41 to<br>5,087.02)   | 10,533.08<br>(5,330.97 to<br>17,633.38)  | 114.98<br>(73.37 to<br>172.50)  | 43.19<br>(22.26 to<br>73.46)    | 35.05<br>(18.07 to<br>58.88)   | 121.78<br>(61.67 to<br>203.83)  |
|                                                                  | 19,827.86<br>(12,028.30 to<br>32,075.94) | 6,367.09<br>(3,832.98 to<br>10,560.57)  | 5,520.22<br>(3,353.24 to<br>8,695.83)   | 12,652.37<br>(6,975.30 to<br>22,036.92)  | 291.11<br>(195.44 to<br>438.97) | 137.18<br>(94.45 to<br>196.58)  | 127.99<br>(91.13 to<br>179.49) | 216.35<br>(138.28 to<br>342.39) |
| Nutritional deficiencies                                         | 19,827.86<br>(12,028.30 to<br>32,075.94) | 6,367.09<br>(3,832.98 to<br>10,560.57)  | 5,520.22<br>(3,353.24 to<br>8,695.83)   | 12,652.37<br>(6,975.30 to<br>22,036.92)  | 291.11<br>(195.44 to<br>438.97) | 137.18<br>(94.45 to<br>196.58)  | 127.99<br>(91.13 to<br>179.49) | 216.35<br>(138.28 to<br>342.39) |
|                                                                  | 18,712.31<br>(11,078.65 to<br>30,690.34) | 5,410.03<br>(3,126.38 to<br>9,177.99)   | 4,685.28<br>(2,757.93 to<br>7,724.47)   | 11,180.17<br>(5,923.60 to<br>20,111.06)  | 267.22<br>(172.89 to<br>410.27) | 112.66<br>(75.99 to<br>164.71)  | 105.37<br>(73.13 to<br>151.72) | 184.01<br>(113.07 to<br>300.75) |
| Protein-energy malnutrition                                      | 18,712.31<br>(11,078.65 to<br>30,690.34) | 5,410.03<br>(3,126.38 to<br>9,177.99)   | 4,685.28<br>(2,757.93 to<br>7,724.47)   | 11,180.17<br>(5,923.60 to<br>20,111.06)  | 267.22<br>(172.89 to<br>410.27) | 112.66<br>(75.99 to<br>164.71)  | 105.37<br>(73.13 to<br>151.72) | 184.01<br>(113.07 to<br>300.75) |
|                                                                  | 140.11<br>(5.43 to<br>659.24)            | 217.31<br>(5.84 to<br>1,147.12)         | 180.15<br>(5.04 to<br>888.54)           | 430.31<br>(8.70 to<br>2,648.29)          | 2.41<br>(0.14 to<br>8.71)       | 5.11<br>(0.19 to<br>17.47)      | 4.54<br>(0.17 to<br>15.44)     | 8.09<br>(0.27 to<br>34.37)      |
| Iodine deficiency                                                | 140.11<br>(5.43 to<br>659.24)            | 217.31<br>(5.84 to<br>1,147.12)         | 180.15<br>(5.04 to<br>888.54)           | 430.31<br>(8.70 to<br>2,648.29)          | 2.41<br>(0.14 to<br>8.71)       | 5.11<br>(0.19 to<br>17.47)      | 4.54<br>(0.17 to<br>15.44)     | 8.09<br>(0.27 to<br>34.37)      |
|                                                                  | 36.41<br>(23.78 to<br>76.68)             | 40.50<br>(23.31 to<br>89.00)            | 36.91<br>(21.33 to<br>83.10)            | 52.45<br>(30.77 to<br>113.62)            | 0.66<br>(0.41 to<br>1.92)       | 0.82<br>(0.43 to<br>2.72)       | 0.76<br>(0.39 to<br>2.66)      | 1.00<br>(0.55 to<br>3.11)       |
| Dietary iron deficiency                                          | 36.41<br>(23.78 to<br>76.68)             | 40.50<br>(23.31 to<br>89.00)            | 36.91<br>(21.33 to<br>83.10)            | 52.45<br>(30.77 to<br>113.62)            | 0.66<br>(0.41 to<br>1.92)       | 0.82<br>(0.43 to<br>2.72)       | 0.76<br>(0.39 to<br>2.66)      | 1.00<br>(0.55 to<br>3.11)       |
|                                                                  | 939.04<br>(588.18 to<br>1,757.46)        | 699.25<br>(434.82 to<br>1,067.80)       | 617.88<br>(393.64 to<br>920.08)         | 989.44<br>(587.83 to<br>1,704.06)        | 20.82<br>(14.57 to<br>30.57)    | 18.59<br>(12.33 to<br>26.78)    | 17.33<br>(11.56 to<br>24.49)   | 23.25<br>(15.44 to<br>33.70)    |
| Other nutritional deficiencies                                   | 939.04<br>(588.18 to<br>1,757.46)        | 699.25<br>(434.82 to<br>1,067.80)       | 617.88<br>(393.64 to<br>920.08)         | 989.44<br>(587.83 to<br>1,704.06)        | 20.82<br>(14.57 to<br>30.57)    | 18.59<br>(12.33 to<br>26.78)    | 17.33<br>(11.56 to<br>24.49)   | 23.25<br>(15.44 to<br>33.70)    |
|                                                                  | 46,409.26<br>(24,573.95 to<br>79,594.29) | 10,347.65<br>(5,968.76 to<br>17,525.66) | 9,245.66<br>(5,388.66 to<br>15,403.12)  | 19,720.35<br>(10,276.18 to<br>36,316.63) | 581.99<br>(323.73 to<br>969.81) | 167.08<br>(108.37 to<br>251.14) | 151.32<br>(99.52 to<br>226.76) | 283.80<br>(168.16 to<br>478.28) |
| Other communicable, maternal, neonatal, and nutritional diseases | 46,409.26<br>(24,573.95 to<br>79,594.29) | 10,347.65<br>(5,968.76 to<br>17,525.66) | 9,245.66<br>(5,388.66 to<br>15,403.12)  | 19,720.35<br>(10,276.18 to<br>36,316.63) | 581.99<br>(323.73 to<br>969.81) | 167.08<br>(108.37 to<br>251.14) | 151.32<br>(99.52 to<br>226.76) | 283.80<br>(168.16 to<br>478.28) |
|                                                                  | 41,227.91<br>(19,530.75 to<br>72,762.90) | 6,294.70<br>(2,480.06 to<br>12,927.01)  | 5,645.24<br>(2,246.13 to<br>11,621.54)  | 13,879.66<br>(5,221.54 to<br>28,662.24)  | 485.14<br>(230.78 to<br>854.25) | 76.27<br>(31.39 to<br>153.56)   | 68.49<br>(28.44 to<br>138.02)  | 165.50<br>(63.93 to<br>339.20)  |
| Sexually transmitted infections excluding HIV                    | 41,227.91<br>(19,530.75 to<br>72,762.90) | 6,294.70<br>(2,480.06 to<br>12,927.01)  | 5,645.24<br>(2,246.13 to<br>11,621.54)  | 13,879.66<br>(5,221.54 to<br>28,662.24)  | 485.14<br>(230.78 to<br>854.25) | 76.27<br>(31.39 to<br>153.56)   | 68.49<br>(28.44 to<br>138.02)  | 165.50<br>(63.93 to<br>339.20)  |
|                                                                  | 41,004.94<br>(19,321.46 to<br>72,566.68) | 6,076.56<br>(2,248.28 to<br>12,777.68)  | 5,446.22<br>(2,036.62 to<br>11,475.29)  | 13,620.66<br>(4,932.28 to<br>28,383.78)  | 480.77<br>(226.99 to<br>850.29) | 71.90<br>(26.83 to<br>150.47)   | 64.46<br>(24.40 to<br>135.07)  | 160.41<br>(58.56 to<br>333.83)  |
| Syphilis                                                         | 41,004.94<br>(19,321.46 to<br>72,566.68) | 6,076.56<br>(2,248.28 to<br>12,777.68)  | 5,446.22<br>(2,036.62 to<br>11,475.29)  | 13,620.66<br>(4,932.28 to<br>28,383.78)  | 480.77<br>(226.99 to<br>850.29) | 71.90<br>(26.83 to<br>150.47)   | 64.46<br>(24.40 to<br>135.07)  | 160.41<br>(58.56 to<br>333.83)  |
|                                                                  | 45.50<br>(26.51 to<br>71.26)             | 44.55<br>(24.79 to<br>73.57)            | 40.61<br>(23.16 to<br>65.13)            | 53.08<br>(29.99 to<br>86.37)             | 0.88<br>(0.51 to<br>1.38)       | 0.88<br>(0.50 to<br>1.41)       | 0.81<br>(0.47 to<br>1.28)      | 1.03<br>(0.59 to<br>1.64)       |
| Chlamydial infection                                             | 45.50<br>(26.51 to<br>71.26)             | 44.55<br>(24.79 to<br>73.57)            | 40.61<br>(23.16 to<br>65.13)            | 53.08<br>(29.99 to<br>86.37)             | 0.88<br>(0.51 to<br>1.38)       | 0.88<br>(0.50 to<br>1.41)       | 0.81<br>(0.47 to<br>1.28)      | 1.03<br>(0.59 to<br>1.64)       |
|                                                                  | 114.67<br>(67.33 to<br>182.06)           | 112.47<br>(61.29 to<br>184.75)          | 102.77<br>(56.21 to<br>167.39)          | 132.87<br>(70.62 to<br>219.12)           | 2.28<br>(1.34 to<br>3.60)       | 2.29<br>(1.28 to<br>3.69)       | 2.12<br>(1.20 to<br>3.39)      | 2.65<br>(1.47 to<br>4.32)       |
| Gonococcal infection                                             | 114.67<br>(67.33 to<br>182.06)           | 112.47<br>(61.29 to<br>184.75)          | 102.77<br>(56.21 to<br>167.39)          | 132.87<br>(70.62 to<br>219.12)           | 2.28<br>(1.34 to<br>3.60)       | 2.29<br>(1.28 to<br>3.69)       | 2.12<br>(1.20 to<br>3.39)      | 2.65<br>(1.47 to<br>4.32)       |
|                                                                  | 62.79<br>(37.34 to<br>99.06)             | 61.13<br>(33.27 to<br>99.80)            | 55.64<br>(30.61 to<br>90.51)            | 73.06<br>(40.23 to<br>121.32)            | 1.22<br>(0.73 to<br>1.92)       | 1.21<br>(0.69 to<br>1.94)       | 1.11<br>(0.64 to<br>1.78)      | 1.42<br>(0.79 to<br>2.33)       |
| Other sexually transmitted infections                            | 62.79<br>(37.34 to<br>99.06)             | 61.13<br>(33.27 to<br>99.80)            | 55.64<br>(30.61 to<br>90.51)            | 73.06<br>(40.23 to<br>121.32)            | 1.22<br>(0.73 to<br>1.92)       | 1.21<br>(0.69 to<br>1.94)       | 1.11<br>(0.64 to<br>1.78)      | 1.42<br>(0.79 to<br>2.33)       |
|                                                                  | 3,363.60<br>(2,761.70 to<br>4,062.42)    | 3,071.49<br>(2,206.30 to<br>4,249.11)   | 2,739.75<br>(2,016.74 to<br>3,693.62)   | 3,912.21<br>(2,900.15 to<br>5,226.88)    | 69.68<br>(56.86 to<br>84.34)    | 69.63<br>(50.78 to<br>95.27)    | 63.02<br>(47.53 to<br>84.17)   | 85.29<br>(64.04 to<br>112.62)   |
| Acute hepatitis                                                  | 3,363.60<br>(2,761.70 to<br>4,062.42)    | 3,071.49<br>(2,206.30 to<br>4,249.11)   | 2,739.75<br>(2,016.74 to<br>3,693.62)   | 3,912.21<br>(2,900.15 to<br>5,226.88)    | 69.68<br>(56.86 to<br>84.34)    | 69.63<br>(50.78 to<br>95.27)    | 63.02<br>(47.53 to<br>84.17)   | 85.29<br>(64.04 to<br>112.62)   |
|                                                                  | 63.29<br>(10.33 to<br>142.46)            | 33.97<br>(10.05 to<br>80.57)            | 30.19<br>(9.04 to<br>70.00)             | 57.00<br>(14.45 to<br>132.13)            | 0.85<br>(0.20 to<br>1.78)       | 0.62<br>(0.19 to<br>1.46)       | 0.56<br>(0.18 to<br>1.30)      | 0.92<br>(0.28 to<br>2.08)       |
| Acute hepatitis A                                                | 63.29<br>(10.33 to<br>142.46)            | 33.97<br>(10.05 to<br>80.57)            | 30.19<br>(9.04 to<br>70.00)             | 57.00<br>(14.45 to<br>132.13)            | 0.85<br>(0.20 to<br>1.78)       | 0.62<br>(0.19 to<br>1.46)       | 0.56<br>(0.18 to<br>1.30)      | 0.92<br>(0.28 to<br>2.08)       |
|                                                                  | 2,580.45<br>(2,041.19 to<br>3,211.57)    | 2,460.67<br>(1,743.17 to<br>3,461.14)   | 2,176.96<br>(1,560.81 to<br>2,975.25)   | 3,072.36<br>(2,242.55 to<br>4,164.90)    | 56.92<br>(45.55 to<br>70.23)    | 57.71<br>(41.63 to<br>80.69)    | 51.77<br>(38.08 to<br>70.67)   | 70.22<br>(51.90 to<br>94.54)    |
| Acute hepatitis B                                                | 2,580.45<br>(2,041.19 to<br>3,211.57)    | 2,460.67<br>(1,743.17 to<br>3,461.14)   | 2,176.96<br>(1,560.81 to<br>2,975.25)   | 3,072.36<br>(2,242.55 to<br>4,164.90)    | 56.92<br>(45.55 to<br>70.23)    | 57.71<br>(41.63 to<br>80.69)    | 51.77<br>(38.08 to<br>70.67)   | 70.22<br>(51.90 to<br>94.54)    |
|                                                                  | 66.60<br>(46.61 to<br>95.74)             | 84.23<br>(53.04 to<br>123.70)           | 80.67<br>(51.45 to<br>117.57)           | 93.93<br>(61.65 to<br>134.47)            | 1.64<br>(1.14 to<br>2.31)       | 2.22<br>(1.43 to<br>3.34)       | 2.16<br>(1.42 to<br>3.19)      | 2.39<br>(1.57 to<br>3.51)       |
| Acute hepatitis C                                                | 66.60<br>(46.61 to<br>95.74)             | 84.23<br>(53.04 to<br>123.70)           | 80.67<br>(51.45 to<br>117.57)           | 93.93<br>(61.65 to<br>134.47)            | 1.64<br>(1.14 to<br>2.31)       | 2.22<br>(1.43 to<br>3.34)       | 2.16<br>(1.42 to<br>3.19)      | 2.39<br>(1.57 to<br>3.51)       |
|                                                                  | 653.26<br>(464.44 to<br>894.63)          | 492.62<br>(306.99 to<br>728.83)         | 451.93<br>(286.02 to<br>667.22)         | 688.93<br>(439.90 to<br>1,007.29)        | 10.27<br>(7.40 to<br>13.89)     | 9.08<br>(5.91 to<br>13.23)      | 8.53<br>(5.53 to<br>12.38)     | 11.76<br>(7.74 to<br>16.71)     |
| Acute hepatitis E                                                | 653.26<br>(464.44 to<br>894.63)          | 492.62<br>(306.99 to<br>728.83)         | 451.93<br>(286.02 to<br>667.22)         | 688.93<br>(439.90 to<br>1,007.29)        | 10.27<br>(7.40 to<br>13.89)     | 9.08<br>(5.91 to<br>13.23)      | 8.53<br>(5.53 to<br>12.38)     | 11.76<br>(7.74 to<br>16.71)     |
|                                                                  | 1,817.74<br>(780.28 to<br>5,729.59)      | 981.46<br>(491.13 to<br>2,295.52)       | 860.67<br>(439.76 to<br>1,981.17)       | 1,928.47<br>(867.14 to<br>5,041.65)      | 27.17<br>(14.06 to<br>72.70)    | 21.17<br>(13.08 to<br>37.41)    | 19.81<br>(12.50 to<br>34.51)   | 33.01<br>(18.13 to<br>66.98)    |
| Other unspecified infectious diseases                            | 1,817.74<br>(780.28 to<br>5,729.59)      | 981.46<br>(491.13 to<br>2,295.52)       | 860.67<br>(439.76 to<br>1,981.17)       | 1,928.47<br>(867.14 to<br>5,041.65)      | 27.17<br>(14.06 to<br>72.70)    | 21.17<br>(13.08 to<br>37.41)    | 19.81<br>(12.50 to<br>34.51)   | 33.01<br>(18.13 to<br>66.98)    |



|                                      | 246,346.85<br>(218,995.03 to<br>276,700.78)     | 332,671.81<br>(275,888.69 to<br>400,342.21)     | 262,484.92<br>(222,022.30 to<br>307,178.02)     | 461,070.06<br>(377,412.42 to<br>560,654.14)      | 7,519.01<br>(6,713.80 to<br>8,352.07)        | 11,828.57<br>(10,290.73 to<br>13,605.96)     | 9,626.85<br>(8,533.57 to<br>10,789.25)       | 15,205.45<br>(13,081.43 to<br>17,692.49)     |
|--------------------------------------|-------------------------------------------------|-------------------------------------------------|-------------------------------------------------|--------------------------------------------------|----------------------------------------------|----------------------------------------------|----------------------------------------------|----------------------------------------------|
| Guinea-Bissau                        |                                                 |                                                 |                                                 |                                                  |                                              |                                              |                                              |                                              |
| Cause                                | YLLs (actual counts)                            |                                                 |                                                 |                                                  | Deaths (actual counts)                       |                                              |                                              |                                              |
|                                      | 2016                                            | 2040 Forecast                                   | 2040 Better Scenario                            | 2040 Worse Scenario                              | 2016                                         | 2040 Forecast                                | 2040 Better Scenario                         | 2040 Worse Scenario                          |
| <b>Neoplasms</b>                     | <b>42,288.93</b><br>(36,316.04 to<br>48,877.59) | <b>77,093.99</b><br>(61,387.95 to<br>97,025.88) | <b>70,720.76</b><br>(58,200.43 to<br>85,756.96) | <b>83,839.88</b><br>(64,806.18 to<br>107,981.95) | <b>1,357.65</b><br>(1,166.03 to<br>1,560.65) | <b>2,609.74</b><br>(2,141.85 to<br>3,179.74) | <b>2,491.10</b><br>(2,114.08 to<br>2,915.00) | <b>2,690.24</b><br>(2,129.04 to<br>3,342.47) |
| Lip and oral cavity cancer           | 446.90<br>(340.97 to<br>606.70)                 | 865.84<br>(423.47 to<br>1,664.34)               | 622.66<br>(341.44 to<br>1,122.23)               | 1,316.64<br>(564.50 to<br>2,646.78)              | 15.43<br>(11.96 to<br>20.60)                 | 29.98<br>(15.77 to<br>55.96)                 | 22.89<br>(13.47 to<br>39.98)                 | 43.26<br>(19.68 to<br>86.25)                 |
| Nasopharynx cancer                   | 123.73<br>(84.18 to<br>169.96)                  | 251.75<br>(108.31 to<br>521.57)                 | 169.07<br>(83.01 to<br>318.90)                  | 401.35<br>(160.14 to<br>874.43)                  | 3.25<br>(2.21 to<br>4.49)                    | 6.81<br>(2.90 to<br>14.00)                   | 4.61<br>(2.26 to<br>8.65)                    | 10.68<br>(4.16 to<br>23.02)                  |
| Other pharynx cancer                 | 251.20<br>(175.01 to<br>331.05)                 | 356.99<br>(185.05 to<br>616.34)                 | 320.45<br>(172.94 to<br>541.18)                 | 472.79<br>(226.57 to<br>848.80)                  | 8.49<br>(6.01 to<br>11.08)                   | 12.46<br>(6.77 to<br>21.19)                  | 11.61<br>(6.50 to<br>19.64)                  | 15.85<br>(7.92 to<br>28.37)                  |
| Esophageal cancer                    | 1,464.66<br>(1,128.54 to<br>1,822.08)           | 2,431.49<br>(1,183.39 to<br>4,543.29)           | 1,754.87<br>(971.41 to<br>3,032.67)             | 3,393.88<br>(1,536.85 to<br>6,632.91)            | 53.32<br>(41.62 to<br>65.64)                 | 86.97<br>(44.97 to<br>158.81)                | 66.38<br>(38.83 to<br>109.35)                | 116.26<br>(55.18 to<br>217.66)               |
| Stomach cancer                       | 4,311.47<br>(3,638.57 to<br>5,073.58)           | 5,041.20<br>(3,986.26 to<br>6,395.73)           | 4,810.23<br>(3,855.35 to<br>5,975.80)           | 5,442.86<br>(4,266.09 to<br>6,928.99)            | 160.88<br>(136.25 to<br>186.60)              | 194.35<br>(158.77 to<br>238.52)              | 194.85<br>(161.29 to<br>236.30)              | 199.99<br>(159.71 to<br>248.28)              |
| Colon and rectum cancer              | 2,438.00<br>(1,973.96 to<br>2,998.19)           | 5,273.97<br>(3,693.89 to<br>7,610.34)           | 5,424.92<br>(3,846.45 to<br>7,794.57)           | 5,271.84<br>(3,594.66 to<br>7,736.93)            | 88.90<br>(72.85 to<br>108.05)                | 201.48<br>(145.03 to<br>283.04)              | 217.85<br>(158.21 to<br>306.55)              | 191.05<br>(131.71 to<br>275.13)              |
| Liver cancer                         | 6,575.41<br>(5,202.17 to<br>8,453.38)           | 14,955.77<br>(9,908.43 to<br>22,620.82)         | 12,717.29<br>(9,023.70 to<br>18,000.41)         | 16,736.95<br>(10,591.57 to<br>26,354.83)         | 196.12<br>(156.34 to<br>246.24)              | 457.06<br>(312.55 to<br>673.18)              | 404.03<br>(294.27 to<br>563.28)              | 492.65<br>(319.26 to<br>759.44)              |
| Liver cancer due to hepatitis B      | 3,822.02<br>(3,010.57 to<br>4,938.82)           | 8,671.66<br>(5,663.98 to<br>13,036.19)          | 7,436.53<br>(5,236.34 to<br>10,495.96)          | 9,459.00<br>(5,923.47 to<br>14,872.05)           | 110.03<br>(85.50 to<br>140.72)               | 255.79<br>(172.00 to<br>376.26)              | 227.34<br>(163.24 to<br>315.89)              | 269.32<br>(172.62 to<br>414.03)              |
| Liver cancer due to hepatitis C      | 446.64<br>(297.44 to<br>633.89)                 | 1,035.94<br>(625.15 to<br>1,723.99)             | 913.34<br>(581.09 to<br>1,437.22)               | 1,096.54<br>(642.89 to<br>1,885.25)              | 16.64<br>(11.18 to<br>24.25)                 | 39.63<br>(23.80 to<br>63.70)                 | 36.97<br>(23.60 to<br>56.01)                 | 39.88<br>(23.25 to<br>66.77)                 |
| Liver cancer due to alcohol use      | 700.74<br>(530.02 to<br>939.47)                 | 1,664.13<br>(1,033.07 to<br>2,677.14)           | 1,322.21<br>(890.22 to<br>1,950.24)             | 2,192.72<br>(1,269.60 to<br>3,680.30)            | 23.87<br>(18.22 to<br>31.24)                 | 56.20<br>(36.37 to<br>87.07)                 | 47.01<br>(32.68 to<br>67.04)                 | 70.60<br>(42.86 to<br>113.54)                |
| Liver cancer due to other causes     | 1,606.00<br>(1,254.34 to<br>2,146.14)           | 3,584.04<br>(2,336.55 to<br>5,580.42)           | 3,045.20<br>(2,116.66 to<br>4,424.96)           | 3,988.69<br>(2,495.45 to<br>6,471.40)            | 45.57<br>(35.79 to<br>59.73)                 | 105.45<br>(69.12 to<br>160.14)               | 92.70<br>(65.48 to<br>131.55)                | 112.86<br>(70.75 to<br>177.93)               |
| Gallbladder and biliary tract cancer | 513.83<br>(316.79 to<br>755.07)                 | 729.15<br>(462.16 to<br>1,054.58)               | 781.21<br>(492.18 to<br>1,138.11)               | 671.28<br>(420.40 to<br>979.85)                  | 20.61<br>(13.00 to<br>29.85)                 | 30.11<br>(19.41 to<br>42.40)                 | 33.44<br>(21.87 to<br>47.46)                 | 26.68<br>(16.92 to<br>37.92)                 |
| Pancreatic cancer                    | 1,238.24<br>(984.54 to<br>1,508.40)             | 2,869.48<br>(2,217.31 to<br>3,745.12)           | 2,948.88<br>(2,303.06 to<br>3,760.93)           | 2,677.43<br>(2,042.44 to<br>3,554.47)            | 49.42<br>(39.85 to<br>60.49)                 | 117.59<br>(91.63 to<br>151.51)               | 126.10<br>(100.27 to<br>157.77)              | 105.16<br>(80.26 to<br>137.77)               |
| Larynx cancer                        | 426.74<br>(295.89 to<br>542.39)                 | 732.66<br>(341.25 to<br>1,356.56)               | 446.55<br>(232.26 to<br>757.33)                 | 1,097.28<br>(470.12 to<br>2,097.72)              | 15.73<br>(11.09 to<br>19.95)                 | 26.77<br>(13.02 to<br>48.12)                 | 17.10<br>(9.37 to<br>27.78)                  | 38.58<br>(17.20 to<br>73.04)                 |
| Tracheal, bronchus, and lung cancer  | 2,465.45<br>(1,827.90 to<br>3,178.99)           | 5,968.83<br>(2,820.02 to<br>10,735.69)          | 2,850.43<br>(1,575.93 to<br>4,736.76)           | 7,143.51<br>(3,166.98 to<br>12,934.42)           | 95.49<br>(71.44 to<br>121.70)                | 229.58<br>(115.86 to<br>396.00)              | 115.67<br>(67.43 to<br>182.42)               | 264.28<br>(125.22 to<br>466.59)              |
| Malignant skin melanoma              | 124.96<br>(92.31 to<br>182.52)                  | 287.85<br>(211.77 to<br>418.13)                 | 322.52<br>(239.66 to<br>467.72)                 | 246.78<br>(182.16 to<br>362.65)                  | 4.26<br>(3.23 to<br>6.20)                    | 10.34<br>(7.81 to<br>14.81)                  | 12.16<br>(9.36 to<br>17.15)                  | 8.40<br>(6.33 to<br>12.32)                   |
| Non-melanoma skin cancer             | 125.75<br>(95.66 to<br>156.75)                  | 237.79<br>(182.83 to<br>297.15)                 | 239.65<br>(184.70 to<br>300.26)                 | 247.33<br>(187.78 to<br>308.89)                  | 4.27<br>(3.34 to<br>5.17)                    | 8.75<br>(6.99 to<br>10.30)                   | 9.44<br>(7.50 to<br>11.15)                   | 8.44<br>(6.58 to<br>10.06)                   |
| Breast cancer                        | 3,550.14<br>(2,444.85 to<br>4,808.86)           | 6,922.27<br>(4,616.60 to<br>9,936.35)           | 6,730.57<br>(4,560.27 to<br>9,489.35)           | 7,358.88<br>(4,739.11 to<br>10,640.07)           | 109.36<br>(76.17 to<br>147.35)               | 221.47<br>(150.21 to<br>309.02)              | 220.57<br>(154.06 to<br>303.70)              | 229.52<br>(151.82 to<br>333.12)              |

|                                 |                                       |                                       |                                       |                                        |                                |                                 |                                 |                                 |
|---------------------------------|---------------------------------------|---------------------------------------|---------------------------------------|----------------------------------------|--------------------------------|---------------------------------|---------------------------------|---------------------------------|
| Cervical cancer                 | 4,737.30<br>(2,692.16 to<br>6,467.02) | 6,303.45<br>(3,517.88 to<br>8,855.12) | 5,940.88<br>(3,338.49 to<br>8,304.15) | 7,027.86<br>(3,808.92 to<br>10,032.79) | 145.88<br>(84.64 to<br>196.65) | 195.27<br>(11.40 to<br>267.19)  | 188.04<br>(111.28 to<br>253.31) | 212.85<br>(119.52 to<br>294.12) |
| Uterine cancer                  | 545.76<br>(334.94 to<br>727.24)       | 877.55<br>(540.96 to<br>1,204.76)     | 842.17<br>(524.31 to<br>1,160.31)     | 963.12<br>(587.10 to<br>1,306.81)      | 20.72<br>(13.07 to<br>27.16)   | 34.45<br>(22.04 to<br>45.44)    | 34.25<br>(22.32 to<br>45.31)    | 36.43<br>(23.14 to<br>47.81)    |
| Ovarian cancer                  | 575.28<br>(402.25 to<br>880.15)       | 1,335.96<br>(897.02 to<br>2,052.42)   | 1,394.00<br>(940.96 to<br>2,136.75)   | 1,217.60<br>(809.35 to<br>1,870.15)    | 18.16<br>(12.81 to<br>27.62)   | 42.93<br>(29.41 to<br>65.11)    | 45.60<br>(31.52 to<br>68.50)    | 38.35<br>(26.09 to<br>58.25)    |
| Prostate cancer                 | 1,654.08<br>(945.83 to<br>2,570.67)   | 3,531.69<br>(2,072.93 to<br>5,448.14) | 4,046.82<br>(2,492.14 to<br>6,072.69) | 2,975.78<br>(1,739.78 to<br>4,726.33)  | 87.34<br>(50.75 to<br>131.17)  | 194.59<br>(114.64 to<br>293.01) | 233.52<br>(144.87 to<br>340.32) | 156.31<br>(90.97 to<br>242.57)  |
| Testicular cancer               | 123.11<br>(80.28 to<br>165.88)        | 176.15<br>(112.05 to<br>246.30)       | 171.83<br>(108.65 to<br>239.26)       | 189.48<br>(121.29 to<br>264.47)        | 2.75<br>(1.76 to<br>3.67)      | 4.05<br>(2.54 to<br>5.62)       | 4.04<br>(2.51 to<br>5.56)       | 4.22<br>(2.64 to<br>5.77)       |
| <b>Guinea-Bissau</b>            |                                       |                                       |                                       |                                        |                                |                                 |                                 |                                 |
| Cause                           | YLLs (actual counts)                  |                                       |                                       |                                        | Deaths (actual counts)         |                                 |                                 |                                 |
|                                 | 2016                                  | 2040 Forecast                         | 2040 Better Scenario                  | 2040 Worse Scenario                    | 2016                           | 2040 Forecast                   | 2040 Better Scenario            | 2040 Worse Scenario             |
| Kidney cancer                   | 452.25<br>(372.30 to<br>543.10)       | 894.87<br>(678.24 to<br>1,243.74)     | 945.37<br>(723.75 to<br>1,276.32)     | 868.85<br>(671.32 to<br>1,185.03)      | 12.10<br>(9.86 to<br>15.15)    | 28.41<br>(21.25 to<br>39.47)    | 31.06<br>(23.99 to<br>41.99)    | 25.24<br>(19.17 to<br>34.70)    |
| Bladder cancer                  | 667.75<br>(492.24 to<br>902.10)       | 1,387.84<br>(915.61 to<br>2,142.66)   | 1,291.05<br>(889.31 to<br>1,904.24)   | 1,438.16<br>(913.62 to<br>2,304.03)    | 26.22<br>(19.78 to<br>35.09)   | 55.38<br>(38.11 to<br>82.09)    | 54.91<br>(39.76 to<br>77.48)    | 54.20<br>(35.73 to<br>82.97)    |
| Brain and nervous system cancer | 1,374.15<br>(1,038.64 to<br>1,646.78) | 2,548.75<br>(1,894.95 to<br>3,107.75) | 2,674.62<br>(2,001.91 to<br>3,280.71) | 2,613.95<br>(1,955.70 to<br>3,165.70)  | 30.97<br>(23.49 to<br>37.70)   | 65.03<br>(49.25 to<br>79.02)    | 70.05<br>(53.31 to<br>85.51)    | 62.03<br>(46.75 to<br>74.99)    |
| Thyroid cancer                  | 148.98<br>(110.83 to<br>197.47)       | 275.78<br>(185.11 to<br>396.73)       | 248.63<br>(172.99 to<br>353.88)       | 306.66<br>(201.69 to<br>444.90)        | 4.75<br>(3.59 to<br>6.22)      | 9.00<br>(6.25 to<br>12.62)      | 8.38<br>(6.02 to<br>11.56)      | 9.66<br>(6.55 to<br>13.70)      |
| Mesothelioma                    | 76.75<br>(51.29 to<br>110.93)         | 143.08<br>(95.64 to<br>212.86)        | 141.86<br>(96.49 to<br>207.06)        | 149.34<br>(97.62 to<br>227.06)         | 2.36<br>(1.64 to<br>3.33)      | 4.56<br>(3.17 to<br>6.51)       | 4.72<br>(3.36 to<br>6.64)       | 4.55<br>(3.10 to<br>6.64)       |
| Hodgkin lymphoma                | 324.11<br>(243.99 to<br>404.54)       | 313.25<br>(221.58 to<br>425.83)       | 281.02<br>(198.87 to<br>377.60)       | 407.18<br>(295.28 to<br>550.58)        | 6.86<br>(5.06 to<br>8.40)      | 7.04<br>(5.03 to<br>9.26)       | 6.45<br>(4.62 to<br>8.37)       | 8.70<br>(6.22 to<br>11.31)      |
| Non-Hodgkin lymphoma            | 1,895.34<br>(1,560.88 to<br>2,263.11) | 3,267.17<br>(2,571.49 to<br>4,053.90) | 3,358.48<br>(2,660.31 to<br>4,176.48) | 3,405.65<br>(2,711.28 to<br>4,216.40)  | 41.24<br>(34.19 to<br>50.66)   | 82.39<br>(66.03 to<br>104.11)   | 87.11<br>(70.14 to<br>109.37)   | 79.25<br>(63.43 to<br>99.33)    |
| Multiple myeloma                | 391.80<br>(282.98 to<br>567.63)       | 981.46<br>(675.08 to<br>1,468.23)     | 1,023.51<br>(714.73 to<br>1,510.35)   | 892.20<br>(596.84 to<br>1,324.58)      | 13.82<br>(10.08 to<br>20.01)   | 35.10<br>(24.61 to<br>51.20)    | 37.71<br>(27.09 to<br>55.14)    | 30.90<br>(21.16 to<br>45.08)    |
| Leukemia                        | 2,221.07<br>(1,829.00 to<br>2,636.64) | 3,274.21<br>(2,555.93 to<br>4,326.35) | 3,191.10<br>(2,548.64 to<br>4,149.25) | 3,597.30<br>(2,829.67 to<br>4,702.03)  | 48.41<br>(40.12 to<br>58.77)   | 82.26<br>(63.87 to<br>109.68)   | 81.23<br>(65.08 to<br>105.31)   | 84.82<br>(64.92 to<br>113.20)   |
| Acute lymphoid leukemia         | 429.17<br>(336.03 to<br>549.25)       | 605.85<br>(462.57 to<br>826.57)       | 604.98<br>(460.86 to<br>809.22)       | 683.19<br>(521.67 to<br>906.38)        | 7.33<br>(5.95 to<br>9.40)      | 12.05<br>(9.22 to<br>16.72)     | 12.05<br>(9.41 to<br>16.46)     | 12.77<br>(9.77 to<br>17.45)     |
| Chronic lymphoid leukemia       | 95.44<br>(74.62 to<br>123.50)         | 161.17<br>(121.07 to<br>219.89)       | 159.03<br>(122.36 to<br>209.45)       | 158.00<br>(114.54 to<br>218.09)        | 4.09<br>(3.19 to<br>5.26)      | 7.07<br>(5.35 to<br>9.66)       | 7.17<br>(5.53 to<br>9.41)       | 6.70<br>(4.85 to<br>9.28)       |
| Acute myeloid leukemia          | 758.34<br>(583.83 to<br>958.17)       | 1,337.80<br>(1,040.64 to<br>1,703.12) | 1,355.30<br>(1,058.79 to<br>1,708.89) | 1,422.78<br>(1,103.41 to<br>1,822.84)  | 14.18<br>(11.35 to<br>17.32)   | 29.99<br>(23.37 to<br>38.94)    | 30.64<br>(24.28 to<br>39.07)    | 29.69<br>(23.20 to<br>38.97)    |
| Chronic myeloid leukemia        | 291.71<br>(224.81 to<br>383.20)       | 340.12<br>(237.00 to<br>480.72)       | 320.03<br>(229.28 to<br>451.33)       | 351.73<br>(240.35 to<br>504.85)        | 7.08<br>(5.52 to<br>9.19)      | 8.90<br>(6.40 to<br>12.50)      | 8.62<br>(6.36 to<br>11.89)      | 8.92<br>(6.29 to<br>12.70)      |
| Other leukemia                  | 646.41<br>(442.48 to<br>872.69)       | 829.28<br>(511.70 to<br>1,255.55)     | 751.76<br>(470.19 to<br>1,119.65)     | 981.60<br>(610.14 to<br>1,467.05)      | 15.74<br>(10.89 to<br>21.39)   | 24.26<br>(15.51 to<br>35.11)    | 22.75<br>(14.99 to<br>32.30)    | 26.74<br>(17.04 to<br>39.08)    |
| Other neoplasms                 | 3,054.72<br>(2,517.15 to<br>3,779.88) | 4,857.74<br>(3,982.37 to<br>6,330.47) | 5,030.14<br>(4,116.59 to<br>6,532.25) | 5,307.95<br>(4,275.76 to<br>6,838.13)  | 70.56<br>(59.26 to<br>88.59)   | 135.57<br>(114.72 to<br>171.14) | 147.35<br>(124.37 to<br>187.80) | 131.92<br>(109.86 to<br>167.37) |

|                                               |                                          |                                            |                                          |                                             |                                       |                                       |                                       |                                       |
|-----------------------------------------------|------------------------------------------|--------------------------------------------|------------------------------------------|---------------------------------------------|---------------------------------------|---------------------------------------|---------------------------------------|---------------------------------------|
| Cardiovascular diseases                       | 81,304.47<br>(70,310.62 to<br>93,154.28) | 108,932.75<br>(75,170.10 to<br>149,529.77) | 63,017.74<br>(45,651.24 to<br>84,437.25) | 179,572.26<br>(121,619.64 to<br>252,494.10) | 3,154.38<br>(2,731.64 to<br>3,592.39) | 4,558.84<br>(3,422.66 to<br>5,922.14) | 2,911.19<br>(2,267.73 to<br>3,705.64) | 6,935.87<br>(5,075.59 to<br>9,168.76) |
| Rheumatic heart disease                       | 2,250.59<br>(1,766.57 to<br>2,763.88)    | 1,308.41<br>(907.45 to<br>1,811.07)        | 1,156.63<br>(831.89 to<br>1,595.37)      | 1,746.01<br>(1,217.35 to<br>2,388.65)       | 65.79<br>(51.65 to<br>80.03)          | 45.83<br>(33.46 to<br>60.68)          | 43.12<br>(32.78 to<br>56.79)          | 55.60<br>(40.50 to<br>73.84)          |
| Ischemic heart disease                        | 35,676.99<br>(29,880.65 to<br>43,071.43) | 53,321.41<br>(31,373.13 to<br>84,850.14)   | 26,856.72<br>(16,027.55 to<br>42,895.21) | 89,816.64<br>(52,323.66 to<br>141,883.14)   | 1,534.40<br>(1,301.94 to<br>1,826.85) | 2,386.59<br>(1,536.42 to<br>3,599.12) | 1,375.09<br>(897.74 to<br>2,056.50)   | 3,706.59<br>(2,332.71 to<br>5,597.81) |
| Stroke                                        | 30,605.71<br>(25,772.01 to<br>36,094.72) | 34,670.50<br>(20,717.38 to<br>56,666.87)   | 17,746.23<br>(11,024.35 to<br>28,969.57) | 63,344.84<br>(38,303.96 to<br>102,403.74)   | 1,144.63<br>(973.05 to<br>1,339.32)   | 1,409.50<br>(939.82 to<br>2,109.03)   | 819.05<br>(570.66 to<br>1,204.86)     | 2,347.56<br>(1,534.59 to<br>3,601.59) |
| Ischemic stroke                               | 8,458.89<br>(7,140.31 to<br>9,921.49)    | 9,894.88<br>(6,065.07 to<br>16,320.43)     | 5,896.39<br>(3,775.66 to<br>9,433.06)    | 14,857.04<br>(8,898.22 to<br>24,127.34)     | 415.10<br>(355.61 to<br>481.32)       | 537.59<br>(343.68 to<br>876.87)       | 362.64<br>(244.40 to<br>582.98)       | 737.60<br>(467.06 to<br>1,231.26)     |
| Intracerebral hemorrhage                      | 22,146.82<br>(18,472.88 to<br>26,372.97) | 24,775.62<br>(13,251.71 to<br>44,411.85)   | 11,849.84<br>(6,694.92 to<br>21,007.58)  | 48,487.80<br>(25,545.16 to<br>84,978.41)    | 729.53<br>(607.97 to<br>864.68)       | 871.91<br>(510.05 to<br>1,475.13)     | 456.41<br>(283.99 to<br>746.04)       | 1,609.96<br>(928.82 to<br>2,769.33)   |
| Hypertensive heart disease                    | 2,872.89<br>(1,325.45 to<br>4,155.61)    | 3,891.95<br>(1,641.75 to<br>6,883.21)      | 2,941.14<br>(1,377.01 to<br>4,848.08)    | 5,592.98<br>(2,140.58 to<br>10,823.09)      | 111.88<br>(52.59 to<br>162.19)        | 166.72<br>(72.28 to<br>293.14)        | 133.37<br>(63.40 to<br>214.50)        | 224.03<br>(88.20 to<br>453.78)        |
| Cardiomyopathy and myocarditis                | 1,251.65<br>(942.73 to<br>1,712.92)      | 2,222.00<br>(1,557.36 to<br>3,412.96)      | 2,225.82<br>(1,570.94 to<br>3,372.32)    | 2,336.83<br>(1,613.35 to<br>3,590.25)       | 32.86<br>(25.35 to<br>44.56)          | 65.52<br>(47.53 to<br>97.53)          | 69.30<br>(50.36 to<br>100.83)         | 63.68<br>(45.47 to<br>95.21)          |
| Myocarditis                                   | 291.02<br>(203.99 to<br>432.12)          | 414.99<br>(273.61 to<br>635.68)            | 401.93<br>(262.27 to<br>615.13)          | 471.06<br>(310.94 to<br>717.36)             | 5.58<br>(3.98 to<br>8.17)             | 9.91<br>(6.15 to<br>13.23)            | 9.49<br>(6.21 to<br>13.46)            | 9.49<br>(6.51 to<br>14.11)            |
| <b>Guinea-Bissau</b>                          |                                          |                                            |                                          |                                             |                                       |                                       |                                       |                                       |
| Cause                                         | YLLs (actual counts)                     |                                            |                                          |                                             | Deaths (actual counts)                |                                       |                                       |                                       |
|                                               | 2016                                     | 2040 Forecast                              | 2040 Better Scenario                     | 2040 Worse Scenario                         | 2016                                  | 2040 Forecast                         | 2040 Better Scenario                  | 2040 Worse Scenario                   |
| Alcoholic cardiomyopathy                      | 98.14<br>(66.21 to<br>142.44)            | 187.31<br>(120.72 to<br>286.58)            | 193.58<br>(123.43 to<br>296.54)          | 197.24<br>(132.57 to<br>293.44)             | 2.98<br>(2.03 to<br>4.24)             | 5.75<br>(3.71 to<br>8.58)             | 6.09<br>(3.97 to<br>9.04)             | 5.90<br>(4.02 to<br>8.59)             |
| Other cardiomyopathy                          | 862.49<br>(636.98 to<br>1,176.57)        | 1,619.69<br>(1,063.09 to<br>2,616.86)      | 1,630.31<br>(1,084.46 to<br>2,591.13)    | 1,668.53<br>(1,075.20 to<br>2,705.87)       | 24.29<br>(18.35 to<br>32.84)          | 50.84<br>(35.26 to<br>78.94)          | 54.10<br>(37.83 to<br>82.34)          | 48.28<br>(32.73 to<br>75.01)          |
| Atrial fibrillation and flutter               | 171.19<br>(128.58 to<br>223.67)          | 377.98<br>(277.02 to<br>503.19)            | 424.18<br>(314.50 to<br>559.17)          | 347.25<br>(249.32 to<br>476.08)             | 12.72<br>(9.58 to<br>16.28)           | 31.66<br>(22.06 to<br>43.07)          | 38.49<br>(27.26 to<br>51.67)          | 26.47<br>(17.38 to<br>37.68)          |
| Aortic aneurysm                               | 368.25<br>(260.63 to<br>481.05)          | 646.57<br>(442.62 to<br>898.05)            | 638.07<br>(455.55 to<br>868.54)          | 636.57<br>(425.54 to<br>900.31)             | 14.20<br>(10.38 to<br>18.36)          | 26.30<br>(19.07 to<br>35.16)          | 27.88<br>(20.83 to<br>36.77)          | 24.24<br>(16.87 to<br>33.35)          |
| Peripheral artery disease                     | 12.93<br>(8.12 to<br>22.81)              | 43.11<br>(24.75 to<br>80.71)               | 48.05<br>(28.25 to<br>90.21)             | 35.36<br>(20.72 to<br>65.31)                | 0.72<br>(0.47 to<br>1.26)             | 2.72<br>(1.53 to<br>5.05)             | 3.31<br>(1.97 to<br>6.07)             | 2.05<br>(1.19 to<br>3.73)             |
| Endocarditis                                  | 927.92<br>(720.91 to<br>1,153.35)        | 1,389.94<br>(974.96 to<br>1,973.27)        | 1,344.70<br>(947.11 to<br>1,886.48)      | 1,646.73<br>(1,172.15 to<br>2,311.00)       | 22.69<br>(17.90 to<br>28.07)          | 41.48<br>(29.41 to<br>55.87)          | 42.57<br>(30.32 to<br>57.44)          | 43.30<br>(30.49 to<br>58.84)          |
| Other cardiovascular and circulatory diseases | 7,166.35<br>(5,351.31 to<br>10,290.95)   | 11,060.89<br>(7,776.34 to<br>16,099.92)    | 9,636.20<br>(7,009.00 to<br>13,443.32)   | 14,069.14<br>(9,585.72 to<br>20,560.93)     | 214.49<br>(157.07 to<br>310.16)       | 382.51<br>(273.38 to<br>550.27)       | 359.01<br>(266.16 to<br>500.32)       | 442.35<br>(309.19 to<br>649.85)       |
| Chronic respiratory diseases                  | 13,923.91<br>(11,863.86 to<br>16,574.36) | 16,874.00<br>(11,060.54 to<br>26,987.52)   | 10,163.63<br>(7,492.01 to<br>14,141.66)  | 23,408.10<br>(14,607.78 to<br>39,312.87)    | 499.48<br>(422.04 to<br>597.87)       | 651.20<br>(428.55 to<br>1,049.02)     | 403.61<br>(302.74 to<br>561.07)       | 850.42<br>(530.39 to<br>1,424.86)     |
| Chronic obstructive pulmonary disease         | 7,518.86<br>(6,208.20 to<br>9,131.34)    | 10,781.87<br>(5,905.88 to<br>19,900.83)    | 5,077.52<br>(3,235.58 to<br>8,093.11)    | 15,867.00<br>(8,195.91 to<br>29,923.82)     | 310.67<br>(255.57 to<br>374.42)       | 456.62<br>(262.28 to<br>822.62)       | 233.16<br>(154.33 to<br>371.20)       | 626.05<br>(333.11 to<br>1,162.77)     |
| Pneumoconiosis                                | 18.48<br>(13.28 to<br>26.50)             | 19.09<br>(13.73 to<br>26.43)               | 18.44<br>(13.03 to<br>25.94)             | 19.33<br>(13.82 to<br>26.49)                | 0.62<br>(0.46 to<br>0.86)             | 0.74<br>(0.55 to<br>0.98)             | 0.74<br>(0.55 to<br>0.98)             | 0.72<br>(0.52 to<br>0.96)             |
| Silicosis                                     | 1.87<br>(1.02 to<br>3.15)                | 1.33<br>(0.71 to<br>2.46)                  | 1.32<br>(0.70 to<br>2.46)                | 1.38<br>(0.73 to<br>2.60)                   | 0.06<br>(0.04 to<br>0.10)             | 0.05<br>(0.03 to<br>0.08)             | 0.05<br>(0.03 to<br>0.09)             | 0.05<br>(0.03 to<br>0.08)             |

|                                                                |                                                         |                                                         |                                                         |                                                         |                                                |                                                  |                                                  |                                                  |
|----------------------------------------------------------------|---------------------------------------------------------|---------------------------------------------------------|---------------------------------------------------------|---------------------------------------------------------|------------------------------------------------|--------------------------------------------------|--------------------------------------------------|--------------------------------------------------|
|                                                                | 3.66<br>(2.39 to<br>5.76)                               | 4.97<br>(3.30 to<br>7.39)                               | 5.16<br>(3.43 to<br>7.80)                               | 4.79<br>(3.20 to<br>7.27)                               | 0.09<br>(0.06 to<br>0.13)                      | 0.13<br>(0.09 to<br>0.19)                        | 0.14<br>(0.10 to<br>0.21)                        | 0.13<br>(0.09 to<br>0.18)                        |
| Asbestosis                                                     |                                                         |                                                         |                                                         |                                                         |                                                |                                                  |                                                  |                                                  |
|                                                                | 1.39<br>(0.54 to<br>2.49)                               | 1.20<br>(0.44 to<br>2.27)                               | 0.94<br>(0.34 to<br>1.80)                               | 1.49<br>(0.58 to<br>2.81)                               | 0.05<br>(0.02 to<br>0.08)                      | 0.05<br>(0.02 to<br>0.08)                        | 0.05<br>(0.01 to<br>0.07)                        | 0.05<br>(0.02 to<br>0.10)                        |
| Coal workers pneumoconiosis                                    |                                                         |                                                         |                                                         |                                                         |                                                |                                                  |                                                  |                                                  |
|                                                                | 11.56<br>(7.98 to<br>16.77)                             | 11.59<br>(8.02 to<br>16.18)                             | 11.01<br>(7.44 to<br>15.62)                             | 11.67<br>(8.03 to<br>16.35)                             | 0.43<br>(0.31 to<br>0.60)                      | 0.51<br>(0.37 to<br>0.70)                        | 0.51<br>(0.36 to<br>0.70)                        | 0.49<br>(0.34 to<br>0.68)                        |
| Other pneumoconiosis                                           |                                                         |                                                         |                                                         |                                                         |                                                |                                                  |                                                  |                                                  |
|                                                                | 4,838.85<br>(3,757.78 to<br>6,144.89)                   | 3,672.70<br>(2,294.21 to<br>5,658.15)                   | 2,804.82<br>(1,839.53 to<br>4,159.02)                   | 4,806.48<br>(2,939.89 to<br>7,478.77)                   | 146.69<br>(114.24 to<br>187.79)                | 122.14<br>(79.63 to<br>187.17)                   | 98.69<br>(67.51 to<br>146.38)                    | 148.99<br>(94.14 to<br>232.23)                   |
| Asthma                                                         |                                                         |                                                         |                                                         |                                                         |                                                |                                                  |                                                  |                                                  |
|                                                                | 89.22<br>(49.29 to<br>167.00)                           | 203.80<br>(110.88 to<br>375.48)                         | 230.38<br>(125.23 to<br>426.97)                         | 173.51<br>(94.94 to<br>318.52)                          | 3.20<br>(1.79 to<br>6.02)                      | 7.76<br>(4.22 to<br>14.24)                       | 9.18<br>(5.06 to<br>16.83)                       | 6.22<br>(3.33 to<br>11.48)                       |
| Interstitial lung disease and pulmonary sarcoidosis            |                                                         |                                                         |                                                         |                                                         |                                                |                                                  |                                                  |                                                  |
|                                                                | 1,458.49<br>(795.12 to<br>2,066.39)                     | 2,196.55<br>(1,285.06 to<br>3,295.27)                   | 2,032.47<br>(1,257.56 to<br>2,869.80)                   | 2,541.79<br>(1,460.24 to<br>3,930.29)                   | 38.30<br>(20.46 to<br>55.22)                   | 63.95<br>(36.35 to<br>94.58)                     | 61.84<br>(37.55 to<br>86.88)                     | 68.45<br>(38.97 to<br>104.37)                    |
| Other chronic respiratory diseases                             |                                                         |                                                         |                                                         |                                                         |                                                |                                                  |                                                  |                                                  |
|                                                                | <b>17,905.65</b><br>(14,119.44 to<br><b>22,664.51</b> ) | <b>28,081.26</b><br>(20,502.99 to<br><b>38,588.30</b> ) | <b>26,983.58</b><br>(20,030.24 to<br><b>36,542.32</b> ) | <b>31,702.27</b><br>(23,635.89 to<br><b>43,422.76</b> ) | <b>505.09</b><br>(404.37 to<br><b>636.63</b> ) | <b>833.22</b><br>(631.18 to<br><b>1,111.74</b> ) | <b>822.93</b><br>(626.89 to<br><b>1,085.10</b> ) | <b>909.03</b><br>(695.67 to<br><b>1,213.30</b> ) |
| <b>Cirrhosis and other chronic liver diseases</b>              |                                                         |                                                         |                                                         |                                                         |                                                |                                                  |                                                  |                                                  |
|                                                                | 7,581.66<br>(5,815.40 to<br>10,211.58)                  | 12,526.22<br>(9,029.94 to<br>17,517.83)                 | 12,279.85<br>(8,905.26 to<br>17,015.25)                 | 13,227.93<br>(9,558.68 to<br>18,427.62)                 | 221.21<br>(172.28 to<br>292.30)                | 377.63<br>(284.07 to<br>518.30)                  | 380.91<br>(287.65 to<br>515.02)                  | 386.76<br>(288.12 to<br>528.77)                  |
| Cirrhosis and other chronic liver diseases due to hepatitis B  |                                                         |                                                         |                                                         |                                                         |                                                |                                                  |                                                  |                                                  |
|                                                                | 3,349.75<br>(2,210.48 to<br>4,944.83)                   | 5,720.93<br>(3,586.55 to<br>8,860.71)                   | 5,600.39<br>(3,596.80 to<br>8,613.34)                   | 6,046.82<br>(3,747.07 to<br>9,296.09)                   | 99.25<br>(65.82 to<br>147.17)                  | 173.30<br>(111.46 to<br>261.02)                  | 173.68<br>(112.25 to<br>258.94)                  | 178.60<br>(115.00 to<br>268.60)                  |
| Cirrhosis and other chronic liver diseases due to hepatitis C  |                                                         |                                                         |                                                         |                                                         |                                                |                                                  |                                                  |                                                  |
|                                                                | 3,685.89<br>(2,773.52 to<br>4,892.92)                   | 5,619.44<br>(3,969.24 to<br>7,928.59)                   | 5,062.03<br>(3,628.14 to<br>7,039.51)                   | 7,455.47<br>(5,379.49 to<br>10,335.69)                  | 112.22<br>(85.56 to<br>146.88)                 | 176.43<br>(130.01 to<br>241.08)                  | 163.80<br>(121.43 to<br>223.10)                  | 227.09<br>(167.97 to<br>307.93)                  |
| Cirrhosis and other chronic liver diseases due to alcohol use  |                                                         |                                                         |                                                         |                                                         |                                                |                                                  |                                                  |                                                  |
|                                                                | 3,288.34<br>(2,602.53 to<br>4,205.21)                   | 4,214.67<br>(3,023.24 to<br>5,792.99)                   | 4,041.30<br>(2,932.01 to<br>5,492.04)                   | 4,972.05<br>(3,598.68 to<br>6,736.35)                   | 72.41<br>(57.15 to<br>91.72)                   | 105.86<br>(78.58 to<br>139.87)                   | 104.53<br>(78.24 to<br>136.08)                   | 116.59<br>(87.19 to<br>153.35)                   |
| Cirrhosis and other chronic liver diseases due to other causes |                                                         |                                                         |                                                         |                                                         |                                                |                                                  |                                                  |                                                  |
|                                                                | 14,972.12<br>(11,494.98 to<br>18,440.80)                | 16,999.61<br>(12,673.35 to<br>22,006.01)                | 15,770.65<br>(11,917.67 to<br>20,288.46)                | 21,056.52<br>(15,553.39 to<br>27,801.73)                | 404.29<br>(312.44 to<br>491.08)                | 541.77<br>(408.69 to<br>675.86)                  | 530.00<br>(407.99 to<br>659.69)                  | 613.33<br>(459.96 to<br>781.10)                  |
| Digestive diseases                                             |                                                         |                                                         |                                                         |                                                         |                                                |                                                  |                                                  |                                                  |
|                                                                | 3,350.05<br>(2,526.37 to<br>4,646.95)                   | 2,530.29<br>(1,740.09 to<br>3,787.16)                   | 2,167.06<br>(1,500.96 to<br>3,163.12)                   | 3,348.10<br>(2,334.33 to<br>4,934.40)                   | 98.04<br>(74.66 to<br>134.86)                  | 84.38<br>(59.86 to<br>122.87)                    | 75.99<br>(54.67 to<br>109.35)                    | 104.41<br>(74.57 to<br>151.26)                   |
| Peptic ulcer disease                                           |                                                         |                                                         |                                                         |                                                         |                                                |                                                  |                                                  |                                                  |

**Guinea-Bissau**

| Cause                                      | YLLs (actual counts)                  |                                       |                                       |                                       | Deaths (actual counts)        |                                 |                                 |                                 |
|--------------------------------------------|---------------------------------------|---------------------------------------|---------------------------------------|---------------------------------------|-------------------------------|---------------------------------|---------------------------------|---------------------------------|
|                                            | 2016                                  | 2040 Forecast                         | 2040 Better Scenario                  | 2040 Worse Scenario                   | 2016                          | 2040 Forecast                   | 2040 Better Scenario            | 2040 Worse Scenario             |
|                                            |                                       |                                       |                                       |                                       |                               |                                 |                                 |                                 |
| Gastritis and duodenitis                   | 704.58<br>(450.42 to<br>1,012.95)     | 941.16<br>(599.78 to<br>1,373.75)     | 895.05<br>(575.17 to<br>1,291.72)     | 1,073.75<br>(683.53 to<br>1,582.35)   | 16.52<br>(11.07 to<br>22.43)  | 24.13<br>(16.11 to<br>33.75)    | 23.67<br>(16.16 to<br>32.95)    | 26.29<br>(17.45 to<br>36.96)    |
| Appendicitis                               | 1,259.75<br>(805.33 to<br>1,883.74)   | 1,182.90<br>(776.53 to<br>1,677.60)   | 1,085.59<br>(721.79 to<br>1,523.75)   | 1,517.21<br>(986.44 to<br>2,164.12)   | 31.63<br>(20.36 to<br>44.17)  | 37.17<br>(24.40 to<br>51.65)    | 36.27<br>(24.08 to<br>50.72)    | 42.90<br>(27.88 to<br>58.92)    |
| Paralytic ileus and intestinal obstruction | 4,140.13<br>(2,961.42 to<br>5,778.90) | 4,943.97<br>(3,721.11 to<br>6,679.86) | 4,920.72<br>(3,731.28 to<br>6,622.36) | 5,852.61<br>(4,312.77 to<br>8,071.23) | 99.79<br>(75.00 to<br>131.84) | 157.49<br>(120.33 to<br>206.46) | 166.39<br>(128.38 to<br>218.08) | 162.33<br>(122.88 to<br>213.91) |
| Inguinal, femoral, and abdominal hernia    | 702.20<br>(466.87 to<br>1,046.88)     | 655.00<br>(414.67 to<br>1,025.92)     | 627.67<br>(397.02 to<br>984.37)       | 755.70<br>(477.07 to<br>1,157.67)     | 22.60<br>(14.70 to<br>34.81)  | 23.49<br>(14.88 to<br>37.29)    | 23.99<br>(15.30 to<br>38.00)    | 24.84<br>(15.98 to<br>39.06)    |
| Inflammatory bowel disease                 | 323.91<br>(175.86 to<br>641.57)       | 509.46<br>(297.08 to<br>908.15)       | 520.81<br>(307.29 to<br>921.01)       | 532.12<br>(303.64 to<br>996.58)       | 8.58<br>(4.94 to<br>15.49)    | 15.75<br>(9.31 to<br>26.38)     | 16.83<br>(10.06 to<br>27.94)    | 15.21<br>(8.85 to<br>26.32)     |
| Vascular intestinal disorders              | 347.65<br>(226.18 to<br>513.87)       | 496.03<br>(346.26 to<br>678.86)       | 505.02<br>(356.09 to<br>685.41)       | 528.45<br>(356.04 to<br>759.47)       | 11.88<br>(8.28 to<br>15.72)   | 20.80<br>(14.87 to<br>27.27)    | 22.60<br>(16.48 to<br>29.63)    | 20.04<br>(14.08 to<br>26.46)    |
| Gallbladder and biliary diseases           | 608.86<br>(434.36 to<br>759.29)       | 856.80<br>(512.55 to<br>1,331.80)     | 653.27<br>(417.81 to<br>972.21)       | 1,124.70<br>(664.35 to<br>1,762.61)   | 18.98<br>(13.57 to<br>25.25)  | 30.98<br>(18.76 to<br>49.28)    | 24.88<br>(16.00 to<br>37.92)    | 37.82<br>(22.09 to<br>60.03)    |

|                                         |                                                            |                                                             |                                                             |                                                              |                                                      |                                                      |                                                      |                                                      |
|-----------------------------------------|------------------------------------------------------------|-------------------------------------------------------------|-------------------------------------------------------------|--------------------------------------------------------------|------------------------------------------------------|------------------------------------------------------|------------------------------------------------------|------------------------------------------------------|
| Pancreatitis                            | 1,678.09<br>(1,235.37 to<br>2,191.39)                      | 2,715.35<br>(2,307.09 to<br>3,124.61)                       | 2,359.87<br>(1,230.21 to<br>4,679.95)                       | 3,705.47<br>(1,591.42 to<br>8,565.65)                        | 45.34<br>(33.58 to<br>57.68)                         | 76.49<br>(39.97 to<br>155.28)                        | 68.68<br>(38.63 to<br>131.21)                        | 101.03<br>(45.54 to<br>220.85)                       |
| Other digestive diseases                | 1,856.91<br>(1,335.13 to<br>2,466.22)                      | 2,168.65<br>(1,518.26 to<br>2,910.75)                       | 2,035.60<br>(1,440.59 to<br>2,758.39)                       | 2,618.41<br>(1,832.39 to<br>3,555.67)                        | 50.93<br>(37.57 to<br>64.90)                         | 71.10<br>(51.93 to<br>94.11)                         | 70.70<br>(52.61 to<br>93.03)                         | 78.44<br>(56.39 to<br>102.91)                        |
| <b>Neurological disorders</b>           | <b>5,537.89</b><br><b>(4,509.50 to</b><br><b>6,544.41)</b> | <b>8,943.76</b><br><b>(7,180.39 to</b><br><b>11,073.26)</b> | <b>8,892.24</b><br><b>(7,303.53 to</b><br><b>10,797.42)</b> | <b>10,102.56</b><br><b>(7,727.75 to</b><br><b>12,878.14)</b> | <b>192.94</b><br><b>(164.26 to</b><br><b>223.83)</b> | <b>436.64</b><br><b>(333.96 to</b><br><b>564.22)</b> | <b>488.90</b><br><b>(383.89 to</b><br><b>608.37)</b> | <b>395.69</b><br><b>(301.93 to</b><br><b>517.80)</b> |
| Alzheimer's disease and other dementias | 1,407.98<br>(1,130.64 to<br>1,743.96)                      | 3,572.67<br>(2,472.45 to<br>5,035.77)                       | 3,884.57<br>(2,883.18 to<br>5,221.11)                       | 3,060.59<br>(2,049.08 to<br>4,571.91)                        | 108.90<br>(88.29 to<br>133.46)                       | 305.35<br>(202.56 to<br>441.86)                      | 356.29<br>(254.55 to<br>484.43)                      | 242.73<br>(152.59 to<br>371.47)                      |
| Parkinson's disease                     | 122.40<br>(91.17 to<br>158.73)                             | 354.31<br>(253.75 to<br>475.91)                             | 451.52<br>(337.02 to<br>583.30)                             | 259.70<br>(184.10 to<br>358.67)                              | 8.44<br>(6.29 to<br>11.03)                           | 26.64<br>(18.19 to<br>36.92)                         | 35.77<br>(25.78 to<br>47.27)                         | 18.41<br>(12.10 to<br>26.34)                         |
| Epilepsy                                | 3,401.24<br>(2,551.83 to<br>4,153.22)                      | 3,945.44<br>(2,502.08 to<br>5,664.50)                       | 3,436.36<br>(2,240.41 to<br>4,825.23)                       | 5,637.40<br>(3,591.10 to<br>8,152.21)                        | 64.09<br>(47.81 to<br>78.37)                         | 81.49<br>(52.33 to<br>116.01)                        | 72.16<br>(47.18 to<br>101.37)                        | 111.53<br>(71.46 to<br>161.77)                       |
| Multiple sclerosis                      | 46.57<br>(30.65 to<br>71.79)                               | 98.61<br>(65.45 to<br>154.84)                               | 102.44<br>(67.85 to<br>161.21)                              | 91.83<br>(61.10 to<br>143.94)                                | 1.25<br>(0.82 to<br>1.92)                            | 2.71<br>(1.79 to<br>4.18)                            | 2.86<br>(1.88 to<br>4.45)                            | 2.47<br>(1.63 to<br>3.81)                            |
| Motor neuron disease                    | 67.25<br>(49.45 to<br>92.62)                               | 142.68<br>(110.75 to<br>193.79)                             | 155.20<br>(120.89 to<br>207.43)                             | 132.31<br>(101.92 to<br>178.88)                              | 1.75<br>(1.39 to<br>2.39)                            | 4.25<br>(3.37 to<br>5.68)                            | 4.71<br>(3.77 to<br>6.25)                            | 3.75<br>(2.97 to<br>5.06)                            |
| Other neurological disorders            | 492.45<br>(301.17 to<br>735.36)                            | 830.06<br>(535.03 to<br>1,191.76)                           | 862.14<br>(568.70 to<br>1,223.63)                           | 920.73<br>(568.58 to<br>1,381.13)                            | 8.51<br>(5.45 to<br>12.30)                           | 16.19<br>(10.95 to<br>22.29)                         | 17.10<br>(11.84 to<br>23.27)                         | 16.80<br>(10.86 to<br>23.89)                         |
| <b>Mental disorders</b>                 | <b>1,615.52</b><br><b>(1,064.54 to</b><br><b>2,324.82)</b> | <b>3,043.92</b><br><b>(1,956.87 to</b><br><b>4,540.89)</b>  | <b>3,053.17</b><br><b>(1,967.12 to</b><br><b>4,553.53)</b>  | <b>3,136.43</b><br><b>(2,019.91 to</b><br><b>4,677.70)</b>   | <b>38.18</b><br><b>(25.75 to</b><br><b>54.15)</b>    | <b>72.91</b><br><b>(48.39 to</b><br><b>105.53)</b>   | <b>74.98</b><br><b>(49.86 to</b><br><b>108.21)</b>   | <b>73.24</b><br><b>(48.78 to</b><br><b>106.60)</b>   |
| Alcohol use disorders                   | 694.30<br>(418.37 to<br>1,042.82)                          | 1,040.17<br>(589.64 to<br>1,670.51)                         | 1,026.31<br>(579.51 to<br>1,664.88)                         | 1,113.44<br>(642.36 to<br>1,756.20)                          | 18.83<br>(11.57 to<br>27.78)                         | 29.13<br>(17.15 to<br>45.14)                         | 29.56<br>(17.34 to<br>46.14)                         | 30.32<br>(17.89 to<br>46.05)                         |
| Drug use disorders                      | 917.02<br>(483.06 to<br>1,572.67)                          | 1,995.40<br>(1,046.96 to<br>3,264.84)                       | 2,018.39<br>(1,069.84 to<br>3,367.47)                       | 2,014.45<br>(1,047.01 to<br>3,417.72)                        | 19.27<br>(9.98 to<br>32.58)                          | 43.63<br>(22.29 to<br>72.25)                         | 45.26<br>(24.58 to<br>73.82)                         | 42.76<br>(22.58 to<br>71.60)                         |
| Opioid use disorders                    | 844.82<br>(422.11 to<br>1,478.21)                          | 1,802.71<br>(900.45 to<br>3,155.71)                         | 1,817.57<br>(910.83 to<br>3,156.27)                         | 1,825.14<br>(901.46 to<br>3,217.13)                          | 17.05<br>(8.20 to<br>29.92)                          | 37.26<br>(18.25 to<br>65.30)                         | 38.08<br>(18.66 to<br>66.01)                         | 37.02<br>(18.08 to<br>65.57)                         |
| Cocaine use disorders                   | 18.12<br>(5.88 to<br>40.00)                                | 48.98<br>(16.51 to<br>109.03)                               | 48.11<br>(16.43 to<br>106.29)                               | 51.79<br>(17.42 to<br>115.38)                                | 0.48<br>(0.16 to<br>1.01)                            | 1.32<br>(0.48 to<br>2.78)                            | 1.34<br>(0.49 to<br>2.76)                            | 1.34<br>(0.48 to<br>2.86)                            |
| Amphetamine use disorders               | 9.27<br>(3.30 to<br>21.29)                                 | 33.72<br>(12.50 to<br>77.86)                                | 32.26<br>(12.06 to<br>74.24)                                | 37.38<br>(13.32 to<br>86.53)                                 | 0.25<br>(0.09 to<br>0.54)                            | 0.91<br>(0.36 to<br>1.94)                            | 0.91<br>(0.35 to<br>1.88)                            | 0.98<br>(0.37 to<br>2.11)                            |
| Other drug use disorders                | 44.82<br>(24.93 to<br>73.90)                               | 109.99<br>(62.73 to<br>178.48)                              | 120.46<br>(68.18 to<br>192.66)                              | 100.14<br>(56.36 to<br>167.06)                               | 1.50<br>(0.83 to<br>2.37)                            | 4.13<br>(2.31 to<br>6.35)                            | 4.93<br>(2.80 to<br>7.52)                            | 3.42<br>(1.91 to<br>5.35)                            |
| Eating disorders                        | 4.20<br>(2.55 to<br>8.46)                                  | 8.35<br>(5.03 to<br>16.14)                                  | 8.47<br>(5.07 to<br>16.70)                                  | 8.54<br>(5.23 to<br>16.11)                                   | 0.08<br>(0.05 to<br>0.16)                            | 0.15<br>(0.09 to<br>0.30)                            | 0.16<br>(0.09 to<br>0.31)                            | 0.16<br>(0.10 to<br>0.30)                            |

**Guinea-Bissau**

| Cause                                                      | YLLs (actual counts)                                          |                                                               |                                                               |                                                               | Deaths (actual counts)                                 |                                                            |                                                            |                                                            |
|------------------------------------------------------------|---------------------------------------------------------------|---------------------------------------------------------------|---------------------------------------------------------------|---------------------------------------------------------------|--------------------------------------------------------|------------------------------------------------------------|------------------------------------------------------------|------------------------------------------------------------|
|                                                            | 2016                                                          | 2040 Forecast                                                 | 2040 Better Scenario                                          | 2040 Worse Scenario                                           | 2016                                                   | 2040 Forecast                                              | 2040 Better Scenario                                       | 2040 Worse Scenario                                        |
| <b>Diabetes, urogenital, blood, and endocrine diseases</b> | <b>32,907.95</b><br><b>(28,175.43 to</b><br><b>40,141.78)</b> | <b>49,042.97</b><br><b>(37,607.82 to</b><br><b>64,356.47)</b> | <b>41,716.00</b><br><b>(32,394.16 to</b><br><b>54,110.42)</b> | <b>64,895.26</b><br><b>(50,804.95 to</b><br><b>83,570.20)</b> | <b>909.75</b><br><b>(778.33 to</b><br><b>1,051.52)</b> | <b>1,735.12</b><br><b>(1,337.47 to</b><br><b>2,446.54)</b> | <b>1,523.56</b><br><b>(1,203.78 to</b><br><b>2,145.80)</b> | <b>2,122.71</b><br><b>(1,674.34 to</b><br><b>2,882.89)</b> |
| Diabetes mellitus                                          | 9,778.33<br>(8,228.31 to<br>11,441.37)                        | 18,534.68<br>(12,315.59 to<br>27,613.01)                      | 14,984.69<br>(9,862.28 to<br>22,131.34)                       | 24,538.21<br>(16,060.95 to<br>35,987.56)                      | 385.88<br>(327.73 to<br>450.88)                        | 788.24<br>(542.07 to<br>1,118.38)                          | 680.80<br>(472.82 to<br>954.90)                            | 980.79<br>(650.89 to<br>1,382.49)                          |
| Acute glomerulonephritis                                   | 16.28<br>(14.45 to<br>18.21)                                  | 19.89<br>(15.69 to<br>24.90)                                  | 18.46<br>(14.72 to<br>22.82)                                  | 27.31<br>(21.40 to<br>34.36)                                  | 0.26<br>(0.23 to<br>0.29)                              | 0.35<br>(0.28 to<br>0.42)                                  | 0.32<br>(0.26 to<br>0.39)                                  | 0.45<br>(0.36 to<br>0.55)                                  |

|                                                            |                                        |                                         |                                         |                                          |                                 |                                   |                                   |                                   |
|------------------------------------------------------------|----------------------------------------|-----------------------------------------|-----------------------------------------|------------------------------------------|---------------------------------|-----------------------------------|-----------------------------------|-----------------------------------|
| Chronic kidney disease                                     | 9,696.12<br>(7,977.97 to<br>11,815.71) | 15,693.58<br>(9,514.98 to<br>28,225.77) | 12,611.19<br>(8,067.12 to<br>22,298.55) | 21,208.61<br>(13,198.02 to<br>36,331.12) | 265.66<br>(220.35 to<br>324.58) | 574.69<br>(301.64 to<br>1,353.36) | 468.50<br>(262.07 to<br>1,080.59) | 718.48<br>(388.17 to<br>1,544.02) |
| Chronic kidney disease due to diabetes mellitus            | 2,233.28<br>(1,726.17 to<br>2,903.17)  | 4,564.59<br>(2,580.08 to<br>9,148.80)   | 3,657.16<br>(2,181.09 to<br>7,081.64)   | 5,910.71<br>(3,378.36 to<br>11,396.66)   | 74.94<br>(59.12 to<br>95.16)    | 184.22<br>(93.85 to<br>428.33)    | 150.27<br>(80.65 to<br>345.78)    | 226.14<br>(116.42 to<br>497.05)   |
| Chronic kidney disease due to hypertension                 | 1,177.04<br>(919.02 to<br>1,497.31)    | 2,557.59<br>(1,278.58 to<br>6,029.36)   | 2,036.70<br>(1,094.50 to<br>4,743.48)   | 3,217.08<br>(1,632.35 to<br>7,055.85)    | 48.69<br>(38.48 to<br>61.72)    | 130.88<br>(59.43 to<br>351.51)    | 108.32<br>(53.35 to<br>291.83)    | 153.86<br>(69.52 to<br>390.07)    |
| Chronic kidney disease due to glomerulonephritis           | 2,983.84<br>(2,423.17 to<br>3,784.72)  | 4,011.09<br>(2,545.59 to<br>6,496.39)   | 3,231.89<br>(2,110.46 to<br>5,051.55)   | 5,728.31<br>(3,784.92 to<br>8,817.70)    | 65.04<br>(52.06 to<br>81.62)    | 115.47<br>(62.90 to<br>246.98)    | 92.70<br>(53.35 to<br>197.31)     | 152.13<br>(86.96 to<br>300.86)    |
| Chronic kidney disease due to other and unspecified causes | 3,301.96<br>(2,665.57 to<br>4,088.71)  | 4,560.31<br>(2,844.09 to<br>7,486.37)   | 3,685.44<br>(2,344.43 to<br>5,869.86)   | 6,452.51<br>(4,096.73 to<br>10,026.44)   | 76.99<br>(61.78 to<br>95.75)    | 144.12<br>(78.75 to<br>292.00)    | 117.21<br>(68.33 to<br>237.81)    | 186.35<br>(104.97 to<br>357.12)   |
| Urinary diseases and male infertility                      | 3,152.55<br>(2,694.62 to<br>3,719.61)  | 5,339.08<br>(4,397.44 to<br>6,502.57)   | 5,336.51<br>(4,402.12 to<br>6,468.78)   | 5,952.06<br>(4,909.19 to<br>7,203.85)    | 87.00<br>(73.63 to<br>103.89)   | 174.46<br>(148.87 to<br>208.55)   | 185.82<br>(158.27 to<br>224.35)   | 174.32<br>(147.20 to<br>209.29)   |
| Urinary tract infections                                   | 1,729.20<br>(1,336.93 to<br>2,173.10)  | 3,752.98<br>(2,995.38 to<br>4,642.41)   | 3,858.92<br>(3,088.88 to<br>4,772.01)   | 4,029.11<br>(3,173.13 to<br>5,011.77)    | 46.65<br>(36.36 to<br>58.25)    | 125.72<br>(104.23 to<br>154.49)   | 137.38<br>(112.69 to<br>168.18)   | 120.26<br>(97.69 to<br>147.78)    |
| Urolithiasis                                               | 49.85<br>(33.80 to<br>70.61)           | 110.74<br>(70.04 to<br>166.43)          | 107.49<br>(68.47 to<br>162.92)          | 128.11<br>(82.23 to<br>192.67)           | 0.96<br>(0.68 to<br>1.30)       | 2.24<br>(1.53 to<br>3.17)         | 2.26<br>(1.56 to<br>3.19)         | 2.44<br>(1.66 to<br>3.49)         |
| Other urinary diseases                                     | 1,373.50<br>(987.92 to<br>1,777.31)    | 1,475.37<br>(944.04 to<br>2,080.33)     | 1,370.10<br>(873.54 to<br>1,896.98)     | 1,794.84<br>(1,183.77 to<br>2,503.73)    | 39.39<br>(28.24 to<br>50.48)    | 46.50<br>(30.73 to<br>64.00)      | 46.19<br>(30.08 to<br>61.98)      | 51.63<br>(34.61 to<br>69.90)      |
| Gynecological diseases                                     | 198.63<br>(118.27 to<br>284.34)        | 289.11<br>(162.00 to<br>454.87)         | 254.69<br>(144.11 to<br>397.42)         | 361.87<br>(201.38 to<br>567.20)          | 4.62<br>(2.74 to<br>6.54)       | 6.70<br>(3.78 to<br>10.45)        | 5.99<br>(3.46 to<br>9.25)         | 8.25<br>(4.67 to<br>12.77)        |
| Uterine fibroids                                           | 16.78<br>(6.13 to<br>33.61)            | 18.24<br>(6.10 to<br>41.31)             | 15.99<br>(5.25 to<br>36.23)             | 23.30<br>(8.08 to<br>51.24)              | 0.54<br>(0.20 to<br>1.10)       | 0.56<br>(0.20 to<br>1.17)         | 0.51<br>(0.18 to<br>1.10)         | 0.69<br>(0.25 to<br>1.41)         |
| Polycystic ovarian syndrome                                | 37.63<br>(4.21 to<br>88.51)            | 33.90<br>(2.81 to<br>98.09)             | 27.03<br>(2.16 to<br>76.61)             | 49.41<br>(4.25 to<br>138.58)             | 0.83<br>(0.10 to<br>1.93)       | 0.76<br>(0.06 to<br>2.12)         | 0.61<br>(0.05 to<br>1.70)         | 1.10<br>(0.10 to<br>3.02)         |
| Endometriosis                                              | 0.31<br>(0.10 to<br>0.98)              | 0.64<br>(0.19 to<br>2.00)               | 0.57<br>(0.16 to<br>1.83)               | 0.81<br>(0.24 to<br>2.48)                | 0.01<br>(0.00 to<br>0.02)       | 0.01<br>(0.00 to<br>0.05)         | 0.01<br>(0.00 to<br>0.04)         | 0.02<br>(0.01 to<br>0.06)         |
| Genital prolapse                                           | 8.16<br>(1.51 to<br>18.07)             | 9.43<br>(1.20 to<br>25.54)              | 7.93<br>(1.04 to<br>21.88)              | 12.65<br>(1.68 to<br>33.33)              | 0.18<br>(0.05 to<br>0.38)       | 0.20<br>(0.04 to<br>0.50)         | 0.17<br>(0.03 to<br>0.42)         | 0.26<br>(0.05 to<br>0.64)         |
| Other gynecological diseases                               | 135.75<br>(71.87 to<br>210.63)         | 226.89<br>(111.43 to<br>365.97)         | 203.17<br>(104.57 to<br>323.16)         | 275.69<br>(133.34 to<br>442.39)          | 3.06<br>(1.58 to<br>4.74)       | 5.17<br>(2.62 to<br>8.26)         | 4.69<br>(2.46 to<br>7.41)         | 6.19<br>(3.09 to<br>9.89)         |
| Hemoglobinopathies and hemolytic anemias                   | 8,807.14<br>(6,173.07 to<br>14,888.65) | 7,577.44<br>(5,030.30 to<br>10,970.82)  | 6,960.24<br>(4,697.60 to<br>9,993.01)   | 10,709.00<br>(7,007.46 to<br>16,180.28)  | 138.38<br>(99.36 to<br>217.12)  | 144.18<br>(99.93 to<br>206.56)    | 134.11<br>(94.66 to<br>190.10)    | 189.93<br>(129.25 to<br>275.08)   |
| Thalassemias                                               | 673.29<br>(84.50 to<br>1,855.75)       | 309.13<br>(41.55 to<br>875.34)          | 337.20<br>(46.79 to<br>937.57)          | 465.13<br>(56.88 to<br>1,378.83)         | 8.04<br>(1.01 to<br>22.06)      | 3.78<br>(0.52 to<br>10.68)        | 4.12<br>(0.58 to<br>11.40)        | 5.62<br>(0.71 to<br>16.52)        |
| Sickle cell disorders                                      | 5,636.81<br>(3,446.64 to<br>10,127.71) | 4,208.95<br>(2,653.88 to<br>6,514.49)   | 3,896.10<br>(2,456.87 to<br>6,042.70)   | 6,251.92<br>(3,766.16 to<br>10,207.74)   | 75.07<br>(47.09 to<br>128.74)   | 62.98<br>(40.33 to<br>93.60)      | 58.31<br>(37.50 to<br>86.69)      | 89.66<br>(55.35 to<br>141.78)     |
| G6PD deficiency                                            | 2,015.14<br>(1,461.43 to<br>2,923.02)  | 2,633.60<br>(1,692.48 to<br>3,920.51)   | 2,323.50<br>(1,532.34 to<br>3,413.99)   | 3,491.98<br>(2,258.86 to<br>5,205.75)    | 38.22<br>(28.08 to<br>52.86)    | 57.78<br>(38.26 to<br>84.19)      | 51.72<br>(35.13 to<br>74.96)      | 73.53<br>(49.07 to<br>107.83)     |
| Other hemoglobinopathies and hemolytic anemias             | 481.89<br>(340.43 to<br>670.28)        | 425.76<br>(279.32 to<br>643.45)         | 403.45<br>(267.47 to<br>607.68)         | 499.97<br>(331.03 to<br>748.52)          | 17.05<br>(12.33 to<br>24.46)    | 19.64<br>(12.98 to<br>29.13)      | 19.96<br>(13.51 to<br>29.91)      | 21.12<br>(13.49 to<br>31.57)      |
| Endocrine, metabolic, blood, and immune disorders          | 1,258.90<br>(1,003.95 to<br>1,651.30)  | 1,589.19<br>(1,207.67 to<br>2,176.18)   | 1,550.22<br>(1,192.16 to<br>2,101.17)   | 1,998.19<br>(1,507.22 to<br>2,758.44)    | 27.96<br>(22.49 to<br>37.71)    | 46.51<br>(36.30 to<br>65.77)      | 48.01<br>(37.90 to<br>68.04)      | 50.49<br>(39.01 to<br>71.04)      |
| <b>Guinea-Bissau</b>                                       |                                        |                                         |                                         |                                          |                                 |                                   |                                   |                                   |
| <b>YLLs (actual counts)</b>                                |                                        |                                         |                                         |                                          | <b>Deaths (actual counts)</b>   |                                   |                                   |                                   |

| Cause                                         | 2016                                         | 2040 Forecast                                | 2040 Better Scenario                         | 2040 Worse Scenario                           | 2016                                      | 2040 Forecast                             | 2040 Better Scenario                      | 2040 Worse Scenario                       |
|-----------------------------------------------|----------------------------------------------|----------------------------------------------|----------------------------------------------|-----------------------------------------------|-------------------------------------------|-------------------------------------------|-------------------------------------------|-------------------------------------------|
| <b>Musculoskeletal disorders</b>              | <b>469.28</b><br>(334.96 to 662.62)          | <b>1,007.71</b><br>(706.02 to 1,455.18)      | <b>1,074.14</b><br>(756.03 to 1,550.69)      | <b>974.23</b><br>(679.89 to 1,417.90)         | <b>11.29</b><br>(8.13 to 15.66)           | <b>27.47</b><br>(20.11 to 38.00)          | <b>30.44</b><br>(22.47 to 42.05)          | <b>25.04</b><br>(18.17 to 34.73)          |
| Rheumatoid arthritis                          | 42.92<br>(24.09 to 69.74)                    | 77.38<br>(42.66 to 130.36)                   | 75.76<br>(41.39 to 125.92)                   | 86.45<br>(48.08 to 143.75)                    | 1.75<br>(1.01 to 2.71)                    | 3.81<br>(2.07 to 6.17)                    | 3.93<br>(2.16 to 6.31)                    | 3.93<br>(2.18 to 6.35)                    |
| Other musculoskeletal disorders               | 426.37<br>(299.05 to 613.28)                 | 930.33<br>(642.85 to 1,363.64)               | 998.38<br>(694.44 to 1,468.71)               | 887.78<br>(606.71 to 1,319.75)                | 9.54<br>(6.87 to 13.68)                   | 23.66<br>(17.02 to 33.92)                 | 26.51<br>(19.23 to 38.20)                 | 21.11<br>(14.96 to 30.77)                 |
| <b>Other non-communicable diseases</b>        | <b>35,421.13</b><br>(20,480.92 to 53,633.84) | <b>22,651.83</b><br>(13,431.03 to 34,642.47) | <b>21,093.03</b><br>(12,693.12 to 31,592.78) | <b>42,382.46</b><br>(23,600.91 to 66,966.71)  | <b>445.96</b><br>(267.06 to 663.14)       | <b>361.66</b><br>(237.03 to 521.09)       | <b>350.15</b><br>(234.46 to 493.75)       | <b>589.88</b><br>(357.34 to 894.74)       |
| <b>Congenital birth defects</b>               | <b>52,380.41</b><br>(17,677.33 to 49,851.12) | <b>18,853.99</b><br>(9,943.55 to 30,149.26)  | <b>17,318.05</b><br>(9,329.47 to 27,304.61)  | <b>37,133.97</b><br>(19,201.04 to 60,853.78)  | <b>392.68</b><br>(218.63 to 603.28)       | <b>251.66</b><br>(136.49 to 398.29)       | <b>232.33</b><br>(127.20 to 360.58)       | <b>468.92</b><br>(247.56 to 756.31)       |
| Neural tube defects                           | 8,131.22<br>(3,881.08 to 15,506.99)          | 1,772.44<br>(698.20 to 4,180.01)             | 1,495.92<br>(583.19 to 3,400.98)             | 4,267.74<br>(1,705.68 to 9,396.01)            | 95.66<br>(45.93 to 182.29)                | 21.96<br>(8.78 to 51.31)                  | 18.57<br>(7.37 to 42.33)                  | 51.41<br>(20.98 to 113.30)                |
| Congenital heart anomalies                    | 8,301.07<br>(4,534.11 to 13,084.93)          | 6,082.86<br>(3,390.37 to 9,966.03)           | 5,635.63<br>(3,194.13 to 9,237.40)           | 10,952.78<br>(5,885.81 to 18,433.53)          | 103.47<br>(57.27 to 161.22)               | 84.01<br>(47.02 to 133.44)                | 78.00<br>(44.42 to 122.88)                | 142.94<br>(79.36 to 234.42)               |
| Orofacial clefts                              | 324.37<br>(54.86 to 907.53)                  | 127.66<br>(17.01 to 390.03)                  | 105.77<br>(14.11 to 329.67)                  | 337.68<br>(44.53 to 1,029.26)                 | 3.76<br>(0.64 to 10.51)                   | 1.48<br>(0.20 to 4.53)                    | 1.23<br>(0.16 to 3.81)                    | 3.92<br>(0.52 to 11.94)                   |
| Down syndrome                                 | 262.89<br>(107.68 to 542.99)                 | 260.50<br>(111.56 to 536.23)                 | 236.82<br>(102.37 to 479.34)                 | 445.66<br>(175.44 to 981.27)                  | 3.63<br>(1.59 to 7.31)                    | 4.41<br>(2.00 to 8.69)                    | 4.03<br>(1.84 to 7.76)                    | 6.79<br>(2.92 to 14.02)                   |
| Other chromosomal abnormalities               | 983.77<br>(258.89 to 2,084.53)               | 880.32<br>(203.17 to 1,925.46)               | 795.09<br>(182.23 to 1,721.75)               | 1,938.34<br>(461.67 to 4,292.39)              | 11.57<br>(3.03 to 24.46)                  | 10.65<br>(2.47 to 22.97)                  | 9.63<br>(2.23 to 20.85)                   | 23.02<br>(5.49 to 50.62)                  |
| Congenital musculoskeletal and limb anomalies | 304.52<br>(63.54 to 499.21)                  | 152.56<br>(49.61 to 370.20)                  | 144.66<br>(48.01 to 345.48)                  | 309.97<br>(96.85 to 756.28)                   | 2.41<br>(0.76 to 5.84)                    | 1.85<br>(0.63 to 4.42)                    | 1.76<br>(0.60 to 4.15)                    | 3.69<br>(1.17 to 8.98)                    |
| Urogenital congenital anomalies               | 278.07<br>(116.74 to 570.66)                 | 247.46<br>(118.61 to 485.84)                 | 241.99<br>(115.14 to 473.72)                 | 400.47<br>(178.80 to 823.34)                  | 3.98<br>(1.82 to 7.72)                    | 4.58<br>(2.37 to 8.44)                    | 4.55<br>(2.35 to 8.42)                    | 6.37<br>(3.20 to 12.34)                   |
| Digestive congenital anomalies                | 1,602.88<br>(726.25 to 2,797.03)             | 946.79<br>(390.79 to 1,746.66)               | 867.97<br>(368.22 to 1,617.19)               | 2,039.21<br>(842.98 to 3,804.88)              | 18.86<br>(8.62 to 32.87)                  | 11.47<br>(4.95 to 20.91)                  | 10.54<br>(4.62 to 19.37)                  | 24.26<br>(10.22 to 44.97)                 |
| Other congenital birth defects                | 12,291.61<br>(3,531.11 to 25,803.62)         | 8,383.41<br>(2,841.39 to 16,382.81)          | 7,794.19<br>(2,727.10 to 15,131.64)          | 16,442.11<br>(5,081.61 to 33,372.59)          | 149.33<br>(44.80 to 309.85)               | 111.25<br>(40.85 to 215.14)               | 104.04<br>(39.54 to 199.30)               | 206.52<br>(67.68 to 411.03)               |
| Skin and subcutaneous diseases                | 1,213.06<br>(763.29 to 1,936.93)             | 3,022.06<br>(1,915.42 to 4,506.29)           | 3,055.15<br>(1,935.19 to 4,541.87)           | 3,530.97<br>(2,280.31 to 5,439.16)            | 32.06<br>(19.99 to 51.69)                 | 101.00<br>(63.41 to 152.99)               | 109.46<br>(70.39 to 165.67)               | 101.03<br>(63.71 to 155.44)               |
| Cellulitis                                    | 76.21<br>(33.39 to 130.39)                   | 275.57<br>(119.37 to 464.16)                 | 301.26<br>(130.54 to 499.40)                 | 265.19<br>(116.03 to 459.40)                  | 2.29<br>(0.94 to 4.00)                    | 9.99<br>(4.09 to 17.78)                   | 11.49<br>(4.73 to 19.35)                  | 8.71<br>(3.63 to 15.48)                   |
| Pyoderma                                      | 1,024.74<br>(658.67 to 1,697.59)             | 2,506.23<br>(1,627.26 to 3,818.24)           | 2,487.38<br>(1,613.67 to 3,771.83)           | 3,021.46<br>(1,963.14 to 4,775.29)            | 25.31<br>(15.98 to 41.08)                 | 79.14<br>(50.89 to 122.80)                | 83.32<br>(53.92 to 128.89)                | 82.48<br>(54.20 to 129.28)                |
| Decubitus ulcer                               | 74.39<br>(36.21 to 119.66)                   | 163.99<br>(80.54 to 265.13)                  | 187.26<br>(91.24 to 299.29)                  | 157.36<br>(77.78 to 257.18)                   | 3.71<br>(1.76 to 6.05)                    | 10.12<br>(4.86 to 17.57)                  | 12.75<br>(6.09 to 21.69)                  | 8.09<br>(3.88 to 14.08)                   |
| Other skin and subcutaneous diseases          | 37.71<br>(18.93 to 62.71)                    | 76.26<br>(40.35 to 122.90)                   | 79.24<br>(42.52 to 125.87)                   | 86.97<br>(44.95 to 143.81)                    | 0.74<br>(0.37 to 1.28)                    | 1.74<br>(0.92 to 2.91)                    | 1.91<br>(1.01 to 3.17)                    | 1.75<br>(0.90 to 2.92)                    |
| Sudden infant death syndrome                  | 1,827.66<br>(668.77 to 3,507.56)             | 775.78<br>(256.78 to 1,557.88)               | 719.83<br>(246.85 to 1,424.54)               | 1,717.51<br>(558.04 to 3,536.85)              | 21.21<br>(7.76 to 40.71)                  | 9.00<br>(2.98 to 18.08)                   | 8.35<br>(2.86 to 16.53)                   | 19.93<br>(6.48 to 41.05)                  |
| <b>Injuries</b>                               | <b>67,071.13</b><br>(57,472.67 to 77,142.30) | <b>77,207.81</b><br>(61,006.40 to 95,697.97) | <b>71,151.11</b><br>(56,398.27 to 88,066.71) | <b>98,551.37</b><br>(76,855.74 to 122,277.90) | <b>1,320.43</b><br>(1,146.90 to 1,508.21) | <b>1,758.62</b><br>(1,446.79 to 2,103.85) | <b>1,688.16</b><br>(1,393.47 to 2,012.78) | <b>2,058.78</b><br>(1,675.15 to 2,476.63) |





|                                                 |                                         |                                          |                                          |                                          |                                 |                                 |                                 |                                 |
|-------------------------------------------------|-----------------------------------------|------------------------------------------|------------------------------------------|------------------------------------------|---------------------------------|---------------------------------|---------------------------------|---------------------------------|
| Non-venomous animal contact                     | 487.41<br>(230.52 to<br>886.55)         | 464.04<br>(224.10 to<br>848.91)          | 413.53<br>(204.92 to<br>746.03)          | 736.95<br>(339.02 to<br>1,403.74)        | 7.97<br>(3.94 to<br>13.98)      | 9.55<br>(4.89 to<br>16.67)      | 8.94<br>(4.55 to<br>15.27)      | 13.19<br>(6.54 to<br>24.25)     |
| Foreign body                                    | 2,400.08<br>(1,770.28 to<br>3,204.40)   | 2,422.83<br>(1,794.80 to<br>3,167.54)    | 2,435.03<br>(1,829.62 to<br>3,172.92)    | 3,298.33<br>(2,346.12 to<br>4,532.41)    | 38.60<br>(29.95 to<br>48.75)    | 48.60<br>(38.35 to<br>60.16)    | 51.04<br>(40.53 to<br>62.56)    | 57.03<br>(43.32 to<br>73.14)    |
| Pulmonary aspiration and foreign body in airway | 2,124.11<br>(1,551.22 to<br>2,946.31)   | 2,156.22<br>(1,606.05 to<br>2,894.78)    | 2,184.16<br>(1,623.47 to<br>2,905.78)    | 2,935.66<br>(2,079.35 to<br>4,117.35)    | 34.01<br>(26.32 to<br>45.01)    | 43.51<br>(34.34 to<br>55.44)    | 46.13<br>(36.87 to<br>58.09)    | 50.69<br>(38.66 to<br>67.45)    |
| Foreign body in other body part                 | 275.96<br>(81.95 to<br>555.38)          | 266.61<br>(69.60 to<br>584.94)           | 250.87<br>(65.33 to<br>553.69)           | 362.67<br>(98.46 to<br>764.19)           | 4.60<br>(1.31 to<br>9.47)       | 5.09<br>(1.29 to<br>11.32)      | 4.91<br>(1.20 to<br>11.00)      | 6.33<br>(1.77 to<br>13.56)      |
| Environmental heat and cold exposure            | 1,303.77<br>(577.59 to<br>2,161.76)     | 1,093.16<br>(430.03 to<br>1,972.01)      | 928.27<br>(364.08 to<br>1,641.48)        | 1,610.66<br>(655.82 to<br>2,838.61)      | 24.98<br>(11.14 to<br>41.17)    | 23.29<br>(9.65 to<br>40.62)     | 20.34<br>(8.40 to<br>34.97)     | 31.96<br>(13.20 to<br>54.61)    |
| Other unintentional injuries                    | 2,478.98<br>(1,858.03 to<br>3,229.33)   | 1,812.44<br>(1,262.23 to<br>2,509.72)    | 1,678.17<br>(1,194.58 to<br>2,319.63)    | 2,402.55<br>(1,694.02 to<br>3,321.88)    | 43.97<br>(33.40 to<br>56.39)    | 36.56<br>(26.79 to<br>48.75)    | 34.69<br>(25.45 to<br>46.47)    | 44.93<br>(32.79 to<br>60.02)    |
| Self-harm and interpersonal violence            | 12,606.27<br>(9,733.16 to<br>15,977.13) | 16,975.21<br>(12,196.80 to<br>22,561.41) | 16,414.14<br>(11,992.00 to<br>21,589.53) | 19,208.41<br>(13,611.65 to<br>26,016.71) | 259.05<br>(200.44 to<br>334.33) | 373.14<br>(269.18 to<br>499.02) | 366.89<br>(268.83 to<br>491.11) | 409.40<br>(289.67 to<br>551.11) |

**Guinea-Bissau**

| Cause                                                                        | YLLs (actual counts)                  |                                        |                                        |                                         | Deaths (actual counts)           |                                 |                                 |                                 |
|------------------------------------------------------------------------------|---------------------------------------|----------------------------------------|----------------------------------------|-----------------------------------------|----------------------------------|---------------------------------|---------------------------------|---------------------------------|
|                                                                              | 2016                                  | 2040 Forecast                          | 2040 Better Scenario                   | 2040 Worse Scenario                     | 2016                             | 2040 Forecast                   | 2040 Better Scenario            | 2040 Worse Scenario             |
| Self-harm                                                                    | 5,719.71<br>(4,102.08 to<br>8,567.86) | 8,966.21<br>(5,951.86 to<br>13,941.57) | 8,524.66<br>(5,732.58 to<br>13,104.55) | 10,246.25<br>(6,542.29 to<br>16,108.06) | 137.47<br>(99.45 to<br>202.23)   | 220.98<br>(145.98 to<br>334.43) | 215.69<br>(144.83 to<br>323.96) | 244.68<br>(155.40 to<br>375.92) |
| Self-harm by firearm                                                         | 900.18<br>(336.74 to<br>1,969.93)     | 1,173.01<br>(382.92 to<br>2,643.49)    | 1,098.26<br>(361.96 to<br>2,439.42)    | 1,371.49<br>(439.87 to<br>3,090.49)     | 21.72<br>(8.60 to<br>46.38)      | 29.52<br>(10.26 to<br>65.23)    | 28.53<br>(10.09 to<br>62.09)    | 33.29<br>(11.27 to<br>73.72)    |
| Self-harm by other specified means                                           | 4,819.53<br>(3,415.11 to<br>6,787.99) | 7,793.19<br>(5,171.43 to<br>11,745.24) | 7,426.40<br>(5,017.14 to<br>11,027.80) | 8,874.76<br>(5,698.25 to<br>13,754.07)  | 9,874.76<br>(6,273 to<br>160.91) | 115.76<br>(129.64 to<br>286.12) | 191.45<br>(128.09 to<br>274.94) | 187.16<br>(139.37 to<br>324.34) |
| Interpersonal violence                                                       | 6,886.56<br>(4,984.83 to<br>9,256.67) | 8,009.00<br>(5,451.51 to<br>10,812.13) | 7,889.48<br>(5,411.75 to<br>10,619.43) | 8,962.16<br>(6,082.96 to<br>12,290.18)  | 121.58<br>(88.18 to<br>155.35)   | 152.17<br>(104.06 to<br>200.38) | 151.20<br>(103.68 to<br>197.19) | 164.73<br>(118.89 to<br>218.71) |
| Physical violence by firearm                                                 | 3,070.59<br>(1,974.21 to<br>4,293.80) | 3,721.78<br>(2,285.74 to<br>5,468.15)  | 3,698.45<br>(2,293.92 to<br>5,384.82)  | 3,956.99<br>(2,436.26 to<br>5,866.92)   | 54.47<br>(34.68 to<br>76.21)     | 68.41<br>(42.53 to<br>98.74)    | 68.30<br>(42.67 to<br>97.29)    | 71.40<br>(44.14 to<br>104.00)   |
| Physical violence by sharp object                                            | 1,948.25<br>(1,193.35 to<br>2,868.00) | 2,623.71<br>(1,601.73 to<br>3,813.98)  | 2,618.86<br>(1,613.29 to<br>3,813.55)  | 2,817.20<br>(1,732.59 to<br>4,157.12)   | 35.86<br>(21.67 to<br>50.80)     | 51.79<br>(31.02 to<br>72.98)    | 52.27<br>(31.60 to<br>73.42)    | 53.81<br>(32.64 to<br>77.41)    |
| Physical violence by other means                                             | 1,867.72<br>(1,206.95 to<br>3,253.38) | 1,663.50<br>(1,055.87 to<br>2,726.16)  | 1,572.17<br>(998.77 to<br>2,538.64)    | 2,187.97<br>(1,342.87 to<br>3,732.81)   | 31.25<br>(21.20 to<br>51.00)     | 31.97<br>(20.92 to<br>49.30)    | 30.62<br>(20.31 to<br>47.42)    | 39.51<br>(25.26 to<br>63.49)    |
| Forces of nature, conflict and terrorism, and executions and police conflict | 20.35<br>(15.84 to<br>33.27)          | 1,836.83<br>(0.00 to<br>11,707.91)     | 1,853.37<br>(0.00 to<br>11,800.18)     | 2,101.61<br>(0.00 to<br>13,420.18)      | 0.44<br>(0.00 to<br>0.74)        | 31.86<br>(0.26 to<br>203.19)    | 32.41<br>(0.00 to<br>206.69)    | 34.81<br>(0.00 to<br>222.06)    |
| Exposure to forces of nature                                                 | 0.00<br>(0.00 to<br>0.00)             | 5.53<br>(0.00 to<br>89.17)             | 5.61<br>(0.00 to<br>90.13)             | 6.48<br>(0.00 to<br>104.82)             | 0.00<br>(0.00 to<br>0.00)        | 0.11<br>(0.00 to<br>1.67)       | 0.11<br>(0.00 to<br>1.74)       | 0.11<br>(0.00 to<br>1.83)       |
| Conflict and terrorism                                                       | 0.00<br>(0.00 to<br>0.00)             | 1,827.84<br>(0.00 to<br>11,707.91)     | 1,844.25<br>(0.00 to<br>11,800.18)     | 2,091.44<br>(0.00 to<br>13,420.18)      | 0.00<br>(0.00 to<br>0.00)        | 31.69<br>(0.00 to<br>203.19)    | 32.24<br>(0.00 to<br>206.69)    | 34.63<br>(0.00 to<br>222.06)    |
| Executions and police conflict                                               | 20.35<br>(15.84 to<br>33.27)          | 3.47<br>(0.00 to<br>50.32)             | 3.50<br>(0.00 to<br>50.80)             | 3.68<br>(0.00 to<br>53.40)              | 0.44<br>(0.26 to<br>0.74)        | 0.06<br>(0.00 to<br>0.91)       | 0.06<br>(0.00 to<br>0.93)       | 0.07<br>(0.00 to<br>0.94)       |

**Liberia**

| Cause | YLLs (actual counts) |               |                      |                     | Deaths (actual counts) |               |                      |                     |
|-------|----------------------|---------------|----------------------|---------------------|------------------------|---------------|----------------------|---------------------|
|       | 2016                 | 2040 Forecast | 2040 Better Scenario | 2040 Worse Scenario | 2016                   | 2040 Forecast | 2040 Better Scenario | 2040 Worse Scenario |

|                                                                   |                                                   |                                                   |                                               |                                                   |                                          |                                          |                                          |                                          |
|-------------------------------------------------------------------|---------------------------------------------------|---------------------------------------------------|-----------------------------------------------|---------------------------------------------------|------------------------------------------|------------------------------------------|------------------------------------------|------------------------------------------|
| All causes                                                        | 1,634,669.25<br>(1,482,199.58 to<br>1,823,011.44) | 1,422,893.24<br>(1,160,084.09 to<br>1,739,930.28) | 957,678.98<br>(780,086.96 to<br>1,156,261.38) | 2,268,684.24<br>(1,808,967.16 to<br>2,788,302.10) | 32,362.14<br>(30,285.29 to<br>34,857.23) | 44,674.87<br>(37,848.95 to<br>52,277.30) | 31,706.36<br>(27,145.60 to<br>36,730.55) | 61,055.00<br>(51,156.34 to<br>71,848.90) |
| Communicable, maternal, neonatal, and nutritional diseases        | 1,156,138.17<br>(1,021,303.04 to<br>1,312,337.08) | 631,403.51<br>(467,262.85 to<br>863,619.82)       | 366,322.00<br>(267,077.81 to<br>502,855.09)   | 1,243,414.48<br>(904,816.02 to<br>1,638,150.01)   | 18,322.29<br>(16,521.95 to<br>20,408.60) | 14,906.10<br>(10,609.77 to<br>20,835.00) | 8,838.53<br>(6,328.01 to<br>12,287.98)   | 25,032.65<br>(18,502.16 to<br>33,156.46) |
| HIV/AIDS and tuberculosis                                         | 147,735.88<br>(124,592.82 to<br>177,505.39)       | 141,728.78<br>(85,474.62 to<br>211,755.48)        | 70,879.41<br>(36,339.53 to<br>124,001.24)     | 345,638.83<br>(214,297.25 to<br>510,936.44)       | 3,271.87<br>(2,822.16 to<br>3,829.76)    | 3,416.07<br>(2,184.96 to<br>4,929.84)    | 1,721.48<br>(968.57 to<br>2,704.99)      | 7,729.04<br>(4,849.02 to<br>11,313.35)   |
| Tuberculosis                                                      | 49,502.97<br>(40,507.10 to<br>61,243.09)          | 40,777.28<br>(22,924.79 to<br>69,153.98)          | 16,773.15<br>(9,959.15 to<br>26,311.09)       | 70,494.12<br>(38,490.95 to<br>123,500.85)         | 1,345.38<br>(1,059.42 to<br>1,685.01)    | 1,294.48<br>(745.04 to<br>2,093.45)      | 568.08<br>(350.20 to<br>860.09)          | 2,103.11<br>(1,163.58 to<br>3,486.67)    |
| HIV/AIDS                                                          | 98,232.91<br>(76,791.38 to<br>124,121.69)         | 100,951.49<br>(49,839.01 to<br>160,417.43)        | 54,106.26<br>(21,135.99 to<br>104,159.73)     | 275,144.71<br>(150,104.85 to<br>430,061.51)       | 1,926.49<br>(1,554.86 to<br>2,375.57)    | 2,121.58<br>(1,089.31 to<br>3,322.21)    | 1,153.41<br>(471.02 to<br>2,065.44)      | 5,625.93<br>(3,074.38 to<br>8,753.88)    |
| Diarrhea, lower respiratory, and other common infectious diseases | 467,009.03<br>(380,039.25 to<br>583,686.05)       | 272,278.12<br>(153,503.54 to<br>454,478.71)       | 145,523.79<br>(79,134.92 to<br>244,076.45)    | 488,814.36<br>(291,009.40 to<br>786,147.06)       | 7,753.56<br>(6,499.54 to<br>9,467.56)    | 7,719.61<br>(4,252.36 to<br>12,878.66)   | 4,393.40<br>(2,482.58 to<br>7,412.31)    | 11,153.21<br>(6,498.82 to<br>17,829.88)  |
| Diarrheal diseases                                                | 241,302.04<br>(167,964.65 to<br>324,420.13)       | 120,708.57<br>(38,673.21 to<br>280,392.16)        | 60,844.14<br>(16,391.48 to<br>145,878.51)     | 202,547.87<br>(83,365.07 to<br>410,918.70)        | 3,842.19<br>(2,671.16 to<br>5,630.86)    | 3,338.21<br>(822.21 to<br>8,512.51)      | 1,689.14<br>(380.13 to<br>4,749.90)      | 4,761.41<br>(1,473.60 to<br>10,816.22)   |
| Intestinal infectious diseases                                    | 7,072.65<br>(3,294.29 to<br>13,281.68)            | 5,931.68<br>(2,630.75 to<br>11,394.18)            | 4,730.75<br>(2,127.45 to<br>8,881.50)         | 8,336.31<br>(3,730.28 to<br>16,087.85)            | 101.62<br>(48.11 to<br>189.32)           | 92.47<br>(41.53 to<br>175.53)            | 74.38<br>(35.03 to<br>136.09)            | 124.42<br>(56.16 to<br>238.60)           |
| Typhoid fever                                                     | 5,832.72<br>(2,588.47 to<br>11,456.34)            | 4,777.71<br>(1,989.71 to<br>9,474.08)             | 3,858.81<br>(1,637.83 to<br>7,667.23)         | 6,671.72<br>(2,718.03 to<br>13,433.11)            | 83.99<br>(37.71 to<br>161.34)            | 74.58<br>(31.79 to<br>146.14)            | 60.78<br>(26.19 to<br>118.11)            | 99.67<br>(41.67 to<br>195.48)            |
| Paratyphoid fever                                                 | 1,167.78<br>(400.03 to<br>2,717.08)               | 1,132.25<br>(424.99 to<br>2,631.80)               | 859.77<br>(325.98 to<br>1,951.29)             | 1,623.08<br>(588.75 to<br>3,790.40)               | 16.66<br>(5.90 to<br>38.73)              | 17.47<br>(6.84 to<br>39.04)              | 13.36<br>(5.26 to<br>29.14)              | 24.08<br>(9.31 to<br>54.58)              |
| Other intestinal infectious diseases                              | 72.15<br>(21.79 to<br>196.32)                     | 21.72<br>(6.27 to<br>62.56)                       | 33.77<br>(3.35 to<br>62.56)                   | 41.51<br>(10.51 to<br>118.29)                     | 0.97<br>(0.32 to<br>2.55)                | 0.42<br>(0.14 to<br>1.00)                | 0.25<br>(0.08 to<br>0.64)                | 0.67<br>(0.21 to<br>1.75)                |
| Lower respiratory infections                                      | 117,234.25<br>(91,192.31 to<br>150,950.13)        | 100,022.83<br>(57,151.28 to<br>170,059.91)        | 52,015.39<br>(33,093.92 to<br>81,832.90)      | 193,322.69<br>(97,974.59 to<br>368,369.15)        | 2,411.71<br>(1,925.14 to<br>2,941.72)    | 3,499.64<br>(2,234.98 to<br>5,295.42)    | 2,062.25<br>(1,399.37 to<br>2,951.51)    | 5,018.11<br>(2,995.95 to<br>8,111.66)    |
| Upper respiratory infections                                      | 350.81<br>(121.85 to<br>870.43)                   | 258.81<br>(112.80 to<br>529.10)                   | 128.24<br>(53.35 to<br>257.09)                | 457.46<br>(168.23 to<br>1,074.03)                 | 5.44<br>(2.45 to<br>11.45)               | 5.96<br>(2.82 to<br>11.32)               | 3.12<br>(1.37 to<br>6.02)                | 9.02<br>(3.73 to<br>18.39)               |
| Otitis media                                                      | 3.82<br>(1.85 to<br>8.33)                         | 1.04<br>(0.54 to<br>1.98)                         | 1.16<br>(0.59 to<br>2.24)                     | 1.08<br>(0.57 to<br>1.99)                         | 0.10<br>(0.06 to<br>0.18)                | 0.06<br>(0.03 to<br>0.13)                | 0.08<br>(0.03 to<br>0.18)                | 0.05<br>(0.02 to<br>0.11)                |
| Meningitis                                                        | 49,347.92<br>(32,198.98 to<br>92,225.86)          | 27,657.24<br>(17,036.33 to<br>46,349.89)          | 21,192.46<br>(13,524.41 to<br>34,008.00)      | 51,627.30<br>(27,469.48 to<br>101,655.92)         | 761.37<br>(529.19 to<br>1,267.00)        | 547.41<br>(356.95 to<br>821.34)          | 462.54<br>(310.54 to<br>674.06)          | 828.57<br>(498.89 to<br>1,412.60)        |
| Pneumococcal meningitis                                           | 3,578.24<br>(2,326.54 to<br>6,021.41)             | 2,092.29<br>(1,291.78 to<br>3,497.73)             | 1,866.80<br>(1,175.93 to<br>2,929.84)         | 3,172.25<br>(1,871.82 to<br>5,484.34)             | 64.90<br>(44.60 to<br>98.72)             | 51.62<br>(33.57 to<br>86.44)             | 49.47<br>(32.19 to<br>78.33)             | 66.06<br>(42.26 to<br>110.98)            |
| H influenzae type B meningitis                                    | 5,903.92<br>(3,622.55 to<br>11,651.82)            | 6,589.15<br>(2,035.01 to<br>17,288.95)            | 3,301.18<br>(1,475.28 to<br>7,457.93)         | 22,322.21<br>(5,328.17 to<br>60,359.37)           | 85.70<br>(55.62 to<br>150.90)            | 94.66<br>(38.90 to<br>223.11)            | 57.94<br>(32.63 to<br>110.08)            | 277.45<br>(76.73 to<br>743.71)           |
| Meningococcal meningitis                                          | 16,082.29<br>(16,724.19 to<br>46,411.43)          | 12,292.54<br>(7,609.44 to<br>19,909.88)           | 10,540.44<br>(6,597.37 to<br>16,648.89)       | 16,653.23<br>(10,000.23 to<br>28,802.45)          | 395.67<br>(268.44 to<br>654.13)          | 254.62<br>(391.22)                       | 227.91<br>(146.89 to<br>339.80)          | 305.85<br>(195.34 to<br>477.24)          |
| Other meningitis                                                  | 13,783.47<br>(8,780.04 to<br>28,561.44)           | 6,683.28<br>(4,282.08 to<br>11,118.60)            | 5,484.04<br>(3,539.50 to<br>8,903.38)         | 9,479.61<br>(5,882.34 to<br>17,157.90)            | 215.09<br>(148.25 to<br>384.50)          | 146.51<br>(99.22 to<br>223.63)           | 127.23<br>(87.61 to<br>196.16)           | 179.21<br>(118.70 to<br>285.84)          |
| Encephalitis                                                      | 2,355.40<br>(1,645.03 to<br>3,220.79)             | 2,080.25<br>(1,315.64 to<br>2,977.63)             | 1,581.57<br>(974.99 to<br>2,243.99)           | 3,070.50<br>(1,915.70 to<br>4,375.48)             | 37.20<br>(26.13 to<br>49.15)             | 42.45<br>(27.57 to<br>59.90)             | 33.72<br>(21.25 to<br>46.46)             | 54.97<br>(35.77 to<br>76.18)             |
| Diphtheria                                                        | 94.87<br>(43.37 to<br>172.71)                     | 21.80<br>(9.74 to<br>49.77)                       | 12.76<br>(6.71 to<br>23.15)                   | 53.67<br>(18.37 to<br>138.56)                     | 1.23<br>(0.60 to<br>2.14)                | 0.33<br>(0.16 to<br>0.68)                | 0.23<br>(0.12 to<br>0.41)                | 0.71<br>(0.28 to<br>1.72)                |
| Whooping cough                                                    | 25,596.59<br>(2,029.15 to<br>82,798.26)           | 14,209.45<br>(1,210.29 to<br>44,225.67)           | 4,519.90<br>(323.79 to<br>15,617.94)          | 26,245.69<br>(2,041.91 to<br>83,202.81)           | 302.71<br>(24.06 to<br>981.79)           | 169.10<br>(14.47 to<br>526.01)           | 55.09<br>(4.03 to<br>190.35)             | 310.88<br>(24.09 to<br>987.41)           |

| Tetanus                                       | 866.41<br>(442.38 to<br>1,632.81)           | 154.16<br>(76.83 to<br>310.87)           | 108.89<br>(50.19 to<br>216.77)           | 214.08<br>(104.49 to<br>437.53)           | 13.96<br>(7.89 to<br>24.30)           | 2.90<br>(1.50 to<br>5.24)             | 2.43<br>(1.13 to<br>4.77)           | 3.56<br>(1.84 to<br>7.09)             |
|-----------------------------------------------|---------------------------------------------|------------------------------------------|------------------------------------------|-------------------------------------------|---------------------------------------|---------------------------------------|-------------------------------------|---------------------------------------|
| Measles                                       | 22,010.07<br>(7,632.08 to<br>50,794.72)     | 832.50<br>(60.09 to<br>3,834.77)         | 163.44<br>(28.61 to<br>582.93)           | 2,213.58<br>(154.67 to<br>8,967.34)       | 263.25<br>(91.30 to<br>608.36)        | 9.99<br>(0.76 to<br>45.37)            | 2.08<br>(0.39 to<br>7.22)           | 26.34<br>(1.92 to<br>106.56)          |
| <b>Liberia</b>                                |                                             |                                          |                                          |                                           |                                       |                                       |                                     |                                       |
| Cause                                         | YLLs (actual counts)                        |                                          |                                          |                                           | Deaths (actual counts)                |                                       |                                     |                                       |
|                                               | 2016                                        | 2040 Forecast                            | 2040 Better Scenario                     | 2040 Worse Scenario                       | 2016                                  | 2040 Forecast                         | 2040 Better Scenario                | 2040 Worse Scenario                   |
| Varicella and herpes zoster                   | 774.20<br>(438.93 to<br>1,264.48)           | 399.79<br>(231.49 to<br>649.47)          | 225.09<br>(132.74 to<br>366.44)          | 714.13<br>(386.48 to<br>1,235.50)         | 12.80<br>(8.54 to<br>18.97)           | 11.08<br>(7.04 to<br>16.10)           | 7.34<br>(4.47 to<br>11.18)          | 15.16<br>(9.41 to<br>23.55)           |
| Neglected tropical diseases and malaria       | 199,785.25<br>(139,245.59 to<br>278,672.31) | 65,431.68<br>(46,702.40 to<br>88,684.91) | 55,908.96<br>(39,892.68 to<br>75,352.63) | 93,693.64<br>(64,160.43 to<br>132,924.95) | 2,868.66<br>(2,085.67 to<br>3,834.76) | 1,444.11<br>(1,037.11 to<br>1,955.93) | 1,303.31<br>(950.31 to<br>1,736.60) | 1,771.79<br>(1,268.18 to<br>2,388.39) |
| Malaria                                       | 181,264.70<br>(120,308.73 to<br>257,413.39) | 54,055.10<br>(36,910.75 to<br>75,976.24) | 48,220.51<br>(33,550.91 to<br>66,291.15) | 75,996.04<br>(50,110.50 to<br>112,915.67) | 2,569.38<br>(1,798.19 to<br>3,524.48) | 1,202.12<br>(814.09 to<br>1,693.59)   | 1,133.48<br>(789.55 to<br>1,563.21) | 1,442.04<br>(991.63 to<br>2,025.58)   |
| Chagas disease                                | 0.00<br>(0.00 to<br>0.00)                   | 0.00<br>(0.00 to<br>0.00)                | 0.00<br>(0.00 to<br>0.00)                | 0.00<br>(0.00 to<br>0.00)                 | 0.00<br>(0.00 to<br>0.00)             | 0.00<br>(0.00 to<br>0.00)             | 0.00<br>(0.00 to<br>0.00)           | 0.00<br>(0.00 to<br>0.00)             |
| Leishmaniasis                                 | 0.00<br>(0.00 to<br>0.00)                   | 0.00<br>(0.00 to<br>0.00)                | 0.00<br>(0.00 to<br>0.00)                | 0.00<br>(0.00 to<br>0.00)                 | 0.00<br>(0.00 to<br>0.00)             | 0.00<br>(0.00 to<br>0.00)             | 0.00<br>(0.00 to<br>0.00)           | 0.00<br>(0.00 to<br>0.00)             |
| African trypanosomiasis                       | 0.00<br>(0.00 to<br>0.00)                   | 0.00<br>(0.00 to<br>0.00)                | 0.00<br>(0.00 to<br>0.00)                | 0.00<br>(0.00 to<br>0.00)                 | 0.00<br>(0.00 to<br>0.00)             | 0.00<br>(0.00 to<br>0.00)             | 0.00<br>(0.00 to<br>0.00)           | 0.00<br>(0.00 to<br>0.00)             |
| Schistosomiasis                               | 1,920.05<br>(1,266.21 to<br>2,741.56)       | 1,769.74<br>(1,105.17 to<br>2,643.60)    | 1,301.92<br>(827.80 to<br>1,908.34)      | 2,011.47<br>(1,298.15 to<br>2,918.67)     | 54.64<br>(36.71 to<br>78.69)          | 57.55<br>(36.72 to<br>85.03)          | 44.34<br>(28.14 to<br>65.81)        | 62.47<br>(40.39 to<br>91.54)          |
| Cysticercosis                                 | 170.48<br>(134.80 to<br>212.03)             | 88.57<br>(65.25 to<br>119.95)            | 74.90<br>(54.63 to<br>102.64)            | 99.16<br>(72.19 to<br>131.11)             | 3.56<br>(2.84 to<br>4.40)             | 2.19<br>(1.62 to<br>2.94)             | 1.89<br>(1.40 to<br>2.53)           | 2.35<br>(1.74 to<br>3.09)             |
| Cystic echinococcosis                         | 164.00<br>(113.64 to<br>226.43)             | 100.37<br>(58.92 to<br>166.36)           | 39.28<br>(24.89 to<br>58.51)             | 156.77<br>(97.57 to<br>247.20)            | 3.42<br>(2.38 to<br>4.68)             | 2.83<br>(1.70 to<br>4.59)             | 1.16<br>(0.76 to<br>1.71)           | 4.09<br>(2.61 to<br>6.32)             |
| Dengue                                        | 110.62<br>(6.72 to<br>523.14)               | 315.15<br>(21.69 to<br>1,294.72)         | 282.13<br>(19.95 to<br>1,141.50)         | 429.05<br>(27.81 to<br>1,891.82)          | 1.72<br>(0.11 to<br>7.79)             | 1.72<br>(0.53 to<br>30.88)            | 7.22<br>(0.49 to<br>28.37)          | 8.79<br>(0.59 to<br>36.25)            |
| Yellow fever                                  | 3,360.69<br>(684.36 to<br>9,668.79)         | 1,527.04<br>(281.55 to<br>4,546.50)      | 867.56<br>(167.35 to<br>2,748.28)        | 2,212.84<br>(427.21 to<br>6,944.57)       | 54.00<br>(11.02 to<br>155.35)         | 26.90<br>(5.10 to<br>80.04)           | 15.39<br>(2.97 to<br>47.78)         | 37.44<br>(7.30 to<br>114.77)          |
| Rabies                                        | 842.59<br>(245.68 to<br>2,212.92)           | 522.90<br>(133.80 to<br>1,484.99)        | 154.94<br>(40.79 to<br>435.37)           | 988.35<br>(269.43 to<br>2,798.50)         | 14.14<br>(3.99 to<br>36.48)           | 10.36<br>(2.58 to<br>30.34)           | 3.06<br>(0.82 to<br>8.68)           | 18.51<br>(4.69 to<br>52.57)           |
| Intestinal nematode infections                | 1,484.49<br>(890.09 to<br>2,390.28)         | 1,006.46<br>(590.13 to<br>1,637.39)      | 990.91<br>(572.41 to<br>1,623.21)        | 1,658.97<br>(938.08 to<br>2,783.56)       | 18.80<br>(11.70 to<br>29.89)          | 14.66<br>(9.17 to<br>22.57)           | 14.75<br>(9.59 to<br>22.59)         | 22.32<br>(13.25 to<br>36.06)          |
| Other neglected tropical diseases             | 10,467.63<br>(6,090.84 to<br>17,686.36)     | 6,046.35<br>(3,709.04 to<br>9,470.46)    | 3,976.81<br>(2,455.79 to<br>6,209.39)    | 10,140.99<br>(6,128.82 to<br>16,841.17)   | 149.01<br>(92.06 to<br>236.37)        | 119.80<br>(78.22 to<br>176.72)        | 82.05<br>(54.54 to<br>119.80)       | 173.77<br>(112.05 to<br>268.33)       |
| Maternal disorders                            | 44,363.68<br>(37,002.32 to<br>53,116.41)    | 43,519.55<br>(30,153.10 to<br>63,463.69) | 19,448.61<br>(12,922.51 to<br>28,581.88) | 63,684.80<br>(42,156.90 to<br>96,106.29)  | 842.69<br>(698.54 to<br>1,011.14)     | 854.65<br>(586.15 to<br>1,260.58)     | 383.03<br>(251.77 to<br>570.58)     | 1,241.70<br>(808.37 to<br>1,907.15)   |
| Maternal hemorrhage                           | 13,486.94<br>(9,688.06 to<br>17,837.65)     | 11,722.09<br>(7,160.01 to<br>18,946.99)  | 5,202.59<br>(3,083.91 to<br>8,188.82)    | 16,530.63<br>(9,589.46 to<br>26,728.97)   | 259.67<br>(183.99 to<br>345.12)       | 231.20<br>(138.22 to<br>372.62)       | 102.80<br>(59.95 to<br>165.65)      | 324.43<br>(194.06 to<br>531.68)       |
| Maternal sepsis and other maternal infections | 1,046.23<br>(554.20 to<br>1,698.46)         | 883.94<br>(427.43 to<br>1,591.09)        | 392.02<br>(189.34 to<br>703.59)          | 1,275.41<br>(594.77 to<br>2,242.60)       | 20.08<br>(10.63 to<br>31.75)          | 7.74<br>(8.51 to<br>31.39)            | 7.74<br>(3.66 to<br>13.88)          | 24.96<br>(11.73 to<br>44.71)          |
| Maternal hypertensive disorders               | 5,815.61<br>(4,113.33 to<br>7,936.84)       | 5,203.58<br>(3,191.14 to<br>7,933.16)    | 2,286.69<br>(1,363.41 to<br>3,659.18)    | 7,443.89<br>(4,488.98 to<br>11,606.23)    | 108.02<br>(77.18 to<br>148.15)        | 99.53<br>(60.34 to<br>157.06)         | 43.84<br>(25.86 to<br>71.26)        | 141.46<br>(84.60 to<br>221.99)        |

|                                                                         |                                                    |                                                  |                                                 |                                                    |                                              |                                            |                                        |                                              |
|-------------------------------------------------------------------------|----------------------------------------------------|--------------------------------------------------|-------------------------------------------------|----------------------------------------------------|----------------------------------------------|--------------------------------------------|----------------------------------------|----------------------------------------------|
|                                                                         | 2,186.93<br>(1,275.07 to<br>3,529.25)              | 2,075.12<br>(1,026.66 to<br>3,846.51)            | 867.08<br>(420.08 to<br>1,614.46)               | 3,008.11<br>(1,420.62 to<br>5,591.88)              | 42.17<br>(24.31 to<br>69.15)                 | 40.98<br>(19.87 to<br>76.64)               | 17.16<br>(8.07 to<br>32.21)            | 59.13<br>(27.40 to<br>109.85)                |
| Maternal obstructed labor and uterine rupture                           | 8,299.42<br>(5,136.60 to<br>12,064.76)             | 9,041.60<br>(4,460.09 to<br>16,594.84)           | 3,960.05<br>(1,894.73 to<br>7,269.07)           | 13,009.32<br>(6,508.51 to<br>23,059.48)            | 156.11<br>(97.85 to<br>224.68)               | 176.14<br>(87.59 to<br>321.20)             | 156.11<br>(88.71 to<br>224.77)         | 77.29<br>(37.23 to<br>140.51)                |
| Maternal abortion, miscarriage, and ectopic pregnancy                   | 8,352.52<br>(6,013.86 to<br>11,148.17)             | 7,428.94<br>(4,627.22 to<br>11,594.26)           | 3,429.63<br>(2,058.03 to<br>5,369.47)           | 11,382.80<br>(6,795.62 to<br>17,976.73)            | 156.72<br>(112.60 to<br>210.61)              | 142.86<br>(88.71 to<br>224.77)             | 66.11<br>(11.13 to<br>104.61)          | 216.59<br>(128.96 to<br>345.04)              |
| Indirect maternal deaths                                                | 659.97<br>(313.43 to<br>1,146.23)                  | 476.75<br>(213.76 to<br>888.61)                  | 213.88<br>(91.82 to<br>396.15)                  | 713.50<br>(321.91 to<br>1,325.55)                  | 12.51<br>(5.74 to<br>21.70)                  | 9.32<br>(4.04 to<br>16.97)                 | 4.19<br>(1.78 to<br>7.97)              | 13.81<br>(6.05 to<br>26.03)                  |
| Late maternal deaths                                                    | 372.06<br>(198.10 to<br>569.45)                    | 3,047.55<br>(1,410.07 to<br>5,381.29)            | 1,345.38<br>(480.13 to<br>2,619.71)             | 4,943.39<br>(2,372.57 to<br>8,712.79)              | 7.49<br>(4.00 to<br>11.48)                   | 64.79<br>(30.09 to<br>114.83)              | 28.98<br>(11.13 to<br>55.09)           | 103.81<br>(49.08 to<br>187.41)               |
| Maternal deaths aggravated by HIV/AIDS                                  | 4,143.99<br>(2,705.26 to<br>5,861.70)              | 3,639.98<br>(2,077.25 to<br>6,035.61)            | 1,751.29<br>(987.44 to<br>3,013.80)             | 5,377.76<br>(3,069.56 to<br>9,141.40)              | 79.93<br>(51.71 to<br>114.63)                | 72.42<br>(40.64 to<br>122.15)              | 34.93<br>(19.24 to<br>61.24)           | 105.86<br>(59.18 to<br>181.59)               |
| Other maternal disorders                                                | <b>Liberia</b>                                     |                                                  |                                                 |                                                    |                                              |                                            |                                        |                                              |
| Cause                                                                   | YLLs (actual counts)                               |                                                  |                                                 |                                                    | Deaths (actual counts)                       |                                            |                                        |                                              |
|                                                                         | 2016                                               | 2040 Forecast                                    | 2040 Better Scenario                            | 2040 Worse Scenario                                | 2016                                         | 2040 Forecast                              | 2040 Better Scenario                   | 2040 Worse Scenario                          |
| <b>Neonatal disorders</b>                                               | <b>231,058.88</b><br>(195,151.87 to<br>270,478.74) | <b>87,915.18</b><br>(65,770.09 to<br>116,681.12) | <b>59,927.62</b><br>(44,924.80 to<br>79,311.87) | <b>217,179.54</b><br>(158,087.17 to<br>292,666.30) | <b>2,669.23</b><br>(2,254.46 to<br>3,124.76) | <b>1,015.86</b><br>(760.15 to<br>1,348.16) | <b>692.47</b><br>(519.18 to<br>916.36) | <b>2,509.37</b><br>(1,826.62 to<br>3,381.96) |
| Neonatal preterm birth                                                  | 74,328.24<br>(49,088.80 to<br>103,512.85)          | 22,644.72<br>(14,032.48 to<br>33,172.76)         | 15,568.96<br>(9,507.10 to<br>22,783.59)         | 64,008.35<br>(39,935.72 to<br>93,415.95)           | 858.56<br>(567.09 to<br>1,195.67)            | 261.63<br>(162.09 to<br>383.20)            | 179.89<br>(109.83 to<br>263.22)        | 739.47<br>(461.36 to<br>1,079.28)            |
| Neonatal encephalopathy due to birth asphyxia and trauma                | 91,083.37<br>(63,988.19 to<br>123,126.62)          | 32,966.79<br>(19,377.94 to<br>51,576.00)         | 23,107.36<br>(13,957.01 to<br>35,664.60)        | 76,529.32<br>(43,363.39 to<br>120,717.28)          | 1,052.08<br>(739.07 to<br>1,410.48)          | 380.88<br>(224.02 to<br>595.80)            | 266.97<br>(161.26 to<br>411.98)        | 884.16<br>(500.95 to<br>1,394.36)            |
| Neonatal sepsis and other neonatal infections                           | 43,846.95<br>(28,584.17 to<br>64,432.50)           | 23,505.71<br>(14,016.91 to<br>36,332.79)         | 15,955.30<br>(9,467.64 to<br>24,377.05)         | 55,014.07<br>(32,837.79 to<br>84,188.23)           | 506.64<br>(330.25 to<br>744.34)              | 271.65<br>(162.00 to<br>419.81)            | 184.39<br>(109.40 to<br>281.80)        | 635.76<br>(379.50 to<br>922.69)              |
| Hemolytic disease and other neonatal jaundice                           | 5,203.14<br>(2,960.79 to<br>8,596.21)              | 1,479.14<br>(733.22 to<br>2,697.30)              | 894.31<br>(445.83 to<br>1,599.82)               | 3,629.52<br>(1,760.38 to<br>6,586.81)              | 60.13<br>(34.22 to<br>99.37)                 | 17.10<br>(8.49 to<br>31.17)                | 10.34<br>(5.15 to<br>18.48)            | 41.95<br>(20.35 to<br>76.10)                 |
| Other neonatal disorders                                                | 16,597.17<br>(10,392.76 to<br>24,673.23)           | 7,318.82<br>(4,062.11 to<br>12,485.89)           | 4,401.69<br>(2,401.56 to<br>7,318.35)           | 17,998.27<br>(9,904.34 to<br>30,466.66)            | 191.82<br>(120.11 to<br>285.18)              | 84.60<br>(46.96 to<br>144.28)              | 50.88<br>(27.76 to<br>84.54)           | 208.03<br>(114.52 to<br>352.05)              |
| <b>Nutritional deficiencies</b>                                         | <b>22,761.25</b><br>(14,472.32 to<br>35,876.88)    | <b>8,721.38</b><br>(5,935.23 to<br>13,526.43)    | <b>5,939.94</b><br>(4,021.26 to<br>9,216.03)    | <b>14,949.39</b><br>(9,351.54 to<br>24,832.26)     | <b>349.45</b><br>(244.83 to<br>519.69)       | <b>229.71</b><br>(171.52 to<br>317.20)     | <b>175.73</b><br>(131.33 to<br>239.36) | <b>304.73</b><br>(214.61 to<br>447.76)       |
| Protein-energy malnutrition                                             | 21,369.58<br>(13,299.81 to<br>34,199.62)           | 7,032.15<br>(4,593.06 to<br>11,537.83)           | 4,752.48<br>(3,098.33 to<br>7,534.38)           | 12,790.07<br>(7,647.79 to<br>21,616.97)            | 313.45<br>(215.28 to<br>477.30)              | 176.63<br>(127.14 to<br>244.14)            | 135.22<br>(96.95 to<br>185.46)         | 244.60<br>(168.75 to<br>368.43)              |
| Iodine deficiency                                                       | 153.32<br>(7.24 to<br>743.73)                      | 321.03<br>(11.35 to<br>1,264.92)                 | 200.66<br>(5.86 to<br>784.73)                   | 525.11<br>(13.54 to<br>2,849.71)                   | 2.96<br>(0.25 to<br>11.06)                   | 9.81<br>(0.41 to<br>31.84)                 | 6.80<br>(0.22 to<br>22.76)             | 12.60<br>(0.46 to<br>42.74)                  |
| Dietary iron deficiency                                                 | 77.56<br>(50.16 to<br>144.33)                      | 108.57<br>(63.39 to<br>222.85)                   | 84.19<br>(49.19 to<br>174.14)                   | 126.29<br>(73.56 to<br>248.01)                     | 1.50<br>(0.93 to<br>3.83)                    | 2.35<br>(1.29 to<br>7.15)                  | 1.87<br>(1.01 to<br>6.27)              | 2.62<br>(1.45 to<br>7.38)                    |
| Other nutritional deficiencies                                          | 1,160.79<br>(746.46 to<br>1,725.20)                | 1,259.62<br>(802.23 to<br>1,823.30)              | 902.63<br>(560.13 to<br>1,317.22)               | 1,507.92<br>(922.86 to<br>2,276.44)                | 31.54<br>(20.69 to<br>43.61)                 | 40.93<br>(26.23 to<br>57.26)               | 31.83<br>(20.24 to<br>45.13)           | 44.92<br>(28.02 to<br>64.42)                 |
| <b>Other communicable, maternal, neonatal, and nutritional diseases</b> | <b>43,424.20</b><br>(23,667.41 to<br>73,413.48)    | <b>11,808.82</b><br>(8,008.48 to<br>17,700.77)   | <b>8,693.67</b><br>(5,725.71 to<br>13,161.87)   | <b>19,453.93</b><br>(11,706.17 to<br>32,678.54)    | <b>566.82</b><br>(336.51 to<br>918.52)       | <b>226.09</b><br>(168.77 to<br>307.97)     | <b>169.10</b><br>(124.92 to<br>228.66) | <b>322.82</b><br>(220.18 to<br>481.98)       |
| Sexually transmitted infections excluding HIV                           | 35,263.04<br>(16,362.75 to<br>64,455.64)           | 5,214.60<br>(2,237.90 to<br>10,311.65)           | 3,963.46<br>(1,729.89 to<br>7,769.04)           | 10,741.96<br>(4,330.76 to<br>22,680.99)            | 415.07<br>(193.43 to<br>755.57)              | 64.61<br>(29.46 to<br>124.67)              | 49.27<br>(22.81 to<br>93.97)           | 129.50<br>(53.75 to<br>268.63)               |
| Syphilis                                                                | 34,990.12<br>(16,148.05 to<br>64,204.05)           | 4,917.62<br>(1,936.20 to<br>10,041.24)           | 3,731.87<br>(1,517.07 to<br>7,527.63)           | 10,408.21<br>(4,045.02 to<br>22,307.52)            | 409.64<br>(189.03 to<br>750.53)              | 58.44<br>(23.40 to<br>118.66)              | 44.36<br>(18.27 to<br>88.84)           | 122.71<br>(48.26 to<br>261.20)               |

|                                       |                                             |                                             |                                             |                                               |                                          |                                          |                                          |                                          |
|---------------------------------------|---------------------------------------------|---------------------------------------------|---------------------------------------------|-----------------------------------------------|------------------------------------------|------------------------------------------|------------------------------------------|------------------------------------------|
| Chlamydial infection                  | 56.23<br>(40.03 to<br>77.98)                | 60.70<br>(40.90 to<br>89.00)                | 47.22<br>(31.41 to<br>69.99)                | 68.48<br>(46.11 to<br>102.00)                 | 1.10<br>(0.79 to<br>1.53)                | 1.24<br>(0.84 to<br>1.83)                | 0.98<br>(0.67 to<br>1.45)                | 1.37<br>(0.93 to<br>2.00)                |
| Gonococcal infection                  | 139.74<br>(99.30 to<br>192.80)              | 153.00<br>(102.44 to<br>229.56)             | 119.74<br>(80.19 to<br>179.68)              | 171.15<br>(115.46 to<br>251.92)               | 2.83<br>(2.03 to<br>4.03)                | 3.23<br>(2.18 to<br>4.87)                | 2.59<br>(1.76 to<br>3.91)                | 3.54<br>(2.43 to<br>5.26)                |
| Other sexually transmitted infections | 76.95<br>(54.14 to<br>107.19)               | 83.28<br>(54.81 to<br>125.72)               | 64.63<br>(42.09 to<br>97.16)                | 94.11<br>(61.97 to<br>140.99)                 | 1.51<br>(1.08 to<br>2.13)                | 1.70<br>(1.14 to<br>2.54)                | 1.34<br>(0.89 to<br>1.99)                | 1.88<br>(1.25 to<br>2.81)                |
| Acute hepatitis                       | 5,386.06<br>(4,365.46 to<br>6,420.92)       | 4,926.97<br>(3,600.10 to<br>6,584.37)       | 3,554.58<br>(2,566.27 to<br>4,764.99)       | 5,913.04<br>(4,302.53 to<br>7,856.01)         | 109.35<br>(89.96 to<br>129.58)           | 116.50<br>(87.94 to<br>153.59)           | 85.46<br>(63.91 to<br>112.51)            | 134.36<br>(100.78 to<br>175.45)          |
| Acute hepatitis A                     | 97.61<br>(12.23 to<br>251.96)               | 52.30<br>(13.61 to<br>124.38)               | 38.20<br>(10.16 to<br>92.79)                | 80.78<br>(18.10 to<br>203.89)                 | 1.29<br>(0.22 to<br>3.08)                | 1.01<br>(0.29 to<br>2.32)                | 0.75<br>(0.22 to<br>1.73)                | 1.38<br>(0.40 to<br>3.25)                |
| Acute hepatitis B                     | 5,986.27<br>(3,223.05 to<br>4,946.03)       | 3,970.33<br>(2,823.16 to<br>5,461.35)       | 2,800.03<br>(1,986.55 to<br>3,906.21)       | 4,654.34<br>(3,331.82 to<br>6,321.17)         | 86.98<br>(70.82 to<br>105.83)            | 97.04<br>(71.74 to<br>129.57)            | 69.59<br>(51.35 to<br>93.75)             | 110.81<br>(82.41 to<br>148.12)           |
| Acute hepatitis C                     | 105.21<br>(73.51 to<br>145.69)              | 125.68<br>(80.77 to<br>185.76)              | 106.50<br>(67.07 to<br>157.08)              | 138.84<br>(89.10 to<br>202.56)                | 2.51<br>(1.74 to<br>3.58)                | 3.45<br>(2.22 to<br>5.19)                | 2.98<br>(1.90 to<br>4.49)                | 3.66<br>(2.38 to<br>5.48)                |
| Acute hepatitis E                     | 1,196.97<br>(823.84 to<br>1,617.86)         | 778.65<br>(505.87 to<br>1,185.01)           | 609.84<br>(388.20 to<br>913.25)             | 1,039.07<br>(671.21 to<br>1,538.09)           | 18.57<br>(13.15 to<br>24.73)             | 15.01<br>(10.07 to<br>21.87)             | 12.14<br>(8.09 to<br>17.68)              | 18.51<br>(12.60 to<br>26.95)             |
| Other unspecified infectious diseases | 2,775.11<br>(1,144.72 to<br>10,009.16)      | 1,667.25<br>(1,013.04 to<br>3,214.55)       | 1,175.63<br>(707.75 to<br>2,389.23)         | 2,798.94<br>(1,472.66 to<br>6,343.36)         | 42.40<br>(22.40 to<br>126.21)            | 44.98<br>(32.46 to<br>69.37)             | 34.37<br>(24.76 to<br>54.37)             | 58.97<br>(38.83 to<br>101.15)            |
| Non-communicable diseases             | 387,123.81<br>(338,920.40 to<br>432,387.85) | 665,494.41<br>(537,117.41 to<br>810,116.88) | 479,874.03<br>(397,497.12 to<br>567,231.83) | 875,264.55<br>(691,432.47 to<br>1,089,604.93) | 12,113.10<br>(11,023.10 to<br>13,104.66) | 26,483.11<br>(22,009.05 to<br>31,201.19) | 19,824.95<br>(17,016.34 to<br>22,620.62) | 32,404.55<br>(26,680.64 to<br>38,816.06) |

**Liberia**

| Cause                           | YLLs (actual counts)                     |                                             |                                             |                                             | Deaths (actual counts)                |                                       |                                       |                                       |
|---------------------------------|------------------------------------------|---------------------------------------------|---------------------------------------------|---------------------------------------------|---------------------------------------|---------------------------------------|---------------------------------------|---------------------------------------|
|                                 | 2016                                     | 2040 Forecast                               | 2040 Better Scenario                        | 2040 Worse Scenario                         | 2016                                  | 2040 Forecast                         | 2040 Better Scenario                  | 2040 Worse Scenario                   |
| Neoplasms                       | 73,266.78<br>(63,952.61 to<br>81,633.50) | 152,929.81<br>(126,294.33 to<br>184,524.92) | 147,438.82<br>(121,738.35 to<br>176,873.41) | 166,571.55<br>(136,188.05 to<br>205,231.22) | 2,452.01<br>(2,162.16 to<br>2,706.16) | 5,644.70<br>(4,800.15 to<br>6,586.83) | 5,717.76<br>(4,888.15 to<br>6,600.31) | 5,870.75<br>(4,924.29 to<br>7,003.08) |
| Lip and oral cavity cancer      | 708.19<br>(580.71 to<br>835.56)          | 1,414.36<br>(803.60 to<br>2,342.96)         | 1,120.35<br>(672.67 to<br>1,773.93)         | 2,058.33<br>(1,089.04 to<br>3,540.48)       | 25.46<br>(21.14 to<br>29.77)          | 53.46<br>(31.84 to<br>84.76)          | 45.03<br>(28.71 to<br>68.78)          | 74.40<br>(40.69 to<br>126.62)         |
| Nasopharynx cancer              | 166.18<br>(123.99 to<br>213.86)          | 345.59<br>(186.08 to<br>587.04)             | 251.34<br>(141.45 to<br>412.56)             | 524.10<br>(264.68 to<br>925.01)             | 4.41<br>(3.28 to<br>5.73)             | 9.96<br>(5.47 to<br>16.75)            | 7.43<br>(4.22 to<br>12.04)            | 14.78<br>(7.54 to<br>26.05)           |
| Other pharynx cancer            | 405.58<br>(327.06 to<br>509.16)          | 614.85<br>(353.36 to<br>1,030.02)           | 517.55<br>(306.35 to<br>846.25)             | 833.70<br>(439.06 to<br>1,423.92)           | 14.41<br>(11.67 to<br>17.89)          | 23.16<br>(13.58 to<br>37.29)          | 20.47<br>(12.46 to<br>32.75)          | 30.33<br>(16.35 to<br>50.99)          |
| Esophageal cancer               | 2,548.79<br>(1,842.94 to<br>3,127.34)    | 4,855.76<br>(2,780.12 to<br>7,976.00)       | 3,962.17<br>(2,242.18 to<br>6,467.53)       | 6,556.20<br>(3,496.17 to<br>11,404.07)      | 96.89<br>(71.49 to<br>116.93)         | 189.86<br>(110.40 to<br>305.78)       | 162.06<br>(95.21 to<br>263.26)        | 247.21<br>(133.22 to<br>412.05)       |
| Stomach cancer                  | 6,206.05<br>(5,380.33 to<br>7,058.62)    | 9,255.95<br>(7,338.90 to<br>11,774.27)      | 8,310.60<br>(6,617.93 to<br>10,495.54)      | 9,619.38<br>(7,606.15 to<br>12,495.01)      | 246.23<br>(214.79 to<br>277.90)       | 396.76<br>(324.93 to<br>497.11)       | 376.97<br>(310.31 to<br>471.46)       | 396.56<br>(318.96 to<br>502.75)       |
| Colon and rectum cancer         | 3,812.09<br>(3,001.53 to<br>4,673.26)    | 9,357.32<br>(6,117.19 to<br>13,669.85)      | 10,038.06<br>(6,535.81 to<br>15,033.93)     | 9,473.27<br>(6,134.54 to<br>14,116.41)      | 147.54<br>(117.47 to<br>180.49)       | 395.49<br>(265.64 to<br>575.01)       | 450.01<br>(302.54 to<br>653.94)       | 382.49<br>(254.77 to<br>551.45)       |
| Liver cancer                    | 14,774.79<br>(11,378.16 to<br>18,668.45) | 38,035.86<br>(25,675.73 to<br>55,982.62)    | 34,366.25<br>(24,038.52 to<br>48,972.96)    | 44,620.56<br>(28,343.15 to<br>69,806.10)    | 454.74<br>(356.56 to<br>569.80)       | 1,248.70<br>(866.29 to<br>1,803.25)   | 1,175.04<br>(842.43 to<br>1,655.64)   | 1,413.00<br>(929.82 to<br>2,160.47)   |
| Liver cancer due to hepatitis B | 8,438.16<br>(6,472.30 to<br>10,744.54)   | 21,484.91<br>(14,430.57 to<br>32,800.34)    | 19,735.91<br>(13,497.04 to<br>29,034.75)    | 24,342.93<br>(15,559.39 to<br>39,206.29)    | 249.99<br>(193.75 to<br>314.13)       | 678.37<br>(457.84 to<br>983.51)       | 647.26<br>(450.14 to<br>911.68)       | 741.98<br>(476.82 to<br>1,151.02)     |
| Liver cancer due to hepatitis C | 981.39<br>(640.64 to<br>1,410.94)        | 2,658.58<br>(1,583.68 to<br>4,235.12)       | 2,501.87<br>(1,535.07 to<br>3,878.68)       | 2,905.45<br>(1,676.93 to<br>4,677.04)       | 37.70<br>(24.59 to<br>53.87)          | 108.31<br>(66.83 to<br>167.48)        | 107.45<br>(67.43 to<br>163.21)        | 113.37<br>(66.39 to<br>182.23)        |

|                                      |                                       |                                         |                                         |                                         |                                 |                                 |                                 |                                 |
|--------------------------------------|---------------------------------------|-----------------------------------------|-----------------------------------------|-----------------------------------------|---------------------------------|---------------------------------|---------------------------------|---------------------------------|
| Liver cancer due to alcohol use      | 1,934.97<br>(1,438.08 to<br>2,541.95) | 5,272.22<br>(3,279.52 to<br>8,252.60)   | 4,398.35<br>(2,848.97 to<br>6,627.85)   | 7,472.66<br>(4,505.83 to<br>12,321.62)  | 67.22<br>(49.48 to<br>87.77)    | 187.98<br>(121.39 to<br>286.02) | 164.98<br>(109.90 to<br>241.38) | 254.72<br>(158.97 to<br>402.64) |
| Liver cancer due to other causes     | 3,420.27<br>(2,539.77 to<br>4,462.11) | 8,620.16<br>(5,576.90 to<br>13,259.21)  | 7,730.12<br>(5,135.27 to<br>11,413.60)  | 9,899.51<br>(6,031.09 to<br>15,933.15)  | 99.82<br>(74.42 to<br>127.76)   | 274.04<br>(177.45 to<br>418.00) | 255.36<br>(170.75 to<br>375.78) | 302.94<br>(188.26 to<br>474.13) |
| Gallbladder and biliary tract cancer | 907.96<br>(652.05 to<br>1,240.25)     | 1,470.90<br>(1,046.14 to<br>2,022.09)   | 1,594.92<br>(1,129.35 to<br>2,179.46)   | 1,372.71<br>(983.49 to<br>1,880.79)     | 37.67<br>(27.13 to<br>51.38)    | 63.85<br>(46.51 to<br>85.75)    | 72.42<br>(52.68 to<br>97.35)    | 57.83<br>(42.07 to<br>78.51)    |
| Pancreatic cancer                    | 2,455.25<br>(2,096.23 to<br>2,832.63) | 6,585.63<br>(5,327.54 to<br>8,168.50)   | 7,277.32<br>(5,885.22 to<br>8,970.99)   | 6,214.06<br>(5,034.14 to<br>7,673.26)   | 101.51<br>(86.94 to<br>117.40)  | 283.37<br>(233.11 to<br>348.51) | 326.56<br>(269.72 to<br>399.48) | 259.06<br>(211.06 to<br>322.53) |
| Larynx cancer                        | 530.18<br>(434.96 to<br>614.80)       | 1,060.65<br>(648.81 to<br>1,672.92)     | 783.90<br>(517.83 to<br>1,165.44)       | 1,585.06<br>(861.52 to<br>2,716.67)     | 20.47<br>(17.02 to<br>23.67)    | 42.63<br>(27.12 to<br>66.17)    | 32.94<br>(22.52 to<br>47.61)    | 61.68<br>(34.67 to<br>103.73)   |
| Tracheal, bronchus, and lung cancer  | 3,089.14<br>(2,565.84 to<br>3,596.62) | 7,214.34<br>(4,580.92 to<br>10,917.43)  | 5,078.73<br>(3,491.71 to<br>7,202.46)   | 9,273.69<br>(5,597.82 to<br>14,611.12)  | 125.46<br>(104.54 to<br>145.87) | 306.02<br>(196.65 to<br>455.10) | 225.26<br>(156.14 to<br>309.46) | 380.85<br>(233.49 to<br>578.26) |
| Malignant skin melanoma              | 217.74<br>(156.58 to<br>303.91)       | 523.53<br>(369.53 to<br>725.41)         | 636.34<br>(442.41 to<br>895.44)         | 470.69<br>(334.59 to<br>656.97)         | 7.92<br>(5.78 to<br>10.72)      | 20.82<br>(15.18 to<br>28.55)    | 26.88<br>(19.64 to<br>35.88)    | 17.93<br>(13.11 to<br>24.21)    |
| Non-melanoma skin cancer             | 193.12<br>(158.43 to<br>234.74)       | 479.55<br>(386.83 to<br>585.47)         | 442.25<br>(354.65 to<br>539.82)         | 485.22<br>(390.47 to<br>592.04)         | 7.08<br>(5.88 to<br>8.43)       | 20.31<br>(16.98 to<br>23.96)    | 20.26<br>(17.02 to<br>23.84)    | 19.38<br>(16.08 to<br>23.10)    |
| Breast cancer                        | 6,604.03<br>(4,908.79 to<br>8,699.02) | 13,130.70<br>(8,682.72 to<br>19,529.70) | 13,106.51<br>(8,806.76 to<br>19,336.67) | 13,977.71<br>(9,047.02 to<br>21,441.24) | 211.93<br>(157.85 to<br>279.09) | 448.31<br>(301.91 to<br>660.90) | 462.42<br>(316.26 to<br>669.09) | 466.63<br>(308.58 to<br>701.16) |
| Cervical cancer                      | 7,401.03<br>(4,674.08 to<br>9,882.77) | 11,643.53<br>(6,954.27 to<br>16,378.96) | 9,999.65<br>(5,999.53 to<br>14,094.82)  | 12,191.08<br>(7,191.38 to<br>17,291.45) | 236.93<br>(149.29 to<br>316.98) | 381.83<br>(233.39 to<br>525.31) | 338.00<br>(206.36 to<br>468.49) | 391.82<br>(234.81 to<br>541.06) |
| Uterine cancer                       | 997.04<br>(672.70 to<br>1,305.13)     | 1,999.74<br>(1,303.62 to<br>2,727.45)   | 1,698.49<br>(1,104.48 to<br>2,334.79)   | 2,070.98<br>(1,325.80 to<br>2,821.11)   | 39.38<br>(26.83 to<br>51.38)    | 82.90<br>(55.87 to<br>109.62)   | 73.86<br>(49.73 to<br>99.36)    | 83.23<br>(54.82 to<br>110.83)   |
| Ovarian cancer                       | 1,349.70<br>(871.94 to<br>1,585.50)   | 2,894.94<br>(1,861.57 to<br>4,027.89)   | 3,270.89<br>(2,191.47 to<br>4,623.68)   | 2,715.31<br>(1,764.28 to<br>3,850.17)   | 40.64<br>(28.30 to<br>51.08)    | 98.63<br>(64.19 to<br>135.31)   | 114.27<br>(77.91 to<br>158.57)  | 90.75<br>(59.63 to<br>126.68)   |
| Prostate cancer                      | 3,257.67<br>(1,986.02 to<br>4,106.10) | 9,243.24<br>(5,757.94 to<br>11,450.25)  | 10,727.85<br>(6,680.27 to<br>13,277.04) | 8,291.72<br>(5,092.96 to<br>10,351.03)  | 178.74<br>(108.66 to<br>224.78) | 541.04<br>(334.29 to<br>674.51) | 658.33<br>(411.14 to<br>804.87) | 469.64<br>(282.86 to<br>594.53) |
| Testicular cancer                    | 147.18<br>(106.52 to<br>198.37)       | 246.56<br>(172.12 to<br>340.25)         | 222.94<br>(154.12 to<br>310.19)         | 258.25<br>(180.15 to<br>355.13)         | 3.38<br>(2.46 to<br>4.57)       | 6.19<br>(4.43 to<br>8.50)       | 5.74<br>(4.04 to<br>8.00)       | 6.31<br>(4.50 to<br>8.58)       |

**Liberia**

| Cause                           | YLLs (actual counts)                  |                                       |                                       |                                       | Deaths (actual counts)       |                                 |                                 |                                |
|---------------------------------|---------------------------------------|---------------------------------------|---------------------------------------|---------------------------------------|------------------------------|---------------------------------|---------------------------------|--------------------------------|
|                                 | 2016                                  | 2040 Forecast                         | 2040 Better Scenario                  | 2040 Worse Scenario                   | 2016                         | 2040 Forecast                   | 2040 Better Scenario            | 2040 Worse Scenario            |
| Kidney cancer                   | 815.77<br>(611.67 to<br>1,034.81)     | 1,780.50<br>(1,299.70 to<br>2,297.80) | 2,127.89<br>(1,548.35 to<br>2,766.05) | 1,720.24<br>(1,253.03 to<br>2,211.02) | 23.73<br>(18.20 to<br>29.68) | 63.58<br>(47.37 to<br>80.80)    | 79.01<br>(60.52 to<br>100.52)   | 57.93<br>(43.47 to<br>74.22)   |
| Bladder cancer                  | 1,077.79<br>(927.16 to<br>1,239.46)   | 2,677.90<br>(2,134.28 to<br>3,309.45) | 2,634.10<br>(2,104.63 to<br>3,227.66) | 2,705.29<br>(2,136.94 to<br>3,399.73) | 44.76<br>(38.30 to<br>51.18) | 118.94<br>(96.45 to<br>146.28)  | 123.79<br>(100.87 to<br>150.38) | 115.08<br>(91.98 to<br>144.79) |
| Brain and nervous system cancer | 2,391.03<br>(1,898.88 to<br>2,846.05) | 4,643.36<br>(3,594.81 to<br>5,663.46) | 5,003.50<br>(3,869.09 to<br>6,161.62) | 4,733.41<br>(3,687.12 to<br>5,766.19) | 55.98<br>(45.44 to<br>65.78) | 130.78<br>(104.26 to<br>156.76) | 145.35<br>(114.72 to<br>175.22) | 125.66<br>(99.97 to<br>150.70) |
| Thyroid cancer                  | 249.90<br>(210.89 to<br>297.12)       | 535.79<br>(394.50 to<br>714.05)       | 454.10<br>(338.57 to<br>597.94)       | 592.46<br>(428.78 to<br>809.42)       | 8.28<br>(6.97 to<br>9.82)    | 18.78<br>(14.05 to<br>24.43)    | 16.54<br>(12.62 to<br>21.10)    | 20.10<br>(14.93 to<br>26.81)   |
| Mesothelioma                    | 104.95<br>(84.71 to<br>144.96)        | 228.59<br>(173.73 to<br>321.91)       | 214.41<br>(158.56 to<br>299.35)       | 230.69<br>(176.43 to<br>324.67)       | 3.42<br>(2.76 to<br>4.71)    | 8.05<br>(6.18 to<br>11.05)      | 7.98<br>(5.99 to<br>10.97)      | 7.80<br>(6.05 to<br>10.74)     |
| Hodgkin lymphoma                | 390.27<br>(301.58 to<br>504.27)       | 481.34<br>(355.01 to<br>629.78)       | 356.68<br>(260.75 to<br>473.10)       | 573.96<br>(417.40 to<br>761.45)       | 8.52<br>(6.47 to<br>10.49)   | 11.83<br>(8.68 to<br>15.20)     | 9.01<br>(6.44 to<br>11.66)      | 13.43<br>(9.96 to<br>17.37)    |

|                                |                                                        |                                                        |                                                       |                                                        |                                                  |                                                    |                                                  |                                                     |
|--------------------------------|--------------------------------------------------------|--------------------------------------------------------|-------------------------------------------------------|--------------------------------------------------------|--------------------------------------------------|----------------------------------------------------|--------------------------------------------------|-----------------------------------------------------|
| Non-Hodgkin lymphoma           | 3,193.91<br>(2,534.42 to 3,833.93)                     | 5,699.87<br>(4,353.40 to 7,065.55)                     | 6,040.02<br>(4,701.81 to 7,621.96)                    | 5,920.74<br>(4,568.19 to 7,541.60)                     | 72.46<br>(58.85 to 85.43)                        | 157.76<br>(124.87 to 195.28)                       | 176.37<br>(140.27 to 218.08)                     | 155.71<br>(122.20 to 193.66)                        |
| Multiple myeloma               | 648.13<br>(474.45 to 888.11)                           | 1,768.03<br>(1,253.63 to 2,553.25)                     | 1,968.23<br>(1,412.31 to 2,773.27)                    | 1,692.41<br>(1,183.87 to 2,491.80)                     | 23.66<br>(17.34 to 32.25)                        | 68.02<br>(48.86 to 95.94)                          | 78.46<br>(57.39 to 110.07)                       | 63.40<br>(45.41 to 91.94)                           |
| Leukemia                       | 3,682.23<br>(2,742.98 to 4,446.55)                     | 5,783.80<br>(4,188.90 to 7,448.71)                     | 5,858.74<br>(4,246.25 to 7,503.79)                    | 6,354.06<br>(4,545.67 to 8,258.08)                     | 84.08<br>(64.64 to 100.28)                       | 164.12<br>(121.62 to 206.62)                       | 169.23<br>(124.12 to 212.26)                     | 170.24<br>(126.71 to 216.94)                        |
| Acute lymphoid leukemia        | 760.26<br>(526.38 to 1,038.66)                         | 1,054.34<br>(682.19 to 1,480.50)                       | 1,117.62<br>(721.75 to 1,572.88)                      | 1,193.60<br>(773.19 to 1,685.09)                       | 13.36<br>(9.18 to 17.72)                         | 22.87<br>(14.63 to 31.56)                          | 24.65<br>(15.61 to 34.31)                        | 24.48<br>(15.98 to 33.52)                           |
| Chronic lymphoid leukemia      | 189.55<br>(129.76 to 239.80)                           | 392.21<br>(258.73 to 541.00)                           | 394.12<br>(261.38 to 534.31)                          | 393.43<br>(257.11 to 553.34)                           | 8.37<br>(5.74 to 10.67)                          | 17.90<br>(11.92 to 24.27)                          | 18.55<br>(12.35 to 24.88)                        | 17.48<br>(11.44 to 24.35)                           |
| Acute myeloid leukemia         | 1,281.01<br>(883.46 to 1,646.40)                       | 2,243.16<br>(1,589.08 to 2,940.71)                     | 2,494.23<br>(1,759.01 to 3,230.30)                    | 2,409.85<br>(1,669.77 to 3,194.76)                     | 25.64<br>(18.08 to 32.39)                        | 57.18<br>(41.09 to 73.66)                          | 64.97<br>(46.83 to 83.69)                        | 57.86<br>(40.92 to 75.72)                           |
| Chronic myeloid leukemia       | 418.09<br>(302.91 to 536.71)                           | 543.09<br>(364.96 to 744.82)                           | 519.44<br>(351.25 to 708.52)                          | 571.97<br>(382.22 to 796.21)                           | 10.64<br>(7.96 to 13.40)                         | 15.64<br>(11.05 to 21.09)                          | 15.60<br>(11.10 to 20.72)                        | 15.96<br>(11.11 to 21.72)                           |
| Other leukemia                 | 1,033.32<br>(731.96 to 1,384.51)                       | 1,551.00<br>(1,064.77 to 2,223.49)                     | 1,333.31<br>(907.50 to 1,898.92)                      | 1,785.21<br>(1,206.37 to 2,572.64)                     | 26.06<br>(18.71 to 34.19)                        | 50.53<br>(35.51 to 69.91)                          | 45.46<br>(31.79 to 62.63)                        | 54.46<br>(37.55 to 75.94)                           |
| Other neoplasms                | 5,041.08<br>(4,304.35 to 5,986.97)                     | 9,047.64<br>(7,609.26 to 11,018.67)                    | 9,375.00<br>(7,846.56 to 11,384.98)                   | 9,456.26<br>(7,948.19 to 11,540.31)                    | 126.34<br>(110.25 to 146.06)                     | 289.54<br>(249.59 to 338.56)                       | 318.08<br>(273.42 to 371.65)                     | 277.50<br>(240.89 to 325.69)                        |
| <b>Cardiovascular diseases</b> | <b>112,987.75</b><br><b>(100,057.62 to 124,667.59)</b> | <b>226,001.90</b><br><b>(149,550.37 to 327,280.92)</b> | <b>103,821.83</b><br><b>(73,332.08 to 141,278.33)</b> | <b>345,952.82</b><br><b>(224,254.03 to 512,693.75)</b> | <b>4,742.59</b><br><b>(4,202.07 to 5,170.96)</b> | <b>10,663.85</b><br><b>(7,535.39 to 14,869.08)</b> | <b>5,525.82</b><br><b>(4,140.54 to 7,241.62)</b> | <b>15,022.49</b><br><b>(10,585.83 to 21,067.59)</b> |
| Rheumatic heart disease        | 2,636.36<br>(2,138.89 to 3,269.83)                     | 2,287.15<br>(1,712.33 to 3,096.11)                     | 1,590.38<br>(1,173.80 to 2,166.06)                    | 2,700.69<br>(1,964.28 to 3,711.52)                     | 85.47<br>(69.81 to 106.48)                       | 94.67<br>(73.59 to 123.52)                         | 71.29<br>(54.99 to 93.00)                        | 103.54<br>(78.67 to 139.30)                         |
| Ischemic heart disease         | 49,889.75<br>(43,069.35 to 57,208.13)                  | 116,396.71<br>(65,813.59 to 191,277.72)                | 46,040.66<br>(27,554.09 to 72,553.47)                 | 181,504.01<br>(104,903.24 to 288,963.27)               | 2,331.32<br>(2,029.36 to 2,649.78)               | 5,828.68<br>(3,584.82 to 9,113.87)                 | 2,680.92<br>(1,702.36 to 4,002.51)               | 8,346.36<br>(5,112.07 to 12,680.58)                 |
| Stroke                         | 40,766.53<br>(35,797.87 to 45,920.11)                  | 69,012.61<br>(41,352.53 to 115,409.60)                 | 26,350.17<br>(16,714.26 to 41,024.79)                 | 116,138.93<br>(67,551.03 to 194,876.12)                | 1,646.91<br>(1,453.57 to 1,856.98)               | 3,143.14<br>(2,081.77 to 4,774.99)                 | 1,413.60<br>(987.90 to 2,028.72)                 | 4,804.68<br>(3,025.08 to 7,532.16)                  |
| Ischemic stroke                | 11,700.64<br>(10,135.43 to 13,474.45)                  | 20,106.44<br>(12,206.51 to 33,001.10)                  | 9,591.94<br>(6,078.98 to 14,891.69)                   | 28,459.94<br>(17,005.81 to 46,208.66)                  | 621.68<br>(538.39 to 710.35)                     | 1,193.79<br>(756.66 to 1,954.26)                   | 658.38<br>(440.54 to 1,019.55)                   | 1,547.20<br>(966.78 to 2,500.34)                    |
| Intracerebral hemorrhage       | 29,065.89<br>(25,433.26 to 32,771.84)                  | 48,906.17<br>(26,046.24 to 87,693.68)                  | 16,758.24<br>(9,748.77 to 28,694.21)                  | 87,678.99<br>(45,427.21 to 156,706.77)                 | 1,025.23<br>(893.46 to 1,155.59)                 | 1,949.36<br>(1,147.53 to 3,244.36)                 | 755.23<br>(490.71 to 1,168.38)                   | 3,257.48<br>(1,854.71 to 5,599.49)                  |
| Hypertensive heart disease     | 4,416.73<br>(2,348.20 to 6,392.12)                     | 7,649.05<br>(3,703.83 to 14,103.42)                    | 4,930.46<br>(2,565.33 to 8,347.91)                    | 10,599.87<br>(4,527.17 to 21,396.56)                   | 184.19<br>(98.99 to 261.45)                      | 356.68<br>(183.53 to 638.17)                       | 248.33<br>(136.38 to 401.95)                     | 465.94<br>(213.77 to 899.86)                        |
| Cardiomyopathy and myocarditis | 1,805.22<br>(1,339.59 to 2,696.17)                     | 3,584.66<br>(2,241.53 to 5,981.24)                     | 3,540.19<br>(2,241.08 to 5,817.88)                    | 3,778.91<br>(2,392.98 to 6,328.33)                     | 50.58<br>(36.92 to 75.59)                        | 123.10<br>(78.10 to 199.49)                        | 131.01<br>(210.32 to 196.27)                     | 120.77<br>(76.91 to 196.27)                         |
| Myocarditis                    | 389.88<br>(224.94 to 708.48)                           | 593.66<br>(297.72 to 1,238.13)                         | 535.35<br>(267.99 to 1,115.56)                        | 654.28<br>(334.61 to 1,344.23)                         | 7.84<br>(4.51 to 14.38)                          | 14.65<br>(7.70 to 29.27)                           | 14.53<br>(8.86 to 28.86)                         | 14.87<br>(7.84 to 29.69)                            |
| <b>Liberia</b>                 |                                                        |                                                        |                                                       |                                                        |                                                  |                                                    |                                                  |                                                     |
| Cause                          | YLLs (actual counts)                                   |                                                        |                                                       |                                                        | Deaths (actual counts)                           |                                                    |                                                  |                                                     |
|                                | 2016                                                   | 2040 Forecast                                          | 2040 Better Scenario                                  | 2040 Worse Scenario                                    | 2016                                             | 2040 Forecast                                      | 2040 Better Scenario                             | 2040 Worse Scenario                                 |
| Alcoholic cardiomyopathy       | 136.71<br>(70.74 to 292.96)                            | 285.54<br>(130.49 to 666.42)                           | 303.85<br>(135.23 to 709.08)                          | 330.50<br>(158.99 to 739.00)                           | 4.27<br>(2.14 to 9.49)                           | 9.50<br>(4.32 to 22.63)                            | 10.44<br>(4.65 to 25.35)                         | 10.73<br>(5.21 to 24.44)                            |
| Other cardiomyopathy           | 1,278.63<br>(940.53 to 1,878.06)                       | 2,705.46<br>(1,651.36 to 4,616.01)                     | 2,700.99<br>(1,650.99 to 4,466.53)                    | 2,794.13<br>(1,720.40 to 4,859.18)                     | 38.46<br>(28.09 to 55.53)                        | 98.96<br>(61.88 to 160.91)                         | 106.04<br>(66.70 to 168.34)                      | 95.16<br>(58.75 to 155.62)                          |





| Liberia                                    |                                        |                                          |                                          |                                          |                                 |                                     |                                       |                                     |
|--------------------------------------------|----------------------------------------|------------------------------------------|------------------------------------------|------------------------------------------|---------------------------------|-------------------------------------|---------------------------------------|-------------------------------------|
| Cause                                      | YLLs (actual counts)                   |                                          |                                          |                                          | Deaths (actual counts)          |                                     |                                       |                                     |
|                                            | 2016                                   | 2040 Forecast                            | 2040 Better Scenario                     | 2040 Worse Scenario                      | 2016                            | 2040 Forecast                       | 2040 Better Scenario                  | 2040 Worse Scenario                 |
| Gastritis and duodenitis                   | 1,107.90<br>(697.91 to<br>1,714.83)    | 1,818.48<br>(1,121.17 to<br>2,881.06)    | 1,535.33<br>(942.57 to<br>2,423.38)      | 1,947.73<br>(1,189.69 to<br>3,039.38)    | 28.07<br>(18.33 to<br>43.44)    | 52.19<br>(33.47 to<br>81.68)        | 45.72<br>(29.43 to<br>70.30)          | 53.80<br>(34.38 to<br>83.66)        |
| Appendicitis                               | 1,620.80<br>(1,211.96 to<br>2,194.74)  | 1,911.88<br>(1,476.59 to<br>2,418.63)    | 1,451.57<br>(1,122.06 to<br>1,853.17)    | 2,213.00<br>(1,665.21 to<br>2,928.99)    | 44.58<br>(35.28 to<br>55.38)    | 69.95<br>(54.49 to<br>86.25)        | 57.45<br>(44.48 to<br>70.71)          | 74.11<br>(58.10 to<br>92.81)        |
| Paralytic ileus and intestinal obstruction | 7,339.64<br>(5,531.65 to<br>10,288.81) | 10,266.89<br>(8,253.78 to<br>14,043.62)  | 9,433.75<br>(7,529.43 to<br>12,638.44)   | 11,316.76<br>(8,979.53 to<br>15,364.43)  | 186.59<br>(149.55 to<br>246.34) | 372.70<br>(308.15 to<br>497.18)     | 366.52<br>(303.93 to<br>480.77)       | 370.73<br>(306.75 to<br>491.86)     |
| Inguinal, femoral, and abdominal hernia    | 745.15<br>(476.22 to<br>1,083.99)      | 990.24<br>(629.89 to<br>1,495.31)        | 812.81<br>(515.97 to<br>1,245.92)        | 1,059.75<br>(665.34 to<br>1,614.78)      | 26.27<br>(16.85 to<br>38.84)    | 41.55<br>(26.68 to<br>61.52)        | 36.54<br>(23.69 to<br>53.76)          | 41.92<br>(26.89 to<br>62.63)        |
| Inflammatory bowel disease                 | 516.70<br>(350.11 to<br>794.04)        | 955.76<br>(680.53 to<br>1,438.57)        | 945.11<br>(676.49 to<br>1,437.69)        | 959.91<br>(682.10 to<br>1,458.44)        | 15.00<br>(10.74 to<br>22.47)    | 33.43<br>(24.56 to<br>50.23)        | 34.80<br>(25.79 to<br>52.43)          | 31.91<br>(23.58 to<br>47.96)        |
| Vascular intestinal disorders              | 525.12<br>(351.28 to<br>692.93)        | 954.33<br>(678.65 to<br>1,237.02)        | 897.75<br>(631.51 to<br>1,181.10)        | 957.69<br>(684.72 to<br>1,231.57)        | 20.89<br>(13.90 to<br>26.70)    | 46.93<br>(33.05 to<br>60.58)        | 47.55<br>(33.40 to<br>61.11)          | 44.15<br>(31.48 to<br>56.66)        |
| Gallbladder and biliary diseases           | 1,024.79<br>(774.22 to<br>1,281.22)    | 1,721.20<br>(1,039.12 to<br>2,733.69)    | 1,164.82<br>(735.34 to<br>1,792.82)      | 2,222.82<br>(1,313.66 to<br>3,571.25)    | 34.44<br>(25.98 to<br>45.00)    | 70.02<br>(42.90 to<br>111.68)       | 50.70<br>(32.89 to<br>77.66)          | 84.92<br>(50.80 to<br>137.02)       |
| Pancreatitis                               | 2,546.01<br>(1,876.59 to<br>3,328.61)  | 4,586.08<br>(2,189.21 to<br>9,651.38)    | 3,492.71<br>(1,815.12 to<br>7,017.88)    | 6,004.85<br>(2,599.08 to<br>13,892.50)   | 72.92<br>(55.00 to<br>94.42)    | 141.84<br>(75.63 to<br>273.99)      | 113.51<br>(65.03 to<br>211.31)        | 180.06<br>(85.15 to<br>391.46)      |
| Other digestive diseases                   | 2,555.58<br>(1,941.18 to<br>3,346.77)  | 3,984.42<br>(2,888.81 to<br>5,169.42)    | 3,179.74<br>(2,266.22 to<br>4,127.08)    | 4,413.90<br>(3,223.61 to<br>5,703.13)    | 76.35<br>(58.65 to<br>94.90)    | 150.43<br>(110.25 to<br>190.85)     | 129.20<br>(93.27 to<br>163.69)        | 155.27<br>(115.41 to<br>195.80)     |
| Neurological disorders                     | 9,345.81<br>(7,959.75 to<br>11,025.51) | 18,929.72<br>(15,239.58 to<br>23,703.71) | 18,696.59<br>(15,504.32 to<br>22,911.90) | 20,606.77<br>(16,149.86 to<br>26,482.54) | 383.83<br>(326.35 to<br>454.47) | 1,069.29<br>(836.23 to<br>1,375.19) | 1,248.42<br>(1,018.07 to<br>1,571.13) | 1,000.47<br>(771.99 to<br>1,314.58) |
| Alzheimer's disease and other dementias    | 3,132.89<br>(2,518.37 to<br>3,877.54)  | 9,401.14<br>(6,847.42 to<br>12,979.55)   | 10,574.71<br>(8,191.79 to<br>13,876.86)  | 8,739.60<br>(6,148.77 to<br>12,739.65)   | 248.94<br>(202.34 to<br>306.60) | 806.96<br>(572.92 to<br>1,101.44)   | 987.65<br>(749.95 to<br>1,288.65)     | 708.44<br>(477.57 to<br>1,019.29)   |
| Parkinson's disease                        | 271.89<br>(202.51 to<br>352.53)        | 908.28<br>(670.35 to<br>1,177.95)        | 1,265.83<br>(963.62 to<br>1,620.08)      | 738.43<br>(543.32 to<br>971.52)          | 19.29<br>(14.36 to<br>25.40)    | 69.28<br>(50.33 to<br>92.47)        | 102.43<br>(76.89 to<br>132.64)        | 54.13<br>(38.73 to<br>73.20)        |
| Epilepsy                                   | 4,911.89<br>(3,992.29 to<br>6,003.21)  | 6,911.13<br>(4,420.97 to<br>10,461.48)   | 4,994.35<br>(3,219.57 to<br>7,479.19)    | 9,286.70<br>(5,869.18 to<br>14,499.86)   | 95.16<br>(78.33 to<br>115.50)   | 153.67<br>(100.29 to<br>230.90)     | 114.15<br>(74.82 to<br>167.00)        | 198.26<br>(126.86 to<br>305.42)     |
| Multiple sclerosis                         | 67.97<br>(41.23 to<br>99.28)           | 151.01<br>(87.19 to<br>225.86)           | 163.83<br>(93.82 to<br>244.31)           | 144.36<br>(84.34 to<br>216.35)           | 1.88<br>(1.13 to<br>2.74)       | 4.39<br>(2.51 to<br>6.56)           | 4.88<br>(2.77 to<br>7.19)             | 4.13<br>(2.39 to<br>6.22)           |
| Motor neuron disease                       | 97.64<br>(77.59 to<br>127.85)          | 218.69<br>(166.42 to<br>305.96)          | 251.91<br>(188.24 to<br>357.00)          | 209.19<br>(161.38 to<br>289.40)          | 2.58<br>(2.10 to<br>3.44)       | 7.06<br>(5.43 to<br>9.97)           | 8.30<br>(6.28 to<br>11.87)            | 6.49<br>(5.06 to<br>9.16)           |
| Other neurological disorders               | 863.52<br>(560.89 to<br>1,234.55)      | 1,339.47<br>(929.25 to<br>1,791.46)      | 1,445.96<br>(1,030.40 to<br>1,922.44)    | 1,488.49<br>(1,007.37 to<br>2,061.32)    | 15.18<br>(10.55 to<br>20.42)    | 27.94<br>(20.47 to<br>35.98)        | 31.01<br>(23.38 to<br>39.25)          | 29.03<br>(21.05 to<br>38.03)        |
| Mental disorders                           | 3,035.25<br>(1,957.25 to<br>3,880.16)  | 6,598.47<br>(4,267.31 to<br>8,991.08)    | 6,487.10<br>(4,173.40 to<br>8,856.25)    | 6,789.58<br>(4,411.54 to<br>9,274.90)    | 73.53<br>(48.34 to<br>92.61)    | 167.80<br>(111.24 to<br>218.33)     | 169.76<br>(111.72 to<br>221.88)       | 168.90<br>(112.91 to<br>221.02)     |
| Alcohol use disorders                      | 1,221.37<br>(845.32 to<br>1,767.89)    | 2,127.18<br>(1,394.52 to<br>3,224.87)    | 1,992.41<br>(1,285.62 to<br>3,060.92)    | 2,296.40<br>(1,543.42 to<br>3,451.41)    | 33.86<br>(24.08 to<br>47.46)    | 62.68<br>(43.31 to<br>91.39)        | 60.79<br>(41.52 to<br>89.64)          | 66.00<br>(46.63 to<br>94.58)        |
| Drug use disorders                         | 1,807.40<br>(989.76 to<br>2,485.82)    | 4,457.89<br>(2,460.92 to<br>6,403.79)    | 4,481.12<br>(2,495.57 to<br>6,461.27)    | 4,479.31<br>(2,433.33 to<br>6,444.66)    | 39.55<br>(21.30 to<br>54.20)    | 104.87<br>(58.40 to<br>147.42)      | 108.72<br>(61.54 to<br>151.58)        | 102.64<br>(55.66 to<br>143.79)      |
| Opioid use disorders                       | 1,672.27<br>(917.37 to<br>2,292.13)    | 4,039.33<br>(2,229.82 to<br>5,846.63)    | 4,039.26<br>(2,237.32 to<br>5,871.06)    | 4,074.18<br>(2,195.36 to<br>5,874.13)    | 34.95<br>(18.78 to<br>47.70)    | 88.46<br>(48.28 to<br>124.50)       | 89.75<br>(50.27 to<br>126.83)         | 87.76<br>(47.16 to<br>123.94)       |

|                                                            |                                          |                                            |                                          |                                            |                                       |                                       |                                       |                                       |
|------------------------------------------------------------|------------------------------------------|--------------------------------------------|------------------------------------------|--------------------------------------------|---------------------------------------|---------------------------------------|---------------------------------------|---------------------------------------|
|                                                            | 25.01<br>(10.19 to<br>46.01)             | 79.07<br>(33.48 to<br>141.88)              | 71.74<br>(31.29 to<br>130.12)            | 81.62<br>(34.54 to<br>147.76)              | 0.69<br>(0.28 to<br>1.21)             | 2.45<br>(1.05 to<br>4.11)             | 2.30<br>(1.01 to<br>3.85)             | 2.44<br>(1.03 to<br>4.11)             |
| Cocaine use disorders                                      |                                          |                                            |                                          |                                            |                                       |                                       |                                       |                                       |
|                                                            | 12.84<br>(5.38 to<br>23.87)              | 55.82<br>(23.87 to<br>100.96)              | 48.09<br>(21.05 to<br>84.79)             | 59.22<br>(25.74 to<br>106.34)              | 0.36<br>(0.15 to<br>0.63)             | 1.72<br>(0.73 to<br>2.93)             | 1.55<br>(0.64 to<br>2.58)             | 1.77<br>(0.78 to<br>3.04)             |
| Amphetamine use disorders                                  |                                          |                                            |                                          |                                            |                                       |                                       |                                       |                                       |
|                                                            | 97.28<br>(43.30 to<br>162.42)            | 283.66<br>(141.53 to<br>473.10)            | 322.04<br>(156.41 to<br>529.11)          | 264.30<br>(130.58 to<br>440.94)            | 3.55<br>(1.62 to<br>5.36)             | 12.24<br>(5.83 to<br>18.16)           | 15.12<br>(7.10 to<br>22.03)           | 10.67<br>(4.99 to<br>16.12)           |
| Other drug use disorders                                   |                                          |                                            |                                          |                                            |                                       |                                       |                                       |                                       |
|                                                            | 6.47<br>(3.73 to<br>13.57)               | 13.40<br>(7.29 to<br>24.84)                | 13.57<br>(7.59 to<br>26.79)              | 13.86<br>(7.48 to<br>26.16)                | 0.12<br>(0.07 to<br>0.24)             | 0.25<br>(0.13 to<br>0.46)             | 0.25<br>(0.14 to<br>0.49)             | 0.26<br>(0.14 to<br>0.47)             |
| Eating disorders                                           |                                          |                                            |                                          |                                            |                                       |                                       |                                       |                                       |
| <b>Liberia</b>                                             |                                          |                                            |                                          |                                            |                                       |                                       |                                       |                                       |
| Cause                                                      | YLLs (actual counts)                     |                                            |                                          |                                            | Deaths (actual counts)                |                                       |                                       |                                       |
|                                                            | 2016                                     | 2040 Forecast                              | 2040 Better Scenario                     | 2040 Worse Scenario                        | 2016                                  | 2040 Forecast                         | 2040 Better Scenario                  | 2040 Worse Scenario                   |
| <b>Diabetes, urogenital, blood, and endocrine diseases</b> | 51,308.01<br>(44,946.63 to<br>59,097.47) | 102,294.61<br>(80,004.22 to<br>132,715.75) | 73,493.34<br>(57,197.84 to<br>95,760.95) | 124,160.96<br>(95,990.40 to<br>160,836.48) | 1,510.83<br>(1,342.89 to<br>1,714.72) | 4,146.07<br>(3,239.11 to<br>5,834.55) | 3,107.64<br>(2,447.82 to<br>4,173.67) | 4,705.18<br>(3,649.44 to<br>6,467.24) |
| Diabetes mellitus                                          | 14,539.86<br>(12,385.78 to<br>16,442.77) | 39,685.82<br>(26,171.64 to<br>59,323.30)   | 26,383.26<br>(17,530.48 to<br>39,382.63) | 49,230.47<br>(31,934.60 to<br>72,591.07)   | 614.37<br>(526.01 to<br>700.88)       | 1,894.23<br>(1,326.12 to<br>2,642.21) | 1,356.26<br>(964.34 to<br>1,900.23)   | 2,219.15<br>(1,491.35 to<br>3,187.82) |
| Acute glomerulonephritis                                   | 28.75<br>(24.88 to<br>32.74)             | 37.89<br>(31.04 to<br>45.97)               | 31.06<br>(25.16 to<br>37.76)             | 47.37<br>(38.07 to<br>58.01)               | 0.47<br>(0.41 to<br>0.53)             | 0.70<br>(0.59 to<br>0.84)             | 0.59<br>(0.48 to<br>0.71)             | 0.83<br>(0.69 to<br>1.01)             |
| Chronic kidney disease                                     | 15,653.76<br>(13,114.51 to<br>19,400.70) | 33,596.92<br>(21,606.95 to<br>62,007.46)   | 21,633.61<br>(14,246.01 to<br>38,600.66) | 41,002.95<br>(26,122.92 to<br>72,507.94)   | 462.43<br>(391.04 to<br>561.25)       | 1,379.70<br>(801.28 to<br>3,213.69)   | 926.68<br>(563.62 to<br>2,110.53)     | 1,574.50<br>(906.37 to<br>3,396.21)   |
| Chronic kidney disease due to diabetes mellitus            | 3,590.35<br>(2,872.54 to<br>4,525.37)    | 9,901.19<br>(5,873.09 to<br>18,499.87)     | 6,452.09<br>(3,943.96 to<br>12,145.19)   | 11,668.20<br>(6,844.78 to<br>21,440.93)    | 130.06<br>(104.08 to<br>163.31)       | 437.74<br>(240.97 to<br>1,043.27)     | 296.88<br>(165.58 to<br>687.90)       | 495.26<br>(272.78 to<br>1,071.11)     |
| Chronic kidney disease due to hypertension                 | 2,053.12<br>(1,652.85 to<br>2,573.06)    | 6,056.14<br>(3,401.45 to<br>13,917.93)     | 3,954.61<br>(2,297.44 to<br>8,973.29)    | 6,971.12<br>(3,887.84 to<br>15,566.13)     | 92.36<br>(74.79 to<br>114.91)         | 337.25<br>(179.26 to<br>856.05)       | 234.13<br>(131.57 to<br>591.58)       | 369.49<br>(191.42 to<br>911.07)       |
| Chronic kidney disease due to glomerulonephritis           | 4,740.96<br>(3,827.59 to<br>5,966.29)    | 8,188.08<br>(5,401.06 to<br>13,694.98)     | 5,183.82<br>(3,480.56 to<br>8,434.07)    | 10,421.50<br>(6,810.93 to<br>17,036.79)    | 109.13<br>(88.69 to<br>136.79)        | 265.56<br>(156.23 to<br>614.59)       | 171.52<br>(103.97 to<br>377.69)       | 313.93<br>(184.87 to<br>671.45)       |
| Chronic kidney disease due to other and unspecified causes | 5,269.33<br>(4,259.70 to<br>6,801.33)    | 9,451.51<br>(6,212.51 to<br>15,927.88)     | 6,043.08<br>(4,010.24 to<br>10,052.36)   | 11,942.12<br>(7,759.20 to<br>19,619.29)    | 130.88<br>(106.88 to<br>164.12)       | 339.15<br>(203.25 to<br>761.57)       | 224.15<br>(137.62 to<br>480.16)       | 395.83<br>(239.56 to<br>812.18)       |
| Urinary diseases and male infertility                      | 5,692.48<br>(4,787.20 to<br>6,728.38)    | 11,973.13<br>(10,041.42 to<br>14,331.74)   | 11,326.85<br>(9,364.28 to<br>13,773.12)  | 12,743.57<br>(10,736.04 to<br>15,187.67)   | 166.01<br>(140.99 to<br>192.78)       | 461.41<br>(389.76 to<br>541.49)       | 471.62<br>(396.58 to<br>562.65)       | 447.35<br>(378.64 to<br>523.15)       |
| Urinary tract infections                                   | 3,658.26<br>(2,902.85 to<br>4,624.22)    | 8,884.56<br>(7,021.56 to<br>11,279.47)     | 8,881.52<br>(7,023.88 to<br>11,423.61)   | 9,310.30<br>(7,386.64 to<br>11,825.60)     | 103.97<br>(82.02 to<br>135.27)        | 345.70<br>(276.80 to<br>439.39)       | 372.71<br>(298.32 to<br>475.82)       | 328.16<br>(261.10 to<br>413.11)       |
| Urolithiasis                                               | 119.27<br>(78.22 to<br>165.15)           | 265.76<br>(168.15 to<br>391.01)            | 239.45<br>(153.91 to<br>341.77)          | 299.51<br>(187.56 to<br>443.25)            | 2.28<br>(1.48 to<br>3.14)             | 5.75<br>(3.69 to<br>8.72)             | 5.46<br>(3.55 to<br>8.17)             | 6.11<br>(3.85 to<br>9.12)             |
| Other urinary diseases                                     | 1,914.95<br>(1,422.65 to<br>2,439.39)    | 2,822.81<br>(1,851.18 to<br>3,895.99)      | 2,205.88<br>(1,399.81 to<br>3,136.48)    | 3,133.77<br>(2,063.42 to<br>4,321.47)      | 59.77<br>(43.35 to<br>77.31)          | 109.96<br>(71.66 to<br>154.75)        | 93.44<br>(58.31 to<br>135.95)         | 113.07<br>(73.36 to<br>160.99)        |
| Gynecological diseases                                     | 271.33<br>(187.19 to<br>361.93)          | 486.98<br>(310.54 to<br>724.65)            | 351.21<br>(224.20 to<br>514.04)          | 556.20<br>(347.90 to<br>812.07)            | 6.53<br>(4.50 to<br>8.73)             | 12.01<br>(7.79 to<br>17.23)           | 8.89<br>(5.83 to<br>12.61)            | 13.46<br>(8.65 to<br>19.27)           |
| Uterine fibroids                                           | 19.87<br>(10.69 to<br>33.07)             | 29.17<br>(14.67 to<br>51.20)               | 20.20<br>(9.88 to<br>36.99)              | 33.38<br>(16.59 to<br>59.25)               | 0.70<br>(0.37 to<br>1.16)             | 1.03<br>(0.51 to<br>1.80)             | 0.75<br>(0.38 to<br>1.31)             | 1.13<br>(0.56 to<br>1.96)             |
| Polycystic ovarian syndrome                                | 44.43<br>(7.27 to<br>91.84)              | 53.56<br>(7.54 to<br>122.60)               | 29.75<br>(3.92 to<br>68.30)              | 67.85<br>(9.88 to<br>154.06)               | 1.00<br>(0.17 to<br>2.04)             | 1.23<br>(0.19 to<br>2.87)             | 0.68<br>(0.10 to<br>1.56)             | 1.56<br>(0.23 to<br>3.48)             |
| Endometriosis                                              | 0.52<br>(0.20 to<br>1.24)                | 1.20<br>(0.42 to<br>3.04)                  | 0.84<br>(0.28 to<br>2.19)                | 1.38<br>(0.48 to<br>3.66)                  | 0.01<br>(0.00 to<br>0.03)             | 0.03<br>(0.01 to<br>0.07)             | 0.02<br>(0.01 to<br>0.05)             | 0.03<br>(0.01 to<br>0.08)             |

|                                                   |                                                  |                                                 |                                                 |                                                  |                                          |                                          |                                        |                                            |
|---------------------------------------------------|--------------------------------------------------|-------------------------------------------------|-------------------------------------------------|--------------------------------------------------|------------------------------------------|------------------------------------------|----------------------------------------|--------------------------------------------|
|                                                   | 7.92<br>(1.61 to<br>21.27)                       | 11.83<br>(2.08 to<br>35.85)                     | 7.63<br>(1.31 to<br>22.64)                      | 14.11<br>(2.39 to<br>40.37)                      | 0.19<br>(0.06 to<br>0.50)                | 0.28<br>(0.07 to<br>0.77)                | 0.19<br>(0.05 to<br>0.50)              | 0.32<br>(0.08 to<br>0.87)                  |
| Genital prolapse                                  |                                                  |                                                 |                                                 |                                                  |                                          |                                          |                                        |                                            |
| Other gynecological diseases                      | 198.60<br>(127.39 to<br>282.88)                  | 391.23<br>(232.57 to<br>599.01)                 | 292.79<br>(177.24 to<br>446.70)                 | 439.47<br>(259.93 to<br>672.94)                  | 4.63<br>(2.92 to<br>6.57)                | 9.45<br>(5.70 to<br>14.36)               | 7.25<br>(4.48 to<br>10.77)             | 10.42<br>(6.17 to<br>15.76)                |
| Hemoglobinopathies and hemolytic anemias          | 12,614.86<br>(8,886.47 to<br>16,805.48)          | 12,842.71<br>(8,922.41 to<br>16,939.64)         | 10,484.67<br>(7,250.42 to<br>13,870.90)         | 16,260.91<br>(11,266.12 to<br>22,009.21)         | 203.03<br>(142.49 to<br>268.38)          | 273.78<br>(191.99 to<br>362.21)          | 223.94<br>(158.58 to<br>298.03)        | 321.95<br>(221.72 to<br>434.13)            |
| Thalassemias                                      | 1,138.28<br>(344.49 to<br>2,108.15)              | 371.48<br>(121.61 to<br>688.05)                 | 467.40<br>(161.71 to<br>849.29)                 | 580.48<br>(184.72 to<br>1,118.12)                | 4.60<br>(4.19 to<br>25.18)               | 13.64<br>(1.58 to<br>8.38)               | 5.80<br>(2.02 to<br>10.45)             | 7.08<br>(2.33 to<br>13.47)                 |
| Sickle cell disorders                             | 10,050.45<br>(7,126.69 to<br>13,562.63)          | 9,507.30<br>(6,466.46 to<br>12,731.92)          | 7,801.55<br>(5,519.89 to<br>10,415.39)          | 12,363.60<br>(8,393.30 to<br>16,738.55)          | 141.90<br>(99.83 to<br>188.64)           | 157.92<br>(107.43 to<br>210.27)          | 129.75<br>(88.16 to<br>173.74)         | 196.72<br>(133.45 to<br>265.05)            |
| G6PD deficiency                                   | 969.14<br>(661.34 to<br>1,329.15)                | 2,210.03<br>(1,495.59 to<br>3,058.66)           | 1,605.90<br>(1,090.83 to<br>2,263.39)           | 2,531.52<br>(1,713.91 to<br>3,577.52)            | 24.17<br>(16.83 to<br>33.02)             | 66.43<br>(45.43 to<br>94.49)             | 49.37<br>(32.95 to<br>71.28)           | 73.75<br>(49.84 to<br>107.18)              |
| Other hemoglobinopathies and hemolytic anemias    | 456.99<br>(297.21 to<br>642.50)                  | 753.90<br>(485.25 to<br>1,084.67)               | 609.83<br>(387.33 to<br>878.89)                 | 785.52<br>(502.27 to<br>1,151.06)                | 23.32<br>(15.18 to<br>33.63)             | 44.83<br>(28.54 to<br>67.04)             | 39.03<br>(25.76 to<br>58.70)           | 44.40<br>(27.88 to<br>67.42)               |
| Endocrine, metabolic, blood, and immune disorders | 2,506.97<br>(1,794.73 to<br>3,501.42)            | 3,671.15<br>(2,685.39 to<br>5,147.16)           | 3,282.67<br>(2,437.09 to<br>4,601.91)           | 4,319.48<br>(3,097.64 to<br>6,186.72)            | 57.99<br>(43.58 to<br>80.85)             | 124.24<br>(93.41 to<br>176.65)           | 119.67<br>(90.52 to<br>171.44)         | 127.93<br>(95.30 to<br>183.93)             |
| <b>Liberia</b>                                    |                                                  |                                                 |                                                 |                                                  |                                          |                                          |                                        |                                            |
| Cause                                             | YLLs (actual counts)                             |                                                 |                                                 |                                                  | Deaths (actual counts)                   |                                          |                                        |                                            |
|                                                   | 2016                                             | 2040 Forecast                                   | 2040 Better Scenario                            | 2040 Worse Scenario                              | 2016                                     | 2040 Forecast                            | 2040 Better Scenario                   | 2040 Worse Scenario                        |
| <b>Musculoskeletal disorders</b>                  | <b>828.79</b><br>(565.99 to<br>1,235.70)         | <b>1,743.51</b><br>(1,188.26 to<br>2,586.97)    | <b>1,940.76</b><br>(1,327.27 to<br>2,872.58)    | <b>1,725.82</b><br>(1,179.55 to<br>2,567.61)     | <b>20.90</b><br>(14.67 to<br>30.40)      | <b>54.03</b><br>(38.44 to<br>78.92)      | <b>62.41</b><br>(44.53 to<br>90.43)    | <b>50.40</b><br>(35.90 to<br>72.51)        |
| Rheumatoid arthritis                              | 86.61<br>(47.70 to<br>132.29)                    | 209.05<br>(112.33 to<br>325.17)                 | 177.66<br>(93.59 to<br>286.48)                  | 218.56<br>(120.23 to<br>336.56)                  | 3.77<br>(2.07 to<br>5.92)                | 11.13<br>(6.08 to<br>17.55)              | 10.02<br>(5.11 to<br>16.34)            | 10.98<br>(6.08 to<br>17.11)                |
| Other musculoskeletal disorders                   | 742.19<br>(504.30 to<br>1,136.80)                | 1,534.46<br>(1,033.01 to<br>2,269.53)           | 1,763.10<br>(1,196.59 to<br>2,703.66)           | 1,507.25<br>(1,023.41 to<br>2,321.65)            | 17.13<br>(12.18 to<br>26.16)             | 42.90<br>(30.23 to<br>66.07)             | 52.39<br>(37.34 to<br>79.90)           | 39.42<br>(27.87 to<br>61.11)               |
| <b>Other non-communicable diseases</b>            | <b>70,909.48</b><br>(37,032.57 to<br>100,430.40) | <b>44,581.72</b><br>(28,367.51 to<br>62,772.44) | <b>37,015.55</b><br>(24,551.34 to<br>51,932.10) | <b>79,144.02</b><br>(45,842.13 to<br>116,737.31) | <b>890.24</b><br>(494.24 to<br>1,233.98) | <b>768.91</b><br>(560.52 to<br>1,031.22) | <b>686.59</b><br>(515.29 to<br>914.93) | <b>1,161.35</b><br>(762.01 to<br>1,635.53) |
| Congenital birth defects                          | 65,675.83<br>(32,468.47 to<br>94,811.48)         | 36,322.48<br>(20,438.65 to<br>52,749.21)        | 29,229.97<br>(16,719.01 to<br>43,059.30)        | 69,036.64<br>(36,556.18 to<br>105,679.26)        | 790.57<br>(399.92 to<br>1,132.17)        | 484.92<br>(290.75 to<br>693.67)          | 393.69<br>(240.21 to<br>570.22)        | 870.75<br>(481.24 to<br>1,306.55)          |
| Neural tube defects                               | 11,686.78<br>(6,071.79 to<br>22,582.62)          | 2,682.09<br>(1,263.62 to<br>5,963.65)           | 1,755.27<br>(822.55 to<br>4,123.07)             | 5,922.28<br>(2,711.21 to<br>13,347.64)           | 32.95<br>(71.09 to<br>265.85)            | 136.84<br>(16.00 to<br>74.54)            | 21.61<br>(10.20 to<br>51.93)           | 70.94<br>(32.78 to<br>159.62)              |
| Congenital heart anomalies                        | 17,569.02<br>(8,376.29 to<br>31,166.69)          | 11,253.15<br>(6,630.43 to<br>18,772.60)         | 9,211.68<br>(5,571.99 to<br>15,295.24)          | 19,819.36<br>(10,910.26 to<br>34,967.77)         | 215.87<br>(106.83 to<br>379.95)          | 154.46<br>(94.62 to<br>254.04)           | 126.95<br>(79.30 to<br>204.93)         | 256.81<br>(148.72 to<br>442.83)            |
| Orofacial clefts                                  | 684.24<br>(112.01 to<br>2,003.66)                | 267.51<br>(41.35 to<br>783.01)                  | 167.42<br>(24.24 to<br>473.98)                  | 634.03<br>(94.06 to<br>1,880.84)                 | 7.93<br>(1.30 to<br>23.22)               | 3.10<br>(0.48 to<br>9.06)                | 1.94<br>(0.28 to<br>5.48)              | 7.34<br>(1.09 to<br>21.76)                 |
| Down syndrome                                     | 573.23<br>(221.66 to<br>1,169.85)                | 551.14<br>(277.32 to<br>1,055.00)               | 433.90<br>(212.40 to<br>842.27)                 | 875.81<br>(399.43 to<br>1,756.11)                | 7.79<br>(3.36 to<br>15.56)               | 9.79<br>(5.31 to<br>17.89)               | 7.77<br>(4.19 to<br>14.56)             | 13.86<br>(6.87 to<br>26.22)                |
| Other chromosomal abnormalities                   | 2,484.06<br>(752.61 to<br>5,977.28)              | 2,048.92<br>(597.23 to<br>4,531.18)             | 1,576.49<br>(447.89 to<br>3,493.16)             | 4,299.06<br>(1,254.30 to<br>10,109.67)           | 29.12<br>(8.80 to<br>69.63)              | 24.75<br>(7.17 to<br>54.03)              | 19.09<br>(5.42 to<br>41.41)            | 50.98<br>(14.85 to<br>119.25)              |
| Congenital musculoskeletal and limb anomalies     | 507.97<br>(153.55 to<br>1,369.96)                | 294.05<br>(117.14 to<br>912.42)                 | 294.05<br>(105.76 to<br>766.24)                 | 679.17<br>(221.81 to<br>1,911.32)                | 5.96<br>(1.83 to<br>16.09)               | 4.14<br>(1.49 to<br>10.99)               | 3.57<br>(1.33 to<br>9.25)              | 8.07<br>(2.71 to<br>22.43)                 |
| Urogenital congenital anomalies                   | 624.11<br>(291.78 to<br>1,125.15)                | 499.19<br>(293.72 to<br>785.49)                 | 454.25<br>(268.89 to<br>710.99)                 | 789.92<br>(424.91 to<br>1,335.39)                | 8.66<br>(4.63 to<br>14.58)               | 9.71<br>(6.00 to<br>14.09)               | 8.94<br>(5.55 to<br>12.67)             | 13.12<br>(7.73 to<br>20.27)                |

|                                      |                                                                |                                                                 |                                                                 |                                                                  |                                                            |                                                            |                                                            |                                                            |
|--------------------------------------|----------------------------------------------------------------|-----------------------------------------------------------------|-----------------------------------------------------------------|------------------------------------------------------------------|------------------------------------------------------------|------------------------------------------------------------|------------------------------------------------------------|------------------------------------------------------------|
| Digestive congenital anomalies       | 4,069.52<br>(1,531.67 to<br>7,665.84)                          | 2,177.66<br>(946.42 to<br>4,431.56)                             | 1,735.97<br>(777.41 to<br>3,399.54)                             | 4,500.66<br>(1,813.42 to<br>9,131.66)                            | 47.72<br>(18.17 to<br>89.53)                               | 26.42<br>(11.78 to<br>52.15)                               | 21.13<br>(9.74 to<br>40.37)                                | 53.51<br>(22.23 to<br>106.86)                              |
| Other congenital birth defects       | 27,476.90<br>(8,252.38 to<br>49,525.36)                        | 16,501.49<br>(6,188.68 to<br>28,866.97)                         | 13,600.93<br>(5,526.15 to<br>23,318.63)                         | 31,516.36<br>(10,874.11 to<br>56,903.13)                         | 330.67<br>(102.73 to<br>591.33)                            | 219.61<br>(92.63 to<br>372.43)                             | 182.69<br>(81.50 to<br>304.04)                             | 396.12<br>(145.00 to<br>702.78)                            |
| Skin and subcutaneous diseases       | 2,287.59<br>(1,508.67 to<br>3,837.99)                          | 7,095.61<br>(4,518.69 to<br>10,860.39)                          | 6,818.55<br>(4,413.22 to<br>10,411.10)                          | 7,657.06<br>(4,896.46 to<br>12,212.43)                           | 65.48<br>(42.02 to<br>107.61)                              | 270.49<br>(172.79 to<br>418.34)                            | 281.68<br>(182.11 to<br>434.52)                            | 262.17<br>(169.96 to<br>410.84)                            |
| Cellulitis                           | 181.76<br>(94.85 to<br>331.12)                                 | 788.72<br>(409.27 to<br>1,334.69)                               | 906.38<br>(480.97 to<br>1,484.39)                               | 754.24<br>(393.26 to<br>1,284.86)                                | 5.91<br>(2.91 to<br>10.89)                                 | 31.23<br>(15.38 to<br>54.18)                               | 37.76<br>(18.90 to<br>62.56)                               | 28.04<br>(13.92 to<br>47.91)                               |
| Pyoderma                             | 1,895.97<br>(1,237.12 to<br>3,188.90)                          | 5,790.40<br>(3,600.69 to<br>8,854.58)                           | 5,333.89<br>(3,411.49 to<br>8,185.96)                           | 6,394.15<br>(4,146.61 to<br>10,320.49)                           | 50.69<br>(32.58 to<br>83.70)                               | 210.03<br>(133.35 to<br>330.15)                            | 207.39<br>(132.28 to<br>320.62)                            | 208.96<br>(135.63 to<br>353.59)                            |
| Decubitus ulcer                      | 138.91<br>(74.34 to<br>239.80)                                 | 370.15<br>(188.27 to<br>618.16)                                 | 421.91<br>(212.75 to<br>709.28)                                 | 349.03<br>(179.92 to<br>585.47)                                  | 7.40<br>(3.69 to<br>12.79)                                 | 25.43<br>(12.17 to<br>43.70)                               | 32.16<br>(15.48 to<br>54.76)                               | 21.44<br>(10.26 to<br>37.33)                               |
| Other skin and subcutaneous diseases | 70.95<br>(39.28 to<br>131.40)                                  | 146.34<br>(87.30 to<br>256.76)                                  | 156.37<br>(93.43 to<br>268.66)                                  | 159.64<br>(93.27 to<br>283.21)                                   | 1.47<br>(0.82 to<br>2.72)                                  | 3.80<br>(2.19 to<br>6.72)                                  | 4.36<br>(2.52 to<br>7.65)                                  | 3.73<br>(2.14 to<br>6.74)                                  |
| Sudden infant death syndrome         | 2,946.05<br>(1,430.07 to<br>5,311.06)                          | 1,163.63<br>(500.11 to<br>2,345.35)                             | 967.03<br>(420.90 to<br>1,891.85)                               | 2,450.33<br>(1,017.95 to<br>5,240.79)                            | 34.19<br>(16.60 to<br>61.66)                               | 13.50<br>(5.80 to<br>27.22)                                | 11.22<br>(4.88 to<br>21.96)                                | 28.43<br>(11.81 to<br>60.82)                               |
| <b>Injuries</b>                      | <b>91,407.27</b><br><b>(79,054.28 to</b><br><b>103,126.98)</b> | <b>125,995.31</b><br><b>(95,149.05 to</b><br><b>184,227.40)</b> | <b>111,482.94</b><br><b>(83,715.14 to</b><br><b>166,732.11)</b> | <b>150,005.21</b><br><b>(112,857.25 to</b><br><b>218,019.12)</b> | <b>1,926.75</b><br><b>(1,679.27 to</b><br><b>2,147.16)</b> | <b>3,285.66</b><br><b>(2,620.46 to</b><br><b>4,252.88)</b> | <b>3,042.87</b><br><b>(2,413.27 to</b><br><b>4,006.83)</b> | <b>3,617.80</b><br><b>(2,825.62 to</b><br><b>4,759.20)</b> |
| <b>Transport injuries</b>            | <b>21,867.28</b><br><b>(18,551.99 to</b><br><b>25,372.17)</b>  | <b>38,443.62</b><br><b>(28,097.34 to</b><br><b>53,080.45)</b>   | <b>34,826.57</b><br><b>(25,866.44 to</b><br><b>47,002.63)</b>   | <b>45,225.15</b><br><b>(32,640.75 to</b><br><b>62,865.96)</b>    | <b>447.91</b><br><b>(387.04 to</b><br><b>506.54)</b>       | <b>917.85</b><br><b>(684.40 to</b><br><b>1,236.69)</b>     | <b>861.96</b><br><b>(645.15 to</b><br><b>1,134.09)</b>     | <b>1,022.45</b><br><b>(742.22 to</b><br><b>1,395.20)</b>   |
| Road injuries                        | 20,548.83<br>(17,247.49 to<br>24,005.00)                       | 35,963.21<br>(26,046.40 to<br>48,908.06)                        | 32,808.53<br>(24,317.25 to<br>44,151.70)                        | 42,162.12<br>(30,582.90 to<br>58,416.00)                         | 423.33<br>(362.78 to<br>481.99)                            | 863.89<br>(641.25 to<br>1,155.05)                          | 817.20<br>(611.30 to<br>1,073.86)                          | 958.59<br>(697.84 to<br>1,312.68)                          |
| Pedestrian road injuries             | 6,606.00<br>(4,924.43 to<br>8,438.02)                          | 9,888.03<br>(6,575.49 to<br>14,446.33)                          | 8,783.24<br>(5,896.80 to<br>12,654.19)                          | 11,621.62<br>(7,622.42 to<br>17,198.25)                          | 140.19<br>(108.34 to<br>175.75)                            | 254.72<br>(174.22 to<br>363.93)                            | 235.11<br>(164.34 to<br>328.18)                            | 282.74<br>(190.97 to<br>414.10)                            |

**Liberia**

| Cause                         | YLLs (actual counts)                                          |                                                               |                                                               |                                                               | Deaths (actual counts)                                 |                                                            |                                                            |                                                            |
|-------------------------------|---------------------------------------------------------------|---------------------------------------------------------------|---------------------------------------------------------------|---------------------------------------------------------------|--------------------------------------------------------|------------------------------------------------------------|------------------------------------------------------------|------------------------------------------------------------|
|                               | 2016                                                          | 2040 Forecast                                                 | 2040 Better Scenario                                          | 2040 Worse Scenario                                           | 2016                                                   | 2040 Forecast                                              | 2040 Better Scenario                                       | 2040 Worse Scenario                                        |
|                               | Cyclist road injuries                                         | 455.17<br>(310.53 to<br>632.62)                               | 894.22<br>(558.44 to<br>1,338.86)                             | 835.45<br>(523.73 to<br>1,247.03)                             | 1,032.59<br>(636.82 to<br>1,596.07)                    | 9.91<br>(6.93 to<br>13.86)                                 | 22.80<br>(14.75 to<br>33.83)                               | 22.23<br>(14.38 to<br>32.80)                               |
| Motorcyclist road injuries    | 2,685.57<br>(1,942.59 to<br>3,722.71)                         | 5,067.12<br>(3,209.08 to<br>8,266.78)                         | 4,730.55<br>(3,050.13 to<br>7,536.71)                         | 5,933.03<br>(3,697.20 to<br>9,505.24)                         | 50.87<br>(37.86 to<br>68.50)                           | 108.40<br>(71.08 to<br>172.96)                             | 103.82<br>(69.85 to<br>160.92)                             | 121.47<br>(78.87 to<br>193.81)                             |
| Motor vehicle road injuries   | 10,391.43<br>(8,106.46 to<br>13,024.38)                       | 19,349.31<br>(13,731.66 to<br>27,610.49)                      | 17,750.82<br>(12,763.04 to<br>24,358.66)                      | 22,680.51<br>(15,849.58 to<br>32,131.80)                      | 213.72<br>(170.95 to<br>261.55)                        | 458.83<br>(333.21 to<br>632.89)                            | 437.47<br>(322.02 to<br>587.19)                            | 508.53<br>(356.05 to<br>711.82)                            |
| Other road injuries           | 410.65<br>(271.28 to<br>564.36)                               | 764.53<br>(448.00 to<br>1,217.88)                             | 708.47<br>(414.19 to<br>1,119.21)                             | 894.38<br>(513.85 to<br>1,444.90)                             | 8.64<br>(5.63 to<br>12.12)                             | 19.14<br>(11.32 to<br>30.30)                               | 18.57<br>(10.90 to<br>29.05)                               | 20.99<br>(12.24 to<br>33.75)                               |
| Other transport injuries      | 1,318.45<br>(887.58 to<br>1,867.22)                           | 2,480.41<br>(1,511.69 to<br>4,002.69)                         | 2,018.04<br>(1,204.79 to<br>3,172.25)                         | 3,063.02<br>(1,807.20 to<br>4,917.21)                         | 24.58<br>(16.52 to<br>34.34)                           | 53.96<br>(33.02 to<br>85.49)                               | 44.76<br>(27.08 to<br>70.17)                               | 63.86<br>(37.86 to<br>102.33)                              |
| <b>Unintentional injuries</b> | <b>47,536.53</b><br><b>(39,605.12 to</b><br><b>55,617.26)</b> | <b>49,155.79</b><br><b>(38,275.41 to</b><br><b>60,874.92)</b> | <b>40,809.76</b><br><b>(31,365.16 to</b><br><b>51,009.74)</b> | <b>61,297.71</b><br><b>(47,340.57 to</b><br><b>77,835.90)</b> | <b>966.56</b><br><b>(799.70 to</b><br><b>1,115.03)</b> | <b>1,430.63</b><br><b>(1,149.20 to</b><br><b>1,722.48)</b> | <b>1,288.83</b><br><b>(1,025.13 to</b><br><b>1,556.23)</b> | <b>1,563.46</b><br><b>(1,235.63 to</b><br><b>1,905.90)</b> |
| Falls                         | 6,617.01<br>(5,151.85 to<br>8,420.88)                         | 10,722.90<br>(8,562.34 to<br>13,313.98)                       | 10,139.68<br>(8,043.79 to<br>12,589.80)                       | 11,487.12<br>(9,005.92 to<br>14,447.87)                       | 210.07<br>(167.52 to<br>255.55)                        | 210.07<br>(395.74 to<br>613.82)                            | 507.65<br>(407.42 to<br>628.43)                            | 468.85<br>(369.17 to<br>586.67)                            |
| Drowning                      | 9,382.92<br>(7,406.05 to<br>11,765.03)                        | 8,192.19<br>(6,101.24 to<br>11,000.14)                        | 6,691.82<br>(4,965.02 to<br>8,896.38)                         | 10,724.22<br>(7,779.81 to<br>14,392.23)                       | 163.48<br>(134.11 to<br>197.81)                        | 185.07<br>(142.19 to<br>239.94)                            | 156.81<br>(121.65 to<br>204.23)                            | 220.71<br>(165.57 to<br>290.46)                            |

|                                                 |                                                 |                                                 |                                                 |                                                 |                                        |                                          |                                          |                                          |
|-------------------------------------------------|-------------------------------------------------|-------------------------------------------------|-------------------------------------------------|-------------------------------------------------|----------------------------------------|------------------------------------------|------------------------------------------|------------------------------------------|
|                                                 | 4,920.00<br>(3,607.98 to<br>6,471.46)           | 4,216.26<br>(2,881.47 to<br>5,999.49)           | 3,280.63<br>(2,246.41 to<br>4,683.96)           | 5,488.58<br>(3,738.38 to<br>8,010.34)           | 104.50<br>(75.06 to<br>133.43)         | 125.66<br>(86.86 to<br>174.06)           | 103.88<br>(70.84 to<br>144.28)           | 144.75<br>(99.30 to<br>206.24)           |
| Fire, heat, and hot substances                  |                                                 |                                                 |                                                 |                                                 |                                        |                                          |                                          |                                          |
|                                                 | 2,836.29<br>(1,702.01 to<br>5,239.04)           | 1,807.94<br>(1,117.70 to<br>3,122.97)           | 1,224.71<br>(744.01 to<br>2,048.32)             | 2,615.59<br>(1,516.98 to<br>4,757.79)           | 51.40<br>(33.01 to<br>84.97)           | 42.17<br>(26.81 to<br>69.90)             | 29.57<br>(18.87 to<br>46.97)             | 54.73<br>(33.45 to<br>90.00)             |
| Poisonings                                      |                                                 |                                                 |                                                 |                                                 |                                        |                                          |                                          |                                          |
|                                                 | 6,719.16<br>(5,115.53 to<br>8,413.29)           | 5,941.12<br>(4,215.87 to<br>7,998.09)           | 4,550.28<br>(3,120.03 to<br>6,269.69)           | 7,820.25<br>(5,403.45 to<br>10,924.98)          | 115.96<br>(86.57 to<br>144.00)         | 132.70<br>(92.77 to<br>177.10)           | 106.12<br>(71.91 to<br>143.60)           | 158.07<br>(108.63 to<br>217.79)          |
| Exposure to mechanical forces                   |                                                 |                                                 |                                                 |                                                 |                                        |                                          |                                          |                                          |
|                                                 | 2,116.07<br>(1,344.35 to<br>2,880.13)           | 1,867.75<br>(1,126.78 to<br>2,768.53)           | 1,366.20<br>(818.49 to<br>2,055.80)             | 2,337.24<br>(1,390.46 to<br>3,513.21)           | 38.65<br>(25.00 to<br>51.54)           | 41.20<br>(25.39 to<br>58.76)             | 31.20<br>(19.43 to<br>45.20)             | 48.28<br>(29.62 to<br>69.03)             |
| Unintentional firearm injuries                  |                                                 |                                                 |                                                 |                                                 |                                        |                                          |                                          |                                          |
|                                                 | 1,542.45<br>(971.16 to<br>2,540.60)             | 870.20<br>(566.84 to<br>1,371.53)               | 667.85<br>(428.26 to<br>1,067.93)               | 1,460.54<br>(896.88 to<br>2,520.12)             | 19.80<br>(12.91 to<br>31.73)           | 12.66<br>(8.51 to<br>19.04)              | 9.73<br>(6.39 to<br>14.96)               | 19.99<br>(12.58 to<br>32.80)             |
| Unintentional suffocation                       |                                                 |                                                 |                                                 |                                                 |                                        |                                          |                                          |                                          |
|                                                 | 3,060.65<br>(2,253.93 to<br>4,021.76)           | 3,203.18<br>(2,181.32 to<br>4,484.90)           | 2,516.22<br>(1,690.56 to<br>3,617.54)           | 4,022.47<br>(2,751.36 to<br>5,778.46)           | 57.51<br>(41.06 to<br>76.13)           | 78.84<br>(52.70 to<br>109.72)            | 65.19<br>(42.51 to<br>92.88)             | 89.81<br>(59.60 to<br>127.10)            |
| Other exposure to mechanical forces             |                                                 |                                                 |                                                 |                                                 |                                        |                                          |                                          |                                          |
|                                                 | 5,491.42<br>(3,754.75 to<br>7,063.75)           | 5,948.80<br>(3,958.26 to<br>7,896.97)           | 4,917.36<br>(3,194.68 to<br>6,591.88)           | 7,405.29<br>(4,856.83 to<br>10,070.66)          | 102.23<br>(72.44 to<br>126.82)         | 145.03<br>(100.57 to<br>181.74)          | 125.18<br>(85.75 to<br>159.66)           | 163.07<br>(110.80 to<br>210.72)          |
| Adverse effects of medical treatment            |                                                 |                                                 |                                                 |                                                 |                                        |                                          |                                          |                                          |
|                                                 | 3,323.87<br>(2,290.08 to<br>4,795.16)           | 4,364.11<br>(2,910.01 to<br>6,551.22)           | 3,153.27<br>(2,128.53 to<br>4,806.54)           | 5,663.24<br>(3,731.41 to<br>8,562.42)           | 71.35<br>(50.02 to<br>103.53)          | 122.84<br>(84.71 to<br>181.33)           | 92.99<br>(64.32 to<br>138.48)            | 142.96<br>(96.80 to<br>208.41)           |
| Animal contact                                  |                                                 |                                                 |                                                 |                                                 |                                        |                                          |                                          |                                          |
|                                                 | 2,693.06<br>(1,707.75 to<br>4,175.23)           | 3,581.24<br>(2,238.55 to<br>5,654.98)           | 2,574.11<br>(1,631.03 to<br>4,111.34)           | 4,611.46<br>(2,818.19 to<br>7,215.97)           | 59.96<br>(39.17 to<br>93.44)           | 103.64<br>(68.71 to<br>160.10)           | 77.92<br>(51.91 to<br>119.86)            | 120.13<br>(77.36 to<br>180.99)           |
| Venomous animal contact                         |                                                 |                                                 |                                                 |                                                 |                                        |                                          |                                          |                                          |
|                                                 | 630.80<br>(314.30 to<br>997.24)                 | 782.87<br>(387.03 to<br>1,291.81)               | 579.16<br>(287.58 to<br>946.02)                 | 1,051.78<br>(532.31 to<br>1,699.44)             | 11.40<br>(5.77 to<br>17.84)            | 19.19<br>(10.19 to<br>30.39)             | 15.07<br>(8.02 to<br>23.98)              | 22.84<br>(11.76 to<br>35.56)             |
| Non-venomous animal contact                     |                                                 |                                                 |                                                 |                                                 |                                        |                                          |                                          |                                          |
|                                                 | 3,551.50<br>(2,710.62 to<br>4,646.22)           | 3,750.79<br>(2,559.77 to<br>4,978.78)           | 3,750.78<br>(2,267.37 to<br>4,967.64)           | 4,736.22<br>(3,338.66 to<br>6,302.77)           | 59.57<br>(45.43 to<br>76.18)           | 87.67<br>(58.59 to<br>114.81)            | 92.94<br>(61.74 to<br>122.46)            | 95.84<br>(66.31 to<br>123.98)            |
| Foreign body                                    |                                                 |                                                 |                                                 |                                                 |                                        |                                          |                                          |                                          |
|                                                 | 3,166.61<br>(2,375.58 to<br>4,275.07)           | 3,286.73<br>(2,344.17 to<br>4,456.23)           | 3,355.58<br>(2,386.05 to<br>4,480.44)           | 4,171.15<br>(2,996.11 to<br>5,780.22)           | 52.86<br>(41.12 to<br>71.49)           | 77.73<br>(54.76 to<br>103.51)            | 84.23<br>(58.52 to<br>110.05)            | 84.62<br>(61.19 to<br>113.02)            |
| Pulmonary aspiration and foreign body in airway |                                                 |                                                 |                                                 |                                                 |                                        |                                          |                                          |                                          |
|                                                 | 384.88<br>(118.09 to<br>898.15)                 | 464.06<br>(121.69 to<br>1,195.30)               | 395.20<br>(98.49 to<br>1,035.50)                | 565.07<br>(159.07 to<br>1,399.35)               | 6.71<br>(1.92 to<br>16.03)             | 9.94<br>(2.41 to<br>26.44)               | 8.71<br>(2.02 to<br>23.28)               | 11.22<br>(2.97 to<br>28.16)              |
| Foreign body in other body part                 |                                                 |                                                 |                                                 |                                                 |                                        |                                          |                                          |                                          |
|                                                 | 2,128.02<br>(889.26 to<br>2,977.50)             | 2,050.69<br>(795.61 to<br>3,084.97)             | 1,348.08<br>(520.21 to<br>2,095.76)             | 2,680.25<br>(1,043.13 to<br>4,097.58)           | 41.84<br>(17.21 to<br>57.55)           | 48.71<br>(19.38 to<br>72.24)             | 33.16<br>(12.95 to<br>50.17)             | 59.24<br>(23.14 to<br>88.65)             |
| Environmental heat and cold exposure            |                                                 |                                                 |                                                 |                                                 |                                        |                                          |                                          |                                          |
|                                                 | 2,566.34<br>(1,927.79 to<br>3,296.22)           | 2,160.98<br>(1,507.09 to<br>3,034.27)           | 1,753.15<br>(1,215.34 to<br>2,511.00)           | 2,676.95<br>(1,852.63 to<br>3,705.91)           | 46.15<br>(34.48 to<br>59.71)           | 48.32<br>(33.51 to<br>67.72)             | 40.53<br>(28.15 to<br>57.73)             | 55.24<br>(38.35 to<br>77.02)             |
| Other unintentional injuries                    |                                                 |                                                 |                                                 |                                                 |                                        |                                          |                                          |                                          |
|                                                 | <b>21,260.62</b><br>(17,180.33 to<br>24,954.79) | <b>33,289.36</b><br>(22,961.55 to<br>47,591.42) | <b>30,728.69</b><br>(21,540.11 to<br>43,038.46) | <b>37,451.76</b><br>(24,958.74 to<br>55,965.18) | <b>500.21</b><br>(407.66 to<br>580.93) | <b>852.43</b><br>(594.37 to<br>1,206.28) | <b>806.14</b><br>(579.39 to<br>1,103.28) | <b>936.08</b><br>(622.43 to<br>1,373.85) |
| Self-harm and interpersonal violence            |                                                 |                                                 |                                                 |                                                 |                                        |                                          |                                          |                                          |
| <b>Liberia</b>                                  |                                                 |                                                 |                                                 |                                                 |                                        |                                          |                                          |                                          |
| Cause                                           | YLLs (actual counts)                            |                                                 |                                                 |                                                 | Deaths (actual counts)                 |                                          |                                          |                                          |
|                                                 | 2016                                            | 2040 Forecast                                   | 2040 Better Scenario                            | 2040 Worse Scenario                             | 2016                                   | 2040 Forecast                            | 2040 Better Scenario                     | 2040 Worse Scenario                      |
| Self-harm                                       | 14,361.33<br>(11,525.73 to<br>17,251.98)        | 24,429.15<br>(15,825.29 to<br>36,582.63)        | 22,026.74<br>(14,673.50 to<br>32,042.46)        | 27,992.27<br>(17,140.30 to<br>44,174.81)        | 380.68<br>(304.58 to<br>455.44)        | 688.27<br>(459.12 to<br>907.38)          | 644.16<br>(444.37 to<br>907.96)          | 763.90<br>(482.43 to<br>1,169.16)        |
| Self-harm by firearm                            | 1,561.26<br>(724.04 to<br>2,587.06)             | 2,315.32<br>(893.51 to<br>4,378.79)             | 2,014.47<br>(787.51 to<br>3,735.13)             | 2,671.67<br>(1,023.68 to<br>5,148.30)           | 42.26<br>(19.39 to<br>70.37)           | 70.63<br>(27.70 to<br>133.69)            | 64.50<br>(25.49 to<br>120.07)            | 78.29<br>(29.85 to<br>149.71)            |
| Self-harm by other specified means              | 12,800.07<br>(10,015.89 to<br>15,827.90)        | 22,113.83<br>(14,228.77 to<br>33,379.22)        | 20,012.26<br>(13,209.09 to<br>29,346.18)        | 25,320.60<br>(15,459.99 to<br>40,526.31)        | 338.41<br>(265.35 to<br>415.80)        | 617.64<br>(405.89 to<br>902.90)          | 579.65<br>(393.17 to<br>828.82)          | 685.61<br>(426.93 to<br>1,056.70)        |
| Interpersonal violence                          | 6,899.30<br>(3,507.05 to<br>9,143.78)           | 8,860.21<br>(4,214.13 to<br>12,609.10)          | 8,701.96<br>(4,218.13 to<br>12,322.78)          | 9,459.49<br>(4,405.38 to<br>13,449.03)          | 119.53<br>(62.54 to<br>156.58)         | 164.16<br>(80.95 to<br>229.15)           | 161.98<br>(81.23 to<br>226.11)           | 172.18<br>(83.12 to<br>240.92)           |

|                                                                              |                                        |                                       |                                       |                                          |                                 |                                 |                                 |                                 |
|------------------------------------------------------------------------------|----------------------------------------|---------------------------------------|---------------------------------------|------------------------------------------|---------------------------------|---------------------------------|---------------------------------|---------------------------------|
| Physical violence by firearm                                                 | 3,840.75<br>(1,822.54 to<br>5,484.11)  | 5,099.54<br>(2,243.09 to<br>7,581.55) | 4,894.17<br>(2,255.17 to<br>7,423.30) | 5,252.12<br>(2,276.01 to<br>8,062.55)    | 66.97<br>(32.03 to<br>95.27)    | 91.07<br>(41.52 to<br>135.19)   | 89.23<br>(41.39 to<br>132.79)   | 94.36<br>(42.05 to<br>140.26)   |
| Physical violence by sharp object                                            | 1,912.94<br>(720.57 to<br>3,005.44)    | 2,711.40<br>(956.06 to<br>4,543.37)   | 2,781.44<br>(996.99 to<br>4,619.34)   | 2,806.99<br>(982.91 to<br>4,709.68)      | 33.58<br>(13.08 to<br>52.19)    | 50.85<br>(19.23 to<br>83.13)    | 52.46<br>(19.97 to<br>84.70)    | 51.70<br>(19.29 to<br>84.63)    |
| Physical violence by other means                                             | 1,145.60<br>(720.57 to<br>1,652.69)    | 1,139.27<br>(656.50 to<br>1,763.93)   | 1,026.34<br>(598.14 to<br>1,573.94)   | 1,400.38<br>(802.76 to<br>2,190.61)      | 18.98<br>(12.10 to<br>26.84)    | 22.23<br>(13.32 to<br>34.09)    | 20.29<br>(12.41 to<br>31.60)    | 26.12<br>(15.35 to<br>40.36)    |
| Forces of nature, conflict and terrorism, and executions and police conflict | 742.83<br>(162.25 to<br>1,406.15)      | 5,106.55<br>(0.00 to<br>62,920.72)    | 5,117.92<br>(0.00 to<br>63,069.93)    | 6,030.59<br>(0.00 to<br>75,015.29)       | 12.07<br>(2.89 to<br>22.68)     | 84.76<br>(0.00 to<br>1,035.62)  | 85.94<br>(0.00 to<br>1,048.12)  | 95.81<br>(0.00 to<br>1,176.40)  |
| Exposure to forces of nature                                                 | 0.00<br>(0.00 to<br>0.00)              | 82.23<br>(0.00 to<br>123.79)          | 82.89<br>(0.00 to<br>125.13)          | 97.37<br>(0.00 to<br>146.53)             | 0.00<br>(0.00 to<br>0.00)       | 1.55<br>(0.00 to<br>2.35)       | 1.60<br>(0.00 to<br>2.41)       | 1.72<br>(0.00 to<br>2.60)       |
| Conflict and terrorism                                                       | 708.63<br>(124.00 to<br>1,369.04)      | 4,980.29<br>(0.00 to<br>62,920.72)    | 4,990.70<br>(0.00 to<br>63,069.93)    | 5,886.30<br>(0.00 to<br>75,015.29)       | 11.37<br>(1.99 to<br>21.96)     | 82.39<br>(0.00 to<br>1,035.62)  | 83.52<br>(0.00 to<br>1,048.12)  | 93.25<br>(0.00 to<br>1,176.40)  |
| Executions and police conflict                                               | 34.20<br>(27.33 to<br>45.24)           | 44.02<br>(0.00 to<br>528.98)          | 44.34<br>(0.00 to<br>533.41)          | 46.92<br>(0.00 to<br>559.79)             | 0.71<br>(0.48 to<br>1.10)       | 0.81<br>(0.00 to<br>10.03)      | 0.82<br>(0.00 to<br>10.18)      | 0.84<br>(0.00 to<br>10.37)      |
| <b>Mali</b>                                                                  |                                        |                                       |                                       |                                          |                                 |                                 |                                 |                                 |
| Cause                                                                        | YLLs (in 1000s)                        |                                       |                                       |                                          | Deaths (in 1000s)               |                                 |                                 |                                 |
|                                                                              | 2016                                   | 2040 Forecast                         | 2040 Better Scenario                  | 2040 Worse Scenario                      | 2016                            | 2040 Forecast                   | 2040 Better Scenario            | 2040 Worse Scenario             |
| All causes                                                                   | 9,926.72<br>(8,631.11 to<br>11,501.67) | 7,836.16<br>(6,265.93 to<br>9,709.17) | 6,165.63<br>(4,865.96 to<br>7,562.54) | 14,433.06<br>(11,328.46 to<br>18,008.87) | 155.61<br>(138.04 to<br>175.61) | 166.96<br>(139.48 to<br>197.08) | 134.42<br>(112.58 to<br>156.75) | 269.28<br>(225.70 to<br>317.64) |
| Communicable, maternal, neonatal, and nutritional diseases                   | 7,877.90<br>(6,681.86 to<br>9,337.81)  | 4,916.38<br>(3,608.56 to<br>6,477.74) | 3,675.86<br>(2,680.57 to<br>4,850.29) | 10,267.34<br>(7,668.46 to<br>13,262.28)  | 105.53<br>(90.87 to<br>123.24)  | 75.60<br>(55.82 to<br>98.24)    | 55.85<br>(41.31 to<br>72.63)    | 147.76<br>(112.38 to<br>186.64) |
| HIV/AIDS and tuberculosis                                                    | 324.69<br>(256.58 to<br>409.46)        | 338.85<br>(191.30 to<br>532.58)       | 212.01<br>(103.12 to<br>396.28)       | 876.53<br>(610.60 to<br>1,189.59)        | 7.16<br>(5.96 to<br>8.72)       | 9.35<br>(4.62 to<br>10.81)      | 4.63<br>(2.47 to<br>7.84)       | 18.57<br>(13.19 to<br>24.62)    |
| Tuberculosis                                                                 | 60.99<br>(45.32 to<br>85.45)           | 44.90<br>(28.83 to<br>70.63)          | 33.84<br>(22.65 to<br>50.96)          | 100.48<br>(65.32 to<br>153.14)           | 1.92<br>(1.45 to<br>2.69)       | 1.57<br>(1.05 to<br>2.40)       | 1.22<br>(0.85 to<br>1.79)       | 3.33<br>(2.25 to<br>5.03)       |
| HIV/AIDS                                                                     | 263.50<br>(197.91 to<br>348.85)        | 293.95<br>(145.71 to<br>490.57)       | 178.16<br>(69.31 to<br>360.04)        | 776.06<br>(516.30 to<br>1,091.10)        | 5.24<br>(4.12 to<br>6.73)       | 5.78<br>(2.97 to<br>9.26)       | 3.41<br>(1.30 to<br>6.62)       | 15.24<br>(10.02 to<br>21.36)    |
| Diarrhea, lower respiratory, and other common infectious diseases            | 2,265.71<br>(1,779.05 to<br>2,901.47)  | 1,745.88<br>(996.96 to<br>2,654.53)   | 1,099.35<br>(610.10 to<br>1,750.16)   | 3,724.03<br>(2,172.22 to<br>5,407.22)    | 32.72<br>(25.99 to<br>41.12)    | 31.15<br>(17.56 to<br>48.99)    | 19.73<br>(10.46 to<br>33.06)    | 57.83<br>(34.46 to<br>85.78)    |
| Diarrheal diseases                                                           | 1,206.33<br>(845.81 to<br>1,641.98)    | 796.47<br>(357.99 to<br>1,404.77)     | 524.81<br>(203.02 to<br>954.80)       | 1,562.94<br>(785.85 to<br>2,562.87)      | 18.03<br>(12.83 to<br>24.21)    | 15.77<br>(5.73 to<br>31.77)     | 9.96<br>(3.38 to<br>21.52)      | 27.37<br>(11.82 to<br>49.42)    |
| Intestinal infectious diseases                                               | 33.87<br>(15.79 to<br>63.82)           | 47.40<br>(21.00 to<br>95.94)          | 42.63<br>(19.01 to<br>83.81)          | 68.47<br>(30.02 to<br>137.53)            | 0.47<br>(0.22 to<br>0.88)       | 0.67<br>(0.30 to<br>1.34)       | 0.60<br>(0.28 to<br>1.17)       | 0.95<br>(0.42 to<br>1.87)       |
| Typhoid fever                                                                | 27.70<br>(11.78 to<br>55.41)           | 38.11<br>(15.26 to<br>81.60)          | 34.35<br>(14.17 to<br>72.29)          | 54.37<br>(20.93 to<br>117.64)            | 0.39<br>(0.17 to<br>0.75)       | 0.54<br>(0.23 to<br>1.11)       | 0.49<br>(0.21 to<br>1.00)       | 0.75<br>(0.30 to<br>1.59)       |
| Paratyphoid fever                                                            | 5.49<br>(1.88 to<br>13.11)             | 9.00<br>(3.16 to<br>21.42)            | 8.06<br>(2.81 to<br>18.52)            | 13.42<br>(4.79 to<br>31.83)              | 0.08<br>(0.03 to<br>0.18)       | 0.13<br>(0.05 to<br>0.29)       | 0.11<br>(0.04 to<br>0.26)       | 0.19<br>(0.07 to<br>0.43)       |
| Other intestinal infectious diseases                                         | 0.69<br>(0.20 to<br>1.85)              | 0.29<br>(0.06 to<br>0.94)             | 0.22<br>(0.05 to<br>0.68)             | 0.68<br>(0.15 to<br>2.08)                | 0.01<br>(0.00 to<br>0.02)       | 0.00<br>(0.00 to<br>0.01)       | 0.00<br>(0.00 to<br>0.01)       | 0.01<br>(0.00 to<br>0.03)       |
| Lower respiratory infections                                                 | 524.17<br>(380.18 to<br>725.75)        | 445.98<br>(194.51 to<br>874.15)       | 240.48<br>(101.51 to<br>499.33)       | 1,147.74<br>(452.93 to<br>1,972.90)      | 7.46<br>(5.66 to<br>9.87)       | 8.27<br>(4.51 to<br>14.18)      | 4.67<br>(2.64 to<br>8.17)       | 17.23<br>(8.29 to<br>27.64)     |
| Upper respiratory infections                                                 | 1.77<br>(0.45 to<br>4.26)              | 1.21<br>(0.27 to<br>3.63)             | 0.89<br>(0.22 to<br>2.52)             | 3.12<br>(0.65 to<br>9.19)                | 0.02<br>(0.01 to<br>0.05)       | 0.02<br>(0.01 to<br>0.05)       | 0.01<br>(0.00 to<br>0.03)       | 0.04<br>(0.01 to<br>0.12)       |

|                                |                                 |                                 |                                 |                                   |                           |                           |                           |                            |
|--------------------------------|---------------------------------|---------------------------------|---------------------------------|-----------------------------------|---------------------------|---------------------------|---------------------------|----------------------------|
| Otitis media                   | 0.04<br>(0.01 to<br>0.13)       | 0.01<br>(0.00 to<br>0.03)       | 0.01<br>(0.00 to<br>0.03)       | 0.01<br>(0.00 to<br>0.04)         | 0.00<br>(0.00 to<br>0.00) | 0.00<br>(0.00 to<br>0.00) | 0.00<br>(0.00 to<br>0.00) | 0.00<br>(0.00 to<br>0.00)  |
| Meningitis                     | 369.08<br>(232.82 to<br>663.87) | 296.97<br>(165.98 to<br>534.90) | 226.29<br>(132.38 to<br>400.91) | 689.98<br>(332.43 to<br>1,321.48) | 5.12<br>(3.28 to<br>8.79) | 4.47<br>(2.66 to<br>7.71) | 3.63<br>(2.25 to<br>6.29) | 9.16<br>(4.77 to<br>17.00) |
| Pneumococcal meningitis        | 27.47<br>(17.11 to<br>46.55)    | 18.92<br>(10.37 to<br>35.73)    | 15.82<br>(8.84 to<br>29.30)     | 35.41<br>(17.94 to<br>69.48)      | 0.43<br>(0.27 to<br>0.73) | 0.35<br>(0.20 to<br>0.65) | 0.31<br>(0.18 to<br>0.56) | 0.56<br>(0.31 to<br>1.10)  |
| H influenzae type B meningitis | 49.65<br>(30.70 to<br>85.42)    | 91.09<br>(24.17 to<br>230.86)   | 45.67<br>(15.50 to<br>108.03)   | 372.36<br>(79.96 to<br>907.51)    | 0.66<br>(0.42 to<br>1.14) | 1.15<br>(0.35 to<br>2.81) | 0.62<br>(0.25 to<br>1.37) | 4.44<br>(1.03 to<br>10.75) |
| Meningococcal meningitis       | 81.42<br>(51.32 to<br>138.52)   | 67.46<br>(37.54 to<br>122.58)   | 60.46<br>(34.91 to<br>105.44)   | 97.17<br>(53.78 to<br>178.13)     | 1.13<br>(0.72 to<br>1.87) | 1.07<br>(0.61 to<br>1.95) | 0.98<br>(0.57 to<br>1.77) | 1.45<br>(0.81 to<br>2.64)  |
| Other meningitis               | 210.53<br>(129.53 to<br>401.57) | 119.49<br>(68.31 to<br>223.11)  | 104.34<br>(61.26 to<br>187.06)  | 185.03<br>(99.63 to<br>357.50)    | 2.89<br>(1.86 to<br>5.22) | 1.90<br>(1.16 to<br>3.34) | 1.71<br>(1.07 to<br>2.97) | 2.71<br>(1.57 to<br>4.91)  |
| Encephalitis                   | 14.01<br>(8.20 to<br>24.31)     | 17.06<br>(9.33 to<br>29.62)     | 14.48<br>(8.07 to<br>24.96)     | 28.45<br>(15.42 to<br>50.43)      | 0.20<br>(0.12 to<br>0.32) | 0.26<br>(0.15 to<br>0.41) | 0.22<br>(0.14 to<br>0.36) | 0.40<br>(0.23 to<br>0.67)  |
| Diphtheria                     | 1.07<br>(0.45 to<br>2.13)       | 0.34<br>(0.10 to<br>0.93)       | 0.15<br>(0.06 to<br>0.31)       | 1.14<br>(0.27 to<br>3.14)         | 0.01<br>(0.01 to<br>0.03) | 0.00<br>(0.00 to<br>0.01) | 0.00<br>(0.00 to<br>0.00) | 0.01<br>(0.00 to<br>0.04)  |
| Whooping cough                 | 88.44<br>(8.59 to<br>283.92)    | 131.46<br>(14.44 to<br>377.05)  | 44.52<br>(4.23 to<br>147.87)    | 196.61<br>(20.56 to<br>603.30)    | 1.04<br>(0.10 to<br>3.35) | 1.56<br>(0.17 to<br>4.48) | 0.53<br>(0.05 to<br>1.77) | 2.32<br>(0.24 to<br>7.14)  |
| Tetanus                        | 6.22<br>(2.63 to<br>14.10)      | 1.97<br>(0.76 to<br>4.67)       | 1.52<br>(0.58 to<br>3.97)       | 2.43<br>(0.95 to<br>5.83)         | 0.11<br>(0.05 to<br>0.26) | 0.03<br>(0.01 to<br>0.09) | 0.03<br>(0.01 to<br>0.08) | 0.04<br>(0.02 to<br>0.10)  |
| Measles                        | 17.03<br>(5.41 to<br>40.98)     | 4.30<br>(0.34 to<br>23.02)      | 1.47<br>(0.19 to<br>6.04)       | 16.99<br>(1.29 to<br>64.08)       | 0.20<br>(0.06 to<br>0.49) | 0.05<br>(0.00 to<br>0.27) | 0.02<br>(0.00 to<br>0.07) | 0.20<br>(0.02 to<br>0.75)  |

**Mali**

| Cause                                          | YLLs (in 1000s)                                            |                                                          |                                                        |                                                            | Deaths (in 1000s)                                 |                                                   |                                                  |                                                   |
|------------------------------------------------|------------------------------------------------------------|----------------------------------------------------------|--------------------------------------------------------|------------------------------------------------------------|---------------------------------------------------|---------------------------------------------------|--------------------------------------------------|---------------------------------------------------|
|                                                | 2016                                                       | 2040 Forecast                                            | 2040 Better Scenario                                   | 2040 Worse Scenario                                        | 2016                                              | 2040 Forecast                                     | 2040 Better Scenario                             | 2040 Worse Scenario                               |
| Varicella and herpes zoster                    | 3.68<br>(2.05 to<br>6.15)                                  | 2.72<br>(1.36 to<br>5.02)                                | 2.11<br>(1.11 to<br>3.79)                              | 6.15<br>(2.94 to<br>11.61)                                 | 0.06<br>(0.04 to<br>0.09)                         | 0.05<br>(0.03 to<br>0.08)                         | 0.04<br>(0.03 to<br>0.07)                        | 0.10<br>(0.05 to<br>0.17)                         |
| <b>Neglected tropical diseases and malaria</b> | <b>2,379.95</b><br><b>(1,856.13 to</b><br><b>3,007.63)</b> | <b>1,011.50</b><br><b>(758.32 to</b><br><b>1,330.59)</b> | <b>886.92</b><br><b>(670.64 to</b><br><b>1,161.89)</b> | <b>1,652.03</b><br><b>(1,228.73 to</b><br><b>2,176.76)</b> | <b>30.05</b><br><b>(23.66 to</b><br><b>37.45)</b> | <b>14.23</b><br><b>(11.02 to</b><br><b>18.16)</b> | <b>12.75</b><br><b>(9.92 to</b><br><b>16.20)</b> | <b>22.03</b><br><b>(16.99 to</b><br><b>28.25)</b> |
| Malaria                                        | 2,289.83<br>(1,761.07 to<br>2,899.50)                      | 945.77<br>(704.14 to<br>1,255.38)                        | 833.31<br>(622.58 to<br>1,094.19)                      | 1,507.50<br>(1,094.88 to<br>2,018.03)                      | 28.79<br>(22.40 to<br>36.05)                      | 13.27<br>(10.08 to<br>17.07)                      | 11.95<br>(9.15 to<br>15.32)                      | 20.01<br>(14.96 to<br>26.21)                      |
| Chagas disease                                 | 0.00<br>(0.00 to<br>0.00)                                  | 0.00<br>(0.00 to<br>0.00)                                | 0.00<br>(0.00 to<br>0.00)                              | 0.00<br>(0.00 to<br>0.00)                                  | 0.00<br>(0.00 to<br>0.00)                         | 0.00<br>(0.00 to<br>0.00)                         | 0.00<br>(0.00 to<br>0.00)                        | 0.00<br>(0.00 to<br>0.00)                         |
| Leishmaniasis                                  | 0.00<br>(0.00 to<br>0.00)                                  | 0.00<br>(0.00 to<br>0.00)                                | 0.00<br>(0.00 to<br>0.00)                              | 0.00<br>(0.00 to<br>0.00)                                  | 0.00<br>(0.00 to<br>0.00)                         | 0.00<br>(0.00 to<br>0.00)                         | 0.00<br>(0.00 to<br>0.00)                        | 0.00<br>(0.00 to<br>0.00)                         |
| African trypanosomiasis                        | 0.00<br>(0.00 to<br>0.00)                                  | 0.00<br>(0.00 to<br>0.00)                                | 0.00<br>(0.00 to<br>0.00)                              | 0.00<br>(0.00 to<br>0.00)                                  | 0.00<br>(0.00 to<br>0.00)                         | 0.00<br>(0.00 to<br>0.00)                         | 0.00<br>(0.00 to<br>0.00)                        | 0.00<br>(0.00 to<br>0.00)                         |
| Schistosomiasis                                | 3.99<br>(2.72 to<br>5.52)                                  | 2.75<br>(1.82 to<br>4.00)                                | 2.48<br>(1.63 to<br>3.61)                              | 3.95<br>(2.62 to<br>5.68)                                  | 0.10<br>(0.07 to<br>0.14)                         | 0.08<br>(0.05 to<br>0.11)                         | 0.07<br>(0.05 to<br>0.10)                        | 0.10<br>(0.07 to<br>0.15)                         |
| Cysticercosis                                  | 0.19<br>(0.07 to<br>0.40)                                  | 0.08<br>(0.03 to<br>0.19)                                | 0.08<br>(0.03 to<br>0.17)                              | 0.11<br>(0.04 to<br>0.25)                                  | 0.00<br>(0.00 to<br>0.01)                         | 0.00<br>(0.00 to<br>0.00)                         | 0.00<br>(0.00 to<br>0.00)                        | 0.00<br>(0.00 to<br>0.00)                         |
| Cystic echinococcosis                          | 1.08<br>(0.74 to<br>1.53)                                  | 0.34<br>(0.22 to<br>0.48)                                | 0.25<br>(0.16 to<br>0.36)                              | 0.98<br>(0.64 to<br>1.42)                                  | 0.02<br>(0.01 to<br>0.02)                         | 0.01<br>(0.00 to<br>0.01)                         | 0.01<br>(0.01 to<br>0.01)                        | 0.02<br>(0.01 to<br>0.02)                         |

|                                                          |                                        |                                      |                                      |                                        |                                  |                                  |                                  |                                  |
|----------------------------------------------------------|----------------------------------------|--------------------------------------|--------------------------------------|----------------------------------------|----------------------------------|----------------------------------|----------------------------------|----------------------------------|
| Dengue                                                   | 0.32<br>(0.01 to<br>1.37)              | 1.25<br>(0.05 to<br>5.01)            | 1.11<br>(0.05 to<br>4.37)            | 1.97<br>(0.08 to<br>8.37)              | 0.00<br>(0.00 to<br>0.02)        | 0.02<br>(0.00 to<br>0.07)        | 0.02<br>(0.00 to<br>0.07)        | 0.03<br>(0.00 to<br>0.11)        |
| Yellow fever                                             | 3.30<br>(0.61 to<br>10.16)             | 1.46<br>(0.28 to<br>4.40)            | 1.21<br>(0.23 to<br>3.70)            | 2.80<br>(0.53 to<br>8.30)              | 0.05<br>(0.01 to<br>0.15)        | 0.02<br>(0.00 to<br>0.07)        | 0.02<br>(0.00 to<br>0.06)        | 0.04<br>(0.01 to<br>0.13)        |
| Rabies                                                   | 18.49<br>(6.02 to<br>41.34)            | 7.49<br>(2.18 to<br>16.98)           | 5.25<br>(1.42 to<br>12.48)           | 26.43<br>(7.84 to<br>58.52)            | 0.28<br>(0.09 to<br>0.60)        | 0.12<br>(0.03 to<br>0.27)        | 0.08<br>(0.02 to<br>0.20)        | 0.40<br>(0.12 to<br>0.88)        |
| Intestinal nematode infections                           | 2.38<br>(1.28 to<br>3.89)              | 4.02<br>(2.14 to<br>6.69)            | 3.61<br>(1.89 to<br>6.12)            | 5.90<br>(3.12 to<br>9.87)              | 0.03<br>(0.02 to<br>0.05)        | 0.05<br>(0.03 to<br>0.08)        | 0.04<br>(0.02 to<br>0.07)        | 0.07<br>(0.04 to<br>0.12)        |
| Other neglected tropical diseases                        | 60.37<br>(29.87 to<br>113.72)          | 48.35<br>(25.15 to<br>89.93)         | 39.61<br>(20.16 to<br>73.73)         | 102.40<br>(52.10 to<br>186.99)         | 0.78<br>(0.41 to<br>1.42)        | 0.67<br>(0.37 to<br>1.19)        | 0.56<br>(0.31 to<br>0.98)        | 1.36<br>(0.72 to<br>2.38)        |
| <b>Maternal disorders</b>                                | <b>158.54</b><br>(111.00 to<br>207.31) | <b>99.15</b><br>(62.06 to<br>146.09) | <b>78.92</b><br>(50.76 to<br>111.65) | <b>216.47</b><br>(144.10 to<br>305.58) | <b>2.82</b><br>(1.99 to<br>3.66) | <b>1.78</b><br>(1.11 to<br>2.59) | <b>1.42</b><br>(0.91 to<br>2.01) | <b>3.87</b><br>(2.57 to<br>5.41) |
| Maternal hemorrhage                                      | 41.77<br>(27.31 to<br>58.74)           | 25.67<br>(14.79 to<br>40.58)         | 20.54<br>(12.39 to<br>31.60)         | 53.93<br>(33.15 to<br>83.58)           | 0.76<br>(0.50 to<br>1.05)        | 0.47<br>(0.27 to<br>0.74)        | 0.38<br>(0.23 to<br>0.57)        | 0.98<br>(0.61 to<br>1.50)        |
| Maternal sepsis and other maternal infections            | 15.05<br>(8.94 to<br>22.50)            | 7.85<br>(4.28 to<br>12.57)           | 6.26<br>(3.58 to<br>10.10)           | 16.99<br>(9.78 to<br>26.88)            | 0.27<br>(0.16 to<br>0.40)        | 0.14<br>(0.08 to<br>0.22)        | 0.11<br>(0.06 to<br>0.18)        | 0.30<br>(0.18 to<br>0.47)        |
| Maternal hypertensive disorders                          | 32.69<br>(21.18 to<br>45.73)           | 20.96<br>(12.10 to<br>32.14)         | 16.71<br>(10.10 to<br>25.38)         | 44.70<br>(27.11 to<br>67.19)           | 0.57<br>(0.38 to<br>0.79)        | 0.37<br>(0.21 to<br>0.56)        | 0.29<br>(0.18 to<br>0.45)        | 0.78<br>(0.48 to<br>1.17)        |
| Maternal obstructed labor and uterine rupture            | 10.61<br>(6.28 to<br>15.96)            | 6.61<br>(3.44 to<br>10.81)           | 5.21<br>(2.84 to<br>8.45)            | 14.70<br>(8.26 to<br>23.49)            | 0.19<br>(0.12 to<br>0.29)        | 0.12<br>(0.06 to<br>0.20)        | 0.10<br>(0.05 to<br>0.15)        | 0.27<br>(0.15 to<br>0.43)        |
| Maternal abortion, miscarriage, and ectopic pregnancy    | 11.26<br>(6.32 to<br>17.83)            | 6.66<br>(3.16 to<br>12.16)           | 5.29<br>(2.52 to<br>9.36)            | 14.51<br>(7.02 to<br>26.79)            | 0.20<br>(0.11 to<br>0.31)        | 0.12<br>(0.06 to<br>0.22)        | 0.09<br>(0.05 to<br>0.17)        | 0.26<br>(0.12 to<br>0.46)        |
| Indirect maternal deaths                                 | 32.00<br>(20.00 to<br>46.67)           | 20.14<br>(11.43 to<br>32.96)         | 15.99<br>(9.26 to<br>25.21)          | 46.64<br>(27.63 to<br>72.97)           | 0.56<br>(0.35 to<br>0.81)        | 0.35<br>(0.20 to<br>0.58)        | 0.28<br>(0.16 to<br>0.44)        | 0.82<br>(0.48 to<br>1.27)        |
| Late maternal deaths                                     | 2.19<br>(1.02 to<br>4.16)              | 1.06<br>(0.46 to<br>2.09)            | 0.84<br>(0.37 to<br>1.64)            | 2.41<br>(1.09 to<br>4.68)              | 0.04<br>(0.02 to<br>0.07)        | 0.02<br>(0.01 to<br>0.04)        | 0.02<br>(0.01 to<br>0.03)        | 0.04<br>(0.02 to<br>0.08)        |
| Maternal deaths aggravated by HIV/AIDS                   | 0.70<br>(0.35 to<br>1.11)              | 2.79<br>(1.17 to<br>5.13)            | 2.12<br>(0.58 to<br>3.91)            | 6.39<br>(2.93 to<br>11.29)             | 0.01<br>(0.01 to<br>0.02)        | 0.05<br>(0.02 to<br>0.10)        | 0.04<br>(0.01 to<br>0.08)        | 0.12<br>(0.06 to<br>0.22)        |
| Other maternal disorders                                 | 12.26<br>(6.88 to<br>18.46)            | 7.41<br>(3.94 to<br>12.40)           | 5.97<br>(3.26 to<br>9.67)            | 16.21<br>(8.99 to<br>26.54)            | 0.22<br>(0.13 to<br>0.33)        | 0.13<br>(0.07 to<br>0.22)        | 0.11<br>(0.06 to<br>0.18)        | 0.29<br>(0.16 to<br>0.48)        |
| <b>Mali</b>                                              |                                        |                                      |                                      |                                        |                                  |                                  |                                  |                                  |
| Cause                                                    | YLLs (in 1000s)                        |                                      |                                      |                                        | Deaths (in 1000s)                |                                  |                                  |                                  |
|                                                          | 2016                                   | 2040 Forecast                        | 2040 Better Scenario                 | 2040 Worse Scenario                    | 2016                             | 2040 Forecast                    | 2040 Better Scenario             | 2040 Worse Scenario              |
| Neonatal disorders                                       | 1,821.17<br>(1,505.64 to<br>2,194.56)  | 1,351.47<br>(791.77 to<br>2,100.61)  | 1,089.60<br>(627.37 to<br>1,688.48)  | 3,049.68<br>(1,824.24 to<br>4,659.44)  | 21.04<br>(17.39 to<br>25.35)     | 15.62<br>(9.15 to<br>24.27)      | 12.59<br>(7.25 to<br>19.51)      | 35.24<br>(21.08 to<br>53.83)     |
| Neonatal preterm birth                                   | 641.43<br>(440.30 to<br>863.41)        | 389.90<br>(221.62 to<br>601.21)      | 306.71<br>(171.53 to<br>471.53)      | 975.71<br>(563.46 to<br>1,504.00)      | 7.41<br>(5.09 to<br>9.97)        | 4.51<br>(2.56 to<br>6.95)        | 3.54<br>(1.98 to<br>5.45)        | 11.27<br>(6.51 to<br>17.38)      |
| Neonatal encephalopathy due to birth asphyxia and trauma | 694.31<br>(479.51 to<br>959.32)        | 506.89<br>(239.19 to<br>921.82)      | 416.39<br>(198.45 to<br>751.86)      | 1,058.64<br>(503.73 to<br>1,902.09)    | 8.02<br>(5.54 to<br>11.08)       | 5.86<br>(2.77 to<br>10.65)       | 4.81<br>(2.29 to<br>8.69)        | 12.23<br>(5.82 to<br>21.97)      |
| Neonatal sepsis and other neonatal infections            | 292.61<br>(175.24 to<br>427.52)        | 312.34<br>(160.59 to<br>548.25)      | 254.34<br>(128.60 to<br>450.97)      | 672.84<br>(342.62 to<br>1,163.87)      | 3.38<br>(2.02 to<br>4.94)        | 3.61<br>(1.86 to<br>6.34)        | 2.94<br>(1.49 to<br>5.21)        | 7.78<br>(3.96 to<br>13.45)       |
| Hemolytic disease and other neonatal jaundice            | 60.71<br>(36.67 to<br>95.08)           | 27.97<br>(12.93 to<br>51.03)         | 22.12<br>(10.44 to<br>40.72)         | 66.67<br>(31.18 to<br>120.64)          | 0.70<br>(0.42 to<br>1.10)        | 0.32<br>(0.15 to<br>0.59)        | 0.26<br>(0.12 to<br>0.47)        | 0.77<br>(0.36 to<br>1.39)        |



|                                                                         |                                                  |                                                  |                                                  |                                                  |                                         |                                         |                                         |                                           |
|-------------------------------------------------------------------------|--------------------------------------------------|--------------------------------------------------|--------------------------------------------------|--------------------------------------------------|-----------------------------------------|-----------------------------------------|-----------------------------------------|-------------------------------------------|
| Other neonatal disorders                                                | 132.12<br>(82.03 to 206.90)                      | 114.37<br>(52.73 to 220.58)                      | 90.05<br>(42.40 to 174.38)                       | 275.83<br>(130.91 to 518.67)                     | 1.53<br>(0.95 to 2.39)                  | 1.32<br>(0.61 to 2.55)                  | 1.04<br>(0.49 to 2.02)                  | 3.19<br>(1.51 to 5.99)                    |
| <b>Nutritional deficiencies</b>                                         | <b>487.34</b><br><b>(280.25 to 777.14)</b>       | <b>212.20</b><br><b>(112.27 to 360.03)</b>       | <b>174.96</b><br><b>(93.19 to 297.77)</b>        | <b>453.84</b><br><b>(241.50 to 768.66)</b>       | <b>6.40</b><br><b>(3.82 to 10.10)</b>   | <b>3.34</b><br><b>(1.90 to 5.32)</b>    | <b>2.89</b><br><b>(1.71 to 4.50)</b>    | <b>6.39</b><br><b>(3.57 to 10.34)</b>     |
| Protein-energy malnutrition                                             | 468.98<br>(265.86 to 754.52)                     | 190.58<br>(99.12 to 333.96)                      | 156.42<br>(81.57 to 272.94)                      | 415.86<br>(208.55 to 730.13)                     | 6.05<br>(3.58 to 9.62)                  | 2.90<br>(1.64 to 4.70)                  | 2.50<br>(1.48 to 4.02)                  | 5.71<br>(3.11 to 9.47)                    |
| Iodine deficiency                                                       | 1.78<br>(0.04 to 10.29)                          | 5.72<br>(0.05 to 40.06)                          | 4.53<br>(0.04 to 30.79)                          | 13.12<br>(0.09 to 101.26)                        | 0.03<br>(0.00 to 0.13)                  | 0.09<br>(0.00 to 0.52)                  | 0.08<br>(0.00 to 0.39)                  | 0.19<br>(0.00 to 1.24)                    |
| Dietary iron deficiency                                                 | 0.92<br>(0.48 to 1.61)                           | 1.17<br>(0.57 to 2.24)                           | 1.08<br>(0.53 to 2.04)                           | 1.57<br>(0.79 to 3.02)                           | 0.02<br>(0.01 to 0.03)                  | 0.02<br>(0.01 to 0.05)                  | 0.02<br>(0.01 to 0.05)                  | 0.03<br>(0.01 to 0.06)                    |
| Other nutritional deficiencies                                          | 15.66<br>(7.09 to 28.47)                         | 14.73<br>(6.37 to 27.45)                         | 12.94<br>(5.71 to 23.71)                         | 12.94<br>(9.95 to 45.28)                         | 0.31<br>(0.15 to 0.50)                  | 0.33<br>(0.15 to 0.56)                  | 0.30<br>(0.14 to 0.51)                  | 0.47<br>(0.21 to 0.82)                    |
| <b>Other communicable, maternal, neonatal, and nutritional diseases</b> | <b>440.70</b><br><b>(234.96 to 746.65)</b>       | <b>157.32</b><br><b>(80.23 to 264.51)</b>        | <b>134.08</b><br><b>(69.10 to 222.77)</b>        | <b>294.75</b><br><b>(145.58 to 503.61)</b>       | <b>5.34</b><br><b>(2.93 to 8.90)</b>    | <b>2.13</b><br><b>(1.22 to 3.40)</b>    | <b>1.84</b><br><b>(1.06 to 2.93)</b>    | <b>3.82</b><br><b>(2.08 to 6.28)</b>      |
| Sexually transmitted infections excluding HIV                           | 397.87<br>(200.66 to 690.84)                     | 116.06<br>(46.63 to 216.13)                      | 98.48<br>(40.30 to 185.35)                       | 222.35<br>(88.95 to 418.21)                      | 4.66<br>(2.36 to 8.08)                  | 1.37<br>(0.56 to 2.54)                  | 1.17<br>(0.48 to 2.19)                  | 2.62<br>(1.05 to 4.91)                    |
| Syphilis                                                                | 396.65<br>(199.18 to 689.49)                     | 114.50<br>(45.45 to 214.86)                      | 97.02<br>(39.10 to 184.14)                       | 220.38<br>(87.07 to 416.68)                      | 4.64<br>(2.34 to 8.06)                  | 1.34<br>(0.53 to 2.52)                  | 1.14<br>(0.46 to 2.17)                  | 2.58<br>(1.03 to 4.86)                    |
| Chlamydia infection                                                     | 0.26<br>(0.13 to 0.41)                           | 0.33<br>(0.17 to 0.56)                           | 0.30<br>(0.16 to 0.51)                           | 0.41<br>(0.21 to 0.70)                           | 0.00<br>(0.00 to 0.01)                  | 0.01<br>(0.00 to 0.01)                  | 0.01<br>(0.00 to 0.01)                  | 0.01<br>(0.00 to 0.01)                    |
| Gonococcal infection                                                    | 0.62<br>(0.33 to 0.98)                           | 0.80<br>(0.41 to 1.33)                           | 0.74<br>(0.38 to 1.20)                           | 1.00<br>(0.51 to 1.62)                           | 0.01<br>(0.01 to 0.02)                  | 0.01<br>(0.01 to 0.02)                  | 0.01<br>(0.01 to 0.02)                  | 0.02<br>(0.01 to 0.03)                    |
| Other sexually transmitted infections                                   | 0.35<br>(0.18 to 0.54)                           | 0.44<br>(0.23 to 0.73)                           | 0.41<br>(0.21 to 0.67)                           | 0.56<br>(0.29 to 0.92)                           | 0.01<br>(0.00 to 0.01)                  | 0.01<br>(0.00 to 0.01)                  | 0.01<br>(0.00 to 0.01)                  | 0.01<br>(0.01 to 0.02)                    |
| Acute hepatitis                                                         | 20.52<br>(16.34 to 25.53)                        | 19.63<br>(14.30 to 26.89)                        | 17.60<br>(13.05 to 23.67)                        | 28.80<br>(21.67 to 38.32)                        | 0.37<br>(0.30 to 0.46)                  | 0.39<br>(0.29 to 0.53)                  | 0.36<br>(0.27 to 0.48)                  | 0.56<br>(0.43 to 0.73)                    |
| Acute hepatitis A                                                       | 0.85<br>(0.09 to 2.00)                           | 0.51<br>(0.10 to 1.29)                           | 0.43<br>(0.09 to 1.05)                           | 0.99<br>(0.16 to 2.52)                           | 0.01<br>(0.00 to 0.02)                  | 0.01<br>(0.00 to 0.02)                  | 0.01<br>(0.00 to 0.01)                  | 0.01<br>(0.00 to 0.03)                    |
| Acute hepatitis B                                                       | 12.92<br>(9.84 to 16.48)                         | 12.91<br>(9.32 to 17.88)                         | 11.60<br>(8.36 to 15.89)                         | 18.48<br>(13.53 to 24.79)                        | 0.26<br>(0.20 to 0.33)                  | 0.29<br>(0.21 to 0.39)                  | 0.26<br>(0.19 to 0.35)                  | 0.40<br>(0.30 to 0.53)                    |
| Acute hepatitis C                                                       | 0.35<br>(0.24 to 0.50)                           | 0.47<br>(0.30 to 0.68)                           | 0.44<br>(0.28 to 0.64)                           | 0.57<br>(0.37 to 0.84)                           | 0.01<br>(0.01 to 0.01)                  | 0.01<br>(0.01 to 0.02)                  | 0.01<br>(0.01 to 0.02)                  | 0.01<br>(0.01 to 0.02)                    |
| Acute hepatitis E                                                       | 6.40<br>(4.52 to 8.83)                           | 5.75<br>(3.68 to 8.61)                           | 5.13<br>(3.21 to 7.65)                           | 8.75<br>(5.60 to 13.22)                          | 0.09<br>(0.06 to 0.12)                  | 0.09<br>(0.06 to 0.13)                  | 0.08<br>(0.05 to 0.12)                  | 0.13<br>(0.09 to 0.19)                    |
| Other unspecified infectious diseases                                   | 22.31<br>(8.17 to 76.52)                         | 21.63<br>(9.71 to 55.15)                         | 18.01<br>(8.27 to 46.00)                         | 43.61<br>(18.73 to 110.98)                       | 0.31<br>(0.14 to 0.93)                  | 0.36<br>(0.21 to 0.75)                  | 0.32<br>(0.19 to 0.64)                  | 0.64<br>(0.34 to 1.40)                    |
| <b>Non-communicable diseases</b>                                        | <b>1,593.47</b><br><b>(1,194.13 to 1,936.54)</b> | <b>2,367.97</b><br><b>(1,857.73 to 2,928.19)</b> | <b>1,980.09</b><br><b>(1,576.70 to 2,406.11)</b> | <b>3,425.96</b><br><b>(2,646.58 to 4,269.92)</b> | <b>42.35</b><br><b>(35.42 to 49.60)</b> | <b>80.25</b><br><b>(66.89 to 94.69)</b> | <b>67.91</b><br><b>(57.60 to 78.36)</b> | <b>107.89</b><br><b>(89.06 to 128.68)</b> |

**Mali**

| Cause | YLLs (in 1000s) |                              |                              |                              | Deaths (in 1000s)            |                         |                           |                           |
|-------|-----------------|------------------------------|------------------------------|------------------------------|------------------------------|-------------------------|---------------------------|---------------------------|
|       | 2016            | 2040 Forecast                | 2040 Better Scenario         | 2040 Worse Scenario          | 2016                         | 2040 Forecast           | 2040 Better Scenario      | 2040 Worse Scenario       |
|       | Neoplasms       | 285.87<br>(234.72 to 343.90) | 604.28<br>(472.91 to 764.72) | 558.44<br>(447.57 to 693.53) | 635.74<br>(497.96 to 812.57) | 8.71<br>(7.17 to 10.46) | 19.88<br>(16.09 to 24.48) | 18.82<br>(15.51 to 22.75) |

|                                      |                               |                                 |                                 |                                 |                           |                           |                           |                           |
|--------------------------------------|-------------------------------|---------------------------------|---------------------------------|---------------------------------|---------------------------|---------------------------|---------------------------|---------------------------|
| Lip and oral cavity cancer           | 1.51<br>(1.19 to<br>1.93)     | 3.31<br>(2.24 to<br>5.24)       | 2.81<br>(1.97 to<br>4.06)       | 4.26<br>(2.73 to<br>6.93)       | 0.06<br>(0.04 to<br>0.07) | 0.13<br>(0.09 to<br>0.19) | 0.11<br>(0.08 to<br>0.16) | 0.16<br>(0.10 to<br>0.25) |
| Nasopharynx cancer                   | 0.39<br>(0.30 to<br>0.51)     | 0.87<br>(0.57 to<br>1.35)       | 0.71<br>(0.49 to<br>1.05)       | 1.19<br>(0.76 to<br>1.88)       | 0.01<br>(0.01 to<br>0.01) | 0.02<br>(0.02 to<br>0.04) | 0.02<br>(0.01 to<br>0.03) | 0.03<br>(0.02 to<br>0.05) |
| Other pharynx cancer                 | 0.70<br>(0.48 to<br>0.98)     | 1.26<br>(0.78 to<br>1.90)       | 1.23<br>(0.76 to<br>1.84)       | 1.43<br>(0.86 to<br>2.20)       | 0.02<br>(0.02 to<br>0.03) | 0.04<br>(0.03 to<br>0.07) | 0.04<br>(0.03 to<br>0.06) | 0.05<br>(0.03 to<br>0.07) |
| Esophageal cancer                    | 4.51<br>(3.50 to<br>5.75)     | 8.82<br>(5.03 to<br>15.11)      | 7.72<br>(4.55 to<br>12.63)      | 10.94<br>(6.10 to<br>18.75)     | 0.15<br>(0.12 to<br>0.19) | 0.31<br>(0.18 to<br>0.51) | 0.28<br>(0.17 to<br>0.45) | 0.37<br>(0.21 to<br>0.63) |
| Stomach cancer                       | 28.94<br>(23.17 to<br>35.67)  | 39.62<br>(29.45 to<br>52.82)    | 38.11<br>(28.57 to<br>49.87)    | 45.45<br>(33.72 to<br>61.01)    | 1.00<br>(0.81 to<br>1.22) | 1.46<br>(1.13 to<br>1.91) | 1.44<br>(1.12 to<br>1.85) | 1.62<br>(1.24 to<br>2.13) |
| Colon and rectum cancer              | 13.37<br>(10.09 to<br>18.02)  | 32.26<br>(21.80 to<br>45.62)    | 32.09<br>(21.60 to<br>45.20)    | 31.19<br>(20.95 to<br>45.13)    | 0.44<br>(0.34 to<br>0.59) | 1.17<br>(0.83 to<br>1.65) | 1.20<br>(0.85 to<br>1.66) | 1.09<br>(0.76 to<br>1.56) |
| Liver cancer                         | 87.34<br>(65.36 to<br>113.69) | 209.21<br>(140.29 to<br>313.86) | 180.22<br>(127.51 to<br>254.14) | 272.22<br>(146.11 to<br>341.68) | 2.49<br>(1.90 to<br>3.21) | 6.33<br>(4.35 to<br>9.35) | 5.57<br>(4.04 to<br>7.68) | 6.57<br>(4.40 to<br>9.81) |
| Liver cancer due to hepatitis B      | 49.75<br>(36.31 to<br>65.08)  | 117.31<br>(78.46 to<br>179.32)  | 101.38<br>(71.21 to<br>146.82)  | 123.23<br>(80.96 to<br>192.91)  | 1.38<br>(1.02 to<br>1.80) | 3.44<br>(2.35 to<br>5.22) | 3.04<br>(2.17 to<br>4.34) | 3.54<br>(2.37 to<br>5.44) |
| Liver cancer due to hepatitis C      | 7.63<br>(5.24 to<br>10.62)    | 19.02<br>(11.95 to<br>29.73)    | 16.72<br>(10.86 to<br>24.74)    | 19.61<br>(12.03 to<br>31.28)    | 0.27<br>(0.19 to<br>0.37) | 0.70<br>(0.45 to<br>1.07) | 0.63<br>(0.42 to<br>0.91) | 0.70<br>(0.44 to<br>1.09) |
| Liver cancer due to alcohol use      | 6.77<br>(4.83 to<br>9.18)     | 17.56<br>(10.91 to<br>27.92)    | 14.66<br>(9.67 to<br>22.14)     | 19.83<br>(12.05 to<br>31.96)    | 0.22<br>(0.16 to<br>0.29) | 0.57<br>(0.37 to<br>0.88) | 0.49<br>(0.34 to<br>0.72) | 0.63<br>(0.40 to<br>0.98) |
| Liver cancer due to other causes     | 23.20<br>(16.58 to<br>30.90)  | 55.32<br>(35.05 to<br>84.43)    | 47.46<br>(31.74 to<br>69.08)    | 59.54<br>(37.41 to<br>92.53)    | 0.63<br>(0.46 to<br>0.84) | 1.62<br>(1.04 to<br>2.44) | 1.41<br>(0.96 to<br>1.99) | 1.70<br>(1.08 to<br>2.62) |
| Gallbladder and biliary tract cancer | 3.61<br>(2.72 to<br>4.68)     | 5.13<br>(3.93 to<br>6.50)       | 5.35<br>(4.06 to<br>6.87)       | 4.82<br>(3.74 to<br>6.08)       | 0.15<br>(0.11 to<br>0.20) | 0.23<br>(0.18 to<br>0.29) | 0.25<br>(0.19 to<br>0.31) | 0.21<br>(0.16 to<br>0.25) |
| Pancreatic cancer                    | 6.50<br>(5.34 to<br>8.05)     | 17.73<br>(13.78 to<br>22.55)    | 18.06<br>(14.02 to<br>22.90)    | 16.22<br>(12.61 to<br>20.51)    | 0.27<br>(0.22 to<br>0.33) | 0.77<br>(0.62 to<br>0.96) | 0.81<br>(0.65 to<br>1.00) | 0.68<br>(0.54 to<br>0.84) |
| Larynx cancer                        | 1.17<br>(0.89 to<br>1.51)     | 2.57<br>(1.57 to<br>4.37)       | 1.94<br>(1.32 to<br>2.88)       | 3.28<br>(1.90 to<br>5.68)       | 0.05<br>(0.04 to<br>0.06) | 0.10<br>(0.07 to<br>0.17) | 0.08<br>(0.06 to<br>0.12) | 0.13<br>(0.08 to<br>0.22) |
| Tracheal, bronchus, and lung cancer  | 8.50<br>(6.62 to<br>10.92)    | 24.41<br>(13.76 to<br>42.43)    | 13.26<br>(8.54 to<br>20.50)     | 25.39<br>(13.88 to<br>46.04)    | 0.34<br>(0.27 to<br>0.43) | 1.01<br>(0.59 to<br>1.73) | 0.57<br>(0.37 to<br>0.86) | 1.02<br>(0.57 to<br>1.82) |
| Malignant skin melanoma              | 1.28<br>(0.82 to<br>1.80)     | 2.94<br>(1.92 to<br>4.11)       | 3.14<br>(2.02 to<br>4.42)       | 2.53<br>(1.61 to<br>3.52)       | 0.04<br>(0.03 to<br>0.06) | 0.10<br>(0.07 to<br>0.14) | 0.11<br>(0.08 to<br>0.15) | 0.08<br>(0.06 to<br>0.11) |
| Non-melanoma skin cancer             | 0.38<br>(0.43 to<br>0.80)     | 1.35<br>(1.01 to<br>1.81)       | 1.35<br>(1.00 to<br>1.82)       | 1.49<br>(1.11 to<br>1.97)       | 0.02<br>(0.02 to<br>0.03) | 0.06<br>(0.04 to<br>0.07) | 0.06<br>(0.05 to<br>0.08) | 0.06<br>(0.05 to<br>0.07) |
| Breast cancer                        | 21.28<br>(14.43 to<br>29.78)  | 43.59<br>(28.32 to<br>66.31)    | 42.79<br>(28.08 to<br>63.50)    | 44.84<br>(28.50 to<br>69.19)    | 0.65<br>(0.45 to<br>0.90) | 1.44<br>(0.97 to<br>2.11) | 1.44<br>(0.99 to<br>2.06) | 1.43<br>(0.94 to<br>2.14) |
| Cervical cancer                      | 21.28<br>(14.36 to<br>31.17)  | 30.95<br>(20.34 to<br>46.96)    | 29.82<br>(19.76 to<br>44.75)    | 36.07<br>(23.99 to<br>54.68)    | 0.66<br>(0.45 to<br>0.97) | 1.00<br>(0.68 to<br>1.49) | 0.99<br>(0.66 to<br>1.45) | 1.14<br>(0.77 to<br>1.67) |
| Uterine cancer                       | 1.79<br>(1.31 to<br>2.43)     | 3.10<br>(2.16 to<br>4.22)       | 2.99<br>(2.12 to<br>4.09)       | 3.70<br>(2.64 to<br>5.01)       | 0.06<br>(0.05 to<br>0.08) | 0.12<br>(0.08 to<br>0.15) | 0.11<br>(0.08 to<br>0.15) | 0.13<br>(0.10 to<br>0.18) |
| Ovarian cancer                       | 3.24<br>(2.26 to<br>4.44)     | 7.35<br>(4.94 to<br>10.30)      | 7.48<br>(5.04 to<br>10.49)      | 6.49<br>(4.33 to<br>9.13)       | 0.10<br>(0.07 to<br>0.14) | 0.25<br>(0.17 to<br>0.34) | 0.25<br>(0.18 to<br>0.35) | 0.21<br>(0.15 to<br>0.29) |
| Prostate cancer                      | 5.57<br>(3.77 to<br>7.82)     | 17.94<br>(12.64 to<br>24.56)    | 19.19<br>(13.77 to<br>26.52)    | 16.05<br>(11.15 to<br>21.79)    | 0.30<br>(0.20 to<br>0.44) | 1.01<br>(0.73 to<br>1.48) | 1.11<br>(0.81 to<br>1.64) | 0.87<br>(0.62 to<br>1.30) |

|                                 |                                                      |                                                      |                                                      |                                                          |                                                   |                                                   |                                                   |                                                   |
|---------------------------------|------------------------------------------------------|------------------------------------------------------|------------------------------------------------------|----------------------------------------------------------|---------------------------------------------------|---------------------------------------------------|---------------------------------------------------|---------------------------------------------------|
| Testicular cancer               | 0.61<br>(0.41 to<br>0.89)                            | 1.00<br>(0.69 to<br>1.44)                            | 0.98<br>(0.67 to<br>1.41)                            | 1.11<br>(0.77 to<br>1.59)                                | 0.01<br>(0.02)                                    | 0.02<br>(0.02 to<br>0.03)                         | 0.02<br>(0.02 to<br>0.03)                         | 0.03<br>(0.02 to<br>0.04)                         |
| <b>Mali</b>                     |                                                      |                                                      |                                                      |                                                          |                                                   |                                                   |                                                   |                                                   |
| Cause                           | YLLs (in 1000s)                                      |                                                      |                                                      |                                                          | Deaths (in 1000s)                                 |                                                   |                                                   |                                                   |
|                                 | 2016                                                 | 2040 Forecast                                        | 2040 Better Scenario                                 | 2040 Worse Scenario                                      | 2016                                              | 2040 Forecast                                     | 2040 Better Scenario                              | 2040 Worse Scenario                               |
| Kidney cancer                   | 3.65<br>(2.87 to<br>4.58)                            | 8.01<br>(6.08 to<br>10.12)                           | 8.26<br>(6.29 to<br>10.50)                           | 7.58<br>(5.75 to<br>9.78)                                | 0.10<br>(0.08 to<br>0.12)                         | 0.24<br>(0.19 to<br>0.30)                         | 0.25<br>(0.20 to<br>0.32)                         | 0.21<br>(0.17 to<br>0.26)                         |
| Bladder cancer                  | 14.39<br>(10.67 to<br>18.75)                         | 30.41<br>(21.26 to<br>41.68)                         | 29.25<br>(20.90 to<br>39.37)                         | 31.63<br>(22.06 to<br>43.39)                             | 0.51<br>(0.38 to<br>0.65)                         | 1.16<br>(0.83 to<br>1.54)                         | 1.15<br>(0.84 to<br>1.50)                         | 1.16<br>(0.83 to<br>1.54)                         |
| Brain and nervous system cancer | 6.92<br>(5.53 to<br>9.05)                            | 16.23<br>(12.78 to<br>20.73)                         | 16.54<br>(12.90 to<br>21.07)                         | 16.53<br>(13.05 to<br>21.46)                             | 0.15<br>(0.12 to<br>0.19)                         | 0.40<br>(0.33 to<br>0.49)                         | 0.42<br>(0.34 to<br>0.51)                         | 0.39<br>(0.31 to<br>0.47)                         |
| Thyroid cancer                  | 1.25<br>(0.93 to<br>1.72)                            | 2.20<br>(1.56 to<br>3.21)                            | 1.99<br>(1.46 to<br>2.88)                            | 2.53<br>(1.78 to<br>3.73)                                | 0.04<br>(0.03 to<br>0.05)                         | 0.07<br>(0.05 to<br>0.10)                         | 0.06<br>(0.05 to<br>0.09)                         | 0.08<br>(0.06 to<br>0.11)                         |
| Mesothelioma                    | 0.32<br>(0.23 to<br>0.47)                            | 0.65<br>(0.45 to<br>0.94)                            | 0.65<br>(0.45 to<br>0.94)                            | 0.70<br>(0.50 to<br>1.02)                                | 0.01<br>(0.01 to<br>0.01)                         | 0.02<br>(0.02 to<br>0.03)                         | 0.02<br>(0.02 to<br>0.03)                         | 0.02<br>(0.02 to<br>0.03)                         |
| Hodgkin lymphoma                | 2.78<br>(1.13 to<br>4.09)                            | 3.32<br>(1.30 to<br>5.23)                            | 3.04<br>(1.21 to<br>4.73)                            | 4.74<br>(1.86 to<br>7.43)                                | 0.05<br>(0.02 to<br>0.07)                         | 0.06<br>(0.03 to<br>0.09)                         | 0.05<br>(0.02 to<br>0.08)                         | 0.08<br>(0.04 to<br>0.12)                         |
| Non-Hodgkin lymphoma            | 9.76<br>(7.44 to<br>12.26)                           | 20.73<br>(15.51 to<br>27.08)                         | 20.74<br>(15.36 to<br>27.10)                         | 20.40<br>(15.28 to<br>26.54)                             | 0.22<br>(0.16 to<br>0.27)                         | 0.51<br>(0.37 to<br>0.65)                         | 0.52<br>(0.38 to<br>0.66)                         | 0.48<br>(0.36 to<br>0.60)                         |
| Multiple myeloma                | 1.88<br>(1.52 to<br>2.76)                            | 5.09<br>(3.53 to<br>7.44)                            | 5.12<br>(3.57 to<br>7.37)                            | 4.56<br>(3.15 to<br>6.64)                                | 0.07<br>(0.05 to<br>0.10)                         | 0.20<br>(0.14 to<br>0.28)                         | 0.20<br>(0.14 to<br>0.28)                         | 0.17<br>(0.12 to<br>0.24)                         |
| Leukemia                        | 11.68<br>(8.90 to<br>15.00)                          | 21.96<br>(16.06 to<br>28.59)                         | 21.13<br>(15.64 to<br>27.46)                         | 23.10<br>(16.73 to<br>30.17)                             | 0.25<br>(0.19 to<br>0.33)                         | 0.52<br>(0.38 to<br>0.69)                         | 0.51<br>(0.37 to<br>0.66)                         | 0.53<br>(0.39 to<br>0.70)                         |
| Acute lymphoid leukemia         | 2.48<br>(1.74 to<br>3.51)                            | 4.76<br>(3.09 to<br>6.72)                            | 4.66<br>(3.05 to<br>6.60)                            | 4.93<br>(3.24 to<br>6.99)                                | 0.04<br>(0.03 to<br>0.06)                         | 0.09<br>(0.06 to<br>0.13)                         | 0.09<br>(0.06 to<br>0.12)                         | 0.09<br>(0.06 to<br>0.12)                         |
| Chronic lymphoid leukemia       | 0.51<br>(0.32 to<br>0.75)                            | 1.04<br>(0.63 to<br>1.52)                            | 1.00<br>(0.61 to<br>1.47)                            | 1.02<br>(0.62 to<br>1.51)                                | 0.02<br>(0.01 to<br>0.03)                         | 0.05<br>(0.03 to<br>0.06)                         | 0.04<br>(0.03 to<br>0.06)                         | 0.04<br>(0.03 to<br>0.06)                         |
| Acute myeloid leukemia          | 3.95<br>(2.61 to<br>5.64)                            | 9.21<br>(6.06 to<br>12.87)                           | 9.09<br>(6.00 to<br>12.66)                           | 9.04<br>(5.95 to<br>12.73)                               | 0.07<br>(0.05 to<br>0.11)                         | 0.20<br>(0.13 to<br>0.27)                         | 0.19<br>(0.13 to<br>0.27)                         | 0.18<br>(0.12 to<br>0.26)                         |
| Chronic myeloid leukemia        | 1.29<br>(0.83 to<br>1.83)                            | 1.69<br>(1.06 to<br>2.48)                            | 1.58<br>(1.01 to<br>2.27)                            | 1.74<br>(1.09 to<br>2.56)                                | 0.03<br>(0.02 to<br>0.04)                         | 0.05<br>(0.03 to<br>0.06)                         | 0.04<br>(0.03 to<br>0.06)                         | 0.05<br>(0.03 to<br>0.06)                         |
| Other leukemia                  | 3.45<br>(2.37 to<br>4.61)                            | 5.26<br>(3.41 to<br>7.44)                            | 4.80<br>(3.10 to<br>6.74)                            | 6.38<br>(4.16 to<br>8.80)                                | 0.08<br>(0.06 to<br>0.11)                         | 0.15<br>(0.10 to<br>0.20)                         | 0.14<br>(0.09 to<br>0.19)                         | 0.17<br>(0.11 to<br>0.23)                         |
| Other neoplasms                 | 21.08<br>(17.19 to<br>25.43)                         | 42.28<br>(33.56 to<br>51.82)                         | 42.46<br>(33.65 to<br>52.01)                         | 45.51<br>(36.11 to<br>55.56)                             | 0.50<br>(0.40 to<br>0.60)                         | 1.11<br>(0.92 to<br>1.31)                         | 1.14<br>(0.94 to<br>1.36)                         | 1.10<br>(0.92 to<br>1.31)                         |
| <b>Cardiovascular diseases</b>  | <b>378.49</b><br><b>(309.38 to</b><br><b>450.86)</b> | <b>611.41</b><br><b>(421.78 to</b><br><b>845.90)</b> | <b>400.48</b><br><b>(291.79 to</b><br><b>531.95)</b> | <b>1,094.22</b><br><b>(754.60 to</b><br><b>1,530.56)</b> | <b>14.69</b><br><b>(12.26 to</b><br><b>17.62)</b> | <b>28.22</b><br><b>(21.01 to</b><br><b>37.79)</b> | <b>19.81</b><br><b>(15.22 to</b><br><b>25.81)</b> | <b>46.36</b><br><b>(33.96 to</b><br><b>62.11)</b> |
| Rheumatic heart disease         | 13.91<br>(10.58 to<br>17.35)                         | 9.44<br>(6.47 to<br>12.69)                           | 8.54<br>(6.01 to<br>11.49)                           | 14.43<br>(10.08 to<br>19.39)                             | 0.36<br>(0.27 to<br>0.45)                         | 0.32<br>(0.24 to<br>0.43)                         | 0.31<br>(0.22 to<br>0.40)                         | 0.45<br>(0.32 to<br>0.58)                         |
| Ischemic heart disease          | 140.66<br>(110.95 to<br>174.09)                      | 283.14<br>(169.74 to<br>441.03)                      | 160.29<br>(97.91 to<br>259.91)                       | 512.49<br>(304.79 to<br>793.95)                          | 6.71<br>(5.44 to<br>8.18)                         | 14.74<br>(9.51 to<br>21.96)                       | 9.40<br>(6.20 to<br>14.19)                        | 24.51<br>(15.69 to<br>37.04)                      |
| Stroke                          | 142.69<br>(114.83 to<br>174.47)                      | 181.91<br>(110.07 to<br>287.07)                      | 109.00<br>(69.75 to<br>172.32)                       | 383.32<br>(232.05 to<br>608.71)                          | 5.17<br>(4.17 to<br>6.33)                         | 8.03<br>(5.36 to<br>11.96)                        | 5.28<br>(3.70 to<br>7.71)                         | 15.18<br>(9.94 to<br>23.22)                       |

|                                               |                                                    |                                                     |                                                    |                                                      |                                                |                                                |                                                |                                                 |
|-----------------------------------------------|----------------------------------------------------|-----------------------------------------------------|----------------------------------------------------|------------------------------------------------------|------------------------------------------------|------------------------------------------------|------------------------------------------------|-------------------------------------------------|
| Ischemic stroke                               | 35.98<br>(27.51 to<br>47.40)                       | 53.07<br>(30.96 to<br>87.39)                        | 34.97<br>(21.21 to<br>56.60)                       | 91.50<br>(51.84 to<br>151.53)                        | 1.91<br>(1.48 to<br>2.45)                      | 3.29<br>(2.07 to<br>5.18)                      | 2.39<br>(1.57 to<br>3.64)                      | 5.14<br>(3.14 to<br>8.32)                       |
| Intracerebral hemorrhage                      | 106.70<br>(86.31 to<br>129.59)                     | 128.84<br>(72.90 to<br>217.60)                      | 74.03<br>(44.26 to<br>122.44)                      | 291.82<br>(165.06 to<br>485.82)                      | 3.26<br>(2.63 to<br>3.99)                      | 4.74<br>(2.90 to<br>7.60)                      | 2.90<br>(1.90 to<br>4.52)                      | 10.04<br>(5.95 to<br>16.09)                     |
| Hypertensive heart disease                    | 14.69<br>(8.02 to<br>21.58)                        | 22.80<br>(11.72 to<br>41.06)                        | 17.69<br>(9.48 to<br>29.45)                        | 33.57<br>(15.92 to<br>66.12)                         | 0.59<br>(0.34 to<br>0.86)                      | 1.06<br>(0.59 to<br>1.89)                      | 0.85<br>(0.50 to<br>1.37)                      | 1.45<br>(0.74 to<br>2.82)                       |
| Cardiomyopathy and myocarditis                | 8.33<br>(5.78 to<br>11.58)                         | 14.90<br>(9.00 to<br>21.82)                         | 14.47<br>(8.85 to<br>20.88)                        | 16.33<br>(9.94 to<br>24.03)                          | 0.20<br>(0.13 to<br>0.27)                      | 0.45<br>(0.27 to<br>0.66)                      | 0.46<br>(0.27 to<br>0.67)                      | 0.44<br>(0.27 to<br>0.65)                       |
| Myocarditis                                   | 2.21<br>(1.17 to<br>3.55)                          | 3.08<br>(1.39 to<br>5.57)                           | 2.97<br>(1.33 to<br>5.44)                          | 3.70<br>(1.75 to<br>6.47)                            | 0.04<br>(0.02 to<br>0.07)                      | 0.07<br>(0.03 to<br>0.13)                      | 0.07<br>(0.03 to<br>0.13)                      | 0.07<br>(0.03 to<br>0.14)                       |
| <b>Mali</b>                                   |                                                    |                                                     |                                                    |                                                      |                                                |                                                |                                                |                                                 |
| Cause                                         | YLLs (in 1000s)                                    |                                                     |                                                    |                                                      | Deaths (in 1000s)                              |                                                |                                                |                                                 |
|                                               | 2016                                               | 2040 Forecast                                       | 2040 Better Scenario                               | 2040 Worse Scenario                                  | 2016                                           | 2040 Forecast                                  | 2040 Better Scenario                           | 2040 Worse Scenario                             |
| Alcoholic cardiomyopathy                      | 0.34<br>(0.13 to<br>0.67)                          | 0.79<br>(0.26 to<br>1.65)                           | 0.81<br>(0.26 to<br>1.71)                          | 0.75<br>(0.26 to<br>1.52)                            | 0.01<br>(0.00 to<br>0.02)                      | 0.03<br>(0.01 to<br>0.06)                      | 0.03<br>(0.01 to<br>0.06)                      | 0.02<br>(0.01 to<br>0.05)                       |
| Other cardiomyopathy                          | 5.78<br>(4.15 to<br>8.02)                          | 11.04<br>(7.21 to<br>16.74)                         | 10.69<br>(6.97 to<br>16.05)                        | 11.88<br>(7.66 to<br>17.88)                          | 0.15<br>(0.10 to<br>0.20)                      | 0.38<br>(0.22 to<br>0.54)                      | 0.36<br>(0.24 to<br>0.54)                      | 0.34<br>(0.22 to<br>0.53)                       |
| Atrial fibrillation and flutter               | 1.27<br>(0.97 to<br>1.69)                          | 3.48<br>(2.65 to<br>4.56)                           | 3.67<br>(2.79 to<br>4.76)                          | 3.30<br>(2.47 to<br>4.33)                            | 0.11<br>(0.08 to<br>0.14)                      | 0.33<br>(0.24 to<br>0.44)                      | 0.36<br>(0.27 to<br>0.48)                      | 0.29<br>(0.20 to<br>0.38)                       |
| Aortic aneurysm                               | 1.46<br>(1.00 to<br>2.08)                          | 3.07<br>(2.00 to<br>4.63)                           | 2.98<br>(1.94 to<br>4.50)                          | 3.10<br>(2.01 to<br>4.72)                            | 0.06<br>(0.04 to<br>0.09)                      | 0.15<br>(0.10 to<br>0.21)                      | 0.15<br>(0.10 to<br>0.22)                      | 0.14<br>(0.09 to<br>0.20)                       |
| Peripheral artery disease                     | 0.08<br>(0.05 to<br>0.18)                          | 0.34<br>(0.18 to<br>0.75)                           | 0.35<br>(0.18 to<br>0.78)                          | 0.27<br>(0.14 to<br>0.56)                            | 0.01<br>(0.00 to<br>0.01)                      | 0.02<br>(0.01 to<br>0.05)                      | 0.03<br>(0.01 to<br>0.06)                      | 0.02<br>(0.01 to<br>0.04)                       |
| Endocarditis                                  | 7.67<br>(5.39 to<br>10.23)                         | 13.63<br>(9.35 to<br>19.29)                         | 12.86<br>(8.91 to<br>17.92)                        | 16.86<br>(11.36 to<br>23.78)                         | 0.17<br>(0.13 to<br>0.22)                      | 0.37<br>(0.26 to<br>0.50)                      | 0.37<br>(0.26 to<br>0.49)                      | 0.41<br>(0.28 to<br>0.55)                       |
| Other cardiovascular and circulatory diseases | 47.74<br>(36.07 to<br>65.88)                       | 78.70<br>(55.97 to<br>110.28)                       | 70.64<br>(51.90 to<br>95.55)                       | 110.55<br>(78.77 to<br>153.74)                       | 1.33<br>(0.99 to<br>1.84)                      | 2.75<br>(2.00 to<br>3.82)                      | 2.60<br>(1.94 to<br>3.49)                      | 3.47<br>(2.53 to<br>4.82)                       |
| <b>Chronic respiratory diseases</b>           | <b>97.33</b><br><b>(74.63 to</b><br><b>127.52)</b> | <b>143.22</b><br><b>(91.65 to</b><br><b>234.62)</b> | <b>95.59</b><br><b>(66.39 to</b><br><b>140.75)</b> | <b>192.60</b><br><b>(121.19 to</b><br><b>322.08)</b> | <b>3.47</b><br><b>(2.69 to</b><br><b>4.47)</b> | <b>5.55</b><br><b>(3.59 to</b><br><b>9.24)</b> | <b>3.74</b><br><b>(2.66 to</b><br><b>5.52)</b> | <b>7.11</b><br><b>(4.55 to</b><br><b>12.10)</b> |
| Chronic obstructive pulmonary disease         | 49.93<br>(36.02 to<br>68.02)                       | 87.78<br>(46.47 to<br>175.04)                       | 48.20<br>(28.36 to<br>84.35)                       | 123.83<br>(63.34 to<br>246.06)                       | 2.06<br>(1.54 to<br>2.72)                      | 3.77<br>(2.07 to<br>7.27)                      | 2.18<br>(1.34 to<br>3.78)                      | 5.01<br>(2.71 to<br>9.75)                       |
| Pneumoconiosis                                | 0.12<br>(0.07 to<br>0.18)                          | 0.16<br>(0.10 to<br>0.23)                           | 0.15<br>(0.10 to<br>0.23)                          | 0.17<br>(0.11 to<br>0.25)                            | 0.00<br>(0.00 to<br>0.01)                      | 0.01<br>(0.00 to<br>0.01)                      | 0.01<br>(0.00 to<br>0.01)                      | 0.01<br>(0.00 to<br>0.01)                       |
| Silicosis                                     | 0.01<br>(0.00 to<br>0.02)                          | 0.01<br>(0.00 to<br>0.02)                           | 0.01<br>(0.00 to<br>0.02)                          | 0.01<br>(0.00 to<br>0.02)                            | 0.00<br>(0.00 to<br>0.00)                      | 0.00<br>(0.00 to<br>0.00)                      | 0.00<br>(0.00 to<br>0.00)                      | 0.00<br>(0.00 to<br>0.00)                       |
| Asbestosis                                    | 0.03<br>(0.02 to<br>0.05)                          | 0.05<br>(0.03 to<br>0.08)                           | 0.05<br>(0.03 to<br>0.08)                          | 0.05<br>(0.03 to<br>0.08)                            | 0.00<br>(0.00 to<br>0.00)                      | 0.00<br>(0.00 to<br>0.00)                      | 0.00<br>(0.00 to<br>0.00)                      | 0.00<br>(0.00 to<br>0.00)                       |
| Coal workers pneumoconiosis                   | 0.01<br>(0.00 to<br>0.01)                          | 0.01<br>(0.00 to<br>0.01)                           | 0.01<br>(0.00 to<br>0.01)                          | 0.01<br>(0.00 to<br>0.02)                            | 0.00<br>(0.00 to<br>0.00)                      | 0.00<br>(0.00 to<br>0.00)                      | 0.00<br>(0.00 to<br>0.00)                      | 0.00<br>(0.00 to<br>0.00)                       |
| Other pneumoconiosis                          | 0.07<br>(0.04 to<br>0.10)                          | 0.09<br>(0.06 to<br>0.14)                           | 0.08<br>(0.05 to<br>0.13)                          | 0.10<br>(0.06 to<br>0.15)                            | 0.00<br>(0.00 to<br>0.00)                      | 0.00<br>(0.00 to<br>0.01)                      | 0.00<br>(0.00 to<br>0.01)                      | 0.00<br>(0.00 to<br>0.01)                       |
| Asthma                                        | 35.98<br>(25.16 to<br>54.93)                       | 32.21<br>(18.85 to<br>55.31)                        | 25.13<br>(15.88 to<br>40.60)                       | 42.75<br>(25.25 to<br>75.37)                         | 1.09<br>(0.76 to<br>1.66)                      | 1.06<br>(0.66 to<br>1.83)                      | 0.85<br>(0.56 to<br>1.37)                      | 1.34<br>(0.82 to<br>2.35)                       |



|                              |                                       |                                        |                                        |                                        |                                      |                                      |                                      |                                      |
|------------------------------|---------------------------------------|----------------------------------------|----------------------------------------|----------------------------------------|--------------------------------------|--------------------------------------|--------------------------------------|--------------------------------------|
| Parkinson's disease          | 0.86<br>(0.63 to 1.16)                | 3.05<br>(2.29 to 4.03)                 | 3.53<br>(2.66 to 4.62)                 | 2.29<br>(1.71 to 3.05)                 | 0.06<br>(0.05 to 0.09)               | 0.25<br>(0.18 to 0.34)               | 0.30<br>(0.22 to 0.40)               | 0.18<br>(0.13 to 0.24)               |
| Epilepsy                     | 21.98<br>(15.35 to 28.69)             | 28.75<br>(19.63 to 39.31)              | 26.15<br>(18.23 to 35.19)              | 42.18<br>(29.14 to 58.00)              | 0.38<br>(0.28 to 0.47)               | 0.54<br>(0.39 to 0.73)               | 0.50<br>(0.37 to 0.66)               | 0.76<br>(0.55 to 1.01)               |
| Multiple sclerosis           | 0.27<br>(0.13 to 0.41)                | 0.61<br>(0.29 to 0.98)                 | 0.62<br>(0.30 to 1.00)                 | 0.58<br>(0.27 to 0.91)                 | 0.01<br>(0.00 to 0.01)               | 0.02<br>(0.01 to 0.03)               | 0.02<br>(0.01 to 0.03)               | 0.02<br>(0.01 to 0.03)               |
| Motor neuron disease         | 0.39<br>(0.29 to 0.56)                | 0.73<br>(0.54 to 1.04)                 | 0.75<br>(0.55 to 1.08)                 | 0.73<br>(0.54 to 1.01)                 | 0.01<br>(0.01 to 0.01)               | 0.02<br>(0.01 to 0.03)               | 0.02<br>(0.02 to 0.03)               | 0.02<br>(0.01 to 0.03)               |
| Other neurological disorders | 3.53<br>(1.97 to 5.62)                | 7.15<br>(4.28 to 10.99)                | 7.18<br>(4.37 to 10.89)                | 7.65<br>(4.38 to 12.24)                | 0.06<br>(0.03 to 0.08)               | 0.12<br>(0.08 to 0.17)               | 0.12<br>(0.08 to 0.17)               | 0.12<br>(0.08 to 0.18)               |
| <b>Mental disorders</b>      | <b>7.22</b><br><b>(3.36 to 11.61)</b> | <b>16.10</b><br><b>(7.63 to 25.67)</b> | <b>16.16</b><br><b>(7.70 to 25.77)</b> | <b>16.52</b><br><b>(7.94 to 26.50)</b> | <b>0.17</b><br><b>(0.08 to 0.27)</b> | <b>0.40</b><br><b>(0.18 to 0.63)</b> | <b>0.41</b><br><b>(0.19 to 0.65)</b> | <b>0.40</b><br><b>(0.18 to 0.64)</b> |
| Alcohol use disorders        | 2.73<br>(0.70 to 5.39)                | 5.05<br>(1.11 to 10.35)                | 5.03<br>(1.11 to 10.27)                | 5.34<br>(1.20 to 10.83)                | 0.08<br>(0.02 to 0.14)               | 0.15<br>(0.04 to 0.29)               | 0.15<br>(0.04 to 0.30)               | 0.20<br>(0.09 to 0.30)               |
| Drug use disorders           | 4.47<br>(2.37 to 6.92)                | 11.00<br>(5.71 to 17.26)               | 11.09<br>(5.75 to 17.42)               | 11.14<br>(5.77 to 17.41)               | 0.10<br>(0.05 to 0.15)               | 0.25<br>(0.13 to 0.38)               | 0.26<br>(0.13 to 0.38)               | 0.25<br>(0.13 to 0.38)               |
| Opioid use disorders         | 4.07<br>(1.99 to 6.54)                | 9.77<br>(4.53 to 16.10)                | 9.82<br>(4.55 to 16.17)                | 9.90<br>(4.56 to 16.29)                | 0.08<br>(0.04 to 0.13)               | 0.20<br>(0.09 to 0.34)               | 0.21<br>(0.09 to 0.34)               | 0.20<br>(0.09 to 0.34)               |
| Cocaine use disorders        | 0.11<br>(0.03 to 0.24)                | 0.31<br>(0.08 to 0.70)                 | 0.31<br>(0.08 to 0.69)                 | 0.35<br>(0.09 to 0.78)                 | 0.00<br>(0.00 to 0.01)               | 0.01<br>(0.00 to 0.02)               | 0.01<br>(0.00 to 0.02)               | 0.01<br>(0.00 to 0.02)               |
| Amphetamine use disorders    | 0.05<br>(0.02 to 0.12)                | 0.21<br>(0.06 to 0.48)                 | 0.21<br>(0.06 to 0.46)                 | 0.25<br>(0.07 to 0.58)                 | 0.00<br>(0.00 to 0.00)               | 0.01<br>(0.00 to 0.01)               | 0.01<br>(0.00 to 0.01)               | 0.01<br>(0.00 to 0.01)               |
| Other drug use disorders     | 0.24<br>(0.12 to 0.38)                | 0.71<br>(0.36 to 1.09)                 | 0.75<br>(0.38 to 1.16)                 | 0.64<br>(0.32 to 1.00)                 | 0.01<br>(0.00 to 0.01)               | 0.03<br>(0.02 to 0.04)               | 0.04<br>(0.02 to 0.05)               | 0.03<br>(0.01 to 0.04)               |
| Eating disorders             | 0.02<br>(0.01 to 0.04)                | 0.05<br>(0.02 to 0.10)                 | 0.05<br>(0.02 to 0.10)                 | 0.05<br>(0.02 to 0.10)                 | 0.00<br>(0.00 to 0.00)               | 0.00<br>(0.00 to 0.00)               | 0.00<br>(0.00 to 0.00)               | 0.00<br>(0.00 to 0.00)               |

**Mali**

| Cause                                                      | YLLs (in 1000s)                            |                                            |                                            |                                            | Deaths (in 1000s)                    |                                       |                                       |                                         |
|------------------------------------------------------------|--------------------------------------------|--------------------------------------------|--------------------------------------------|--------------------------------------------|--------------------------------------|---------------------------------------|---------------------------------------|-----------------------------------------|
|                                                            | 2016                                       | 2040 Forecast                              | 2040 Better Scenario                       | 2040 Worse Scenario                        | 2016                                 | 2040 Forecast                         | 2040 Better Scenario                  | 2040 Worse Scenario                     |
| <b>Diabetes, urogenital, blood, and endocrine diseases</b> | <b>207.85</b><br><b>(156.11 to 251.36)</b> | <b>305.59</b><br><b>(229.35 to 387.68)</b> | <b>274.51</b><br><b>(207.93 to 348.28)</b> | <b>451.60</b><br><b>(343.77 to 570.46)</b> | <b>4.78</b><br><b>(3.84 to 5.72)</b> | <b>9.89</b><br><b>(7.77 to 12.33)</b> | <b>9.12</b><br><b>(7.22 to 11.41)</b> | <b>13.59</b><br><b>(10.82 to 17.14)</b> |
| Diabetes mellitus                                          | 39.41<br>(30.98 to 49.43)                  | 90.98<br>(58.80 to 135.49)                 | 78.81<br>(52.06 to 115.98)                 | 138.44<br>(89.88 to 200.83)                | 1.61<br>(1.26 to 2.04)               | 4.40<br>(3.00 to 6.25)                | 4.01<br>(2.80 to 5.56)                | 6.21<br>(4.24 to 8.85)                  |
| Acute glomerulonephritis                                   | 0.12<br>(0.10 to 0.14)                     | 0.20<br>(0.16 to 0.25)                     | 0.19<br>(0.15 to 0.23)                     | 0.27<br>(0.22 to 0.34)                     | 0.00<br>(0.00 to 0.00)               | 0.00<br>(0.00 to 0.00)                | 0.00<br>(0.00 to 0.00)                | 0.00<br>(0.00 to 0.01)                  |
| Chronic kidney disease                                     | 51.42<br>(39.21 to 65.65)                  | 78.14<br>(53.00 to 111.71)                 | 67.08<br>(46.70 to 94.22)                  | 124.26<br>(84.66 to 176.36)                | 1.26<br>(0.97 to 1.58)               | 2.58<br>(1.73 to 3.84)                | 2.24<br>(1.55 to 3.21)                | 3.78<br>(2.53 to 5.53)                  |
| Chronic kidney disease due to diabetes mellitus            | 8.59<br>(6.23 to 11.36)                    | 17.55<br>(11.11 to 27.14)                  | 14.99<br>(9.74 to 22.33)                   | 25.97<br>(16.00 to 40.68)                  | 0.30<br>(0.22 to 0.39)               | 0.74<br>(0.46 to 1.17)                | 0.64<br>(0.41 to 0.97)                | 1.04<br>(0.64 to 1.66)                  |
| Chronic kidney disease due to hypertension                 | 4.71<br>(3.49 to 6.16)                     | 10.12<br>(6.35 to 15.34)                   | 8.65<br>(5.62 to 12.74)                    | 14.77<br>(9.07 to 22.72)                   | 0.21<br>(0.16 to 0.28)               | 0.57<br>(0.36 to 0.87)                | 0.50<br>(0.33 to 0.74)                | 0.78<br>(0.48 to 1.20)                  |
| Chronic kidney disease due to glomerulonephritis           | 18.21<br>(13.54 to 23.75)                  | 23.85<br>(15.96 to 33.68)                  | 20.53<br>(13.93 to 28.58)                  | 39.60<br>(26.52 to 55.80)                  | 0.34<br>(0.26 to 0.44)               | 0.57<br>(0.38 to 0.83)                | 0.49<br>(0.34 to 0.71)                | 0.88<br>(0.60 to 1.29)                  |

|                                                            |                            |                            |                            |                             |                        |                        |                        |                        |
|------------------------------------------------------------|----------------------------|----------------------------|----------------------------|-----------------------------|------------------------|------------------------|------------------------|------------------------|
| Chronic kidney disease due to other and unspecified causes | 19.91<br>(14.60 to 25.93)  | 26.61<br>(17.81 to 38.54)  | 22.90<br>(15.74 to 32.34)  | 43.93<br>(30.04 to 62.10)   | 0.40<br>(0.30 to 0.52) | 0.71<br>(0.48 to 1.07) | 0.61<br>(0.43 to 0.89) | 1.08<br>(0.72 to 1.63) |
| Urinary diseases and male infertility                      | 22.28<br>(17.78 to 27.37)  | 37.50<br>(29.75 to 46.39)  | 36.71<br>(29.16 to 45.61)  | 46.15<br>(36.47 to 57.17)   | 0.52<br>(0.43 to 0.62) | 1.17<br>(0.98 to 1.38) | 1.21<br>(1.01 to 1.43) | 1.26<br>(1.04 to 1.49) |
| Urinary tract infections                                   | 14.10<br>(10.65 to 17.96)  | 28.11<br>(21.59 to 35.87)  | 27.87<br>(21.56 to 35.38)  | 33.25<br>(25.12 to 42.95)   | 0.31<br>(0.24 to 0.39) | 0.87<br>(0.69 to 1.08) | 0.92<br>(0.73 to 1.14) | 0.89<br>(0.70 to 1.10) |
| Urolithiasis                                               | 0.38<br>(0.26 to 0.53)     | 0.93<br>(0.63 to 1.29)     | 0.90<br>(0.61 to 1.25)     | 1.08<br>(0.72 to 1.53)      | 0.01<br>(0.00 to 0.01) | 0.02<br>(0.01 to 0.02) | 0.02<br>(0.01 to 0.02) | 0.02<br>(0.01 to 0.03) |
| Other urinary diseases                                     | 7.79<br>(5.34 to 10.67)    | 8.45<br>(5.48 to 11.88)    | 7.94<br>(5.10 to 11.19)    | 11.82<br>(7.68 to 16.38)    | 0.20<br>(0.14 to 0.27) | 0.28<br>(0.18 to 0.40) | 0.28<br>(0.18 to 0.40) | 0.35<br>(0.23 to 0.49) |
| Gynecological diseases                                     | 1.02<br>(0.59 to 1.55)     | 1.51<br>(0.83 to 2.43)     | 1.38<br>(0.77 to 2.22)     | 2.06<br>(1.16 to 3.27)      | 0.02<br>(0.01 to 0.03) | 0.03<br>(0.02 to 0.05) | 0.03<br>(0.02 to 0.05) | 0.05<br>(0.03 to 0.07) |
| Uterine fibroids                                           | 0.07<br>(0.03 to 0.16)     | 0.08<br>(0.03 to 0.20)     | 0.08<br>(0.03 to 0.18)     | 0.12<br>(0.05 to 0.29)      | 0.00<br>(0.00 to 0.00) | 0.00<br>(0.00 to 0.01) | 0.00<br>(0.00 to 0.01) | 0.00<br>(0.00 to 0.01) |
| Polycystic ovarian syndrome                                | 0.17<br>(0.02 to 0.40)     | 0.15<br>(0.01 to 0.39)     | 0.13<br>(0.01 to 0.33)     | 0.25<br>(0.03 to 0.64)      | 0.00<br>(0.00 to 0.01) | 0.00<br>(0.00 to 0.01) | 0.00<br>(0.00 to 0.01) | 0.01<br>(0.00 to 0.01) |
| Endometriosis                                              | 0.00<br>(0.00 to 0.00)     | 0.00<br>(0.00 to 0.01)     | 0.00<br>(0.00 to 0.01)     | 0.00<br>(0.00 to 0.01)      | 0.00<br>(0.00 to 0.00) | 0.00<br>(0.00 to 0.00) | 0.00<br>(0.00 to 0.00) | 0.00<br>(0.00 to 0.00) |
| Genital prolapse                                           | 0.04<br>(0.01 to 0.12)     | 0.05<br>(0.01 to 0.16)     | 0.05<br>(0.01 to 0.14)     | 0.08<br>(0.01 to 0.23)      | 0.00<br>(0.00 to 0.00) | 0.00<br>(0.00 to 0.00) | 0.00<br>(0.00 to 0.00) | 0.00<br>(0.00 to 0.00) |
| Other gynecological diseases                               | 0.73<br>(0.38 to 1.15)     | 1.22<br>(0.62 to 2.09)     | 1.13<br>(0.58 to 1.91)     | 1.61<br>(0.80 to 2.72)      | 0.02<br>(0.01 to 0.02) | 0.03<br>(0.01 to 0.04) | 0.03<br>(0.01 to 0.04) | 0.04<br>(0.02 to 0.06) |
| Hemoglobinopathies and hemolytic anemias                   | 80.73<br>(45.78 to 106.00) | 80.97<br>(48.77 to 111.91) | 74.94<br>(45.11 to 102.10) | 117.50<br>(68.89 to 164.73) | 1.13<br>(0.66 to 1.47) | 1.30<br>(0.81 to 1.75) | 1.22<br>(0.76 to 1.66) | 1.81<br>(1.11 to 2.46) |
| Thalassemias                                               | 0.21<br>(0.09 to 0.33)     | 0.17<br>(0.07 to 0.28)     | 0.17<br>(0.07 to 0.28)     | 0.19<br>(0.08 to 0.32)      | 0.00<br>(0.00 to 0.00) | 0.00<br>(0.00 to 0.00) | 0.00<br>(0.00 to 0.00) | 0.00<br>(0.00 to 0.00) |
| Sickle cell disorders                                      | 77.25<br>(43.41 to 102.11) | 75.59<br>(45.00 to 105.22) | 69.84<br>(41.68 to 96.00)  | 110.31<br>(63.72 to 155.54) | 1.02<br>(0.58 to 1.32) | 1.09<br>(0.66 to 1.48) | 1.01<br>(0.61 to 1.36) | 1.54<br>(0.92 to 2.12) |
| G6PD deficiency                                            | 1.80<br>(1.17 to 2.44)     | 3.31<br>(2.01 to 4.98)     | 3.06<br>(1.88 to 4.61)     | 4.64<br>(2.90 to 6.85)      | 0.04<br>(0.03 to 0.06) | 0.09<br>(0.06 to 0.15) | 0.09<br>(0.05 to 0.14) | 0.13<br>(0.08 to 0.19) |
| Other hemoglobinopathies and hemolytic anemias             | 1.46<br>(0.91 to 2.22)     | 1.91<br>(1.17 to 2.93)     | 1.88<br>(1.17 to 2.88)     | 2.36<br>(1.47 to 3.63)      | 0.08<br>(0.05 to 0.12) | 0.12<br>(0.08 to 0.19) | 0.12<br>(0.08 to 0.19) | 0.14<br>(0.09 to 0.22) |
| Endocrine, metabolic, blood, and immune disorders          | 12.88<br>(8.31 to 20.20)   | 16.30<br>(11.07 to 25.39)  | 15.40<br>(10.57 to 24.12)  | 22.91<br>(15.07 to 35.90)   | 0.24<br>(0.17 to 0.37) | 0.40<br>(0.30 to 0.62) | 0.40<br>(0.30 to 0.63) | 0.48<br>(0.35 to 0.75) |

**Mali**

| Cause                           | YLLs (in 1000s)        |                         |                         |                         | Deaths (in 1000s)      |                        |                        |                        |
|---------------------------------|------------------------|-------------------------|-------------------------|-------------------------|------------------------|------------------------|------------------------|------------------------|
|                                 | 2016                   | 2040 Forecast           | 2040 Better Scenario    | 2040 Worse Scenario     | 2016                   | 2040 Forecast          | 2040 Better Scenario   | 2040 Worse Scenario    |
| Musculoskeletal disorders       | 2.90<br>(1.80 to 4.84) | 6.75<br>(4.31 to 11.23) | 6.97<br>(4.43 to 11.63) | 6.50<br>(4.12 to 10.79) | 0.07<br>(0.04 to 0.11) | 0.18<br>(0.12 to 0.28) | 0.19<br>(0.13 to 0.29) | 0.16<br>(0.11 to 0.25) |
| Rheumatoid arthritis            | 0.30<br>(0.15 to 0.49) | 0.57<br>(0.29 to 0.94)  | 0.56<br>(0.28 to 0.90)  | 0.70<br>(0.37 to 1.12)  | 0.01<br>(0.01 to 0.02) | 0.02<br>(0.01 to 0.05) | 0.03<br>(0.01 to 0.05) | 0.03<br>(0.02 to 0.05) |
| Other musculoskeletal disorders | 2.60<br>(1.63 to 4.51) | 6.18<br>(3.92 to 10.60) | 6.41<br>(4.07 to 11.02) | 5.80<br>(3.67 to 10.05) | 0.05<br>(0.04 to 0.09) | 0.15<br>(0.10 to 0.25) | 0.16<br>(0.11 to 0.26) | 0.13<br>(0.09 to 0.22) |

|                                               |                                                |                                                |                                                |                                                  |                                          |                                            |                                            |                                             |
|-----------------------------------------------|------------------------------------------------|------------------------------------------------|------------------------------------------------|--------------------------------------------------|------------------------------------------|--------------------------------------------|--------------------------------------------|---------------------------------------------|
| <b>Other non-communicable diseases</b>        | <b>420.57</b><br>(152.87 to<br><b>666.90</b> ) | <b>374.02</b><br>(145.32 to<br><b>617.33</b> ) | <b>334.04</b><br>(134.88 to<br><b>539.80</b> ) | <b>652.77</b><br>(241.99 to<br><b>1,091.02</b> ) | <b>5.09</b><br>(1.97 to<br><b>8.01</b> ) | <b>5.06</b><br>(2.38 to<br><b>8.01</b> )   | <b>4.44</b><br>(2.28 to<br><b>7.19</b> )   | <b>8.32</b><br>(3.49 to<br><b>13.56</b> )   |
| Congenital birth defects                      | 394.77<br>(129.58 to<br>639.52)                | 332.20<br>(109.36 to<br>567.12)                | 294.36<br>(99.52 to<br>496.75)                 | 593.13<br>(191.66 to<br>1,018.76)                | 4.07<br>(1.57 to<br>7.55)                | 4.02<br>(1.39 to<br>6.82)                  | 4.02<br>(1.27 to<br>5.99)                  | 3.57<br>(2.36 to<br>12.11)                  |
| Neural tube defects                           | 113.23<br>(43.80 to<br>229.01)                 | 36.82<br>(12.17 to<br>93.75)                   | 30.97<br>(9.99 to<br>80.60)                    | 78.57<br>(26.54 to<br>191.79)                    | 1.32<br>(0.51 to<br>2.67)                | 0.44<br>(0.15 to<br>1.10)                  | 0.37<br>(0.12 to<br>0.95)                  | 0.92<br>(0.31 to<br>2.27)                   |
| Congenital heart anomalies                    | 87.66<br>(28.42 to<br>177.59)                  | 90.89<br>(35.06 to<br>181.46)                  | 81.67<br>(32.10 to<br>159.15)                  | 152.86<br>(55.33 to<br>309.77)                   | 1.05<br>(0.35 to<br>2.11)                | 1.12<br>(0.46 to<br>2.19)                  | 1.01<br>(0.42 to<br>1.93)                  | 1.86<br>(0.70 to<br>3.71)                   |
| Orofacial clefts                              | 3.40<br>(0.60 to<br>11.88)                     | 2.47<br>(0.36 to<br>8.16)                      | 2.04<br>(0.29 to<br>6.74)                      | 5.57<br>(0.84 to<br>18.14)                       | 0.04<br>(0.01 to<br>0.14)                | 0.03<br>(0.00 to<br>0.09)                  | 0.02<br>(0.00 to<br>0.08)                  | 0.06<br>(0.01 to<br>0.21)                   |
| Down syndrome                                 | 3.29<br>(0.72 to<br>11.63)                     | 3.93<br>(1.02 to<br>13.92)                     | 3.48<br>(0.93 to<br>11.71)                     | 6.93<br>(1.62 to<br>25.19)                       | 0.04<br>(0.01 to<br>0.14)                | 0.05<br>(0.02 to<br>0.17)                  | 0.05<br>(0.01 to<br>0.15)                  | 0.09<br>(0.02 to<br>0.31)                   |
| Other chromosomal abnormalities               | 10.39<br>(1.45 to<br>25.67)                    | 15.89<br>(2.08 to<br>39.58)                    | 13.95<br>(1.82 to<br>33.83)                    | 29.39<br>(3.90 to<br>73.49)                      | 0.12<br>(0.02 to<br>0.30)                | 0.19<br>(0.02 to<br>0.46)                  | 0.16<br>(0.02 to<br>0.40)                  | 0.34<br>(0.05 to<br>0.86)                   |
| Congenital musculoskeletal and limb anomalies | 2.66<br>(0.44 to<br>9.53)                      | 3.43<br>(0.66 to<br>13.09)                     | 3.09<br>(0.62 to<br>11.77)                     | 5.79<br>(1.07 to<br>22.20)                       | 0.03<br>(0.01 to<br>0.11)                | 0.04<br>(0.01 to<br>0.15)                  | 0.04<br>(0.01 to<br>0.14)                  | 0.07<br>(0.01 to<br>0.26)                   |
| Urogenital congenital anomalies               | 2.74<br>(0.73 to<br>6.24)                      | 3.34<br>(1.12 to<br>7.91)                      | 3.09<br>(1.05 to<br>7.30)                      | 5.14<br>(1.63 to<br>12.13)                       | 0.03<br>(0.01 to<br>0.08)                | 0.04<br>(0.02 to<br>0.10)                  | 0.04<br>(0.02 to<br>0.10)                  | 0.07<br>(0.03 to<br>0.15)                   |
| Digestive congenital anomalies                | 18.12<br>(4.77 to<br>48.60)                    | 18.34<br>(5.71 to<br>50.18)                    | 16.20<br>(5.20 to<br>45.38)                    | 33.08<br>(9.77 to<br>89.33)                      | 0.21<br>(0.06 to<br>0.57)                | 0.22<br>(0.07 to<br>0.59)                  | 0.19<br>(0.06 to<br>0.53)                  | 0.39<br>(0.12 to<br>1.04)                   |
| Other congenital birth defects                | 153.29<br>(22.22 to<br>342.34)                 | 137.10<br>(29.50 to<br>344.44)                 | 139.87<br>(27.32 to<br>303.64)                 | 275.79<br>(46.94 to<br>615.17)                   | 1.81<br>(0.28 to<br>4.03)                | 1.89<br>(0.38 to<br>4.15)                  | 1.69<br>(0.36 to<br>3.63)                  | 3.29<br>(0.59 to<br>7.28)                   |
| Skin and subcutaneous diseases                | 8.51<br>(5.51 to<br>14.20)                     | 26.43<br>(16.81 to<br>42.94)                   | 25.96<br>(16.64 to<br>42.16)                   | 32.39<br>(20.59 to<br>53.74)                     | 0.22<br>(0.14 to<br>0.38)                | 0.86<br>(0.55 to<br>1.36)                  | 0.90<br>(0.57 to<br>1.44)                  | 0.91<br>(0.58 to<br>1.47)                   |
| Cellulitis                                    | 0.48<br>(0.24 to<br>0.83)                      | 2.07<br>(1.02 to<br>3.53)                      | 2.16<br>(1.09 to<br>3.66)                      | 2.02<br>(1.00 to<br>3.57)                        | 0.01<br>(0.01 to<br>0.03)                | 0.08<br>(0.03 to<br>0.14)                  | 0.08<br>(0.04 to<br>0.15)                  | 0.07<br>(0.03 to<br>0.12)                   |
| Pyoderma                                      | 7.27<br>(4.72 to<br>12.33)                     | 22.25<br>(14.03 to<br>37.32)                   | 21.59<br>(13.75 to<br>35.83)                   | 28.21<br>(18.11 to<br>48.70)                     | 0.18<br>(0.12 to<br>0.31)                | 0.69<br>(0.44 to<br>1.11)                  | 0.71<br>(0.45 to<br>1.14)                  | 0.76<br>(0.48 to<br>1.25)                   |
| Decubitus ulcer                               | 0.47<br>(0.24 to<br>0.85)                      | 1.35<br>(0.72 to<br>2.31)                      | 1.44<br>(0.77 to<br>2.46)                      | 1.34<br>(0.70 to<br>2.37)                        | 0.02<br>(0.01 to<br>0.04)                | 0.08<br>(0.04 to<br>0.14)                  | 0.10<br>(0.05 to<br>0.17)                  | 0.07<br>(0.04 to<br>0.12)                   |
| Other skin and subcutaneous diseases          | 0.28<br>(0.15 to<br>0.55)                      | 0.76<br>(0.41 to<br>1.40)                      | 0.77<br>(0.42 to<br>1.41)                      | 0.83<br>(0.43 to<br>1.56)                        | 0.01<br>(0.00 to<br>0.01)                | 0.02<br>(0.01 to<br>0.05)                  | 0.02<br>(0.01 to<br>0.03)                  | 0.02<br>(0.01 to<br>0.05)                   |
| Sudden infant death syndrome                  | 17.29<br>(8.87 to<br>30.84)                    | 15.40<br>(7.05 to<br>29.93)                    | 13.72<br>(6.19 to<br>26.77)                    | 27.25<br>(12.20 to<br>54.49)                     | 0.20<br>(0.10 to<br>0.36)                | 0.18<br>(0.08 to<br>0.35)                  | 0.16<br>(0.07 to<br>0.31)                  | 0.32<br>(0.14 to<br>0.63)                   |
| <b>Injuries</b>                               | <b>455.35</b><br>(372.62 to<br><b>546.72</b> ) | <b>551.81</b><br>(442.35 to<br><b>683.97</b> ) | <b>509.69</b><br>(412.34 to<br><b>627.13</b> ) | <b>739.77</b><br>(587.54 to<br><b>915.61</b> )   | <b>7.72</b><br>(6.47 to<br><b>9.14</b> ) | <b>11.10</b><br>(9.18 to<br><b>13.88</b> ) | <b>10.66</b><br>(8.84 to<br><b>12.82</b> ) | <b>13.63</b><br>(11.27 to<br><b>16.39</b> ) |
| <b>Transport injuries</b>                     | <b>109.17</b><br>(84.82 to<br><b>135.94</b> )  | <b>192.46</b><br>(149.05 to<br><b>240.33</b> ) | <b>173.35</b><br>(133.32 to<br><b>216.52</b> ) | <b>240.63</b><br>(186.10 to<br><b>303.49</b> )   | <b>1.88</b><br>(1.50 to<br><b>2.28</b> ) | <b>3.66</b><br>(2.88 to<br><b>4.46</b> )   | <b>3.39</b><br>(2.66 to<br><b>4.13</b> )   | <b>4.30</b><br>(3.39 to<br><b>5.27</b> )    |
| Road injuries                                 | 104.06<br>(81.20 to<br>129.58)                 | 183.50<br>(141.41 to<br>229.42)                | 164.98<br>(126.62 to<br>206.83)                | 228.60<br>(176.15 to<br>290.54)                  | 1.80<br>(1.44 to<br>2.18)                | 3.50<br>(2.77 to<br>4.26)                  | 3.24<br>(2.55 to<br>3.95)                  | 4.09<br>(3.21 to<br>5.04)                   |
| Pedestrian road injuries                      | 34.74<br>(25.43 to<br>46.34)                   | 46.09<br>(32.69 to<br>63.50)                   | 42.21<br>(29.85 to<br>58.34)                   | 57.78<br>(40.83 to<br>79.19)                     | 0.60<br>(0.45 to<br>0.78)                | 0.93<br>(0.68 to<br>1.28)                  | 0.88<br>(0.65 to<br>1.20)                  | 1.10<br>(0.81 to<br>1.49)                   |
| <b>Mali</b>                                   |                                                |                                                |                                                |                                                  |                                          |                                            |                                            |                                             |
| <b>YLLs (in 1000s)</b>                        |                                                |                                                |                                                |                                                  | <b>Deaths (in 1000s)</b>                 |                                            |                                            |                                             |



| Cause                                           | 2016                                     | 2040 Forecast                            | 2040 Better Scenario                     | 2040 Worse Scenario                      | 2016                               | 2040 Forecast                      | 2040 Better Scenario               | 2040 Worse Scenario                |
|-------------------------------------------------|------------------------------------------|------------------------------------------|------------------------------------------|------------------------------------------|------------------------------------|------------------------------------|------------------------------------|------------------------------------|
| Cyclist road injuries                           | 2.49<br>(1.58 to<br>3.53)                | 5.04<br>(3.24 to<br>7.33)                | 4.52<br>(2.92 to<br>6.60)                | 6.23<br>(3.87 to<br>9.06)                | 0.04<br>(0.03 to<br>0.06)          | 0.10<br>(0.07 to<br>0.14)          | 0.09<br>(0.06 to<br>0.13)          | 0.11<br>(0.07 to<br>0.16)          |
| Motorcyclist road injuries                      | 14.55<br>(9.65 to<br>19.91)              | 28.87<br>(19.05 to<br>41.99)             | 26.04<br>(17.15 to<br>38.06)             | 36.02<br>(23.66 to<br>52.39)             | 0.23<br>(0.15 to<br>0.32)          | 0.49<br>(0.32 to<br>0.71)          | 0.45<br>(0.30 to<br>0.66)          | 0.58<br>(0.38 to<br>0.83)          |
| Motor vehicle road injuries                     | 50.33<br>(37.99 to<br>64.87)             | 99.67<br>(74.22 to<br>130.25)            | 88.77<br>(66.38 to<br>115.95)            | 123.81<br>(91.56 to<br>162.54)           | 0.89<br>(0.68 to<br>1.14)          | 1.90<br>(1.44 to<br>2.42)          | 1.75<br>(1.32 to<br>2.24)          | 2.21<br>(1.67 to<br>2.83)          |
| Other road injuries                             | 1.95<br>(1.10 to<br>3.18)                | 3.83<br>(2.17 to<br>6.40)                | 3.44<br>(1.97 to<br>5.73)                | 4.77<br>(2.64 to<br>7.97)                | 0.04<br>(0.02 to<br>0.06)          | 0.08<br>(0.05 to<br>0.15)          | 0.07<br>(0.04 to<br>0.12)          | 0.09<br>(0.05 to<br>0.14)          |
| Other transport injuries                        | 5.11<br>(3.10 to<br>8.72)                | 8.96<br>(5.39 to<br>15.43)               | 8.37<br>(5.00 to<br>14.23)               | 12.03<br>(7.29 to<br>20.48)              | 0.08<br>(0.05 to<br>0.13)          | 0.16<br>(0.10 to<br>0.26)          | 0.15<br>(0.09 to<br>0.25)          | 0.20<br>(0.13 to<br>0.34)          |
| <b>Unintentional injuries</b>                   | <b>285.06<br/>(218.50 to<br/>360.14)</b> | <b>283.61<br/>(211.12 to<br/>374.21)</b> | <b>262.37<br/>(198.03 to<br/>341.53)</b> | <b>415.40<br/>(306.34 to<br/>558.57)</b> | <b>4.70<br/>(3.84 to<br/>5.68)</b> | <b>5.84<br/>(4.66 to<br/>7.29)</b> | <b>5.68<br/>(4.59 to<br/>7.01)</b> | <b>7.61<br/>(6.04 to<br/>9.49)</b> |
| Falls                                           | 32.27<br>(24.17 to<br>42.82)             | 45.09<br>(33.97 to<br>58.70)             | 44.13<br>(33.51 to<br>57.84)             | 55.83<br>(41.52 to<br>74.27)             | 0.79<br>(0.63 to<br>0.99)          | 1.60<br>(1.29 to<br>2.00)          | 1.68<br>(1.36 to<br>2.11)          | 1.68<br>(1.34 to<br>2.12)          |
| Drowning                                        | 60.12<br>(45.09 to<br>80.63)             | 51.53<br>(35.90 to<br>72.39)             | 47.47<br>(33.57 to<br>66.87)             | 75.08<br>(53.05 to<br>106.63)            | 0.87<br>(0.66 to<br>1.13)          | 0.79<br>(0.61 to<br>1.17)          | 0.79<br>(0.58 to<br>1.10)          | 1.16<br>(0.85 to<br>1.60)          |
| Fire, heat, and hot substances                  | 31.44<br>(18.59 to<br>42.52)             | 25.12<br>(15.25 to<br>36.78)             | 22.78<br>(14.35 to<br>32.99)             | 39.15<br>(23.23 to<br>57.49)             | 0.53<br>(0.35 to<br>0.69)          | 0.51<br>(0.35 to<br>0.70)          | 0.49<br>(0.34 to<br>0.67)          | 0.71<br>(0.48 to<br>1.00)          |
| Poisonings                                      | 17.80<br>(8.10 to<br>42.06)              | 11.97<br>(5.47 to<br>27.20)              | 10.44<br>(4.89 to<br>23.39)              | 21.29<br>(9.27 to<br>50.04)              | 0.27<br>(0.14 to<br>0.56)          | 0.20<br>(0.11 to<br>0.40)          | 0.18<br>(0.10 to<br>0.36)          | 0.33<br>(0.17 to<br>0.71)          |
| Exposure to mechanical forces                   | 45.67<br>(30.20 to<br>64.99)             | 39.77<br>(24.23 to<br>61.88)             | 35.90<br>(22.30 to<br>54.66)             | 62.33<br>(37.92 to<br>96.21)             | 0.68<br>(0.47 to<br>0.96)          | 0.67<br>(0.44 to<br>1.01)          | 0.63<br>(0.41 to<br>0.94)          | 0.98<br>(0.63 to<br>1.46)          |
| Unintentional firearm injuries                  | 13.30<br>(7.27 to<br>21.27)              | 10.25<br>(5.18 to<br>18.61)              | 9.23<br>(4.66 to<br>16.64)               | 15.85<br>(8.03 to<br>28.25)              | 0.21<br>(0.12 to<br>0.35)          | 0.19<br>(0.10 to<br>0.34)          | 0.17<br>(0.09 to<br>0.31)          | 0.27<br>(0.14 to<br>0.47)          |
| Unintentional suffocation                       | 11.79<br>(5.32 to<br>22.86)              | 9.85<br>(4.59 to<br>18.59)               | 8.73<br>(4.22 to<br>16.47)               | 16.77<br>(7.58 to<br>32.67)              | 0.15<br>(0.07 to<br>0.28)          | 0.13<br>(0.06 to<br>0.23)          | 0.11<br>(0.06 to<br>0.20)          | 0.21<br>(0.10 to<br>0.40)          |
| Other exposure to mechanical forces             | 20.58<br>(14.40 to<br>28.96)             | 19.67<br>(12.57 to<br>29.37)             | 17.94<br>(11.66 to<br>26.76)             | 29.70<br>(18.89 to<br>44.85)             | 0.32<br>(0.24 to<br>0.44)          | 0.36<br>(0.23 to<br>0.54)          | 0.34<br>(0.22 to<br>0.50)          | 0.50<br>(0.33 to<br>0.73)          |
| Adverse effects of medical treatment            | 32.37<br>(16.91 to<br>50.70)             | 35.23<br>(19.34 to<br>56.20)             | 32.47<br>(17.98 to<br>50.55)             | 51.68<br>(27.14 to<br>84.77)             | 0.51<br>(0.29 to<br>0.74)          | 0.64<br>(0.40 to<br>0.92)          | 0.61<br>(0.38 to<br>0.86)          | 0.86<br>(0.51 to<br>1.29)          |
| Animal contact                                  | 17.98<br>(11.90 to<br>26.13)             | 23.24<br>(14.55 to<br>35.51)             | 20.79<br>(13.24 to<br>31.26)             | 37.53<br>(23.48 to<br>57.06)             | 0.33<br>(0.23 to<br>0.48)          | 0.48<br>(0.32 to<br>0.71)          | 0.45<br>(0.31 to<br>0.67)          | 0.71<br>(0.47 to<br>1.03)          |
| Venomous animal contact                         | 14.34<br>(9.19 to<br>21.94)              | 18.41<br>(11.37 to<br>29.47)             | 16.49<br>(10.11 to<br>26.96)             | 29.60<br>(17.88 to<br>47.37)             | 0.27<br>(0.18 to<br>0.43)          | 0.40<br>(0.26 to<br>0.63)          | 0.37<br>(0.25 to<br>0.60)          | 0.58<br>(0.38 to<br>0.91)          |
| Non-venomous animal contact                     | 3.64<br>(1.39 to<br>7.13)                | 4.83<br>(1.88 to<br>9.46)                | 4.30<br>(1.73 to<br>8.50)                | 7.93<br>(2.97 to<br>15.90)               | 0.06<br>(0.02 to<br>0.10)          | 0.08<br>(0.04 to<br>0.15)          | 0.08<br>(0.04 to<br>0.14)          | 0.13<br>(0.06 to<br>0.24)          |
| Foreign body                                    | 20.88<br>(12.68 to<br>32.48)             | 29.40<br>(18.56 to<br>44.28)             | 28.27<br>(18.03 to<br>42.19)             | 38.08<br>(22.98 to<br>60.37)             | 0.31<br>(0.20 to<br>0.44)          | 0.49<br>(0.34 to<br>0.68)          | 0.49<br>(0.35 to<br>0.67)          | 0.58<br>(0.39 to<br>0.84)          |
| Pulmonary aspiration and foreign body in airway | 18.54<br>(11.31 to<br>30.00)             | 26.36<br>(16.54 to<br>41.10)             | 25.43<br>(16.23 to<br>39.09)             | 33.90<br>(20.31 to<br>56.03)             | 0.27<br>(0.18 to<br>0.40)          | 0.44<br>(0.30 to<br>0.63)          | 0.44<br>(0.31 to<br>0.62)          | 0.51<br>(0.34 to<br>0.77)          |
| Foreign body in other body part                 | 2.34<br>(0.59 to<br>5.58)                | 3.04<br>(0.73 to<br>8.14)                | 2.84<br>(0.68 to<br>7.71)                | 4.19<br>(1.03 to<br>10.49)               | 0.04<br>(0.01 to<br>0.09)          | 0.05<br>(0.01 to<br>0.15)          | 0.05<br>(0.01 to<br>0.14)          | 0.07<br>(0.02 to<br>0.18)          |

|                                                                              |                                               |                                               |                                             |                                                   |                                          |                                          |                                          |                                          |
|------------------------------------------------------------------------------|-----------------------------------------------|-----------------------------------------------|---------------------------------------------|---------------------------------------------------|------------------------------------------|------------------------------------------|------------------------------------------|------------------------------------------|
| Environmental heat and cold exposure                                         | 8.89<br>(4.32 to<br>12.17)                    | 8.37<br>(4.02 to<br>12.41)                    | 7.32<br>(3.49 to<br>10.72)                  | 14.31<br>(6.80 to<br>21.03)                       | 0.15<br>(0.07 to<br>0.20)                | 0.16<br>(0.08 to<br>0.23)                | 0.14<br>(0.07 to<br>0.20)                | 0.25<br>(0.12 to<br>0.36)                |
| Other unintentional injuries                                                 | 17.63<br>(11.58 to<br>24.36)                  | 13.90<br>(8.96 to<br>20.10)                   | 12.81<br>(8.47 to<br>18.42)                 | 20.12<br>(12.92 to<br>28.99)                      | 0.27<br>(0.18 to<br>0.36)                | 0.24<br>(0.16 to<br>0.35)                | 0.23<br>(0.16 to<br>0.33)                | 0.33<br>(0.22 to<br>0.46)                |
| Self-harm and interpersonal violence                                         | <b>46.88</b><br>(34.06 to<br>66.46)           | <b>73.74</b><br>(51.87 to<br>109.16)          | <b>71.98</b><br>(50.94 to<br>106.15)        | <b>81.54</b><br>(58.02 to<br>119.33)              | <b>0.92</b><br>(0.66 to<br>1.34)         | <b>1.57</b><br>(1.10 to<br>2.39)         | <b>1.55</b><br>(1.09 to<br>2.37)         | <b>1.69</b><br>(1.20 to<br>2.55)         |
| <b>Mali</b>                                                                  |                                               |                                               |                                             |                                                   |                                          |                                          |                                          |                                          |
| Cause                                                                        | YLLs (in 1000s)                               |                                               |                                             |                                                   | Deaths (in 1000s)                        |                                          |                                          |                                          |
|                                                                              | 2016                                          | 2040 Forecast                                 | 2040 Better Scenario                        | 2040 Worse Scenario                               | 2016                                     | 2040 Forecast                            | 2040 Better Scenario                     | 2040 Worse Scenario                      |
| Self-harm                                                                    | 22.10<br>(14.44 to<br>37.69)                  | 41.80<br>(26.76 to<br>72.43)                  | 40.52<br>(25.90 to<br>70.45)                | 46.34<br>(29.60 to<br>79.36)                      | 0.51<br>(0.33 to<br>0.87)                | 1.02<br>(0.66 to<br>1.75)                | 1.00<br>(0.66 to<br>1.74)                | 1.10<br>(0.71 to<br>1.90)                |
| Self-harm by firearm                                                         | 4.37<br>(1.94 to<br>9.21)                     | 6.70<br>(2.78 to<br>13.78)                    | 6.44<br>(2.72 to<br>13.37)                  | 7.63<br>(3.22 to<br>15.68)                        | 0.11<br>(0.05 to<br>0.21)                | 0.18<br>(0.08 to<br>0.35)                | 0.17<br>(0.07 to<br>0.34)                | 0.20<br>(0.08 to<br>0.39)                |
| Self-harm by other specified means                                           | 17.73<br>(11.34 to<br>32.79)                  | 35.10<br>(21.93 to<br>64.73)                  | 34.07<br>(21.46 to<br>62.57)                | 38.70<br>(24.27 to<br>70.31)                      | 0.40<br>(0.26 to<br>0.74)                | 0.84<br>(0.53 to<br>1.54)                | 0.83<br>(0.53 to<br>1.53)                | 0.91<br>(0.57 to<br>1.65)                |
| Interpersonal violence                                                       | 24.78<br>(18.30 to<br>33.32)                  | 31.94<br>(22.85 to<br>44.16)                  | 31.47<br>(22.52 to<br>43.52)                | 35.20<br>(25.51 to<br>48.29)                      | 0.41<br>(0.30 to<br>0.55)                | 0.55<br>(0.40 to<br>0.76)                | 0.55<br>(0.40 to<br>0.75)                | 0.59<br>(0.43 to<br>0.81)                |
| Physical violence by firearm                                                 | 11.75<br>(7.16 to<br>18.13)                   | 15.46<br>(9.46 to<br>24.31)                   | 15.32<br>(9.38 to<br>24.01)                 | 16.44<br>(9.97 to<br>25.67)                       | 0.20<br>(0.12 to<br>0.30)                | 0.27<br>(0.17 to<br>0.42)                | 0.27<br>(0.17 to<br>0.41)                | 0.28<br>(0.17 to<br>0.44)                |
| Physical violence by sharp object                                            | 6.57<br>(3.84 to<br>9.74)                     | 9.57<br>(5.56 to<br>14.43)                    | 9.57<br>(5.56 to<br>14.38)                  | 9.95<br>(5.86 to<br>14.92)                        | 0.11<br>(0.06 to<br>0.16)                | 0.17<br>(0.10 to<br>0.25)                | 0.17<br>(0.10 to<br>0.25)                | 0.17<br>(0.10 to<br>0.26)                |
| Physical violence by other means                                             | 6.46<br>(4.49 to<br>9.60)                     | 6.91<br>(4.69 to<br>10.78)                    | 6.58<br>(4.45 to<br>10.36)                  | 8.81<br>(6.01 to<br>13.56)                        | 0.10<br>(0.07 to<br>0.15)                | 0.11<br>(0.08 to<br>0.18)                | 0.11<br>(0.08 to<br>0.17)                | 0.14<br>(0.10 to<br>0.21)                |
| Forces of nature, conflict and terrorism, and executions and police conflict | 14.24<br>(2.56 to<br>27.39)                   | 2.00<br>(0.00 to<br>25.02)                    | 1.98<br>(0.00 to<br>24.70)                  | 2.20<br>(0.00 to<br>27.41)                        | 0.22<br>(0.04 to<br>0.43)                | 0.03<br>(0.00 to<br>0.41)                | 0.03<br>(0.00 to<br>0.41)                | 0.04<br>(0.00 to<br>0.44)                |
| Exposure to forces of nature                                                 | 0.00<br>(0.00 to<br>0.00)                     | 0.14<br>(0.00 to<br>1.87)                     | 0.14<br>(0.00 to<br>1.85)                   | 0.16<br>(0.00 to<br>2.08)                         | 0.00<br>(0.00 to<br>0.00)                | 0.00<br>(0.00 to<br>0.03)                | 0.00<br>(0.00 to<br>0.03)                | 0.00<br>(0.00 to<br>0.03)                |
| Conflict and terrorism                                                       | 14.10<br>(2.43 to<br>27.25)                   | 1.84<br>(0.00 to<br>24.98)                    | 1.82<br>(0.00 to<br>24.66)                  | 2.02<br>(0.00 to<br>27.36)                        | 0.22<br>(0.04 to<br>0.42)                | 0.03<br>(0.00 to<br>0.41)                | 0.03<br>(0.00 to<br>0.41)                | 0.03<br>(0.00 to<br>0.44)                |
| Executions and police conflict                                               | 0.14<br>(0.11 to<br>0.21)                     | 0.02<br>(0.00 to<br>0.24)                     | 0.02<br>(0.00 to<br>0.24)                   | 0.02<br>(0.00 to<br>0.25)                         | 0.00<br>(0.00 to<br>0.00)                | 0.00<br>(0.00 to<br>0.00)                | 0.00<br>(0.00 to<br>0.00)                | 0.00<br>(0.00 to<br>0.00)                |
| <b>Mauritania</b>                                                            |                                               |                                               |                                             |                                                   |                                          |                                          |                                          |                                          |
| Cause                                                                        | YLLs (actual counts)                          |                                               |                                             |                                                   | Deaths (actual counts)                   |                                          |                                          |                                          |
|                                                                              | 2016                                          | 2040 Forecast                                 | 2040 Better Scenario                        | 2040 Worse Scenario                               | 2016                                     | 2040 Forecast                            | 2040 Better Scenario                     | 2040 Worse Scenario                      |
| All causes                                                                   | 928,414.34<br>(824,724.08 to<br>1,037,897.86) | 919,639.83<br>(722,526.09 to<br>1,172,247.13) | 720,552.05<br>(564,363.28 to<br>917,722.89) | 1,322,775.41<br>(1,024,504.78 to<br>1,678,106.52) | 20,010.02<br>(17,425.12 to<br>22,604.22) | 32,230.99<br>(26,976.69 to<br>38,381.81) | 26,810.54<br>(22,507.77 to<br>31,954.20) | 41,170.76<br>(34,165.51 to<br>49,666.47) |
| Communicable, maternal, neonatal, and nutritional diseases                   | 565,528.05<br>(488,171.97 to<br>658,665.97)   | 369,244.22<br>(257,355.49 to<br>521,466.02)   | 256,454.90<br>(175,053.50 to<br>390,785.38) | 637,143.20<br>(448,247.08 to<br>858,425.50)       | 9,021.70<br>(7,724.90 to<br>10,532.01)   | 8,497.83<br>(5,896.91 to<br>12,516.78)   | 6,256.86<br>(4,304.36 to<br>9,631.73)    | 13,179.91<br>(9,198.66 to<br>18,815.67)  |
| HIV/AIDS and tuberculosis                                                    | 38,522.18<br>(11,723.32 to<br>113,559.07)     | 46,219.92<br>(7,657.98 to<br>178,896.47)      | 36,548.84<br>(4,375.49 to<br>171,175.41)    | 67,129.38<br>(15,186.16 to<br>214,072.44)         | 880.65<br>(328.73 to<br>2,430.36)        | 1,137.85<br>(285.79 to<br>3,876.41)      | 894.40<br>(177.21 to<br>3,589.41)        | 1,591.24<br>(470.72 to<br>4,632.11)      |
| Tuberculosis                                                                 | 11,054.97<br>(7,261.47 to<br>16,304.66)       | 8,473.56<br>(5,217.05 to<br>13,413.41)        | 5,434.27<br>(3,327.53 to<br>8,523.85)       | 12,587.74<br>(7,706.74 to<br>19,932.75)           | 329.59<br>(223.80 to<br>508.83)          | 335.75<br>(229.08 to<br>521.67)          | 224.81<br>(152.66 to<br>348.42)          | 469.94<br>(315.57 to<br>730.22)          |

|                                                                          |                                                      |                                                      |                                                     |                                                      |                                                |                                                |                                                |                                                 |
|--------------------------------------------------------------------------|------------------------------------------------------|------------------------------------------------------|-----------------------------------------------------|------------------------------------------------------|------------------------------------------------|------------------------------------------------|------------------------------------------------|-------------------------------------------------|
| HIV/AIDS                                                                 | 27,467.21<br>(1,000.97 to<br>106,468.45)             | 37,746.36<br>(94.41 to<br>172,434.65)                | 31,114.57<br>(0.00 to<br>167,445.34)                | 54,541.64<br>(2,938.23 to<br>203,237.73)             | 551.06<br>(19.38 to<br>2,139.01)               | 802.10<br>(1.86 to<br>3,590.90)                | 669.60<br>(0.00 to<br>3,373.49)                | 1,121.31<br>(49.57 to<br>4,218.97)              |
| <b>Diarrhea, lower respiratory, and other common infectious diseases</b> | <b>238,722.57<br/>(195,087.46 to<br/>287,618.10)</b> | <b>173,138.66<br/>(102,757.59 to<br/>275,034.91)</b> | <b>112,101.55<br/>(64,537.20 to<br/>186,010.66)</b> | <b>306,099.53<br/>(176,346.44 to<br/>491,524.49)</b> | <b>4,384.93<br/>(3,498.46 to<br/>5,408.69)</b> | <b>5,120.94<br/>(3,144.31 to<br/>8,528.42)</b> | <b>3,699.36<br/>(2,292.14 to<br/>6,112.30)</b> | <b>7,932.80<br/>(4,760.40 to<br/>13,365.19)</b> |
| Diarrheal diseases                                                       | 81,763.98<br>(57,943.53 to<br>120,262.28)            | 48,753.76<br>(20,066.67 to<br>117,442.97)            | 32,777.09<br>(10,213.19 to<br>82,642.39)            | 92,966.78<br>(37,776.21 to<br>221,120.56)            | 1,521.84<br>(1,006.22 to<br>2,471.44)          | 1,363.15<br>(398.99 to<br>3,976.79)            | 961.86<br>(239.70 to<br>2,817.51)              | 2,578.96<br>(734.62 to<br>6,843.94)             |
| Intestinal infectious diseases                                           | 10,964.38<br>(4,959.21 to<br>19,784.06)              | 8,509.40<br>(3,801.59 to<br>16,012.26)               | 7,075.82<br>(3,169.10 to<br>13,046.18)              | 11,155.97<br>(4,792.81 to<br>20,957.24)              | 154.70<br>(70.82 to<br>279.92)                 | 127.81<br>(58.52 to<br>234.76)                 | 107.78<br>(49.45 to<br>198.09)                 | 163.01<br>(70.84 to<br>304.22)                  |
| Typhoid fever                                                            | 9,036.17<br>(3,781.55 to<br>17,016.62)               | 6,863.38<br>(2,766.62 to<br>13,467.83)               | 5,743.45<br>(2,316.73 to<br>11,078.53)              | 8,944.95<br>(3,432.97 to<br>17,835.68)               | 127.71<br>(55.95 to<br>235.81)                 | 103.22<br>(42.69 to<br>199.16)                 | 87.62<br>(36.42 to<br>167.97)                  | 130.83<br>(52.23 to<br>258.61)                  |
| Paratyphoid fever                                                        | 1,829.17<br>(610.10 to<br>4,325.36)                  | 1,616.84<br>(575.55 to<br>3,635.55)                  | 1,312.20<br>(464.45 to<br>2,991.14)                 | 2,161.62<br>(749.03 to<br>5,066.48)                  | 25.66<br>(8.48 to<br>60.35)                    | 24.03<br>(8.66 to<br>52.62)                    | 19.74<br>(7.23 to<br>43.56)                    | 31.35<br>(11.09 to<br>71.64)                    |
| Other intestinal infectious diseases                                     | 99.04<br>(30.23 to<br>262.66)                        | 29.19<br>(7.79 to<br>83.05)                          | 20.16<br>(5.26 to<br>58.50)                         | 49.40<br>(12.66 to<br>145.29)                        | 1.33<br>(0.44 to<br>3.34)                      | 0.56<br>(0.18 to<br>1.46)                      | 0.42<br>(0.13 to<br>1.04)                      | 0.84<br>(0.26 to<br>2.21)                       |
| Lower respiratory infections                                             | 95,079.01<br>(73,296.56 to<br>122,478.36)            | 82,190.45<br>(45,845.83 to<br>138,327.56)            | 50,063.29<br>(29,997.66 to<br>79,972.94)            | 146,053.00<br>(78,184.95 to<br>235,165.03)           | 1,962.10<br>(1,560.82 to<br>2,496.97)          | 3,020.62<br>(1,991.67 to<br>4,468.28)          | 2,163.08<br>(1,469.99 to<br>3,036.80)          | 4,315.30<br>(2,709.18 to<br>6,486.32)           |
| Upper respiratory infections                                             | 129.50<br>(42.73 to<br>315.86)                       | 80.82<br>(28.50 to<br>187.31)                        | 52.53<br>(17.83 to<br>120.97)                       | 137.55<br>(40.59 to<br>337.52)                       | 1.96<br>(0.86 to<br>4.09)                      | 1.88<br>(0.78 to<br>3.92)                      | 1.29<br>(0.51 to<br>2.76)                      | 2.81<br>(1.05 to<br>6.29)                       |
| Otitis media                                                             | 8.41<br>(1.96 to<br>23.33)                           | 2.44<br>(0.68 to<br>5.42)                            | 2.48<br>(0.68 to<br>5.54)                           | 2.61<br>(0.71 to<br>5.90)                            | 0.18<br>(0.05 to<br>0.41)                      | 0.16<br>(0.04 to<br>0.38)                      | 0.18<br>(0.05 to<br>0.43)                      | 0.14<br>(0.04 to<br>0.33)                       |
| Meningitis                                                               | 32,170.22<br>(21,533.03 to<br>52,731.73)             | 19,218.88<br>(11,020.77 to<br>33,354.73)             | 15,472.23<br>(8,856.68 to<br>26,459.98)             | 34,154.83<br>(18,244.14 to<br>61,959.22)             | 510.60<br>(345.55 to<br>801.11)                | 413.57<br>(253.90 to<br>670.33)                | 364.84<br>(222.56 to<br>585.82)                | 591.78<br>(352.12 to<br>977.24)                 |
| Pneumococcal meningitis                                                  | 2,577.57<br>(1,608.08 to<br>4,215.25)                | 1,545.15<br>(816.08 to<br>2,863.69)                  | 1,364.87<br>(713.25 to<br>2,538.06)                 | 2,437.51<br>(1,303.16 to<br>4,541.67)                | 47.20<br>(29.25 to<br>78.57)                   | 41.84<br>(23.60 to<br>74.08)                   | 39.51<br>(22.48 to<br>68.95)                   | 55.61<br>(32.01 to<br>98.61)                    |
| H influenzae type B meningitis                                           | 4,197.51<br>(2,671.40 to<br>7,100.99)                | 4,113.78<br>(1,337.12 to<br>10,221.67)               | 2,293.47<br>(935.67 to<br>4,973.84)                 | 14,296.24<br>(3,413.14 to<br>36,139.23)              | 61.56<br>(39.93 to<br>100.99)                  | 64.07<br>(27.29 to<br>136.40)                  | 43.60<br>(21.70 to<br>80.72)                   | 182.14<br>(52.98 to<br>437.22)                  |
| Meningococcal meningitis                                                 | 10,993.28<br>(7,046.72 to<br>17,950.67)              | 6,547.20<br>(3,536.48 to<br>12,001.55)               | 5,763.85<br>(3,089.29 to<br>10,702.04)              | 8,291.81<br>(4,530.45 to<br>14,767.36)               | 167.87<br>(107.23 to<br>262.18)                | 140.04<br>(77.78 to<br>250.67)                 | 128.91<br>(70.69 to<br>230.31)                 | 160.91<br>(92.64 to<br>280.65)                  |
| Other meningitis                                                         | 14,401.86<br>(9,426.55 to<br>24,741.51)              | 7,012.76<br>(4,312.78 to<br>11,278.37)               | 6,080.05<br>(3,672.23 to<br>9,506.78)               | 9,129.28<br>(5,477.49 to<br>15,670.78)               | 233.98<br>(160.25 to<br>365.11)                | 167.62<br>(106.61 to<br>245.08)                | 152.83<br>(96.65 to<br>225.03)                 | 193.11<br>(123.53 to<br>295.99)                 |
| Encephalitis                                                             | 2,456.43<br>(1,520.04 to<br>3,506.51)                | 2,020.38<br>(1,150.93 to<br>3,105.03)                | 1,658.71<br>(914.67 to<br>2,573.44)                 | 2,754.10<br>(1,617.65 to<br>4,290.20)                | 37.56<br>(23.12 to<br>52.32)                   | 41.17<br>(23.57 to<br>61.85)                   | 35.35<br>(19.85 to<br>53.65)                   | 50.95<br>(29.89 to<br>77.15)                    |
| Diphtheria                                                               | 87.40<br>(40.34 to<br>168.32)                        | 21.96<br>(7.74 to<br>56.06)                          | 11.31<br>(5.13 to<br>22.13)                         | 56.58<br>(16.59 to<br>160.87)                        | 1.11<br>(0.54 to<br>2.07)                      | 0.31<br>(0.12 to<br>0.71)                      | 0.18<br>(0.09 to<br>0.32)                      | 0.72<br>(0.23 to<br>1.93)                       |
| Whooping cough                                                           | 12,841.11<br>(1,072.01 to<br>37,138.73)              | 11,482.92<br>(1,059.04 to<br>32,846.40)              | 4,547.46<br>(344.04 to<br>14,630.00)                | 16,975.15<br>(1,446.46 to<br>51,603.11)              | 151.87<br>(12.68 to<br>439.20)                 | 136.06<br>(12.54 to<br>390.62)                 | 54.30<br>(4.15 to<br>174.53)                   | 200.77<br>(17.06 to<br>610.49)                  |
| Tetanus                                                                  | 1,194.85<br>(472.34 to<br>2,872.30)                  | 267.17<br>(90.02 to<br>697.99)                       | 130.75<br>(45.38 to<br>355.55)                      | 379.93<br>(124.89 to<br>1,002.39)                    | 16.42<br>(7.01 to<br>39.41)                    | 4.09<br>(1.54 to<br>7.51)                      | 2.54<br>(0.97 to<br>7.51)                      | 5.37<br>(1.98 to<br>13.47)                      |
| Measles                                                                  | 1,442.31<br>(457.30 to<br>3,507.70)                  | 271.75<br>(21.16 to<br>1,578.00)                     | 92.08<br>(11.98 to<br>423.01)                       | 938.40<br>(83.46 to<br>3,681.57)                     | 17.22<br>(5.46 to<br>41.85)                    | 3.27<br>(0.27 to<br>18.47)                     | 1.14<br>(0.16 to<br>5.08)                      | 11.16<br>(1.03 to<br>43.39)                     |
| <b>Mauritania</b>                                                        |                                                      |                                                      |                                                     |                                                      |                                                |                                                |                                                |                                                 |
| Cause                                                                    | YLLs (actual counts)                                 |                                                      |                                                     |                                                      | Deaths (actual counts)                         |                                                |                                                |                                                 |
|                                                                          | 2016                                                 | 2040 Forecast                                        | 2040 Better Scenario                                | 2040 Worse Scenario                                  | 2016                                           | 2040 Forecast                                  | 2040 Better Scenario                           | 2040 Worse Scenario                             |

|                                                       |                                                               |                                                               |                                                              |                                                               |                                                      |                                                      |                                                      |                                                      |
|-------------------------------------------------------|---------------------------------------------------------------|---------------------------------------------------------------|--------------------------------------------------------------|---------------------------------------------------------------|------------------------------------------------------|------------------------------------------------------|------------------------------------------------------|------------------------------------------------------|
| Varicella and herpes zoster                           | 584.96<br>(328.95 to<br>977.19)                               | 318.73<br>(183.06 to<br>556.52)                               | 217.79<br>(123.96 to<br>373.86)                              | 524.62<br>(280.23 to<br>969.62)                               | 9.35<br>(6.08 to<br>14.14)                           | 8.86<br>(5.59 to<br>13.87)                           | 6.82<br>(4.18 to<br>10.69)                           | 11.84<br>(7.16 to<br>18.67)                          |
| <b>Neglected tropical diseases and malaria</b>        | <b>28,860.44</b><br><b>(19,740.77 to</b><br><b>40,728.24)</b> | <b>13,609.40</b><br><b>(9,249.31 to</b><br><b>19,088.39)</b>  | <b>10,920.77</b><br><b>(7,397.22 to</b><br><b>15,319.12)</b> | <b>19,718.77</b><br><b>(13,341.99 to</b><br><b>28,104.50)</b> | <b>431.79</b><br><b>(305.43 to</b><br><b>588.97)</b> | <b>277.55</b><br><b>(191.94 to</b><br><b>381.09)</b> | <b>236.93</b><br><b>(162.54 to</b><br><b>324.64)</b> | <b>357.47</b><br><b>(246.13 to</b><br><b>482.10)</b> |
| Malaria                                               | 17,999.24<br>(10,218.29 to<br>28,959.51)                      | 6,974.72<br>(4,077.32 to<br>11,016.48)                        | 6,055.17<br>(3,667.70 to<br>9,416.07)                        | 9,287.33<br>(5,137.95 to<br>15,535.56)                        | 262.08<br>(157.96 to<br>402.86)                      | 147.72<br>(91.70 to<br>223.38)                       | 136.25<br>(85.28 to<br>207.11)                       | 174.39<br>(105.55 to<br>274.91)                      |
| Chagas disease                                        | 0.00<br>(0.00 to<br>0.00)                                     | 0.00<br>(0.00 to<br>0.00)                                     | 0.00<br>(0.00 to<br>0.00)                                    | 0.00<br>(0.00 to<br>0.00)                                     | 0.00<br>(0.00 to<br>0.00)                            | 0.00<br>(0.00 to<br>0.00)                            | 0.00<br>(0.00 to<br>0.00)                            | 0.00<br>(0.00 to<br>0.00)                            |
| Leishmaniasis                                         | 0.00<br>(0.00 to<br>0.00)                                     | 0.00<br>(0.00 to<br>0.00)                                     | 0.00<br>(0.00 to<br>0.00)                                    | 0.00<br>(0.00 to<br>0.00)                                     | 0.00<br>(0.00 to<br>0.00)                            | 0.00<br>(0.00 to<br>0.00)                            | 0.00<br>(0.00 to<br>0.00)                            | 0.00<br>(0.00 to<br>0.00)                            |
| African trypanosomiasis                               | 0.00<br>(0.00 to<br>0.00)                                     | 0.00<br>(0.00 to<br>0.00)                                     | 0.00<br>(0.00 to<br>0.00)                                    | 0.00<br>(0.00 to<br>0.00)                                     | 0.00<br>(0.00 to<br>0.00)                            | 0.00<br>(0.00 to<br>0.00)                            | 0.00<br>(0.00 to<br>0.00)                            | 0.00<br>(0.00 to<br>0.00)                            |
| Schistosomiasis                                       | 971.21<br>(534.14 to<br>1,510.17)                             | 766.12<br>(424.15 to<br>1,232.79)                             | 648.97<br>(356.71 to<br>1,046.34)                            | 895.25<br>(488.97 to<br>1,478.29)                             | 28.23<br>(16.89 to<br>44.10)                         | 28.13<br>(15.81 to<br>46.00)                         | 24.65<br>(13.46 to<br>40.86)                         | 31.26<br>(17.50 to<br>50.10)                         |
| Cysticercosis                                         | 18.14<br>(6.35 to<br>41.10)                                   | 7.86<br>(2.64 to<br>18.08)                                    | 7.00<br>(2.31 to<br>16.07)                                   | 9.07<br>(3.05 to<br>21.16)                                    | 0.37<br>(0.13 to<br>0.83)                            | 0.20<br>(0.07 to<br>0.45)                            | 0.18<br>(0.06 to<br>0.41)                            | 0.22<br>(0.08 to<br>0.50)                            |
| Cystic echinococcosis                                 | 0.00<br>(0.00 to<br>0.00)                                     | 0.00<br>(0.00 to<br>0.00)                                     | 0.00<br>(0.00 to<br>0.00)                                    | 0.00<br>(0.00 to<br>0.00)                                     | 0.00<br>(0.00 to<br>0.00)                            | 0.00<br>(0.00 to<br>0.00)                            | 0.00<br>(0.00 to<br>0.00)                            | 0.00<br>(0.00 to<br>0.00)                            |
| Dengue                                                | 15.06<br>(1.52 to<br>46.85)                                   | 49.97<br>(5.78 to<br>141.92)                                  | 43.83<br>(5.16 to<br>123.70)                                 | 66.42<br>(7.38 to<br>197.20)                                  | 0.23<br>(0.02 to<br>0.68)                            | 1.14<br>(0.13 to<br>3.11)                            | 1.06<br>(0.12 to<br>2.85)                            | 1.32<br>(0.15 to<br>3.68)                            |
| Yellow fever                                          | 1,118.90<br>(223.04 to<br>3,287.22)                           | 434.26<br>(75.66 to<br>1,387.94)                              | 308.90<br>(51.18 to<br>1,025.65)                             | 639.08<br>(115.13 to<br>2,013.32)                             | 17.55<br>(3.45 to<br>53.63)                          | 7.22<br>(1.24 to<br>22.76)                           | 5.21<br>(0.88 to<br>16.58)                           | 10.29<br>(1.84 to<br>31.60)                          |
| Rabies                                                | 1,184.44<br>(319.44 to<br>3,390.48)                           | 524.71<br>(126.17 to<br>1,469.77)                             | 270.89<br>(60.10 to<br>776.39)                               | 1,025.42<br>(254.93 to<br>2,695.43)                           | 19.02<br>(5.30 to<br>51.47)                          | 9.49<br>(2.31 to<br>26.87)                           | 4.94<br>(1.15 to<br>14.07)                           | 17.83<br>(4.61 to<br>46.52)                          |
| Intestinal nematode infections                        | 72.80<br>(6.95 to<br>191.40)                                  | 78.49<br>(9.93 to<br>204.88)                                  | 67.47<br>(9.69 to<br>172.17)                                 | 112.05<br>(11.80 to<br>295.34)                                | 0.91<br>(0.12 to<br>2.30)                            | 1.05<br>(0.22 to<br>2.52)                            | 0.92<br>(0.22 to<br>2.16)                            | 1.44<br>(0.23 to<br>3.61)                            |
| Other neglected tropical diseases                     | 7,480.65<br>(3,990.19 to<br>13,553.40)                        | 4,773.27<br>(2,663.57 to<br>7,799.23)                         | 3,518.54<br>(1,966.57 to<br>5,755.06)                        | 7,684.14<br>(4,329.38 to<br>12,372.39)                        | 103.39<br>(57.98 to<br>179.52)                       | 82.62<br>(49.27 to<br>126.51)                        | 63.71<br>(37.87 to<br>97.77)                         | 120.71<br>(71.69 to<br>186.24)                       |
| <b>Maternal disorders</b>                             | <b>27,117.30</b><br><b>(16,171.63 to</b><br><b>37,036.77)</b> | <b>19,634.90</b><br><b>(11,642.90 to</b><br><b>28,860.39)</b> | <b>12,695.44</b><br><b>(7,389.81 to</b><br><b>18,583.63)</b> | <b>29,181.20</b><br><b>(16,965.51 to</b><br><b>41,991.61)</b> | <b>516.32</b><br><b>(310.73 to</b><br><b>707.44)</b> | <b>382.78</b><br><b>(223.00 to</b><br><b>568.21)</b> | <b>247.93</b><br><b>(145.82 to</b><br><b>368.87)</b> | <b>567.13</b><br><b>(327.55 to</b><br><b>826.47)</b> |
| Maternal hemorrhage                                   | 10,123.66<br>(5,775.41 to<br>14,599.85)                       | 7,021.42<br>(3,726.53 to<br>10,918.80)                        | 4,543.69<br>(2,425.17 to<br>7,038.62)                        | 10,296.01<br>(5,420.83 to<br>16,194.45)                       | 195.16<br>(112.47 to<br>282.99)                      | 138.51<br>(71.38 to<br>216.11)                       | 89.72<br>(46.22 to<br>140.25)                        | 202.73<br>(104.66 to<br>324.07)                      |
| Maternal sepsis and other maternal infections         | 1,453.12<br>(585.21 to<br>2,658.93)                           | 958.51<br>(376.40 to<br>1,877.46)                             | 616.42<br>(238.94 to<br>1,174.27)                            | 1,416.97<br>(536.77 to<br>2,666.67)                           | 27.86<br>(11.36 to<br>50.79)                         | 18.85<br>(7.37 to<br>36.37)                          | 12.14<br>(4.75 to<br>23.13)                          | 27.80<br>(10.54 to<br>51.07)                         |
| Maternal hypertensive disorders                       | 5,381.32<br>(3,227.42 to<br>7,981.79)                         | 3,867.02<br>(2,055.45 to<br>5,973.39)                         | 2,484.96<br>(1,310.29 to<br>3,941.82)                        | 5,719.78<br>(2,991.38 to<br>9,014.53)                         | 99.80<br>(58.69 to<br>148.68)                        | 73.63<br>(39.38 to<br>115.53)                        | 47.37<br>(25.04 to<br>75.90)                         | 108.62<br>(57.29 to<br>171.27)                       |
| Maternal obstructed labor and uterine rupture         | 1,224.83<br>(578.93 to<br>2,059.36)                           | 910.20<br>(422.65 to<br>1,624.95)                             | 569.89<br>(254.13 to<br>1,006.94)                            | 1,372.30<br>(620.82 to<br>2,453.26)                           | 23.67<br>(11.37 to<br>40.16)                         | 17.98<br>(8.02 to<br>33.12)                          | 11.27<br>(4.92 to<br>20.53)                          | 27.06<br>(12.13 to<br>48.76)                         |
| Maternal abortion, miscarriage, and ectopic pregnancy | 603.89<br>(218.17 to<br>1,226.35)                             | 518.64<br>(175.63 to<br>1,109.68)                             | 333.85<br>(116.44 to<br>722.91)                              | 771.68<br>(258.38 to<br>1,669.71)                             | 11.67<br>(4.43 to<br>23.48)                          | 10.28<br>(3.68 to<br>21.82)                          | 6.63<br>(2.40 to<br>14.33)                           | 15.25<br>(5.29 to<br>32.28)                          |
| Indirect maternal deaths                              | 5,306.83<br>(3,062.82 to<br>7,852.58)                         | 3,958.04<br>(2,127.88 to<br>6,379.54)                         | 2,565.64<br>(1,356.82 to<br>4,148.19)                        | 6,015.20<br>(3,079.42 to<br>9,705.27)                         | 99.70<br>(57.04 to<br>147.12)                        | 75.74<br>(40.20 to<br>120.48)                        | 49.25<br>(25.90 to<br>80.61)                         | 114.56<br>(59.60 to<br>183.12)                       |
| Late maternal deaths                                  | 372.29<br>(155.72 to<br>696.10)                               | 223.23<br>(88.17 to<br>422.68)                                | 143.45<br>(55.76 to<br>268.93)                               | 336.63<br>(130.82 to<br>649.83)                               | 7.08<br>(2.92 to<br>13.28)                           | 4.37<br>(1.70 to<br>8.34)                            | 2.82<br>(1.07 to<br>5.22)                            | 6.57<br>(2.48 to<br>12.54)                           |

|                                                                         |                                                    |                                                  |                                                 |                                                    |                                              |                                            |                                          |                                              |
|-------------------------------------------------------------------------|----------------------------------------------------|--------------------------------------------------|-------------------------------------------------|----------------------------------------------------|----------------------------------------------|--------------------------------------------|------------------------------------------|----------------------------------------------|
| Maternal deaths aggravated by HIV/AIDS                                  | 32.56<br>(5.43 to<br>77.09)                        | 239.75<br>(854.49)                               | 149.40<br>(0.10 to<br>572.25)                   | 390.97<br>(3.05 to<br>1,220.20)                    | 0.64<br>(0.11 to<br>1.48)                    | 4.88<br>(0.00 to<br>17.68)                 | 3.04<br>(0.00 to<br>11.68)               | 7.92<br>(0.05 to<br>24.22)                   |
| Other maternal disorders                                                | 2,618.81<br>(1,449.35 to<br>4,060.95)              | 1,938.08<br>(1,004.64 to<br>3,159.43)            | 1,288.15<br>(655.50 to<br>2,142.47)             | 2,861.66<br>(1,463.78 to<br>4,769.29)              | 50.74<br>(28.09 to<br>80.32)                 | 38.54<br>(19.51 to<br>63.35)               | 25.69<br>(12.92 to<br>43.44)             | 56.62<br>(29.01 to<br>94.87)                 |
| <b>Mauritania</b>                                                       |                                                    |                                                  |                                                 |                                                    |                                              |                                            |                                          |                                              |
| Cause                                                                   | YLLs (actual counts)                               |                                                  |                                                 |                                                    | Deaths (actual counts)                       |                                            |                                          |                                              |
|                                                                         | 2016                                               | 2040 Forecast                                    | 2040 Better Scenario                            | 2040 Worse Scenario                                | 2016                                         | 2040 Forecast                              | 2040 Better Scenario                     | 2040 Worse Scenario                          |
| <b>Neonatal disorders</b>                                               | <b>180,674.03</b><br>(148,706.78 to<br>217,469.46) | <b>96,439.58</b><br>(65,534.98 to<br>137,409.77) | <b>68,823.76</b><br>(46,146.84 to<br>97,203.49) | <b>184,042.31</b><br>(123,145.14 to<br>262,015.63) | <b>2,087.39</b><br>(1,718.29 to<br>2,512.26) | <b>1,114.49</b><br>(757.36 to<br>1,587.94) | <b>795.36</b><br>(533.35 to<br>1,123.08) | <b>2,126.74</b><br>(1,423.15 to<br>3,026.98) |
| Neonatal preterm birth                                                  | 66,024.54<br>(46,385.02 to<br>89,760.66)           | 31,025.22<br>(20,002.96 to<br>45,896.19)         | 20,605.11<br>(13,297.25 to<br>30,484.19)        | 61,995.46<br>(39,791.60 to<br>90,786.37)           | 762.70<br>(535.88 to<br>1,036.91)            | 358.46<br>(231.16 to<br>530.26)            | 238.08<br>(153.74 to<br>352.15)          | 716.24<br>(459.95 to<br>1,048.75)            |
| Neonatal encephalopathy due to birth asphyxia and trauma                | 59,771.06<br>(40,944.35 to<br>82,194.00)           | 29,201.25<br>(15,987.85 to<br>50,682.57)         | 21,897.69<br>(12,086.55 to<br>38,131.13)        | 53,642.56<br>(29,185.05 to<br>92,975.78)           | 690.47<br>(472.93 to<br>949.43)              | 337.42<br>(184.77 to<br>585.56)            | 253.02<br>(139.75 to<br>440.50)          | 619.82<br>(337.19 to<br>1,074.03)            |
| Neonatal sepsis and other neonatal infections                           | 39,106.70<br>(26,382.73 to<br>55,939.98)           | 27,395.23<br>(17,309.10 to<br>41,768.71)         | 20,225.77<br>(12,639.45 to<br>30,591.33)        | 51,033.05<br>(32,126.45 to<br>78,751.65)           | 451.93<br>(304.89 to<br>646.35)              | 316.68<br>(200.08 to<br>482.59)            | 233.80<br>(146.35 to<br>353.53)          | 589.89<br>(371.43 to<br>909.86)              |
| Hemolytic disease and other neonatal jaundice                           | 3,722.19<br>(2,239.06 to<br>5,876.55)              | 923.01<br>(698.37 to<br>2,275.57)                | 488.05<br>(1,633.14)                            | 2,597.58<br>(1,387.31 to<br>4,436.79)              | 43.01<br>(25.88 to<br>67.96)                 | 15.32<br>(8.07 to<br>26.29)                | 10.67<br>(5.64 to<br>18.87)              | 30.02<br>(16.03 to<br>51.30)                 |
| Other neonatal disorders                                                | 12,049.54<br>(7,180.64 to<br>19,284.45)            | 7,492.04<br>(3,909.69 to<br>13,578.44)           | 5,172.17<br>(2,666.31 to<br>9,521.63)           | 14,773.67<br>(7,451.68 to<br>26,862.61)            | 139.28<br>(83.09 to<br>222.90)               | 86.61<br>(45.22 to<br>156.90)              | 59.79<br>(30.84 to<br>110.02)            | 170.78<br>(86.21 to<br>310.35)               |
| <b>Nutritional deficiencies</b>                                         | <b>21,590.68</b><br>(13,225.18 to<br>34,589.66)    | <b>8,979.92</b><br>(5,800.43 to<br>15,020.98)    | <b>6,509.57</b><br>(4,206.99 to<br>10,790.68)   | <b>13,770.70</b><br>(8,362.30 to<br>23,407.73)     | <b>328.98</b><br>(219.74 to<br>494.99)       | <b>258.48</b><br>(192.38 to<br>362.11)     | <b>214.36</b><br>(158.83 to<br>299.71)   | <b>321.25</b><br>(226.29 to<br>468.03)       |
| Protein-energy malnutrition                                             | 20,483.83<br>(12,254.16 to<br>33,265.10)           | 7,805.85<br>(4,870.26 to<br>12,821.40)           | 5,583.50<br>(3,567.32 to<br>9,091.22)           | 12,207.11<br>(7,236.21 to<br>20,636.18)            | 303.26<br>(201.48 to<br>466.60)              | 220.43<br>(160.68 to<br>307.52)            | 182.07<br>(134.02 to<br>249.77)          | 276.83<br>(194.51 to<br>401.64)              |
| Iodine deficiency                                                       | 158.38<br>(5.31 to<br>993.42)                      | 313.33<br>(9.31 to<br>1,339.99)                  | 219.16<br>(6.56 to<br>857.83)                   | 492.73<br>(12.79 to<br>2,471.81)                   | 2.70<br>(0.14 to<br>12.47)                   | 9.19<br>(0.28 to<br>32.11)                 | 7.17<br>(0.18 to<br>24.55)               | 11.93<br>(0.37 to<br>39.95)                  |
| Dietary iron deficiency                                                 | 78.38<br>(45.55 to<br>147.76)                      | 82.91<br>(43.36 to<br>191.54)                    | 70.85<br>(36.15 to<br>165.07)                   | 99.28<br>(52.47 to<br>222.88)                      | 1.42<br>(0.78 to<br>3.56)                    | 1.80<br>(0.84 to<br>6.57)                  | 1.57<br>(0.72 to<br>5.95)                | 2.06<br>(0.99 to<br>7.10)                    |
| Other nutritional deficiencies                                          | 870.09<br>(515.47 to<br>1,489.45)                  | 777.84<br>(437.70 to<br>1,449.34)                | 636.06<br>(356.76 to<br>1,194.84)               | 971.59<br>(542.76 to<br>1,790.41)                  | 21.61<br>(13.65 to<br>35.27)                 | 27.06<br>(16.55 to<br>47.68)               | 23.55<br>(14.25 to<br>41.71)             | 30.44<br>(18.47 to<br>52.86)                 |
| <b>Other communicable, maternal, neonatal, and nutritional diseases</b> | <b>30,040.85</b><br>(14,762.97 to<br>53,369.44)    | <b>11,221.84</b><br>(6,353.88 to<br>19,003.84)   | <b>8,854.98</b><br>(5,203.20 to<br>15,011.22)   | <b>17,201.32</b><br>(9,104.91 to<br>31,538.10)     | <b>391.64</b><br>(210.85 to<br>669.75)       | <b>205.74</b><br>(138.93 to<br>302.23)     | <b>168.52</b><br>(115.00 to<br>245.96)   | <b>283.29</b><br>(181.50 to<br>457.52)       |
| Sexually transmitted infections excluding HIV                           | 23,697.55<br>(9,068.88 to<br>46,581.04)            | 5,898.87<br>(1,890.56 to<br>12,916.29)           | 4,595.73<br>(1,508.20 to<br>9,791.87)           | 9,880.78<br>(2,966.70 to<br>21,820.13)             | 279.80<br>(108.94 to<br>548.13)              | 72.32<br>(25.01 to<br>154.67)              | 56.70<br>(20.28 to<br>117.29)            | 119.17<br>(38.02 to<br>259.06)               |
| Syphilis                                                                | 23,473.72<br>(8,872.30 to<br>46,280.08)            | 5,652.74<br>(1,658.90 to<br>12,675.94)           | 4,380.36<br>(1,319.68 to<br>9,604.57)           | 9,603.00<br>(2,772.77 to<br>21,616.36)             | 275.30<br>(104.32 to<br>542.71)              | 66.97<br>(20.03 to<br>149.44)              | 51.95<br>(16.10 to<br>113.18)            | 113.25<br>(33.18 to<br>253.81)               |
| Chlamydial infection                                                    | 46.11<br>(26.70 to<br>71.81)                       | 49.95<br>(29.60 to<br>79.52)                     | 43.65<br>(25.96 to<br>69.23)                    | 56.48<br>(33.12 to<br>90.87)                       | 0.91<br>(0.55 to<br>1.44)                    | 1.07<br>(0.67 to<br>1.68)                  | 0.95<br>(0.60 to<br>1.48)                | 1.18<br>(0.73 to<br>1.88)                    |
| Gonococcal infection                                                    | 114.63<br>(66.92 to<br>184.04)                     | 127.17<br>(73.03 to<br>202.02)                   | 111.56<br>(63.61 to<br>175.67)                  | 143.04<br>(81.24 to<br>227.63)                     | 2.35<br>(1.42 to<br>3.79)                    | 2.83<br>(1.73 to<br>4.44)                  | 2.52<br>(1.58 to<br>3.95)                | 3.12<br>(1.90 to<br>4.86)                    |
| Other sexually transmitted infections                                   | 63.09<br>(36.79 to<br>100.00)                      | 69.01<br>(40.43 to<br>110.49)                    | 60.17<br>(35.01 to<br>96.61)                    | 78.25<br>(45.58 to<br>123.87)                      | 1.24<br>(0.75 to<br>2.00)                    | 1.45<br>(0.89 to<br>2.28)                  | 1.28<br>(0.79 to<br>2.04)                | 1.62<br>(0.98 to<br>2.55)                    |
| Acute hepatitis                                                         | 3,113.02<br>(2,241.56 to<br>4,041.99)              | 2,920.90<br>(1,879.49 to<br>4,263.96)            | 2,425.67<br>(1,546.37 to<br>3,577.34)           | 3,519.20<br>(2,281.51 to<br>5,103.42)              | 64.98<br>(46.74 to<br>84.61)                 | 74.66<br>(50.11 to<br>105.00)              | 63.04<br>(42.34 to<br>89.01)             | 87.03<br>(58.94 to<br>122.26)                |

|                                       |                                                    |                                                    |                                                    |                                                    |                                               |                                                 |                                                 |                                                 |
|---------------------------------------|----------------------------------------------------|----------------------------------------------------|----------------------------------------------------|----------------------------------------------------|-----------------------------------------------|-------------------------------------------------|-------------------------------------------------|-------------------------------------------------|
| Acute hepatitis A                     | 83.73<br>(10.96 to<br>195.00)                      | 40.39<br>(10.81 to<br>85.63)                       | 31.88<br>(9.07 to<br>67.73)                        | 60.14<br>(13.99 to<br>133.40)                      | 1.09<br>(0.21 to<br>2.38)                     | 0.74<br>(0.25 to<br>1.52)                       | 0.61<br>(0.21 to<br>1.24)                       | 1.00<br>(0.31 to<br>2.02)                       |
| Acute hepatitis B                     | 2,241.09<br>(1,481.13 to<br>2,978.01)              | 2,271.06<br>(1,417.46 to<br>3,405.63)              | 1,876.81<br>(1,148.62 to<br>2,873.19)              | 2,702.16<br>(1,677.26 to<br>4,014.39)              | 50.95<br>(34.71 to<br>67.23)                  | 60.50<br>(39.80 to<br>86.41)                    | 50.61<br>(32.90 to<br>72.63)                    | 70.48<br>(46.02 to<br>100.66)                   |
| Acute hepatitis C                     | 68.06<br>(45.28 to<br>97.83)                       | 85.65<br>(52.50 to<br>132.25)                      | 77.58<br>(46.92 to<br>122.08)                      | 94.72<br>(58.75 to<br>146.08)                      | 1.66<br>(1.10 to<br>2.43)                     | 2.52<br>(1.56 to<br>3.82)                       | 2.32<br>(1.44 to<br>3.57)                       | 2.70<br>(1.69 to<br>4.08)                       |
| Acute hepatitis E                     | 720.13<br>(488.34 to<br>1,005.49)                  | 523.80<br>(334.64 to<br>776.49)                    | 439.40<br>(281.10 to<br>657.65)                    | 662.18<br>(425.83 to<br>979.00)                    | 11.28<br>(7.86 to<br>15.64)                   | 10.90<br>(7.17 to<br>15.68)                     | 9.51<br>(6.29 to<br>13.82)                      | 12.85<br>(8.50 to<br>18.22)                     |
| Other unspecified infectious diseases | 3,230.28<br>(1,283.95 to<br>9,724.29)              | 2,402.07<br>(1,264.39 to<br>5,197.03)              | 1,833.56<br>(1,001.06 to<br>3,982.68)              | 3,801.34<br>(1,806.12 to<br>8,946.76)              | 46.86<br>(23.19 to<br>122.76)                 | 58.76<br>(39.39 to<br>95.44)                    | 48.77<br>(33.06 to<br>76.93)                    | 77.08<br>(47.55 to<br>136.87)                   |
| <b>Non-communicable diseases</b>      | <b>297,222.04</b><br>(235,219.27 to<br>351,137.49) | <b>471,944.38</b><br>(357,489.12 to<br>609,964.51) | <b>394,518.04</b><br>(299,221.94 to<br>505,426.23) | <b>595,298.00</b><br>(442,602.63 to<br>777,488.77) | <b>9,669.00</b><br>(7,829.03 to<br>11,452.27) | <b>21,483.79</b><br>(17,467.72 to<br>25,435.10) | <b>18,453.74</b><br>(15,309.27 to<br>21,904.75) | <b>25,617.12</b><br>(20,624.41 to<br>31,137.71) |

| Mauritania                           |                                                 |                                                    |                                                   |                                                    |                                              |                                              |                                              |                                              |
|--------------------------------------|-------------------------------------------------|----------------------------------------------------|---------------------------------------------------|----------------------------------------------------|----------------------------------------------|----------------------------------------------|----------------------------------------------|----------------------------------------------|
| Cause                                | YLLs (actual counts)                            |                                                    |                                                   |                                                    | Deaths (actual counts)                       |                                              |                                              |                                              |
|                                      | 2016                                            | 2040 Forecast                                      | 2040 Better Scenario                              | 2040 Worse Scenario                                | 2016                                         | 2040 Forecast                                | 2040 Better Scenario                         | 2040 Worse Scenario                          |
| <b>Neoplasms</b>                     | <b>67,437.54</b><br>(50,737.59 to<br>82,729.14) | <b>141,659.18</b><br>(100,201.62 to<br>189,873.28) | <b>134,485.81</b><br>(96,546.61 to<br>179,378.80) | <b>152,944.36</b><br>(106,409.55 to<br>210,246.64) | <b>2,346.84</b><br>(1,737.95 to<br>2,719.20) | <b>5,755.19</b><br>(4,411.21 to<br>7,323.66) | <b>5,624.81</b><br>(4,362.08 to<br>7,050.86) | <b>5,974.40</b><br>(4,462.47 to<br>7,831.03) |
| Lip and oral cavity cancer           | 664.48<br>(456.84 to<br>906.75)                 | 1,379.03<br>(836.66 to<br>2,281.91)                | 1,199.53<br>(755.06 to<br>1,873.85)               | 1,655.55<br>(941.27 to<br>2,920.63)                | 24.52<br>(17.60 to<br>32.58)                 | 58.30<br>(38.14 to<br>87.95)                 | 52.31<br>(35.59 to<br>76.94)                 | 67.21<br>(41.41 to<br>110.22)                |
| Nasopharynx cancer                   | 150.79<br>(94.34 to<br>223.73)                  | 297.59<br>(153.91 to<br>549.36)                    | 244.49<br>(130.47 to<br>439.75)                   | 381.10<br>(186.86 to<br>796.96)                    | 4.02<br>(2.56 to<br>5.93)                    | 9.02<br>(4.85 to<br>16.89)                   | 7.52<br>(4.24 to<br>13.27)                   | 11.34<br>(5.72 to<br>22.52)                  |
| Other pharynx cancer                 | 320.34<br>(219.78 to<br>434.88)                 | 533.53<br>(340.11 to<br>805.20)                    | 510.36<br>(321.31 to<br>780.78)                   | 556.15<br>(355.34 to<br>828.55)                    | 11.66<br>(8.31 to<br>15.34)                  | 22.27<br>(15.23 to<br>31.99)                 | 21.81<br>(14.77 to<br>31.72)                 | 22.50<br>(15.30 to<br>32.10)                 |
| Esophageal cancer                    | 1,820.54<br>(1,204.97 to<br>2,664.20)           | 3,516.29<br>(1,655.41 to<br>7,405.27)              | 3,080.65<br>(1,495.44 to<br>6,136.33)             | 4,317.54<br>(1,892.71 to<br>10,039.18)             | 70.54<br>(49.82 to<br>99.20)                 | 152.89<br>(77.72 to<br>299.99)               | 137.34<br>(71.99 to<br>252.95)               | 181.27<br>(86.13 to<br>386.70)               |
| Stomach cancer                       | 4,025.52<br>(2,985.52 to<br>5,168.95)           | 6,455.30<br>(4,609.46 to<br>9,223.44)              | 5,969.23<br>(4,263.57 to<br>8,382.36)             | 6,926.08<br>(4,886.60 to<br>9,916.49)              | 167.38<br>(129.08 to<br>211.12)              | 317.76<br>(242.31 to<br>427.90)              | 302.81<br>(232.76 to<br>401.80)              | 327.75<br>(246.82 to<br>447.03)              |
| Colon and rectum cancer              | 3,145.36<br>(2,161.45 to<br>4,328.19)           | 8,365.80<br>(5,226.86 to<br>12,460.15)             | 8,654.25<br>(5,393.15 to<br>12,922.42)            | 8,401.41<br>(5,239.31 to<br>12,549.68)             | 126.70<br>(91.00 to<br>165.55)               | 404.66<br>(276.60 to<br>573.22)              | 431.57<br>(269.19 to<br>609.26)              | 391.04<br>(260.59 to<br>560.25)              |
| Liver cancer                         | 12,481.10<br>(7,721.44 to<br>17,676.69)         | 29,545.42<br>(16,158.15 to<br>48,483.04)           | 25,984.65<br>(14,757.75 to<br>41,344.26)          | 33,727.42<br>(17,461.65 to<br>57,306.08)           | 385.73<br>(253.82 to<br>525.05)              | 1,078.08<br>(656.47 to<br>1,705.29)          | 971.39<br>(614.90 to<br>1,480.21)            | 1,189.66<br>(698.23 to<br>1,952.05)          |
| Liver cancer due to hepatitis B      | 7,252.32<br>(4,454.38 to<br>10,432.43)          | 16,889.11<br>(9,000.66 to<br>27,887.62)            | 14,892.35<br>(8,286.43 to<br>24,128.37)           | 19,185.93<br>(9,875.02 to<br>32,870.37)            | 217.96<br>(140.76 to<br>301.26)              | 593.94<br>(354.39 to<br>944.40)              | 536.12<br>(331.03 to<br>832.02)              | 652.87<br>(375.49 to<br>1,088.56)            |
| Liver cancer due to hepatitis C      | 870.27<br>(508.91 to<br>1,287.18)               | 2,319.12<br>(1,234.93 to<br>3,892.03)              | 2,074.43<br>(1,139.28 to<br>3,378.58)             | 2,563.70<br>(1,310.23 to<br>4,450.88)              | 33.85<br>(20.88 to<br>50.58)                 | 105.69<br>(60.52 to<br>175.48)               | 97.38<br>(57.16 to<br>156.89)                | 112.32<br>(62.73 to<br>187.90)               |
| Liver cancer due to alcohol use      | 889.10<br>(537.73 to<br>1,280.58)               | 2,390.59<br>(1,270.38 to<br>4,076.24)              | 2,081.85<br>(1,137.70 to<br>3,371.90)             | 2,752.22<br>(1,362.11 to<br>5,006.68)              | 31.17<br>(19.60 to<br>43.25)                 | 94.29<br>(54.78 to<br>153.67)                | 84.19<br>(51.93 to<br>130.75)                | 104.93<br>(57.40 to<br>178.86)               |
| Liver cancer due to other causes     | 3,469.40<br>(2,032.30 to<br>5,060.39)           | 7,946.59<br>(4,146.78 to<br>13,531.98)             | 6,936.02<br>(3,721.26 to<br>11,528.44)            | 9,225.56<br>(4,588.63 to<br>16,112.88)             | 102.75<br>(64.28 to<br>145.41)               | 284.17<br>(164.19 to<br>468.70)              | 253.69<br>(151.57 to<br>400.46)              | 319.55<br>(172.72 to<br>545.15)              |
| Gallbladder and biliary tract cancer | 810.25<br>(558.82 to<br>1,115.75)               | 1,414.81<br>(1,027.03 to<br>1,900.99)              | 1,465.47<br>(1,057.96 to<br>1,990.42)             | 1,347.60<br>(980.04 to<br>1,799.43)                | 34.25<br>(23.91 to<br>46.51)                 | 66.97<br>(49.77 to<br>87.98)                 | 70.97<br>(52.91 to<br>94.34)                 | 61.95<br>(45.95 to<br>80.80)                 |
| Pancreatic cancer                    | 2,878.91<br>(2,135.84 to<br>3,669.62)           | 7,718.21<br>(5,555.38 to<br>9,893.61)              | 7,962.32<br>(5,719.95 to<br>10,219.70)            | 7,593.42<br>(5,414.68 to<br>9,976.17)              | 120.13<br>(91.41 to<br>152.72)               | 361.82<br>(275.54 to<br>459.55)              | 381.69<br>(289.86 to<br>478.13)              | 345.75<br>(260.72 to<br>439.38)              |

|                                     |                                       |                                         |                                         |                                         |                                 |                                 |                                 |                                   |
|-------------------------------------|---------------------------------------|-----------------------------------------|-----------------------------------------|-----------------------------------------|---------------------------------|---------------------------------|---------------------------------|-----------------------------------|
| Larynx cancer                       | 363.62<br>(236.50 to<br>504.06)       | 744.20<br>(356.24 to<br>1,296.11)       | 562.15<br>(290.61 to<br>985.54)         | 1,047.31<br>(452.52 to<br>2,138.83)     | 14.46<br>(9.80 to<br>19.63)     | 33.64<br>(17.36 to<br>60.57)    | 26.00<br>(14.79 to<br>43.24)    | 45.75<br>(21.21 to<br>88.49)      |
| Tracheal, bronchus, and lung cancer | 3,754.92<br>(2,537.05 to<br>5,546.80) | 8,934.39<br>(4,164.14 to<br>19,067.42)  | 6,532.96<br>(3,387.11 to<br>12,707.85)  | 12,834.24<br>(5,329.66 to<br>29,777.99) | 154.52<br>(107.23 to<br>218.15) | 411.07<br>(202.47 to<br>809.89) | 309.79<br>(171.98 to<br>558.18) | 575.13<br>(253.90 to<br>1,232.19) |
| Malignant skin melanoma             | 249.45<br>(159.88 to<br>470.31)       | 628.55<br>(410.50 to<br>1,170.72)       | 694.13<br>(447.69 to<br>1,295.30)       | 568.28<br>(373.66 to<br>1,074.55)       | 9.15<br>(6.20 to<br>15.67)      | 27.90<br>(20.14 to<br>47.73)    | 31.78<br>(22.82 to<br>54.52)    | 24.21<br>(17.60 to<br>42.06)      |
| Non-melanoma skin cancer            | 149.63<br>(90.82 to<br>239.88)        | 394.18<br>(252.20 to<br>620.88)         | 374.89<br>(240.68 to<br>586.87)         | 405.61<br>(257.79 to<br>628.22)         | 5.69<br>(3.94 to<br>8.17)       | 19.68<br>(14.78 to<br>26.47)    | 19.51<br>(14.62 to<br>26.20)    | 19.17<br>(14.32 to<br>25.83)      |
| Breast cancer                       | 6,335.05<br>(3,935.84 to<br>9,168.92) | 12,957.62<br>(8,129.13 to<br>19,168.83) | 12,907.89<br>(8,252.07 to<br>19,024.16) | 12,986.08<br>(8,050.18 to<br>19,357.43) | 206.34<br>(131.00 to<br>290.97) | 471.84<br>(313.85 to<br>673.81) | 478.69<br>(319.66 to<br>677.49) | 462.28<br>(302.51 to<br>672.56)   |
| Cervical cancer                     | 6,046.48<br>(3,812.58 to<br>8,683.15) | 9,238.22<br>(5,813.74 to<br>13,497.06)  | 8,418.78<br>(5,216.28 to<br>12,240.29)  | 9,984.70<br>(6,004.57 to<br>14,723.05)  | 196.33<br>(123.48 to<br>277.19) | 322.31<br>(201.78 to<br>458.50) | 298.43<br>(184.58 to<br>420.58) | 341.37<br>(210.08 to<br>484.32)   |
| Uterine cancer                      | 868.16<br>(584.85 to<br>1,212.60)     | 1,749.11<br>(1,193.09 to<br>2,385.83)   | 1,590.44<br>(1,092.43 to<br>2,209.10)   | 1,867.71<br>(1,280.17 to<br>2,569.28)   | 35.16<br>(23.72 to<br>48.67)    | 78.48<br>(55.31 to<br>104.76)   | 73.09<br>(51.88 to<br>98.06)    | 81.28<br>(57.50 to<br>107.11)     |
| Ovarian cancer                      | 1,377.04<br>(897.94 to<br>1,898.90)   | 3,037.40<br>(1,930.86 to<br>4,301.49)   | 3,185.93<br>(2,035.96 to<br>4,478.77)   | 2,912.46<br>(1,835.49 to<br>4,256.10)   | 44.91<br>(29.19 to<br>61.42)    | 107.80<br>(71.27 to<br>151.57)  | 114.59<br>(76.59 to<br>158.24)  | 101.97<br>(67.02 to<br>146.30)    |
| Prostate cancer                     | 2,934.81<br>(1,564.96 to<br>4,300.86) | 10,198.85<br>(5,708.70 to<br>14,074.07) | 10,862.93<br>(6,194.90 to<br>15,112.44) | 9,445.32<br>(5,229.01 to<br>13,059.35)  | 162.56<br>(88.44 to<br>233.87)  | 656.64<br>(382.59 to<br>868.82) | 716.38<br>(422.58 to<br>947.66) | 589.31<br>(334.75 to<br>784.42)   |
| Testicular cancer                   | 91.68<br>(46.22 to<br>140.02)         | 154.12<br>(75.16 to<br>265.49)          | 144.87<br>(70.13 to<br>251.28)          | 162.59<br>(79.67 to<br>276.14)          | 2.15<br>(1.20 to<br>3.20)       | 4.31<br>(2.50 to<br>6.74)       | 4.12<br>(2.38 to<br>6.46)       | 4.44<br>(2.58 to<br>6.99)         |

**Mauritania**

| Cause                           | YLLs (actual counts)                  |                                       |                                       |                                       | Deaths (actual counts)        |                                 |                                 |                                 |
|---------------------------------|---------------------------------------|---------------------------------------|---------------------------------------|---------------------------------------|-------------------------------|---------------------------------|---------------------------------|---------------------------------|
|                                 | 2016                                  | 2040 Forecast                         | 2040 Better Scenario                  | 2040 Worse Scenario                   | 2016                          | 2040 Forecast                   | 2040 Better Scenario            | 2040 Worse Scenario             |
| Kidney cancer                   | 969.06<br>(739.00 to<br>1,213.89)     | 2,004.04<br>(1,441.42 to<br>2,668.11) | 2,132.33<br>(1,537.77 to<br>2,857.93) | 1,968.92<br>(1,414.06 to<br>2,657.58) | 26.72<br>(20.66 to<br>33.04)  | 74.80<br>(57.61 to<br>94.89)    | 81.97<br>(63.26 to<br>103.85)   | 69.44<br>(53.48 to<br>89.55)    |
| Bladder cancer                  | 947.69<br>(614.36 to<br>1,315.21)     | 2,452.68<br>(1,536.74 to<br>3,811.39) | 2,346.71<br>(1,502.98 to<br>3,526.58) | 2,609.39<br>(1,593.11 to<br>4,246.90) | 40.27<br>(28.43 to<br>52.81)  | 123.85<br>(84.94 to<br>173.17)  | 122.52<br>(85.68 to<br>168.32)  | 126.13<br>(83.61 to<br>184.31)  |
| Brain and nervous system cancer | 2,798.48<br>(1,986.03 to<br>3,568.62) | 5,188.78<br>(3,529.15 to<br>7,035.56) | 5,280.63<br>(3,600.54 to<br>7,237.73) | 5,276.60<br>(3,617.70 to<br>7,090.86) | 64.11<br>(44.31 to<br>84.06)  | 151.49<br>(104.81 to<br>200.96) | 158.06<br>(110.05 to<br>211.43) | 146.50<br>(101.90 to<br>192.37) |
| Thyroid cancer                  | 236.54<br>(157.82 to<br>312.95)       | 494.19<br>(315.77 to<br>729.48)       | 429.35<br>(277.29 to<br>624.04)       | 551.04<br>(349.51 to<br>823.65)       | 7.95<br>(5.60 to<br>10.54)    | 18.94<br>(12.78 to<br>26.92)    | 16.82<br>(11.64 to<br>23.29)    | 20.52<br>(13.75 to<br>29.19)    |
| Mesothelioma                    | 100.38<br>(71.16 to<br>137.71)        | 216.13<br>(151.04 to<br>299.49)       | 207.33<br>(144.06 to<br>291.38)       | 221.79<br>(156.22 to<br>305.84)       | 3.32<br>(2.44 to<br>4.46)     | 8.60<br>(6.46 to<br>11.29)      | 8.51<br>(6.33 to<br>11.25)      | 8.47<br>(6.41 to<br>11.00)      |
| Hodgkin lymphoma                | 265.95<br>(180.82 to<br>374.19)       | 297.73<br>(185.11 to<br>456.79)       | 248.35<br>(152.65 to<br>378.20)       | 358.26<br>(225.03 to<br>539.63)       | 5.75<br>(4.03 to<br>7.85)     | 7.79<br>(5.18 to<br>11.10)      | 6.65<br>(4.40 to<br>9.62)       | 8.99<br>(6.07 to<br>12.90)      |
| Non-Hodgkin lymphoma            | 3,698.82<br>(2,656.97 to<br>4,759.47) | 6,258.30<br>(4,216.60 to<br>8,627.64) | 6,246.98<br>(4,201.31 to<br>8,665.61) | 6,501.39<br>(4,417.72 to<br>8,932.31) | 80.45<br>(58.58 to<br>102.18) | 181.58<br>(130.94 to<br>236.55) | 186.49<br>(135.23 to<br>245.44) | 178.34<br>(127.94 to<br>233.28) |
| Multiple myeloma                | 718.62<br>(493.54 to<br>1,020.39)     | 2,027.30<br>(1,380.43 to<br>3,000.77) | 2,072.43<br>(1,407.34 to<br>3,015.46) | 1,954.93<br>(1,318.85 to<br>2,935.99) | 26.69<br>(18.81 to<br>38.12)  | 84.43<br>(60.48 to<br>123.36)   | 88.05<br>(62.59 to<br>126.78)   | 79.47<br>(56.52 to<br>118.13)   |
| Leukemia                        | 3,586.96<br>(2,333.40 to<br>4,733.93) | 5,654.19<br>(3,561.77 to<br>8,121.39) | 5,430.22<br>(3,466.67 to<br>7,816.60) | 6,103.76<br>(3,773.88 to<br>8,936.63) | 79.24<br>(52.74 to<br>102.06) | 166.44<br>(110.21 to<br>228.34) | 162.01<br>(108.26 to<br>220.97) | 172.14<br>(113.12 to<br>239.41) |
| Acute lymphoid leukemia         | 799.04<br>(484.83 to<br>1,091.35)     | 1,090.66<br>(604.64 to<br>1,658.07)   | 1,063.08<br>(589.63 to<br>1,622.13)   | 1,187.30<br>(651.34 to<br>1,806.27)   | 13.91<br>(8.47 to<br>19.15)   | 23.82<br>(13.28 to<br>35.92)    | 23.57<br>(13.07 to<br>35.66)    | 24.95<br>(13.96 to<br>37.50)    |

|                                 |                                                  |                                                   |                                                  |                                                    |                                              |                                               |                                              |                                                |
|---------------------------------|--------------------------------------------------|---------------------------------------------------|--------------------------------------------------|----------------------------------------------------|----------------------------------------------|-----------------------------------------------|----------------------------------------------|------------------------------------------------|
| Chronic lymphoid leukemia       | 168.65<br>(105.98 to<br>237.57)                  | 391.52<br>(232.70 to<br>567.18)                   | 374.53<br>(222.99 to<br>537.43)                  | 401.18<br>(238.86 to<br>592.11)                    | 7.47<br>(4.70 to<br>10.37)                   | 18.96<br>(11.50 to<br>27.14)                  | 18.42<br>(11.22 to<br>25.93)                 | 19.05<br>(11.60 to<br>27.53)                   |
| Acute myeloid leukemia          | 1,469.92<br>(954.34 to<br>2,049.95)              | 2,503.65<br>(1,523.79 to<br>3,734.78)             | 2,507.64<br>(1,537.83 to<br>3,700.98)            | 2,629.97<br>(1,600.32 to<br>3,926.77)              | 28.65<br>(19.09 to<br>39.20)                 | 64.79<br>(42.50 to<br>92.18)                  | 66.07<br>(43.33 to<br>93.49)                 | 64.90<br>(41.74 to<br>93.83)                   |
| Chronic myeloid leukemia        | 303.43<br>(149.85 to<br>473.81)                  | 396.83<br>(201.02 to<br>673.00)                   | 371.43<br>(188.77 to<br>620.64)                  | 419.40<br>(208.22 to<br>724.43)                    | 7.72<br>(4.40 to<br>11.43)                   | 12.66<br>(7.44 to<br>19.51)                   | 12.19<br>(7.29 to<br>18.35)                  | 12.95<br>(7.43 to<br>20.34)                    |
| Other leukemia                  | 845.91<br>(499.18 to<br>1,139.07)                | 1,271.53<br>(715.79 to<br>1,898.54)               | 1,113.54<br>(629.59 to<br>1,667.56)              | 1,465.91<br>(824.77 to<br>2,175.45)                | 21.49<br>(13.38 to<br>28.76)                 | 46.21<br>(29.35 to<br>63.24)                  | 41.75<br>(26.50 to<br>56.99)                 | 50.29<br>(31.27 to<br>69.76)                   |
| Other neoplasms                 | 5,646.90<br>(4,337.80 to<br>7,382.93)            | 9,803.24<br>(7,138.48 to<br>12,921.01)            | 9,745.54<br>(7,037.28 to<br>12,982.67)           | 10,277.72<br>(7,474.46 to<br>13,477.97)            | 136.15<br>(105.72 to<br>175.77)              | 331.83<br>(262.38 to<br>417.01)               | 343.93<br>(270.53 to<br>434.84)              | 321.01<br>(252.00 to<br>399.58)                |
| <b>Cardiovascular diseases</b>  | <b>81,981.36</b><br>(62,906.57 to<br>101,745.84) | <b>132,766.67</b><br>(89,849.59 to<br>192,489.23) | <b>88,037.06</b><br>(61,488.27 to<br>123,807.24) | <b>201,364.88</b><br>(129,092.63 to<br>297,590.11) | <b>3,692.43</b><br>(2,943.05 to<br>4,500.14) | <b>7,459.79</b><br>(5,561.37 to<br>10,086.23) | <b>5,309.10</b><br>(4,068.10 to<br>6,909.85) | <b>10,462.72</b><br>(7,483.40 to<br>14,362.83) |
| Rheumatic heart disease         | 1,459.91<br>(1,058.28 to<br>1,964.00)            | 1,312.92<br>(914.24 to<br>1,845.80)               | 1,070.23<br>(743.69 to<br>1,546.47)              | 1,578.55<br>(1,101.46 to<br>2,287.78)              | 49.20<br>(36.33 to<br>66.18)                 | 66.06<br>(49.08 to<br>91.87)                  | 56.46<br>(41.82 to<br>77.69)                 | 73.76<br>(54.53 to<br>102.60)                  |
| Ischemic heart disease          | 39,625.77<br>(28,768.16 to<br>50,707.54)         | 68,080.47<br>(40,511.55 to<br>112,347.63)         | 40,479.99<br>(24,529.70 to<br>66,417.96)         | 110,188.91<br>(62,984.09 to<br>181,459.06)         | 1,993.60<br>(1,520.15 to<br>2,467.94)        | 4,075.60<br>(2,673.78 to<br>6,150.30)         | 2,653.87<br>(1,764.99 to<br>3,977.57)        | 6,063.05<br>(3,865.22 to<br>9,443.88)          |
| Stroke                          | 25,813.11<br>(18,901.77 to<br>34,167.28)         | 33,388.23<br>(19,643.14 to<br>55,120.86)          | 21,055.66<br>(12,385.77 to<br>33,839.45)         | 54,688.97<br>(29,921.11 to<br>94,171.49)           | 1,111.18<br>(829.17 to<br>1,463.56)          | 1,836.87<br>(1,179.23 to<br>2,812.50)         | 1,268.81<br>(839.28 to<br>1,882.35)          | 2,727.66<br>(1,686.22 to<br>4,286.75)          |
| Ischemic stroke                 | 9,560.14<br>(6,865.35 to<br>12,942.90)           | 14,061.74<br>(7,786.24 to<br>23,597.92)           | 9,736.87<br>(5,520.56 to<br>16,406.33)           | 20,920.04<br>(11,352.56 to<br>36,239.99)           | 535.54<br>(385.90 to<br>719.74)              | 965.56<br>(583.95 to<br>1,590.70)             | 719.64<br>(444.03 to<br>1,174.09)            | 1,317.21<br>(772.47 to<br>2,223.66)            |
| Intracerebral hemorrhage        | 16,252.96<br>(11,871.21 to<br>21,207.88)         | 19,326.49<br>(9,915.41 to<br>35,280.30)           | 11,318.79<br>(5,827.14 to<br>20,099.82)          | 33,768.93<br>(16,371.44 to<br>63,620.28)           | 575.64<br>(419.38 to<br>760.00)              | 871.30<br>(498.61 to<br>1,461.67)             | 549.17<br>(323.89 to<br>887.93)              | 1,410.45<br>(761.33 to<br>2,453.10)            |
| Hypertensive heart disease      | 2,979.04<br>(1,627.52 to<br>4,486.12)            | 5,697.06<br>(2,850.85 to<br>10,045.84)            | 4,292.75<br>(2,253.99 to<br>7,066.18)            | 7,263.98<br>(3,486.28 to<br>13,674.85)             | 133.13<br>(74.39 to<br>196.99)               | 311.85<br>(168.91 to<br>519.62)               | 245.49<br>(137.74 to<br>381.32)              | 376.64<br>(191.22 to<br>691.88)                |
| Cardiomyopathy and myocarditis  | 1,437.54<br>(980.36 to<br>2,053.28)              | 2,786.42<br>(1,716.73 to<br>4,340.18)             | 2,747.07<br>(1,693.31 to<br>4,230.56)            | 2,888.96<br>(1,780.30 to<br>4,548.00)              | 40.92<br>(28.61 to<br>57.69)                 | 115.32<br>(76.63 to<br>170.14)                | 118.99<br>(79.09 to<br>175.70)               | 111.22<br>(72.73 to<br>167.74)                 |
| Myocarditis                     | 283.49<br>(166.83 to<br>511.29)                  | 373.56<br>(186.48 to<br>748.50)                   | 349.87<br>(172.56 to<br>712.77)                  | 407.93<br>(203.41 to<br>794.70)                    | 5.96<br>(3.56 to<br>10.24)                   | 11.65<br>(6.71 to<br>20.44)                   | 11.73<br>(6.83 to<br>20.57)                  | 11.41<br>(6.43 to<br>19.86)                    |
| <b>Mauritania</b>               |                                                  |                                                   |                                                  |                                                    |                                              |                                               |                                              |                                                |
| Cause                           | YLLs (actual counts)                             |                                                   |                                                  |                                                    | Deaths (actual counts)                       |                                               |                                              |                                                |
|                                 | 2016                                             | 2040 Forecast                                     | 2040 Better Scenario                             | 2040 Worse Scenario                                | 2016                                         | 2040 Forecast                                 | 2040 Better Scenario                         | 2040 Worse Scenario                            |
| Alcoholic cardiomyopathy        | 86.04<br>(35.89 to<br>159.63)                    | 196.58<br>(73.83 to<br>386.70)                    | 211.91<br>(82.14 to<br>418.04)                   | 183.34<br>(68.88 to<br>367.47)                     | 2.70<br>(1.13 to<br>4.92)                    | 7.15<br>(2.93 to<br>13.54)                    | 7.84<br>(3.29 to<br>14.77)                   | 6.51<br>(2.65 to<br>12.25)                     |
| Other cardiomyopathy            | 1,068.00<br>(750.57 to<br>1,499.61)              | 2,216.27<br>(1,398.53 to<br>3,505.36)             | 2,185.30<br>(1,384.90 to<br>3,418.56)            | 2,297.69<br>(1,424.94 to<br>3,705.02)              | 32.26<br>(23.01 to<br>44.26)                 | 96.52<br>(63.32 to<br>146.14)                 | 99.42<br>(66.29 to<br>146.52)                | 93.30<br>(60.30 to<br>141.05)                  |
| Atrial fibrillation and flutter | 340.27<br>(245.32 to<br>463.85)                  | 1,202.89<br>(883.50 to<br>1,611.84)               | 1,235.07<br>(911.88 to<br>1,646.92)              | 1,122.26<br>(814.78 to<br>1,545.66)                | 28.26<br>(20.61 to<br>38.41)                 | 116.05<br>(84.55 to<br>158.78)                | 124.49<br>(90.54 to<br>167.02)               | 102.55<br>(73.69 to<br>143.23)                 |
| Aortic aneurysm                 | 366.73<br>(247.92 to<br>531.44)                  | 912.24<br>(584.69 to<br>1,418.43)                 | 870.38<br>(573.26 to<br>1,321.95)                | 914.87<br>(574.15 to<br>1,464.37)                  | 16.26<br>(11.85 to<br>22.43)                 | 50.12<br>(35.79 to<br>70.55)                  | 50.50<br>(36.48 to<br>69.80)                 | 47.68<br>(33.39 to<br>69.14)                   |
| Peripheral artery disease       | 34.65<br>(18.95 to<br>61.19)                     | 159.86<br>(87.59 to<br>289.16)                    | 180.74<br>(97.23 to<br>328.65)                   | 145.01<br>(79.70 to<br>259.52)                     | 2.25<br>(1.26 to<br>3.93)                    | 12.30<br>(7.05 to<br>21.02)                   | 14.64<br>(8.30 to<br>25.44)                  | 10.43<br>(5.86 to<br>18.00)                    |
| Endocarditis                    | 1,579.41<br>(1,118.34 to<br>2,240.87)            | 2,646.03<br>(1,729.31 to<br>4,172.80)             | 2,463.42<br>(1,618.39 to<br>3,874.35)            | 2,979.31<br>(1,941.91 to<br>4,579.97)              | 40.49<br>(29.28 to<br>56.65)                 | 100.04<br>(67.85 to<br>149.36)                | 97.35<br>(66.01 to<br>144.91)                | 102.89<br>(68.87 to<br>153.55)                 |



|                                                                |                                                   |                                                   |                                                   |                                                   |                                          |                                              |                                              |                                              |
|----------------------------------------------------------------|---------------------------------------------------|---------------------------------------------------|---------------------------------------------------|---------------------------------------------------|------------------------------------------|----------------------------------------------|----------------------------------------------|----------------------------------------------|
| Other cardiovascular and circulatory diseases                  | 8,344.93<br>(5,834.49 to<br>14,207.62)            | 16,580.54<br>(10,967.95 to<br>27,144.54)          | 13,641.75<br>(9,104.11 to<br>22,219.02)           | 19,594.05<br>(12,533.43 to<br>32,513.98)          | 277.14<br>(189.92 to<br>501.58)          | 775.60<br>(545.69 to<br>1,295.76)            | 678.52<br>(475.42 to<br>1,137.84)            | 846.83<br>(581.79 to<br>1,417.59)            |
| <b>Chronic respiratory diseases</b>                            | <b>11,077.57<br/>(8,399.62 to<br/>14,293.07)</b>  | <b>16,146.62<br/>(10,358.18 to<br/>24,852.24)</b> | <b>11,676.75<br/>(7,806.16 to<br/>16,915.19)</b>  | <b>22,482.81<br/>(13,780.77 to<br/>37,629.27)</b> | <b>458.64<br/>(358.59 to<br/>586.07)</b> | <b>844.12<br/>(585.11 to<br/>1,219.91)</b>   | <b>628.41<br/>(462.42 to<br/>850.59)</b>     | <b>1,124.21<br/>(731.93 to<br/>1,760.31)</b> |
| Chronic obstructive pulmonary disease                          | 5,943.61<br>(4,400.56 to<br>7,759.70)             | 9,543.68<br>(5,393.94 to<br>16,585.71)            | 6,204.86<br>(3,762.47 to<br>9,923.40)             | 14,679.12<br>(7,791.11 to<br>27,319.77)           | 289.84<br>(219.45 to<br>377.46)          | 555.96<br>(352.96 to<br>895.18)              | 380.63<br>(258.84 to<br>563.66)              | 803.46<br>(474.75 to<br>1,430.34)            |
| Pneumoconiosis                                                 | 11.95<br>(7.00 to<br>17.26)                       | 19.72<br>(12.97 to<br>28.00)                      | 18.52<br>(11.89 to<br>26.56)                      | 20.80<br>(13.87 to<br>29.38)                      | 0.50<br>(0.33 to<br>0.70)                | 1.16<br>(0.84 to<br>1.57)                    | 1.11<br>(0.79 to<br>1.49)                    | 1.18<br>(0.85 to<br>1.62)                    |
| Silicosis                                                      | 0.86<br>(0.36 to<br>1.58)                         | 1.07<br>(0.53 to<br>1.82)                         | 1.01<br>(0.50 to<br>1.76)                         | 1.10<br>(0.56 to<br>1.89)                         | 0.04<br>(0.02 to<br>0.06)                | 0.16<br>(0.05 to<br>0.10)                    | 0.06<br>(0.03 to<br>0.10)                    | 0.06<br>(0.03 to<br>0.10)                    |
| Asbestosis                                                     | 3.34<br>(1.57 to<br>5.57)                         | 5.41<br>(2.87 to<br>8.73)                         | 5.53<br>(2.87 to<br>9.17)                         | 5.29<br>(2.87 to<br>8.35)                         | 0.09<br>(0.05 to<br>0.15)                | 0.20<br>(0.11 to<br>0.31)                    | 0.21<br>(0.12 to<br>0.33)                    | 0.19<br>(0.11 to<br>0.29)                    |
| Coal workers pneumoconiosis                                    | 0.44<br>(0.24 to<br>0.82)                         | 0.71<br>(0.36 to<br>1.28)                         | 0.53<br>(0.26 to<br>0.97)                         | 0.87<br>(0.44 to<br>1.61)                         | 0.02<br>(0.01 to<br>0.04)                | 0.04<br>(0.02 to<br>0.08)                    | 0.03<br>(0.02 to<br>0.06)                    | 0.05<br>(0.03 to<br>0.10)                    |
| Other pneumoconiosis                                           | 7.30<br>(4.73 to<br>10.26)                        | 12.54<br>(8.84 to<br>17.52)                       | 11.46<br>(7.88 to<br>16.08)                       | 13.54<br>(9.62 to<br>19.21)                       | 0.35<br>(0.24 to<br>0.48)                | 0.85<br>(0.61 to<br>1.17)                    | 0.81<br>(0.58 to<br>1.11)                    | 0.88<br>(0.63 to<br>1.23)                    |
| Asthma                                                         | 3,465.99<br>(2,391.54 to<br>4,982.15)             | 3,621.79<br>(2,083.18 to<br>6,074.16)             | 2,668.51<br>(1,591.80 to<br>4,296.32)             | 4,558.93<br>(2,557.39 to<br>7,204.42)             | 121.95<br>(85.44 to<br>176.15)           | 167.19<br>(100.58 to<br>266.95)              | 129.53<br>(80.13 to<br>203.85)               | 197.18<br>(116.28 to<br>323.30)              |
| Interstitial lung disease and pulmonary sarcoidosis            | 146.82<br>(100.58 to<br>204.02)                   | 378.68<br>(256.82 to<br>538.49)                   | 422.41<br>(287.89 to<br>606.08)                   | 341.28<br>(232.53 to<br>478.34)                   | 5.63<br>(3.89 to<br>7.97)                | 18.05<br>(12.78 to<br>25.43)                 | 20.72<br>(14.82 to<br>29.68)                 | 15.63<br>(11.06 to<br>21.72)                 |
| Other chronic respiratory diseases                             | 1,509.20<br>(961.58 to<br>2,278.58)               | 2,582.76<br>(1,508.23 to<br>4,213.95)             | 2,362.44<br>(1,397.84 to<br>3,743.77)             | 2,882.68<br>(1,654.99 to<br>4,732.91)             | 40.73<br>(24.82 to<br>64.17)             | 101.75<br>(61.00 to<br>160.39)               | 96.40<br>(59.24 to<br>149.98)                | 106.76<br>(62.33 to<br>175.73)               |
| <b>Cirrhosis and other chronic liver diseases</b>              | <b>17,272.87<br/>(11,935.29 to<br/>24,581.45)</b> | <b>31,268.60<br/>(20,347.27 to<br/>46,806.65)</b> | <b>29,628.87<br/>(18,706.62 to<br/>43,396.81)</b> | <b>33,258.03<br/>(21,638.00 to<br/>49,890.21)</b> | <b>527.94<br/>(375.06 to<br/>746.02)</b> | <b>1,146.62<br/>(820.18 to<br/>1,620.75)</b> | <b>1,087.49<br/>(773.55 to<br/>1,535.90)</b> | <b>1,181.11<br/>(851.24 to<br/>1,659.59)</b> |
| Cirrhosis and other chronic liver diseases due to hepatitis B  | 7,022.85<br>(4,618.60 to<br>10,444.88)            | 13,651.26<br>(8,665.12 to<br>20,651.14)           | 12,810.80<br>(8,181.66 to<br>19,416.91)           | 14,283.40<br>(9,200.31 to<br>21,646.52)           | 227.35<br>(157.68 to<br>333.00)          | 516.97<br>(364.12 to<br>742.27)              | 494.85<br>(346.59 to<br>712.70)              | 526.45<br>(373.35 to<br>757.89)              |
| Cirrhosis and other chronic liver diseases due to hepatitis C  | 3,218.11<br>(1,823.57 to<br>5,209.38)             | 6,312.90<br>(3,532.88 to<br>10,173.63)            | 5,912.44<br>(3,280.42 to<br>9,583.41)             | 6,622.76<br>(3,668.25 to<br>10,820.16)            | 104.01<br>(61.28 to<br>164.37)           | 232.28<br>(141.27 to<br>359.69)              | 221.23<br>(134.30 to<br>339.16)              | 238.22<br>(142.63 to<br>373.65)              |
| Cirrhosis and other chronic liver diseases due to alcohol use  | 3,326.32<br>(2,137.49 to<br>4,986.88)             | 6,369.20<br>(4,000.90 to<br>9,617.46)             | 5,824.86<br>(3,663.55 to<br>8,788.57)             | 6,817.74<br>(4,278.21 to<br>10,121.05)            | 111.67<br>(75.14 to<br>161.24)           | 245.65<br>(167.17 to<br>352.46)              | 229.11<br>(155.79 to<br>328.88)              | 256.20<br>(175.13 to<br>364.03)              |
| Cirrhosis and other chronic liver diseases due to other causes | 3,705.58<br>(2,648.49 to<br>5,074.44)             | 4,935.24<br>(3,334.21 to<br>7,045.10)             | 4,480.77<br>(2,993.62 to<br>6,465.52)             | 5,534.13<br>(3,706.91 to<br>7,946.37)             | 84.90<br>(61.88 to<br>115.36)            | 151.72<br>(110.56 to<br>208.03)              | 142.30<br>(102.51 to<br>195.50)              | 160.25<br>(115.65 to<br>219.65)              |
| <b>Digestive diseases</b>                                      | <b>15,484.00<br/>(10,988.38 to<br/>22,358.87)</b> | <b>24,434.13<br/>(16,754.34 to<br/>36,348.07)</b> | <b>21,889.74<br/>(14,944.69 to<br/>32,314.46)</b> | <b>27,363.94<br/>(18,854.05 to<br/>40,810.53)</b> | <b>450.12<br/>(332.07 to<br/>635.64)</b> | <b>1,014.19<br/>(781.24 to<br/>1,378.40)</b> | <b>942.32<br/>(721.01 to<br/>1,282.50)</b>   | <b>1,063.02<br/>(809.73 to<br/>1,468.06)</b> |
| Peptic ulcer disease                                           | 1,840.93<br>(1,227.88 to<br>2,760.32)             | 2,145.61<br>(1,396.61 to<br>3,305.63)             | 1,685.66<br>(1,093.87 to<br>2,645.56)             | 2,605.95<br>(1,715.62 to<br>4,078.96)             | 60.92<br>(40.89 to<br>90.24)             | 96.25<br>(66.34 to<br>139.56)                | 78.61<br>(53.57 to<br>115.60)                | 110.61<br>(77.71 to<br>162.23)               |

**Mauritania**

| Cause        | YLLs (actual counts)                |                                     |                                     |                                       | Deaths (actual counts)              |                              |                              |                              |
|--------------|-------------------------------------|-------------------------------------|-------------------------------------|---------------------------------------|-------------------------------------|------------------------------|------------------------------|------------------------------|
|              | 2016                                | 2040 Forecast                       | 2040 Better Scenario                | 2040 Worse Scenario                   | 2016                                | 2040 Forecast                | 2040 Better Scenario         | 2040 Worse Scenario          |
|              | Gastritis and duodenitis            | 641.06<br>(284.36 to<br>1,301.77)   | 1,079.09<br>(451.31 to<br>2,289.08) | 975.68<br>(400.39 to<br>2,076.31)     | 1,185.00<br>(502.34 to<br>2,534.40) | 16.22<br>(8.02 to<br>31.46)  | 34.24<br>(17.02 to<br>65.91) | 31.66<br>(15.84 to<br>60.86) |
| Appendicitis | 1,106.33<br>(721.70 to<br>1,705.73) | 1,432.06<br>(914.94 to<br>2,122.33) | 1,216.77<br>(783.30 to<br>1,809.62) | 1,671.09<br>(1,101.79 to<br>2,476.76) | 31.90<br>(20.97 to<br>46.44)        | 63.22<br>(43.46 to<br>88.12) | 56.51<br>(38.30 to<br>78.38) | 67.99<br>(46.83 to<br>94.70) |



| Mauritania                                                 |                                              |                                              |                                              |                                               |                                         |                                           |                                           |                                           |
|------------------------------------------------------------|----------------------------------------------|----------------------------------------------|----------------------------------------------|-----------------------------------------------|-----------------------------------------|-------------------------------------------|-------------------------------------------|-------------------------------------------|
| Cause                                                      | YLLs (actual counts)                         |                                              |                                              |                                               | Deaths (actual counts)                  |                                           |                                           |                                           |
|                                                            | 2016                                         | 2040 Forecast                                | 2040 Better Scenario                         | 2040 Worse Scenario                           | 2016                                    | 2040 Forecast                             | 2040 Better Scenario                      | 2040 Worse Scenario                       |
| <b>Diabetes, urogenital, blood, and endocrine diseases</b> | <b>36,267.00</b><br>(28,904.37 to 44,023.35) | <b>62,942.82</b><br>(47,471.30 to 83,939.66) | <b>52,556.79</b><br>(39,224.37 to 70,598.39) | <b>77,594.47</b><br>(58,058.83 to 103,792.48) | <b>1,097.01</b><br>(870.79 to 1,339.18) | <b>2,886.15</b><br>(2,287.68 to 3,686.47) | <b>2,483.99</b><br>(1,989.27 to 3,222.56) | <b>3,366.40</b><br>(2,649.88 to 4,396.25) |
| Diabetes mellitus                                          | 9,360.62<br>(7,024.64 to 12,196.84)          | 21,301.09<br>(13,194.64 to 32,783.66)        | 16,558.78<br>(10,220.19 to 25,476.60)        | 26,641.28<br>(16,214.09 to 41,805.10)         | 416.20<br>(318.18 to 541.54)            | 1,181.10<br>(806.02 to 1,731.94)          | 957.58<br>(643.13 to 1,414.95)            | 1,396.85<br>(937.50 to 2,075.15)          |
| Acute glomerulonephritis                                   | 33.45<br>(25.48 to 40.86)                    | 40.17<br>(27.63 to 55.34)                    | 34.53<br>(23.57 to 48.01)                    | 50.10<br>(35.14 to 68.79)                     | 0.54<br>(0.40 to 0.66)                  | 0.71<br>(0.49 to 0.96)                    | 0.62<br>(0.43 to 0.86)                    | 0.85<br>(0.59 to 1.14)                    |
| Chronic kidney disease                                     | 10,588.91<br>(7,687.92 to 13,666.32)         | 18,380.50<br>(11,860.17 to 28,559.11)        | 14,414.49<br>(9,498.87 to 22,408.51)         | 24,697.78<br>(15,622.95 to 38,970.53)         | 327.36<br>(240.01 to 418.88)            | 860.40<br>(555.81 to 1,374.39)            | 695.19<br>(457.63 to 1,119.80)            | 1,113.29<br>(685.25 to 1,885.22)          |
| Chronic kidney disease due to diabetes mellitus            | 2,273.94<br>(1,545.24 to 3,021.48)           | 5,436.90<br>(3,336.27 to 8,761.52)           | 4,318.10<br>(2,683.65 to 7,076.61)           | 7,208.58<br>(4,260.88 to 12,086.35)           | 87.85<br>(62.76 to 115.40)              | 271.73<br>(165.54 to 437.67)              | 220.86<br>(137.81 to 353.58)              | 351.26<br>(206.19 to 598.31)              |
| Chronic kidney disease due to hypertension                 | 1,426.58<br>(1,002.91 to 1,871.51)           | 3,572.11<br>(2,215.26 to 5,734.23)           | 2,844.40<br>(1,825.78 to 4,449.71)           | 4,705.69<br>(2,800.20 to 7,907.82)            | 69.58<br>(50.62 to 89.86)               | 229.55<br>(142.49 to 389.61)              | 188.86<br>(120.59 to 325.64)              | 290.46<br>(173.85 to 505.60)              |
| Chronic kidney disease due to glomerulonephritis           | 3,264.33<br>(2,354.99 to 4,334.15)           | 4,261.11<br>(2,670.62 to 6,457.54)           | 3,286.01<br>(2,061.75 to 5,008.86)           | 5,822.10<br>(3,582.74 to 9,016.79)            | 76.99<br>(55.75 to 102.07)              | 151.87<br>(95.04 to 249.94)               | 119.84<br>(76.66 to 197.42)               | 200.73<br>(120.59 to 346.73)              |
| Chronic kidney disease due to other and unspecified causes | 3,624.06<br>(2,628.37 to 4,714.95)           | 5,110.37<br>(3,260.71 to 7,790.96)           | 3,965.97<br>(2,561.78 to 6,094.72)           | 6,961.40<br>(4,410.18 to 10,893.78)           | 92.94<br>(66.23 to 123.42)              | 207.24<br>(131.57 to 332.86)              | 165.62<br>(106.59 to 267.59)              | 270.83<br>(168.75 to 446.18)              |
| Urinary diseases and male infertility                      | 4,828.05<br>(3,544.41 to 6,105.23)           | 11,325.92<br>(8,263.00 to 14,377.10)         | 11,106.30<br>(8,070.17 to 14,187.00)         | 17,737.81<br>(8,518.32 to 14,965.73)          | 147.98<br>(110.20 to 185.64)            | 517.69<br>(401.49 to 629.51)              | 531.59<br>(412.66 to 644.49)              | 494.91<br>(381.79 to 597.07)              |
| Urinary tract infections                                   | 3,703.34<br>(2,621.29 to 4,850.28)           | 9,538.31<br>(6,841.38 to 12,489.76)          | 9,532.81<br>(6,808.19 to 12,357.88)          | 9,725.58<br>(6,911.52 to 12,619.31)           | 112.02<br>(77.57 to 149.60)             | 434.57<br>(323.71 to 540.76)              | 455.35<br>(339.89 to 568.51)              | 407.70<br>(301.75 to 512.99)              |
| Urolithiasis                                               | 102.34<br>(62.68 to 151.62)                  | 214.30<br>(127.61 to 340.66)                 | 204.45<br>(123.22 to 322.78)                 | 230.62<br>(136.70 to 367.94)                  | 2.01<br>(1.25 to 2.98)                  | 5.34<br>(3.32 to 8.21)                    | 5.33<br>(3.31 to 8.07)                    | 5.39<br>(3.33 to 8.40)                    |
| Other urinary diseases                                     | 1,022.37<br>(647.88 to 1,431.98)             | 1,573.31<br>(876.36 to 2,495.50)             | 1,369.04<br>(745.80 to 2,180.94)             | 1,781.61<br>(1,013.15 to 2,794.66)            | 33.95<br>(21.99 to 47.56)               | 77.79<br>(45.89 to 116.49)                | 70.90<br>(41.98 to 108.08)                | 81.82<br>(49.64 to 120.36)                |
| Gynecological diseases                                     | 185.42<br>(114.42 to 271.90)                 | 286.22<br>(170.33 to 442.17)                 | 240.11<br>(141.46 to 370.01)                 | 332.83<br>(195.88 to 518.07)                  | 4.56<br>(2.92 to 6.64)                  | 7.55<br>(4.73 to 11.13)                   | 6.45<br>(4.10 to 9.62)                    | 8.58<br>(5.40 to 12.83)                   |
| Uterine fibroids                                           | 12.56<br>(6.64 to 21.07)                     | 16.93<br>(8.70 to 30.13)                     | 13.86<br>(7.32 to 24.75)                     | 19.90<br>(10.21 to 35.01)                     | 0.46<br>(0.26 to 0.77)                  | 0.68<br>(0.38 to 1.15)                    | 0.58<br>(0.32 to 0.95)                    | 0.77<br>(0.42 to 1.29)                    |
| Polycystic ovarian syndrome                                | 27.45<br>(7.46 to 53.34)                     | 25.62<br>(5.82 to 55.40)                     | 18.63<br>(4.26 to 40.41)                     | 33.70<br>(7.71 to 72.48)                      | 0.62<br>(0.17 to 1.16)                  | 0.60<br>(0.14 to 1.27)                    | 0.43<br>(0.10 to 0.92)                    | 0.78<br>(0.19 to 1.66)                    |
| Endometriosis                                              | 0.48<br>(0.18 to 1.23)                       | 0.88<br>(0.31 to 2.42)                       | 0.72<br>(0.25 to 1.99)                       | 1.04<br>(0.37 to 2.85)                        | 0.01<br>(0.00 to 0.03)                  | 0.02<br>(0.01 to 0.06)                    | 0.02<br>(0.01 to 0.04)                    | 0.02<br>(0.01 to 0.06)                    |
| Genital prolapse                                           | 4.89<br>(0.78 to 14.76)                      | 5.83<br>(0.93 to 17.83)                      | 4.58<br>(0.73 to 13.97)                      | 7.14<br>(1.12 to 21.53)                       | 0.12<br>(0.03 to 0.34)                  | 0.14<br>(0.03 to 0.41)                    | 0.12<br>(0.03 to 0.32)                    | 0.17<br>(0.04 to 0.48)                    |
| Other gynecological diseases                               | 140.04<br>(81.37 to 210.26)                  | 236.96<br>(135.72 to 375.85)                 | 202.31<br>(114.85 to 318.32)                 | 271.05<br>(154.54 to 429.61)                  | 3.35<br>(2.02 to 4.93)                  | 6.11<br>(3.76 to 9.23)                    | 5.30<br>(3.26 to 7.98)                    | 6.84<br>(4.21 to 10.43)                   |
| Hemoglobinopathies and hemolytic anemias                   | 8,680.29<br>(6,478.41 to 11,025.95)          | 8,019.21<br>(5,356.05 to 11,404.35)          | 6,912.09<br>(4,595.23 to 10,161.42)          | 9,960.42<br>(6,702.98 to 14,030.26)           | 140.03<br>(104.02 to 177.34)            | 181.45<br>(124.33 to 258.99)              | 159.15<br>(109.33 to 227.72)              | 211.19<br>(146.57 to 295.23)              |
| Thalassemias                                               | 492.42<br>(77.09 to 1,339.49)                | 237.14<br>(36.55 to 649.03)                  | 240.04<br>(39.10 to 653.03)                  | 309.38<br>(46.76 to 877.18)                   | 5.85<br>(0.91 to 15.92)                 | 2.85<br>(0.45 to 7.76)                    | 2.89<br>(0.48 to 7.83)                    | 3.70<br>(0.56 to 10.45)                   |

|                                                   |                                                   |                                                   |                                                   |                                                   |                                            |                                          |                                          |                                            |
|---------------------------------------------------|---------------------------------------------------|---------------------------------------------------|---------------------------------------------------|---------------------------------------------------|--------------------------------------------|------------------------------------------|------------------------------------------|--------------------------------------------|
| Sickle cell disorders                             | 6,881.78<br>(4,994.70 to<br>8,927.30)             | 5,786.36<br>(3,788.04 to<br>8,289.04)             | 4,989.04<br>(3,195.27 to<br>7,003.00)             | 7,304.79<br>(4,727.17 to<br>10,372.72)            | 96.11<br>(69.79 to<br>123.39)              | 95.91<br>(62.46 to<br>139.98)            | 83.57<br>(53.17 to<br>122.89)            | 116.87<br>(76.73 to<br>167.57)             |
| G6PD deficiency                                   | 905.30<br>(586.41 to<br>1,295.12)                 | 1,369.25<br>(808.81 to<br>2,201.77)               | 1,130.46<br>(651.55 to<br>1,846.96)               | 1,665.50<br>(992.91 to<br>2,673.17)               | 18.48<br>(12.14 to<br>26.77)               | 40.53<br>(24.97 to<br>64.45)             | 34.14<br>(20.44 to<br>55.40)             | 47.16<br>(28.60 to<br>74.14)               |
| Other hemoglobinopathies and hemolytic anemias    | 400.78<br>(270.40 to<br>561.18)                   | 626.46<br>(416.22 to<br>950.44)                   | 552.55<br>(364.70 to<br>849.71)                   | 680.75<br>(453.29 to<br>1,017.83)                 | 19.58<br>(12.99 to<br>28.76)               | 42.15<br>(29.20 to<br>63.80)             | 38.57<br>(26.67 to<br>59.18)             | 43.46<br>(29.47 to<br>65.69)               |
| Endocrine, metabolic, blood, and immune disorders | 2,590.26<br>(1,983.89 to<br>3,942.33)             | 3,589.71<br>(2,619.31 to<br>5,508.41)             | 3,290.49<br>(2,394.47 to<br>5,111.28)             | 4,174.25<br>(3,003.43 to<br>6,424.60)             | 60.34<br>(46.11 to<br>94.50)               | 137.25<br>(103.23 to<br>211.61)          | 133.41<br>(100.13 to<br>207.20)          | 140.73<br>(107.19 to<br>215.18)            |
| <b>Mauritania</b>                                 |                                                   |                                                   |                                                   |                                                   |                                            |                                          |                                          |                                            |
| Cause                                             | YLLs (actual counts)                              |                                                   |                                                   |                                                   | Deaths (actual counts)                     |                                          |                                          |                                            |
|                                                   | 2016                                              | 2040 Forecast                                     | 2040 Better Scenario                              | 2040 Worse Scenario                               | 2016                                       | 2040 Forecast                            | 2040 Better Scenario                     | 2040 Worse Scenario                        |
| <b>Musculoskeletal disorders</b>                  | <b>779.68<br/>(512.22 to<br/>1,112.61)</b>        | <b>1,688.75<br/>(1,091.93 to<br/>2,413.43)</b>    | <b>1,768.19<br/>(1,151.92 to<br/>2,541.81)</b>    | <b>1,642.31<br/>(1,066.47 to<br/>2,336.86)</b>    | <b>19.86<br/>(13.23 to<br/>28.16)</b>      | <b>58.98<br/>(41.10 to<br/>81.23)</b>    | <b>63.55<br/>(44.19 to<br/>87.69)</b>    | <b>54.51<br/>(37.38 to<br/>75.03)</b>      |
| Rheumatoid arthritis                              | 66.45<br>(42.93 to<br>101.14)                     | 160.14<br>(98.59 to<br>246.21)                    | 143.16<br>(86.30 to<br>228.04)                    | 173.02<br>(107.24 to<br>261.50)                   | 2.92<br>(1.80 to<br>4.55)                  | 9.43<br>(5.74 to<br>14.53)               | 8.67<br>(5.24 to<br>13.84)               | 9.75<br>(5.86 to<br>14.81)                 |
| Other musculoskeletal disorders                   | 713.23<br>(466.73 to<br>1,022.69)                 | 1,528.61<br>(977.03 to<br>2,203.14)               | 1,625.03<br>(1,041.19 to<br>2,343.39)             | 1,469.29<br>(937.33 to<br>2,117.97)               | 16.95<br>(11.27 to<br>24.16)               | 49.55<br>(34.00 to<br>68.90)             | 54.89<br>(37.74 to<br>76.09)             | 44.76<br>(30.73 to<br>62.53)               |
| <b>Other non-communicable diseases</b>            | <b>55,629.78<br/>(30,755.29 to<br/>80,940.26)</b> | <b>35,728.73<br/>(20,869.66 to<br/>53,721.97)</b> | <b>30,337.16<br/>(18,233.27 to<br/>44,854.76)</b> | <b>53,001.51<br/>(29,747.72 to<br/>82,666.60)</b> | <b>708.16<br/>(414.69 to<br/>1,009.27)</b> | <b>690.01<br/>(468.93 to<br/>966.66)</b> | <b>631.52<br/>(433.76 to<br/>875.64)</b> | <b>879.79<br/>(570.35 to<br/>1,280.04)</b> |
| Congenital birth defects                          | 50,297.44<br>(26,280.43 to<br>76,066.24)          | 26,276.79<br>(13,260.72 to<br>43,325.57)          | 21,462.36<br>(11,097.74 to<br>35,116.47)          | 41,934.09<br>(20,401.14 to<br>70,654.96)          | 601.80<br>(321.67 to<br>906.75)            | 338.62<br>(178.06 to<br>554.61)          | 279.51<br>(150.37 to<br>452.30)          | 524.00<br>(267.07 to<br>870.98)            |
| Neural tube defects                               | 12,572.20<br>(5,293.49 to<br>23,059.91)           | 2,808.39<br>(879.05 to<br>6,157.02)               | 2,952.60<br>(643.10 to<br>4,526.57)               | 5,073.84<br>(1,598.16 to<br>10,872.58)            | 147.05<br>(61.78 to<br>269.14)             | 34.18<br>(10.77 to<br>74.47)             | 25.08<br>(7.95 to<br>56.14)              | 60.82<br>(19.08 to<br>130.91)              |
| Congenital heart anomalies                        | 11,476.56<br>(5,827.66 to<br>19,526.54)           | 6,945.75<br>(3,592.75 to<br>12,148.55)            | 5,786.66<br>(3,018.52 to<br>10,008.15)            | 10,493.64<br>(5,299.35 to<br>18,632.35)           | 140.11<br>(73.83 to<br>237.54)             | 91.60<br>(48.72 to<br>158.60)            | 77.02<br>(41.04 to<br>130.31)            | 134.15<br>(69.07 to<br>235.24)             |
| Orofacial clefts                                  | 525.36<br>(61.45 to<br>1,955.67)                  | 249.56<br>(25.69 to<br>949.56)                    | 181.30<br>(19.02 to<br>674.11)                    | 464.81<br>(46.80 to<br>1,761.32)                  | 6.09<br>(0.71 to<br>22.67)                 | 2.89<br>(0.30 to<br>11.02)               | 2.10<br>(0.22 to<br>7.80)                | 5.39<br>(0.54 to<br>20.41)                 |
| Down syndrome                                     | 661.77<br>(249.66 to<br>1,494.93)                 | 564.88<br>(247.91 to<br>1,241.54)                 | 467.03<br>(209.10 to<br>1,001.94)                 | 822.97<br>(334.21 to<br>1,874.41)                 | 8.81<br>(3.65 to<br>18.70)                 | 9.27<br>(4.51 to<br>18.91)               | 7.84<br>(3.75 to<br>15.95)               | 12.57<br>(5.72 to<br>27.16)                |
| Other chromosomal abnormalities                   | 3,116.36<br>(1,028.63 to<br>6,133.97)             | 2,740.51<br>(986.46 to<br>5,721.26)               | 2,200.02<br>(803.12 to<br>4,489.02)               | 4,583.26<br>(1,650.34 to<br>9,734.81)             | 36.54<br>(12.02 to<br>71.81)               | 32.77<br>(12.08 to<br>68.53)             | 26.38<br>(9.82 to<br>53.04)              | 54.29<br>(19.54 to<br>114.64)              |
| Congenital musculoskeletal and limb anomalies     | 311.61<br>(99.88 to<br>673.90)                    | 203.54<br>(72.53 to<br>463.60)                    | 174.10<br>(64.34 to<br>396.32)                    | 323.36<br>(110.18 to<br>746.70)                   | 3.65<br>(1.20 to<br>7.86)                  | 2.44<br>(0.91 to<br>5.52)                | 2.09<br>(0.80 to<br>4.72)                | 3.83<br>(1.36 to<br>8.83)                  |
| Urogenital congenital anomalies                   | 414.79<br>(189.59 to<br>797.56)                   | 317.73<br>(162.96 to<br>604.29)                   | 285.09<br>(146.17 to<br>542.42)                   | 441.89<br>(216.03 to<br>879.16)                   | 5.63<br>(2.84 to<br>10.31)                 | 5.74<br>(3.15 to<br>9.64)                | 5.28<br>(2.85 to<br>8.88)                | 7.25<br>(3.90 to<br>12.97)                 |
| Digestive congenital anomalies                    | 2,531.01<br>(1,141.48 to<br>4,403.59)             | 1,351.35<br>(595.49 to<br>2,551.95)               | 1,099.51<br>(500.82 to<br>2,062.94)               | 2,225.38<br>(946.94 to<br>4,272.95)               | 29.71<br>(13.51 to<br>51.36)               | 16.33<br>(7.37 to<br>30.96)              | 13.34<br>(6.20 to<br>24.75)              | 26.55<br>(11.49 to<br>50.97)               |
| Other congenital birth defects                    | 18,687.79<br>(5,603.85 to<br>34,968.34)           | 11,095.08<br>(3,921.93 to<br>22,119.71)           | 9,216.05<br>(3,448.30 to<br>18,395.61)            | 17,504.93<br>(5,700.52 to<br>36,162.71)           | 224.21<br>(69.63 to<br>416.39)             | 143.40<br>(55.67 to<br>282.03)           | 120.38<br>(49.18 to<br>235.44)           | 219.15<br>(77.58 to<br>443.86)             |
| Skin and subcutaneous diseases                    | 2,691.22<br>(1,661.63 to<br>4,687.74)             | 8,065.71<br>(5,026.73 to<br>13,248.31)            | 7,738.65<br>(4,787.97 to<br>12,532.01)            | 8,743.99<br>(5,436.69 to<br>14,310.51)            | 75.70<br>(48.18 to<br>125.37)              | 335.30<br>(219.95 to<br>527.36)          | 338.83<br>(221.87 to<br>538.23)          | 328.83<br>(214.26 to<br>517.64)            |
| Cellulitis                                        | 200.41<br>(101.66 to<br>370.62)                   | 846.26<br>(410.06 to<br>1,503.24)                 | 901.73<br>(436.88 to<br>1,598.33)                 | 811.48<br>(396.39 to<br>1,457.77)                 | 6.35<br>(3.03 to<br>11.92)                 | 35.94<br>(16.54 to<br>63.02)             | 39.51<br>(18.41 to<br>68.33)             | 32.50<br>(14.87 to<br>57.83)               |



|                                                 |                                         |                                         |                                         |                                         |                                 |                                 |                                 |                                 |
|-------------------------------------------------|-----------------------------------------|-----------------------------------------|-----------------------------------------|-----------------------------------------|---------------------------------|---------------------------------|---------------------------------|---------------------------------|
|                                                 | 1,339.99<br>(852.30 to<br>2,158.45)     | 763.67<br>(453.82 to<br>1,217.62)       | 607.73<br>(363.50 to<br>973.06)         | 1,140.81<br>(661.31 to<br>1,828.83)     | 17.01<br>(11.01 to<br>26.48)    | 10.50<br>(6.43 to<br>16.72)     | 8.44<br>(5.05 to<br>13.31)      | 15.20<br>(9.04 to<br>23.98)     |
| Unintentional suffocation                       |                                         |                                         |                                         |                                         |                                 |                                 |                                 |                                 |
|                                                 | 2,632.99<br>(1,854.30 to<br>4,052.30)   | 2,352.99<br>(1,306.57 to<br>4,229.54)   | 1,996.62<br>(1,097.49 to<br>3,579.27)   | 2,930.31<br>(1,676.33 to<br>5,145.43)   | 48.15<br>(32.08 to<br>77.02)    | 62.98<br>(35.61 to<br>107.44)   | 56.28<br>(31.40 to<br>95.39)    | 71.13<br>(41.65 to<br>119.96)   |
| Other exposure to mechanical forces             |                                         |                                         |                                         |                                         |                                 |                                 |                                 |                                 |
|                                                 | 4,857.25<br>(3,610.01 to<br>6,217.33)   | 4,577.22<br>(2,872.35 to<br>7,110.23)   | 3,974.26<br>(2,439.06 to<br>6,295.21)   | 5,656.54<br>(3,645.32 to<br>8,584.52)   | 87.56<br>(64.62 to<br>111.49)   | 116.19<br>(78.18 to<br>167.84)  | 105.31<br>(69.67 to<br>153.93)  | 130.69<br>(88.17 to<br>187.76)  |
| Adverse effects of medical treatment            |                                         |                                         |                                         |                                         |                                 |                                 |                                 |                                 |
|                                                 | 2,897.59<br>(1,884.25 to<br>3,927.30)   | 3,123.07<br>(1,838.80 to<br>4,568.57)   | 2,507.81<br>(1,503.95 to<br>3,685.51)   | 4,083.80<br>(2,449.10 to<br>5,962.75)   | 58.31<br>(37.59 to<br>77.74)    | 88.17<br>(54.43 to<br>124.16)   | 74.20<br>(46.35 to<br>105.15)   | 104.79<br>(65.10 to<br>147.58)  |
| Animal contact                                  |                                         |                                         |                                         |                                         |                                 |                                 |                                 |                                 |
|                                                 | 2,325.31<br>(1,384.36 to<br>3,240.03)   | 2,540.46<br>(1,454.97 to<br>3,893.04)   | 2,037.00<br>(1,176.21 to<br>3,081.23)   | 3,297.12<br>(1,911.95 to<br>4,982.18)   | 48.72<br>(30.40 to<br>66.80)    | 74.01<br>(45.92 to<br>106.96)   | 62.03<br>(38.30 to<br>88.66)    | 87.81<br>(54.34 to<br>126.14)   |
| Venomous animal contact                         |                                         |                                         |                                         |                                         |                                 |                                 |                                 |                                 |
|                                                 | 572.28<br>(302.62 to<br>874.39)         | 582.62<br>(307.02 to<br>938.98)         | 470.81<br>(245.77 to<br>768.31)         | 786.68<br>(414.34 to<br>1,313.21)       | 9.59<br>(5.25 to<br>14.16)      | 14.16<br>(7.93 to<br>21.84)     | 12.17<br>(6.67 to<br>18.87)     | 16.98<br>(9.64 to<br>26.54)     |
| Non-venomous animal contact                     |                                         |                                         |                                         |                                         |                                 |                                 |                                 |                                 |
|                                                 | 4,225.42<br>(3,028.43 to<br>5,587.46)   | 4,157.55<br>(2,862.98 to<br>5,754.94)   | 3,930.03<br>(2,728.95 to<br>5,383.23)   | 5,046.32<br>(3,434.94 to<br>6,975.19)   | 68.34<br>(50.46 to<br>89.49)    | 95.58<br>(70.70 to<br>125.39)   | 95.79<br>(71.55 to<br>125.01)   | 102.45<br>(75.58 to<br>134.09)  |
| Foreign body                                    |                                         |                                         |                                         |                                         |                                 |                                 |                                 |                                 |
|                                                 | 3,890.84<br>(2,738.54 to<br>5,307.25)   | 3,829.24<br>(2,644.67 to<br>5,414.07)   | 3,642.07<br>(2,538.18 to<br>5,135.49)   | 4,641.58<br>(3,150.43 to<br>6,582.99)   | 62.80<br>(46.25 to<br>85.11)    | 88.69<br>(66.17 to<br>118.93)   | 89.53<br>(67.38 to<br>118.64)   | 94.56<br>(70.12 to<br>127.47)   |
| Pulmonary aspiration and foreign body in airway |                                         |                                         |                                         |                                         |                                 |                                 |                                 |                                 |
|                                                 | 334.58<br>(116.48 to<br>693.11)         | 328.32<br>(93.54 to<br>792.51)          | 287.96<br>(78.11 to<br>715.04)          | 404.74<br>(120.45 to<br>936.24)         | 5.54<br>(1.92 to<br>11.96)      | 6.90<br>(1.89 to<br>16.87)      | 6.26<br>(1.68 to<br>15.46)      | 7.89<br>(2.26 to<br>18.73)      |
| Foreign body in other body part                 |                                         |                                         |                                         |                                         |                                 |                                 |                                 |                                 |
|                                                 | 1,380.28<br>(572.26 to<br>2,035.52)     | 1,239.21<br>(432.86 to<br>2,294.50)     | 961.79<br>(332.59 to<br>1,753.59)       | 1,634.34<br>(584.08 to<br>2,910.26)     | 26.22<br>(10.89 to<br>38.44)    | 31.62<br>(11.97 to<br>53.12)    | 25.41<br>(9.42 to<br>43.45)     | 38.93<br>(14.60 to<br>65.13)    |
| Environmental heat and cold exposure            |                                         |                                         |                                         |                                         |                                 |                                 |                                 |                                 |
|                                                 | 2,013.16<br>(1,478.20 to<br>2,634.27)   | 1,467.59<br>(916.19 to<br>2,288.50)     | 1,261.50<br>(772.97 to<br>1,994.68)     | 1,798.16<br>(1,149.23 to<br>2,723.40)   | 35.34<br>(25.70 to<br>46.68)    | 35.01<br>(22.49 to<br>52.27)    | 31.26<br>(20.25 to<br>46.42)    | 39.76<br>(26.15 to<br>56.62)    |
| Other unintentional injuries                    |                                         |                                         |                                         |                                         |                                 |                                 |                                 |                                 |
|                                                 | 10,438.53<br>(5,999.50 to<br>18,045.04) | 14,504.62<br>(7,969.05 to<br>28,057.86) | 13,859.28<br>(7,634.41 to<br>26,638.60) | 15,261.44<br>(8,407.49 to<br>29,328.31) | 219.33<br>(129.08 to<br>385.00) | 370.32<br>(218.59 to<br>691.35) | 346.38<br>(212.11 to<br>669.09) | 377.49<br>(223.13 to<br>703.76) |
| Self-harm and interpersonal violence            |                                         |                                         |                                         |                                         |                                 |                                 |                                 |                                 |

**Mauritania**

| Cause                                                                        | YLLs (actual counts)                   |                                        |                                        |                                        | Deaths (actual counts)         |                                 |                                 |                                 |
|------------------------------------------------------------------------------|----------------------------------------|----------------------------------------|----------------------------------------|----------------------------------------|--------------------------------|---------------------------------|---------------------------------|---------------------------------|
|                                                                              | 2016                                   | 2040 Forecast                          | 2040 Better Scenario                   | 2040 Worse Scenario                    | 2016                           | 2040 Forecast                   | 2040 Better Scenario            | 2040 Worse Scenario             |
| Self-harm                                                                    | 5,437.07<br>(2,824.89 to<br>11,346.32) | 9,487.33<br>(4,798.60 to<br>20,491.71) | 9,023.61<br>(4,578.02 to<br>19,348.39) | 9,865.26<br>(5,034.28 to<br>21,556.70) | 133.03<br>(73.66 to<br>264.83) | 273.73<br>(154.04 to<br>556.42) | 266.18<br>(150.23 to<br>540.43) | 276.39<br>(155.85 to<br>564.06) |
| Self-harm by firearm                                                         | 724.29<br>(269.22 to<br>1,929.53)      | 1,100.06<br>(411.73 to<br>3,066.95)    | 1,026.20<br>(388.52 to<br>2,868.49)    | 1,159.02<br>(430.19 to<br>3,273.24)    | 18.71<br>(7.63 to<br>46.83)    | 34.35<br>(14.15 to<br>89.08)    | 32.82<br>(13.64 to<br>84.33)    | 35.11<br>(14.45 to<br>91.45)    |
| Self-harm by other specified means                                           | 4,712.78<br>(2,466.17 to<br>9,584.25)  | 8,387.26<br>(4,340.47 to<br>17,879.92) | 7,997.41<br>(4,171.44 to<br>17,156.99) | 8,706.24<br>(4,493.74 to<br>18,699.89) | 114.32<br>(63.92 to<br>226.75) | 239.37<br>(136.18 to<br>480.16) | 233.36<br>(133.13 to<br>469.22) | 241.28<br>(137.71 to<br>497.54) |
| Interpersonal violence                                                       | 5,001.46<br>(2,880.40 to<br>7,752.87)  | 5,017.29<br>(2,629.34 to<br>8,506.96)  | 4,835.67<br>(2,520.82 to<br>8,189.89)  | 5,396.19<br>(2,855.11 to<br>9,157.40)  | 86.30<br>(50.79 to<br>132.12)  | 96.59<br>(52.63 to<br>160.16)   | 94.20<br>(51.33 to<br>156.06)   | 101.10<br>(55.44 to<br>167.28)  |
| Physical violence by firearm                                                 | 2,494.56<br>(1,191.09 to<br>4,078.45)  | 2,480.28<br>(1,090.71 to<br>4,553.27)  | 2,405.78<br>(1,059.07 to<br>4,439.01)  | 2,604.91<br>(1,152.78 to<br>4,749.41)  | 43.55<br>(20.72 to<br>70.05)   | 46.09<br>(20.66 to<br>82.63)    | 44.96<br>(20.06 to<br>81.22)    | 47.76<br>(21.68 to<br>85.77)    |
| Physical violence by sharp object                                            | 1,368.36<br>(705.84 to<br>2,299.58)    | 1,547.87<br>(766.87 to<br>2,765.03)    | 1,524.39<br>(750.12 to<br>2,765.06)    | 1,619.20<br>(805.90 to<br>2,889.35)    | 24.23<br>(12.45 to<br>40.24)   | 30.92<br>(16.03 to<br>53.09)    | 30.83<br>(15.98 to<br>52.75)    | 31.51<br>(16.40 to<br>53.92)    |
| Physical violence by other means                                             | 1,138.54<br>(677.47 to<br>1,854.61)    | 989.13<br>(543.45 to<br>1,686.46)      | 905.50<br>(496.40 to<br>1,552.20)      | 1,172.08<br>(651.79 to<br>2,007.58)    | 18.52<br>(11.17 to<br>29.50)   | 19.58<br>(11.37 to<br>31.68)    | 18.41<br>(10.76 to<br>29.77)    | 21.83<br>(12.81 to<br>35.62)    |
| Forces of nature, conflict and terrorism, and executions and police conflict | 38.91<br>(28.17 to<br>61.13)           | 651.50<br>(7,103.68)                   | 635.91<br>(6,919.51)                   | 706.44<br>(7,684.79)                   | 0.73<br>(0.51 to<br>1.20)      | 11.78<br>(0.00 to<br>127.58)    | 11.65<br>(0.00 to<br>125.96)    | 12.39<br>(0.00 to<br>134.55)    |

|                                                                   |                                         |                                         |                                        |                                          |                                 |                                 |                                 |                                 |
|-------------------------------------------------------------------|-----------------------------------------|-----------------------------------------|----------------------------------------|------------------------------------------|---------------------------------|---------------------------------|---------------------------------|---------------------------------|
| Exposure to forces of nature                                      | 0.00<br>(0.00 to<br>0.00)               | 46.08<br>(0.00 to<br>435.20)            | 44.82<br>(0.00 to<br>423.13)           | 50.51<br>(0.00 to<br>477.41)             | 0.00<br>(0.00 to<br>0.00)       | 0.91<br>(0.00 to<br>8.57)       | 0.90<br>(0.00 to<br>8.52)       | 0.95<br>(0.00 to<br>9.01)       |
| Conflict and terrorism                                            | 0.00<br>(0.00 to<br>0.00)               | 594.51<br>(0.00 to<br>7,103.68)         | 580.29<br>(0.00 to<br>6,919.51)        | 644.60<br>(0.00 to<br>7,684.79)          | 0.00<br>(0.00 to<br>0.00)       | 10.66<br>(0.00 to<br>127.58)    | 10.54<br>(0.00 to<br>125.96)    | 11.22<br>(0.00 to<br>134.55)    |
| Executions and police conflict                                    | 38.91<br>(28.17 to<br>61.13)            | 10.92<br>(0.00 to<br>115.41)            | 10.80<br>(0.00 to<br>114.28)           | 11.34<br>(0.00 to<br>119.79)             | 0.73<br>(0.51 to<br>1.20)       | 0.21<br>(0.00 to<br>2.19)       | 0.20<br>(0.00 to<br>2.18)       | 0.21<br>(0.00 to<br>2.23)       |
| <b>Niger</b>                                                      |                                         |                                         |                                        |                                          |                                 |                                 |                                 |                                 |
| Cause                                                             | YLLs (in 1000s)                         |                                         |                                        |                                          | Deaths (in 1000s)               |                                 |                                 |                                 |
|                                                                   | 2016                                    | 2040 Forecast                           | 2040 Better Scenario                   | 2040 Worse Scenario                      | 2016                            | 2040 Forecast                   | 2040 Better Scenario            | 2040 Worse Scenario             |
| All causes                                                        | 11,016.74<br>(9,681.52 to<br>12,736.36) | 10,994.11<br>(8,934.25 to<br>13,340.91) | 8,301.03<br>(6,726.59 to<br>10,162.11) | 18,676.63<br>(15,491.32 to<br>22,231.90) | 177.62<br>(158.86 to<br>199.59) | 231.12<br>(199.71 to<br>266.35) | 181.15<br>(156.32 to<br>209.60) | 347.76<br>(298.79 to<br>399.57) |
| Communicable, maternal, neonatal, and nutritional diseases        | 8,776.79<br>(7,458.42 to<br>10,295.25)  | 7,209.65<br>(5,495.52 to<br>9,125.61)   | 5,157.16<br>(3,873.21 to<br>6,646.55)  | 13,507.66<br>(10,628.09 to<br>16,707.40) | 121.52<br>(106.49 to<br>139.98) | 112.78<br>(88.09 to<br>142.57)  | 82.11<br>(63.54 to<br>107.23)   | 197.23<br>(157.07 to<br>242.42) |
| HIV/AIDS and tuberculosis                                         | 382.93<br>(322.02 to<br>448.95)         | 362.31<br>(252.13 to<br>496.81)         | 230.22<br>(148.08 to<br>340.15)        | 783.77<br>(539.75 to<br>1,132.45)        | 8.73<br>(7.19 to<br>10.38)      | 8.60<br>(6.26 to<br>11.23)      | 5.66<br>(3.96 to<br>7.72)       | 17.05<br>(12.00 to<br>23.78)    |
| Tuberculosis                                                      | 219.06<br>(165.03 to<br>277.26)         | 180.41<br>(121.58 to<br>260.19)         | 119.96<br>(81.46 to<br>171.25)         | 335.31<br>(233.76 to<br>478.51)          | 5.67<br>(4.26 to<br>7.26)       | 5.04<br>(3.44 to<br>6.90)       | 3.50<br>(2.44 to<br>4.76)       | 8.69<br>(6.16 to<br>11.96)      |
| HIV/AIDS                                                          | 163.87<br>(135.79 to<br>197.49)         | 181.90<br>(84.37 to<br>293.55)          | 110.26<br>(39.78 to<br>207.94)         | 448.45<br>(236.33 to<br>774.36)          | 3.06<br>(2.61 to<br>3.60)       | 3.56<br>(1.76 to<br>5.65)       | 2.16<br>(0.84 to<br>3.80)       | 8.36<br>(4.30 to<br>14.51)      |
| Diarrhea, lower respiratory, and other common infectious diseases | 3,505.50<br>(2,709.41 to<br>4,470.46)   | 3,542.75<br>(2,308.45 to<br>4,925.22)   | 2,309.09<br>(1,417.58 to<br>3,491.31)  | 6,653.32<br>(4,592.86 to<br>9,903.26)    | 50.79<br>(40.92 to<br>62.59)    | 59.56<br>(39.57 to<br>84.62)    | 40.45<br>(25.97 to<br>60.85)    | 101.72<br>(69.64 to<br>138.76)  |
| Diarrheal diseases                                                | 1,444.35<br>(1,001.39 to<br>2,027.40)   | 1,117.89<br>(544.89 to<br>1,887.25)     | 835.55<br>(412.55 to<br>1,440.93)      | 2,048.90<br>(1,056.66 to<br>3,327.09)    | 21.04<br>(15.02 to<br>28.95)    | 19.21<br>(8.73 to<br>37.67)     | 14.46<br>(6.54 to<br>28.41)     | 33.88<br>(16.09 to<br>60.23)    |
| Intestinal infectious diseases                                    | 34.82<br>(15.80 to<br>65.27)            | 63.47<br>(29.31 to<br>123.81)           | 55.91<br>(25.68 to<br>107.26)          | 88.62<br>(40.01 to<br>171.43)            | 0.48<br>(0.22 to<br>0.90)       | 0.90<br>(0.42 to<br>1.76)       | 0.79<br>(0.37 to<br>1.51)       | 1.23<br>(0.56 to<br>2.39)       |
| Typhoid fever                                                     | 28.64<br>(11.74 to<br>57.76)            | 50.79<br>(20.97 to<br>103.84)           | 44.98<br>(18.82 to<br>92.37)           | 70.32<br>(27.91 to<br>148.00)            | 0.40<br>(0.17 to<br>0.78)       | 0.72<br>(0.31 to<br>1.47)       | 0.64<br>(0.27 to<br>1.28)       | 0.97<br>(0.40 to<br>2.01)       |
| Paratyphoid fever                                                 | 5.57<br>(1.94 to<br>13.76)              | 12.32<br>(4.57 to<br>28.17)             | 10.69<br>(3.96 to<br>24.49)            | 17.56<br>(6.67 to<br>40.66)              | 0.08<br>(0.03 to<br>0.19)       | 0.17<br>(0.07 to<br>0.39)       | 0.15<br>(0.06 to<br>0.34)       | 0.24<br>(0.09 to<br>0.55)       |
| Other intestinal infectious diseases                              | 0.61<br>(0.17 to<br>1.75)               | 0.35<br>(0.08 to<br>1.08)               | 0.24<br>(0.05 to<br>0.74)              | 0.74<br>(0.16 to<br>2.20)                | 0.01<br>(0.00 to<br>0.02)       | 0.00<br>(0.00 to<br>0.01)       | 0.00<br>(0.00 to<br>0.01)       | 0.01<br>(0.00 to<br>0.03)       |
| Lower respiratory infections                                      | 1,214.05<br>(903.30 to<br>1,639.71)     | 1,663.02<br>(800.52 to<br>2,489.48)     | 933.44<br>(422.14 to<br>1,677.45)      | 2,925.08<br>(1,774.60 to<br>4,180.63)    | 18.65<br>(14.63 to<br>23.84)    | 29.87<br>(17.73 to<br>43.15)    | 18.17<br>(10.74 to<br>28.82)    | 46.45<br>(29.91 to<br>64.64)    |
| Upper respiratory infections                                      | 2.94<br>(0.74 to<br>8.16)               | 2.75<br>(0.71 to<br>7.96)               | 1.81<br>(0.50 to<br>5.11)              | 6.01<br>(1.40 to<br>17.46)               | 0.04<br>(0.01 to<br>0.10)       | 0.04<br>(0.01 to<br>0.11)       | 0.03<br>(0.01 to<br>0.07)       | 0.09<br>(0.03 to<br>0.23)       |
| Otitis media                                                      | 0.06<br>(0.02 to<br>0.15)               | 0.01<br>(0.01 to<br>0.03)               | 0.01<br>(0.01 to<br>0.03)              | 0.02<br>(0.01 to<br>0.04)                | 0.00<br>(0.00 to<br>0.00)       | 0.00<br>(0.00 to<br>0.00)       | 0.00<br>(0.00 to<br>0.00)       | 0.00<br>(0.00 to<br>0.00)       |
| Meningitis                                                        | 593.87<br>(387.38 to<br>939.82)         | 477.08<br>(285.16 to<br>807.62)         | 379.19<br>(230.79 to<br>627.47)        | 1,210.90<br>(590.69 to<br>2,272.24)      | 7.87<br>(5.27 to<br>11.93)      | 6.80<br>(4.28 to<br>11.02)      | 5.63<br>(3.65 to<br>8.93)       | 15.50<br>(8.29 to<br>28.19)     |
| Pneumococcal meningitis                                           | 43.45<br>(27.26 to<br>70.44)            | 26.98<br>(15.37 to<br>47.11)            | 23.61<br>(13.78 to<br>40.65)           | 58.27<br>(29.45 to<br>108.67)            | 0.63<br>(0.41 to<br>1.01)       | 0.45<br>(0.27 to<br>0.77)       | 0.41<br>(0.26 to<br>0.69)       | 0.84<br>(0.47 to<br>1.50)       |
| H influenzae type B meningitis                                    | 84.96<br>(51.45 to<br>137.48)           | 130.90<br>(32.55 to<br>372.54)          | 80.94<br>(23.80 to<br>214.98)          | 675.39<br>(153.58 to<br>1,774.95)        | 1.09<br>(0.67 to<br>1.73)       | 1.64<br>(0.47 to<br>4.45)       | 1.05<br>(0.37 to<br>2.62)       | 8.03<br>(1.91 to<br>20.95)      |

|                                         |                                                            |                                                          |                                                          |                                                            |                                                   |                                                   |                                                   |                                                   |
|-----------------------------------------|------------------------------------------------------------|----------------------------------------------------------|----------------------------------------------------------|------------------------------------------------------------|---------------------------------------------------|---------------------------------------------------|---------------------------------------------------|---------------------------------------------------|
| Meningococcal meningitis                | 131.23<br>(80.32 to<br>209.28)                             | 113.39<br>(68.46 to<br>181.24)                           | 99.24<br>(61.16 to<br>156.12)                            | 164.78<br>(93.57 to<br>269.35)                             | 1.73<br>(1.08 to<br>2.72)                         | 1.66<br>(1.03 to<br>2.70)                         | 1.49<br>(0.93 to<br>2.36)                         | 2.29<br>(1.33 to<br>3.65)                         |
| Other meningitis                        | 334.24<br>(214.65 to<br>539.75)                            | 205.81<br>(126.79 to<br>328.04)                          | 175.40<br>(111.12 to<br>277.01)                          | 312.46<br>(175.09 to<br>506.28)                            | 4.43<br>(2.95 to<br>6.92)                         | 3.05<br>(2.00 to<br>4.58)                         | 2.67<br>(1.80 to<br>3.98)                         | 4.33<br>(2.58 to<br>6.80)                         |
| Encephalitis                            | 16.03<br>(9.41 to<br>26.40)                                | 24.91<br>(13.77 to<br>42.91)                             | 20.54<br>(11.57 to<br>34.29)                             | 39.31<br>(21.55 to<br>69.85)                               | 0.23<br>(0.14 to<br>0.36)                         | 0.37<br>(0.22 to<br>0.60)                         | 0.32<br>(0.19 to<br>0.49)                         | 0.56<br>(0.32 to<br>0.91)                         |
| Diphtheria                              | 0.60<br>(0.22 to<br>1.29)                                  | 0.23<br>(0.07 to<br>0.72)                                | 0.13<br>(0.05 to<br>0.34)                                | 1.05<br>(0.22 to<br>3.30)                                  | 0.01<br>(0.00 to<br>0.02)                         | 0.00<br>(0.00 to<br>0.01)                         | 0.00<br>(0.00 to<br>0.00)                         | 0.01<br>(0.00 to<br>0.04)                         |
| Whooping cough                          | 108.44<br>(89.95 to<br>379.28)                             | 158.45<br>(12.83 to<br>541.77)                           | 66.57<br>(4.98 to<br>230.80)                             | 256.84<br>(20.46 to<br>874.58)                             | 1.28<br>(0.11 to<br>4.49)                         | 1.88<br>(0.15 to<br>6.39)                         | 0.80<br>(0.06 to<br>2.76)                         | 3.04<br>(0.24 to<br>10.36)                        |
| Tetanus                                 | 32.85<br>(17.76 to<br>57.44)                               | 8.27<br>(3.73 to<br>16.78)                               | 5.39<br>(2.44 to<br>10.22)                               | 15.26<br>(6.96 to<br>32.35)                                | 0.47<br>(0.26 to<br>0.80)                         | 0.12<br>(0.06 to<br>0.23)                         | 0.09<br>(0.04 to<br>0.17)                         | 0.21<br>(0.10 to<br>0.41)                         |
| Measles                                 | 51.00<br>(16.46 to<br>120.41)                              | 20.77<br>(1.49 to<br>95.60)                              | 6.37<br>(0.75 to<br>29.30)                               | 49.57<br>(6.42 to<br>176.34)                               | 0.61<br>(0.20 to<br>1.44)                         | 0.25<br>(0.02 to<br>1.14)                         | 0.08<br>(0.01 to<br>0.35)                         | 0.59<br>(0.08 to<br>2.10)                         |
| <b>Niger</b>                            |                                                            |                                                          |                                                          |                                                            |                                                   |                                                   |                                                   |                                                   |
| Cause                                   | YLLs (in 1000s)                                            |                                                          |                                                          |                                                            | Deaths (in 1000s)                                 |                                                   |                                                   |                                                   |
|                                         | 2016                                                       | 2040 Forecast                                            | 2040 Better Scenario                                     | 2040 Worse Scenario                                        | 2016                                              | 2040 Forecast                                     | 2040 Better Scenario                              | 2040 Worse Scenario                               |
| Varicella and herpes zoster             | 6.49<br>(3.58 to<br>11.02)                                 | 5.89<br>(3.02 to<br>11.04)                               | 4.18<br>(2.24 to<br>7.89)                                | 11.76<br>(5.92 to<br>22.91)                                | 0.10<br>(0.06 to<br>0.15)                         | 0.11<br>(0.06 to<br>0.18)                         | 0.08<br>(0.05 to<br>0.13)                         | 0.18<br>(0.11 to<br>0.32)                         |
| Neglected tropical diseases and malaria | <b>2,773.89</b><br><b>(1,882.00 to</b><br><b>3,738.99)</b> | <b>1,390.37</b><br><b>(909.49 to</b><br><b>1,977.19)</b> | <b>1,195.90</b><br><b>(793.49 to</b><br><b>1,659.42)</b> | <b>2,216.86</b><br><b>(1,419.18 to</b><br><b>3,159.41)</b> | <b>35.27</b><br><b>(24.93 to</b><br><b>46.77)</b> | <b>19.77</b><br><b>(13.70 to</b><br><b>26.91)</b> | <b>17.39</b><br><b>(12.26 to</b><br><b>23.21)</b> | <b>29.85</b><br><b>(20.28 to</b><br><b>41.56)</b> |
| Malaria                                 | 2,642.24<br>(1,736.77 to<br>3,604.16)                      | 1,268.22<br>(796.55 to<br>1,835.02)                      | 1,105.81<br>(717.14 to<br>1,555.40)                      | 1,970.86<br>(1,173.25 to<br>2,900.97)                      | 33.40<br>(22.68 to<br>44.95)                      | 17.95<br>(11.96 to<br>24.94)                      | 16.02<br>(11.02 to<br>21.82)                      | 26.38<br>(16.61 to<br>37.74)                      |
| Chagas disease                          | 0.00<br>(0.00 to<br>0.00)                                  | 0.00<br>(0.00 to<br>0.00)                                | 0.00<br>(0.00 to<br>0.00)                                | 0.00<br>(0.00 to<br>0.00)                                  | 0.00<br>(0.00 to<br>0.00)                         | 0.00<br>(0.00 to<br>0.00)                         | 0.00<br>(0.00 to<br>0.00)                         | 0.00<br>(0.00 to<br>0.00)                         |
| Leishmaniasis                           | 0.05<br>(0.03 to<br>0.09)                                  | 0.05<br>(0.03 to<br>0.08)                                | 0.03<br>(0.02 to<br>0.06)                                | 0.08<br>(0.05 to<br>0.13)                                  | 0.00<br>(0.00 to<br>0.00)                         | 0.00<br>(0.00 to<br>0.00)                         | 0.00<br>(0.00 to<br>0.00)                         | 0.00<br>(0.00 to<br>0.00)                         |
| African trypanosomiasis                 | 0.00<br>(0.00 to<br>0.00)                                  | 0.00<br>(0.00 to<br>0.00)                                | 0.00<br>(0.00 to<br>0.00)                                | 0.00<br>(0.00 to<br>0.00)                                  | 0.00<br>(0.00 to<br>0.00)                         | 0.00<br>(0.00 to<br>0.00)                         | 0.00<br>(0.00 to<br>0.00)                         | 0.00<br>(0.00 to<br>0.00)                         |
| Schistosomiasis                         | 4.31<br>(3.04 to<br>5.92)                                  | 3.82<br>(2.58 to<br>5.47)                                | 3.22<br>(2.17 to<br>4.59)                                | 5.16<br>(3.50 to<br>7.33)                                  | 0.11<br>(0.08 to<br>0.15)                         | 0.10<br>(0.07 to<br>0.14)                         | 0.09<br>(0.06 to<br>0.13)                         | 0.13<br>(0.09 to<br>0.18)                         |
| Cysticercosis                           | 0.26<br>(0.10 to<br>0.59)                                  | 0.14<br>(0.05 to<br>0.32)                                | 0.13<br>(0.04 to<br>0.29)                                | 0.19<br>(0.07 to<br>0.43)                                  | 0.00<br>(0.00 to<br>0.01)                         | 0.00<br>(0.00 to<br>0.01)                         | 0.00<br>(0.00 to<br>0.01)                         | 0.00<br>(0.00 to<br>0.01)                         |
| Cystic echinococcosis                   | 1.85<br>(1.24 to<br>2.68)                                  | 0.90<br>(0.58 to<br>1.34)                                | 0.56<br>(0.35 to<br>0.83)                                | 2.14<br>(1.36 to<br>3.23)                                  | 0.03<br>(0.02 to<br>0.04)                         | 0.02<br>(0.01 to<br>0.03)                         | 0.01<br>(0.01 to<br>0.02)                         | 0.04<br>(0.02 to<br>0.06)                         |
| Dengue                                  | 0.42<br>(0.01 to<br>1.91)                                  | 1.82<br>(0.06 to<br>7.75)                                | 1.60<br>(0.05 to<br>6.61)                                | 2.79<br>(0.08 to<br>12.23)                                 | 0.01<br>(0.00 to<br>0.02)                         | 0.03<br>(0.00 to<br>0.12)                         | 0.03<br>(0.00 to<br>0.10)                         | 0.04<br>(0.00 to<br>0.17)                         |
| Yellow fever                            | 11.72<br>(2.01 to<br>35.85)                                | 7.98<br>(1.27 to<br>27.50)                               | 5.99<br>(0.97 to<br>20.20)                               | 13.55<br>(2.24 to<br>43.99)                                | 0.18<br>(0.03 to<br>0.56)                         | 0.13<br>(0.02 to<br>0.43)                         | 0.10<br>(0.02 to<br>0.33)                         | 0.21<br>(0.03 to<br>0.67)                         |
| Rabies                                  | 27.20<br>(7.53 to<br>80.48)                                | 18.58<br>(4.41 to<br>57.55)                              | 10.44<br>(2.36 to<br>34.00)                              | 51.46<br>(11.66 to<br>149.82)                              | 0.41<br>(0.11 to<br>1.22)                         | 0.29<br>(0.06 to<br>0.93)                         | 0.17<br>(0.03 to<br>0.55)                         | 0.79<br>(0.17 to<br>2.35)                         |
| Intestinal nematode infections          | 3.24<br>(1.73 to<br>5.43)                                  | 5.92<br>(3.16 to<br>10.20)                               | 5.40<br>(2.89 to<br>9.31)                                | 8.77<br>(4.77 to<br>15.06)                                 | 0.04<br>(0.02 to<br>0.07)                         | 0.07<br>(0.04 to<br>0.12)                         | 0.07<br>(0.04 to<br>0.11)                         | 0.11<br>(0.06 to<br>0.18)                         |



|                                                          |                                                            |                                                            |                                                          |                                                            |                                                   |                                                   |                                                  |                                                   |
|----------------------------------------------------------|------------------------------------------------------------|------------------------------------------------------------|----------------------------------------------------------|------------------------------------------------------------|---------------------------------------------------|---------------------------------------------------|--------------------------------------------------|---------------------------------------------------|
| Other neglected tropical diseases                        | 82.60<br>(42.22 to<br>156.90)                              | 82.92<br>(45.83 to<br>147.50)                              | 62.71<br>(34.13 to<br>110.32)                            | 161.85<br>(86.99 to<br>289.55)                             | 1.08<br>(0.60 to<br>1.95)                         | 1.17<br>(0.70 to<br>1.98)                         | 0.91<br>(0.55 to<br>1.48)                        | 2.16<br>(1.23 to<br>3.69)                         |
| <b>Maternal disorders</b>                                | <b>215.41</b><br><b>(157.26 to</b><br><b>268.88)</b>       | <b>203.31</b><br><b>(130.91 to</b><br><b>312.17)</b>       | <b>137.31</b><br><b>(89.72 to</b><br><b>207.81)</b>      | <b>372.47</b><br><b>(248.51 to</b><br><b>556.63)</b>       | <b>3.90</b><br><b>(2.87 to</b><br><b>4.83)</b>    | <b>3.68</b><br><b>(2.40 to</b><br><b>5.57)</b>    | <b>2.49</b><br><b>(1.63 to</b><br><b>3.74)</b>   | <b>6.72</b><br><b>(4.51 to</b><br><b>9.99)</b>    |
| Maternal hemorrhage                                      | 72.40<br>(48.80 to<br>98.84)                               | 66.54<br>(39.59 to<br>106.02)                              | 45.30<br>(27.82 to<br>72.87)                             | 117.65<br>(70.88 to<br>184.37)                             | 1.33<br>(0.90 to<br>1.80)                         | 1.23<br>(0.73 to<br>1.93)                         | 0.84<br>(0.52 to<br>1.31)                        | 2.16<br>(1.33 to<br>3.37)                         |
| Maternal sepsis and other maternal infections            | 8.33<br>(4.41 to<br>13.62)                                 | 7.25<br>(3.40 to<br>13.65)                                 | 4.90<br>(2.30 to<br>9.27)                                | 13.14<br>(6.15 to<br>24.14)                                | 0.15<br>(0.08 to<br>0.25)                         | 0.13<br>(0.06 to<br>0.24)                         | 0.09<br>(0.04 to<br>0.16)                        | 0.24<br>(0.12 to<br>0.42)                         |
| Maternal hypertensive disorders                          | 39.06<br>(25.34 to<br>55.26)                               | 38.26<br>(21.68 to<br>62.52)                               | 25.96<br>(14.55 to<br>42.49)                             | 68.61<br>(40.42 to<br>107.11)                              | 0.69<br>(0.46 to<br>0.98)                         | 0.68<br>(0.40 to<br>1.11)                         | 0.46<br>(0.26 to<br>0.76)                        | 1.21<br>(0.73 to<br>1.90)                         |
| Maternal obstructed labor and uterine rupture            | 5.86<br>(2.98 to<br>9.99)                                  | 6.00<br>(2.86 to<br>11.28)                                 | 3.97<br>(1.86 to<br>7.52)                                | 11.07<br>(5.20 to<br>20.40)                                | 0.11<br>(0.05 to<br>0.18)                         | 0.11<br>(0.05 to<br>0.21)                         | 0.07<br>(0.03 to<br>0.14)                        | 0.20<br>(0.10 to<br>0.37)                         |
| Maternal abortion, miscarriage, and ectopic pregnancy    | 17.76<br>(10.49 to<br>27.00)                               | 9.94<br>(4.75 to<br>19.59)                                 | 6.60<br>(3.18 to<br>13.11)                               | 17.95<br>(8.83 to<br>36.59)                                | 0.32<br>(0.19 to<br>0.48)                         | 0.32<br>(0.09 to<br>0.34)                         | 0.18<br>(0.06 to<br>0.23)                        | 0.32<br>(0.16 to<br>0.64)                         |
| Indirect maternal deaths                                 | 46.81<br>(30.71 to<br>65.47)                               | 47.47<br>(27.43 to<br>78.03)                               | 32.00<br>(18.42 to<br>53.07)                             | 91.59<br>(53.88 to<br>146.47)                              | 0.84<br>(0.55 to<br>1.16)                         | 0.84<br>(0.50 to<br>1.38)                         | 0.57<br>(0.34 to<br>0.92)                        | 1.62<br>(0.96 to<br>2.55)                         |
| Late maternal deaths                                     | 4.49<br>(2.13 to<br>8.46)                                  | 3.51<br>(1.55 to<br>7.21)                                  | 2.36<br>(1.02 to<br>4.68)                                | 6.65<br>(3.01 to<br>13.46)                                 | 0.08<br>(0.04 to<br>0.15)                         | 0.06<br>(0.03 to<br>0.13)                         | 0.04<br>(0.02 to<br>0.08)                        | 0.12<br>(0.05 to<br>0.24)                         |
| Maternal deaths aggravated by HIV/AIDS                   | 0.58<br>(0.31 to<br>0.91)                                  | 5.07<br>(2.09 to<br>9.20)                                  | 2.93<br>(0.88 to<br>5.86)                                | 10.34<br>(4.74 to<br>18.06)                                | 0.01<br>(0.01 to<br>0.02)                         | 0.10<br>(0.04 to<br>0.18)                         | 0.06<br>(0.02 to<br>0.12)                        | 0.20<br>(0.09 to<br>0.35)                         |
| Other maternal disorders                                 | 20.11<br>(11.55 to<br>30.30)                               | 19.27<br>(9.79 to<br>32.43)                                | 13.28<br>(6.92 to<br>22.08)                              | 35.48<br>(18.56 to<br>58.45)                               | 0.37<br>(0.21 to<br>0.55)                         | 0.35<br>(0.18 to<br>0.59)                         | 0.24<br>(0.13 to<br>0.40)                        | 0.64<br>(0.35 to<br>1.06)                         |
| <b>Niger</b>                                             |                                                            |                                                            |                                                          |                                                            |                                                   |                                                   |                                                  |                                                   |
| Cause                                                    | YLLs (in 1000s)                                            |                                                            |                                                          |                                                            | Deaths (in 1000s)                                 |                                                   |                                                  |                                                   |
|                                                          | 2016                                                       | 2040 Forecast                                              | 2040 Better Scenario                                     | 2040 Worse Scenario                                        | 2016                                              | 2040 Forecast                                     | 2040 Better Scenario                             | 2040 Worse Scenario                               |
| <b>Neonatal disorders</b>                                | <b>1,442.67</b><br><b>(1,141.04 to</b><br><b>1,820.08)</b> | <b>1,383.22</b><br><b>(1,002.19 to</b><br><b>1,895.06)</b> | <b>1,047.01</b><br><b>(753.68 to</b><br><b>1,443.74)</b> | <b>2,887.38</b><br><b>(2,129.19 to</b><br><b>3,927.28)</b> | <b>16.67</b><br><b>(13.18 to</b><br><b>21.03)</b> | <b>15.98</b><br><b>(11.58 to</b><br><b>21.90)</b> | <b>12.10</b><br><b>(8.71 to</b><br><b>16.68)</b> | <b>33.36</b><br><b>(24.61 to</b><br><b>45.38)</b> |
| Neonatal preterm birth                                   | 424.38<br>(237.04 to<br>609.37)                            | 360.61<br>(189.39 to<br>556.71)                            | 250.14<br>(127.50 to<br>393.88)                          | 783.77<br>(418.73 to<br>1,182.73)                          | 4.90<br>(2.74 to<br>7.04)                         | 4.17<br>(2.19 to<br>6.43)                         | 2.89<br>(1.47 to<br>4.55)                        | 9.06<br>(4.84 to<br>13.66)                        |
| Neonatal encephalopathy due to birth asphyxia and trauma | 503.28<br>(320.58 to<br>748.46)                            | 427.91<br>(232.35 to<br>700.56)                            | 339.36<br>(185.90 to<br>548.50)                          | 856.71<br>(469.96 to<br>1,397.77)                          | 5.81<br>(3.70 to<br>8.65)                         | 4.94<br>(2.69 to<br>8.09)                         | 3.92<br>(2.15 to<br>6.34)                        | 9.90<br>(5.43 to<br>16.15)                        |
| Neonatal sepsis and other neonatal infections            | 338.35<br>(211.73 to<br>508.86)                            | 428.66<br>(262.72 to<br>650.52)                            | 334.98<br>(202.62 to<br>516.02)                          | 877.19<br>(538.01 to<br>1,328.89)                          | 3.91<br>(2.45 to<br>5.88)                         | 4.95<br>(3.04 to<br>7.52)                         | 3.87<br>(2.34 to<br>5.96)                        | 10.14<br>(6.22 to<br>15.36)                       |
| Hemolytic disease and other neonatal jaundice            | 49.50<br>(26.20 to<br>96.10)                               | 31.52<br>(14.19 to<br>64.60)                               | 23.43<br>(10.80 to<br>48.59)                             | 69.37<br>(31.85 to<br>140.04)                              | 0.57<br>(0.30 to<br>1.11)                         | 0.36<br>(0.16 to<br>0.75)                         | 0.27<br>(0.12 to<br>0.56)                        | 0.80<br>(0.37 to<br>1.62)                         |
| Other neonatal disorders                                 | 127.16<br>(70.18 to<br>222.02)                             | 134.52<br>(66.46 to<br>247.52)                             | 99.09<br>(49.60 to<br>185.26)                            | 300.33<br>(150.25 to<br>558.52)                            | 1.47<br>(0.81 to<br>2.57)                         | 1.55<br>(0.77 to<br>2.86)                         | 1.15<br>(0.57 to<br>2.14)                        | 3.47<br>(1.74 to<br>6.45)                         |
| <b>Nutritional deficiencies</b>                          | <b>372.48</b><br><b>(203.21 to</b><br><b>626.99)</b>       | <b>240.33</b><br><b>(128.74 to</b><br><b>413.70)</b>       | <b>166.20</b><br><b>(91.35 to</b><br><b>288.93)</b>      | <b>450.23</b><br><b>(239.05 to</b><br><b>776.44)</b>       | <b>4.90</b><br><b>(2.88 to</b><br><b>8.00)</b>    | <b>3.64</b><br><b>(2.20 to</b><br><b>5.83)</b>    | <b>2.72</b><br><b>(1.68 to</b><br><b>4.24)</b>   | <b>6.23</b><br><b>(3.61 to</b><br><b>10.17)</b>   |
| Protein-energy malnutrition                              | 355.55<br>(191.99 to<br>602.25)                            | 217.26<br>(109.36 to<br>381.86)                            | 148.61<br>(77.32 to<br>262.53)                           | 409.69<br>(210.28 to<br>712.71)                            | 4.62<br>(2.65 to<br>7.60)                         | 3.23<br>(1.86 to<br>5.26)                         | 2.39<br>(1.45 to<br>3.79)                        | 5.58<br>(3.09 to<br>9.27)                         |
| Iodine deficiency                                        | 2.03<br>(0.03 to<br>12.70)                                 | 7.82<br>(0.06 to<br>61.98)                                 | 5.34<br>(0.04 to<br>41.42)                               | 15.74<br>(0.10 to<br>122.94)                               | 0.03<br>(0.00 to<br>0.15)                         | 0.12<br>(0.00 to<br>0.76)                         | 0.09<br>(0.00 to<br>0.52)                        | 0.22<br>(0.00 to<br>1.52)                         |

|                                                                         |                                                  |                                                  |                                                  |                                                  |                                         |                                           |                                         |                                            |
|-------------------------------------------------------------------------|--------------------------------------------------|--------------------------------------------------|--------------------------------------------------|--------------------------------------------------|-----------------------------------------|-------------------------------------------|-----------------------------------------|--------------------------------------------|
| Dietary iron deficiency                                                 | 0.44<br>(0.24 to 1.43)                           | 0.80<br>(2.69)                                   | 0.70<br>(0.35 to 2.25)                           | 1.08<br>(0.53 to 3.94)                           | 0.01<br>(0.00 to 0.03)                  | 0.02<br>(0.01 to 0.07)                    | 0.01<br>(0.01 to 0.07)                  | 0.02<br>(0.01 to 0.09)                     |
| Other nutritional deficiencies                                          | 14.46<br>(6.01 to 32.37)                         | 14.44<br>(6.80 to 29.53)                         | 11.55<br>(5.63 to 23.30)                         | 23.72<br>(9.92 to 54.14)                         | 0.24<br>(0.13 to 0.46)                  | 0.28<br>(0.15 to 0.48)                    | 0.23<br>(0.13 to 0.40)                  | 0.40<br>(0.21 to 0.77)                     |
| <b>Other communicable, maternal, neonatal, and nutritional diseases</b> | <b>83.92</b><br><b>(53.68 to 183.80)</b>         | <b>87.36</b><br><b>(53.83 to 162.11)</b>         | <b>71.43</b><br><b>(45.63 to 128.16)</b>         | <b>143.64</b><br><b>(84.66 to 301.64)</b>        | <b>1.27</b><br><b>(0.88 to 2.46)</b>    | <b>1.55</b><br><b>(1.06 to 2.48)</b>      | <b>1.31</b><br><b>(0.91 to 2.02)</b>    | <b>2.31</b><br><b>(1.52 to 4.12)</b>       |
| Sexually transmitted infections excluding HIV                           | 17.61<br>(8.66 to 31.57)                         | 9.97<br>(4.72 to 18.84)                          | 8.29<br>(3.94 to 15.30)                          | 17.09<br>(7.62 to 32.85)                         | 0.22<br>(0.11 to 0.38)                  | 0.13<br>(0.07 to 0.24)                    | 0.11<br>(0.06 to 0.20)                  | 0.22<br>(0.10 to 0.41)                     |
| Syphilis                                                                | 16.64<br>(7.72 to 30.76)                         | 8.31<br>(3.33 to 16.89)                          | 6.81<br>(2.77 to 13.50)                          | 15.09<br>(5.90 to 31.03)                         | 0.20<br>(0.09 to 0.36)                  | 0.10<br>(0.04 to 0.20)                    | 0.08<br>(0.04 to 0.16)                  | 0.18<br>(0.07 to 0.37)                     |
| Chlamydial infection                                                    | 0.20<br>(0.10 to 0.31)                           | 0.35<br>(0.17 to 0.59)                           | 0.31<br>(0.15 to 0.52)                           | 0.42<br>(0.20 to 0.71)                           | 0.00<br>(0.00 to 0.01)                  | 0.01<br>(0.00 to 0.01)                    | 0.01<br>(0.00 to 0.01)                  | 0.01<br>(0.00 to 0.01)                     |
| Gonococcal infection                                                    | 0.49<br>(0.24 to 0.74)                           | 0.84<br>(0.42 to 1.35)                           | 0.75<br>(0.38 to 1.21)                           | 1.01<br>(0.51 to 1.60)                           | 0.01<br>(0.00 to 0.01)                  | 0.02<br>(0.01 to 0.03)                    | 0.01<br>(0.01 to 0.02)                  | 0.02<br>(0.01 to 0.03)                     |
| Other sexually transmitted infections                                   | 0.28<br>(0.13 to 0.42)                           | 0.47<br>(0.23 to 0.77)                           | 0.42<br>(0.20 to 0.69)                           | 0.57<br>(0.27 to 0.94)                           | 0.01<br>(0.00 to 0.01)                  | 0.01<br>(0.00 to 0.01)                    | 0.01<br>(0.00 to 0.01)                  | 0.01<br>(0.01 to 0.02)                     |
| Acute hepatitis                                                         | 27.73<br>(22.23 to 34.26)                        | 32.29<br>(23.02 to 44.28)                        | 27.44<br>(19.64 to 37.83)                        | 43.95<br>(31.53 to 59.08)                        | 0.51<br>(0.41 to 0.63)                  | 0.64<br>(0.48 to 0.86)                    | 0.55<br>(0.40 to 0.74)                  | 0.84<br>(0.63 to 1.10)                     |
| Acute hepatitis A                                                       | 0.90<br>(0.08 to 2.32)                           | 0.71<br>(0.12 to 1.79)                           | 0.57<br>(0.11 to 1.42)                           | 1.23<br>(0.18 to 3.20)                           | 0.01<br>(0.00 to 0.03)                  | 0.01<br>(0.00 to 0.02)                    | 0.01<br>(0.00 to 0.02)                  | 0.02<br>(0.00 to 0.04)                     |
| Acute hepatitis B                                                       | 17.51<br>(13.64 to 22.17)                        | 21.92<br>(15.50 to 30.63)                        | 18.50<br>(12.94 to 26.05)                        | 28.86<br>(20.15 to 39.30)                        | 0.37<br>(0.29 to 0.47)                  | 0.48<br>(0.35 to 0.65)                    | 0.41<br>(0.29 to 0.56)                  | 0.61<br>(0.45 to 0.81)                     |
| Acute hepatitis C                                                       | 0.45<br>(0.31 to 0.63)                           | 0.65<br>(0.43 to 0.95)                           | 0.60<br>(0.39 to 0.88)                           | 0.77<br>(0.50 to 1.11)                           | 0.01<br>(0.01 to 0.01)                  | 0.02<br>(0.01 to 0.02)                    | 0.01<br>(0.01 to 0.02)                  | 0.02<br>(0.01 to 0.03)                     |
| Acute hepatitis E                                                       | 8.87<br>(6.36 to 12.42)                          | 9.01<br>(5.65 to 13.85)                          | 7.77<br>(4.83 to 11.76)                          | 13.08<br>(7.95 to 19.97)                         | 0.12<br>(0.09 to 0.17)                  | 0.14<br>(0.09 to 0.20)                    | 0.12<br>(0.08 to 0.18)                  | 0.19<br>(0.12 to 0.29)                     |
| Other unspecified infectious diseases                                   | 38.57<br>(11.80 to 132.52)                       | 45.11<br>(16.91 to 123.16)                       | 35.70<br>(13.65 to 91.74)                        | 82.59<br>(29.86 to 250.21)                       | 0.54<br>(0.20 to 1.65)                  | 0.78<br>(0.34 to 1.73)                    | 0.65<br>(0.29 to 1.36)                  | 1.25<br>(0.54 to 3.24)                     |
| <b>Non-communicable diseases</b>                                        | <b>1,702.47</b><br><b>(1,352.46 to 2,075.84)</b> | <b>2,964.32</b><br><b>(2,478.82 to 3,602.23)</b> | <b>2,397.82</b><br><b>(2,003.40 to 2,892.70)</b> | <b>4,120.76</b><br><b>(3,410.44 to 5,043.74)</b> | <b>46.70</b><br><b>(39.77 to 54.29)</b> | <b>102.20</b><br><b>(90.19 to 117.45)</b> | <b>83.86</b><br><b>(74.40 to 94.77)</b> | <b>131.48</b><br><b>(113.81 to 153.44)</b> |

**Niger**

| Cause                      | YLLs (in 1000s)              |                              |                              |                              | Deaths (in 1000s)      |                           |                           |                           |
|----------------------------|------------------------------|------------------------------|------------------------------|------------------------------|------------------------|---------------------------|---------------------------|---------------------------|
|                            | 2016                         | 2040 Forecast                | 2040 Better Scenario         | 2040 Worse Scenario          | 2016                   | 2040 Forecast             | 2040 Better Scenario      | 2040 Worse Scenario       |
| Neoplasms                  | 262.61<br>(221.28 to 310.13) | 569.92<br>(464.48 to 697.33) | 539.66<br>(448.08 to 645.60) | 603.98<br>(489.99 to 746.58) | 8.40<br>(6.99 to 9.94) | 19.48<br>(16.07 to 23.27) | 18.93<br>(15.98 to 22.02) | 19.51<br>(15.96 to 23.63) |
| Lip and oral cavity cancer | 2.62<br>(2.10 to 3.37)       | 5.76<br>(4.02 to 8.47)       | 4.83<br>(3.56 to 6.66)       | 6.74<br>(4.57 to 10.53)      | 0.09<br>(0.07 to 0.12) | 0.21<br>(0.15 to 0.31)    | 0.19<br>(0.14 to 0.25)    | 0.24<br>(0.16 to 0.35)    |
| Nasopharynx cancer         | 0.79<br>(0.57 to 1.08)       | 1.91<br>(1.19 to 3.16)       | 1.51<br>(0.99 to 2.25)       | 2.40<br>(1.45 to 4.06)       | 0.02<br>(0.02 to 0.03) | 0.05<br>(0.03 to 0.08)    | 0.04<br>(0.03 to 0.06)    | 0.06<br>(0.04 to 0.11)    |
| Other pharynx cancer       | 1.27<br>(0.98 to 1.66)       | 2.05<br>(1.44 to 2.96)       | 1.93<br>(1.37 to 2.72)       | 2.32<br>(1.59 to 3.38)       | 0.04<br>(0.03 to 0.06) | 0.07<br>(0.05 to 0.11)    | 0.07<br>(0.05 to 0.10)    | 0.08<br>(0.06 to 0.12)    |
| Esophageal cancer          | 8.90<br>(7.00 to 11.11)      | 15.97<br>(9.17 to 26.55)     | 13.17<br>(8.16 to 21.59)     | 18.56<br>(10.42 to 32.01)    | 0.33<br>(0.26 to 0.40) | 0.61<br>(0.36 to 1.02)    | 0.52<br>(0.33 to 0.84)    | 0.68<br>(0.39 to 1.17)    |

|                                      |                              |                                |                                |                                |                           |                           |                           |                           |
|--------------------------------------|------------------------------|--------------------------------|--------------------------------|--------------------------------|---------------------------|---------------------------|---------------------------|---------------------------|
| Stomach cancer                       | 25.10<br>(20.29 to<br>30.55) | 34.03<br>(27.28 to<br>43.34)   | 32.01<br>(25.71 to<br>40.36)   | 37.01<br>(29.11 to<br>47.80)   | 0.96<br>(0.79 to<br>1.16) | 1.44<br>(1.17 to<br>1.81) | 1.41<br>(1.15 to<br>1.76) | 1.49<br>(1.19 to<br>1.90) |
| Colon and rectum cancer              | 9.54<br>(6.50 to<br>13.27)   | 24.00<br>(15.62 to<br>36.30)   | 24.74<br>(16.30 to<br>37.39)   | 23.03<br>(14.76 to<br>35.02)   | 0.36<br>(0.25 to<br>0.50) | 0.99<br>(0.66 to<br>1.48) | 1.06<br>(0.71 to<br>1.58) | 0.90<br>(0.59 to<br>1.37) |
| Liver cancer                         | 45.68<br>(35.37 to<br>58.30) | 117.17<br>(84.12 to<br>164.10) | 108.88<br>(80.08 to<br>146.04) | 128.29<br>(88.58 to<br>185.47) | 1.40<br>(1.09 to<br>1.75) | 3.64<br>(2.68 to<br>4.93) | 3.47<br>(2.63 to<br>4.48) | 3.85<br>(2.75 to<br>5.44) |
| Liver cancer due to hepatitis B      | 24.83<br>(19.08 to<br>32.33) | 63.40<br>(45.26 to<br>89.96)   | 59.24<br>(43.94 to<br>80.86)   | 68.89<br>(47.70 to<br>102.89)  | 0.74<br>(0.57 to<br>0.94) | 1.91<br>(1.40 to<br>2.60) | 1.82<br>(1.36 to<br>2.39) | 2.00<br>(1.41 to<br>2.90) |
| Liver cancer due to hepatitis C      | 2.34<br>(1.31 to<br>3.63)    | 5.70<br>(3.31 to<br>9.04)      | 5.43<br>(3.19 to<br>8.42)      | 6.03<br>(3.38 to<br>9.88)      | 0.09<br>(0.05 to<br>0.14) | 0.24<br>(0.14 to<br>0.39) | 0.24<br>(0.14 to<br>0.38) | 0.24<br>(0.14 to<br>0.40) |
| Liver cancer due to alcohol use      | 4.49<br>(3.23 to<br>5.88)    | 11.48<br>(7.82 to<br>16.50)    | 10.45<br>(7.38 to<br>14.65)    | 12.95<br>(8.42 to<br>19.63)    | 0.16<br>(0.11 to<br>0.20) | 0.40<br>(0.29 to<br>0.57) | 0.38<br>(0.28 to<br>0.51) | 0.44<br>(0.30 to<br>0.64) |
| Liver cancer due to other causes     | 14.02<br>(10.36 to<br>18.46) | 36.59<br>(24.46 to<br>52.27)   | 33.76<br>(23.21 to<br>46.69)   | 40.41<br>(26.05 to<br>60.29)   | 0.41<br>(0.31 to<br>0.53) | 1.09<br>(0.75 to<br>1.51) | 1.03<br>(0.74 to<br>1.39) | 1.17<br>(0.78 to<br>1.69) |
| Gallbladder and biliary tract cancer | 3.29<br>(2.29 to<br>4.58)    | 5.07<br>(3.60 to<br>7.01)      | 5.32<br>(3.75 to<br>7.37)      | 4.78<br>(3.43 to<br>6.52)      | 0.13<br>(0.09 to<br>0.19) | 0.22<br>(0.16 to<br>0.30) | 0.24<br>(0.17 to<br>0.32) | 0.20<br>(0.15 to<br>0.27) |
| Pancreatic cancer                    | 8.04<br>(6.54 to<br>9.82)    | 20.84<br>(16.73 to<br>25.67)   | 21.36<br>(17.35 to<br>25.90)   | 19.34<br>(15.39 to<br>24.06)   | 0.33<br>(0.27 to<br>0.40) | 0.90<br>(0.73 to<br>1.10) | 0.95<br>(0.78 to<br>1.13) | 0.80<br>(0.64 to<br>1.00) |
| Larynx cancer                        | 2.09<br>(1.56 to<br>2.74)    | 3.92<br>(2.35 to<br>6.15)      | 2.71<br>(1.81 to<br>3.96)      | 4.80<br>(2.78 to<br>7.78)      | 0.08<br>(0.06 to<br>0.10) | 0.16<br>(0.10 to<br>0.24) | 0.11<br>(0.08 to<br>0.16) | 0.18<br>(0.11 to<br>0.29) |
| Tracheal, bronchus, and lung cancer  | 13.80<br>(10.82 to<br>17.28) | 37.10<br>(19.75 to<br>63.99)   | 20.41<br>(12.52 to<br>32.90)   | 39.66<br>(20.73 to<br>69.71)   | 0.55<br>(0.43 to<br>0.68) | 1.57<br>(0.85 to<br>2.61) | 0.89<br>(0.54 to<br>1.36) | 1.60<br>(0.84 to<br>2.74) |
| Malignant skin melanoma              | 0.75<br>(0.54 to<br>1.12)    | 1.95<br>(1.41 to<br>2.88)      | 2.15<br>(1.55 to<br>3.23)      | 1.71<br>(1.24 to<br>2.50)      | 0.03<br>(0.02 to<br>0.04) | 0.07<br>(0.05 to<br>0.10) | 0.08<br>(0.06 to<br>0.12) | 0.06<br>(0.05 to<br>0.09) |
| Non-melanoma skin cancer             | 0.76<br>(0.58 to<br>0.98)    | 2.00<br>(1.54 to<br>2.54)      | 1.94<br>(1.52 to<br>2.45)      | 2.14<br>(1.63 to<br>2.71)      | 0.03<br>(0.02 to<br>0.03) | 0.08<br>(0.06 to<br>0.09) | 0.08<br>(0.06 to<br>0.10) | 0.08<br>(0.06 to<br>0.09) |
| Breast cancer                        | 15.63<br>(10.69 to<br>22.48) | 35.97<br>(24.05 to<br>53.19)   | 35.53<br>(23.97 to<br>52.02)   | 36.51<br>(24.05 to<br>54.18)   | 0.50<br>(0.34 to<br>0.72) | 1.19<br>(0.80 to<br>1.74) | 1.19<br>(0.81 to<br>1.72) | 1.17<br>(0.78 to<br>1.73) |
| Cervical cancer                      | 28.41<br>(18.78 to<br>38.46) | 45.87<br>(30.08 to<br>64.80)   | 42.44<br>(28.52 to<br>59.94)   | 51.30<br>(33.27 to<br>71.73)   | 0.89<br>(0.60 to<br>1.21) | 1.45<br>(0.97 to<br>2.01) | 1.37<br>(0.92 to<br>1.89) | 1.59<br>(1.07 to<br>2.20) |
| Uterine cancer                       | 3.14<br>(2.25 to<br>4.30)    | 6.28<br>(4.62 to<br>8.32)      | 5.82<br>(4.31 to<br>7.75)      | 7.04<br>(5.22 to<br>9.30)      | 0.12<br>(0.09 to<br>0.17) | 0.26<br>(0.19 to<br>0.35) | 0.24<br>(0.18 to<br>0.32) | 0.28<br>(0.21 to<br>0.36) |
| Ovarian cancer                       | 3.05<br>(2.09 to<br>4.18)    | 7.79<br>(5.28 to<br>10.91)     | 8.21<br>(5.66 to<br>11.47)     | 7.12<br>(4.77 to<br>10.04)     | 0.10<br>(0.07 to<br>0.14) | 0.26<br>(0.17 to<br>0.35) | 0.27<br>(0.19 to<br>0.38) | 0.25<br>(0.15 to<br>0.32) |
| Prostate cancer                      | 12.94<br>(7.93 to<br>17.28)  | 32.74<br>(20.97 to<br>41.49)   | 36.07<br>(23.46 to<br>45.13)   | 28.83<br>(18.22 to<br>36.96)   | 0.67<br>(0.41 to<br>0.89) | 1.99<br>(1.27 to<br>2.51) | 2.28<br>(1.49 to<br>2.81) | 1.68<br>(1.04 to<br>2.17) |
| Testicular cancer                    | 0.62<br>(0.43 to<br>0.84)    | 1.39<br>(0.93 to<br>1.95)      | 1.33<br>(0.87 to<br>1.87)      | 1.51<br>(1.02 to<br>2.11)      | 0.01<br>(0.01 to<br>0.02) | 0.03<br>(0.02 to<br>0.04) | 0.03<br>(0.02 to<br>0.04) | 0.03<br>(0.02 to<br>0.05) |

**Niger**

| Cause         | YLLs (in 1000s)           |                           |                           |                           | Deaths (in 1000s)         |                           |                           |                           |
|---------------|---------------------------|---------------------------|---------------------------|---------------------------|---------------------------|---------------------------|---------------------------|---------------------------|
|               | 2016                      | 2040 Forecast             | 2040 Better Scenario      | 2040 Worse Scenario       | 2016                      | 2040 Forecast             | 2040 Better Scenario      | 2040 Worse Scenario       |
| Kidney cancer | 3.09<br>(2.34 to<br>4.08) | 6.75<br>(4.95 to<br>8.88) | 7.14<br>(5.33 to<br>9.32) | 6.73<br>(4.90 to<br>8.92) | 0.08<br>(0.06 to<br>0.10) | 0.20<br>(0.14 to<br>0.26) | 0.21<br>(0.16 to<br>0.28) | 0.18<br>(0.13 to<br>0.23) |

|                                 |                                                      |                                                        |                                                      |                                                            |                                                   |                                                   |                                                   |                                                   |
|---------------------------------|------------------------------------------------------|--------------------------------------------------------|------------------------------------------------------|------------------------------------------------------------|---------------------------------------------------|---------------------------------------------------|---------------------------------------------------|---------------------------------------------------|
| Bladder cancer                  | 3.88<br>(3.06 to<br>4.81)                            | 9.41<br>(7.03 to<br>12.39)                             | 8.93<br>(6.88 to<br>11.36)                           | 9.51<br>(7.02 to<br>12.70)                                 | 0.16<br>(0.12 to<br>0.19)                         | 0.41<br>(0.32 to<br>0.53)                         | 0.41<br>(0.32 to<br>0.51)                         | 0.40<br>(0.32 to<br>0.52)                         |
| Brain and nervous system cancer | 9.45<br>(5.08 to<br>13.20)                           | 23.62<br>(12.48 to<br>33.10)                           | 24.24<br>(12.91 to<br>34.01)                         | 24.69<br>(13.01 to<br>34.47)                               | 0.21<br>(0.11 to<br>0.29)                         | 0.55<br>(0.30 to<br>0.75)                         | 0.57<br>(0.31 to<br>0.79)                         | 0.54<br>(0.29 to<br>0.74)                         |
| Thyroid cancer                  | 0.95<br>(0.75 to<br>1.17)                            | 2.00<br>(1.55 to<br>2.62)                              | 1.85<br>(1.45 to<br>2.37)                            | 2.27<br>(1.74 to<br>2.99)                                  | 0.03<br>(0.02 to<br>0.04)                         | 0.07<br>(0.05 to<br>0.08)                         | 0.06<br>(0.05 to<br>0.08)                         | 0.07<br>(0.06 to<br>0.09)                         |
| Mesothelioma                    | 0.34<br>(0.23 to<br>0.49)                            | 0.80<br>(0.55 to<br>1.15)                              | 0.78<br>(0.54 to<br>1.11)                            | 0.85<br>(0.58 to<br>1.24)                                  | 0.01<br>(0.01 to<br>0.02)                         | 0.03<br>(0.02 to<br>0.04)                         | 0.03<br>(0.02 to<br>0.04)                         | 0.03<br>(0.02 to<br>0.04)                         |
| Hodgkin lymphoma                | 2.13<br>(1.59 to<br>2.80)                            | 3.22<br>(2.29 to<br>4.46)                              | 2.79<br>(2.00 to<br>3.84)                            | 4.27<br>(3.06 to<br>5.89)                                  | 0.04<br>(0.03 to<br>0.06)                         | 0.07<br>(0.05 to<br>0.09)                         | 0.06<br>(0.04 to<br>0.08)                         | 0.08<br>(0.06 to<br>0.11)                         |
| Non-Hodgkin lymphoma            | 14.03<br>(10.36 to<br>17.66)                         | 31.35<br>(22.61 to<br>40.49)                           | 32.27<br>(23.55 to<br>41.44)                         | 33.04<br>(23.99 to<br>42.98)                               | 0.29<br>(0.21 to<br>0.36)                         | 0.70<br>(0.51 to<br>0.87)                         | 0.74<br>(0.54 to<br>0.92)                         | 0.70<br>(0.51 to<br>0.87)                         |
| Multiple myeloma                | 2.12<br>(1.42 to<br>2.96)                            | 5.77<br>(3.85 to<br>8.24)                              | 6.10<br>(4.10 to<br>8.70)                            | 5.36<br>(3.54 to<br>7.71)                                  | 0.08<br>(0.05 to<br>0.11)                         | 0.21<br>(0.14 to<br>0.30)                         | 0.23<br>(0.16 to<br>0.32)                         | 0.19<br>(0.13 to<br>0.27)                         |
| Leukemia                        | 17.22<br>(12.24 to<br>21.44)                         | 33.03<br>(23.01 to<br>42.58)                           | 32.82<br>(23.04 to<br>42.31)                         | 36.53<br>(25.45 to<br>47.15)                               | 0.35<br>(0.25 to<br>0.44)                         | 0.73<br>(0.52 to<br>0.92)                         | 0.73<br>(0.52 to<br>0.91)                         | 0.77<br>(0.54 to<br>0.97)                         |
| Acute lymphoid leukemia         | 3.93<br>(2.48 to<br>5.39)                            | 7.66<br>(4.61 to<br>11.03)                             | 7.76<br>(4.69 to<br>11.41)                           | 8.45<br>(5.15 to<br>12.01)                                 | 0.06<br>(0.04 to<br>0.09)                         | 0.13<br>(0.08 to<br>0.19)                         | 0.14<br>(0.08 to<br>0.20)                         | 0.14<br>(0.08 to<br>0.20)                         |
| Chronic lymphoid leukemia       | 0.64<br>(0.42 to<br>0.88)                            | 1.31<br>(0.85 to<br>1.80)                              | 1.31<br>(0.86 to<br>1.78)                            | 1.30<br>(0.84 to<br>1.79)                                  | 0.03<br>(0.02 to<br>0.04)                         | 0.06<br>(0.04 to<br>0.08)                         | 0.06<br>(0.04 to<br>0.08)                         | 0.06<br>(0.04 to<br>0.08)                         |
| Acute myeloid leukemia          | 5.62<br>(3.58 to<br>7.67)                            | 12.95<br>(8.20 to<br>17.92)                            | 13.43<br>(8.58 to<br>18.43)                          | 13.63<br>(8.51 to<br>18.89)                                | 0.10<br>(0.06 to<br>0.13)                         | 0.25<br>(0.16 to<br>0.34)                         | 0.26<br>(0.17 to<br>0.35)                         | 0.25<br>(0.16 to<br>0.34)                         |
| Chronic myeloid leukemia        | 1.58<br>(1.06 to<br>2.11)                            | 2.29<br>(1.43 to<br>3.29)                              | 2.22<br>(1.39 to<br>3.18)                            | 2.38<br>(1.48 to<br>3.44)                                  | 0.04<br>(0.03 to<br>0.05)                         | 0.06<br>(0.04 to<br>0.08)                         | 0.06<br>(0.04 to<br>0.08)                         | 0.06<br>(0.04 to<br>0.08)                         |
| Other leukemia                  | 3.44<br>(3.61 to<br>7.82)                            | 8.84<br>(5.67 to<br>13.33)                             | 8.10<br>(5.21 to<br>12.27)                           | 10.77<br>(7.06 to<br>16.05)                                | 0.12<br>(0.08 to<br>0.17)                         | 0.23<br>(0.15 to<br>0.33)                         | 0.22<br>(0.15 to<br>0.31)                         | 0.26<br>(0.17 to<br>0.37)                         |
| Other neoplasms                 | 22.97<br>(18.60 to<br>27.72)                         | 52.14<br>(39.69 to<br>64.83)                           | 52.39<br>(39.93 to<br>64.89)                         | 57.66<br>(44.52 to<br>70.64)                               | 0.52<br>(0.39 to<br>0.62)                         | 1.32<br>(0.96 to<br>1.58)                         | 1.38<br>(1.01 to<br>1.66)                         | 1.32<br>(0.98 to<br>1.58)                         |
| <b>Cardiovascular diseases</b>  | <b>469.68</b><br><b>(398.12 to</b><br><b>560.14)</b> | <b>951.58</b><br><b>(710.73 to</b><br><b>1,269.14)</b> | <b>602.39</b><br><b>(461.40 to</b><br><b>785.98)</b> | <b>1,510.15</b><br><b>(1,110.25 to</b><br><b>2,081.36)</b> | <b>18.04</b><br><b>(15.32 to</b><br><b>21.66)</b> | <b>42.91</b><br><b>(33.67 to</b><br><b>55.54)</b> | <b>29.15</b><br><b>(23.32 to</b><br><b>37.05)</b> | <b>62.99</b><br><b>(49.02 to</b><br><b>82.41)</b> |
| Rheumatic heart disease         | 22.07<br>(14.24 to<br>31.55)                         | 17.51<br>(10.41 to<br>26.94)                           | 14.59<br>(8.74 to<br>22.56)                          | 24.89<br>(15.05 to<br>39.22)                               | 0.57<br>(0.36 to<br>0.81)                         | 0.58<br>(0.35 to<br>0.86)                         | 0.51<br>(0.31 to<br>0.75)                         | 0.73<br>(0.45 to<br>1.12)                         |
| Ischemic heart disease          | 189.37<br>(145.99 to<br>244.82)                      | 463.70<br>(294.80 to<br>722.28)                        | 265.11<br>(169.26 to<br>406.48)                      | 748.80<br>(472.36 to<br>1,163.19)                          | 8.49<br>(6.71 to<br>10.80)                        | 23.32<br>(16.10 to<br>34.53)                      | 14.80<br>(10.19 to<br>21.65)                      | 34.80<br>(23.63 to<br>51.65)                      |
| Stroke                          | 171.94<br>(124.89 to<br>214.60)                      | 293.61<br>(170.00 to<br>461.91)                        | 170.01<br>(101.78 to<br>262.19)                      | 512.48<br>(296.94 to<br>809.87)                            | 6.31<br>(4.57 to<br>7.93)                         | 12.61<br>(7.59 to<br>18.61)                       | 7.97<br>(5.03 to<br>11.44)                        | 20.08<br>(12.33 to<br>30.13)                      |
| Ischemic stroke                 | 43.89<br>(28.54 to<br>57.26)                         | 77.96<br>(40.16 to<br>125.70)                          | 50.80<br>(27.13 to<br>79.46)                         | 116.53<br>(60.90 to<br>189.66)                             | 2.23<br>(1.49 to<br>2.88)                         | 4.71<br>(2.56 to<br>7.30)                         | 3.34<br>(1.87 to<br>5.04)                         | 6.48<br>(3.46 to<br>10.36)                        |
| Intracerebral hemorrhage        | 128.05<br>(94.92 to<br>162.72)                       | 215.66<br>(120.53 to<br>359.39)                        | 119.22<br>(69.24 to<br>198.22)                       | 395.95<br>(218.03 to<br>646.91)                            | 4.09<br>(3.04 to<br>5.26)                         | 7.90<br>(4.58 to<br>12.47)                        | 4.63<br>(2.79 to<br>7.25)                         | 13.60<br>(8.01 to<br>21.88)                       |
| Hypertensive heart disease      | 15.65<br>(9.10 to<br>24.12)                          | 26.39<br>(14.36 to<br>46.27)                           | 20.26<br>(11.75 to<br>32.99)                         | 35.29<br>(17.88 to<br>67.13)                               | 0.63<br>(0.37 to<br>0.96)                         | 1.20<br>(0.70 to<br>2.07)                         | 0.96<br>(0.60 to<br>1.52)                         | 1.51<br>(0.81 to<br>2.79)                         |
| Cardiomyopathy and myocarditis  | 8.11<br>(4.83 to<br>11.96)                           | 17.01<br>(9.07 to<br>27.54)                            | 16.69<br>(9.01 to<br>26.95)                          | 18.58<br>(10.19 to<br>29.77)                               | 0.20<br>(0.12 to<br>0.30)                         | 0.49<br>(0.25 to<br>0.77)                         | 0.51<br>(0.26 to<br>0.80)                         | 0.49<br>(0.26 to<br>0.79)                         |

| Mycarditis                                                    | 2.04<br>(0.92 to<br>3.97)                          | 3.81<br>(1.43 to<br>7.94)                           | 3.60<br>(1.33 to<br>7.67)                           | 4.45<br>(1.78 to<br>8.78)                            | 0.04<br>(0.02 to<br>0.08)                      | 0.08<br>(0.03 to<br>0.18)                      | 0.08<br>(0.03 to<br>0.18)                      | 0.09<br>(0.03 to<br>0.18)                       |
|---------------------------------------------------------------|----------------------------------------------------|-----------------------------------------------------|-----------------------------------------------------|------------------------------------------------------|------------------------------------------------|------------------------------------------------|------------------------------------------------|-------------------------------------------------|
| <b>Niger</b>                                                  |                                                    |                                                     |                                                     |                                                      |                                                |                                                |                                                |                                                 |
| Cause                                                         | YLLs (in 1000s)                                    |                                                     |                                                     |                                                      | Deaths (in 1000s)                              |                                                |                                                |                                                 |
|                                                               | 2016                                               | 2040 Forecast                                       | 2040 Better Scenario                                | 2040 Worse Scenario                                  | 2016                                           | 2040 Forecast                                  | 2040 Better Scenario                           | 2040 Worse Scenario                             |
| Alcoholic cardiomyopathy                                      | 0.42<br>(0.13 to<br>0.89)                          | 0.94<br>(0.26 to<br>1.93)                           | 0.99<br>(0.28 to<br>2.08)                           | 0.87<br>(0.25 to<br>1.75)                            | 0.01<br>(0.00 to<br>0.03)                      | 0.03<br>(0.01 to<br>0.06)                      | 0.03<br>(0.01 to<br>0.07)                      | 0.03<br>(0.01 to<br>0.06)                       |
| Other cardiomyopathy                                          | 5.65<br>(3.62 to<br>8.35)                          | 12.27<br>(7.04 to<br>20.80)                         | 12.10<br>(7.02 to<br>20.02)                         | 13.27<br>(7.72 to<br>22.47)                          | 0.15<br>(0.09 to<br>0.22)                      | 0.38<br>(0.21 to<br>0.63)                      | 0.39<br>(0.22 to<br>0.65)                      | 0.38<br>(0.21 to<br>0.62)                       |
| Atrial fibrillation and flutter                               | 1.40<br>(1.04 to<br>1.85)                          | 4.14<br>(3.12 to<br>5.52)                           | 4.44<br>(3.40 to<br>5.85)                           | 3.79<br>(2.84 to<br>5.14)                            | 0.10<br>(0.08 to<br>0.14)                      | 0.37<br>(0.27 to<br>0.49)                      | 0.41<br>(0.31 to<br>0.55)                      | 0.31<br>(0.23 to<br>0.42)                       |
| Aortic aneurysm                                               | 1.73<br>(1.18 to<br>2.50)                          | 3.72<br>(2.45 to<br>5.49)                           | 3.64<br>(2.44 to<br>5.30)                           | 3.70<br>(2.40 to<br>5.51)                            | 0.07<br>(0.05 to<br>0.10)                      | 0.17<br>(0.11 to<br>0.24)                      | 0.17<br>(0.12 to<br>0.25)                      | 0.15<br>(0.10 to<br>0.23)                       |
| Peripheral artery disease                                     | 0.07<br>(0.04 to<br>0.13)                          | 0.26<br>(0.15 to<br>0.54)                           | 0.28<br>(0.16 to<br>0.59)                           | 0.22<br>(0.12 to<br>0.44)                            | 0.00<br>(0.00 to<br>0.01)                      | 0.02<br>(0.01 to<br>0.04)                      | 0.02<br>(0.01 to<br>0.04)                      | 0.01<br>(0.01 to<br>0.03)                       |
| Endocarditis                                                  | 7.74<br>(5.60 to<br>10.66)                         | 15.86<br>(11.03 to<br>22.39)                        | 14.92<br>(10.46 to<br>21.14)                        | 19.32<br>(13.39 to<br>27.41)                         | 0.18<br>(0.13 to<br>0.24)                      | 0.43<br>(0.31 to<br>0.60)                      | 0.43<br>(0.30 to<br>0.60)                      | 0.47<br>(0.33 to<br>0.66)                       |
| Other cardiovascular and circulatory diseases                 | 51.61<br>(38.25 to<br>74.40)                       | 109.36<br>(78.77 to<br>154.55)                      | 92.43<br>(67.15 to<br>133.11)                       | 143.08<br>(101.79 to<br>203.57)                      | 1.48<br>(1.07 to<br>2.18)                      | 3.74<br>(2.73 to<br>5.46)                      | 3.37<br>(2.47 to<br>4.88)                      | 4.42<br>(3.17 to<br>6.38)                       |
| <b>Chronic respiratory diseases</b>                           | <b>84.08</b><br><b>(66.56 to</b><br><b>103.80)</b> | <b>126.33</b><br><b>(81.70 to</b><br><b>208.21)</b> | <b>85.52</b><br><b>(60.75 to</b><br><b>126.53)</b>  | <b>164.94</b><br><b>(106.28 to</b><br><b>281.07)</b> | <b>2.95</b><br><b>(2.35 to</b><br><b>3.66)</b> | <b>5.11</b><br><b>(3.27 to</b><br><b>8.71)</b> | <b>3.43</b><br><b>(2.44 to</b><br><b>5.19)</b> | <b>6.25</b><br><b>(3.92 to</b><br><b>11.22)</b> |
| Chronic obstructive pulmonary disease                         | 40.72<br>(28.90 to<br>51.35)                       | 76.79<br>(40.57 to<br>155.03)                       | 42.17<br>(24.25 to<br>76.51)                        | 102.42<br>(52.24 to<br>212.01)                       | 1.73<br>(1.27 to<br>2.18)                      | 3.59<br>(1.97 to<br>7.18)                      | 2.05<br>(1.20 to<br>3.70)                      | 4.46<br>(2.40 to<br>9.24)                       |
| Pneumoconiosis                                                | 0.09<br>(0.05 to<br>0.14)                          | 0.12<br>(0.08 to<br>0.19)                           | 0.12<br>(0.07 to<br>0.18)                           | 0.13<br>(0.09 to<br>0.20)                            | 0.00<br>(0.00 to<br>0.00)                      | 0.01<br>(0.00 to<br>0.01)                      | 0.01<br>(0.00 to<br>0.01)                      | 0.01<br>(0.00 to<br>0.01)                       |
| Silicosis                                                     | 0.01<br>(0.00 to<br>0.02)                          | 0.01<br>(0.00 to<br>0.02)                           | 0.01<br>(0.00 to<br>0.02)                           | 0.01<br>(0.00 to<br>0.02)                            | 0.00<br>(0.00 to<br>0.00)                      | 0.00<br>(0.00 to<br>0.00)                      | 0.00<br>(0.00 to<br>0.00)                      | 0.00<br>(0.00 to<br>0.00)                       |
| Asbestosis                                                    | 0.02<br>(0.01 to<br>0.03)                          | 0.03<br>(0.02 to<br>0.06)                           | 0.04<br>(0.02 to<br>0.06)                           | 0.03<br>(0.02 to<br>0.06)                            | 0.00<br>(0.00 to<br>0.00)                      | 0.00<br>(0.00 to<br>0.00)                      | 0.00<br>(0.00 to<br>0.00)                      | 0.00<br>(0.00 to<br>0.00)                       |
| Coal workers pneumoconiosis                                   | 0.01<br>(0.00 to<br>0.02)                          | 0.01<br>(0.00 to<br>0.02)                           | 0.01<br>(0.00 to<br>0.01)                           | 0.01<br>(0.00 to<br>0.02)                            | 0.00<br>(0.00 to<br>0.00)                      | 0.00<br>(0.00 to<br>0.00)                      | 0.00<br>(0.00 to<br>0.00)                      | 0.00<br>(0.00 to<br>0.00)                       |
| Other pneumoconiosis                                          | 0.05<br>(0.03 to<br>0.08)                          | 0.07<br>(0.05 to<br>0.11)                           | 0.06<br>(0.04 to<br>0.10)                           | 0.08<br>(0.05 to<br>0.11)                            | 0.00<br>(0.00 to<br>0.00)                      | 0.00<br>(0.00 to<br>0.01)                      | 0.00<br>(0.00 to<br>0.01)                      | 0.00<br>(0.00 to<br>0.01)                       |
| Asthma                                                        | 32.92<br>(23.76 to<br>45.27)                       | 28.37<br>(18.24 to<br>45.94)                        | 23.49<br>(15.39 to<br>36.42)                        | 38.18<br>(23.85 to<br>61.82)                         | 0.96<br>(0.69 to<br>1.39)                      | 0.92<br>(0.61 to<br>1.54)                      | 0.80<br>(0.54 to<br>1.29)                      | 1.15<br>(0.74 to<br>1.93)                       |
| Interstitial lung disease and pulmonary sarcoidosis           | 0.48<br>(0.19 to<br>0.93)                          | 1.22<br>(0.47 to<br>2.38)                           | 1.35<br>(0.52 to<br>2.64)                           | 1.09<br>(0.43 to<br>2.10)                            | 0.02<br>(0.01 to<br>0.03)                      | 0.05<br>(0.02 to<br>0.09)                      | 0.05<br>(0.02 to<br>0.11)                      | 0.04<br>(0.01 to<br>0.08)                       |
| Other chronic respiratory diseases                            | 9.87<br>(6.54 to<br>14.04)                         | 19.83<br>(13.46 to<br>27.97)                        | 18.40<br>(12.83 to<br>25.63)                        | 23.12<br>(15.55 to<br>32.79)                         | 0.25<br>(0.16 to<br>0.35)                      | 0.55<br>(0.37 to<br>0.79)                      | 0.53<br>(0.37 to<br>0.74)                      | 0.59<br>(0.39 to<br>0.87)                       |
| <b>Cirrhosis and other chronic liver diseases</b>             | <b>77.77</b><br><b>(42.59 to</b><br><b>122.07)</b> | <b>160.51</b><br><b>(81.88 to</b><br><b>260.89)</b> | <b>150.75</b><br><b>(77.61 to</b><br><b>246.94)</b> | <b>181.65</b><br><b>(92.89 to</b><br><b>296.39)</b>  | <b>2.14</b><br><b>(1.16 to</b><br><b>3.39)</b> | <b>4.61</b><br><b>(2.45 to</b><br><b>7.35)</b> | <b>4.43</b><br><b>(2.38 to</b><br><b>7.06)</b> | <b>5.00</b><br><b>(2.67 to</b><br><b>8.02)</b>  |
| Cirrhosis and other chronic liver diseases due to hepatitis B | 29.60<br>(15.21 to<br>49.37)                       | 66.45<br>(32.83 to<br>113.28)                       | 63.15<br>(31.51 to<br>106.26)                       | 72.19<br>(35.72 to<br>123.84)                        | 0.89<br>(0.47 to<br>1.48)                      | 2.00<br>(1.04 to<br>3.28)                      | 1.95<br>(1.02 to<br>3.18)                      | 2.11<br>(1.09 to<br>3.48)                       |

|                                                                |                                         |                                          |                                          |                                          |                                    |                                    |                                    |                                    |
|----------------------------------------------------------------|-----------------------------------------|------------------------------------------|------------------------------------------|------------------------------------------|------------------------------------|------------------------------------|------------------------------------|------------------------------------|
|                                                                | 14.93<br>(6.80 to<br>26.37)             | 32.16<br>(14.05 to<br>56.73)             | 30.51<br>(13.60 to<br>53.07)             | 34.97<br>(15.08 to<br>62.07)             | 0.46<br>(0.21 to<br>0.79)          | 0.99<br>(0.45 to<br>1.76)          | 0.96<br>(0.45 to<br>1.65)          | 1.05<br>(0.48 to<br>1.88)          |
| Cirrhosis and other chronic liver diseases due to hepatitis C  |                                         |                                          |                                          |                                          |                                    |                                    |                                    |                                    |
|                                                                | 13.15<br>(6.66 to<br>21.78)             | 27.84<br>(13.69 to<br>48.18)             | 25.60<br>(12.98 to<br>43.63)             | 31.91<br>(15.69 to<br>55.54)             | 0.42<br>(0.22 to<br>0.68)          | 0.90<br>(0.47 to<br>1.48)          | 0.85<br>(0.45 to<br>1.37)          | 1.00<br>(0.52 to<br>1.67)          |
| Cirrhosis and other chronic liver diseases due to alcohol use  |                                         |                                          |                                          |                                          |                                    |                                    |                                    |                                    |
|                                                                | 20.09<br>(12.39 to<br>28.83)            | 34.07<br>(18.99 to<br>53.29)             | 31.49<br>(17.52 to<br>49.24)             | 42.58<br>(23.64 to<br>66.09)             | 0.38<br>(0.23 to<br>0.54)          | 0.72<br>(0.41 to<br>1.09)          | 0.68<br>(0.39 to<br>1.02)          | 0.84<br>(0.48 to<br>1.28)          |
| Cirrhosis and other chronic liver diseases due to other causes |                                         |                                          |                                          |                                          |                                    |                                    |                                    |                                    |
| <b>Digestive diseases</b>                                      | <b>124.63<br/>(92.89 to<br/>179.39)</b> | <b>176.86<br/>(132.88 to<br/>237.73)</b> | <b>160.14<br/>(120.85 to<br/>214.82)</b> | <b>223.74<br/>(166.39 to<br/>309.88)</b> | <b>3.04<br/>(2.38 to<br/>3.98)</b> | <b>5.25<br/>(4.11 to<br/>6.73)</b> | <b>4.98<br/>(3.95 to<br/>6.35)</b> | <b>6.04<br/>(4.71 to<br/>7.81)</b> |
| Peptic ulcer disease                                           | 24.11<br>(16.26 to<br>35.74)            | 23.07<br>(14.97 to<br>33.18)             | 18.94<br>(12.48 to<br>27.11)             | 32.16<br>(21.30 to<br>46.70)             | 0.64<br>(0.44 to<br>0.87)          | 0.73<br>(0.48 to<br>1.00)          | 0.63<br>(0.41 to<br>0.85)          | 0.93<br>(0.62 to<br>1.27)          |
| <b>Niger</b>                                                   |                                         |                                          |                                          |                                          |                                    |                                    |                                    |                                    |
| <b>Cause</b>                                                   | <b>YLLs (in 1000s)</b>                  |                                          |                                          |                                          | <b>Deaths (in 1000s)</b>           |                                    |                                    |                                    |
|                                                                | <b>2016</b>                             | <b>2040 Forecast</b>                     | <b>2040 Better Scenario</b>              | <b>2040 Worse Scenario</b>               | <b>2016</b>                        | <b>2040 Forecast</b>               | <b>2040 Better Scenario</b>        | <b>2040 Worse Scenario</b>         |
| Gastritis and duodenitis                                       | 5.76<br>(3.61 to<br>9.21)               | 9.95<br>(6.02 to<br>15.92)               | 9.15<br>(5.61 to<br>14.60)               | 11.78<br>(7.10 to<br>18.60)              | 0.13<br>(0.08 to<br>0.21)          | 0.25<br>(0.15 to<br>0.39)          | 0.23<br>(0.14 to<br>0.37)          | 0.28<br>(0.17 to<br>0.44)          |
| Appendicitis                                                   | 12.56<br>(6.98 to<br>28.86)             | 13.89<br>(8.87 to<br>25.86)              | 11.99<br>(7.82 to<br>21.23)              | 19.41<br>(11.64 to<br>40.62)             | 0.26<br>(0.18 to<br>0.45)          | 0.37<br>(0.27 to<br>0.53)          | 0.34<br>(0.27 to<br>0.47)          | 0.46<br>(0.32 to<br>0.72)          |
| Paralytic ileus and intestinal obstruction                     | 41.89<br>(28.68 to<br>63.91)            | 64.97<br>(47.51 to<br>89.91)             | 61.59<br>(45.37 to<br>84.58)             | 79.86<br>(56.89 to<br>114.97)            | 0.94<br>(0.70 to<br>1.30)          | 1.88<br>(1.47 to<br>2.45)          | 1.88<br>(1.48 to<br>2.45)          | 2.03<br>(1.56 to<br>2.68)          |
| Inguinal, femoral, and abdominal hernia                        | 5.11<br>(3.13 to<br>8.03)               | 6.08<br>(3.73 to<br>9.05)                | 5.54<br>(3.44 to<br>8.35)                | 7.42<br>(4.52 to<br>11.27)               | 0.15<br>(0.10 to<br>0.23)          | 0.22<br>(0.14 to<br>0.33)          | 0.21<br>(0.13 to<br>0.32)          | 0.24<br>(0.15 to<br>0.36)          |
| Inflammatory bowel disease                                     | 2.91<br>(1.65 to<br>6.40)               | 5.25<br>(3.44 to<br>8.96)                | 5.19<br>(3.41 to<br>8.83)                | 5.74<br>(3.62 to<br>10.74)               | 0.07<br>(0.05 to<br>0.12)          | 0.15<br>(0.11 to<br>0.23)          | 0.16<br>(0.11 to<br>0.24)          | 0.16<br>(0.11 to<br>0.24)          |
| Vascular intestinal disorders                                  | 2.29<br>(1.37 to<br>4.50)               | 3.53<br>(2.34 to<br>5.49)                | 3.42<br>(2.28 to<br>5.20)                | 4.04<br>(2.56 to<br>6.92)                | 0.07<br>(0.05 to<br>0.09)          | 0.14<br>(0.10 to<br>0.19)          | 0.15<br>(0.10 to<br>0.20)          | 0.14<br>(0.10 to<br>0.19)          |
| Gallbladder and biliary diseases                               | 4.34<br>(3.22 to<br>5.70)               | 6.80<br>(4.51 to<br>10.07)               | 5.68<br>(3.86 to<br>8.18)                | 9.27<br>(5.96 to<br>13.83)               | 0.13<br>(0.10 to<br>0.17)          | 0.24<br>(0.16 to<br>0.37)          | 0.21<br>(0.14 to<br>0.31)          | 0.31<br>(0.20 to<br>0.49)          |
| Pancreatitis                                                   | 10.00<br>(6.12 to<br>15.82)             | 19.11<br>(10.28 to<br>34.09)             | 17.07<br>(9.42 to<br>28.61)              | 23.02<br>(11.79 to<br>44.44)             | 0.28<br>(0.17 to<br>0.43)          | 0.56<br>(0.31 to<br>0.98)          | 0.51<br>(0.30 to<br>0.84)          | 0.65<br>(0.34 to<br>1.26)          |
| Other digestive diseases                                       | 15.66<br>(10.27 to<br>28.39)            | 24.20<br>(15.68 to<br>36.31)             | 21.56<br>(13.99 to<br>31.65)             | 31.05<br>(19.93 to<br>47.29)             | 0.37<br>(0.25 to<br>0.56)          | 0.71<br>(0.46 to<br>1.04)          | 0.66<br>(0.43 to<br>0.97)          | 0.83<br>(0.54 to<br>1.19)          |
| <b>Neurological disorders</b>                                  | <b>41.77<br/>(32.83 to<br/>51.01)</b>   | <b>93.09<br/>(76.25 to<br/>113.55)</b>   | <b>91.00<br/>(75.07 to<br/>109.67)</b>   | <b>105.61<br/>(84.15 to<br/>131.66)</b>  | <b>1.45<br/>(1.20 to<br/>1.74)</b> | <b>4.40<br/>(3.55 to<br/>5.46)</b> | <b>4.81<br/>(3.95 to<br/>5.84)</b> | <b>4.08<br/>(3.20 to<br/>5.13)</b> |
| Alzheimer's disease and other dementias                        | 11.34<br>(8.71 to<br>14.43)             | 34.65<br>(26.14 to<br>45.68)             | 37.61<br>(29.45 to<br>47.87)             | 31.01<br>(22.57 to<br>42.12)             | 0.87<br>(0.68 to<br>1.10)          | 3.10<br>(2.27 to<br>4.12)          | 3.54<br>(2.73 to<br>4.55)          | 2.60<br>(1.83 to<br>3.59)          |
| Parkinson's disease                                            | 0.90<br>(0.65 to<br>1.19)               | 3.33<br>(2.46 to<br>4.41)                | 4.04<br>(3.01 to<br>5.36)                | 2.58<br>(1.88 to<br>3.46)                | 0.06<br>(0.04 to<br>0.08)          | 0.26<br>(0.19 to<br>0.36)          | 0.33<br>(0.24 to<br>0.44)          | 0.19<br>(0.14 to<br>0.27)          |
| Epilepsy                                                       | 25.54<br>(18.75 to<br>32.42)            | 45.68<br>(32.54 to<br>62.57)             | 39.66<br>(28.56 to<br>53.23)             | 61.92<br>(44.13 to<br>83.31)             | 0.45<br>(0.35 to<br>0.55)          | 0.85<br>(0.63 to<br>1.14)          | 0.75<br>(0.56 to<br>0.99)          | 1.10<br>(0.82 to<br>1.45)          |
| Multiple sclerosis                                             | 0.31<br>(0.13 to<br>0.50)               | 0.79<br>(0.34 to<br>1.30)                | 0.82<br>(0.35 to<br>1.34)                | 0.75<br>(0.32 to<br>1.23)                | 0.01<br>(0.00 to<br>0.01)          | 0.02<br>(0.01 to<br>0.04)          | 0.02<br>(0.01 to<br>0.04)          | 0.02<br>(0.01 to<br>0.03)          |
| Motor neuron disease                                           | 0.41<br>(0.30 to<br>0.61)               | 0.82<br>(0.60 to<br>1.24)                | 0.87<br>(0.64 to<br>1.31)                | 0.83<br>(0.61 to<br>1.21)                | 0.01<br>(0.01 to<br>0.01)          | 0.02<br>(0.02 to<br>0.04)          | 0.02<br>(0.02 to<br>0.04)          | 0.02<br>(0.02 to<br>0.03)          |

|                                                            |                                       |                                         |                                         |                                         |                                      |                                      |                                      |                                      |
|------------------------------------------------------------|---------------------------------------|-----------------------------------------|-----------------------------------------|-----------------------------------------|--------------------------------------|--------------------------------------|--------------------------------------|--------------------------------------|
| Other neurological disorders                               | 3.28<br>(2.13 to 4.70)                | 7.81<br>(5.40 to 10.86)                 | 8.01<br>(5.58 to 10.98)                 | 8.51<br>(5.64 to 12.19)                 | 0.05<br>(0.04 to 0.07)               | 0.13<br>(0.10 to 0.17)               | 0.14<br>(0.11 to 0.18)               | 0.14<br>(0.10 to 0.18)               |
| <b>Mental disorders</b>                                    | <b>8.70</b><br><b>(5.69 to 12.66)</b> | <b>23.79</b><br><b>(14.81 to 36.18)</b> | <b>23.71</b><br><b>(14.85 to 35.79)</b> | <b>24.26</b><br><b>(15.15 to 36.82)</b> | <b>0.21</b><br><b>(0.14 to 0.31)</b> | <b>0.56</b><br><b>(0.37 to 0.82)</b> | <b>0.57</b><br><b>(0.38 to 0.82)</b> | <b>0.56</b><br><b>(0.36 to 0.81)</b> |
| Alcohol use disorders                                      | 3.63<br>(2.13 to 5.86)                | 6.81<br>(3.72 to 11.20)                 | 6.69<br>(3.67 to 11.06)                 | 7.05<br>(3.88 to 11.53)                 | 0.10<br>(0.06 to 0.16)               | 0.19<br>(0.11 to 0.30)               | 0.19<br>(0.11 to 0.31)               | 0.20<br>(0.11 to 0.31)               |
| Drug use disorders                                         | 5.05<br>(2.58 to 7.91)                | 16.92<br>(8.60 to 27.66)                | 16.96<br>(8.71 to 27.76)                | 17.15<br>(8.56 to 27.99)                | 0.11<br>(0.06 to 0.17)               | 0.37<br>(0.20 to 0.57)               | 0.38<br>(0.20 to 0.58)               | 0.36<br>(0.19 to 0.56)               |
| Opioid use disorders                                       | 4.58<br>(2.05 to 7.50)                | 15.15<br>(6.81 to 25.90)                | 15.16<br>(6.90 to 25.85)                | 15.37<br>(6.80 to 26.12)                | 0.10<br>(0.04 to 0.16)               | 0.31<br>(0.14 to 0.51)               | 0.31<br>(0.14 to 0.51)               | 0.31<br>(0.14 to 0.51)               |
| Cocaine use disorders                                      | 0.13<br>(0.04 to 0.28)                | 0.48<br>(0.13 to 1.05)                  | 0.46<br>(0.13 to 1.00)                  | 0.52<br>(0.14 to 1.12)                  | 0.00<br>(0.00 to 0.01)               | 0.01<br>(0.00 to 0.02)               | 0.01<br>(0.00 to 0.02)               | 0.01<br>(0.00 to 0.03)               |
| Amphetamine use disorders                                  | 0.07<br>(0.02 to 0.15)                | 0.34<br>(0.10 to 0.77)                  | 0.31<br>(0.10 to 0.70)                  | 0.39<br>(0.12 to 0.87)                  | 0.00<br>(0.00 to 0.00)               | 0.01<br>(0.00 to 0.02)               | 0.01<br>(0.00 to 0.02)               | 0.01<br>(0.00 to 0.02)               |
| Other drug use disorders                                   | 0.27<br>(0.15 to 0.41)                | 0.96<br>(0.53 to 1.53)                  | 1.04<br>(0.59 to 1.64)                  | 0.88<br>(0.49 to 1.42)                  | 0.01<br>(0.01 to 0.01)               | 0.04<br>(0.02 to 0.05)               | 0.05<br>(0.03 to 0.06)               | 0.03<br>(0.02 to 0.05)               |
| Eating disorders                                           | 0.02<br>(0.01 to 0.04)                | 0.06<br>(0.03 to 0.11)                  | 0.06<br>(0.03 to 0.11)                  | 0.06<br>(0.03 to 0.11)                  | 0.00<br>(0.00 to 0.00)               | 0.00<br>(0.00 to 0.00)               | 0.00<br>(0.00 to 0.00)               | 0.00<br>(0.00 to 0.00)               |
| <b>Niger</b>                                               |                                       |                                         |                                         |                                         |                                      |                                      |                                      |                                      |
| Cause                                                      | YLLs (in 1000s)                       |                                         |                                         |                                         | Deaths (in 1000s)                    |                                      |                                      |                                      |
|                                                            | 2016                                  | 2040 Forecast                           | 2040 Better Scenario                    | 2040 Worse Scenario                     | 2016                                 | 2040 Forecast                        | 2040 Better Scenario                 | 2040 Worse Scenario                  |
| Diabetes, urogenital, blood, and endocrine diseases        | 241.53<br>(195.10 to 295.47)          | 451.44<br>(355.63 to 563.31)            | 386.43<br>(300.77 to 478.71)            | 623.32<br>(492.05 to 778.33)            | 5.64<br>(4.69 to 6.71)               | 14.11<br>(11.58 to 17.29)            | 12.38<br>(10.11 to 15.12)            | 18.12<br>(14.63 to 22.45)            |
| Diabetes mellitus                                          | 52.15<br>(42.36 to 63.67)             | 140.93<br>(94.43 to 207.40)             | 116.22<br>(78.06 to 172.25)             | 194.68<br>(130.43 to 284.80)            | 2.04<br>(1.64 to 2.48)               | 6.51<br>(4.57 to 9.10)               | 5.64<br>(3.97 to 7.91)               | 8.37<br>(5.81 to 12.06)              |
| Acute glomerulonephritis                                   | 0.13<br>(0.11 to 0.16)                | 0.28<br>(0.23 to 0.35)                  | 0.26<br>(0.20 to 0.32)                  | 0.37<br>(0.30 to 0.46)                  | 0.00<br>(0.00 to 0.00)               | 0.00<br>(0.00 to 0.01)               | 0.00<br>(0.00 to 0.01)               | 0.01<br>(0.00 to 0.01)               |
| Chronic kidney disease                                     | 59.62<br>(44.60 to 79.06)             | 122.14<br>(78.97 to 171.55)             | 98.38<br>(64.42 to 135.01)              | 178.01<br>(112.94 to 243.63)            | 1.48<br>(1.11 to 1.92)               | 3.75<br>(2.42 to 5.40)               | 3.09<br>(2.04 to 4.29)               | 5.09<br>(3.24 to 7.25)               |
| Chronic kidney disease due to diabetes mellitus            | 10.80<br>(7.52 to 14.79)              | 26.23<br>(16.08 to 38.77)               | 21.17<br>(13.06 to 31.37)               | 35.75<br>(21.10 to 54.87)               | 0.37<br>(0.26 to 0.50)               | 1.03<br>(0.62 to 1.55)               | 0.85<br>(0.53 to 1.26)               | 1.35<br>(0.79 to 2.12)               |
| Chronic kidney disease due to hypertension                 | 6.05<br>(4.32 to 8.40)                | 14.95<br>(9.30 to 22.57)                | 12.12<br>(7.92 to 18.09)                | 20.09<br>(12.19 to 30.81)               | 0.26<br>(0.18 to 0.35)               | 0.78<br>(0.48 to 1.17)               | 0.66<br>(0.43 to 0.98)               | 0.99<br>(0.59 to 1.56)               |
| Chronic kidney disease due to glomerulonephritis           | 20.30<br>(14.82 to 26.80)             | 38.62<br>(24.23 to 53.81)               | 31.01<br>(19.68 to 43.44)               | 58.37<br>(36.68 to 81.39)               | 0.39<br>(0.28 to 0.51)               | 0.88<br>(0.57 to 1.23)               | 0.71<br>(0.46 to 0.97)               | 1.25<br>(0.81 to 1.75)               |
| Chronic kidney disease due to other and unspecified causes | 22.47<br>(16.37 to 30.68)             | 42.35<br>(27.05 to 59.77)               | 34.08<br>(21.93 to 48.50)               | 63.79<br>(40.25 to 89.66)               | 0.46<br>(0.34 to 0.62)               | 1.07<br>(0.70 to 1.54)               | 0.87<br>(0.57 to 1.23)               | 1.50<br>(0.97 to 2.16)               |
| Urinary diseases and male infertility                      | 22.06<br>(18.03 to 27.46)             | 43.85<br>(35.67 to 55.12)               | 41.80<br>(34.20 to 52.67)               | 52.78<br>(42.30 to 66.51)               | 0.53<br>(0.44 to 0.64)               | 1.33<br>(1.13 to 1.56)               | 1.34<br>(1.15 to 1.59)               | 1.41<br>(1.19 to 1.67)               |
| Urinary tract infections                                   | 11.80<br>(8.65 to 15.81)              | 29.21<br>(22.48 to 37.18)               | 28.73<br>(22.21 to 36.55)               | 33.97<br>(26.00 to 43.81)               | 0.27<br>(0.19 to 0.36)               | 0.88<br>(0.68 to 1.12)               | 0.92<br>(0.71 to 1.17)               | 0.90<br>(0.69 to 1.14)               |
| Urolithiasis                                               | 0.39<br>(0.25 to 0.55)                | 1.32<br>(0.86 to 1.99)                  | 1.25<br>(0.82 to 1.87)                  | 1.52<br>(0.97 to 2.31)                  | 0.01<br>(0.00 to 0.01)               | 0.02<br>(0.00 to 0.04)               | 0.02<br>(0.00 to 0.04)               | 0.03<br>(0.02 to 0.04)               |

|                                                   |                               |                                |                                |                                 |                           |                           |                           |                           |
|---------------------------------------------------|-------------------------------|--------------------------------|--------------------------------|---------------------------------|---------------------------|---------------------------|---------------------------|---------------------------|
| Other urinary diseases                            | 9.87<br>(6.93 to<br>13.09)    | 13.32<br>(8.71 to<br>19.35)    | 11.82<br>(7.72 to<br>17.23)    | 17.28<br>(11.31 to<br>24.94)    | 0.25<br>(0.18 to<br>0.33) | 0.42<br>(0.28 to<br>0.60) | 0.40<br>(0.26 to<br>0.59) | 0.49<br>(0.26 to<br>0.69) |
| Gynecological diseases                            | 1.21<br>(0.78 to<br>1.78)     | 2.41<br>(1.46 to<br>3.86)      | 2.06<br>(1.24 to<br>3.25)      | 3.07<br>(1.86 to<br>4.83)       | 0.03<br>(0.02 to<br>0.04) | 0.05<br>(0.03 to<br>0.08) | 0.05<br>(0.03 to<br>0.07) | 0.07<br>(0.04 to<br>0.10) |
| Uterine fibroids                                  | 0.09<br>(0.03 to<br>0.21)     | 0.14<br>(0.04 to<br>0.35)      | 0.12<br>(0.03 to<br>0.30)      | 0.19<br>(0.05 to<br>0.45)       | 0.00<br>(0.00 to<br>0.01) | 0.00<br>(0.00 to<br>0.01) | 0.00<br>(0.00 to<br>0.01) | 0.01<br>(0.00 to<br>0.01) |
| Polycystic ovarian syndrome                       | 0.22<br>(0.03 to<br>0.49)     | 0.28<br>(0.02 to<br>0.68)      | 0.21<br>(0.02 to<br>0.53)      | 0.41<br>(0.04 to<br>1.00)       | 0.00<br>(0.00 to<br>0.01) | 0.01<br>(0.00 to<br>0.01) | 0.00<br>(0.00 to<br>0.01) | 0.01<br>(0.00 to<br>0.02) |
| Endometriosis                                     | 0.00<br>(0.00 to<br>0.01)     | 0.00<br>(0.00 to<br>0.02)      | 0.00<br>(0.00 to<br>0.01)      | 0.01<br>(0.00 to<br>0.02)       | 0.00<br>(0.00 to<br>0.00) | 0.00<br>(0.00 to<br>0.00) | 0.00<br>(0.00 to<br>0.00) | 0.00<br>(0.00 to<br>0.00) |
| Genital prolapse                                  | 0.07<br>(0.01 to<br>0.19)     | 0.12<br>(0.02 to<br>0.38)      | 0.10<br>(0.01 to<br>0.31)      | 0.17<br>(0.02 to<br>0.50)       | 0.00<br>(0.00 to<br>0.00) | 0.00<br>(0.00 to<br>0.01) | 0.00<br>(0.00 to<br>0.01) | 0.00<br>(0.00 to<br>0.01) |
| Other gynecological diseases                      | 0.83<br>(0.42 to<br>1.31)     | 1.86<br>(0.97 to<br>3.04)      | 1.62<br>(0.86 to<br>2.68)      | 2.30<br>(1.17 to<br>3.78)       | 0.02<br>(0.01 to<br>0.03) | 0.04<br>(0.02 to<br>0.07) | 0.04<br>(0.02 to<br>0.06) | 0.05<br>(0.03 to<br>0.08) |
| Hemoglobinopathies and hemolytic anemias          | 95.97<br>(62.04 to<br>129.41) | 124.69<br>(84.71 to<br>169.78) | 111.87<br>(75.71 to<br>149.97) | 171.51<br>(115.25 to<br>234.62) | 1.36<br>(0.91 to<br>1.78) | 2.04<br>(1.43 to<br>2.75) | 1.85<br>(1.30 to<br>2.47) | 2.68<br>(1.85 to<br>3.55) |
| Thalassemias                                      | 1.42<br>(0.75 to<br>2.23)     | 1.07<br>(0.55 to<br>1.79)      | 1.15<br>(0.61 to<br>1.90)      | 1.30<br>(0.67 to<br>2.17)       | 0.02<br>(0.01 to<br>0.03) | 0.01<br>(0.01 to<br>0.02) | 0.01<br>(0.01 to<br>0.02) | 0.02<br>(0.01 to<br>0.03) |
| Sickle cell disorders                             | 90.31<br>(57.62 to<br>123.18) | 114.73<br>(76.87 to<br>158.89) | 102.88<br>(68.43 to<br>139.50) | 159.20<br>(105.76 to<br>220.82) | 1.20<br>(0.79 to<br>1.59) | 1.69<br>(1.14 to<br>2.27) | 1.52<br>(1.02 to<br>2.03) | 2.27<br>(1.53 to<br>3.10) |
| G6PD deficiency                                   | 2.72<br>(1.86 to<br>3.92)     | 6.45<br>(4.24 to<br>9.80)      | 5.58<br>(3.70 to<br>8.51)      | 8.23<br>(5.45 to<br>12.47)      | 0.07<br>(0.05 to<br>0.10) | 0.19<br>(0.12 to<br>0.29) | 0.16<br>(0.11 to<br>0.26) | 0.23<br>(0.15 to<br>0.35) |
| Other hemoglobinopathies and hemolytic anemias    | 1.51<br>(1.02 to<br>2.23)     | 2.44<br>(1.64 to<br>3.80)      | 2.27<br>(1.50 to<br>3.51)      | 2.79<br>(1.87 to<br>4.35)       | 0.08<br>(0.05 to<br>0.12) | 0.15<br>(0.10 to<br>0.25) | 0.15<br>(0.10 to<br>0.24) | 0.17<br>(0.11 to<br>0.27) |
| Endocrine, metabolic, blood, and immune disorders | 10.38<br>(7.78 to<br>14.61)   | 17.14<br>(12.44 to<br>24.25)   | 15.86<br>(11.68 to<br>22.10)   | 22.90<br>(16.71 to<br>32.84)    | 0.20<br>(0.15 to<br>0.28) | 0.42<br>(0.31 to<br>0.59) | 0.41<br>(0.30 to<br>0.57) | 0.48<br>(0.36 to<br>0.68) |

**Niger**

| Cause                                  | YLLs (in 1000s)                        |                                        |                                        |                                          | Deaths (in 1000s)                |                                  |                                  |                                   |
|----------------------------------------|----------------------------------------|----------------------------------------|----------------------------------------|------------------------------------------|----------------------------------|----------------------------------|----------------------------------|-----------------------------------|
|                                        | 2016                                   | 2040 Forecast                          | 2040 Better Scenario                   | 2040 Worse Scenario                      | 2016                             | 2040 Forecast                    | 2040 Better Scenario             | 2040 Worse Scenario               |
| <b>Musculoskeletal disorders</b>       | <b>2.94</b><br>(1.99 to<br>4.69)       | <b>8.04</b><br>(5.43 to<br>12.71)      | <b>8.41</b><br>(5.69 to<br>13.28)      | <b>7.98</b><br>(5.39 to<br>12.73)        | <b>0.07</b><br>(0.05 to<br>0.10) | <b>0.21</b><br>(0.14 to<br>0.31) | <b>0.22</b><br>(0.15 to<br>0.33) | <b>0.19</b><br>(0.13 to<br>0.30)  |
| Rheumatoid arthritis                   | 0.37<br>(0.20 to<br>0.63)              | 0.87<br>(0.48 to<br>1.50)              | 0.81<br>(0.43 to<br>1.42)              | 1.02<br>(0.57 to<br>1.71)                | 0.01<br>(0.01 to<br>0.02)        | 0.04<br>(0.02 to<br>0.07)        | 0.04<br>(0.02 to<br>0.07)        | 0.04<br>(0.02 to<br>0.07)         |
| Other musculoskeletal disorders        | 2.57<br>(1.72 to<br>4.27)              | 7.16<br>(4.78 to<br>11.66)             | 7.60<br>(5.13 to<br>12.34)             | 6.96<br>(4.62 to<br>11.53)               | 0.05<br>(0.04 to<br>0.09)        | 0.16<br>(0.11 to<br>0.26)        | 0.18<br>(0.12 to<br>0.28)        | 0.15<br>(0.10 to<br>0.24)         |
| <b>Other non-communicable diseases</b> | <b>388.76</b><br>(156.33 to<br>643.15) | <b>402.76</b><br>(173.32 to<br>693.38) | <b>349.81</b><br>(153.53 to<br>599.42) | <b>675.13</b><br>(277.90 to<br>1,169.41) | <b>4.75</b><br>(2.63 to<br>7.72) | <b>5.56</b><br>(2.83 to<br>9.09) | <b>4.97</b><br>(2.63 to<br>7.98) | <b>8.74</b><br>(4.06 to<br>14.62) |
| Congenital birth defects               | 360.25<br>(130.62 to<br>614.45)        | 351.05<br>(124.10 to<br>631.99)        | 301.70<br>(107.74 to<br>544.53)        | 603.09<br>(209.84 to<br>1,094.40)        | 4.28<br>(1.58 to<br>7.28)        | 4.30<br>(1.58 to<br>7.70)        | 3.71<br>(1.39 to<br>6.61)        | 7.28<br>(2.59 to<br>13.11)        |
| Neural tube defects                    | 103.13<br>(40.45 to<br>217.06)         | 44.06<br>(14.18 to<br>107.28)          | 34.78<br>(11.41 to<br>85.19)           | 86.80<br>(29.04 to<br>198.59)            | 1.21<br>(0.48 to<br>2.55)        | 0.53<br>(0.17 to<br>1.27)        | 0.42<br>(0.14 to<br>1.01)        | 1.03<br>(0.34 to<br>2.34)         |
| Congenital heart anomalies             | 83.52<br>(28.89 to<br>181.85)          | 99.51<br>(39.70 to<br>209.32)          | 87.46<br>(35.23 to<br>179.95)          | 161.21<br>(63.00 to<br>350.18)           | 1.01<br>(0.36 to<br>2.18)        | 1.25<br>(0.51 to<br>2.59)        | 1.10<br>(0.46 to<br>2.24)        | 1.98<br>(0.80 to<br>4.24)         |



|                                               |                                        |                                          |                                        |                                            |                                   |                                     |                                     |                                     |
|-----------------------------------------------|----------------------------------------|------------------------------------------|----------------------------------------|--------------------------------------------|-----------------------------------|-------------------------------------|-------------------------------------|-------------------------------------|
| Orofacial clefts                              | 3.90<br>(0.31 to<br>14.55)             | 3.57<br>(0.24 to<br>13.47)               | 2.79<br>(0.19 to<br>10.43)             | 7.31<br>(0.50 to<br>27.61)                 | 0.05<br>(0.00 to<br>0.17)         | 0.04<br>(0.00 to<br>0.16)           | 0.03<br>(0.00 to<br>0.12)           | 0.08<br>(0.01 to<br>0.32)           |
| Down syndrome                                 | 2.99<br>(0.71 to<br>9.94)              | 4.31<br>(1.15 to<br>12.83)               | 3.69<br>(1.02 to<br>10.87)             | 7.12<br>(1.81 to<br>22.04)                 | 0.04<br>(0.01 to<br>0.12)         | 0.06<br>(0.02 to<br>0.17)           | 0.05<br>(0.02 to<br>0.14)           | 0.09<br>(0.03 to<br>0.27)           |
| Other chromosomal abnormalities               | 9.02<br>(1.10 to<br>23.52)             | 16.11<br>(2.10 to<br>39.51)              | 13.66<br>(1.78 to<br>33.72)            | 28.92<br>(3.86 to<br>74.27)                | 0.11<br>(0.01 to<br>0.27)         | 0.19<br>(0.02 to<br>0.46)           | 0.16<br>(0.02 to<br>0.40)           | 0.34<br>(0.05 to<br>0.87)           |
| Congenital musculoskeletal and limb anomalies | 2.29<br>(0.43 to<br>8.27)              | 3.13<br>(0.67 to<br>11.59)               | 2.78<br>(0.61 to<br>10.42)             | 5.20<br>(1.09 to<br>19.75)                 | 0.03<br>(0.01 to<br>0.10)         | 0.04<br>(0.01 to<br>0.14)           | 0.03<br>(0.01 to<br>0.12)           | 0.06<br>(0.01 to<br>0.23)           |
| Urogenital congenital anomalies               | 2.58<br>(0.76 to<br>5.79)              | 3.35<br>(1.10 to<br>7.27)                | 3.07<br>(1.01 to<br>6.70)              | 5.14<br>(1.65 to<br>11.24)                 | 0.03<br>(0.01 to<br>0.07)         | 0.05<br>(0.02 to<br>0.10)           | 0.04<br>(0.02 to<br>0.09)           | 0.07<br>(0.02 to<br>0.15)           |
| Digestive congenital anomalies                | 16.22<br>(4.64 to<br>39.82)            | 18.73<br>(5.53 to<br>50.33)              | 16.11<br>(4.82 to<br>42.92)            | 32.70<br>(9.65 to<br>87.63)                | 0.19<br>(0.05 to<br>0.47)         | 0.22<br>(0.07 to<br>0.59)           | 0.19<br>(0.06 to<br>0.51)           | 0.38<br>(0.11 to<br>1.03)           |
| Other congenital birth defects                | 136.58<br>(21.66 to<br>303.72)         | 158.28<br>(30.54 to<br>358.45)           | 137.36<br>(27.65 to<br>305.47)         | 268.70<br>(50.02 to<br>618.56)             | 1.63<br>(0.27 to<br>3.60)         | 1.93<br>(0.39 to<br>4.35)           | 1.68<br>(0.36 to<br>3.72)           | 3.23<br>(0.63 to<br>7.39)           |
| Skin and subcutaneous diseases                | 9.30<br>(5.89 to<br>15.20)             | 32.76<br>(21.37 to<br>52.06)             | 31.60<br>(20.76 to<br>49.46)           | 38.87<br>(24.68 to<br>62.65)               | 0.24<br>(0.15 to<br>0.40)         | 1.04<br>(0.67 to<br>1.63)           | 1.07<br>(0.69 to<br>1.66)           | 1.08<br>(0.69 to<br>1.69)           |
| Cellulitis                                    | 0.53<br>(0.24 to<br>0.89)              | 2.36<br>(1.11 to<br>3.91)                | 2.50<br>(1.20 to<br>4.08)              | 2.35<br>(1.06 to<br>4.02)                  | 0.02<br>(0.01 to<br>0.03)         | 0.08<br>(0.04 to<br>0.14)           | 0.09<br>(0.04 to<br>0.16)           | 0.08<br>(0.03 to<br>0.13)           |
| Pyoderma                                      | 8.00<br>(4.97 to<br>13.50)             | 27.82<br>(18.63 to<br>44.24)             | 26.40<br>(17.86 to<br>41.74)           | 33.87<br>(22.21 to<br>54.31)               | 0.20<br>(0.13 to<br>0.32)         | 0.84<br>(0.55 to<br>1.33)           | 0.84<br>(0.56 to<br>1.32)           | 0.90<br>(0.59 to<br>1.46)           |
| Decubitus ulcer                               | 0.49<br>(0.24 to<br>0.84)              | 1.66<br>(0.80 to<br>2.80)                | 1.78<br>(0.86 to<br>2.99)              | 1.65<br>(0.80 to<br>2.80)                  | 0.02<br>(0.01 to<br>0.04)         | 0.10<br>(0.04 to<br>0.17)           | 0.11<br>(0.05 to<br>0.20)           | 0.08<br>(0.04 to<br>0.15)           |
| Other skin and subcutaneous diseases          | 0.29<br>(0.14 to<br>0.53)              | 0.91<br>(0.51 to<br>1.58)                | 0.93<br>(0.52 to<br>1.60)              | 1.01<br>(0.54 to<br>1.77)                  | 0.01<br>(0.00 to<br>0.01)         | 0.02<br>(0.01 to<br>0.03)           | 0.02<br>(0.01 to<br>0.03)           | 0.02<br>(0.01 to<br>0.03)           |
| Sudden infant death syndrome                  | 19.21<br>(7.06 to<br>36.30)            | 18.95<br>(6.40 to<br>38.11)              | 16.50<br>(5.66 to<br>32.55)            | 33.16<br>(11.00 to<br>66.71)               | 0.22<br>(0.08 to<br>0.42)         | 0.22<br>(0.07 to<br>0.44)           | 0.19<br>(0.07 to<br>0.38)           | 0.38<br>(0.13 to<br>0.77)           |
| <b>Injuries</b>                               | <b>537.48</b><br>(447.20 to<br>640.17) | <b>820.14</b><br>(633.66 to<br>1,031.69) | <b>746.05</b><br>(581.77 to<br>935.85) | <b>1,048.21</b><br>(813.29 to<br>1,314.13) | <b>9.40</b><br>(7.87 to<br>11.04) | <b>16.13</b><br>(12.86 to<br>19.87) | <b>15.17</b><br>(12.13 to<br>18.68) | <b>19.05</b><br>(15.02 to<br>23.47) |
| <b>Transport injuries</b>                     | <b>119.15</b><br>(95.95 to<br>148.78)  | <b>272.90</b><br>(213.79 to<br>350.19)   | <b>248.97</b><br>(195.83 to<br>317.82) | <b>319.30</b><br>(247.05 to<br>411.01)     | <b>2.14</b><br>(1.74 to<br>2.59)  | <b>5.11</b><br>(4.10 to<br>6.43)    | <b>4.77</b><br>(3.84 to<br>5.97)    | <b>5.67</b><br>(4.50 to<br>7.12)    |
| Road injuries                                 | 111.75<br>(90.39 to<br>139.11)         | 256.36<br>(201.40 to<br>327.61)          | 234.00<br>(183.89 to<br>297.03)        | 297.89<br>(231.91 to<br>381.36)            | 2.02<br>(1.65 to<br>2.44)         | 4.82<br>(3.87 to<br>6.01)           | 4.51<br>(3.64 to<br>5.60)           | 5.31<br>(4.25 to<br>6.66)           |
| Pedestrian road injuries                      | 29.76<br>(22.91 to<br>38.10)           | 54.06<br>(39.93 to<br>72.13)             | 49.71<br>(36.72 to<br>66.39)           | 62.76<br>(46.41 to<br>83.85)               | 0.55<br>(0.44 to<br>0.70)         | 1.10<br>(0.84 to<br>1.43)           | 1.03<br>(0.79 to<br>1.34)           | 1.21<br>(0.91 to<br>1.57)           |

**Niger**

| Cause                       | YLLs (in 1000s)              |                                 |                                 |                                 | Deaths (in 1000s)         |                           |                           |                           |
|-----------------------------|------------------------------|---------------------------------|---------------------------------|---------------------------------|---------------------------|---------------------------|---------------------------|---------------------------|
|                             | 2016                         | 2040 Forecast                   | 2040 Better Scenario            | 2040 Worse Scenario             | 2016                      | 2040 Forecast             | 2040 Better Scenario      | 2040 Worse Scenario       |
| Cyclist road injuries       | 2.49<br>(1.44 to<br>3.72)    | 5.97<br>(3.60 to<br>9.11)       | 5.45<br>(3.32 to<br>8.32)       | 7.02<br>(4.07 to<br>11.01)      | 0.04<br>(0.03 to<br>0.06) | 0.11<br>(0.07 to<br>0.17) | 0.11<br>(0.07 to<br>0.16) | 0.12<br>(0.08 to<br>0.19) |
| Motorcyclist road injuries  | 17.00<br>(11.75 to<br>23.81) | 41.76<br>(27.99 to<br>59.93)    | 38.34<br>(25.68 to<br>55.23)    | 49.54<br>(32.39 to<br>71.16)    | 0.27<br>(0.19 to<br>0.38) | 0.70<br>(0.48 to<br>0.99) | 0.65<br>(0.45 to<br>0.93) | 0.79<br>(0.53 to<br>1.13) |
| Motor vehicle road injuries | 60.09<br>(46.68 to<br>76.63) | 148.75<br>(113.64 to<br>193.86) | 135.20<br>(103.28 to<br>175.41) | 171.74<br>(127.79 to<br>227.64) | 1.10<br>(0.86 to<br>1.36) | 2.80<br>(2.20 to<br>3.57) | 2.61<br>(2.04 to<br>3.33) | 3.06<br>(2.38 to<br>3.95) |

|                                                 |                                                      |                                                      |                                                      |                                                      |                                                |                                                 |                                                 |                                                  |
|-------------------------------------------------|------------------------------------------------------|------------------------------------------------------|------------------------------------------------------|------------------------------------------------------|------------------------------------------------|-------------------------------------------------|-------------------------------------------------|--------------------------------------------------|
| Other road injuries                             | 2.42<br>(1.28 to<br>3.83)                            | 5.81<br>(3.14 to<br>9.47)                            | 5.31<br>(2.91 to<br>8.58)                            | 6.83<br>(3.57 to<br>11.21)                           | 0.04<br>(0.03 to<br>0.07)                      | 0.11<br>(0.06 to<br>0.18)                       | 0.11<br>(0.06 to<br>0.17)                       | 0.12<br>(0.07 to<br>0.20)                        |
| Other transport injuries                        | 7.40<br>(4.19 to<br>12.90)                           | 16.54<br>(9.38 to<br>28.51)                          | 14.97<br>(8.53 to<br>25.83)                          | 21.41<br>(12.17 to<br>37.03)                         | 0.12<br>(0.07 to<br>0.20)                      | 0.29<br>(0.17 to<br>0.49)                       | 0.27<br>(0.16 to<br>0.44)                       | 0.36<br>(0.21 to<br>0.61)                        |
| <b>Unintentional injuries</b>                   | <b>346.02</b><br><b>(278.16 to</b><br><b>428.71)</b> | <b>426.89</b><br><b>(313.15 to</b><br><b>574.67)</b> | <b>380.07</b><br><b>(281.72 to</b><br><b>500.29)</b> | <b>599.01</b><br><b>(437.99 to</b><br><b>807.68)</b> | <b>5.83</b><br><b>(4.79 to</b><br><b>6.94)</b> | <b>8.48</b><br><b>(6.54 to</b><br><b>10.80)</b> | <b>7.90</b><br><b>(6.13 to</b><br><b>10.02)</b> | <b>10.72</b><br><b>(8.32 to</b><br><b>13.76)</b> |
| Falls                                           | 36.03<br>(26.40 to<br>50.16)                         | 58.60<br>(43.82 to<br>78.42)                         | 56.36<br>(42.55 to<br>74.95)                         | 70.58<br>(51.37 to<br>96.97)                         | 0.88<br>(0.68 to<br>1.14)                      | 1.95<br>(1.55 to<br>2.47)                       | 2.01<br>(1.60 to<br>2.57)                       | 2.11<br>(1.57 to<br>2.58)                        |
| Drowning                                        | 70.45<br>(52.10 to<br>95.07)                         | 77.48<br>(51.94 to<br>114.41)                        | 69.25<br>(46.75 to<br>103.06)                        | 108.89<br>(72.56 to<br>161.07)                       | 1.04<br>(0.79 to<br>1.36)                      | 1.26<br>(0.89 to<br>1.80)                       | 1.15<br>(0.82 to<br>1.63)                       | 1.67<br>(1.17 to<br>2.41)                        |
| Fire, heat, and hot substances                  | 38.73<br>(25.71 to<br>53.96)                         | 38.63<br>(25.61 to<br>57.75)                         | 33.54<br>(22.41 to<br>49.33)                         | 56.91<br>(36.94 to<br>85.79)                         | 0.66<br>(0.48 to<br>0.88)                      | 0.77<br>(0.56 to<br>1.07)                       | 0.69<br>(0.50 to<br>0.95)                       | 1.02<br>(0.72 to<br>1.44)                        |
| Poisonings                                      | 24.53<br>(12.39 to<br>51.06)                         | 21.05<br>(10.19 to<br>45.31)                         | 17.19<br>(8.38 to<br>36.87)                          | 34.14<br>(15.86 to<br>76.68)                         | 0.39<br>(0.22 to<br>0.75)                      | 0.36<br>(0.19 to<br>0.73)                       | 0.30<br>(0.16 to<br>0.61)                       | 0.54<br>(0.28 to<br>1.09)                        |
| Exposure to mechanical forces                   | 57.14<br>(40.16 to<br>80.09)                         | 65.00<br>(40.47 to<br>101.33)                        | 56.17<br>(34.99 to<br>87.28)                         | 95.06<br>(59.53 to<br>144.95)                        | 0.88<br>(0.63 to<br>1.21)                      | 1.10<br>(0.71 to<br>1.73)                       | 0.97<br>(0.62 to<br>1.53)                       | 1.50<br>(0.98 to<br>2.28)                        |
| Unintentional firearm injuries                  | 18.11<br>(9.99 to<br>29.17)                          | 19.12<br>(9.19 to<br>36.27)                          | 16.31<br>(7.82 to<br>30.81)                          | 27.16<br>(13.23 to<br>49.97)                         | 0.30<br>(0.17 to<br>0.50)                      | 0.34<br>(0.17 to<br>0.65)                       | 0.30<br>(0.15 to<br>0.56)                       | 0.46<br>(0.23 to<br>0.86)                        |
| Unintentional suffocation                       | 13.76<br>(7.26 to<br>26.15)                          | 14.35<br>(7.57 to<br>27.12)                          | 12.27<br>(6.53 to<br>22.89)                          | 23.21<br>(12.01 to<br>43.50)                         | 0.17<br>(0.09 to<br>0.32)                      | 0.18<br>(0.10 to<br>0.34)                       | 0.16<br>(0.09 to<br>0.29)                       | 0.29<br>(0.16 to<br>0.54)                        |
| Other exposure to mechanical forces             | 25.28<br>(18.29 to<br>34.74)                         | 31.53<br>(20.04 to<br>46.15)                         | 27.58<br>(17.65 to<br>40.51)                         | 44.70<br>(28.58 to<br>65.20)                         | 0.41<br>(0.29 to<br>0.54)                      | 0.57<br>(0.37 to<br>0.84)                       | 0.51<br>(0.34 to<br>0.76)                       | 0.75<br>(0.49 to<br>1.08)                        |
| Adverse effects of medical treatment            | 36.00<br>(21.21 to<br>52.71)                         | 50.01<br>(29.11 to<br>75.64)                         | 44.78<br>(25.71 to<br>67.41)                         | 69.05<br>(39.31 to<br>106.08)                        | 0.58<br>(0.37 to<br>0.80)                      | 0.91<br>(0.57 to<br>1.27)                       | 0.84<br>(0.53 to<br>1.15)                       | 1.16<br>(0.71 to<br>1.66)                        |
| Animal contact                                  | 25.59<br>(15.17 to<br>37.37)                         | 40.40<br>(23.32 to<br>65.11)                         | 34.06<br>(19.78 to<br>55.48)                         | 60.55<br>(34.94 to<br>96.84)                         | 0.48<br>(0.30 to<br>0.73)                      | 0.82<br>(0.50 to<br>1.32)                       | 0.72<br>(0.44 to<br>1.15)                       | 1.12<br>(0.69 to<br>1.78)                        |
| Venomous animal contact                         | 20.49<br>(11.59 to<br>32.47)                         | 31.71<br>(17.16 to<br>54.66)                         | 26.69<br>(14.80 to<br>45.57)                         | 47.42<br>(25.93 to<br>79.97)                         | 0.40<br>(0.24 to<br>0.66)                      | 0.67<br>(0.39 to<br>1.16)                       | 0.59<br>(0.34 to<br>1.00)                       | 0.91<br>(0.52 to<br>1.54)                        |
| Non-venomous animal contact                     | 5.10<br>(1.74 to<br>9.70)                            | 8.69<br>(3.11 to<br>16.04)                           | 7.37<br>(2.67 to<br>13.34)                           | 13.13<br>(4.72 to<br>24.05)                          | 0.08<br>(0.03 to<br>0.14)                      | 0.15<br>(0.06 to<br>0.27)                       | 0.13<br>(0.05 to<br>0.23)                       | 0.21<br>(0.08 to<br>0.37)                        |
| Foreign body                                    | 21.43<br>(14.86 to<br>30.42)                         | 35.14<br>(24.07 to<br>49.77)                         | 34.14<br>(23.60 to<br>48.26)                         | 45.16<br>(30.91 to<br>63.72)                         | 0.32<br>(0.24 to<br>0.45)                      | 0.60<br>(0.44 to<br>0.85)                       | 0.60<br>(0.44 to<br>0.86)                       | 0.70<br>(0.51 to<br>0.98)                        |
| Pulmonary aspiration and foreign body in airway | 18.69<br>(12.47 to<br>27.39)                         | 30.63<br>(20.96 to<br>43.94)                         | 30.01<br>(20.66 to<br>42.62)                         | 39.26<br>(26.42 to<br>57.40)                         | 0.28<br>(0.20 to<br>0.40)                      | 0.52<br>(0.38 to<br>0.72)                       | 0.52<br>(0.39 to<br>0.73)                       | 0.60<br>(0.43 to<br>0.84)                        |
| Foreign body in other body part                 | 2.75<br>(0.67 to<br>6.78)                            | 4.51<br>(1.06 to<br>12.59)                           | 4.13<br>(0.95 to<br>11.56)                           | 5.90<br>(1.40 to<br>15.38)                           | 0.04<br>(0.01 to<br>0.12)                      | 0.08<br>(0.02 to<br>0.23)                       | 0.07<br>(0.02 to<br>0.22)                       | 0.10<br>(0.02 to<br>0.27)                        |
| Environmental heat and cold exposure            | 15.13<br>(7.33 to<br>22.16)                          | 18.79<br>(8.42 to<br>31.45)                          | 15.22<br>(6.91 to<br>25.00)                          | 28.75<br>(13.09 to<br>46.32)                         | 0.27<br>(0.13 to<br>0.38)                      | 0.35<br>(0.16 to<br>0.56)                       | 0.29<br>(0.14 to<br>0.45)                       | 0.51<br>(0.24 to<br>0.80)                        |
| Other unintentional injuries                    | 20.99<br>(14.18 to<br>29.17)                         | 21.78<br>(14.20 to<br>32.91)                         | 19.37<br>(12.57 to<br>28.78)                         | 29.92<br>(19.46 to<br>44.96)                         | 0.33<br>(0.23 to<br>0.45)                      | 0.37<br>(0.25 to<br>0.55)                       | 0.34<br>(0.23 to<br>0.50)                       | 0.48<br>(0.32 to<br>0.71)                        |
| <b>Self-harm and interpersonal violence</b>     | <b>59.13</b><br><b>(43.04 to</b><br><b>82.63)</b>    | <b>119.19</b><br><b>(82.36 to</b><br><b>174.94)</b>  | <b>115.86</b><br><b>(80.25 to</b><br><b>169.29)</b>  | <b>128.57</b><br><b>(89.31 to</b><br><b>188.84)</b>  | <b>1.23</b><br><b>(0.89 to</b><br><b>1.75)</b> | <b>2.52</b><br><b>(1.74 to</b><br><b>3.71)</b>  | <b>2.48</b><br><b>(1.72 to</b><br><b>3.64)</b>  | <b>2.65</b><br><b>(1.82 to</b><br><b>3.87)</b>   |
| <b>Niger</b>                                    |                                                      |                                                      |                                                      |                                                      |                                                |                                                 |                                                 |                                                  |
| <b>YLLs (in 1000s)</b>                          |                                                      |                                                      |                                                      |                                                      | <b>Deaths (in 1000s)</b>                       |                                                 |                                                 |                                                  |

| Cause                                                                        | 2016                      | 2040 Forecast              | 2040 Better Scenario       | 2040 Worse Scenario        | 2016                   | 2040 Forecast          | 2040 Better Scenario   | 2040 Worse Scenario    |
|------------------------------------------------------------------------------|---------------------------|----------------------------|----------------------------|----------------------------|------------------------|------------------------|------------------------|------------------------|
| Self-harm                                                                    | 30.66<br>(20.07 to 50.67) | 69.13<br>(43.43 to 117.67) | 66.46<br>(42.03 to 112.41) | 74.30<br>(46.67 to 127.81) | 0.75<br>(0.50 to 1.23) | 1.65<br>(1.06 to 2.73) | 1.62<br>(1.05 to 2.68) | 1.73<br>(1.10 to 2.84) |
| Self-harm by firearm                                                         | 5.79<br>(2.55 to 10.83)   | 10.29<br>(4.28 to 20.14)   | 9.73<br>(4.05 to 18.95)    | 11.30<br>(4.76 to 22.02)   | 0.14<br>(0.06 to 0.26) | 0.26<br>(0.11 to 0.46) | 0.25<br>(0.11 to 0.45) | 0.27<br>(0.12 to 0.50) |
| Self-harm by other specified means                                           | 24.87<br>(15.69 to 44.99) | 58.84<br>(36.14 to 103.76) | 56.73<br>(35.20 to 100.39) | 63.00<br>(38.63 to 111.78) | 0.61<br>(0.39 to 1.09) | 1.40<br>(0.89 to 2.45) | 1.37<br>(0.88 to 2.39) | 1.45<br>(0.92 to 2.56) |
| Interpersonal violence                                                       | 28.47<br>(20.63 to 38.24) | 50.07<br>(34.00 to 71.69)  | 49.40<br>(33.60 to 70.86)  | 54.27<br>(36.66 to 76.86)  | 0.48<br>(0.35 to 0.64) | 0.87<br>(0.59 to 1.22) | 0.86<br>(0.59 to 1.21) | 0.92<br>(0.63 to 1.29) |
| Physical violence by firearm                                                 | 14.27<br>(9.06 to 21.05)  | 26.81<br>(15.75 to 40.94)  | 26.51<br>(15.52 to 40.52)  | 28.23<br>(16.58 to 43.25)  | 0.25<br>(0.16 to 0.36) | 0.47<br>(0.28 to 0.71) | 0.46<br>(0.27 to 0.70) | 0.48<br>(0.29 to 0.74) |
| Physical violence by sharp object                                            | 7.19<br>(3.97 to 10.84)   | 14.06<br>(7.70 to 21.83)   | 14.19<br>(7.80 to 21.90)   | 14.62<br>(8.00 to 22.65)   | 0.12<br>(0.07 to 0.18) | 0.25<br>(0.14 to 0.38) | 0.25<br>(0.14 to 0.39) | 0.25<br>(0.14 to 0.38) |
| Physical violence by other means                                             | 7.01<br>(4.80 to 10.65)   | 9.19<br>(6.02 to 14.96)    | 8.70<br>(5.70 to 14.19)    | 11.42<br>(7.51 to 18.24)   | 0.11<br>(0.07 to 0.16) | 0.15<br>(0.10 to 0.25) | 0.15<br>(0.10 to 0.24) | 0.18<br>(0.12 to 0.30) |
| Forces of nature, conflict and terrorism, and executions and police conflict | 13.18<br>(4.46 to 23.55)  | 1.16<br>(0.00 to 8.17)     | 1.15<br>(0.00 to 8.13)     | 1.32<br>(0.00 to 9.31)     | 0.20<br>(0.07 to 0.36) | 0.02<br>(0.00 to 0.14) | 0.02<br>(0.00 to 0.14) | 0.02<br>(0.00 to 0.15) |
| Exposure to forces of nature                                                 | 0.00<br>(0.00 to 0.00)    | 0.75<br>(0.00 to 7.96)     | 0.75<br>(0.00 to 7.93)     | 0.87<br>(0.00 to 9.08)     | 0.00<br>(0.00 to 0.00) | 0.01<br>(0.00 to 0.13) | 0.01<br>(0.00 to 0.14) | 0.01<br>(0.00 to 0.15) |
| Conflict and terrorism                                                       | 13.01<br>(4.31 to 23.41)  | 0.38<br>(0.00 to 3.57)     | 0.38<br>(0.00 to 3.54)     | 0.43<br>(0.00 to 4.02)     | 0.20<br>(0.07 to 0.36) | 0.01<br>(0.00 to 0.06) | 0.01<br>(0.00 to 0.06) | 0.01<br>(0.00 to 0.06) |
| Executions and police conflict                                               | 0.17<br>(0.13 to 0.28)    | 0.02<br>(0.00 to 0.29)     | 0.02<br>(0.00 to 0.29)     | 0.02<br>(0.00 to 0.31)     | 0.00<br>(0.00 to 0.01) | 0.00<br>(0.00 to 0.01) | 0.00<br>(0.00 to 0.01) | 0.00<br>(0.00 to 0.01) |

Nigeria

| Cause                                                             | YLLs (in 1000s)                       |                                       |                                       |                                        | Deaths (in 1000s)                  |                                    |                                  |                                    |
|-------------------------------------------------------------------|---------------------------------------|---------------------------------------|---------------------------------------|----------------------------------------|------------------------------------|------------------------------------|----------------------------------|------------------------------------|
|                                                                   | 2016                                  | 2040 Forecast                         | 2040 Better Scenario                  | 2040 Worse Scenario                    | 2016                               | 2040 Forecast                      | 2040 Better Scenario             | 2040 Worse Scenario                |
| All causes                                                        | 86,625.13<br>(75,130.68 to 99,285.48) | 69,189.56<br>(49,724.95 to 89,178.79) | 38,047.22<br>(29,590.55 to 47,669.14) | 93,615.12<br>(67,872.89 to 119,592.44) | 1,353.95<br>(1,203.93 to 1,520.76) | 1,661.39<br>(1,377.66 to 1,980.84) | 1,135.52<br>(978.94 to 1,325.62) | 2,164.66<br>(1,763.47 to 2,583.10) |
| Communicable, maternal, neonatal, and nutritional diseases        | 70,160.52<br>(59,107.36 to 81,824.17) | 45,027.51<br>(29,342.81 to 62,755.82) | 20,281.53<br>(13,456.95 to 28,022.35) | 65,769.97<br>(43,378.39 to 88,075.76)  | 976.95<br>(849.80 to 1,110.30)     | 801.12<br>(564.53 to 1,054.87)     | 422.80<br>(306.30 to 559.01)     | 1,193.73<br>(845.90 to 1,559.94)   |
| HIV/AIDS and tuberculosis                                         | 8,475.04<br>(7,151.96 to 10,489.98)   | 7,106.42<br>(4,232.99 to 11,026.87)   | 3,763.69<br>(1,669.35 to 7,427.11)    | 18,264.36<br>(11,437.33 to 26,565.60)  | 169.08<br>(145.99 to 202.04)       | 158.48<br>(101.40 to 226.91)       | 84.80<br>(42.06 to 147.47)       | 384.61<br>(243.84 to 544.32)       |
| Tuberculosis                                                      | 1,380.03<br>(1,072.03 to 1,865.27)    | 1,130.58<br>(695.98 to 1,865.12)      | 553.50<br>(340.29 to 935.13)          | 1,832.00<br>(1,052.89 to 3,111.30)     | 34.40<br>(26.53 to 46.55)          | 38.76<br>(24.73 to 61.51)          | 20.61<br>(13.16 to 32.90)        | 60.85<br>(35.36 to 99.85)          |
| HIV/AIDS                                                          | 7,095.01<br>(5,756.43 to 9,047.83)    | 5,975.84<br>(3,238.18 to 9,836.34)    | 3,210.20<br>(1,150.85 to 6,861.50)    | 16,432.36<br>(9,720.73 to 24,815.59)   | 134.68<br>(113.83 to 167.13)       | 119.73<br>(66.54 to 189.84)        | 64.19<br>(23.84 to 125.88)       | 323.77<br>(188.19 to 485.11)       |
| Diarrhea, lower respiratory, and other common infectious diseases | 21,779.26<br>(17,182.78 to 26,827.70) | 15,706.47<br>(7,484.53 to 24,602.92)  | 6,470.95<br>(3,452.60 to 10,291.23)   | 21,758.33<br>(10,840.41 to 33,479.84)  | 316.98<br>(252.24 to 388.51)       | 345.85<br>(201.64 to 542.25)       | 188.23<br>(112.68 to 299.15)     | 469.72<br>(279.95 to 709.26)       |
| Diarrheal diseases                                                | 9,733.30<br>(7,018.24 to 12,807.66)   | 5,249.83<br>(2,007.01 to 10,015.23)   | 2,187.12<br>(700.03 to 4,547.40)      | 6,750.55<br>(2,698.28 to 12,363.32)    | 135.26<br>(97.56 to 175.44)        | 107.02<br>(37.44 to 243.09)        | 51.45<br>(14.41 to 126.68)       | 146.62<br>(51.90 to 320.42)        |
| Intestinal infectious diseases                                    | 410.12<br>(194.53 to 751.13)          | 446.67<br>(196.49 to 852.14)          | 282.56<br>(123.51 to 535.50)          | 487.01<br>(215.72 to 958.90)           | 5.66<br>(2.70 to 10.36)            | 6.41<br>(2.89 to 12.04)            | 4.22<br>(1.95 to 7.81)           | 6.95<br>(3.17 to 13.34)            |



|                                                       |                                                        |                                                        |                                                      |                                                          |                                                   |                                                  |                                                 |                                                   |
|-------------------------------------------------------|--------------------------------------------------------|--------------------------------------------------------|------------------------------------------------------|----------------------------------------------------------|---------------------------------------------------|--------------------------------------------------|-------------------------------------------------|---------------------------------------------------|
| Leishmaniasis                                         | 0.02<br>(0.01 to<br>0.04)                              | 0.02<br>(0.01 to<br>0.03)                              | 0.01<br>(0.01 to<br>0.02)                            | 0.02<br>(0.01 to<br>0.04)                                | 0.00<br>(0.00 to<br>0.00)                         | 0.00<br>(0.00 to<br>0.00)                        | 0.00<br>(0.00 to<br>0.00)                       | 0.00<br>(0.00 to<br>0.00)                         |
| African trypanosomiasis                               | 0.00<br>(0.00 to<br>0.00)                              | 0.00<br>(0.00 to<br>0.00)                              | 0.00<br>(0.00 to<br>0.00)                            | 0.00<br>(0.00 to<br>0.00)                                | 0.00<br>(0.00 to<br>0.00)                         | 0.00<br>(0.00 to<br>0.00)                        | 0.00<br>(0.00 to<br>0.00)                       | 0.00<br>(0.00 to<br>0.00)                         |
| Schistosomiasis                                       | 45.35<br>(30.44 to<br>63.63)                           | 34.69<br>(23.26 to<br>51.07)                           | 25.24<br>(16.85 to<br>37.72)                         | 37.93<br>(25.37 to<br>55.08)                             | 1.08<br>(0.75 to<br>1.50)                         | 1.13<br>(0.78 to<br>1.65)                        | 0.88<br>(0.60 to<br>1.31)                       | 1.19<br>(0.82 to<br>1.75)                         |
| Cysticercosis                                         | 2.99<br>(1.83 to<br>4.67)                              | 1.17<br>(0.67 to<br>1.90)                              | 0.86<br>(0.50 to<br>1.38)                            | 1.24<br>(0.71 to<br>2.02)                                | 0.05<br>(0.03 to<br>0.08)                         | 0.02<br>(0.01 to<br>0.04)                        | 0.02<br>(0.01 to<br>0.03)                       | 0.02<br>(0.01 to<br>0.04)                         |
| Cystic echinococcosis                                 | 2.38<br>(1.69 to<br>3.24)                              | 0.94<br>(0.58 to<br>1.45)                              | 0.35<br>(0.23 to<br>0.53)                            | 1.28<br>(0.77 to<br>2.00)                                | 0.04<br>(0.03 to<br>0.05)                         | 0.02<br>(0.01 to<br>0.03)                        | 0.01<br>(0.01 to<br>0.01)                       | 0.03<br>(0.02 to<br>0.04)                         |
| Dengue                                                | 8.45<br>(0.48 to<br>36.46)                             | 27.88<br>(1.82 to<br>114.70)                           | 16.43<br>(1.17 to<br>63.12)                          | 29.72<br>(1.92 to<br>123.29)                             | 0.11<br>(0.01 to<br>0.46)                         | 0.45<br>(0.03 to<br>1.73)                        | 0.32<br>(0.03 to<br>1.15)                       | 0.47<br>(0.04 to<br>1.74)                         |
| Yellow fever                                          | 54.00<br>(10.48 to<br>161.15)                          | 26.49<br>(4.93 to<br>82.08)                            | 14.04<br>(2.68 to<br>41.69)                          | 31.82<br>(6.06 to<br>97.07)                              | 0.83<br>(0.16 to<br>2.47)                         | 0.42<br>(0.08 to<br>1.30)                        | 0.23<br>(0.05 to<br>0.71)                       | 0.50<br>(0.10 to<br>1.54)                         |
| Rabies                                                | 83.03<br>(28.25 to<br>209.26)                          | 43.48<br>(12.79 to<br>110.36)                          | 13.18<br>(3.76 to<br>36.16)                          | 63.03<br>(18.99 to<br>161.34)                            | 1.16<br>(0.39 to<br>2.89)                         | 0.66<br>(0.19 to<br>1.66)                        | 0.21<br>(0.06 to<br>0.55)                       | 0.95<br>(0.29 to<br>2.33)                         |
| Intestinal nematode infections                        | 91.32<br>(53.80 to<br>149.41)                          | 123.74<br>(44.25 to<br>241.08)                         | 72.24<br>(26.05 to<br>138.40)                        | 127.90<br>(46.34 to<br>249.09)                           | 1.10<br>(0.65 to<br>1.79)                         | 1.52<br>(0.57 to<br>2.91)                        | 0.90<br>(0.34 to<br>1.69)                       | 1.56<br>(0.59 to<br>3.00)                         |
| Other neglected tropical diseases                     | 522.28<br>(236.84 to<br>1,023.79)                      | 425.26<br>(183.52 to<br>817.20)                        | 192.35<br>(86.17 to<br>366.49)                       | 498.14<br>(217.66 to<br>945.86)                          | 6.64<br>(3.19 to<br>12.54)                        | 6.07<br>(3.00 to<br>10.64)                       | 3.08<br>(1.60 to<br>5.25)                       | 7.00<br>(3.40 to<br>12.38)                        |
| <b>Maternal disorders</b>                             | <b>969.92</b><br><b>(627.95 to</b><br><b>1,339.12)</b> | <b>838.13</b><br><b>(476.37 to</b><br><b>1,332.21)</b> | <b>423.82</b><br><b>(242.19 to</b><br><b>673.73)</b> | <b>1,103.99</b><br><b>(642.70 to</b><br><b>1,786.59)</b> | <b>17.83</b><br><b>(11.49 to</b><br><b>24.65)</b> | <b>15.64</b><br><b>(8.93 to</b><br><b>25.04)</b> | <b>7.94</b><br><b>(4.54 to</b><br><b>12.50)</b> | <b>20.59</b><br><b>(11.97 to</b><br><b>32.98)</b> |
| Maternal hemorrhage                                   | 181.14<br>(109.05 to<br>270.44)                        | 146.99<br>(79.90 to<br>251.51)                         | 77.40<br>(40.70 to<br>131.93)                        | 186.87<br>(101.39 to<br>319.18)                          | 3.40<br>(2.02 to<br>5.03)                         | 2.79<br>(1.53 to<br>4.86)                        | 1.47<br>(0.77 to<br>2.51)                       | 3.54<br>(1.93 to<br>6.08)                         |
| Maternal sepsis and other maternal infections         | 103.57<br>(62.80 to<br>153.53)                         | 72.44<br>(37.85 to<br>121.13)                          | 37.49<br>(19.05 to<br>62.04)                         | 93.19<br>(50.61 to<br>156.51)                            | 1.90<br>(1.15 to<br>2.83)                         | 1.34<br>(0.71 to<br>2.26)                        | 0.70<br>(0.37 to<br>1.15)                       | 1.73<br>(0.93 to<br>2.89)                         |
| Maternal hypertensive disorders                       | 217.37<br>(136.38 to<br>312.41)                        | 188.57<br>(101.41 to<br>313.45)                        | 97.80<br>(52.03 to<br>167.74)                        | 240.71<br>(130.60 to<br>406.77)                          | 3.93<br>(2.50 to<br>5.65)                         | 3.45<br>(1.85 to<br>5.76)                        | 1.80<br>(0.95 to<br>3.08)                       | 4.40<br>(2.38 to<br>7.38)                         |
| Maternal obstructed labor and uterine rupture         | 63.68<br>(36.83 to<br>97.66)                           | 55.33<br>(27.25 to<br>96.07)                           | 27.83<br>(14.00 to<br>46.98)                         | 71.84<br>(36.53 to<br>126.83)                            | 1.20<br>(0.71 to<br>1.87)                         | 1.05<br>(0.51 to<br>1.85)                        | 0.53<br>(0.26 to<br>0.90)                       | 1.36<br>(0.69 to<br>2.40)                         |
| Maternal abortion, miscarriage, and ectopic pregnancy | 95.88<br>(57.00 to<br>141.21)                          | 50.93<br>(23.49 to<br>101.47)                          | 26.77<br>(12.13 to<br>50.97)                         | 66.35<br>(31.39 to<br>125.59)                            | 1.74<br>(1.04 to<br>2.59)                         | 0.94<br>(0.43 to<br>1.85)                        | 0.50<br>(0.22 to<br>0.95)                       | 1.22<br>(0.59 to<br>2.31)                         |
| Indirect maternal deaths                              | 213.29<br>(132.05 to<br>319.50)                        | 180.72<br>(91.58 to<br>300.78)                         | 91.02<br>(46.49 to<br>154.36)                        | 239.74<br>(127.95 to<br>411.71)                          | 3.88<br>(2.36 to<br>5.78)                         | 3.30<br>(1.67 to<br>5.53)                        | 1.67<br>(0.85 to<br>2.79)                       | 4.37<br>(2.32 to<br>7.43)                         |
| Late maternal deaths                                  | 8.46<br>(3.90 to<br>16.03)                             | 5.68<br>(2.37 to<br>11.61)                             | 2.87<br>(1.17 to<br>5.84)                            | 7.45<br>(3.09 to<br>15.77)                               | 0.16<br>(0.07 to<br>0.30)                         | 0.11<br>(0.04 to<br>0.21)                        | 0.05<br>(0.02 to<br>0.11)                       | 0.14<br>(0.06 to<br>0.29)                         |
| Maternal deaths aggravated by HIV/AIDS                | 16.57<br>(8.57 to<br>26.43)                            | 80.74<br>(30.98 to<br>151.48)                          | 32.77<br>(4.89 to<br>70.55)                          | 124.29<br>(58.62 to<br>216.86)                           | 0.32<br>(0.16 to<br>0.51)                         | 0.65<br>(0.64 to<br>2.93)                        | 0.65<br>(0.09 to<br>1.39)                       | 2.44<br>(1.15 to<br>4.26)                         |
| Other maternal disorders                              | 69.96<br>(40.10 to<br>109.14)                          | 56.73<br>(28.48 to<br>96.96)                           | 29.87<br>(15.30 to<br>52.23)                         | 73.56<br>(37.85 to<br>125.44)                            | 1.30<br>(0.75 to<br>2.06)                         | 1.07<br>(0.54 to<br>1.84)                        | 0.57<br>(0.29 to<br>0.99)                       | 1.38<br>(0.70 to<br>2.36)                         |

**Nigeria**

| Cause | YLLs (in 1000s) |               |                      |                     | Deaths (in 1000s) |               |                      |                     |
|-------|-----------------|---------------|----------------------|---------------------|-------------------|---------------|----------------------|---------------------|
|       | 2016            | 2040 Forecast | 2040 Better Scenario | 2040 Worse Scenario | 2016              | 2040 Forecast | 2040 Better Scenario | 2040 Worse Scenario |

|                                                                         |                                                            |                                                          |                                                      |                                                          |                                                   |                                                   |                                                  |                                                   |
|-------------------------------------------------------------------------|------------------------------------------------------------|----------------------------------------------------------|------------------------------------------------------|----------------------------------------------------------|---------------------------------------------------|---------------------------------------------------|--------------------------------------------------|---------------------------------------------------|
|                                                                         | 16,193.28<br>(11,907.07 to<br>20,749.45)                   | 12,303.24<br>(4,351.70 to<br>21,363.37)                  | 4,696.46<br>(1,652.04 to<br>8,317.97)                | 14,728.86<br>(5,185.83 to<br>25,756.70)                  | 187.04<br>(137.54 to<br>239.65)                   | 142.14<br>(50.30 to<br>246.78)                    | 54.26<br>(19.10 to<br>96.09)                     | 170.17<br>(59.94 to<br>297.58)                    |
| <b>Neonatal disorders</b>                                               |                                                            |                                                          |                                                      |                                                          |                                                   |                                                   |                                                  |                                                   |
| Neonatal preterm birth                                                  | 4,634.99<br>(3,009.89 to<br>6,771.78)                      | 3,254.65<br>(1,026.75 to<br>5,915.69)                    | 1,095.33<br>(343.75 to<br>2,005.67)                  | 3,966.97<br>(1,273.39 to<br>7,238.68)                    | 53.53<br>(34.76 to<br>78.21)                      | 37.60<br>(11.87 to<br>68.33)                      | 12.65<br>(3.97 to<br>23.17)                      | 45.82<br>(14.71 to<br>83.61)                      |
| Neonatal encephalopathy due to birth asphyxia and trauma                | 6,790.51<br>(4,567.21 to<br>9,486.71)                      | 4,558.31<br>(1,036.79 to<br>9,145.12)                    | 1,859.10<br>(429.06 to<br>3,654.85)                  | 5,375.82<br>(1,268.70 to<br>10,867.07)                   | 78.42<br>(52.75 to<br>109.56)                     | 52.66<br>(11.98 to<br>105.63)                     | 21.48<br>(4.96 to<br>42.22)                      | 62.10<br>(14.66 to<br>125.52)                     |
| Neonatal sepsis and other neonatal infections                           | 3,252.31<br>(1,989.41 to<br>5,182.13)                      | 3,306.69<br>(1,400.78 to<br>6,150.93)                    | 1,314.53<br>(554.21 to<br>2,486.04)                  | 3,924.75<br>(1,671.97 to<br>7,410.91)                    | 37.57<br>(22.98 to<br>59.88)                      | 38.21<br>(16.21 to<br>71.08)                      | 15.19<br>(6.41 to<br>28.73)                      | 45.35<br>(19.34 to<br>85.64)                      |
| Hemolytic disease and other neonatal jaundice                           | 460.84<br>(270.66 to<br>718.98)                            | 216.15<br>(80.76 to<br>428.78)                           | 78.16<br>(29.54 to<br>153.87)                        | 266.57<br>(98.80 to<br>525.29)                           | 5.32<br>(3.13 to<br>8.30)                         | 2.50<br>(0.93 to<br>4.95)                         | 0.90<br>(0.34 to<br>1.78)                        | 3.08<br>(1.14 to<br>6.07)                         |
| Other neonatal disorders                                                | 1,054.63<br>(507.69 to<br>2,129.82)                        | 967.44<br>(286.62 to<br>2,243.96)                        | 349.35<br>(106.54 to<br>808.26)                      | 1,194.73<br>(365.52 to<br>2,750.99)                      | 12.18<br>(5.87 to<br>24.61)                       | 11.18<br>(3.31 to<br>25.92)                       | 4.04<br>(1.23 to<br>9.34)                        | 13.81<br>(4.24 to<br>31.79)                       |
| <b>Nutritional deficiencies</b>                                         | <b>2,368.91</b><br><b>(1,410.94 to</b><br><b>3,815.04)</b> | <b>1,031.20</b><br><b>(426.42 to</b><br><b>1,866.84)</b> | <b>442.07</b><br><b>(212.23 to</b><br><b>768.59)</b> | <b>1,241.47</b><br><b>(518.30 to</b><br><b>2,318.91)</b> | <b>29.99</b><br><b>(18.67 to</b><br><b>47.03)</b> | <b>17.93</b><br><b>(10.63 to</b><br><b>27.67)</b> | <b>10.02</b><br><b>(7.06 to</b><br><b>14.14)</b> | <b>20.44</b><br><b>(11.58 to</b><br><b>33.71)</b> |
| Protein-energy malnutrition                                             | 2,305.79<br>(1,363.44 to<br>3,685.27)                      | 960.54<br>(385.57 to<br>1,788.44)                        | 404.17<br>(187.34 to<br>716.88)                      | 1,159.53<br>(470.43 to<br>2,170.40)                      | 28.90<br>(17.82 to<br>45.29)                      | 16.29<br>(9.39 to<br>25.94)                       | 8.92<br>(6.12 to<br>12.97)                       | 18.64<br>(10.16 to<br>30.97)                      |
| Iodine deficiency                                                       | 5.98<br>(0.13 to<br>43.11)                                 | 23.32<br>(0.21 to<br>202.48)                             | 9.56<br>(0.10 to<br>71.75)                           | 28.55<br>(0.24 to<br>236.62)                             | 0.08<br>(0.00 to<br>0.52)                         | 0.45<br>(0.01 to<br>2.53)                         | 0.24<br>(0.00 to<br>1.22)                        | 0.52<br>(0.01 to<br>3.09)                         |
| Dietary iron deficiency                                                 | 2.40<br>(1.62 to<br>4.26)                                  | 2.83<br>(1.75 to<br>5.82)                                | 2.07<br>(1.28 to<br>4.22)                            | 3.06<br>(1.92 to<br>6.25)                                | 0.04<br>(0.03 to<br>0.09)                         | 0.06<br>(0.03 to<br>0.18)                         | 0.04<br>(0.02 to<br>0.13)                        | 0.06<br>(0.03 to<br>0.19)                         |
| Other nutritional deficiencies                                          | 54.75<br>(25.28 to<br>138.04)                              | 44.52<br>(22.79 to<br>103.38)                            | 26.27<br>(14.93 to<br>51.70)                         | 50.33<br>(25.46 to<br>122.56)                            | 0.96<br>(0.53 to<br>1.91)                         | 1.14<br>(0.69 to<br>3.91)                         | 0.82<br>(0.50 to<br>1.29)                        | 1.22<br>(0.73 to<br>2.11)                         |
| <b>Other communicable, maternal, neonatal, and nutritional diseases</b> | <b>991.91</b><br><b>(593.84 to</b><br><b>1,655.83)</b>     | <b>574.69</b><br><b>(322.50 to</b><br><b>1,018.61)</b>   | <b>300.80</b><br><b>(188.41 to</b><br><b>495.58)</b> | <b>649.77</b><br><b>(365.66 to</b><br><b>1,135.83)</b>   | <b>13.46</b><br><b>(8.71 to</b><br><b>21.23)</b>  | <b>10.28</b><br><b>(6.94 to</b><br><b>15.67)</b>  | <b>6.35</b><br><b>(4.58 to</b><br><b>8.79)</b>   | <b>11.26</b><br><b>(7.50 to</b><br><b>17.44)</b>  |
| Sexually transmitted infections excluding HIV                           | 608.85<br>(269.64 to<br>1,083.16)                          | 202.63<br>(67.93 to<br>448.85)                           | 91.62<br>(33.90 to<br>188.62)                        | 228.12<br>(77.29 to<br>483.86)                           | 7.19<br>(3.22 to<br>12.73)                        | 2.47<br>(0.90 to<br>5.31)                         | 1.16<br>(0.46 to<br>2.31)                        | 2.78<br>(1.02 to<br>5.78)                         |
| Syphilis                                                                | 601.85<br>(264.04 to<br>1,075.75)                          | 193.91<br>(61.26 to<br>435.26)                           | 84.46<br>(27.81 to<br>182.21)                        | 218.84<br>(68.60 to<br>476.06)                           | 7.06<br>(3.10 to<br>12.59)                        | 2.29<br>(0.74 to<br>5.15)                         | 1.01<br>(0.34 to<br>2.31)                        | 2.59<br>(0.84 to<br>5.57)                         |
| Chlamydial infection                                                    | 1.44<br>(0.76 to<br>2.51)                                  | 1.79<br>(0.89 to<br>3.24)                                | 1.47<br>(0.74 to<br>2.66)                            | 1.91<br>(0.93 to<br>3.44)                                | 0.03<br>(0.01 to<br>0.05)                         | 0.04<br>(0.02 to<br>0.06)                         | 0.03<br>(0.02 to<br>0.06)                        | 0.04<br>(0.02 to<br>0.07)                         |
| Gonococcal infection                                                    | 3.60<br>(1.89 to<br>6.14)                                  | 4.50<br>(2.19 to<br>8.20)                                | 3.71<br>(1.83 to<br>6.77)                            | 4.78<br>(2.31 to<br>8.62)                                | 0.07<br>(0.04 to<br>0.12)                         | 0.10<br>(0.05 to<br>0.17)                         | 0.08<br>(0.04 to<br>0.14)                        | 0.10<br>(0.05 to<br>0.18)                         |
| Other sexually transmitted infections                                   | 1.97<br>(1.02 to<br>3.47)                                  | 2.43<br>(1.20 to<br>4.53)                                | 1.98<br>(0.98 to<br>3.69)                            | 2.58<br>(1.28 to<br>4.79)                                | 0.04<br>(0.02 to<br>0.07)                         | 0.05<br>(0.03 to<br>0.09)                         | 0.04<br>(0.02 to<br>0.07)                        | 0.05<br>(0.03 to<br>0.10)                         |
| Acute hepatitis                                                         | 181.82<br>(146.30 to<br>226.50)                            | 171.93<br>(124.37 to<br>235.60)                          | 118.01<br>(84.52 to<br>161.12)                       | 191.05<br>(138.51 to<br>261.73)                          | 3.55<br>(2.78 to<br>4.45)                         | 4.18<br>(3.06 to<br>5.65)                         | 3.06<br>(2.25 to<br>4.10)                        | 4.58<br>(3.39 to<br>6.17)                         |
| Acute hepatitis A                                                       | 12.17<br>(0.83 to<br>28.98)                                | 7.22<br>(1.10 to<br>21.71)                               | 3.30<br>(0.69 to<br>8.95)                            | 8.29<br>(1.23 to<br>25.05)                               | 0.15<br>(0.02 to<br>0.34)                         | 0.10<br>(0.02 to<br>0.27)                         | 0.05<br>(0.02 to<br>0.12)                        | 0.12<br>(0.03 to<br>0.31)                         |
| Acute hepatitis B                                                       | 115.80<br>(84.98 to<br>149.87)                             | 123.31<br>(86.77 to<br>173.09)                           | 88.22<br>(62.34 to<br>122.90)                        | 137.43<br>(96.25 to<br>193.37)                           | 2.59<br>(1.92 to<br>3.32)                         | 3.24<br>(2.31 to<br>4.43)                         | 2.40<br>(1.73 to<br>3.30)                        | 3.57<br>(2.55 to<br>4.83)                         |
| Acute hepatitis C                                                       | 3.66<br>(2.47 to<br>5.32)                                  | 4.78<br>(3.02 to<br>7.52)                                | 3.89<br>(2.51 to<br>6.16)                            | 5.04<br>(3.17 to<br>7.77)                                | 0.09<br>(0.06 to<br>0.13)                         | 0.14<br>(0.09 to<br>0.21)                         | 0.12<br>(0.07 to<br>0.18)                        | 0.14<br>(0.09 to<br>0.22)                         |
| Acute hepatitis E                                                       | 50.19<br>(35.29 to<br>70.85)                               | 36.62<br>(21.56 to<br>58.21)                             | 22.59<br>(13.98 to<br>34.82)                         | 40.29<br>(23.84 to<br>63.80)                             | 0.72<br>(0.52 to<br>0.99)                         | 0.70<br>(0.46 to<br>1.03)                         | 0.49<br>(0.33 to<br>0.71)                        | 0.74<br>(0.49 to<br>1.10)                         |

|                                       |                                         |                                          |                                          |                                          |                                 |                                 |                                 |                                 |
|---------------------------------------|-----------------------------------------|------------------------------------------|------------------------------------------|------------------------------------------|---------------------------------|---------------------------------|---------------------------------|---------------------------------|
|                                       | 201.24<br>(75.67 to<br>683.82)          | 200.12<br>(82.63 to<br>526.54)           | 91.18<br>(43.32 to<br>214.48)            | 230.60<br>(96.20 to<br>588.49)           | 2.71<br>(1.19 to<br>8.38)       | 3.62<br>(2.04 to<br>7.35)       | 2.12<br>(1.34 to<br>3.68)       | 4.01<br>(2.21 to<br>8.11)       |
| Other unspecified infectious diseases |                                         |                                          |                                          |                                          |                                 |                                 |                                 |                                 |
| Non-communicable diseases             | 12,413.07<br>(9,148.49 to<br>15,813.47) | 19,647.62<br>(15,254.32 to<br>24,629.94) | 14,727.80<br>(11,895.70 to<br>17,827.26) | 22,628.82<br>(17,639.88 to<br>28,691.08) | 308.86<br>(247.27 to<br>369.60) | 754.51<br>(648.65 to<br>871.03) | 628.87<br>(546.62 to<br>718.18) | 853.58<br>(723.69 to<br>998.36) |
| <b>Nigeria</b>                        |                                         |                                          |                                          |                                          |                                 |                                 |                                 |                                 |
| Cause                                 | YLLs (in 1000s)                         |                                          |                                          |                                          | Deaths (in 1000s)               |                                 |                                 |                                 |
|                                       | 2016                                    | 2040 Forecast                            | 2040 Better Scenario                     | 2040 Worse Scenario                      | 2016                            | 2040 Forecast                   | 2040 Better Scenario            | 2040 Worse Scenario             |
|                                       | 2,368.17<br>(1,868.49 to<br>2,898.59)   | 5,396.81<br>(4,185.89 to<br>6,709.34)    | 5,165.29<br>(3,996.12 to<br>6,409.68)    | 5,764.90<br>(4,422.51 to<br>7,285.94)    | 74.81<br>(59.45 to<br>92.25)    | 214.56<br>(174.19 to<br>258.65) | 216.67<br>(176.75 to<br>259.20) | 220.98<br>(176.48 to<br>268.98) |
| Neoplasms                             |                                         |                                          |                                          |                                          |                                 |                                 |                                 |                                 |
| Lip and oral cavity cancer            | 12.82<br>(9.74 to<br>16.27)             | 24.06<br>(14.49 to<br>40.86)             | 20.72<br>(12.75 to<br>35.35)             | 35.28<br>(18.94 to<br>62.92)             | 0.44<br>(0.34 to<br>0.55)       | 0.98<br>(0.61 to<br>1.63)       | 0.88<br>(0.57 to<br>1.47)       | 1.37<br>(0.76 to<br>2.41)       |
| Nasopharynx cancer                    | 7.32<br>(5.40 to<br>9.60)               | 13.15<br>(7.25 to<br>23.88)              | 10.07<br>(5.83 to<br>17.05)              | 21.07<br>(10.61 to<br>40.19)             | 0.17<br>(0.13 to<br>0.22)       | 0.34<br>(0.19 to<br>0.60)       | 0.27<br>(0.16 to<br>0.45)       | 0.54<br>(0.28 to<br>0.99)       |
| Other pharynx cancer                  | 9.11<br>(6.81 to<br>11.62)              | 13.26<br>(7.98 to<br>22.91)              | 11.95<br>(7.16 to<br>20.60)              | 18.37<br>(9.93 to<br>33.71)              | 0.31<br>(0.24 to<br>0.40)       | 0.57<br>(0.36 to<br>0.92)       | 0.53<br>(0.34 to<br>0.87)       | 0.76<br>(0.43 to<br>1.36)       |
| Esophageal cancer                     | 51.54<br>(36.01 to<br>70.35)            | 97.95<br>(56.77 to<br>161.07)            | 84.66<br>(49.68 to<br>137.34)            | 135.12<br>(74.92 to<br>228.84)           | 1.95<br>(1.41 to<br>2.61)       | 4.30<br>(2.61 to<br>6.94)       | 3.85<br>(2.38 to<br>6.22)       | 5.70<br>(3.28 to<br>9.40)       |
| Stomach cancer                        | 56.89<br>(43.40 to<br>71.10)            | 102.14<br>(76.96 to<br>134.12)           | 91.50<br>(69.94 to<br>120.31)            | 105.26<br>(79.63 to<br>139.74)           | 2.19<br>(1.70 to<br>2.72)       | 4.97<br>(3.89 to<br>6.38)       | 4.64<br>(3.68 to<br>5.86)       | 4.96<br>(3.85 to<br>6.45)       |
| Colon and rectum cancer               | 118.72<br>(89.47 to<br>159.75)          | 305.44<br>(207.58 to<br>449.86)          | 317.26<br>(218.05 to<br>456.24)          | 324.21<br>(217.80 to<br>483.90)          | 4.28<br>(3.28 to<br>5.41)       | 14.00<br>(9.81 to<br>19.74)     | 15.04<br>(10.68 to<br>20.91)    | 14.28<br>(10.02 to<br>20.41)    |
| Liver cancer                          | 517.61<br>(318.16 to<br>743.25)         | 1,264.17<br>(728.57 to<br>1,922.15)      | 1,151.41<br>(681.08 to<br>1,715.69)      | 1,483.18<br>(824.88 to<br>2,346.69)      | 15.37<br>(9.73 to<br>21.53)     | 43.57<br>(26.92 to<br>63.66)    | 41.03<br>(26.03 to<br>58.85)    | 49.46<br>(29.29 to<br>75.06)    |
| Liver cancer due to hepatitis B       | 309.56<br>(192.62 to<br>448.09)         | 756.13<br>(446.23 to<br>1,164.24)        | 694.17<br>(410.60 to<br>1,039.49)        | 827.45<br>(468.47 to<br>1,322.31)        | 8.80<br>(5.61 to<br>12.44)      | 24.80<br>(15.07 to<br>36.73)    | 23.52<br>(14.87 to<br>34.27)    | 26.32<br>(15.61 to<br>39.98)    |
| Liver cancer due to hepatitis C       | 30.56<br>(19.20 to<br>43.49)            | 83.76<br>(49.65 to<br>125.88)            | 78.81<br>(48.13 to<br>116.42)            | 89.10<br>(50.68 to<br>137.27)            | 1.13<br>(0.74 to<br>1.58)       | 3.70<br>(2.35 to<br>5.44)       | 3.61<br>(2.37 to<br>5.18)       | 3.80<br>(2.33 to<br>5.68)       |
| Liver cancer due to alcohol use       | 85.10<br>(51.28 to<br>124.02)           | 199.71<br>(113.62 to<br>302.84)          | 177.53<br>(103.56 to<br>265.47)          | 320.14<br>(170.80 to<br>512.41)          | 2.85<br>(1.80 to<br>4.10)       | 7.58<br>(4.62 to<br>11.05)      | 6.97<br>(4.39 to<br>9.93)       | 11.36<br>(6.50 to<br>17.57)     |
| Liver cancer due to other causes      | 92.39<br>(53.46 to<br>136.70)           | 224.57<br>(127.26 to<br>348.71)          | 200.90<br>(116.68 to<br>304.99)          | 246.48<br>(136.10 to<br>394.80)          | 2.60<br>(1.56 to<br>3.75)       | 7.49<br>(4.57 to<br>11.10)      | 6.93<br>(4.24 to<br>10.10)      | 7.97<br>(4.70 to<br>12.25)      |
| Gallbladder and biliary tract cancer  | 22.34<br>(16.02 to<br>29.74)            | 39.49<br>(29.36 to<br>53.37)             | 41.28<br>(30.45 to<br>53.37)             | 37.87<br>(28.28 to<br>51.24)             | 0.93<br>(0.68 to<br>1.24)       | 1.97<br>(1.52 to<br>2.61)       | 2.13<br>(1.63 to<br>2.87)       | 1.85<br>(1.43 to<br>2.43)       |
| Pancreatic cancer                     | 47.68<br>(35.92 to<br>59.58)            | 137.32<br>(102.85 to<br>181.48)          | 145.77<br>(109.67 to<br>192.11)          | 131.00<br>(99.02 to<br>171.62)           | 1.98<br>(1.49 to<br>2.47)       | 6.71<br>(5.19 to<br>8.70)       | 7.32<br>(5.71 to<br>9.40)       | 6.25<br>(4.84 to<br>7.97)       |
| Larynx cancer                         | 15.10<br>(10.78 to<br>20.09)            | 27.99<br>(16.37 to<br>47.26)             | 22.67<br>(13.54 to<br>36.72)             | 40.49<br>(22.06 to<br>71.49)             | 0.52<br>(0.38 to<br>0.69)       | 1.07<br>(0.66 to<br>1.73)       | 0.90<br>(0.56 to<br>1.41)       | 1.50<br>(0.84 to<br>2.65)       |
| Tracheal, bronchus, and lung cancer   | 75.98<br>(57.84 to<br>95.60)            | 192.10<br>(125.28 to<br>293.39)          | 157.86<br>(108.12 to<br>229.25)          | 238.49<br>(145.17 to<br>388.13)          | 3.08<br>(2.38 to<br>3.87)       | 8.98<br>(6.04 to<br>13.50)      | 7.73<br>(5.47 to<br>11.12)      | 10.91<br>(6.82 to<br>17.26)     |
| Malignant skin melanoma               | 9.57<br>(6.96 to<br>13.43)              | 25.64<br>(19.58 to<br>33.10)             | 30.03<br>(22.98 to<br>38.74)             | 23.36<br>(17.87 to<br>29.88)             | 0.35<br>(0.27 to<br>0.46)       | 1.31<br>(0.96 to<br>1.61)       | 1.60<br>(1.14 to<br>1.97)       | 1.15<br>(0.85 to<br>1.41)       |
| Non-melanoma skin cancer              | 4.54<br>(3.19 to<br>6.46)               | 12.75<br>(9.36 to<br>17.41)              | 11.69<br>(8.60 to<br>15.85)              | 12.75<br>(9.35 to<br>17.59)              | 0.16<br>(0.12 to<br>0.22)       | 0.65<br>(0.51 to<br>0.82)       | 0.63<br>(0.50 to<br>0.80)       | 0.62<br>(0.49 to<br>0.80)       |

|                                 |                                 |                                   |                                   |                                   |                             |                              |                              |                              |
|---------------------------------|---------------------------------|-----------------------------------|-----------------------------------|-----------------------------------|-----------------------------|------------------------------|------------------------------|------------------------------|
| Breast cancer                   | 367.17<br>(244.89 to<br>504.92) | 754.84<br>(457.36 to<br>1,144.27) | 749.71<br>(461.42 to<br>1,120.29) | 828.25<br>(495.38 to<br>1,270.50) | 11.05<br>(7.56 to<br>14.93) | 25.68<br>(16.92 to<br>37.00) | 25.89<br>(17.11 to<br>36.88) | 27.77<br>(18.11 to<br>41.11) |
| Cervical cancer                 | 138.06<br>(76.41 to<br>195.00)  | 232.25<br>(120.18 to<br>351.83)   | 203.46<br>(105.77 to<br>309.29)   | 242.25<br>(125.87 to<br>361.70)   | 4.49<br>(2.43 to<br>6.32)   | 8.19<br>(4.34 to<br>12.03)   | 7.27<br>(3.88 to<br>10.67)   | 8.45<br>(4.44 to<br>12.22)   |
| Uterine cancer                  | 24.94<br>(16.73 to<br>34.21)    | 54.17<br>(36.19 to<br>75.75)      | 46.05<br>(30.37 to<br>65.24)      | 56.83<br>(38.08 to<br>79.75)      | 0.91<br>(0.62 to<br>1.24)   | 2.26<br>(1.61 to<br>3.08)    | 1.96<br>(1.38 to<br>2.65)    | 2.34<br>(1.65 to<br>3.15)    |
| Ovarian cancer                  | 42.41<br>(28.30 to<br>57.52)    | 90.76<br>(58.88 to<br>130.22)     | 99.11<br>(64.93 to<br>142.31)     | 87.00<br>(56.79 to<br>124.00)     | 1.33<br>(0.90 to<br>1.79)   | 3.20<br>(2.19 to<br>4.40)    | 3.54<br>(2.42 to<br>4.85)    | 3.04<br>(2.06 to<br>4.18)    |
| Prostate cancer                 | 221.99<br>(89.04 to<br>341.52)  | 850.85<br>(395.65 to<br>1,207.75) | 919.40<br>(447.78 to<br>1,291.30) | 796.58<br>(353.86 to<br>1,144.16) | 11.41<br>(4.81 to<br>17.30) | 51.65<br>(26.22 to<br>70.12) | 57.45<br>(30.56 to<br>77.03) | 47.05<br>(22.50 to<br>64.88) |
| Testicular cancer               | 2.81<br>(1.96 to<br>3.94)       | 5.05<br>(3.49 to<br>7.07)         | 4.55<br>(3.16 to<br>6.47)         | 5.16<br>(3.57 to<br>7.23)         | 0.06<br>(0.05 to<br>0.09)   | 0.13<br>(0.09 to<br>0.18)    | 0.12<br>(0.09 to<br>0.17)    | 0.13<br>(0.10 to<br>0.18)    |
| <b>Nigeria</b>                  |                                 |                                   |                                   |                                   |                             |                              |                              |                              |
| Cause                           | YLLs (in 1000s)                 |                                   |                                   |                                   | Deaths (in 1000s)           |                              |                              |                              |
|                                 | 2016                            | 2040 Forecast                     | 2040 Better Scenario              | 2040 Worse Scenario               | 2016                        | 2040 Forecast                | 2040 Better Scenario         | 2040 Worse Scenario          |
| Kidney cancer                   | 19.78<br>(15.54 to<br>24.80)    | 44.33<br>(33.56 to<br>57.46)      | 46.84<br>(35.21 to<br>61.30)      | 41.81<br>(31.94 to<br>53.88)      | 0.51<br>(0.39 to<br>0.63)   | 1.51<br>(1.15 to<br>1.91)    | 1.72<br>(1.30 to<br>2.25)    | 1.38<br>(1.06 to<br>1.73)    |
| Bladder cancer                  | 11.23<br>(8.70 to<br>13.89)     | 30.00<br>(23.12 to<br>39.33)      | 29.25<br>(22.64 to<br>38.43)      | 29.51<br>(22.70 to<br>38.46)      | 0.52<br>(0.41 to<br>0.65)   | 1.79<br>(1.40 to<br>2.30)    | 1.83<br>(1.45 to<br>2.35)    | 1.70<br>(1.32 to<br>2.17)    |
| Brain and nervous system cancer | 106.03<br>(72.49 to<br>153.31)  | 203.27<br>(141.33 to<br>292.89)   | 187.87<br>(133.34 to<br>262.06)   | 198.08<br>(136.79 to<br>286.84)   | 2.16<br>(1.54 to<br>3.04)   | 5.15<br>(3.80 to<br>7.17)    | 5.19<br>(3.85 to<br>7.17)    | 4.92<br>(3.63 to<br>6.81)    |
| Thyroid cancer                  | 4.46<br>(3.28 to<br>5.95)       | 9.55<br>(6.81 to<br>13.08)        | 8.46<br>(5.99 to<br>11.55)        | 8.46<br>(7.05 to<br>14.21)        | 0.15<br>(0.11 to<br>0.19)   | 0.38<br>(0.29 to<br>0.49)    | 0.35<br>(0.26 to<br>0.44)    | 0.40<br>(0.29 to<br>0.53)    |
| Mesothelioma                    | 2.50<br>(1.83 to<br>3.25)       | 5.80<br>(4.23 to<br>7.78)         | 5.48<br>(3.92 to<br>7.32)         | 5.81<br>(4.24 to<br>7.69)         | 0.08<br>(0.06 to<br>0.10)   | 0.23<br>(0.18 to<br>0.30)    | 0.23<br>(0.17 to<br>0.29)    | 0.23<br>(0.18 to<br>0.29)    |
| Hodgkin lymphoma                | 40.93<br>(29.10 to<br>64.56)    | 58.08<br>(39.86 to<br>88.69)      | 42.02<br>(29.15 to<br>63.26)      | 63.10<br>(44.40 to<br>96.83)      | 0.86<br>(0.62 to<br>1.19)   | 1.59<br>(1.00 to<br>2.06)    | 1.24<br>(0.75 to<br>1.61)    | 1.68<br>(1.08 to<br>2.15)    |
| Non-Hodgkin lymphoma            | 109.03<br>(85.22 to<br>134.23)  | 194.09<br>(143.39 to<br>252.49)   | 177.56<br>(133.60 to<br>229.73)   | 190.82<br>(141.15 to<br>249.15)   | 2.18<br>(1.75 to<br>2.64)   | 4.83<br>(3.82 to<br>6.01)    | 4.84<br>(3.79 to<br>6.03)    | 4.66<br>(3.69 to<br>5.79)    |
| Multiple myeloma                | 16.50<br>(11.81 to<br>21.56)    | 44.33<br>(30.92 to<br>60.54)      | 47.21<br>(33.41 to<br>63.44)      | 43.02<br>(29.43 to<br>59.27)      | 0.61<br>(0.43 to<br>0.79)   | 1.84<br>(1.35 to<br>2.44)    | 2.00<br>(1.49 to<br>2.62)    | 1.76<br>(1.24 to<br>2.35)    |
| Leukemia                        | 101.41<br>(82.34 to<br>132.89)  | 184.39<br>(144.10 to<br>239.29)   | 167.80<br>(130.34 to<br>216.38)   | 185.46<br>(145.96 to<br>239.99)   | 2.25<br>(1.82 to<br>2.74)   | 5.34<br>(4.17 to<br>6.62)    | 5.16<br>(4.00 to<br>6.42)    | 5.30<br>(4.09 to<br>6.57)    |
| Acute lymphoid leukemia         | 21.89<br>(16.57 to<br>34.07)    | 35.84<br>(25.47 to<br>51.93)      | 32.01<br>(22.64 to<br>44.67)      | 35.62<br>(25.14 to<br>51.34)      | 0.38<br>(0.29 to<br>0.52)   | 0.73<br>(0.54 to<br>1.02)    | 0.70<br>(0.50 to<br>0.99)    | 0.72<br>(0.52 to<br>1.01)    |
| Chronic lymphoid leukemia       | 4.88<br>(2.66 to<br>6.79)       | 11.74<br>(6.25 to<br>16.31)       | 11.45<br>(6.15 to<br>15.75)       | 11.78<br>(6.12 to<br>16.57)       | 0.22<br>(0.12 to<br>0.30)   | 0.59<br>(0.31 to<br>0.82)    | 0.58<br>(0.31 to<br>0.79)    | 0.58<br>(0.30 to<br>0.81)    |
| Acute myeloid leukemia          | 42.54<br>(33.04 to<br>56.94)    | 82.02<br>(61.34 to<br>111.92)     | 77.87<br>(58.15 to<br>107.11)     | 80.32<br>(59.94 to<br>108.93)     | 0.82<br>(0.64 to<br>1.06)   | 2.00<br>(1.51 to<br>2.69)    | 2.05<br>(1.54 to<br>2.79)    | 1.94<br>(1.46 to<br>2.61)    |
| Chronic myeloid leukemia        | 7.62<br>(5.19 to<br>10.60)      | 10.51<br>(6.84 to<br>15.17)       | 9.93<br>(6.54 to<br>14.29)        | 10.85<br>(6.99 to<br>15.87)       | 0.19<br>(0.13 to<br>0.26)   | 0.34<br>(0.23 to<br>0.47)    | 0.33<br>(0.23 to<br>0.46)    | 0.34<br>(0.23 to<br>0.47)    |
| Other leukemia                  | 24.48<br>(19.05 to<br>33.07)    | 44.29<br>(33.89 to<br>58.69)      | 36.53<br>(27.70 to<br>48.78)      | 46.89<br>(35.30 to<br>61.73)      | 0.64<br>(0.50 to<br>0.81)   | 1.68<br>(1.24 to<br>2.11)    | 1.50<br>(1.09 to<br>1.92)    | 1.72<br>(1.27 to<br>2.18)    |



|                                               |                                                  |                                                  |                                                  |                                                  |                                          |                                            |                                            |                                            |
|-----------------------------------------------|--------------------------------------------------|--------------------------------------------------|--------------------------------------------------|--------------------------------------------------|------------------------------------------|--------------------------------------------|--------------------------------------------|--------------------------------------------|
| Other neoplasms                               | 209.67<br>(161.01 to 294.27)                     | 379.58<br>(286.24 to 522.48)                     | 333.65<br>(257.58 to 437.73)                     | 374.61<br>(282.05 to 516.05)                     | 4.48<br>(3.53 to 5.66)                   | 11.35<br>(9.37 to 14.00)                   | 11.32<br>(9.39 to 13.96)                   | 10.82<br>(8.90 to 13.35)                   |
| <b>Cardiovascular diseases</b>                | <b>2,152.79</b><br><b>(1,712.57 to 2,603.25)</b> | <b>3,847.89</b><br><b>(2,849.39 to 5,212.12)</b> | <b>2,396.98</b><br><b>(1,835.96 to 3,120.91)</b> | <b>5,420.64</b><br><b>(3,889.52 to 7,605.03)</b> | <b>88.32</b><br><b>(69.95 to 106.59)</b> | <b>227.40</b><br><b>(177.10 to 298.58)</b> | <b>152.75</b><br><b>(122.73 to 192.45)</b> | <b>300.09</b><br><b>(225.48 to 405.74)</b> |
| Rheumatic heart disease                       | 59.96<br>(46.05 to 78.54)                        | 55.90<br>(39.59 to 76.95)                        | 38.42<br>(27.92 to 51.18)                        | 61.73<br>(44.29 to 84.78)                        | 1.61<br>(1.24 to 2.08)                   | 2.63<br>(2.01 to 3.50)                     | 2.02<br>(1.55 to 2.68)                     | 2.78<br>(2.13 to 3.70)                     |
| Ischemic heart disease                        | 871.72<br>(655.97 to 1,095.05)                   | 1,633.68<br>(1,036.62 to 2,578.60)               | 911.73<br>(580.05 to 1,393.58)                   | 2,468.89<br>(1,520.31 to 3,926.39)               | 42.96<br>(33.17 to 53.20)                | 109.44<br>(73.04 to 161.74)                | 66.68<br>(45.28 to 97.40)                  | 152.28<br>(99.57 to 229.63)                |
| Stroke                                        | 699.56<br>(567.55 to 844.29)                     | 1,006.24<br>(655.22 to 1,539.80)                 | 530.47<br>(358.33 to 786.28)                     | 1,617.71<br>(1,019.57 to 2,587.51)               | 27.03<br>(21.60 to 32.79)                | 58.50<br>(41.26 to 85.05)                  | 34.92<br>(25.26 to 49.83)                  | 85.08<br>(57.95 to 126.56)                 |
| Ischemic stroke                               | 195.09<br>(151.25 to 246.12)                     | 369.20<br>(236.23 to 589.66)                     | 225.25<br>(149.28 to 353.96)                     | 524.74<br>(325.52 to 862.37)                     | 10.62<br>(8.41 to 13.11)                 | 27.96<br>(18.82 to 44.45)                  | 18.65<br>(12.79 to 28.44)                  | 36.47<br>(23.76 to 60.63)                  |
| Intracerebral hemorrhage                      | 504.47<br>(411.90 to 601.89)                     | 637.04<br>(383.83 to 1,049.19)                   | 305.22<br>(192.14 to 487.92)                     | 1,092.98<br>(626.51 to 1,852.31)                 | 16.42<br>(12.90 to 19.81)                | 30.53<br>(20.17 to 46.14)                  | 16.27<br>(11.11 to 24.31)                  | 48.61<br>(30.22 to 78.30)                  |
| Hypertensive heart disease                    | 77.17<br>(53.16 to 102.53)                       | 183.75<br>(109.52 to 307.91)                     | 125.09<br>(77.92 to 190.99)                      | 232.98<br>(129.29 to 417.97)                     | 3.28<br>(2.30 to 4.29)                   | 11.05<br>(6.87 to 18.05)                   | 7.82<br>(5.08 to 11.46)                    | 13.23<br>(7.86 to 24.05)                   |
| Cardiomyopathy and myocarditis                | 64.36<br>(47.27 to 94.45)                        | 127.60<br>(87.17 to 204.60)                      | 119.21<br>(81.38 to 193.79)                      | 129.87<br>(87.44 to 211.91)                      | 1.62<br>(1.17 to 2.51)                   | 4.91<br>(3.41 to 7.66)                     | 5.00<br>(3.48 to 7.90)                     | 4.77<br>(3.26 to 7.57)                     |
| Myocarditis                                   | 13.91<br>(9.47 to 21.65)                         | 19.41<br>(12.04 to 35.29)                        | 16.34<br>(9.88 to 30.90)                         | 19.83<br>(12.40 to 35.79)                        | 0.25<br>(0.18 to 0.42)                   | 0.53<br>(0.35 to 0.95)                     | 0.51<br>(0.33 to 0.90)                     | 0.51<br>(0.34 to 0.92)                     |
| <b>Nigeria</b>                                |                                                  |                                                  |                                                  |                                                  |                                          |                                            |                                            |                                            |
| Cause                                         | YLLs (in 1000s)                                  |                                                  |                                                  |                                                  | Deaths (in 1000s)                        |                                            |                                            |                                            |
|                                               | 2016                                             | 2040 Forecast                                    | 2040 Better Scenario                             | 2040 Worse Scenario                              | 2016                                     | 2040 Forecast                              | 2040 Better Scenario                       | 2040 Worse Scenario                        |
| Alcoholic cardiomyopathy                      | 5.58<br>(2.56 to 17.33)                          | 10.96<br>(4.59 to 33.71)                         | 12.07<br>(5.25 to 36.53)                         | 14.77<br>(6.40 to 43.79)                         | 0.17<br>(0.08 to 0.53)                   | 0.39<br>(0.17 to 1.18)                     | 0.44<br>(0.20 to 1.29)                     | 0.51<br>(0.23 to 1.48)                     |
| Other cardiomyopathy                          | 44.88<br>(33.99 to 60.77)                        | 97.23<br>(66.24 to 146.19)                       | 90.81<br>(61.65 to 138.08)                       | 95.27<br>(63.85 to 143.42)                       | 1.20<br>(0.90 to 1.69)                   | 3.99<br>(2.73 to 6.04)                     | 4.05<br>(2.81 to 6.08)                     | 3.75<br>(2.55 to 5.54)                     |
| Atrial fibrillation and flutter               | 10.50<br>(7.54 to 14.28)                         | 46.09<br>(32.57 to 62.38)                        | 48.37<br>(34.50 to 65.47)                        | 46.66<br>(32.99 to 63.44)                        | 0.79<br>(0.57 to 1.07)                   | 4.61<br>(3.33 to 6.15)                     | 5.08<br>(3.70 to 6.75)                     | 4.43<br>(3.14 to 5.91)                     |
| Aortic aneurysm                               | 11.78<br>(8.90 to 15.45)                         | 28.96<br>(21.72 to 39.26)                        | 29.35<br>(22.17 to 39.17)                        | 28.99<br>(21.29 to 41.02)                        | 0.50<br>(0.39 to 0.65)                   | 1.68<br>(1.31 to 2.25)                     | 1.79<br>(1.41 to 2.32)                     | 1.61<br>(1.22 to 2.20)                     |
| Peripheral artery disease                     | 1.02<br>(0.69 to 1.46)                           | 5.24<br>(3.60 to 7.51)                           | 6.21<br>(4.24 to 8.67)                           | 4.82<br>(3.29 to 6.78)                           | 0.06<br>(0.04 to 0.08)                   | 0.42<br>(0.30 to 0.59)                     | 0.53<br>(0.38 to 0.72)                     | 0.37<br>(0.26 to 0.51)                     |
| Endocarditis                                  | 55.55<br>(41.08 to 78.44)                        | 111.45<br>(76.66 to 155.55)                      | 92.13<br>(63.31 to 130.04)                       | 112.98<br>(77.42 to 158.09)                      | 1.37<br>(1.02 to 1.84)                   | 4.08<br>(2.84 to 5.79)                     | 3.76<br>(2.61 to 5.36)                     | 3.98<br>(2.78 to 5.71)                     |
| Other cardiovascular and circulatory diseases | 301.16<br>(231.97 to 426.85)                     | 648.97<br>(473.52 to 930.30)                     | 496.01<br>(368.34 to 705.61)                     | 716.01<br>(524.46 to 1,034.13)                   | 9.09<br>(6.83 to 13.54)                  | 30.06<br>(22.87 to 43.83)                  | 25.15<br>(19.58 to 35.94)                  | 31.58<br>(23.81 to 47.38)                  |
| <b>Chronic respiratory diseases</b>           | <b>365.87</b><br><b>(290.03 to 459.29)</b>       | <b>580.96</b><br><b>(403.46 to 866.21)</b>       | <b>408.62</b><br><b>(295.14 to 582.08)</b>       | <b>707.67</b><br><b>(483.19 to 1,108.12)</b>     | <b>12.84</b><br><b>(10.33 to 16.22)</b>  | <b>29.30</b><br><b>(20.63 to 43.68)</b>    | <b>21.96</b><br><b>(16.44 to 30.28)</b>    | <b>34.56</b><br><b>(23.59 to 54.09)</b>    |
| Chronic obstructive pulmonary disease         | 179.23<br>(138.12 to 234.77)                     | 345.95<br>(209.02 to 604.76)                     | 223.43<br>(141.57 to 369.79)                     | 452.25<br>(257.63 to 805.69)                     | 7.87<br>(6.03 to 10.30)                  | 20.15<br>(12.83 to 33.37)                  | 14.05<br>(9.53 to 21.65)                   | 24.98<br>(15.23 to 42.93)                  |
| Pneumoconiosis                                | 0.39<br>(0.26 to 0.56)                           | 0.71<br>(0.51 to 0.99)                           | 0.64<br>(0.44 to 0.91)                           | 0.72<br>(0.51 to 1.00)                           | 0.01<br>(0.01 to 0.02)                   | 0.04<br>(0.03 to 0.06)                     | 0.04<br>(0.03 to 0.05)                     | 0.04<br>(0.03 to 0.06)                     |

|                                                                |                                                  |                                                      |                                                    |                                                      |                                             |                                             |                                             |                                             |
|----------------------------------------------------------------|--------------------------------------------------|------------------------------------------------------|----------------------------------------------------|------------------------------------------------------|---------------------------------------------|---------------------------------------------|---------------------------------------------|---------------------------------------------|
| Silicosis                                                      | 0.03<br>(0.01 to<br>0.04)                        | 0.04<br>(0.02 to<br>0.06)                            | 0.03<br>(0.02 to<br>0.06)                          | 0.04<br>(0.02 to<br>0.06)                            | 0.00<br>(0.00 to<br>0.00)                   | 0.00<br>(0.00 to<br>0.00)                   | 0.00<br>(0.00 to<br>0.00)                   | 0.00<br>(0.00 to<br>0.00)                   |
| Asbestosis                                                     | 0.12<br>(0.07 to<br>0.19)                        | 0.21<br>(0.12 to<br>0.32)                            | 0.21<br>(0.12 to<br>0.33)                          | 0.20<br>(0.12 to<br>0.31)                            | 0.00<br>(0.00 to<br>0.01)                   | 0.01<br>(0.00 to<br>0.01)                   | 0.01<br>(0.00 to<br>0.01)                   | 0.01<br>(0.00 to<br>0.01)                   |
| Coal workers pneumoconiosis                                    | 0.01<br>(0.01 to<br>0.02)                        | 0.02<br>(0.01 to<br>0.05)                            | 0.02<br>(0.01 to<br>0.03)                          | 0.03<br>(0.01 to<br>0.05)                            | 0.00<br>(0.00 to<br>0.00)                   | 0.00<br>(0.00 to<br>0.00)                   | 0.00<br>(0.00 to<br>0.00)                   | 0.00<br>(0.00 to<br>0.00)                   |
| Other pneumoconiosis                                           | 0.23<br>(0.16 to<br>0.32)                        | 0.44<br>(0.32 to<br>0.61)                            | 0.38<br>(0.27 to<br>0.53)                          | 0.46<br>(0.33 to<br>0.63)                            | 0.01<br>(0.01 to<br>0.01)                   | 0.03<br>(0.02 to<br>0.04)                   | 0.03<br>(0.02 to<br>0.04)                   | 0.03<br>(0.02 to<br>0.04)                   |
| Asthma                                                         | 113.70<br>(83.74 to<br>154.89)                   | 103.87<br>(69.65 to<br>153.89)                       | 73.31<br>(50.06 to<br>108.31)                      | 121.36<br>(79.53 to<br>183.91)                       | 3.23<br>(2.45 to<br>4.23)                   | 4.56<br>(3.19 to<br>6.75)                   | 3.56<br>(2.53 to<br>5.23)                   | 5.07<br>(3.46 to<br>7.63)                   |
| Interstitial lung disease and pulmonary sarcoidosis            | 5.06<br>(3.70 to<br>7.22)                        | 12.84<br>(8.98 to<br>18.90)                          | 14.73<br>(10.14 to<br>22.31)                       | 11.76<br>(8.27 to<br>17.35)                          | 0.18<br>(0.13 to<br>0.26)                   | 0.61<br>(0.42 to<br>0.91)                   | 0.73<br>(0.50 to<br>1.12)                   | 0.54<br>(0.38 to<br>0.81)                   |
| Other chronic respiratory diseases                             | 67.49<br>(47.91 to<br>96.29)                     | 117.58<br>(82.74 to<br>163.68)                       | 96.50<br>(69.34 to<br>134.51)                      | 121.57<br>(85.04 to<br>169.91)                       | 1.55<br>(1.08 to<br>2.19)                   | 3.94<br>(2.74 to<br>5.70)                   | 3.57<br>(2.52 to<br>5.16)                   | 3.92<br>(2.67 to<br>5.68)                   |
| <b>Cirrhosis and other chronic liver diseases</b>              | <b>840.41</b><br>(566.78 to<br><b>1,232.36</b> ) | <b>1,558.23</b><br>(1,022.24 to<br><b>2,307.73</b> ) | <b>1,363.71</b><br>(892.05 to<br><b>2,012.49</b> ) | <b>1,748.07</b><br>(1,141.93 to<br><b>2,613.07</b> ) | <b>22.73</b><br>(15.37 to<br><b>33.54</b> ) | <b>51.08</b><br>(35.26 to<br><b>73.10</b> ) | <b>46.29</b><br>(32.09 to<br><b>67.35</b> ) | <b>56.18</b><br>(38.47 to<br><b>82.34</b> ) |
| Cirrhosis and other chronic liver diseases due to hepatitis B  | 373.58<br>(228.29 to<br>593.84)                  | 801.74<br>(489.23 to<br>1,248.40)                    | 728.36<br>(448.53 to<br>1,129.06)                  | 812.14<br>(492.51 to<br>1,261.72)                    | 10.96<br>(7.01 to<br>16.75)                 | 27.33<br>(18.08 to<br>41.79)                | 25.35<br>(16.80 to<br>38.10)                | 27.20<br>(17.81 to<br>41.42)                |
| Cirrhosis and other chronic liver diseases due to hepatitis C  | 67.91<br>(37.15 to<br>121.80)                    | 144.57<br>(81.99 to<br>248.08)                       | 130.88<br>(73.91 to<br>225.64)                     | 146.40<br>(82.45 to<br>251.40)                       | 1.99<br>(1.13 to<br>3.39)                   | 4.75<br>(2.83 to<br>7.75)                   | 4.38<br>(2.59 to<br>6.99)                   | 4.75<br>(2.83 to<br>7.79)                   |
| Cirrhosis and other chronic liver diseases due to alcohol use  | 189.91<br>(118.83 to<br>296.72)                  | 320.47<br>(206.93 to<br>515.26)                      | 275.23<br>(177.68 to<br>434.73)                    | 487.19<br>(305.02 to<br>786.41)                      | 5.83<br>(3.80 to<br>8.76)                   | 11.69<br>(7.90 to<br>17.63)                 | 10.29<br>(7.02 to<br>15.29)                 | 16.82<br>(11.08 to<br>25.92)                |
| Cirrhosis and other chronic liver diseases due to other causes | 399.02<br>(151.45 to<br>283.88)                  | 291.45<br>(201.00 to<br>417.65)                      | 229.25<br>(157.55 to<br>322.83)                    | 302.33<br>(207.87 to<br>434.58)                      | 3.96<br>(2.93 to<br>5.30)                   | 7.31<br>(5.34 to<br>10.04)                  | 6.27<br>(4.50 to<br>8.56)                   | 7.42<br>(5.42 to<br>10.13)                  |
| <b>Digestive diseases</b>                                      | <b>659.04</b><br>(454.52 to<br><b>987.04</b> )   | <b>911.83</b><br>(677.74 to<br><b>1,227.32</b> )     | <b>702.00</b><br>(531.61 to<br><b>929.00</b> )     | <b>991.76</b><br>(735.98 to<br><b>1,348.14</b> )     | <b>14.95</b><br>(11.74 to<br><b>19.54</b> ) | <b>33.33</b><br>(26.95 to<br><b>41.24</b> ) | <b>28.85</b><br>(23.42 to<br><b>35.97</b> ) | <b>34.70</b><br>(27.89 to<br><b>43.52</b> ) |
| Peptic ulcer disease                                           | 73.03<br>(52.45 to<br>113.97)                    | 80.99<br>(55.65 to<br>111.53)                        | 54.72<br>(38.74 to<br>74.38)                       | 91.39<br>(65.20 to<br>125.36)                        | 1.89<br>(1.42 to<br>2.51)                   | 3.37<br>(2.47 to<br>4.34)                   | 2.47<br>(1.84 to<br>3.20)                   | 3.67<br>(2.77 to<br>4.71)                   |

**Nigeria**

| Cause                                      | YLLs (in 1000s)                 |                                 |                                 |                                 | Deaths (in 1000s)         |                              |                             |                              |
|--------------------------------------------|---------------------------------|---------------------------------|---------------------------------|---------------------------------|---------------------------|------------------------------|-----------------------------|------------------------------|
|                                            | 2016                            | 2040 Forecast                   | 2040 Better Scenario            | 2040 Worse Scenario             | 2016                      | 2040 Forecast                | 2040 Better Scenario        | 2040 Worse Scenario          |
| Gastritis and duodenitis                   | 24.95<br>(16.04 to<br>38.82)    | 42.59<br>(25.07 to<br>63.45)    | 34.79<br>(20.15 to<br>52.74)    | 44.28<br>(26.17 to<br>65.19)    | 0.55<br>(0.35 to<br>0.80) | 1.24<br>(0.75 to<br>1.81)    | 1.07<br>(0.65 to<br>1.60)   | 1.26<br>(0.78 to<br>1.83)    |
| Appendicitis                               | 62.47<br>(29.84 to<br>159.33)   | 62.76<br>(39.90 to<br>124.39)   | 41.88<br>(28.18 to<br>66.32)    | 68.47<br>(43.31 to<br>142.97)   | 1.19<br>(0.77 to<br>2.32) | 2.16<br>(1.58 to<br>3.03)    | 1.70<br>(1.25 to<br>2.21)   | 2.23<br>(1.63 to<br>3.21)    |
| Paralytic ileus and intestinal obstruction | 277.71<br>(174.26 to<br>459.90) | 385.27<br>(272.35 to<br>568.58) | 302.70<br>(223.88 to<br>413.63) | 393.83<br>(276.43 to<br>594.59) | 5.77<br>(4.16 to<br>8.33) | 13.20<br>(10.44 to<br>17.64) | 12.13<br>(9.73 to<br>16.15) | 12.90<br>(10.14 to<br>17.25) |
| Inguinal, femoral, and abdominal hernia    | 17.53<br>(10.57 to<br>28.70)    | 24.82<br>(14.90 to<br>39.32)    | 19.76<br>(11.88 to<br>32.21)    | 25.82<br>(15.60 to<br>41.05)    | 0.50<br>(0.31 to<br>0.77) | 1.12<br>(0.72 to<br>1.78)    | 0.98<br>(0.62 to<br>1.57)   | 1.12<br>(0.71 to<br>1.80)    |
| Inflammatory bowel disease                 | 17.86<br>(10.05 to<br>39.40)    | 29.42<br>(19.79 to<br>49.14)    | 26.41<br>(17.90 to<br>41.27)    | 29.19<br>(19.36 to<br>49.26)    | 0.42<br>(0.28 to<br>0.70) | 1.03<br>(0.72 to<br>1.61)    | 1.02<br>(0.70 to<br>1.59)   | 0.99<br>(0.69 to<br>1.54)    |
| Vascular intestinal disorders              | 15.81<br>(8.95 to<br>33.99)     | 25.38<br>(16.77 to<br>38.59)    | 21.62<br>(14.62 to<br>30.70)    | 25.47<br>(16.88 to<br>39.28)    | 0.42<br>(0.29 to<br>0.62) | 1.30<br>(0.97 to<br>1.79)    | 1.25<br>(0.92 to<br>1.69)   | 1.25<br>(0.92 to<br>1.71)    |

|                                                            |                                              |                                              |                                              |                                              |                                     |                                      |                                     |                                      |
|------------------------------------------------------------|----------------------------------------------|----------------------------------------------|----------------------------------------------|----------------------------------------------|-------------------------------------|--------------------------------------|-------------------------------------|--------------------------------------|
|                                                            | 24.20<br>(18.36 to<br>31.41)                 | 42.70<br>(27.16 to<br>66.16)                 | 29.57<br>(19.09 to<br>45.67)                 | 50.22<br>(31.18 to<br>79.30)                 | 0.69<br>(0.52 to<br>0.92)           | 1.90<br>(1.19 to<br>3.01)            | 1.41<br>(0.93 to<br>2.19)           | 2.15<br>(1.32 to<br>3.50)            |
| Gallbladder and biliary diseases                           |                                              |                                              |                                              |                                              |                                     |                                      |                                     |                                      |
|                                                            | 50.03<br>(32.20 to<br>81.03)                 | 90.33<br>(37.39 to<br>200.85)                | 76.24<br>(32.42 to<br>168.39)                | 127.46<br>(47.30 to<br>294.28)               | 1.41<br>(0.92 to<br>2.22)           | 3.19<br>(1.60 to<br>6.33)            | 2.79<br>(1.42 to<br>5.34)           | 4.25<br>(1.91 to<br>9.06)            |
| Pancreatitis                                               |                                              |                                              |                                              |                                              |                                     |                                      |                                     |                                      |
|                                                            | 95.45<br>(51.18 to<br>170.93)                | 127.57<br>(83.11 to<br>199.17)               | 94.31<br>(62.92 to<br>143.78)                | 135.63<br>(88.19 to<br>210.93)               | 2.11<br>(1.41 to<br>3.19)           | 4.81<br>(3.36 to<br>7.02)            | 4.04<br>(2.85 to<br>6.00)           | 4.89<br>(3.45 to<br>7.15)            |
| Other digestive diseases                                   |                                              |                                              |                                              |                                              |                                     |                                      |                                     |                                      |
| <b>Neurological disorders</b>                              | <b>364.49</b><br>(256.20 to<br>495.31)       | <b>821.64</b><br>(621.82 to<br>1,108.89)     | <b>750.69</b><br>(584.83 to<br>972.67)       | <b>871.81</b><br>(637.02 to<br>1,258.14)     | <b>12.14</b><br>(9.45 to<br>15.25)  | <b>52.40</b><br>(42.00 to<br>65.17)  | <b>56.07</b><br>(46.21 to<br>68.09) | <b>49.68</b><br>(38.70 to<br>63.31)  |
|                                                            | 86.28<br>(65.45 to<br>110.63)                | 394.43<br>(301.99 to<br>527.49)              | 412.95<br>(328.08 to<br>533.89)              | 374.07<br>(276.18 to<br>508.40)              | 6.91<br>(5.33 to<br>8.76)           | 40.70<br>(30.67 to<br>53.45)         | 44.88<br>(35.21 to<br>56.91)        | 37.03<br>(26.99 to<br>49.69)         |
| Alzheimer's disease and other dementias                    |                                              |                                              |                                              |                                              |                                     |                                      |                                     |                                      |
|                                                            | 8.81<br>(6.15 to<br>12.15)                   | 43.68<br>(31.24 to<br>59.14)                 | 54.10<br>(39.43 to<br>71.72)                 | 37.96<br>(27.14 to<br>51.90)                 | 0.61<br>(0.43 to<br>0.83)           | 3.85<br>(2.74 to<br>5.21)            | 4.94<br>(3.63 to<br>6.58)           | 3.25<br>(2.29 to<br>4.55)            |
| Parkinson's disease                                        |                                              |                                              |                                              |                                              |                                     |                                      |                                     |                                      |
|                                                            | 218.37<br>(126.78 to<br>364.62)              | 299.86<br>(137.70 to<br>607.08)              | 211.22<br>(93.46 to<br>442.06)               | 377.55<br>(173.40 to<br>778.64)              | 3.77<br>(2.14 to<br>6.51)           | 6.22<br>(2.83 to<br>12.60)           | 4.70<br>(2.09 to<br>9.76)           | 7.83<br>(3.52 to<br>16.20)           |
| Epilepsy                                                   |                                              |                                              |                                              |                                              |                                     |                                      |                                     |                                      |
|                                                            | 2.19<br>(1.16 to<br>3.49)                    | 4.44<br>(2.22 to<br>7.22)                    | 4.75<br>(2.34 to<br>7.63)                    | 4.29<br>(2.19 to<br>7.05)                    | 0.06<br>(0.03 to<br>0.10)           | 0.14<br>(0.07 to<br>0.22)            | 0.15<br>(0.07 to<br>0.24)           | 0.13<br>(0.07 to<br>0.21)            |
| Multiple sclerosis                                         |                                              |                                              |                                              |                                              |                                     |                                      |                                     |                                      |
|                                                            | 5.90<br>(2.79 to<br>8.88)                    | 8.60<br>(5.32 to<br>12.18)                   | 8.20<br>(5.13 to<br>11.23)                   | 8.27<br>(5.08 to<br>11.78)                   | 0.11<br>(0.07 to<br>0.15)           | 0.24<br>(0.16 to<br>0.32)            | 0.26<br>(0.16 to<br>0.34)           | 0.23<br>(0.15 to<br>0.30)            |
| Motor neuron disease                                       |                                              |                                              |                                              |                                              |                                     |                                      |                                     |                                      |
|                                                            | 42.93<br>(19.59 to<br>77.42)                 | 70.64<br>(36.16 to<br>124.64)                | 59.47<br>(34.09 to<br>96.61)                 | 69.67<br>(34.51 to<br>124.64)                | 0.67<br>(0.34 to<br>1.11)           | 1.25<br>(0.74 to<br>1.98)            | 1.14<br>(0.75 to<br>1.68)           | 1.21<br>(0.69 to<br>1.96)            |
| Other neurological disorders                               |                                              |                                              |                                              |                                              |                                     |                                      |                                     |                                      |
| <b>Mental disorders</b>                                    | <b>107.48</b><br>(57.48 to<br>162.17)        | <b>224.27</b><br>(122.73 to<br>346.01)       | <b>219.09</b><br>(120.26 to<br>336.95)       | <b>232.53</b><br>(125.87 to<br>358.89)       | <b>2.47</b><br>(1.42 to<br>3.65)    | <b>5.82</b><br>(3.51 to<br>8.47)     | <b>5.83</b><br>(3.55 to<br>8.41)    | <b>5.96</b><br>(3.56 to<br>8.65)     |
|                                                            | 37.66<br>(20.25 to<br>70.06)                 | 65.30<br>(32.71 to<br>130.85)                | 62.65<br>(31.29 to<br>127.87)                | 74.44<br>(38.44 to<br>143.42)                | 1.02<br>(0.56 to<br>1.84)           | 2.05<br>(1.15 to<br>3.79)            | 2.00<br>(1.12 to<br>3.75)           | 2.27<br>(1.27 to<br>4.09)            |
| Alcohol use disorders                                      |                                              |                                              |                                              |                                              |                                     |                                      |                                     |                                      |
|                                                            | 69.55<br>(26.88 to<br>121.31)                | 158.41<br>(65.59 to<br>270.02)               | 155.91<br>(65.38 to<br>263.89)               | 157.54<br>(64.51 to<br>271.09)               | 1.45<br>(0.57 to<br>2.47)           | 3.76<br>(1.63 to<br>6.05)            | 3.81<br>(1.66 to<br>6.08)           | 3.68<br>(1.53 to<br>6.02)            |
| Drug use disorders                                         |                                              |                                              |                                              |                                              |                                     |                                      |                                     |                                      |
|                                                            | 65.18<br>(25.27 to<br>113.26)                | 143.71<br>(59.75 to<br>246.27)               | 140.65<br>(58.97 to<br>240.97)               | 143.36<br>(58.00 to<br>249.81)               | 1.31<br>(0.50 to<br>2.23)           | 3.09<br>(1.30 to<br>5.06)            | 3.07<br>(1.31 to<br>4.95)           | 3.06<br>(1.26 to<br>5.08)            |
| Opioid use disorders                                       |                                              |                                              |                                              |                                              |                                     |                                      |                                     |                                      |
|                                                            | 0.65<br>(0.28 to<br>1.28)                    | 2.14<br>(0.99 to<br>4.11)                    | 1.95<br>(0.93 to<br>3.75)                    | 2.18<br>(0.99 to<br>4.21)                    | 0.02<br>(0.01 to<br>0.03)           | 0.07<br>(0.03 to<br>0.13)            | 0.07<br>(0.03 to<br>0.12)           | 0.07<br>(0.03 to<br>0.13)            |
| Cocaine use disorders                                      |                                              |                                              |                                              |                                              |                                     |                                      |                                     |                                      |
|                                                            | 0.32<br>(0.14 to<br>0.62)                    | 1.40<br>(0.63 to<br>2.69)                    | 1.24<br>(0.57 to<br>2.28)                    | 1.45<br>(0.64 to<br>2.77)                    | 0.01<br>(0.00 to<br>0.02)           | 0.05<br>(0.02 to<br>0.09)            | 0.04<br>(0.02 to<br>0.08)           | 0.05<br>(0.02 to<br>0.09)            |
| Amphetamine use disorders                                  |                                              |                                              |                                              |                                              |                                     |                                      |                                     |                                      |
|                                                            | 3.40<br>(1.18 to<br>6.96)                    | 11.16<br>(4.29 to<br>20.55)                  | 12.07<br>(4.64 to<br>22.07)                  | 10.55<br>(3.89 to<br>19.70)                  | 0.11<br>(0.04 to<br>0.20)           | 0.55<br>(0.23 to<br>0.90)            | 0.63<br>(0.26 to<br>1.02)           | 0.50<br>(0.20 to<br>0.81)            |
| Other drug use disorders                                   |                                              |                                              |                                              |                                              |                                     |                                      |                                     |                                      |
|                                                            | 0.27<br>(0.17 to<br>0.40)                    | 0.55<br>(0.35 to<br>0.87)                    | 0.52<br>(0.32 to<br>0.82)                    | 0.55<br>(0.34 to<br>0.85)                    | 0.00<br>(0.00 to<br>0.01)           | 0.01<br>(0.01 to<br>0.02)            | 0.01<br>(0.01 to<br>0.01)           | 0.01<br>(0.01 to<br>0.01)            |
| Eating disorders                                           |                                              |                                              |                                              |                                              |                                     |                                      |                                     |                                      |
| <b>Nigeria</b>                                             |                                              |                                              |                                              |                                              |                                     |                                      |                                     |                                      |
| Cause                                                      | YLLs (in 1000s)                              |                                              |                                              |                                              | Deaths (in 1000s)                   |                                      |                                     |                                      |
|                                                            | 2016                                         | 2040 Forecast                                | 2040 Better Scenario                         | 2040 Worse Scenario                          | 2016                                | 2040 Forecast                        | 2040 Better Scenario                | 2040 Worse Scenario                  |
| <b>Diabetes, urogenital, blood, and endocrine diseases</b> | <b>1,705.87</b><br>(1,354.94 to<br>2,044.30) | <b>2,510.43</b><br>(1,933.94 to<br>3,198.36) | <b>1,760.60</b><br>(1,370.12 to<br>2,217.09) | <b>2,771.72</b><br>(2,133.08 to<br>3,518.09) | <b>33.77</b><br>(27.66 to<br>40.46) | <b>85.66</b><br>(69.94 to<br>106.92) | <b>66.62</b><br>(54.12 to<br>81.55) | <b>93.30</b><br>(75.51 to<br>115.84) |
| Diabetes mellitus                                          | 239.08<br>(187.86 to<br>300.11)              | 618.06<br>(407.62 to<br>896.83)              | 433.62<br>(287.08 to<br>626.50)              | 750.48<br>(480.40 to<br>1,105.67)            | 9.75<br>(7.60 to<br>12.26)          | 35.89<br>(25.15 to<br>49.93)         | 26.78<br>(18.73 to<br>37.37)        | 41.48<br>(28.37 to<br>58.52)         |

|                                                            |                                   |                                     |                                 |                                     |                             |                              |                              |                              |
|------------------------------------------------------------|-----------------------------------|-------------------------------------|---------------------------------|-------------------------------------|-----------------------------|------------------------------|------------------------------|------------------------------|
| Acute glomerulonephritis                                   | 1.14<br>(0.97 to<br>1.33)         | 1.77<br>(1.29 to<br>2.38)           | 1.23<br>(0.91 to<br>1.63)       | 1.89<br>(1.38 to<br>2.50)           | 0.02<br>(0.01 to<br>0.02)   | 0.03<br>(0.02 to<br>0.04)    | 0.02<br>(0.02 to<br>0.03)    | 0.03<br>(0.02 to<br>0.04)    |
| Chronic kidney disease                                     | 179.19<br>(145.83 to<br>226.08)   | 309.86<br>(218.95 to<br>451.72)     | 198.66<br>(140.55 to<br>289.85) | 357.53<br>(250.62 to<br>530.20)     | 4.35<br>(3.47 to<br>5.49)   | 13.40<br>(9.27 to<br>20.54)  | 9.42<br>(6.66 to<br>14.06)   | 15.10<br>(10.08 to<br>23.96) |
| Chronic kidney disease due to diabetes mellitus            | 29.45<br>(21.81 to<br>39.05)      | 78.45<br>(51.45 to<br>123.14)       | 54.83<br>(36.41 to<br>84.98)    | 90.53<br>(57.76 to<br>140.83)       | 1.05<br>(0.78 to<br>1.38)   | 4.08<br>(2.65 to<br>6.63)    | 2.95<br>(1.98 to<br>4.67)    | 4.60<br>(2.90 to<br>7.86)    |
| Chronic kidney disease due to hypertension                 | 16.31<br>(12.14 to<br>21.40)      | 50.41<br>(33.27 to<br>77.47)        | 35.35<br>(23.99 to<br>53.79)    | 57.83<br>(36.88 to<br>92.88)        | 0.74<br>(0.56 to<br>0.98)   | 3.47<br>(2.28 to<br>5.48)    | 2.55<br>(1.75 to<br>4.00)    | 3.85<br>(2.47 to<br>6.28)    |
| Chronic kidney disease due to glomerulonephritis           | 63.59<br>(50.31 to<br>82.36)      | 83.27<br>(56.57 to<br>119.44)       | 49.61<br>(34.98 to<br>70.82)    | 96.35<br>(65.41 to<br>137.58)       | 1.18<br>(0.94 to<br>1.51)   | 2.50<br>(1.70 to<br>3.85)    | 1.65<br>(1.13 to<br>2.46)    | 2.85<br>(1.91 to<br>4.42)    |
| Chronic kidney disease due to other and unspecified causes | 69.84<br>(55.14 to<br>91.10)      | 97.74<br>(65.80 to<br>140.35)       | 58.86<br>(40.40 to<br>84.92)    | 112.83<br>(76.61 to<br>165.23)      | 1.37<br>(1.08 to<br>1.77)   | 3.35<br>(2.25 to<br>5.16)    | 2.27<br>(1.55 to<br>3.43)    | 3.80<br>(2.54 to<br>5.97)    |
| Urinary diseases and male infertility                      | 199.91<br>(157.52 to<br>245.35)   | 386.92<br>(292.66 to<br>488.07)     | 318.10<br>(248.60 to<br>393.95) | 390.32<br>(296.18 to<br>494.80)     | 4.25<br>(3.44 to<br>5.13)   | 14.76<br>(12.17 to<br>17.53) | 14.29<br>(11.81 to<br>16.96) | 14.11<br>(11.58 to<br>16.69) |
| Urinary tract infections                                   | 149.53<br>(113.84 to<br>190.88)   | 315.10<br>(235.88 to<br>403.73)     | 264.36<br>(206.39 to<br>333.14) | 314.15<br>(233.43 to<br>406.71)     | 3.09<br>(2.46 to<br>3.80)   | 11.96<br>(9.92 to<br>14.49)  | 11.94<br>(9.82 to<br>14.41)  | 11.29<br>(9.30 to<br>13.74)  |
| Urolithiasis                                               | 3.20<br>(2.11 to<br>4.60)         | 7.81<br>(4.66 to<br>11.94)          | 6.50<br>(3.86 to<br>9.82)       | 8.04<br>(4.75 to<br>12.24)          | 0.06<br>(0.04 to<br>0.08)   | 0.16<br>(0.10 to<br>0.26)    | 0.15<br>(0.09 to<br>0.24)    | 0.16<br>(0.10 to<br>0.26)    |
| Other urinary diseases                                     | 47.19<br>(32.04 to<br>67.96)      | 64.01<br>(39.75 to<br>91.65)        | 47.23<br>(29.27 to<br>67.76)    | 68.12<br>(42.13 to<br>96.91)        | 1.10<br>(0.77 to<br>1.46)   | 2.64<br>(1.60 to<br>3.85)    | 2.20<br>(1.28 to<br>3.23)    | 2.66<br>(1.62 to<br>3.84)    |
| Gynecological diseases                                     | 4.78<br>(2.96 to<br>7.46)         | 7.84<br>(4.39 to<br>12.92)          | 6.08<br>(3.44 to<br>9.96)       | 8.54<br>(4.87 to<br>14.39)          | 0.11<br>(0.07 to<br>0.18)   | 0.21<br>(0.13 to<br>0.35)    | 0.17<br>(0.10 to<br>0.26)    | 0.23<br>(0.14 to<br>0.36)    |
| Uterine fibroids                                           | 0.27<br>(0.10 to<br>0.66)         | 0.43<br>(0.16 to<br>1.08)           | 0.32<br>(0.11 to<br>0.80)       | 0.47<br>(0.18 to<br>1.14)           | 0.01<br>(0.00 to<br>0.02)   | 0.02<br>(0.01 to<br>0.05)    | 0.01<br>(0.01 to<br>0.03)    | 0.02<br>(0.01 to<br>0.05)    |
| Polycystic ovarian syndrome                                | 0.81<br>(0.17 to<br>1.80)         | 0.83<br>(0.15 to<br>2.17)           | 0.53<br>(0.09 to<br>1.43)       | 0.99<br>(0.18 to<br>2.59)           | 0.02<br>(0.00 to<br>0.04)   | 0.02<br>(0.00 to<br>0.05)    | 0.01<br>(0.00 to<br>0.03)    | 0.02<br>(0.00 to<br>0.06)    |
| Endometriosis                                              | 0.01<br>(0.00 to<br>0.03)         | 0.02<br>(0.01 to<br>0.07)           | 0.02<br>(0.01 to<br>0.05)       | 0.03<br>(0.01 to<br>0.07)           | 0.00<br>(0.00 to<br>0.00)   | 0.00<br>(0.00 to<br>0.00)    | 0.00<br>(0.00 to<br>0.00)    | 0.00<br>(0.00 to<br>0.00)    |
| Genital prolapse                                           | 0.15<br>(0.03 to<br>0.43)         | 0.21<br>(0.04 to<br>0.62)           | 0.15<br>(0.03 to<br>0.46)       | 0.24<br>(0.04 to<br>0.69)           | 0.00<br>(0.00 to<br>0.01)   | 0.01<br>(0.00 to<br>0.01)    | 0.00<br>(0.01 to<br>0.01)    | 0.01<br>(0.00 to<br>0.02)    |
| Other gynecological diseases                               | 3.53<br>(2.03 to<br>5.37)         | 6.34<br>(3.40 to<br>10.73)          | 5.06<br>(2.73 to<br>8.48)       | 6.82<br>(3.70 to<br>11.59)          | 0.08<br>(0.05 to<br>0.12)   | 0.17<br>(0.10 to<br>0.26)    | 0.14<br>(0.08 to<br>0.21)    | 0.18<br>(0.10 to<br>0.28)    |
| Hemoglobinopathies and hemolytic anemias                   | 964.99<br>(694.66 to<br>1,232.39) | 1,025.52<br>(708.79 to<br>1,424.72) | 691.70<br>(477.27 to<br>946.84) | 1,095.50<br>(755.04 to<br>1,529.56) | 13.29<br>(9.76 to<br>16.64) | 16.88<br>(11.98 to<br>22.57) | 12.08<br>(8.64 to<br>16.55)  | 17.90<br>(12.76 to<br>24.05) |
| Thalassemias                                               | 0.22<br>(0.12 to<br>0.34)         | 0.15<br>(0.07 to<br>0.28)           | 0.11<br>(0.05 to<br>0.20)       | 0.14<br>(0.07 to<br>0.26)           | 0.00<br>(0.00 to<br>0.00)   | 0.00<br>(0.00 to<br>0.00)    | 0.00<br>(0.00 to<br>0.00)    | 0.00<br>(0.00 to<br>0.00)    |
| Sickle cell disorders                                      | 948.44<br>(682.03 to<br>1,216.06) | 980.24<br>(666.16 to<br>1,378.32)   | 656.71<br>(448.70 to<br>911.69) | 1,047.31<br>(715.92 to<br>1,469.06) | 12.66<br>(9.23 to<br>16.04) | 14.39<br>(9.87 to<br>19.93)  | 10.03<br>(6.95 to<br>13.83)  | 15.34<br>(10.46 to<br>21.32) |
| G6PD deficiency                                            | 11.01<br>(7.80 to<br>15.60)       | 30.19<br>(19.84 to<br>48.53)        | 22.52<br>(14.68 to<br>36.73)    | 32.69<br>(21.67 to<br>51.10)        | 0.28<br>(0.19 to<br>0.44)   | 1.22<br>(0.77 to<br>2.04)    | 0.95<br>(0.60 to<br>1.60)    | 1.30<br>(0.81 to<br>2.13)    |
| Other hemoglobinopathies and hemolytic anemias             | 5.32<br>(3.35 to<br>8.61)         | 14.95<br>(9.74 to<br>24.25)         | 12.37<br>(8.15 to<br>20.28)     | 15.36<br>(9.96 to<br>25.20)         | 0.34<br>(0.21 to<br>0.56)   | 1.27<br>(0.85 to<br>2.08)    | 1.10<br>(0.73 to<br>1.79)    | 1.27<br>(0.82 to<br>2.05)    |
| Endocrine, metabolic, blood, and immune disorders          | 116.78<br>(70.44 to<br>179.42)    | 160.45<br>(105.35 to<br>246.09)     | 111.22<br>(80.01 to<br>167.39)  | 167.48<br>(109.99 to<br>256.48)     | 2.01<br>(1.39 to<br>3.12)   | 4.48<br>(3.44 to<br>6.96)    | 3.86<br>(3.01 to<br>5.88)    | 4.46<br>(3.39 to<br>6.85)    |

| Nigeria                                       |                                           |                                           |                                         |                                           |                                  |                                  |                                  |                                  |
|-----------------------------------------------|-------------------------------------------|-------------------------------------------|-----------------------------------------|-------------------------------------------|----------------------------------|----------------------------------|----------------------------------|----------------------------------|
| Cause                                         | YLLs (in 1000s)                           |                                           |                                         |                                           | Deaths (in 1000s)                |                                  |                                  |                                  |
|                                               | 2016                                      | 2040 Forecast                             | 2040 Better Scenario                    | 2040 Worse Scenario                       | 2016                             | 2040 Forecast                    | 2040 Better Scenario             | 2040 Worse Scenario              |
| <b>Musculoskeletal disorders</b>              | <b>24.18</b><br>(16.87 to 33.37)          | <b>55.98</b><br>(40.38 to 76.67)          | <b>56.33</b><br>(41.20 to 78.19)        | <b>53.50</b><br>(38.84 to 73.88)          | <b>0.55</b><br>(0.41 to 0.74)    | <b>1.84</b><br>(1.44 to 2.41)    | <b>1.99</b><br>(1.55 to 2.64)    | <b>1.71</b><br>(1.34 to 2.24)    |
| Rheumatoid arthritis                          | 1.64<br>(1.07 to 2.59)                    | 4.79<br>(3.02 to 7.43)                    | 3.91<br>(2.43 to 6.11)                  | 5.00<br>(3.26 to 7.60)                    | 0.07<br>(0.04 to 0.10)           | 0.29<br>(0.18 to 0.44)           | 0.24<br>(0.15 to 0.39)           | 0.29<br>(0.18 to 0.44)           |
| Other musculoskeletal disorders               | 22.54<br>(15.72 to 31.04)                 | 51.19<br>(36.35 to 71.42)                 | 52.42<br>(38.25 to 73.52)               | 48.50<br>(34.80 to 68.05)                 | 0.49<br>(0.36 to 0.66)           | 1.55<br>(1.21 to 2.09)           | 1.74<br>(1.35 to 2.52)           | 1.42<br>(1.10 to 1.90)           |
| <b>Other non-communicable diseases</b>        | <b>3,824.79</b><br>(1,552.57 to 6,614.45) | <b>3,739.58</b><br>(1,489.73 to 6,815.72) | <b>1,904.50</b><br>(876.98 to 3,320.70) | <b>4,066.24</b><br>(1,610.74 to 7,380.21) | <b>46.26</b><br>(19.36 to 78.92) | <b>53.13</b><br>(25.59 to 88.93) | <b>31.86</b><br>(18.21 to 49.52) | <b>56.44</b><br>(26.61 to 98.45) |
| Congenital birth defects                      | 3,571.66<br>(1,336.56 to 6,342.90)        | 3,294.31<br>(1,172.38 to 6,264.37)        | 1,579.78<br>(602.89 to 2,965.57)        | 3,607.42<br>(1,263.16 to 6,919.68)        | 42.06<br>(16.01 to 74.55)        | 39.51<br>(14.56 to 74.46)        | 19.35<br>(7.84 to 35.74)         | 43.21<br>(15.85 to 82.22)        |
| Neural tube defects                           | 691.63<br>(276.51 to 1,460.40)            | 260.37<br>(76.89 to 630.99)               | 103.17<br>(31.46 to 246.61)             | 303.10<br>(92.35 to 730.63)               | 8.06<br>(3.22 to 17.02)          | 3.06<br>(0.92 to 7.35)           | 1.22<br>(0.37 to 2.93)           | 3.56<br>(1.09 to 8.53)           |
| Congenital heart anomalies                    | 833.42<br>(288.10 to 1,710.91)            | 865.82<br>(318.86 to 1,775.82)            | 438.07<br>(173.98 to 853.10)            | 936.93<br>(341.71 to 1,924.35)            | 9.92<br>(3.57 to 20.18)          | 10.54<br>(4.06 to 21.16)         | 5.47<br>(2.28 to 10.43)          | 11.39<br>(4.35 to 23.15)         |
| Orofacial clefts                              | 21.95<br>(4.04 to 60.80)                  | 17.79<br>(2.86 to 56.21)                  | 6.64<br>(1.04 to 19.75)                 | 21.04<br>(3.53 to 65.12)                  | 0.25<br>(0.05 to 0.70)           | 0.21<br>(0.03 to 0.65)           | 0.08<br>(0.23)                   | 0.24<br>(0.04 to 0.75)           |
| Down syndrome                                 | 41.90<br>(10.58 to 152.20)                | 48.47<br>(13.56 to 165.02)                | 23.90<br>(7.45 to 74.95)                | 53.61<br>(14.81 to 185.39)                | 0.51<br>(0.14 to 1.81)           | 0.63<br>(0.20 to 1.98)           | 0.33<br>(0.12 to 0.94)           | 0.69<br>(0.22 to 2.23)           |
| Other chromosomal abnormalities               | 180.26<br>(45.50 to 386.07)               | 273.76<br>(70.65 to 640.14)               | 124.37<br>(32.45 to 279.63)             | 301.76<br>(76.86 to 695.90)               | 2.10<br>(0.53 to 4.49)           | 2.10<br>(0.83 to 7.51)           | 1.47<br>(0.39 to 3.28)           | 3.54<br>(0.92 to 8.11)           |
| Congenital musculoskeletal and limb anomalies | 25.85<br>(6.13 to 73.54)                  | 31.86<br>(7.04 to 92.22)                  | 15.80<br>(3.76 to 46.29)                | 33.96<br>(7.30 to 99.61)                  | 0.30<br>(0.07 to 0.86)           | 0.37<br>(0.09 to 1.08)           | 0.19<br>(0.05 to 0.54)           | 0.40<br>(0.09 to 1.16)           |
| Urogenital congenital anomalies               | 27.11<br>(9.64 to 65.68)                  | 32.56<br>(11.46 to 85.14)                 | 18.21<br>(6.68 to 46.07)                | 34.04<br>(12.08 to 88.17)                 | 0.34<br>(0.13 to 0.79)           | 0.44<br>(0.17 to 1.07)           | 0.27<br>(0.11 to 0.62)           | 0.46<br>(0.18 to 1.10)           |
| Digestive congenital anomalies                | 163.71<br>(64.23 to 419.29)               | 171.92<br>(60.71 to 412.13)               | 79.69<br>(27.71 to 190.44)              | 188.20<br>(66.07 to 451.04)               | 1.91<br>(0.75 to 4.91)           | 2.02<br>(0.71 to 4.82)           | 0.94<br>(0.34 to 2.24)           | 2.21<br>(0.78 to 5.29)           |
| Other congenital birth defects                | 1,585.84<br>(324.26 to 3,815.71)          | 1,591.76<br>(372.03 to 3,865.14)          | 769.92<br>(197.28 to 1,807.34)          | 1,734.79<br>(394.22 to 4,219.18)          | 18.66<br>(3.94 to 44.71)         | 19.03<br>(4.62 to 45.70)         | 9.38<br>(2.58 to 21.80)          | 20.71<br>(4.89 to 49.94)         |
| Skin and subcutaneous diseases                | 90.45<br>(59.29 to 159.36)                | 303.67<br>(203.71 to 528.55)              | 258.26<br>(177.33 to 440.76)            | 305.52<br>(203.10 to 529.02)              | 2.32<br>(1.54 to 4.12)           | 11.98<br>(8.27 to 20.82)         | 11.74<br>(8.18 to 19.74)         | 11.46<br>(7.86 to 19.95)         |
| Cellulitis                                    | 37.86<br>(4.70 to 18.01)                  | 37.86<br>(22.07 to 77.61)                 | 39.43<br>(22.78 to 78.55)               | 35.70<br>(20.47 to 73.17)                 | 0.25<br>(0.14 to 0.50)           | 1.57<br>(0.91 to 3.04)           | 1.78<br>(1.02 to 3.40)           | 1.44<br>(0.82 to 2.77)           |
| Pyoderma                                      | 74.80<br>(48.37 to 133.72)                | 243.13<br>(158.23 to 417.80)              | 196.84<br>(131.18 to 328.82)            | 248.35<br>(160.77 to 437.67)              | 1.82<br>(1.19 to 3.25)           | 9.00<br>(6.15 to 15.70)          | 8.39<br>(5.71 to 14.40)          | 8.77<br>(5.96 to 15.44)          |
| Decubitus ulcer                               | 4.32<br>(2.46 to 7.20)                    | 15.96<br>(8.99 to 26.52)                  | 16.11<br>(9.16 to 27.49)                | 14.89<br>(8.47 to 24.73)                  | 0.20<br>(0.11 to 0.33)           | 1.25<br>(0.68 to 2.12)           | 1.41<br>(0.77 to 2.41)           | 1.10<br>(0.60 to 1.90)           |
| Other skin and subcutaneous diseases          | 2.86<br>(1.62 to 5.16)                    | 6.72<br>(3.84 to 12.10)                   | 5.88<br>(3.56 to 10.48)                 | 6.58<br>(3.71 to 11.94)                   | 0.05<br>(0.03 to 0.09)           | 0.16<br>(0.10 to 0.30)           | 0.16<br>(0.10 to 0.29)           | 0.15<br>(0.09 to 0.28)           |
| Sudden infant death syndrome                  | 162.68<br>(83.67 to 295.21)               | 141.60<br>(42.62 to 303.06)               | 66.46<br>(19.90 to 144.24)              | 153.30<br>(46.93 to 334.14)               | 1.89<br>(0.97 to 3.43)           | 1.64<br>(0.49 to 3.52)           | 0.77<br>(0.23 to 1.67)           | 1.78<br>(0.54 to 3.88)           |

|                                      |                                       |                                       |                                       |                                       |                              |                                |                               |                                |
|--------------------------------------|---------------------------------------|---------------------------------------|---------------------------------------|---------------------------------------|------------------------------|--------------------------------|-------------------------------|--------------------------------|
| Injuries                             | 4,051.54<br>(3,361.50 to<br>4,863.38) | 4,514.43<br>(3,338.85 to<br>5,877.68) | 3,037.89<br>(2,314.21 to<br>3,931.33) | 5,216.33<br>(3,880.31 to<br>6,786.20) | 68.14<br>(57.66 to<br>79.46) | 105.76<br>(85.76 to<br>129.79) | 83.85<br>(68.92 to<br>103.08) | 117.35<br>(94.76 to<br>145.46) |
| Transport injuries                   | 1,117.07<br>(856.89 to<br>1,414.46)   | 1,565.66<br>(1,110.69 to<br>2,141.02) | 930.81<br>(660.32 to<br>1,291.87)     | 2,014.00<br>(1,415.77 to<br>2,837.75) | 19.03<br>(14.67 to<br>23.76) | 32.05<br>(23.72 to<br>43.39)   | 21.91<br>(15.84 to<br>30.17)  | 40.36<br>(29.00 to<br>56.16)   |
| Road injuries                        | 1,043.50<br>(796.23 to<br>1,329.53)   | 1,452.95<br>(1,007.17 to<br>1,985.94) | 851.07<br>(594.31 to<br>1,192.19)     | 1,884.37<br>(1,287.82 to<br>2,672.16) | 17.89<br>(13.58 to<br>22.43) | 30.02<br>(21.66 to<br>40.13)   | 20.36<br>(14.30 to<br>28.37)  | 38.01<br>(26.92 to<br>52.84)   |
| Pedestrian road injuries             | 357.25<br>(244.61 to<br>475.75)       | 410.94<br>(257.71 to<br>593.67)       | 263.24<br>(164.21 to<br>388.64)       | 510.77<br>(315.91 to<br>766.41)       | 6.15<br>(4.26 to<br>8.03)    | 9.29<br>(6.03 to<br>13.55)     | 6.69<br>(4.33 to<br>9.94)     | 11.43<br>(7.28 to<br>17.39)    |
| <b>Nigeria</b>                       |                                       |                                       |                                       |                                       |                              |                                |                               |                                |
| Cause                                | YLLs (in 1000s)                       |                                       |                                       |                                       | Deaths (in 1000s)            |                                |                               |                                |
|                                      | 2016                                  | 2040 Forecast                         | 2040 Better Scenario                  | 2040 Worse Scenario                   | 2016                         | 2040 Forecast                  | 2040 Better Scenario          | 2040 Worse Scenario            |
| Cyclist road injuries                | 35.48<br>(20.85 to<br>50.63)          | 55.49<br>(32.63 to<br>87.14)          | 32.52<br>(19.88 to<br>48.67)          | 72.08<br>(41.65 to<br>115.27)         | 0.63<br>(0.40 to<br>0.87)    | 1.18<br>(0.77 to<br>1.73)      | 0.83<br>(0.54 to<br>1.21)     | 1.48<br>(0.93 to<br>2.24)      |
| Motorcyclist road injuries           | 122.29<br>(79.18 to<br>170.62)        | 195.77<br>(121.19 to<br>295.29)       | 118.96<br>(71.19 to<br>184.85)        | 250.02<br>(154.31 to<br>380.80)       | 1.94<br>(1.30 to<br>2.70)    | 3.48<br>(2.24 to<br>5.23)      | 2.41<br>(1.48 to<br>3.76)     | 4.35<br>(2.76 to<br>6.65)      |
| Motor vehicle road injuries          | 511.85<br>(381.92 to<br>684.77)       | 765.13<br>(521.21 to<br>1,080.31)     | 421.83<br>(284.62 to<br>619.53)       | 1,018.37<br>(692.66 to<br>1,445.28)   | 8.88<br>(6.56 to<br>11.78)   | 15.52<br>(10.85 to<br>21.72)   | 10.05<br>(6.97 to<br>14.45)   | 20.07<br>(13.71 to<br>28.61)   |
| Other road injuries                  | 16.64<br>(10.42 to<br>25.82)          | 25.62<br>(15.76 to<br>39.82)          | 14.51<br>(9.29 to<br>22.09)           | 33.12<br>(20.37 to<br>51.97)          | 0.29<br>(0.20 to<br>0.42)    | 0.54<br>(0.36 to<br>0.80)      | 0.37<br>(0.24 to<br>0.56)     | 0.68<br>(0.45 to<br>1.01)      |
| Other transport injuries             | 73.56<br>(49.97 to<br>105.97)         | 112.70<br>(70.59 to<br>176.92)        | 79.74<br>(51.61 to<br>129.41)         | 129.63<br>(80.51 to<br>208.46)        | 1.14<br>(0.79 to<br>1.68)    | 2.03<br>(1.32 to<br>3.41)      | 1.55<br>(1.01 to<br>2.27)     | 2.35<br>(1.49 to<br>4.05)      |
| Unintentional injuries               | 2,383.06<br>(1,827.54 to<br>3,052.04) | 2,346.54<br>(1,635.84 to<br>3,214.29) | 1,563.29<br>(1,159.69 to<br>2,012.64) | 2,522.09<br>(1,772.34 to<br>3,486.42) | 38.14<br>(31.32 to<br>46.33) | 57.62<br>(46.25 to<br>70.17)   | 46.76<br>(38.39 to<br>55.46)  | 59.07<br>(46.85 to<br>72.72)   |
| Falls                                | 340.40<br>(242.68 to<br>496.84)       | 494.36<br>(365.76 to<br>670.59)       | 394.86<br>(299.50 to<br>504.93)       | 502.83<br>(366.64 to<br>692.69)       | 7.60<br>(5.80 to<br>9.72)    | 21.83<br>(17.31 to<br>26.34)   | 20.66<br>(16.56 to<br>24.81)  | 20.89<br>(16.27 to<br>25.67)   |
| Drowning                             | 493.29<br>(358.22 to<br>745.99)       | 393.41<br>(237.81 to<br>649.74)       | 251.60<br>(160.64 to<br>407.02)       | 433.44<br>(264.34 to<br>714.90)       | 7.06<br>(5.24 to<br>10.74)   | 7.06<br>(4.77 to<br>11.35)     | 5.08<br>(3.54 to<br>8.28)     | 7.71<br>(5.20 to<br>12.40)     |
| Fire, heat, and hot substances       | 238.85<br>(152.75 to<br>347.15)       | 184.87<br>(115.06 to<br>276.82)       | 114.12<br>(73.84 to<br>162.95)        | 207.36<br>(128.82 to<br>312.57)       | 3.83<br>(2.69 to<br>5.16)    | 4.33<br>(2.95 to<br>5.78)      | 3.20<br>(2.18 to<br>4.15)     | 4.73<br>(3.20 to<br>6.44)      |
| Poisonings                           | 116.39<br>(52.49 to<br>273.24)        | 78.02<br>(33.82 to<br>185.79)         | 40.72<br>(19.93 to<br>85.15)          | 91.27<br>(40.24 to<br>215.99)         | 1.73<br>(0.92 to<br>3.70)    | 1.38<br>(0.74 to<br>2.68)      | 0.84<br>(0.49 to<br>1.43)     | 1.60<br>(0.86 to<br>3.17)      |
| Exposure to mechanical forces        | 357.48<br>(212.11 to<br>513.05)       | 303.32<br>(177.27 to<br>478.93)       | 181.36<br>(110.66 to<br>262.73)       | 333.72<br>(196.35 to<br>534.20)       | 5.15<br>(3.40 to<br>6.97)    | 5.48<br>(3.56 to<br>7.82)      | 3.77<br>(2.40 to<br>5.38)     | 5.88<br>(3.87 to<br>8.33)      |
| Unintentional firearm injuries       | 74.99<br>(33.61 to<br>126.01)         | 65.89<br>(25.37 to<br>129.99)         | 43.62<br>(16.26 to<br>94.61)          | 73.00<br>(28.59 to<br>145.97)         | 1.22<br>(0.55 to<br>2.20)    | 1.33<br>(0.54 to<br>2.69)      | 0.96<br>(0.38 to<br>2.07)     | 1.44<br>(0.57 to<br>3.00)      |
| Unintentional suffocation            | 111.77<br>(48.86 to<br>222.85)        | 86.35<br>(35.89 to<br>191.92)         | 43.41<br>(20.23 to<br>91.76)          | 95.90<br>(40.06 to<br>213.85)         | 1.36<br>(0.62 to<br>2.66)    | 1.08<br>(0.48 to<br>2.34)      | 0.56<br>(0.28 to<br>1.15)     | 1.20<br>(0.54 to<br>2.60)      |
| Other exposure to mechanical forces  | 170.72<br>(101.37 to<br>240.59)       | 151.09<br>(91.17 to<br>231.39)        | 94.33<br>(60.44 to<br>136.00)         | 164.82<br>(101.57 to<br>253.79)       | 2.57<br>(1.72 to<br>3.44)    | 3.06<br>(2.08 to<br>4.20)      | 2.24<br>(1.49 to<br>2.97)     | 3.23<br>(2.18 to<br>4.43)      |
| Adverse effects of medical treatment | 281.78<br>(147.70 to<br>439.93)       | 281.25<br>(156.02 to<br>473.80)       | 177.86<br>(112.84 to<br>273.62)       | 303.09<br>(166.61 to<br>499.63)       | 4.21<br>(2.53 to<br>6.05)    | 5.42<br>(3.73 to<br>7.70)      | 3.99<br>(2.96 to<br>5.25)     | 5.68<br>(3.85 to<br>8.21)      |
| Animal contact                       | 111.97<br>(67.25 to<br>161.93)        | 150.77<br>(75.75 to<br>233.23)        | 93.51<br>(45.20 to<br>137.93)         | 167.97<br>(84.88 to<br>258.01)        | 2.05<br>(1.14 to<br>2.82)    | 3.61<br>(1.75 to<br>5.21)      | 2.57<br>(1.21 to<br>3.67)     | 3.90<br>(1.92 to<br>5.62)      |

|                                                 |                                          |                                          |                                          |                                            |                                     |                                      |                                      |                                       |
|-------------------------------------------------|------------------------------------------|------------------------------------------|------------------------------------------|--------------------------------------------|-------------------------------------|--------------------------------------|--------------------------------------|---------------------------------------|
| Venomous animal contact                         | 88.90<br>(49.38 to<br>130.15)            | 120.16<br>(55.34 to<br>186.32)           | 75.59<br>(33.69 to<br>114.81)            | 133.89<br>(63.96 to<br>205.56)             | 1.70<br>(0.88 to<br>2.39)           | 3.01<br>(1.39 to<br>4.36)            | 2.15<br>(0.99 to<br>3.08)            | 3.25<br>(1.56 to<br>4.69)             |
| Non-venomous animal contact                     | 23.07<br>(10.56 to<br>51.30)             | 30.61<br>(14.22 to<br>61.18)             | 17.92<br>(8.75 to<br>33.62)              | 34.09<br>(16.12 to<br>67.81)               | 0.35<br>(0.18 to<br>0.69)           | 0.60<br>(0.30 to<br>1.04)            | 0.42<br>(0.20 to<br>0.69)            | 0.65<br>(0.33 to<br>1.13)             |
| Foreign body                                    | 249.57<br>(136.45 to<br>487.35)          | 308.14<br>(173.96 to<br>586.86)          | 214.29<br>(134.84 to<br>357.51)          | 313.71<br>(172.54 to<br>615.50)            | 3.59<br>(2.19 to<br>6.33)           | 5.55<br>(3.79 to<br>8.62)            | 4.59<br>(3.41 to<br>6.18)            | 5.48<br>(3.66 to<br>8.79)             |
| Pulmonary aspiration and foreign body in airway | 232.28<br>(125.66 to<br>467.82)          | 288.12<br>(160.68 to<br>563.45)          | 200.85<br>(127.70 to<br>343.33)          | 292.37<br>(159.86 to<br>589.76)            | 3.33<br>(2.03 to<br>6.03)           | 5.20<br>(3.58 to<br>8.30)            | 4.32<br>(3.23 to<br>5.97)            | 5.11<br>(3.44 to<br>8.42)             |
| Foreign body in other body part                 | 17.29<br>(5.40 to<br>36.85)              | 20.02<br>(6.17 to<br>43.14)              | 13.45<br>(4.28 to<br>28.60)              | 21.34<br>(6.48 to<br>46.06)                | 0.26<br>(0.09 to<br>0.48)           | 0.36<br>(0.12 to<br>0.74)            | 0.27<br>(0.09 to<br>0.61)            | 0.37<br>(0.13 to<br>0.77)             |
| Environmental heat and cold exposure            | 65.21<br>(27.27 to<br>95.41)             | 57.61<br>(23.31 to<br>92.95)             | 32.80<br>(13.38 to<br>49.72)             | 66.35<br>(26.37 to<br>105.66)              | 1.04<br>(0.45 to<br>1.46)           | 1.17<br>(0.49 to<br>1.77)            | 0.75<br>(0.32 to<br>1.07)            | 1.31<br>(0.54 to<br>1.92)             |
| Other unintentional injuries                    | 128.12<br>(76.83 to<br>177.17)           | 94.80<br>(60.83 to<br>141.14)            | 62.07<br>(41.17 to<br>88.40)             | 102.35<br>(65.50 to<br>150.06)             | 1.90<br>(1.25 to<br>2.53)           | 1.79<br>(1.27 to<br>2.42)            | 1.32<br>(0.96 to<br>1.73)            | 1.88<br>(1.32 to<br>2.57)             |
| <b>Self-harm and interpersonal violence</b>     | <b>334.60<br/>(221.40 to<br/>511.67)</b> | <b>547.41<br/>(340.29 to<br/>925.08)</b> | <b>495.25<br/>(309.72 to<br/>823.33)</b> | <b>625.63<br/>(375.27 to<br/>1,088.68)</b> | <b>7.37<br/>(4.96 to<br/>11.72)</b> | <b>15.15<br/>(9.33 to<br/>25.26)</b> | <b>14.31<br/>(8.89 to<br/>23.64)</b> | <b>16.99<br/>(10.07 to<br/>28.72)</b> |

**Nigeria**

| Cause                                                                               | YLLs (in 1000s)                         |                                       |                                       |                                       | Deaths (in 1000s)                  |                                    |                                    |                                    |
|-------------------------------------------------------------------------------------|-----------------------------------------|---------------------------------------|---------------------------------------|---------------------------------------|------------------------------------|------------------------------------|------------------------------------|------------------------------------|
|                                                                                     | 2016                                    | 2040 Forecast                         | 2040 Better Scenario                  | 2040 Worse Scenario                   | 2016                               | 2040 Forecast                      | 2040 Better Scenario               | 2040 Worse Scenario                |
| Self-harm                                                                           | 243.98<br>(152.91 to<br>419.80)         | 454.62<br>(258.40 to<br>803.54)       | 414.58<br>(238.38 to<br>729.20)       | 530.85<br>(287.31 to<br>967.73)       | 6.09<br>(3.83 to<br>10.28)         | 13.56<br>(7.92 to<br>23.43)        | 12.87<br>(7.58 to<br>22.12)        | 15.37<br>(8.68 to<br>26.85)        |
| Self-harm by firearm                                                                | 19.79<br>(8.27 to<br>44.80)             | 28.95<br>(11.43 to<br>65.87)          | 25.66<br>(9.93 to<br>58.05)           | 34.17<br>(13.02 to<br>79.31)          | 0.50<br>(0.21 to<br>1.09)          | 0.91<br>(0.35 to<br>1.97)          | 0.85<br>(0.33 to<br>1.84)          | 1.04<br>(0.39 to<br>2.26)          |
| Self-harm by other specified means                                                  | 224.20<br>(137.69 to<br>386.14)         | 425.67<br>(240.19 to<br>754.60)       | 388.91<br>(221.25 to<br>683.11)       | 496.68<br>(269.32 to<br>899.26)       | 5.59<br>(3.48 to<br>9.43)          | 12.64<br>(7.39 to<br>21.83)        | 12.02<br>(7.03 to<br>20.53)        | 14.34<br>(8.06 to<br>25.15)        |
| Interpersonal violence                                                              | 80.62<br>(52.29 to<br>109.31)           | 92.79<br>(56.40 to<br>128.85)         | 80.67<br>(49.35 to<br>113.24)         | 94.78<br>(56.70 to<br>131.48)         | 1.27<br>(0.84 to<br>1.72)          | 1.59<br>(1.00 to<br>2.20)          | 1.44<br>(0.92 to<br>2.04)          | 1.62<br>(1.01 to<br>2.24)          |
| Physical violence by firearm                                                        | 34.57<br>(19.11 to<br>51.77)            | 41.04<br>(21.94 to<br>64.30)          | 37.07<br>(19.78 to<br>58.51)          | 41.43<br>(21.79 to<br>65.49)          | 0.56<br>(0.32 to<br>0.86)          | 0.70<br>(0.38 to<br>1.07)          | 0.64<br>(0.35 to<br>0.99)          | 0.70<br>(0.38 to<br>1.08)          |
| Physical violence by sharp object                                                   | 23.86<br>(11.41 to<br>37.23)            | 31.22<br>(14.45 to<br>50.56)          | 29.05<br>(13.36 to<br>48.09)          | 31.06<br>(14.29 to<br>50.81)          | 0.39<br>(0.20 to<br>0.62)          | 0.56<br>(0.28 to<br>0.90)          | 0.54<br>(0.27 to<br>0.88)          | 0.56<br>(0.27 to<br>0.90)          |
| Physical violence by other means                                                    | 22.20<br>(14.83 to<br>32.77)            | 20.54<br>(11.89 to<br>32.20)          | 14.55<br>(8.62 to<br>23.04)           | 22.28<br>(12.89 to<br>35.27)          | 0.32<br>(0.21 to<br>0.46)          | 0.33<br>(0.20 to<br>0.51)          | 0.25<br>(0.16 to<br>0.41)          | 0.36<br>(0.22 to<br>0.56)          |
| <b>Forces of nature, conflict and terrorism, and executions and police conflict</b> | <b>226.80<br/>(39.74 to<br/>437.74)</b> | <b>54.83<br/>(0.00 to<br/>583.55)</b> | <b>48.63<br/>(0.00 to<br/>510.63)</b> | <b>54.61<br/>(0.00 to<br/>582.09)</b> | <b>3.60<br/>(0.63 to<br/>6.95)</b> | <b>0.94<br/>(0.00 to<br/>9.77)</b> | <b>0.87<br/>(0.00 to<br/>8.92)</b> | <b>0.93<br/>(0.00 to<br/>9.69)</b> |
| Exposure to forces of nature                                                        | 0.00<br>(0.00 to<br>0.00)               | 1.63<br>(0.00 to<br>12.93)            | 1.40<br>(0.00 to<br>11.06)            | 1.62<br>(0.00 to<br>12.90)            | 0.00<br>(0.00 to<br>0.00)          | 0.03<br>(0.00 to<br>0.24)          | 0.03<br>(0.00 to<br>0.22)          | 0.03<br>(0.00 to<br>0.23)          |
| Conflict and terrorism                                                              | 225.52<br>(38.54 to<br>436.48)          | 43.61<br>(0.00 to<br>583.55)          | 38.22<br>(0.00 to<br>510.63)          | 43.47<br>(0.00 to<br>582.09)          | 3.58<br>(0.61 to<br>6.93)          | 0.74<br>(0.00 to<br>9.77)          | 0.67<br>(0.00 to<br>8.92)          | 0.73<br>(0.00 to<br>9.69)          |
| Executions and police conflict                                                      | 1.28<br>(1.03 to<br>1.95)               | 9.59<br>(0.00 to<br>76.29)            | 9.01<br>(0.00 to<br>71.90)            | 9.52<br>(0.00 to<br>75.55)            | 0.02<br>(0.02 to<br>0.03)          | 0.17<br>(0.00 to<br>1.40)          | 0.17<br>(0.00 to<br>1.35)          | 0.17<br>(0.00 to<br>1.38)          |

**Sao Tome and Principe**

|  | YLLs (actual counts) |  |  |  | Deaths (actual counts) |  |  |  |
|--|----------------------|--|--|--|------------------------|--|--|--|
|--|----------------------|--|--|--|------------------------|--|--|--|

| Cause                                                             | 2016                                  | 2040 Forecast                         | 2040 Better Scenario                  | 2040 Worse Scenario                   | 2016                           | 2040 Forecast                      | 2040 Better Scenario             | 2040 Worse Scenario                |
|-------------------------------------------------------------------|---------------------------------------|---------------------------------------|---------------------------------------|---------------------------------------|--------------------------------|------------------------------------|----------------------------------|------------------------------------|
| All causes                                                        | 39,489.31<br>(35,350.54 to 44,133.66) | 37,333.85<br>(27,354.74 to 50,619.68) | 32,462.10<br>(23,816.72 to 43,341.58) | 54,314.87<br>(39,513.12 to 73,775.49) | 980.54<br>(882.33 to 1,095.21) | 1,326.09<br>(1,041.64 to 1,668.13) | 1,170.17<br>(921.83 to 1,469.90) | 1,757.63<br>(1,361.79 to 2,236.97) |
| Communicable, maternal, neonatal, and nutritional diseases        | 18,840.33<br>(16,031.69 to 22,599.46) | 8,830.69<br>(5,464.40 to 14,184.80)   | 7,355.17<br>(4,559.51 to 11,980.53)   | 16,389.85<br>(10,783.93 to 24,550.65) | 318.05<br>(266.29 to 380.08)   | 234.53<br>(147.98 to 359.58)       | 200.74<br>(127.58 to 312.05)     | 380.38<br>(238.40 to 566.63)       |
| HIV/AIDS and tuberculosis                                         | 1,446.77<br>(545.15 to 4,090.44)      | 1,458.83<br>(269.07 to 5,471.61)      | 1,304.60<br>(193.84 to 5,228.81)      | 2,223.00<br>(600.21 to 6,767.98)      | 33.74<br>(15.82 to 81.69)      | 33.93<br>(8.88 to 115.17)          | 29.78<br>(6.61 to 111.13)        | 52.09<br>(17.96 to 143.10)         |
| Tuberculosis                                                      | 480.55<br>(353.95 to 608.57)          | 328.61<br>(162.31 to 650.45)          | 235.23<br>(115.08 to 446.35)          | 674.94<br>(315.06 to 1,404.75)        | 15.09<br>(11.51 to 18.88)      | 11.14<br>(6.25 to 19.69)           | 8.12<br>(4.51 to 14.11)          | 21.92<br>(11.27 to 40.85)          |
| HIV/AIDS                                                          | 966.21<br>(62.21 to 3,699.66)         | 1,130.22<br>(7.32 to 5,085.21)        | 1,069.38<br>(5.50 to 4,982.42)        | 1,548.06<br>(57.77 to 6,185.99)       | 18.64<br>(1.24 to 68.17)       | 22.79<br>(0.24 to 105.26)          | 21.65<br>(0.20 to 104.44)        | 30.17<br>(1.04 to 124.05)          |
| Diarrhea, lower respiratory, and other common infectious diseases | 8,083.12<br>(6,218.07 to 10,034.20)   | 4,202.93<br>(2,196.71 to 7,277.03)    | 3,377.67<br>(1,848.35 to 5,715.03)    | 8,215.15<br>(4,109.26 to 14,358.02)   | 162.36<br>(123.27 to 199.32)   | 148.52<br>(82.50 to 240.32)        | 125.89<br>(71.73 to 199.88)      | 240.97<br>(129.96 to 403.55)       |
| Diarrheal diseases                                                | 1,915.07<br>(1,139.90 to 3,015.17)    | 571.49<br>(93.75 to 1,626.27)         | 368.27<br>(67.36 to 1,081.13)         | 1,371.73<br>(290.41 to 3,329.93)      | 30.03<br>(18.10 to 47.74)      | 15.66<br>(2.88 to 47.45)           | 10.48<br>(2.08 to 32.02)         | 32.23<br>(6.36 to 92.53)           |
| Intestinal infectious diseases                                    | 300.37<br>(131.89 to 558.51)          | 199.28<br>(83.41 to 395.90)           | 184.47<br>(77.94 to 355.39)           | 284.84<br>(118.05 to 551.36)          | 4.13<br>(1.89 to 7.63)         | 2.89<br>(1.34 to 6.06)             | 2.89<br>(1.27 to 5.57)           | 4.25<br>(1.78 to 8.26)             |
| Typhoid fever                                                     | 250.85<br>(102.52 to 487.20)          | 161.70<br>(64.88 to 320.92)           | 150.12<br>(60.76 to 299.49)           | 229.57<br>(90.64 to 465.43)           | 3.45<br>(1.46 to 6.72)         | 2.52<br>(1.05 to 5.03)             | 2.36<br>(0.99 to 4.71)           | 3.43<br>(1.40 to 6.87)             |
| Paratyphoid fever                                                 | 48.93<br>(16.50 to 120.98)            | 37.43<br>(13.28 to 83.45)             | 34.23<br>(11.81 to 77.15)             | 55.01<br>(19.38 to 120.92)            | 0.67<br>(0.23 to 1.64)         | 0.58<br>(0.21 to 1.24)             | 0.53<br>(0.19 to 1.15)           | 0.82<br>(0.30 to 1.79)             |
| Other intestinal infectious diseases                              | 0.60<br>(0.17 to 1.54)                | 0.14<br>(0.04 to 0.38)                | 0.12<br>(0.03 to 0.32)                | 0.27<br>(0.07 to 0.76)                | 0.01<br>(0.00 to 0.02)         | 0.00<br>(0.00 to 0.01)             | 0.00<br>(0.00 to 0.01)           | 0.01<br>(0.00 to 0.01)             |
| Lower respiratory infections                                      | 4,419.61<br>(3,322.11 to 5,726.54)    | 2,937.44<br>(1,513.47 to 5,033.09)    | 2,411.75<br>(1,269.76 to 4,016.49)    | 5,589.14<br>(2,632.91 to 10,249.45)   | 107.65<br>(75.76 to 137.66)    | 119.26<br>(64.99 to 189.84)        | 103.08<br>(57.99 to 160.78)      | 188.21<br>(96.65 to 322.92)        |
| Upper respiratory infections                                      | 6.04<br>(2.04 to 14.66)               | 2.99<br>(1.20 to 6.57)                | 2.39<br>(0.94 to 5.38)                | 5.42<br>(2.08 to 12.11)               | 0.09<br>(0.04 to 0.20)         | 0.07<br>(0.03 to 0.15)             | 0.06<br>(0.03 to 0.13)           | 0.12<br>(0.05 to 0.25)             |
| Otitis media                                                      | 0.11<br>(0.04 to 0.31)                | 0.04<br>(0.02 to 0.11)                | 0.04<br>(0.02 to 0.12)                | 0.04<br>(0.01 to 0.11)                | 0.00<br>(0.00 to 0.01)         | 0.00<br>(0.00 to 0.01)             | 0.00<br>(0.00 to 0.01)           | 0.00<br>(0.00 to 0.01)             |
| Meningitis                                                        | 581.59<br>(313.98 to 1,330.17)        | 265.22<br>(147.22 to 498.03)          | 244.44<br>(136.25 to 449.86)          | 405.13<br>(213.93 to 852.29)          | 8.96<br>(5.42 to 17.81)        | 5.99<br>(3.66 to 9.76)             | 5.74<br>(3.51 to 9.24)           | 7.63<br>(4.57 to 13.57)            |
| Pneumococcal meningitis                                           | 38.45<br>(21.72 to 76.95)             | 24.66<br>(13.72 to 46.90)             | 24.18<br>(13.45 to 45.03)             | 30.74<br>(16.45 to 62.90)             | 0.70<br>(0.45 to 1.23)         | 0.65<br>(0.40 to 1.08)             | 0.66<br>(0.40 to 1.10)           | 0.71<br>(0.43 to 1.28)             |
| H influenzae type B meningitis                                    | 64.35<br>(33.79 to 143.20)            | 41.29<br>(17.02 to 100.82)            | 33.35<br>(15.56 to 75.40)             | 111.95<br>(30.93 to 329.78)           | 0.94<br>(0.55 to 1.87)         | 0.72<br>(0.39 to 1.48)             | 0.64<br>(0.36 to 1.20)           | 1.53<br>(0.54 to 4.14)             |
| Meningococcal meningitis                                          | 284.21<br>(156.98 to 598.79)          | 123.18<br>(65.19 to 234.02)           | 116.56<br>(61.69 to 221.50)           | 157.73<br>(82.12 to 310.38)           | 4.34<br>(2.68 to 8.10)         | 2.78<br>(1.56 to 4.85)             | 2.69<br>(1.50 to 4.67)           | 3.20<br>(1.81 to 5.73)             |
| Other meningitis                                                  | 194.58<br>(95.52 to 513.61)           | 76.10<br>(42.41 to 146.36)            | 70.35<br>(39.35 to 130.22)            | 104.71<br>(53.37 to 238.54)           | 2.98<br>(1.66 to 6.65)         | 1.84<br>(1.10 to 2.98)             | 1.76<br>(1.03 to 2.82)           | 2.19<br>(1.27 to 3.88)             |
| Encephalitis                                                      | 235.77<br>(98.59 to 432.89)           | 134.35<br>(72.25 to 231.64)           | 120.41<br>(65.43 to 210.47)           | 3.02<br>(97.99 to 355.93)             | 3.51<br>(1.83 to 5.90)         | 3.02<br>(1.85 to 4.55)             | 2.78<br>(1.69 to 4.26)           | 3.93<br>(2.30 to 6.32)             |
| Diphtheria                                                        | 1.04<br>(0.45 to 2.08)                | 0.16<br>(0.06 to 0.33)                | 0.11<br>(0.05 to 0.22)                | 0.55<br>(0.13 to 1.67)                | 0.01<br>(0.01 to 0.03)         | 0.00<br>(0.00 to 0.01)             | 0.00<br>(0.00 to 0.00)           | 0.01<br>(0.00 to 0.02)             |



|                                               |                                                        |                                                      |                                                      |                                                      |                                                 |                                                |                                                |                                                 |
|-----------------------------------------------|--------------------------------------------------------|------------------------------------------------------|------------------------------------------------------|------------------------------------------------------|-------------------------------------------------|------------------------------------------------|------------------------------------------------|-------------------------------------------------|
| Whooping cough                                | 313.24<br>(29.27 to<br>1,067.56)                       | 60.28<br>(3.94 to<br>229.23)                         | 18.56<br>(1.26 to<br>74.54)                          | 251.57<br>(18.93 to<br>862.87)                       | 3.70<br>(0.35 to<br>12.60)                      | 0.72<br>(0.05 to<br>2.75)                      | 0.23<br>(0.02 to<br>0.92)                      | 2.98<br>(0.22 to<br>10.20)                      |
| Tetanus                                       | 89.65<br>(33.12 to<br>213.56)                          | 14.67<br>(4.40 to<br>34.91)                          | 13.18<br>(3.96 to<br>31.84)                          | 26.36<br>(7.90 to<br>75.48)                          | 1.47<br>(0.57 to<br>3.22)                       | 0.31<br>(0.10 to<br>0.80)                      | 0.30<br>(0.09 to<br>0.81)                      | 0.44<br>(0.15 to<br>1.10)                       |
| Measles                                       | 176.58<br>(54.40 to<br>429.77)                         | 5.71<br>(0.68 to<br>31.63)                           | 4.85<br>(0.61 to<br>25.89)                           | 58.74<br>(3.32 to<br>342.13)                         | 2.10<br>(0.65 to<br>5.11)                       | 0.07<br>(0.01 to<br>0.37)                      | 0.06<br>(0.01 to<br>0.31)                      | 0.70<br>(0.04 to<br>4.06)                       |
| <b>Sao Tome and Principe</b>                  |                                                        |                                                      |                                                      |                                                      |                                                 |                                                |                                                |                                                 |
| Cause                                         | YLLs (actual counts)                                   |                                                      |                                                      |                                                      | Deaths (actual counts)                          |                                                |                                                |                                                 |
|                                               | 2016                                                   | 2040 Forecast                                        | 2040 Better Scenario                                 | 2040 Worse Scenario                                  | 2016                                            | 2040 Forecast                                  | 2040 Better Scenario                           | 2040 Worse Scenario                             |
| Varicella and herpes zoster                   | 44.05<br>(21.15 to<br>81.49)                           | 11.30<br>(5.99 to<br>19.89)                          | 9.20<br>(4.84 to<br>15.94)                           | 21.63<br>(10.89 to<br>40.05)                         | 0.70<br>(0.42 to<br>1.15)                       | 0.31<br>(0.19 to<br>0.47)                      | 0.27<br>(0.16 to<br>0.42)                      | 0.46<br>(0.28 to<br>0.72)                       |
| Neglected tropical diseases and malaria       | <b>591.09</b><br><b>(244.69 to</b><br><b>1,120.07)</b> | <b>246.83</b><br><b>(111.28 to</b><br><b>454.97)</b> | <b>218.05</b><br><b>(97.75 to</b><br><b>400.14)</b>  | <b>400.11</b><br><b>(172.88 to</b><br><b>757.68)</b> | <b>8.26</b><br><b>(3.63 to</b><br><b>14.90)</b> | <b>4.81</b><br><b>(2.26 to</b><br><b>8.23)</b> | <b>4.31</b><br><b>(1.97 to</b><br><b>7.40)</b> | <b>7.01</b><br><b>(3.29 to</b><br><b>12.21)</b> |
| Malaria                                       | 6.76<br>(3.15 to<br>12.90)                             | 4.20<br>(2.02 to<br>7.35)                            | 4.10<br>(1.96 to<br>7.15)                            | 4.71<br>(2.26 to<br>8.28)                            | 0.11<br>(0.06 to<br>0.19)                       | 0.10<br>(0.05 to<br>0.17)                      | 0.10<br>(0.05 to<br>0.16)                      | 0.10<br>(0.05 to<br>0.18)                       |
| Chagas disease                                | 0.00<br>(0.00 to<br>0.00)                              | 0.00<br>(0.00 to<br>0.00)                            | 0.00<br>(0.00 to<br>0.00)                            | 0.00<br>(0.00 to<br>0.00)                            | 0.00<br>(0.00 to<br>0.00)                       | 0.00<br>(0.00 to<br>0.00)                      | 0.00<br>(0.00 to<br>0.00)                      | 0.00<br>(0.00 to<br>0.00)                       |
| Leishmaniasis                                 | 0.00<br>(0.00 to<br>0.00)                              | 0.00<br>(0.00 to<br>0.00)                            | 0.00<br>(0.00 to<br>0.00)                            | 0.00<br>(0.00 to<br>0.00)                            | 0.00<br>(0.00 to<br>0.00)                       | 0.00<br>(0.00 to<br>0.00)                      | 0.00<br>(0.00 to<br>0.00)                      | 0.00<br>(0.00 to<br>0.00)                       |
| African trypanosomiasis                       | 0.00<br>(0.00 to<br>0.00)                              | 0.00<br>(0.00 to<br>0.00)                            | 0.00<br>(0.00 to<br>0.00)                            | 0.00<br>(0.00 to<br>0.00)                            | 0.00<br>(0.00 to<br>0.00)                       | 0.00<br>(0.00 to<br>0.00)                      | 0.00<br>(0.00 to<br>0.00)                      | 0.00<br>(0.00 to<br>0.00)                       |
| Schistosomiasis                               | 16.24<br>(7.47 to<br>29.42)                            | 17.46<br>(6.32 to<br>37.45)                          | 15.82<br>(5.79 to<br>33.18)                          | 21.42<br>(7.90 to<br>45.59)                          | 0.47<br>(0.22 to<br>0.84)                       | 0.58<br>(0.22 to<br>1.19)                      | 0.54<br>(0.20 to<br>1.08)                      | 0.69<br>(0.26 to<br>1.40)                       |
| Cysticercosis                                 | 0.00<br>(0.00 to<br>0.00)                              | 0.00<br>(0.00 to<br>0.00)                            | 0.00<br>(0.00 to<br>0.00)                            | 0.00<br>(0.00 to<br>0.00)                            | 0.00<br>(0.00 to<br>0.00)                       | 0.00<br>(0.00 to<br>0.00)                      | 0.00<br>(0.00 to<br>0.00)                      | 0.00<br>(0.00 to<br>0.00)                       |
| Cystic echinococcosis                         | 0.47<br>(0.31 to<br>0.67)                              | 0.21<br>(0.12 to<br>0.36)                            | 0.16<br>(0.09 to<br>0.27)                            | 0.39<br>(0.22 to<br>0.62)                            | 0.01<br>(0.01 to<br>0.01)                       | 0.01<br>(0.00 to<br>0.01)                      | 0.00<br>(0.00 to<br>0.01)                      | 0.01<br>(0.01 to<br>0.02)                       |
| Dengue                                        | 0.00<br>(0.00 to<br>0.00)                              | 0.00<br>(0.00 to<br>0.00)                            | 0.00<br>(0.00 to<br>0.00)                            | 0.00<br>(0.00 to<br>0.00)                            | 0.00<br>(0.00 to<br>0.00)                       | 0.00<br>(0.00 to<br>0.00)                      | 0.00<br>(0.00 to<br>0.00)                      | 0.00<br>(0.00 to<br>0.00)                       |
| Yellow fever                                  | 42.69<br>(8.77 to<br>135.22)                           | 15.00<br>(2.23 to<br>55.34)                          | 12.69<br>(1.81 to<br>47.23)                          | 23.65<br>(3.68 to<br>86.29)                          | 0.65<br>(0.14 to<br>2.00)                       | 0.26<br>(0.04 to<br>0.92)                      | 0.22<br>(0.03 to<br>0.81)                      | 0.40<br>(0.06 to<br>1.43)                       |
| Rabies                                        | 19.98<br>(4.99 to<br>61.85)                            | 6.48<br>(1.32 to<br>20.70)                           | 4.59<br>(0.93 to<br>15.24)                           | 14.89<br>(3.20 to<br>46.42)                          | 0.31<br>(0.08 to<br>0.94)                       | 0.13<br>(0.03 to<br>0.40)                      | 0.09<br>(0.02 to<br>0.30)                      | 0.28<br>(0.06 to<br>0.86)                       |
| Intestinal nematode infections                | 14.58<br>(1.35 to<br>41.12)                            | 7.96<br>(1.76 to<br>22.08)                           | 7.82<br>(1.76 to<br>21.49)                           | 11.72<br>(2.00 to<br>31.96)                          | 0.18<br>(0.02 to<br>0.50)                       | 0.17<br>(0.04 to<br>0.29)                      | 0.12<br>(0.04 to<br>0.29)                      | 0.16<br>(0.04 to<br>0.41)                       |
| Other neglected tropical diseases             | 490.37<br>(136.73 to<br>992.21)                        | 195.51<br>(58.17 to<br>381.64)                       | 172.88<br>(51.59 to<br>340.06)                       | 323.33<br>(100.15 to<br>650.18)                      | 6.52<br>(1.83 to<br>12.75)                      | 3.62<br>(1.08 to<br>6.70)                      | 3.24<br>(0.97 to<br>6.02)                      | 5.37<br>(1.65 to<br>10.05)                      |
| Maternal disorders                            | <b>419.48</b><br><b>(283.60 to</b><br><b>566.23)</b>   | <b>280.63</b><br><b>(145.43 to</b><br><b>478.37)</b> | <b>217.93</b><br><b>(111.27 to</b><br><b>379.28)</b> | <b>480.21</b><br><b>(250.00 to</b><br><b>827.31)</b> | <b>7.78</b><br><b>(5.38 to</b><br><b>10.58)</b> | <b>5.36</b><br><b>(2.81 to</b><br><b>9.09)</b> | <b>4.16</b><br><b>(2.13 to</b><br><b>7.21)</b> | <b>9.14</b><br><b>(4.66 to</b><br><b>15.60)</b> |
| Maternal hemorrhage                           | 158.73<br>(98.95 to<br>225.28)                         | 101.08<br>(47.35 to<br>180.25)                       | 78.44<br>(36.34 to<br>144.84)                        | 171.33<br>(79.08 to<br>303.19)                       | 2.99<br>(1.85 to<br>4.29)                       | 1.95<br>(0.91 to<br>3.47)                      | 1.52<br>(0.71 to<br>2.78)                      | 3.30<br>(1.52 to<br>5.91)                       |
| Maternal sepsis and other maternal infections | 20.80<br>(8.66 to<br>38.54)                            | 12.29<br>(4.24 to<br>27.77)                          | 9.53<br>(3.14 to<br>22.41)                           | 21.05<br>(7.13 to<br>49.54)                          | 0.39<br>(0.16 to<br>0.71)                       | 0.24<br>(0.08 to<br>0.53)                      | 0.18<br>(0.06 to<br>0.42)                      | 0.40<br>(0.14 to<br>0.92)                       |

| Maternal hypertensive disorders                                         | 86.27<br>(53.25 to<br>131.48)                | 55.25<br>(26.03 to<br>101.41)                | 42.69<br>(19.42 to<br>80.17)                 | 94.79<br>(45.38 to<br>171.06)                | 1.56<br>(0.98 to<br>2.35)           | 1.04<br>(0.49 to<br>1.88)           | 0.80<br>(0.37 to<br>1.49)           | 1.77<br>(0.84 to<br>3.24)           |
|-------------------------------------------------------------------------|----------------------------------------------|----------------------------------------------|----------------------------------------------|----------------------------------------------|-------------------------------------|-------------------------------------|-------------------------------------|-------------------------------------|
| Maternal obstructed labor and uterine rupture                           | 19.07<br>(9.73 to<br>33.33)                  | 12.59<br>(5.38 to<br>27.07)                  | 9.58<br>(3.93 to<br>21.26)                   | 22.21<br>(9.41 to<br>46.92)                  | 0.36<br>(0.18 to<br>0.63)           | 0.24<br>(0.10 to<br>0.52)           | 0.18<br>(0.08 to<br>0.41)           | 0.43<br>(0.18 to<br>0.90)           |
| Maternal abortion, miscarriage, and ectopic pregnancy                   | 18.08<br>(8.67 to<br>33.94)                  | 14.49<br>(5.22 to<br>32.02)                  | 10.97<br>(3.80 to<br>24.84)                  | 24.68<br>(8.91 to<br>55.76)                  | 0.33<br>(0.16 to<br>0.61)           | 0.28<br>(0.10 to<br>0.62)           | 0.21<br>(0.08 to<br>0.48)           | 0.47<br>(0.17 to<br>1.08)           |
| Indirect maternal deaths                                                | 74.59<br>(45.10 to<br>110.84)                | 51.90<br>(23.45 to<br>94.41)                 | 40.65<br>(17.85 to<br>75.39)                 | 90.02<br>(39.80 to<br>165.16)                | 1.36<br>(0.84 to<br>2.00)           | 0.97<br>(0.43 to<br>1.77)           | 0.76<br>(0.34 to<br>1.40)           | 1.68<br>(0.74 to<br>3.11)           |
| Late maternal deaths                                                    | 5.26<br>(2.45 to<br>9.71)                    | 2.78<br>(1.08 to<br>5.80)                    | 2.16<br>(0.82 to<br>4.62)                    | 4.84<br>(1.90 to<br>10.28)                   | 0.10<br>(0.04 to<br>0.18)           | 0.05<br>(0.02 to<br>0.11)           | 0.04<br>(0.02 to<br>0.09)           | 0.09<br>(0.04 to<br>0.20)           |
| Maternal deaths aggravated by HIV/AIDS                                  | 0.92<br>(0.11 to<br>2.65)                    | 5.76<br>(0.91 to<br>24.64)                   | 4.48<br>(0.00 to<br>20.12)                   | 10.17<br>(0.11 to<br>40.31)                  | 0.02<br>(0.00 to<br>0.05)           | 0.12<br>(0.00 to<br>0.49)           | 0.09<br>(0.00 to<br>0.40)           | 0.20<br>(0.09 to<br>0.81)           |
| Other maternal disorders                                                | 35.75<br>(21.45 to<br>54.69)                 | 24.49<br>(11.76 to<br>46.62)                 | 19.43<br>(9.15 to<br>37.67)                  | 41.12<br>(19.52 to<br>77.69)                 | 0.67<br>(0.41 to<br>1.01)           | 0.47<br>(0.23 to<br>0.87)           | 0.38<br>(0.18 to<br>0.73)           | 0.79<br>(0.38 to<br>1.50)           |
| <b>Sao Tome and Principe</b>                                            |                                              |                                              |                                              |                                              |                                     |                                     |                                     |                                     |
| Cause                                                                   | YLLs (actual counts)                         |                                              |                                              |                                              | Deaths (actual counts)              |                                     |                                     |                                     |
|                                                                         | 2016                                         | 2040 Forecast                                | 2040 Better Scenario                         | 2040 Worse Scenario                          | 2016                                | 2040 Forecast                       | 2040 Better Scenario                | 2040 Worse Scenario                 |
| <b>Neonatal disorders</b>                                               | <b>6,269.25</b><br>(5,014.49 to<br>7,635.46) | <b>1,964.71</b><br>(1,289.57 to<br>2,808.97) | <b>1,635.12</b><br>(1,073.20 to<br>2,352.60) | <b>4,006.51</b><br>(2,516.19 to<br>5,887.91) | <b>72.46</b><br>(57.97 to<br>88.28) | <b>22.71</b><br>(14.90 to<br>32.48) | <b>18.90</b><br>(12.41 to<br>27.18) | <b>46.32</b><br>(29.08 to<br>68.08) |
| Neonatal preterm birth                                                  | 2,065.89<br>(1,315.25 to<br>3,016.49)        | 565.98<br>(321.55 to<br>924.65)              | 433.97<br>(243.69 to<br>721.74)              | 1,213.71<br>(684.32 to<br>2,057.64)          | 23.87<br>(15.20 to<br>35.21)        | 6.54<br>(3.72 to<br>10.69)          | 5.02<br>(2.82 to<br>8.34)           | 14.03<br>(7.91 to<br>23.77)         |
| Neonatal encephalopathy due to birth asphyxia and trauma                | 2,117.08<br>(1,290.16 to<br>3,033.77)        | 650.50<br>(302.67 to<br>1,165.12)            | 563.58<br>(260.05 to<br>1,010.79)            | 1,276.91<br>(589.78 to<br>2,382.18)          | 24.46<br>(14.91 to<br>35.05)        | 7.52<br>(3.50 to<br>13.46)          | 6.51<br>(3.01 to<br>11.68)          | 14.76<br>(6.82 to<br>27.54)         |
| Neonatal sepsis and other neonatal infections                           | 1,568.27<br>(1,048.23 to<br>2,258.71)        | 588.20<br>(361.14 to<br>898.27)              | 505.18<br>(313.47 to<br>783.26)              | 1,169.69<br>(693.88 to<br>1,841.93)          | 18.13<br>(12.13 to<br>26.12)        | 8.80<br>(4.18 to<br>10.39)          | 5.84<br>(3.62 to<br>9.06)           | 13.53<br>(8.03 to<br>21.29)         |
| Hemolytic disease and other neonatal jaundice                           | 85.79<br>(48.82 to<br>141.66)                | 16.45<br>(7.82 to<br>29.41)                  | 13.78<br>(6.67 to<br>24.59)                  | 35.08<br>(16.74 to<br>63.31)                 | 0.99<br>(0.56 to<br>1.64)           | 0.19<br>(0.09 to<br>0.34)           | 0.16<br>(0.08 to<br>0.28)           | 0.41<br>(0.19 to<br>0.73)           |
| Other neonatal disorders                                                | 432.21<br>(273.08 to<br>660.83)              | 143.57<br>(76.20 to<br>248.09)               | 118.62<br>(61.87 to<br>206.17)               | 311.12<br>(157.87 to<br>556.78)              | 5.00<br>(3.16 to<br>7.65)           | 1.66<br>(0.88 to<br>2.87)           | 1.37<br>(0.72 to<br>2.38)           | 3.60<br>(1.83 to<br>6.44)           |
| <b>Nutritional deficiencies</b>                                         | <b>1,430.91</b><br>(883.56 to<br>2,441.08)   | <b>355.37</b><br>(217.14 to<br>555.08)       | <b>315.06</b><br>(192.75 to<br>497.12)       | <b>582.48</b><br>(339.29 to<br>997.17)       | <b>23.81</b><br>(16.61 to<br>35.44) | <b>10.79</b><br>(7.58 to<br>14.75)  | <b>9.99</b><br>(7.08 to<br>13.70)   | <b>13.93</b><br>(9.42 to<br>19.70)  |
| Protein-energy malnutrition                                             | 1,384.09<br>(842.30 to<br>2,375.62)          | 313.36<br>(188.95 to<br>515.58)              | 277.64<br>(167.61 to<br>450.76)              | 524.00<br>(298.32 to<br>945.20)              | 22.67<br>(15.41 to<br>34.28)        | 9.49<br>(6.54 to<br>13.10)          | 8.81<br>(6.02 to<br>12.26)          | 12.33<br>(8.28 to<br>18.05)         |
| Iodine deficiency                                                       | 5.57<br>(0.23 to<br>29.82)                   | 10.60<br>(0.26 to<br>36.29)                  | 9.08<br>(0.20 to<br>30.77)                   | 17.49<br>(0.43 to<br>78.15)                  | 0.10<br>(0.01 to<br>0.39)           | 0.35<br>(0.01 to<br>1.23)           | 0.31<br>(0.01 to<br>1.11)           | 0.47<br>(0.01 to<br>1.58)           |
| Dietary iron deficiency                                                 | 4.93<br>(2.86 to<br>7.78)                    | 4.30<br>(2.00 to<br>7.75)                    | 3.95<br>(1.84 to<br>7.17)                    | 5.48<br>(2.66 to<br>9.75)                    | 0.08<br>(0.05 to<br>0.14)           | 0.08<br>(0.04 to<br>0.17)           | 0.08<br>(0.04 to<br>0.15)           | 0.10<br>(0.05 to<br>0.19)           |
| Other nutritional deficiencies                                          | 36.32<br>(22.53 to<br>58.83)                 | 27.11<br>(14.45 to<br>45.67)                 | 24.39<br>(12.63 to<br>41.62)                 | 35.51<br>(19.00 to<br>59.78)                 | 0.96<br>(0.61 to<br>1.54)           | 0.86<br>(0.50 to<br>1.41)           | 0.80<br>(0.44 to<br>1.32)           | 1.03<br>(0.58 to<br>1.68)           |
| <b>Other communicable, maternal, neonatal, and nutritional diseases</b> | <b>599.72</b><br>(300.38 to<br>1,512.65)     | <b>321.39</b><br>(190.28 to<br>551.60)       | <b>286.73</b><br>(170.89 to<br>486.44)       | <b>482.39</b><br>(270.84 to<br>936.54)       | <b>9.64</b><br>(5.97 to<br>20.48)   | <b>8.41</b><br>(5.66 to<br>12.23)   | <b>7.70</b><br>(5.08 to<br>11.32)   | <b>10.93</b><br>(7.29 to<br>17.19)  |
| Sexually transmitted infections excluding HIV                           | 68.82<br>(28.98 to<br>159.26)                | 18.85<br>(9.67 to<br>36.61)                  | 17.27<br>(8.77 to<br>33.54)                  | 27.71<br>(13.33 to<br>58.50)                 | 0.89<br>(0.42 to<br>1.95)           | 0.32<br>(0.18 to<br>0.56)           | 0.29<br>(0.16 to<br>0.52)           | 0.44<br>(0.23 to<br>0.83)           |

|                                       |                                                     |                                                     |                                                     |                                                     |                                            |                                              |                                              |                                                |
|---------------------------------------|-----------------------------------------------------|-----------------------------------------------------|-----------------------------------------------------|-----------------------------------------------------|--------------------------------------------|----------------------------------------------|----------------------------------------------|------------------------------------------------|
| Syphilis                              | 60.40<br>(20.39 to 151.03)                          | 10.37<br>(3.95 to 26.32)                            | 9.41<br>(3.56 to 24.30)                             | 17.71<br>(6.20 to 46.78)                            | 0.73<br>(0.26 to 1.79)                     | 0.14<br>(0.06 to 0.33)                       | 0.13<br>(0.06 to 0.31)                       | 0.23<br>(0.09 to 0.57)                         |
| Chlamydial infection                  | 1.73<br>(1.09 to 2.57)                              | 1.70<br>(0.87 to 2.92)                              | 1.57<br>(0.80 to 2.74)                              | 2.01<br>(1.03 to 3.40)                              | 0.03<br>(0.02 to 0.05)                     | 0.04<br>(0.02 to 0.06)                       | 0.03<br>(0.02 to 0.05)                       | 0.04<br>(0.02 to 0.07)                         |
| Gonococcal infection                  | 4.32<br>(2.77 to 6.31)                              | 4.44<br>(2.30 to 7.92)                              | 4.12<br>(2.13 to 7.39)                              | 5.21<br>(2.70 to 9.24)                              | 0.09<br>(0.06 to 0.12)                     | 0.09<br>(0.05 to 0.16)                       | 0.09<br>(0.05 to 0.15)                       | 0.11<br>(0.06 to 0.19)                         |
| Other sexually transmitted infections | 2.37<br>(1.49 to 3.52)                              | 2.34<br>(1.19 to 4.01)                              | 2.17<br>(1.10 to 3.71)                              | 2.78<br>(1.42 to 4.73)                              | 0.05<br>(0.03 to 0.07)                     | 0.05<br>(0.03 to 0.08)                       | 0.04<br>(0.02 to 0.07)                       | 0.06<br>(0.03 to 0.09)                         |
| Acute hepatitis                       | 104.38<br>(78.38 to 131.48)                         | 108.55<br>(64.91 to 172.95)                         | 98.24<br>(57.81 to 159.04)                          | 136.61<br>(83.61 to 211.20)                         | 2.23<br>(1.69 to 2.75)                     | 2.77<br>(1.75 to 4.17)                       | 2.53<br>(1.59 to 3.82)                       | 3.37<br>(2.13 to 5.03)                         |
| Acute hepatitis A                     | 3.24<br>(0.45 to 7.51)                              | 1.21<br>(0.40 to 2.69)                              | 1.10<br>(0.36 to 2.38)                              | 1.83<br>(0.56 to 4.21)                              | 0.04<br>(0.01 to 0.09)                     | 0.02<br>(0.01 to 0.05)                       | 0.02<br>(0.01 to 0.05)                       | 0.03<br>(0.01 to 0.07)                         |
| Acute hepatitis B                     | 80.56<br>(58.55 to 103.01)                          | 90.42<br>(53.24 to 148.68)                          | 81.38<br>(47.63 to 136.36)                          | 113.10<br>(68.15 to 183.69)                         | 1.82<br>(1.36 to 2.30)                     | 2.34<br>(1.46 to 3.64)                       | 2.12<br>(1.31 to 3.31)                       | 2.86<br>(1.80 to 4.39)                         |
| Acute hepatitis C                     | 2.15<br>(1.45 to 3.02)                              | 3.28<br>(1.76 to 5.28)                              | 3.13<br>(1.67 to 5.04)                              | 3.68<br>(2.03 to 5.77)                              | 0.05<br>(0.04 to 0.08)                     | 0.10<br>(0.05 to 0.15)                       | 0.09<br>(0.05 to 0.15)                       | 0.10<br>(0.06 to 0.17)                         |
| Acute hepatitis E                     | 18.43<br>(12.50 to 26.00)                           | 13.63<br>(7.50 to 21.63)                            | 12.64<br>(6.89 to 20.19)                            | 18.00<br>(9.91 to 28.18)                            | 0.31<br>(0.22 to 0.42)                     | 0.30<br>(0.18 to 0.48)                       | 0.29<br>(0.17 to 0.45)                       | 0.38<br>(0.23 to 0.58)                         |
| Other unspecified infectious diseases | 426.51<br>(142.86 to 1,365.33)                      | 193.99<br>(101.26 to 413.10)                        | 171.23<br>(89.04 to 357.70)                         | 318.07<br>(148.30 to 758.44)                        | 6.52<br>(3.15 to 17.69)                    | 5.32<br>(3.43 to 8.65)                       | 4.88<br>(3.06 to 7.71)                       | 7.12<br>(4.36 to 12.75)                        |
| <b>Non-communicable diseases</b>      | <b>17,312.79</b><br><b>(14,690.06 to 19,704.68)</b> | <b>24,552.66</b><br><b>(17,039.29 to 33,777.21)</b> | <b>21,490.99</b><br><b>(15,048.98 to 29,618.79)</b> | <b>33,309.40</b><br><b>(23,159.16 to 46,368.76)</b> | <b>597.01</b><br><b>(519.57 to 673.02)</b> | <b>993.81</b><br><b>(762.67 to 1,265.46)</b> | <b>877.73</b><br><b>(676.06 to 1,107.15)</b> | <b>1,270.39</b><br><b>(966.47 to 1,646.51)</b> |

**Sao Tome and Principe**

| Cause                           | YLLs (actual counts)                             |                                                  |                                                  |                                                  | Deaths (actual counts)                    |                                            |                                            |                                            |
|---------------------------------|--------------------------------------------------|--------------------------------------------------|--------------------------------------------------|--------------------------------------------------|-------------------------------------------|--------------------------------------------|--------------------------------------------|--------------------------------------------|
|                                 | 2016                                             | 2040 Forecast                                    | 2040 Better Scenario                             | 2040 Worse Scenario                              | 2016                                      | 2040 Forecast                              | 2040 Better Scenario                       | 2040 Worse Scenario                        |
| <b>Neoplasms</b>                | <b>3,350.87</b><br><b>(2,718.96 to 3,976.42)</b> | <b>6,185.56</b><br><b>(4,391.97 to 8,494.12)</b> | <b>5,780.36</b><br><b>(4,142.71 to 7,837.45)</b> | <b>7,095.73</b><br><b>(4,988.41 to 9,939.30)</b> | <b>106.59</b><br><b>(91.27 to 122.75)</b> | <b>238.89</b><br><b>(181.60 to 307.75)</b> | <b>225.69</b><br><b>(172.69 to 287.63)</b> | <b>258.34</b><br><b>(195.11 to 342.33)</b> |
| Lip and oral cavity cancer      | 12.50<br>(9.45 to 16.23)                         | 29.55<br>(15.73 to 54.08)                        | 21.13<br>(11.67 to 37.15)                        | 51.87<br>(25.89 to 99.94)                        | 0.51<br>(0.40 to 0.66)                    | 1.18<br>(0.66 to 2.03)                     | 0.86<br>(0.51 to 1.42)                     | 1.97<br>(1.04 to 3.58)                     |
| Nasopharynx cancer              | 4.51<br>(3.50 to 5.80)                           | 9.17<br>(4.68 to 16.62)                          | 6.57<br>(3.59 to 11.31)                          | 16.96<br>(8.08 to 32.31)                         | 0.12<br>(0.09 to 0.16)                    | 0.27<br>(0.14 to 0.49)                     | 0.19<br>(0.11 to 0.33)                     | 0.49<br>(0.24 to 0.93)                     |
| Other pharynx cancer            | 9.81<br>(7.72 to 11.99)                          | 17.77<br>(10.43 to 28.40)                        | 15.94<br>(9.68 to 24.82)                         | 24.62<br>(14.13 to 40.09)                        | 0.41<br>(0.32 to 0.49)                    | 0.77<br>(0.47 to 1.22)                     | 0.70<br>(0.44 to 1.07)                     | 1.01<br>(0.58 to 1.64)                     |
| Esophageal cancer               | 78.60<br>(58.78 to 101.37)                       | 166.52<br>(77.38 to 326.75)                      | 121.92<br>(60.96 to 233.10)                      | 254.30<br>(110.38 to 536.36)                     | 3.28<br>(2.52 to 4.11)                    | 6.60<br>(3.31 to 12.20)                    | 4.91<br>(2.64 to 8.79)                     | 9.65<br>(4.49 to 18.76)                    |
| Stomach cancer                  | 258.87<br>(207.74 to 311.77)                     | 426.97<br>(284.79 to 621.65)                     | 399.32<br>(267.23 to 575.56)                     | 467.85<br>(309.91 to 688.72)                     | 12.75<br>(10.44 to 15.20)                 | 20.78<br>(14.93 to 28.78)                  | 19.85<br>(14.41 to 27.09)                  | 21.62<br>(15.62 to 30.11)                  |
| Colon and rectum cancer         | 183.05<br>(134.44 to 231.06)                     | 584.27<br>(372.57 to 891.50)                     | 575.16<br>(367.36 to 872.86)                     | 579.05<br>(367.34 to 890.59)                     | 8.59<br>(6.41 to 10.69)                   | 27.66<br>(18.91 to 39.84)                  | 27.79<br>(19.13 to 40.14)                  | 26.05<br>(17.63 to 37.80)                  |
| Liver cancer                    | 62.72<br>(45.44 to 82.36)                        | 159.72<br>(92.00 to 269.90)                      | 142.68<br>(84.02 to 230.73)                      | 195.04<br>(108.76 to 347.53)                     | 2.10<br>(1.62 to 2.66)                    | 5.61<br>(3.61 to 8.75)                     | 5.07<br>(3.33 to 7.62)                     | 6.58<br>(4.04 to 10.94)                    |
| Liver cancer due to hepatitis B | 35.80<br>(25.99 to 47.81)                        | 90.12<br>(50.95 to 152.22)                       | 81.58<br>(47.14 to 134.25)                       | 104.80<br>(56.25 to 189.57)                      | 1.14<br>(0.85 to 1.47)                    | 3.03<br>(1.90 to 4.82)                     | 2.77<br>(1.78 to 4.29)                     | 3.38<br>(2.03 to 5.66)                     |

|                                      |                              |                                |                              |                                  |                           |                           |                           |                           |
|--------------------------------------|------------------------------|--------------------------------|------------------------------|----------------------------------|---------------------------|---------------------------|---------------------------|---------------------------|
| Liver cancer due to hepatitis C      | 4.08<br>(2.63 to 5.93)       | 11.44<br>(6.30 to 19.77)       | 10.42<br>(5.84 to 17.42)     | 12.85<br>(6.86 to 23.38)         | 0.19<br>(0.12 to 0.27)    | 0.51<br>(0.30 to 0.82)    | 0.48<br>(0.28 to 0.75)    | 0.55<br>(0.31 to 0.92)    |
| Liver cancer due to alcohol use      | 9.45<br>(6.82 to 12.69)      | 26.08<br>(14.50 to 44.19)      | 21.86<br>(12.49 to 36.22)    | 39.33<br>(21.00 to 70.65)        | 0.36<br>(0.27 to 0.47)    | 0.99<br>(0.60 to 1.59)    | 0.85<br>(0.53 to 1.32)    | 1.43<br>(0.83 to 2.39)    |
| Liver cancer due to other causes     | 13.39<br>(9.40 to 17.89)     | 32.08<br>(17.54 to 53.57)      | 28.81<br>(15.88 to 46.56)    | 38.06<br>(20.43 to 66.89)        | 0.41<br>(0.31 to 0.53)    | 1.08<br>(0.67 to 1.70)    | 0.98<br>(0.62 to 1.48)    | 1.23<br>(0.72 to 2.01)    |
| Gallbladder and biliary tract cancer | 37.59<br>(30.34 to 46.02)    | 70.01<br>(50.75 to 92.64)      | 72.37<br>(51.74 to 96.19)    | 64.68<br>(48.16 to 83.82)        | 1.68<br>(1.37 to 2.06)    | 3.14<br>(2.44 to 3.97)    | 3.30<br>(2.52 to 4.20)    | 2.80<br>(2.23 to 3.44)    |
| Pancreatic cancer                    | 89.31<br>(70.20 to 109.72)   | 300.55<br>(202.12 to 417.04)   | 294.33<br>(198.58 to 404.31) | 294.82<br>(197.13 to 409.12)     | 4.01<br>(3.20 to 4.89)    | 13.14<br>(9.41 to 17.40)  | 13.05<br>(9.35 to 17.28)  | 12.45<br>(8.91 to 16.59)  |
| Larynx cancer                        | 16.70<br>(12.62 to 21.67)    | 38.05<br>(17.18 to 73.70)      | 23.77<br>(11.46 to 43.91)    | 64.10<br>(28.19 to 128.72)       | 0.76<br>(0.60 to 0.98)    | 1.64<br>(0.80 to 3.09)    | 1.03<br>(0.54 to 1.82)    | 2.65<br>(1.23 to 5.17)    |
| Tracheal, bronchus, and lung cancer  | 296.29<br>(230.19 to 365.42) | 750.89<br>(383.47 to 1,307.25) | 498.40<br>(269.19 to 858.96) | 1,184.67<br>(580.61 to 2,146.19) | 13.20<br>(10.44 to 16.15) | 32.42<br>(17.74 to 55.13) | 21.77<br>(12.55 to 35.84) | 49.02<br>(26.14 to 84.76) |
| Malignant skin melanoma              | 6.32<br>(4.45 to 8.59)       | 16.69<br>(10.56 to 25.06)      | 17.84<br>(11.09 to 27.32)    | 14.56<br>(9.41 to 21.50)         | 0.22<br>(0.16 to 0.29)    | 0.61<br>(0.42 to 0.86)    | 0.66<br>(0.45 to 0.95)    | 0.51<br>(0.36 to 0.71)    |
| Non-melanoma skin cancer             | 6.45<br>(4.54 to 8.67)       | 15.72<br>(10.07 to 24.50)      | 15.50<br>(9.78 to 24.36)     | 16.21<br>(10.55 to 24.82)        | 0.28<br>(0.22 to 0.36)    | 0.69<br>(0.51 to 0.91)    | 0.70<br>(0.51 to 0.94)    | 0.66<br>(0.51 to 0.87)    |
| Breast cancer                        | 193.38<br>(136.99 to 257.52) | 465.39<br>(274.48 to 742.22)   | 459.06<br>(274.87 to 726.40) | 503.39<br>(287.46 to 884.94)     | 6.34<br>(4.62 to 8.33)    | 16.45<br>(10.20 to 25.86) | 16.45<br>(10.35 to 25.60) | 17.19<br>(10.19 to 29.30) |
| Cervical cancer                      | 343.75<br>(213.36 to 478.65) | 569.20<br>(318.72 to 913.94)   | 535.07<br>(301.56 to 865.89) | 633.81<br>(352.05 to 1,016.91)   | 11.06<br>(6.74 to 15.16)  | 19.18<br>(10.97 to 29.62) | 18.25<br>(10.42 to 28.35) | 20.75<br>(11.93 to 31.86) |
| Uterine cancer                       | 29.18<br>(22.28 to 37.67)    | 63.91<br>(46.68 to 84.44)      | 61.81<br>(44.83 to 83.54)    | 66.76<br>(49.95 to 87.80)        | 1.69<br>(1.31 to 2.16)    | 3.76<br>(2.88 to 4.76)    | 3.73<br>(2.83 to 4.76)    | 3.67<br>(2.85 to 4.62)    |
| Ovarian cancer                       | 42.64<br>(32.20 to 56.72)    | 121.71<br>(79.39 to 179.96)    | 126.06<br>(82.04 to 184.77)  | 110.24<br>(73.22 to 160.34)      | 1.50<br>(1.13 to 1.99)    | 4.57<br>(3.13 to 6.58)    | 4.77<br>(3.27 to 6.87)    | 4.03<br>(2.78 to 5.66)    |
| Prostate cancer                      | 69.33<br>(48.94 to 93.24)    | 252.41<br>(180.21 to 350.74)   | 265.12<br>(186.89 to 370.53) | 223.57<br>(163.79 to 309.28)     | 4.85<br>(3.42 to 6.47)    | 15.47<br>(11.39 to 20.02) | 16.59<br>(11.98 to 21.49) | 13.11<br>(9.87 to 17.14)  |
| Testicular cancer                    | 3.77<br>(1.73 to 5.56)       | 6.34<br>(2.62 to 11.03)        | 6.19<br>(2.56 to 11.03)      | 6.73<br>(2.82 to 11.56)          | 0.08<br>(0.04 to 0.12)    | 0.16<br>(0.07 to 0.27)    | 0.16<br>(0.07 to 0.27)    | 0.17<br>(0.07 to 0.27)    |

**Sao Tome and Principe**

| Cause                           | YLLs (actual counts)      |                              |                              |                              | Deaths (actual counts) |                         |                        |                         |
|---------------------------------|---------------------------|------------------------------|------------------------------|------------------------------|------------------------|-------------------------|------------------------|-------------------------|
|                                 | 2016                      | 2040 Forecast                | 2040 Better Scenario         | 2040 Worse Scenario          | 2016                   | 2040 Forecast           | 2040 Better Scenario   | 2040 Worse Scenario     |
| Kidney cancer                   | 56.13<br>(31.36 to 97.01) | 80.10<br>(52.60 to 115.69)   | 81.35<br>(53.41 to 117.35)   | 84.58<br>(54.19 to 127.44)   | 1.08<br>(0.76 to 1.55) | 2.46<br>(1.69 to 3.51)  | 2.51<br>(1.75 to 3.55) | 2.35<br>(1.60 to 3.32)  |
| Bladder cancer                  | 64.77<br>(47.78 to 81.69) | 156.83<br>(96.15 to 255.24)  | 142.47<br>(89.59 to 223.27)  | 173.39<br>(103.43 to 299.64) | 3.24<br>(2.56 to 3.93) | 7.45<br>(5.17 to 10.47) | 6.92<br>(4.94 to 9.50) | 7.71<br>(5.21 to 11.04) |
| Brain and nervous system cancer | 77.49<br>(57.97 to 99.15) | 160.37<br>(103.59 to 235.54) | 164.92<br>(105.88 to 242.86) | 159.32<br>(105.29 to 228.94) | 1.73<br>(1.27 to 2.27) | 4.58<br>(3.06 to 6.73)  | 4.76<br>(3.15 to 7.06) | 4.31<br>(2.95 to 6.19)  |
| Thyroid cancer                  | 7.99<br>(6.17 to 10.03)   | 16.55<br>(10.57 to 24.74)    | 15.41<br>(9.83 to 22.95)     | 18.69<br>(11.97 to 28.21)    | 0.26<br>(0.21 to 0.32) | 0.59<br>(0.41 to 0.85)  | 0.55<br>(0.38 to 0.78) | 0.64<br>(0.45 to 0.91)  |
| Mesothelioma                    | 3.69<br>(2.82 to 4.73)    | 8.16<br>(5.34 to 11.78)      | 8.05<br>(5.17 to 11.93)      | 8.38<br>(5.65 to 11.87)      | 0.12<br>(0.09 to 0.15) | 0.28<br>(0.20 to 0.39)  | 0.28<br>(0.19 to 0.40) | 0.28<br>(0.20 to 0.38)  |

|                                |                                                            |                                                            |                                                            |                                                             |                                                      |                                                      |                                                      |                                                      |
|--------------------------------|------------------------------------------------------------|------------------------------------------------------------|------------------------------------------------------------|-------------------------------------------------------------|------------------------------------------------------|------------------------------------------------------|------------------------------------------------------|------------------------------------------------------|
|                                | 5.60<br>(3.87 to<br>9.42)                                  | 6.07<br>(3.79 to<br>9.58)                                  | 5.55<br>(3.79 to<br>8.74)                                  | 7.55<br>(4.74 to<br>12.13)                                  | 0.13<br>(0.09 to<br>0.18)                            | 0.17<br>(0.11 to<br>0.24)                            | 0.15<br>(0.10 to<br>0.22)                            | 0.20<br>(0.13 to<br>0.28)                            |
| Hodgkin lymphoma               |                                                            |                                                            |                                                            |                                                             |                                                      |                                                      |                                                      |                                                      |
|                                | 157.49<br>(118.78 to<br>200.50)                            | 262.65<br>(181.27 to<br>373.10)                            | 267.31<br>(183.93 to<br>381.33)                            | 269.44<br>(189.99 to<br>376.54)                             | 3.31<br>(2.67 to<br>4.00)                            | 3.31<br>(5.33 to<br>9.84)                            | 7.60<br>(5.48 to<br>10.21)                           | 7.07<br>(5.25 to<br>9.38)                            |
| Non-Hodgkin lymphoma           |                                                            |                                                            |                                                            |                                                             |                                                      |                                                      |                                                      |                                                      |
|                                | 21.07<br>(16.52 to<br>26.35)                               | 69.10<br>(45.77 to<br>97.52)                               | 70.61<br>(46.05 to<br>101.20)                              | 64.54<br>(42.67 to<br>90.01)                                | 0.80<br>(0.63 to<br>0.99)                            | 2.71<br>(1.86 to<br>3.71)                            | 2.80<br>(1.91 to<br>3.89)                            | 2.46<br>(1.72 to<br>3.37)                            |
| Multiple myeloma               |                                                            |                                                            |                                                            |                                                             |                                                      |                                                      |                                                      |                                                      |
|                                | 151.30<br>(106.91 to<br>192.01)                            | 243.26<br>(152.92 to<br>363.76)                            | 239.04<br>(151.29 to<br>350.54)                            | 262.10<br>(163.58 to<br>386.02)                             | 3.10<br>(2.38 to<br>3.73)                            | 6.56<br>(4.37 to<br>9.50)                            | 6.44<br>(4.31 to<br>9.18)                            | 6.77<br>(4.51 to<br>9.65)                            |
| Leukemia                       |                                                            |                                                            |                                                            |                                                             |                                                      |                                                      |                                                      |                                                      |
|                                | 40.30<br>(23.19 to<br>61.66)                               | 54.00<br>(28.97 to<br>88.37)                               | 53.63<br>(29.02 to<br>87.13)                               | 59.25<br>(32.41 to<br>94.92)                                | 0.67<br>(0.40 to<br>0.98)                            | 1.19<br>(0.66 to<br>1.94)                            | 1.18<br>(0.66 to<br>1.90)                            | 1.25<br>(0.70 to<br>2.01)                            |
| Acute lymphoid leukemia        |                                                            |                                                            |                                                            |                                                             |                                                      |                                                      |                                                      |                                                      |
|                                | 5.55<br>(3.95 to<br>7.22)                                  | 15.08<br>(9.47 to<br>21.40)                                | 14.47<br>(9.02 to<br>20.34)                                | 15.44<br>(9.76 to<br>21.67)                                 | 0.24<br>(0.17 to<br>0.31)                            | 0.68<br>(0.45 to<br>0.94)                            | 0.66<br>(0.43 to<br>0.91)                            | 0.68<br>(0.45 to<br>0.95)                            |
| Chronic lymphoid leukemia      |                                                            |                                                            |                                                            |                                                             |                                                      |                                                      |                                                      |                                                      |
|                                | 68.77<br>(44.39 to<br>92.47)                               | 125.03<br>(74.32 to<br>189.68)                             | 125.33<br>(74.72 to<br>187.60)                             | 130.49<br>(78.23 to<br>199.02)                              | 1.28<br>(0.88 to<br>1.64)                            | 3.13<br>(1.95 to<br>4.65)                            | 3.14<br>(1.97 to<br>4.59)                            | 3.12<br>(1.94 to<br>4.71)                            |
| Acute myeloid leukemia         |                                                            |                                                            |                                                            |                                                             |                                                      |                                                      |                                                      |                                                      |
|                                | 15.05<br>(10.16 to<br>20.53)                               | 21.13<br>(11.14 to<br>36.68)                               | 20.11<br>(10.73 to<br>34.62)                               | 22.54<br>(11.84 to<br>40.00)                                | 0.39<br>(0.28 to<br>0.52)                            | 0.60<br>(0.36 to<br>0.93)                            | 0.57<br>(0.35 to<br>0.89)                            | 0.62<br>(0.37 to<br>0.98)                            |
| Chronic myeloid leukemia       |                                                            |                                                            |                                                            |                                                             |                                                      |                                                      |                                                      |                                                      |
|                                | 21.65<br>(14.02 to<br>32.42)                               | 28.02<br>(17.85 to<br>43.08)                               | 25.49<br>(16.27 to<br>38.95)                               | 34.38<br>(21.87 to<br>52.14)                                | 0.52<br>(0.40 to<br>0.71)                            | 0.97<br>(0.64 to<br>1.49)                            | 0.89<br>(0.59 to<br>1.36)                            | 1.10<br>(0.75 to<br>1.68)                            |
| Other leukemia                 |                                                            |                                                            |                                                            |                                                             |                                                      |                                                      |                                                      |                                                      |
|                                | 1,060.57<br>(687.17 to<br>1,456.34)                        | 1,117.65<br>(808.34 to<br>1,496.59)                        | 1,127.40<br>(808.08 to<br>1,522.96)                        | 1,274.52<br>(915.33 to<br>1,682.42)                         | 19.39<br>(15.70 to<br>23.90)                         | 32.62<br>(24.75 to<br>43.77)                         | 33.82<br>(25.41 to<br>45.58)                         | 32.19<br>(25.25 to<br>41.33)                         |
| Other neoplasms                |                                                            |                                                            |                                                            |                                                             |                                                      |                                                      |                                                      |                                                      |
|                                | <b>4,330.71</b><br><b>(3,706.08 to</b><br><b>4,999.17)</b> | <b>5,361.62</b><br><b>(3,992.05 to</b><br><b>8,454.87)</b> | <b>3,974.49</b><br><b>(2,612.40 to</b><br><b>5,978.52)</b> | <b>9,301.34</b><br><b>(5,601.80 to</b><br><b>15,234.29)</b> | <b>204.44</b><br><b>(176.90 to</b><br><b>232.82)</b> | <b>266.24</b><br><b>(188.20 to</b><br><b>378.21)</b> | <b>206.61</b><br><b>(149.65 to</b><br><b>283.89)</b> | <b>417.27</b><br><b>(282.71 to</b><br><b>619.99)</b> |
| Cardiovascular diseases        |                                                            |                                                            |                                                            |                                                             |                                                      |                                                      |                                                      |                                                      |
|                                | 143.28<br>(108.17 to<br>187.33)                            | 97.36<br>(65.71 to<br>151.13)                              | 85.51<br>(58.11 to<br>132.29)                              | 124.30<br>(82.53 to<br>189.82)                              | 3.36<br>(4.01 to<br>7.18)                            | 4.38<br>(3.05 to<br>6.44)                            | 3.99<br>(2.76 to<br>5.94)                            | 5.17<br>(3.65 to<br>7.70)                            |
| Rheumatic heart disease        |                                                            |                                                            |                                                            |                                                             |                                                      |                                                      |                                                      |                                                      |
|                                | 1,322.13<br>(1,073.16 to<br>1,583.88)                      | 1,781.07<br>(959.65 to<br>3,120.64)                        | 1,159.17<br>(650.90 to<br>1,968.92)                        | 3,450.45<br>(1,780.13 to<br>6,237.97)                       | 75.66<br>(63.12 to<br>89.01)                         | 98.22<br>(58.91 to<br>153.52)                        | 69.09<br>(42.40 to<br>107.40)                        | 167.87<br>(97.23 to<br>273.88)                       |
| Ischemic heart disease         |                                                            |                                                            |                                                            |                                                             |                                                      |                                                      |                                                      |                                                      |
|                                | 1,803.97<br>(1,495.86 to<br>2,127.02)                      | 1,789.85<br>(966.70 to<br>3,152.28)                        | 1,178.20<br>(661.60 to<br>2,009.14)                        | 3,663.28<br>(1,861.86 to<br>6,900.93)                       | 85.89<br>(72.67 to<br>99.57)                         | 90.85<br>(55.97 to<br>143.50)                        | 64.85<br>(41.68 to<br>98.33)                         | 163.18<br>(96.56 to<br>270.33)                       |
| Stroke                         |                                                            |                                                            |                                                            |                                                             |                                                      |                                                      |                                                      |                                                      |
|                                | 622.87<br>(515.94 to<br>732.96)                            | 688.22<br>(387.94 to<br>1,174.75)                          | 490.70<br>(289.40 to<br>808.12)                            | 1,166.09<br>(633.89 to<br>2,029.42)                         | 40.96<br>(34.61 to<br>47.97)                         | 44.13<br>(27.60 to<br>71.18)                         | 33.78<br>(21.49 to<br>51.91)                         | 66.89<br>(39.93 to<br>110.80)                        |
| Ischemic stroke                |                                                            |                                                            |                                                            |                                                             |                                                      |                                                      |                                                      |                                                      |
|                                | 1,181.10<br>(950.81 to<br>1,440.19)                        | 1,101.63<br>(526.49 to<br>2,183.06)                        | 687.50<br>(344.54 to<br>1,339.36)                          | 2,497.19<br>(1,110.31 to<br>4,936.24)                       | 44.93<br>(36.97 to<br>52.97)                         | 46.72<br>(25.72 to<br>82.63)                         | 31.08<br>(18.15 to<br>52.36)                         | 96.29<br>(48.82 to<br>176.09)                        |
| Intracerebral hemorrhage       |                                                            |                                                            |                                                            |                                                             |                                                      |                                                      |                                                      |                                                      |
|                                | 101.64<br>(75.06 to<br>127.63)                             | 167.73<br>(93.16 to<br>315.53)                             | 135.01<br>(78.96 to<br>229.38)                             | 263.35<br>(132.37 to<br>544.90)                             | 4.88<br>(3.73 to<br>6.13)                            | 8.24<br>(5.10 to<br>14.23)                           | 6.81<br>(4.45 to<br>11.02)                           | 12.15<br>(6.89 to<br>24.14)                          |
| Hypertensive heart disease     |                                                            |                                                            |                                                            |                                                             |                                                      |                                                      |                                                      |                                                      |
|                                | 104.05<br>(76.66 to<br>147.84)                             | 201.20<br>(114.62 to<br>365.77)                            | 199.40<br>(113.57 to<br>366.75)                            | 214.55<br>(122.30 to<br>396.87)                             | 3.05<br>(2.37 to<br>4.07)                            | 6.94<br>(4.53 to<br>10.93)                           | 7.05<br>(4.67 to<br>10.98)                           | 6.87<br>(4.45 to<br>11.10)                           |
| Cardiomyopathy and myocarditis |                                                            |                                                            |                                                            |                                                             |                                                      |                                                      |                                                      |                                                      |
|                                | 22.50<br>(12.72 to<br>39.29)                               | 28.02<br>(13.22 to<br>55.95)                               | 27.24<br>(12.79 to<br>54.56)                               | 31.15<br>(14.94 to<br>63.04)                                | 0.51<br>(0.32 to<br>0.83)                            | 0.73<br>(0.43 to<br>1.29)                            | 0.73<br>(0.42 to<br>1.29)                            | 0.74<br>(0.42 to<br>1.32)                            |
| Myocarditis                    |                                                            |                                                            |                                                            |                                                             |                                                      |                                                      |                                                      |                                                      |

**Sao Tome and Principe**

| Cause                    | YLLs (actual counts)       |                             |                             |                              | Deaths (actual counts)    |                           |                           |                           |
|--------------------------|----------------------------|-----------------------------|-----------------------------|------------------------------|---------------------------|---------------------------|---------------------------|---------------------------|
|                          | 2016                       | 2040 Forecast               | 2040 Better Scenario        | 2040 Worse Scenario          | 2016                      | 2040 Forecast             | 2040 Better Scenario      | 2040 Worse Scenario       |
| Alcoholic cardiomyopathy | 7.88<br>(4.77 to<br>14.94) | 18.38<br>(8.68 to<br>39.77) | 18.16<br>(8.53 to<br>39.75) | 21.36<br>(11.10 to<br>44.90) | 0.25<br>(0.16 to<br>0.47) | 0.62<br>(0.33 to<br>1.29) | 0.61<br>(0.32 to<br>1.31) | 0.71<br>(0.41 to<br>1.40) |

|                                                                |                                                |                                                |                                                |                                                |                                       |                                         |                                         |                                          |
|----------------------------------------------------------------|------------------------------------------------|------------------------------------------------|------------------------------------------------|------------------------------------------------|---------------------------------------|-----------------------------------------|-----------------------------------------|------------------------------------------|
|                                                                | 73.68<br>(55.35 to<br>102.18)                  | 154.80<br>(87.13 to<br>291.83)                 | 153.99<br>(86.97 to<br>291.71)                 | 162.04<br>(91.40 to<br>323.96)                 | 2.29<br>(1.79 to<br>2.98)             | 5.59<br>(3.52 to<br>9.00)               | 5.70<br>(3.65 to<br>9.12)               | 5.42<br>(3.43 to<br>9.19)                |
| Other cardiomyopathy                                           |                                                |                                                |                                                |                                                |                                       |                                         |                                         |                                          |
| Atrial fibrillation and flutter                                | 27.19<br>(20.64 to<br>35.24)                   | 60.13<br>(43.08 to<br>81.92)                   | 60.08<br>(43.15 to<br>82.01)                   | 60.14<br>(42.95 to<br>83.20)                   | 2.70<br>(2.03 to<br>3.59)             | 5.36<br>(3.92 to<br>7.18)               | 5.55<br>(4.05 to<br>7.42)               | 4.95<br>(3.54 to<br>6.77)                |
| Aortic aneurysm                                                | 25.06<br>(19.05 to<br>32.24)                   | 58.68<br>(37.17 to<br>90.21)                   | 57.67<br>(36.84 to<br>89.03)                   | 57.65<br>(36.63 to<br>89.25)                   | 1.22<br>(0.97 to<br>1.54)             | 2.82<br>(1.98 to<br>4.06)               | 2.85<br>(2.00 to<br>4.01)               | 2.61<br>(1.84 to<br>3.79)                |
| Peripheral artery disease                                      | 2.14<br>(1.31 to<br>3.23)                      | 9.98<br>(5.47 to<br>17.00)                     | 10.65<br>(5.72 to<br>17.98)                    | 8.50<br>(4.80 to<br>14.83)                     | 0.16<br>(0.10 to<br>0.25)             | 0.68<br>(0.39 to<br>1.11)               | 0.75<br>(0.42 to<br>1.23)               | 0.53<br>(0.31 to<br>0.87)                |
| Endocarditis                                                   | 109.47<br>(76.56 to<br>157.77)                 | 162.07<br>(97.45 to<br>286.01)                 | 156.37<br>(93.73 to<br>278.30)                 | 189.56<br>(114.17 to<br>337.69)                | 2.56<br>(1.99 to<br>3.35)             | 5.19<br>(3.31 to<br>8.08)               | 5.13<br>(3.27 to<br>7.78)               | 5.48<br>(3.54 to<br>8.45)                |
| Other cardiovascular and circulatory diseases                  | 691.78<br>(522.23 to<br>931.84)                | 1,033.54<br>(674.05 to<br>1,598.83)            | 931.45<br>(613.17 to<br>1,403.42)              | 1,269.56<br>(813.16 to<br>1,995.81)            | 22.94<br>(16.92 to<br>31.60)          | 43.56<br>(30.56 to<br>65.54)            | 40.54<br>(28.77 to<br>59.54)            | 48.46<br>(33.74 to<br>74.66)             |
| <b>Chronic respiratory diseases</b>                            | <b>1,551.75<br/>(1,240.85 to<br/>1,904.29)</b> | <b>1,948.95<br/>(1,180.37 to<br/>3,048.83)</b> | <b>1,482.34<br/>(924.41 to<br/>2,238.66)</b>   | <b>3,249.16<br/>(1,818.57 to<br/>5,577.15)</b> | <b>72.92<br/>(60.42 to<br/>86.98)</b> | <b>89.20<br/>(59.53 to<br/>130.78)</b>  | <b>68.27<br/>(46.88 to<br/>97.12)</b>   | <b>141.87<br/>(88.17 to<br/>229.00)</b>  |
| Chronic obstructive pulmonary disease                          | 911.66<br>(729.19 to<br>1,112.17)              | 1,134.12<br>(620.68 to<br>1,928.36)            | 751.53<br>(444.17 to<br>1,234.16)              | 2,257.63<br>(1,130.67 to<br>4,357.44)          | 50.12<br>(40.78 to<br>60.11)          | 57.88<br>(35.02 to<br>93.60)            | 39.70<br>(25.33 to<br>60.66)            | 106.12<br>(58.48 to<br>188.65)           |
| Pneumoconiosis                                                 | 2.25<br>(1.56 to<br>3.12)                      | 3.24<br>(2.10 to<br>4.90)                      | 3.23<br>(2.06 to<br>4.96)                      | 3.39<br>(2.28 to<br>5.00)                      | 0.10<br>(0.08 to<br>0.14)             | 0.15<br>(0.11 to<br>0.21)               | 0.16<br>(0.11 to<br>0.22)               | 0.16<br>(0.12 to<br>0.21)                |
| Silicosis                                                      | 0.20<br>(0.11 to<br>0.33)                      | 0.22<br>(0.11 to<br>0.39)                      | 0.21<br>(0.11 to<br>0.38)                      | 0.22<br>(0.12 to<br>0.39)                      | 0.01<br>(0.01 to<br>0.01)             | 0.01<br>(0.01 to<br>0.02)               | 0.01<br>(0.01 to<br>0.02)               | 0.01<br>(0.01 to<br>0.02)                |
| Asbestosis                                                     | 0.56<br>(0.32 to<br>0.85)                      | 1.04<br>(0.55 to<br>1.79)                      | 1.06<br>(0.55 to<br>1.85)                      | 0.99<br>(0.53 to<br>1.68)                      | 0.01<br>(0.01 to<br>0.02)             | 0.03<br>(0.02 to<br>0.05)               | 0.03<br>(0.02 to<br>0.05)               | 0.03<br>(0.02 to<br>0.05)                |
| Coal workers pneumoconiosis                                    | 0.08<br>(0.04 to<br>0.14)                      | 0.09<br>(0.05 to<br>0.16)                      | 0.08<br>(0.04 to<br>0.14)                      | 0.12<br>(0.07 to<br>0.22)                      | 0.00<br>(0.00 to<br>0.01)             | 0.00<br>(0.00 to<br>0.01)               | 0.00<br>(0.00 to<br>0.01)               | 0.01<br>(0.00 to<br>0.01)                |
| Other pneumoconiosis                                           | 1.41<br>(1.01 to<br>1.91)                      | 1.90<br>(1.29 to<br>2.80)                      | 1.88<br>(1.24 to<br>2.82)                      | 2.06<br>(1.44 to<br>2.97)                      | 0.07<br>(0.06 to<br>0.10)             | 0.11<br>(0.08 to<br>0.15)               | 0.11<br>(0.08 to<br>0.15)               | 0.11<br>(0.08 to<br>0.15)                |
| Asthma                                                         | 393.20<br>(295.31 to<br>534.35)                | 355.84<br>(215.31 to<br>586.75)                | 298.42<br>(184.35 to<br>478.38)                | 472.20<br>(284.07 to<br>812.12)                | 15.14<br>(11.59 to<br>19.96)          | 14.98<br>(9.80 to<br>23.54)             | 12.95<br>(8.62 to<br>19.83)             | 18.40<br>(11.64 to<br>29.65)             |
| Interstitial lung disease and pulmonary sarcoidosis            | 18.77<br>(12.20 to<br>25.81)                   | 59.38<br>(35.09 to<br>90.34)                   | 64.09<br>(37.63 to<br>96.26)                   | 50.86<br>(30.62 to<br>75.48)                   | 0.78<br>(0.51 to<br>1.07)             | 2.55<br>(1.57 to<br>3.65)               | 2.81<br>(1.72 to<br>4.09)               | 2.09<br>(1.32 to<br>3.00)                |
| Other chronic respiratory diseases                             | 225.87<br>(147.75 to<br>325.50)                | 396.38<br>(206.75 to<br>647.92)                | 365.07<br>(192.48 to<br>590.59)                | 465.07<br>(237.12 to<br>790.18)                | 6.77<br>(4.19 to<br>9.68)             | 13.63<br>(7.68 to<br>21.25)             | 12.65<br>(7.33 to<br>19.36)             | 15.11<br>(8.29 to<br>24.04)              |
| <b>Cirrhosis and other chronic liver diseases</b>              | <b>2,855.50<br/>(1,457.56 to<br/>2,616.68)</b> | <b>4,048.38<br/>(2,510.50 to<br/>5,809.53)</b> | <b>3,838.60<br/>(2,384.05 to<br/>5,538.53)</b> | <b>4,692.59<br/>(2,978.75 to<br/>6,721.13)</b> | <b>61.54<br/>(46.16 to<br/>75.97)</b> | <b>133.16<br/>(82.21 to<br/>182.21)</b> | <b>127.65<br/>(87.92 to<br/>174.69)</b> | <b>150.26<br/>(105.53 to<br/>202.52)</b> |
| Cirrhosis and other chronic liver diseases due to hepatitis B  | 848.28<br>(582.88 to<br>1,105.01)              | 1,859.25<br>(1,149.59 to<br>2,761.26)          | 1,800.08<br>(1,123.26 to<br>2,683.57)          | 1,970.27<br>(1,227.68 to<br>2,889.82)          | 26.78<br>(19.39 to<br>33.69)          | 62.14<br>(41.62 to<br>87.77)            | 60.82<br>(40.61 to<br>86.72)            | 64.15<br>(43.64 to<br>89.16)             |
| Cirrhosis and other chronic liver diseases due to hepatitis C  | 282.45<br>(165.11 to<br>443.06)                | 650.48<br>(349.31 to<br>1,109.28)              | 628.63<br>(337.91 to<br>1,073.73)              | 692.06<br>(374.53 to<br>1,162.81)              | 8.73<br>(5.54 to<br>12.92)            | 21.28<br>(12.28 to<br>33.81)            | 20.75<br>(11.83 to<br>33.01)            | 22.16<br>(12.78 to<br>35.45)             |
| Cirrhosis and other chronic liver diseases due to alcohol use  | 509.85<br>(349.00 to<br>665.25)                | 980.44<br>(600.98 to<br>1,466.29)              | 875.20<br>(525.97 to<br>1,325.33)              | 1,398.61<br>(866.20 to<br>2,050.08)            | 16.55<br>(12.21 to<br>20.88)          | 33.36<br>(22.20 to<br>46.75)            | 30.19<br>(20.03 to<br>42.51)            | 46.46<br>(31.64 to<br>63.74)             |
| Cirrhosis and other chronic liver diseases due to other causes | 414.92<br>(304.79 to<br>579.53)                | 558.21<br>(369.96 to<br>801.24)                | 534.71<br>(354.58 to<br>778.31)                | 631.65<br>(425.37 to<br>904.69)                | 9.47<br>(7.30 to<br>12.19)            | 16.37<br>(11.77 to<br>22.41)            | 15.90<br>(11.36 to<br>21.91)            | 17.51<br>(12.76 to<br>23.58)             |
| <b>Digestive diseases</b>                                      | <b>952.80<br/>(605.18 to<br/>1,697.63)</b>     | <b>1,421.79<br/>(772.57 to<br/>2,837.54)</b>   | <b>1,316.78<br/>(723.97 to<br/>2,600.50)</b>   | <b>1,724.72<br/>(925.01 to<br/>3,544.65)</b>   | <b>28.81<br/>(19.84 to<br/>48.26)</b> | <b>52.67<br/>(33.04 to<br/>93.63)</b>   | <b>50.01<br/>(31.15 to<br/>89.66)</b>   | <b>59.21<br/>(36.47 to<br/>107.88)</b>   |

|                                            |                                                      |                                                      |                                                      |                                                        |                                                   |                                                   |                                                   |                                                   |
|--------------------------------------------|------------------------------------------------------|------------------------------------------------------|------------------------------------------------------|--------------------------------------------------------|---------------------------------------------------|---------------------------------------------------|---------------------------------------------------|---------------------------------------------------|
| Peptic ulcer disease                       | 113.36<br>(69.92 to<br>205.77)                       | 119.44<br>(66.07 to<br>232.55)                       | 104.74<br>(56.07 to<br>206.14)                       | 152.58<br>(86.71 to<br>294.03)                         | 4.18<br>(2.67 to<br>7.48)                         | 4.93<br>(2.89 to<br>9.18)                         | 4.42<br>(2.55 to<br>8.26)                         | 5.94<br>(3.55 to<br>11.15)                        |
| <b>Sao Tome and Principe</b>               |                                                      |                                                      |                                                      |                                                        |                                                   |                                                   |                                                   |                                                   |
| Cause                                      | YLLs (actual counts)                                 |                                                      |                                                      |                                                        | Deaths (actual counts)                            |                                                   |                                                   |                                                   |
|                                            | 2016                                                 | 2040 Forecast                                        | 2040 Better Scenario                                 | 2040 Worse Scenario                                    | 2016                                              | 2040 Forecast                                     | 2040 Better Scenario                              | 2040 Worse Scenario                               |
| Gastritis and duodenitis                   | 46.33<br>(19.32 to<br>103.03)                        | 83.26<br>(28.81 to<br>206.16)                        | 79.32<br>(27.32 to<br>197.05)                        | 92.58<br>(32.94 to<br>228.93)                          | 1.18<br>(0.54 to<br>2.47)                         | 2.36<br>(0.93 to<br>5.53)                         | 2.28<br>(0.89 to<br>5.27)                         | 2.53<br>(1.03 to<br>5.86)                         |
| Appendicitis                               | 54.92<br>(34.75 to<br>107.69)                        | 65.14<br>(35.64 to<br>136.90)                        | 60.20<br>(32.50 to<br>124.68)                        | 78.38<br>(44.28 to<br>161.95)                          | 1.70<br>(1.08 to<br>3.28)                         | 2.55<br>(1.51 to<br>5.21)                         | 2.41<br>(1.41 to<br>4.96)                         | 2.82<br>(1.72 to<br>5.61)                         |
| Paralytic ileus and intestinal obstruction | 383.60<br>(223.47 to<br>702.90)                      | 514.04<br>(303.10 to<br>938.74)                      | 501.00<br>(293.88 to<br>914.18)                      | 572.30<br>(340.58 to<br>1,053.99)                      | 9.62<br>(6.26 to<br>16.12)                        | 18.50<br>(12.00 to<br>31.41)                      | 18.49<br>(12.00 to<br>31.40)                      | 18.72<br>(12.25 to<br>31.47)                      |
| Inguinal, femoral, and abdominal hernia    | 37.00<br>(17.30 to<br>78.11)                         | 51.34<br>(22.27 to<br>117.64)                        | 48.66<br>(20.70 to<br>110.49)                        | 57.51<br>(25.07 to<br>133.06)                          | 1.51<br>(0.73 to<br>3.06)                         | 2.27<br>(1.07 to<br>4.66)                         | 2.21<br>(1.04 to<br>4.53)                         | 2.37<br>(1.15 to<br>5.01)                         |
| Inflammatory bowel disease                 | 25.27<br>(14.77 to<br>40.19)                         | 52.52<br>(28.21 to<br>91.11)                         | 52.54<br>(27.86 to<br>91.59)                         | 53.10<br>(28.92 to<br>91.51)                           | 0.73<br>(0.46 to<br>1.12)                         | 1.85<br>(1.09 to<br>3.05)                         | 1.88<br>(1.10 to<br>3.12)                         | 1.78<br>(1.07 to<br>2.91)                         |
| Vascular intestinal disorders              | 28.72<br>(8.30 to<br>66.54)                          | 64.78<br>(19.05 to<br>147.08)                        | 63.80<br>(18.94 to<br>144.19)                        | 66.19<br>(19.26 to<br>150.22)                          | 1.40<br>(0.39 to<br>3.24)                         | 3.48<br>(1.01 to<br>7.66)                         | 3.51<br>(1.02 to<br>7.66)                         | 3.33<br>(0.96 to<br>7.42)                         |
| Gallbladder and biliary diseases           | 54.42<br>(35.17 to<br>91.09)                         | 77.60<br>(40.14 to<br>145.00)                        | 63.46<br>(33.54 to<br>116.90)                        | 106.92<br>(55.01 to<br>207.53)                         | 2.03<br>(1.44 to<br>2.99)                         | 3.39<br>(1.91 to<br>5.98)                         | 2.84<br>(1.65 to<br>4.90)                         | 4.35<br>(2.43 to<br>7.72)                         |
| Pancreatitis                               | 112.79<br>(55.62 to<br>234.53)                       | 232.67<br>(67.97 to<br>684.45)                       | 192.66<br>(57.33 to<br>554.45)                       | 357.71<br>(101.07 to<br>1,055.28)                      | 3.36<br>(1.74 to<br>6.53)                         | 7.10<br>(2.44 to<br>19.74)                        | 6.01<br>(2.14 to<br>15.91)                        | 10.57<br>(3.41 to<br>30.32)                       |
| Other digestive diseases                   | 96.40<br>(48.03 to<br>195.46)                        | 161.00<br>(72.09 to<br>366.02)                       | 150.41<br>(64.94 to<br>342.67)                       | 187.45<br>(83.34 to<br>423.83)                         | 3.10<br>(1.74 to<br>5.90)                         | 6.24<br>(3.22 to<br>12.97)                        | 5.96<br>(3.01 to<br>12.38)                        | 6.79<br>(3.48 to<br>14.09)                        |
| <b>Neurological disorders</b>              | <b>400.88</b><br><b>(319.22 to</b><br><b>490.67)</b> | <b>710.24</b><br><b>(530.62 to</b><br><b>952.03)</b> | <b>699.01</b><br><b>(525.44 to</b><br><b>933.34)</b> | <b>747.60</b><br><b>(547.12 to</b><br><b>1,043.41)</b> | <b>21.88</b><br><b>(17.82 to</b><br><b>26.43)</b> | <b>45.45</b><br><b>(35.41 to</b><br><b>58.77)</b> | <b>47.01</b><br><b>(36.92 to</b><br><b>59.41)</b> | <b>40.72</b><br><b>(31.21 to</b><br><b>54.14)</b> |
| Alzheimer's disease and other dementias    | 161.33<br>(128.10 to<br>203.70)                      | 389.19<br>(289.99 to<br>531.71)                      | 393.51<br>(298.14 to<br>522.11)                      | 354.24<br>(258.10 to<br>501.81)                        | 16.49<br>(13.16 to<br>20.61)                      | 35.48<br>(26.43 to<br>48.21)                      | 36.94<br>(28.17 to<br>48.31)                      | 30.19<br>(21.44 to<br>43.09)                      |
| Parkinson's disease                        | 14.23<br>(10.27 to<br>18.77)                         | 46.78<br>(34.69 to<br>60.49)                         | 52.43<br>(38.12 to<br>68.10)                         | 36.11<br>(26.54 to<br>47.34)                           | 1.25<br>(0.90 to<br>1.68)                         | 3.69<br>(2.72 to<br>4.88)                         | 4.22<br>(3.10 to<br>5.52)                         | 2.71<br>(2.00 to<br>3.58)                         |
| Epilepsy                                   | 178.64<br>(120.38 to<br>248.86)                      | 201.35<br>(103.23 to<br>368.54)                      | 177.98<br>(92.18 to<br>319.53)                       | 282.34<br>(143.96 to<br>515.02)                        | 3.29<br>(2.31 to<br>4.41)                         | 4.54<br>(2.45 to<br>7.85)                         | 4.04<br>(2.22 to<br>6.93)                         | 6.14<br>(3.25 to<br>10.71)                        |
| Multiple sclerosis                         | 2.31<br>(1.33 to<br>3.37)                            | 5.84<br>(2.91 to<br>9.32)                            | 5.98<br>(2.98 to<br>9.53)                            | 5.45<br>(2.77 to<br>8.56)                              | 0.06<br>(0.04 to<br>0.09)                         | 0.17<br>(0.09 to<br>0.26)                         | 0.17<br>(0.09 to<br>0.27)                         | 0.15<br>(0.08 to<br>0.23)                         |
| Motor neuron disease                       | 4.26<br>(2.85 to<br>8.26)                            | 10.22<br>(5.69 to<br>21.40)                          | 10.72<br>(5.93 to<br>22.44)                          | 9.41<br>(5.47 to<br>19.24)                             | 0.11<br>(0.07 to<br>0.21)                         | 0.34<br>(0.20 to<br>0.68)                         | 0.35<br>(0.21 to<br>0.72)                         | 0.30<br>(0.18 to<br>0.60)                         |
| Other neurological disorders               | 40.11<br>(26.94 to<br>53.95)                         | 56.87<br>(36.43 to<br>80.03)                         | 58.40<br>(37.48 to<br>82.35)                         | 60.06<br>(37.97 to<br>84.21)                           | 0.68<br>(0.47 to<br>0.89)                         | 1.24<br>(0.83 to<br>1.71)                         | 1.29<br>(0.86 to<br>1.79)                         | 1.23<br>(0.81 to<br>1.68)                         |
| <b>Mental disorders</b>                    | <b>113.38</b><br><b>(67.75 to</b><br><b>170.69)</b>  | <b>251.94</b><br><b>(124.05 to</b><br><b>448.45)</b> | <b>248.69</b><br><b>(122.76 to</b><br><b>443.10)</b> | <b>263.13</b><br><b>(130.71 to</b><br><b>464.83)</b>   | <b>2.66</b><br><b>(1.66 to</b><br><b>4.03)</b>    | <b>6.29</b><br><b>(3.43 to</b><br><b>10.54)</b>   | <b>6.26</b><br><b>(3.42 to</b><br><b>10.46)</b>   | <b>6.47</b><br><b>(3.53 to</b><br><b>10.85)</b>   |
| Alcohol use disorders                      | 72.84<br>(39.69 to<br>115.71)                        | 139.37<br>(60.81 to<br>255.64)                       | 135.62<br>(58.98 to<br>252.01)                       | 150.22<br>(67.10 to<br>272.11)                         | 1.82<br>(1.05 to<br>2.88)                         | 3.74<br>(1.78 to<br>6.51)                         | 3.66<br>(1.76 to<br>6.44)                         | 3.97<br>(1.94 to<br>6.79)                         |
| Drug use disorders                         | 40.20<br>(18.93 to<br>71.16)                         | 111.98<br>(45.73 to<br>222.73)                       | 112.47<br>(45.84 to<br>224.95)                       | 112.32<br>(46.20 to<br>221.79)                         | 0.83<br>(0.41 to<br>1.43)                         | 2.54<br>(1.20 to<br>4.90)                         | 2.58<br>(1.22 to<br>4.96)                         | 2.49<br>(1.17 to<br>4.77)                         |

|                                                            |                                       |                                       |                                       |                                       |                              |                                 |                                |                                 |
|------------------------------------------------------------|---------------------------------------|---------------------------------------|---------------------------------------|---------------------------------------|------------------------------|---------------------------------|--------------------------------|---------------------------------|
| Opioid use disorders                                       | 37.31<br>(17.61 to<br>66.14)          | 101.23<br>(41.51 to<br>203.67)        | 101.48<br>(41.50 to<br>204.22)        | 101.96<br>(42.16 to<br>203.66)        | 0.73<br>(0.36 to<br>1.25)    | 2.15<br>(0.98 to<br>4.20)       | 2.17<br>(0.99 to<br>4.21)      | 2.14<br>(0.99 to<br>4.13)       |
| Cocaine use disorders                                      | 0.51<br>(0.17 to<br>1.25)             | 1.97<br>(0.66 to<br>4.93)             | 1.91<br>(0.65 to<br>4.76)             | 2.10<br>(0.72 to<br>5.34)             | 0.01<br>(0.01 to<br>0.03)    | 0.06<br>(0.02 to<br>0.13)       | 0.06<br>(0.02 to<br>0.13)      | 0.06<br>(0.02 to<br>0.14)       |
| Amphetamine use disorders                                  | 0.25<br>(0.09 to<br>0.60)             | 1.24<br>(0.43 to<br>2.97)             | 1.17<br>(0.41 to<br>2.82)             | 1.38<br>(0.47 to<br>3.31)             | 0.01<br>(0.00 to<br>0.01)    | 0.04<br>(0.01 to<br>0.08)       | 0.03<br>(0.01 to<br>0.08)      | 0.04<br>(0.01 to<br>0.08)       |
| Other drug use disorders                                   | 2.12<br>(0.81 to<br>4.76)             | 7.54<br>(2.87 to<br>16.51)            | 7.92<br>(3.07 to<br>17.24)            | 6.88<br>(2.58 to<br>15.20)            | 0.08<br>(0.04 to<br>0.15)    | 0.30<br>(0.14 to<br>0.55)       | 0.32<br>(0.16 to<br>0.60)      | 0.25<br>(0.12 to<br>0.48)       |
| Eating disorders                                           | 0.34<br>(0.19 to<br>0.65)             | 0.60<br>(0.28 to<br>1.21)             | 0.60<br>(0.29 to<br>1.24)             | 0.60<br>(0.30 to<br>1.23)             | 0.01<br>(0.00 to<br>0.01)    | 0.01<br>(0.01 to<br>0.02)       | 0.01<br>(0.01 to<br>0.02)      | 0.01<br>(0.01 to<br>0.02)       |
| <b>Sao Tome and Principe</b>                               |                                       |                                       |                                       |                                       |                              |                                 |                                |                                 |
| Cause                                                      | YLLs (actual counts)                  |                                       |                                       |                                       | Deaths (actual counts)       |                                 |                                |                                 |
|                                                            | 2016                                  | 2040 Forecast                         | 2040 Better Scenario                  | 2040 Worse Scenario                   | 2016                         | 2040 Forecast                   | 2040 Better Scenario           | 2040 Worse Scenario             |
| Diabetes, urogenital, blood, and endocrine diseases        | 2,125.58<br>(1,764.74 to<br>2,524.59) | 3,345.24<br>(2,315.86 to<br>4,660.94) | 2,944.95<br>(2,042.21 to<br>4,095.54) | 4,265.12<br>(2,953.04 to<br>5,918.48) | 67.31<br>(57.72 to<br>78.00) | 138.55<br>(105.65 to<br>181.11) | 123.62<br>(92.98 to<br>162.01) | 165.19<br>(126.15 to<br>216.93) |
| Diabetes mellitus                                          | 279.77<br>(224.47 to<br>333.68)       | 653.27<br>(396.74 to<br>1,062.90)     | 555.80<br>(340.12 to<br>905.96)       | 871.31<br>(521.90 to<br>1,402.34)     | 13.32<br>(10.87 to<br>15.68) | 32.34<br>(21.51 to<br>48.74)    | 28.28<br>(18.83 to<br>42.14)   | 40.62<br>(26.24 to<br>61.51)    |
| Acute glomerulonephritis                                   | 1.63<br>(1.21 to<br>1.99)             | 1.56<br>(1.01 to<br>2.21)             | 1.46<br>(0.92 to<br>2.08)             | 2.04<br>(1.30 to<br>2.78)             | 0.02<br>(0.02 to<br>0.03)    | 0.03<br>(0.02 to<br>0.04)       | 0.03<br>(0.02 to<br>0.04)      | 0.04<br>(0.02 to<br>0.05)       |
| Chronic kidney disease                                     | 1,069.75<br>(848.11 to<br>1,328.37)   | 1,670.82<br>(1,034.14 to<br>2,637.46) | 1,394.16<br>(864.12 to<br>2,217.54)   | 2,248.09<br>(1,379.05 to<br>3,605.19) | 35.75<br>(29.87 to<br>42.64) | 69.97<br>(45.58 to<br>105.09)   | 58.83<br>(39.55 to<br>87.21)   | 88.45<br>(57.27 to<br>134.60)   |
| Chronic kidney disease due to diabetes mellitus            | 242.91<br>(183.55 to<br>304.92)       | 536.63<br>(314.81 to<br>883.27)       | 447.16<br>(270.49 to<br>729.98)       | 703.21<br>(404.31 to<br>1,177.38)     | 9.88<br>(7.79 to<br>12.28)   | 23.63<br>(14.65 to<br>37.07)    | 19.88<br>(12.53 to<br>30.64)   | 29.64<br>(17.91 to<br>47.71)    |
| Chronic kidney disease due to hypertension                 | 144.30<br>(114.01 to<br>179.48)       | 302.00<br>(187.42 to<br>469.44)       | 251.24<br>(158.80 to<br>384.77)       | 389.26<br>(236.80 to<br>620.92)       | 7.96<br>(6.42 to<br>9.73)    | 17.12<br>(11.15 to<br>25.17)    | 14.50<br>(9.70 to<br>21.06)    | 20.78<br>(13.28 to<br>31.62)    |
| Chronic kidney disease due to glomerulonephritis           | 323.60<br>(244.63 to<br>412.41)       | 382.10<br>(234.20 to<br>613.94)       | 319.41<br>(197.31 to<br>502.72)       | 533.09<br>(326.06 to<br>857.89)       | 8.02<br>(6.42 to<br>10.06)   | 12.62<br>(7.94 to<br>20.26)     | 10.53<br>(6.77 to<br>16.48)    | 16.59<br>(10.54 to<br>26.54)    |
| Chronic kidney disease due to other and unspecified causes | 358.94<br>(273.13 to<br>462.52)       | 450.09<br>(276.31 to<br>722.47)       | 376.34<br>(233.02 to<br>586.20)       | 622.53<br>(379.43 to<br>977.14)       | 9.89<br>(7.89 to<br>12.31)   | 16.60<br>(10.60 to<br>24.88)    | 13.91<br>(9.13 to<br>20.84)    | 21.43<br>(13.49 to<br>32.95)    |
| Urinary diseases and male infertility                      | 230.16<br>(179.06 to<br>277.13)       | 493.25<br>(371.66 to<br>624.19)       | 493.43<br>(371.61 to<br>633.36)       | 496.59<br>(378.98 to<br>620.68)       | 7.78<br>(6.51 to<br>8.97)    | 21.11<br>(17.45 to<br>24.98)    | 21.91<br>(17.93 to<br>26.12)   | 19.36<br>(16.25 to<br>22.56)    |
| Urinary tract infections                                   | 191.41<br>(146.81 to<br>236.68)       | 442.52<br>(334.80 to<br>568.45)       | 448.72<br>(336.64 to<br>576.11)       | 441.05<br>(339.05 to<br>555.10)       | 6.30<br>(5.20 to<br>7.44)    | 19.16<br>(15.78 to<br>22.65)    | 20.03<br>(16.38 to<br>23.94)   | 17.28<br>(14.40 to<br>20.25)    |
| Urolithiasis                                               | 2.74<br>(1.89 to<br>3.88)             | 5.72<br>(3.56 to<br>8.55)             | 5.63<br>(3.49 to<br>8.45)             | 6.30<br>(3.93 to<br>9.45)             | 0.06<br>(0.04 to<br>0.08)    | 0.14<br>(0.10 to<br>0.19)       | 0.14<br>(0.09 to<br>0.20)      | 0.14<br>(0.10 to<br>0.20)       |
| Other urinary diseases                                     | 36.01<br>(24.74 to<br>47.45)          | 42.01<br>(23.88 to<br>67.14)          | 39.08<br>(22.17 to<br>62.32)          | 49.24<br>(28.95 to<br>76.36)          | 1.43<br>(0.92 to<br>1.92)    | 1.81<br>(1.09 to<br>2.57)       | 1.74<br>(1.04 to<br>2.52)      | 1.94<br>(1.20 to<br>2.72)       |
| Gynecological diseases                                     | 10.61<br>(6.95 to<br>15.65)           | 16.86<br>(9.36 to<br>27.62)           | 15.28<br>(8.51 to<br>25.19)           | 20.54<br>(11.52 to<br>33.73)          | 0.28<br>(0.19 to<br>0.40)    | 0.47<br>(0.28 to<br>0.73)       | 0.43<br>(0.25 to<br>0.67)      | 0.55<br>(0.33 to<br>0.88)       |
| Uterine fibroids                                           | 0.78<br>(0.32 to<br>1.32)             | 1.08<br>(0.42 to<br>2.05)             | 0.96<br>(0.38 to<br>1.86)             | 1.34<br>(0.52 to<br>2.53)             | 0.03<br>(0.01 to<br>0.05)    | 0.04<br>(0.02 to<br>0.08)       | 0.04<br>(0.02 to<br>0.07)      | 0.05<br>(0.02 to<br>0.09)       |
| Polycystic ovarian syndrome                                | 1.57<br>(0.43 to<br>3.36)             | 1.37<br>(0.27 to<br>3.33)             | 1.14<br>(0.22 to<br>2.85)             | 1.99<br>(0.40 to<br>4.95)             | 0.04<br>(0.01 to<br>0.08)    | 0.03<br>(0.01 to<br>0.08)       | 0.03<br>(0.01 to<br>0.07)      | 0.05<br>(0.01 to<br>0.12)       |



|                                                   |                                 |                                 |                                 |                                 |                           |                            |                           |                            |
|---------------------------------------------------|---------------------------------|---------------------------------|---------------------------------|---------------------------------|---------------------------|----------------------------|---------------------------|----------------------------|
| Endometriosis                                     | 0.03<br>(0.01 to<br>0.08)       | 0.05<br>(0.02 to<br>0.17)       | 0.05<br>(0.01 to<br>0.15)       | 0.07<br>(0.02 to<br>0.21)       | 0.00<br>(0.00 to<br>0.00) | 0.00<br>(0.00 to<br>0.00)  | 0.00<br>(0.00 to<br>0.00) | 0.00<br>(0.00 to<br>0.00)  |
| Genital prolapse                                  | 0.26<br>(0.04 to<br>0.74)       | 0.33<br>(0.05 to<br>1.09)       | 0.29<br>(0.04 to<br>0.99)       | 0.43<br>(0.06 to<br>1.38)       | 0.01<br>(0.00 to<br>0.02) | 0.01<br>(0.00 to<br>0.02)  | 0.01<br>(0.00 to<br>0.02) | 0.01<br>(0.00 to<br>0.03)  |
| Other gynecological diseases                      | 7.97<br>(4.96 to<br>12.20)      | 14.03<br>(7.60 to<br>23.58)     | 12.85<br>(6.90 to<br>21.89)     | 16.72<br>(9.07 to<br>28.33)     | 0.21<br>(0.13 to<br>0.30) | 0.38<br>(0.22 to<br>0.61)  | 0.35<br>(0.20 to<br>0.56) | 0.44<br>(0.25 to<br>0.73)  |
| Hemoglobinopathies and hemolytic anemias          | 385.26<br>(293.34 to<br>480.39) | 328.58<br>(215.33 to<br>461.88) | 307.40<br>(197.91 to<br>437.26) | 414.84<br>(275.34 to<br>569.60) | 6.29<br>(4.80 to<br>7.84) | 7.49<br>(5.10 to<br>10.34) | 7.04<br>(4.70 to<br>9.83) | 8.90<br>(6.15 to<br>11.99) |
| Thalassemias                                      | 11.05<br>(1.52 to<br>32.61)     | 3.38<br>(0.47 to<br>10.08)      | 3.58<br>(0.52 to<br>10.71)      | 4.45<br>(0.60 to<br>13.62)      | 0.13<br>(0.02 to<br>0.39) | 0.04<br>(0.01 to<br>0.12)  | 0.04<br>(0.01 to<br>0.13) | 0.05<br>(0.01 to<br>0.16)  |
| Sickle cell disorders                             | 333.57<br>(247.80 to<br>416.95) | 261.79<br>(166.32 to<br>373.71) | 245.67<br>(153.64 to<br>355.70) | 333.84<br>(214.90 to<br>461.36) | 4.73<br>(3.56 to<br>5.90) | 4.73<br>(2.92 to<br>6.88)  | 4.45<br>(2.73 to<br>6.48) | 5.81<br>(3.65 to<br>8.16)  |
| G6PD deficiency                                   | 28.24<br>(19.41 to<br>38.61)    | 45.19<br>(27.65 to<br>70.14)    | 40.99<br>(24.72 to<br>64.79)    | 56.53<br>(35.52 to<br>88.06)    | 0.62<br>(0.43 to<br>0.84) | 0.62<br>(0.93 to<br>2.19)  | 1.45<br>(0.84 to<br>2.05) | 1.33<br>(1.13 to<br>2.62)  |
| Other hemoglobinopathies and hemolytic anemias    | 12.41<br>(8.90 to<br>16.93)     | 18.22<br>(12.46 to<br>25.91)    | 17.17<br>(11.65 to<br>24.78)    | 20.02<br>(13.67 to<br>28.67)    | 0.81<br>(0.58 to<br>1.14) | 1.27<br>(0.88 to<br>1.80)  | 1.22<br>(0.84 to<br>1.73) | 1.31<br>(0.89 to<br>1.88)  |
| Endocrine, metabolic, blood, and immune disorders | 148.40<br>(94.27 to<br>222.77)  | 183.89<br>(127.74 to<br>260.59) | 177.42<br>(120.58 to<br>251.31) | 211.71<br>(146.68 to<br>297.54) | 3.86<br>(2.96 to<br>5.12) | 7.16<br>(5.06 to<br>9.86)  | 7.11<br>(4.97 to<br>9.82) | 7.28<br>(5.26 to<br>9.82)  |

**Sao Tome and Principe**

| Cause                                         | YLLs (actual counts)                         |                                            |                                            |                                              | Deaths (actual counts)              |                                     |                                     |                                     |
|-----------------------------------------------|----------------------------------------------|--------------------------------------------|--------------------------------------------|----------------------------------------------|-------------------------------------|-------------------------------------|-------------------------------------|-------------------------------------|
|                                               | 2016                                         | 2040 Forecast                              | 2040 Better Scenario                       | 2040 Worse Scenario                          | 2016                                | 2040 Forecast                       | 2040 Better Scenario                | 2040 Worse Scenario                 |
| <b>Musculoskeletal disorders</b>              | <b>32.04</b><br>(22.79 to<br>42.47)          | <b>64.20</b><br>(40.86 to<br>96.37)        | <b>65.86</b><br>(41.82 to<br>98.77)        | <b>62.86</b><br>(40.78 to<br>93.51)          | <b>0.86</b><br>(0.63 to<br>1.11)    | <b>2.04</b><br>(1.40 to<br>2.85)    | <b>2.12</b><br>(1.44 to<br>2.96)    | <b>1.91</b><br>(1.33 to<br>2.67)    |
| Rheumatoid arthritis                          | 7.28<br>(4.53 to<br>10.62)                   | 12.82<br>(7.25 to<br>20.19)                | 12.07<br>(6.72 to<br>19.19)                | 14.48<br>(8.64 to<br>22.53)                  | 0.27<br>(0.17 to<br>0.38)           | 0.62<br>(0.36 to<br>0.91)           | 0.59<br>(0.35 to<br>0.89)           | 0.65<br>(0.40 to<br>0.96)           |
| Other musculoskeletal disorders               | 24.76<br>(17.10 to<br>34.13)                 | 51.38<br>(31.69 to<br>77.37)               | 53.80<br>(33.22 to<br>81.08)               | 48.38<br>(30.24 to<br>72.91)                 | 0.59<br>(0.42 to<br>0.78)           | 1.43<br>(0.95 to<br>2.01)           | 1.53<br>(1.01 to<br>2.16)           | 1.26<br>(0.84 to<br>1.77)           |
| <b>Other non-communicable diseases</b>        | <b>2,399.28</b><br>(1,786.83 to<br>3,134.54) | <b>1,214.74</b><br>(901.61 to<br>1,596.39) | <b>1,139.89</b><br>(848.16 to<br>1,513.59) | <b>1,907.15</b><br>(1,361.08 to<br>2,582.57) | <b>30.02</b><br>(22.79 to<br>38.85) | <b>21.31</b><br>(16.19 to<br>27.88) | <b>20.50</b><br>(15.63 to<br>26.96) | <b>29.14</b><br>(21.58 to<br>38.61) |
| Congenital birth defects                      | 2,148.18<br>(1,536.02 to<br>2,894.85)        | 951.73<br>(666.44 to<br>1,304.17)          | 884.81<br>(614.47 to<br>1,217.91)          | 1,577.56<br>(1,071.54 to<br>2,246.60)        | 25.67<br>(18.42 to<br>34.42)        | 12.62<br>(8.86 to<br>16.95)         | 11.78<br>(8.24 to<br>15.88)         | 20.09<br>(13.64 to<br>28.14)        |
| Neural tube defects                           | 172.77<br>(72.50 to<br>470.54)               | 30.37<br>(11.79 to<br>93.31)               | 26.35<br>(10.31 to<br>81.77)               | 59.57<br>(22.67 to<br>179.64)                | 2.02<br>(0.85 to<br>5.53)           | 0.37<br>(0.15 to<br>1.18)           | 0.33<br>(0.13 to<br>1.02)           | 0.72<br>(0.28 to<br>2.16)           |
| Congenital heart anomalies                    | 613.89<br>(300.17 to<br>981.34)              | 279.86<br>(154.05 to<br>453.27)            | 261.14<br>(141.18 to<br>425.48)            | 451.85<br>(231.32 to<br>746.58)              | 7.39<br>(3.72 to<br>11.70)          | 3.69<br>(2.10 to<br>5.82)           | 3.45<br>(1.96 to<br>5.49)           | 5.76<br>(3.14 to<br>9.41)           |
| Orofacial clefts                              | 13.83<br>(2.66 to<br>41.86)                  | 4.03<br>(0.70 to<br>12.49)                 | 3.46<br>(0.60 to<br>10.50)                 | 8.30<br>(1.46 to<br>25.89)                   | 0.16<br>(0.03 to<br>0.49)           | 0.05<br>(0.01 to<br>0.14)           | 0.04<br>(0.01 to<br>0.12)           | 0.10<br>(0.02 to<br>0.30)           |
| Down syndrome                                 | 39.91<br>(18.34 to<br>88.83)                 | 25.92<br>(12.86 to<br>56.93)               | 24.15<br>(11.92 to<br>53.38)               | 37.62<br>(18.60 to<br>84.71)                 | 0.52<br>(0.25 to<br>1.15)           | 0.45<br>(0.23 to<br>0.97)           | 0.42<br>(0.21 to<br>0.90)           | 0.61<br>(0.31 to<br>1.29)           |
| Other chromosomal abnormalities               | 190.85<br>(62.91 to<br>365.88)               | 100.31<br>(32.90 to<br>185.78)             | 91.48<br>(30.03 to<br>173.82)              | 179.33<br>(58.67 to<br>351.46)               | 2.23<br>(0.73 to<br>4.28)           | 1.21<br>(0.40 to<br>2.23)           | 1.10<br>(0.37 to<br>2.07)           | 2.13<br>(0.69 to<br>4.15)           |
| Congenital musculoskeletal and limb anomalies | 16.68<br>(8.77 to<br>33.34)                  | 8.83<br>(4.58 to<br>17.40)                 | 8.38<br>(4.40 to<br>16.50)                 | 14.54<br>(7.47 to<br>29.21)                  | 0.20<br>(0.10 to<br>0.39)           | 0.11<br>(0.06 to<br>0.21)           | 0.10<br>(0.05 to<br>0.20)           | 0.17<br>(0.09 to<br>0.35)           |

|                                      |                                                            |                                                            |                                                            |                                                            |                                                   |                                                    |                                                    |                                                     |
|--------------------------------------|------------------------------------------------------------|------------------------------------------------------------|------------------------------------------------------------|------------------------------------------------------------|---------------------------------------------------|----------------------------------------------------|----------------------------------------------------|-----------------------------------------------------|
| Urogenital congenital anomalies      | 21.09<br>(11.69 to<br>39.19)                               | 14.69<br>(8.81 to<br>23.86)                                | 14.22<br>(8.58 to<br>23.24)                                | 20.61<br>(12.11 to<br>35.57)                               | 0.27<br>(0.16 to<br>0.49)                         | 0.28<br>(0.18 to<br>0.42)                          | 0.27<br>(0.17 to<br>0.41)                          | 0.35<br>(0.22 to<br>0.56)                           |
| Digestive congenital anomalies       | 130.02<br>(75.65 to<br>216.58)                             | 57.40<br>(31.58 to<br>101.39)                              | 53.26<br>(29.13 to<br>96.12)                               | 99.74<br>(52.98 to<br>178.61)                              | 1.52<br>(0.88 to<br>2.53)                         | 0.70<br>(0.39 to<br>1.22)                          | 0.65<br>(0.36 to<br>1.16)                          | 1.19<br>(0.64 to<br>2.11)                           |
| Other congenital birth defects       | 949.13<br>(471.89 to<br>1,565.12)                          | 430.33<br>(226.41 to<br>697.15)                            | 402.37<br>(211.77 to<br>655.64)                            | 706.00<br>(352.36 to<br>1,188.69)                          | 11.36<br>(5.71 to<br>18.60)                       | 5.78<br>(3.13 to<br>9.07)                          | 5.42<br>(2.96 to<br>8.54)                          | 9.06<br>(4.64 to<br>14.96)                          |
| Skin and subcutaneous diseases       | 119.18<br>(59.51 to<br>197.27)                             | 221.58<br>(129.32 to<br>346.06)                            | 216.42<br>(127.64 to<br>336.70)                            | 257.56<br>(144.58 to<br>393.39)                            | 2.81<br>(1.55 to<br>4.42)                         | 8.20<br>(5.01 to<br>13.27)                         | 8.27<br>(5.09 to<br>13.27)                         | 8.22<br>(4.88 to<br>13.11)                          |
| Cellulitis                           | 4.70<br>(2.53 to<br>8.41)                                  | 21.23<br>(11.11 to<br>36.09)                               | 22.25<br>(11.70 to<br>37.78)                               | 19.73<br>(10.32 to<br>34.58)                               | 0.16<br>(0.08 to<br>0.29)                         | 0.87<br>(0.43 to<br>1.49)                          | 0.93<br>(0.46 to<br>1.59)                          | 0.76<br>(0.37 to<br>1.31)                           |
| Pyoderma                             | 108.69<br>(53.26 to<br>183.08)                             | 189.16<br>(107.80 to<br>297.76)                            | 182.57<br>(103.89 to<br>288.67)                            | 226.77<br>(123.74 to<br>356.29)                            | 2.38<br>(1.26 to<br>3.85)                         | 6.71<br>(3.92 to<br>11.25)                         | 6.67<br>(3.92 to<br>11.05)                         | 6.93<br>(3.97 to<br>11.43)                          |
| Decubitus ulcer                      | 3.77<br>(2.12 to<br>6.10)                                  | 7.67<br>(3.98 to<br>12.32)                                 | 8.01<br>(4.13 to<br>12.84)                                 | 7.28<br>(3.95 to<br>11.68)                                 | 0.23<br>(0.12 to<br>0.37)                         | 0.54<br>(0.25 to<br>0.89)                          | 0.58<br>(0.28 to<br>0.96)                          | 0.44<br>(0.21 to<br>0.74)                           |
| Other skin and subcutaneous diseases | 2.02<br>(1.15 to<br>3.45)                                  | 3.52<br>(1.98 to<br>5.79)                                  | 3.59<br>(2.04 to<br>5.91)                                  | 3.77<br>(2.10 to<br>6.17)                                  | 0.04<br>(0.02 to<br>0.07)                         | 0.09<br>(0.05 to<br>0.15)                          | 0.10<br>(0.05 to<br>0.16)                          | 0.09<br>(0.05 to<br>0.15)                           |
| Sudden infant death syndrome         | 131.92<br>(62.41 to<br>253.01)                             | 41.43<br>(17.17 to<br>85.08)                               | 38.65<br>(16.28 to<br>78.76)                               | 72.03<br>(28.96 to<br>150.25)                              | 1.53<br>(0.72 to<br>2.94)                         | 4.08<br>(2.0 to<br>9.99)                           | 0.45<br>(0.19 to<br>0.91)                          | 0.84<br>(0.34 to<br>1.74)                           |
| <b>Injuries</b>                      | <b>3,336.18</b><br><b>(2,571.59 to</b><br><b>4,188.69)</b> | <b>3,950.51</b><br><b>(2,558.43 to</b><br><b>6,060.50)</b> | <b>3,615.94</b><br><b>(2,328.25 to</b><br><b>5,533.82)</b> | <b>4,615.62</b><br><b>(3,036.76 to</b><br><b>7,110.69)</b> | <b>65.48</b><br><b>(51.61 to</b><br><b>79.20)</b> | <b>97.75</b><br><b>(68.83 to</b><br><b>140.95)</b> | <b>91.70</b><br><b>(65.13 to</b><br><b>129.95)</b> | <b>106.85</b><br><b>(75.33 to</b><br><b>157.00)</b> |
| <b>Transport injuries</b>            | <b>1,050.19</b><br><b>(773.35 to</b><br><b>1,401.86)</b>   | <b>1,665.34</b><br><b>(972.17 to</b><br><b>2,730.90)</b>   | <b>1,413.20</b><br><b>(834.33 to</b><br><b>2,314.52)</b>   | <b>1,959.58</b><br><b>(1,143.43 to</b><br><b>3,285.92)</b> | <b>20.74</b><br><b>(15.60 to</b><br><b>26.55)</b> | <b>38.90</b><br><b>(24.57 to</b><br><b>60.71)</b>  | <b>33.81</b><br><b>(21.52 to</b><br><b>52.29)</b>  | <b>43.70</b><br><b>(26.64 to</b><br><b>69.30)</b>   |
| Road injuries                        | 971.44<br>(711.55 to<br>1,310.57)                          | 1,548.46<br>(903.42 to<br>2,533.63)                        | 1,305.68<br>(768.77 to<br>2,128.96)                        | 1,811.59<br>(1,057.36 to<br>3,006.06)                      | 19.35<br>(14.58 to<br>24.83)                      | 36.45<br>(23.13 to<br>55.84)                       | 31.53<br>(20.24 to<br>48.17)                       | 40.68<br>(24.94 to<br>64.32)                        |
| Pedestrian road injuries             | 294.88<br>(191.62 to<br>408.73)                            | 402.93<br>(213.48 to<br>701.58)                            | 346.43<br>(182.25 to<br>595.57)                            | 472.01<br>(247.65 to<br>822.46)                            | 6.22<br>(4.23 to<br>8.34)                         | 10.38<br>(6.15 to<br>17.01)                        | 9.13<br>(5.50 to<br>14.67)                         | 11.59<br>(6.61 to<br>19.37)                         |
| <b>Sao Tome and Principe</b>         |                                                            |                                                            |                                                            |                                                            |                                                   |                                                    |                                                    |                                                     |
| Cause                                | YLLs (actual counts)                                       |                                                            |                                                            |                                                            | Deaths (actual counts)                            |                                                    |                                                    |                                                     |
|                                      | 2016                                                       | 2040 Forecast                                              | 2040 Better Scenario                                       | 2040 Worse Scenario                                        | 2016                                              | 2040 Forecast                                      | 2040 Better Scenario                               | 2040 Worse Scenario                                 |
| Cyclist road injuries                | 28.00<br>(17.12 to<br>40.38)                               | 50.20<br>(26.25 to<br>92.04)                               | 42.98<br>(22.61 to<br>78.42)                               | 57.81<br>(29.81 to<br>106.87)                              | 0.60<br>(0.39 to<br>0.83)                         | 1.28<br>(0.74 to<br>2.19)                          | 1.14<br>(0.66 to<br>1.92)                          | 1.40<br>(0.78 to<br>2.45)                           |
| Motorcyclist road injuries           | 109.86<br>(62.61 to<br>173.38)                             | 197.25<br>(98.95 to<br>391.12)                             | 174.55<br>(87.83 to<br>342.27)                             | 227.07<br>(112.20 to<br>449.18)                            | 2.00<br>(1.24 to<br>3.10)                         | 4.11<br>(2.22 to<br>7.67)                          | 3.70<br>(2.01 to<br>6.82)                          | 4.58<br>(2.40 to<br>8.77)                           |
| Motor vehicle road injuries          | 520.63<br>(360.42 to<br>735.02)                            | 867.69<br>(502.40 to<br>1,438.07)                          | 716.34<br>(419.70 to<br>1,186.90)                          | 1,018.94<br>(589.10 to<br>1,709.59)                        | 10.16<br>(7.22 to<br>13.91)                       | 19.94<br>(12.62 to<br>31.34)                       | 16.94<br>(10.83 to<br>26.74)                       | 22.29<br>(13.51 to<br>35.90)                        |
| Other road injuries                  | 18.07<br>(11.22 to<br>29.82)                               | 30.39<br>(15.31 to<br>57.85)                               | 25.38<br>(12.92 to<br>48.26)                               | 35.75<br>(17.97 to<br>68.63)                               | 0.36<br>(0.24 to<br>0.58)                         | 0.73<br>(0.41 to<br>1.29)                          | 0.63<br>(0.36 to<br>1.11)                          | 0.81<br>(0.45 to<br>1.44)                           |
| Other transport injuries             | 78.75<br>(50.52 to<br>127.17)                              | 116.88<br>(56.49 to<br>232.11)                             | 107.52<br>(52.67 to<br>209.36)                             | 147.99<br>(73.37 to<br>293.80)                             | 1.40<br>(0.89 to<br>2.43)                         | 2.46<br>(1.21 to<br>4.79)                          | 2.27<br>(1.12 to<br>4.44)                          | 3.02<br>(1.49 to<br>5.94)                           |
| <b>Unintentional injuries</b>        | <b>1,515.22</b><br><b>(1,158.57 to</b><br><b>1,960.27)</b> | <b>1,304.45</b><br><b>(918.94 to</b><br><b>1,816.33)</b>   | <b>1,247.46</b><br><b>(890.39 to</b><br><b>1,741.12)</b>   | <b>1,574.82</b><br><b>(1,121.56 to</b><br><b>2,230.35)</b> | <b>30.99</b><br><b>(24.92 to</b><br><b>37.40)</b> | <b>39.27</b><br><b>(30.64 to</b><br><b>49.84)</b>  | <b>38.78</b><br><b>(30.32 to</b><br><b>49.68)</b>  | <b>41.85</b><br><b>(32.88 to</b><br><b>52.99)</b>   |
| Falls                                | 409.78<br>(290.33 to<br>601.21)                            | 567.51<br>(383.29 to<br>814.94)                            | 559.94<br>(377.16 to<br>806.81)                            | 605.61<br>(415.57 to<br>868.68)                            | 12.54<br>(9.78 to<br>16.27)                       | 22.37<br>(17.65 to<br>28.93)                       | 22.69<br>(17.81 to<br>29.31)                       | 21.71<br>(17.15 to<br>28.47)                        |

|                                                 |                                |                                |                                |                                  |                          |                           |                           |                           |
|-------------------------------------------------|--------------------------------|--------------------------------|--------------------------------|----------------------------------|--------------------------|---------------------------|---------------------------|---------------------------|
| Drowning                                        | 240.36<br>(176.83 to 367.88)   | 163.16<br>(102.53 to 243.52)   | 150.80<br>(95.14 to 231.64)    | 214.62<br>(135.01 to 323.84)     | 4.02<br>(3.02 to 5.61)   | 3.59<br>(2.37 to 5.26)    | 3.36<br>(2.24 to 4.95)    | 4.40<br>(2.92 to 6.44)    |
| Fire, heat, and hot substances                  | 59.07<br>(38.11 to 100.41)     | 35.19<br>(23.34 to 55.40)      | 32.03<br>(21.12 to 50.73)      | 48.01<br>(30.75 to 78.54)        | 1.13<br>(0.81 to 1.69)   | 0.99<br>(0.72 to 1.39)    | 0.92<br>(0.67 to 1.31)    | 1.20<br>(0.85 to 1.72)    |
| Poisonings                                      | 86.27<br>(43.88 to 184.48)     | 37.65<br>(17.70 to 73.54)      | 32.60<br>(15.26 to 65.20)      | 56.49<br>(26.67 to 116.41)       | 1.40<br>(0.75 to 2.71)   | 0.77<br>(0.40 to 1.43)    | 0.68<br>(0.35 to 1.26)    | 1.09<br>(0.56 to 2.07)    |
| Exposure to mechanical forces                   | 244.42<br>(164.24 to 361.36)   | 137.46<br>(85.84 to 206.04)    | 124.35<br>(76.70 to 186.27)    | 192.22<br>(121.14 to 297.51)     | 3.90<br>(2.76 to 5.36)   | 2.98<br>(1.96 to 4.20)    | 2.74<br>(1.78 to 3.94)    | 3.80<br>(2.55 to 5.31)    |
| Unintentional firearm injuries                  | 110.67<br>(68.50 to 170.16)    | 69.45<br>(38.31 to 109.61)     | 62.58<br>(34.40 to 99.71)      | 93.40<br>(52.10 to 149.51)       | 1.97<br>(1.27 to 2.80)   | 1.66<br>(0.98 to 2.50)    | 1.52<br>(0.90 to 2.28)    | 2.05<br>(1.23 to 3.04)    |
| Unintentional suffocation                       | 76.41<br>(43.88 to 135.10)     | 29.10<br>(16.58 to 52.50)      | 26.13<br>(14.74 to 46.87)      | 47.04<br>(26.25 to 86.58)        | 0.96<br>(0.56 to 1.65)   | 0.41<br>(0.24 to 0.71)    | 0.37<br>(0.21 to 0.64)    | 0.64<br>(0.37 to 1.14)    |
| Other exposure to mechanical forces             | 57.34<br>(39.17 to 82.98)      | 38.91<br>(25.19 to 58.51)      | 35.64<br>(22.75 to 54.62)      | 51.77<br>(33.56 to 78.18)        | 0.97<br>(0.70 to 1.28)   | 0.91<br>(0.63 to 1.32)    | 0.85<br>(0.59 to 1.26)    | 1.11<br>(0.77 to 1.59)    |
| Adverse effects of medical treatment            | 190.55<br>(128.93 to 295.89)   | 135.52<br>(90.77 to 195.58)    | 125.92<br>(84.51 to 183.53)    | 176.93<br>(116.08 to 272.18)     | 3.27<br>(2.45 to 4.43)   | 3.29<br>(2.42 to 4.38)    | 3.12<br>(2.26 to 4.21)    | 3.87<br>(2.91 to 5.15)    |
| Animal contact                                  | 4.12<br>(2.06 to 6.40)         | 2.41<br>(1.34 to 3.73)         | 2.12<br>(1.18 to 3.29)         | 3.76<br>(1.93 to 6.17)           | 0.06<br>(0.03 to 0.09)   | 0.05<br>(0.03 to 0.07)    | 0.05<br>(0.03 to 0.07)    | 0.07<br>(0.04 to 0.10)    |
| Venomous animal contact                         | 3.18<br>(1.53 to 4.87)         | 1.92<br>(1.06 to 3.00)         | 1.69<br>(0.93 to 2.66)         | 2.96<br>(1.50 to 4.85)           | 0.05<br>(0.03 to 0.07)   | 0.04<br>(0.03 to 0.06)    | 0.04<br>(0.03 to 0.05)    | 0.06<br>(0.03 to 0.08)    |
| Non-venomous animal contact                     | 0.94<br>(0.41 to 1.88)         | 0.49<br>(0.25 to 0.89)         | 0.43<br>(0.22 to 0.77)         | 0.80<br>(0.37 to 1.54)           | 0.01<br>(0.01 to 0.02)   | 0.01<br>(0.00 to 0.01)    | 0.01<br>(0.00 to 0.02)    | 0.01<br>(0.01 to 0.02)    |
| Foreign body                                    | 217.60<br>(143.51 to 320.86)   | 177.39<br>(110.50 to 267.81)   | 175.16<br>(109.64 to 265.03)   | 216.08<br>(136.01 to 330.09)     | 3.45<br>(2.38 to 4.85)   | 4.03<br>(2.64 to 5.72)    | 4.99<br>(2.68 to 5.78)    | 4.31<br>(2.84 to 6.06)    |
| Pulmonary aspiration and foreign body in airway | 199.59<br>(129.63 to 300.52)   | 161.41<br>(103.42 to 237.23)   | 160.12<br>(103.05 to 234.79)   | 196.07<br>(127.27 to 296.80)     | 3.15<br>(2.18 to 4.55)   | 3.70<br>(2.51 to 5.09)    | 3.77<br>(2.58 to 5.15)    | 3.92<br>(2.67 to 5.47)    |
| Foreign body in other body part                 | 18.01<br>(6.24 to 40.32)       | 15.99<br>(4.20 to 43.09)       | 15.04<br>(3.95 to 41.04)       | 20.01<br>(5.61 to 52.50)         | 0.29<br>(0.10 to 0.67)   | 0.33<br>(0.08 to 0.89)    | 0.32<br>(0.08 to 0.84)    | 0.39<br>(0.10 to 1.02)    |
| Environmental heat and cold exposure            | 7.94<br>(3.83 to 15.46)        | 8.04<br>(3.51 to 16.20)        | 6.99<br>(2.99 to 14.26)        | 11.42<br>(4.94 to 23.46)         | 0.15<br>(0.07 to 0.27)   | 0.19<br>(0.09 to 0.37)    | 0.17<br>(0.08 to 0.33)    | 0.25<br>(0.11 to 0.49)    |
| Other unintentional injuries                    | 55.13<br>(39.20 to 79.42)      | 40.13<br>(25.59 to 59.06)      | 37.56<br>(23.49 to 55.99)      | 49.68<br>(32.45 to 73.16)        | 1.06<br>(0.78 to 1.43)   | 1.01<br>(0.69 to 1.41)    | 0.97<br>(0.64 to 1.35)    | 1.15<br>(0.80 to 1.56)    |
| Self-harm and interpersonal violence            | 769.07<br>(422.69 to 1,070.51) | 980.71<br>(481.29 to 1,608.04) | 955.28<br>(468.68 to 1,587.82) | 1,081.22<br>(522.95 to 1,774.82) | 13.71<br>(7.94 to 18.53) | 19.58<br>(10.60 to 31.03) | 19.11<br>(10.44 to 30.75) | 21.30<br>(11.46 to 33.85) |

**Sao Tome and Principe**

| Cause                              | YLLs (actual counts)         |                              |                              |                              | Deaths (actual counts) |                         |                         |                         |
|------------------------------------|------------------------------|------------------------------|------------------------------|------------------------------|------------------------|-------------------------|-------------------------|-------------------------|
|                                    | 2016                         | 2040 Forecast                | 2040 Better Scenario         | 2040 Worse Scenario          | 2016                   | 2040 Forecast           | 2040 Better Scenario    | 2040 Worse Scenario     |
| Self-harm                          | 176.27<br>(113.09 to 246.95) | 287.16<br>(153.99 to 493.02) | 269.28<br>(147.41 to 462.97) | 341.69<br>(179.86 to 588.02) | 3.76<br>(2.56 to 5.16) | 6.68<br>(3.93 to 10.83) | 6.32<br>(3.79 to 10.27) | 7.78<br>(4.43 to 12.76) |
| Self-harm by firearm               | 14.78<br>(7.90 to 24.20)     | 18.17<br>(8.73 to 33.83)     | 16.84<br>(8.19 to 30.85)     | 22.07<br>(10.47 to 41.25)    | 0.34<br>(0.19 to 0.54) | 0.48<br>(0.25 to 0.85)  | 0.45<br>(0.24 to 0.76)  | 0.56<br>(0.28 to 0.97)  |
| Self-harm by other specified means | 161.49<br>(103.06 to 229.27) | 268.98<br>(144.86 to 464.28) | 252.44<br>(136.90 to 434.34) | 319.62<br>(169.08 to 555.56) | 3.42<br>(2.34 to 4.71) | 6.20<br>(3.62 to 10.15) | 5.87<br>(3.49 to 9.54)  | 7.22<br>(4.10 to 11.94) |

|                                                                              |                                 |                                   |                                   |                                   |                            |                             |                             |                             |
|------------------------------------------------------------------------------|---------------------------------|-----------------------------------|-----------------------------------|-----------------------------------|----------------------------|-----------------------------|-----------------------------|-----------------------------|
| Interpersonal violence                                                       | 592.80<br>(284.11 to<br>846.18) | 693.56<br>(293.54 to<br>1,181.01) | 686.00<br>(294.51 to<br>1,163.24) | 739.53<br>(308.57 to<br>1,238.60) | 9.96<br>(4.89 to<br>13.90) | 12.90<br>(5.81 to<br>21.63) | 12.80<br>(5.77 to<br>21.42) | 13.52<br>(5.94 to<br>22.45) |
| Physical violence by firearm                                                 | 300.62<br>(130.77 to<br>452.27) | 360.53<br>(139.38 to<br>653.04)   | 356.69<br>(140.71 to<br>645.71)   | 378.62<br>(145.12 to<br>682.03)   | 5.10<br>(2.26 to<br>7.63)  | 6.54<br>(2.59 to<br>11.81)  | 6.48<br>(2.62 to<br>11.68)  | 6.79<br>(2.67 to<br>12.11)  |
| Physical violence by sharp object                                            | 174.73<br>(60.31 to<br>288.22)  | 235.23<br>(72.47 to<br>431.94)    | 236.38<br>(72.59 to<br>433.92)    | 240.05<br>(74.23 to<br>440.95)    | 3.01<br>(1.08 to<br>4.86)  | 4.46<br>(1.48 to<br>7.96)   | 4.50<br>(1.52 to<br>8.01)   | 4.48<br>(1.46 to<br>7.94)   |
| Physical violence by other means                                             | 117.45<br>(66.79 to<br>206.21)  | 97.80<br>(49.92 to<br>168.63)     | 92.93<br>(48.40 to<br>160.32)     | 120.86<br>(59.42 to<br>213.08)    | 1.85<br>(1.09 to<br>3.03)  | 1.90<br>(1.04 to<br>3.19)   | 1.82<br>(1.00 to<br>2.98)   | 2.25<br>(1.16 to<br>3.80)   |
| Forces of nature, conflict and terrorism, and executions and police conflict | 1.70<br>(1.24 to<br>2.29)       | 0.00<br>(0.00 to<br>0.00)         | 0.00<br>(0.00 to<br>0.00)         | 0.00<br>(0.00 to<br>0.00)         | 0.03<br>(0.02 to<br>0.03)  | 0.00<br>(0.00 to<br>0.00)   | 0.00<br>(0.00 to<br>0.00)   | 0.00<br>(0.00 to<br>0.00)   |
| Exposure to forces of nature                                                 | 0.00<br>(0.00 to<br>0.00)       | 0.00<br>(0.00 to<br>0.00)         | 0.00<br>(0.00 to<br>0.00)         | 0.00<br>(0.00 to<br>0.00)         | 0.00<br>(0.00 to<br>0.00)  | 0.00<br>(0.00 to<br>0.00)   | 0.00<br>(0.00 to<br>0.00)   | 0.00<br>(0.00 to<br>0.00)   |
| Conflict and terrorism                                                       | 0.00<br>(0.00 to<br>0.00)       | 0.00<br>(0.00 to<br>0.00)         | 0.00<br>(0.00 to<br>0.00)         | 0.00<br>(0.00 to<br>0.00)         | 0.00<br>(0.00 to<br>0.00)  | 0.00<br>(0.00 to<br>0.00)   | 0.00<br>(0.00 to<br>0.00)   | 0.00<br>(0.00 to<br>0.00)   |
| Executions and police conflict                                               | 1.70<br>(1.24 to<br>2.29)       | 0.00<br>(0.00 to<br>0.00)         | 0.00<br>(0.00 to<br>0.00)         | 0.00<br>(0.00 to<br>0.00)         | 0.03<br>(0.02 to<br>0.03)  | 0.00<br>(0.00 to<br>0.00)   | 0.00<br>(0.00 to<br>0.00)   | 0.00<br>(0.00 to<br>0.00)   |

**Senegal**

| Cause                                                                    | YLLs (actual counts)                              |                                                   |                                                   |                                                   | Deaths (actual counts)                    |                                             |                                            |                                             |
|--------------------------------------------------------------------------|---------------------------------------------------|---------------------------------------------------|---------------------------------------------------|---------------------------------------------------|-------------------------------------------|---------------------------------------------|--------------------------------------------|---------------------------------------------|
|                                                                          | 2016                                              | 2040 Forecast                                     | 2040 Better Scenario                              | 2040 Worse Scenario                               | 2016                                      | 2040 Forecast                               | 2040 Better Scenario                       | 2040 Worse Scenario                         |
| <b>All causes</b>                                                        | 4,553,931.15<br>(4,210,088.20 to<br>4,946,520.63) | 4,103,486.19<br>(3,396,083.43 to<br>5,049,370.19) | 3,134,364.77<br>(2,640,157.69 to<br>3,811,173.95) | 6,349,552.73<br>(5,172,160.96 to<br>7,828,125.71) | 94,943.36<br>(89,599.43 to<br>101,839.93) | 125,157.83<br>(108,952.39 to<br>147,465.24) | 101,157.02<br>(89,052.33 to<br>117,817.21) | 170,721.31<br>(146,955.00 to<br>201,936.40) |
| <b>Communicable, maternal, neonatal, and nutritional diseases</b>        | 2,806,705.03<br>(2,543,701.16 to<br>3,140,636.52) | 1,568,239.37<br>(1,177,135.73 to<br>2,100,044.96) | 1,024,534.90<br>(789,336.51 to<br>1,331,183.48)   | 2,956,621.24<br>(2,204,130.26 to<br>3,936,808.82) | 44,838.64<br>(41,366.00 to<br>49,141.01)  | 34,977.35<br>(26,760.52 to<br>47,496.47)    | 23,690.46<br>(18,877.73 to<br>31,242.46)   | 56,519.07<br>(43,340.66 to<br>75,267.00)    |
| <b>HIV/AIDS and tuberculosis</b>                                         | 279,263.25<br>(240,646.04 to<br>321,830.34)       | 278,976.08<br>(195,452.62 to<br>375,651.96)       | 159,944.28<br>(113,201.35 to<br>227,088.54)       | 533,403.21<br>(380,912.01 to<br>711,530.24)       | 6,895.84<br>(6,059.24 to<br>7,895.23)     | 6,748.57<br>(5,008.76 to<br>8,855.53)       | 4,139.66<br>(3,101.67 to<br>5,489.08)      | 12,331.39<br>(9,213.48 to<br>15,920.33)     |
| <b>Tuberculosis</b>                                                      | 180,604.56<br>(153,096.44 to<br>212,248.65)       | 118,480.08<br>(89,536.34 to<br>156,903.87)        | 82,950.26<br>(63,324.05 to<br>109,853.88)         | 207,084.88<br>(158,725.22 to<br>274,874.67)       | 4,914.97<br>(4,220.64 to<br>5,745.23)     | 3,676.62<br>(2,855.43 to<br>4,699.74)       | 2,668.79<br>(2,107.82 to<br>3,409.41)      | 6,121.27<br>(4,756.22 to<br>7,857.98)       |
| <b>HIV/AIDS</b>                                                          | 98,658.69<br>(70,312.07 to<br>133,835.13)         | 160,496.00<br>(82,418.11 to<br>257,783.83)        | 76,994.02<br>(36,087.54 to<br>139,812.97)         | 326,318.33<br>(186,877.40 to<br>500,811.61)       | 1,980.87<br>(1,483.86 to<br>2,595.89)     | 3,071.96<br>(1,533.44 to<br>5,026.91)       | 1,470.87<br>(644.70 to<br>2,595.88)        | 6,210.12<br>(3,461.39 to<br>9,560.09)       |
| <b>Diarrhea, lower respiratory, and other common infectious diseases</b> | 1,164,852.48<br>(999,237.35 to<br>1,353,954.88)   | 693,952.45<br>(421,710.77 to<br>1,107,011.93)     | 416,971.92<br>(266,800.81 to<br>661,864.82)       | 1,250,036.40<br>(755,436.11 to<br>2,053,159.52)   | 19,911.99<br>(17,457.43 to<br>23,256.87)  | 18,885.64<br>(11,856.53 to<br>30,302.93)    | 12,120.08<br>(8,000.50 to<br>18,968.55)    | 27,732.90<br>(17,375.58 to<br>44,729.68)    |
| <b>Diarrheal diseases</b>                                                | 421,876.59<br>(314,169.73 to<br>559,893.00)       | 213,447.62<br>(54,908.52 to<br>552,606.18)        | 100,772.55<br>(23,818.51 to<br>277,444.45)        | 395,321.88<br>(129,685.25 to<br>926,698.31)       | 7,082.16<br>(5,240.64 to<br>9,853.09)     | 5,807.59<br>(1,440.82 to<br>16,107.60)      | 2,894.98<br>(704.85 to<br>8,334.44)        | 9,315.99<br>(2,660.10 to<br>24,628.14)      |
| <b>Intestinal infectious diseases</b>                                    | 30,675.90<br>(14,091.94 to<br>56,542.90)          | 26,116.09<br>(11,987.14 to<br>49,647.37)          | 22,418.41<br>(10,622.59 to<br>42,341.70)          | 37,207.27<br>(16,456.82 to<br>72,596.81)          | 429.58<br>(200.60 to<br>785.73)           | 394.75<br>(183.43 to<br>729.55)             | 343.79<br>(163.67 to<br>635.91)            | 542.90<br>(249.13 to<br>1,035.01)           |
| <b>Typhoid fever</b>                                                     | 27,710.29<br>(12,254.63 to<br>52,371.85)          | 23,108.91<br>(10,086.74 to<br>45,476.76)          | 19,890.87<br>(9,067.03 to<br>38,170.10)           | 32,781.40<br>(13,945.81 to<br>65,344.72)          | 387.98<br>(175.81 to<br>723.12)           | 349.03<br>(157.18 to<br>665.41)             | 304.84<br>(139.25 to<br>575.62)            | 477.86<br>(207.47 to<br>937.45)             |
| <b>Paratyphoid fever</b>                                                 | 2,770.26<br>(983.25 to<br>6,714.11)               | 2,948.80<br>(1,124.03 to<br>6,847.08)             | 2,485.22<br>(946.03 to<br>5,515.25)               | 4,307.58<br>(1,633.55 to<br>10,181.57)            | 38.98<br>(14.50 to<br>93.57)              | 44.64<br>(17.53 to<br>100.50)               | 38.11<br>(15.03 to<br>82.02)               | 63.14<br>(24.86 to<br>144.50)               |
| <b>Other intestinal infectious diseases</b>                              | 195.34<br>(59.37 to<br>507.02)                    | 58.38<br>(16.18 to<br>151.72)                     | 42.32<br>(11.95 to<br>114.65)                     | 118.29<br>(30.26 to<br>324.21)                    | 2.62<br>(0.83 to<br>6.51)                 | 1.09<br>(0.37 to<br>2.54)                   | 0.84<br>(0.28 to<br>2.01)                  | 1.90<br>(0.58 to<br>4.74)                   |
| <b>Lower respiratory infections</b>                                      | 431,454.60<br>(343,584.43 to<br>538,682.56)       | 314,362.43<br>(184,861.64 to<br>540,148.35)       | 181,789.91<br>(118,836.70 to<br>296,871.42)       | 568,742.27<br>(297,032.29 to<br>1,116,707.53)     | 8,226.97<br>(6,794.01 to<br>10,062.91)    | 9,982.52<br>(6,373.52 to<br>15,343.47)      | 6,511.97<br>(4,547.70 to<br>9,504.36)      | 13,864.58<br>(8,365.90 to<br>22,800.63)     |

|                                |                                             |                                            |                                           |                                             |                                       |                                       |                                       |                                       |
|--------------------------------|---------------------------------------------|--------------------------------------------|-------------------------------------------|---------------------------------------------|---------------------------------------|---------------------------------------|---------------------------------------|---------------------------------------|
| Upper respiratory infections   | 855.88<br>(268.17 to<br>2,012.11)           | 513.91<br>(202.67 to<br>1,114.64)          | 363.78<br>(139.20 to<br>774.90)           | 999.91<br>(352.31 to<br>2,395.44)           | 13.06<br>(5.52 to<br>26.90)           | 11.40<br>(4.76 to<br>21.35)           | 8.50<br>(3.62 to<br>16.31)            | 19.49<br>(8.09 to<br>38.26)           |
| Otitis media                   | 32.61<br>(13.53 to<br>80.27)                | 6.98<br>(3.24 to<br>13.40)                 | 7.25<br>(3.36 to<br>13.71)                | 7.49<br>(3.39 to<br>15.41)                  | 0.73<br>(0.36 to<br>1.49)             | 0.36<br>(0.15 to<br>0.69)             | 0.41<br>(0.17 to<br>0.80)             | 0.31<br>(0.14 to<br>0.60)             |
| Meningitis                     | 205,832.76<br>(135,393.42 to<br>364,402.28) | 115,181.35<br>(72,124.18 to<br>186,207.37) | 99,285.39<br>(64,289.39 to<br>153,399.72) | 180,390.80<br>(107,965.08 to<br>313,958.73) | 3,210.42<br>(2,194.16 to<br>5,126.47) | 2,306.17<br>(1,463.60 to<br>3,600.85) | 2,123.66<br>(1,362.04 to<br>3,228.02) | 3,088.83<br>(1,965.24 to<br>5,085.67) |
| Pneumococcal meningitis        | 16,700.94<br>(10,889.52 to<br>27,673.95)    | 10,310.74<br>(6,007.78 to<br>17,656.66)    | 9,702.59<br>(5,846.03 to<br>16,236.52)    | 13,231.59<br>(7,672.91 to<br>24,204.12)     | 303.63<br>(197.13 to<br>476.70)       | 243.65<br>(142.32 to<br>407.14)       | 241.41<br>(144.74 to<br>399.01)       | 275.81<br>(161.34 to<br>467.44)       |
| H influenzae type B meningitis | 26,329.76<br>(16,467.88 to<br>46,094.94)    | 20,372.08<br>(8,489.04 to<br>45,117.22)    | 14,130.15<br>(7,320.45 to<br>27,050.51)   | 52,994.75<br>(15,564.17 to<br>133,358.67)   | 388.32<br>(256.20 to<br>632.82)       | 318.70<br>(163.35 to<br>636.25)       | 250.19<br>(149.68 to<br>427.21)       | 695.86<br>(249.13 to<br>1,637.58)     |
| Meningococcal meningitis       | 85,491.91<br>(55,460.52 to<br>142,643.21)   | 47,774.98<br>(27,981.52 to<br>79,003.58)   | 43,017.98<br>(25,905.32 to<br>68,687.26)  | 62,996.40<br>(37,638.57 to<br>105,479.60)   | 1,309.26<br>(864.20 to<br>2,079.15)   | 959.55<br>(558.41 to<br>1,553.27)     | 900.18<br>(533.97 to<br>1,435.95)     | 1,151.48<br>(672.77 to<br>1,871.95)   |
| Other meningitis               | 77,310.16<br>(49,043.40 to<br>147,833.40)   | 36,723.54<br>(23,418.30 to<br>58,586.29)   | 32,434.67<br>(21,139.12 to<br>48,943.82)  | 51,168.06<br>(31,187.17 to<br>92,270.88)    | 1,209.21<br>(818.51 to<br>2,081.52)   | 784.26<br>(523.41 to<br>1,176.10)     | 731.87<br>(490.78 to<br>1,069.57)     | 965.67<br>(630.29 to<br>1,513.81)     |
| Encephalitis                   | 11,166.65<br>(7,493.26 to<br>15,368.78)     | 8,918.57<br>(5,682.38 to<br>12,604.31)     | 7,518.10<br>(4,781.68 to<br>10,534.77)    | 13,610.25<br>(8,706.16 to<br>19,631.62)     | 167.62<br>(114.46 to<br>222.86)       | 171.56<br>(112.63 to<br>232.99)       | 151.65<br>(98.43 to<br>206.17)        | 234.03<br>(153.58 to<br>323.52)       |
| Diphtheria                     | 142.97<br>(60.67 to<br>270.91)              | 28.37<br>(12.49 to<br>62.65)               | 17.35<br>(9.47 to<br>30.50)               | 88.95<br>(23.33 to<br>258.42)               | 1.83<br>(0.85 to<br>3.35)             | 0.44<br>(0.21 to<br>0.87)             | 0.31<br>(0.17 to<br>0.54)             | 1.15<br>(0.35 to<br>3.15)             |
| Whooping cough                 | 33,622.42<br>(2,942.11 to<br>107,733.95)    | 11,123.43<br>(807.39 to<br>39,724.31)      | 2,379.61<br>(190.26 to<br>8,211.42)       | 40,535.55<br>(190.26 to<br>129,816.16)      | 397.08<br>(34.71 to<br>1,272.76)      | 132.80<br>(9.78 to<br>475.38)         | 29.87<br>(2.42 to<br>103.35)          | 478.93<br>(38.32 to<br>1,538.28)      |
| Tetanus                        | 5,579.09<br>(3,006.94 to<br>11,047.92)      | 791.96<br>(359.99 to<br>1,548.37)          | 606.87<br>(242.88 to<br>1,185.43)         | 1,767.54<br>(700.69 to<br>4,233.50)         | 84.82<br>(47.60 to<br>146.92)         | 14.86<br>(6.78 to<br>28.83)           | 12.89<br>(5.32 to<br>25.36)           | 26.03<br>(11.76 to<br>56.14)          |
| Measles                        | 18,778.18<br>(5,909.45 to<br>46,442.54)     | 1,613.33<br>(123.49 to<br>10,232.70)       | 482.10<br>(72.80 to<br>2,209.43)          | 7,613.75<br>(369.90 to<br>38,566.28)        | 223.70<br>(70.40 to<br>552.59)        | 19.37<br>(1.58 to<br>120.53)          | 5.98<br>(0.96 to<br>26.64)            | 90.29<br>(4.62 to<br>458.35)          |

**Senegal**

| Cause                                          | YLLs (actual counts)                                             |                                                                 |                                                                |                                                                  | Deaths (actual counts)                                     |                                                            |                                                            |                                                            |
|------------------------------------------------|------------------------------------------------------------------|-----------------------------------------------------------------|----------------------------------------------------------------|------------------------------------------------------------------|------------------------------------------------------------|------------------------------------------------------------|------------------------------------------------------------|------------------------------------------------------------|
|                                                | 2016                                                             | 2040 Forecast                                                   | 2040 Better Scenario                                           | 2040 Worse Scenario                                              | 2016                                                       | 2040 Forecast                                              | 2040 Better Scenario                                       | 2040 Worse Scenario                                        |
| Varicella and herpes zoster                    | 4,835.16<br>(2,461.30 to<br>8,413.48)                            | 1,848.40<br>(1,049.55 to<br>3,112.11)                           | 1,330.59<br>(791.11 to<br>2,192.12)                            | 3,750.75<br>(1,916.45 to<br>6,851.91)                            | 74.03<br>(45.97 to<br>115.57)                              | 43.82<br>(29.42 to<br>64.94)                               | 36.08<br>(23.89 to<br>53.03)                               | 70.37<br>(44.80 to<br>109.36)                              |
| <b>Neglected tropical diseases and malaria</b> | <b>277,383.15</b><br><b>(198,888.98 to</b><br><b>372,617.77)</b> | <b>111,234.93</b><br><b>(83,078.59 to</b><br><b>147,759.16)</b> | <b>99,135.61</b><br><b>(74,238.63 to</b><br><b>132,116.46)</b> | <b>156,311.89</b><br><b>(113,721.33 to</b><br><b>210,214.79)</b> | <b>4,141.82</b><br><b>(3,153.38 to</b><br><b>5,351.86)</b> | <b>2,416.53</b><br><b>(1,837.07 to</b><br><b>3,194.44)</b> | <b>2,273.06</b><br><b>(1,748.27 to</b><br><b>3,015.04)</b> | <b>2,989.97</b><br><b>(2,261.25 to</b><br><b>3,942.40)</b> |
| Malaria                                        | 219,840.11<br>(146,813.51 to<br>312,176.38)                      | 80,929.69<br>(56,686.65 to<br>112,921.36)                       | 75,047.26<br>(53,988.26 to<br>103,866.10)                      | 105,043.33<br>(69,514.90 to<br>153,209.68)                       | 3,265.49<br>(2,314.71 to<br>4,452.60)                      | 1,821.96<br>(1,300.70 to<br>2,569.09)                      | 1,778.39<br>(1,278.53 to<br>2,475.33)                      | 2,089.22<br>(1,465.81 to<br>2,944.86)                      |
| Chagas disease                                 | 0.00<br>(0.00 to<br>0.00)                                        | 0.00<br>(0.00 to<br>0.00)                                       | 0.00<br>(0.00 to<br>0.00)                                      | 0.00<br>(0.00 to<br>0.00)                                        | 0.00<br>(0.00 to<br>0.00)                                  | 0.00<br>(0.00 to<br>0.00)                                  | 0.00<br>(0.00 to<br>0.00)                                  | 0.00<br>(0.00 to<br>0.00)                                  |
| Leishmaniasis                                  | 149.39<br>(81.60 to<br>232.95)                                   | 113.73<br>(57.08 to<br>182.95)                                  | 87.21<br>(43.36 to<br>141.17)                                  | 170.60<br>(88.78 to<br>271.77)                                   | 4.45<br>(2.37 to<br>6.94)                                  | 3.51<br>(1.66 to<br>5.82)                                  | 2.75<br>(1.31 to<br>4.62)                                  | 5.11<br>(2.45 to<br>8.39)                                  |
| African trypanosomiasis                        | 0.00<br>(0.00 to<br>0.00)                                        | 0.00<br>(0.00 to<br>0.00)                                       | 0.00<br>(0.00 to<br>0.00)                                      | 0.00<br>(0.00 to<br>0.00)                                        | 0.00<br>(0.00 to<br>0.00)                                  | 0.00<br>(0.00 to<br>0.00)                                  | 0.00<br>(0.00 to<br>0.00)                                  | 0.00<br>(0.00 to<br>0.00)                                  |
| Schistosomiasis                                | 4,457.73<br>(3,114.92 to<br>5,976.06)                            | 3,782.85<br>(2,499.91 to<br>5,329.78)                           | 3,374.48<br>(2,233.00 to<br>4,705.70)                          | 4,555.72<br>(3,015.06 to<br>6,354.60)                            | 122.38<br>(86.49 to<br>163.51)                             | 117.43<br>(79.93 to<br>163.24)                             | 107.78<br>(72.65 to<br>151.11)                             | 135.65<br>(92.57 to<br>187.02)                             |
| Cysticercosis                                  | 78.86<br>(30.53 to<br>167.96)                                    | 39.83<br>(15.02 to<br>84.15)                                    | 37.47<br>(14.45 to<br>81.33)                                   | 45.16<br>(17.13 to<br>97.35)                                     | 1.58<br>(0.61 to<br>3.33)                                  | 0.95<br>(0.36 to<br>2.01)                                  | 0.91<br>(0.35 to<br>1.95)                                  | 1.04<br>(0.40 to<br>2.20)                                  |

|                                                       |                                                                 |                                                                |                                                               |                                                                 |                                                            |                                                          |                                                        |                                                            |
|-------------------------------------------------------|-----------------------------------------------------------------|----------------------------------------------------------------|---------------------------------------------------------------|-----------------------------------------------------------------|------------------------------------------------------------|----------------------------------------------------------|--------------------------------------------------------|------------------------------------------------------------|
|                                                       | 558.82<br>(413.74 to<br>748.74)                                 | 235.17<br>(163.39 to<br>327.11)                                | 158.41<br>(109.02 to<br>221.49)                               | 441.47<br>(308.21 to<br>620.63)                                 | 10.92<br>(8.26 to<br>14.46)                                | 6.12<br>(4.37 to<br>8.35)                                | 4.26<br>(2.97 to<br>5.83)                              | 10.81<br>(7.64 to<br>14.70)                                |
| Cystic echinococcosis                                 |                                                                 |                                                                |                                                               |                                                                 |                                                            |                                                          |                                                        |                                                            |
|                                                       | 319.86<br>(20.82 to<br>1,361.04)                                | 930.72<br>(68.90 to<br>3,334.74)                               | 861.97<br>(63.30 to<br>3,078.35)                              | 1,249.26<br>(92.34 to<br>4,851.52)                              | 4.82<br>(0.35 to<br>19.66)                                 | 30.73<br>(1.56 to<br>71.72)                              | 20.31<br>(1.54 to<br>68.59)                            | 24.23<br>(1.80 to<br>87.67)                                |
| Dengue                                                |                                                                 |                                                                |                                                               |                                                                 |                                                            |                                                          |                                                        |                                                            |
|                                                       | 3,777.73<br>(749.49 to<br>11,388.73)                            | 1,394.35<br>(271.23 to<br>4,484.65)                            | 1,070.82<br>(209.90 to<br>3,368.53)                           | 2,227.09<br>(433.14 to<br>7,029.37)                             | 58.74<br>(11.72 to<br>175.41)                              | 23.65<br>(4.67 to<br>77.80)                              | 18.40<br>(3.63 to<br>58.54)                            | 36.49<br>(7.19 to<br>116.44)                               |
| Yellow fever                                          |                                                                 |                                                                |                                                               |                                                                 |                                                            |                                                          |                                                        |                                                            |
|                                                       | 6,803.51<br>(1,304.41 to<br>21,034.11)                          | 2,594.81<br>(501.25 to<br>7,934.56)                            | 1,562.19<br>(291.35 to<br>4,769.43)                           | 5,948.24<br>(1,195.02 to<br>17,863.18)                          | 108.71<br>(22.13 to<br>331.94)                             | 48.98<br>(9.61 to<br>147.02)                             | 29.76<br>(5.83 to<br>91.81)                            | 107.92<br>(22.65 to<br>317.71)                             |
| Rabies                                                |                                                                 |                                                                |                                                               |                                                                 |                                                            |                                                          |                                                        |                                                            |
|                                                       | 1,021.76<br>(549.13 to<br>1,673.48)                             | 753.37<br>(397.78 to<br>1,297.39)                              | 676.60<br>(357.90 to<br>1,171.30)                             | 1,131.89<br>(573.07 to<br>1,986.92)                             | 12.72<br>(7.11 to<br>20.42)                                | 10.39<br>(5.96 to<br>16.95)                              | 9.58<br>(5.61 to<br>15.62)                             | 14.82<br>(8.01 to<br>25.31)                                |
| Intestinal nematode infections                        |                                                                 |                                                                |                                                               |                                                                 |                                                            |                                                          |                                                        |                                                            |
|                                                       | 40,375.59<br>(19,539.72 to<br>74,942.66)                        | 20,460.41<br>(11,179.63 to<br>31,451.57)                       | 16,259.19<br>(8,919.75 to<br>24,806.97)                       | 35,499.12<br>(19,452.03 to<br>56,338.36)                        | 552.00<br>(280.94 to<br>974.36)                            | 362.80<br>(200.29 to<br>523.52)                          | 300.92<br>(166.09 to<br>431.59)                        | 564.68<br>(326.71 to<br>842.96)                            |
| Other neglected tropical diseases                     |                                                                 |                                                                |                                                               |                                                                 |                                                            |                                                          |                                                        |                                                            |
|                                                       | <b>110,035.14</b><br><b>(87,810.65 to</b><br><b>133,045.56)</b> | <b>74,287.01</b><br><b>(52,893.00 to</b><br><b>105,232.39)</b> | <b>52,231.48</b><br><b>(37,023.91 to</b><br><b>74,241.17)</b> | <b>127,722.72</b><br><b>(92,821.78 to</b><br><b>181,057.86)</b> | <b>2,032.15</b><br><b>(1,615.98 to</b><br><b>2,487.86)</b> | <b>1,395.03</b><br><b>(982.94 to</b><br><b>1,985.04)</b> | <b>982.40</b><br><b>(689.82 to</b><br><b>1,402.00)</b> | <b>2,386.59</b><br><b>(1,713.04 to</b><br><b>3,362.97)</b> |
| Maternal disorders                                    |                                                                 |                                                                |                                                               |                                                                 |                                                            |                                                          |                                                        |                                                            |
|                                                       | 42,324.38<br>(30,757.86 to<br>56,387.00)                        | 27,123.62<br>(17,660.25 to<br>40,373.21)                       | 19,130.19<br>(12,612.65 to<br>28,484.56)                      | 45,546.34<br>(30,071.98 to<br>67,461.97)                        | 792.37<br>(577.34 to<br>1,059.72)                          | 516.30<br>(333.87 to<br>765.21)                          | 364.50<br>(240.38 to<br>544.57)                        | 864.04<br>(565.35 to<br>1,268.13)                          |
| Maternal hemorrhage                                   |                                                                 |                                                                |                                                               |                                                                 |                                                            |                                                          |                                                        |                                                            |
|                                                       | 5,554.50<br>(2,448.31 to<br>10,069.99)                          | 3,484.53<br>(1,443.93 to<br>6,813.14)                          | 2,446.62<br>(1,034.50 to<br>4,745.52)                         | 5,973.48<br>(2,506.67 to<br>11,394.22)                          | 103.26<br>(46.33 to<br>184.10)                             | 65.74<br>(27.25 to<br>126.25)                            | 46.22<br>(19.48 to<br>89.86)                           | 112.22<br>(47.77 to<br>214.97)                             |
| Maternal sepsis and other maternal infections         |                                                                 |                                                                |                                                               |                                                                 |                                                            |                                                          |                                                        |                                                            |
|                                                       | 22,894.49<br>(16,196.07 to<br>31,429.55)                        | 15,484.02<br>(9,701.91 to<br>23,035.17)                        | 10,859.84<br>(6,690.51 to<br>16,412.94)                       | 26,349.91<br>(16,774.80 to<br>39,369.23)                        | 413.55<br>(291.11 to<br>563.87)                            | 284.52<br>(176.24 to<br>434.70)                          | 199.78<br>(121.40 to<br>304.44)                        | 482.04<br>(306.50 to<br>725.32)                            |
| Maternal hypertensive disorders                       |                                                                 |                                                                |                                                               |                                                                 |                                                            |                                                          |                                                        |                                                            |
|                                                       | 5,032.99<br>(2,767.19 to<br>8,309.01)                           | 3,479.12<br>(1,714.52 to<br>6,203.74)                          | 2,389.57<br>(1,179.49 to<br>4,203.52)                         | 6,067.41<br>(3,047.84 to<br>10,613.78)                          | 94.24<br>(51.59 to<br>159.89)                              | 66.15<br>(32.26 to<br>117.28)                            | 45.47<br>(22.08 to<br>82.28)                           | 114.97<br>(56.89 to<br>201.27)                             |
| Maternal obstructed labor and uterine rupture         |                                                                 |                                                                |                                                               |                                                                 |                                                            |                                                          |                                                        |                                                            |
|                                                       | 2,021.04<br>(771.84 to<br>4,209.65)                             | 1,623.66<br>(550.99 to<br>3,647.18)                            | 1,128.84<br>(366.83 to<br>2,482.46)                           | 2,765.53<br>(919.33 to<br>6,226.56)                             | 37.74<br>(14.68 to<br>76.35)                               | 30.91<br>(10.34 to<br>67.05)                             | 21.52<br>(7.05 to<br>46.15)                            | 52.39<br>(17.51 to<br>117.35)                              |
| Maternal abortion, miscarriage, and ectopic pregnancy |                                                                 |                                                                |                                                               |                                                                 |                                                            |                                                          |                                                        |                                                            |
|                                                       | 20,469.55<br>(14,164.33 to<br>28,735.20)                        | 14,234.93<br>(8,604.31 to<br>22,502.81)                        | 9,984.74<br>(6,180.90 to<br>15,551.73)                        | 25,620.05<br>(15,676.30 to<br>39,830.22)                        | 372.29<br>(256.70 to<br>521.25)                            | 282.02<br>(161.30 to<br>409.47)                          | 184.25<br>(115.38 to<br>290.49)                        | 468.56<br>(290.09 to<br>727.16)                            |
| Indirect maternal deaths                              |                                                                 |                                                                |                                                               |                                                                 |                                                            |                                                          |                                                        |                                                            |
|                                                       | 1,819.51<br>(927.87 to<br>3,215.32)                             | 1,070.46<br>(509.09 to<br>1,957.21)                            | 747.91<br>(355.81 to<br>1,346.23)                             | 1,899.88<br>(912.58 to<br>3,426.09)                             | 33.49<br>(17.01 to<br>58.79)                               | 20.03<br>(9.35 to<br>35.77)                              | 14.03<br>(6.68 to<br>25.17)                            | 35.32<br>(17.12 to<br>63.54)                               |
| Late maternal deaths                                  |                                                                 |                                                                |                                                               |                                                                 |                                                            |                                                          |                                                        |                                                            |
|                                                       | 282.99<br>(145.32 to<br>442.44)                                 | 1,133.12<br>(504.51 to<br>2,040.79)                            | 776.45<br>(258.19 to<br>1,457.30)                             | 2,017.54<br>(897.66 to<br>3,627.65)                             | 5.66<br>(2.91 to<br>8.85)                                  | 22.87<br>(10.21 to<br>41.35)                             | 15.76<br>(5.54 to<br>29.38)                            | 40.35<br>(17.95 to<br>73.40)                               |
| Maternal deaths aggravated by HIV/AIDS                |                                                                 |                                                                |                                                               |                                                                 |                                                            |                                                          |                                                        |                                                            |
|                                                       | 9,635.69<br>(6,070.81 to<br>13,746.42)                          | 6,653.55<br>(3,749.80 to<br>10,617.07)                         | 4,767.32<br>(2,688.56 to<br>7,557.46)                         | 11,482.57<br>(6,524.33 to<br>18,402.86)                         | 179.54<br>(113.38 to<br>255.72)                            | 126.48<br>(71.41 to<br>202.58)                           | 90.86<br>(51.53 to<br>143.25)                          | 216.69<br>(125.34 to<br>348.70)                            |
| Other maternal disorders                              |                                                                 |                                                                |                                                               |                                                                 |                                                            |                                                          |                                                        |                                                            |

| Senegal                                                  |                                             |                                             |                                             |                                               |                                        |                                       |                                       |                                        |
|----------------------------------------------------------|---------------------------------------------|---------------------------------------------|---------------------------------------------|-----------------------------------------------|----------------------------------------|---------------------------------------|---------------------------------------|----------------------------------------|
| Cause                                                    | YLLs (actual counts)                        |                                             |                                             |                                               | Deaths (actual counts)                 |                                       |                                       |                                        |
|                                                          | 2016                                        | 2040 Forecast                               | 2040 Better Scenario                        | 2040 Worse Scenario                           | 2016                                   | 2040 Forecast                         | 2040 Better Scenario                  | 2040 Worse Scenario                    |
| Neonatal disorders                                       | 810,288.24<br>(686,355.30 to<br>954,960.11) | 338,525.46<br>(199,542.19 to<br>497,837.49) | 238,198.42<br>(143,494.04 to<br>339,923.89) | 771,162.01<br>(446,635.30 to<br>1,118,702.17) | 9,362.89<br>(7,929.78 to<br>11,034.99) | 3,912.75<br>(2,308.63 to<br>5,752.96) | 2,753.28<br>(1,658.46 to<br>3,927.28) | 8,912.66<br>(5,166.55 to<br>12,929.65) |
| Neonatal preterm birth                                   | 280,565.93<br>(193,508.67 to<br>386,522.83) | 103,301.56<br>(57,612.61 to<br>157,504.57)  | 66,368.74<br>(36,519.55 to<br>103,045.14)   | 243,633.71<br>(136,006.18 to<br>378,442.59)   | 3,241.48<br>(2,235.14 to<br>4,465.16)  | 1,193.73<br>(666.27 to<br>1,819.47)   | 767.02<br>(422.01 to<br>1,190.71)     | 2,815.14<br>(1,571.18 to<br>4,373.04)  |
| Neonatal encephalopathy due to birth asphyxia and trauma | 276,449.05<br>(189,436.19 to<br>378,788.08) | 104,449.15<br>(47,593.03 to<br>182,873.83)  | 77,272.25<br>(35,051.73 to<br>135,772.59)   | 229,893.79<br>(103,515.61 to<br>409,072.19)   | 3,193.85<br>(2,189.50 to<br>4,376.28)  | 1,207.06<br>(550.35 to<br>2,112.76)   | 893.01<br>(405.13 to<br>1,568.51)     | 2,656.62<br>(1,197.01 to<br>4,727.76)  |
| Neonatal sepsis and other neonatal infections            | 178,774.87<br>(122,304.56 to<br>242,363.86) | 100,277.80<br>(60,160.63 to<br>155,438.16)  | 73,344.33<br>(44,467.12 to<br>110,343.07)   | 224,084.09<br>(133,888.65 to<br>339,897.86)   | 2,066.29<br>(1,414.00 to<br>2,801.00)  | 1,159.30<br>(695.74 to<br>1,796.18)   | 847.94<br>(515.06 to<br>1,274.76)     | 2,590.45<br>(1,548.56 to<br>3,930.59)  |

|                                                                         |                                                            |                                                            |                                                            |                                                            |                                                   |                                                   |                                                   |                                                     |
|-------------------------------------------------------------------------|------------------------------------------------------------|------------------------------------------------------------|------------------------------------------------------------|------------------------------------------------------------|---------------------------------------------------|---------------------------------------------------|---------------------------------------------------|-----------------------------------------------------|
| Hemolytic disease and other neonatal jaundice                           | 16,208.70<br>(10,033.03 to<br>24,853.34)                   | 4,465.79<br>(1,263.03 to<br>8,126.03)                      | 3,126.46<br>(1,566.41 to<br>5,582.40)                      | 10,718.00<br>(5,432.47 to<br>19,052.83)                    | 187.35<br>(115.94 to<br>287.28)                   | 51.63<br>(25.77 to<br>93.93)                      | 36.14<br>(18.12 to<br>64.49)                      | 123.90<br>(62.79 to<br>220.31)                      |
| Other neonatal disorders                                                | 58,289.67<br>(37,326.82 to<br>84,446.52)                   | 26,031.16<br>(13,231.02 to<br>44,430.02)                   | 18,086.64<br>(9,526.73 to<br>30,091.85)                    | 62,832.42<br>(32,065.37 to<br>105,751.87)                  | 673.92<br>(431.76 to<br>975.94)                   | 301.03<br>(152.99 to<br>513.52)                   | 209.17<br>(110.30 to<br>347.85)                   | 726.55<br>(370.85 to<br>1,222.49)                   |
| <b>Nutritional deficiencies</b>                                         | <b>111,344.32<br/>(69,978.62 to<br/>175,138.82)</b>        | <b>39,226.05<br/>(26,211.03 to<br/>59,907.45)</b>          | <b>31,060.28<br/>(21,098.09 to<br/>46,607.73)</b>          | <b>70,447.41<br/>(43,905.70 to<br/>115,643.17)</b>         | <b>1,656.86<br/>(1,139.25 to<br/>2,450.04)</b>    | <b>942.85<br/>(726.57 to<br/>1,257.23)</b>        | <b>831.79<br/>(649.32 to<br/>1,079.19)</b>        | <b>1,356.83<br/>(982.39 to<br/>1,934.28)</b>        |
| Protein-energy malnutrition                                             | 104,398.91<br>(64,242.65 to<br>167,745.13)                 | 33,181.84<br>(20,821.06 to<br>52,901.94)                   | 26,042.26<br>(17,058.48 to<br>40,683.62)                   | 61,338.18<br>(36,283.38 to<br>103,339.93)                  | 1,517.07<br>(1,011.17 to<br>2,309.44)             | 781.84<br>(578.31 to<br>1,041.25)                 | 688.51<br>(522.61 to<br>907.49)                   | 1,147.05<br>(795.56 to<br>1,686.37)                 |
| Iodine deficiency                                                       | 805.12<br>(21.95 to<br>4,981.90)                           | 1,390.31<br>(31.09 to<br>6,428.03)                         | 1,058.08<br>(24.31 to<br>4,833.22)                         | 2,592.32<br>(51.83 to<br>14,324.32)                        | 12.82<br>(0.57 to<br>62.72)                       | 34.28<br>(0.99 to<br>113.17)                      | 28.67<br>(0.76 to<br>94.98)                       | 51.93<br>(1.55 to<br>191.16)                        |
| Dietary iron deficiency                                                 | 310.59<br>(205.73 to<br>608.88)                            | 336.42<br>(208.27 to<br>677.72)                            | 296.19<br>(183.93 to<br>609.72)                            | 435.62<br>(270.24 to<br>861.31)                            | 5.33<br>(3.45 to<br>13.51)                        | 6.67<br>(3.95 to<br>20.22)                        | 6.02<br>(3.51 to<br>19.25)                        | 8.19<br>(4.90 to<br>23.32)                          |
| Other nutritional deficiencies                                          | 5,829.70<br>(3,412.74 to<br>11,246.87)                     | 4,317.49<br>(2,908.96 to<br>6,387.47)                      | 3,663.75<br>(2,477.92 to<br>5,273.29)                      | 6,081.29<br>(3,936.31 to<br>9,952.20)                      | 121.64<br>(83.04 to<br>188.40)                    | 120.05<br>(83.92 to<br>164.51)                    | 108.59<br>(75.15 to<br>149.16)                    | 149.66<br>(103.94 to<br>207.06)                     |
| <b>Other communicable, maternal, neonatal, and nutritional diseases</b> | <b>53,538.45<br/>(36,746.76 to<br/>84,367.22)</b>          | <b>32,037.39<br/>(23,525.45 to<br/>45,423.43)</b>          | <b>26,992.91<br/>(20,112.85 to<br/>37,517.59)</b>          | <b>47,537.61<br/>(33,445.75 to<br/>71,380.41)</b>          | <b>837.09<br/>(630.44 to<br/>1,193.22)</b>        | <b>675.98<br/>(529.27 to<br/>881.00)</b>          | <b>590.18<br/>(469.42 to<br/>758.74)</b>          | <b>908.72<br/>(692.92 to<br/>1,240.21)</b>          |
| Sexually transmitted infections excluding HIV                           | 20,267.08<br>(8,759.50 to<br>40,740.22)                    | 5,873.45<br>(2,670.37 to<br>12,229.42)                     | 4,762.61<br>(2,240.36 to<br>9,718.50)                      | 10,562.35<br>(4,226.71 to<br>22,636.31)                    | 249.09<br>(115.52 to<br>488.57)                   | 82.28<br>(42.19 to<br>157.43)                     | 68.27<br>(36.30 to<br>127.55)                     | 139.04<br>(62.58 to<br>286.66)                      |
| Syphilis                                                                | 19,156.23<br>(7,700.68 to<br>39,714.91)                    | 4,723.68<br>(1,632.00 to<br>10,824.85)                     | 3,723.41<br>(1,330.46 to<br>8,528.15)                      | 9,208.16<br>(2,963.44 to<br>21,149.66)                     | 227.04<br>(92.59 to<br>467.52)                    | 58.31<br>(22.11 to<br>129.20)                     | 46.31<br>(18.07 to<br>103.48)                     | 111.33<br>(38.42 to<br>252.20)                      |
| Chlamydial infection                                                    | 226.33<br>(148.93 to<br>358.60)                            | 233.58<br>(142.20 to<br>374.73)                            | 210.99<br>(130.10 to<br>340.06)                            | 275.72<br>(166.94 to<br>440.89)                            | 4.42<br>(2.92 to<br>7.04)                         | 4.40<br>(2.96 to<br>7.69)                         | 4.40<br>(2.80 to<br>7.10)                         | 5.55<br>(3.44 to<br>8.91)                           |
| Gonococcal infection                                                    | 572.26<br>(377.82 to<br>910.29)                            | 595.38<br>(376.90 to<br>952.24)                            | 539.15<br>(342.75 to<br>858.94)                            | 698.52<br>(443.13 to<br>1,133.44)                          | 11.53<br>(7.74 to<br>18.35)                       | 12.61<br>(8.04 to<br>20.40)                       | 11.60<br>(7.47 to<br>18.54)                       | 14.51<br>(9.19 to<br>23.28)                         |
| Other sexually transmitted infections                                   | 312.26<br>(206.46 to<br>495.23)                            | 320.81<br>(203.17 to<br>503.17)                            | 289.06<br>(185.46 to<br>450.36)                            | 379.95<br>(240.24 to<br>599.76)                            | 6.10<br>(4.04 to<br>9.71)                         | 6.55<br>(4.22 to<br>10.50)                        | 5.96<br>(3.89 to<br>9.55)                         | 7.64<br>(4.87 to<br>12.28)                          |
| Acute hepatitis                                                         | 20,295.03<br>(16,893.49 to<br>24,252.23)                   | 19,062.35<br>(14,665.25 to<br>24,710.51)                   | 16,543.44<br>(12,806.25 to<br>21,524.49)                   | 24,289.27<br>(18,747.83 to<br>31,763.21)                   | 401.07<br>(337.68 to<br>471.70)                   | 432.22<br>(341.01 to<br>543.56)                   | 380.84<br>(302.63 to<br>482.75)                   | 533.94<br>(422.95 to<br>676.50)                     |
| Acute hepatitis A                                                       | 465.98<br>(70.90 to<br>1,079.24)                           | 252.48<br>(73.45 to<br>566.69)                             | 210.99<br>(63.81 to<br>471.18)                             | 392.88<br>(105.12 to<br>865.29)                            | 6.15<br>(1.28 to<br>13.46)                        | 4.65<br>(1.67 to<br>9.91)                         | 4.01<br>(1.43 to<br>8.79)                         | 6.58<br>(2.27 to<br>13.54)                          |
| Acute hepatitis B                                                       | 15,143.19<br>(12,346.15 to<br>18,479.06)                   | 15,255.89<br>(11,665.29 to<br>19,917.35)                   | 13,210.48<br>(10,088.47 to<br>17,433.49)                   | 19,192.99<br>(14,526.70 to<br>25,135.67)                   | 320.70<br>(266.86 to<br>386.33)                   | 357.77<br>(281.37 to<br>455.16)                   | 313.51<br>(245.62 to<br>401.83)                   | 440.86<br>(340.54 to<br>562.06)                     |
| Acute hepatitis C                                                       | 373.57<br>(267.65 to<br>519.35)                            | 492.11<br>(327.74 to<br>718.70)                            | 459.49<br>(305.46 to<br>669.92)                            | 560.57<br>(375.29 to<br>811.45)                            | 8.60<br>(6.12 to<br>11.92)                        | 12.97<br>(8.55 to<br>19.16)                       | 12.31<br>(8.13 to<br>18.19)                       | 14.29<br>(9.40 to<br>21.01)                         |
| Acute hepatitis E                                                       | 4,312.28<br>(3,062.49 to<br>5,997.05)                      | 3,061.87<br>(1,958.61 to<br>4,752.27)                      | 2,662.48<br>(1,715.99 to<br>4,115.33)                      | 4,142.82<br>(2,686.22 to<br>6,385.53)                      | 65.61<br>(47.62 to<br>89.49)                      | 56.83<br>(38.38 to<br>84.22)                      | 51.01<br>(34.80 to<br>74.78)                      | 72.22<br>(48.50 to<br>106.59)                       |
| Other unspecified infectious diseases                                   | 12,976.34<br>(5,263.95 to<br>41,493.00)                    | 7,101.59<br>(3,903.26 to<br>16,774.68)                     | 5,686.86<br>(3,237.84 to<br>12,780.33)                     | 12,685.99<br>(6,171.25 to<br>32,297.89)                    | 186.93<br>(95.37 to<br>512.18)                    | 161.48<br>(110.04 to<br>270.98)                   | 141.07<br>(99.24 to<br>230.51)                    | 235.74<br>(147.53 to<br>451.66)                     |
| <b>Non-communicable diseases</b>                                        | <b>1,380,074.57<br/>(1,242,218.67 to<br/>1,511,480.92)</b> | <b>2,079,663.32<br/>(1,706,402.45 to<br/>2,555,919.81)</b> | <b>1,704,875.74<br/>(1,423,705.13 to<br/>2,069,527.73)</b> | <b>2,845,603.67<br/>(2,310,123.60 to<br/>3,521,750.92)</b> | <b>42,754.79<br/>(39,607.68 to<br/>45,895.40)</b> | <b>78,849.56<br/>(68,165.44 to<br/>91,975.94)</b> | <b>66,854.74<br/>(58,332.55 to<br/>77,039.20)</b> | <b>101,565.46<br/>(85,743.35 to<br/>120,257.92)</b> |

**Senegal**

| Cause | YLLs (actual counts) |               |                      |                     | Deaths (actual counts) |               |                      |                     |
|-------|----------------------|---------------|----------------------|---------------------|------------------------|---------------|----------------------|---------------------|
|       | 2016                 | 2040 Forecast | 2040 Better Scenario | 2040 Worse Scenario | 2016                   | 2040 Forecast | 2040 Better Scenario | 2040 Worse Scenario |

|                                      | 368,118.80<br>(241,989.01 to<br>296,950.42) | 550,452.09<br>(458,269.49 to<br>671,037.30) | 520,648.66<br>(433,994.97 to<br>633,280.05) | 608,375.25<br>(500,785.51 to<br>749,848.35) | 8,799.97<br>(8,018.78 to<br>9,684.80) | 19,436.11<br>(16,933.22 to<br>23,000.41) | 19,179.63<br>(16,576.48 to<br>22,210.11) | 20,938.11<br>(17,833.10 to<br>24,702.46) |
|--------------------------------------|---------------------------------------------|---------------------------------------------|---------------------------------------------|---------------------------------------------|---------------------------------------|------------------------------------------|------------------------------------------|------------------------------------------|
| <b>Neoplasms</b>                     |                                             |                                             |                                             |                                             |                                       |                                          |                                          |                                          |
| Lip and oral cavity cancer           | 2,646.27<br>(2,260.89 to<br>3,105.65)       | 5,770.36<br>(4,067.00 to<br>8,269.27)       | 4,835.60<br>(3,541.34 to<br>6,731.12)       | 7,770.53<br>(5,161.66 to<br>11,926.07)      | 95.68<br>(82.70 to<br>110.35)         | 210.88<br>(155.88 to<br>291.62)          | 185.17<br>(141.77 to<br>248.18)          | 278.04<br>(193.05 to<br>418.70)          |
| Nasopharynx cancer                   | 754.25<br>(596.41 to<br>936.67)             | 1,669.75<br>(1,071.63 to<br>2,675.00)       | 1,295.37<br>(867.25 to<br>1,962.84)         | 2,308.18<br>(1,403.80 to<br>3,814.34)       | 19.54<br>(15.51 to<br>24.46)          | 46.08<br>(29.64 to<br>72.47)             | 36.04<br>(24.41 to<br>54.26)             | 63.76<br>(39.40 to<br>104.26)            |
| Other pharynx cancer                 | 1,377.15<br>(1,126.19 to<br>1,601.15)       | 2,271.63<br>(1,582.21 to<br>3,245.59)       | 2,184.45<br>(1,531.40 to<br>3,100.25)       | 2,542.07<br>(1,727.79 to<br>3,730.11)       | 48.57<br>(40.22 to<br>55.77)          | 83.97<br>(60.22 to<br>116.11)            | 83.02<br>(59.92 to<br>115.08)            | 91.01<br>(62.77 to<br>127.93)            |
| Esophageal cancer                    | 7,897.33<br>(6,820.49 to<br>9,121.06)       | 16,074.09<br>(9,367.12 to<br>26,652.94)     | 13,092.68<br>(7,995.88 to<br>21,141.75)     | 21,344.17<br>(11,564.03 to<br>37,403.14)    | 299.00<br>(259.96 to<br>340.71)       | 594.17<br>(359.68 to<br>967.19)          | 506.03<br>(319.15 to<br>808.44)          | 774.56<br>(440.51 to<br>1,313.62)        |
| Stomach cancer                       | 21,722.83<br>(19,025.54 to<br>24,565.50)    | 31,681.66<br>(24,967.57 to<br>41,359.92)    | 29,832.03<br>(23,725.21 to<br>38,364.97)    | 35,320.61<br>(27,578.98 to<br>46,383.79)    | 861.90<br>(762.62 to<br>967.21)       | 1,309.17<br>(1,064.39 to<br>1,641.84)    | 1,280.99<br>(1,050.49 to<br>1,602.74)    | 1,403.84<br>(1,122.58 to<br>1,794.25)    |
| Colon and rectum cancer              | 12,590.08<br>(11,128.86 to<br>14,231.71)    | 32,013.11<br>(23,405.22 to<br>43,874.90)    | 33,234.99<br>(24,358.99 to<br>45,174.82)    | 30,768.26<br>(22,559.95 to<br>41,996.74)    | 488.69<br>(434.89 to<br>548.11)       | 1,314.96<br>(996.40 to<br>1,776.04)      | 1,414.54<br>(1,072.96 to<br>1,893.12)    | 1,213.98<br>(899.97 to<br>1,658.48)      |
| Liver cancer                         | 44,187.62<br>(36,963.76 to<br>53,360.11)    | 107,598.60<br>(77,278.00 to<br>152,235.60)  | 99,921.39<br>(74,031.40 to<br>137,248.81)   | 124,968.77<br>(85,409.25 to<br>184,618.59)  | 1,341.57<br>(85.40 to<br>1,584.99)    | 3,423.59<br>(2,536.67 to<br>4,725.68)    | 3,261.19<br>(2,491.56 to<br>4,379.54)    | 3,884.66<br>(2,725.33 to<br>5,574.47)    |
| Liver cancer due to hepatitis B      | 27,628.68<br>(22,686.86 to<br>33,679.65)    | 66,894.14<br>(47,793.31 to<br>94,546.67)    | 62,397.69<br>(45,765.79 to<br>87,235.20)    | 76,944.66<br>(52,341.63 to<br>112,865.96)   | 823.89<br>(671.78 to<br>987.51)       | 2,091.82<br>(1,540.91 to<br>2,826.28)    | 2,000.10<br>(1,495.95 to<br>2,674.59)    | 2,351.59<br>(1,640.48 to<br>3,323.21)    |
| Liver cancer due to hepatitis C      | 1,376.42<br>(976.93 to<br>1,877.28)         | 3,554.86<br>(2,283.43 to<br>5,279.25)       | 3,358.52<br>(2,181.15 to<br>5,001.07)       | 4,027.70<br>(2,499.48 to<br>6,324.18)       | 53.89<br>(37.54 to<br>73.88)          | 143.07<br>(93.72 to<br>212.21)           | 140.20<br>(94.22 to<br>203.63)           | 156.31<br>(146.67 to<br>242.33)          |
| Liver cancer due to alcohol use      | 3,081.85<br>(2,420.00 to<br>3,923.28)       | 8,288.22<br>(5,688.48 to<br>12,037.71)      | 7,577.61<br>(5,389.68 to<br>10,712.89)      | 9,992.73<br>(6,476.88 to<br>15,260.07)      | 108.54<br>(86.38 to<br>135.94)        | 290.67<br>(203.62 to<br>407.73)          | 273.66<br>(199.81 to<br>376.32)          | 341.32<br>(225.18 to<br>504.60)          |
| Liver cancer due to other causes     | 12,100.67<br>(9,694.51 to<br>15,202.06)     | 28,861.37<br>(20,104.44 to<br>41,586.57)    | 26,587.57<br>(18,938.25 to<br>37,559.07)    | 34,003.68<br>(22,567.02 to<br>51,513.88)    | 355.25<br>(288.95 to<br>438.81)       | 898.03<br>(641.49 to<br>1,267.87)        | 847.22<br>(617.27 to<br>1,158.32)        | 1,035.44<br>(697.97 to<br>1,532.23)      |
| Gallbladder and biliary tract cancer | 3,200.77<br>(2,165.73 to<br>4,363.67)       | 5,439.41<br>(3,659.08 to<br>7,765.02)       | 5,714.71<br>(3,832.39 to<br>8,230.07)       | 5,119.86<br>(3,462.02 to<br>7,275.25)       | 133.80<br>(91.07 to<br>182.23)        | 234.23<br>(161.50 to<br>318.79)          | 253.13<br>(173.57 to<br>347.06)          | 213.29<br>(146.67 to<br>292.79)          |
| Pancreatic cancer                    | 8,951.77<br>(7,789.12 to<br>10,284.82)      | 25,132.01<br>(20,367.52 to<br>31,370.94)    | 25,764.10<br>(20,796.71 to<br>32,333.97)    | 24,688.68<br>(19,778.08 to<br>30,860.80)    | 375.68<br>(327.39 to<br>431.02)       | 1,063.52<br>(877.12 to<br>1,301.56)      | 1,124.92<br>(935.00 to<br>1,383.38)      | 1,013.92<br>(829.61 to<br>1,258.53)      |
| Larynx cancer                        | 2,139.17<br>(1,589.77 to<br>2,578.31)       | 4,473.20<br>(2,466.23 to<br>7,641.95)       | 3,156.58<br>(1,872.52 to<br>5,070.37)       | 6,928.92<br>(3,669.44 to<br>11,727.49)      | 82.75<br>(63.52 to<br>98.93)          | 170.42<br>(98.38 to<br>279.68)           | 126.01<br>(77.79 to<br>193.83)           | 265.35<br>(147.61 to<br>442.91)          |
| Tracheal, bronchus, and lung cancer  | 17,054.93<br>(14,960.66 to<br>19,462.34)    | 40,781.76<br>(25,406.51 to<br>63,762.76)    | 23,995.80<br>(16,102.12 to<br>34,184.05)    | 58,567.79<br>(35,669.68 to<br>90,936.53)    | 699.97<br>(616.64 to<br>791.03)       | 1,636.84<br>(1,047.24 to<br>2,470.78)    | 1,019.16<br>(714.47 to<br>1,429.06)      | 2,355.79<br>(1,478.96 to<br>3,599.49)    |
| Malignant skin melanoma              | 887.67<br>(723.92 to<br>1,358.76)           | 2,313.90<br>(1,807.20 to<br>3,537.97)       | 2,550.39<br>(1,974.62 to<br>3,910.57)       | 2,038.08<br>(1,595.32 to<br>3,133.44)       | 31.69<br>(26.06 to<br>46.99)          | 88.14<br>(71.88 to<br>127.76)            | 100.87<br>(81.48 to<br>147.43)           | 74.21<br>(61.05 to<br>108.04)            |
| Non-melanoma skin cancer             | 737.72<br>(628.07 to<br>858.12)             | 1,733.72<br>(1,445.98 to<br>2,106.11)       | 1,691.22<br>(1,393.19 to<br>2,051.16)       | 1,833.98<br>(1,524.57 to<br>2,248.26)       | 26.71<br>(23.06 to<br>30.76)          | 69.13<br>(60.83 to<br>78.77)             | 70.99<br>(61.93 to<br>81.12)             | 68.66<br>(60.06 to<br>78.39)             |
| Breast cancer                        | 21,586.91<br>(17,673.86 to<br>26,082.38)    | 46,972.83<br>(34,274.42 to<br>63,697.32)    | 47,015.07<br>(34,418.50 to<br>63,156.37)    | 47,424.18<br>(34,594.88 to<br>65,343.44)    | 679.72<br>(561.31 to<br>813.21)       | 1,583.12<br>(1,177.07 to<br>2,111.21)    | 1,616.58<br>(1,209.87 to<br>2,117.50)    | 1,563.47<br>(1,162.61 to<br>2,108.01)    |
| Cervical cancer                      | 28,432.12<br>(17,702.37 to<br>36,023.85)    | 43,044.70<br>(26,198.67 to<br>60,616.84)    | 40,468.69<br>(24,546.49 to<br>57,532.57)    | 48,045.74<br>(28,444.97 to<br>68,062.61)    | 892.12<br>(561.36 to<br>1,121.89)     | 1,397.22<br>(850.29 to<br>1,915.91)      | 1,337.56<br>(817.86 to<br>1,846.42)      | 1,530.89<br>(911.56 to<br>2,105.14)      |
| Uterine cancer                       | 3,394.98<br>(2,579.36 to<br>4,178.26)       | 6,694.36<br>(4,873.77 to<br>8,974.74)       | 6,310.58<br>(4,565.38 to<br>8,598.14)       | 7,366.52<br>(5,384.51 to<br>9,843.56)       | 134.19<br>(102.93 to<br>163.33)       | 277.12<br>(208.39 to<br>354.96)          | 269.10<br>(203.81 to<br>350.04)          | 294.65<br>(220.65 to<br>374.86)          |
| Ovarian cancer                       | 4,200.42<br>(3,356.59 to<br>5,262.57)       | 10,709.10<br>(7,632.22 to<br>14,920.44)     | 11,174.44<br>(8,016.15 to<br>15,383.75)     | 9,897.03<br>(7,049.09 to<br>13,548.13)      | 134.32<br>(108.09 to<br>167.96)       | 359.94<br>(260.20 to<br>489.74)          | 380.69<br>(277.34 to<br>519.50)          | 326.21<br>(236.22 to<br>446.06)          |



| Prostate cancer                 | 11,487.32<br>(7,119.79 to<br>14,295.16)                          | 30,482.97<br>(19,471.52 to<br>37,240.06)                         | 33,144.00<br>(21,541.94 to<br>40,355.28)                         | 27,599.59<br>(17,499.21 to<br>33,898.98)                           | 653.66<br>(400.78 to<br>808.99)                               | 1,757.19<br>(1,126.16 to<br>2,132.08)                         | 1,973.71<br>(1,286.43 to<br>2,364.69)                         | 1,532.03<br>(962.59 to<br>1,889.47)                           |
|---------------------------------|------------------------------------------------------------------|------------------------------------------------------------------|------------------------------------------------------------------|--------------------------------------------------------------------|---------------------------------------------------------------|---------------------------------------------------------------|---------------------------------------------------------------|---------------------------------------------------------------|
| Testicular cancer               | 666.69<br>(484.90 to<br>983.57)                                  | 1,131.15<br>(775.79 to<br>1,682.32)                              | 1,082.18<br>(741.09 to<br>1,614.92)                              | 1,224.88<br>(832.70 to<br>1,812.15)                                | 14.62<br>(10.87 to<br>21.04)                                  | 26.62<br>(18.86 to<br>38.89)                                  | 25.88<br>(18.20 to<br>38.05)                                  | 28.18<br>(19.90 to<br>40.89)                                  |
| <b>Senegal</b>                  |                                                                  |                                                                  |                                                                  |                                                                    |                                                               |                                                               |                                                               |                                                               |
| Cause                           | YLLs (actual counts)                                             |                                                                  |                                                                  |                                                                    | Deaths (actual counts)                                        |                                                               |                                                               |                                                               |
|                                 | 2016                                                             | 2040 Forecast                                                    | 2040 Better Scenario                                             | 2040 Worse Scenario                                                | 2016                                                          | 2040 Forecast                                                 | 2040 Better Scenario                                          | 2040 Worse Scenario                                           |
| Kidney cancer                   | 3,225.05<br>(2,638.33 to<br>3,909.77)                            | 6,871.99<br>(5,687.62 to<br>8,319.11)                            | 7,145.79<br>(5,924.10 to<br>8,706.87)                            | 6,803.74<br>(5,553.75 to<br>8,344.38)                              | 85.50<br>(74.18 to<br>96.59)                                  | 229.16<br>(194.89 to<br>270.63)                               | 246.98<br>(208.76 to<br>293.28)                               | 213.14<br>(178.29 to<br>254.78)                               |
| Bladder cancer                  | 4,044.86<br>(3,512.75 to<br>4,614.11)                            | 9,971.88<br>(7,789.38 to<br>12,992.34)                           | 9,415.80<br>(7,486.84 to<br>11,918.15)                           | 11,004.08<br>(8,349.07 to<br>14,854.78)                            | 169.58<br>(148.83 to<br>191.62)                               | 423.57<br>(340.89 to<br>527.13)                               | 419.33<br>(342.82 to<br>511.55)                               | 499.74<br>(352.01 to<br>584.45)                               |
| Brain and nervous system cancer | 10,399.44<br>(8,227.14 to<br>12,266.25)                          | 20,778.08<br>(15,502.04 to<br>26,047.86)                         | 21,202.09<br>(15,888.96 to<br>26,798.78)                         | 21,235.09<br>(15,990.04 to<br>26,740.36)                           | 231.09<br>(186.12 to<br>266.54)                               | 554.35<br>(428.56 to<br>680.15)                               | 581.65<br>(451.31 to<br>717.73)                               | 534.49<br>(414.35 to<br>650.88)                               |
| Thyroid cancer                  | 952.04<br>(791.70 to<br>1,156.50)                                | 1,928.02<br>(1,444.56 to<br>2,628.00)                            | 1,780.78<br>(1,345.09 to<br>2,436.68)                            | 2,206.43<br>(1,604.35 to<br>3,040.21)                              | 31.16<br>(25.82 to<br>37.31)                                  | 66.33<br>(50.73 to<br>88.53)                                  | 62.75<br>(48.34 to<br>82.45)                                  | 73.65<br>(55.04 to<br>99.23)                                  |
| Mesothelioma                    | 419.22<br>(335.83 to<br>555.06)                                  | 894.41<br>(679.49 to<br>1,214.88)                                | 875.17<br>(661.99 to<br>1,196.11)                                | 937.06<br>(709.33 to<br>1,274.79)                                  | 13.45<br>(10.92 to<br>17.56)                                  | 30.73<br>(24.08 to<br>40.44)                                  | 31.16<br>(24.21 to<br>40.58)                                  | 30.84<br>(24.07 to<br>40.67)                                  |
| Hodgkin lymphoma                | 1,653.70<br>(1,301.61 to<br>2,097.49)                            | 1,839.04<br>(1,341.23 to<br>2,499.03)                            | 1,596.21<br>(1,148.13 to<br>2,154.97)                            | 2,350.98<br>(1,715.81 to<br>3,121.85)                              | 34.71<br>(27.09 to<br>42.92)                                  | 43.18<br>(31.10 to<br>56.12)                                  | 38.31<br>(27.26 to<br>49.99)                                  | 52.93<br>(39.11 to<br>68.00)                                  |
| Non-Hodgkin lymphoma            | 13,802.90<br>(11,629.92 to<br>16,362.17)                         | 23,979.75<br>(19,445.33 to<br>29,858.36)                         | 24,284.72<br>(19,686.58 to<br>30,214.42)                         | 25,081.36<br>(20,088.77 to<br>31,603.54)                           | 294.65<br>(257.86 to<br>335.29)                               | 630.22<br>(528.54 to<br>757.92)                               | 660.28<br>(548.86 to<br>799.50)                               | 617.63<br>(514.56 to<br>741.76)                               |
| Multiple myeloma                | 2,452.44<br>(2,054.91 to<br>3,090.16)                            | 7,115.64<br>(5,465.69 to<br>9,548.31)                            | 7,467.79<br>(5,803.51 to<br>9,989.03)                            | 6,707.25<br>(5,095.75 to<br>9,136.86)                              | 88.83<br>(74.57 to<br>111.62)                                 | 267.16<br>(211.33 to<br>347.68)                               | 286.44<br>(226.97 to<br>369.73)                               | 245.38<br>(191.88 to<br>323.39)                               |
| Leukemia                        | 14,938.54<br>(11,680.00 to<br>18,080.09)                         | 23,099.40<br>(17,446.70 to<br>29,275.15)                         | 22,391.16<br>(17,154.10 to<br>28,281.39)                         | 25,354.66<br>(19,113.32 to<br>32,439.86)                           | 321.50<br>(254.60 to<br>374.30)                               | 603.57<br>(474.59 to<br>746.62)                               | 599.70<br>(475.07 to<br>737.01)                               | 637.03<br>(495.69 to<br>796.80)                               |
| Acute lymphoid leukemia         | 3,230.68<br>(2,238.65 to<br>4,336.16)                            | 4,538.07<br>(3,022.75 to<br>6,240.43)                            | 4,445.09<br>(2,976.57 to<br>6,104.83)                            | 5,043.30<br>(3,328.17 to<br>6,959.68)                              | 54.80<br>(38.91 to<br>71.62)                                  | 93.43<br>(63.40 to<br>125.26)                                 | 93.07<br>(63.97 to<br>125.18)                                 | 99.50<br>(67.05 to<br>133.35)                                 |
| Chronic lymphoid leukemia       | 630.99<br>(457.58 to<br>780.36)                                  | 1,281.36<br>(914.02 to<br>1,714.65)                              | 1,271.55<br>(904.27 to<br>1,683.79)                              | 1,318.17<br>(934.78 to<br>1,788.48)                                | 27.86<br>(19.66 to<br>34.54)                                  | 57.39<br>(40.32 to<br>74.85)                                  | 58.10<br>(41.00 to<br>75.58)                                  | 57.70<br>(40.37 to<br>76.27)                                  |
| Acute myeloid leukemia          | 5,465.36<br>(3,719.58 to<br>7,423.64)                            | 9,636.35<br>(6,844.76 to<br>12,820.16)                           | 9,686.70<br>(6,947.81 to<br>12,895.72)                           | 10,201.68<br>(7,131.96 to<br>13,817.34)                            | 101.79<br>(74.94 to<br>130.19)                                | 226.81<br>(169.03 to<br>292.25)                               | 233.13<br>(175.41 to<br>300.19)                               | 228.10<br>(166.80 to<br>297.66)                               |
| Chronic myeloid leukemia        | 1,641.79<br>(1,242.50 to<br>2,076.88)                            | 2,054.42<br>(1,435.91 to<br>2,930.68)                            | 1,985.64<br>(1,398.10 to<br>2,816.72)                            | 2,182.31<br>(1,520.98 to<br>3,154.90)                              | 39.90<br>(31.24 to<br>49.69)                                  | 55.47<br>(40.58 to<br>75.58)                                  | 54.84<br>(41.62 to<br>74.73)                                  | 57.64<br>(41.62 to<br>79.66)                                  |
| Other leukemia                  | 3,969.71<br>(2,867.43 to<br>5,150.72)                            | 5,499.20<br>(3,644.06 to<br>7,617.74)                            | 5,002.17<br>(3,314.50 to<br>6,981.15)                            | 6,609.20<br>(4,395.16 to<br>9,171.66)                              | 97.15<br>(71.56 to<br>123.69)                                 | 170.47<br>(118.47 to<br>229.98)                               | 160.56<br>(111.93 to<br>214.76)                               | 194.10<br>(134.43 to<br>264.57)                               |
| Other neoplasms                 | 22,314.60<br>(18,690.90 to<br>27,178.17)                         | 38,075.58<br>(31,897.44 to<br>47,511.65)                         | 38,024.89<br>(31,705.77 to<br>47,750.37)                         | 40,936.77<br>(33,674.80 to<br>50,695.87)                           | 515.34<br>(448.07 to<br>607.58)                               | 1,131.53<br>(985.66 to<br>1,344.45)                           | 1,187.45<br>(1,029.46 to<br>1,421.44)                         | 1,106.76<br>(959.16 to<br>1,311.81)                           |
| <b>Cardiovascular diseases</b>  | <b>377,348.36</b><br><b>(338,116.89 to</b><br><b>413,995.76)</b> | <b>596,695.23</b><br><b>(406,005.21 to</b><br><b>848,481.01)</b> | <b>370,586.71</b><br><b>(262,076.58 to</b><br><b>512,386.80)</b> | <b>992,663.51</b><br><b>(655,103.24 to</b><br><b>1,458,810.55)</b> | <b>16,210.58</b><br><b>(14,583.24 to</b><br><b>17,639.67)</b> | <b>27,861.02</b><br><b>(20,731.50 to</b><br><b>37,471.39)</b> | <b>18,883.15</b><br><b>(14,491.38 to</b><br><b>24,414.25)</b> | <b>42,664.89</b><br><b>(30,660.37 to</b><br><b>58,703.82)</b> |
| Rheumatic heart disease         | 8,260.81<br>(6,901.92 to<br>9,724.53)                            | 6,184.78<br>(4,752.17 to<br>8,403.11)                            | 5,283.91<br>(4,021.41 to<br>7,115.53)                            | 8,048.98<br>(6,221.62 to<br>10,787.48)                             | 265.15<br>(225.16 to<br>310.03)                               | 251.00<br>(200.24 to<br>324.34)                               | 226.55<br>(181.13 to<br>290.23)                               | 302.18<br>(239.73 to<br>392.57)                               |
| Ischemic heart disease          | 178,784.45<br>(155,876.49 to<br>200,314.20)                      | 310,270.35<br>(184,000.30 to<br>501,230.74)                      | 169,375.89<br>(105,592.89 to<br>268,642.20)                      | 539,149.14<br>(316,130.37 to<br>869,045.84)                        | 8,546.64<br>(7,517.51 to<br>9,503.01)                         | 15,434.00<br>(10,093.65 to<br>22,969.13)                      | 9,467.72<br>(6,355.81 to<br>14,164.20)                        | 24,566.48<br>(15,828.92 to<br>37,372.04)                      |

|                                               |                                                               |                                                                |                                                               |                                                                 |                                                            |                                                            |                                                            |                                                            |
|-----------------------------------------------|---------------------------------------------------------------|----------------------------------------------------------------|---------------------------------------------------------------|-----------------------------------------------------------------|------------------------------------------------------------|------------------------------------------------------------|------------------------------------------------------------|------------------------------------------------------------|
| Stroke                                        | 128,317.33<br>(109,774.48 to<br>149,089.53)                   | 167,572.09<br>(98,370.62 to<br>285,123.31)                     | 96,055.62<br>(59,273.30 to<br>160,341.97)                     | 305,322.72<br>(171,038.01 to<br>522,886.61)                     | 5,258.87<br>(4,531.10 to<br>6,069.16)                      | 7,539.95<br>(4,864.10 to<br>11,720.75)                     | 4,834.98<br>(3,226.43 to<br>7,089.61)                      | 12,495.55<br>(7,793.93 to<br>19,906.60)                    |
| Ischemic stroke                               | 38,737.20<br>(32,190.65 to<br>45,883.78)                      | 51,969.28<br>(29,810.66 to<br>84,016.15)                       | 33,566.16<br>(20,067.88 to<br>52,236.76)                      | 81,157.66<br>(45,568.99 to<br>133,341.47)                       | 2,137.49<br>(1,790.55 to<br>2,488.07)                      | 3,087.09<br>(1,889.37 to<br>4,741.38)                      | 2,213.45<br>(1,406.58 to<br>3,322.77)                      | 4,407.54<br>(2,664.72 to<br>6,884.52)                      |
| Intracerebral hemorrhage                      | 89,580.13<br>(76,495.22 to<br>103,851.55)                     | 115,602.81<br>(60,928.64 to<br>214,092.99)                     | 62,489.46<br>(34,488.20 to<br>114,281.42)                     | 224,165.07<br>(112,549.91 to<br>406,339.17)                     | 3,131.38<br>(2,684.75 to<br>3,652.02)                      | 4,452.86<br>(2,606.56 to<br>7,513.72)                      | 2,621.53<br>(1,610.93 to<br>4,263.32)                      | 8,088.01<br>(4,538.81 to<br>13,985.14)                     |
| Hypertensive heart disease                    | 13,052.98<br>(7,676.54 to<br>18,347.37)                       | 21,917.61<br>(11,195.51 to<br>39,596.43)                       | 17,240.21<br>(9,161.30 to<br>28,692.03)                       | 29,993.80<br>(14,503.03 to<br>57,744.75)                        | 554.06<br>(337.87 to<br>772.52)                            | 1,030.23<br>(557.16 to<br>1,822.53)                        | 845.03<br>(476.82 to<br>1,366.54)                          | 1,329.03<br>(673.03 to<br>2,553.42)                        |
| Cardiomyopathy and myocarditis                | 5,804.54<br>(4,187.76 to<br>7,385.08)                         | 11,392.80<br>(7,223.76 to<br>17,013.66)                        | 11,271.15<br>(7,142.19 to<br>16,575.02)                       | 12,010.26<br>(7,563.15 to<br>18,413.98)                         | 159.10<br>(116.47 to<br>202.21)                            | 371.97<br>(245.82 to<br>541.93)                            | 386.24<br>(257.65 to<br>557.35)                            | 365.27<br>(242.05 to<br>533.94)                            |
| Myocarditis                                   | 1,314.04<br>(788.18 to<br>1,965.80)                           | 1,950.27<br>(1,067.34 to<br>3,113.31)                          | 1,851.23<br>(993.53 to<br>2,950.17)                           | 2,195.01<br>(1,216.81 to<br>3,468.28)                           | 26.65<br>(16.19 to<br>39.80)                               | 46.92<br>(27.37 to<br>71.70)                               | 47.43<br>(27.32 to<br>72.64)                               | 48.84<br>(28.47 to<br>74.82)                               |
| <b>Senegal</b>                                |                                                               |                                                                |                                                               |                                                                 |                                                            |                                                            |                                                            |                                                            |
| Cause                                         | YLLs (actual counts)                                          |                                                                |                                                               |                                                                 | Deaths (actual counts)                                     |                                                            |                                                            |                                                            |
|                                               | 2016                                                          | 2040 Forecast                                                  | 2040 Better Scenario                                          | 2040 Worse Scenario                                             | 2016                                                       | 2040 Forecast                                              | 2040 Better Scenario                                       | 2040 Worse Scenario                                        |
| Alcoholic cardiomyopathy                      | 333.78<br>(180.13 to<br>514.85)                               | 798.14<br>(406.42 to<br>1,309.20)                              | 851.55<br>(438.08 to<br>1,380.04)                             | 737.44<br>(382.35 to<br>1,201.70)                               | 10.10<br>(5.51 to<br>15.36)                                | 25.07<br>(12.73 to<br>40.26)                               | 27.19<br>(14.12 to<br>43.00)                               | 22.73<br>(11.81 to<br>35.98)                               |
| Other cardiomyopathy                          | 4,156.72<br>(3,122.52 to<br>5,296.70)                         | 8,644.39<br>(5,448.56 to<br>13,687.89)                         | 8,568.37<br>(5,400.29 to<br>13,255.75)                        | 9,077.81<br>(5,697.37 to<br>14,747.16)                          | 122.35<br>(92.41 to<br>154.93)                             | 299.98<br>(197.14 to<br>458.26)                            | 311.62<br>(205.51 to<br>470.87)                            | 293.70<br>(192.50 to<br>452.16)                            |
| Atrial fibrillation and flutter               | 1,206.23<br>(931.55 to<br>1,548.02)                           | 3,133.21<br>(2,415.13 to<br>4,062.39)                          | 3,415.36<br>(2,605.57 to<br>4,449.79)                         | 2,909.75<br>(2,226.69 to<br>3,817.53)                           | 99.70<br>(76.51 to<br>127.96)                              | 275.02<br>(207.39 to<br>362.16)                            | 317.41<br>(240.75 to<br>410.66)                            | 237.05<br>(175.55 to<br>313.10)                            |
| Aortic aneurysm                               | 1,443.26<br>(1,159.21 to<br>1,795.44)                         | 3,022.81<br>(2,230.32 to<br>4,175.94)                          | 3,039.97<br>(2,248.36 to<br>4,133.70)                         | 3,127.55<br>(2,287.88 to<br>4,391.57)                           | 59.96<br>(48.72 to<br>74.21)                               | 135.77<br>(105.57 to<br>177.05)                            | 143.66<br>(111.13 to<br>188.06)                            | 131.36<br>(100.52 to<br>176.09)                            |
| Peripheral artery disease                     | 72.41<br>(48.08 to<br>124.99)                                 | 313.76<br>(188.13 to<br>584.53)                                | 346.69<br>(206.85 to<br>644.35)                               | 265.11<br>(161.32 to<br>481.23)                                 | 4.52<br>(3.01 to<br>7.66)                                  | 20.74<br>(12.80 to<br>37.04)                               | 24.52<br>(15.08 to<br>43.67)                               | 16.28<br>(10.18 to<br>28.98)                               |
| Endocarditis                                  | 5,291.40<br>(4,046.54 to<br>6,681.36)                         | 8,829.12<br>(5,991.09 to<br>13,049.92)                         | 8,310.06<br>(5,669.37 to<br>11,993.99)                        | 10,394.18<br>(7,049.00 to<br>15,183.95)                         | 132.99<br>(103.06 to<br>160.52)                            | 286.02<br>(196.10 to<br>395.43)                            | 284.58<br>(196.11 to<br>393.41)                            | 302.93<br>(206.60 to<br>426.72)                            |
| Other cardiovascular and circulatory diseases | 35,114.95<br>(27,096.20 to<br>49,806.25)                      | 64,058.70<br>(46,552.11 to<br>95,186.14)                       | 56,247.85<br>(40,775.05 to<br>81,728.64)                      | 81,442.01<br>(58,237.07 to<br>122,859.24)                       | 1,129.59<br>(848.65 to<br>1,652.34)                        | 2,516.33<br>(1,847.33 to<br>3,747.82)                      | 2,352.46<br>(1,724.42 to<br>3,481.07)                      | 2,918.76<br>(2,112.58 to<br>4,385.65)                      |
| <b>Chronic respiratory diseases</b>           | <b>69,246.63</b><br><b>(60,810.46 to</b><br><b>81,714.55)</b> | <b>92,915.53</b><br><b>(64,279.17 to</b><br><b>139,559.04)</b> | <b>62,512.76</b><br><b>(46,834.68 to</b><br><b>87,093.95)</b> | <b>143,084.24</b><br><b>(95,568.67 to</b><br><b>229,680.25)</b> | <b>2,682.69</b><br><b>(2,361.94 to</b><br><b>3,172.21)</b> | <b>3,884.22</b><br><b>(2,739.72 to</b><br><b>5,929.25)</b> | <b>2,706.53</b><br><b>(2,085.77 to</b><br><b>3,676.72)</b> | <b>5,875.69</b><br><b>(3,913.63 to</b><br><b>9,460.87)</b> |
| Chronic obstructive pulmonary disease         | 37,386.08<br>(30,756.73 to<br>44,859.69)                      | 58,359.89<br>(34,520.59 to<br>105,477.16)                      | 32,355.95<br>(21,455.21 to<br>49,842.80)                      | 99,517.18<br>(56,389.89 to<br>183,310.83)                       | 1,698.54<br>(1,411.12 to<br>2,029.09)                      | 2,687.90<br>(1,666.55 to<br>4,662.31)                      | 1,617.39<br>(1,120.77 to<br>2,413.37)                      | 4,450.31<br>(2,622.28 to<br>7,847.31)                      |
| Pneumoconiosis                                | 85.15<br>(63.01 to<br>115.10)                                 | 117.40<br>(84.50 to<br>159.54)                                 | 110.51<br>(78.23 to<br>152.74)                                | 122.16<br>(89.36 to<br>165.05)                                  | 3.16<br>(2.41 to<br>4.12)                                  | 5.13<br>(3.86 to<br>6.73)                                  | 4.95<br>(3.65 to<br>6.50)                                  | 5.16<br>(3.86 to<br>6.90)                                  |
| Silicosis                                     | 7.60<br>(3.98 to<br>12.41)                                    | 7.46<br>(3.85 to<br>13.69)                                     | 7.21<br>(3.75 to<br>13.25)                                    | 7.92<br>(4.11 to<br>14.70)                                      | 0.27<br>(0.15 to<br>0.44)                                  | 0.30<br>(0.17 to<br>0.50)                                  | 0.30<br>(0.17 to<br>0.50)                                  | 0.31<br>(0.17 to<br>0.51)                                  |
| Asbestosis                                    | 21.11<br>(13.99 to<br>30.17)                                  | 34.63<br>(23.06 to<br>51.46)                                   | 35.34<br>(22.85 to<br>53.15)                                  | 33.91<br>(22.76 to<br>50.43)                                    | 0.53<br>(0.36 to<br>0.75)                                  | 1.01<br>(0.68 to<br>1.45)                                  | 1.05<br>(0.69 to<br>1.55)                                  | 0.96<br>(0.66 to<br>1.39)                                  |
| Coal workers pneumoconiosis                   | 4.68<br>(2.30 to<br>8.25)                                     | 5.57<br>(2.71 to<br>10.10)                                     | 4.27<br>(2.04 to<br>8.01)                                     | 7.13<br>(3.52 to<br>12.88)                                      | 0.18<br>(0.09 to<br>0.31)                                  | 0.24<br>(0.12 to<br>0.44)                                  | 0.19<br>(0.09 to<br>0.35)                                  | 0.30<br>(0.15 to<br>0.55)                                  |
| Other pneumoconiosis                          | 51.77<br>(38.44 to<br>69.45)                                  | 69.74<br>(49.94 to<br>94.52)                                   | 63.70<br>(45.02 to<br>86.82)                                  | 73.20<br>(53.08 to<br>98.65)                                    | 2.17<br>(1.64 to<br>2.82)                                  | 3.57<br>(2.65 to<br>4.84)                                  | 3.40<br>(2.51 to<br>4.56)                                  | 3.59<br>(2.63 to<br>5.00)                                  |

|                                                                |                                                    |                                                     |                                                     |                                                      |                                                |                                                |                                                |                                                |
|----------------------------------------------------------------|----------------------------------------------------|-----------------------------------------------------|-----------------------------------------------------|------------------------------------------------------|------------------------------------------------|------------------------------------------------|------------------------------------------------|------------------------------------------------|
| Asthma                                                         | 22,899.22<br>(18,174.12 to<br>29,345.88)           | 18,615.09<br>(12,547.94 to<br>28,616.37)            | 15,345.43<br>(10,503.04 to<br>22,881.15)            | 25,370.18<br>(16,463.44 to<br>39,480.38)             | 737.41<br>(587.67 to<br>949.00)                | 682.74<br>(463.29 to<br>1,019.91)              | 590.38<br>(409.59 to<br>860.72)                | 872.36<br>(573.39 to<br>1,329.01)              |
| Interstitial lung disease and pulmonary sarcoidosis            | 550.78<br>(360.25 to<br>847.21)                    | 1,494.87<br>(927.52 to<br>2,315.14)                 | 1,647.08<br>(1,008.70 to<br>2,555.07)               | 1,312.17<br>(815.44 to<br>2,065.03)                  | 20.62<br>(12.81 to<br>31.78)                   | 60.36<br>(37.11 to<br>93.55)                   | 68.87<br>(42.04 to<br>105.91)                  | 50.59<br>(31.03 to<br>78.90)                   |
| Other chronic respiratory diseases                             | 8,325.39<br>(5,575.30 to<br>11,031.58)             | 14,328.27<br>(9,368.85 to<br>19,655.18)             | 13,053.78<br>(8,797.74 to<br>17,803.44)             | 16,762.56<br>(10,779.00 to<br>23,474.22)             | 222.96<br>(144.00 to<br>293.91)                | 448.10<br>(293.26 to<br>619.43)                | 424.94<br>(285.95 to<br>571.51)                | 497.27<br>(316.17 to<br>704.33)                |
| <b>Cirrhosis and other chronic liver diseases</b>              | <b>75,843.41<br/>(47,699.50 to<br/>109,807.04)</b> | <b>146,679.50<br/>(87,899.32 to<br/>220,946.86)</b> | <b>138,951.40<br/>(83,528.44 to<br/>209,384.47)</b> | <b>161,393.00<br/>(96,539.62 to<br/>244,854.40)</b>  | <b>2,187.73<br/>(1,395.60 to<br/>3,130.23)</b> | <b>4,585.59<br/>(2,850.16 to<br/>6,797.45)</b> | <b>4,444.68<br/>(2,788.03 to<br/>6,537.14)</b> | <b>4,893.38<br/>(3,026.92 to<br/>7,261.26)</b> |
| Cirrhosis and other chronic liver diseases due to hepatitis B  | 32,949.65<br>(20,232.47 to<br>49,745.12)           | 68,028.37<br>(40,011.43 to<br>107,173.40)           | 65,154.11<br>(38,482.92 to<br>101,063.50)           | 72,979.44<br>(42,748.92 to<br>115,367.26)            | 995.43<br>(622.25 to<br>1,470.97)              | 2,163.19<br>(1,322.79 to<br>3,207.26)          | 2,118.25<br>(1,307.92 to<br>3,190.96)          | 2,259.06<br>(1,378.76 to<br>3,475.85)          |
| Cirrhosis and other chronic liver diseases due to hepatitis C  | 12,103.27<br>(6,595.15 to<br>19,341.67)            | 25,608.11<br>(13,731.56 to<br>41,269.86)            | 24,468.45<br>(13,277.99 to<br>39,486.25)            | 27,532.91<br>(14,730.07 to<br>44,665.16)             | 565.43<br>(204.60 to<br>578.30)                | 804.41<br>(449.84 to<br>1,266.96)              | 782.09<br>(439.66 to<br>1,228.03)              | 846.77<br>(468.05 to<br>1,348.83)              |
| Cirrhosis and other chronic liver diseases due to alcohol use  | 15,099.93<br>(9,060.62 to<br>22,704.60)            | 30,462.69<br>(17,837.32 to<br>47,032.72)            | 28,372.96<br>(16,491.09 to<br>43,303.07)            | 34,549.89<br>(20,387.85 to<br>53,731.49)             | 479.37<br>(296.83 to<br>706.97)                | 1,008.81<br>(613.98 to<br>1,527.65)            | 959.80<br>(581.61 to<br>1,443.47)              | 1,118.80<br>(676.91 to<br>1,724.36)            |
| Cirrhosis and other chronic liver diseases due to other causes | 15,690.56<br>(10,413.48 to<br>21,407.34)           | 22,580.33<br>(14,075.19 to<br>32,931.08)            | 20,955.87<br>(13,043.78 to<br>30,604.47)            | 26,330.76<br>(16,387.63 to<br>38,273.81)             | 347.51<br>(231.81 to<br>474.21)                | 609.19<br>(394.25 to<br>863.89)                | 584.54<br>(379.23 to<br>819.63)                | 668.75<br>(435.35 to<br>950.48)                |
| <b>Digestive diseases</b>                                      | <b>83,066.56<br/>(67,610.37 to<br/>104,922.45)</b> | <b>111,689.13<br/>(90,271.42 to<br/>140,621.16)</b> | <b>102,864.83<br/>(82,576.68 to<br/>130,492.97)</b> | <b>132,397.78<br/>(106,714.44 to<br/>168,167.16)</b> | <b>2,285.43<br/>(1,938.04 to<br/>2,685.71)</b> | <b>3,820.02<br/>(3,238.45 to<br/>4,576.01)</b> | <b>3,681.44<br/>(3,084.30 to<br/>4,405.18)</b> | <b>4,211.07<br/>(3,554.81 to<br/>5,067.21)</b> |
| Peptic ulcer disease                                           | 13,629.66<br>(10,691.61 to<br>17,089.73)           | 12,296.17<br>(8,961.34 to<br>16,333.62)             | 10,381.73<br>(7,467.22 to<br>13,899.22)             | 16,332.98<br>(11,988.53 to<br>21,656.47)             | 421.34<br>(326.57 to<br>526.86)                | 449.60<br>(333.04 to<br>592.53)                | 396.56<br>(289.08 to<br>524.49)                | 561.53<br>(413.24 to<br>733.41)                |

**Senegal**

| Cause                                      | YLLs (actual counts)                              |                                                   |                                                   |                                                   | Deaths (actual counts)                         |                                                |                                                |                                                |
|--------------------------------------------|---------------------------------------------------|---------------------------------------------------|---------------------------------------------------|---------------------------------------------------|------------------------------------------------|------------------------------------------------|------------------------------------------------|------------------------------------------------|
|                                            | 2016                                              | 2040 Forecast                                     | 2040 Better Scenario                              | 2040 Worse Scenario                               | 2016                                           | 2040 Forecast                                  | 2040 Better Scenario                           | 2040 Worse Scenario                            |
| Gastritis and duodenitis                   | 3,765.04<br>(2,696.17 to<br>5,231.34)             | 5,845.30<br>(4,062.80 to<br>8,285.12)             | 5,423.49<br>(3,733.87 to<br>7,718.57)             | 6,644.02<br>(4,623.25 to<br>9,393.13)             | 89.91<br>(65.74 to<br>121.80)                  | 155.83<br>(112.18 to<br>211.52)                | 148.20<br>(106.53 to<br>202.19)                | 170.78<br>(123.18 to<br>230.84)                |
| Appendicitis                               | 6,572.16<br>(4,844.98 to<br>9,823.90)             | 7,185.76<br>(5,180.41 to<br>9,619.20)             | 6,351.56<br>(4,600.40 to<br>8,521.85)             | 9,007.41<br>(6,491.88 to<br>12,484.02)            | 174.07<br>(134.37 to<br>227.59)                | 252.15<br>(186.97 to<br>318.71)                | 236.10<br>(171.60 to<br>298.88)                | 289.41<br>(215.93 to<br>369.23)                |
| Paralytic ileus and intestinal obstruction | 30,492.84<br>(22,445.99 to<br>44,510.81)          | 41,733.90<br>(32,554.87 to<br>56,071.12)          | 39,798.10<br>(30,777.21 to<br>53,171.04)          | 48,170.25<br>(36,690.02 to<br>65,694.59)          | 745.40<br>(595.00 to<br>973.34)                | 1,411.92<br>(1,148.81 to<br>1,818.75)          | 1,422.69<br>(1,145.58 to<br>1,840.07)          | 1,465.70<br>(1,192.07 to<br>1,896.49)          |
| Inguinal, femoral, and abdominal hernia    | 3,158.11<br>(2,177.34 to<br>4,447.43)             | 3,687.68<br>(2,500.71 to<br>5,384.20)             | 3,402.06<br>(2,306.70 to<br>5,006.07)             | 4,254.77<br>(2,855.34 to<br>6,199.03)             | 107.19<br>(74.70 to<br>153.73)                 | 143.48<br>(98.73 to<br>209.00)                 | 138.96<br>(95.06 to<br>201.91)                 | 154.89<br>(105.57 to<br>224.82)                |
| Inflammatory bowel disease                 | 2,127.30<br>(1,464.31 to<br>3,298.14)             | 3,754.06<br>(2,723.31 to<br>5,780.69)             | 3,755.31<br>(2,702.04 to<br>5,751.46)             | 3,899.34<br>(2,810.40 to<br>5,984.70)             | 58.10<br>(43.48 to<br>86.10)                   | 124.31<br>(93.14 to<br>187.30)                 | 128.55<br>(96.09 to<br>194.81)                 | 121.75<br>(91.31 to<br>182.12)                 |
| Vascular intestinal disorders              | 1,914.87<br>(1,394.62 to<br>2,610.04)             | 3,260.99<br>(2,371.02 to<br>4,261.73)             | 3,205.32<br>(2,311.58 to<br>4,202.08)             | 3,453.82<br>(2,517.88 to<br>4,530.90)             | 72.37<br>(53.92 to<br>91.87)                   | 151.88<br>(111.96 to<br>192.84)                | 157.38<br>(114.97 to<br>199.45)                | 149.13<br>(110.19 to<br>190.26)                |
| Gallbladder and biliary diseases           | 3,371.76<br>(2,667.57 to<br>4,206.31)             | 4,794.41<br>(3,096.49 to<br>7,330.90)             | 3,902.37<br>(2,595.15 to<br>5,812.63)             | 6,611.97<br>(4,137.98 to<br>10,331.29)            | 113.07<br>(87.74 to<br>144.35)                 | 192.73<br>(125.23 to<br>296.39)                | 163.69<br>(108.79 to<br>242.04)                | 250.07<br>(156.20 to<br>390.09)                |
| Pancreatitis                               | 9,121.50<br>(6,758.32 to<br>11,799.92)            | 16,515.40<br>(11,496.48 to<br>23,376.98)          | 15,240.03<br>(10,563.08 to<br>21,346.12)          | 18,927.31<br>(13,052.37 to<br>27,512.26)          | 254.15<br>(190.76 to<br>325.38)                | 492.08<br>(348.22 to<br>679.14)                | 463.85<br>(326.55 to<br>632.20)                | 552.46<br>(388.45 to<br>776.17)                |
| Other digestive diseases                   | 8,913.32<br>(6,210.86 to<br>11,976.00)            | 12,615.46<br>(8,517.64 to<br>17,581.33)           | 11,424.85<br>(7,663.40 to<br>15,907.92)           | 15,095.90<br>(10,284.28 to<br>20,909.30)          | 249.84<br>(176.43 to<br>323.96)                | 446.03<br>(306.00 to<br>579.20)                | 425.46<br>(291.29 to<br>559.93)                | 495.35<br>(342.38 to<br>648.95)                |
| <b>Neurological disorders</b>              | <b>37,815.11<br/>(33,496.28 to<br/>42,497.48)</b> | <b>70,727.60<br/>(59,381.00 to<br/>84,864.18)</b> | <b>70,629.17<br/>(59,900.81 to<br/>84,987.90)</b> | <b>75,503.06<br/>(62,628.02 to<br/>91,207.34)</b> | <b>1,578.93<br/>(1,380.90 to<br/>1,833.46)</b> | <b>3,948.73<br/>(3,208.66 to<br/>5,024.25)</b> | <b>4,353.43<br/>(3,617.08 to<br/>5,356.47)</b> | <b>3,630.44<br/>(2,868.44 to<br/>4,697.70)</b> |

|                                         |                                                             |                                                              |                                                              |                                                              |                                                      |                                                      |                                                      |                                                      |
|-----------------------------------------|-------------------------------------------------------------|--------------------------------------------------------------|--------------------------------------------------------------|--------------------------------------------------------------|------------------------------------------------------|------------------------------------------------------|------------------------------------------------------|------------------------------------------------------|
| Alzheimer's disease and other dementias | 12,326.03<br>(10,127.54 to<br>15,253.12)                    | 33,148.10<br>(25,292.02 to<br>44,823.68)                     | 35,632.97<br>(28,027.97 to<br>46,419.53)                     | 30,783.22<br>(22,406.59 to<br>43,582.95)                     | 1,042.64<br>(855.94 to<br>1,284.48)                  | 2,943.46<br>(2,210.75 to<br>3,966.48)                | 3,335.91<br>(2,619.45 to<br>4,318.47)                | 2,563.38<br>(1,815.68 to<br>3,655.62)                |
| Parkinson's disease                     | 1,073.75<br>(818.86 to<br>1,397.36)                         | 3,473.48<br>(2,624.44 to<br>4,462.93)                        | 4,166.13<br>(3,134.20 to<br>5,347.77)                        | 2,734.88<br>(2,054.03 to<br>3,543.50)                        | 79.91<br>(60.01 to<br>104.59)                        | 267.79<br>(199.92 to<br>347.81)                      | 334.07<br>(253.10 to<br>434.92)                      | 201.07<br>(145.31 to<br>266.36)                      |
| Epilepsy                                | 20,275.64<br>(17,418.67 to<br>23,614.64)                    | 26,563.44<br>(20,246.10 to<br>35,099.33)                     | 23,176.03<br>(17,503.28 to<br>30,727.70)                     | 34,084.67<br>(25,965.34 to<br>44,289.41)                     | 378.12<br>(327.22 to<br>435.08)                      | 565.77<br>(441.96 to<br>719.22)                      | 504.46<br>(391.25 to<br>650.91)                      | 696.52<br>(546.08 to<br>885.24)                      |
| Multiple sclerosis                      | 326.81<br>(199.12 to<br>474.24)                             | 760.40<br>(436.88 to<br>1,135.54)                            | 791.16<br>(452.98 to<br>1,187.63)                            | 727.92<br>(816.17 to<br>1,353.17)                            | 8.86<br>(5.34 to<br>12.78)                           | 21.69<br>(12.47 to<br>31.91)                         | 22.90<br>(13.10 to<br>33.92)                         | 20.40<br>(11.77 to<br>30.17)                         |
| Motor neuron disease                    | 450.37<br>(362.50 to<br>555.23)                             | 1,105.88<br>(856.11 to<br>1,440.24)                          | 1,176.60<br>(900.23 to<br>1,543.27)                          | 1,044.83<br>(816.17 to<br>1,353.17)                          | 11.59<br>(9.48 to<br>14.21)                          | 34.43<br>(27.03 to<br>44.31)                         | 37.27<br>(29.08 to<br>48.67)                         | 31.33<br>(25.05 to<br>39.82)                         |
| Other neurological disorders            | 3,362.50<br>(2,313.77 to<br>4,652.33)                       | 5,676.29<br>(4,073.30 to<br>7,803.13)                        | 5,686.29<br>(4,143.77 to<br>7,756.98)                        | 6,127.54<br>(4,259.06 to<br>8,690.90)                        | 57.81<br>(42.01 to<br>76.48)                         | 115.58<br>(87.13 to<br>153.40)                       | 118.83<br>(90.60 to<br>157.67)                       | 117.76<br>(86.84 to<br>158.25)                       |
| <b>Mental disorders</b>                 | <b>9,382.52</b><br><b>(4,614.96 to</b><br><b>13,770.31)</b> | <b>21,386.80</b><br><b>(9,807.49 to</b><br><b>32,177.75)</b> | <b>21,291.55</b><br><b>(9,874.75 to</b><br><b>32,354.87)</b> | <b>21,779.52</b><br><b>(9,992.54 to</b><br><b>32,840.81)</b> | <b>222.98</b><br><b>(105.37 to</b><br><b>322.77)</b> | <b>527.22</b><br><b>(240.57 to</b><br><b>780.31)</b> | <b>535.31</b><br><b>(244.27 to</b><br><b>795.41)</b> | <b>524.11</b><br><b>(240.06 to</b><br><b>776.46)</b> |
| Alcohol use disorders                   | 3,665.63<br>(966.25 to<br>6,575.61)                         | 7,080.35<br>(1,624.31 to<br>13,484.12)                       | 7,000.14<br>(1,613.71 to<br>13,450.09)                       | 7,257.93<br>(1,686.80 to<br>13,727.51)                       | 101.01<br>(28.79 to<br>177.84)                       | 204.42<br>(52.26 to<br>374.25)                       | 206.10<br>(53.30 to<br>377.94)                       | 204.93<br>(51.94 to<br>374.25)                       |
| Drug use disorders                      | 5,691.14<br>(3,224.43 to<br>8,093.44)                       | 14,253.53<br>(7,421.76 to<br>21,407.50)                      | 14,238.43<br>(7,298.55 to<br>21,271.89)                      | 14,467.30<br>(7,492.57 to<br>21,727.74)                      | 121.50<br>(68.00 to<br>167.25)                       | 321.81<br>(170.17 to<br>452.03)                      | 328.22<br>(171.08 to<br>460.54)                      | 318.18<br>(168.90 to<br>451.98)                      |
| Opioid use disorders                    | 5,212.96<br>(2,797.14 to<br>7,668.12)                       | 12,800.88<br>(6,228.25 to<br>20,057.11)                      | 12,756.97<br>(6,229.78 to<br>19,944.14)                      | 13,023.62<br>(6,349.43 to<br>20,414.64)                      | 105.61<br>(55.75 to<br>151.59)                       | 269.61<br>(131.21 to<br>404.63)                      | 271.61<br>(132.80 to<br>409.68)                      | 270.05<br>(131.17 to<br>409.44)                      |
| Cocaine use disorders                   | 116.94<br>(36.20 to<br>230.68)                              | 348.54<br>(107.92 to<br>740.33)                              | 334.32<br>(104.23 to<br>676.33)                              | 373.81<br>(113.65 to<br>759.97)                              | 3.06<br>(1.01 to<br>5.74)                            | 9.69<br>(3.13 to<br>18.57)                           | 9.50<br>(3.11 to<br>18.11)                           | 10.09<br>(3.27 to<br>19.57)                          |
| Amphetamine use disorders               | 60.57<br>(21.14 to<br>126.87)                               | 247.70<br>(86.67 to<br>519.22)                               | 230.42<br>(80.72 to<br>487.03)                               | 278.63<br>(96.86 to<br>589.82)                               | 1.61<br>(0.55 to<br>3.16)                            | 6.89<br>(2.41 to<br>13.27)                           | 6.56<br>(2.37 to<br>12.51)                           | 7.52<br>(2.60 to<br>14.65)                           |
| Other drug use disorders                | 300.68<br>(155.20 to<br>466.89)                             | 856.41<br>(437.96 to<br>1,348.49)                            | 916.72<br>(465.89 to<br>1,426.34)                            | 791.24<br>(408.72 to<br>1,253.37)                            | 11.22<br>(5.65 to<br>15.77)                          | 35.63<br>(17.92 to<br>50.63)                         | 40.54<br>(20.45 to<br>57.75)                         | 30.52<br>(15.48 to<br>43.67)                         |
| Eating disorders                        | 25.75<br>(16.35 to<br>54.05)                                | 52.92<br>(31.86 to<br>107.24)                                | 52.97<br>(31.57 to<br>109.64)                                | 54.28<br>(33.39 to<br>105.34)                                | 0.47<br>(0.30 to<br>0.97)                            | 0.99<br>(0.59 to<br>1.99)                            | 0.99<br>(0.59 to<br>2.02)                            | 1.00<br>(0.61 to<br>1.96)                            |

| Senegal                                                    |                                                                  |                                                                  |                                                                  |                                                                  |                                                            |                                                              |                                                              |                                                               |
|------------------------------------------------------------|------------------------------------------------------------------|------------------------------------------------------------------|------------------------------------------------------------------|------------------------------------------------------------------|------------------------------------------------------------|--------------------------------------------------------------|--------------------------------------------------------------|---------------------------------------------------------------|
| Cause                                                      | YLLs (actual counts)                                             |                                                                  |                                                                  |                                                                  | Deaths (actual counts)                                     |                                                              |                                                              |                                                               |
|                                                            | 2016                                                             | 2040 Forecast                                                    | 2040 Better Scenario                                             | 2040 Worse Scenario                                              | 2016                                                       | 2040 Forecast                                                | 2040 Better Scenario                                         | 2040 Worse Scenario                                           |
| <b>Diabetes, urogenital, blood, and endocrine diseases</b> | <b>183,930.13</b><br><b>(165,897.65 to</b><br><b>211,031.84)</b> | <b>304,375.52</b><br><b>(236,972.00 to</b><br><b>389,972.37)</b> | <b>260,812.68</b><br><b>(204,938.87 to</b><br><b>336,483.09)</b> | <b>402,134.98</b><br><b>(316,033.46 to</b><br><b>513,929.69)</b> | <b>5,283.00</b><br><b>(4,782.41 to</b><br><b>5,937.16)</b> | <b>11,407.94</b><br><b>(9,254.26 to</b><br><b>14,085.64)</b> | <b>10,167.98</b><br><b>(8,206.90 to</b><br><b>12,579.48)</b> | <b>14,220.42</b><br><b>(11,440.72 to</b><br><b>17,520.67)</b> |
| Diabetes mellitus                                          | 51,362.11<br>(44,322.80 to<br>60,818.22)                         | 111,878.87<br>(71,031.48 to<br>170,547.27)                       | 93,090.91<br>(58,817.38 to<br>141,172.14)                        | 150,670.50<br>(94,510.17 to<br>226,518.58)                       | 2,185.78<br>(1,869.78 to<br>2,598.22)                      | 5,240.03<br>(3,541.87 to<br>7,600.45)                        | 4,606.88<br>(3,110.04 to<br>6,609.58)                        | 6,697.77<br>(4,408.98 to<br>9,667.30)                         |
| Acute glomerulonephritis                                   | 133.79<br>(117.20 to<br>152.23)                                  | 165.61<br>(130.61 to<br>209.13)                                  | 145.70<br>(114.90 to<br>185.48)                                  | 218.94<br>(171.07 to<br>277.98)                                  | 2.11<br>(1.88 to<br>2.37)                                  | 2.93<br>(2.38 to<br>3.66)                                    | 2.63<br>(2.13 to<br>3.30)                                    | 3.68<br>(2.98 to<br>4.58)                                     |
| Chronic kidney disease                                     | 54,245.81<br>(46,260.25 to<br>63,139.80)                         | 90,267.40<br>(62,500.85 to<br>129,724.32)                        | 73,128.22<br>(51,491.92 to<br>104,680.01)                        | 127,184.57<br>(88,064.22 to<br>186,160.70)                       | 1,561.94<br>(1,337.93 to<br>1,777.87)                      | 3,281.81<br>(2,263.37 to<br>4,748.10)                        | 2,745.50<br>(1,916.58 to<br>3,930.38)                        | 4,390.72<br>(2,966.47 to<br>6,492.70)                         |
| Chronic kidney disease due to diabetes mellitus            | 12,173.03<br>(9,983.99 to<br>14,639.35)                          | 26,529.11<br>(17,090.84 to<br>40,815.97)                         | 21,715.47<br>(14,193.02 to<br>32,929.13)                         | 36,274.21<br>(22,840.54 to<br>57,373.05)                         | 434.48<br>(354.87 to<br>517.84)                            | 1,063.92<br>(695.60 to<br>1,604.01)                          | 894.04<br>(602.20 to<br>1,323.29)                            | 1,407.41<br>(885.77 to<br>2,173.54)                           |
| Chronic kidney disease due to hypertension                 | 6,648.97<br>(5,394.34 to<br>8,083.18)                            | 14,264.27<br>(9,313.55 to<br>21,451.36)                          | 11,754.33<br>(7,895.36 to<br>17,522.58)                          | 19,273.91<br>(12,086.51 to<br>29,770.78)                         | 303.50<br>(247.41 to<br>360.53)                            | 741.87<br>(488.87 to<br>1,082.34)                            | 637.06<br>(431.80 to<br>909.46)                              | 952.94<br>(605.53 to<br>1,437.14)                             |

|                                                            |                                          |                                          |                                          |                                          |                                   |                                       |                                       |                                       |
|------------------------------------------------------------|------------------------------------------|------------------------------------------|------------------------------------------|------------------------------------------|-----------------------------------|---------------------------------------|---------------------------------------|---------------------------------------|
| Chronic kidney disease due to glomerulonephritis           | 16,833.11<br>(13,729.53 to<br>20,231.38) | 23,082.78<br>(16,065.99 to<br>33,539.80) | 18,461.73<br>(12,765.85 to<br>26,408.11) | 33,505.80<br>(23,428.22 to<br>48,243.42) | 375.72<br>(311.60 to<br>444.94)   | 650.23<br>(446.05 to<br>958.48)       | 531.36<br>(364.62 to<br>777.15)       | 901.40<br>(608.47 to<br>1,350.81)     |
| Chronic kidney disease due to other and unspecified causes | 18,990.70<br>(15,436.30 to<br>22,357.04) | 26,391.24<br>(18,173.36 to<br>37,726.21) | 21,196.69<br>(14,595.93 to<br>30,220.62) | 38,130.65<br>(26,430.39 to<br>53,989.57) | 448.24<br>(371.17 to<br>535.80)   | 825.79<br>(566.83 to<br>1,181.66)     | 683.05<br>(474.77 to<br>969.21)       | 1,128.97<br>(761.80 to<br>1,654.85)   |
| Urinary diseases and male infertility                      | 18,037.28<br>(15,926.52 to<br>20,460.66) | 37,939.09<br>(32,103.12 to<br>44,932.69) | 37,124.00<br>(31,226.54 to<br>44,559.77) | 41,407.59<br>(35,316.32 to<br>48,559.62) | 519.04<br>(464.97 to<br>583.95)   | 1,402.38<br>(1,232.06 to<br>1,596.07) | 1,455.88<br>(1,276.56 to<br>1,673.03) | 1,390.87<br>(1,229.35 to<br>1,568.21) |
| Urinary tract infections                                   | 11,476.16<br>(9,749.16 to<br>13,458.62)  | 28,936.51<br>(24,095.24 to<br>34,439.81) | 29,006.45<br>(24,085.14 to<br>35,148.79) | 30,603.67<br>(25,543.29 to<br>36,255.91) | 324.69<br>(279.81 to<br>376.88)   | 1,096.39<br>(949.22 to<br>1,269.90)   | 1,165.31<br>(1,000.90 to<br>1,367.13) | 1,049.64<br>(898.93 to<br>1,209.35)   |
| Urolithiasis                                               | 327.60<br>(245.16 to<br>427.69)          | 766.65<br>(527.37 to<br>1,082.72)        | 722.13<br>(499.21 to<br>1,016.82)        | 876.28<br>(599.92 to<br>1,258.61)        | 6.17<br>(4.78 to<br>7.92)         | 16.07<br>(11.91 to<br>21.42)          | 15.73<br>(11.67 to<br>20.96)          | 17.36<br>(12.69 to<br>23.47)          |
| Other urinary diseases                                     | 6,233.53<br>(4,786.03 to<br>7,617.81)    | 8,235.95<br>(5,713.99 to<br>10,998.82)   | 7,395.41<br>(5,804.55 to<br>9,833.58)    | 9,927.64<br>(7,002.16 to<br>13,081.02)   | 188.18<br>(142.43 to<br>232.05)   | 289.93<br>(204.65 to<br>375.69)       | 274.84<br>(188.59 to<br>361.13)       | 323.86<br>(229.89 to<br>420.03)       |
| Gynecological diseases                                     | 1,047.80<br>(744.77 to<br>1,376.23)      | 1,672.23<br>(1,084.40 to<br>2,564.53)    | 1,454.58<br>(953.95 to<br>2,223.72)      | 2,069.24<br>(1,336.47 to<br>3,200.44)    | 24.91<br>(17.97 to<br>32.39)      | 41.22<br>(27.31 to<br>61.75)          | 36.44<br>(24.32 to<br>54.43)          | 50.09<br>(32.61 to<br>75.91)          |
| Uterine fibroids                                           | 80.98<br>(38.96 to<br>150.98)            | 105.56<br>(46.88 to<br>214.12)           | 90.72<br>(39.67 to<br>184.66)            | 133.08<br>(58.90 to<br>264.49)           | 2.75<br>(1.33 to<br>4.85)         | 3.64<br>(1.61 to<br>6.94)             | 3.24<br>(1.43 to<br>6.20)             | 4.42<br>(1.98 to<br>8.43)             |
| Polycystic ovarian syndrome                                | 175.67<br>(33.22 to<br>390.58)           | 173.84<br>(25.85 to<br>434.96)           | 135.33<br>(19.33 to<br>344.02)           | 251.60<br>(37.99 to<br>626.41)           | 3.89<br>(0.75 to<br>8.55)         | 3.99<br>(0.59 to<br>9.87)             | 3.11<br>(0.46 to<br>7.62)             | 5.76<br>(0.90 to<br>13.97)            |
| Endometriosis                                              | 2.24<br>(0.86 to<br>5.88)                | 4.76<br>(1.55 to<br>13.77)               | 4.09<br>(1.33 to<br>12.05)               | 5.96<br>(1.96 to<br>17.26)               | 0.05<br>(0.02 to<br>0.13)         | 0.11<br>(0.03 to<br>0.32)             | 0.09<br>(0.03 to<br>0.28)             | 0.13<br>(0.04 to<br>0.41)             |
| Genital prolapse                                           | 31.93<br>(5.00 to<br>89.41)              | 39.15<br>(5.14 to<br>113.44)             | 32.41<br>(4.30 to<br>94.10)              | 52.11<br>(6.73 to<br>146.58)             | 0.75<br>(0.17 to<br>1.94)         | 0.88<br>(0.17 to<br>2.50)             | 0.74<br>(0.15 to<br>2.00)             | 1.15<br>(0.23 to<br>3.03)             |
| Other gynecological diseases                               | 756.98<br>(490.61 to<br>1,067.61)        | 1,348.92<br>(793.00 to<br>2,121.69)      | 1,192.02<br>(724.51 to<br>1,860.52)      | 1,626.49<br>(930.95 to<br>2,573.23)      | 17.48<br>(11.52 to<br>24.37)      | 32.61<br>(20.15 to<br>49.95)          | 29.26<br>(18.51 to<br>44.64)          | 38.64<br>(23.36 to<br>60.15)          |
| Hemoglobinopathies and hemolytic anemias                   | 50,497.83<br>(37,357.81 to<br>65,620.46) | 50,686.73<br>(36,226.17 to<br>68,150.52) | 44,875.75<br>(32,031.24 to<br>60,938.84) | 66,166.70<br>(46,725.41 to<br>88,734.64) | 800.19<br>(598.73 to<br>1,044.08) | 1,044.58<br>(750.78 to<br>1,413.24)   | 947.00<br>(676.68 to<br>1,286.82)     | 1,284.19<br>(919.68 to<br>1,717.96)   |
| Thalassemias                                               | 130.19<br>(74.61 to<br>215.72)           | 49.02<br>(26.29 to<br>84.98)             | 47.39<br>(25.46 to<br>80.97)             | 69.05<br>(35.63 to<br>120.67)            | 1.54<br>(0.88 to<br>2.55)         | 0.59<br>(0.32 to<br>1.01)             | 0.57<br>(0.31 to<br>0.97)             | 0.82<br>(0.43 to<br>1.43)             |
| Sickle cell disorders                                      | 45,723.77<br>(33,110.31 to<br>59,805.07) | 42,796.55<br>(30,003.52 to<br>56,832.27) | 37,841.87<br>(26,737.29 to<br>50,654.79) | 56,511.56<br>(39,419.66 to<br>75,827.98) | 647.92<br>(478.43 to<br>833.62)   | 733.84<br>(516.33 to<br>977.35)       | 656.99<br>(464.07 to<br>884.83)       | 929.14<br>(650.79 to<br>1,236.64)     |
| G6PD deficiency                                            | 3,296.47<br>(2,449.23 to<br>4,537.61)    | 5,731.09<br>(3,964.88 to<br>8,451.48)    | 4,996.73<br>(3,459.02 to<br>7,459.30)    | 7,227.16<br>(4,977.78 to<br>10,614.29)   | 174.81<br>(55.59 to<br>106.74)    | 174.81<br>(118.53 to<br>264.56)       | 155.92<br>(106.63 to<br>235.29)       | 211.16<br>(143.74 to<br>316.16)       |
| Other hemoglobinopathies and hemolytic anemias             | 1,347.41<br>(932.58 to<br>1,912.09)      | 2,110.07<br>(1,425.55 to<br>3,068.13)    | 1,989.76<br>(1,363.06 to<br>2,887.11)    | 2,358.94<br>(1,549.25 to<br>3,424.78)    | 74.58<br>(51.76 to<br>109.14)     | 135.34<br>(93.59 to<br>203.12)        | 133.52<br>(92.91 to<br>194.09)        | 143.07<br>(94.39 to<br>216.69)        |
| Endocrine, metabolic, blood, and immune disorders          | 8,605.50<br>(6,756.49 to<br>11,985.52)   | 11,765.59<br>(9,252.28 to<br>16,334.41)  | 10,993.53<br>(8,597.71 to<br>15,399.30)  | 14,417.44<br>(11,241.27 to<br>20,010.73) | 189.04<br>(154.49 to<br>268.45)   | 374.99<br>(302.70 to<br>539.96)       | 373.66<br>(301.54 to<br>540.65)       | 403.09<br>(326.96 to<br>575.32)       |

| Senegal                   |                                       |                                       |                                       |                                       |                              |                                 |                                 |                                 |
|---------------------------|---------------------------------------|---------------------------------------|---------------------------------------|---------------------------------------|------------------------------|---------------------------------|---------------------------------|---------------------------------|
| Cause                     | YLLs (actual counts)                  |                                       |                                       |                                       | Deaths (actual counts)       |                                 |                                 |                                 |
|                           | 2016                                  | 2040 Forecast                         | 2040 Better Scenario                  | 2040 Worse Scenario                   | 2016                         | 2040 Forecast                   | 2040 Better Scenario            | 2040 Worse Scenario             |
| Musculoskeletal disorders | 2,945.54<br>(2,281.23 to<br>4,089.97) | 6,533.22<br>(4,833.79 to<br>9,343.89) | 6,828.33<br>(5,058.90 to<br>9,730.12) | 6,336.68<br>(4,711.16 to<br>9,037.03) | 74.19<br>(57.98 to<br>99.43) | 196.13<br>(151.14 to<br>271.32) | 212.48<br>(164.32 to<br>292.32) | 180.95<br>(138.73 to<br>249.03) |
| Rheumatoid arthritis      | 295.79<br>(191.50 to<br>441.08)       | 628.76<br>(395.14 to<br>986.05)       | 591.80<br>(367.99 to<br>941.89)       | 708.75<br>(451.72 to<br>1,071.76)     | 12.43<br>(7.85 to<br>18.41)  | 32.19<br>(19.68 to<br>50.75)    | 31.58<br>(19.18 to<br>50.52)    | 34.07<br>(21.22 to<br>52.01)    |



| Senegal                                         |                                          |                                          |                                          |                                          |                                    |                                    |                                    |                                    |
|-------------------------------------------------|------------------------------------------|------------------------------------------|------------------------------------------|------------------------------------------|------------------------------------|------------------------------------|------------------------------------|------------------------------------|
| Cause                                           | YLLs (actual counts)                     |                                          |                                          |                                          | Deaths (actual counts)             |                                    |                                    |                                    |
|                                                 | 2016                                     | 2040 Forecast                            | 2040 Better Scenario                     | 2040 Worse Scenario                      | 2016                               | 2040 Forecast                      | 2040 Better Scenario               | 2040 Worse Scenario                |
| Cyclist road injuries                           | 2,082.19<br>(1,428.96 to 2,832.52)       | 3,852.57<br>(2,448.39 to 5,542.05)       | 3,264.95<br>(2,062.94 to 4,723.49)       | 4,395.18<br>(2,825.25 to 6,322.78)       | 43.24<br>(29.13 to 57.71)          | 92.00<br>(58.57 to 130.76)         | 82.31<br>(52.28 to 117.18)         | 98.25<br>(62.21 to 138.91)         |
| Motorcyclist road injuries                      | 11,307.84<br>(8,421.45 to 15,416.31)     | 21,158.77<br>(14,934.79 to 30,570.90)    | 18,436.51<br>(13,004.98 to 26,840.07)    | 24,028.33<br>(16,916.54 to 34,640.54)    | 207.36<br>(156.66 to 279.18)       | 428.21<br>(310.86 to 602.90)       | 384.51<br>(277.59 to 543.05)       | 464.95<br>(336.75 to 657.24)       |
| Motor vehicle road injuries                     | 51,183.43<br>(40,272.40 to 64,306.57)    | 90,492.49<br>(68,157.24 to 120,276.69)   | 74,439.69<br>(55,917.76 to 99,587.80)    | 104,706.66<br>(78,392.27 to 137,415.88)  | 1,022.88<br>(809.98 to 1,254.21)   | 2,024.53<br>(1,549.54 to 2,623.93) | 1,740.68<br>(1,336.21 to 2,272.19) | 2,208.99<br>(1,705.98 to 2,841.87) |
| Other road injuries                             | 1,719.40<br>(1,143.37 to 2,366.06)       | 3,154.72<br>(1,924.05 to 4,695.44)       | 2,631.16<br>(1,607.30 to 3,939.11)       | 3,642.30<br>(2,239.46 to 5,359.26)       | 35.05<br>(23.56 to 48.58)          | 73.61<br>(45.68 to 107.00)         | 64.68<br>(40.34 to 94.69)          | 79.38<br>(49.34 to 115.42)         |
| Other transport injuries                        | 5,997.51<br>(3,990.24 to 9,384.54)       | 10,698.59<br>(6,573.05 to 17,690.76)     | 9,706.45<br>(5,941.22 to 16,038.17)      | 12,871.45<br>(8,004.61 to 21,109.06)     | 108.60<br>(72.16 to 168.24)        | 220.23<br>(137.47 to 357.25)       | 203.56<br>(126.20 to 331.08)       | 253.13<br>(158.90 to 410.09)       |
| Unintentional injuries                          | 213,160.38<br>(181,049.83 to 251,219.92) | 193,409.16<br>(149,443.30 to 241,510.74) | 172,424.86<br>(134,090.08 to 215,413.50) | 253,305.39<br>(194,517.96 to 323,758.98) | 4,106.02<br>(3,506.81 to 4,667.07) | 5,172.20<br>(4,246.84 to 6,089.00) | 4,951.40<br>(4,057.96 to 5,877.95) | 5,954.19<br>(4,853.11 to 7,109.11) |
| Falls                                           | 28,615.00<br>(24,054.34 to 35,116.98)    | 41,652.57<br>(35,320.25 to 49,234.00)    | 40,383.23<br>(34,264.04 to 47,679.95)    | 46,506.31<br>(38,937.69 to 55,919.96)    | 889.81<br>(774.97 to 1,022.48)     | 1,798.81<br>(1,565.02 to 2,051.84) | 1,875.68<br>(1,622.71 to 2,134.53) | 1,780.54<br>(1,527.73 to 2,042.99) |
| Drowning                                        | 38,798.40<br>(30,311.56 to 53,162.89)    | 29,949.19<br>(22,149.74 to 41,528.90)    | 26,163.75<br>(19,356.76 to 36,293.26)    | 40,210.51<br>(28,967.50 to 56,346.18)    | 643.32<br>(523.04 to 835.20)       | 623.84<br>(486.95 to 827.62)       | 568.99<br>(443.41 to 746.37)       | 768.40<br>(589.03 to 1,032.52)     |
| Fire, heat, and hot substances                  | 21,645.89<br>(15,330.67 to 29,009.35)    | 15,842.22<br>(9,901.39 to 21,183.48)     | 13,699.43<br>(8,516.76 to 18,452.24)     | 21,701.40<br>(13,961.41 to 29,670.89)    | 426.71<br>(296.28 to 533.26)       | 427.65<br>(277.13 to 547.15)       | 393.25<br>(248.39 to 504.75)       | 518.34<br>(337.12 to 668.49)       |
| Poisonings                                      | 14,396.39<br>(8,271.29 to 29,483.20)     | 7,433.50<br>(4,511.91 to 13,430.44)      | 5,977.24<br>(3,676.72 to 10,409.84)      | 11,618.06<br>(6,413.54 to 22,959.43)     | 242.22<br>(157.10 to 435.59)       | 242.22<br>(101.14 to 242.61)       | 130.71<br>(86.77 to 202.11)        | 219.99<br>(139.16 to 368.00)       |
| Exposure to mechanical forces                   | 31,210.22<br>(23,977.63 to 41,885.82)    | 24,122.08<br>(16,181.35 to 34,838.94)    | 20,568.17<br>(13,741.88 to 29,902.12)    | 33,756.40<br>(22,681.24 to 48,449.69)    | 516.90<br>(391.40 to 690.29)       | 503.73<br>(341.16 to 713.17)       | 448.93<br>(299.38 to 641.30)       | 644.01<br>(438.04 to 902.65)       |
| Unintentional firearm injuries                  | 8,835.83<br>(5,546.19 to 13,339.60)      | 6,484.31<br>(3,595.44 to 11,239.55)      | 5,512.56<br>(3,031.64 to 9,690.30)       | 8,757.39<br>(4,866.75 to 14,805.76)      | 155.69<br>(98.15 to 235.52)        | 134.95<br>(78.75 to 229.09)        | 118.33<br>(67.87 to 201.22)        | 171.59<br>(99.80 to 284.89)        |
| Unintentional suffocation                       | 7,863.04<br>(5,082.73 to 12,659.10)      | 4,286.85<br>(2,638.86 to 7,157.78)       | 3,444.84<br>(2,161.25 to 5,597.20)       | 7,193.31<br>(4,127.52 to 12,418.35)      | 99.96<br>(66.12 to 156.86)         | 60.49<br>(38.84 to 95.18)          | 49.41<br>(32.21 to 77.15)          | 96.98<br>(58.94 to 162.66)         |
| Other exposure to mechanical forces             | 14,511.35<br>(11,033.37 to 19,464.97)    | 13,350.93<br>(8,821.21 to 19,720.13)     | 11,610.77<br>(7,613.80 to 17,096.22)     | 17,805.70<br>(11,850.45 to 26,198.09)    | 261.26<br>(193.69 to 345.41)       | 308.29<br>(202.40 to 438.73)       | 281.19<br>(182.47 to 399.31)       | 375.44<br>(252.50 to 537.80)       |
| Adverse effects of medical treatment            | 25,359.21<br>(19,335.79 to 31,336.39)    | 25,053.49<br>(16,424.42 to 33,432.80)    | 22,261.10<br>(14,419.25 to 29,790.29)    | 32,693.10<br>(22,115.14 to 43,967.95)    | 452.43<br>(340.51 to 541.14)       | 564.78<br>(387.59 to 725.49)       | 523.79<br>(356.11 to 675.78)       | 673.68<br>(467.62 to 875.21)       |
| Animal contact                                  | 13,145.89<br>(7,753.23 to 17,867.56)     | 13,254.13<br>(7,544.24 to 18,782.70)     | 10,986.83<br>(6,298.62 to 15,755.25)     | 19,259.22<br>(10,939.50 to 27,577.34)    | 255.24<br>(153.48 to 334.92)       | 333.46<br>(196.54 to 465.14)       | 291.61<br>(173.25 to 408.16)       | 433.71<br>(252.82 to 602.67)       |
| Venomous animal contact                         | 10,986.63<br>(6,128.74 to 15,319.73)     | 11,147.73<br>(6,263.13 to 16,057.01)     | 9,246.52<br>(5,257.00 to 13,459.60)      | 16,085.58<br>(8,751.99 to 23,682.73)     | 220.63<br>(130.28 to 294.71)       | 288.49<br>(170.61 to 409.38)       | 251.93<br>(150.31 to 360.55)       | 373.83<br>(215.03 to 525.22)       |
| Non-venomous animal contact                     | 2,159.26<br>(1,235.77 to 3,348.03)       | 2,106.40<br>(1,147.54 to 3,295.84)       | 1,740.31<br>(956.70 to 2,745.11)         | 3,173.64<br>(1,716.99 to 4,941.66)       | 34.61<br>(20.19 to 51.87)          | 44.97<br>(25.04 to 66.89)          | 39.68<br>(21.62 to 58.75)          | 59.88<br>(33.09 to 90.10)          |
| Foreign body                                    | 18,579.46<br>(13,690.67 to 24,595.17)    | 18,436.68<br>(13,430.51 to 25,814.40)    | 17,245.05<br>(12,692.82 to 23,668.19)    | 23,872.35<br>(16,975.96 to 33,848.01)    | 293.80<br>(227.54 to 377.83)       | 385.43<br>(298.48 to 514.29)       | 384.07<br>(299.92 to 512.98)       | 437.37<br>(331.30 to 589.20)       |
| Pulmonary aspiration and foreign body in airway | 16,723.29<br>(12,134.06 to 23,028.72)    | 16,513.58<br>(12,053.65 to 23,416.08)    | 15,525.49<br>(11,334.49 to 21,702.00)    | 21,385.75<br>(15,113.62 to 31,456.23)    | 263.21<br>(199.46 to 355.51)       | 347.45<br>(268.02 to 461.51)       | 348.99<br>(272.34 to 463.31)       | 391.70<br>(294.29 to 540.33)       |

|                                      |                                                               |                                                                |                                                                |                                                                 |                                                            |                                                            |                                                            |                                                            |
|--------------------------------------|---------------------------------------------------------------|----------------------------------------------------------------|----------------------------------------------------------------|-----------------------------------------------------------------|------------------------------------------------------------|------------------------------------------------------------|------------------------------------------------------------|------------------------------------------------------------|
|                                      | 1,856.17<br>(579.84 to<br>4,182.18)                           | 1,923.10<br>(486.57 to<br>4,683.39)                            | 1,719.56<br>(422.94 to<br>4,276.13)                            | 2,486.61<br>(675.69 to<br>5,910.39)                             | 30.59<br>(9.43 to<br>69.95)                                | 37.98<br>(9.16 to<br>92.74)                                | 35.08<br>(8.23 to<br>86.39)                                | 45.67<br>(11.94 to<br>109.18)                              |
| Foreign body in other body part      | 7,619.04<br>(3,347.75 to<br>10,954.65)                        | 7,032.57<br>(2,840.00 to<br>10,907.06)                         | 5,725.82<br>(2,300.77 to<br>9,103.82)                          | 10,050.12<br>(4,088.02 to<br>15,467.85)                         | 144.75<br>(63.60 to<br>204.62)                             | 156.38<br>(65.71 to<br>234.92)                             | 131.27<br>(54.68 to<br>200.48)                             | 210.48<br>(88.55 to<br>313.81)                             |
| Environmental heat and cold exposure | 13,790.87<br>(11,267.63 to<br>16,952.60)                      | 10,632.72<br>(7,875.04 to<br>14,211.79)                        | 9,414.25<br>(6,946.32 to<br>12,777.65)                         | 13,637.92<br>(10,132.15 to<br>18,200.57)                        | 240.83<br>(200.00 to<br>290.39)                            | 222.39<br>(172.24 to<br>288.69)                            | 203.10<br>(155.73 to<br>266.07)                            | 267.66<br>(207.95 to<br>345.52)                            |
| Other unintentional injuries         | <b>53,789.55</b><br><b>(45,428.37 to</b><br><b>65,861.65)</b> | <b>94,331.55</b><br><b>(75,581.13 to</b><br><b>120,818.51)</b> | <b>91,071.96</b><br><b>(72,879.81 to</b><br><b>116,469.50)</b> | <b>100,020.19</b><br><b>(79,952.46 to</b><br><b>128,345.49)</b> | <b>1,250.16</b><br><b>(1,070.76 to</b><br><b>1,484.74)</b> | <b>2,380.83</b><br><b>(1,942.67 to</b><br><b>2,942.10)</b> | <b>2,347.56</b><br><b>(1,917.74 to</b><br><b>2,896.54)</b> | <b>2,452.88</b><br><b>(1,987.97 to</b><br><b>3,026.08)</b> |

| Senegal                                                                      |                                                      |                                                      |                                                      |                                                      |                                                |                                                 |                                                 |                                                 |
|------------------------------------------------------------------------------|------------------------------------------------------|------------------------------------------------------|------------------------------------------------------|------------------------------------------------------|------------------------------------------------|-------------------------------------------------|-------------------------------------------------|-------------------------------------------------|
| Cause                                                                        | YLLs (actual counts)                                 |                                                      |                                                      |                                                      | Deaths (actual counts)                         |                                                 |                                                 |                                                 |
|                                                                              | 2016                                                 | 2040 Forecast                                        | 2040 Better Scenario                                 | 2040 Worse Scenario                                  | 2016                                           | 2040 Forecast                                   | 2040 Better Scenario                            | 2040 Worse Scenario                             |
| Self-harm                                                                    | 41,682.50<br>(34,801.48 to<br>54,240.23)             | 78,366.07<br>(62,195.17 to<br>102,797.81)            | 75,456.89<br>(60,137.46 to<br>99,295.30)             | 83,045.36<br>(65,881.31 to<br>109,365.54)            | 1,043.67<br>(882.46 to<br>1,281.69)            | 2,090.78<br>(1,708.37 to<br>2,580.04)           | 2,061.86<br>(1,683.87 to<br>2,542.14)           | 2,149.64<br>(1,759.23 to<br>2,669.59)           |
| Self-harm by firearm                                                         | 5,777.92<br>(3,276.39 to<br>10,378.55)               | 8,361.07<br>(4,573.60 to<br>14,429.38)               | 7,904.02<br>(4,313.94 to<br>13,600.33)               | 9,073.14<br>(4,977.18 to<br>15,884.49)               | 141.58<br>(85.71 to<br>235.61)                 | 223.51<br>(130.14 to<br>363.55)                 | 216.48<br>(126.85 to<br>354.33)                 | 235.53<br>(135.58 to<br>382.81)                 |
| Self-harm by other specified means                                           | 35,904.59<br>(28,941.80 to<br>45,889.18)             | 70,005.00<br>(54,906.31 to<br>92,137.77)             | 67,552.88<br>(53,291.97 to<br>88,760.10)             | 73,972.22<br>(57,874.31 to<br>98,071.64)             | 902.10<br>(741.10 to<br>1,106.77)              | 1,867.22<br>(1,488.45 to<br>2,339.34)           | 1,845.38<br>(1,473.28 to<br>2,310.99)           | 1,914.12<br>(1,512.52 to<br>2,409.71)           |
| Interpersonal violence                                                       | 12,107.04<br>(8,067.21 to<br>15,801.89)              | 15,965.48<br>(9,442.87 to<br>22,655.19)              | 15,615.07<br>(9,261.45 to<br>22,196.70)              | 16,974.84<br>(10,194.22 to<br>23,894.01)             | 206.49<br>(139.42 to<br>264.49)                | 290.05<br>(177.63 to<br>405.23)                 | 285.70<br>(174.59 to<br>399.52)                 | 303.24<br>(185.99 to<br>421.60)                 |
| Physical violence by firearm                                                 | 6,748.40<br>(3,959.50 to<br>9,492.52)                | 9,148.95<br>(4,797.71 to<br>13,942.12)               | 8,954.37<br>(4,721.38 to<br>13,739.51)               | 9,604.67<br>(5,036.11 to<br>14,095.14)               | 116.13<br>(68.44 to<br>162.56)                 | 163.36<br>(87.37 to<br>247.19)                  | 160.48<br>(85.83 to<br>242.57)                  | 169.94<br>(91.02 to<br>256.64)                  |
| Physical violence by sharp object                                            | 3,165.20<br>(1,625.54 to<br>4,718.44)                | 4,625.65<br>(2,207.57 to<br>7,310.28)                | 4,618.44<br>(2,204.99 to<br>7,247.49)                | 4,756.51<br>(2,294.67 to<br>7,525.05)                | 54.74<br>(28.97 to<br>80.92)                   | 85.33<br>(43.28 to<br>131.69)                   | 85.85<br>(43.78 to<br>132.06)                   | 86.31<br>(43.98 to<br>131.75)                   |
| Physical violence by other means                                             | 2,193.45<br>(1,468.45 to<br>3,303.91)                | 2,190.88<br>(1,437.50 to<br>3,283.98)                | 2,042.26<br>(1,339.91 to<br>3,110.97)                | 2,613.66<br>(1,713.40 to<br>3,952.48)                | 35.62<br>(24.66 to<br>52.08)                   | 41.35<br>(28.07 to<br>62.05)                    | 39.36<br>(26.48 to<br>59.33)                    | 46.99<br>(31.64 to<br>70.10)                    |
| Forces of nature, conflict and terrorism, and executions and police conflict | <b>161.98</b><br><b>(129.01 to</b><br><b>261.17)</b> | <b>453.88</b><br><b>(0.00 to</b><br><b>3,027.20)</b> | <b>440.51</b><br><b>(0.00 to</b><br><b>2,938.08)</b> | <b>512.58</b><br><b>(0.00 to</b><br><b>3,407.43)</b> | <b>3.19</b><br><b>(2.21 to</b><br><b>4.77)</b> | <b>8.11</b><br><b>(0.00 to</b><br><b>52.46)</b> | <b>8.02</b><br><b>(0.00 to</b><br><b>51.63)</b> | <b>8.77</b><br><b>(0.00 to</b><br><b>56.85)</b> |
| Exposure to forces of nature                                                 | 0.00<br>(0.00 to<br>0.00)                            | 192.71<br>(0.00 to<br>1,567.61)                      | 185.87<br>(0.00 to<br>1,515.21)                      | 222.28<br>(0.00 to<br>1,809.32)                      | 0.00<br>(0.00 to<br>0.00)                      | 3.56<br>(0.00 to<br>29.08)                      | 3.52<br>(0.00 to<br>28.78)                      | 3.88<br>(0.00 to<br>31.71)                      |
| Conflict and terrorism                                                       | 0.00<br>(0.00 to<br>0.00)                            | 201.95<br>(0.00 to<br>2,210.29)                      | 196.15<br>(0.00 to<br>2,144.45)                      | 227.61<br>(0.00 to<br>2,496.59)                      | 0.00<br>(0.00 to<br>0.00)                      | 3.48<br>(0.00 to<br>38.06)                      | 3.42<br>(0.00 to<br>37.52)                      | 3.77<br>(0.00 to<br>41.41)                      |
| Executions and police conflict                                               | 161.98<br>(129.01 to<br>261.17)                      | 59.21<br>(0.00 to<br>1,143.00)                       | 58.50<br>(0.00 to<br>1,127.34)                       | 62.69<br>(0.00 to<br>1,210.12)                       | 3.19<br>(2.21 to<br>4.77)                      | 1.08<br>(0.00 to<br>20.73)                      | 1.07<br>(0.00 to<br>20.61)                      | 1.12<br>(0.00 to<br>21.50)                      |

| Sierra Leone                                               |                                                                        |                                                                        |                                                                        |                                                                        |                                                               |                                                               |                                                               |                                                                 |
|------------------------------------------------------------|------------------------------------------------------------------------|------------------------------------------------------------------------|------------------------------------------------------------------------|------------------------------------------------------------------------|---------------------------------------------------------------|---------------------------------------------------------------|---------------------------------------------------------------|-----------------------------------------------------------------|
| Cause                                                      | YLLs (actual counts)                                                   |                                                                        |                                                                        |                                                                        | Deaths (actual counts)                                        |                                                               |                                                               |                                                                 |
|                                                            | 2016                                                                   | 2040 Forecast                                                          | 2040 Better Scenario                                                   | 2040 Worse Scenario                                                    | 2016                                                          | 2040 Forecast                                                 | 2040 Better Scenario                                          | 2040 Worse Scenario                                             |
| All causes                                                 | <b>3,653,538.10</b><br><b>(3,349,692.97 to</b><br><b>3,987,321.71)</b> | <b>2,525,068.30</b><br><b>(1,985,352.66 to</b><br><b>3,230,451.13)</b> | <b>1,895,599.86</b><br><b>(1,491,826.99 to</b><br><b>2,412,392.23)</b> | <b>4,602,037.89</b><br><b>(3,576,468.60 to</b><br><b>5,731,171.19)</b> | <b>61,529.68</b><br><b>(57,162.56 to</b><br><b>66,337.18)</b> | <b>68,548.52</b><br><b>(56,063.47 to</b><br><b>84,397.28)</b> | <b>52,642.78</b><br><b>(43,352.79 to</b><br><b>64,385.57)</b> | <b>103,330.40</b><br><b>(84,718.27 to</b><br><b>124,706.86)</b> |
| Communicable, maternal, neonatal, and nutritional diseases | 2,685,521.21<br>(2,387,228.02 to<br>3,042,851.95)                      | 1,214,153.16<br>(869,828.31 to<br>1,699,028.01)                        | 838,262.10<br>(608,343.45 to<br>1,154,795.90)                          | 2,717,774.93<br>(1,969,454.45 to<br>3,615,335.17)                      | 38,599.28<br>(34,831.05 to<br>43,212.00)                      | 25,399.36<br>(18,217.23 to<br>35,660.55)                      | 17,313.38<br>(12,538.30 to<br>24,333.68)                      | 46,996.06<br>(34,093.26 to<br>62,993.60)                        |
| HIV/AIDS and tuberculosis                                  | 211,304.02<br>(183,178.50 to<br>245,512.92)                            | 156,819.29<br>(87,439.19 to<br>242,985.32)                             | 97,047.96<br>(46,991.10 to<br>161,731.35)                              | 357,555.97<br>(208,589.40 to<br>525,456.06)                            | 4,648.36<br>(4,091.32 to<br>5,297.45)                         | 3,689.36<br>(2,228.24 to<br>5,529.30)                         | 2,310.91<br>(1,284.09 to<br>3,585.07)                         | 7,983.15<br>(4,827.71 to<br>11,600.91)                          |



|                                                                          |                                                          |                                                      |                                                      |                                                          |                                                   |                                                  |                                                 |                                                   |
|--------------------------------------------------------------------------|----------------------------------------------------------|------------------------------------------------------|------------------------------------------------------|----------------------------------------------------------|---------------------------------------------------|--------------------------------------------------|-------------------------------------------------|---------------------------------------------------|
| Tuberculosis                                                             | 90,393.68<br>(76,965.54 to<br>104,942.69)                | 53,513.28<br>(30,978.20 to<br>92,891.30)             | 30,498.07<br>(17,756.79 to<br>53,553.58)             | 114,200.79<br>(62,902.23 to<br>203,848.14)               | 2,287.15<br>(1,941.65 to<br>2,659.14)             | 1,588.38<br>(973.94 to<br>2,671.89)              | 945.08<br>(593.34 to<br>1,552.02)               | 3,181.26<br>(1,857.08 to<br>5,454.47)             |
| HIV/AIDS                                                                 | 120,910.34<br>(94,914.42 to<br>153,617.64)               | 103,306.01<br>(37,024.70 to<br>175,186.95)           | 66,549.89<br>(19,185.62 to<br>129,585.24)            | 243,355.18<br>(108,677.36 to<br>403,005.57)              | 2,361.22<br>(1,918.81 to<br>2,904.19)             | 2,100.98<br>(779.13 to<br>3,505.64)              | 1,365.83<br>(390.88 to<br>2,486.81)             | 4,801.89<br>(2,008.23 to<br>7,985.08)             |
| <b>Diarrhea, lower respiratory, and other common infectious diseases</b> | <b>1,013,190.99<br/>(803,837.75 to<br/>1,275,636.63)</b> | <b>558,477.06<br/>(326,324.88 to<br/>925,441.59)</b> | <b>329,569.80<br/>(188,506.89 to<br/>560,552.04)</b> | <b>1,275,402.50<br/>(747,840.92 to<br/>1,987,912.22)</b> | <b>15,345.30<br/>(12,434.46 to<br/>18,812.24)</b> | <b>13,918.24<br/>(7,902.25 to<br/>22,747.07)</b> | <b>8,398.05<br/>(4,907.55 to<br/>13,838.86)</b> | <b>24,144.99<br/>(14,588.64 to<br/>37,083.48)</b> |
| Diarrheal diseases                                                       | 418,749.10<br>(292,305.80 to<br>567,723.68)              | 196,215.60<br>(71,394.35 to<br>418,389.11)           | 120,845.88<br>(38,642.43 to<br>269,554.01)           | 361,001.26<br>(161,422.33 to<br>695,036.63)              | 6,309.66<br>(4,466.58 to<br>8,444.87)             | 4,925.58<br>(1,386.32 to<br>11,506.90)           | 2,962.95<br>(800.93 to<br>7,627.87)             | 7,517.62<br>(2,720.91 to<br>15,567.08)            |
| Intestinal infectious diseases                                           | 13,556.98<br>(6,342.85 to<br>25,389.90)                  | 11,735.55<br>(4,987.69 to<br>23,254.27)              | 10,254.38<br>(4,496.55 to<br>20,222.46)              | 18,312.89<br>(7,702.65 to<br>36,153.64)                  | 191.70<br>(91.65 to<br>357.05)                    | 179.68<br>(78.85 to<br>356.65)                   | 157.77<br>(70.01 to<br>311.42)                  | 266.35<br>(114.40 to<br>524.07)                   |
| Typhoid fever                                                            | 10,997.14<br>(4,849.35 to<br>21,237.55)                  | 9,497.57<br>(3,777.14 to<br>20,279.75)               | 8,356.03<br>(3,282.98 to<br>17,674.68)               | 14,667.76<br>(5,684.50 to<br>31,230.04)                  | 156.23<br>(70.17 to<br>296.50)                    | 145.55<br>(59.26 to<br>301.04)                   | 128.69<br>(51.93 to<br>263.58)                  | 213.60<br>(85.26 to<br>446.89)                    |
| Paratyphoid fever                                                        | 2,156.28<br>(770.03 to<br>5,090.36)                      | 2,139.88<br>(764.22 to<br>4,858.83)                  | 1,829.62<br>(645.18 to<br>4,251.31)                  | 3,407.56<br>(1,198.43 to<br>8,113.52)                    | 30.46<br>(11.08 to<br>71.67)                      | 32.62<br>(12.09 to<br>72.77)                     | 27.99<br>(10.16 to<br>62.98)                    | 49.53<br>(17.73 to<br>115.25)                     |
| Other intestinal infectious diseases                                     | 403.56<br>(116.19 to<br>1,083.39)                        | 98.10<br>(23.69 to<br>296.33)                        | 68.73<br>(15.62 to<br>213.85)                        | 237.56<br>(54.27 to<br>747.45)                           | 5.01<br>(1.49 to<br>13.14)                        | 1.51<br>(0.43 to<br>4.14)                        | 1.09<br>(0.31 to<br>2.87)                       | 3.22<br>(0.82 to<br>9.38)                         |
| Lower respiratory infections                                             | 401,701.42<br>(316,595.51 to<br>510,143.24)              | 260,202.60<br>(142,512.76 to<br>447,372.26)          | 129,462.28<br>(76,016.61 to<br>214,089.52)           | 667,768.63<br>(322,054.46 to<br>1,120,636.10)            | 6,372.75<br>(5,271.16 to<br>7,757.83)             | 7,281.96<br>(4,599.07 to<br>11,339.32)           | 4,006.35<br>(2,677.93 to<br>6,023.22)           | 13,199.26<br>(7,596.53 to<br>20,792.42)           |
| Upper respiratory infections                                             | 785.56<br>(220.04 to<br>1,940.72)                        | 413.64<br>(138.20 to<br>1,042.37)                    | 266.26<br>(88.07 to<br>666.10)                       | 954.38<br>(270.19 to<br>2,708.26)                        | 10.64<br>(3.81 to<br>24.63)                       | 7.71<br>(2.98 to<br>16.30)                       | 5.11<br>(2.00 to<br>10.55)                      | 15.12<br>(5.37 to<br>36.92)                       |
| Otitis media                                                             | 56.63<br>(6.64 to<br>338.94)                             | 8.17<br>(1.92 to<br>40.43)                           | 8.09<br>(2.04 to<br>39.43)                           | 14.82<br>(2.17 to<br>86.79)                              | 0.77<br>(0.16 to<br>4.16)                         | 0.20<br>(0.08 to<br>0.63)                        | 0.22<br>(0.09 to<br>0.67)                       | 0.26<br>(0.07 to<br>1.14)                         |
| Meningitis                                                               | 140,228.29<br>(91,383.36 to<br>256,233.34)               | 68,440.97<br>(38,897.98 to<br>126,366.76)            | 57,928.53<br>(33,218.58 to<br>105,599.26)            | 181,456.72<br>(90,395.35 to<br>360,332.39)               | 1,980.46<br>(1,300.61 to<br>3,546.04)             | 1,231.25<br>(715.43 to<br>2,124.67)              | 1,102.53<br>(643.17 to<br>1,910.95)             | 2,563.86<br>(1,377.49 to<br>4,839.23)             |
| Pneumococcal meningitis                                                  | 9,724.01<br>(6,025.15 to<br>17,697.15)                   | 5,318.68<br>(2,920.40 to<br>9,522.33)                | 4,987.28<br>(2,795.68 to<br>8,814.30)                | 10,836.76<br>(5,553.40 to<br>21,360.60)                  | 156.42<br>(97.73 to<br>269.49)                    | 116.51<br>(66.03 to<br>197.25)                   | 114.62<br>(65.57 to<br>194.72)                  | 187.71<br>(104.44 to<br>333.72)                   |
| H influenzae type B meningitis                                           | 17,641.01<br>(10,769.64 to<br>33,276.96)                 | 15,613.00<br>(4,791.73 to<br>39,933.54)              | 10,480.18<br>(3,890.37 to<br>24,933.77)              | 94,745.43<br>(21,508.10 to<br>248,459.45)                | 237.80<br>(148.29 to<br>437.06)                   | 218.39<br>(81.66 to<br>511.94)                   | 160.77<br>(72.03 to<br>347.40)                  | 1,141.45<br>(279.26 to<br>2,961.19)               |
| Meningococcal meningitis                                                 | 74,310.14<br>(47,071.13 to<br>133,673.04)                | 31,130.99<br>(17,137.37 to<br>55,354.27)             | 28,058.66<br>(15,437.64 to<br>49,918.79)             | 48,666.40<br>(26,753.91 to<br>89,149.77)                 | 1,043.42<br>(674.58 to<br>1,835.67)               | 582.25<br>(324.75 to<br>1,008.58)                | 540.75<br>(304.56 to<br>931.21)                 | 791.50<br>(447.10 to<br>1,391.07)                 |
| Other meningitis                                                         | 38,553.13<br>(24,771.90 to<br>73,491.36)                 | 16,378.30<br>(9,625.23 to<br>29,608.76)              | 14,402.40<br>(8,340.62 to<br>25,695.95)              | 27,208.13<br>(15,303.93 to<br>50,388.40)                 | 542.82<br>(364.96 to<br>983.94)                   | 314.11<br>(187.22 to<br>538.45)                  | 286.39<br>(166.73 to<br>485.10)                 | 443.20<br>(269.91 to<br>764.98)                   |
| Encephalitis                                                             | 5,390.10<br>(2,947.93 to<br>9,533.44)                    | 4,162.52<br>(2,256.82 to<br>7,236.25)                | 3,501.13<br>(1,907.92 to<br>6,098.83)                | 7,377.21<br>(3,859.91 to<br>13,497.52)                   | 76.57<br>(43.61 to<br>128.78)                     | 73.90<br>(43.57 to<br>118.92)                    | 63.82<br>(37.60 to<br>103.43)                   | 113.89<br>(63.44 to<br>196.08)                    |
| Diphtheria                                                               | 192.33<br>(78.78 to<br>392.22)                           | 37.93<br>(14.02 to<br>100.14)                        | 22.45<br>(10.25 to<br>48.24)                         | 202.56<br>(51.02 to<br>625.98)                           | 2.37<br>(1.04 to<br>4.72)                         | 0.53<br>(0.22 to<br>1.24)                        | 0.35<br>(0.17 to<br>0.67)                       | 2.47<br>(0.68 to<br>7.55)                         |
| Whooping cough                                                           | 23,890.10<br>(1,793.54 to<br>79,743.99)                  | 15,490.90<br>(1,298.40 to<br>51,887.54)              | 6,106.83<br>(490.60 to<br>22,629.70)                 | 33,492.88<br>(2,486.47 to<br>117,741.14)                 | 281.81<br>(21.15 to<br>941.08)                    | 183.80<br>(15.42 to<br>610.89)                   | 73.37<br>(5.92 to<br>267.72)                    | 395.80<br>(29.47 to<br>1,392.64)                  |
| Tetanus                                                                  | 4,882.56<br>(2,328.61 to<br>10,502.12)                   | 682.13<br>(307.22 to<br>1,372.92)                    | 480.10<br>(210.16 to<br>879.14)                      | 1,418.60<br>(593.18 to<br>3,284.04)                      | 68.76<br>(35.76 to<br>132.54)                     | 11.67<br>(5.48 to<br>21.15)                      | 9.43<br>(4.15 to<br>16.93)                      | 20.07<br>(9.43 to<br>41.14)                       |
| Measles                                                                  | 1,783.34<br>(599.26 to<br>4,121.67)                      | 243.27<br>(23.10 to<br>1,238.92)                     | 101.44<br>(15.71 to<br>416.63)                       | 1,536.21<br>(111.69 to<br>6,244.19)                      | 21.25<br>(7.13 to<br>49.14)                       | 2.94<br>(0.29 to<br>14.75)                       | 1.26<br>(0.21 to<br>5.06)                       | 18.24<br>(1.36 to<br>73.87)                       |
| <b>Sierra Leone</b>                                                      |                                                          |                                                      |                                                      |                                                          |                                                   |                                                  |                                                 |                                                   |
| <b>YLLs (actual counts)</b>                                              |                                                          |                                                      |                                                      |                                                          | <b>Deaths (actual counts)</b>                     |                                                  |                                                 |                                                   |

| Cause                                                 | 2016                                                 | 2040 Forecast                                        | 2040 Better Scenario                                 | 2040 Worse Scenario                                  | 2016                                            | 2040 Forecast                                  | 2040 Better Scenario                           | 2040 Worse Scenario                            |
|-------------------------------------------------------|------------------------------------------------------|------------------------------------------------------|------------------------------------------------------|------------------------------------------------------|-------------------------------------------------|------------------------------------------------|------------------------------------------------|------------------------------------------------|
| Varicella and herpes zoster                           | 1,974.59<br>(1,115.55 to<br>3,239.94)                | 843.79<br>(471.49 to<br>1,428.88)                    | 592.43<br>(333.93 to<br>1,005.22)                    | 1,866.34<br>(972.73 to<br>3,377.64)                  | 28.56<br>(18.11 to<br>44.01)                    | 19.04<br>(12.04 to<br>28.47)                   | 14.88<br>(9.37 to<br>22.86)                    | 32.05<br>(19.14 to<br>50.97)                   |
| <b>Neglected tropical diseases and malaria</b>        | <b>745,886.53<br/>(553,607.92 to<br/>968,120.10)</b> | <b>203,777.21<br/>(147,895.24 to<br/>269,752.53)</b> | <b>187,150.67<br/>(136,154.54 to<br/>249,377.44)</b> | <b>363,985.23<br/>(249,428.71 to<br/>504,835.52)</b> | <b>9,644.33<br/>(7,337.50 to<br/>12,289.16)</b> | <b>3,633.81<br/>(2,720.21 to<br/>4,788.87)</b> | <b>3,457.01<br/>(2,604.87 to<br/>4,567.16)</b> | <b>5,494.51<br/>(4,000.87 to<br/>7,330.42)</b> |
| Malaria                                               | 704,656.73<br>(516,355.31 to<br>925,200.65)          | 180,406.96<br>(126,979.85 to<br>244,295.05)          | 168,487.07<br>(118,544.46 to<br>228,917.99)          | 317,443.09<br>(208,251.94 to<br>455,006.02)          | 9,064.87<br>(6,782.59 to<br>11,673.61)          | 3,234.92<br>(2,356.30 to<br>4,362.62)          | 3,135.28<br>(2,296.34 to<br>4,214.82)          | 4,795.71<br>(3,363.72 to<br>6,549.19)          |
| Chagas disease                                        | 0.00<br>(0.00 to<br>0.00)                            | 0.00<br>(0.00 to<br>0.00)                            | 0.00<br>(0.00 to<br>0.00)                            | 0.00<br>(0.00 to<br>0.00)                            | 0.00<br>(0.00 to<br>0.00)                       | 0.00<br>(0.00 to<br>0.00)                      | 0.00<br>(0.00 to<br>0.00)                      | 0.00<br>(0.00 to<br>0.00)                      |
| Leishmaniasis                                         | 0.00<br>(0.00 to<br>0.00)                            | 0.00<br>(0.00 to<br>0.00)                            | 0.00<br>(0.00 to<br>0.00)                            | 0.00<br>(0.00 to<br>0.00)                            | 0.00<br>(0.00 to<br>0.00)                       | 0.00<br>(0.00 to<br>0.00)                      | 0.00<br>(0.00 to<br>0.00)                      | 0.00<br>(0.00 to<br>0.00)                      |
| African trypanosomiasis                               | 0.00<br>(0.00 to<br>0.00)                            | 0.00<br>(0.00 to<br>0.00)                            | 0.00<br>(0.00 to<br>0.00)                            | 0.00<br>(0.00 to<br>0.00)                            | 0.00<br>(0.00 to<br>0.00)                       | 0.00<br>(0.00 to<br>0.00)                      | 0.00<br>(0.00 to<br>0.00)                      | 0.00<br>(0.00 to<br>0.00)                      |
| Schistosomiasis                                       | 1,884.05<br>(1,234.91 to<br>2,682.11)                | 1,585.64<br>(980.72 to<br>2,519.02)                  | 1,311.18<br>(813.60 to<br>2,066.13)                  | 1,946.08<br>(1,210.20 to<br>3,037.96)                | 47.46<br>(31.85 to<br>66.16)                    | 47.19<br>(29.95 to<br>69.82)                   | 40.33<br>(25.33 to<br>59.79)                   | 54.35<br>(34.95 to<br>80.00)                   |
| Cysticercosis                                         | 98.80<br>(48.98 to<br>185.19)                        | 47.48<br>(20.61 to<br>95.42)                         | 42.57<br>(18.72 to<br>87.30)                         | 57.98<br>(25.34 to<br>115.79)                        | 1.83<br>(0.92 to<br>3.40)                       | 1.07<br>(0.48 to<br>2.11)                      | 0.97<br>(0.44 to<br>1.94)                      | 1.23<br>(0.55 to<br>2.40)                      |
| Cystic echinococcosis                                 | 300.12<br>(212.44 to<br>409.25)                      | 126.99<br>(82.18 to<br>189.87)                       | 71.90<br>(47.07 to<br>105.85)                        | 254.20<br>(167.78 to<br>374.63)                      | 5.25<br>(3.75 to<br>7.00)                       | 3.07<br>(2.01 to<br>4.45)                      | 1.78<br>(1.20 to<br>2.57)                      | 5.51<br>(3.65 to<br>7.98)                      |
| Dengue                                                | 293.48<br>(14.69 to<br>1,390.13)                     | 729.15<br>(47.43 to<br>3,075.08)                     | 677.78<br>(43.51 to<br>2,754.53)                     | 1,212.51<br>(71.44 to<br>5,464.72)                   | 3.97<br>(0.23 to<br>17.98)                      | 14.00<br>(0.97 to<br>54.76)                    | 13.44<br>(0.94 to<br>52.47)                    | 19.55<br>(1.32 to<br>81.80)                    |
| Yellow fever                                          | 5,013.08<br>(1,037.60 to<br>14,874.58)               | 2,044.98<br>(395.29 to<br>6,606.92)                  | 1,454.11<br>(278.20 to<br>4,769.08)                  | 3,433.98<br>(699.32 to<br>10,980.23)                 | 78.98<br>(16.80 to<br>232.09)                   | 35.13<br>(6.82 to<br>112.33)                   | 25.07<br>(4.83 to<br>80.13)                    | 56.02<br>(11.23 to<br>175.29)                  |
| Rabies                                                | 1,796.48<br>(584.88 to<br>3,721.40)                  | 826.02<br>(246.23 to<br>1,673.75)                    | 394.89<br>(117.28 to<br>815.06)                      | 2,129.33<br>(591.13 to<br>4,600.47)                  | 27.94<br>(8.96 to<br>55.69)                     | 15.19<br>(4.21 to<br>31.53)                    | 7.24<br>(2.05 to<br>15.00)                     | 36.35<br>(9.89 to<br>77.21)                    |
| Intestinal nematode infections                        | 4,957.21<br>(2,897.42 to<br>7,934.21)                | 4,042.13<br>(2,398.42 to<br>6,416.63)                | 4,028.82<br>(2,346.73 to<br>6,450.68)                | 7,593.91<br>(4,378.66 to<br>12,166.64)               | 60.48<br>(35.76 to<br>95.97)                    | 52.30<br>(31.51 to<br>80.92)                   | 52.41<br>(30.94 to<br>81.92)                   | 94.58<br>(55.37 to<br>149.99)                  |
| Other neglected tropical diseases                     | 26,822.23<br>(14,782.04 to<br>46,412.24)             | 13,967.86<br>(8,695.28 to<br>22,503.51)              | 10,682.34<br>(6,655.98 to<br>17,075.76)              | 29,834.15<br>(17,581.22 to<br>48,639.27)             | 352.54<br>(203.03 to<br>588.29)                 | 230.94<br>(151.35 to<br>342.33)                | 180.48<br>(120.55 to<br>268.62)                | 431.22<br>(266.53 to<br>671.83)                |
| <b>Maternal disorders</b>                             | <b>71,246.82<br/>(58,536.86 to<br/>85,108.16)</b>    | <b>59,117.18<br/>(28,505.86 to<br/>111,298.16)</b>   | <b>36,150.23<br/>(16,672.99 to<br/>69,038.22)</b>    | <b>98,850.30<br/>(46,283.50 to<br/>185,536.44)</b>   | <b>1,275.47<br/>(1,045.06 to<br/>1,535.42)</b>  | <b>1,088.08<br/>(531.35 to<br/>2,021.32)</b>   | <b>665.20<br/>(316.33 to<br/>1,264.00)</b>     | <b>1,805.04<br/>(849.68 to<br/>3,315.99)</b>   |
| Maternal hemorrhage                                   | 38,032.59<br>(30,010.25 to<br>47,536.45)             | 31,072.98<br>(14,692.36 to<br>60,792.17)             | 18,922.67<br>(8,855.49 to<br>37,226.78)              | 50,404.97<br>(23,668.98 to<br>99,521.13)             | 688.74<br>(547.96 to<br>870.03)                 | 577.12<br>(275.34 to<br>1,110.25)              | 351.39<br>(169.78 to<br>681.87)                | 950.32<br>(444.79 to<br>1,796.36)              |
| Maternal sepsis and other maternal infections         | 2,868.48<br>(1,225.47 to<br>5,144.06)                | 2,077.81<br>(652.10 to<br>4,873.91)                  | 1,264.68<br>(395.68 to<br>3,012.77)                  | 3,455.89<br>(1,068.96 to<br>8,177.98)                | 51.46<br>(22.43 to<br>91.37)                    | 38.30<br>(12.09 to<br>89.90)                   | 23.31<br>(7.35 to<br>55.89)                    | 63.22<br>(19.39 to<br>144.25)                  |
| Maternal hypertensive disorders                       | 6,217.20<br>(4,227.26 to<br>8,852.52)                | 4,710.38<br>(2,016.71 to<br>9,445.53)                | 2,852.44<br>(1,183.03 to<br>5,932.55)                | 7,794.62<br>(3,304.93 to<br>15,263.75)               | 108.04<br>(73.57 to<br>152.67)                  | 84.42<br>(36.51 to<br>166.14)                  | 51.11<br>(21.45 to<br>104.58)                  | 138.55<br>(58.85 to<br>272.05)                 |
| Maternal obstructed labor and uterine rupture         | 2,419.68<br>(1,314.27 to<br>4,088.17)                | 1,968.51<br>(732.24 to<br>4,299.29)                  | 1,156.09<br>(421.48 to<br>2,545.19)                  | 3,299.75<br>(1,255.08 to<br>7,052.60)                | 43.76<br>(23.94 to<br>72.62)                    | 36.51<br>(13.88 to<br>78.56)                   | 21.44<br>(7.89 to<br>47.13)                    | 60.83<br>(23.39 to<br>128.49)                  |
| Maternal abortion, miscarriage, and ectopic pregnancy | 4,515.61<br>(2,276.97 to<br>7,795.74)                | 4,350.75<br>(1,480.73 to<br>10,367.77)               | 2,684.15<br>(934.11 to<br>6,377.80)                  | 7,465.28<br>(2,504.79 to<br>18,037.69)               | 79.58<br>(39.97 to<br>134.09)                   | 78.80<br>(27.87 to<br>187.54)                  | 48.60<br>(17.49 to<br>117.19)                  | 134.07<br>(46.54 to<br>320.32)                 |
| Indirect maternal deaths                              | 10,861.97<br>(7,538.57 to<br>15,315.99)              | 8,722.59<br>(3,597.92 to<br>18,054.75)               | 5,436.64<br>(2,226.51 to<br>11,497.01)               | 15,488.13<br>(6,240.63 to<br>31,298.17)              | 190.20<br>(131.93 to<br>267.71)                 | 156.46<br>(65.01 to<br>318.83)                 | 97.53<br>(39.62 to<br>206.63)                  | 274.95<br>(112.72 to<br>542.06)                |

|                                                                         |                                                    |                                                    |                                                    |                                                    |                                              |                                              |                                              |                                              |
|-------------------------------------------------------------------------|----------------------------------------------------|----------------------------------------------------|----------------------------------------------------|----------------------------------------------------|----------------------------------------------|----------------------------------------------|----------------------------------------------|----------------------------------------------|
| Late maternal deaths                                                    | 775.78<br>(382.07 to<br>1,363.15)                  | 486.23<br>(172.33 to<br>1,064.24)                  | 298.12<br>(102.83 to<br>665.65)                    | 846.23<br>(295.29 to<br>1,842.72)                  | 13.69<br>(6.50 to<br>24.29)                  | 8.86<br>(3.16 to<br>19.22)                   | 5.43<br>(1.90 to<br>11.87)                   | 15.26<br>(5.41 to<br>32.86)                  |
| Maternal deaths aggravated by HIV/AIDS                                  | 546.02<br>(292.19 to<br>817.00)                    | 1,780.94<br>(516.71 to<br>3,802.31)                | 1,017.90<br>(133.70 to<br>2,497.51)                | 3,383.54<br>(1,260.31 to<br>7,169.34)              | 10.39<br>(5.56 to<br>15.64)                  | 34.63<br>(10.21 to<br>73.86)                 | 19.83<br>(2.35 to<br>47.08)                  | 65.19<br>(25.02 to<br>134.13)                |
| Other maternal disorders                                                | 5,009.50<br>(3,215.40 to<br>7,291.64)              | 3,946.99<br>(1,719.86 to<br>8,082.70)              | 2,517.53<br>(1,049.53 to<br>5,277.53)              | 6,711.89<br>(2,856.26 to<br>13,614.11)             | 89.60<br>(57.72 to<br>130.34)                | 72.98<br>(32.29 to<br>148.15)                | 46.55<br>(20.07 to<br>98.49)                 | 122.65<br>(53.37 to<br>249.24)               |
| <b>Sierra Leone</b>                                                     |                                                    |                                                    |                                                    |                                                    |                                              |                                              |                                              |                                              |
| Cause                                                                   | YLLs (actual counts)                               |                                                    |                                                    |                                                    | Deaths (actual counts)                       |                                              |                                              |                                              |
|                                                                         | 2016                                               | 2040 Forecast                                      | 2040 Better Scenario                               | 2040 Worse Scenario                                | 2016                                         | 2040 Forecast                                | 2040 Better Scenario                         | 2040 Worse Scenario                          |
| <b>Neonatal disorders</b>                                               | <b>532,556.50</b><br>(451,243.36 to<br>622,931.41) | <b>195,292.14</b><br>(129,929.59 to<br>274,480.75) | <b>156,078.76</b><br>(104,591.51 to<br>218,273.29) | <b>542,444.62</b><br>(353,707.65 to<br>761,394.71) | <b>6,152.09</b><br>(5,212.34 to<br>7,196.08) | <b>2,256.67</b><br>(1,501.45 to<br>3,171.10) | <b>1,803.55</b><br>(1,208.83 to<br>2,522.23) | <b>6,267.77</b><br>(4,086.85 to<br>8,796.40) |
| Neonatal preterm birth                                                  | 162,987.49<br>(105,667.34 to<br>231,691.88)        | 48,440.36<br>(28,244.03 to<br>74,499.56)           | 39,440.23<br>(22,838.38 to<br>60,472.98)           | 157,861.02<br>(92,855.43 to<br>244,312.36)         | 1,882.67<br>(1,220.80 to<br>2,676.15)        | 559.70<br>(326.43 to<br>860.70)              | 455.71<br>(263.89 to<br>698.69)              | 1,823.77<br>(1,072.72 to<br>2,822.54)        |
| Neonatal encephalopathy due to birth asphyxia and trauma                | 230,478.64<br>(162,255.26 to<br>311,559.76)        | 81,430.23<br>(43,898.53 to<br>131,549.26)          | 65,864.82<br>(35,771.25 to<br>105,778.14)          | 210,039.55<br>(108,490.88 to<br>349,955.96)        | 2,662.10<br>(1,873.96 to<br>3,598.98)        | 940.77<br>(507.55 to<br>1,519.74)            | 760.95<br>(413.39 to<br>1,221.97)            | 2,426.55<br>(1,254.17 to<br>4,042.39)        |
| Neonatal sepsis and other neonatal infections                           | 88,294.40<br>(58,563.89 to<br>134,138.11)          | 45,826.15<br>(27,681.72 to<br>74,225.17)           | 36,336.80<br>(22,395.93 to<br>57,716.33)           | 119,694.45<br>(70,938.15 to<br>190,208.50)         | 1,020.24<br>(676.76 to<br>1,549.95)          | 529.67<br>(319.98 to<br>857.87)              | 419.99<br>(258.85 to<br>667.18)              | 1,383.40<br>(820.15 to<br>2,197.69)          |
| Hemolytic disease and other neonatal jaundice                           | 15,359.95<br>(9,514.49 to<br>24,030.03)            | 3,729.41<br>(1,947.41 to<br>6,488.67)              | 2,758.49<br>(1,474.41 to<br>4,722.85)              | 10,398.77<br>(5,304.48 to<br>17,960.39)            | 177.53<br>(109.95 to<br>277.67)              | 43.11<br>(22.53 to<br>74.98)                 | 31.89<br>(17.05 to<br>54.56)                 | 120.21<br>(61.37 to<br>207.48)               |
| Other neonatal disorders                                                | 35,436.03<br>(21,164.31 to<br>57,186.73)           | 15,865.99<br>(7,927.21 to<br>28,720.18)            | 11,678.42<br>(5,827.90 to<br>21,283.08)            | 44,450.84<br>(21,862.81 to<br>82,222.53)           | 409.55<br>(244.64 to<br>661.01)              | 183.42<br>(91.61 to<br>332.08)               | 135.01<br>(67.36 to<br>246.09)               | 513.84<br>(252.97 to<br>950.15)              |
| <b>Nutritional deficiencies</b>                                         | <b>87,320.37</b><br>(54,196.93 to<br>131,626.24)   | <b>34,783.63</b><br>(15,849.18 to<br>38,542.12)    | <b>19,251.25</b><br>(12,181.53 to<br>29,837.61)    | <b>55,178.96</b><br>(32,533.60 to<br>90,335.29)    | <b>1,147.36</b><br>(747.36 to<br>1,675.19)   | <b>481.75</b><br>(353.66 to<br>667.21)       | <b>401.86</b><br>(294.67 to<br>549.45)       | <b>848.57</b><br>(557.40 to<br>1,277.98)     |
| Protein-energy malnutrition                                             | 84,646.52<br>(51,454.22 to<br>129,052.99)          | 22,410.77<br>(13,874.30 to<br>34,736.65)           | 17,393.67<br>(10,882.22 to<br>27,620.28)           | 51,008.72<br>(28,898.88 to<br>84,990.01)           | 1,099.79<br>(713.40 to<br>1,625.39)          | 426.40<br>(308.47 to<br>593.23)              | 356.10<br>(257.69 to<br>488.25)              | 769.03<br>(485.73 to<br>1,186.69)            |
| Iodine deficiency                                                       | 368.97<br>(7.61 to<br>2,825.30)                    | 714.21<br>(11.91 to<br>4,197.95)                   | 516.24<br>(8.28 to<br>2,980.78)                    | 1,638.37<br>(18.54 to<br>11,885.27)                | 5.24<br>(0.21 to<br>33.84)                   | 14.77<br>(0.37 to<br>60.09)                  | 11.43<br>(0.25 to<br>43.98)                  | 26.49<br>(0.50 to<br>151.05)                 |
| Dietary iron deficiency                                                 | 74.64<br>(47.73 to<br>147.76)                      | 93.18<br>(46.83 to<br>201.68)                      | 79.41<br>(39.80 to<br>172.29)                      | 122.55<br>(61.23 to<br>266.44)                     | 1.29<br>(0.79 to<br>2.96)                    | 1.84<br>(0.87 to<br>5.16)                    | 1.59<br>(0.74 to<br>4.71)                    | 2.27<br>(1.11 to<br>6.26)                    |
| Other nutritional deficiencies                                          | 2,230.24<br>(896.98 to<br>4,391.12)                | 1,565.47<br>(780.74 to<br>2,599.78)                | 1,261.94<br>(621.13 to<br>2,061.34)                | 2,409.32<br>(1,057.95 to<br>4,562.48)              | 41.05<br>(20.15 to<br>68.53)                 | 38.74<br>(21.83 to<br>58.04)                 | 32.74<br>(18.44 to<br>48.12)                 | 50.78<br>(26.96 to<br>81.09)                 |
| <b>Other communicable, maternal, neonatal, and nutritional diseases</b> | <b>24,015.98</b><br>(17,387.84 to<br>37,006.75)    | <b>15,886.65</b><br>(10,560.73 to<br>24,381.64)    | <b>13,013.43</b><br>(8,627.97 to<br>20,477.49)     | <b>24,437.35</b><br>(15,988.29 to<br>37,678.60)    | <b>386.37</b><br>(235.20 to<br>536.32)       | <b>331.45</b><br>(207.20 to<br>487.20)       | <b>276.81</b><br>(194.03 to<br>411.41)       | <b>452.03</b><br>(312.25 to<br>663.57)       |
| Sexually transmitted infections excluding HIV                           | 4,253.58<br>(2,043.44 to<br>7,543.87)              | 1,573.44<br>(767.75 to<br>2,815.81)                | 1,332.42<br>(650.23 to<br>2,385.14)                | 2,834.12<br>(1,262.34 to<br>5,360.12)              | 54.07<br>(27.50 to<br>92.79)                 | 21.43<br>(12.49 to<br>40.93)                 | 20.82<br>(10.73 to<br>34.34)                 | 39.96<br>(19.53 to<br>71.28)                 |
| Syphilis                                                                | 3,788.69<br>(1,637.36 to<br>7,026.76)              | 968.47<br>(386.36 to<br>1,940.86)                  | 812.68<br>(328.18 to<br>1,618.21)                  | 2,123.83<br>(821.19 to<br>4,546.79)                | 45.24<br>(20.07 to<br>83.11)                 | 12.61<br>(5.39 to<br>24.01)                  | 10.58<br>(4.49 to<br>20.18)                  | 26.33<br>(10.70 to<br>54.35)                 |
| Chlamydial infection                                                    | 96.42<br>(50.20 to<br>142.73)                      | 125.04<br>(53.19 to<br>256.42)                     | 107.34<br>(44.57 to<br>220.52)                     | 147.35<br>(62.52 to<br>296.58)                     | 1.80<br>(0.95 to<br>2.63)                    | 2.40<br>(1.06 to<br>4.67)                    | 2.08<br>(0.90 to<br>4.08)                    | 2.78<br>(1.22 to<br>5.37)                    |
| Gonococcal infection                                                    | 237.94<br>(126.84 to<br>349.47)                    | 310.80<br>(132.73 to<br>632.32)                    | 267.49<br>(112.99 to<br>547.73)                    | 362.94<br>(156.42 to<br>741.62)                    | 4.57<br>(2.51 to<br>6.65)                    | 6.15<br>(2.80 to<br>12.00)                   | 5.35<br>(2.43 to<br>10.44)                   | 7.05<br>(3.22 to<br>13.80)                   |
| Other sexually transmitted infections                                   | 130.53<br>(69.92 to<br>191.51)                     | 169.13<br>(69.98 to<br>339.05)                     | 144.90<br>(59.56 to<br>293.48)                     | 200.00<br>(83.52 to<br>396.53)                     | 2.46<br>(1.34 to<br>3.57)                    | 3.27<br>(1.42 to<br>6.25)                    | 2.81<br>(1.22 to<br>5.43)                    | 3.80<br>(1.66 to<br>7.16)                    |

|                                       |                                                      |                                                          |                                                        |                                                            |                                                   |                                                   |                                                   |                                                   |
|---------------------------------------|------------------------------------------------------|----------------------------------------------------------|--------------------------------------------------------|------------------------------------------------------------|---------------------------------------------------|---------------------------------------------------|---------------------------------------------------|---------------------------------------------------|
| Acute hepatitis                       | 13,805.08<br>(11,085.21 to<br>16,904.90)             | 10,815.38<br>(7,130.19 to<br>17,127.88)                  | 8,864.05<br>(5,915.96 to<br>14,100.91)                 | 14,373.12<br>(9,588.17 to<br>21,938.98)                    | 240.47<br>(201.86 to<br>308.60)                   | 231.31<br>(158.99 to<br>352.41)                   | 191.42<br>(132.37 to<br>294.25)                   | 290.86<br>(200.79 to<br>434.26)                   |
| Acute hepatitis A                     | 525.81<br>(60.66 to<br>1,259.57)                     | 211.04<br>(62.93 to<br>479.44)                           | 173.01<br>(50.87 to<br>389.15)                         | 402.03<br>(93.96 to<br>970.46)                             | 6.54<br>(1.03 to<br>15.06)                        | 3.45<br>(1.24 to<br>7.28)                         | 2.87<br>(1.07 to<br>6.03)                         | 5.83<br>(1.83 to<br>12.93)                        |
| Acute hepatitis B                     | 8,943.71<br>(6,932.38 to<br>11,456.29)               | 8,105.21<br>(5,184.66 to<br>12,953.08)                   | 6,538.10<br>(4,201.67 to<br>10,464.23)                 | 10,209.35<br>(6,629.31 to<br>16,193.55)                    | 179.78<br>(142.36 to<br>229.24)                   | 183.66<br>(123.09 to<br>282.81)                   | 149.81<br>(101.62 to<br>232.17)                   | 223.98<br>(152.05 to<br>347.06)                   |
| Acute hepatitis C                     | 221.34<br>(152.35 to<br>311.99)                      | 251.33<br>(152.20 to<br>409.07)                          | 227.09<br>(137.97 to<br>365.43)                        | 292.81<br>(179.09 to<br>469.04)                            | 4.78<br>(3.29 to<br>6.65)                         | 6.39<br>(3.94 to<br>10.13)                        | 5.85<br>(3.64 to<br>9.26)                         | 7.06<br>(4.39 to<br>11.06)                        |
| Acute hepatitis E                     | 4,114.23<br>(2,954.65 to<br>5,614.78)                | 2,247.79<br>(1,325.50 to<br>3,759.99)                    | 1,925.84<br>(1,146.36 to<br>3,223.08)                  | 3,468.93<br>(2,085.70 to<br>5,677.15)                      | 58.37<br>(42.42 to<br>79.41)                      | 37.81<br>(23.32 to<br>61.33)                      | 32.89<br>(20.32 to<br>53.69)                      | 53.99<br>(32.76 to<br>85.20)                      |
| Other unspecified infectious diseases | 5,957.31<br>(2,326.47 to<br>18,773.91)               | 3,497.82<br>(1,853.17 to<br>7,719.29)                    | 2,816.97<br>(1,512.40 to<br>6,136.68)                  | 7,230.11<br>(3,241.03 to<br>18,807.51)                     | 82.83<br>(39.31 to<br>231.64)                     | 75.71<br>(50.25 to<br>130.35)                     | 64.57<br>(43.50 to<br>109.36)                     | 121.21<br>(68.85 to<br>258.54)                    |
| <b>Non-communicable diseases</b>      | <b>782,903.30<br/>(599,645.80 to<br/>935,582.09)</b> | <b>1,096,933.34<br/>(843,346.27 to<br/>1,392,642.01)</b> | <b>859,847.54<br/>(671,124.60 to<br/>1,081,744.20)</b> | <b>1,596,262.66<br/>(1,223,192.94 to<br/>2,030,967.07)</b> | <b>19,590.60<br/>(16,669.40 to<br/>22,327.78)</b> | <b>38,209.08<br/>(31,127.96 to<br/>46,625.78)</b> | <b>30,593.57<br/>(25,440.38 to<br/>36,344.55)</b> | <b>50,395.98<br/>(40,362.36 to<br/>62,275.00)</b> |

**Sierra Leone**

| Cause                                | YLLs (actual counts)                                |                                                      |                                                      |                                                      | Deaths (actual counts)                         |                                                 |                                                 |                                                 |
|--------------------------------------|-----------------------------------------------------|------------------------------------------------------|------------------------------------------------------|------------------------------------------------------|------------------------------------------------|-------------------------------------------------|-------------------------------------------------|-------------------------------------------------|
|                                      | 2016                                                | 2040 Forecast                                        | 2040 Better Scenario                                 | 2040 Worse Scenario                                  | 2016                                           | 2040 Forecast                                   | 2040 Better Scenario                            | 2040 Worse Scenario                             |
|                                      | <b>110,241.32<br/>(93,430.70 to<br/>128,029.61)</b> | <b>236,395.00<br/>(182,569.60 to<br/>310,277.20)</b> | <b>227,975.91<br/>(175,947.29 to<br/>296,660.94)</b> | <b>262,212.10<br/>(199,000.29 to<br/>346,021.33)</b> | <b>3,426.61<br/>(2,922.48 to<br/>3,955.92)</b> | <b>8,257.92<br/>(6,694.09 to<br/>10,287.87)</b> | <b>8,249.24<br/>(6,740.20 to<br/>10,223.89)</b> | <b>8,661.10<br/>(6,931.58 to<br/>10,844.19)</b> |
| <b>Neoplasms</b>                     |                                                     |                                                      |                                                      |                                                      |                                                |                                                 |                                                 |                                                 |
| Lip and oral cavity cancer           | 1,086.59<br>(887.11 to<br>1,308.58)                 | 2,176.50<br>(1,156.90 to<br>3,643.61)                | 1,819.51<br>(995.21 to<br>2,998.45)                  | 3,783.02<br>(1,874.98 to<br>6,509.74)                | 36.70<br>(30.05 to<br>45.51)                   | 78.22<br>(43.80 to<br>127.38)                   | 68.35<br>(38.91 to<br>108.72)                   | 128.79<br>(65.51 to<br>216.38)                  |
| Nasopharynx cancer                   | 292.52<br>(215.65 to<br>380.51)                     | 558.12<br>(304.86 to<br>964.18)                      | 439.59<br>(242.24 to<br>741.84)                      | 1,024.26<br>(526.81 to<br>1,827.15)                  | 7.53<br>(5.61 to<br>9.80)                      | 15.32<br>(8.40 to<br>26.27)                     | 12.23<br>(6.79 to<br>20.37)                     | 27.59<br>(14.12 to<br>48.47)                    |
| Other pharynx cancer                 | 715.70<br>(511.35 to<br>922.49)                     | 1,130.55<br>(581.62 to<br>2,037.06)                  | 1,039.31<br>(543.85 to<br>1,839.39)                  | 1,700.99<br>(808.27 to<br>3,134.03)                  | 23.47<br>(16.90 to<br>29.97)                   | 39.94<br>(21.09 to<br>69.62)                    | 38.06<br>(20.71 to<br>66.35)                    | 57.54<br>(27.68 to<br>102.80)                   |
| Esophageal cancer                    | 3,466.99<br>(2,888.73 to<br>4,128.52)               | 5,831.11<br>(3,507.79 to<br>9,812.22)                | 4,965.77<br>(3,015.68 to<br>8,298.70)                | 9,027.70<br>(4,911.25 to<br>15,701.55)               | 125.97<br>(105.35 to<br>148.51)                | 222.28<br>(137.20 to<br>366.24)                 | 196.88<br>(123.47 to<br>320.17)                 | 327.70<br>(185.02 to<br>553.98)                 |
| Stomach cancer                       | 9,803.92<br>(8,317.37 to<br>11,467.75)              | 15,130.25<br>(11,520.59 to<br>20,038.12)             | 14,273.71<br>(10,884.09 to<br>18,924.85)             | 16,043.31<br>(12,147.09 to<br>21,623.64)             | 358.64<br>(305.62 to<br>414.61)                | 607.29<br>(484.81 to<br>776.50)                 | 599.03<br>(475.44 to<br>763.70)                 | 612.64<br>(480.52 to<br>792.62)                 |
| Colon and rectum cancer              | 5,547.07<br>(4,596.78 to<br>6,774.45)               | 14,086.75<br>(9,326.76 to<br>20,744.70)              | 14,977.73<br>(9,906.74 to<br>21,955.00)              | 24,817.15<br>(9,605.30 to<br>22,454.16)              | 197.50<br>(162.92 to<br>241.11)                | 560.26<br>(386.35 to<br>810.15)                 | 623.72<br>(432.93 to<br>892.22)                 | 556.68<br>(373.94 to<br>811.73)                 |
| Liver cancer                         | 18,362.13<br>(14,405.92 to<br>22,871.51)            | 46,128.69<br>(31,787.86 to<br>67,504.59)             | 42,709.38<br>(30,193.70 to<br>61,641.19)             | 53,005.63<br>(35,591.91 to<br>80,533.03)             | 545.28<br>(432.31 to<br>672.64)                | 1,476.46<br>(1,064.71 to<br>2,080.56)           | 1,410.92<br>(1,045.46 to<br>1,935.05)           | 1,636.09<br>(1,141.26 to<br>2,388.26)           |
| Liver cancer due to hepatitis B      | 10,469.16<br>(8,002.40 to<br>13,261.46)             | 26,460.73<br>(17,712.24 to<br>39,157.46)             | 24,722.27<br>(17,029.91 to<br>35,129.23)             | 28,432.80<br>(18,585.45 to<br>42,889.40)             | 298.48<br>(231.29 to<br>378.45)                | 813.26<br>(576.09 to<br>1,158.78)               | 782.36<br>(569.76 to<br>1,082.44)               | 842.10<br>(572.42 to<br>1,226.66)               |
| Liver cancer due to hepatitis C      | 1,159.28<br>(768.95 to<br>1,677.04)                 | 3,235.77<br>(1,965.23 to<br>5,155.23)                | 3,075.43<br>(1,883.90 to<br>4,738.31)                | 3,355.78<br>(2,017.15 to<br>5,423.96)                | 42.48<br>(28.17 to<br>60.69)                   | 128.44<br>(79.18 to<br>196.96)                  | 127.54<br>(81.06 to<br>192.68)                  | 126.74<br>(77.10 to<br>199.46)                  |
| Liver cancer due to alcohol use      | 2,873.43<br>(2,180.59 to<br>3,791.55)               | 6,997.79<br>(4,728.19 to<br>10,578.11)               | 6,216.93<br>(4,296.37 to<br>9,086.14)                | 10,900.82<br>(7,057.57 to<br>16,995.25)              | 96.11<br>(73.55 to<br>125.66)                  | 242.56<br>(169.56 to<br>350.19)                 | 223.55<br>(161.32 to<br>313.50)                 | 361.11<br>(243.46 to<br>534.98)                 |
| Liver cancer due to other causes     | 3,860.25<br>(2,924.25 to<br>5,010.31)               | 9,434.40<br>(6,343.80 to<br>14,315.17)               | 8,694.76<br>(6,014.29 to<br>12,912.46)               | 10,316.23<br>(6,716.73 to<br>16,055.50)              | 108.22<br>(82.78 to<br>137.36)                 | 292.21<br>(203.29 to<br>423.98)                 | 277.48<br>(198.34 to<br>392.08)                 | 306.14<br>(205.07 to<br>457.76)                 |
| Gallbladder and biliary tract cancer | 1,311.64<br>(893.48 to<br>1,792.70)                 | 2,442.68<br>(1,586.58 to<br>3,569.44)                | 2,621.98<br>(1,697.60 to<br>3,855.48)                | 2,233.09<br>(1,474.10 to<br>3,242.42)                | 51.41<br>(35.01 to<br>70.46)                   | 101.81<br>(68.41 to<br>142.30)                  | 113.13<br>(75.61 to<br>160.27)                  | 89.54<br>(61.55 to<br>125.10)                   |

|                                     |                                         |                                          |                                          |                                          |                                 |                                   |                                   |                                   |
|-------------------------------------|-----------------------------------------|------------------------------------------|------------------------------------------|------------------------------------------|---------------------------------|-----------------------------------|-----------------------------------|-----------------------------------|
| Pancreatic cancer                   | 3,431.55<br>(2,800.03 to<br>4,200.11)   | 10,095.17<br>(7,562.25 to<br>13,525.01)  | 10,755.13<br>(8,047.19 to<br>14,460.13)  | 9,391.54<br>(7,085.60 to<br>12,495.41)   | 134.39<br>(109.37 to<br>168.68) | 420.20<br>(326.74 to<br>555.60)   | 463.36<br>(359.03 to<br>607.31)   | 374.80<br>(289.80 to<br>492.92)   |
| Larynx cancer                       | 966.48<br>(779.93 to<br>1,177.85)       | 1,785.76<br>(1,038.83 to<br>3,245.68)    | 1,294.18<br>(806.38 to<br>2,184.36)      | 3,133.10<br>(1,655.45 to<br>5,823.66)    | 35.48<br>(28.73 to<br>43.21)    | 68.49<br>(41.58 to<br>122.84)     | 51.53<br>(33.07 to<br>85.43)      | 114.57<br>(61.94 to<br>209.42)    |
| Tracheal, bronchus, and lung cancer | 6,043.89<br>(5,194.87 to<br>6,966.92)   | 15,000.31<br>(9,563.64 to<br>23,534.86)  | 9,113.64<br>(6,189.72 to<br>13,218.32)   | 19,977.12<br>(12,490.05 to<br>31,661.55) | 231.37<br>(198.95 to<br>265.55) | 605.31<br>(399.04 to<br>916.35)   | 382.61<br>(274.00 to<br>538.68)   | 769.69<br>(490.66 to<br>1,178.66) |
| Malignant skin melanoma             | 340.43<br>(264.71 to<br>485.44)         | 949.24<br>(705.39 to<br>1,391.38)        | 1,088.18<br>(809.49 to<br>1,593.69)      | 824.48<br>(618.10 to<br>1,208.86)        | 11.30<br>(8.77 to<br>15.99)     | 35.48<br>(27.92 to<br>49.45)      | 42.63<br>(33.52 to<br>59.25)      | 29.18<br>(23.06 to<br>40.94)      |
| Non-melanoma skin cancer            | 302.93<br>(250.82 to<br>363.40)         | 733.86<br>(598.85 to<br>894.49)          | 713.44<br>(580.69 to<br>876.34)          | 751.31<br>(611.27 to<br>917.53)          | 9.92<br>(8.36 to<br>11.59)      | 28.53<br>(24.82 to<br>32.52)      | 29.55<br>(25.61 to<br>33.64)      | 27.13<br>(23.17 to<br>31.31)      |
| Breast cancer                       | 10,018.08<br>(7,261.34 to<br>13,417.48) | 24,070.33<br>(13,639.55 to<br>41,449.11) | 23,973.23<br>(13,797.11 to<br>40,633.92) | 26,498.55<br>(14,546.87 to<br>47,851.40) | 300.35<br>(220.50 to<br>403.29) | 771.73<br>(456.69 to<br>1,275.25) | 786.52<br>(471.13 to<br>1,276.94) | 825.62<br>(472.91 to<br>1,471.34) |
| Cervical cancer                     | 11,895.12<br>(6,695.93 to<br>16,163.43) | 20,930.44<br>(10,597.49 to<br>33,577.11) | 19,160.44<br>(9,696.83 to<br>30,612.12)  | 22,537.04<br>(11,570.48 to<br>35,103.15) | 356.86<br>(203.17 to<br>488.06) | 649.15<br>(335.72 to<br>1,003.46) | 607.02<br>(312.78 to<br>944.79)   | 682.08<br>(363.98 to<br>1,040.51) |
| Uterine cancer                      | 1,355.10<br>(862.69 to<br>1,799.11)     | 3,029.05<br>(1,773.63 to<br>4,440.56)    | 2,792.06<br>(1,659.81 to<br>4,158.97)    | 3,201.52<br>(1,888.93 to<br>4,661.89)    | 50.02<br>(32.23 to<br>66.47)    | 119.48<br>(76.30 to<br>167.65)    | 114.12<br>(72.94 to<br>160.64)    | 121.26<br>(76.40 to<br>169.87)    |
| Ovarian cancer                      | 1,781.63<br>(1,273.22 to<br>2,508.34)   | 5,446.43<br>(3,213.21 to<br>8,560.97)    | 5,843.68<br>(3,446.99 to<br>9,335.42)    | 4,891.82<br>(2,923.51 to<br>7,670.65)    | 54.84<br>(38.93 to<br>77.12)    | 176.47<br>(109.26 to<br>268.22)   | 192.43<br>(119.12 to<br>295.91)   | 154.51<br>(96.72 to<br>234.22)    |
| Prostate cancer                     | 4,132.54<br>(2,662.20 to<br>5,285.35)   | 11,621.35<br>(7,528.37 to<br>14,490.97)  | 13,251.34<br>(8,645.83 to<br>16,526.20)  | 10,031.61<br>(6,346.55 to<br>12,777.49)  | 215.78<br>(137.15 to<br>275.33) | 669.45<br>(430.26 to<br>837.16)   | 796.09<br>(525.54 to<br>992.24)   | 552.37<br>(343.08 to<br>715.79)   |
| Testicular cancer                   | 267.25<br>(194.93 to<br>348.37)         | 441.40<br>(308.69 to<br>601.18)          | 419.66<br>(295.28 to<br>576.31)          | 469.23<br>(329.94 to<br>635.25)          | 5.90<br>(4.25 to<br>7.79)       | 10.49<br>(7.53 to<br>14.02)       | 10.17<br>(7.17 to<br>13.74)       | 10.82<br>(7.74 to<br>14.24)       |
| <b>Sierra Leone</b>                 |                                         |                                          |                                          |                                          |                                 |                                   |                                   |                                   |
| Cause                               | YLLs (actual counts)                    |                                          |                                          |                                          | Deaths (actual counts)          |                                   |                                   |                                   |
|                                     | 2016                                    | 2040 Forecast                            | 2040 Better Scenario                     | 2040 Worse Scenario                      | 2016                            | 2040 Forecast                     | 2040 Better Scenario              | 2040 Worse Scenario               |
| Kidney cancer                       | 1,252.61<br>(1,019.53 to<br>1,558.13)   | 2,608.66<br>(2,097.51 to<br>3,299.91)    | 2,922.58<br>(2,334.62 to<br>3,733.32)    | 2,625.86<br>(2,086.70 to<br>3,360.45)    | 31.80<br>(26.76 to<br>38.50)    | 85.77<br>(69.90 to<br>106.35)     | 99.22<br>(81.26 to<br>123.47)     | 77.98<br>(64.04 to<br>96.50)      |
| Bladder cancer                      | 1,628.34<br>(1,354.55 to<br>1,972.47)   | 4,115.69<br>(3,172.34 to<br>5,347.28)    | 4,038.94<br>(3,144.34 to<br>5,208.12)    | 4,246.39<br>(3,197.88 to<br>5,578.50)    | 62.72<br>(52.15 to<br>74.72)    | 172.98<br>(137.03 to<br>218.73)   | 178.26<br>(142.65 to<br>224.74)   | 168.39<br>(130.58 to<br>217.76)   |
| Brain and nervous system cancer     | 4,085.30<br>(3,008.22 to<br>5,507.84)   | 8,216.88<br>(5,858.25 to<br>11,705.93)   | 8,715.82<br>(6,195.34 to<br>12,329.70)   | 8,649.55<br>(6,060.99 to<br>12,307.34)   | 88.07<br>(67.71 to<br>116.31)   | 216.08<br>(162.39 to<br>294.70)   | 234.85<br>(173.83 to<br>321.10)   | 208.67<br>(155.12 to<br>284.78)   |
| Thyroid cancer                      | 364.93<br>(276.61 to<br>454.37)         | 814.63<br>(555.97 to<br>1,187.71)        | 732.37<br>(508.05 to<br>1,049.75)        | 881.54<br>(592.95 to<br>1,288.35)        | 11.35<br>(8.65 to<br>14.20)     | 27.13<br>(19.28 to<br>37.94)      | 25.16<br>(18.15 to<br>34.63)      | 28.26<br>(19.87 to<br>39.53)      |
| Mesothelioma                        | 175.79<br>(126.92 to<br>246.54)         | 410.53<br>(277.21 to<br>621.65)          | 395.64<br>(272.53 to<br>599.29)          | 422.71<br>(282.75 to<br>642.40)          | 5.24<br>(3.84 to<br>7.25)       | 13.23<br>(9.78 to<br>18.72)       | 13.30<br>(9.80 to<br>18.76)       | 12.99<br>(9.39 to<br>18.48)       |
| Hodgkin lymphoma                    | 741.15<br>(560.48 to<br>979.20)         | 842.30<br>(581.18 to<br>1,203.38)        | 710.30<br>(485.83 to<br>1,025.05)        | 1,082.00<br>(753.90 to<br>1,558.14)      | 15.10<br>(11.46 to<br>19.60)    | 19.51<br>(13.75 to<br>27.11)      | 16.79<br>(11.77 to<br>23.23)      | 23.53<br>(16.90 to<br>32.69)      |
| Non-Hodgkin lymphoma                | 5,327.44<br>(4,370.99 to<br>6,780.83)   | 9,916.34<br>(7,436.01 to<br>13,207.46)   | 10,472.34<br>(7,805.42 to<br>14,047.19)  | 10,548.62<br>(8,006.35 to<br>14,224.04)  | 112.72<br>(94.30 to<br>141.13)  | 261.55<br>(204.91 to<br>340.76)   | 283.86<br>(221.86 to<br>369.90)   | 253.53<br>(200.57 to<br>329.92)   |
| Multiple myeloma                    | 933.73<br>(722.53 to<br>1,224.77)       | 2,894.18<br>(2,020.85 to<br>4,207.42)    | 3,110.86<br>(2,188.48 to<br>4,394.76)    | 2,635.09<br>(1,850.04 to<br>3,843.61)    | 32.41<br>(25.26 to<br>42.64)    | 106.52<br>(77.29 to<br>149.70)    | 117.73<br>(85.89 to<br>162.72)    | 93.86<br>(67.83 to<br>133.16)     |
| Leukemia                            | 6,166.52<br>(4,631.55 to<br>7,860.78)   | 9,450.17<br>(6,762.81 to<br>12,960.05)   | 9,523.85<br>(6,921.51 to<br>13,020.35)   | 10,656.37<br>(7,541.27 to<br>14,683.18)  | 127.72<br>(97.84 to<br>159.80)  | 246.54<br>(182.08 to<br>328.93)   | 251.81<br>(187.96 to<br>333.25)   | 255.65<br>(186.46 to<br>343.71)   |



|                                                                |                                                   |                                                    |                                                    |                                                    |                                              |                                                |                                                |                                                |
|----------------------------------------------------------------|---------------------------------------------------|----------------------------------------------------|----------------------------------------------------|----------------------------------------------------|----------------------------------------------|------------------------------------------------|------------------------------------------------|------------------------------------------------|
|                                                                | 3,214.65<br>(2,312.07 to<br>4,672.54)             | 5,014.46<br>(3,316.90 to<br>7,652.56)              | 4,834.86<br>(3,208.75 to<br>7,273.31)              | 6,225.73<br>(4,084.05 to<br>9,419.32)              | 69.19<br>(53.48 to<br>93.80)                 | 152.43<br>(106.04 to<br>220.94)                | 155.31<br>(108.28 to<br>219.27)                | 163.65<br>(112.93 to<br>240.38)                |
| Endocarditis                                                   |                                                   |                                                    |                                                    |                                                    |                                              |                                                |                                                |                                                |
| Other cardiovascular and circulatory diseases                  | 20,676.56<br>(15,738.57 to<br>29,692.24)          | 39,841.10<br>(27,337.56 to<br>60,053.09)           | 31,784.45<br>(22,391.63 to<br>46,793.90)           | 50,052.90<br>(34,151.86 to<br>76,379.58)           | 558.43<br>(427.27 to<br>811.44)              | 1,417.36<br>(1,035.99 to<br>2,067.95)          | 1,218.62<br>(912.12 to<br>1,746.78)            | 1,602.26<br>(1,148.76 to<br>2,374.79)          |
| <b>Chronic respiratory diseases</b>                            | <b>30,814.38<br/>(24,530.77 to<br/>37,878.45)</b> | <b>45,526.55<br/>(29,736.73 to<br/>75,085.61)</b>  | <b>28,238.25<br/>(20,141.88 to<br/>40,784.88)</b>  | <b>64,095.28<br/>(40,435.56 to<br/>109,947.54)</b> | <b>1,049.48<br/>(835.51 to<br/>1,305.17)</b> | <b>1,856.23<br/>(1,226.13 to<br/>3,050.97)</b> | <b>1,182.15<br/>(877.95 to<br/>1,701.14)</b>   | <b>2,442.73<br/>(1,553.36 to<br/>4,185.19)</b> |
| Chronic obstructive pulmonary disease                          | 15,955.52<br>(11,763.53 to<br>20,290.97)          | 29,055.11<br>(16,095.74 to<br>56,573.69)           | 14,627.73<br>(9,066.10 to<br>24,508.80)            | 43,903.97<br>(23,439.38 to<br>85,161.26)           | 637.91<br>(474.64 to<br>818.49)              | 1,306.30<br>(757.69 to<br>2,453.69)            | 706.01<br>(461.46 to<br>1,161.20)              | 1,823.18<br>(1,017.94 to<br>3,452.45)          |
| Pneumoconiosis                                                 | 37.80<br>(27.08 to<br>52.82)                      | 52.29<br>(37.02 to<br>72.57)                       | 48.98<br>(34.54 to<br>69.35)                       | 54.16<br>(37.87 to<br>74.97)                       | 1.25<br>(0.90 to<br>1.73)                    | 2.20<br>(1.60 to<br>2.98)                      | 2.14<br>(1.56 to<br>2.92)                      | 2.17<br>(1.54 to<br>3.03)                      |
| Silicosis                                                      | 4.55<br>(2.41 to<br>7.41)                         | 4.37<br>(2.23 to<br>7.27)                          | 4.19<br>(2.15 to<br>6.95)                          | 4.50<br>(2.15 to<br>7.70)                          | 0.14<br>(0.08 to<br>0.23)                    | 0.16<br>(0.09 to<br>0.26)                      | 0.16<br>(0.09 to<br>0.26)                      | 0.16<br>(0.09 to<br>0.26)                      |
| Asbestosis                                                     | 8.41<br>(5.54 to<br>12.73)                        | 13.39<br>(8.70 to<br>20.37)                        | 13.76<br>(8.86 to<br>20.76)                        | 13.13<br>(8.50 to<br>19.92)                        | 0.20<br>(0.13 to<br>0.31)                    | 0.38<br>(0.25 to<br>0.58)                      | 0.40<br>(0.27 to<br>0.61)                      | 0.36<br>(0.24 to<br>0.56)                      |
| Coal workers pneumoconiosis                                    | 2.45<br>(1.28 to<br>4.14)                         | 2.96<br>(1.45 to<br>5.42)                          | 2.19<br>(1.03 to<br>4.14)                          | 3.64<br>(1.78 to<br>6.50)                          | 0.09<br>(0.04 to<br>0.15)                    | 0.12<br>(0.06 to<br>0.23)                      | 0.09<br>(0.04 to<br>0.18)                      | 0.15<br>(0.07 to<br>0.27)                      |
| Other pneumoconiosis                                           | 22.38<br>(15.79 to<br>31.87)                      | 31.56<br>(22.13 to<br>43.93)                       | 28.85<br>(20.26 to<br>40.66)                       | 32.89<br>(22.83 to<br>46.23)                       | 0.82<br>(0.59 to<br>1.12)                    | 1.47<br>(1.07 to<br>2.11)                      | 1.50<br>(1.04 to<br>2.01)                      | 1.50<br>(1.03 to<br>2.14)                      |
| Asthma                                                         | 11,161.35<br>(8,646.29 to<br>14,217.32)           | 10,144.38<br>(6,350.31 to<br>15,765.51)            | 7,548.85<br>(4,904.40 to<br>11,463.88)             | 12,927.09<br>(7,885.33 to<br>20,625.15)            | 318.72<br>(247.22 to<br>407.06)              | 349.81<br>(226.35 to<br>537.46)                | 275.13<br>(188.39 to<br>406.46)                | 411.60<br>(261.87 to<br>646.96)                |
| Interstitial lung disease and pulmonary sarcoidosis            | 219.42<br>(141.34 to<br>371.35)                   | 608.34<br>(372.57 to<br>1,021.49)                  | 703.17<br>(428.42 to<br>1,191.64)                  | 535.24<br>(328.83 to<br>912.23)                    | 7.50<br>(4.80 to<br>12.35)                   | 23.83<br>(14.91 to<br>38.50)                   | 28.78<br>(17.87 to<br>46.42)                   | 19.63<br>(12.27 to<br>32.48)                   |
| Other chronic respiratory diseases                             | 3,440.28<br>(2,262.47 to<br>4,771.95)             | 5,666.44<br>(3,822.79 to<br>8,023.55)              | 5,309.52<br>(3,695.26 to<br>7,384.46)              | 6,674.81<br>(4,415.43 to<br>9,458.59)              | 84.10<br>(55.56 to<br>116.60)                | 174.99<br>(116.33 to<br>240.18)                | 170.99<br>(116.56 to<br>230.28)                | 186.15<br>(122.99 to<br>259.54)                |
| <b>Cirrhosis and other chronic liver diseases</b>              | <b>40,272.89<br/>(24,114.49 to<br/>54,696.95)</b> | <b>82,873.84<br/>(45,139.59 to<br/>122,954.48)</b> | <b>77,092.35<br/>(42,084.62 to<br/>113,883.73)</b> | <b>98,262.63<br/>(53,628.40 to<br/>146,335.88)</b> | <b>1,100.69<br/>(658.51 to<br/>1,490.24)</b> | <b>2,490.88<br/>(1,419.53 to<br/>3,614.69)</b> | <b>2,377.09<br/>(1,353.79 to<br/>3,420.74)</b> | <b>2,856.44<br/>(1,665.77 to<br/>4,167.65)</b> |
| Cirrhosis and other chronic liver diseases due to hepatitis B  | 16,343.70<br>(9,400.95 to<br>23,203.42)           | 37,580.13<br>(20,529.45 to<br>55,587.86)           | 35,592.41<br>(19,580.12 to<br>52,407.66)           | 39,177.67<br>(21,385.98 to<br>58,946.88)           | 470.98<br>(276.55 to<br>668.59)              | 1,153.73<br>(659.82 to<br>1,681.62)            | 1,121.67<br>(642.07 to<br>1,630.96)            | 1,164.99<br>(663.00 to<br>1,693.99)            |
| Cirrhosis and other chronic liver diseases due to hepatitis C  | 6,326.59<br>(3,164.94 to<br>10,194.18)            | 14,536.27<br>(6,898.34 to<br>24,822.87)            | 13,740.43<br>(6,522.32 to<br>23,571.92)            | 15,175.48<br>(7,213.12 to<br>26,007.32)            | 184.04<br>(93.46 to<br>296.63)               | 444.38<br>(217.15 to<br>725.07)                | 429.29<br>(207.27 to<br>702.20)                | 451.75<br>(219.16 to<br>736.92)                |
| Cirrhosis and other chronic liver diseases due to alcohol use  | 8,807.26<br>(5,048.26 to<br>12,566.41)            | 16,905.08<br>(9,177.91 to<br>25,942.18)            | 14,909.61<br>(8,089.88 to<br>22,721.30)            | 27,570.20<br>(14,874.58 to<br>41,657.76)           | 263.76<br>(151.87 to<br>373.42)              | 536.67<br>(301.88 to<br>800.20)                | 486.68<br>(274.14 to<br>728.79)                | 852.58<br>(471.89 to<br>1,257.27)              |
| Cirrhosis and other chronic liver diseases due to other causes | 8,795.34<br>(5,660.63 to<br>11,816.12)            | 13,852.36<br>(7,570.30 to<br>21,284.26)            | 12,849.89<br>(6,994.90 to<br>19,753.70)            | 16,339.27<br>(9,166.35 to<br>25,052.86)            | 181.91<br>(113.65 to<br>247.11)              | 356.10<br>(194.62 to<br>531.22)                | 339.44<br>(187.74 to<br>505.43)                | 381.72<br>(216.13 to<br>547.51)                |
| <b>Digestive diseases</b>                                      | <b>44,682.53<br/>(33,117.16 to<br/>60,163.80)</b> | <b>53,719.31<br/>(40,596.76 to<br/>72,864.33)</b>  | <b>47,802.74<br/>(35,860.73 to<br/>64,787.78)</b>  | <b>68,341.05<br/>(49,666.48 to<br/>94,848.10)</b>  | <b>1,080.07<br/>(867.48 to<br/>1,353.29)</b> | <b>1,762.27<br/>(1,425.65 to<br/>2,243.83)</b> | <b>1,647.55<br/>(1,328.26 to<br/>2,106.60)</b> | <b>2,000.15<br/>(1,574.25 to<br/>2,600.19)</b> |
| Peptic ulcer disease                                           | 9,349.50<br>(7,385.43 to<br>11,446.09)            | 8,583.81<br>(6,127.16 to<br>11,703.17)             | 6,565.07<br>(4,659.90 to<br>9,097.49)              | 11,108.87<br>(7,981.66 to<br>15,121.74)            | 255.46<br>(206.56 to<br>309.02)              | 294.74<br>(223.38 to<br>381.73)                | 236.84<br>(175.06 to<br>308.81)                | 352.36<br>(262.56 to<br>456.65)                |

**Sierra Leone**

| Cause                    | YLLs (actual counts)                  |                                       |                                       |                                       | Deaths (actual counts)       |                               |                               |                               |
|--------------------------|---------------------------------------|---------------------------------------|---------------------------------------|---------------------------------------|------------------------------|-------------------------------|-------------------------------|-------------------------------|
|                          | 2016                                  | 2040 Forecast                         | 2040 Better Scenario                  | 2040 Worse Scenario                   | 2016                         | 2040 Forecast                 | 2040 Better Scenario          | 2040 Worse Scenario           |
| Gastritis and duodenitis | 2,199.29<br>(1,501.15 to<br>3,245.25) | 3,290.76<br>(2,281.78 to<br>4,739.56) | 3,004.00<br>(2,082.77 to<br>4,337.28) | 3,713.72<br>(2,542.77 to<br>5,436.02) | 50.19<br>(36.02 to<br>71.32) | 87.16<br>(61.72 to<br>120.42) | 81.91<br>(57.36 to<br>114.45) | 93.09<br>(66.85 to<br>131.79) |





|                                                            | 11.20<br>(6.44 to<br>24.61)                       | 23.54<br>(11.95 to<br>49.88)                       | 24.23<br>(12.10 to<br>51.92)                       | 24.39<br>(12.43 to<br>50.37)                       | 0.20<br>(0.12 to<br>0.44)                    | 0.43<br>(0.22 to<br>0.92)                    | 0.45<br>(0.23 to<br>0.97)                    | 0.44<br>(0.23 to<br>0.92)                    |
|------------------------------------------------------------|---------------------------------------------------|----------------------------------------------------|----------------------------------------------------|----------------------------------------------------|----------------------------------------------|----------------------------------------------|----------------------------------------------|----------------------------------------------|
| Eating disorders                                           |                                                   |                                                    |                                                    |                                                    |                                              |                                              |                                              |                                              |
| <b>Sierra Leone</b>                                        |                                                   |                                                    |                                                    |                                                    |                                              |                                              |                                              |                                              |
| Cause                                                      | YLLs (actual counts)                              |                                                    |                                                    |                                                    | Deaths (actual counts)                       |                                              |                                              |                                              |
|                                                            | 2016                                              | 2040 Forecast                                      | 2040 Better Scenario                               | 2040 Worse Scenario                                | 2016                                         | 2040 Forecast                                | 2040 Better Scenario                         | 2040 Worse Scenario                          |
| <b>Diabetes, urogenital, blood, and endocrine diseases</b> | <b>113,529.61</b><br>(95,028.52 to<br>130,872.83) | <b>172,566.04</b><br>(128,197.72 to<br>231,015.56) | <b>144,655.36</b><br>(106,448.10 to<br>195,176.03) | <b>231,762.42</b><br>(173,727.99 to<br>307,322.14) | <b>2,481.51</b><br>(2,157.09 to<br>2,830.44) | <b>5,450.20</b><br>(4,279.17 to<br>7,097.46) | <b>4,662.51</b><br>(3,658.98 to<br>6,067.26) | <b>6,711.34</b><br>(5,210.82 to<br>8,640.94) |
| Diabetes mellitus                                          | 20,870.20<br>(17,958.27 to<br>24,189.62)          | 50,639.61<br>(31,751.33 to<br>80,214.93)           | 39,116.00<br>(24,418.54 to<br>62,654.21)           | 69,533.11<br>(42,552.26 to<br>111,221.37)          | 790.11<br>(670.47 to<br>922.20)              | 2,280.49<br>(1,528.06 to<br>3,341.45)        | 1,872.69<br>(1,270.85 to<br>2,768.07)        | 2,904.89<br>(1,873.41 to<br>4,442.10)        |
| Acute glomerulonephritis                                   | 45.93<br>(40.22 to<br>53.19)                      | 63.99<br>(47.71 to<br>87.04)                       | 57.46<br>(42.61 to<br>79.50)                       | 88.16<br>(66.13 to<br>119.21)                      | 0.73<br>(0.64 to<br>0.83)                    | 1.15<br>(0.88 to<br>1.52)                    | 1.04<br>(0.78 to<br>1.40)                    | 1.47<br>(1.12 to<br>1.96)                    |
| Chronic kidney disease                                     | 24,479.11<br>(20,834.18 to<br>30,526.31)          | 40,093.98<br>(27,971.78 to<br>63,441.39)           | 30,714.29<br>(21,683.04 to<br>47,242.72)           | 54,499.95<br>(38,204.45 to<br>84,270.84)           | 592.42<br>(509.20 to<br>733.86)              | 1,401.30<br>(949.78 to<br>2,460.60)          | 1,102.68<br>(767.76 to<br>1,937.39)          | 1,725.78<br>(1,159.75 to<br>2,976.01)        |
| Chronic kidney disease due to diabetes mellitus            | 4,715.98<br>(3,875.48 to<br>6,073.57)             | 11,189.27<br>(7,287.43 to<br>18,730.08)            | 8,605.86<br>(5,753.03 to<br>13,802.97)             | 14,026.47<br>(9,051.42 to<br>23,159.17)            | 152.62<br>(124.51 to<br>194.71)              | 443.24<br>(283.26 to<br>809.34)              | 350.45<br>(233.00 to<br>633.63)              | 528.87<br>(338.45 to<br>919.12)              |
| Chronic kidney disease due to hypertension                 | 2,443.75<br>(1,950.60 to<br>3,100.39)             | 6,144.93<br>(3,954.34 to<br>10,804.20)             | 4,736.12<br>(3,105.93 to<br>8,069.50)              | 7,510.70<br>(4,722.35 to<br>12,856.60)             | 96.92<br>(77.44 to<br>122.53)                | 309.75<br>(194.05 to<br>581.59)              | 250.06<br>(164.41 to<br>468.58)              | 355.04<br>(215.83 to<br>649.34)              |
| Chronic kidney disease due to glomerulonephritis           | 8,260.42<br>(6,762.63 to<br>10,501.77)            | 10,691.99<br>(7,291.64 to<br>16,017.39)            | 8,138.18<br>(5,605.89 to<br>11,960.60)             | 15,551.65<br>(10,863.63 to<br>22,936.17)           | 159.06<br>(131.59 to<br>199.46)              | 288.72<br>(193.25 to<br>481.38)              | 221.84<br>(151.36 to<br>360.08)              | 379.28<br>(256.97 to<br>621.99)              |
| Chronic kidney disease due to other and unspecified causes | 9,058.95<br>(7,366.78 to<br>11,348.01)            | 12,067.79<br>(8,291.54 to<br>18,097.88)            | 9,234.13<br>(6,424.32 to<br>13,846.44)             | 17,411.14<br>(12,011.50 to<br>25,237.02)           | 183.83<br>(152.50 to<br>227.61)              | 359.60<br>(243.37 to<br>501.93)              | 280.32<br>(192.52 to<br>454.91)              | 462.59<br>(310.17 to<br>724.27)              |
| Urinary diseases and male infertility                      | 9,684.31<br>(8,139.19 to<br>11,457.71)            | 16,799.05<br>(13,525.83 to<br>21,023.44)           | 16,567.78<br>(13,048.25 to<br>20,941.99)           | 19,498.81<br>(15,552.78 to<br>25,422)              | 221.04<br>(189.49 to<br>254.22)              | 559.55<br>(475.42 to<br>650.73)              | 586.52<br>(492.47 to<br>694.19)              | 558.54<br>(476.62 to<br>646.26)              |
| Urinary tract infections                                   | 6,093.96<br>(4,799.89 to<br>7,743.17)             | 12,534.55<br>(9,690.85 to<br>15,978.56)            | 12,813.17<br>(9,709.07 to<br>16,724.40)            | 14,305.76<br>(11,067.96 to<br>18,355.70)           | 131.06<br>(108.32 to<br>157.97)              | 420.27<br>(345.02 to<br>509.58)              | 456.05<br>(369.42 to<br>561.13)              | 407.36<br>(338.69 to<br>485.86)              |
| Urolithiasis                                               | 157.18<br>(112.59 to<br>207.20)                   | 340.14<br>(226.95 to<br>493.11)                    | 329.54<br>(219.80 to<br>476.46)                    | 392.46<br>(260.82 to<br>568.97)                    | 2.85<br>(2.03 to<br>3.87)                    | 7.12<br>(4.82 to<br>10.52)                   | 7.15<br>(4.87 to<br>10.53)                   | 7.66<br>(5.21 to<br>11.13)                   |
| Other urinary diseases                                     | 3,433.17<br>(2,717.40 to<br>4,237.05)             | 3,924.36<br>(2,926.30 to<br>5,178.25)              | 3,425.07<br>(2,505.74 to<br>4,569.65)              | 4,800.59<br>(3,582.84 to<br>6,251.07)              | 87.13<br>(70.58 to<br>105.68)                | 132.17<br>(96.98 to<br>173.70)               | 123.32<br>(88.54 to<br>163.25)               | 143.52<br>(107.55 to<br>185.60)              |
| Gynecological diseases                                     | 524.17<br>(358.30 to<br>698.77)                   | 1,054.88<br>(558.69 to<br>1,828.04)                | 871.65<br>(459.34 to<br>1,499.54)                  | 1,269.25<br>(681.76 to<br>2,153.94)                | 11.66<br>(8.00 to<br>15.32)                  | 24.07<br>(13.55 to<br>39.48)                 | 20.18<br>(11.24 to<br>33.33)                 | 28.42<br>(15.81 to<br>46.14)                 |
| Uterine fibroids                                           | 36.92<br>(17.05 to<br>66.48)                      | 61.28<br>(24.17 to<br>132.50)                      | 49.67<br>(19.49 to<br>111.22)                      | 74.34<br>(29.34 to<br>159.26)                      | 1.12<br>(0.52 to<br>2.00)                    | 1.88<br>(0.79 to<br>3.63)                    | 1.58<br>(0.66 to<br>3.12)                    | 2.18<br>(0.95 to<br>4.09)                    |
| Polycystic ovarian syndrome                                | 88.10<br>(15.04 to<br>233.53)                     | 113.27<br>(15.70 to<br>347.23)                     | 80.39<br>(10.60 to<br>255.12)                      | 156.01<br>(21.60 to<br>456.58)                     | 1.90<br>(0.34 to<br>4.93)                    | 2.48<br>(0.35 to<br>7.28)                    | 1.76<br>(0.24 to<br>5.52)                    | 3.41<br>(0.49 to<br>9.90)                    |
| Endometriosis                                              | 0.94<br>(0.32 to<br>2.90)                         | 2.57<br>(0.66 to<br>8.99)                          | 2.11<br>(0.51 to<br>7.50)                          | 3.09<br>(0.81 to<br>10.91)                         | 0.02<br>(0.01 to<br>0.06)                    | 0.06<br>(0.01 to<br>0.20)                    | 0.05<br>(0.01 to<br>0.17)                    | 0.07<br>(0.02 to<br>0.23)                    |
| Genital prolapse                                           | 20.02<br>(3.08 to<br>46.81)                       | 35.76<br>(3.91 to<br>111.76)                       | 27.54<br>(2.91 to<br>88.51)                        | 45.69<br>(4.90 to<br>141.08)                       | 0.43<br>(0.11 to<br>0.94)                    | 0.73<br>(0.14 to<br>2.11)                    | 0.57<br>(0.11 to<br>1.72)                    | 0.92<br>(0.17 to<br>2.65)                    |
| Other gynecological diseases                               | 378.19<br>(231.41 to<br>538.16)                   | 842.01<br>(421.22 to<br>1,465.91)                  | 711.93<br>(350.82 to<br>1,238.86)                  | 990.12<br>(491.83 to<br>1,742.64)                  | 8.19<br>(4.97 to<br>11.69)                   | 18.92<br>(9.82 to<br>32.09)                  | 16.23<br>(8.61 to<br>26.98)                  | 21.85<br>(11.20 to<br>37.09)                 |
| Hemoglobinopathies and hemolytic anemias                   | 53,252.06<br>(38,131.70 to<br>65,351.71)          | 58,298.32<br>(37,182.33 to<br>89,280.58)           | 52,017.60<br>(33,167.09 to<br>78,844.57)           | 79,310.02<br>(50,381.27 to<br>119,286.91)          | 779.21<br>(562.72 to<br>944.57)              | 1,018.60<br>(655.82 to<br>1,516.62)          | 914.41<br>(587.37 to<br>1,356.52)            | 1,309.89<br>(838.54 to<br>1,928.43)          |

|                                                   |                                            |                                            |                                            |                                            |                                       |                                     |                                     |                                       |
|---------------------------------------------------|--------------------------------------------|--------------------------------------------|--------------------------------------------|--------------------------------------------|---------------------------------------|-------------------------------------|-------------------------------------|---------------------------------------|
| Thalassemias                                      | 136.28<br>(14.47 to<br>472.80)             | 65.67<br>(7.47 to<br>236.71)               | 76.31<br>(8.78 to<br>271.67)               | 105.11<br>(11.46 to<br>375.74)             | 1.63<br>(0.18 to<br>5.67)             | 0.81<br>(0.09 to<br>2.89)           | 0.94<br>(0.11 to<br>3.31)           | 1.28<br>(0.14 to<br>4.62)             |
| Sickle cell disorders                             | 52,072.29<br>(37,172.40 to<br>64,052.83)   | 55,798.05<br>(35,144.39 to<br>85,742.10)   | 49,800.10<br>(31,338.57 to<br>76,183.12)   | 76,440.66<br>(47,890.79 to<br>116,157.69)  | 738.55<br>(529.09 to<br>901.30)       | 906.41<br>(570.87 to<br>1,386.59)   | 810.28<br>(511.46 to<br>1,227.57)   | 1,191.75<br>(750.70 to<br>1,800.94)   |
| G6PD deficiency                                   | 635.37<br>(426.36 to<br>898.34)            | 1,593.88<br>(1,014.19 to<br>2,463.09)      | 1,356.76<br>(857.95 to<br>2,109.86)        | 1,898.53<br>(1,238.28 to<br>2,922.51)      | 17.08<br>(11.06 to<br>25.39)          | 56.50<br>(34.43 to<br>88.19)        | 49.45<br>(30.16 to<br>78.06)        | 63.53<br>(40.12 to<br>100.27)         |
| Other hemoglobinopathies and hemolytic anemias    | 408.11<br>(257.33 to<br>596.05)            | 840.72<br>(520.18 to<br>1,262.27)          | 784.43<br>(487.42 to<br>1,165.97)          | 865.72<br>(528.45 to<br>1,302.25)          | 22.15<br>(14.19 to<br>33.02)          | 54.87<br>(34.05 to<br>84.54)        | 53.74<br>(34.89 to<br>81.49)        | 53.34<br>(31.91 to<br>83.55)          |
| Endocrine, metabolic, blood, and immune disorders | 4,673.82<br>(3,107.44 to<br>6,902.25)      | 5,616.21<br>(4,122.31 to<br>8,038.30)      | 5,310.57<br>(3,911.92 to<br>7,551.97)      | 7,563.12<br>(5,267.56 to<br>11,119.67)     | 86.34<br>(62.55 to<br>127.05)         | 165.03<br>(125.90 to<br>242.88)     | 164.99<br>(125.21 to<br>243.84)     | 182.34<br>(137.39 to<br>267.36)       |
| <b>Sierra Leone</b>                               |                                            |                                            |                                            |                                            |                                       |                                     |                                     |                                       |
| Cause                                             | YLLs (actual counts)                       |                                            |                                            |                                            | Deaths (actual counts)                |                                     |                                     |                                       |
|                                                   | 2016                                       | 2040 Forecast                              | 2040 Better Scenario                       | 2040 Worse Scenario                        | 2016                                  | 2040 Forecast                       | 2040 Better Scenario                | 2040 Worse Scenario                   |
| Musculoskeletal disorders                         | 1,379.25<br>(881.87 to<br>1,982.94)        | 3,373.44<br>(2,028.16 to<br>5,450.32)      | 3,656.78<br>(2,218.68 to<br>5,923.13)      | 3,352.61<br>(1,969.15 to<br>5,442.83)      | 30.74<br>(20.88 to<br>43.44)          | 92.41<br>(62.35 to<br>139.12)       | 103.28<br>(69.78 to<br>152.55)      | 85.41<br>(56.89 to<br>129.15)         |
| Rheumatoid arthritis                              | 107.09<br>(57.73 to<br>183.49)             | 281.90<br>(156.82 to<br>476.87)            | 260.77<br>(139.56 to<br>445.15)            | 303.45<br>(169.75 to<br>504.20)            | 4.14<br>(2.33 to<br>6.61)             | 14.27<br>(7.93 to<br>23.45)         | 13.88<br>(7.55 to<br>23.42)         | 14.13<br>(7.83 to<br>22.73)           |
| Other musculoskeletal disorders                   | 1,272.16<br>(796.84 to<br>1,857.12)        | 3,091.54<br>(1,831.92 to<br>5,106.08)      | 3,396.00<br>(2,027.02 to<br>5,630.34)      | 3,049.17<br>(1,747.36 to<br>5,080.23)      | 26.60<br>(17.58 to<br>38.48)          | 78.14<br>(50.55 to<br>120.04)       | 89.40<br>(58.53 to<br>136.98)       | 71.28<br>(45.17 to<br>111.13)         |
| Other non-communicable diseases                   | 225,152.10<br>(85,424.35 to<br>335,662.62) | 117,911.80<br>(53,326.93 to<br>177,614.68) | 105,190.12<br>(48,637.25 to<br>157,566.64) | 245,408.54<br>(99,256.88 to<br>396,543.37) | 2,712.31<br>(1,066.82 to<br>4,018.10) | 1,731.08<br>(925.69 to<br>2,532.95) | 1,595.97<br>(888.08 to<br>2,314.83) | 3,205.02<br>(1,448.04 to<br>4,913.93) |
| Congenital birth defects                          | 213,701.38<br>(75,074.52 to<br>324,483.30) | 103,542.37<br>(40,334.16 to<br>160,953.87) | 91,274.30<br>(35,432.34 to<br>141,237.48)  | 224,850.34<br>(81,575.67 to<br>365,698.00) | 5,533.71<br>(900.77 to<br>3,838.57)   | 5,533.71<br>(900.77 to<br>3,838.57) | 1,312.36<br>(534.94 to<br>1,784.54) | 2,738.19<br>(1,035.21 to<br>4,404.41) |
| Neural tube defects                               | 47,368.24<br>(20,496.76 to<br>84,536.16)   | 8,757.32<br>(3,523.57 to<br>18,279.52)     | 6,860.79<br>(2,628.89 to<br>15,214.20)     | 22,175.15<br>(8,432.64 to<br>46,832.25)    | 552.49<br>(239.57 to<br>985.69)       | 105.08<br>(42.78 to<br>218.34)      | 82.37<br>(32.48 to<br>179.90)       | 262.00<br>(100.43 to<br>548.38)       |
| Congenital heart anomalies                        | 52,077.28<br>(20,108.61 to<br>108,267.58)  | 29,889.58<br>(14,344.19 to<br>59,229.14)   | 26,741.84<br>(13,136.71 to<br>51,245.49)   | 60,644.01<br>(26,073.34 to<br>126,872.19)  | 627.82<br>(248.39 to<br>1,289.68)     | 389.57<br>(194.76 to<br>754.39)     | 349.14<br>(178.83 to<br>659.54)     | 754.38<br>(338.35 to<br>1,547.01)     |
| Orofacial clefts                                  | 1,979.42<br>(396.55 to<br>5,903.08)        | 730.89<br>(137.17 to<br>2,149.67)          | 551.19<br>(103.28 to<br>1,584.59)          | 1,979.67<br>(364.99 to<br>6,129.74)        | 22.94<br>(4.60 to<br>68.42)           | 8.47<br>(1.59 to<br>24.93)          | 6.39<br>(1.20 to<br>18.36)          | 22.95<br>(4.23 to<br>71.06)           |
| Down syndrome                                     | 1,583.16<br>(424.08 to<br>4,332.99)        | 1,403.03<br>(497.17 to<br>3,563.14)        | 1,218.62<br>(444.37 to<br>3,132.00)        | 2,667.07<br>(819.35 to<br>7,397.68)        | 20.22<br>(6.02 to<br>54.00)           | 22.07<br>(9.10 to<br>51.11)         | 19.31<br>(7.90 to<br>45.37)         | 37.48<br>(13.46 to<br>93.51)          |
| Other chromosomal abnormalities                   | 6,506.13<br>(1,732.69 to<br>17,300.59)     | 5,502.82<br>(1,432.56 to<br>13,641.62)     | 4,763.14<br>(1,255.77 to<br>11,306.36)     | 12,777.70<br>(3,347.76 to<br>33,034.63)    | 75.98<br>(20.30 to<br>201.12)         | 65.53<br>(17.05 to<br>159.99)       | 56.77<br>(14.96 to<br>132.75)       | 150.28<br>(39.59 to<br>286.13)        |
| Congenital musculoskeletal and limb anomalies     | 1,577.30<br>(337.87 to<br>5,248.06)        | 1,014.11<br>(239.64 to<br>3,568.85)        | 937.35<br>(226.45 to<br>3,280.84)          | 2,216.35<br>(487.71 to<br>7,737.99)        | 18.44<br>(3.98 to<br>61.30)           | 12.10<br>(2.92 to<br>42.22)         | 11.20<br>(2.76 to<br>38.97)         | 26.10<br>(5.87 to<br>90.84)           |
| Urogenital congenital anomalies                   | 1,542.82<br>(513.37 to<br>3,045.92)        | 1,106.21<br>(489.49 to<br>2,018.01)        | 1,057.30<br>(469.66 to<br>1,953.51)        | 2,013.58<br>(771.43 to<br>3,987.74)        | 20.03<br>(7.39 to<br>37.40)           | 18.43<br>(9.55 to<br>30.00)         | 17.71<br>(9.24 to<br>29.23)         | 29.12<br>(13.34 to<br>52.36)          |
| Digestive congenital anomalies                    | 11,645.32<br>(3,744.75 to<br>28,241.99)    | 5,922.54<br>(1,992.80 to<br>14,603.99)     | 5,212.48<br>(1,804.44 to<br>12,774.16)     | 13,565.78<br>(4,207.23 to<br>35,498.37)    | 136.03<br>(44.01 to<br>329.28)        | 70.64<br>(24.51 to<br>171.85)       | 62.25<br>(22.04 to<br>150.42)       | 159.75<br>(50.59 to<br>415.18)        |
| Other congenital birth defects                    | 89,421.72<br>(16,468.55 to<br>179,664.07)  | 49,215.87<br>(11,512.50 to<br>96,749.09)   | 43,931.59<br>(10,716.78 to<br>84,143.95)   | 106,811.04<br>(22,576.24 to<br>223,144.70) | 1,059.75<br>(200.41 to<br>2,120.30)   | 620.45<br>(158.61 to<br>1,202.06)   | 555.83<br>(148.08 to<br>1,045.53)   | 1,296.13<br>(291.00 to<br>2,685.62)   |
| Skin and subcutaneous diseases                    | 3,511.80<br>(2,323.39 to<br>5,804.84)      | 10,842.02<br>(7,346.15 to<br>17,522.73)    | 10,719.12<br>(7,205.21 to<br>17,138.49)    | 12,518.04<br>(8,405.91 to<br>21,053.57)    | 86.45<br>(57.57 to<br>140.79)         | 377.79<br>(257.91 to<br>598.91)     | 397.91<br>(273.98 to<br>634.58)     | 373.53<br>(255.67 to<br>594.04)       |

|                                      |                                             |                                             |                                             |                                             |                                       |                                       |                                       |                                       |
|--------------------------------------|---------------------------------------------|---------------------------------------------|---------------------------------------------|---------------------------------------------|---------------------------------------|---------------------------------------|---------------------------------------|---------------------------------------|
| Cellulitis                           | 214.13<br>(100.11 to<br>391.22)             | 979.01<br>(446.86 to<br>1,710.18)           | 1,080.13<br>(495.70 to<br>1,842.51)         | 957.86<br>(437.01 to<br>1,720.14)           | 6.15<br>(2.79 to<br>11.27)            | 36.98<br>(16.03 to<br>66.42)          | 42.73<br>(19.30 to<br>77.43)          | 32.54<br>(14.21 to<br>59.84)          |
| Pyoderma                             | 3,012.24<br>(2,012.86 to<br>5,071.84)       | 9,076.70<br>(6,164.98 to<br>14,794.06)      | 8,771.94<br>(5,846.47 to<br>14,119.63)      | 10,765.77<br>(7,088.05 to<br>18,263.22)     | 70.13<br>(46.68 to<br>116.11)         | 300.58<br>(206.57 to<br>491.20)       | 306.42<br>(210.74 to<br>497.95)       | 307.54<br>(209.99 to<br>504.84)       |
| Decubitus ulcer                      | 180.85<br>(99.58 to<br>298.99)              | 544.23<br>(301.09 to<br>902.44)             | 612.38<br>(332.73 to<br>1,006.77)           | 515.95<br>(280.56 to<br>858.70)             | 8.21<br>(4.43 to<br>13.55)            | 34.42<br>(17.86 to<br>56.31)          | 42.33<br>(21.85 to<br>67.81)          | 27.61<br>(14.44 to<br>46.37)          |
| Other skin and subcutaneous diseases | 104.57<br>(54.05 to<br>182.45)              | 242.08<br>(126.92 to<br>427.01)             | 254.68<br>(134.41 to<br>444.38)             | 278.46<br>(140.37 to<br>513.64)             | 1.97<br>(1.03 to<br>3.46)             | 5.81<br>(3.23 to<br>10.50)            | 6.42<br>(3.52 to<br>11.31)            | 5.84<br>(3.19 to<br>10.68)            |
| Sudden infant death syndrome         | 7,938.92<br>(3,966.75 to<br>14,771.23)      | 3,527.41<br>(1,585.26 to<br>6,917.19)       | 3,196.70<br>(1,449.38 to<br>6,194.64)       | 8,040.16<br>(3,518.36 to<br>16,188.26)      | 92.14<br>(46.02 to<br>171.48)         | 40.93<br>(18.39 to<br>80.27)          | 37.10<br>(16.82 to<br>71.88)          | 93.30<br>(40.82 to<br>187.83)         |
| Injuries                             | 185,113.59<br>(158,426.52 to<br>218,702.21) | 213,991.81<br>(165,716.91 to<br>277,066.15) | 197,490.21<br>(150,900.75 to<br>258,999.54) | 288,000.31<br>(220,791.15 to<br>377,879.37) | 3,339.80<br>(2,924.20 to<br>3,834.17) | 3,339.80<br>(3,989.37 to<br>6,153.16) | 4,735.82<br>(3,795.83 to<br>5,942.09) | 5,938.36<br>(4,739.44 to<br>7,426.32) |
| Transport injuries                   | 50,616.41<br>(41,581.74 to<br>61,536.35)    | 86,758.40<br>(62,649.64 to<br>120,796.46)   | 80,974.71<br>(58,792.69 to<br>112,704.70)   | 111,892.77<br>(80,319.19 to<br>155,499.21)  | 936.49<br>(772.49 to<br>1,117.83)     | 1,847.27<br>(1,371.02 to<br>2,490.07) | 1,770.10<br>(1,315.65 to<br>2,388.89) | 2,315.23<br>(1,604.48 to<br>3,071.47) |
| Road injuries                        | 47,982.52<br>(39,670.57 to<br>58,247.23)    | 82,767.92<br>(59,822.66 to<br>115,051.60)   | 77,415.47<br>(55,978.82 to<br>107,713.13)   | 106,284.88<br>(76,353.89 to<br>147,754.82)  | 892.55<br>(739.45 to<br>1,061.81)     | 1,768.99<br>(1,306.21 to<br>2,391.60) | 1,699.42<br>(1,261.65 to<br>2,290.73) | 2,111.56<br>(1,531.40 to<br>2,920.10) |
| Pedestrian road injuries             | 6,896.15<br>(5,199.25 to<br>8,900.89)       | 9,427.36<br>(6,410.09 to<br>13,942.11)      | 8,711.47<br>(5,951.10 to<br>12,802.53)      | 12,033.23<br>(8,123.64 to<br>17,929.52)     | 129.89<br>(100.65 to<br>164.37)       | 213.48<br>(149.86 to<br>302.88)       | 202.41<br>(142.91 to<br>287.18)       | 254.87<br>(174.77 to<br>368.46)       |

| Sierra Leone                   |                                            |                                           |                                           |                                             |                                       |                                       |                                       |                                       |
|--------------------------------|--------------------------------------------|-------------------------------------------|-------------------------------------------|---------------------------------------------|---------------------------------------|---------------------------------------|---------------------------------------|---------------------------------------|
| Cause                          | YLLs (actual counts)                       |                                           |                                           |                                             | Deaths (actual counts)                |                                       |                                       |                                       |
|                                | 2016                                       | 2040 Forecast                             | 2040 Better Scenario                      | 2040 Worse Scenario                         | 2016                                  | 2040 Forecast                         | 2040 Better Scenario                  | 2040 Worse Scenario                   |
| Cyclist road injuries          | 1,181.24<br>(731.73 to<br>1,567.90)        | 2,247.87<br>(1,372.96 to<br>3,306.92)     | 2,120.47<br>(1,316.26 to<br>3,114.30)     | 2,863.05<br>(1,664.39 to<br>4,294.40)       | 22.92<br>(15.74 to<br>29.92)          | 50.31<br>(32.57 to<br>72.68)          | 48.91<br>(31.95 to<br>70.03)          | 59.34<br>(37.17 to<br>87.42)          |
| Motorcyclist road injuries     | 8,813.14<br>(6,861.58 to<br>11,537.01)     | 16,299.75<br>(11,131.08 to<br>23,793.46)  | 15,555.00<br>(10,596.05 to<br>22,587.83)  | 20,631.15<br>(13,940.50 to<br>30,605.78)    | 163.62<br>(128.19 to<br>207.70)       | 345.45<br>(241.16 to<br>493.37)       | 338.41<br>(233.76 to<br>481.61)       | 407.91<br>(278.87 to<br>606.94)       |
| Motor vehicle road injuries    | 30,246.18<br>(24,678.30 to<br>37,192.05)   | 53,361.38<br>(38,020.09 to<br>75,619.80)  | 49,685.80<br>(35,400.86 to<br>70,007.70)  | 68,859.39<br>(48,999.28 to<br>98,008.90)    | 560.73<br>(464.81 to<br>670.92)       | 1,128.70<br>(833.17 to<br>1,529.13)   | 1,079.61<br>(797.78 to<br>1,460.23)   | 1,351.93<br>(980.04 to<br>1,890.40)   |
| Other road injuries            | 845.80<br>(440.92 to<br>1,227.59)          | 1,431.56<br>(799.64 to<br>2,164.33)       | 1,342.73<br>(775.88 to<br>2,042.83)       | 1,898.07<br>(1,014.72 to<br>3,065.33)       | 15.38<br>(8.87 to<br>20.79)           | 31.05<br>(18.23 to<br>45.32)          | 30.07<br>(17.79 to<br>43.83)          | 37.51<br>(21.27 to<br>56.29)          |
| Other transport injuries       | 2,633.89<br>(1,697.35 to<br>4,034.52)      | 3,990.48<br>(2,341.92 to<br>6,300.60)     | 3,559.25<br>(2,091.52 to<br>5,632.63)     | 5,607.89<br>(3,247.85 to<br>9,038.50)       | 43.94<br>(28.56 to<br>65.48)          | 78.28<br>(46.42 to<br>124.46)         | 70.68<br>(42.08 to<br>112.05)         | 103.67<br>(60.25 to<br>166.06)        |
| Unintentional injuries         | 114,128.74<br>(90,429.81 to<br>143,372.03) | 93,962.25<br>(72,044.99 to<br>119,244.41) | 84,548.40<br>(64,884.71 to<br>107,144.58) | 136,240.73<br>(101,996.21 to<br>179,116.67) | 1,964.07<br>(1,649.93 to<br>2,343.10) | 2,313.46<br>(1,914.96 to<br>2,754.12) | 2,203.35<br>(1,819.05 to<br>2,632.09) | 2,816.47<br>(2,274.28 to<br>3,440.24) |
| Falls                          | 14,257.88<br>(11,176.70 to<br>19,449.87)   | 18,466.37<br>(14,872.02 to<br>23,001.52)  | 18,084.84<br>(14,528.25 to<br>22,482.09)  | 22,059.07<br>(17,320.89 to<br>29,402.49)    | 343.68<br>(285.92 to<br>419.39)       | 719.95<br>(615.98 to<br>836.20)       | 760.33<br>(649.85 to<br>882.19)       | 707.41<br>(595.38 to<br>839.99)       |
| Drowning                       | 23,370.95<br>(18,023.92 to<br>29,758.54)   | 16,767.06<br>(11,978.07 to<br>22,812.81)  | 14,980.61<br>(10,635.98 to<br>20,406.19)  | 25,249.16<br>(17,789.15 to<br>34,672.68)    | 366.17<br>(294.05 to<br>449.64)       | 335.29<br>(249.22 to<br>402.61)       | 306.72<br>(228.40 to<br>402.32)       | 451.43<br>(332.49 to<br>595.95)       |
| Fire, heat, and hot substances | 12,528.28<br>(8,862.34 to<br>16,120.30)    | 8,411.46<br>(5,790.43 to<br>11,297.83)    | 7,282.62<br>(5,007.61 to<br>9,764.48)     | 12,921.95<br>(8,784.32 to<br>17,907.19)     | 221.16<br>(167.22 to<br>269.17)       | 210.16<br>(151.51 to<br>274.90)       | 190.08<br>(137.78 to<br>247.46)       | 274.40<br>(197.28 to<br>364.45)       |
| Poisonings                     | 7,472.06<br>(3,599.79 to<br>15,736.99)     | 3,658.00<br>(1,980.26 to<br>6,780.52)     | 2,921.00<br>(1,572.55 to<br>5,413.71)     | 6,497.32<br>(3,163.44 to<br>13,591.24)      | 118.10<br>(65.16 to<br>216.26)        | 72.08<br>(41.97 to<br>115.70)         | 58.77<br>(34.80 to<br>94.02)          | 112.20<br>(61.74 to<br>204.89)        |
| Exposure to mechanical forces  | 16,910.93<br>(11,541.14 to<br>23,502.14)   | 11,899.13<br>(8,179.10 to<br>16,523.36)   | 10,185.88<br>(6,935.91 to<br>14,231.73)   | 18,394.49<br>(12,150.14 to<br>26,344.95)    | 262.42<br>(189.76 to<br>347.56)       | 234.68<br>(166.11 to<br>312.98)       | 206.19<br>(145.13 to<br>277.01)       | 319.96<br>(224.15 to<br>435.28)       |

|                                                 |                                          |                                          |                                          |                                          |                                 |                                   |                                   |                                   |
|-------------------------------------------------|------------------------------------------|------------------------------------------|------------------------------------------|------------------------------------------|---------------------------------|-----------------------------------|-----------------------------------|-----------------------------------|
|                                                 | 4,927.09<br>(2,866.76 to<br>7,236.55)    | 3,478.22<br>(1,950.89 to<br>5,385.02)    | 2,892.76<br>(1,594.30 to<br>4,464.26)    | 4,925.62<br>(2,687.03 to<br>7,636.36)    | 83.23<br>(50.68 to<br>117.06)   | 70.93<br>(41.57 to<br>104.13)     | 60.37<br>(35.31 to<br>88.86)      | 91.91<br>(52.81 to<br>136.27)     |
| Unintentional firearm injuries                  | 4,365.86<br>(2,264.60 to<br>7,699.34)    | 2,208.86<br>(1,243.39 to<br>3,725.05)    | 1,897.25<br>(1,066.06 to<br>3,205.38)    | 4,373.69<br>(2,233.94 to<br>8,011.36)    | 54.21<br>(29.62 to<br>93.61)    | 30.00<br>(17.92 to<br>48.24)      | 25.78<br>(15.54 to<br>41.29)      | 56.43<br>(30.53 to<br>99.51)      |
| Unintentional suffocation                       | 7,617.99<br>(4,965.75 to<br>10,555.88)   | 6,212.05<br>(4,089.87 to<br>8,467.60)    | 5,395.87<br>(3,556.34 to<br>7,562.99)    | 9,095.18<br>(5,888.98 to<br>12,967.12)   | 124.99<br>(87.57 to<br>164.48)  | 133.74<br>(92.32 to<br>179.47)    | 120.03<br>(82.04 to<br>162.26)    | 171.62<br>(117.80 to<br>232.45)   |
| Other exposure to mechanical forces             | 13,113.74<br>(7,245.09 to<br>19,245.28)  | 11,495.45<br>(6,688.08 to<br>16,931.94)  | 10,275.20<br>(5,929.81 to<br>15,120.13)  | 16,777.71<br>(9,235.40 to<br>25,476.45)  | 210.81<br>(125.95 to<br>291.16) | 241.11<br>(153.54 to<br>327.62)   | 221.95<br>(141.42 to<br>301.51)   | 307.11<br>(187.86 to<br>432.06)   |
| Adverse effects of medical treatment            | 6,055.61<br>(4,113.66 to<br>7,853.96)    | 6,677.91<br>(4,302.25 to<br>9,238.69)    | 5,525.67<br>(3,528.75 to<br>7,786.77)    | 10,100.07<br>(6,532.98 to<br>14,221.52)  | 116.33<br>(79.69 to<br>145.90)  | 165.44<br>(109.55 to<br>223.27)   | 141.87<br>(92.85 to<br>190.00)    | 215.47<br>(142.01 to<br>286.59)   |
| Animal contact                                  | 4,914.62<br>(3,180.36 to<br>6,532.90)    | 5,505.29<br>(3,469.10 to<br>7,887.94)    | 4,539.45<br>(2,834.92 to<br>6,497.47)    | 8,182.64<br>(5,043.02 to<br>11,721.82)   | 98.39<br>(65.21 to<br>125.93)   | 140.89<br>(91.28 to<br>190.93)    | 120.52<br>(76.73 to<br>164.59)    | 181.34<br>(114.27 to<br>247.62)   |
| Venomous animal contact                         | 1,140.99<br>(550.09 to<br>2,017.81)      | 1,172.63<br>(611.56 to<br>2,045.76)      | 986.22<br>(519.64 to<br>1,738.26)        | 1,917.43<br>(921.08 to<br>3,530.84)      | 17.94<br>(9.34 to<br>30.57)     | 24.54<br>(14.39 to<br>39.29)      | 21.55<br>(12.44 to<br>34.53)      | 34.13<br>(18.76 to<br>57.98)      |
| Non-venomous animal contact                     | 8,426.08<br>(5,281.44 to<br>14,595.44)   | 8,122.50<br>(5,577.35 to<br>12,472.80)   | 8,178.96<br>(5,612.58 to<br>12,396.89)   | 11,928.32<br>(7,467.49 to<br>20,806.36)  | 125.45<br>(85.91 to<br>196.33)  | 160.94<br>(122.29 to<br>213.15)   | 168.28<br>(128.72 to<br>218.90)   | 199.61<br>(141.13 to<br>304.99)   |
| Foreign body                                    | 7,652.46<br>(4,581.63 to<br>13,765.80)   | 7,326.53<br>(4,932.24 to<br>11,761.81)   | 7,453.33<br>(5,079.58 to<br>11,728.95)   | 10,809.53<br>(6,572.24 to<br>19,704.96)  | 113.05<br>(75.49 to<br>184.85)  | 145.53<br>(111.37 to<br>199.56)   | 153.95<br>(118.21 to<br>205.40)   | 180.12<br>(125.44 to<br>287.31)   |
| Pulmonary aspiration and foreign body in airway | 773.62<br>(240.32 to<br>1,460.60)        | 795.97<br>(229.67 to<br>1,700.97)        | 725.62<br>(206.55 to<br>1,573.20)        | 1,118.79<br>(345.61 to<br>2,254.19)      | 12.40<br>(3.97 to<br>24.23)     | 15.42<br>(4.63 to<br>34.11)       | 14.34<br>(4.28 to<br>32.36)       | 19.49<br>(5.86 to<br>40.42)       |
| Foreign body in other body part                 | 4,726.27<br>(2,122.28 to<br>6,854.02)    | 3,560.13<br>(1,547.89 to<br>5,495.13)    | 2,774.67<br>(1,205.12 to<br>4,354.88)    | 5,412.35<br>(2,563.12 to<br>8,471.81)    | 82.50<br>(37.89 to<br>115.50)   | 75.85<br>(33.89 to<br>113.86)     | 60.59<br>(26.49 to<br>90.47)      | 104.41<br>(46.38 to<br>155.71)    |
| Environmental heat and cold exposure            | 7,266.93<br>(5,229.35 to<br>9,410.79)    | 4,904.23<br>(3,586.04 to<br>6,396.15)    | 4,338.95<br>(3,195.59 to<br>5,683.29)    | 6,900.30<br>(4,933.14 to<br>9,220.06)    | 117.44<br>(88.57 to<br>148.60)  | 97.97<br>(74.98 to<br>123.91)     | 88.56<br>(68.49 to<br>113.99)     | 124.47<br>(94.27 to<br>157.75)    |
| Other unintentional injuries                    | 20,316.63<br>(15,644.12 to<br>27,035.04) | 31,045.40<br>(19,835.42 to<br>47,661.43) | 29,716.91<br>(19,105.89 to<br>45,934.94) | 37,231.67<br>(23,021.67 to<br>57,746.86) | 438.24<br>(335.88 to<br>583.63) | 740.61<br>(476.73 to<br>1,123.03) | 722.86<br>(471.79 to<br>1,089.36) | 863.18<br>(539.54 to<br>1,334.35) |

**Sierra Leone**

| Cause                              | YLLs (actual counts)                    |                                          |                                          |                                          | Deaths (actual counts)                   |                                 |                                 |                                   |
|------------------------------------|-----------------------------------------|------------------------------------------|------------------------------------------|------------------------------------------|------------------------------------------|---------------------------------|---------------------------------|-----------------------------------|
|                                    | 2016                                    | 2040 Forecast                            | 2040 Better Scenario                     | 2040 Worse Scenario                      | 2016                                     | 2040 Forecast                   | 2040 Better Scenario            | 2040 Worse Scenario               |
|                                    | Self-harm                               | 14,063.94<br>(10,407.83 to<br>20,152.84) | 23,428.89<br>(14,020.97 to<br>37,801.33) | 22,159.40<br>(13,182.23 to<br>36,245.63) | 28,726.10<br>(16,482.54 to<br>47,129.76) | 333.74<br>(247.51 to<br>472.51) | 603.66<br>(366.89 to<br>953.52) | 586.45<br>(362.70 to<br>930.81)   |
| Self-harm by firearm               | 1,848.95<br>(823.92 to<br>3,449.72)     | 2,545.09<br>(977.11 to<br>5,226.16)      | 2,351.09<br>(897.09 to<br>4,756.64)      | 3,174.70<br>(1,305.25 to<br>6,646.38)    | 43.71<br>(19.98 to<br>79.22)             | 67.54<br>(26.79 to<br>132.14)   | 64.47<br>(25.84 to<br>123.44)   | 80.84<br>(31.78 to<br>164.75)     |
| Self-harm by other specified means | 12,214.99<br>(8,837.72 to<br>17,600.96) | 20,883.80<br>(12,567.50 to<br>33,623.47) | 19,808.31<br>(12,001.11 to<br>31,793.09) | 25,551.39<br>(14,797.55 to<br>42,641.50) | 290.04<br>(212.55 to<br>409.99)          | 536.13<br>(335.09 to<br>849.44) | 571.98<br>(327.73 to<br>831.33) | 633.58<br>(378.55 to<br>1,023.76) |
| Interpersonal violence             | 6,252.69<br>(3,893.51 to<br>8,223.94)   | 7,616.51<br>(4,231.78 to<br>11,081.49)   | 7,557.51<br>(4,217.06 to<br>10,993.32)   | 8,505.57<br>(4,679.62 to<br>12,315.95)   | 104.50<br>(66.73 to<br>135.19)           | 136.95<br>(78.37 to<br>194.76)  | 136.41<br>(78.81 to<br>194.28)  | 148.76<br>(84.18 to<br>211.41)    |
| Physical violence by firearm       | 3,185.64<br>(1,797.64 to<br>4,625.10)   | 3,911.69<br>(1,979.56 to<br>5,932.48)    | 3,874.17<br>(1,985.18 to<br>5,916.81)    | 4,196.10<br>(2,111.62 to<br>6,422.36)    | 54.08<br>(30.70 to<br>77.36)             | 69.30<br>(36.13 to<br>103.65)   | 68.75<br>(36.06 to<br>103.00)   | 73.15<br>(37.02 to<br>109.32)     |
| Physical violence by sharp object  | 1,756.24<br>(815.99 to<br>2,554.16)     | 2,483.10<br>(1,104.87 to<br>3,776.66)    | 2,526.95<br>(1,129.21 to<br>3,835.04)    | 2,627.09<br>(1,166.73 to<br>3,993.22)    | 30.15<br>(14.41 to<br>43.57)             | 45.69<br>(21.30 to<br>67.61)    | 46.71<br>(21.96 to<br>69.17)    | 47.10<br>(21.76 to<br>69.78)      |
| Physical violence by other means   | 1,310.81<br>(929.55 to<br>1,911.16)     | 1,221.72<br>(763.13 to<br>1,987.83)      | 1,156.40<br>(718.73 to<br>1,878.60)      | 1,682.38<br>(1,039.73 to<br>2,722.35)    | 20.27<br>(14.57 to<br>29.05)             | 21.95<br>(13.88 to<br>34.91)    | 20.94<br>(13.18 to<br>33.48)    | 28.51<br>(17.98 to<br>45.74)      |

|                                                                              |                                                |                                                |                                                |                                                |                                       |                                       |                                       |                                        |
|------------------------------------------------------------------------------|------------------------------------------------|------------------------------------------------|------------------------------------------------|------------------------------------------------|---------------------------------------|---------------------------------------|---------------------------------------|----------------------------------------|
| Forces of nature, conflict and terrorism, and executions and police conflict | 51.82<br>(42.84 to 72.54)                      | 2,225.77<br>(0.00 to 24,008.33)                | 2,250.19<br>(0.00 to 24,188.09)                | 2,635.14<br>(0.00 to 28,502.58)                | 0.99<br>(0.73 to 1.43)                | 38.74<br>(0.00 to 413.13)             | 39.51<br>(0.00 to 422.03)             | 43.49<br>(0.00 to 466.82)              |
| Exposure to forces of nature                                                 | 0.00<br>(0.00 to 0.00)                         | 169.09<br>(0.00 to 941.66)                     | 171.62<br>(0.00 to 957.62)                     | 203.88<br>(0.00 to 1,139.24)                   | 0.00<br>(0.00 to 0.00)                | 3.22<br>(0.00 to 17.80)               | 3.32<br>(0.00 to 18.32)               | 3.59<br>(0.00 to 19.85)                |
| Conflict and terrorism                                                       | 0.00<br>(0.00 to 0.00)                         | 2,051.65<br>(0.00 to 24,008.33)                | 2,073.50<br>(0.00 to 24,188.09)                | 2,425.85<br>(0.00 to 28,502.58)                | 0.00<br>(0.00 to 0.00)                | 35.43<br>(0.00 to 413.13)             | 36.10<br>(0.00 to 422.03)             | 39.80<br>(0.00 to 466.82)              |
| Executions and police conflict                                               | 51.82<br>(42.84 to 72.54)                      | 5.02<br>(0.00 to 57.41)                        | 5.07<br>(0.00 to 58.05)                        | 5.41<br>(0.00 to 61.83)                        | 0.99<br>(0.73 to 1.43)                | 0.09<br>(0.00 to 1.05)                | 0.09<br>(0.00 to 1.06)                | 0.10<br>(0.00 to 1.10)                 |
| <b>Togo</b>                                                                  |                                                |                                                |                                                |                                                |                                       |                                       |                                       |                                        |
| Cause                                                                        | YLLs (actual counts)                           |                                                |                                                |                                                | Deaths (actual counts)                |                                       |                                       |                                        |
|                                                                              | 2016                                           | 2040 Forecast                                  | 2040 Better Scenario                           | 2040 Worse Scenario                            | 2016                                  | 2040 Forecast                         | 2040 Better Scenario                  | 2040 Worse Scenario                    |
| All causes                                                                   | 2388,729.40<br>(2,489,423.79 to 3,211,390.72)  | 2,381,822.89<br>(1,945,414.70 to 2,981,874.44) | 1,872,910.34<br>(1,511,525.69 to 2,376,932.65) | 3,804,375.86<br>(3,053,893.37 to 4,701,697.77) | 55,176.61<br>(50,183.48 to 60,431.80) | 70,227.59<br>(59,359.88 to 84,566.10) | 56,952.23<br>(48,257.07 to 68,397.34) | 98,704.29<br>(82,488.64 to 117,769.14) |
| Communicable, maternal, neonatal, and nutritional diseases                   | 1,944,734.39<br>(1,650,913.08 to 2,245,716.67) | 1,036,240.04<br>(769,297.59 to 1,370,517.91)   | 731,991.44<br>(529,517.23 to 979,458.39)       | 2,064,573.18<br>(1,544,115.07 to 2,693,985.81) | 30,694.81<br>(27,013.77 to 34,477.85) | 23,040.24<br>(17,064.03 to 30,937.78) | 16,247.63<br>(11,866.29 to 22,022.84) | 40,785.06<br>(30,528.36 to 53,027.23)  |
| HIV/AIDS and tuberculosis                                                    | 325,545.17<br>(264,684.86 to 396,333.28)       | 287,475.30<br>(150,522.59 to 437,239.67)       | 170,335.55<br>(70,535.82 to 296,883.66)        | 720,956.28<br>(421,934.04 to 1,113,604.94)     | 6,903.11<br>(5,829.35 to 8,139.36)    | 6,371.91<br>(3,624.24 to 9,380.35)    | 3,862.88<br>(1,801.11 to 6,141.75)    | 15,192.11<br>(9,049.75 to 23,051.23)   |
| Tuberculosis                                                                 | 80,065.14<br>(60,239.96 to 98,792.22)          | 45,461.40<br>(27,474.16 to 72,574.74)          | 28,876.23<br>(17,043.49 to 46,382.10)          | 83,271.93<br>(47,796.50 to 136,010.49)         | 2,131.86<br>(1,663.65 to 2,561.73)    | 1,420.50<br>(879.33 to 2,131.71)      | 934.12<br>(1,387.62)                  | 2,475.23<br>(1,485.75 to 3,861.39)     |
| HIV/AIDS                                                                     | 245,480.03<br>(187,272.82 to 317,780.87)       | 242,013.90<br>(106,595.93 to 390,118.72)       | 141,459.32<br>(43,259.15 to 266,881.52)        | 637,684.35<br>(347,884.43 to 1,042,924.27)     | 4,771.24<br>(3,731.81 to 5,988.37)    | 4,951.42<br>(2,316.21 to 7,902.06)    | 2,928.77<br>(918.92 to 5,255.90)      | 12,716.88<br>(6,696.77 to 20,627.26)   |
| Diarrhea, lower respiratory, and other common infectious diseases            | 507,410.11<br>(414,844.84 to 623,125.52)       | 352,489.19<br>(202,484.21 to 586,754.08)       | 222,337.44<br>(126,726.04 to 377,495.35)       | 641,270.04<br>(362,211.90 to 1,052,152.90)     | 9,320.23<br>(7,839.95 to 11,342.21)   | 10,254.97<br>(6,068.36 to 16,841.23)  | 6,732.93<br>(3,991.78 to 11,349.44)   | 15,435.98<br>(9,333.30 to 24,245.49)   |
| Diarrheal diseases                                                           | 157,867.83<br>(109,357.22 to 235,527.13)       | 109,462.54<br>(29,319.75 to 272,667.54)        | 65,333.29<br>(14,965.95 to 177,942.40)         | 178,267.83<br>(58,180.54 to 401,463.41)        | 2,980.81<br>(2,019.07 to 4,817.99)    | 3,166.91<br>(85.56 to 8,517.13)       | 1,906.50<br>(402.96 to 5,587.85)      | 4,629.66<br>(1,233.00 to 10,788.55)    |
| Intestinal infectious diseases                                               | 18,052.09<br>(8,614.77 to 32,696.50)           | 13,666.42<br>(6,168.11 to 26,299.78)           | 12,070.23<br>(5,533.45 to 23,315.69)           | 19,482.37<br>(8,583.05 to 37,532.94)           | 261.62<br>(124.60 to 460.76)          | 213.98<br>(98.08 to 404.52)           | 190.47<br>(87.90 to 363.15)           | 292.89<br>(134.59 to 556.81)           |
| Typhoid fever                                                                | 14,859.10<br>(6,486.40 to 27,924.61)           | 11,113.68<br>(4,618.73 to 22,275.93)           | 9,859.70<br>(4,258.65 to 19,914.01)            | 15,698.32<br>(6,489.48 to 31,718.88)           | 215.87<br>(96.70 to 404.85)           | 174.10<br>(74.48 to 348.39)           | 155.71<br>(67.17 to 311.85)           | 236.12<br>(97.56 to 470.36)            |
| Paratyphoid fever                                                            | 2,934.13<br>(1,037.11 to 6,929.32)             | 2,477.65<br>(935.53 to 5,359.55)               | 2,154.98<br>(794.35 to 4,810.50)               | 3,641.99<br>(1,382.81 to 8,123.25)             | 42.25<br>(15.08 to 98.61)             | 38.52<br>(15.00 to 82.83)             | 37.30<br>(13.15 to 72.31)             | 54.51<br>(21.18 to 121.83)             |
| Other intestinal infectious diseases                                         | 258.85<br>(78.46 to 689.31)                    | 75.09<br>(20.21 to 209.01)                     | 55.56<br>(14.94 to 155.69)                     | 142.06<br>(35.76 to 405.97)                    | 3.50<br>(1.14 to 8.95)                | 1.36<br>(0.42 to 3.32)                | 1.06<br>(0.34 to 2.63)                | 2.26<br>(0.66 to 5.65)                 |
| Lower respiratory infections                                                 | 221,427.46<br>(174,020.60 to 280,669.18)       | 173,611.53<br>(99,786.44 to 289,277.00)        | 104,024.48<br>(62,467.05 to 169,111.51)        | 341,348.52<br>(173,502.31 to 611,568.63)       | 4,445.00<br>(3,637.06 to 5,355.78)    | 5,826.02<br>(3,790.92 to 8,742.74)    | 3,770.89<br>(2,527.36 to 5,491.22)    | 8,905.10<br>(5,505.88 to 13,841.01)    |
| Upper respiratory infections                                                 | 522.66<br>(203.90 to 1,184.07)                 | 322.58<br>(130.09 to 717.47)                   | 231.11<br>(91.05 to 503.05)                    | 592.49<br>(217.73 to 1,374.15)                 | 8.09<br>(3.88 to 15.85)               | 6.97<br>(3.21 to 13.55)               | 5.19<br>(2.27 to 10.29)               | 11.43<br>(4.84 to 22.86)               |
| Otitis media                                                                 | 6.92<br>(3.66 to 14.09)                        | 2.14<br>(1.16 to 3.92)                         | 2.25<br>(1.20 to 4.24)                         | 2.19<br>(1.16 to 4.14)                         | 0.17<br>(0.10 to 0.29)                | 0.12<br>(0.06 to 0.24)                | 0.14<br>(0.07 to 0.27)                | 0.10<br>(0.05 to 0.20)                 |
| Meningitis                                                                   | 76,223.72<br>(56,114.63 to 103,225.06)         | 38,376.40<br>(24,750.39 to 56,893.47)          | 33,337.69<br>(21,628.21 to 49,435.49)          | 65,300.27<br>(39,170.24 to 104,584.99)         | 1,197.89<br>(900.58 to 1,555.35)      | 795.96<br>(539.18 to 1,124.54)        | 731.89<br>(493.13 to 1,046.16)        | 1,120.88<br>(731.69 to 1,655.89)       |
| Pneumococcal meningitis                                                      | 5,411.86<br>(3,829.53 to 7,572.20)             | 3,202.89<br>(2,006.70 to 4,949.54)             | 3,012.01<br>(1,936.60 to 4,638.38)             | 4,484.56<br>(2,786.45 to 7,181.56)             | 100.95<br>(70.91 to 137.75)           | 79.69<br>(51.69 to 118.79)            | 78.16<br>(50.68 to 116.07)            | 97.12<br>(62.24 to 146.12)             |

|                                         |                                             |                                             |                                             |                                             |                                       |                                       |                                       |                                       |
|-----------------------------------------|---------------------------------------------|---------------------------------------------|---------------------------------------------|---------------------------------------------|---------------------------------------|---------------------------------------|---------------------------------------|---------------------------------------|
| H influenzae type B meningitis          | 8,279.74<br>(5,618.55 to<br>12,517.82)      | 6,823.48<br>(2,806.15 to<br>14,805.92)      | 4,647.00<br>(2,326.61 to<br>8,877.33)       | 23,476.04<br>(6,023.51 to<br>57,721.37)     | 124.70<br>(87.50 to<br>176.14)        | 108.92<br>(55.34 to<br>205.67)        | 84.76<br>(49.01 to<br>140.37)         | 302.03<br>(96.02 to<br>702.30)        |
| Meningococcal meningitis                | 37,903.54<br>(26,221.01 to<br>52,360.63)    | 15,889.12<br>(9,807.80 to<br>23,944.82)     | 14,534.99<br>(8,927.82 to<br>22,167.91)     | 20,599.71<br>(12,756.80 to<br>31,582.61)    | 565.02<br>(403.58 to<br>751.51)       | 326.04<br>(209.44 to<br>482.11)       | 307.22<br>(194.27 to<br>455.31)       | 385.34<br>(243.41 to<br>569.55)       |
| Other meningitis                        | 24,628.58<br>(18,141.90 to<br>35,844.29)    | 12,460.92<br>(8,360.01 to<br>18,039.41)     | 11,143.69<br>(7,475.74 to<br>16,067.12)     | 16,739.96<br>(10,885.72 to<br>25,200.14)    | 407.22<br>(309.79 to<br>543.19)       | 281.32<br>(195.24 to<br>388.06)       | 261.75<br>(177.26 to<br>364.56)       | 336.40<br>(229.38 to<br>475.16)       |
| Encephalitis                            | 4,407.54<br>(2,991.79 to<br>6,232.51)       | 3,893.83<br>(2,312.39 to<br>5,929.84)       | 3,329.62<br>(1,933.27 to<br>5,185.53)       | 5,717.45<br>(3,468.50 to<br>8,681.78)       | 69.14<br>(47.18 to<br>94.19)          | 76.06<br>(46.64 to<br>111.33)         | 67.29<br>(40.52 to<br>100.44)         | 100.64<br>(62.21 to<br>146.71)        |
| Diphtheria                              | 92.42<br>(42.32 to<br>178.25)               | 21.57<br>(9.16 to<br>49.37)                 | 13.30<br>(6.68 to<br>24.53)                 | 88.45<br>(21.93 to<br>272.50)               | 1.20<br>(0.61 to<br>2.22)             | 0.33<br>(0.16 to<br>0.68)             | 0.24<br>(0.12 to<br>0.44)             | 1.12<br>(0.32 to<br>3.33)             |
| Whooping cough                          | 19,319.91<br>(1,518.13 to<br>60,413.29)     | 11,479.09<br>(902.87 to<br>37,407.24)       | 2,976.99<br>(214.99 to<br>10,323.10)        | 25,792.98<br>(2,154.21 to<br>81,309.86)     | 228.53<br>(17.95 to<br>714.55)        | 136.34<br>(10.76 to<br>445.62)        | 36.41<br>(2.64 to<br>126.33)          | 304.73<br>(25.36 to<br>961.70)        |
| Tetanus                                 | 2,740.31<br>(1,315.69 to<br>5,441.19)       | 407.36<br>(190.43 to<br>807.08)             | 297.42<br>(138.12 to<br>603.85)             | 738.84<br>(320.96 to<br>1,667.96)           | 40.92<br>(22.61 to<br>75.24)          | 49.92<br>(3.96 to<br>14.03)           | 7.61<br>(3.14 to<br>12.30)            | 11.36<br>(5.66 to<br>23.28)           |
| Measles                                 | 5,248.75<br>(1,716.67 to<br>12,580.39)      | 510.52<br>(46.87 to<br>3,046.93)            | 174.89<br>(27.67 to<br>770.92)              | 2,552.88<br>(173.72 to<br>11,689.21)        | 62.76<br>(20.48 to<br>150.20)         | 6.16<br>(0.60 to<br>36.01)            | 2.19<br>(0.36 to<br>9.37)             | 30.32<br>(2.13 to<br>138.72)          |
| <b>Togo</b>                             |                                             |                                             |                                             |                                             |                                       |                                       |                                       |                                       |
| Cause                                   | YLLs (actual counts)                        |                                             |                                             |                                             | Deaths (actual counts)                |                                       |                                       |                                       |
|                                         | 2016                                        | 2040 Forecast                               | 2040 Better Scenario                        | 2040 Worse Scenario                         | 2016                                  | 2040 Forecast                         | 2040 Better Scenario                  | 2040 Worse Scenario                   |
| Varicella and herpes zoster             | 1,500.51<br>(830.93 to<br>2,360.67)         | 735.21<br>(420.84 to<br>1,211.43)           | 546.17<br>(302.76 to<br>904.15)             | 1,385.77<br>(705.78 to<br>2,429.87)         | 24.08<br>(15.87 to<br>34.97)          | 18.50<br>(12.01 to<br>26.61)          | 15.35<br>(9.86 to<br>23.27)           | 27.71<br>(17.12 to<br>42.56)          |
| Neglected tropical diseases and malaria | 582,933.35<br>(454,434.47 to<br>719,113.01) | 179,041.73<br>(133,073.75 to<br>232,718.02) | 162,679.83<br>(119,697.24 to<br>214,200.01) | 271,161.34<br>(194,601.58 to<br>362,565.39) | 7,831.44<br>(6,188.55 to<br>9,517.55) | 3,345.73<br>(2,510.18 to<br>4,387.00) | 3,149.20<br>(2,369.84 to<br>4,141.44) | 4,449.70<br>(3,354.83 to<br>5,791.02) |
| Malaria                                 | 557,170.14<br>(430,454.31 to<br>693,574.63) | 163,119.87<br>(119,552.94 to<br>214,789.28) | 149,551.70<br>(109,623.27 to<br>197,851.69) | 244,787.19<br>(171,734.89 to<br>332,619.02) | 7,424.94<br>(5,839.62 to<br>9,117.71) | 3,030.77<br>(2,255.51 to<br>4,087.45) | 2,874.01<br>(2,138.29 to<br>3,862.59) | 3,984.75<br>(2,991.65 to<br>5,305.59) |
| Chagas disease                          | 0.00<br>(0.00 to<br>0.00)                   | 0.00<br>(0.00 to<br>0.00)                   | 0.00<br>(0.00 to<br>0.00)                   | 0.00<br>(0.00 to<br>0.00)                   | 0.00<br>(0.00 to<br>0.00)             | 0.00<br>(0.00 to<br>0.00)             | 0.00<br>(0.00 to<br>0.00)             | 0.00<br>(0.00 to<br>0.00)             |
| Leishmaniasis                           | 0.00<br>(0.00 to<br>0.00)                   | 0.00<br>(0.00 to<br>0.00)                   | 0.00<br>(0.00 to<br>0.00)                   | 0.00<br>(0.00 to<br>0.00)                   | 0.00<br>(0.00 to<br>0.00)             | 0.00<br>(0.00 to<br>0.00)             | 0.00<br>(0.00 to<br>0.00)             | 0.00<br>(0.00 to<br>0.00)             |
| African trypanosomiasis                 | 0.00<br>(0.00 to<br>0.00)                   | 0.00<br>(0.00 to<br>0.00)                   | 0.00<br>(0.00 to<br>0.00)                   | 0.00<br>(0.00 to<br>0.00)                   | 0.00<br>(0.00 to<br>0.00)             | 0.00<br>(0.00 to<br>0.00)             | 0.00<br>(0.00 to<br>0.00)             | 0.00<br>(0.00 to<br>0.00)             |
| Schistosomiasis                         | 2,766.33<br>(1,820.60 to<br>3,995.42)       | 2,204.79<br>(1,344.07 to<br>3,469.70)       | 1,911.10<br>(1,165.88 to<br>2,988.43)       | 2,678.11<br>(1,633.07 to<br>4,340.98)       | 72.99<br>(48.67 to<br>102.52)         | 67.42<br>(42.37 to<br>99.72)          | 59.84<br>(37.10 to<br>89.37)          | 78.54<br>(50.33 to<br>117.48)         |
| Cysticercosis                           | 319.98<br>(252.58 to<br>395.41)             | 154.94<br>(109.11 to<br>220.87)             | 142.72<br>(100.38 to<br>205.83)             | 178.54<br>(126.96 to<br>251.24)             | 6.43<br>(5.11 to<br>7.95)             | 3.66<br>(2.67 to<br>5.08)             | 3.41<br>(2.45 to<br>4.76)             | 4.08<br>(2.97 to<br>5.54)             |
| Cystic echinococcosis                   | 254.42<br>(179.17 to<br>349.69)             | 104.82<br>(65.99 to<br>161.12)              | 69.67<br>(44.89 to<br>103.55)               | 191.72<br>(124.85 to<br>289.97)             | 5.17<br>(3.70 to<br>6.96)             | 2.85<br>(1.87 to<br>4.25)             | 1.94<br>(1.30 to<br>2.82)             | 4.87<br>(3.24 to<br>7.17)             |
| Dengue                                  | 128.92<br>(9.52 to<br>499.27)               | 420.00<br>(34.26 to<br>1,463.49)            | 391.81<br>(31.95 to<br>1,361.09)            | 572.61<br>(46.47 to<br>2,011.44)            | 1.98<br>(0.16 to<br>7.22)             | 9.39<br>(0.75 to<br>31.46)            | 9.06<br>(0.74 to<br>29.98)            | 11.17<br>(0.93 to<br>37.74)           |
| Yellow fever                            | 730.94<br>(134.33 to<br>2,198.40)           | 251.91<br>(44.38 to<br>782.41)              | 193.95<br>(33.35 to<br>600.34)              | 401.49<br>(70.98 to<br>1,216.38)            | 11.77<br>(2.20 to<br>35.46)           | 4.42<br>(0.82 to<br>13.61)            | 3.42<br>(0.61 to<br>10.49)            | 6.78<br>(1.23 to<br>20.59)            |
| Rabies                                  | 2,000.08<br>(603.19 to<br>4,843.00)         | 718.53<br>(195.37 to<br>1,729.75)           | 427.08<br>(120.11 to<br>1,039.87)           | 1,648.32<br>(452.18 to<br>4,180.08)         | 33.16<br>(10.06 to<br>78.52)          | 13.88<br>(3.85 to<br>33.05)           | 8.25<br>(2.38 to<br>19.84)            | 30.33<br>(8.36 to<br>76.07)           |

|                                                          |                                                        |                                                        |                                                       |                                                        |                                                  |                                                  |                                                |                                                  |
|----------------------------------------------------------|--------------------------------------------------------|--------------------------------------------------------|-------------------------------------------------------|--------------------------------------------------------|--------------------------------------------------|--------------------------------------------------|------------------------------------------------|--------------------------------------------------|
| Intestinal nematode infections                           | 1,250.91<br>(727.97 to 1,982.64)                       | 1,124.70<br>(630.45 to 1,768.34)                       | 1,063.49<br>(590.61 to 1,694.11)                      | 1,760.98<br>(988.95 to 2,904.76)                       | 15.71<br>(9.39 to 24.42)                         | 15.44<br>(23.32)                                 | 14.79<br>(8.82 to 22.47)                       | 22.96<br>(13.38 to 37.08)                        |
| Other neglected tropical diseases                        | 18,311.44<br>(10,453.94 to 30,623.66)                  | 10,942.16<br>(6,694.71 to 16,830.58)                   | 8,928.32<br>(5,274.94 to 13,760.41)                   | 18,942.37<br>(11,048.60 to 30,206.01)                  | 259.30<br>(158.25 to 405.58)                     | 197.89<br>(129.67 to 281.82)                     | 165.49<br>(107.02 to 234.91)                   | 306.20<br>(198.61 to 457.34)                     |
| <b>Maternal disorders</b>                                | <b>36,876.02</b><br><b>(28,617.94 to 46,110.16)</b>    | <b>25,107.41</b><br><b>(17,151.37 to 34,277.35)</b>    | <b>17,275.67</b><br><b>(11,356.53 to 24,772.89)</b>   | <b>42,045.36</b><br><b>(28,611.37 to 59,830.03)</b>    | <b>682.08</b><br><b>(529.11 to 853.27)</b>       | <b>479.83</b><br><b>(328.59 to 657.01)</b>       | <b>330.35</b><br><b>(215.37 to 474.94)</b>     | <b>799.18</b><br><b>(541.51 to 1,151.24)</b>     |
| Maternal hemorrhage                                      | 12,719.84<br>(9,147.37 to 16,967.74)                   | 8,059.95<br>(5,118.89 to 12,212.27)                    | 5,608.39<br>(3,374.77 to 8,773.76)                    | 13,167.51<br>(8,036.98 to 20,517.29)                   | 238.76<br>(172.26 to 316.99)                     | 154.89<br>(97.21 to 234.59)                      | 107.87<br>(64.96 to 168.24)                    | 251.91<br>(154.00 to 389.31)                     |
| Maternal sepsis and other maternal infections            | 1,628.76<br>(700.26 to 2,893.27)                       | 1,006.15<br>(409.29 to 1,907.99)                       | 699.11<br>(277.65 to 1,328.54)                        | 1,667.07<br>(672.12 to 3,178.85)                       | 30.30<br>(54.03)                                 | 19.19<br>(35.81)                                 | 13.35<br>(25.03)                               | 31.63<br>(12.87 to 59.77)                        |
| Maternal hypertensive disorders                          | 6,891.56<br>(4,675.00 to 9,280.32)                     | 4,487.95<br>(2,722.50 to 6,853.62)                     | 3,104.23<br>(1,823.58 to 4,755.20)                    | 7,431.04<br>(4,448.57 to 11,678.43)                    | 124.85<br>(84.83 to 167.68)                      | 83.60<br>(50.83 to 127.78)                       | 57.88<br>(34.24 to 88.77)                      | 137.65<br>(81.68 to 212.80)                      |
| Maternal obstructed labor and uterine rupture            | 1,539.62<br>(828.93 to 2,569.31)                       | 1,040.88<br>(506.85 to 2,013.70)                       | 706.48<br>(327.09 to 1,329.93)                        | 1,761.36<br>(825.49 to 3,280.33)                       | 28.84<br>(47.85)                                 | 19.95<br>(37.61)                                 | 13.56<br>(24.24 to 25.65)                      | 33.63<br>(15.63 to 62.27)                        |
| Maternal abortion, miscarriage, and ectopic pregnancy    | 4,588.08<br>(2,601.04 to 7,348.83)                     | 1,730.47<br>(830.29 to 3,223.33)                       | 1,201.13<br>(555.18 to 2,325.87)                      | 2,868.96<br>(1,365.80 to 5,362.44)                     | 83.86<br>(48.35 to 131.69)                       | 32.87<br>(16.05 to 59.63)                        | 22.84<br>(10.73 to 43.39)                      | 54.15<br>(26.13 to 101.83)                       |
| Indirect maternal deaths                                 | 5,796.95<br>(3,782.55 to 8,307.17)                     | 4,014.45<br>(2,422.65 to 6,213.01)                     | 2,831.18<br>(1,663.40 to 4,435.75)                    | 6,869.48<br>(4,044.20 to 10,802.62)                    | 105.68<br>(68.88 to 149.72)                      | 74.85<br>(45.66 to 114.76)                       | 52.83<br>(30.71 to 83.26)                      | 127.08<br>(74.76 to 199.23)                      |
| Late maternal deaths                                     | 437.16<br>(205.36 to 789.23)                           | 237.74<br>(108.09 to 445.85)                           | 166.23<br>(73.11 to 317.05)                           | 403.70<br>(180.96 to 767.24)                           | 8.05<br>(3.79 to 14.31)                          | 4.51<br>(8.39)                                   | 3.16<br>(1.36 to 6.11)                         | 7.60<br>(3.40 to 14.79)                          |
| Maternal deaths aggravated by HIV/AIDS                   | 507.68<br>(267.19 to 771.56)                           | 2,619.31<br>(1,104.20 to 4,024.63)                     | 1,586.42<br>(222.73 to 3,152.28)                      | 4,719.57<br>(2,298.59 to 8,013.39)                     | 10.05<br>(5.26 to 14.99)                         | 53.18<br>(22.30 to 92.74)                        | 32.41<br>(5.02 to 64.08)                       | 95.24<br>(46.67 to 163.29)                       |
| Other maternal disorders                                 | 2,766.37<br>(1,703.84 to 4,119.96)                     | 1,910.53<br>(1,089.77 to 3,064.92)                     | 1,372.51<br>(775.26 to 2,277.54)                      | 3,156.66<br>(1,806.41 to 5,135.19)                     | 51.68<br>(32.05 to 77.59)                        | 36.79<br>(21.31 to 59.44)                        | 26.46<br>(14.70 to 43.18)                      | 60.29<br>(33.90 to 98.39)                        |
| <b>Togo</b>                                              |                                                        |                                                        |                                                       |                                                        |                                                  |                                                  |                                                |                                                  |
| Cause                                                    | YLLs (actual counts)                                   |                                                        |                                                       |                                                        | Deaths (actual counts)                           |                                                  |                                                |                                                  |
|                                                          | 2016                                                   | 2040 Forecast                                          | 2040 Better Scenario                                  | 2040 Worse Scenario                                    | 2016                                             | 2040 Forecast                                    | 2040 Better Scenario                           | 2040 Worse Scenario                              |
| <b>Neonatal disorders</b>                                | <b>417,809.28</b><br><b>(320,544.76 to 527,613.14)</b> | <b>159,813.87</b><br><b>(104,959.71 to 236,131.50)</b> | <b>132,192.82</b><br><b>(85,889.42 to 194,707.33)</b> | <b>337,260.35</b><br><b>(220,320.35 to 489,046.84)</b> | <b>4,826.42</b><br><b>(3,702.93 to 6,094.40)</b> | <b>1,846.80</b><br><b>(1,212.68 to 2,728.04)</b> | <b>1,527.61</b><br><b>(992.68 to 2,249.45)</b> | <b>3,897.26</b><br><b>(2,545.53 to 5,649.95)</b> |
| Neonatal preterm birth                                   | 146,276.11<br>(96,540.48 to 204,566.75)                | 48,095.03<br>(30,065.22 to 70,776.06)                  | 37,763.99<br>(23,218.23 to 56,344.21)                 | 110,361.43<br>(68,540.46 to 163,448.35)                | 1,689.57<br>(1,115.03 to 2,362.86)               | 555.69<br>(347.43 to 817.56)                     | 436.34<br>(268.30 to 650.96)                   | 1,275.04<br>(791.87 to 1,888.12)                 |
| Neonatal encephalopathy due to birth asphyxia and trauma | 155,779.99<br>(101,672.17 to 217,793.96)               | 55,418.37<br>(26,433.72 to 92,501.43)                  | 47,579.01<br>(23,286.00 to 78,417.60)                 | 110,516.90<br>(53,595.35 to 185,993.45)                | 1,799.33<br>(1,174.60 to 2,516.02)               | 640.33<br>(305.39 to 1,068.71)                   | 549.74<br>(269.18 to 905.89)                   | 1,276.95<br>(619.42 to 2,148.75)                 |
| Neonatal sepsis and other neonatal infections            | 77,030.39<br>(47,039.17 to 115,459.12)                 | 40,846.04<br>(24,220.79 to 66,591.03)                  | 34,476.50<br>(20,138.59 to 55,277.56)                 | 82,791.89<br>(49,107.35 to 136,091.07)                 | 890.05<br>(543.45 to 1,333.90)                   | 472.13<br>(280.13 to 769.45)                     | 398.50<br>(232.85 to 638.84)                   | 956.97<br>(567.47 to 1,572.49)                   |
| Hemolytic disease and other neonatal jaundice            | 9,531.87<br>(5,659.87 to 15,501.44)                    | 2,288.97<br>(1,146.32 to 4,078.88)                     | 1,844.71<br>(917.73 to 3,301.55)                      | 4,961.25<br>(2,529.31 to 8,896.25)                     | 110.14<br>(65.38 to 179.13)                      | 26.46<br>(13.26 to 47.13)                        | 21.32<br>(10.63 to 38.18)                      | 57.35<br>(29.25 to 102.77)                       |
| Other neonatal disorders                                 | 29,190.93<br>(17,536.25 to 46,075.95)                  | 13,165.46<br>(6,779.77 to 23,938.12)                   | 10,528.62<br>(5,450.21 to 18,797.75)                  | 28,628.86<br>(14,485.28 to 51,226.61)                  | 337.33<br>(202.71 to 532.41)                     | 152.20<br>(78.40 to 276.58)                      | 121.71<br>(63.06 to 217.30)                    | 330.95<br>(167.53 to 592.15)                     |
| <b>Nutritional deficiencies</b>                          | <b>45,613.13</b><br><b>(29,431.44 to 72,053.08)</b>    | <b>16,974.93</b><br><b>(11,389.10 to 25,543.53)</b>    | <b>13,988.19</b><br><b>(9,309.70 to 21,325.23)</b>    | <b>29,621.72</b><br><b>(18,682.58 to 47,608.01)</b>    | <b>683.57</b><br><b>(480.70 to 1,001.46)</b>     | <b>412.31</b><br><b>(319.43 to 551.60)</b>       | <b>365.54</b><br><b>(283.85 to 485.88)</b>     | <b>578.96</b><br><b>(422.69 to 820.23)</b>       |
| Protein-energy malnutrition                              | 42,725.76<br>(26,876.60 to 68,209.03)                  | 14,296.53<br>(9,113.78 to 22,793.45)                   | 11,734.77<br>(7,491.66 to 18,665.70)                  | 25,788.61<br>(15,646.03 to 44,401.11)                  | 621.23<br>(426.32 to 931.65)                     | 337.54<br>(252.28 to 455.75)                     | 299.40<br>(224.51 to 405.28)                   | 485.16<br>(342.51 to 726.29)                     |

|                                                                         |                                                                  |                                                                      |                                                                    |                                                                        |                                                               |                                                               |                                                               |                                                               |
|-------------------------------------------------------------------------|------------------------------------------------------------------|----------------------------------------------------------------------|--------------------------------------------------------------------|------------------------------------------------------------------------|---------------------------------------------------------------|---------------------------------------------------------------|---------------------------------------------------------------|---------------------------------------------------------------|
|                                                                         | 326.28<br>(11.46 to<br>1,581.52)                                 | 588.56<br>(15.23 to<br>2,912.49)                                     | 468.05<br>(12.00 to<br>2,145.53)                                   | 1,040.56<br>(26.12 to<br>6,526.70)                                     | 5.64<br>(0.29 to<br>20.75)                                    | 15.32<br>(0.57 to<br>51.84)                                   | 12.97<br>(0.39 to<br>41.42)                                   | 22.10<br>(0.91 to<br>82.73)                                   |
| Iodine deficiency                                                       |                                                                  |                                                                      |                                                                    |                                                                        |                                                               |                                                               |                                                               |                                                               |
|                                                                         | 134.98<br>(92.38 to<br>248.33)                                   | 144.38<br>(87.64 to<br>302.17)                                       | 127.41<br>(77.69 to<br>264.70)                                     | 182.12<br>(111.65 to<br>368.93)                                        | 2.43<br>(1.60 to<br>5.71)                                     | 3.02<br>(1.69 to<br>9.45)                                     | 2.71<br>(1.51 to<br>8.62)                                     | 3.63<br>(2.09 to<br>10.98)                                    |
| Dietary iron deficiency                                                 |                                                                  |                                                                      |                                                                    |                                                                        |                                                               |                                                               |                                                               |                                                               |
|                                                                         | 2,426.12<br>(1,542.71 to<br>4,201.06)                            | 1,945.46<br>(1,250.78 to<br>2,924.22)                                | 1,657.96<br>(1,063.69 to<br>2,475.07)                              | 2,610.43<br>(1,662.81 to<br>4,169.39)                                  | 54.27<br>(38.80 to<br>78.26)                                  | 56.44<br>(38.68 to<br>77.32)                                  | 50.47<br>(35.08 to<br>69.44)                                  | 68.08<br>(46.81 to<br>95.63)                                  |
| Other nutritional deficiencies                                          |                                                                  |                                                                      |                                                                    |                                                                        |                                                               |                                                               |                                                               |                                                               |
| <b>Other communicable, maternal, neonatal, and nutritional diseases</b> | <b>28,547.33</b><br><b>(19,893.54 to</b><br><b>42,992.84)</b>    | <b>15,337.61</b><br><b>(10,663.85 to</b><br><b>22,679.85)</b>        | <b>13,181.93</b><br><b>(9,117.56 to</b><br><b>19,498.72)</b>       | <b>22,258.10</b><br><b>(14,825.00 to</b><br><b>33,797.08)</b>          | <b>447.97</b><br><b>(337.95 to</b><br><b>619.23)</b>          | <b>328.68</b><br><b>(249.51 to</b><br><b>445.07)</b>          | <b>288.12</b><br><b>(215.70 to</b><br><b>390.62)</b>          | <b>431.88</b><br><b>(317.20 to</b><br><b>591.24)</b>          |
|                                                                         | 12,374.70<br>(5,834.64 to<br>22,813.30)                          | 3,096.78<br>(1,372.70 to<br>6,631.61)                                | 2,678.64<br>(1,198.95 to<br>5,584.46)                              | 5,470.91<br>(2,196.75 to<br>11,847.78)                                 | 149.58<br>(73.08 to<br>271.51)                                | 41.42<br>(21.10 to<br>81.59)                                  | 36.01<br>(18.43 to<br>69.55)                                  | 69.92<br>(31.36 to<br>144.32)                                 |
| Sexually transmitted infections excluding HIV                           |                                                                  |                                                                      |                                                                    |                                                                        |                                                               |                                                               |                                                               |                                                               |
|                                                                         | 11,865.52<br>(5,310.31 to<br>22,336.09)                          | 2,642.32<br>(948.81 to<br>6,182.06)                                  | 2,276.48<br>(811.05 to<br>5,175.36)                                | 4,931.74<br>(1,655.63 to<br>11,317.64)                                 | 139.75<br>(63.27 to<br>261.61)                                | 32.01<br>(12.39 to<br>73.33)                                  | 27.60<br>(10.73 to<br>61.30)                                  | 58.97<br>(20.80 to<br>133.40)                                 |
| Syphilis                                                                |                                                                  |                                                                      |                                                                    |                                                                        |                                                               |                                                               |                                                               |                                                               |
|                                                                         | 104.39<br>(71.96 to<br>143.85)                                   | 91.60<br>(61.09 to<br>130.92)                                        | 80.97<br>(54.42 to<br>115.90)                                      | 109.09<br>(71.84 to<br>157.80)                                         | 1.98<br>(1.39 to<br>2.72)                                     | 1.87<br>(1.27 to<br>2.67)                                     | 1.67<br>(1.14 to<br>2.39)                                     | 2.18<br>(1.49 to<br>3.17)                                     |
| Chlamydial infection                                                    |                                                                  |                                                                      |                                                                    |                                                                        |                                                               |                                                               |                                                               |                                                               |
|                                                                         | 261.66<br>(182.34 to<br>359.94)                                  | 236.04<br>(154.77 to<br>335.21)                                      | 209.22<br>(138.04 to<br>302.63)                                    | 278.70<br>(179.70 to<br>401.62)                                        | 5.12<br>(3.60 to<br>7.00)                                     | 4.97<br>(3.35 to<br>7.08)                                     | 4.46<br>(3.00 to<br>6.41)                                     | 5.74<br>(3.87 to<br>8.26)                                     |
| Gonococcal infection                                                    |                                                                  |                                                                      |                                                                    |                                                                        |                                                               |                                                               |                                                               |                                                               |
|                                                                         | 143.33<br>(98.44 to<br>196.38)                                   | 126.82<br>(83.79 to<br>183.32)                                       | 111.97<br>(74.03 to<br>164.11)                                     | 151.39<br>(98.74 to<br>221.28)                                         | 2.73<br>(1.91 to<br>3.71)                                     | 2.29<br>(1.72 to<br>3.69)                                     | 2.29<br>(1.52 to<br>3.36)                                     | 3.02<br>(2.02 to<br>4.36)                                     |
| Other sexually transmitted infections                                   |                                                                  |                                                                      |                                                                    |                                                                        |                                                               |                                                               |                                                               |                                                               |
|                                                                         | 10,958.93<br>(8,889.20 to<br>13,436.41)                          | 8,867.82<br>(6,143.72 to<br>12,782.24)                               | 7,669.55<br>(5,246.72 to<br>11,104.65)                             | 11,089.25<br>(7,686.23 to<br>15,918.59)                                | 220.56<br>(180.46 to<br>268.83)                               | 207.96<br>(149.25 to<br>293.74)                               | 181.84<br>(129.15 to<br>257.00)                               | 251.60<br>(180.32 to<br>348.33)                               |
| Acute hepatitis                                                         |                                                                  |                                                                      |                                                                    |                                                                        |                                                               |                                                               |                                                               |                                                               |
|                                                                         | 196.85<br>(30.63 to<br>462.74)                                   | 108.54<br>(31.43 to<br>244.10)                                       | 92.45<br>(27.19 to<br>209.13)                                      | 168.94<br>(41.93 to<br>389.50)                                         | 2.65<br>(0.59 to<br>5.78)                                     | 2.01<br>(0.68 to<br>4.48)                                     | 1.75<br>(0.59 to<br>3.85)                                     | 2.82<br>(0.90 to<br>6.02)                                     |
| Acute hepatitis A                                                       |                                                                  |                                                                      |                                                                    |                                                                        |                                                               |                                                               |                                                               |                                                               |
|                                                                         | 8,383.19<br>(6,636.97 to<br>10,530.60)                           | 7,188.78<br>(4,829.19 to<br>10,780.19)                               | 6,170.87<br>(4,073.66 to<br>9,194.51)                              | 8,861.37<br>(5,946.63 to<br>13,036.93)                                 | 178.91<br>(141.65 to<br>223.22)                               | 173.16<br>(121.50 to<br>248.40)                               | 150.09<br>(104.12 to<br>215.80)                               | 208.84<br>(146.22 to<br>294.23)                               |
| Acute hepatitis B                                                       |                                                                  |                                                                      |                                                                    |                                                                        |                                                               |                                                               |                                                               |                                                               |
|                                                                         | 212.53<br>(148.43 to<br>295.34)                                  | 249.22<br>(155.23 to<br>389.90)                                      | 231.49<br>(143.73 to<br>362.61)                                    | 278.56<br>(175.85 to<br>432.85)                                        | 5.01<br>(3.48 to<br>7.15)                                     | 6.82<br>(4.30 to<br>10.46)                                    | 6.40<br>(4.07 to<br>9.84)                                     | 7.41<br>(4.75 to<br>11.34)                                    |
| Acute hepatitis C                                                       |                                                                  |                                                                      |                                                                    |                                                                        |                                                               |                                                               |                                                               |                                                               |
|                                                                         | 2,166.37<br>(1,499.30 to<br>3,025.00)                            | 1,321.29<br>(780.69 to<br>2,192.42)                                  | 1,174.74<br>(694.72 to<br>1,964.43)                                | 1,780.37<br>(1,080.90 to<br>2,935.24)                                  | 33.99<br>(23.73 to<br>47.30)                                  | 25.97<br>(15.94 to<br>40.32)                                  | 23.60<br>(14.51 to<br>36.80)                                  | 32.53<br>(20.17 to<br>51.27)                                  |
| Acute hepatitis E                                                       |                                                                  |                                                                      |                                                                    |                                                                        |                                                               |                                                               |                                                               |                                                               |
|                                                                         | 5,213.70<br>(2,191.13 to<br>16,264.50)                           | 3,373.00<br>(1,896.36 to<br>7,515.52)                                | 2,833.74<br>(1,564.42 to<br>6,476.61)                              | 5,697.94<br>(2,813.06 to<br>14,068.17)                                 | 77.84<br>(40.70 to<br>203.28)                                 | 79.30<br>(55.29 to<br>131.97)                                 | 70.27<br>(48.73 to<br>119.07)                                 | 110.36<br>(70.26 to<br>210.59)                                |
| Other unspecified infectious diseases                                   |                                                                  |                                                                      |                                                                    |                                                                        |                                                               |                                                               |                                                               |                                                               |
| <b>Non-communicable diseases</b>                                        | <b>704,130.81</b><br><b>(620,812.69 to</b><br><b>792,900.49)</b> | <b>1,095,168.90</b><br><b>(862,156.63 to</b><br><b>1,406,908.52)</b> | <b>911,155.42</b><br><b>(732,310.03 to</b><br><b>1,153,492.51)</b> | <b>1,446,340.06</b><br><b>(1,134,620.68 to</b><br><b>1,880,210.90)</b> | <b>20,679.68</b><br><b>(18,566.61 to</b><br><b>22,871.47)</b> | <b>41,004.65</b><br><b>(34,386.29 to</b><br><b>49,504.46)</b> | <b>34,852.76</b><br><b>(29,445.15 to</b><br><b>41,531.29)</b> | <b>51,124.94</b><br><b>(42,184.52 to</b><br><b>63,233.61)</b> |
| <b>Togo</b>                                                             |                                                                  |                                                                      |                                                                    |                                                                        |                                                               |                                                               |                                                               |                                                               |
| Cause                                                                   | YLLs (actual counts)                                             |                                                                      |                                                                    |                                                                        | Deaths (actual counts)                                        |                                                               |                                                               |                                                               |
|                                                                         | 2016                                                             | 2040 Forecast                                                        | 2040 Better Scenario                                               | 2040 Worse Scenario                                                    | 2016                                                          | 2040 Forecast                                                 | 2040 Better Scenario                                          | 2040 Worse Scenario                                           |
| Neoplasms                                                               | 131,523.46<br>(115,334.90 to<br>149,321.15)                      | 285,598.20<br>(227,754.95 to<br>366,271.98)                          | 268,830.95<br>(215,743.68 to<br>339,998.09)                        | 311,491.12<br>(247,272.52 to<br>404,996.13)                            | 4,178.14<br>(3,659.47 to<br>4,726.62)                         | 10,236.59<br>(8,547.01 to<br>12,418.32)                       | 9,911.21<br>(8,355.04 to<br>11,951.16)                        | 10,707.50<br>(8,828.96 to<br>13,194.02)                       |
| Lip and oral cavity cancer                                              | 1,387.84<br>(1,139.06 to<br>1,690.17)                            | 3,103.08<br>(1,772.23 to<br>5,255.03)                                | 2,322.18<br>(1,449.01 to<br>3,704.02)                              | 4,673.38<br>(2,473.15 to<br>8,302.64)                                  | 47.23<br>(39.03 to<br>57.07)                                  | 113.01<br>(68.21 to<br>180.56)                                | 88.48<br>(57.89 to<br>134.96)                                 | 161.91<br>(90.21 to<br>271.58)                                |
| Nasopharynx cancer                                                      | 364.72<br>(250.73 to<br>486.01)                                  | 819.32<br>(377.71 to<br>1,539.64)                                    | 582.51<br>(292.22 to<br>1,038.54)                                  | 1,319.07<br>(564.93 to<br>2,702.36)                                    | 9.35<br>(6.52 to<br>12.42)                                    | 22.61<br>(10.68 to<br>41.36)                                  | 16.20<br>(8.26 to<br>27.93)                                   | 35.89<br>(15.50 to<br>70.58)                                  |
| Other pharynx cancer                                                    | 721.08<br>(509.60 to<br>876.91)                                  | 1,285.34<br>(755.70 to<br>2,068.31)                                  | 1,109.86<br>(679.67 to<br>1,708.90)                                | 1,585.14<br>(882.19 to<br>2,577.44)                                    | 24.16<br>(19.33 to<br>29.04)                                  | 47.33<br>(28.77 to<br>73.92)                                  | 42.07<br>(26.70 to<br>64.20)                                  | 56.42<br>(31.92 to<br>91.60)                                  |



|                                      |                                          |                                          |                                          |                                          |                                 |                                       |                                       |                                       |
|--------------------------------------|------------------------------------------|------------------------------------------|------------------------------------------|------------------------------------------|---------------------------------|---------------------------------------|---------------------------------------|---------------------------------------|
|                                      | 3,915.17<br>(3,278.80 to<br>4,608.98)    | 7,868.99<br>(4,216.50 to<br>14,414.35)   | 6,225.04<br>(3,462.39 to<br>11,072.48)   | 11,108.74<br>(5,502.81 to<br>21,295.89)  | 140.85<br>(120.45 to<br>164.69) | 291.50<br>(161.56 to<br>513.94)       | 239.37<br>(139.24 to<br>408.83)       | 393.71<br>(203.42 to<br>717.26)       |
| Esophageal cancer                    | 11,363.56<br>(9,635.03 to<br>13,265.26)  | 16,921.52<br>(12,961.32 to<br>22,645.13) | 16,053.37<br>(12,326.36 to<br>21,265.91) | 18,419.58<br>(13,891.43 to<br>25,039.85) | 420.71<br>(360.96 to<br>489.66) | 691.08<br>(552.58 to<br>887.36)       | 678.40<br>(547.03 to<br>866.79)       | 721.02<br>(568.25 to<br>948.25)       |
| Stomach cancer                       | 6,687.42<br>(5,470.26 to<br>8,367.12)    | 18,301.76<br>(12,432.18 to<br>25,828.73) | 18,576.18<br>(12,646.92 to<br>25,899.67) | 17,989.28<br>(11,896.12 to<br>25,543.59) | 240.76<br>(199.40 to<br>299.78) | 740.25<br>(527.92 to<br>1,015.06)     | 777.29<br>(552.83 to<br>1,055.22)     | 696.89<br>(492.23 to<br>964.96)       |
| Colon and rectum cancer              | 22,366.83<br>(18,236.81 to<br>28,106.91) | 57,069.78<br>(38,644.80 to<br>86,433.16) | 51,199.09<br>(35,820.52 to<br>75,034.00) | 63,047.30<br>(41,830.70 to<br>99,692.69) | 652.33<br>(536.96 to<br>801.84) | 1,815.87<br>(1,302.06 to<br>2,657.77) | 1,667.60<br>(1,231.97 to<br>2,357.66) | 1,939.90<br>(1,359.23 to<br>2,941.73) |
| Liver cancer                         | 13,074.21<br>(10,500.53 to<br>16,664.08) | 32,849.64<br>(22,269.39 to<br>49,936.72) | 29,754.84<br>(20,766.19 to<br>44,192.43) | 35,636.33<br>(23,313.56 to<br>56,510.16) | 368.81<br>(301.66 to<br>459.76) | 1,009.14<br>(723.25 to<br>1,457.43)   | 934.09<br>(685.12 to<br>1,325.87)     | 1,061.07<br>(731.10 to<br>1,611.36)   |
| Liver cancer due to hepatitis B      | 1,510.95<br>(1,010.52 to<br>2,083.62)    | 4,229.23<br>(2,586.04 to<br>6,608.87)    | 3,869.36<br>(2,385.77 to<br>5,906.46)    | 4,453.46<br>(2,680.33 to<br>7,166.66)    | 55.60<br>(37.82 to<br>77.06)    | 168.76<br>(108.82 to<br>255.49)       | 159.93<br>(103.98 to<br>237.86)       | 170.31<br>(105.65 to<br>261.11)       |
| Liver cancer due to hepatitis C      | 2,092.26<br>(1,594.48 to<br>2,725.18)    | 5,976.23<br>(3,947.41 to<br>9,427.34)    | 4,973.30<br>(3,379.89 to<br>7,649.26)    | 7,426.49<br>(4,632.34 to<br>12,405.18)   | 69.81<br>(53.65 to<br>89.65)    | 207.14<br>(141.67 to<br>308.61)       | 177.99<br>(126.69 to<br>258.11)       | 247.01<br>(161.84 to<br>386.01)       |
| Liver cancer due to alcohol use      | 5,689.41<br>(4,461.15 to<br>7,455.81)    | 14,014.68<br>(9,275.22 to<br>21,614.20)  | 12,601.59<br>(8,521.96 to<br>18,868.11)  | 15,531.01<br>(9,856.94 to<br>24,974.49)  | 158.12<br>(124.82 to<br>202.62) | 430.84<br>(293.17 to<br>641.04)       | 395.59<br>(275.70 to<br>573.38)       | 461.51<br>(301.62 to<br>706.90)       |
| Liver cancer due to other causes     | 1,513.93<br>(1,018.73 to<br>2,102.08)    | 2,800.44<br>(1,890.71 to<br>3,998.09)    | 2,945.65<br>(1,983.14 to<br>4,248.81)    | 2,612.60<br>(1,771.58 to<br>3,723.67)    | 60.69<br>(41.18 to<br>83.69)    | 121.23<br>(84.98 to<br>169.71)        | 130.79<br>(91.09 to<br>183.08)        | 109.66<br>(75.70 to<br>151.83)        |
| Gallbladder and biliary tract cancer | 4,346.40<br>(3,561.63 to<br>5,305.79)    | 12,966.30<br>(9,909.83 to<br>16,911.76)  | 13,339.14<br>(10,183.75 to<br>17,660.64) | 12,499.31<br>(9,551.51 to<br>16,304.86)  | 173.99<br>(141.89 to<br>212.25) | 552.89<br>(432.78 to<br>712.14)       | 584.42<br>(457.66 to<br>748.63)       | 514.46<br>(399.02 to<br>657.91)       |
| Pancreatic cancer                    | 1,184.70<br>(886.63 to<br>1,447.98)      | 2,339.89<br>(1,247.06 to<br>4,236.26)    | 1,589.41<br>(932.67 to<br>2,722.08)      | 3,806.19<br>(1,856.90 to<br>7,243.44)    | 43.34<br>(32.98 to<br>52.72)    | 88.54<br>(49.63 to<br>153.00)         | 62.15<br>(37.95 to<br>100.52)         | 138.79<br>(70.00 to<br>252.09)        |
| Larynx cancer                        | 8,558.11<br>(7,118.62 to<br>10,347.95)   | 20,674.25<br>(12,399.90 to<br>33,492.40) | 12,614.71<br>(8,095.99 to<br>19,549.37)  | 30,532.05<br>(17,623.31 to<br>51,627.67) | 329.59<br>(277.54 to<br>391.33) | 831.60<br>(525.42 to<br>1,276.88)     | 525.81<br>(352.98 to<br>769.66)       | 1,184.10<br>(727.87 to<br>1,889.75)   |
| Tracheal, bronchus, and lung cancer  | 429.30<br>(330.35 to<br>613.92)          | 1,180.87<br>(890.84 to<br>1,733.89)      | 1,305.71<br>(978.37 to<br>1,946.35)      | 1,035.75<br>(785.23 to<br>1,520.66)      | 14.33<br>(11.09 to<br>20.26)    | 45.07<br>(35.28 to<br>62.76)          | 51.55<br>(40.20 to<br>71.93)          | 37.88<br>(29.71 to<br>52.79)          |
| Malignant skin melanoma              | 389.10<br>(322.42 to<br>463.45)          | 921.55<br>(735.94 to<br>1,177.31)        | 908.00<br>(717.34 to<br>1,169.04)        | 950.80<br>(759.69 to<br>1,206.88)        | 12.87<br>(11.12 to<br>14.86)    | 36.17<br>(31.58 to<br>41.79)          | 37.39<br>(32.43 to<br>43.76)          | 35.10<br>(30.47 to<br>40.56)          |
| Non-melanoma skin cancer             | 11,442.26<br>(8,789.32 to<br>14,727.93)  | 25,389.08<br>(17,394.39 to<br>36,312.92) | 24,758.03<br>(17,012.83 to<br>34,924.75) | 26,343.00<br>(17,869.28 to<br>37,872.84) | 350.28<br>(266.87 to<br>447.09) | 864.32<br>(599.72 to<br>1,198.29)     | 858.79<br>(596.51 to<br>1,190.97)     | 874.91<br>(598.60 to<br>1,258.74)     |
| Breast cancer                        | 13,084.67<br>(8,154.35 to<br>17,232.41)  | 20,408.35<br>(12,327.79 to<br>29,182.95) | 19,103.69<br>(11,351.08 to<br>27,513.30) | 22,277.46<br>(13,294.72 to<br>31,753.38) | 402.02<br>(250.75 to<br>529.08) | 671.27<br>(413.97 to<br>928.03)       | 639.27<br>(387.43 to<br>888.48)       | 718.08<br>(439.67 to<br>1,001.64)     |
| Cervical cancer                      | 1,603.91<br>(1,150.88 to<br>2,087.17)    | 3,284.75<br>(2,294.04 to<br>4,453.56)    | 3,097.76<br>(2,135.26 to<br>4,217.22)    | 3,549.50<br>(2,468.95 to<br>4,786.82)    | 61.16<br>(43.84 to<br>79.69)    | 138.39<br>(99.50 to<br>180.66)        | 134.01<br>(96.47 to<br>176.83)        | 144.73<br>(104.67 to<br>187.89)       |
| Uterine cancer                       | 2,130.21<br>(1,594.12 to<br>2,698.46)    | 5,763.29<br>(3,982.95 to<br>8,143.91)    | 5,977.67<br>(4,165.59 to<br>8,280.86)    | 5,265.27<br>(3,626.64 to<br>7,399.68)    | 66.62<br>(49.23 to<br>84.50)    | 196.14<br>(137.03 to<br>275.54)       | 206.18<br>(145.36 to<br>283.61)       | 176.07<br>(123.92 to<br>245.23)       |
| Ovarian cancer                       | 5,215.61<br>(3,195.09 to<br>6,712.88)    | 15,528.54<br>(9,675.87 to<br>19,817.36)  | 17,104.35<br>(10,762.75 to<br>21,829.31) | 13,713.66<br>(8,431.24 to<br>17,264.73)  | 277.63<br>(169.89 to<br>355.62) | 878.78<br>(555.63 to<br>1,092.91)     | 999.52<br>(638.85 to<br>1,237.97)     | 747.31<br>(459.97 to<br>935.00)       |
| Prostate cancer                      | 449.41<br>(291.41 to<br>881.08)          | 687.24<br>(400.82 to<br>1,435.26)        | 665.68<br>(385.02 to<br>1,386.67)        | 728.03<br>(424.38 to<br>1,521.29)        | 9.70<br>(6.33 to<br>18.56)      | 16.21<br>(9.77 to<br>32.55)           | 15.94<br>(9.57 to<br>32.24)           | 16.75<br>(10.23 to<br>33.88)          |
| Testicular cancer                    |                                          |                                          |                                          |                                          |                                 |                                       |                                       |                                       |

Togo

| Cause | YLLs (actual counts) |               |                      |                     | Deaths (actual counts) |               |                      |                     |
|-------|----------------------|---------------|----------------------|---------------------|------------------------|---------------|----------------------|---------------------|
|       | 2016                 | 2040 Forecast | 2040 Better Scenario | 2040 Worse Scenario | 2016                   | 2040 Forecast | 2040 Better Scenario | 2040 Worse Scenario |



| Cardiomyopathy and myocarditis                      | 3,886.24<br>(3,015.07 to<br>5,003.59)             | 7,780.63<br>(5,148.75 to<br>12,206.82)             | 7,859.79<br>(5,216.66 to<br>12,412.01)             | 8,128.59<br>(5,405.32 to<br>12,837.52)             | 101.21<br>(78.89 to<br>128.71)                 | 252.68<br>(174.22 to<br>366.10)                | 265.97<br>(183.18 to<br>386.90)                | 247.32<br>(172.01 to<br>366.76)                |
|-----------------------------------------------------|---------------------------------------------------|----------------------------------------------------|----------------------------------------------------|----------------------------------------------------|------------------------------------------------|------------------------------------------------|------------------------------------------------|------------------------------------------------|
| Myocarditis                                         | 889.90<br>(632.45 to<br>1,215.00)                 | 1,274.26<br>(781.39 to<br>2,001.74)                | 1,234.53<br>(743.58 to<br>1,954.19)                | 1,403.12<br>(866.05 to<br>2,194.96)                | 17.14<br>(12.37 to<br>23.25)                   | 30.30<br>(20.30 to<br>43.98)                   | 30.80<br>(20.44 to<br>45.18)                   | 31.11<br>(20.86 to<br>45.61)                   |
| <b>Togo</b>                                         |                                                   |                                                    |                                                    |                                                    |                                                |                                                |                                                |                                                |
| Cause                                               | YLLs (actual counts)                              |                                                    |                                                    |                                                    | Deaths (actual counts)                         |                                                |                                                |                                                |
|                                                     | 2016                                              | 2040 Forecast                                      | 2040 Better Scenario                               | 2040 Worse Scenario                                | 2016                                           | 2040 Forecast                                  | 2040 Better Scenario                           | 2040 Worse Scenario                            |
| Alcoholic cardiomyopathy                            | 284.01<br>(193.17 to<br>415.00)                   | 678.77<br>(403.00 to<br>1,092.78)                  | 693.38<br>(402.02 to<br>1,106.40)                  | 680.19<br>(416.10 to<br>1,066.58)                  | 8.31<br>(5.67 to<br>11.90)                     | 21.22<br>(13.14 to<br>32.73)                   | 22.01<br>(13.23 to<br>33.56)                   | 20.86<br>(13.29 to<br>31.19)                   |
| Other cardiomyopathy                                | 2,712.33<br>(2,127.61 to<br>3,456.40)             | 5,827.60<br>(3,750.46 to<br>9,592.48)              | 5,931.88<br>(3,837.95 to<br>9,685.25)              | 6,045.28<br>(3,862.95 to<br>10,183.17)             | 75.76<br>(59.62 to<br>96.36)                   | 201.16<br>(135.90 to<br>305.79)                | 213.16<br>(144.25 to<br>318.01)                | 195.36<br>(132.76 to<br>308.48)                |
| Atrial fibrillation and flutter                     | 624.21<br>(468.44 to<br>804.52)                   | 2,060.89<br>(1,520.15 to<br>2,734.61)              | 2,162.04<br>(1,597.87 to<br>2,860.06)              | 1,954.02<br>(1,439.99 to<br>2,635.51)              | 47.14<br>(35.39 to<br>60.71)                   | 178.40<br>(131.34 to<br>236.19)                | 198.89<br>(147.86 to<br>260.68)                | 157.02<br>(114.01 to<br>211.74)                |
| Aortic aneurysm                                     | 1,154.40<br>(898.82 to<br>1,491.91)               | 2,581.67<br>(1,838.04 to<br>3,836.90)              | 2,527.44<br>(1,822.40 to<br>3,700.06)              | 2,573.99<br>(1,801.71 to<br>3,894.42)              | 44.25<br>(35.65 to<br>55.96)                   | 112.71<br>(85.12 to<br>156.42)                 | 116.25<br>(88.89 to<br>159.01)                 | 106.32<br>(79.37 to<br>148.64)                 |
| Peripheral artery disease                           | 42.74<br>(29.46 to<br>62.73)                      | 212.82<br>(128.32 to<br>328.16)                    | 230.34<br>(138.47 to<br>359.88)                    | 181.60<br>(113.43 to<br>284.14)                    | 2.47<br>(1.70 to<br>3.60)                      | 14.00<br>(8.84 to<br>20.66)                    | 16.20<br>(10.10 to<br>24.00)                   | 11.13<br>(7.00 to<br>16.36)                    |
| Endocarditis                                        | 3,221.22<br>(2,481.80 to<br>4,189.10)             | 5,784.17<br>(3,884.89 to<br>8,659.46)              | 5,649.44<br>(3,794.92 to<br>8,365.30)              | 6,544.60<br>(4,456.87 to<br>9,850.55)              | 80.54<br>(63.96 to<br>101.79)                  | 192.99<br>(133.98 to<br>268.80)                | 196.43<br>(135.73 to<br>273.94)                | 199.98<br>(138.68 to<br>285.75)                |
| Other cardiovascular and circulatory diseases       | 23,337.01<br>(17,902.40 to<br>35,704.95)          | 45,032.47<br>(31,774.48 to<br>70,714.87)           | 39,033.54<br>(27,923.64 to<br>59,548.93)           | 54,828.65<br>(37,402.43 to<br>86,918.55)           | 706.55<br>(537.04 to<br>1,134.11)              | 1,752.13<br>(1,287.91 to<br>2,308.09)          | 1,605.58<br>(1,178.26 to<br>2,523.35)          | 1,976.57<br>(1,408.69 to<br>3,249.67)          |
| <b>Chronic respiratory diseases</b>                 | <b>36,212.82<br/>(31,153.20 to<br/>43,407.26)</b> | <b>49,196.45<br/>(31,995.90 to<br/>77,866.88)</b>  | <b>33,363.49<br/>(23,275.10 to<br/>48,832.83)</b>  | <b>73,573.82<br/>(44,180.59 to<br/>123,847.57)</b> | <b>1,296.58<br/>(1,110.90 to<br/>1,571.91)</b> | <b>2,046.64<br/>(1,398.42 to<br/>3,182.20)</b> | <b>1,410.93<br/>(1,029.07 to<br/>2,018.54)</b> | <b>2,922.58<br/>(1,852.53 to<br/>4,853.90)</b> |
| Chronic obstructive pulmonary disease               | 19,966.90<br>(16,766.76 to<br>24,668.45)          | 30,170.25<br>(16,412.70 to<br>55,753.45)           | 17,109.62<br>(10,397.89 to<br>28,632.11)           | 51,220.35<br>(26,232.20 to<br>96,728.76)           | 822.72<br>(682.38 to<br>1,021.40)              | 1,388.55<br>(811.74 to<br>2,471.91)            | 831.18<br>(535.33 to<br>1,333.96)              | 2,193.60<br>(1,218.44 to<br>4,104.39)          |
| Pneumoconiosis                                      | 52.58<br>(38.92 to<br>72.61)                      | 67.94<br>(47.77 to<br>97.03)                       | 64.68<br>(44.62 to<br>94.10)                       | 69.63<br>(49.29 to<br>97.53)                       | 1.71<br>(1.29 to<br>2.31)                      | 2.83<br>(2.12 to<br>3.84)                      | 2.73<br>(2.04 to<br>3.72)                      | 2.81<br>(2.10 to<br>3.82)                      |
| Silicosis                                           | 5.15<br>(3.00 to<br>8.82)                         | 4.58<br>(2.51 to<br>8.39)                          | 4.49<br>(2.46 to<br>8.19)                          | 4.74<br>(2.65 to<br>8.68)                          | 0.17<br>(0.10 to<br>0.28)                      | 0.18<br>(0.11 to<br>0.31)                      | 0.18<br>(0.11 to<br>0.32)                      | 0.18<br>(0.11 to<br>0.31)                      |
| Asbestosis                                          | 13.10<br>(8.95 to<br>19.45)                       | 19.89<br>(12.61 to<br>31.57)                       | 20.53<br>(12.85 to<br>32.54)                       | 19.24<br>(12.39 to<br>30.39)                       | 0.31<br>(0.22 to<br>0.45)                      | 0.56<br>(0.37 to<br>0.85)                      | 0.59<br>(0.38 to<br>0.91)                      | 0.52<br>(0.35 to<br>0.80)                      |
| Coal workers pneumoconiosis                         | 2.71<br>(1.42 to<br>4.88)                         | 3.04<br>(1.56 to<br>5.61)                          | 2.39<br>(1.21 to<br>4.65)                          | 3.83<br>(2.00 to<br>7.13)                          | 0.10<br>(0.05 to<br>0.17)                      | 0.13<br>(0.07 to<br>0.26)                      | 0.10<br>(0.05 to<br>0.19)                      | 0.16<br>(0.08 to<br>0.30)                      |
| Other pneumoconiosis                                | 31.62<br>(23.20 to<br>43.70)                      | 40.42<br>(28.60 to<br>57.50)                       | 37.26<br>(25.88 to<br>53.80)                       | 41.82<br>(29.86 to<br>60.00)                       | 1.14<br>(0.86 to<br>1.53)                      | 1.96<br>(1.43 to<br>2.71)                      | 1.86<br>(1.35 to<br>2.57)                      | 1.95<br>(1.41 to<br>2.68)                      |
| Asthma                                              | 11,566.23<br>(9,097.13 to<br>14,633.53)           | 10,551.07<br>(6,856.35 to<br>15,913.23)            | 8,171.37<br>(5,431.14 to<br>12,001.70)             | 12,844.91<br>(8,176.15 to<br>19,550.85)            | 350.65<br>(275.43 to<br>441.10)                | 388.41<br>(265.28 to<br>572.32)                | 313.17<br>(221.72 to<br>445.02)                | 445.08<br>(293.97 to<br>666.58)                |
| Interstitial lung disease and pulmonary sarcoidosis | 298.78<br>(205.30 to<br>451.05)                   | 855.31<br>(552.86 to<br>1,327.63)                  | 954.84<br>(622.98 to<br>1,488.38)                  | 746.68<br>(486.71 to<br>1,164.16)                  | 10.58<br>(7.17 to<br>15.81)                    | 34.20<br>(23.05 to<br>52.24)                   | 39.38<br>(26.27 to<br>60.07)                   | 28.58<br>(19.27 to<br>43.97)                   |
| Other chronic respiratory diseases                  | 4,328.33<br>(2,747.39 to<br>5,837.45)             | 7,551.89<br>(4,861.02 to<br>11,404.55)             | 7,062.98<br>(4,730.93 to<br>10,502.90)             | 8,692.25<br>(5,433.25 to<br>13,260.48)             | 110.92<br>(69.98 to<br>152.31)                 | 232.65<br>(149.36 to<br>338.25)                | 224.47<br>(147.86 to<br>315.13)                | 252.51<br>(156.79 to<br>376.57)                |
| <b>Cirrhosis and other chronic liver diseases</b>   | <b>42,299.54<br/>(24,693.62 to<br/>61,530.57)</b> | <b>85,331.63<br/>(47,350.54 to<br/>134,085.63)</b> | <b>80,525.84<br/>(44,745.33 to<br/>127,489.61)</b> | <b>93,963.54<br/>(52,154.55 to<br/>147,622.77)</b> | <b>1,172.57<br/>(697.18 to<br/>1,695.04)</b>   | <b>2,636.89<br/>(1,529.61 to<br/>3,989.62)</b> | <b>2,535.20<br/>(1,476.11 to<br/>3,829.94)</b> | <b>2,824.48<br/>(1,649.12 to<br/>4,267.60)</b> |

|                                                                |                                                               |                                                               |                                                               |                                                               |                                                          |                                                            |                                                            |                                                            |
|----------------------------------------------------------------|---------------------------------------------------------------|---------------------------------------------------------------|---------------------------------------------------------------|---------------------------------------------------------------|----------------------------------------------------------|------------------------------------------------------------|------------------------------------------------------------|------------------------------------------------------------|
|                                                                | 17,854.93<br>(10,075.61 to<br>26,892.32)                      | 38,160.21<br>(20,543.86 to<br>61,578.63)                      | 36,870.75<br>(19,712.89 to<br>59,299.79)                      | 40,047.14<br>(21,464.37 to<br>64,456.11)                      | 512.02<br>(296.62 to<br>748.65)                          | 1,193.18<br>(682.88 to<br>1,858.87)                        | 1,175.55<br>(665.89 to<br>1,837.86)                        | 1,220.87<br>(695.02 to<br>1,883.88)                        |
| Cirrhosis and other chronic liver diseases due to hepatitis B  | 7,654.59<br>(3,745.25 to<br>12,815.51)                        | 16,817.93<br>(7,839.34 to<br>29,508.49)                       | 16,222.95<br>(7,566.45 to<br>28,325.23)                       | 17,676.31<br>(8,179.68 to<br>31,130.52)                       | 222.56<br>(108.71 to<br>368.18)                          | 523.08<br>(257.33 to<br>886.73)                            | 512.84<br>(252.98 to<br>873.77)                            | 538.34<br>(261.26 to<br>909.87)                            |
| Cirrhosis and other chronic liver diseases due to hepatitis C  | 8,701.01<br>(4,887.17 to<br>13,416.33)                        | 18,114.17<br>(9,579.14 to<br>29,620.60)                       | 15,804.56<br>(8,297.81 to<br>25,959.11)                       | 22,364.67<br>(11,973.52 to<br>36,489.07)                      | 261.25<br>(150.51 to<br>393.69)                          | 587.46<br>(329.67 to<br>929.44)                            | 523.27<br>(293.21 to<br>825.70)                            | 707.83<br>(402.04 to<br>1,115.54)                          |
| Cirrhosis and other chronic liver diseases due to alcohol use  | 8,089.01<br>(5,043.46 to<br>11,447.30)                        | 12,239.31<br>(7,026.84 to<br>19,301.93)                       | 11,627.58<br>(6,633.31 to<br>18,087.64)                       | 13,875.42<br>(7,979.58 to<br>21,641.00)                       | 176.74<br>(109.96 to<br>247.96)                          | 333.18<br>(195.71 to<br>495.32)                            | 323.54<br>(190.59 to<br>484.36)                            | 357.43<br>(213.28 to<br>536.42)                            |
| Cirrhosis and other chronic liver diseases due to other causes | <b>43,989.08</b><br><b>(35,195.54 to</b><br><b>53,590.65)</b> | <b>61,474.03</b><br><b>(46,102.55 to</b><br><b>82,948.44)</b> | <b>56,220.89</b><br><b>(41,947.58 to</b><br><b>75,663.12)</b> | <b>71,813.68</b><br><b>(52,840.58 to</b><br><b>98,926.33)</b> | <b>1,176.63</b><br><b>(956.03 to</b><br><b>1,423.51)</b> | <b>2,106.95</b><br><b>(1,659.73 to</b><br><b>2,652.66)</b> | <b>2,003.36</b><br><b>(1,587.33 to</b><br><b>2,536.35)</b> | <b>2,298.03</b><br><b>(1,784.55 to</b><br><b>2,941.19)</b> |
| Digestive diseases                                             | 7,884.09<br>(6,228.79 to<br>9,740.32)                         | 7,079.11<br>(5,168.14 to<br>9,318.09)                         | 5,984.47<br>(4,234.15 to<br>8,050.54)                         | 8,925.45<br>(6,471.72 to<br>11,973.47)                        | 228.90<br>(180.01 to<br>282.05)                          | 259.01<br>(193.96 to<br>333.15)                            | 226.71<br>(165.45 to<br>297.71)                            | 309.78<br>(230.68 to<br>394.74)                            |
| Peptic ulcer disease                                           | <b>Togo</b>                                                   |                                                               |                                                               |                                                               |                                                          |                                                            |                                                            |                                                            |
| Cause                                                          | YLLs (actual counts)                                          |                                                               |                                                               |                                                               | Deaths (actual counts)                                   |                                                            |                                                            |                                                            |
|                                                                | 2016                                                          | 2040 Forecast                                                 | 2040 Better Scenario                                          | 2040 Worse Scenario                                           | 2016                                                     | 2040 Forecast                                              | 2040 Better Scenario                                       | 2040 Worse Scenario                                        |
| Gastritis and duodenitis                                       | 2,331.76<br>(1,627.14 to<br>3,218.84)                         | 3,503.70<br>(2,272.23 to<br>5,543.54)                         | 3,306.59<br>(2,121.50 to<br>5,280.57)                         | 3,858.54<br>(2,479.15 to<br>6,023.46)                         | 54.59<br>(39.38 to<br>74.82)                             | 94.64<br>(66.15 to<br>138.86)                              | 91.21<br>(62.53 to<br>135.22)                              | 100.70<br>(69.35 to<br>149.38)                             |
| Appendicitis                                                   | 3,542.42<br>(2,567.23 to<br>5,159.56)                         | 3,868.75<br>(2,822.31 to<br>5,170.53)                         | 3,501.79<br>(2,501.34 to<br>4,742.62)                         | 4,649.27<br>(3,332.95 to<br>6,443.01)                         | 89.96<br>(68.45 to<br>115.87)                            | 135.93<br>(103.38 to<br>169.83)                            | 128.49<br>(95.32 to<br>163.59)                             | 151.01<br>(114.61 to<br>191.90)                            |
| Paralytic ileus and intestinal obstruction                     | 14,137.29<br>(10,516.54 to<br>19,444.32)                      | 21,353.07<br>(15,834.36 to<br>29,288.64)                      | 20,964.02<br>(15,465.33 to<br>28,705.25)                      | 23,450.96<br>(17,249.62 to<br>32,847.62)                      | 349.93<br>(263.56 to<br>469.89)                          | 739.46<br>(573.79 to<br>991.77)                            | 756.18<br>(584.04 to<br>1,014.11)                          | 742.26<br>(567.27 to<br>993.09)                            |
| Inguinal, femoral, and abdominal hernia                        | 1,646.24<br>(1,132.67 to<br>2,285.52)                         | 1,964.94<br>(1,321.53 to<br>2,850.72)                         | 1,843.94<br>(1,239.98 to<br>2,708.12)                         | 2,193.29<br>(1,474.63 to<br>3,176.75)                         | 52.01<br>(36.25 to<br>72.29)                             | 75.28<br>(52.86 to<br>108.20)                              | 73.84<br>(51.26 to<br>107.07)                              | 78.75<br>(54.81 to<br>112.42)                              |
| Inflammatory bowel disease                                     | 1,065.75<br>(683.07 to<br>1,749.48)                           | 2,015.39<br>(1,336.85 to<br>3,175.11)                         | 2,038.72<br>(1,352.51 to<br>3,214.87)                         | 2,037.44<br>(1,333.02 to<br>3,227.63)                         | 28.76<br>(19.35 to<br>44.02)                             | 67.09<br>(47.00 to<br>102.53)                              | 70.03<br>(48.81 to<br>106.54)                              | 64.34<br>(44.44 to<br>98.49)                               |
| Vascular intestinal disorders                                  | 737.78<br>(490.47 to<br>1,128.78)                             | 1,355.38<br>(896.15 to<br>2,023.75)                           | 1,350.62<br>(882.47 to<br>2,022.98)                           | 1,397.36<br>(924.58 to<br>2,082.25)                           | 25.95<br>(17.69 to<br>36.78)                             | 63.10<br>(42.83 to<br>90.55)                               | 65.72<br>(44.53 to<br>94.78)                               | 60.68<br>(41.59 to<br>86.61)                               |
| Gallbladder and biliary diseases                               | 1,887.25<br>(1,407.39 to<br>2,411.09)                         | 2,899.78<br>(1,734.05 to<br>4,564.13)                         | 2,206.42<br>(1,381.37 to<br>3,379.60)                         | 3,498.44<br>(2,077.56 to<br>5,528.72)                         | 57.92<br>(43.65 to<br>75.26)                             | 114.52<br>(70.66 to<br>178.12)                             | 89.90<br>(59.08 to<br>133.02)                              | 129.96<br>(79.51 to<br>204.75)                             |
| Pancreatitis                                                   | 5,249.80<br>(3,863.51 to<br>6,725.48)                         | 9,797.95<br>(4,710.46 to<br>20,606.94)                        | 7,967.00<br>(4,100.47 to<br>16,029.44)                        | 12,996.21<br>(5,662.34 to<br>29,143.96)                       | 139.66<br>(105.52 to<br>175.78)                          | 286.36<br>(144.17 to<br>579.27)                            | 239.58<br>(131.14 to<br>465.26)                            | 368.35<br>(169.53 to<br>807.15)                            |
| Other digestive diseases                                       | 5,506.69<br>(3,967.60 to<br>7,810.44)                         | 7,635.96<br>(5,239.91 to<br>11,157.71)                        | 7,057.30<br>(4,676.36 to<br>10,477.67)                        | 8,806.73<br>(6,119.35 to<br>12,752.05)                        | 148.94<br>(110.81 to<br>206.39)                          | 271.57<br>(190.95 to<br>376.28)                            | 261.69<br>(180.90 to<br>364.72)                            | 292.19<br>(207.66 to<br>408.42)                            |
| Neurological disorders                                         | <b>17,317.47</b><br><b>(14,665.31 to</b><br><b>20,206.20)</b> | <b>36,194.78</b><br><b>(29,033.70 to</b><br><b>45,140.81)</b> | <b>35,460.41</b><br><b>(28,974.25 to</b><br><b>43,739.98)</b> | <b>37,850.76</b><br><b>(29,486.77 to</b><br><b>48,501.36)</b> | <b>635.36</b><br><b>(548.00 to</b><br><b>733.62)</b>     | <b>2,038.09</b><br><b>(1,638.81 to</b><br><b>2,593.35)</b> | <b>2,177.62</b><br><b>(1,812.78 to</b><br><b>2,660.92)</b> | <b>1,812.26</b><br><b>(1,449.94 to</b><br><b>2,323.48)</b> |
| Alzheimer's disease and other dementias                        | 4,793.20<br>(3,835.47 to<br>5,908.60)                         | 17,410.28<br>(13,034.20 to<br>23,721.87)                      | 17,985.77<br>(14,177.50 to<br>23,227.31)                      | 15,245.03<br>(11,112.83 to<br>21,444.48)                      | 376.04<br>(303.12 to<br>462.54)                          | 1,525.54<br>(1,116.42 to<br>2,093.37)                      | 1,662.46<br>(1,283.68 to<br>2,131.78)                      | 1,260.80<br>(885.48 to<br>1,795.59)                        |
| Parkinson's disease                                            | 443.00<br>(329.60 to<br>576.39)                               | 1,820.07<br>(1,373.37 to<br>2,339.16)                         | 2,187.38<br>(1,658.76 to<br>2,794.39)                         | 1,428.60<br>(1,060.74 to<br>1,842.18)                         | 30.56<br>(22.54 to<br>39.68)                             | 139.30<br>(102.71 to<br>182.76)                            | 173.67<br>(130.92 to<br>225.42)                            | 104.56<br>(75.21 to<br>139.25)                             |
| Epilepsy                                                       | 9,936.43<br>(8,110.07 to<br>11,939.26)                        | 13,058.98<br>(8,567.76 to<br>20,207.36)                       | 11,203.15<br>(7,417.63 to<br>17,056.03)                       | 17,120.70<br>(11,000.41 to<br>26,357.30)                      | 188.15<br>(155.99 to<br>221.42)                          | 283.11<br>(191.81 to<br>417.35)                            | 245.72<br>(167.48 to<br>358.41)                            | 358.76<br>(237.76 to<br>536.89)                            |
| Multiple sclerosis                                             | 152.49<br>(103.59 to<br>223.49)                               | 356.55<br>(227.89 to<br>557.65)                               | 369.83<br>(235.49 to<br>579.61)                               | 335.92<br>(216.06 to<br>527.89)                               | 4.01<br>(2.68 to<br>5.82)                                | 10.11<br>(6.49 to<br>15.57)                                | 10.62<br>(6.87 to<br>16.26)                                | 9.36<br>(6.08 to<br>14.62)                                 |

|                              |                                                  |                                                    |                                                    |                                                    |                                           |                                            |                                            |                                            |
|------------------------------|--------------------------------------------------|----------------------------------------------------|----------------------------------------------------|----------------------------------------------------|-------------------------------------------|--------------------------------------------|--------------------------------------------|--------------------------------------------|
| Motor neuron disease         | 229.78<br>(139.78 to 318.45)                     | 611.72<br>(374.88 to 865.68)                       | 661.39<br>(404.03 to 943.88)                       | 564.21<br>(344.50 to 787.81)                       | 5.88<br>(7.90)                            | 18.74<br>(11.55 to 25.77)                  | 20.49<br>(12.90 to 28.46)                  | 16.78<br>(10.36 to 22.76)                  |
| Other neurological disorders | 1,762.56<br>(1,072.13 to 2,565.93)               | 2,937.17<br>(1,882.12 to 4,142.08)                 | 3,052.88<br>(1,982.28 to 4,281.22)                 | 3,156.31<br>(1,968.09 to 4,537.77)                 | 30.72<br>(19.68 to 42.85)                 | 61.29<br>(41.55 to 83.58)                  | 64.66<br>(44.25 to 87.99)                  | 62.00<br>(41.24 to 85.14)                  |
| <b>Mental disorders</b>      | <b>6,276.28</b><br><b>(4,144.30 to 8,003.59)</b> | <b>13,397.27</b><br><b>(8,235.67 to 19,992.27)</b> | <b>13,366.27</b><br><b>(8,215.99 to 19,966.78)</b> | <b>13,636.47</b><br><b>(8,356.63 to 20,227.02)</b> | <b>142.56</b><br><b>(97.40 to 180.07)</b> | <b>325.28</b><br><b>(209.33 to 452.31)</b> | <b>329.75</b><br><b>(212.38 to 458.53)</b> | <b>324.02</b><br><b>(208.17 to 453.53)</b> |
| Alcohol use disorders        | 2,433.81<br>(1,655.61 to 3,489.04)               | 4,399.28<br>(2,763.67 to 6,802.22)                 | 4,287.84<br>(2,677.26 to 6,761.91)                 | 4,598.95<br>(2,906.50 to 7,021.00)                 | 63.83<br>(44.90 to 89.11)                 | 125.15<br>(83.72 to 183.77)                | 124.30<br>(82.65 to 186.12)                | 127.87<br>(85.50 to 185.72)                |
| Drug use disorders           | 3,826.10<br>(2,055.61 to 5,224.17)               | 8,966.23<br>(4,714.24 to 14,246.59)                | 9,046.52<br>(4,825.19 to 14,427.08)                | 9,004.81<br>(4,645.43 to 14,392.88)                | 78.43<br>(42.45 to 105.22)                | 199.54<br>(108.90 to 299.81)               | 204.85<br>(111.62 to 306.27)               | 195.54<br>(105.26 to 293.44)               |
| Opioid use disorders         | 3,575.60<br>(1,909.79 to 4,876.48)               | 8,196.64<br>(4,194.83 to 13,173.64)                | 8,248.84<br>(4,295.77 to 13,253.96)                | 8,257.30<br>(4,184.71 to 13,342.58)                | 70.86<br>(38.01 to 95.58)                 | 171.87<br>(91.14 to 262.80)                | 174.51<br>(93.77 to 268.03)                | 170.48<br>(89.17 to 261.59)                |
| Cocaine use disorders        | 50.06<br>(20.02 to 96.97)                        | 155.44<br>(63.45 to 310.50)                        | 151.14<br>(61.74 to 299.49)                        | 162.83<br>(64.95 to 327.82)                        | 1.31<br>(0.53 to 2.45)                    | 4.50<br>(1.89 to 8.29)                     | 4.48<br>(1.87 to 8.26)                     | 4.56<br>(1.89 to 8.45)                     |
| Amphetamine use disorders    | 26.18<br>(11.87 to 49.29)                        | 111.31<br>(48.19 to 227.45)                        | 105.69<br>(47.05 to 212.46)                        | 120.97<br>(51.59 to 245.98)                        | 0.70<br>(0.31 to 1.29)                    | 3.22<br>(1.40 to 6.08)                     | 3.14<br>(1.39 to 5.77)                     | 3.39<br>(1.46 to 6.50)                     |
| Other drug use disorders     | 174.26<br>(89.51 to 296.17)                      | 502.84<br>(259.37 to 881.92)                       | 540.85<br>(276.15 to 944.05)                       | 463.72<br>(238.27 to 814.30)                       | 5.56<br>(2.87 to 8.30)                    | 19.95<br>(10.65 to 29.36)                  | 22.73<br>(12.11 to 33.25)                  | 17.11<br>(9.32 to 25.41)                   |
| Eating disorders             | 16.37<br>(9.83 to 30.82)                         | 31.76<br>(16.76 to 57.48)                          | 31.91<br>(16.99 to 58.20)                          | 32.71<br>(16.87 to 58.60)                          | 0.30<br>(0.18 to 0.56)                    | 0.59<br>(0.31 to 1.06)                     | 0.60<br>(0.32 to 1.08)                     | 0.61<br>(0.31 to 1.07)                     |

**Togo**

| Cause                                                      | YLLs (actual counts)                                 |                                                        |                                                       |                                                        | Deaths (actual counts)                           |                                                  |                                                  |                                                  |
|------------------------------------------------------------|------------------------------------------------------|--------------------------------------------------------|-------------------------------------------------------|--------------------------------------------------------|--------------------------------------------------|--------------------------------------------------|--------------------------------------------------|--------------------------------------------------|
|                                                            | 2016                                                 | 2040 Forecast                                          | 2040 Better Scenario                                  | 2040 Worse Scenario                                    | 2016                                             | 2040 Forecast                                    | 2040 Better Scenario                             | 2040 Worse Scenario                              |
| <b>Diabetes, urogenital, blood, and endocrine diseases</b> | <b>85,967.16</b><br><b>(73,509.85 to 101,502.07)</b> | <b>137,058.20</b><br><b>(105,094.60 to 179,225.00)</b> | <b>121,078.31</b><br><b>(91,364.34 to 160,801.77)</b> | <b>171,963.49</b><br><b>(130,159.64 to 224,340.26)</b> | <b>2,168.52</b><br><b>(1,862.78 to 2,551.69)</b> | <b>4,797.25</b><br><b>(3,779.32 to 6,168.69)</b> | <b>4,332.18</b><br><b>(3,359.72 to 5,623.73)</b> | <b>5,701.49</b><br><b>(4,449.42 to 7,351.90)</b> |
| Diabetes mellitus                                          | 19,739.53<br>(16,450.49 to 24,649.11)                | 45,034.19<br>(27,642.68 to 71,734.86)                  | 37,773.70<br>(23,293.76 to 60,277.78)                 | 58,114.93<br>(35,382.32 to 93,953.90)                  | 769.92<br>(638.47 to 969.18)                     | 2,077.74<br>(1,383.33 to 3,122.85)               | 1,815.87<br>(1,212.66 to 2,748.43)               | 2,534.54<br>(1,667.72 to 3,853.73)               |
| Acute glomerulonephritis                                   | 54.09<br>(48.00 to 60.48)                            | 70.65<br>(54.75 to 92.68)                              | 65.32<br>(50.47 to 87.34)                             | 89.11<br>(68.98 to 116.21)                             | 0.89<br>(0.79 to 0.99)                           | 1.31<br>(1.04 to 1.68)                           | 1.22<br>(0.96 to 1.61)                           | 1.58<br>(1.25 to 2.02)                           |
| Chronic kidney disease                                     | 20,249.96<br>(15,796.50 to 26,941.23)                | 32,199.87<br>(21,005.97 to 49,962.32)                  | 26,606.18<br>(17,551.24 to 40,858.36)                 | 43,108.86<br>(27,819.04 to 67,321.46)                  | 544.54<br>(427.01 to 727.28)                     | 1,160.12<br>(759.29 to 1,792.41)                 | 978.12<br>(651.56 to 1,482.64)                   | 1,480.08<br>(944.26 to 2,279.19)                 |
| Chronic kidney disease due to diabetes mellitus            | 4,565.16<br>(3,388.19 to 6,293.86)                   | 9,600.24<br>(5,924.69 to 15,576.71)                    | 7,960.99<br>(5,027.88 to 12,892.05)                   | 12,513.12<br>(7,615.51 to 20,428.73)                   | 150.00<br>(206.84)                               | 377.75<br>(239.15 to 604.37)                     | 319.44<br>(206.69 to 508.17)                     | 477.29<br>(291.34 to 780.57)                     |
| Chronic kidney disease due to hypertension                 | 2,373.77<br>(1,756.91 to 3,252.75)                   | 5,118.53<br>(3,232.84 to 8,136.80)                     | 4,254.20<br>(2,714.80 to 6,620.17)                    | 6,591.85<br>(4,083.05 to 10,713.79)                    | 97.78<br>(72.76 to 133.76)                       | 261.67<br>(164.66 to 398.73)                     | 224.89<br>(146.16 to 343.83)                     | 321.19<br>(199.15 to 497.89)                     |
| Chronic kidney disease due to glomerulonephritis           | 6,339.35<br>(4,771.65 to 8,586.23)                   | 8,109.74<br>(5,221.71 to 12,777.24)                    | 6,664.33<br>(4,236.88 to 10,546.97)                   | 11,168.13<br>(7,126.32 to 17,505.77)                   | 136.45<br>(103.92 to 183.65)                     | 228.51<br>(148.71 to 352.95)                     | 189.32<br>(122.44 to 294.45)                     | 301.28<br>(194.40 to 473.97)                     |
| Chronic kidney disease due to other and unspecified causes | 6,971.67<br>(5,197.94 to 9,672.58)                   | 9,371.36<br>(5,998.36 to 14,732.14)                    | 7,726.66<br>(4,909.53 to 12,119.12)                   | 12,833.77<br>(8,075.82 to 19,789.26)                   | 160.31<br>(121.49 to 220.27)                     | 292.19<br>(185.56 to 450.52)                     | 244.47<br>(160.75 to 373.48)                     | 380.32<br>(242.79 to 591.79)                     |
| Urinary diseases and male infertility                      | 8,921.67<br>(7,633.16 to 10,334.30)                  | 18,206.76<br>(14,671.71 to 22,851.77)                  | 18,078.07<br>(14,387.38 to 23,005.75)                 | 19,352.47<br>(15,728.64 to 24,213.18)                  | 242.17<br>(208.25 to 279.15)                     | 668.11<br>(562.75 to 793.19)                     | 696.37<br>(581.72 to 837.88)                     | 651.21<br>(552.78 to 771.22)                     |
| Urinary tract infections                                   | 5,449.79<br>(4,486.81 to 6,589.07)                   | 13,612.41<br>(10,813.56 to 17,384.86)                  | 13,858.25<br>(10,922.02 to 17,867.49)                 | 14,035.09<br>(11,157.38 to 17,808.83)                  | 146.52<br>(119.80 to 178.28)                     | 515.62<br>(427.19 to 629.65)                     | 549.66<br>(452.21 to 673.51)                     | 486.58<br>(404.56 to 590.80)                     |

|                                                   |                                          |                                          |                                          |                                          |                                 |                                 |                                 |                                   |
|---------------------------------------------------|------------------------------------------|------------------------------------------|------------------------------------------|------------------------------------------|---------------------------------|---------------------------------|---------------------------------|-----------------------------------|
| Urolithiasis                                      | 193.37<br>(137.15 to<br>261.04)          | 393.33<br>(248.89 to<br>587.12)          | 381.04<br>(241.91 to<br>569.91)          | 442.36<br>(280.19 to<br>666.00)          | 3.65<br>(2.61 to<br>5.09)       | 8.73<br>(5.69 to<br>13.28)      | 8.74<br>(5.62 to<br>13.30)      | 9.22<br>(6.03 to<br>14.07)        |
| Other urinary diseases                            | 3,278.52<br>(2,591.48 to<br>3,973.60)    | 4,201.02<br>(2,857.15 to<br>5,855.69)    | 3,838.78<br>(2,567.83 to<br>5,500.19)    | 4,875.02<br>(3,439.29 to<br>6,780.79)    | 92.00<br>(72.13 to<br>113.64)   | 143.76<br>(101.73 to<br>190.71) | 137.97<br>(93.39 to<br>188.38)  | 155.41<br>(111.44 to<br>203.73)   |
| Gynecological diseases                            | 529.65<br>(380.95 to<br>695.76)          | 823.90<br>(534.03 to<br>1,209.08)        | 721.34<br>(469.82 to<br>1,069.31)        | 992.73<br>(647.10 to<br>1,465.47)        | 12.18<br>(8.65 to<br>16.10)     | 20.13<br>(13.40 to<br>28.88)    | 17.89<br>(11.96 to<br>26.12)    | 23.78<br>(15.85 to<br>34.30)      |
| Uterine fibroids                                  | 36.41<br>(19.23 to<br>63.21)             | 48.70<br>(24.15 to<br>87.15)             | 42.06<br>(20.56 to<br>78.55)             | 59.70<br>(29.13 to<br>109.14)            | 1.20<br>(0.61 to<br>1.99)       | 1.72<br>(0.89 to<br>3.00)       | 1.53<br>(0.78 to<br>2.76)       | 2.03<br>(1.04 to<br>3.50)         |
| Polycystic ovarian syndrome                       | 81.77<br>(14.49 to<br>173.75)            | 76.96<br>(12.47 to<br>193.21)            | 60.38<br>(9.85 to<br>152.31)             | 107.33<br>(17.31 to<br>264.33)           | 1.79<br>(0.34 to<br>3.77)       | 1.74<br>(0.29 to<br>4.34)       | 1.37<br>(0.23 to<br>3.43)       | 2.42<br>(0.41 to<br>5.99)         |
| Endometriosis                                     | 1.07<br>(0.42 to<br>2.89)                | 2.12<br>(0.72 to<br>6.08)                | 1.83<br>(0.62 to<br>5.35)                | 2.59<br>(0.90 to<br>7.47)                | 0.02<br>(0.01 to<br>0.06)       | 0.05<br>(0.01 to<br>0.14)       | 0.04<br>(0.01 to<br>0.12)       | 0.06<br>(0.02 to<br>0.16)         |
| Genital prolapse                                  | 16.34<br>(2.51 to<br>41.14)              | 20.69<br>(2.89 to<br>58.94)              | 17.22<br>(2.56 to<br>51.21)              | 26.67<br>(3.99 to<br>73.91)              | 0.37<br>(0.09 to<br>0.88)       | 0.46<br>(0.10 to<br>1.19)       | 0.39<br>(0.09 to<br>1.04)       | 0.58<br>(0.13 to<br>1.54)         |
| Other gynecological diseases                      | 394.07<br>(259.46 to<br>545.50)          | 675.43<br>(414.26 to<br>1,024.02)        | 599.85<br>(368.84 to<br>912.38)          | 796.43<br>(494.16 to<br>1,223.03)        | 8.80<br>(5.85 to<br>12.10)      | 16.16<br>(10.13 to<br>24.20)    | 14.56<br>(9.22 to<br>21.71)     | 18.70<br>(11.76 to<br>28.37)      |
| Hemoglobinopathies and hemolytic anemias          | 32,829.27<br>(25,445.79 to<br>42,990.31) | 35,248.38<br>(25,359.82 to<br>48,322.93) | 32,535.49<br>(23,131.72 to<br>44,864.26) | 44,001.47<br>(31,506.81 to<br>60,268.26) | 517.43<br>(401.24 to<br>661.18) | 690.88<br>(507.68 to<br>918.20) | 642.28<br>(462.06 to<br>860.91) | 824.79<br>(596.54 to<br>1,094.15) |
| Thalassemias                                      | 50.73<br>(27.52 to<br>90.65)             | 20.99<br>(10.94 to<br>38.92)             | 23.56<br>(12.24 to<br>43.67)             | 27.33<br>(13.95 to<br>50.84)             | 0.60<br>(0.33 to<br>1.08)       | 0.25<br>(0.13 to<br>0.47)       | 0.29<br>(0.15 to<br>0.53)       | 0.33<br>(0.17 to<br>0.61)         |
| Sickle cell disorders                             | 31,288.53<br>(23,885.52 to<br>41,005.33) | 31,968.55<br>(22,679.00 to<br>44,402.15) | 29,537.30<br>(20,708.55 to<br>41,228.37) | 40,227.47<br>(28,635.84 to<br>55,354.84) | 459.67<br>(353.98 to<br>585.80) | 542.94<br>(383.96 to<br>749.52) | 502.36<br>(350.71 to<br>698.22) | 663.17<br>(470.24 to<br>913.95)   |
| G6PD deficiency                                   | 918.87<br>(642.95 to<br>1,304.63)        | 2,180.99<br>(1,392.44 to<br>3,295.28)    | 1,952.71<br>(1,214.28 to<br>2,977.36)    | 2,580.98<br>(1,634.69 to<br>3,925.27)    | 25.27<br>(17.50 to<br>36.38)    | 76.35<br>(49.98 to<br>116.02)   | 69.46<br>(44.05 to<br>106.77)   | 87.60<br>(56.27 to<br>130.31)     |
| Other hemoglobinopathies and hemolytic anemias    | 571.14<br>(383.91 to<br>830.29)          | 1,077.84<br>(704.71 to<br>1,589.92)      | 1,021.92<br>(671.24 to<br>1,518.50)      | 1,165.69<br>(734.83 to<br>1,725.54)      | 31.89<br>(21.33 to<br>47.25)    | 71.34<br>(47.90 to<br>106.22)   | 70.17<br>(47.87 to<br>105.05)   | 73.69<br>(48.30 to<br>111.74)     |
| Endocrine, metabolic, blood, and immune disorders | 3,642.98<br>(2,987.88 to<br>5,131.87)    | 5,474.45<br>(4,256.92 to<br>7,847.06)    | 5,298.21<br>(4,068.73 to<br>7,554.09)    | 6,303.93<br>(4,883.38 to<br>9,090.70)    | 81.39<br>(67.10 to<br>116.72)   | 178.96<br>(143.33 to<br>258.76) | 180.44<br>(142.98 to<br>261.03) | 185.51<br>(148.47 to<br>269.23)   |

**Togo**

| Cause                                  | YLLs (actual counts)                              |                                                  |                                                  |                                                   | Deaths (actual counts)                     |                                              |                                              |                                              |
|----------------------------------------|---------------------------------------------------|--------------------------------------------------|--------------------------------------------------|---------------------------------------------------|--------------------------------------------|----------------------------------------------|----------------------------------------------|----------------------------------------------|
|                                        | 2016                                              | 2040 Forecast                                    | 2040 Better Scenario                             | 2040 Worse Scenario                               | 2016                                       | 2040 Forecast                                | 2040 Better Scenario                         | 2040 Worse Scenario                          |
| <b>Musculoskeletal disorders</b>       | <b>1,552.35</b><br>(1,175.52 to<br>2,057.71)      | <b>3,459.06</b><br>(2,601.79 to<br>4,718.81)     | <b>3,660.13</b><br>(2,718.92 to<br>4,994.60)     | <b>3,343.13</b><br>(2,506.90 to<br>4,554.80)      | <b>36.72</b><br>(28.37 to<br>47.84)        | <b>103.69</b><br>(80.32 to<br>135.48)        | <b>112.69</b><br>(87.94 to<br>146.21)        | <b>95.31</b><br>(73.83 to<br>124.10)         |
| Rheumatoid arthritis                   | 124.98<br>(85.63 to<br>193.28)                    | 309.22<br>(205.86 to<br>466.78)                  | 293.27<br>(188.65 to<br>443.67)                  | 337.47<br>(225.41 to<br>501.15)                   | 5.18<br>(3.50 to<br>7.71)                  | 16.61<br>(10.90 to<br>25.10)                 | 16.28<br>(10.45 to<br>24.48)                 | 17.17<br>(11.48 to<br>25.27)                 |
| Other musculoskeletal disorders        | 1,427.37<br>(1,082.33 to<br>1,898.75)             | 3,149.84<br>(2,311.92 to<br>4,318.69)            | 3,366.86<br>(2,504.49 to<br>4,619.01)            | 3,005.67<br>(2,206.28 to<br>4,180.37)             | 31.54<br>(24.29 to<br>41.36)               | 87.08<br>(65.87 to<br>114.68)                | 96.41<br>(74.15 to<br>126.38)                | 78.14<br>(59.38 to<br>104.49)                |
| <b>Other non-communicable diseases</b> | <b>126,749.66</b><br>(68,371.28 to<br>183,921.90) | <b>86,187.78</b><br>(53,338.13 to<br>122,324.14) | <b>80,470.98</b><br>(51,076.38 to<br>112,708.54) | <b>133,545.87</b><br>(77,842.58 to<br>194,842.52) | <b>1,595.17</b><br>(910.38 to<br>2,268.96) | <b>1,467.06</b><br>(1,027.33 to<br>1,962.75) | <b>1,417.51</b><br>(1,002.80 to<br>1,897.44) | <b>2,006.93</b><br>(1,297.56 to<br>2,801.42) |
| Congenital birth defects               | 117,931.04<br>(60,542.55 to<br>173,818.97)        | 69,969.59<br>(37,709.58 to<br>104,784.69)        | 64,443.38<br>(34,966.79 to<br>95,798.36)         | 114,406.21<br>(60,541.12 to<br>174,461.49)        | 1,427.66<br>(750.79 to<br>2,086.74)        | 936.16<br>(538.76 to<br>1,364.64)            | 865.72<br>(502.39 to<br>1,244.42)            | 1,466.01<br>(804.90 to<br>2,182.01)          |
| Neural tube defects                    | 21,482.02<br>(10,267.51 to<br>39,785.62)          | 4,442.06<br>(1,811.37 to<br>9,411.83)            | 3,735.38<br>(1,513.98 to<br>8,311.83)            | 8,598.64<br>(3,574.67 to<br>18,577.06)            | 251.77<br>(120.76 to<br>466.60)            | 54.62<br>(22.94 to<br>114.28)                | 45.98<br>(18.96 to<br>102.33)                | 103.72<br>(43.48 to<br>224.74)               |

|                                               |                                             |                                             |                                             |                                             |                                       |                                       |                                       |                                       |
|-----------------------------------------------|---------------------------------------------|---------------------------------------------|---------------------------------------------|---------------------------------------------|---------------------------------------|---------------------------------------|---------------------------------------|---------------------------------------|
|                                               | 30,910.39<br>(16,387.31 to<br>50,287.40)    | 21,898.44<br>(12,888.50 to<br>34,329.68)    | 20,292.33<br>(11,976.95 to<br>31,719.18)    | 33,835.00<br>(18,645.01 to<br>55,602.91)    | 385.09<br>(214.73 to<br>617.25)       | 302.78<br>(180.61 to<br>459.13)       | 281.01<br>(171.40 to<br>422.23)       | 448.07<br>(257.00 to<br>717.17)       |
| Congenital heart anomalies                    | 1,072.80<br>(189.42 to<br>3,117.65)         | 446.01<br>(75.06 to<br>1,358.51)            | 368.16<br>(60.67 to<br>1,131.95)            | 911.14<br>(153.79 to<br>2,679.06)           | 12.43<br>(2.19 to<br>36.20)           | 5.17<br>(0.87 to<br>15.76)            | 4.27<br>(0.70 to<br>13.10)            | 10.56<br>(1.78 to<br>31.05)           |
| Orofacial clefts                              | 1,103.42<br>(478.63 to<br>2,173.40)         | 1,146.75<br>(570.13 to<br>2,111.96)         | 1,042.83<br>(510.70 to<br>1,954.98)         | 1,666.42<br>(784.42 to<br>3,249.00)         | 15.22<br>(7.11 to<br>28.50)           | 20.07<br>(10.79 to<br>34.59)          | 18.31<br>(9.65 to<br>31.93)           | 26.99<br>(13.73 to<br>49.25)          |
| Down syndrome                                 | 4,829.06<br>(1,621.97 to<br>9,675.04)       | 4,399.62<br>(1,433.66 to<br>9,037.29)       | 3,980.45<br>(1,290.82 to<br>8,259.34)       | 7,770.90<br>(2,523.61 to<br>16,410.01)      | 56.70<br>(19.03 to<br>113.13)         | 53.11<br>(17.56 to<br>107.94)         | 48.10<br>(15.59 to<br>98.40)          | 92.54<br>(30.39 to<br>194.99)         |
| Other chromosomal abnormalities               | 936.31<br>(293.32 to<br>2,425.13)           | 666.27<br>(223.17 to<br>1,831.49)           | 629.60<br>(210.76 to<br>1,700.50)           | 1,108.13<br>(357.31 to<br>3,042.40)         | 10.99<br>(3.48 to<br>28.48)           | 8.04<br>(2.80 to<br>21.70)            | 7.60<br>(2.67 to<br>20.26)            | 13.20<br>(4.37 to<br>35.95)           |
| Congenital musculoskeletal and limb anomalies | 1,113.89<br>(517.26 to<br>2,009.16)         | 1,000.58<br>(541.33 to<br>1,680.16)         | 976.29<br>(520.99 to<br>1,650.79)           | 1,390.97<br>(701.98 to<br>2,384.46)         | 15.47<br>(8.06 to<br>26.24)           | 18.79<br>(11.10 to<br>28.82)          | 18.49<br>(10.92 to<br>28.68)          | 23.43<br>(13.36 to<br>37.20)          |
| Urogenital congenital anomalies               | 6,418.24<br>(2,934.24 to<br>11,385.12)      | 3,826.66<br>(1,813.88 to<br>6,941.18)       | 3,516.60<br>(1,654.04 to<br>6,362.51)       | 6,641.30<br>(3,008.10 to<br>12,218.81)      | 75.36<br>(34.70 to<br>133.47)         | 46.38<br>(22.59 to<br>82.81)          | 42.67<br>(20.58 to<br>76.42)          | 79.32<br>(36.96 to<br>144.80)         |
| Digestive congenital anomalies                | 50,064.91<br>(15,966.31 to<br>93,861.12)    | 32,143.21<br>(12,625.94 to<br>56,325.34)    | 29,901.73<br>(11,898.99 to<br>51,751.86)    | 52,483.70<br>(19,242.67 to<br>94,932.78)    | 604.63<br>(200.19 to<br>1,121.68)     | 427.20<br>(182.13 to<br>731.79)       | 399.29<br>(173.02 to<br>679.07)       | 668.18<br>(261.16 to<br>1,183.41)     |
| Other congenital birth defects                | 4,206.59<br>(2,741.03 to<br>6,955.68)       | 13,752.56<br>(8,956.32 to<br>21,307.66)     | 13,720.58<br>(8,914.42 to<br>21,174.72)     | 14,875.41<br>(9,795.36 to<br>23,341.01)     | 113.98<br>(74.84 to<br>184.76)        | 502.29<br>(330.94 to<br>786.08)       | 525.02<br>(341.98 to<br>805.99)       | 491.43<br>(325.01 to<br>778.04)       |
| Skin and subcutaneous diseases                | 293.77<br>(143.99 to<br>509.31)             | 1,439.10<br>(704.83 to<br>2,481.79)         | 1,559.40<br>(763.41 to<br>2,699.51)         | 1,343.90<br>(647.62 to<br>2,352.53)         | 9.06<br>(4.19 to<br>16.20)            | 55.80<br>(24.79 to<br>100.54)         | 62.28<br>(27.91 to<br>109.60)         | 49.11<br>(21.78 to<br>89.74)          |
| Cellulitis                                    | 3,559.17<br>(2,323.63 to<br>6,017.06)       | 11,376.17<br>(7,509.25 to<br>18,049.26)     | 11,150.66<br>(7,258.98 to<br>17,401.15)     | 12,617.66<br>(8,318.62 to<br>20,275.71)     | 90.89<br>(59.12 to<br>151.98)         | 394.58<br>(257.48 to<br>640.67)       | 402.63<br>(262.30 to<br>644.98)       | 398.19<br>(263.17 to<br>652.55)       |
| Pyoderma                                      | 230.25<br>(119.93 to<br>365.31)             | 656.74<br>(344.12 to<br>1,071.64)           | 719.42<br>(380.69 to<br>1,154.92)           | 615.48<br>(319.95 to<br>1,006.10)           | 11.55<br>(5.94 to<br>18.37)           | 44.68<br>(23.22 to<br>72.07)          | 52.30<br>(27.17 to<br>83.60)          | 37.15<br>(19.03 to<br>61.30)          |
| Decubitus ulcer                               | 123.40<br>(65.05 to<br>209.37)              | 280.55<br>(155.14 to<br>462.56)             | 291.11<br>(159.20 to<br>474.55)             | 298.36<br>(160.90 to<br>496.96)             | 2.49<br>(1.34 to<br>4.35)             | 7.23<br>(4.06 to<br>12.53)            | 7.82<br>(4.40 to<br>13.59)            | 6.97<br>(3.82 to<br>12.16)            |
| Other skin and subcutaneous diseases          | 4,612.04<br>(2,424.52 to<br>8,326.11)       | 2,465.63<br>(1,134.65 to<br>4,751.42)       | 2,307.01<br>(1,046.37 to<br>4,412.58)       | 4,264.26<br>(1,961.09 to<br>8,421.51)       | 53.53<br>(28.14 to<br>96.63)          | 28.61<br>(13.17 to<br>55.15)          | 26.77<br>(12.14 to<br>51.21)          | 49.48<br>(22.75 to<br>97.74)          |
| Sudden infant death syndrome                  | 189,864.20<br>(165,736.06 to<br>216,462.89) | 250,413.95<br>(192,421.36 to<br>337,936.70) | 229,763.48<br>(175,003.28 to<br>309,781.72) | 293,462.62<br>(222,740.19 to<br>393,284.82) | 3,802.12<br>(3,358.24 to<br>4,299.74) | 6,182.70<br>(4,997.91 to<br>7,825.54) | 5,851.84<br>(4,707.63 to<br>7,487.90) | 6,794.29<br>(5,453.64 to<br>8,631.81) |
| Injuries                                      | 53,243.71<br>(44,551.43 to<br>63,343.69)    | 90,682.84<br>(66,004.18 to<br>127,953.09)   | 79,721.01<br>(58,289.42 to<br>112,327.97)   | 105,386.31<br>(76,731.04 to<br>150,137.61)  | 1,056.34<br>(891.16 to<br>1,247.75)   | 2,063.77<br>(1,566.75 to<br>2,782.09) | 1,857.59<br>(1,419.02 to<br>2,479.46) | 2,288.97<br>(1,718.26 to<br>3,133.53) |
| Transport injuries                            | 50,246.49<br>(42,047.27 to<br>59,557.54)    | 85,464.64<br>(62,492.54 to<br>121,476.37)   | 74,959.46<br>(55,002.02 to<br>106,004.63)   | 99,087.21<br>(72,306.96 to<br>141,975.04)   | 1,002.86<br>(850.93 to<br>1,184.89)   | 1,957.97<br>(1,490.62 to<br>2,626.66) | 1,760.24<br>(1,351.82 to<br>2,348.56) | 2,165.17<br>(1,634.42 to<br>2,950.48) |
| Road injuries                                 | 16,234.20<br>(12,562.56 to<br>21,004.36)    | 22,700.65<br>(15,508.95 to<br>34,293.67)    | 20,084.14<br>(13,797.99 to<br>30,008.14)    | 26,376.44<br>(17,796.44 to<br>39,922.56)    | 332.45<br>(257.69 to<br>429.06)       | 555.66<br>(392.51 to<br>794.40)       | 503.72<br>(359.74 to<br>710.76)       | 615.05<br>(432.90 to<br>876.85)       |
| Pedestrian road injuries                      | <b>Togo</b>                                 |                                             |                                             |                                             |                                       |                                       |                                       |                                       |
| Cause                                         | YLLs (actual counts)                        |                                             |                                             |                                             | Deaths (actual counts)                |                                       |                                       |                                       |
|                                               | 2016                                        | 2040 Forecast                               | 2040 Better Scenario                        | 2040 Worse Scenario                         | 2016                                  | 2040 Forecast                         | 2040 Better Scenario                  | 2040 Worse Scenario                   |
| Cyclist road injuries                         | 1,709.08<br>(1,149.26 to<br>2,673.98)       | 3,168.22<br>(1,938.49 to<br>5,084.35)       | 2,805.76<br>(1,720.47 to<br>4,495.85)       | 3,641.91<br>(2,194.23 to<br>5,965.71)       | 35.83<br>(24.27 to<br>56.17)          | 77.19<br>(48.80 to<br>122.92)         | 70.62<br>(44.96 to<br>111.46)         | 83.91<br>(52.35 to<br>133.54)         |
| Motorcyclist road injuries                    | 6,411.05<br>(4,911.92 to<br>8,522.89)       | 11,924.15<br>(7,724.18 to<br>17,887.64)     | 10,799.62<br>(7,013.07 to<br>16,258.27)     | 13,617.03<br>(8,791.87 to<br>20,193.45)     | 118.31<br>(92.38 to<br>156.60)        | 243.40<br>(164.98 to<br>352.93)       | 224.04<br>(152.67 to<br>322.40)       | 268.05<br>(181.40 to<br>388.67)       |

|                                                 |                                                    |                                                    |                                                    |                                                     |                                                |                                                |                                                |                                                |
|-------------------------------------------------|----------------------------------------------------|----------------------------------------------------|----------------------------------------------------|-----------------------------------------------------|------------------------------------------------|------------------------------------------------|------------------------------------------------|------------------------------------------------|
|                                                 | 24,920.54<br>(19,743.38 to<br>30,798.80)           | 45,886.42<br>(32,133.72 to<br>66,190.80)           | 39,706.99<br>(27,868.20 to<br>57,142.00)           | 53,381.41<br>(37,290.81 to<br>76,973.21)            | 496.50<br>(400.82 to<br>611.09)                | 1,039.53<br>(756.52 to<br>1,434.48)            | 923.70<br>(677.84 to<br>1,268.50)              | 1,151.93<br>(833.01 to<br>1,604.02)            |
| Motor vehicle road injuries                     |                                                    |                                                    |                                                    |                                                     |                                                |                                                |                                                |                                                |
|                                                 | 971.63<br>(680.96 to<br>1,742.17)                  | 1,785.20<br>(1,141.97 to<br>3,205.94)              | 1,562.96<br>(1,010.33 to<br>2,794.45)              | 2,070.40<br>(1,517.87 to<br>3,747.53)               | 19.77<br>(13.95 to<br>34.48)                   | 42.20<br>(27.83 to<br>74.94)                   | 38.16<br>(25.29 to<br>66.89)                   | 46.23<br>(30.50 to<br>81.94)                   |
| Other road injuries                             |                                                    |                                                    |                                                    |                                                     |                                                |                                                |                                                |                                                |
|                                                 | 2,997.21<br>(1,963.89 to<br>4,348.13)              | 5,218.20<br>(3,103.98 to<br>8,740.27)              | 4,761.56<br>(2,847.40 to<br>7,930.03)              | 6,299.11<br>(3,751.76 to<br>10,514.79)              | 53.48<br>(35.87 to<br>77.36)                   | 105.80<br>(64.22 to<br>171.03)                 | 97.35<br>(59.82 to<br>156.84)                  | 123.80<br>(75.06 to<br>201.12)                 |
| Other transport injuries                        |                                                    |                                                    |                                                    |                                                     |                                                |                                                |                                                |                                                |
| <b>Unintentional injuries</b>                   | <b>93,602.29<br/>(78,351.75 to<br/>110,412.68)</b> | <b>90,955.89<br/>(68,683.22 to<br/>117,897.96)</b> | <b>84,765.71<br/>(64,069.54 to<br/>111,222.86)</b> | <b>112,788.80<br/>(85,889.86 to<br/>146,294.51)</b> | <b>1,837.69<br/>(1,553.69 to<br/>2,114.12)</b> | <b>2,505.33<br/>(2,012.23 to<br/>3,009.34)</b> | <b>2,443.82<br/>(1,954.41 to<br/>2,978.41)</b> | <b>2,778.62<br/>(2,226.81 to<br/>3,372.45)</b> |
|                                                 | 13,437.67<br>(10,869.25 to<br>16,873.29)           | 20,652.63<br>(16,451.28 to<br>26,073.35)           | 20,507.34<br>(16,179.82 to<br>26,188.09)           | 22,318.86<br>(17,611.41 to<br>28,281.39)            | 390.58<br>(322.50 to<br>470.98)                | 887.84<br>(736.03 to<br>1,053.16)              | 929.07<br>(768.20 to<br>1,112.26)              | 862.68<br>(705.71 to<br>1,032.77)              |
| Falls                                           |                                                    |                                                    |                                                    |                                                     |                                                |                                                |                                                |                                                |
|                                                 | 17,645.99<br>(14,213.26 to<br>22,395.44)           | 14,233.82<br>(10,226.16 to<br>19,840.02)           | 13,063.80<br>(9,479.92 to<br>18,328.93)            | 18,555.64<br>(13,242.41 to<br>25,686.58)            | 300.80<br>(245.62 to<br>373.09)                | 307.41<br>(230.95 to<br>412.94)                | 288.01<br>(214.27 to<br>392.16)                | 367.28<br>(276.47 to<br>491.19)                |
| Drowning                                        |                                                    |                                                    |                                                    |                                                     |                                                |                                                |                                                |                                                |
|                                                 | 9,815.99<br>(7,394.86 to<br>12,594.55)             | 7,781.76<br>(5,337.22 to<br>10,698.68)             | 7,016.89<br>(4,751.91 to<br>9,760.33)              | 10,071.92<br>(6,846.13 to<br>14,001.47)             | 199.19<br>(146.49 to<br>242.62)                | 216.73<br>(149.94 to<br>280.40)                | 202.14<br>(138.25 to<br>263.03)                | 253.75<br>(176.98 to<br>331.24)                |
| Fire, heat, and hot substances                  |                                                    |                                                    |                                                    |                                                     |                                                |                                                |                                                |                                                |
|                                                 | 5,497.45<br>(3,072.69 to<br>9,192.98)              | 3,145.70<br>(1,780.70 to<br>5,022.82)              | 2,667.68<br>(1,491.64 to<br>4,286.23)              | 4,540.56<br>(2,519.33 to<br>7,517.93)               | 97.69<br>(58.27 to<br>143.60)                  | 69.13<br>(40.83 to<br>99.09)                   | 59.71<br>(35.75 to<br>85.23)                   | 92.00<br>(54.30 to<br>136.93)                  |
| Poisonings                                      |                                                    |                                                    |                                                    |                                                     |                                                |                                                |                                                |                                                |
|                                                 | 13,112.94<br>(9,784.77 to<br>16,943.96)            | 10,742.79<br>(7,055.15 to<br>15,255.35)            | 9,642.97<br>(6,218.46 to<br>13,840.59)             | 14,134.67<br>(9,421.71 to<br>20,167.82)             | 224.22<br>(166.60 to<br>280.45)                | 230.57<br>(152.59 to<br>315.87)                | 212.01<br>(137.10 to<br>294.20)                | 280.46<br>(188.78 to<br>381.82)                |
| Exposure to mechanical forces                   |                                                    |                                                    |                                                    |                                                     |                                                |                                                |                                                |                                                |
|                                                 | 3,883.11<br>(2,271.67 to<br>5,365.74)              | 2,952.28<br>(1,543.34 to<br>4,759.25)              | 2,596.17<br>(1,326.91 to<br>4,163.38)              | 3,796.74<br>(2,024.77 to<br>5,936.39)               | 69.92<br>(41.63 to<br>93.93)                   | 62.39<br>(34.24 to<br>94.81)                   | 55.97<br>(30.77 to<br>85.50)                   | 76.09<br>(43.29 to<br>114.10)                  |
| Unintentional firearm injuries                  |                                                    |                                                    |                                                    |                                                     |                                                |                                                |                                                |                                                |
|                                                 | 2,874.66<br>(1,849.79 to<br>4,591.68)              | 1,669.57<br>(1,090.80 to<br>2,624.11)              | 1,496.07<br>(969.86 to<br>2,391.43)                | 2,596.08<br>(1,638.71 to<br>4,371.99)               | 37.24<br>(24.97 to<br>57.48)                   | 24.11<br>(16.35 to<br>36.44)                   | 21.64<br>(14.30 to<br>33.16)                   | 35.90<br>(23.46 to<br>57.26)                   |
| Unintentional suffocation                       |                                                    |                                                    |                                                    |                                                     |                                                |                                                |                                                |                                                |
|                                                 | 6,355.17<br>(4,648.14 to<br>8,222.79)              | 6,120.94<br>(3,906.43 to<br>8,974.94)              | 5,550.73<br>(3,471.57 to<br>8,098.19)              | 7,741.86<br>(5,014.05 to<br>11,220.67)              | 117.06<br>(85.56 to<br>149.88)                 | 144.07<br>(92.58 to<br>201.93)                 | 134.39<br>(84.39 to<br>187.97)                 | 168.46<br>(109.65 to<br>237.14)                |
| Other exposure to mechanical forces             |                                                    |                                                    |                                                    |                                                     |                                                |                                                |                                                |                                                |
|                                                 | 11,303.00<br>(7,126.36 to<br>14,955.29)            | 11,813.48<br>(6,856.85 to<br>17,415.90)            | 10,967.48<br>(6,253.34 to<br>16,346.81)            | 14,538.16<br>(8,488.21 to<br>21,096.69)             | 206.18<br>(132.10 to<br>263.91)                | 270.78<br>(168.21 to<br>373.78)                | 257.46<br>(158.61 to<br>356.31)                | 309.16<br>(192.01 to<br>428.36)                |
| Adverse effects of medical treatment            |                                                    |                                                    |                                                    |                                                     |                                                |                                                |                                                |                                                |
|                                                 | 5,518.61<br>(4,011.76 to<br>7,017.63)              | 6,217.40<br>(4,349.27 to<br>8,331.95)              | 5,452.59<br>(3,736.18 to<br>7,500.87)              | 8,398.52<br>(5,686.07 to<br>11,450.48)              | 114.07<br>(85.03 to<br>140.97)                 | 164.77<br>(118.58 to<br>213.19)                | 148.74<br>(103.71 to<br>194.62)                | 202.16<br>(140.06 to<br>263.82)                |
| Animal contact                                  |                                                    |                                                    |                                                    |                                                     |                                                |                                                |                                                |                                                |
|                                                 | 4,497.07<br>(3,092.47 to<br>6,028.25)              | 5,147.73<br>(3,523.42 to<br>7,073.51)              | 4,508.62<br>(2,962.94 to<br>6,347.23)              | 6,905.03<br>(4,552.49 to<br>9,752.09)               | 96.77<br>(69.25 to<br>125.10)                  | 140.66<br>(100.21 to<br>189.40)                | 126.66<br>(87.76 to<br>170.79)                 | 171.99<br>(116.10 to<br>231.77)                |
| Venomous animal contact                         |                                                    |                                                    |                                                    |                                                     |                                                |                                                |                                                |                                                |
|                                                 | 1,021.54<br>(610.95 to<br>1,623.63)                | 1,069.67<br>(640.21 to<br>1,675.14)                | 943.97<br>(569.40 to<br>1,491.79)                  | 1,493.49<br>(871.01 to<br>2,409.64)                 | 17.30<br>(10.79 to<br>26.85)                   | 24.11<br>(14.87 to<br>36.65)                   | 22.09<br>(13.53 to<br>33.37)                   | 30.16<br>(18.46 to<br>46.54)                   |
| Non-venomous animal contact                     |                                                    |                                                    |                                                    |                                                     |                                                |                                                |                                                |                                                |
|                                                 | 6,938.40<br>(5,149.44 to<br>9,634.76)              | 7,826.16<br>(5,715.71 to<br>10,643.99)             | 7,865.18<br>(5,687.55 to<br>10,758.40)             | 9,472.43<br>(6,787.62 to<br>13,370.54)              | 114.39<br>(89.11 to<br>150.68)                 | 171.21<br>(133.79 to<br>221.63)                | 177.80<br>(140.94 to<br>229.22)                | 184.20<br>(140.94 to<br>243.68)                |
| Foreign body                                    |                                                    |                                                    |                                                    |                                                     |                                                |                                                |                                                |                                                |
|                                                 | 6,229.47<br>(4,398.43 to<br>9,051.90)              | 7,031.04<br>(5,013.10 to<br>10,019.31)             | 7,119.47<br>(5,133.24 to<br>9,958.36)              | 8,496.68<br>(5,995.89 to<br>12,406.10)              | 102.24<br>(76.59 to<br>142.09)                 | 155.10<br>(120.23 to<br>207.97)                | 162.43<br>(126.21 to<br>216.54)                | 165.63<br>(125.09 to<br>227.38)                |
| Pulmonary aspiration and foreign body in airway |                                                    |                                                    |                                                    |                                                     |                                                |                                                |                                                |                                                |
|                                                 | 708.93<br>(220.65 to<br>1,359.94)                  | 795.12<br>(215.99 to<br>1,736.16)                  | 745.70<br>(194.69 to<br>1,635.05)                  | 975.75<br>(281.37 to<br>2,059.62)                   | 12.15<br>(3.76 to<br>24.10)                    | 16.12<br>(4.25 to<br>35.44)                    | 15.37<br>(4.01 to<br>34.01)                    | 18.57<br>(5.32 to<br>40.04)                    |
| Foreign body in other body part                 |                                                    |                                                    |                                                    |                                                     |                                                |                                                |                                                |                                                |
|                                                 | 4,360.98<br>(1,920.11 to<br>6,199.17)              | 3,657.75<br>(1,475.98 to<br>6,081.12)              | 3,081.61<br>(1,209.50 to<br>5,229.53)              | 4,953.71<br>(2,027.66 to<br>8,160.22)               | 83.44<br>(36.41 to<br>116.26)                  | 81.79<br>(34.71 to<br>128.02)                  | 70.25<br>(28.91 to<br>112.60)                  | 105.15<br>(44.02 to<br>165.75)                 |
| Environmental heat and cold exposure            |                                                    |                                                    |                                                    |                                                     |                                                |                                                |                                                |                                                |
|                                                 | 5,971.27<br>(4,501.99 to<br>7,587.44)              | 4,884.40<br>(3,241.47 to<br>7,381.22)              | 4,500.17<br>(2,993.19 to<br>6,865.62)              | 6,004.33<br>(3,985.60 to<br>8,972.50)               | 107.12<br>(81.43 to<br>134.76)                 | 105.09<br>(73.35 to<br>149.25)                 | 98.62<br>(68.87 to<br>142.11)                  | 121.79<br>(85.56 to<br>172.54)                 |
| Other unintentional injuries                    |                                                    |                                                    |                                                    |                                                     |                                                |                                                |                                                |                                                |
| <b>Self-harm and interpersonal violence</b>     | <b>42,955.73<br/>(34,229.73 to<br/>52,481.64)</b>  | <b>68,642.82<br/>(46,367.57 to<br/>101,384.05)</b> | <b>65,143.32<br/>(44,382.28 to<br/>96,431.34)</b>  | <b>75,143.15<br/>(50,106.35 to<br/>111,515.03)</b>  | <b>906.83<br/>(725.99 to<br/>1,100.84)</b>     | <b>1,611.08<br/>(1,108.62 to<br/>2,274.89)</b> | <b>1,547.86<br/>(1,088.58 to<br/>2,157.46)</b> | <b>1,724.07<br/>(1,164.98 to<br/>2,458.30)</b> |



| Togo                                                                                |                                                   |                                                      |                                                      |                                                      |                                                |                                                 |                                                 |                                                 |
|-------------------------------------------------------------------------------------|---------------------------------------------------|------------------------------------------------------|------------------------------------------------------|------------------------------------------------------|------------------------------------------------|-------------------------------------------------|-------------------------------------------------|-------------------------------------------------|
| Cause                                                                               | YLLs (actual counts)                              |                                                      |                                                      |                                                      | Deaths (actual counts)                         |                                                 |                                                 |                                                 |
|                                                                                     | 2016                                              | 2040 Forecast                                        | 2040 Better Scenario                                 | 2040 Worse Scenario                                  | 2016                                           | 2040 Forecast                                   | 2040 Better Scenario                            | 2040 Worse Scenario                             |
| Self-harm                                                                           | 27,997.66<br>(21,469.93 to<br>35,096.51)          | 49,991.58<br>(32,460.35 to<br>74,557.12)             | 46,615.32<br>(30,751.86 to<br>68,341.76)             | 55,469.25<br>(34,933.16 to<br>83,687.74)             | 644.67<br>(502.40 to<br>796.70)                | 1,259.01<br>(855.15 to<br>1,771.42)             | 1,196.55<br>(834.30 to<br>1,649.58)             | 1,359.47<br>(892.95 to<br>1,948.02)             |
| Self-harm by firearm                                                                | 2,486.38<br>(1,258.96 to<br>3,948.53)             | 3,495.09<br>(1,587.33 to<br>6,438.38)                | 3,201.80<br>(1,478.63 to<br>5,873.67)                | 3,967.21<br>(1,776.16 to<br>7,528.74)                | 57.65<br>(31.20 to<br>88.12)                   | 91.88<br>(45.11 to<br>162.13)                   | 86.18<br>(42.88 to<br>149.93)                   | 101.01<br>(48.23 to<br>181.06)                  |
| Self-harm by other specified means                                                  | 25,511.28<br>(19,406.75 to<br>32,528.39)          | 46,496.48<br>(30,279.72 to<br>68,849.12)             | 43,413.52<br>(28,636.44 to<br>63,940.67)             | 51,502.04<br>(32,399.08 to<br>77,037.06)             | 587.02<br>(454.82 to<br>737.53)                | 1,167.13<br>(789.07 to<br>1,630.82)             | 1,110.37<br>(771.92 to<br>1,545.33)             | 1,258.45<br>(829.24 to<br>1,818.76)             |
| Interpersonal violence                                                              | 14,958.07<br>(10,830.53 to<br>19,626.02)          | 18,651.24<br>(11,712.53 to<br>29,929.02)             | 18,528.00<br>(11,681.96 to<br>29,828.74)             | 19,673.89<br>(12,516.14 to<br>31,281.46)             | 262.16<br>(190.07 to<br>344.81)                | 352.07<br>(222.62 to<br>553.95)                 | 351.31<br>(222.60 to<br>552.52)                 | 364.60<br>(230.62 to<br>566.42)                 |
| Physical violence by firearm                                                        | 8,858.95<br>(5,699.21 to<br>12,779.02)            | 11,119.74<br>(6,255.58 to<br>19,222.64)              | 11,040.82<br>(6,223.86 to<br>19,160.66)              | 11,587.91<br>(6,627.34 to<br>19,933.43)              | 155.54<br>(99.88 to<br>224.70)                 | 204.46<br>(117.63 to<br>349.48)                 | 203.56<br>(117.19 to<br>346.72)                 | 210.58<br>(121.78 to<br>360.39)                 |
| Physical violence by sharp object                                                   | 3,681.48<br>(2,125.90 to<br>5,852.65)             | 5,119.02<br>(2,626.85 to<br>8,691.88)                | 5,192.57<br>(2,654.14 to<br>8,806.59)                | 5,228.75<br>(2,710.63 to<br>8,719.64)                | 65.79<br>(38.55 to<br>103.80)                  | 99.21<br>(53.33 to<br>162.98)                   | 101.25<br>(54.09 to<br>167.16)                  | 99.33<br>(53.76 to<br>161.09)                   |
| Physical violence by other means                                                    | 2,417.64<br>(1,722.09 to<br>3,779.71)             | 2,412.49<br>(1,546.22 to<br>4,225.63)                | 2,294.61<br>(1,482.91 to<br>3,970.09)                | 2,857.23<br>(1,839.95 to<br>4,874.60)                | 40.84<br>(30.07 to<br>64.67)                   | 48.40<br>(31.33 to<br>84.03)                    | 46.50<br>(30.31 to<br>80.31)                    | 54.70<br>(35.58 to<br>92.95)                    |
| <b>Forces of nature, conflict and terrorism, and executions and police conflict</b> | <b>62.47</b><br><b>(51.52 to</b><br><b>82.64)</b> | <b>132.40</b><br><b>(0.00 to</b><br><b>1,599.61)</b> | <b>133.44</b><br><b>(0.00 to</b><br><b>1,614.95)</b> | <b>144.36</b><br><b>(0.00 to</b><br><b>1,787.93)</b> | <b>1.26</b><br><b>(0.88 to</b><br><b>1.93)</b> | <b>2.52</b><br><b>(0.00 to</b><br><b>31.95)</b> | <b>2.56</b><br><b>(0.00 to</b><br><b>32.61)</b> | <b>2.63</b><br><b>(0.00 to</b><br><b>33.08)</b> |
| Exposure to forces of nature                                                        | 0.00<br>(0.00 to<br>0.00)                         | 40.54<br>(0.00 to<br>775.84)                         | 40.91<br>(0.00 to<br>782.16)                         | 45.90<br>(0.00 to<br>874.22)                         | 0.00<br>(0.00 to<br>0.00)                      | 0.81<br>(0.00 to<br>15.52)                      | 0.83<br>(0.00 to<br>15.94)                      | 0.86<br>(0.00 to<br>16.35)                      |
| Conflict and terrorism                                                              | 0.00<br>(0.00 to<br>0.00)                         | 36.73<br>(0.00 to<br>281.16)                         | 36.97<br>(0.00 to<br>282.57)                         | 40.66<br>(0.00 to<br>311.62)                         | 0.00<br>(0.00 to<br>0.00)                      | 0.66<br>(0.00 to<br>5.09)                       | 0.67<br>(0.00 to<br>5.17)                       | 0.70<br>(0.00 to<br>5.41)                       |
| Executions and police conflict                                                      | 62.47<br>(51.52 to<br>82.64)                      | 55.13<br>(0.00 to<br>184.45)                         | 55.56<br>(0.00 to<br>185.72)                         | 57.80<br>(0.00 to<br>194.24)                         | 1.26<br>(0.88 to<br>1.93)                      | 1.04<br>(0.00 to<br>3.48)                       | 1.06<br>(0.00 to<br>3.53)                       | 1.07<br>(0.00 to<br>3.58)                       |

**Appendix Table 2. Correlation between  $SEV_{rc}$  and  $SEV_r$  in the period 1990-2016. Values were computed as Pearson correlation coefficients. SEV = Summary exposure variable.**

| <b>Risk</b>                                 | <b>Cause of death</b>                        | <b>Correlation</b> |
|---------------------------------------------|----------------------------------------------|--------------------|
| <b>Alcohol use</b>                          | <b>Atrial fibrillation and flutter</b>       | 0.864              |
|                                             | <b>Breast cancer</b>                         | 0.926              |
|                                             | <b>Colon and rectum cancer</b>               | 0.997              |
|                                             | <b>Cyclist road injuries</b>                 | 0.935              |
|                                             | <b>Diabetes mellitus</b>                     | 0.807              |
|                                             | <b>Drowning</b>                              | 0.976              |
|                                             | <b>Epilepsy</b>                              | 0.994              |
|                                             | <b>Esophageal cancer</b>                     | 0.985              |
|                                             | <b>Fire, heat, and hot substances</b>        | 0.976              |
|                                             | <b>Hypertensive heart disease</b>            | 0.995              |
|                                             | <b>Intracerebral hemorrhage</b>              | 0.980              |
|                                             | <b>Ischemic heart disease</b>                | 0.667              |
|                                             | <b>Ischemic stroke</b>                       | 0.922              |
|                                             | <b>Larynx cancer</b>                         | 0.996              |
|                                             | <b>Lip and oral cavity cancer</b>            | 0.989              |
|                                             | <b>Lower respiratory infections</b>          | 0.914              |
|                                             | <b>Motor vehicle road injuries</b>           | 0.935              |
|                                             | <b>Motorcyclist road injuries</b>            | 0.935              |
|                                             | <b>Nasopharynx cancer</b>                    | 0.993              |
|                                             | <b>Other pharynx cancer</b>                  | 0.997              |
|                                             | <b>Other road injuries</b>                   | 0.935              |
|                                             | <b>Other transport injuries</b>              | 0.935              |
|                                             | <b>Pancreatitis</b>                          | 0.859              |
|                                             | <b>Pedestrian road injuries</b>              | 0.935              |
| <b>Physical violence by other means</b>     | 0.984                                        |                    |
| <b>Poisonings</b>                           | 0.976                                        |                    |
| <b>Self-harm by firearm</b>                 | 0.991                                        |                    |
| <b>Self-harm by other specified means</b>   | 0.991                                        |                    |
| <b>Tuberculosis</b>                         | 0.996                                        |                    |
| <b>Ambient ozone pollution</b>              | <b>Chronic obstructive pulmonary disease</b> | 0.984              |
| <b>Ambient particulate matter pollution</b> | <b>Chronic obstructive pulmonary disease</b> | 0.994              |
|                                             | <b>Intracerebral hemorrhage</b>              | 0.992              |
|                                             | <b>Ischemic heart disease</b>                | 0.974              |
|                                             | <b>Ischemic stroke</b>                       | 0.992              |
|                                             | <b>Lower respiratory infections</b>          | 0.963              |
|                                             | <b>Tracheal, bronchus, and lung cancer</b>   | 0.977              |
| <b>Child stunting</b>                       | <b>Lower respiratory infections</b>          | 0.987              |
|                                             | <b>Measles</b>                               | 0.979              |

| <b>Risk</b>                                   | <b>Cause of death</b>                                             | <b>Correlation</b> |
|-----------------------------------------------|-------------------------------------------------------------------|--------------------|
| <b>Child underweight</b>                      | <b>Lower respiratory infections</b>                               | 0.988              |
|                                               | <b>Measles</b>                                                    | 0.986              |
| <b>Child wasting</b>                          | <b>Lower respiratory infections</b>                               | 0.978              |
|                                               | <b>Measles</b>                                                    | 0.970              |
| <b>Childhood sexual abuse against females</b> | <b>Alcohol use disorders</b>                                      | 0.999              |
| <b>Childhood sexual abuse against males</b>   | <b>Alcohol use disorders</b>                                      | 0.999              |
| <b>Diet high in processed meat</b>            | <b>Colon and rectum cancer</b>                                    | 0.992              |
|                                               | <b>Diabetes mellitus</b>                                          | 0.992              |
|                                               | <b>Ischemic heart disease</b>                                     | 0.992              |
| <b>Diet high in red meat</b>                  | <b>Colon and rectum cancer</b>                                    | 0.994              |
|                                               | <b>Diabetes mellitus</b>                                          | 0.995              |
| <b>Diet high in sodium</b>                    | <b>Aortic aneurysm</b>                                            | 0.904              |
|                                               | <b>Atrial fibrillation and flutter</b>                            | 0.849              |
|                                               | <b>Chronic kidney disease due to diabetes mellitus</b>            | 0.897              |
|                                               | <b>Chronic kidney disease due to glomerulonephritis</b>           | 0.897              |
|                                               | <b>Chronic kidney disease due to hypertension</b>                 | 0.897              |
|                                               | <b>Chronic kidney disease due to other and unspecified causes</b> | 0.896              |
|                                               | <b>Endocarditis</b>                                               | 0.903              |
|                                               | <b>Hypertensive heart disease</b>                                 | 0.871              |
|                                               | <b>Intracerebral hemorrhage</b>                                   | 0.898              |
|                                               | <b>Ischemic heart disease</b>                                     | 0.898              |
|                                               | <b>Ischemic stroke</b>                                            | 0.901              |
|                                               | <b>Other cardiomyopathy</b>                                       | 0.903              |
|                                               | <b>Other cardiovascular and circulatory diseases</b>              | 0.904              |
|                                               | <b>Peripheral artery disease</b>                                  | 0.904              |
|                                               | <b>Rheumatic heart disease</b>                                    | 0.906              |
| <b>Stomach cancer</b>                         | 0.840                                                             |                    |
| <b>Diet high in sugar-sweetened beverages</b> | <b>Acute lymphoid leukemia</b>                                    | 0.764              |
|                                               | <b>Acute myeloid leukemia</b>                                     | 0.765              |
|                                               | <b>Alzheimer's disease and other dementias</b>                    | 0.482              |
|                                               | <b>Asthma</b>                                                     | 0.934              |
|                                               | <b>Atrial fibrillation and flutter</b>                            | 0.761              |
|                                               | <b>Breast cancer</b>                                              | 0.177              |
|                                               | <b>Chronic kidney disease due to diabetes mellitus</b>            | 0.945              |
|                                               | <b>Chronic kidney disease due to glomerulonephritis</b>           | 0.946              |
|                                               | <b>Chronic kidney disease due to hypertension</b>                 | 0.945              |

| <b>Risk</b>                                | <b>Cause of death</b>                                             | <b>Correlation</b> |
|--------------------------------------------|-------------------------------------------------------------------|--------------------|
|                                            | <b>Chronic kidney disease due to other and unspecified causes</b> | 0.945              |
|                                            | <b>Chronic lymphoid leukemia</b>                                  | 0.764              |
|                                            | <b>Chronic myeloid leukemia</b>                                   | 0.764              |
|                                            | <b>Colon and rectum cancer</b>                                    | 0.703              |
|                                            | <b>Diabetes mellitus</b>                                          | 0.940              |
|                                            | <b>Esophageal cancer</b>                                          | 0.927              |
|                                            | <b>Gallbladder and biliary diseases</b>                           | 0.936              |
|                                            | <b>Gallbladder and biliary tract cancer</b>                       | 0.884              |
|                                            | <b>Hypertensive heart disease</b>                                 | 0.943              |
|                                            | <b>Intracerebral hemorrhage</b>                                   | 0.812              |
|                                            | <b>Ischemic heart disease</b>                                     | 0.907              |
|                                            | <b>Ischemic stroke</b>                                            | 0.806              |
|                                            | <b>Kidney cancer</b>                                              | 0.908              |
|                                            | <b>Liver cancer due to alcohol use</b>                            | 0.889              |
|                                            | <b>Liver cancer due to hepatitis B</b>                            | 0.896              |
|                                            | <b>Liver cancer due to hepatitis C</b>                            | 0.889              |
|                                            | <b>Liver cancer due to other causes</b>                           | 0.896              |
|                                            | <b>Multiple myeloma</b>                                           | 0.736              |
|                                            | <b>Non-Hodgkin lymphoma</b>                                       | 0.689              |
|                                            | <b>Other leukemia</b>                                             | 0.763              |
|                                            | <b>Ovarian cancer</b>                                             | 0.365              |
|                                            | <b>Pancreatic cancer</b>                                          | 0.694              |
|                                            | <b>Thyroid cancer</b>                                             | 0.865              |
|                                            | <b>Uterine cancer</b>                                             | 0.956              |
| <b>Diet high in trans fatty acids</b>      | <b>Ischemic heart disease</b>                                     | 0.979              |
| <b>Diet low in calcium</b>                 | <b>Colon and rectum cancer</b>                                    | 0.999              |
| <b>Diet low in fiber</b>                   | <b>Colon and rectum cancer</b>                                    | 0.996              |
|                                            | <b>Ischemic heart disease</b>                                     | 0.994              |
| <b>Diet low in fruits</b>                  | <b>Diabetes mellitus</b>                                          | 0.994              |
|                                            | <b>Esophageal cancer</b>                                          | 0.994              |
|                                            | <b>Intracerebral hemorrhage</b>                                   | 0.971              |
|                                            | <b>Ischemic heart disease</b>                                     | 0.993              |
|                                            | <b>Ischemic stroke</b>                                            | 0.946              |
|                                            | <b>Larynx cancer</b>                                              | 0.995              |
|                                            | <b>Lip and oral cavity cancer</b>                                 | 0.995              |
|                                            | <b>Nasopharynx cancer</b>                                         | 0.995              |
|                                            | <b>Other pharynx cancer</b>                                       | 0.995              |
| <b>Tracheal, bronchus, and lung cancer</b> | 0.995                                                             |                    |
| <b>Diet low in legumes</b>                 | <b>Ischemic heart disease</b>                                     | 0.996              |

| <b>Risk</b>                                    | <b>Cause of death</b>                                             | <b>Correlation</b> |
|------------------------------------------------|-------------------------------------------------------------------|--------------------|
| <b>Diet low in milk</b>                        | <b>Colon and rectum cancer</b>                                    | 0.994              |
| <b>Diet low in nuts and seeds</b>              | <b>Diabetes mellitus</b>                                          | 0.992              |
|                                                | <b>Ischemic heart disease</b>                                     | 0.981              |
| <b>Diet low in polyunsaturated fatty acids</b> | <b>Ischemic heart disease</b>                                     | 0.964              |
| <b>Diet low in seafood omega-3 fatty acids</b> | <b>Ischemic heart disease</b>                                     | 0.989              |
| <b>Diet low in vegetables</b>                  | <b>Intracerebral hemorrhage</b>                                   | 0.993              |
|                                                | <b>Ischemic heart disease</b>                                     | 0.993              |
|                                                | <b>Ischemic stroke</b>                                            | 0.990              |
| <b>Diet low in whole grains</b>                | <b>Diabetes mellitus</b>                                          | 0.998              |
|                                                | <b>Intracerebral hemorrhage</b>                                   | 0.996              |
|                                                | <b>Ischemic heart disease</b>                                     | 0.998              |
|                                                | <b>Ischemic stroke</b>                                            | 0.984              |
| <b>High body-mass index</b>                    | <b>Acute lymphoid leukemia</b>                                    | 0.963              |
|                                                | <b>Acute myeloid leukemia</b>                                     | 0.963              |
|                                                | <b>Alzheimer's disease and other dementias</b>                    | 0.854              |
|                                                | <b>Asthma</b>                                                     | 0.879              |
|                                                | <b>Atrial fibrillation and flutter</b>                            | 0.922              |
|                                                | <b>Breast cancer</b>                                              | 0.506              |
|                                                | <b>Chronic kidney disease due to diabetes mellitus</b>            | 0.870              |
|                                                | <b>Chronic kidney disease due to glomerulonephritis</b>           | 0.868              |
|                                                | <b>Chronic kidney disease due to hypertension</b>                 | 0.869              |
|                                                | <b>Chronic kidney disease due to other and unspecified causes</b> | 0.878              |
|                                                | <b>Chronic lymphoid leukemia</b>                                  | 0.963              |
|                                                | <b>Chronic myeloid leukemia</b>                                   | 0.963              |
|                                                | <b>Colon and rectum cancer</b>                                    | 0.953              |
|                                                | <b>Diabetes mellitus</b>                                          | 0.832              |
|                                                | <b>Esophageal cancer</b>                                          | 0.982              |
|                                                | <b>Gallbladder and biliary diseases</b>                           | 0.956              |
|                                                | <b>Gallbladder and biliary tract cancer</b>                       | 0.964              |
|                                                | <b>Hypertensive heart disease</b>                                 | 0.855              |
|                                                | <b>Intracerebral hemorrhage</b>                                   | 0.843              |
|                                                | <b>Ischemic heart disease</b>                                     | 0.907              |
|                                                | <b>Ischemic stroke</b>                                            | 0.882              |
|                                                | <b>Kidney cancer</b>                                              | 0.981              |
|                                                | <b>Liver cancer due to alcohol use</b>                            | 0.975              |
| <b>Liver cancer due to hepatitis B</b>         | 0.975                                                             |                    |

| Risk                                      | Cause of death                                             | Correlation |
|-------------------------------------------|------------------------------------------------------------|-------------|
|                                           | Liver cancer due to hepatitis C                            | 0.975       |
|                                           | Liver cancer due to other causes                           | 0.975       |
|                                           | Multiple myeloma                                           | 0.964       |
|                                           | Non-Hodgkin lymphoma                                       | 0.961       |
|                                           | Other leukemia                                             | 0.963       |
|                                           | Ovarian cancer                                             | 0.949       |
|                                           | Pancreatic cancer                                          | 0.963       |
|                                           | Thyroid cancer                                             | 0.963       |
|                                           | Uterine cancer                                             | 0.977       |
| High fasting plasma glucose (categorical) | Alzheimer's disease and other dementias                    | 0.983       |
|                                           | Bladder cancer                                             | 0.997       |
|                                           | Breast cancer                                              | 0.997       |
|                                           | Colon and rectum cancer                                    | 0.997       |
|                                           | Liver cancer due to other causes                           | 0.997       |
|                                           | Ovarian cancer                                             | 0.997       |
|                                           | Pancreatic cancer                                          | 0.997       |
|                                           | Peripheral artery disease                                  | 0.998       |
|                                           | Tracheal, bronchus, and lung cancer                        | 0.997       |
|                                           | Tuberculosis                                               | 0.998       |
| High fasting plasma glucose (continuous)  | Chronic kidney disease due to diabetes mellitus            | 0.910       |
|                                           | Chronic kidney disease due to glomerulonephritis           | 0.910       |
|                                           | Chronic kidney disease due to hypertension                 | 0.909       |
|                                           | Chronic kidney disease due to other and unspecified causes | 0.910       |
|                                           | Intracerebral hemorrhage                                   | 0.906       |
|                                           | Ischemic heart disease                                     | 0.903       |
|                                           | Ischemic stroke                                            | 0.906       |
| High systolic blood pressure              | Aortic aneurysm                                            | 0.994       |
|                                           | Atrial fibrillation and flutter                            | 0.993       |
|                                           | Chronic kidney disease due to diabetes mellitus            | 0.983       |
|                                           | Chronic kidney disease due to glomerulonephritis           | 0.983       |
|                                           | Chronic kidney disease due to other and unspecified causes | 0.983       |
|                                           | Endocarditis                                               | 0.988       |
|                                           | Intracerebral hemorrhage                                   | 0.983       |
|                                           | Ischemic heart disease                                     | 0.989       |
|                                           | Ischemic stroke                                            | 0.994       |
|                                           | Other cardiomyopathy                                       | 0.988       |

| <b>Risk</b>                                          | <b>Cause of death</b>                                             | <b>Correlation</b> |
|------------------------------------------------------|-------------------------------------------------------------------|--------------------|
|                                                      | <b>Other cardiovascular and circulatory diseases</b>              | 0.995              |
|                                                      | <b>Peripheral artery disease</b>                                  | 0.988              |
|                                                      | <b>Rheumatic heart disease</b>                                    | 0.981              |
| <b>High total cholesterol</b>                        | <b>Ischemic heart disease</b>                                     | 0.987              |
|                                                      | <b>Ischemic stroke</b>                                            | 0.951              |
| <b>Household air pollution from solid fuels</b>      | <b>Chronic obstructive pulmonary disease</b>                      | 0.985              |
|                                                      | <b>Intracerebral hemorrhage</b>                                   | 0.995              |
|                                                      | <b>Ischemic heart disease</b>                                     | 0.996              |
|                                                      | <b>Ischemic stroke</b>                                            | 0.995              |
|                                                      | <b>Lower respiratory infections</b>                               | 0.984              |
|                                                      | <b>Tracheal, bronchus, and lung cancer</b>                        | 0.965              |
| <b>Impaired kidney function</b>                      | <b>Intracerebral hemorrhage</b>                                   | 0.987              |
|                                                      | <b>Ischemic heart disease</b>                                     | 0.993              |
|                                                      | <b>Ischemic stroke</b>                                            | 0.987              |
|                                                      | <b>Peripheral artery disease</b>                                  | 0.978              |
| <b>Intimate partner violence (exposure approach)</b> | <b>Maternal abortion, miscarriage, and ectopic pregnancy</b>      | 0.998              |
| <b>Iron deficiency</b>                               | <b>Maternal hemorrhage</b>                                        | -0.989             |
|                                                      | <b>Maternal sepsis and other maternal infections</b>              | -0.989             |
| <b>Lead exposure in bone</b>                         | <b>Aortic aneurysm</b>                                            | 0.909              |
|                                                      | <b>Atrial fibrillation and flutter</b>                            | 0.919              |
|                                                      | <b>Chronic kidney disease due to diabetes mellitus</b>            | 0.979              |
|                                                      | <b>Chronic kidney disease due to glomerulonephritis</b>           | 0.979              |
|                                                      | <b>Chronic kidney disease due to hypertension</b>                 | 0.979              |
|                                                      | <b>Chronic kidney disease due to other and unspecified causes</b> | 0.979              |
|                                                      | <b>Endocarditis</b>                                               | 0.919              |
|                                                      | <b>Hypertensive heart disease</b>                                 | 0.974              |
|                                                      | <b>Intracerebral hemorrhage</b>                                   | 0.964              |
|                                                      | <b>Ischemic heart disease</b>                                     | 0.967              |
|                                                      | <b>Ischemic stroke</b>                                            | 0.950              |
|                                                      | <b>Other cardiomyopathy</b>                                       | 0.919              |
|                                                      | <b>Other cardiovascular and circulatory diseases</b>              | 0.920              |
|                                                      | <b>Peripheral artery disease</b>                                  | 0.904              |
|                                                      | <b>Rheumatic heart disease</b>                                    | 0.915              |
| <b>Low birth weight for gestation</b>                | <b>Encephalitis</b>                                               | -0.090             |
|                                                      | <b>H influenzae type B meningitis</b>                             | -0.090             |
|                                                      | <b>Hemolytic disease and other neonatal jaundice</b>              | -0.091             |

| <b>Risk</b>                                           | <b>Cause of death</b>                                           | <b>Correlation</b> |
|-------------------------------------------------------|-----------------------------------------------------------------|--------------------|
|                                                       | <b>Lower respiratory infections</b>                             | -0.091             |
|                                                       | <b>Meningococcal meningitis</b>                                 | -0.090             |
|                                                       | <b>Neonatal encephalopathy due to birth asphyxia and trauma</b> | -0.090             |
|                                                       | <b>Neonatal sepsis and other neonatal infections</b>            | -0.090             |
|                                                       | <b>Other meningitis</b>                                         | -0.090             |
|                                                       | <b>Other neonatal disorders</b>                                 | -0.090             |
|                                                       | <b>Otitis media</b>                                             | -0.091             |
|                                                       | <b>Pneumococcal meningitis</b>                                  | -0.090             |
|                                                       | <b>Sudden infant death syndrome</b>                             | 0.112              |
|                                                       | <b>Upper respiratory infections</b>                             | -0.091             |
| <b>Low physical activity</b>                          | <b>Breast cancer</b>                                            | 0.831              |
|                                                       | <b>Colon and rectum cancer</b>                                  | 0.827              |
|                                                       | <b>Diabetes mellitus</b>                                        | 0.823              |
|                                                       | <b>Ischemic heart disease</b>                                   | 0.980              |
|                                                       | <b>Ischemic stroke</b>                                          | 0.980              |
| <b>No access to handwashing facility</b>              | <b>Lower respiratory infections</b>                             | 1.000              |
| <b>Non-exclusive breastfeeding</b>                    | <b>Lower respiratory infections</b>                             | 0.998              |
| <b>Occupational exposure to arsenic</b>               | <b>Tracheal, bronchus, and lung cancer</b>                      | 0.908              |
| <b>Occupational exposure to asbestos</b>              | <b>Larynx cancer</b>                                            | 0.992              |
|                                                       | <b>Ovarian cancer</b>                                           | 0.967              |
|                                                       | <b>Tracheal, bronchus, and lung cancer</b>                      | 0.992              |
| <b>Occupational exposure to benzene</b>               | <b>Acute lymphoid leukemia</b>                                  | 0.992              |
|                                                       | <b>Acute myeloid leukemia</b>                                   | 0.992              |
|                                                       | <b>Chronic lymphoid leukemia</b>                                | 0.992              |
|                                                       | <b>Chronic myeloid leukemia</b>                                 | 0.992              |
|                                                       | <b>Other leukemia</b>                                           | 0.992              |
| <b>Occupational exposure to beryllium</b>             | <b>Tracheal, bronchus, and lung cancer</b>                      | 0.915              |
| <b>Occupational exposure to cadmium</b>               | <b>Tracheal, bronchus, and lung cancer</b>                      | 0.977              |
| <b>Occupational exposure to chromium</b>              | <b>Tracheal, bronchus, and lung cancer</b>                      | 0.989              |
| <b>Occupational exposure to diesel engine exhaust</b> | <b>Tracheal, bronchus, and lung cancer</b>                      | 0.991              |
| <b>Occupational exposure to formaldehyde</b>          | <b>Acute lymphoid leukemia</b>                                  | 0.997              |
|                                                       | <b>Acute myeloid leukemia</b>                                   | 0.997              |
|                                                       | <b>Chronic lymphoid leukemia</b>                                | 0.997              |
|                                                       | <b>Chronic myeloid leukemia</b>                                 | 0.997              |
|                                                       | <b>Nasopharynx cancer</b>                                       | 0.997              |
|                                                       | <b>Other leukemia</b>                                           | 0.997              |
| <b>Occupational exposure to nickel</b>                | <b>Tracheal, bronchus, and lung cancer</b>                      | 0.923              |



| <b>Risk</b>                                                      | <b>Cause of death</b>                                           | <b>Correlation</b> |
|------------------------------------------------------------------|-----------------------------------------------------------------|--------------------|
| <b>Occupational exposure to polycyclic aromatic hydrocarbons</b> | <b>Tracheal, bronchus, and lung cancer</b>                      | 0.989              |
| <b>Occupational exposure to secondhand smoke</b>                 | <b>Breast cancer</b>                                            | 0.778              |
|                                                                  | <b>Chronic obstructive pulmonary disease</b>                    | 0.980              |
|                                                                  | <b>Diabetes mellitus</b>                                        | 0.778              |
|                                                                  | <b>Intracerebral hemorrhage</b>                                 | 0.947              |
|                                                                  | <b>Ischemic heart disease</b>                                   | 0.940              |
|                                                                  | <b>Ischemic stroke</b>                                          | 0.947              |
|                                                                  | <b>Lower respiratory infections</b>                             | 0.986              |
|                                                                  | <b>Tracheal, bronchus, and lung cancer</b>                      | 0.988              |
| <b>Occupational exposure to silica</b>                           | <b>Tracheal, bronchus, and lung cancer</b>                      | 0.983              |
| <b>Occupational exposure to sulfuric acid</b>                    | <b>Larynx cancer</b>                                            | 0.979              |
| <b>Occupational exposure to trichloroethylene</b>                | <b>Kidney cancer</b>                                            | 0.986              |
| <b>Occupational particulate matter, gases, and fumes</b>         | <b>Chronic obstructive pulmonary disease</b>                    | 0.996              |
| <b>Residential radon</b>                                         | <b>Tracheal, bronchus, and lung cancer</b>                      | 1.000              |
| <b>Secondhand smoke</b>                                          | <b>Breast cancer</b>                                            | 0.912              |
|                                                                  | <b>Chronic obstructive pulmonary disease</b>                    | 0.857              |
|                                                                  | <b>Diabetes mellitus</b>                                        | 0.917              |
|                                                                  | <b>Intracerebral hemorrhage</b>                                 | 0.960              |
|                                                                  | <b>Ischemic heart disease</b>                                   | 0.958              |
|                                                                  | <b>Ischemic stroke</b>                                          | 0.960              |
|                                                                  | <b>Lower respiratory infections</b>                             | 0.966              |
|                                                                  | <b>Otitis media</b>                                             | 0.919              |
|                                                                  | <b>Tracheal, bronchus, and lung cancer</b>                      | 0.854              |
| <b>Short gestation for birth weight</b>                          | <b>Encephalitis</b>                                             | 0.794              |
|                                                                  | <b>H influenzae type B meningitis</b>                           | 0.794              |
|                                                                  | <b>Hemolytic disease and other neonatal jaundice</b>            | 0.794              |
|                                                                  | <b>Lower respiratory infections</b>                             | 0.794              |
|                                                                  | <b>Meningococcal meningitis</b>                                 | 0.794              |
|                                                                  | <b>Neonatal encephalopathy due to birth asphyxia and trauma</b> | 0.794              |
|                                                                  | <b>Neonatal sepsis and other neonatal infections</b>            | 0.794              |
|                                                                  | <b>Other meningitis</b>                                         | 0.794              |
|                                                                  | <b>Other neonatal disorders</b>                                 | 0.794              |
|                                                                  | <b>Otitis media</b>                                             | 0.794              |
|                                                                  | <b>Pneumococcal meningitis</b>                                  | 0.794              |

| <b>Risk</b>                                | <b>Cause of death</b>                          | <b>Correlation</b> |
|--------------------------------------------|------------------------------------------------|--------------------|
|                                            | <b>Sudden infant death syndrome</b>            | 0.566              |
|                                            | <b>Upper respiratory infections</b>            | 0.794              |
| <b>Smoking (SIR approach)</b>              | <b>Acute lymphoid leukemia</b>                 | 0.997              |
|                                            | <b>Acute myeloid leukemia</b>                  | 0.997              |
|                                            | <b>Bladder cancer</b>                          | 0.992              |
|                                            | <b>Breast cancer</b>                           | 0.999              |
|                                            | <b>Cervical cancer</b>                         | 0.999              |
|                                            | <b>Chronic lymphoid leukemia</b>               | 0.997              |
|                                            | <b>Chronic myeloid leukemia</b>                | 0.997              |
|                                            | <b>Chronic obstructive pulmonary disease</b>   | 0.973              |
|                                            | <b>Colon and rectum cancer</b>                 | 0.999              |
|                                            | <b>Esophageal cancer</b>                       | 0.982              |
|                                            | <b>Kidney cancer</b>                           | 0.996              |
|                                            | <b>Larynx cancer</b>                           | 0.952              |
|                                            | <b>Lip and oral cavity cancer</b>              | 0.980              |
|                                            | <b>Liver cancer due to alcohol use</b>         | 0.995              |
|                                            | <b>Liver cancer due to hepatitis B</b>         | 0.995              |
|                                            | <b>Liver cancer due to hepatitis C</b>         | 0.995              |
|                                            | <b>Liver cancer due to other causes</b>        | 0.995              |
|                                            | <b>Nasopharynx cancer</b>                      | 0.980              |
|                                            | <b>Other chronic respiratory diseases</b>      | 0.997              |
|                                            | <b>Other leukemia</b>                          | 0.997              |
|                                            | <b>Pancreatic cancer</b>                       | 0.995              |
|                                            | <b>Prostate cancer</b>                         | 1.000              |
| <b>Stomach cancer</b>                      | 0.997                                          |                    |
| <b>Tracheal, bronchus, and lung cancer</b> | 0.961                                          |                    |
| <b>Smoking (prevalence approach)</b>       | <b>Alzheimer's disease and other dementias</b> | 0.773              |
|                                            | <b>Aortic aneurysm</b>                         | 0.989              |
|                                            | <b>Asthma</b>                                  | 0.989              |
|                                            | <b>Atrial fibrillation and flutter</b>         | 0.989              |
|                                            | <b>Diabetes mellitus</b>                       | 0.989              |
|                                            | <b>Gallbladder and biliary diseases</b>        | 0.989              |
|                                            | <b>Hypertensive heart disease</b>              | 0.989              |
|                                            | <b>Intracerebral hemorrhage</b>                | 0.989              |
|                                            | <b>Ischemic heart disease</b>                  | 0.989              |
|                                            | <b>Ischemic stroke</b>                         | 0.989              |
|                                            | <b>Lower respiratory infections</b>            | 0.989              |
|                                            | <b>Multiple sclerosis</b>                      | 0.989              |

| <b>Risk</b>                              | <b>Cause of death</b>                                | <b>Correlation</b> |
|------------------------------------------|------------------------------------------------------|--------------------|
|                                          | <b>Other cardiovascular and circulatory diseases</b> | 0.989              |
|                                          | <b>Parkinson's disease</b>                           | 0.989              |
|                                          | <b>Peptic ulcer disease</b>                          | 0.989              |
|                                          | <b>Peripheral artery disease</b>                     | 0.988              |
|                                          | <b>Rheumatoid arthritis</b>                          | 0.989              |
|                                          | <b>Tuberculosis</b>                                  | 0.989              |
| <b>Suicide due to drug use disorders</b> | <b>Self-harm by firearm</b>                          | 0.996              |
|                                          | <b>Self-harm by other specified means</b>            | 0.997              |
| <b>Vitamin A deficiency</b>              | <b>Measles</b>                                       | 0.995              |
| <b>Zinc deficiency</b>                   | <b>Lower respiratory infections</b>                  | 0.996              |

Appendix Table 3a. Pearson correlation coefficients among the components of SDI, top 20 risks, and vaccines in GBD 2016 for 1990-2016. Blank cells occur where risk pairs are not estimated on overlapping age groups.

| Driver                         | Ambient     |                    |               |              |           | Impaired    |                       |                     |                      |             |                        |                         | Low birth       |                   |                      |           |                    |             |                       |                |                  |             |                   |                      |                   |              |
|--------------------------------|-------------|--------------------|---------------|--------------|-----------|-------------|-----------------------|---------------------|----------------------|-------------|------------------------|-------------------------|-----------------|-------------------|----------------------|-----------|--------------------|-------------|-----------------------|----------------|------------------|-------------|-------------------|----------------------|-------------------|--------------|
|                                | Alcohol use | particulate matter | Child wasting | DTP3 vaccine | Education | Hib vaccine | High FPG (continuous) | High blood pressure | High body-mass index | High sodium | High total cholesterol | Household air pollution | kidney function | Income per capita | weight for gestation | Low fruit | Low nuts and seeds | Low omega-3 | Low physical activity | Low vegetables | Low whole grains | PCV vaccine | Rotavirus vaccine | Smoking (prevalence) | Unsafe sanitation | Unsafe water |
| Alcohol use                    | 1.000       | -0.165             |               | 0.205        | 0.373     | 0.169       | -0.256                | -0.106              | -0.168               | 0.197       | 0.047                  | -0.264                  | -0.322          | 0.279             |                      |           |                    |             |                       |                |                  |             |                   |                      |                   |              |
| Ambient particulate matter     | -0.165      | 1.000              | 0.441         | -0.242       | -0.505    | -0.168      | -0.080                | -0.065              | -0.280               | 0.040       | -0.210                 | 0.329                   | 0.014           | -0.317            | 0.029                | 0.151     | -0.129             | 0.307       | -0.144                | -0.066         | 0.018            | -0.019      | 0.041             | -0.114               | 0.408             | 0.430        |
| Child wasting                  |             | 0.441              | 1.000         | -0.520       | -0.645    | -0.351      |                       |                     | -0.423               |             |                        | 0.613                   |                 | -0.597            |                      |           |                    |             |                       |                |                  | -0.179      | -0.111            |                      | 0.623             | 0.631        |
| DTP3 vaccine                   | 0.205       | -0.242             | -0.520        | 1.000        | 0.602     | 0.423       | 0.042                 | 0.039               | 0.284                | 0.155       | 0.328                  | -0.645                  | -0.123          | 0.578             | -0.312               | -0.353    | -0.179             | -0.421      | 0.077                 | -0.424         | -0.078           | 0.217       | 0.138             | 0.106                | -0.633            | -0.615       |
| Education                      | 0.373       | -0.505             | -0.645        | 0.602        | 1.000     | 0.427       | -0.007                | 0.074               | 0.365                | 0.328       | 0.469                  | -0.794                  | -0.185          | 0.780             | -0.308               | -0.384    | -0.204             | -0.613      | 0.118                 | -0.476         | 0.043            | 0.232       | 0.092             | 0.191                | -0.825            | -0.873       |
| Hib vaccine                    | 0.169       | -0.168             | -0.351        | 0.423        | 0.427     | 1.000       | 0.005                 | 0.012               | 0.236                | -0.046      | 0.166                  | -0.361                  | -0.052          | 0.394             | -0.168               | -0.261    | -0.220             | -0.366      | 0.062                 | -0.142         | -0.079           | 0.465       | 0.319             | -0.012               | -0.423            | -0.393       |
| High FPG (continuous)          | -0.256      | -0.080             |               | 0.042        | -0.007    | 0.005       | 1.000                 | 0.306               | 0.391                | -0.125      | 0.190                  | -0.074                  | 0.372           | 0.076             |                      | -0.124    | 0.034              | -0.046      | 0.472                 | 0.079          | -0.080           | 0.005       | 0.010             | -0.180               | -0.058            | 0.046        |
| High blood pressure            | -0.106      | -0.065             |               | 0.039        | 0.074     | 0.012       | 0.306                 | 1.000               | 0.391                | 0.181       | 0.641                  | -0.015                  | 0.691           | 0.034             |                      | -0.039    | 0.074              | 0.035       | 0.714                 | 0.060          | 0.135            | -0.007      | -0.011            | -0.295               | -0.034            | -0.052       |
| High body-mass index           | -0.168      | -0.280             | -0.423        | 0.284        | 0.365     | 0.236       | 0.391                 | 0.391               | 1.000                | 0.001       | 0.510                  | -0.396                  | 0.335           | 0.414             |                      | -0.351    | -0.157             | -0.304      | 0.459                 | -0.233         | -0.048           | 0.158       | 0.091             | -0.272               | -0.427            | -0.345       |
| High sodium                    | 0.197       | 0.040              |               | 0.155        | 0.328     | -0.046      | -0.125                | 0.181               | 0.001                | 1.000       | 0.207                  | -0.183                  | 0.017           | 0.180             |                      | 0.096     | -0.094             | -0.116      | 0.070                 | -0.371         | 0.304            | -0.023      | -0.033            | 0.111                | -0.196            | -0.337       |
| High total cholesterol         | 0.047       | -0.210             |               | 0.328        | 0.469     | 0.166       | 0.190                 | 0.641               | 0.510                | 0.207       | 1.000                  | -0.446                  | 0.237           | 0.460             |                      | -0.312    | -0.143             | -0.287      | 0.453                 | -0.243         | 0.034            | 0.049       | -0.019            | -0.094               | -0.504            | -0.498       |
| Household air pollution        | -0.264      | 0.329              | 0.613         | -0.645       | -0.794    | -0.361      | -0.074                | -0.015              | -0.396               | -0.183      | -0.446                 | 1.000                   | 0.172           | -0.852            | 0.322                | 0.501     | 0.278              | 0.656       | -0.165                | 0.568          | 0.160            | -0.166      | -0.076            | -0.166               | 0.884             | 0.823        |
| Impaired kidney function       | -0.322      | 0.014              |               | -0.123       | -0.185    | -0.052      | 0.372                 | 0.691               | 0.335                | 0.017       | 0.237                  | 0.172                   | 1.000           | -0.160            |                      | 0.055     | 0.073              | 0.173       | 0.774                 | 0.211          | 0.034            | -0.008      | 0.021             | -0.438               | 0.195             | 0.200        |
| Income per capita              | 0.279       | -0.317             | -0.597        | 0.578        | 0.780     | 0.394       | 0.076                 | 0.034               | 0.414                | 0.180       | 0.460                  | -0.852                  | -0.160          | 1.000             | -0.307               | -0.605    | -0.409             | -0.777      | 0.176                 | -0.523         | -0.042           | 0.237       | 0.064             | 0.104                | -0.875            | -0.825       |
| Low birth weight for gestation |             | 0.029              |               | -0.312       | -0.308    | -0.168      |                       |                     |                      |             |                        | 0.322                   |                 | -0.307            | 1.000                |           |                    |             |                       |                |                  | -0.117      | -0.050            |                      | 0.355             | 0.348        |
| Low fruit                      | -0.103      | 0.151              |               | -0.353       | -0.384    | -0.261      | -0.124                | -0.039              | -0.351               | 0.096       | -0.312                 | 0.501                   | 0.055           | -0.605            |                      | 1.000     | 0.417              | 0.531       | -0.149                | 0.374          | 0.223            | -0.176      | -0.082            | 0.073                | 0.545             | 0.421        |
| Low nuts and seeds             | -0.070      | -0.129             |               | -0.179       | -0.204    | -0.220      | 0.034                 | 0.074               | -0.157               | -0.094      | -0.143                 | 0.278                   | 0.073           | -0.409            |                      | 0.417     | 1.000              | 0.328       | -0.031                | 0.480          | -0.159           | -0.226      | -0.071            | -0.062               | 0.324             | 0.282        |
| Low omega-3                    | -0.267      | 0.307              |               | -0.421       | -0.613    | -0.366      | -0.046                | 0.035               | -0.304               | -0.116      | -0.287                 | 0.656                   | 0.173           | -0.777            |                      | 0.531     | 0.328              | 1.000       | -0.113                | 0.395          | 0.144            | -0.261      | -0.104            | -0.118               | 0.681             | 0.645        |
| Low physical activity          | -0.194      | -0.144             |               | 0.077        | 0.118     | 0.062       | 0.472                 | 0.714               | 0.459                | 0.070       | 0.453                  | -0.165                  | 0.774           | 0.176             |                      | -0.149    | -0.031             | -0.113      | 1.000                 | 0.029          | 0.014            | 0.039       | 0.003             | -0.243               | -0.163            | -0.111       |
| Low vegetables                 | -0.178      | -0.066             |               | -0.424       | -0.476    | -0.142      | 0.079                 | 0.060               | -0.233               | -0.371      | -0.243                 | 0.568                   | 0.211           | -0.523            |                      | 0.374     | 0.480              | 0.395       | 0.029                 | 1.000          | -0.166           | -0.094      | 0.007             | -0.255               | 0.561             | 0.557        |
| Low whole grains               | -0.003      | 0.018              |               | -0.078       | 0.043     | -0.079      | -0.080                | 0.135               | -0.048               | 0.304       | 0.034                  | 0.160                   | 0.034           | -0.042            |                      | 0.223     | -0.159             | 0.144       | 0.014                 | -0.166         | 1.000            | -0.021      | -0.164            | 0.156                | 0.081             | 0.035        |
| PCV vaccine                    | 0.067       | -0.019             | -0.179        | 0.217        | 0.232     | 0.465       | 0.005                 | -0.007              | 0.158                | -0.023      | 0.049                  | -0.166                  | -0.008          | 0.237             | -0.117               | -0.176    | -0.226             | -0.261      | 0.039                 | -0.094         | -0.021           | 1.000       | 0.561             | -0.052               | -0.207            | -0.195       |
| Rotavirus vaccine              | 0.016       | 0.041              | -0.111        | 0.138        | 0.092     | 0.319       | 0.010                 | -0.011              | 0.091                | -0.033      | -0.019                 | -0.076                  | 0.021           | 0.064             | -0.050               | -0.082    | -0.071             | -0.104      | 0.003                 | 0.007          | -0.164           | 0.561       | 1.000             | -0.076               | -0.069            | -0.078       |
| Smoking (prevalence)           | 0.399       | -0.114             |               | 0.106        | 0.191     | -0.012      | -0.180                | -0.295              | -0.272               | 0.111       | -0.094                 | -0.166                  | -0.438          | 0.104             |                      | 0.073     | -0.062             | -0.118      | -0.243                | -0.255         | 0.156            | -0.052      | -0.076            | 1.000                | -0.183            | -0.200       |
| Unsafe sanitation              | -0.265      | 0.408              | 0.623         | -0.633       | -0.825    | -0.423      | -0.058                | -0.034              | -0.427               | -0.196      | -0.504                 | 0.884                   | 0.195           | -0.875            | 0.355                | 0.545     | 0.324              | 0.681       | -0.163                | 0.561          | 0.081            | -0.207      | -0.069            | -0.183               | 1.000             | 0.876        |
| Unsafe water                   | -0.338      | 0.430              | 0.631         | -0.615       | -0.873    | -0.393      | 0.046                 | -0.052              | -0.345               | -0.337      | -0.498                 | 0.823                   | 0.200           | -0.825            | 0.348                | 0.421     | 0.282              | 0.645       | -0.111                | 0.557          | 0.035            | -0.195      | -0.078            | -0.200               | 0.876             | 1.000        |

**Appendix Table 3b. Pearson correlation coefficients among the components of SDI, top 20 risks, and vaccines in reference scenario forecasts 2017-2040. Blank cells occur where risk pairs are not estimated on overlapping age groups.**

| Driver                         | Ambient     |                    |               |              |           | Impaired    |                       |                     |                      |             |                        |                         |                 |                   |                      | Low birth |                    |             |                       |                |                  |             |                   |                      |                   |              |
|--------------------------------|-------------|--------------------|---------------|--------------|-----------|-------------|-----------------------|---------------------|----------------------|-------------|------------------------|-------------------------|-----------------|-------------------|----------------------|-----------|--------------------|-------------|-----------------------|----------------|------------------|-------------|-------------------|----------------------|-------------------|--------------|
|                                | Alcohol use | particulate matter | Child wasting | DTP3 vaccine | Education | Hib vaccine | High FPG (continuous) | High blood pressure | High body-mass index | High sodium | High total cholesterol | Household air pollution | kidney function | Income per capita | weight for gestation | Low fruit | Low nuts and seeds | Low omega-3 | Low physical activity | Low vegetables | Low whole grains | PCV vaccine | Rotavirus vaccine | Smoking (prevalence) | Unsafe sanitation | Unsafe water |
| Alcohol use                    | 1.000       | -0.254             |               | 0.093        | 0.368     | 0.144       | -0.275                | -0.149              | -0.226               | 0.171       | -0.002                 | -0.243                  | -0.350          | 0.310             |                      | -0.089    | -0.041             | -0.300      | -0.219                | -0.219         | -0.031           | 0.099       | 0.013             | 0.398                | -0.221            | -0.306       |
| Ambient particulate matter     | -0.254      | 1.000              | 0.413         | -0.104       | -0.508    | -0.147      | -0.021                | -0.039              | -0.194               | 0.115       | -0.241                 | 0.352                   | 0.053           | -0.331            | 0.021                | 0.150     | -0.172             | 0.341       | -0.120                | -0.058         | 0.061            | -0.035      | 0.060             | -0.098               | 0.426             | 0.427        |
| Child wasting                  |             | 0.413              | 1.000         | -0.346       | -0.563    | -0.369      |                       |                     | -0.289               |             |                        | 0.507                   |                 | -0.533            |                      |           |                    |             |                       |                |                  | -0.231      | -0.058            |                      | 0.514             | 0.559        |
| DTP3 vaccine                   | 0.093       | -0.104             | -0.346        | 1.000        | 0.327     | 0.844       | -0.035                | -0.019              | 0.119                | 0.208       | 0.174                  | -0.362                  | -0.083          | 0.374             | -0.182               | -0.274    | -0.137             | -0.251      | 0.058                 | -0.260         | -0.080           | 0.443       | 0.216             | 0.039                | -0.342            | -0.390       |
| Education                      | 0.368       | -0.508             | -0.563        | 0.327        | 1.000     | 0.377       | -0.041                | 0.011               | 0.312                | 0.318       | 0.431                  | -0.763                  | -0.193          | 0.760             | -0.316               | -0.394    | -0.191             | -0.589      | 0.123                 | -0.482         | 0.064            | 0.215       | 0.025             | 0.151                | -0.754            | -0.814       |
| Hib vaccine                    | 0.144       | -0.147             | -0.369        | 0.844        | 0.377     | 1.000       | -0.055                | -0.003              | 0.124                | 0.222       | 0.204                  | -0.406                  | -0.092          | 0.400             | -0.194               | -0.247    | -0.147             | -0.264      | 0.048                 | -0.282         | -0.069           | 0.493       | 0.241             | 0.047                | -0.395            | -0.435       |
| High FPG (continuous)          | -0.275      | -0.021             |               | -0.035       | -0.041    | -0.055      | 1.000                 | 0.339               | 0.339                | 0.025       | 0.206                  | -0.063                  | 0.397           | -0.019            |                      | -0.047    | 0.093              | 0.013       | 0.474                 | 0.118          | -0.084           | -0.037      | -0.018            | -0.157               | -0.035            | 0.043        |
| High blood pressure            | -0.149      | -0.039             |               | -0.019       | 0.011     | -0.003      | 0.339                 | 1.000               | 0.389                | 0.083       | 0.608                  | 0.025                   | 0.705           | -0.034            |                      | -0.015    | 0.114              | 0.075       | 0.725                 | 0.045          | 0.106            | -0.019      | 0.006             | -0.255               | 0.029             | 0.020        |
| High body-mass index           | -0.226      | -0.194             | -0.289        | 0.119        | 0.312     | 0.124       | 0.339                 | 0.389               | 1.000                | 0.137       | 0.541                  | -0.366                  | 0.364           | 0.339             |                      | -0.342    | -0.105             | -0.277      | 0.471                 | -0.191         | -0.058           | 0.096       | 0.071             | -0.299               | -0.369            | -0.329       |
| High sodium                    | 0.171       | 0.115              |               | 0.208        | 0.318     | 0.222       | 0.025                 | 0.083               | 0.137                | 1.000       | 0.200                  | -0.385                  | -0.013          | 0.371             |                      | -0.138    | -0.206             | -0.293      | 0.205                 | -0.427         | -0.109           | 0.097       | -0.035            | 0.114                | -0.365            | -0.422       |
| High total cholesterol         | -0.002      | -0.241             |               | 0.174        | 0.431     | 0.204       | 0.206                 | 0.608               | 0.541                | 0.200       | 1.000                  | -0.420                  | 0.264           | 0.437             |                      | -0.332    | -0.084             | -0.280      | 0.464                 | -0.253         | 0.012            | 0.063       | -0.091            | -0.150               | -0.469            | -0.464       |
| Household air pollution        | -0.243      | 0.352              | 0.507         | -0.362       | -0.763    | -0.406      | -0.063                | 0.025               | -0.366               | -0.385      | -0.420                 | 1.000                   | 0.180           | -0.818            | 0.278                | 0.493     | 0.219              | 0.637       | -0.157                | 0.513          | 0.187            | -0.158      | 0.016             | -0.125               | 0.858             | 0.818        |
| Impaired kidney function       | -0.350      | 0.053              |               | -0.083       | -0.193    | -0.092      | 0.397                 | 0.705               | 0.364                | -0.013      | 0.264                  | 0.180                   | 1.000           | -0.198            |                      | 0.069     | 0.092              | 0.186       | 0.766                 | 0.196          | 0.006            | -0.016      | 0.065             | -0.415               | 0.219             | 0.208        |
| Income per capita              | 0.310       | -0.331             | -0.533        | 0.374        | 0.760     | 0.400       | -0.019                | -0.034              | 0.339                | 0.371       | 0.437                  | -0.818                  | -0.198          | 1.000             | -0.295               | -0.599    | -0.390             | -0.750      | 0.150                 | -0.524         | -0.035           | 0.200       | -0.048            | 0.086                | -0.840            | -0.834       |
| Low birth weight for gestation |             | 0.021              |               | -0.182       | -0.316    | -0.194      |                       |                     |                      |             |                        | 0.278                   |                 | -0.295            | 1.000                |           |                    |             |                       |                |                  | -0.117      | -0.014            |                      | 0.286             | 0.363        |
| Low fruit                      | -0.089      | 0.150              |               | -0.274       | -0.394    | -0.247      | -0.047                | -0.015              | -0.342               | -0.138      | -0.332                 | 0.493                   | 0.069           | -0.599            |                      | 1.000     | 0.363              | 0.508       | -0.143                | 0.371          | 0.214            | -0.123      | 0.009             | 0.103                | 0.548             | 0.464        |
| Low nuts and seeds             | -0.041      | -0.172             |               | -0.137       | -0.191    | -0.147      | 0.093                 | 0.114               | -0.105               | -0.206      | -0.084                 | 0.219                   | 0.092           | -0.390            |                      | 0.363     | 1.000              | 0.284       | -0.021                | 0.426          | -0.150           | -0.103      | -0.004            | -0.064               | 0.291             | 0.276        |
| Low omega-3                    | -0.300      | 0.341              |               | -0.251       | -0.589    | -0.264      | 0.013                 | 0.075               | -0.277               | -0.293      | -0.280                 | 0.637                   | 0.186           | -0.750            |                      | 0.508     | 0.284              | 1.000       | -0.114                | 0.351          | 0.222            | -0.175      | -0.004            | -0.061               | 0.649             | 0.649        |
| Low physical activity          | -0.219      | -0.120             |               | 0.058        | 0.123     | 0.048       | 0.474                 | 0.725               | 0.471                | 0.205       | 0.464                  | -0.157                  | 0.766           | 0.150             |                      | -0.143    | -0.021             | -0.114      | 1.000                 | 0.022          | -0.019           | 0.033       | 0.001             | -0.244               | -0.154            | -0.116       |
| Low vegetables                 | -0.219      | -0.058             |               | -0.260       | -0.482    | -0.282      | 0.118                 | 0.045               | -0.191               | -0.427      | -0.253                 | 0.513                   | 0.196           | -0.524            |                      | 0.371     | 0.426              | 0.351       | 0.022                 | 1.000          | -0.182           | -0.073      | 0.131             | -0.271               | 0.503             | 0.572        |
| Low whole grains               | -0.031      | 0.061              |               | -0.080       | 0.064     | -0.069      | -0.084                | 0.106               | -0.058               | -0.109      | 0.012                  | 0.187                   | 0.006           | -0.035            |                      | 0.214     | -0.150             | 0.222       | -0.019                | -0.182         | 1.000            | -0.047      | -0.144            | 0.182                | 0.118             | 0.078        |
| PCV vaccine                    | 0.099       | -0.035             | -0.231        | 0.443        | 0.215     | 0.493       | -0.037                | -0.019              | 0.096                | 0.097       | 0.063                  | -0.158                  | -0.016          | 0.200             | -0.117               | -0.123    | -0.103             | -0.175      | 0.033                 | -0.073         | -0.047           | 1.000       | 0.447             | -0.032               | -0.158            | -0.192       |
| Rotavirus vaccine              | 0.013       | 0.060              | -0.058        | 0.216        | 0.025     | 0.241       | -0.018                | 0.006               | 0.071                | -0.035      | -0.091                 | 0.016                   | 0.065           | -0.048            | -0.014               | 0.009     | -0.004             | -0.004      | 0.001                 | 0.131          | -0.144           | 0.447       | 1.000             | -0.151               | 0.068             | 0.045        |
| Smoking (prevalence)           | 0.398       | -0.098             |               | 0.039        | 0.151     | 0.047       | -0.157                | -0.255              | -0.299               | 0.114       | -0.150                 | -0.125                  | -0.415          | 0.086             |                      | 0.103     | -0.064             | -0.061      | -0.244                | -0.271         | 0.182            | -0.032      | -0.151            | 1.000                | -0.159            | -0.145       |
| Unsafe sanitation              | -0.221      | 0.426              | 0.514         | -0.342       | -0.754    | -0.395      | -0.035                | 0.029               | -0.369               | -0.365      | -0.469                 | 0.858                   | 0.219           | -0.840            | 0.286                | 0.548     | 0.291              | 0.649       | -0.154                | 0.503          | 0.118            | -0.158      | 0.068             | -0.159               | 1.000             | 0.847        |
| Unsafe water                   | -0.306      | 0.427              | 0.559         | -0.390       | -0.814    | -0.435      | 0.043                 | 0.020               | -0.329               | -0.422      | -0.464                 | 0.818                   | 0.208           | -0.834            | 0.363                | 0.464     | 0.276              | 0.649       | -0.116                | 0.572          | 0.078            | -0.192      | 0.045             | -0.145               | 0.847             | 1.000        |

Appendix Table 3c. Ratio of correlation coefficients among the components of SDI, top 20 risks, and vaccines in reference scenario forecasts (2017-2040) divided by correlations in the past (1990-2016).

| Driver                         | Ambient     |                    |               |              |           |             |                       |                     |                      |             | Impaired               |                         |                 | Low birth         |                      | Low nuts and |                    |             | Low physical |            | Low whole |        | Rotavirus vaccine | Smoking (prevalence) | Unsafe sanitation | Unsafe water |
|--------------------------------|-------------|--------------------|---------------|--------------|-----------|-------------|-----------------------|---------------------|----------------------|-------------|------------------------|-------------------------|-----------------|-------------------|----------------------|--------------|--------------------|-------------|--------------|------------|-----------|--------|-------------------|----------------------|-------------------|--------------|
|                                | Alcohol use | particulate matter | Child wasting | DTP3 vaccine | Education | Hib vaccine | High FPG (continuous) | High blood pressure | High body-mass index | High sodium | High total cholesterol | Household air pollution | kidney function | Income per capita | weight for gestation | Low fruit    | Low nuts and seeds | Low omega-3 | activity     | vegetables | grains    |        |                   |                      |                   |              |
| Alcohol use                    | 1.000       | 1.546              |               | 0.450        | 0.988     | 0.853       | 1.077                 | 1.412               | 1.343                | 0.868       | -0.048                 | 0.920                   | 1.088           | 1.112             |                      | 0.867        | 0.588              | 1.122       | 1.131        | 1.232      | 11.984    | 1.480  | 0.788             | 0.998                | 0.834             | 0.908        |
| Ambient particulate matter     | 1.546       | 1.000              | 0.938         | 0.429        | 1.005     | 0.874       | 0.256                 | 0.604               | 0.691                | 2.884       | 1.145                  | 1.072                   | 3.723           | 1.044             | 0.712                | 0.995        | 1.333              | 1.110       | 0.832        | 0.880      | 3.366     | 1.824  | 1.443             | 0.861                | 1.044             | 0.992        |
| Child wasting                  |             | 0.938              | 1.000         | 0.666        | 0.872     | 1.052       |                       |                     | 0.684                |             |                        | 0.827                   |                 | 0.893             |                      |              |                    |             |              |            |           | 1.286  | 0.517             |                      | 0.825             | 0.885        |
| DTP3 vaccine                   | 0.450       | 0.429              | 0.666         | 1.000        | 0.542     | 1.996       | -0.837                | -0.481              | 0.420                | 1.338       | 0.529                  | 0.561                   | 0.677           | 0.647             | 0.583                | 0.776        | 0.763              | 0.597       | 0.756        | 0.613      | 1.031     | 2.038  | 1.562             | 0.365                | 0.541             | 0.635        |
| Education                      | 0.988       | 1.005              | 0.872         | 0.542        | 1.000     | 0.883       | 6.189                 | 0.152               | 0.856                | 0.967       | 0.919                  | 0.960                   | 1.044           | 0.974             | 1.026                | 1.025        | 0.933              | 0.961       | 1.045        | 1.011      | 1.485     | 0.925  | 0.273             | 0.790                | 0.915             | 0.933        |
| Hib vaccine                    | 0.853       | 0.874              | 1.052         | 1.996        | 0.883     | 1.000       | -10.008               | -0.237              | 0.523                | -4.863      | 1.229                  | 1.126                   | 1.761           | 1.014             | 1.157                | 0.947        | 0.667              | 0.723       | 0.784        | 1.979      | 0.869     | 1.059  | 0.758             | -3.869               | 0.933             | 1.105        |
| High FPG (continuous)          | 1.077       | 0.256              |               | -0.837       | 6.189     | -10.008     | 1.000                 | 1.107               | 0.866                | -0.203      | 1.085                  | 0.845                   | 1.065           | -0.253            |                      | 0.374        | 2.735              | -0.286      | 1.004        | 1.490      | 1.039     | -7.881 | -1.886            | 0.874                | 0.597             | 0.937        |
| High blood pressure            | 1.412       | 0.604              |               | -0.481       | 0.152     | -0.237      | 1.107                 | 1.000               | 0.994                | 0.458       | 0.949                  | -1.662                  | 1.019           | -0.995            |                      | 0.389        | 1.540              | 2.118       | 1.015        | 0.752      | 0.785     | 2.686  | -0.597            | 0.863                | -0.845            | -0.389       |
| High body-mass index           | 1.343       | 0.691              | 0.684         | 0.420        | 0.856     | 0.523       | 0.866                 | 0.994               | 1.000                | 97.091      | 1.060                  | 0.923                   | 1.087           | 0.818             |                      | 0.976        | 0.668              | 0.910       | 1.028        | 0.820      | 1.192     | 0.608  | 0.780             | 1.101                | 0.863             | 0.952        |
| High sodium                    | 0.868       | 2.884              |               | 1.338        | 0.967     | -4.863      | -0.203                | 0.458               | 97.091               | 1.000       | 0.964                  | 2.098                   | -0.785          | 2.061             |                      | -1.437       | 2.201              | 2.531       | 2.917        | 1.151      | -0.357    | -4.185 | 1.051             | 1.022                | 1.860             | 1.252        |
| High total cholesterol         | -0.048      | 1.145              |               | 0.529        | 0.919     | 1.229       | 1.085                 | 0.949               | 1.060                | 0.964       | 1.000                  | 0.943                   | 1.111           | 0.950             |                      | 1.064        | 0.587              | 0.977       | 1.023        | 1.038      | 0.345     | 1.274  | 4.670             | 1.604                | 0.932             | 0.932        |
| Household air pollution        | 0.920       | 1.072              | 0.827         | 0.561        | 0.960     | 1.126       | 0.845                 | -1.662              | 0.923                | 2.098       | 0.943                  | 1.000                   | 1.050           | 0.960             | 0.862                | 0.983        | 0.789              | 0.971       | 0.953        | 0.905      | 1.168     | 0.951  | -0.213            | 0.749                | 0.970             | 0.994        |
| Impaired kidney function       | 1.088       | 3.723              |               | 0.677        | 1.044     | 1.761       | 1.065                 | 1.019               | 1.087                | -0.785      | 1.111                  | 1.050                   | 1.000           | 1.235             |                      | 1.258        | 1.257              | 1.074       | 0.990        | 0.931      | 0.177     | 1.916  | 3.080             | 0.950                | 1.124             | 1.038        |
| Income per capita              | 1.112       | 1.044              | 0.893         | 0.647        | 0.974     | 1.014       | -0.253                | -0.995              | 0.818                | 2.061       | 0.950                  | 0.960                   | 1.235           | 1.000             | 0.961                | 0.990        | 0.952              | 0.965       | 0.852        | 1.003      | 0.835     | 0.846  | -0.757            | 0.825                | 0.960             | 1.011        |
| Low birth weight for gestation |             | 0.712              |               | 0.583        | 1.026     | 1.157       |                       |                     |                      |             |                        | 0.862                   |                 | 0.961             | 1.000                |              |                    |             |              |            |           | 0.999  | 0.279             |                      | 0.806             | 1.045        |
| Low fruit                      | 0.867       | 0.995              |               | 0.776        | 1.025     | 0.947       | 0.374                 | 0.389               | 0.976                | -1.437      | 1.064                  | 0.983                   | 1.258           | 0.990             |                      | 1.000        | 0.870              | 0.957       | 0.965        | 0.991      | 0.959     | 0.696  | -0.114            | 1.411                | 1.005             | 1.104        |
| Low nuts and seeds             | 0.588       | 1.333              |               | 0.763        | 0.933     | 0.667       | 2.735                 | 1.540               | 0.668                | 2.201       | 0.587                  | 0.789                   | 1.257           | 0.952             |                      | 0.870        | 1.000              | 0.864       | 0.655        | 0.886      | 0.941     | 0.457  | 0.058             | 1.021                | 0.900             | 0.980        |
| Low omega-3                    | 1.122       | 1.110              |               | 0.597        | 0.961     | 0.723       | -0.286                | 2.118               | 0.910                | 2.531       | 0.977                  | 0.971                   | 1.074           | 0.965             |                      | 0.957        | 0.864              | 1.000       | 1.011        | 0.889      | 1.537     | 0.669  | 0.035             | 0.520                | 0.953             | 1.007        |
| Low physical activity          | 1.131       | 0.832              |               | 0.756        | 1.045     | 0.784       | 1.004                 | 1.015               | 1.028                | 2.917       | 1.023                  | 0.953                   | 0.990           | 0.852             |                      | 0.965        | 0.655              | 1.011       | 1.000        | 0.772      | -1.347    | 0.848  | 0.562             | 1.005                | 0.944             | 1.048        |
| Low vegetables                 | 1.232       | 0.880              |               | 0.613        | 1.011     | 1.979       | 1.490                 | 0.752               | 0.820                | 1.151       | 1.038                  | 0.905                   | 0.931           | 1.003             |                      | 0.991        | 0.886              | 0.889       | 0.772        | 1.000      | 1.097     | 0.775  | 17.971            | 1.061                | 0.896             | 1.027        |
| Low whole grains               | 11.984      | 3.366              |               | 1.031        | 1.485     | 0.869       | 1.039                 | 0.785               | 1.192                | -0.357      | 0.345                  | 1.168                   | 0.177           | 0.835             |                      | 0.959        | 0.941              | 1.537       | -1.347       | 1.097      | 1.000     | 2.238  | 0.880             | 1.168                | 1.460             | 2.235        |
| PCV vaccine                    | 1.480       | 1.824              | 1.286         | 2.038        | 0.925     | 1.059       | -7.881                | 2.686               | 0.608                | -4.185      | 1.274                  | 0.951                   | 1.916           | 0.846             | 0.999                | 0.696        | 0.457              | 0.669       | 0.848        | 0.775      | 2.238     | 1.000  | 0.796             | 0.614                | 0.762             | 0.986        |
| Rotavirus vaccine              | 0.788       | 1.443              | 0.517         | 1.562        | 0.273     | 0.758       | -1.886                | -0.597              | 0.780                | 1.051       | 4.670                  | -0.213                  | 3.080           | -0.757            | 0.279                | -0.114       | 0.058              | 0.035       | 0.562        | 17.971     | 0.880     | 0.796  | 1.000             | 1.993                | -0.980            | -0.572       |
| Smoking (prevalence)           | 0.998       | 0.861              |               | 0.365        | 0.790     | -3.869      | 0.874                 | 0.863               | 1.101                | 1.022       | 1.604                  | 0.749                   | 0.950           | 0.825             |                      | 1.411        | 1.021              | 0.520       | 1.005        | 1.061      | 1.168     | 0.614  | 1.993             | 1.000                | 0.869             | 0.725        |
| Unsafe sanitation              | 0.834       | 1.044              | 0.825         | 0.541        | 0.915     | 0.933       | 0.597                 | -0.845              | 0.863                | 1.860       | 0.932                  | 0.970                   | 1.124           | 0.960             | 0.806                | 1.005        | 0.900              | 0.953       | 0.944        | 0.896      | 1.460     | 0.762  | -0.980            | 0.869                | 1.000             | 0.967        |
| Unsafe water                   | 0.908       | 0.992              | 0.885         | 0.635        | 0.933     | 1.105       | 0.937                 | -0.389              | 0.952                | 1.252       | 0.932                  | 0.994                   | 1.038           | 1.011             | 1.045                | 1.104        | 0.980              | 1.007       | 1.048        | 1.027      | 2.235     | 0.986  | -0.572            | 0.725                | 0.967             | 1.000        |
